# Supplementary material
Source: publisher figshare collection journal article supplement (https://springernature.figshare.com/articles/dataset/_/4903193)

1 **SUPPLEMENTARY FIGURE LEGENDS**

2 **Translational contributions to tissue-specificity in rhythmic and**  
3 **constitutive gene expression**

4 Violeta Castelo-Szekely, Alaaddin Bulak Arpat, Peggy Janich, David Gatfield

5 **Figure S1. Overview of sequencing outcome and read length distribution for**  
6 **RPF- and RNA-seq data used in the study.**

7 **A** Summary of outcome of the sequential mapping pipeline, indicating the number (y-  
8 axis) and percentage (within bars) of reads mapping to each database, averaged  
9 over all timepoints. For each sample of the four datasets an average of more than 20  
10 million reads mapped to the protein-coding transcriptome (cDNA) and was used for  
11 the study.

12 **B and C** RPF-seq (B) and RNA-seq (C) read length after trimming of adaptors  
13 showed that most RPF-seq reads had a length of 29-30 nucleotides in both organs,  
14 whereas RNA-seq fragments showed a broader distribution as expected from  
15 chemical RNA fragmentation. Boxplots represent the interquartile range and  
16 whiskers extend to the minimum and maximum values within 1.5 times the  
17 interquartile range.

18 **Figure S2. RPF reads at the stop codon and quality control.**

19 **A** A-site position of RPF-seq reads in the last 200 nt of the CDS, excluding stop  
20 codon reads. Read density along the CDS was similar in liver and kidney; thus the  
21 higher read density observed in Fig. 1C at the stop codon does not affect CDS-based  
22 calculations.

23 **B** Zooming into the footprint read density at the end of the CDS, stop codon, and  
24 beginning of the 3' UTR indicated read differences between organs for the stop  
25 codon itself and up to 4 nt downstream, which were increased in kidney. Stop codon  
26 reads are counted towards the 3' UTR and their higher level in kidney thus also  
27 explains why our analysis in Fig. 1B shows more 3' UTR reads for this organ. The  
28 remainder of the 3' UTR shows a similar depletion of reads in both organs.

29 **C and D** Ribo-seq Unit Step Transformation (RUST) metafootprint analyses to  
30 evaluate the contribution of local mRNA positions to the density of footprints. Light  
31 and dark coloured polygonal areas denote the 10%-90% and 25%-75% percentiles,

32 respectively, and the dash-line denotes the median of the Kullback–Leibler  
33 divergence (K–L) profiles of all samples within kidney (C) and liver (D) separately for  
34 RPF and RNA reads (colour code in inset). The K-L profile for each sample was  
35 calculated from the RUST ratio values of 61 sense codons across a moving window  
36 of 40 triplet codons upstream to 20 triplet codons downstream of predicted A-sites.  
37 High K-L divergence maxima (lowest relative entropy or highest information gain) are  
38 thus found in the vicinity of the A-site in RPF libraries, and the 5' and 3' termini of the  
39 reads in RNA libraries. Importantly, the profiles are similar for kidney and liver,  
40 indicating overall similar footprint quality in the two independent datasets.

41 **Figure S3. High technical and biological reproducibility of datasets.**

42 **A and B** Spearman correlation of normalised CDS read counts between timepoints  
43 and between replicates for kidney RPF-seq (A) and kidney RNA-seq (B) datasets.  
44 The correlation coefficient is indicated by the size and shading of the disks. Biological  
45 replicates thus show excellent correlation; moreover, the correlation coefficients of  
46 different timepoints reflect the rhythmic nature of the data.

47 **C and D** Normalised CDS read counts (RPKM) in liver vs. kidney at the RNA (C) and  
48 RPF level (D). In these graphs, the averages over all timepoints were compared for  
49 the set of commonly expressed genes (N=10289; see Fig. 2A). Note the overall  
50 higher Spearman correlation at the footprint level than transcript level. The difference  
51 between correlations is highly significant with  $p=8.7e-110$ ,  $Z$  value=-22.23; Steiger  
52 test for difference between 2 dependent correlations (Reference: Steiger JH, 1980.  
53 Psychological Bulletin, 87, 245-251).

54 **Figure S4. Additional information for Principal Component Analysis.**

55 Scree plot showing the first 10 components of the PCA in Fig. 1D-E. Components 1  
56 and 2 explained most variance, followed by PC3 to PC5, which explained a closely  
57 similar proportion of variance in the data; the plateau was apparent from the sixth  
58 component.

59 **Figure S5. Contribution of translation efficiency to overall gene expression**  
60 **variation within organs.**

61 **A and B** Scatterplot of mRNA abundance vs. translation efficiency (TE) in kidney (A;  
62 N=12423 genes) and liver (B; N=10676 genes), averaged over all timepoints.  
63 Corresponding density lines are plotted on the margins. Dotted red lines represent  
64 the 2.5 and 97.5 percentiles, and the corresponding fold change is indicated. The  
65 transcript abundance range for 95% of genes thus spanned two orders of magnitude  
66 (>500-fold range in either organ), whereas TE dynamic range was less than 12-fold  
67 in either organ. Transcript abundance differences can thus be considered the main  
68 source of gene expression variability in the tissues. Moreover, Pearson's r values of  
69 0.145 (kidney) and 0.196 (liver) indicate weak positive correlation of transcript  
70 abundance and TE.

71 **C** Scatterplot of transcript abundance (TA) vs. translation efficiency (TE) in main  
72 CDS for kidney and as averages over all timepoints. Highlighted are single protein-  
73 coding genes that contain (red) or do not contain (blue) translated uORFs.  
74 Corresponding density lines are plotted on the margins. uORF translation is thus  
75 clearly associated with significantly reduced translation efficiency. Numbers on the  
76 density curves indicate the location shift relative to all transcripts. Genes with  
77 translated uORFs: TA,  $p=0.16$ ; TE,  $p<2.2e-16$  (Wilcoxon rank sum test). Genes  
78 without translated uORFs: TA,  $p=8.7e-5$ ; TE,  $p<2.2e-16$  (Wilcoxon rank sum test).

79 **Figure S6. Translational compensation is independent of technical biases in**  
80 **the datasets.**

81 **A and B** Measurement error (ME) of all genes in the dataset ( $n=10289$ ) was  
82 calculated separately for RNA-seq (red) and RPF-seq (turquoise) for kidney (A) and  
83 liver (B), and plotted as a function of increasing average expression levels. Briefly,  
84 measurement errors within each bin were calculated as in Albert et al., 2015 (Albert  
85 FW, Muzzey D, Weissman JS, Kruglyak L, 2014. PLoS Genetics, 10, e1004692)

86 using the 12 timepoints as replicates for the measurement estimates (see Methods).

87 **C to E** Spearman correlation between liver and kidney for RNA and RPF data for (C)

88 genes showing the highest measurement errors (bin 1 in A, B), (D) bins 2-10, and (E)

89 genes that have higher measurement error in RPF-seq than in RNA-seq samples in

90 both organs (bins 7-10). Each boxplot contains the correlation coefficients between

91 organs for each timepoint and replicate sample. Together these analyses showed

92 that RPF-seq samples have a higher degree of similarity across organs (indicated p-

93 values are from paired t-tests on Fisher-transformed correlation coefficients), even

94 when considering lowly expressed genes with higher associated experimental error

95 (C), or when considering genes with higher RPF-seq than RNA-seq measurement

96 errors (E). These results thus ruled out that a systematic lower measurement error in

97 RPF-seq experiments could have been the underlying cause of the higher correlation

98 in RPF-seq than RNA-seq observed in Fig. 2C.

99 **F and G** Same as A and B, but with a filtered gene set in which specifically those

100 genes that showed very different expression levels/high variability between organs or

101 between datasets (RPF-seq, RNA-seq) were removed (see Methods). The reason to

102 also analyse such a filtered set was that we wished to be sure that genes that were

103 widely different in their gene expression level were not distorting the analyses (e.g.

104 specifically causing extreme measurement errors under a condition where

105 expression was very low). Moreover, because the binning into the groups was based

106 on expression level across all sets (calculated as the fourth root of the product of

107 liver RNA-seq, liver RPF-seq, kidney RNA-seq and kidney RPF-seq), the highly

108 variable genes made binning inaccurate. This filtered set thus contained genes with

109 overall better comparability across datasets; of note, the distribution of ME

110 differences using the filtered set was very similar to the full set in A-B.

111 **H to L** Inter-organ Spearman correlation in RNA-seq and RPF-seq samples for

112 various gene bins as indicated, using the filtered set. As in C-E, even when

113 considering for example the genes with the highest overall measurement error (H), or

114 the genes with higher RPF-seq than RNA-seq measurement errors in both organs  
115 (L), a significantly higher correlation is observed in RPF-seq samples (paired t-test  
116 on Fisher-transformed correlation coefficients).

117 **Figure S7. Translational compensation detected in rat liver and heart.**

118 **A)** Spearman correlation coefficient between rat heart and liver samples calculated  
119 from the data of Schafer et al., 2015 (Schafer S, Adami E, Heinig M, Rodrigues KE,  
120 Kreuchwig F, Silhavy J, van Heesch S, Simaite D, Rajewsky N, Cuppen E, Pravenec  
121 M, Vingron M, Cook SA, Hubner N, 2015. Nature Communications 8, 7200). Each  
122 boxplot contains the correlation coefficients of all possible pairwise comparisons  
123 between heart and liver replicates (remark: in this study, organs in each of the five  
124 replicates did not necessarily come from the same animals, thus precluding defined  
125 pairwise comparisons between same animals). The indicated p-value is the 95th  
126 percentile of the ensemble of p-values resulting from all possible comparisons  
127 between RPF-seq and RNA-seq correlation coefficients (paired t-test of Fisher-  
128 transformed coefficients). This analysis extended our observation of a globally higher  
129 conservation between organs at the level of translational output (protein production)  
130 than at the level of transcript abundance.

131 **B and C** Normalised CDS read counts (RPKM) in rat liver vs. heart at the RPF-seq  
132 (B) and RNA-seq level (C), averaged over the five replicates used in the study of  
133 Schafer et al., 2015. Note the overall higher Spearman correlation at the footprint  
134 level as compared to the mRNA level. The difference between correlations is highly  
135 significant with  $p=2.3e-201$ ,  $Z$  value=-30.25; Steiger test for difference between 2  
136 dependent correlations (Reference: Steiger JH, 1980. Psychological Bulletin, 87,  
137 245-251).

138 **Figure S8. Analysis of transcript features with predictive value for differential**  
139 **TE.**

140 **A** Cumulative distribution of the indicated transcript features for single isoform genes

141 that do not show differential TE (black, n= 5278), or that show differential TE and  
142 either higher TE in kidney (yellow, N=193) or in liver (green, N=340). The indicated p-  
143 values are Kolmogorov-Smirnov test results of each group vs. 'all'. Statistically  
144 significant comparisons marked in red.

145 **B** Same as (A), but in the form of boxplots and using Wilcoxon rank-sum test for the  
146 differences between group means (again, marked in red, significant results).

147 **C** Fraction of single isoform genes with (blue) or without (red) translated uORFs in  
148 either organ. The group with differential and higher TE in liver contained significantly  
149 more translated uORF-containing transcripts than the genes not showing differential  
150 TE in either organ (p=6.08e-04; Fisher's exact test); for kidney, there was a slight  
151 depletion of uORF-containing transcripts (non-significant). This analysis indicates  
152 that uORF usage may play a role in setting TE differences across tissues. Note that  
153 in this analysis, we did not yet distinguish whether the uORF was translated in liver  
154 and/or kidney, but we treated the 1377 genes with a translated uORF in at least one  
155 organ as a single group.

156 **D** Organ-specific uORF usage and its association with differential TE. The group of  
157 genes with uORFs specifically translated in liver was enriched for transcripts better  
158 translated in kidney, and vice versa, consistent with a role of tissue-specific uORF  
159 usage in setting TE differences. However, due to the low number of differential TE  
160 genes exhibiting uORF translation that was exclusive to one organ for this analysis,  
161 the enrichments and depletions did not reach statistical significance.

162 **E** Scatterplot of upstream ORF vs. CDS TE differences across organs for genes  
163 containing translated uORFs in both organs and detected as differential TE with  
164 higher TE in kidney (yellow) or liver (green), or not showing differential TE (grey). An  
165 anticorrelation between uORF usage and CDS TE was only observed for genes with  
166 differential and higher TE in liver.

167 **Figure S9. Relationship between transcript diversity and differential TE.**

168 **A** Cumulative distribution of the absolute kidney-to-liver TE ratio for genes whose  
169 transcript diversity is present or absent only in the indicated feature. The vertical  
170 dotted grey line marks the 1.5-fold difference used to define differential TE. In this  
171 Figure, all 7 groups are plotted (transcript diversity only/not in 5' UTR, CDS, 3' UTR;  
172 all genes); for better visibility, the analyses of individual features are also shown in  
173 separate panels, i.e. in Fig. 2G (5' UTR), Fig. S9B (CDS) and Fig. S9C (3' UTR).  
174 Collectively, these results showed that transcript diversity that originated only within  
175 the CDS (red), or that was excluded from the 5' UTR (purple), or that was present  
176 only within the 3' UTR (dark green), all showed smaller TE differences across  
177 organs, thus pointing towards variability within the 5' UTR as a contributor to tissue-  
178 specific TE.

179 **B** As in (A) showing the genes with transcript diversity present (red) or absent  
180 (orange) only in the CDS. Note that when transcript diversity is only in CDS (i.e.  
181 UTRs are identical), there is a significant shift to more similar TEs in both organs.  
182 This is consistent with the specific association of 5' UTR diversity with differential TE  
183 that is shown in Fig. 2G.

184 **C** As in (A) showing genes with transcript diversity present (dark green) or absent  
185 (light green) only in the 3' UTR.

186 **Figure S10. Analysis of phase differences in RNA and RPF rhythms in kidney**  
187 **and across organs.**

188 **A** Histogram of phase differences (RPF – RNA, in hours) for all genes that were  
189 detected as rhythmic in the kidney RPF and RNA data (N=542; see Fig. 3A).  
190 Although the distribution mean was not significantly different from 0, more genes had  
191 their footprint abundance peak advanced (N=282) than delayed (N=260) with respect  
192 to their mRNA abundance peak.

193 **B and C** Histogram of the phase differences (footprints to mRNA abundance, in  
194 hours) in kidney (B) and liver (C) for the 178 genes rhythmic in both organs (gene set



195 shown in Fig. 3C). We observed a broader distribution of phase differences in kidney  
196 and globally a phase advance of RPF with respect to RNA (-0.143 hours), as  
197 compared to overall stronger phase coherence of RPF and RNA in liver. See also  
198 Figures 3D-E.

199 **D** Histogram of the differential (kidney – liver) phase difference (RPF – RNA) for the  
200 178 genes that were rhythmic throughout (Fig. 3C). Although statistically not  
201 reaching significance, the mean of -0.178 hours and the overall more genes for  
202 which the phase difference had negative values (96 vs. 82 genes) were consistent  
203 with the finding that RPF rhythms peak earlier than RNA rhythms specifically in  
204 kidney.

205 **Figure S11. Higher expression of deadenylase complex subunits in kidney.**

206 **A and B** Daily expression profiles of the CCR4-NOT complex components in kidney  
207 (A) and liver (B) at the RNA (orange) and RPF (blue) level.

208 **C** RPF expression of the CCR4-NOT subunits (averages over the day). Boxplots  
209 represent the interquartile range and whiskers extend to the minimum and maximum  
210 expression within 1.5 times the interquartile range. Note that differences in protein  
211 biosynthesis are statistically significant for all subunits ( $p < 0.05$ , two-sample t-test)  
212 apart from *Cnot8*.

213 **Figure S12. Heatmaps of all detected RPF and RNA rhythms indicate false-**  
214 **negatives of the rhythmicity detection method.**

215 **A** Same as Fig. 3A, but re-plotted here for ease of comparison with (B-D).

216 **B-D** Heatmap of RNA-seq (left) and RPF-seq (right) expression for genes detected  
217 as rhythmic only at the mRNA level (B, N=796), at both levels (C, N=542), and at the  
218 ribosome footprints only (D, N=435) in kidney. Gene expression levels are  
219 standardised by row (gene). Please note that even the panels that should represent  
220 “non-rhythmicity” (i.e. right panel in B and left panel in D) clearly showed underlying  
221 rhythmicity, albeit with more noise and/or lower amplitude. Many of these cases were

222 therefore probably not truly “non-rhythmic” but rather false-negatives of the detection  
223 method (see Results section).

224 **Figure S13. Core clock gene expression at RNA and RPF levels in both organs.**

225 **Left panels:** Daily expression profiles of the 12 main core clock genes shown in Fig.  
226 5A-C. **Right panels:** Hierarchical clustering of the organs’ RNA and RPF profiles for  
227 each clock gene. Branch height represent the average Euclidean distance. Note that  
228 for 7 out of the 12 core clock genes, protein synthesis profiles were more conserved  
229 across organs than mRNA abundance and than RPF-RNA within organs.

230 **Figure S14. Read distribution for uORF-containing core clock genes.**

231 **A** Normalised read distribution for RPF (in blue) and RNA (in orange) along core  
232 clock transcripts containing uORFs in kidney (top) and liver (bottom) for the timepoint  
233 of maximal CDS translation. Red boxes indicate AUG-initiated uORFs as predicted in  
234 our analyses. For scaling issues and better visualisation, only a portion of the 3’  
235 UTRs, corresponding to the same length as the full 5’ UTR, is depicted (exception  
236 *Nr1d1*, for which the 3’ UTR is so short that it is shown full length).

237 **B** Read distribution to the three translation frames showed a frame bias of footprint  
238 reads for most predicted uORFs that was in a similar range as the frame bias on the  
239 CDS. This frame preference is indicative of active translation on the uORFs.

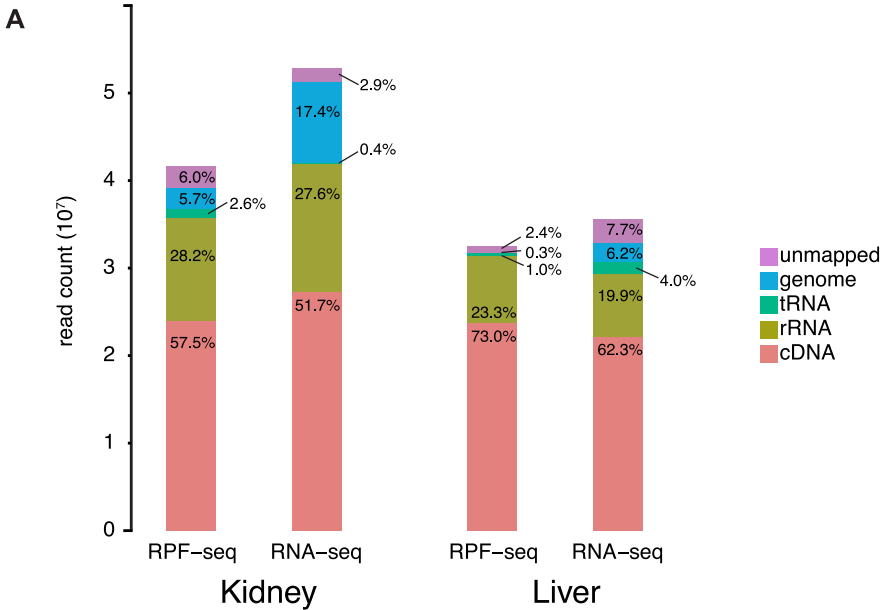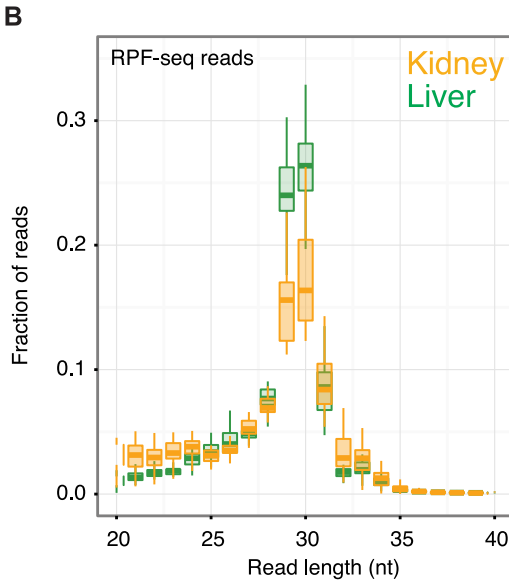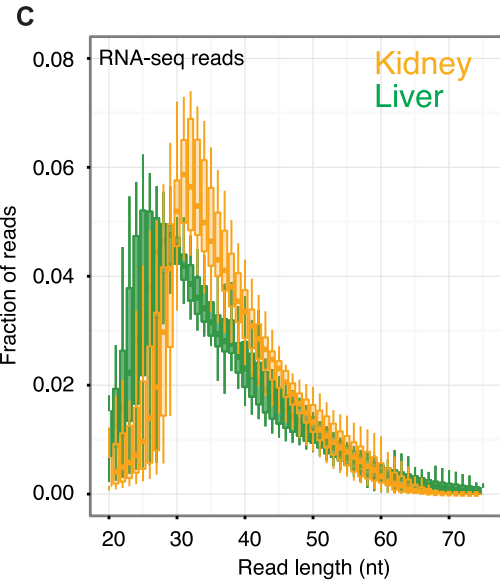

**A** metagene analysis of footprints as in Figure 1C (stop codon reads excluded)

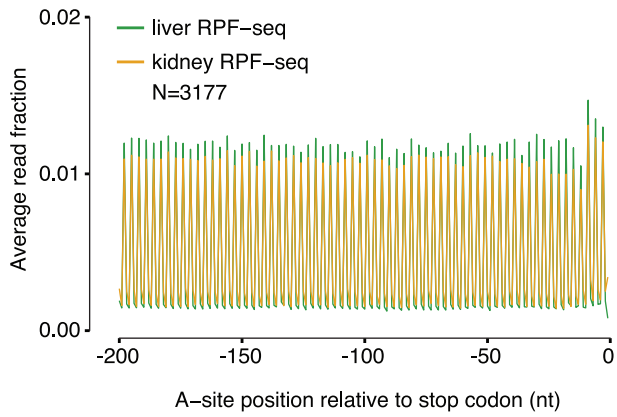

**B** metagene analysis, zoom into beginning of 3' UTR

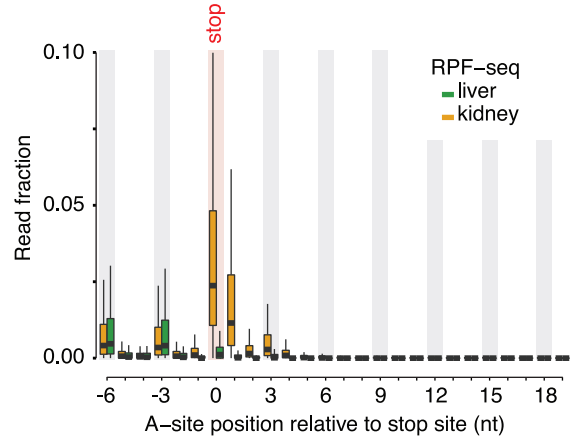

**C** RUST metafootprint analysis - kidney

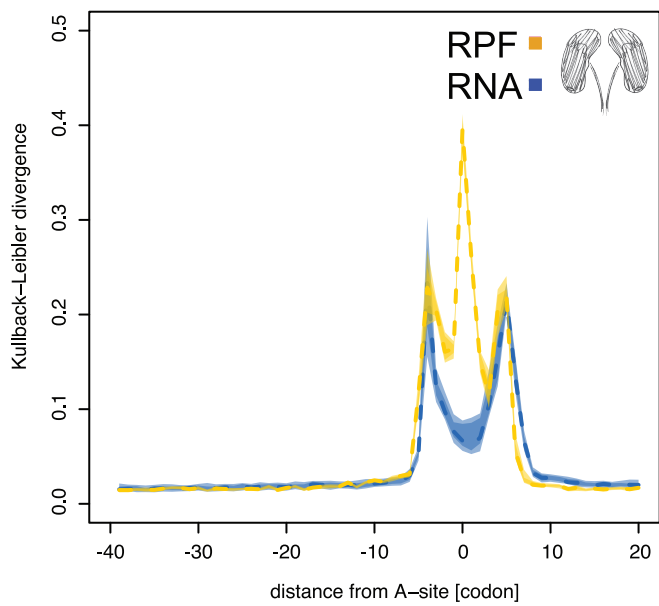

**D** RUST metafootprint analysis - liver

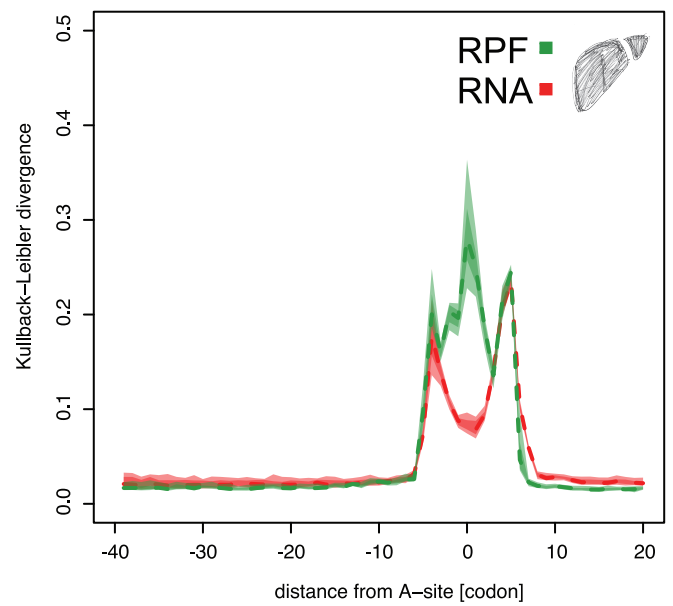

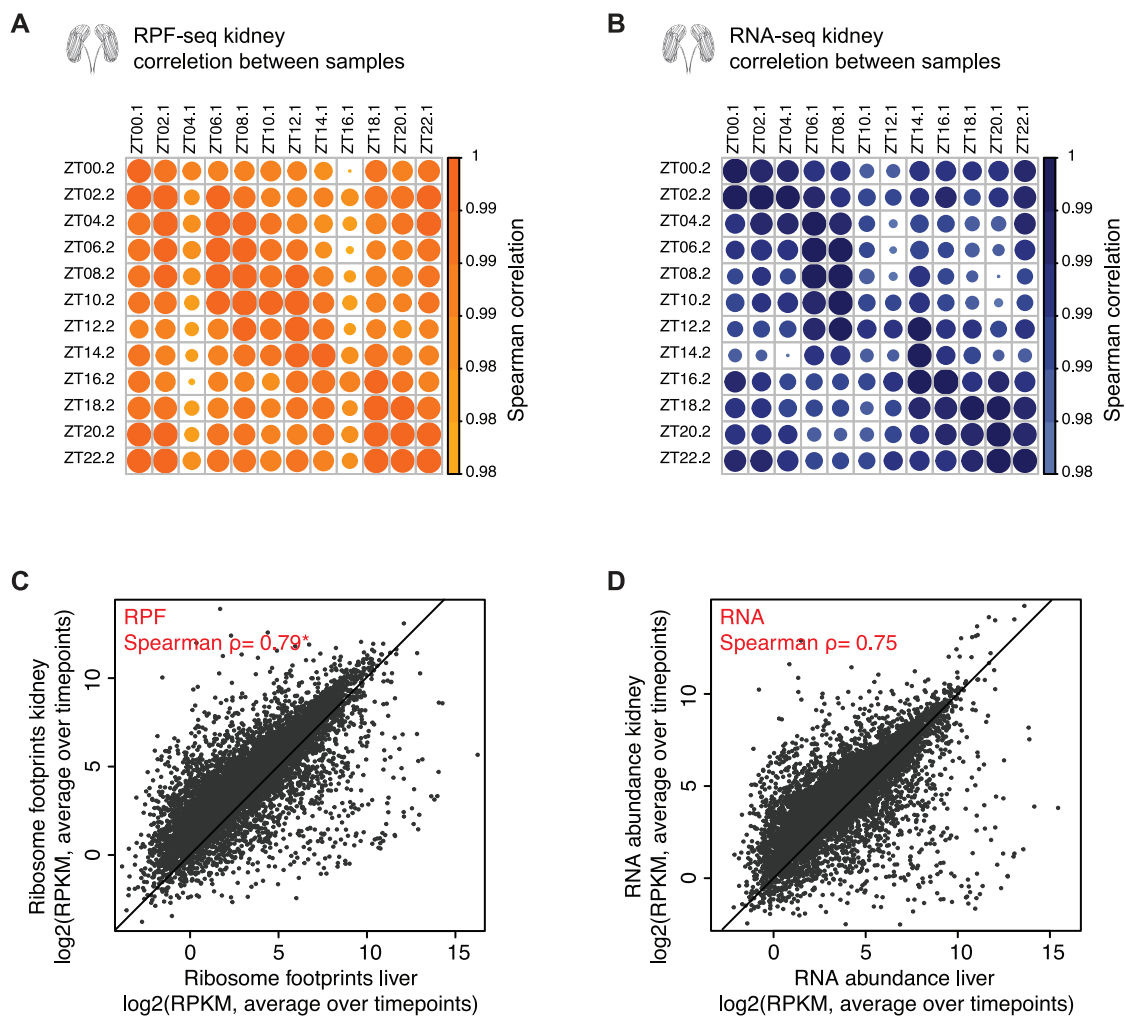

\* correlations are significantly different

Steiger test for difference between 2 dependent correlations, Z value=-22.23, p=8.7e-110 (n=10289)

Steiger, J. H. (1980). Tests for comparing elements of a correlation matrix. Psychological Bulletin, 87, 245-251.

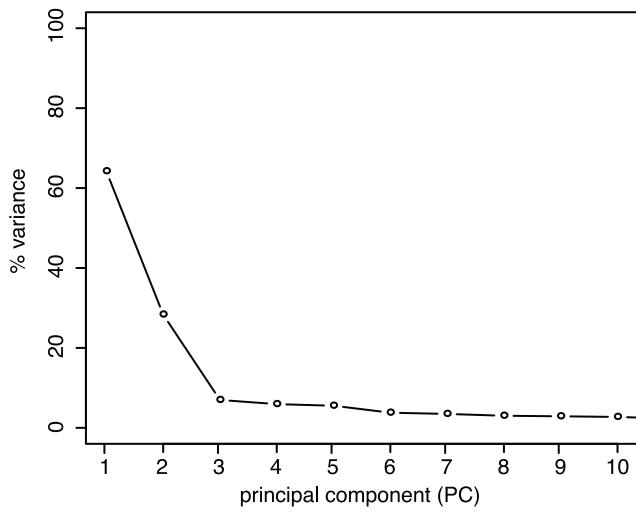

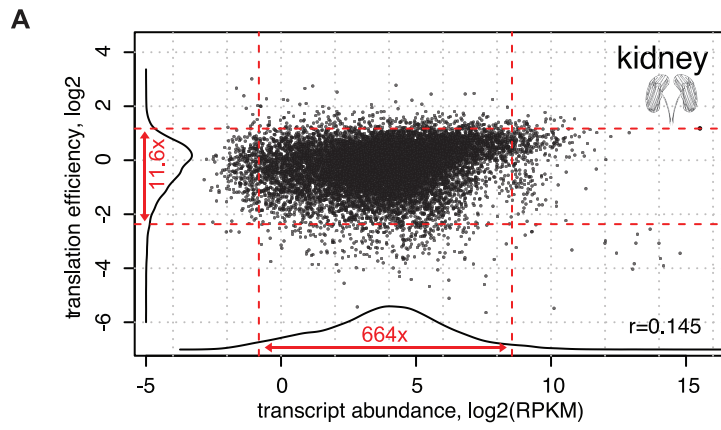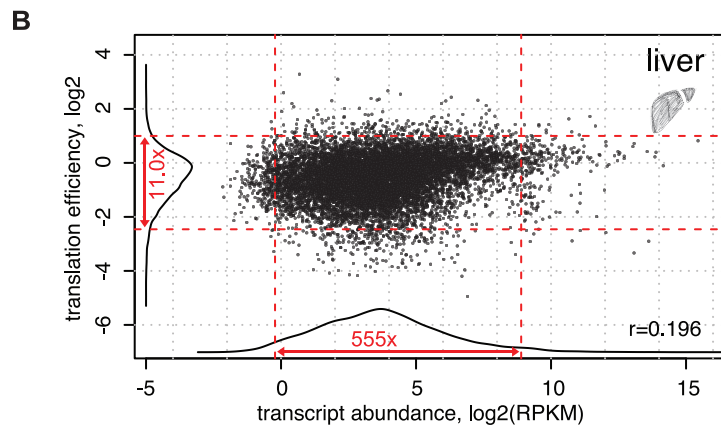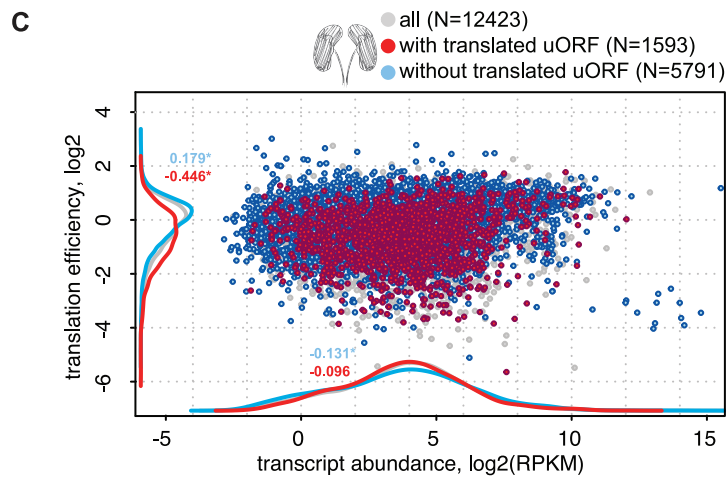

Measurement errors (MEs), genes binned by expression level

based on all genes (full set, N=10289):

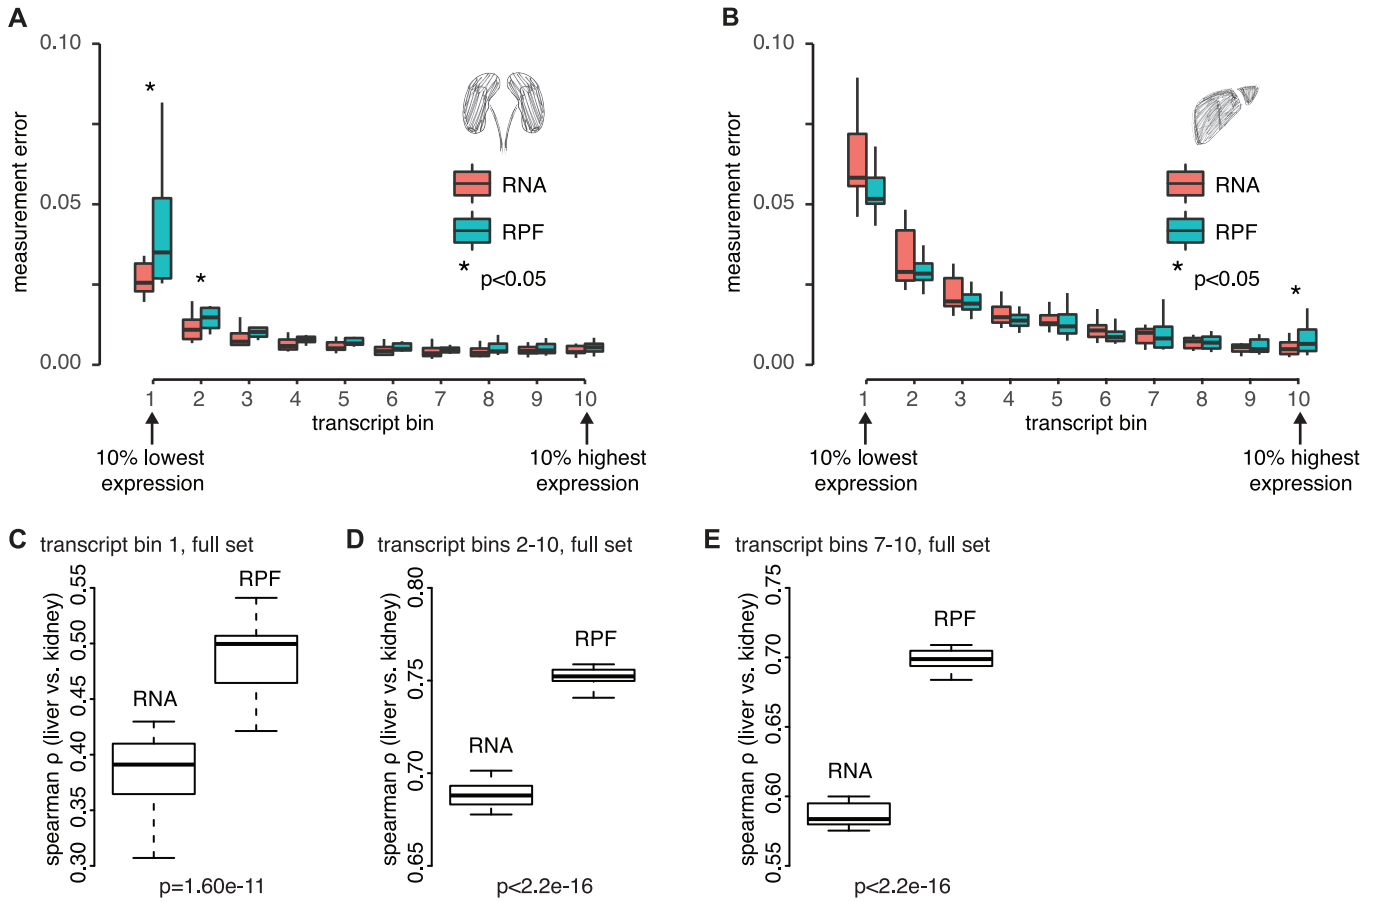

after removal of genes that were most variable in their expression (filtered set, N=9236):

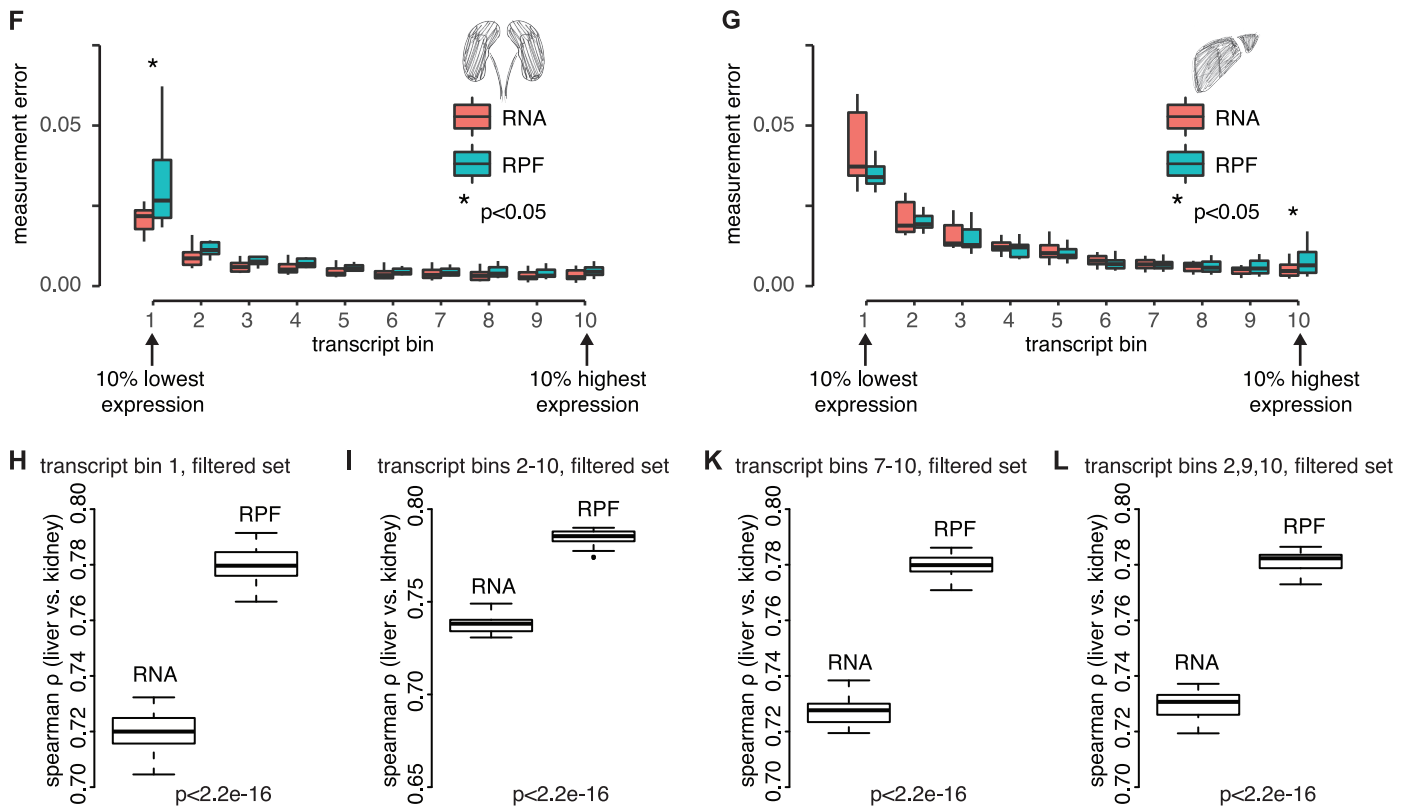



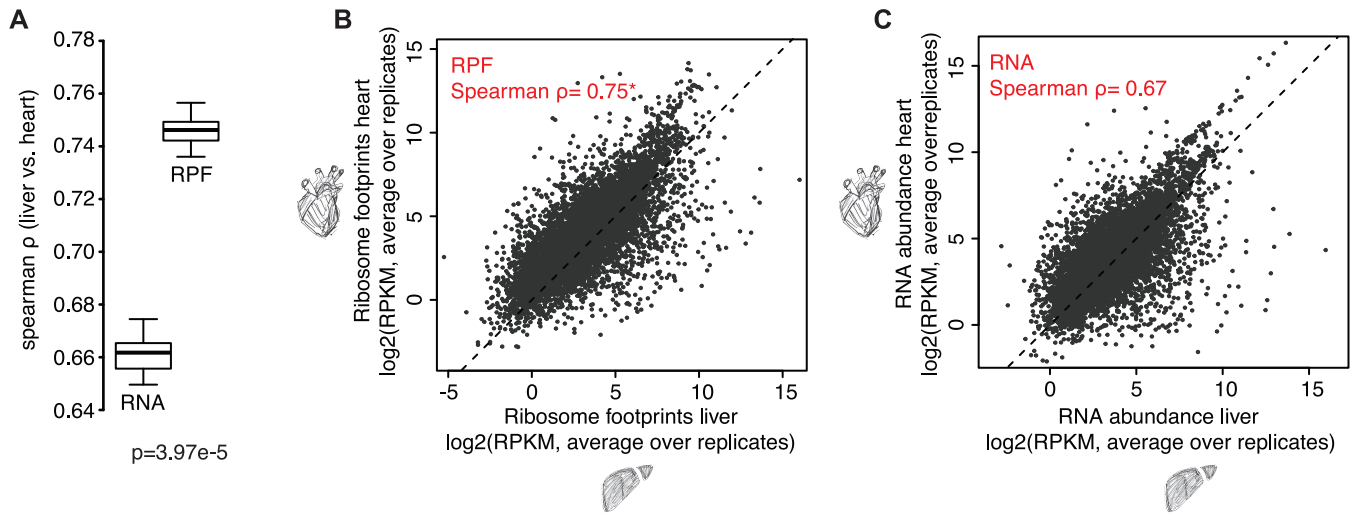

\* correlations are significantly different  
Steiger test for difference between 2 dependent correlations, Z value=-30.25,  $p=2.3e-201$  (n=9325)

Steiger, J. H. (1980). Tests for comparing elements of a correlation matrix. Psychological Bulletin, 87, 245-251.

**A** Cumulative distribution plots

**Transcript Length**

— All (N=5278)  
 — kid.diff.TE (N=193)  $p=7.4e-4$   
 — liv.diff.TE (N=340)  $p=4.1e-4$

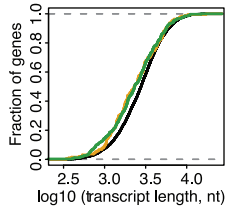

**5' UTR Length**

— All (N=5278)  
 — kid.diff.TE (N=193)  $p=0.5169$   
 — liv.diff.TE (N=340)  $p=0.1045$

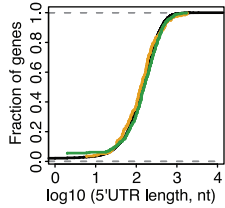

**CDS Length**

— All (N=5278)  
 — kid.diff.TE (N=193)  $p=0.0021$   
 — liv.diff.TE (N=340)  $p=2.41e-5$

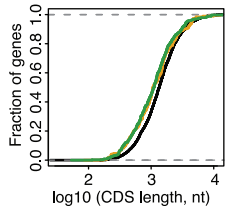

**3' UTR Length**

— All (N=5278)  
 — kid.diff.TE (N=193)  $p=0.073$   
 — liv.diff.TE (N=340)  $p=0.15$

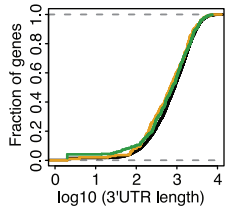

**Kozak Context Score**

— All (N=5278)  
 — kid.diff.TE (N=193)  $p=0.93$   
 — liv.diff.TE (N=340)  $p=0.72$

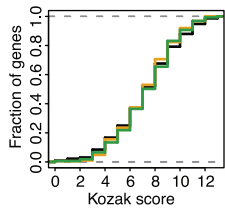

**5' UTR Minimum Folding Energy (MFE)**

— All (N=5278)  
 — kid.diff.TE (N=193)  $p=0.199$   
 — liv.diff.TE (N=340)  $p=0.00517$

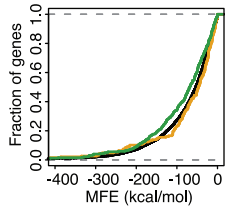

**5' UTR GC Content**

— All (N=5278)  
 — kid.diff.TE (N=193)  $p=3.12e-4$   
 — liv.diff.TE (N=340)  $p=0.138$

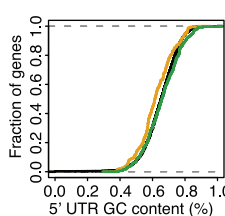

**B** Box plots

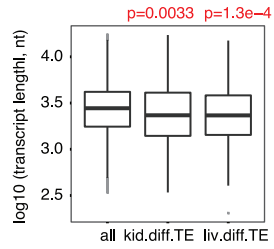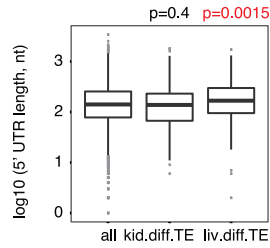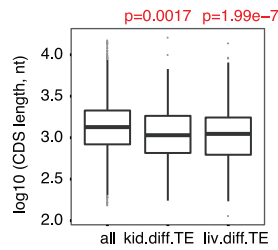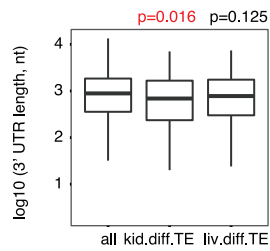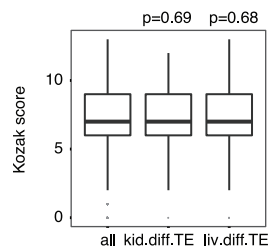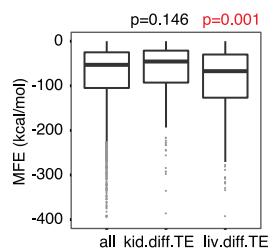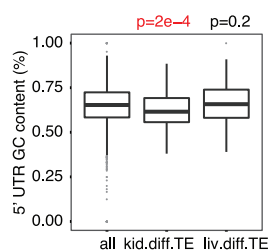

**C** all uORFs - distribution

■ with ■ without  
 translated uORF in liver and/or kidney

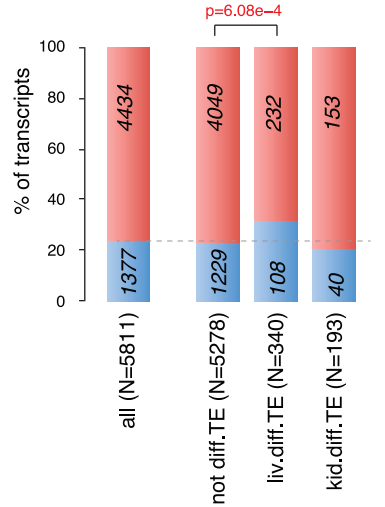

**D** differential TE transcripts with uORF translation uORF usage according to organ

■ kid.diff.TE (higher TE in kidney)  
 ■ liv.diff.TE (higher TE in liver)

uORFs translation detected:

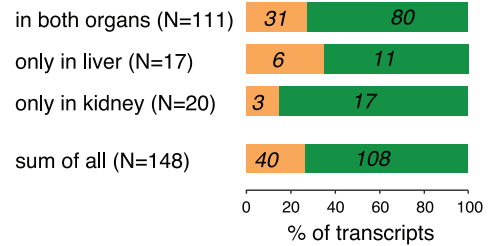

**E** uORF TE - CDS TE correlation

— not diff TE, n=1075  
 — kid diff TE, n=35  
 — liv diff TE, n=89

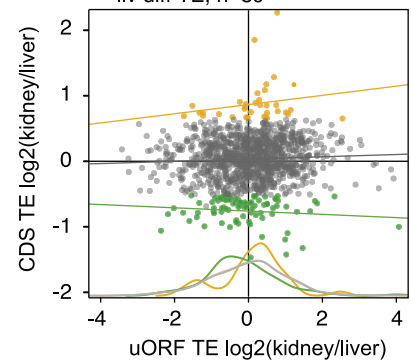

**A**

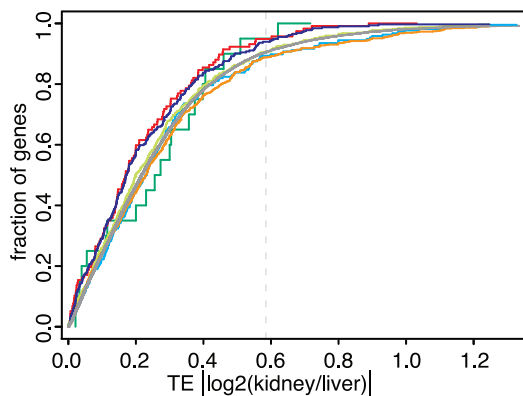

genes with transcript diversity  
 only in 5' UTR (N=216), not in 5' UTR (N=314)  
 only in CDS (N=117), not in CDS (N=774)  
 only in 3' UTR (N=20), not in 3' UTR (N=497)  
 all genes (N=10289)

Kolmogorov-Smirnov test  
 not in 5' UTR vs all:  $p=5.5e-4$   
 only in CDS vs all:  $p=0.036$   
 not in 5' UTR vs only in 5' UTR:  $p=0.012$   
 only in CDS vs not in CDS:  $p=0.015$

**B**

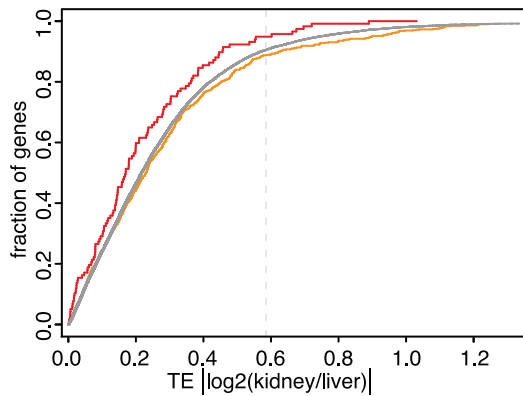

genes with transcript diversity  
 only in CDS (N=117), not in CDS (N=774)  
 all genes (N=10289)

Kolmogorov-Smirnov test  
 only in CDS vs not in CDS:  $p=0.015$   
 only in CDS vs all:  $p=0.036$

**C**

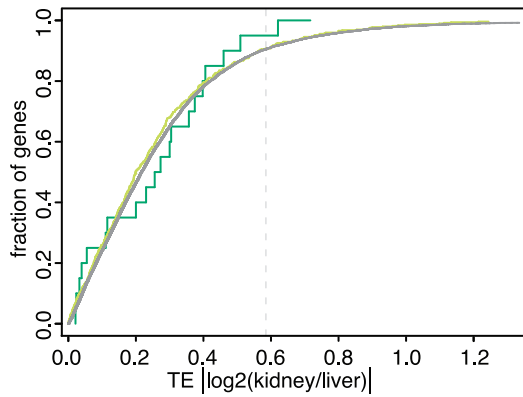

genes with transcript diversity  
 only in 3' UTR (N=20), not in 3' UTR (N=497)  
 all genes (N=10289)

**A** Peak phase difference RPF-RNA of rhythmic genes in kidney (N=542)

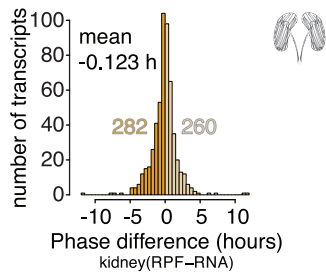

**B** Peak phase difference RPF-RNA of common rhythmic genes (N=178)

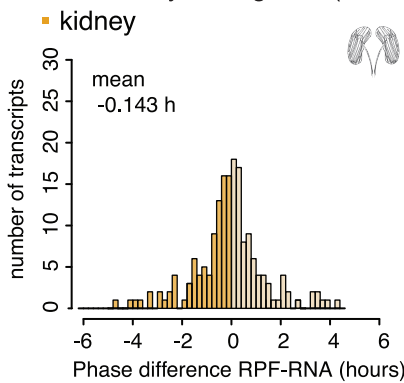

**C** Peak phase difference RPF-RNA of common rhythmic genes (N=178)

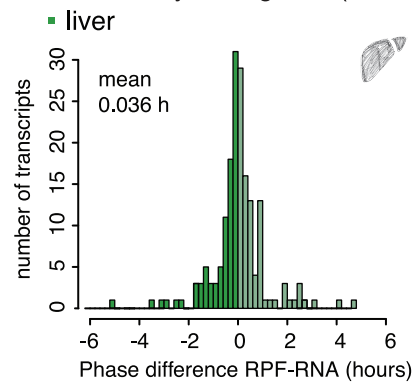

**D** Peak phase difference (RPF-RNA) in kidney relative to that in liver for the common rhythmic gene set (N=178)

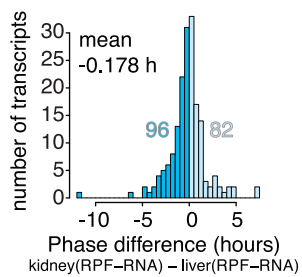

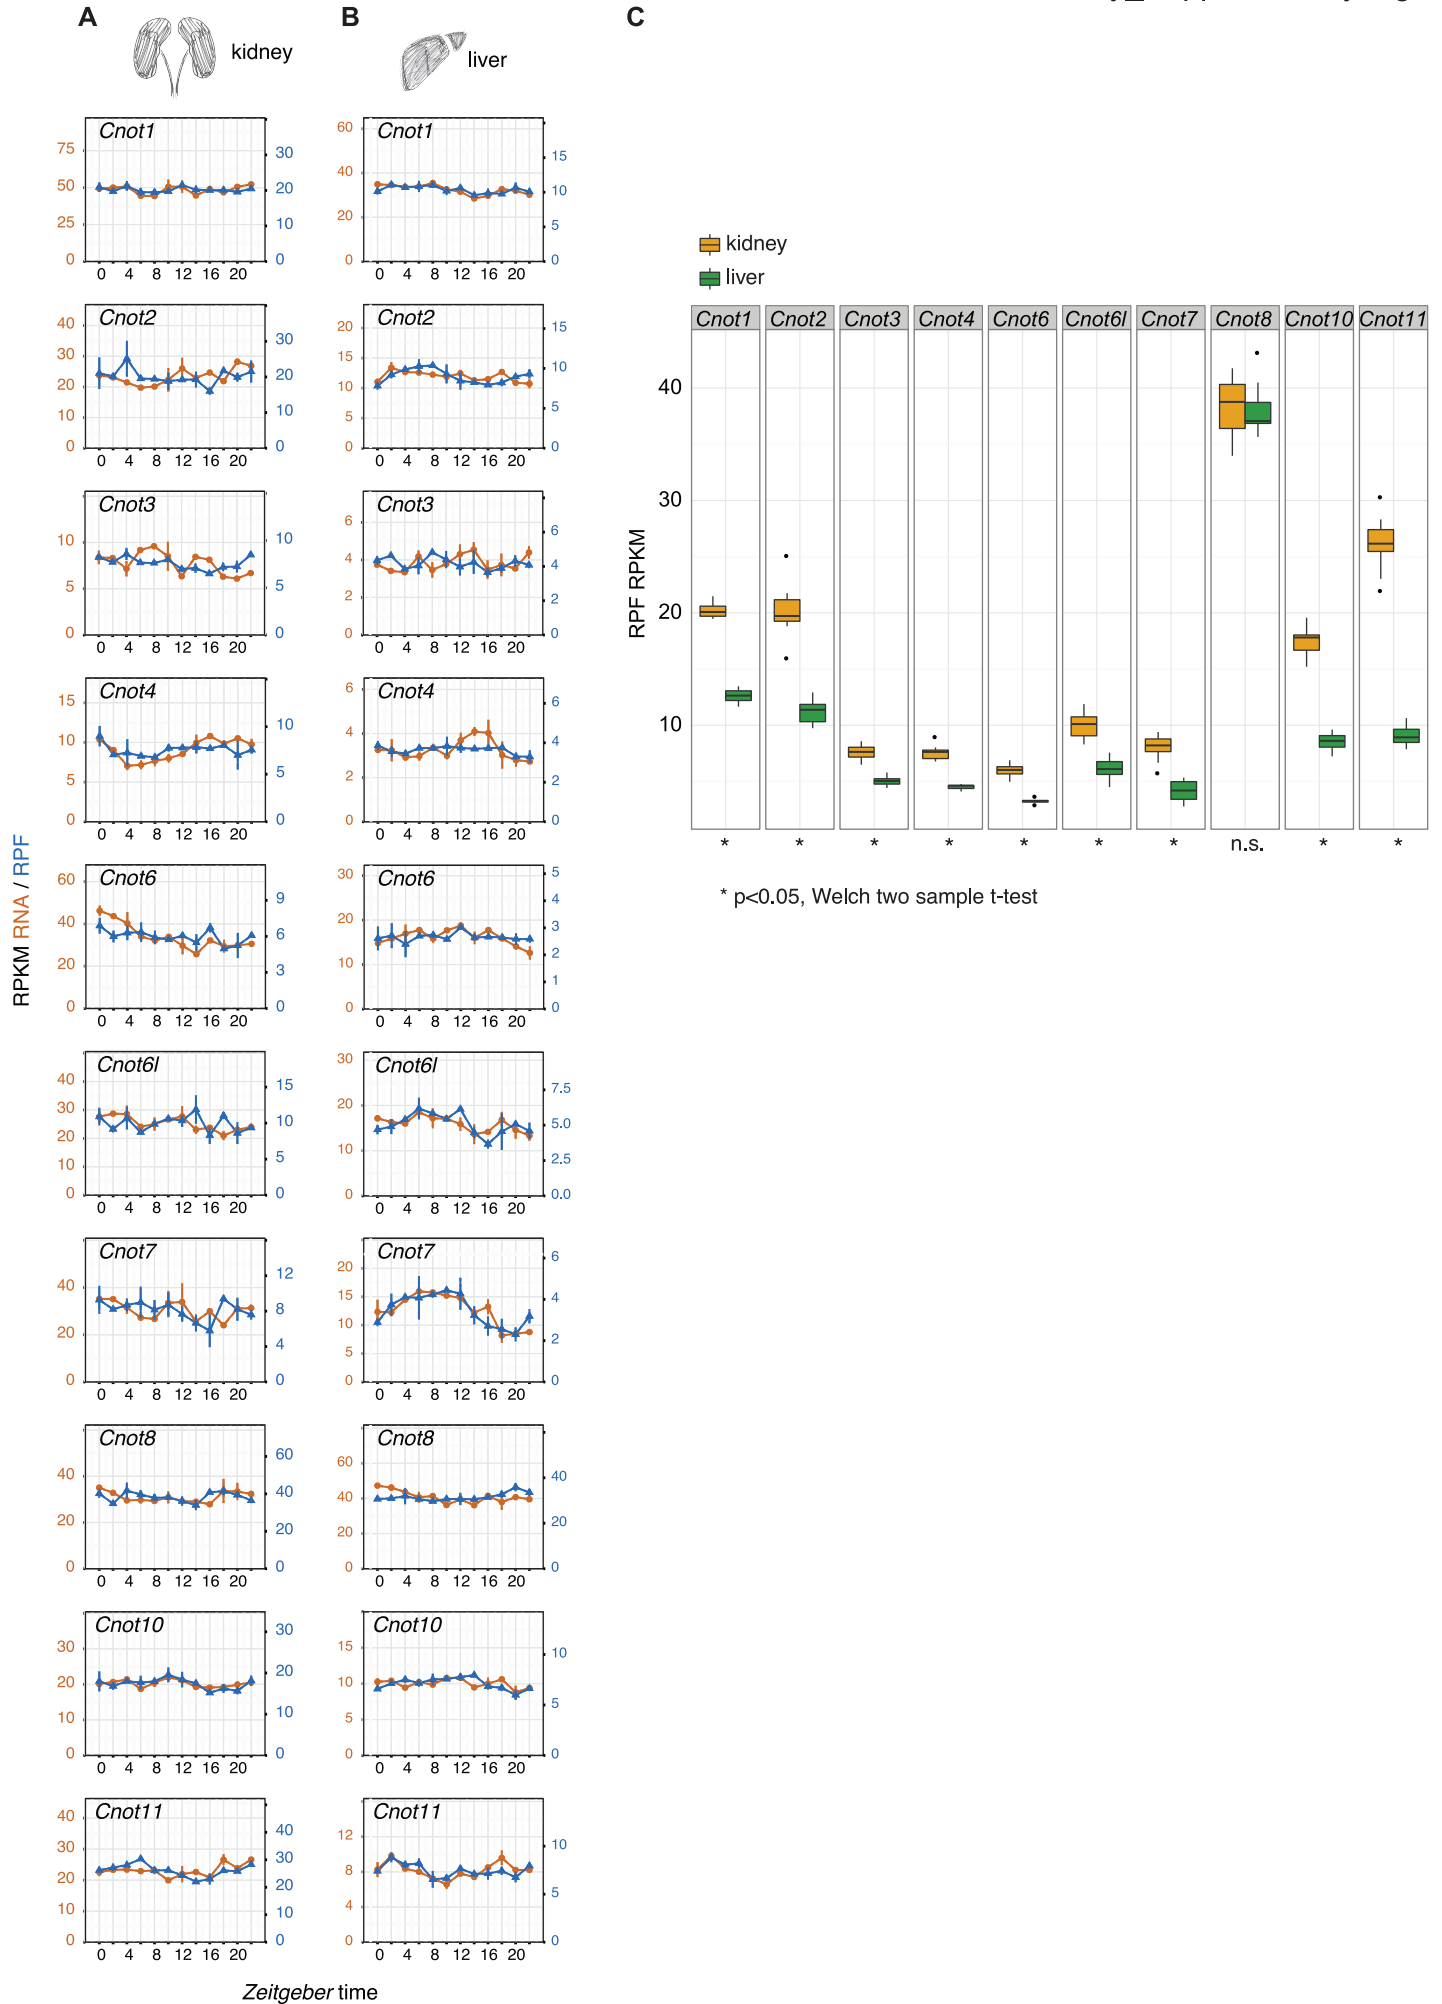

**A** rhythmic in kidney

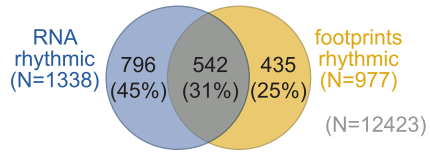

**B** “RNA only” rhythmic (796 genes)

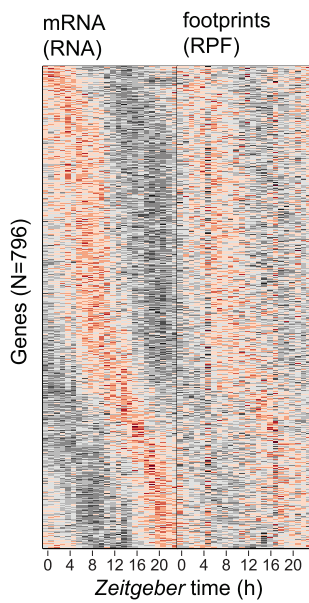

**C** RNA and RPF rhythmic (542 genes)

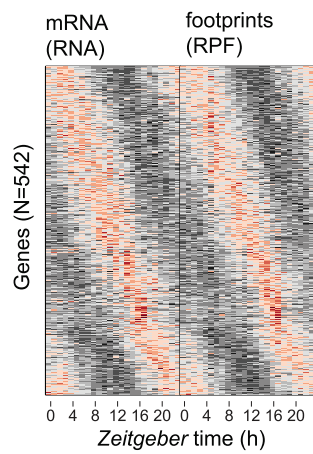

**D** “footprints only” rhythmic (435 genes)

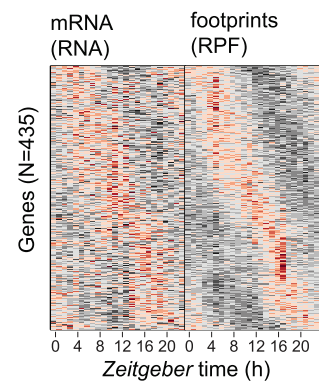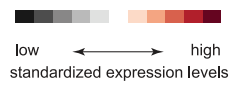

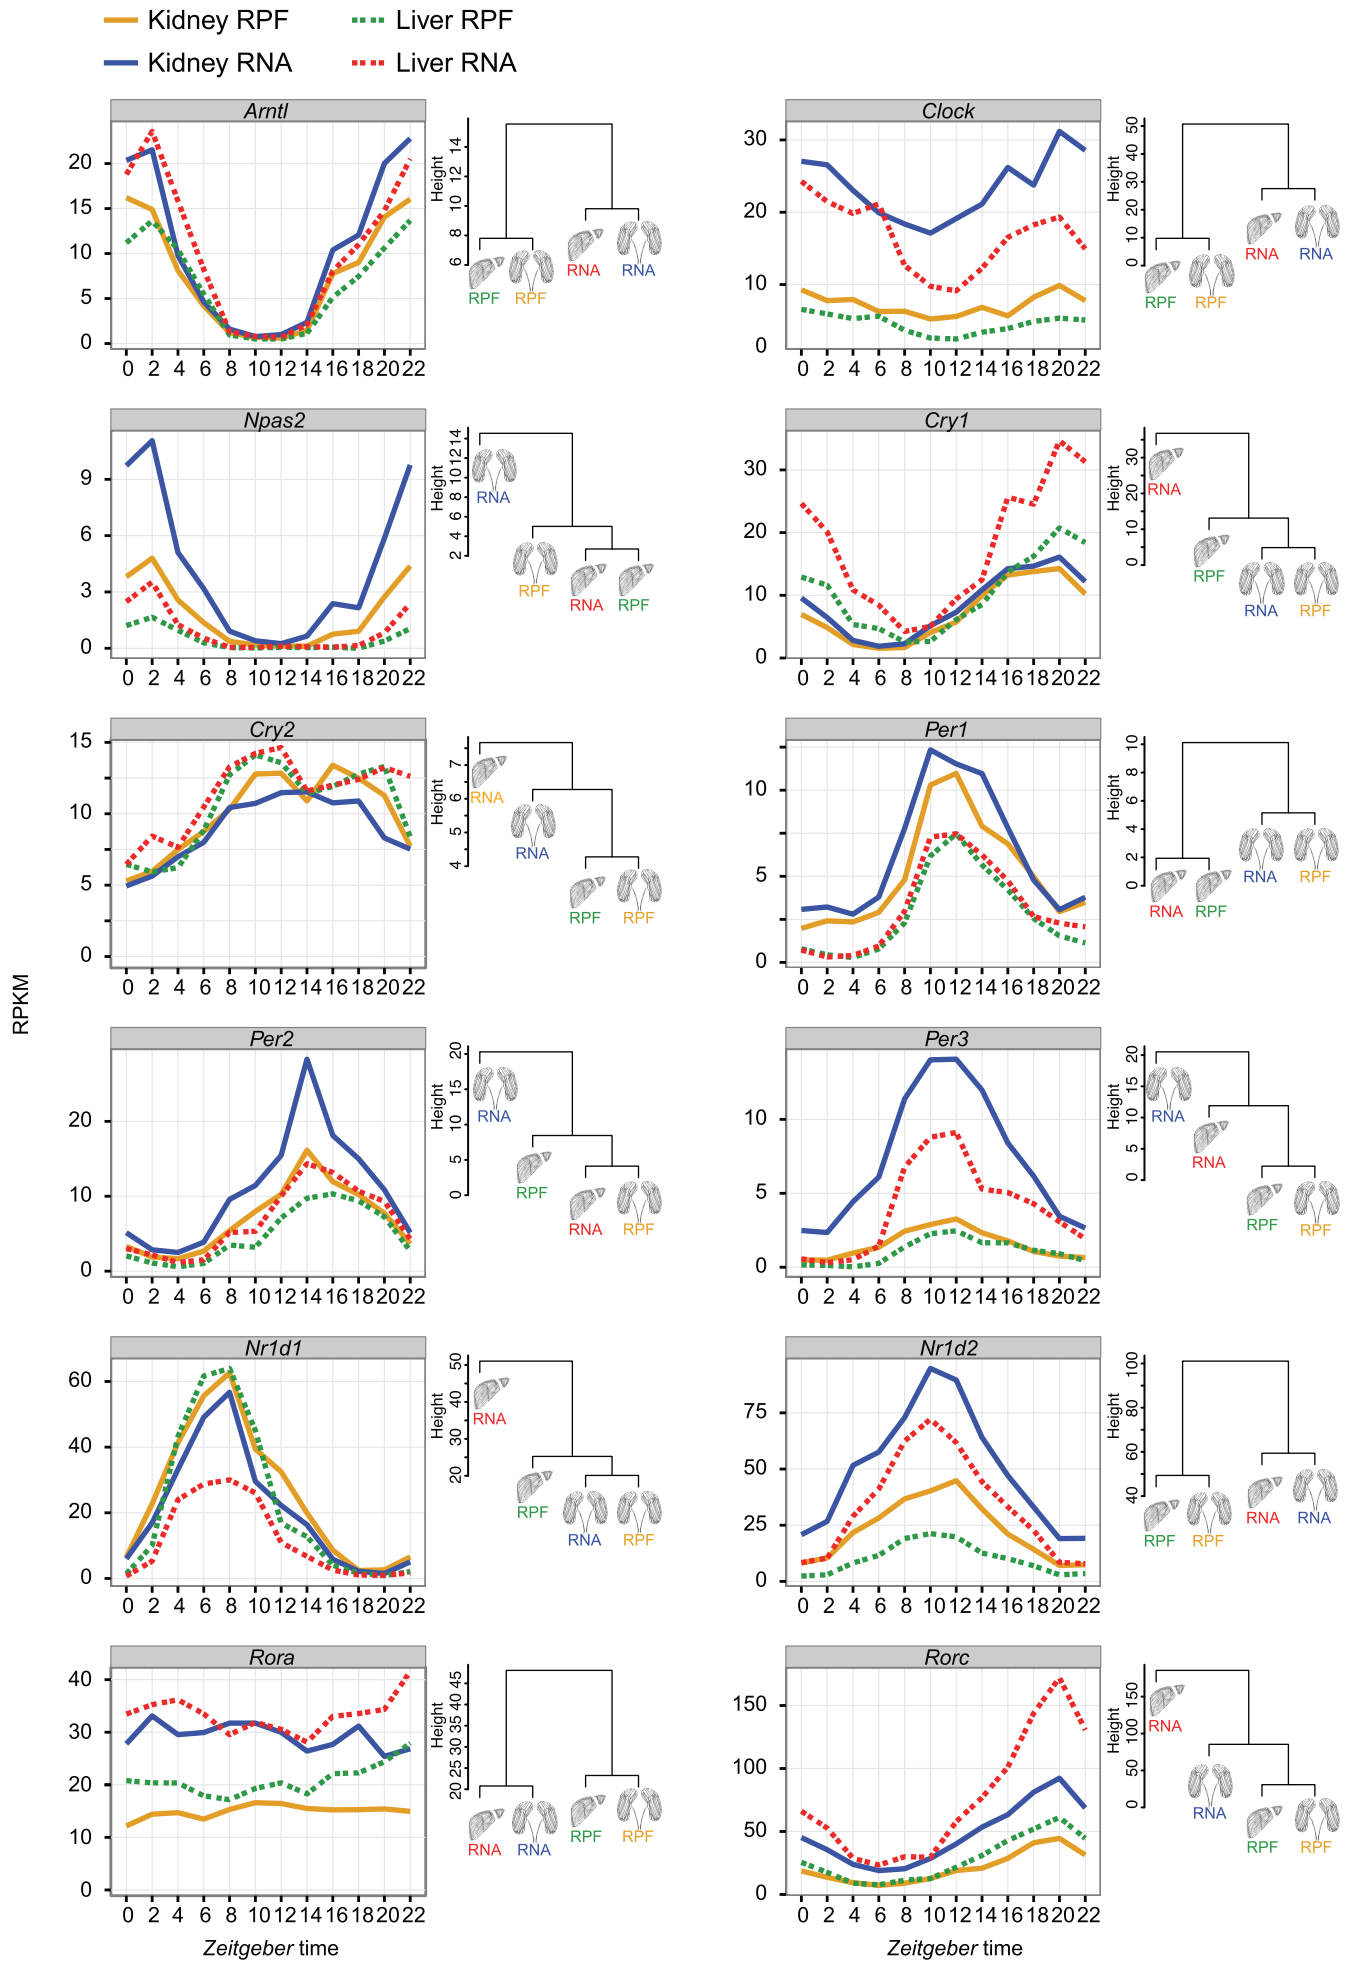

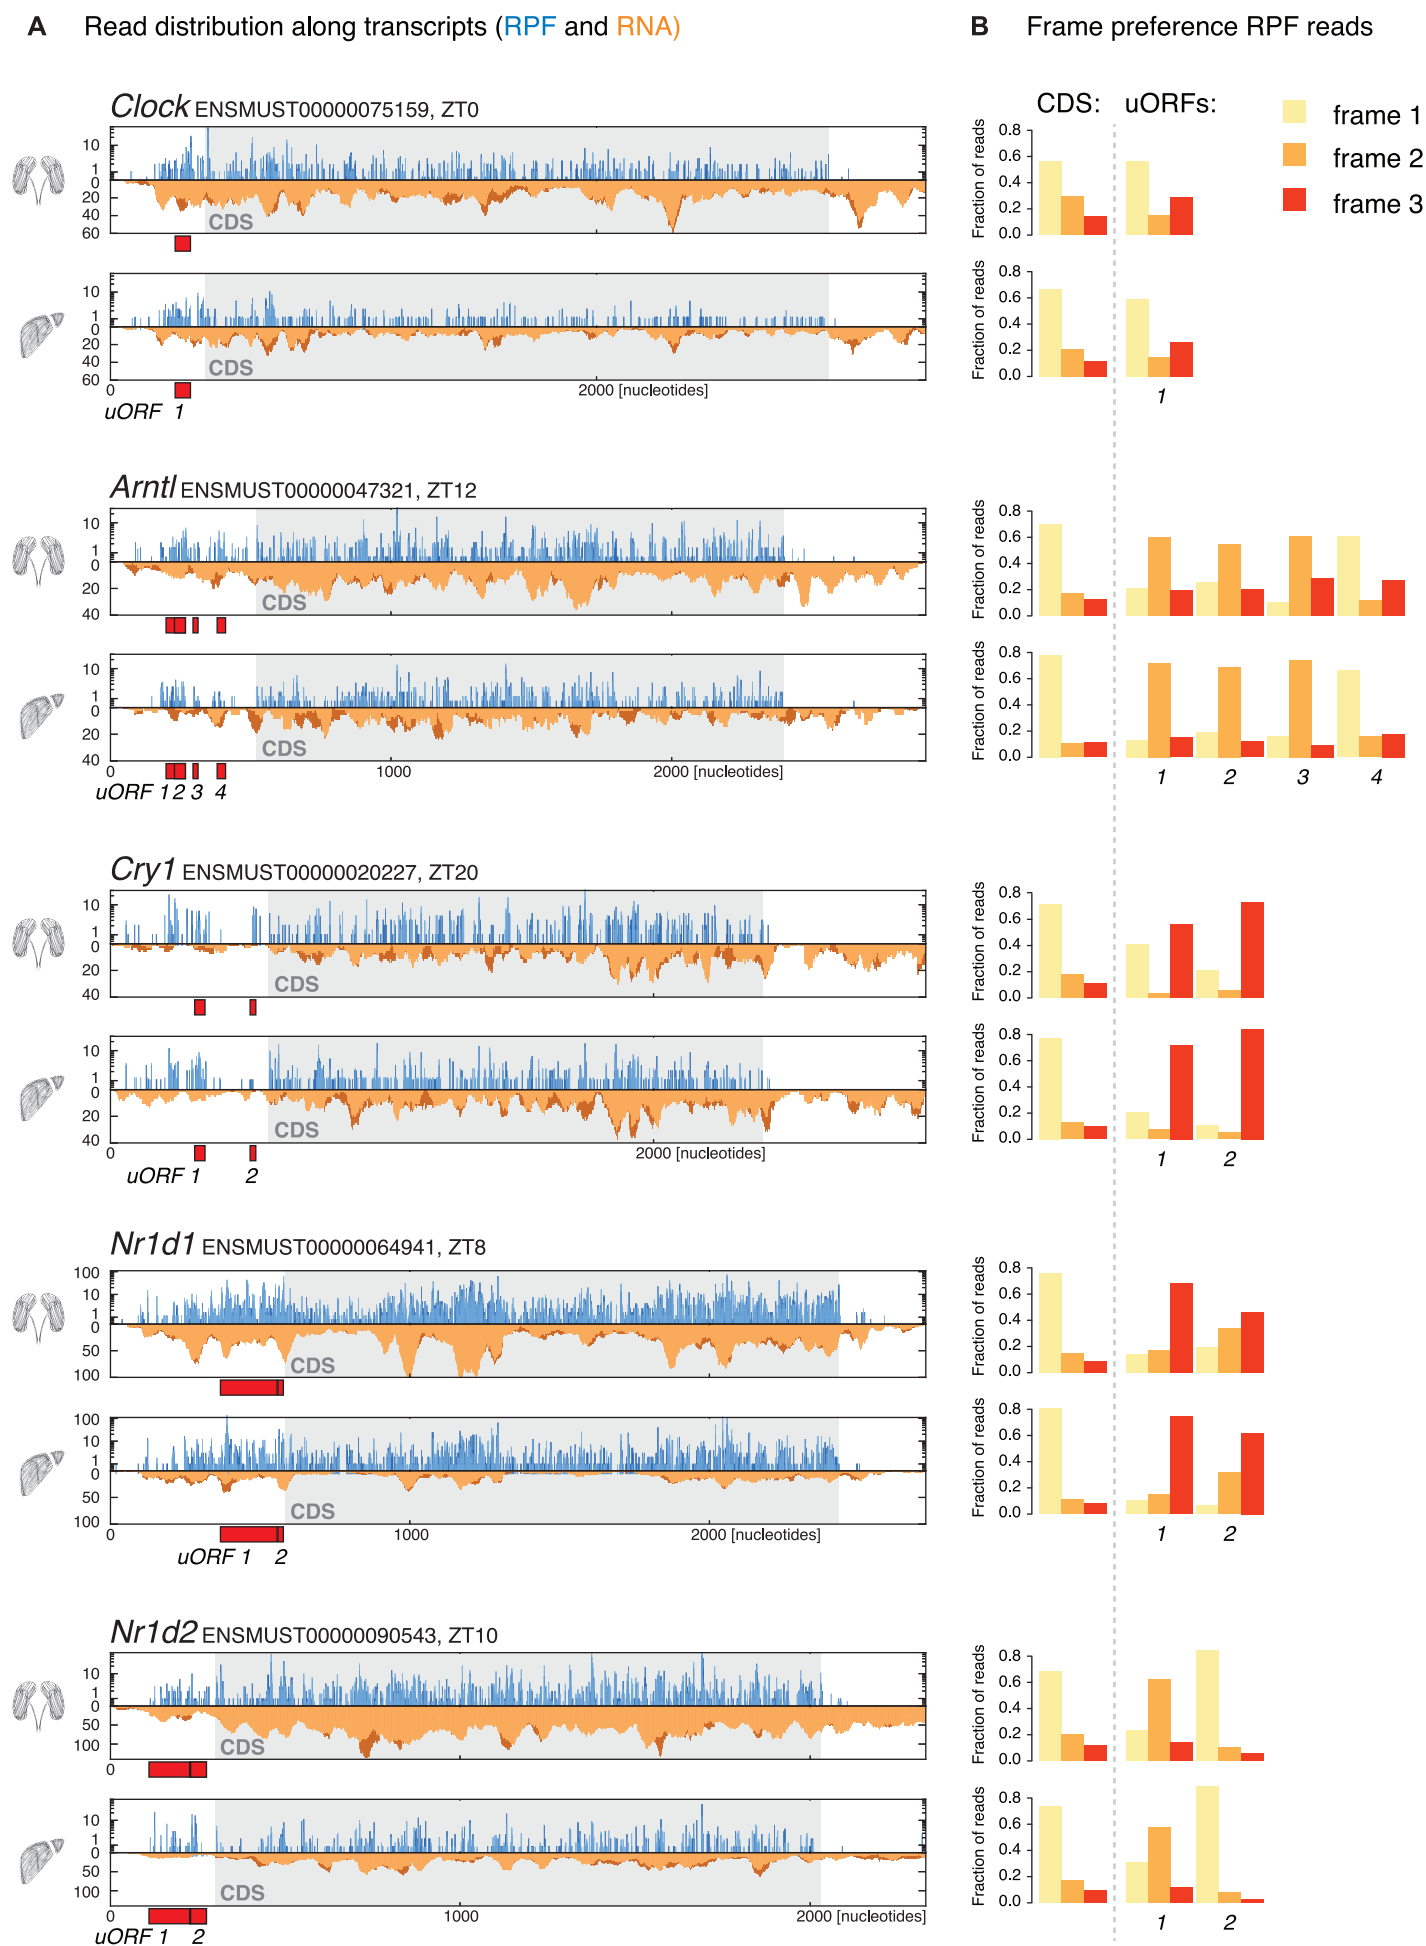

Supplement: Supplementary file [file 1]
