# Supplementary material
Source: publisher figshare collection journal article supplement (https://springernature.figshare.com/articles/dataset/_/4903193)
Supplement: Supplementary file 1777 [file 1]

# Cldn6 TR

# Cldn6 log2(Ribosome occupancy
