# Supplementary material
Source: publisher figshare collection journal article supplement (https://springernature.figshare.com/articles/dataset/_/4903193)
Supplement: Supplementary file 4071 [file 1]

# 2810417H13Rik TR

# 2810417H13Rik log2(Ribosome occup
