# Supplementary material
Source: publisher figshare collection journal article supplement (https://springernature.figshare.com/articles/dataset/_/4903193)
Supplement: Supplementary file 7980 [file 1]

## Arg1 TR

# Arg1 log2(Ribosome occupancy)
