# Supplementary material
Source: publisher figshare collection journal article supplement (https://springernature.figshare.com/articles/dataset/_/4903193)
Supplement: Supplementary file 10175 [file 1]

# Adm2 TR

# Adm2 log2(Ribosome occupancy
