# Supplementary material
Source: publisher figshare collection journal article supplement (https://springernature.figshare.com/articles/dataset/_/4903193)
Supplement: Supplementary file 12830 [file 1]

# Snai1 TR

# Snai1 log2(Ribosome occupancy)
