# Supplementary material (part 1 of 133)
Source: publisher figshare collection journal article supplement (https://springernature.figshare.com/articles/dataset/_/4903193)

# Pde11a

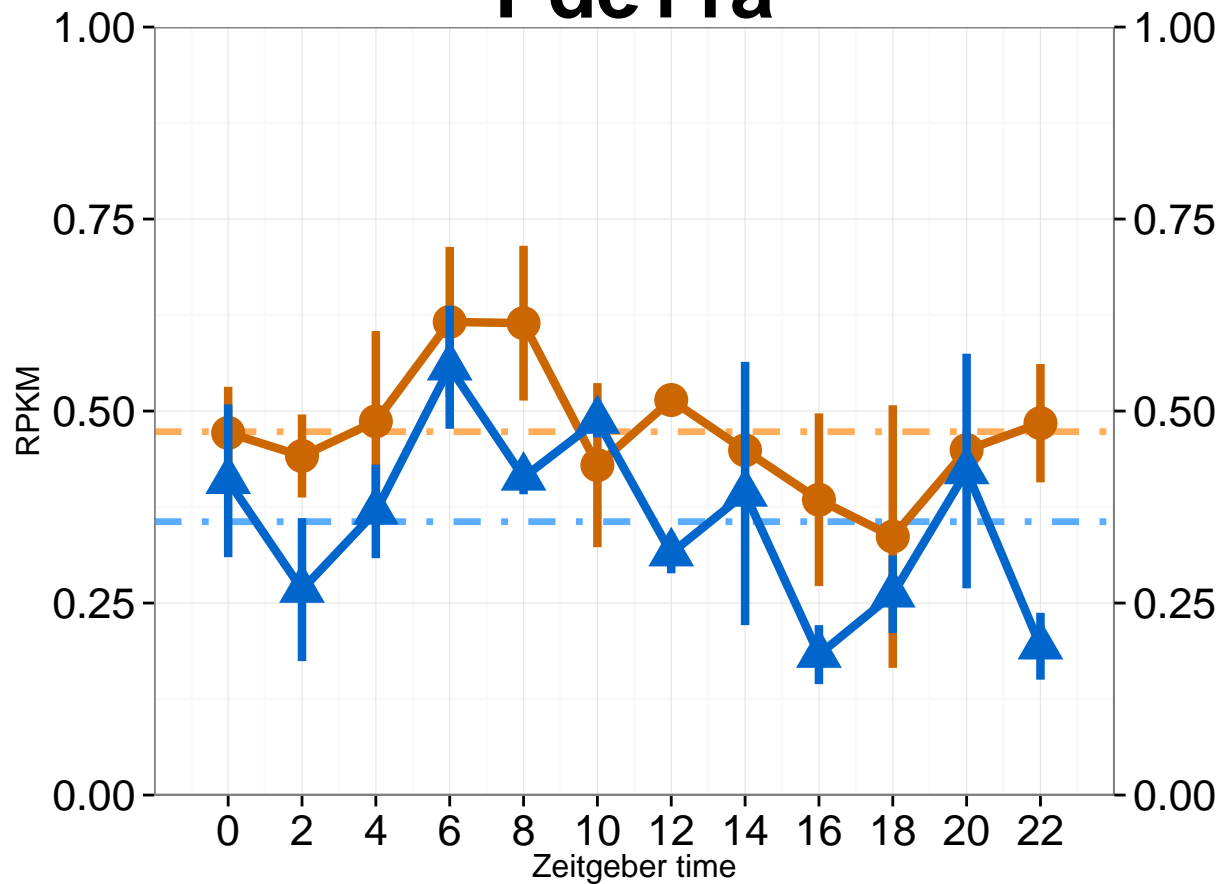

# Pde11a

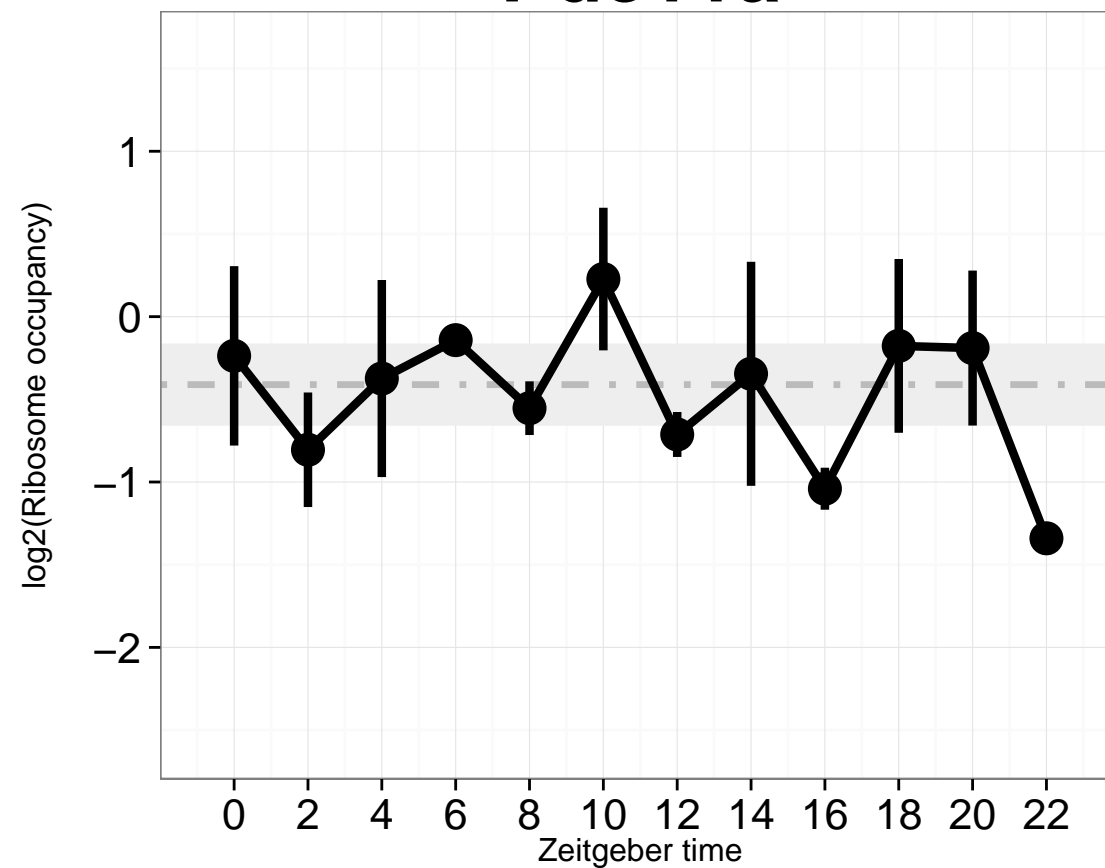

Supplement: Supplementary file 1 [file 1]

# Agbl5

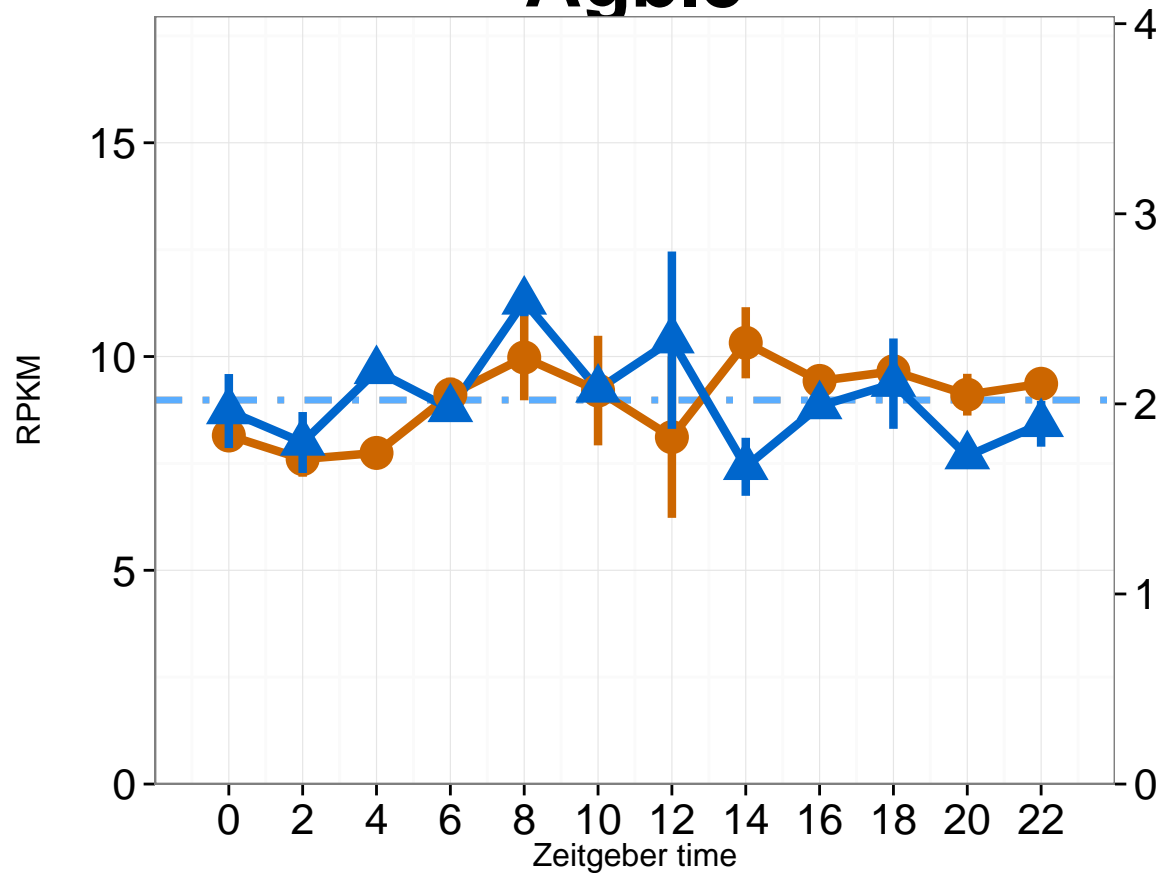

# Agbl5

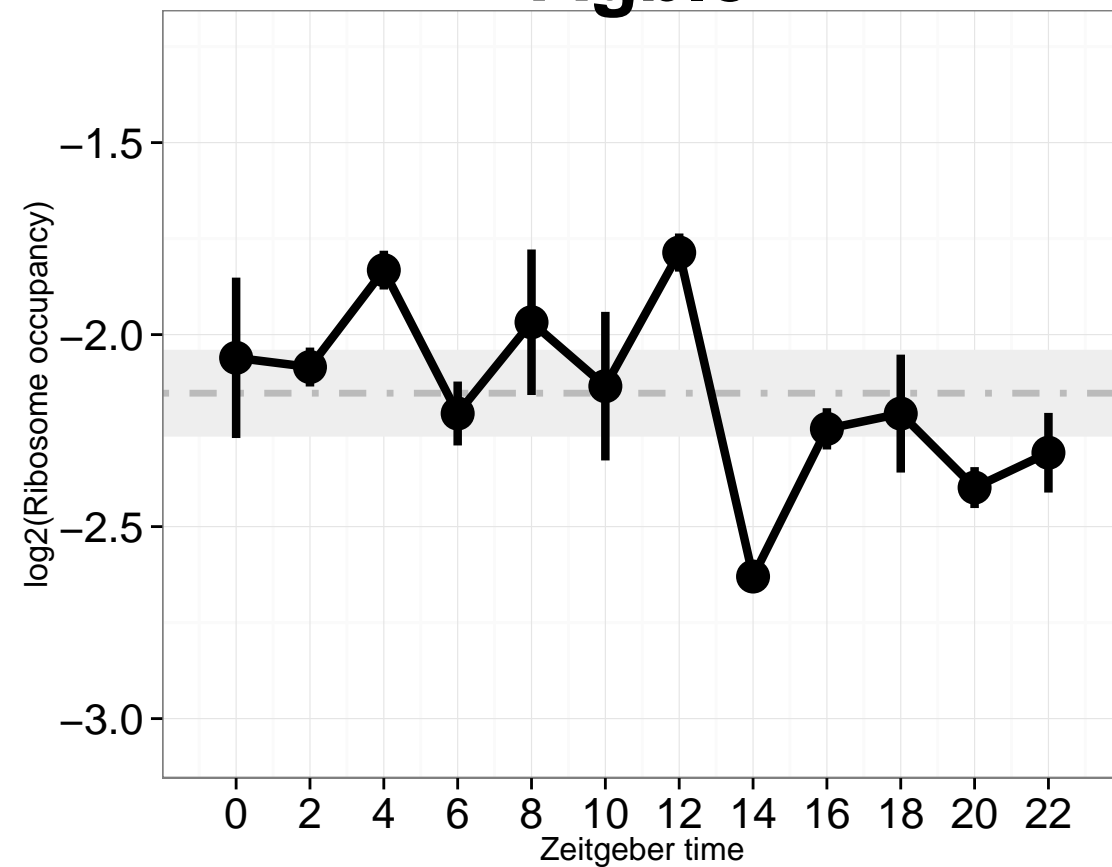

Supplement: Supplementary file 2 [file 1]

## MyIpf TR

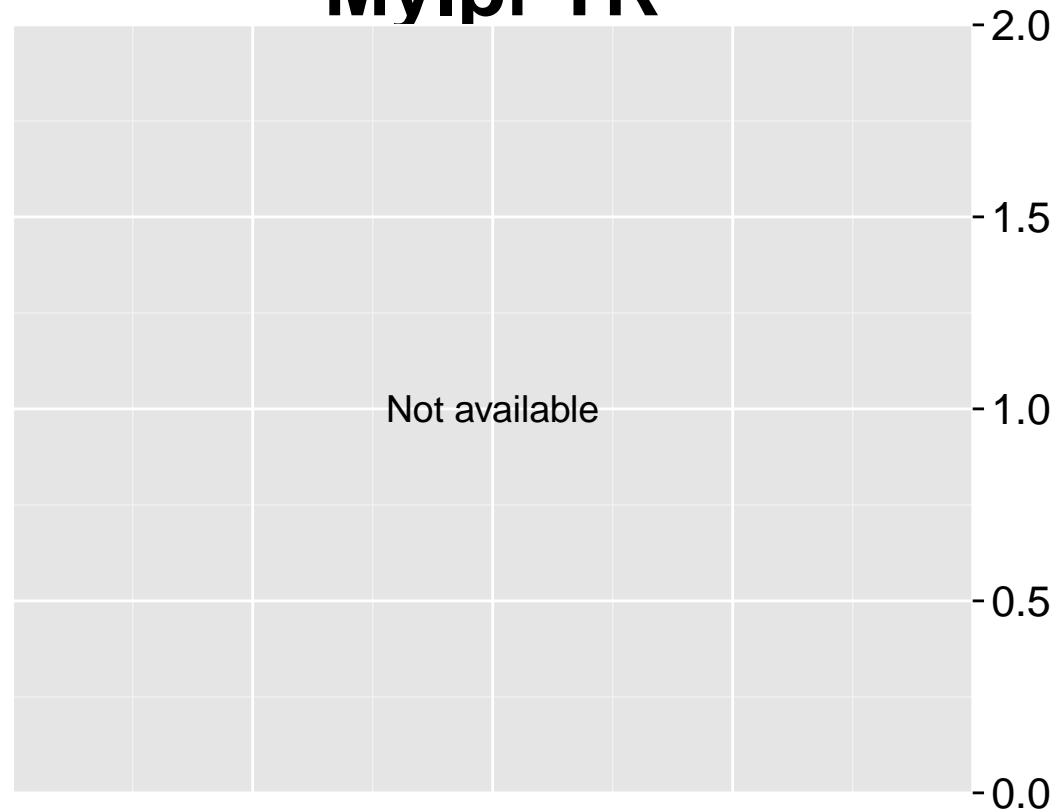

## MyIpf log2(Ribosome occupancy)

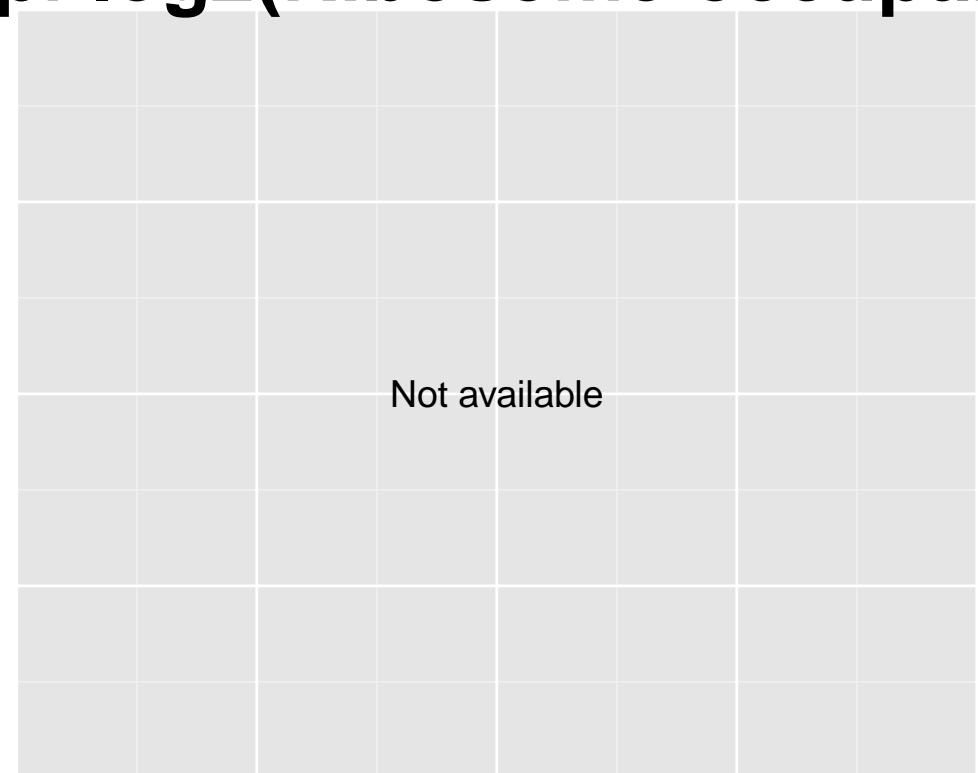

Supplement: Supplementary file 3 [file 1]

# Lclat1

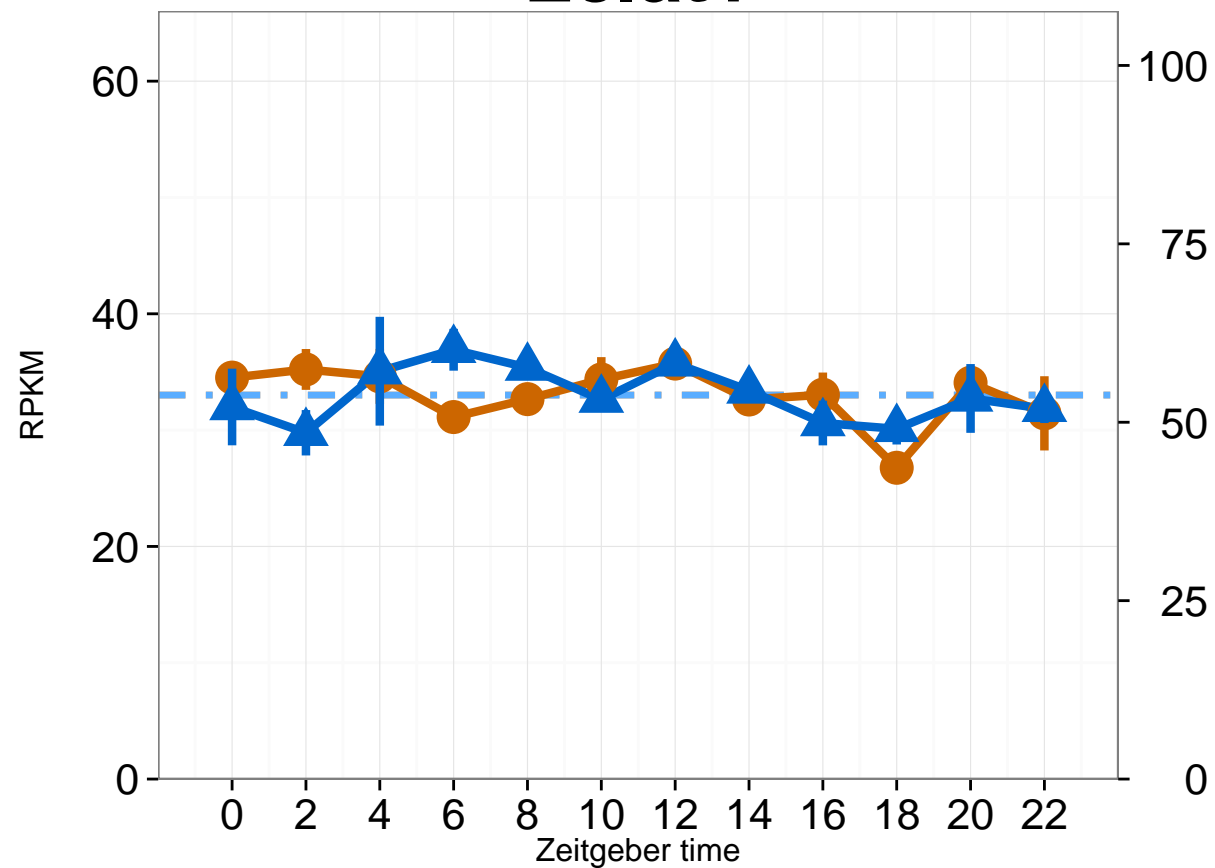

# Lclat1

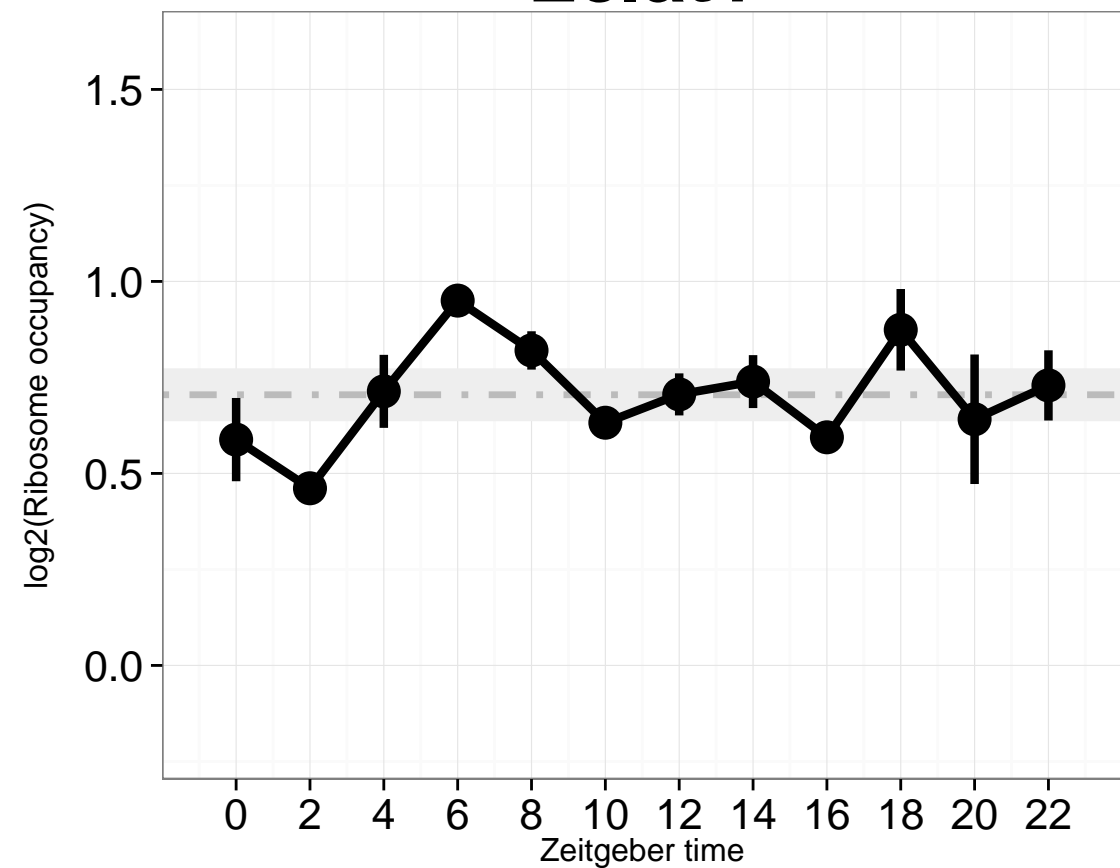

Supplement: Supplementary file 4 [file 1]

# Vil1

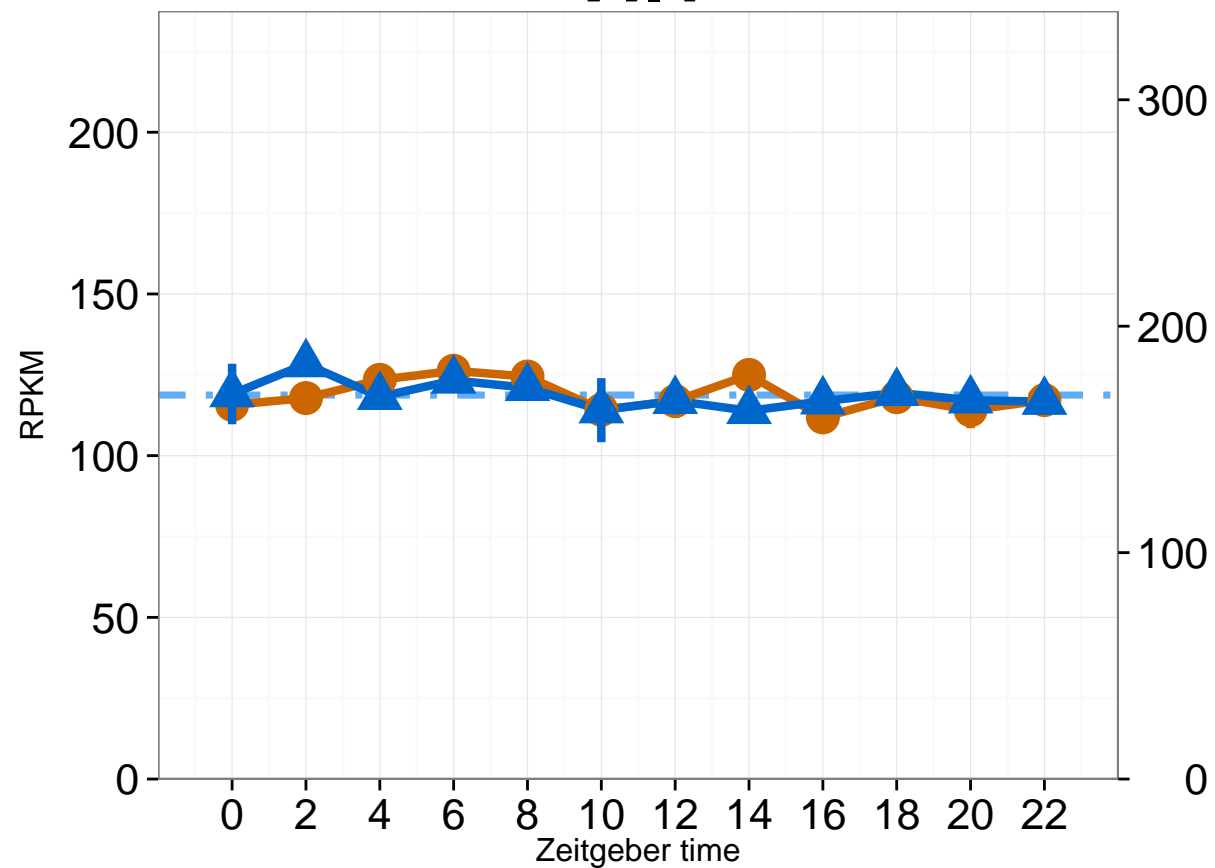

# Vil1

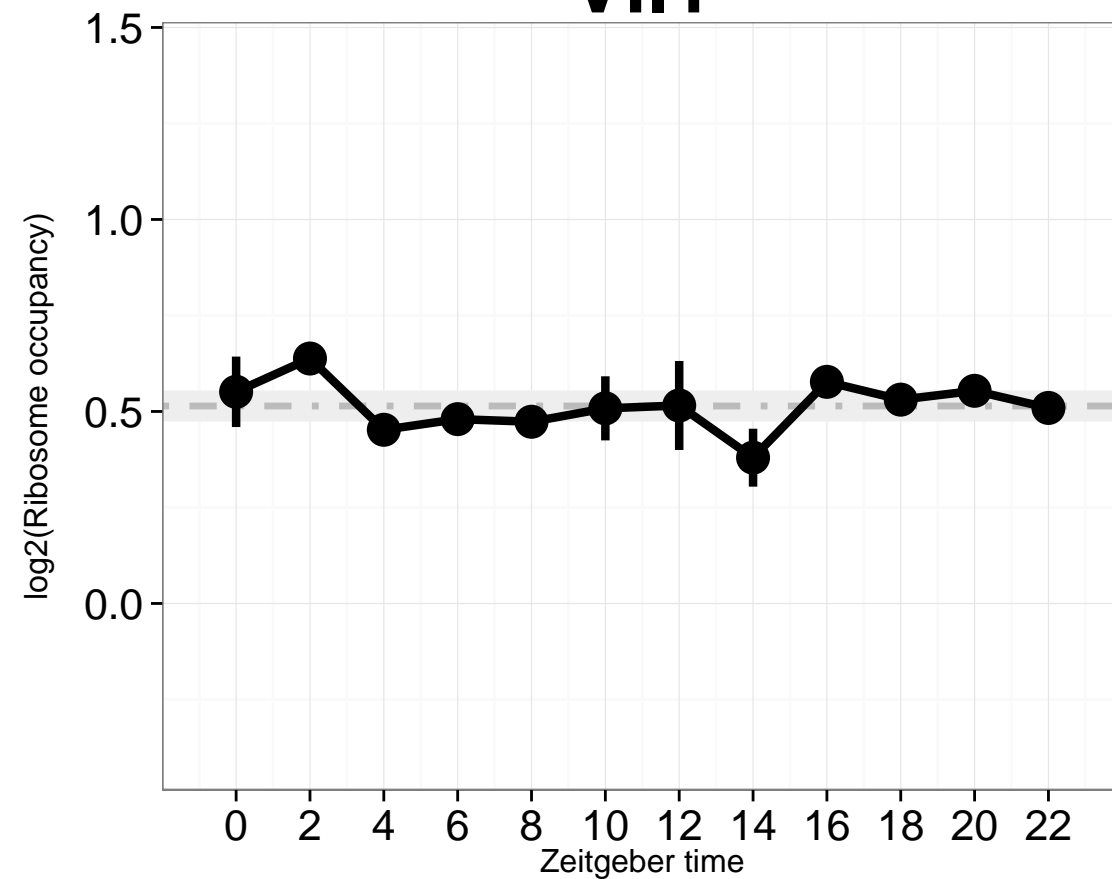

Supplement: Supplementary file 5 [file 1]

## Pcsk7

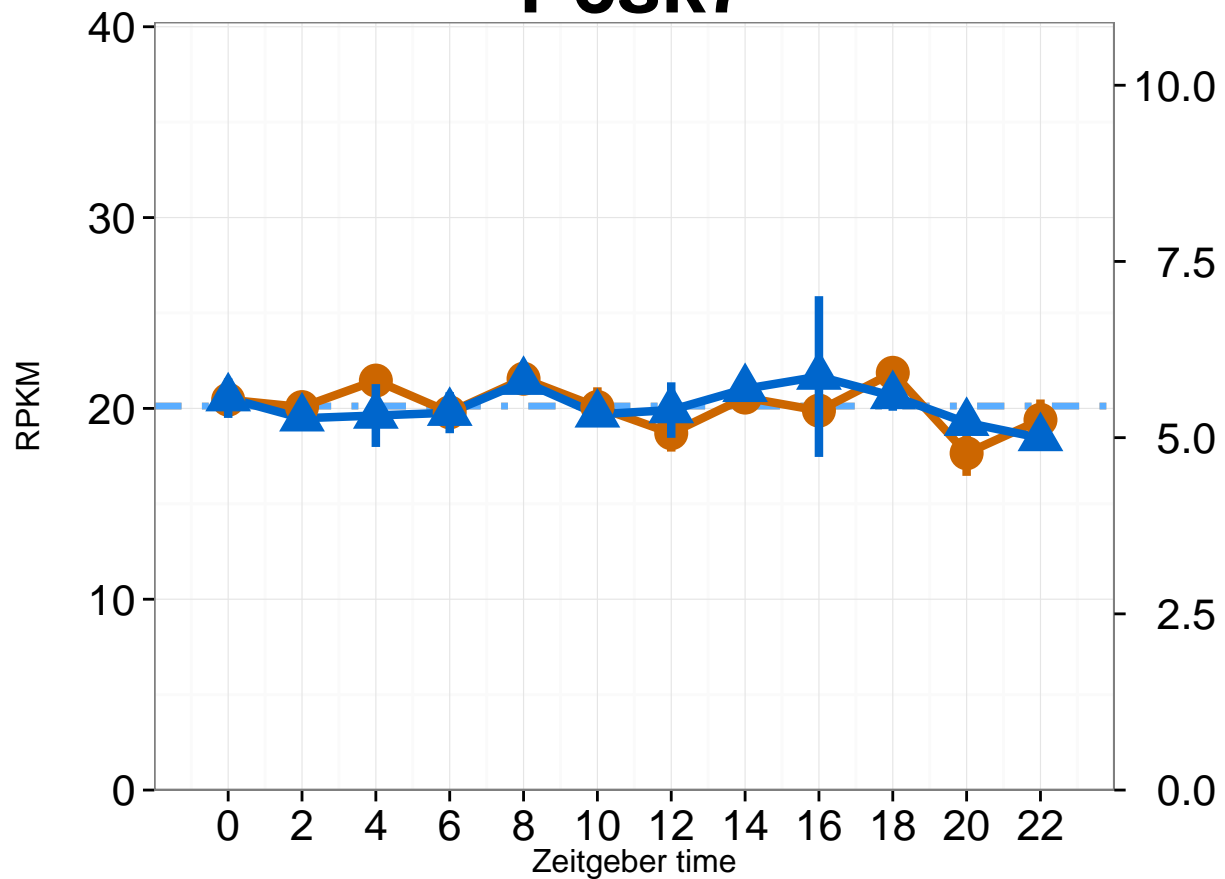

## Pcsk7

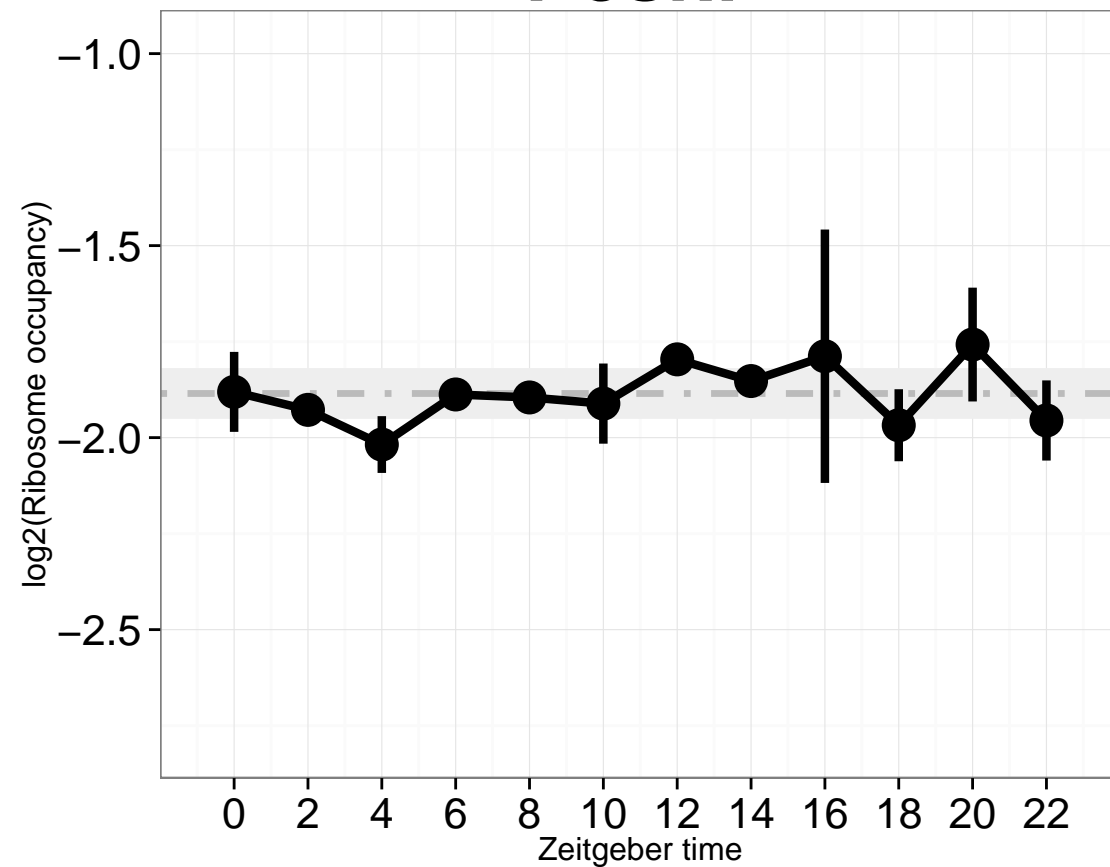

Supplement: Supplementary file 6 [file 1]

## Penk

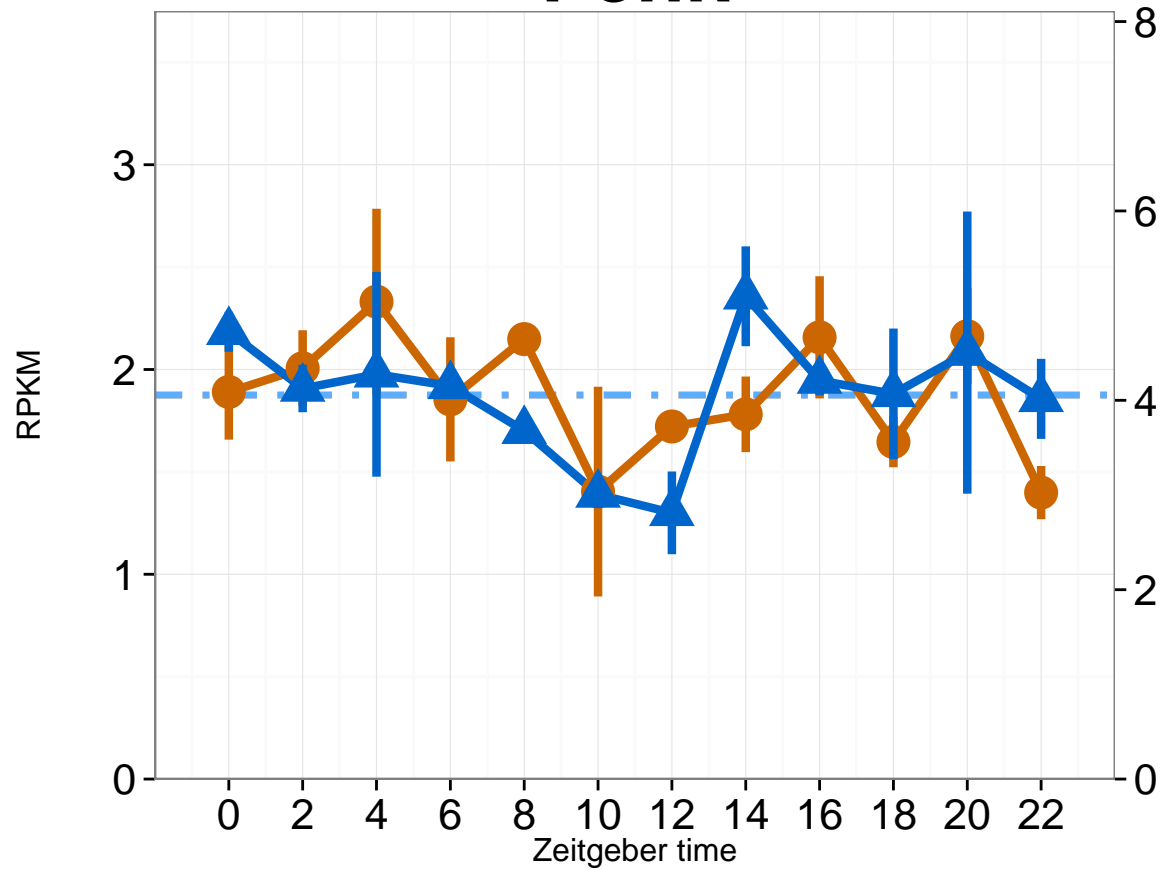

## Penk

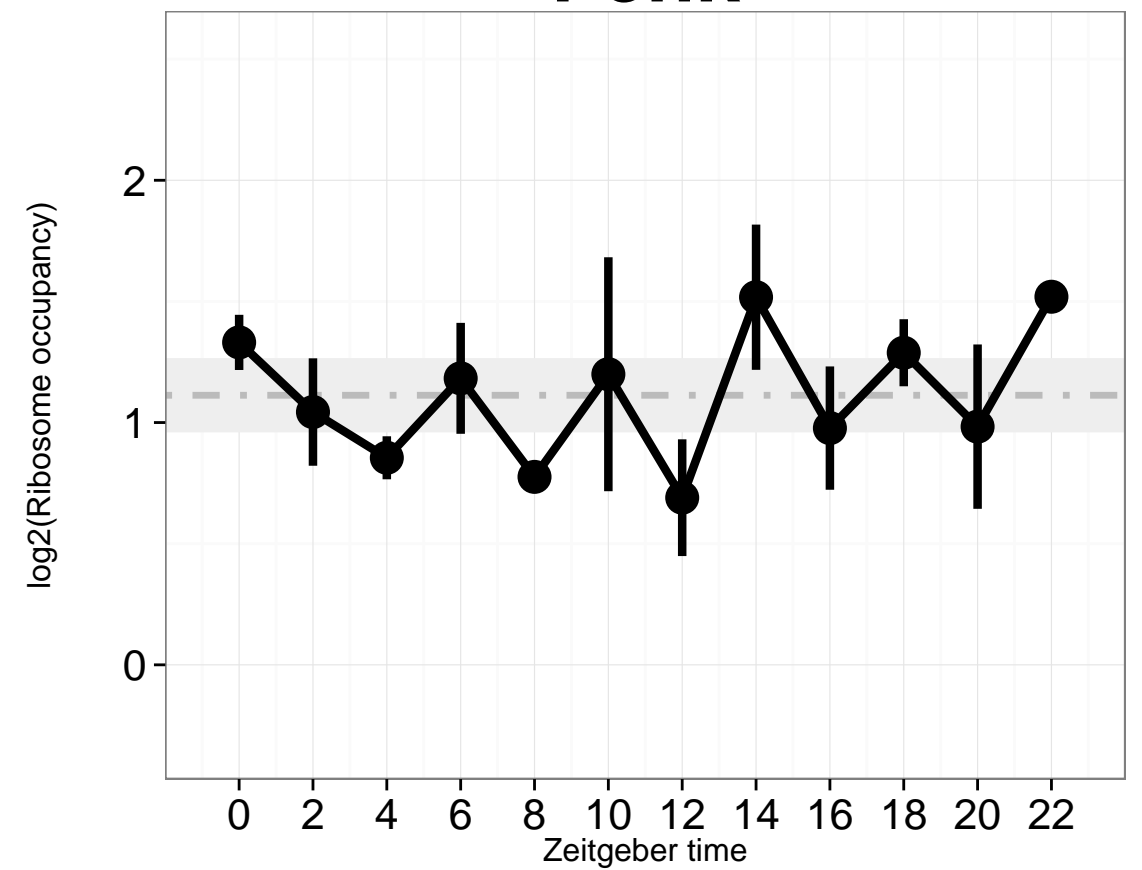

Supplement: Supplementary file 7 [file 1]

# Thtpa

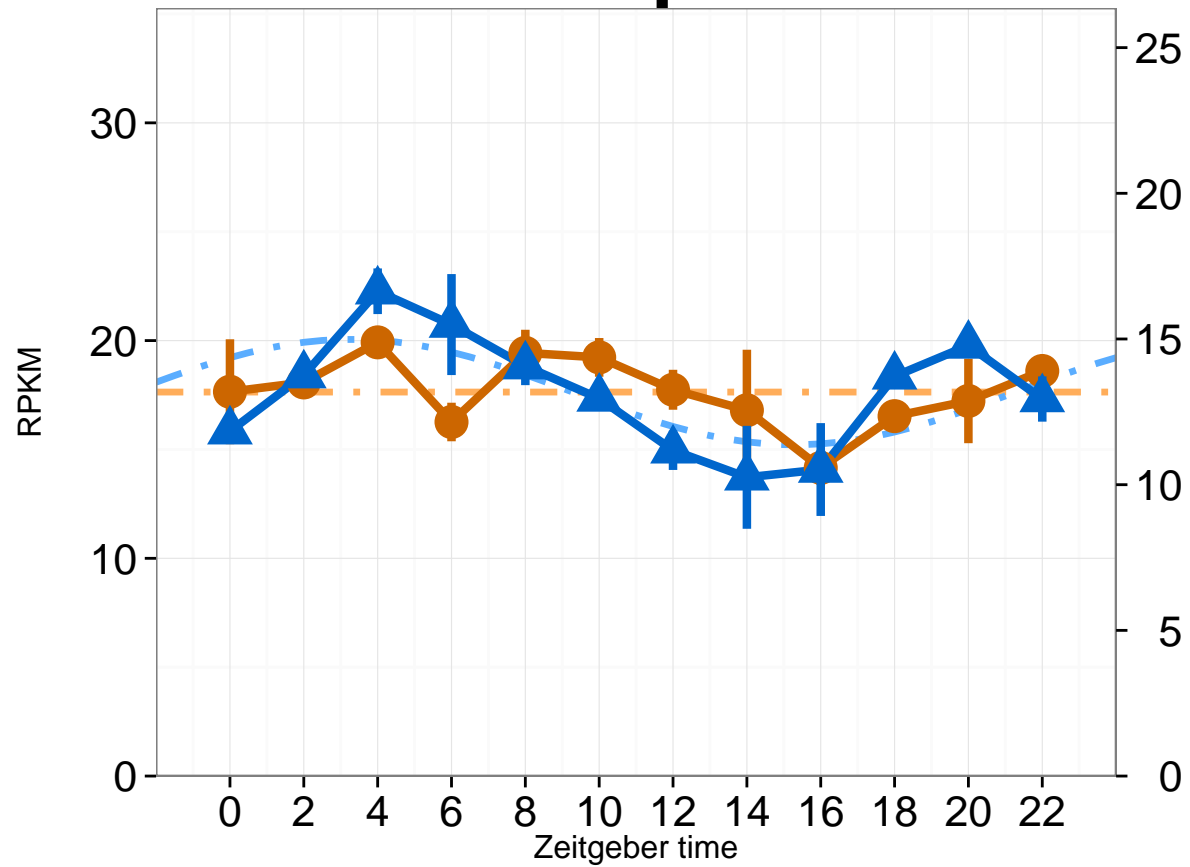

# Thtpa

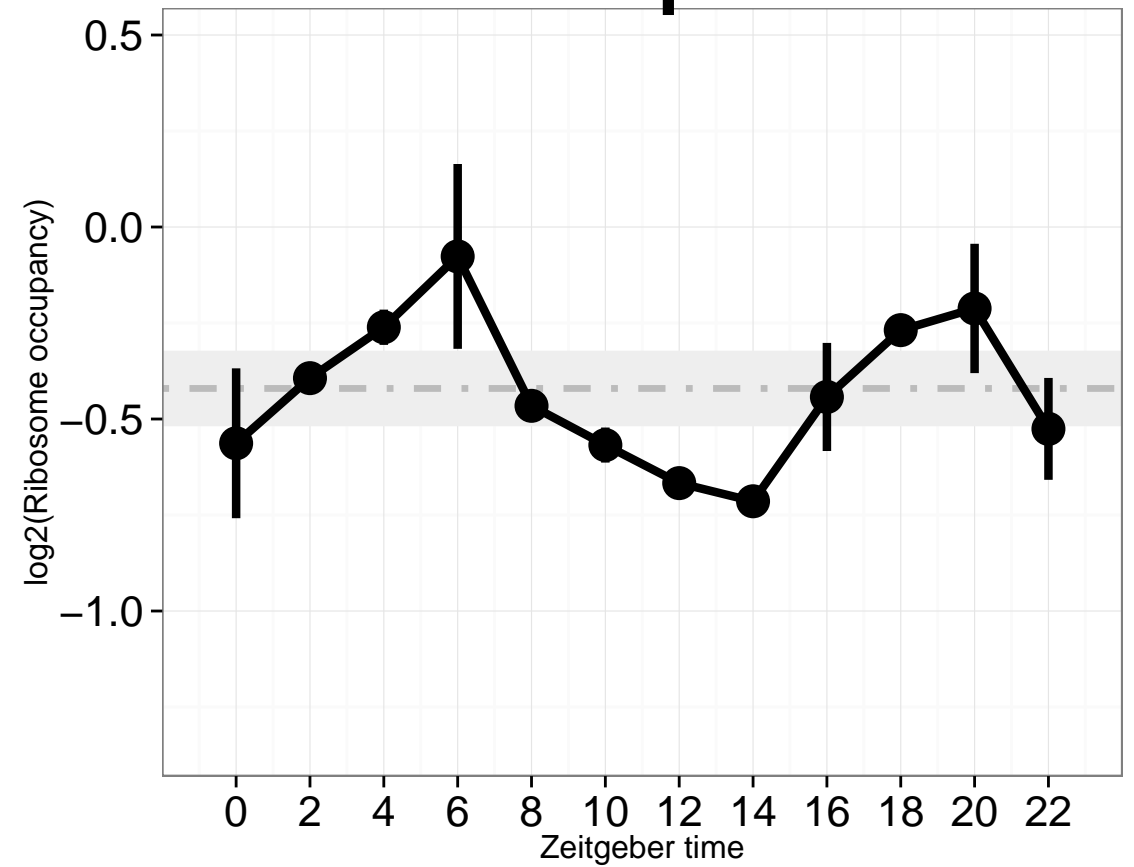

Supplement: Supplementary file 8 [file 1]

## Eef2k

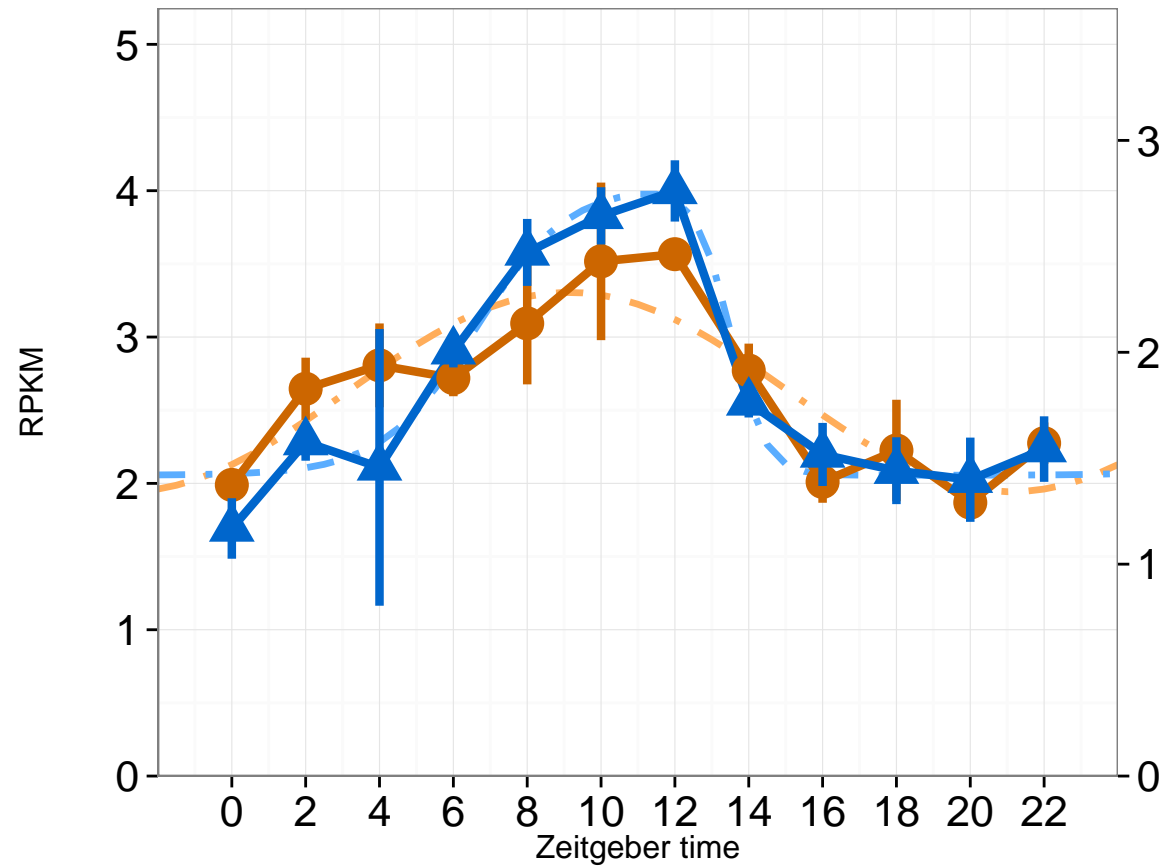

## Eef2k

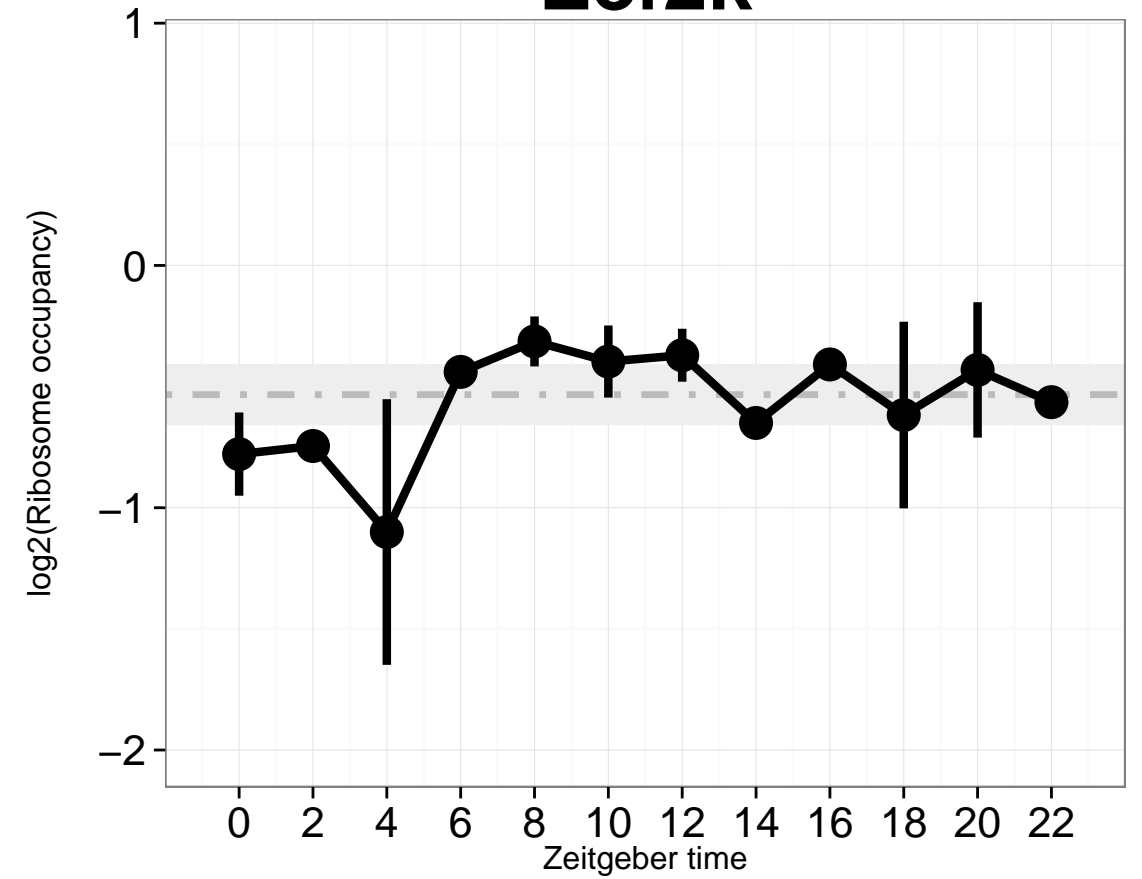

Supplement: Supplementary file 9 [file 1]

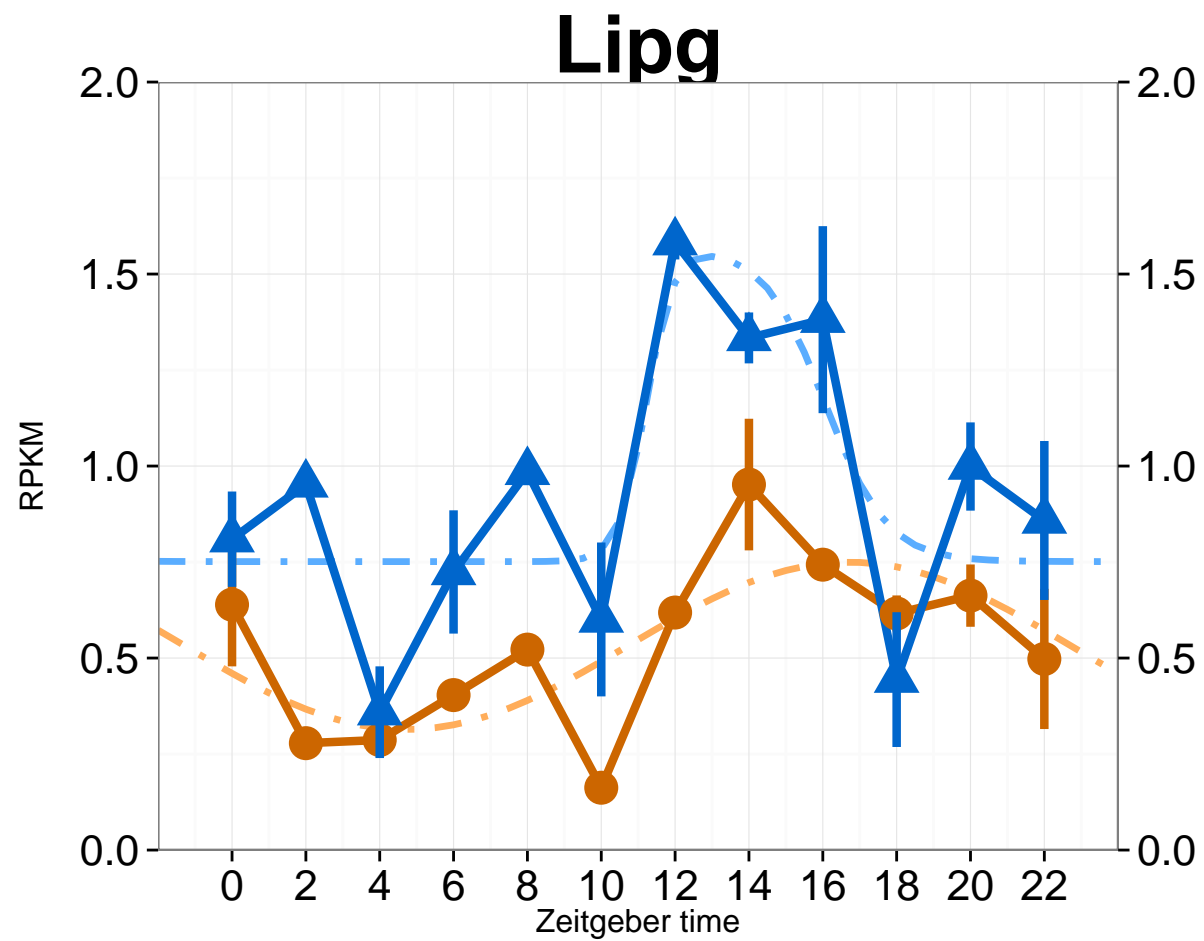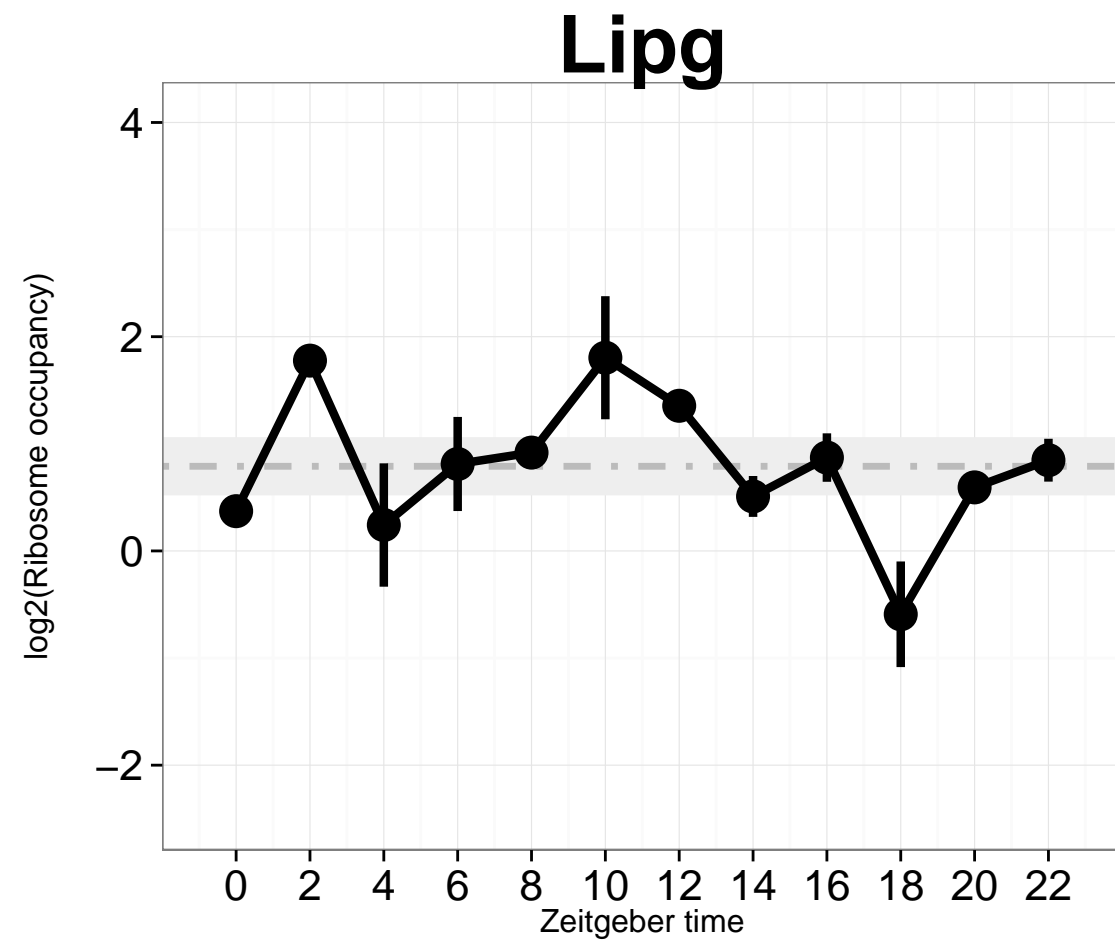

Supplement: Supplementary file 10 [file 1]

# Wbp5

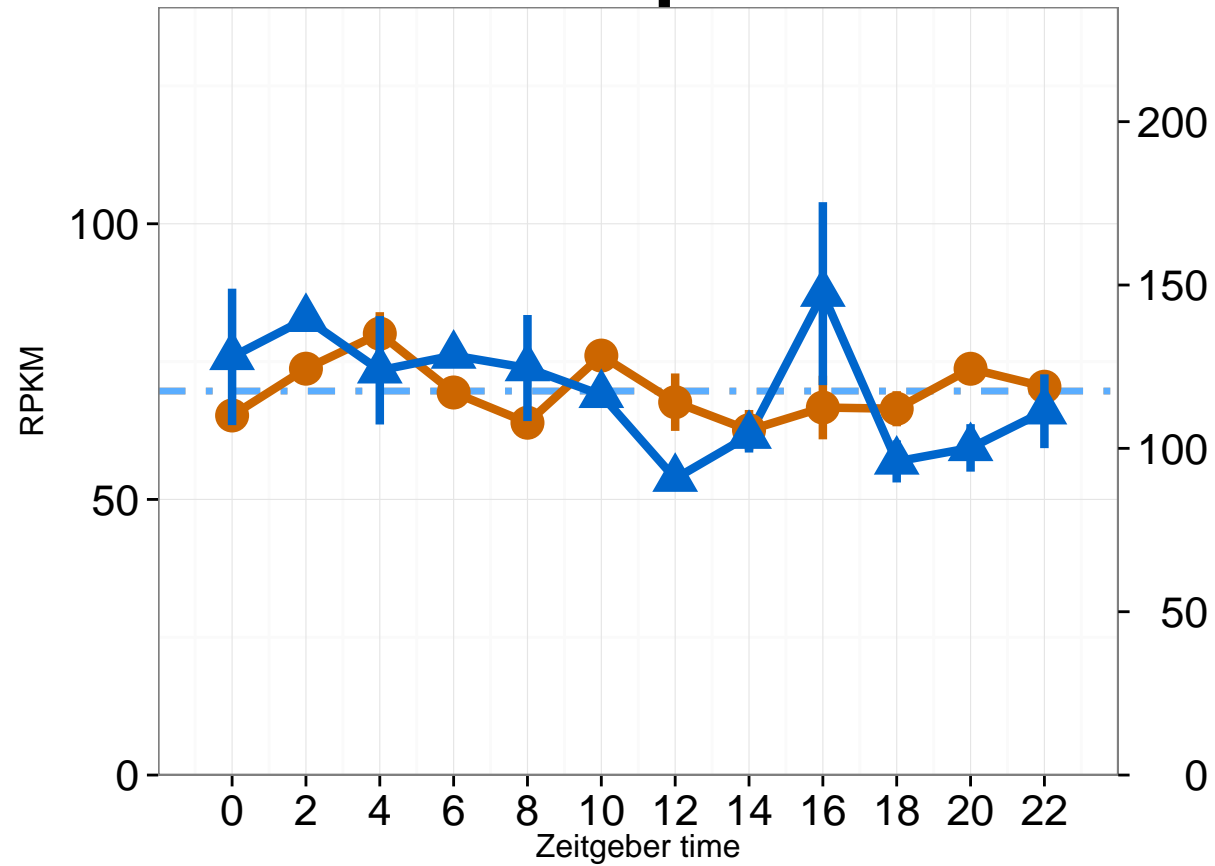

# Wbp5

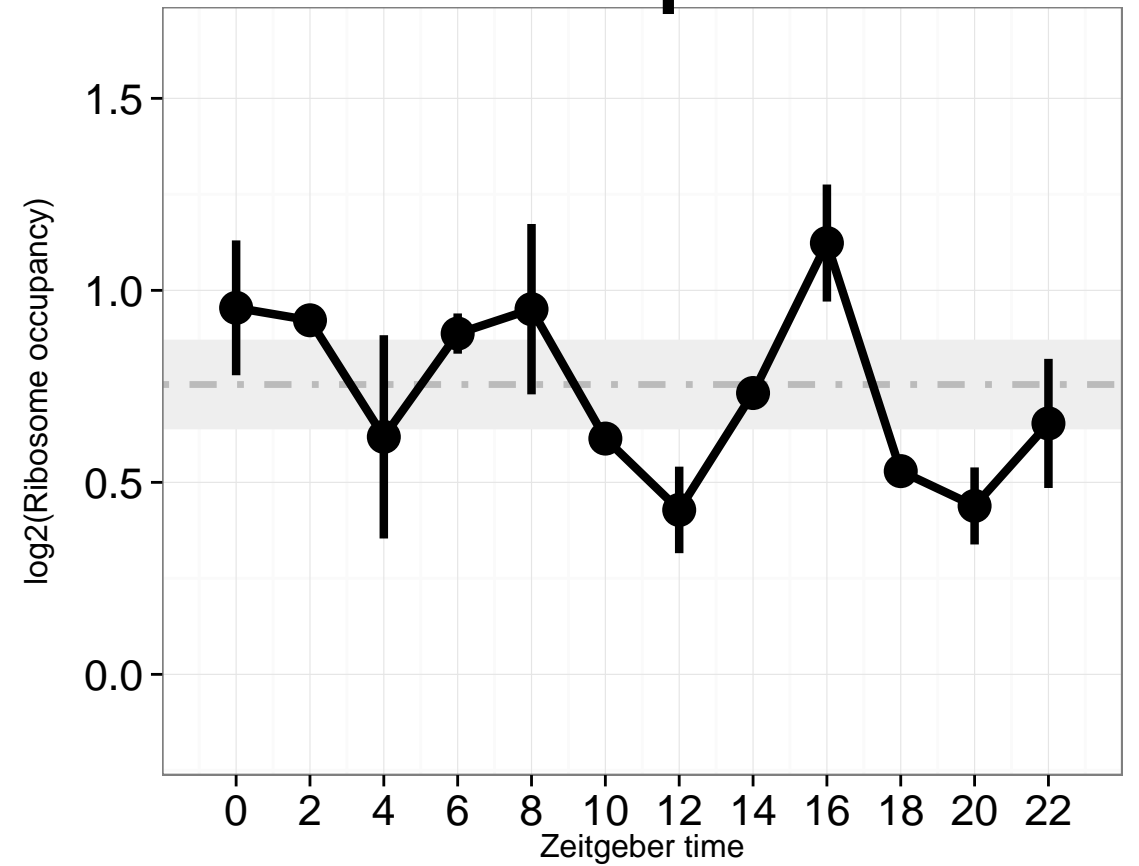

Supplement: Supplementary file 11 [file 1]

# Zfp128

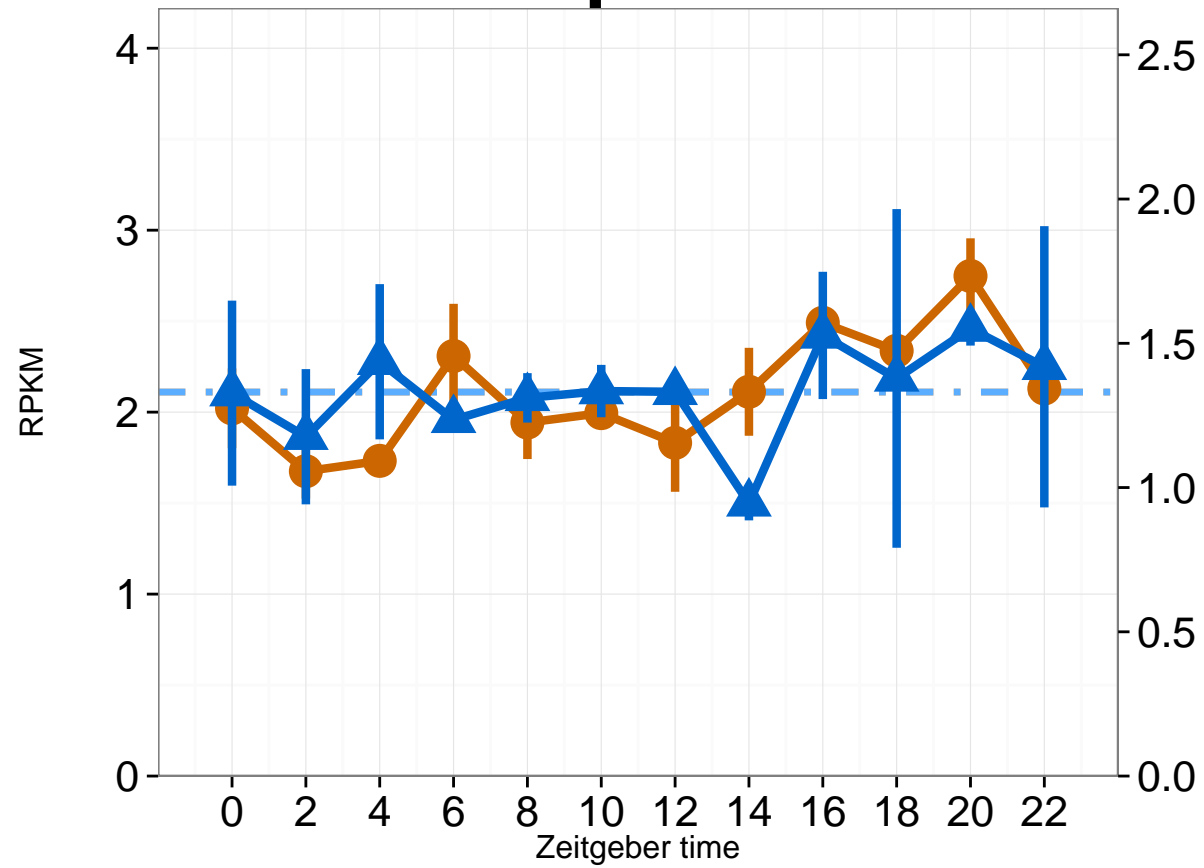

# Zfp128

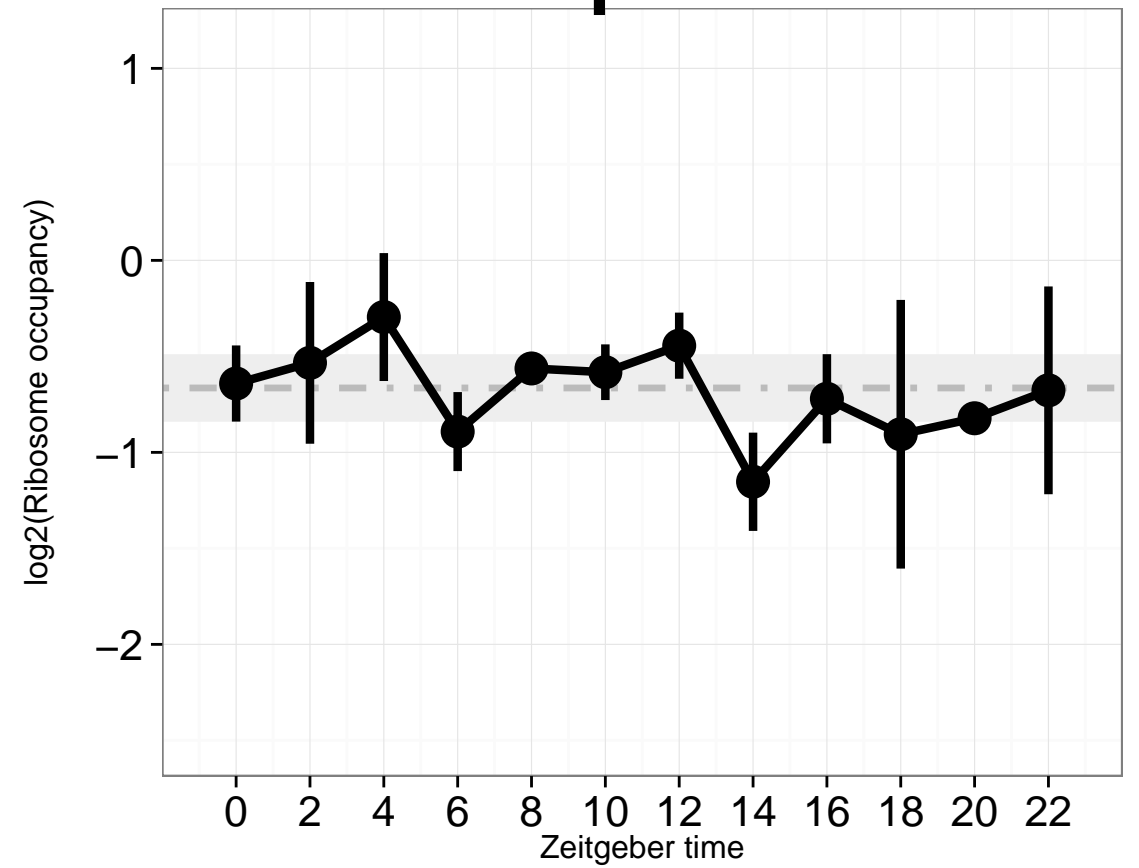

Supplement: Supplementary file 12 [file 1]

## Gm10768

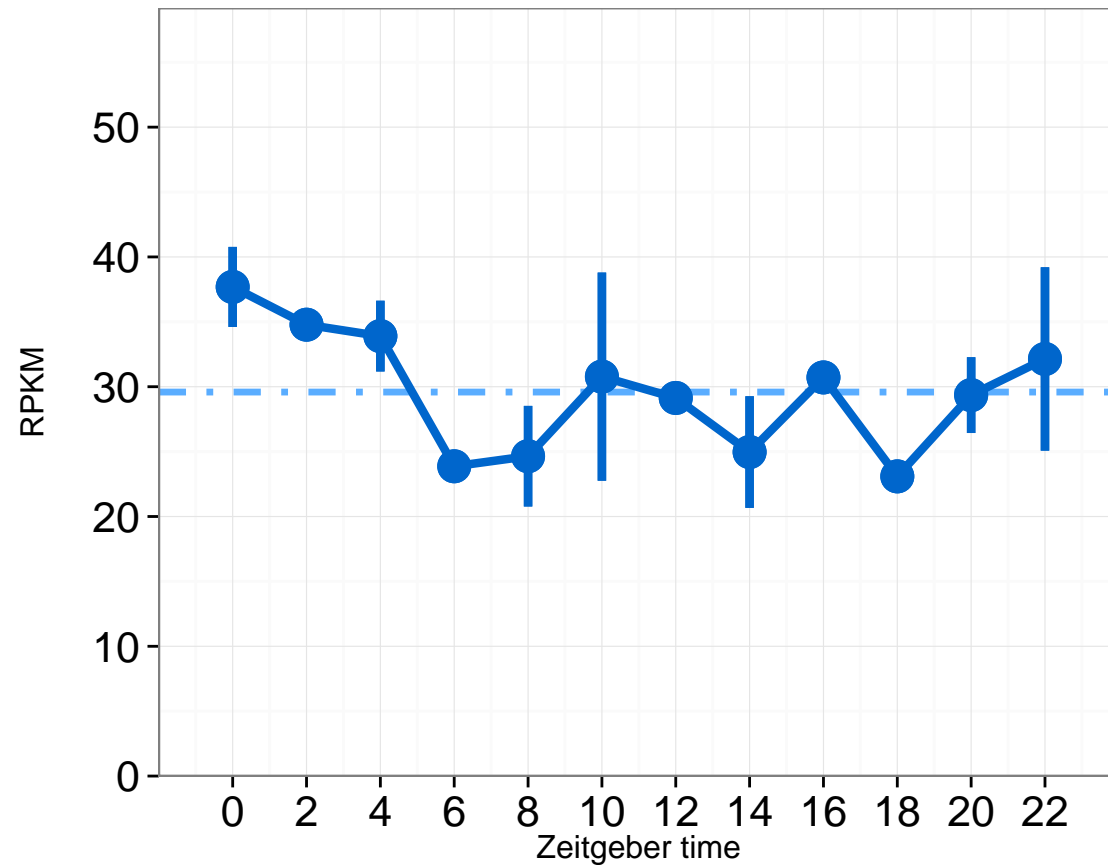

## Gm10768 log2(Ribosome occupanc

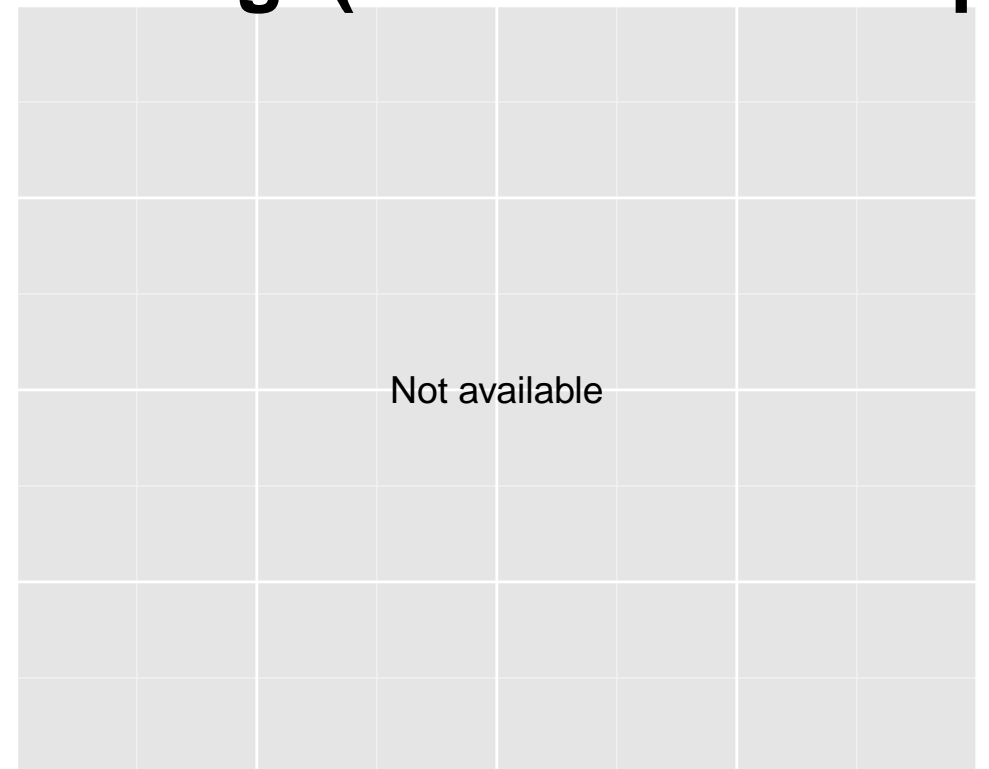

Supplement: Supplementary file 13 [file 1]

## Ppp2r5e

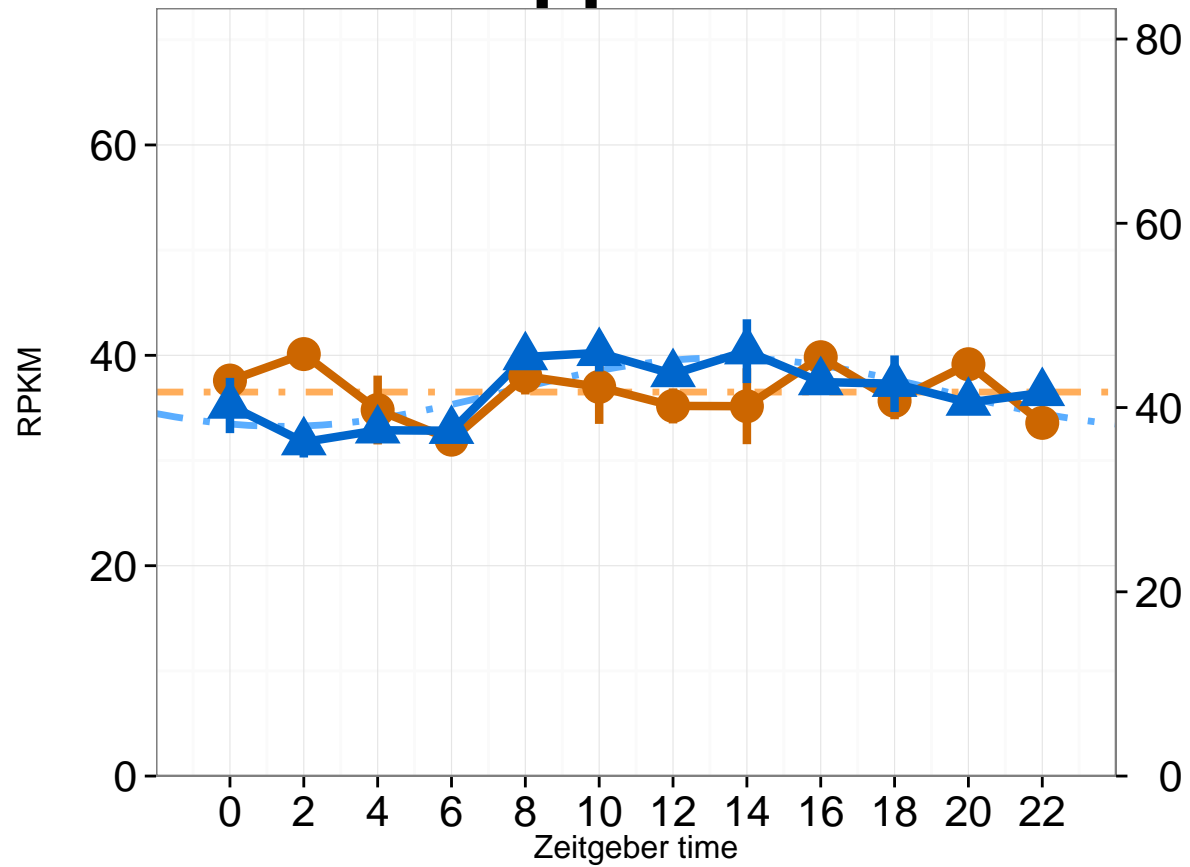

## Ppp2r5e

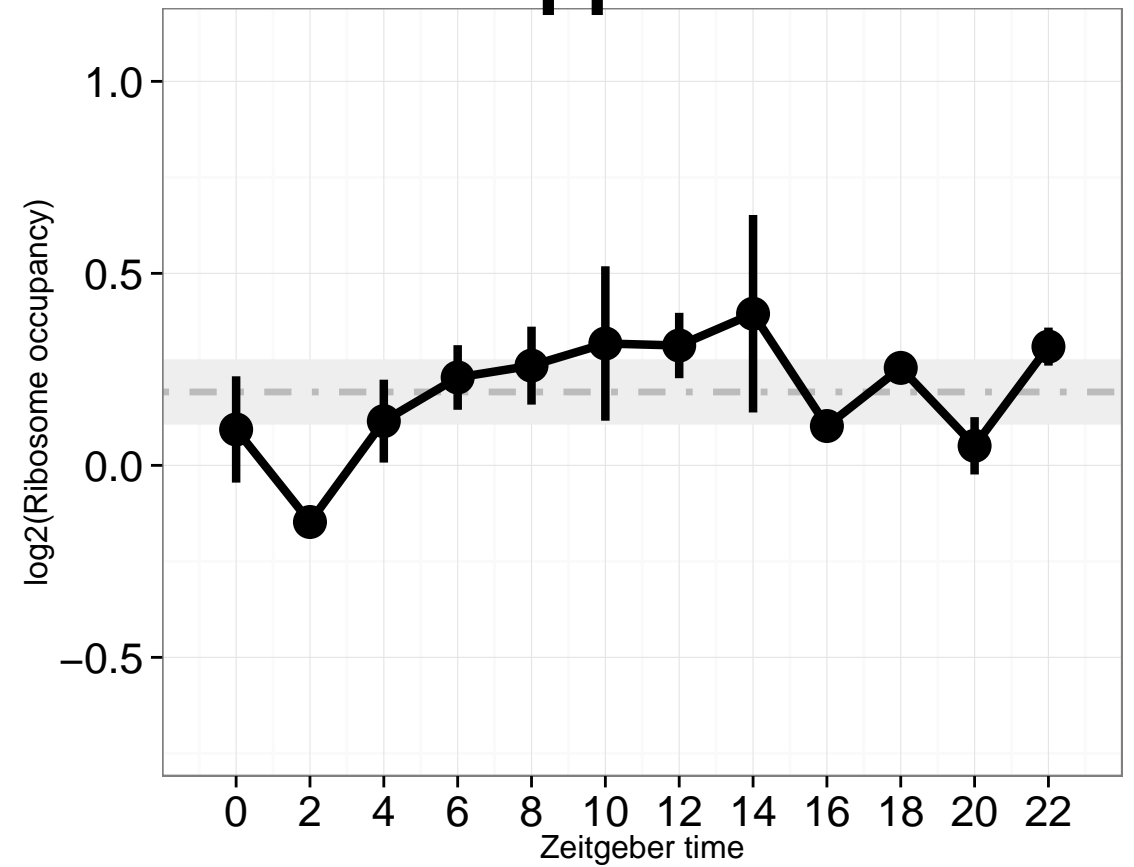

Supplement: Supplementary file 14 [file 1]

# Skp1a

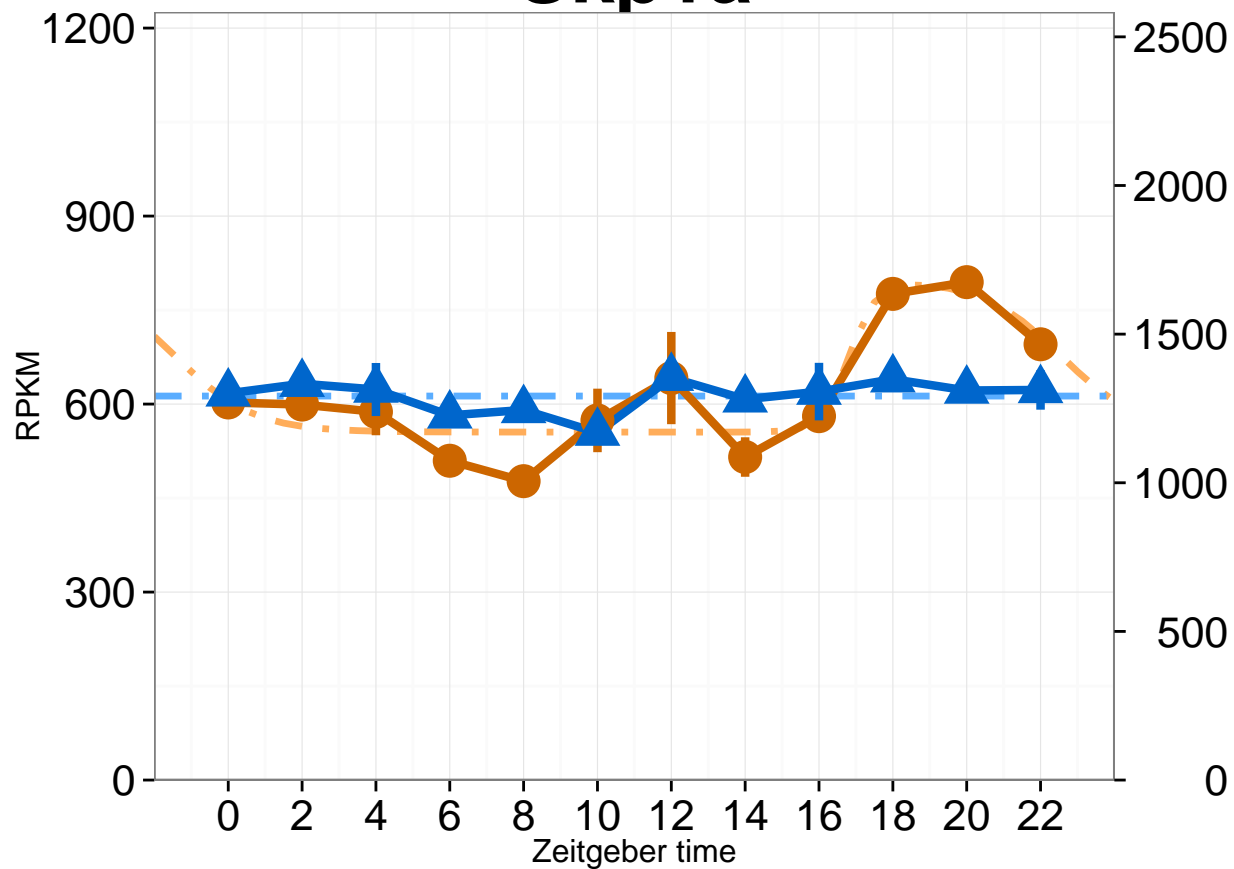

# Skp1a

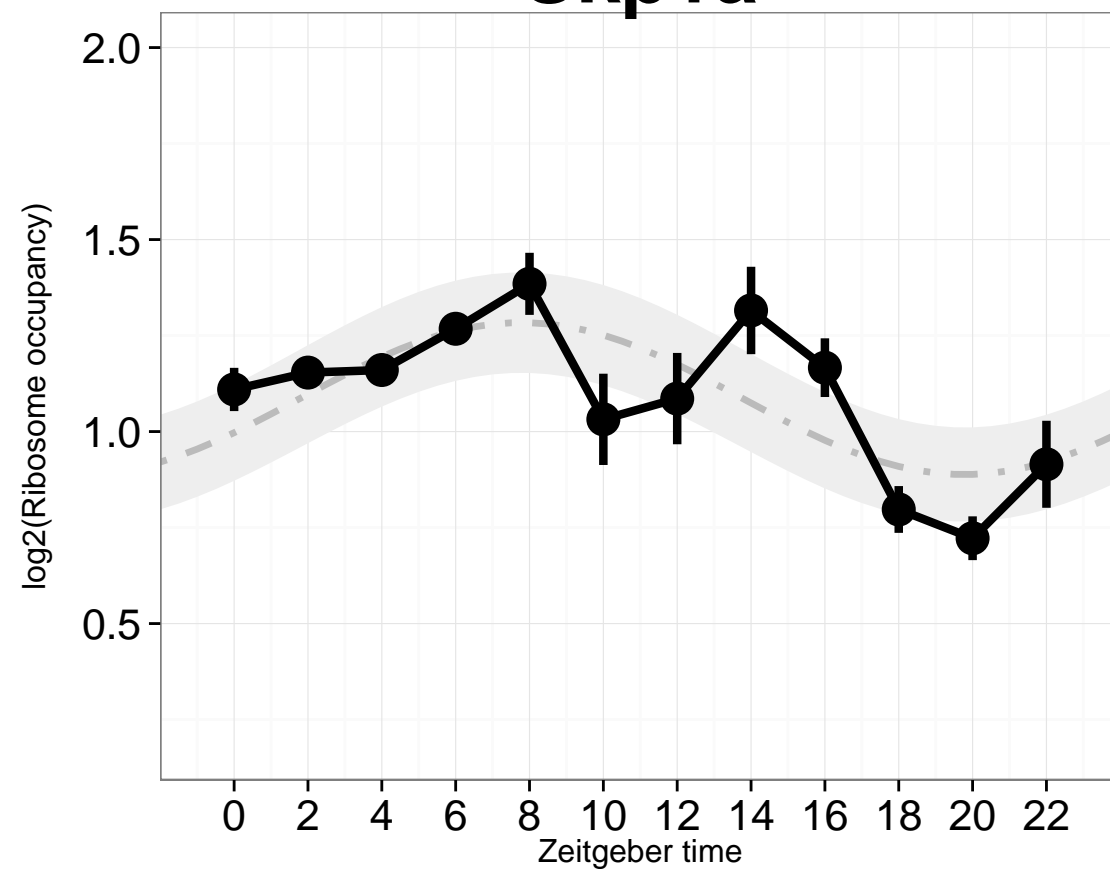

Supplement: Supplementary file 15 [file 1]

# Zbtb49

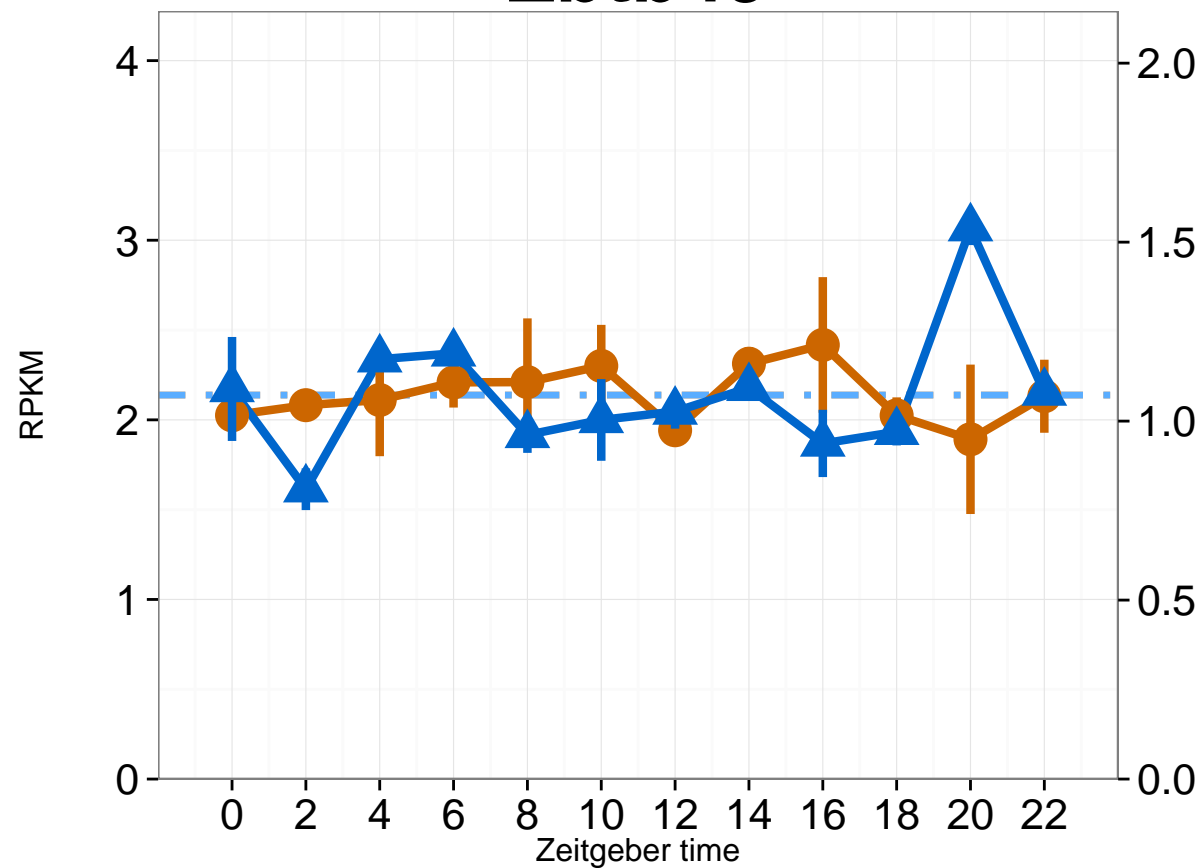

# Zbtb49

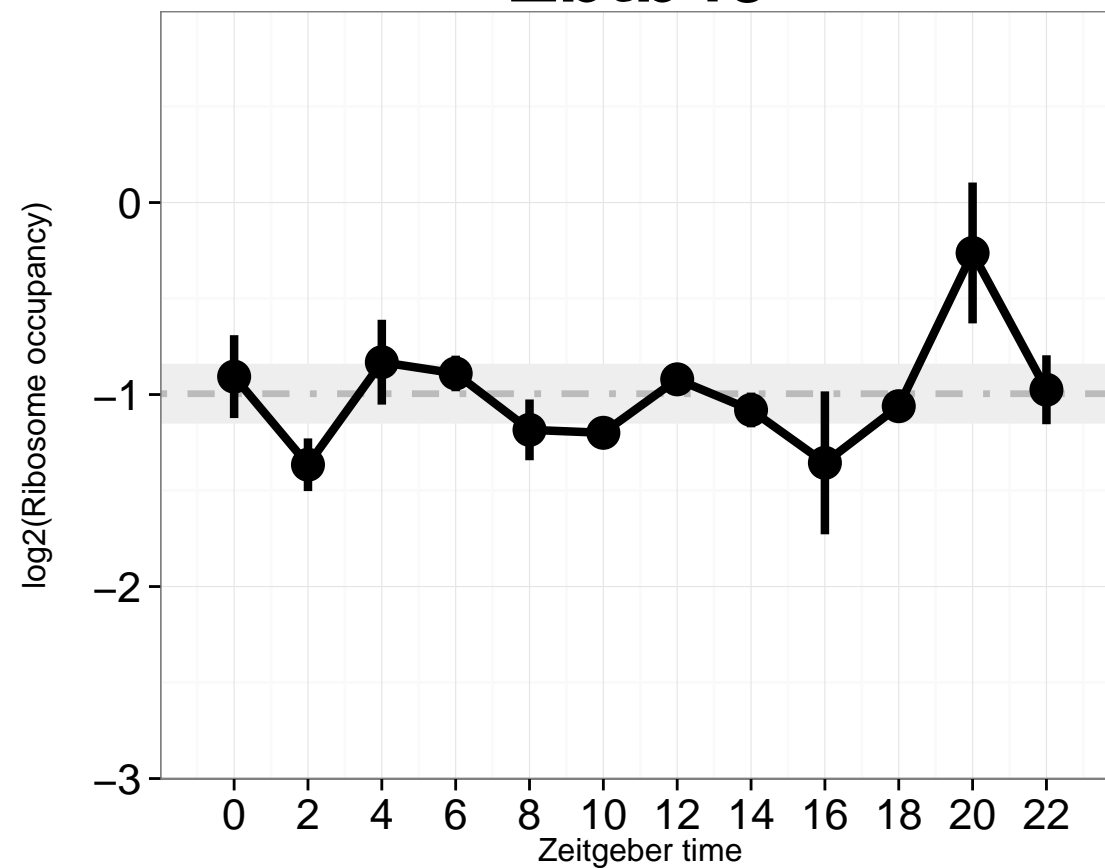

Supplement: Supplementary file 16 [file 1]

## Aasdhppt

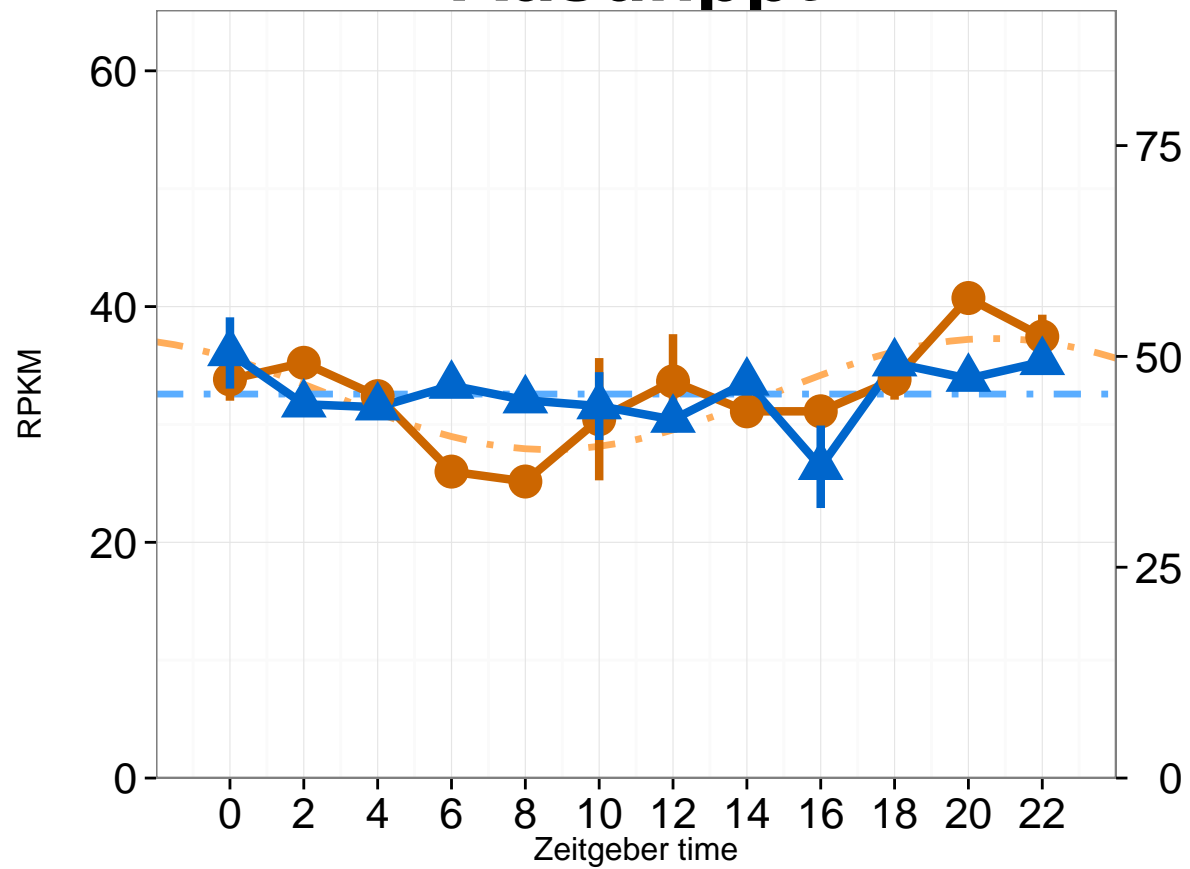

## Aasdhppt

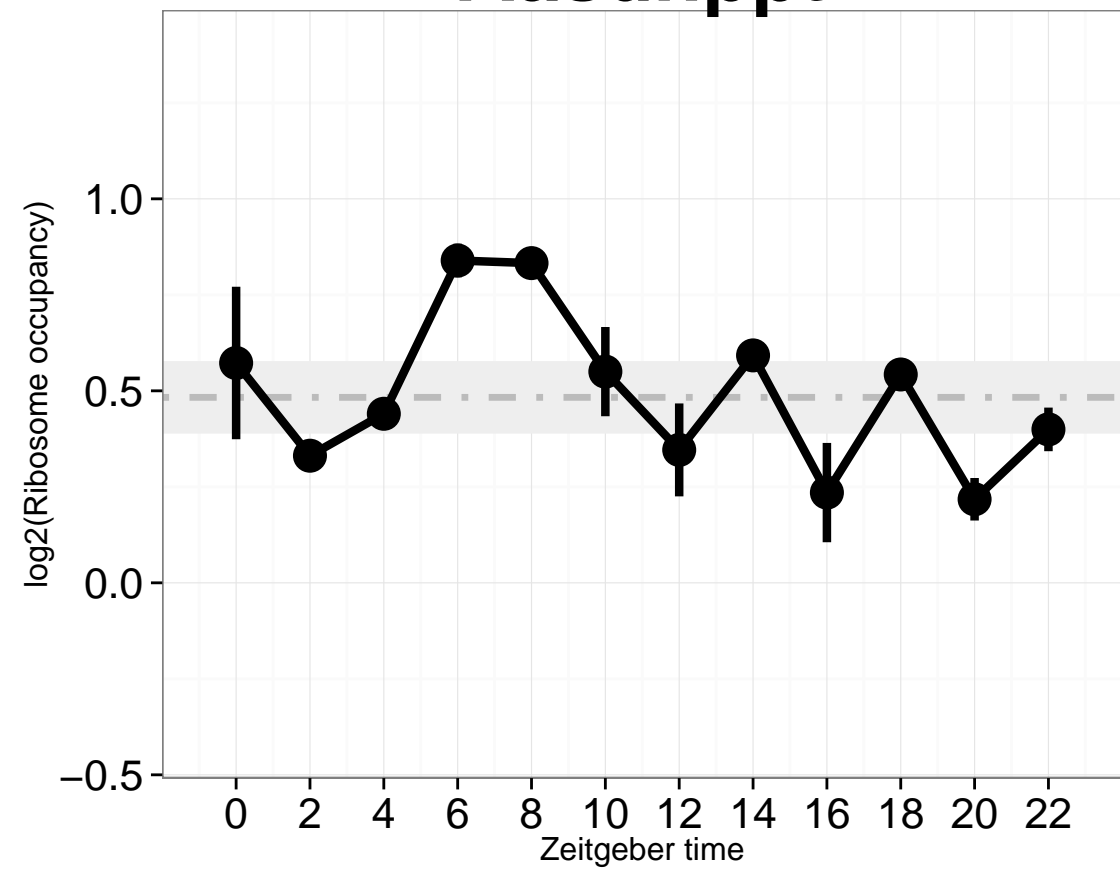

Supplement: Supplementary file 17 [file 1]

# Zfp945

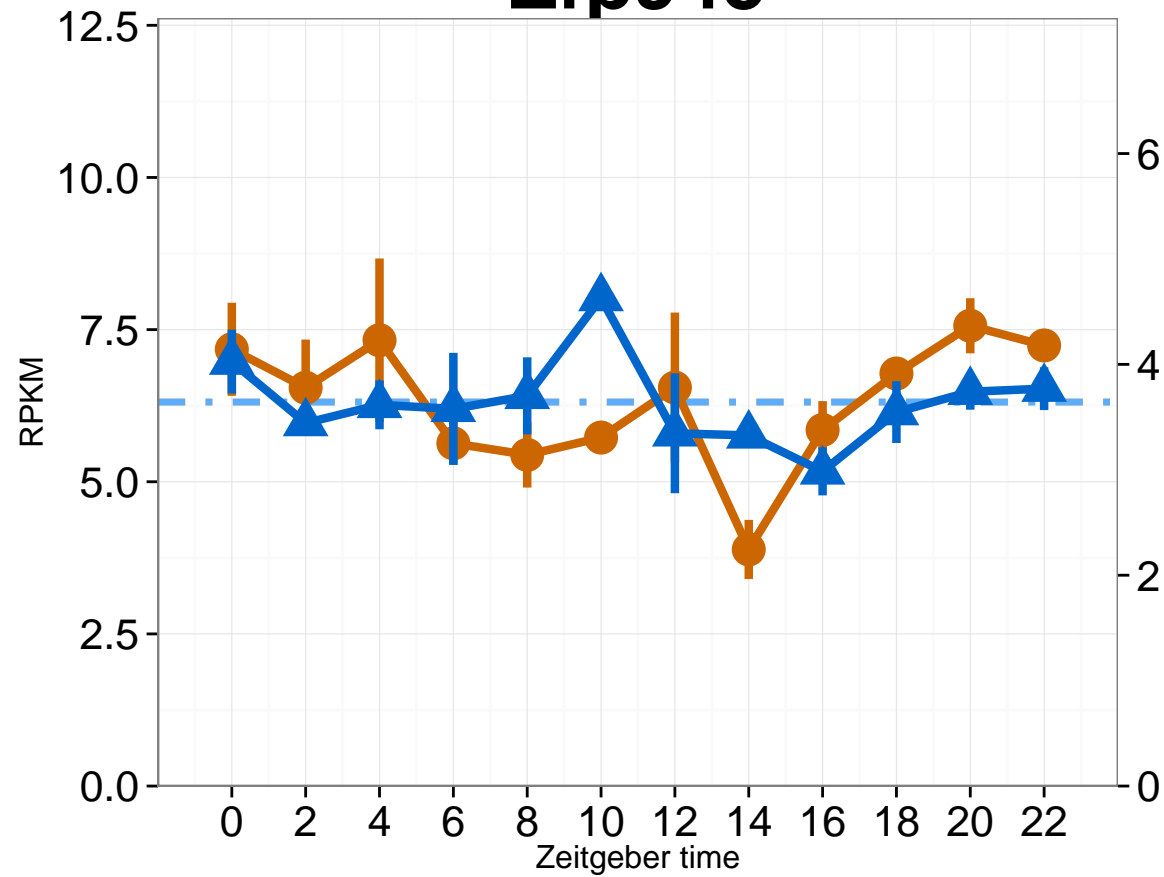

# Zfp945

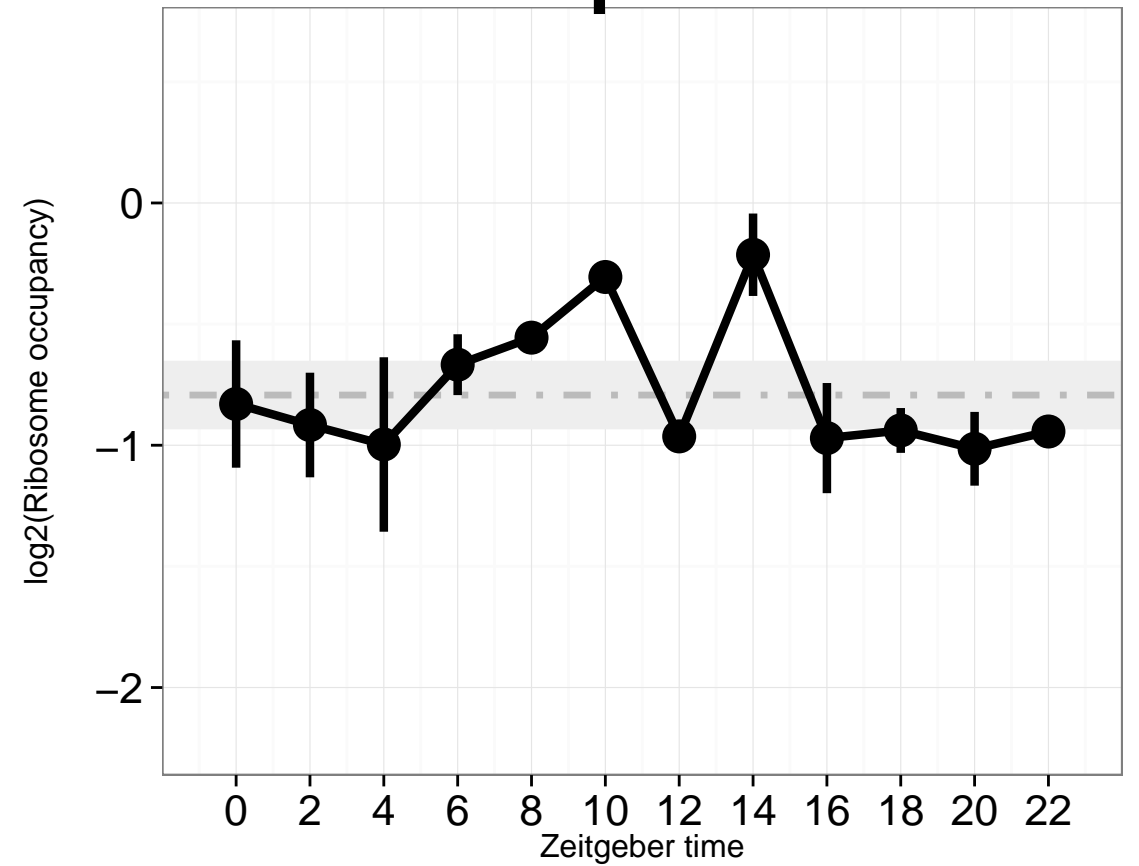

Supplement: Supplementary file 18 [file 1]

## Lrfn4

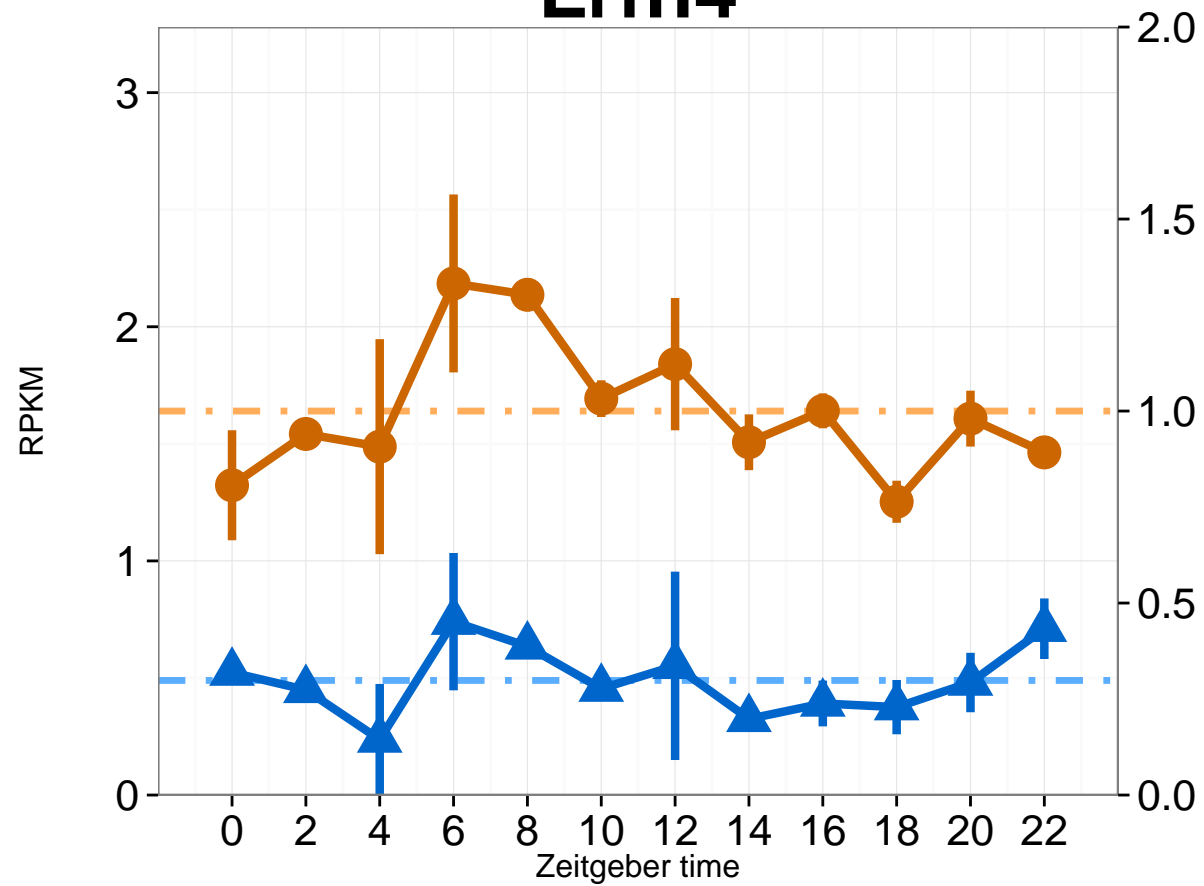

## Lrfn4

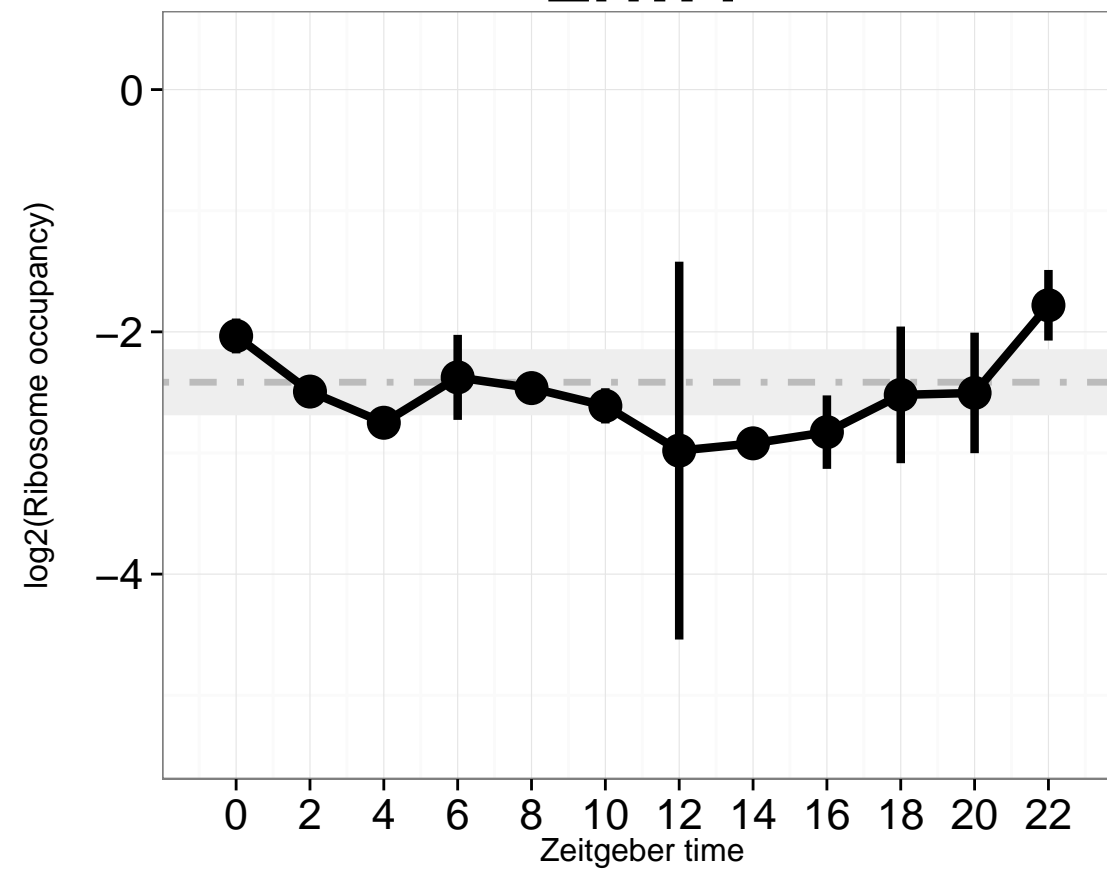

Supplement: Supplementary file 19 [file 1]

## Zcchc11

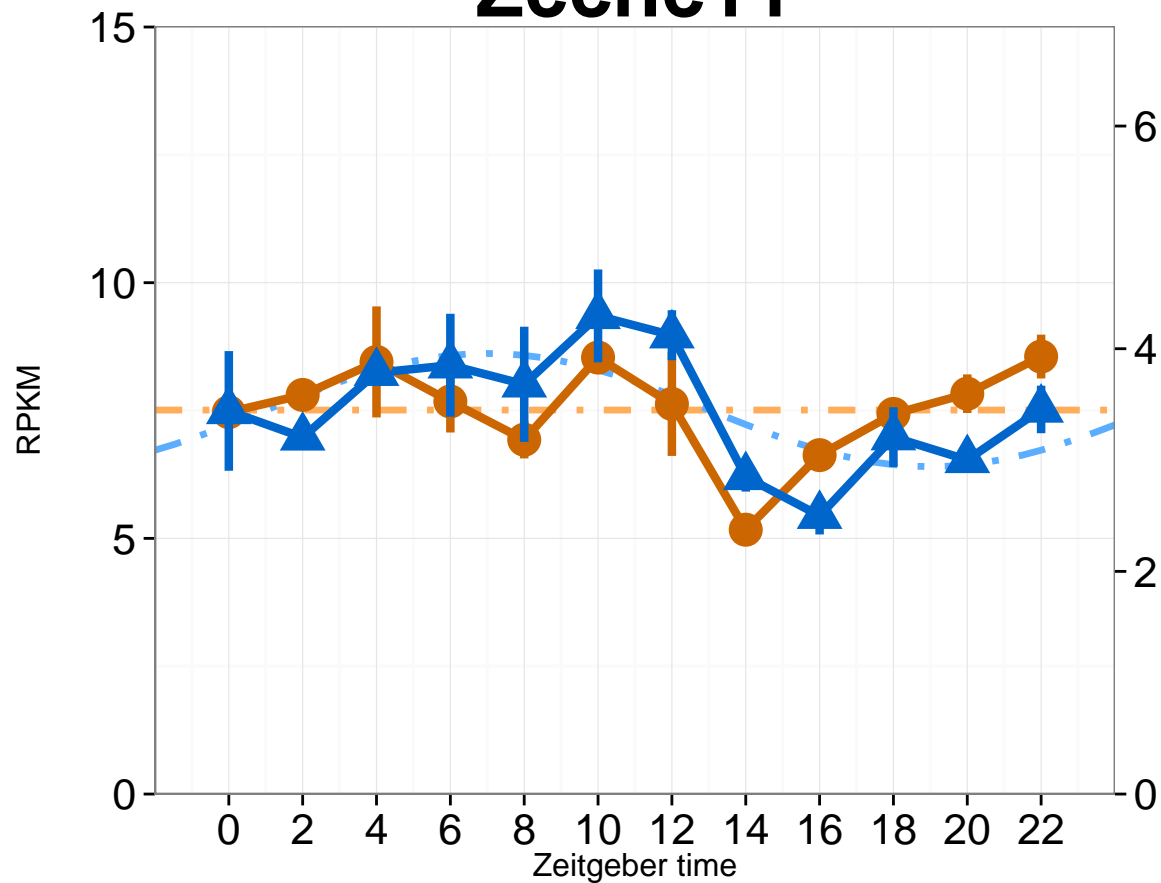

## Zcchc11

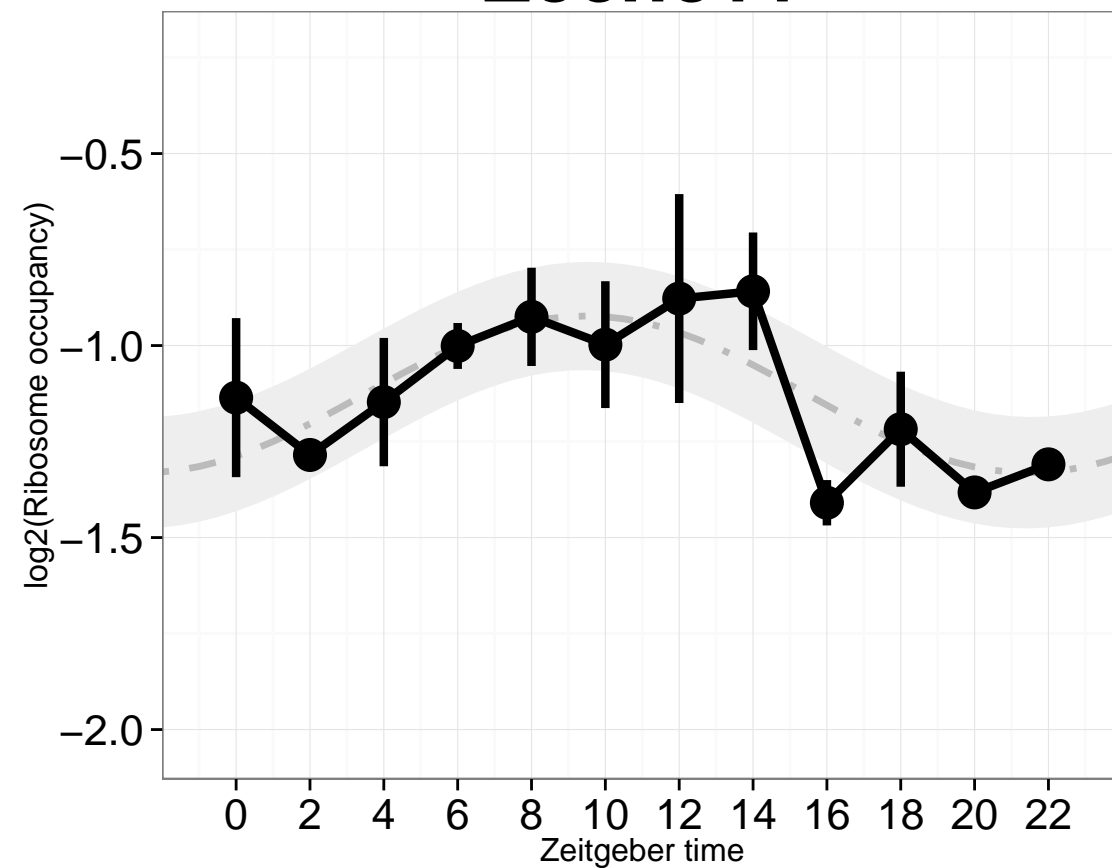

Supplement: Supplementary file 20 [file 1]

# Hnf1b

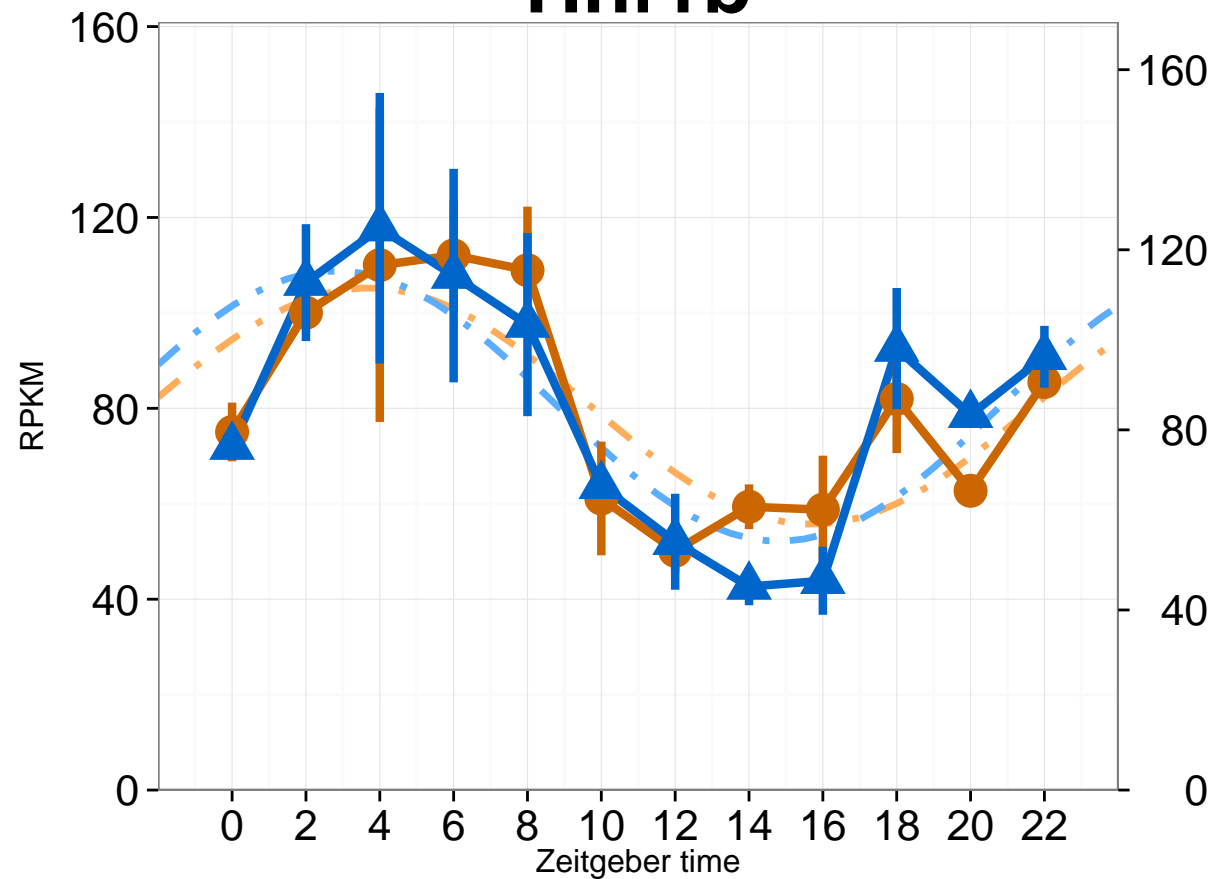

# Hnf1b

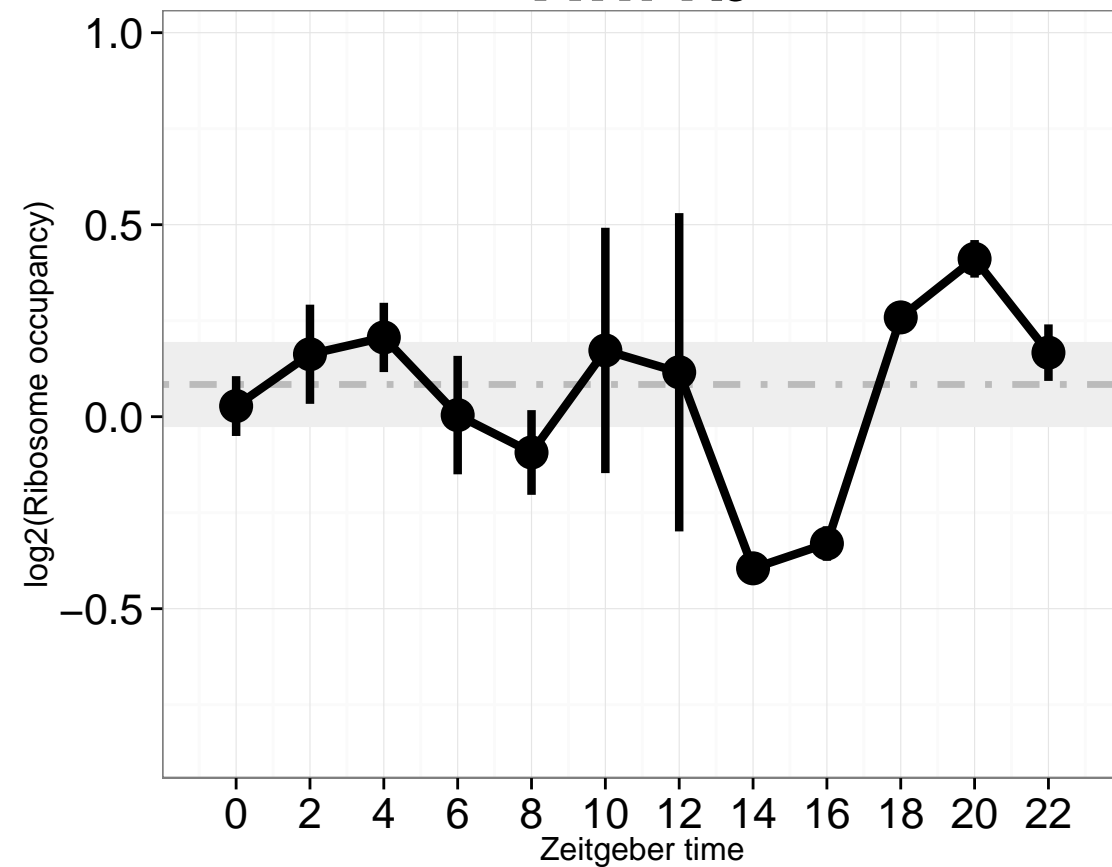

Supplement: Supplementary file 21 [file 1]

# Cep78

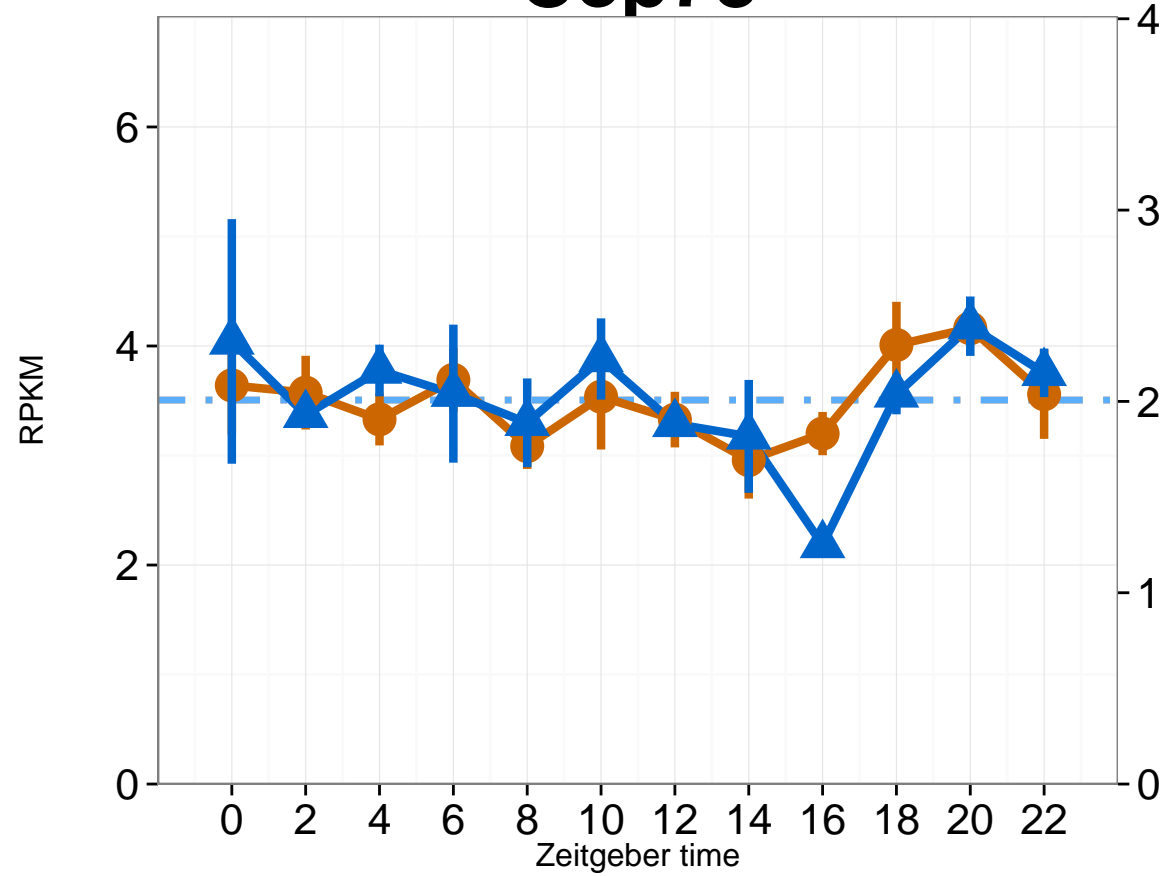

# Cep78

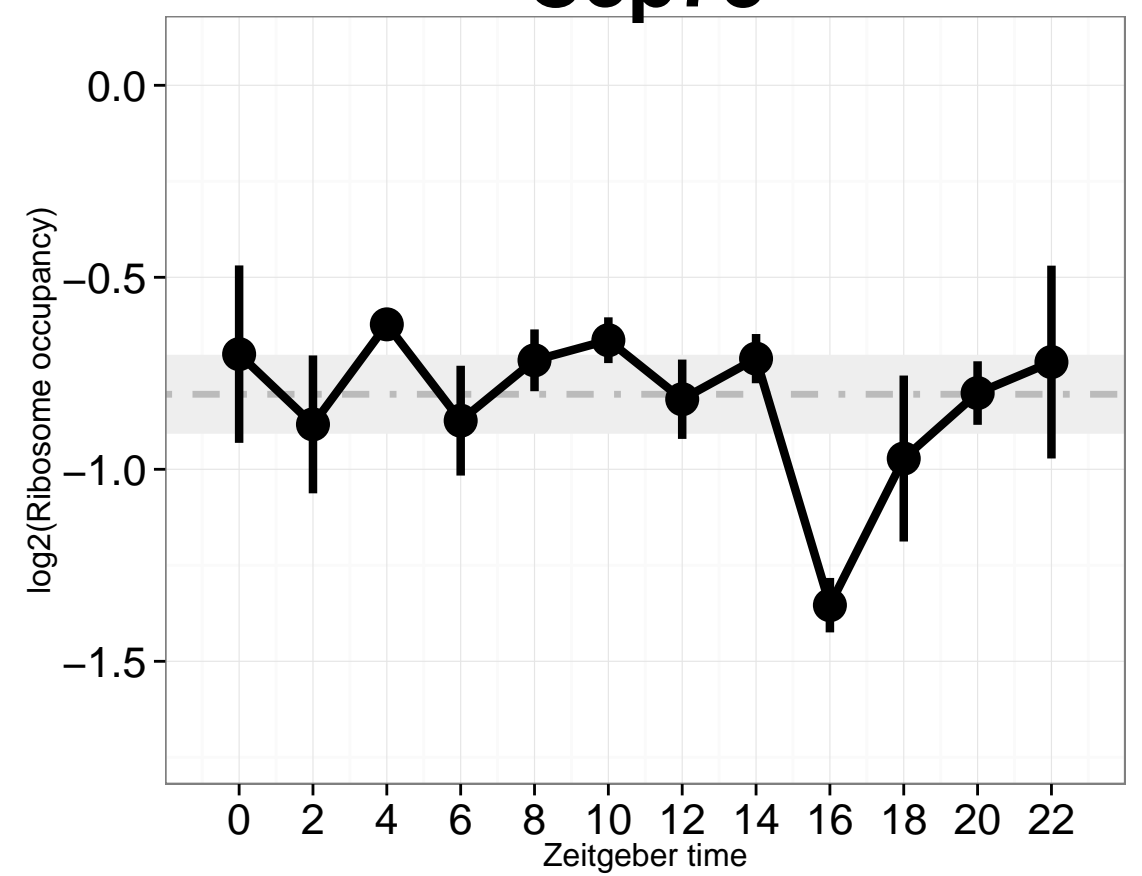

Supplement: Supplementary file 22 [file 1]

# Gxylt1

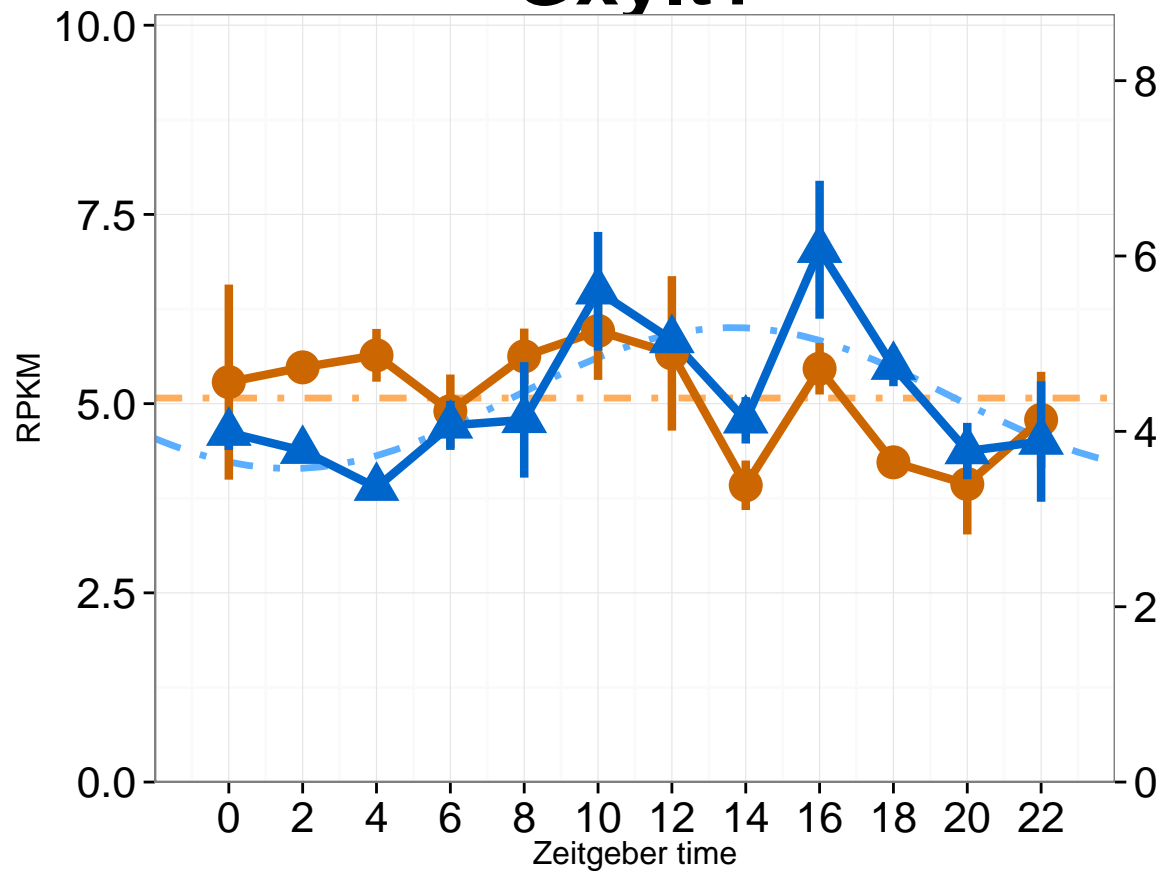

# Gxylt1

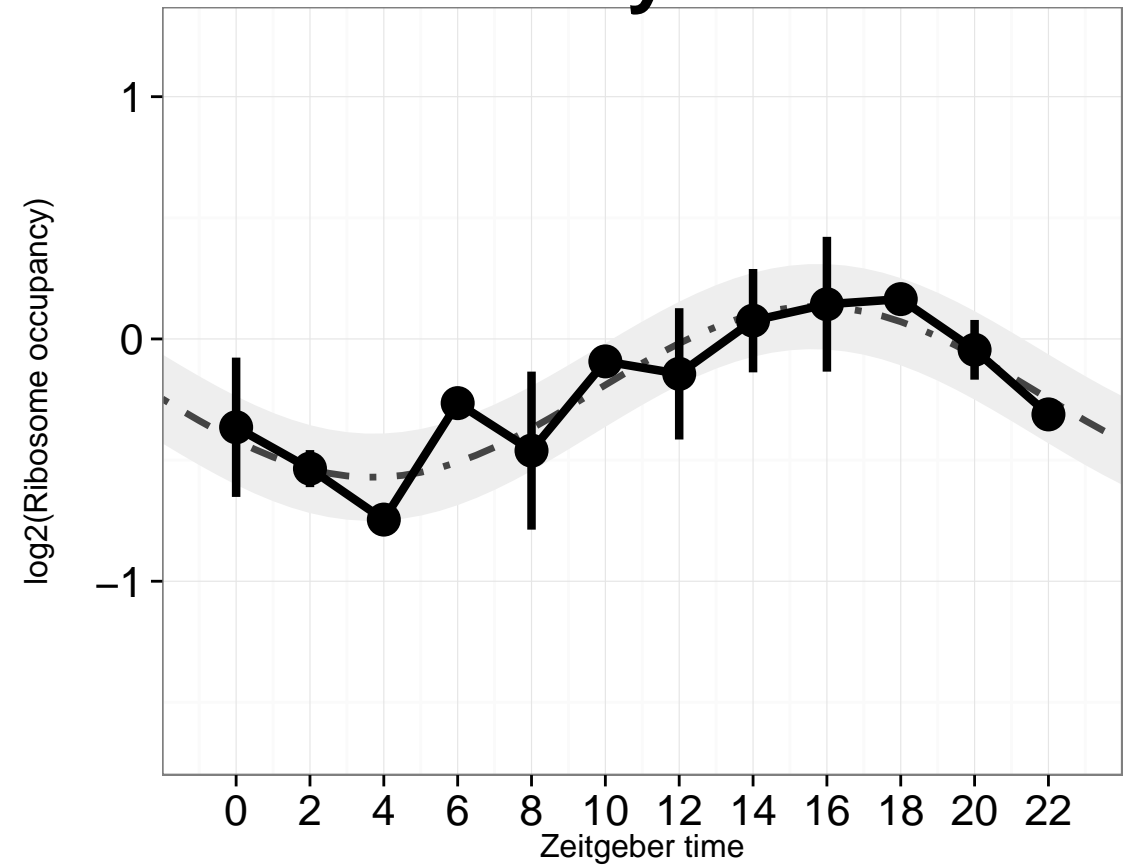

Supplement: Supplementary file 23 [file 1]

# Hmgn1

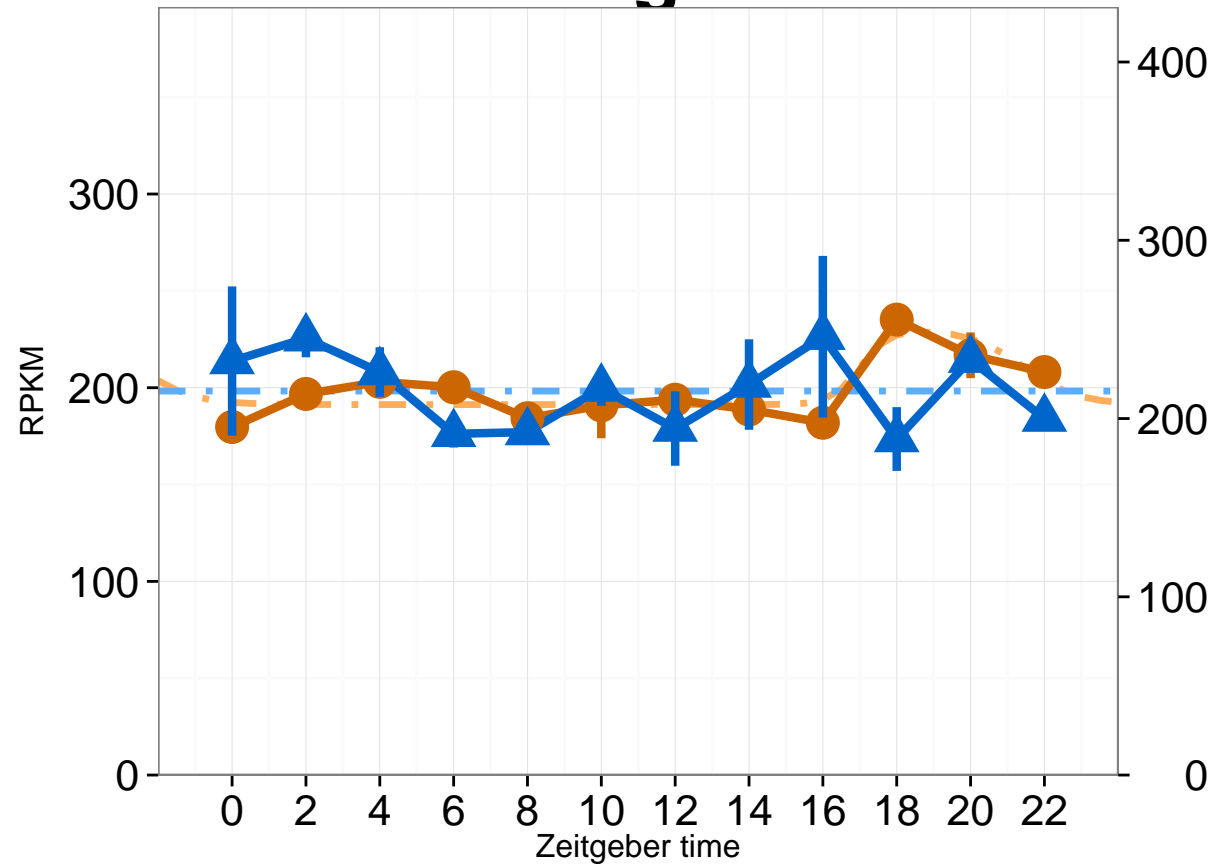

# Hmgn1

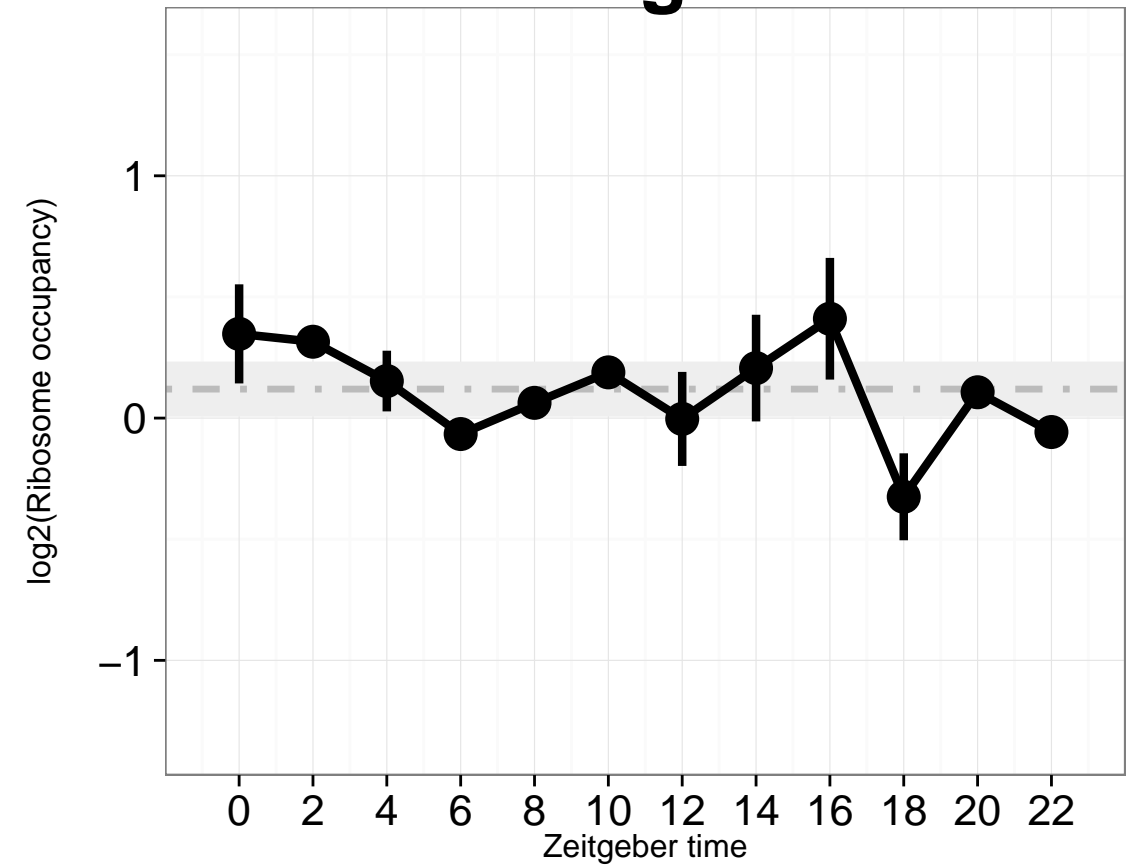

Supplement: Supplementary file 24 [file 1]

## Ssu72

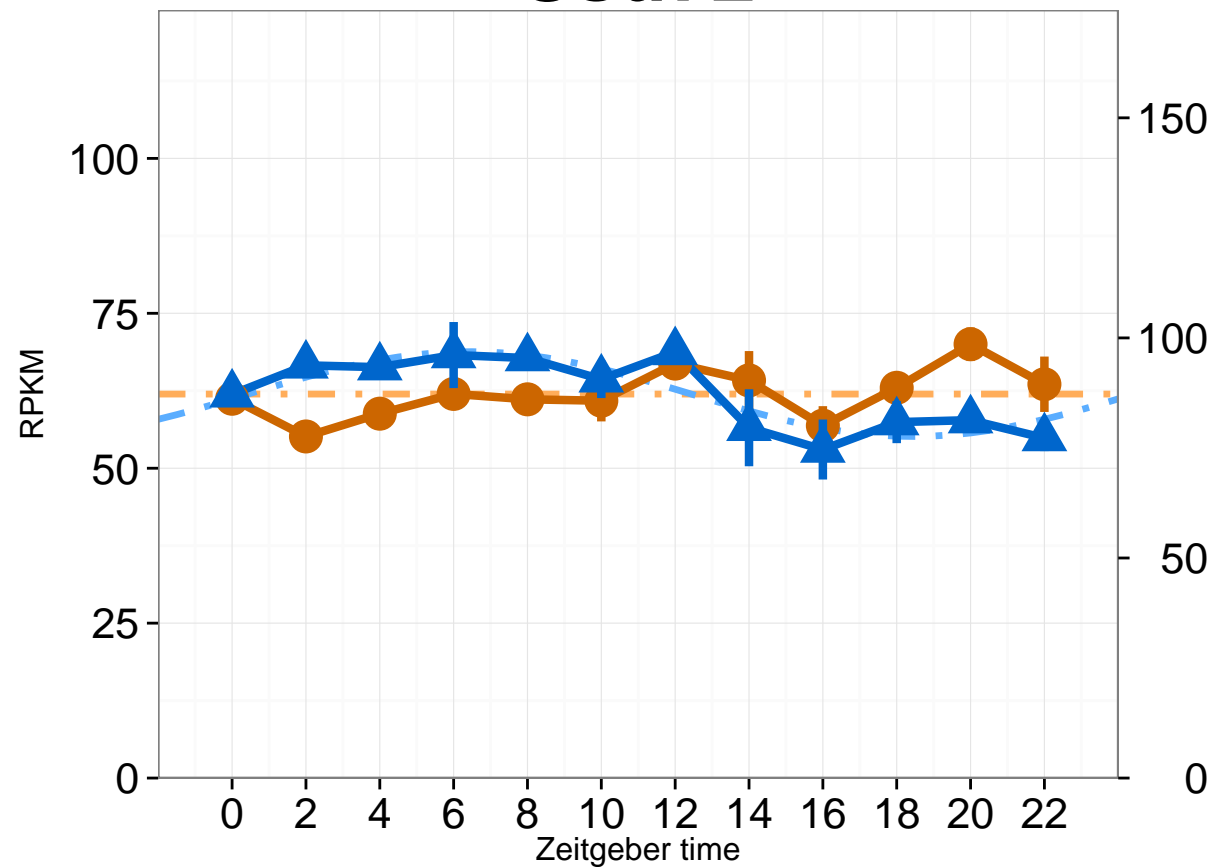

## Ssu72

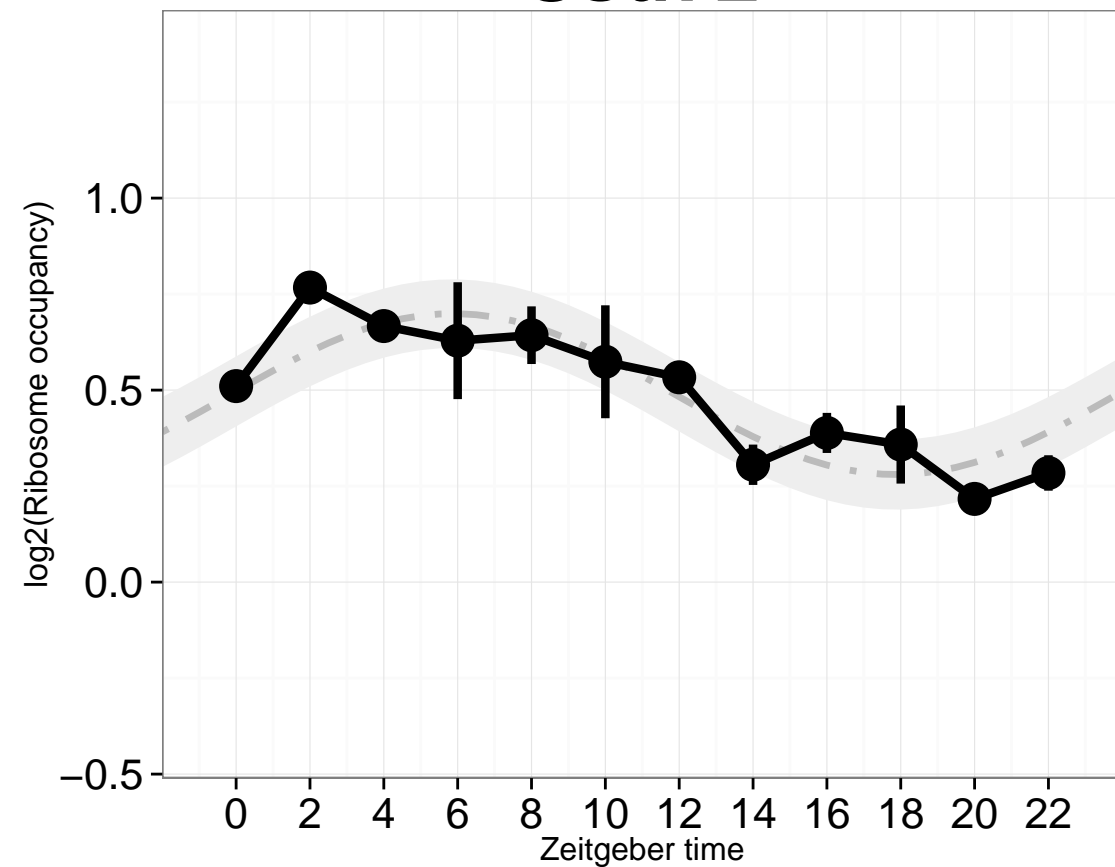

Supplement: Supplementary file 25 [file 1]

## Mmachc

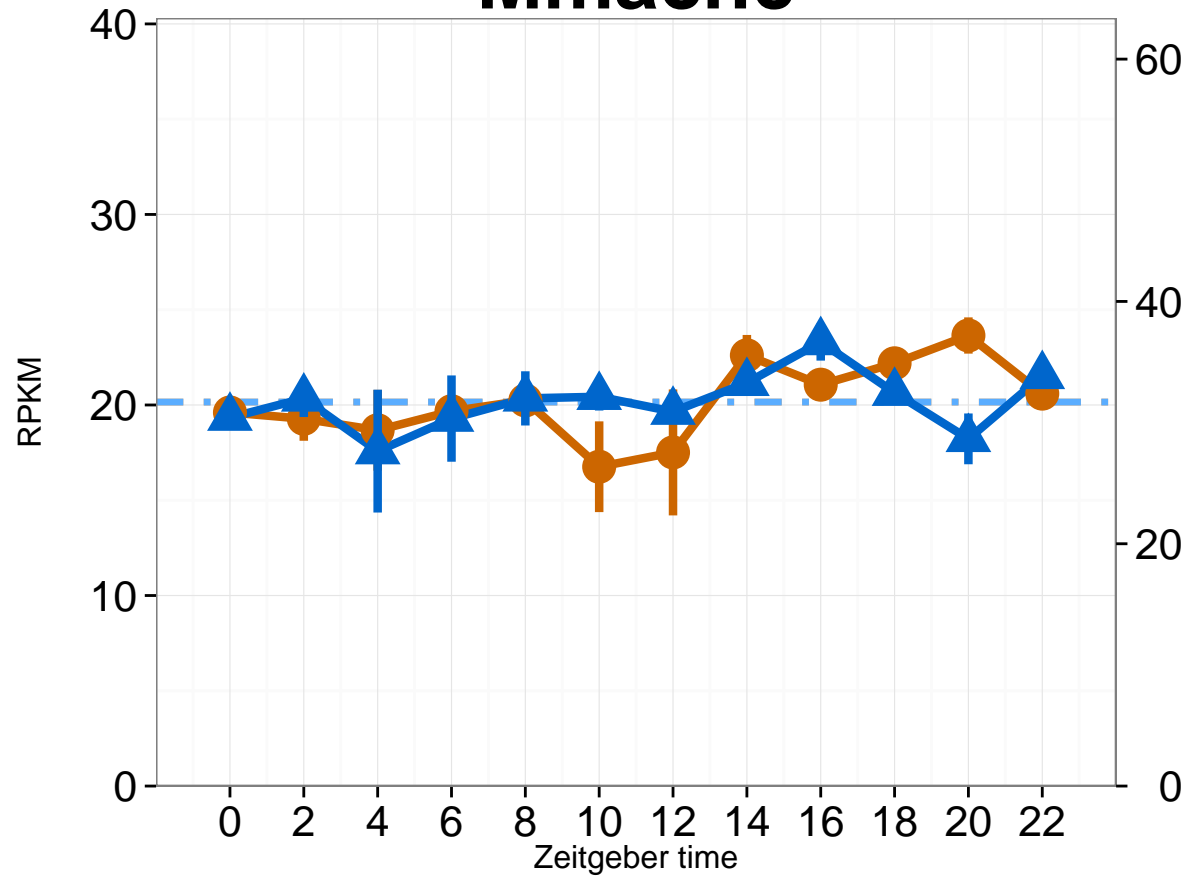

## Mmachc

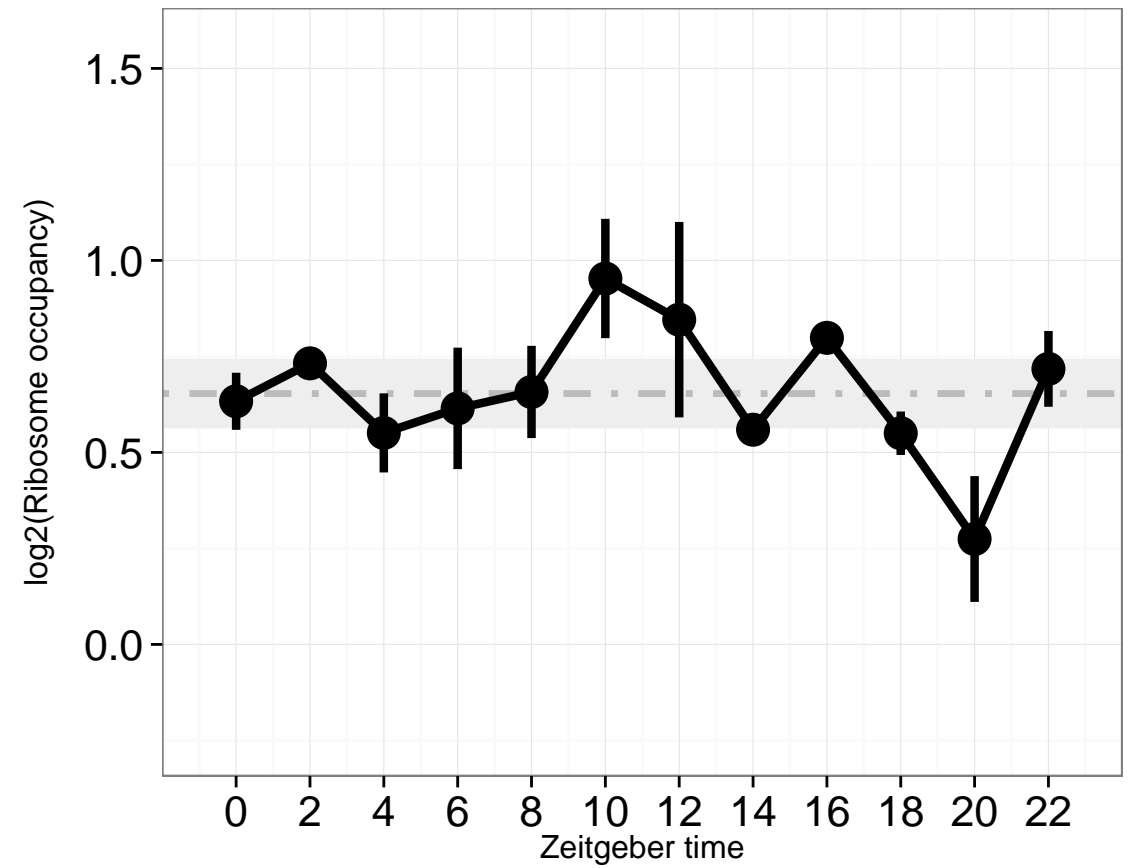

Supplement: Supplementary file 26 [file 1]

# Igsf8

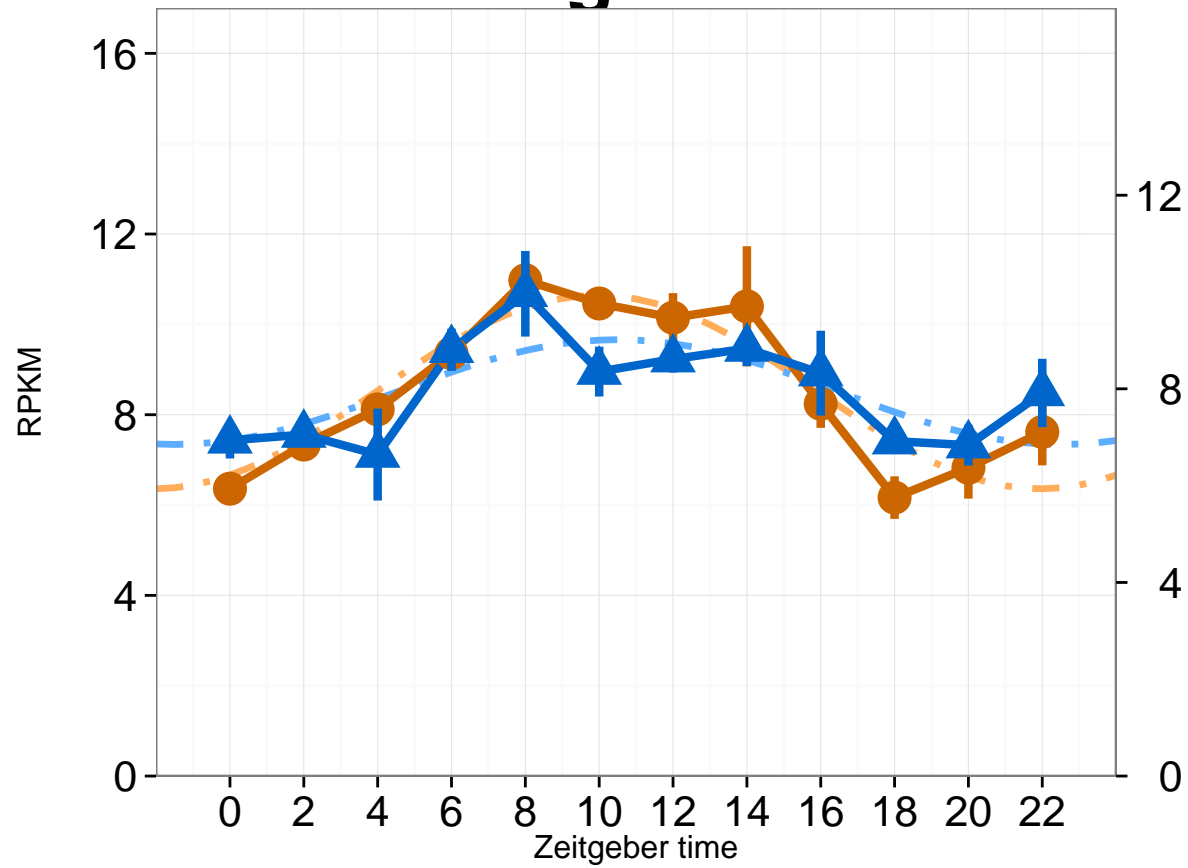

# Igsf8

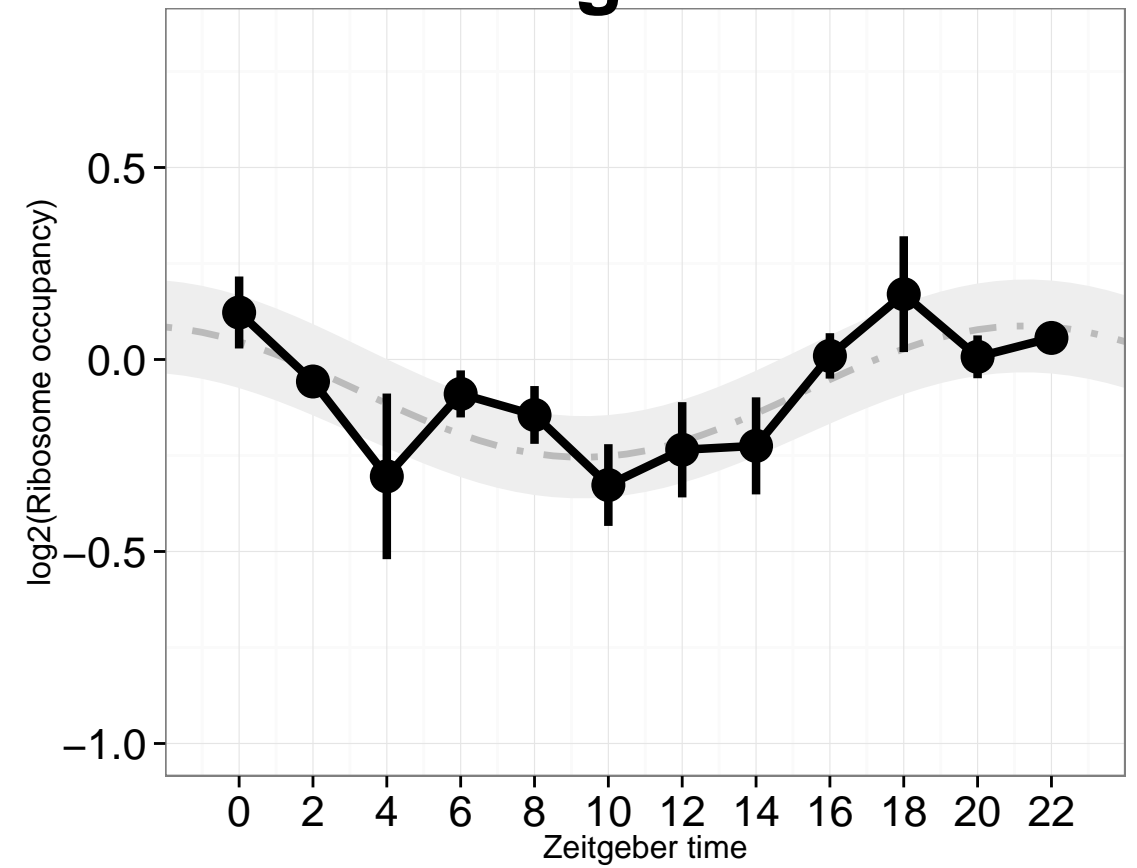

Supplement: Supplementary file 27 [file 1]

## Vps8

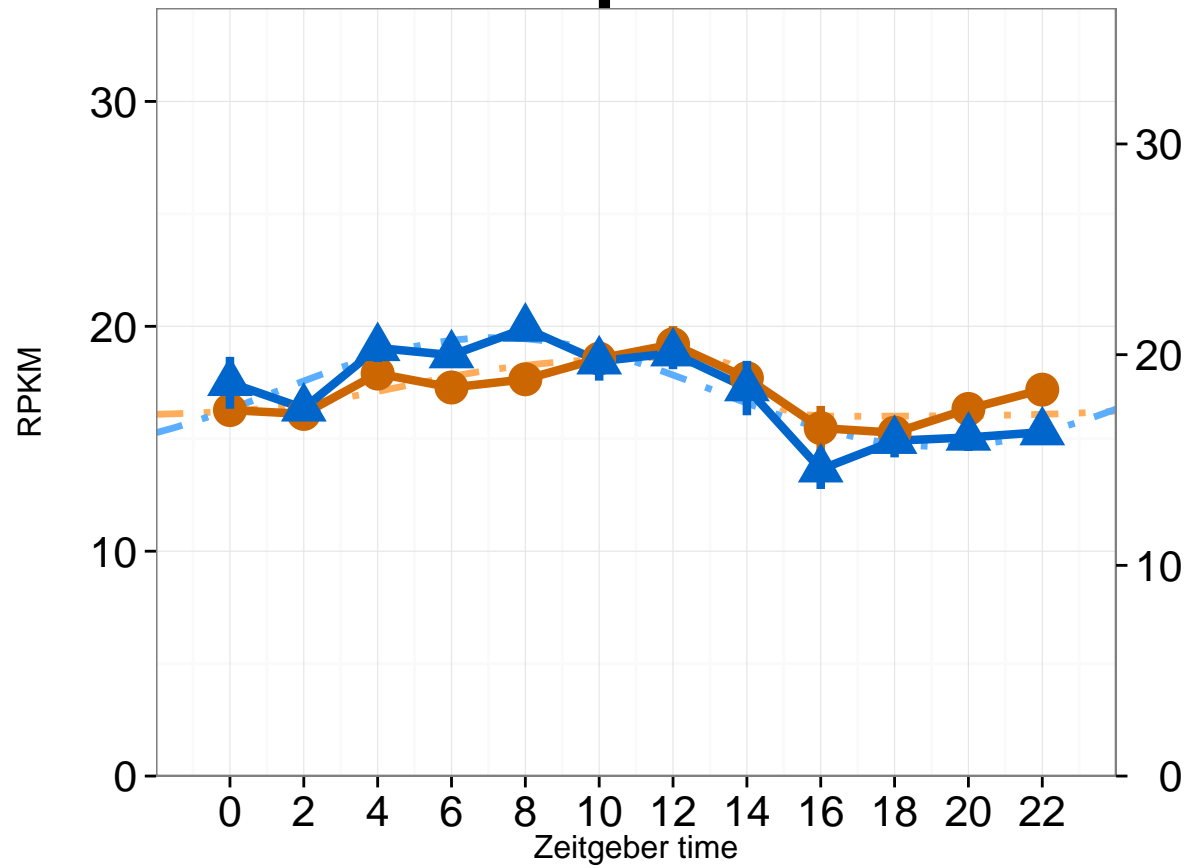

## Vps8

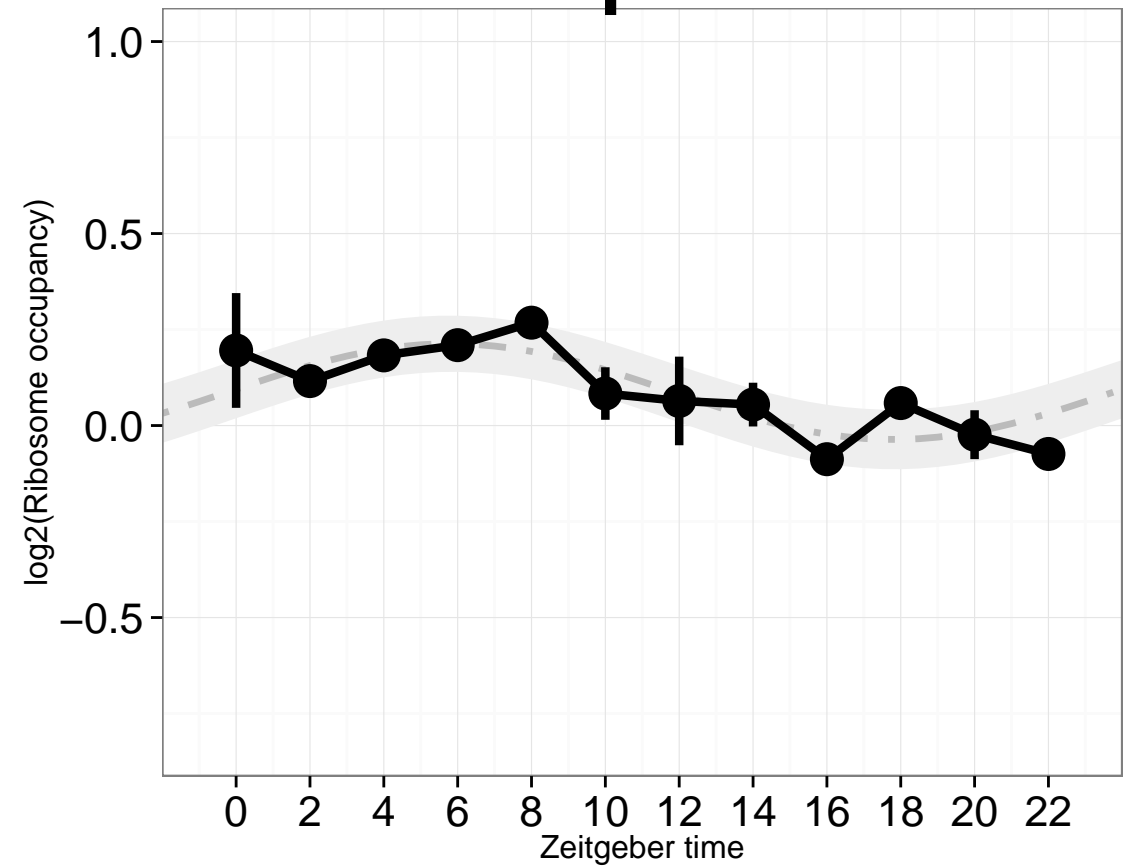

Supplement: Supplementary file 28 [file 1]

## Serf1

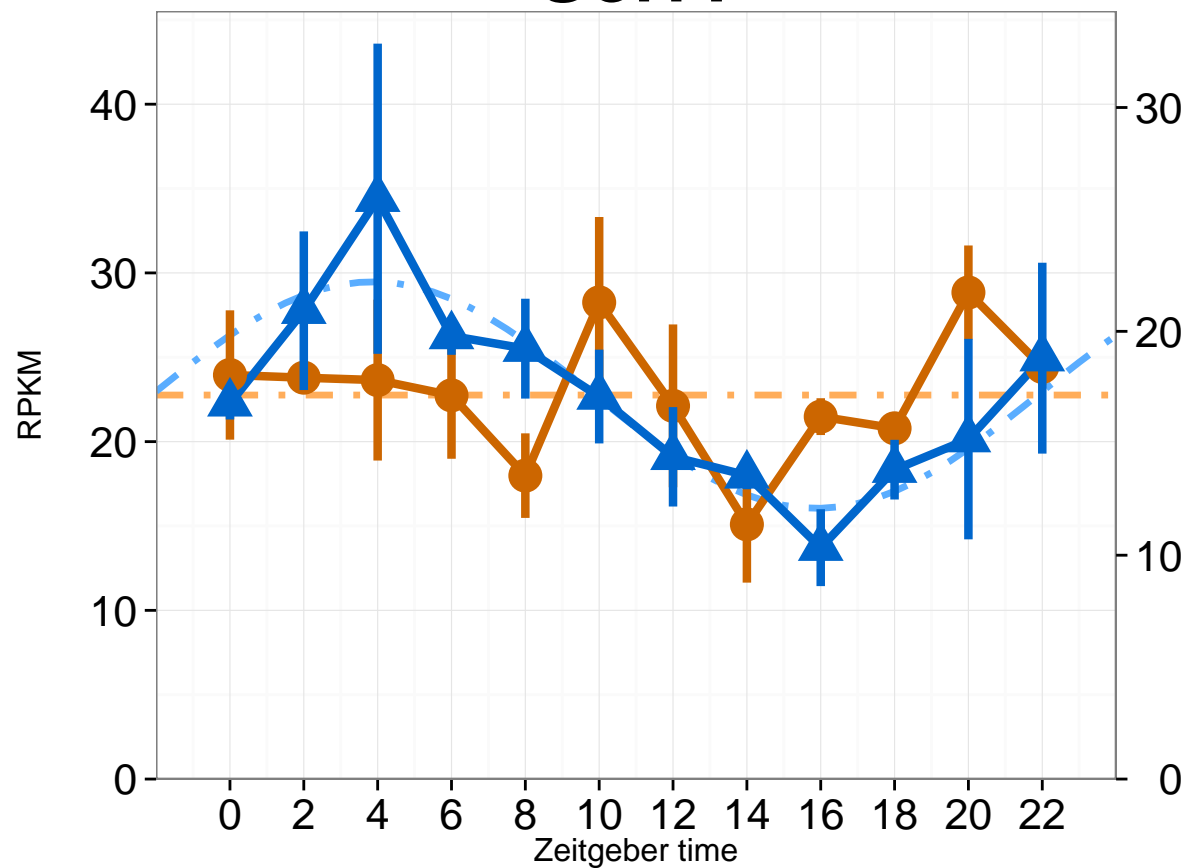

## Serf1

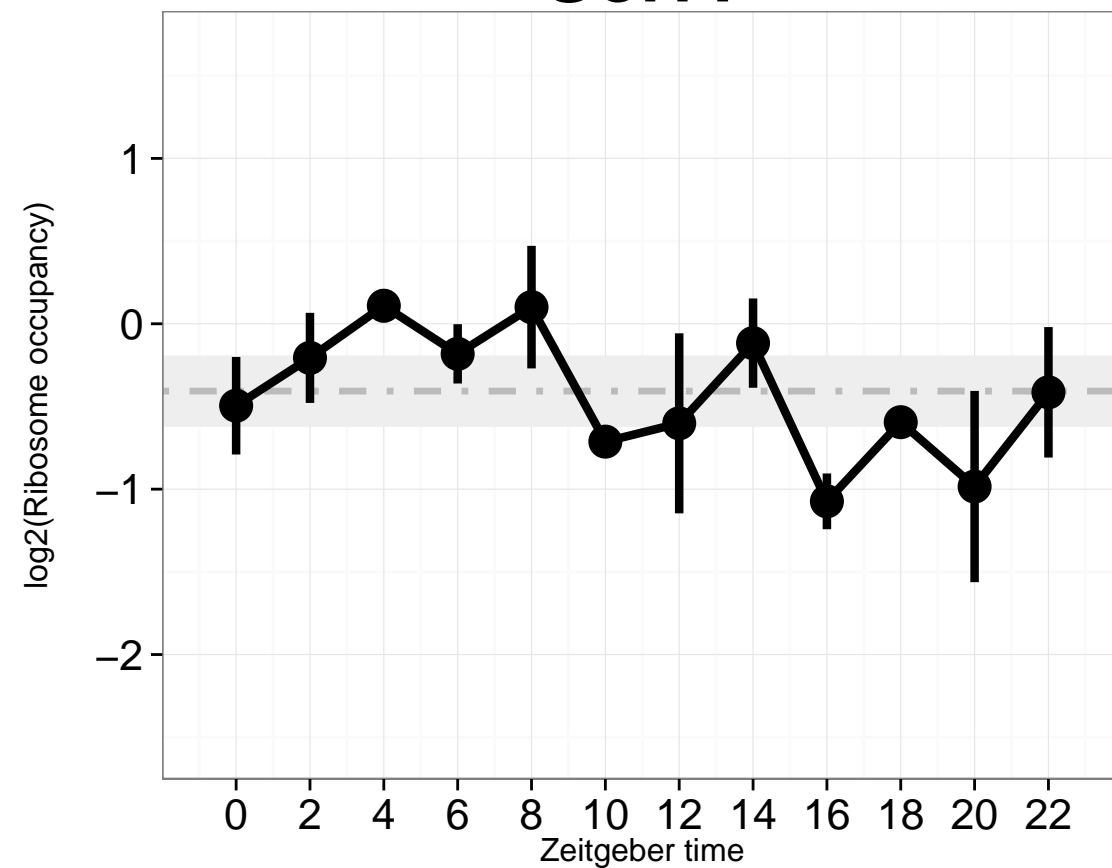

Supplement: Supplementary file 29 [file 1]

# Tmem164

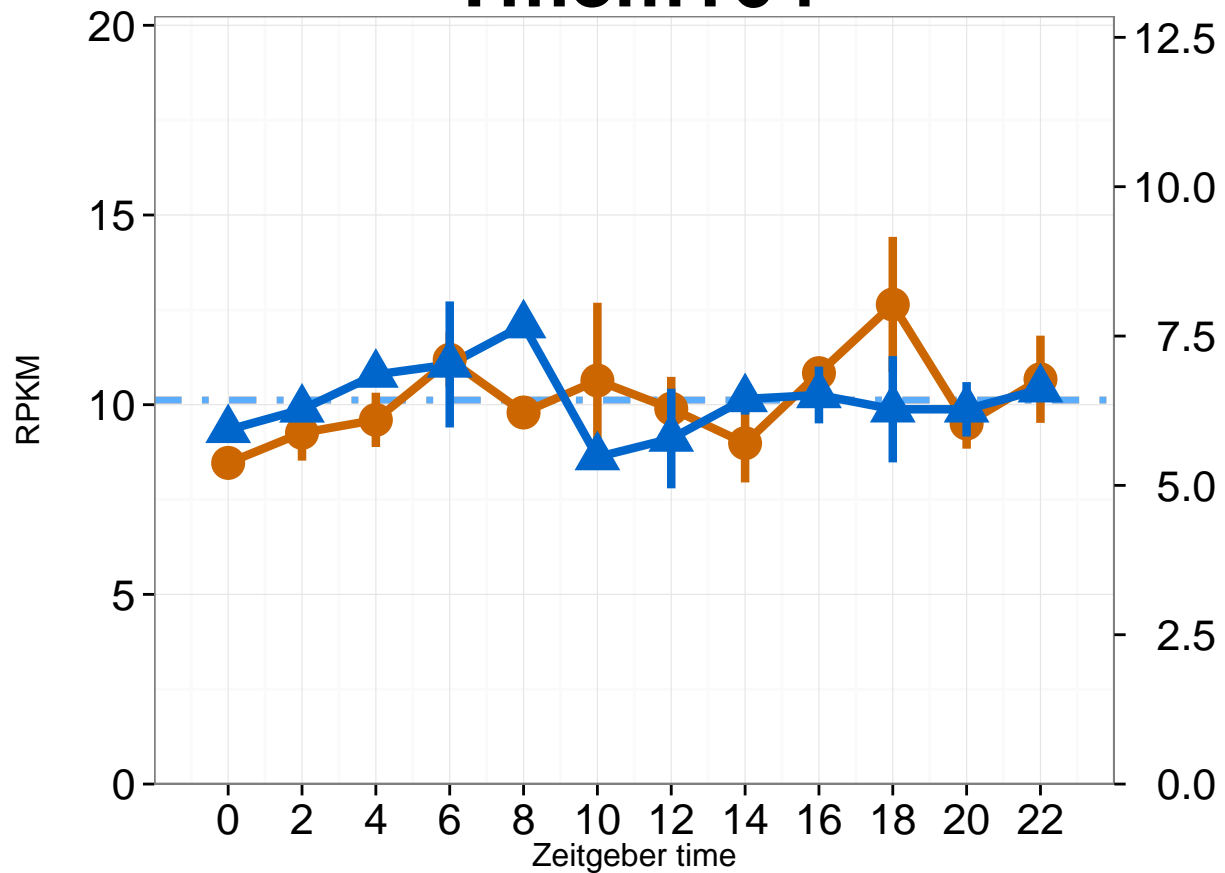

# Tmem164

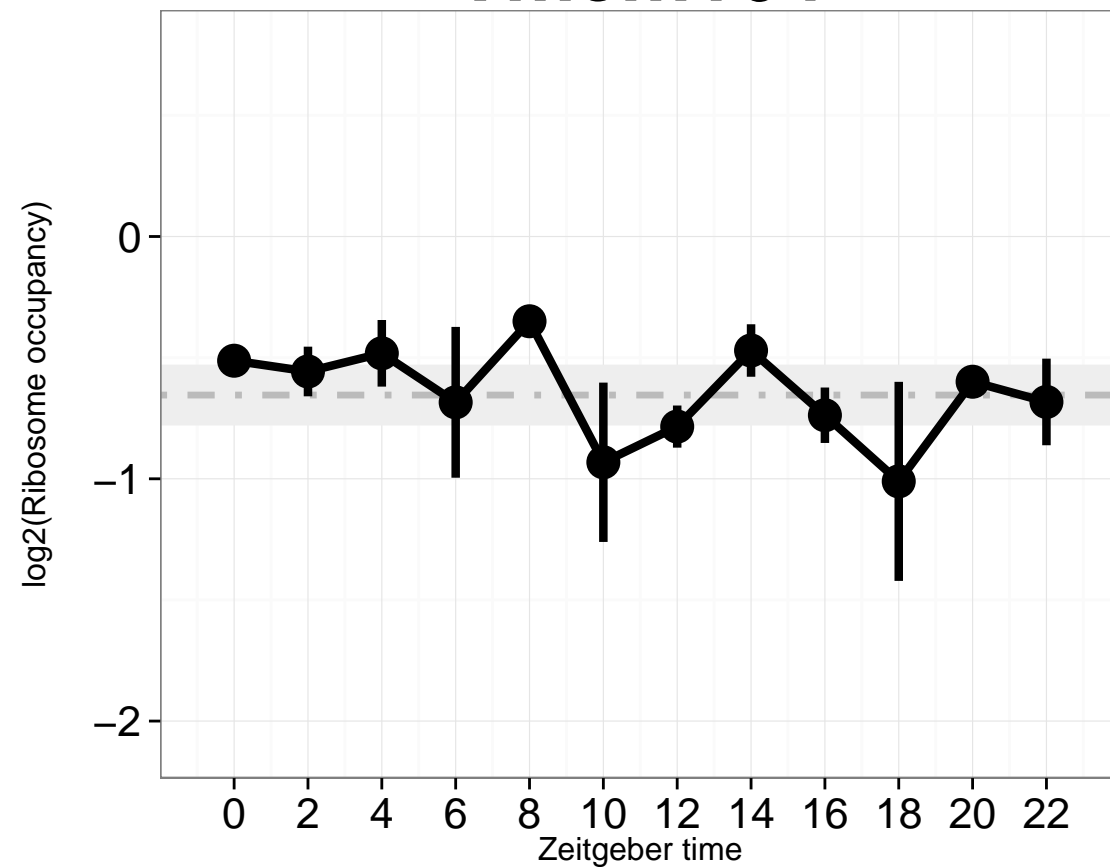

Supplement: Supplementary file 30 [file 1]

# Adamts16

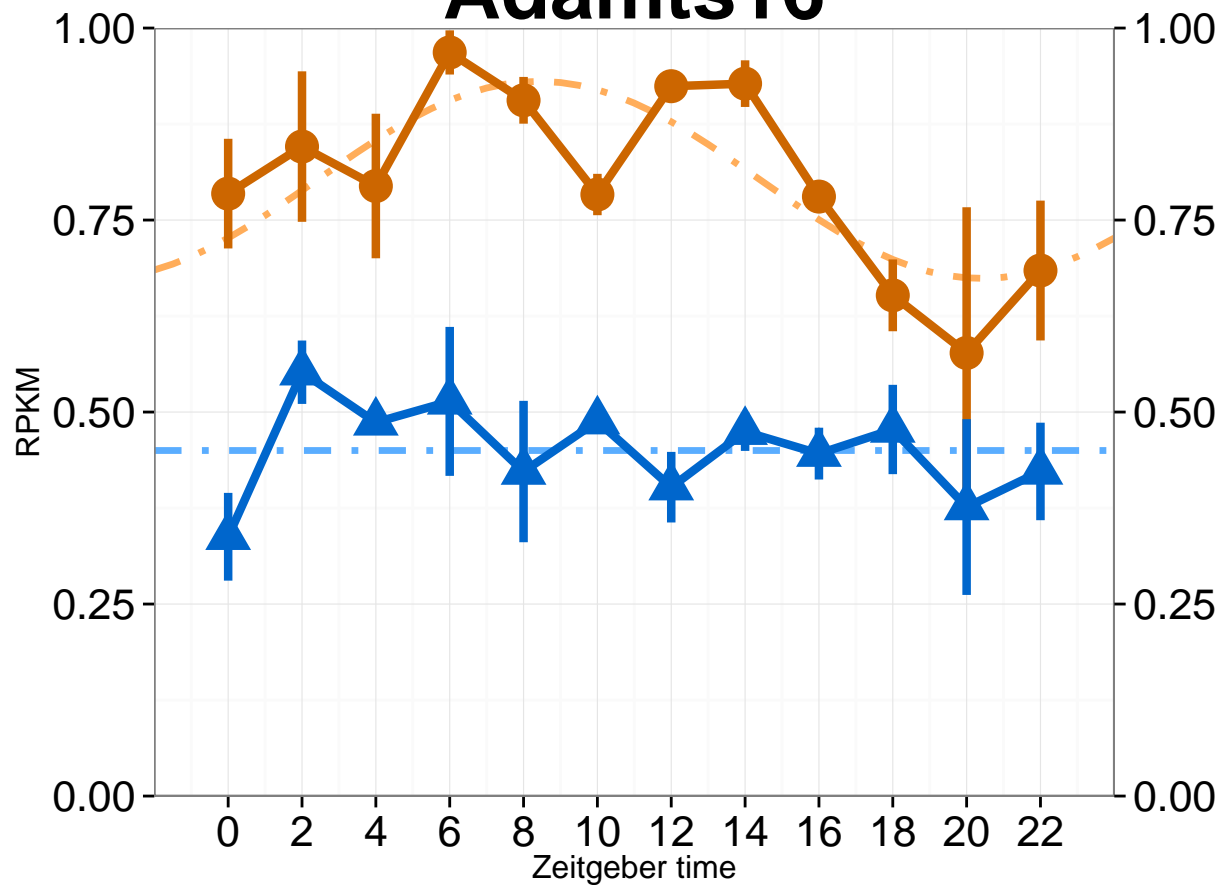

# Adamts16

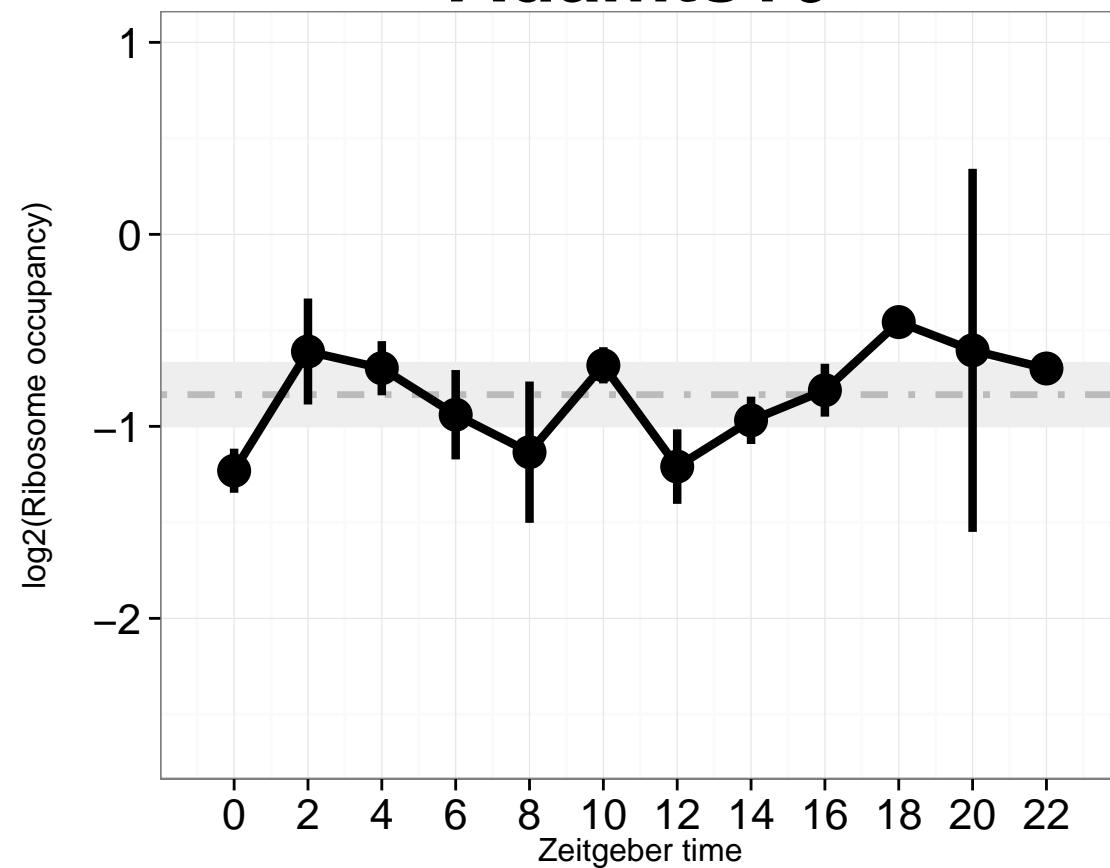

Supplement: Supplementary file 31 [file 1]

## Pno1

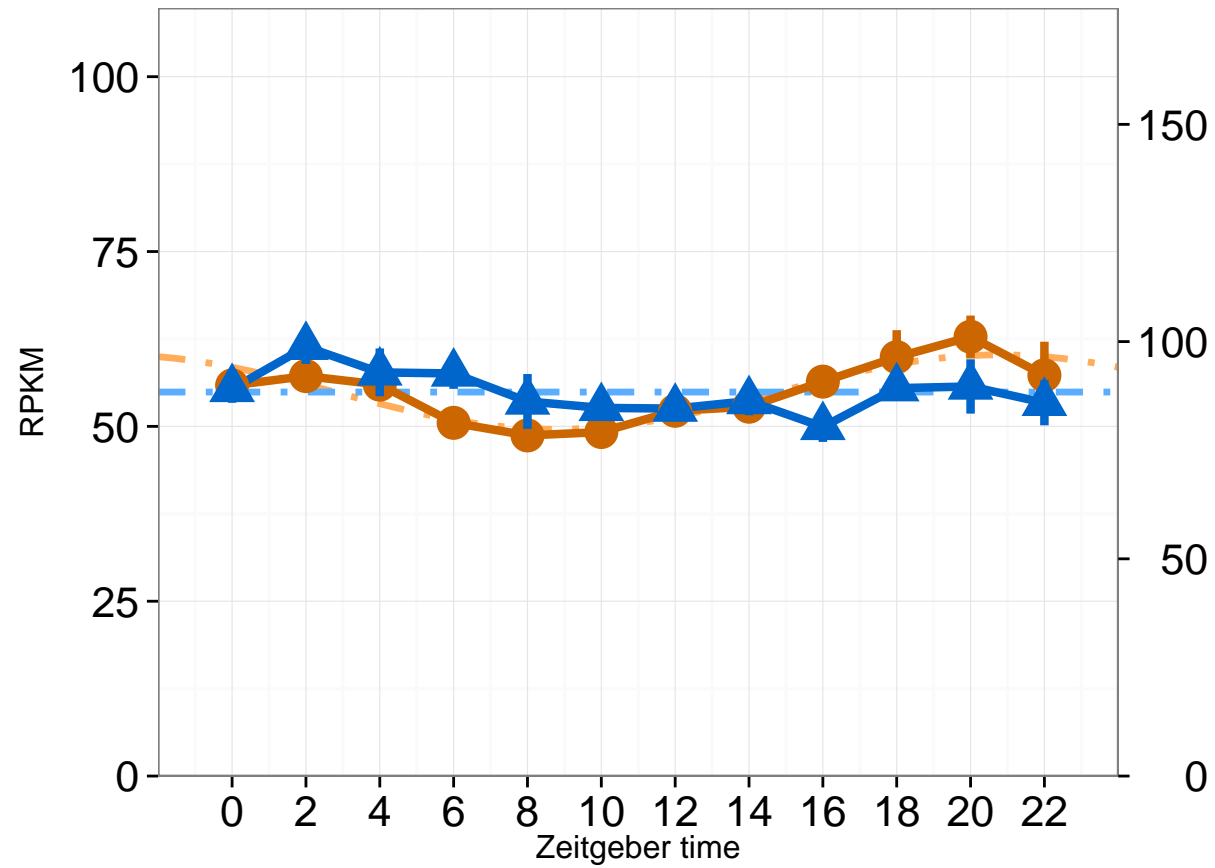

## Pno1

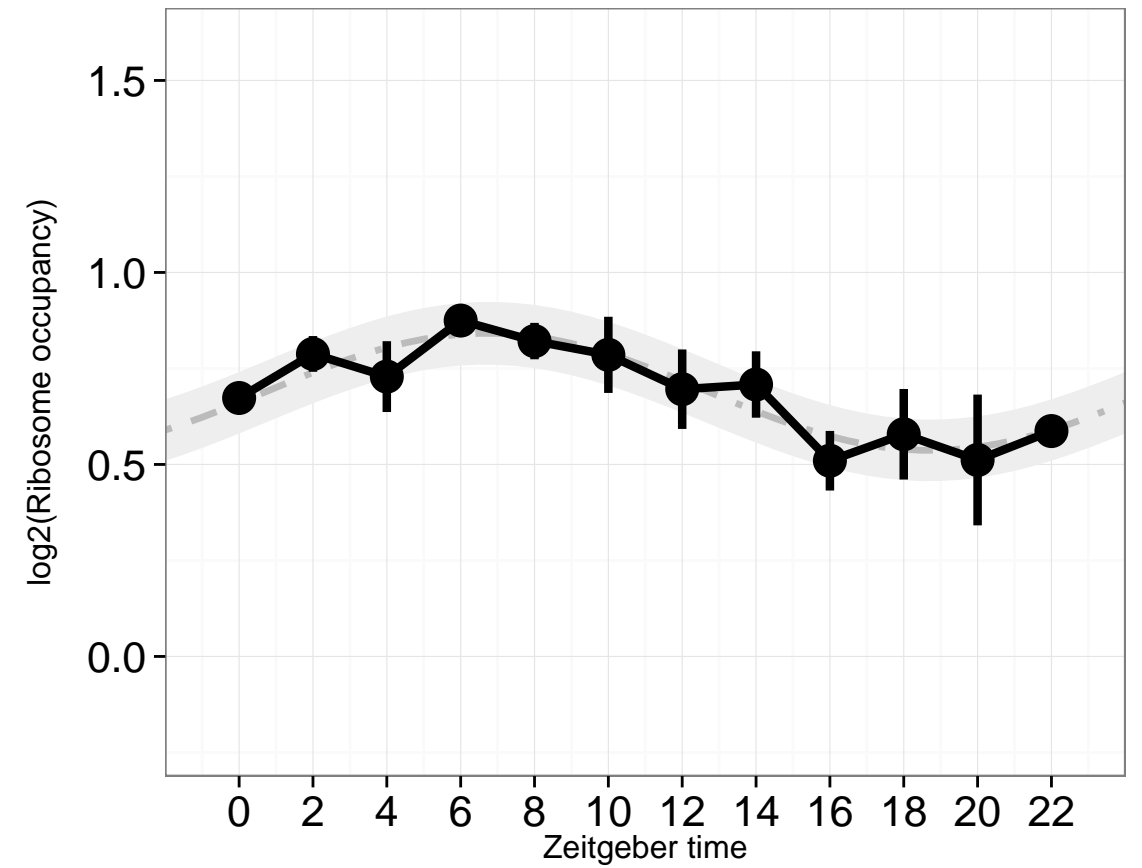

Supplement: Supplementary file 32 [file 1]

# Tnfaip3

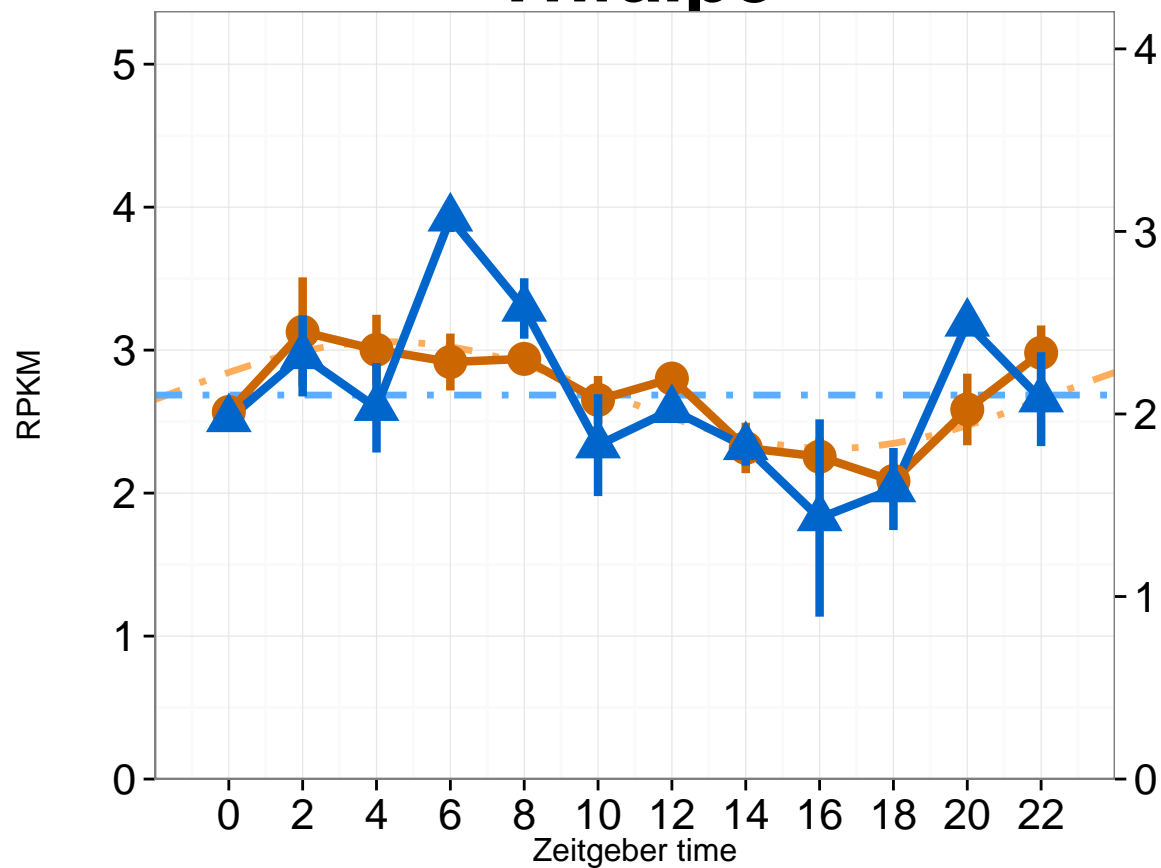

# Tnfaip3

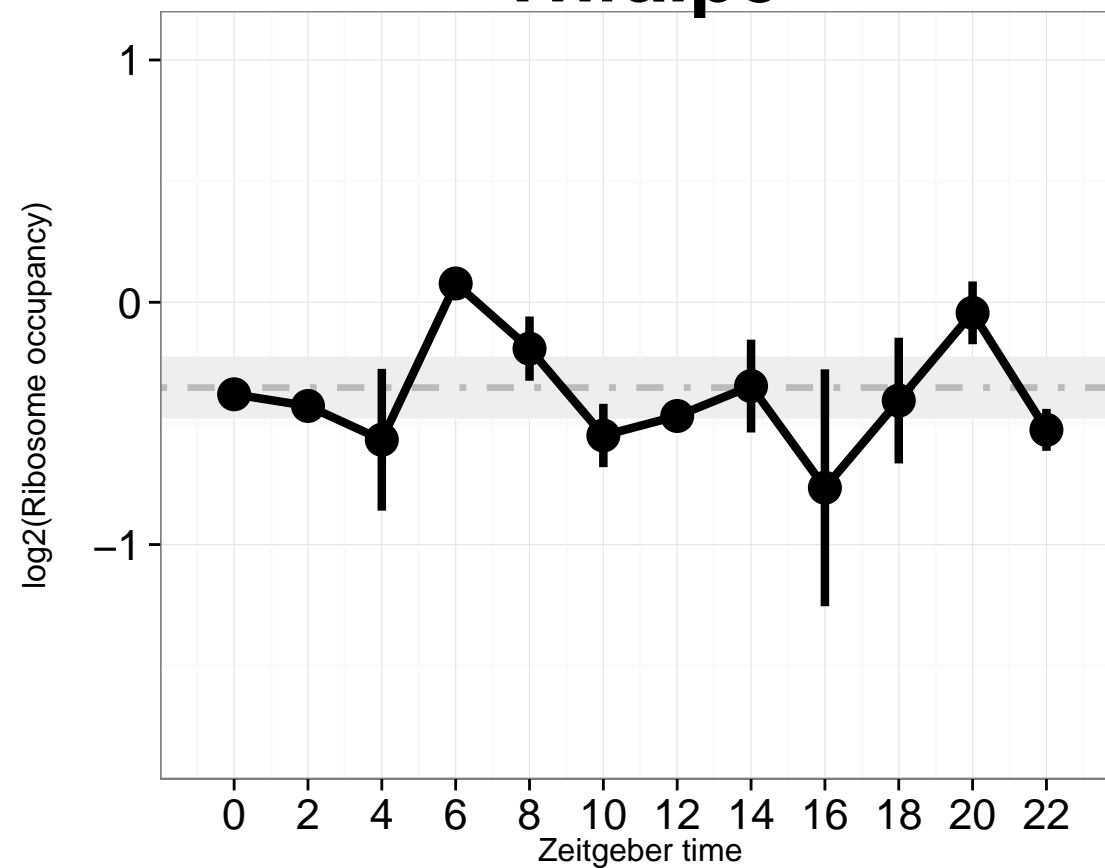

Supplement: Supplementary file 33 [file 1]

# 1600029D21Rik

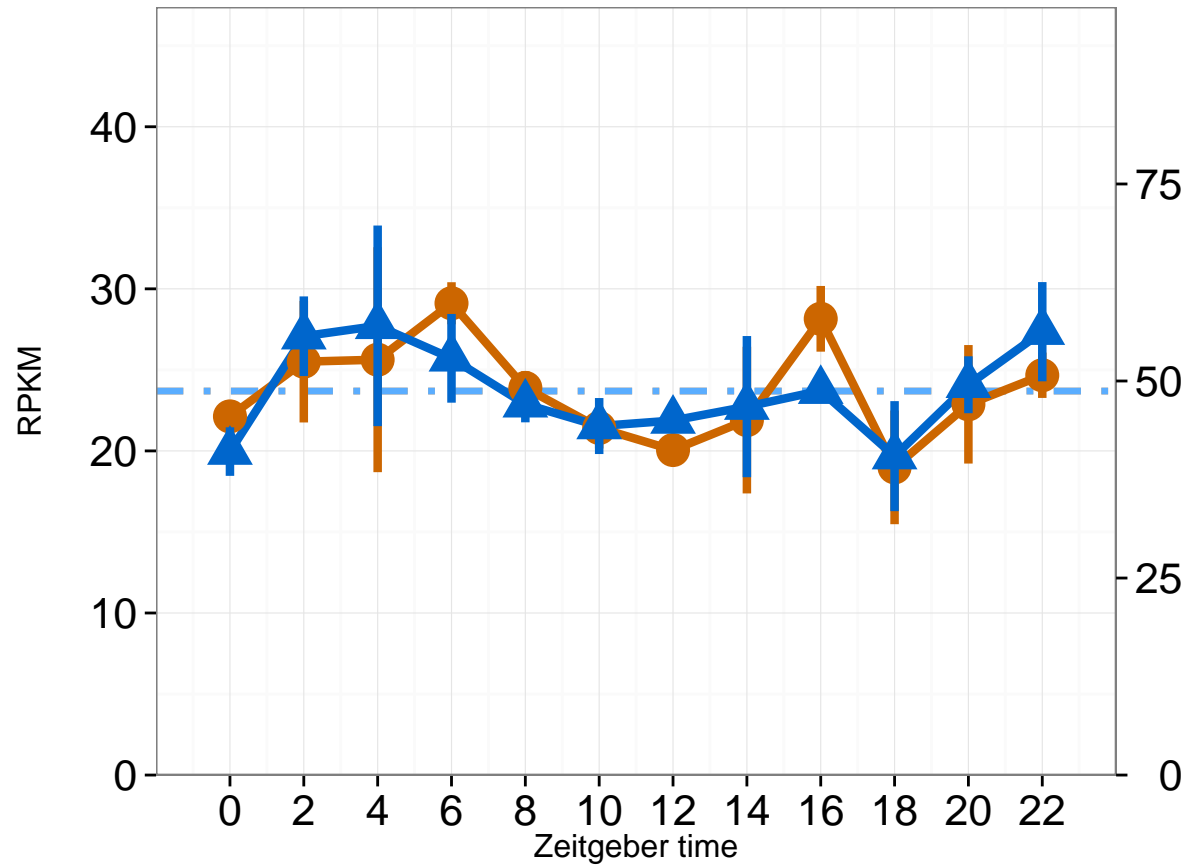

# 1600029D21Rik

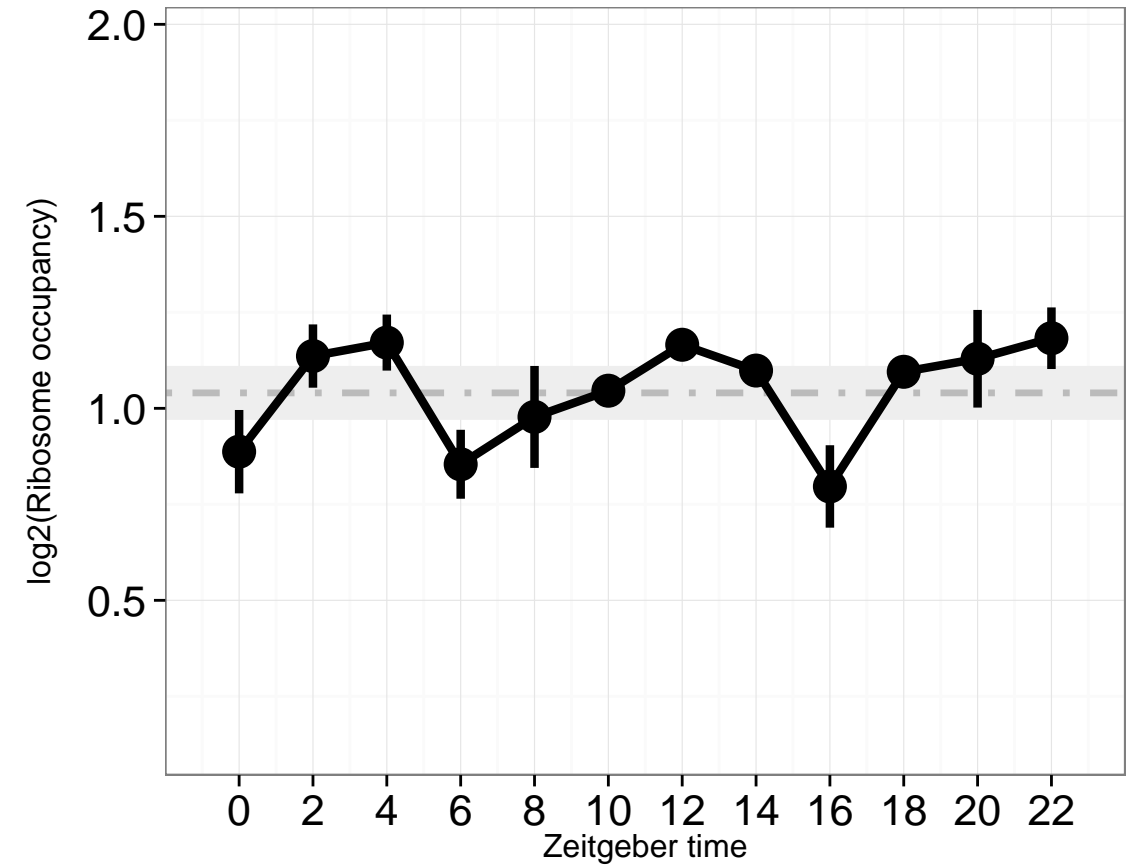

Supplement: Supplementary file 34 [file 1]

## LmIn

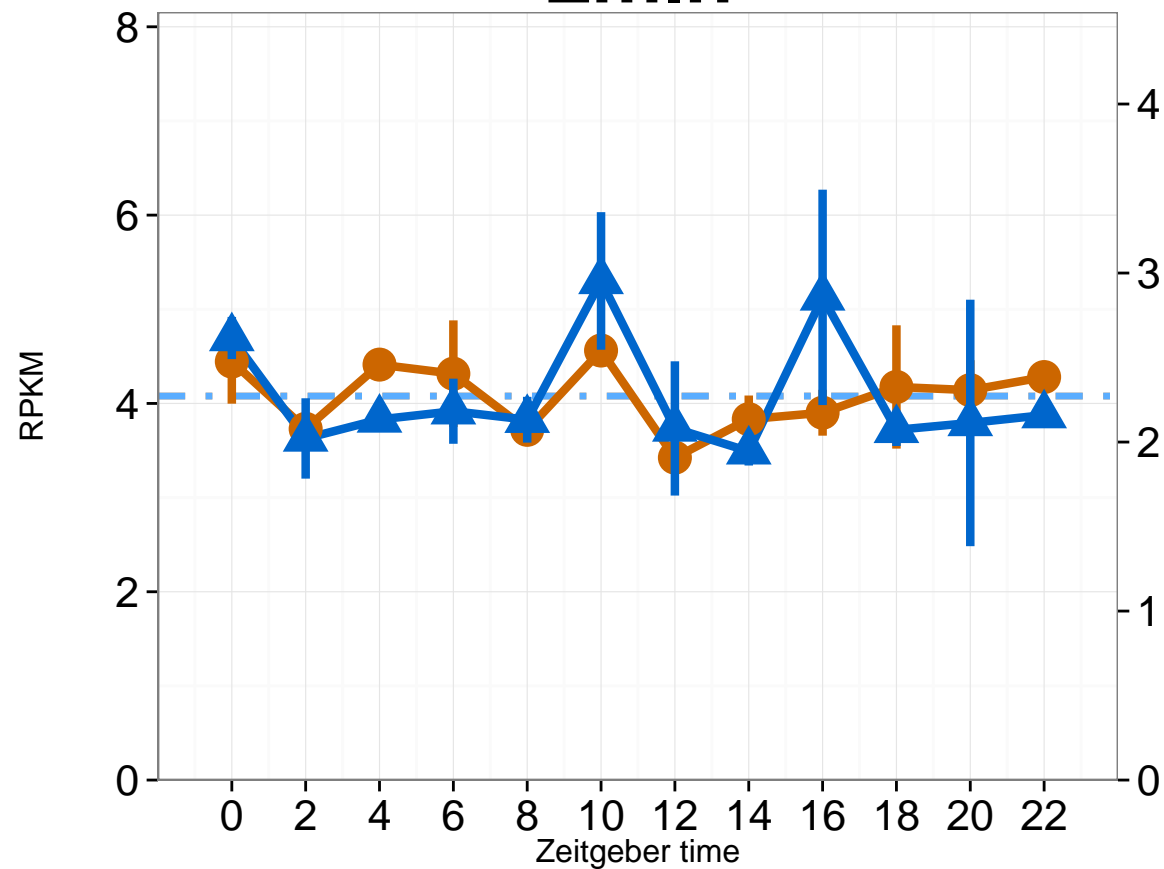

## LmIn

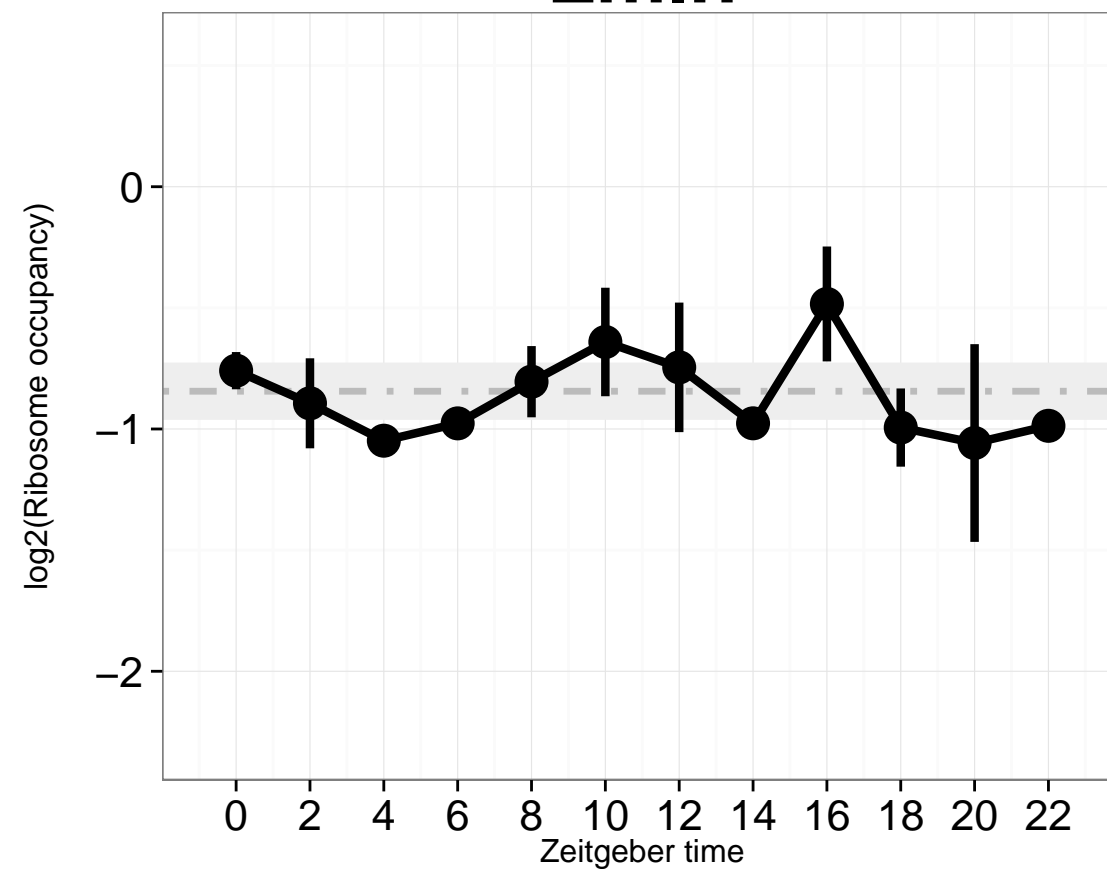

Supplement: Supplementary file 35 [file 1]

## Klhl41

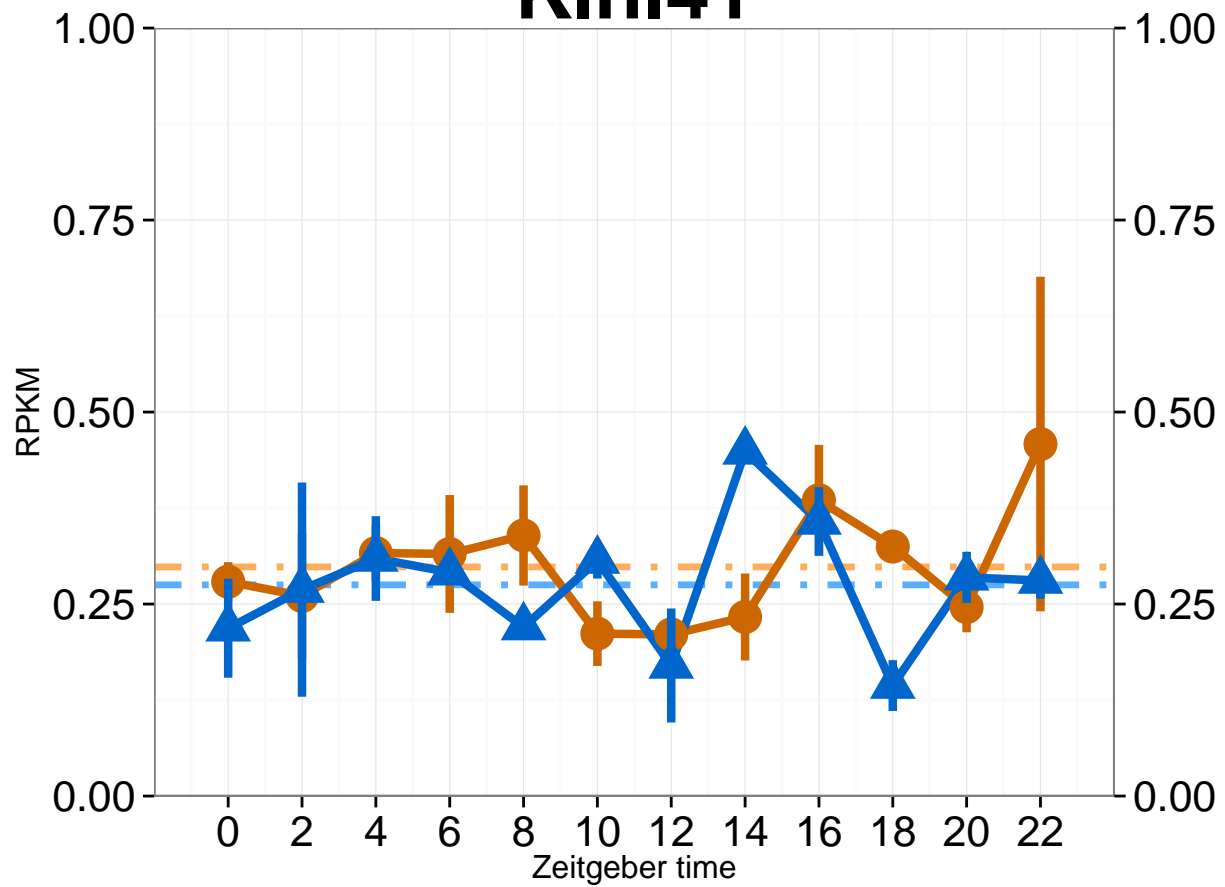

## Klhl41

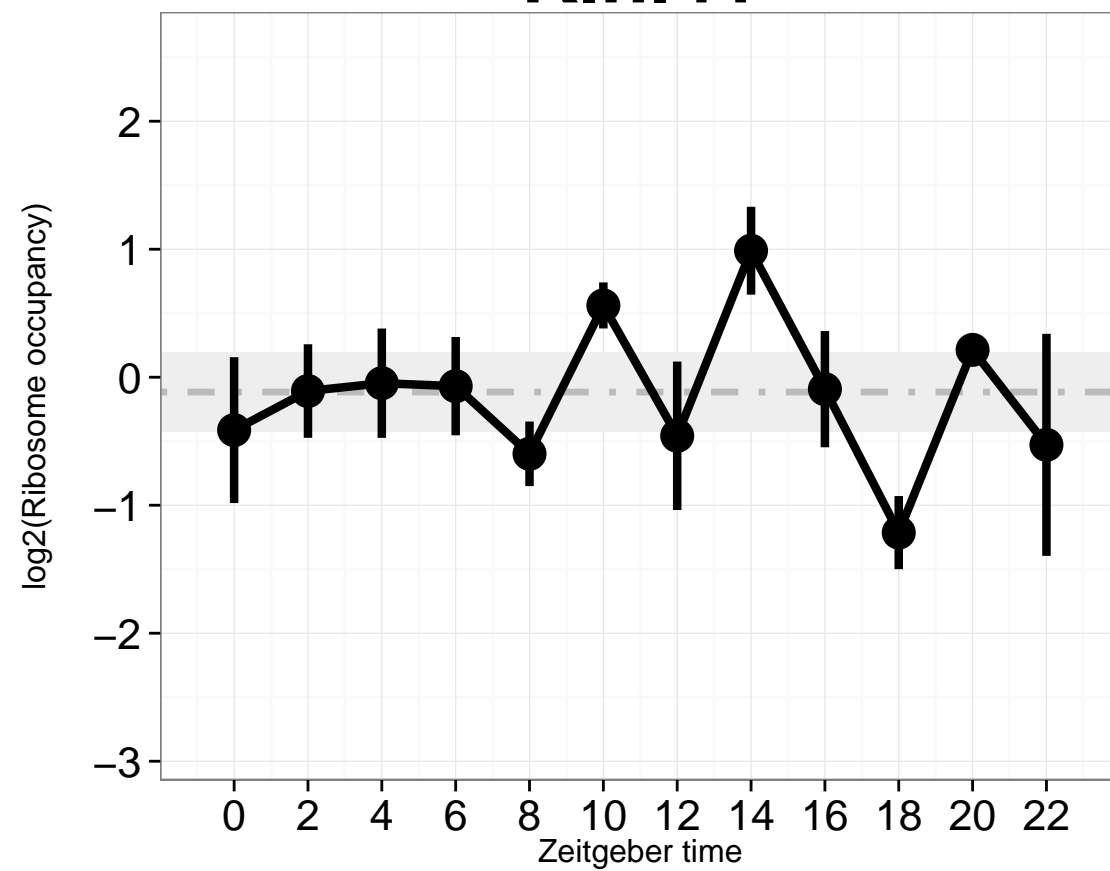

Supplement: Supplementary file 36 [file 1]

## Prrg4

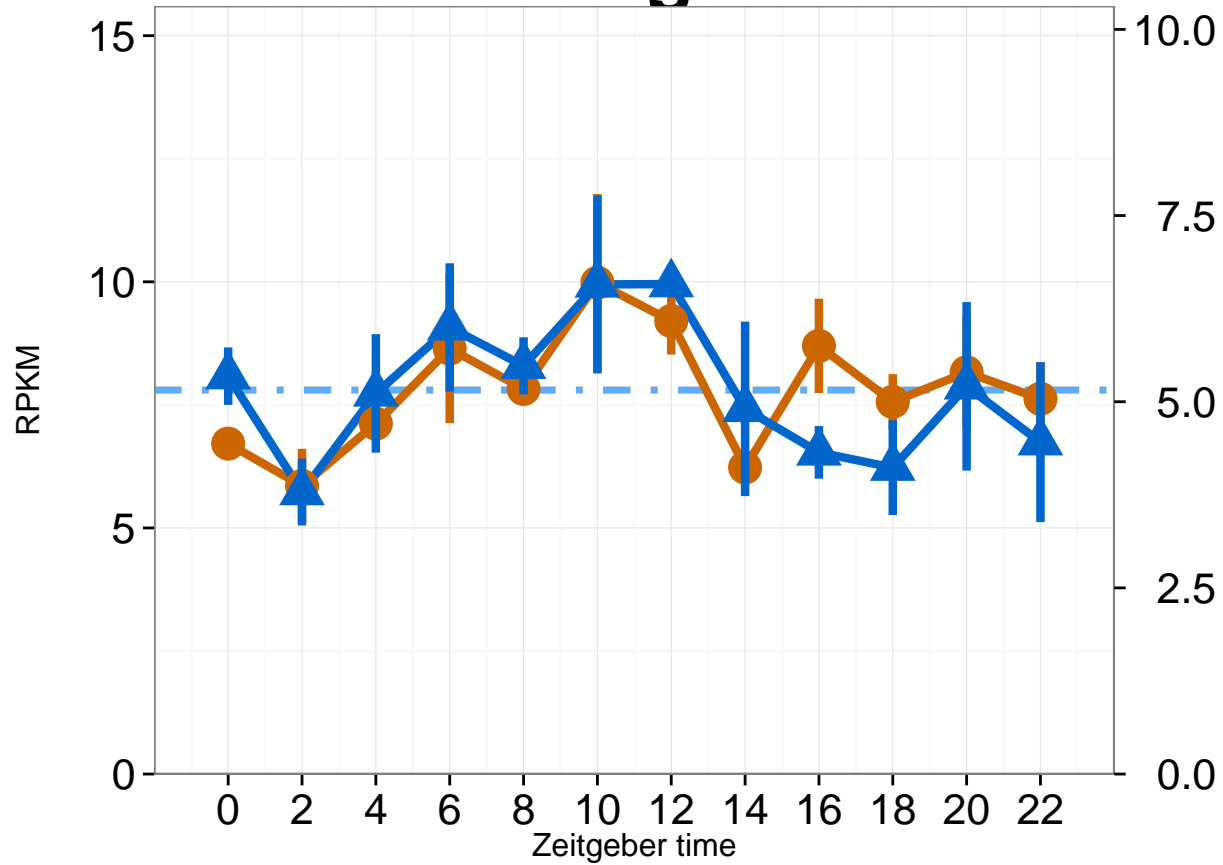

## Prrg4

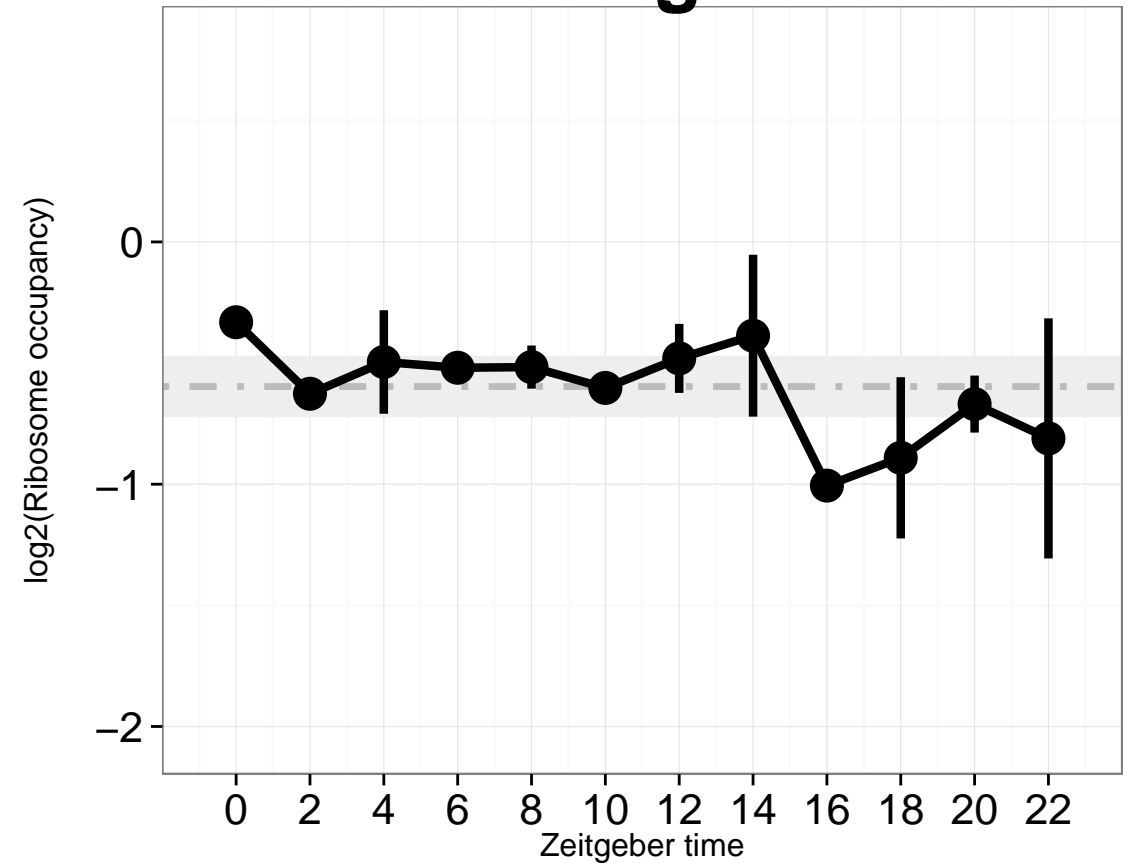

Supplement: Supplementary file 37 [file 1]

# Tgm1

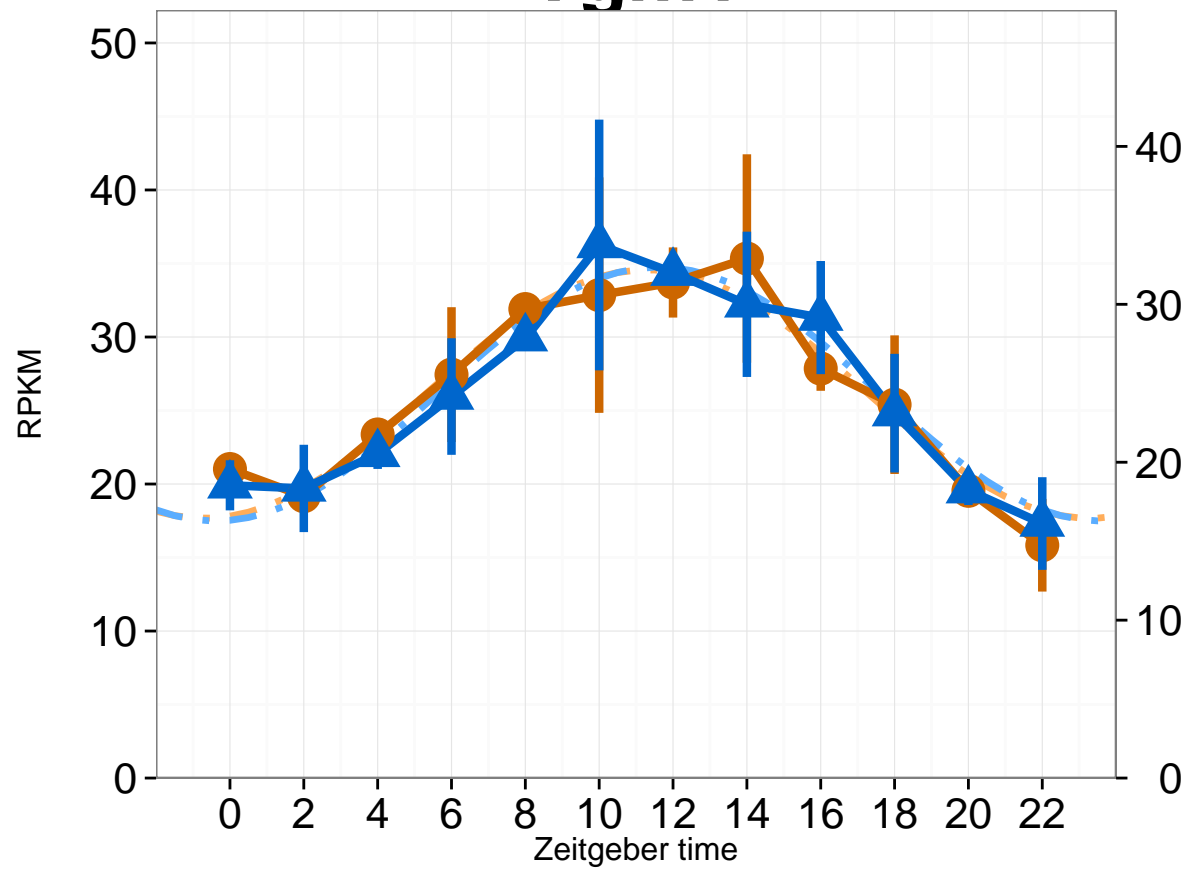

# Tgm1

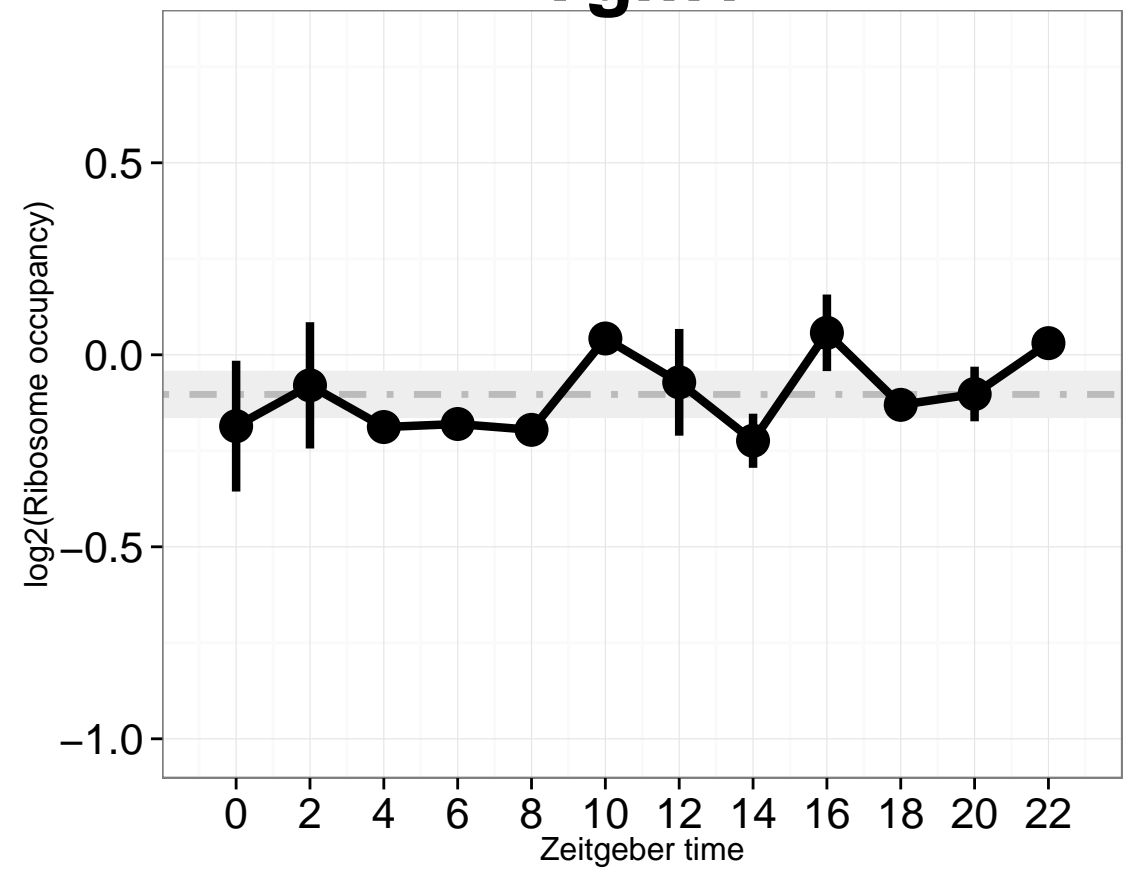

Supplement: Supplementary file 38 [file 1]

# Trp53inp2

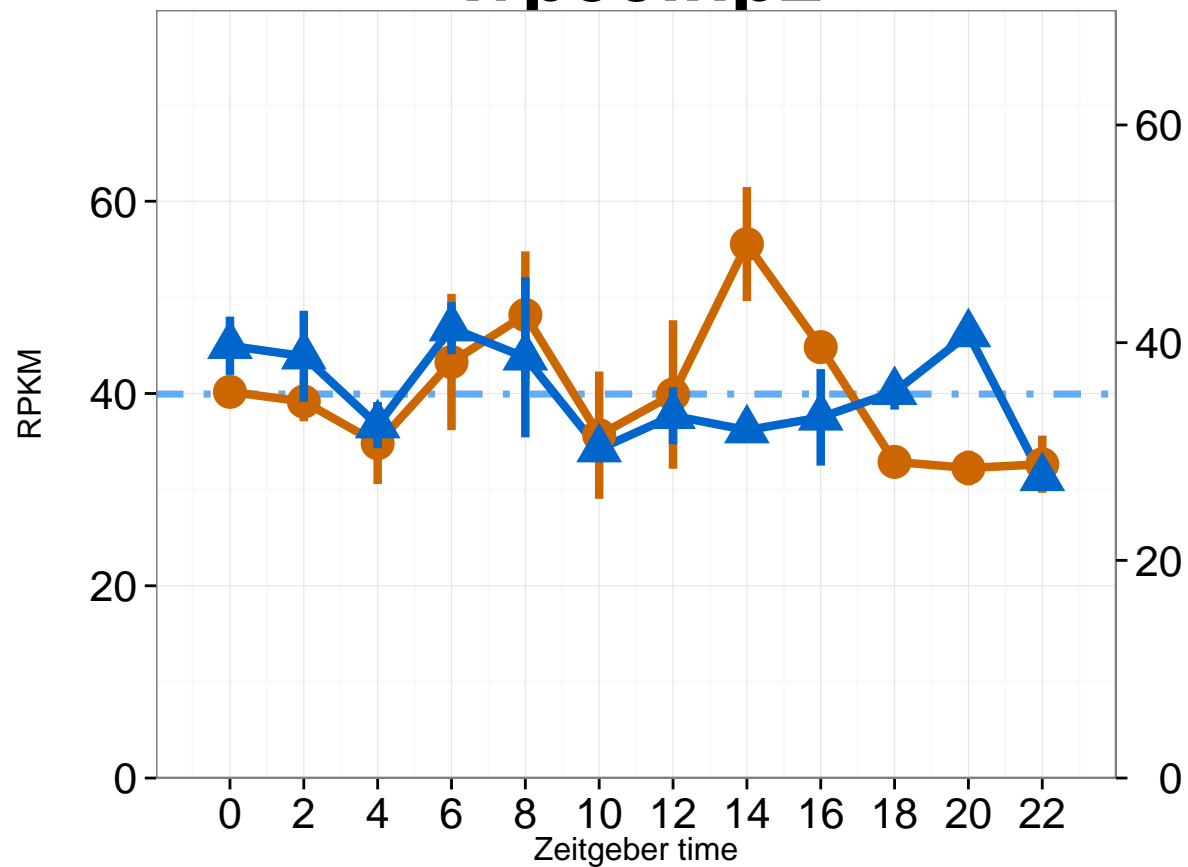

# Trp53inp2

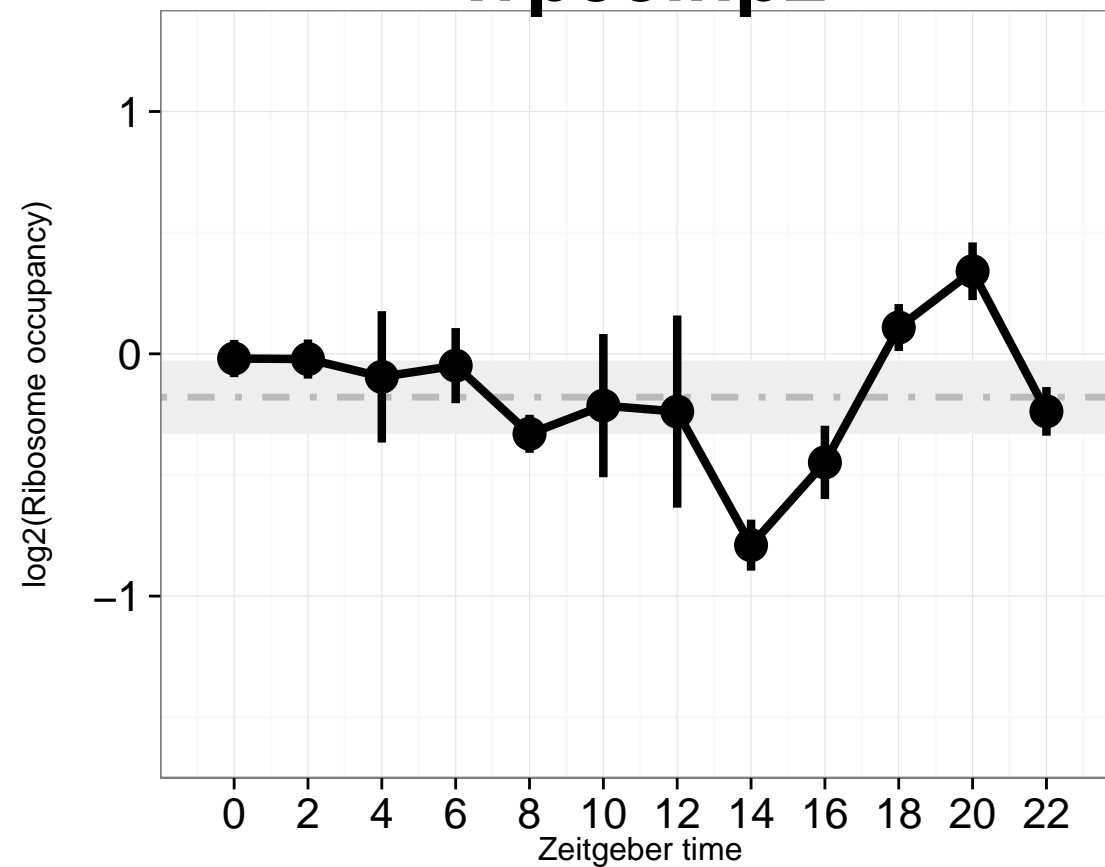

Supplement: Supplementary file 39 [file 1]

# Sap30bp

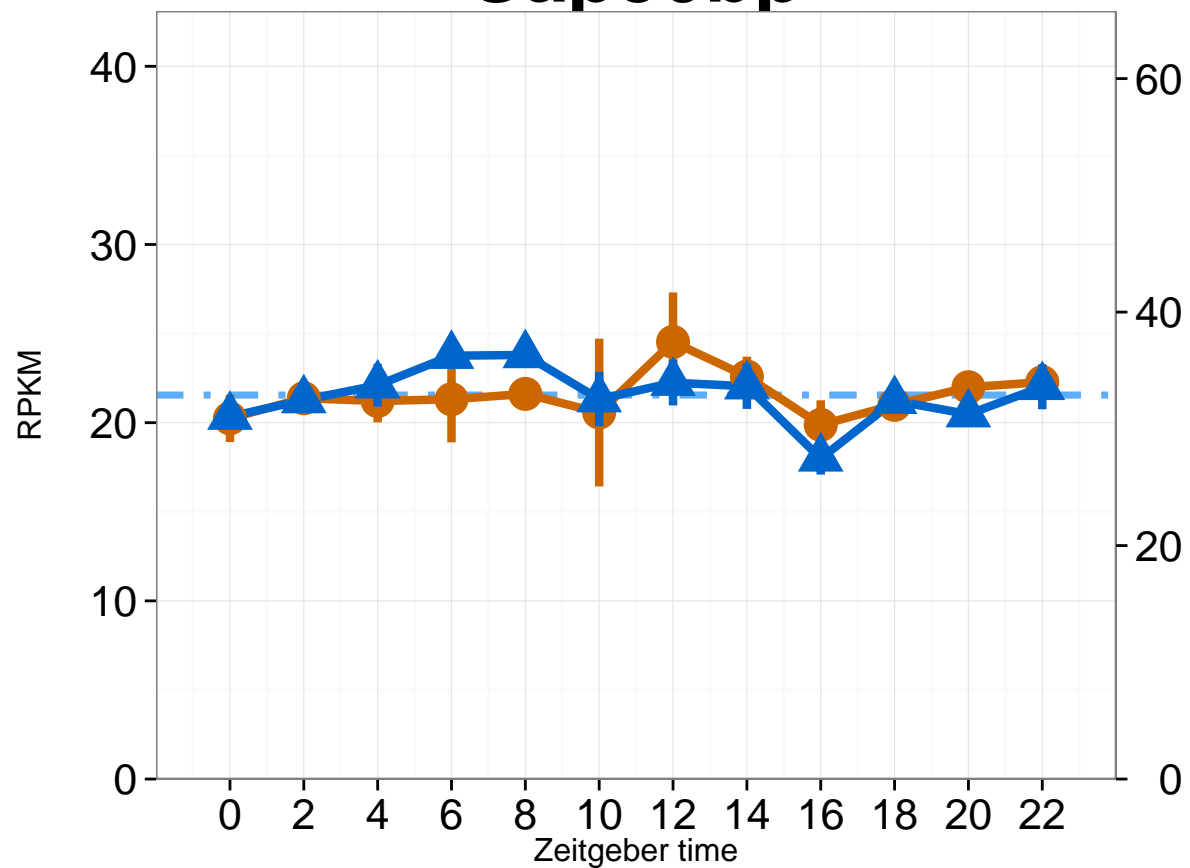

# Sap30bp

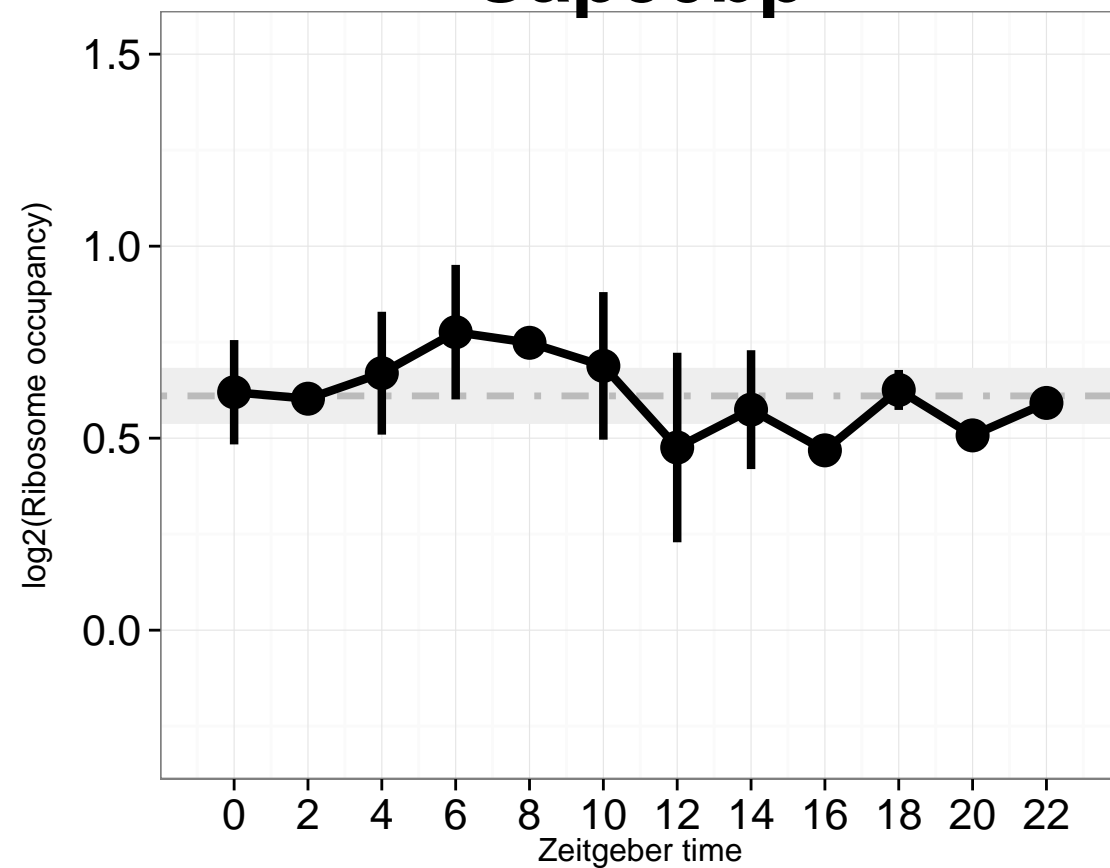

Supplement: Supplementary file 40 [file 1]

## Helz2

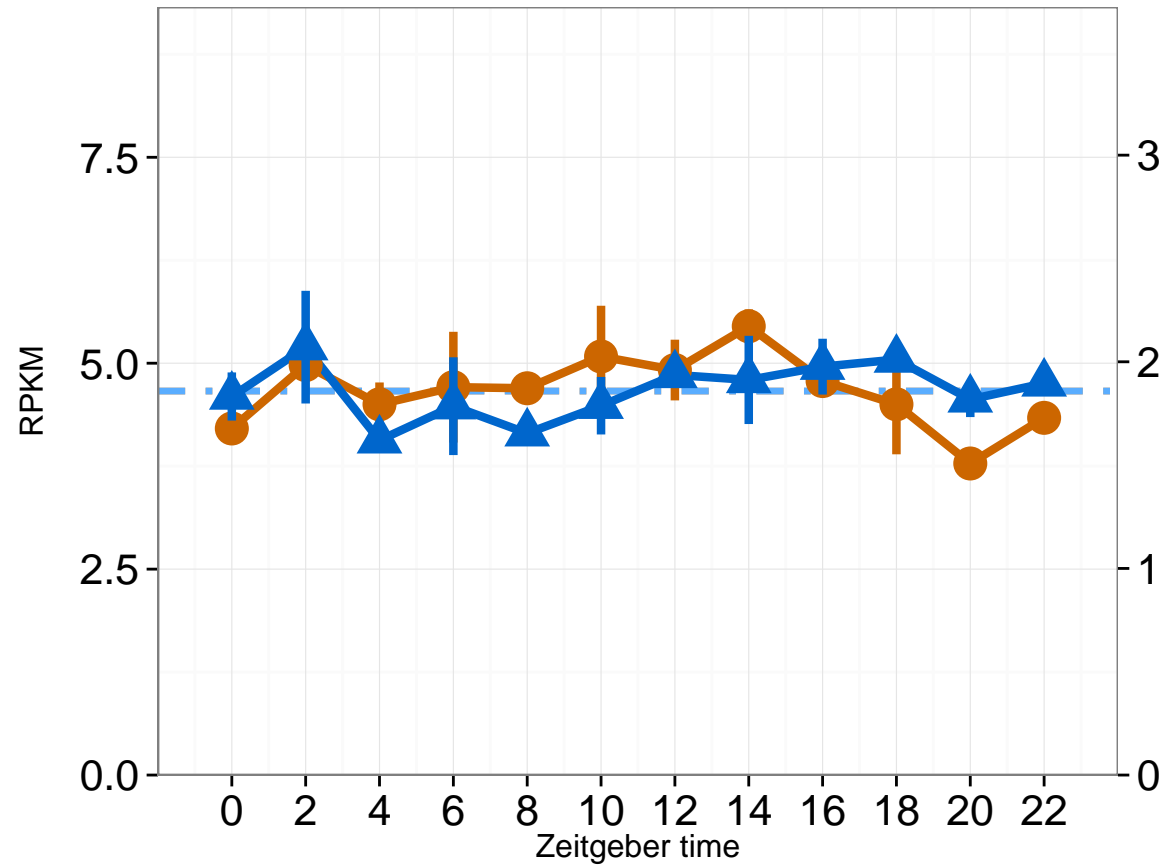

## Helz2

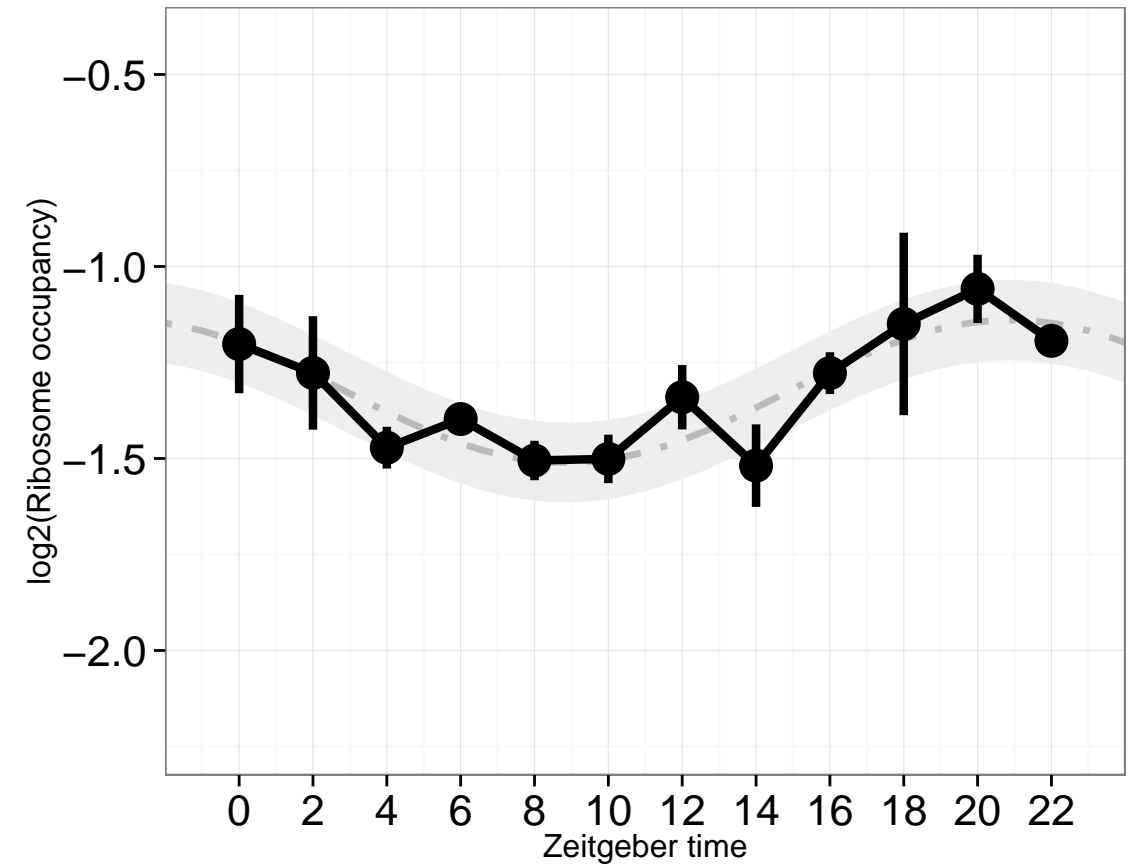

Supplement: Supplementary file 41 [file 1]

## Foxk2

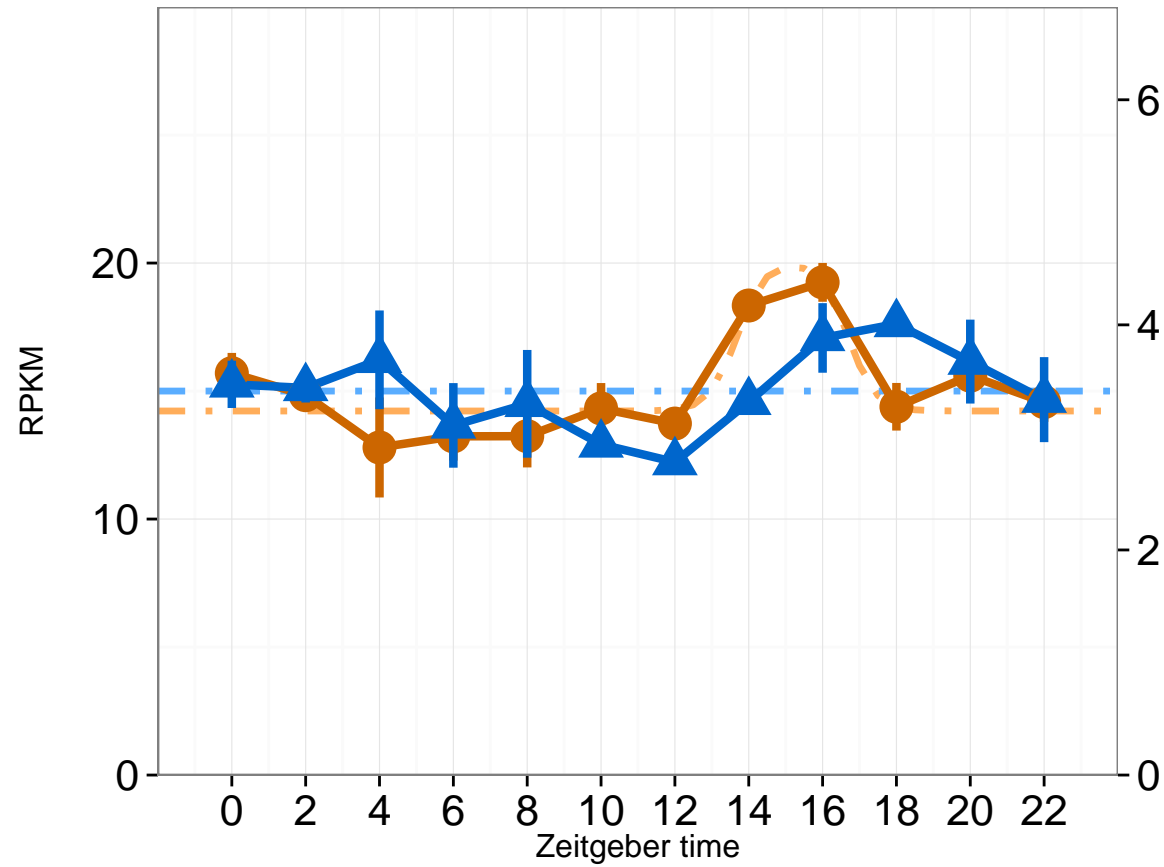

## Foxk2

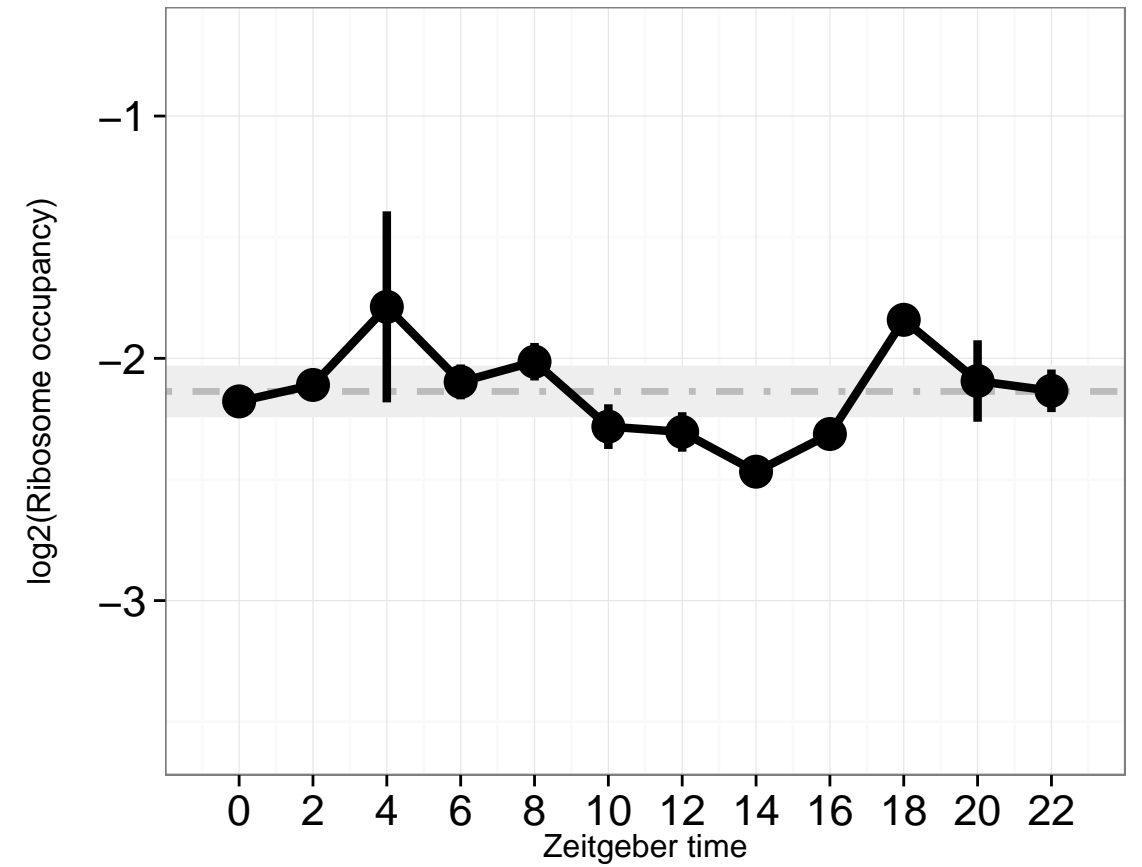

Supplement: Supplementary file 42 [file 1]

## Tsen2

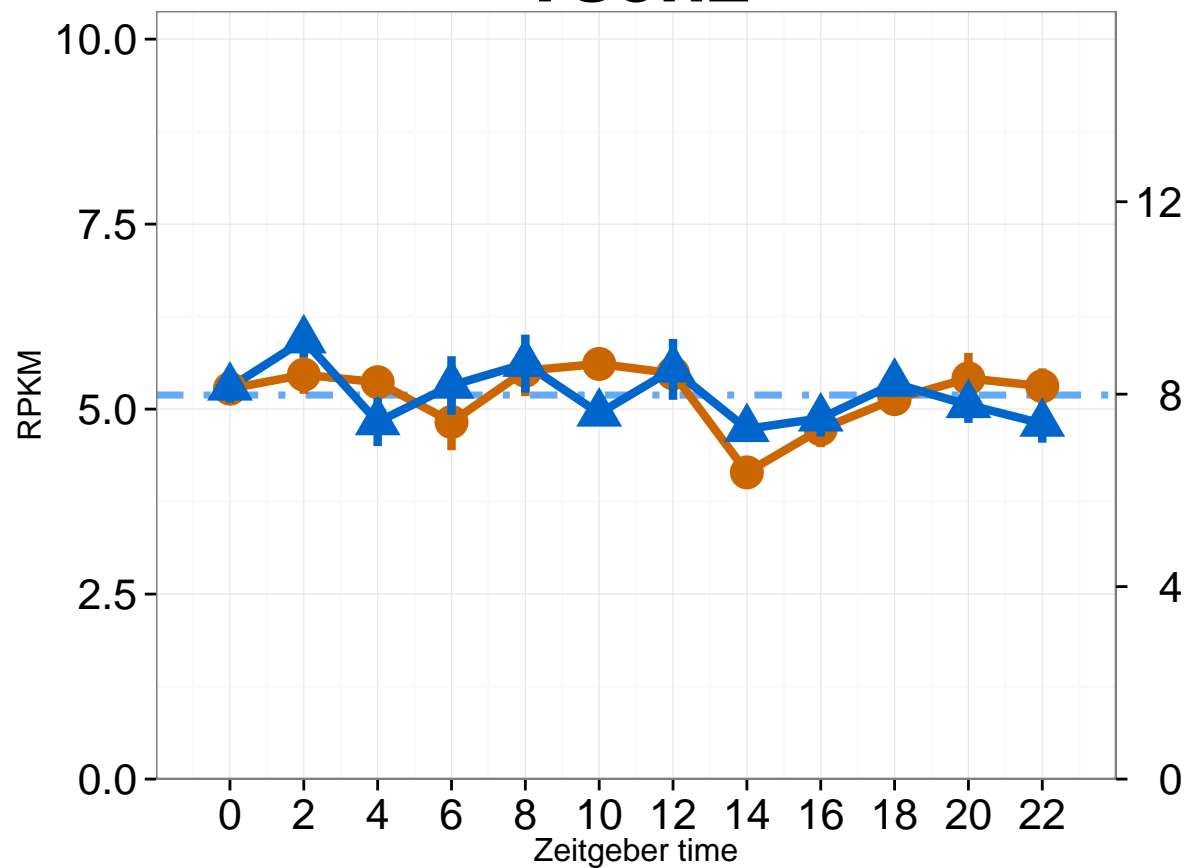

## Tsen2

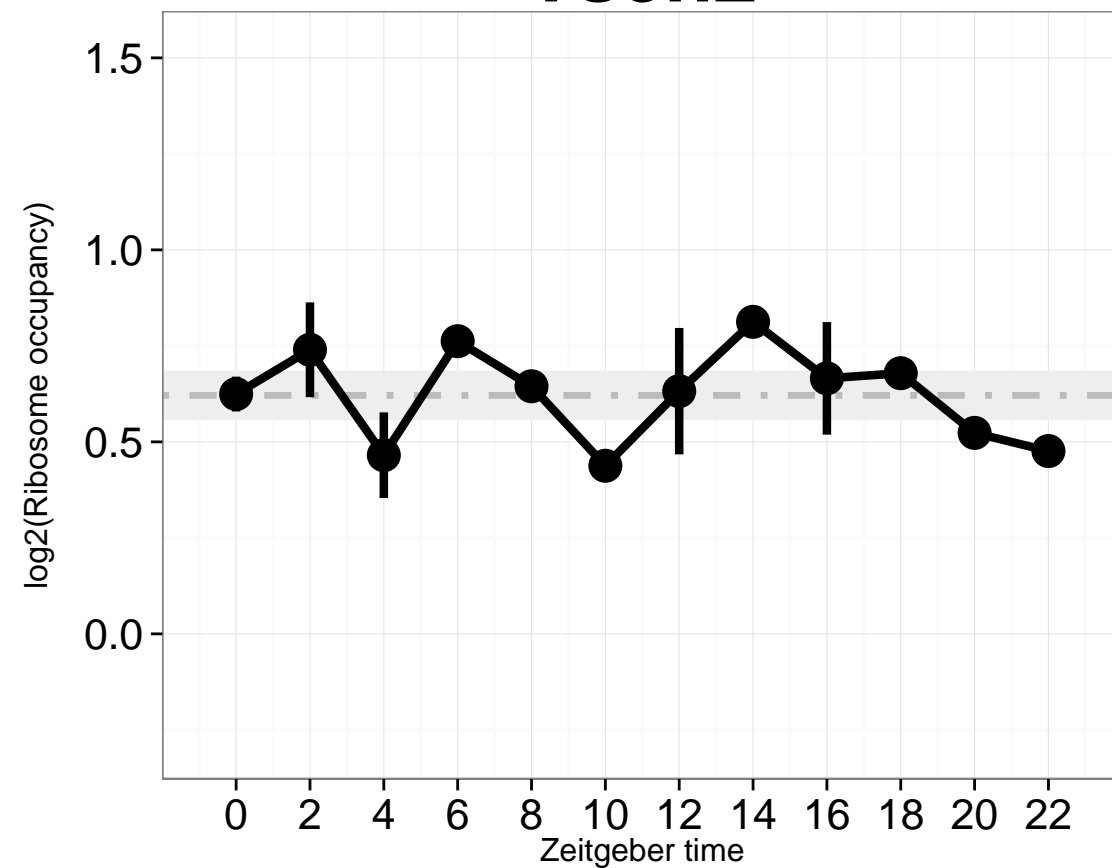

Supplement: Supplementary file 43 [file 1]

## Pkp2

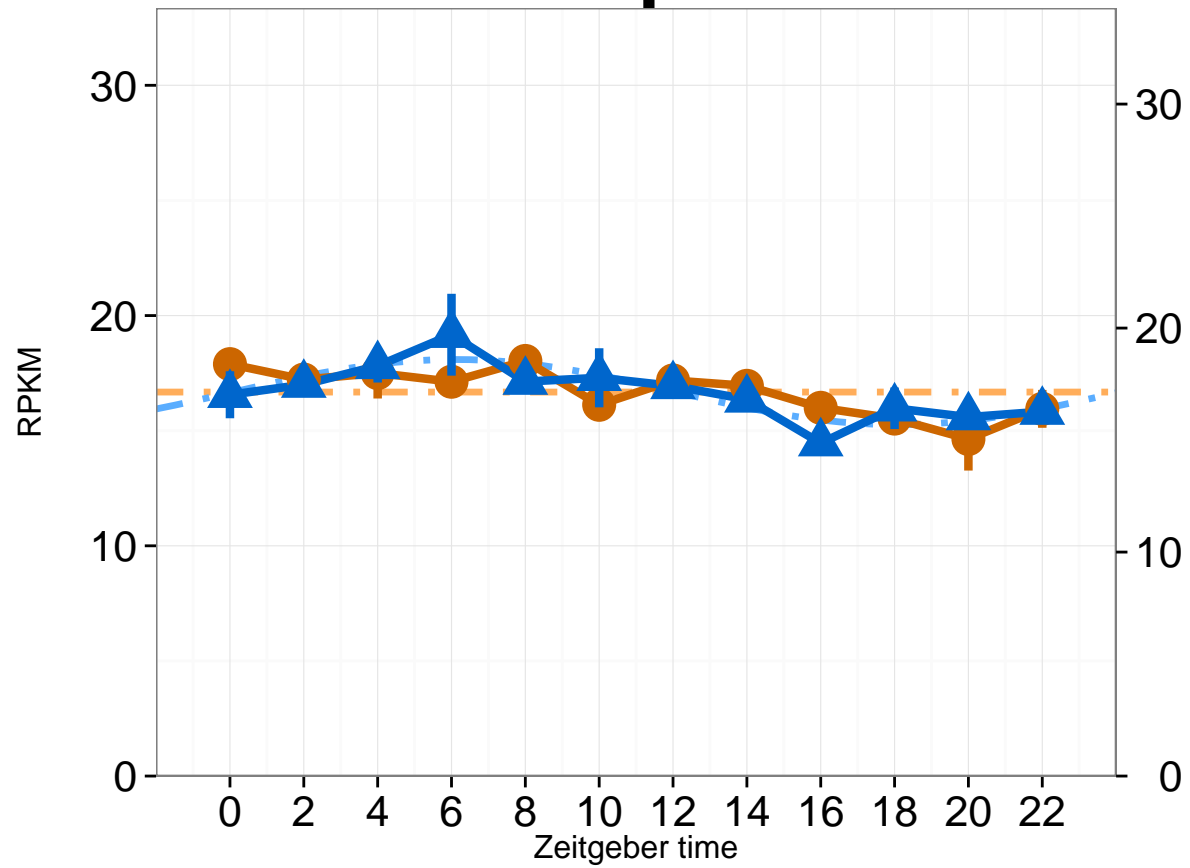

## Pkp2

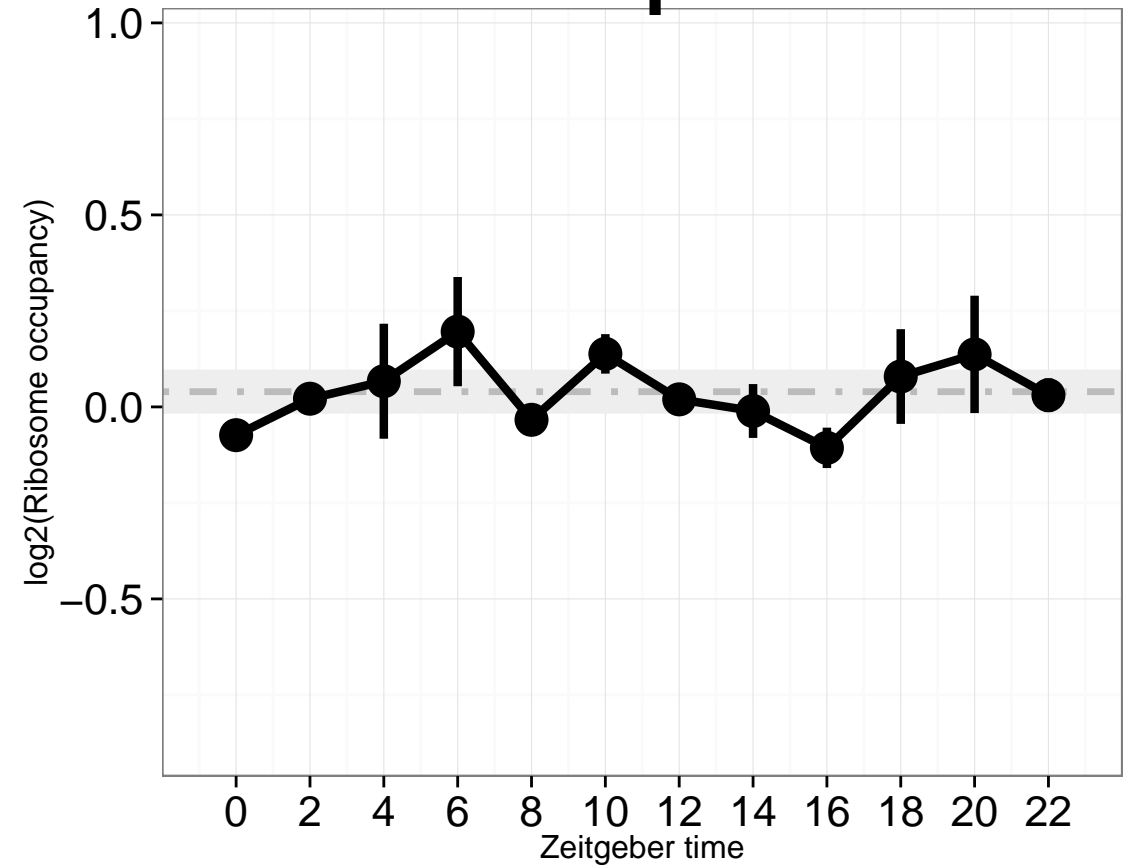

Supplement: Supplementary file 44 [file 1]

## Galnt11

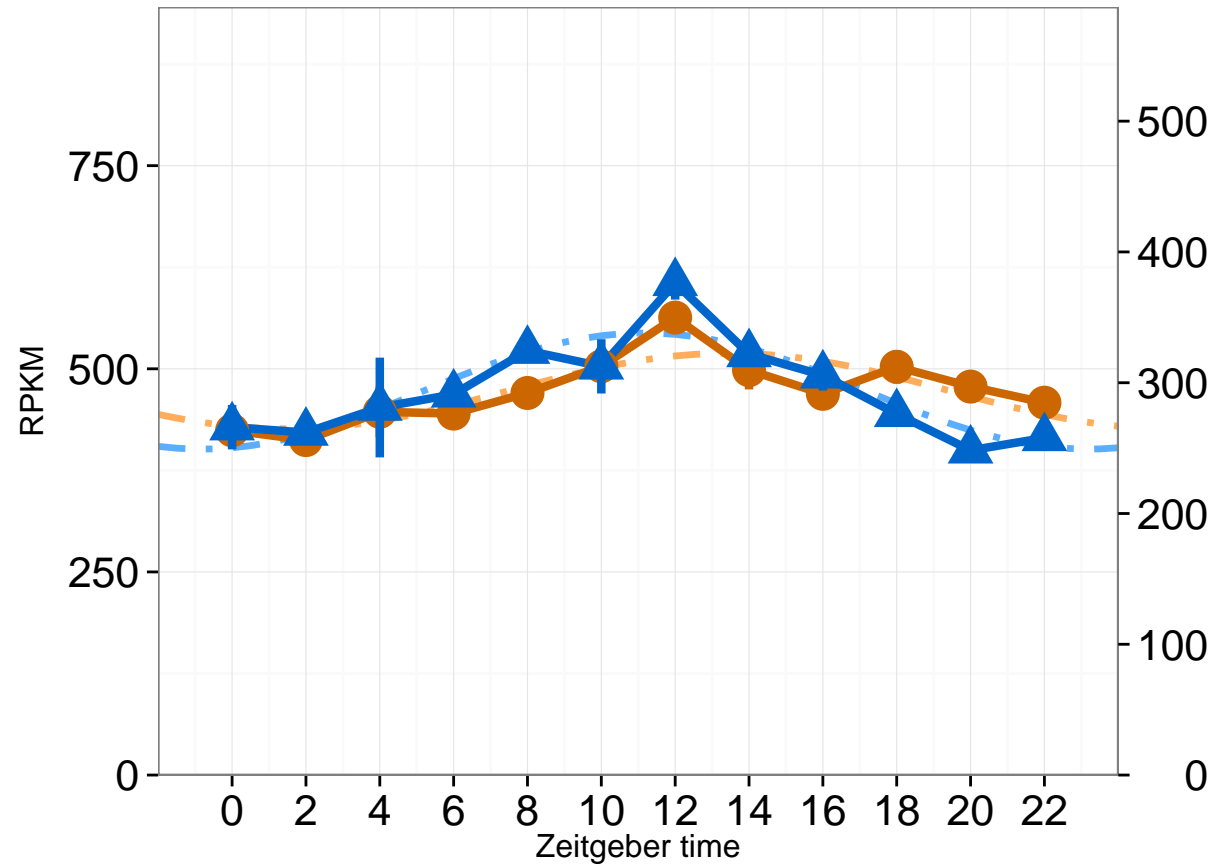

## Galnt11

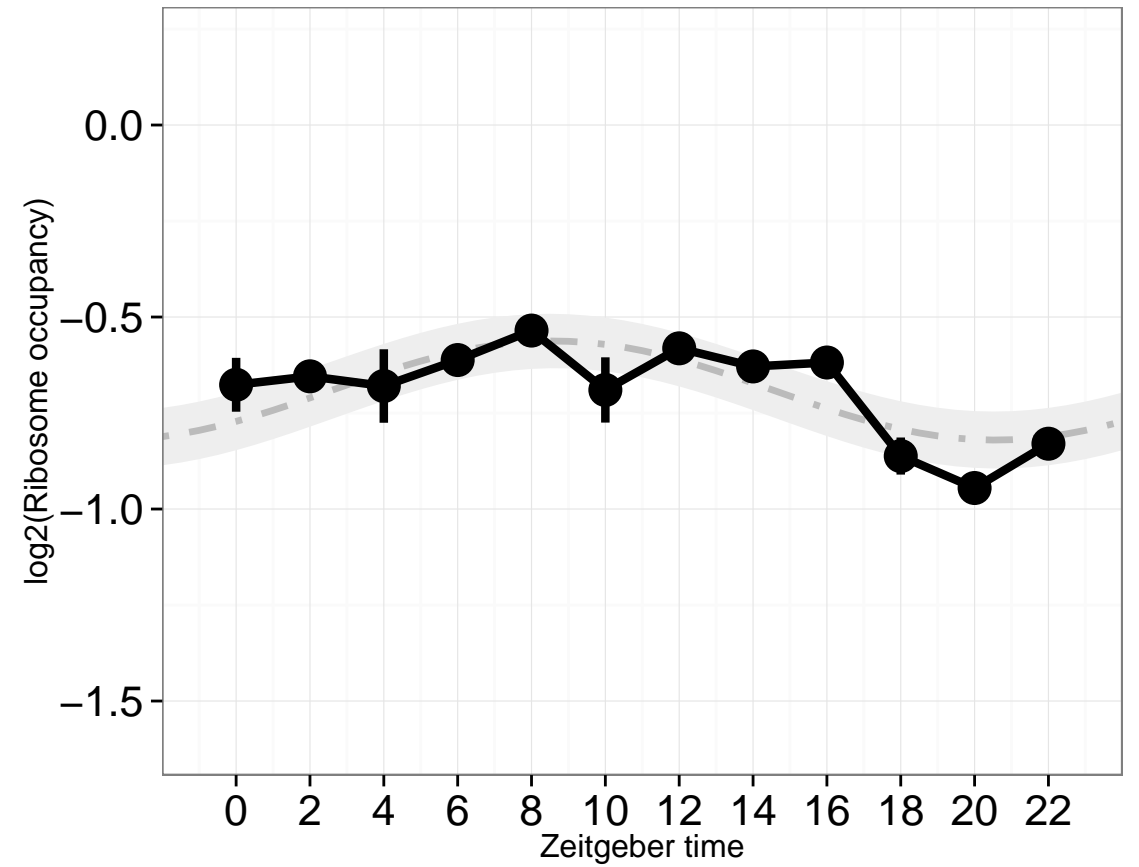

Supplement: Supplementary file 45 [file 1]

## Fbxo6

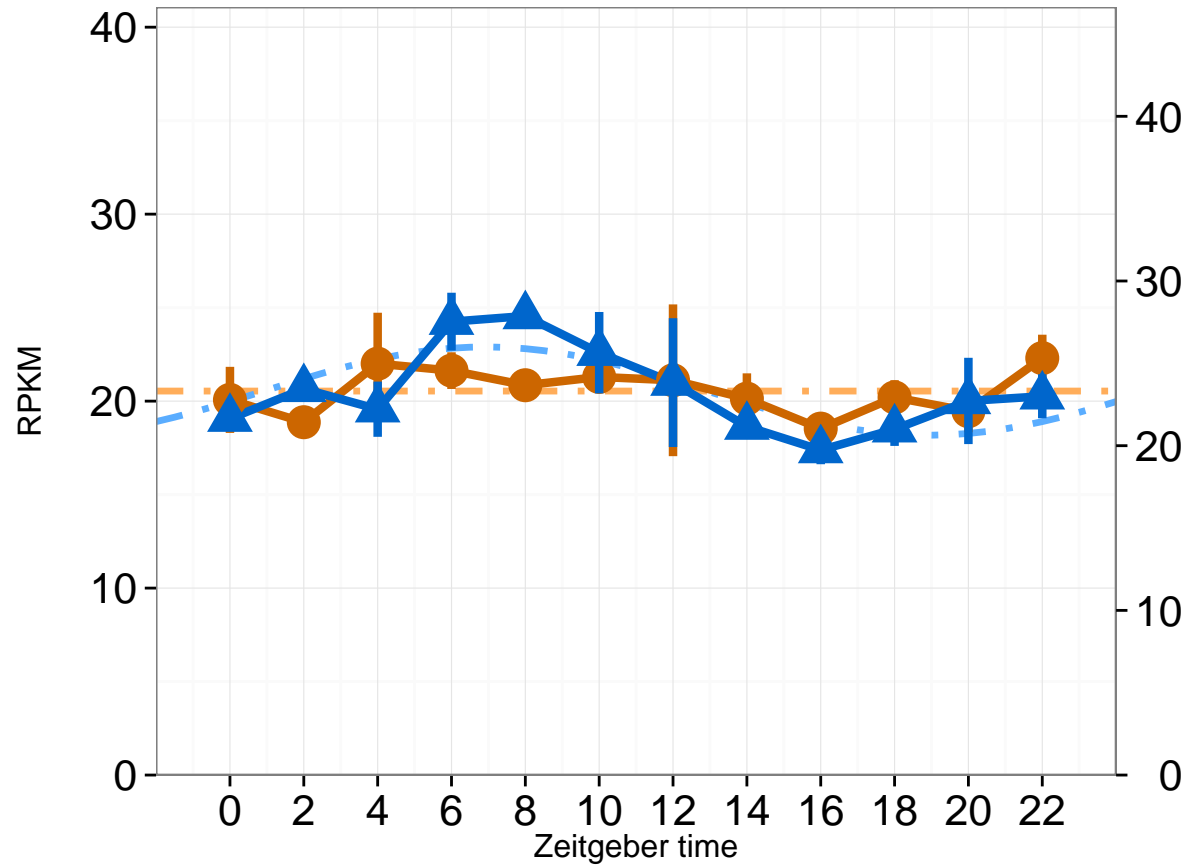

## Fbxo6

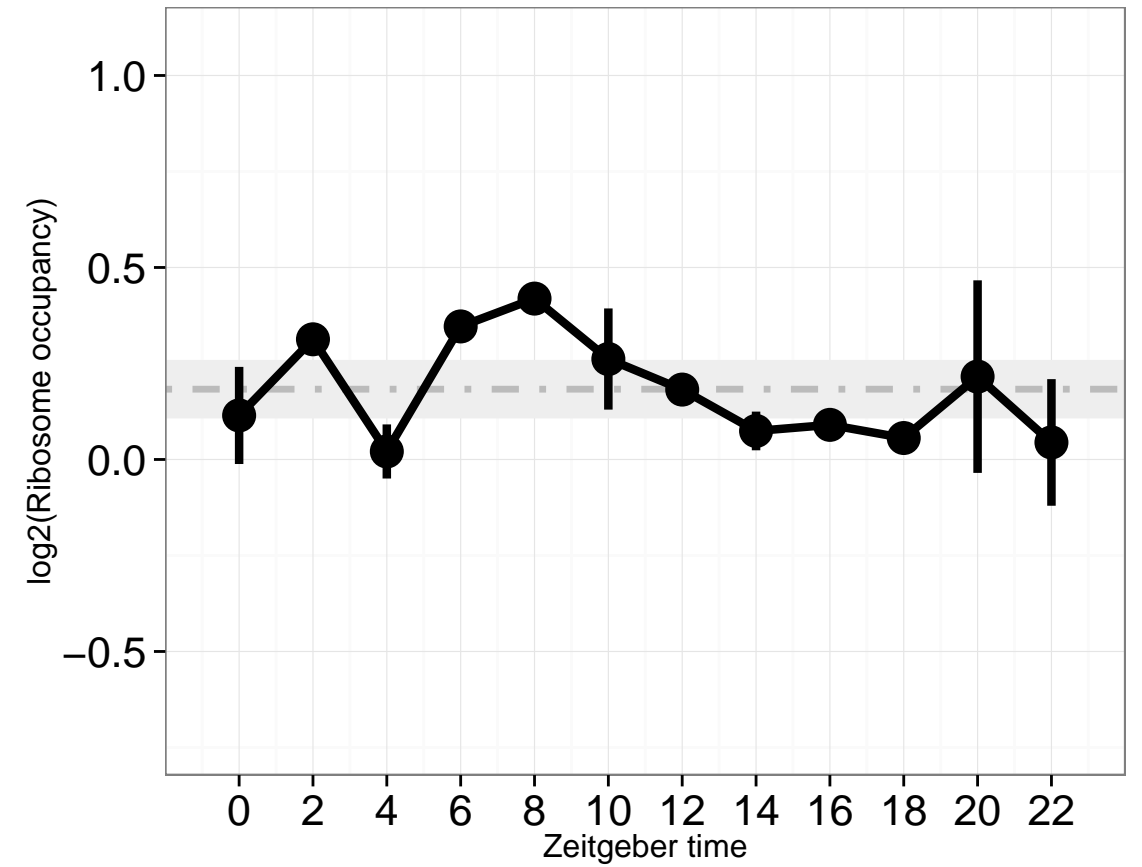

Supplement: Supplementary file 46 [file 1]

# Zfp251

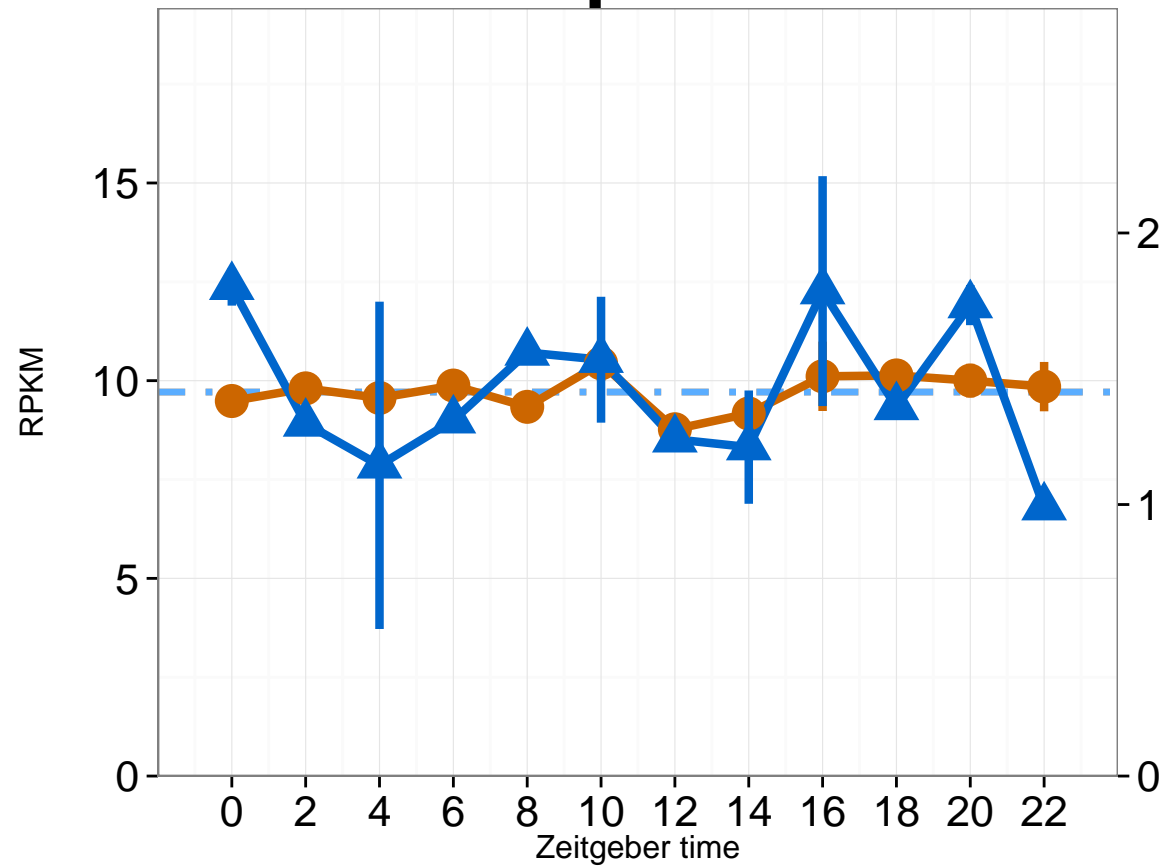

# Zfp251

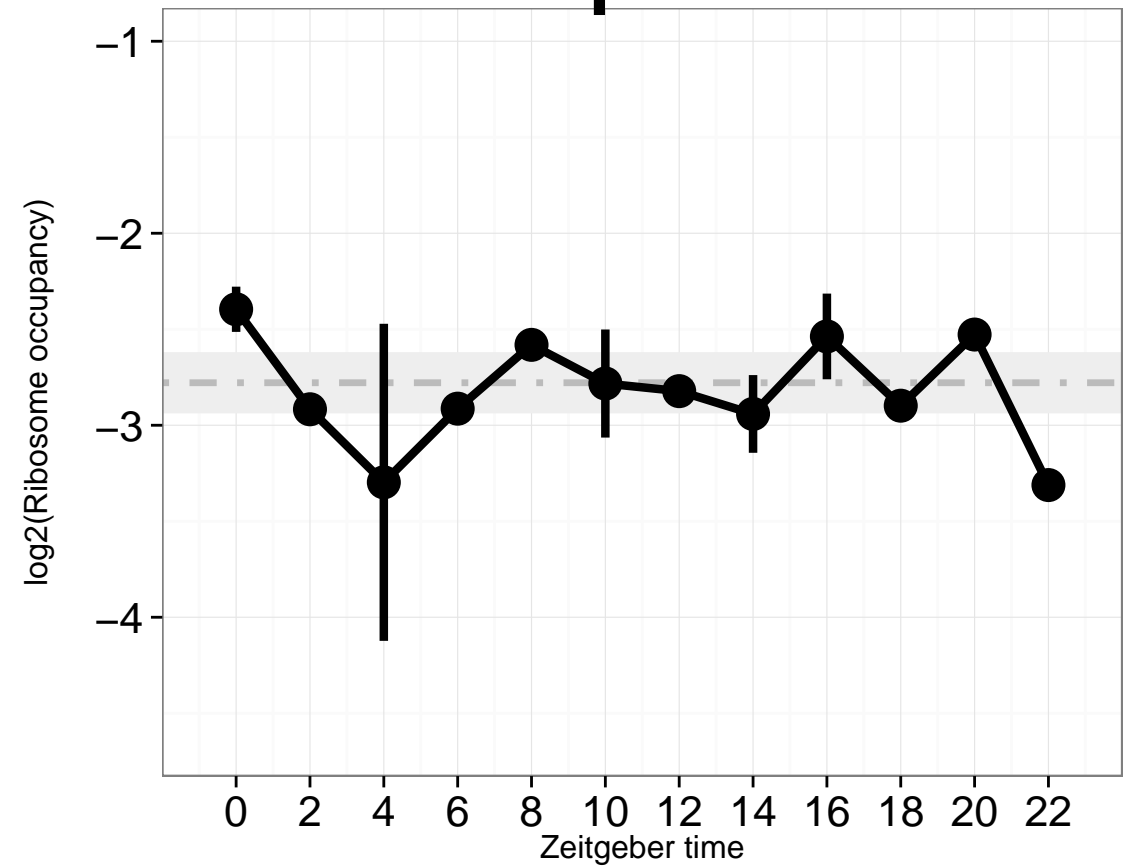

Supplement: Supplementary file 47 [file 1]

## Cwc25

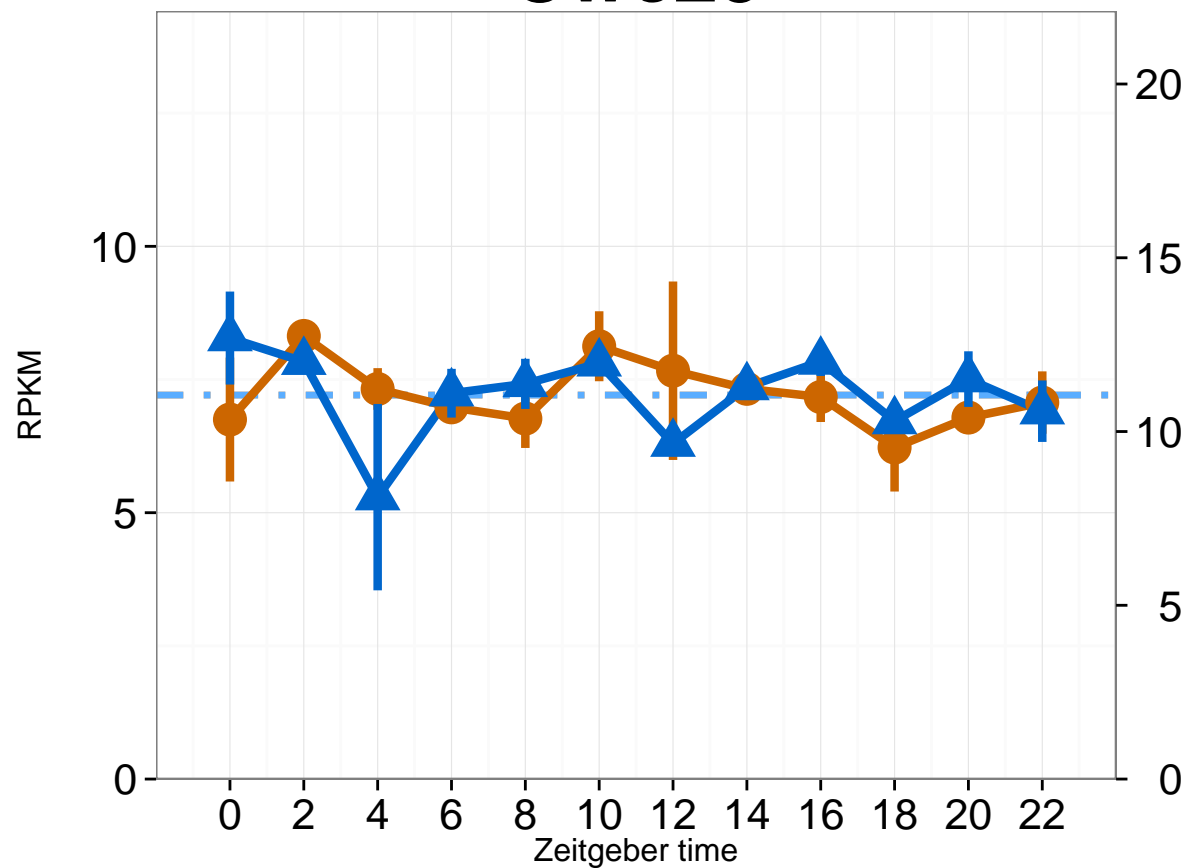

## Cwc25

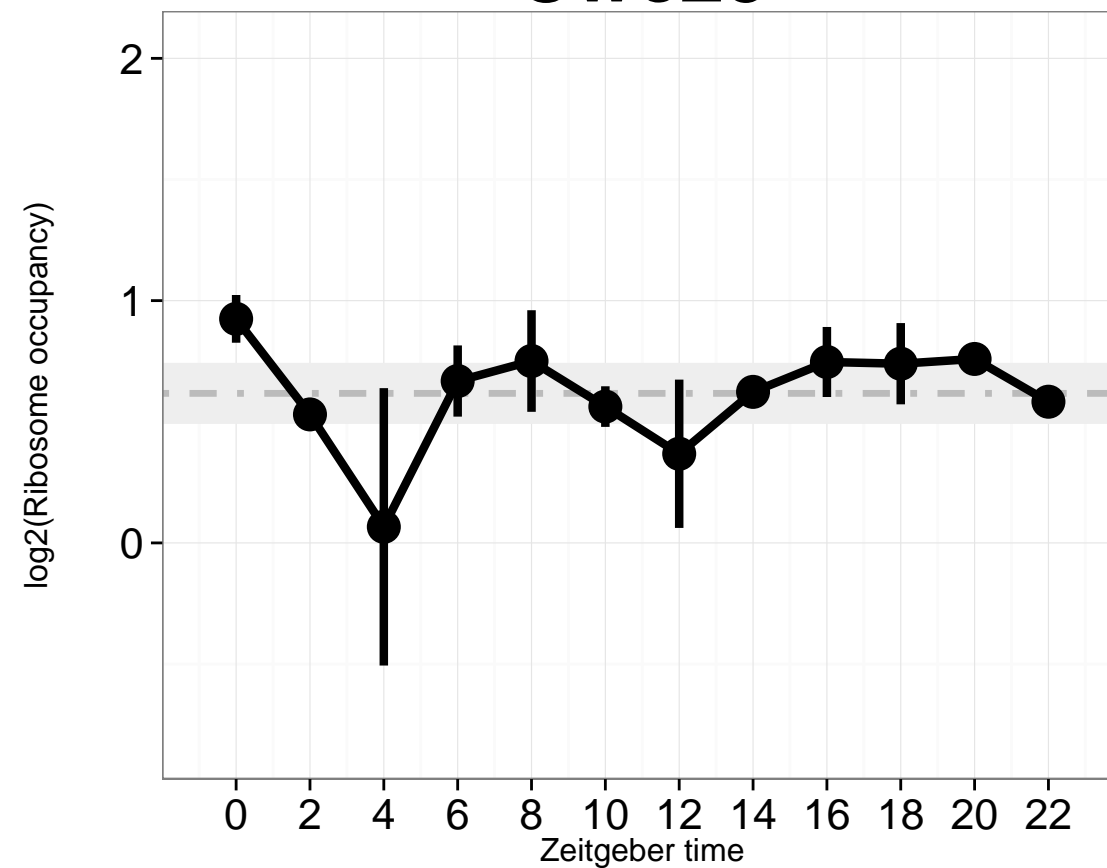

Supplement: Supplementary file 48 [file 1]

## Mylk3

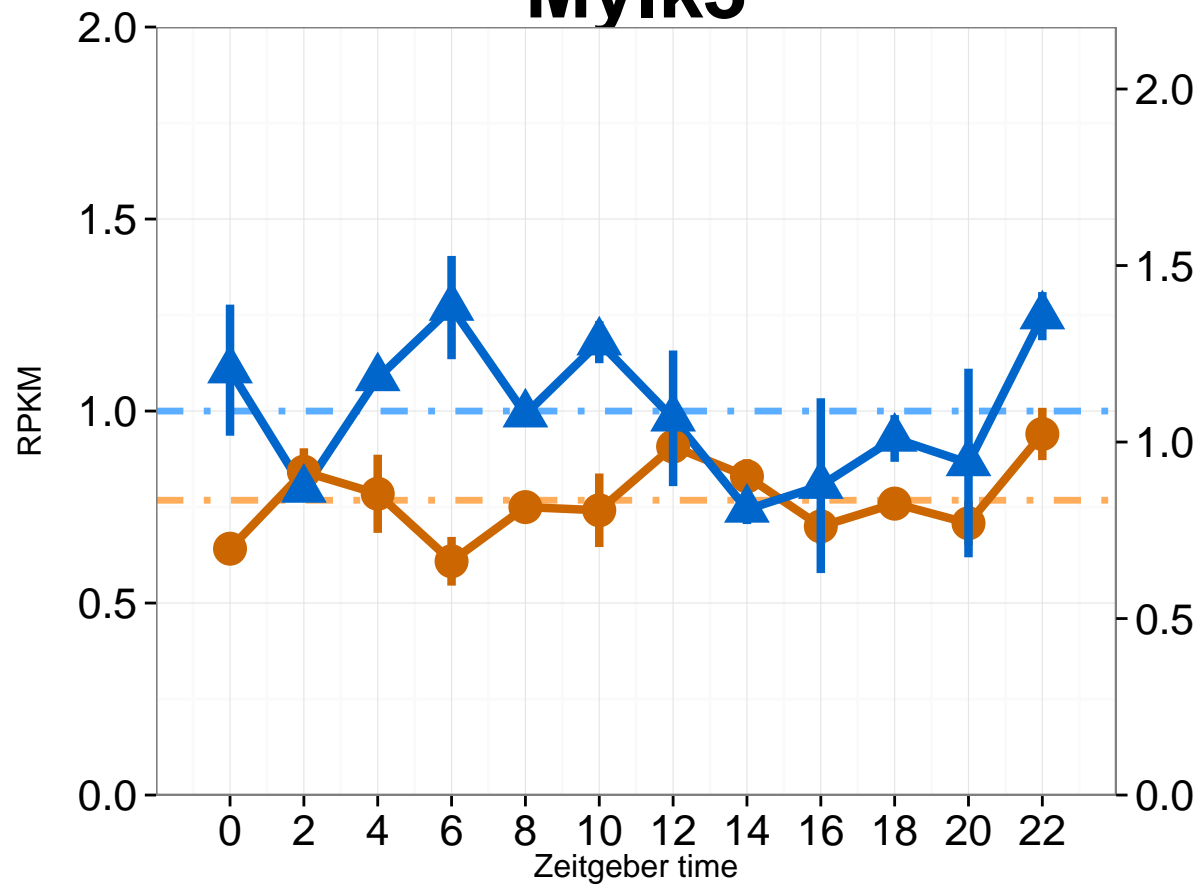

## Mylk3

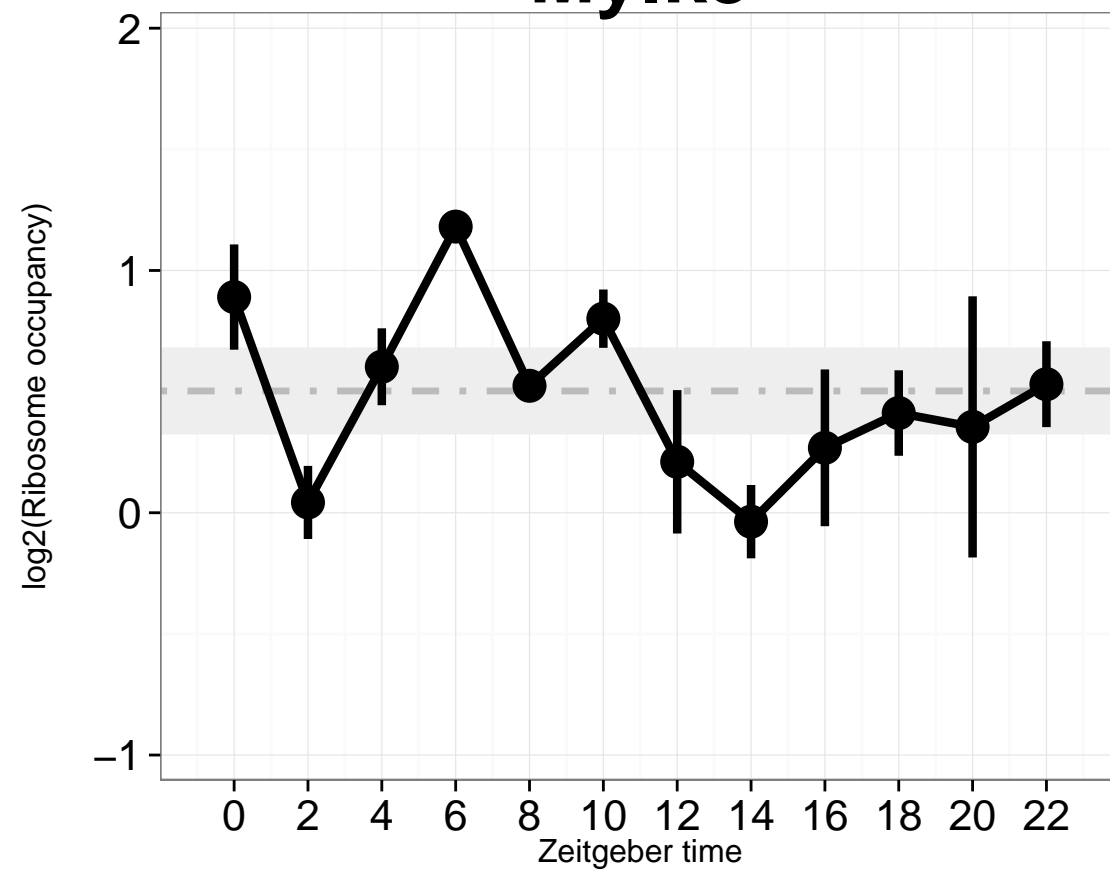

Supplement: Supplementary file 49 [file 1]

# Trmt61a

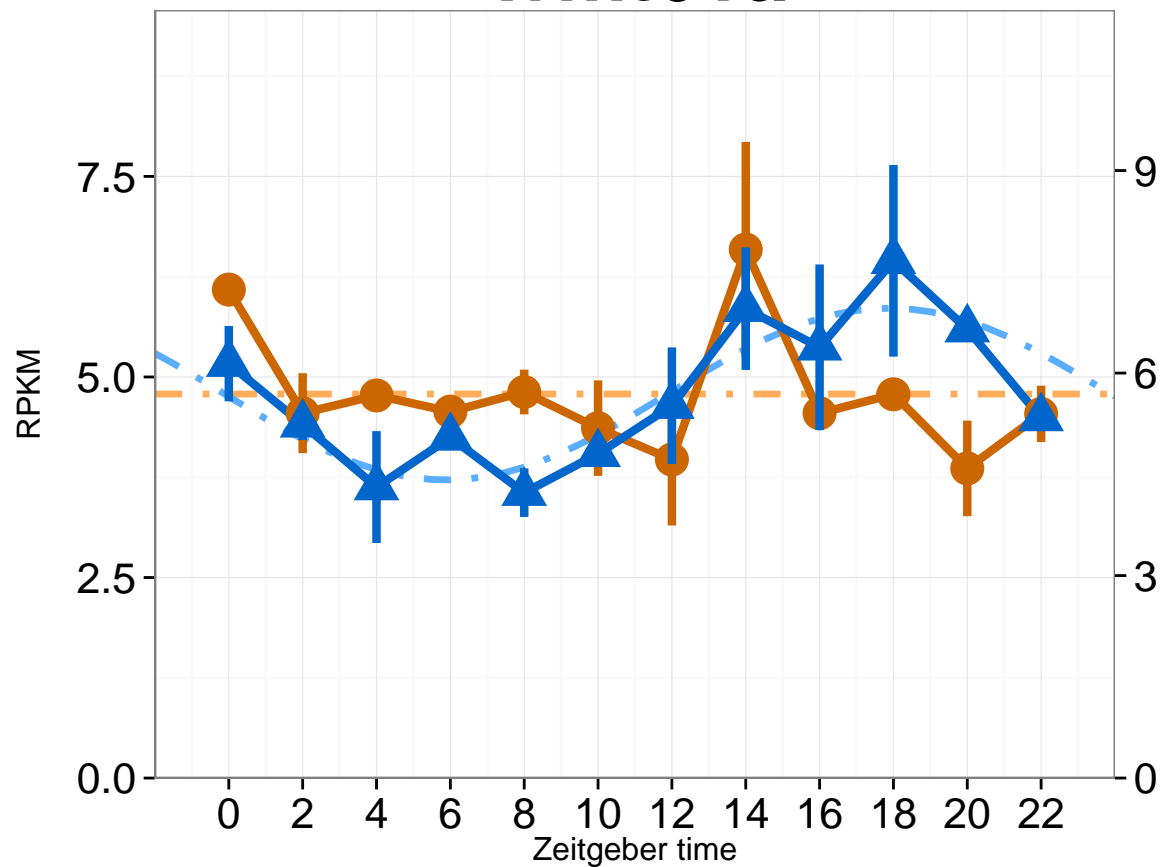

# Trmt61a

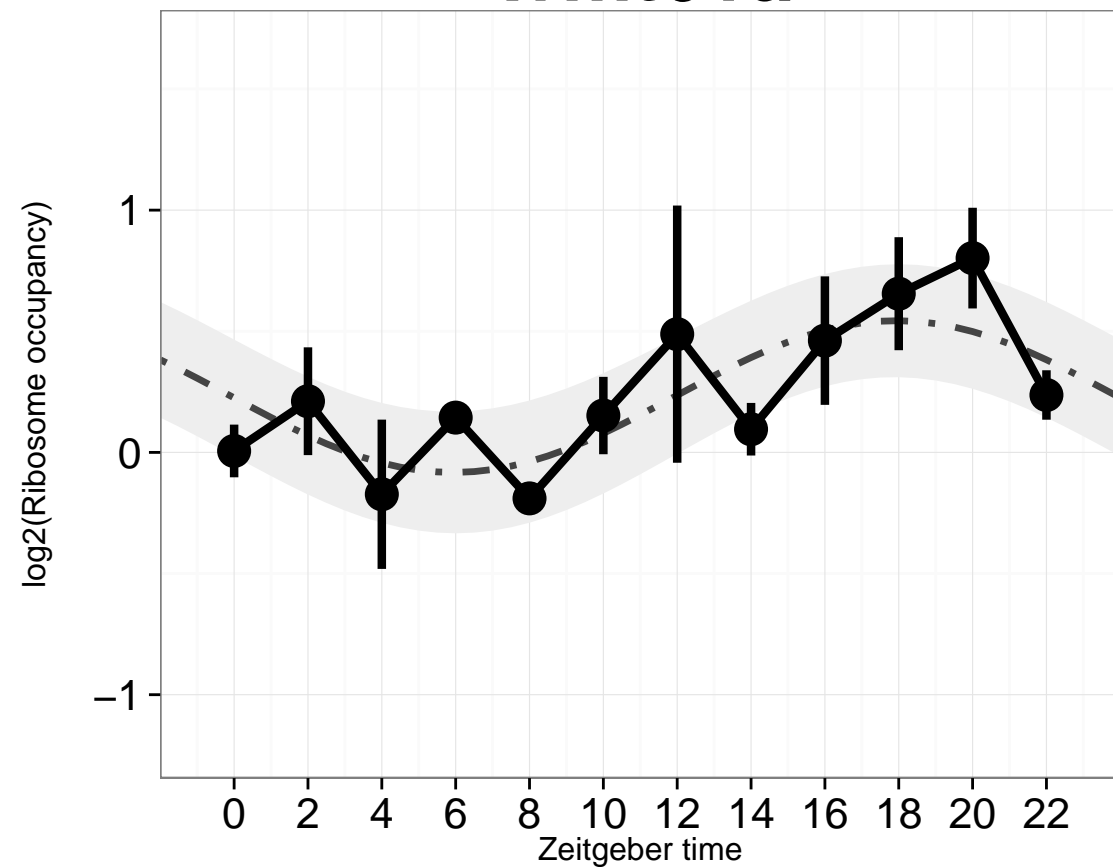

Supplement: Supplementary file 50 [file 1]

## Chchd3

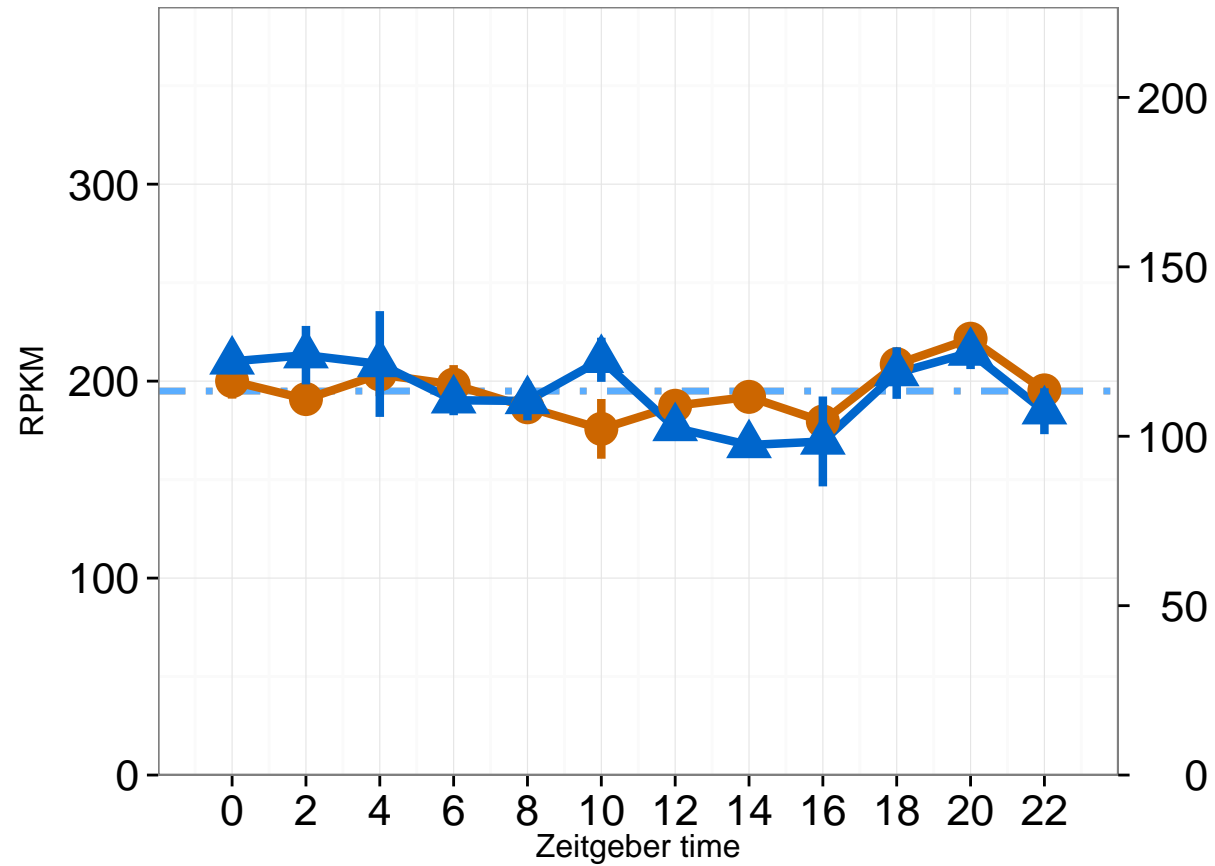

## Chchd3

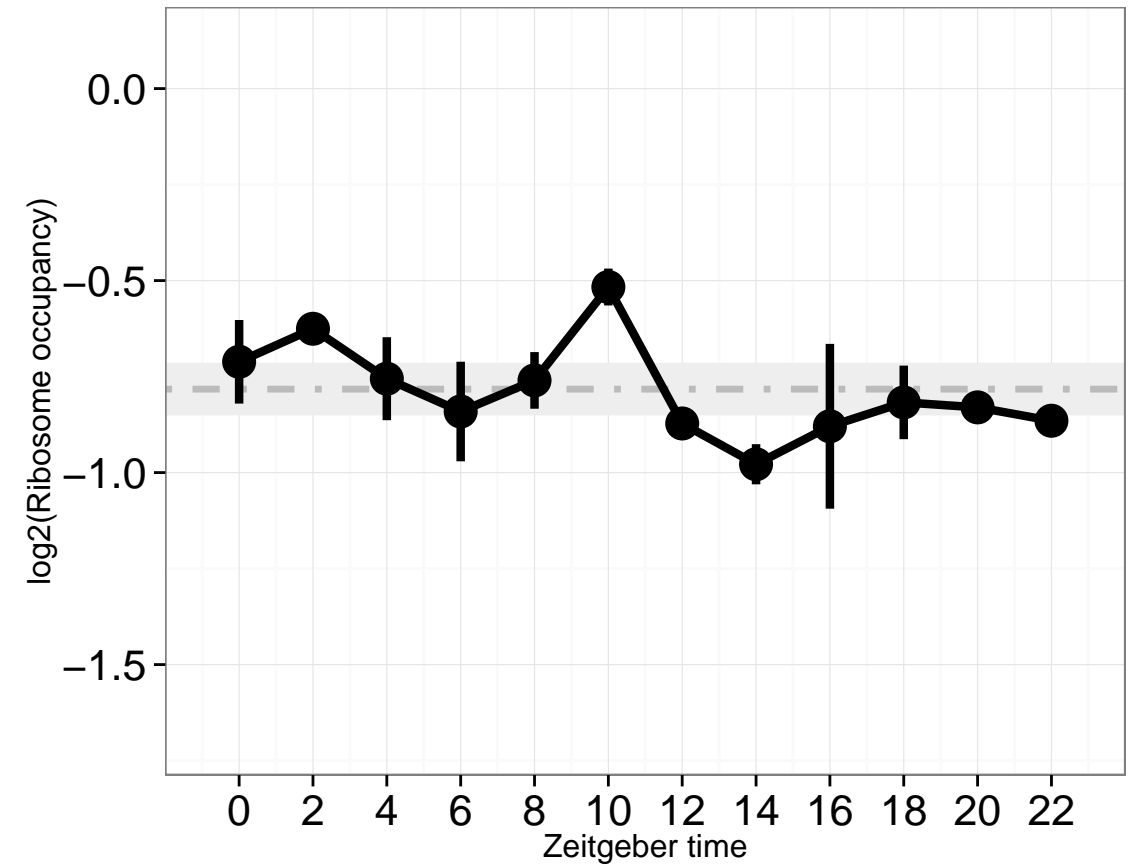

Supplement: Supplementary file 51 [file 1]

# Zfp830

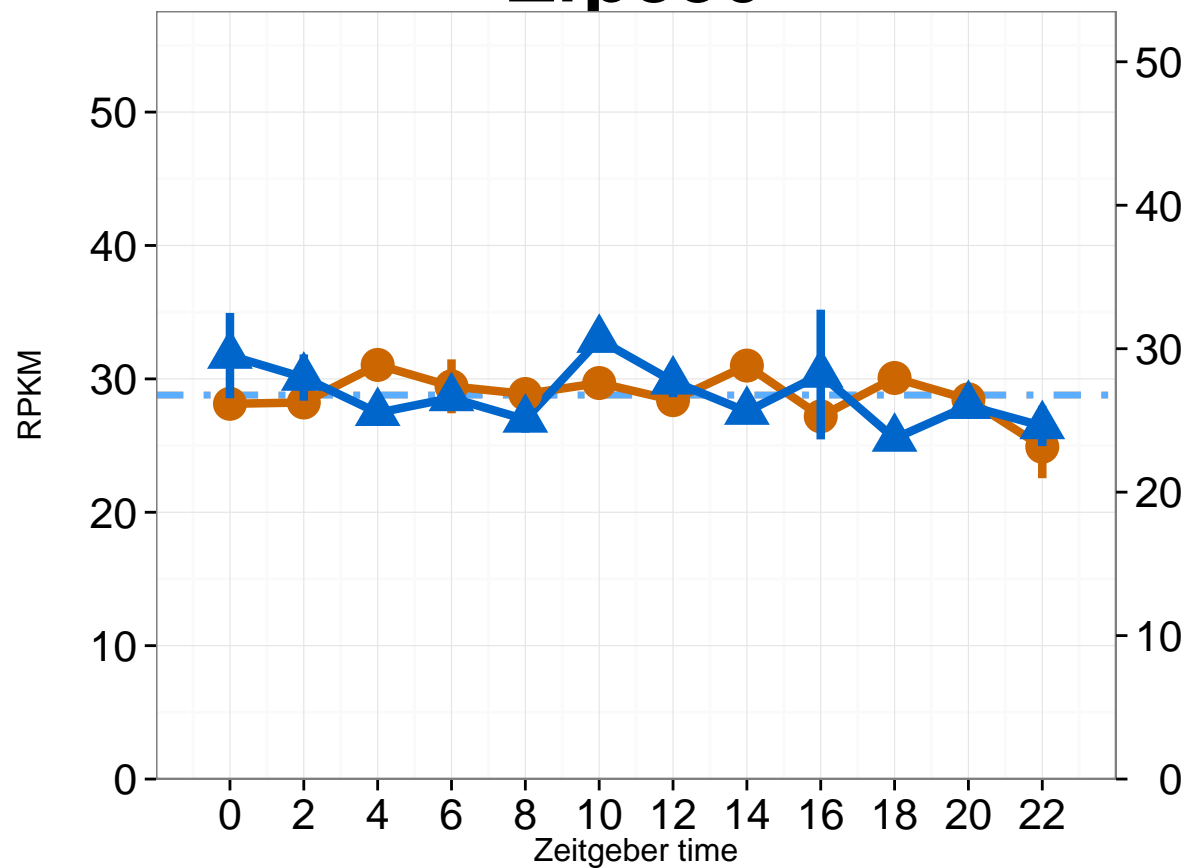

# Zfp830

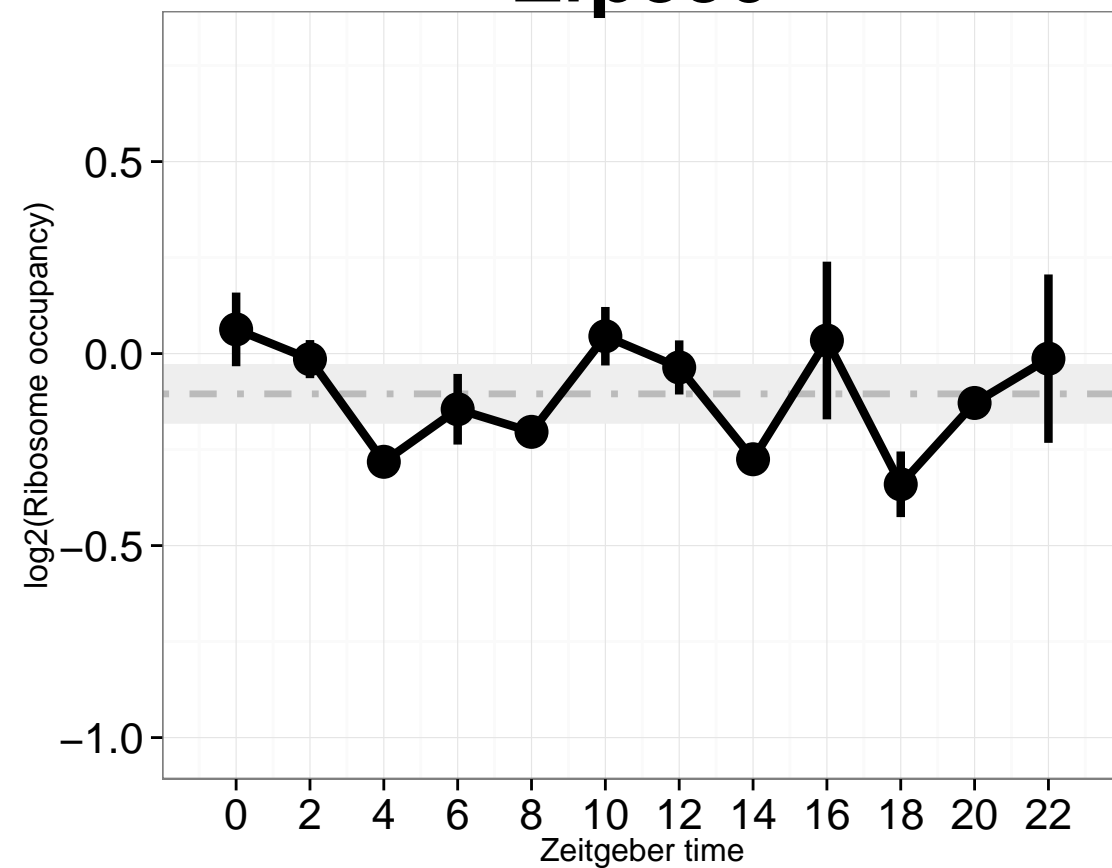

Supplement: Supplementary file 52 [file 1]

## Vprbp

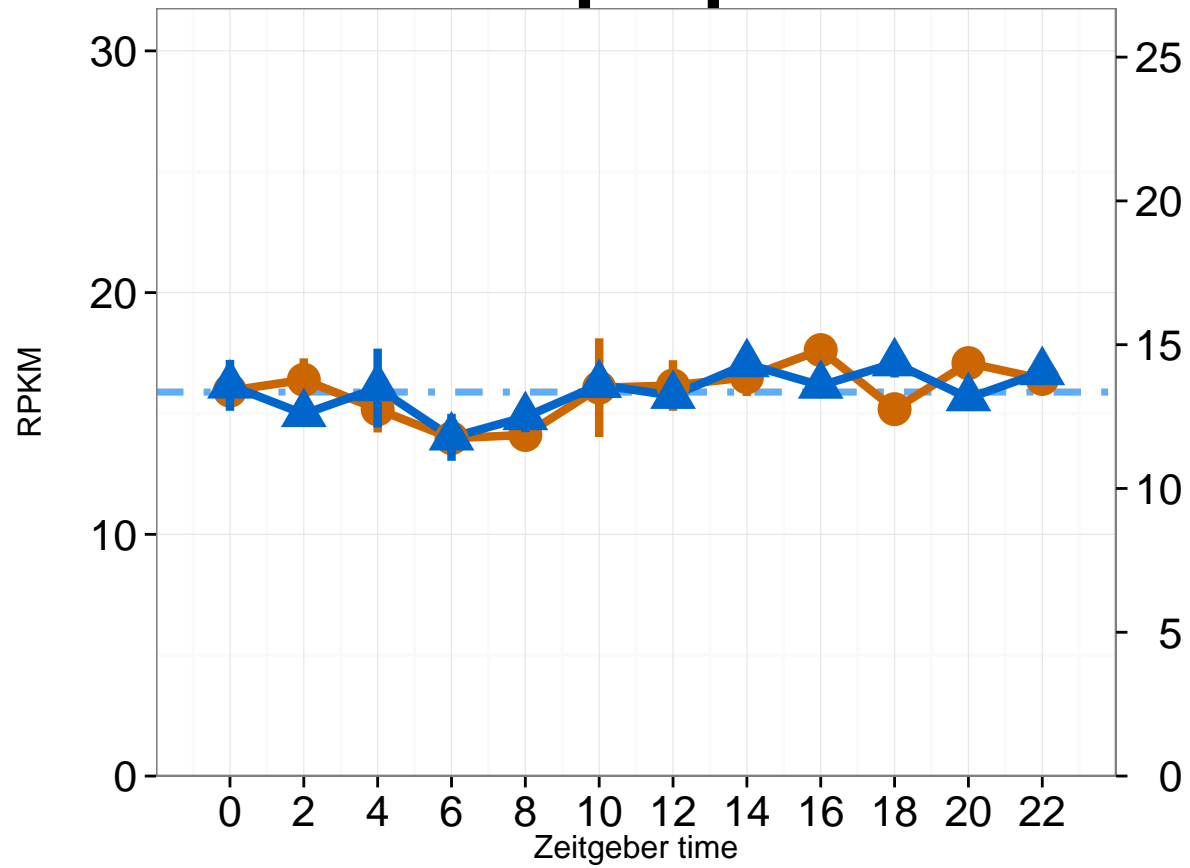

## Vprbp

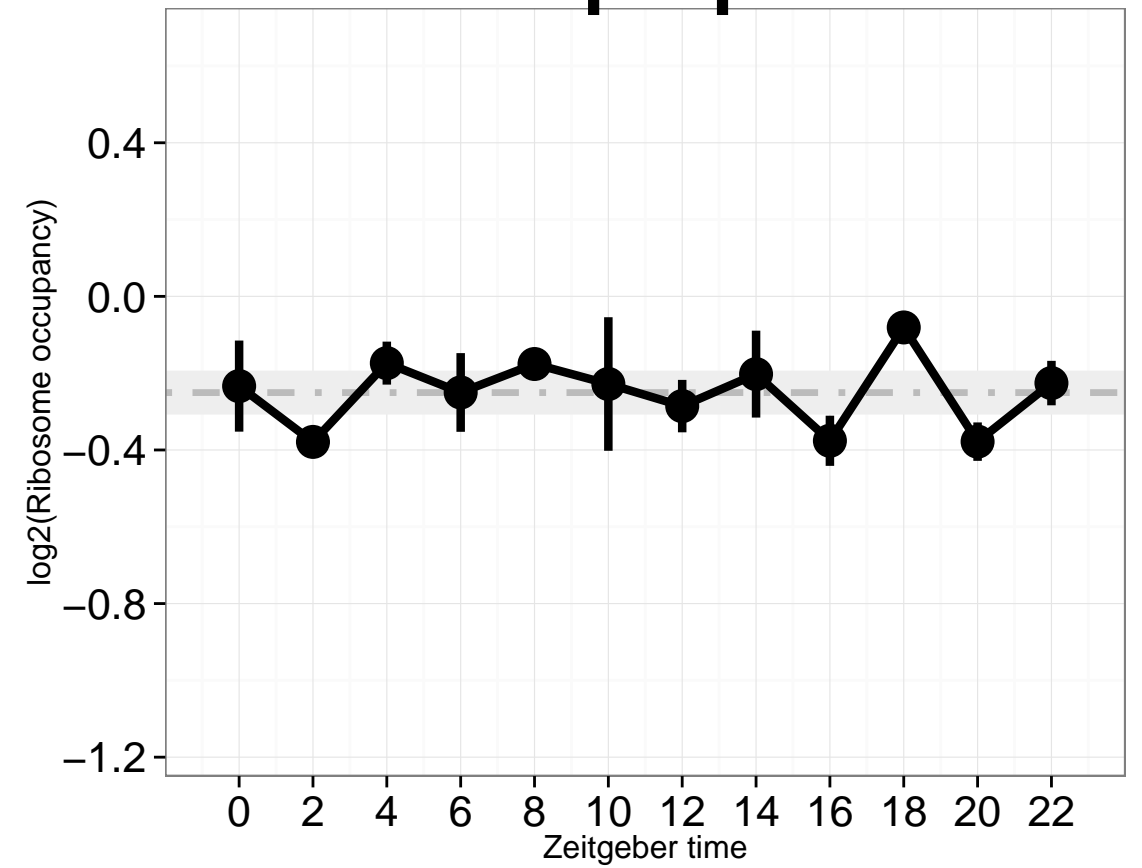

Supplement: Supplementary file 53 [file 1]

# Bicc1

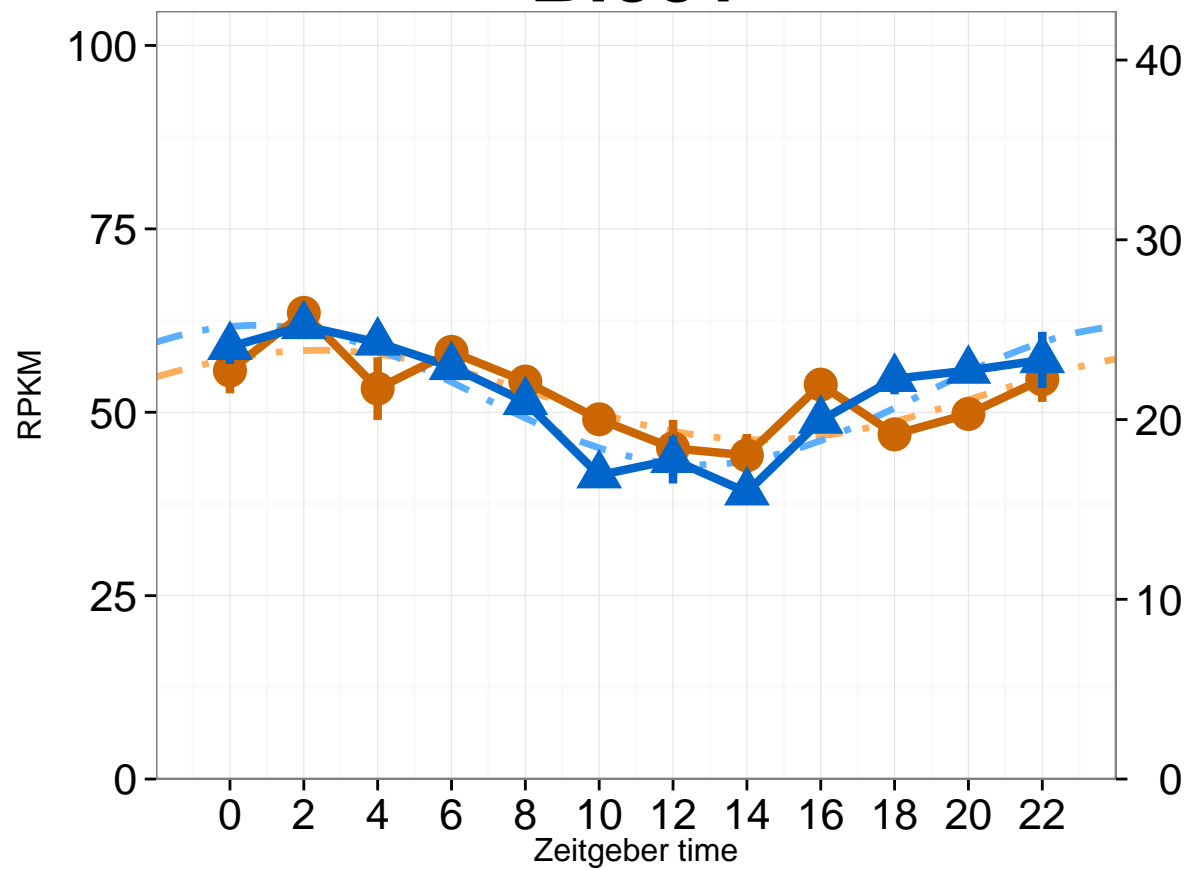

# Bicc1

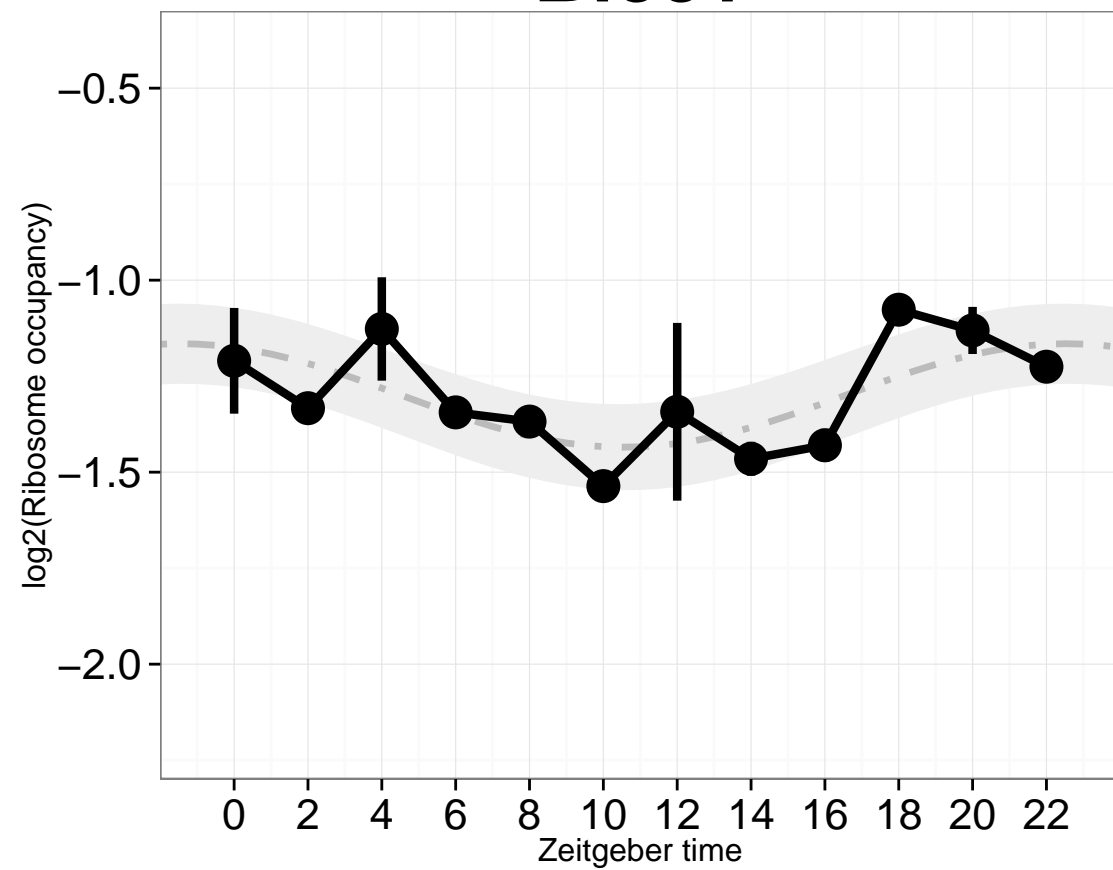

Supplement: Supplementary file 54 [file 1]

# Zfp592

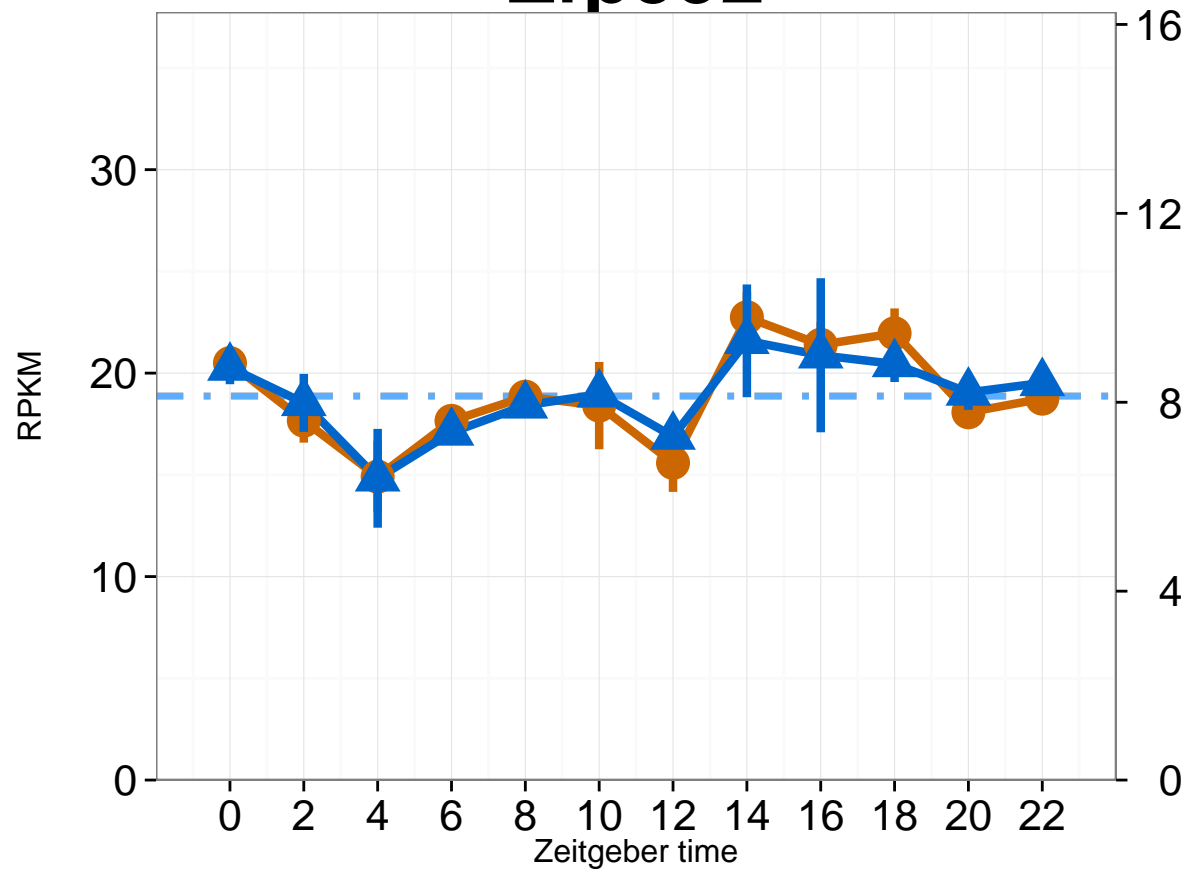

# Zfp592

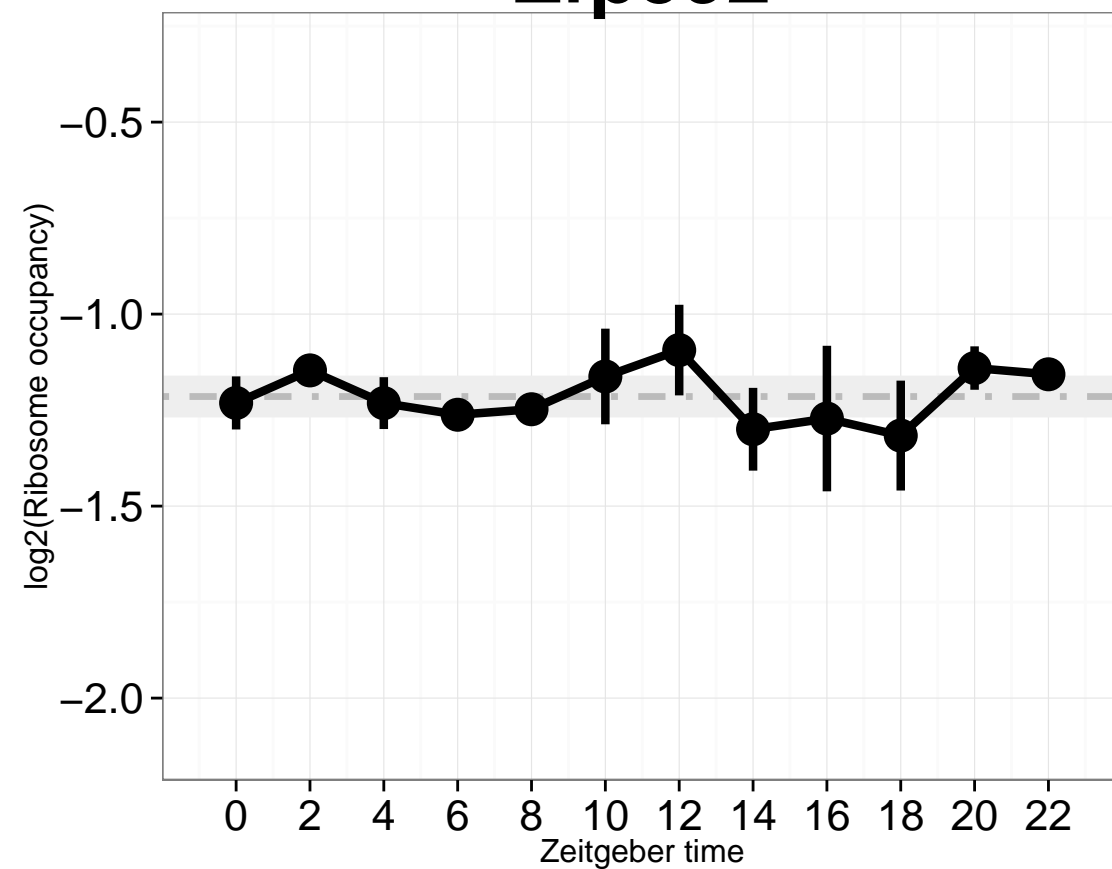

Supplement: Supplementary file 55 [file 1]

## Ncor2

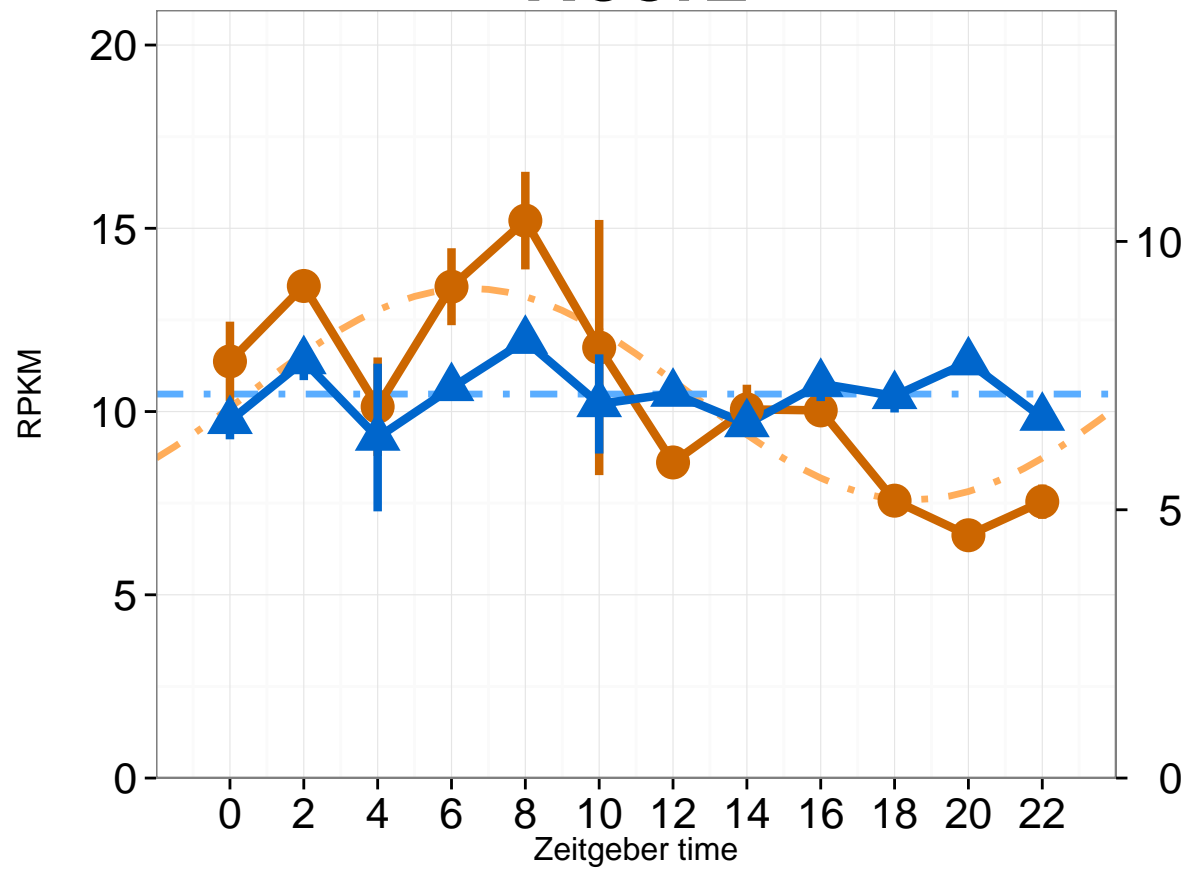

## Ncor2

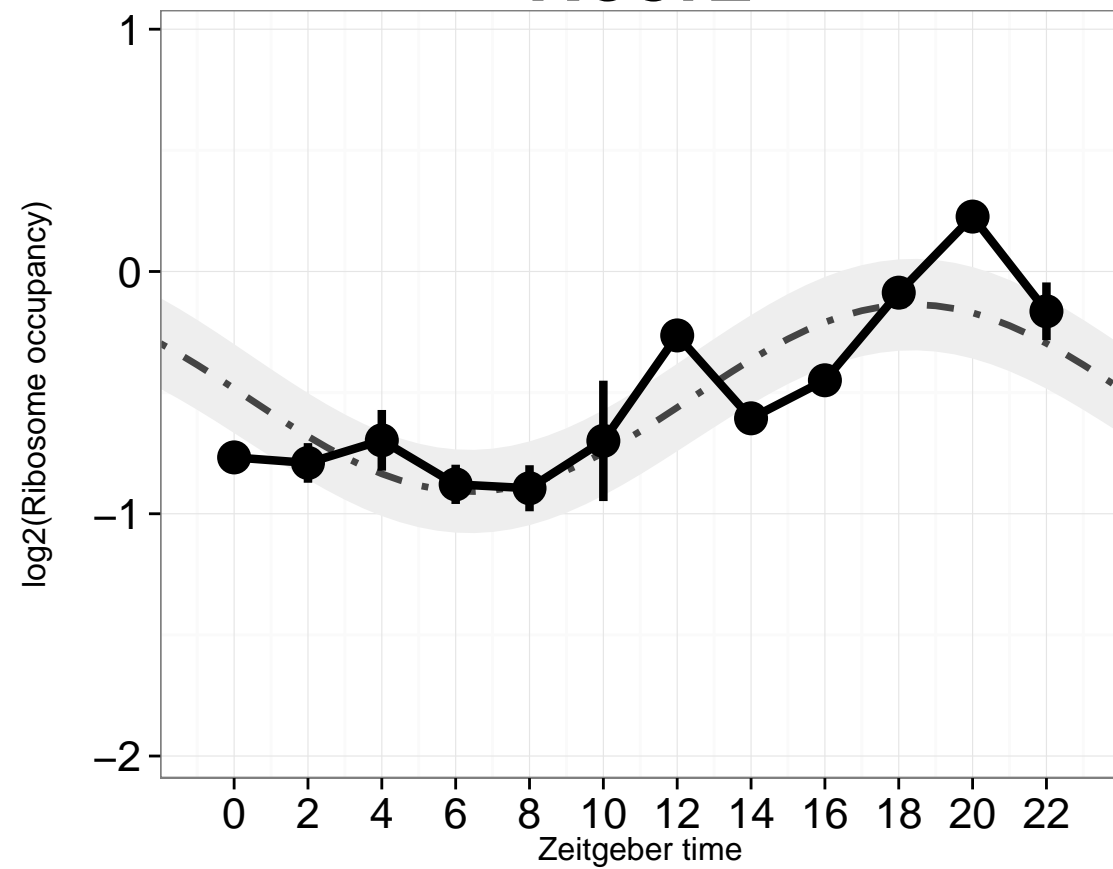

Supplement: Supplementary file 56 [file 1]

# Sox9 TR

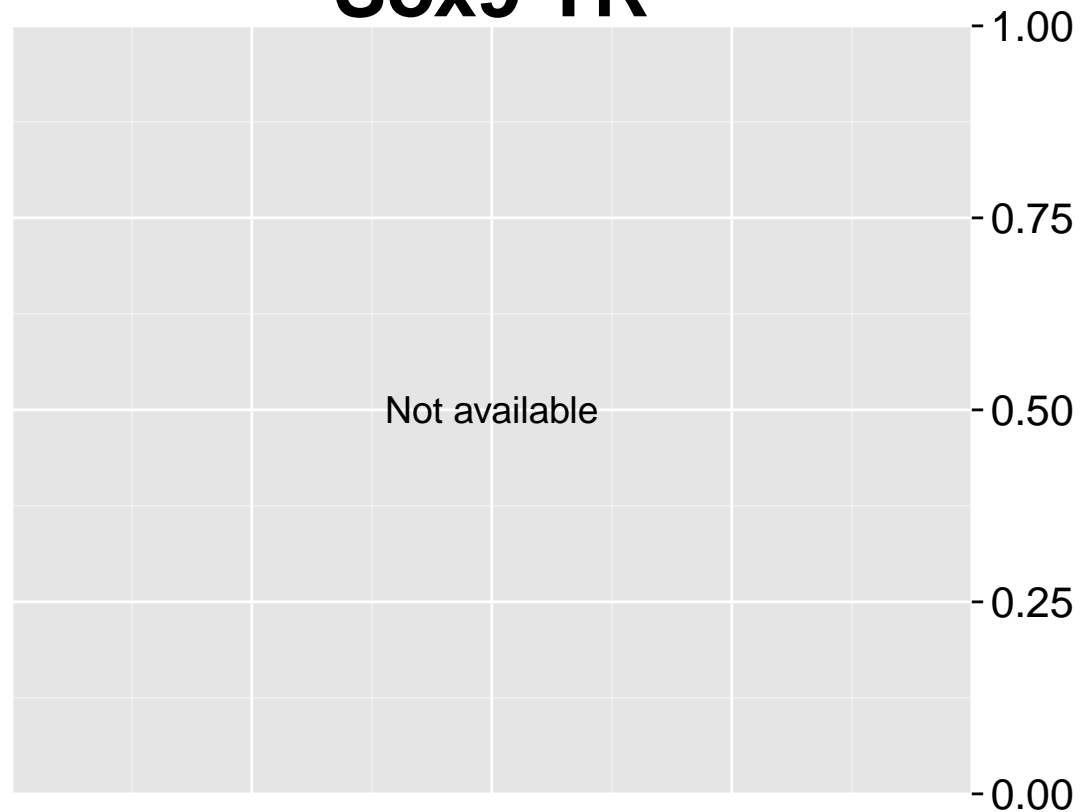

# Sox9 log2(Ribosome occupancy)

Supplement: Supplementary file 57 [file 1]

# AK010878

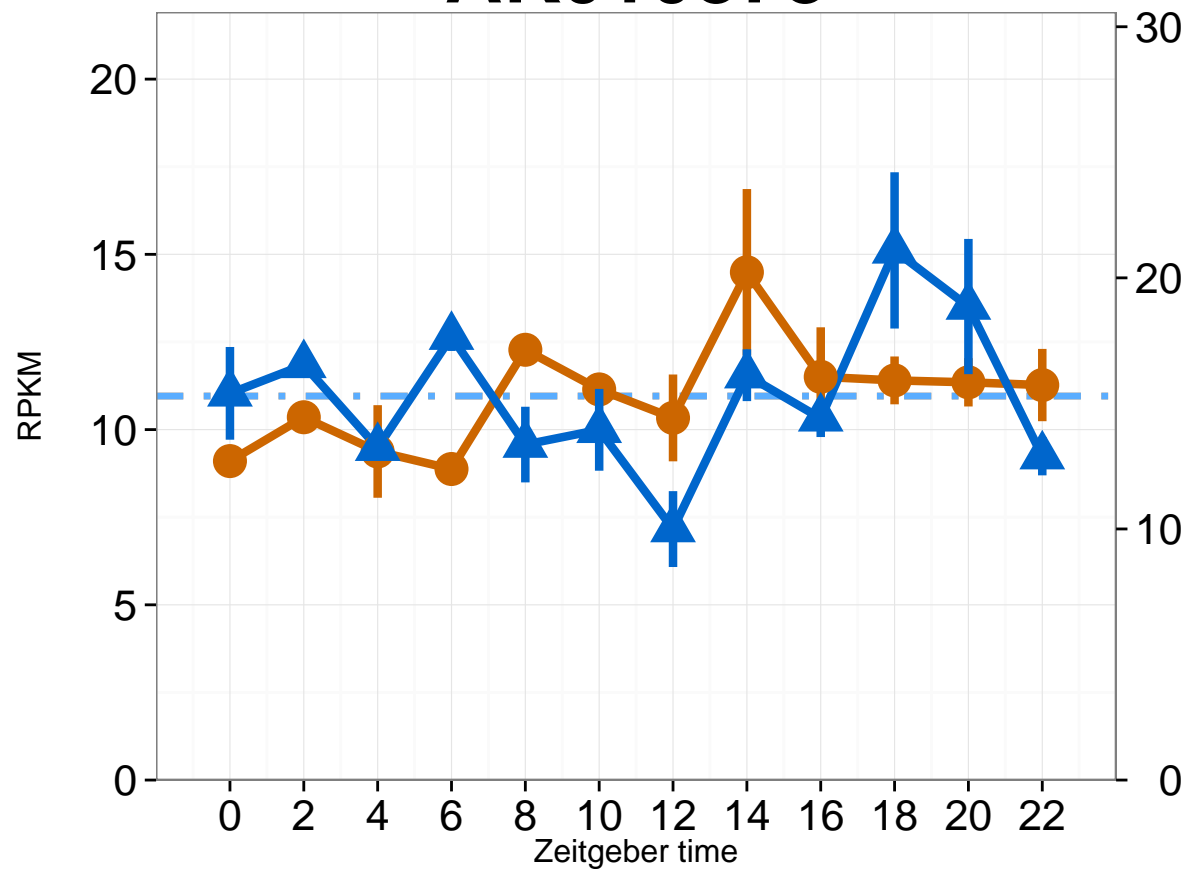

# AK010878

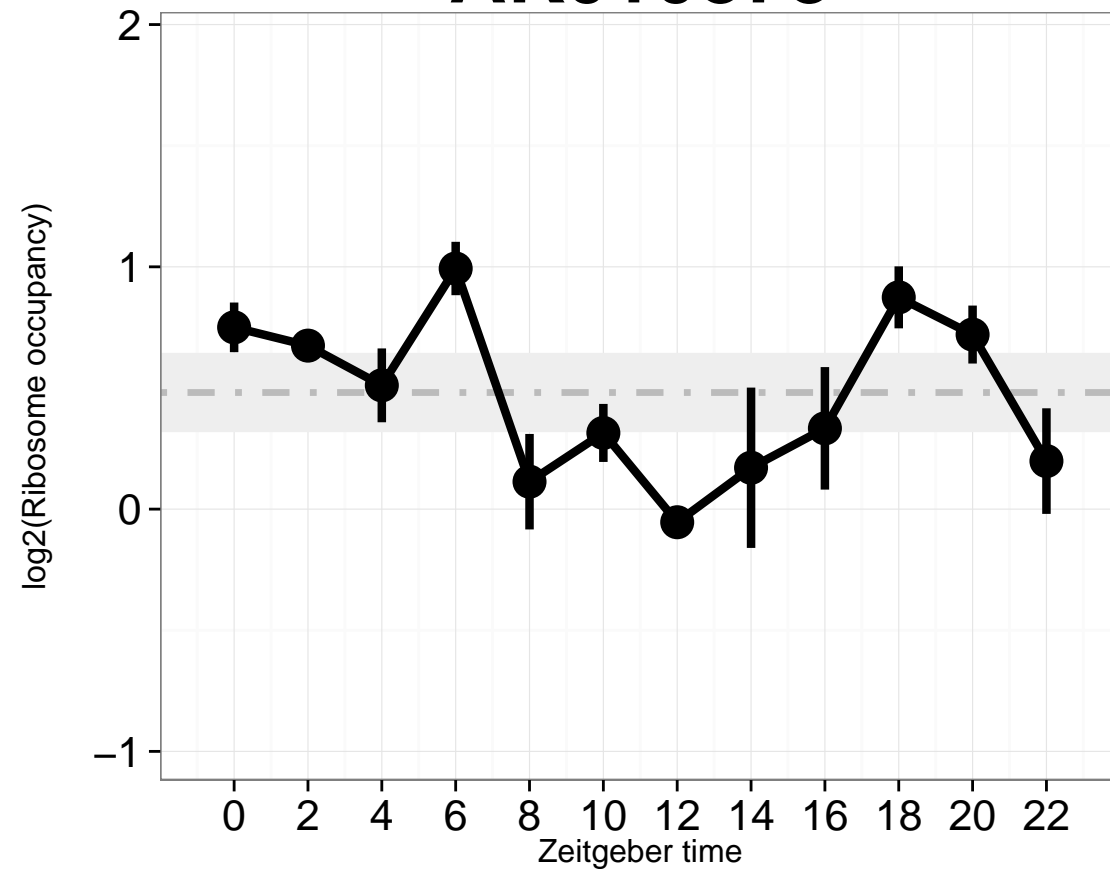

Supplement: Supplementary file 58 [file 1]

# Josd1

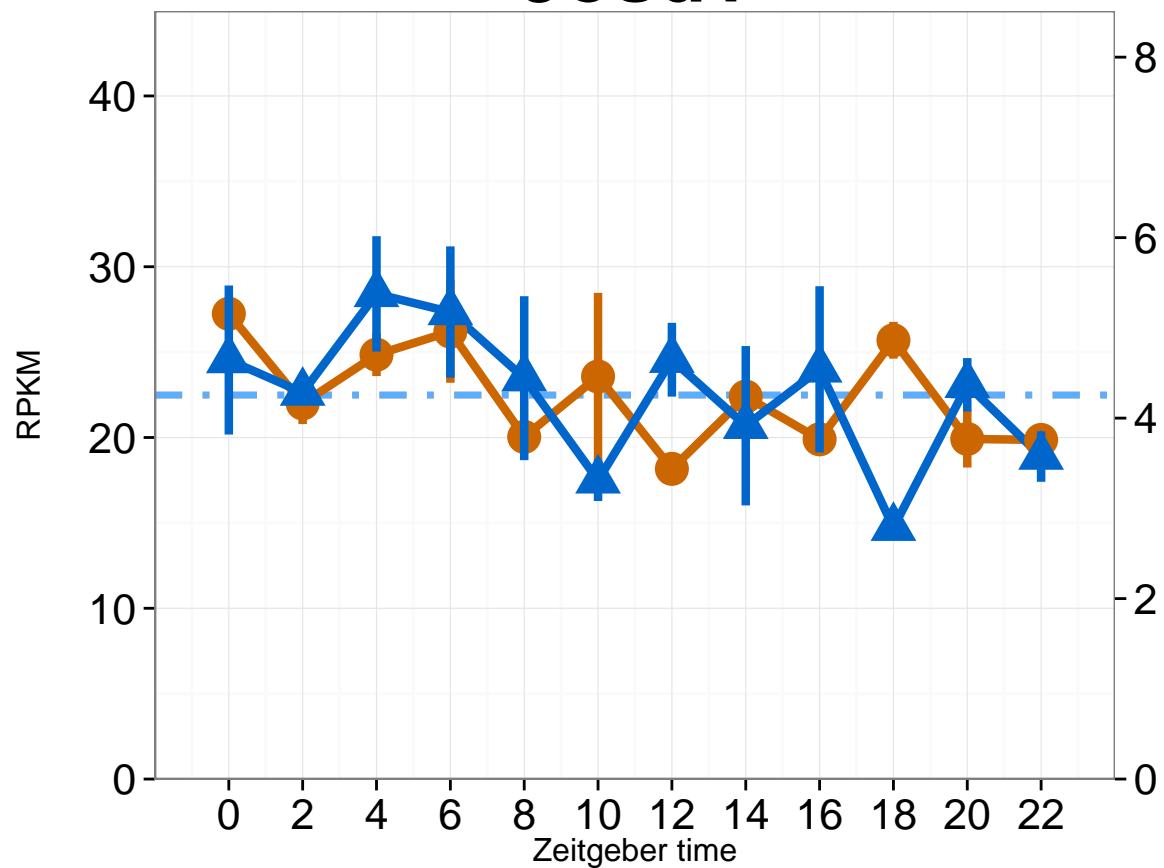

# Josd1

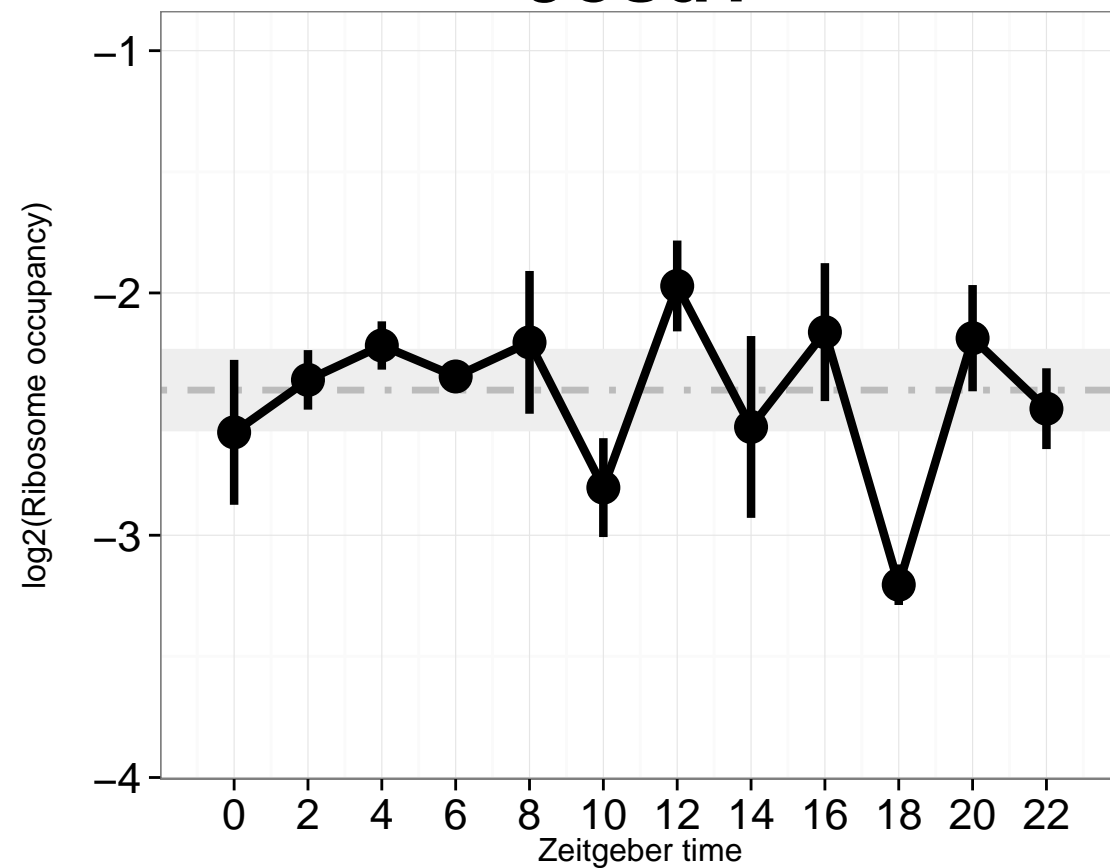

Supplement: Supplementary file 59 [file 1]

## Vps11

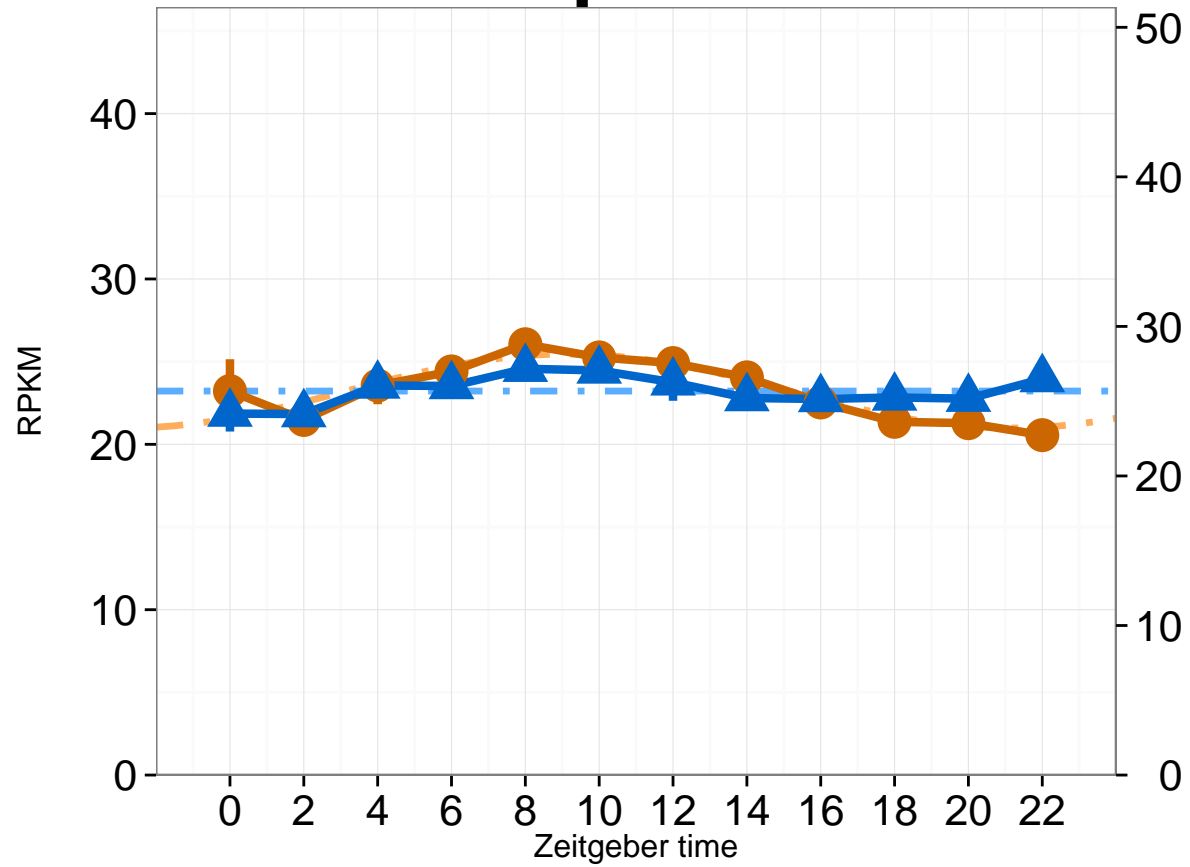

## Vps11

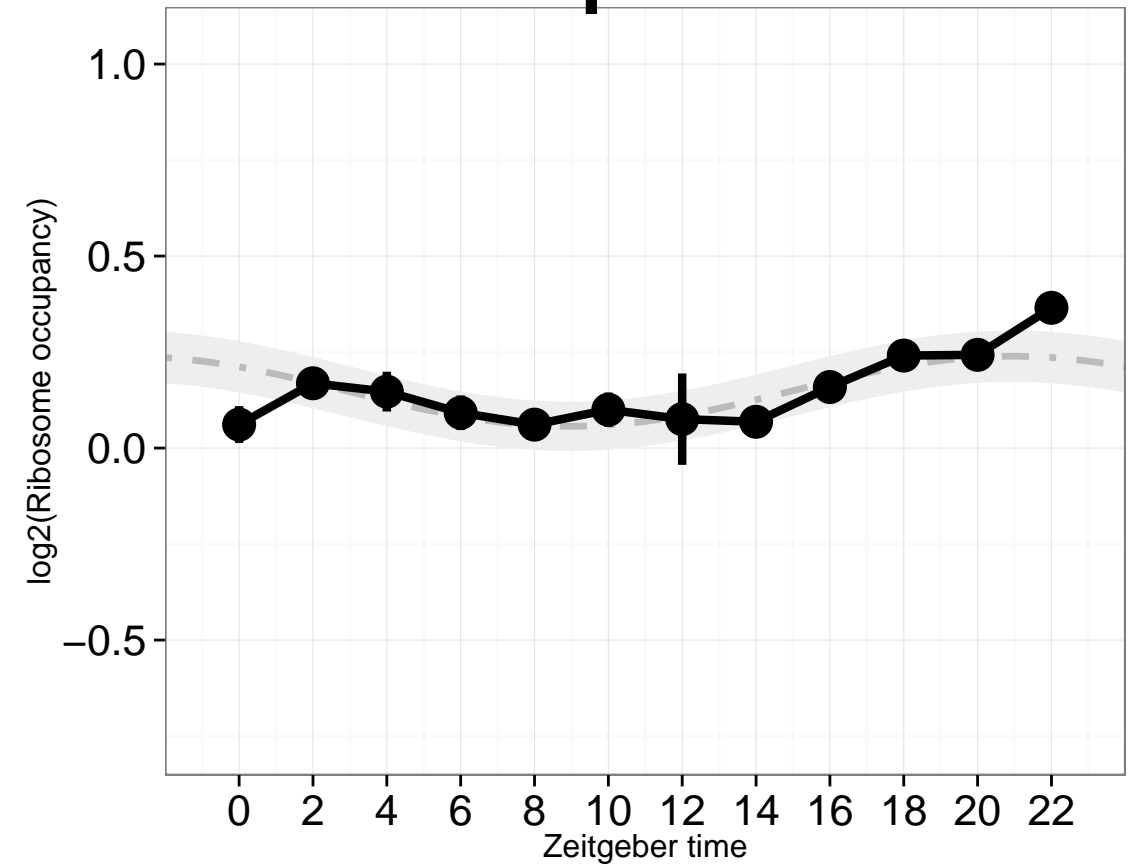

Supplement: Supplementary file 60 [file 1]

# PYURF

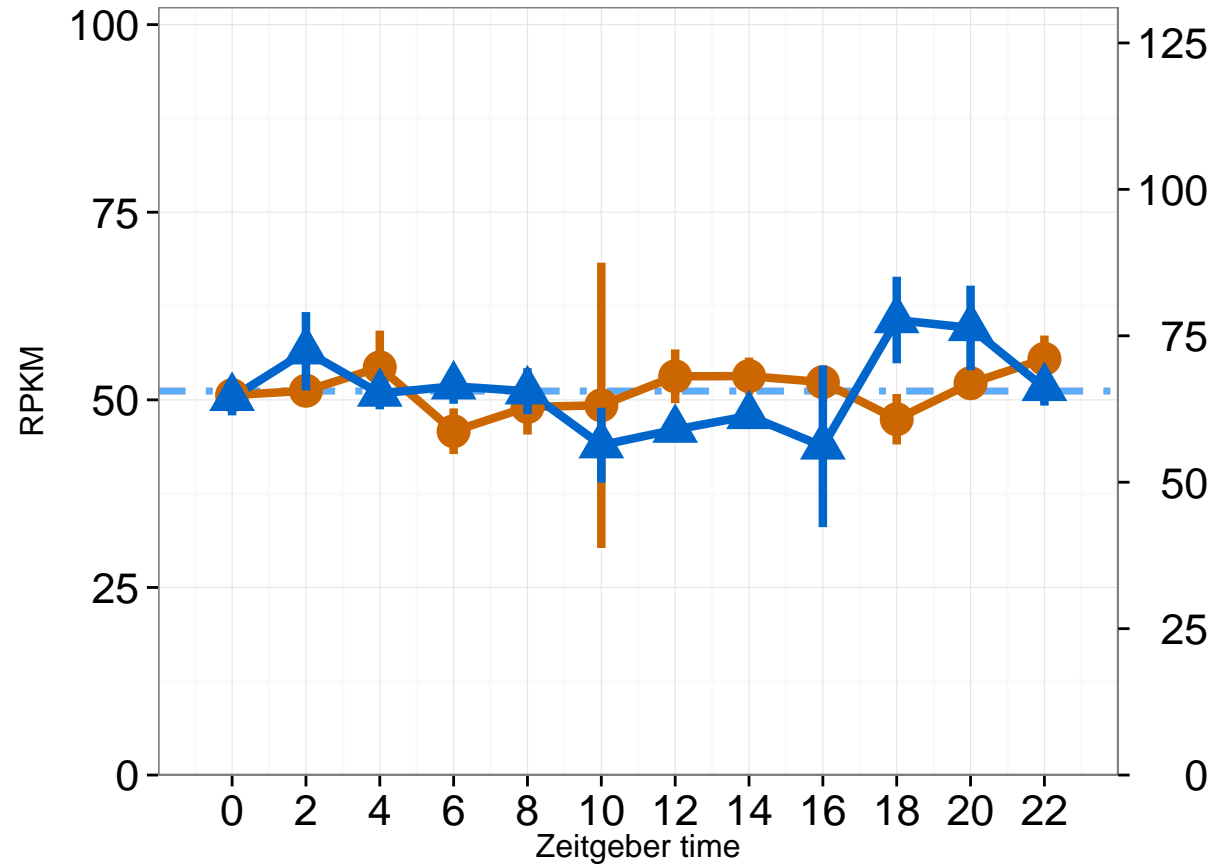

# PYURF

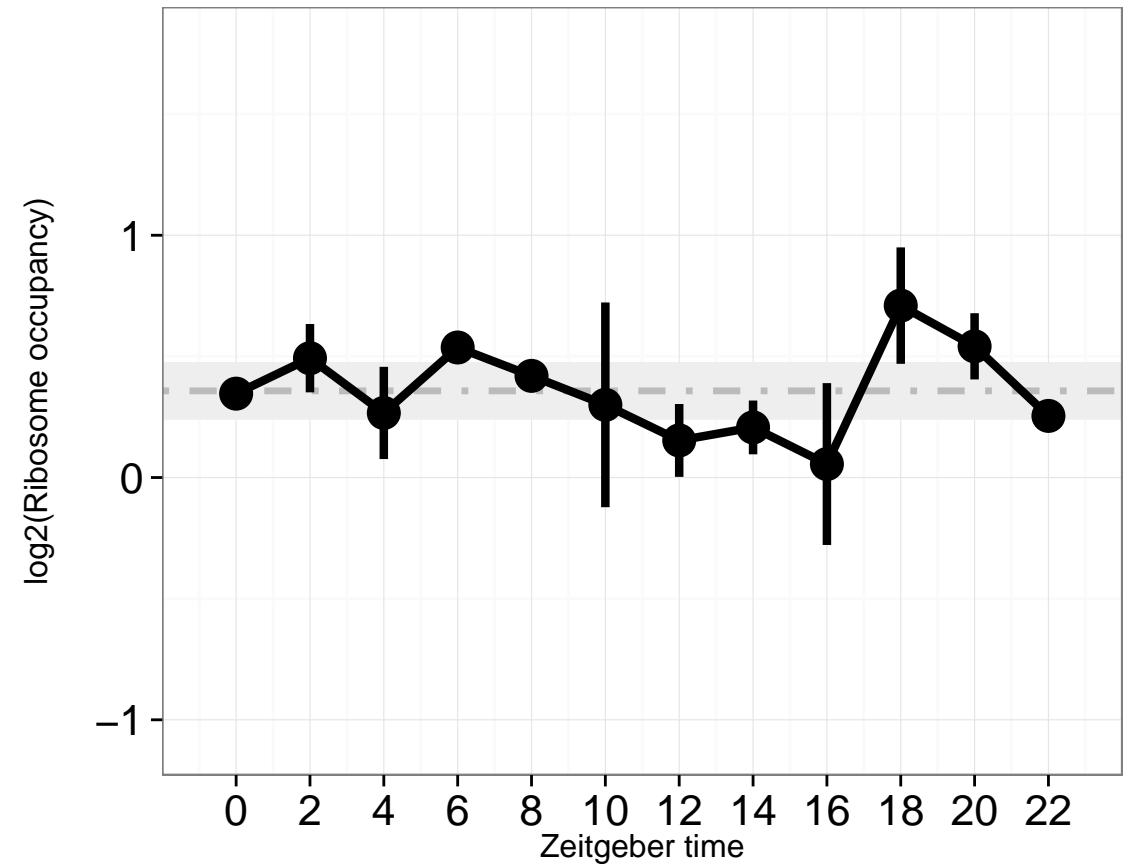

Supplement: Supplementary file 61 [file 1]

## Tmem151b

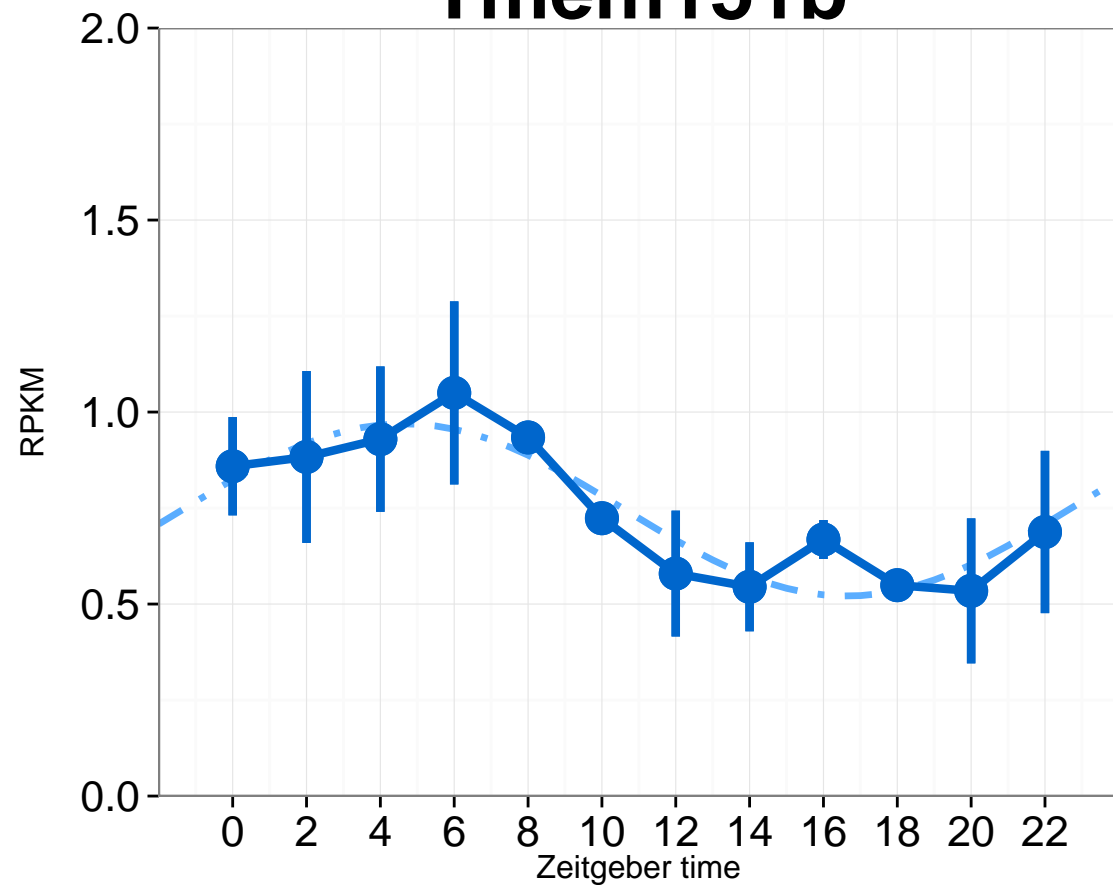

## Tmem151b log2(Ribosome occupan

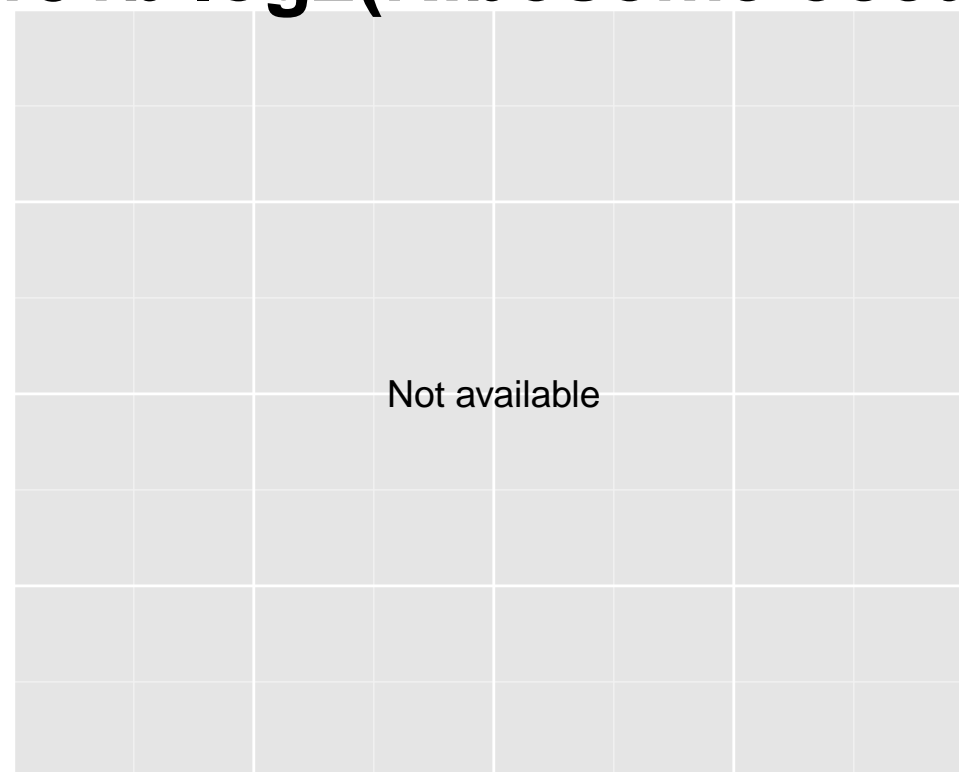

Supplement: Supplementary file 62 [file 1]

## Aldh3a2

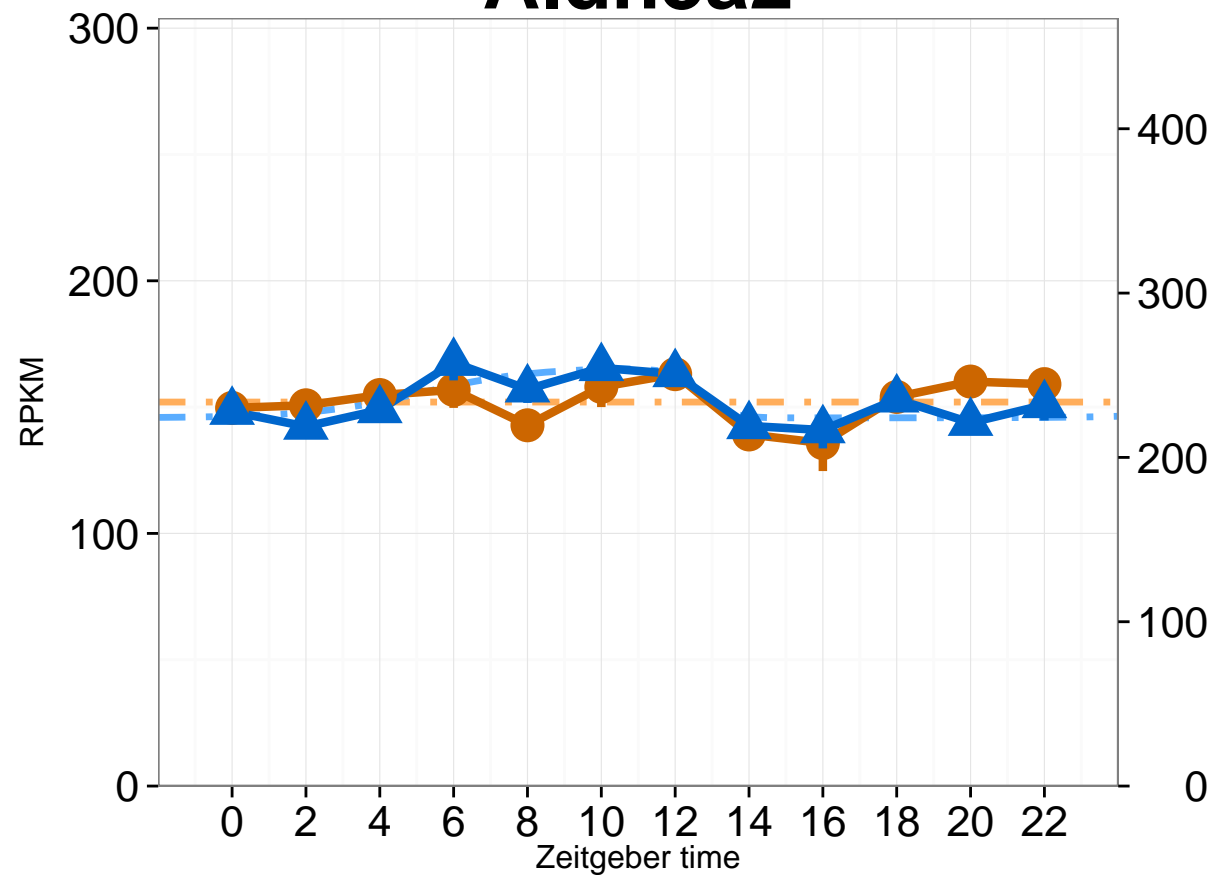

## Aldh3a2

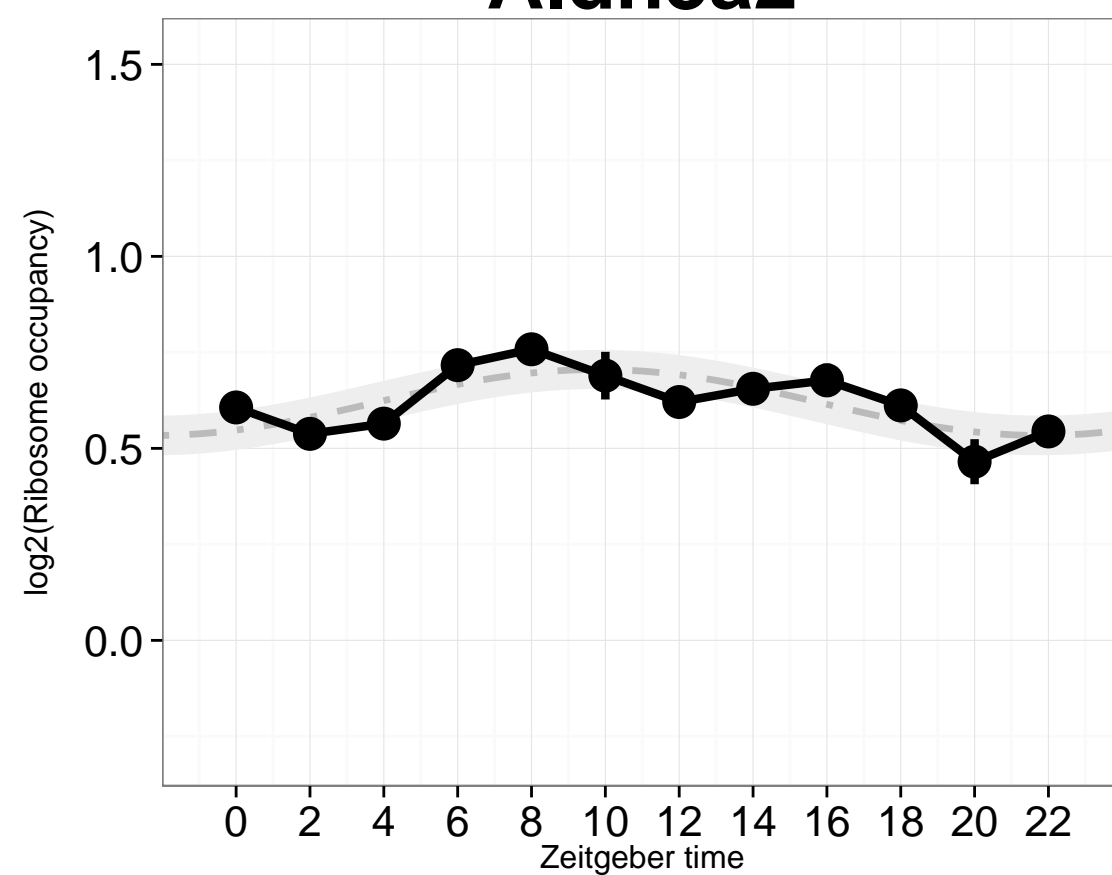

Supplement: Supplementary file 63 [file 1]

# Atp9a

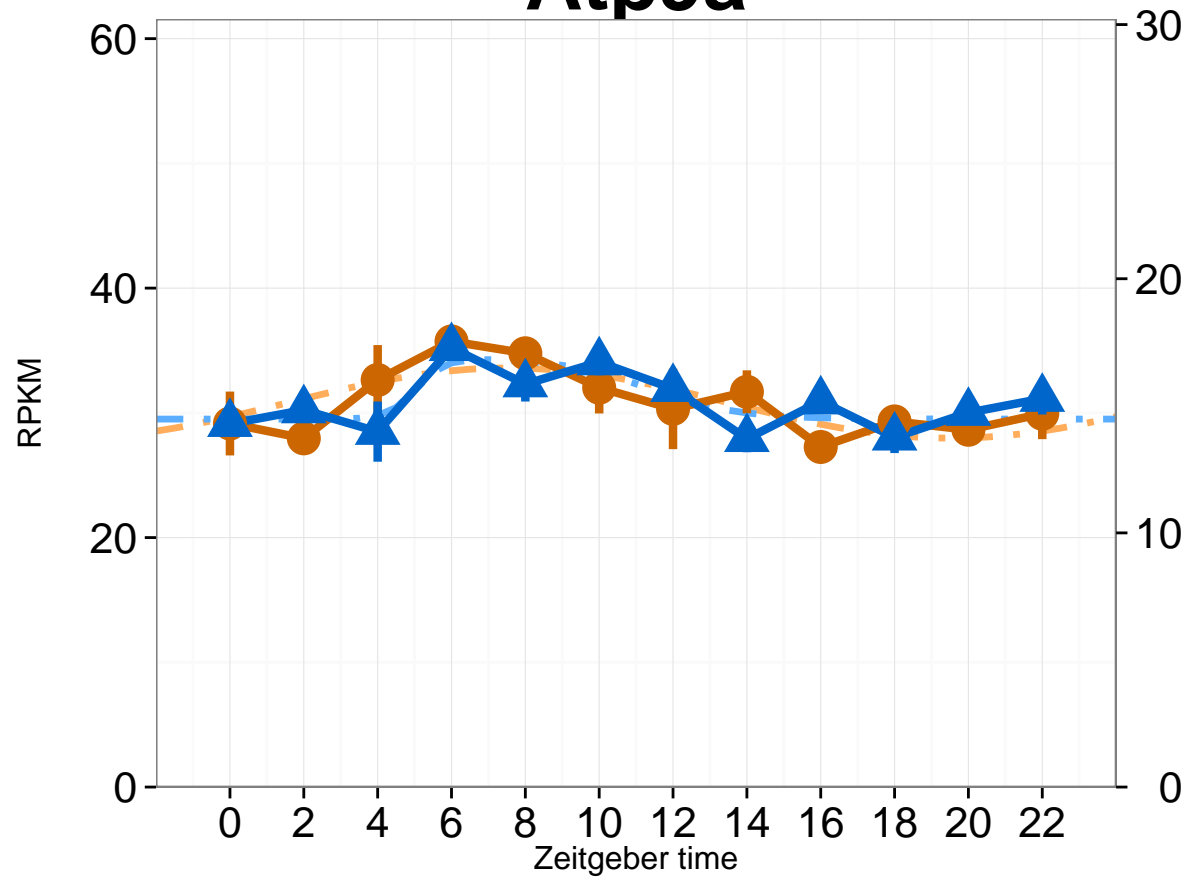

# Atp9a

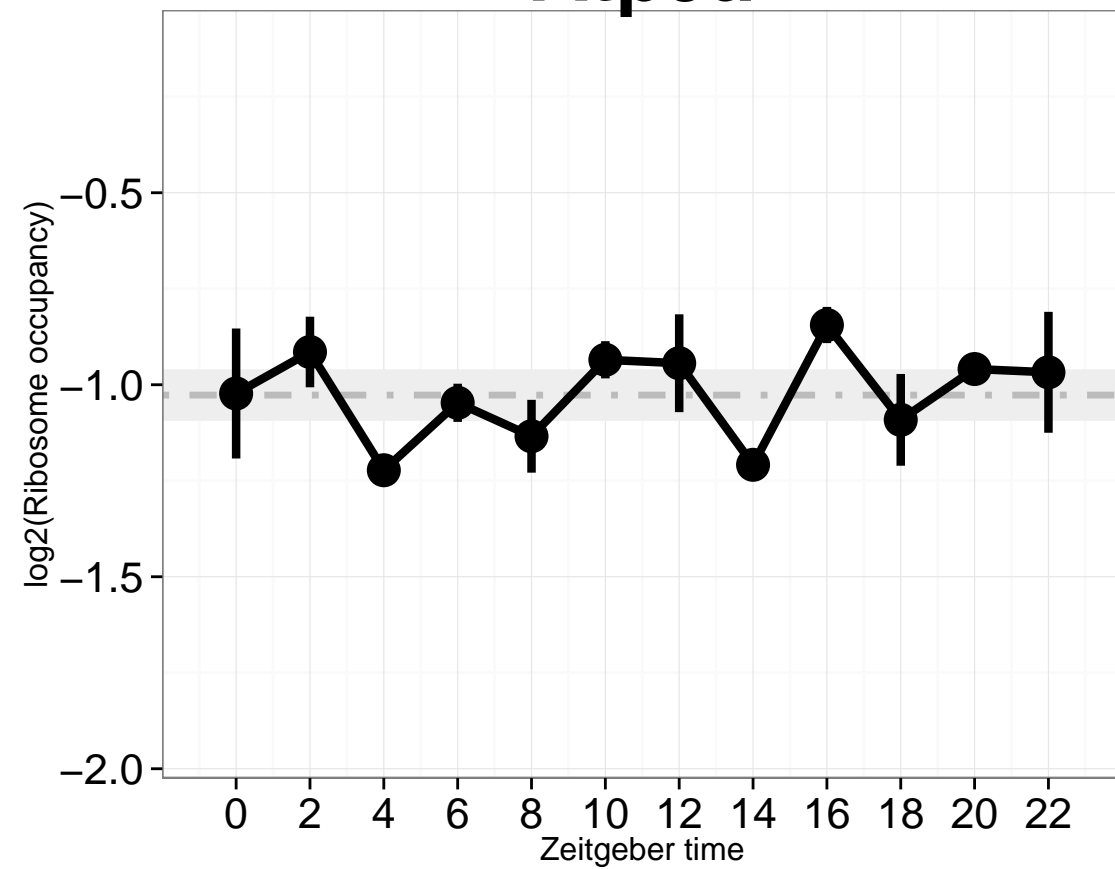

Supplement: Supplementary file 64 [file 1]

## Prelp

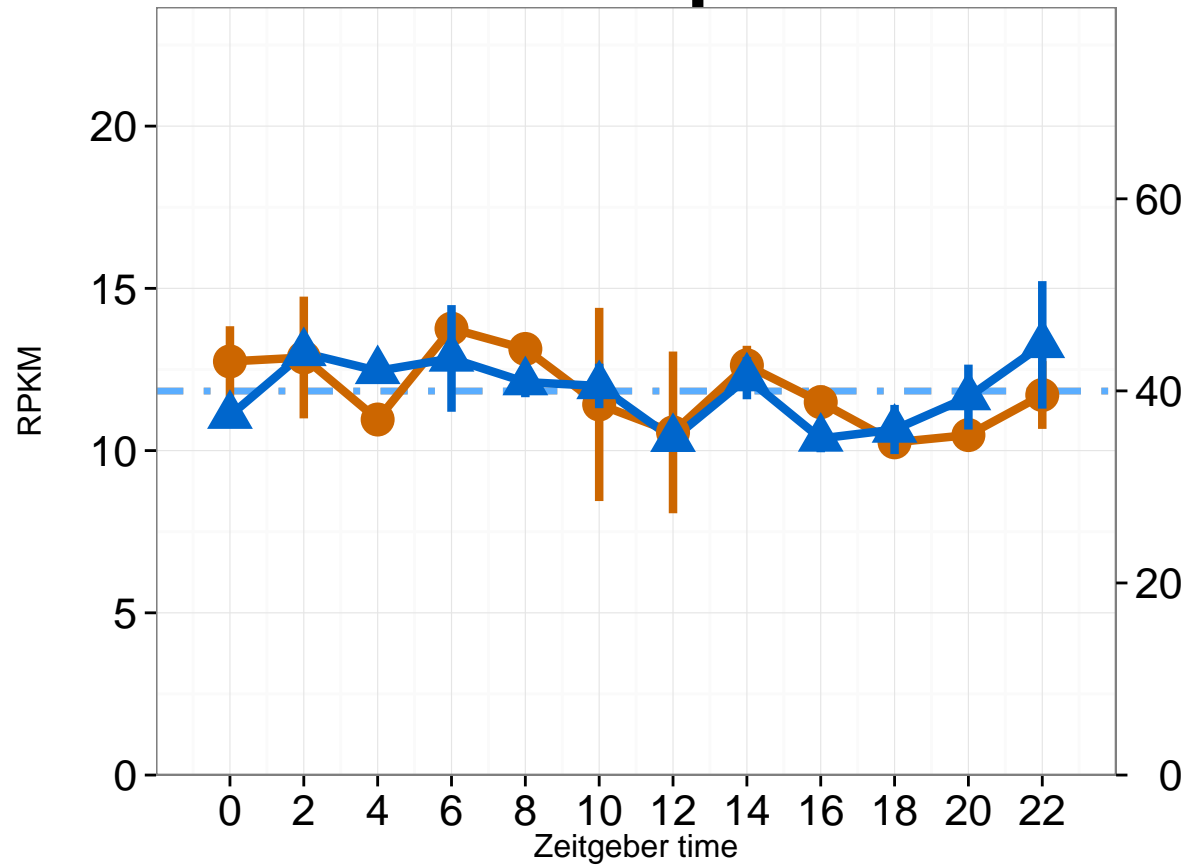

## Prelp

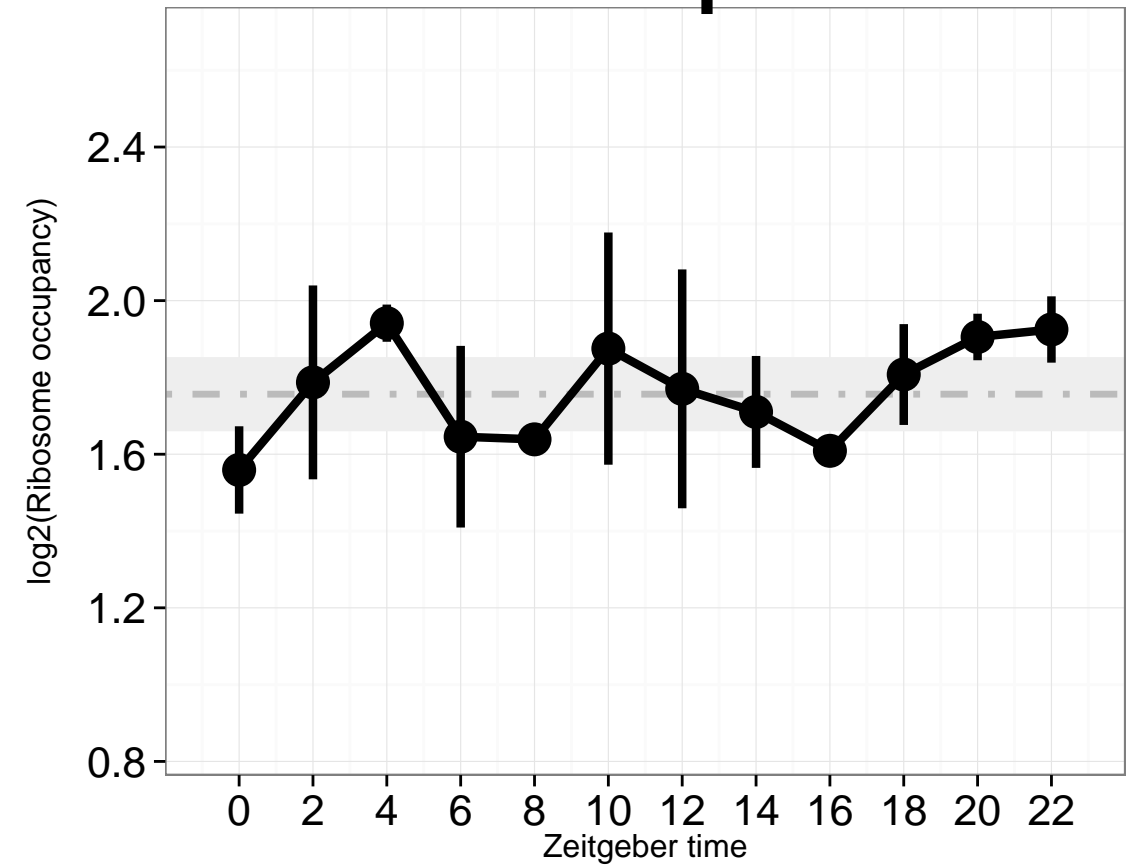

Supplement: Supplementary file 65 [file 1]

# Lat2

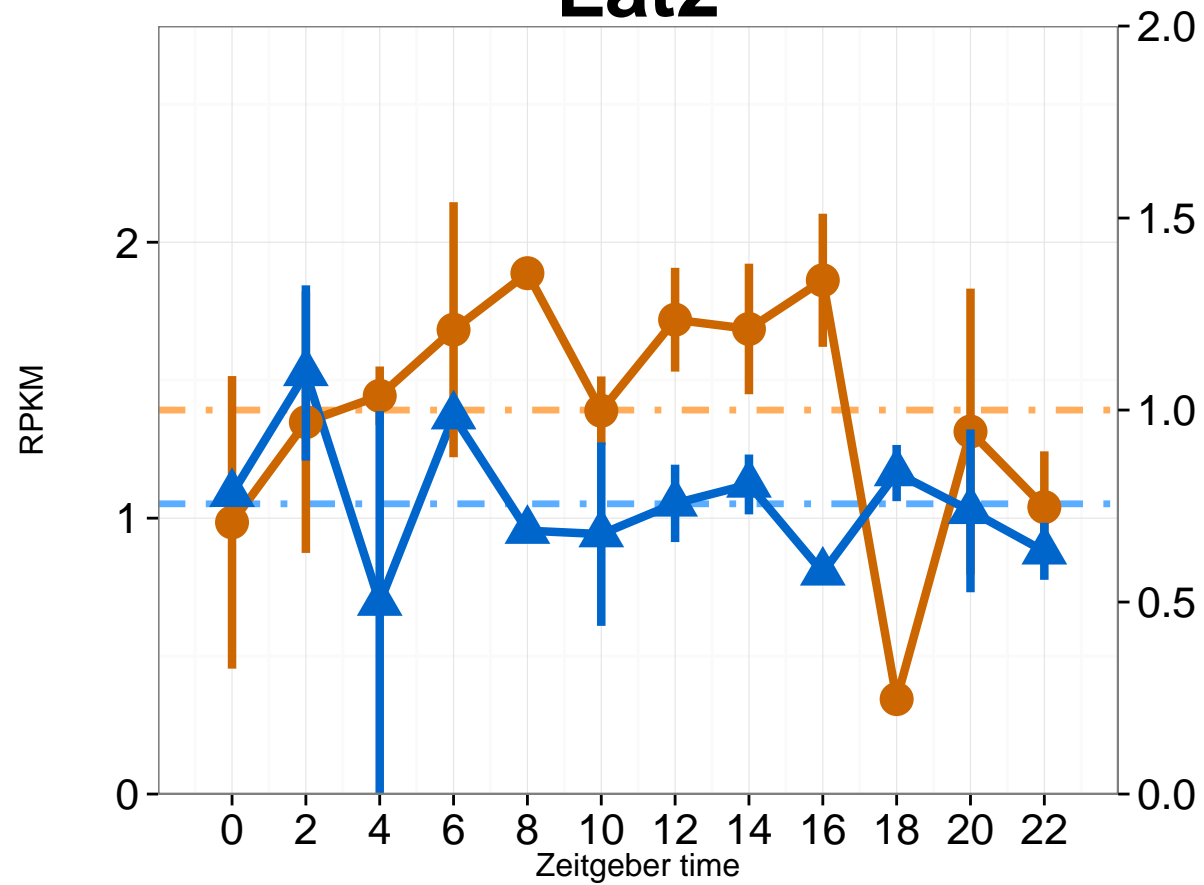

# Lat2

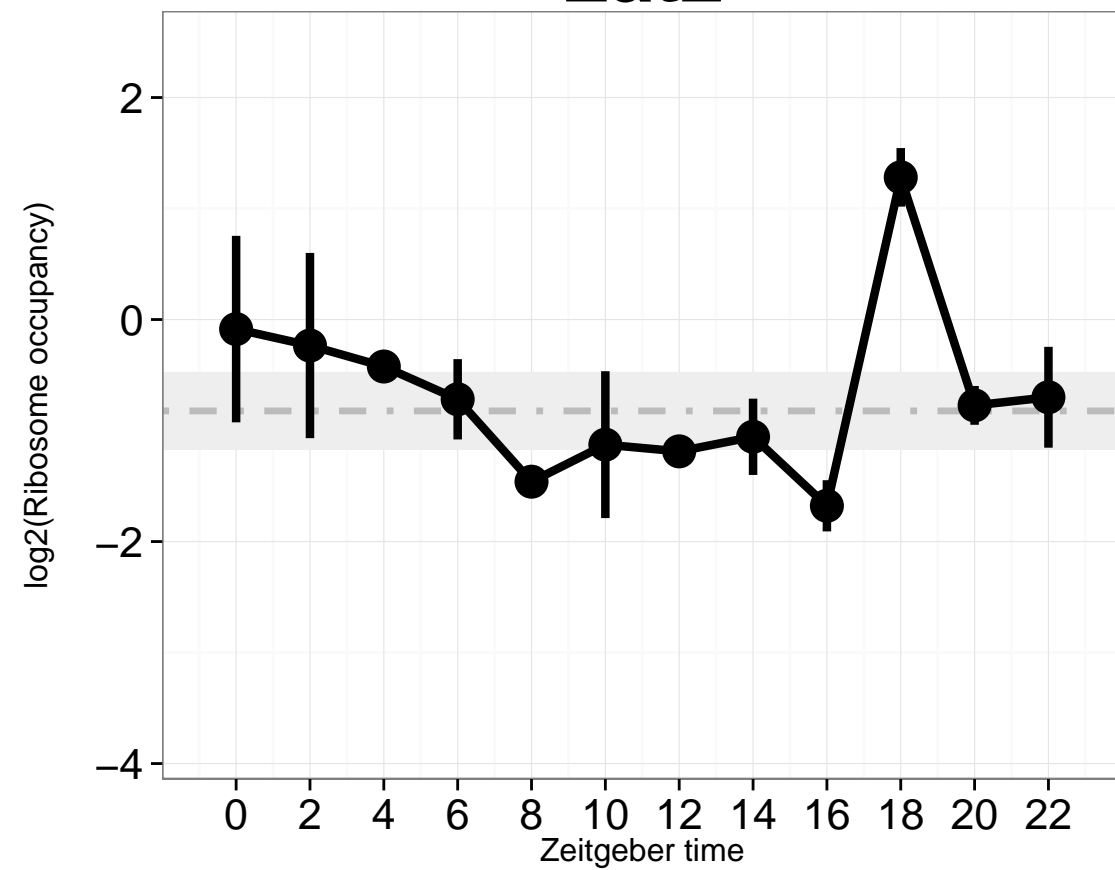

Supplement: Supplementary file 66 [file 1]

# Igsf5

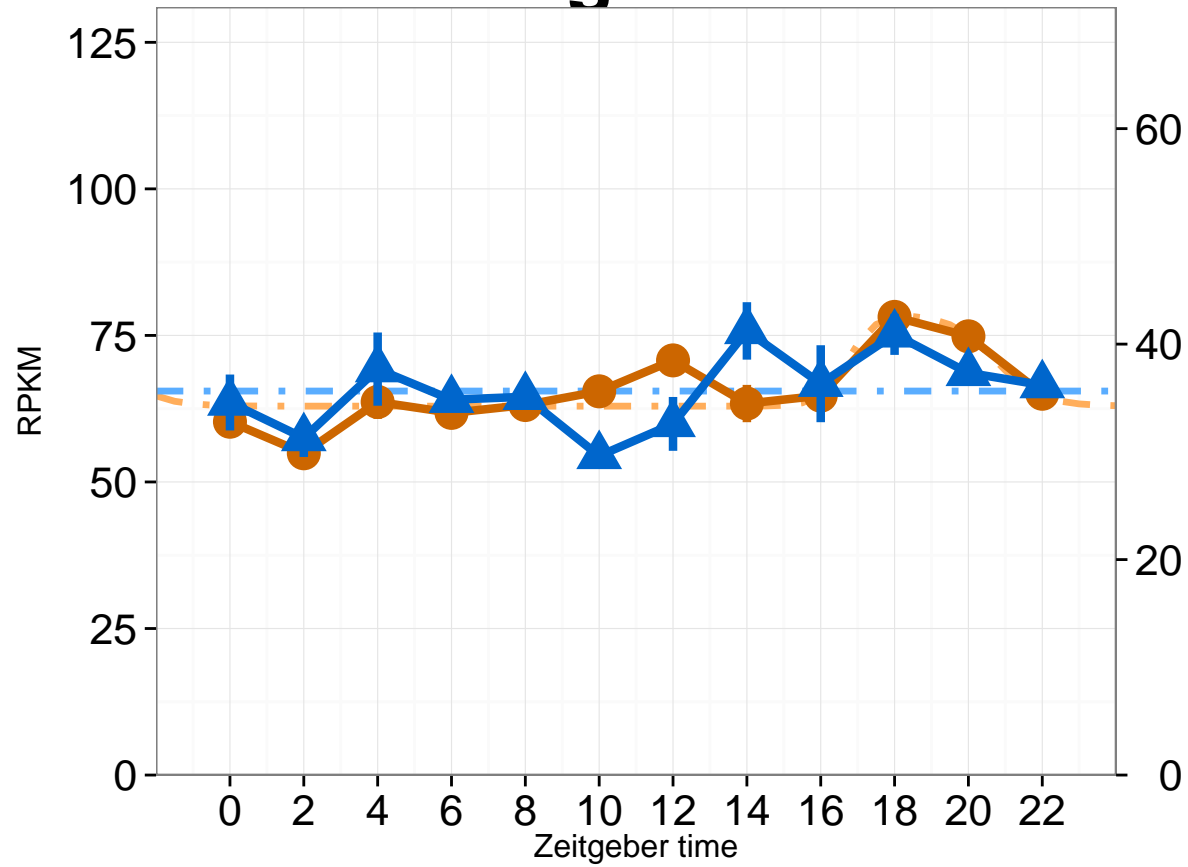

# Igsf5

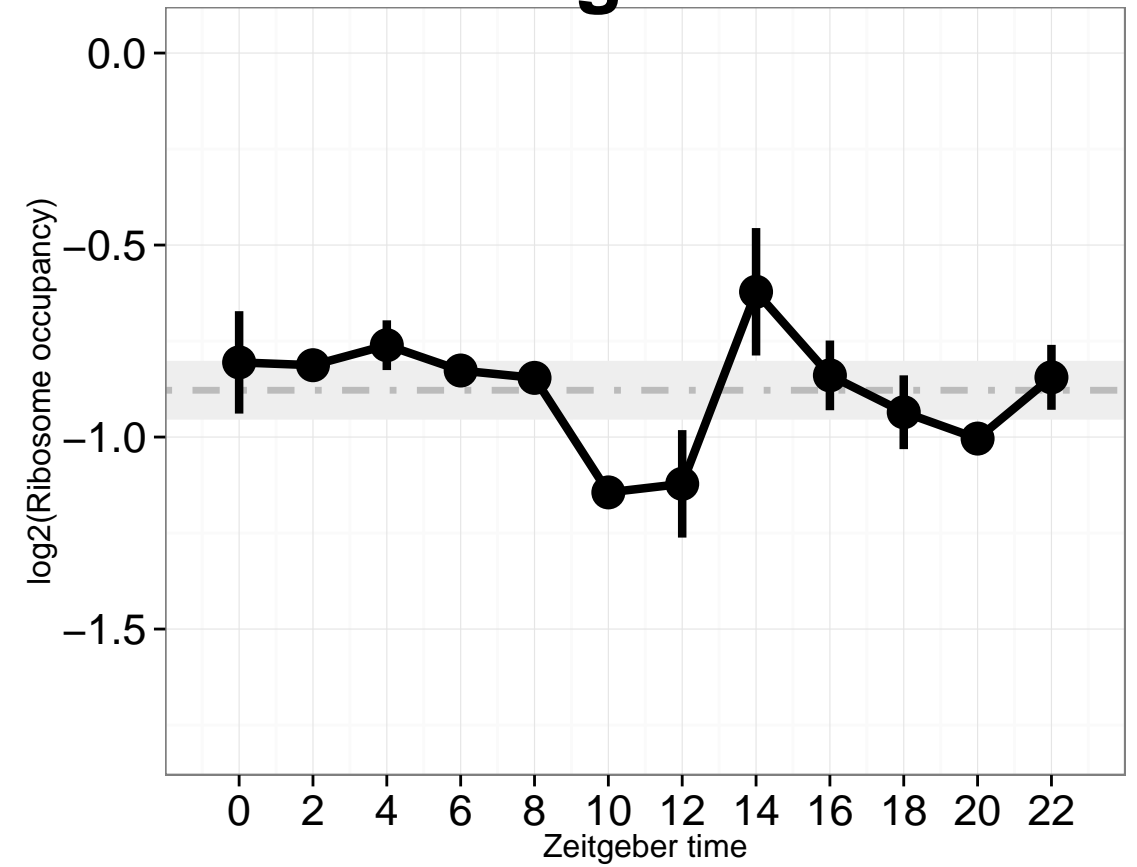

Supplement: Supplementary file 67 [file 1]

## Ddx41

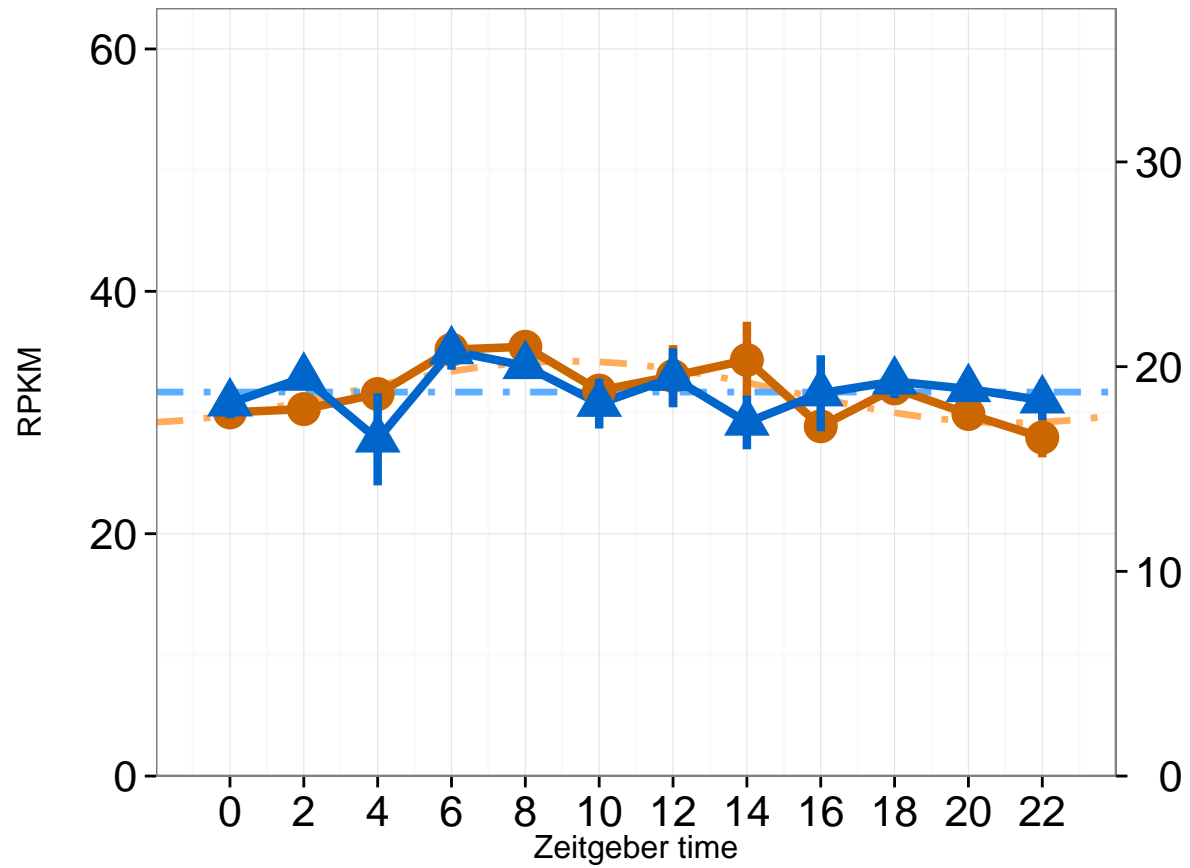

## Ddx41

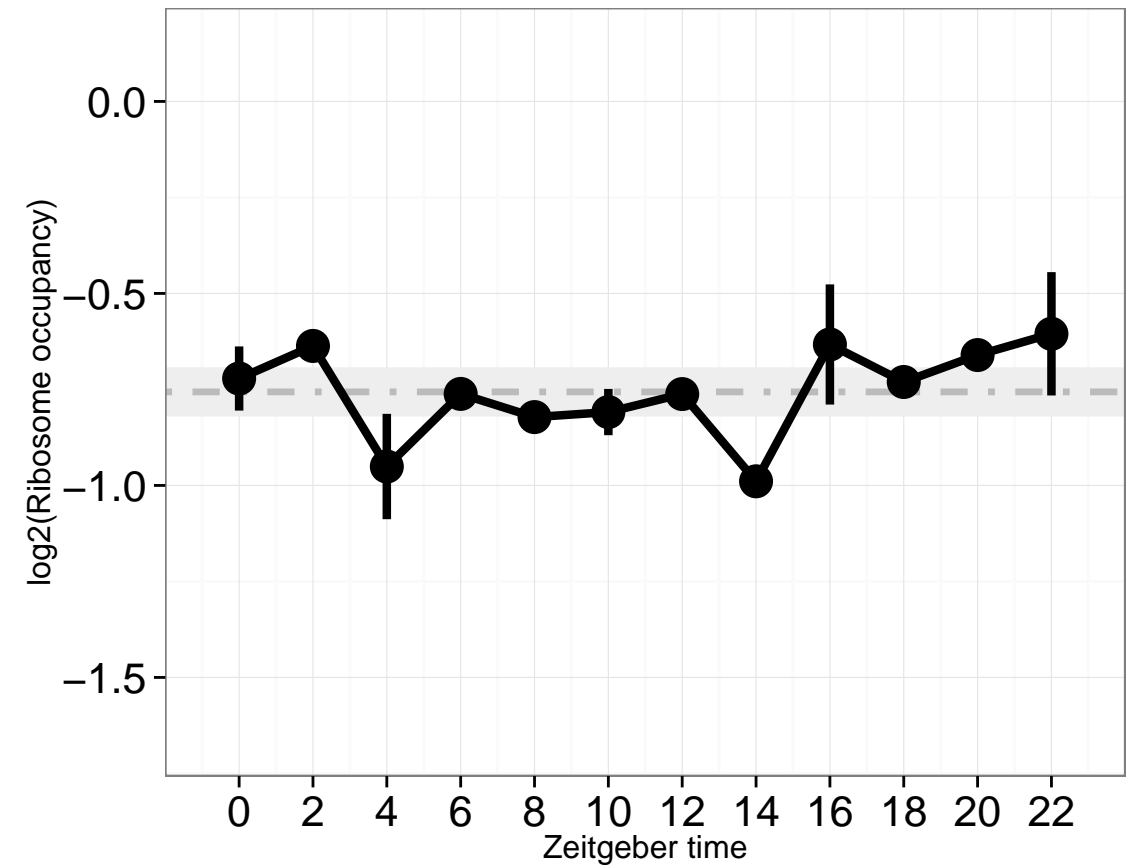

Supplement: Supplementary file 68 [file 1]

# Epn1

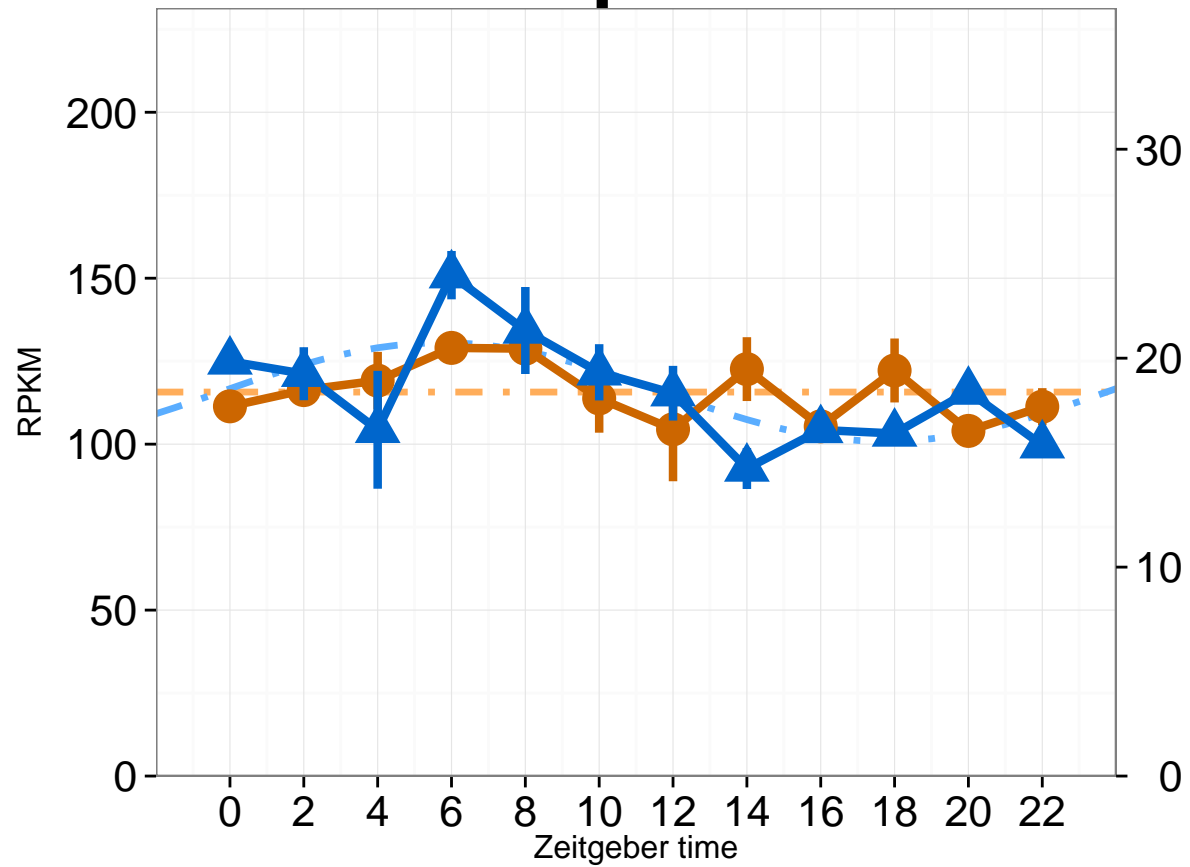

# Epn1

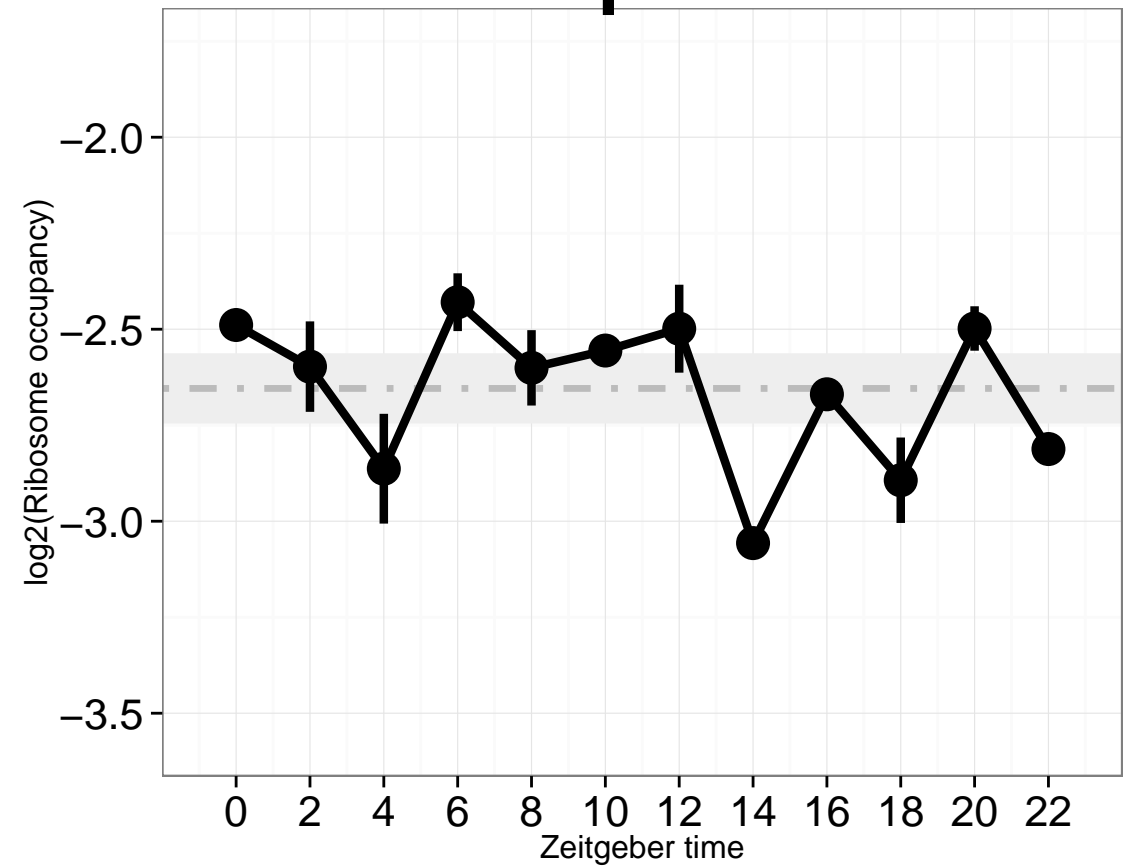

Supplement: Supplementary file 69 [file 1]

## Hhex

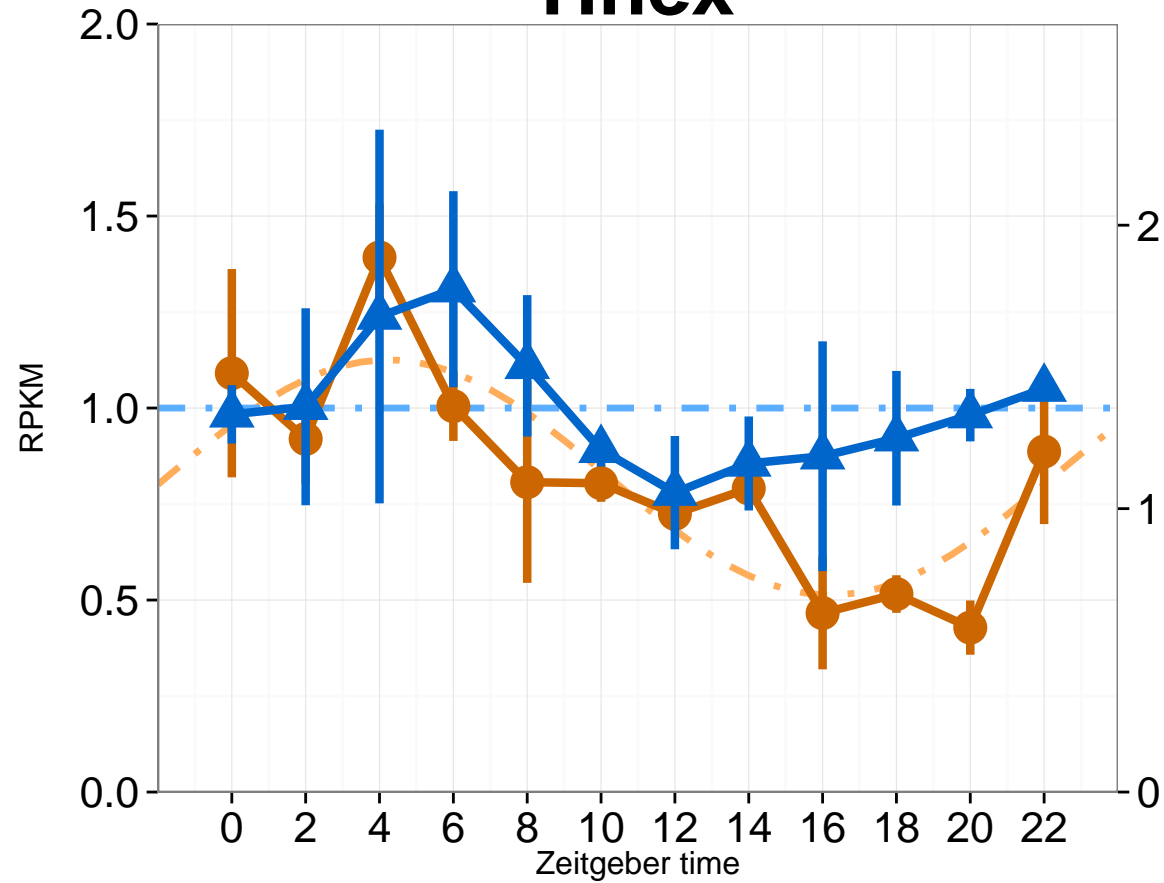

## Hhex

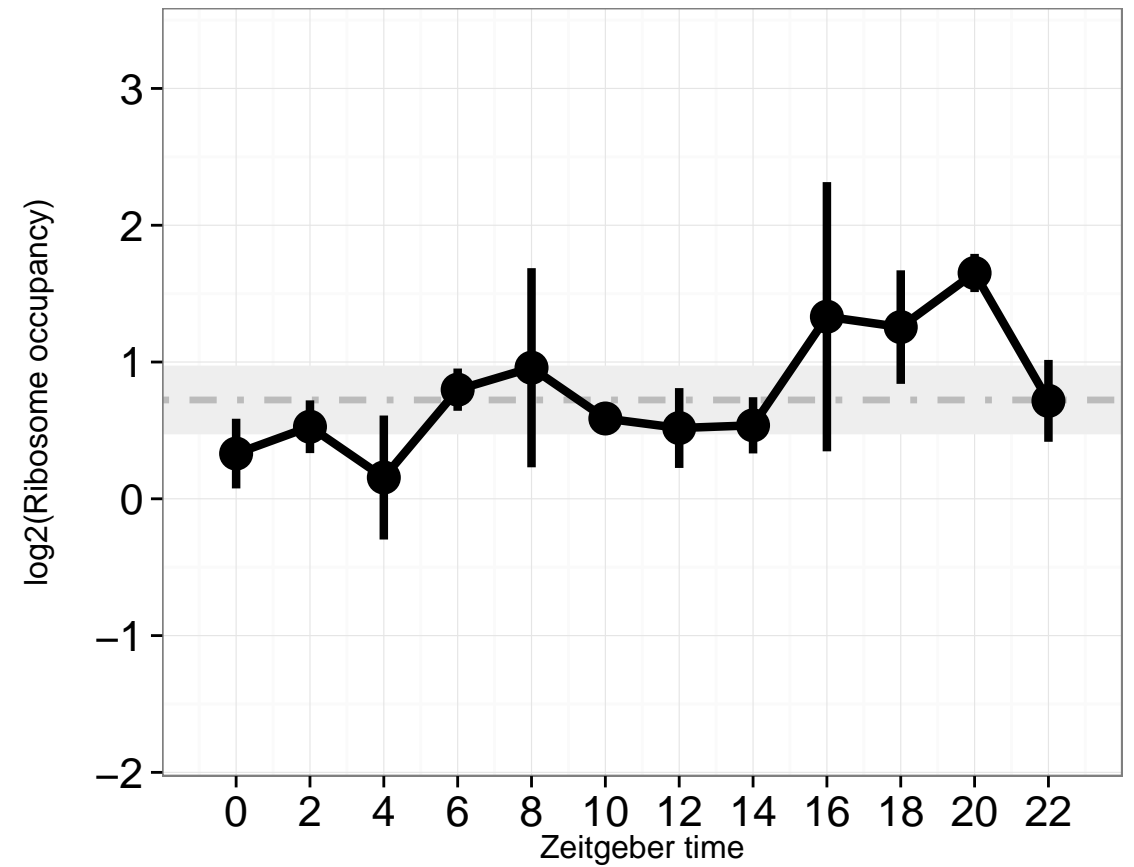

Supplement: Supplementary file 70 [file 1]

# Ndufb7

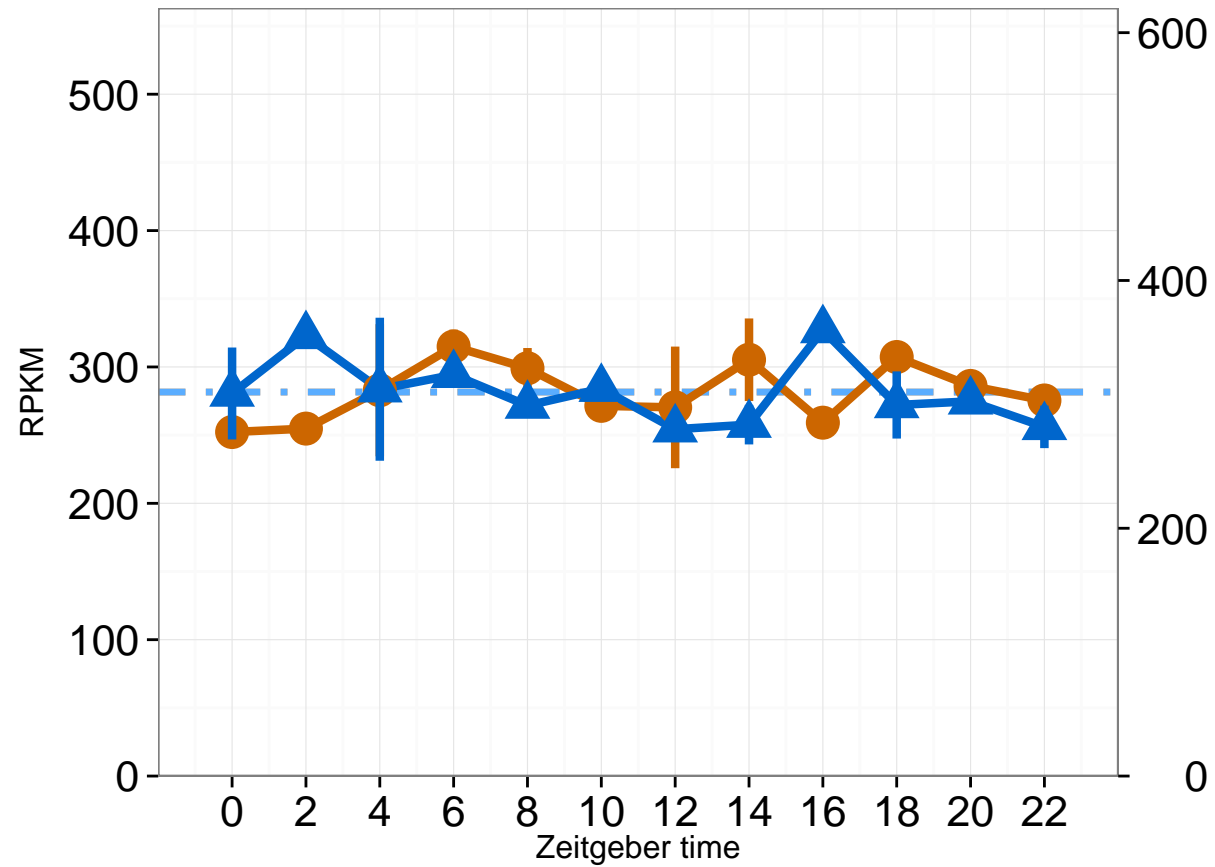

# Ndufb7

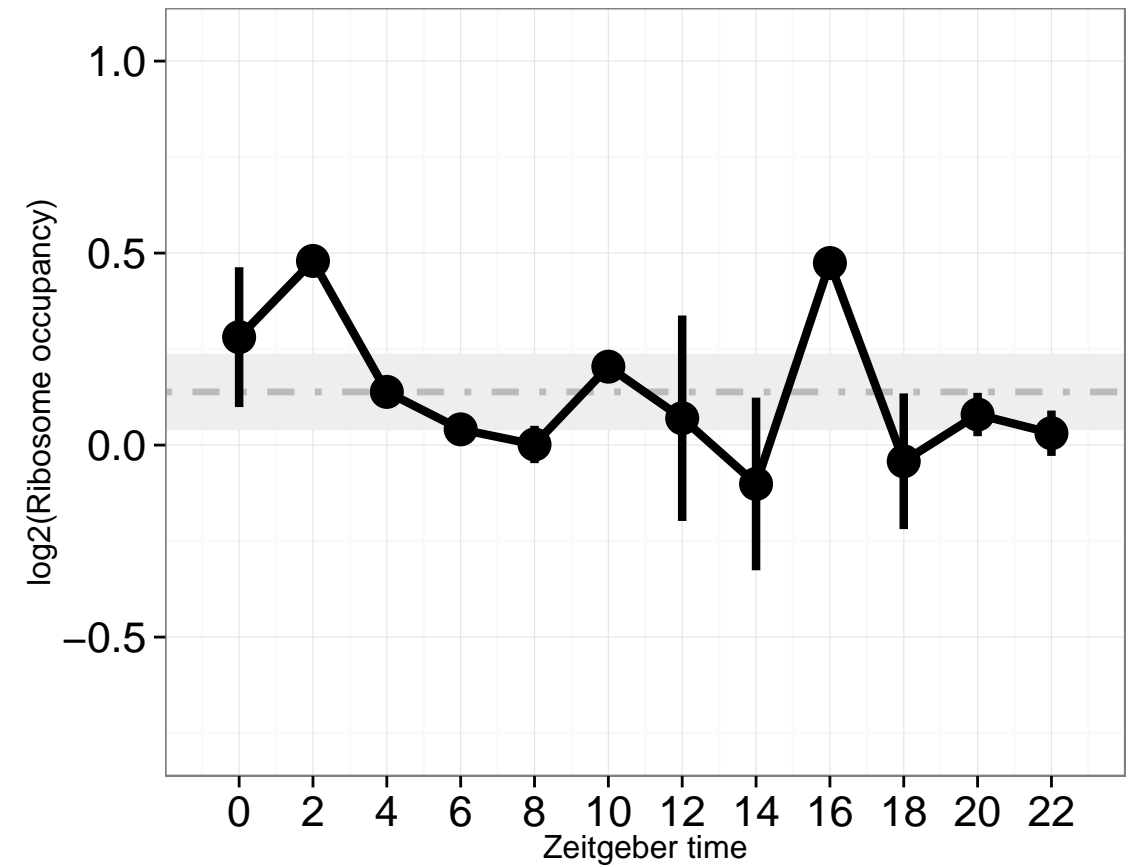

Supplement: Supplementary file 71 [file 1]

## Psph

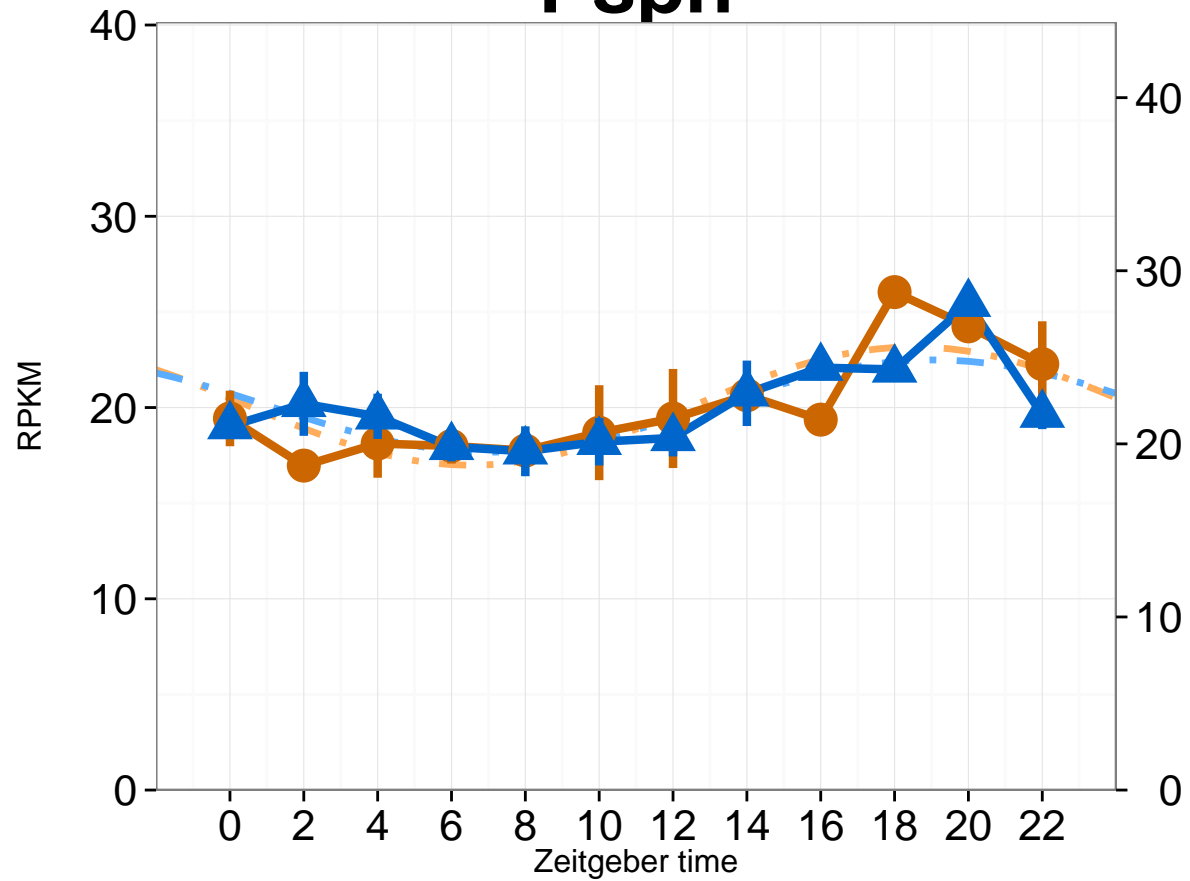

## Psph

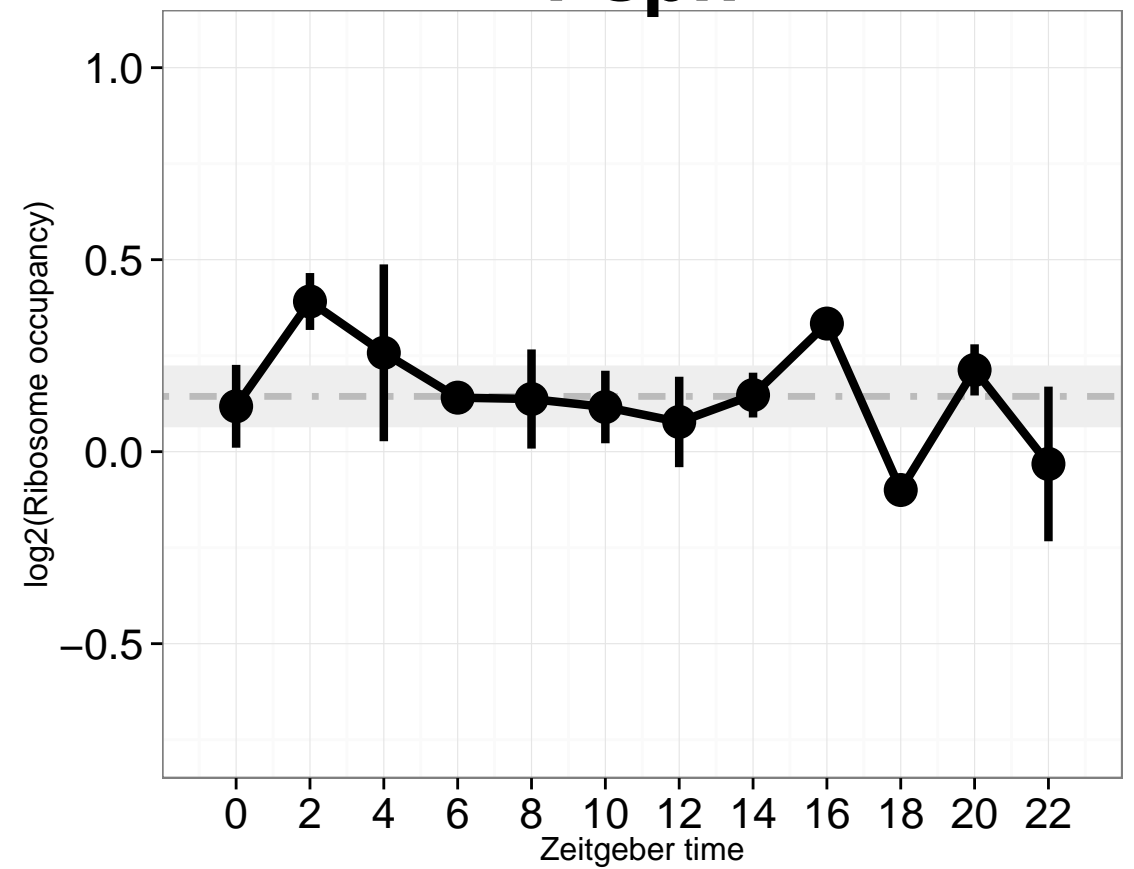

Supplement: Supplementary file 72 [file 1]

# Hunk

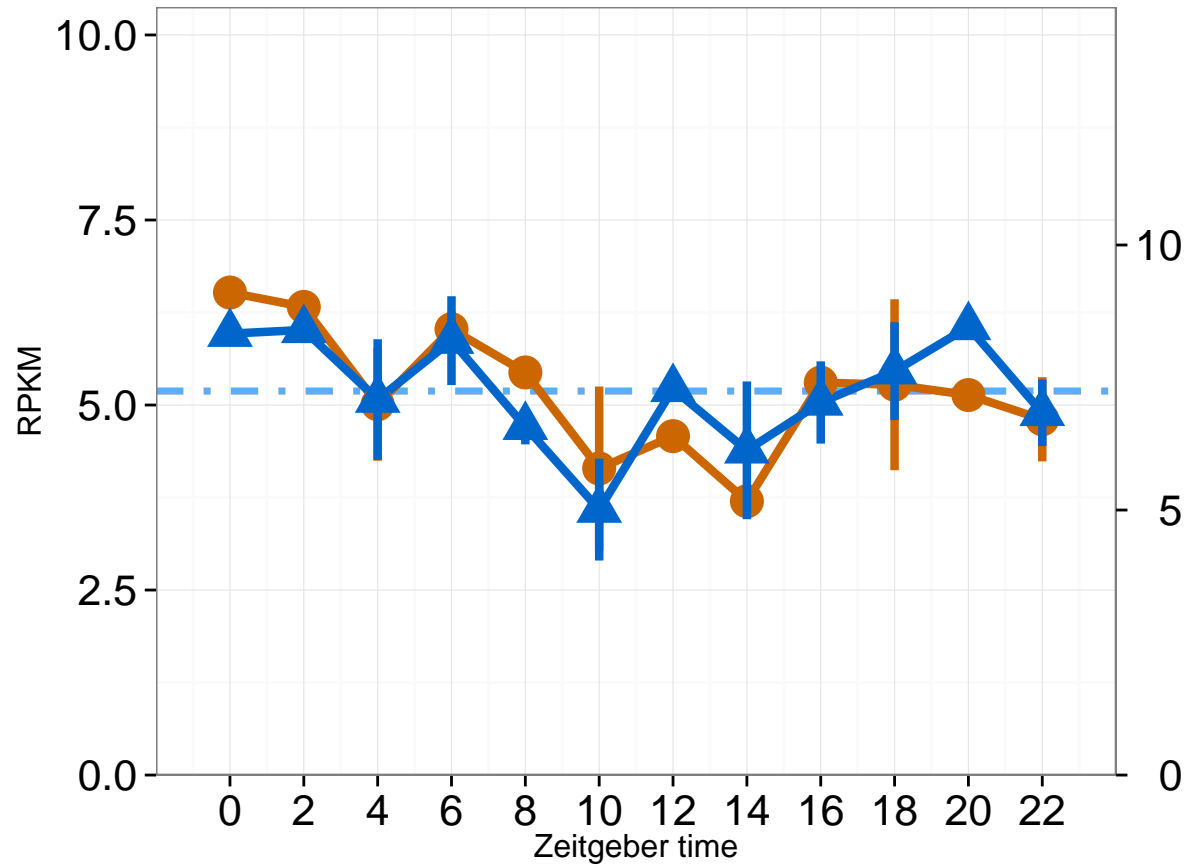

# Hunk

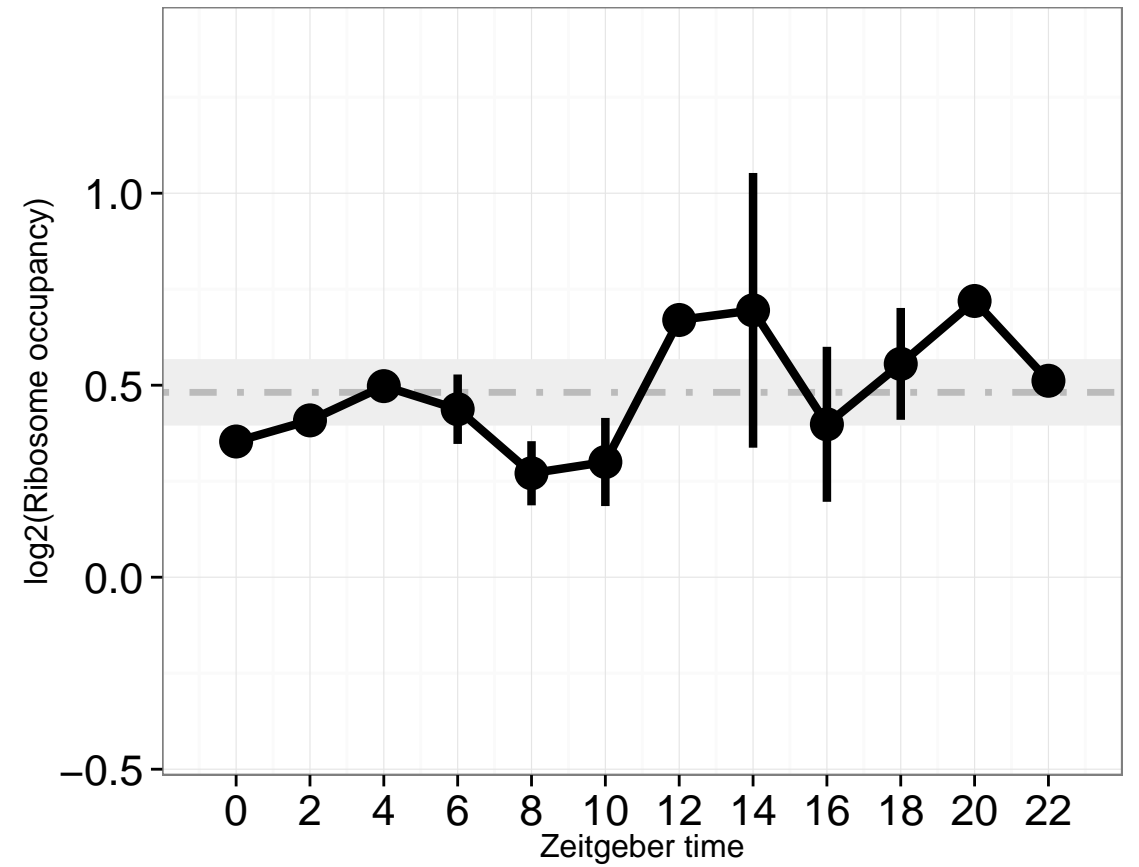

Supplement: Supplementary file 73 [file 1]

# Msantd2

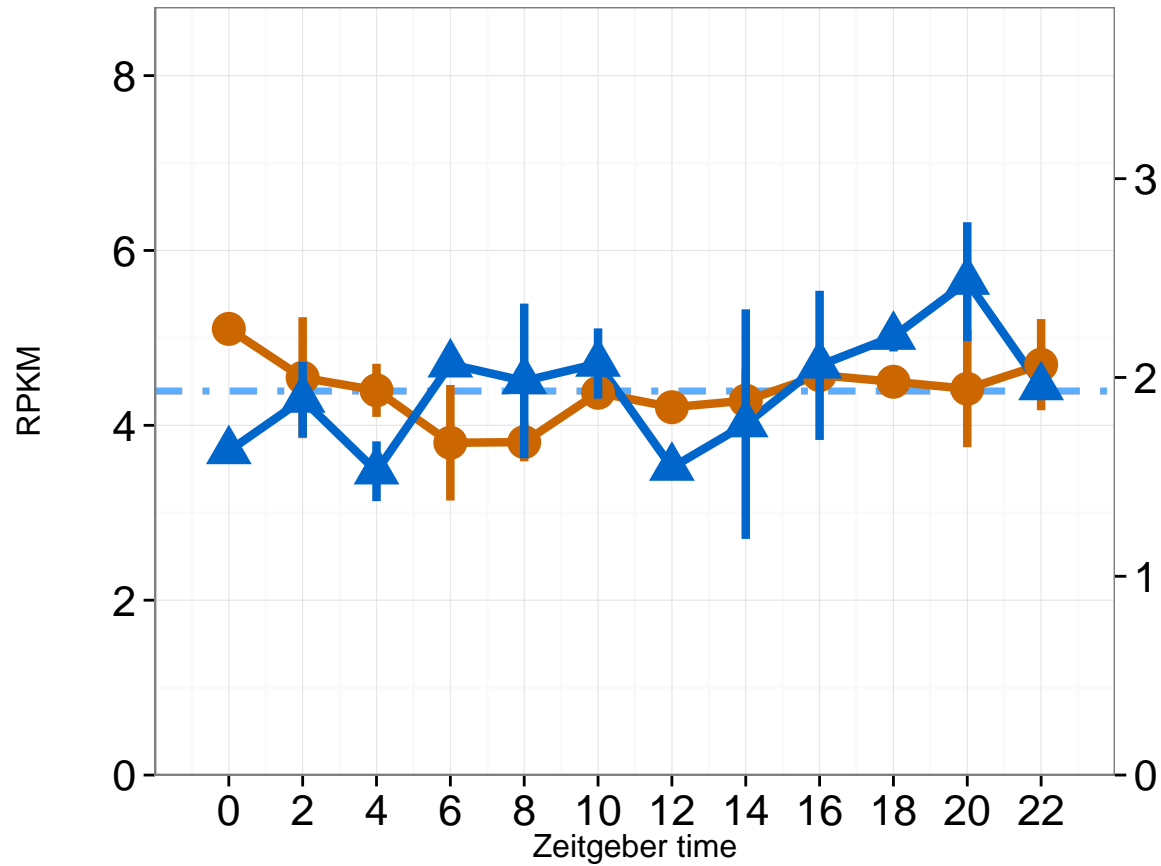

# Msantd2

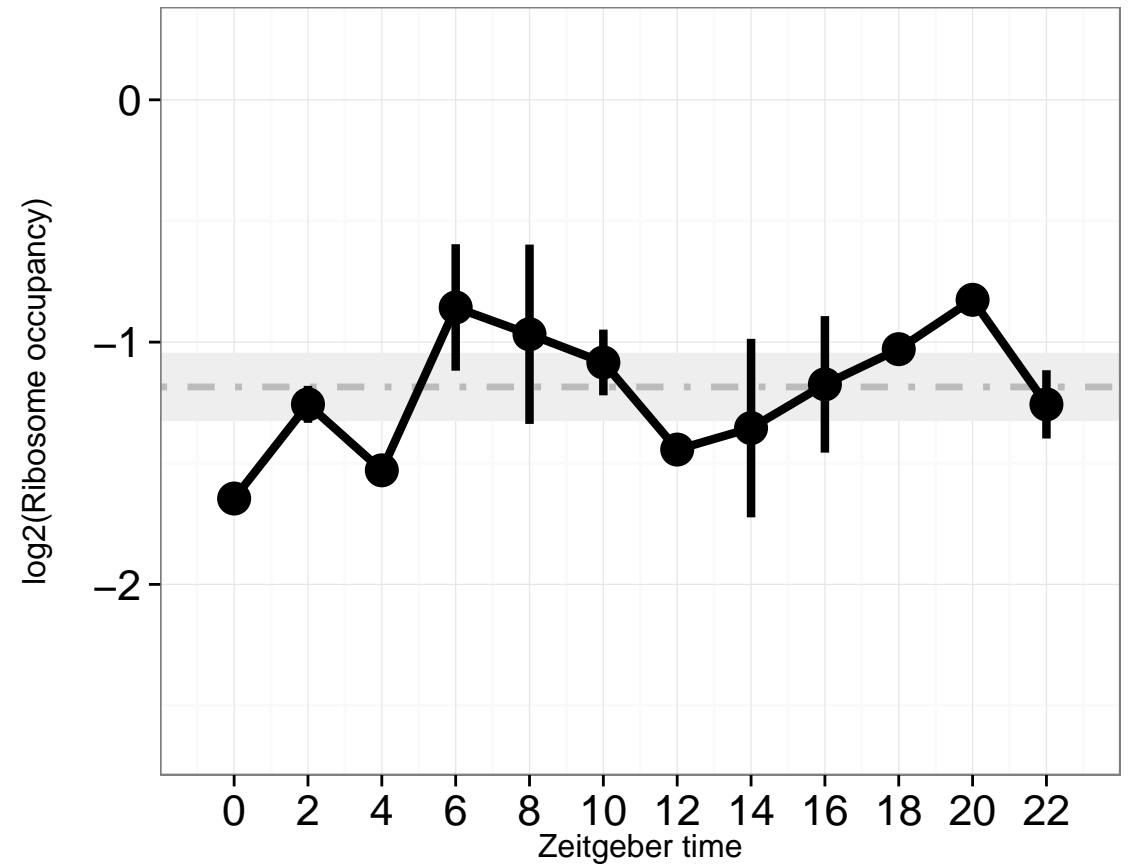

Supplement: Supplementary file 74 [file 1]

## Mfn2

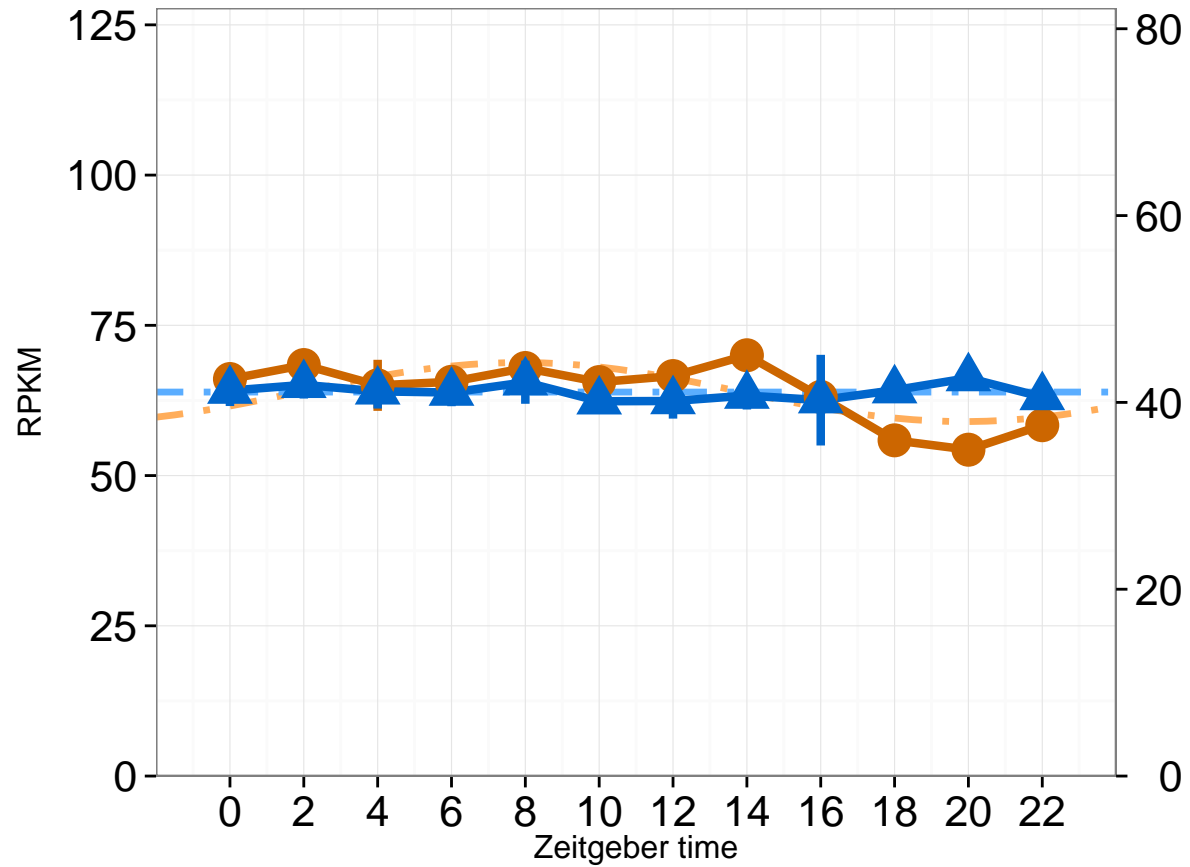

## Mfn2

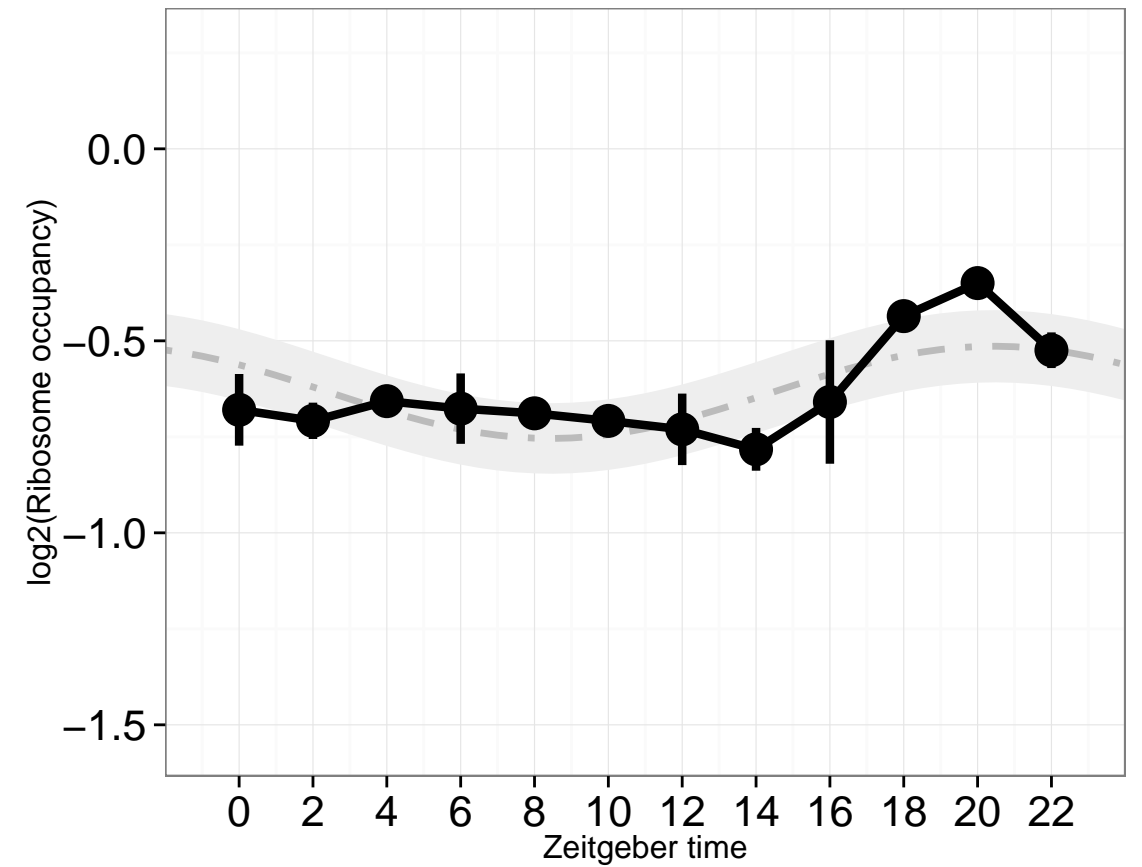

Supplement: Supplementary file 75 [file 1]

# Jmy

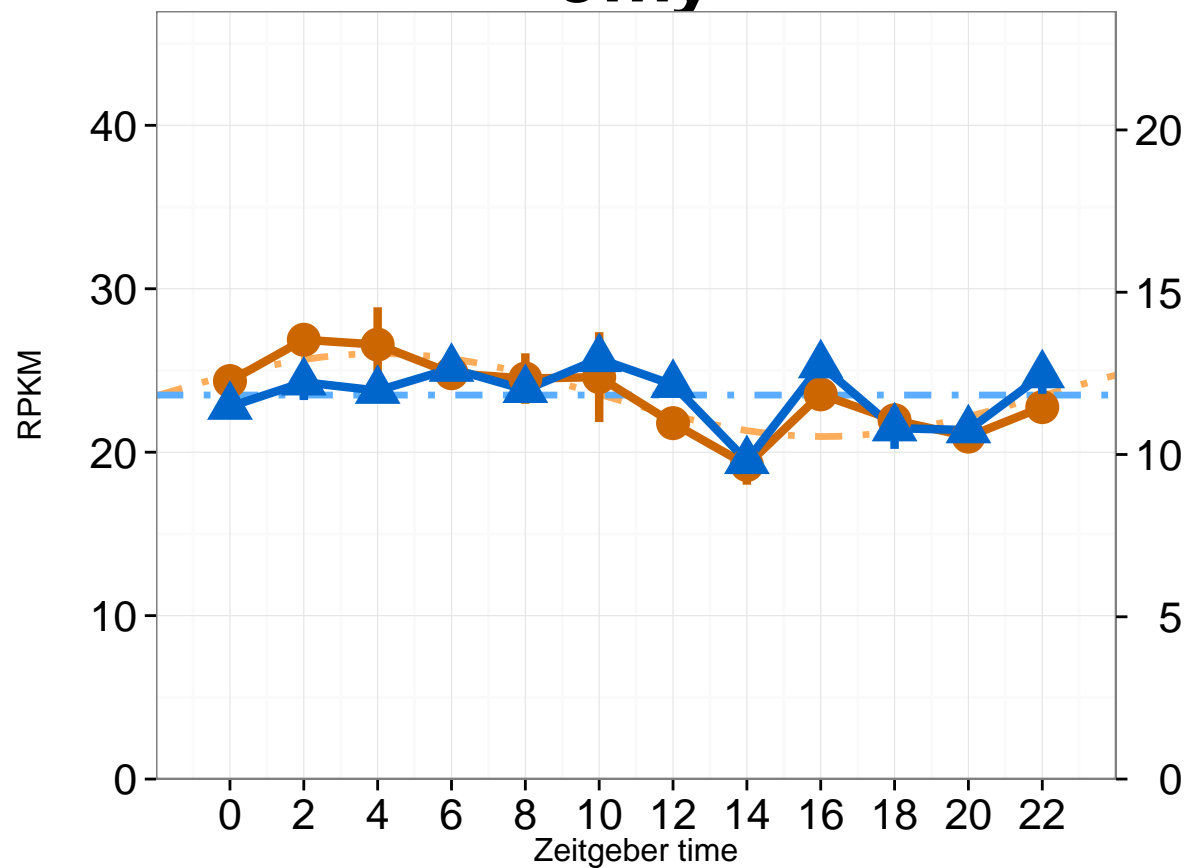

# Jmy

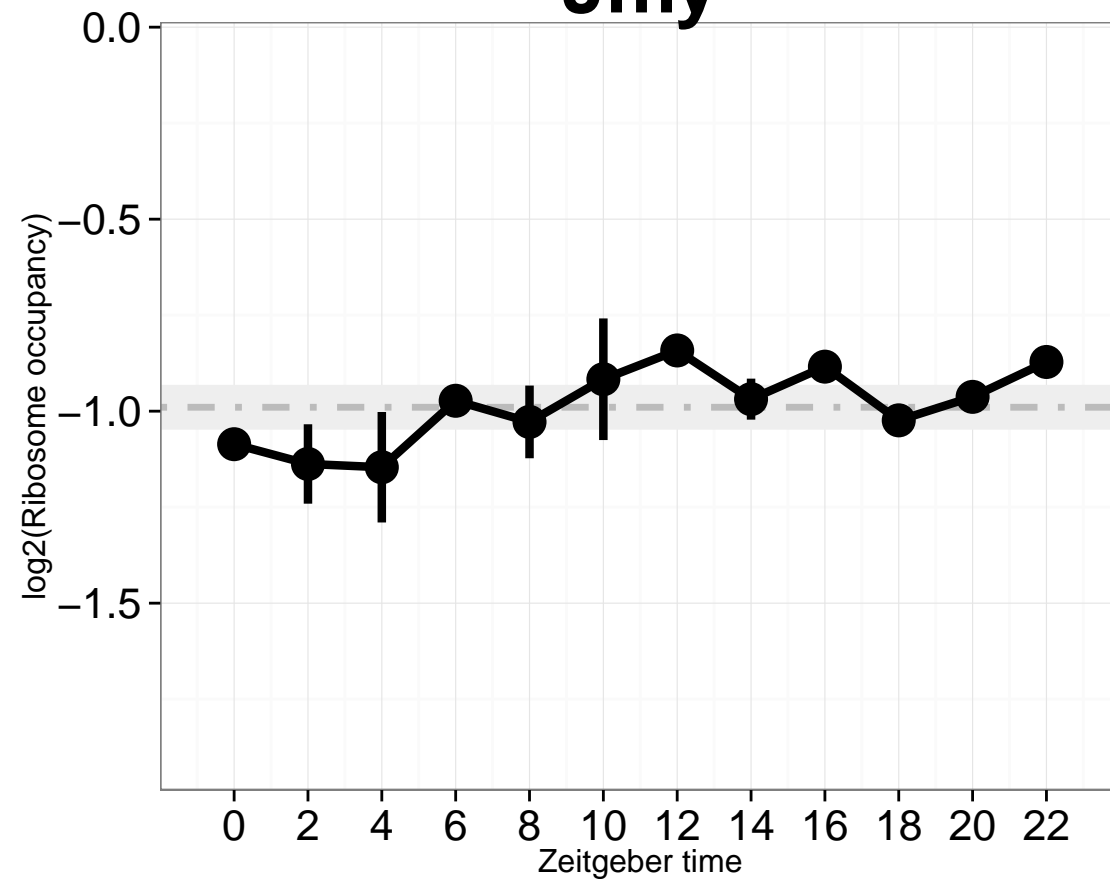

Supplement: Supplementary file 76 [file 1]

## A330021E22Rik

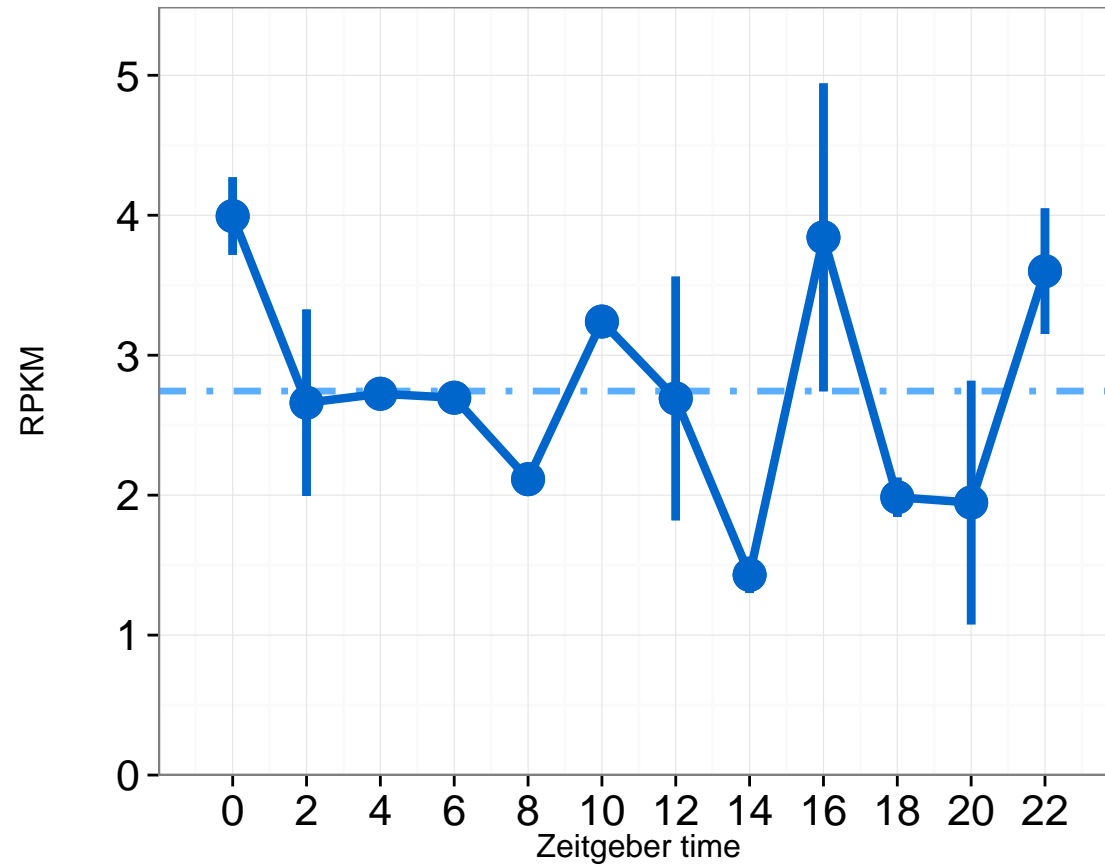

## A330021E22Rik log2(Ribosome occup

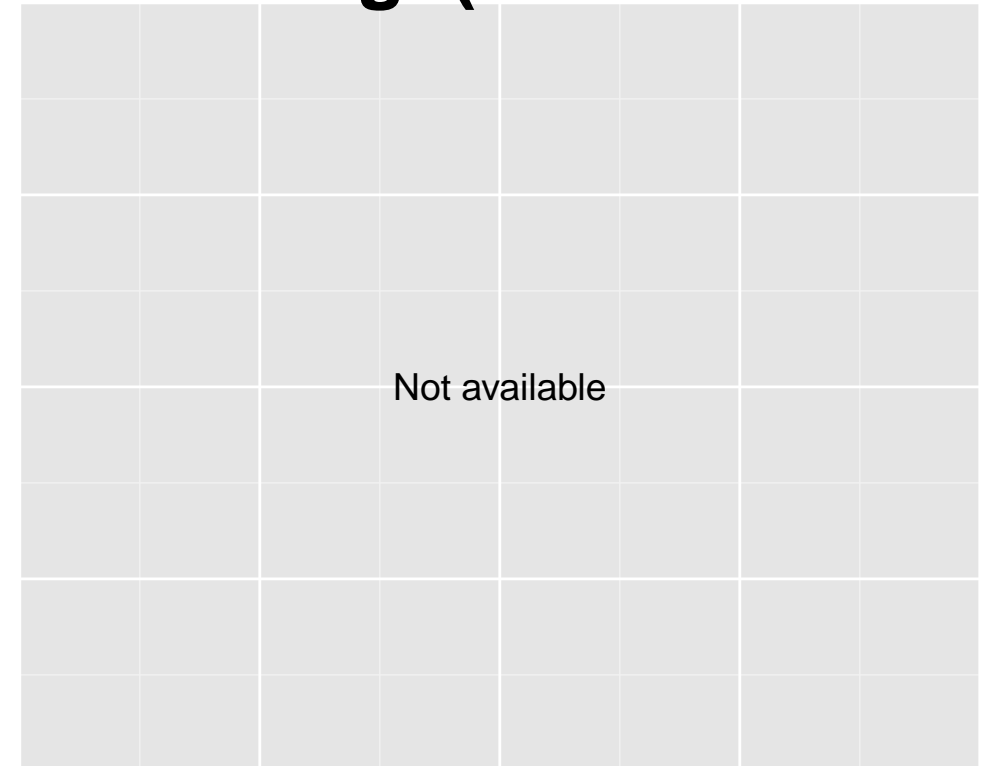

Supplement: Supplementary file 77 [file 1]

## Psmd3

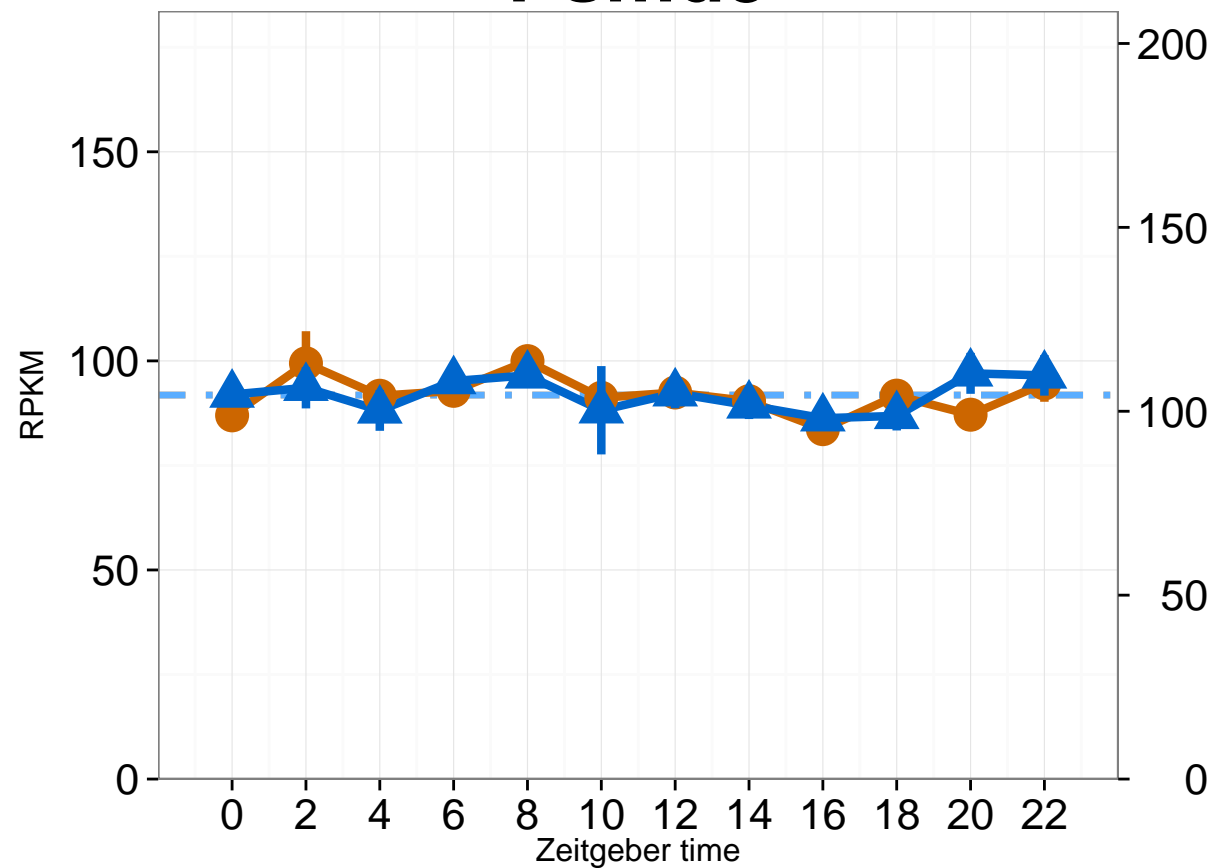

## Psmd3

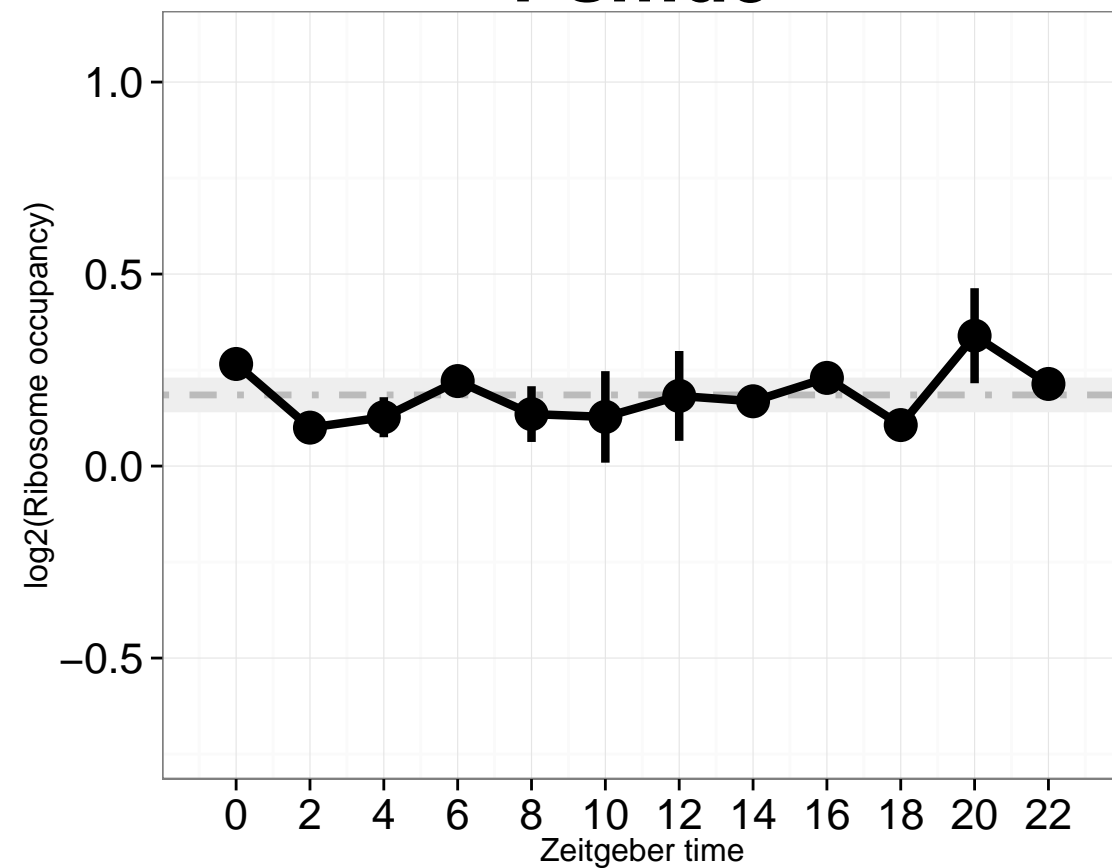

Supplement: Supplementary file 78 [file 1]

## Osgin1

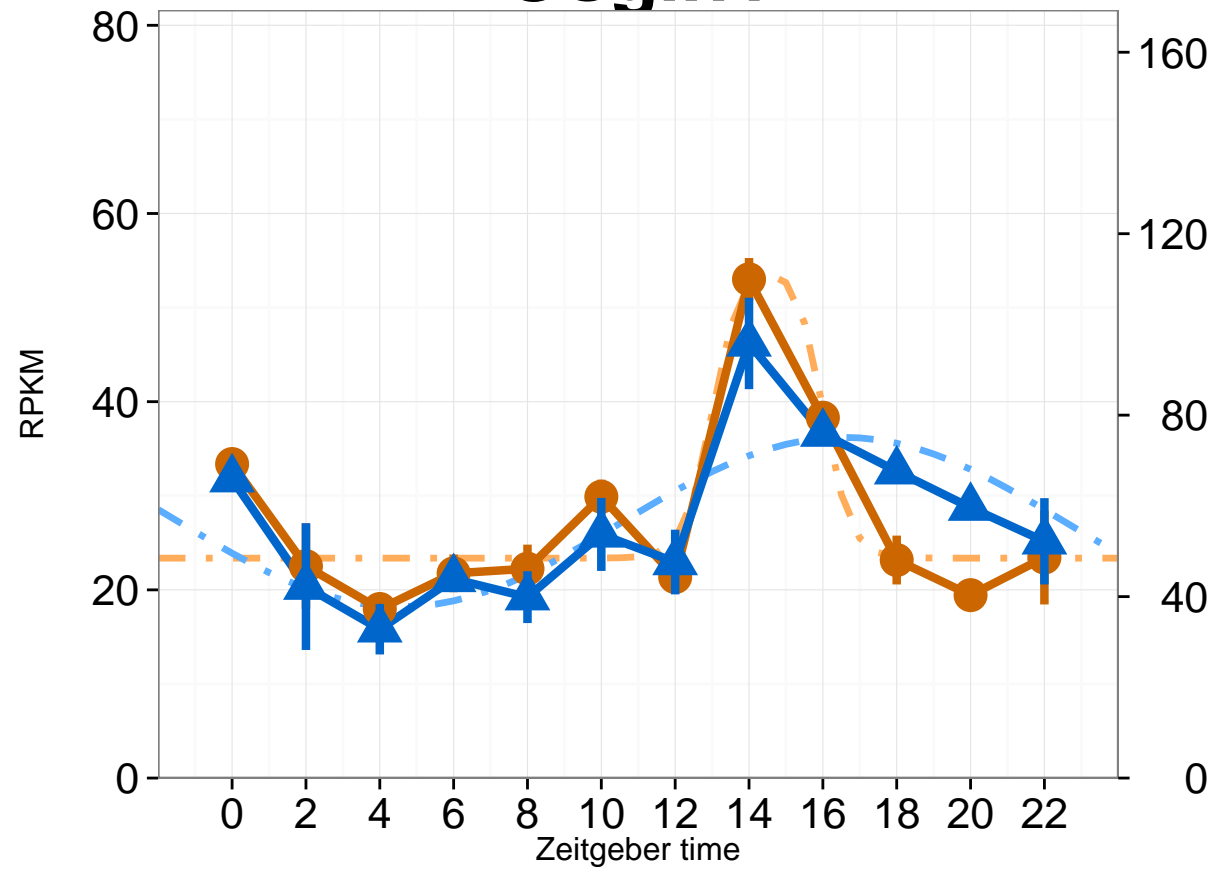

## Osgin1

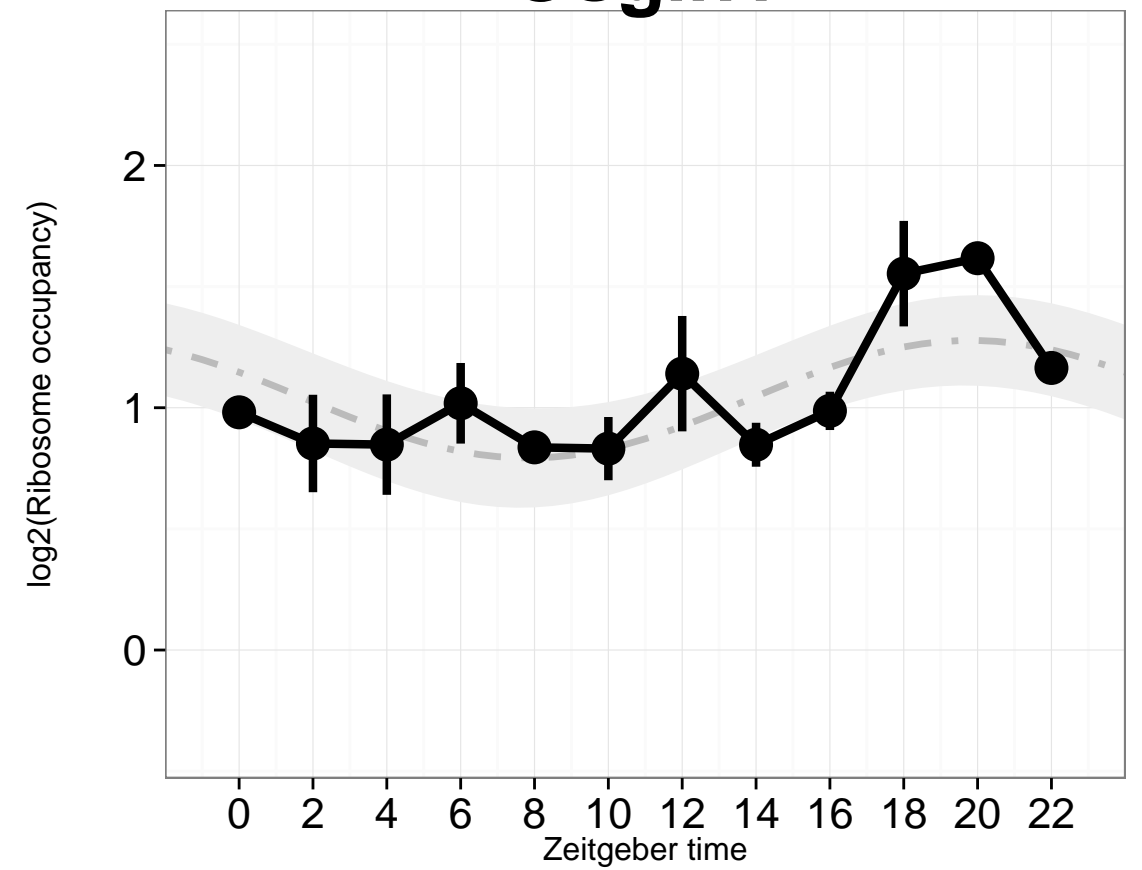

Supplement: Supplementary file 79 [file 1]

## Zfand2b

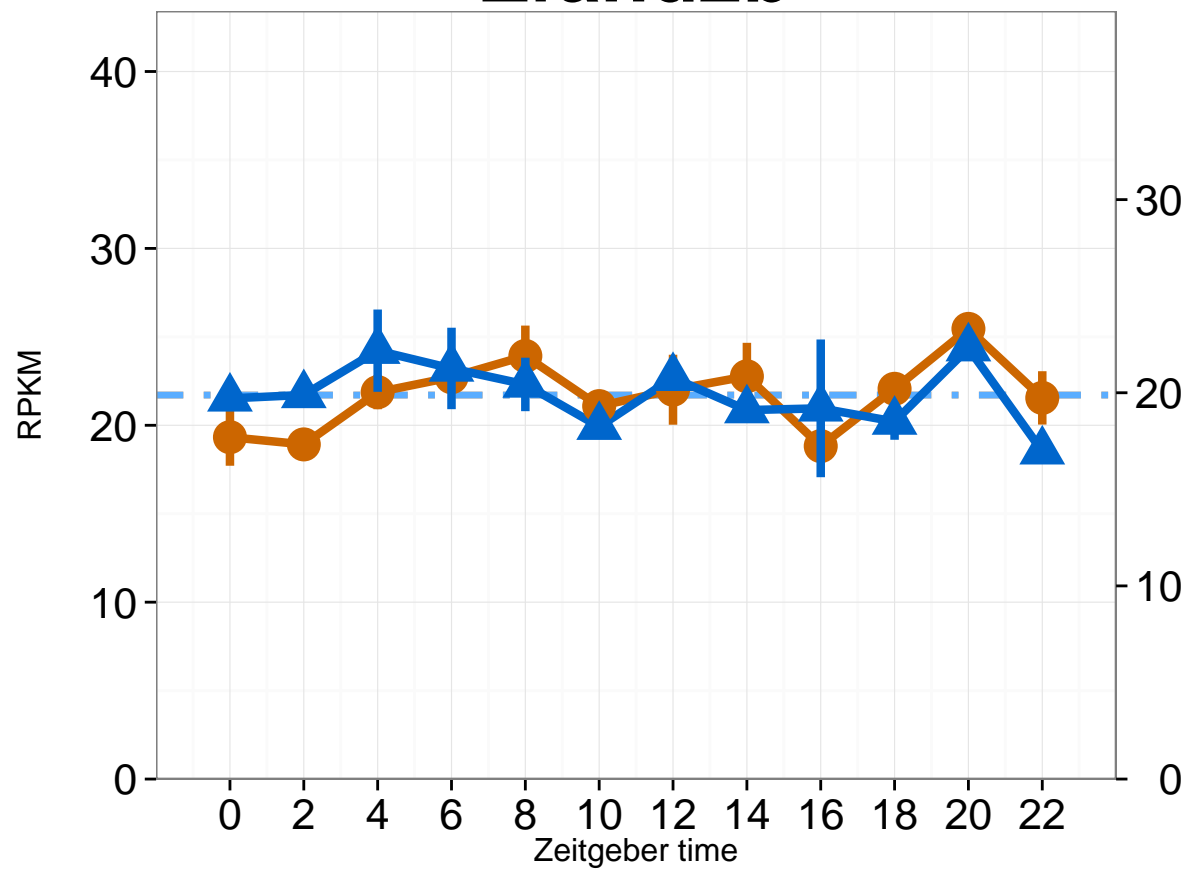

## Zfand2b

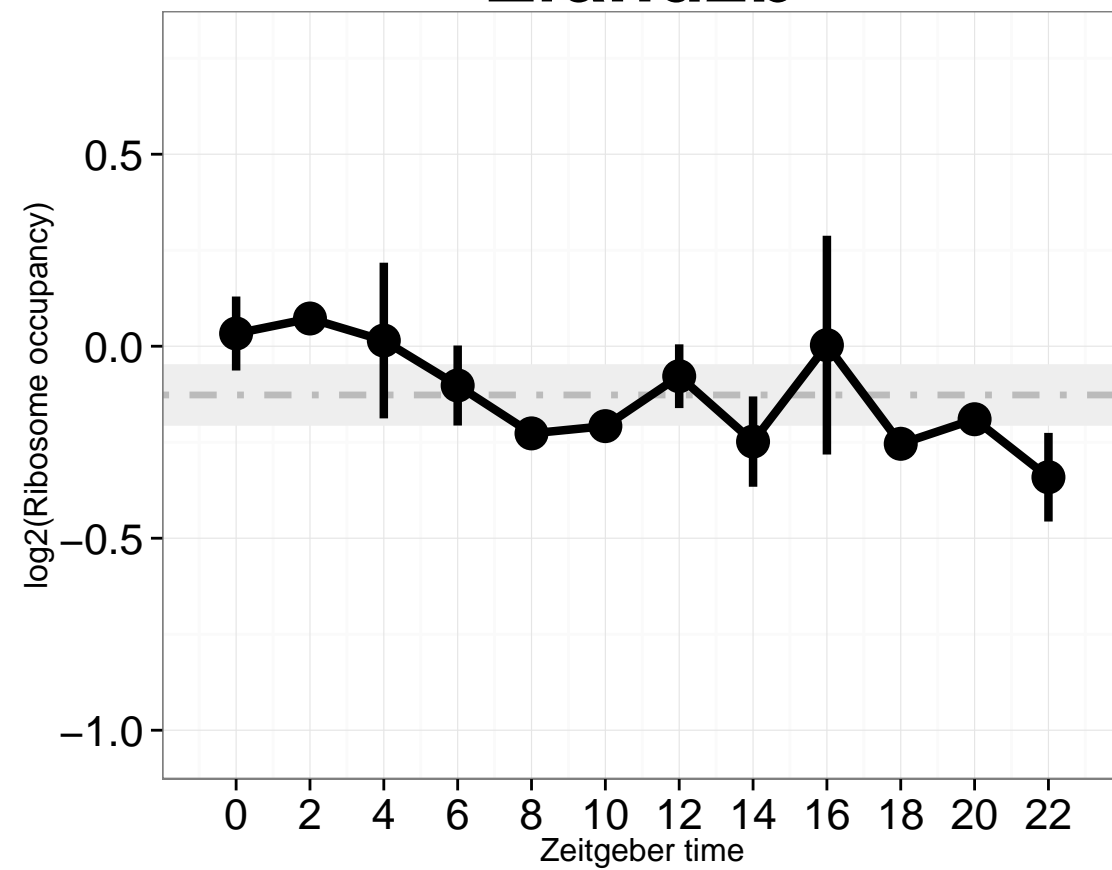

Supplement: Supplementary file 80 [file 1]

# Coro2a

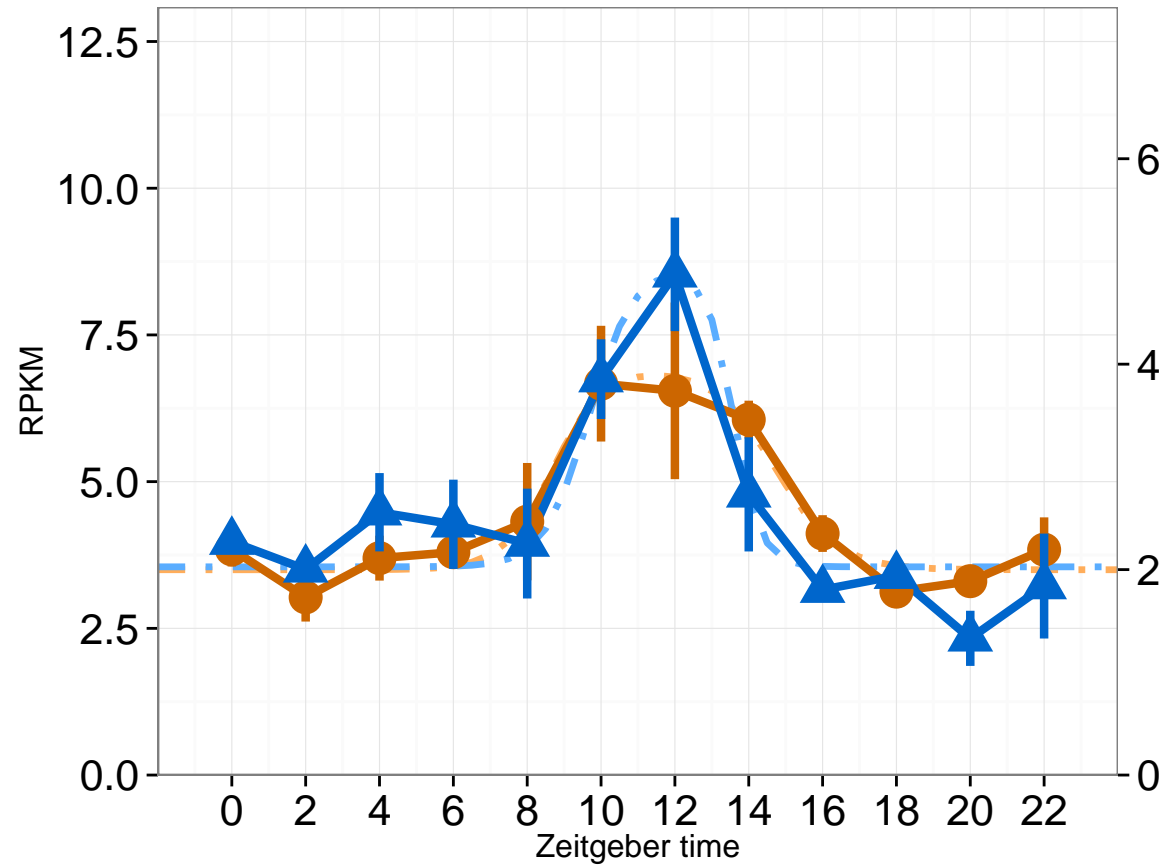

# Coro2a

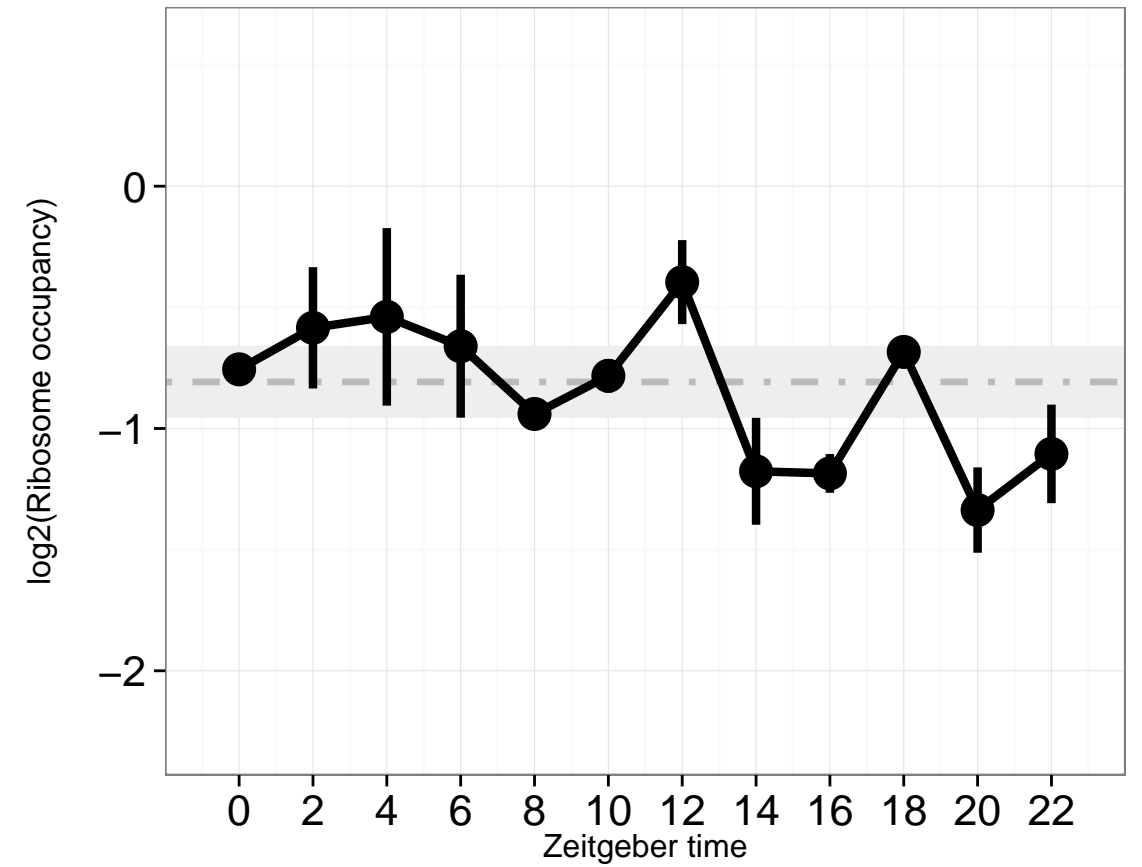

Supplement: Supplementary file 81 [file 1]

# Zfp322a

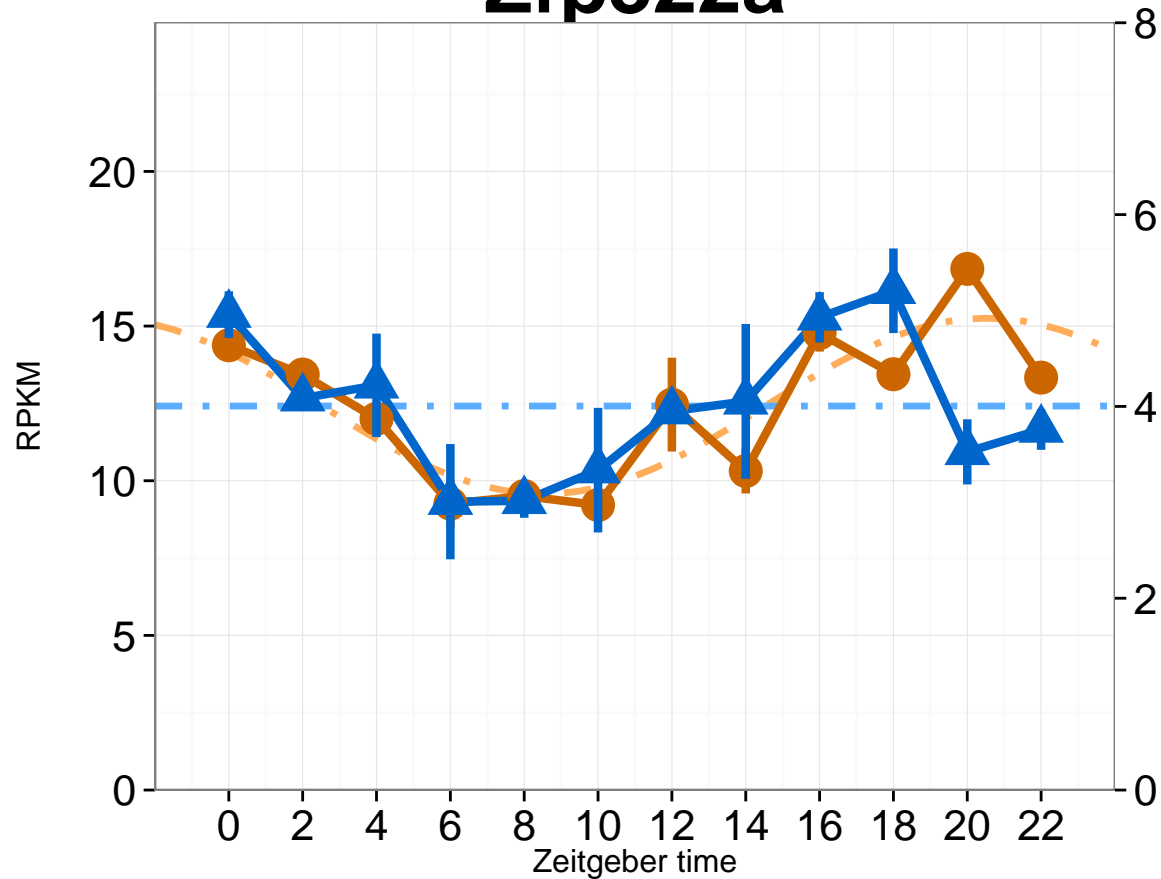

# Zfp322a

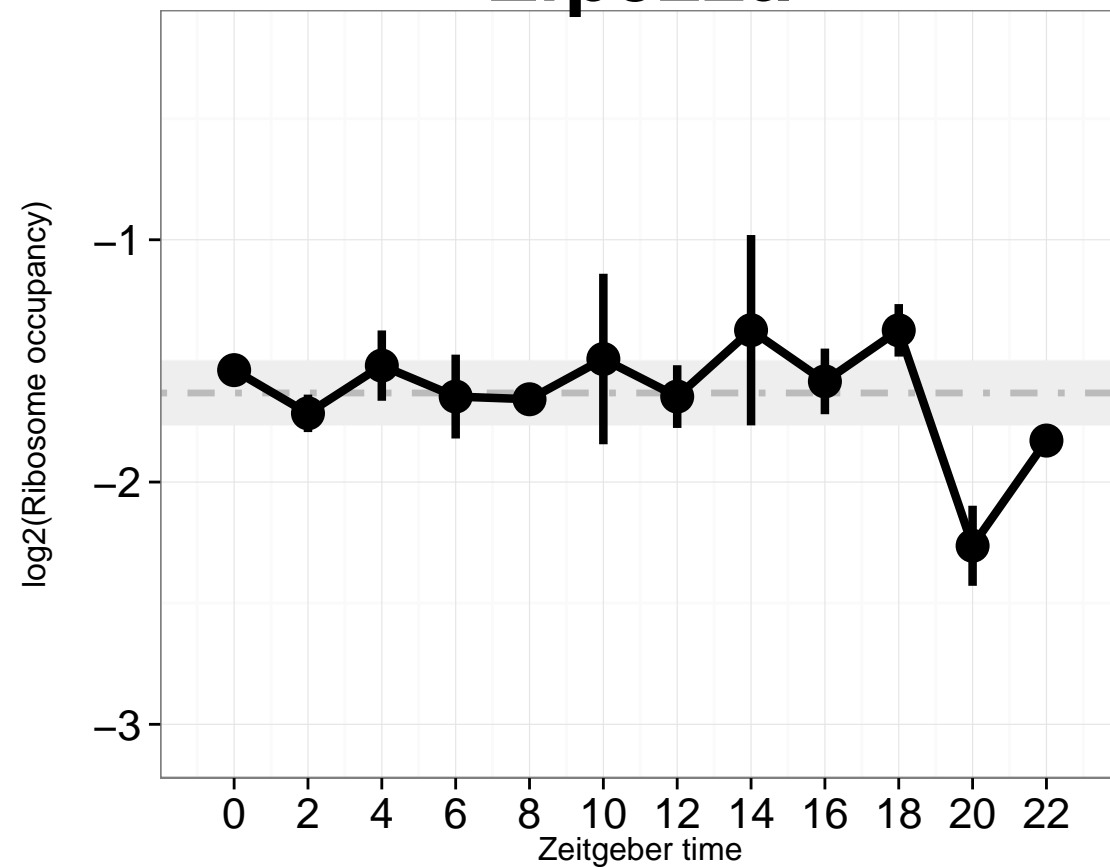

Supplement: Supplementary file 82 [file 1]

## Pyroxd1

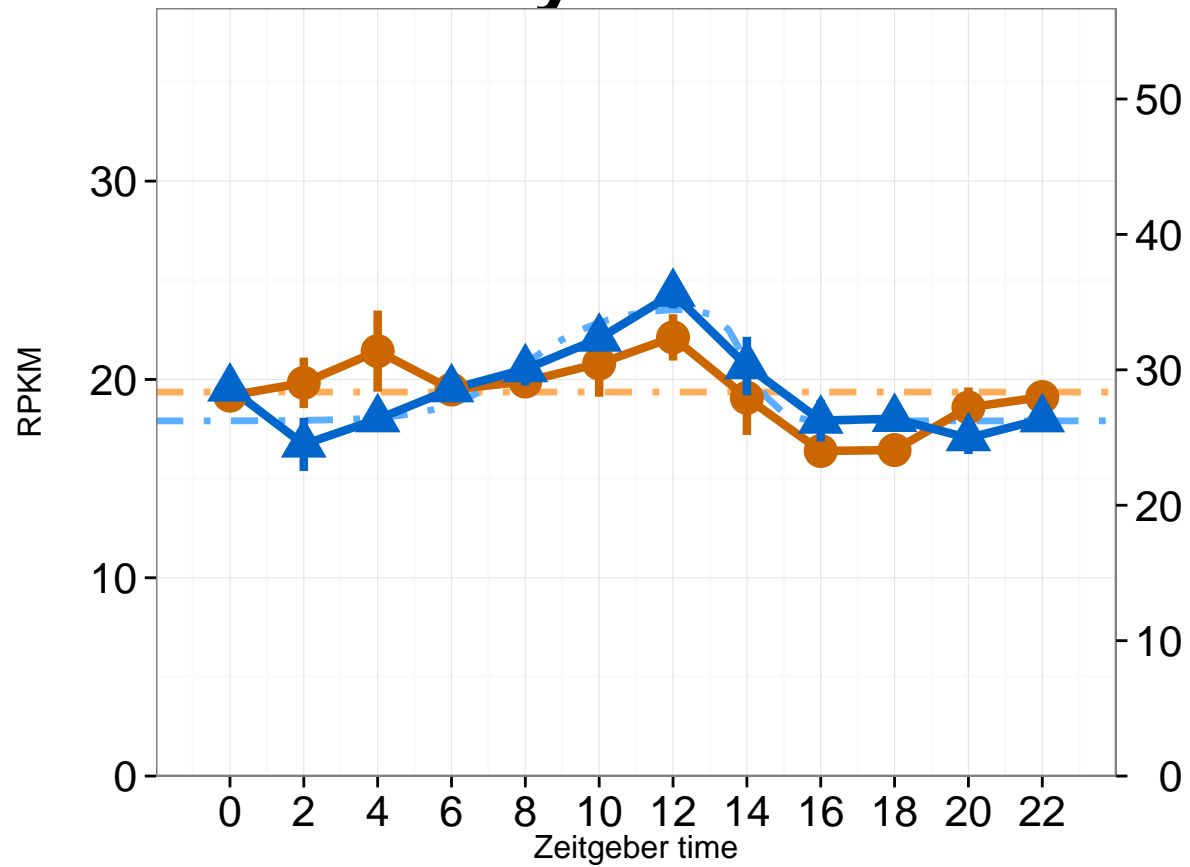

## Pyroxd1

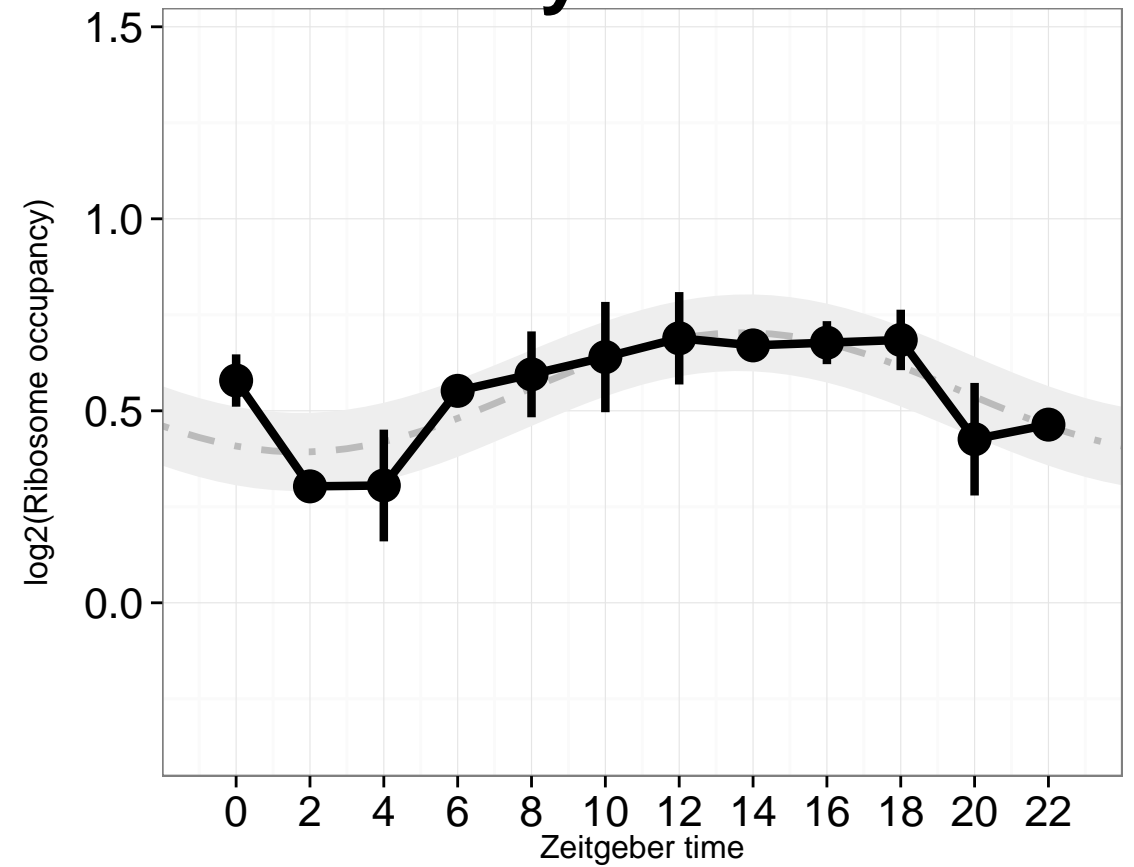

Supplement: Supplementary file 83 [file 1]

## Naca

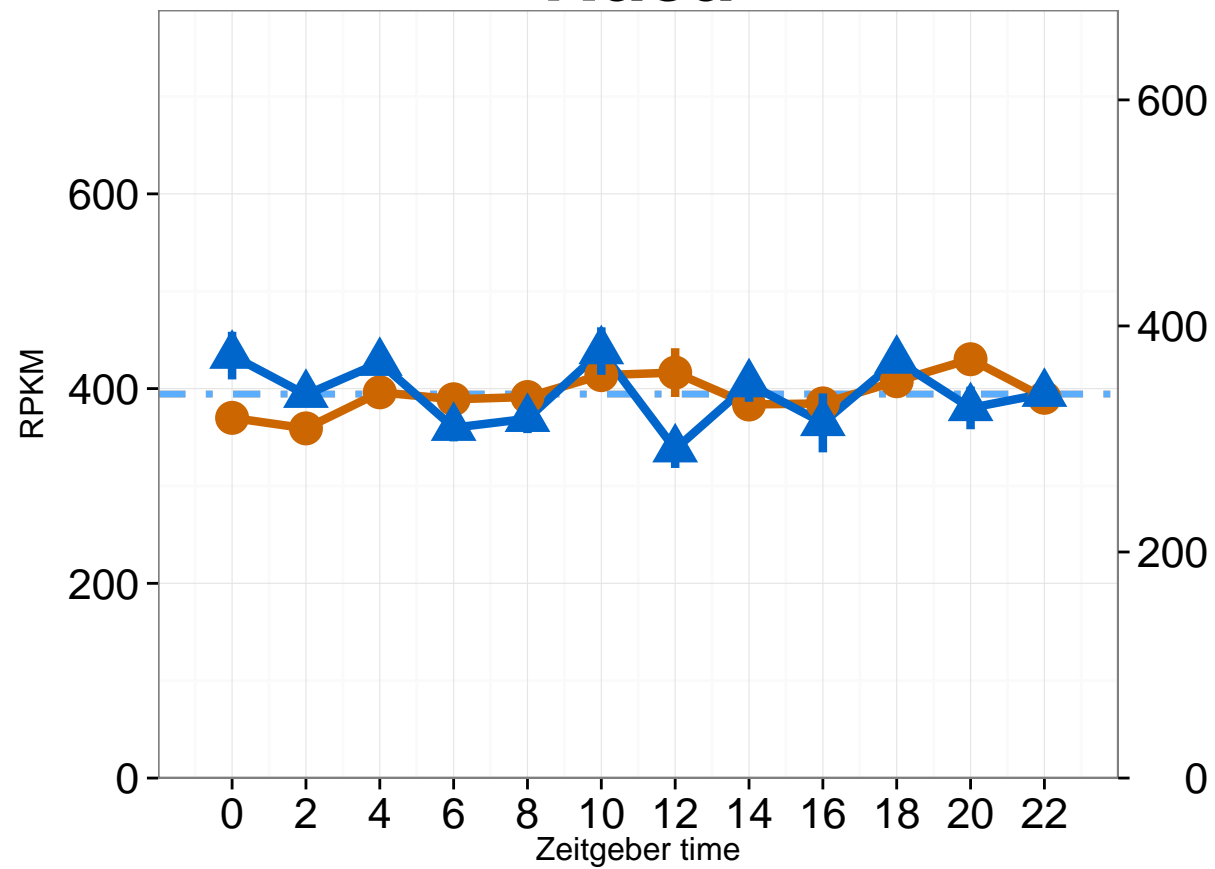

## Naca

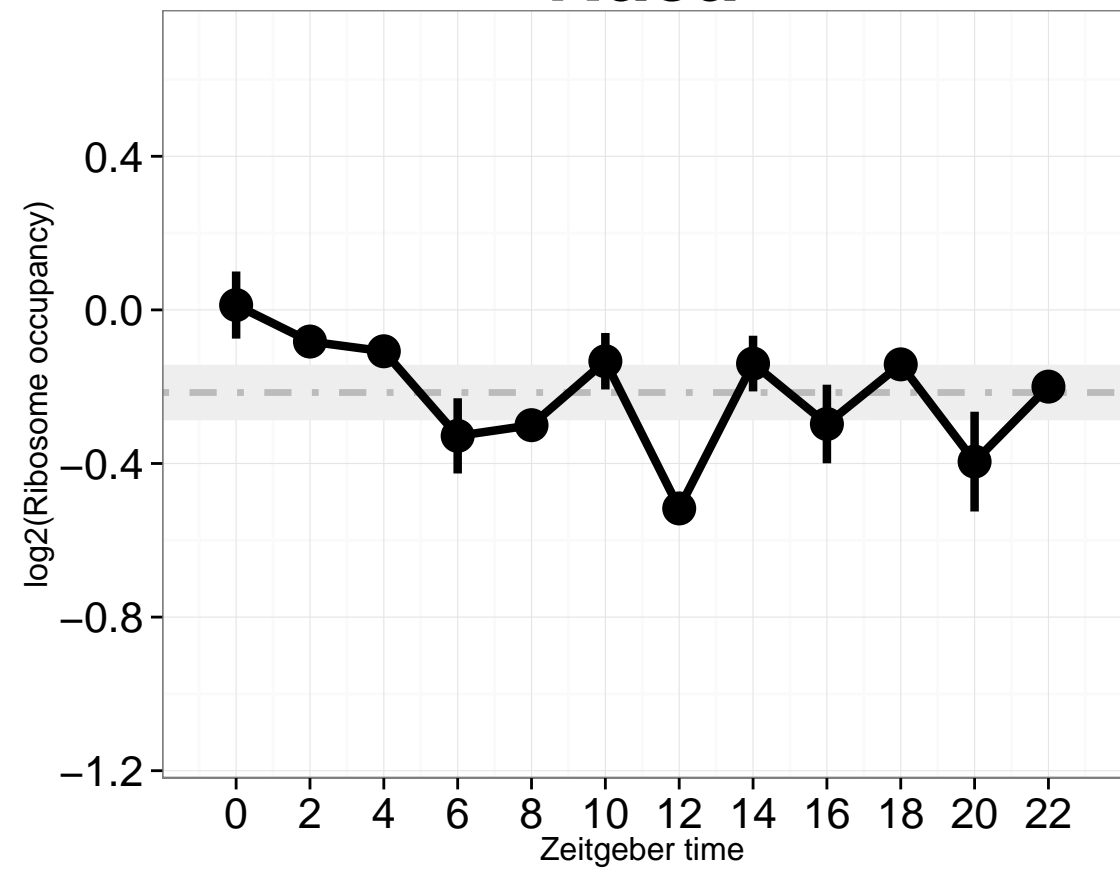

Supplement: Supplementary file 84 [file 1]

# Pabpc1

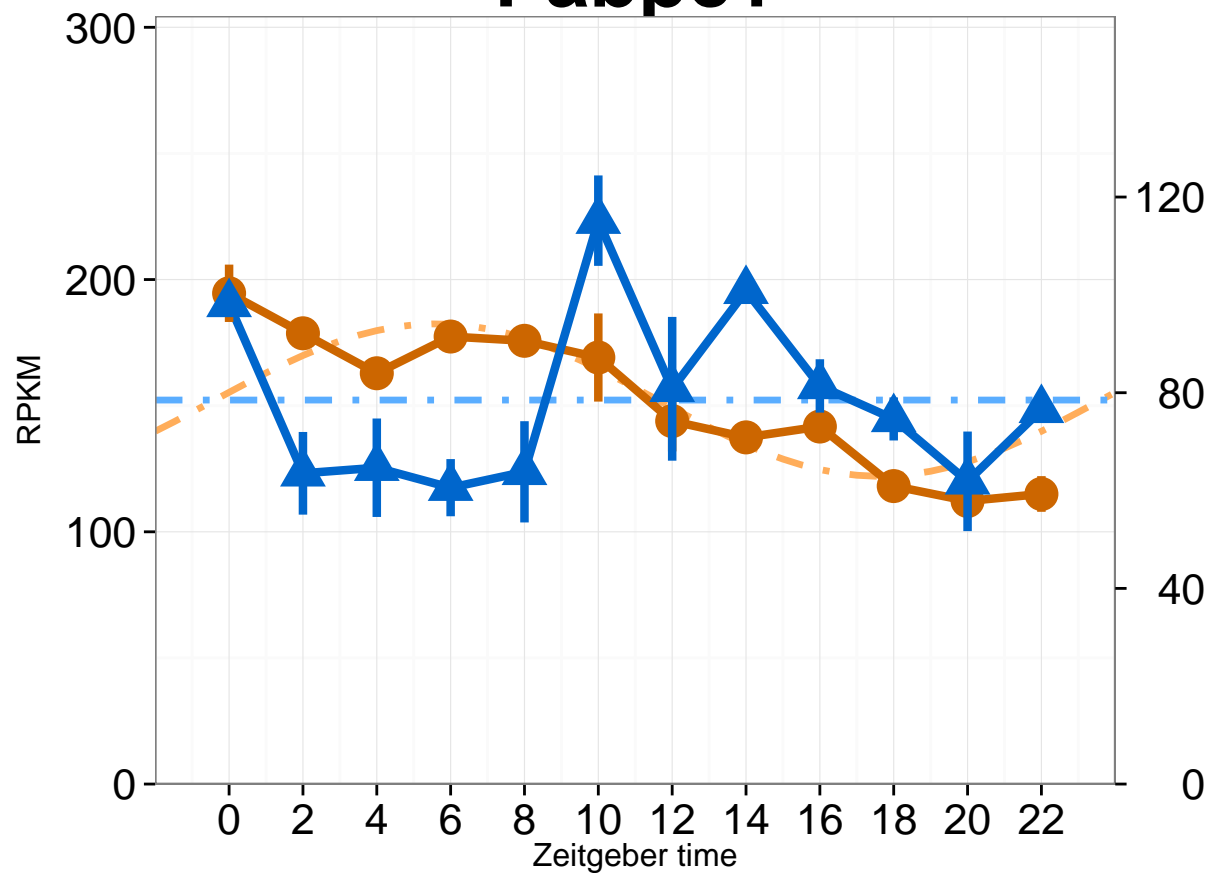

# Pabpc1

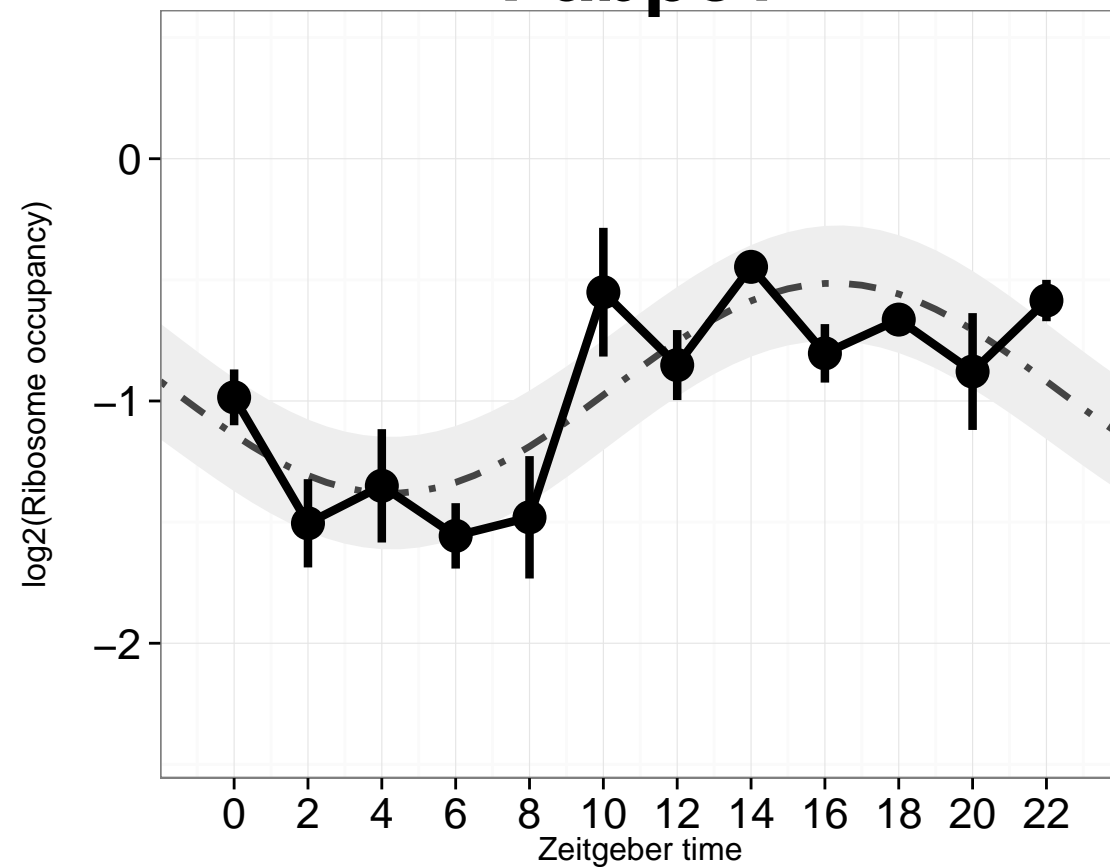

Supplement: Supplementary file 85 [file 1]

# Ccdc151

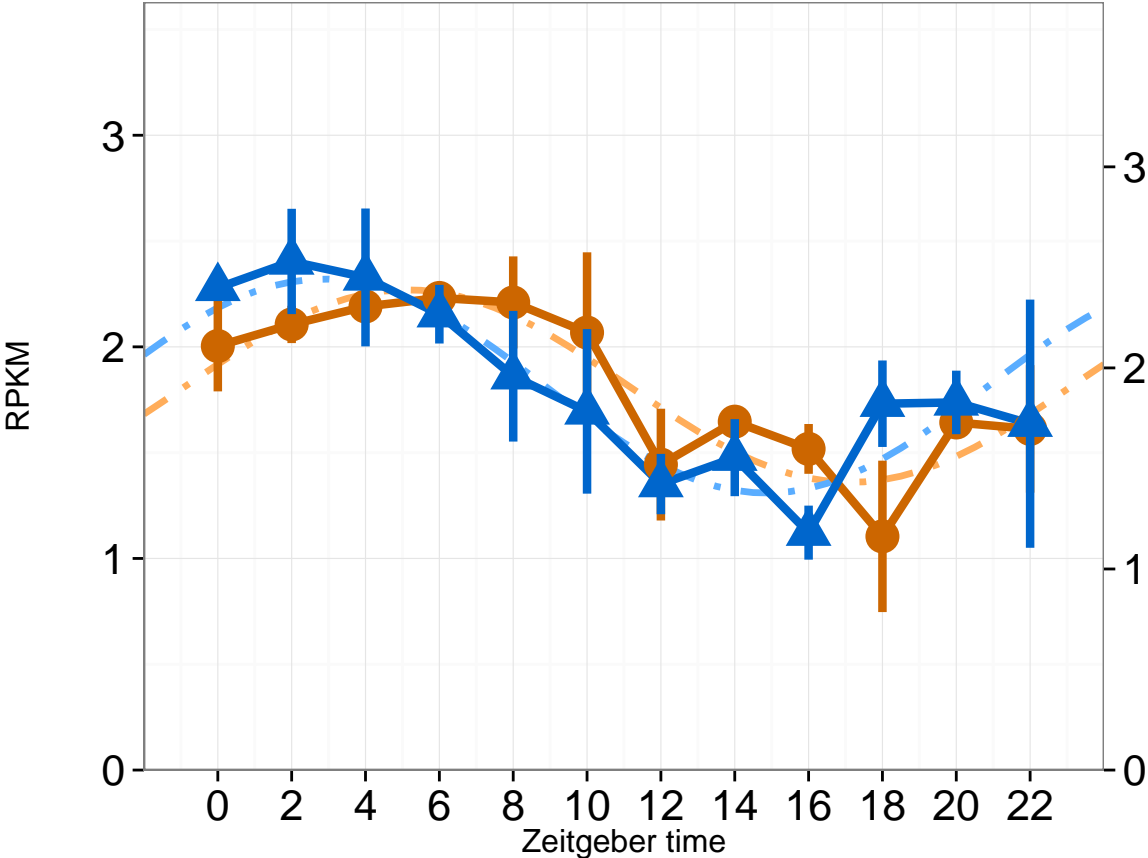

# Ccdc151

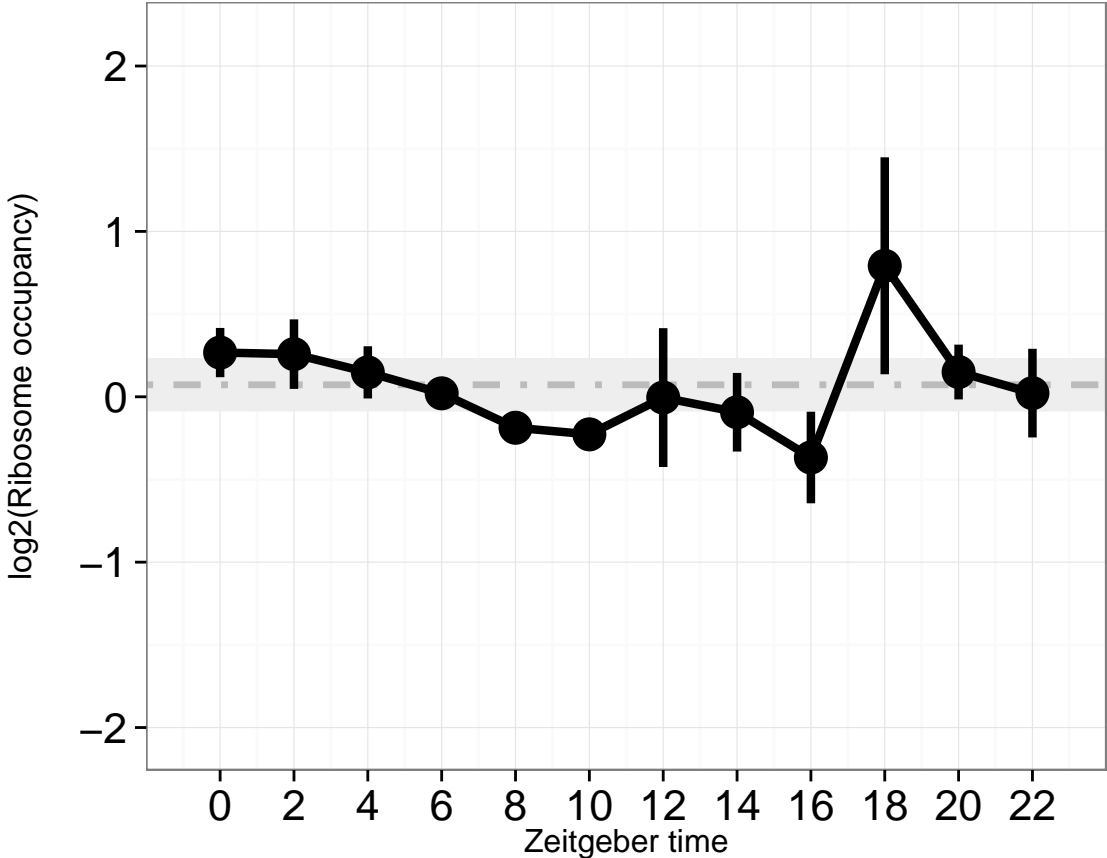

Supplement: Supplementary file 86 [file 1]

## Ago4

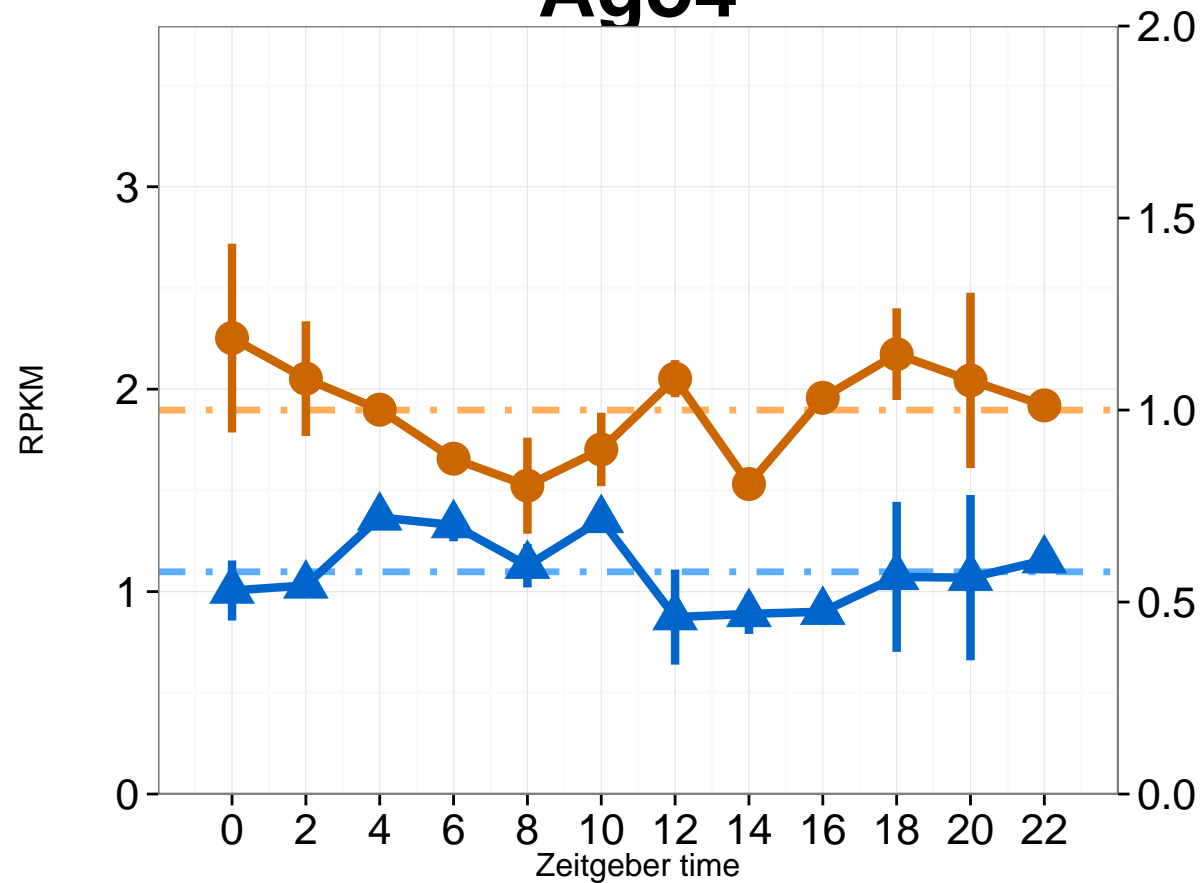

## Ago4

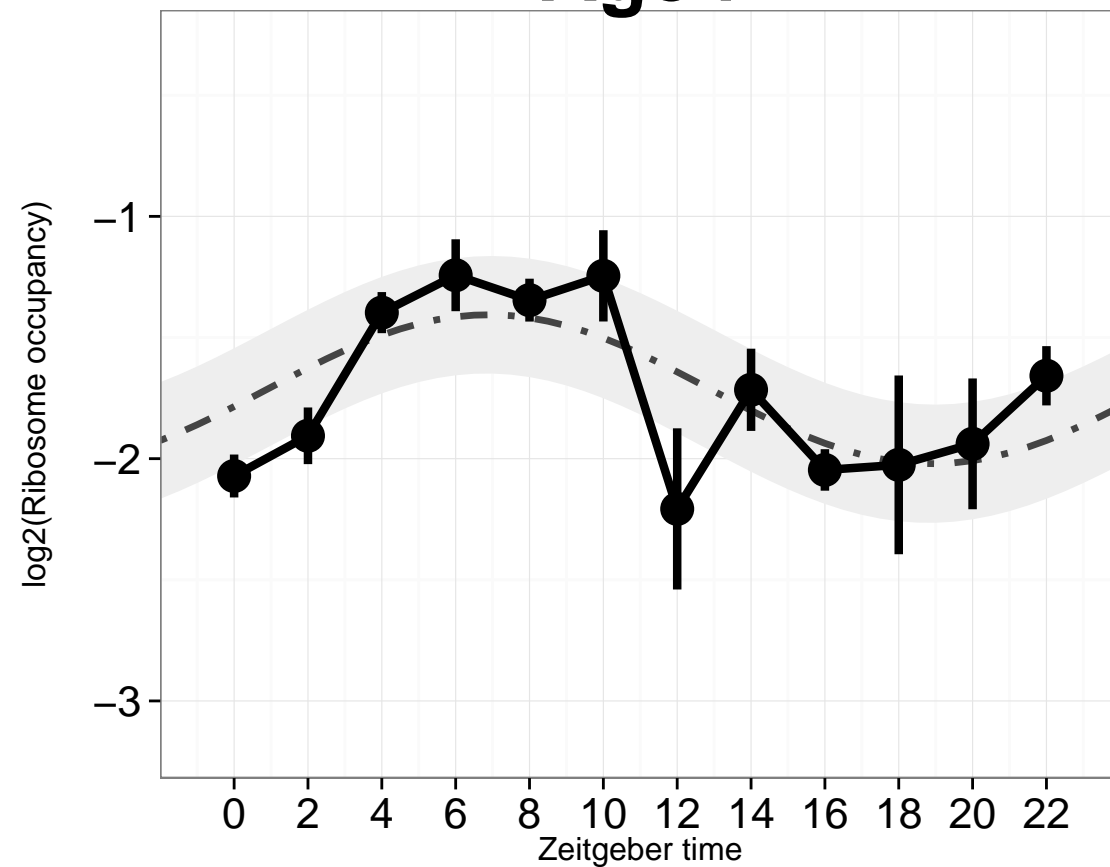

Supplement: Supplementary file 87 [file 1]

# Whsc1

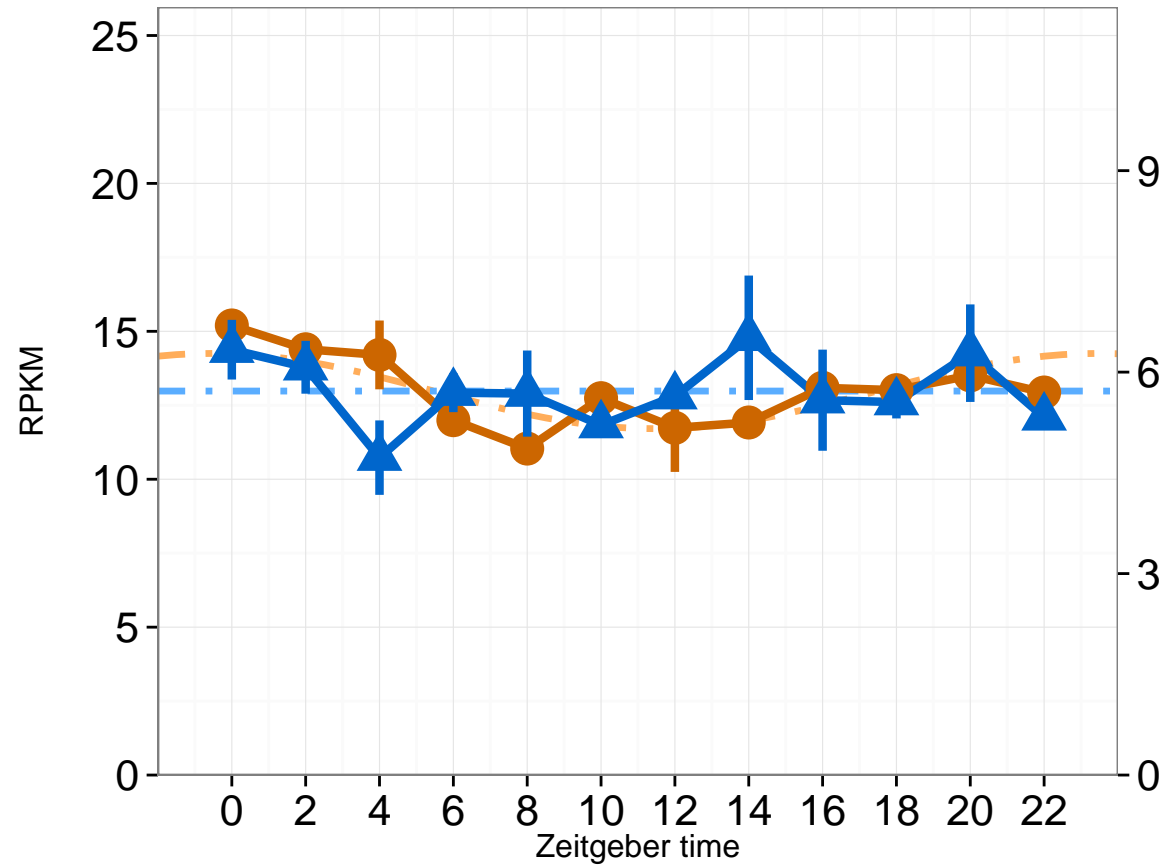

# Whsc1

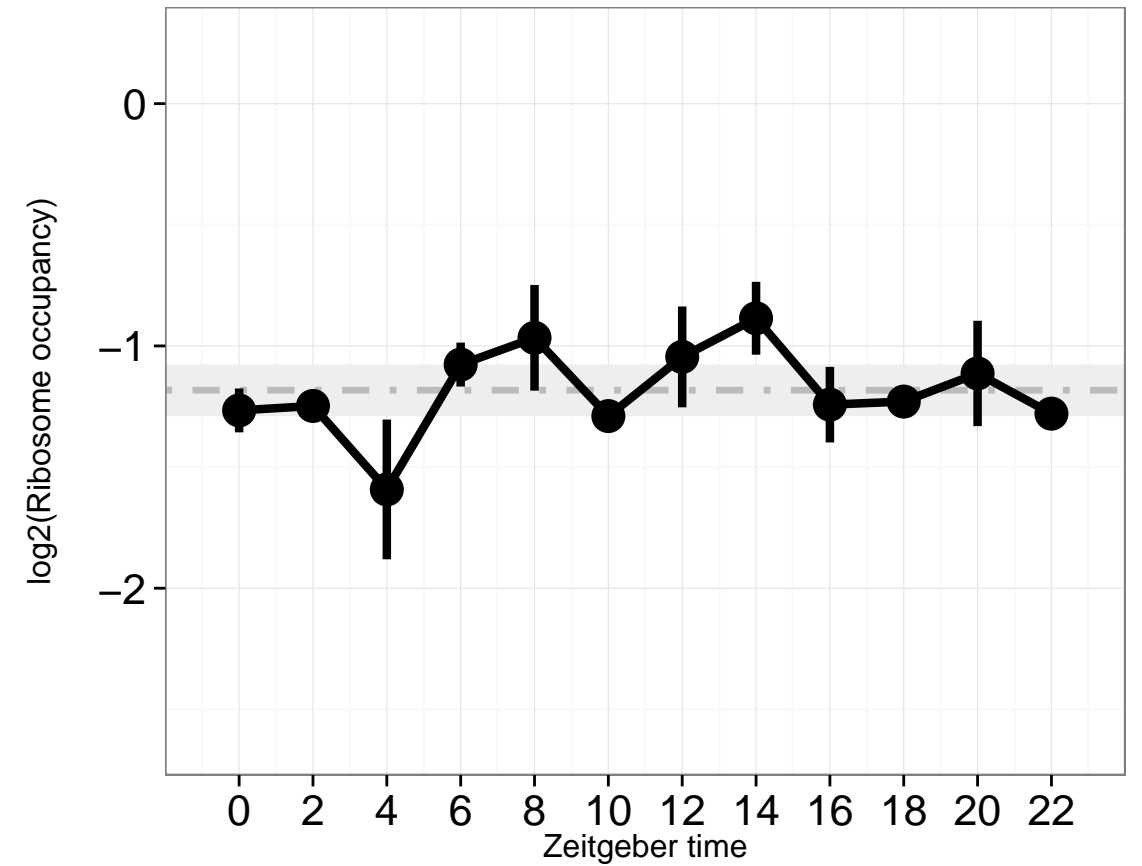

Supplement: Supplementary file 88 [file 1]

**Hoxc11 TR**

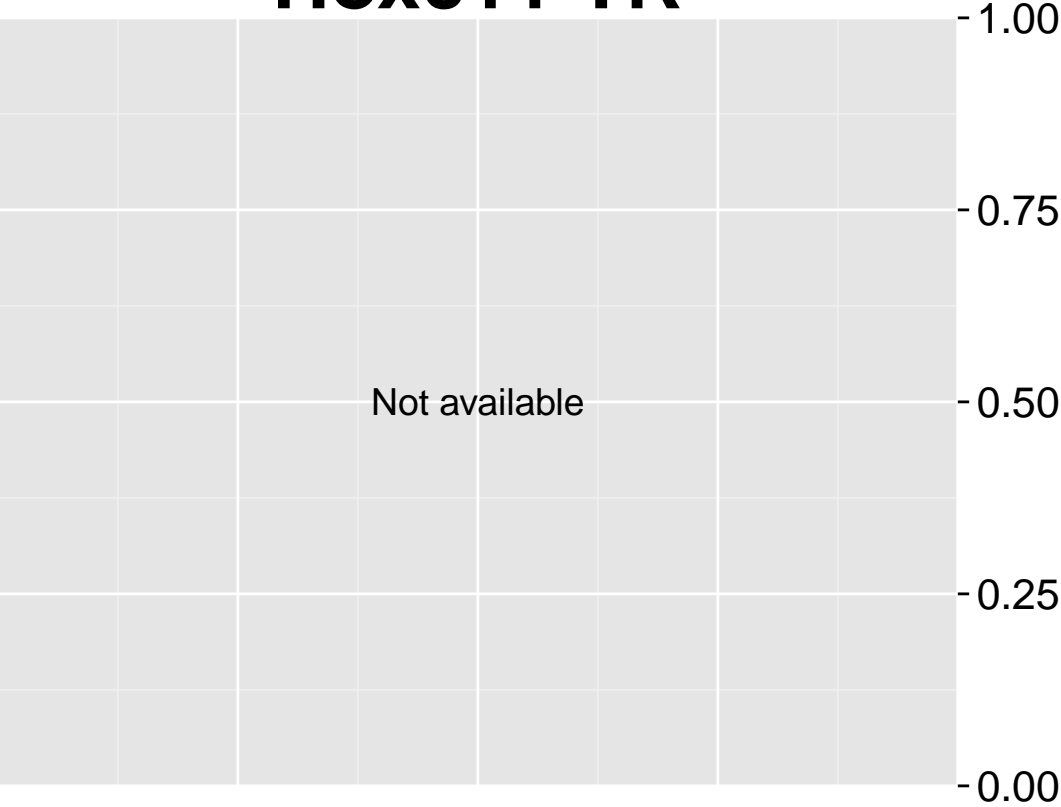

**Hoxc11 log2(Ribosome occupancy**

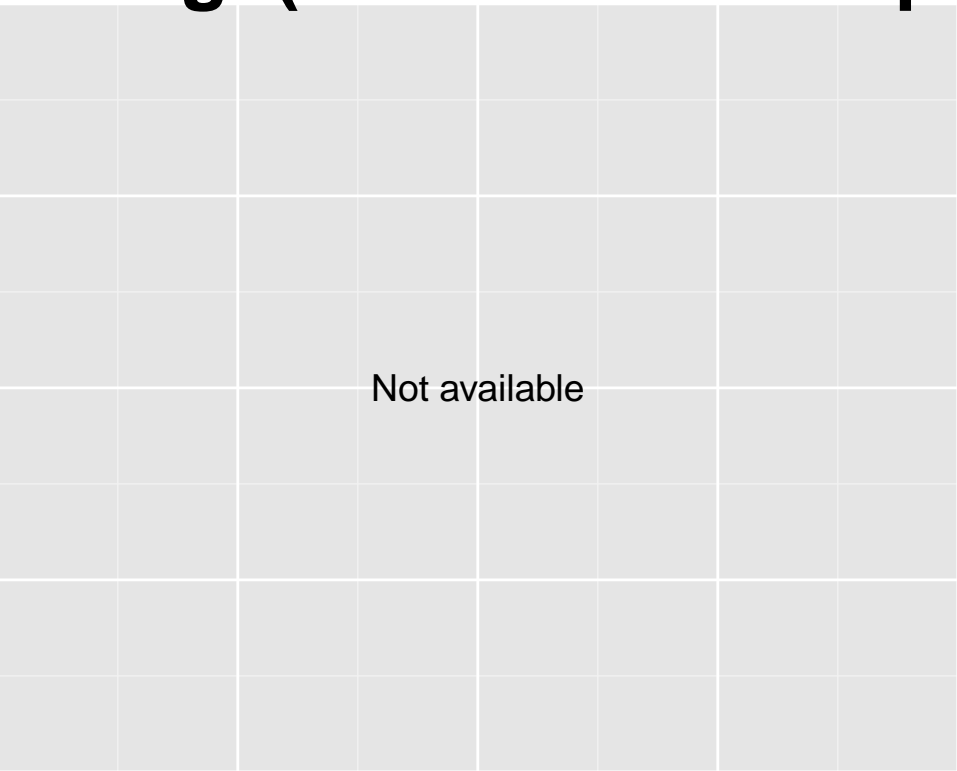

Supplement: Supplementary file 89 [file 1]

# Atad3a

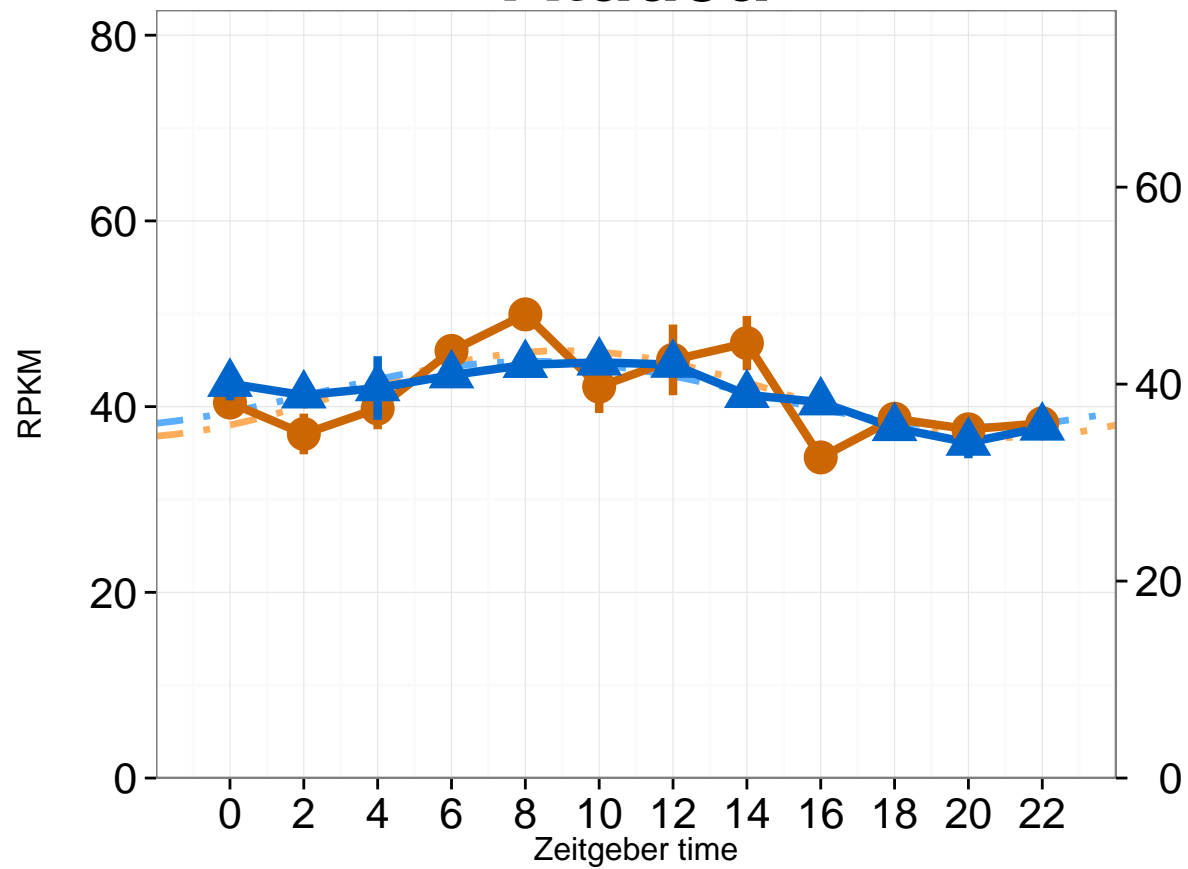

# Atad3a

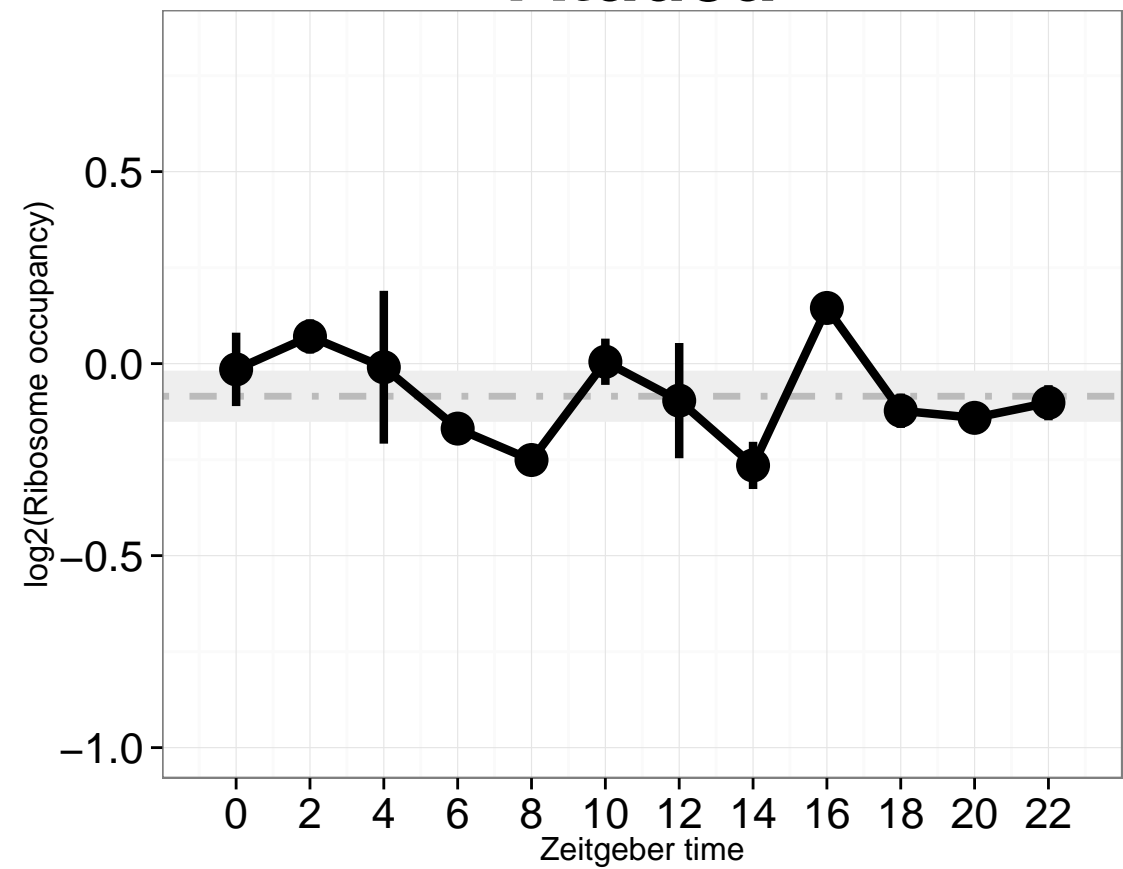

Supplement: Supplementary file 90 [file 1]

## Syng1

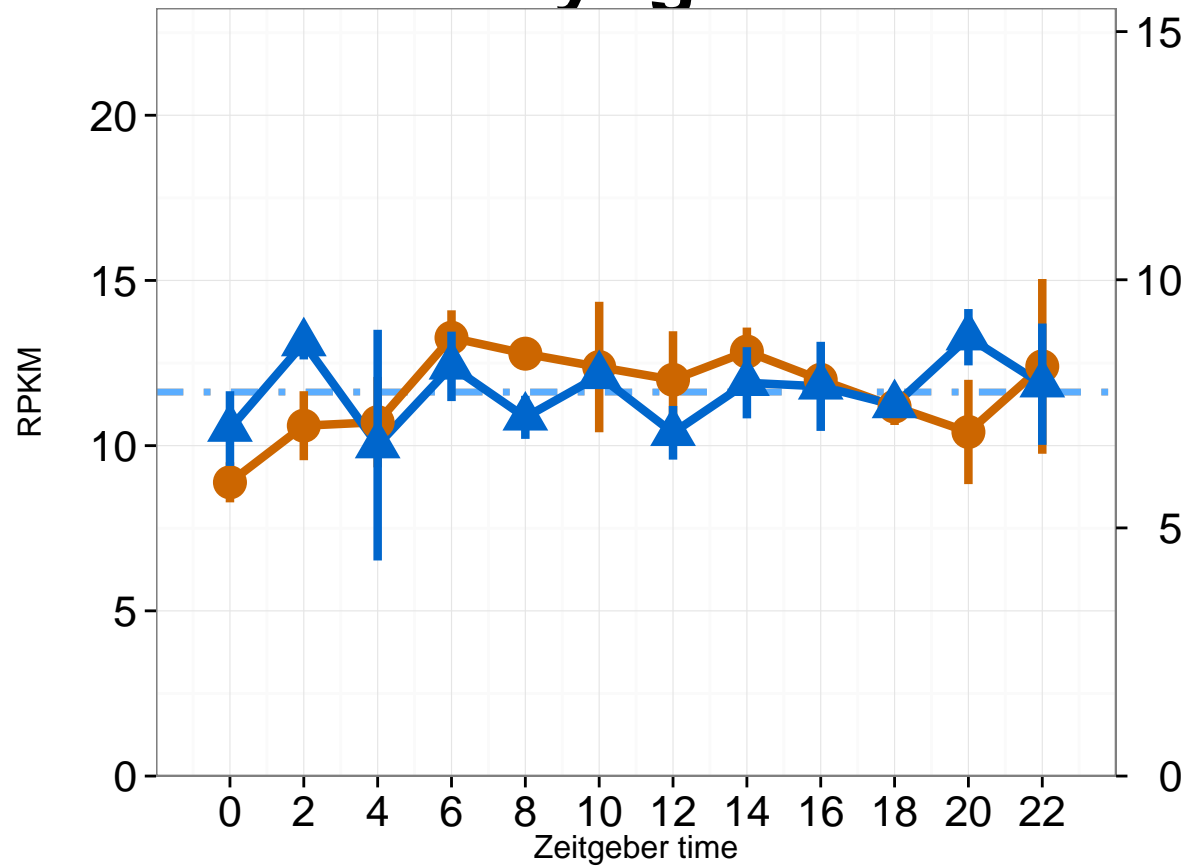

## Syng1

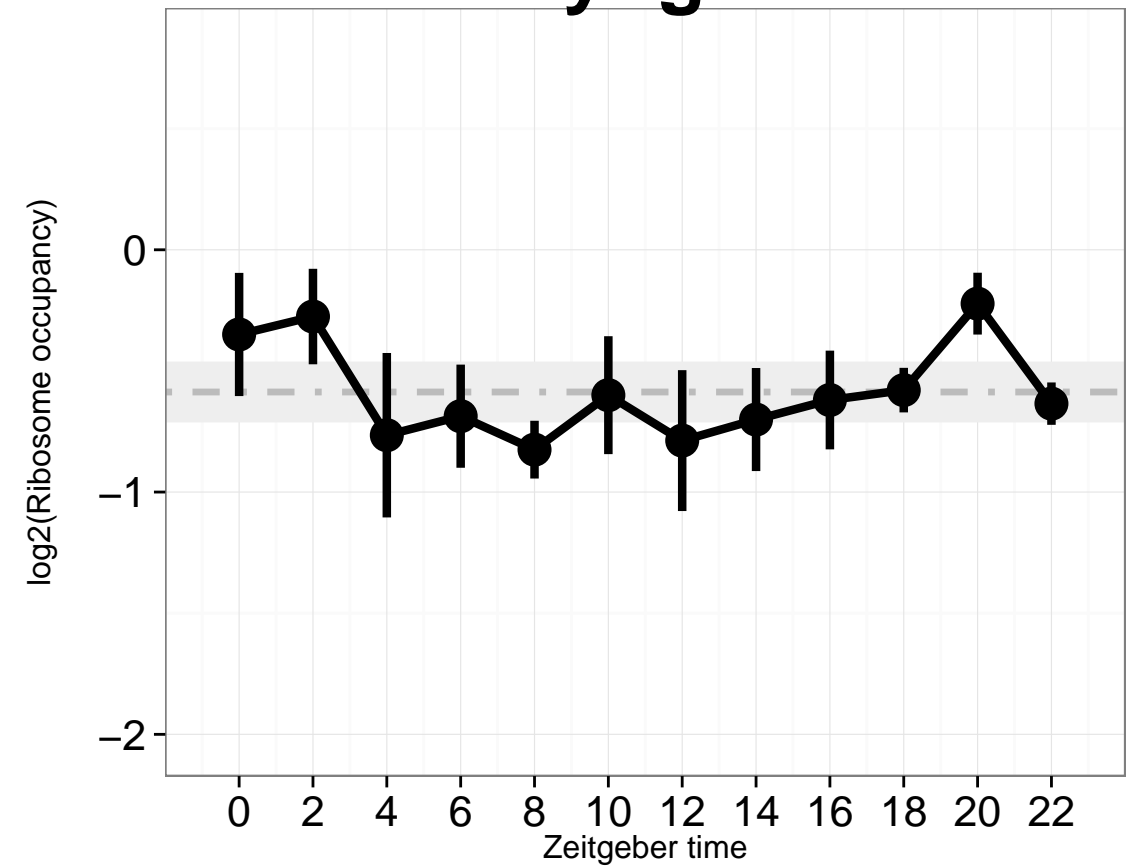

Supplement: Supplementary file 91 [file 1]

# Atp5e

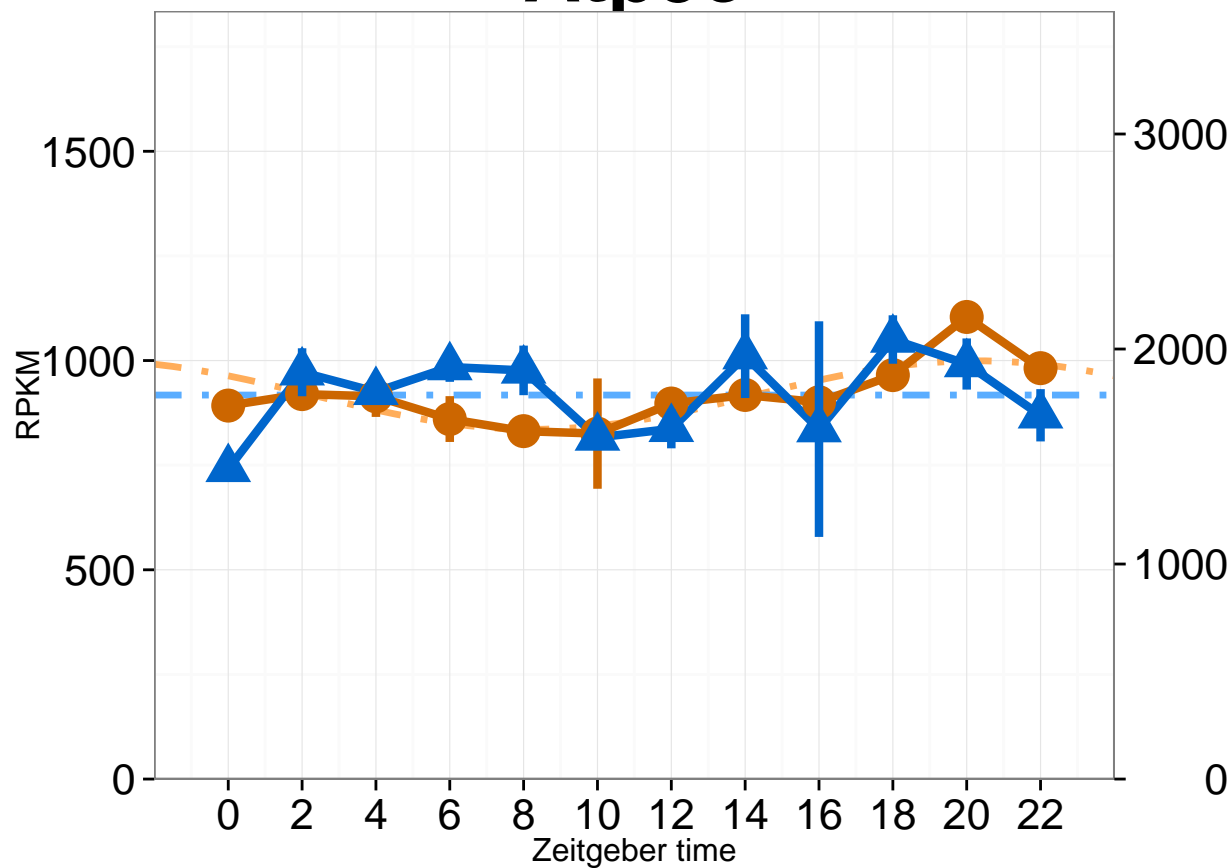

# Atp5e

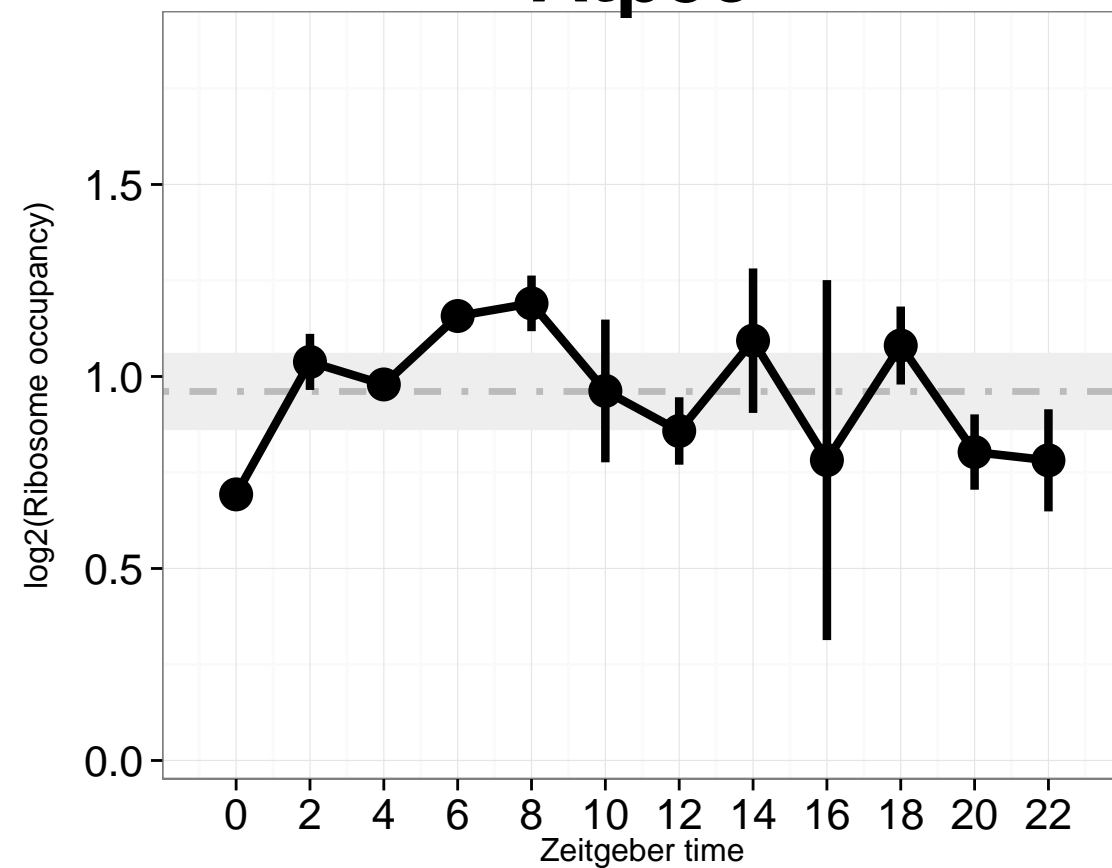

Supplement: Supplementary file 92 [file 1]

## Cbfb

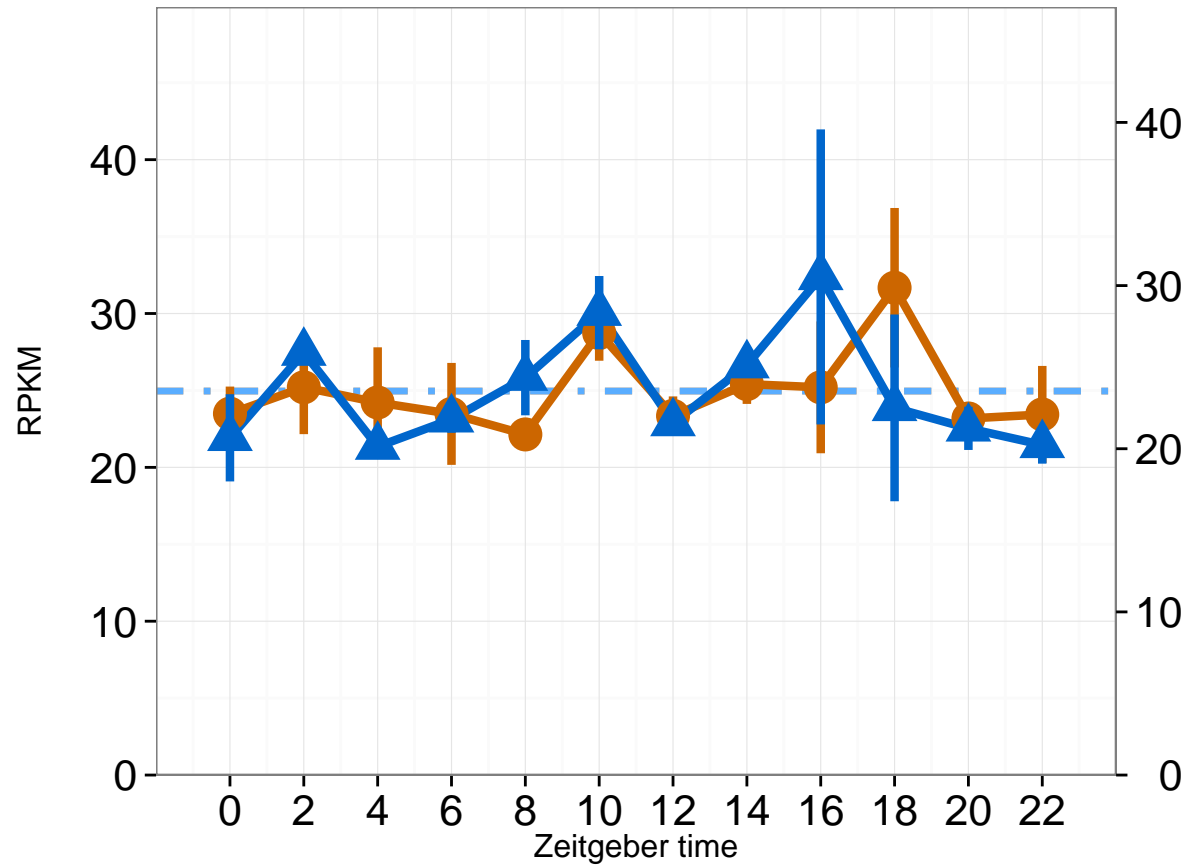

## Cbfb

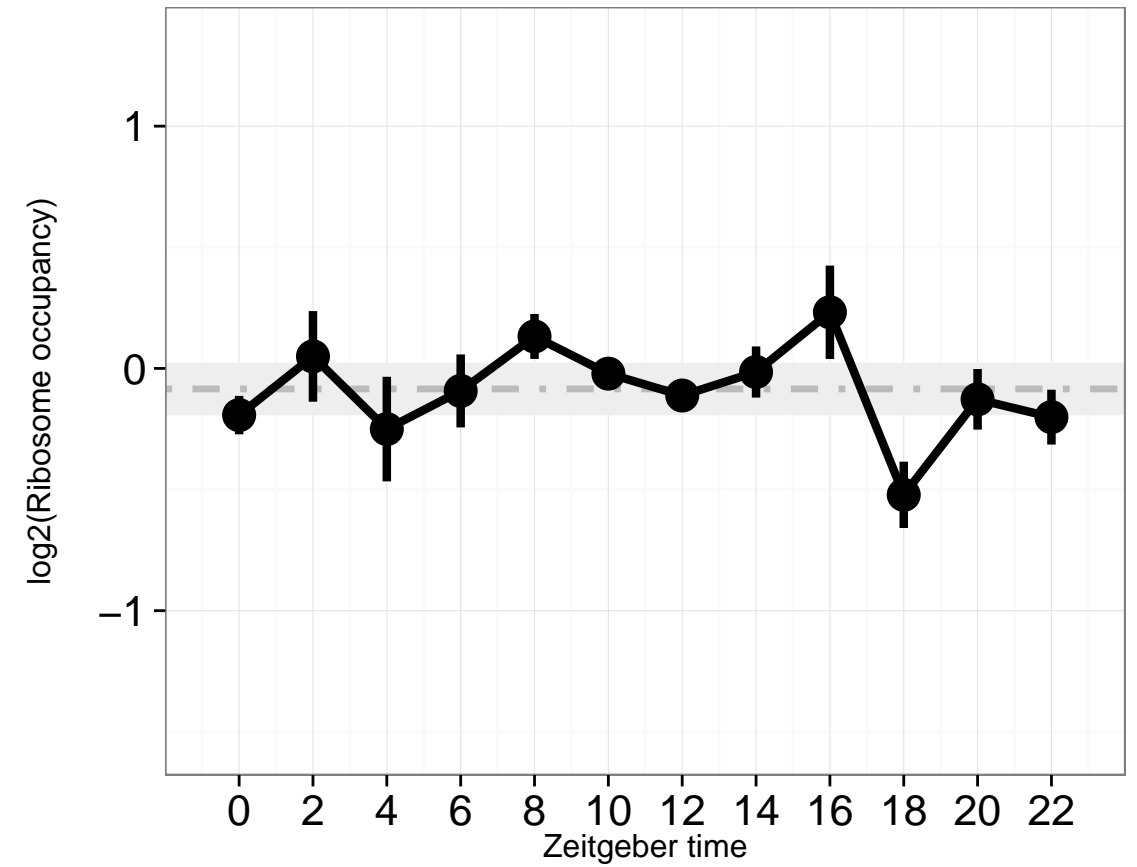

Supplement: Supplementary file 93 [file 1]

## Hnrnph2

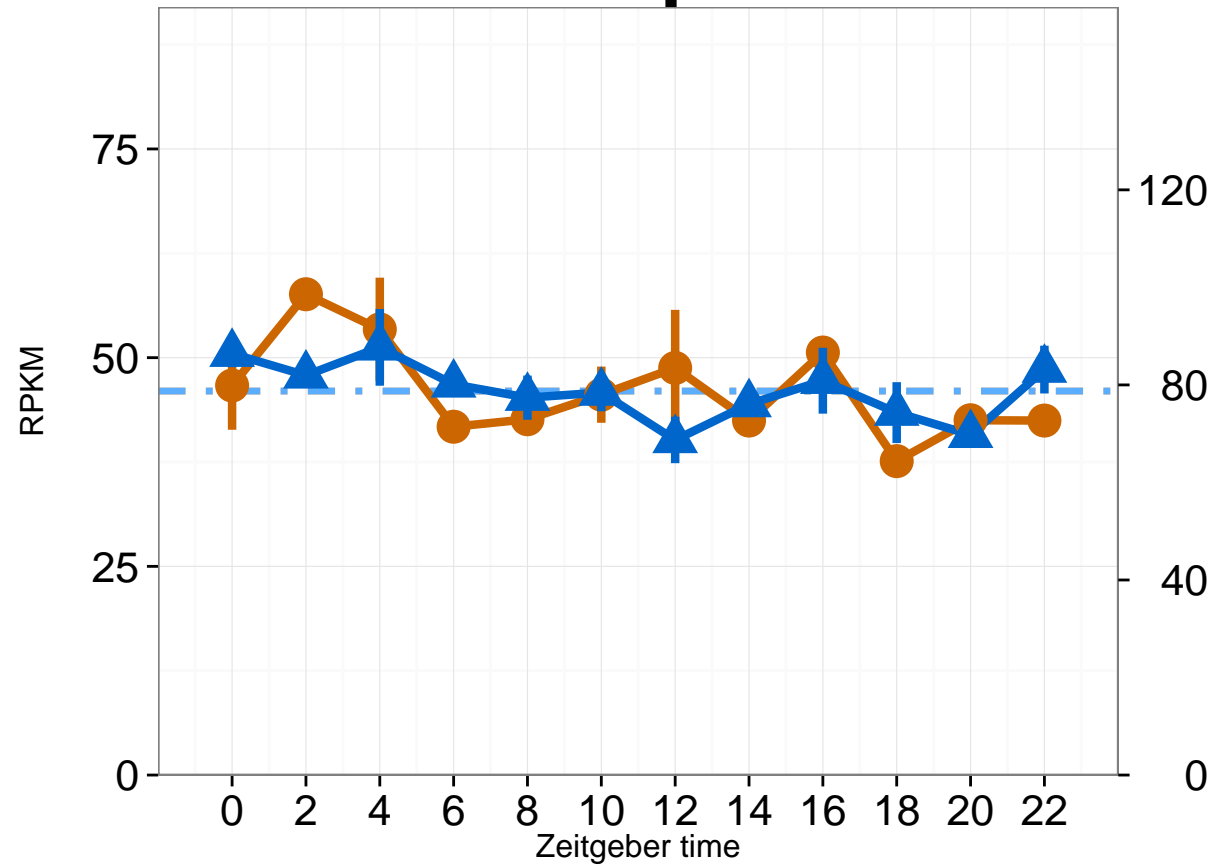

## Hnrnph2

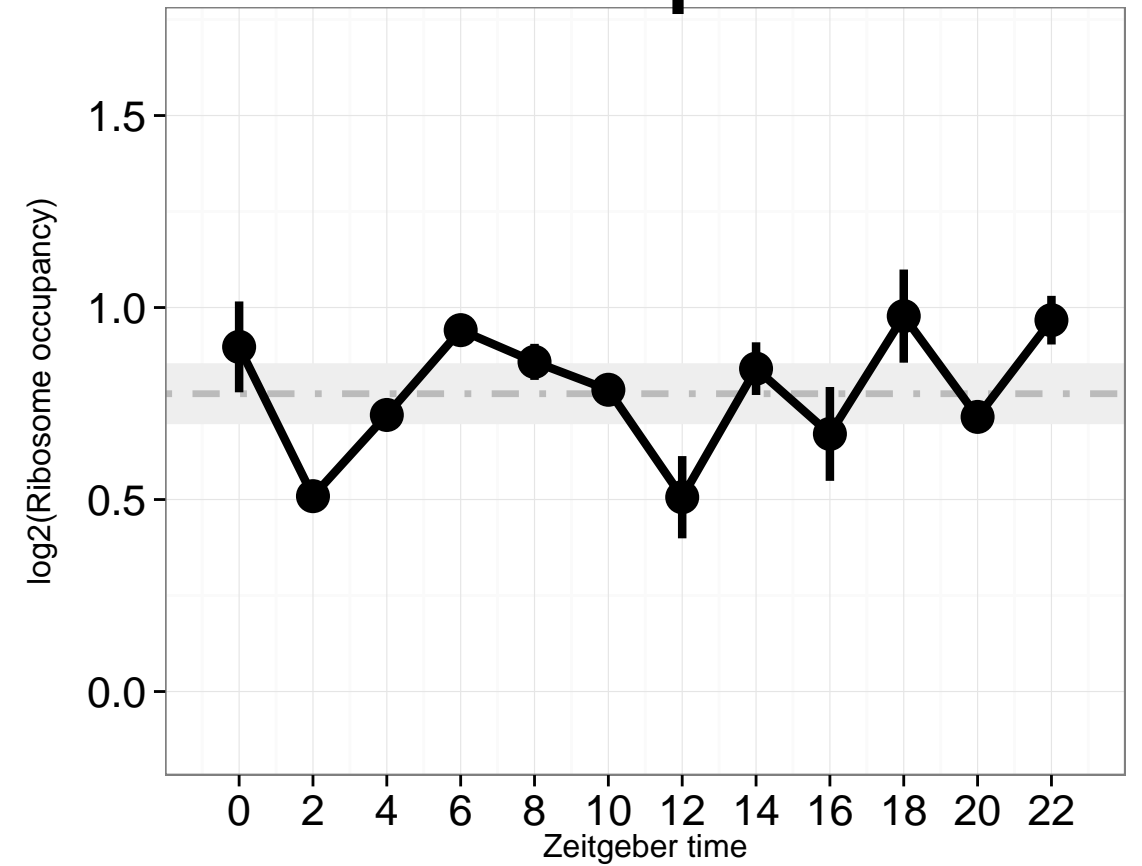

Supplement: Supplementary file 94 [file 1]

# Dctn2

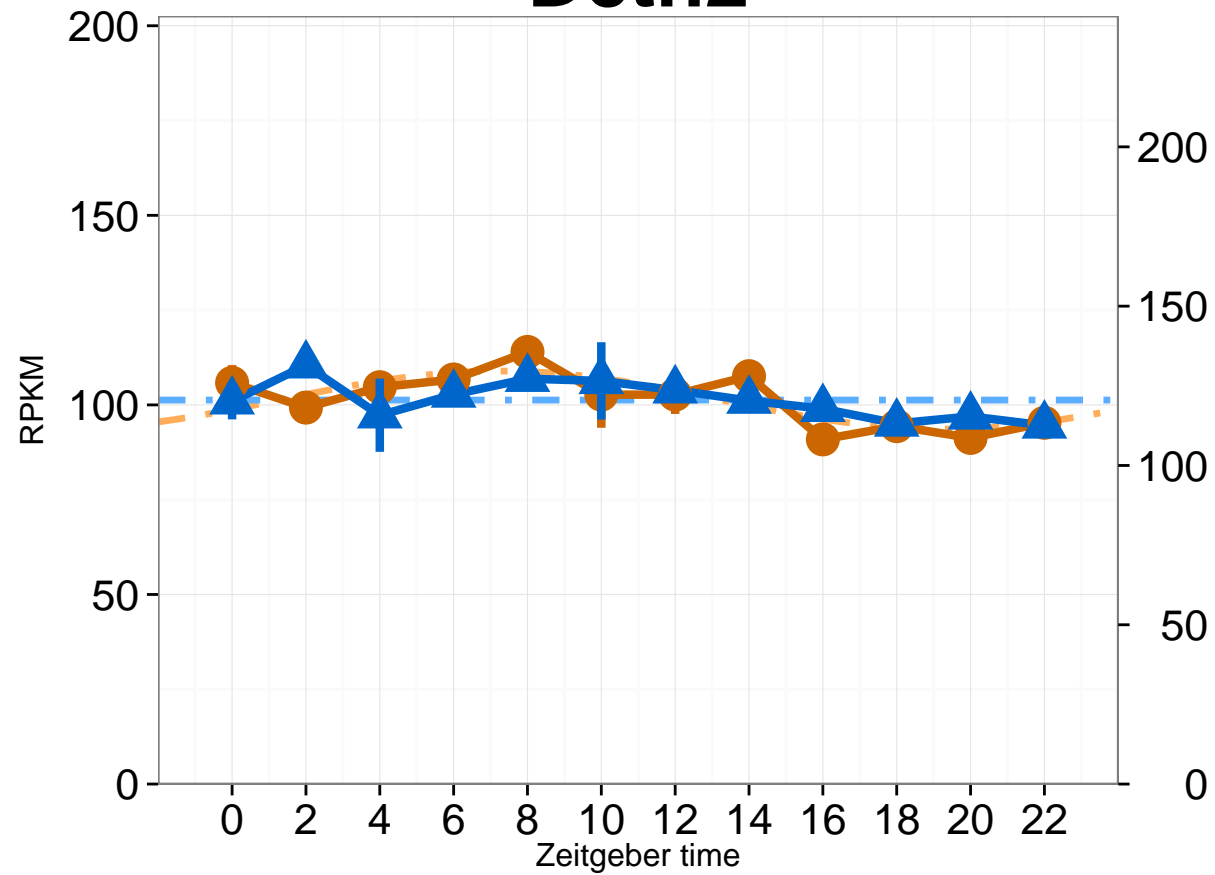

# Dctn2

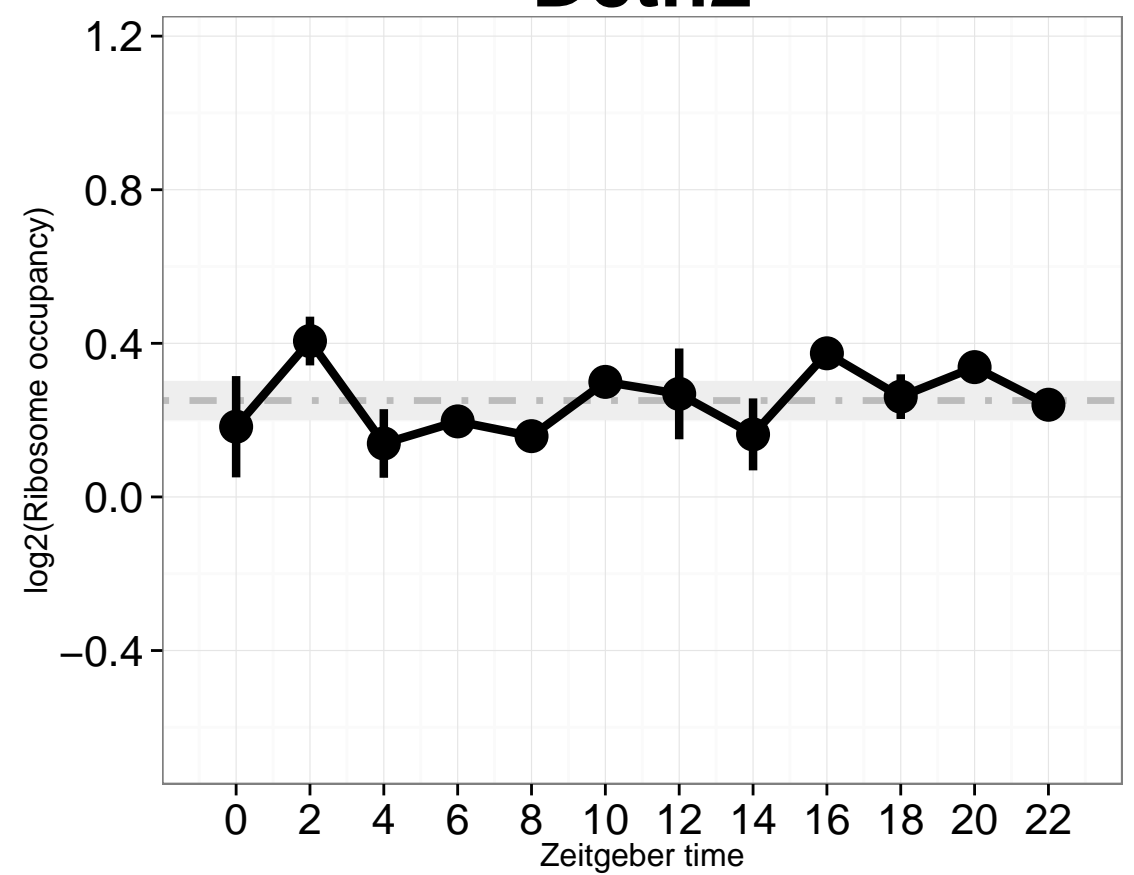

Supplement: Supplementary file 95 [file 1]

# Fgfr1op2

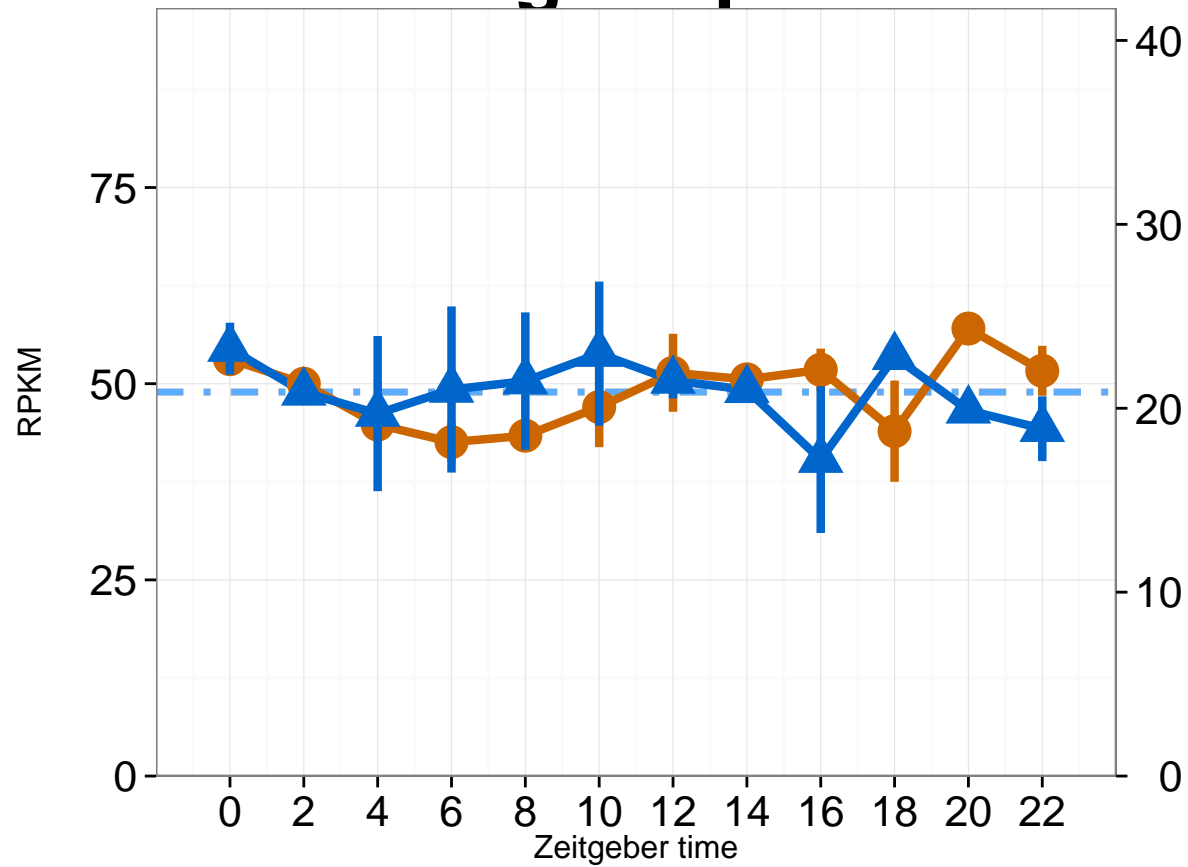

# Fgfr1op2

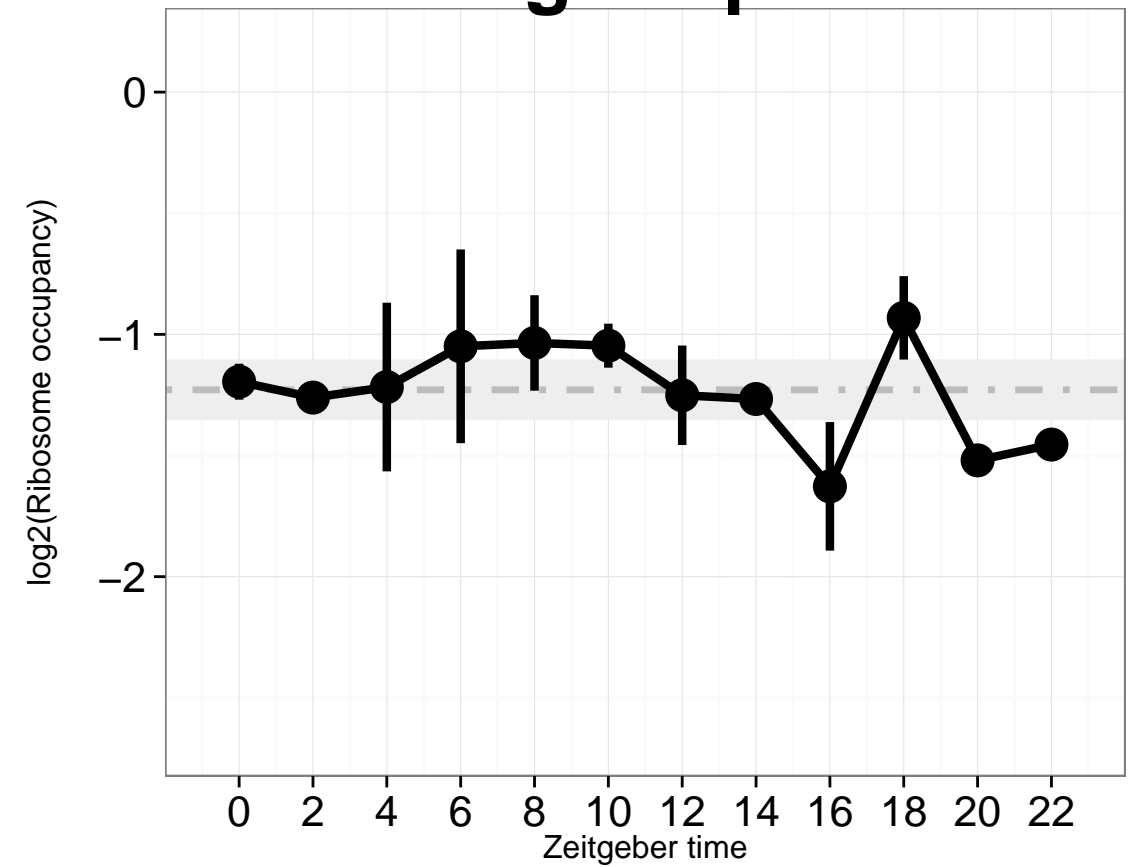

Supplement: Supplementary file 96 [file 1]

## Plscr3

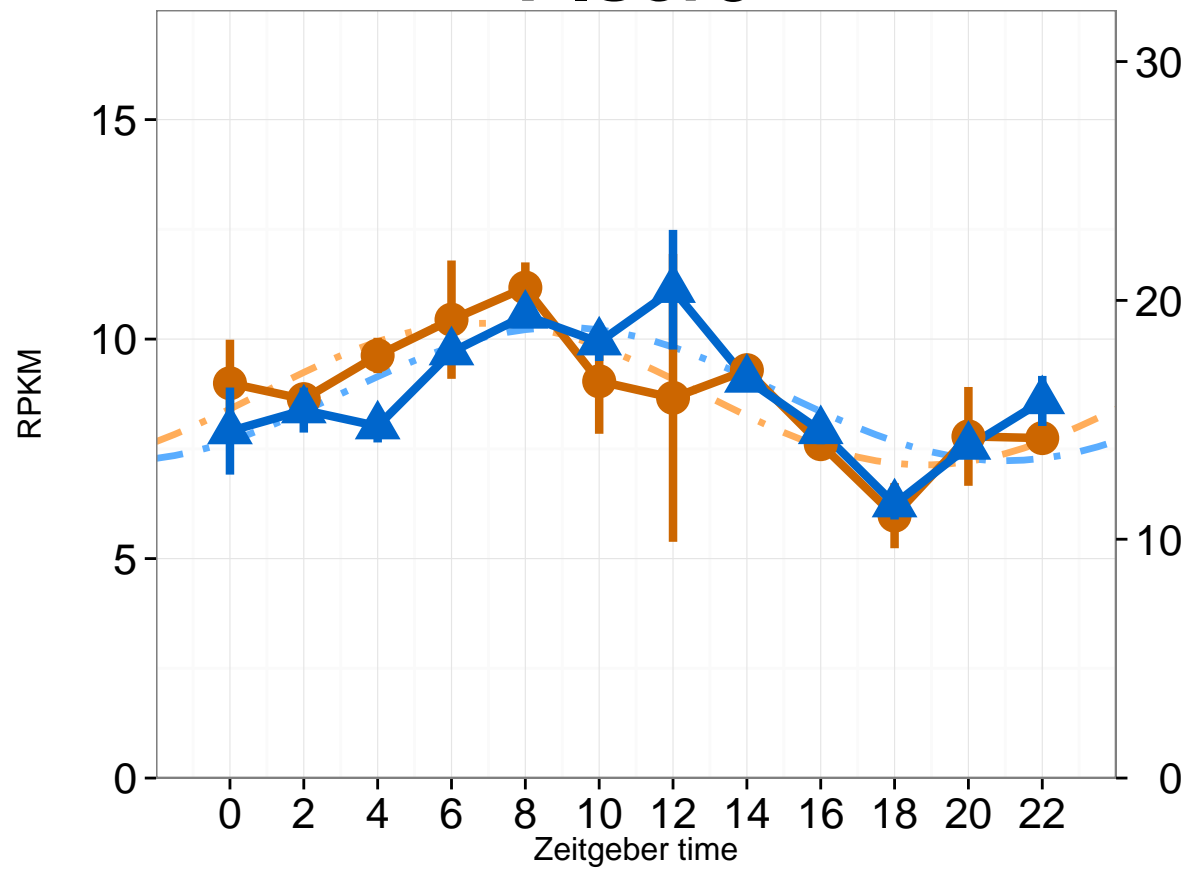

## Plscr3

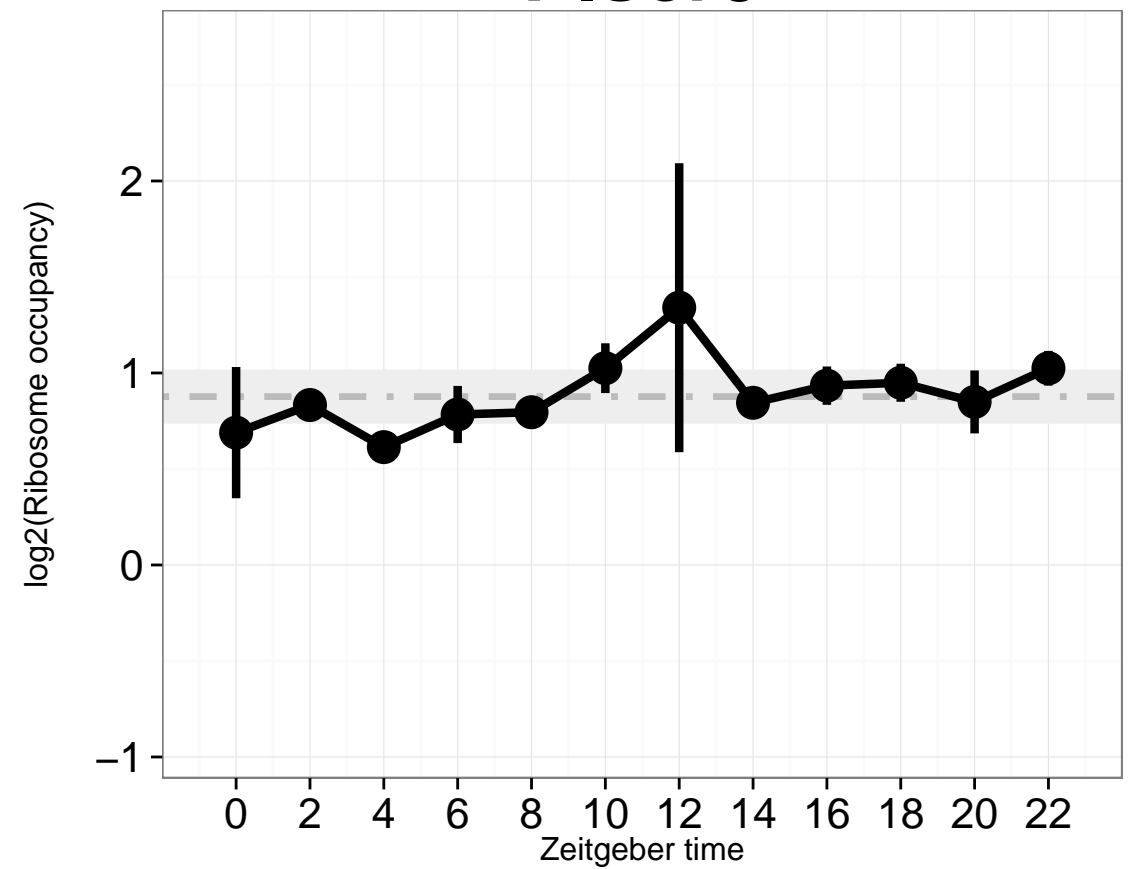

Supplement: Supplementary file 97 [file 1]

## Opa3

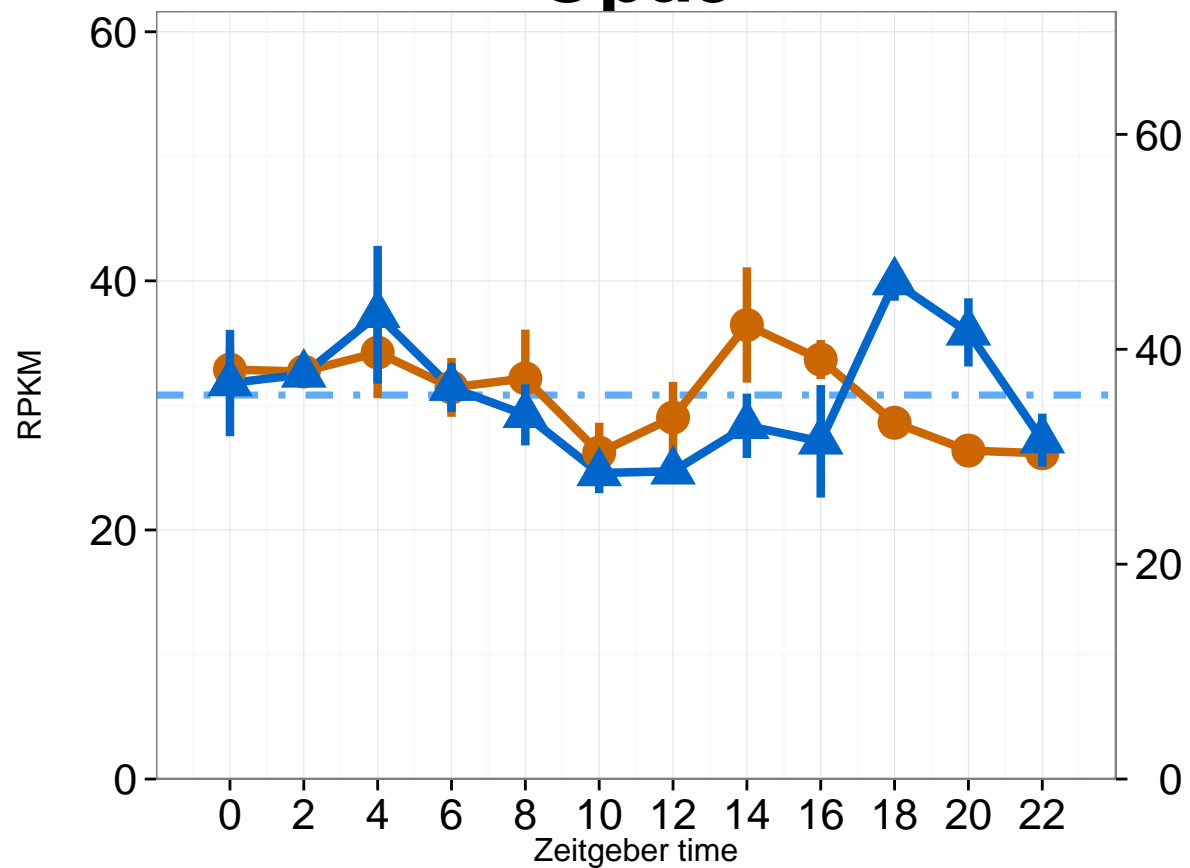

## Opa3

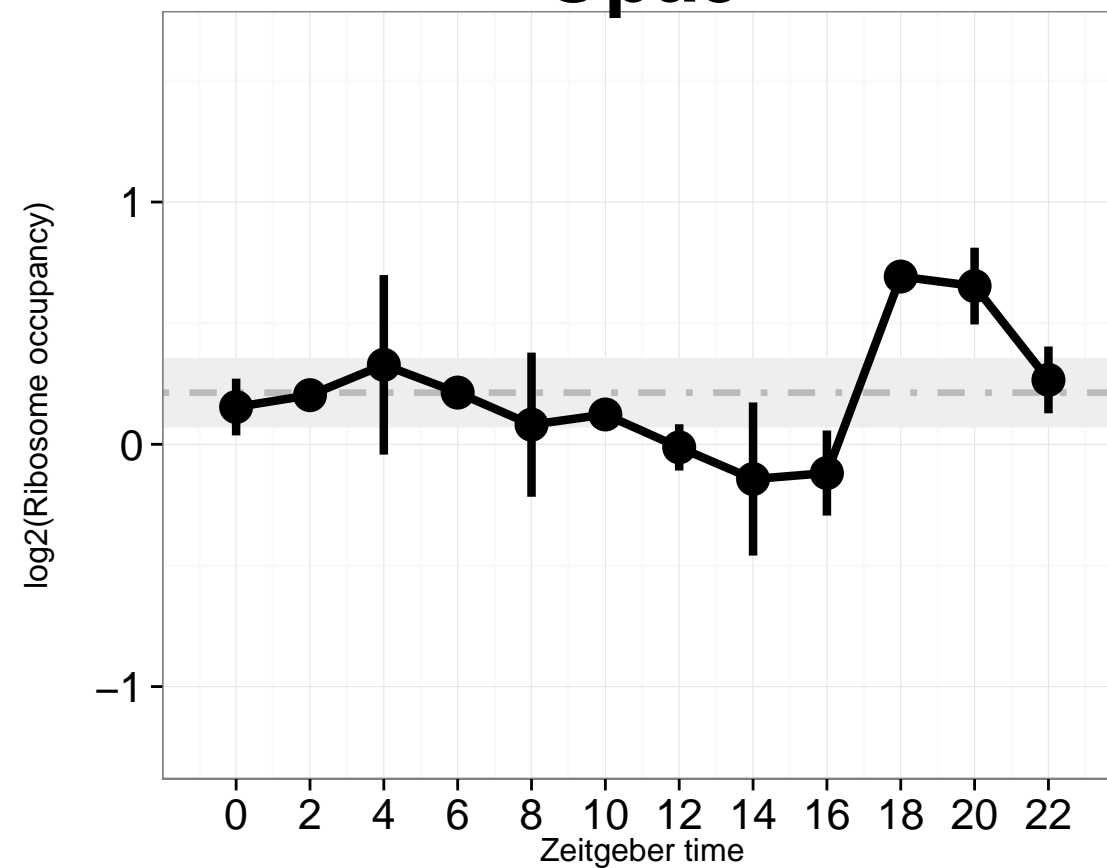

Supplement: Supplementary file 98 [file 1]

# Map3k10

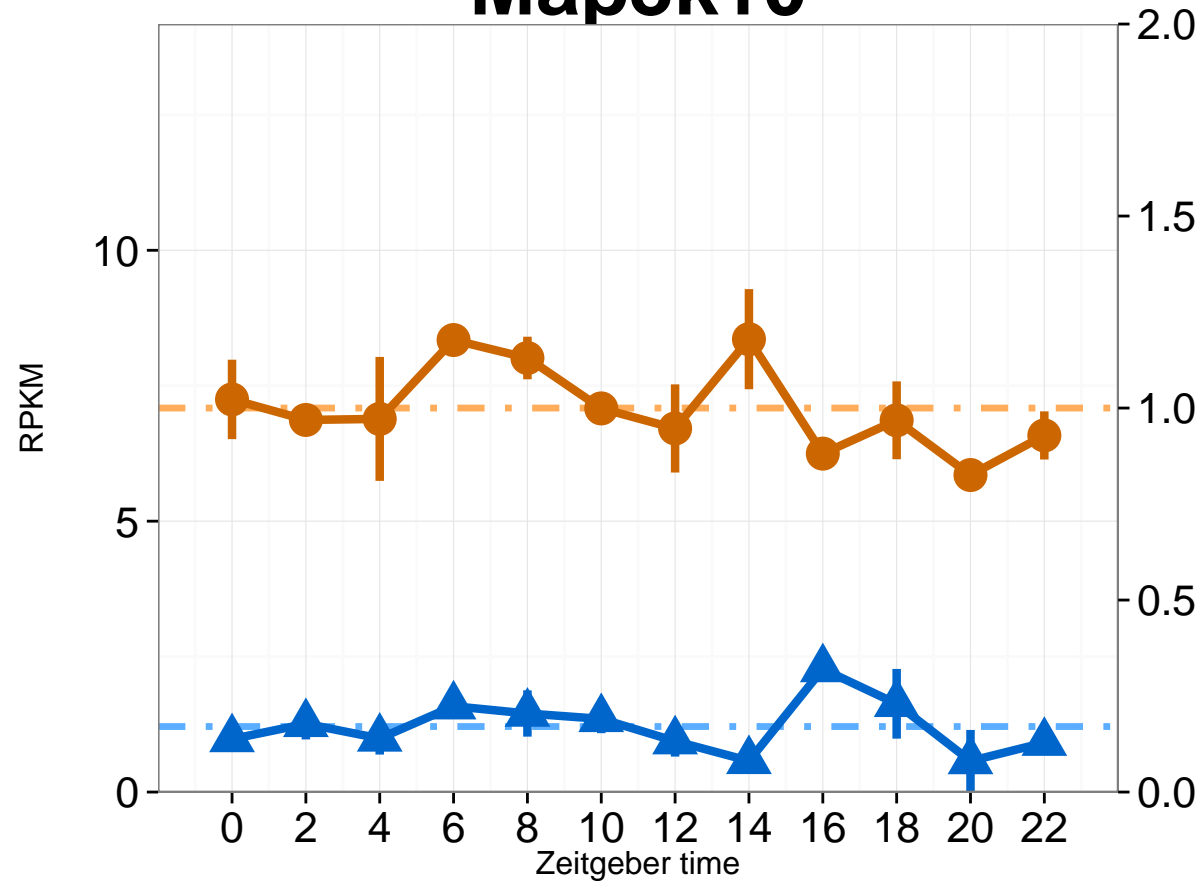

# Map3k10

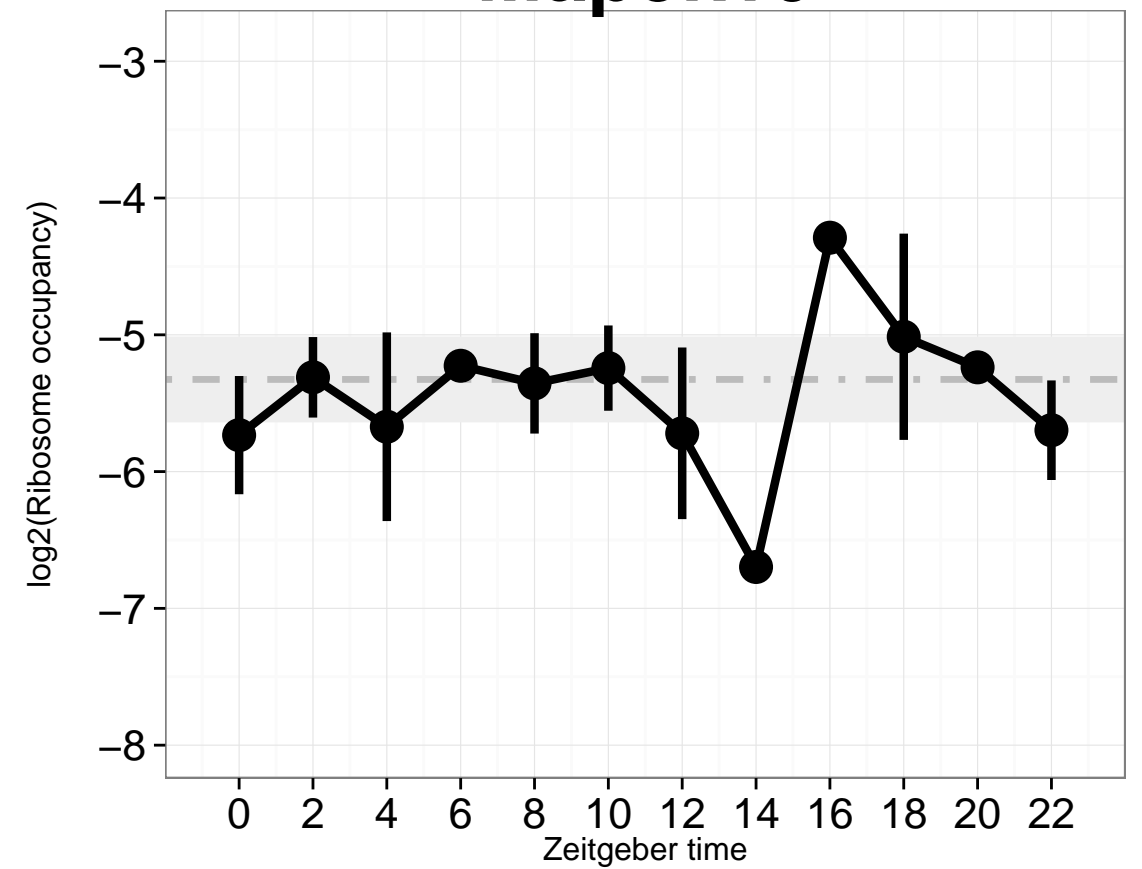

Supplement: Supplementary file 99 [file 1]

## 2510002D24Rik

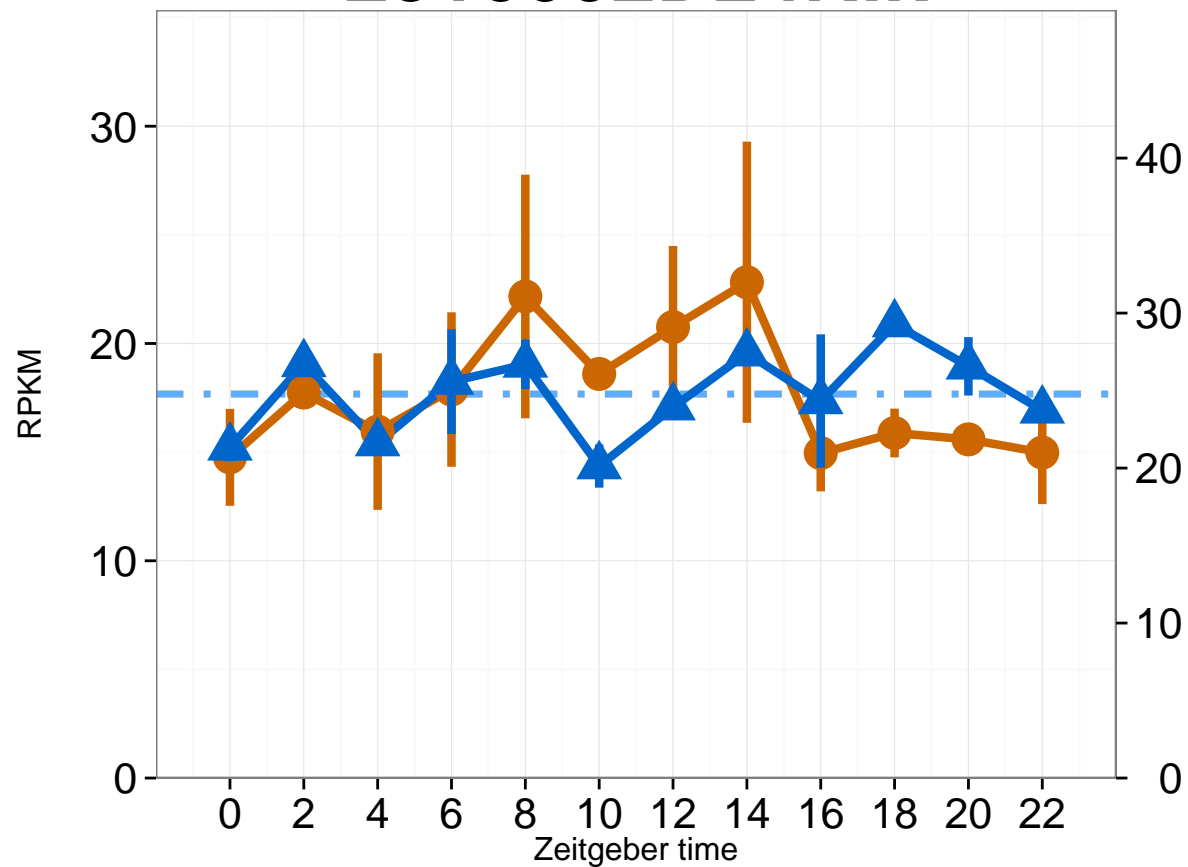

## 2510002D24Rik

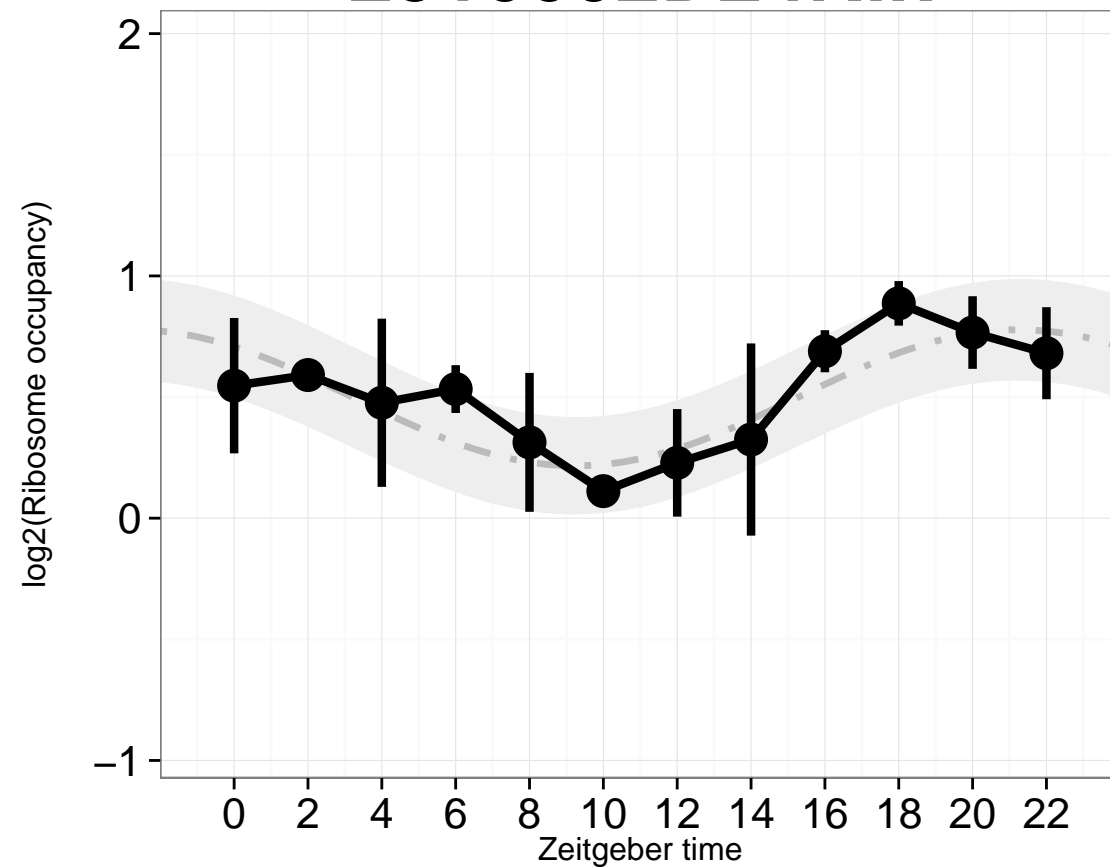

Supplement: Supplementary file 100 [file 1]
