# Supplementary material (part 2 of 133)
Source: publisher figshare collection journal article supplement (https://springernature.figshare.com/articles/dataset/_/4903193)

# Ndufs7

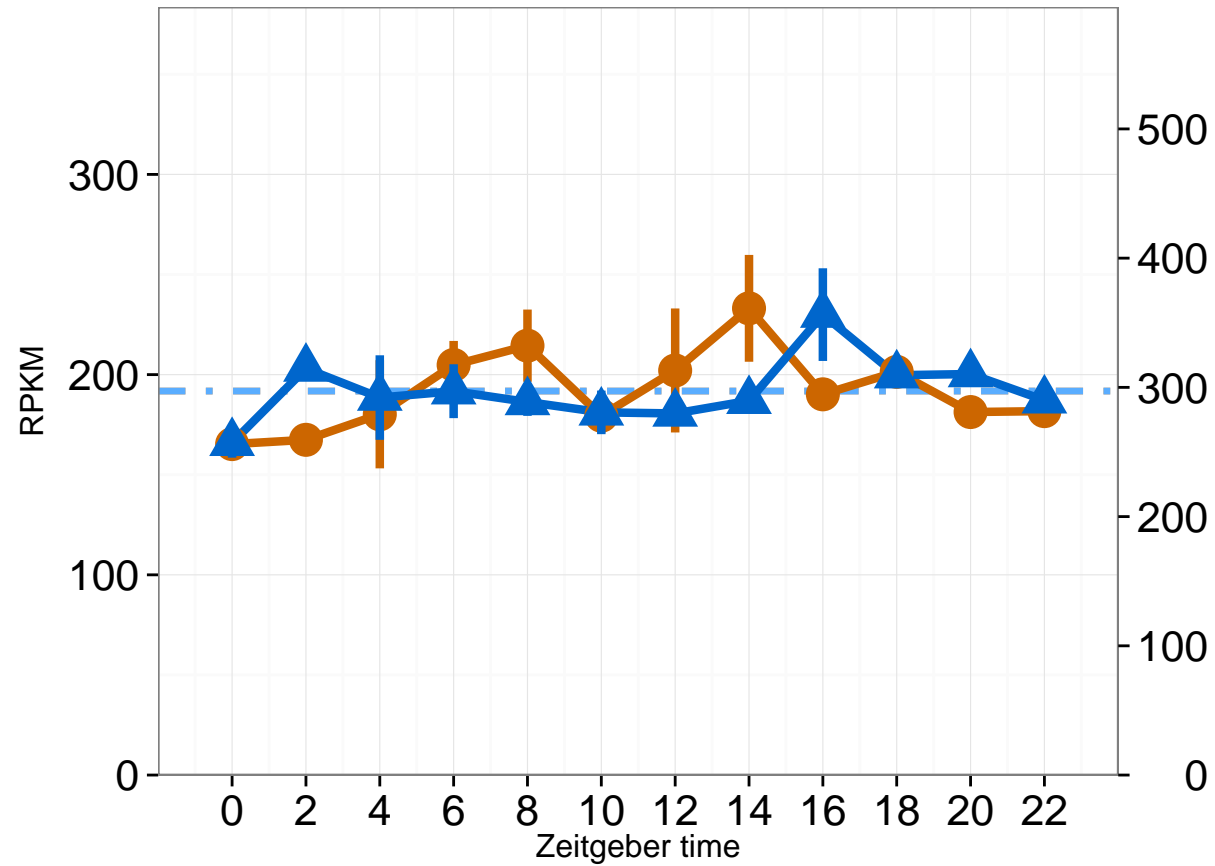

# Ndufs7

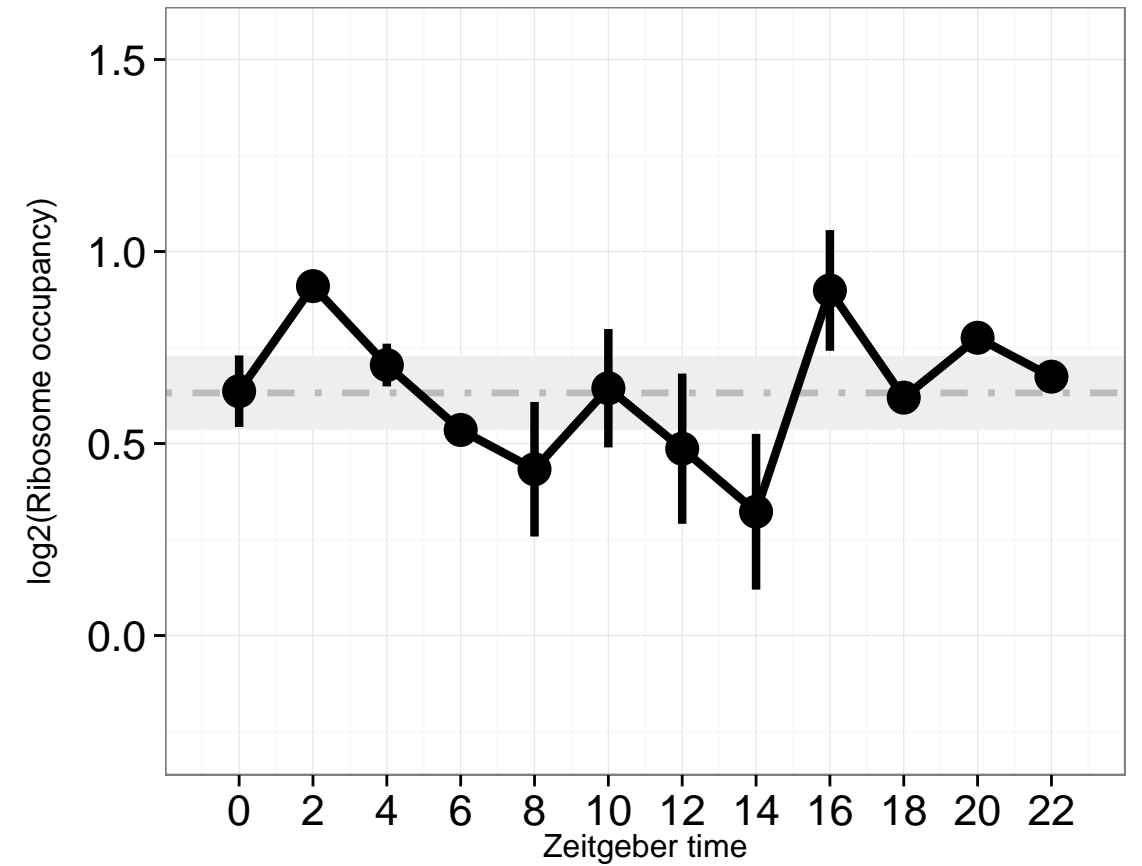

Supplement: Supplementary file 101 [file 1]

## Tbcd

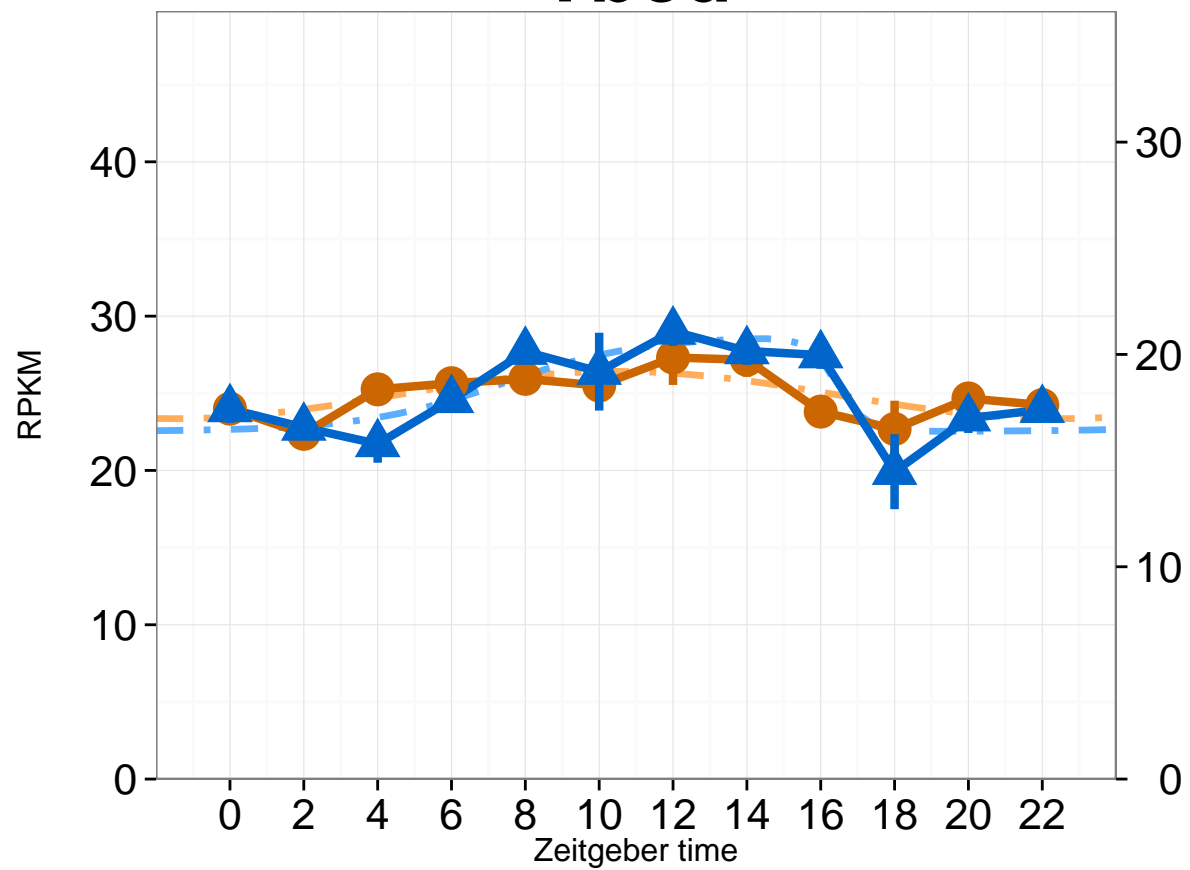

## Tbcd

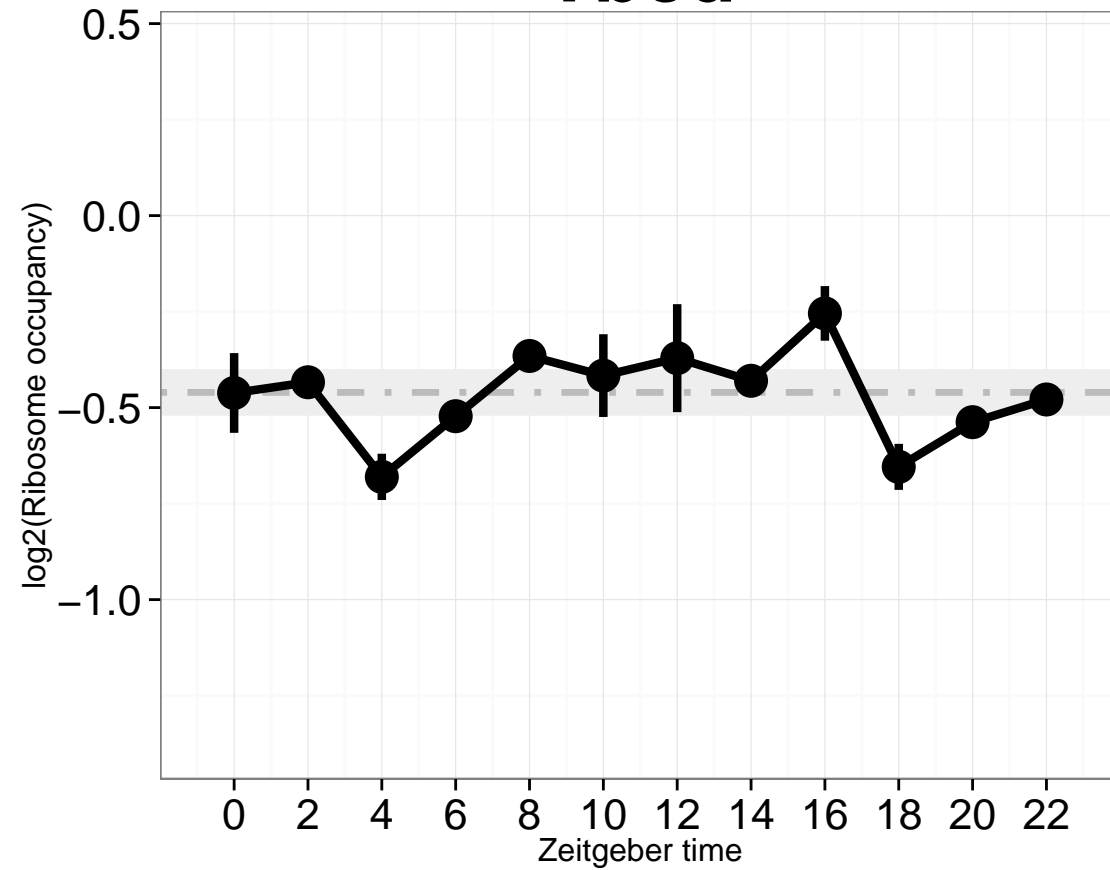

Supplement: Supplementary file 102 [file 1]

## Ufd1l

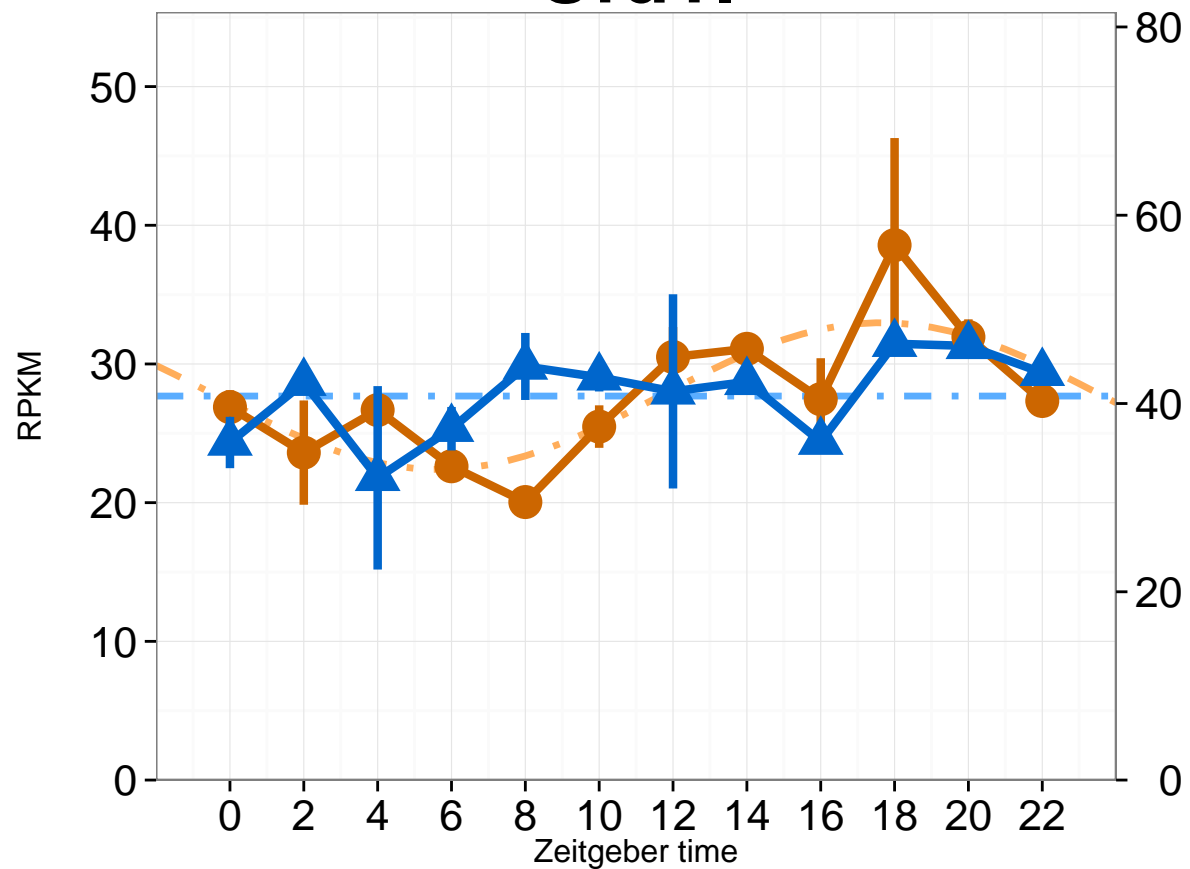

## Ufd1l

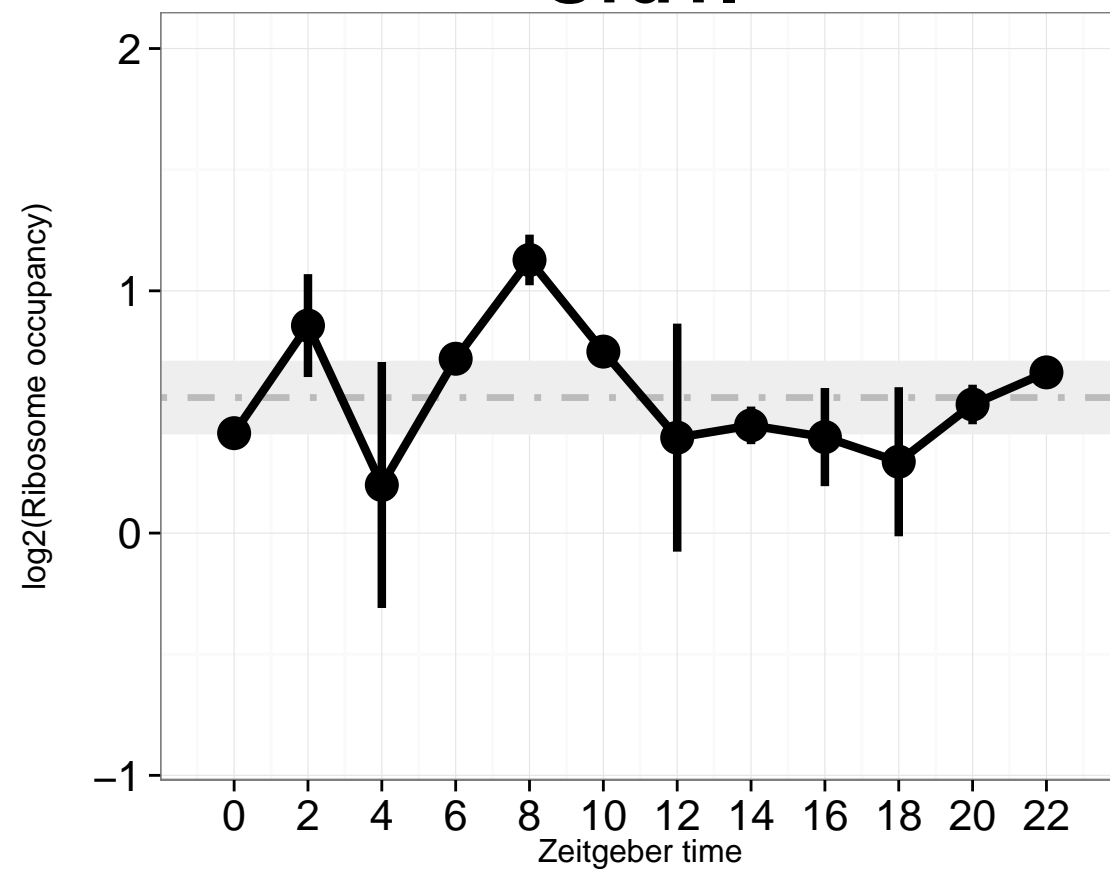

Supplement: Supplementary file 103 [file 1]

## Tmem230

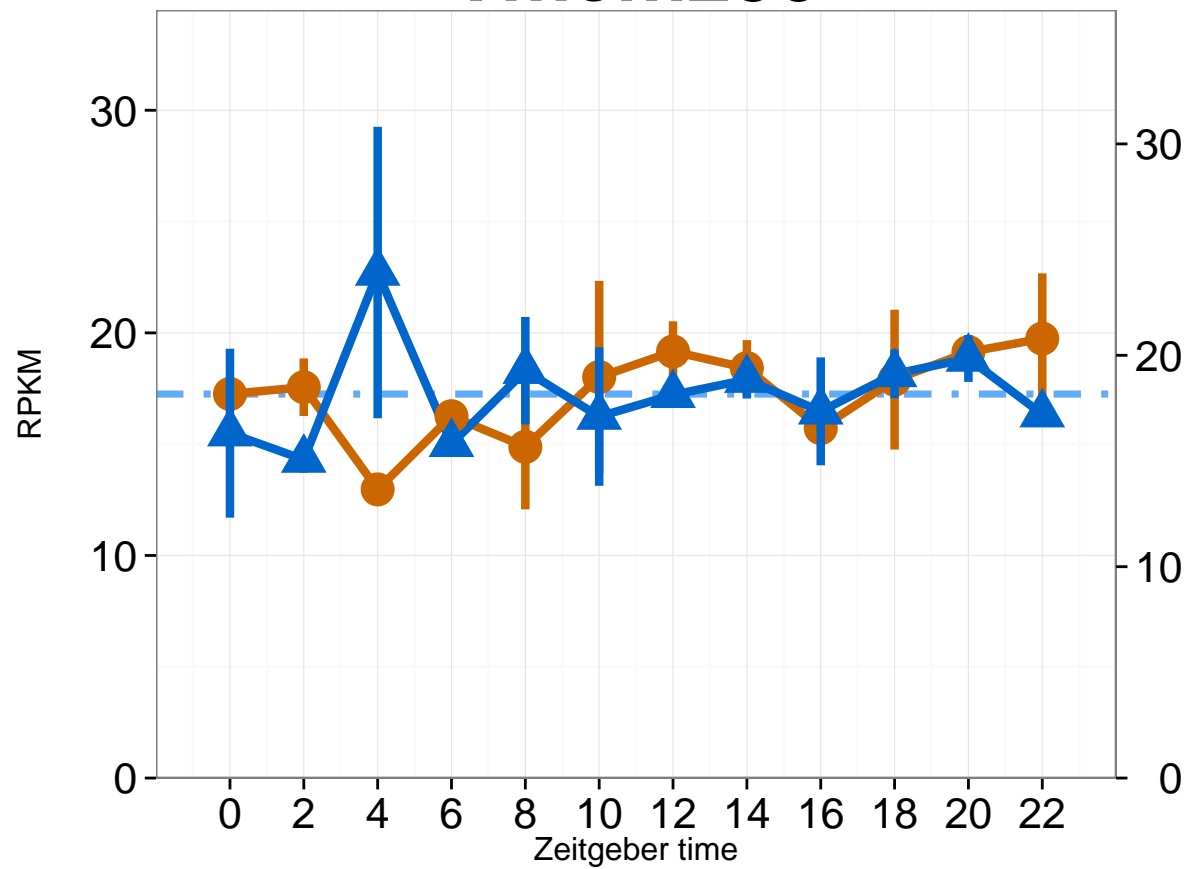

## Tmem230

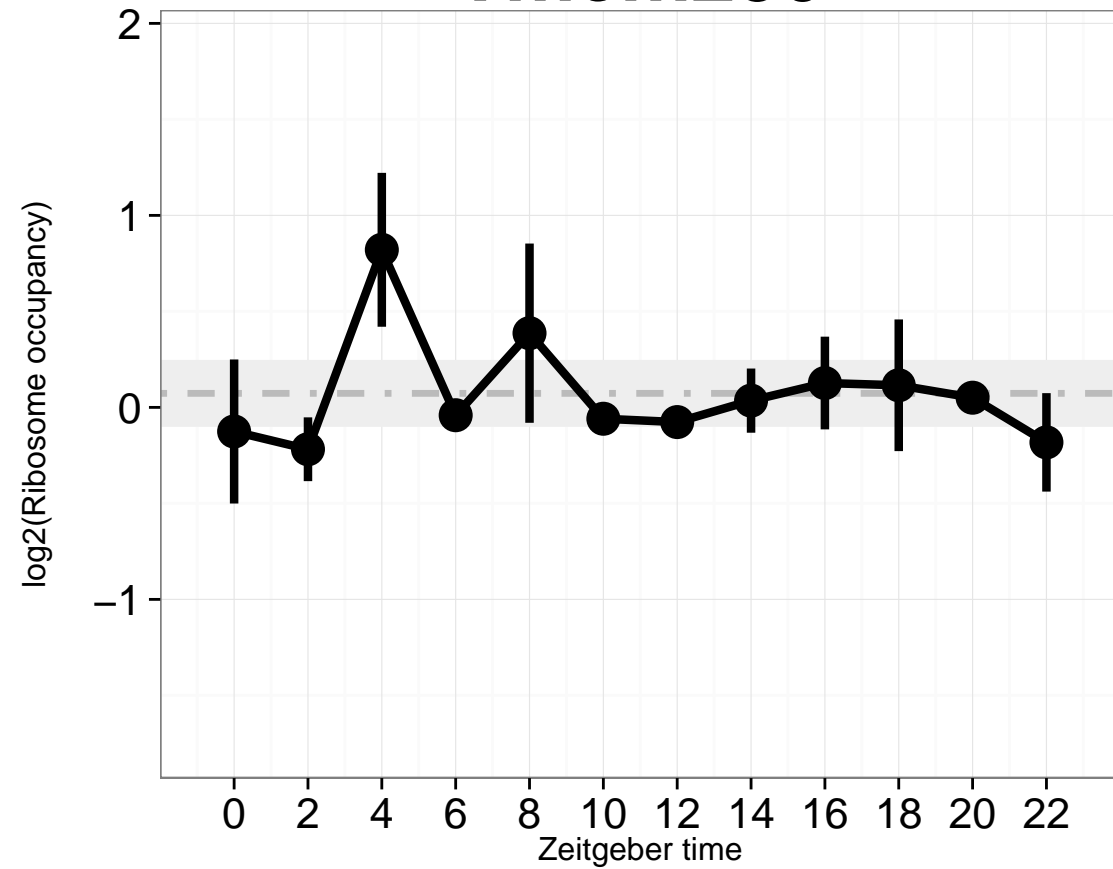

Supplement: Supplementary file 104 [file 1]

## Ston2

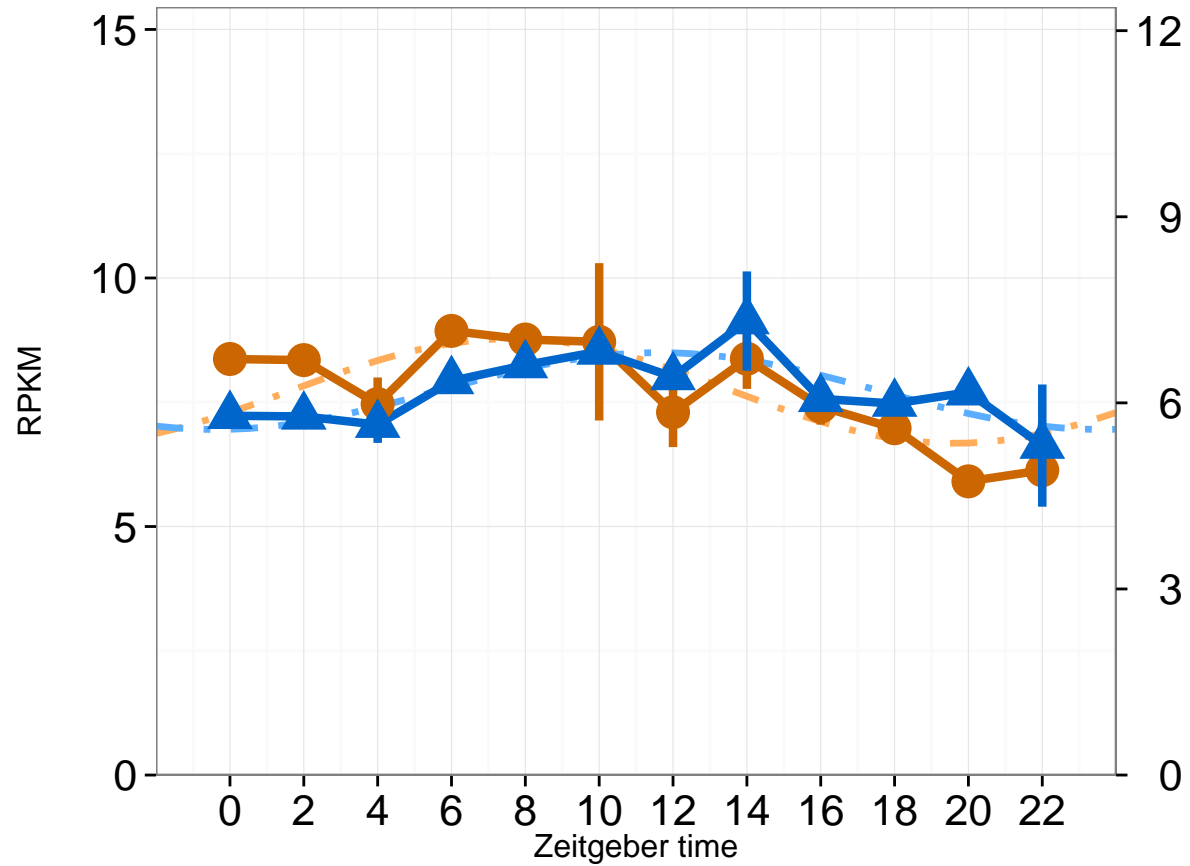

## Ston2

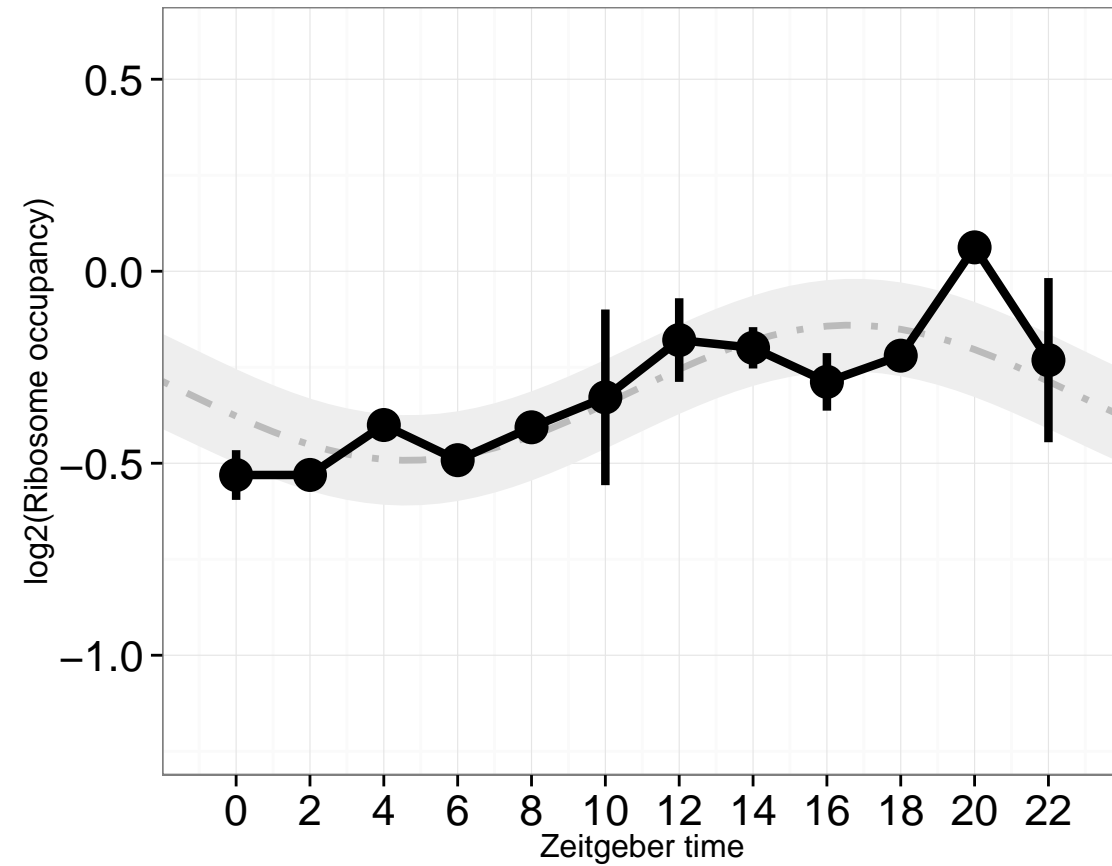

Supplement: Supplementary file 105 [file 1]

## Kdm2a

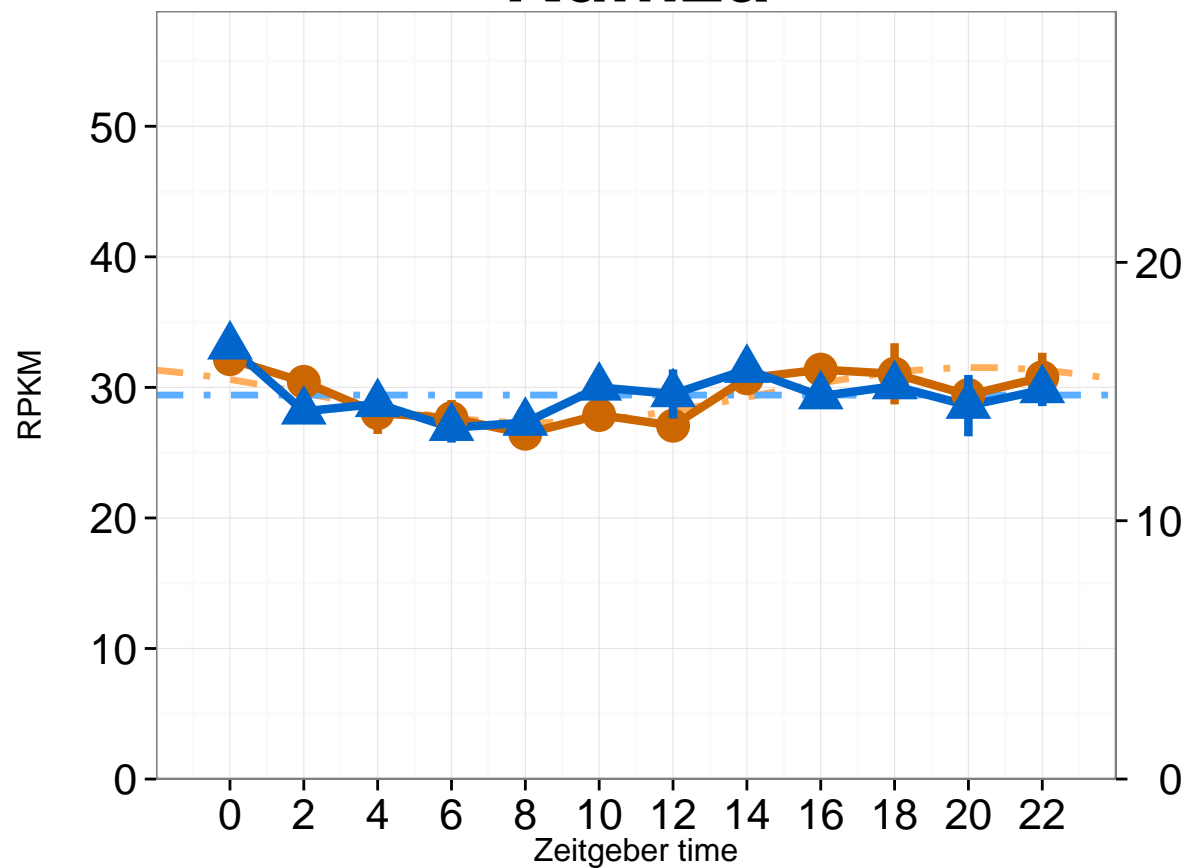

## Kdm2a

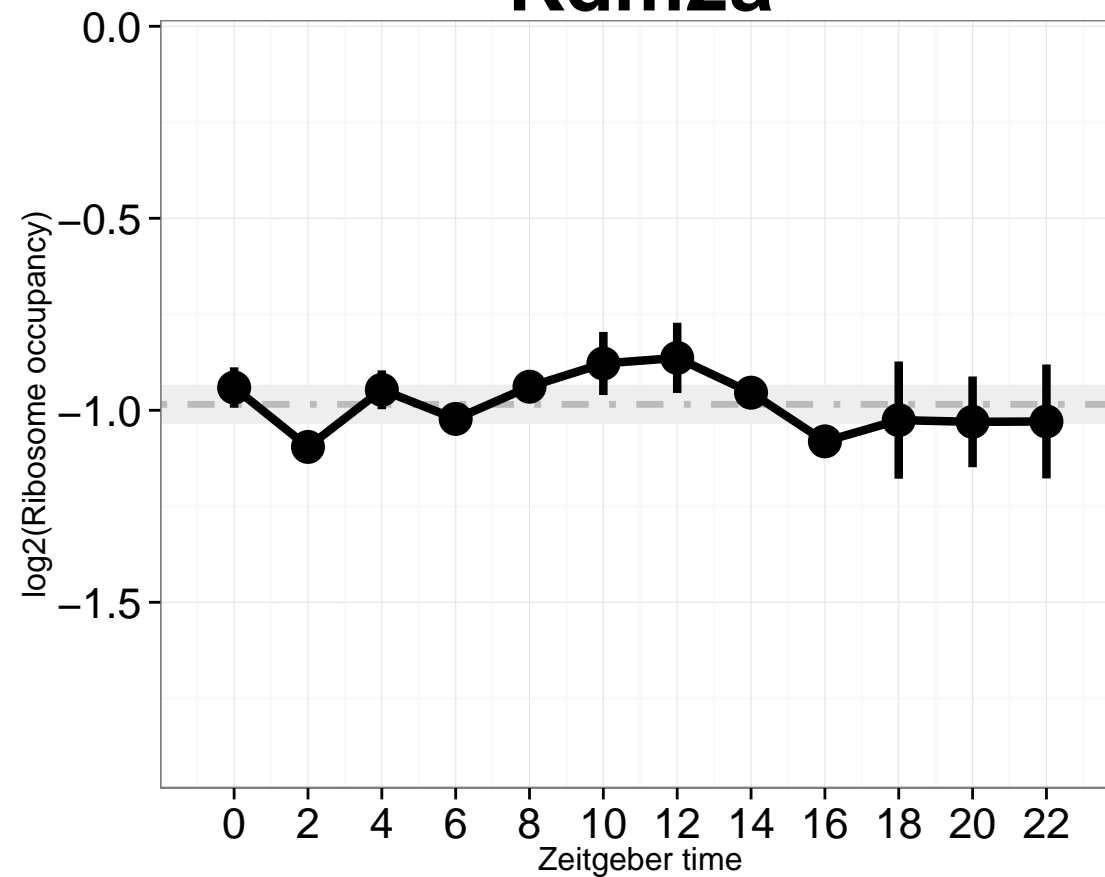

Supplement: Supplementary file 106 [file 1]

# Eif4ebp3

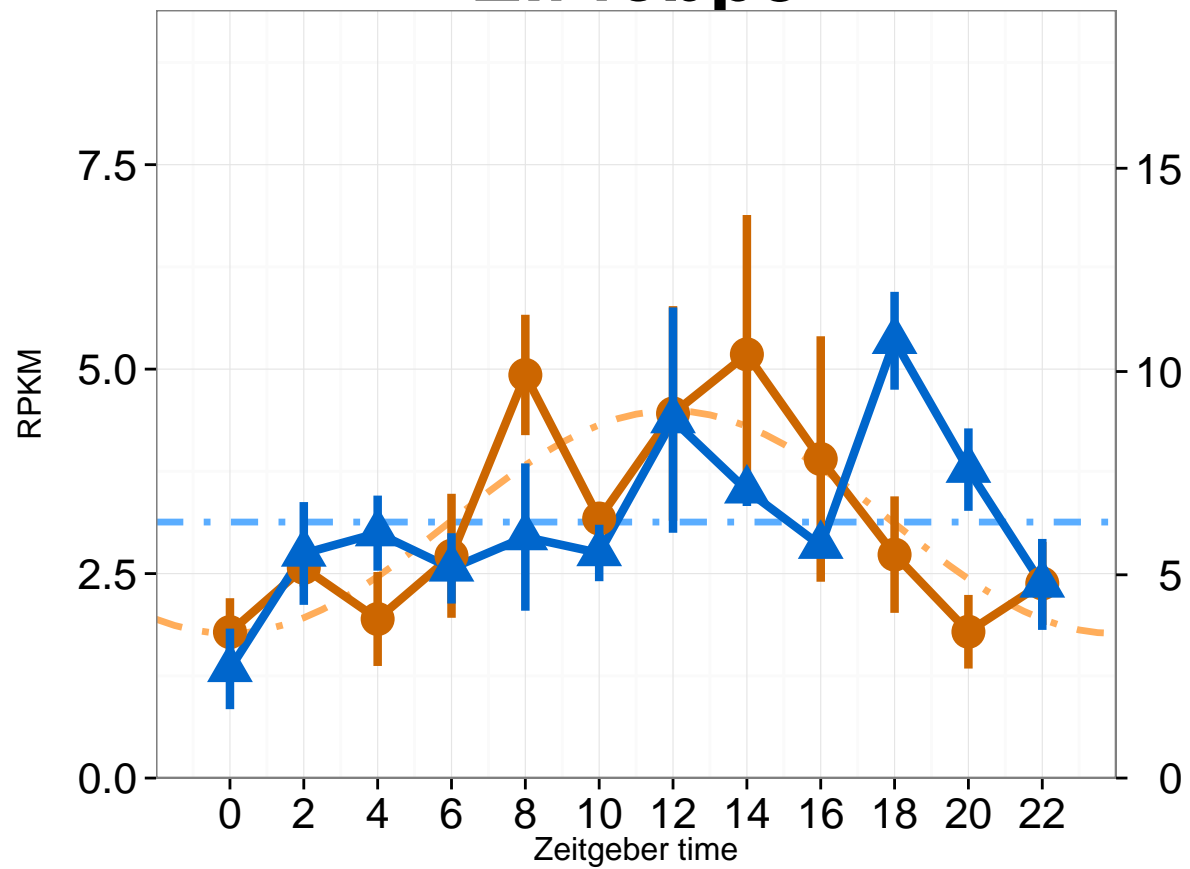

# Eif4ebp3

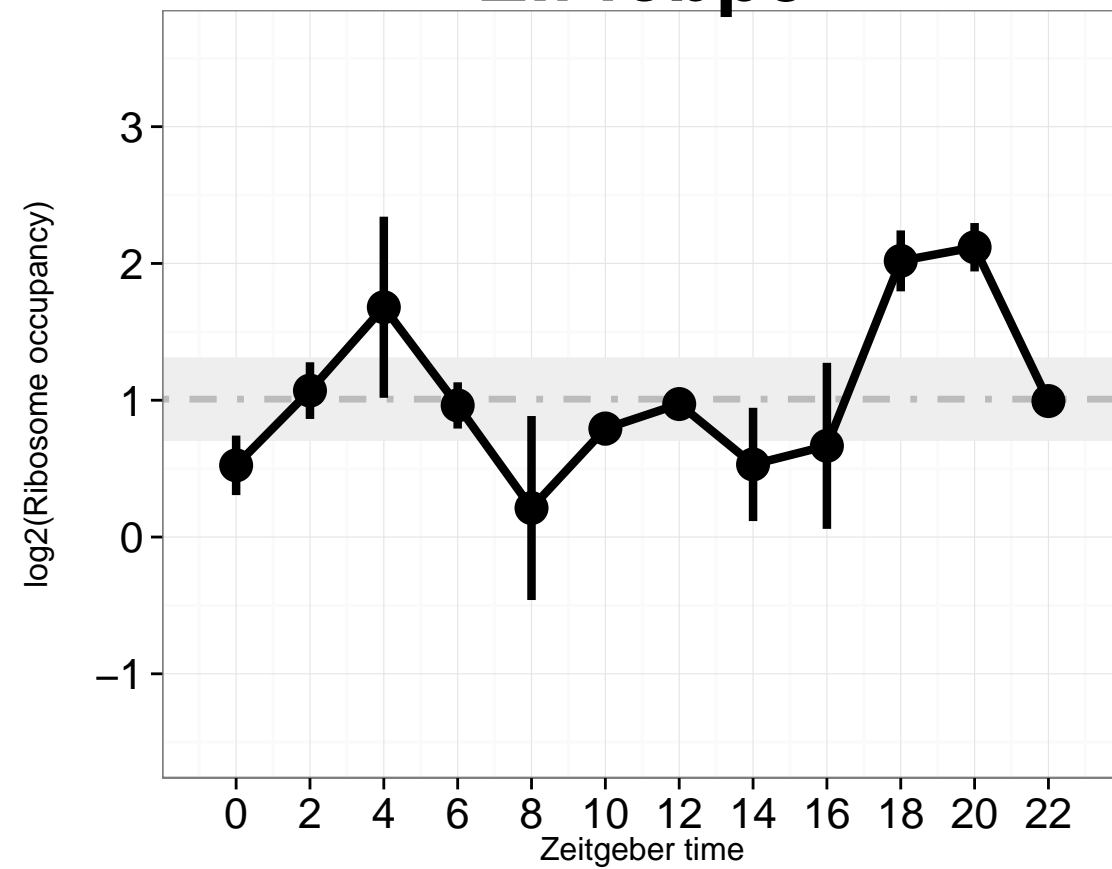

Supplement: Supplementary file 107 [file 1]

## Tef

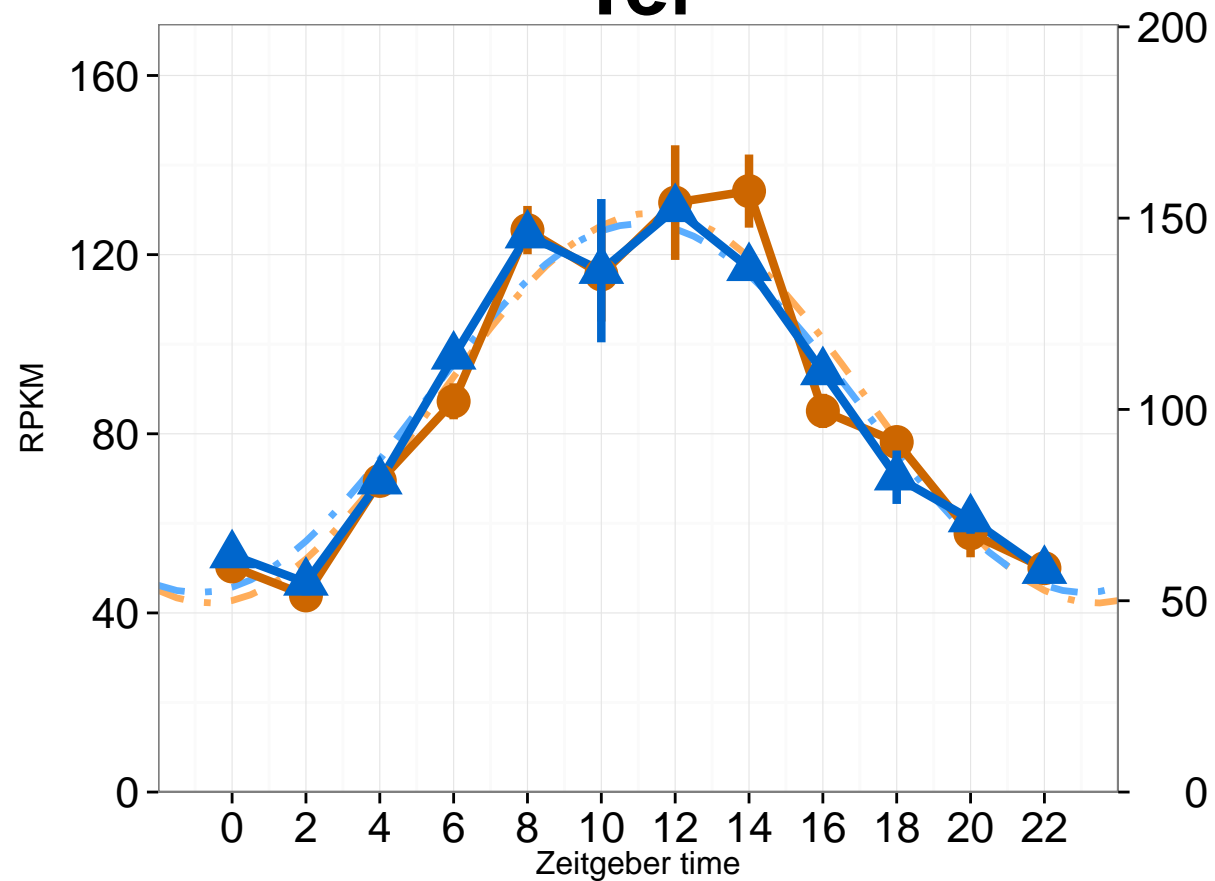

## Tef

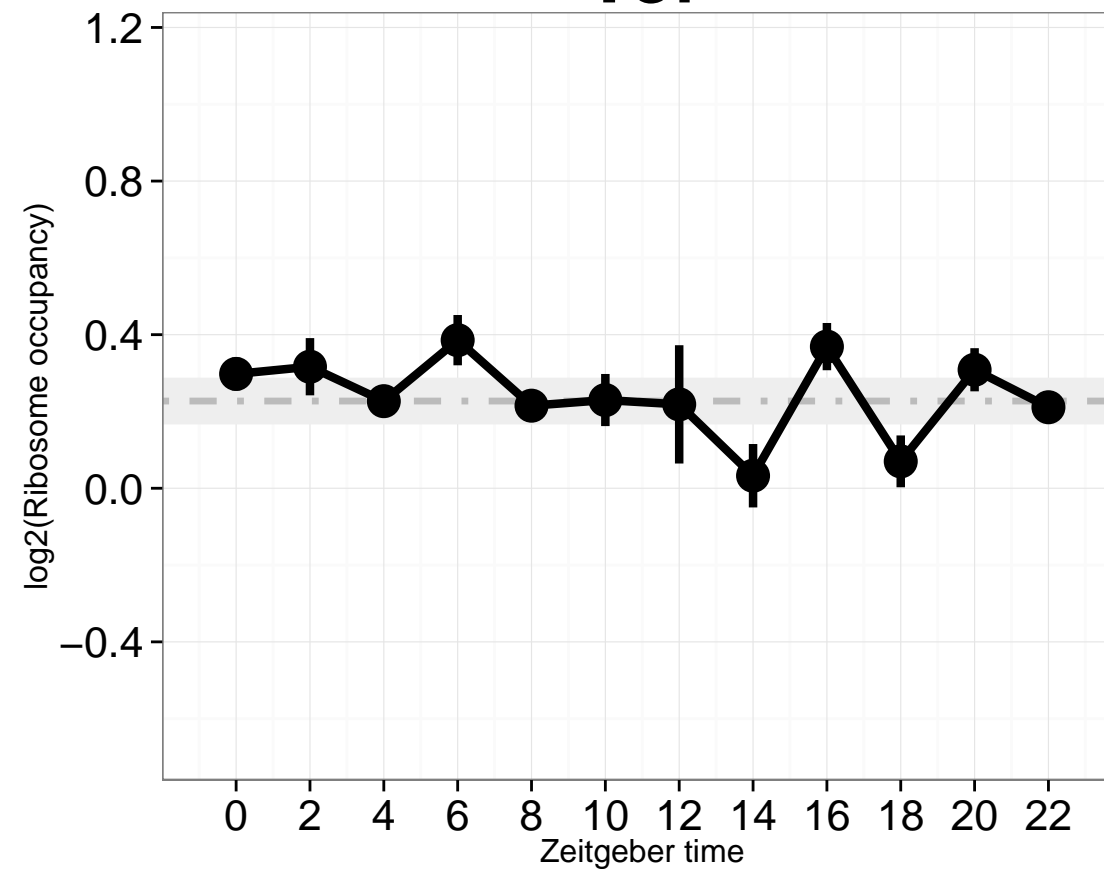

Supplement: Supplementary file 108 [file 1]

## 1700040L02Rik

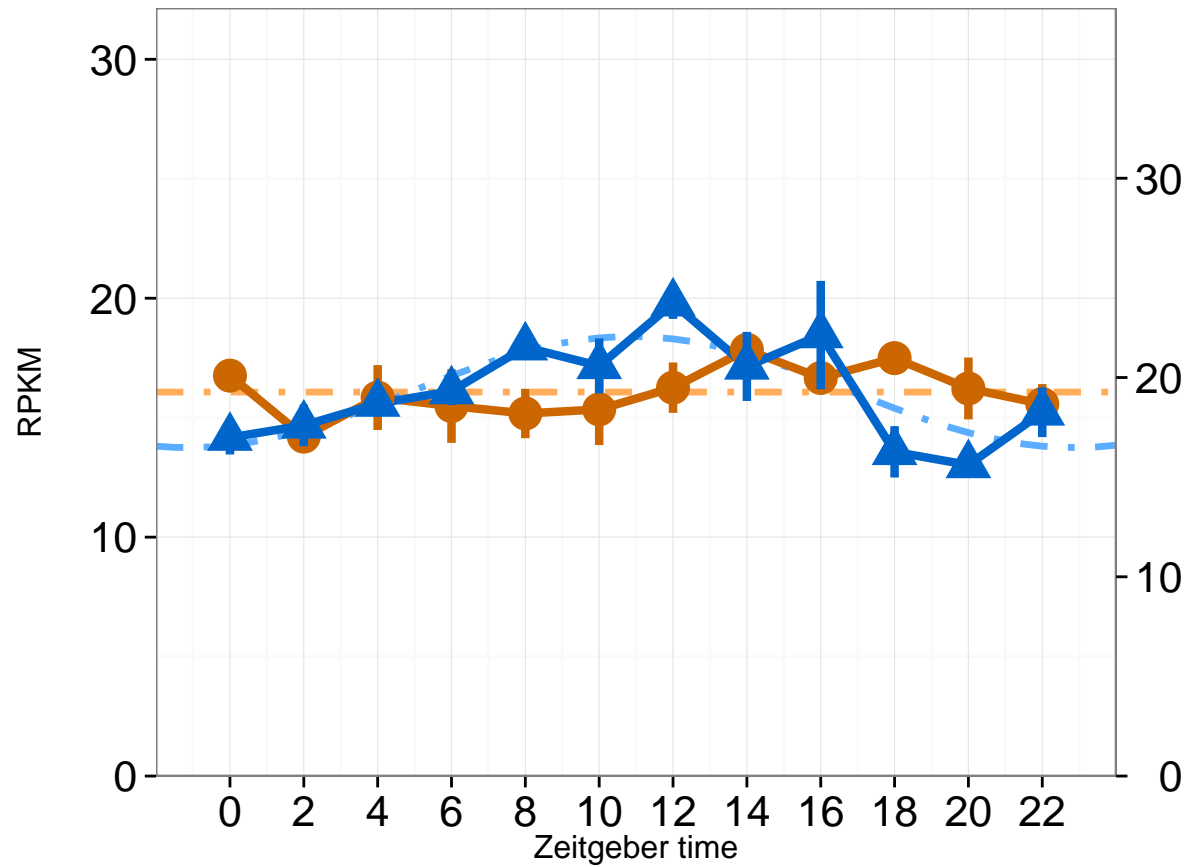

## 1700040L02Rik

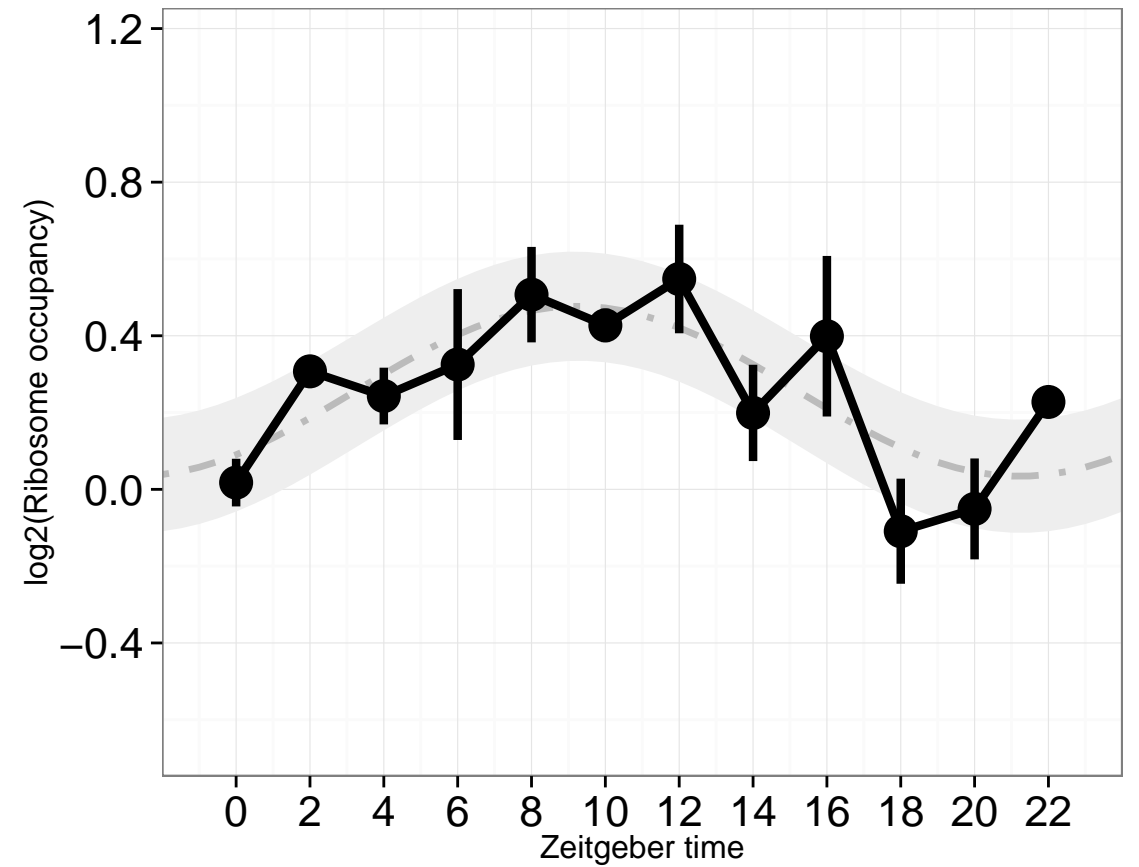

Supplement: Supplementary file 109 [file 1]

## Slc25a28

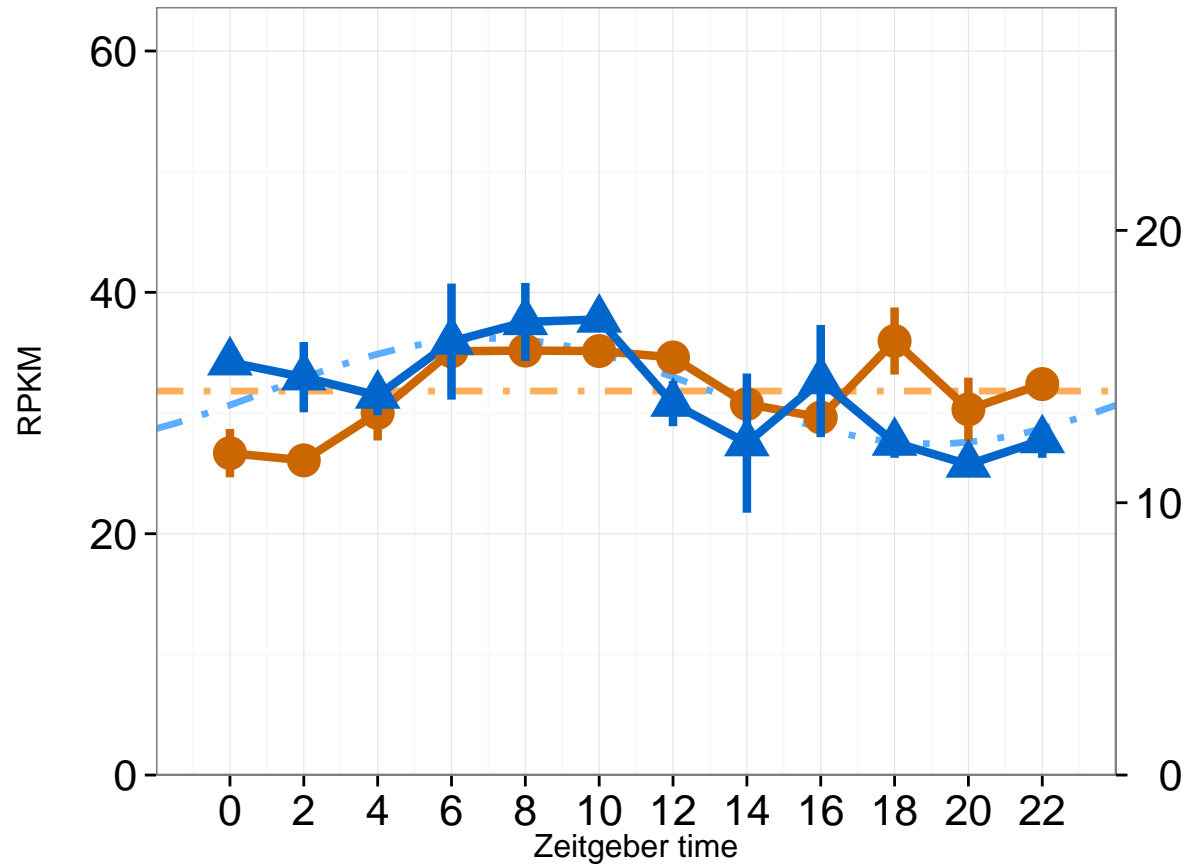

## Slc25a28

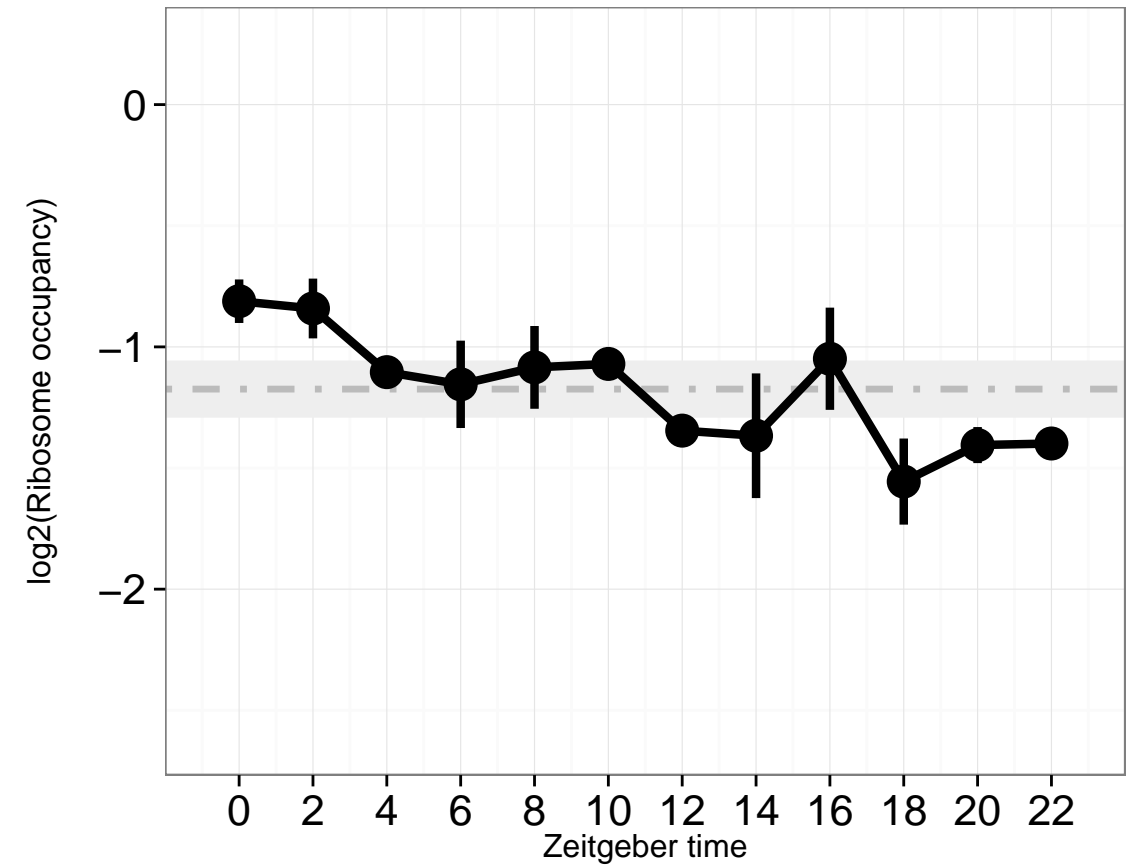

Supplement: Supplementary file 110 [file 1]

## Pin4

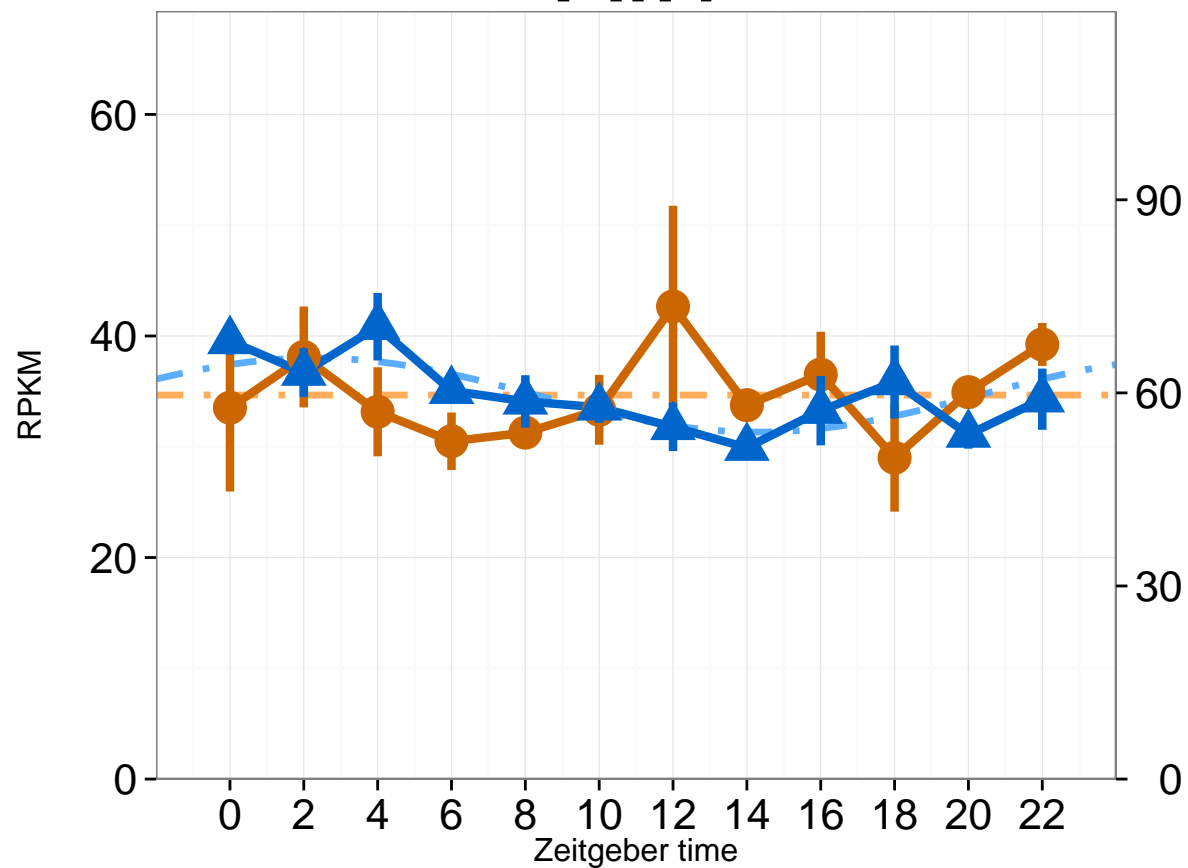

## Pin4

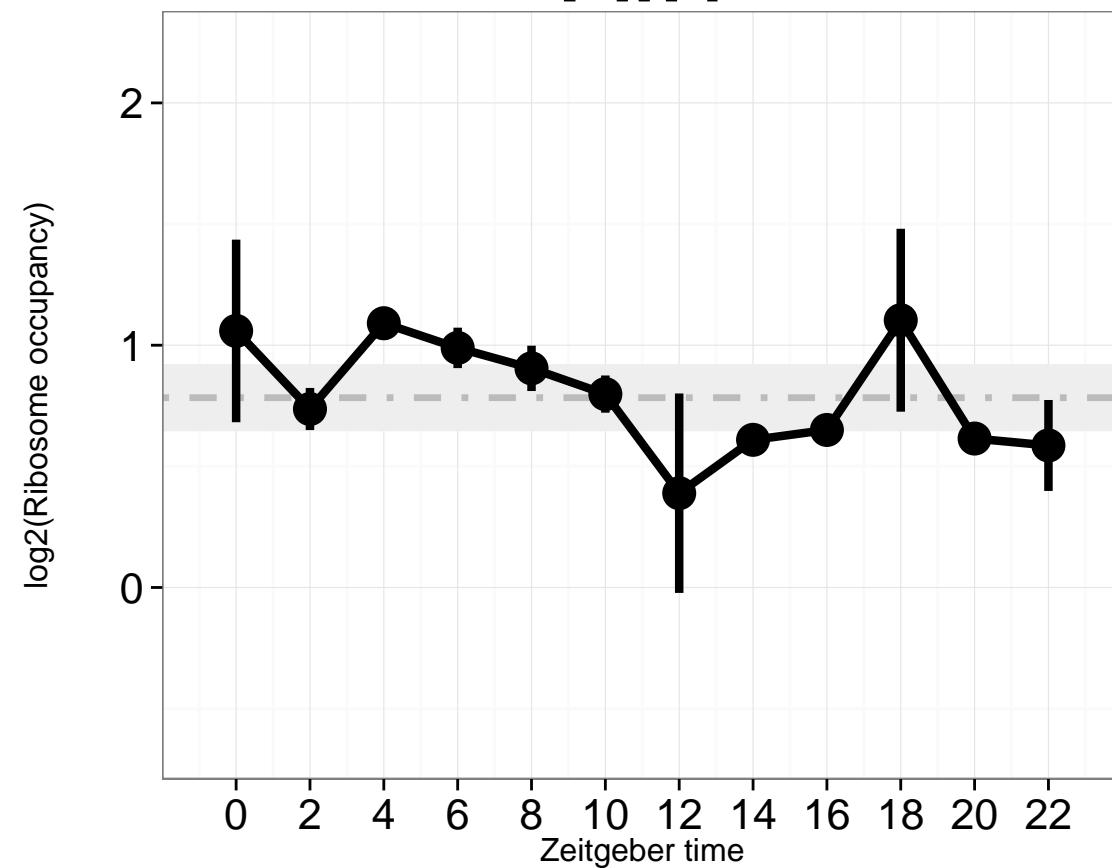

Supplement: Supplementary file 111 [file 1]

## Tln1

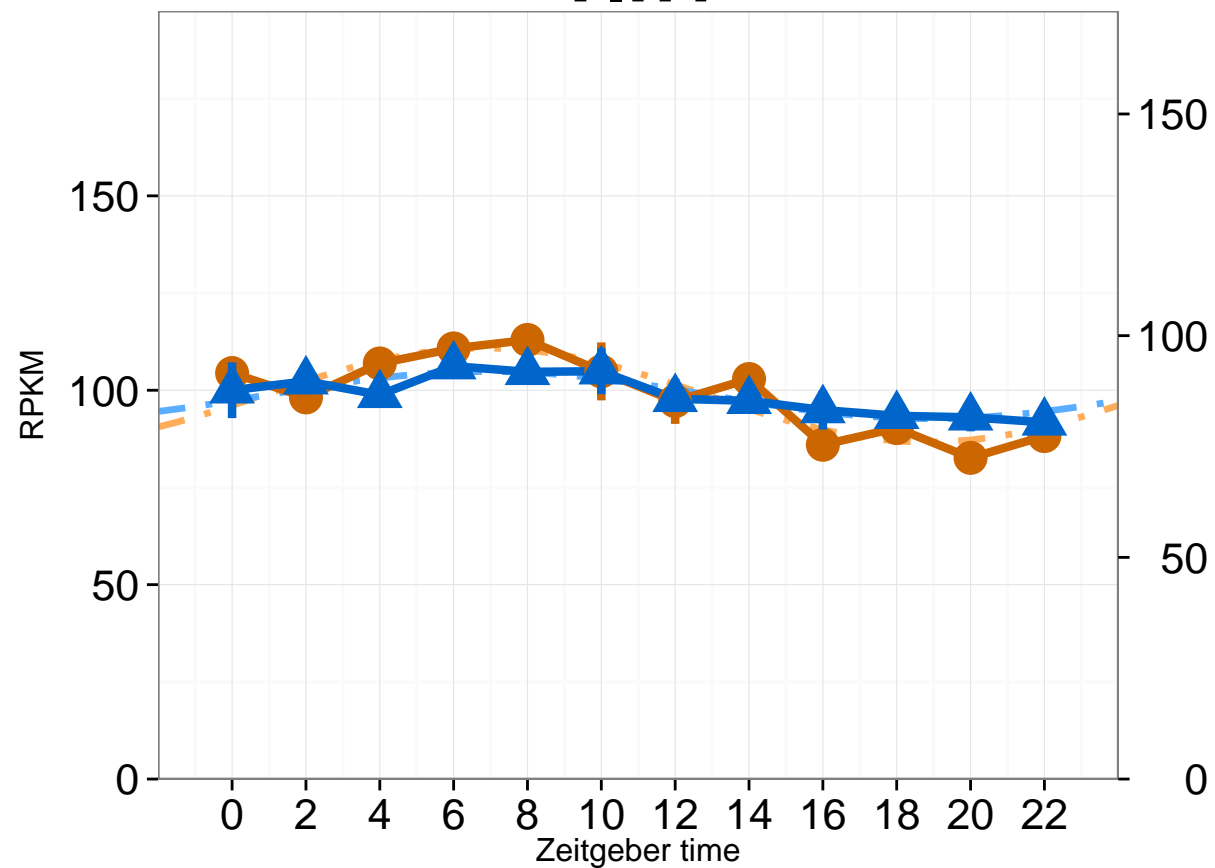

## Tln1

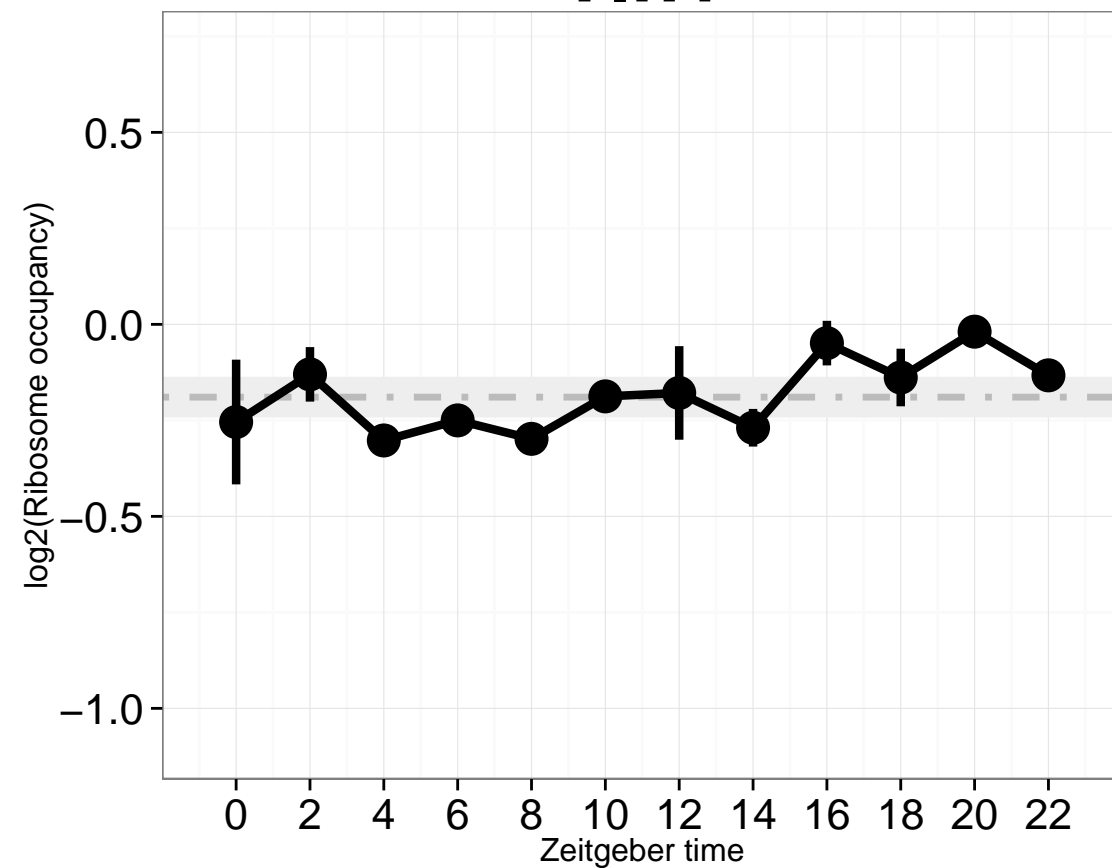

Supplement: Supplementary file 112 [file 1]

# Rprd2

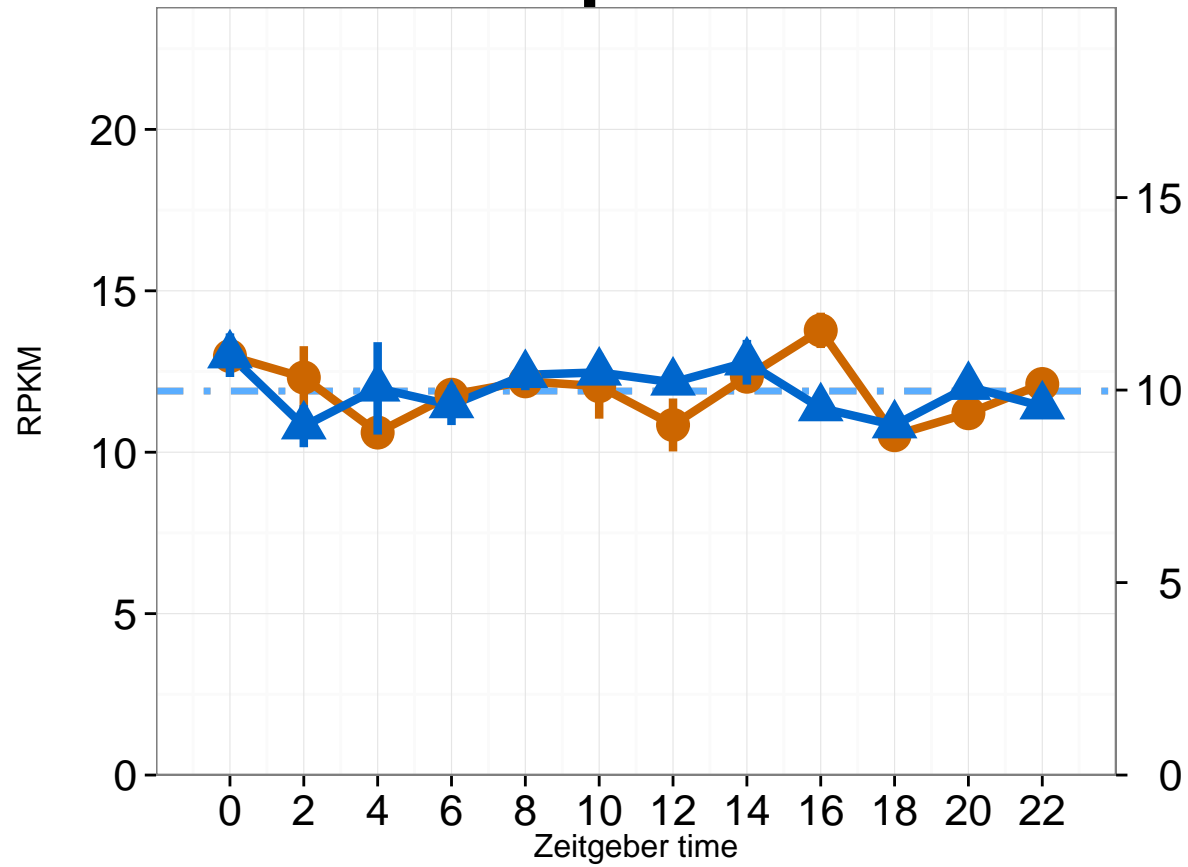

# Rprd2

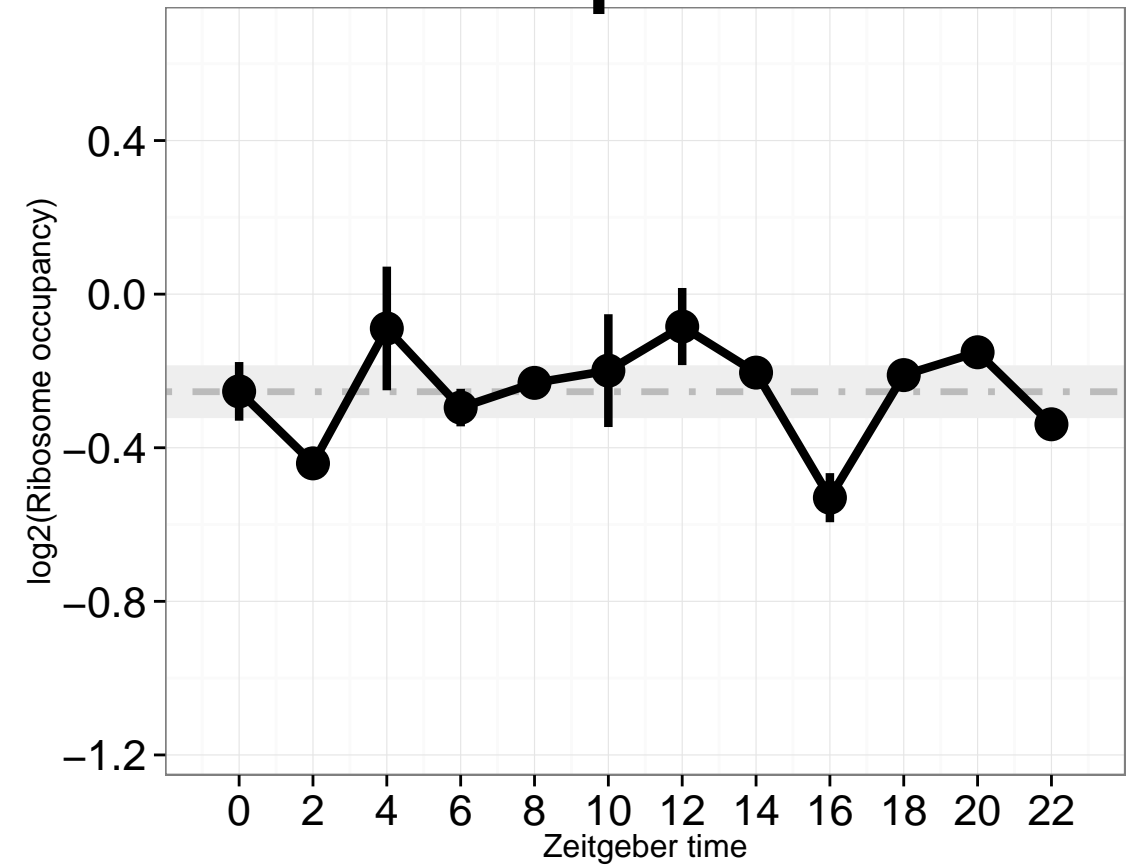

Supplement: Supplementary file 113 [file 1]

## Fn3k

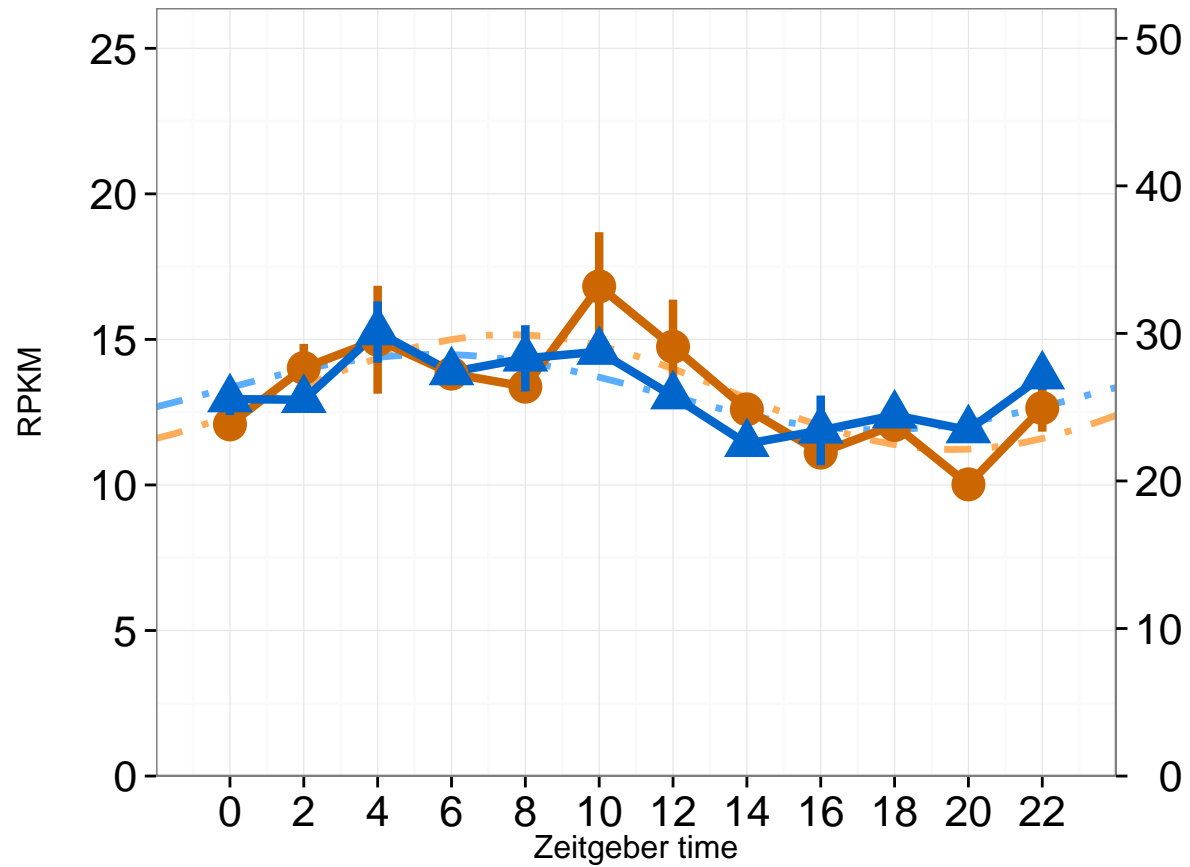

## Fn3k

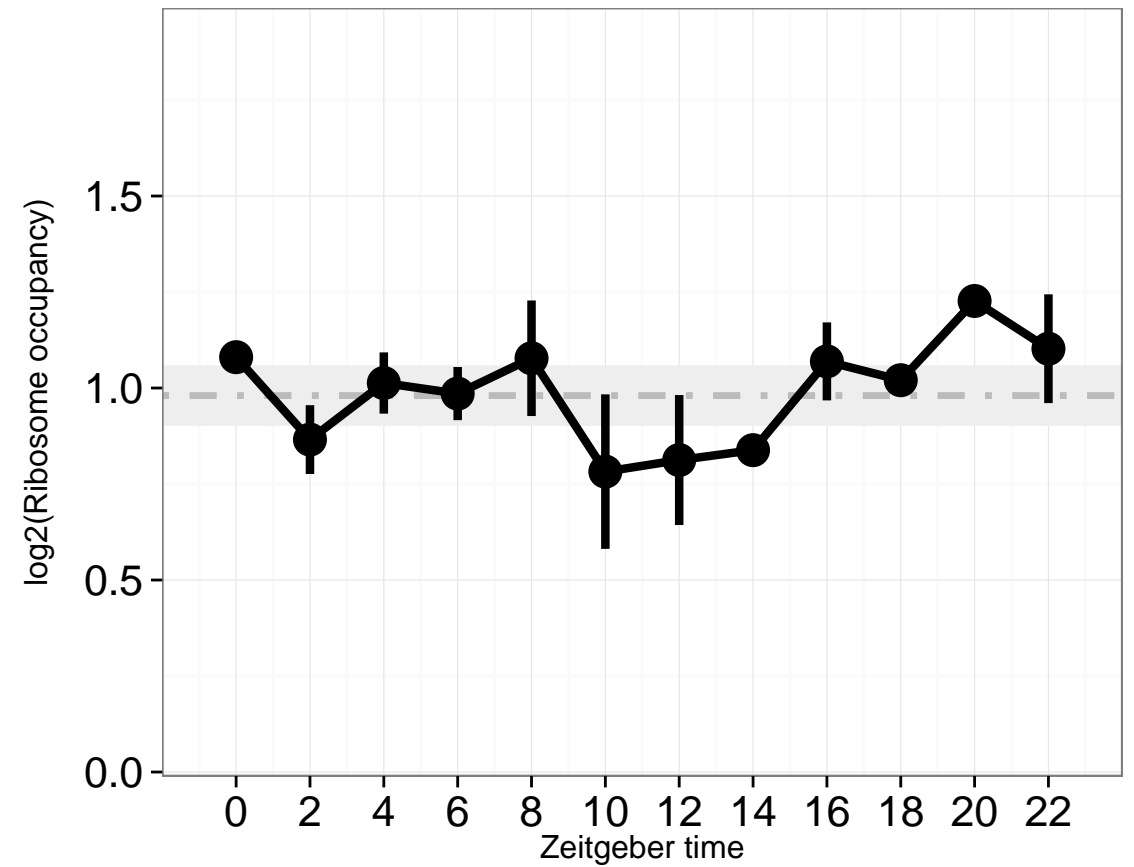

Supplement: Supplementary file 114 [file 1]

# Proser1

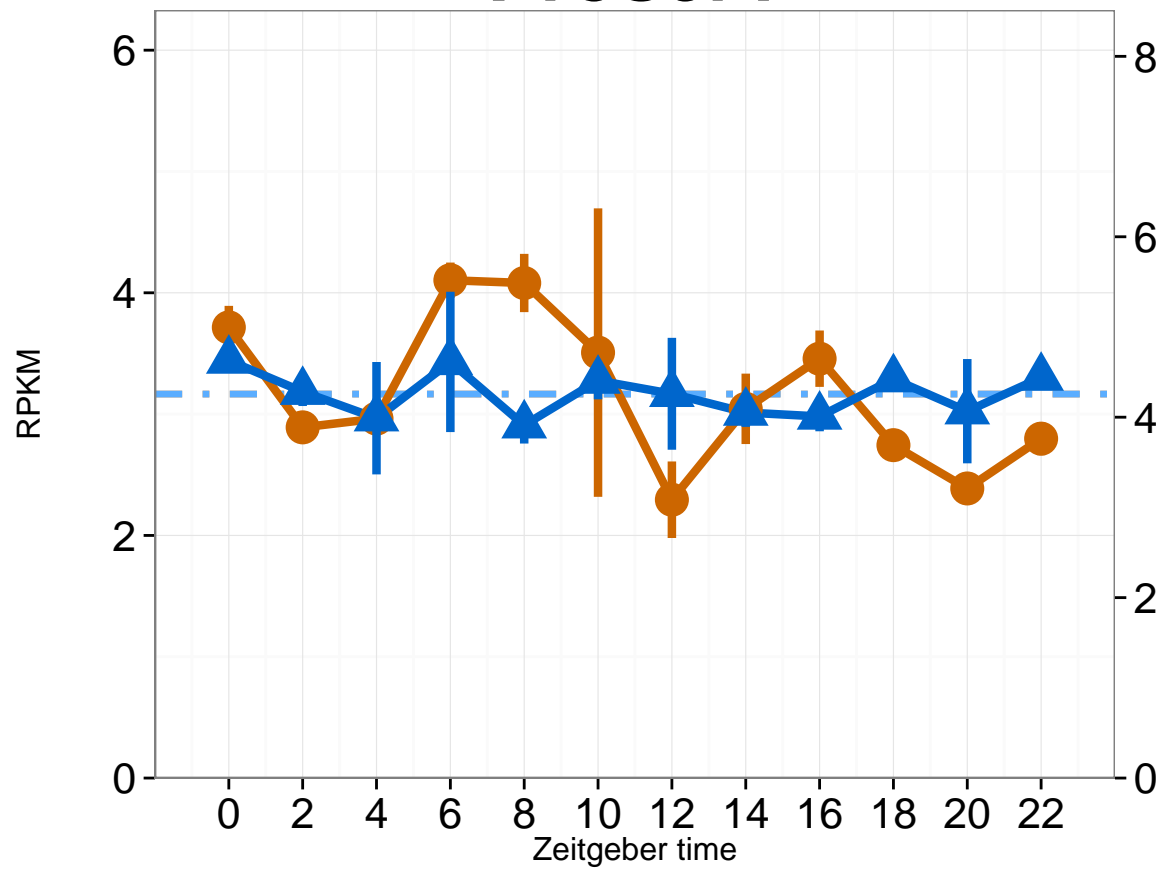

# Proser1

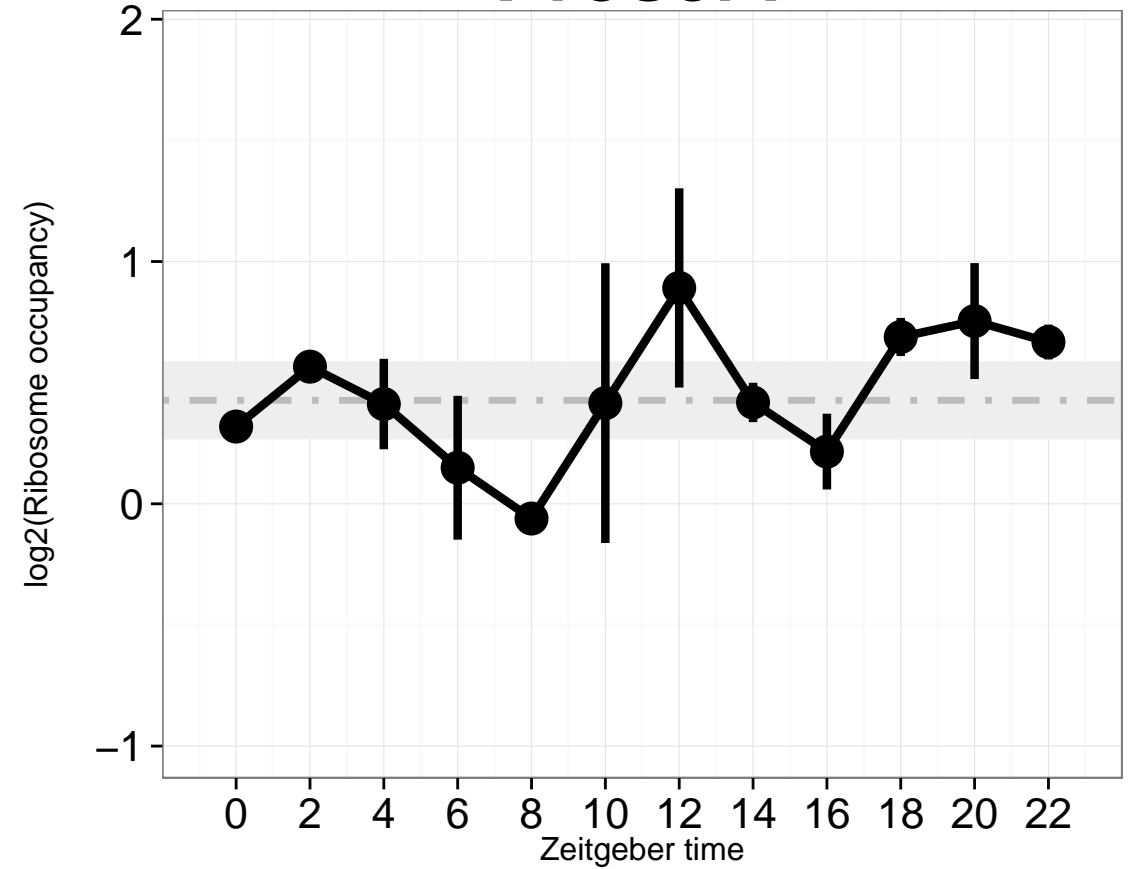

Supplement: Supplementary file 115 [file 1]

# Dnajc12

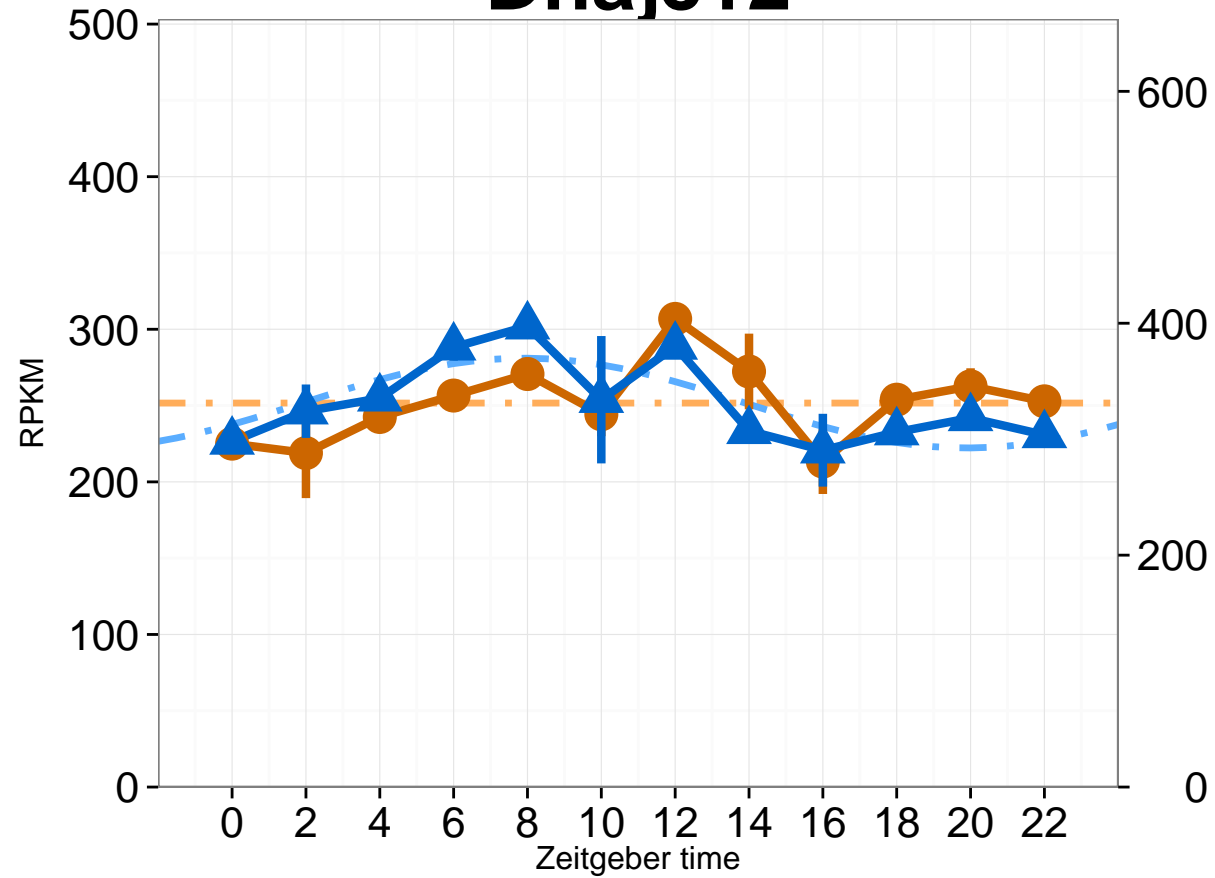

# Dnajc12

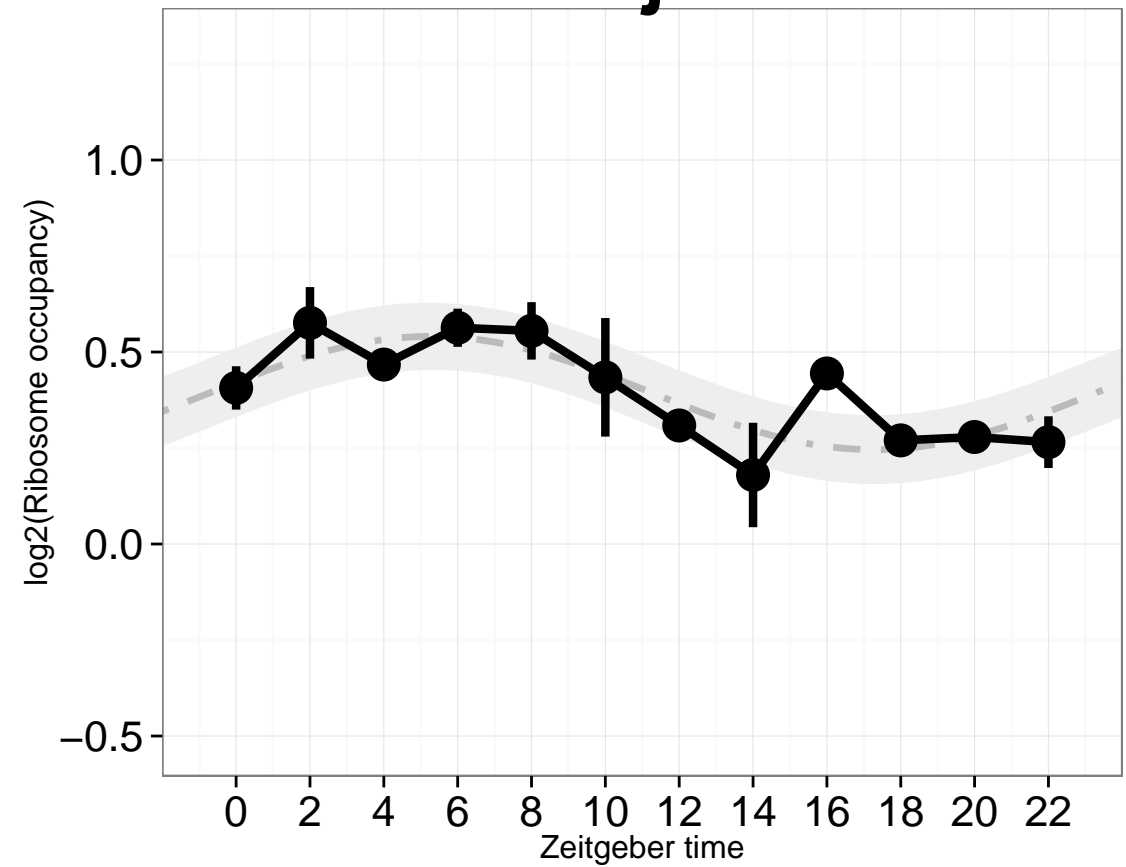

Supplement: Supplementary file 116 [file 1]

## Polr2h

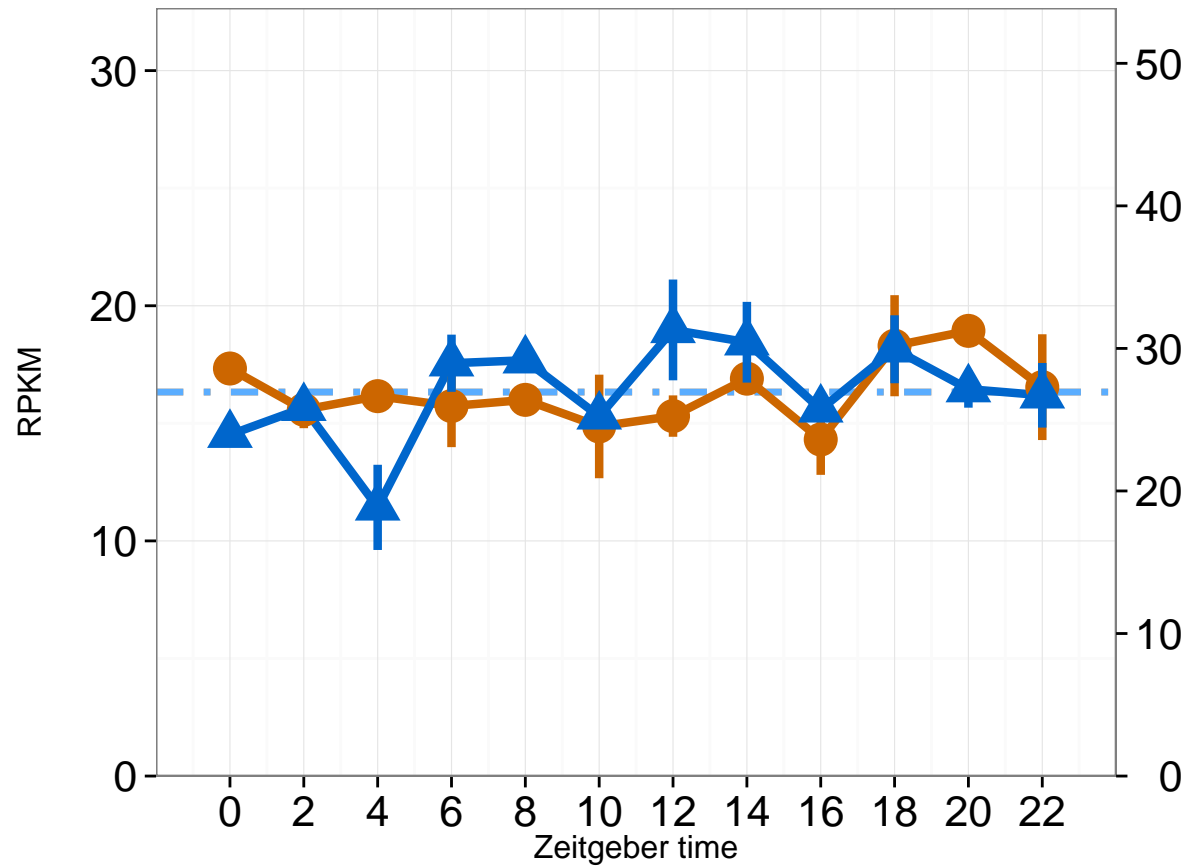

## Polr2h

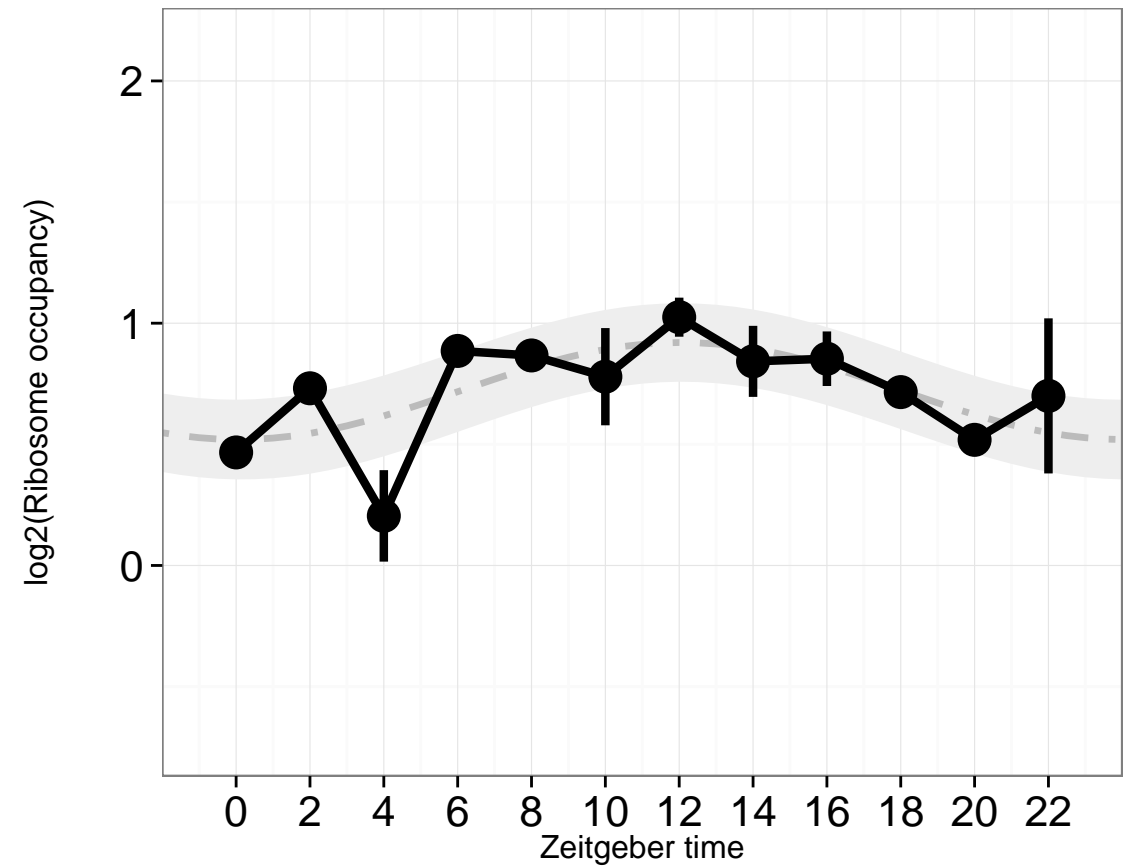

Supplement: Supplementary file 117 [file 1]

# Patz1

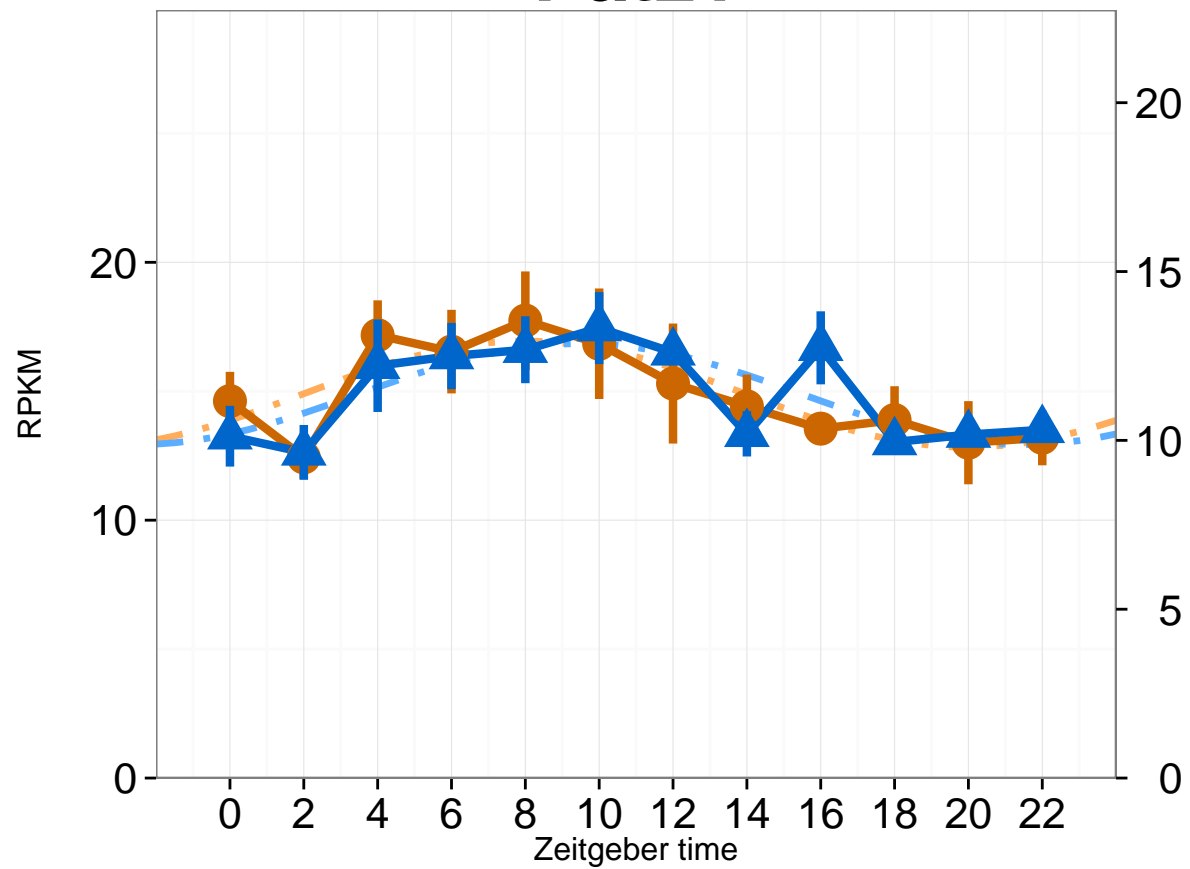

# Patz1

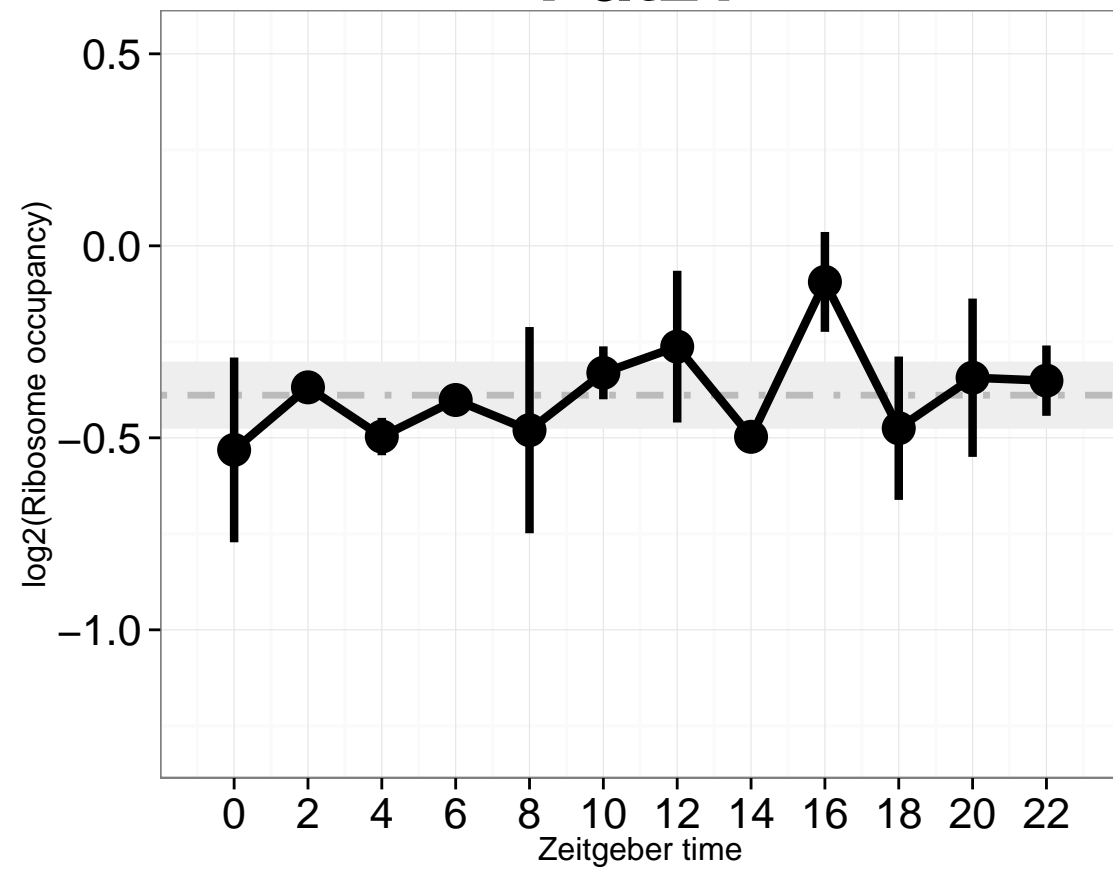

Supplement: Supplementary file 118 [file 1]

## Hjarp

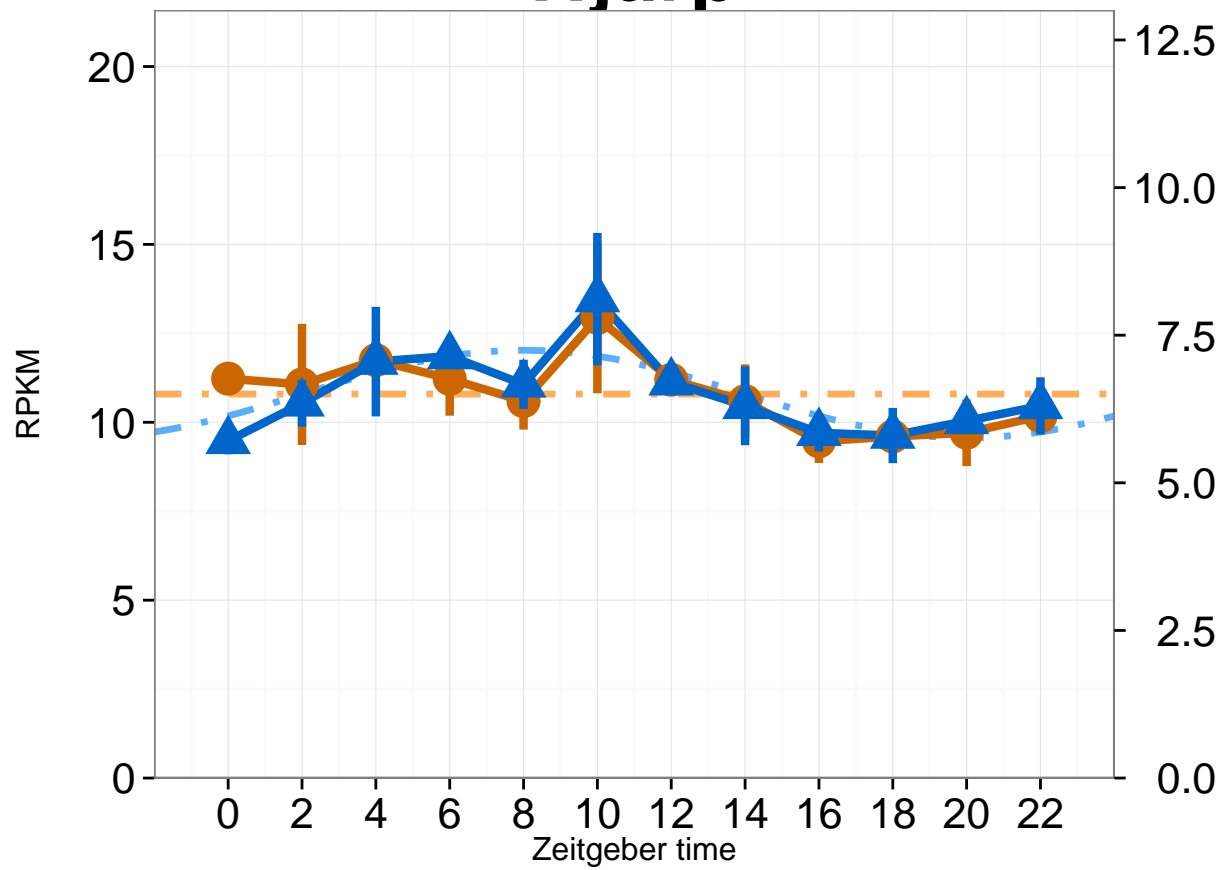

## Hjarp

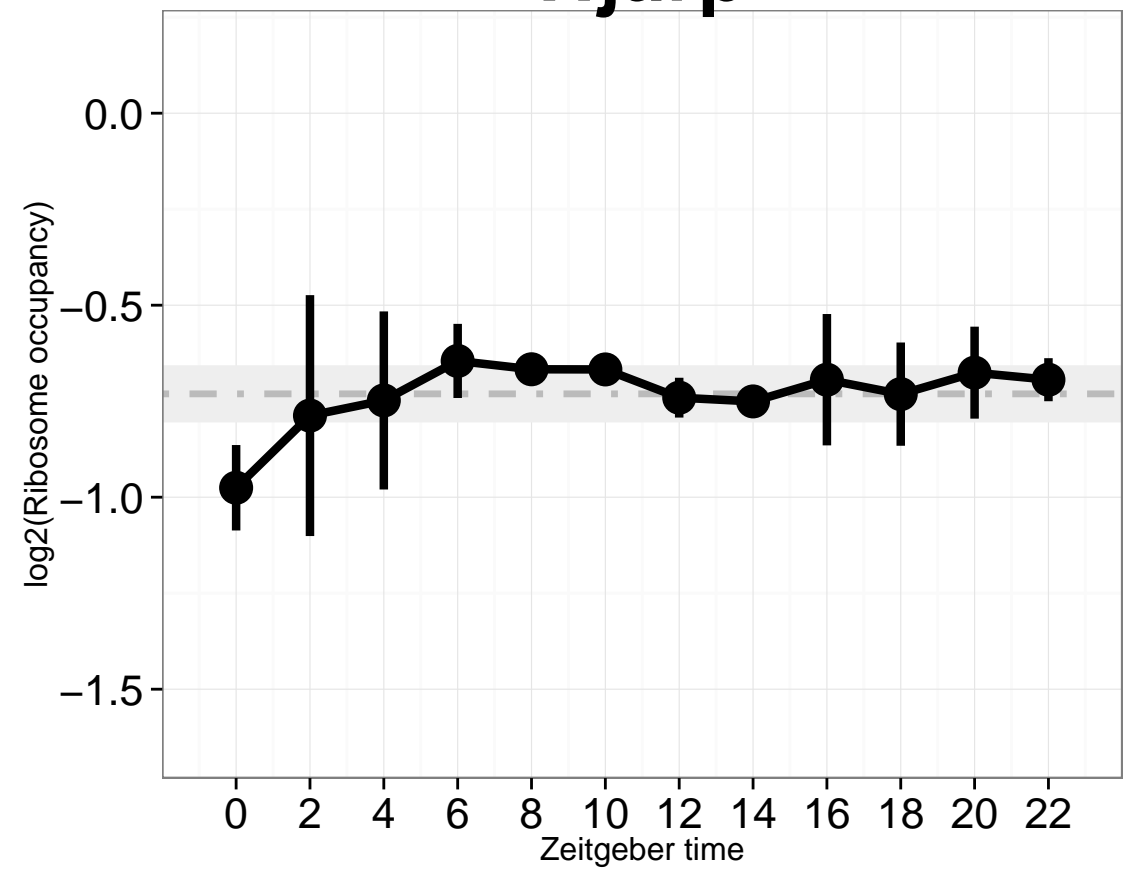

Supplement: Supplementary file 119 [file 1]

# Tbc1d7

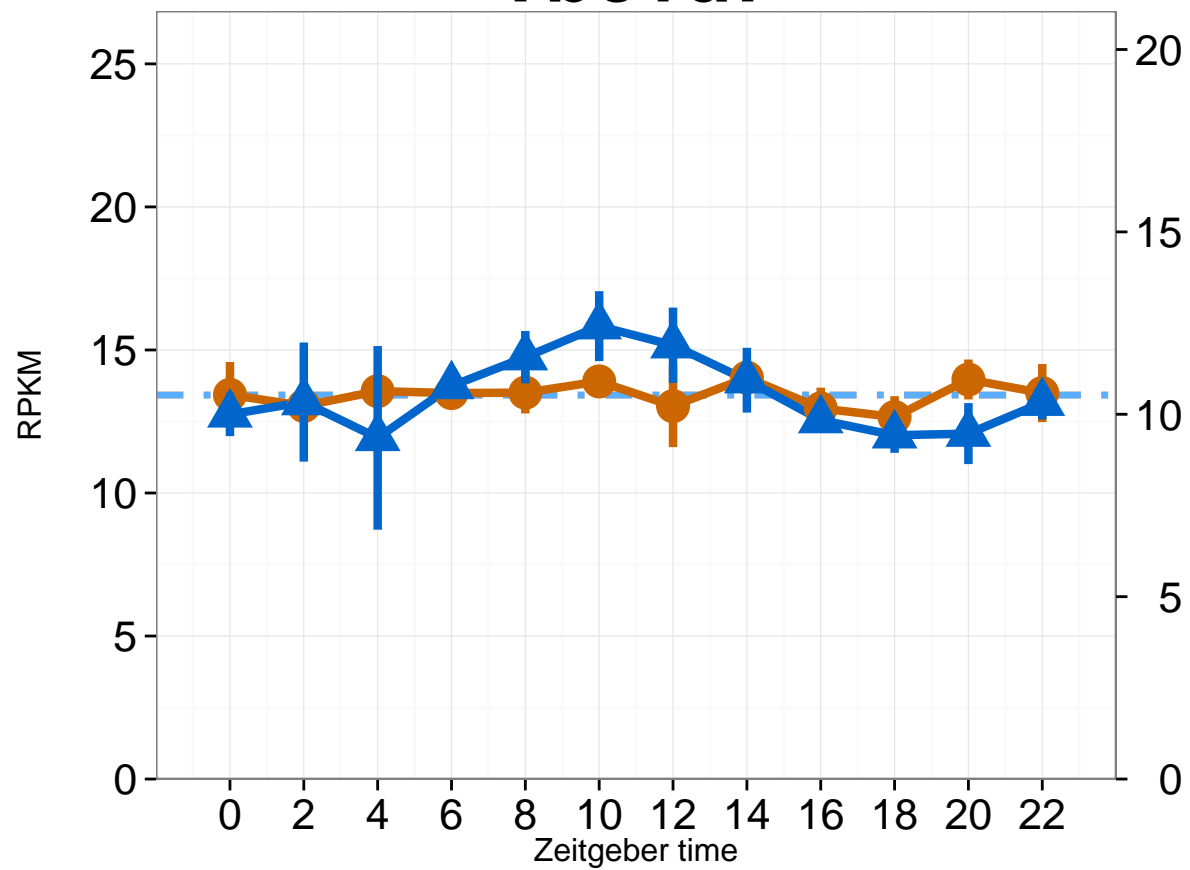

# Tbc1d7

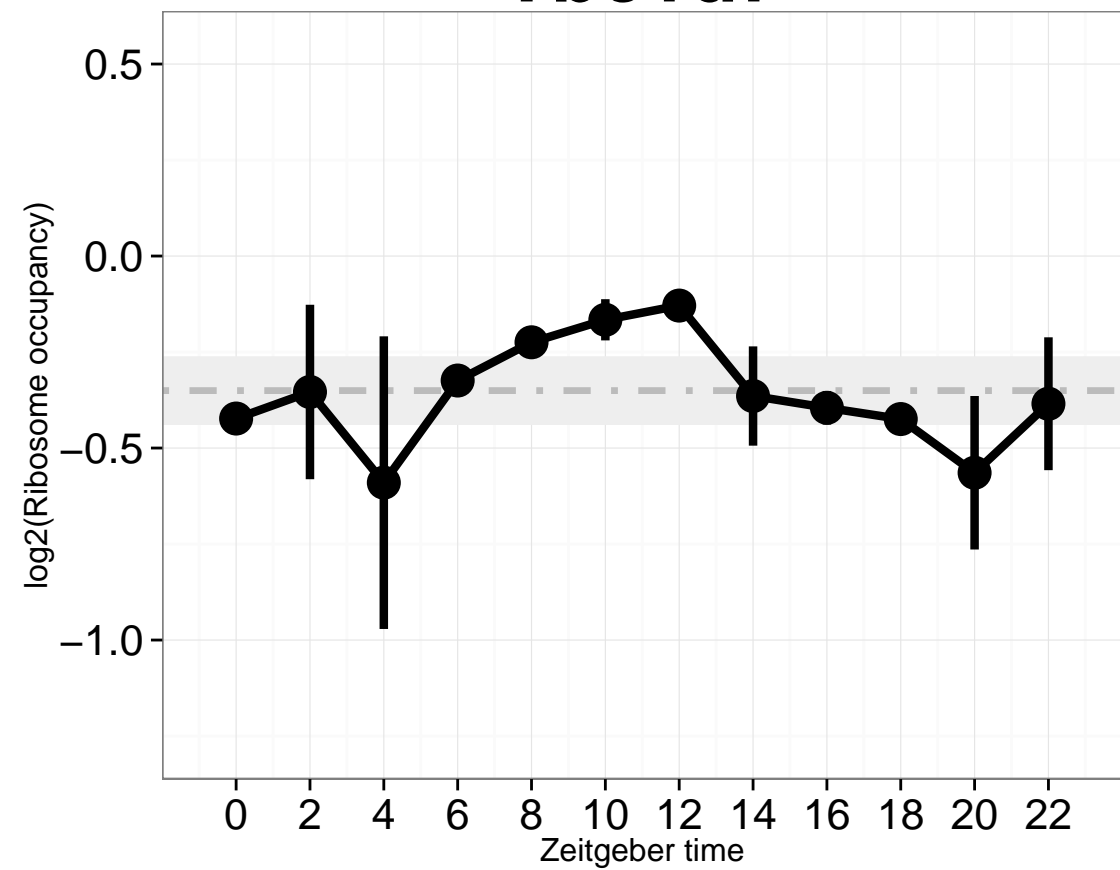

Supplement: Supplementary file 120 [file 1]

# D930015E06Rik

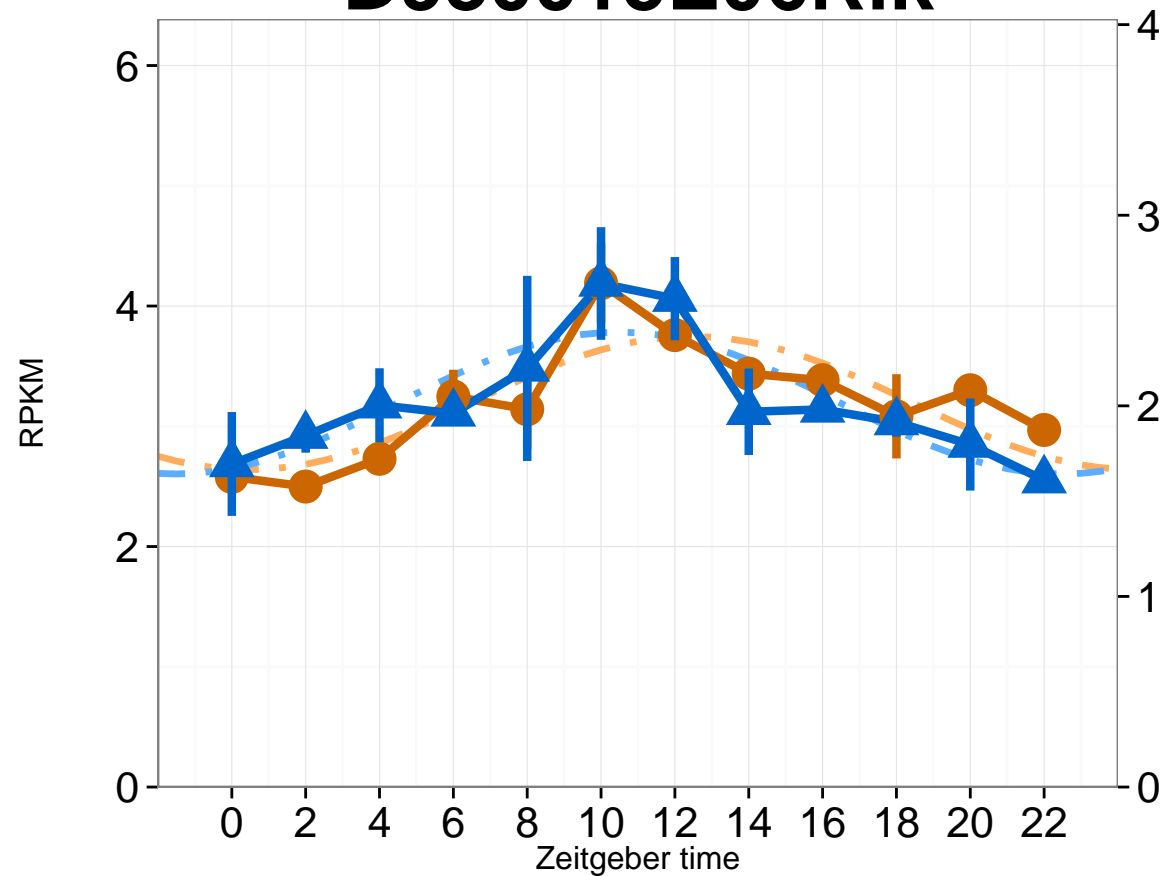

# D930015E06Rik

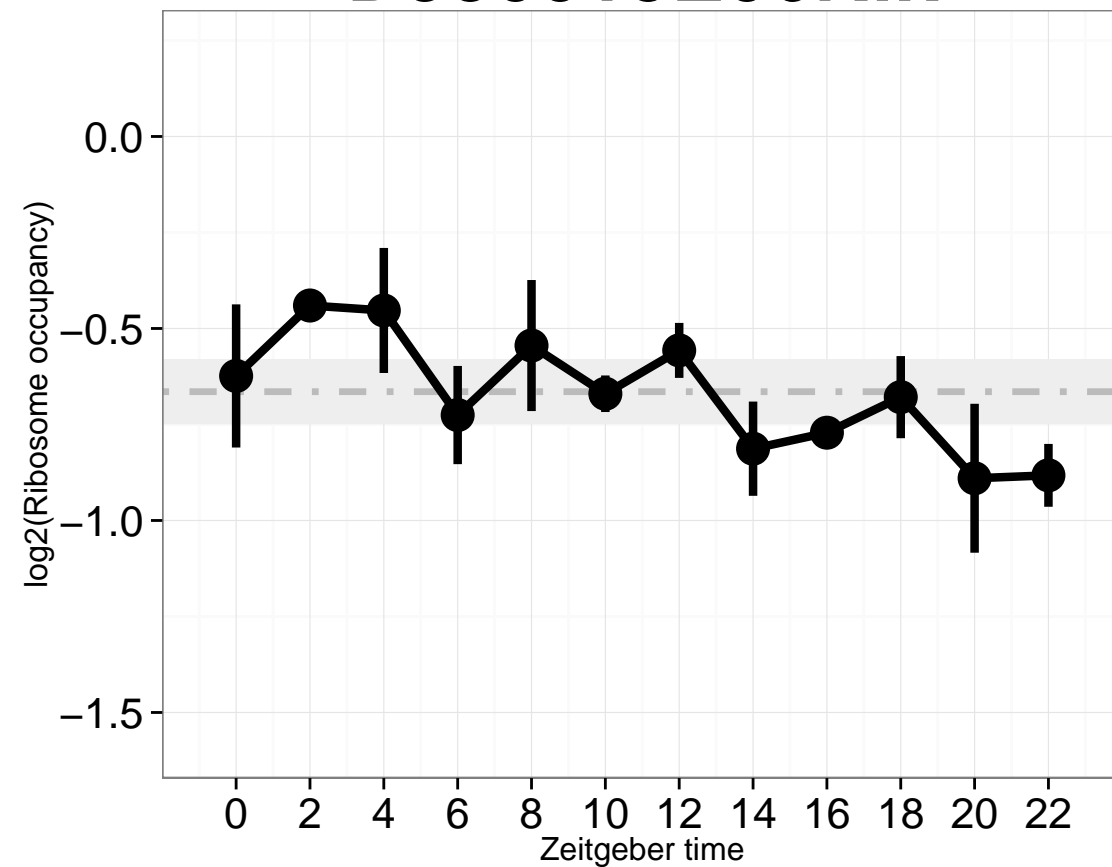

Supplement: Supplementary file 121 [file 1]

# Hirip3

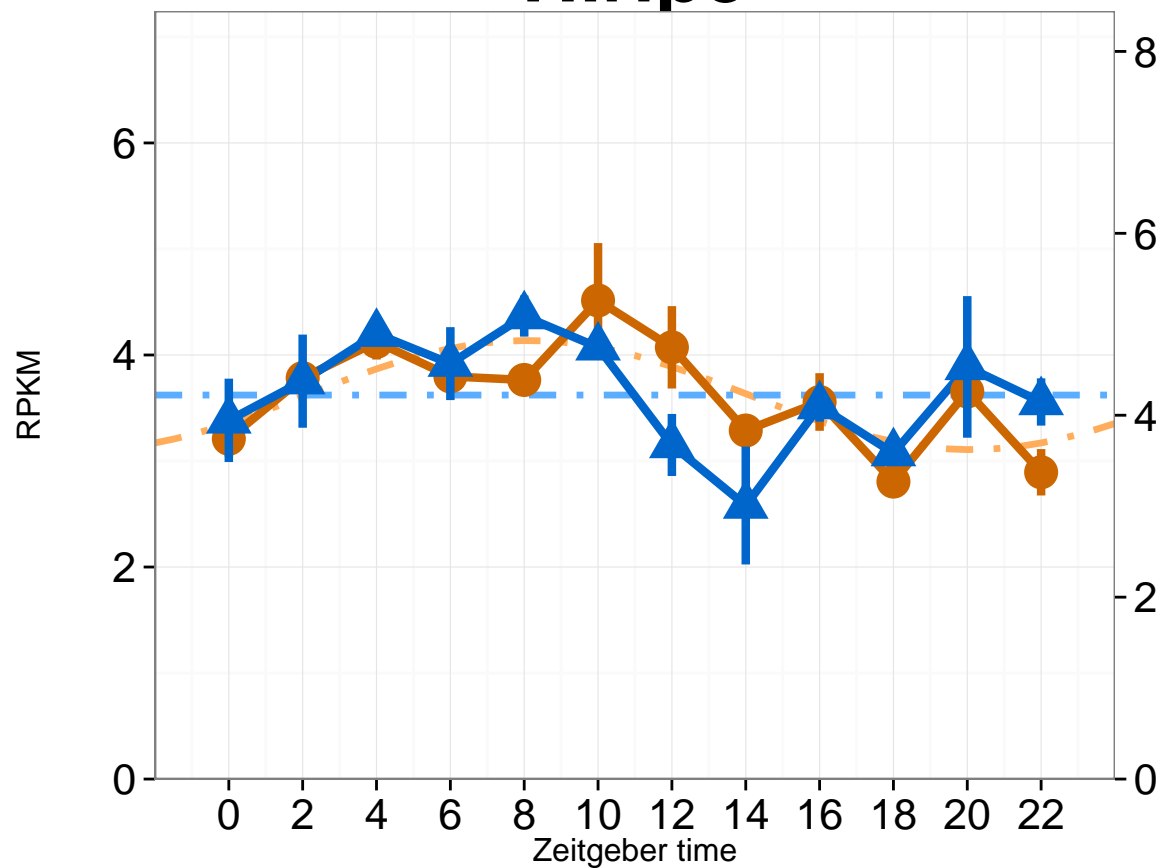

# Hirip3

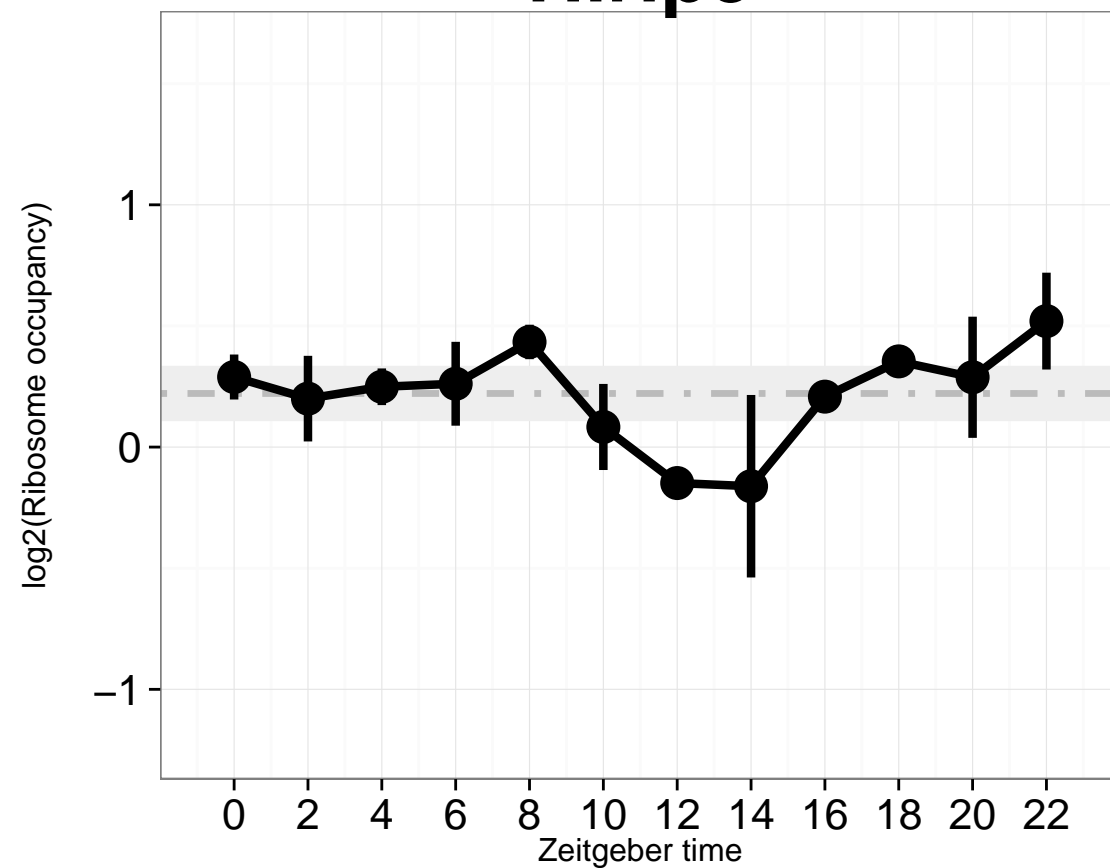

Supplement: Supplementary file 122 [file 1]

# Ccdc160

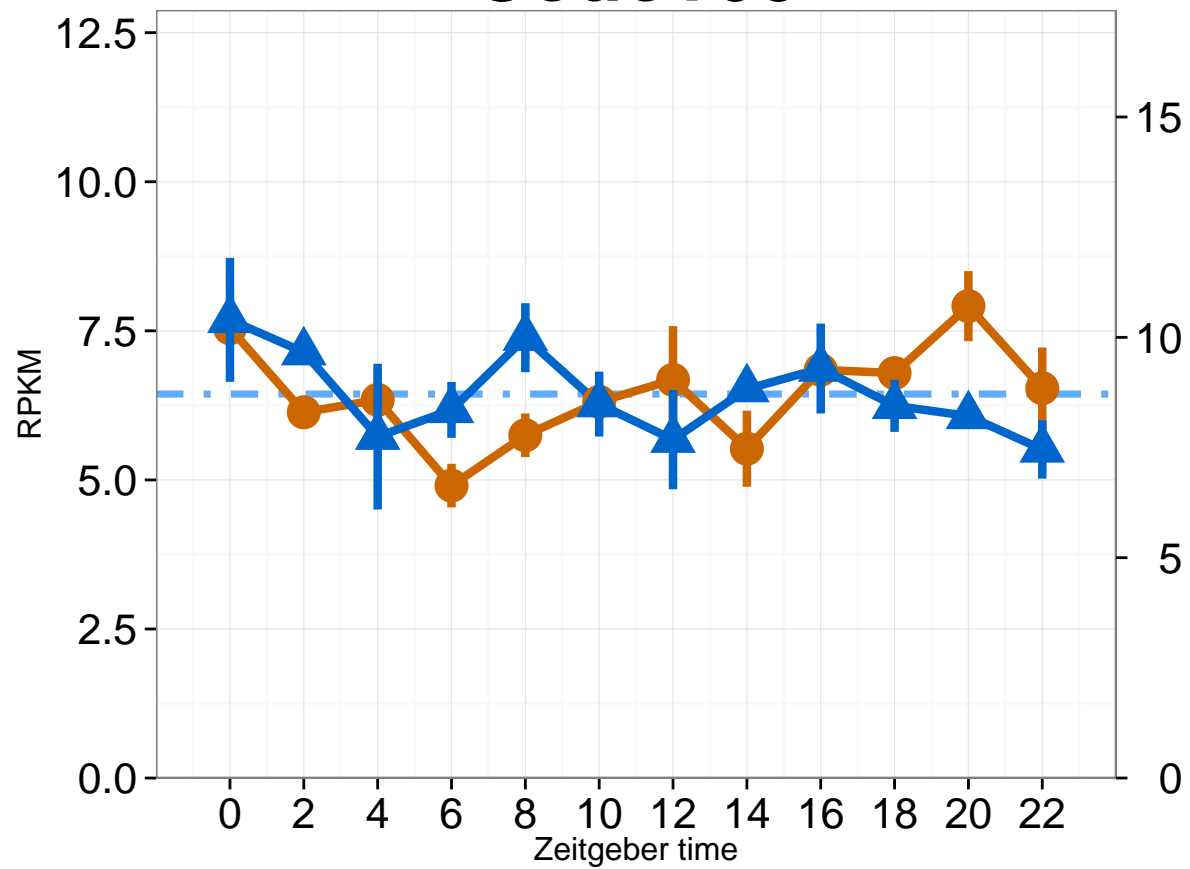

# Ccdc160

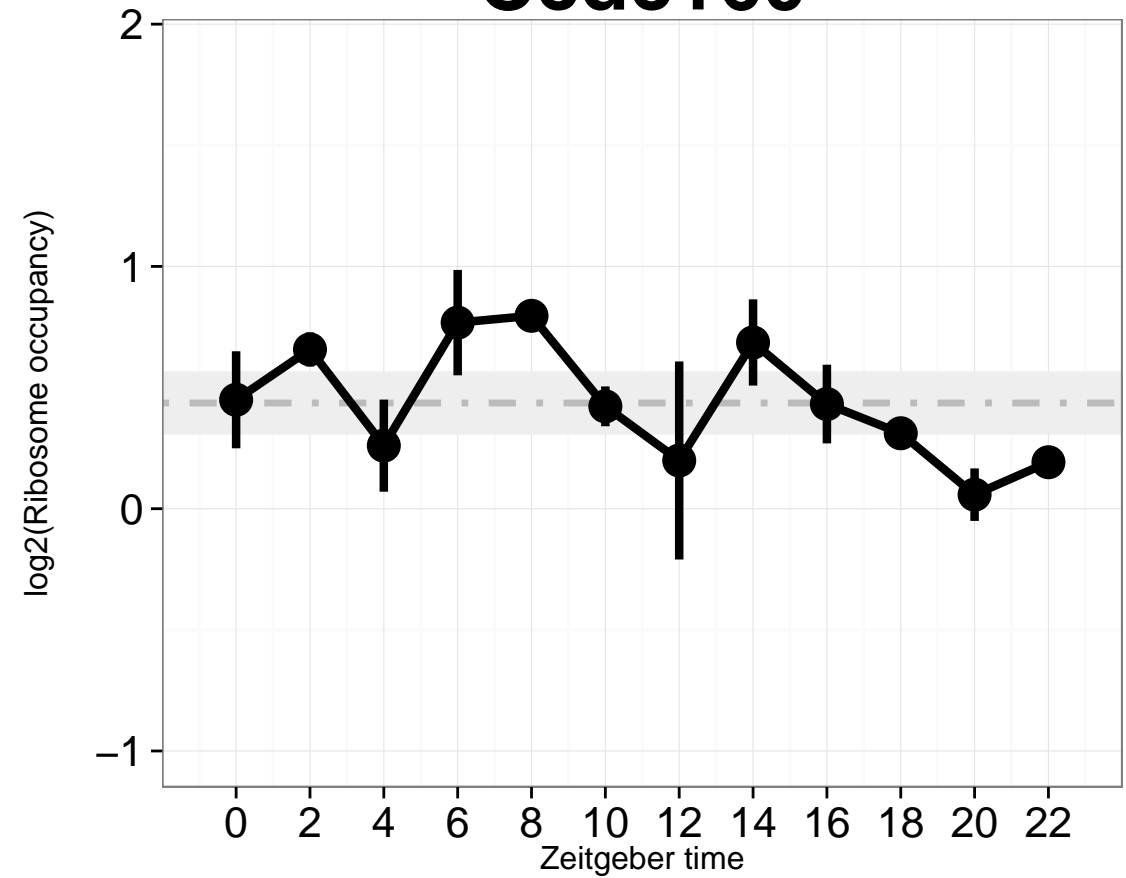

Supplement: Supplementary file 123 [file 1]

## Zcchc6

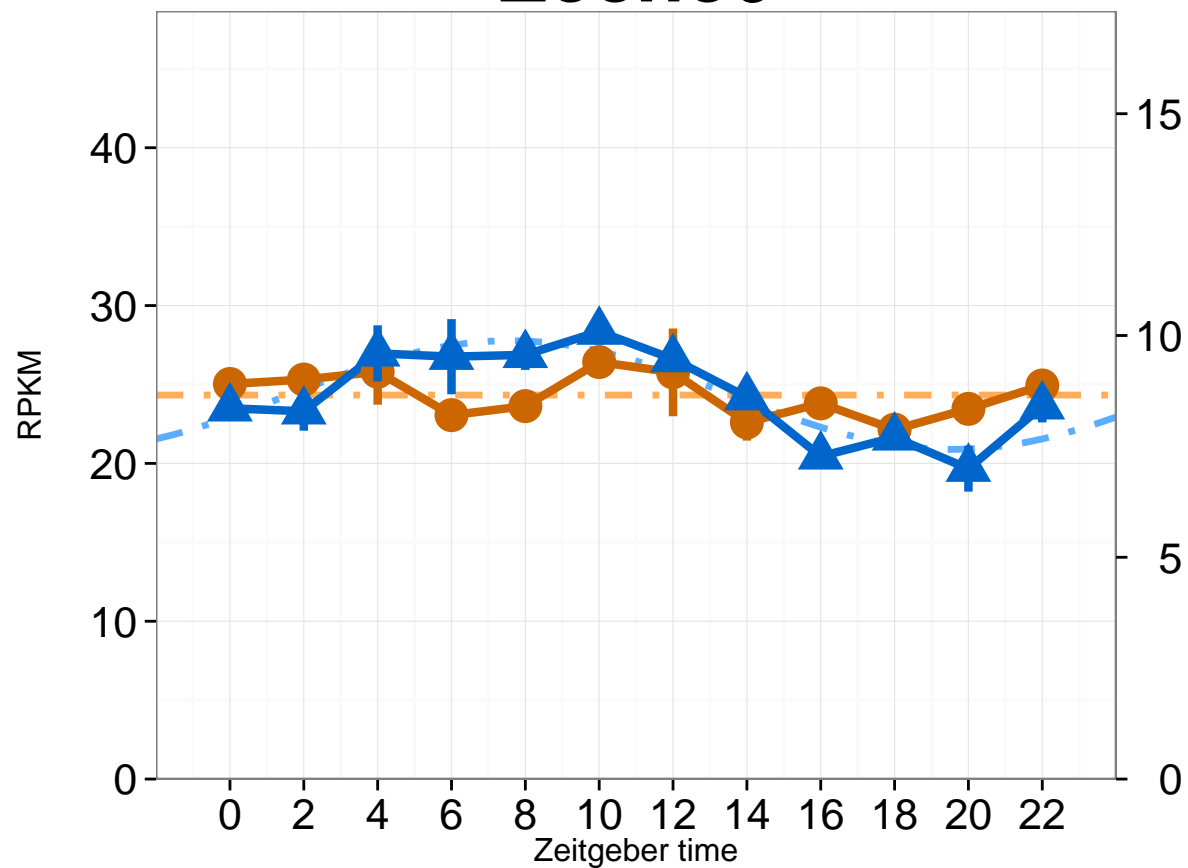

## Zcchc6

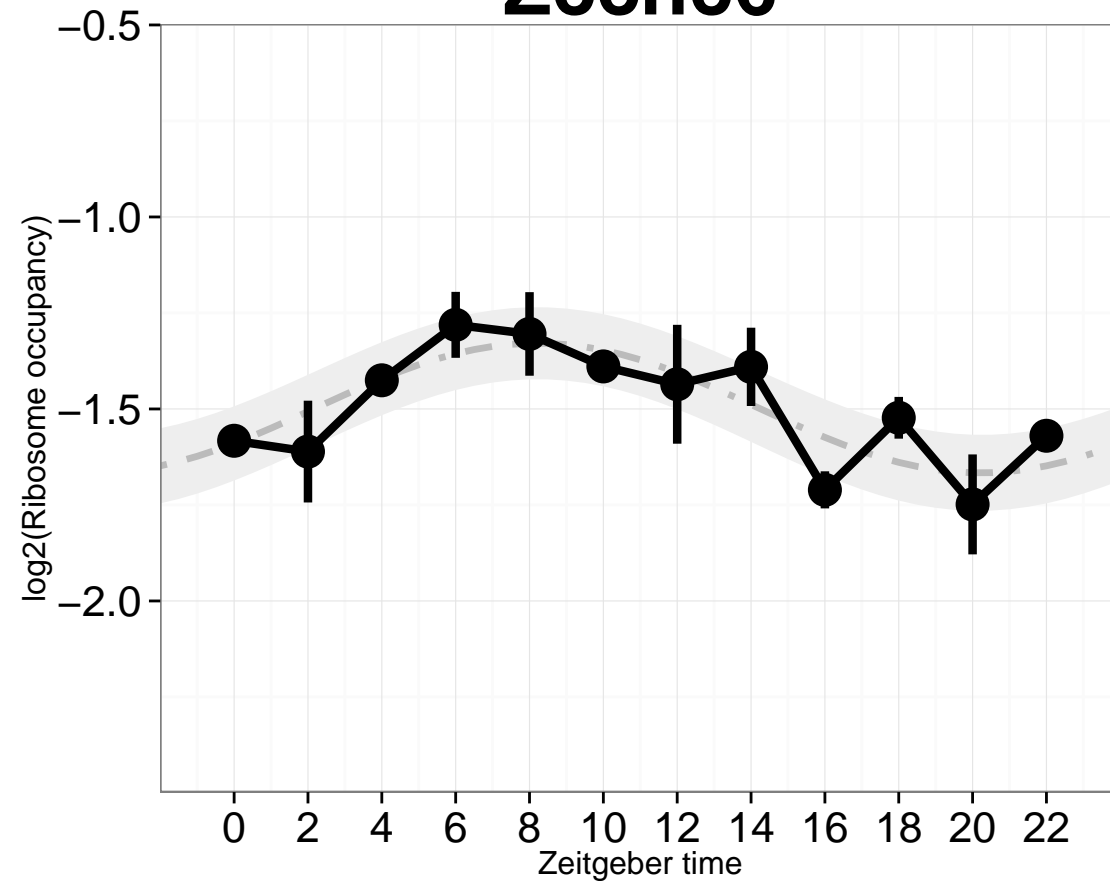

Supplement: Supplementary file 124 [file 1]

## Stox2

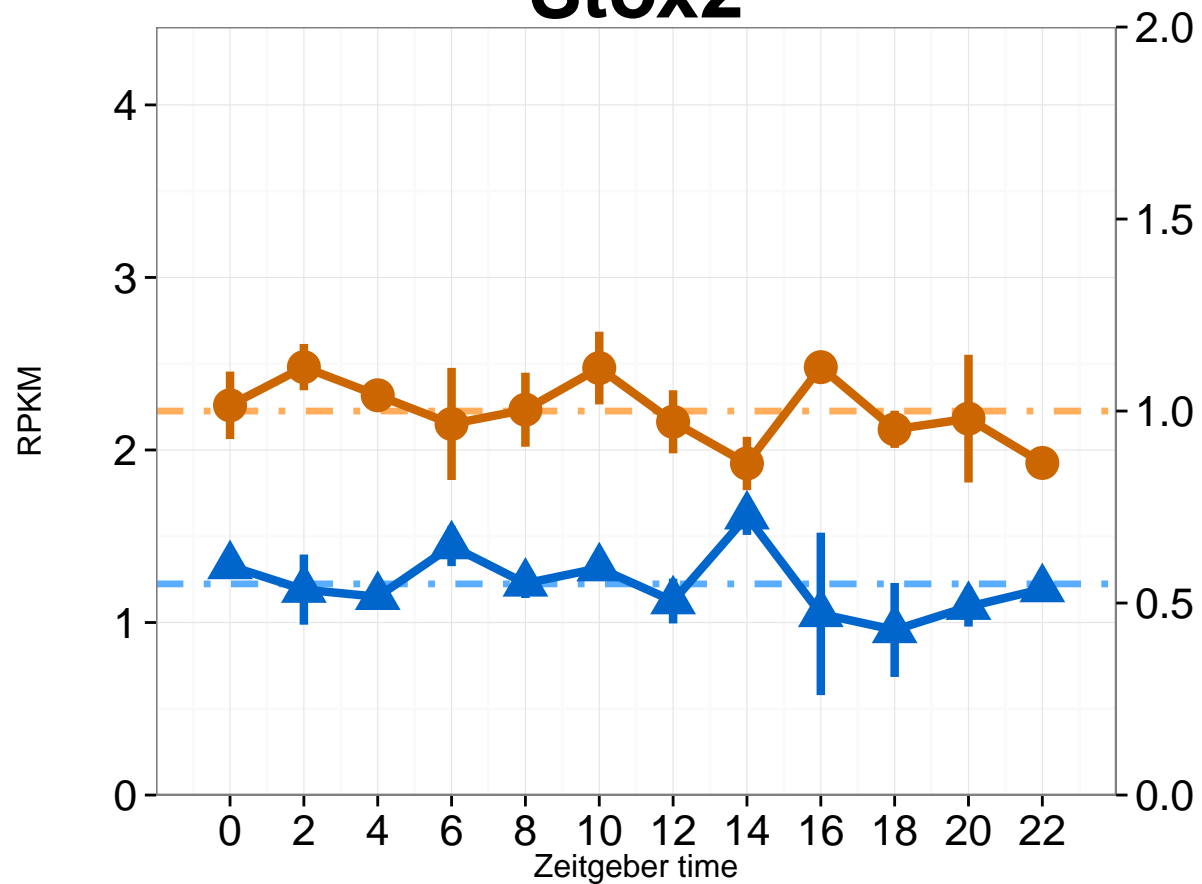

## Stox2

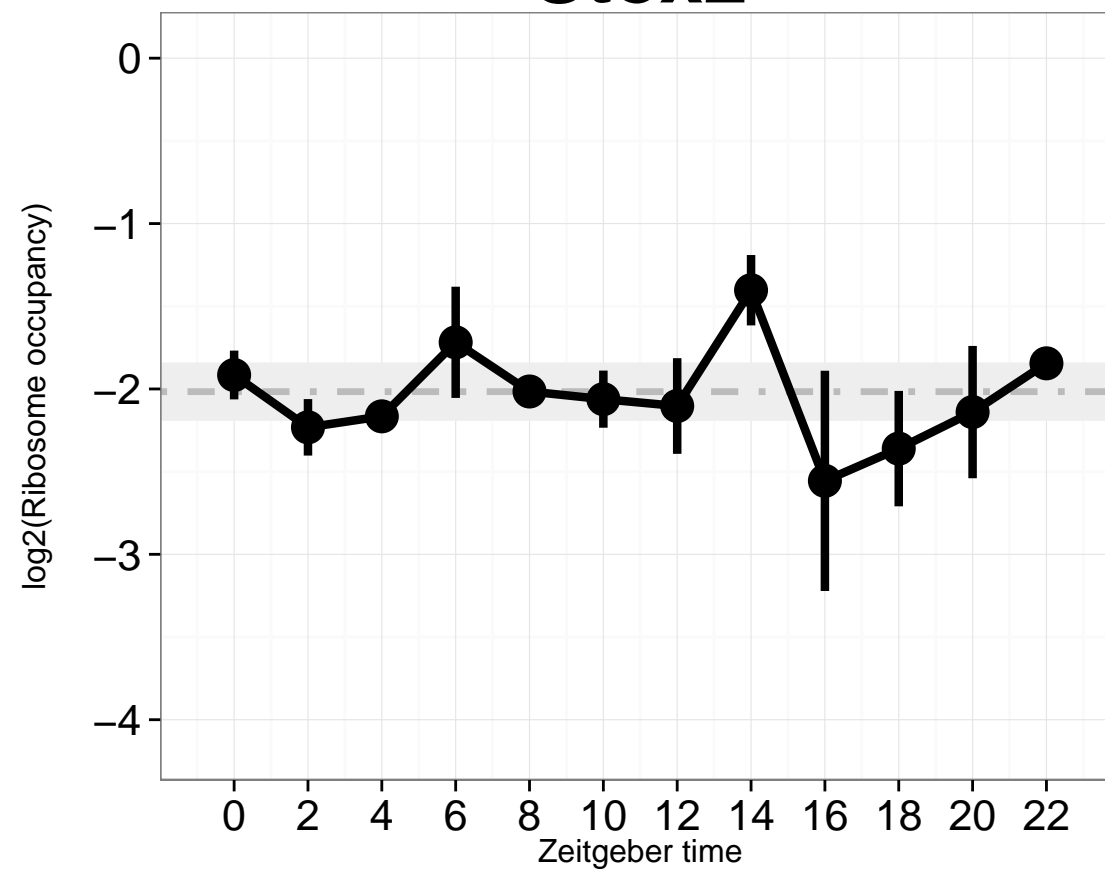

Supplement: Supplementary file 125 [file 1]

## Gstcd

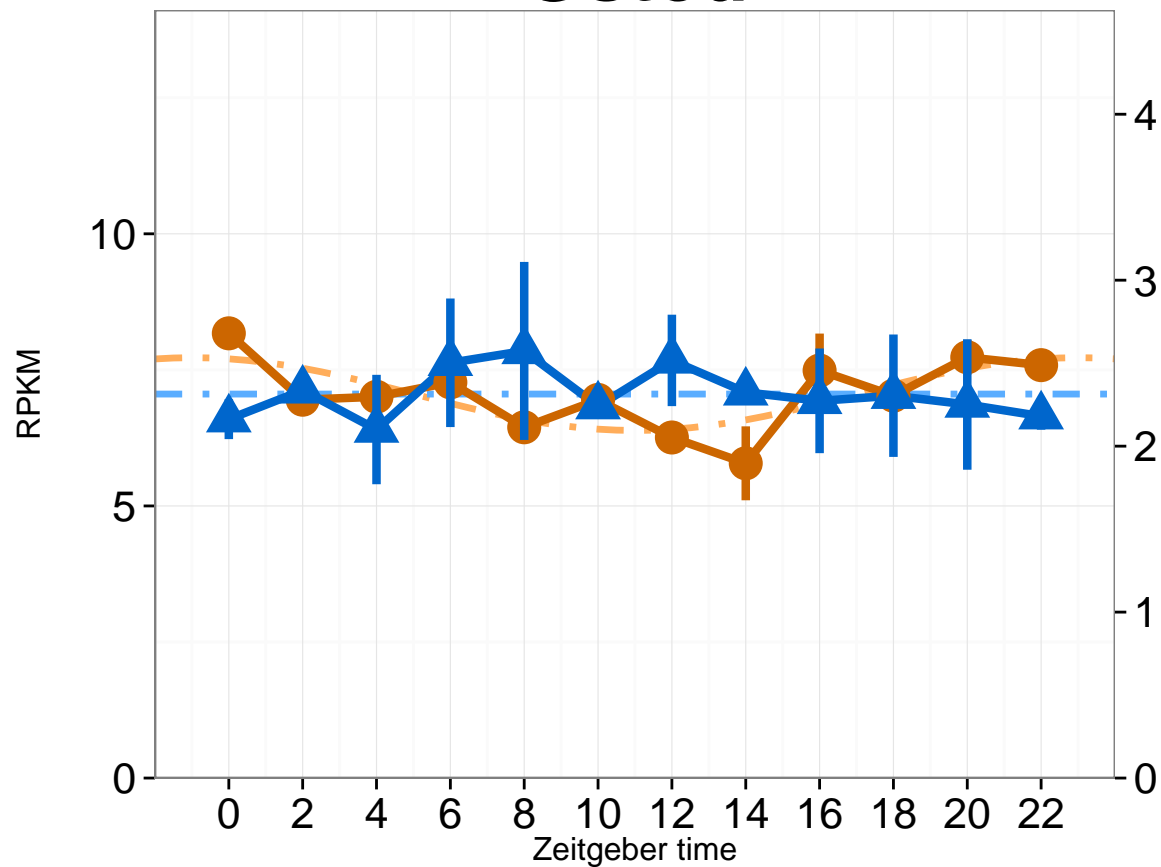

## Gstcd

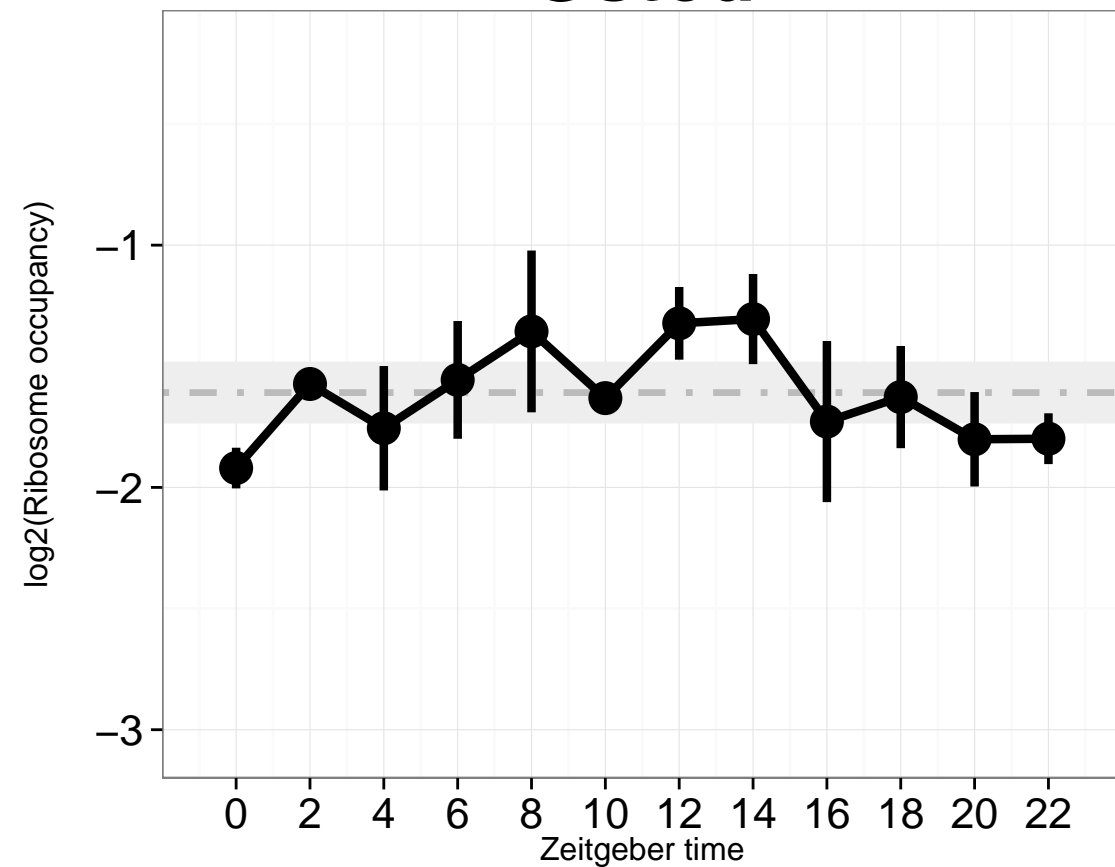

Supplement: Supplementary file 126 [file 1]

# Trim37

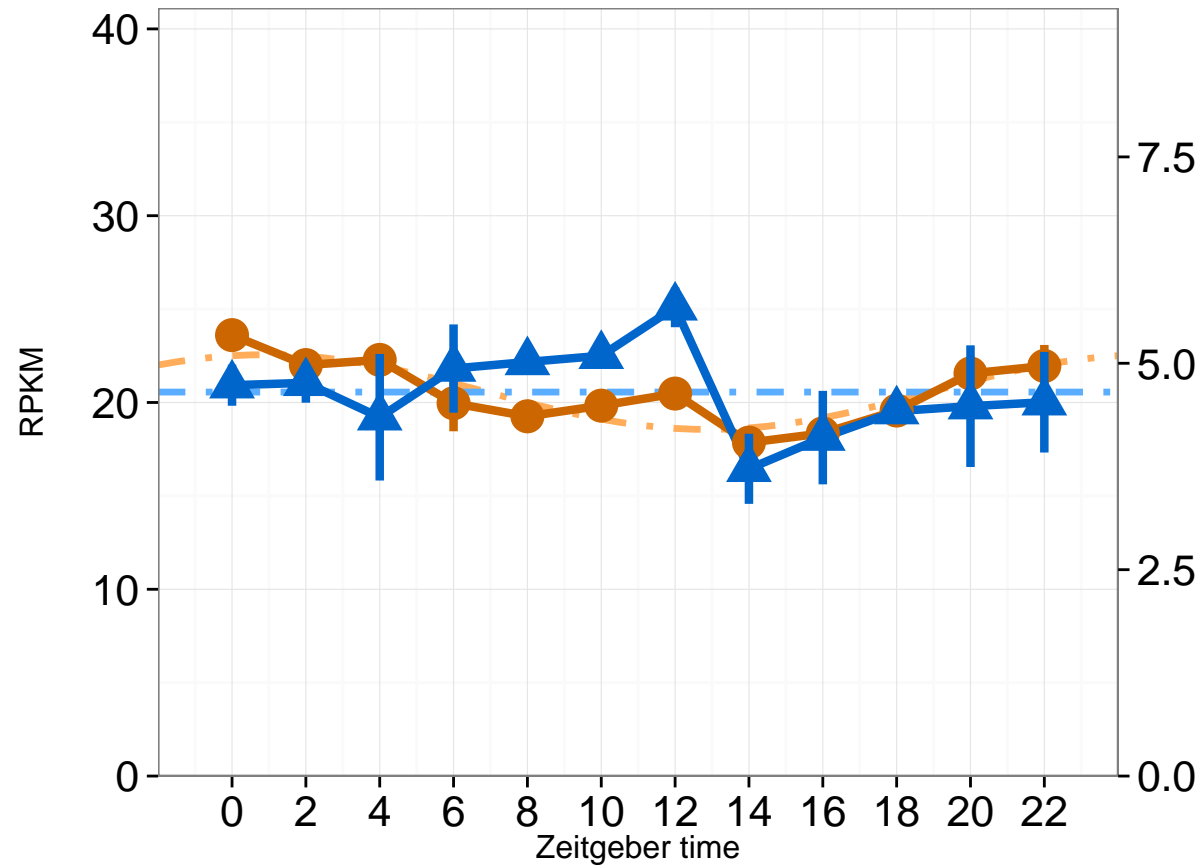

# Trim37

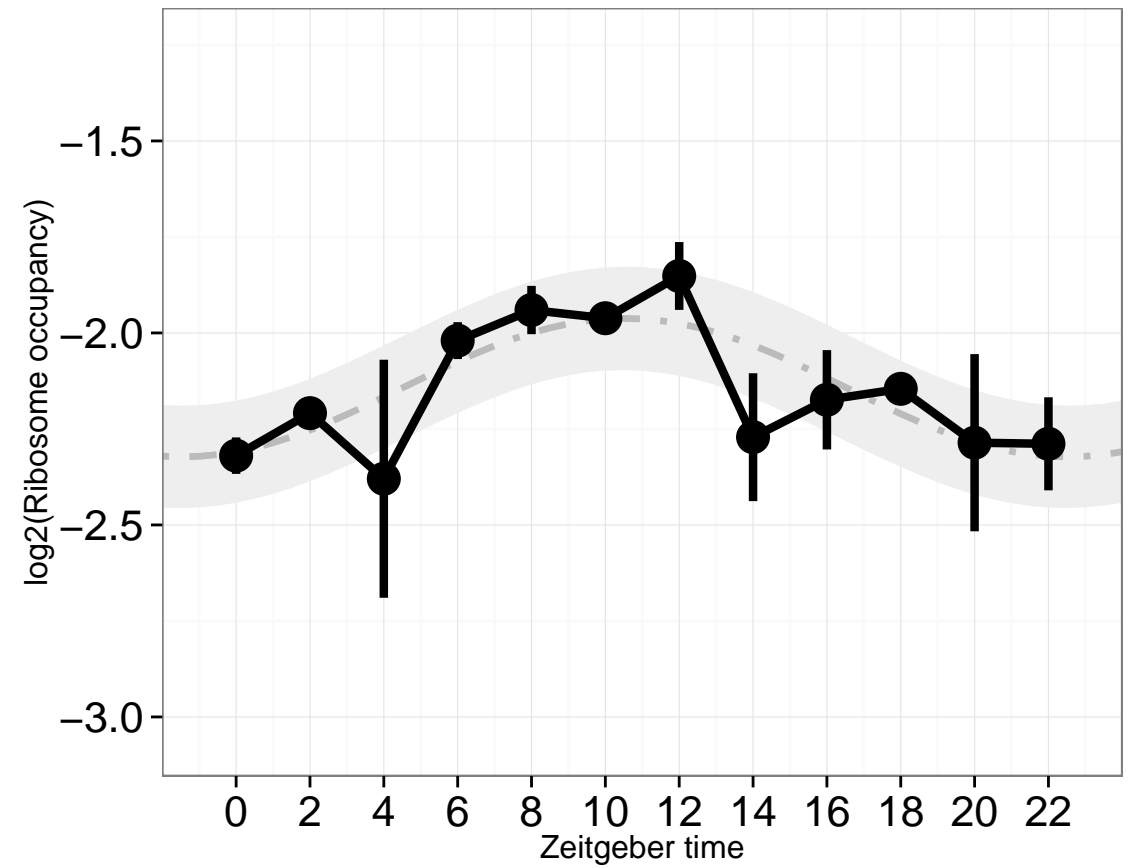

Supplement: Supplementary file 127 [file 1]

## Klh17

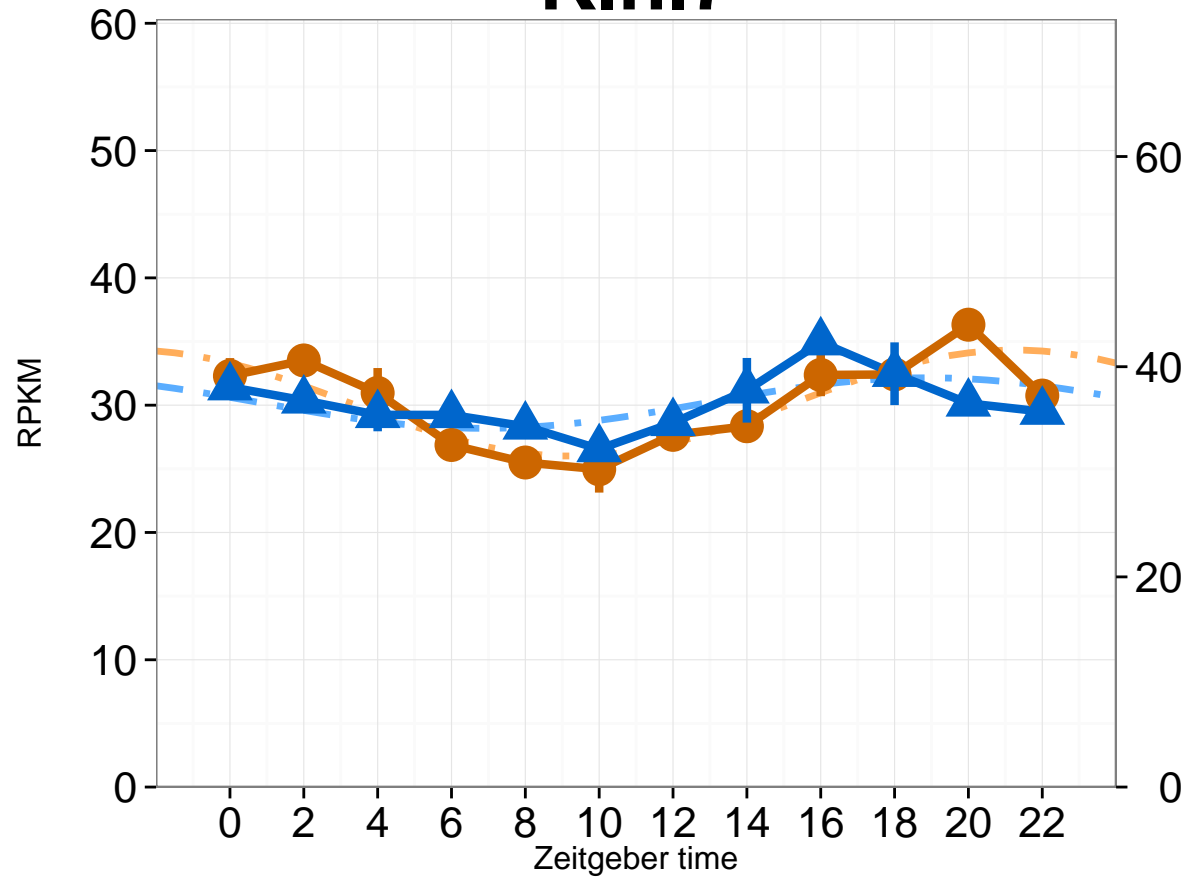

## Klh17

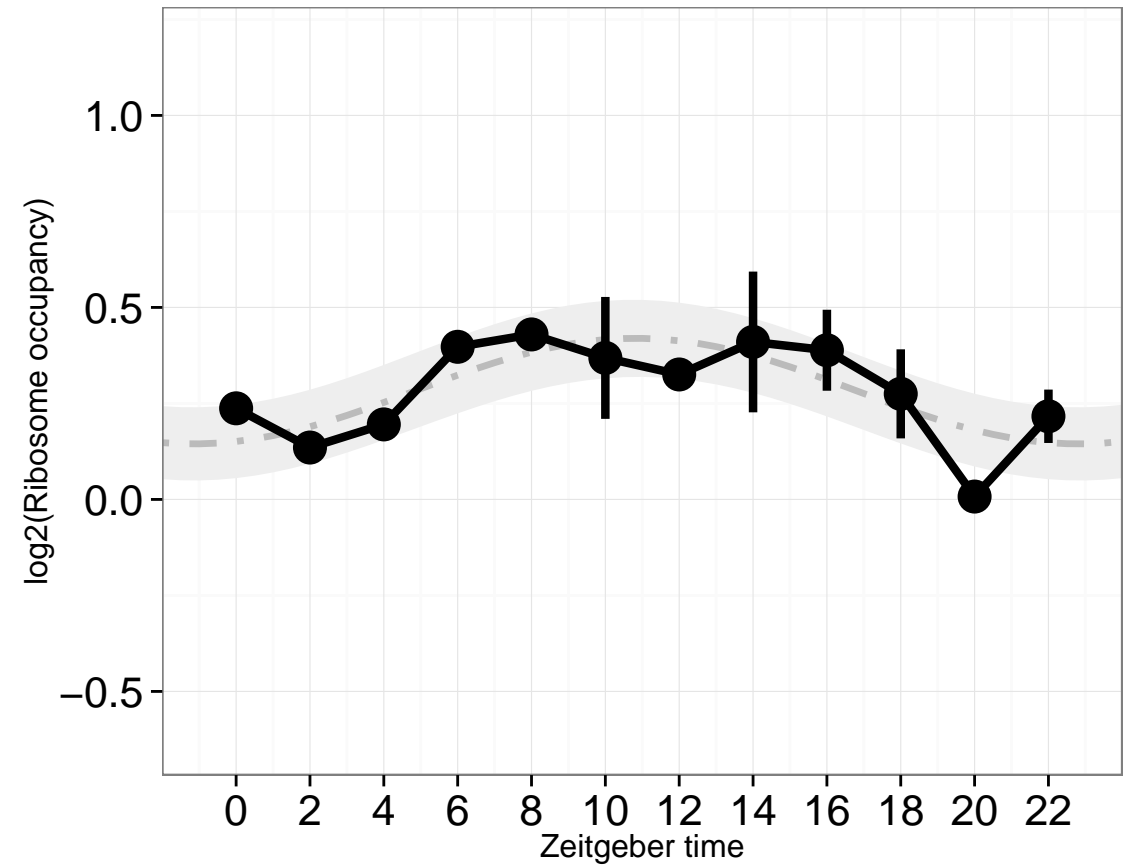

Supplement: Supplementary file 128 [file 1]

# Nampt

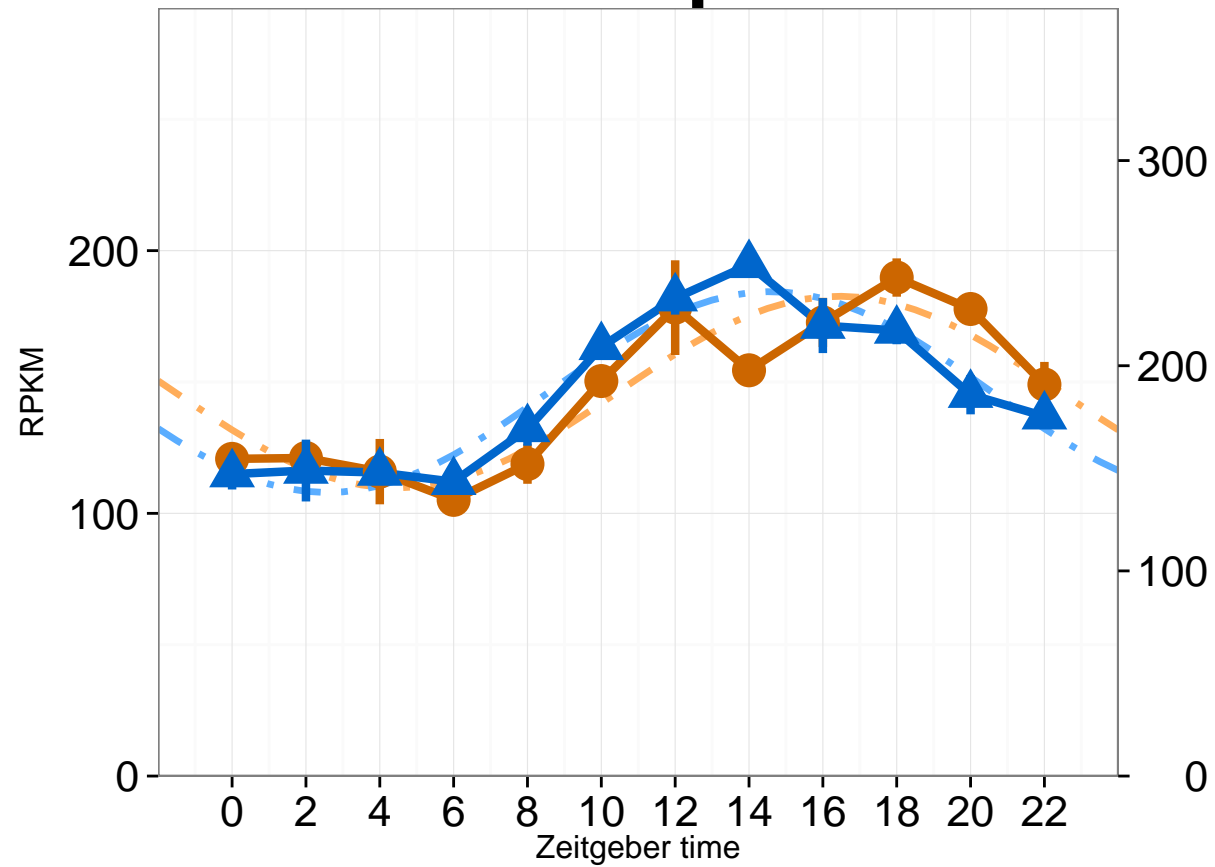

# Nampt

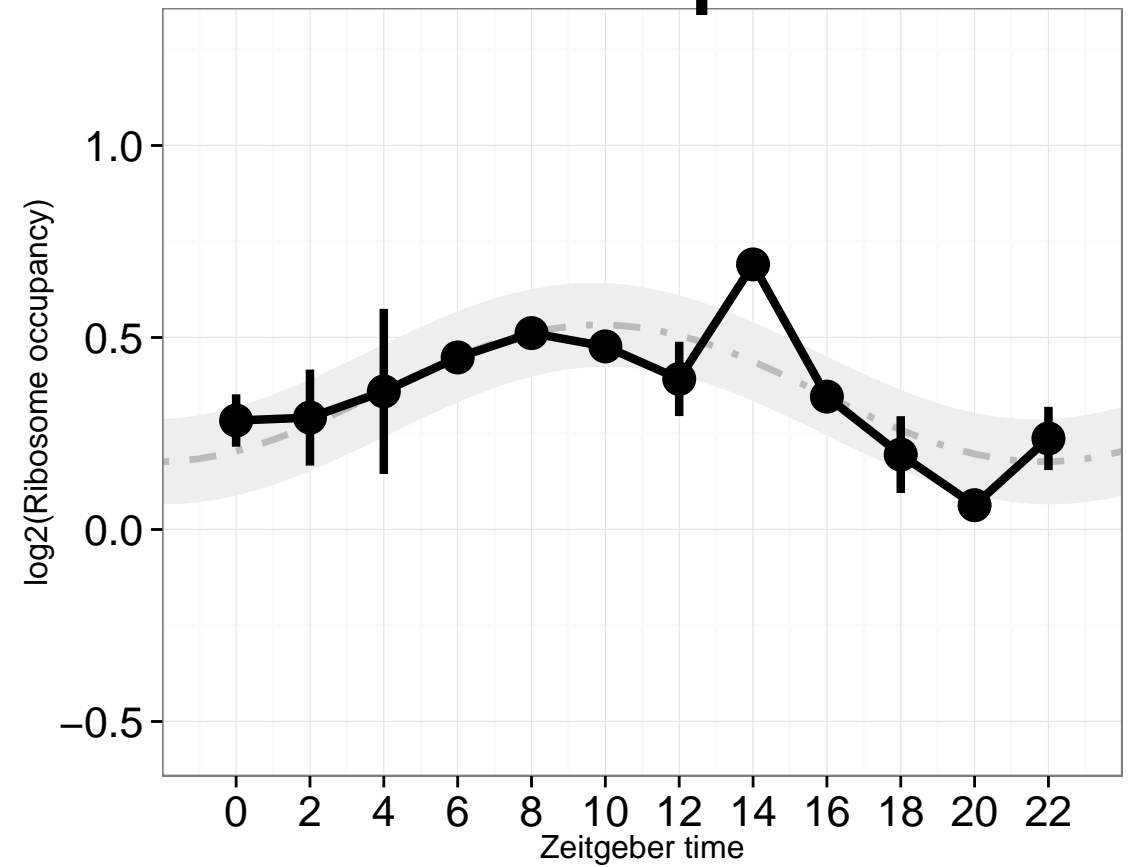

Supplement: Supplementary file 129 [file 1]

## Ccs

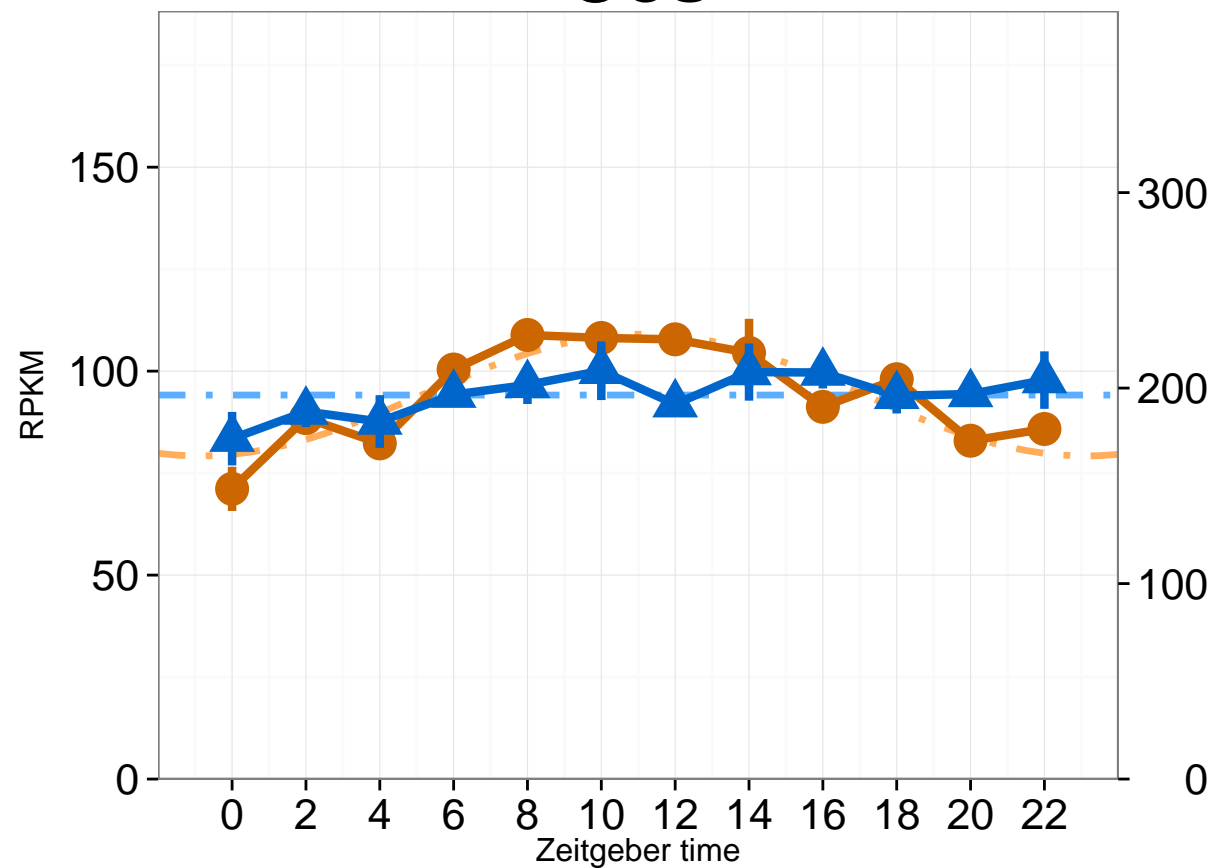

## Ccs

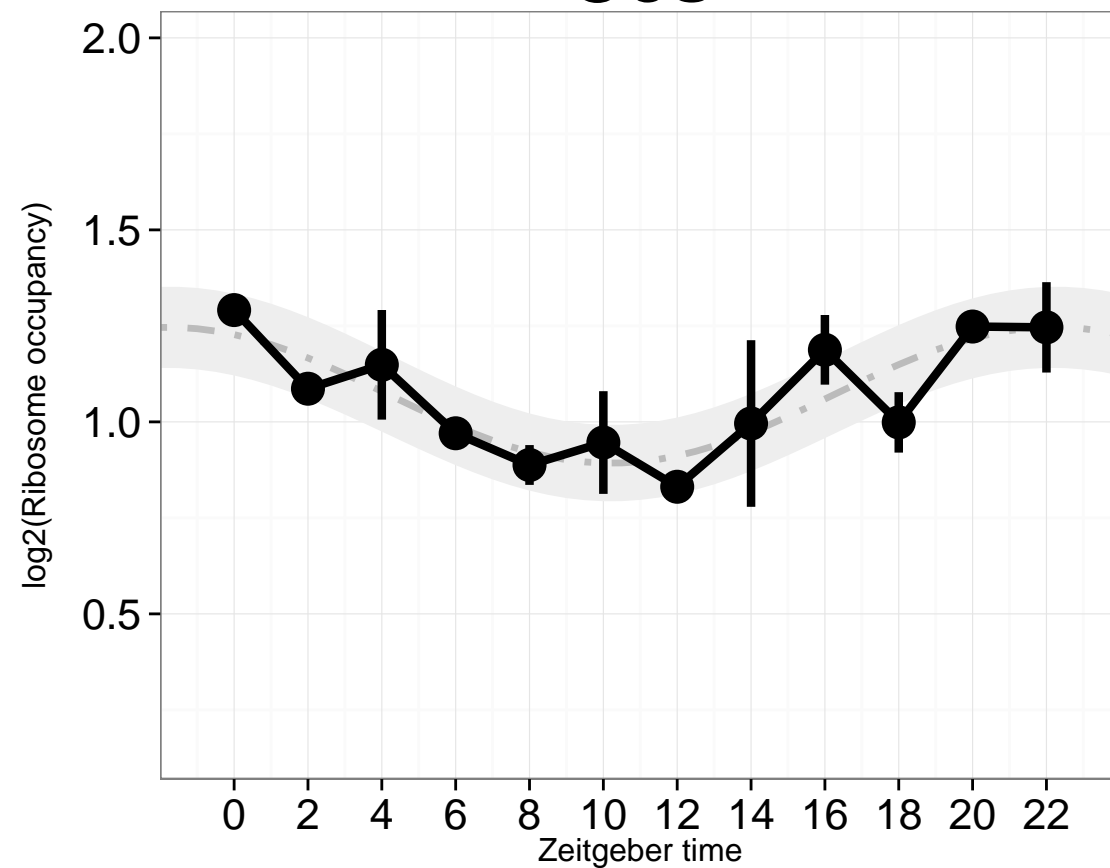

Supplement: Supplementary file 130 [file 1]

## Cd47

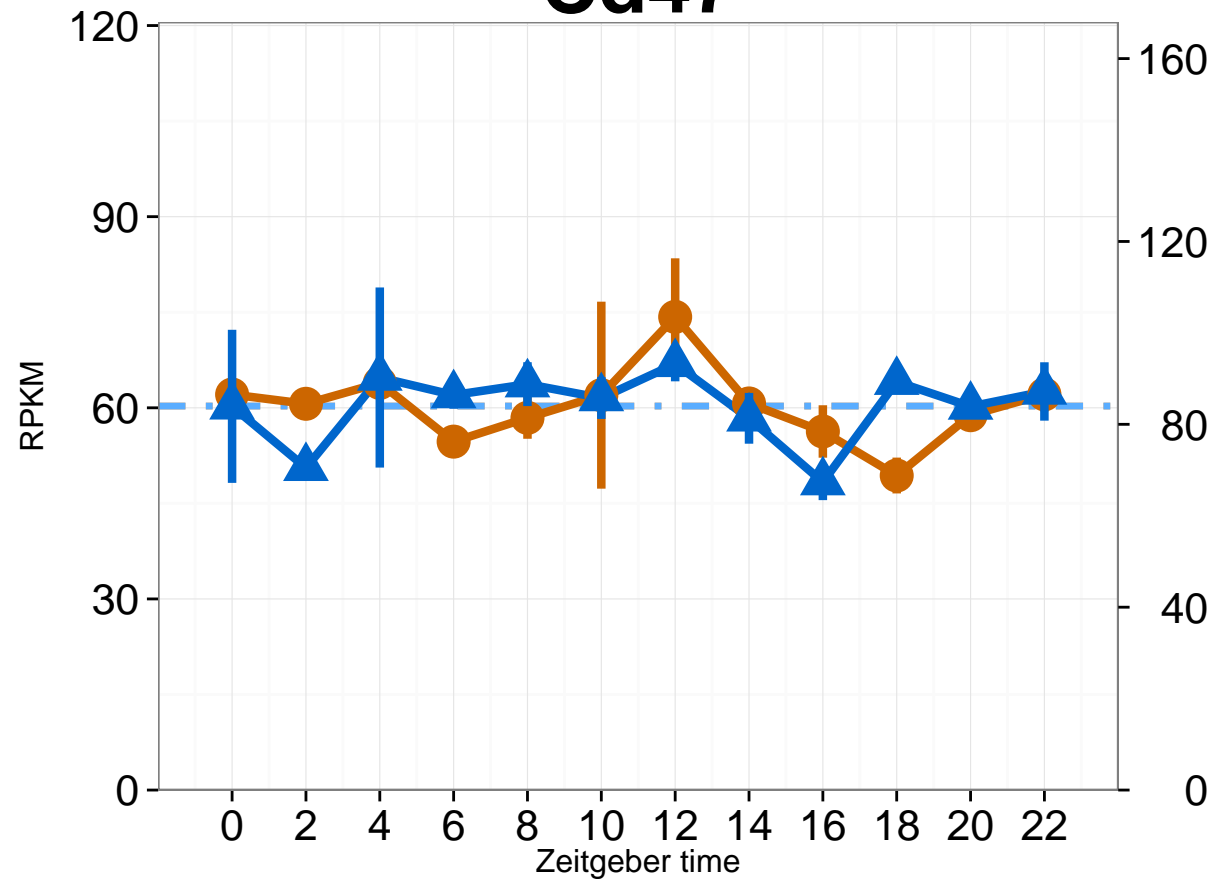

## Cd47

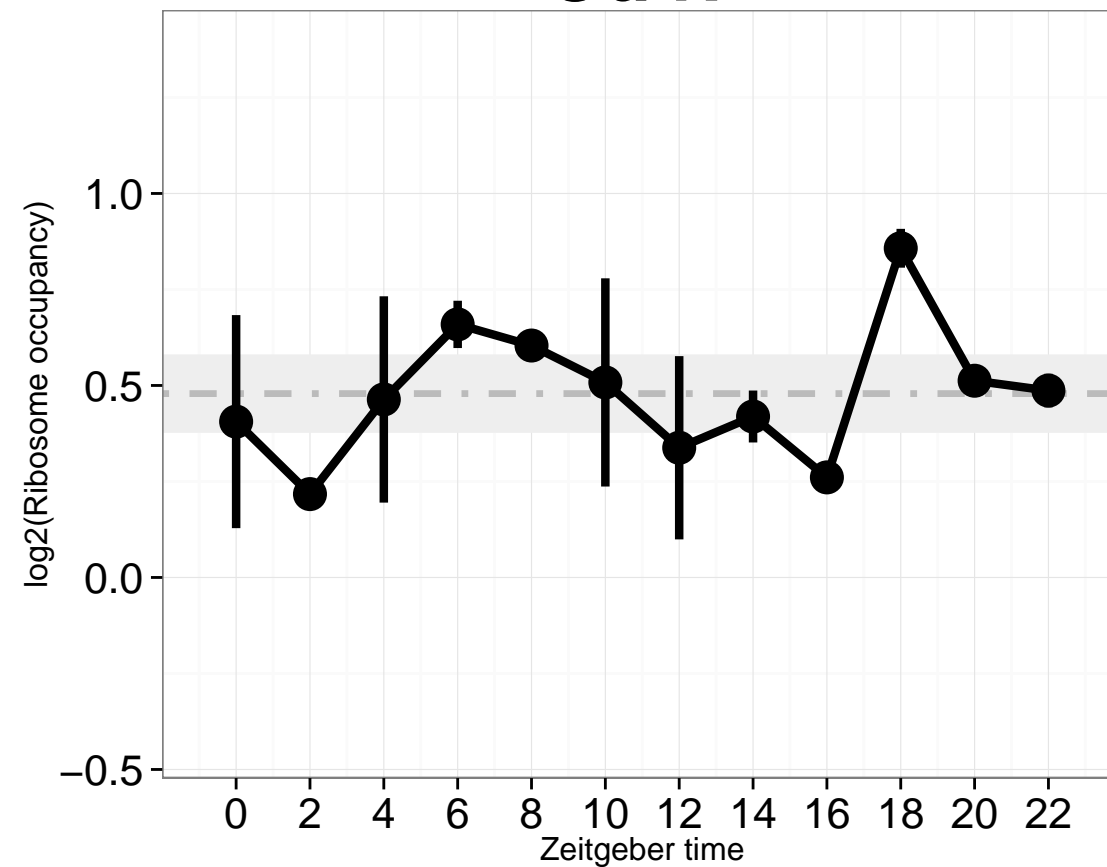

Supplement: Supplementary file 131 [file 1]

# Slc23a3

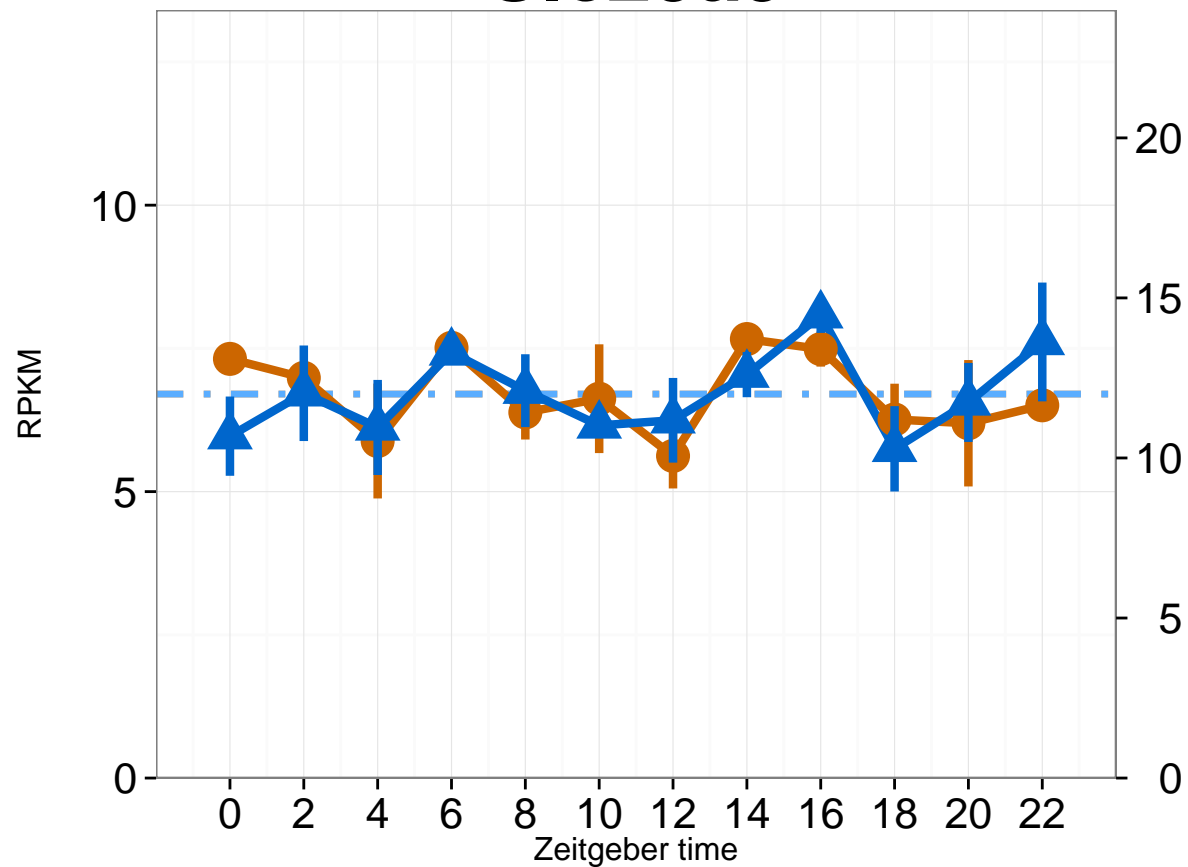

# Slc23a3

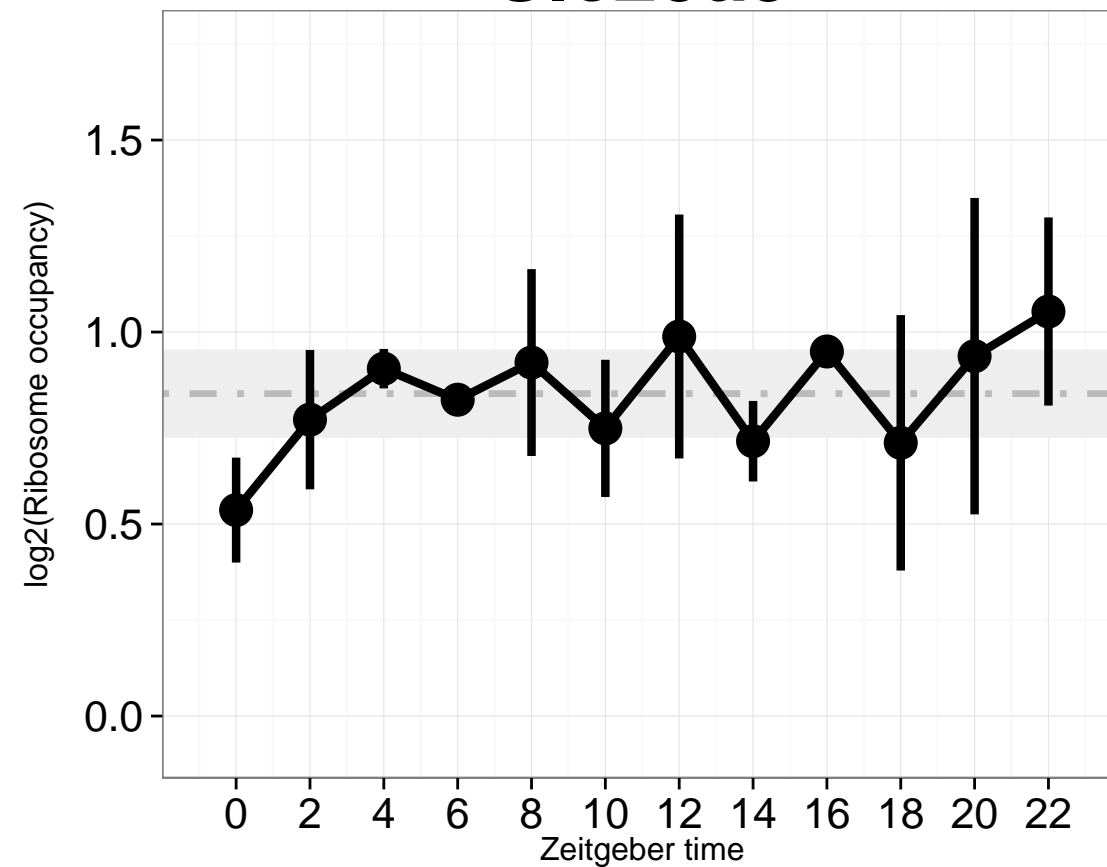

Supplement: Supplementary file 132 [file 1]

# Zbtb8os

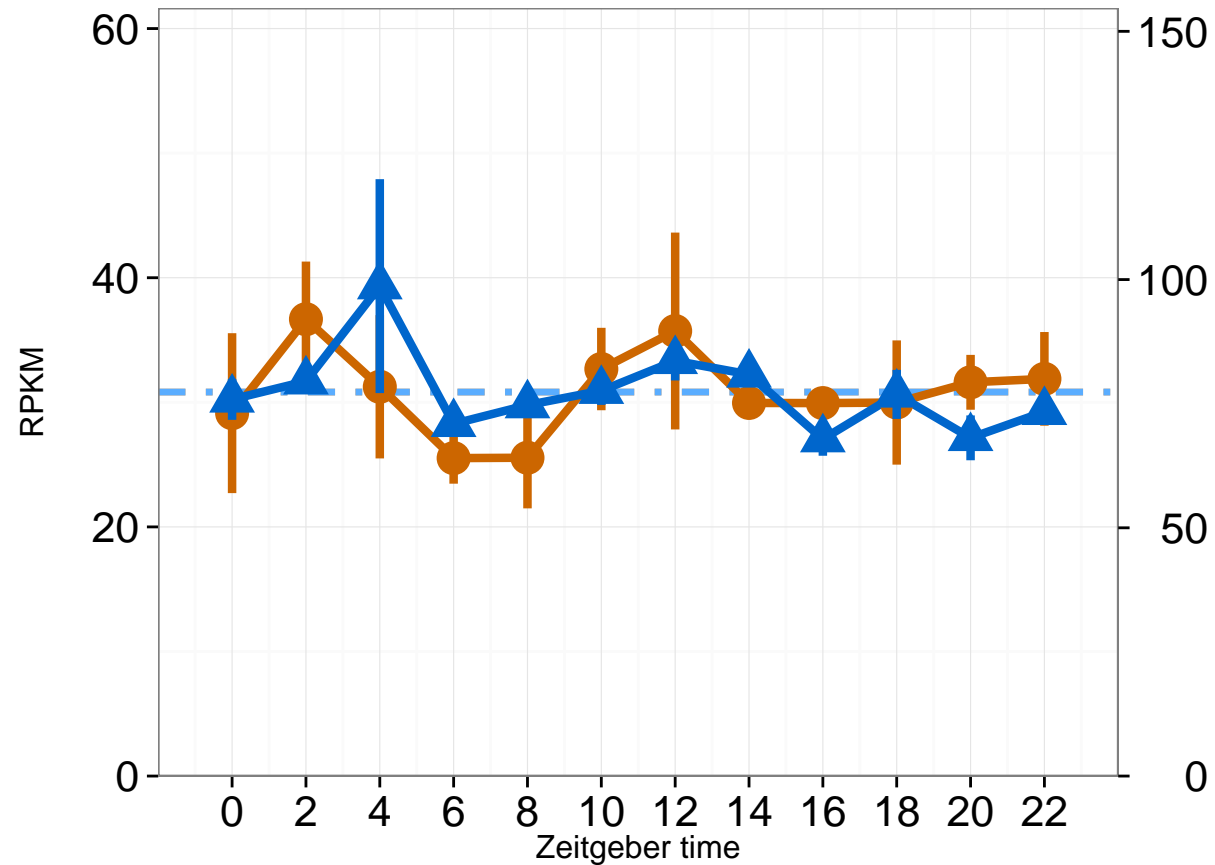

# Zbtb8os

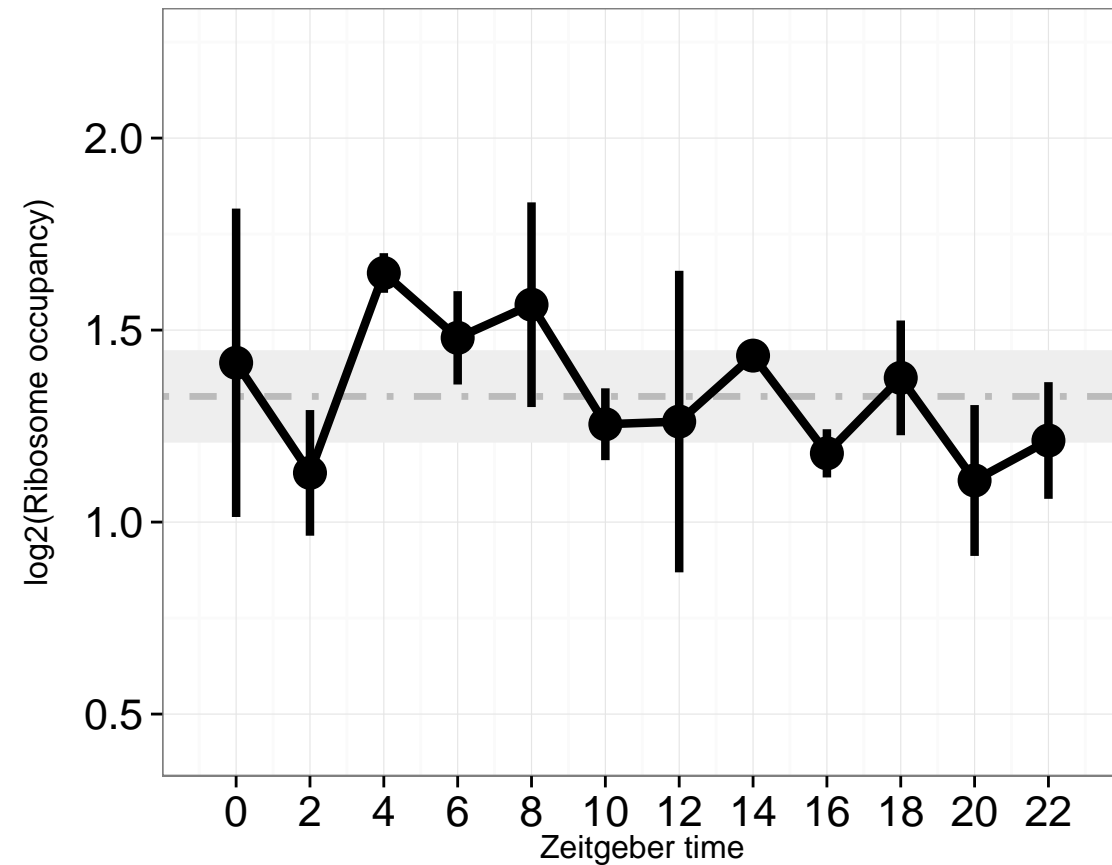

Supplement: Supplementary file 133 [file 1]

# lft81

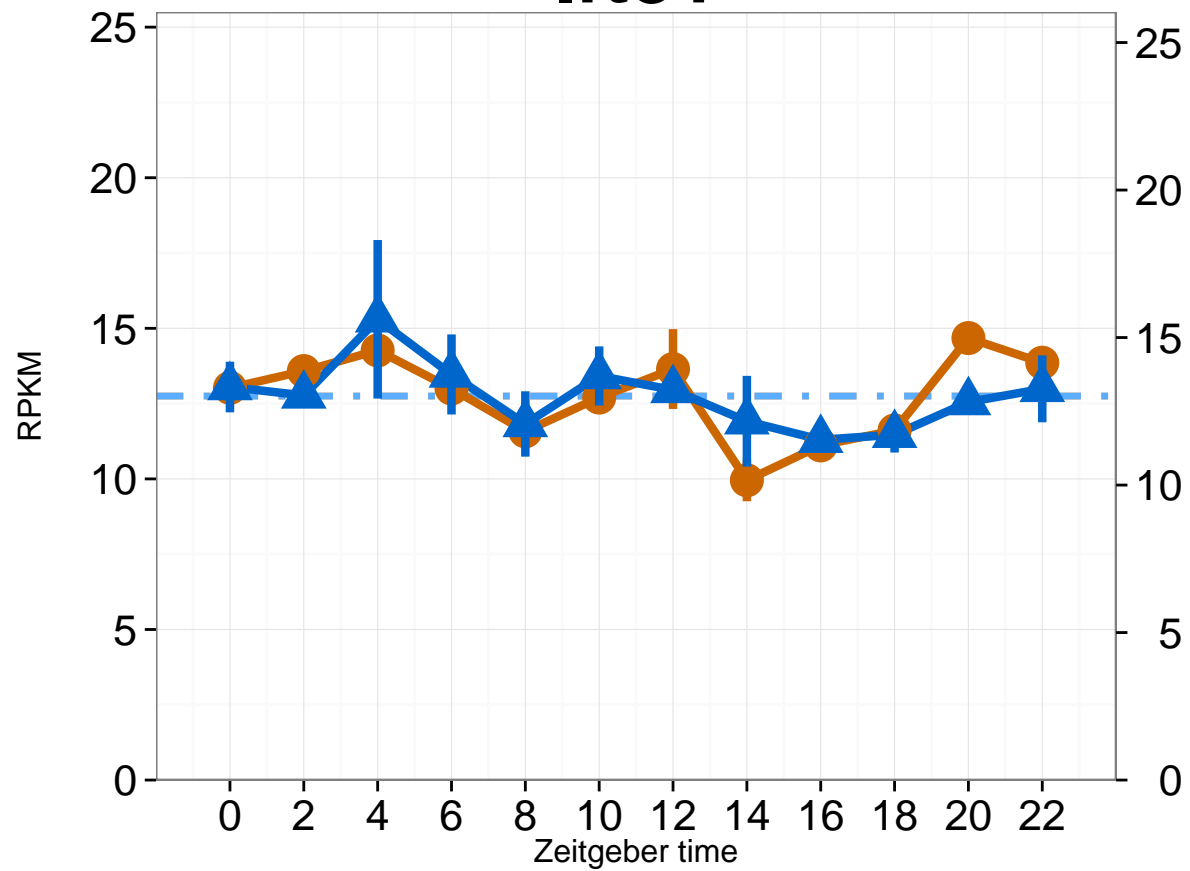

# lft81

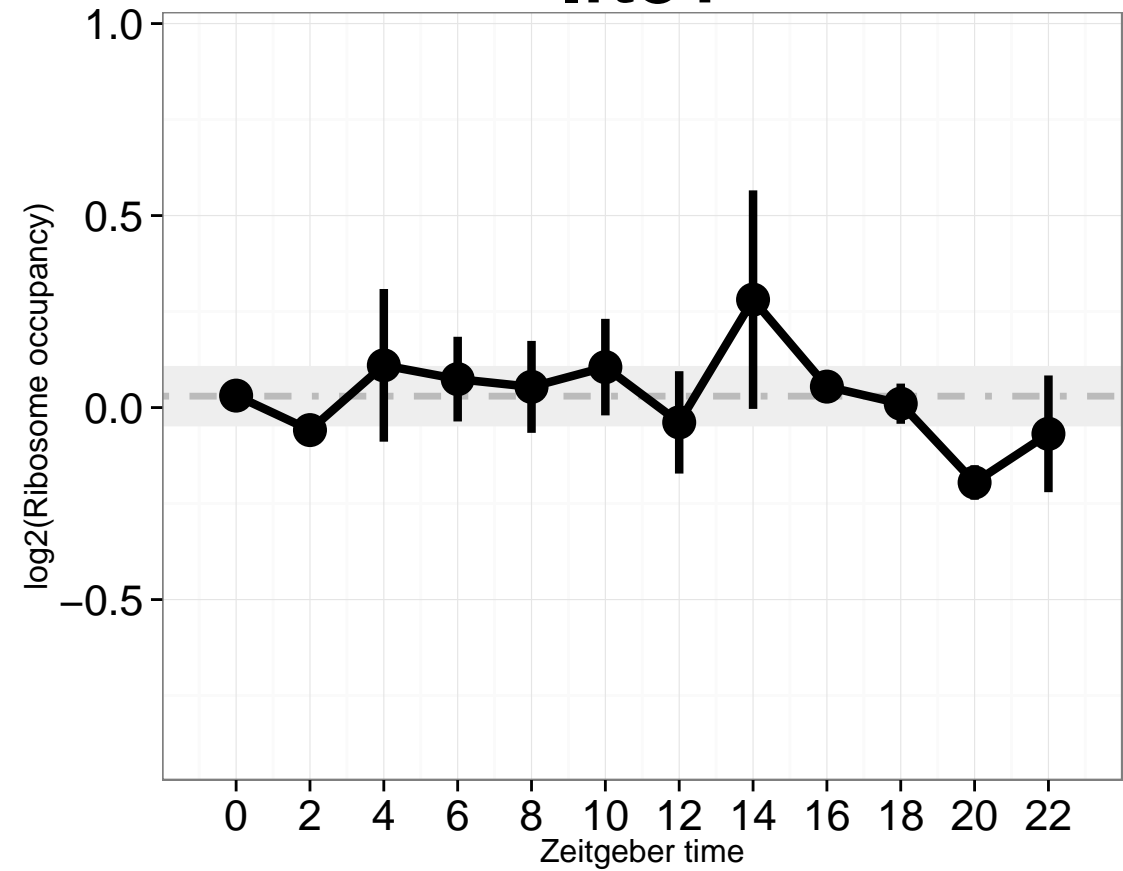

Supplement: Supplementary file 134 [file 1]

## Uckl1

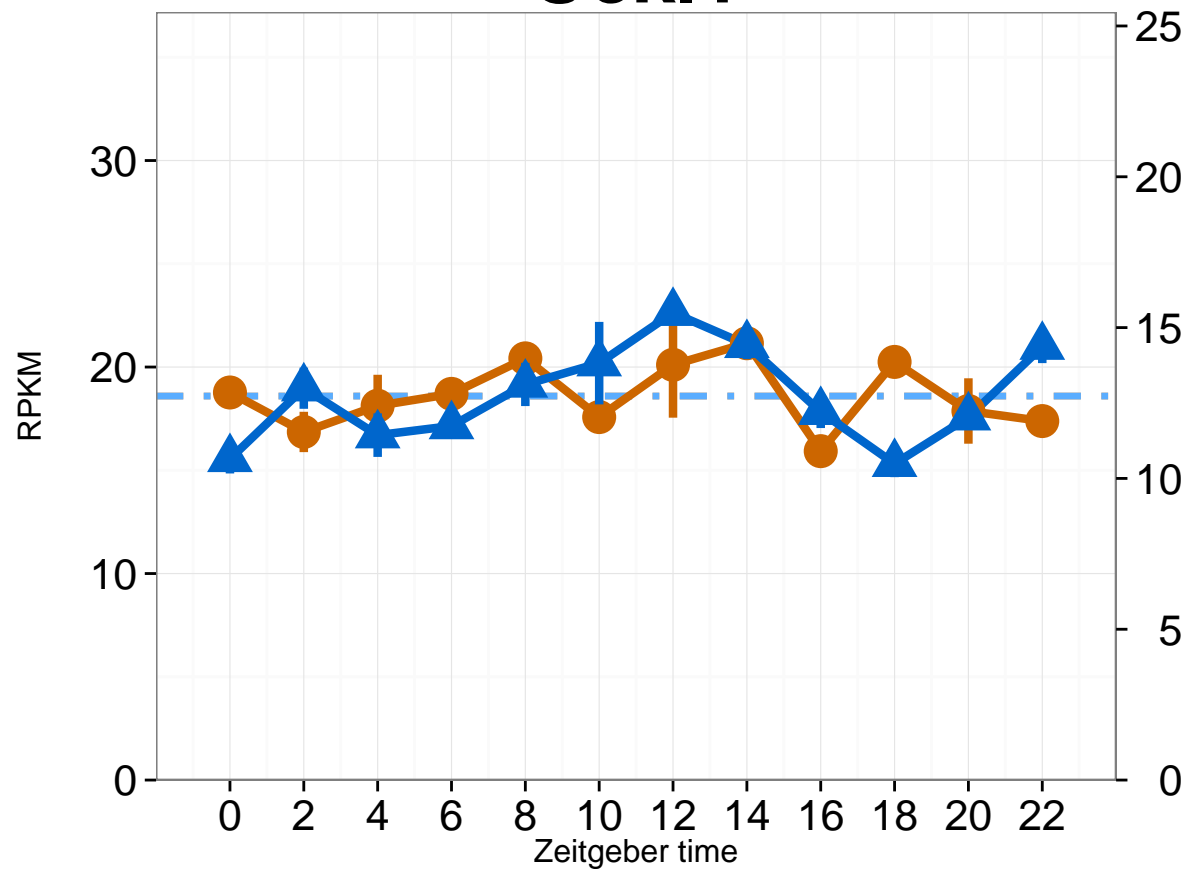

## Uckl1

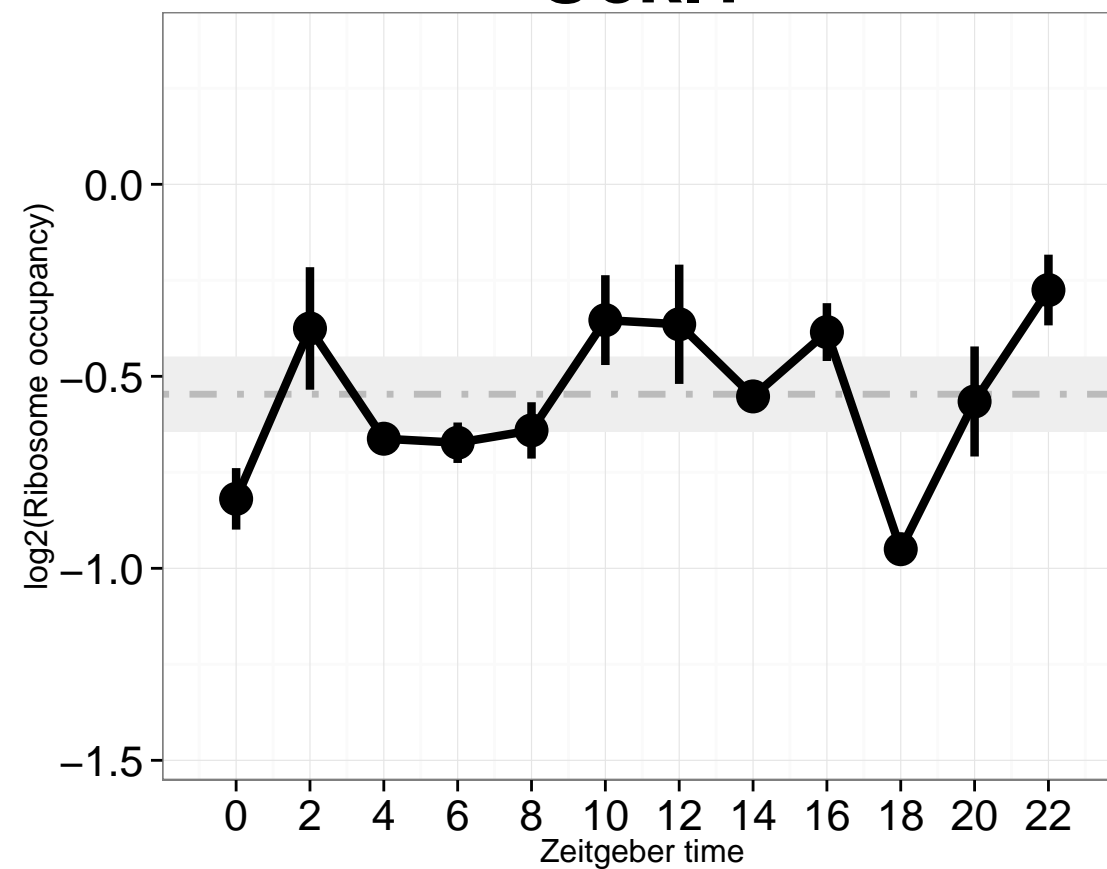

Supplement: Supplementary file 135 [file 1]

## Unc93b1

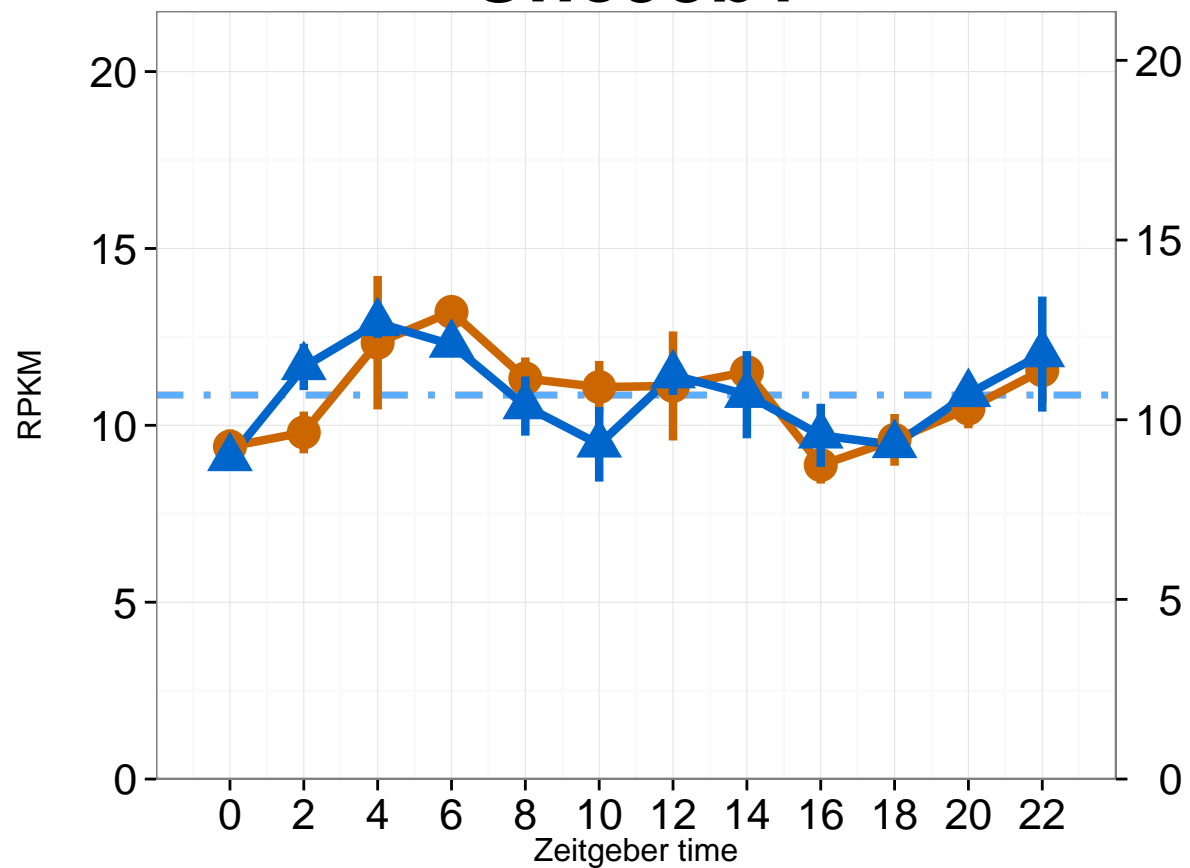

## Unc93b1

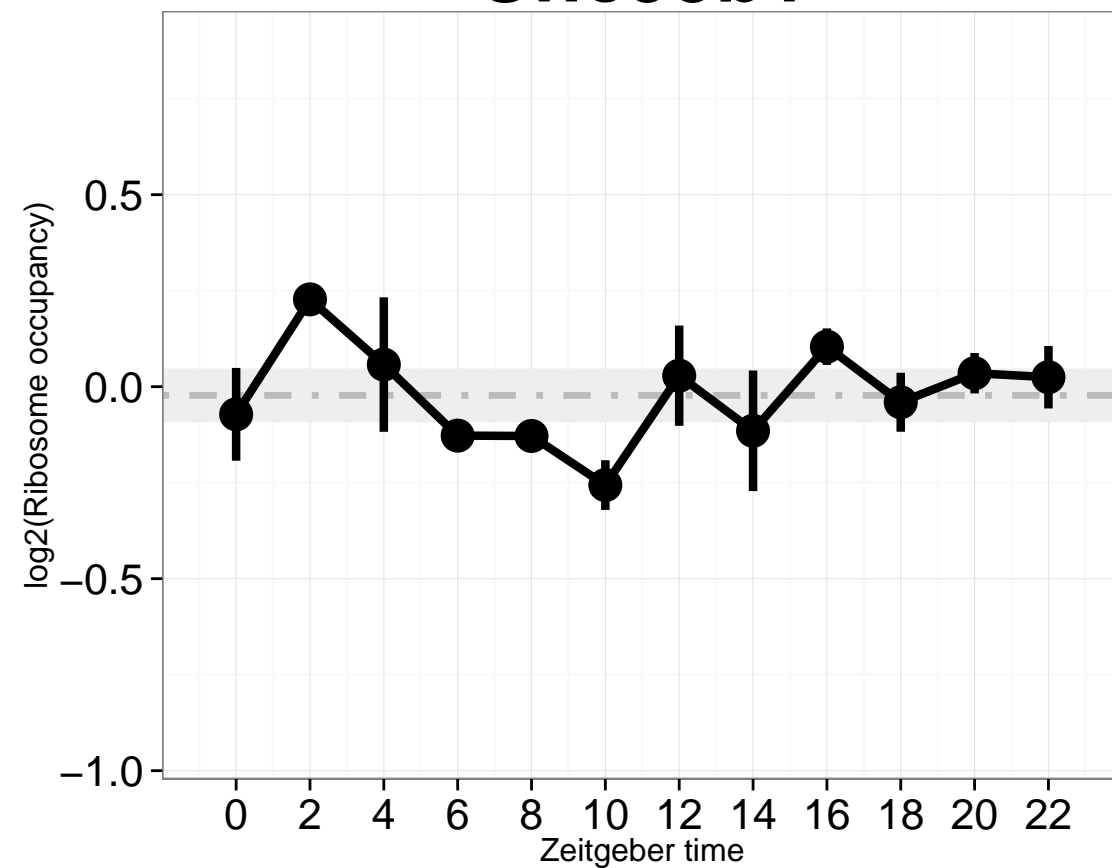

Supplement: Supplementary file 136 [file 1]

## Manea

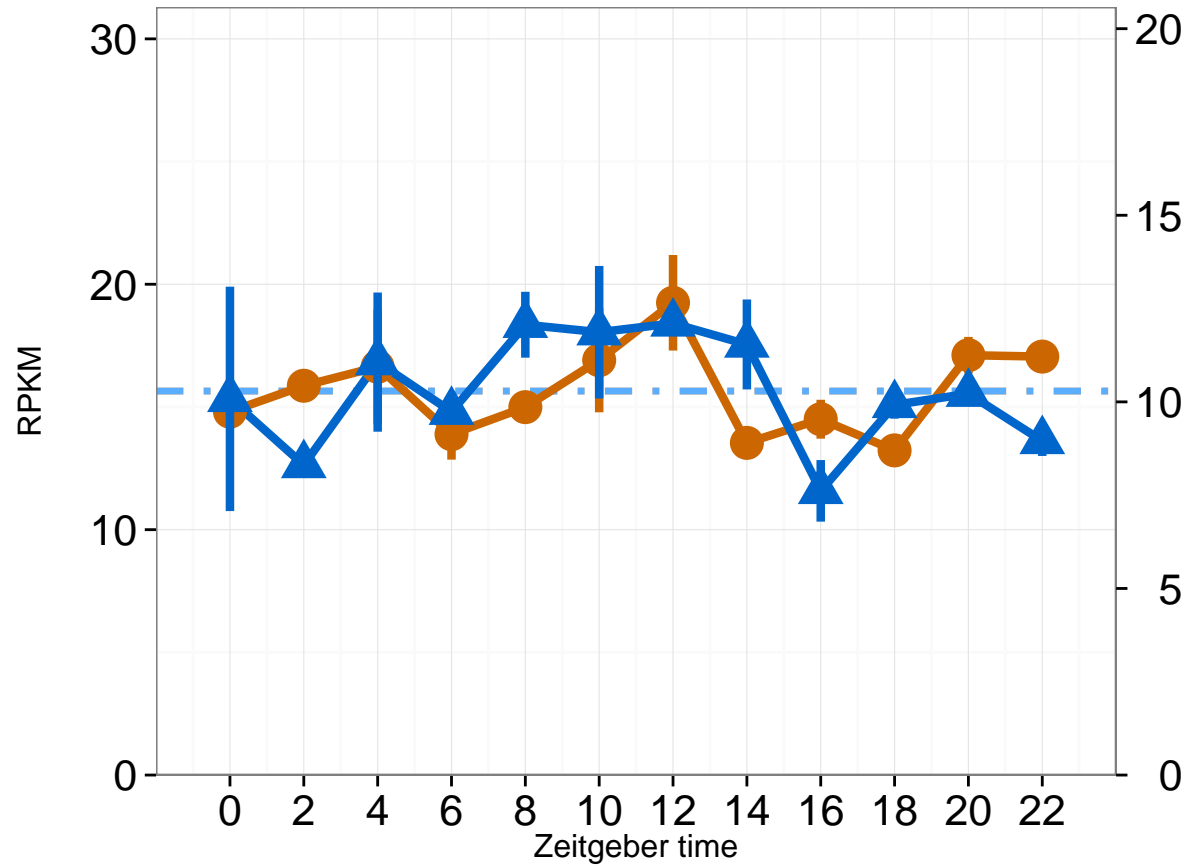

## Manea

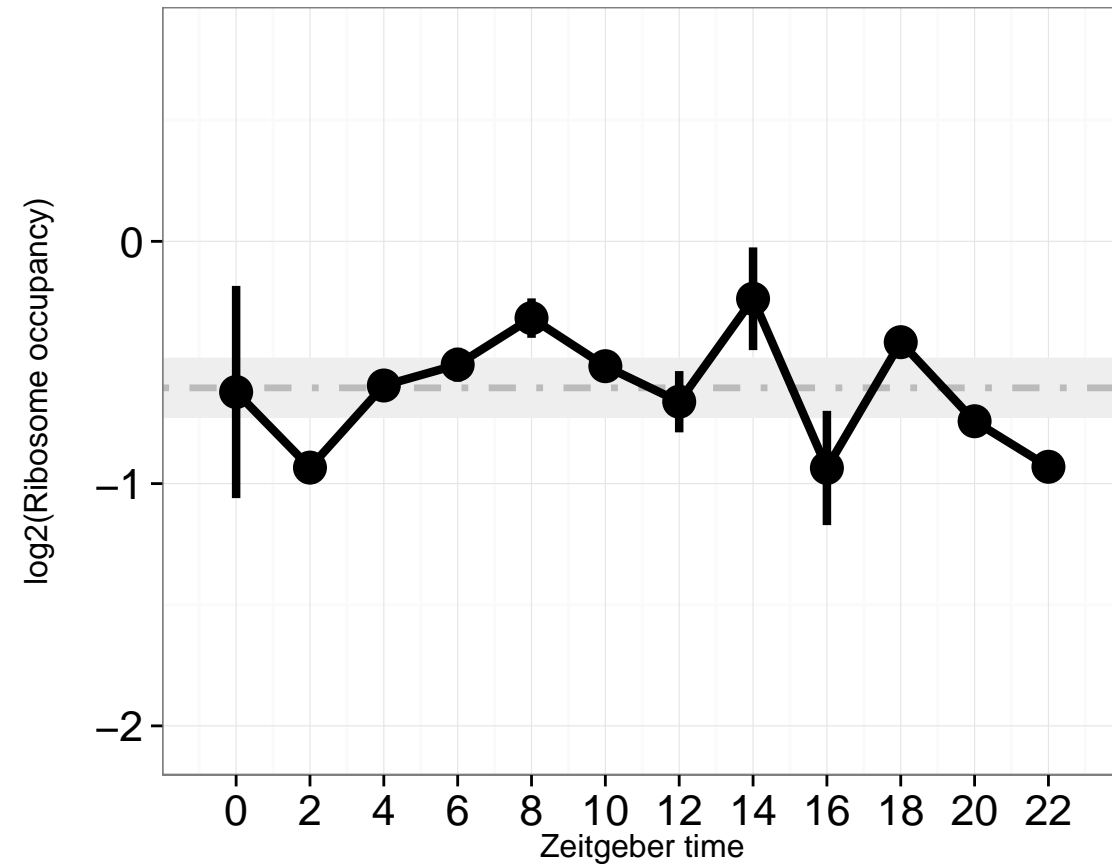

Supplement: Supplementary file 137 [file 1]

## Mbnl1

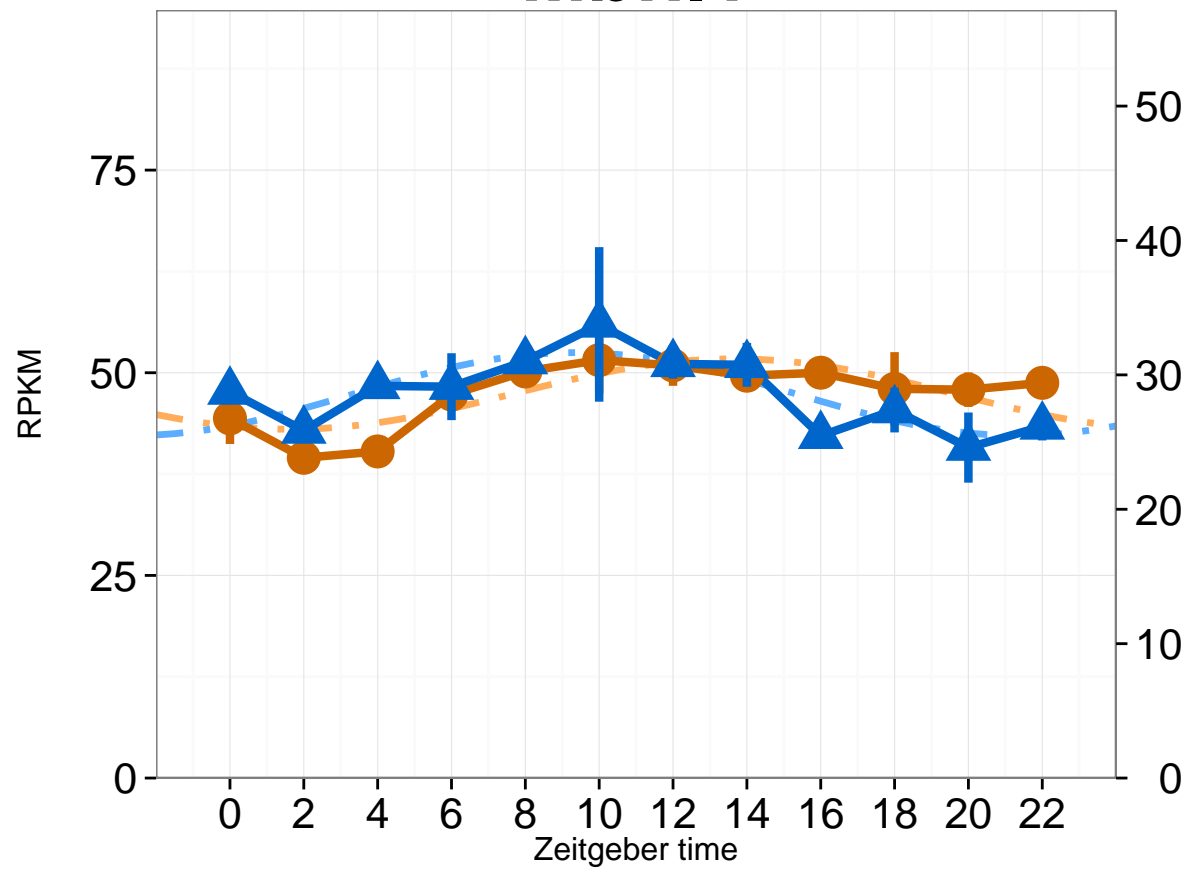

## Mbnl1

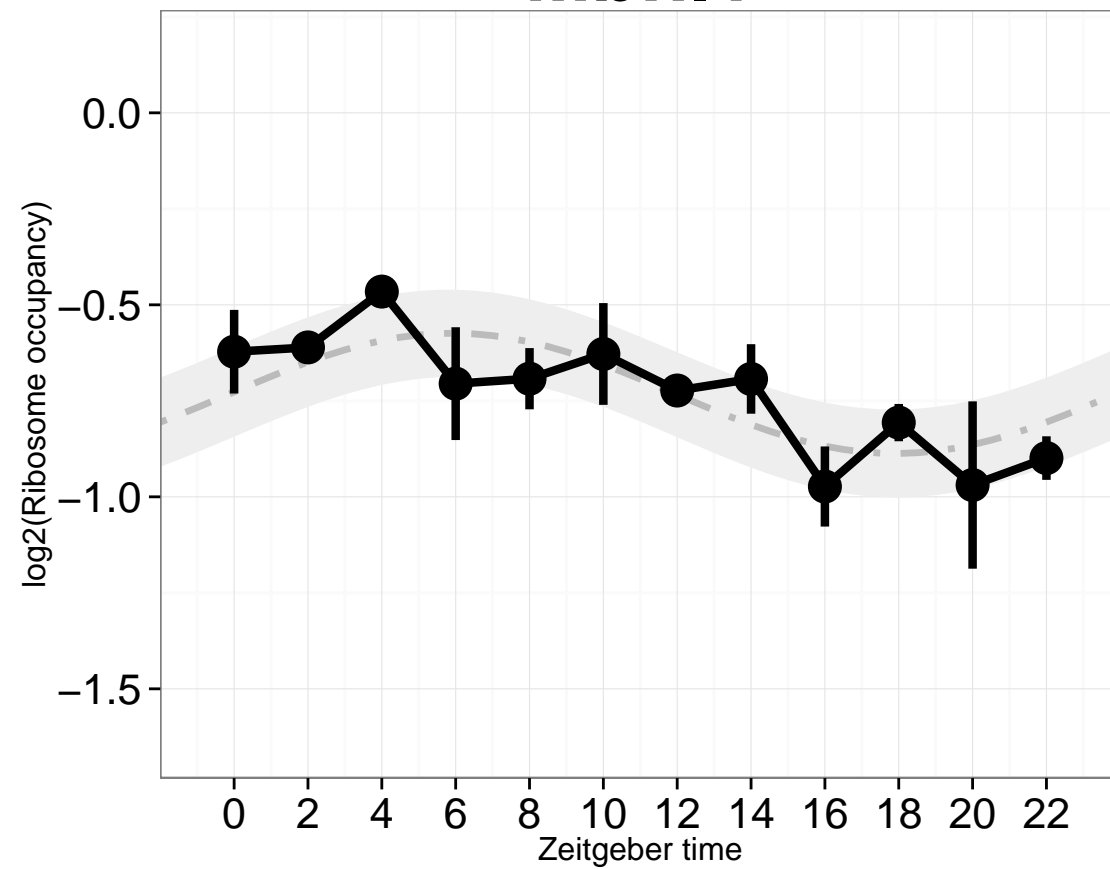

Supplement: Supplementary file 138 [file 1]

## Fabp4

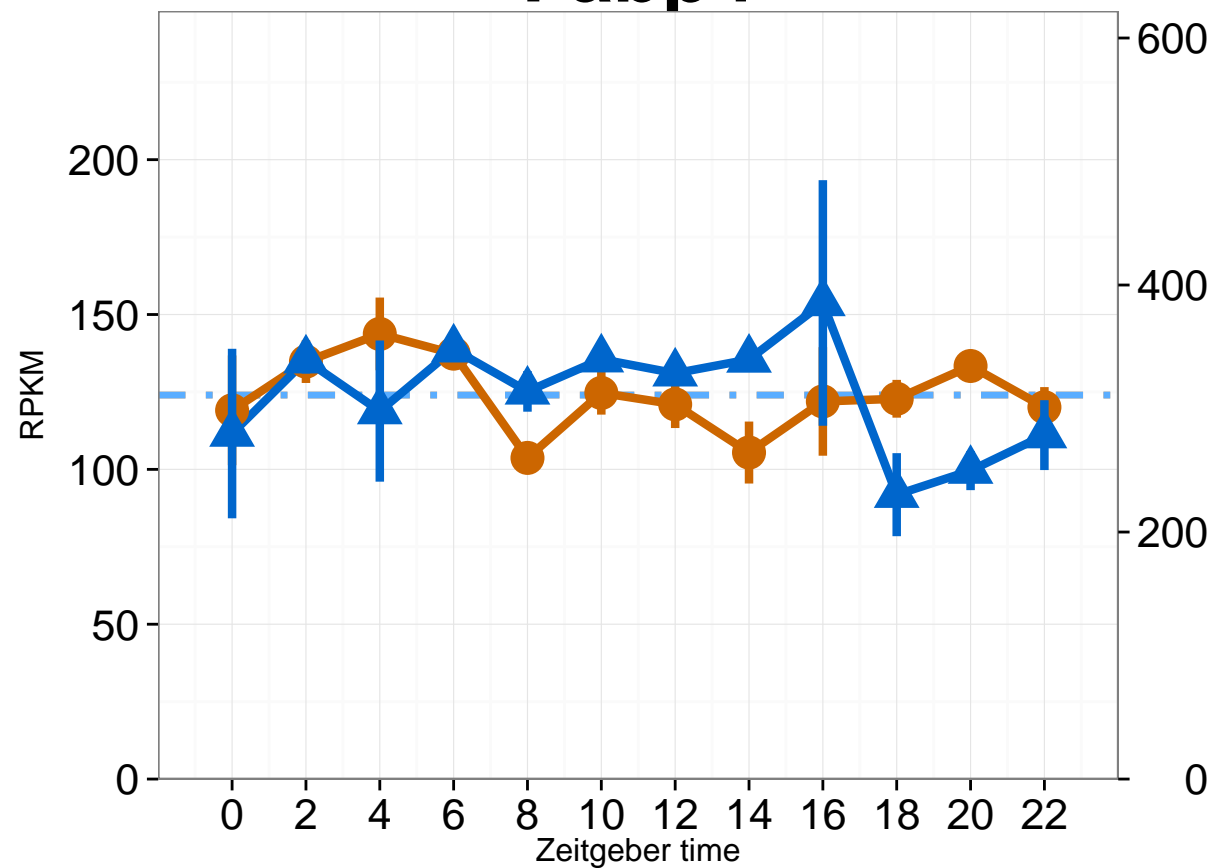

## Fabp4

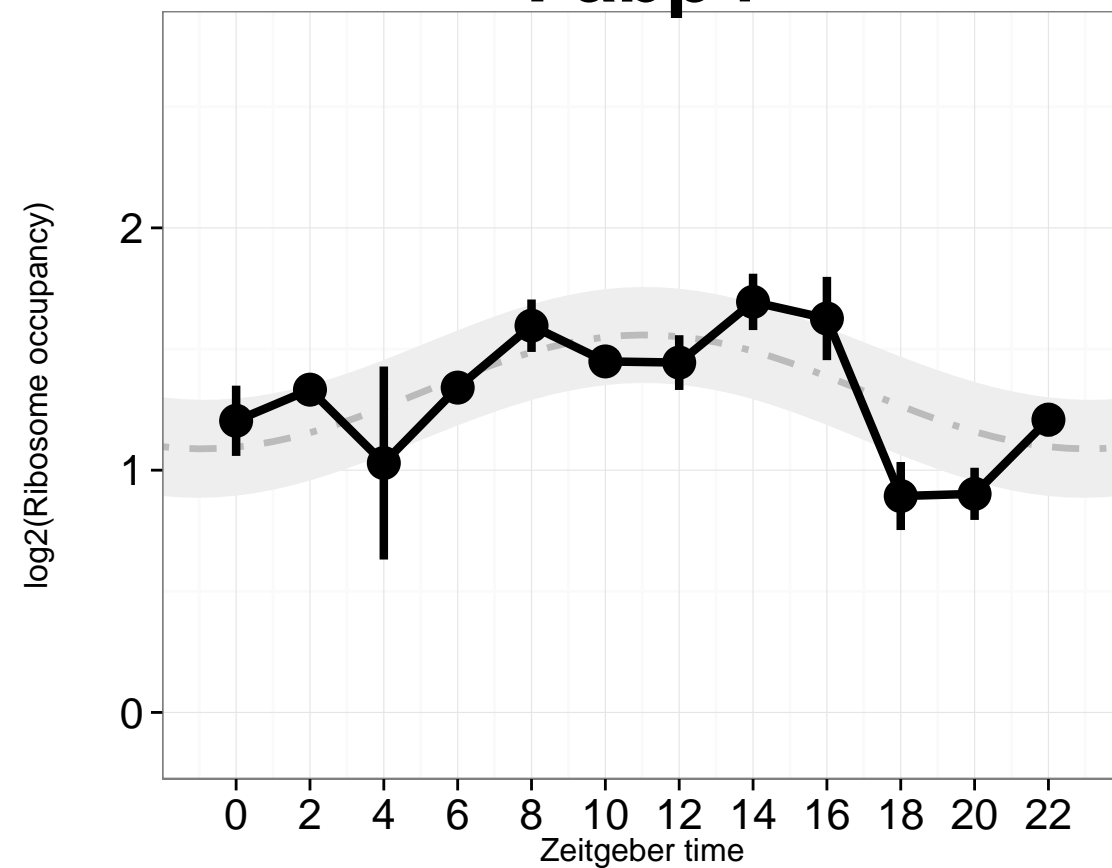

Supplement: Supplementary file 139 [file 1]

## Ido2

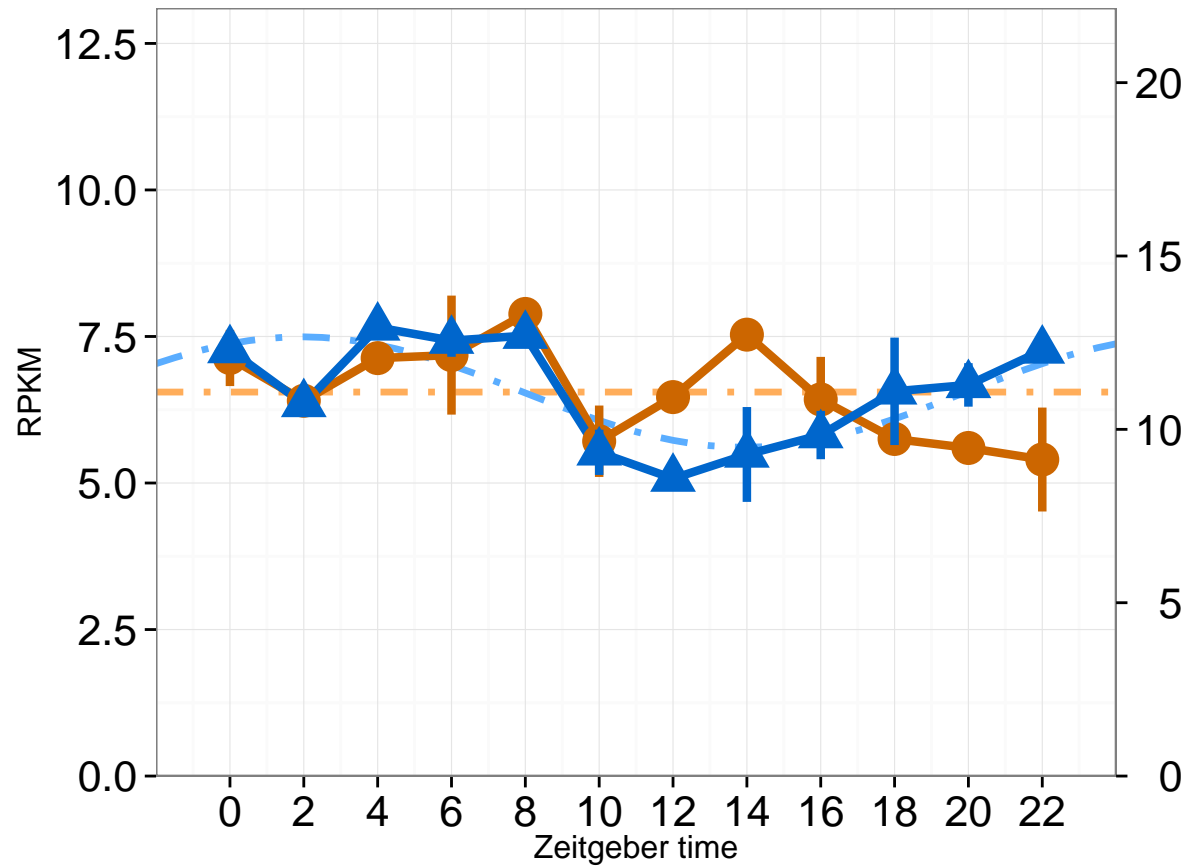

## Ido2

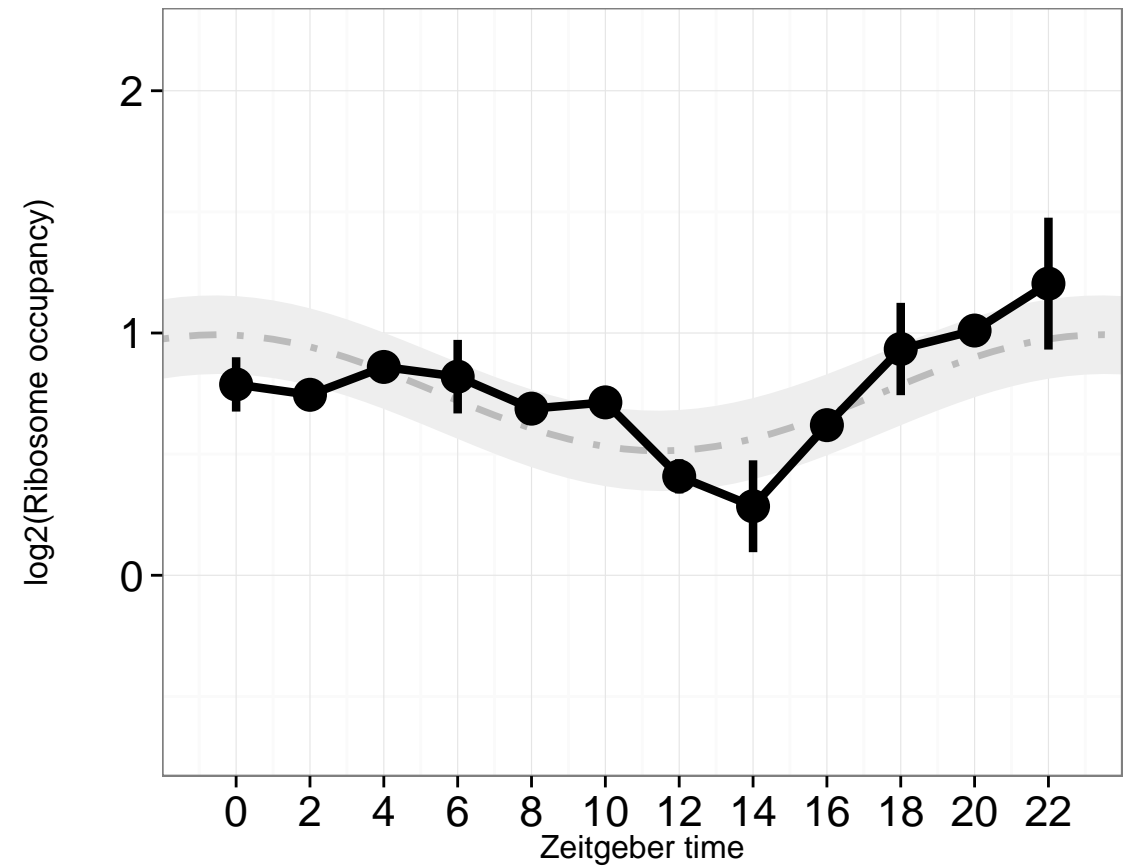

Supplement: Supplementary file 140 [file 1]

## Fdx1l

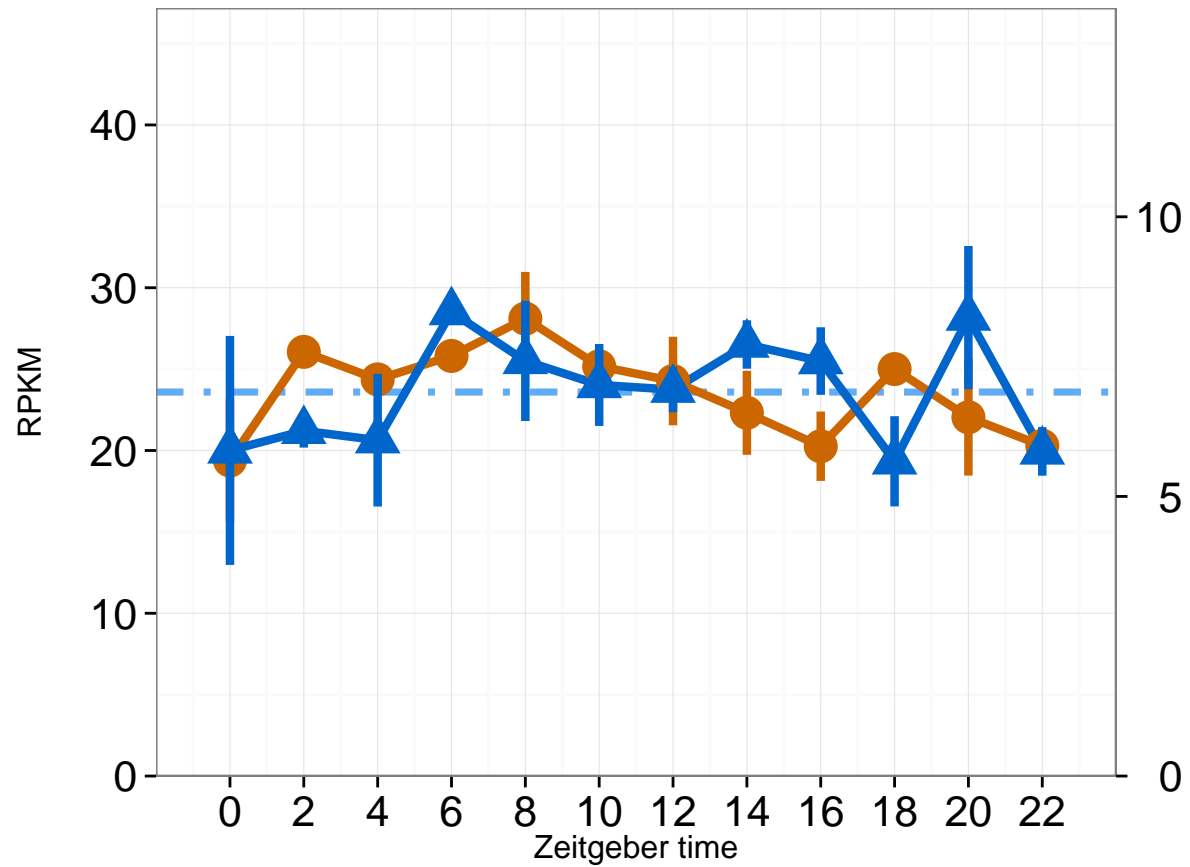

## Fdx1l

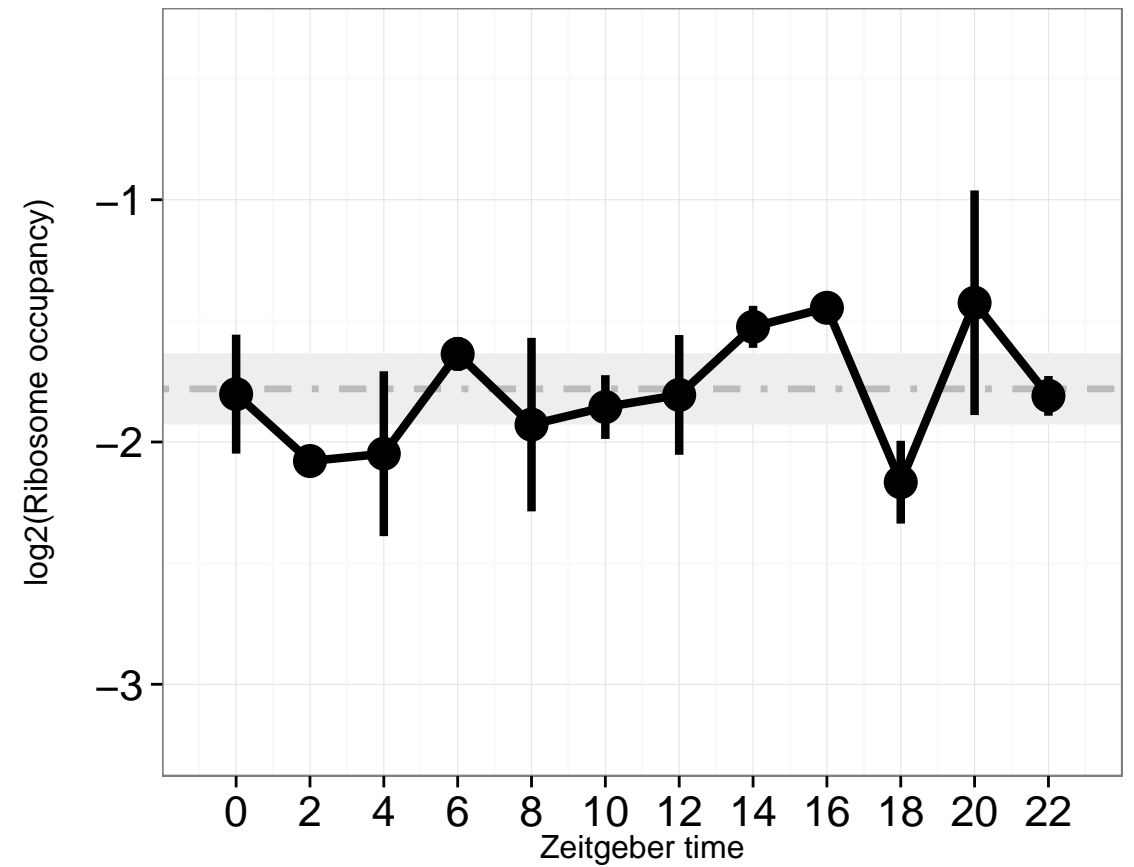

Supplement: Supplementary file 141 [file 1]

## Tctn3

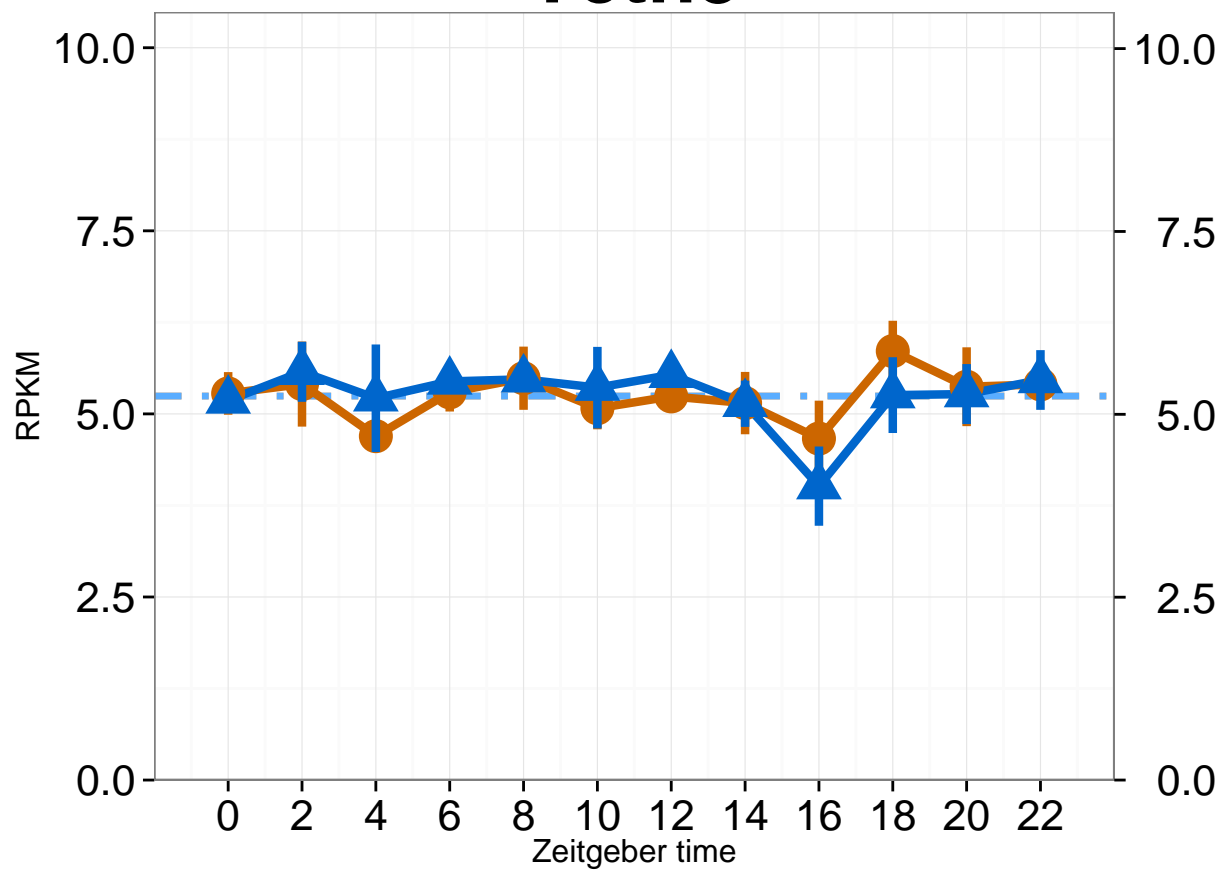

## Tctn3

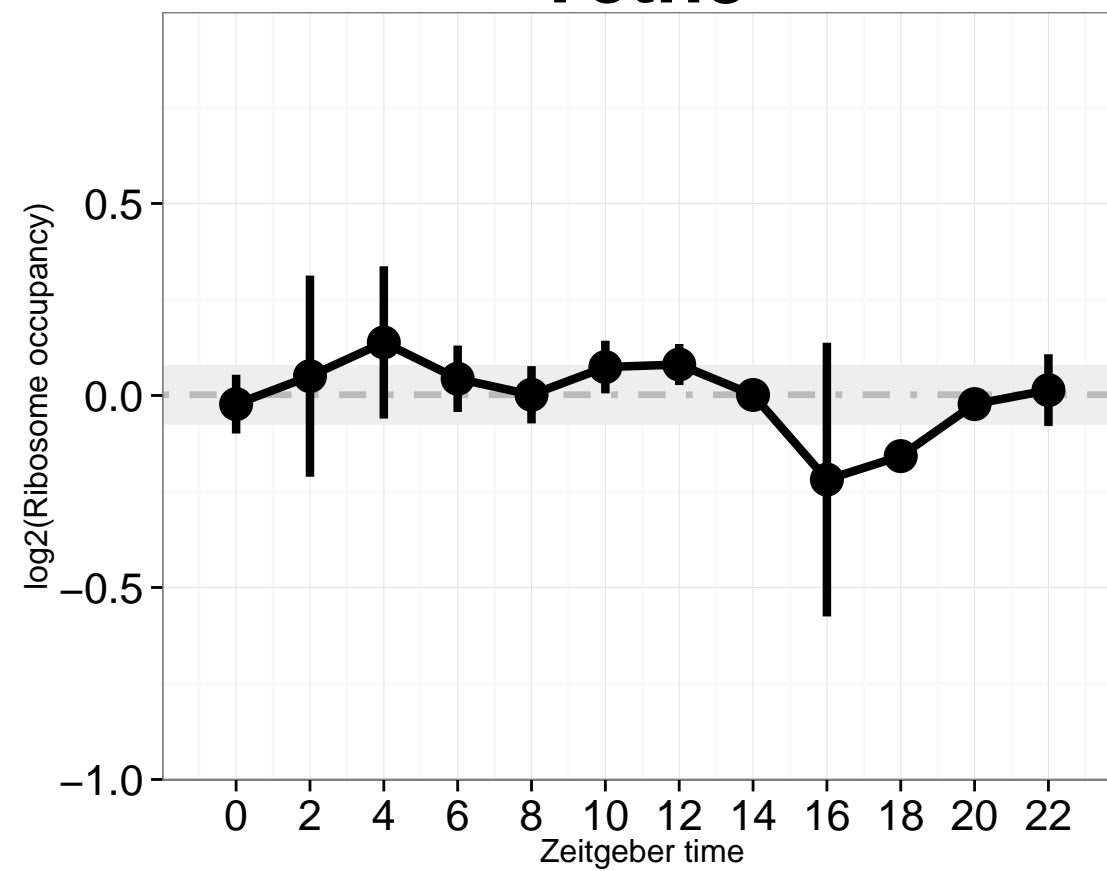

Supplement: Supplementary file 142 [file 1]

## Prkce

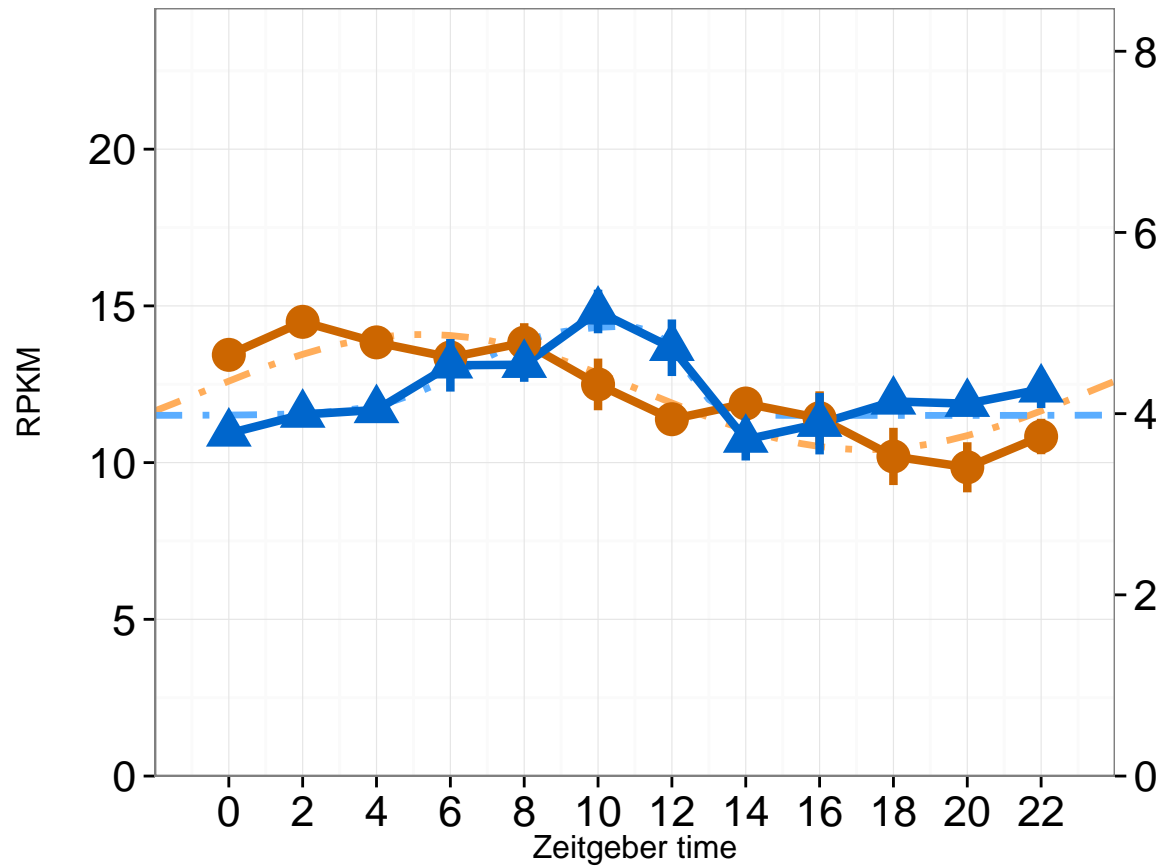

## Prkce

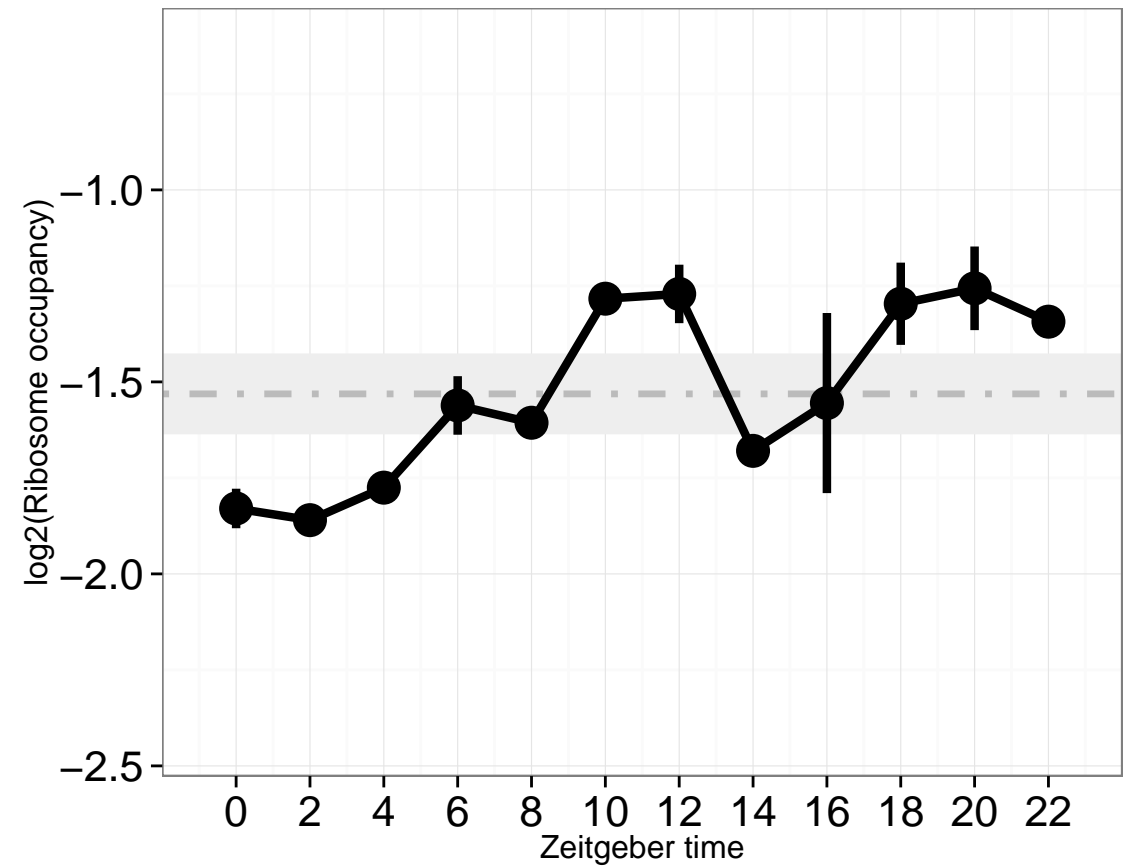

Supplement: Supplementary file 143 [file 1]

## 4930451 G09Rik

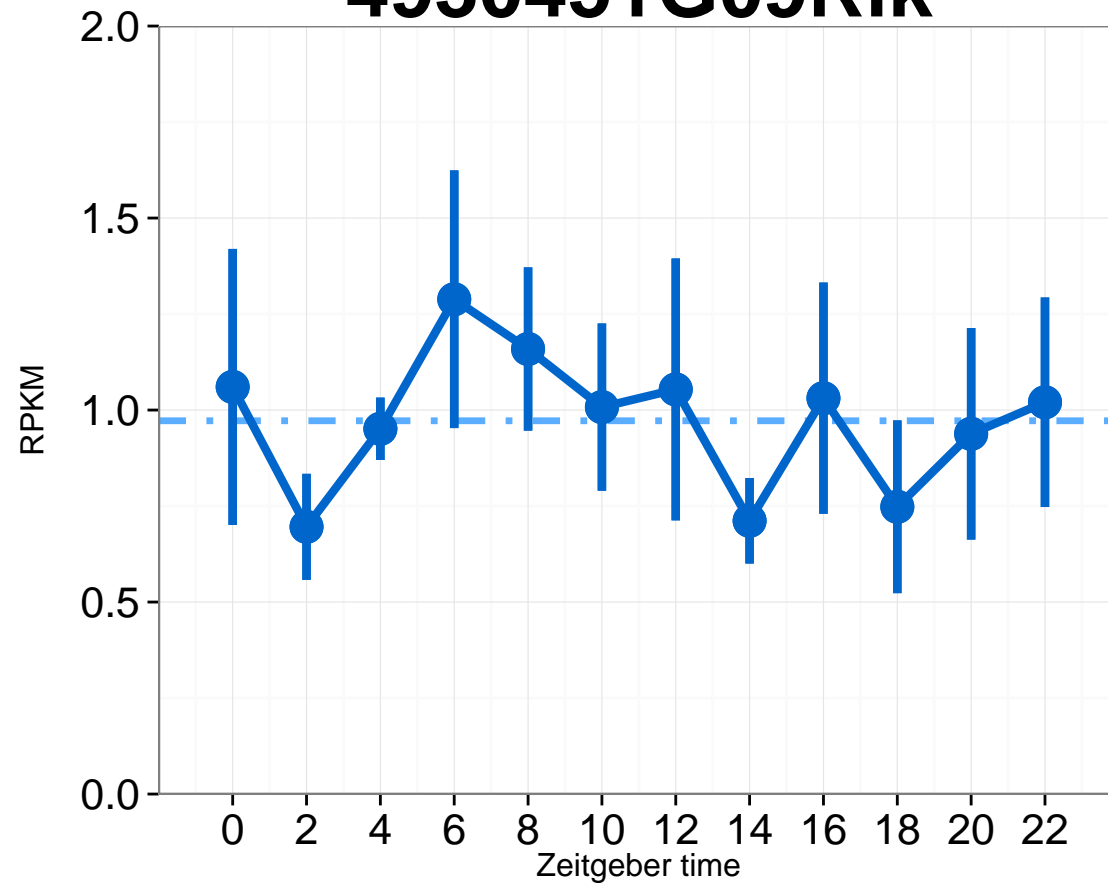

## 4930451 G09Rik log2(Ribosome occup

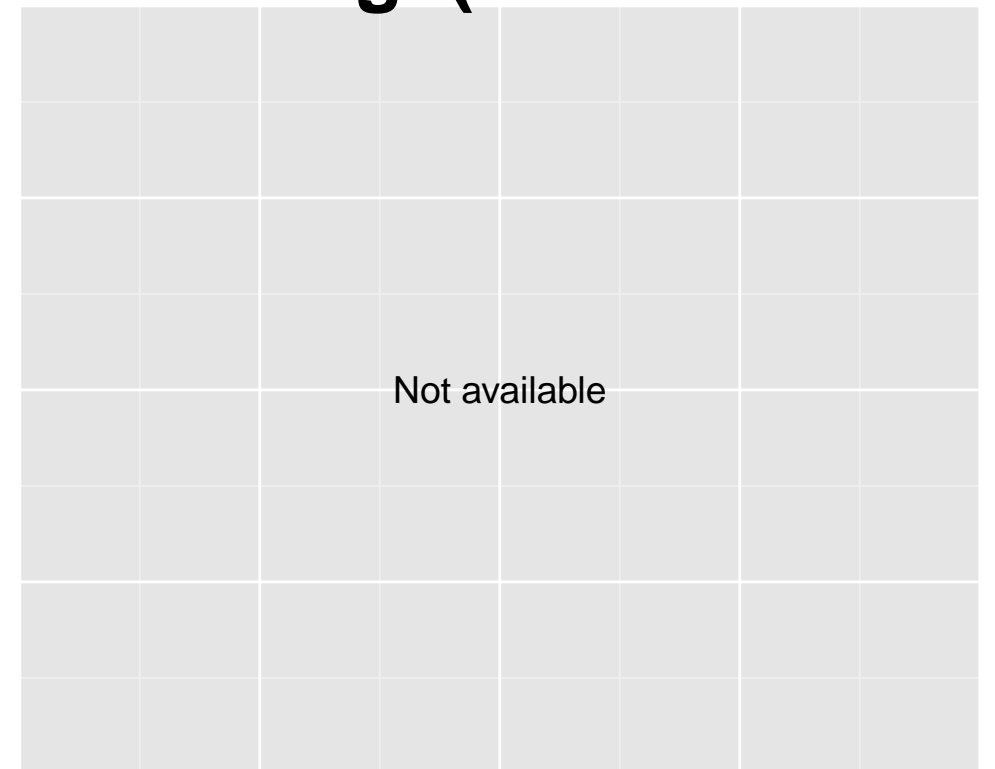

Supplement: Supplementary file 144 [file 1]

## Cml5

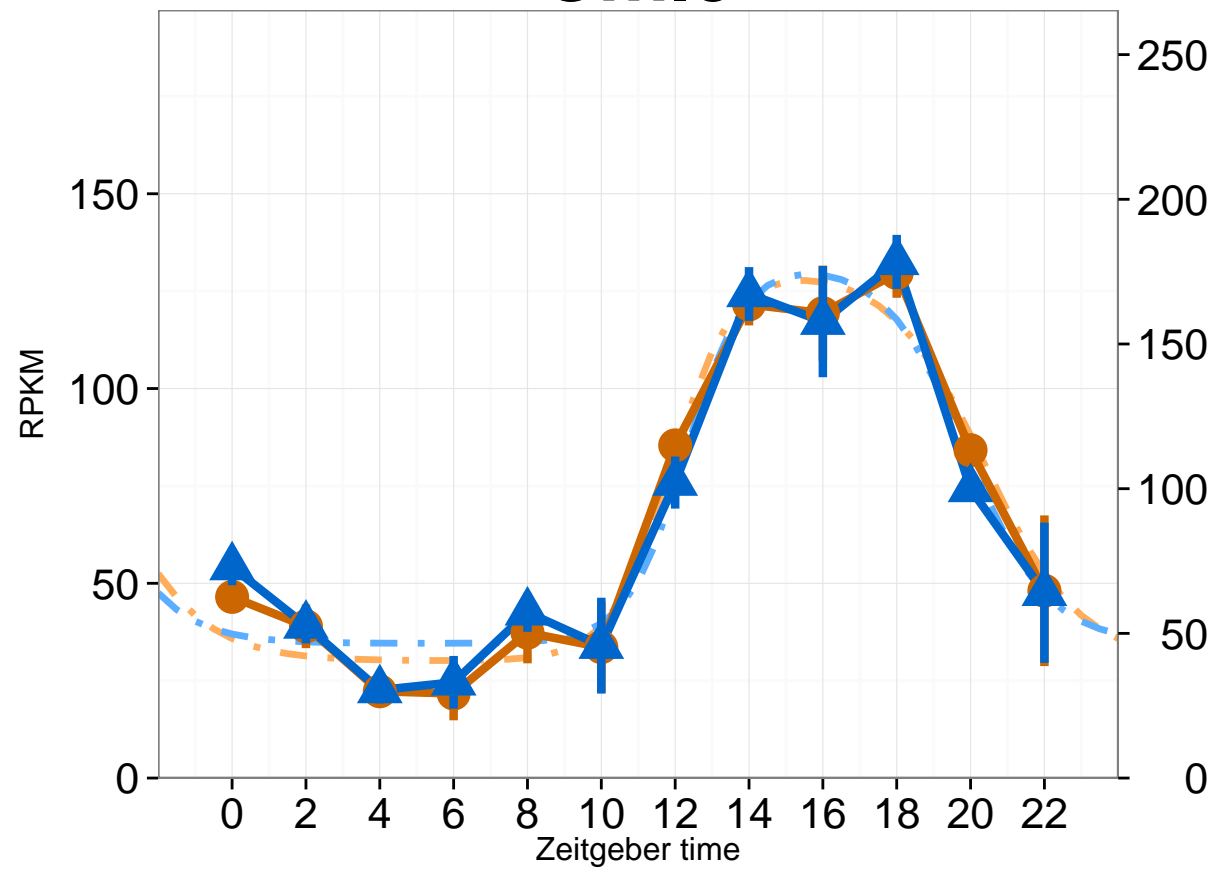

## Cml5

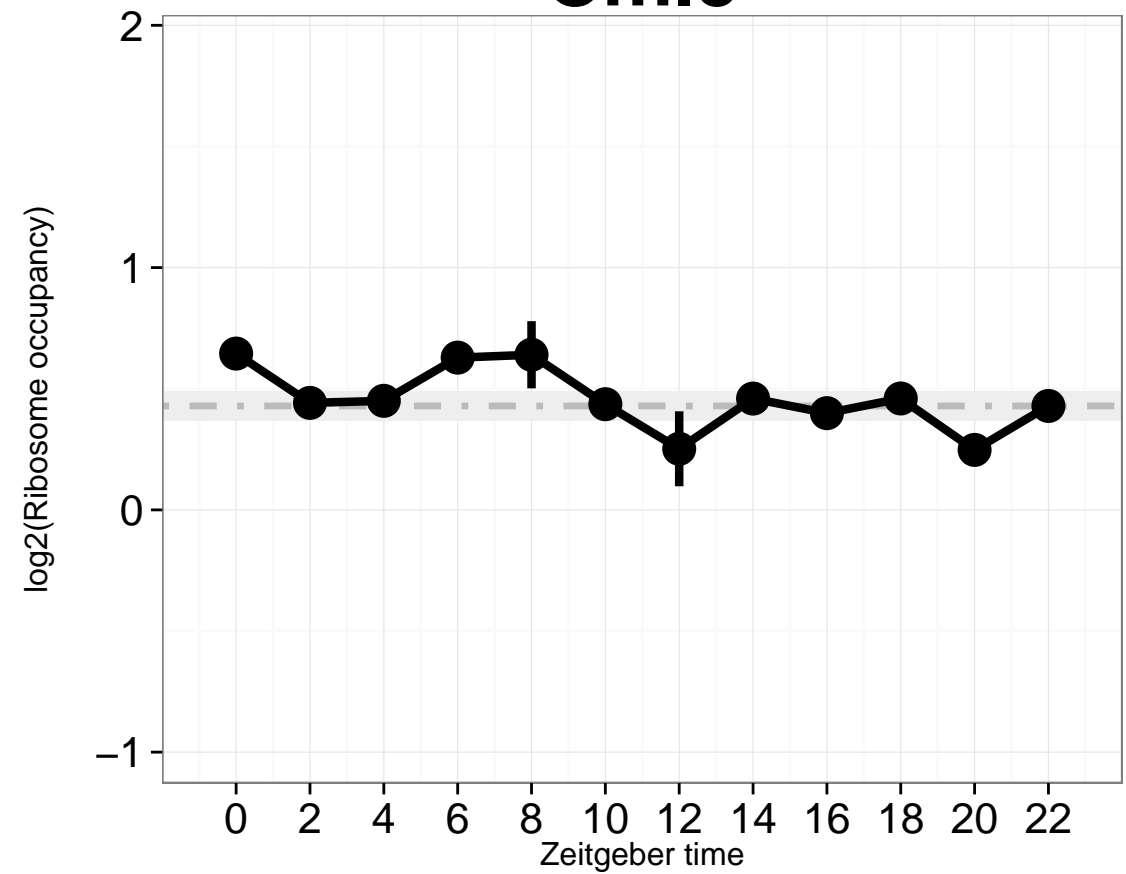

Supplement: Supplementary file 145 [file 1]

## Incenp

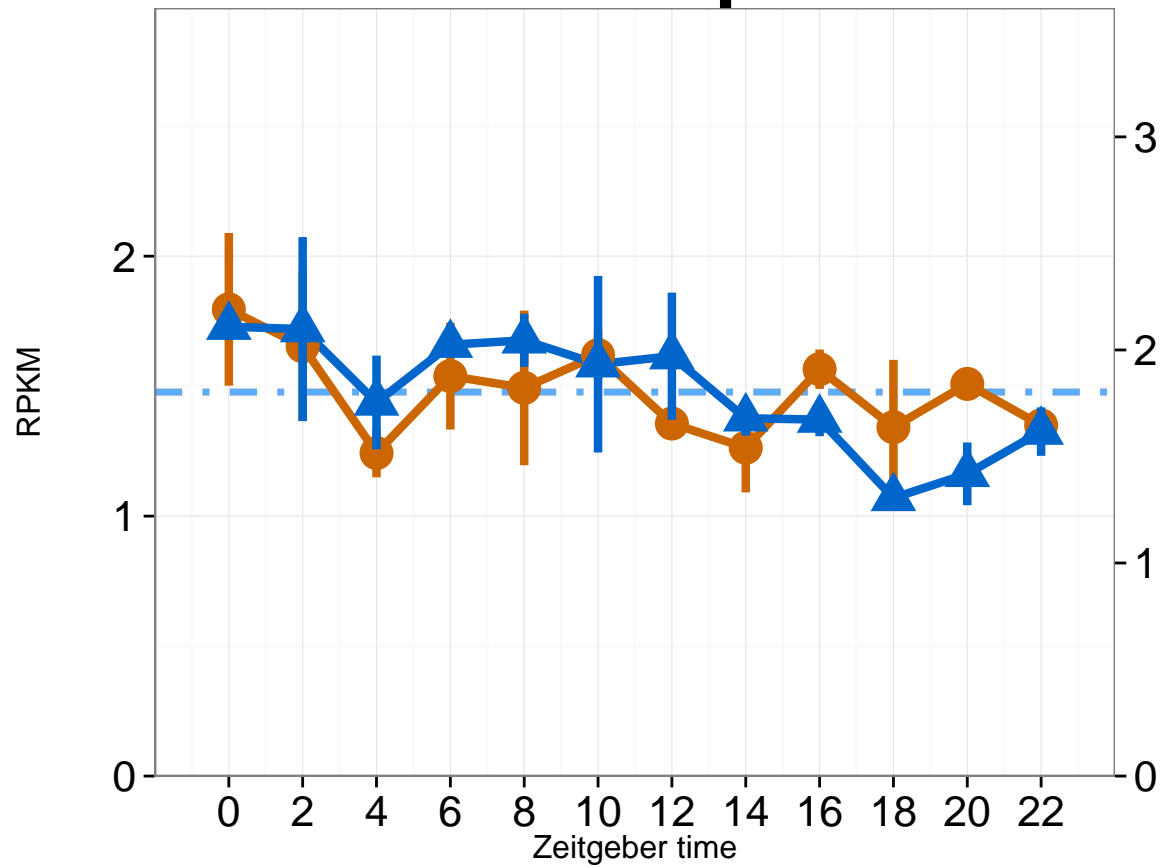

## Incenp

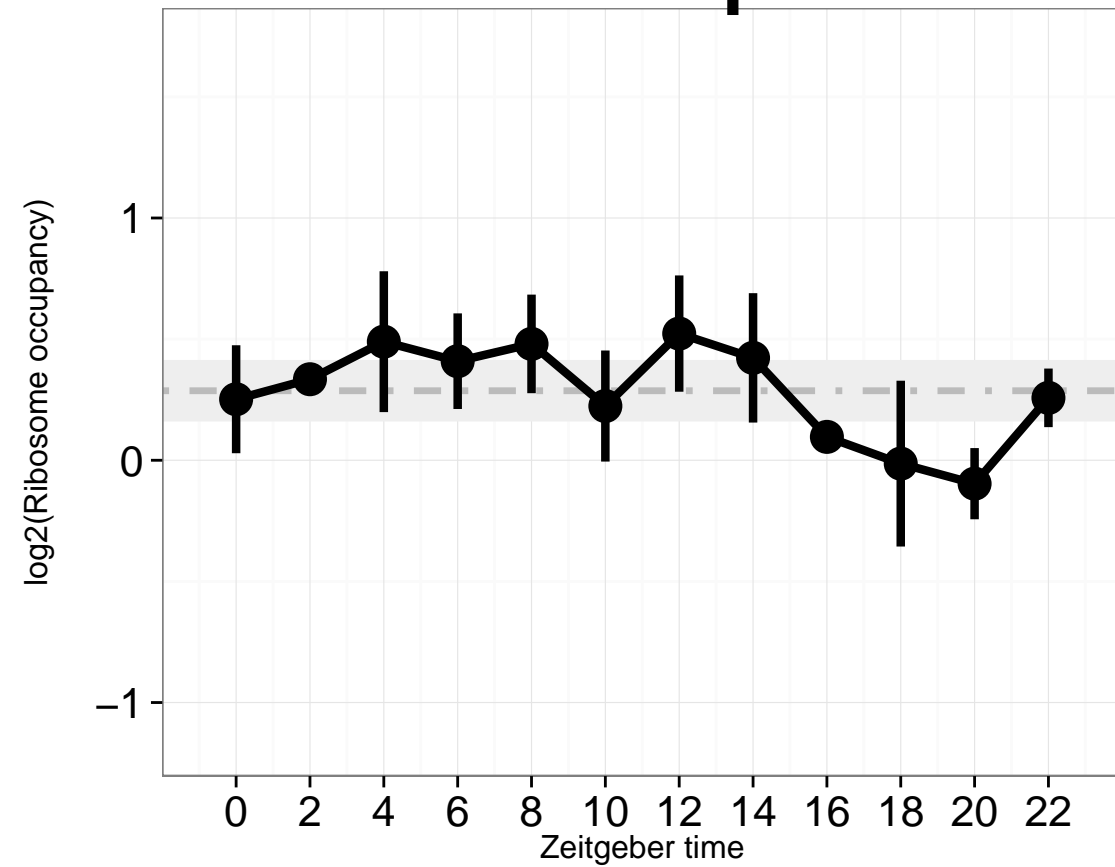

Supplement: Supplementary file 146 [file 1]

## Pcdh17

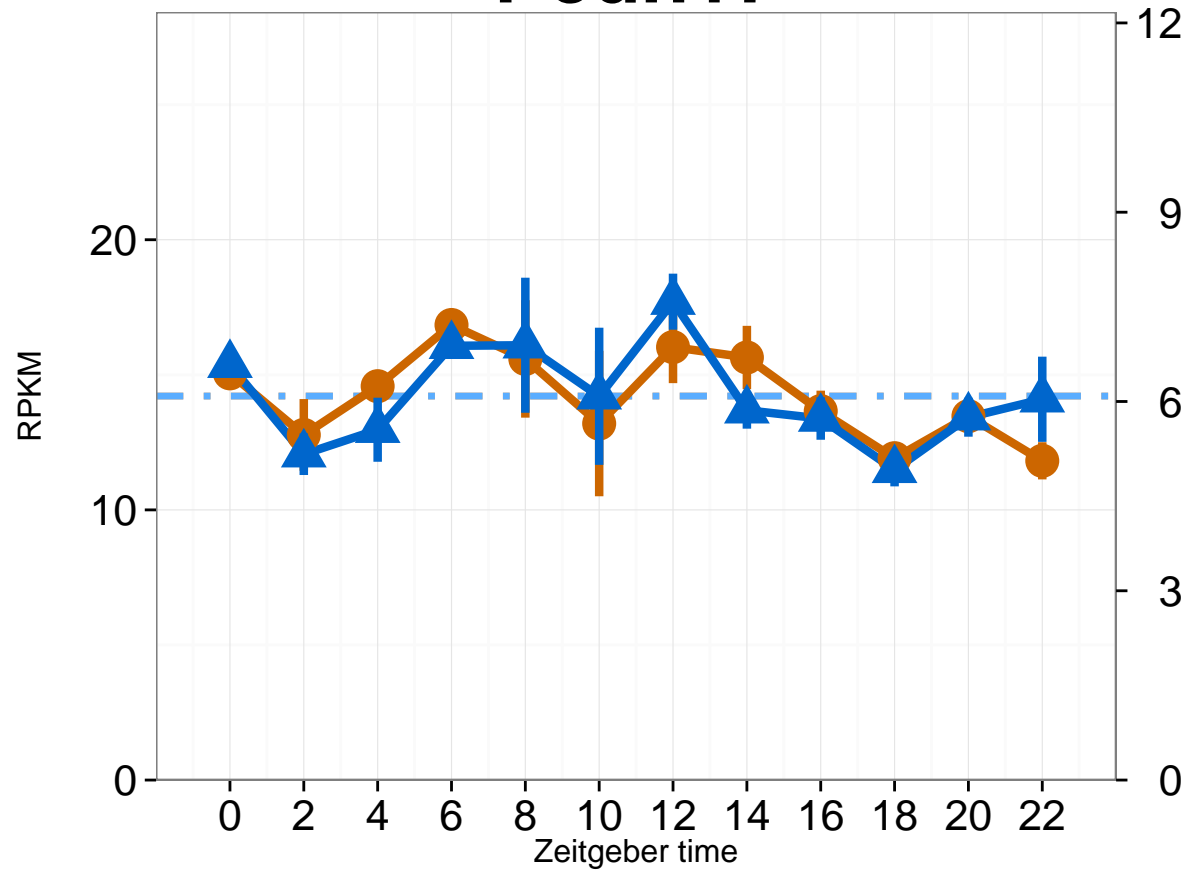

## Pcdh17

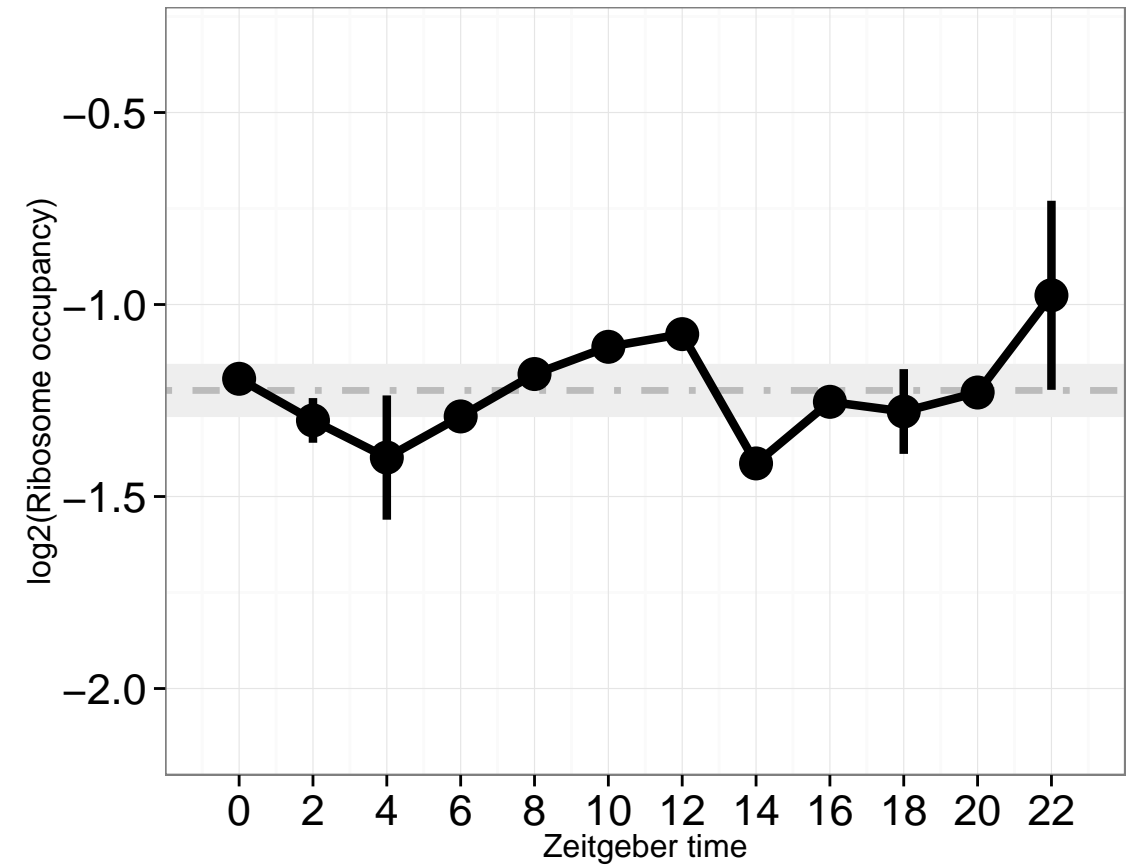

Supplement: Supplementary file 147 [file 1]

# Csgalnact2

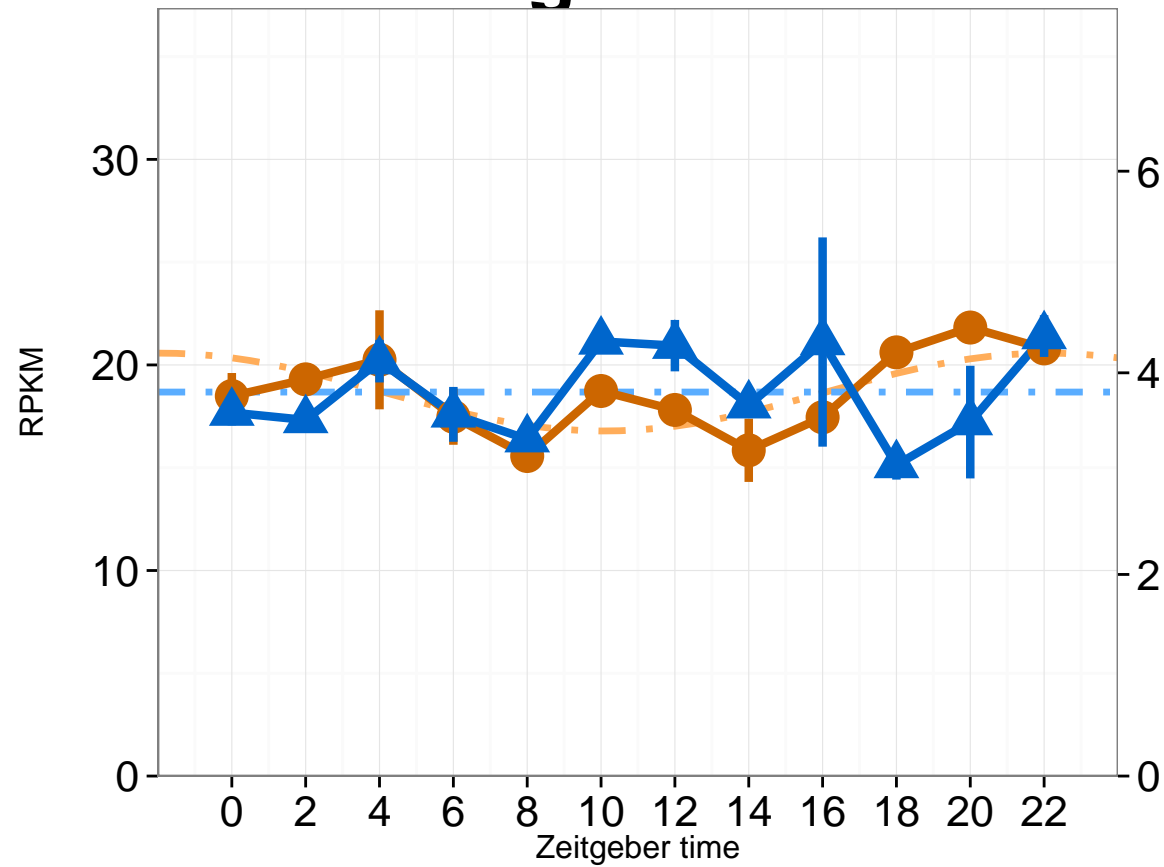

# Csgalnact2

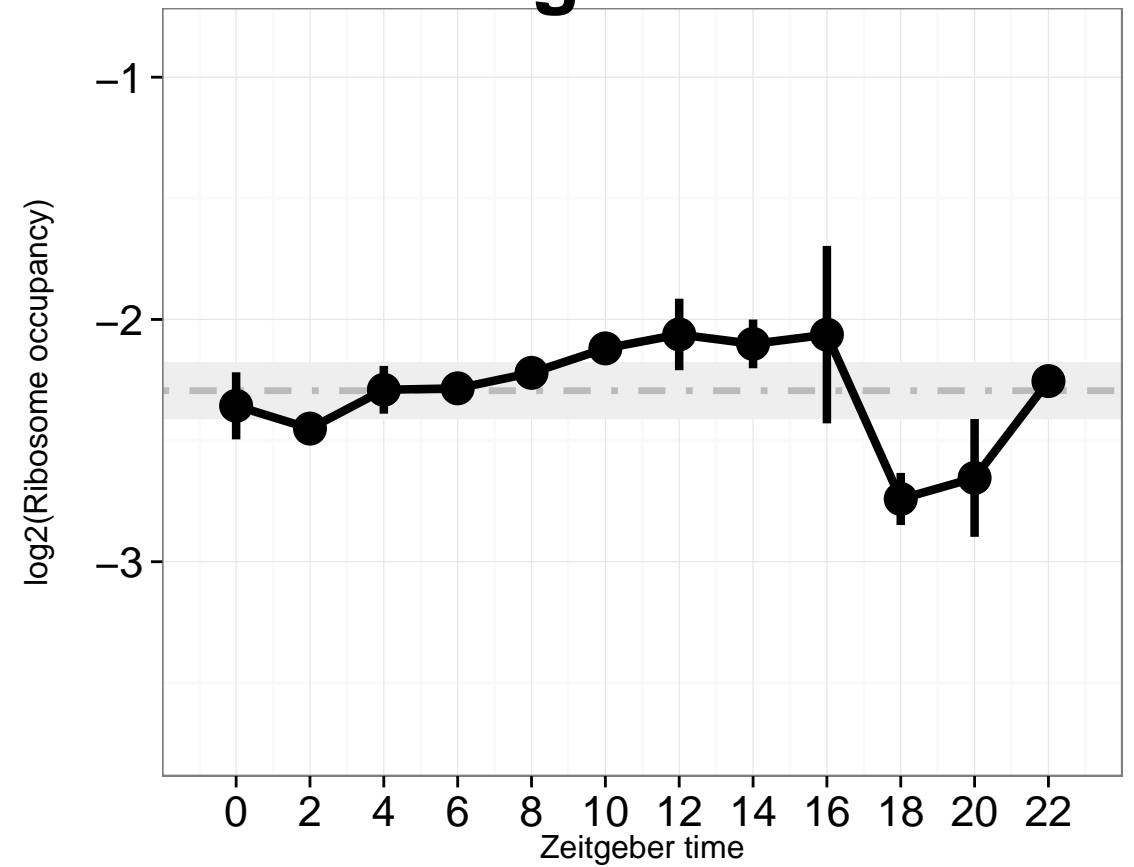

Supplement: Supplementary file 148 [file 1]

## Gng2

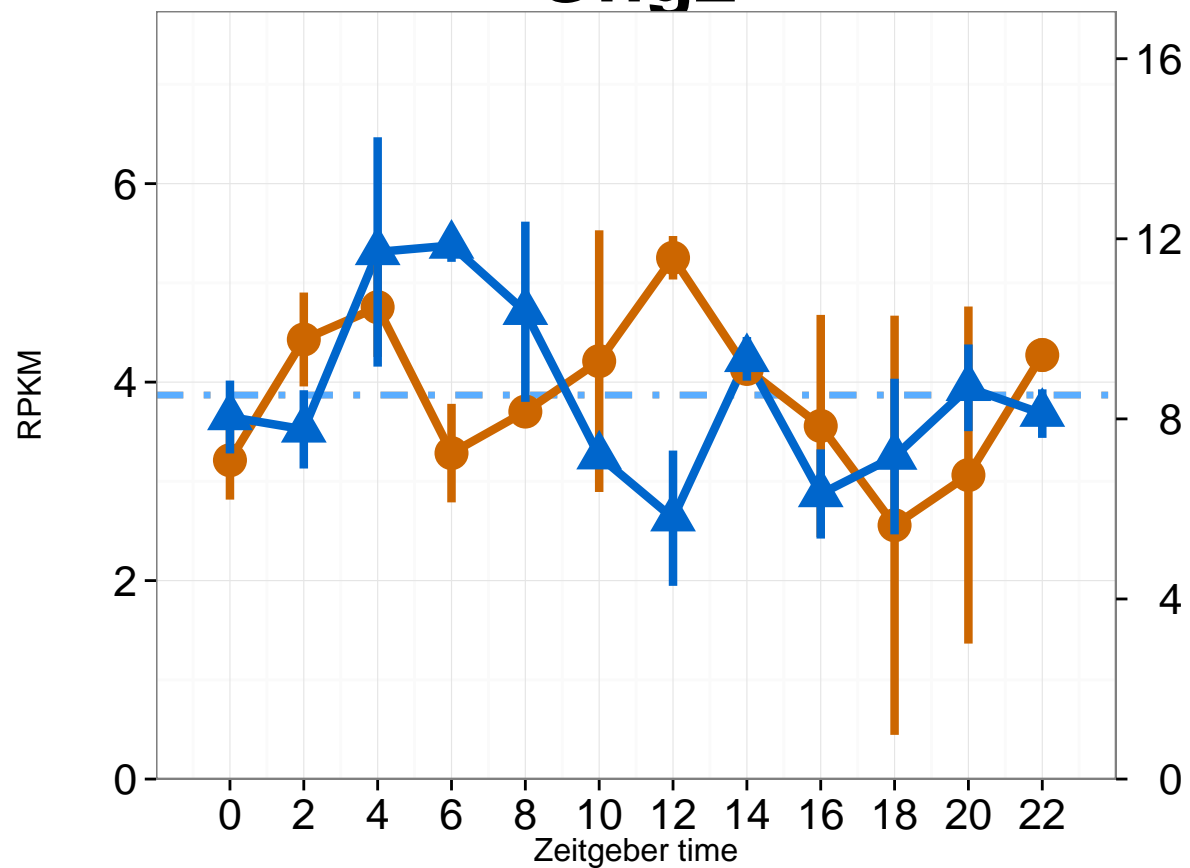

## Gng2

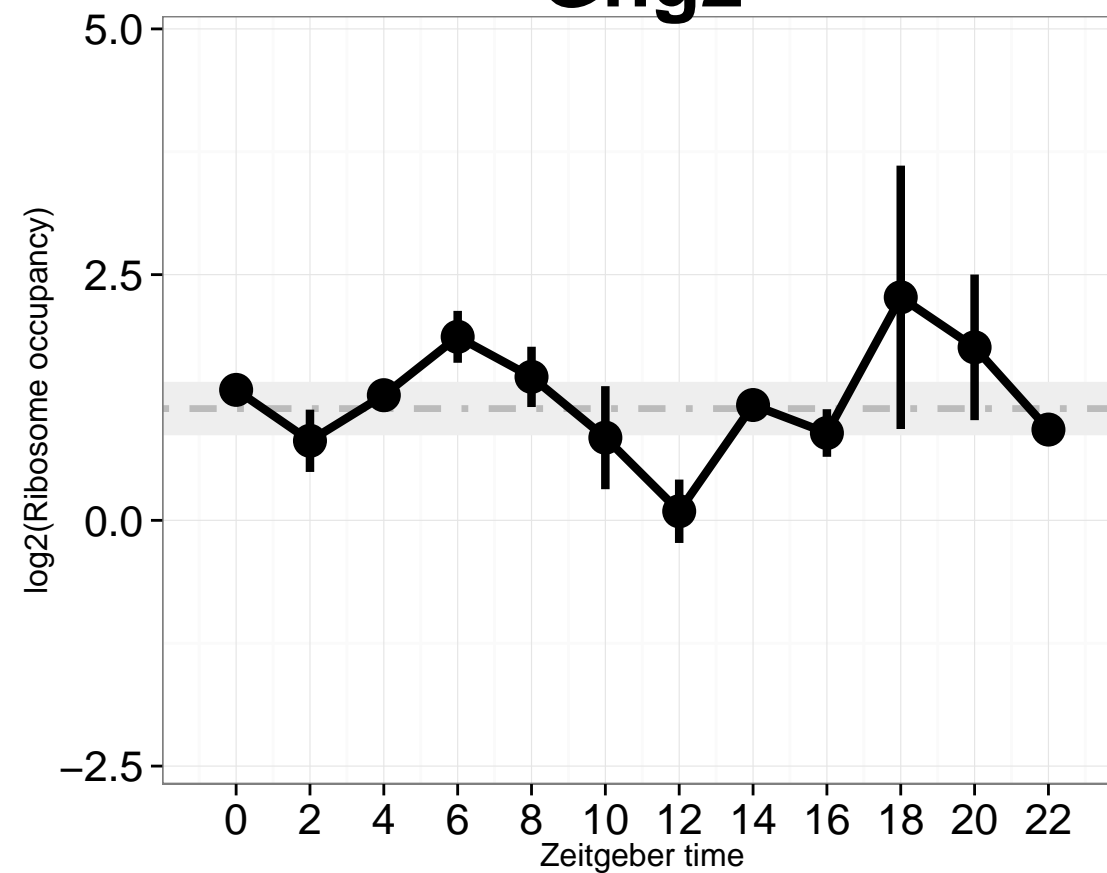

Supplement: Supplementary file 149 [file 1]

# Ptk2b

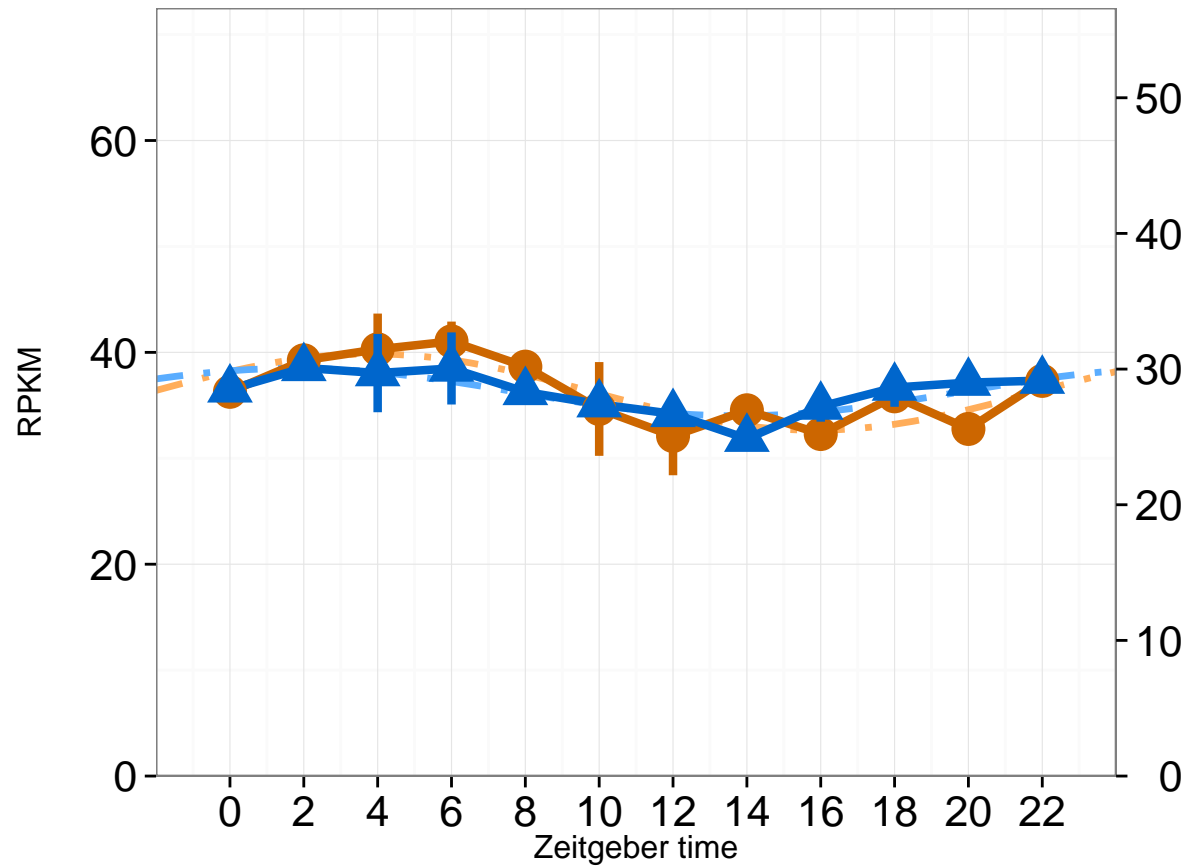

# Ptk2b

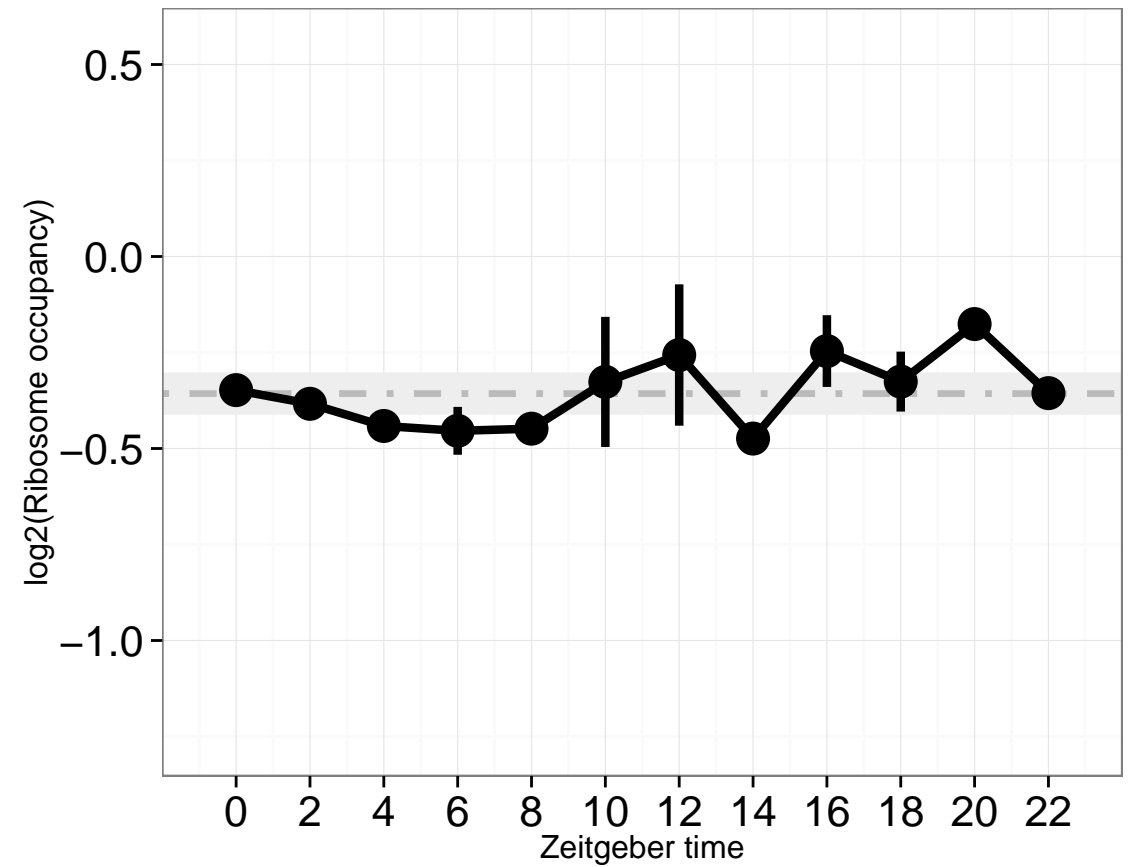

Supplement: Supplementary file 150 [file 1]

## Tmcc3

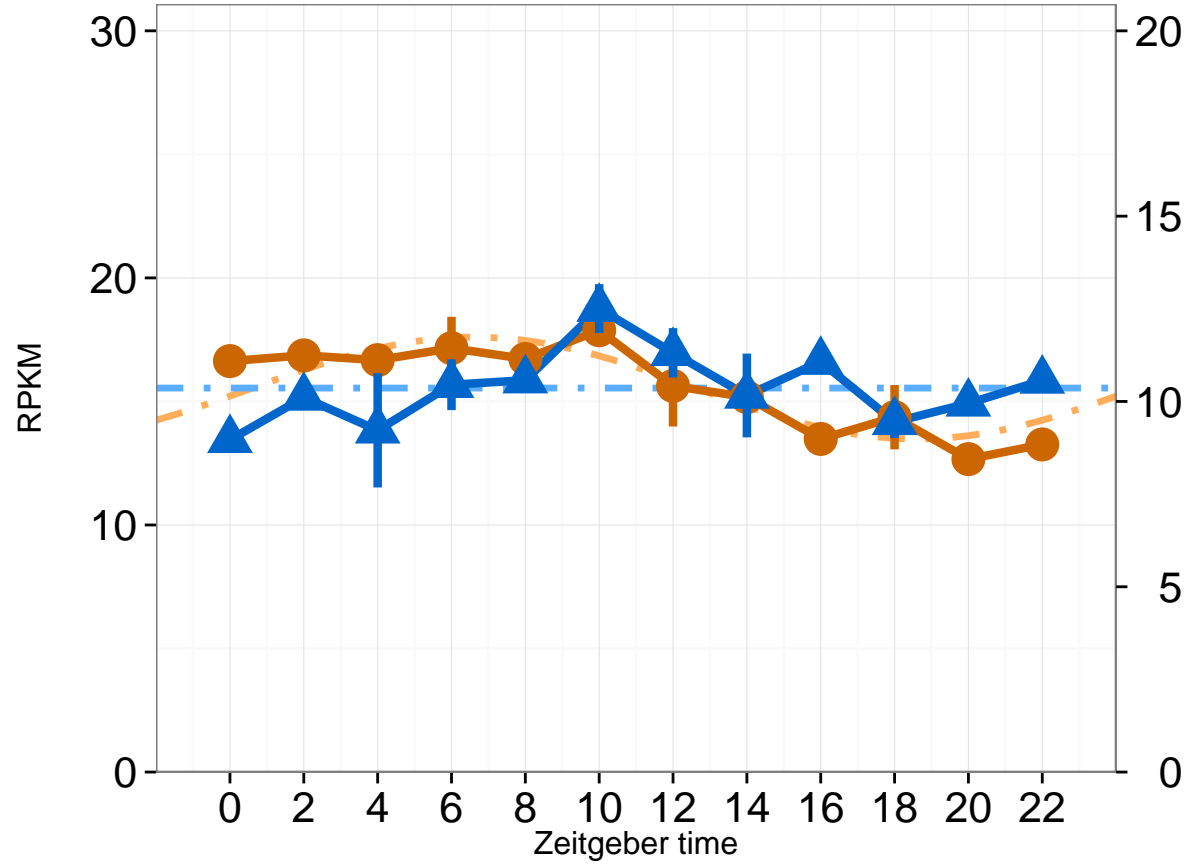

## Tmcc3

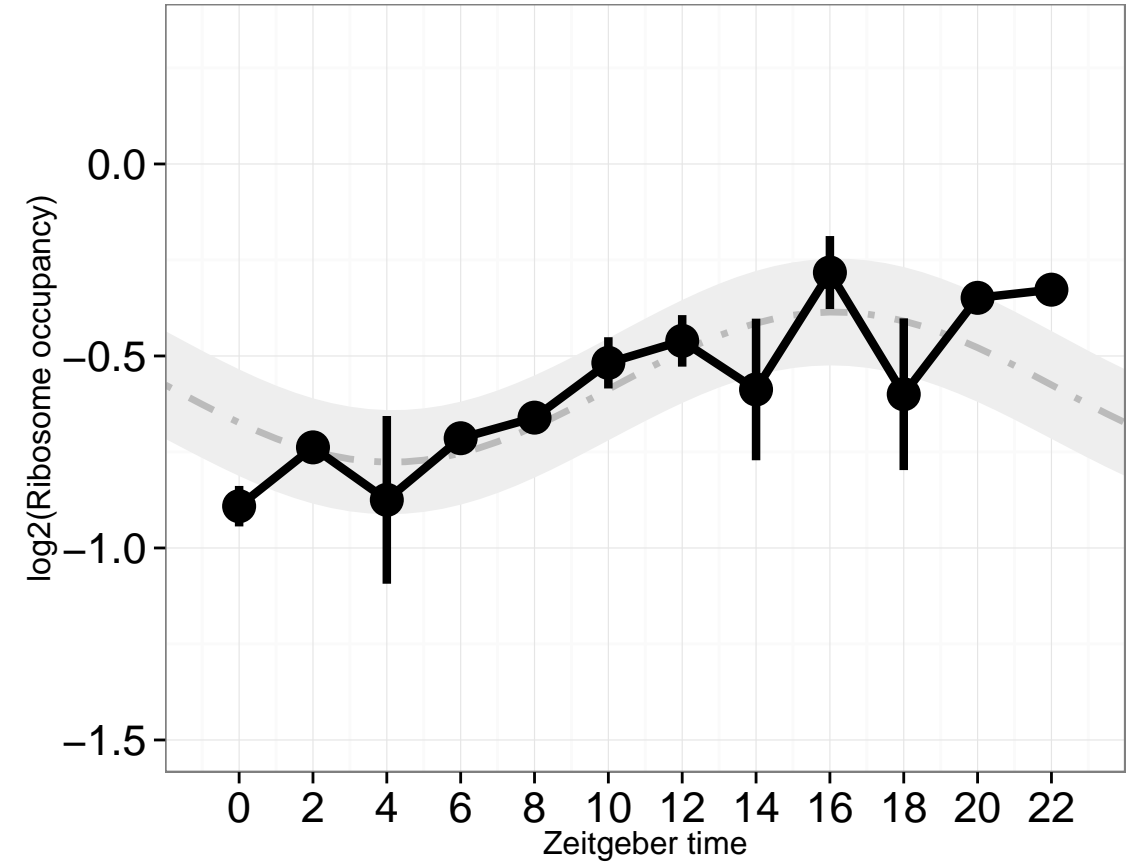

Supplement: Supplementary file 151 [file 1]

# Angptl3

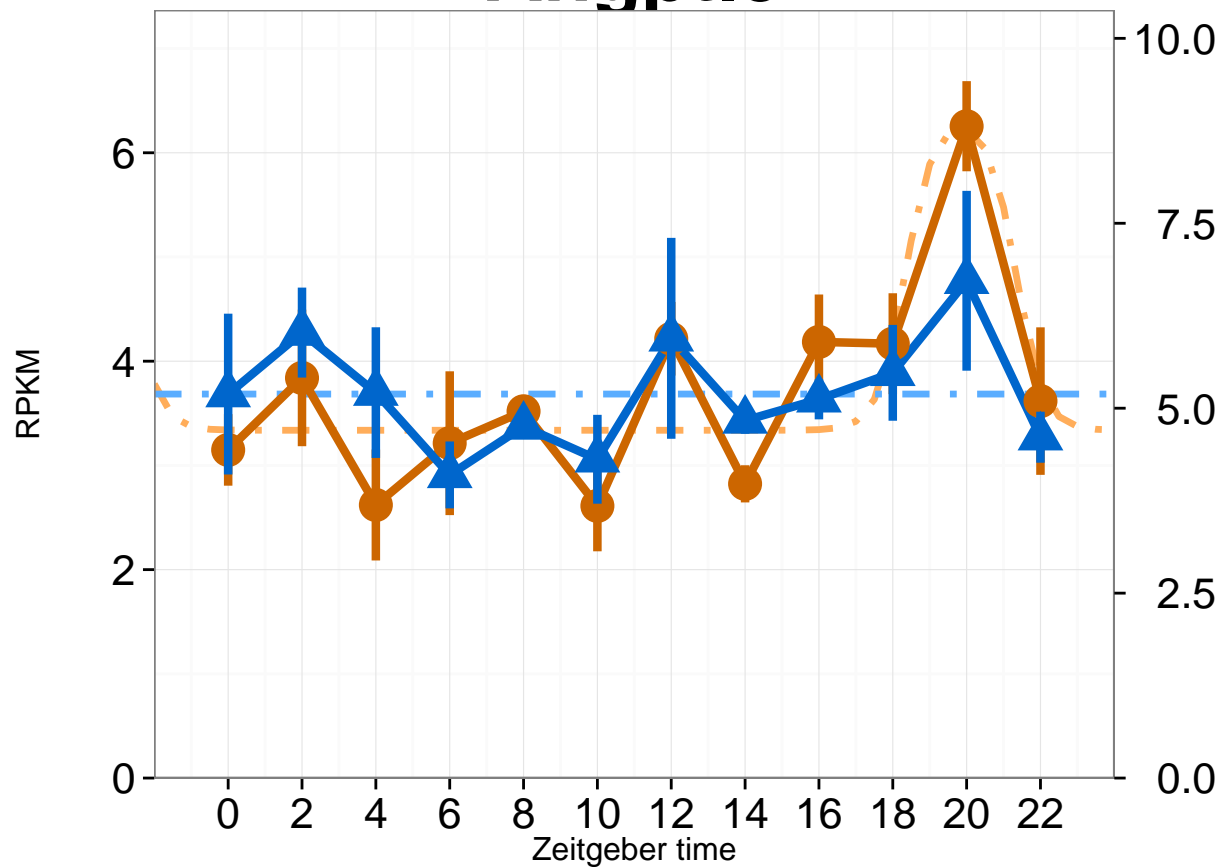

# Angptl3

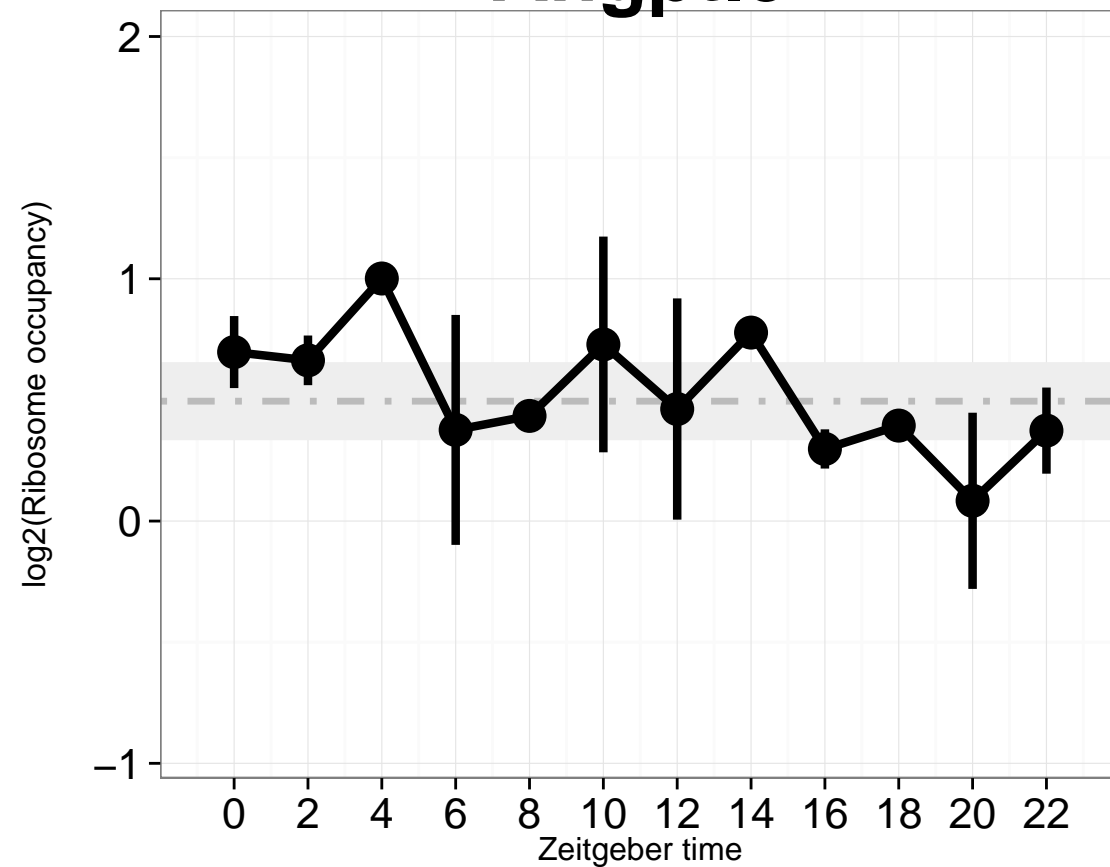

Supplement: Supplementary file 152 [file 1]

## Ank

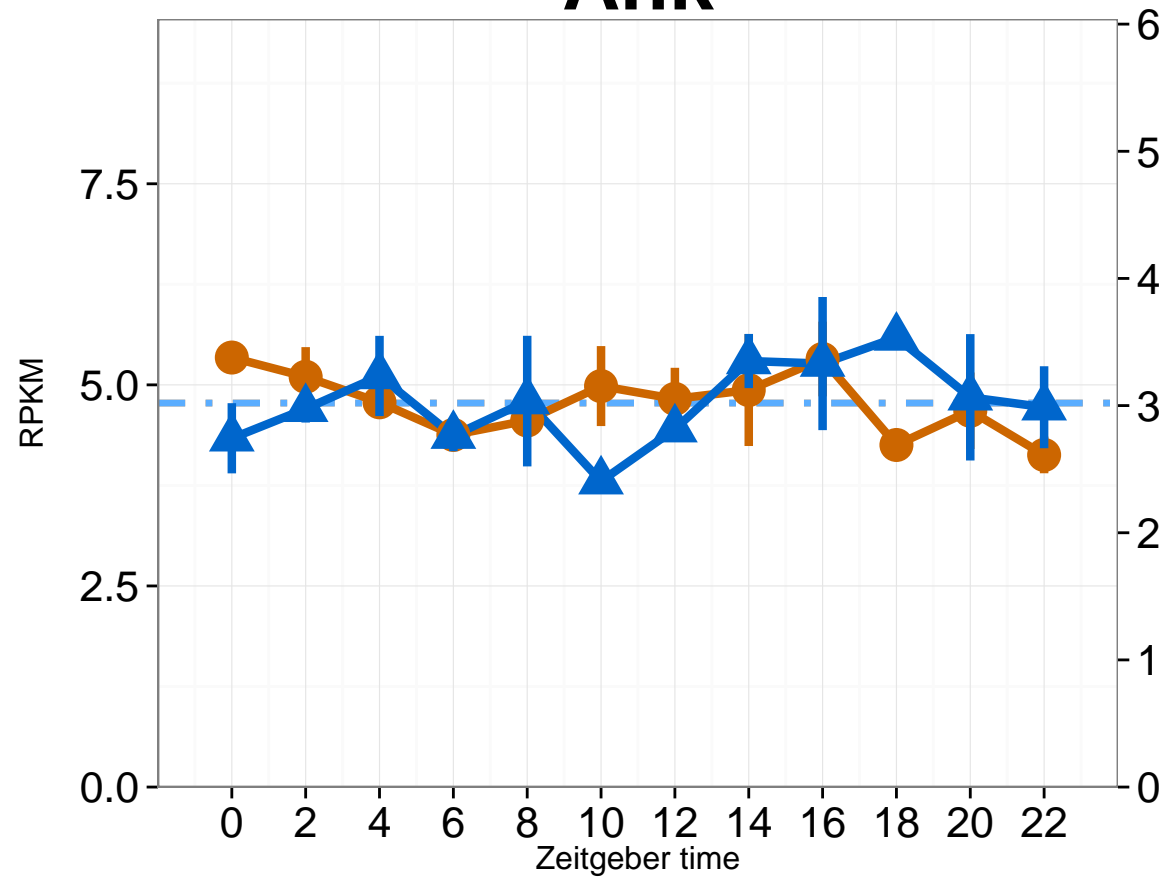

## Ank

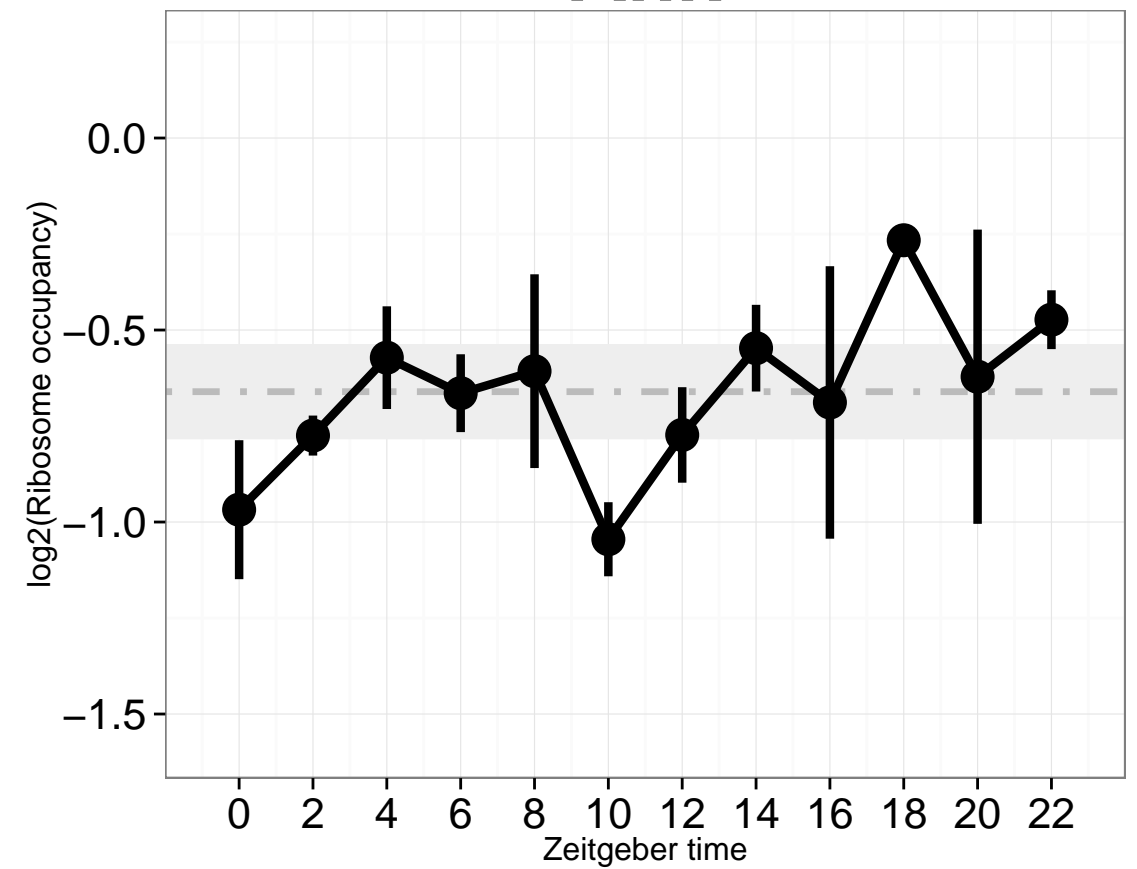

Supplement: Supplementary file 153 [file 1]

## ErbB4

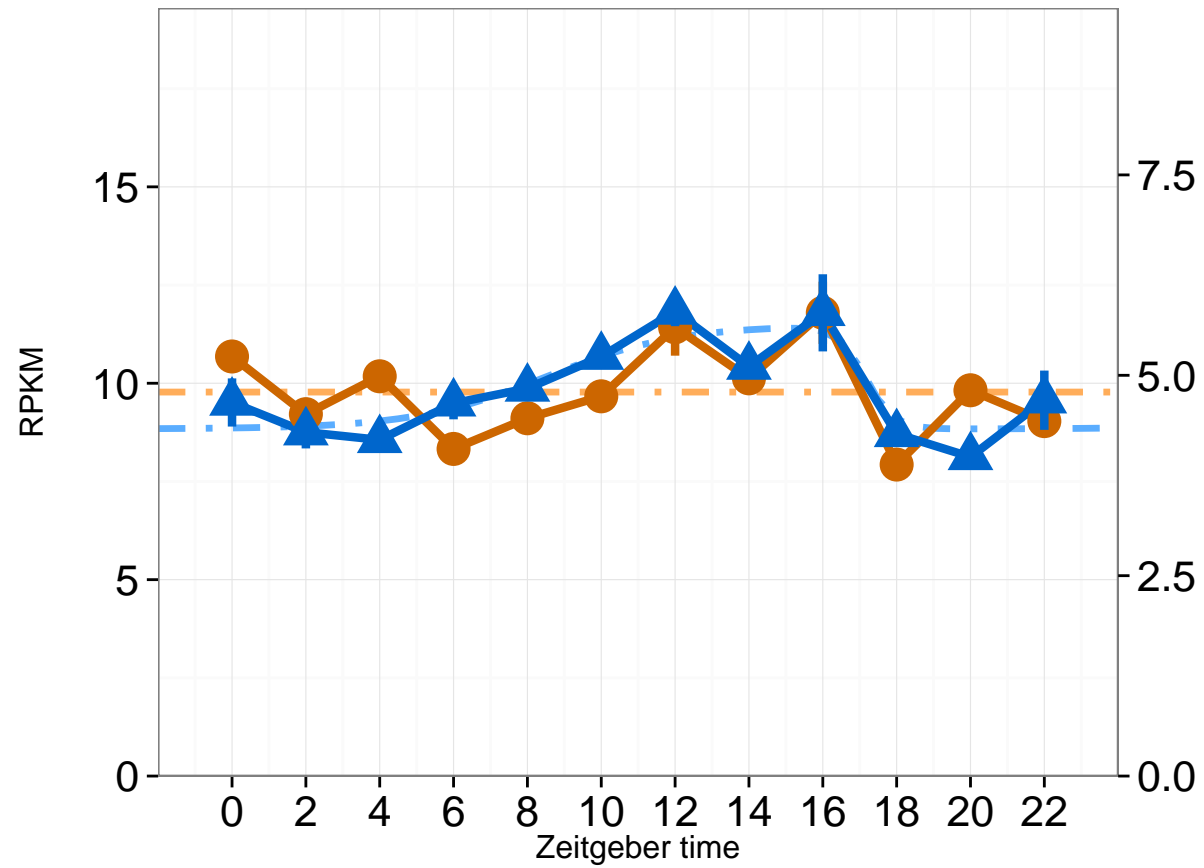

## ErbB4

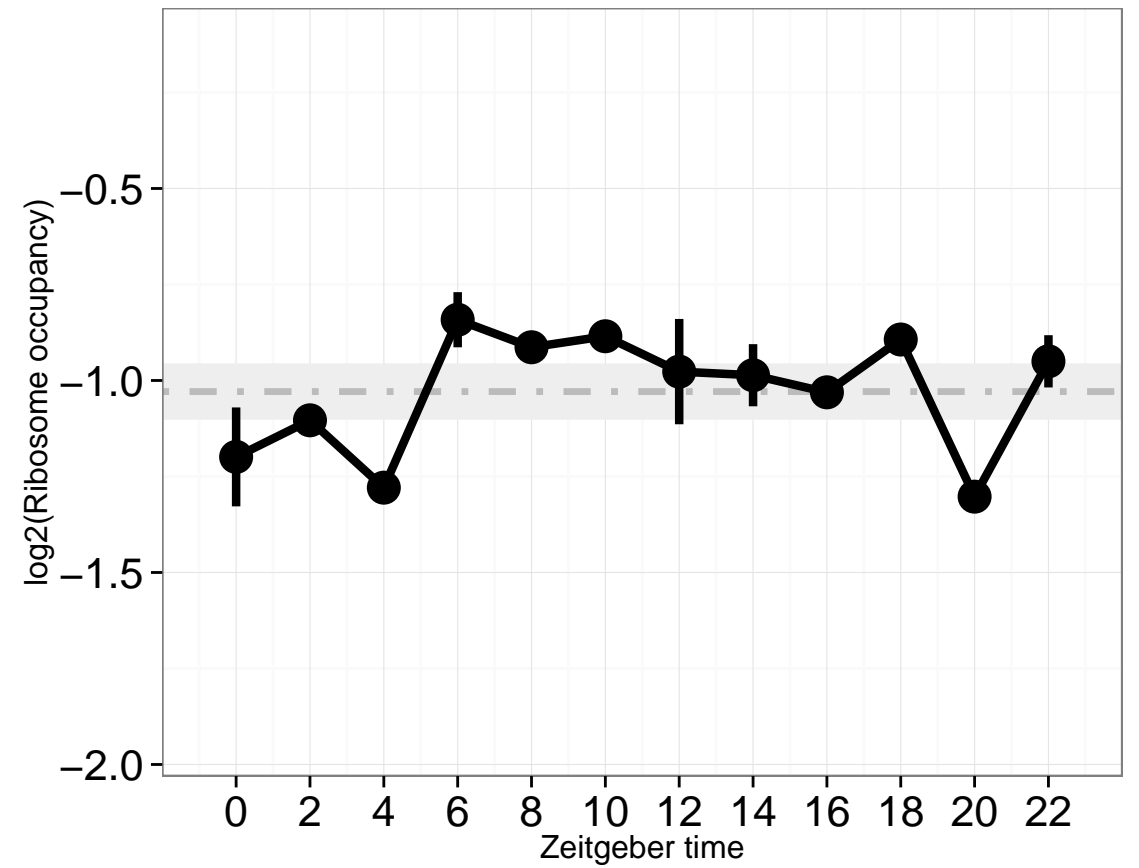

Supplement: Supplementary file 154 [file 1]

## BC049762

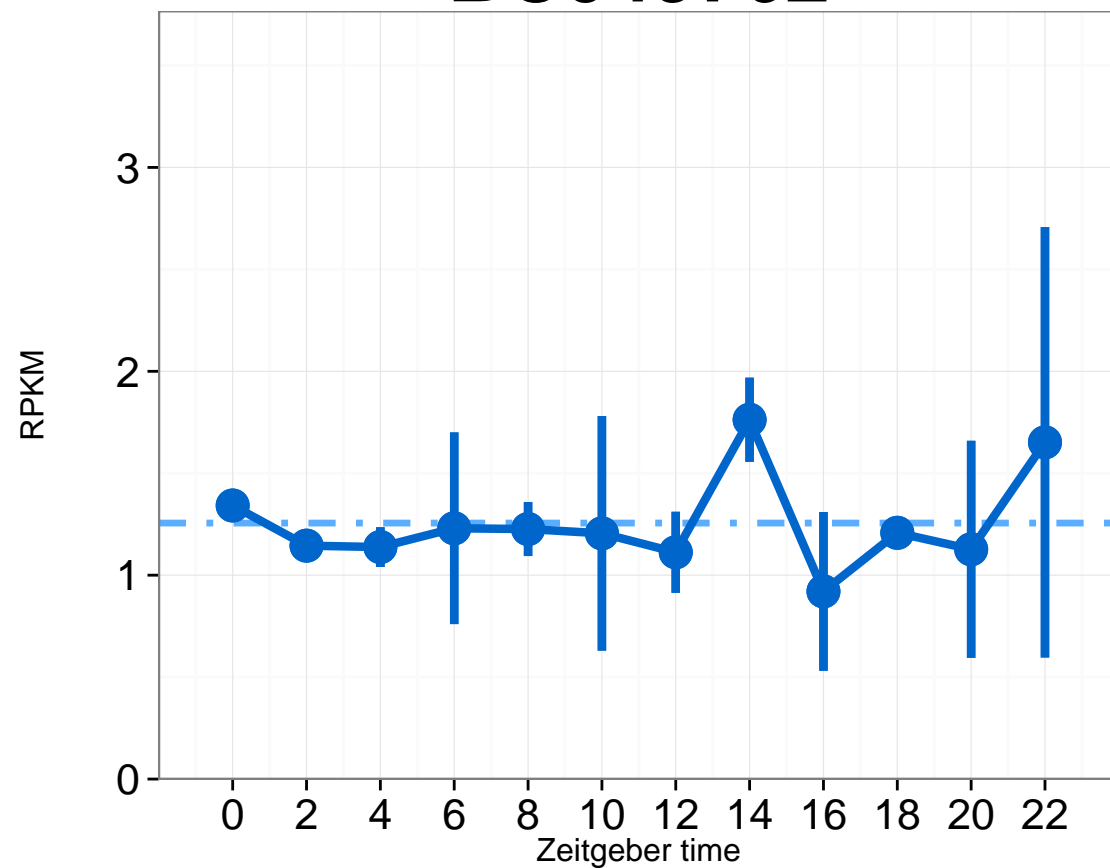

## BC049762 log2(Ribosome occupancy)

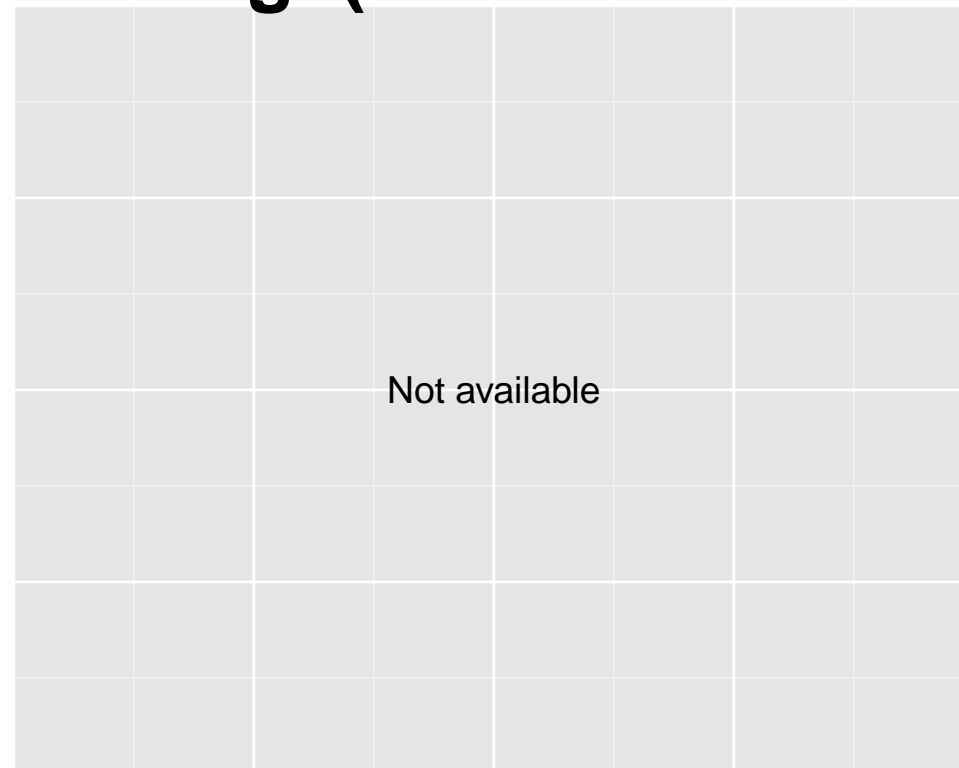

Supplement: Supplementary file 155 [file 1]

## Evpl

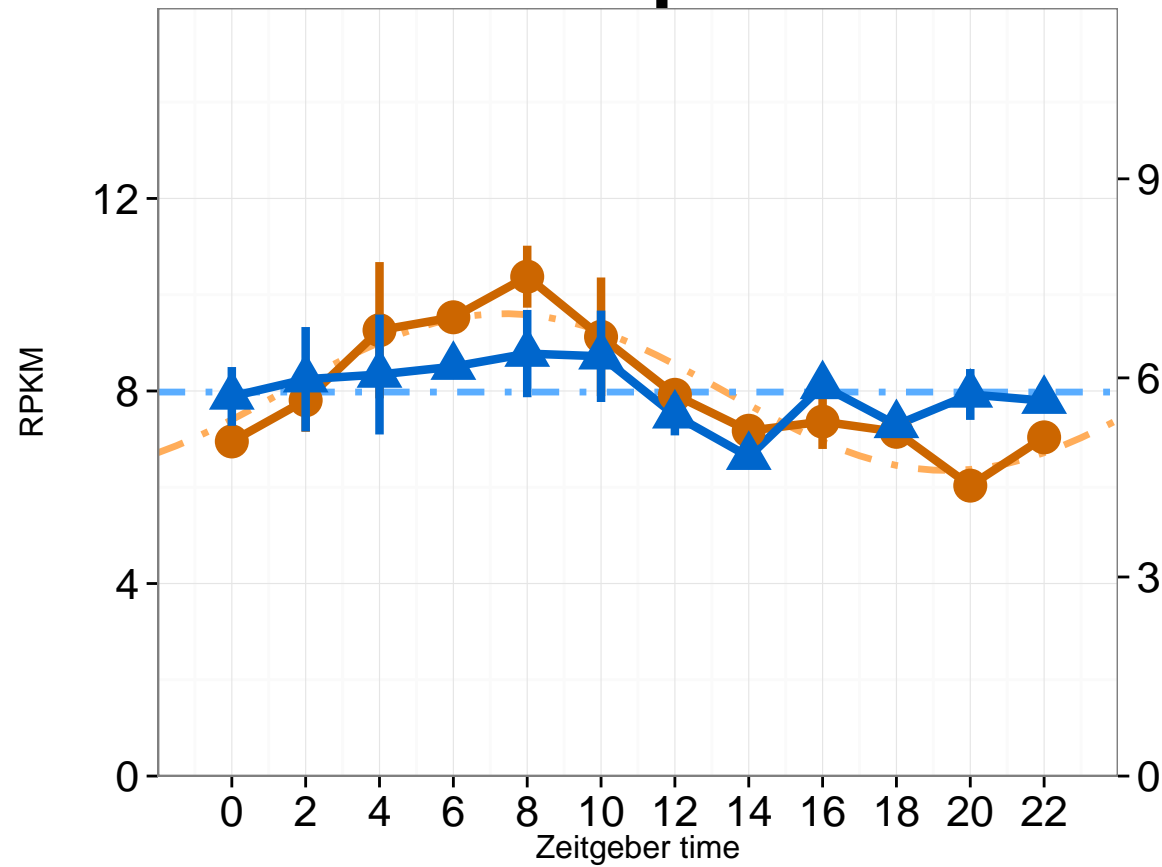

## Evpl

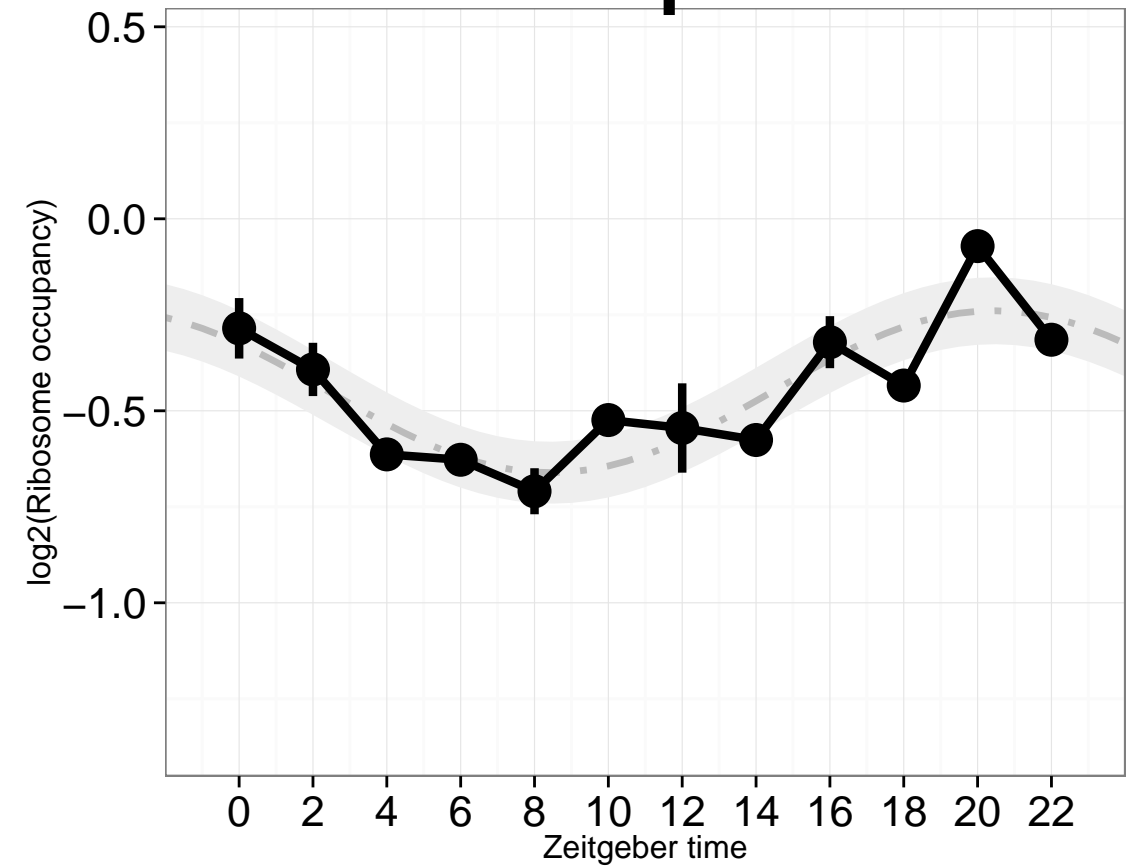

Supplement: Supplementary file 156 [file 1]

## Cluh

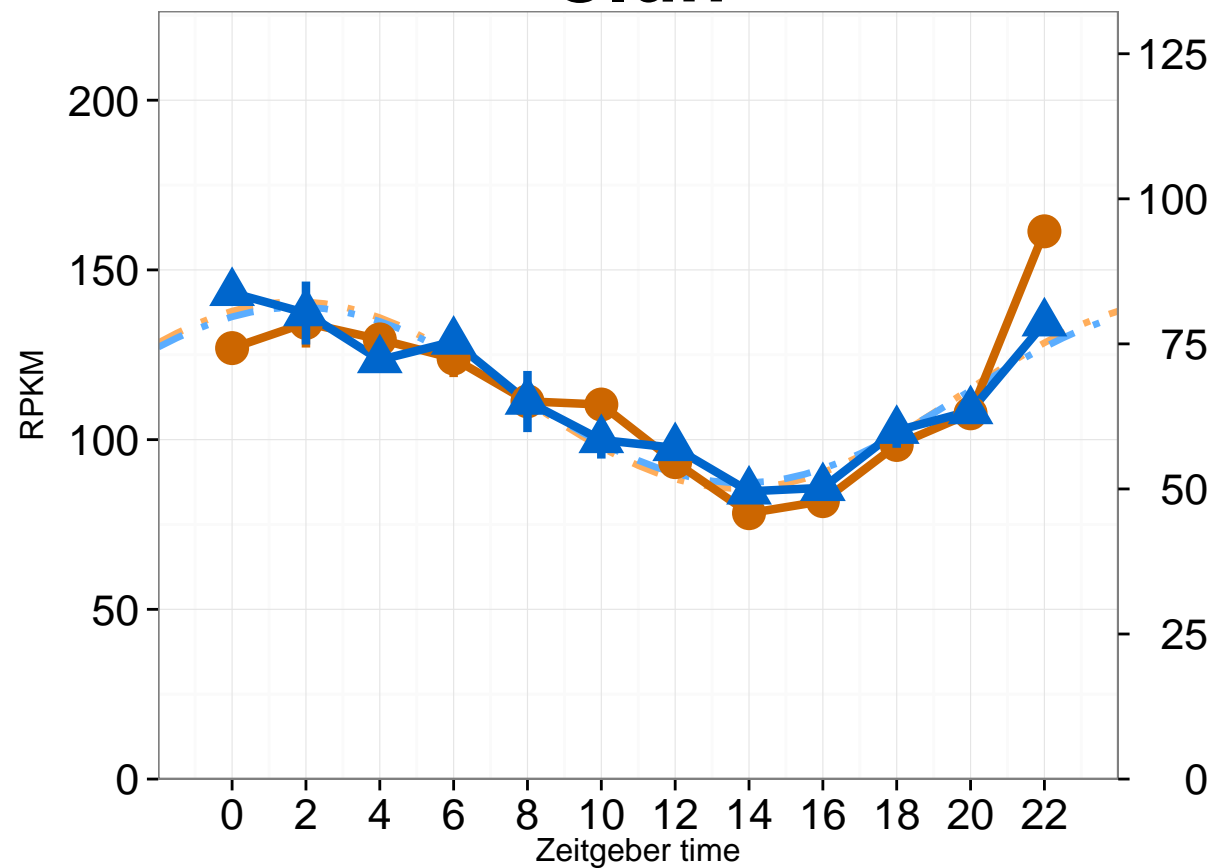

## Cluh

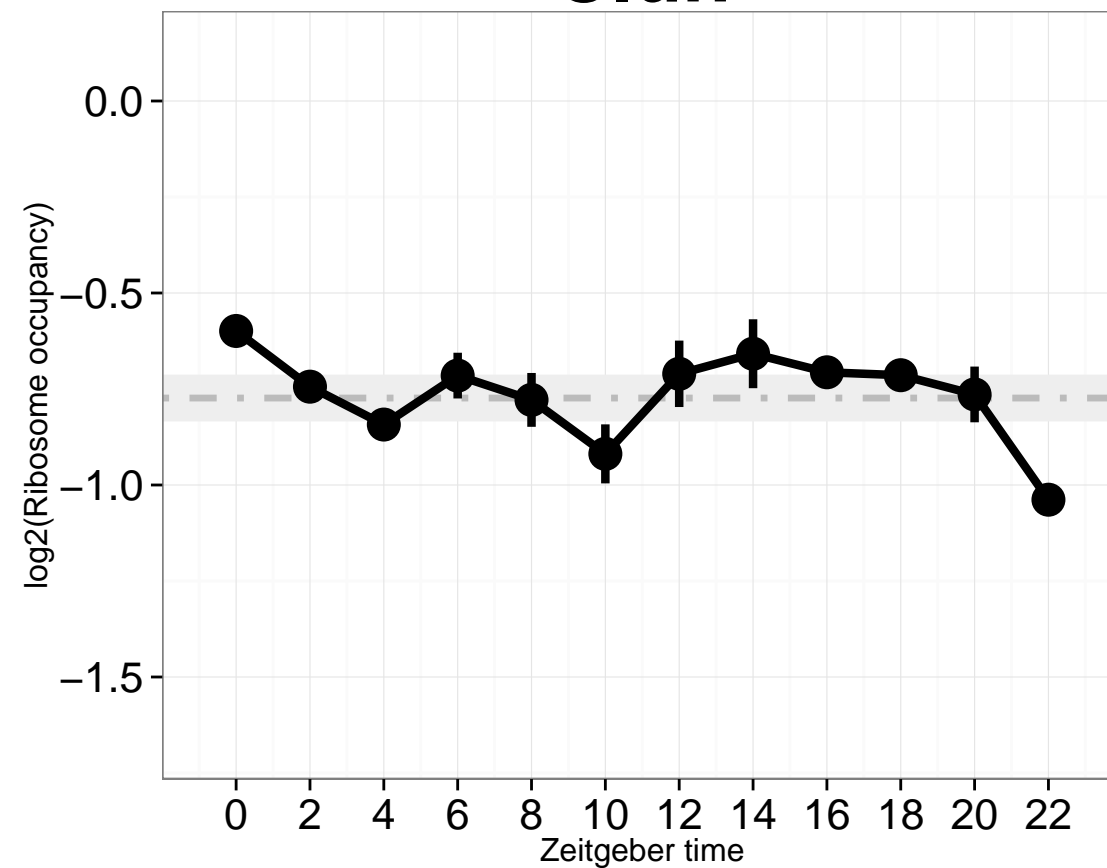

Supplement: Supplementary file 157 [file 1]

## Tmeff1

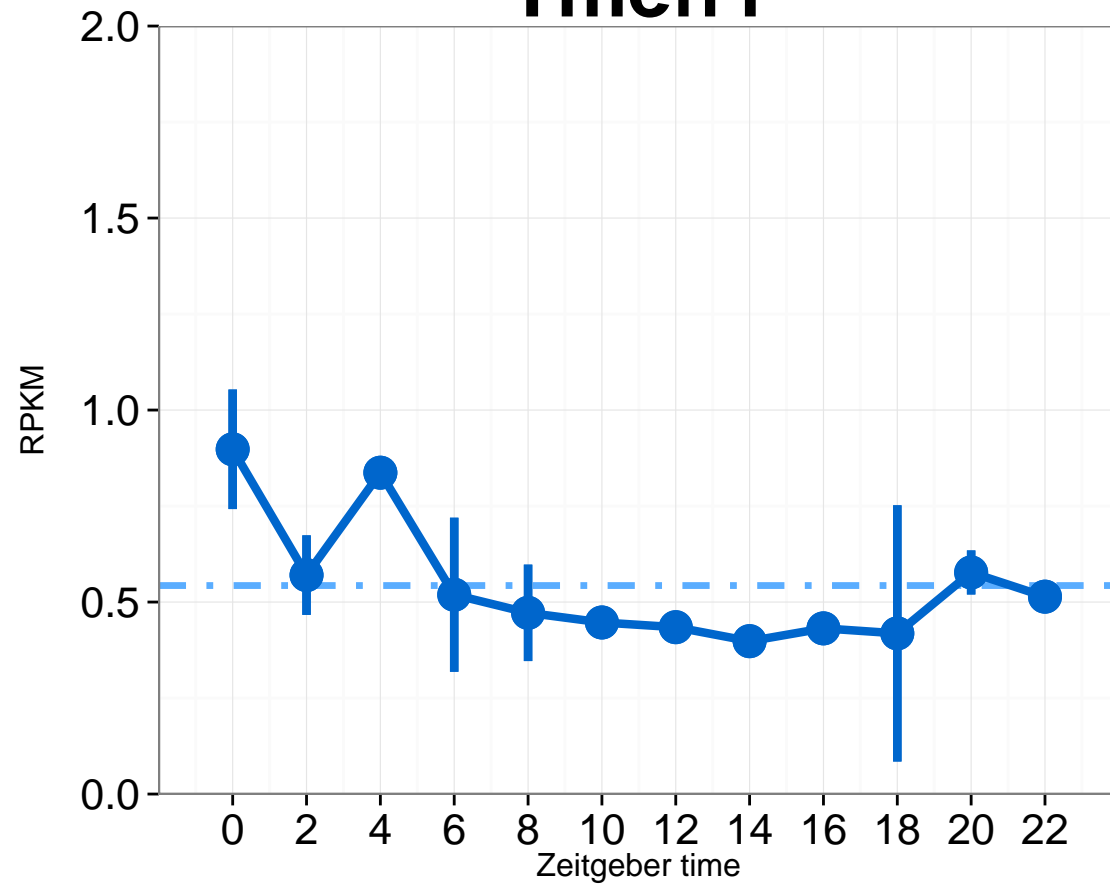

## Tmeff1 log2(Ribosome occupancy

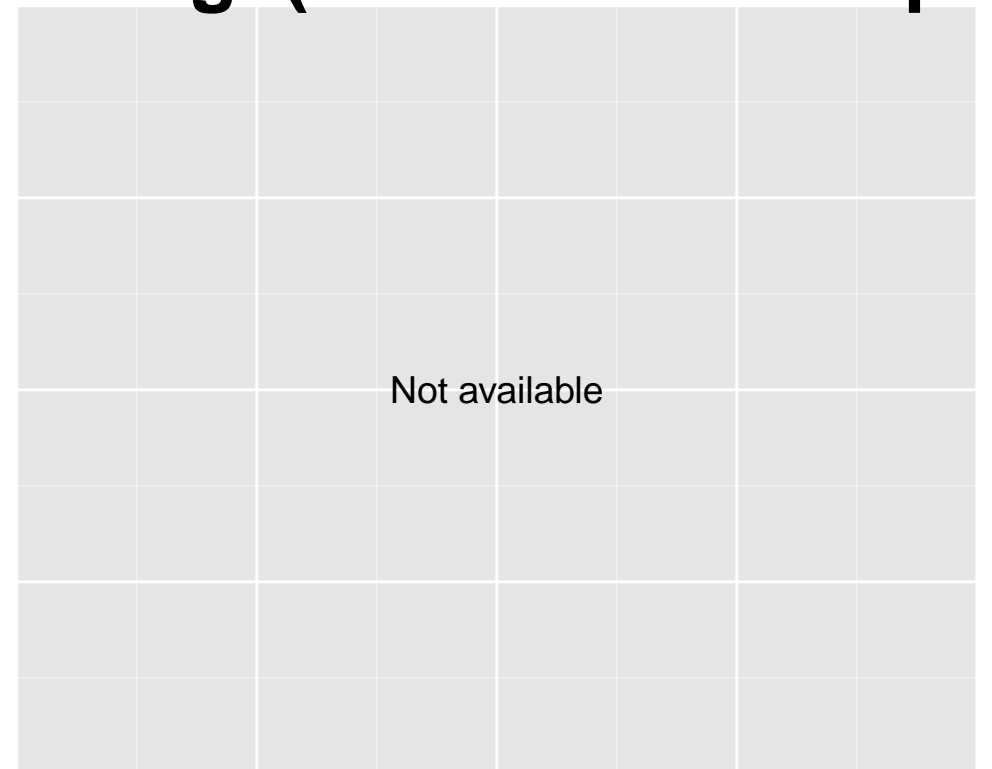

Supplement: Supplementary file 158 [file 1]

# Hyal2

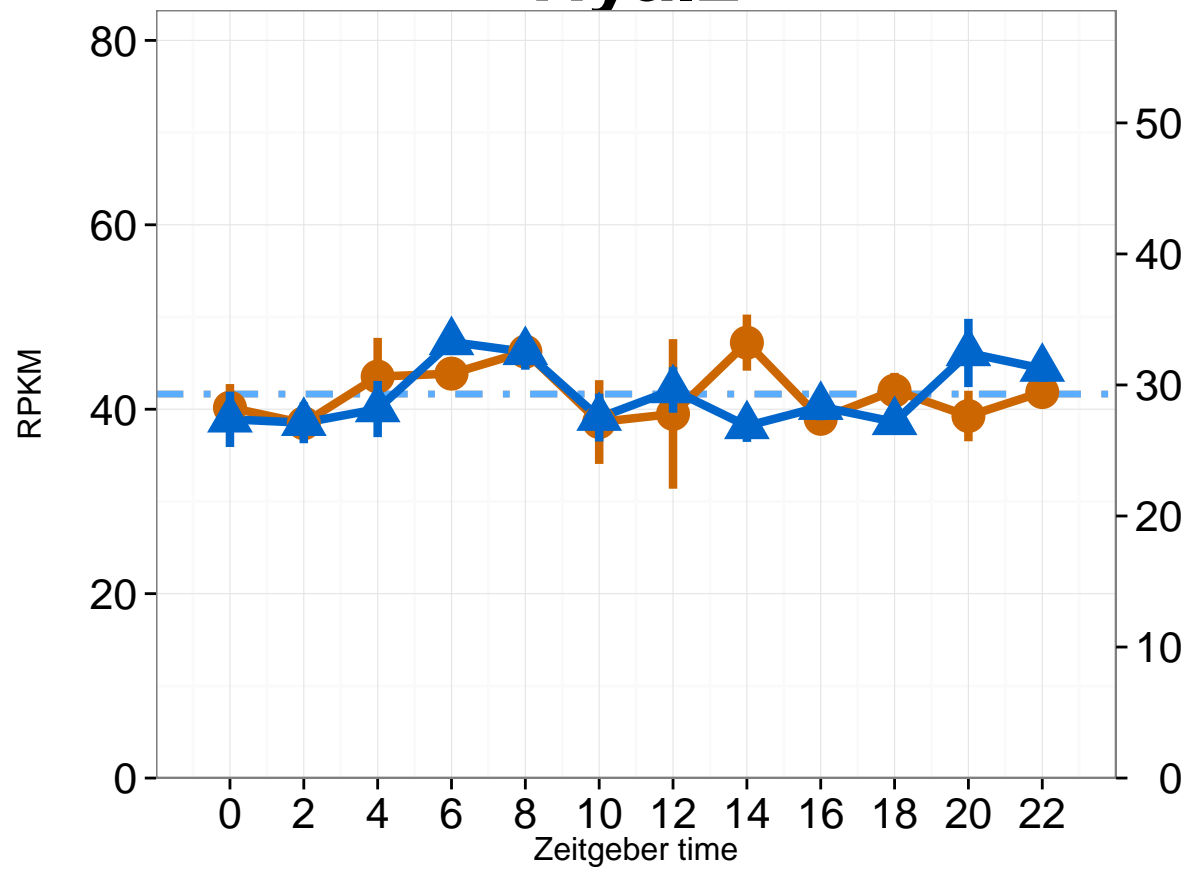

# Hyal2

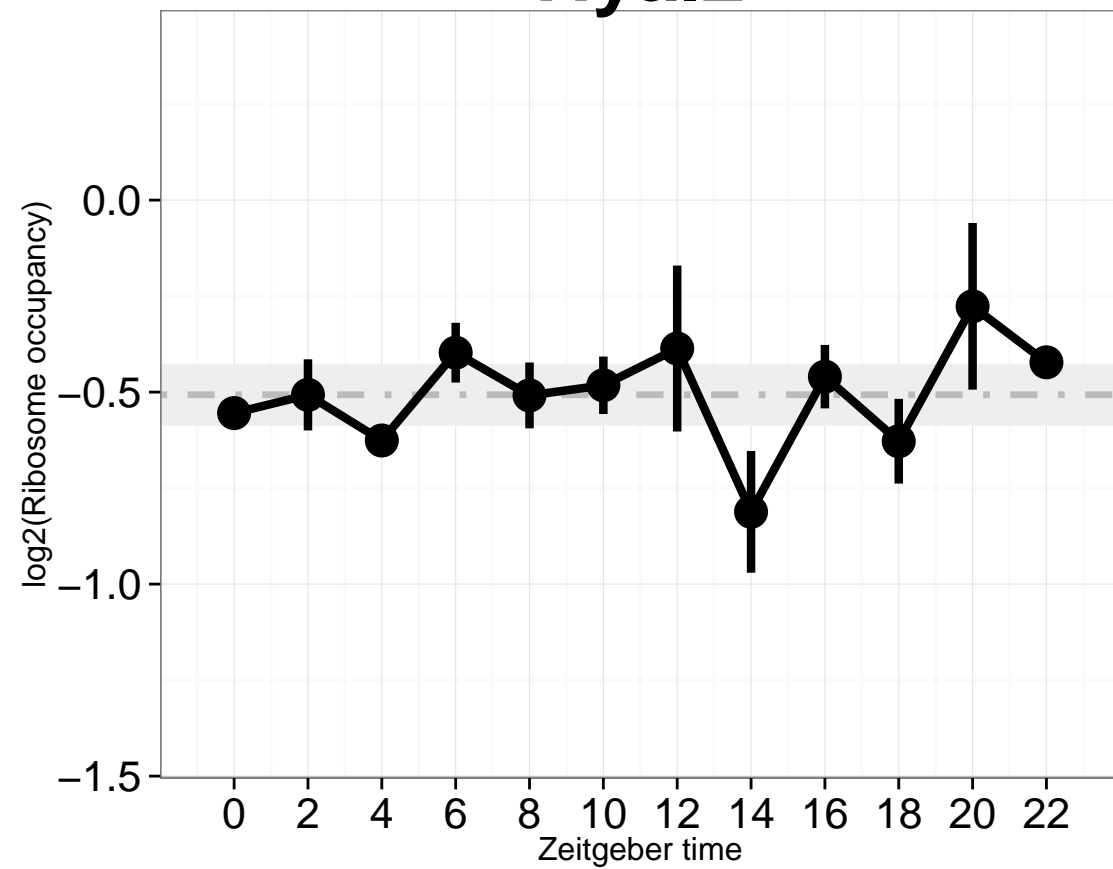

Supplement: Supplementary file 159 [file 1]

## Efnb2

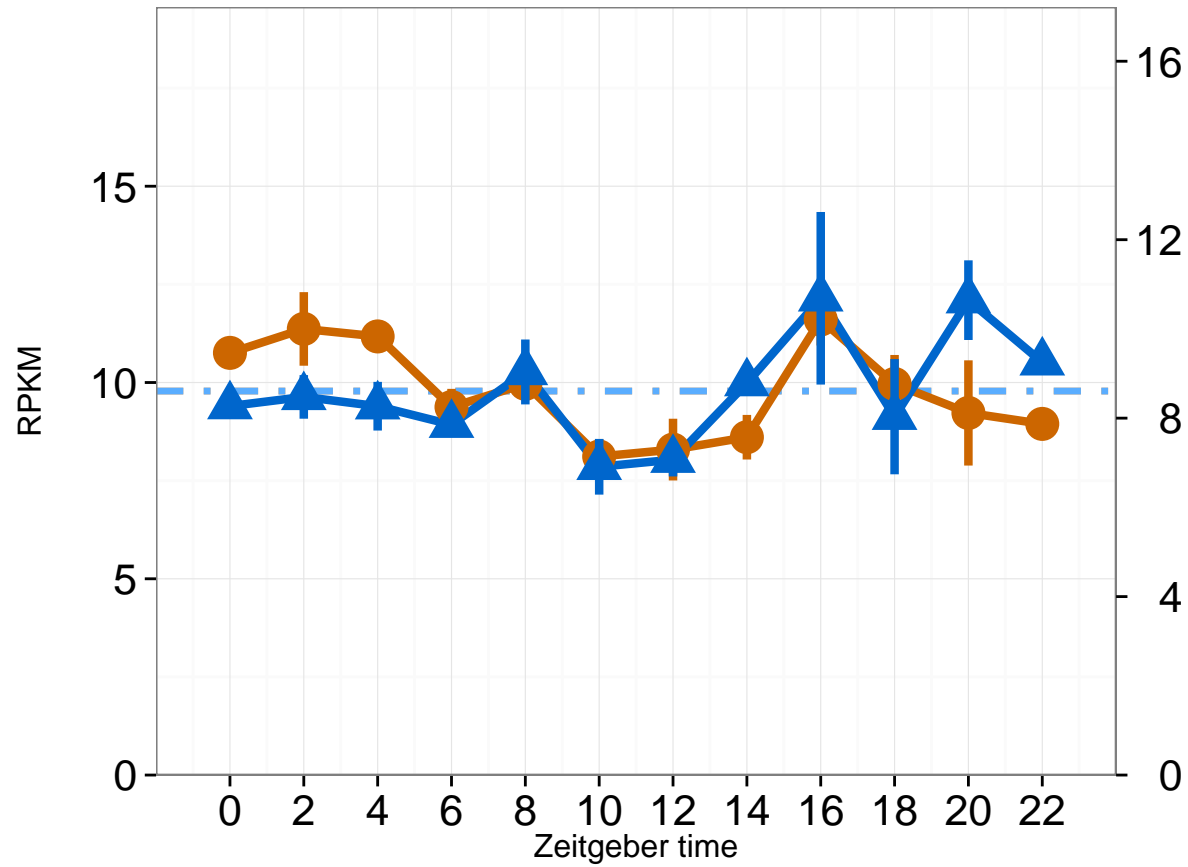

## Efnb2

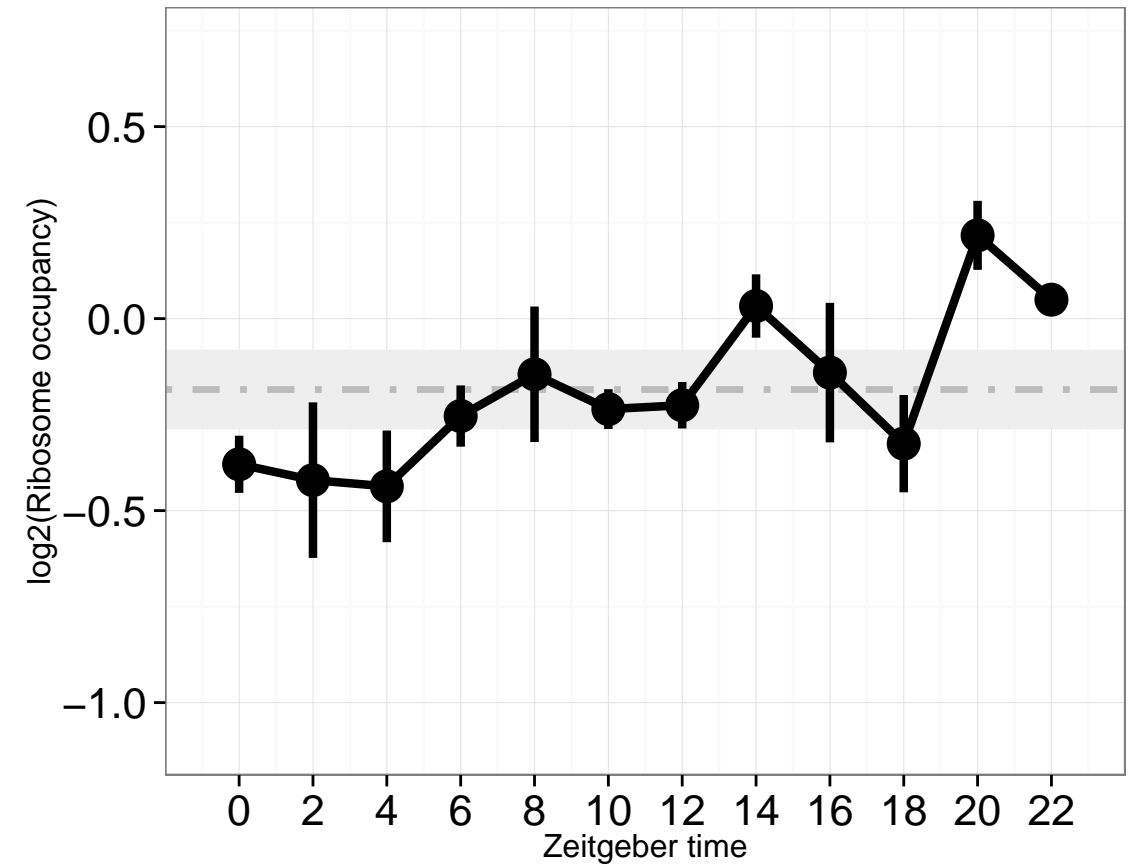

Supplement: Supplementary file 160 [file 1]

## Dapk1

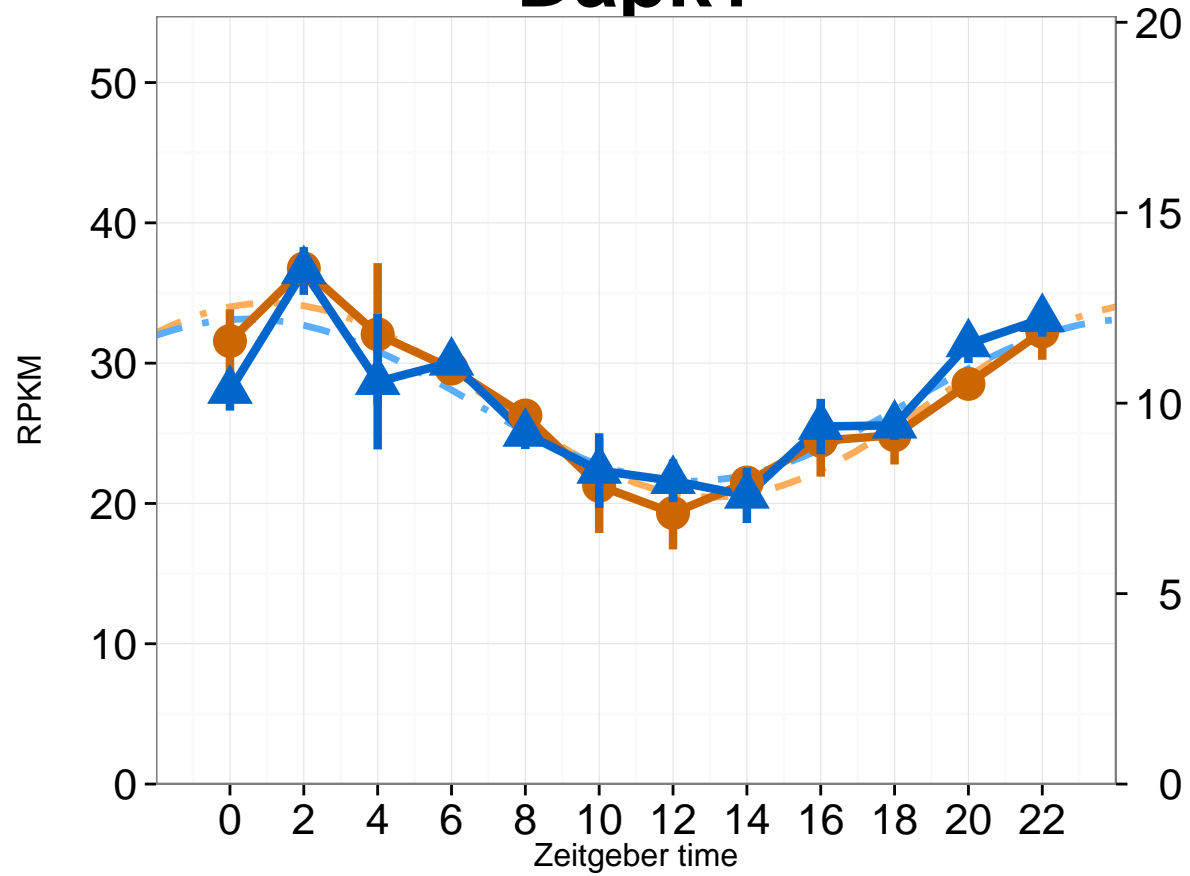

## Dapk1

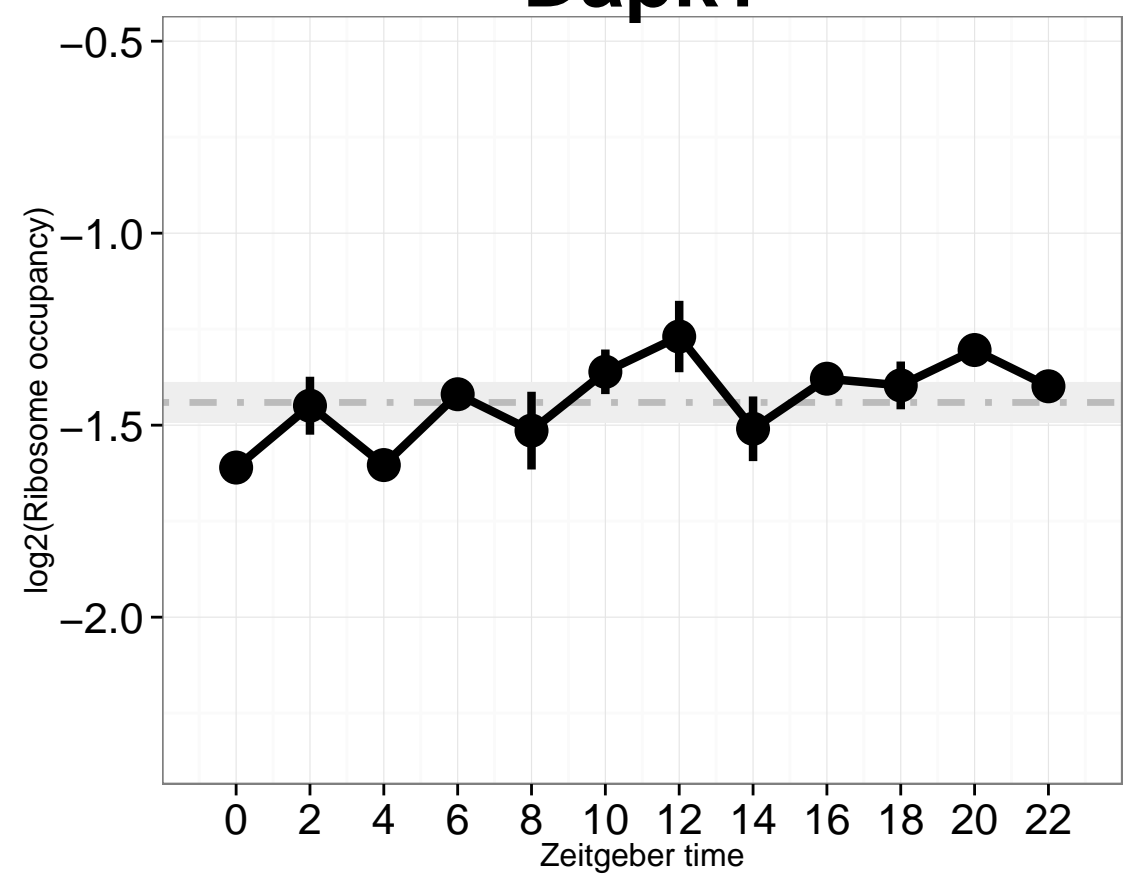

Supplement: Supplementary file 161 [file 1]

# Bhlhe41

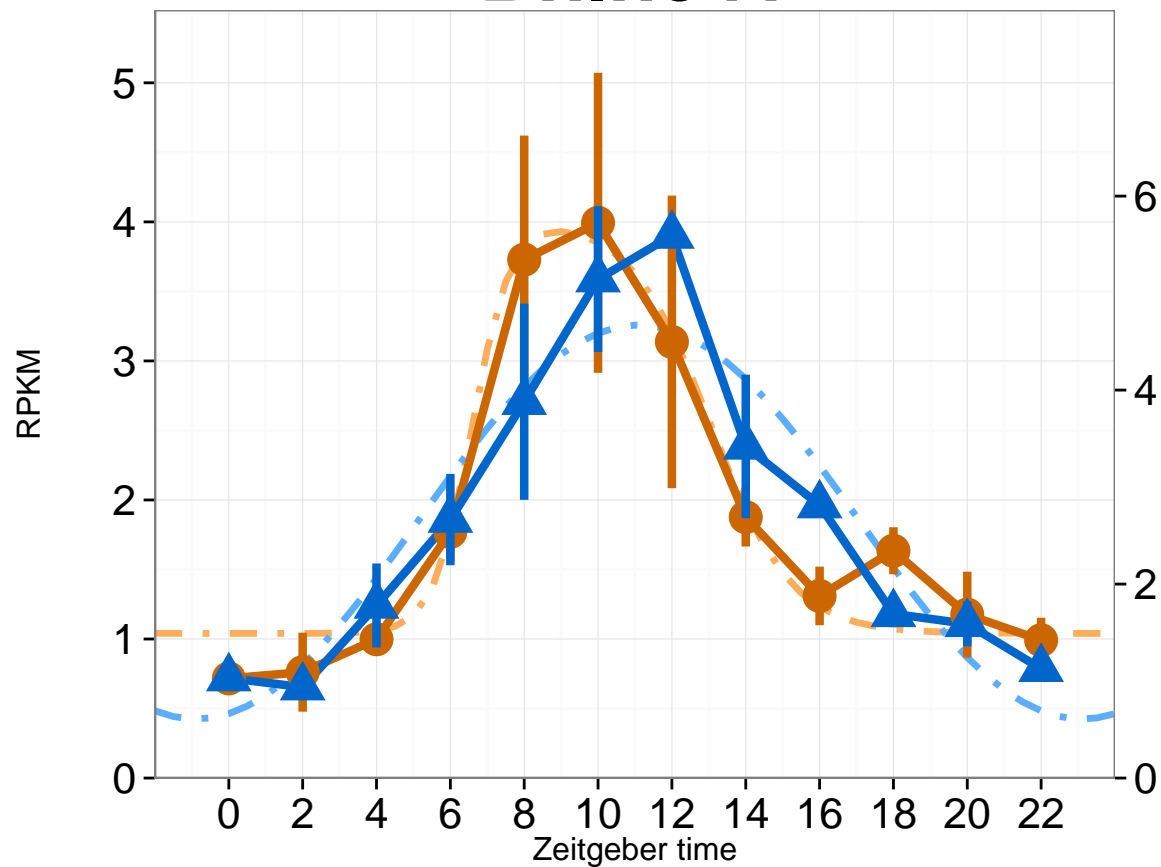

# Bhlhe41

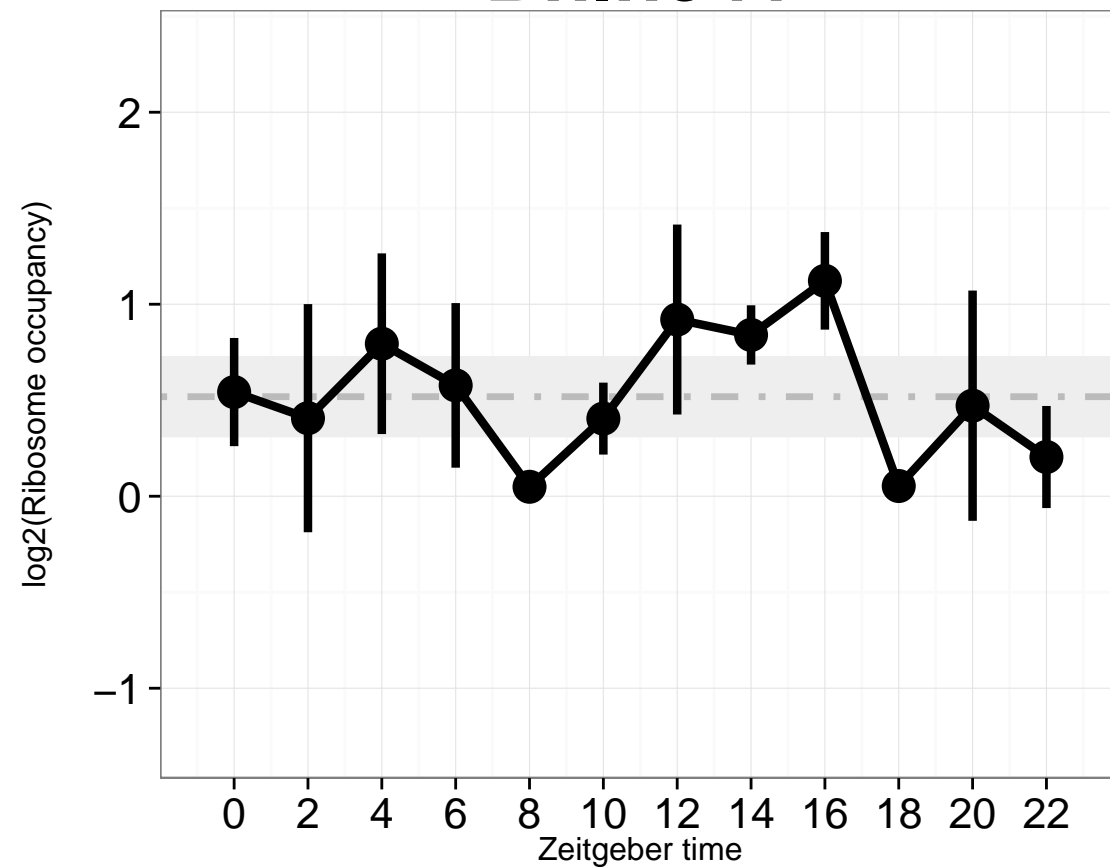

Supplement: Supplementary file 162 [file 1]

# Itgb2

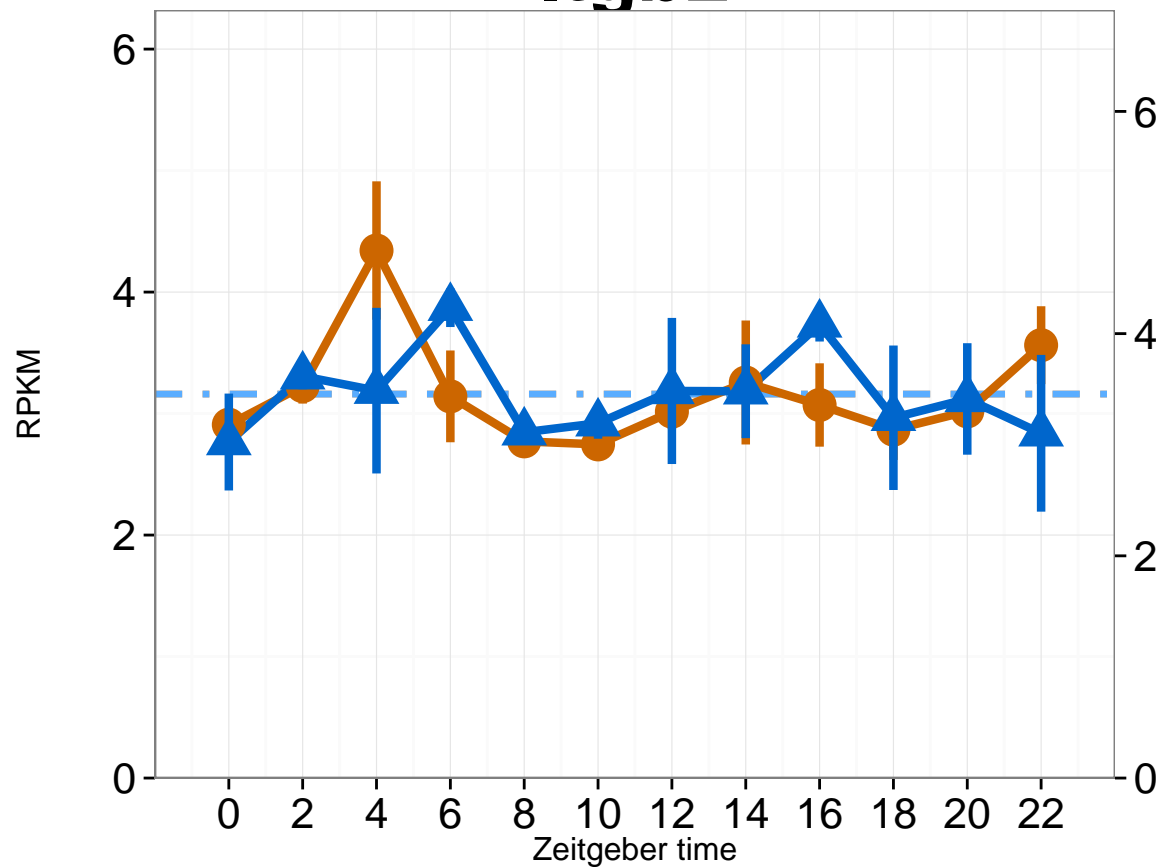

# Itgb2

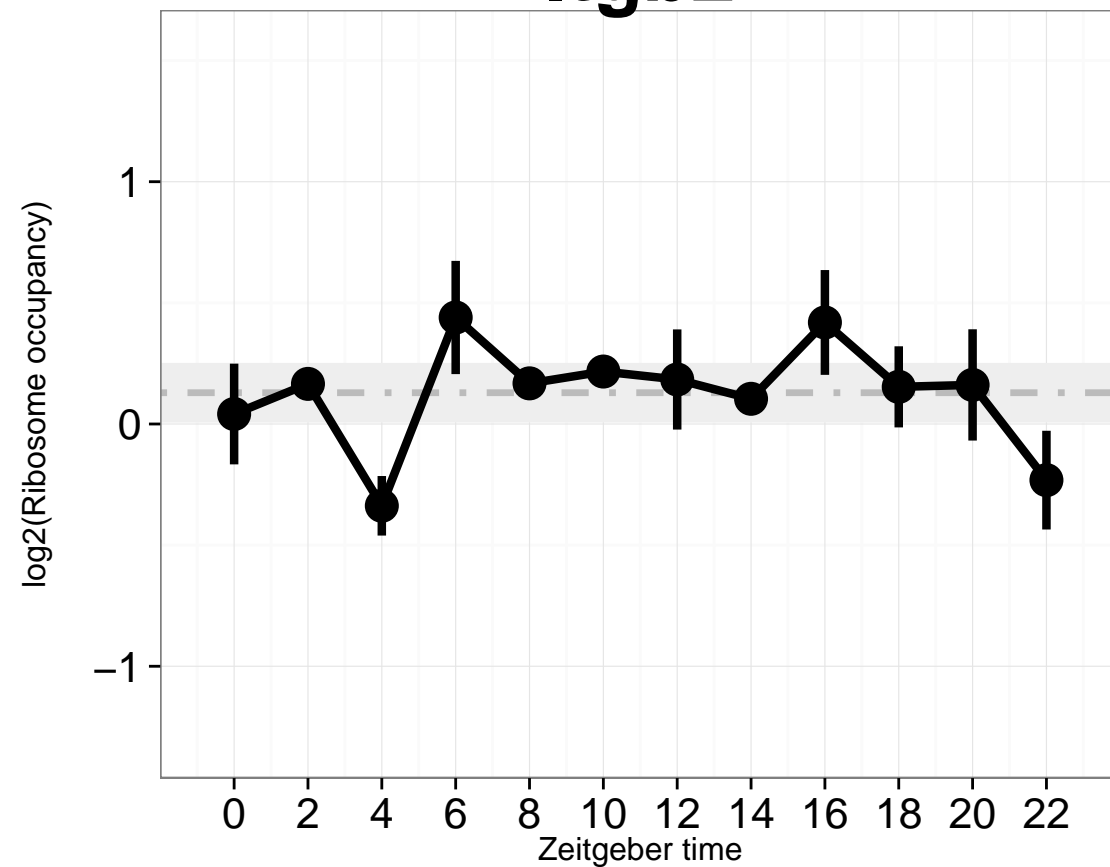

Supplement: Supplementary file 163 [file 1]

## Bmpr2

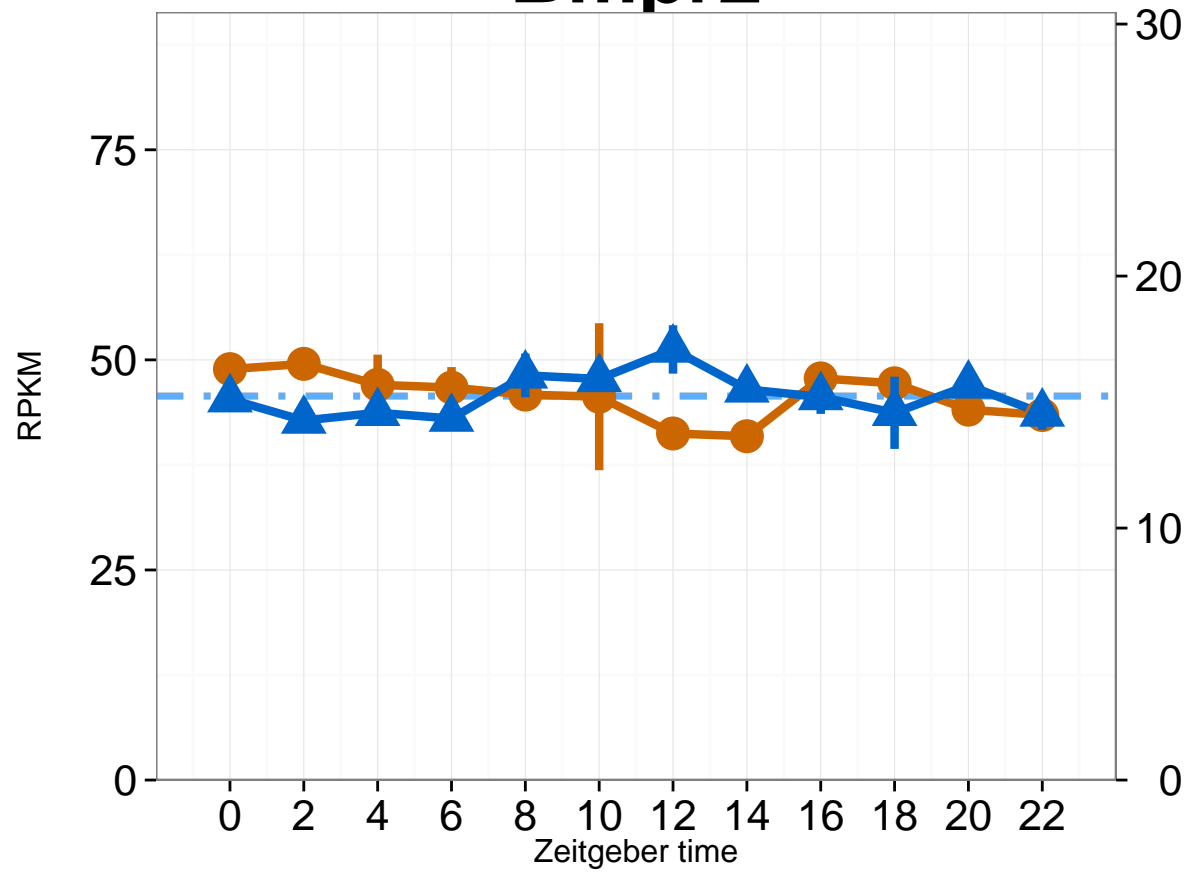

## Bmpr2

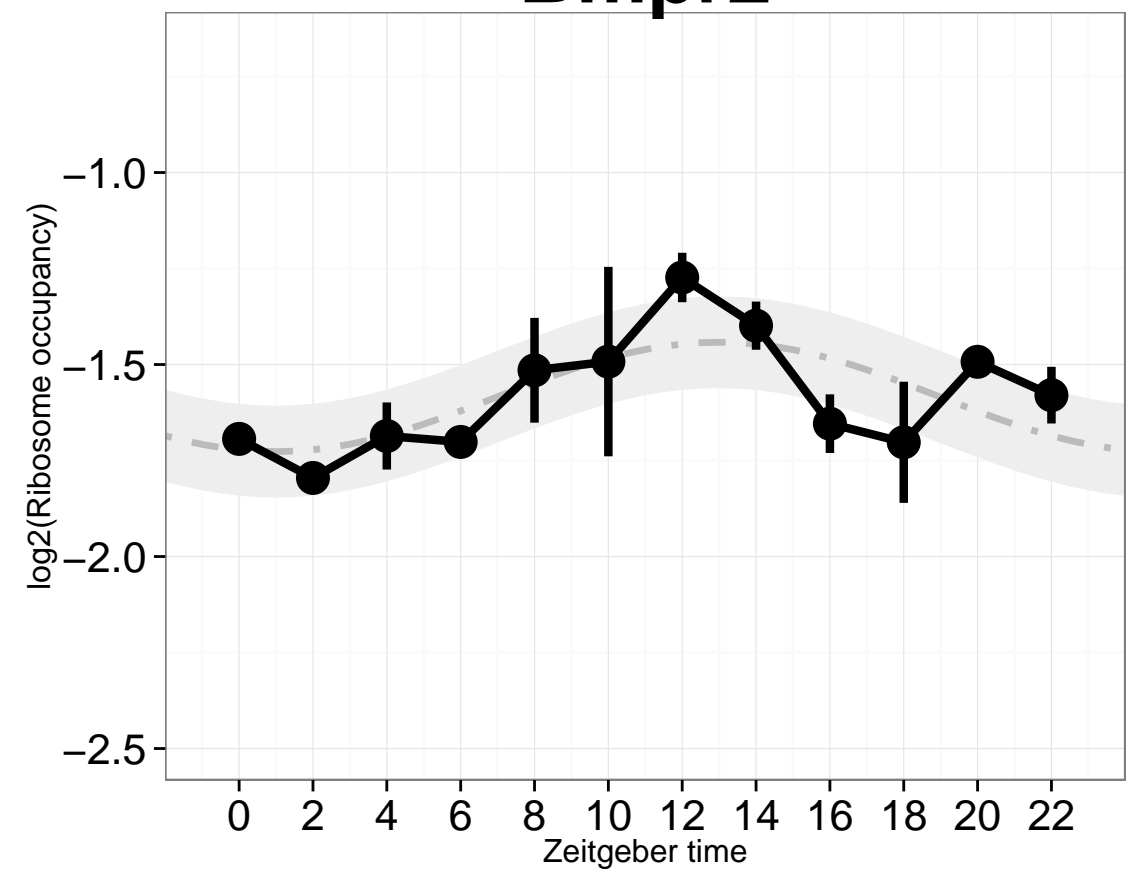

Supplement: Supplementary file 164 [file 1]

# Cox18

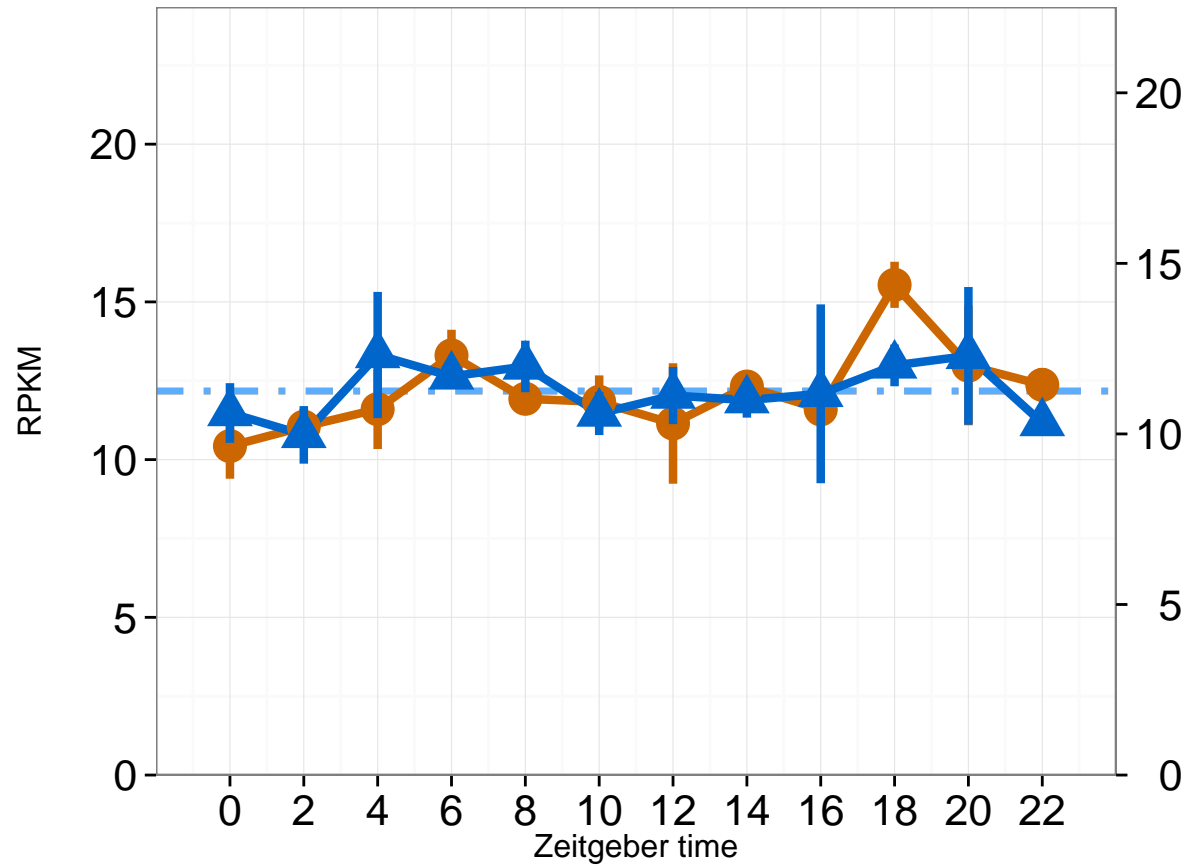

# Cox18

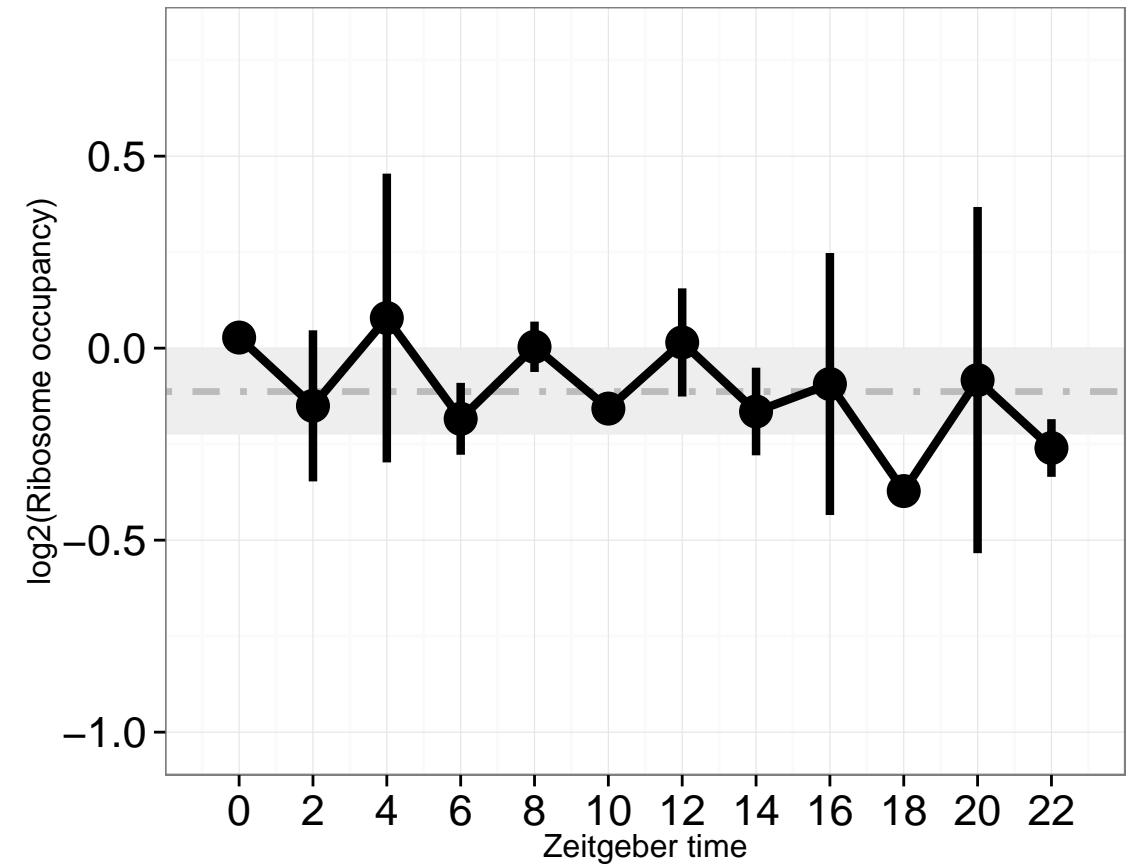

Supplement: Supplementary file 165 [file 1]

# Fmn1

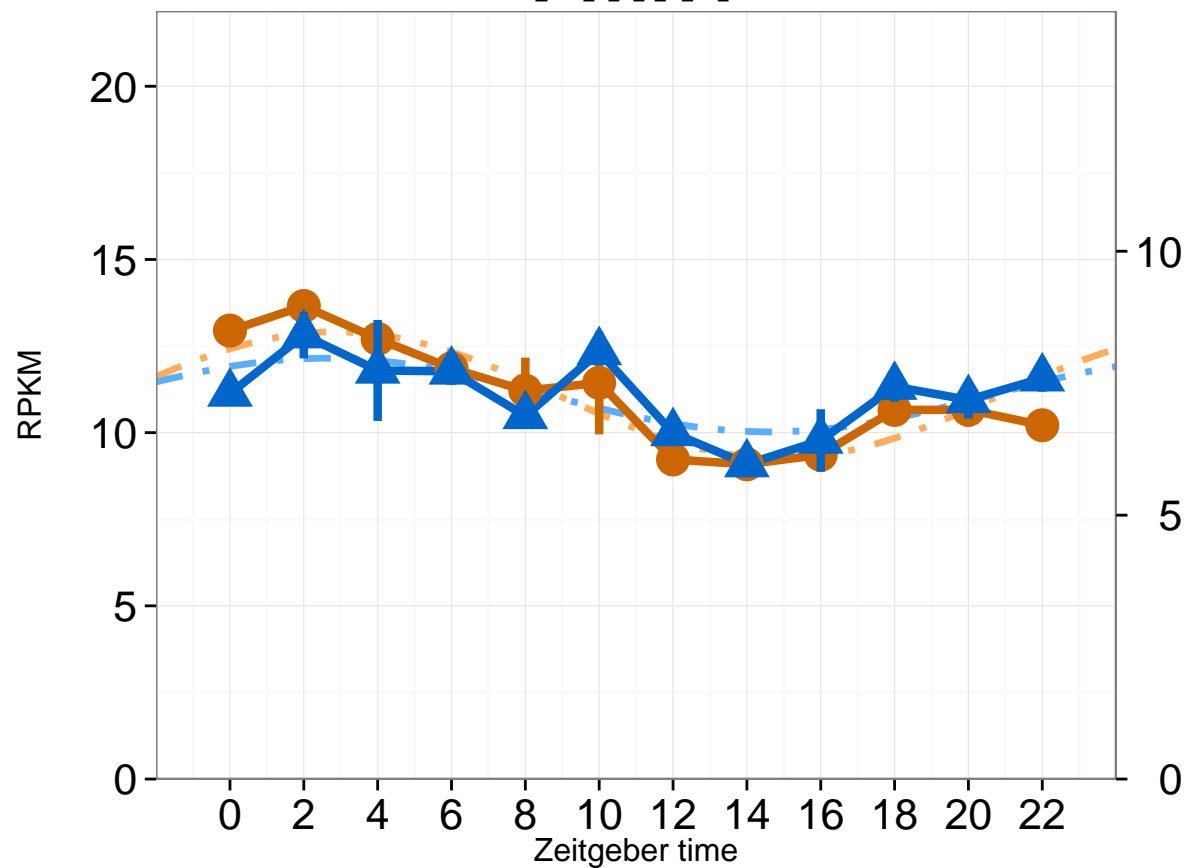

# Fmn1

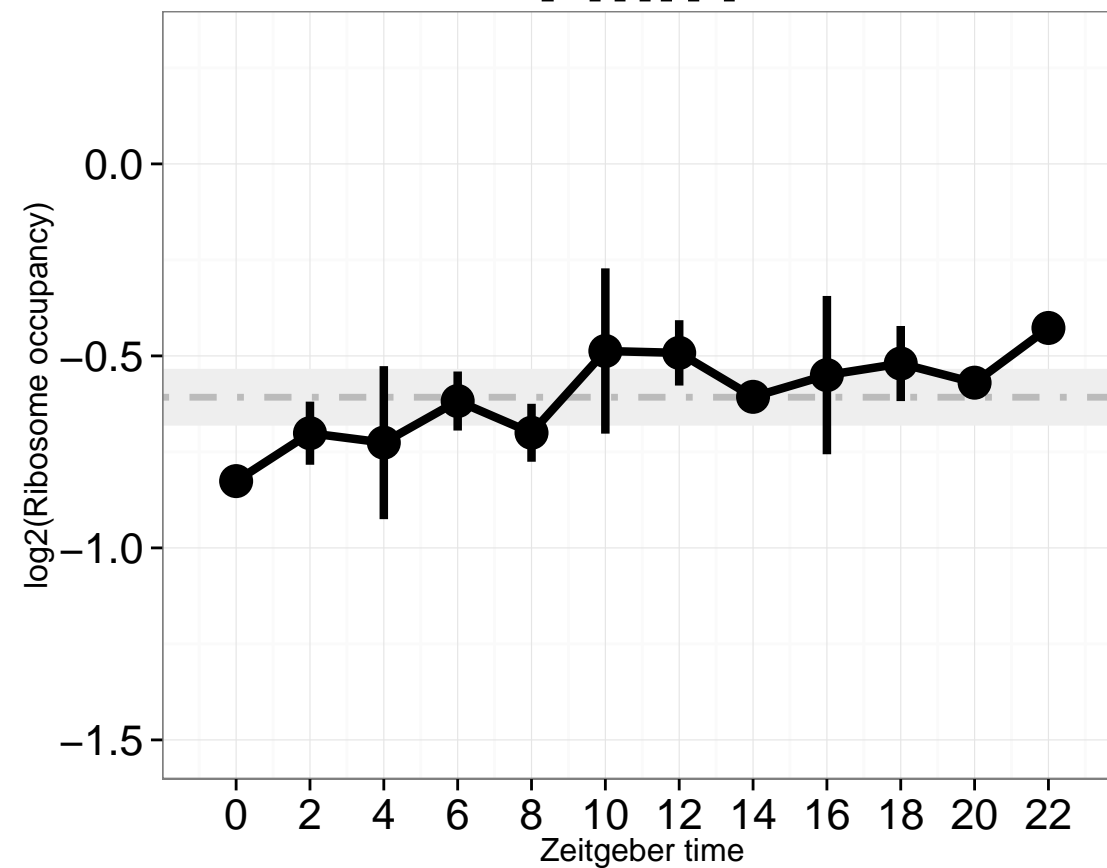

Supplement: Supplementary file 166 [file 1]

## Vars

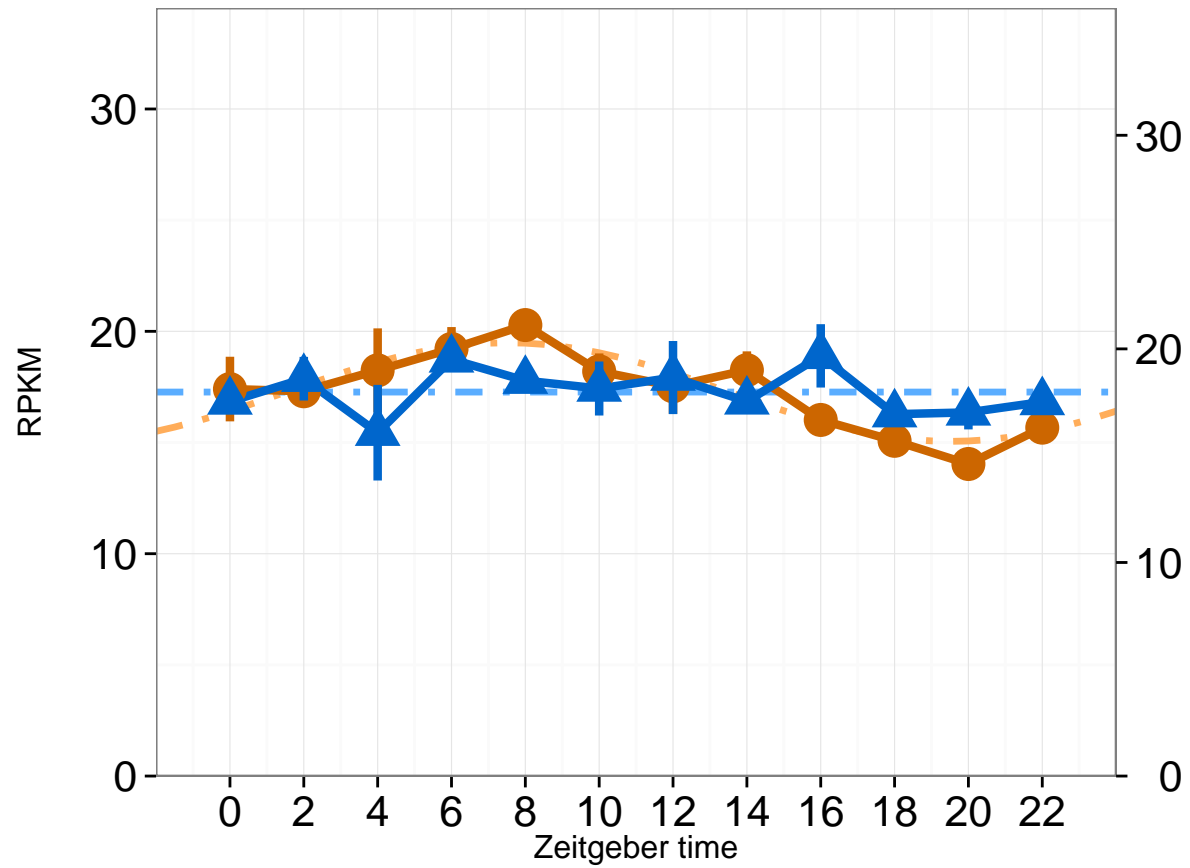

## Vars

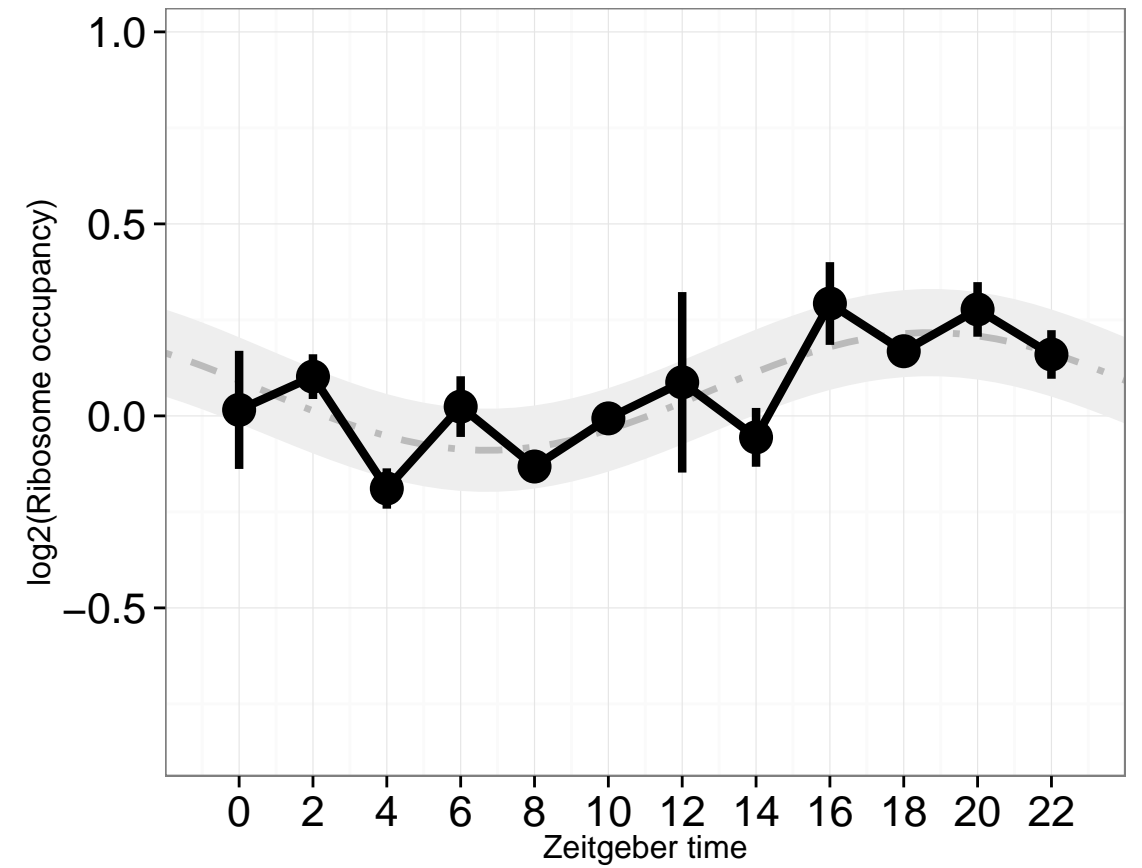

Supplement: Supplementary file 167 [file 1]

## Brox

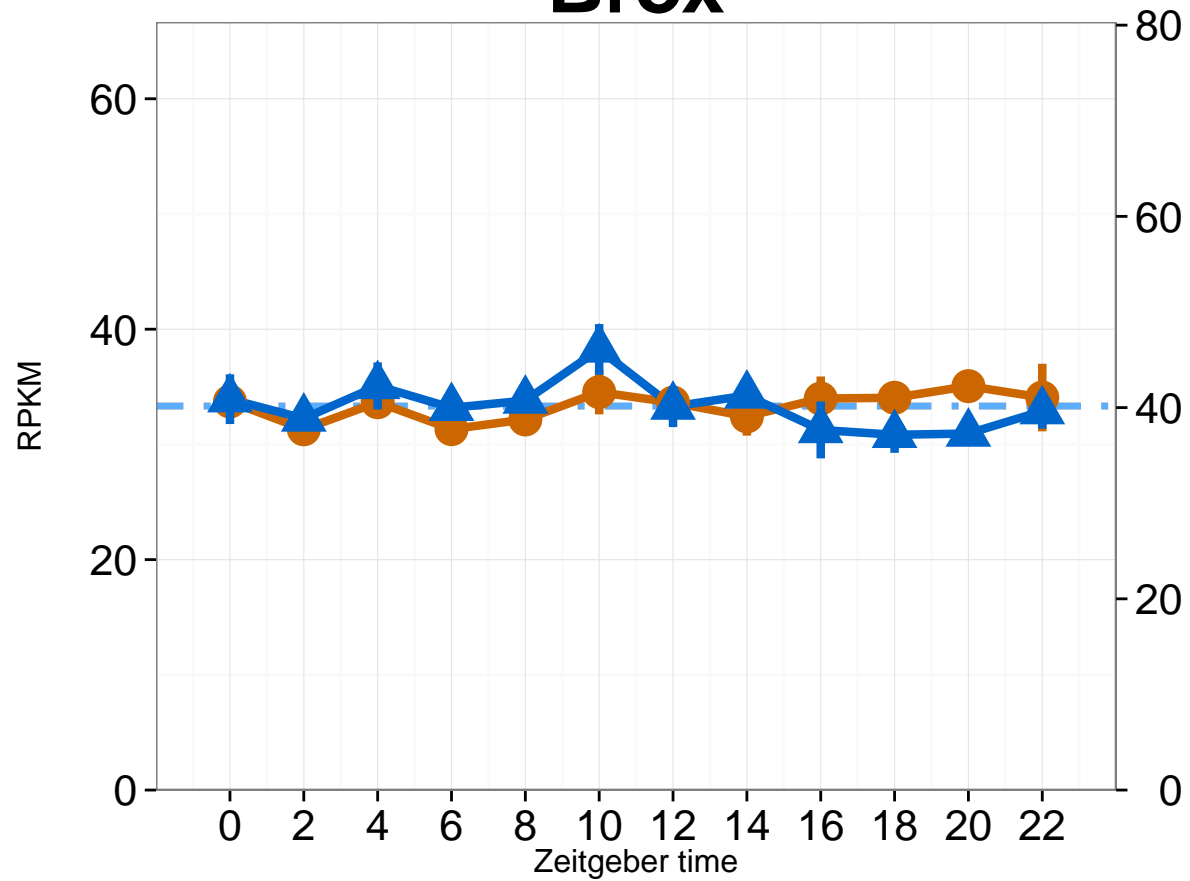

## Brox

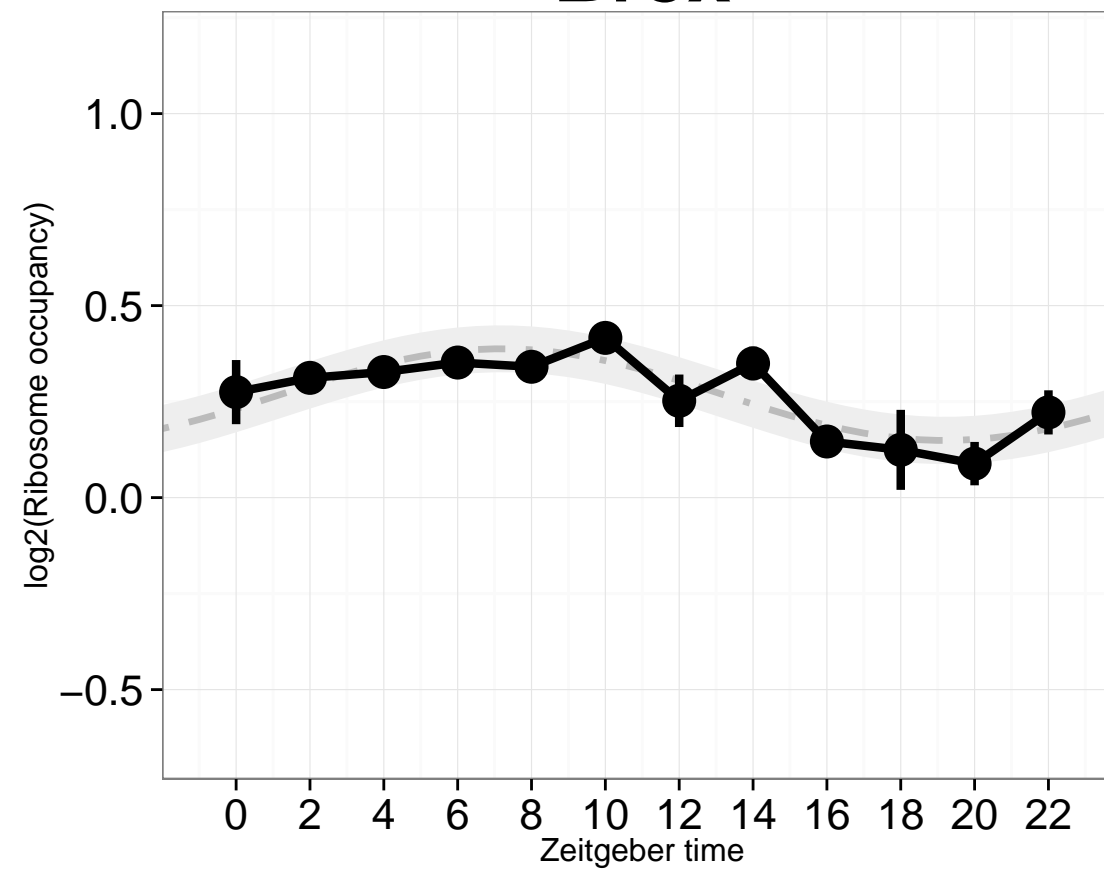

Supplement: Supplementary file 168 [file 1]

## Herc4

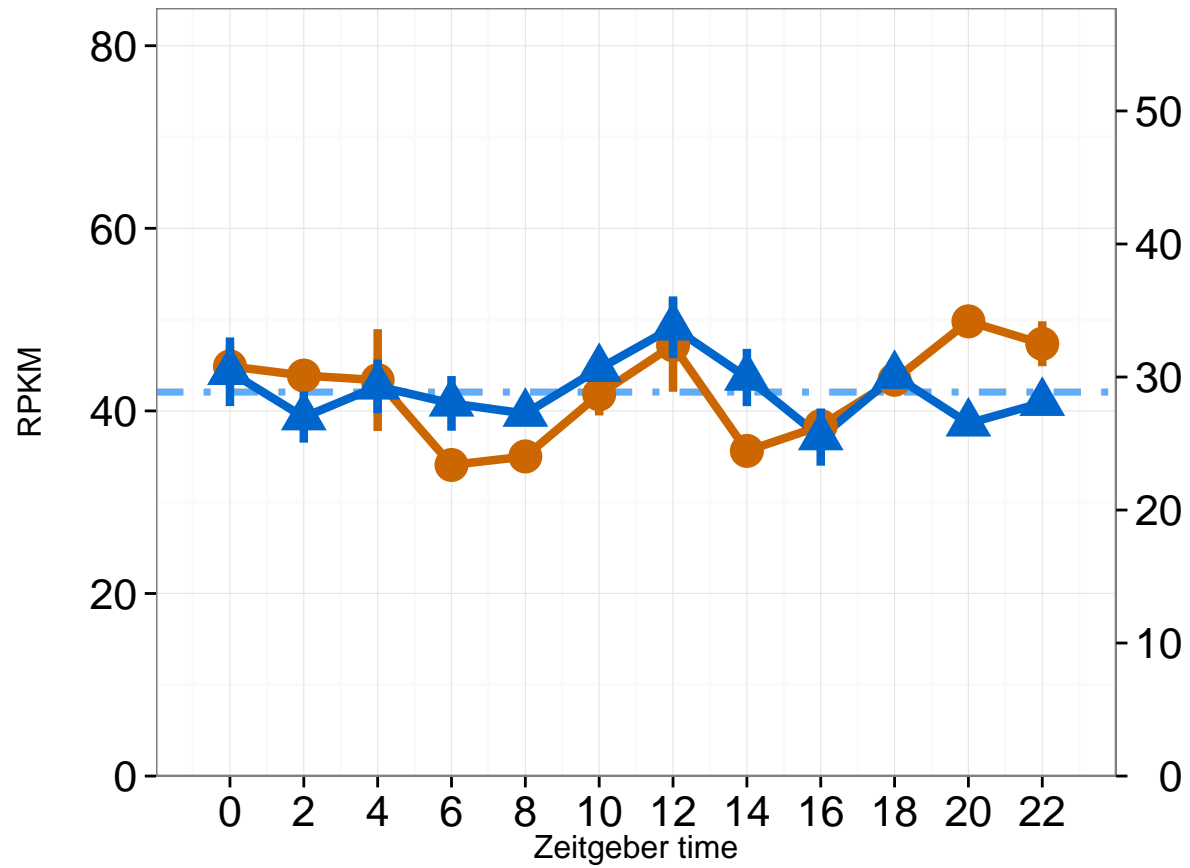

## Herc4

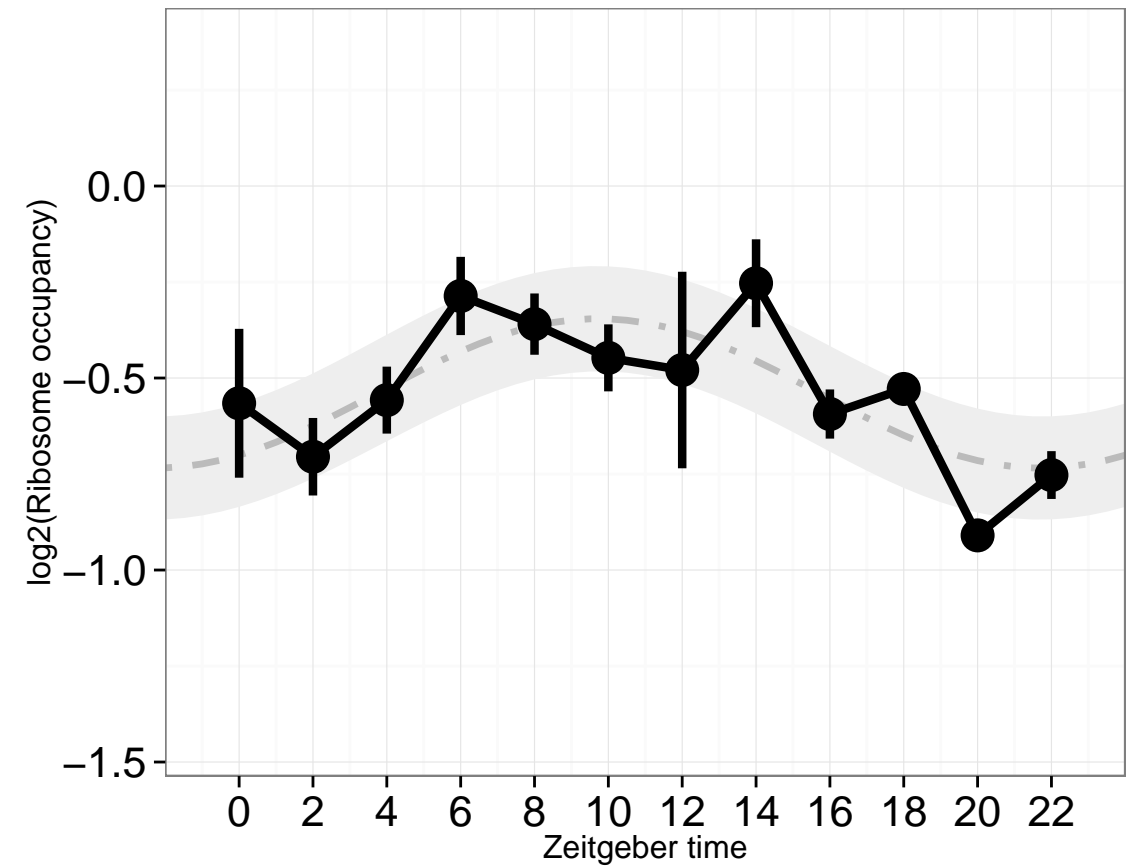

Supplement: Supplementary file 169 [file 1]

## Fbln1

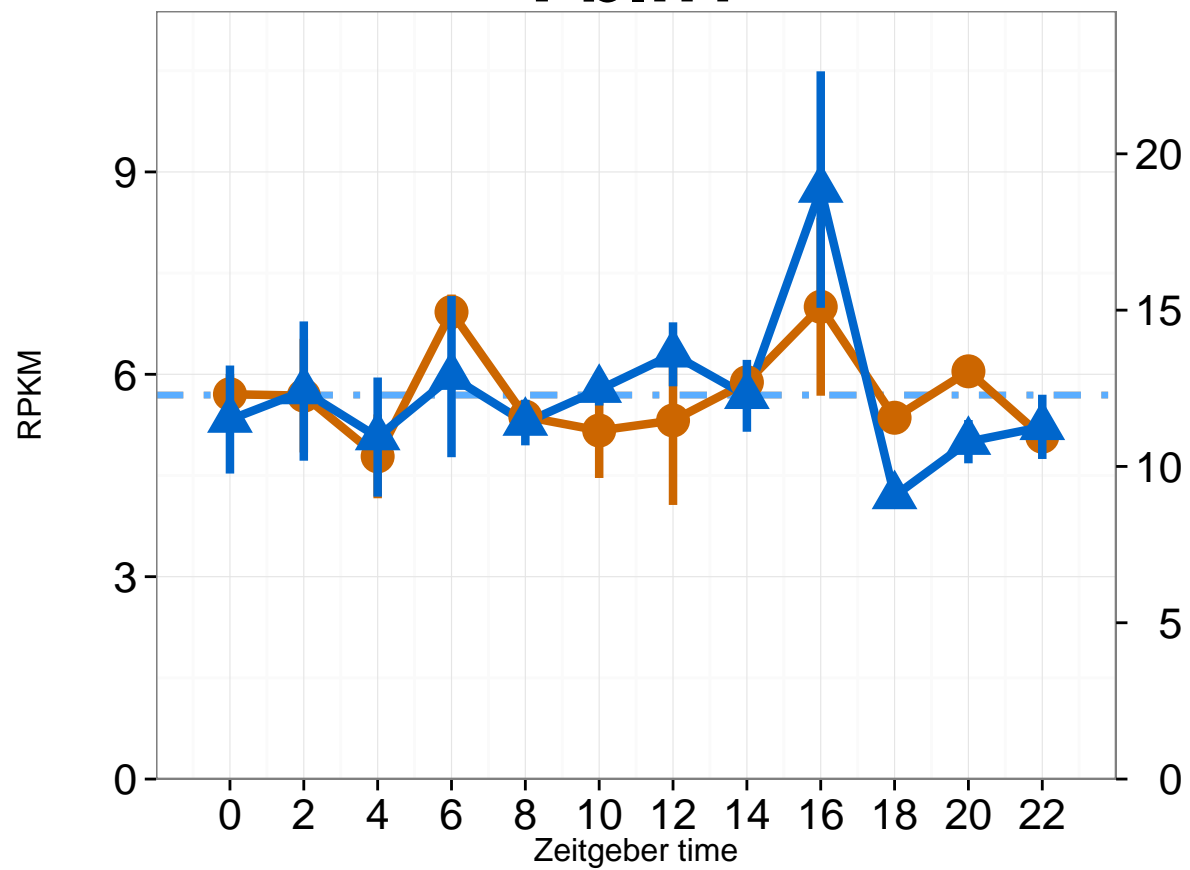

## Fbln1

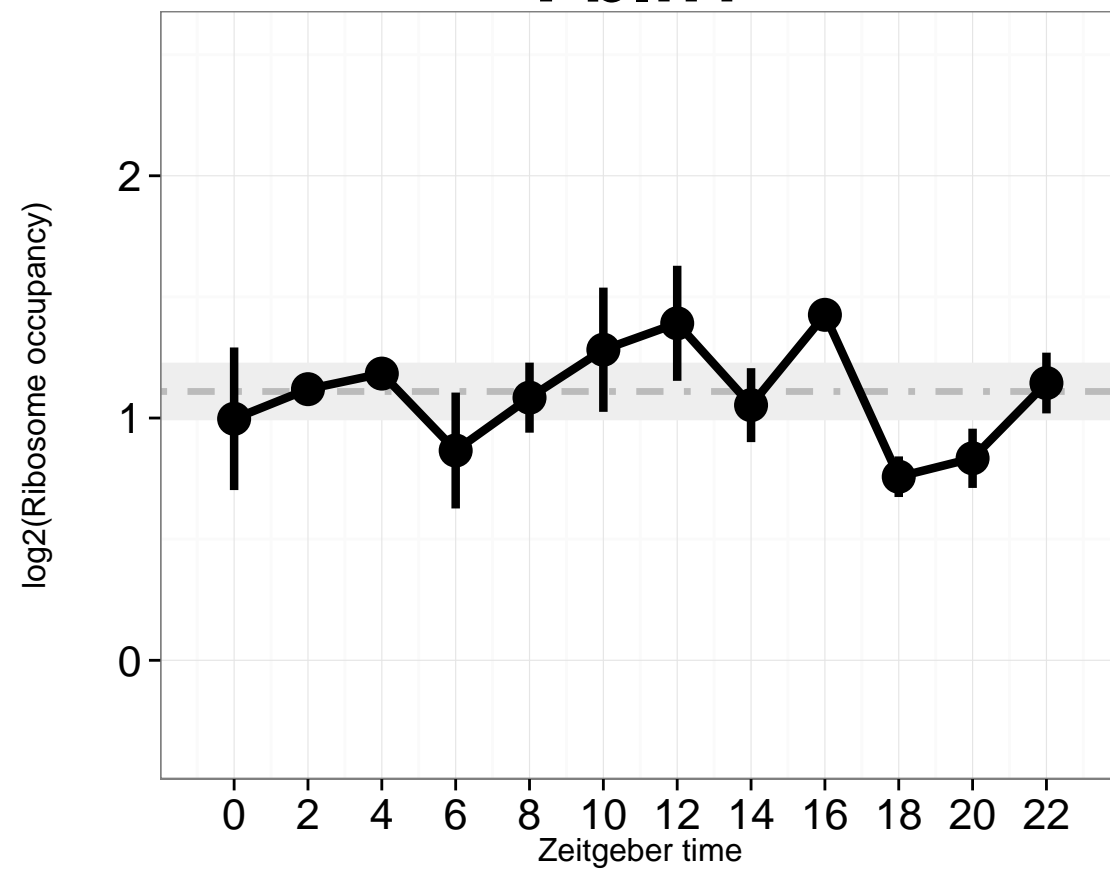

Supplement: Supplementary file 170 [file 1]

Cdc37I1

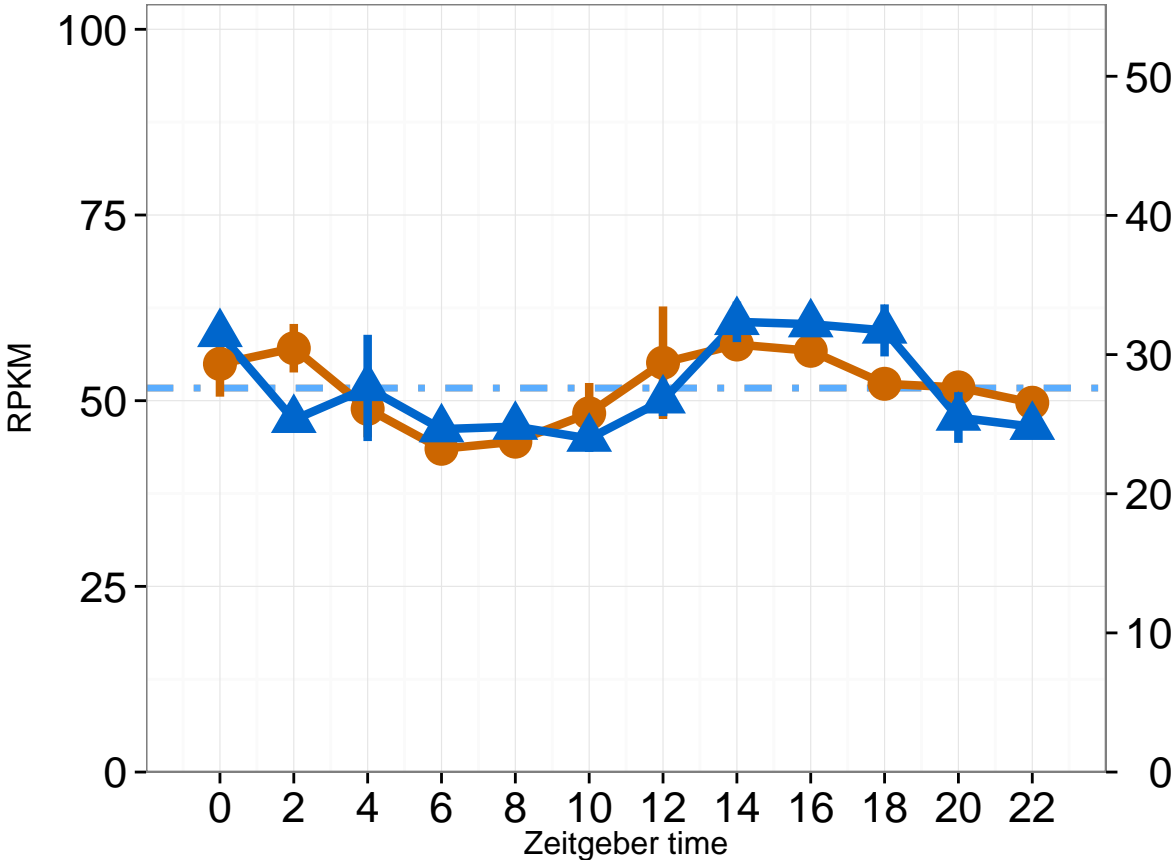

Cdc37I1

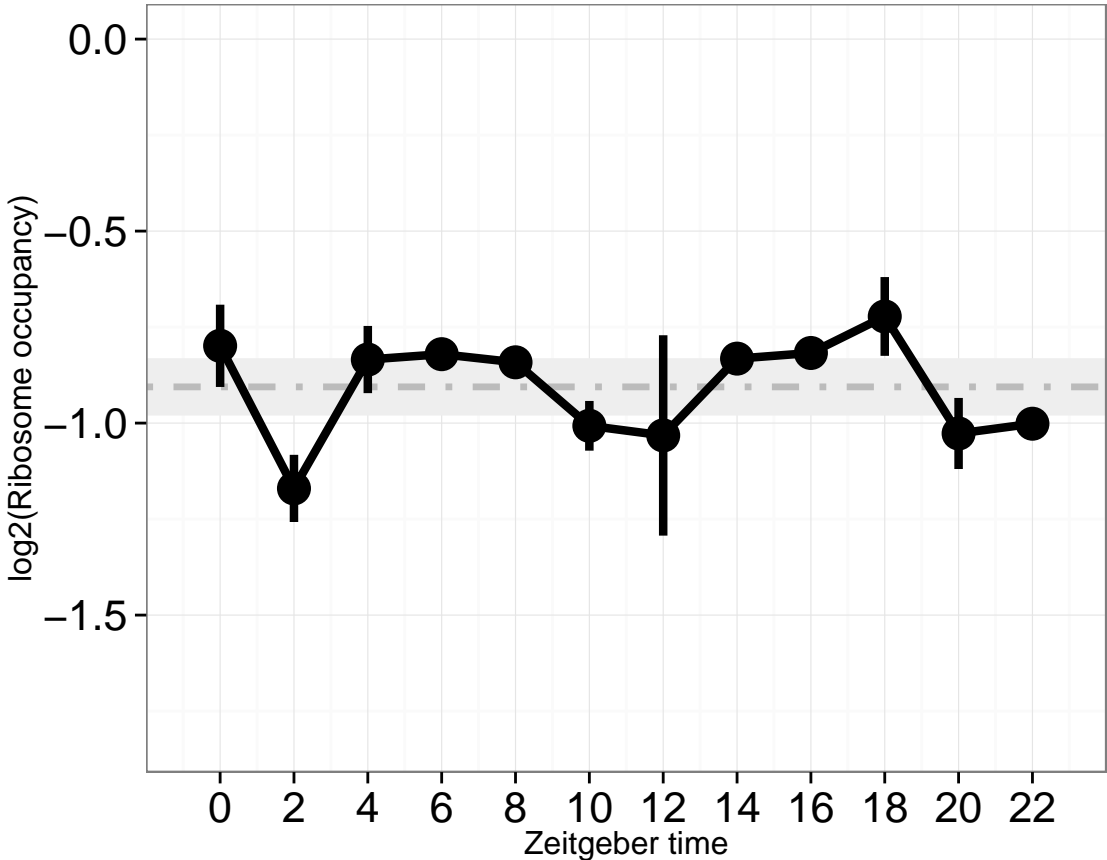

Supplement: Supplementary file 171 [file 1]

# Sdf2l1

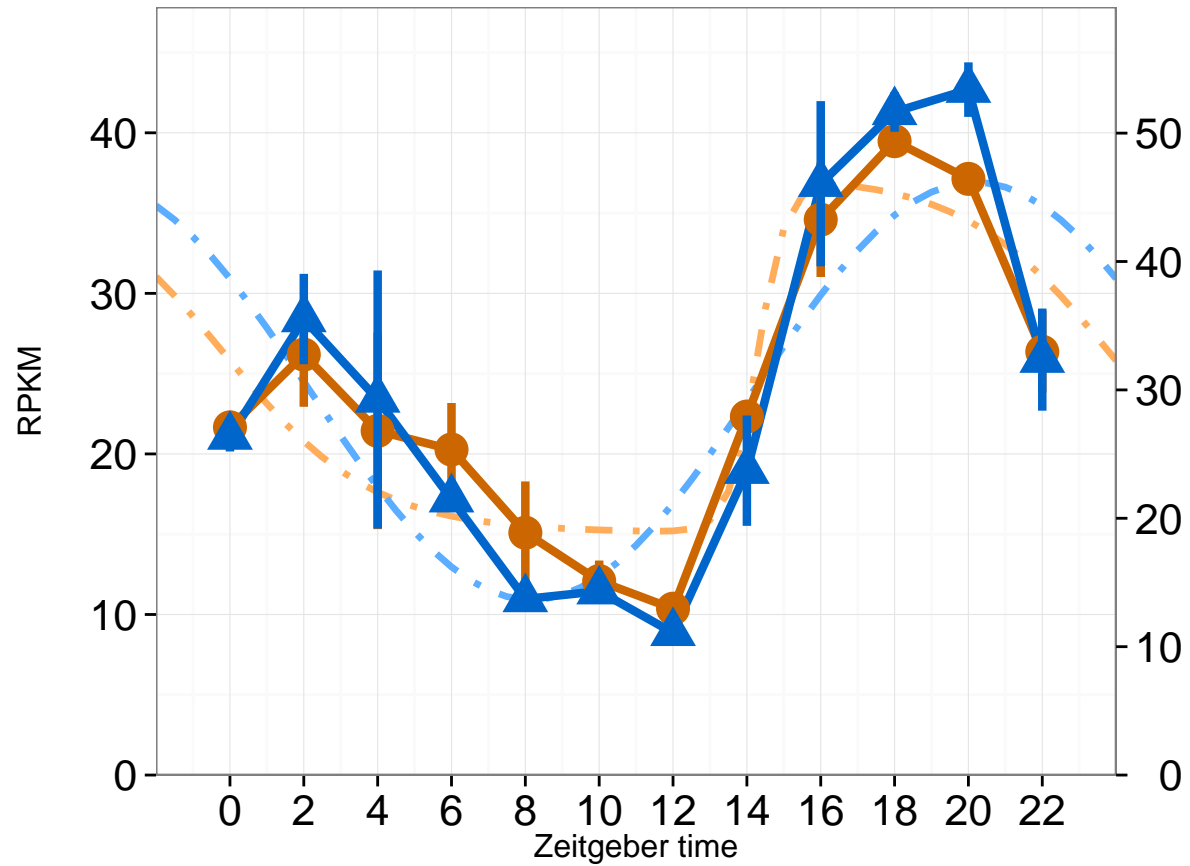

# Sdf2l1

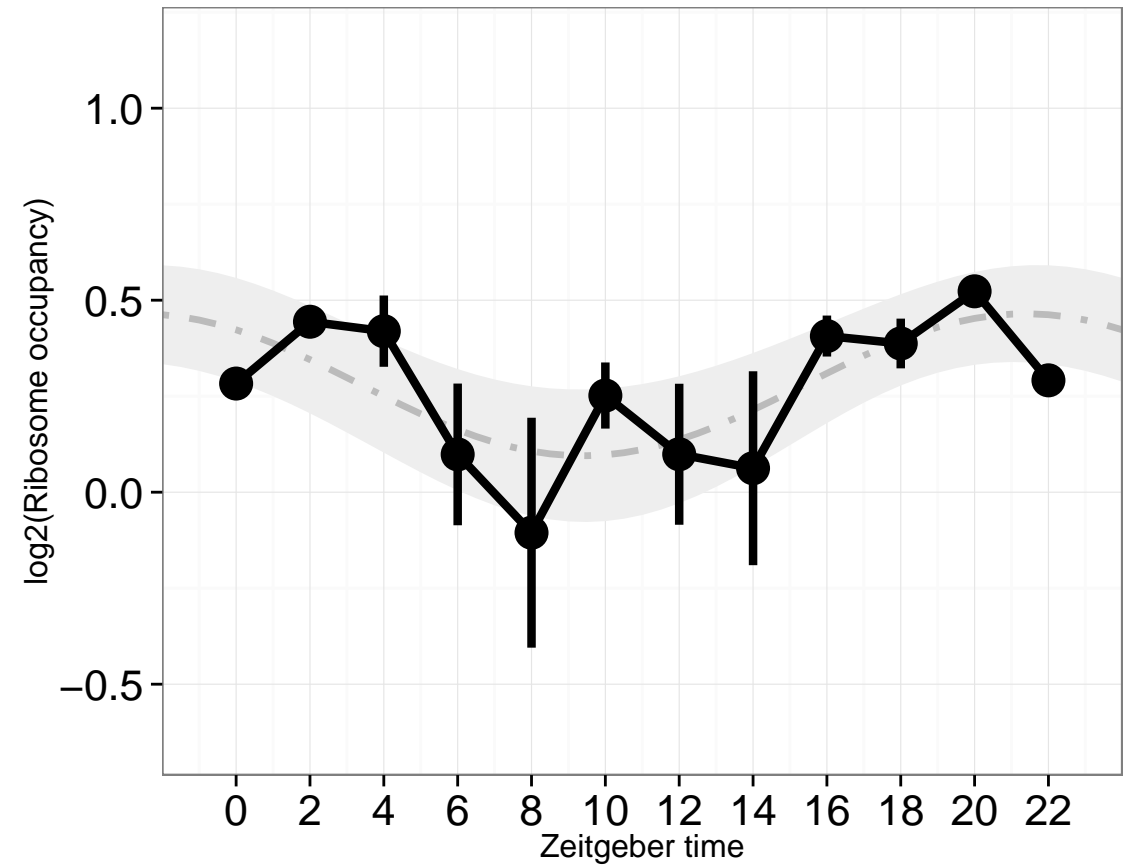

Supplement: Supplementary file 172 [file 1]

# 2010107G23Rik

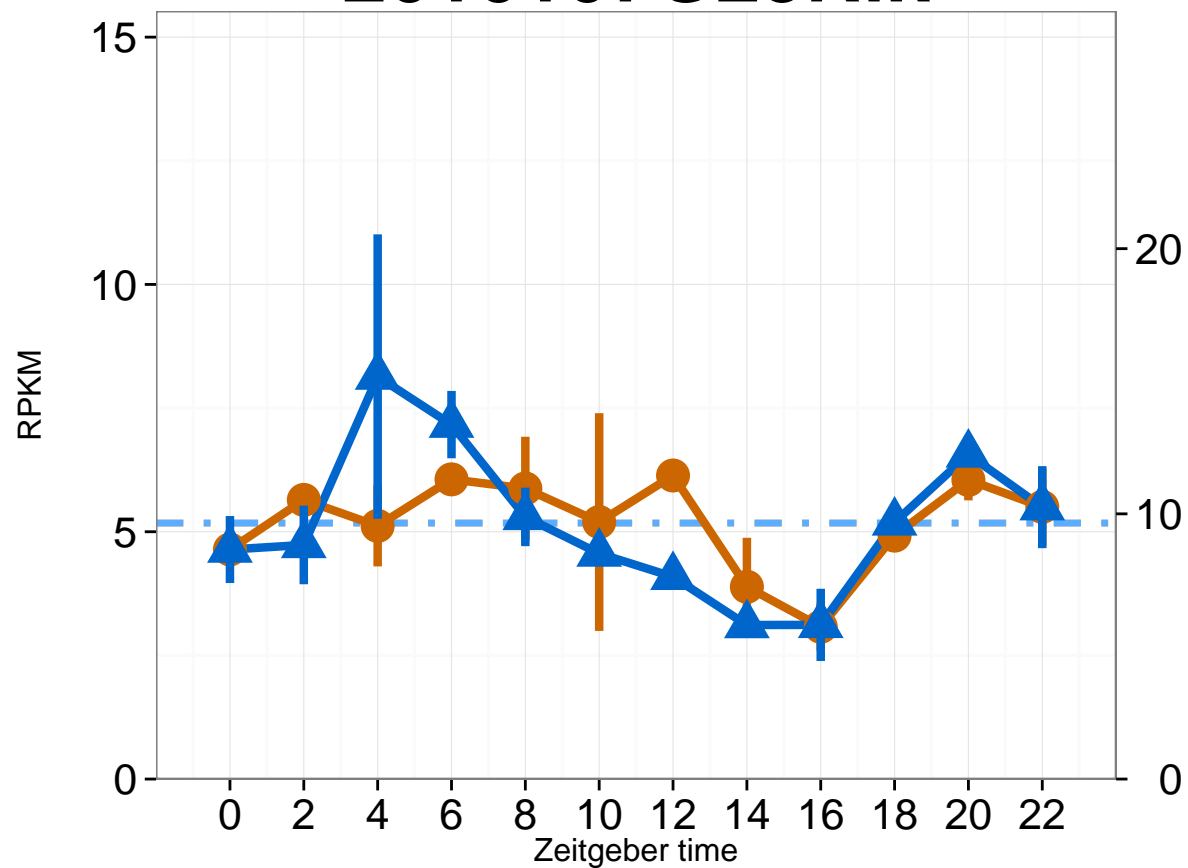

# 2010107G23Rik

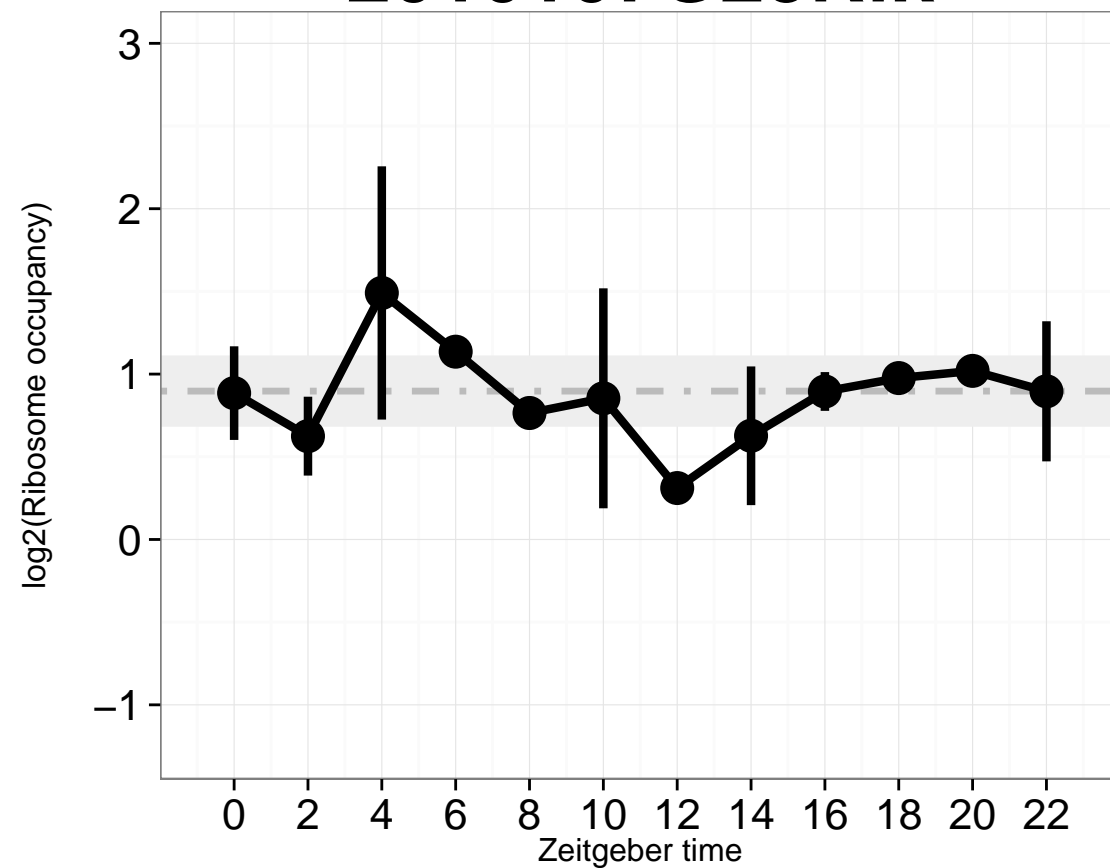

Supplement: Supplementary file 173 [file 1]

# Creld1

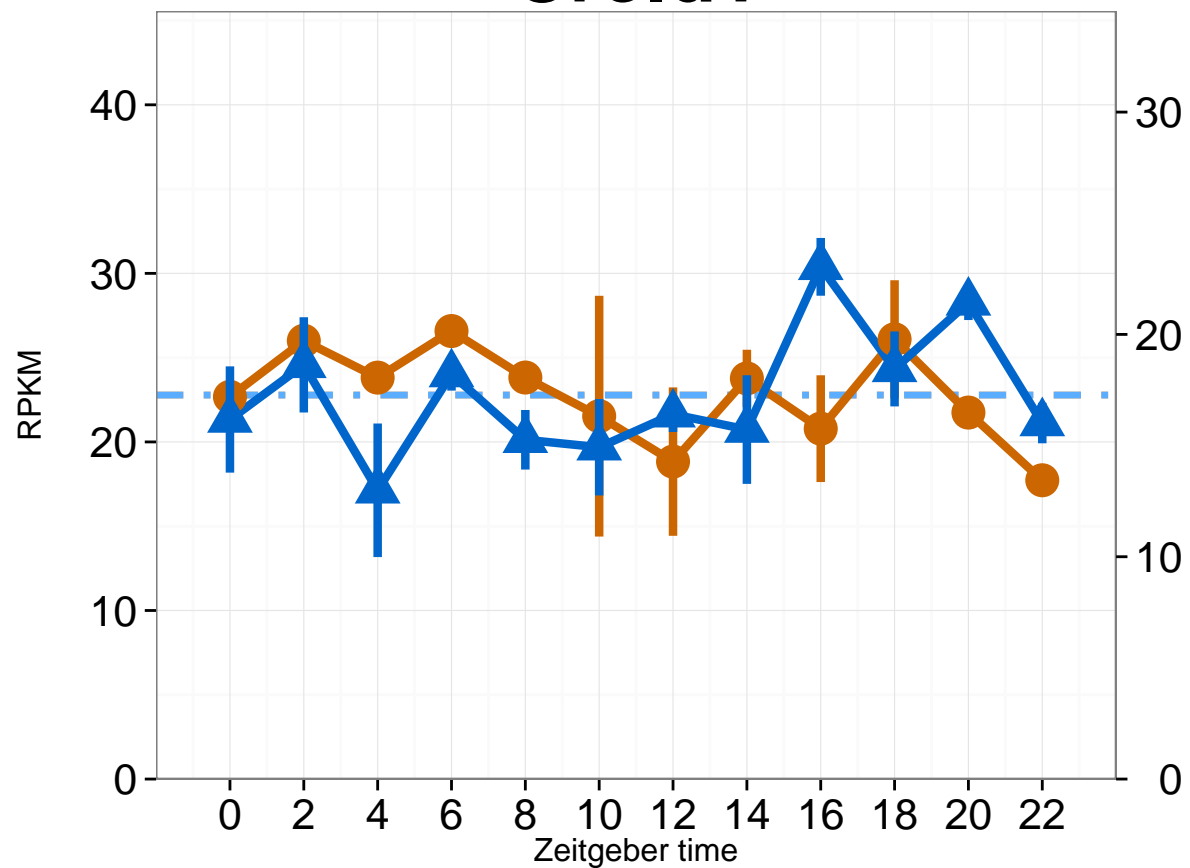

# Creld1

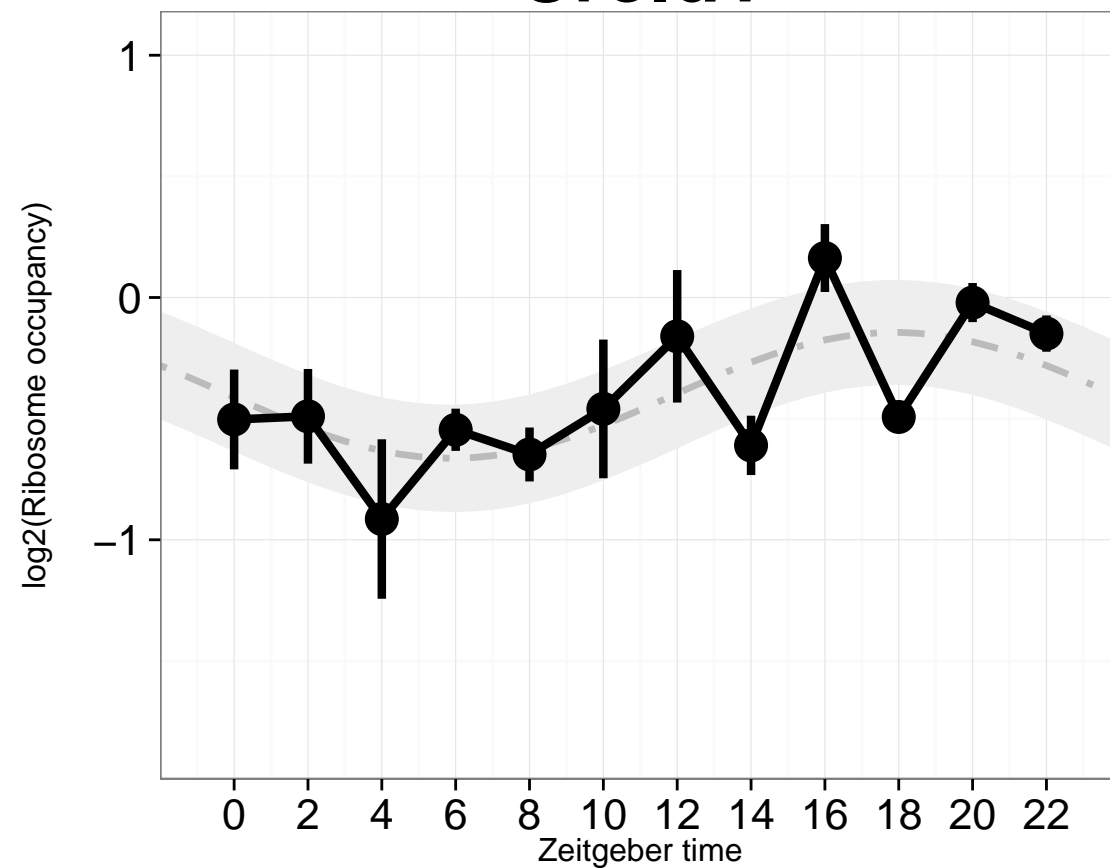

Supplement: Supplementary file 174 [file 1]

# Trpc1

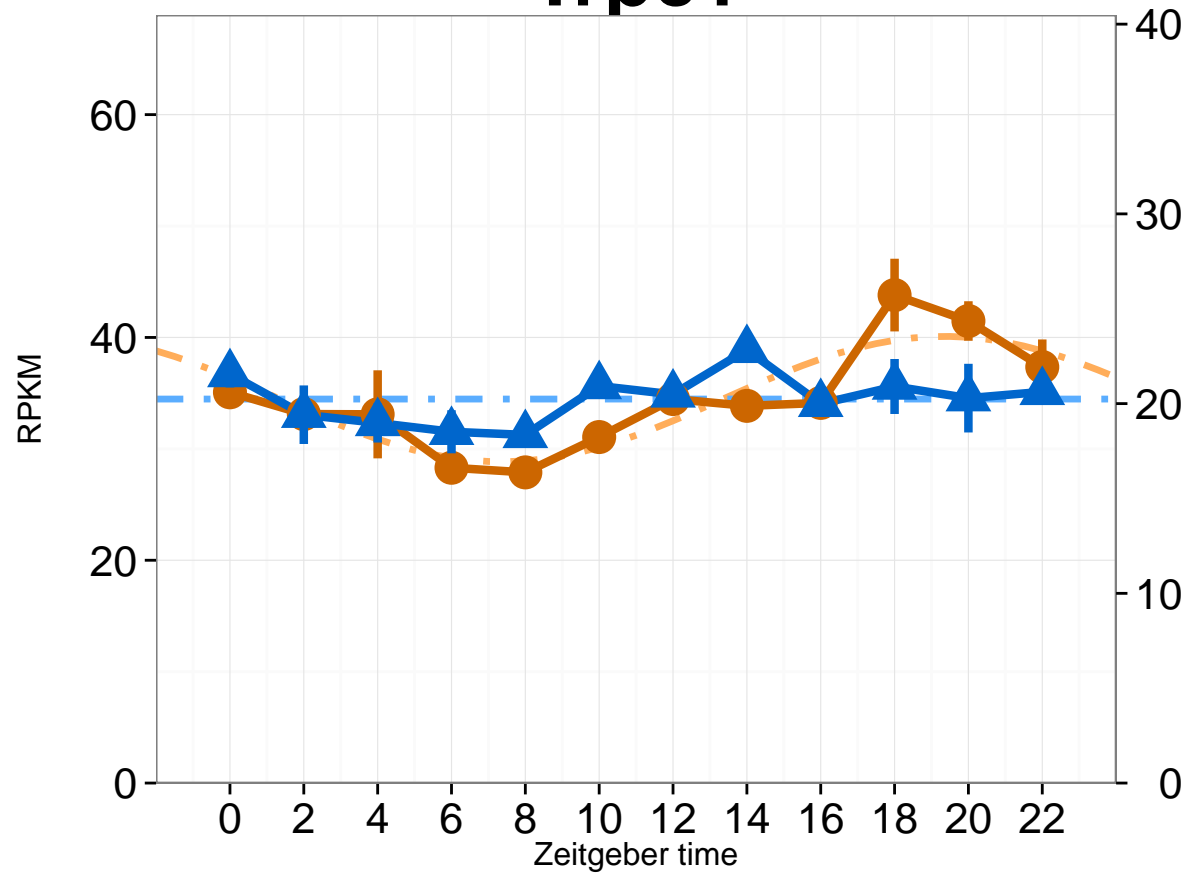

# Trpc1

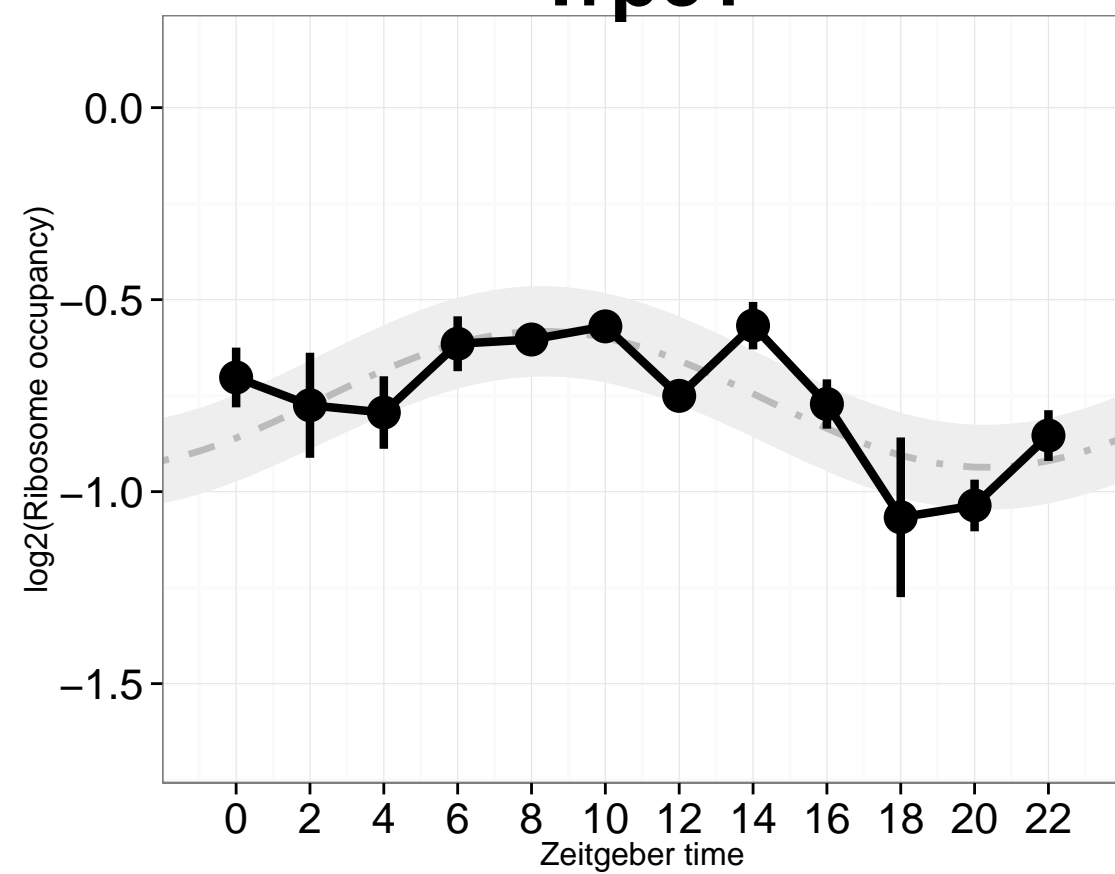

Supplement: Supplementary file 175 [file 1]

# Acy1

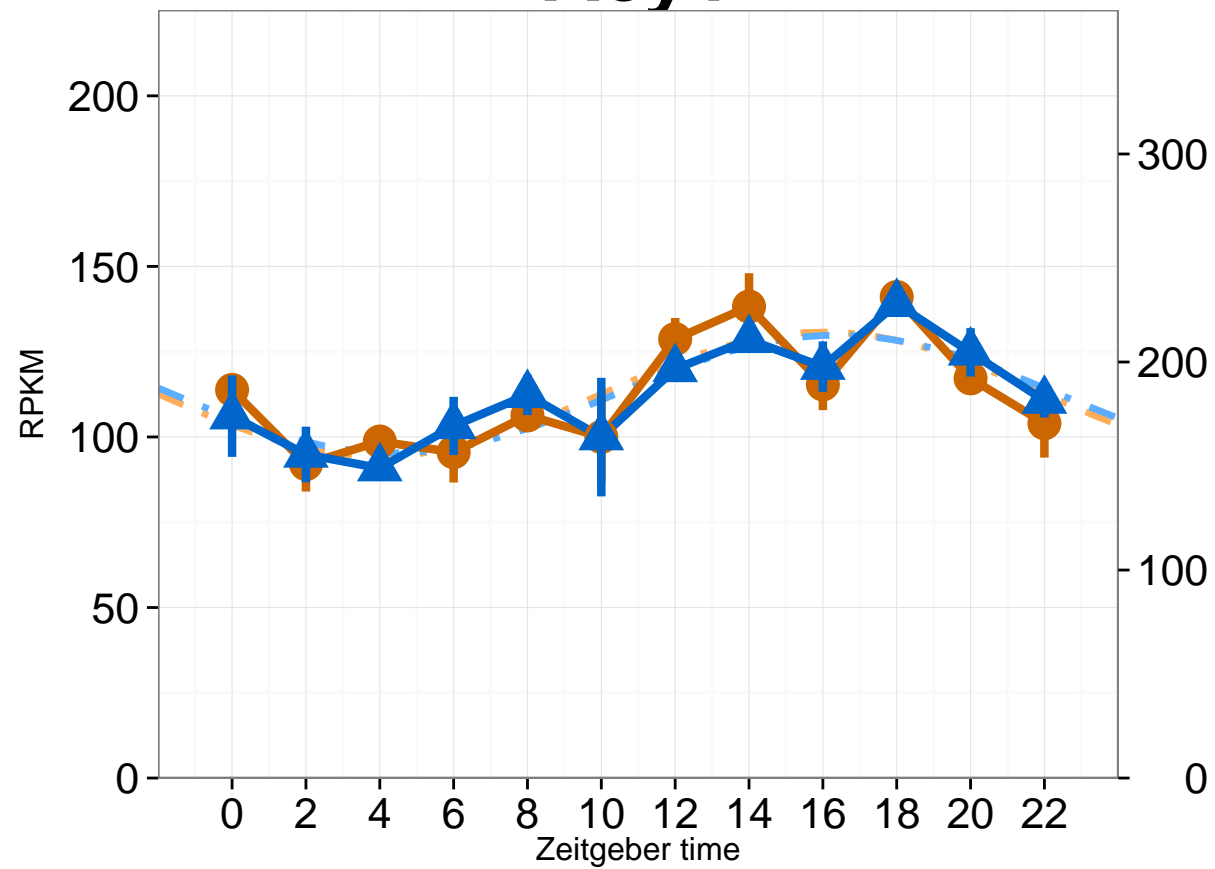

# Acy1

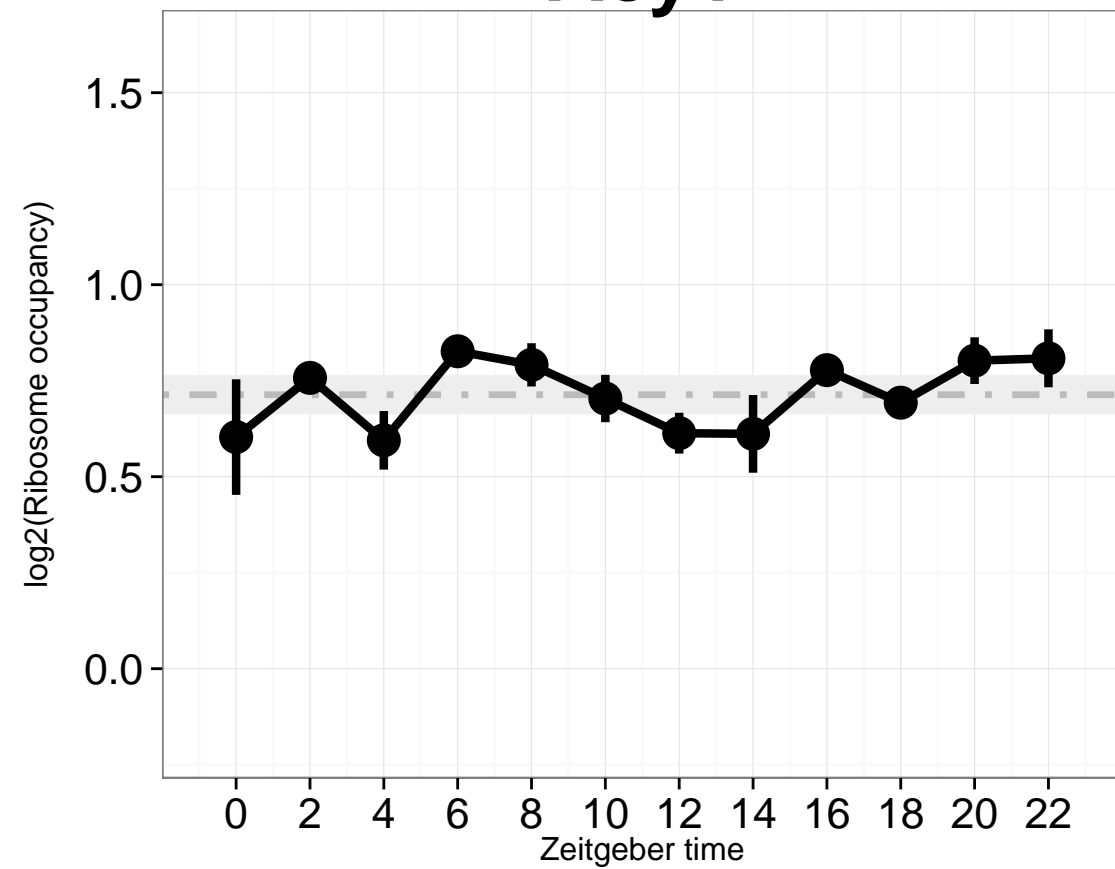

Supplement: Supplementary file 176 [file 1]

# Ddx19a

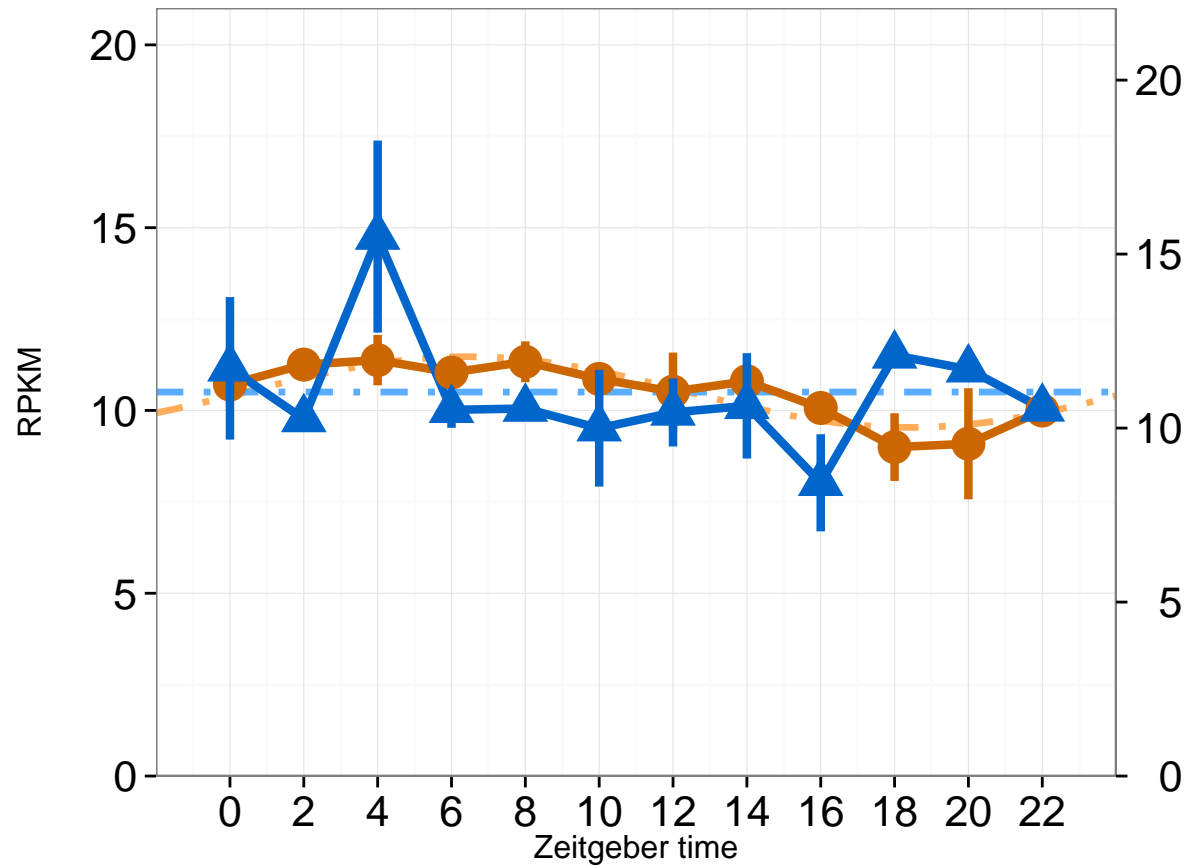

# Ddx19a

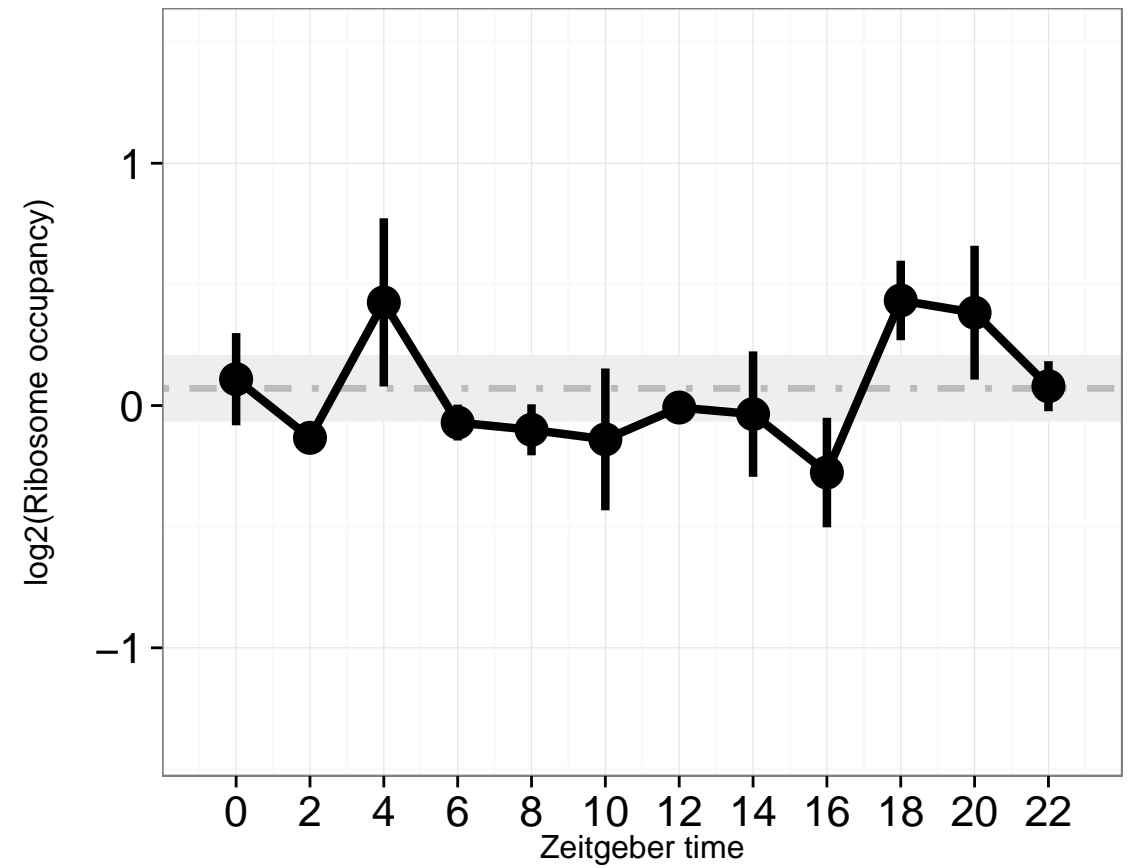

Supplement: Supplementary file 177 [file 1]

## 2510046G10Rik

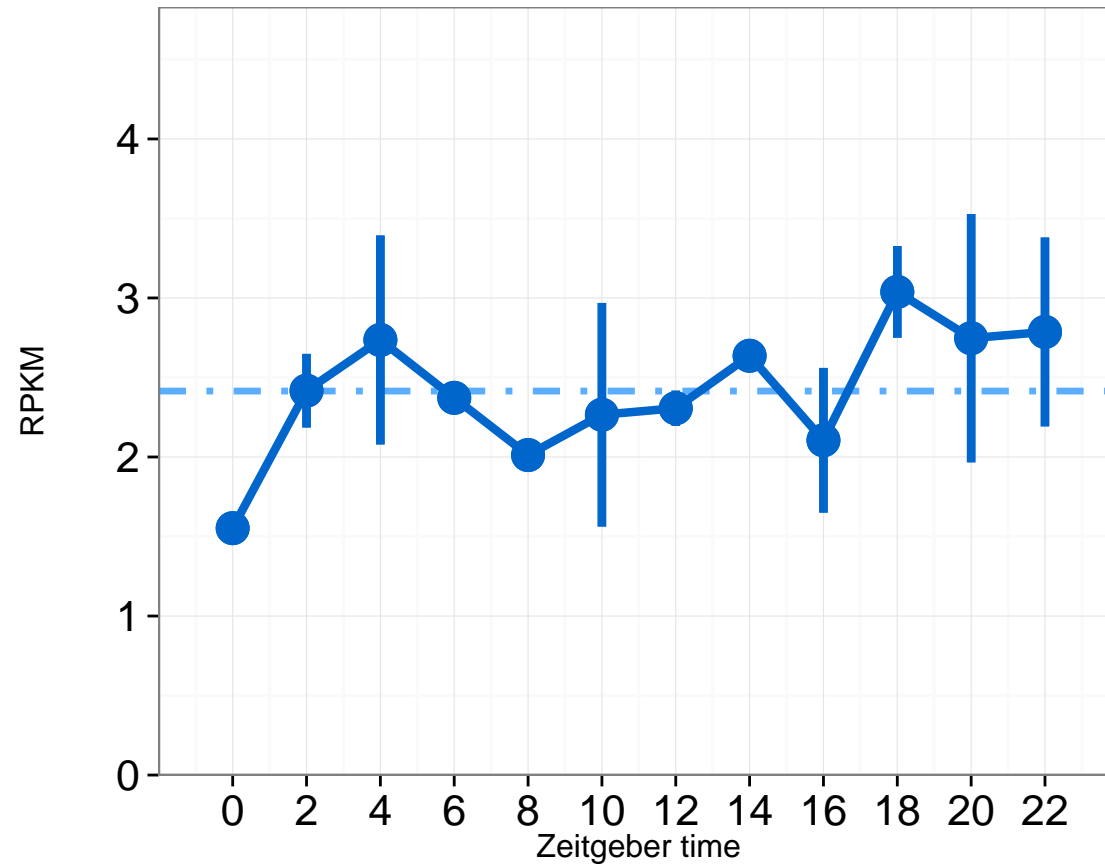

## 2510046G10Rik log2(Ribosome occup

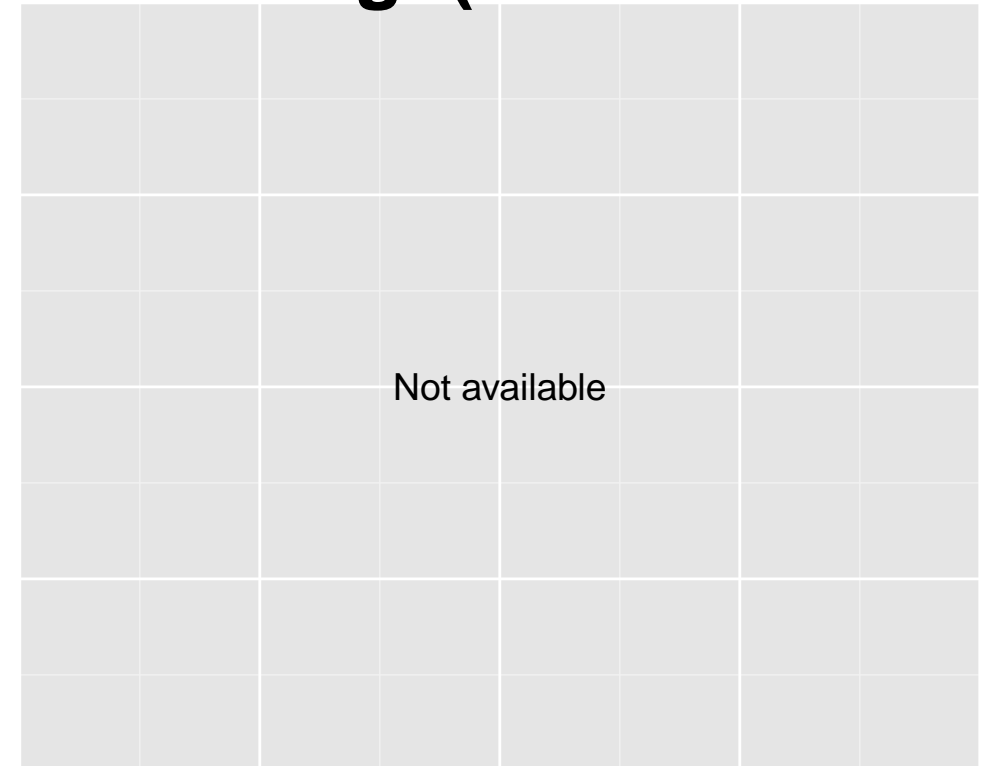

Supplement: Supplementary file 178 [file 1]

## Ovol1

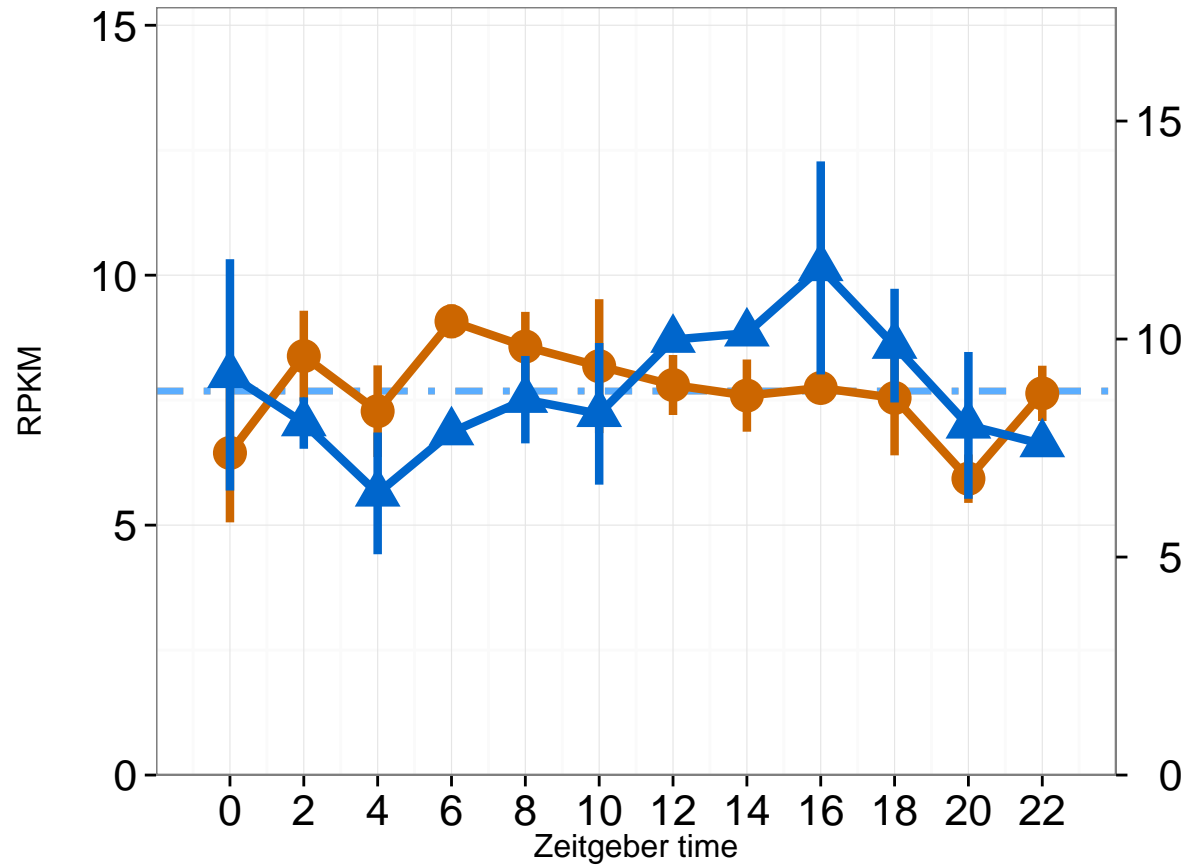

## Ovol1

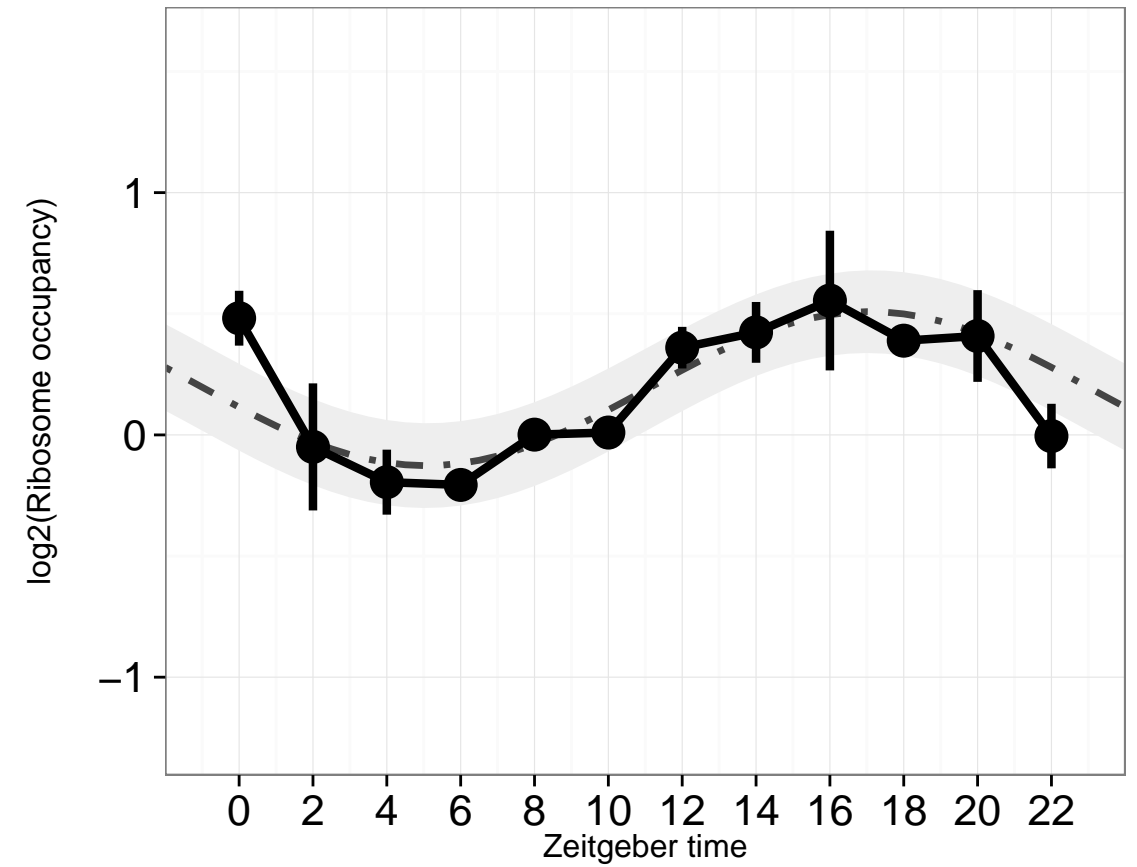

Supplement: Supplementary file 179 [file 1]

## Uba2

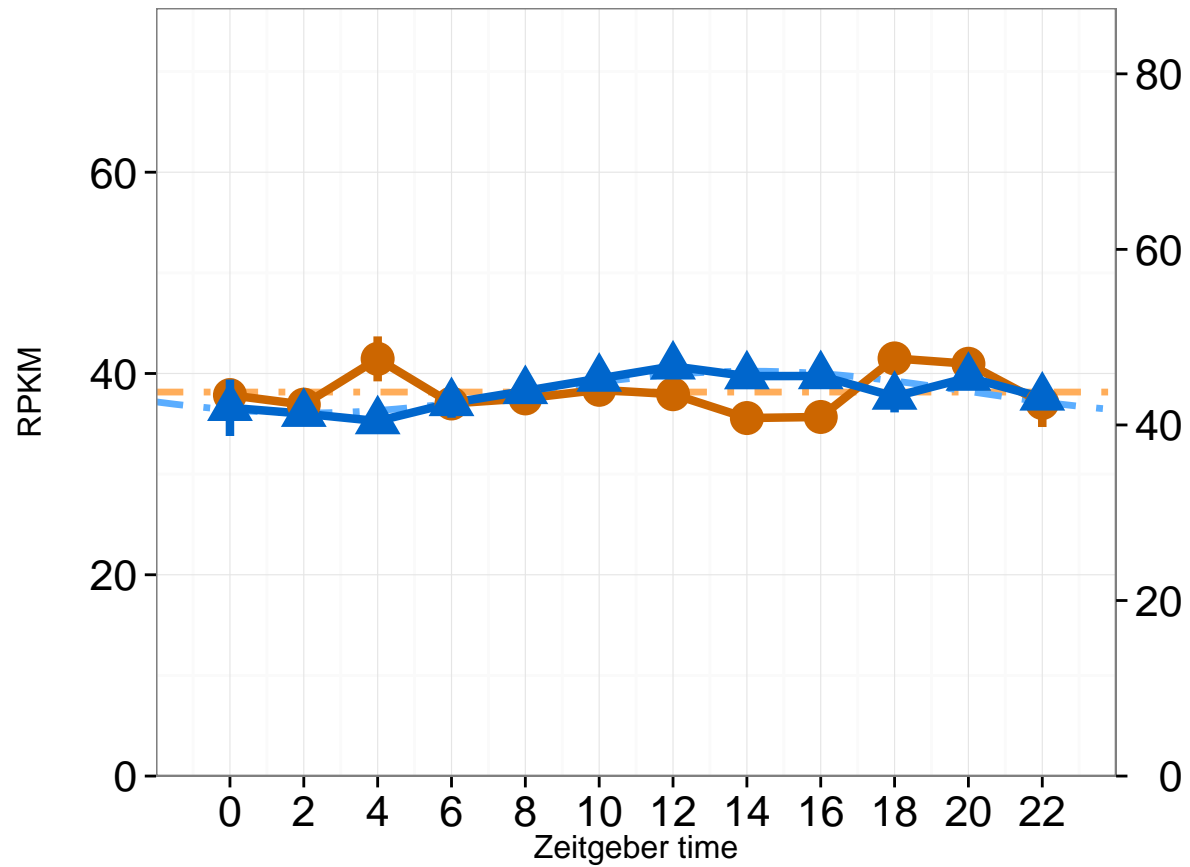

## Uba2

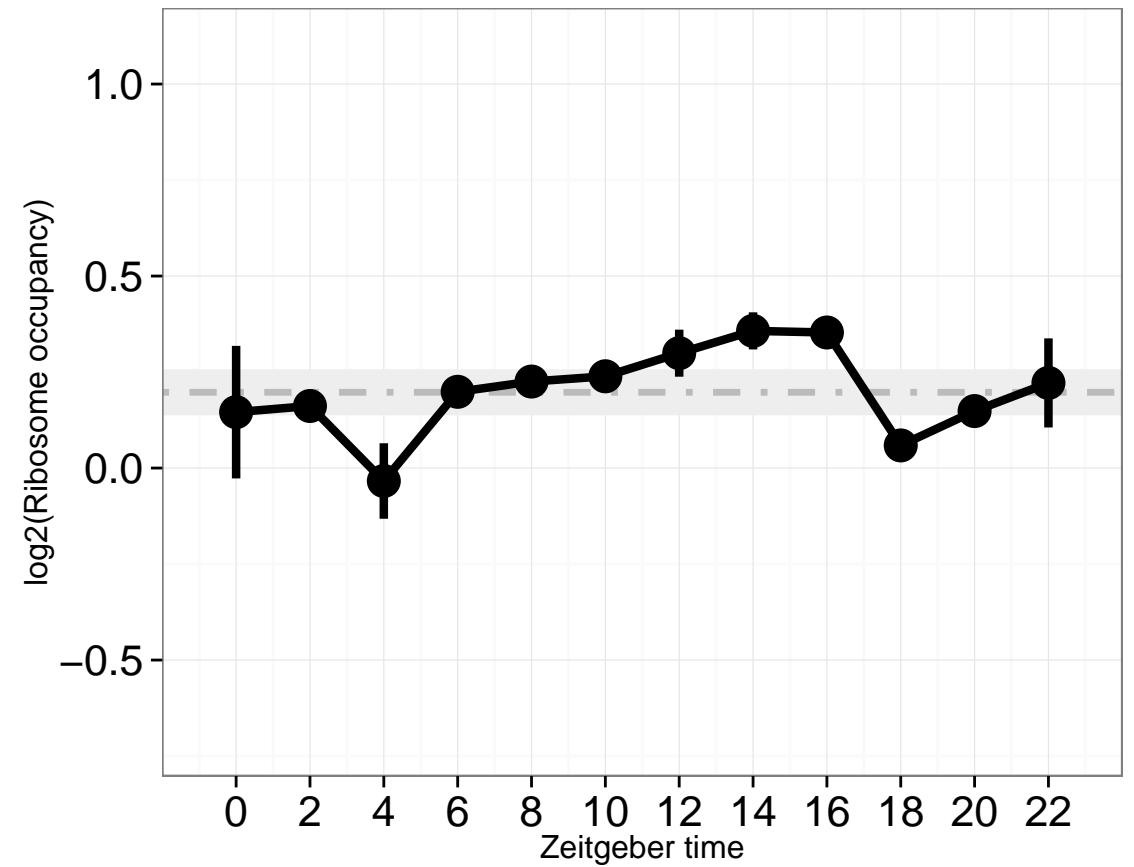

Supplement: Supplementary file 180 [file 1]

## Alas1

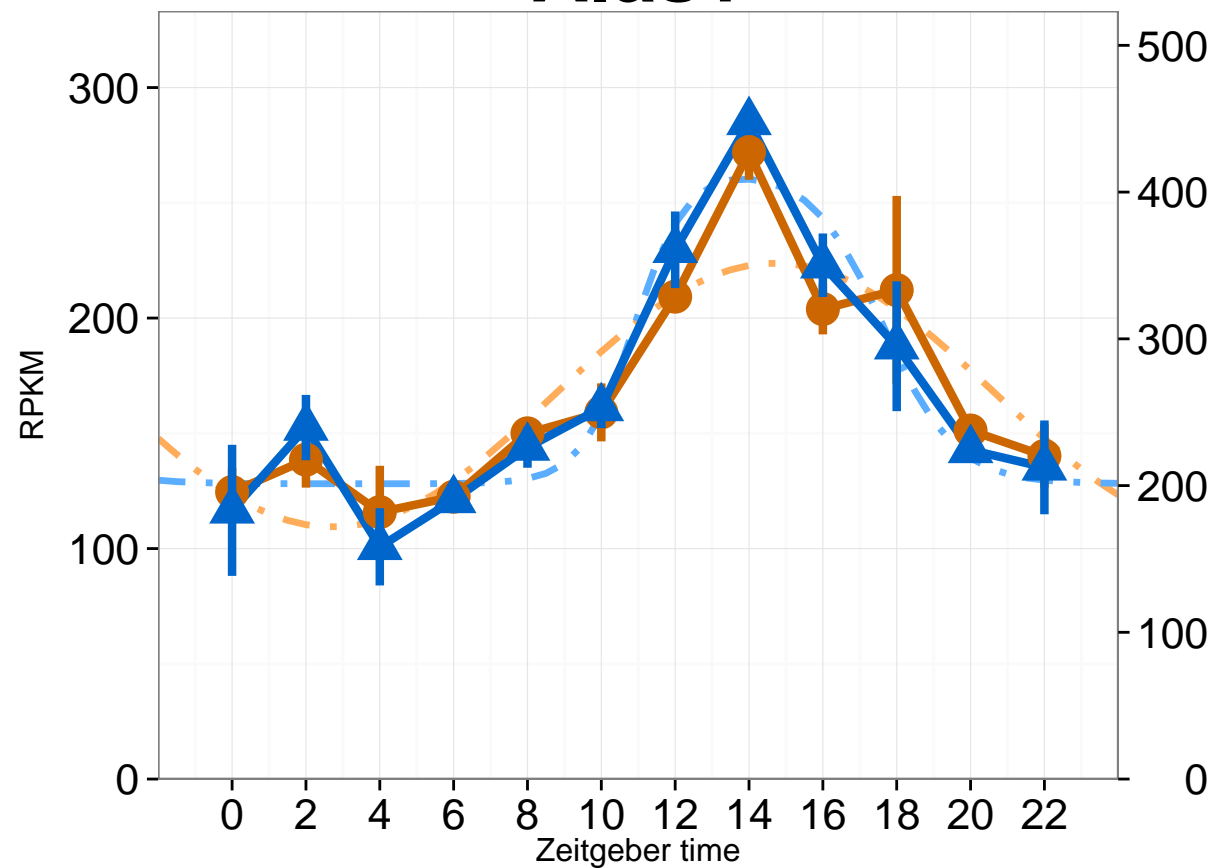

## Alas1

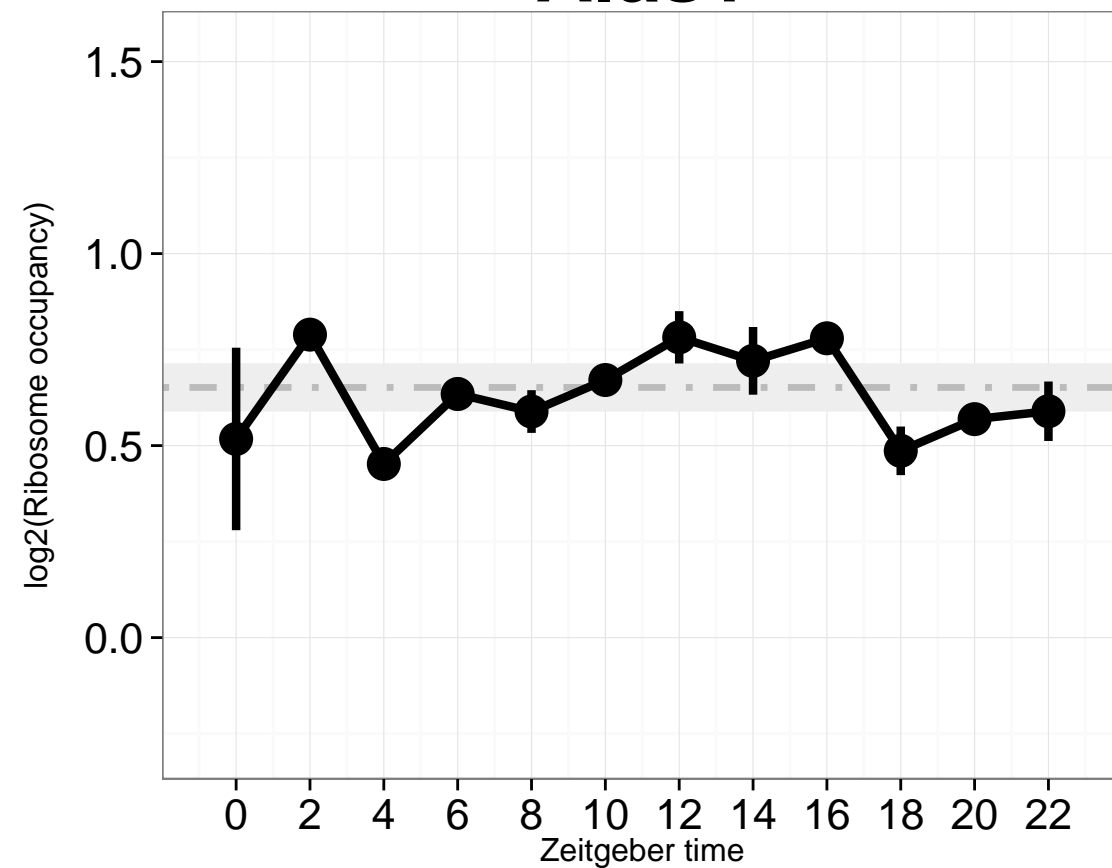

Supplement: Supplementary file 181 [file 1]

# Nde1

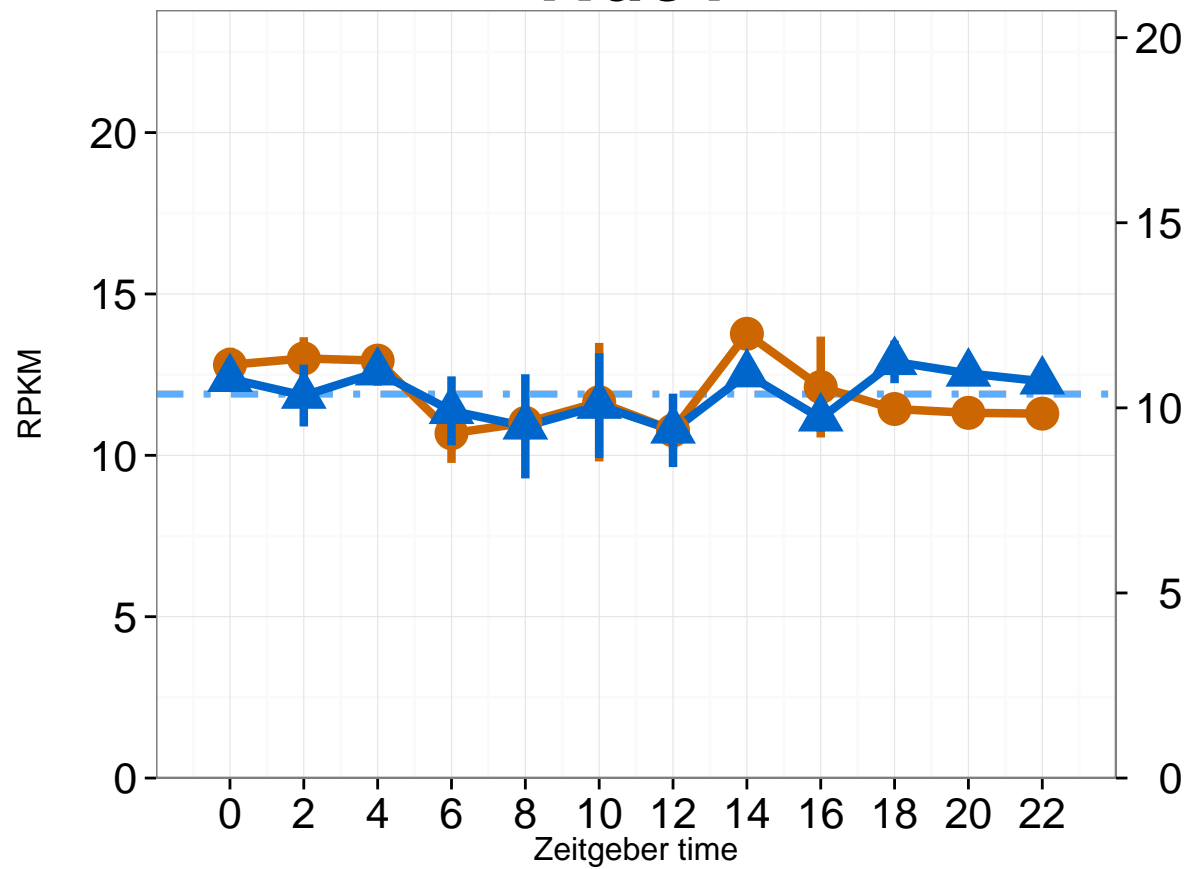

# Nde1

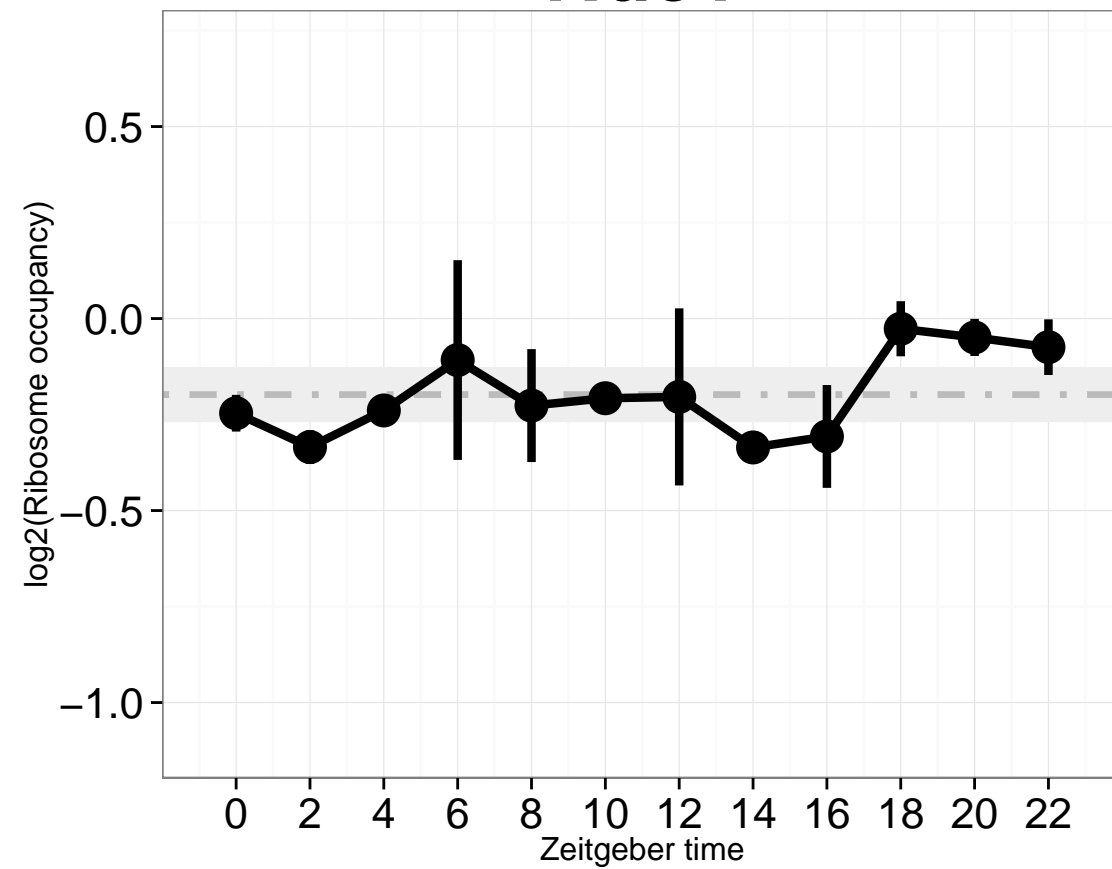

Supplement: Supplementary file 182 [file 1]

## Ikbip

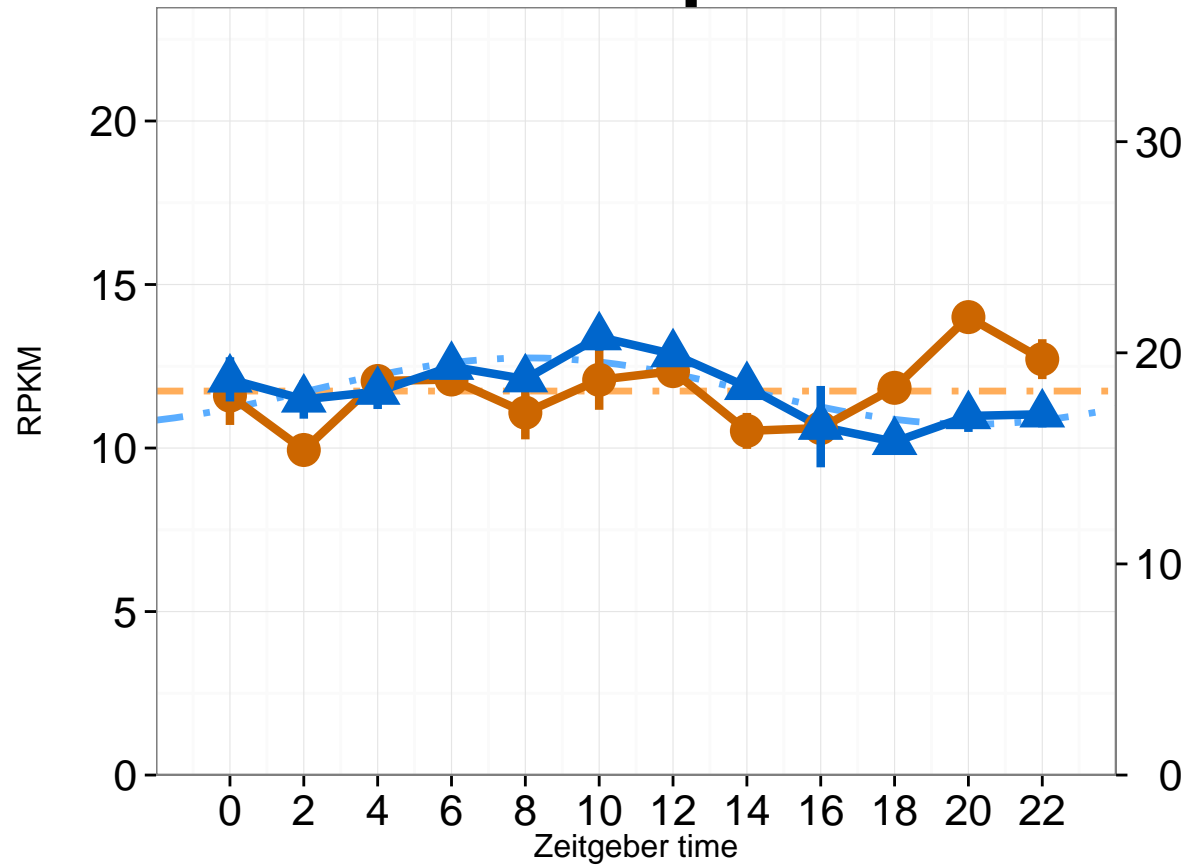

## Ikbip

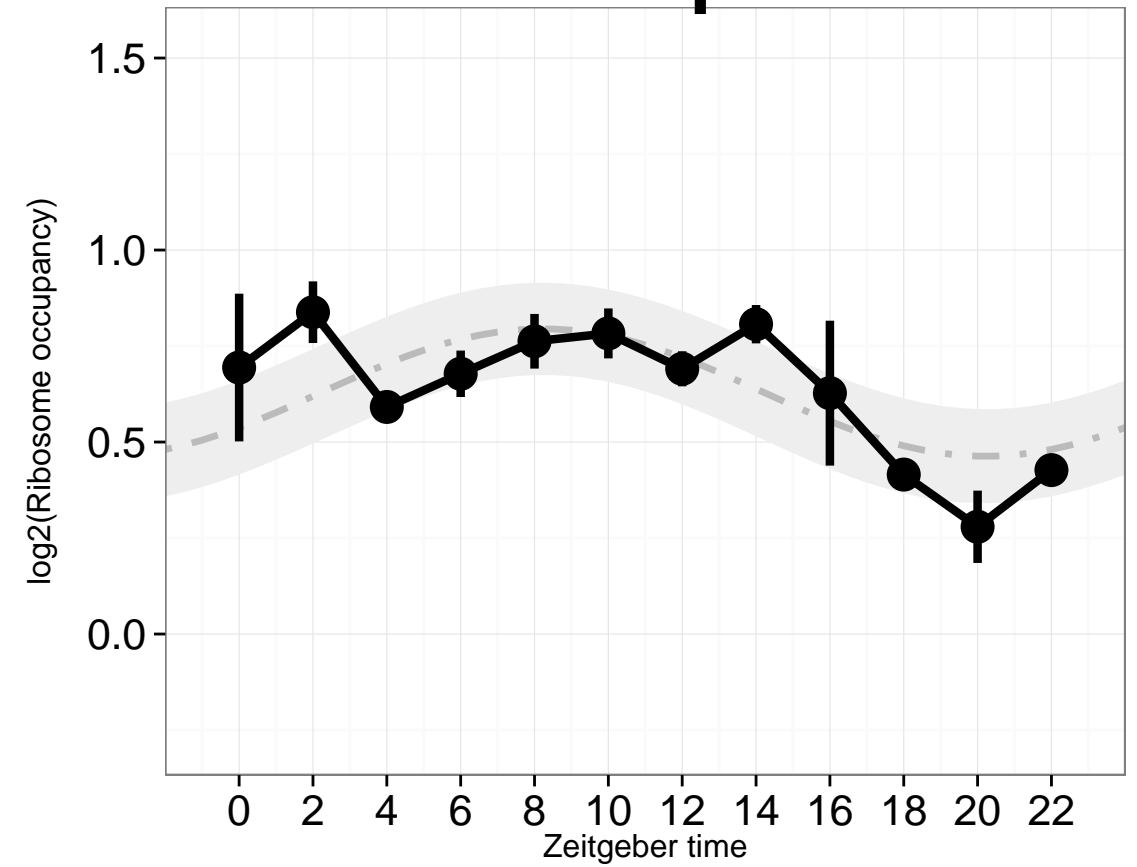

Supplement: Supplementary file 183 [file 1]

## Mettl23

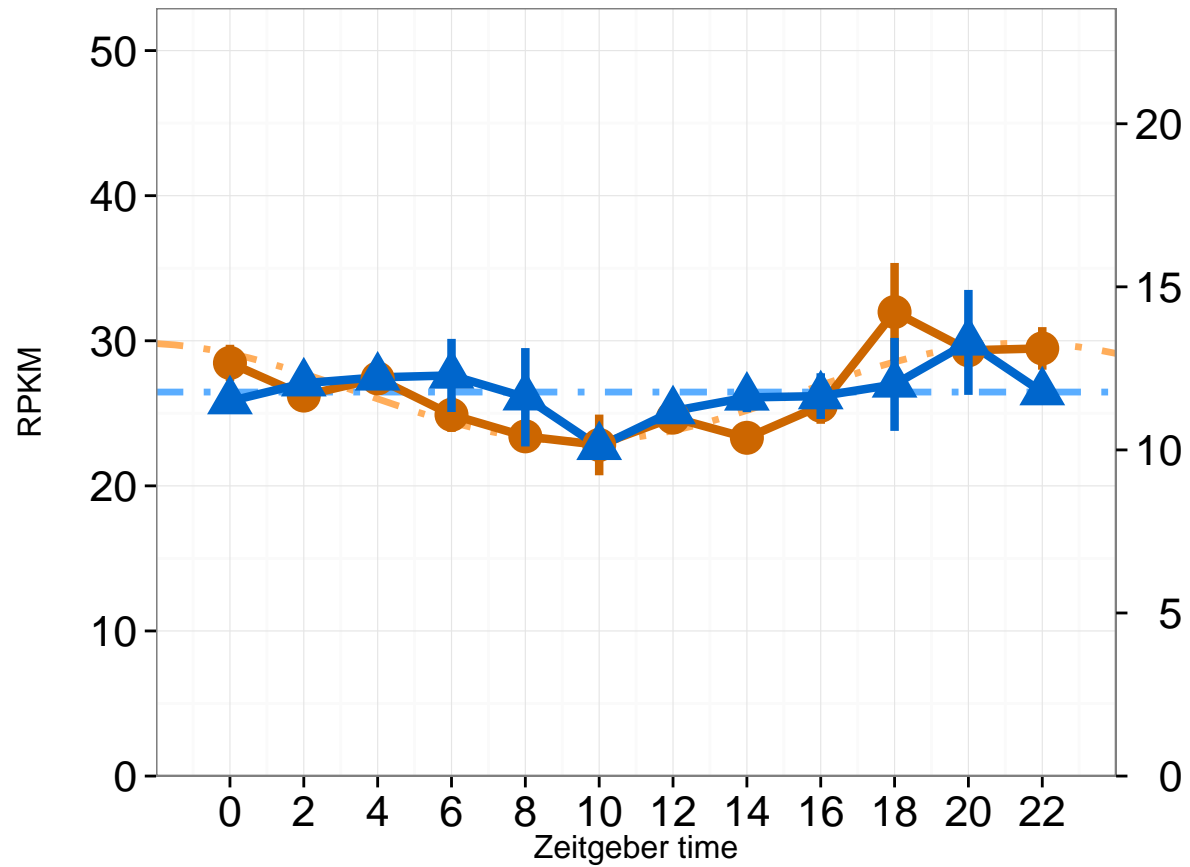

## Mettl23

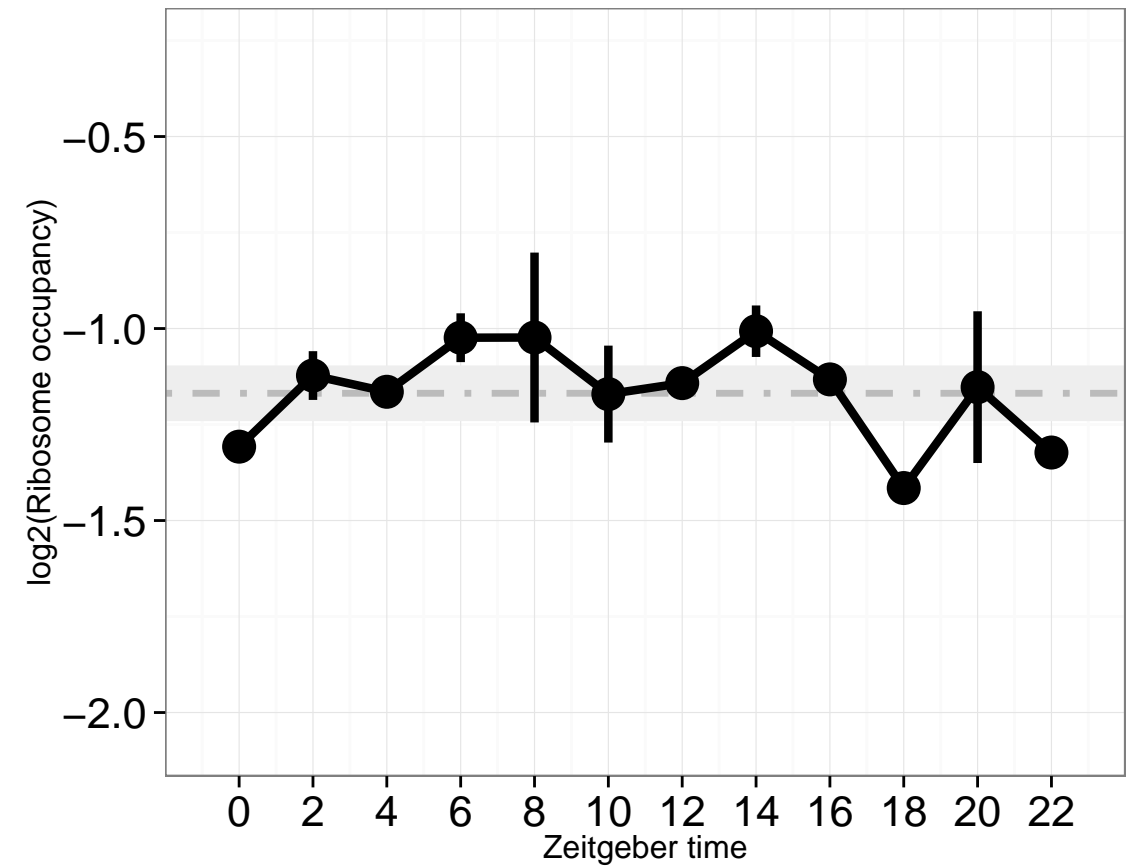

Supplement: Supplementary file 184 [file 1]

# Xrcc6bp1

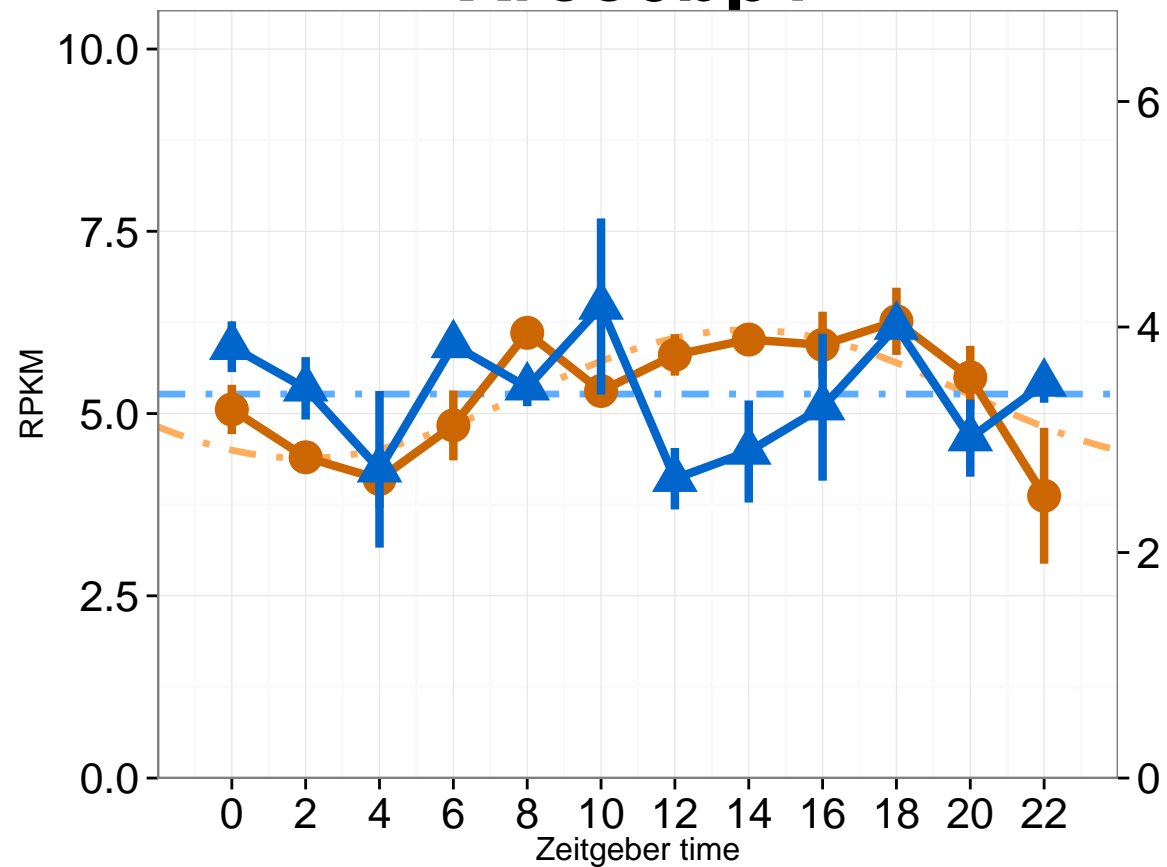

# Xrcc6bp1

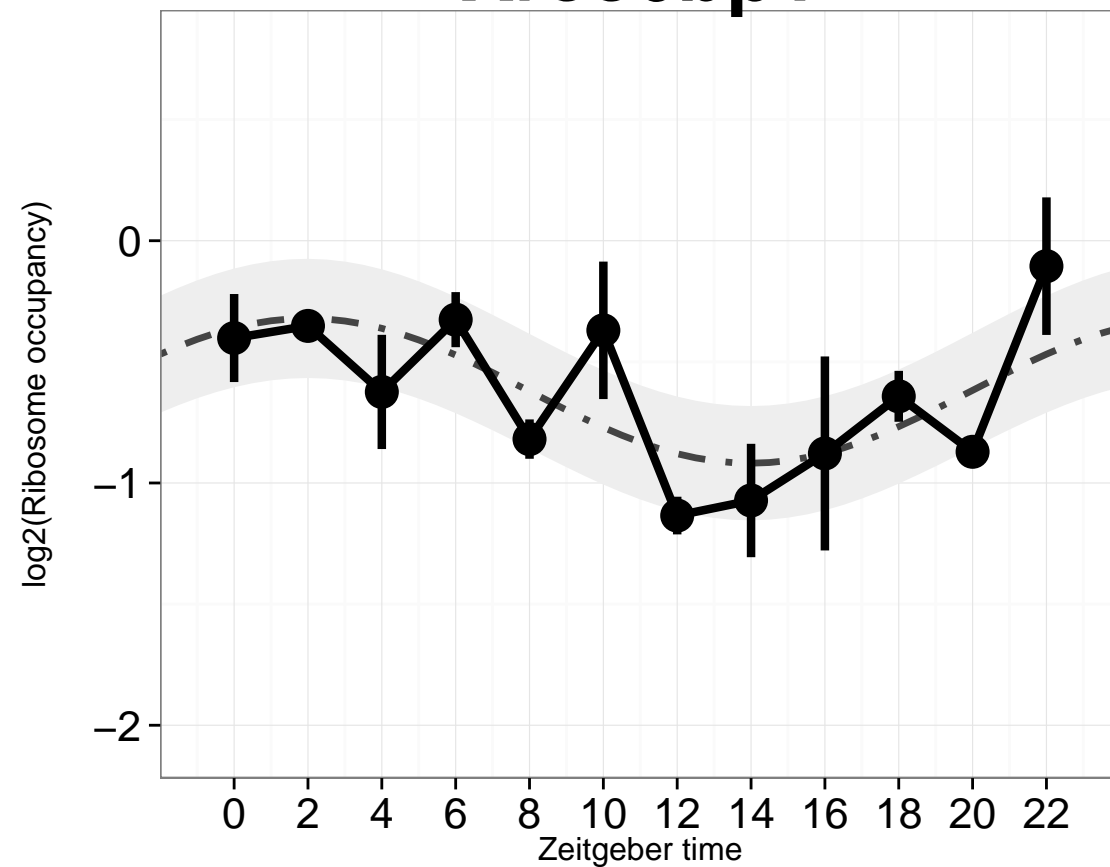

Supplement: Supplementary file 185 [file 1]

# Chn1

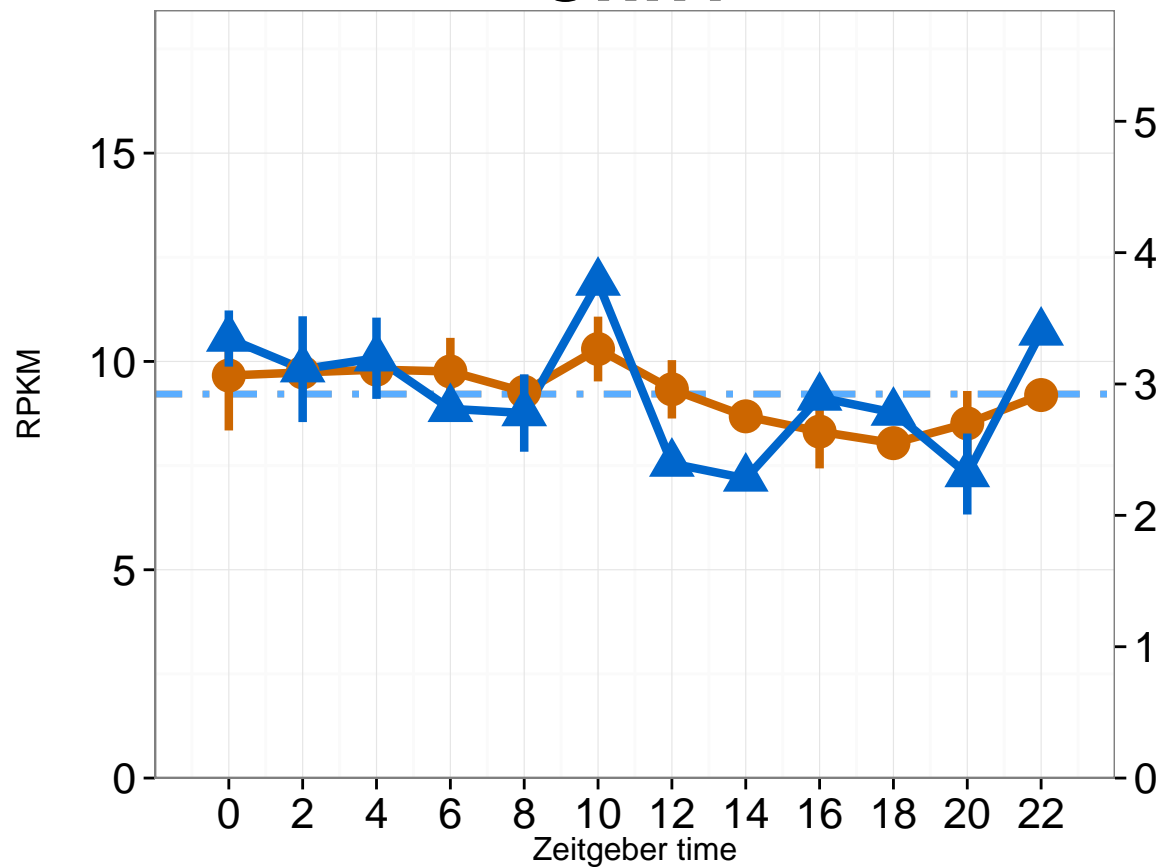

# Chn1

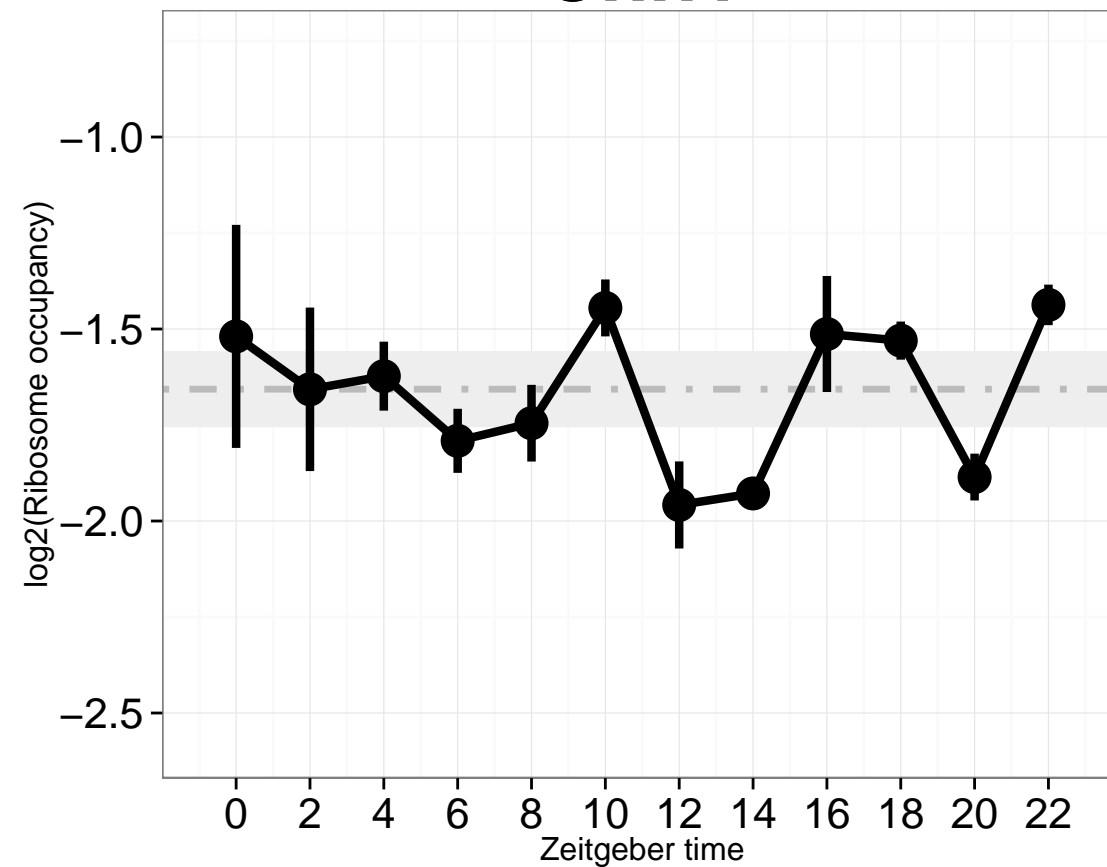

Supplement: Supplementary file 186 [file 1]

## Bcam

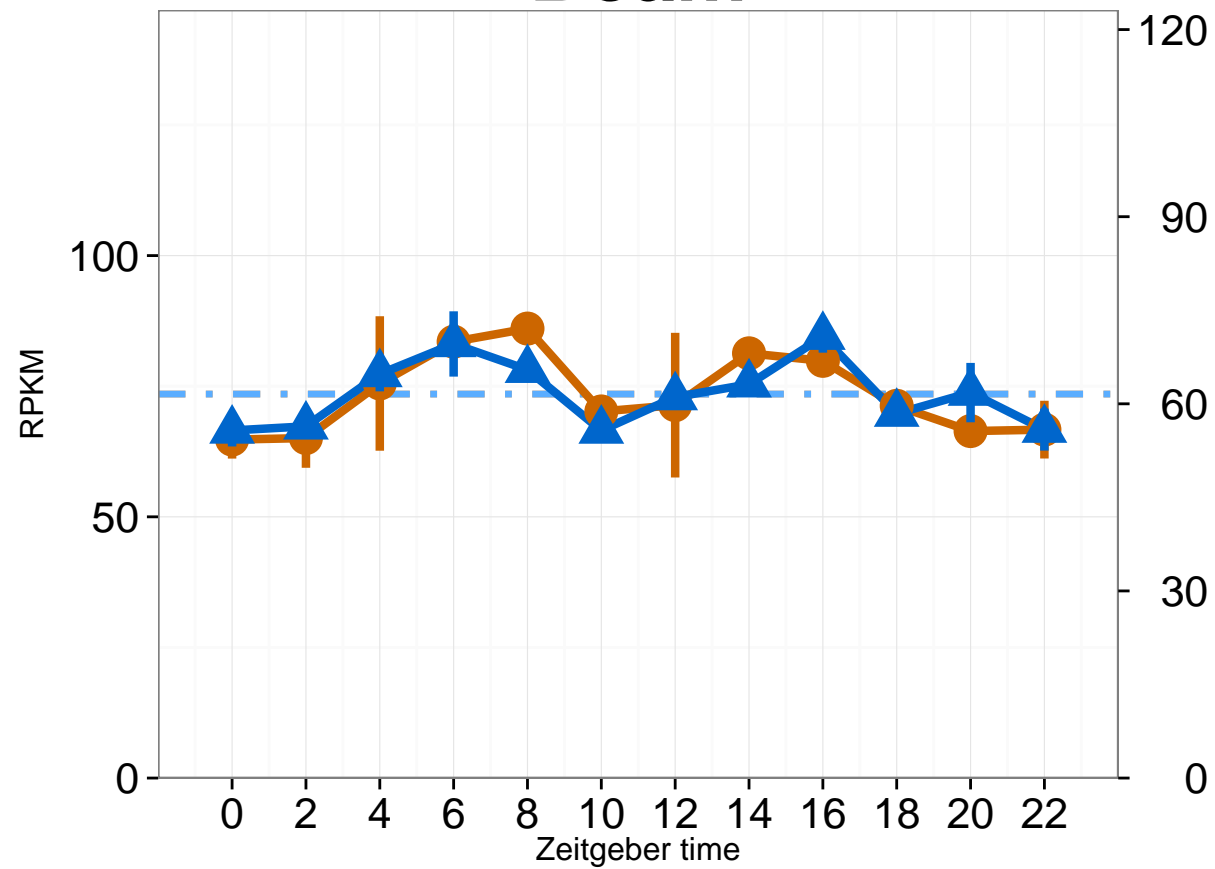

## Bcam

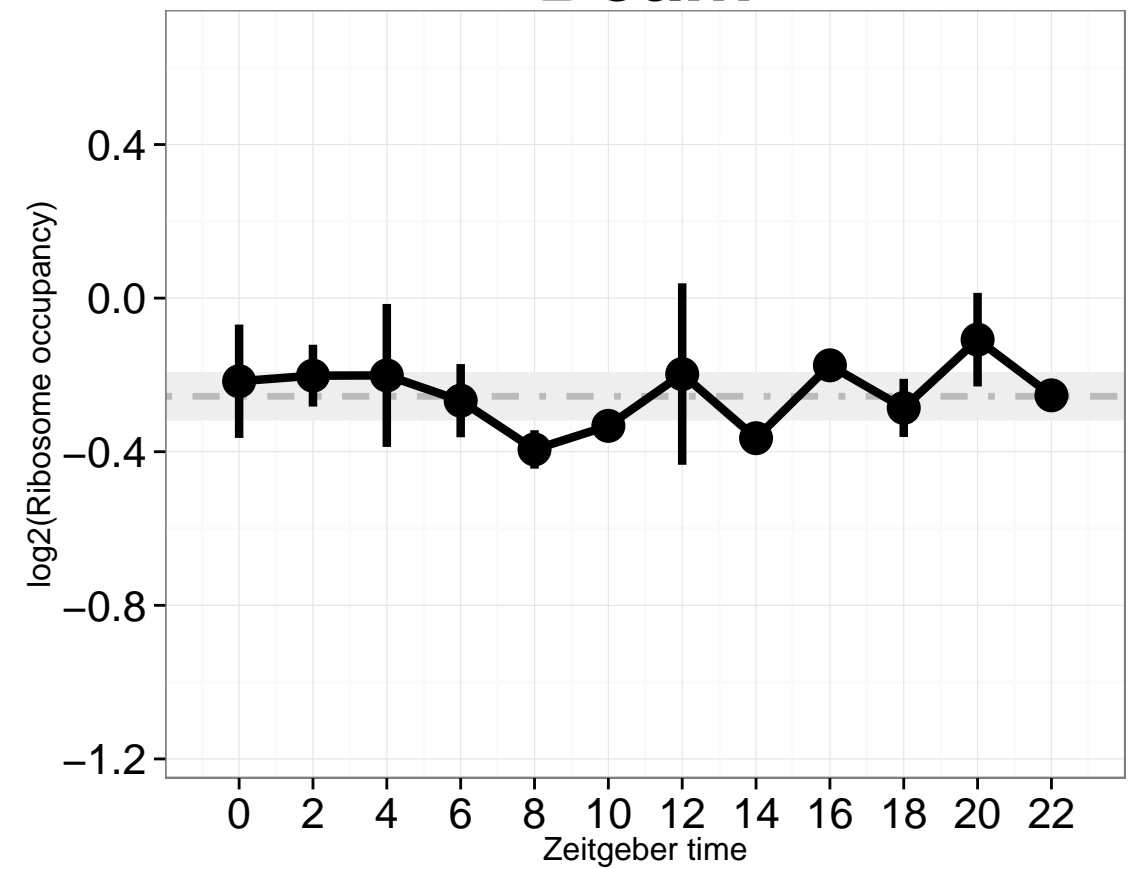

Supplement: Supplementary file 187 [file 1]

## Trmt1l

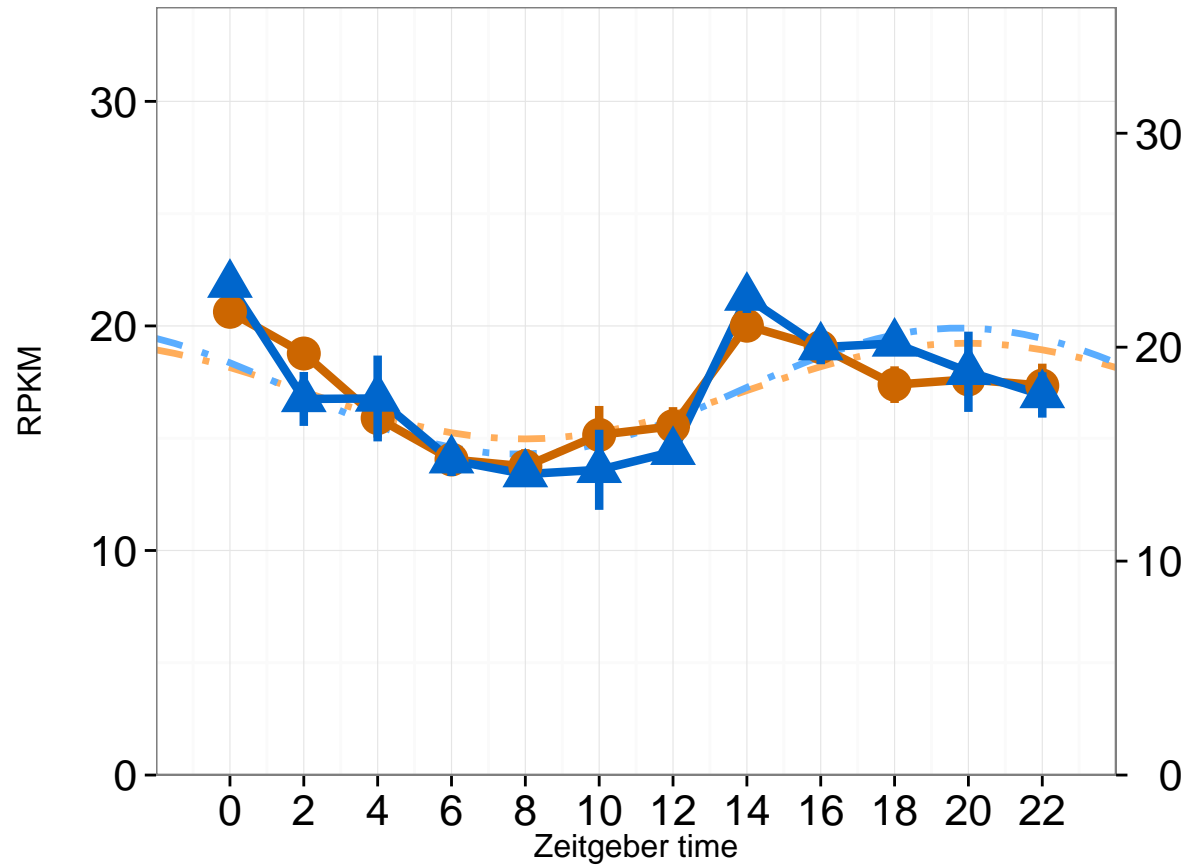

## Trmt1l

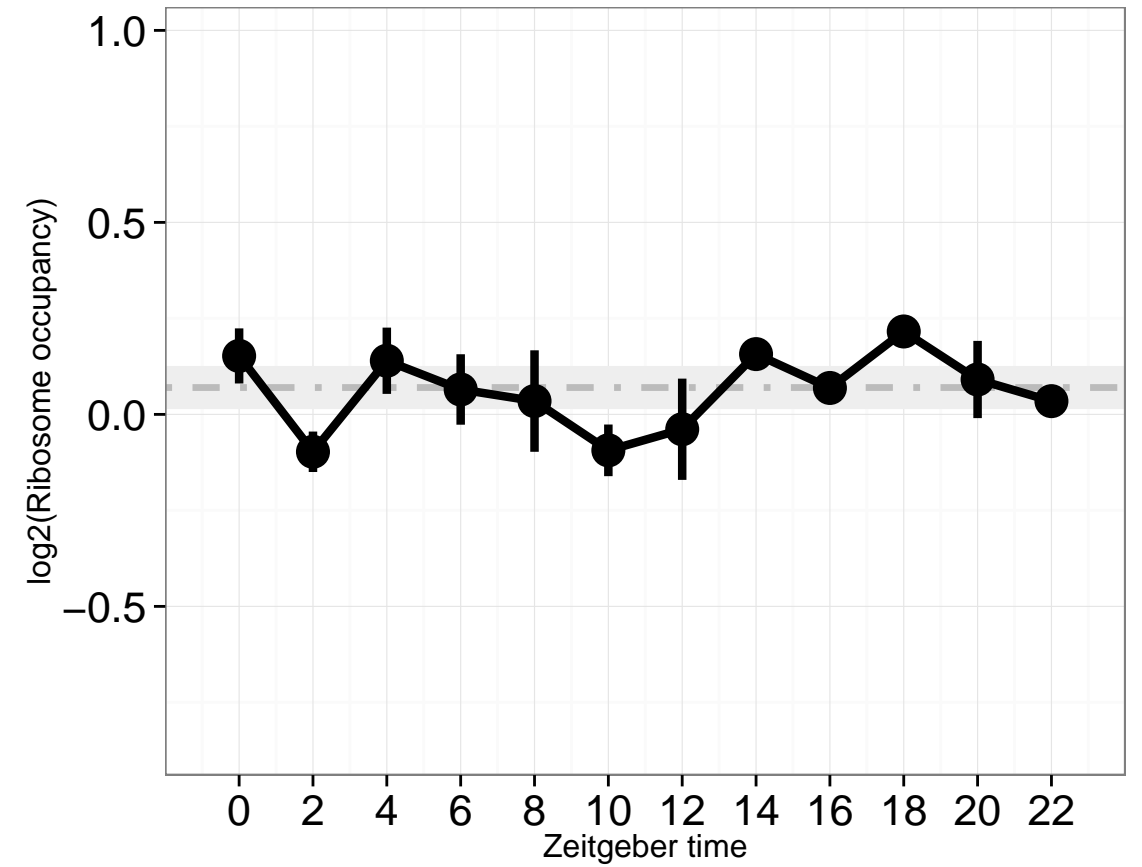

Supplement: Supplementary file 188 [file 1]

# Slc30a6

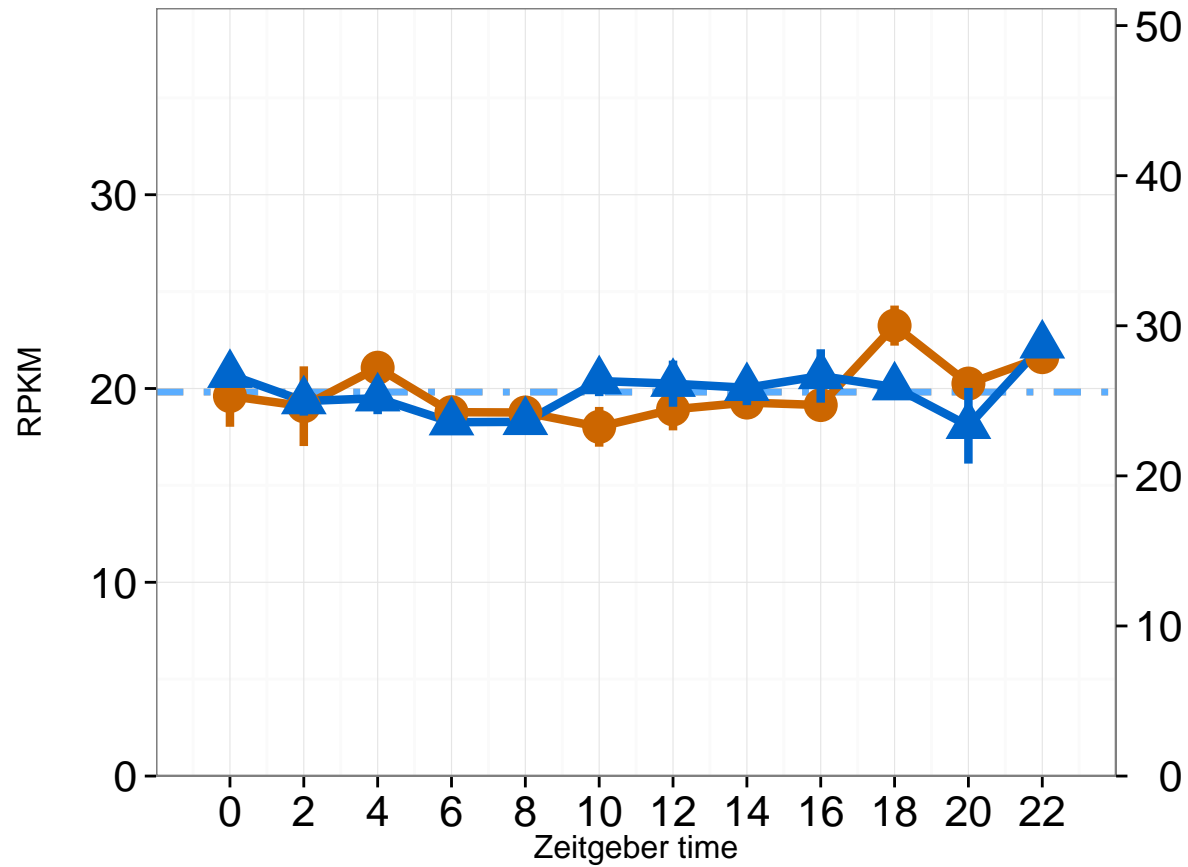

# Slc30a6

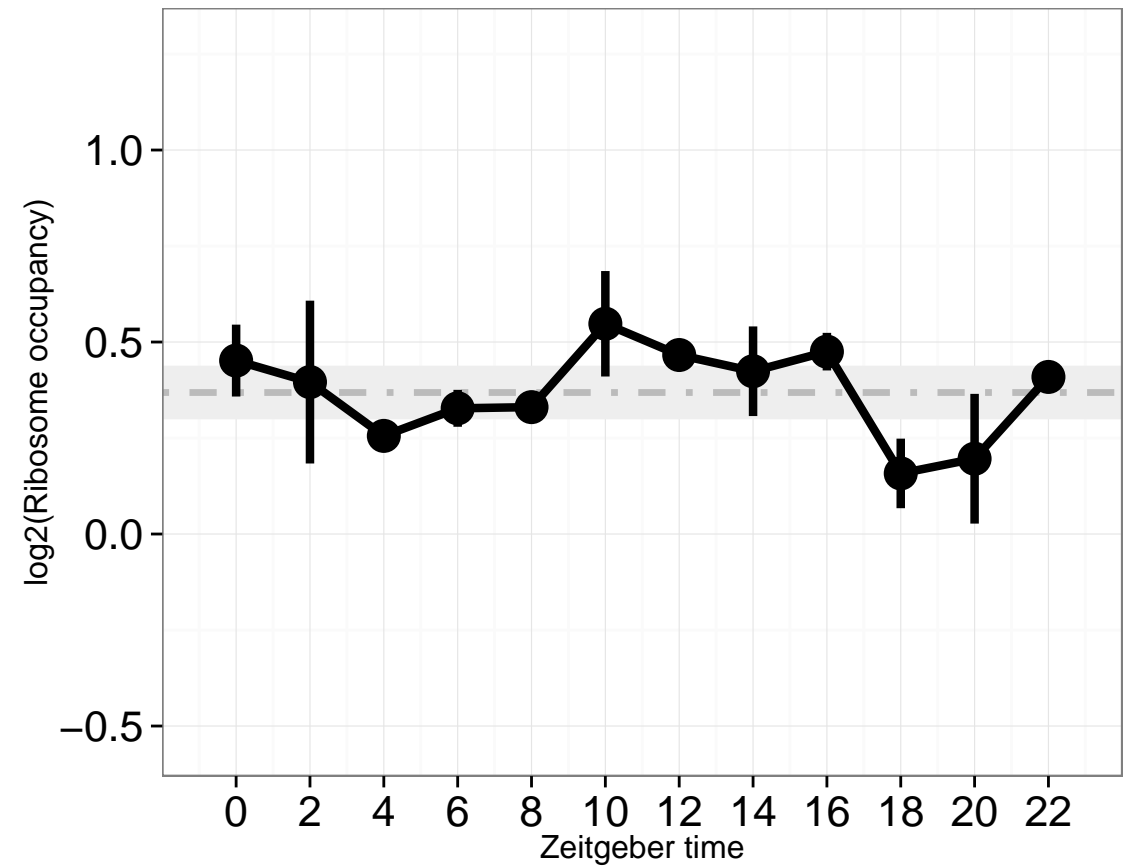

Supplement: Supplementary file 189 [file 1]

# Krt23

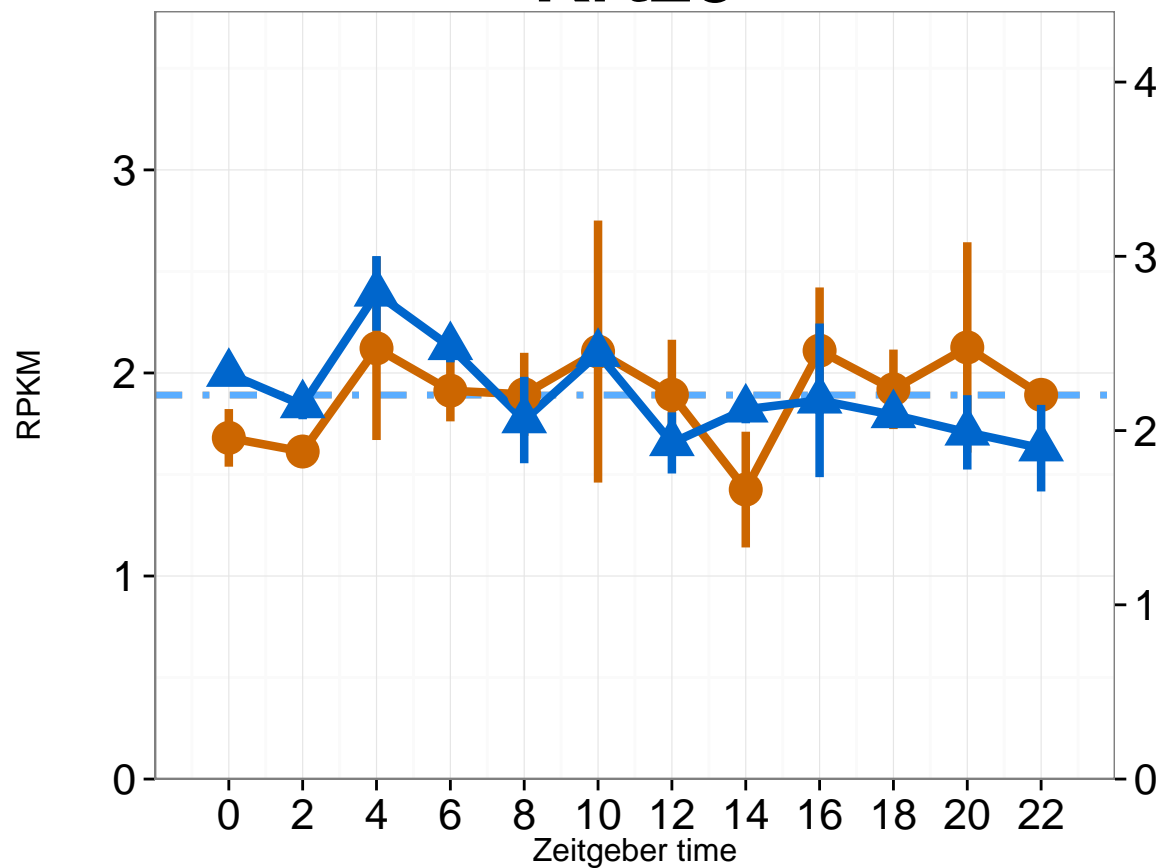

# Krt23

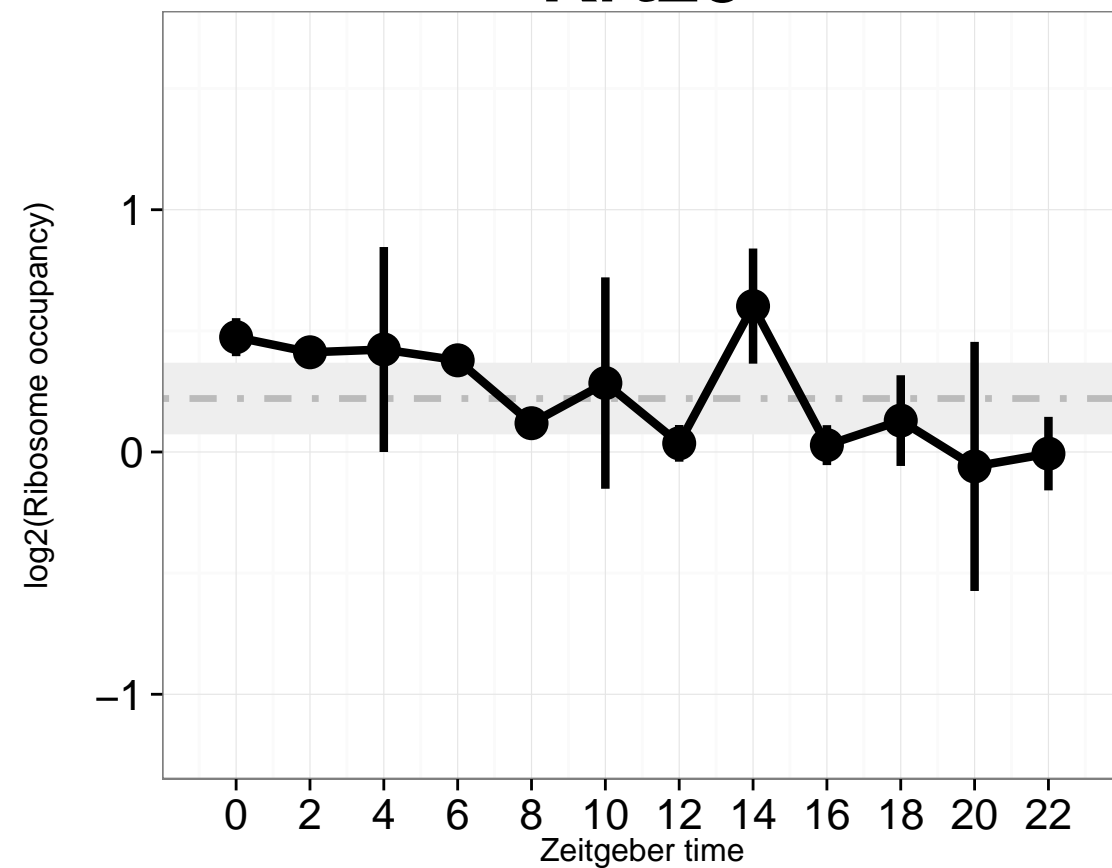

Supplement: Supplementary file 190 [file 1]

## Cnnm4

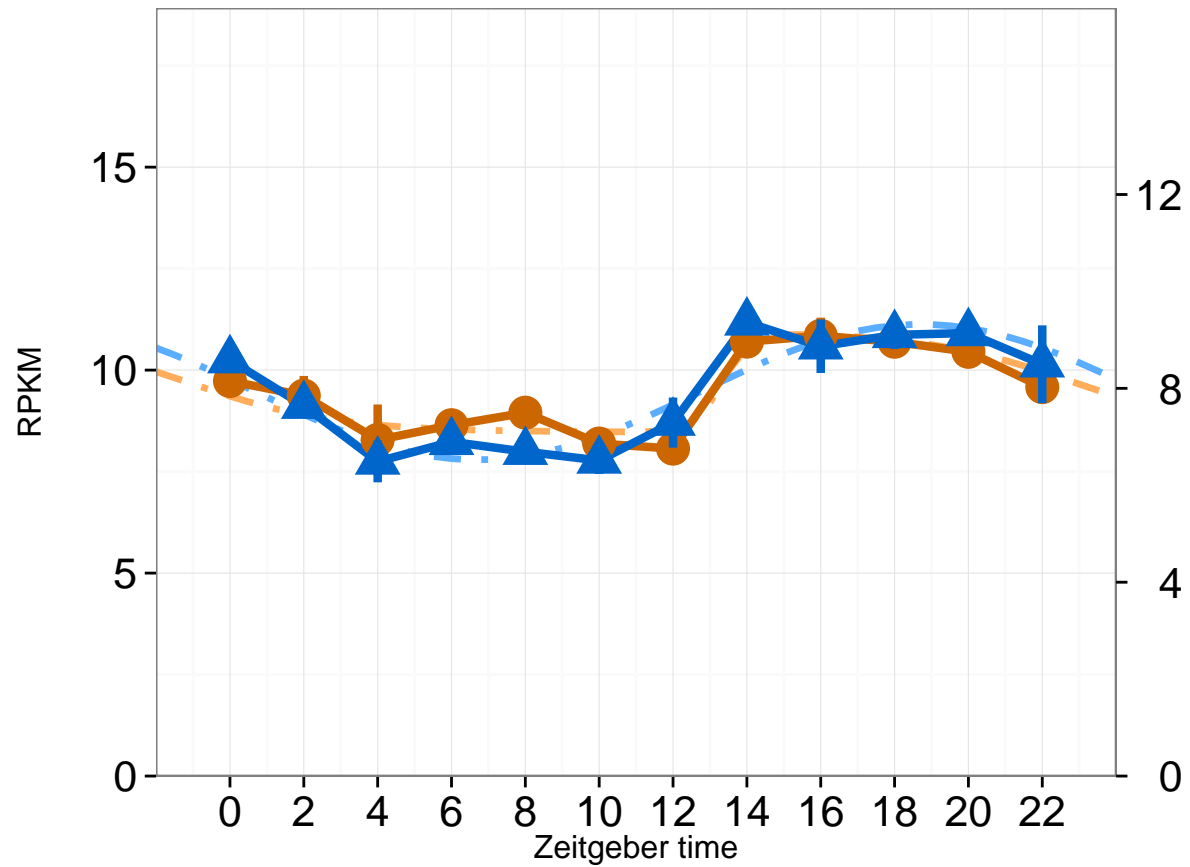

## Cnnm4

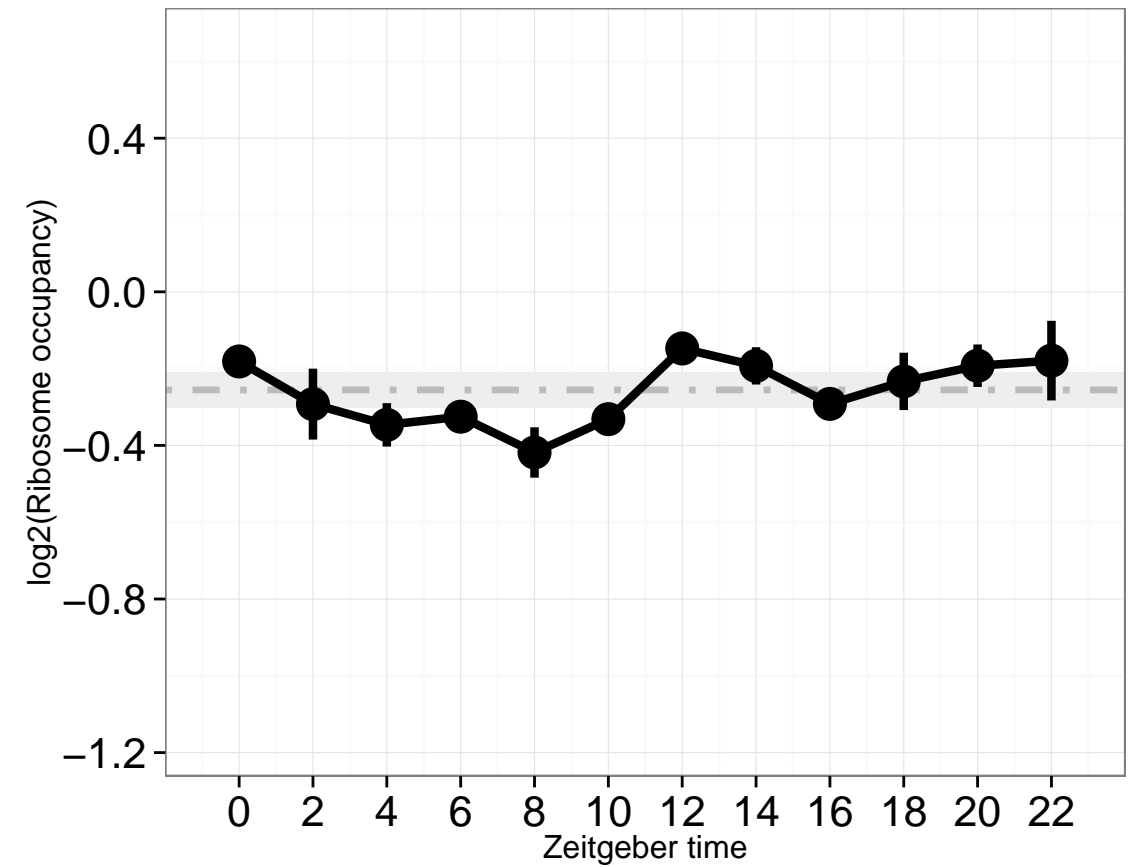

Supplement: Supplementary file 191 [file 1]

# Per2

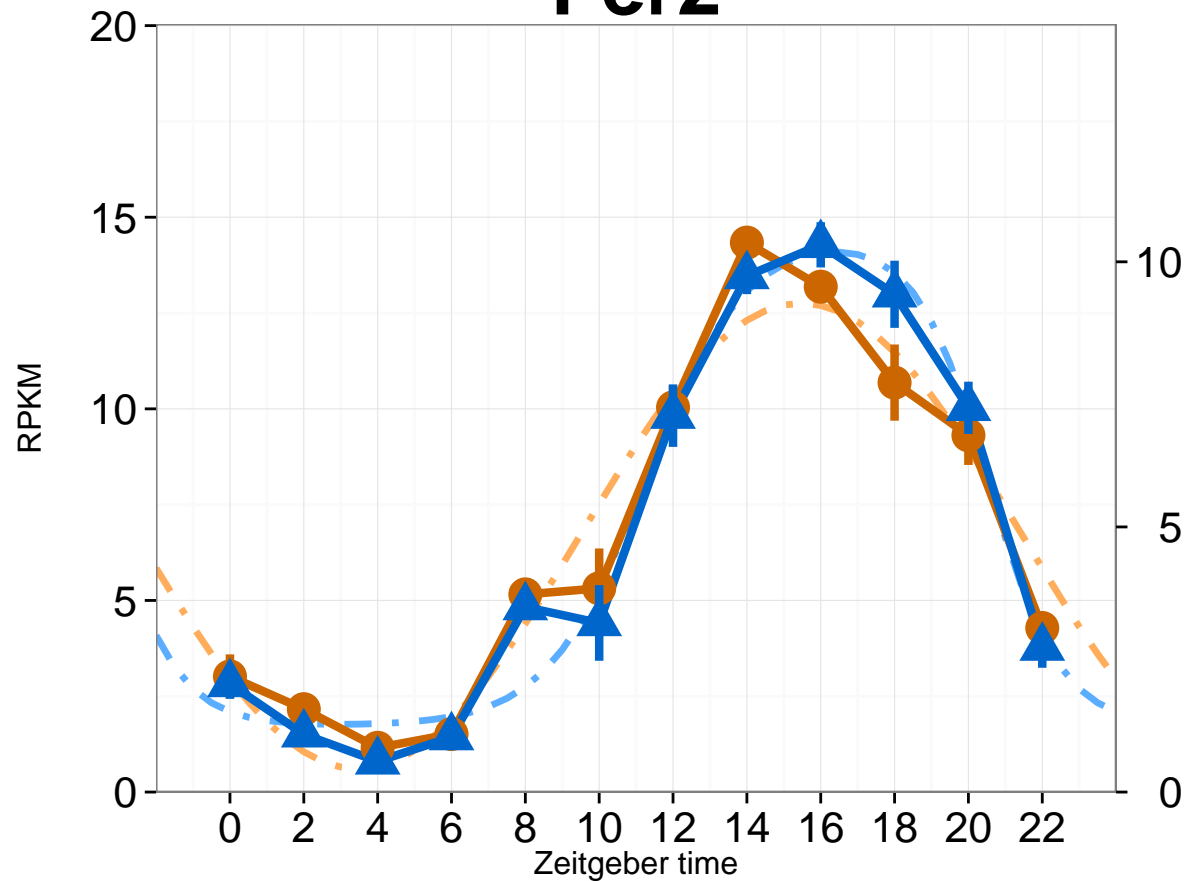

# Per2

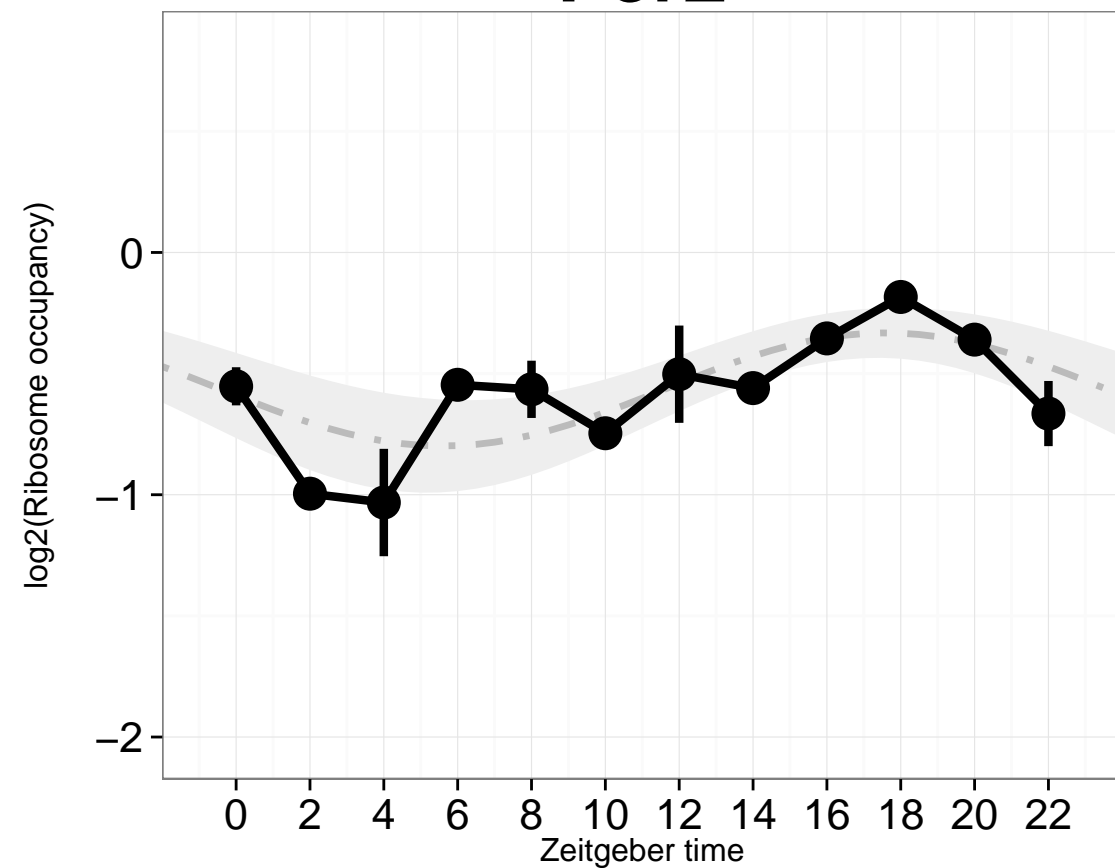

Supplement: Supplementary file 192 [file 1]

## EII3

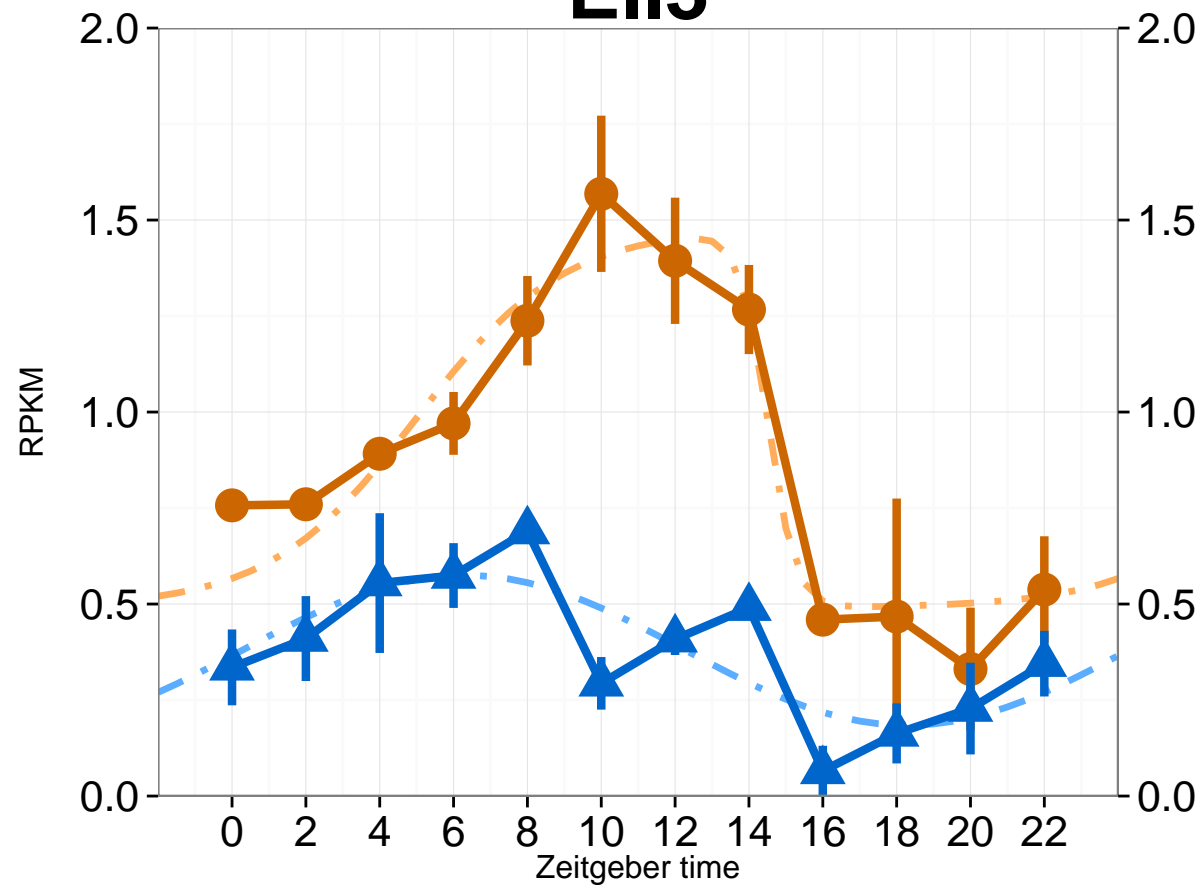

## EII3

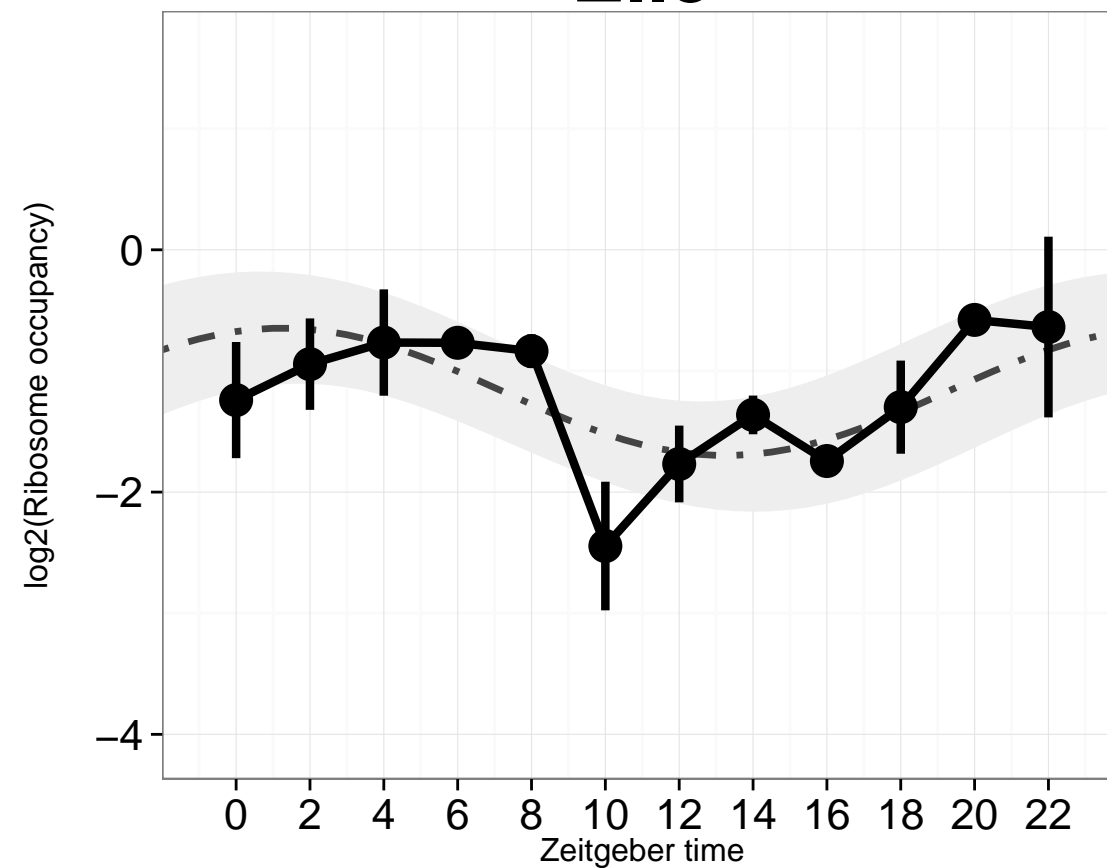

Supplement: Supplementary file 193 [file 1]

## Mcm10

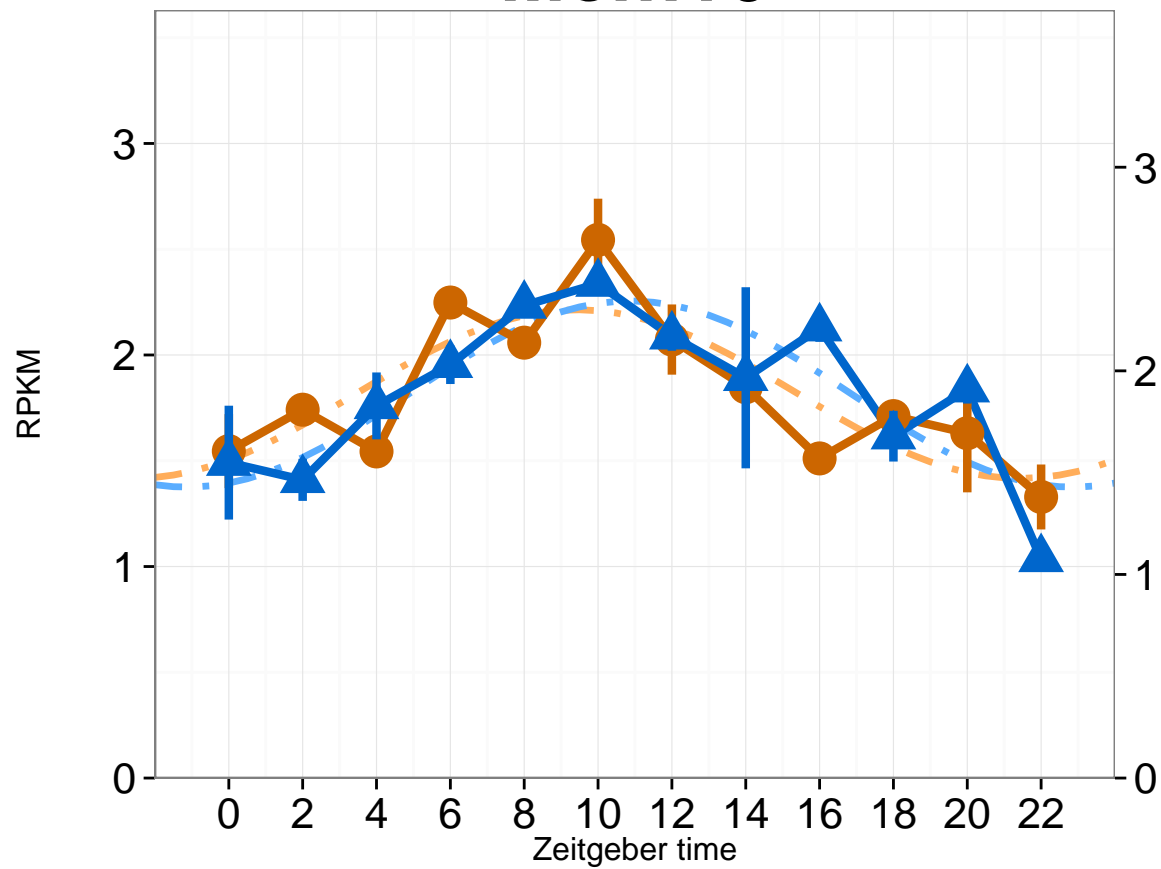

## Mcm10

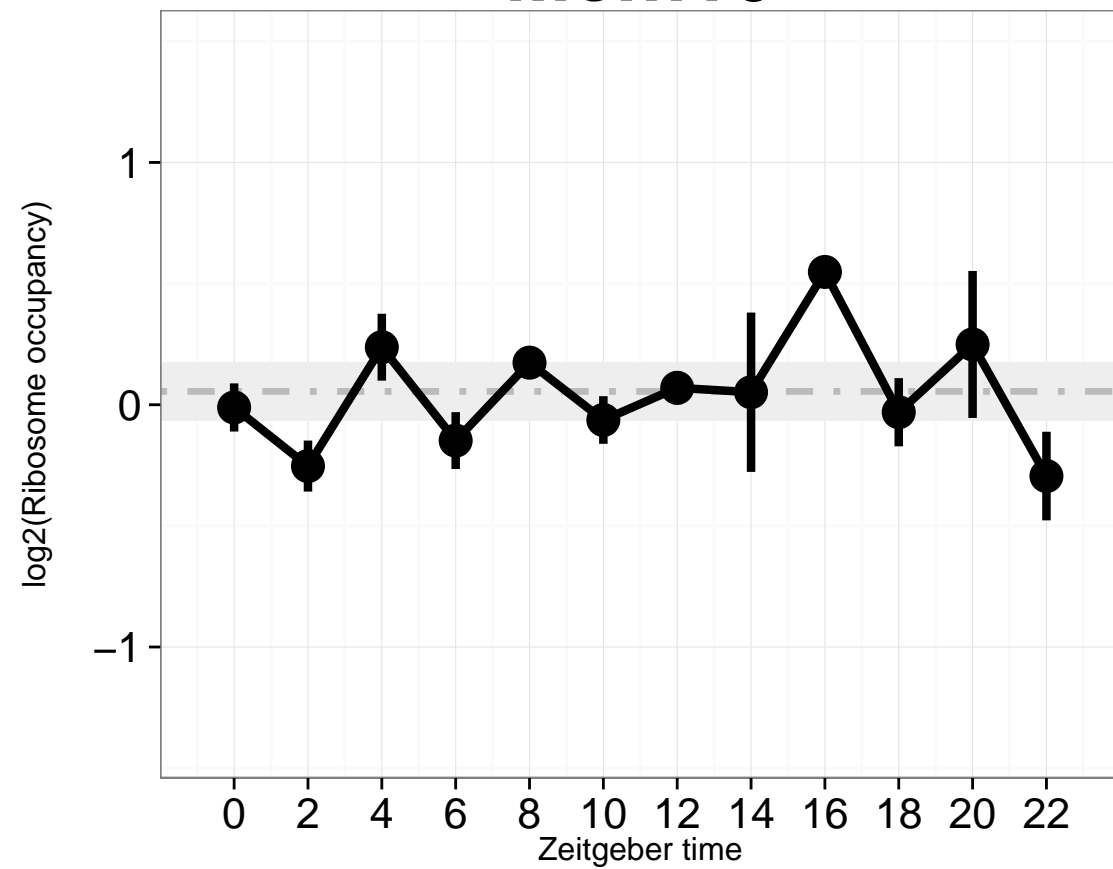

Supplement: Supplementary file 194 [file 1]

## Rlim

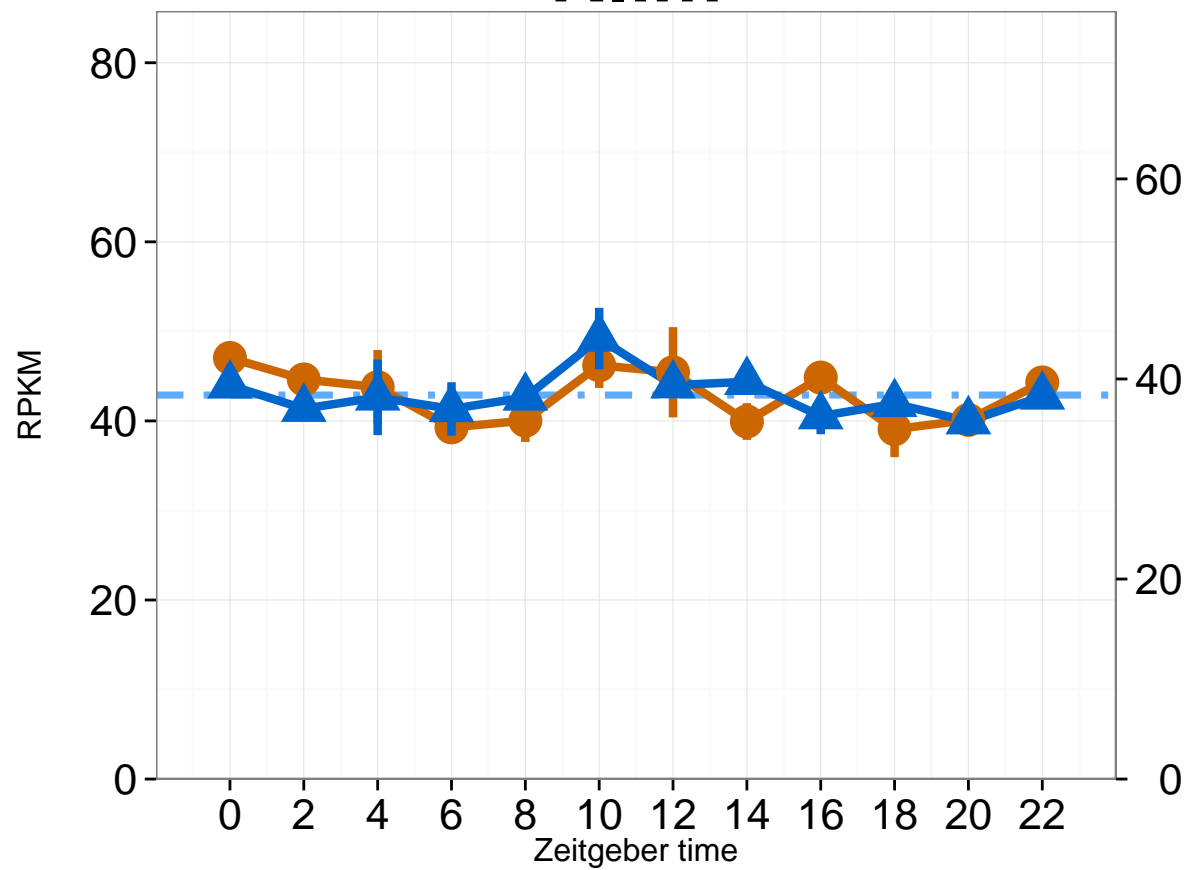

## Rlim

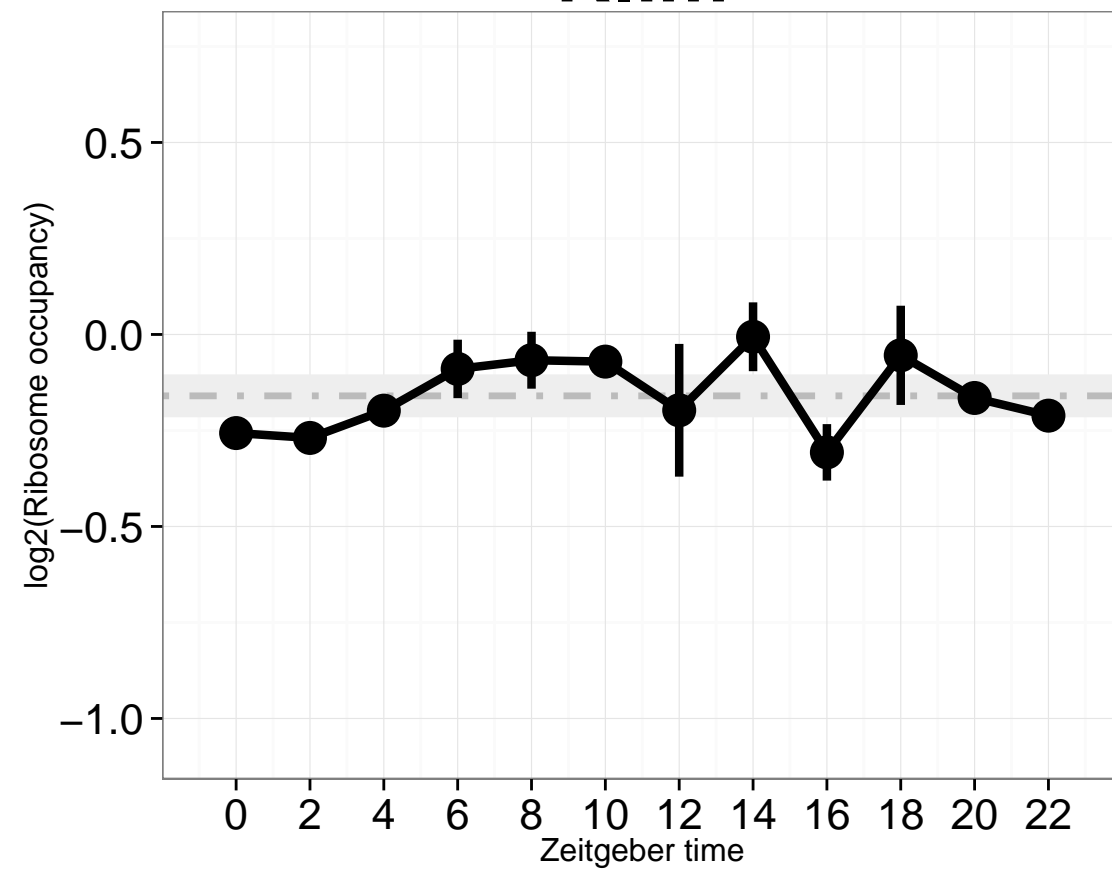

Supplement: Supplementary file 195 [file 1]

## Qdpr

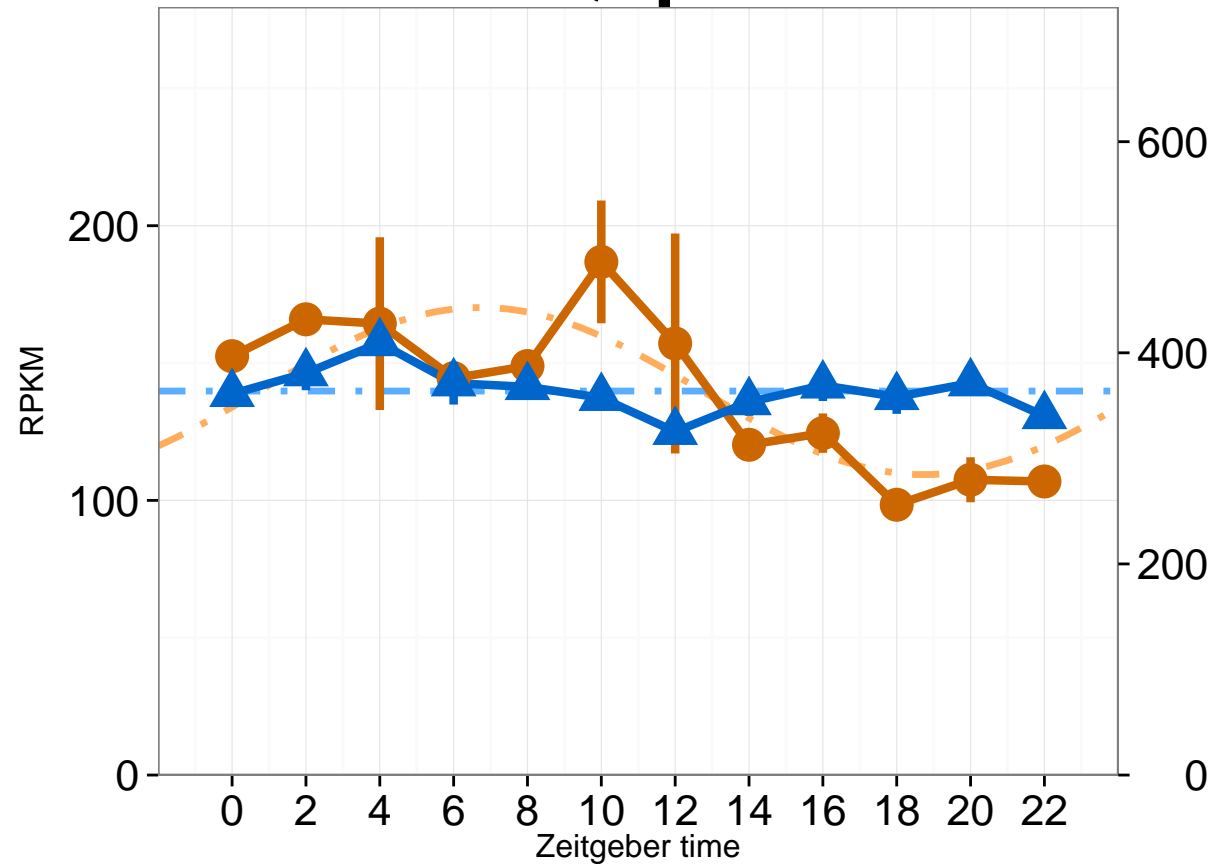

## Qdpr

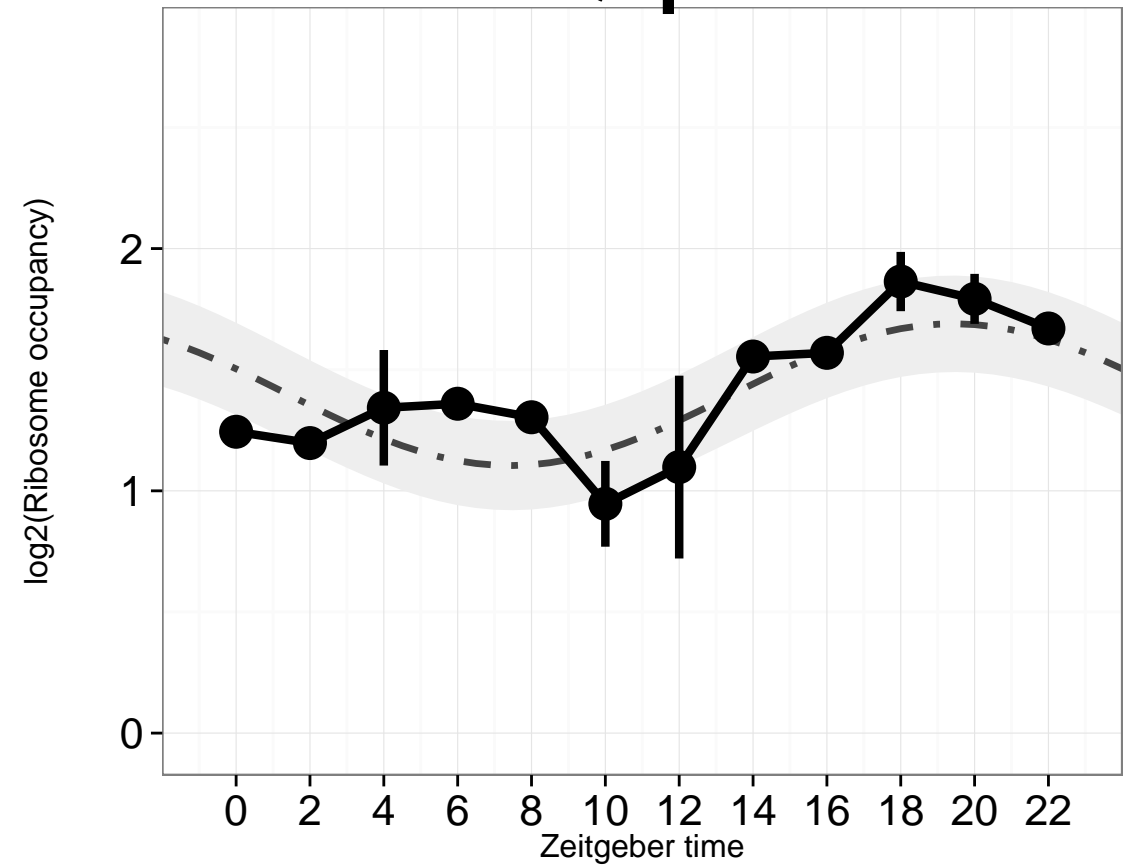

Supplement: Supplementary file 196 [file 1]

## Ppa2

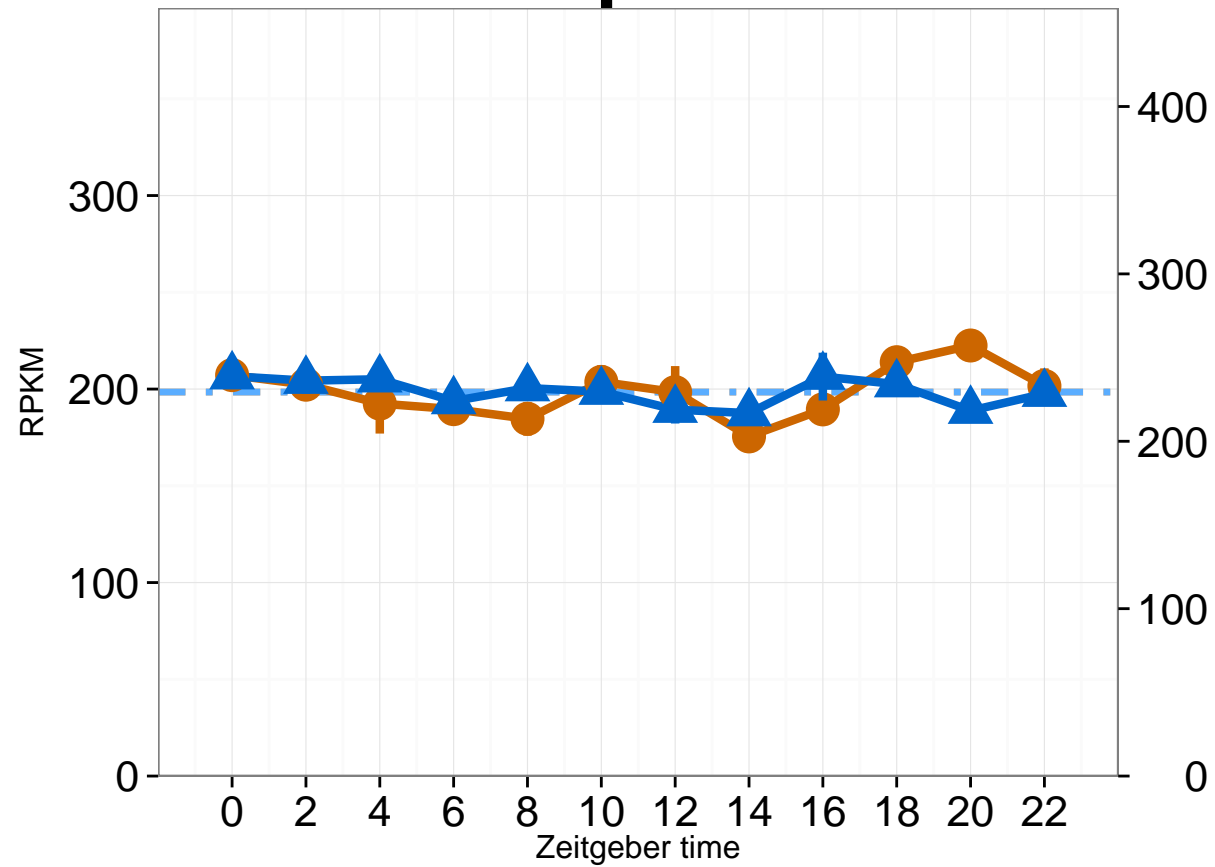

## Ppa2

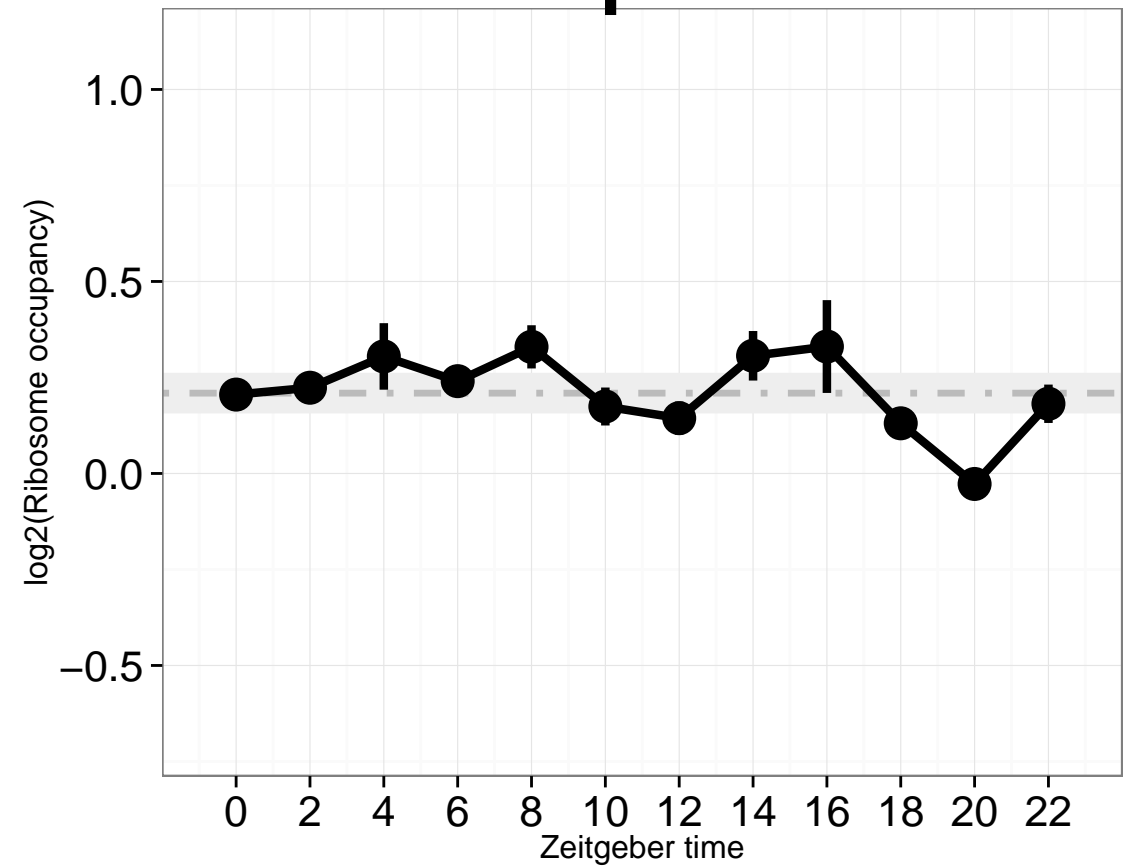

Supplement: Supplementary file 197 [file 1]

## lpmk

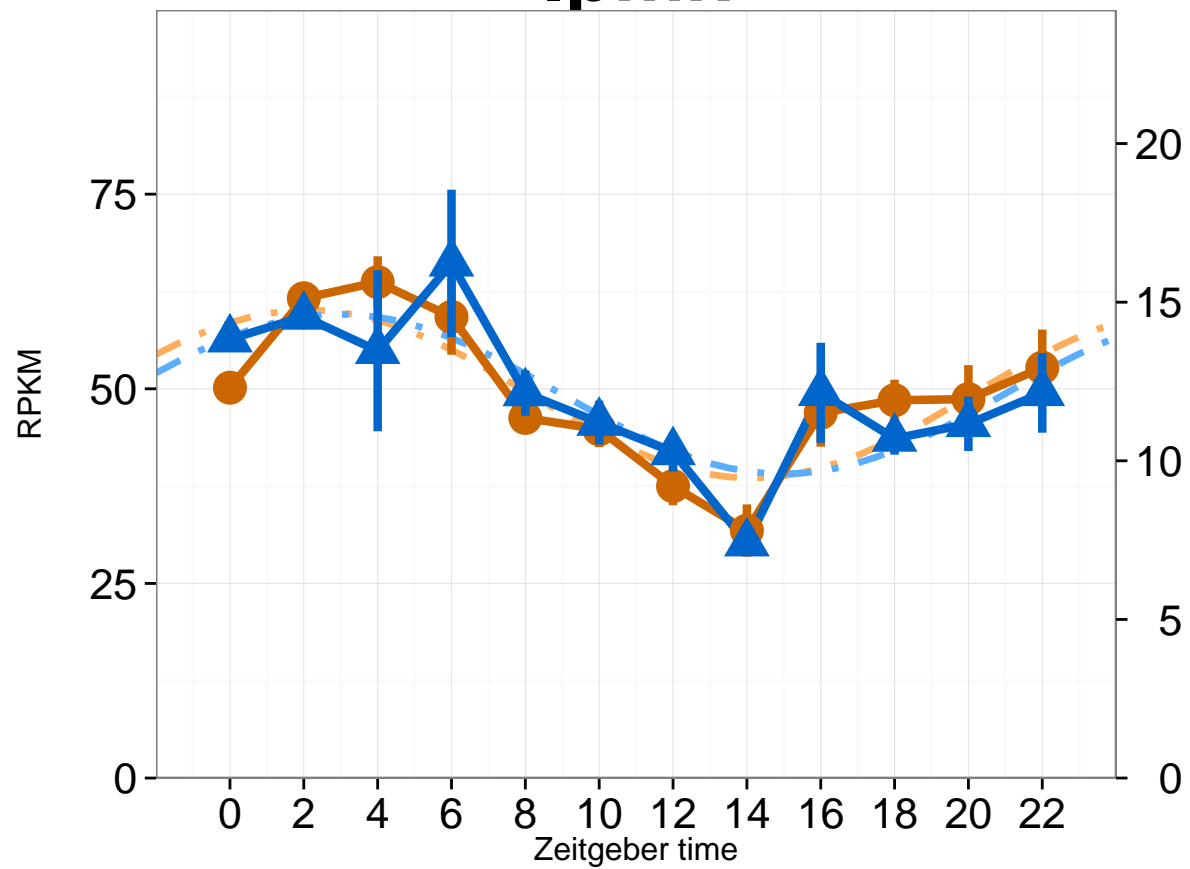

## lpmk

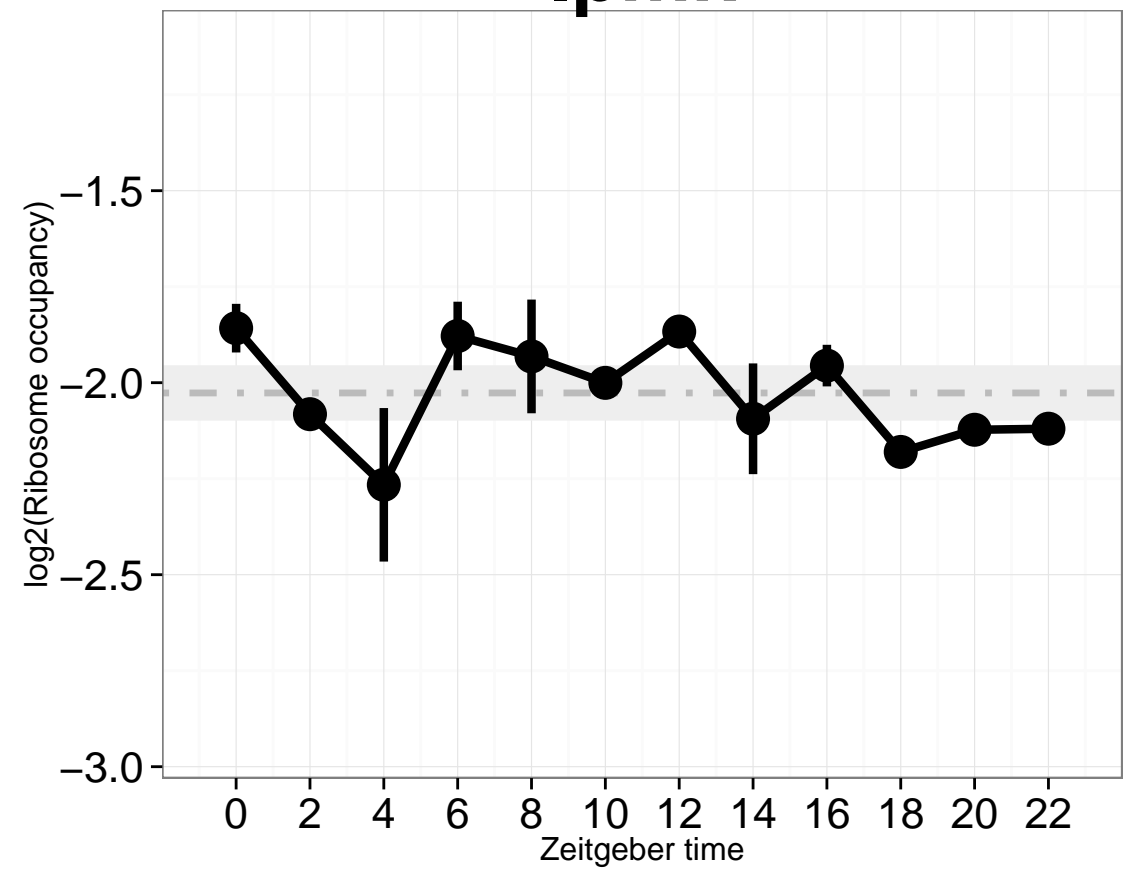

Supplement: Supplementary file 198 [file 1]

# Cpn1

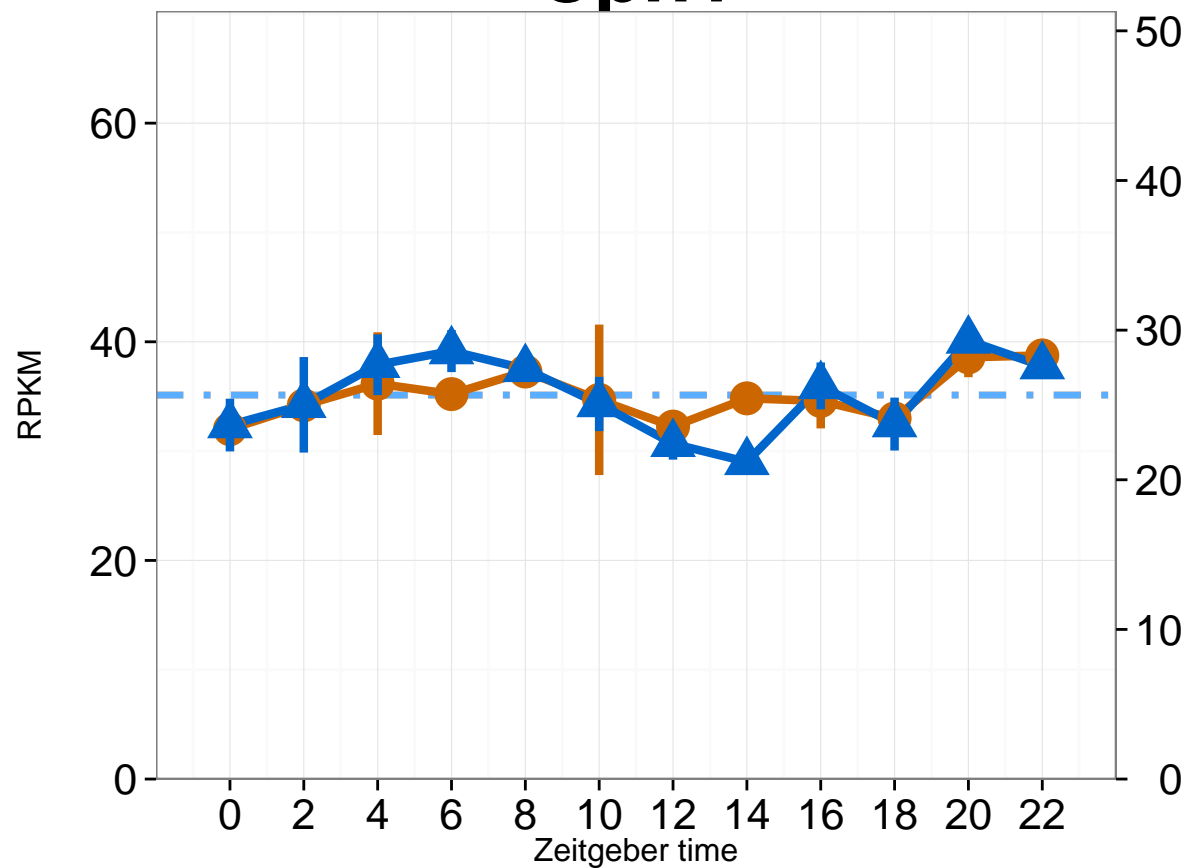

# Cpn1

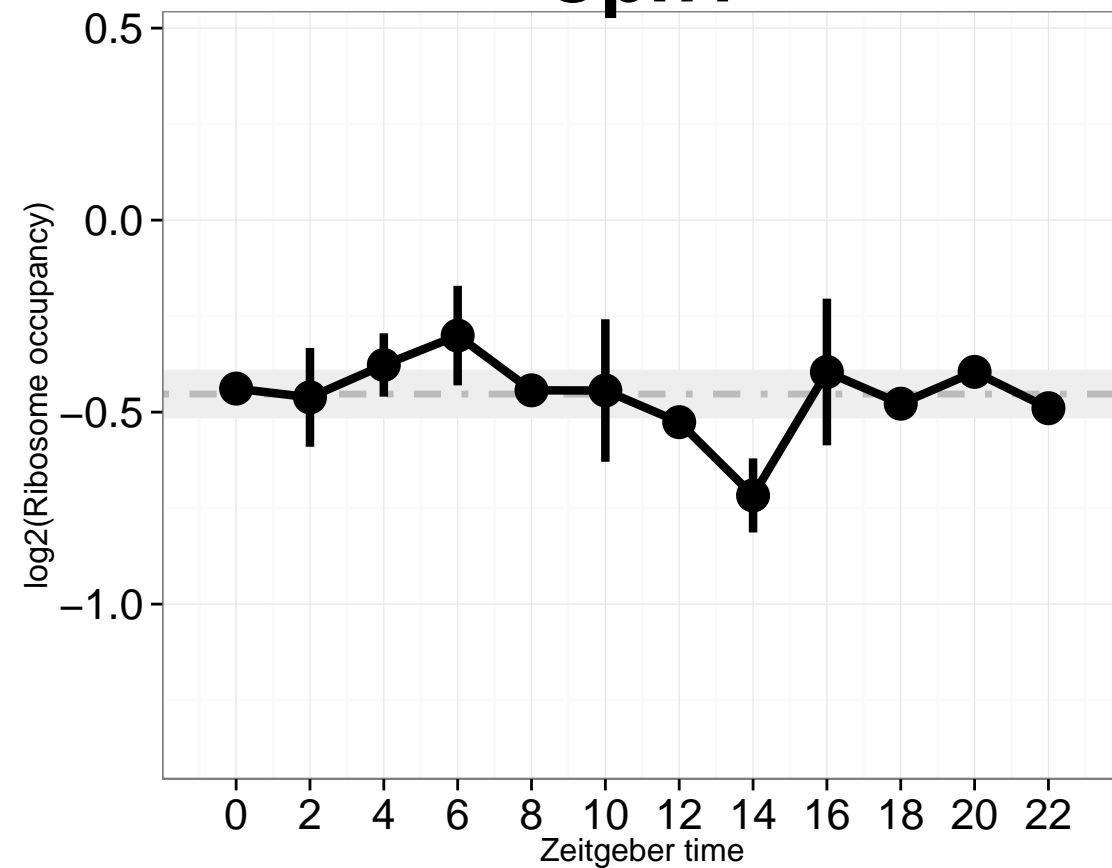

Supplement: Supplementary file 199 [file 1]

## Bola3

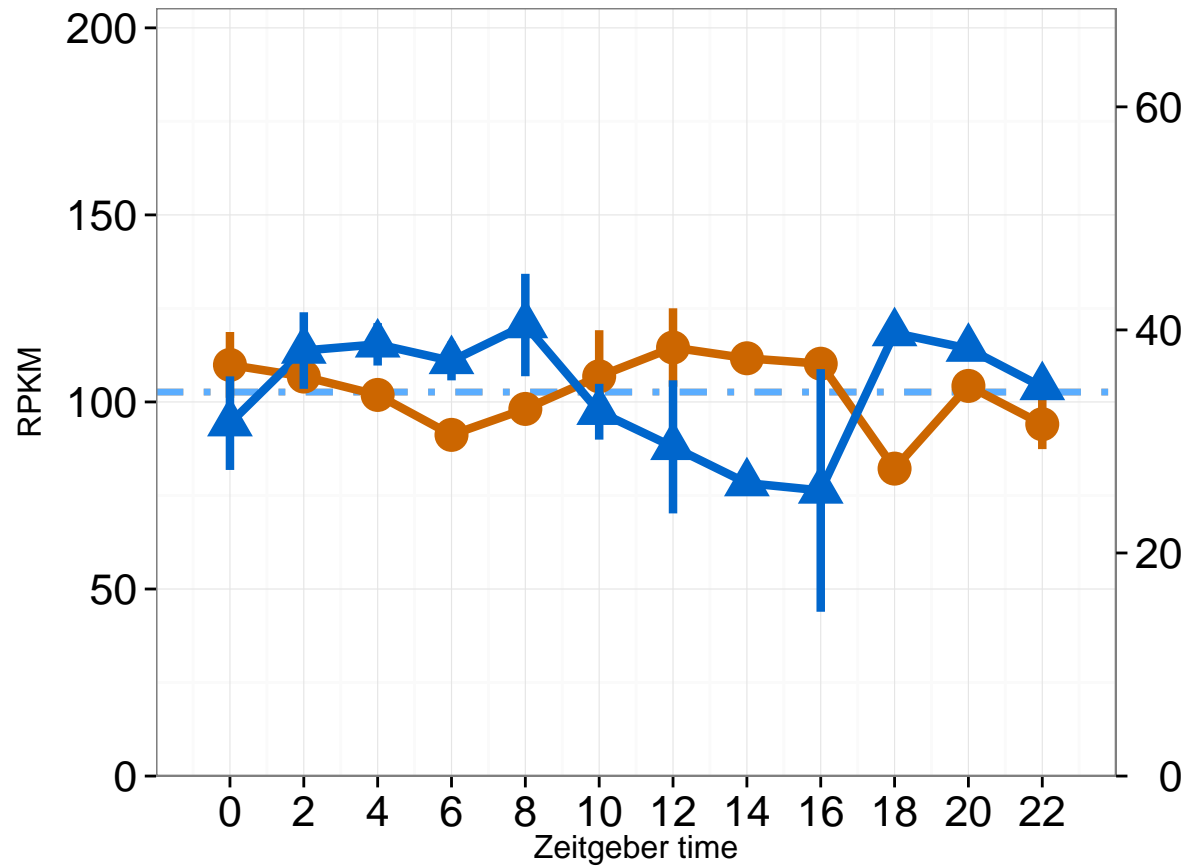

## Bola3

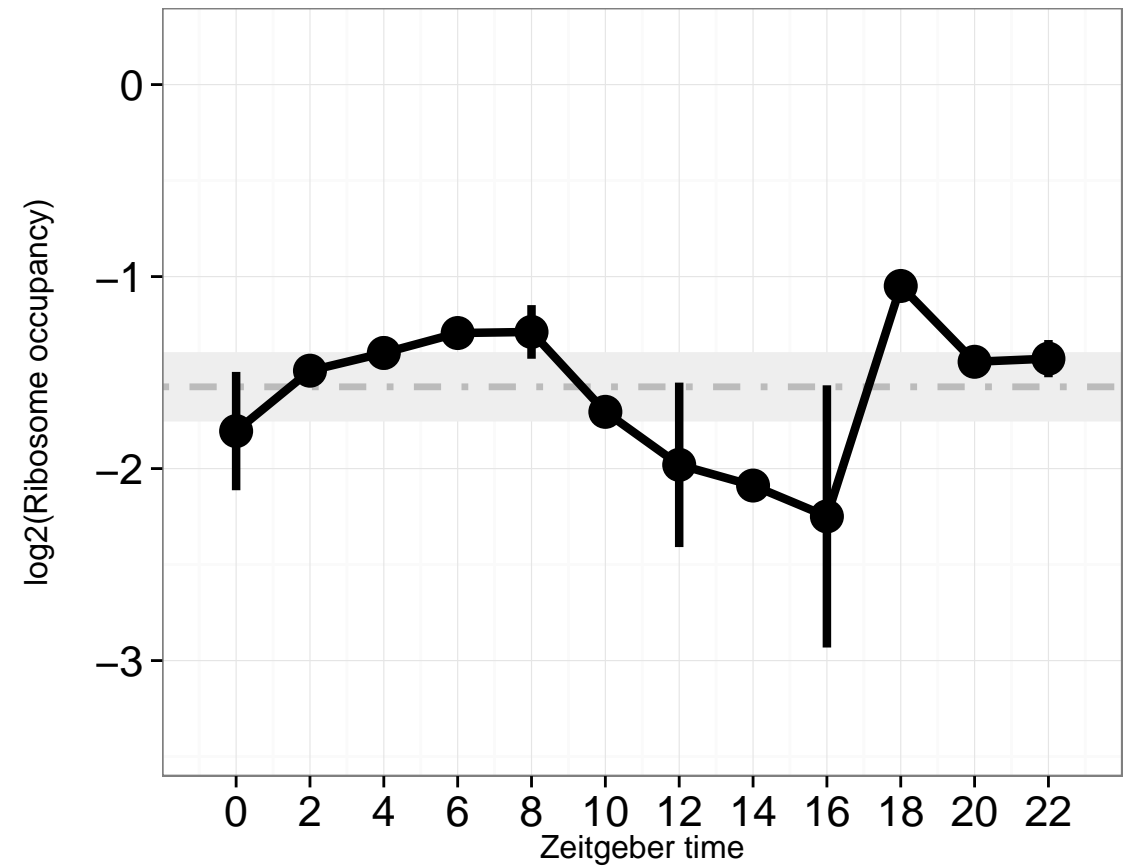

Supplement: Supplementary file 200 [file 1]
