# Supplementary material (part 3 of 133)
Source: publisher figshare collection journal article supplement (https://springernature.figshare.com/articles/dataset/_/4903193)

# Trappc6b

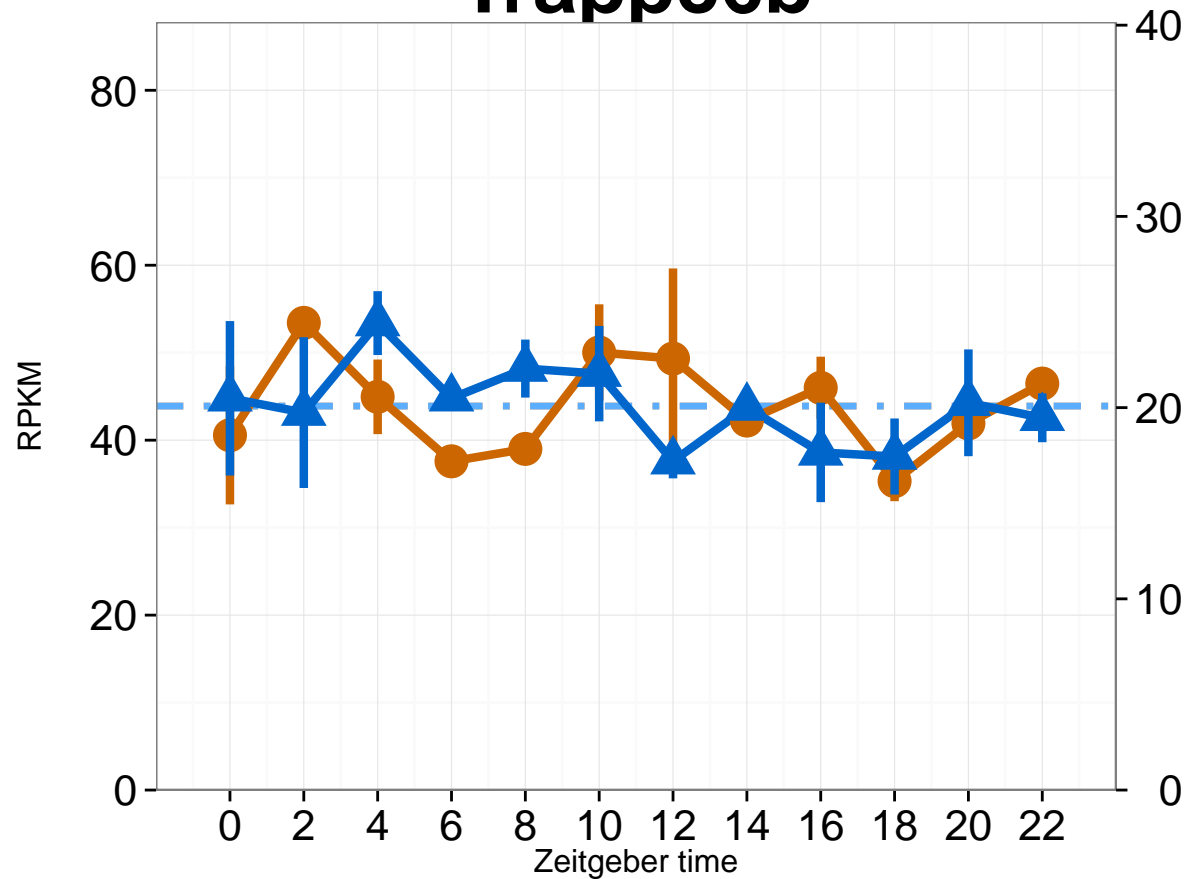

# Trappc6b

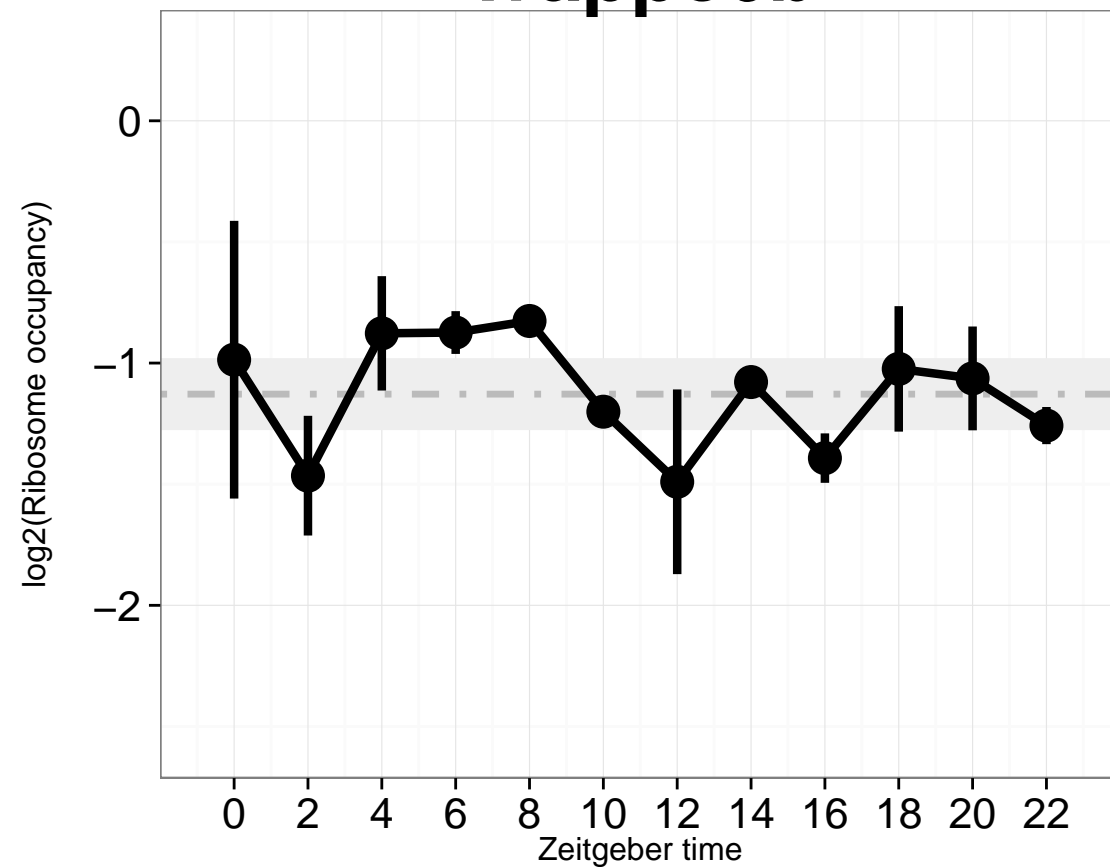

Supplement: Supplementary file 201 [file 1]

## Herc3

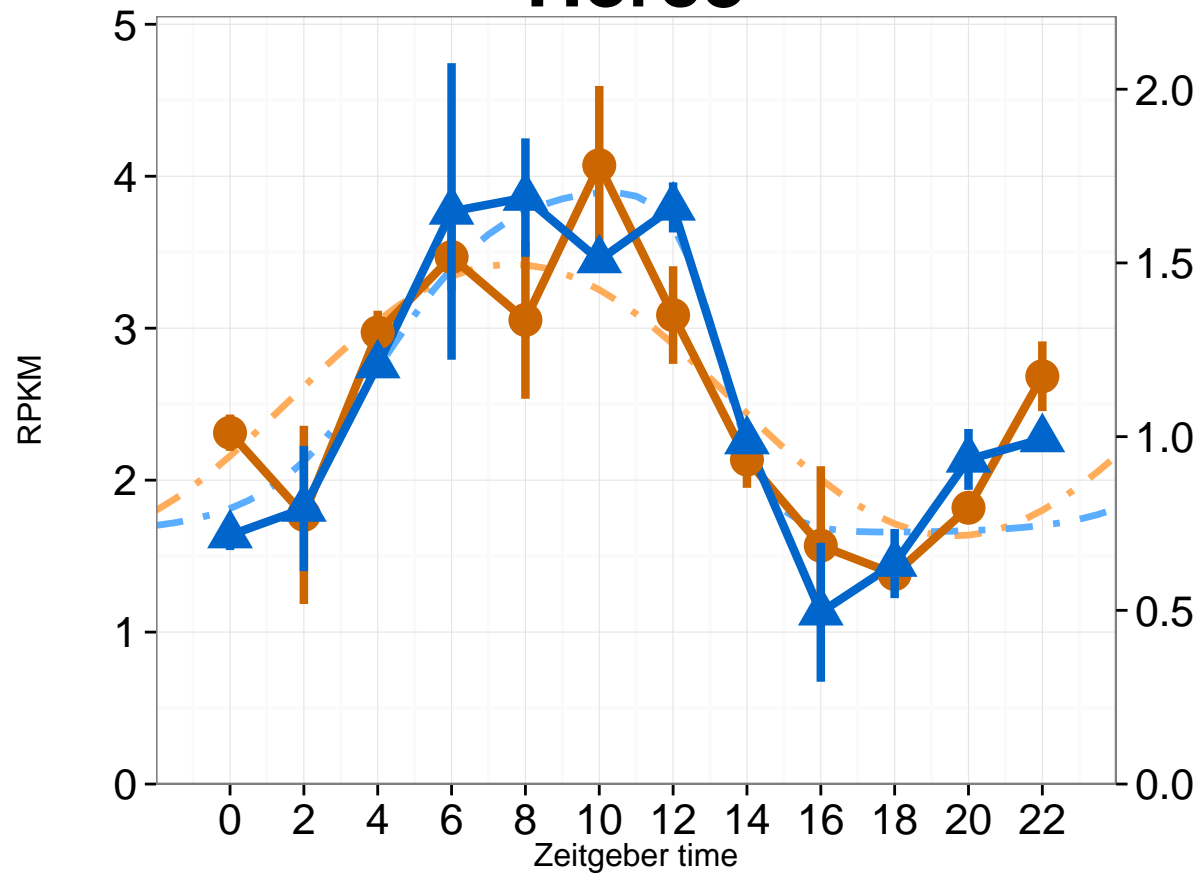

## Herc3

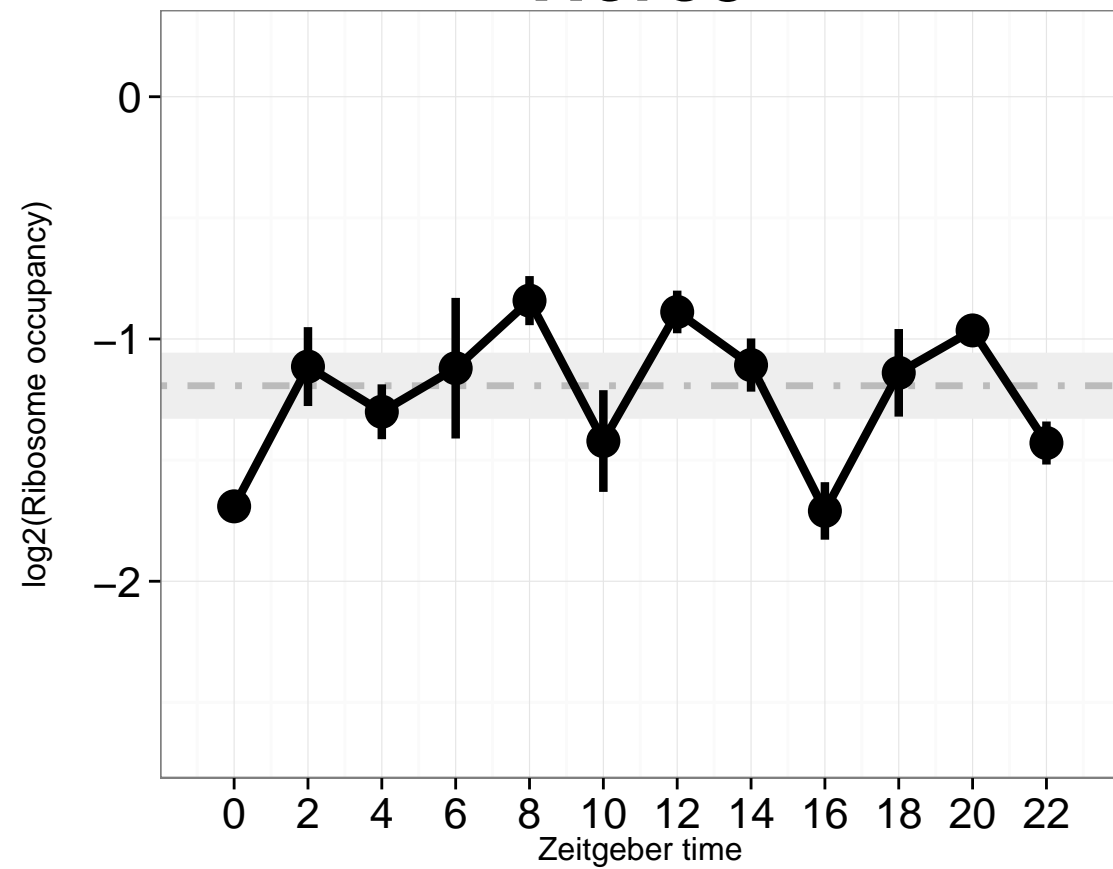

Supplement: Supplementary file 202 [file 1]

## Usp25

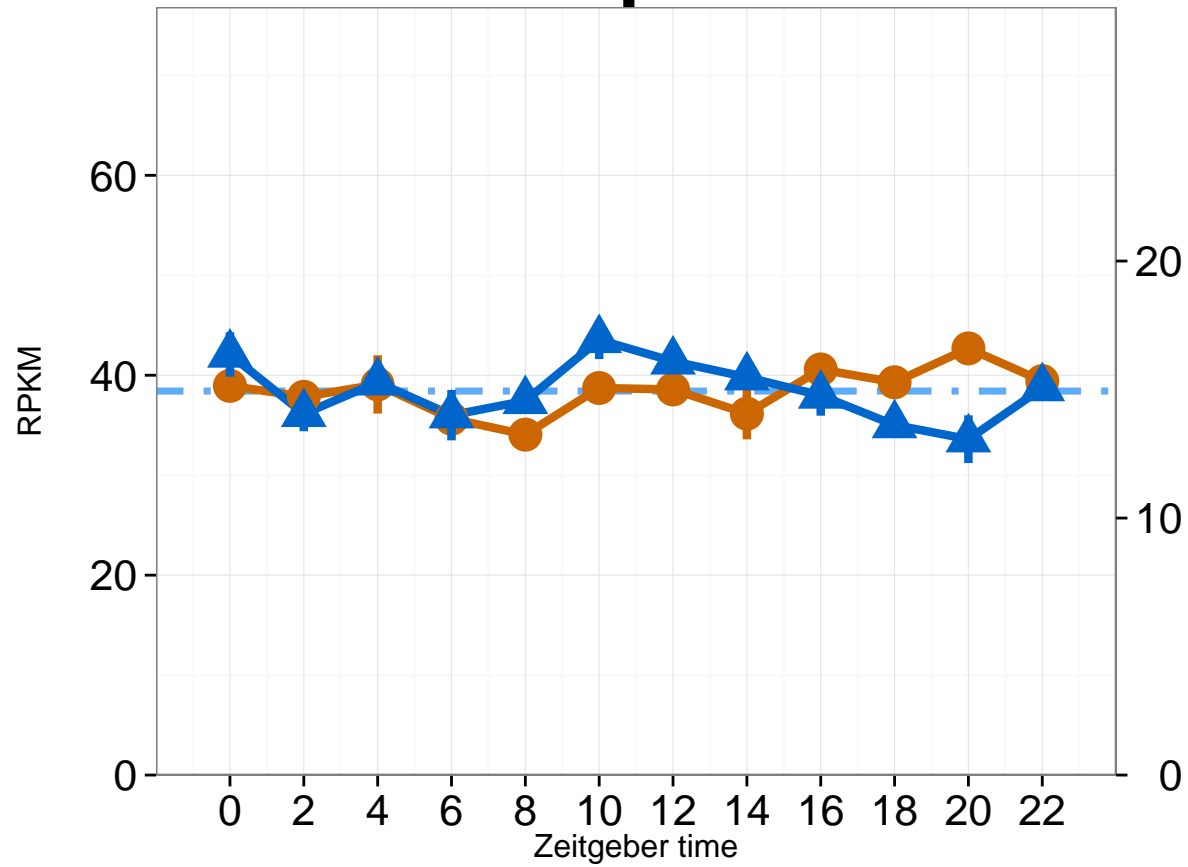

## Usp25

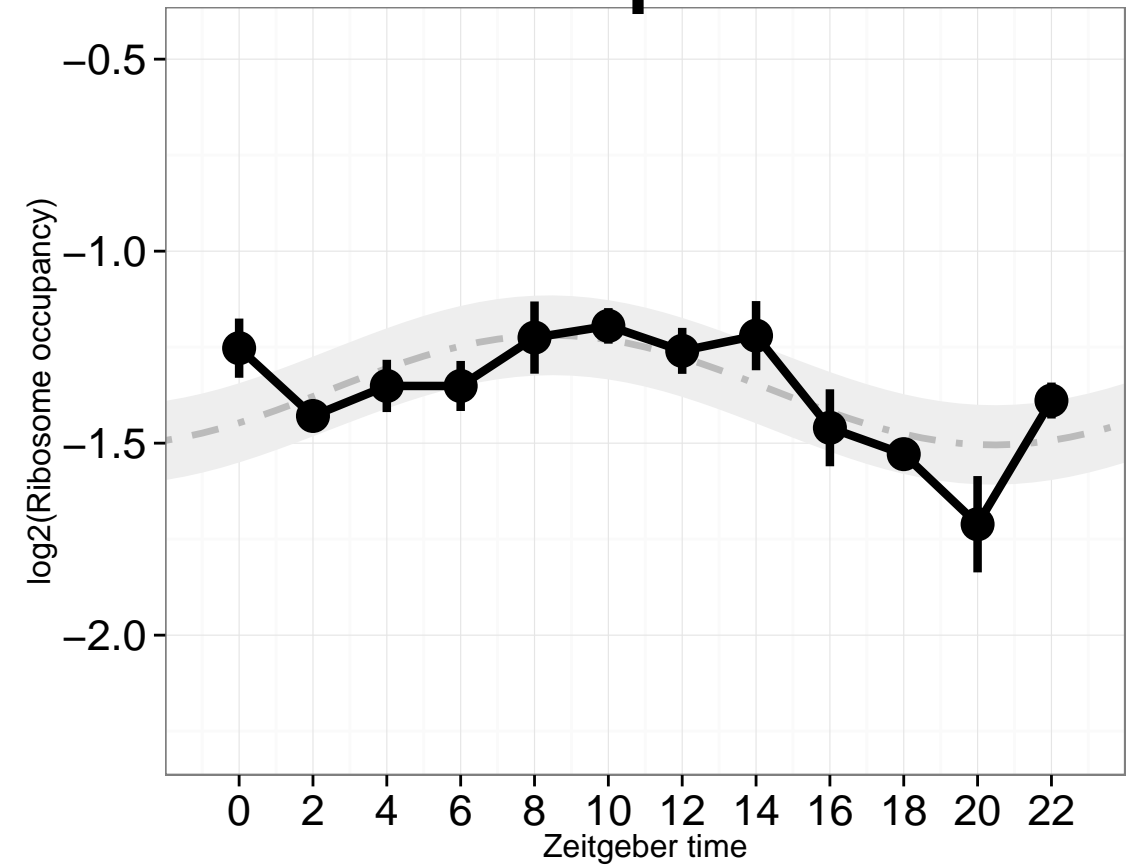

Supplement: Supplementary file 203 [file 1]

# Trip6

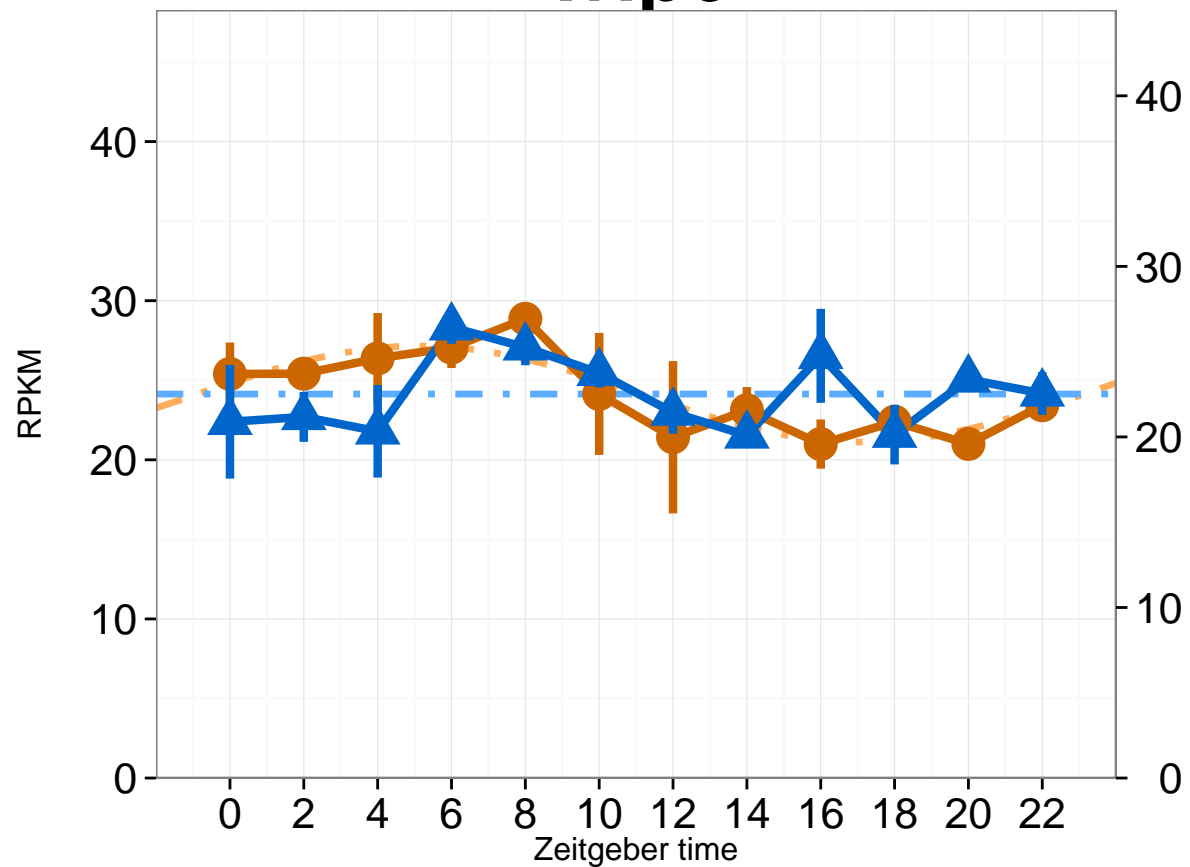

# Trip6

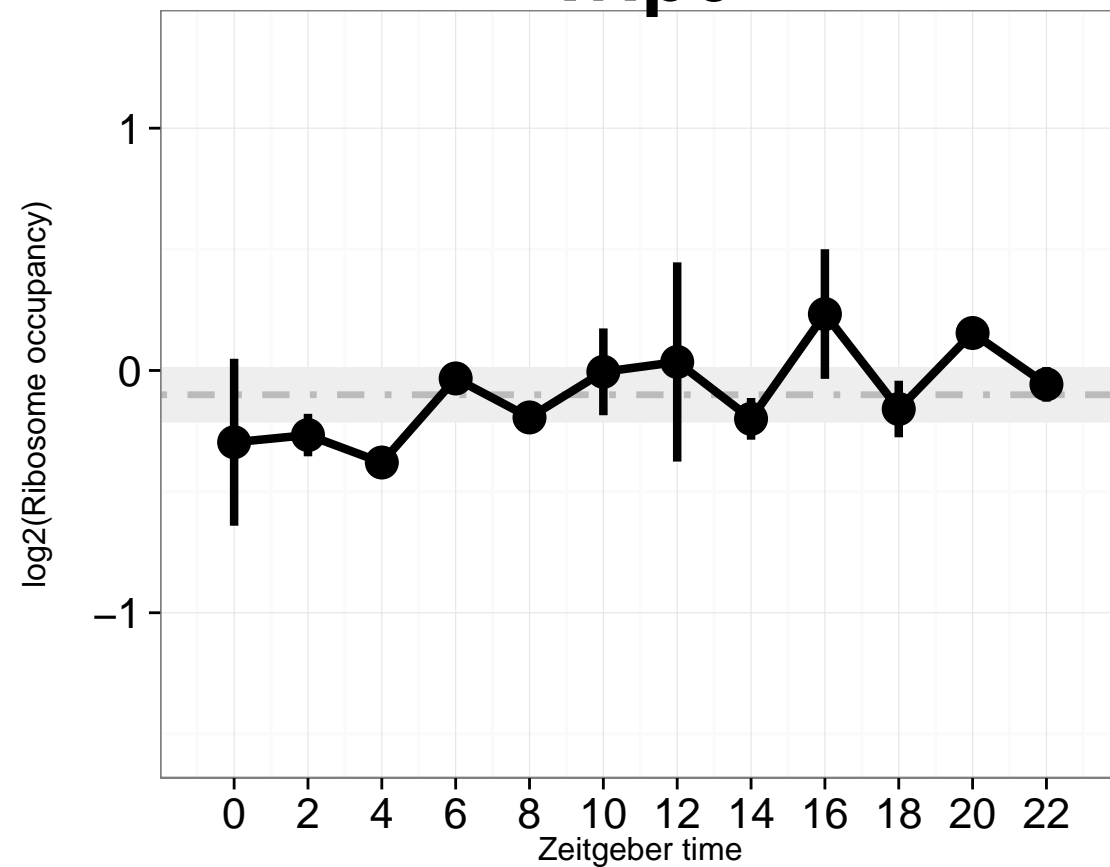

Supplement: Supplementary file 204 [file 1]

# E030030I06Rik

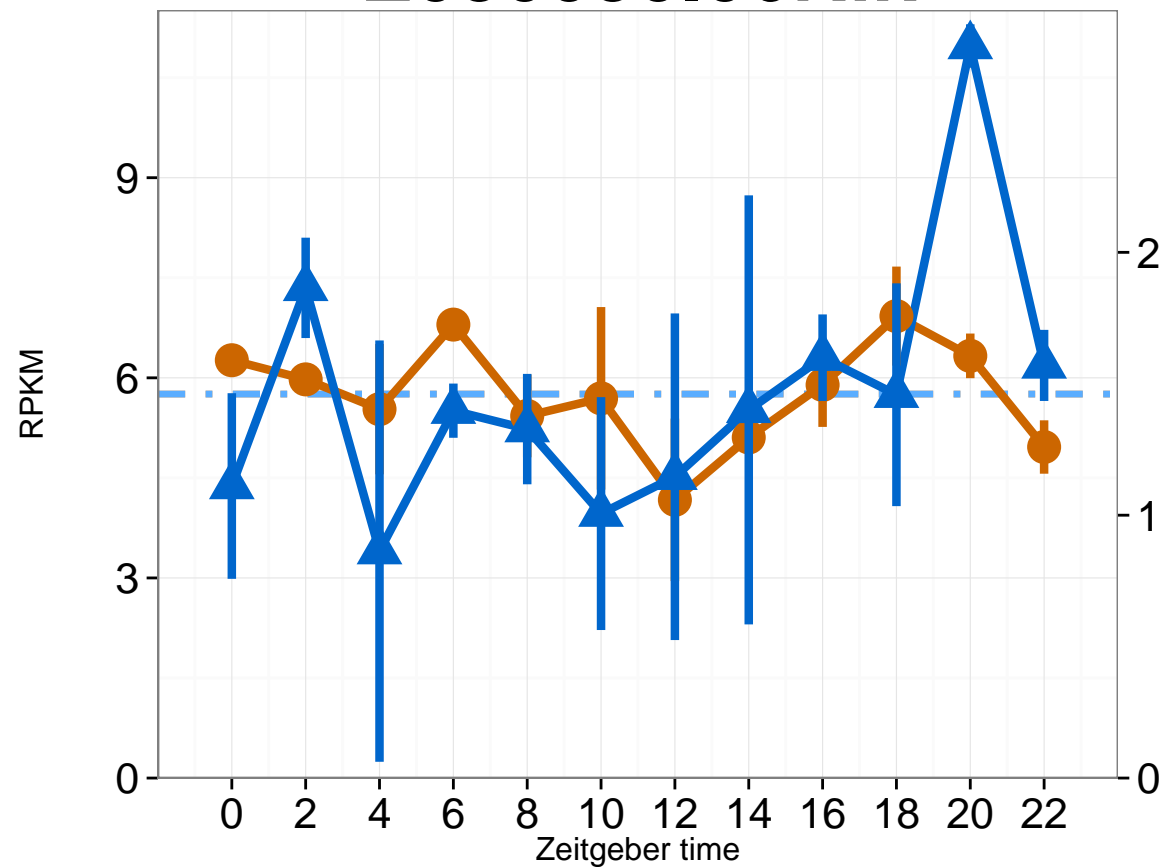

# E030030I06Rik

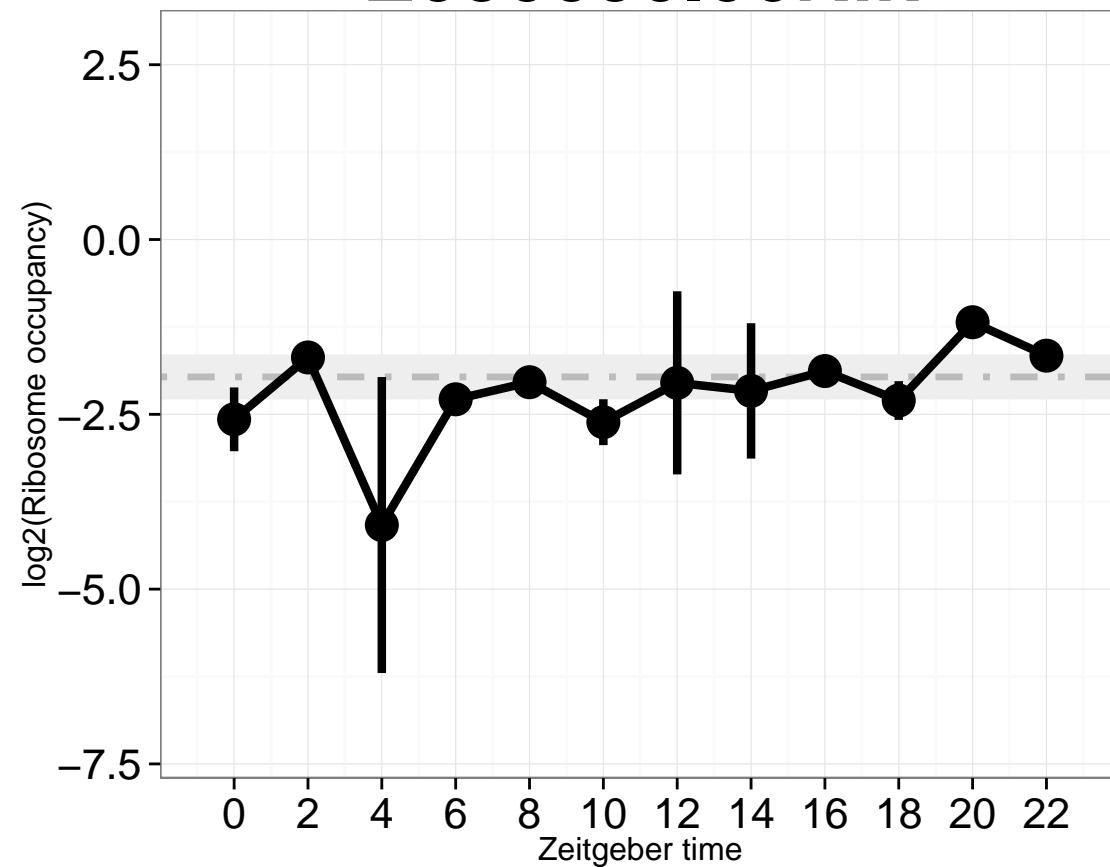

Supplement: Supplementary file 205 [file 1]

## Slc25a17

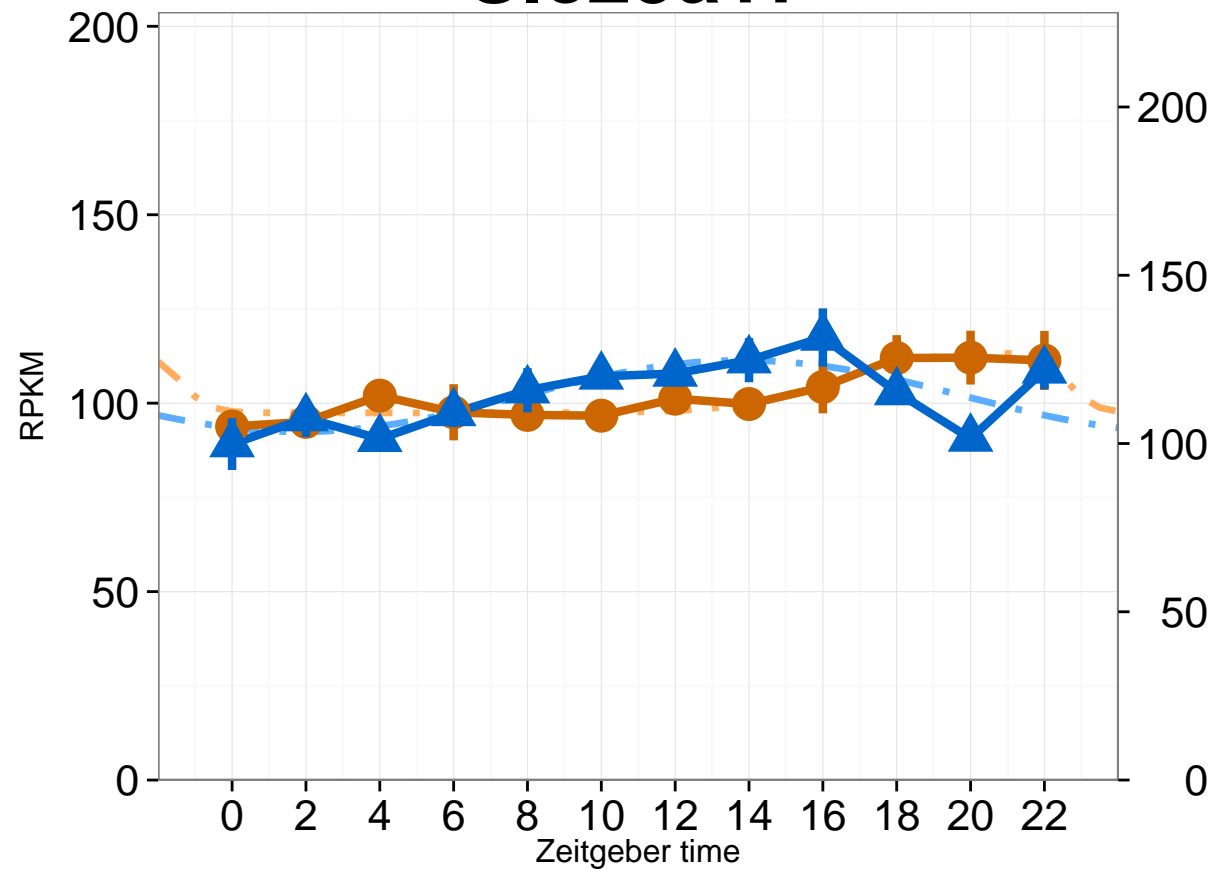

## Slc25a17

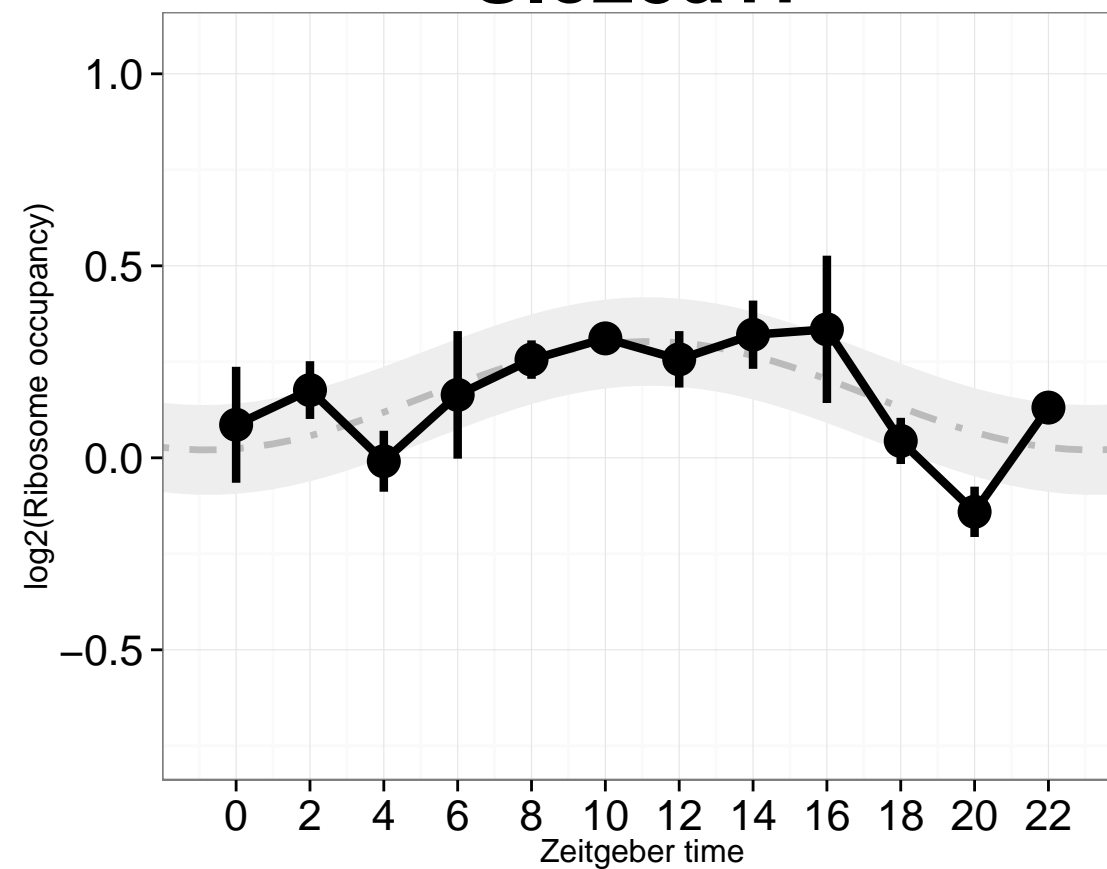

Supplement: Supplementary file 206 [file 1]

## Oasl2

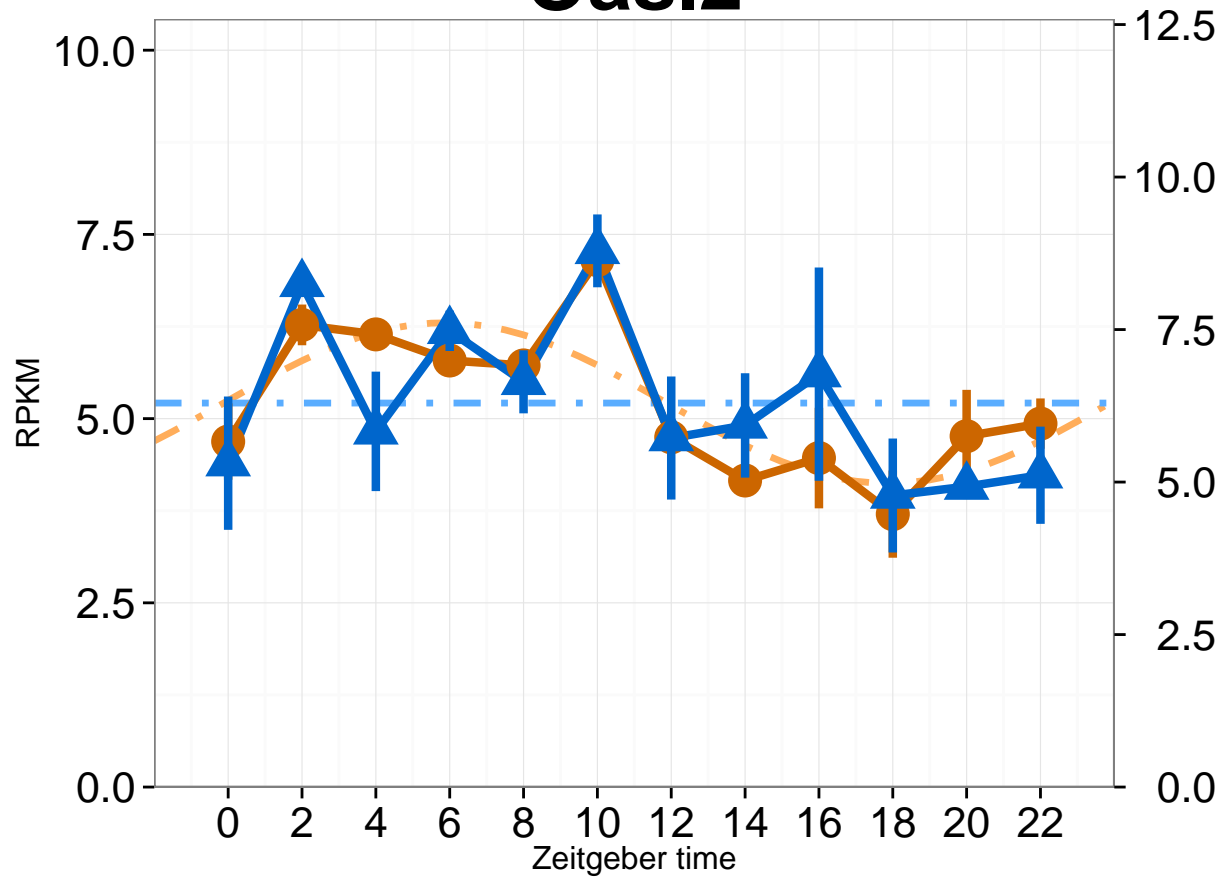

## Oasl2

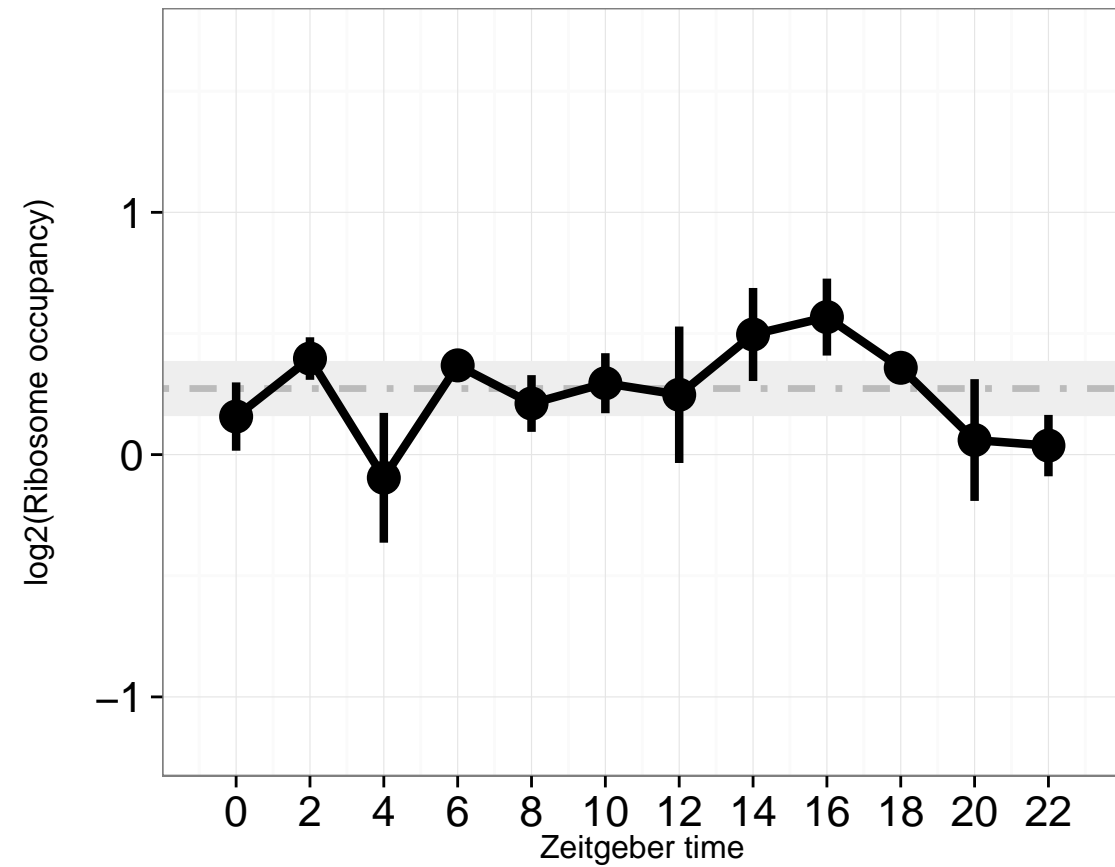

Supplement: Supplementary file 207 [file 1]

## Slc12a3

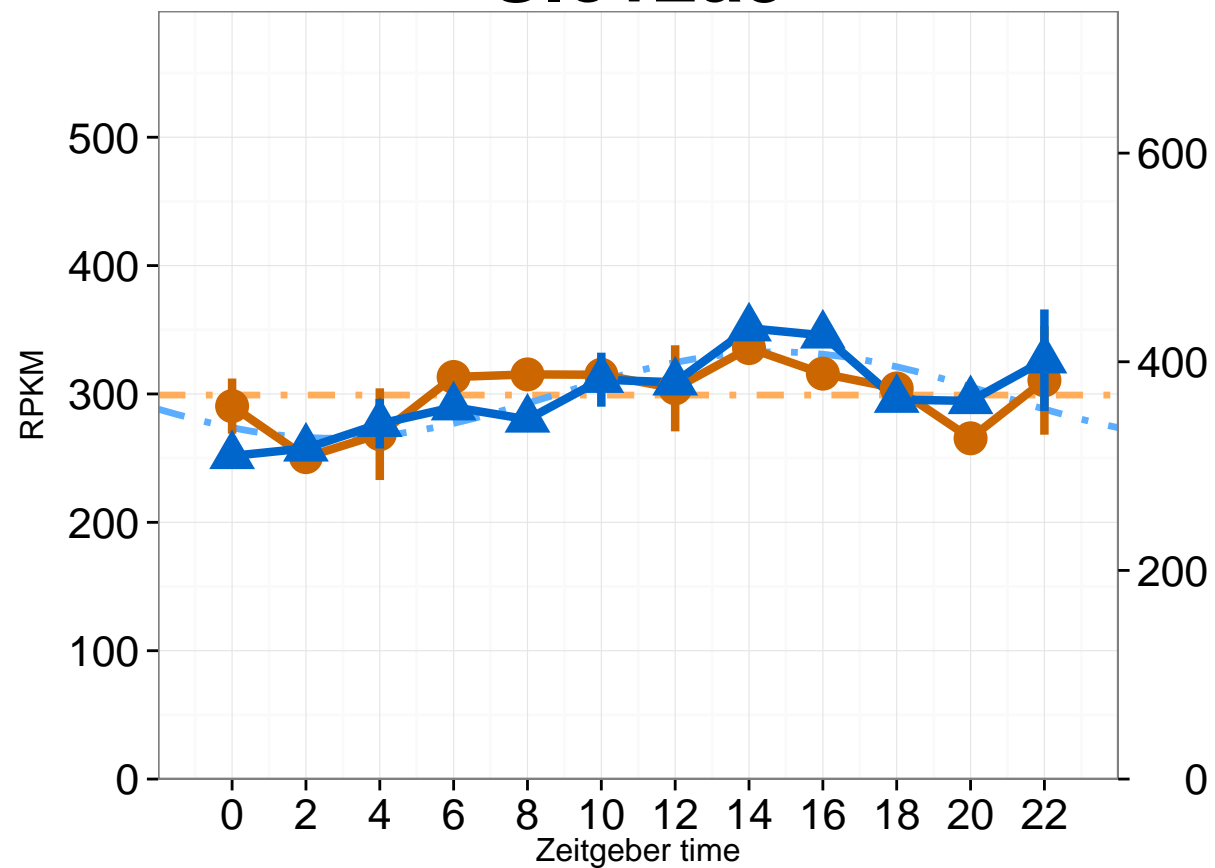

## Slc12a3

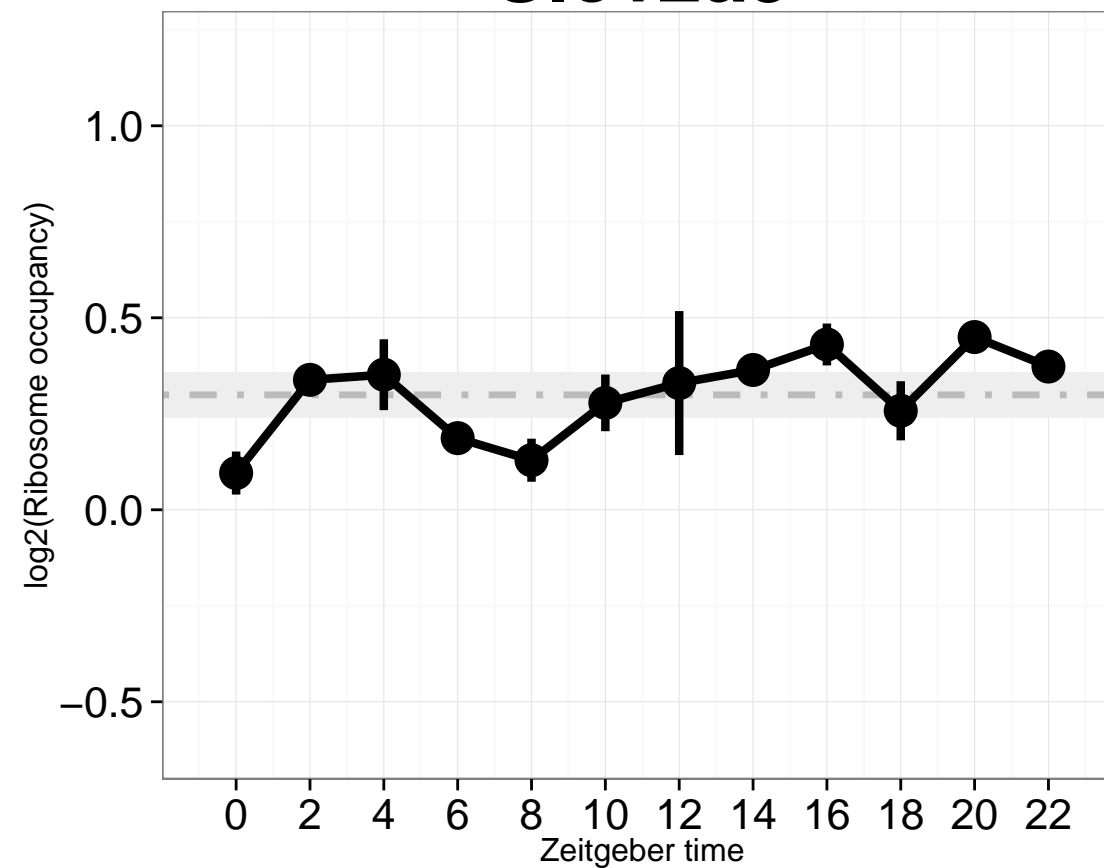

Supplement: Supplementary file 208 [file 1]

# Trim35

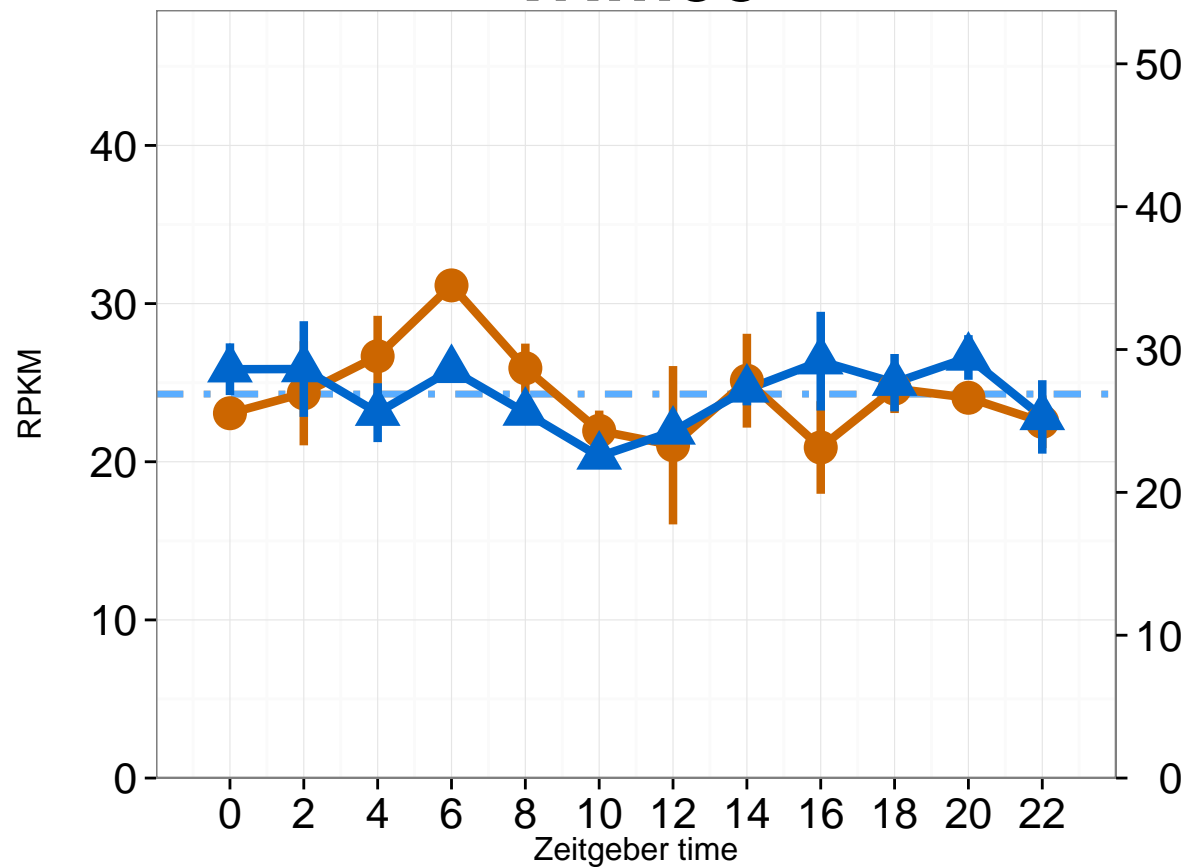

# Trim35

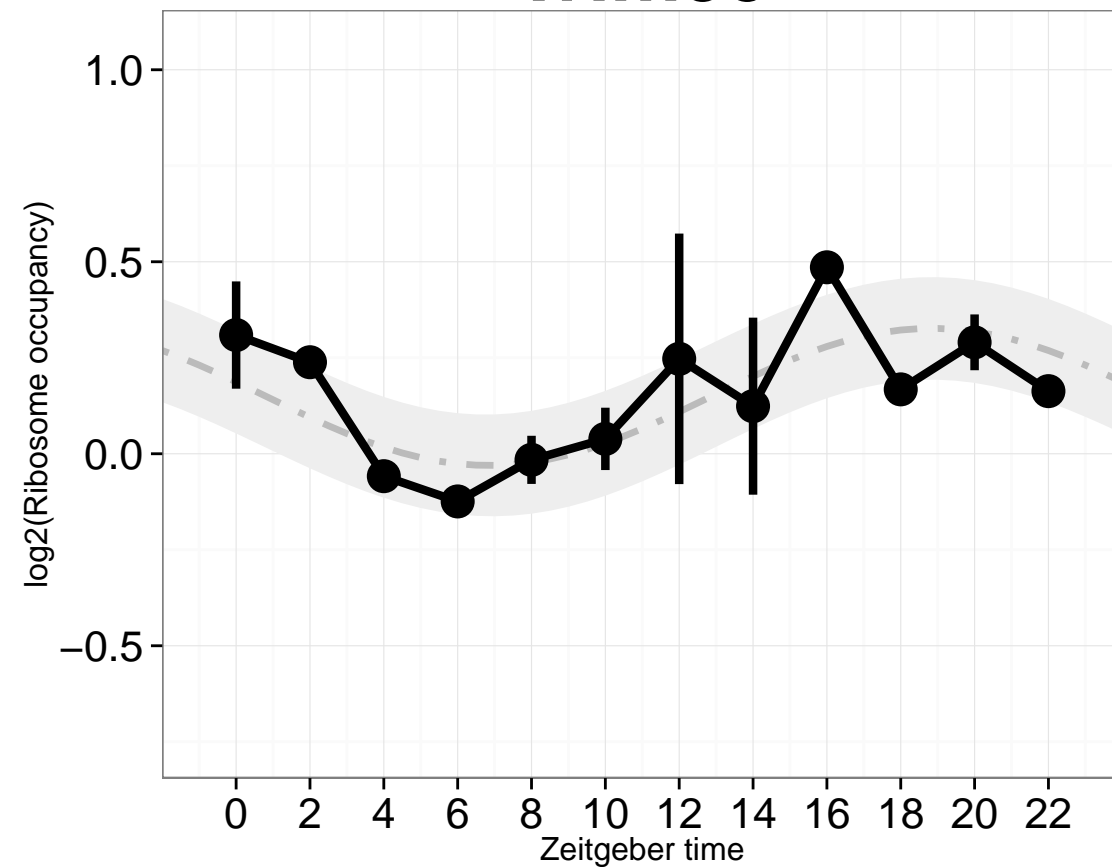

Supplement: Supplementary file 209 [file 1]

## Phkb

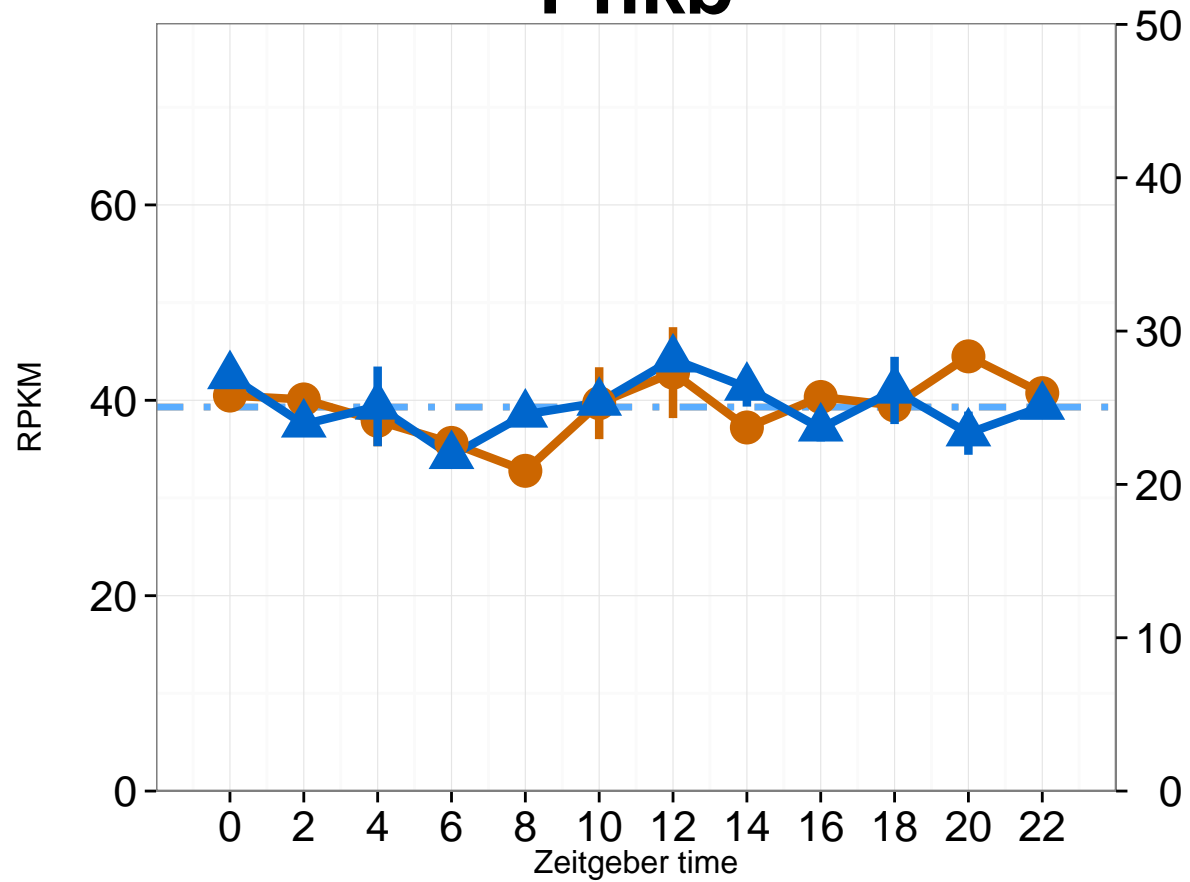

## Phkb

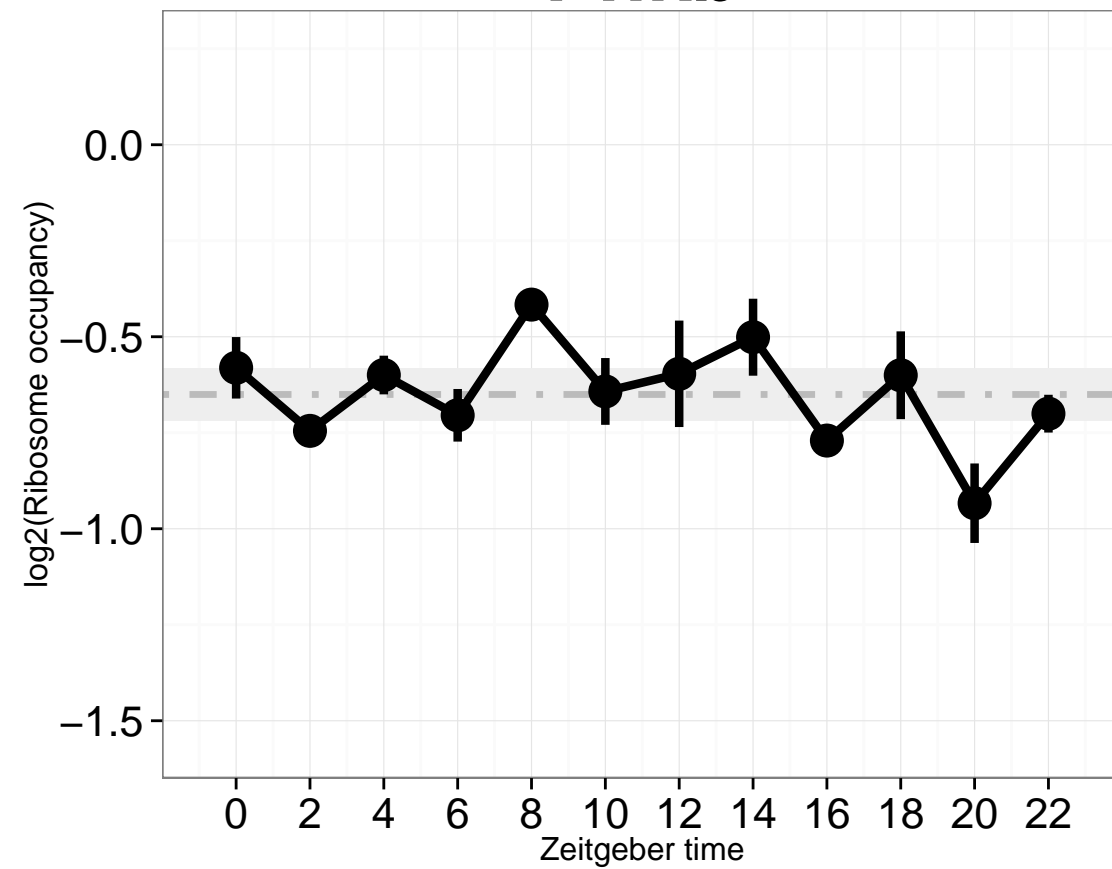

Supplement: Supplementary file 210 [file 1]

## Cd83

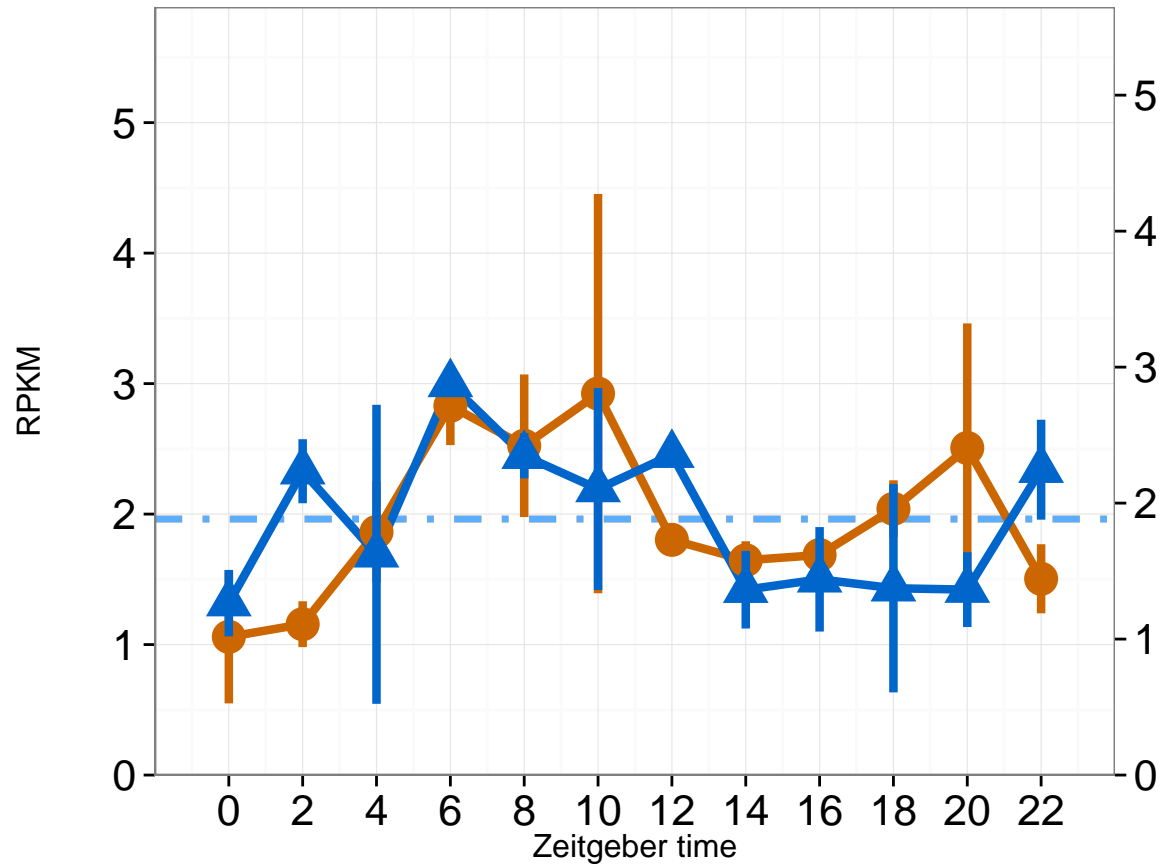

## Cd83

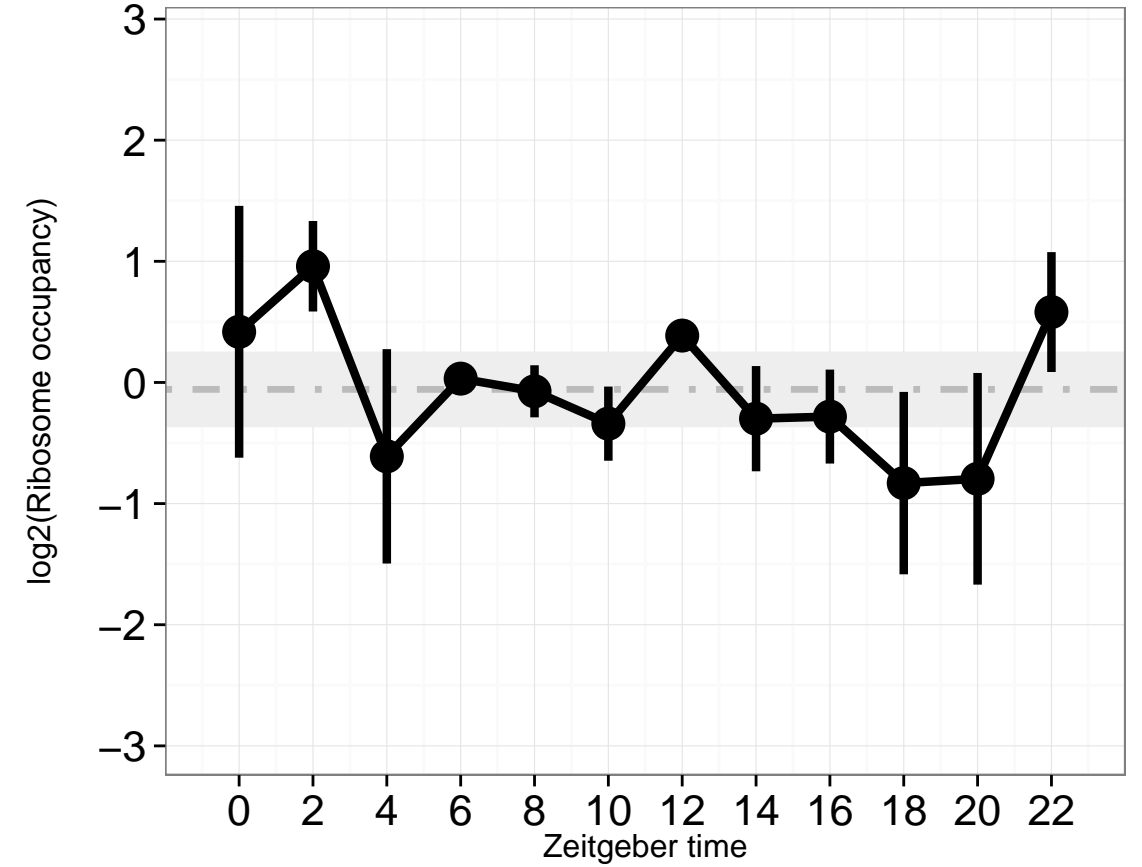

Supplement: Supplementary file 211 [file 1]

## Ppard

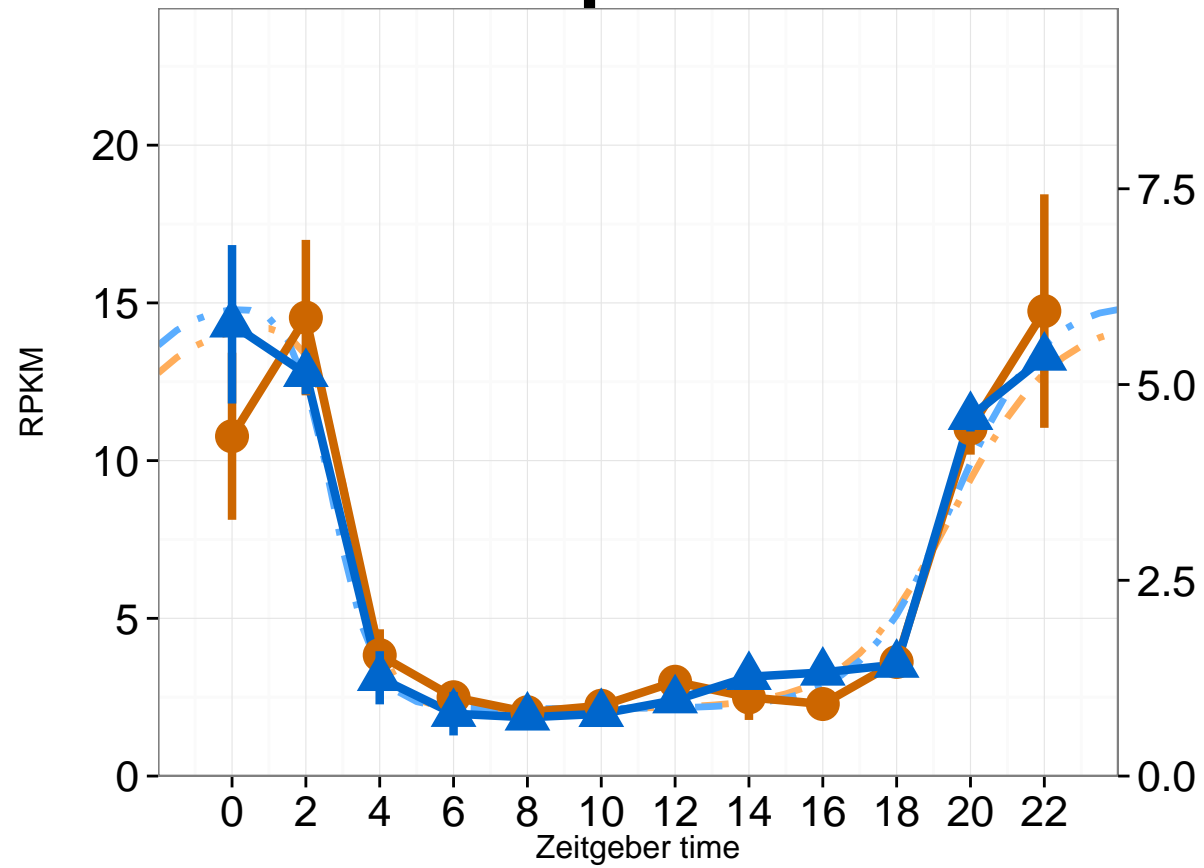

## Ppard

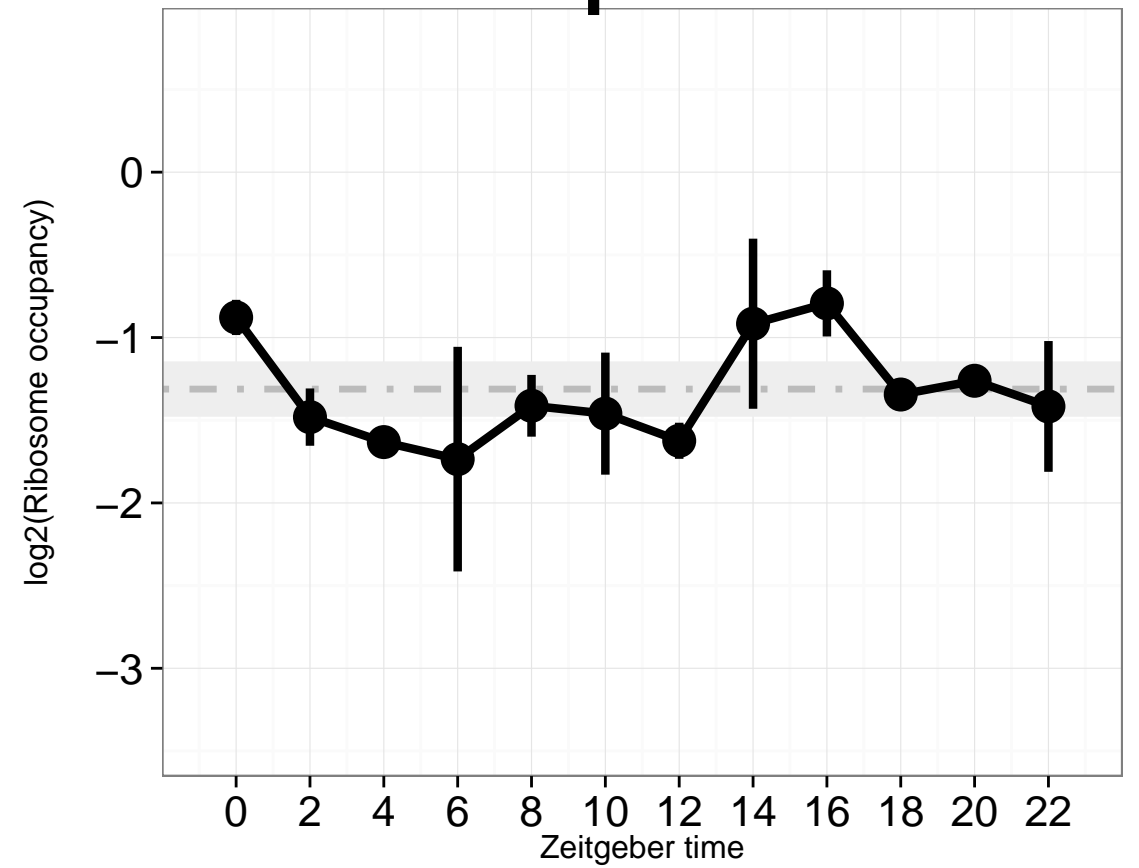

Supplement: Supplementary file 212 [file 1]

## Fabp3

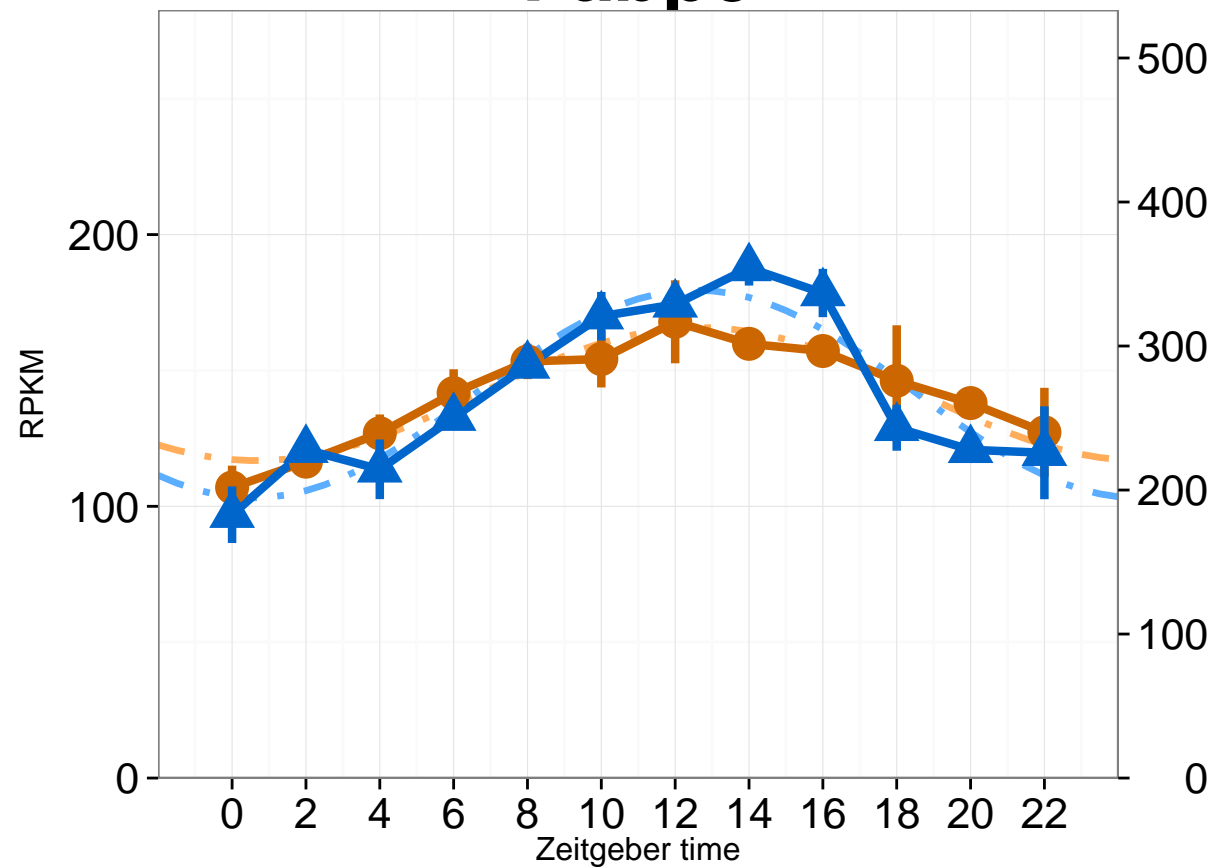

## Fabp3

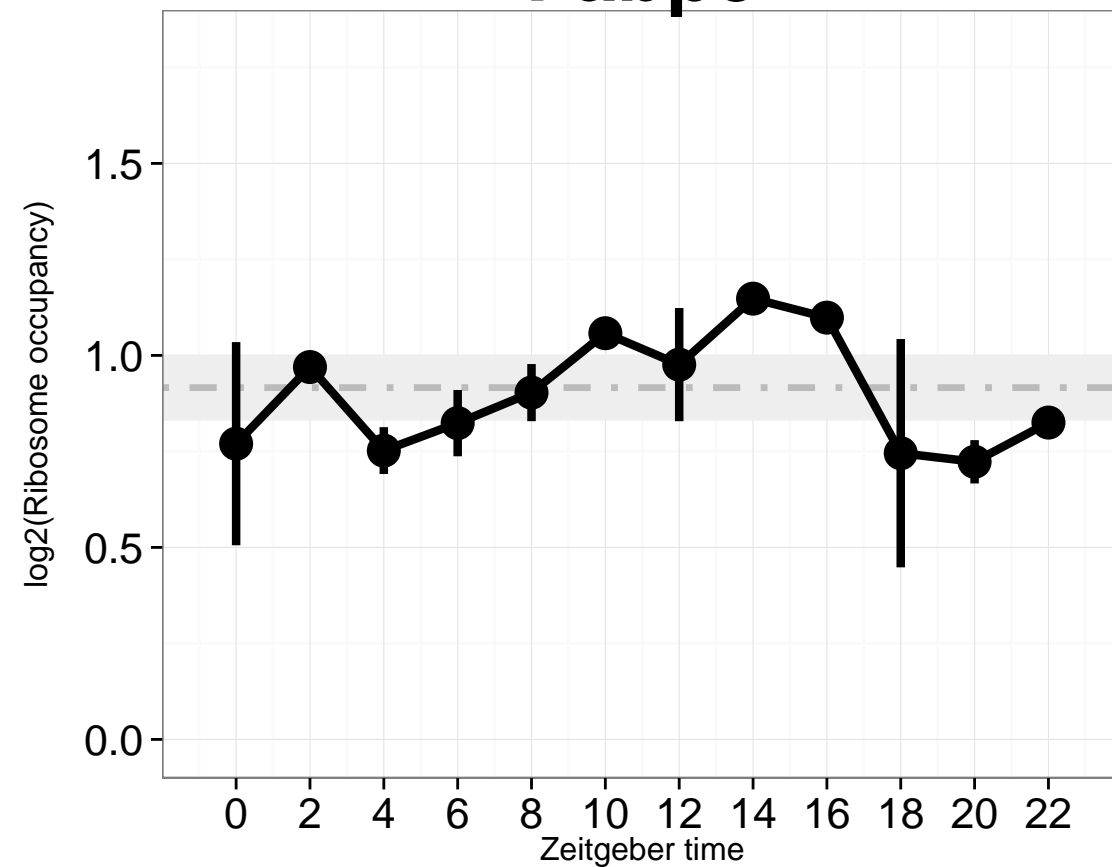

Supplement: Supplementary file 213 [file 1]

## Ehmt1

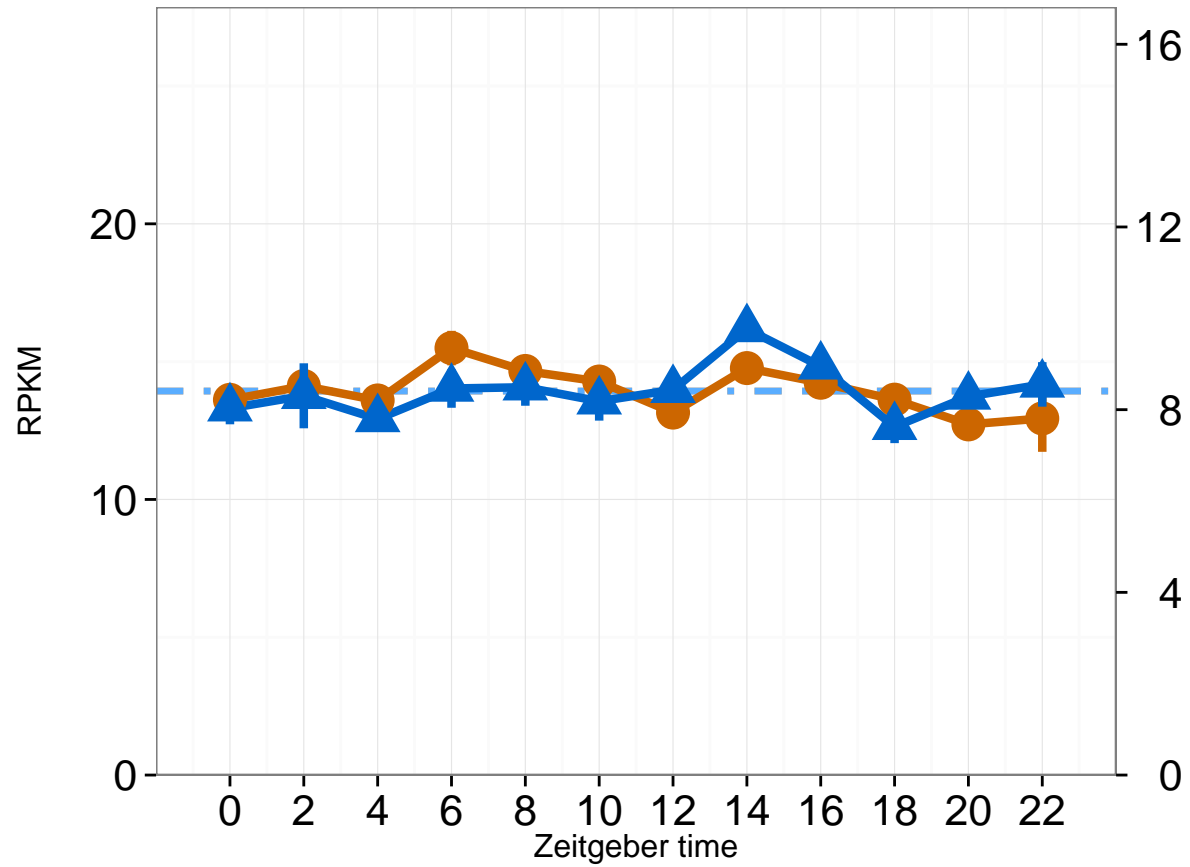

## Ehmt1

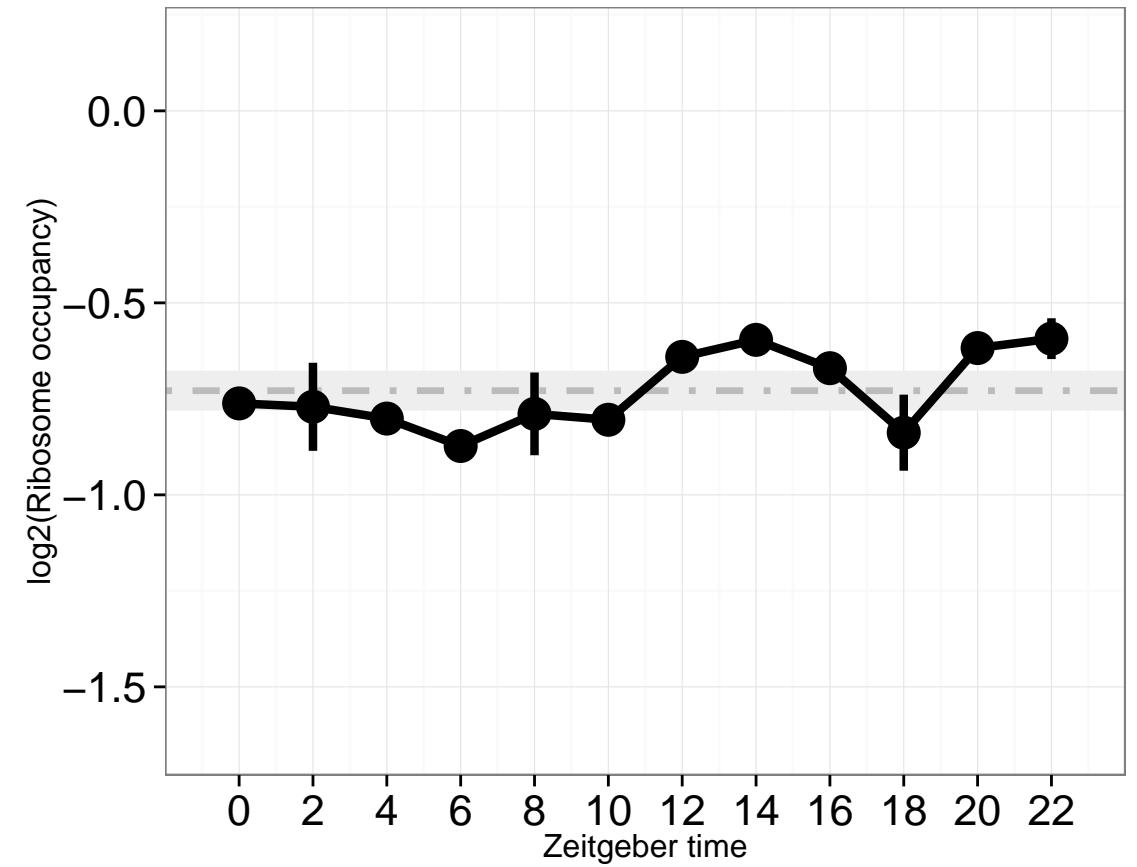

Supplement: Supplementary file 214 [file 1]

## Dhx8

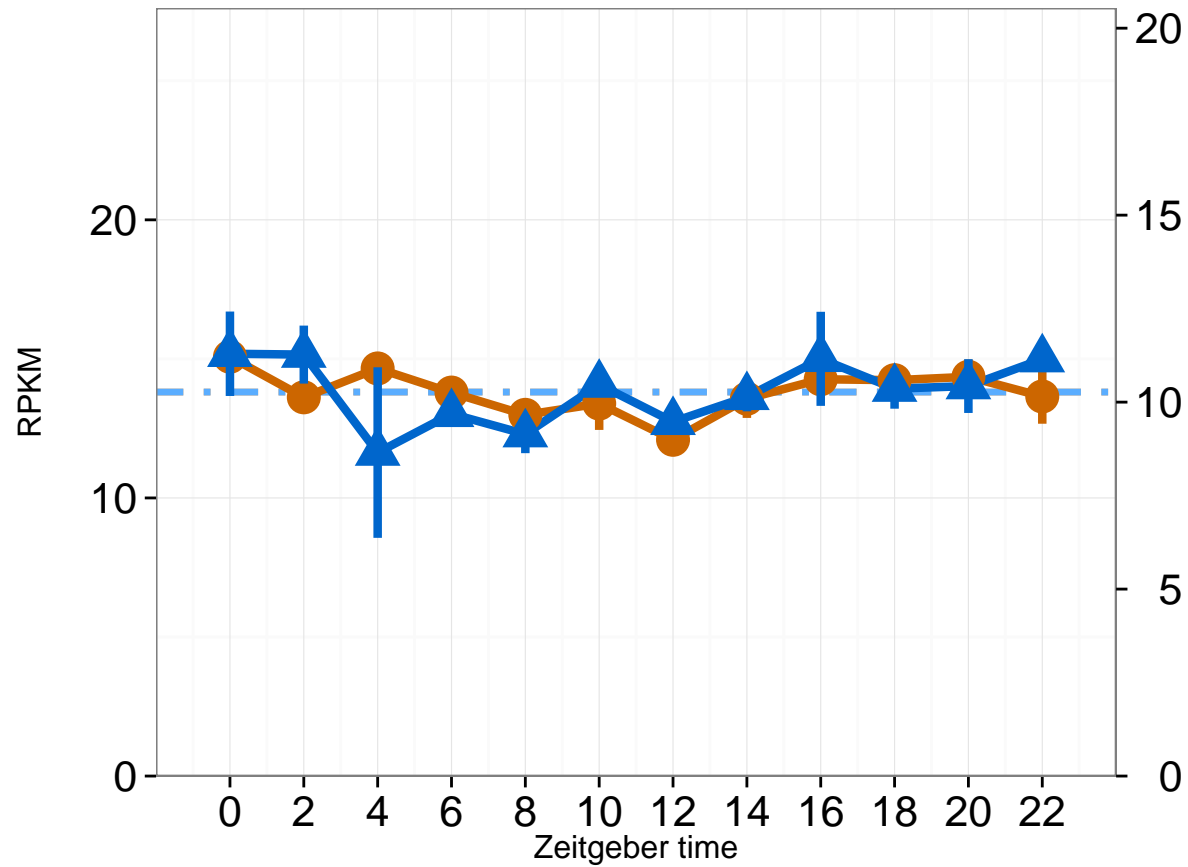

## Dhx8

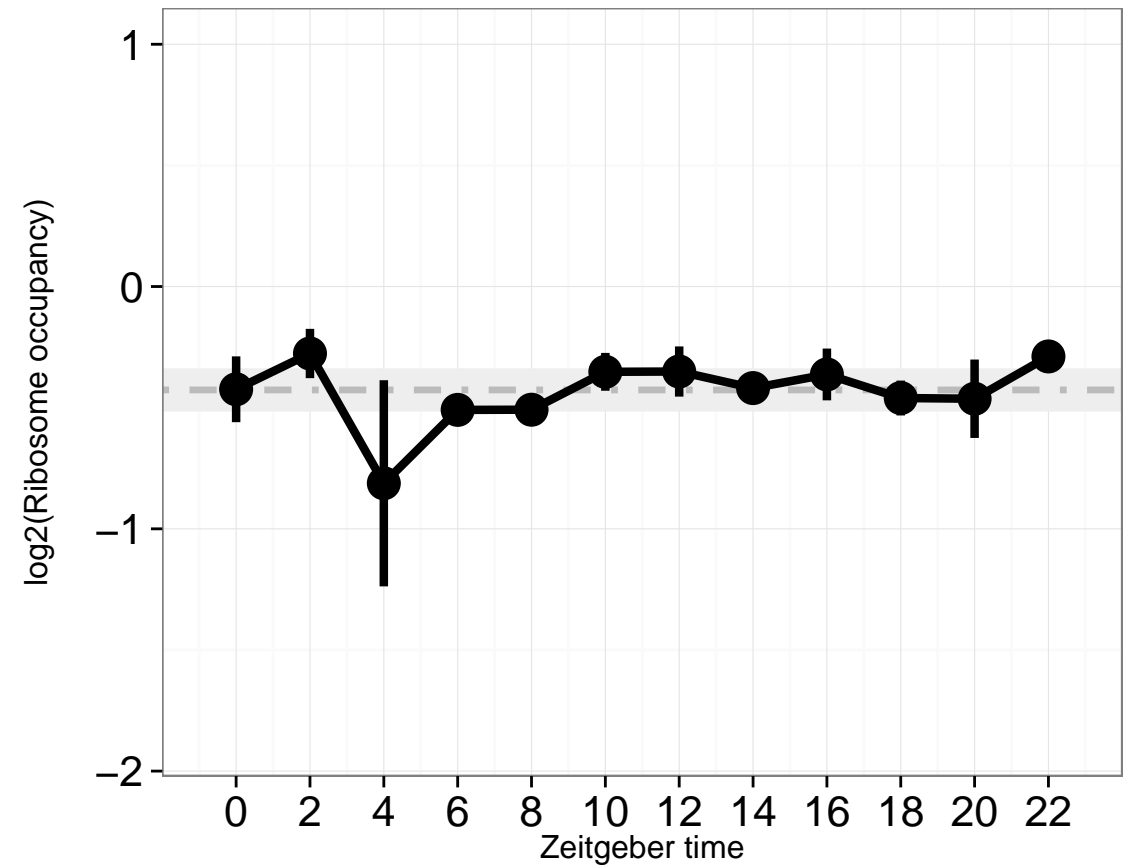

Supplement: Supplementary file 215 [file 1]

## Gss

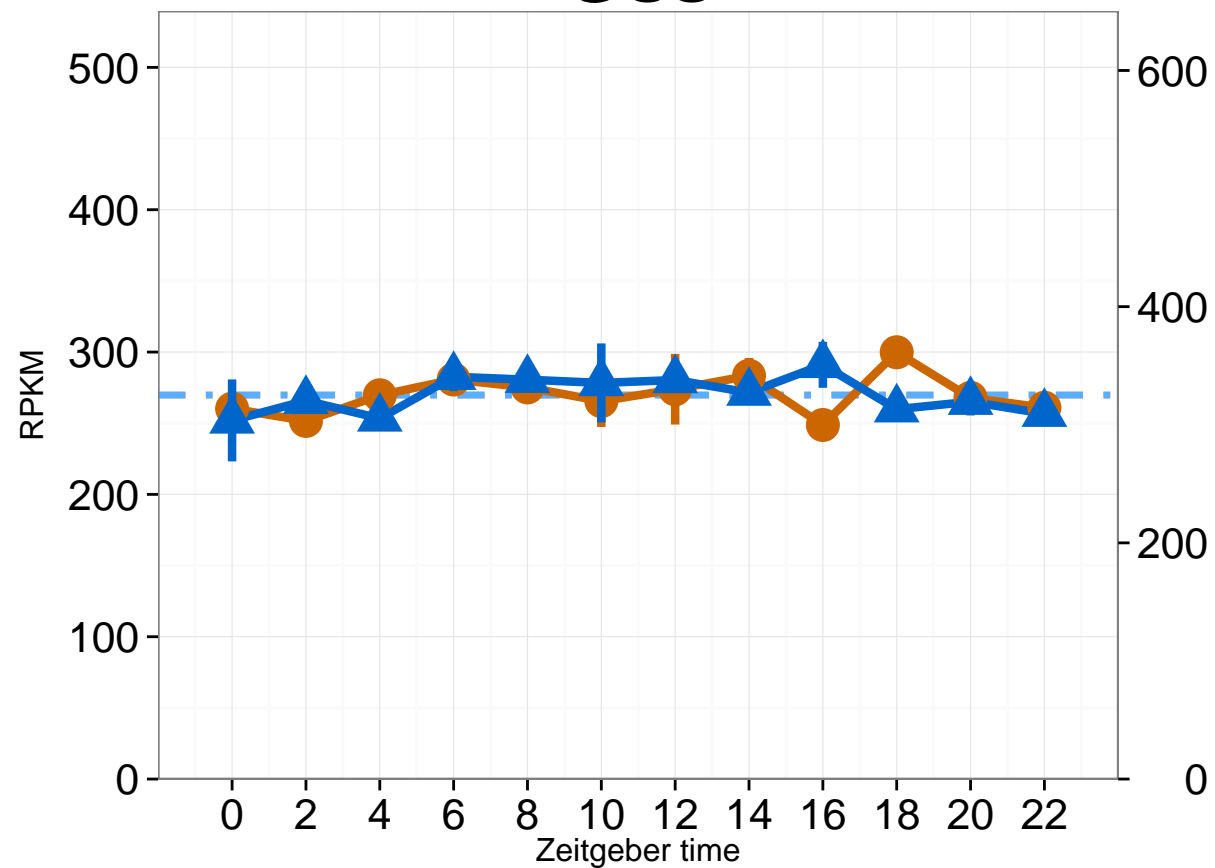

## Gss

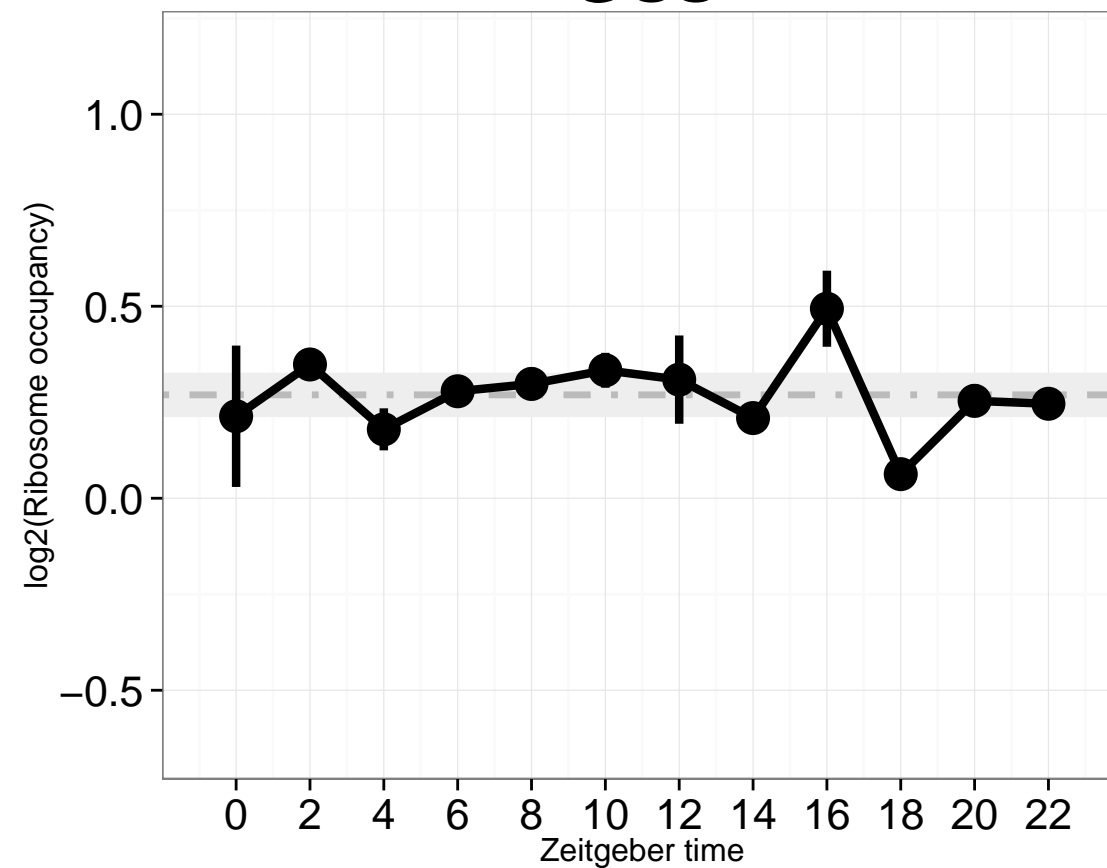

Supplement: Supplementary file 216 [file 1]

# Mapre2

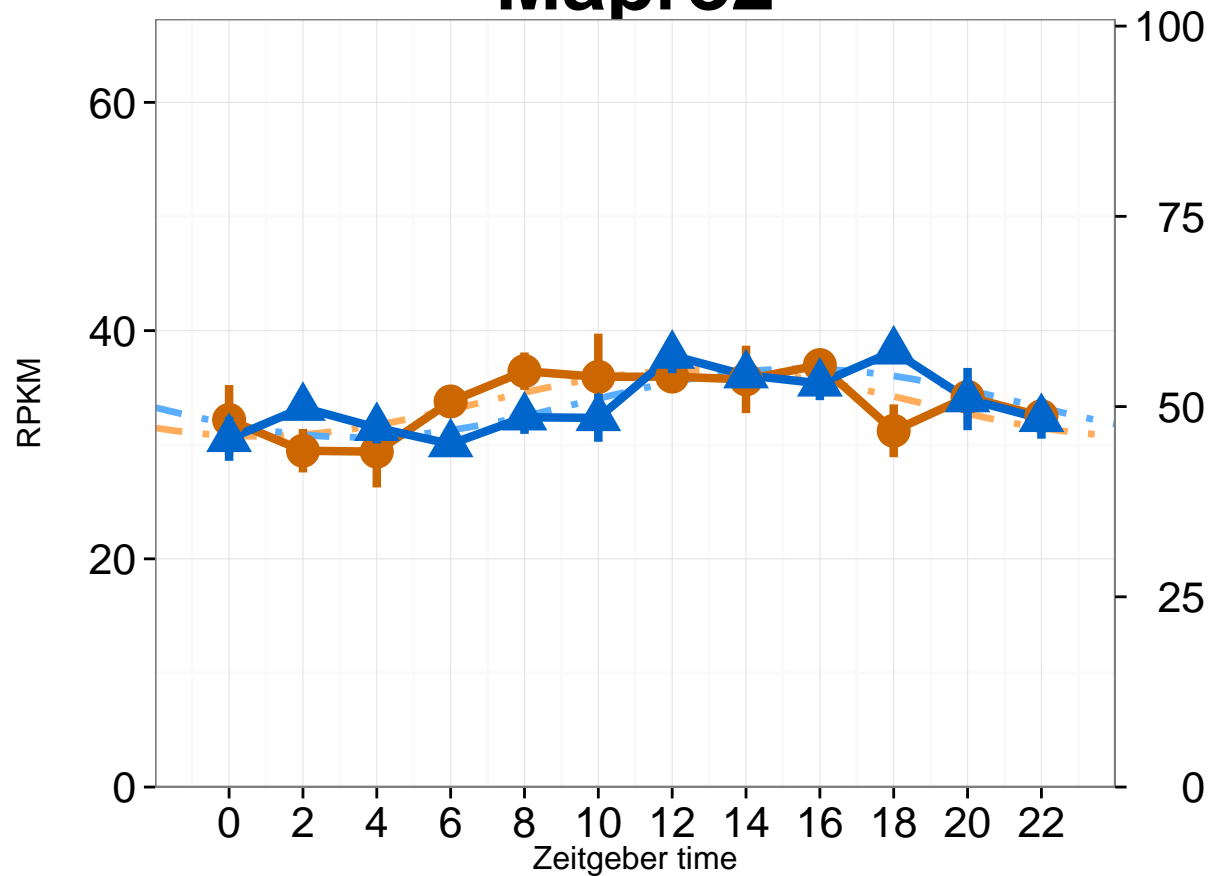

# Mapre2

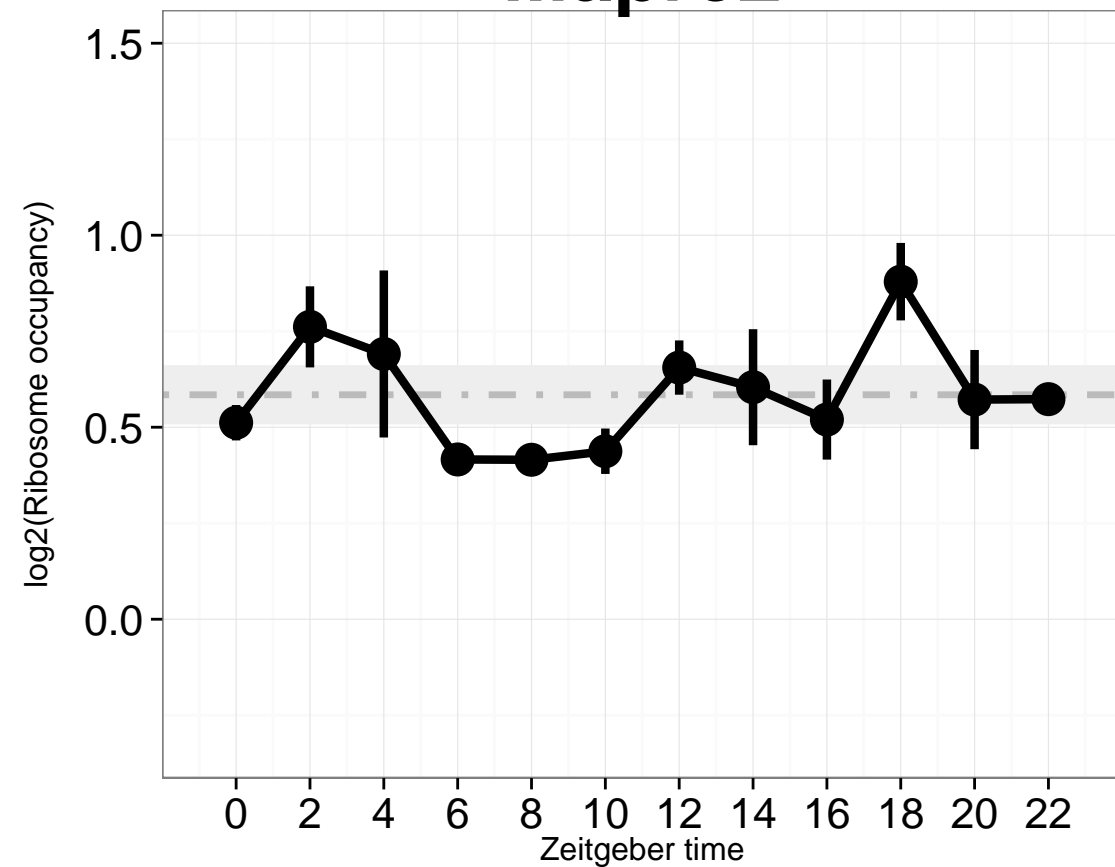

Supplement: Supplementary file 217 [file 1]

# Ext1

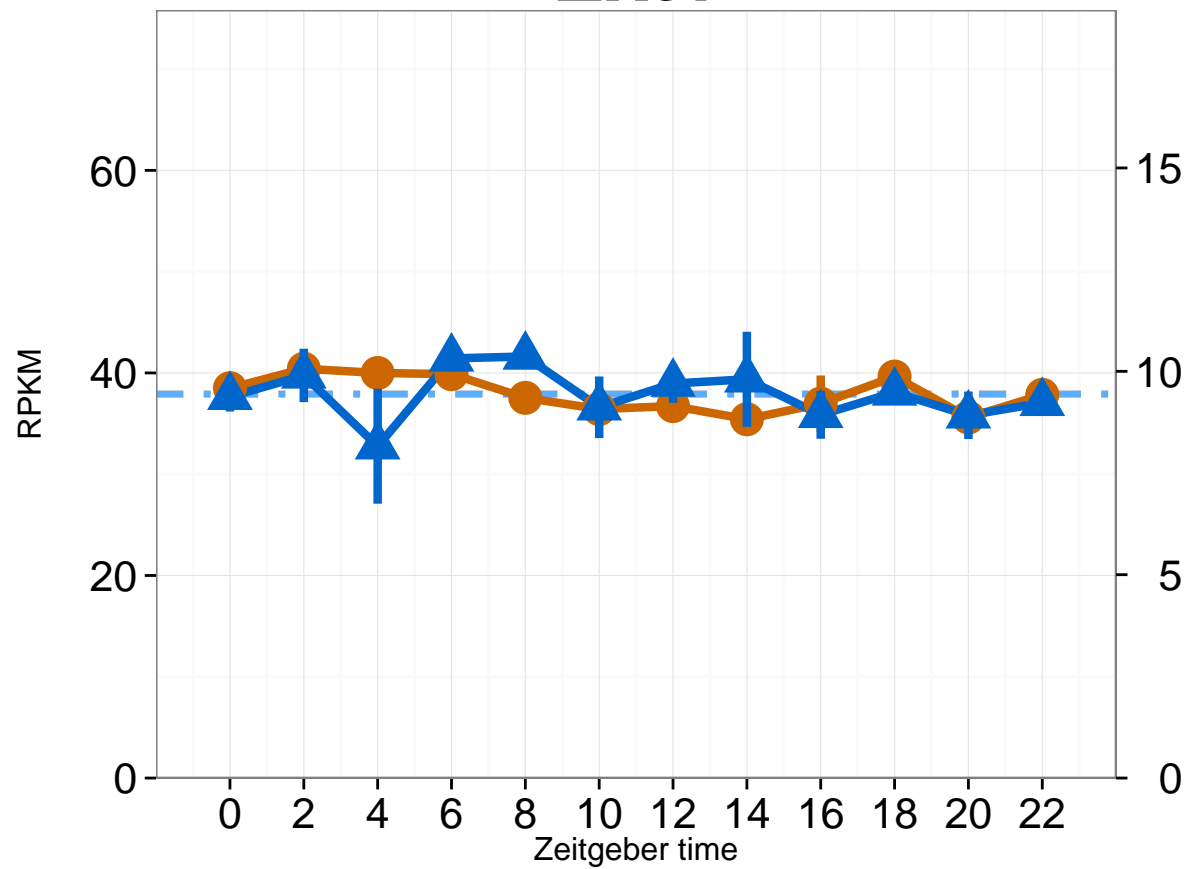

# Ext1

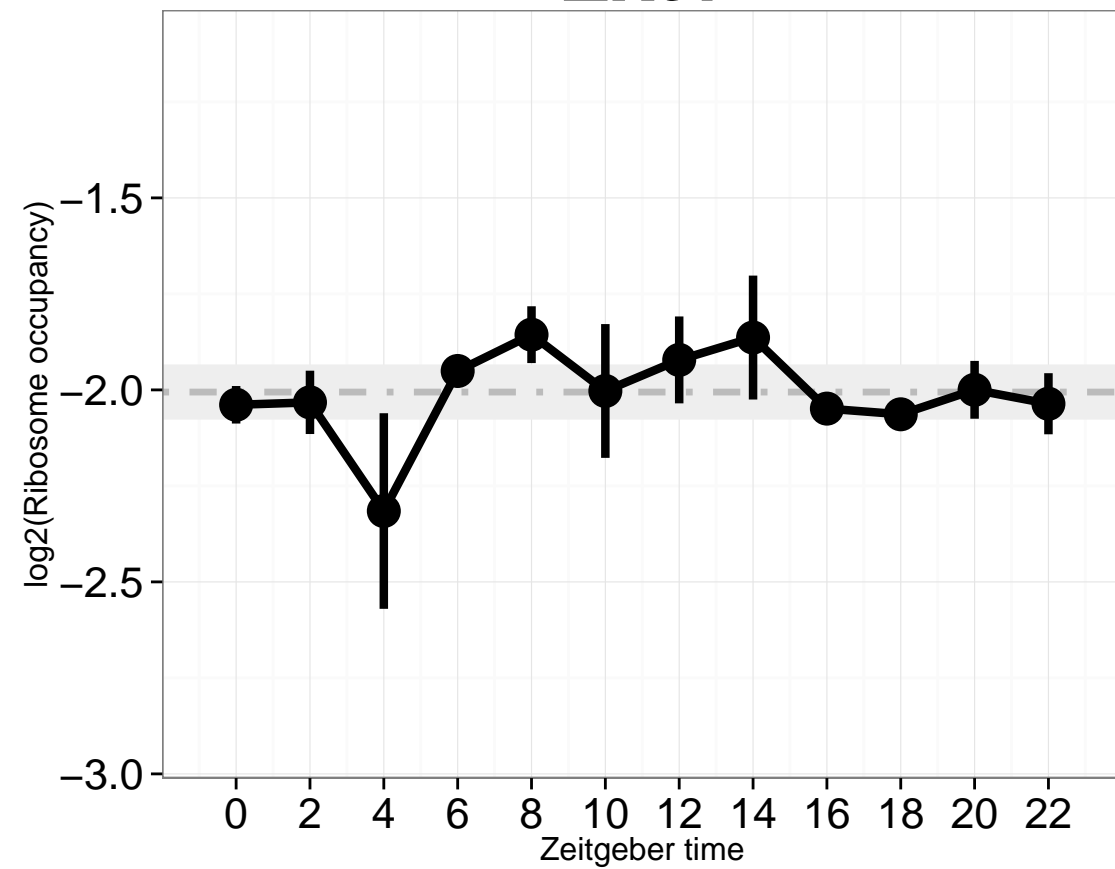

Supplement: Supplementary file 218 [file 1]

## Myo6

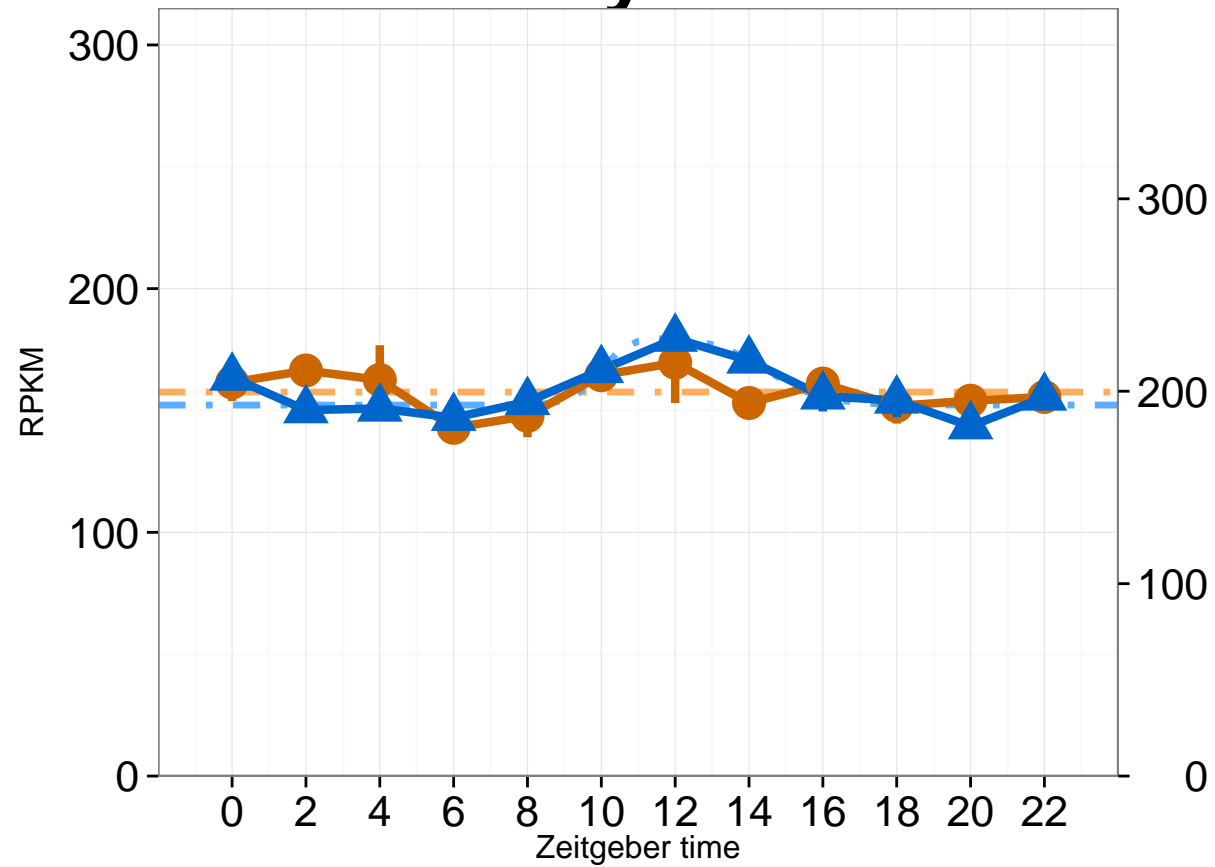

## Myo6

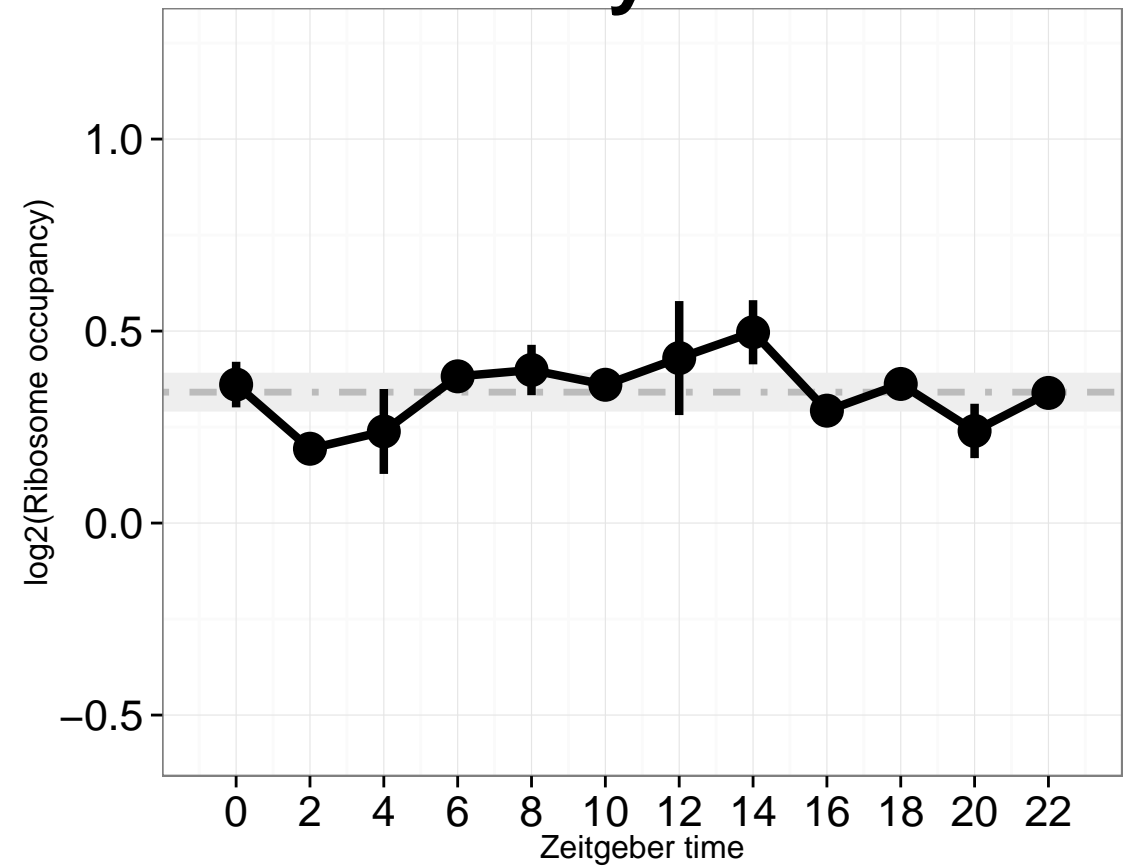

Supplement: Supplementary file 219 [file 1]

## Cdc25b

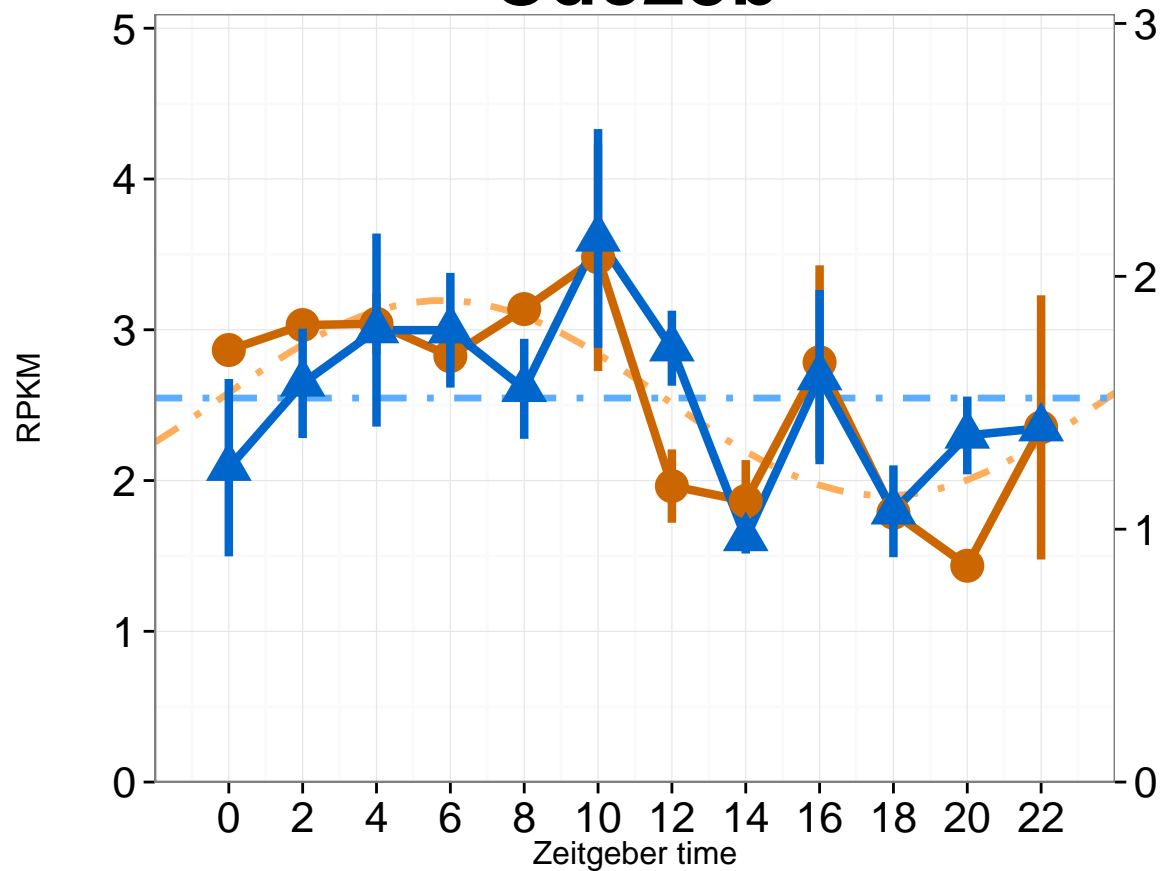

## Cdc25b

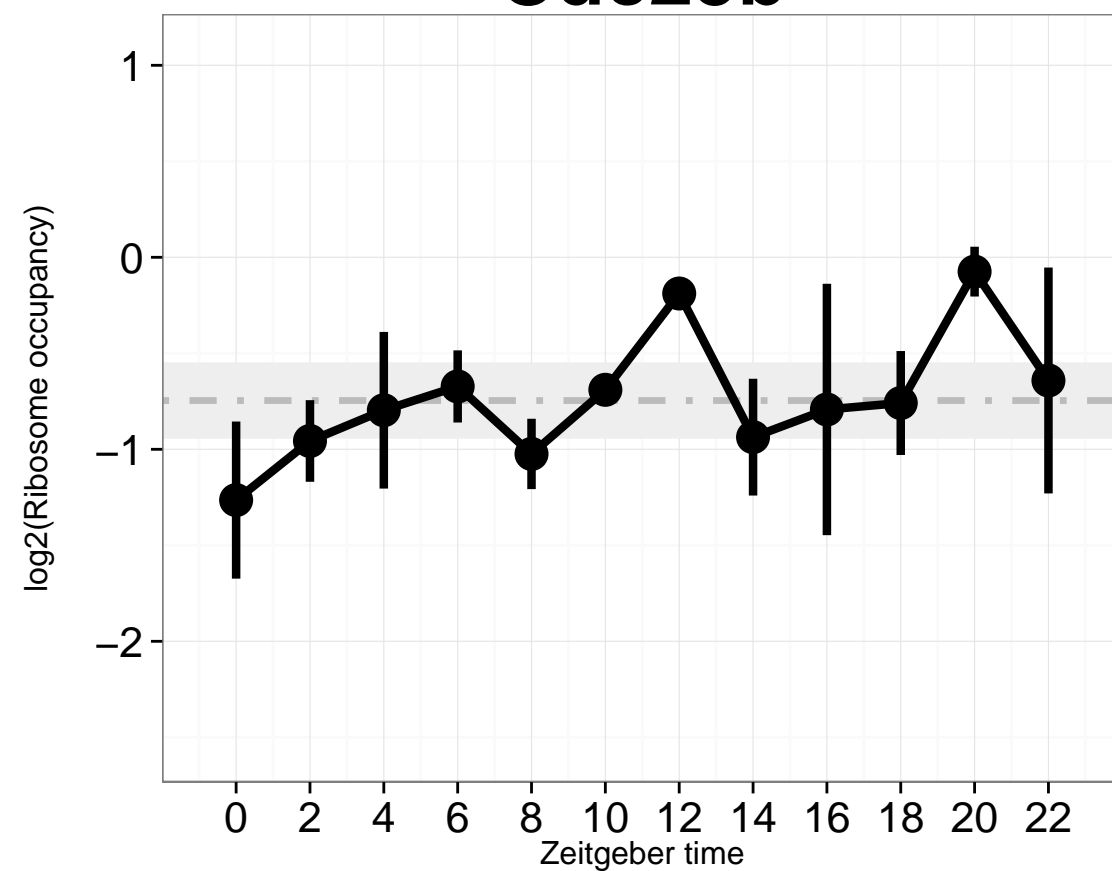

Supplement: Supplementary file 220 [file 1]

## Itpr2

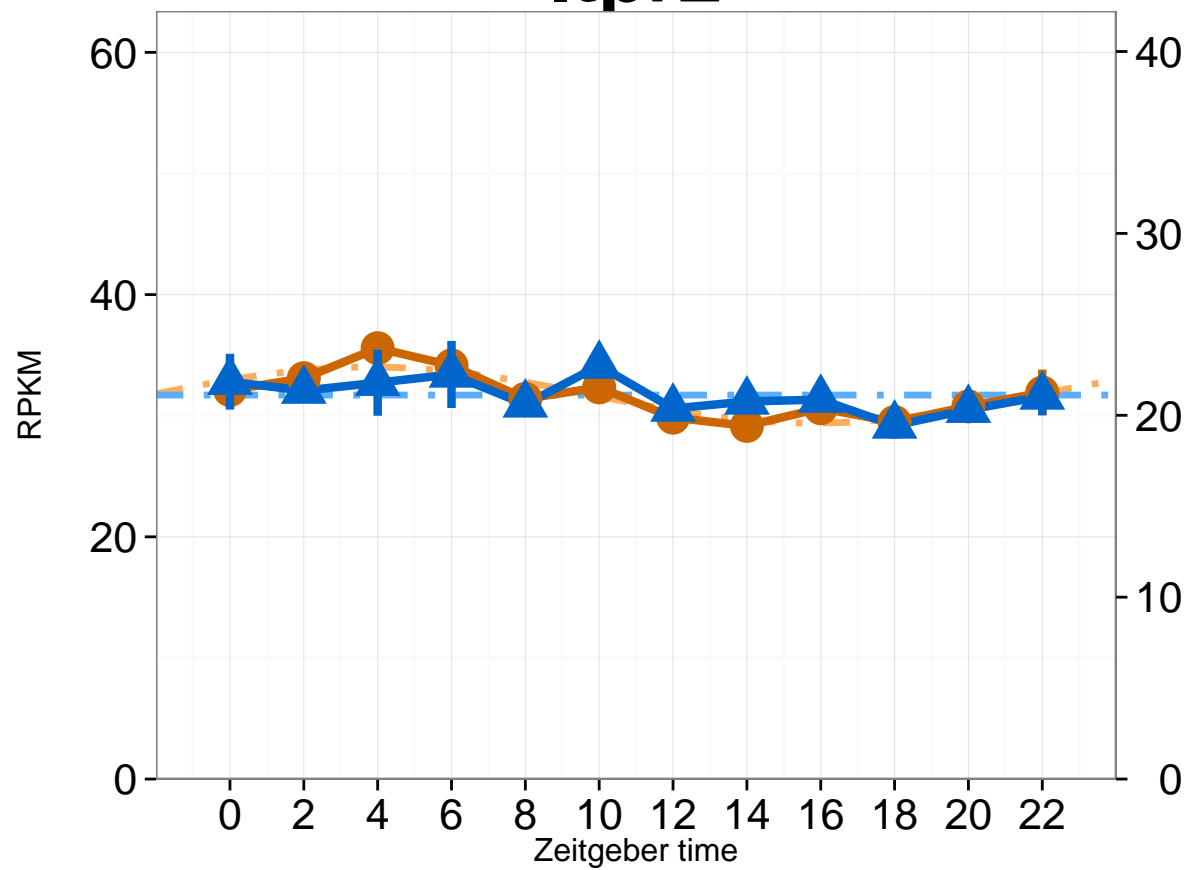

## Itpr2

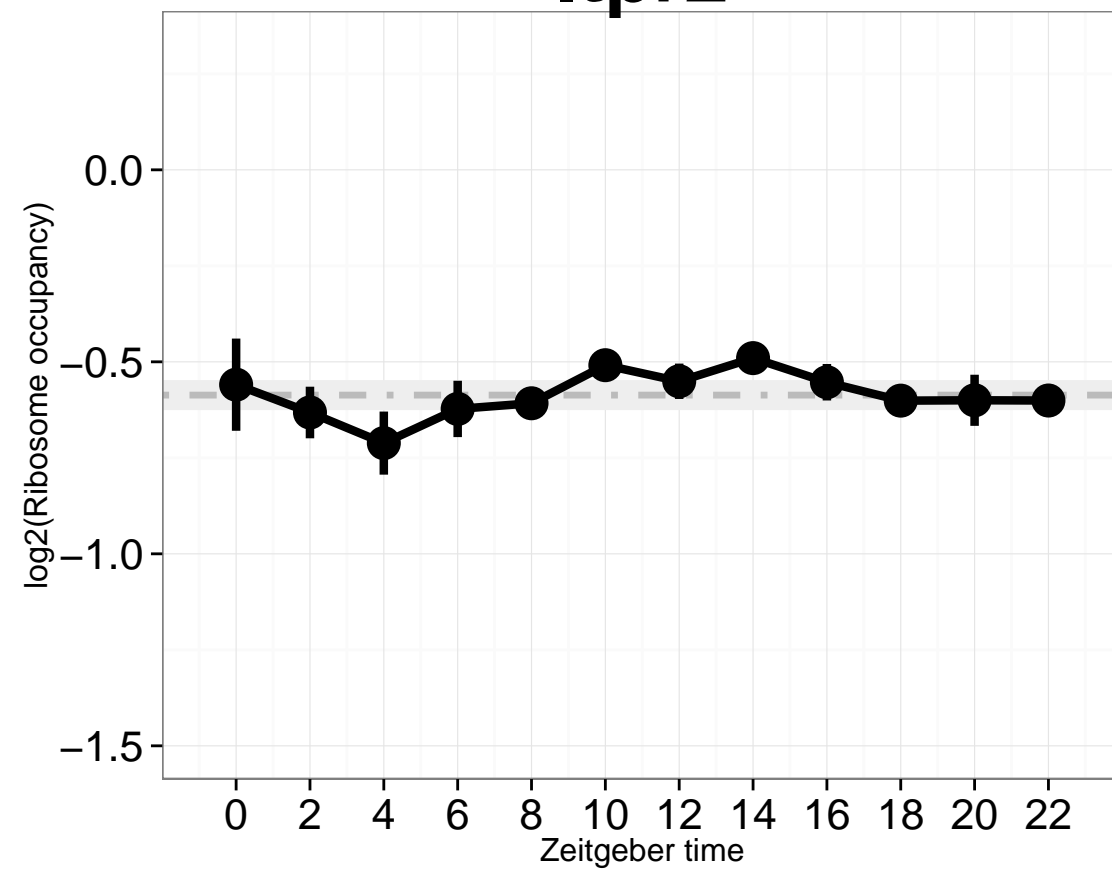

Supplement: Supplementary file 221 [file 1]

## Rnase4

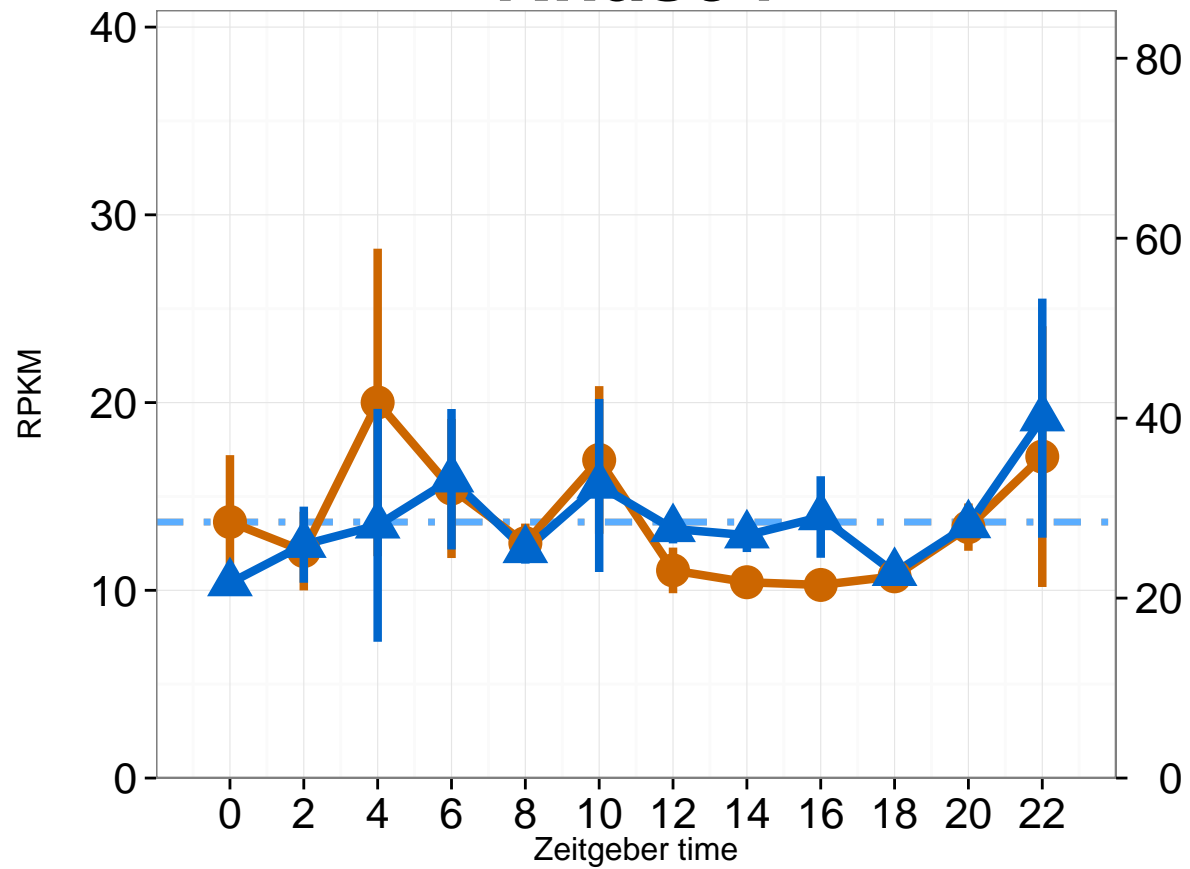

## Rnase4

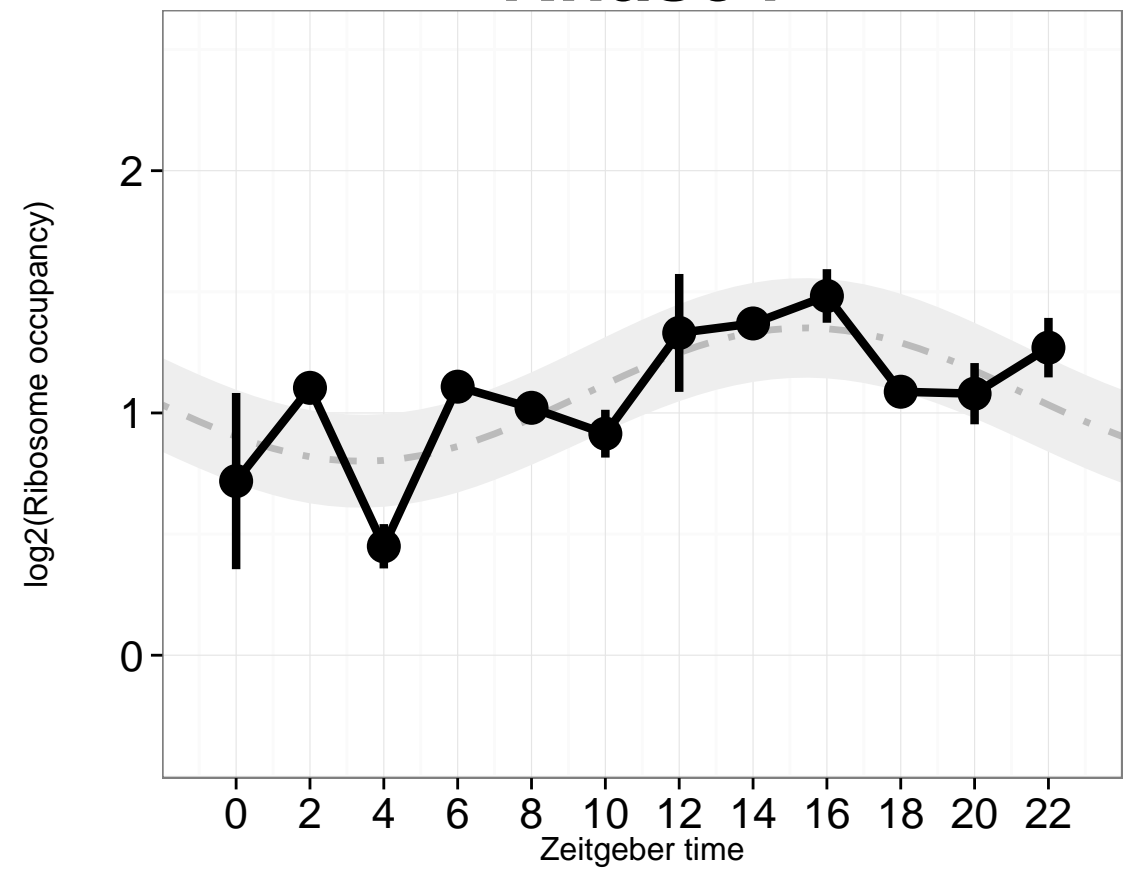

Supplement: Supplementary file 222 [file 1]

# Cpne3

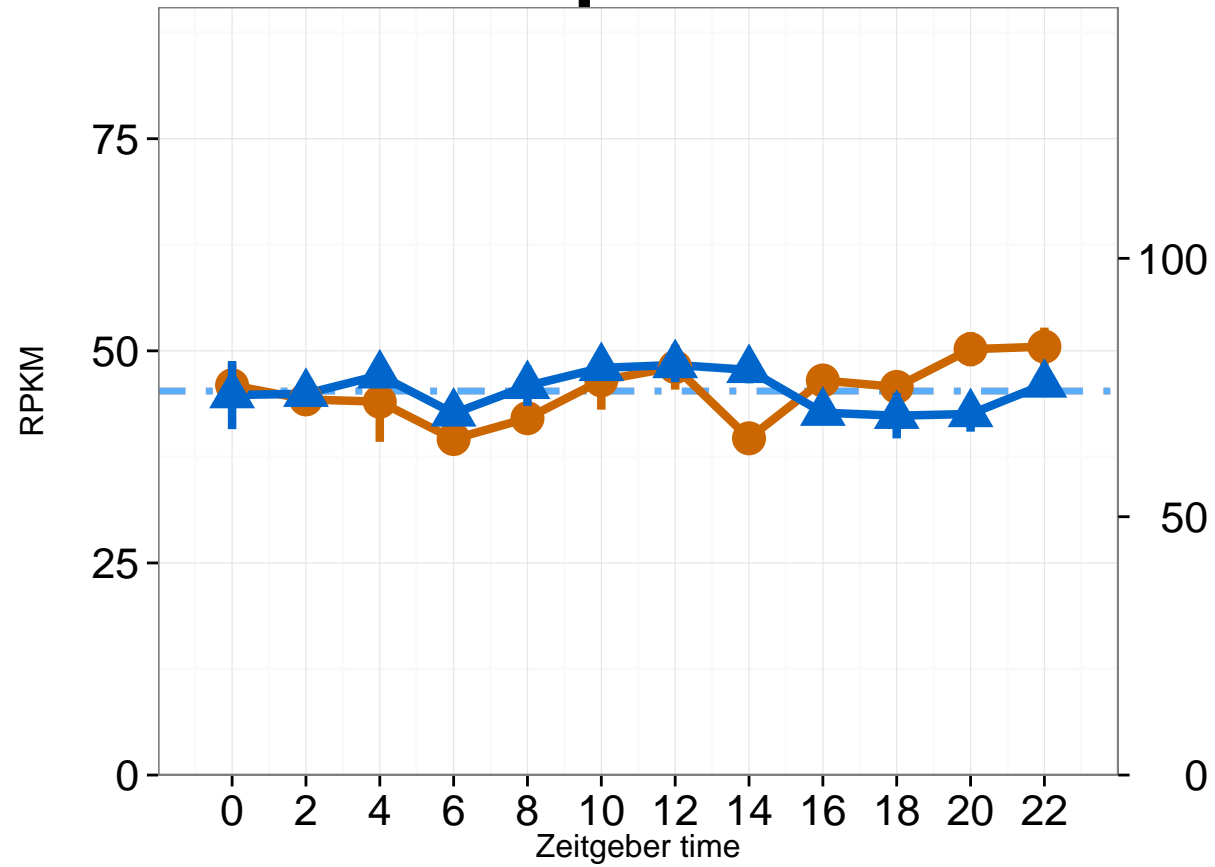

# Cpne3

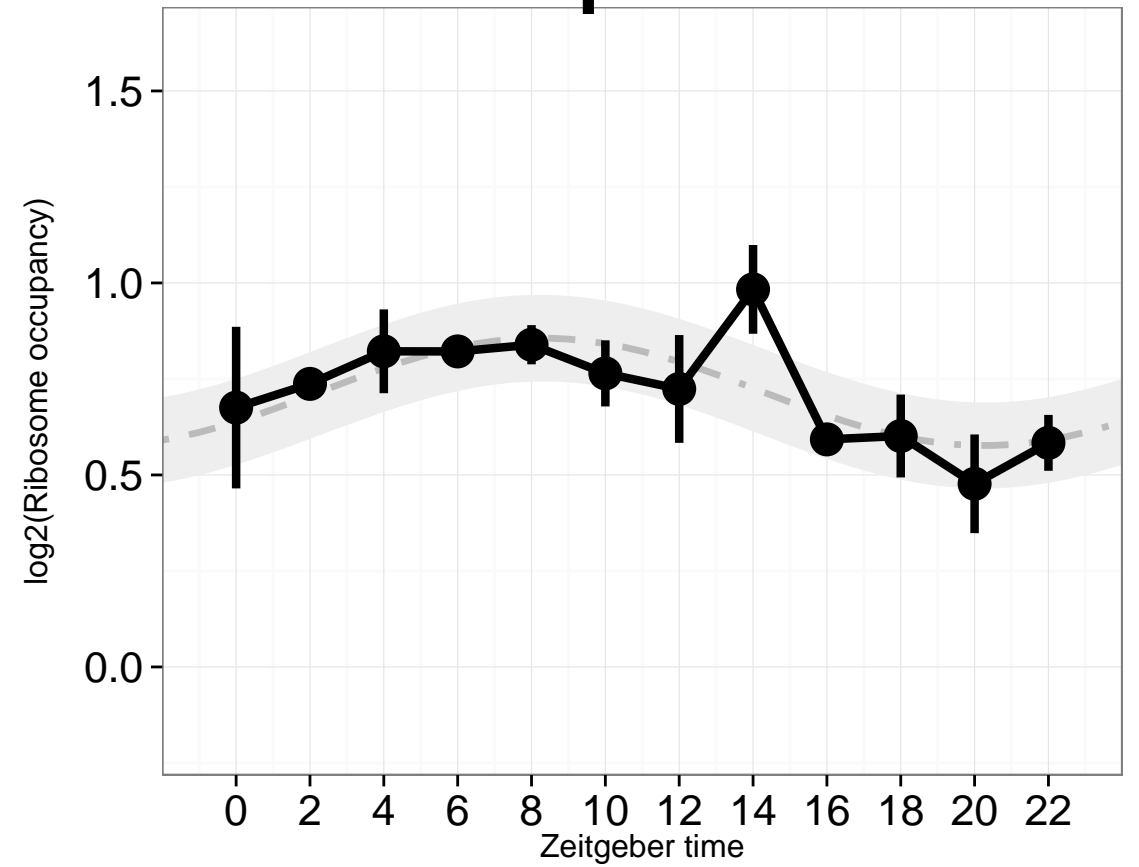

Supplement: Supplementary file 223 [file 1]

# Ppm1k

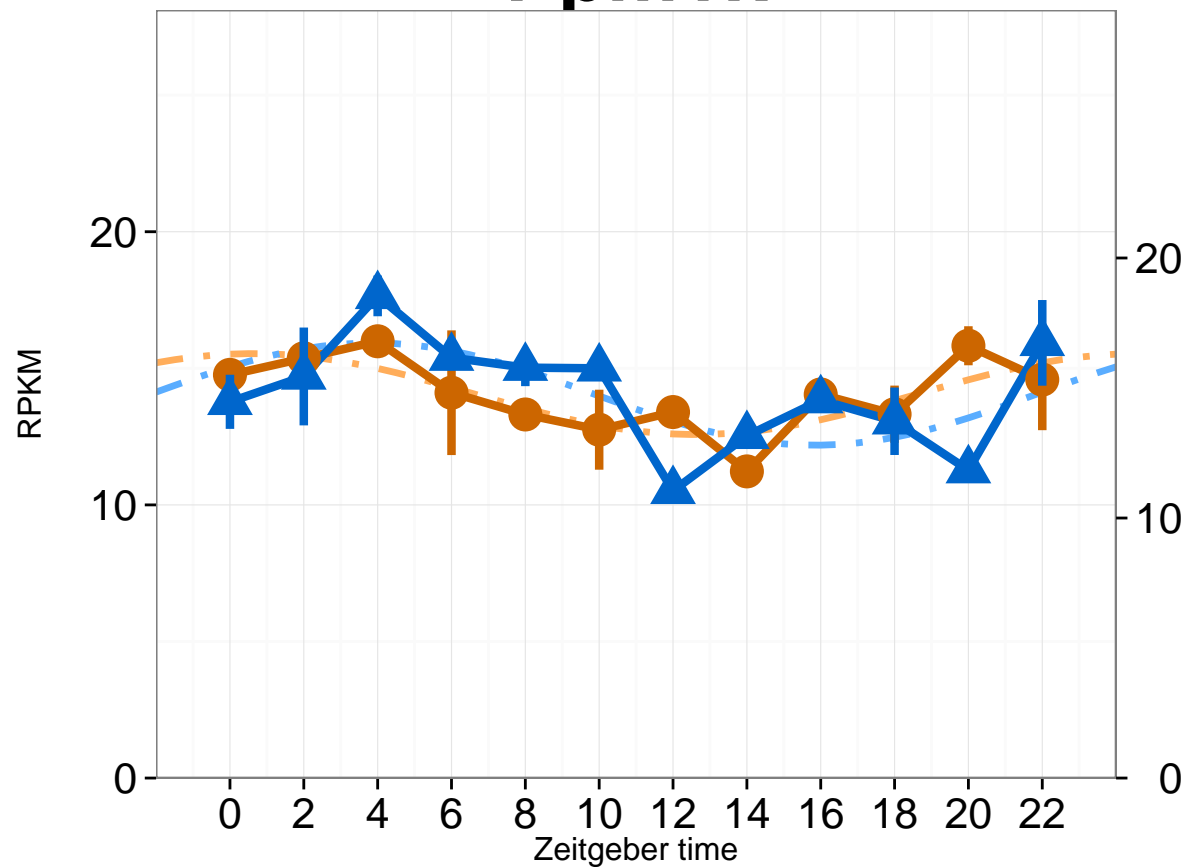

# Ppm1k

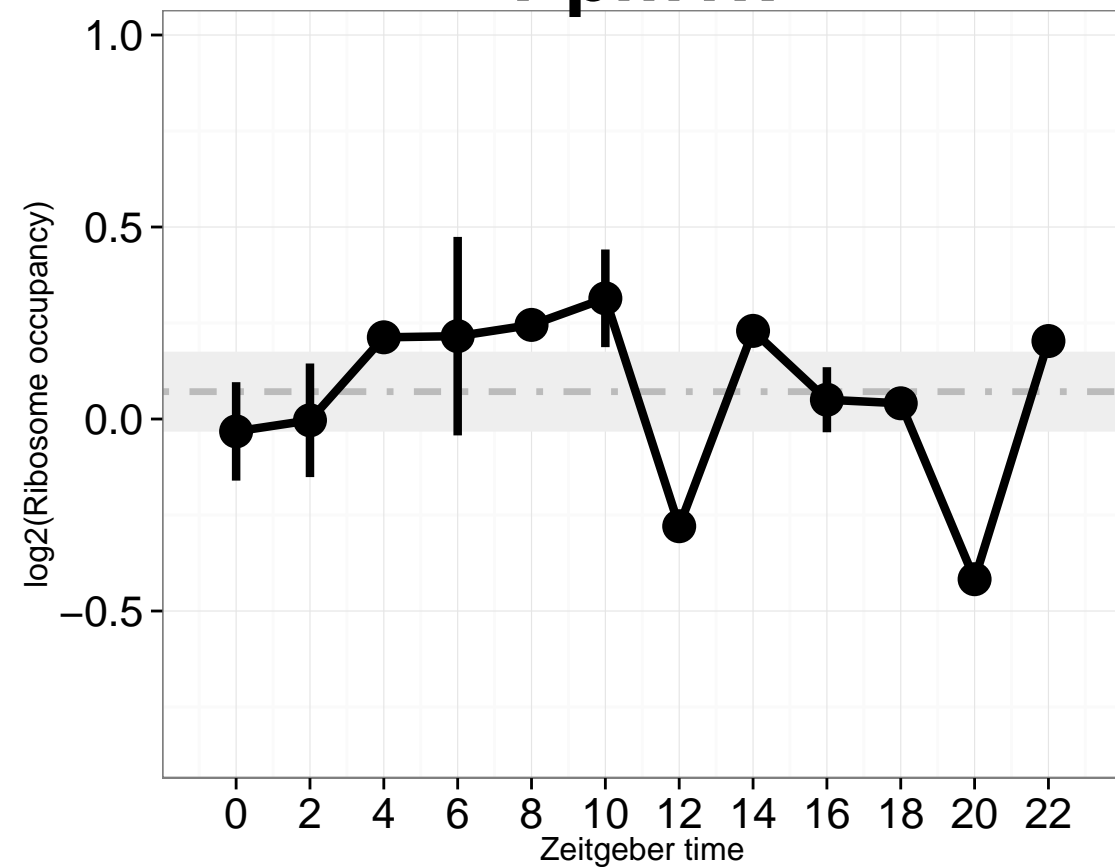

Supplement: Supplementary file 224 [file 1]

## Snip1

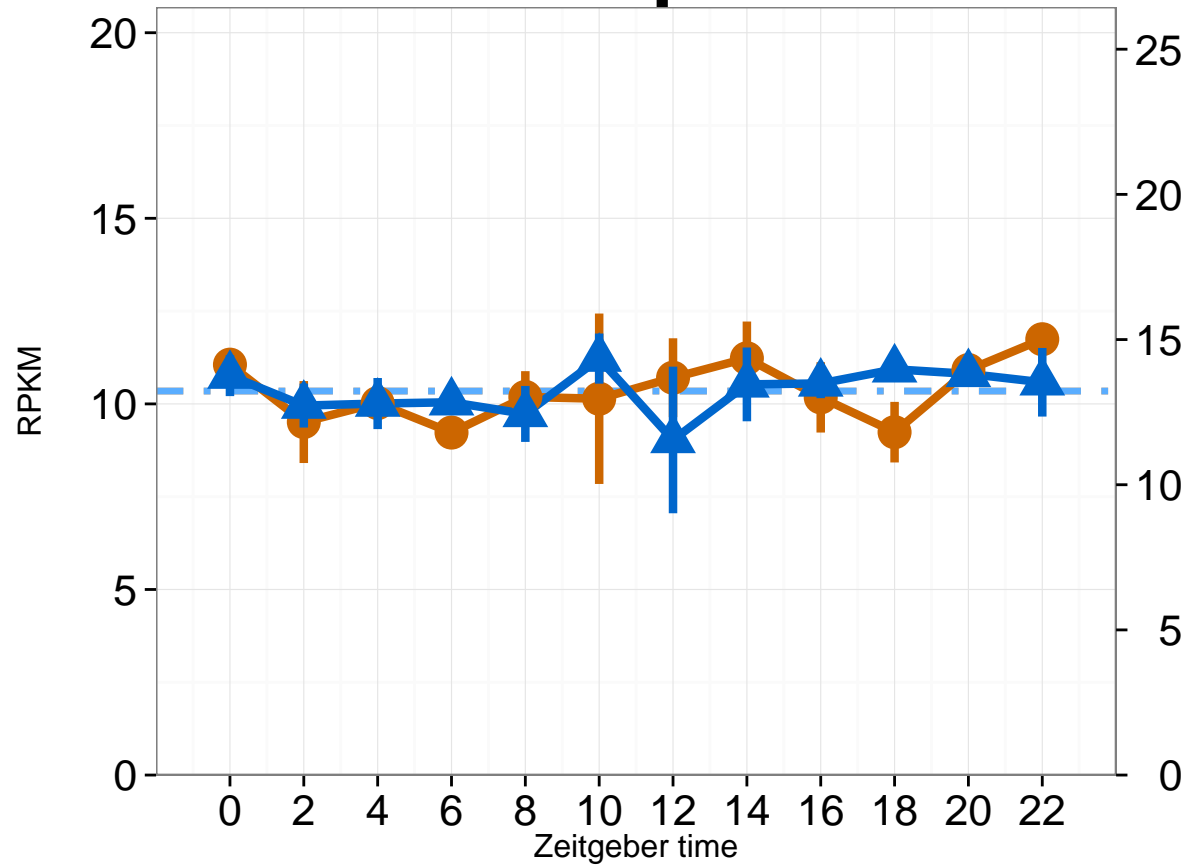

## Snip1

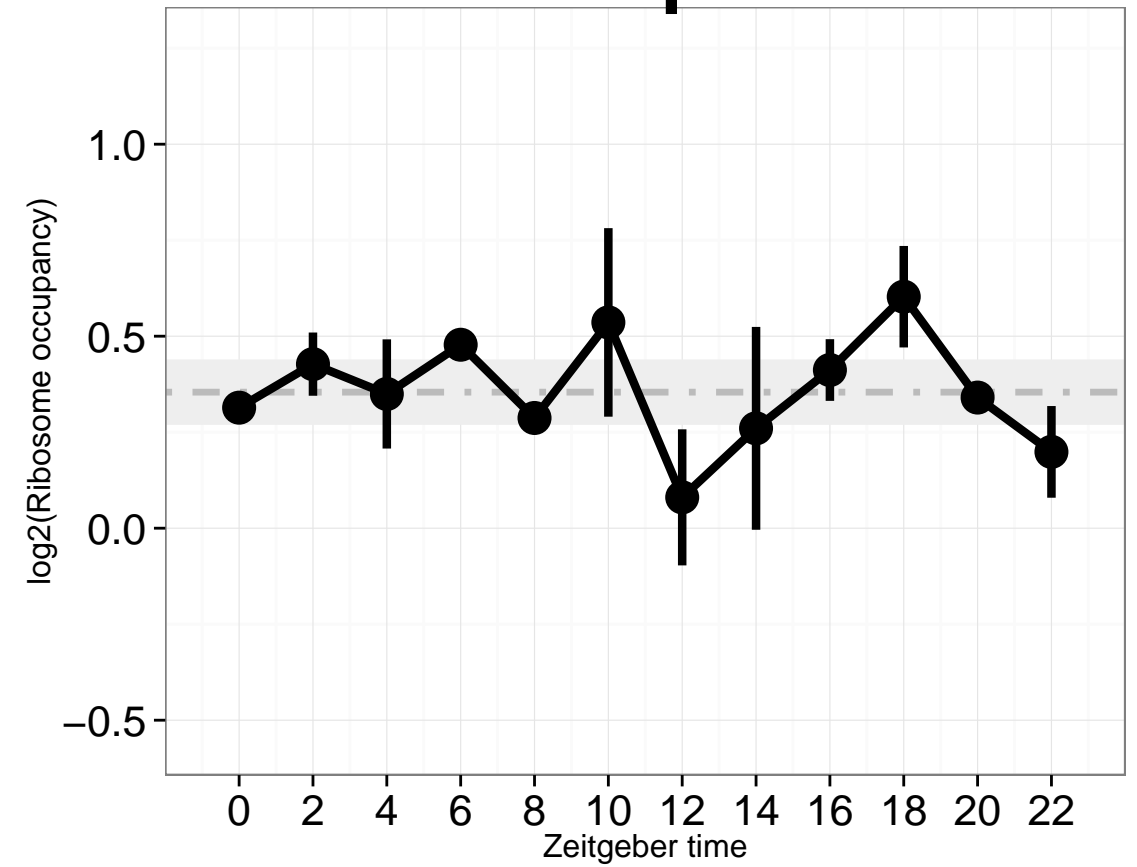

Supplement: Supplementary file 225 [file 1]

## Gpr97

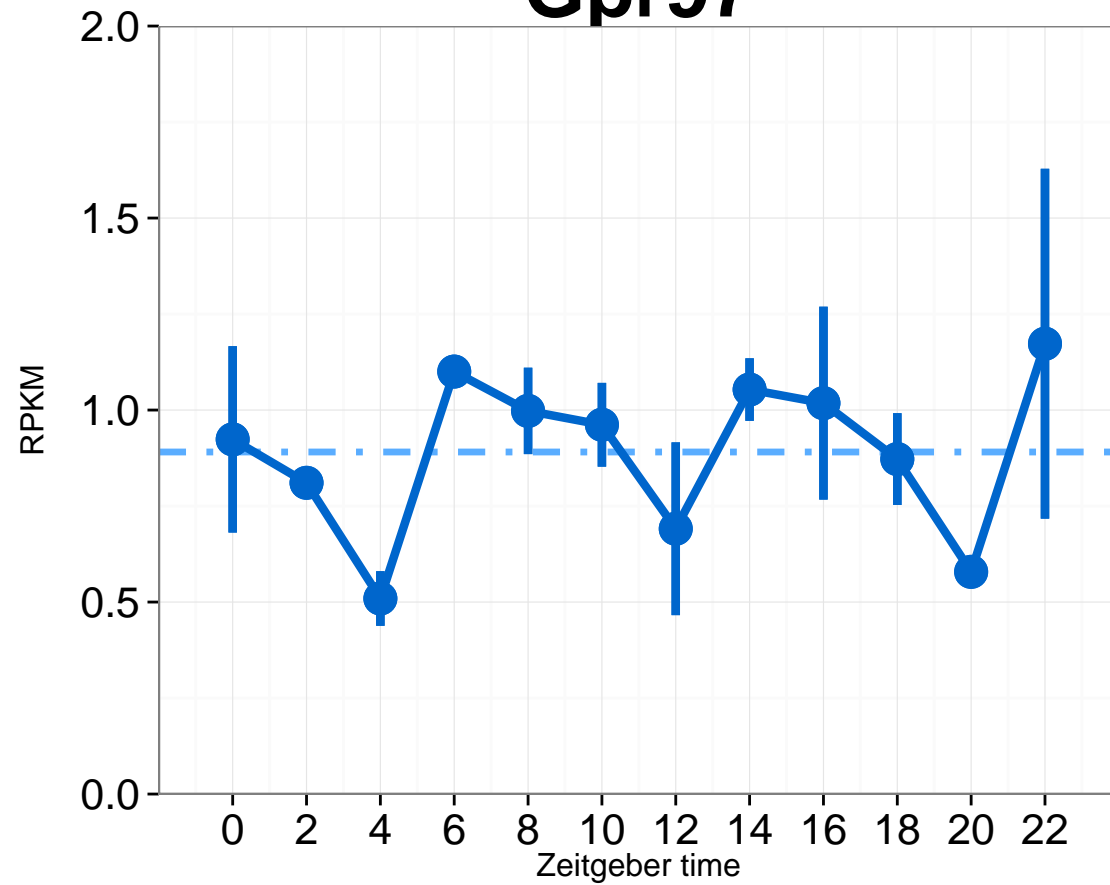

## Gpr97 log2(Ribosome occupancy

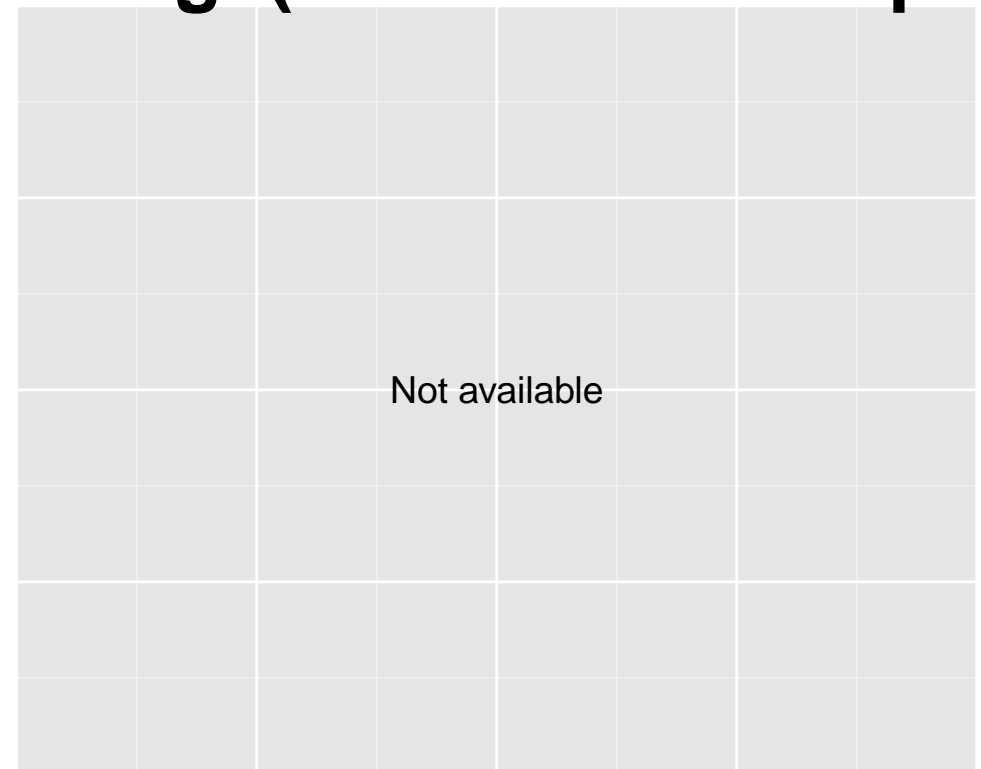

Supplement: Supplementary file 226 [file 1]

## Tspyl2

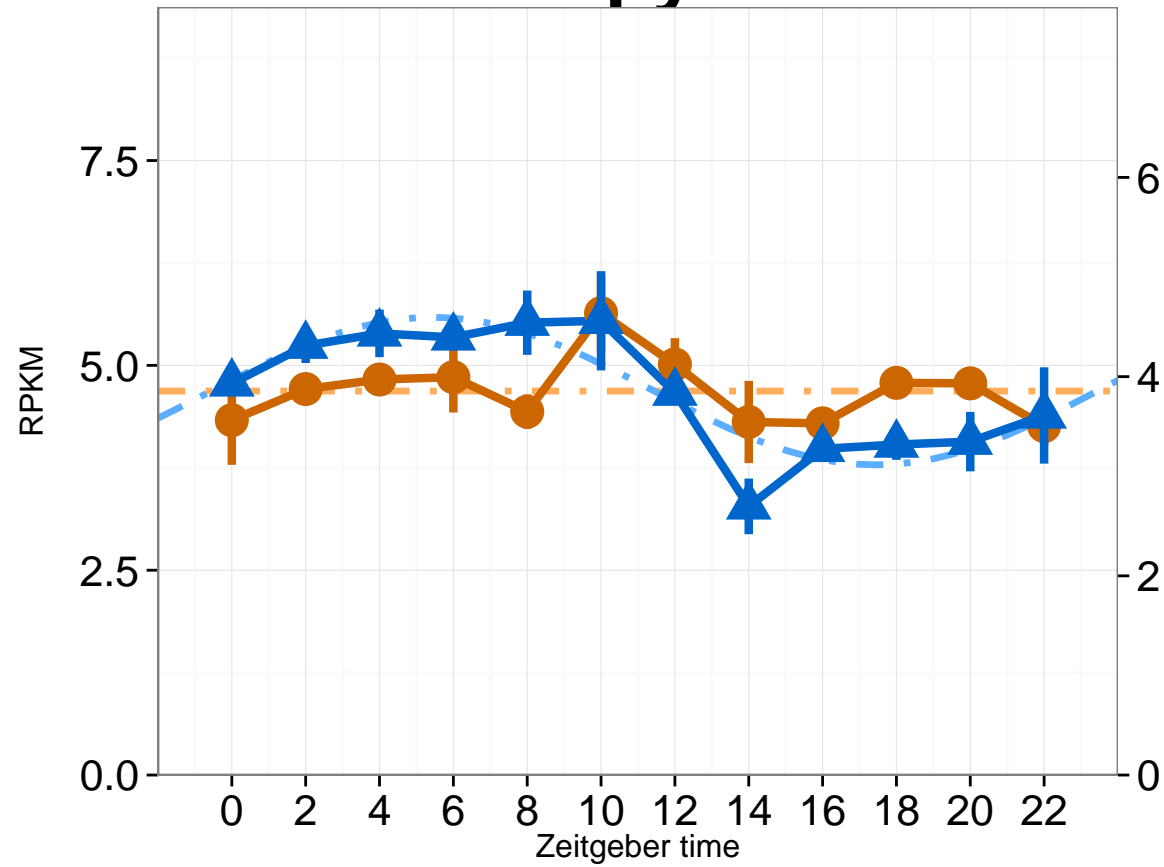

## Tspyl2

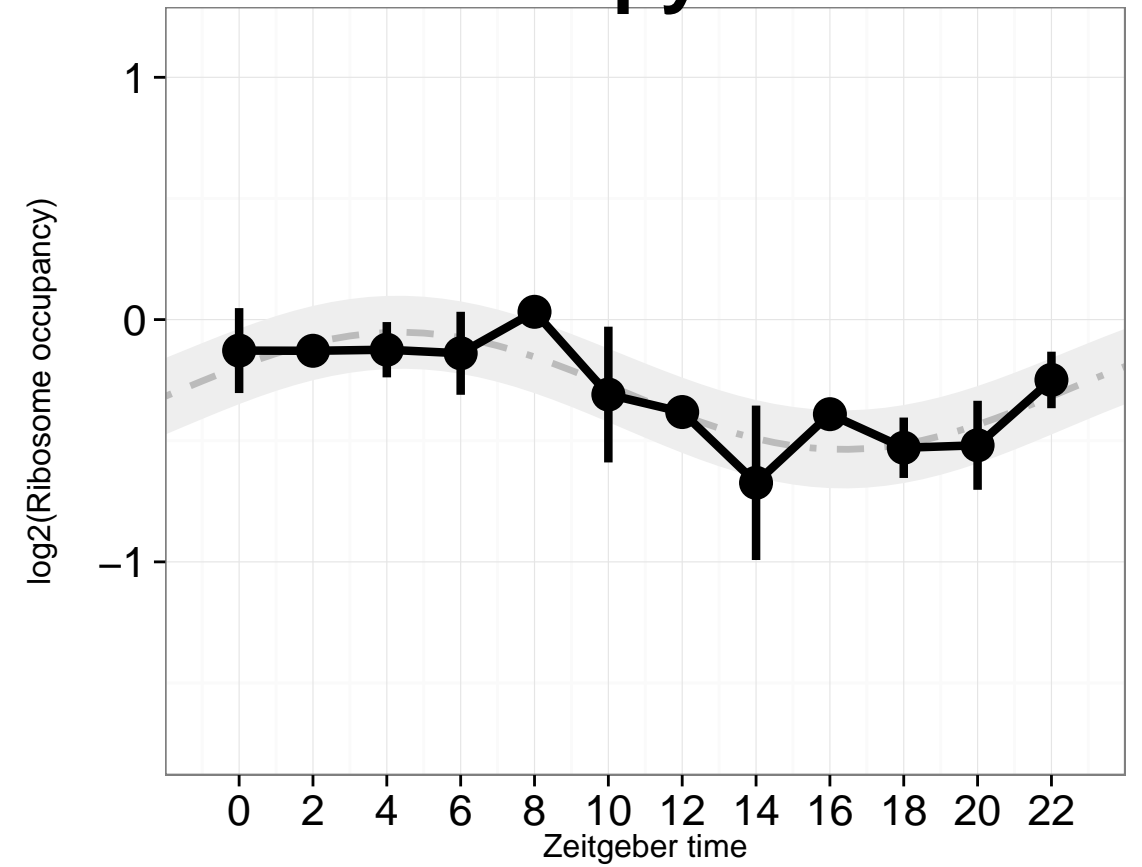

Supplement: Supplementary file 227 [file 1]

## 1700024P16Rik

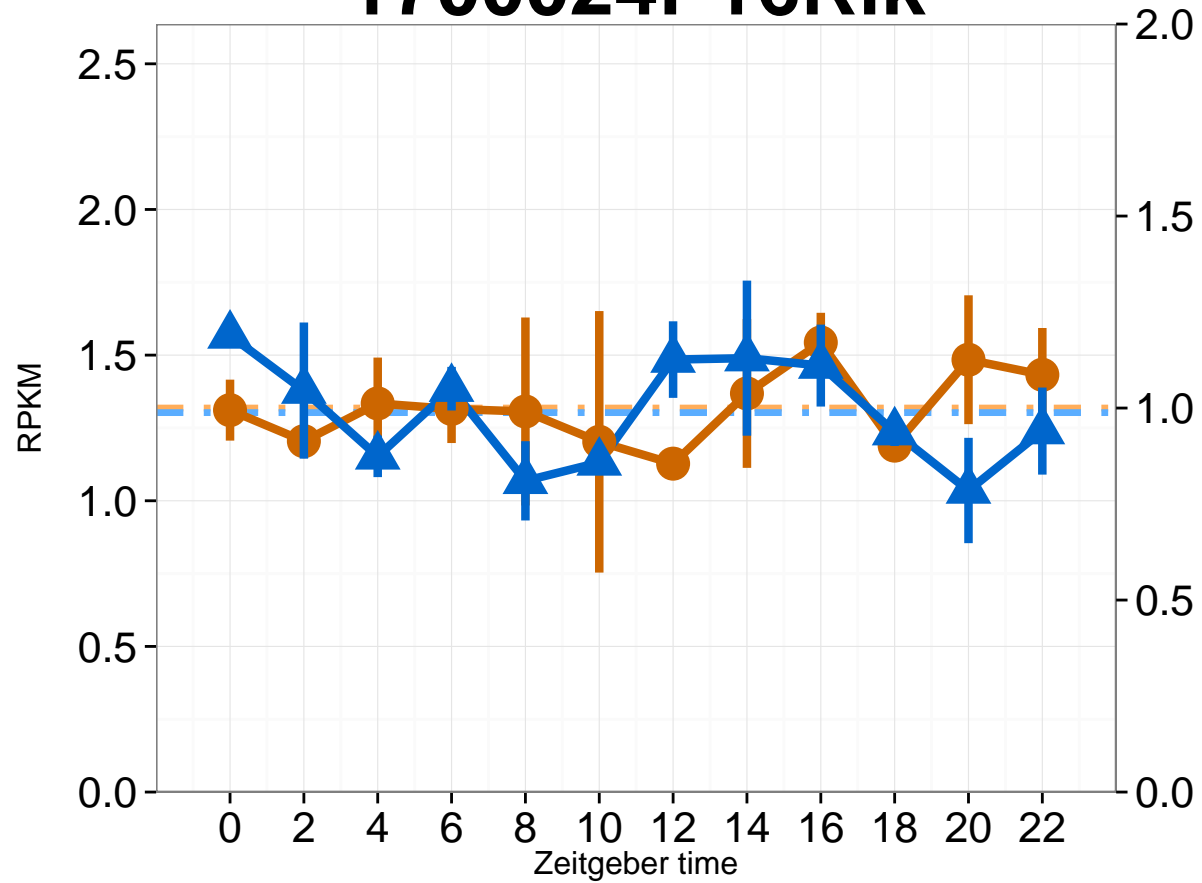

## 1700024P16Rik

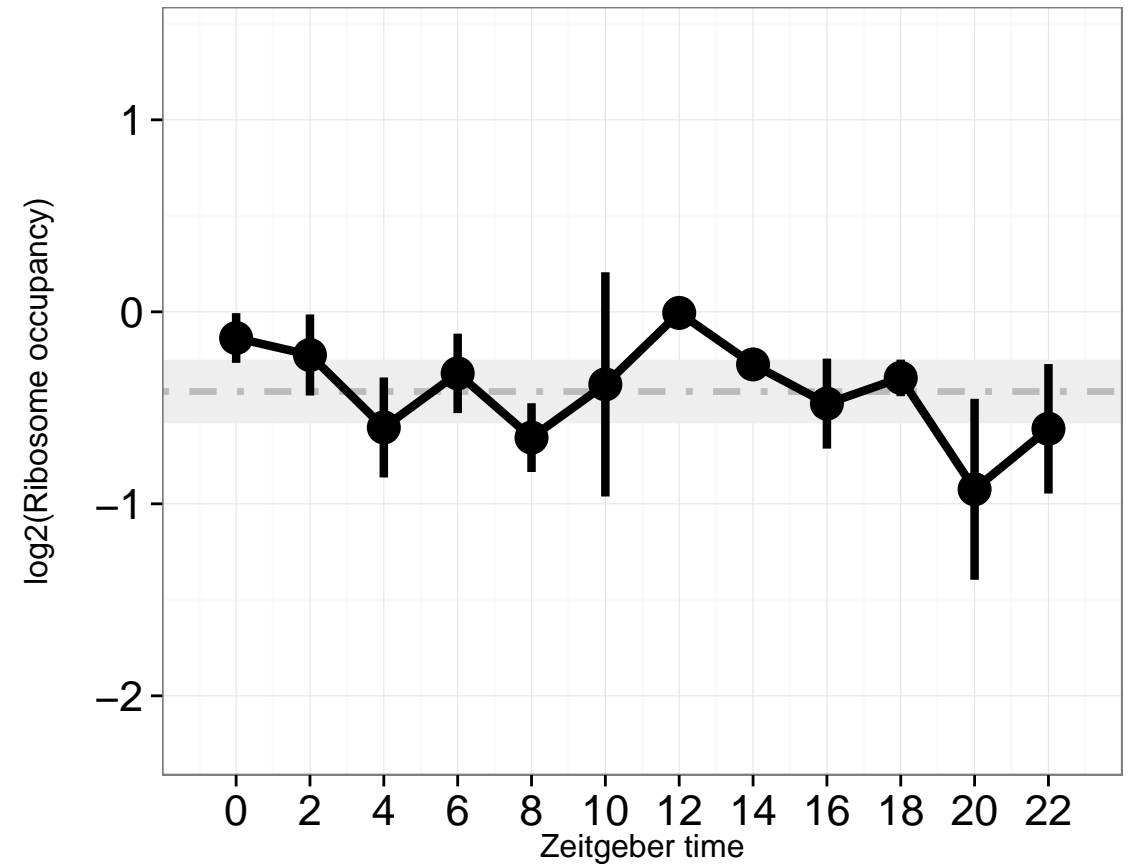

Supplement: Supplementary file 228 [file 1]

# Fundc1

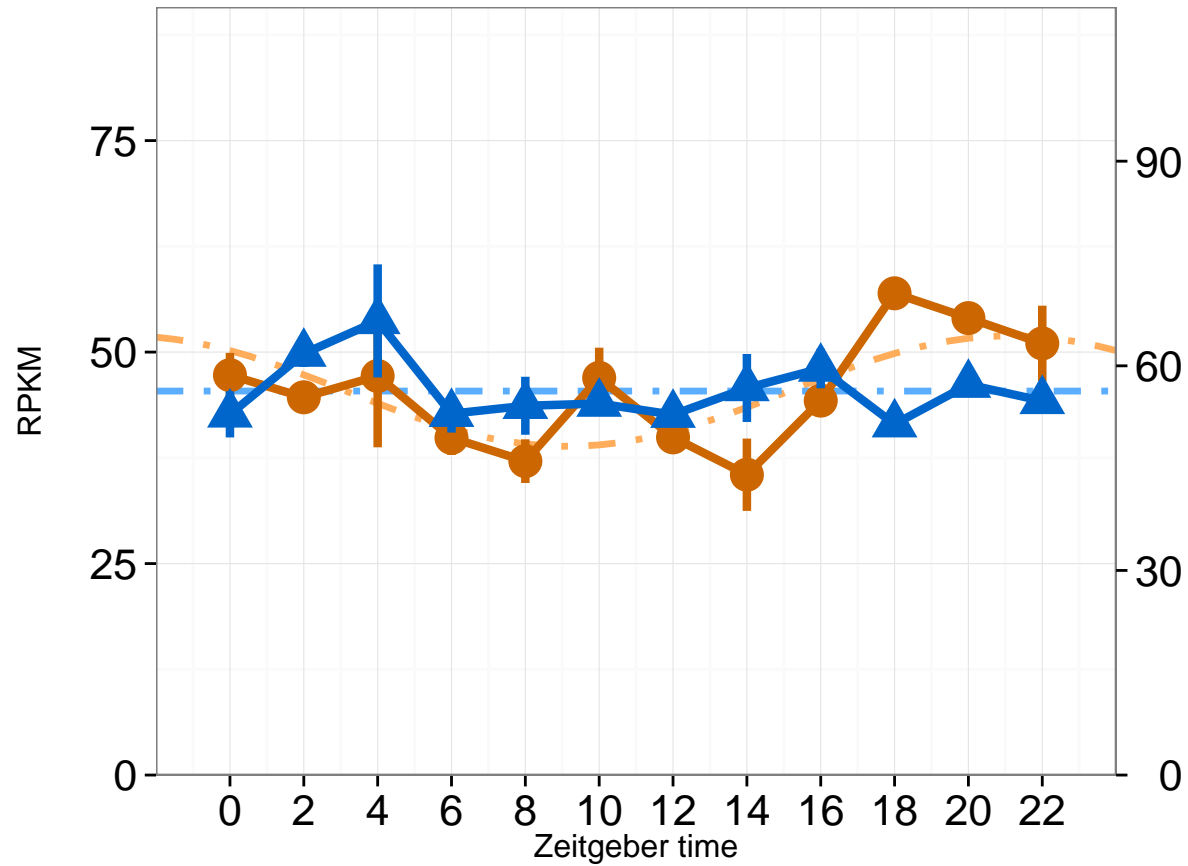

# Fundc1

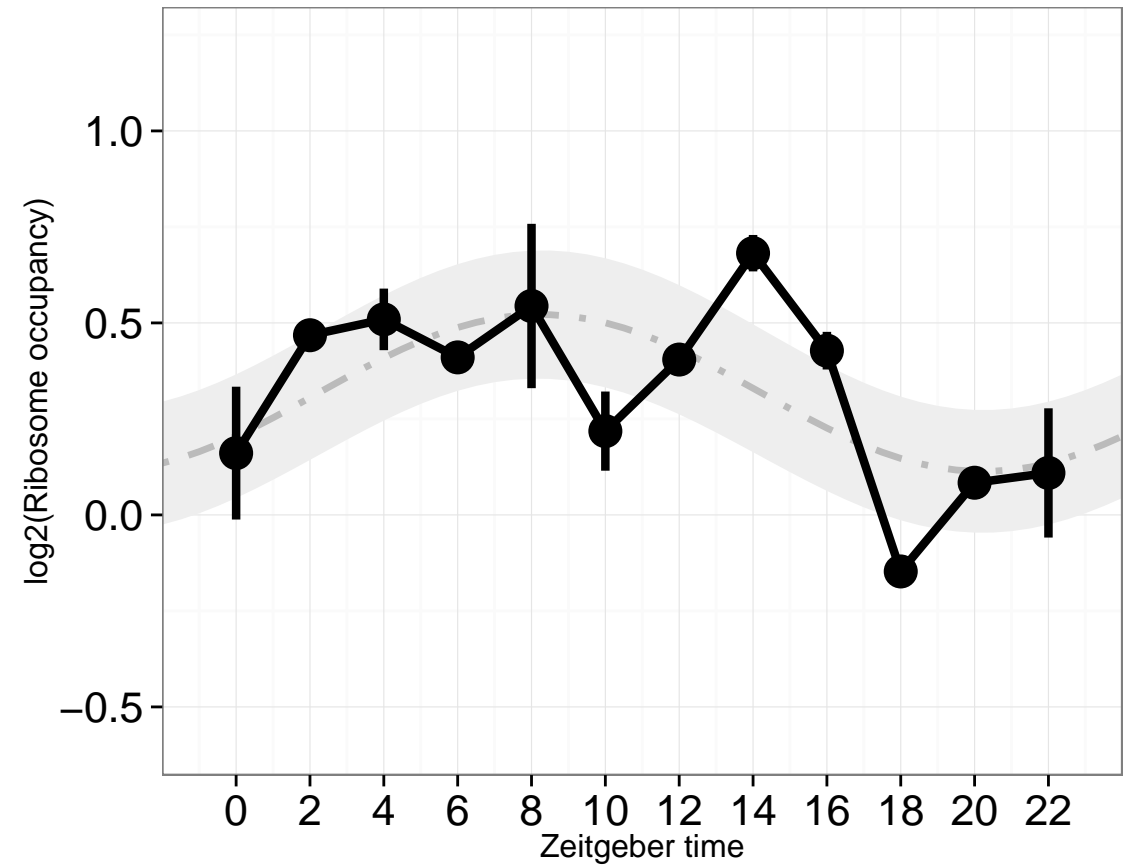

Supplement: Supplementary file 229 [file 1]

## Guk1

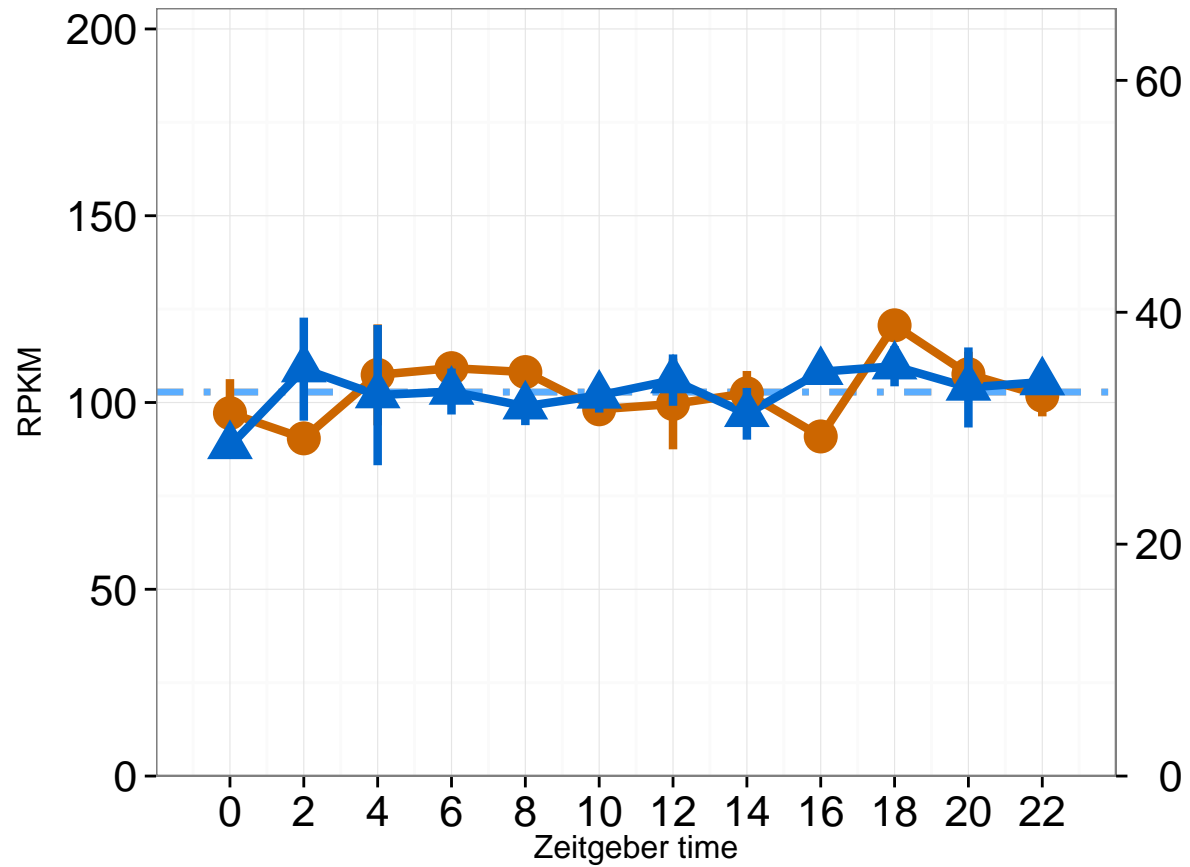

## Guk1

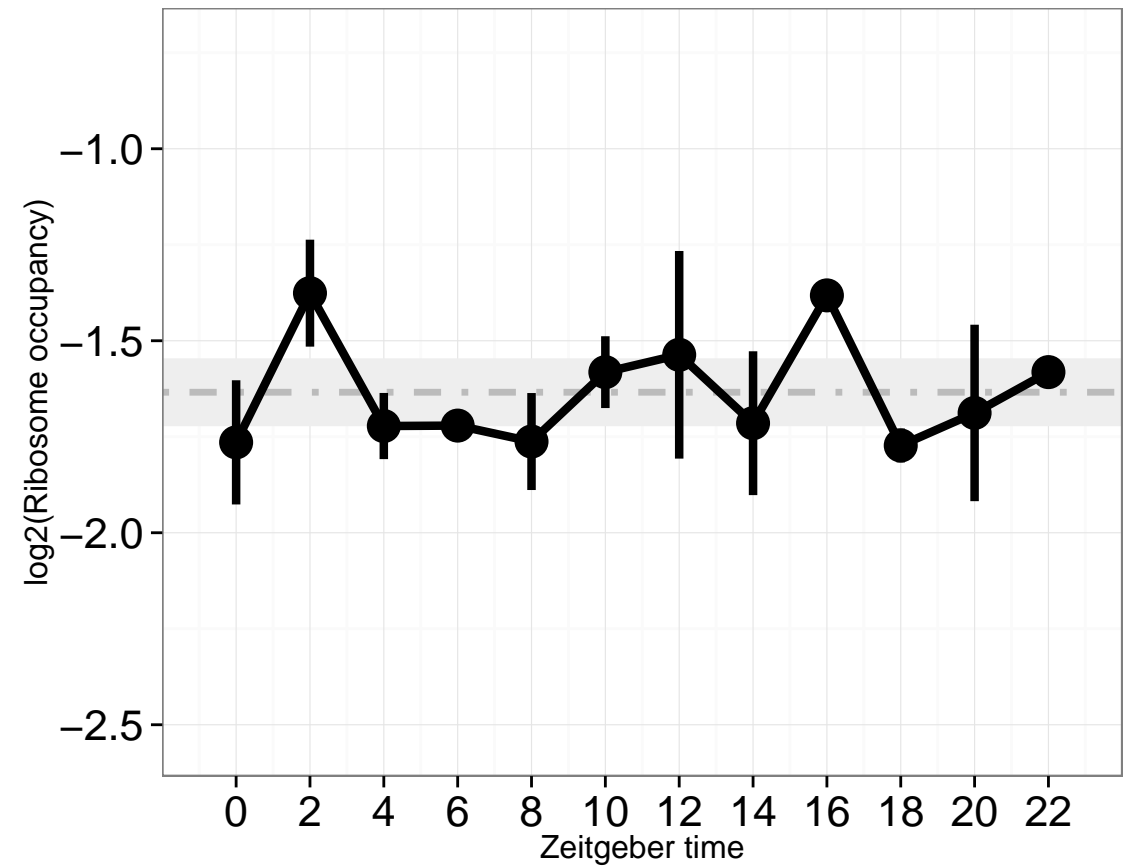

Supplement: Supplementary file 230 [file 1]

## Oma1

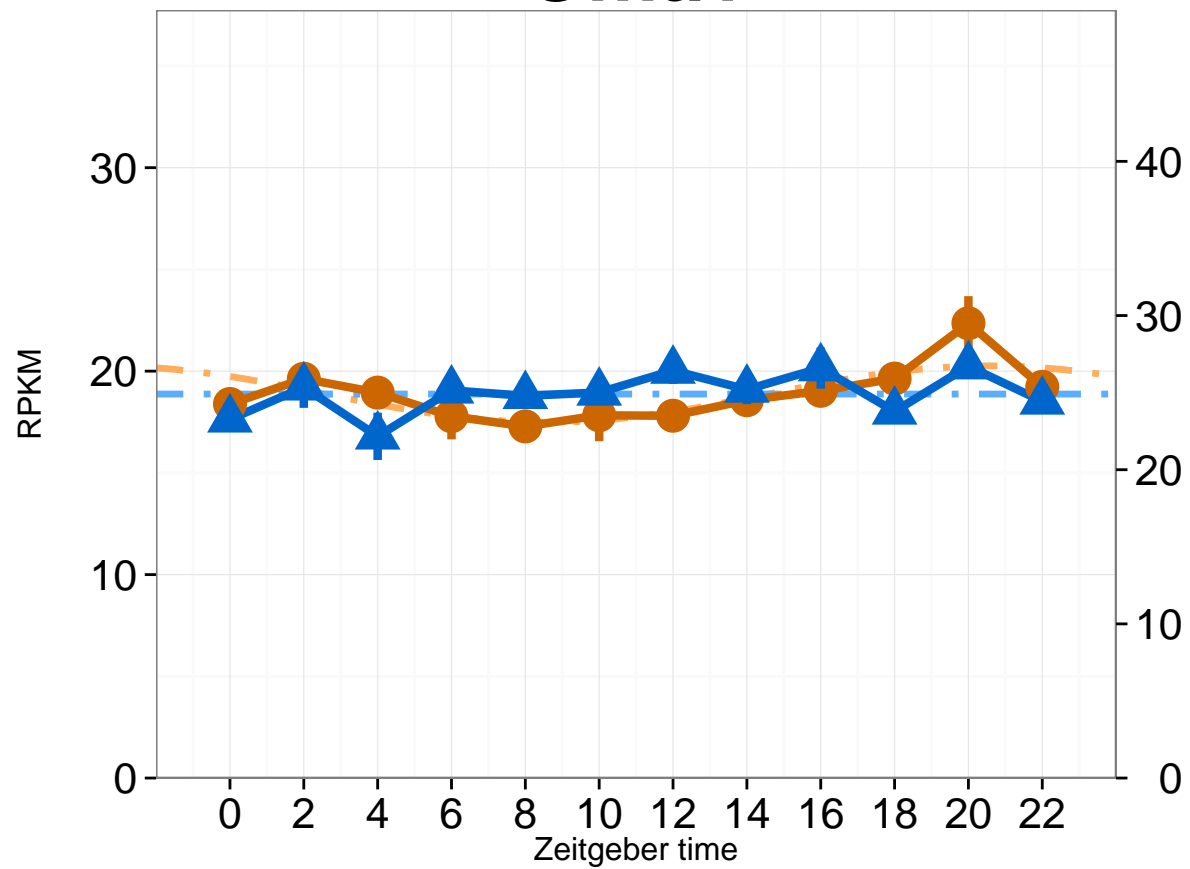

## Oma1

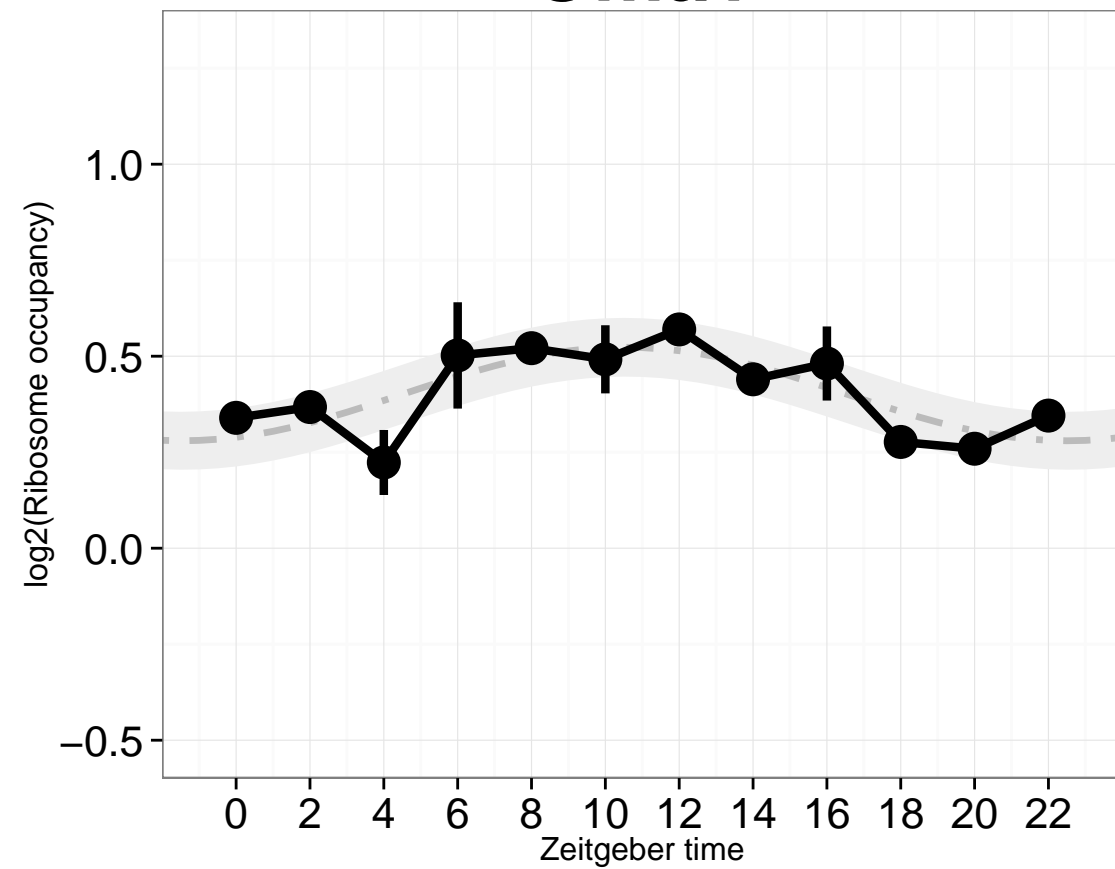

Supplement: Supplementary file 231 [file 1]

## Tchh

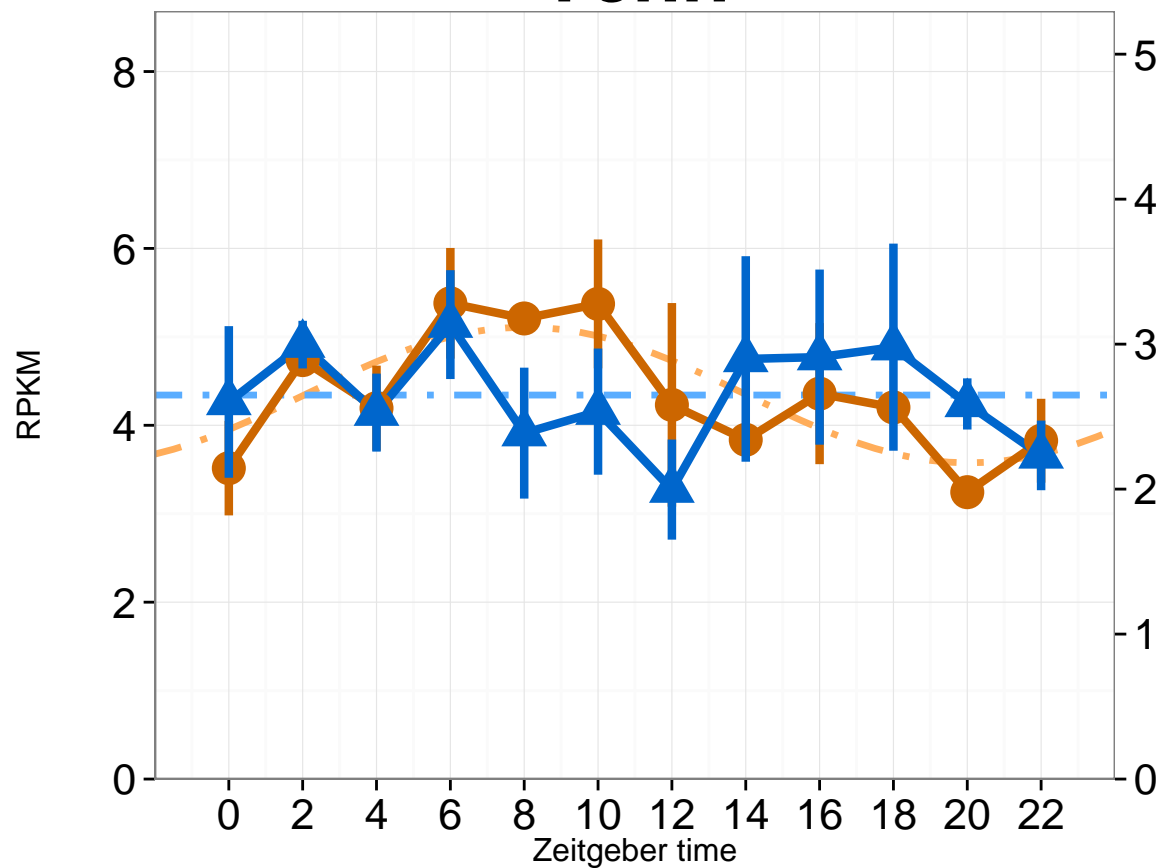

## Tchh

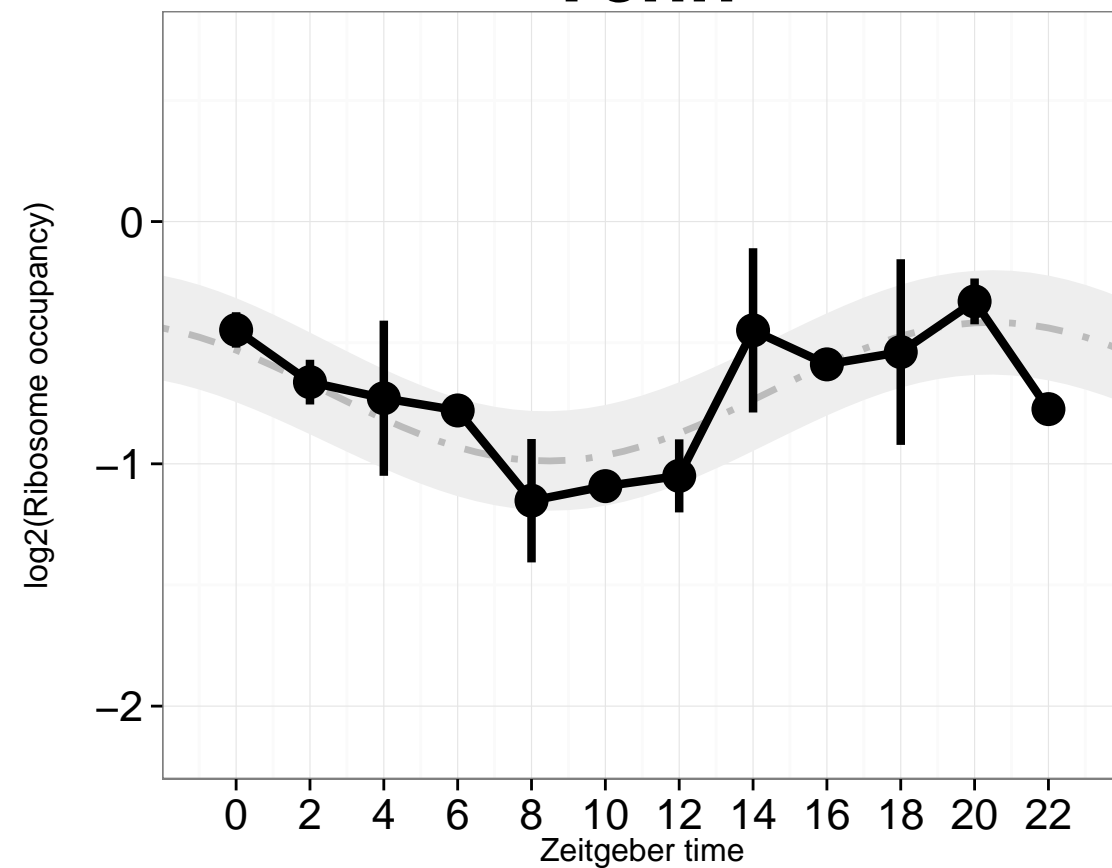

Supplement: Supplementary file 232 [file 1]

## Rcn2

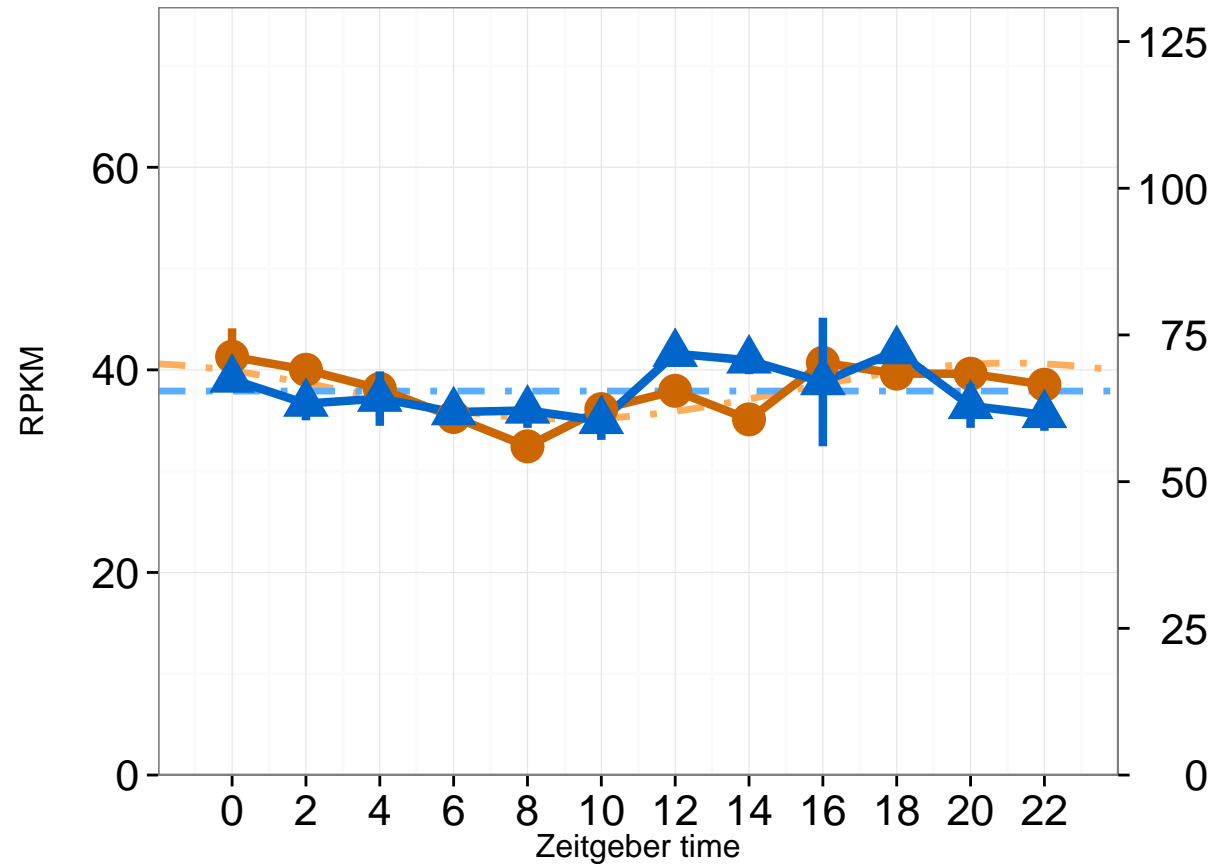

## Rcn2

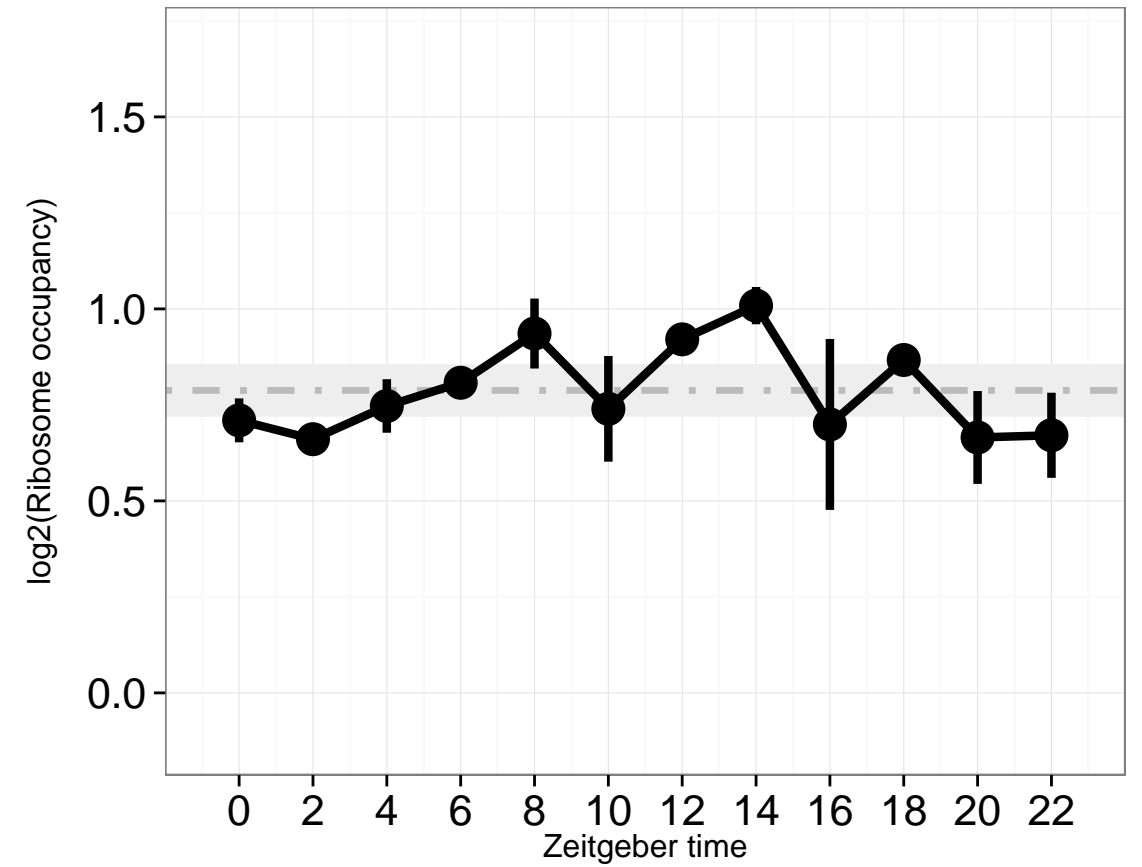

Supplement: Supplementary file 233 [file 1]

**2810459M11Rik**

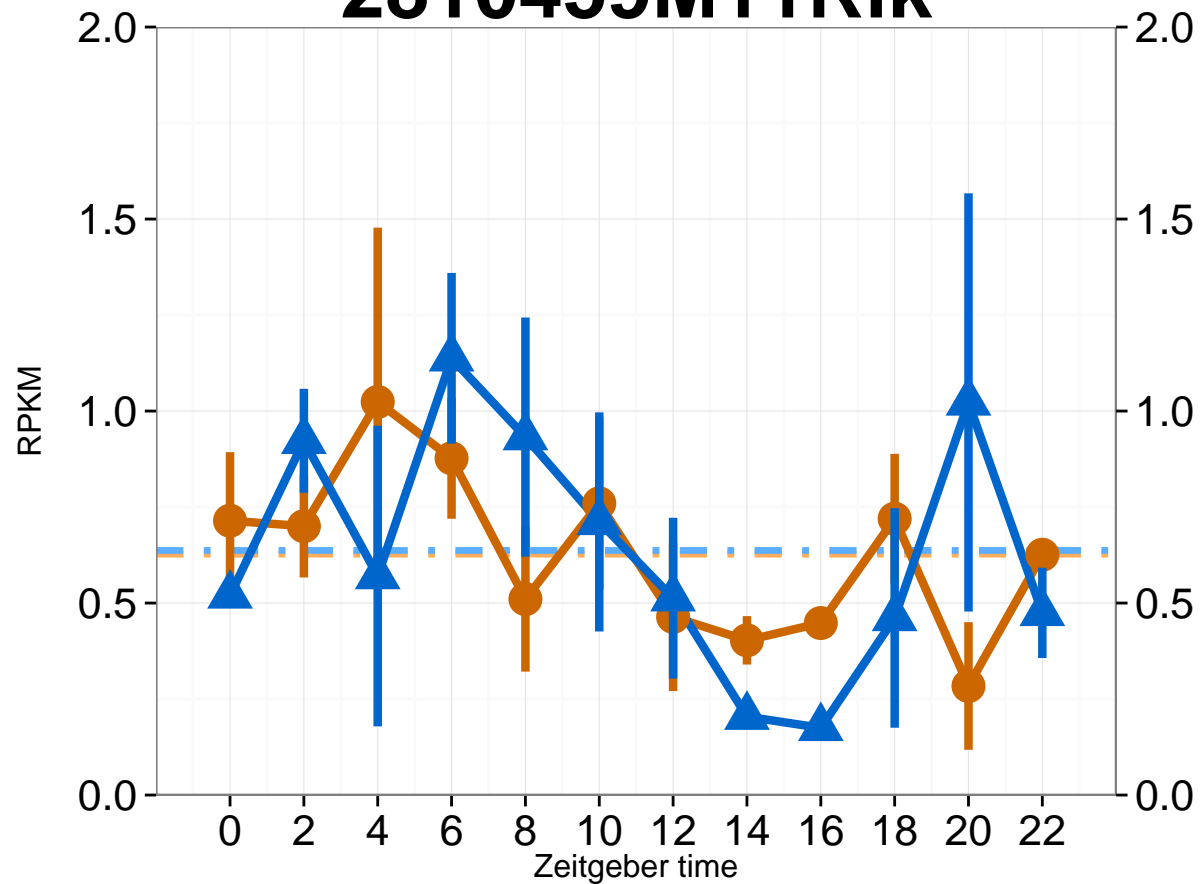

**2810459M11Rik**

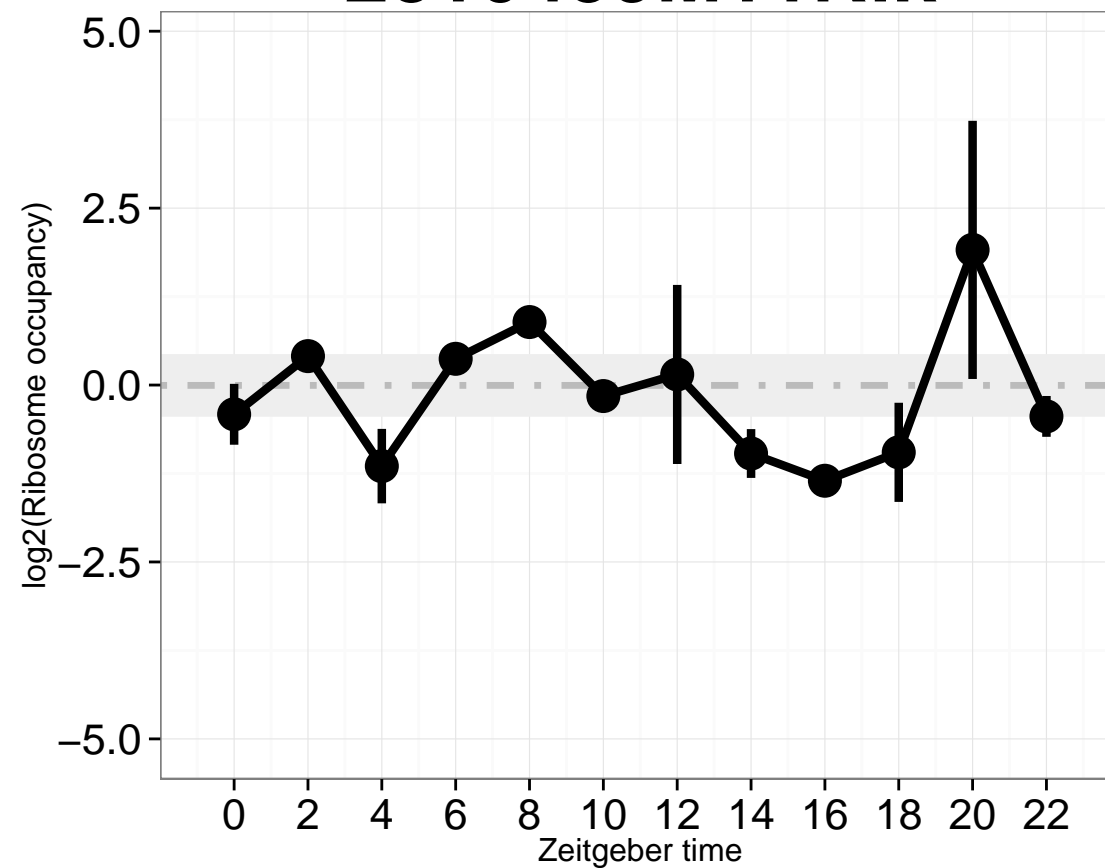

Supplement: Supplementary file 234 [file 1]

# Thap1

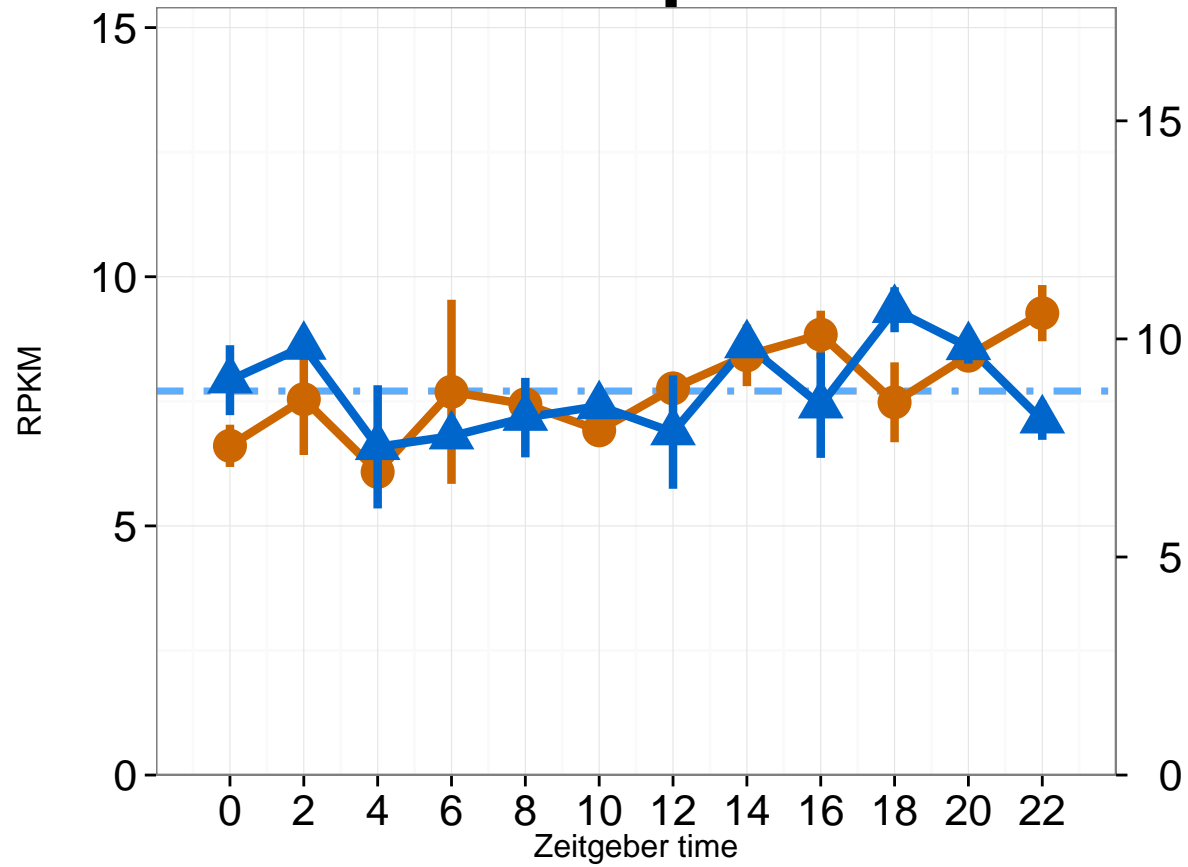

# Thap1

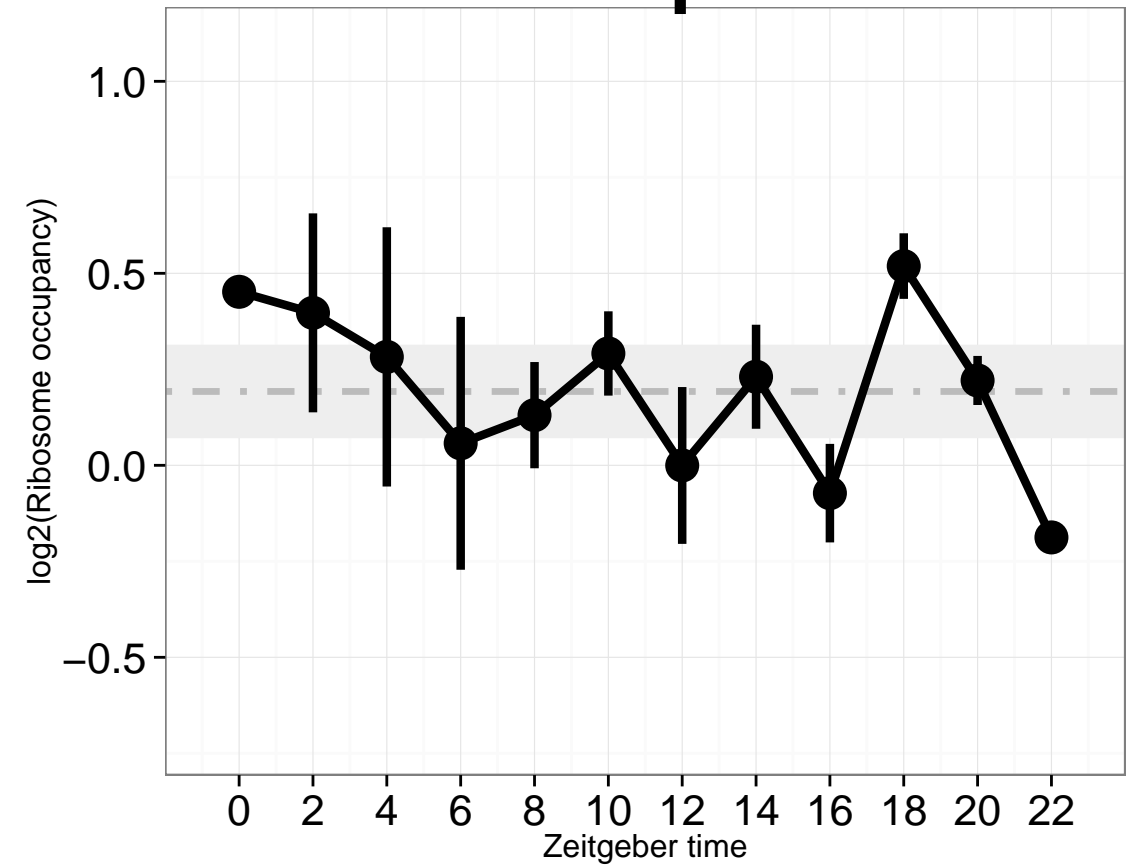

Supplement: Supplementary file 235 [file 1]

# Zfp369

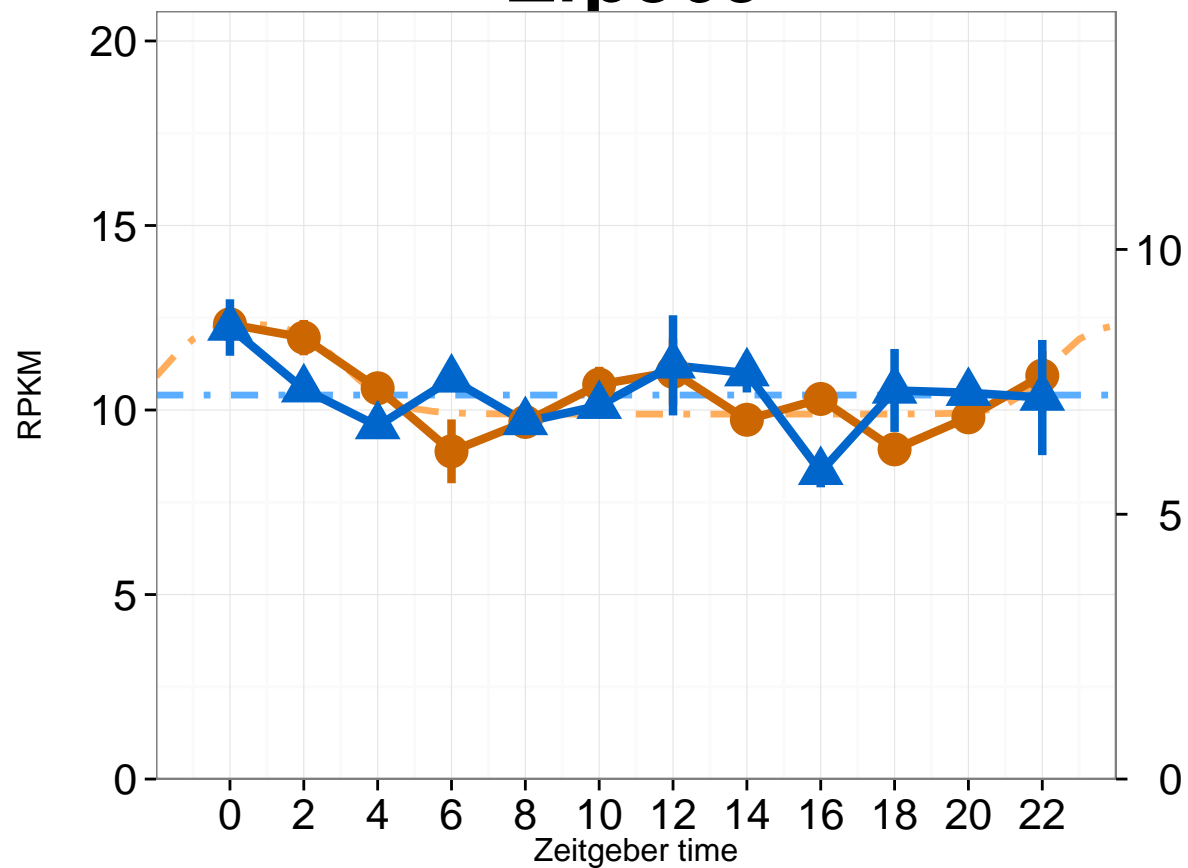

# Zfp369

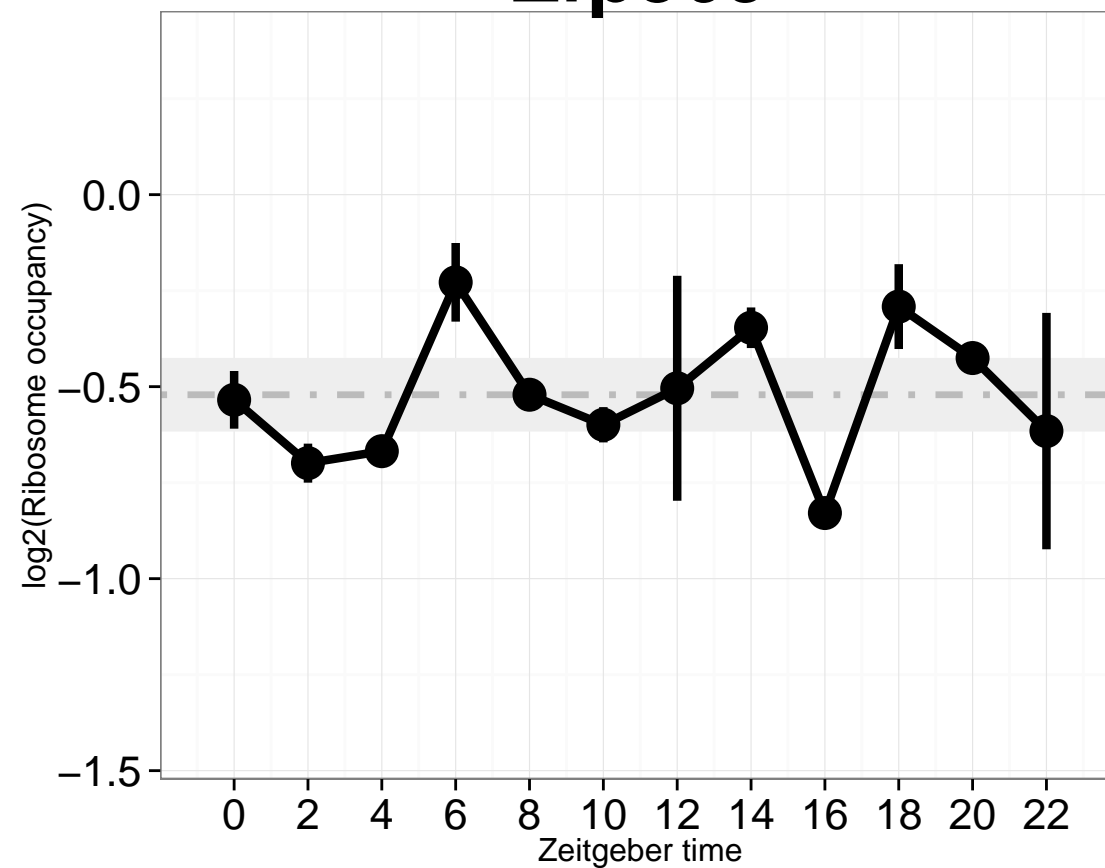

Supplement: Supplementary file 236 [file 1]

# Zfp821

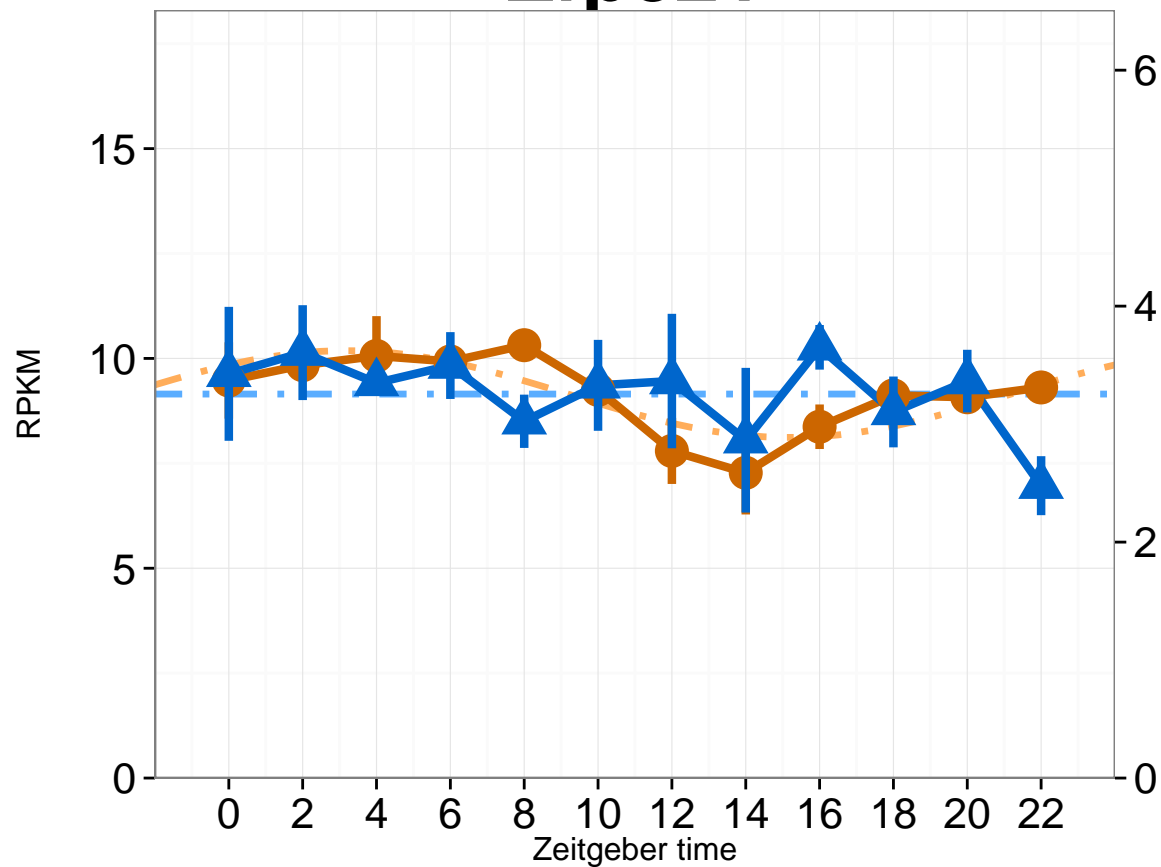

# Zfp821

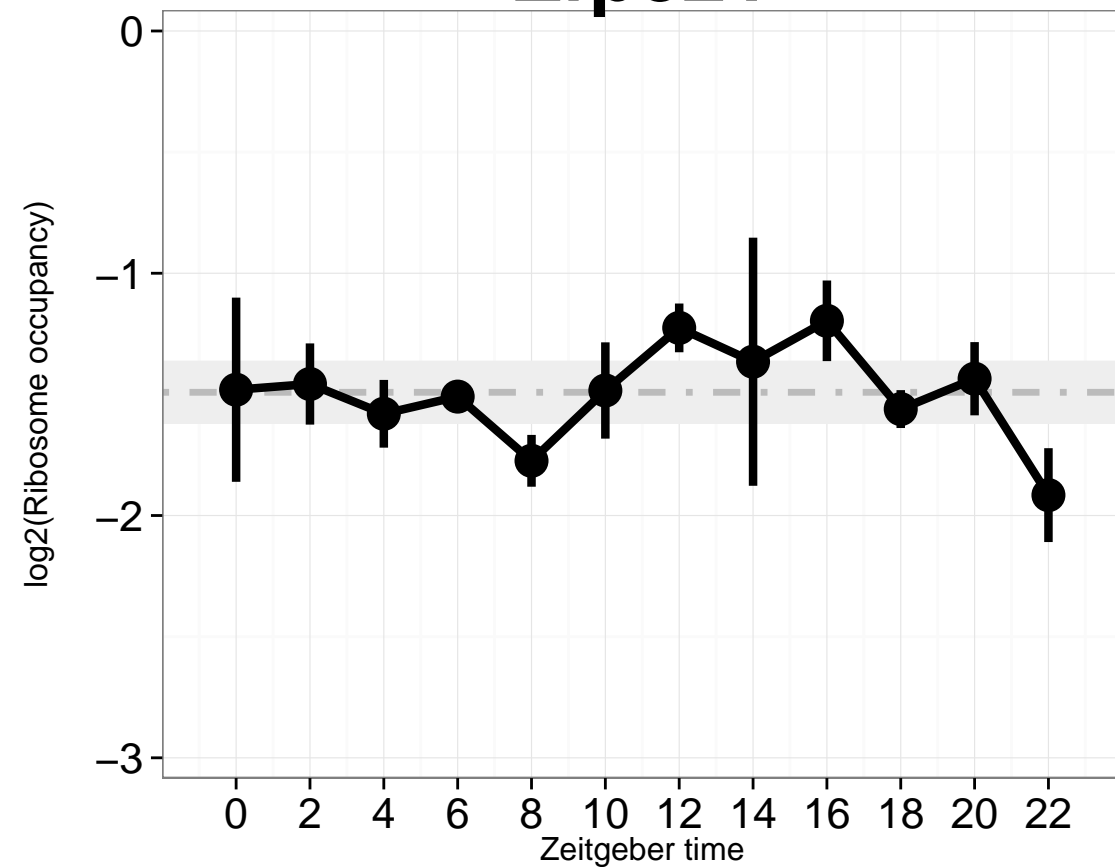

Supplement: Supplementary file 237 [file 1]

## Srek1

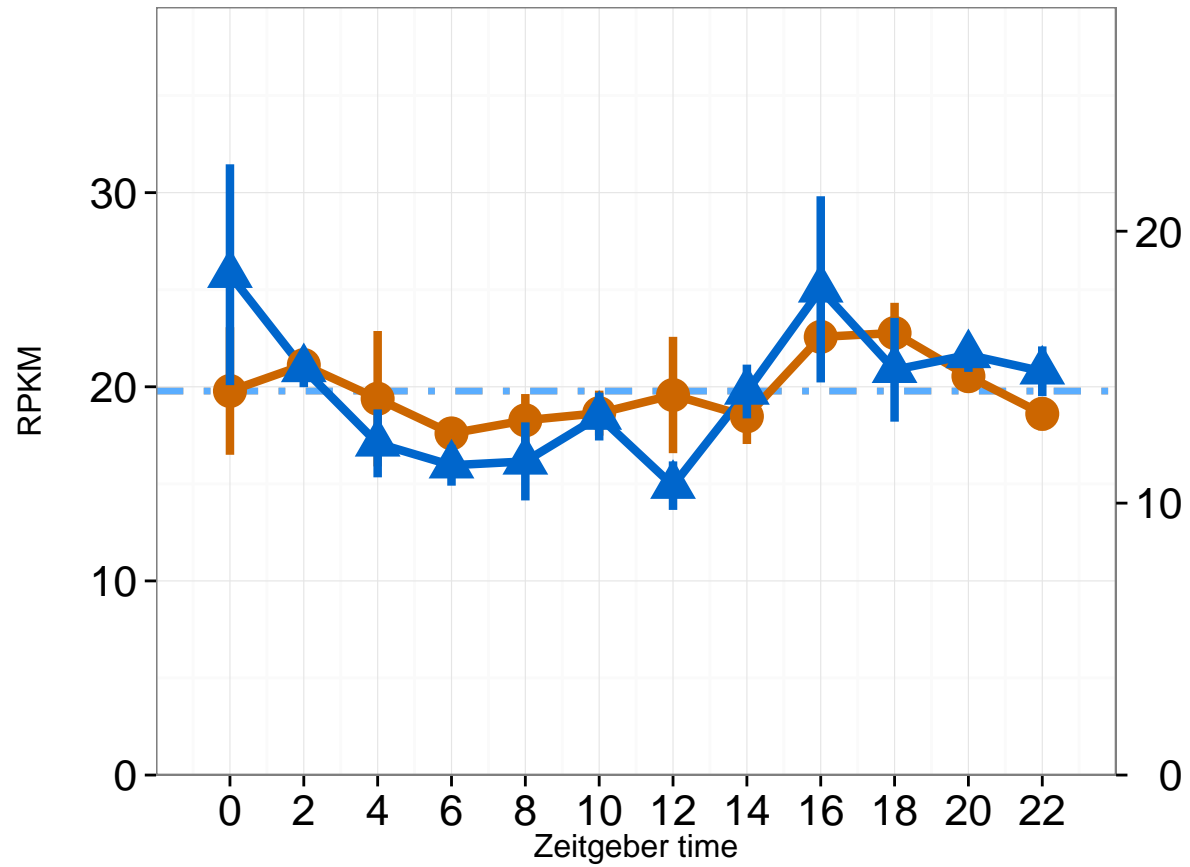

## Srek1

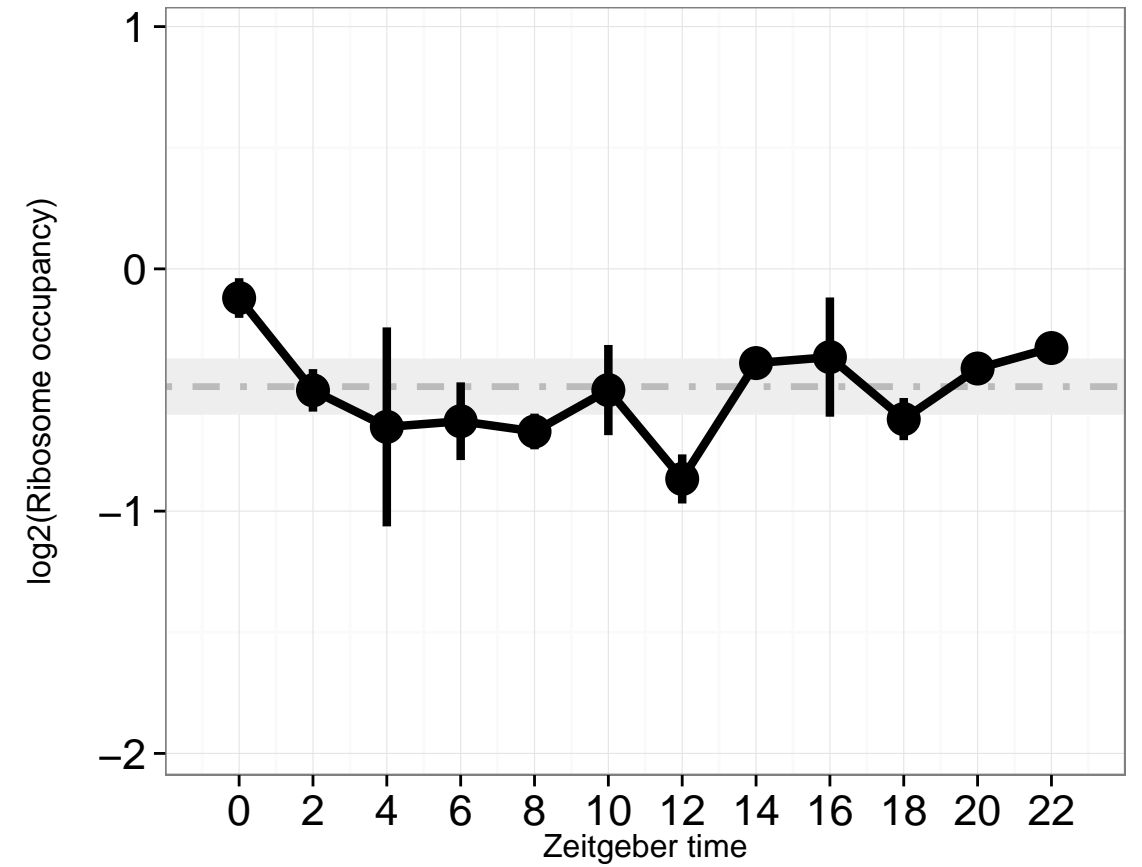

Supplement: Supplementary file 238 [file 1]

## Psmd14

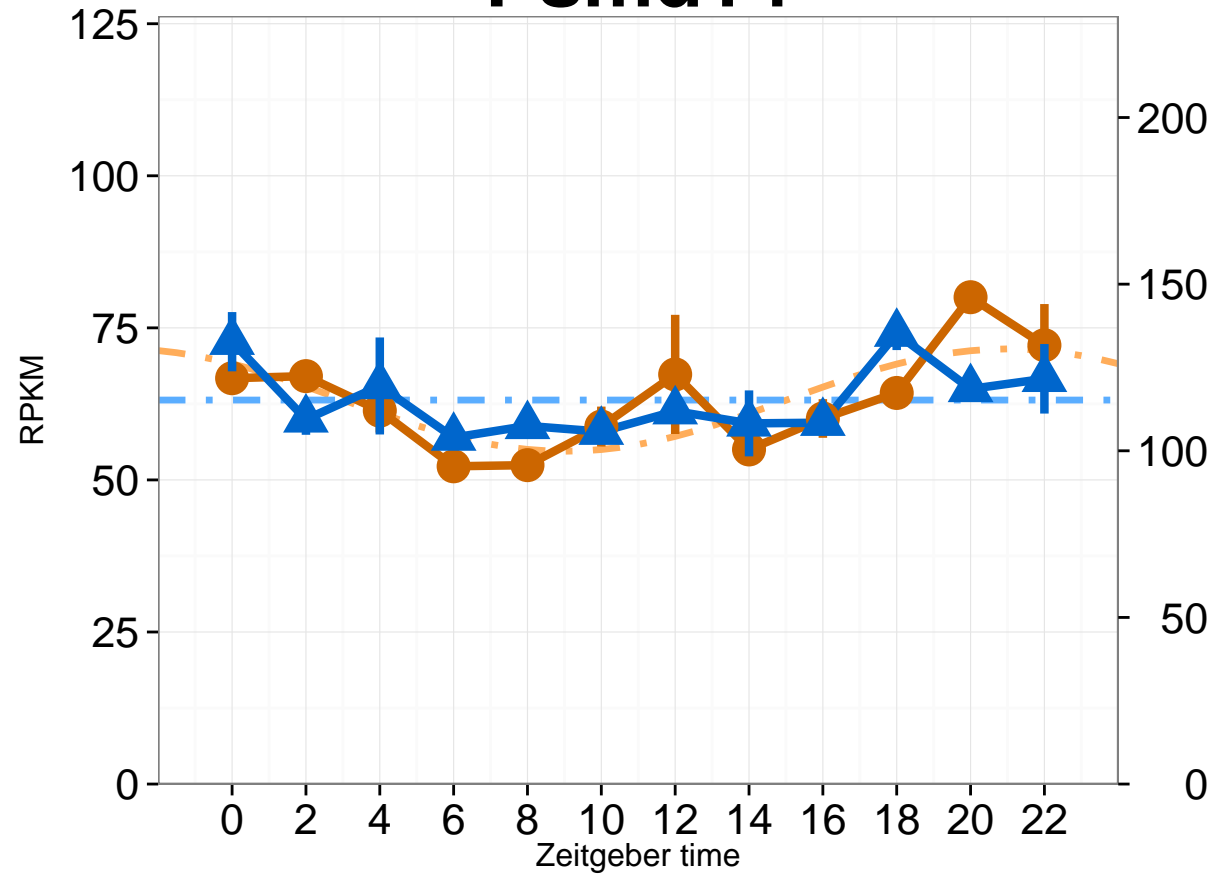

## Psmd14

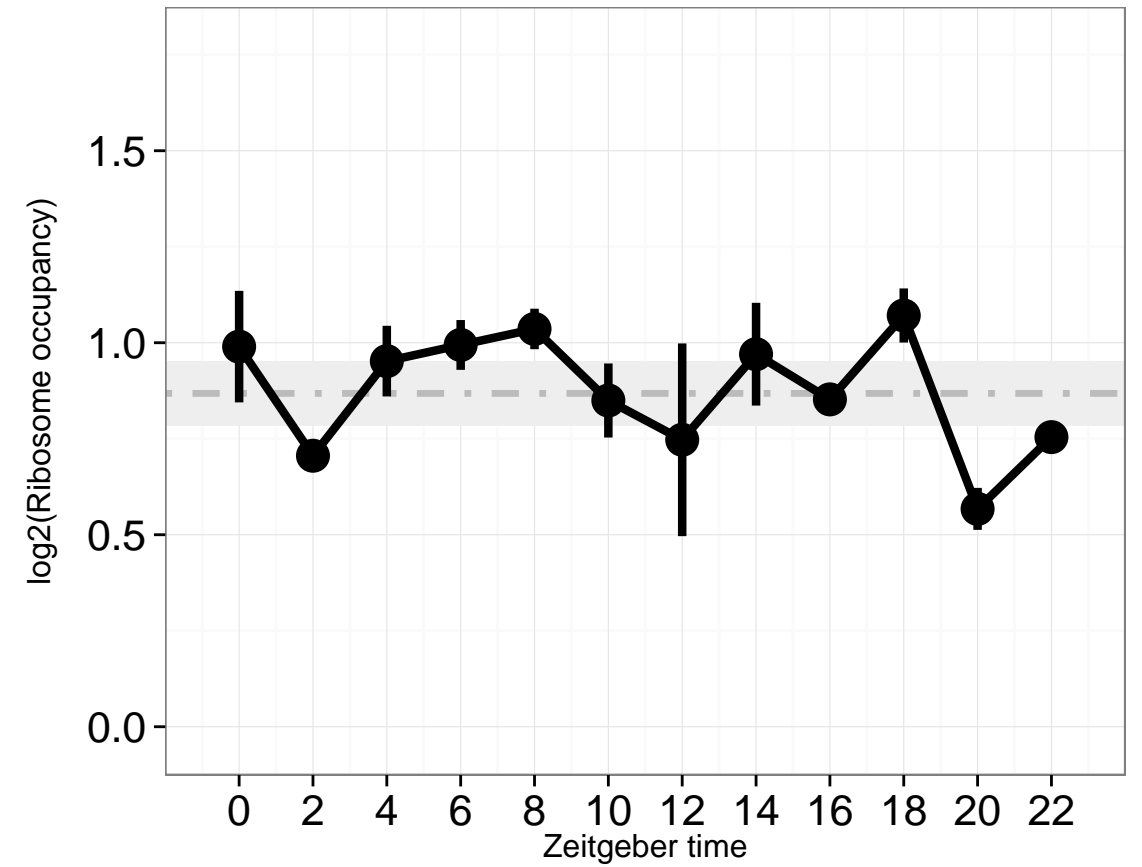

Supplement: Supplementary file 239 [file 1]

## Jmjd1c

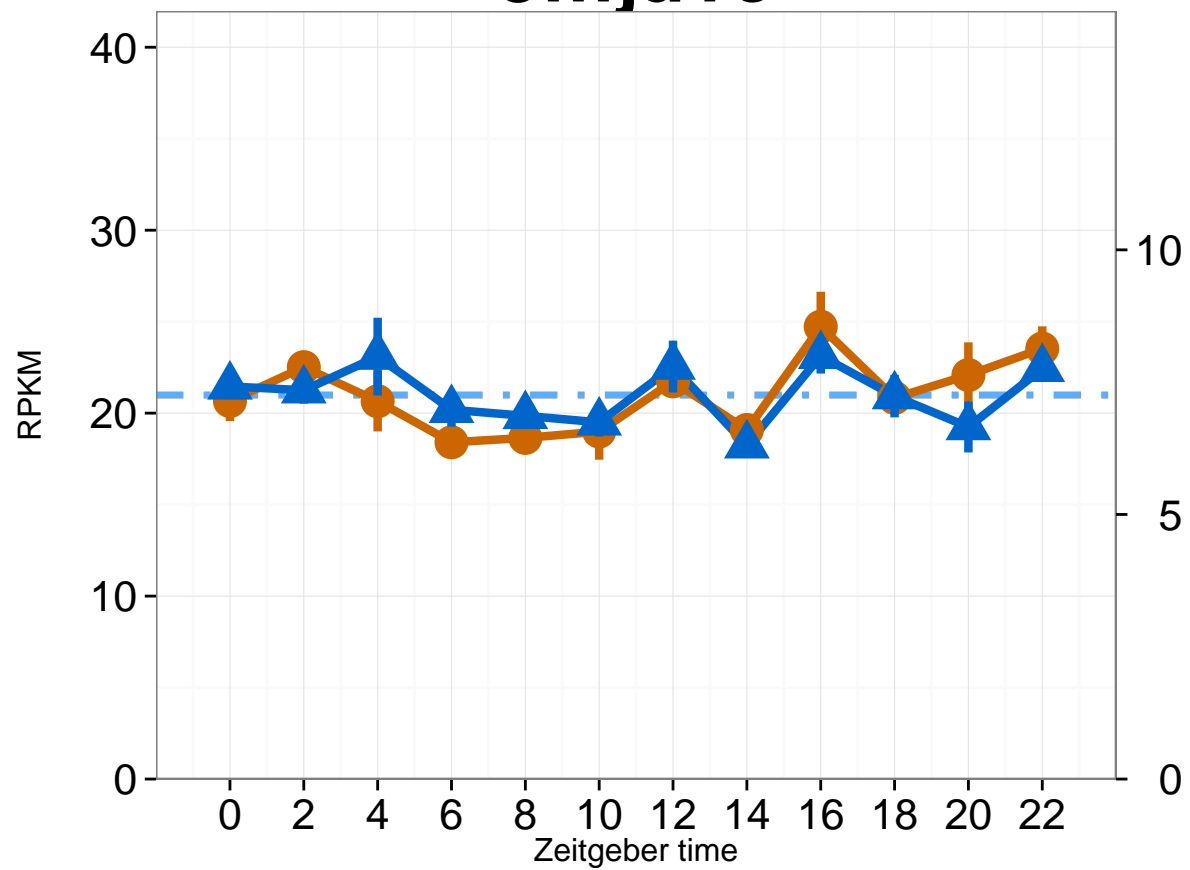

## Jmjd1c

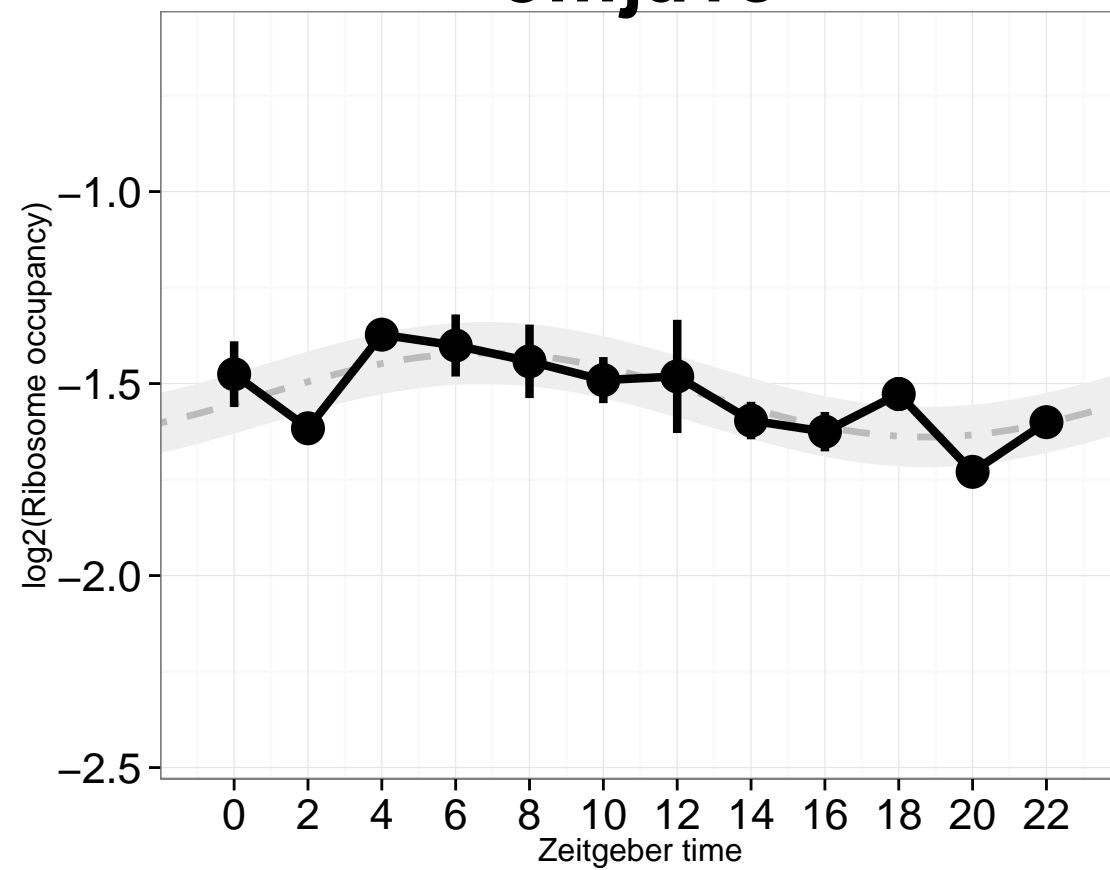

Supplement: Supplementary file 240 [file 1]

## Jrk

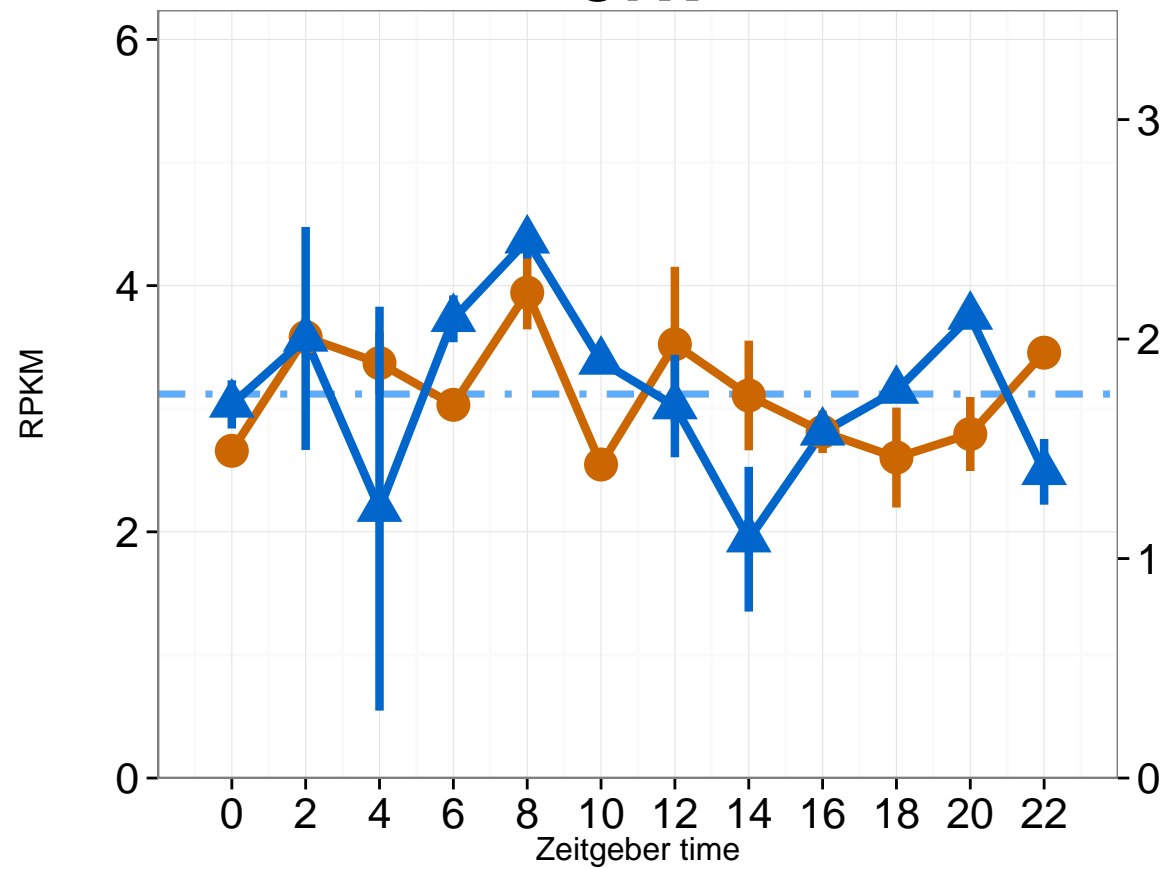

## Jrk

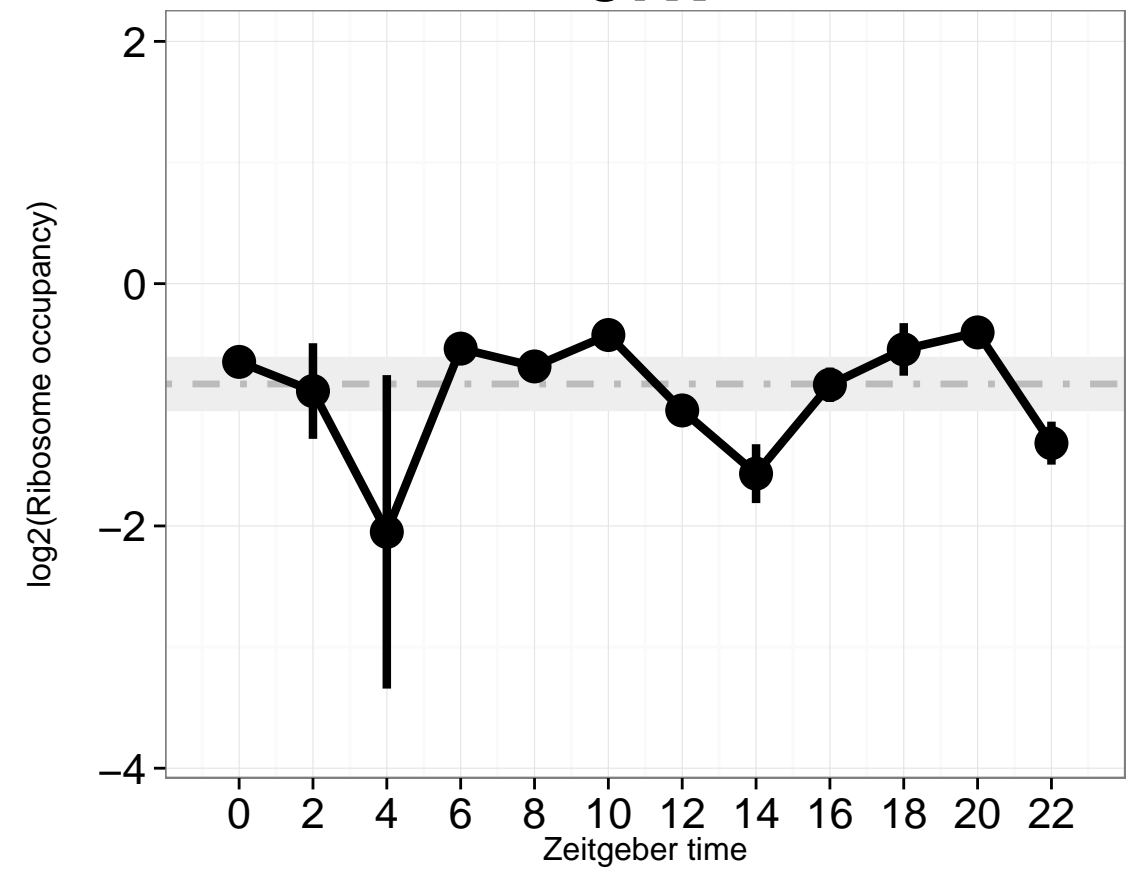

Supplement: Supplementary file 241 [file 1]

## Pitpna

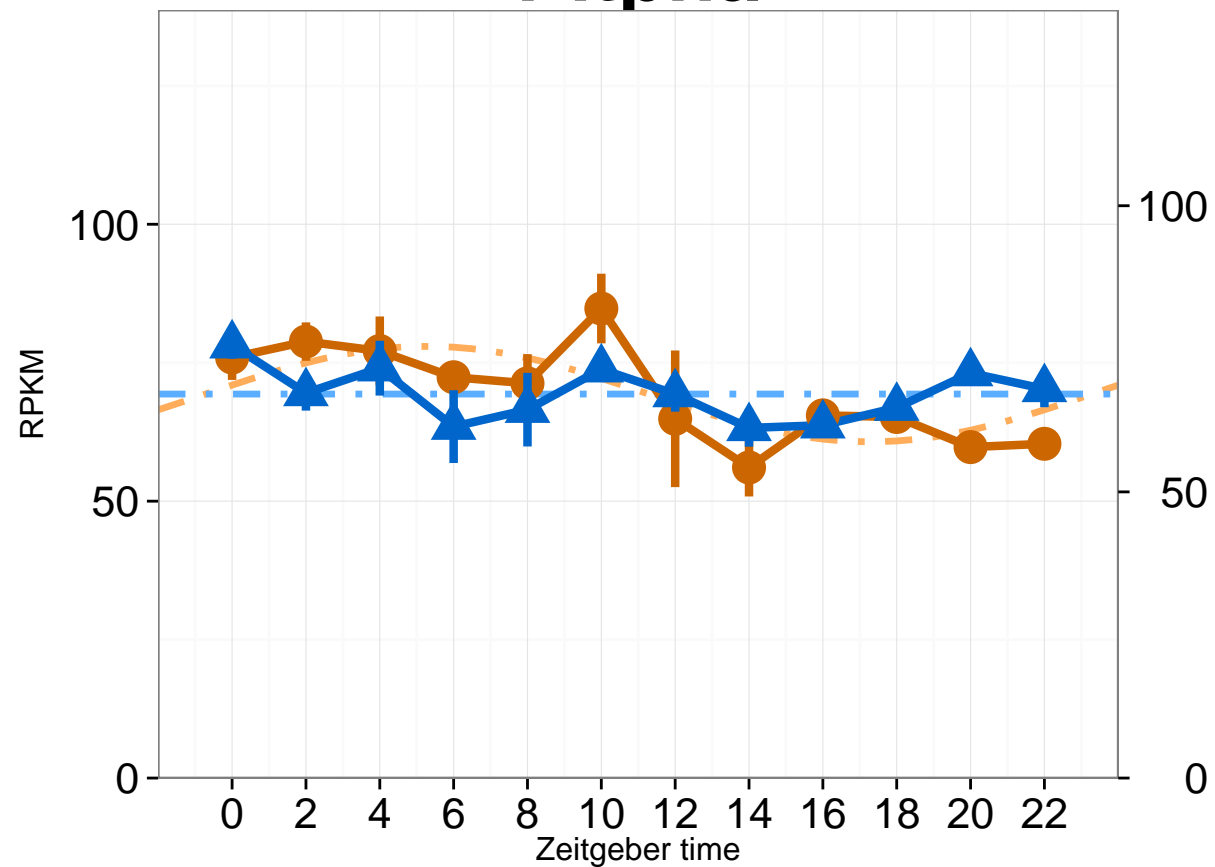

## Pitpna

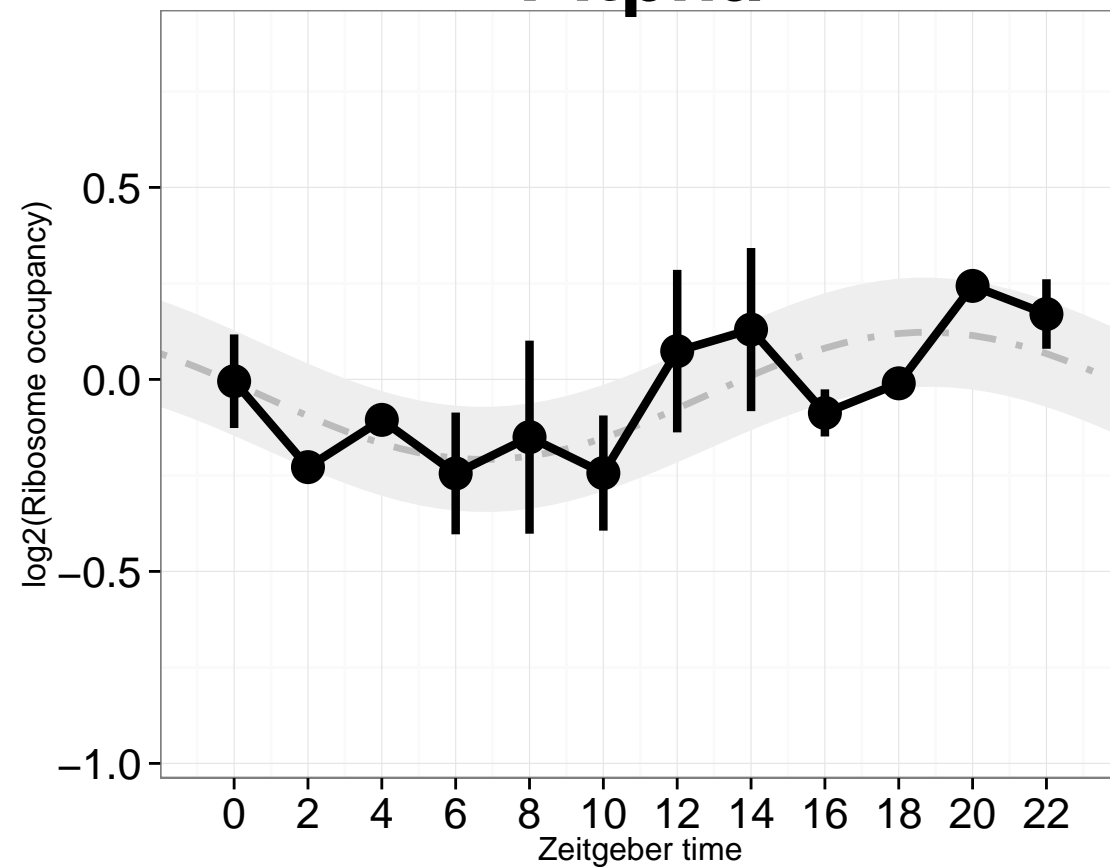

Supplement: Supplementary file 242 [file 1]

# AI837181

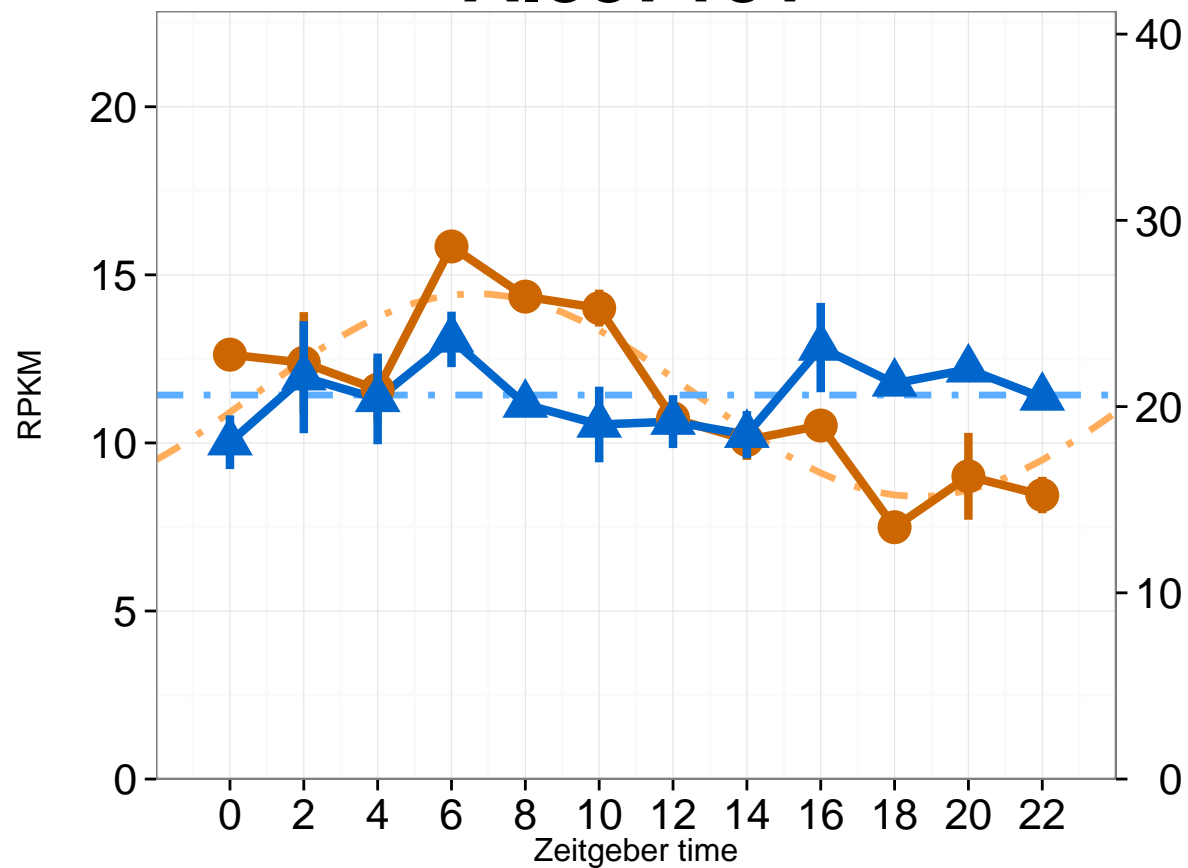

# AI837181

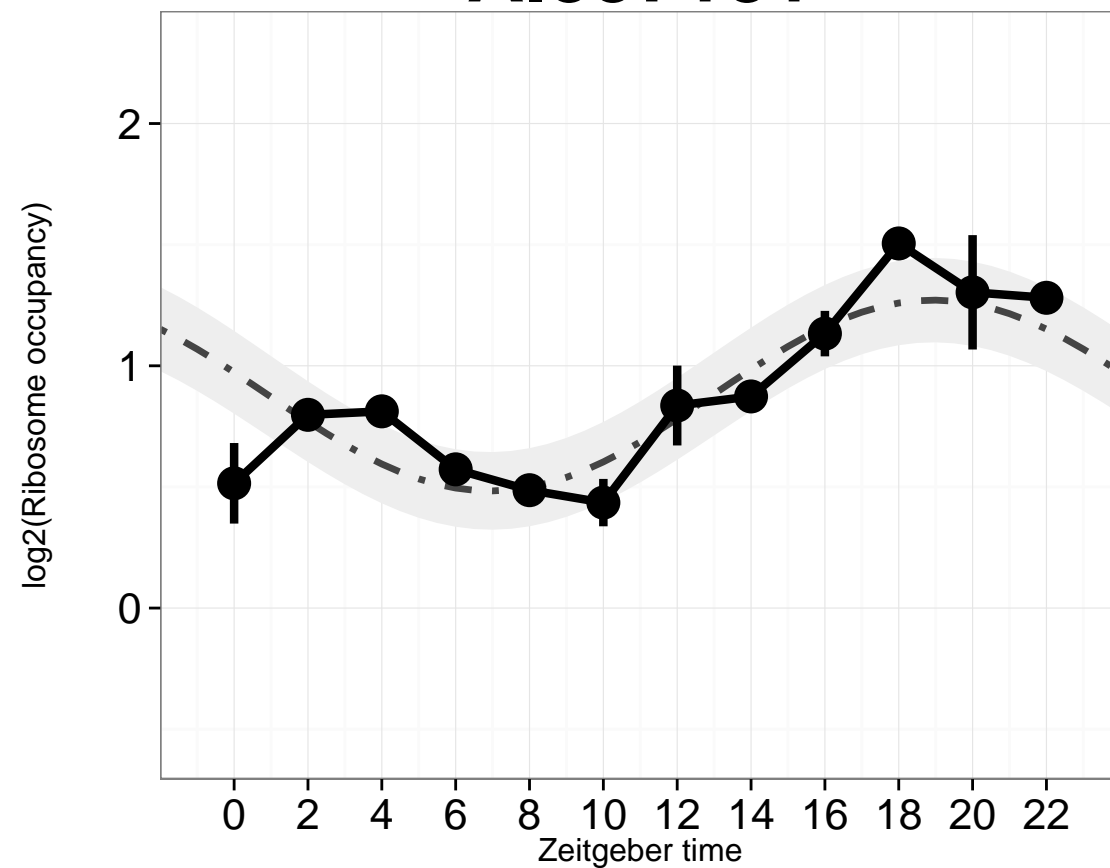

Supplement: Supplementary file 243 [file 1]

# Rpl12

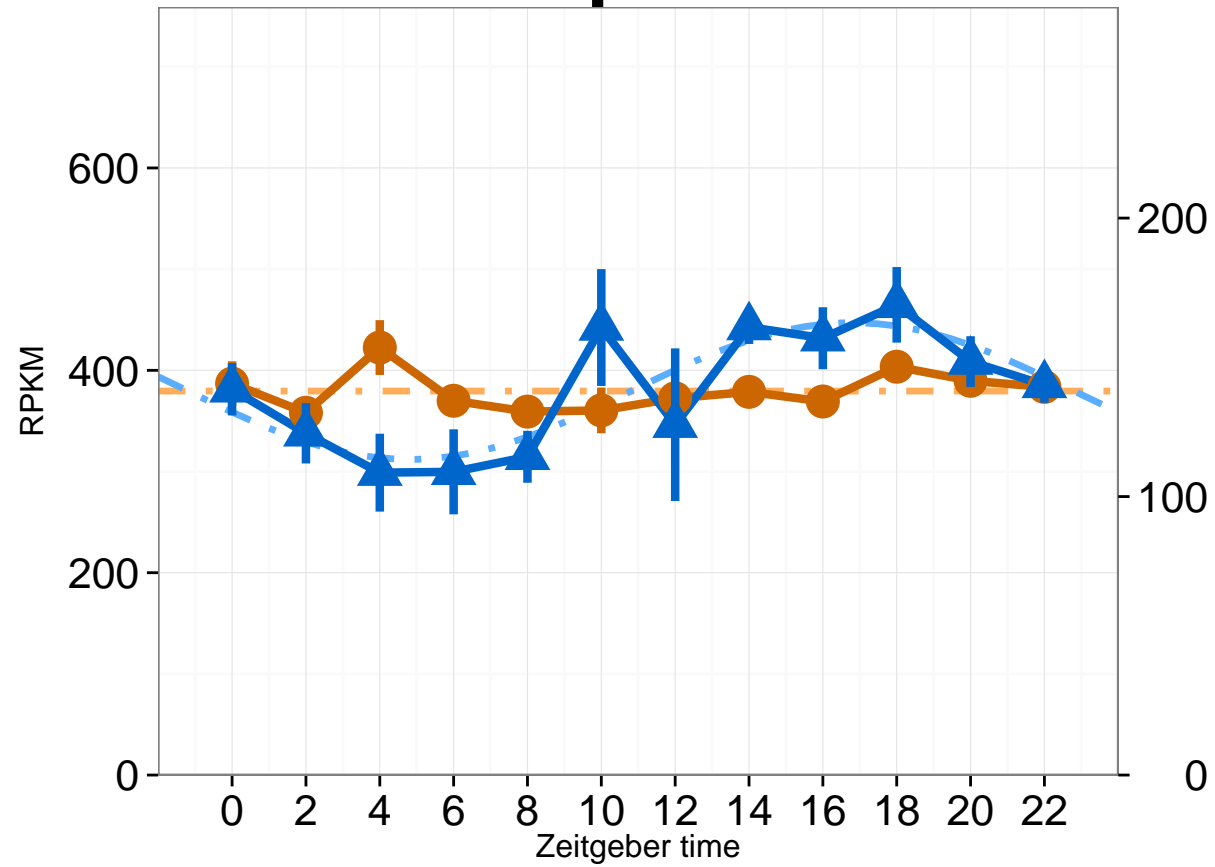

# Rpl12

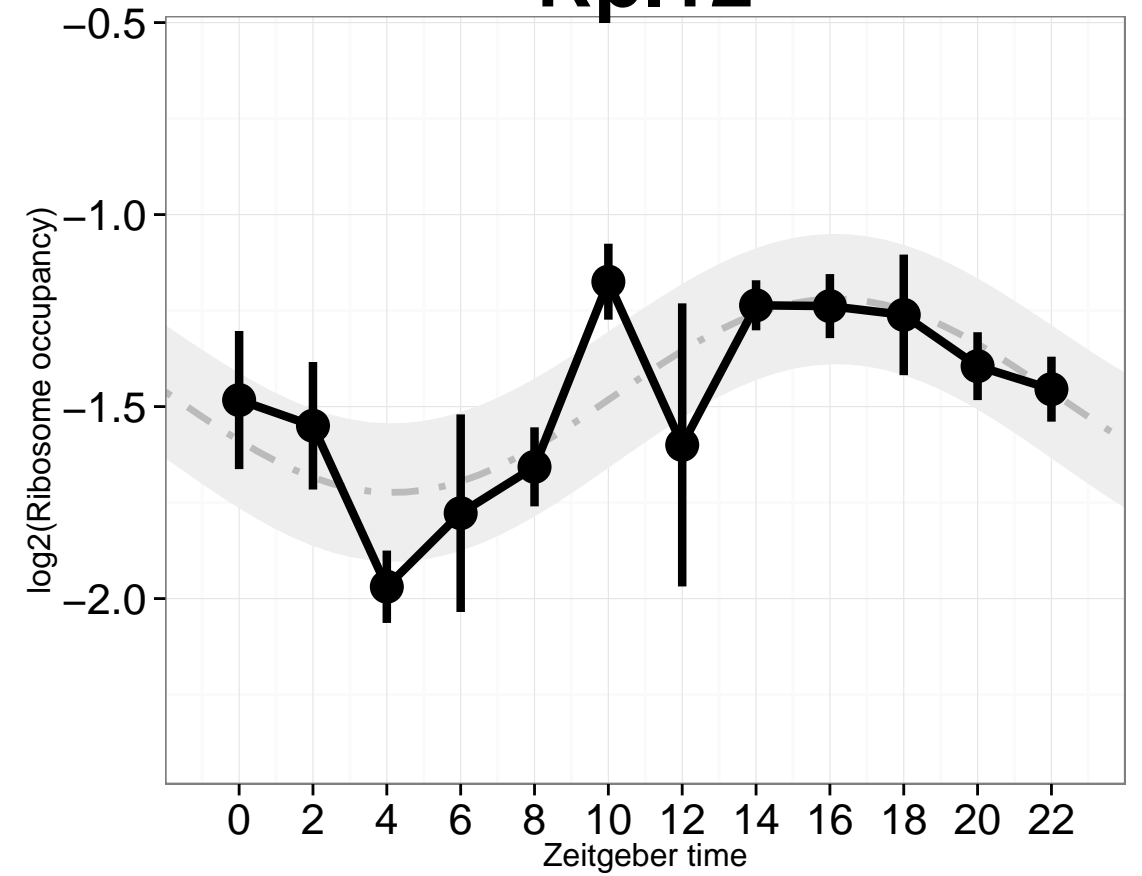

Supplement: Supplementary file 244 [file 1]

# Pdap1

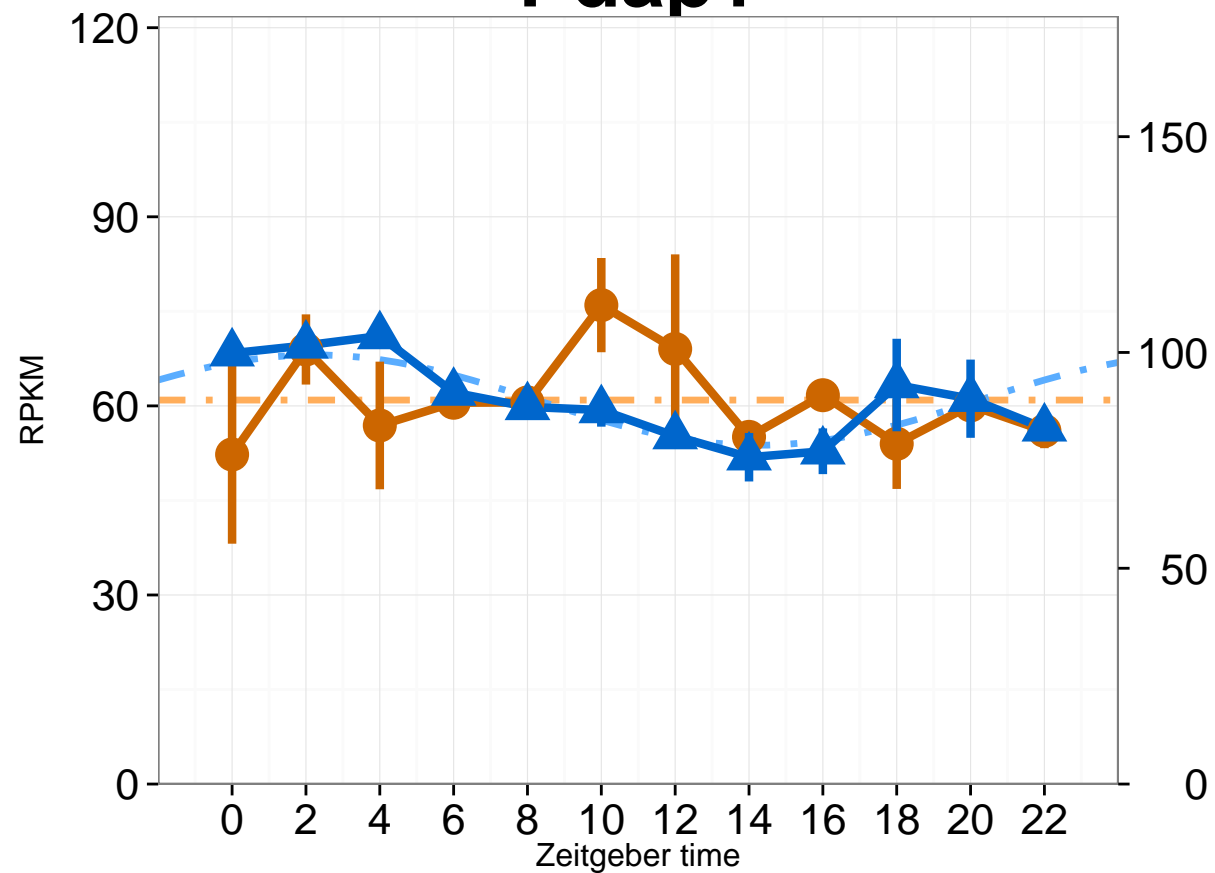

# Pdap1

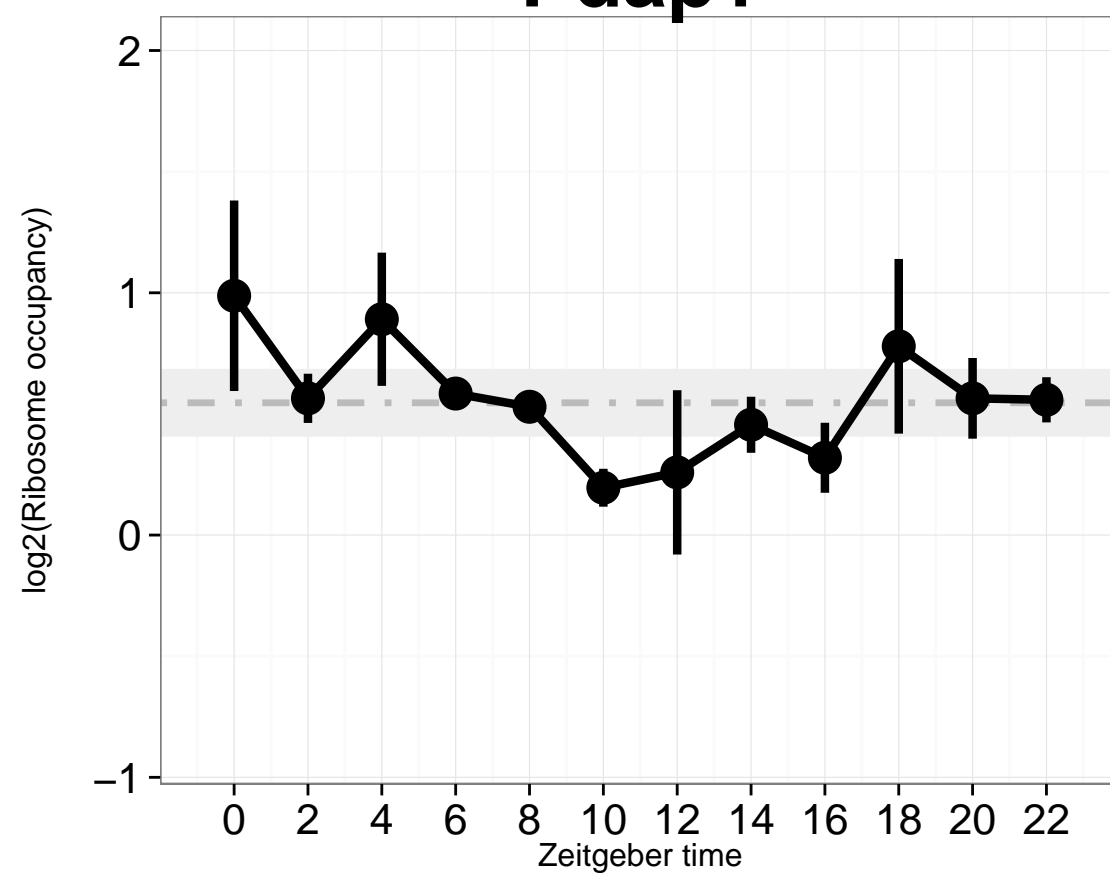

Supplement: Supplementary file 245 [file 1]

## Rad1

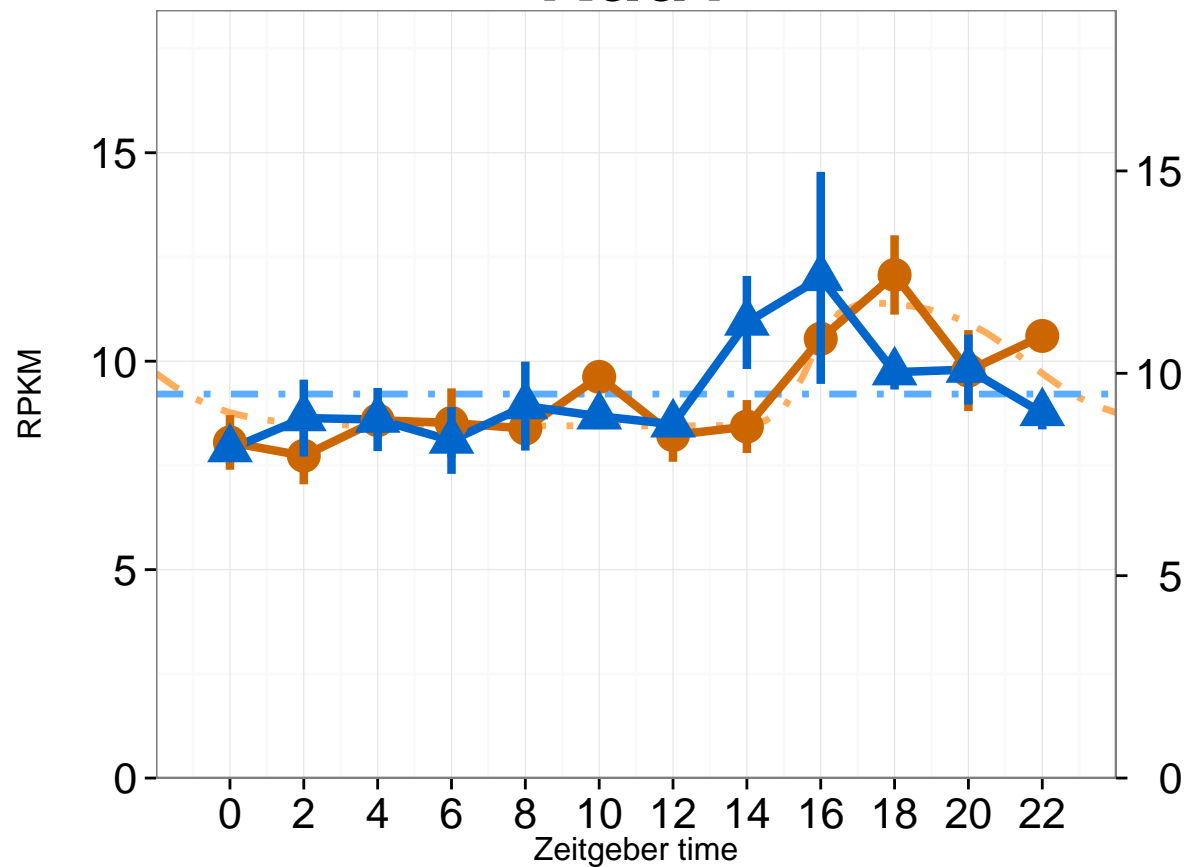

## Rad1

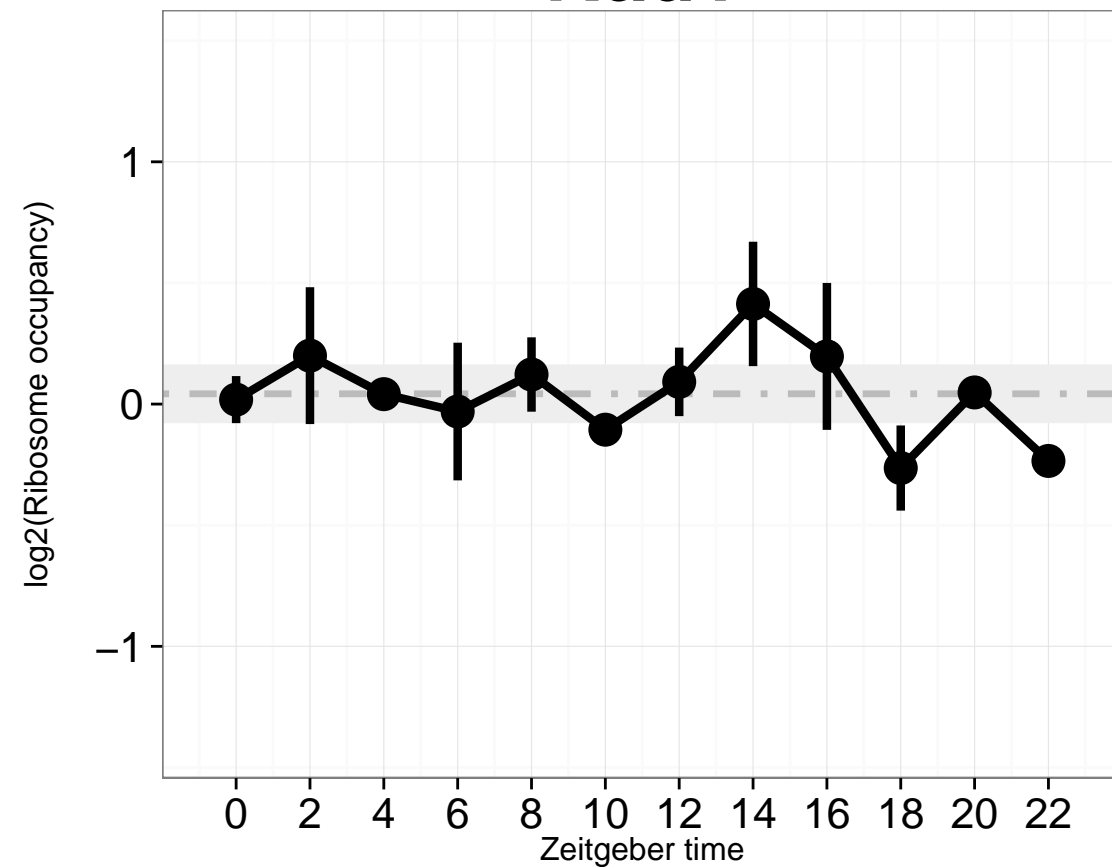

Supplement: Supplementary file 246 [file 1]

# Map2k4

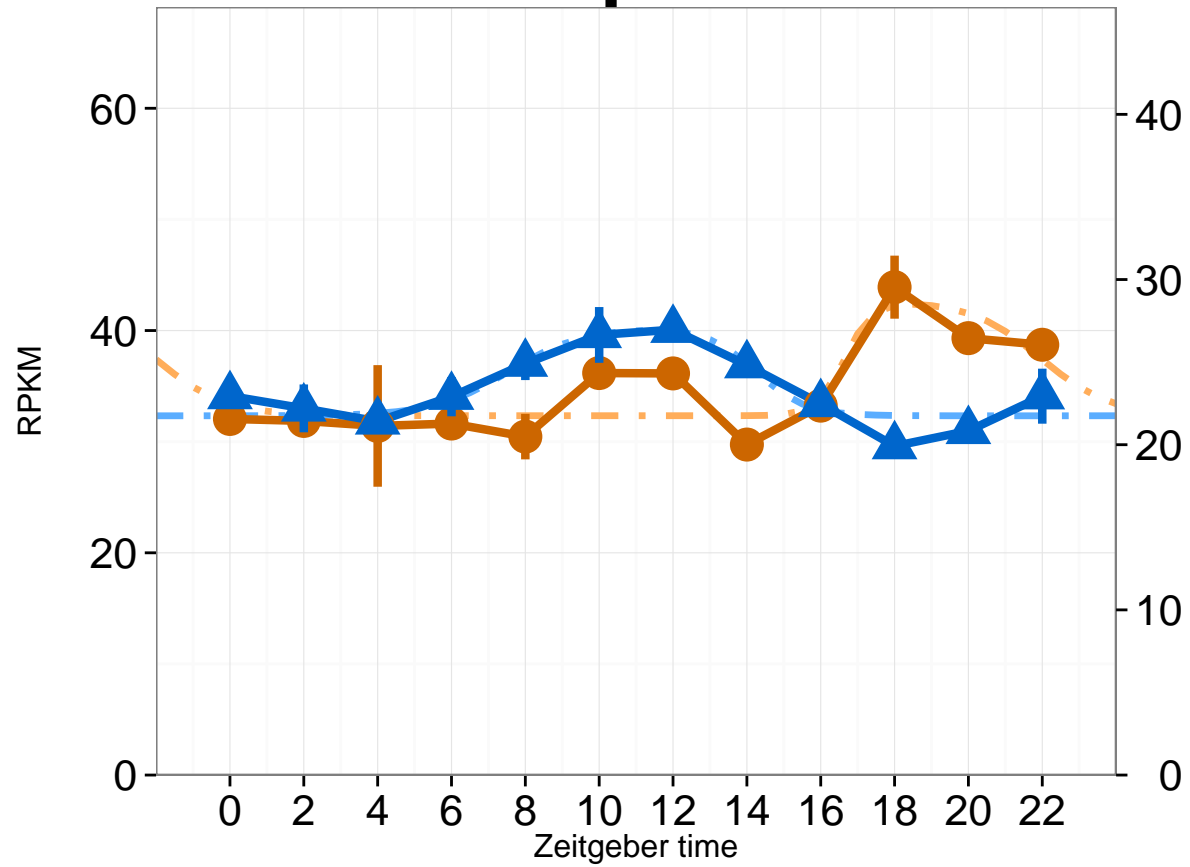

# Map2k4

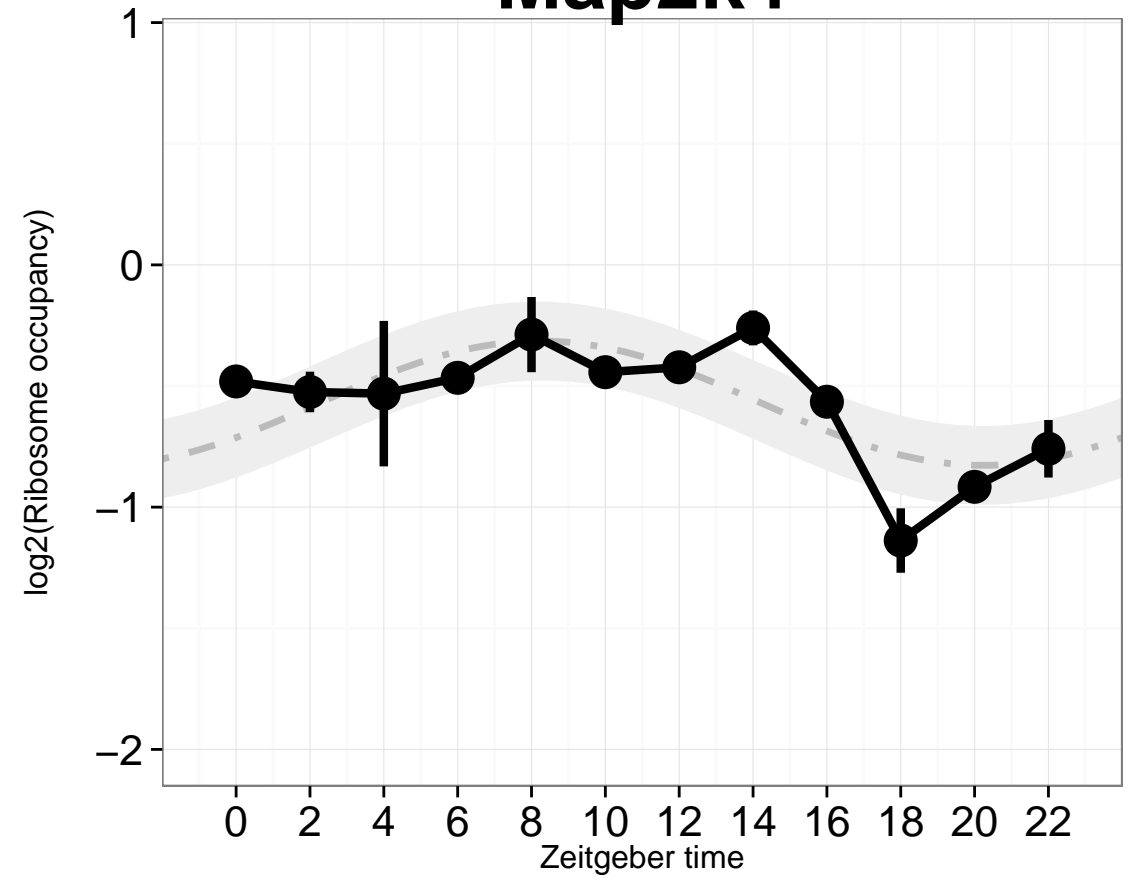

Supplement: Supplementary file 247 [file 1]

## Parg

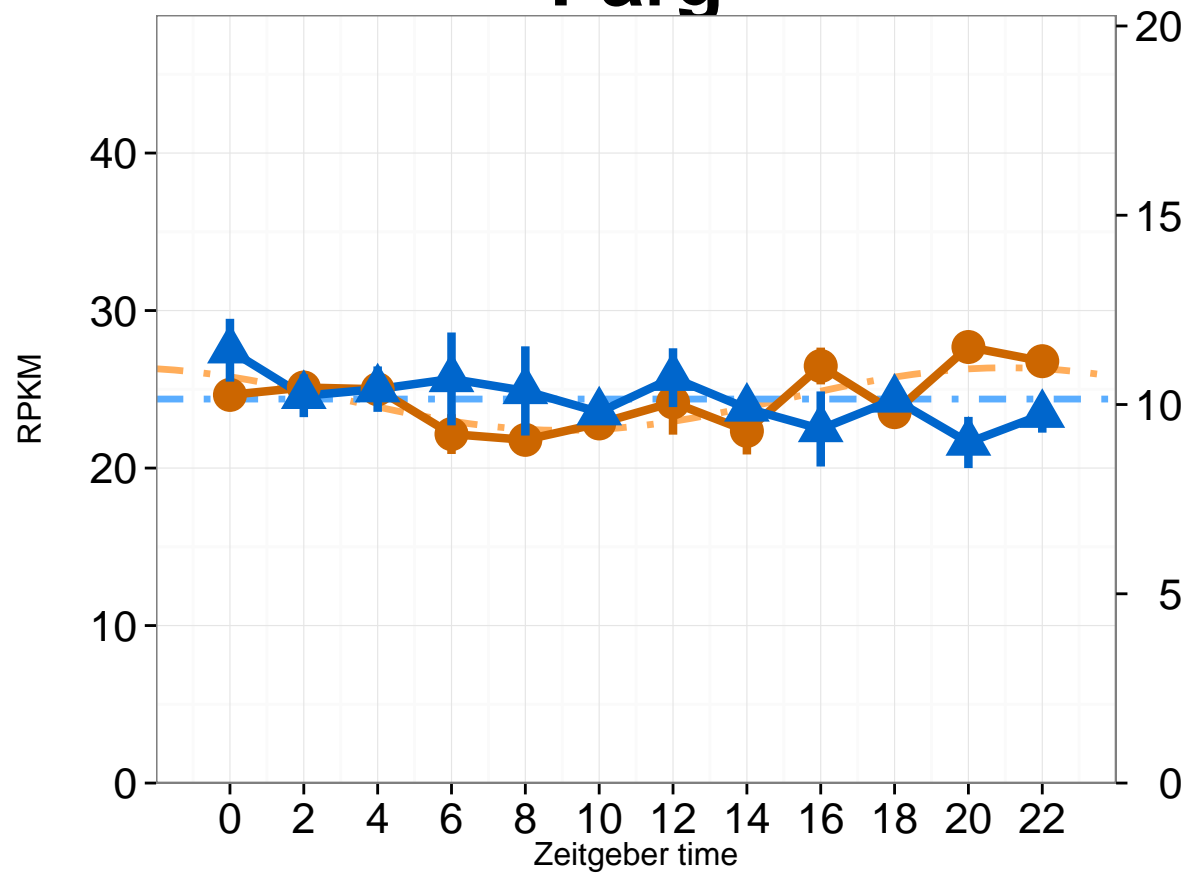

## Parg

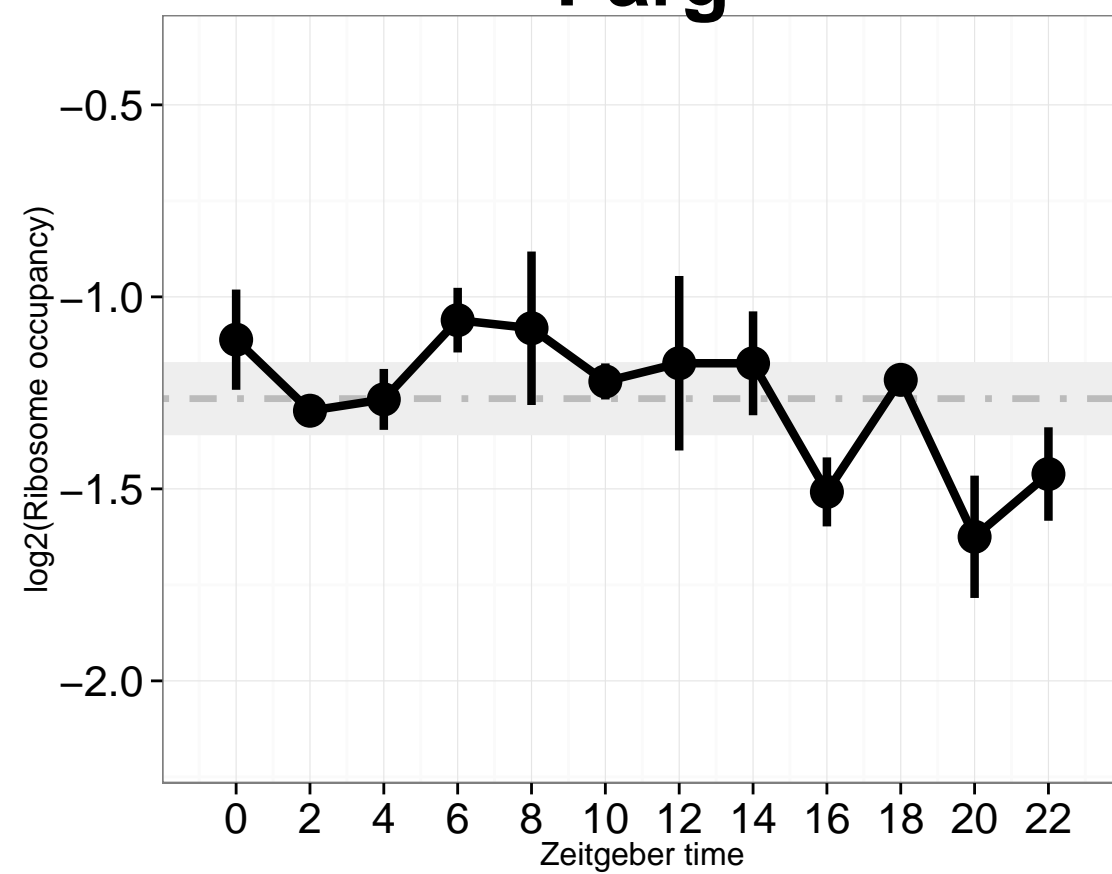

Supplement: Supplementary file 248 [file 1]

## Slc4a8

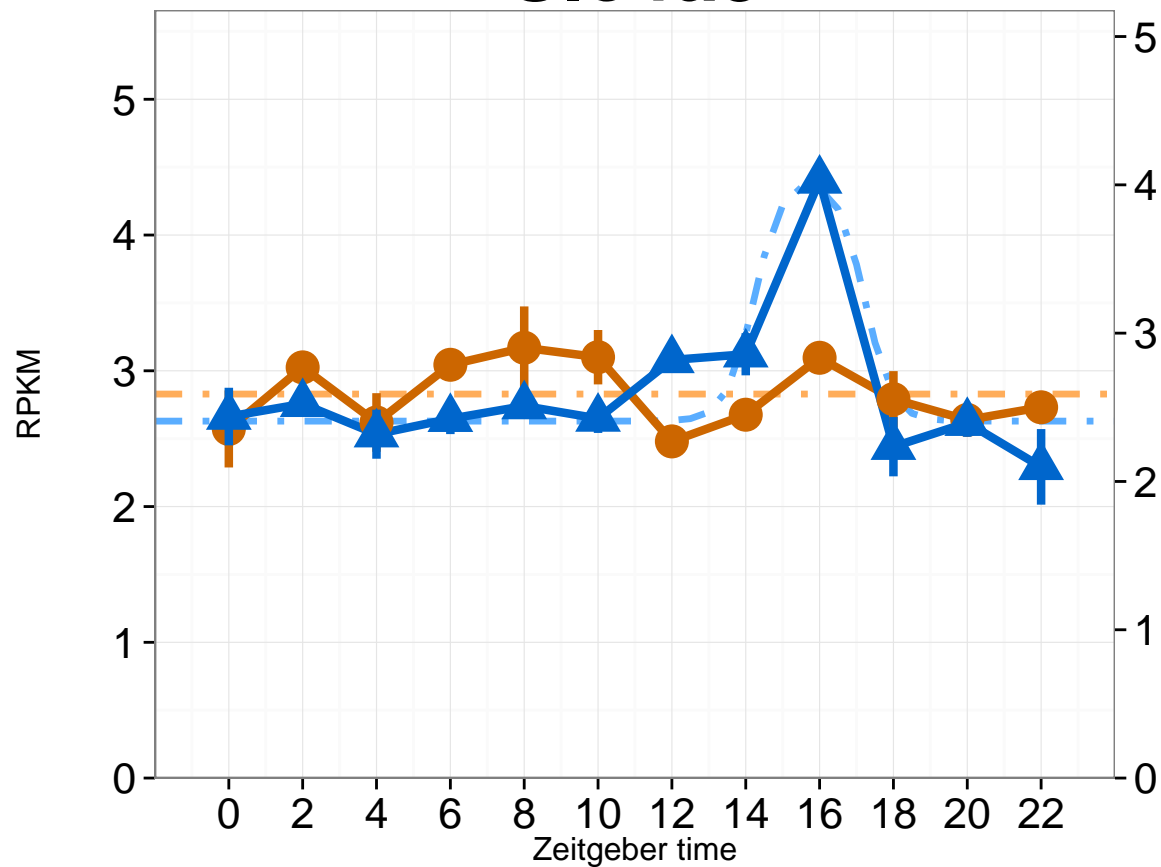

## Slc4a8

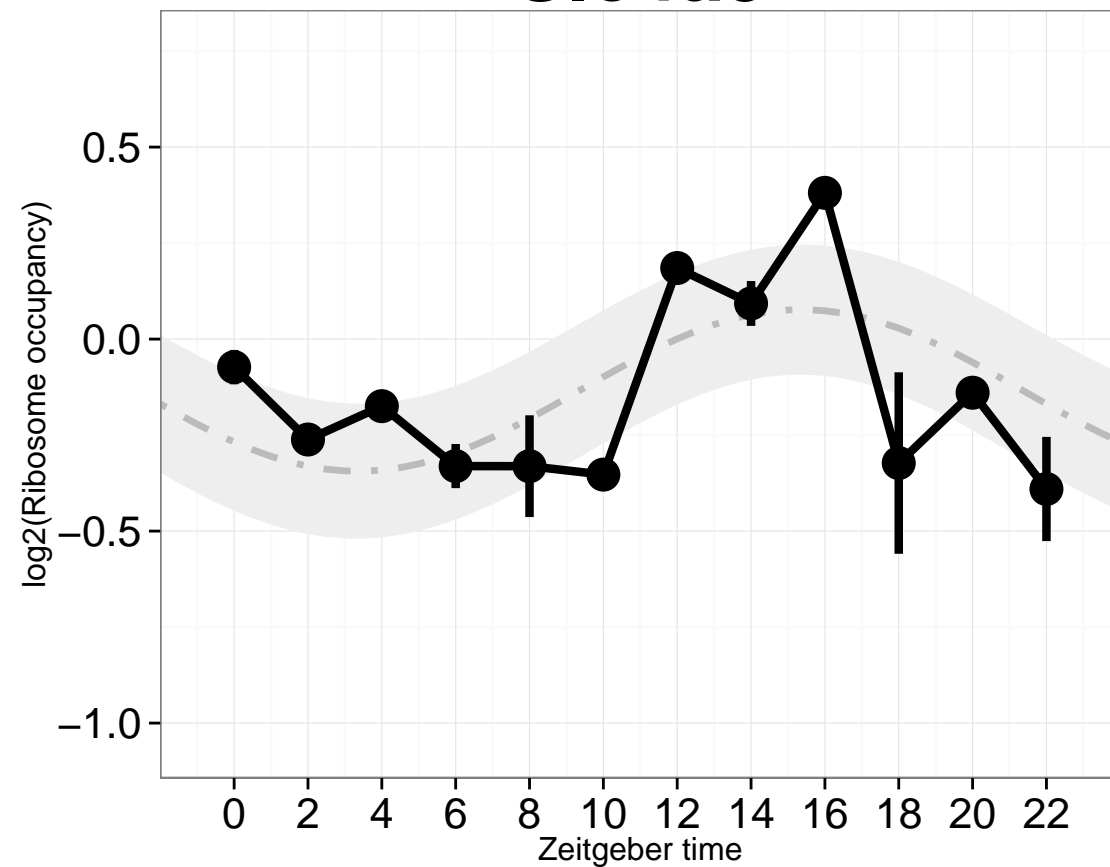

Supplement: Supplementary file 249 [file 1]

## Adamtsl1

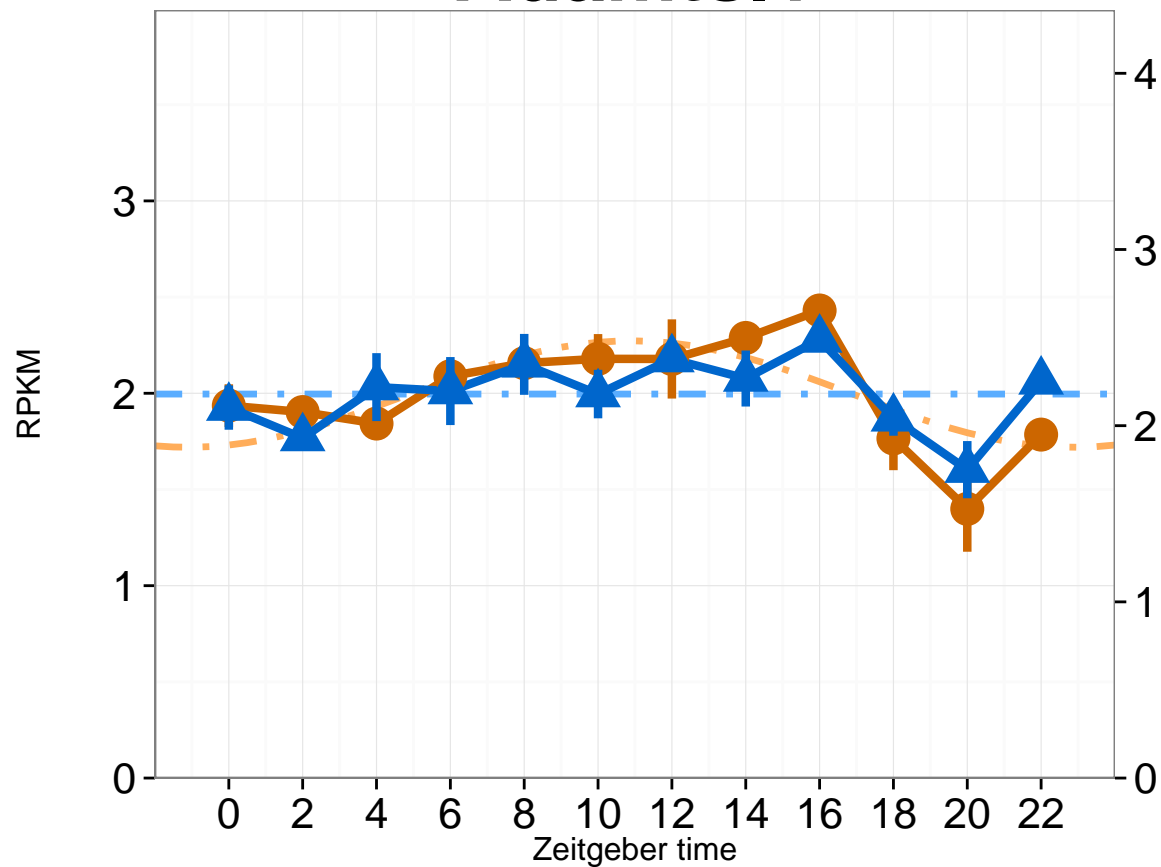

## Adamtsl1

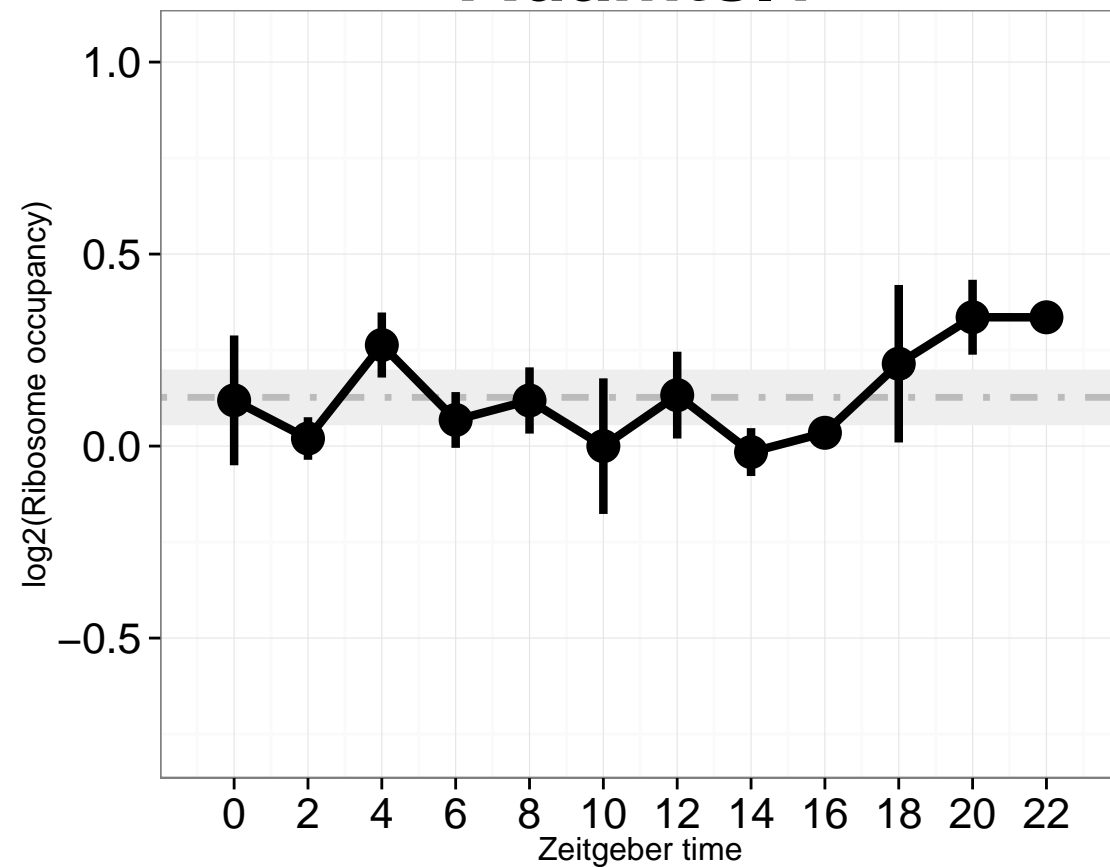

Supplement: Supplementary file 250 [file 1]

# Ap3d1

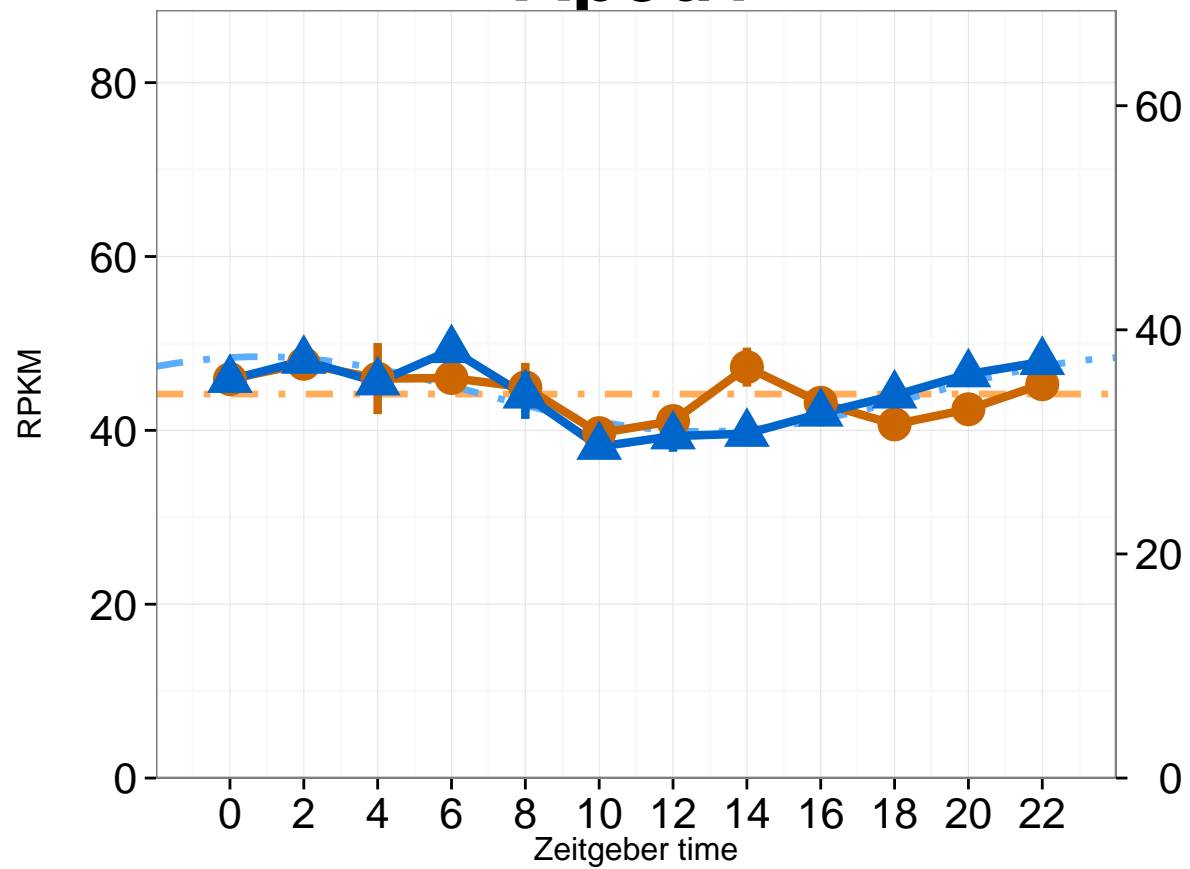

# Ap3d1

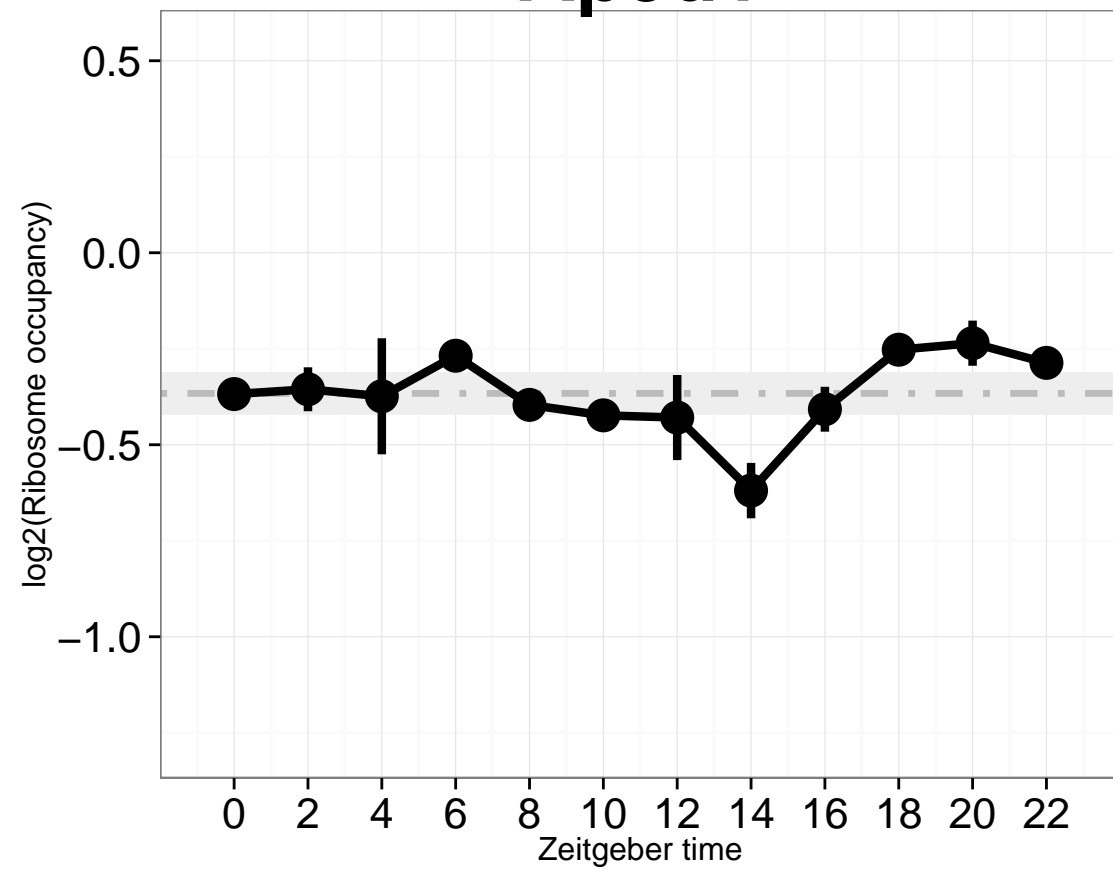

Supplement: Supplementary file 251 [file 1]

# Hey1

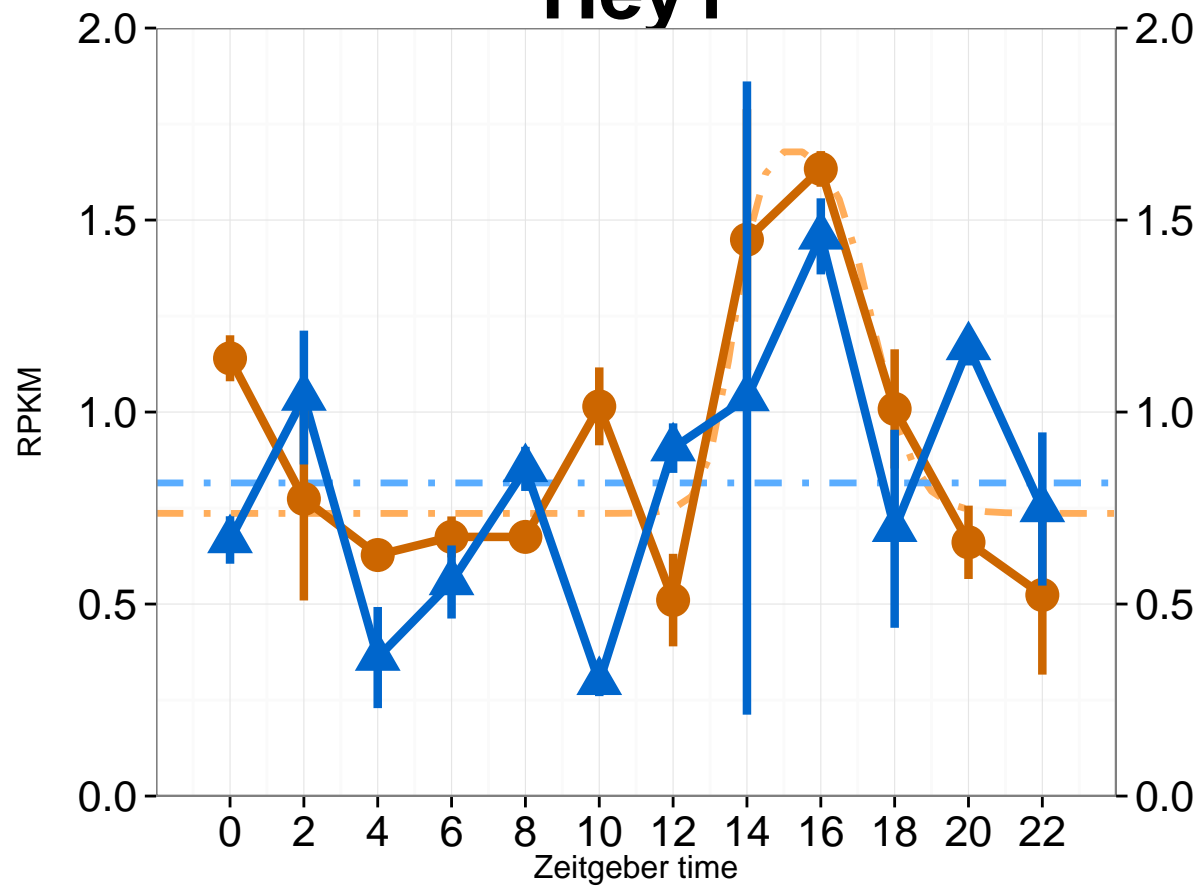

# Hey1

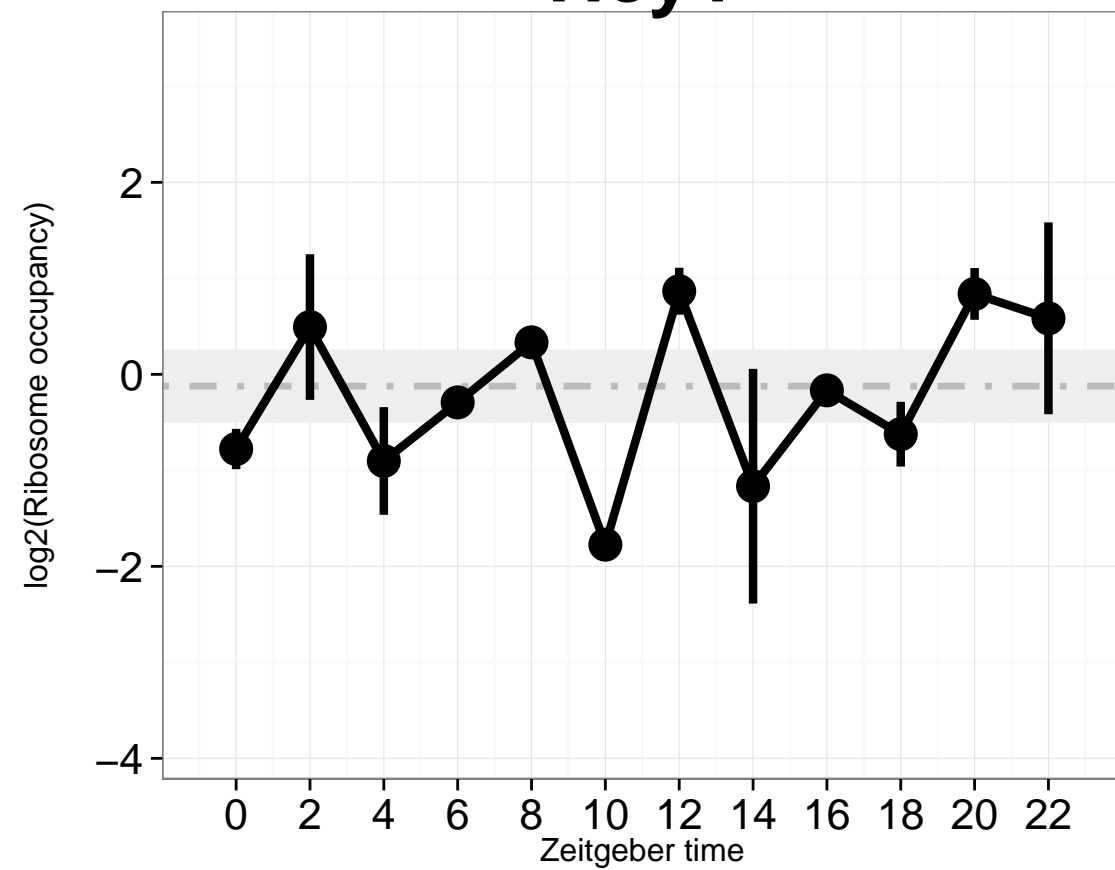

Supplement: Supplementary file 252 [file 1]

# Tm7sf3

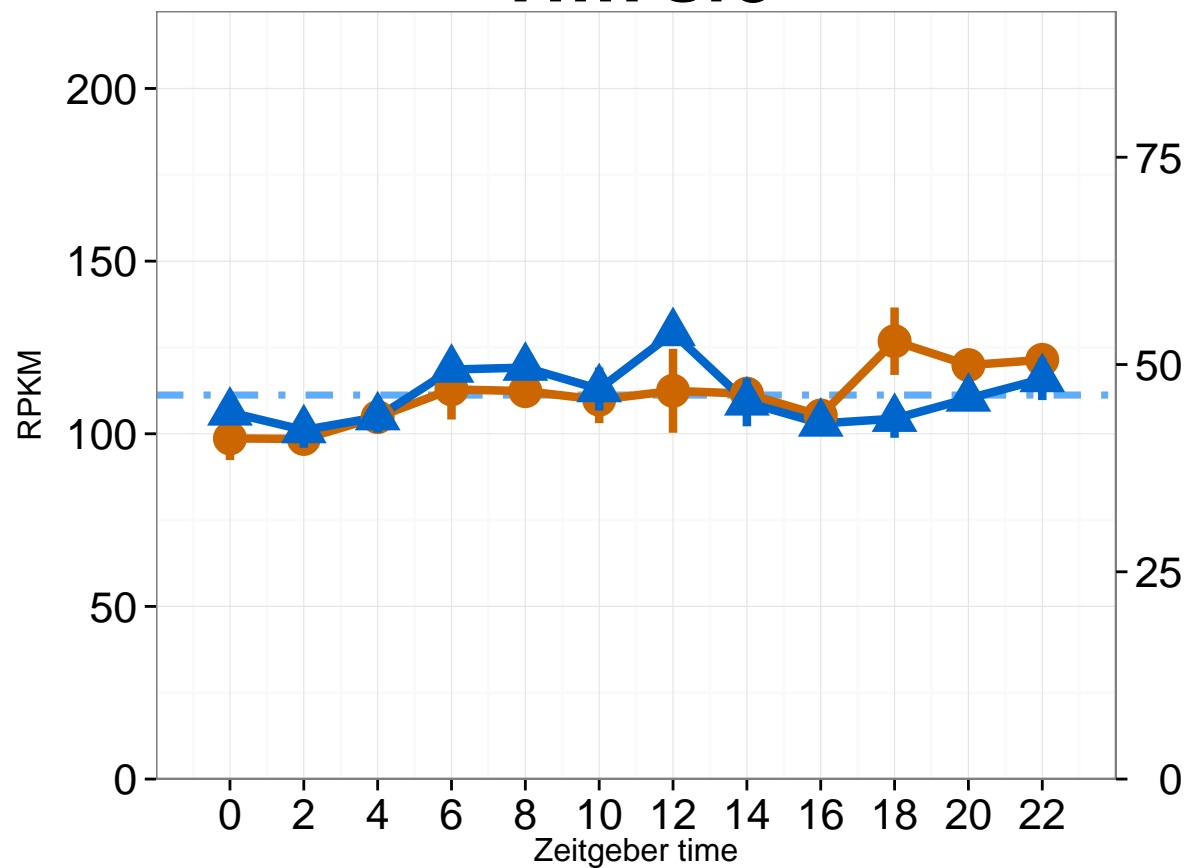

# Tm7sf3

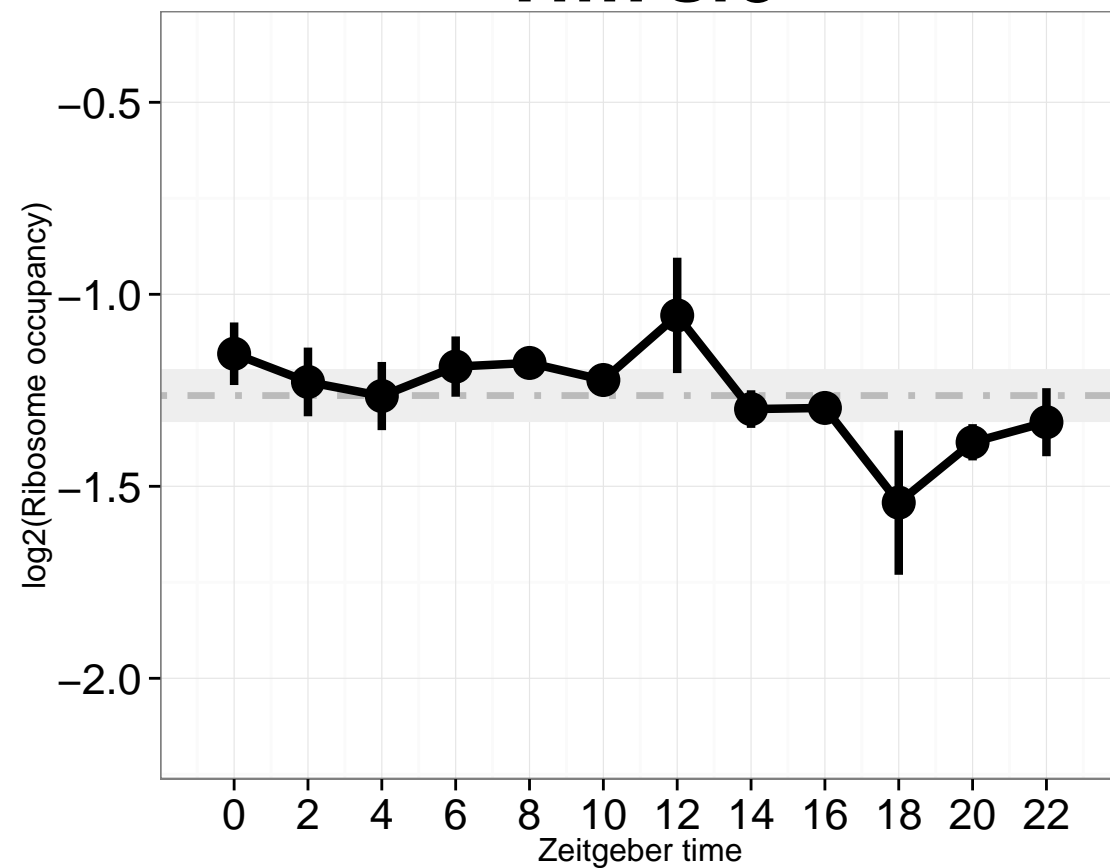

Supplement: Supplementary file 253 [file 1]

# Ppp1r11

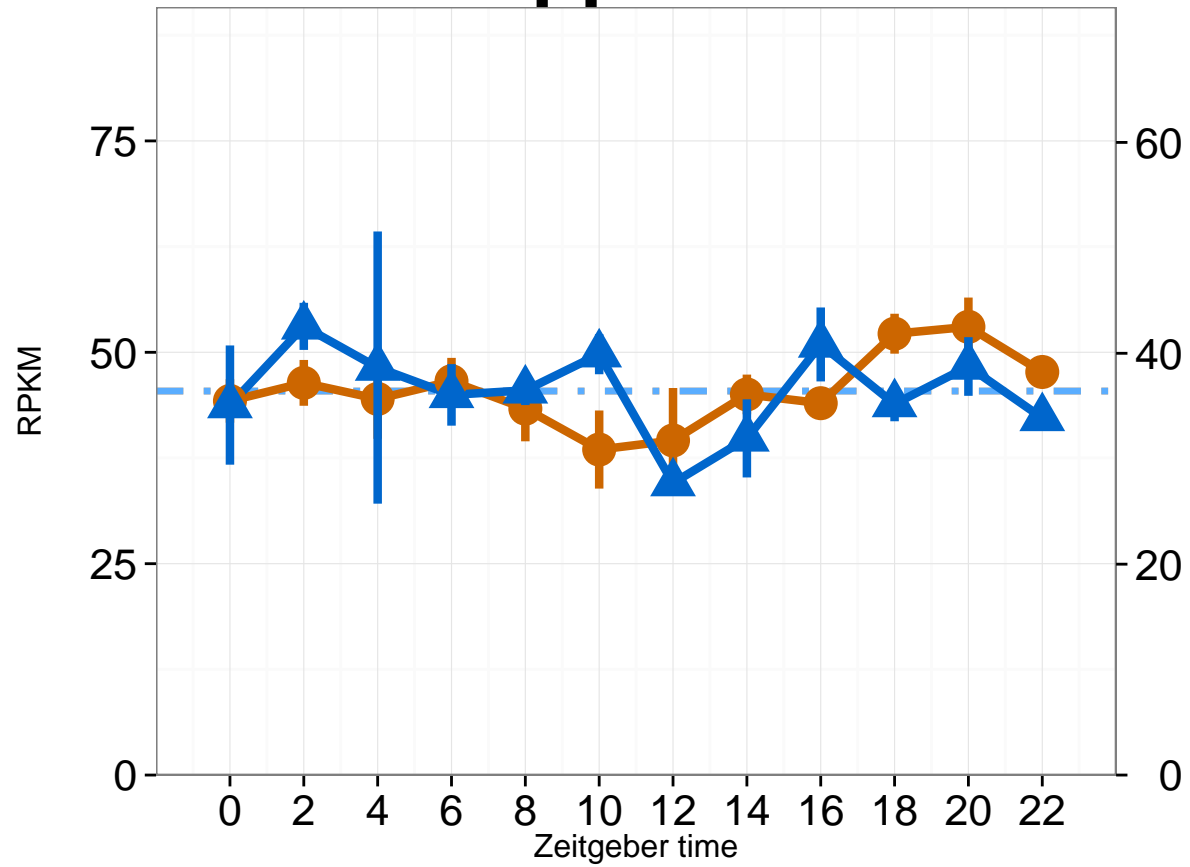

# Ppp1r11

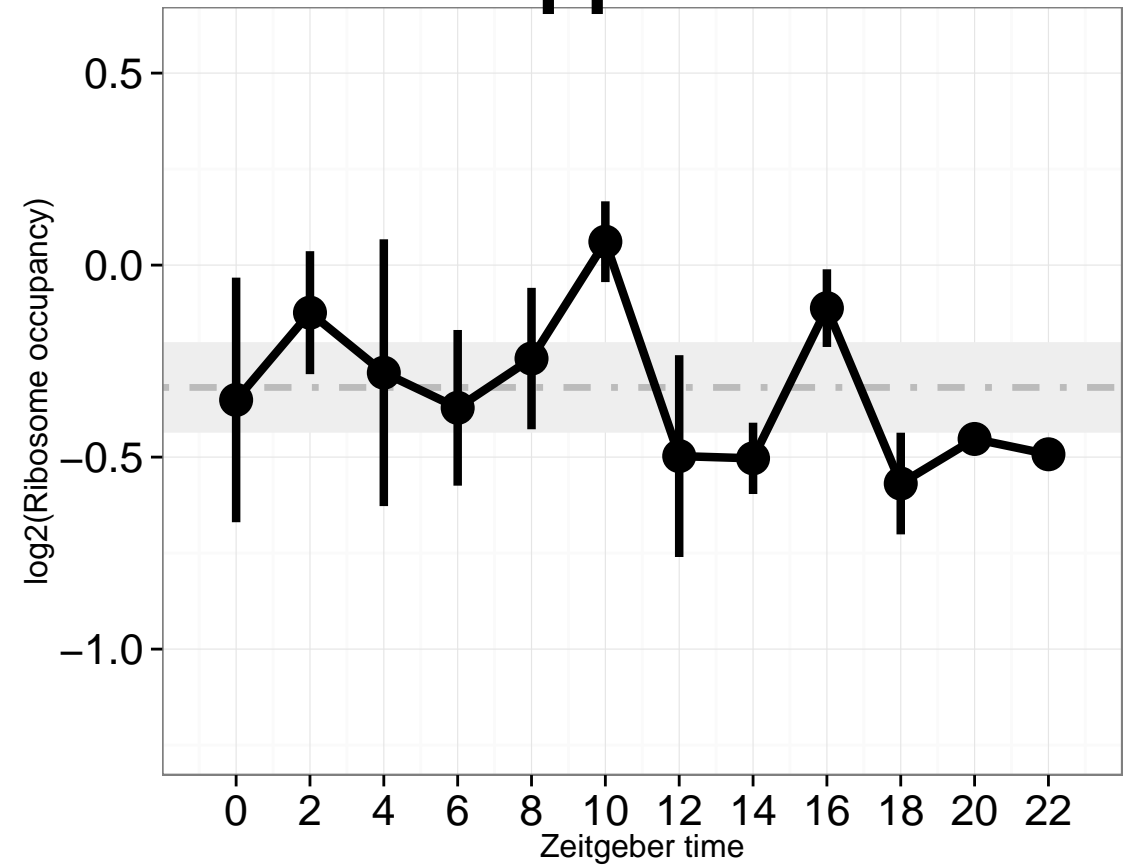

Supplement: Supplementary file 254 [file 1]

## Esrra

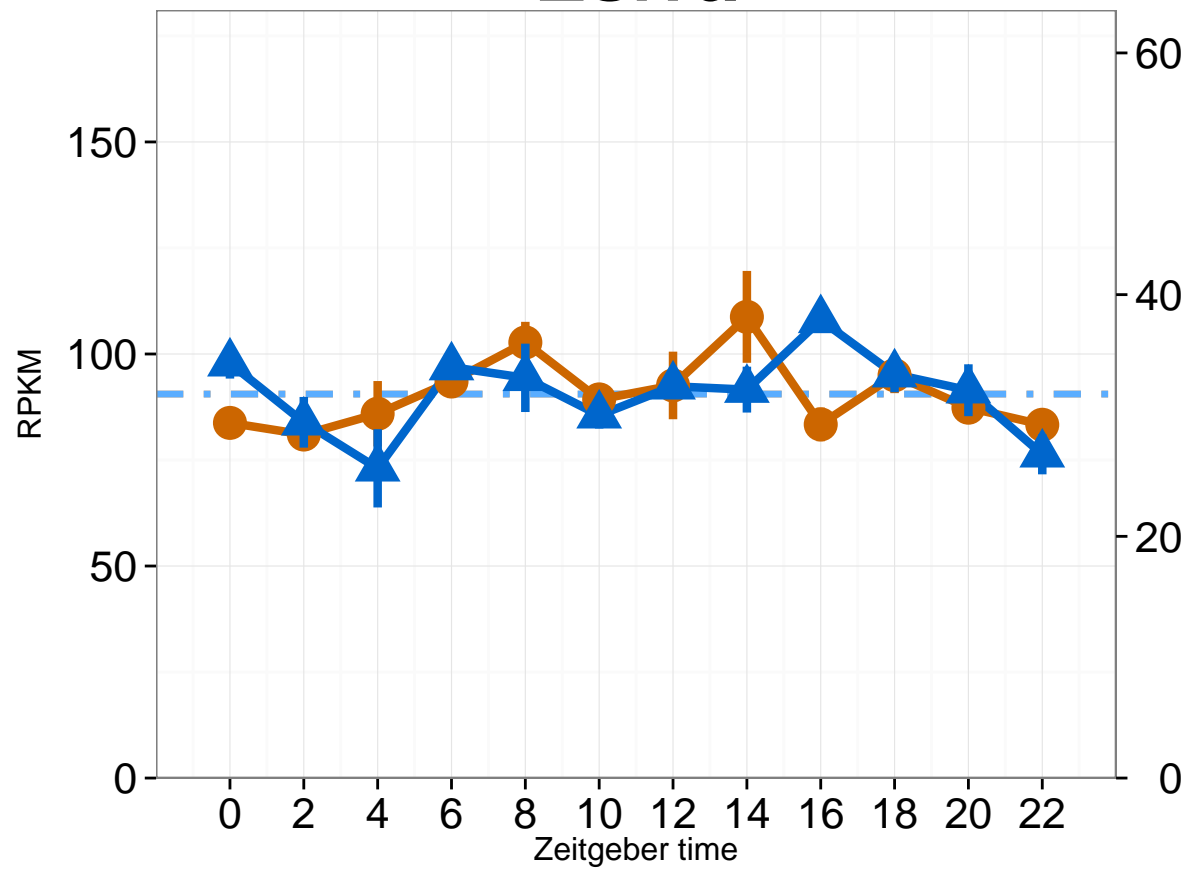

## Esrra

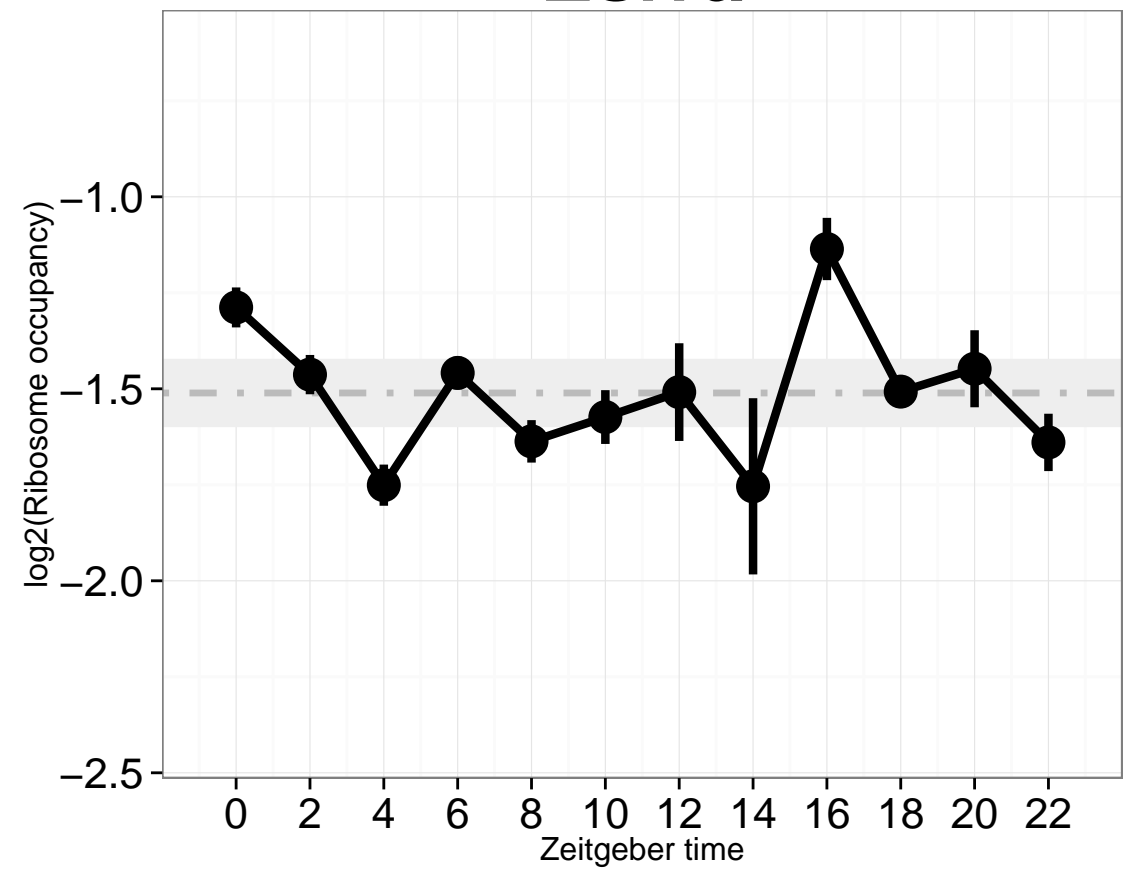

Supplement: Supplementary file 255 [file 1]

# Nsfl1c

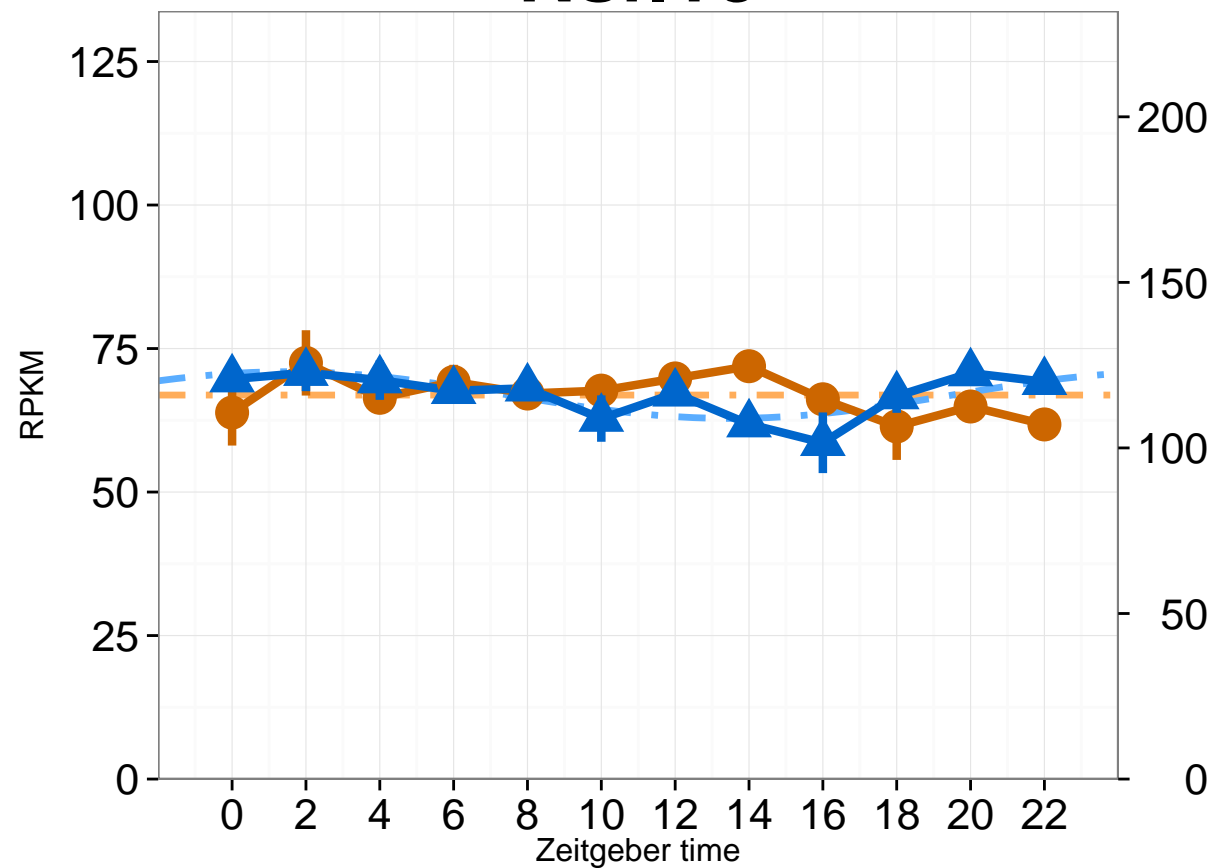

# Nsfl1c

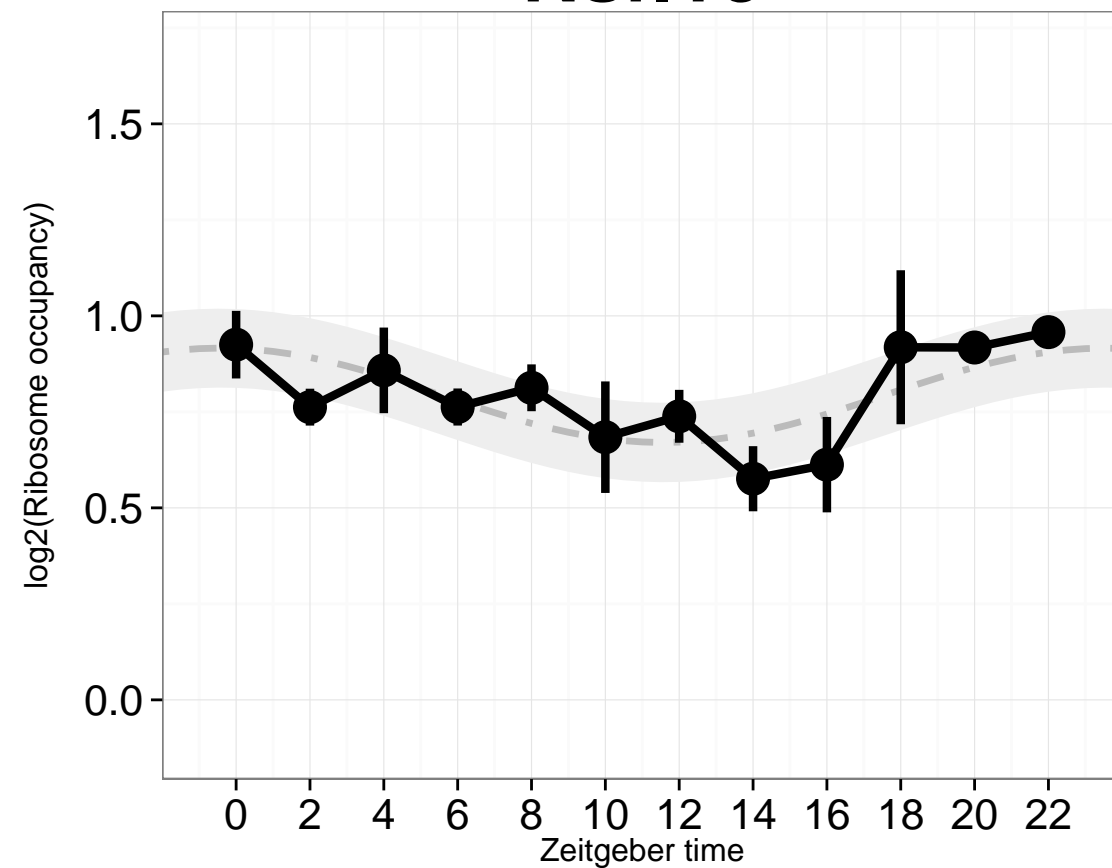

Supplement: Supplementary file 256 [file 1]

# Dcun1d4

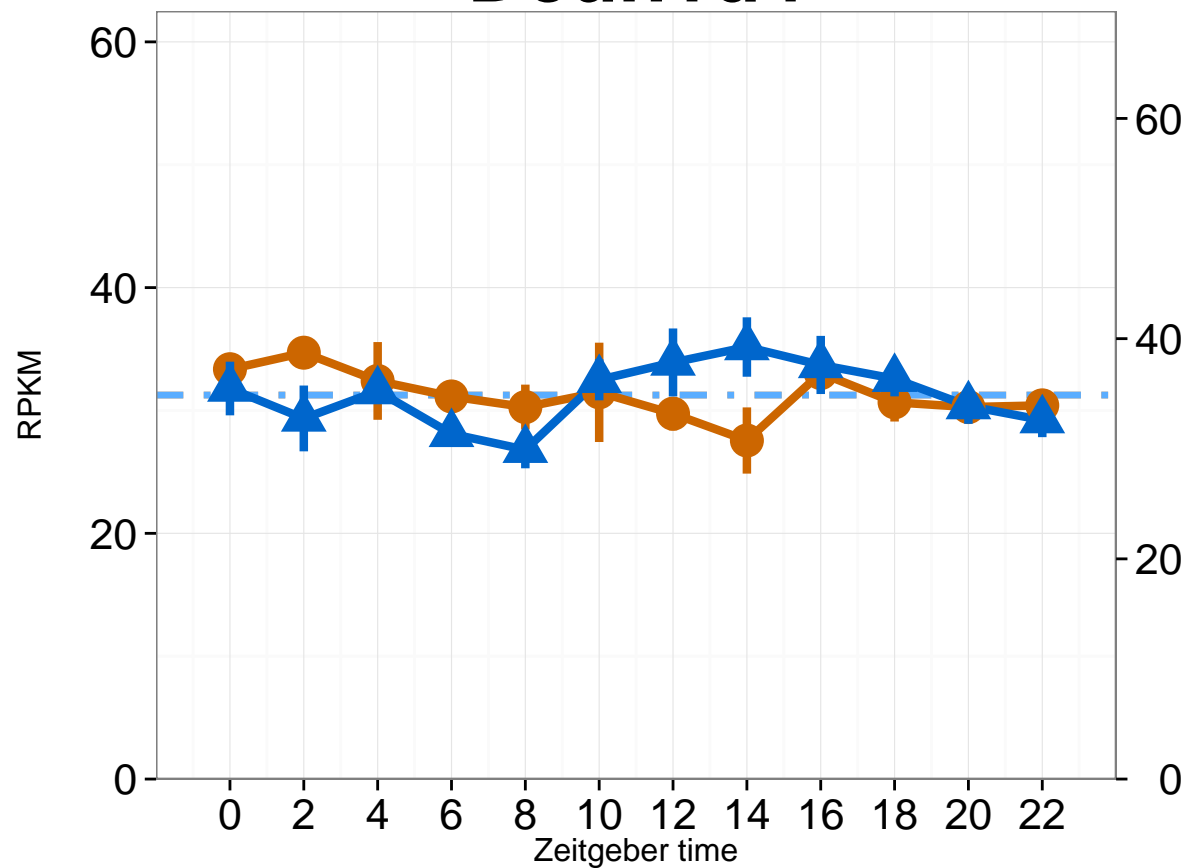

# Dcun1d4

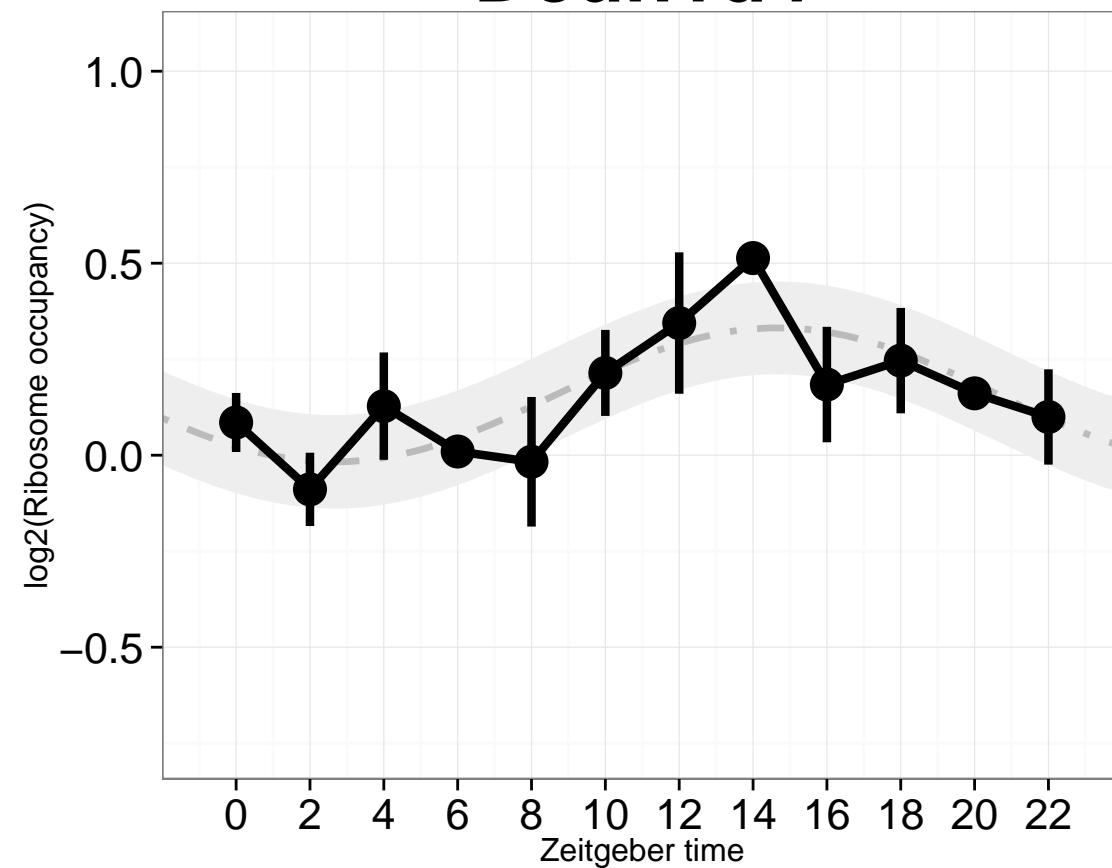

Supplement: Supplementary file 257 [file 1]

## Pim1

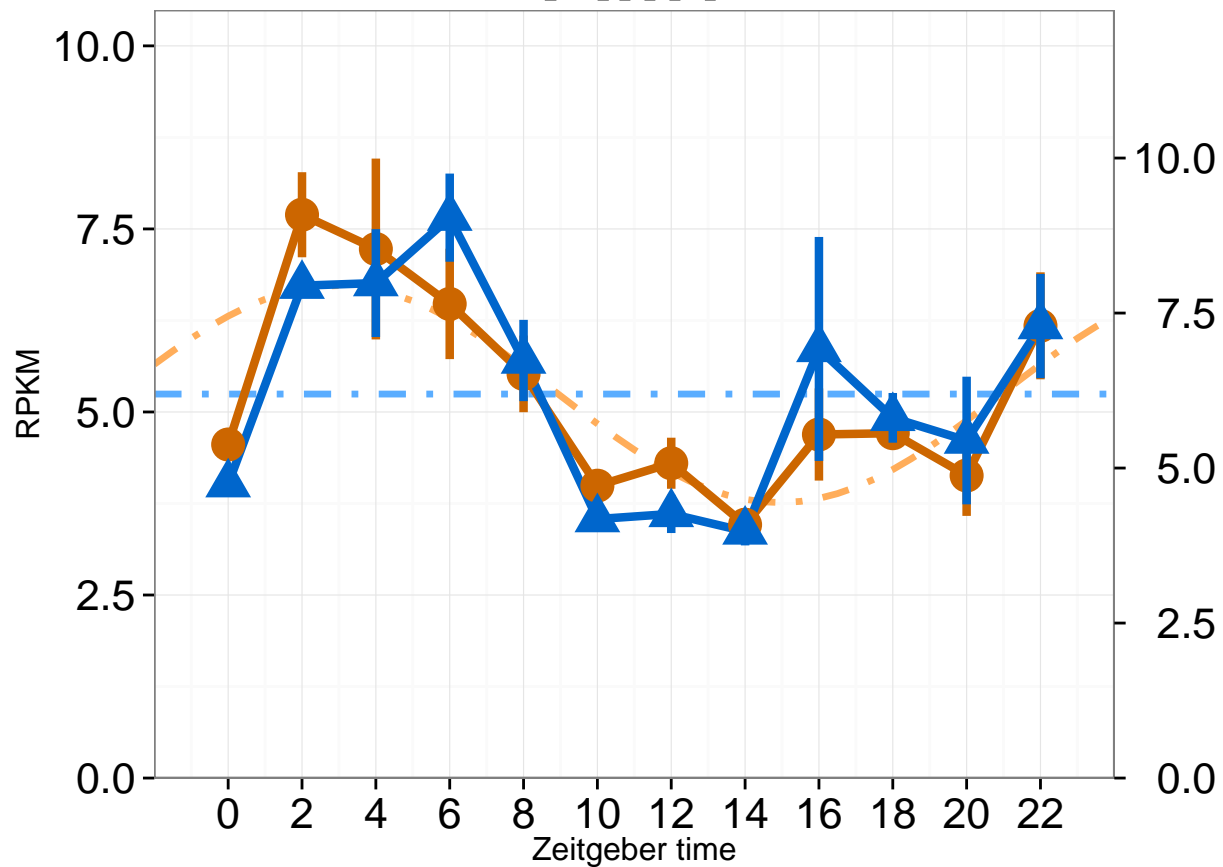

## Pim1

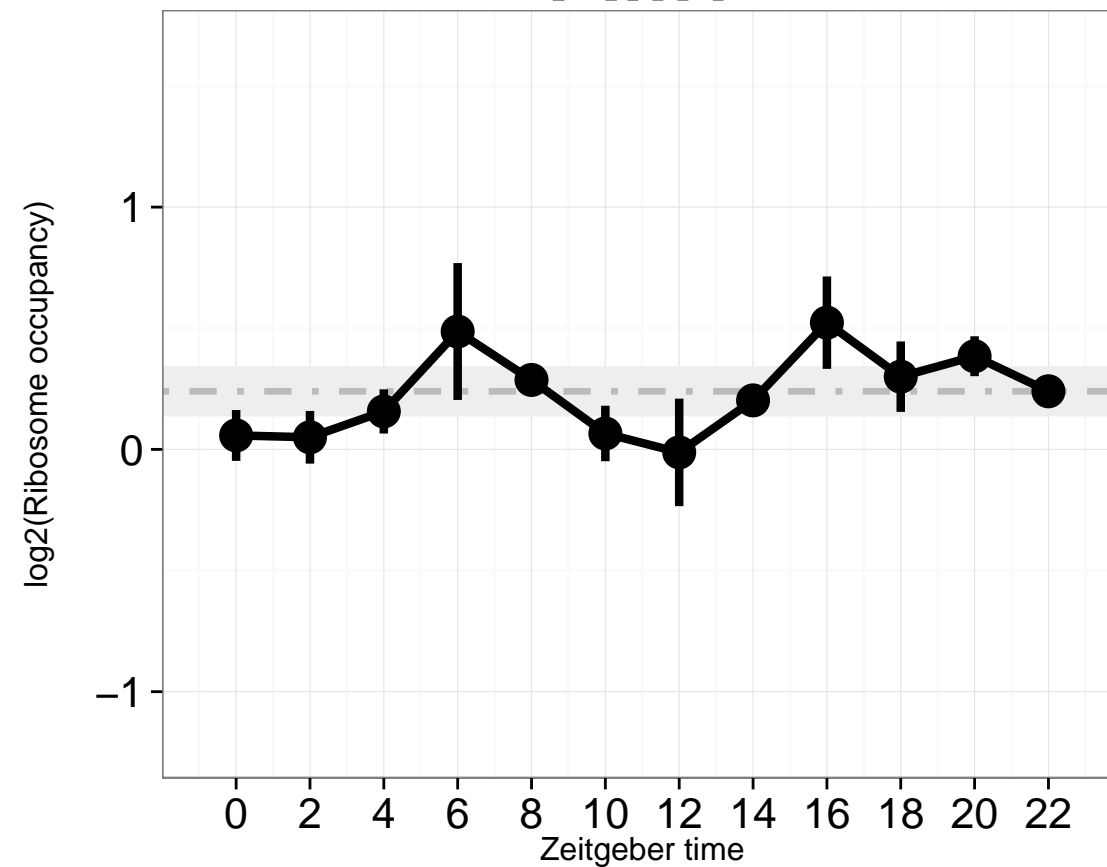

Supplement: Supplementary file 258 [file 1]

## Mospd3

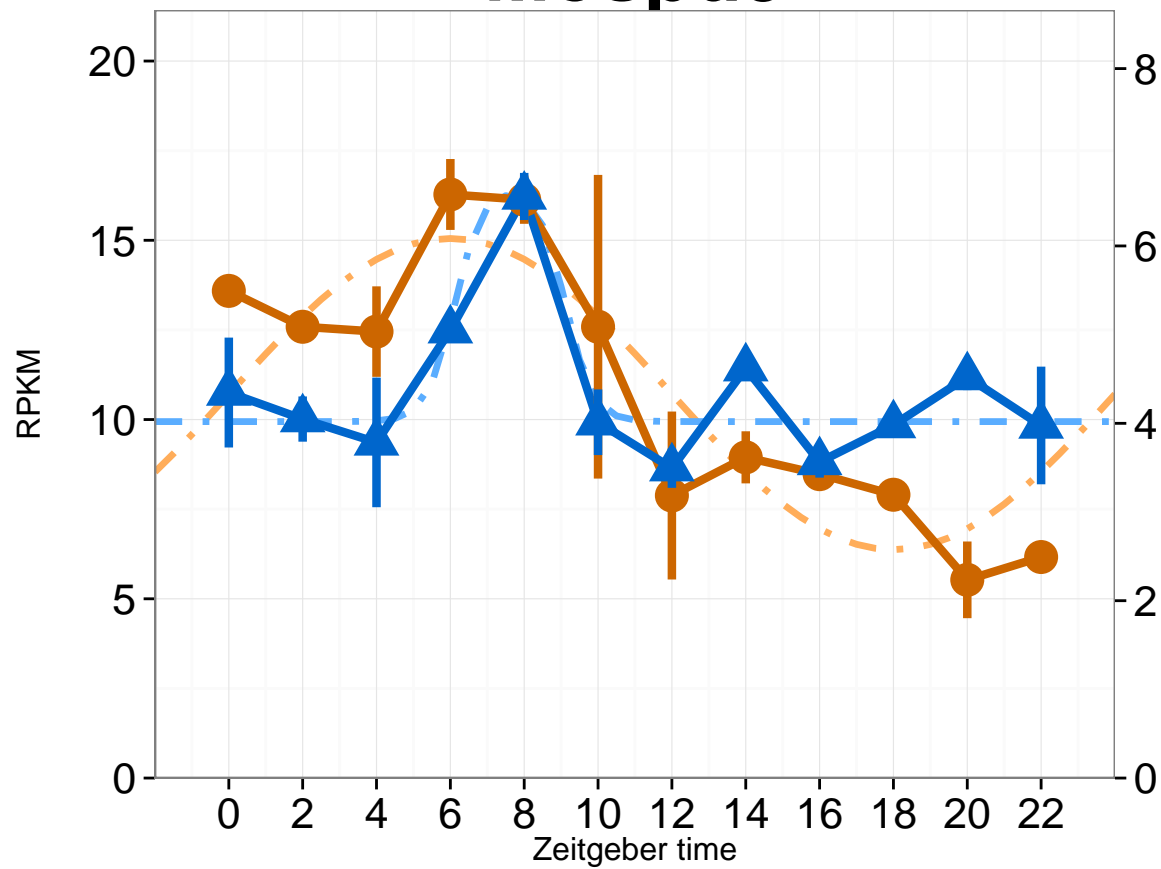

## Mospd3

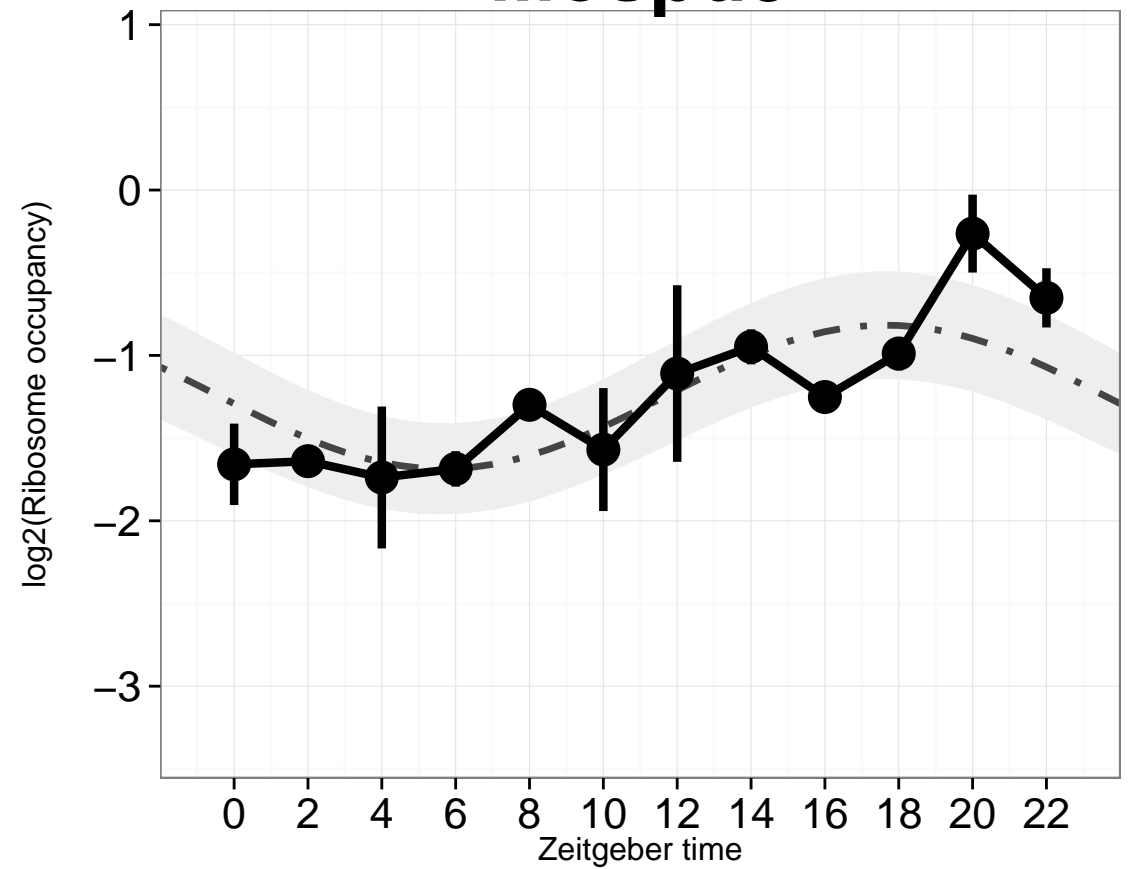

Supplement: Supplementary file 259 [file 1]

# Ly6e

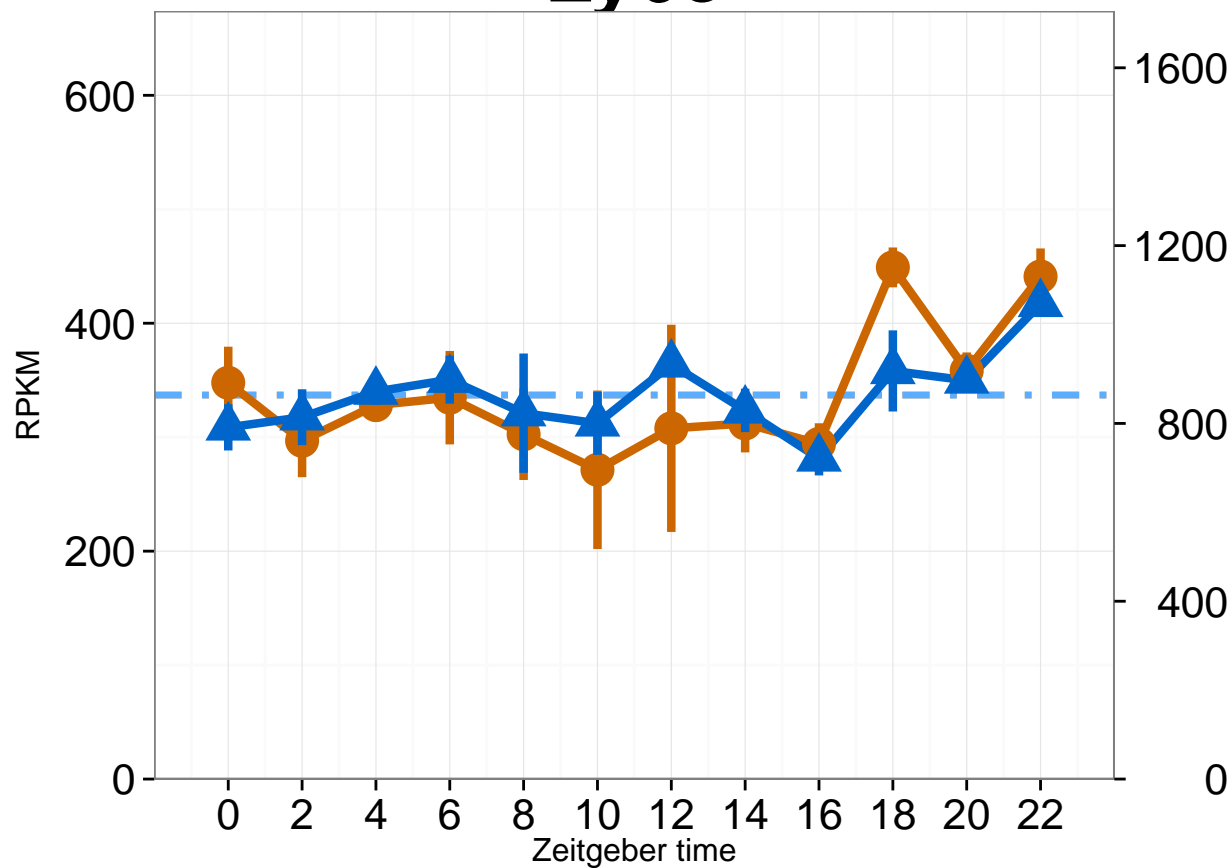

# Ly6e

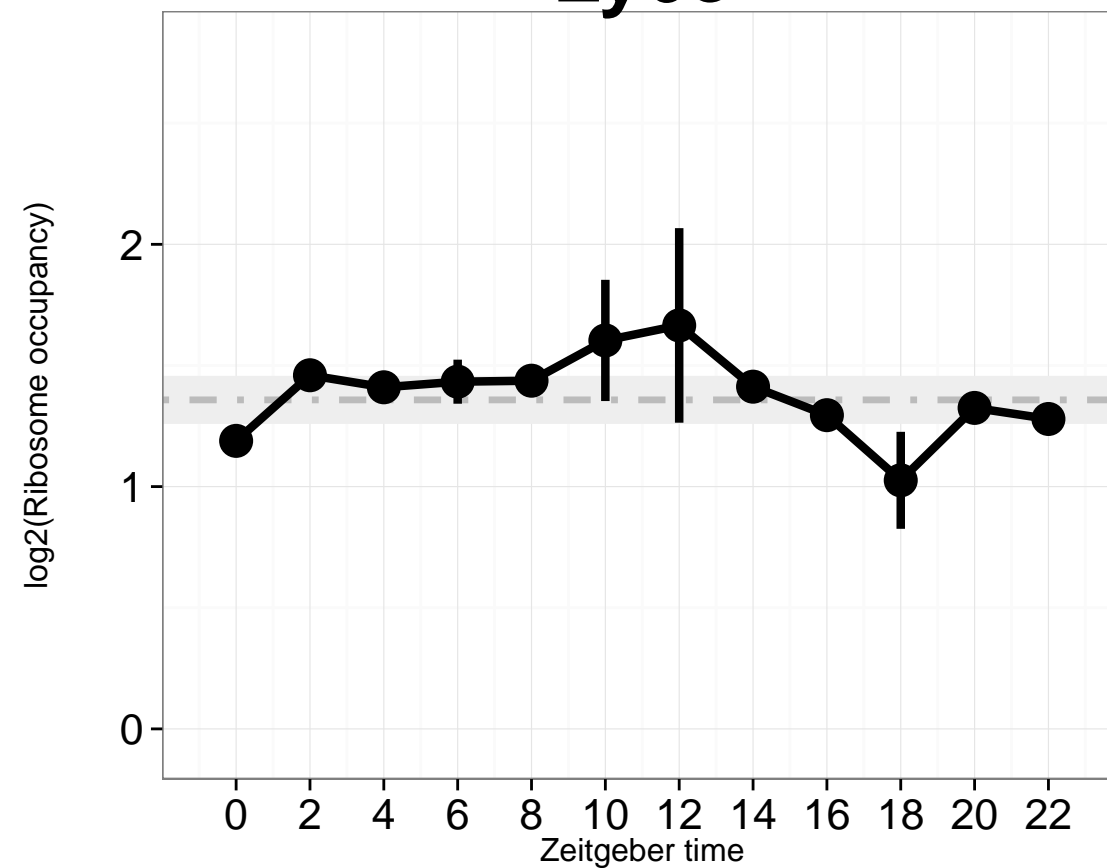

Supplement: Supplementary file 260 [file 1]

# Top2a

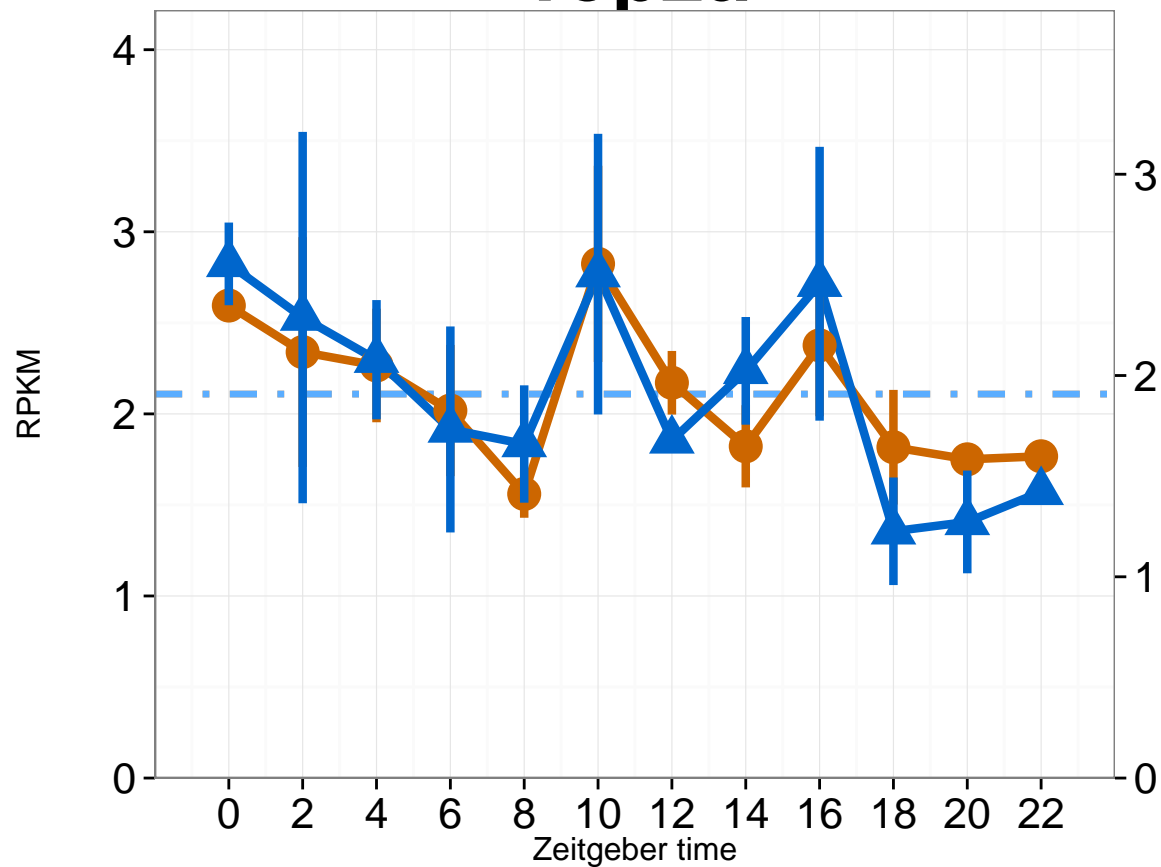

# Top2a

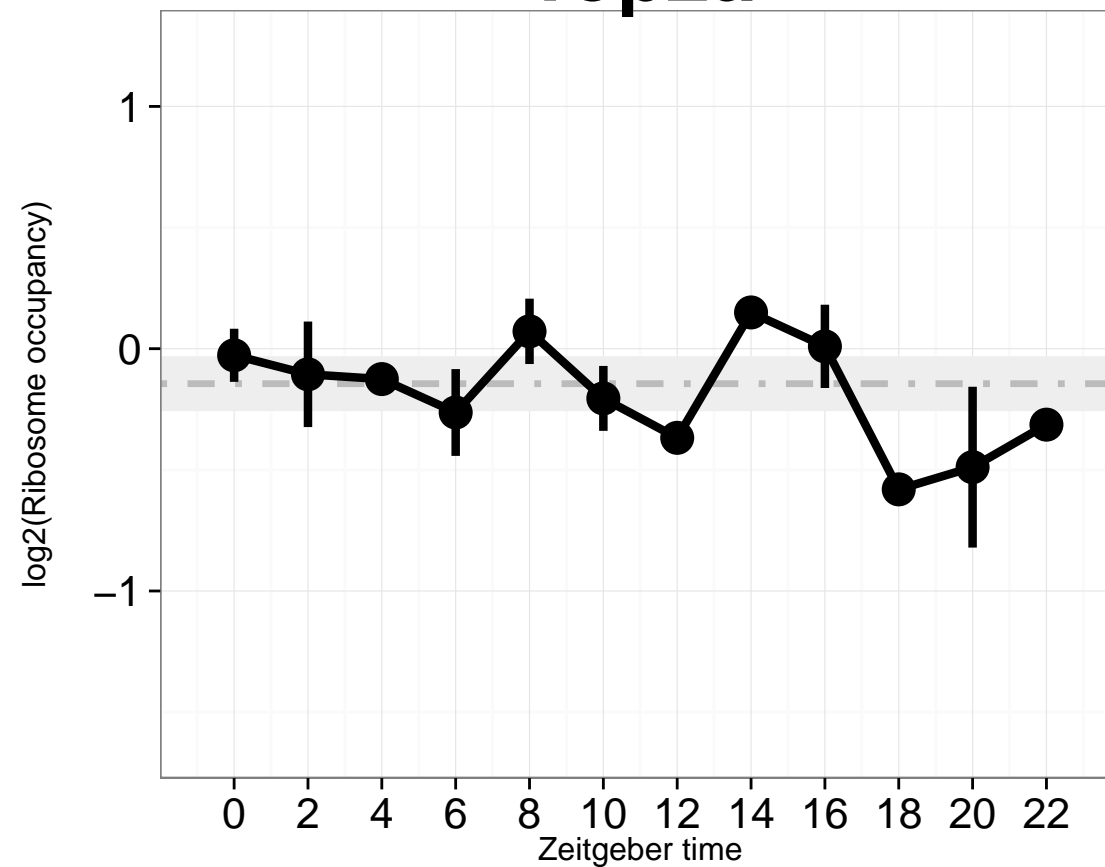

Supplement: Supplementary file 261 [file 1]

# Pcna

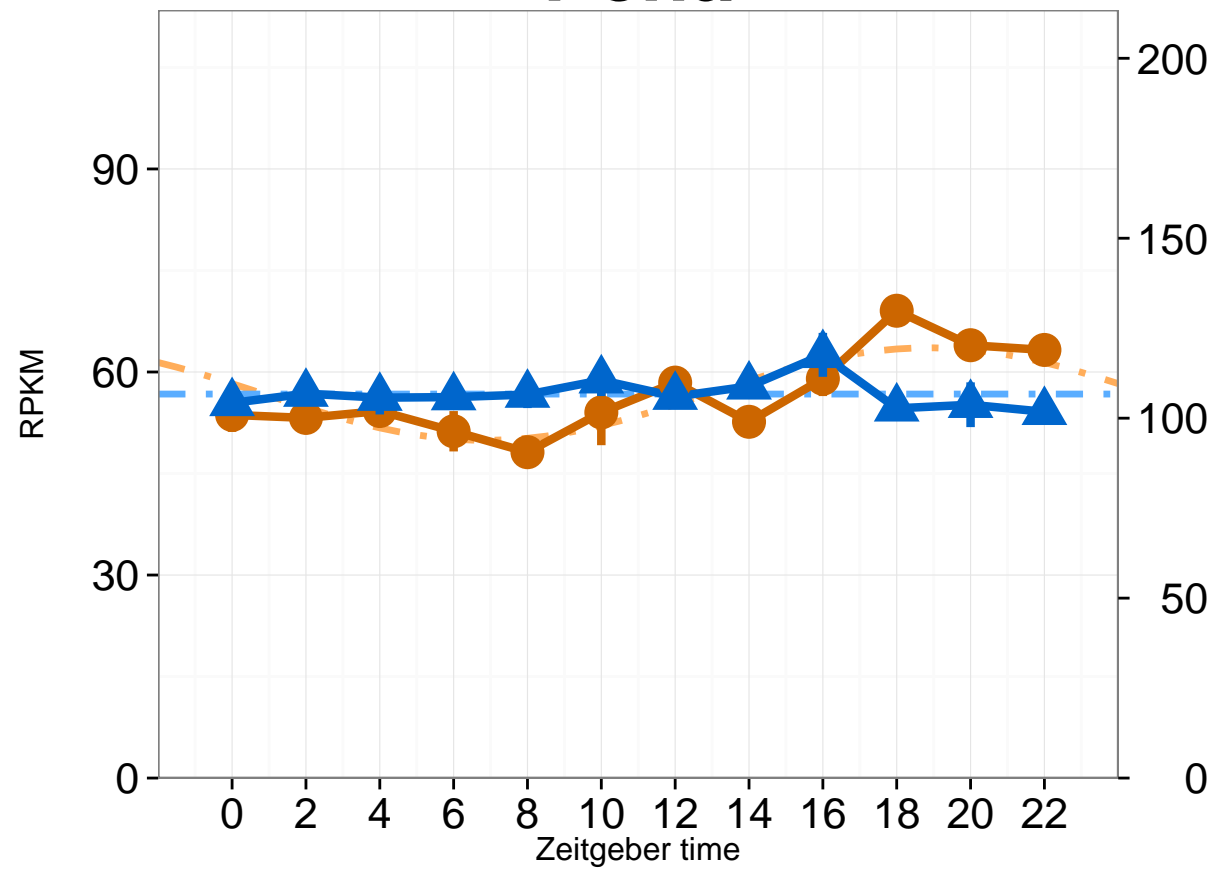

# Pcna

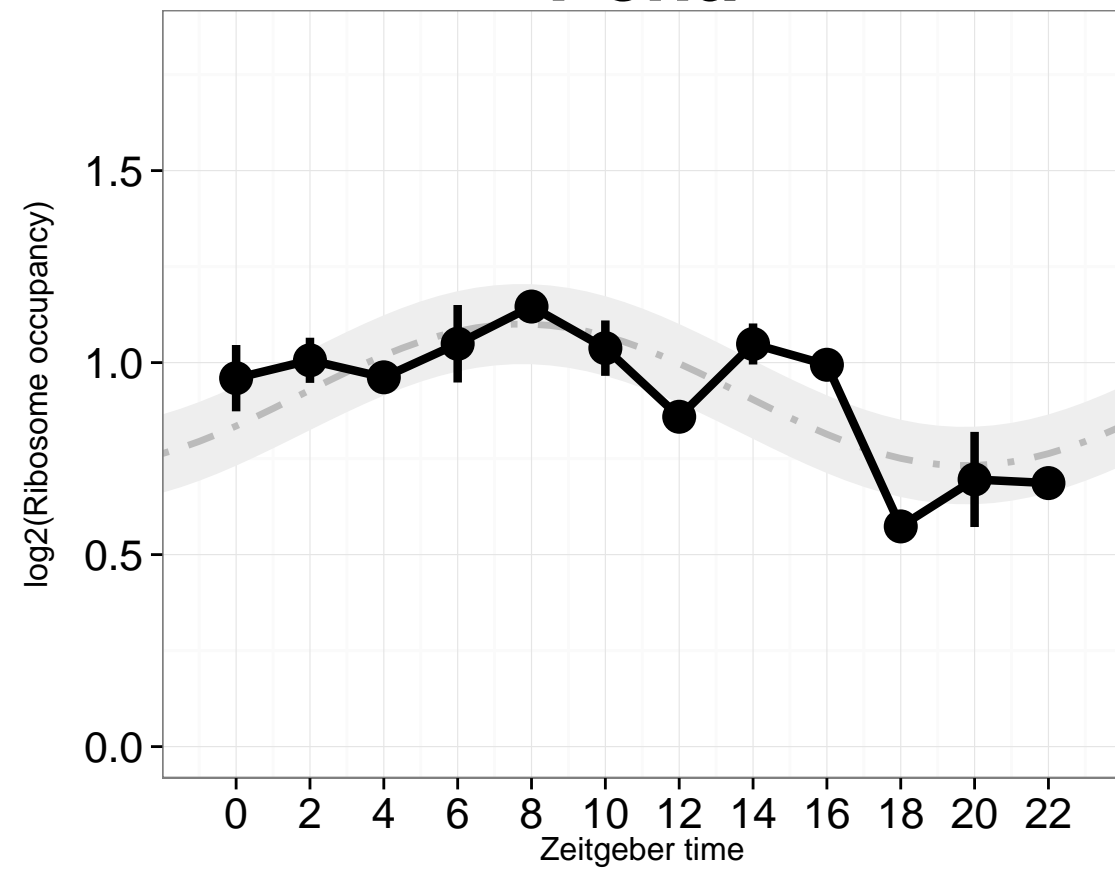

Supplement: Supplementary file 262 [file 1]

## Gm10447

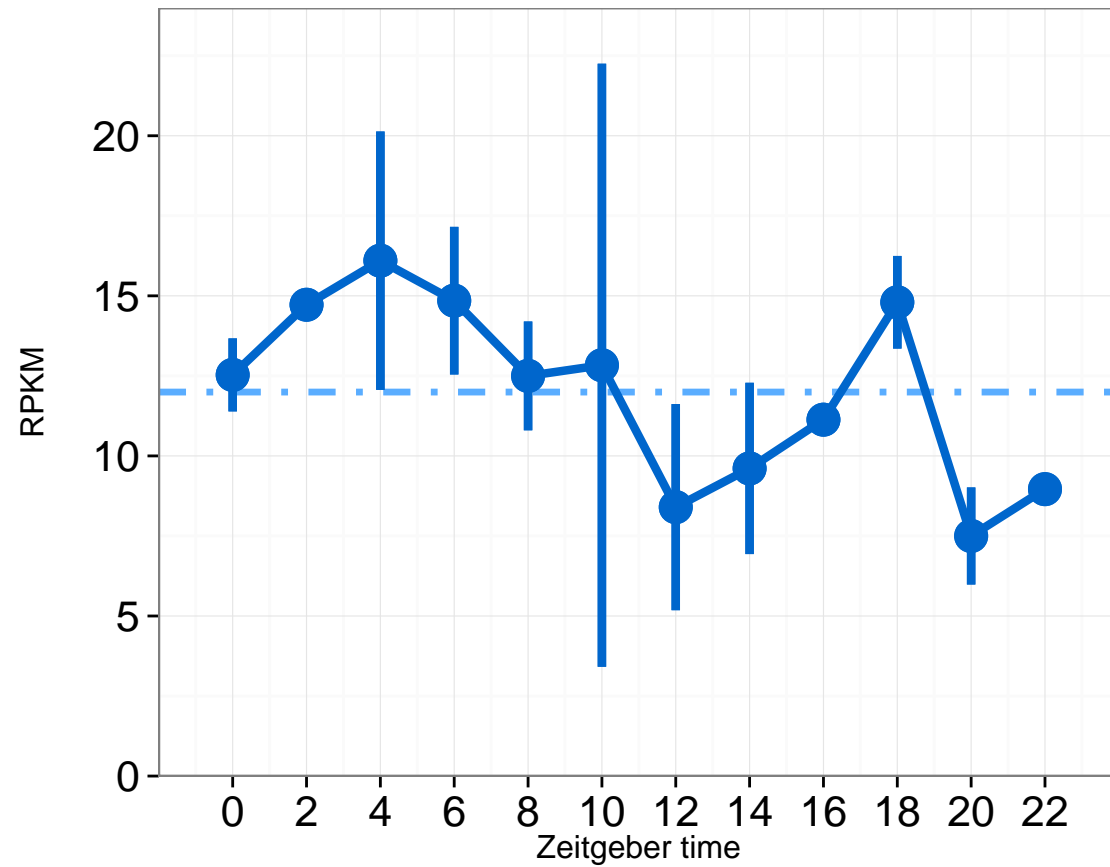

## Gm10447 log2(Ribosome occupanc

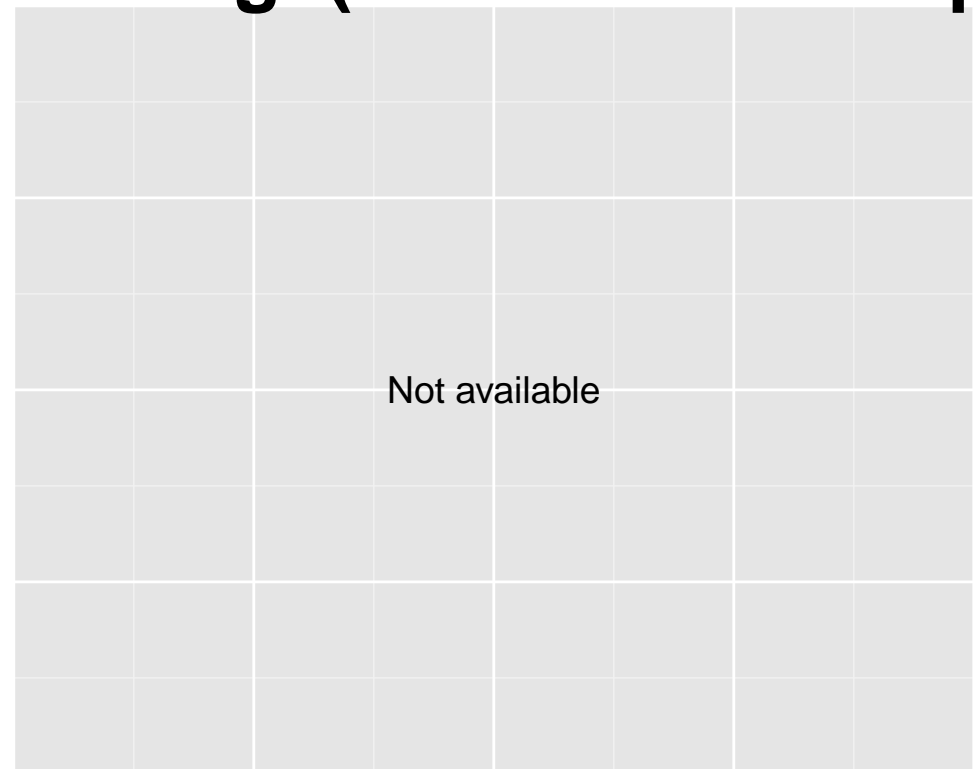

Supplement: Supplementary file 263 [file 1]

## Rnaseh2c

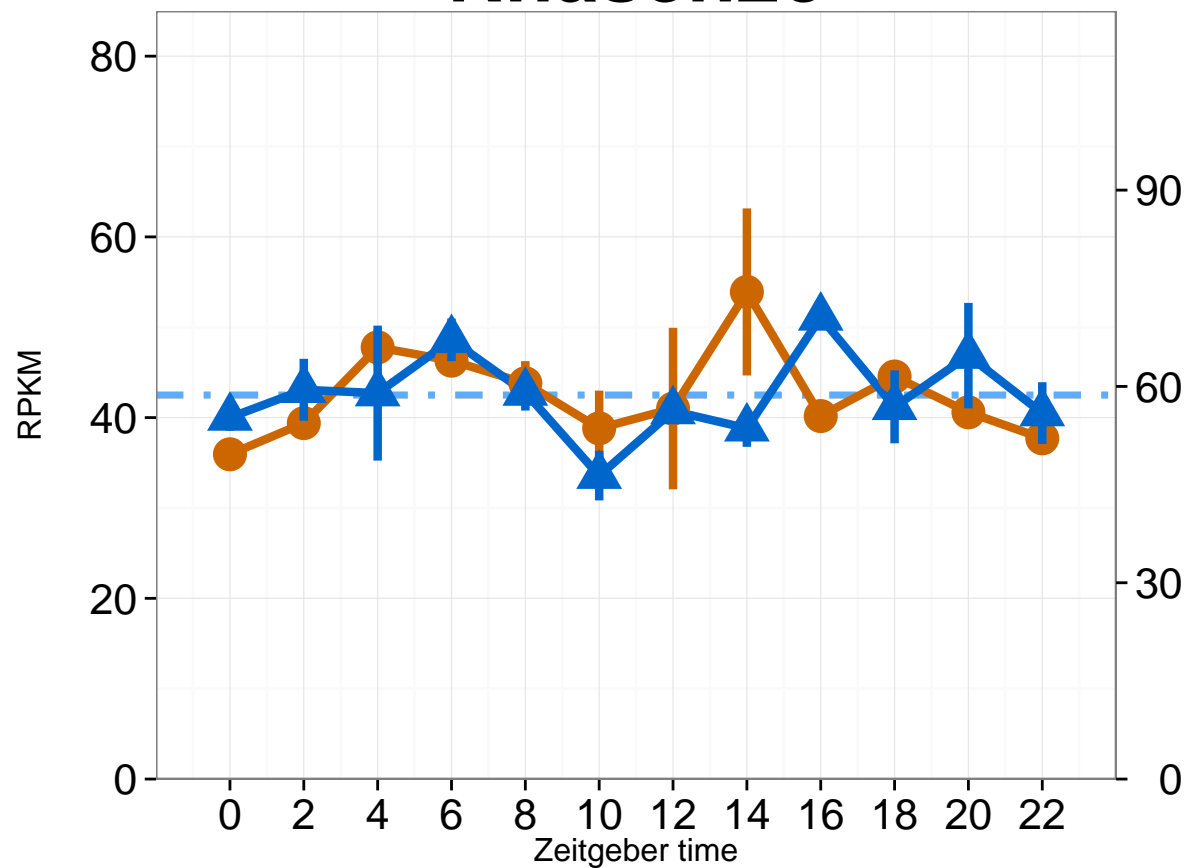

## Rnaseh2c

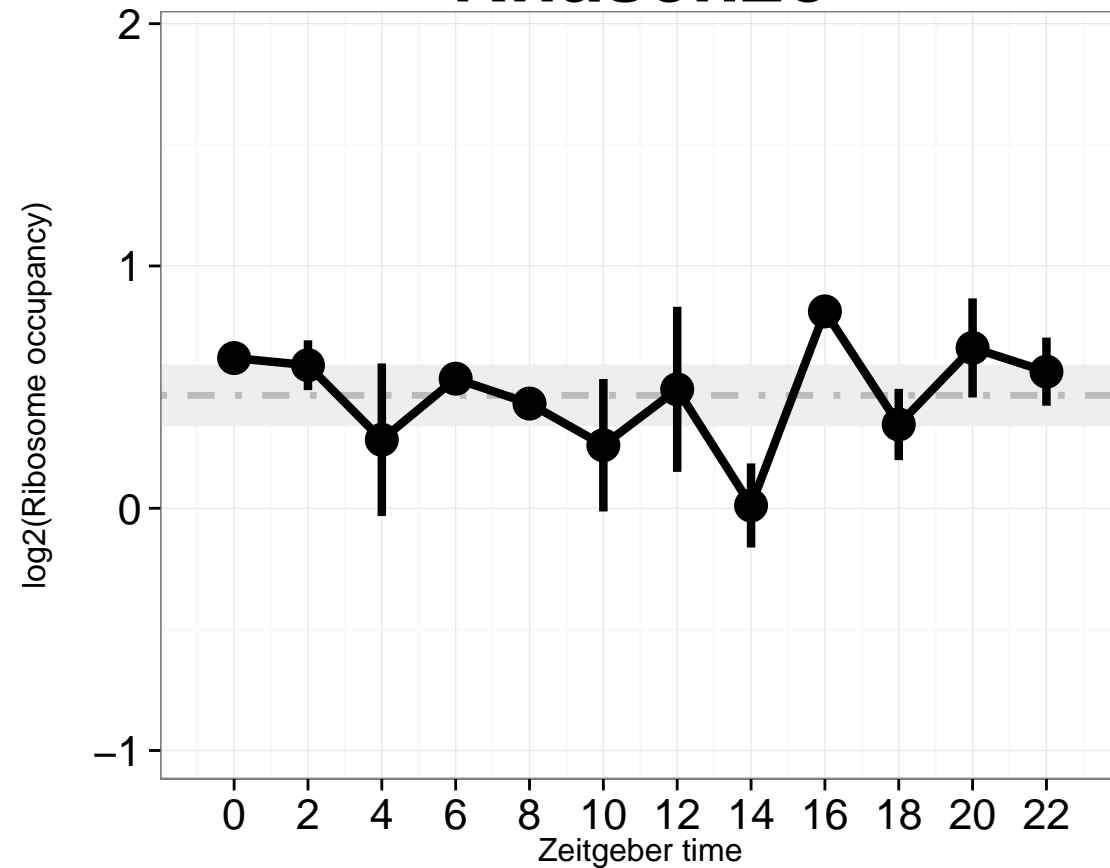

Supplement: Supplementary file 264 [file 1]

# Spsb1

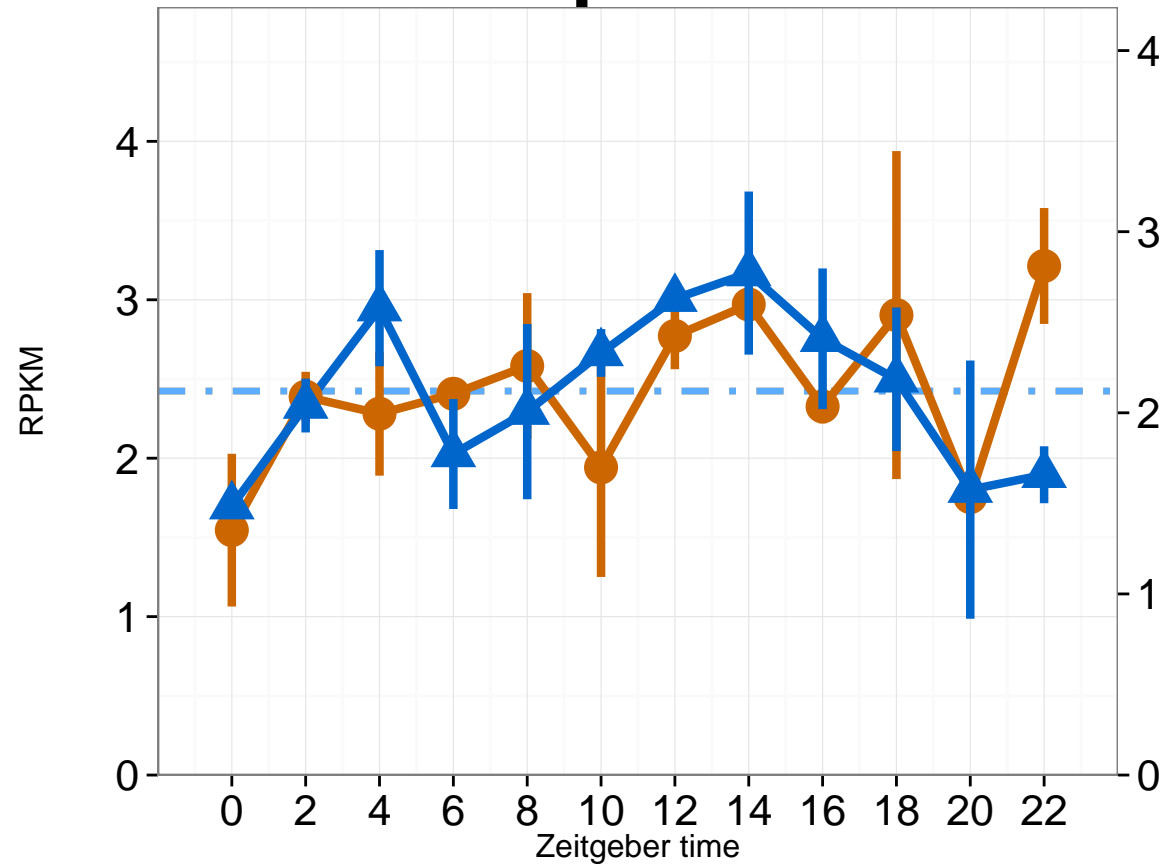

# Spsb1

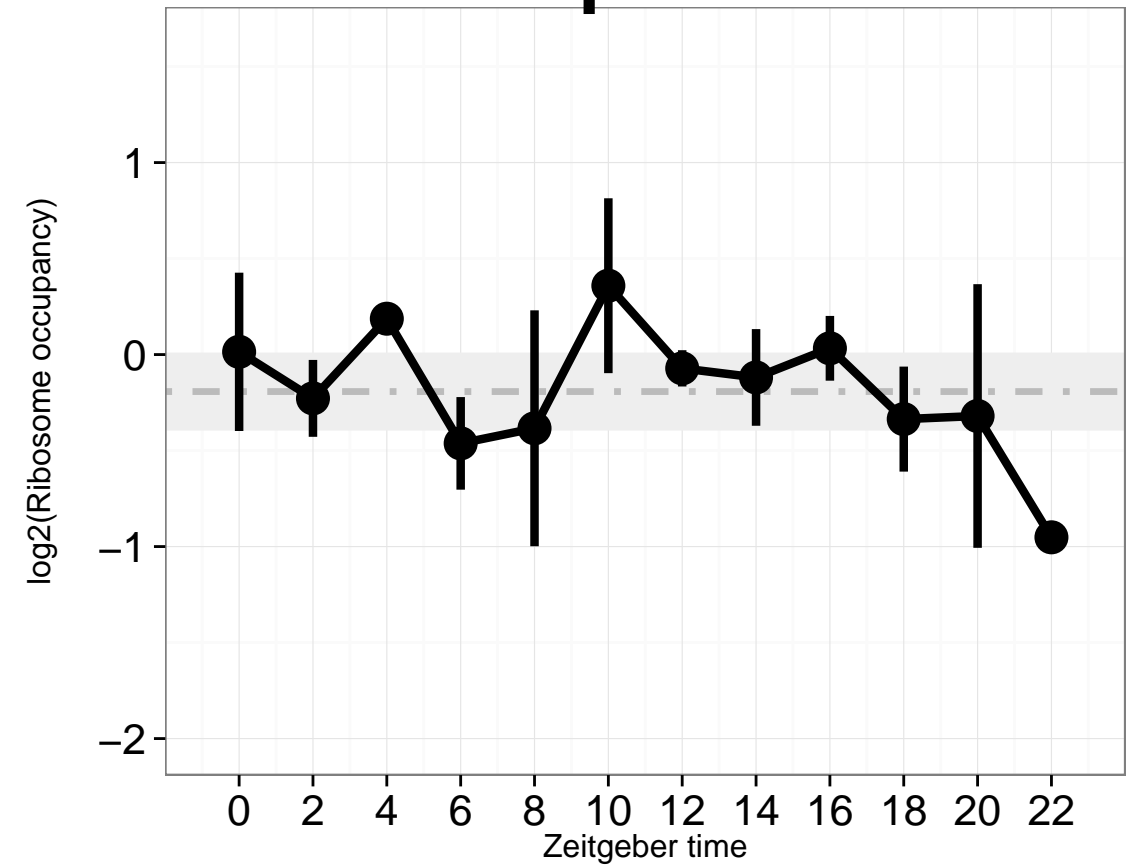

Supplement: Supplementary file 265 [file 1]

# Matr3

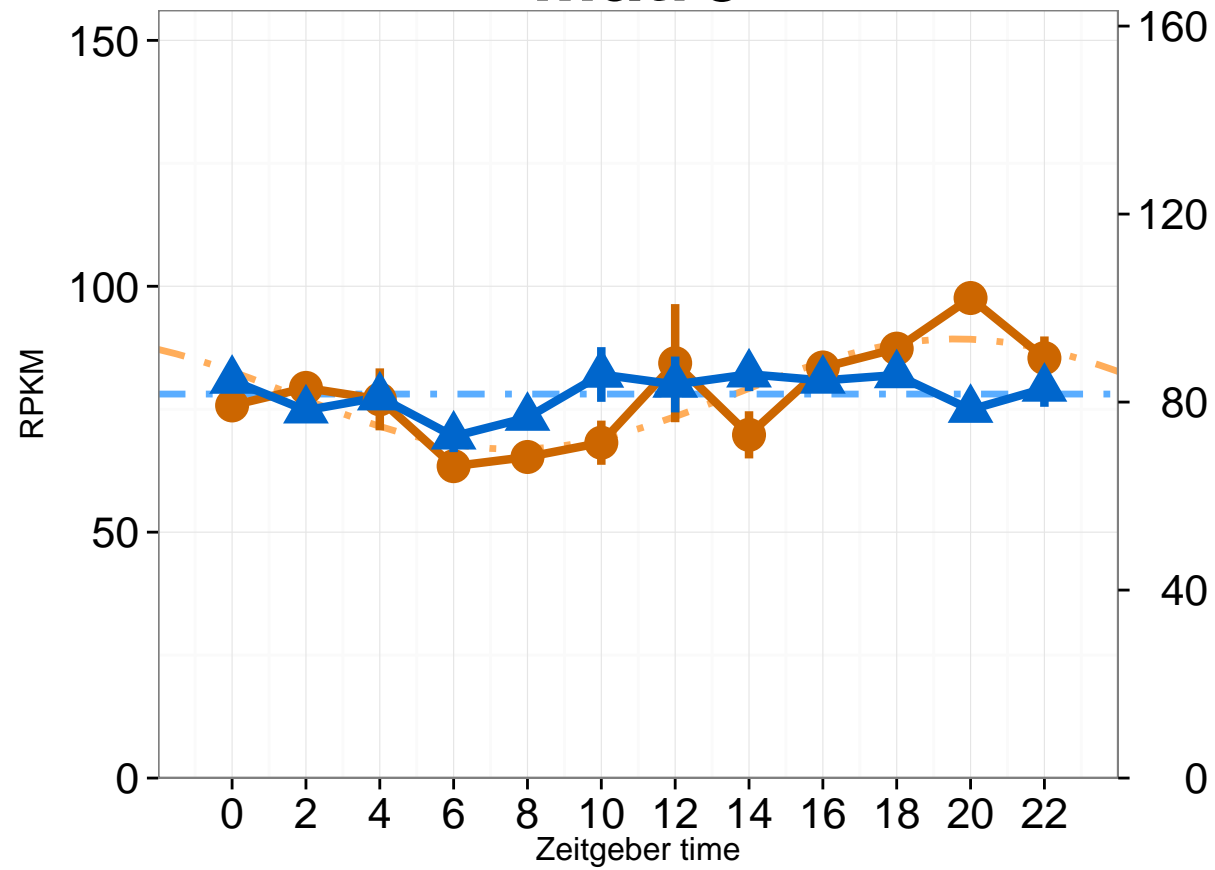

# Matr3

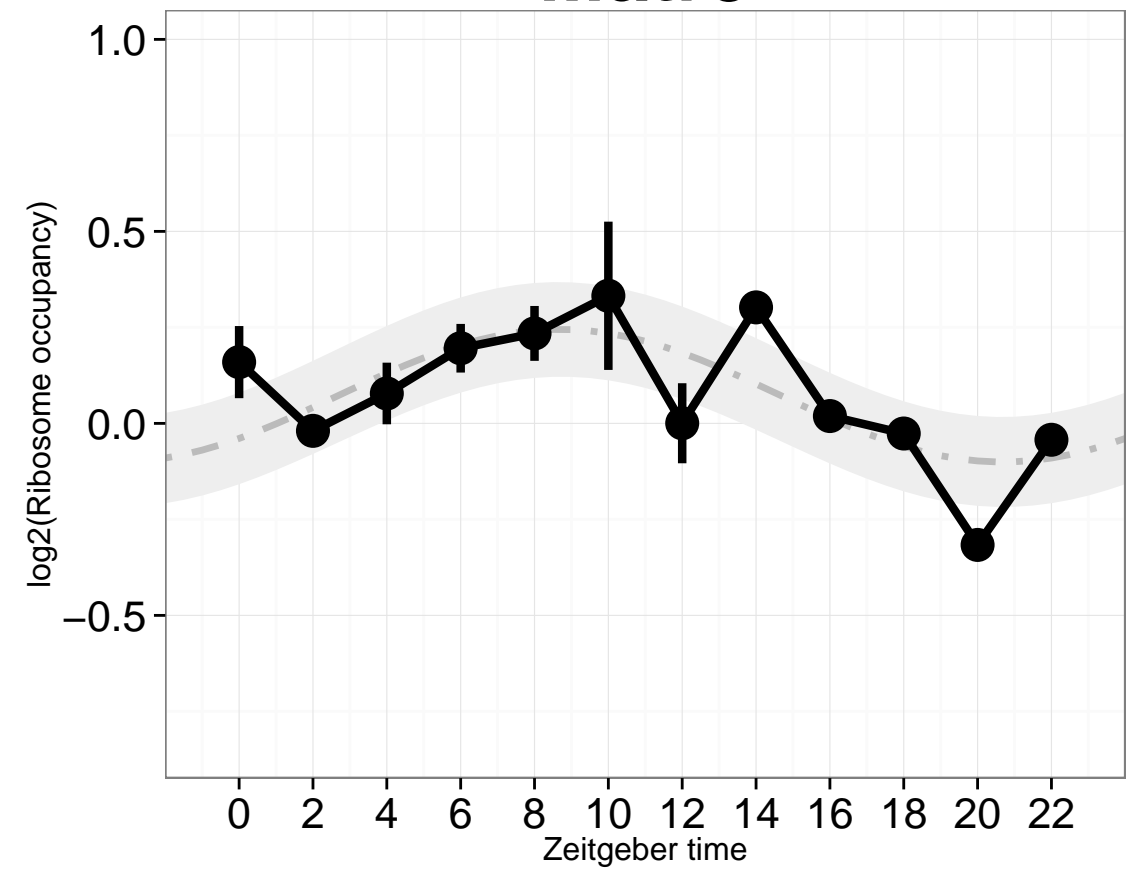

Supplement: Supplementary file 266 [file 1]

## Kti12

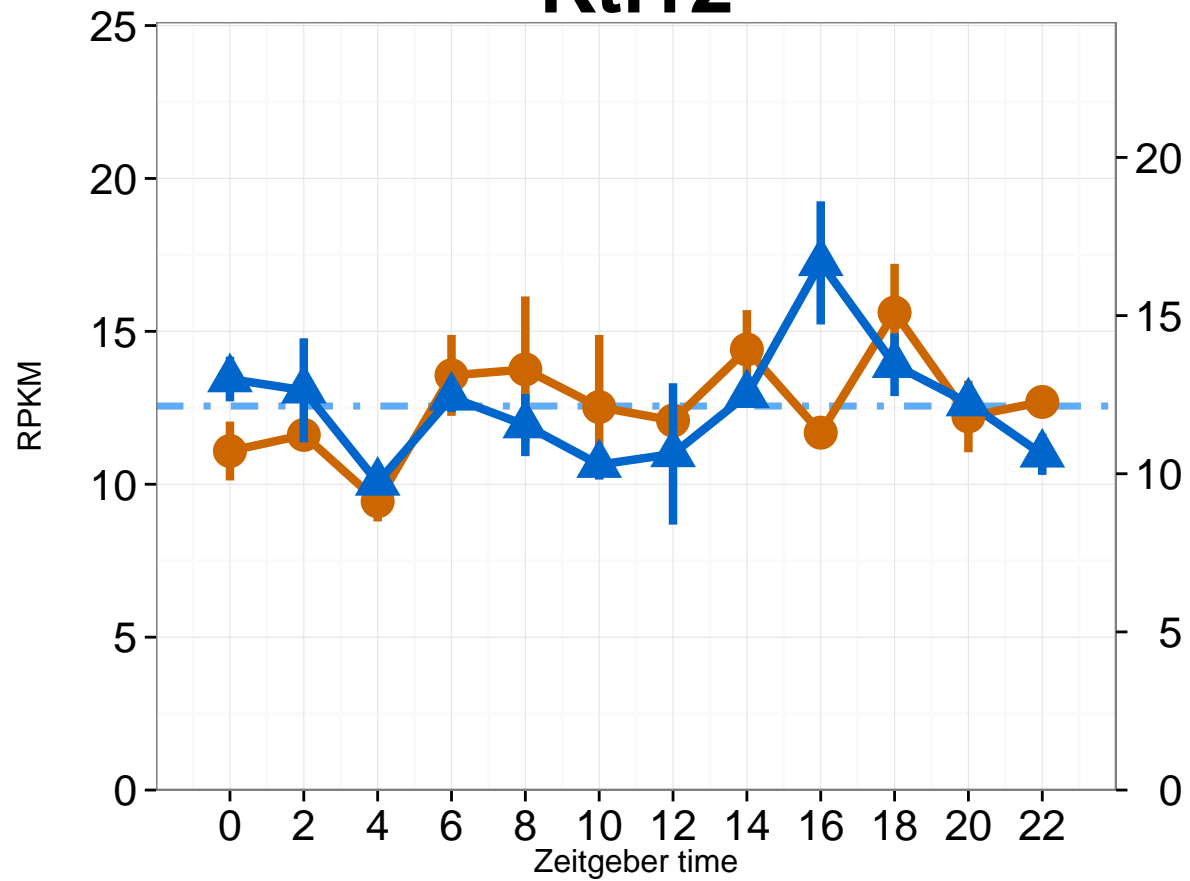

## Kti12

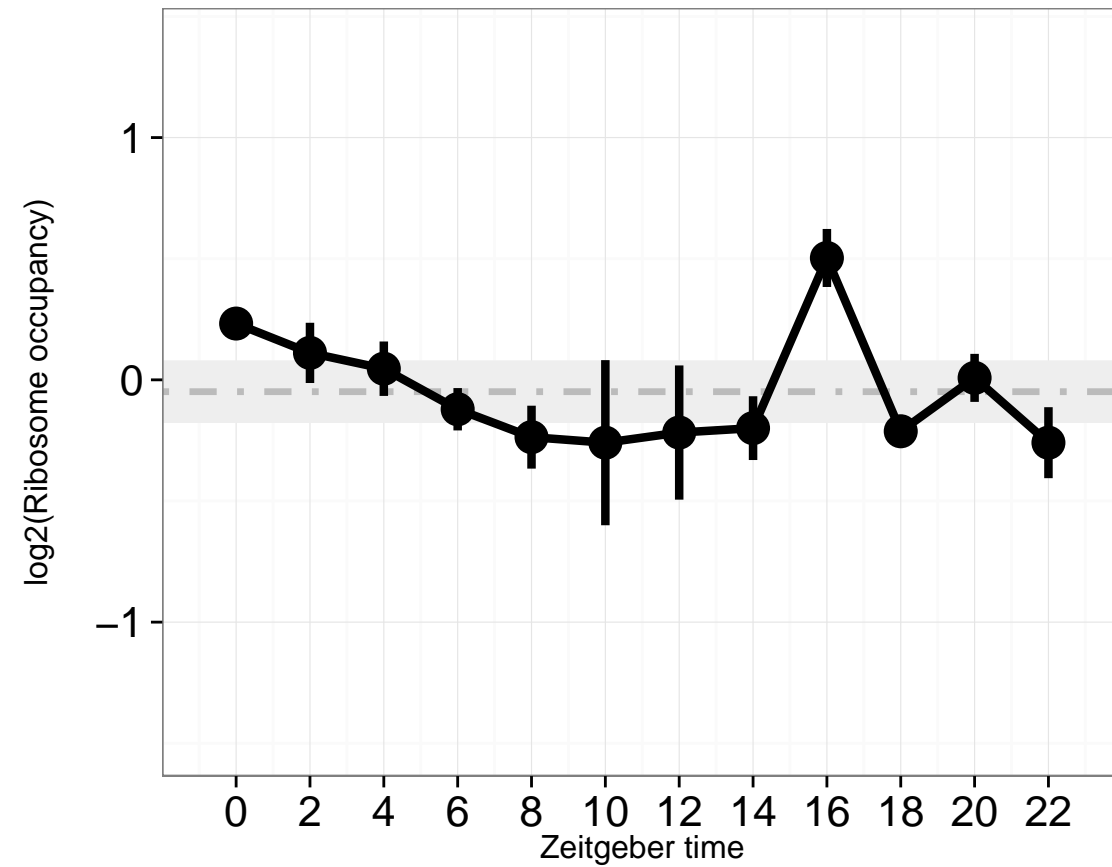

Supplement: Supplementary file 267 [file 1]

## Gtpbp3

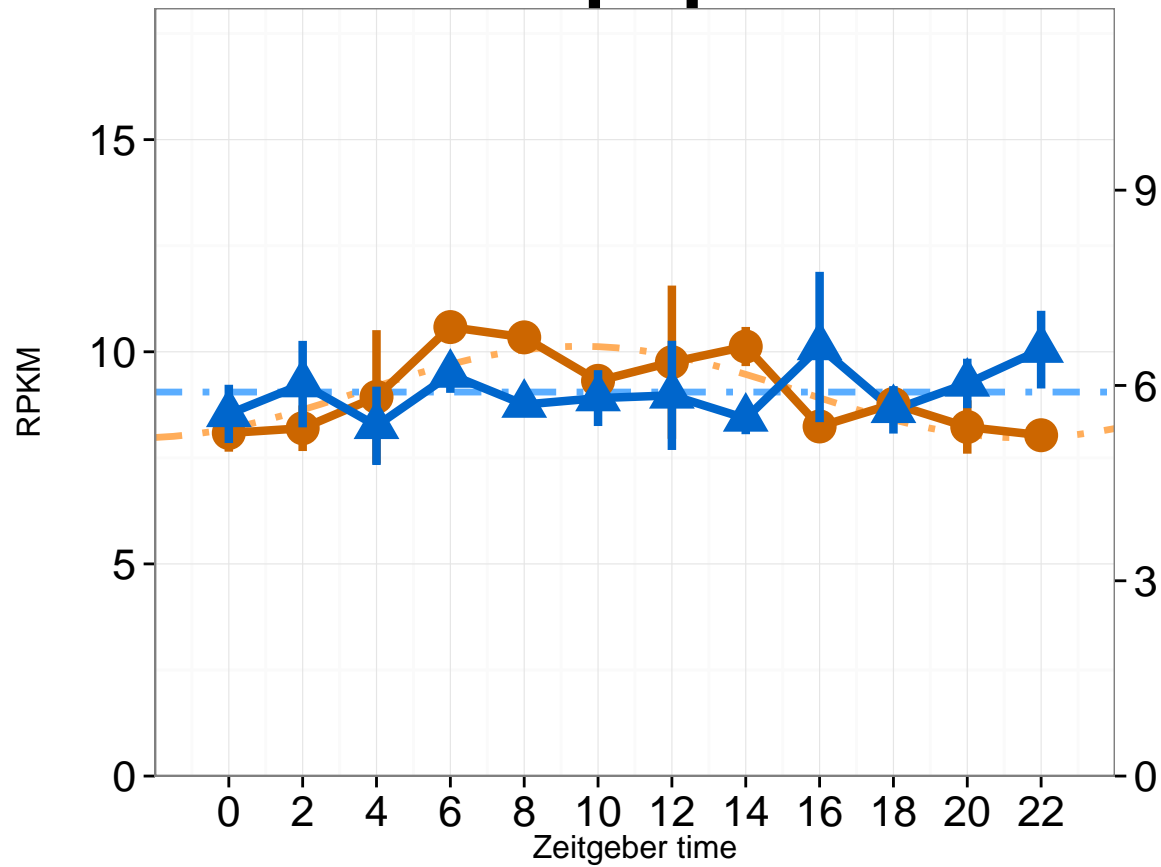

## Gtpbp3

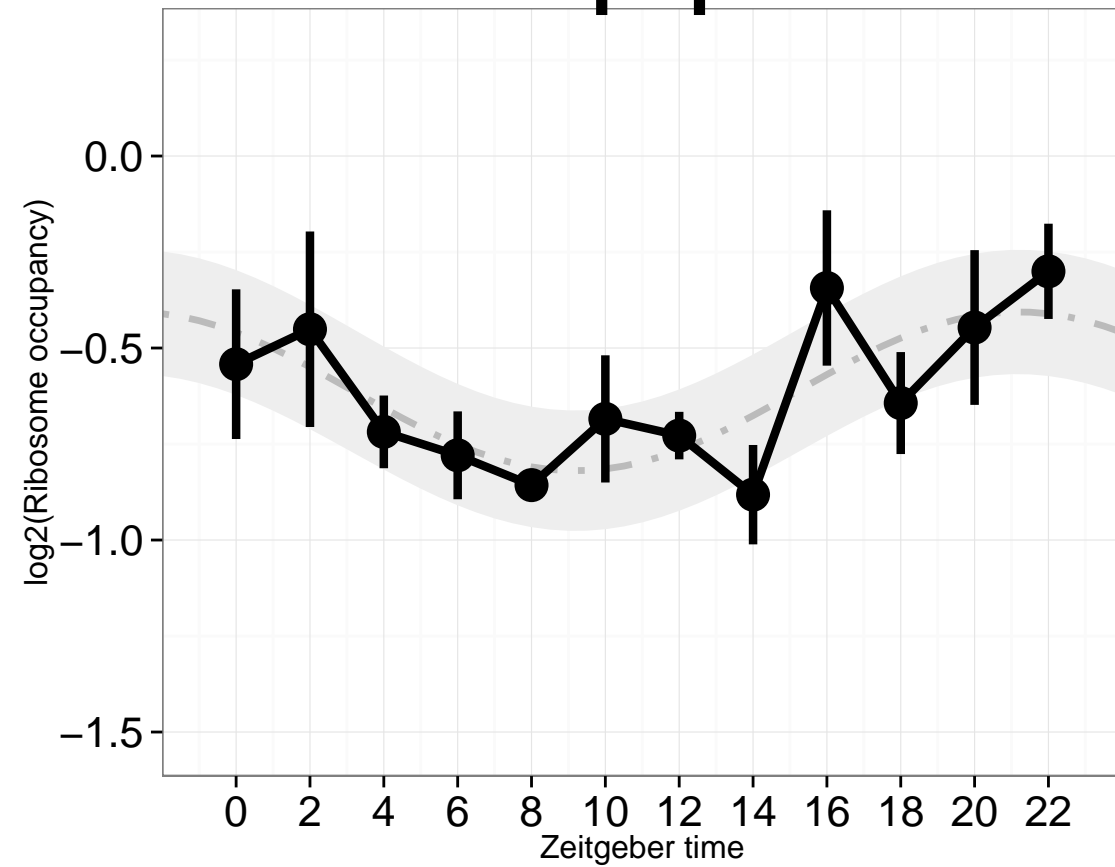

Supplement: Supplementary file 268 [file 1]

## Dpt

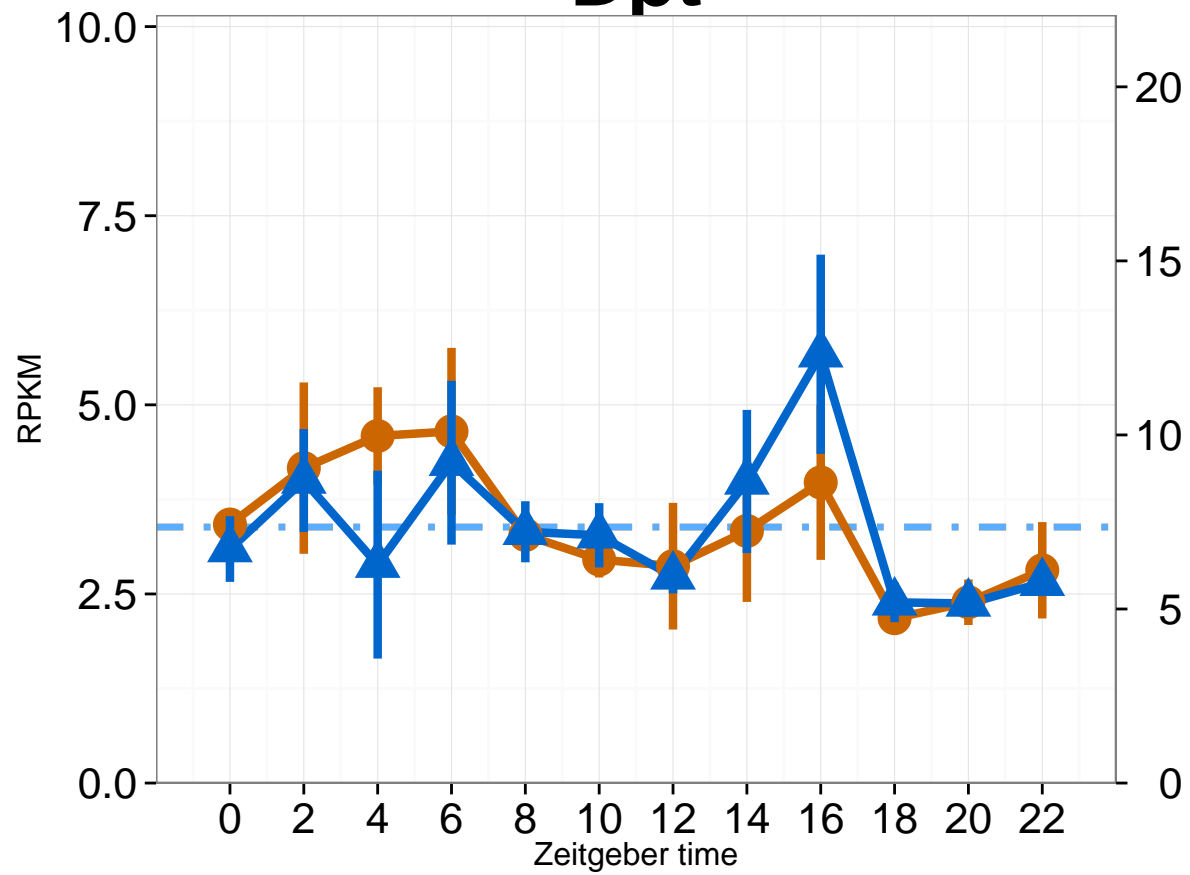

## Dpt

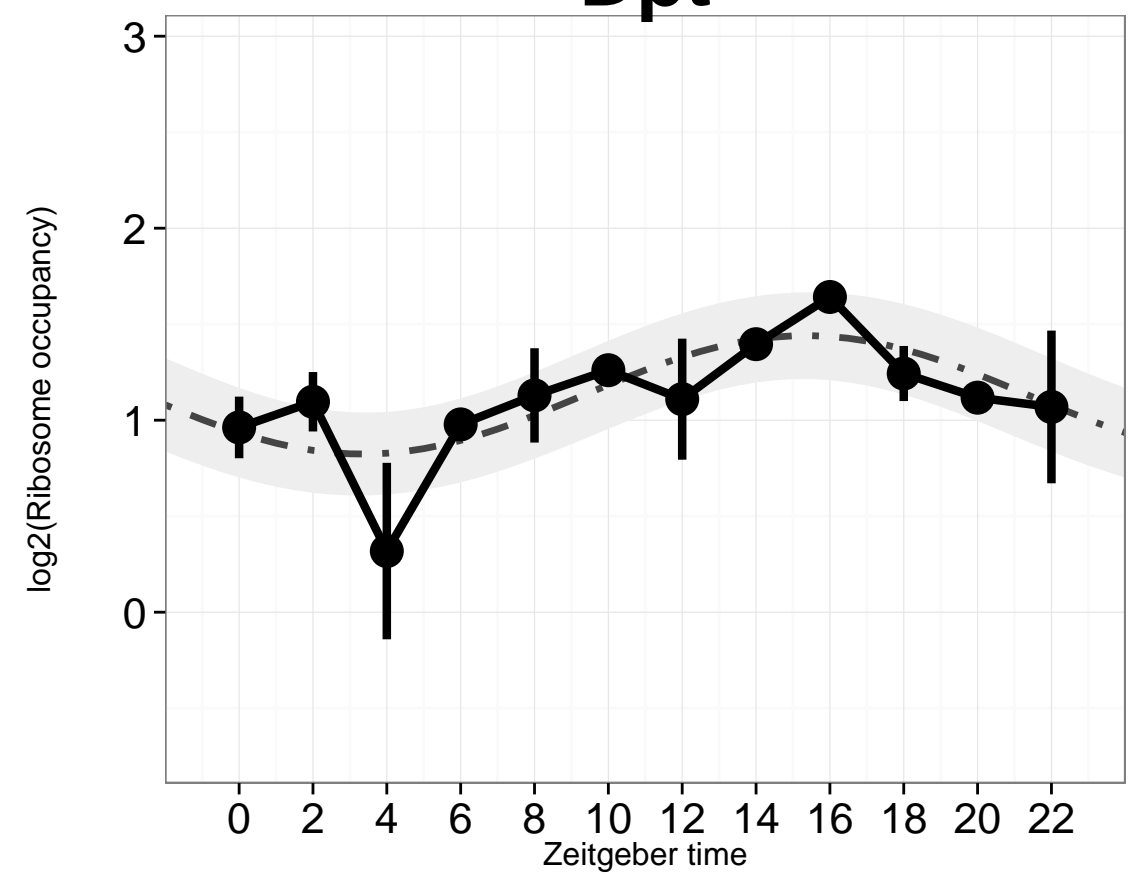

Supplement: Supplementary file 269 [file 1]

# C1qc

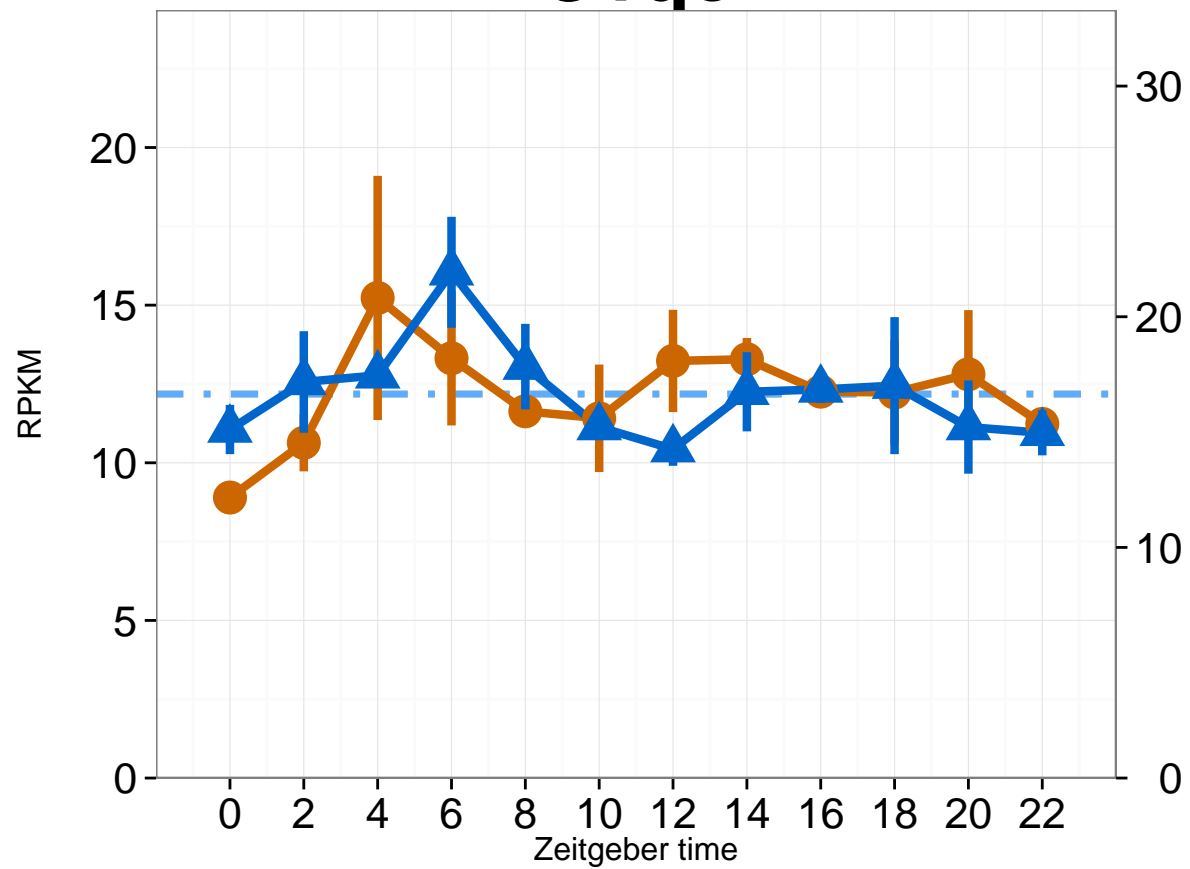

# C1qc

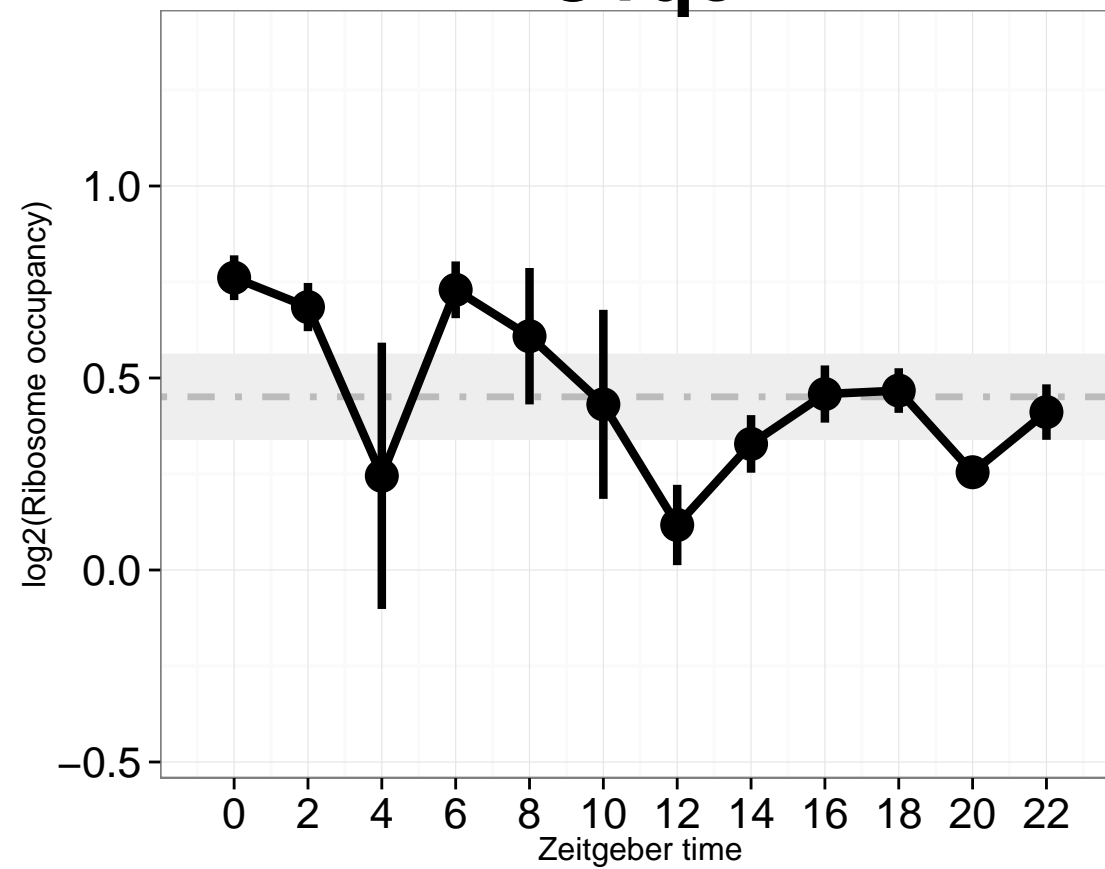

Supplement: Supplementary file 270 [file 1]

## Aebp1

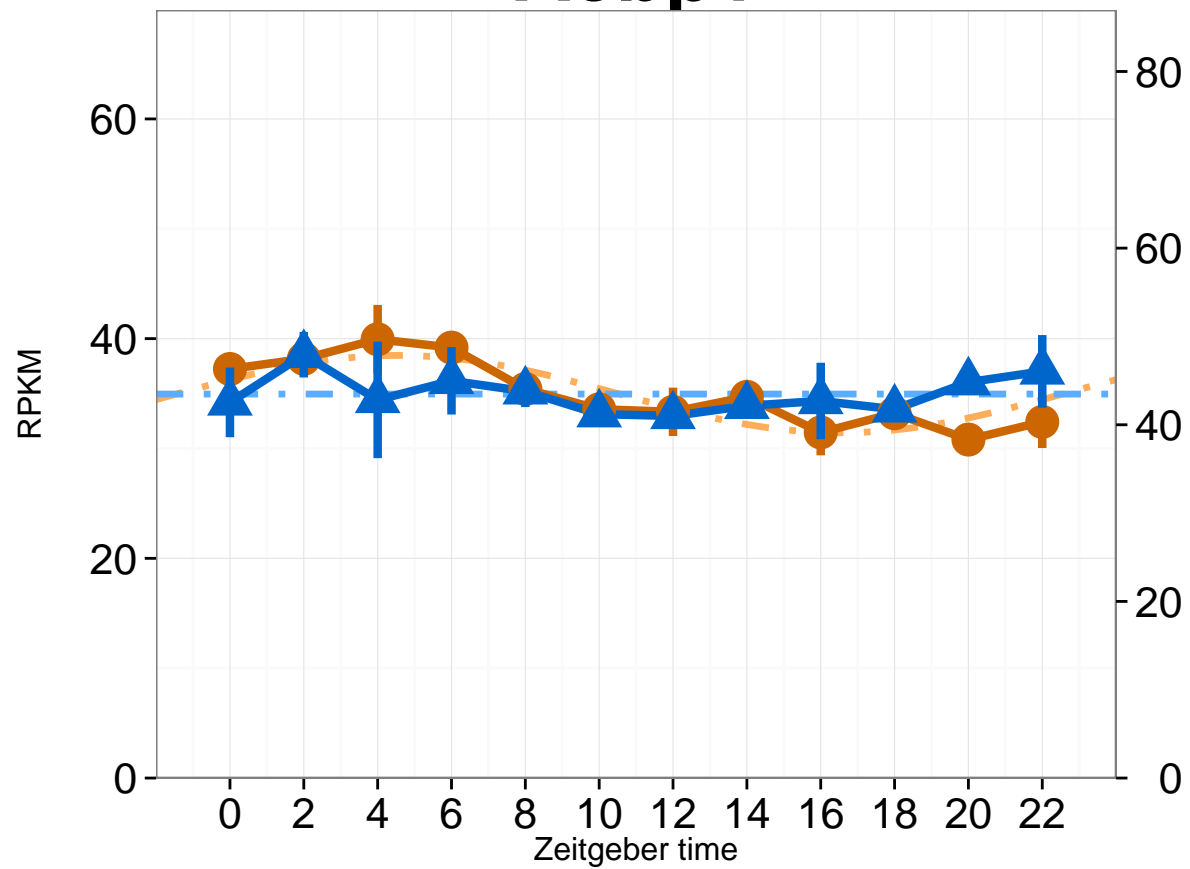

## Aebp1

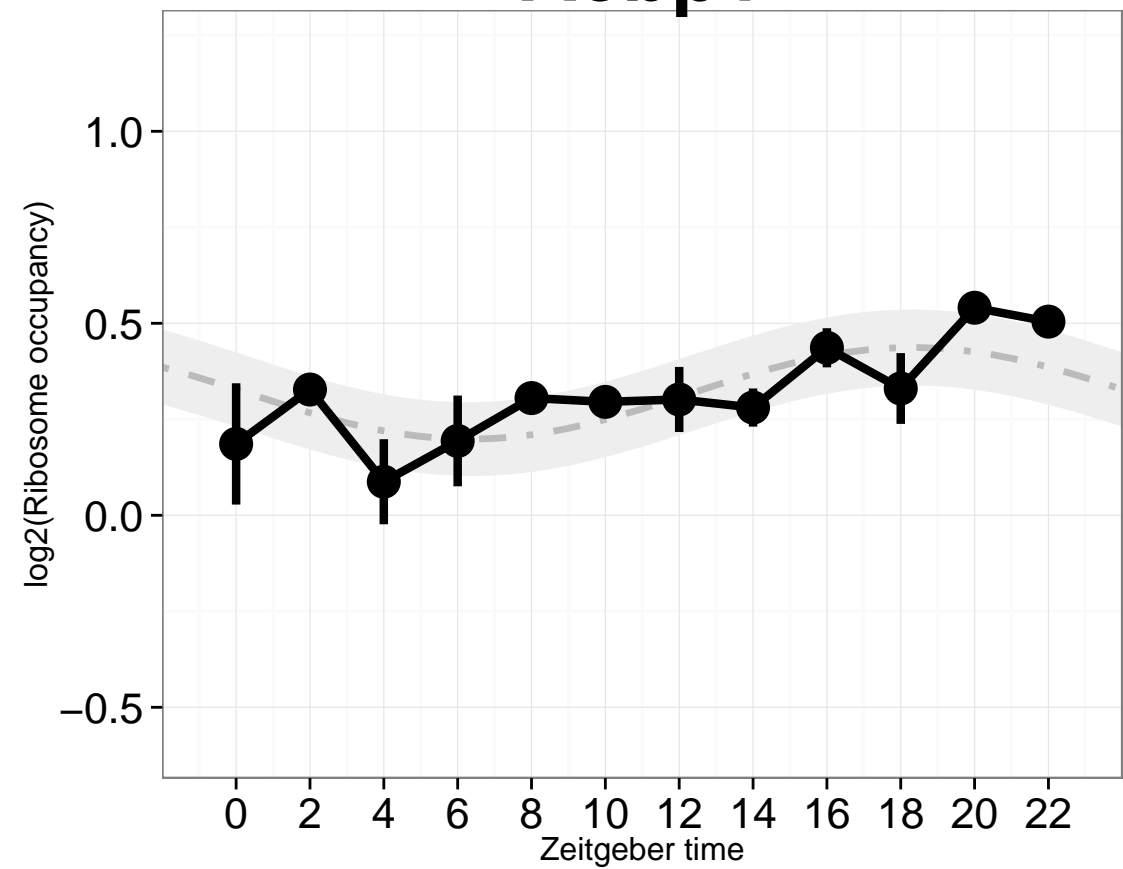

Supplement: Supplementary file 271 [file 1]

## Gen1

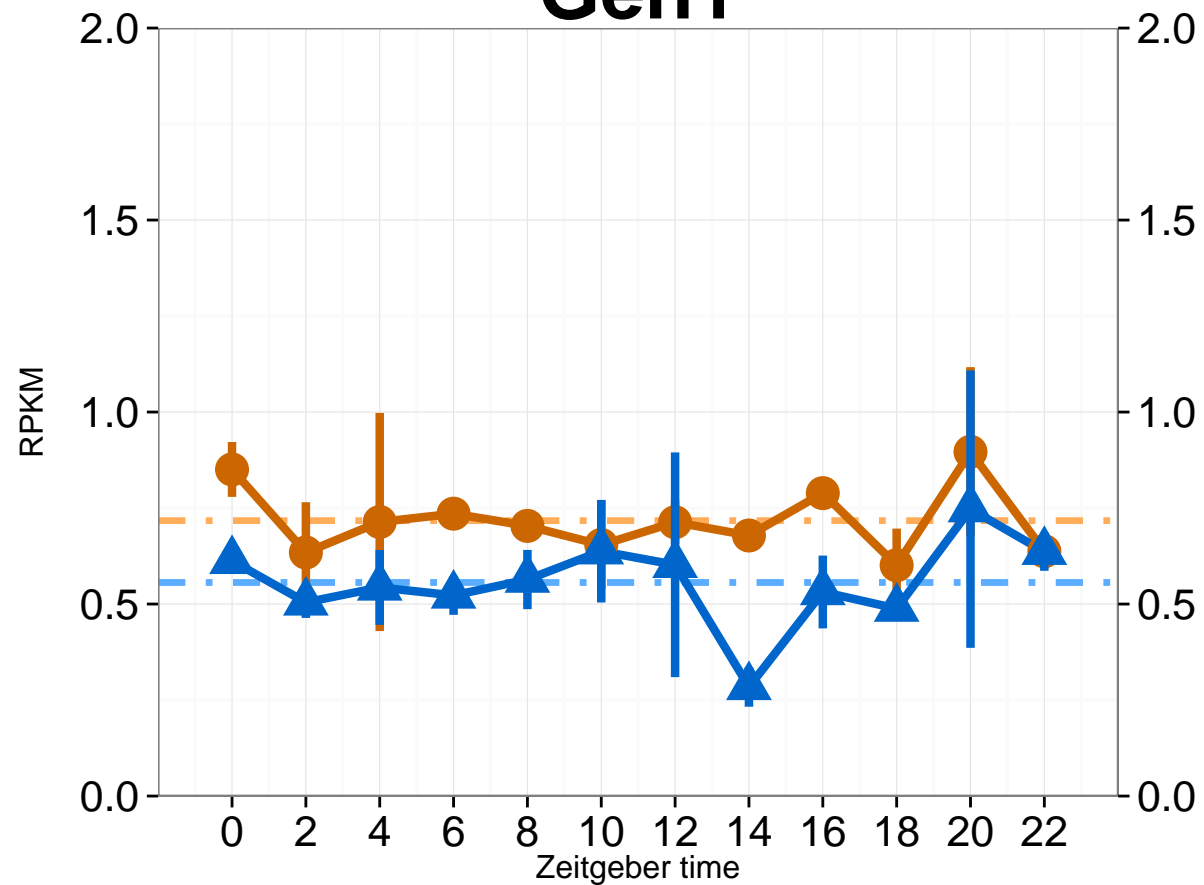

## Gen1

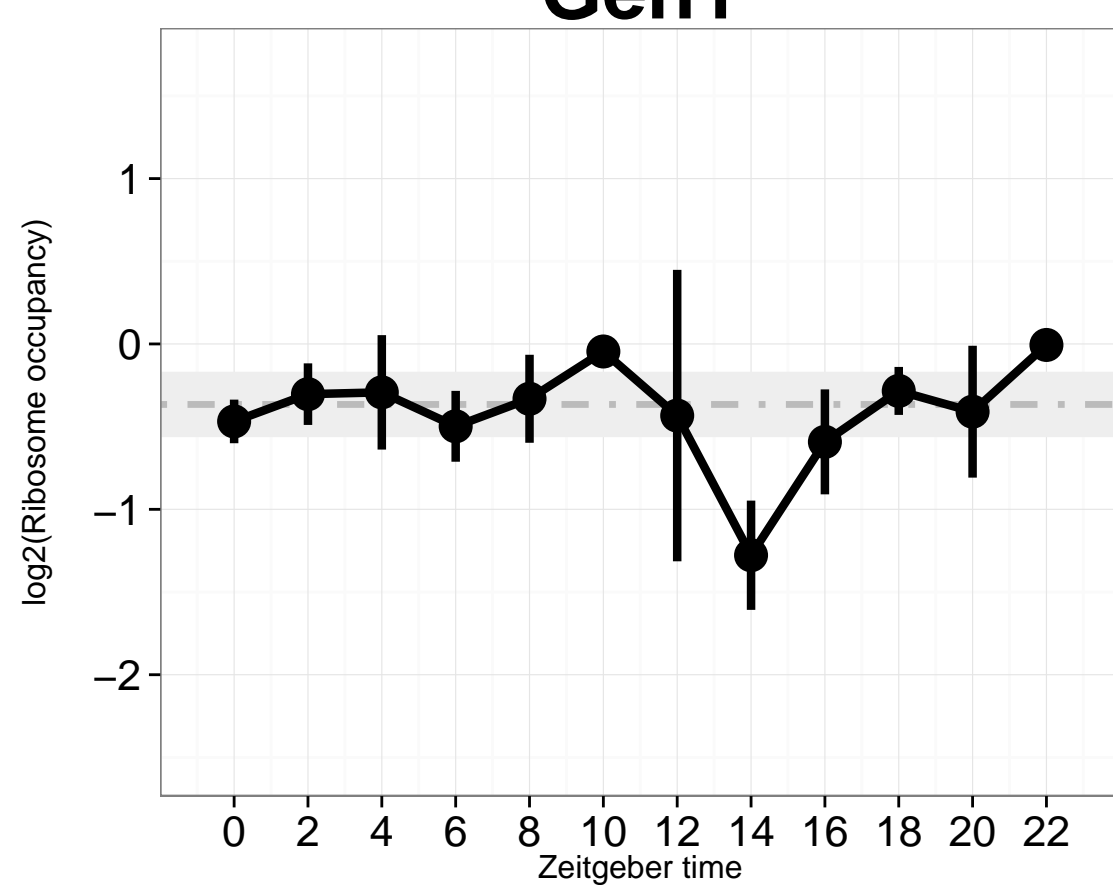

Supplement: Supplementary file 272 [file 1]

# Eif2s3y

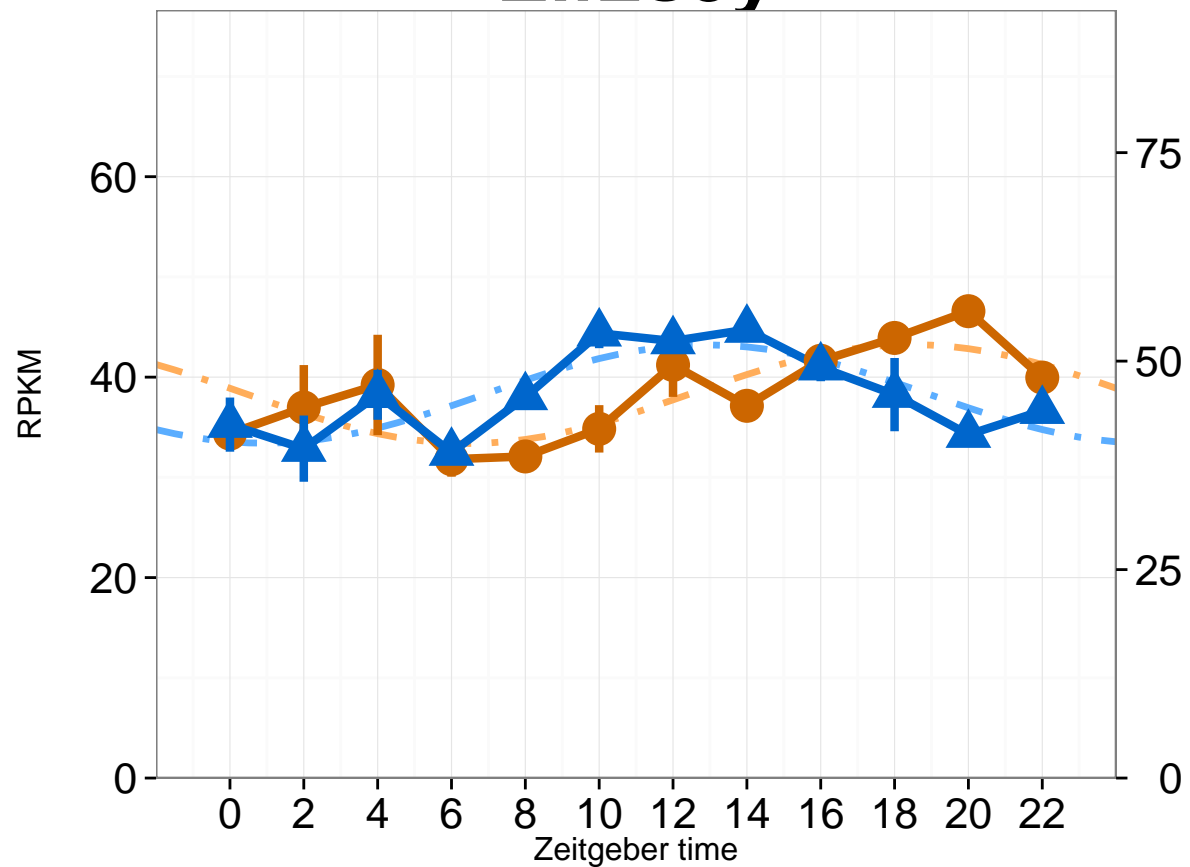

# Eif2s3y

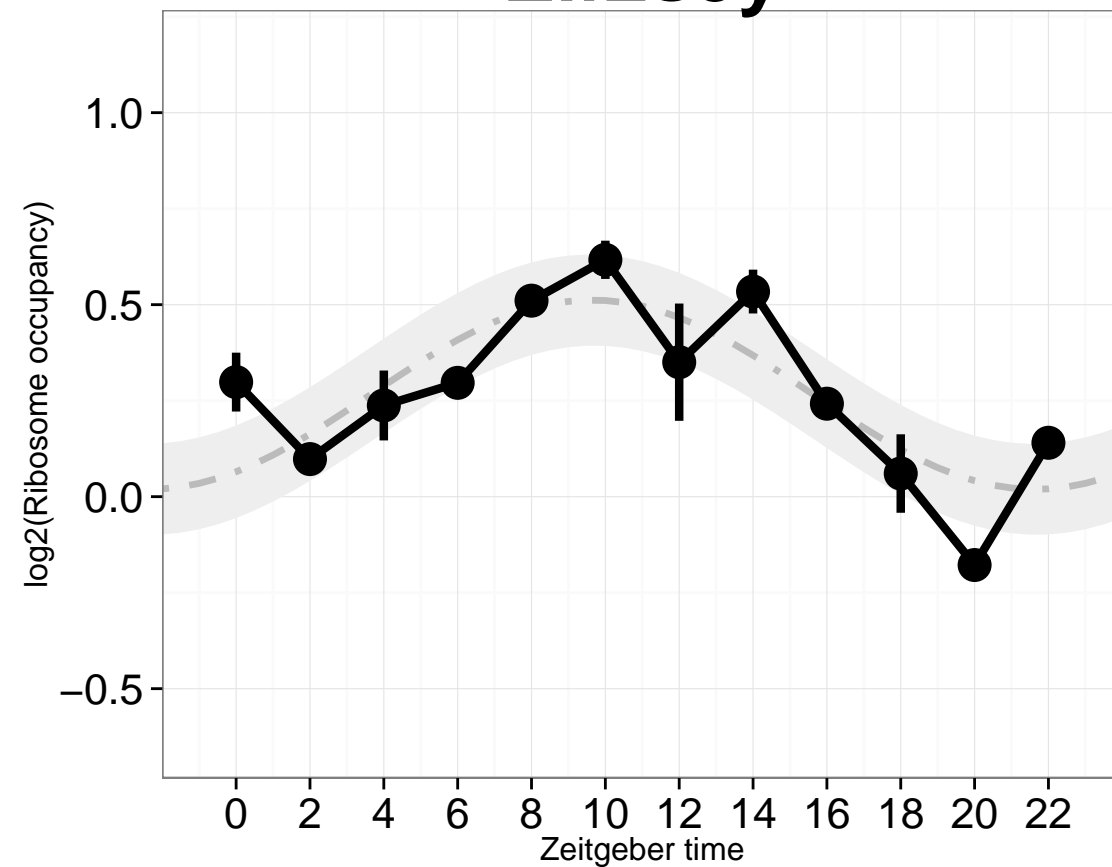

Supplement: Supplementary file 273 [file 1]

## Irgq

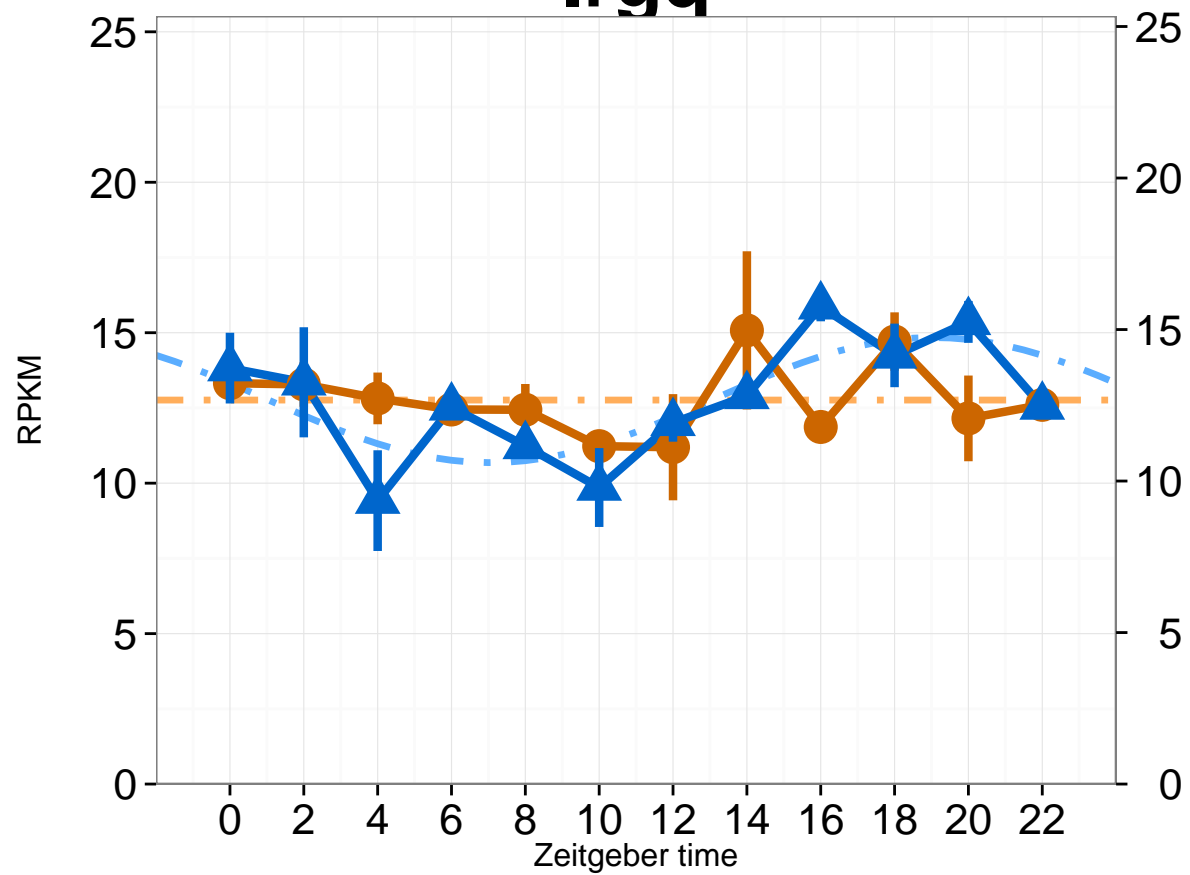

## Irgq

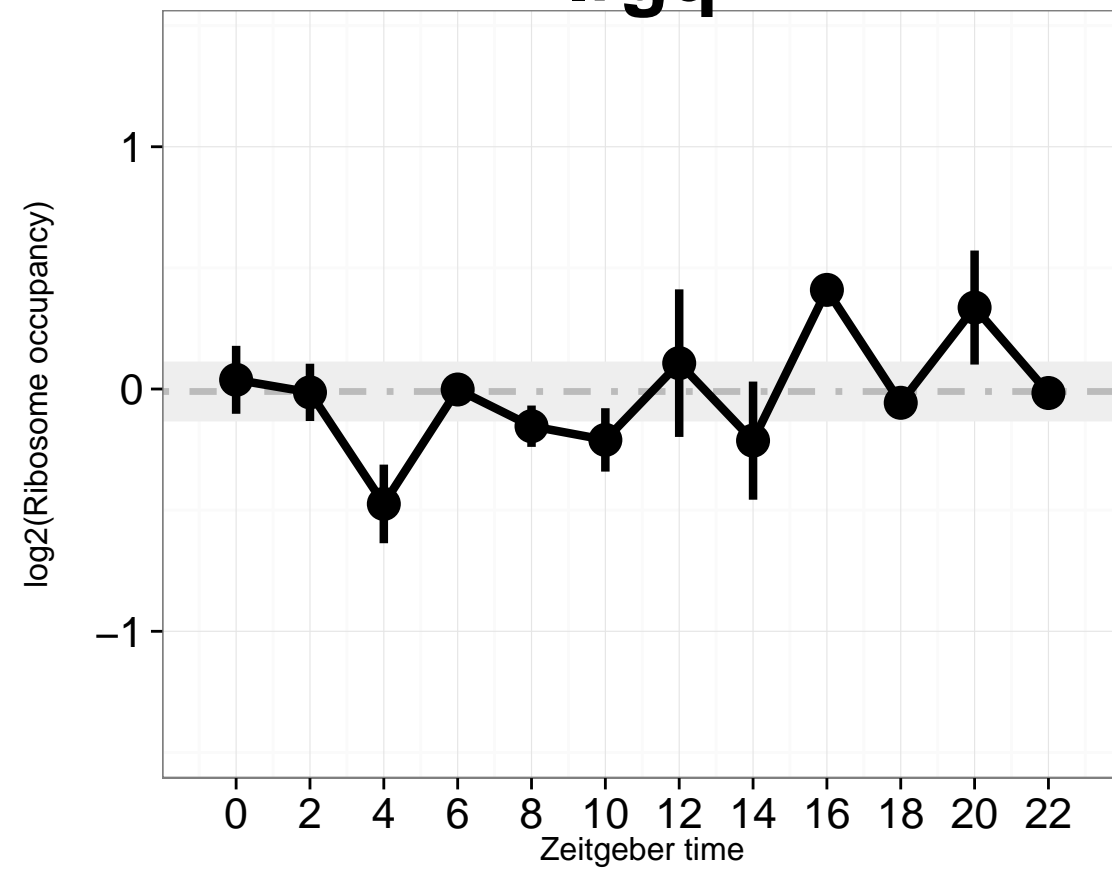

Supplement: Supplementary file 274 [file 1]

## 2410015M20Rik

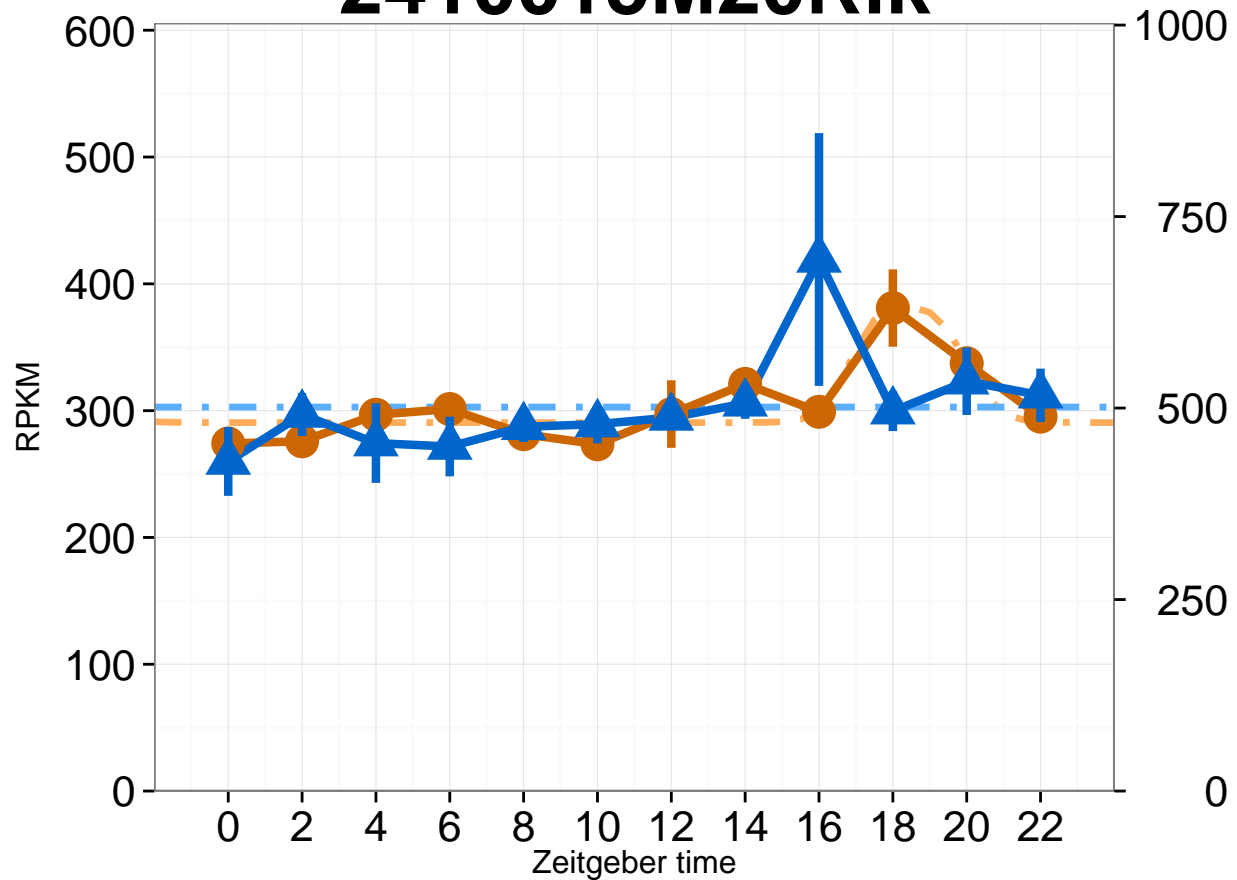

## 2410015M20Rik

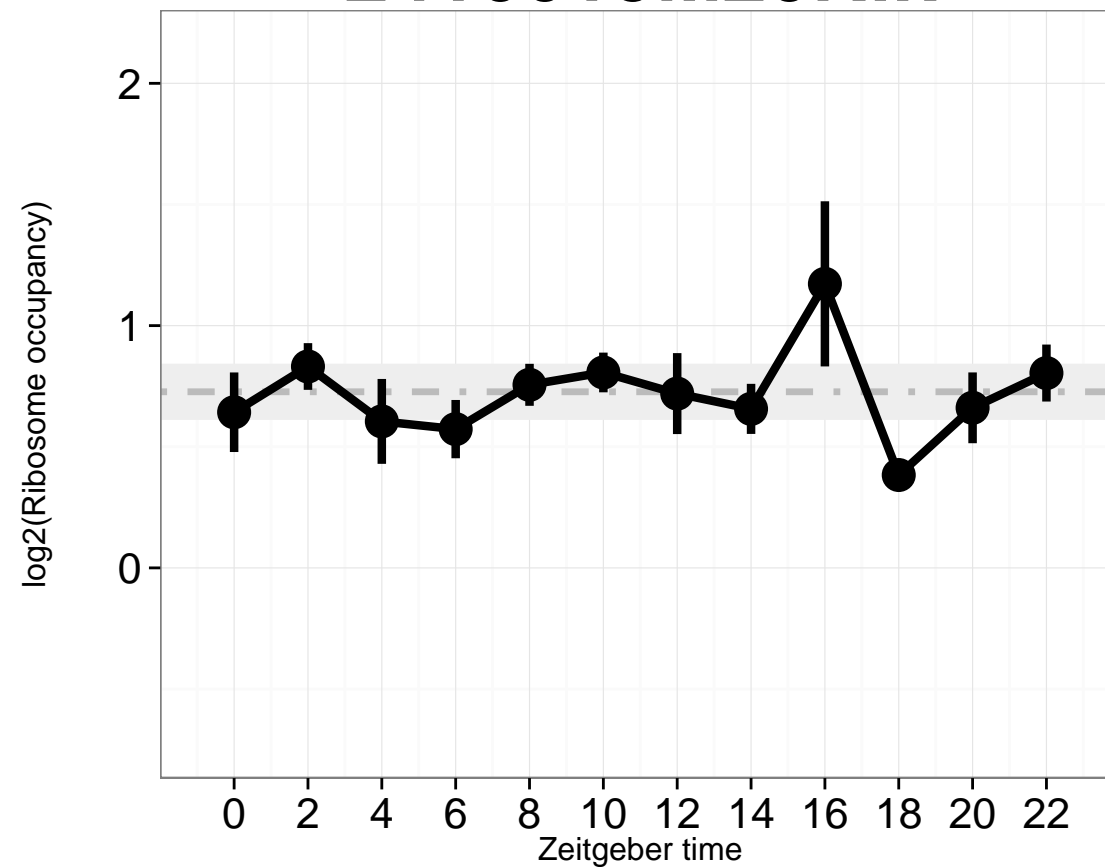

Supplement: Supplementary file 275 [file 1]

# Clec2d

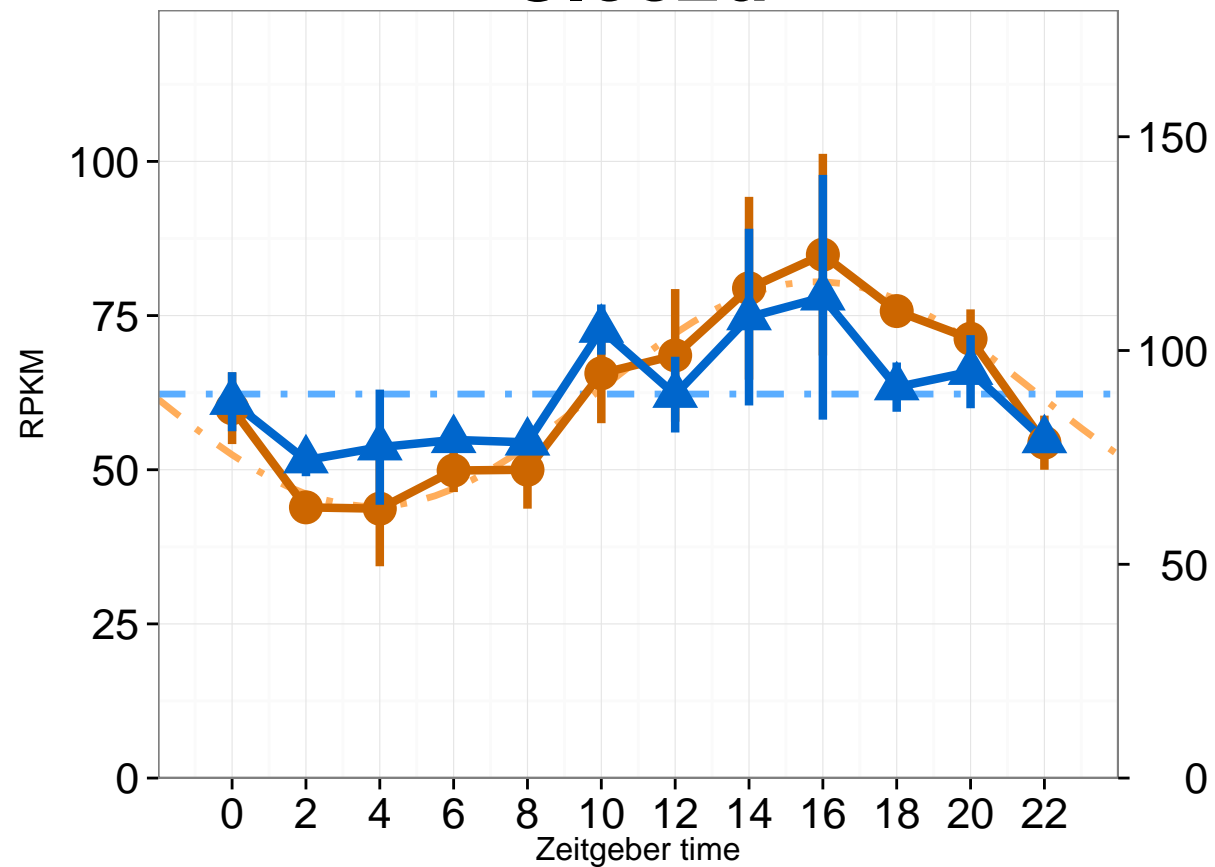

# Clec2d

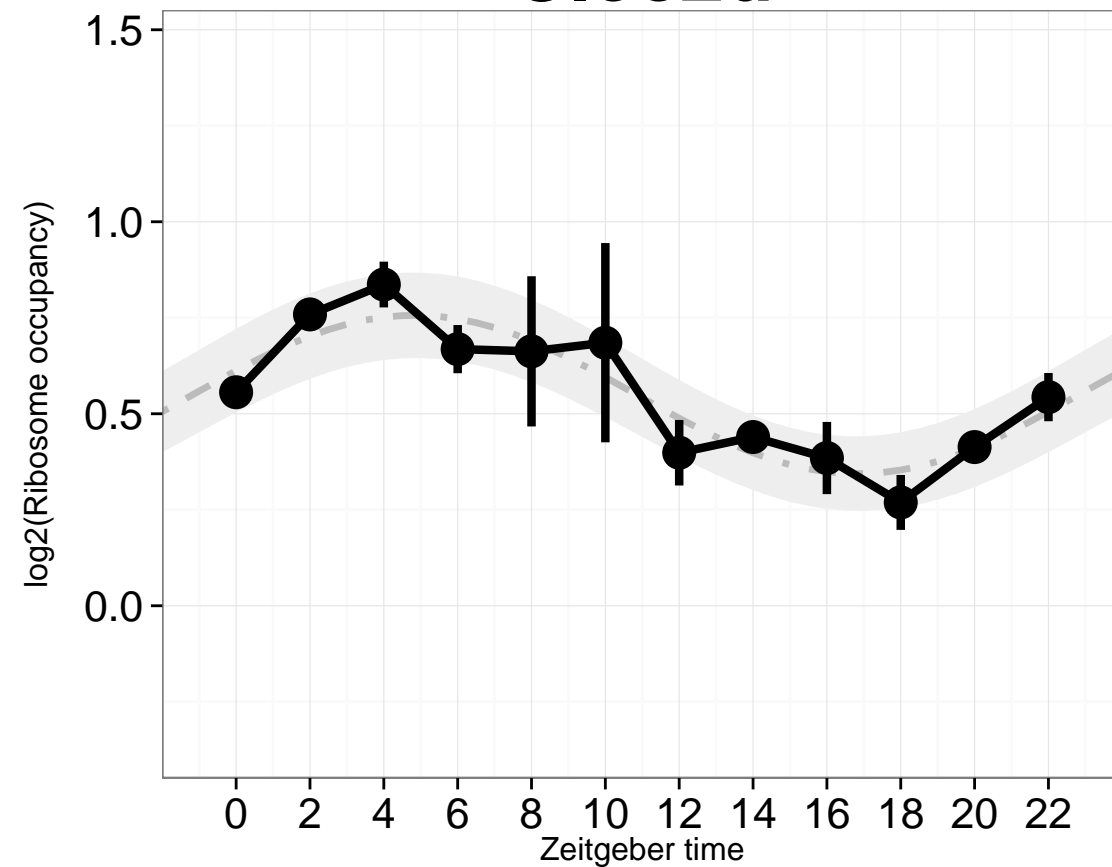

Supplement: Supplementary file 276 [file 1]

# Tanc1

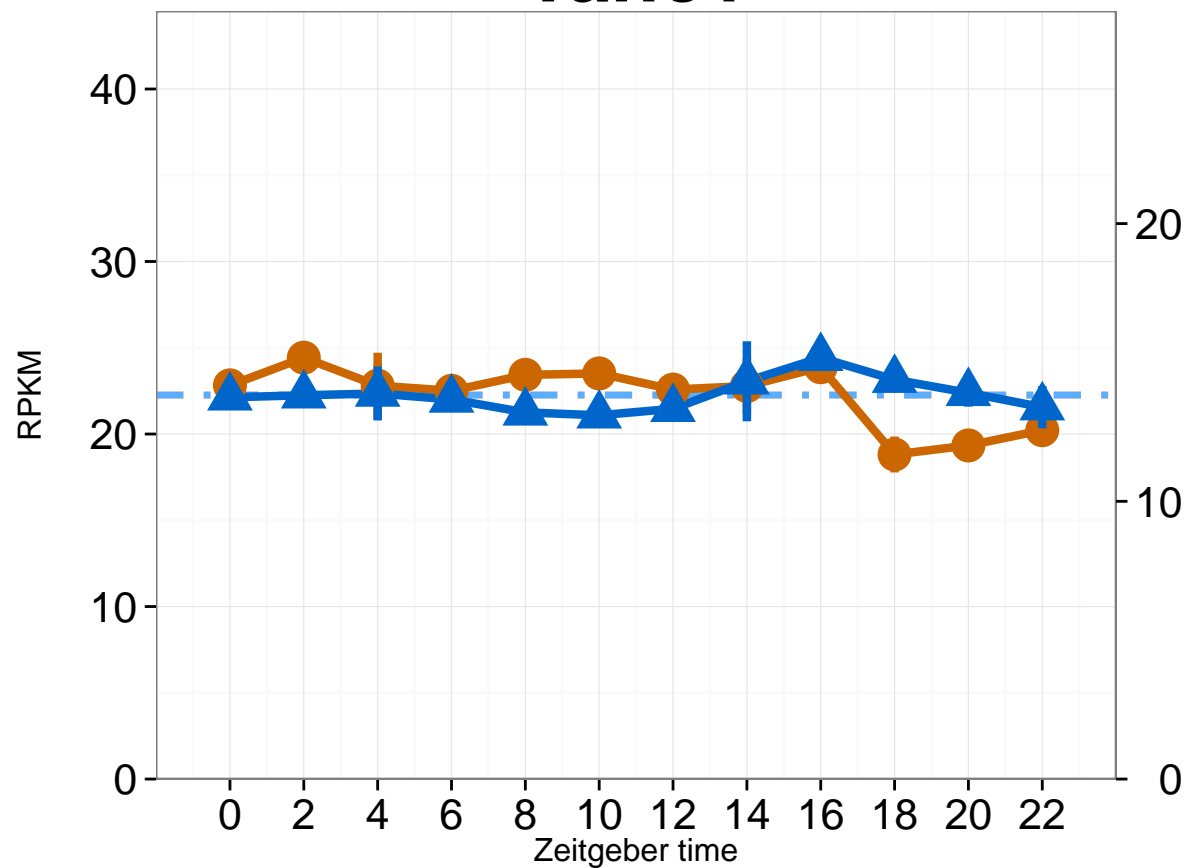

# Tanc1

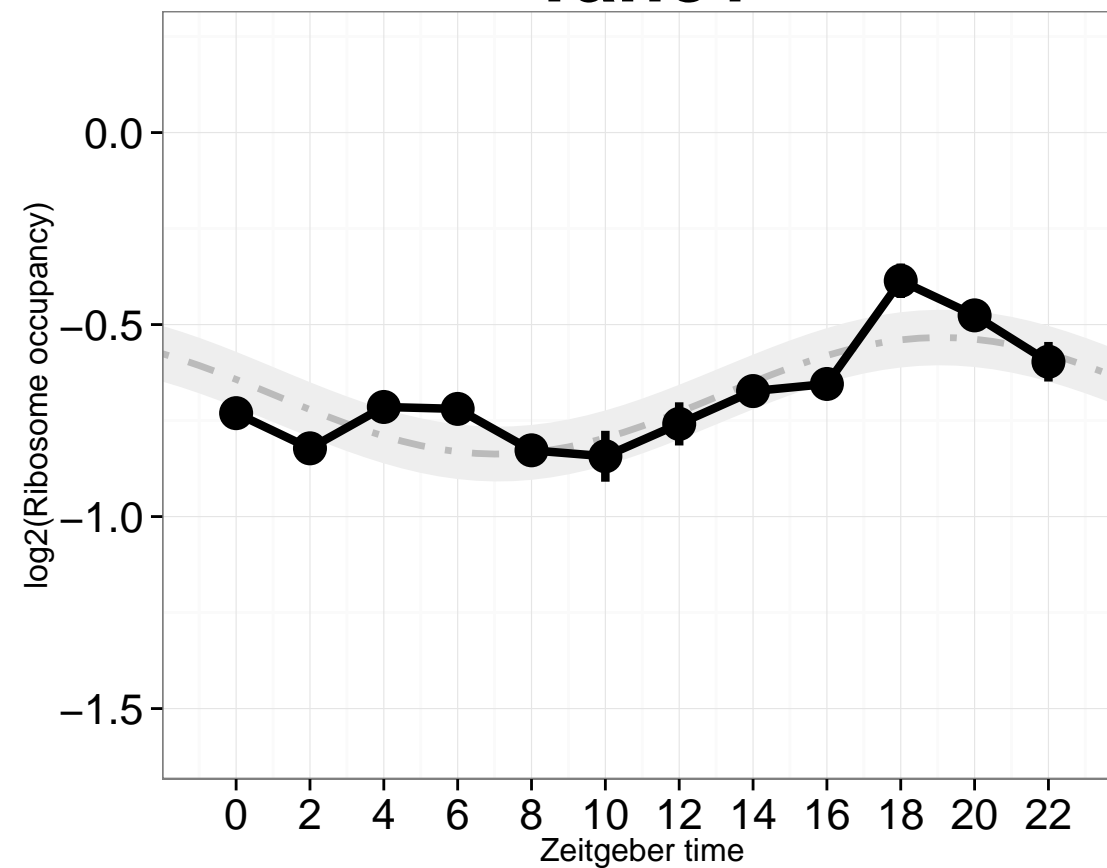

Supplement: Supplementary file 277 [file 1]

## Adat3

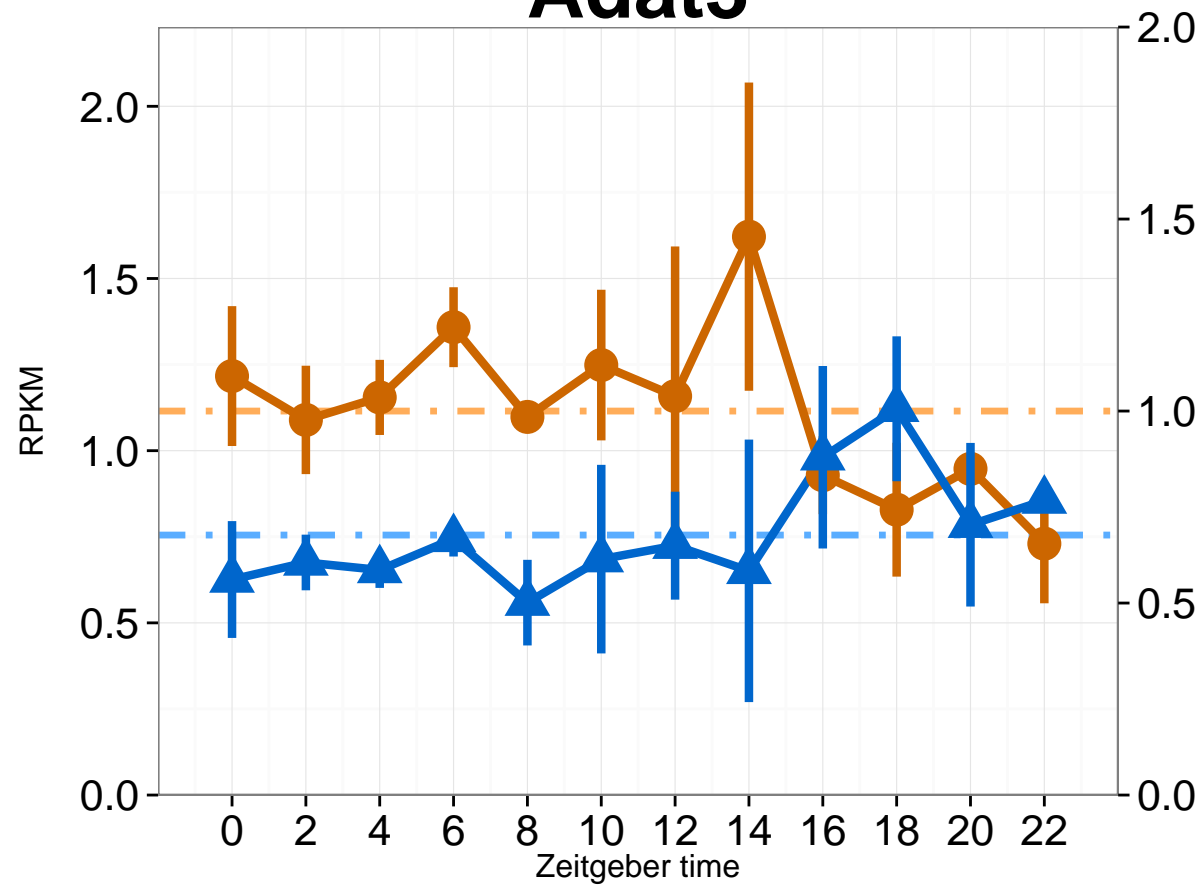

## Adat3

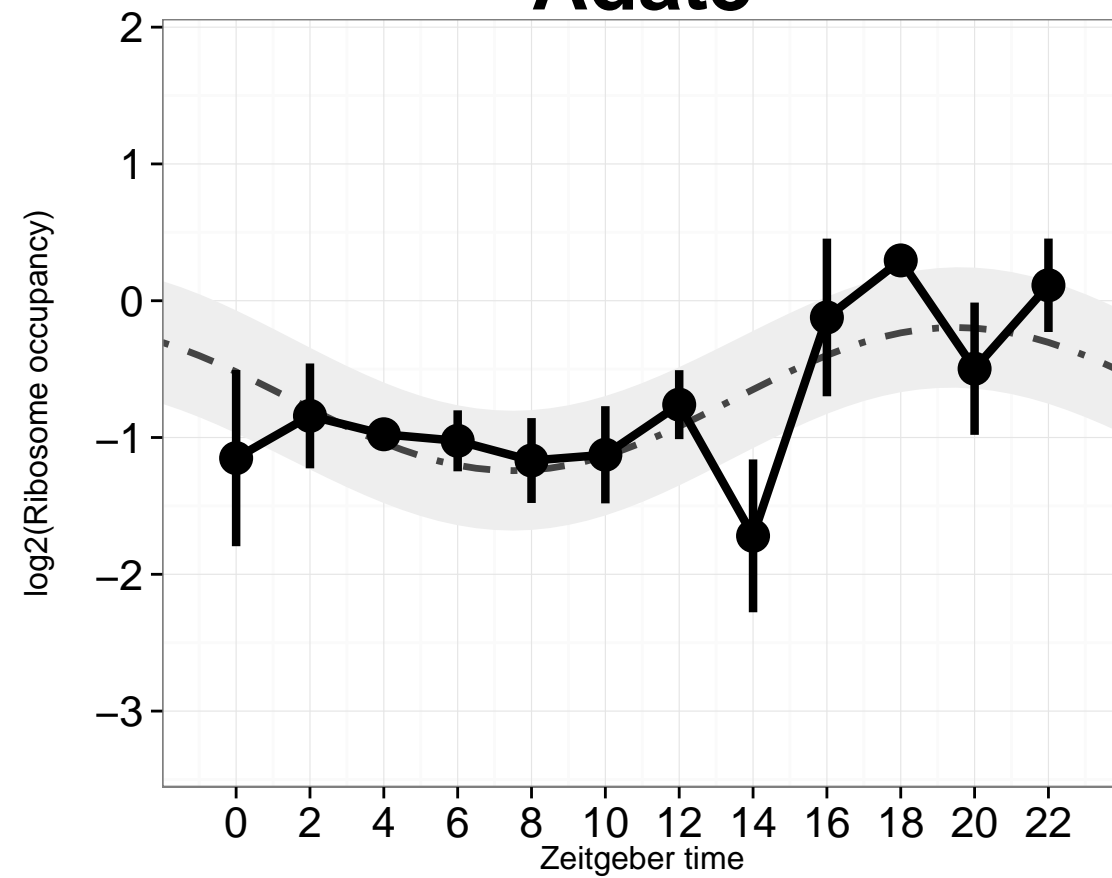

Supplement: Supplementary file 278 [file 1]

# Zfp112

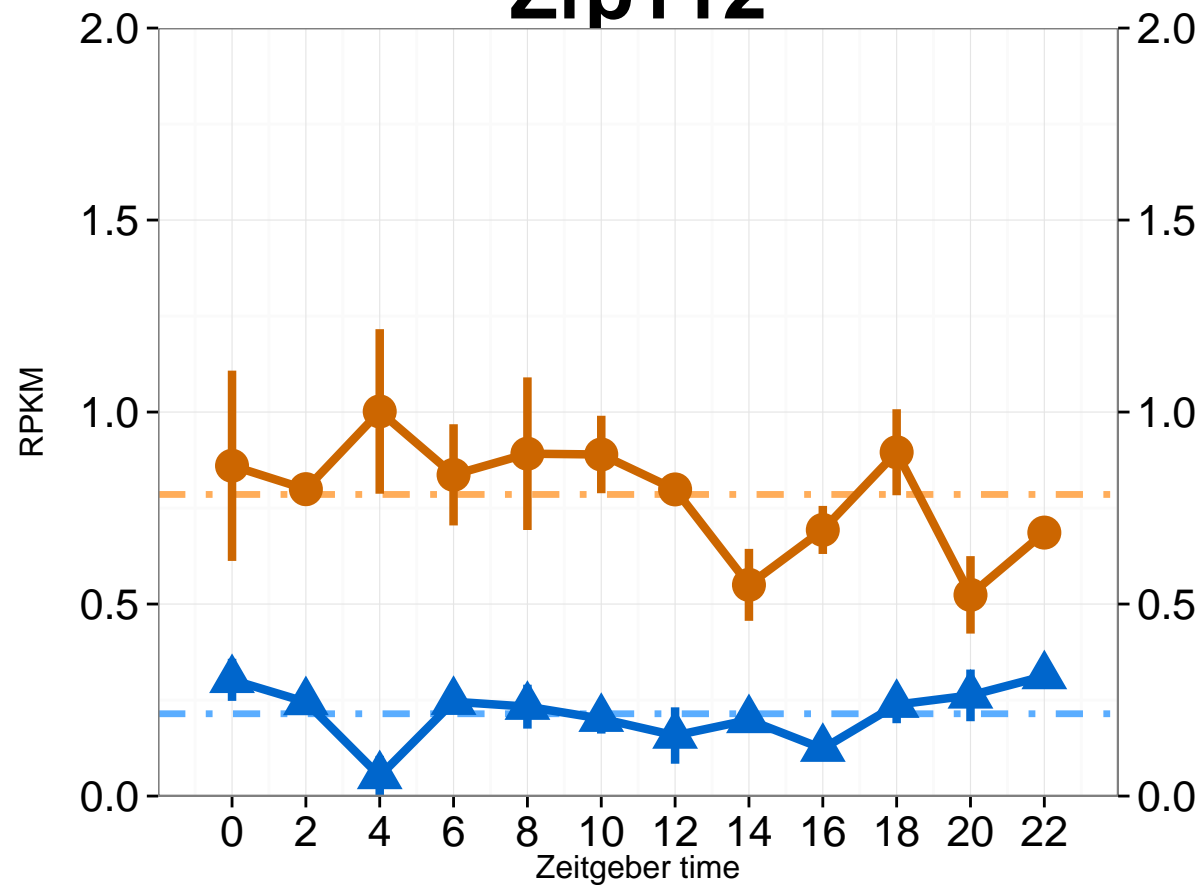

# Zfp112

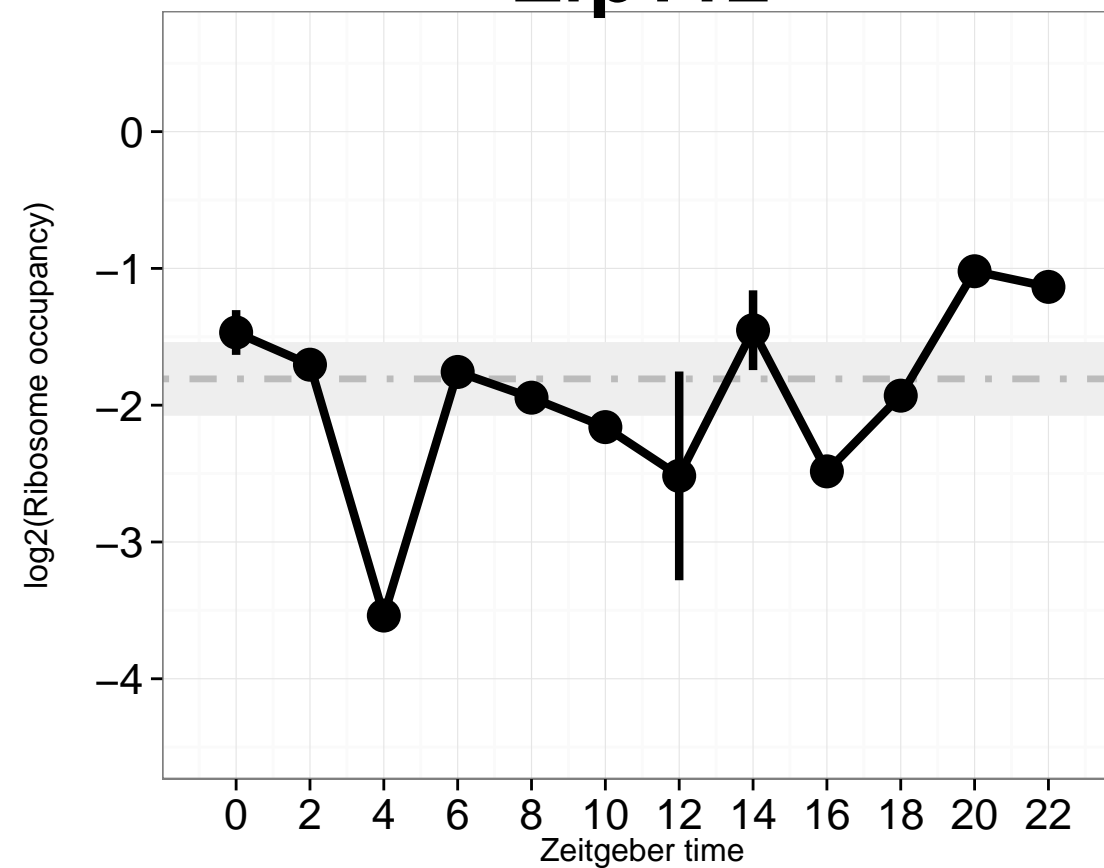

Supplement: Supplementary file 279 [file 1]

## Ifnar2

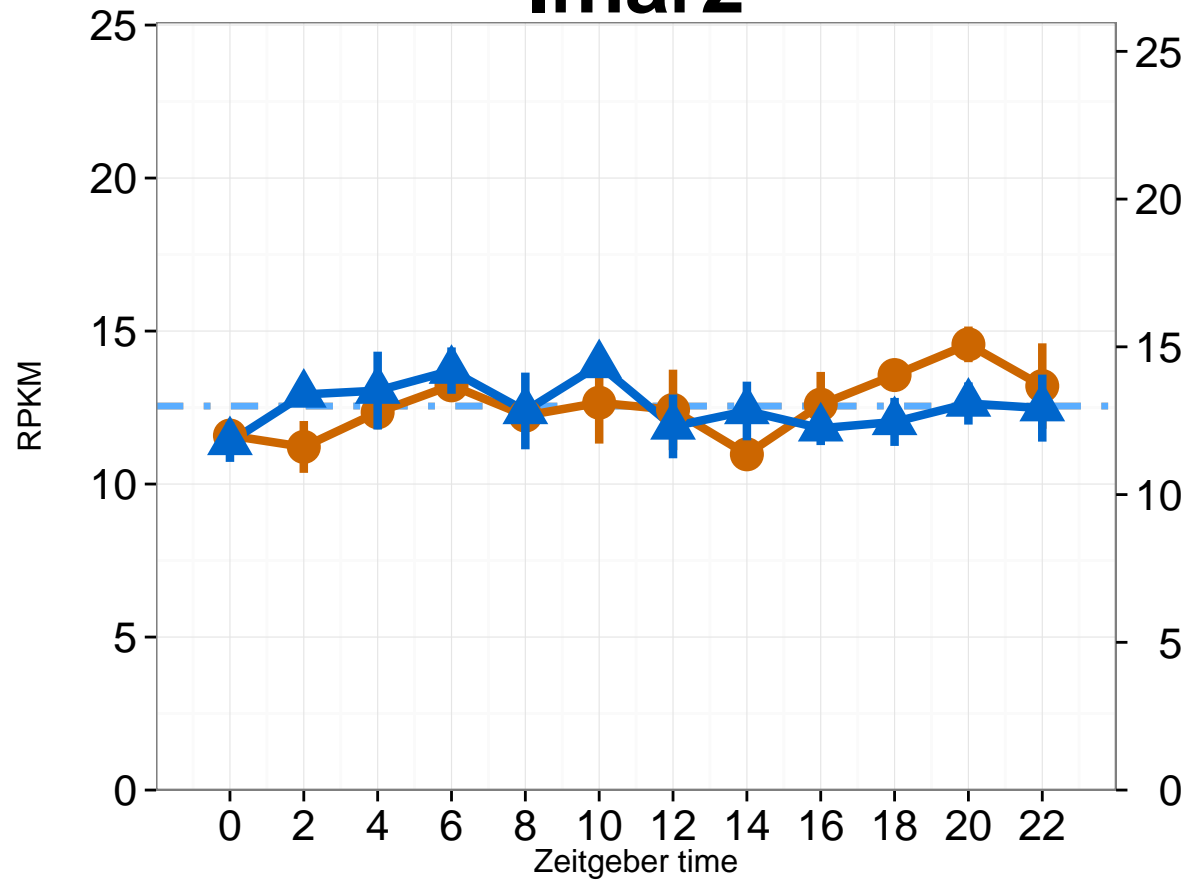

## Ifnar2

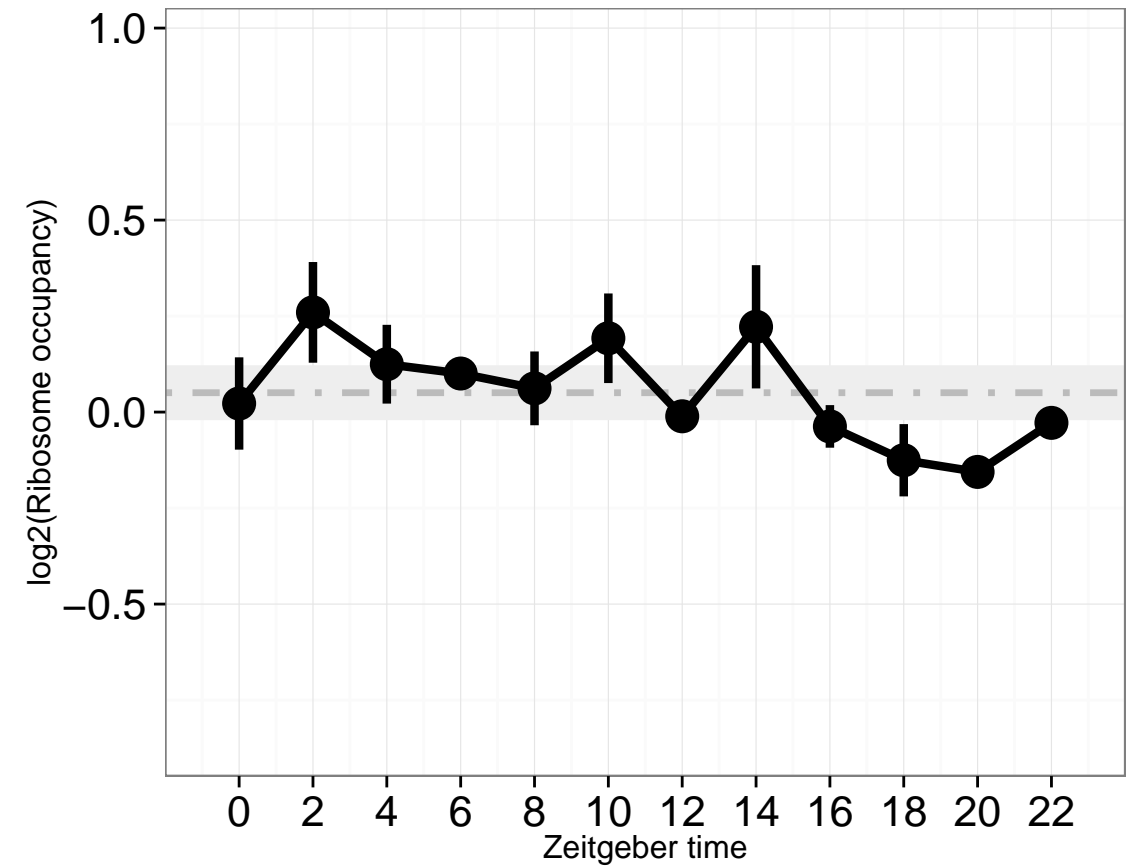

Supplement: Supplementary file 280 [file 1]

## Asb8

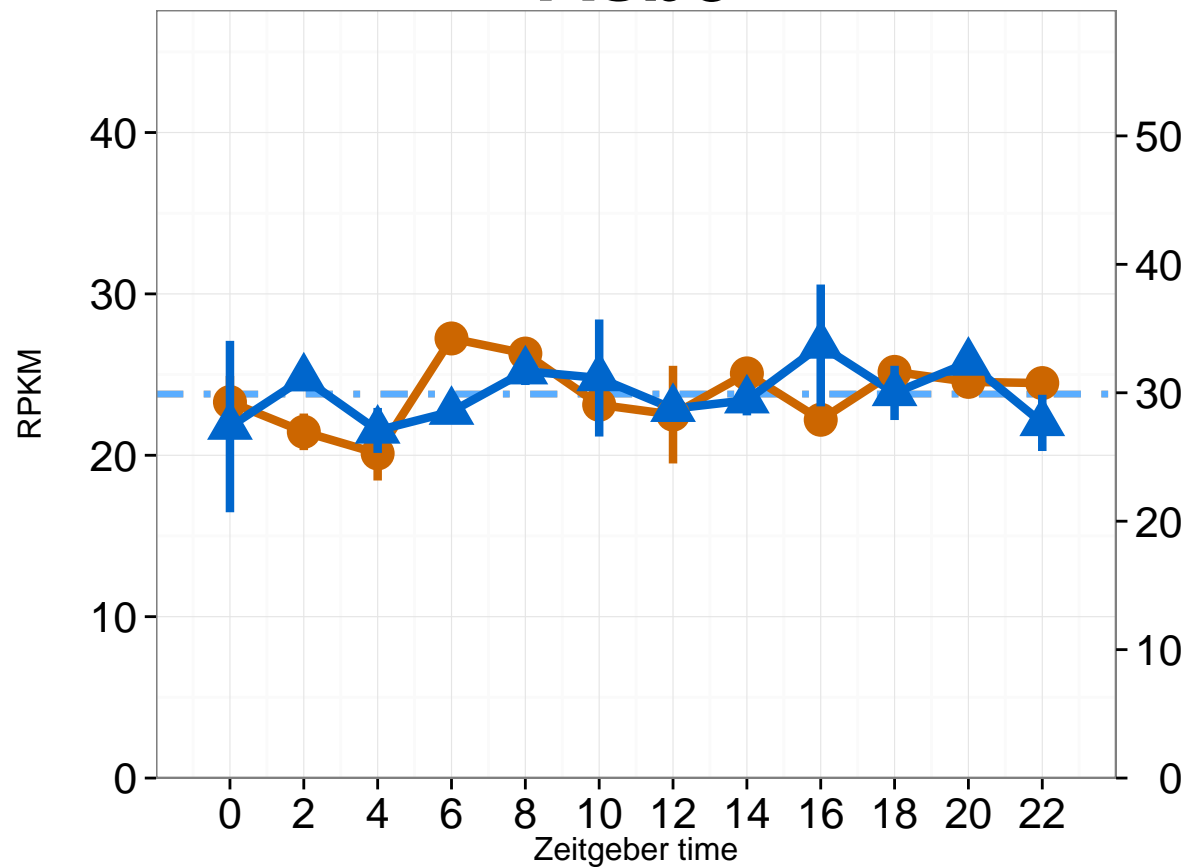

## Asb8

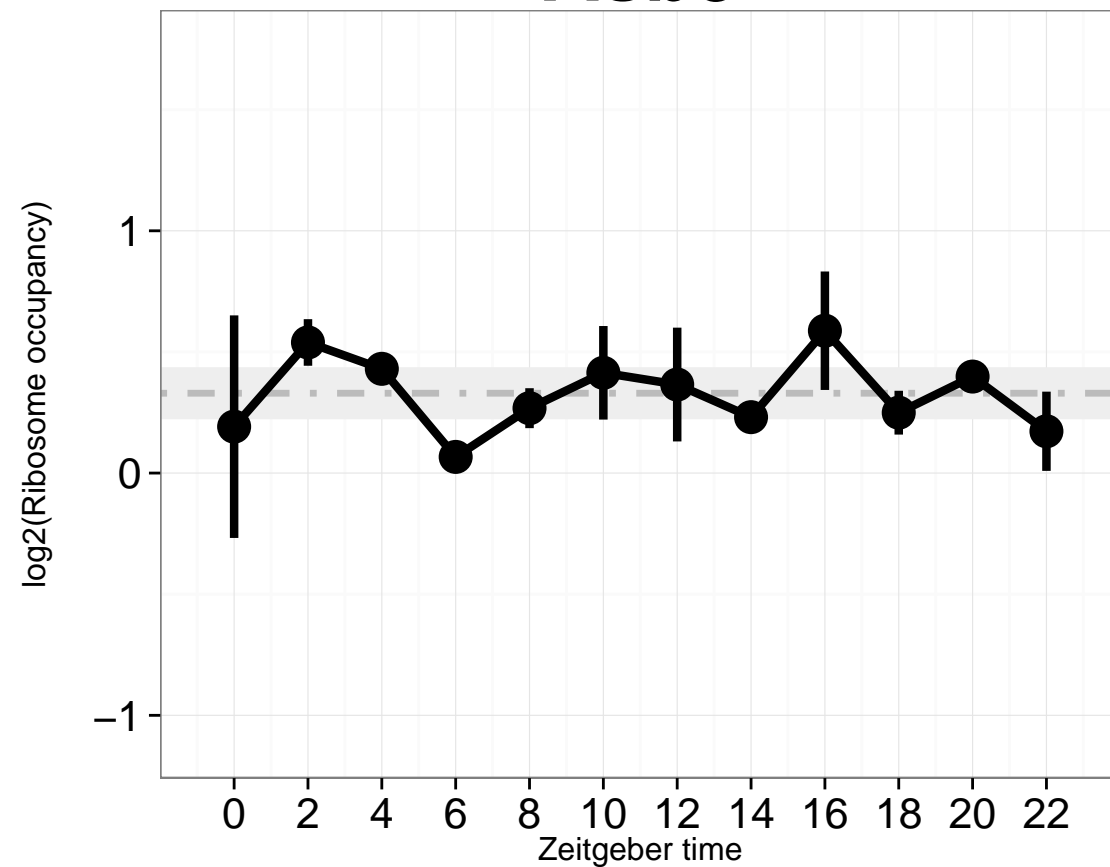

Supplement: Supplementary file 281 [file 1]

## Thra

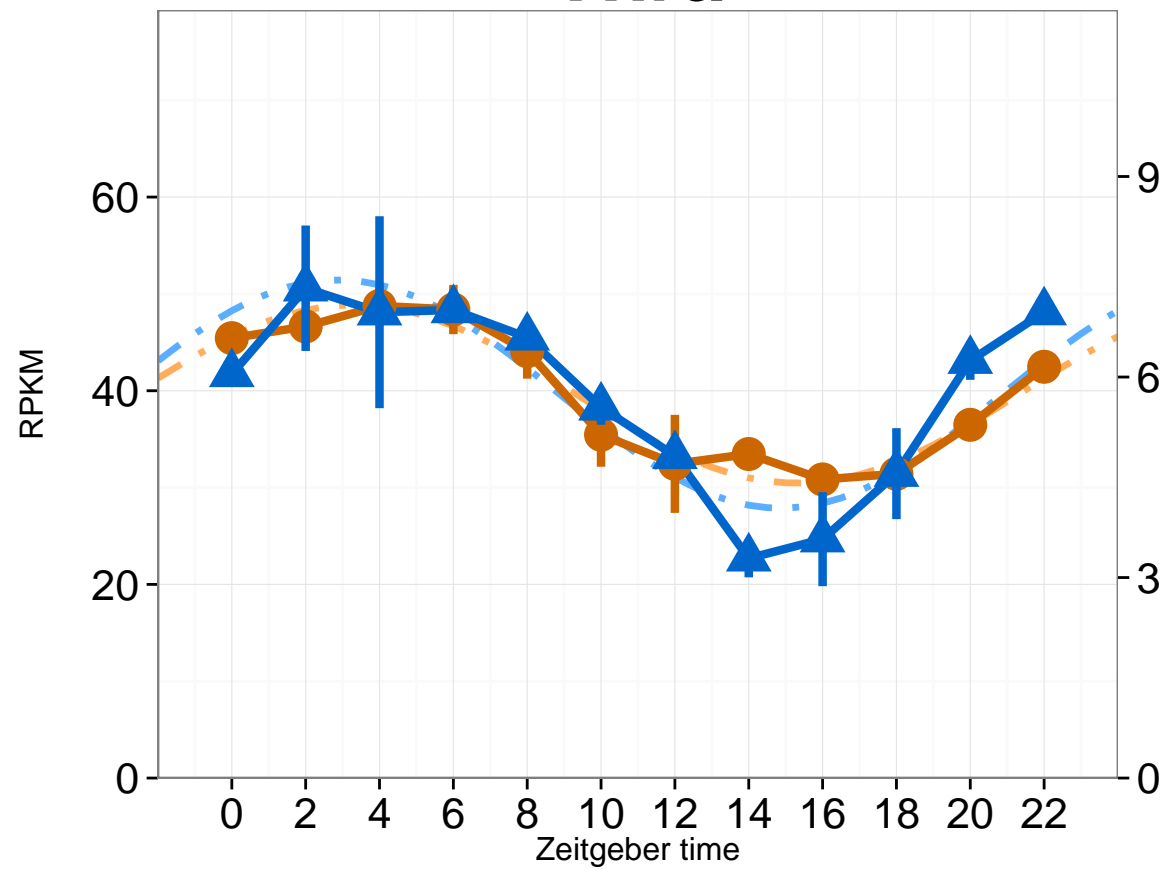

## Thra

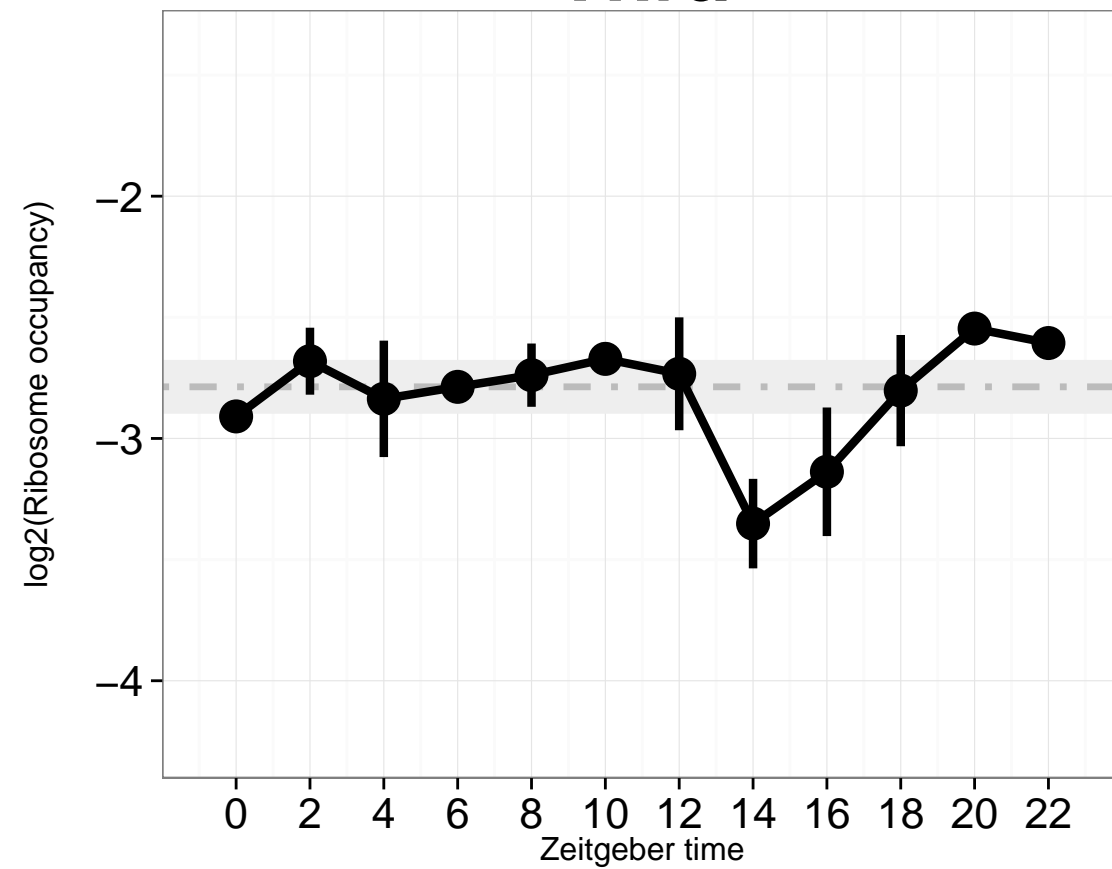

Supplement: Supplementary file 282 [file 1]

# Zfp748

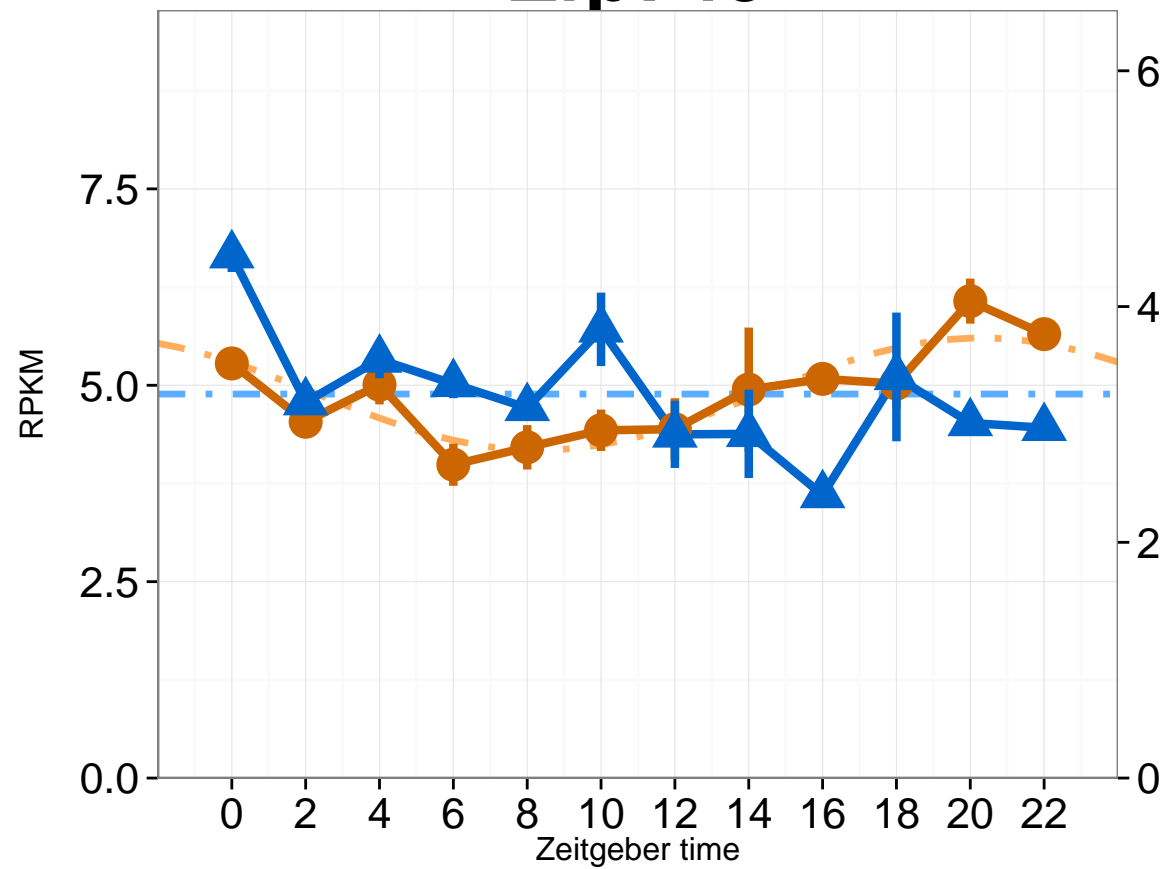

# Zfp748

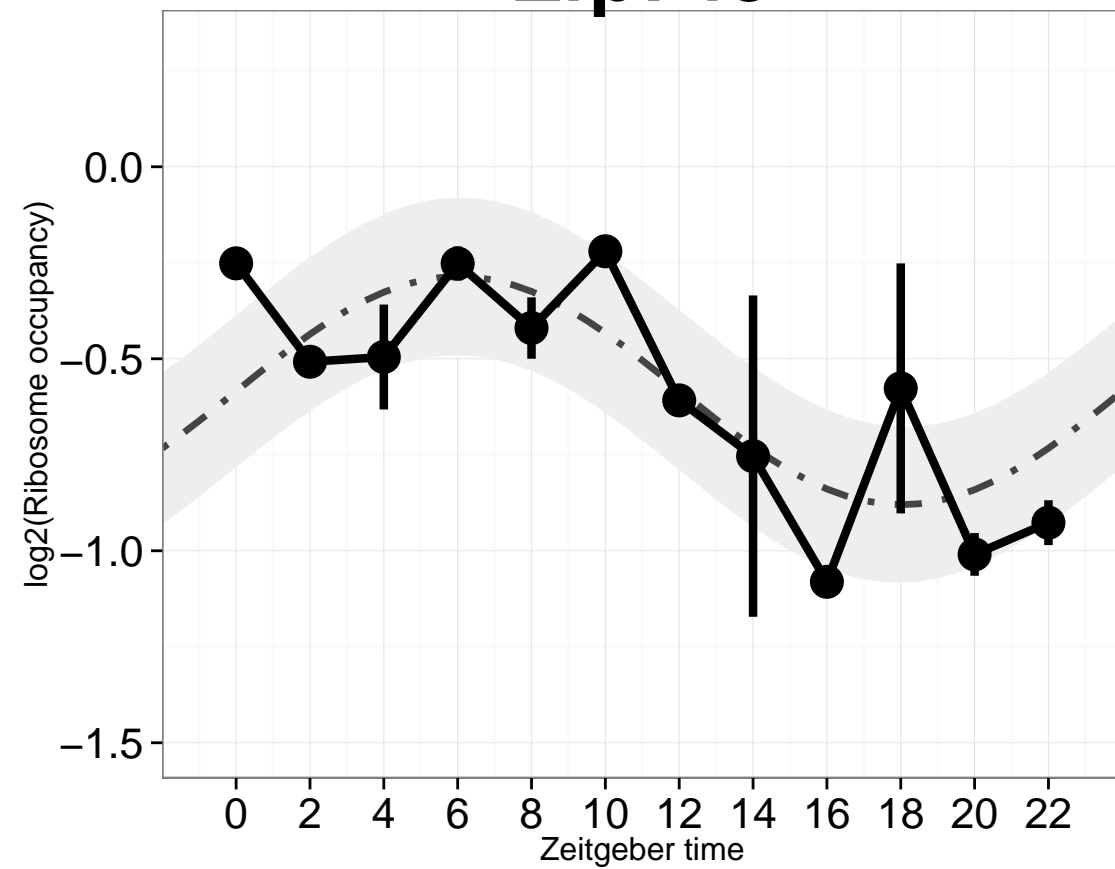

Supplement: Supplementary file 283 [file 1]

## Lmo7

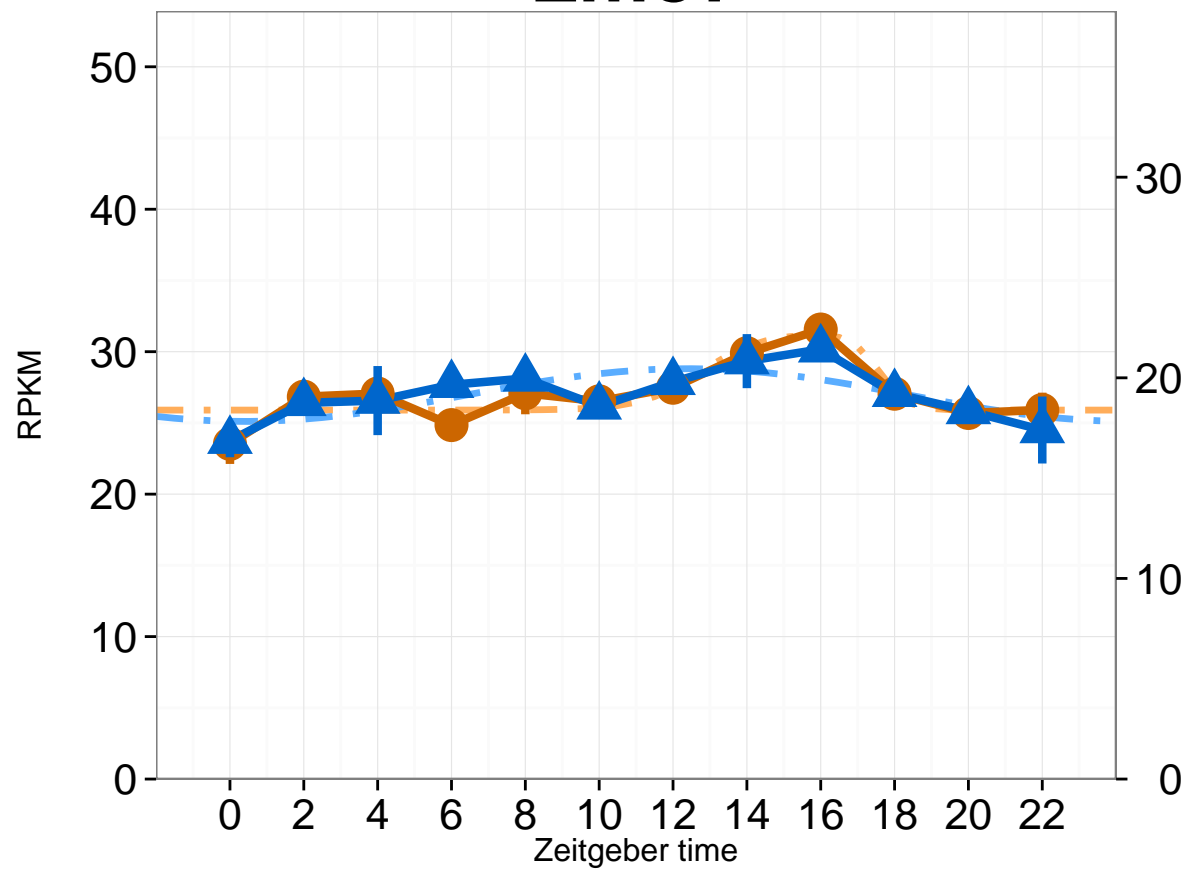

## Lmo7

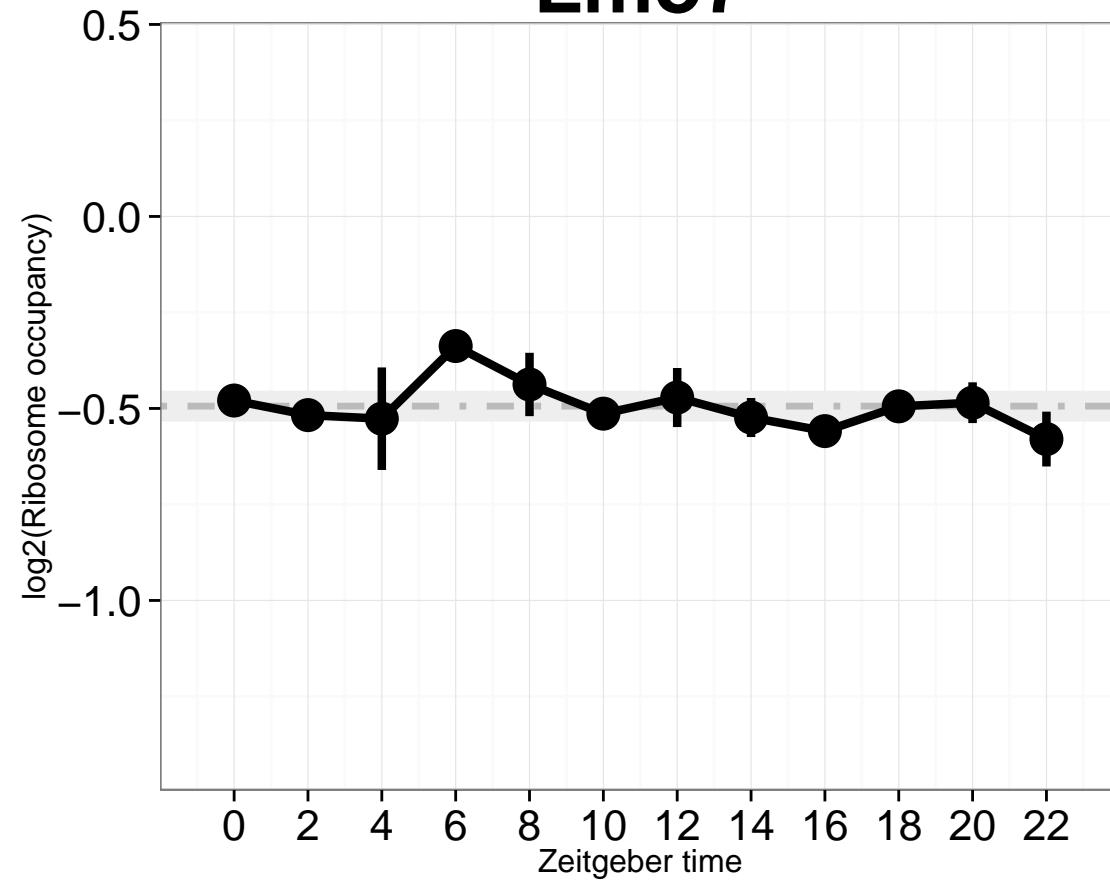

Supplement: Supplementary file 284 [file 1]

## Zbtb3

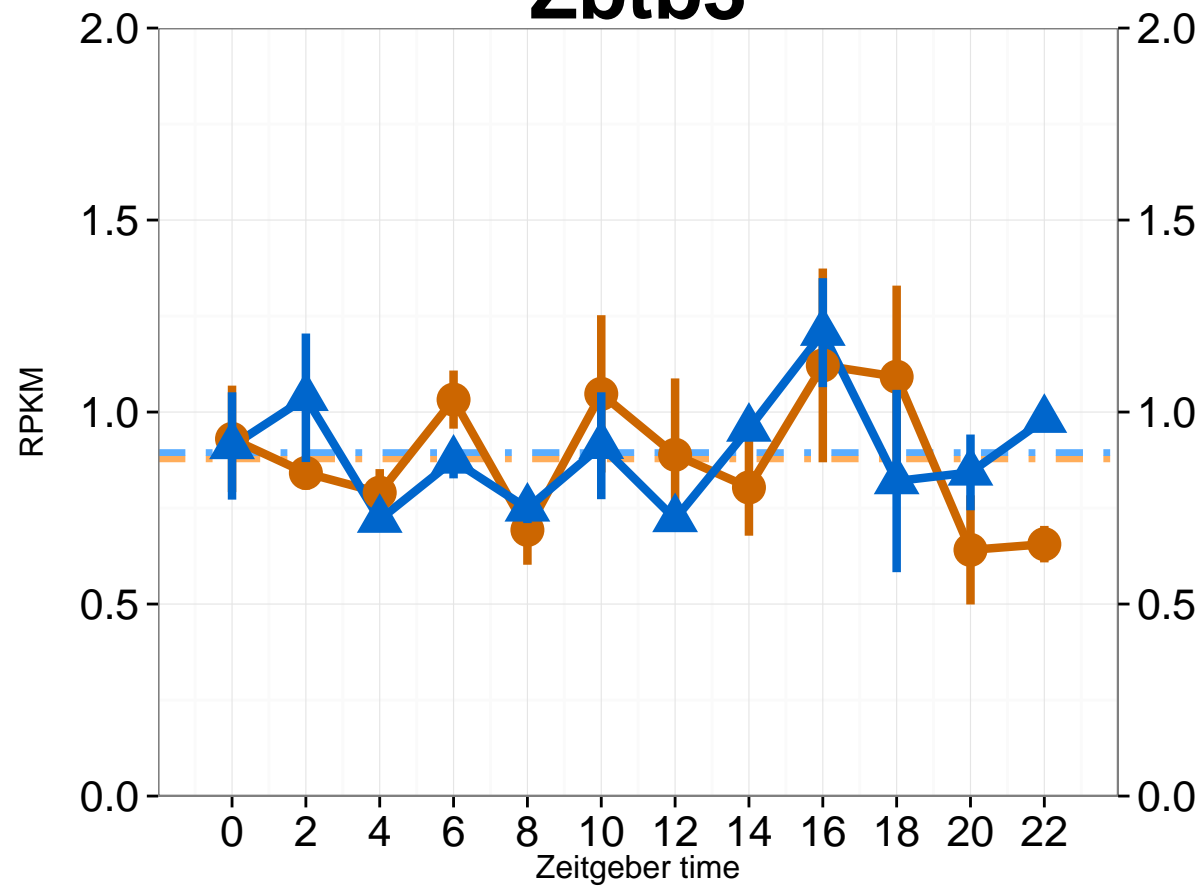

## Zbtb3

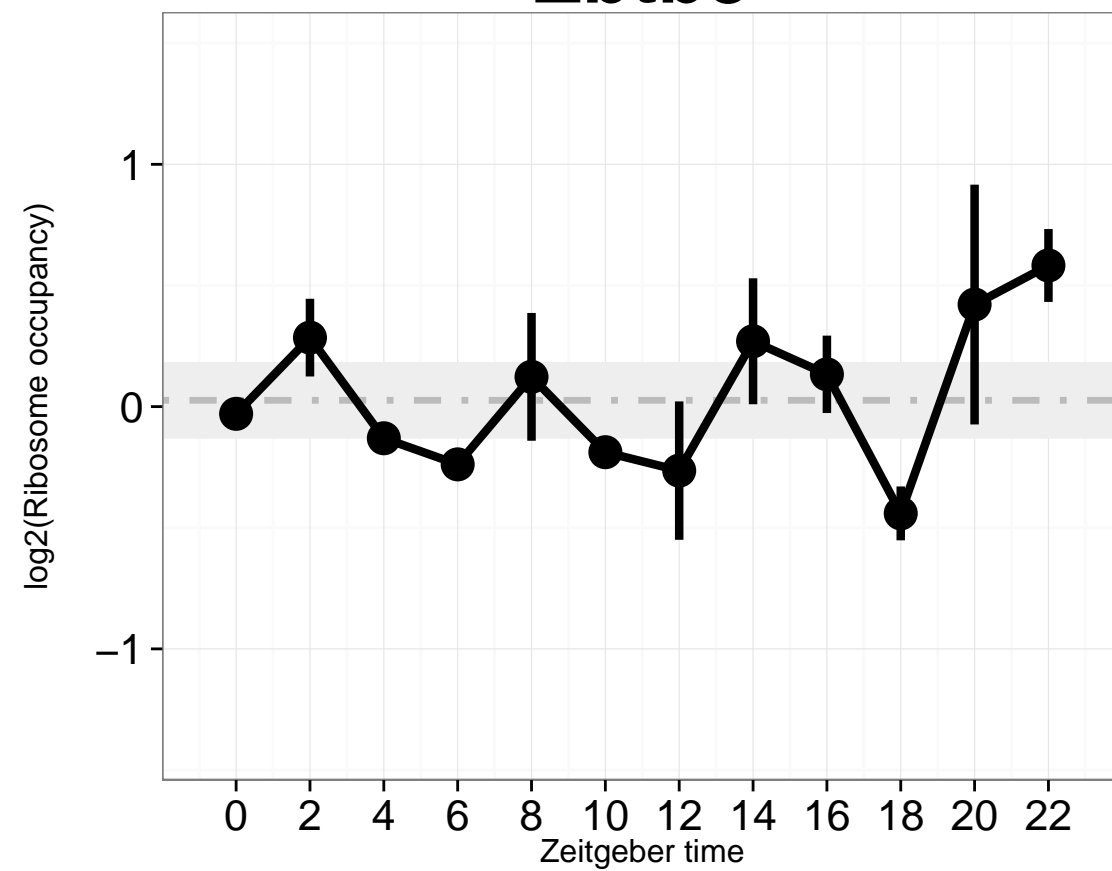

Supplement: Supplementary file 285 [file 1]

## Golgb1

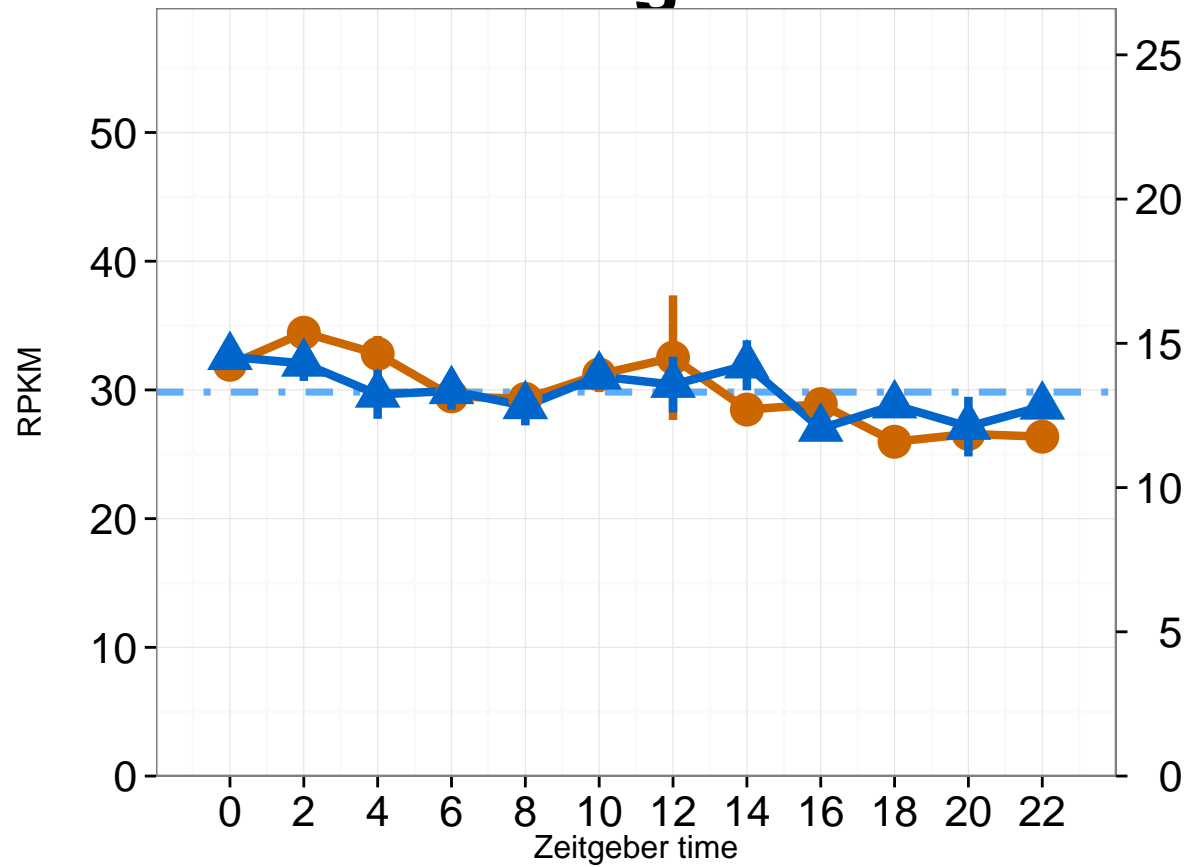

## Golgb1

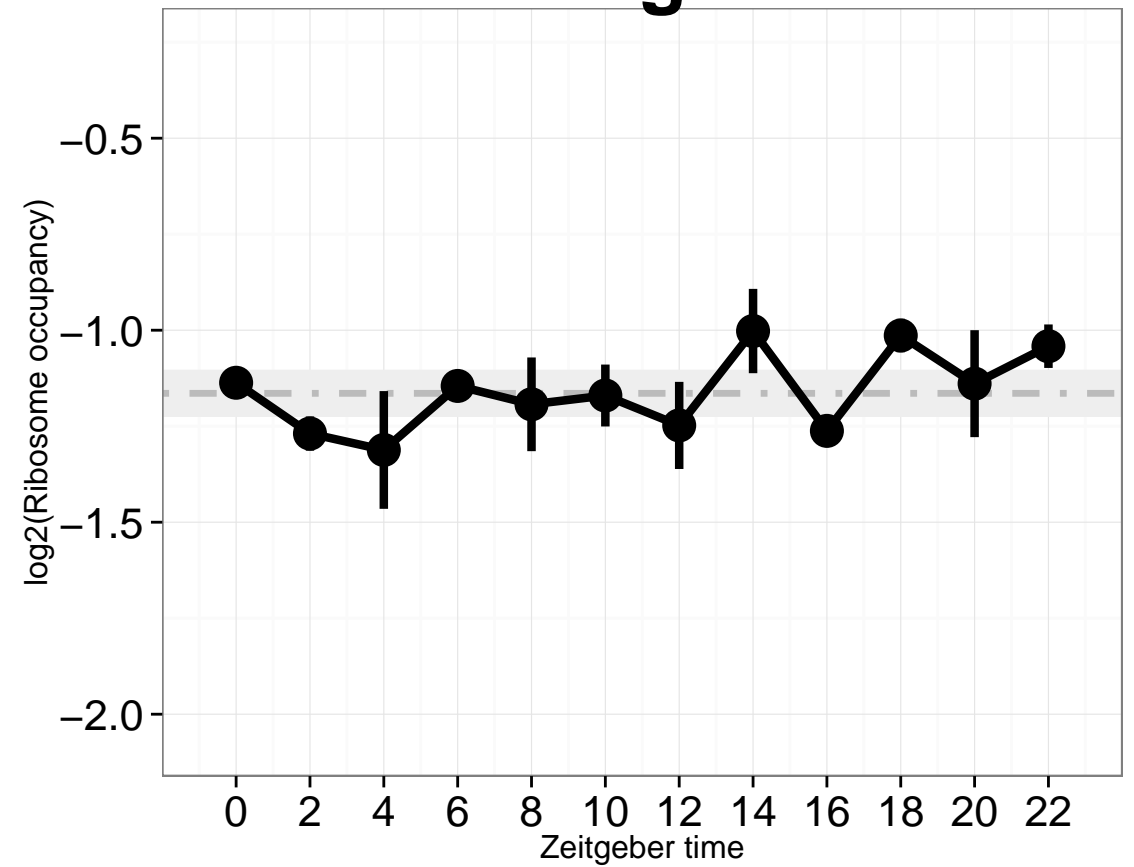

Supplement: Supplementary file 286 [file 1]

## Rrp1

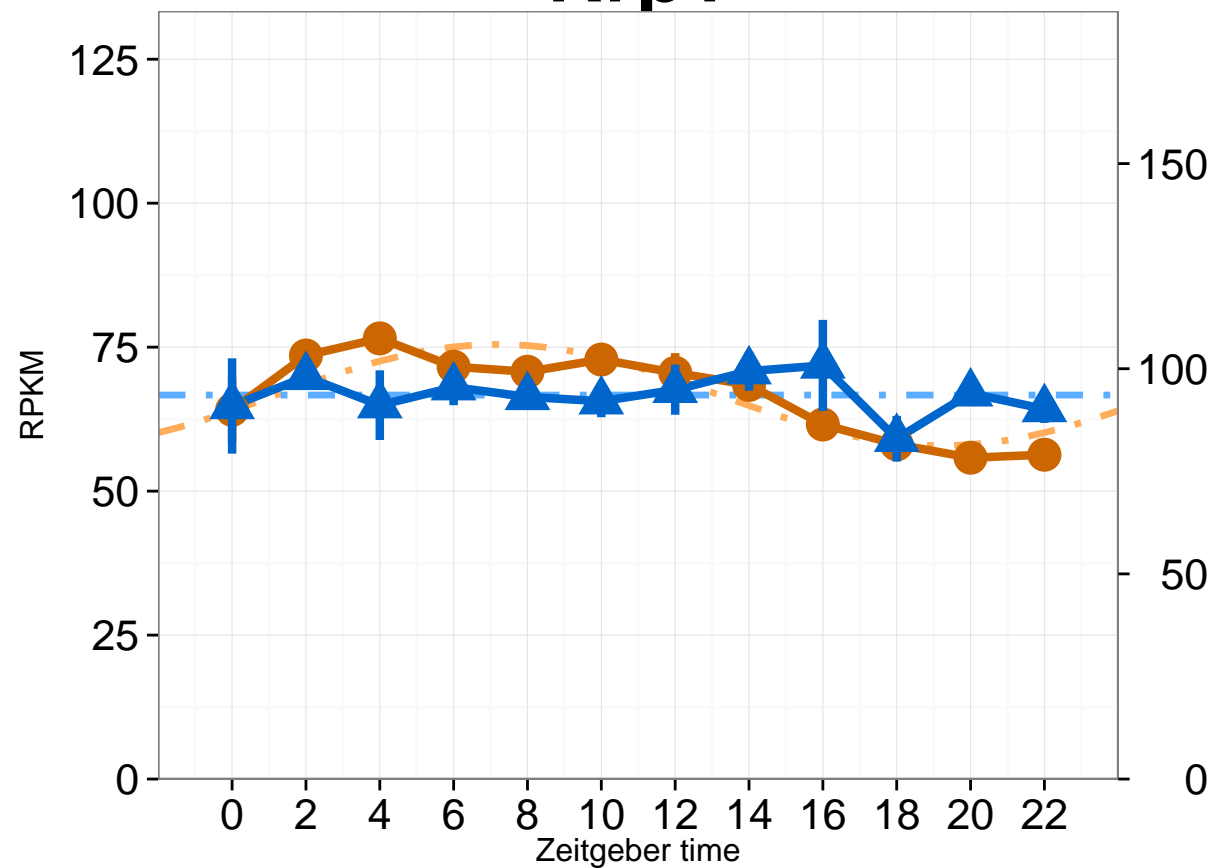

## Rrp1

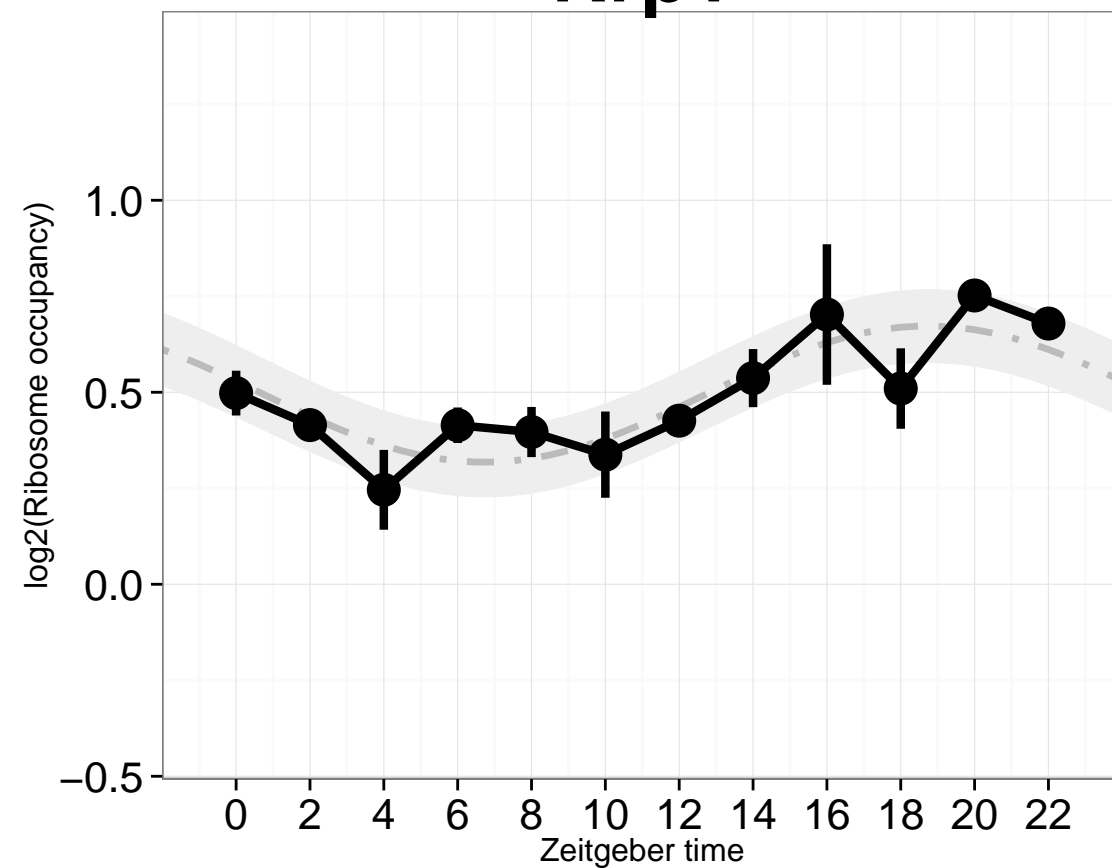

Supplement: Supplementary file 287 [file 1]

## Ablim1

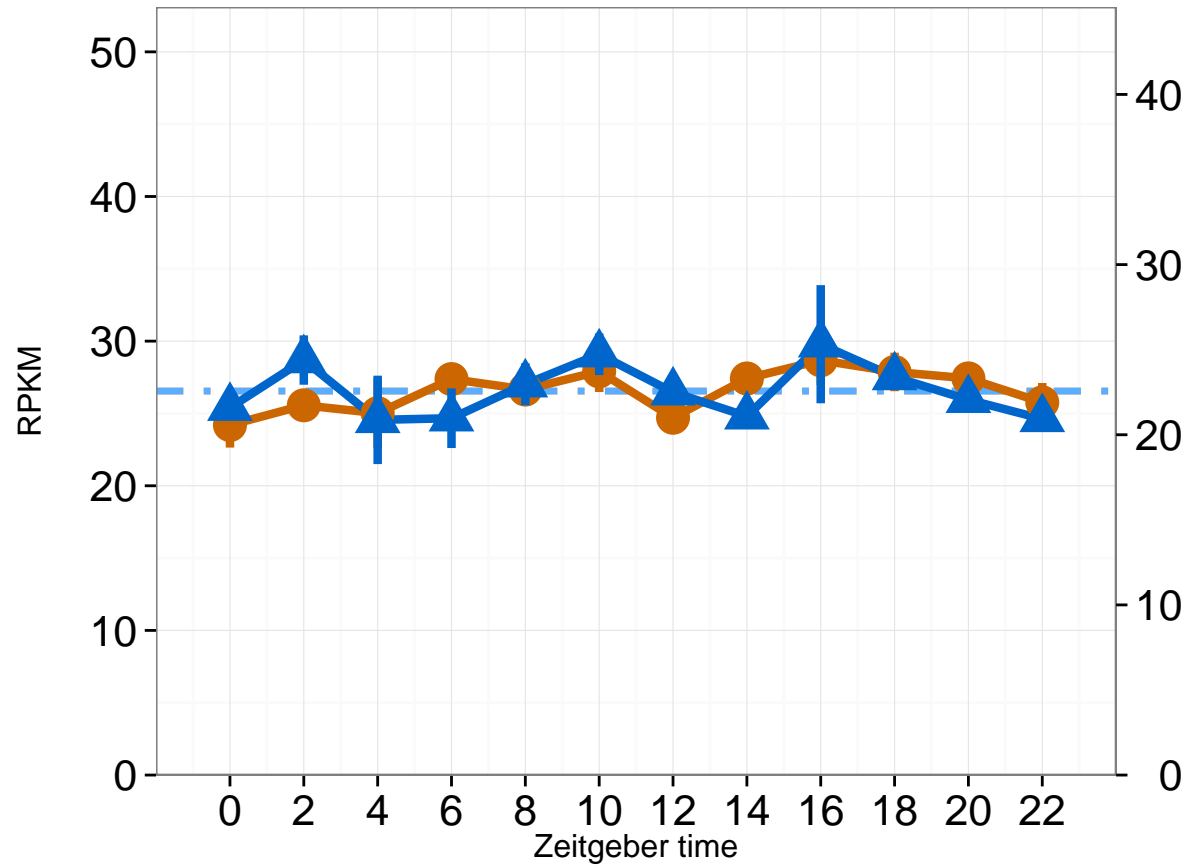

## Ablim1

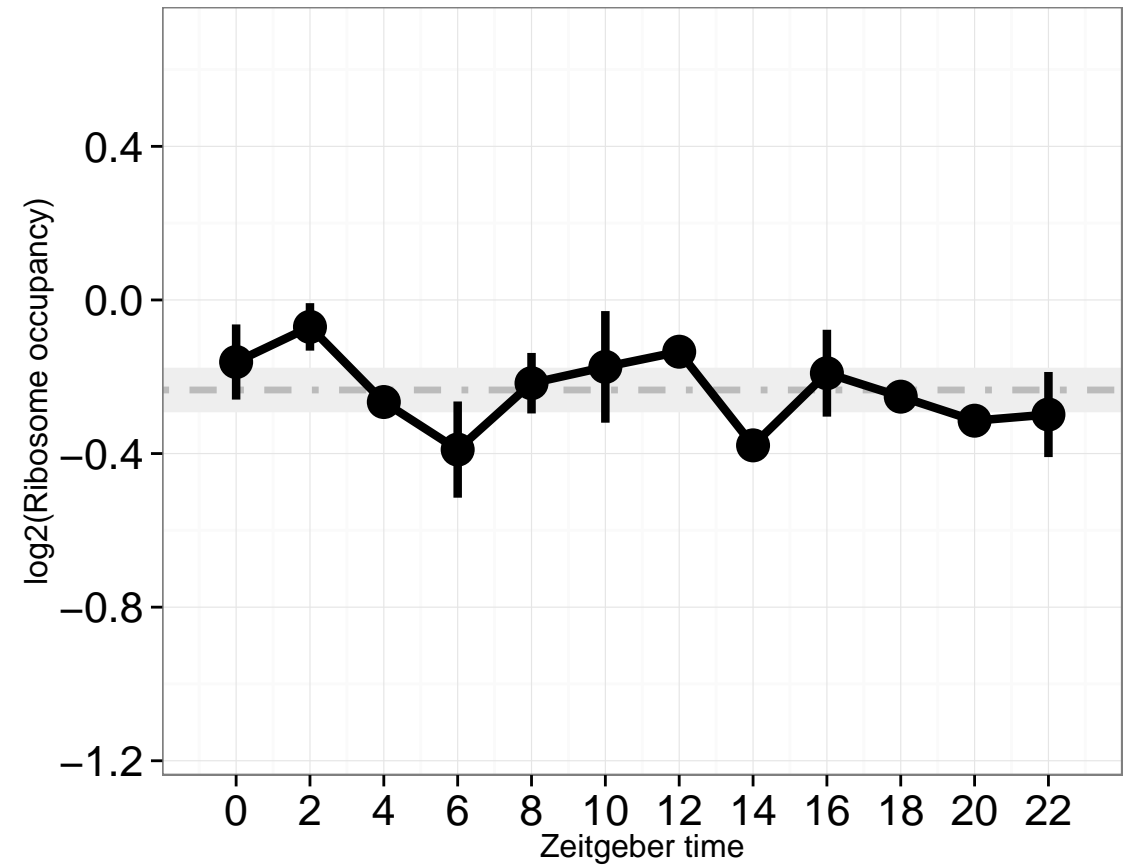

Supplement: Supplementary file 288 [file 1]

# Rfwd3

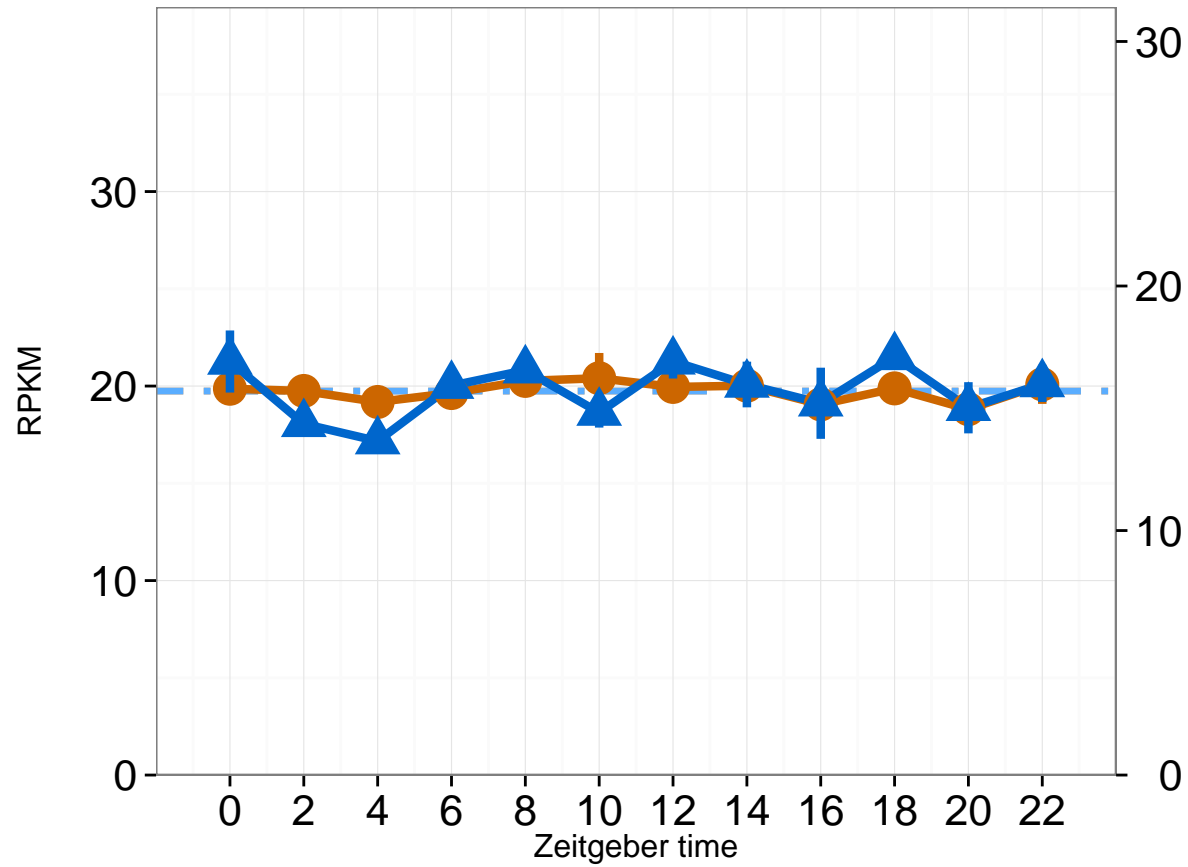

# Rfwd3

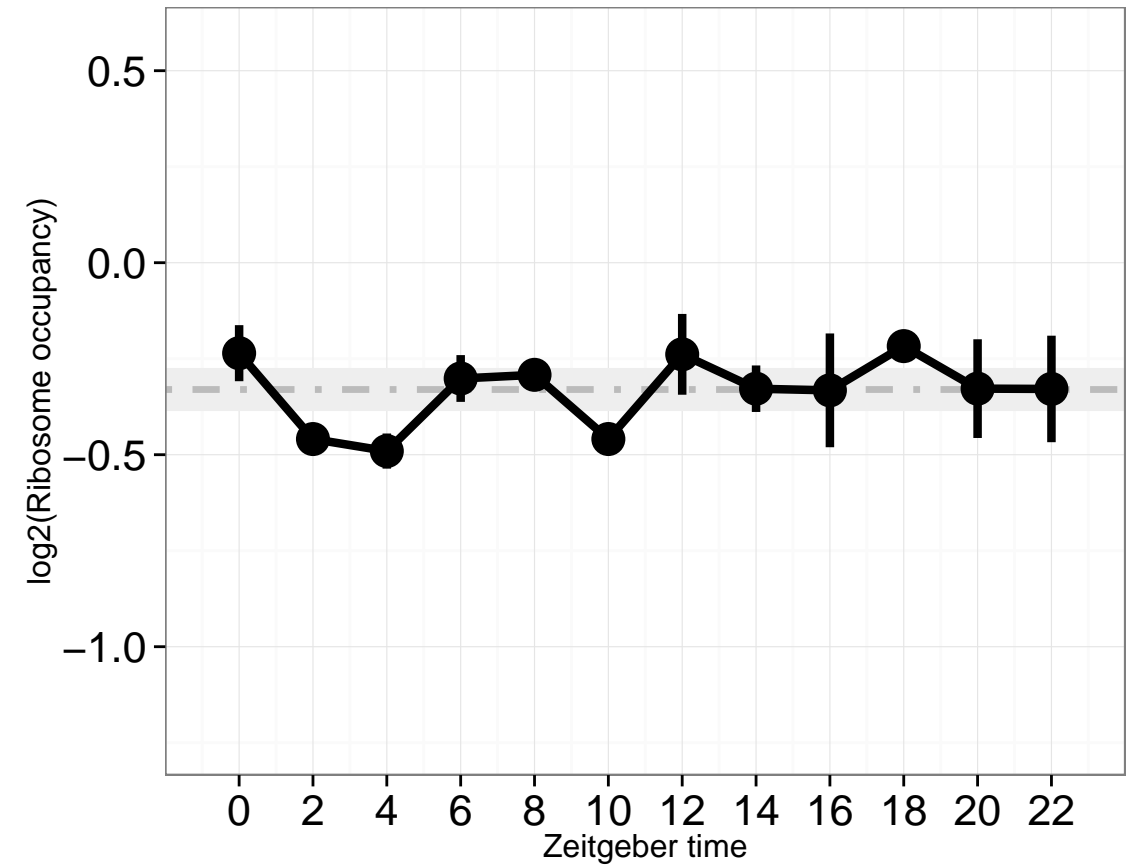

Supplement: Supplementary file 289 [file 1]

# lft57

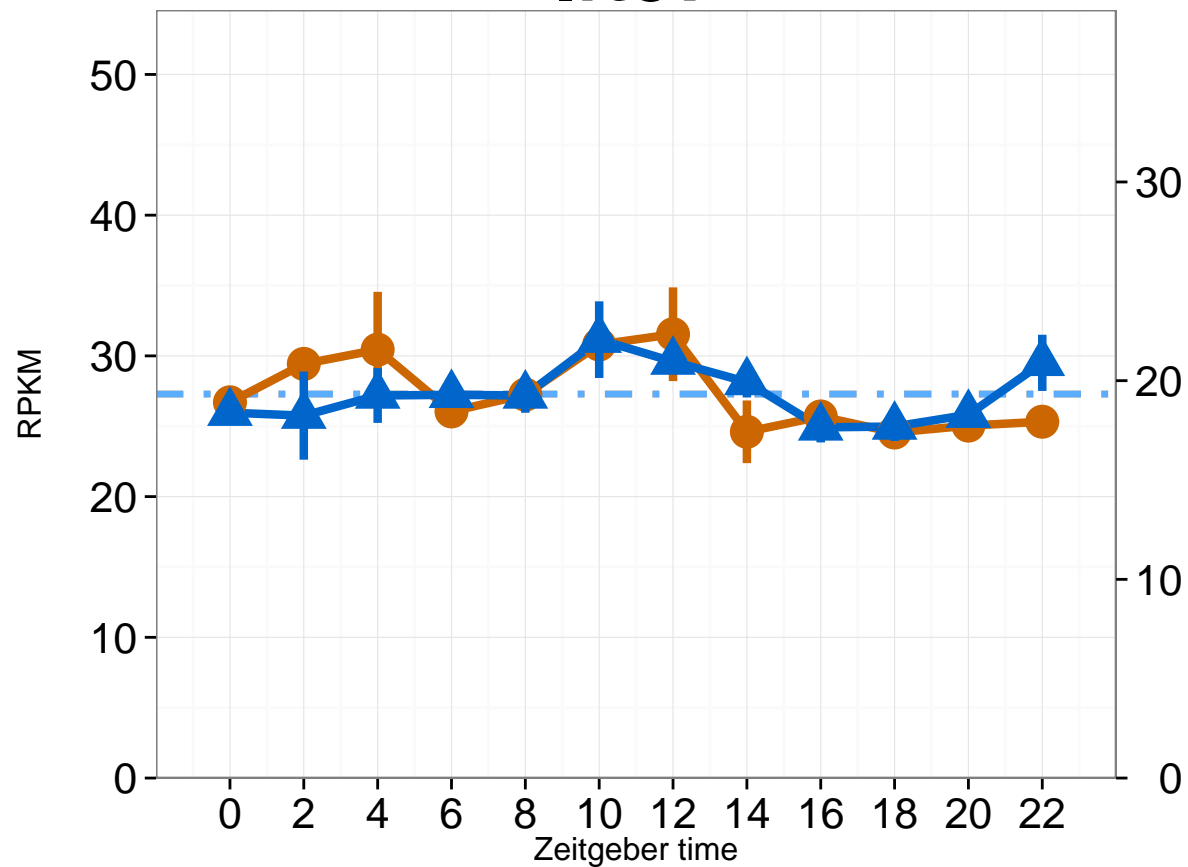

# lft57

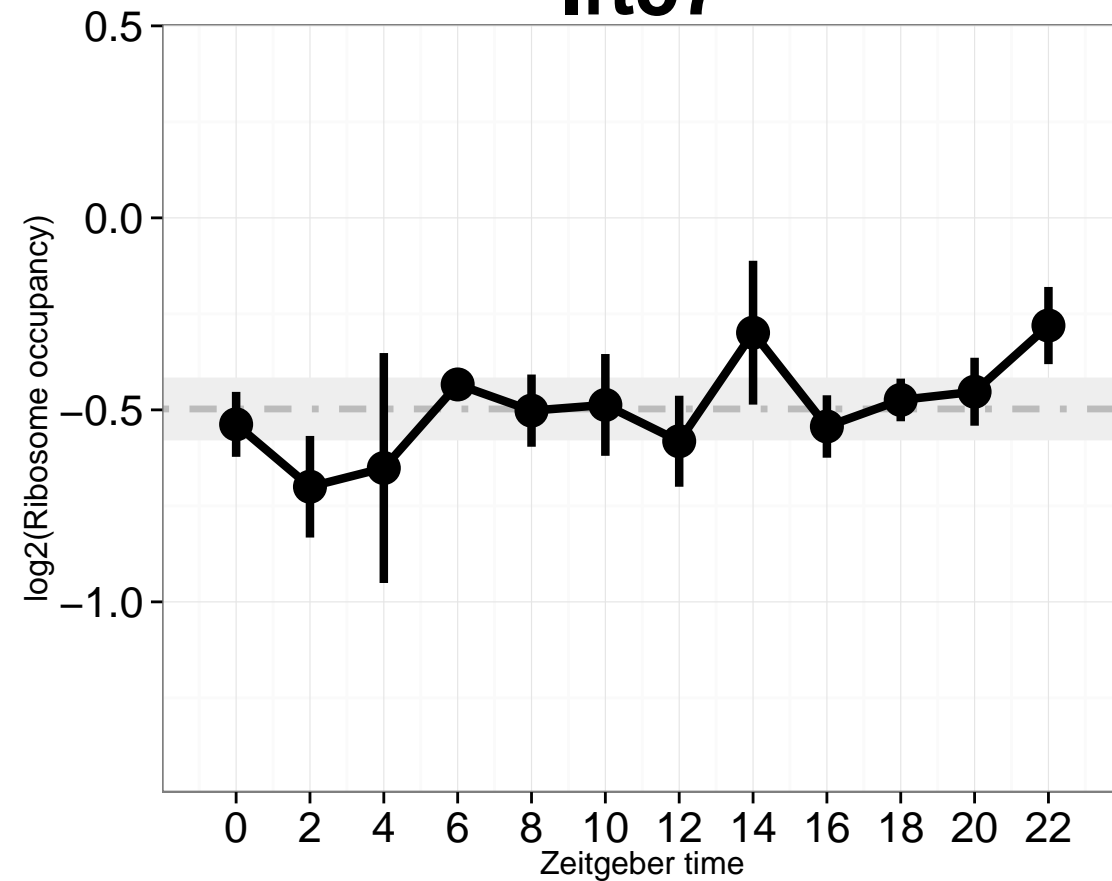

Supplement: Supplementary file 290 [file 1]

## Tgtp2

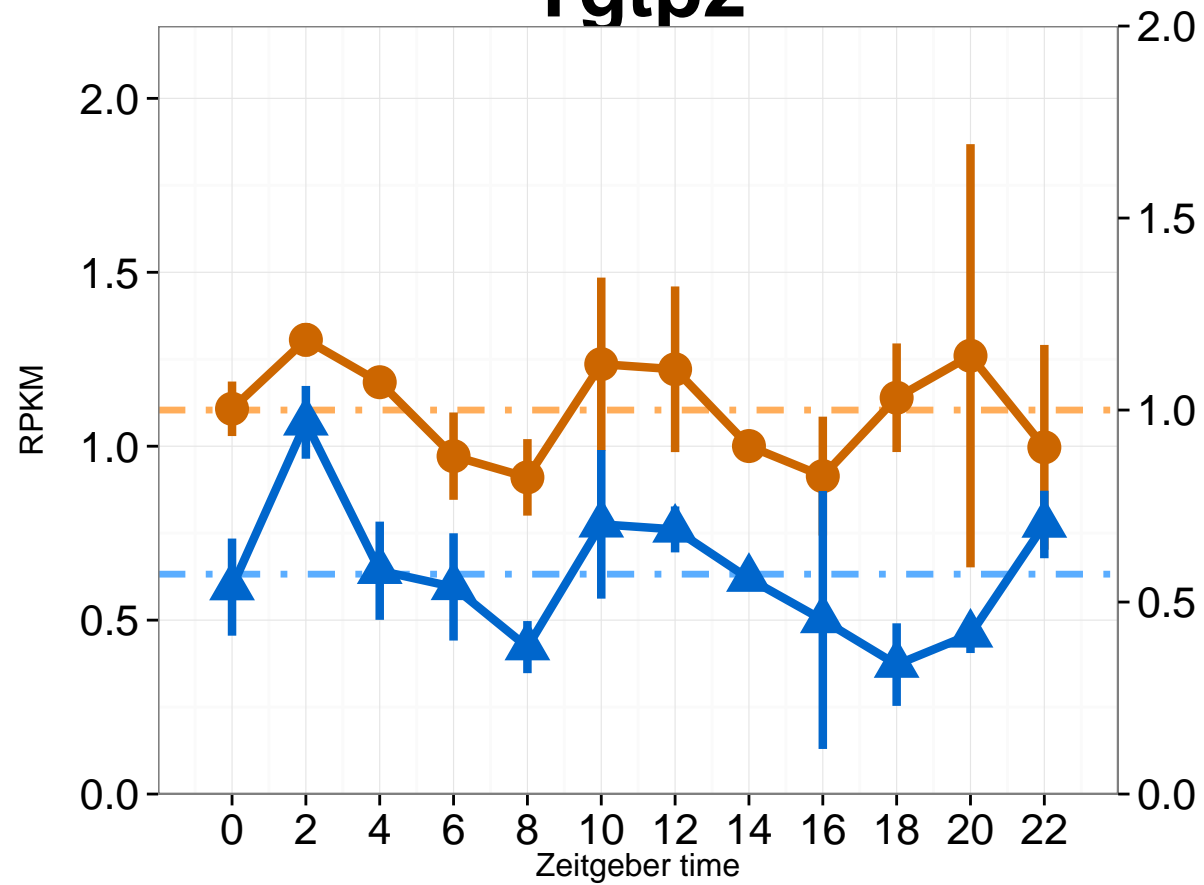

## Tgtp2

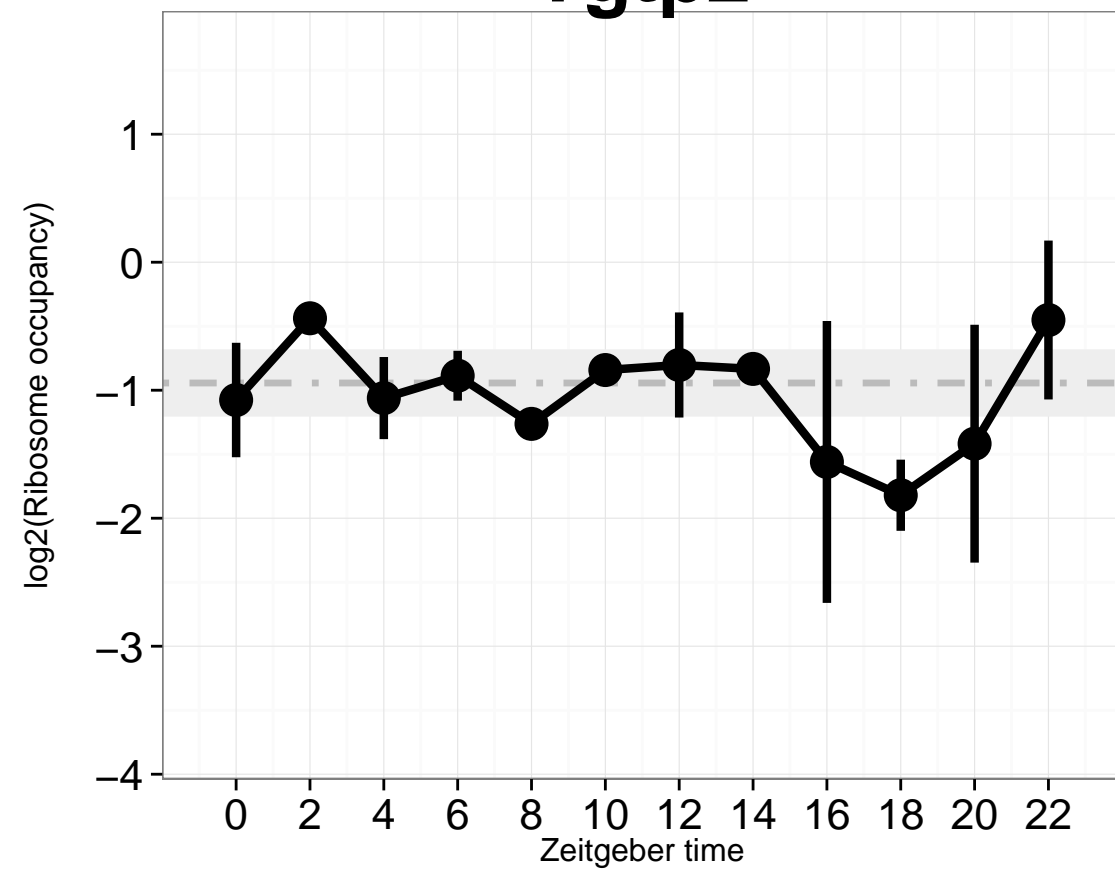

Supplement: Supplementary file 291 [file 1]

# March10

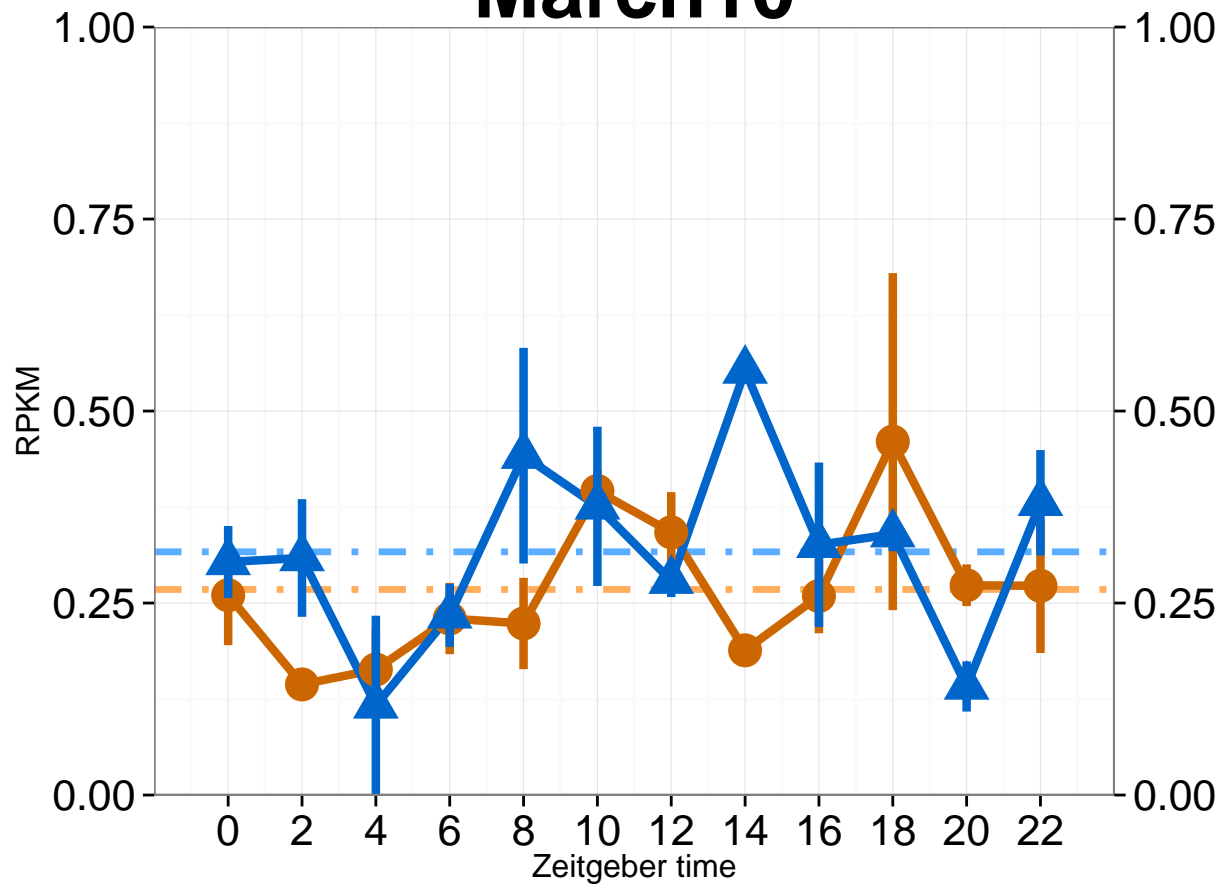

# March10

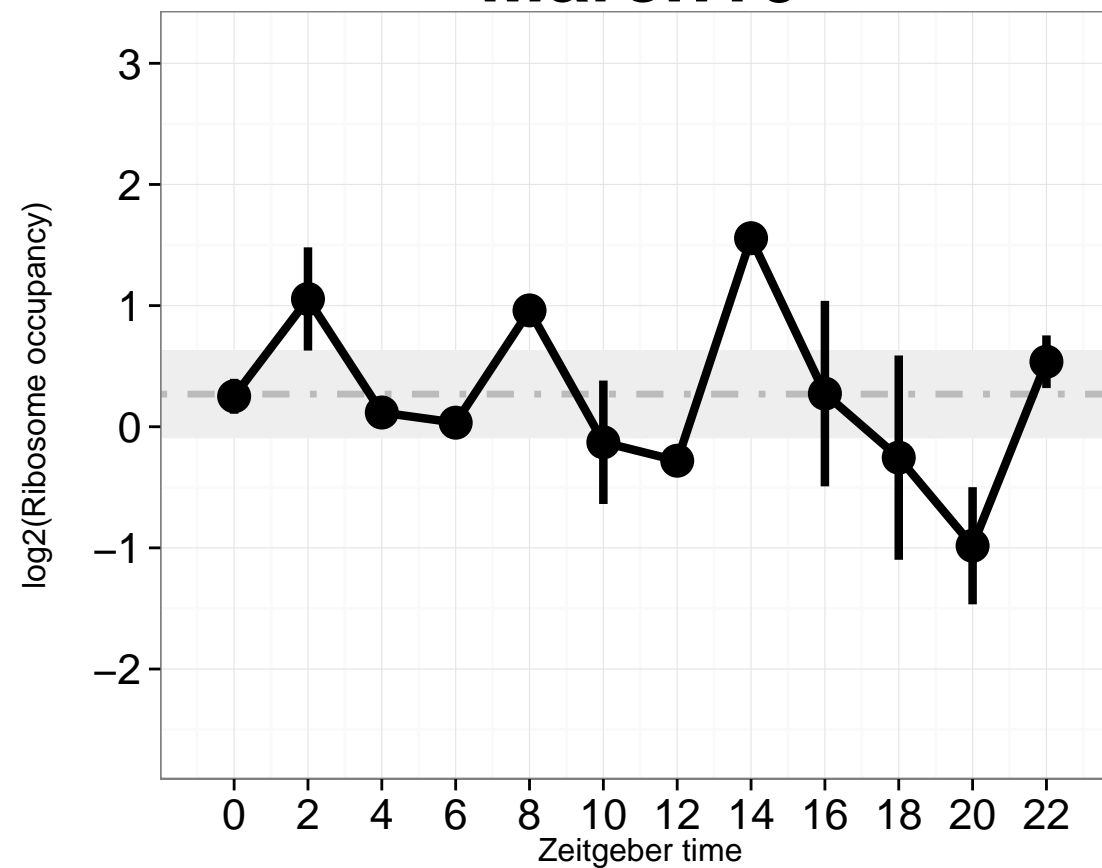

Supplement: Supplementary file 292 [file 1]

# Gipc3

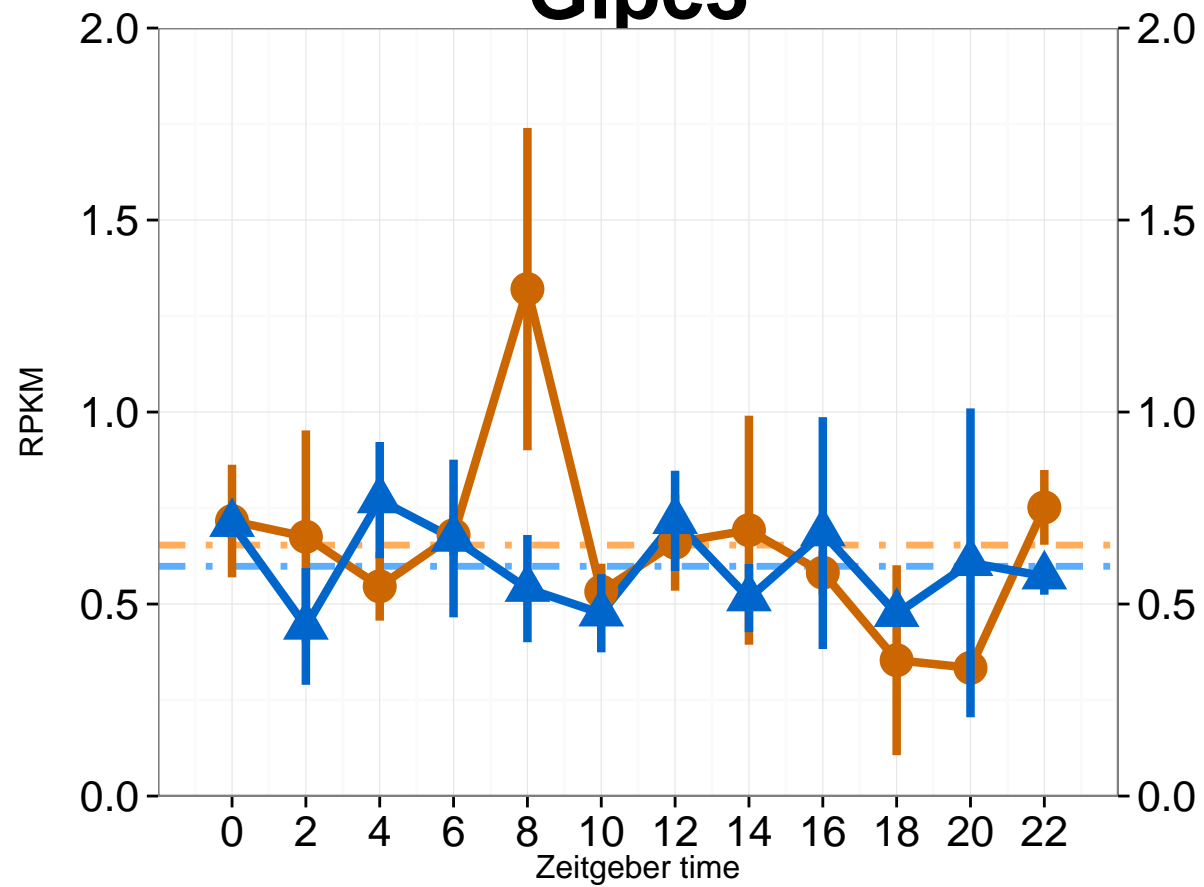

# Gipc3

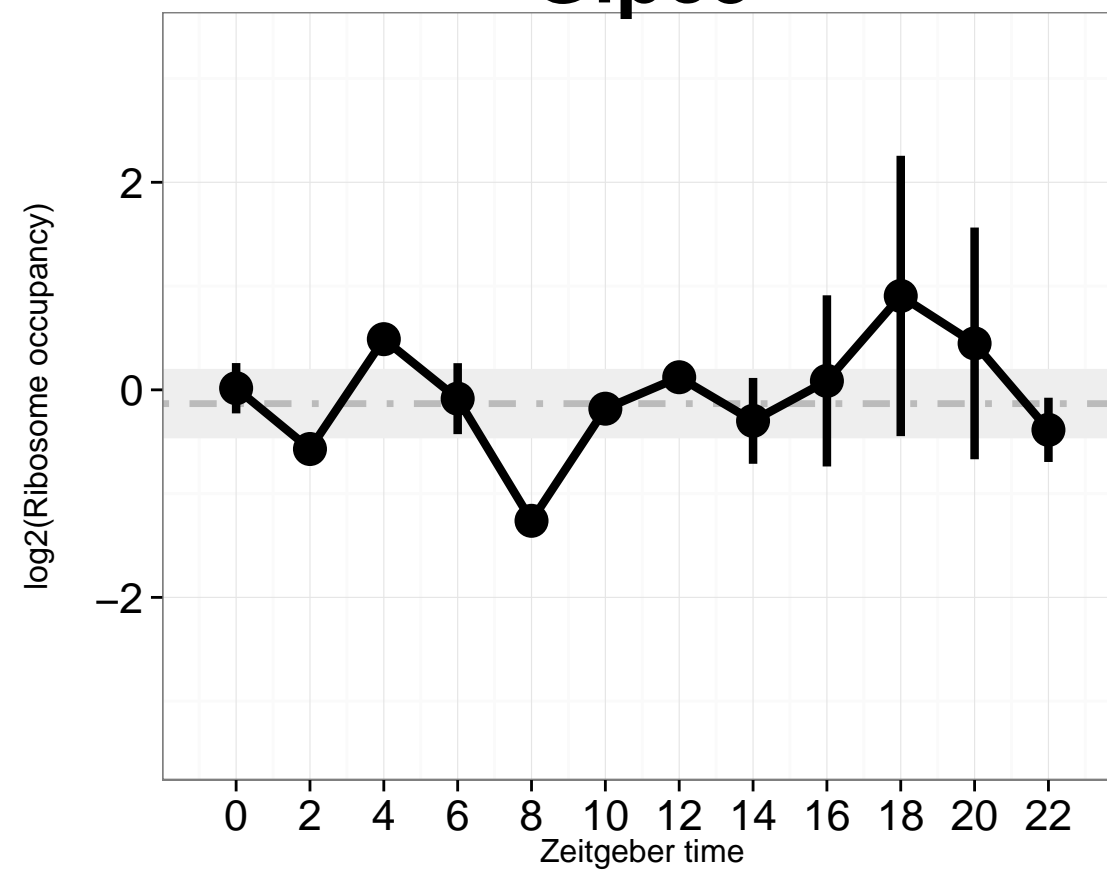

Supplement: Supplementary file 293 [file 1]

# Tmem8

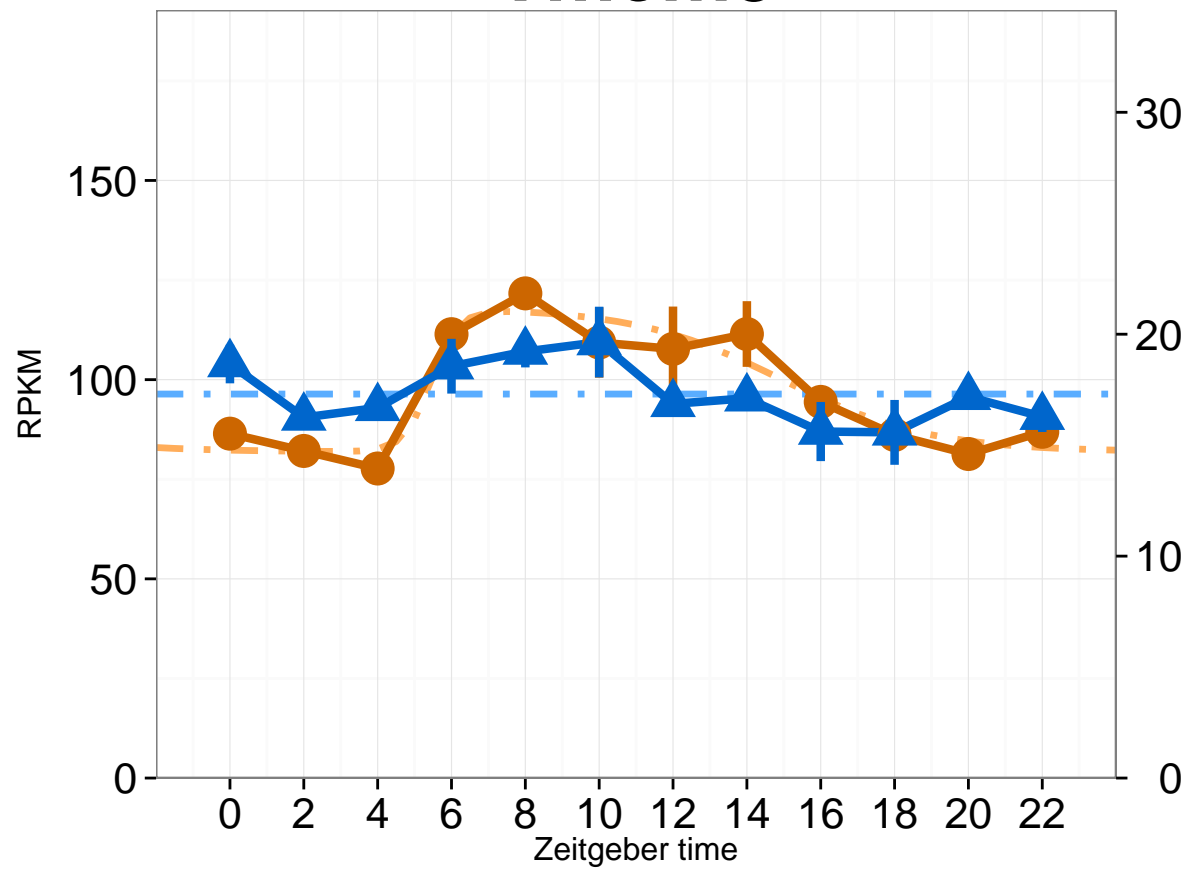

# Tmem8

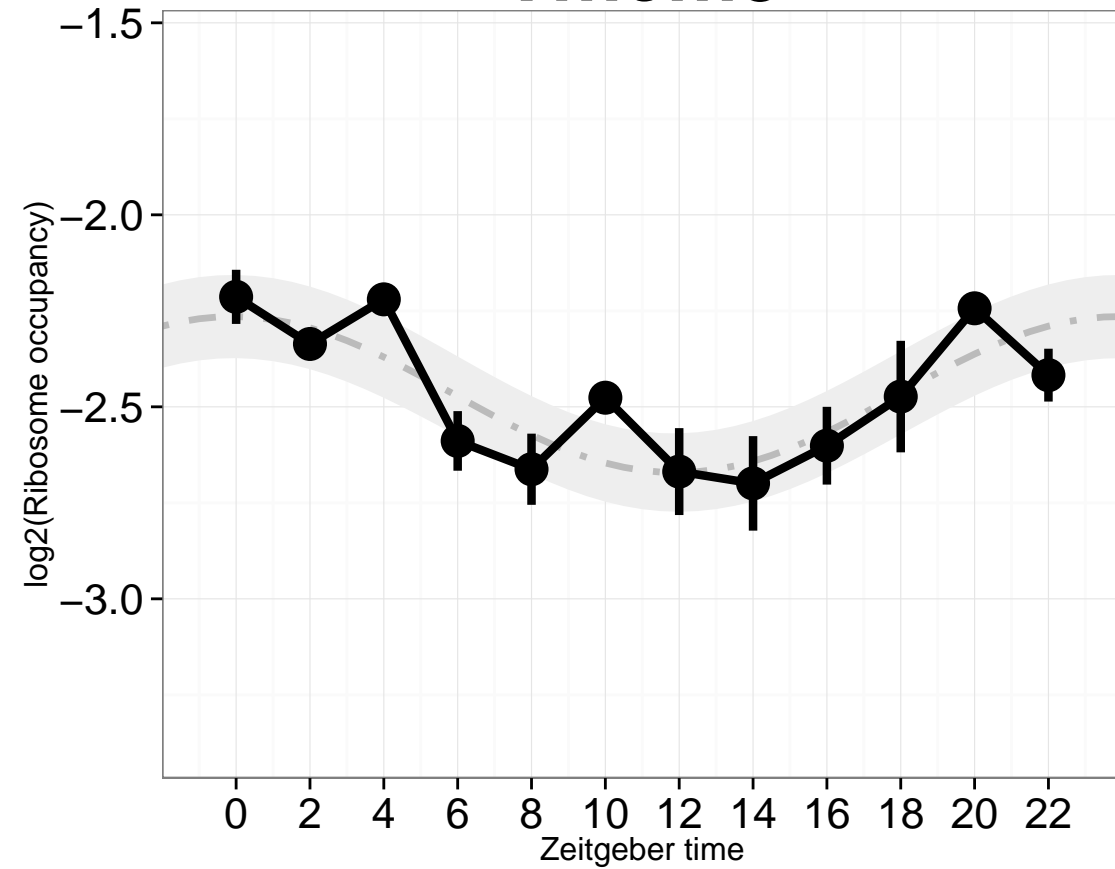

Supplement: Supplementary file 294 [file 1]

## Sgms1

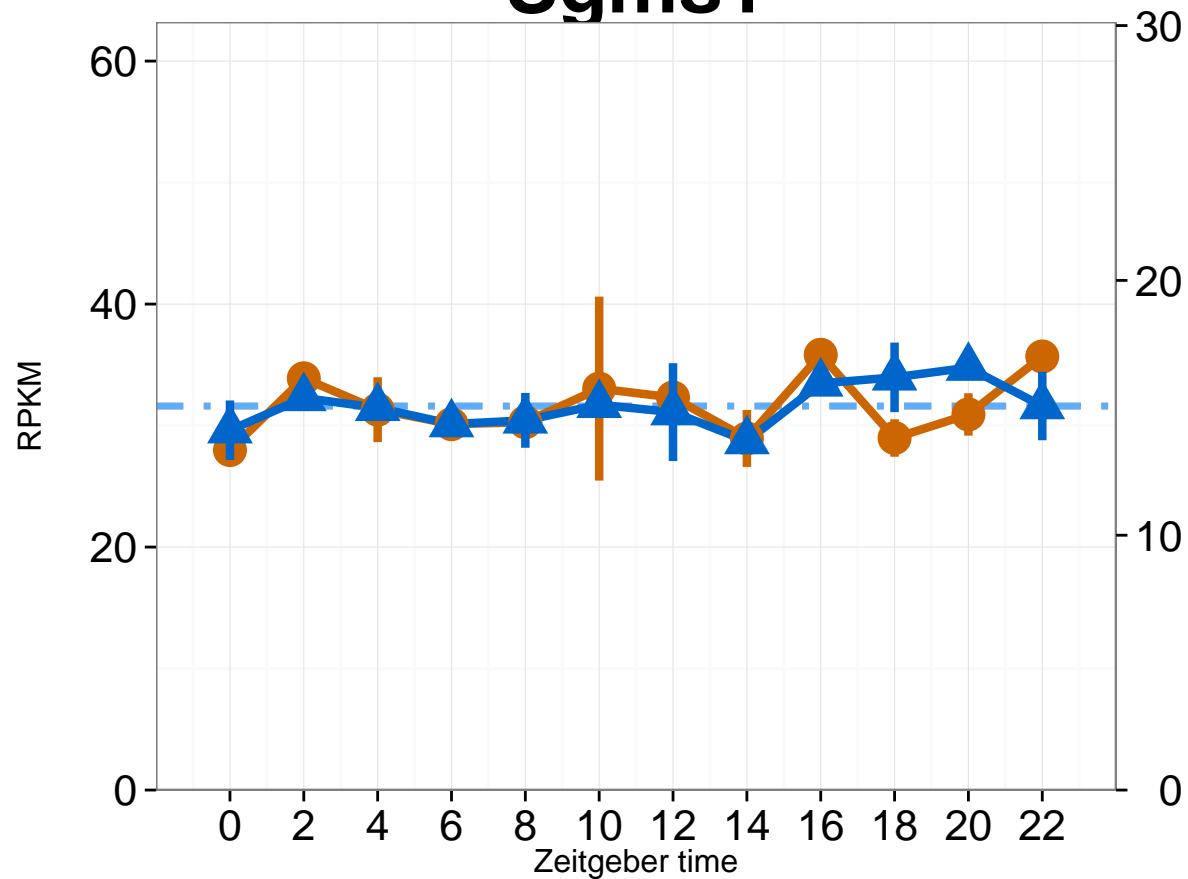

## Sgms1

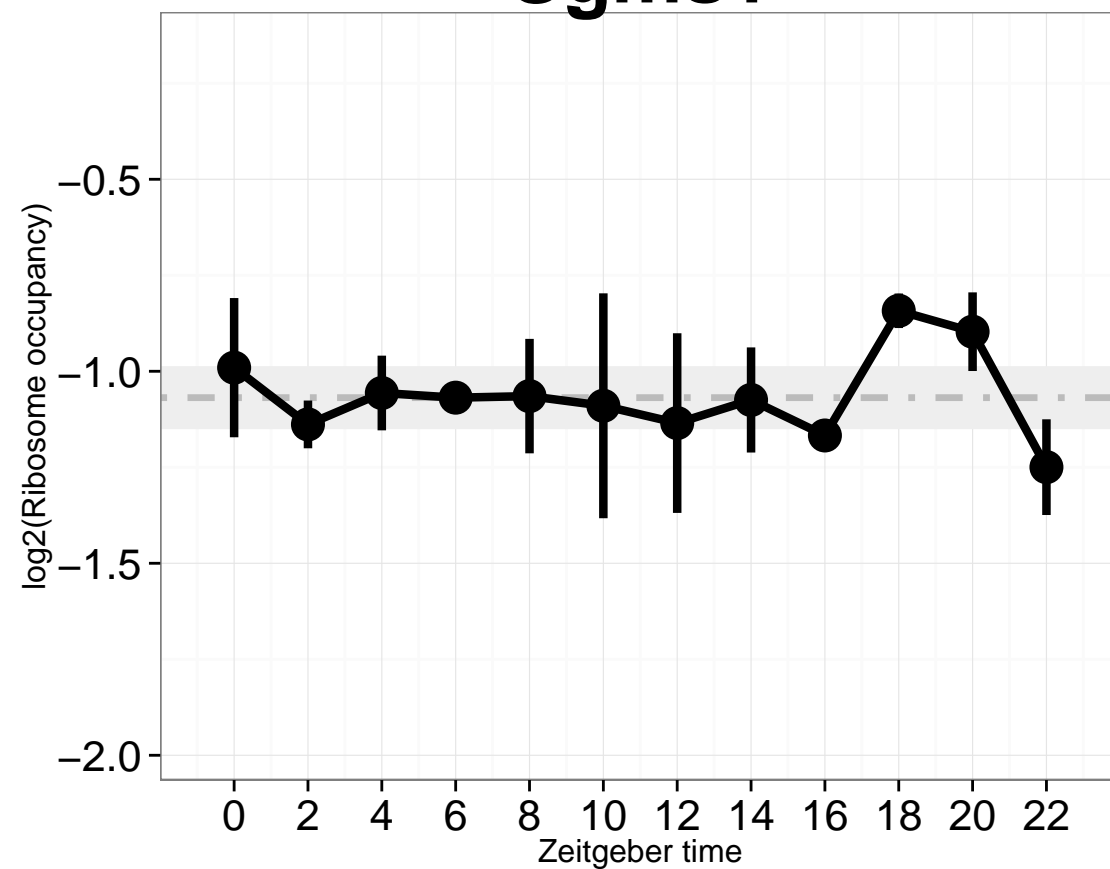

Supplement: Supplementary file 295 [file 1]

# Fam109a

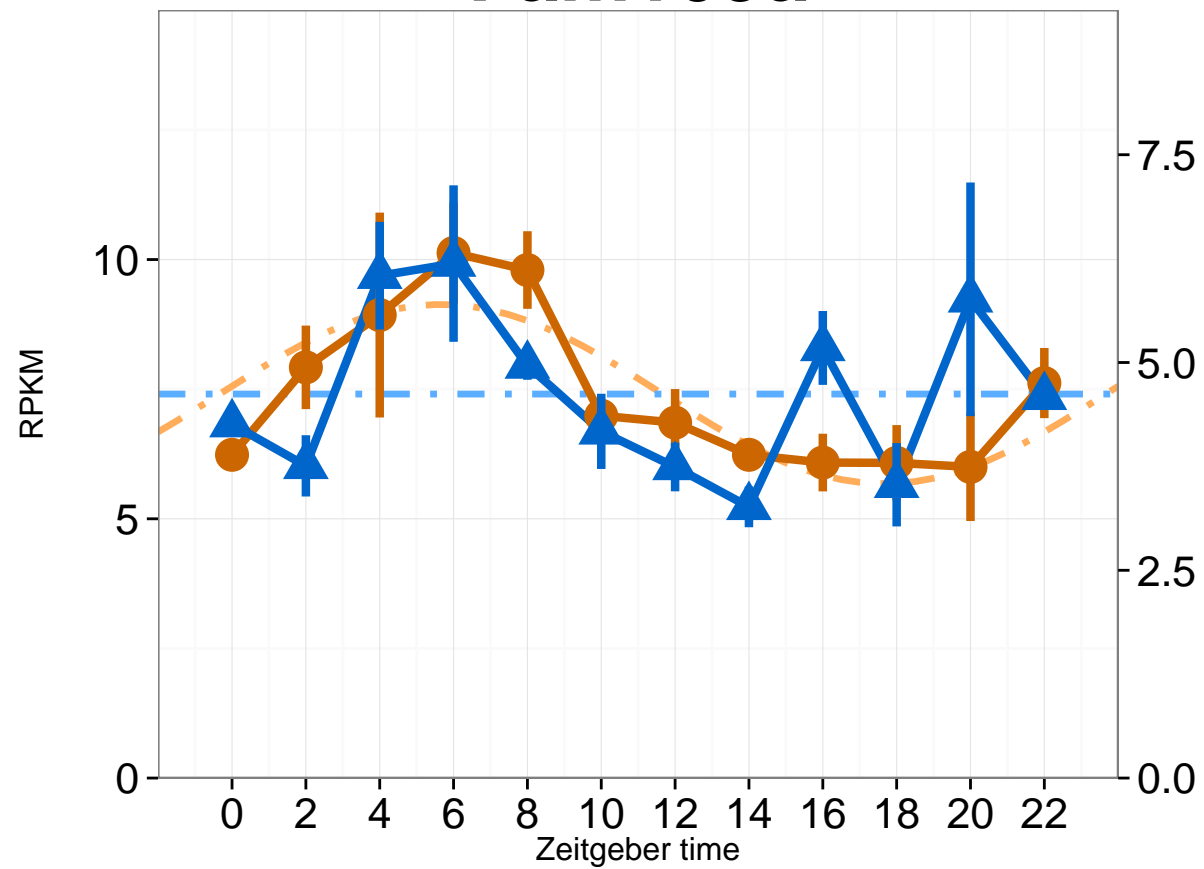

# Fam109a

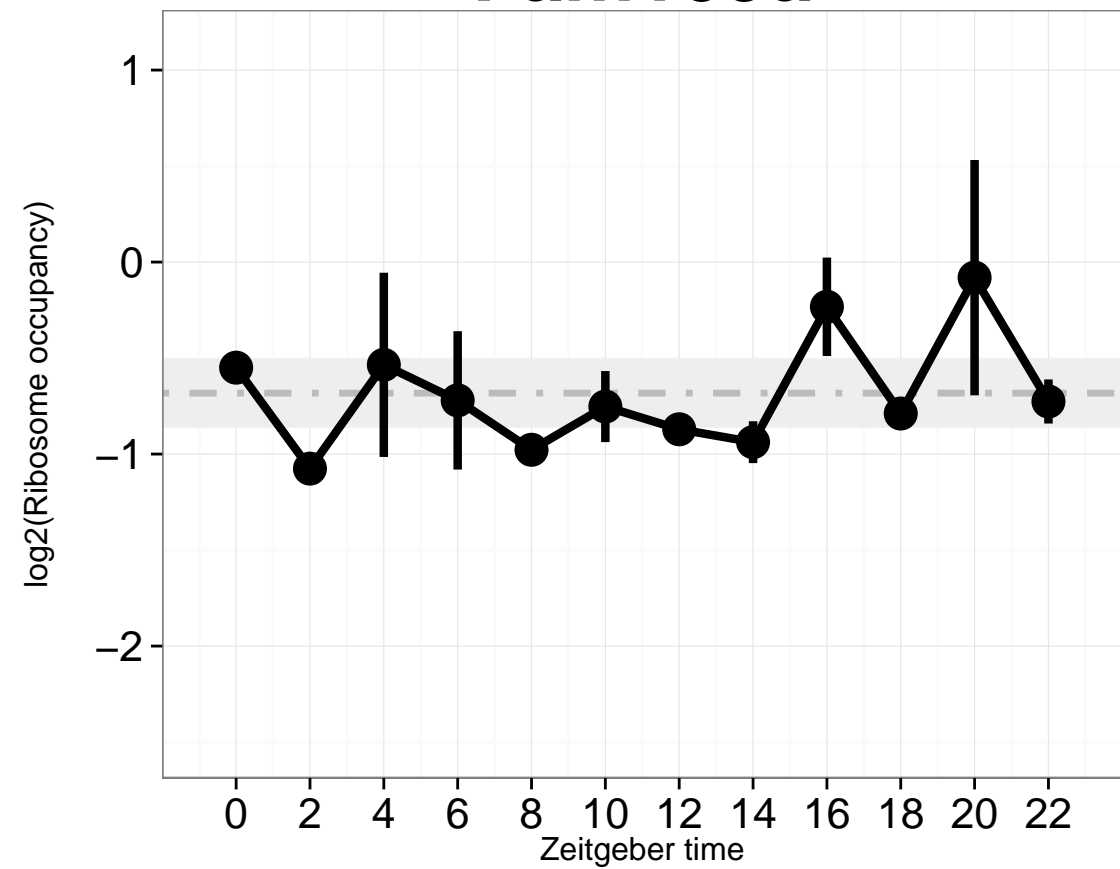

Supplement: Supplementary file 296 [file 1]

## Strn

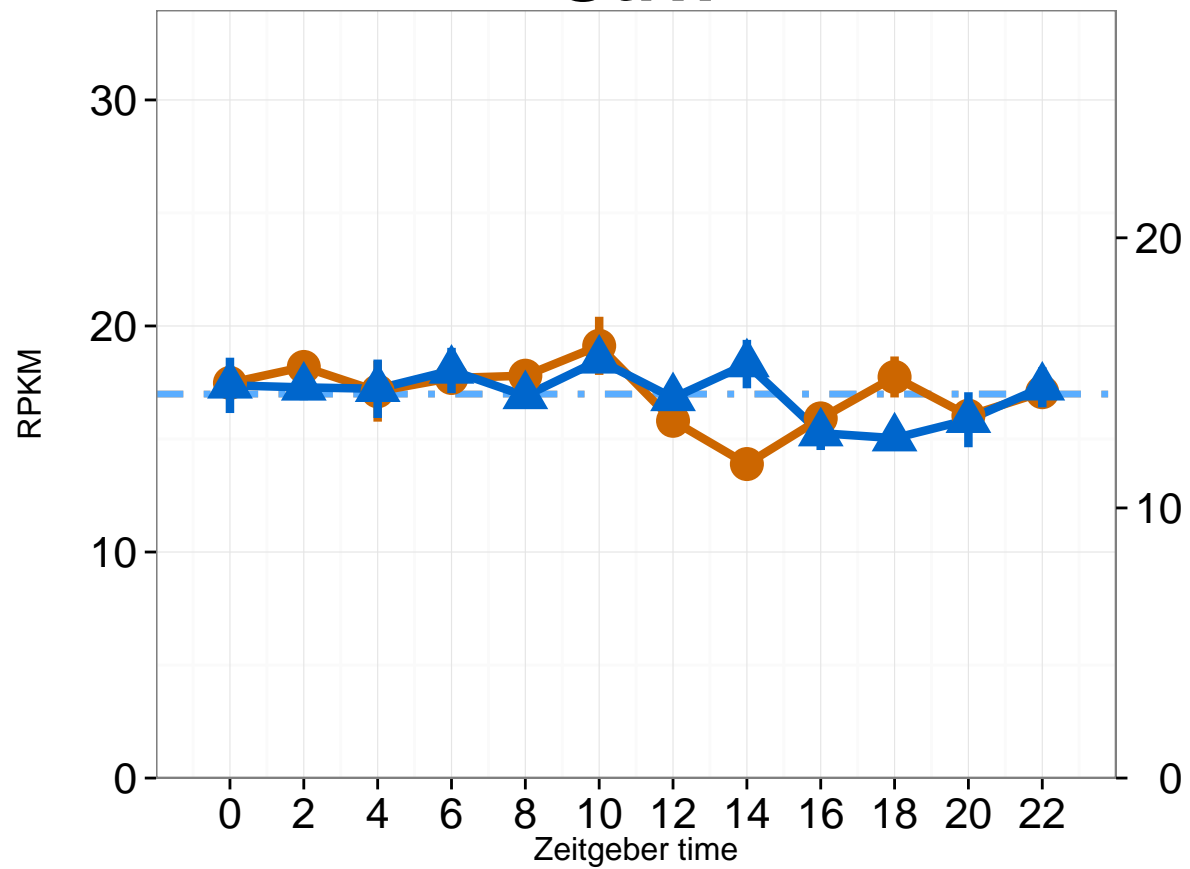

## Strn

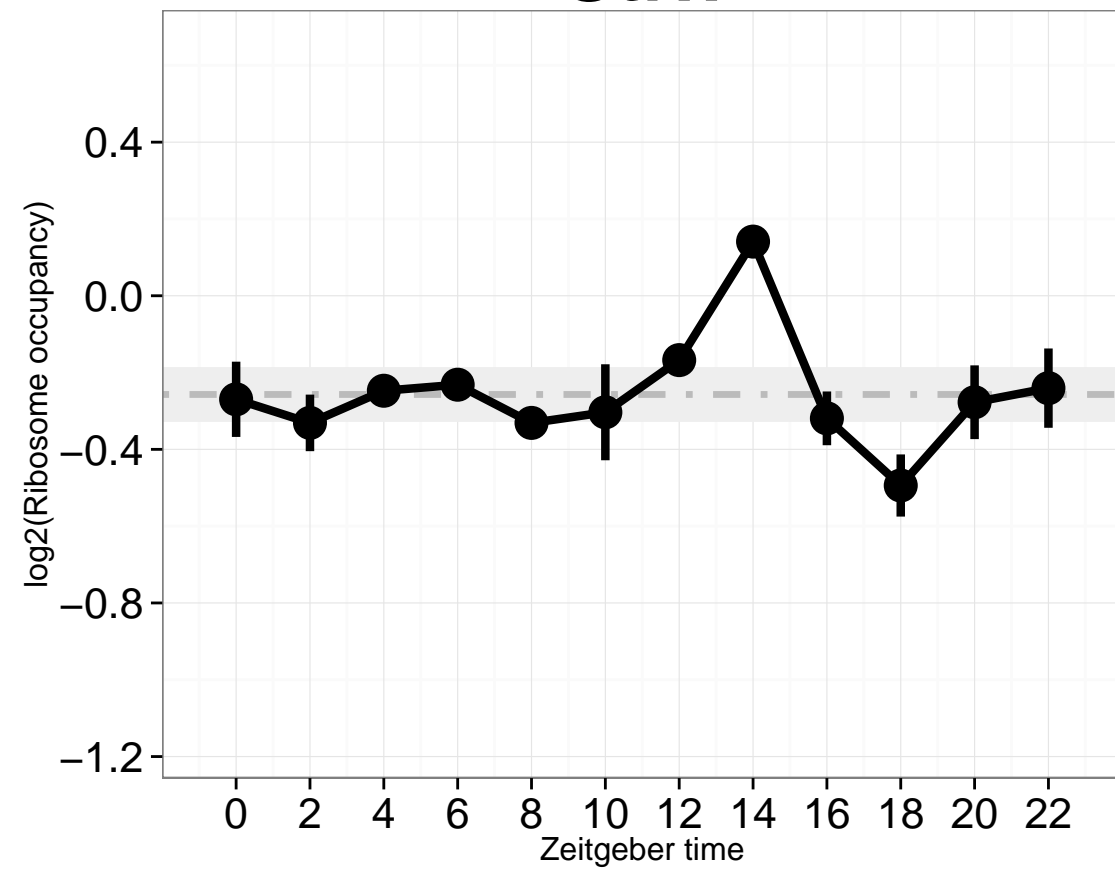

Supplement: Supplementary file 297 [file 1]

## Ethe1

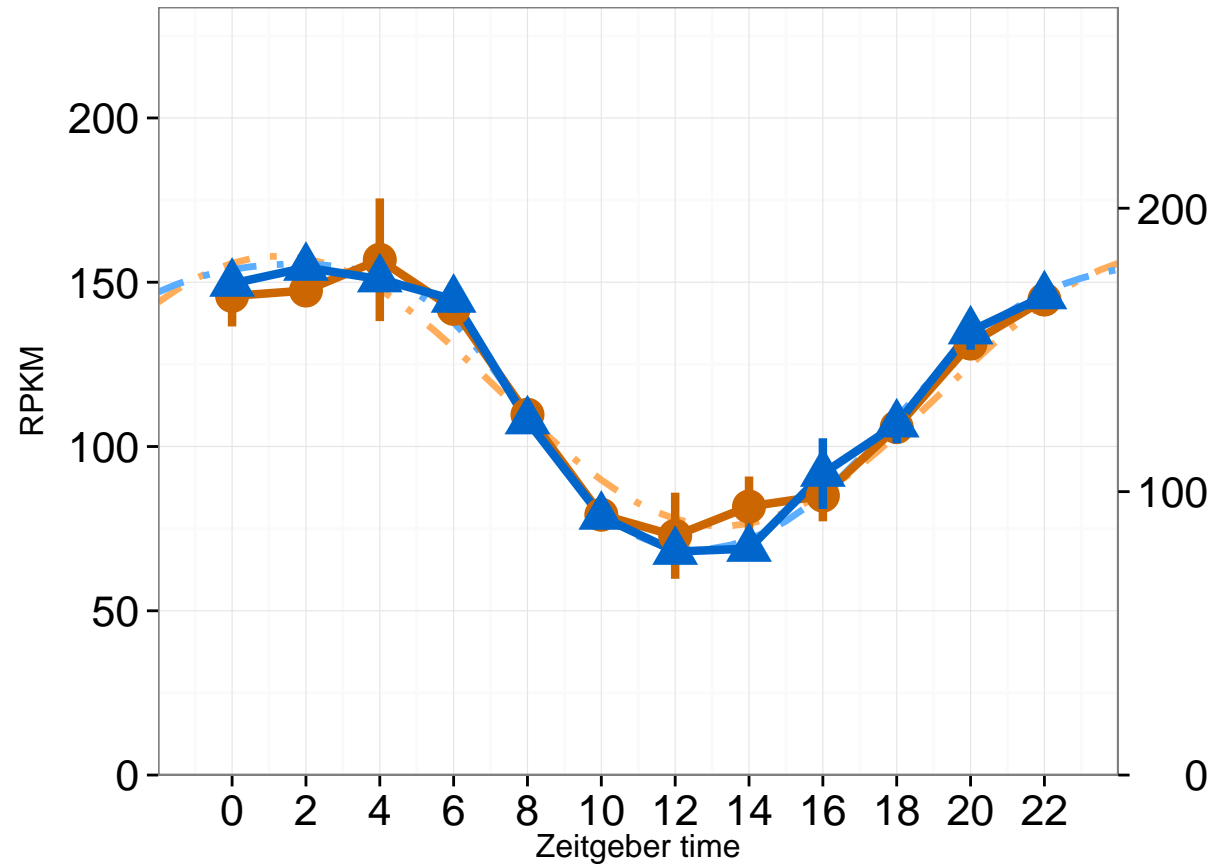

## Ethe1

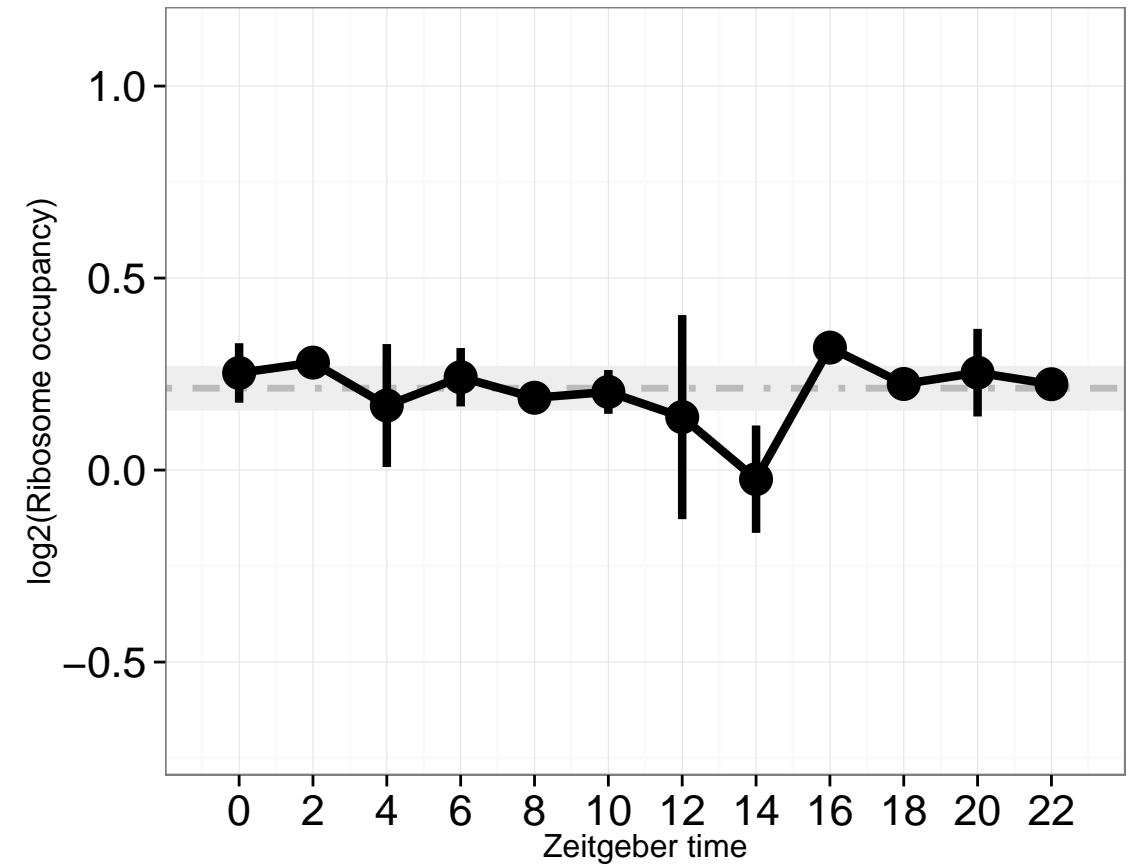

Supplement: Supplementary file 298 [file 1]

## Aspscr1

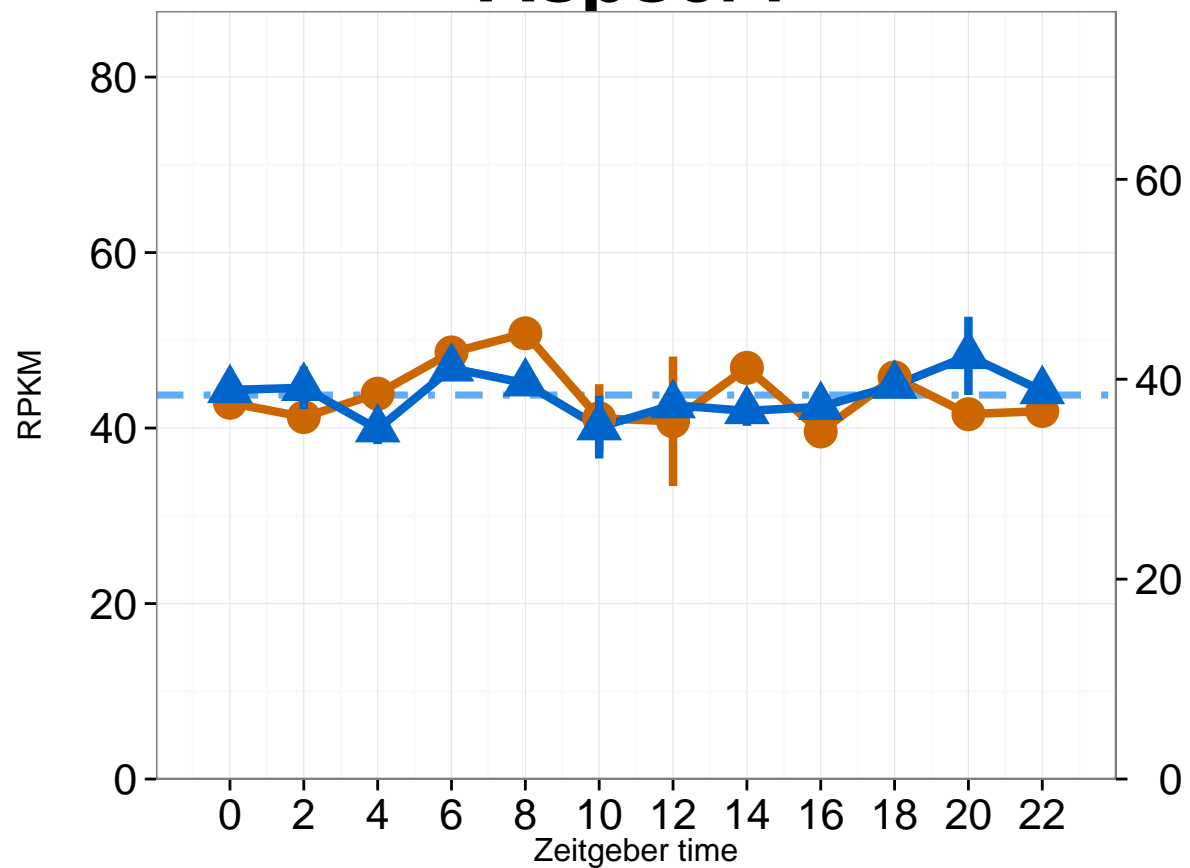

## Aspscr1

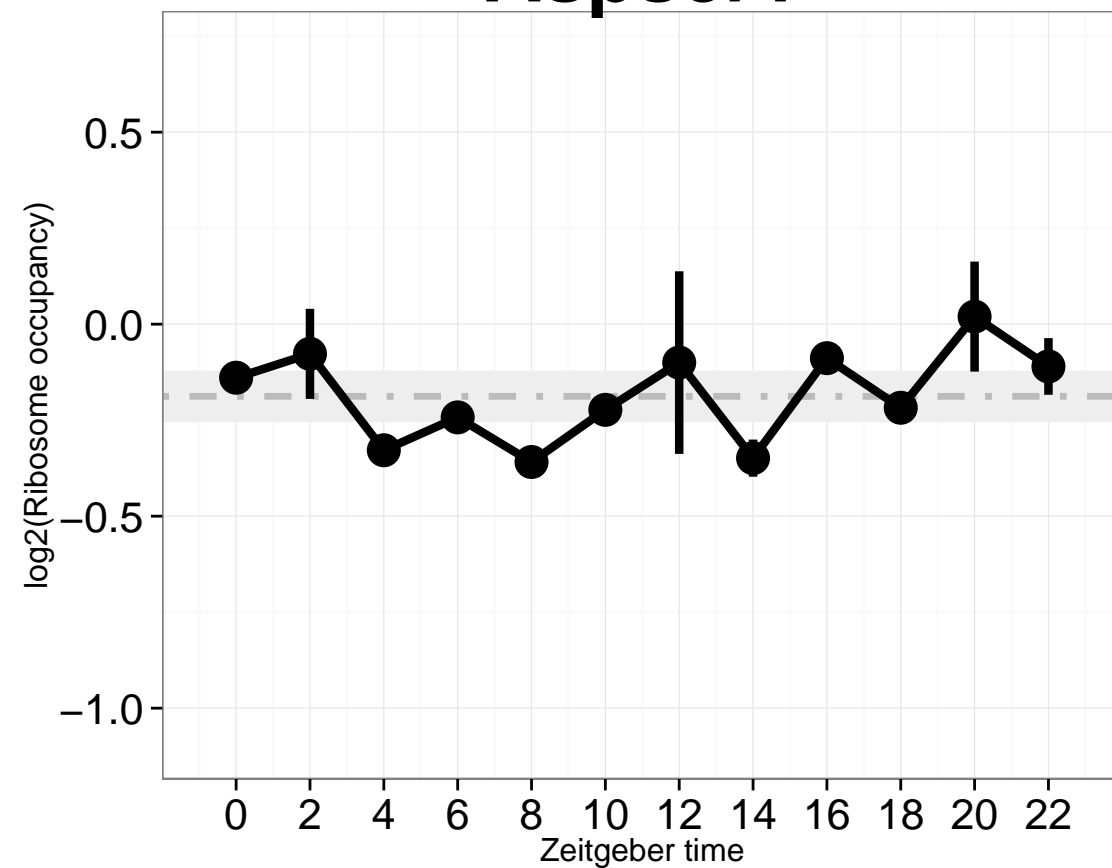

Supplement: Supplementary file 299 [file 1]

## As3mt

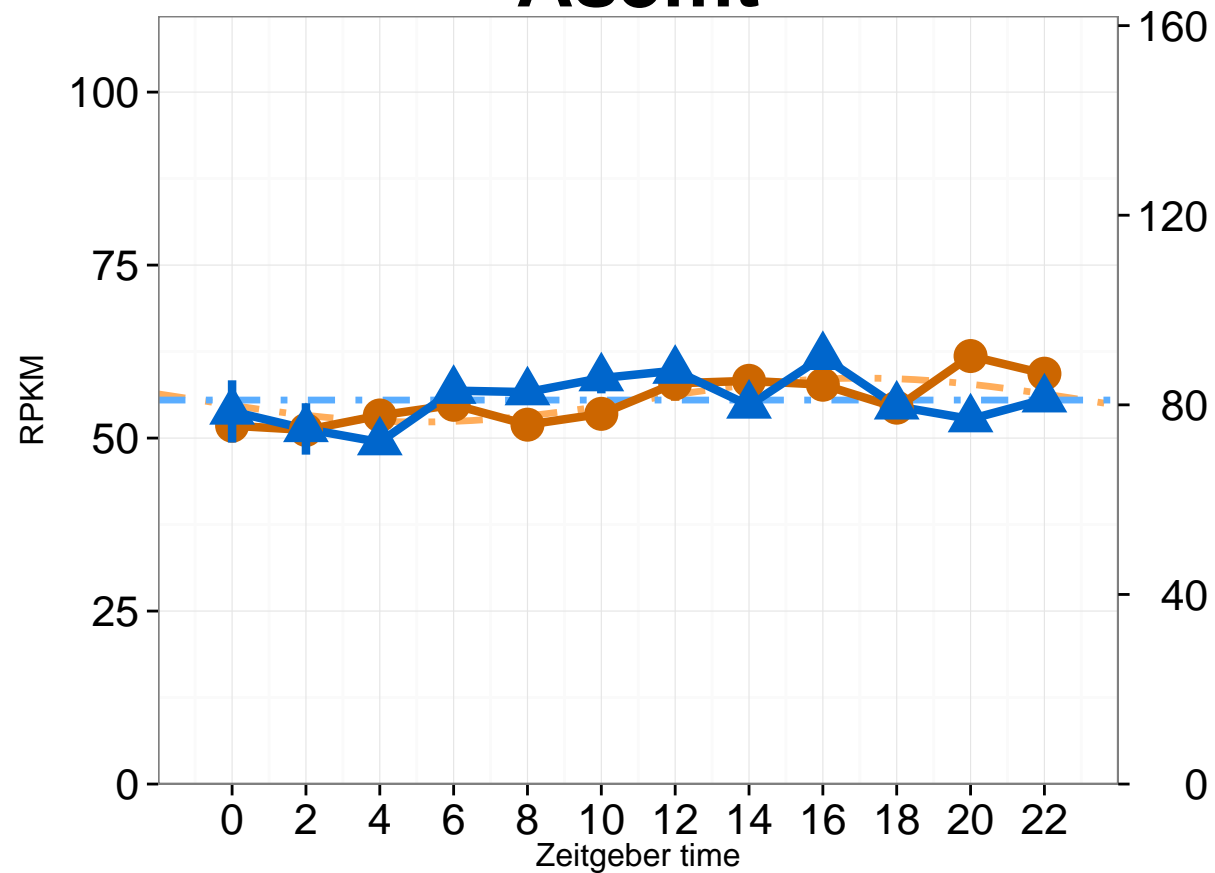

## As3mt

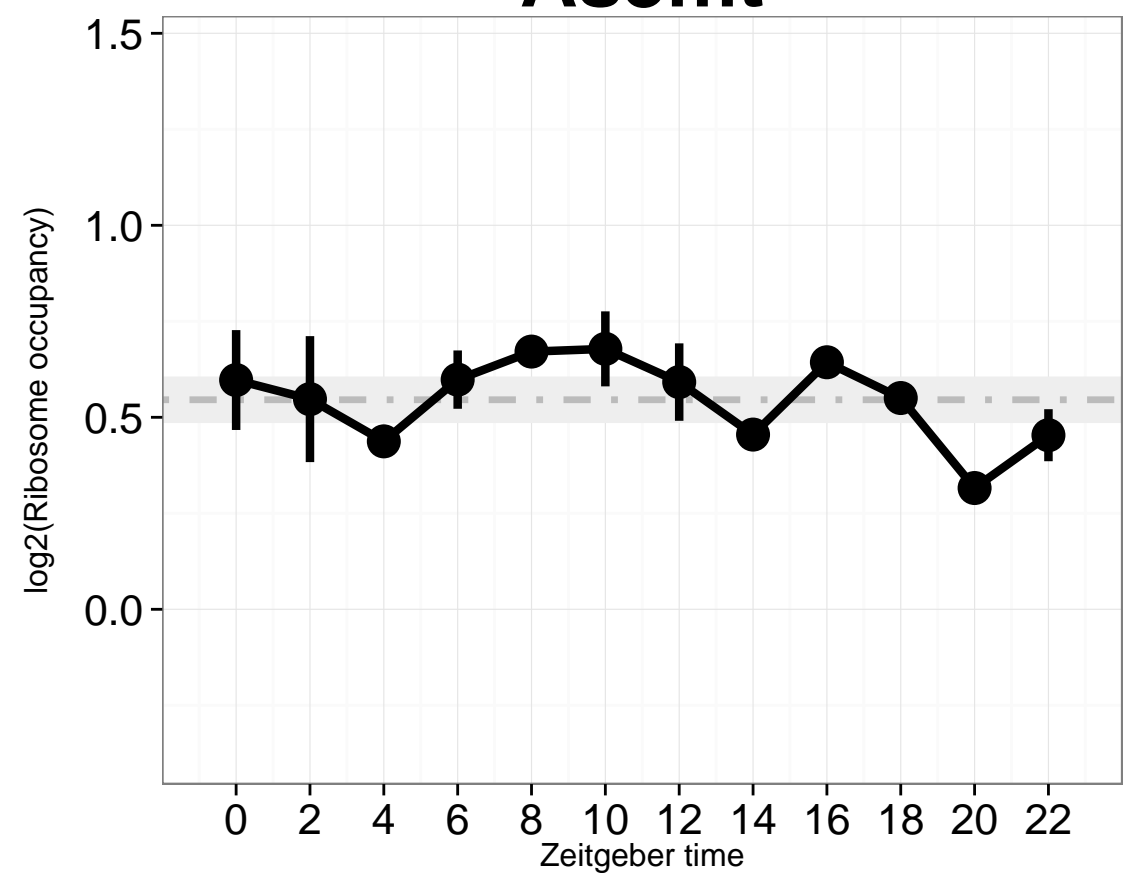

Supplement: Supplementary file 300 [file 1]
