# Supplementary material (part 4 of 133)
Source: publisher figshare collection journal article supplement (https://springernature.figshare.com/articles/dataset/_/4903193)

## Rorb

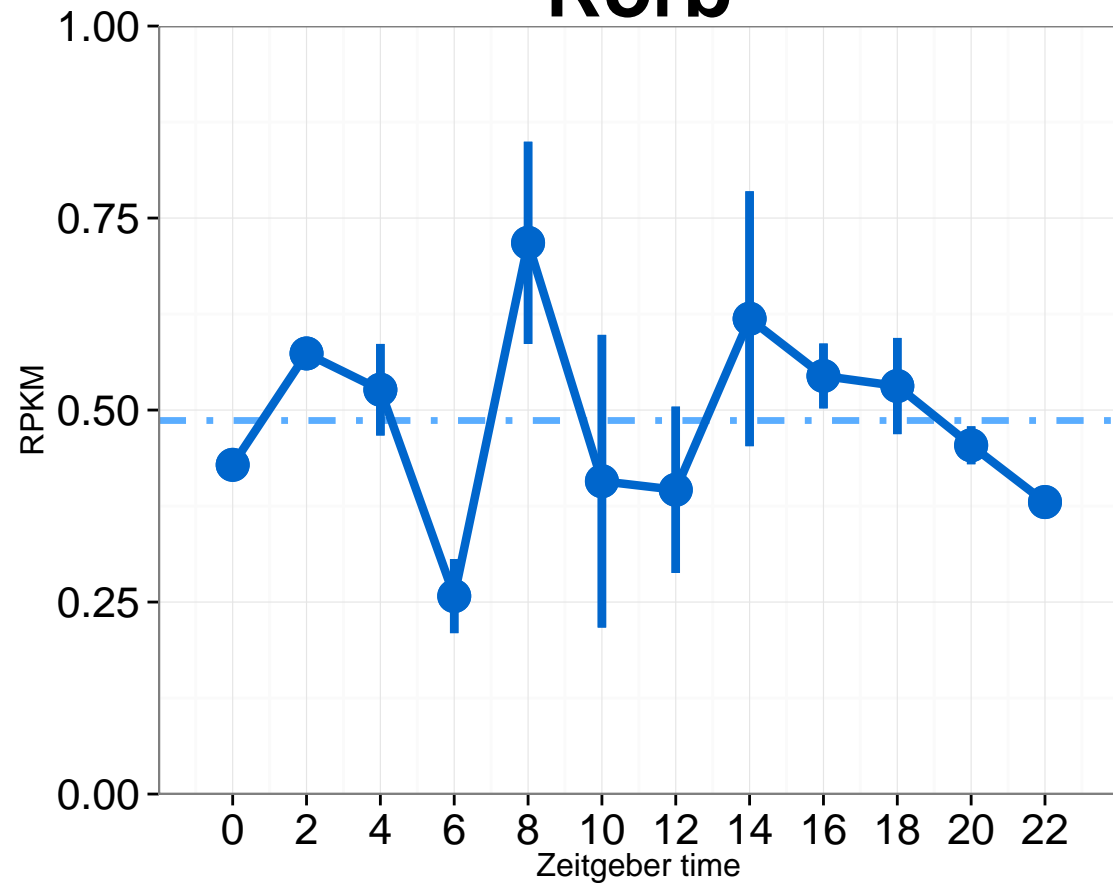

## Rorb log2(Ribosome occupancy)

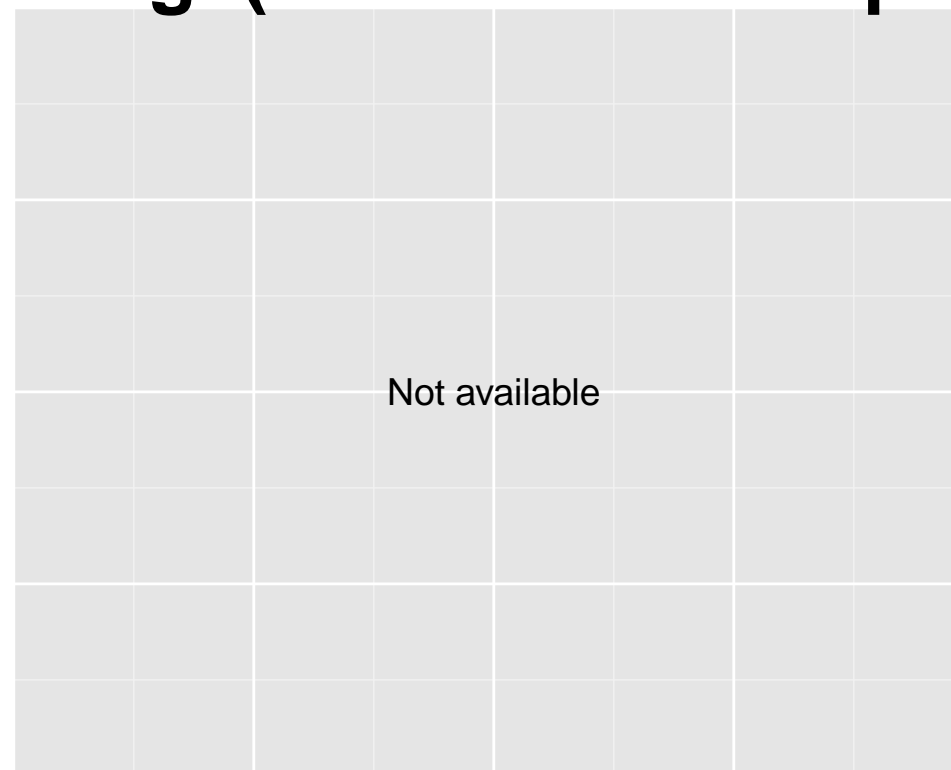

Supplement: Supplementary file 301 [file 1]

# C5ar1

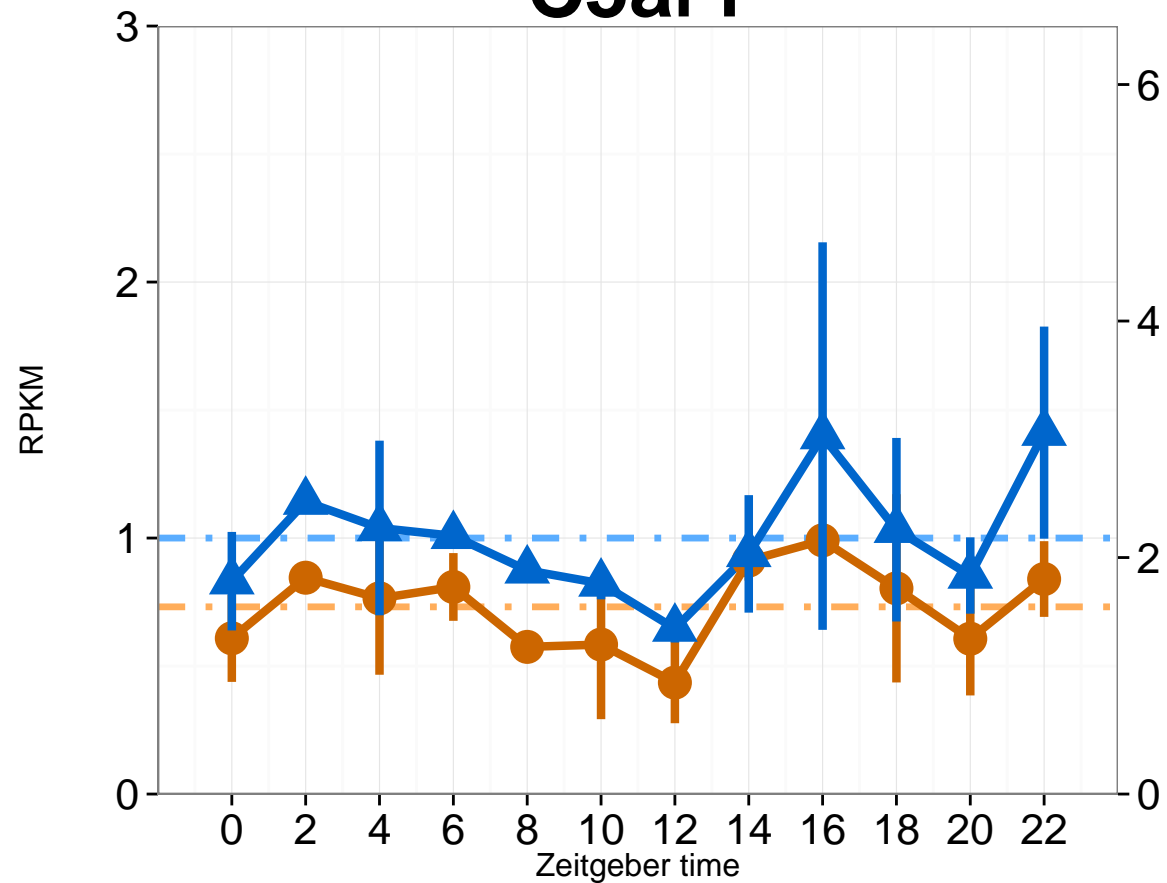

# C5ar1

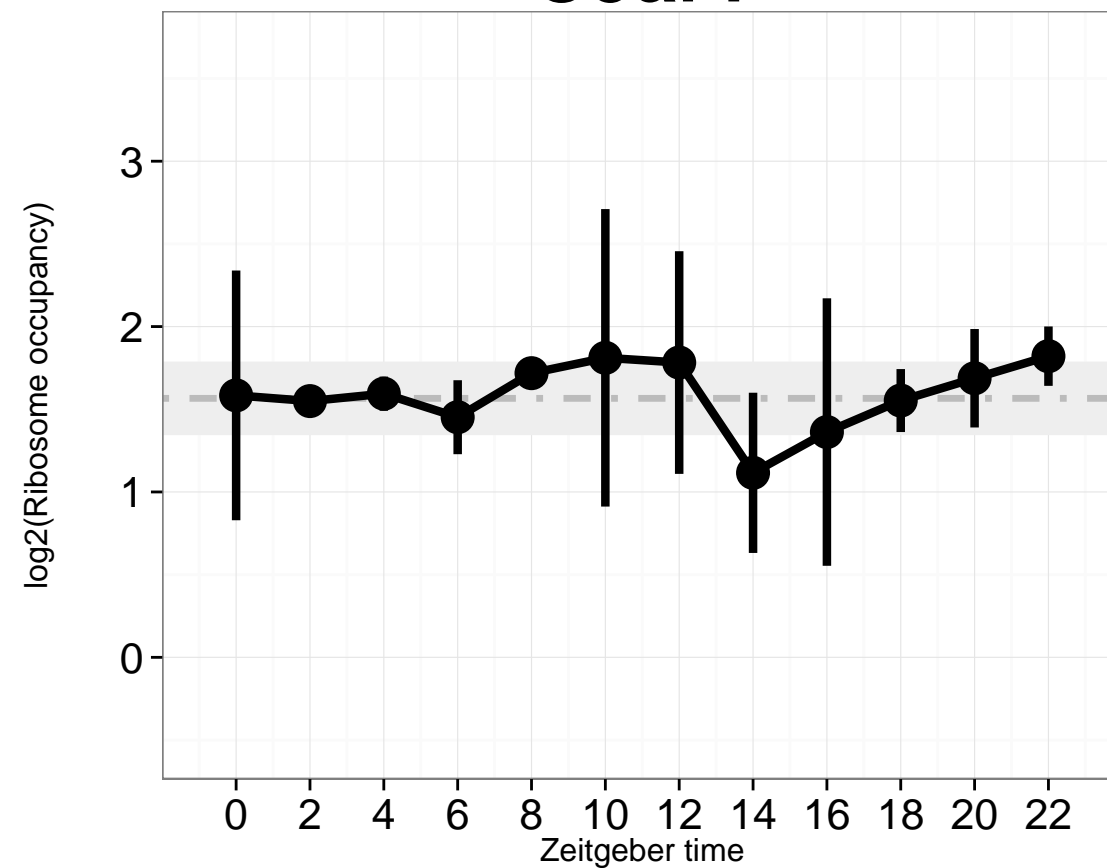

Supplement: Supplementary file 302 [file 1]

# Net1

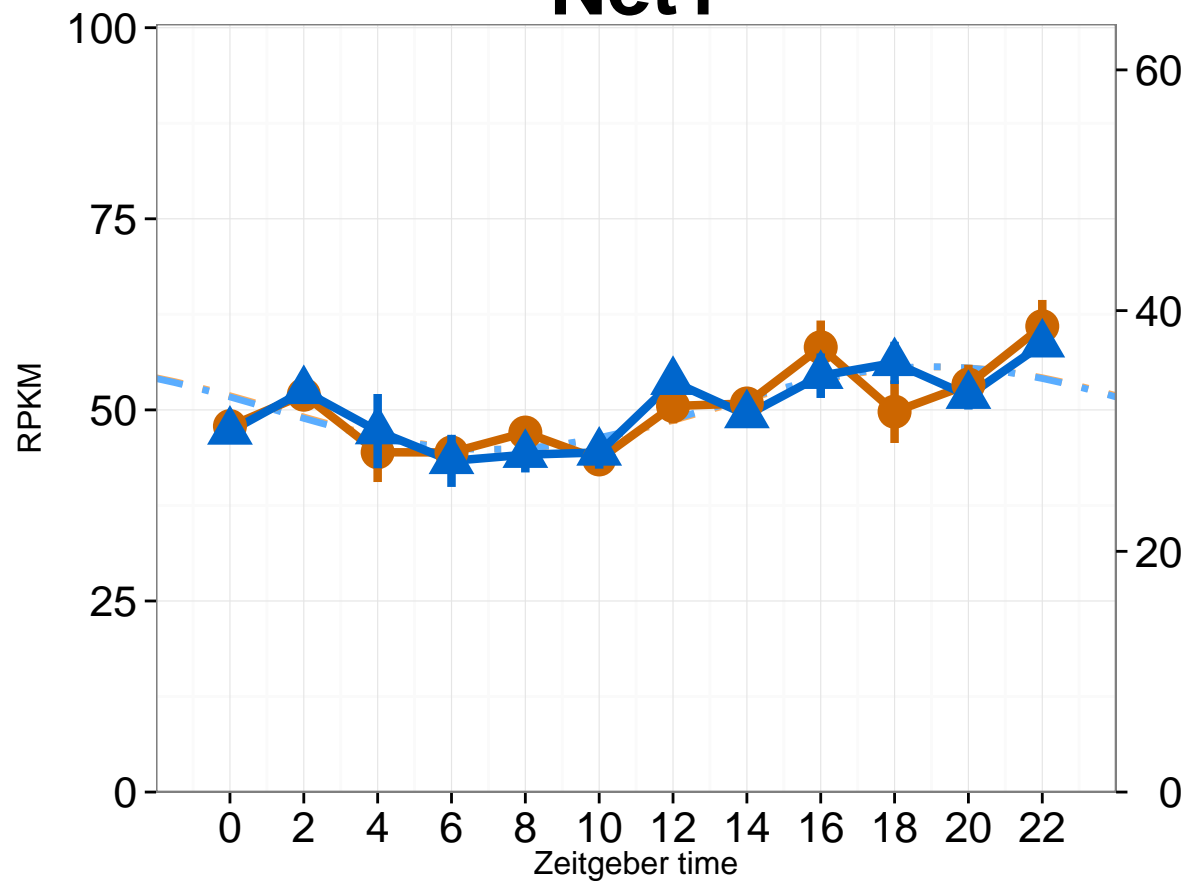

# Net1

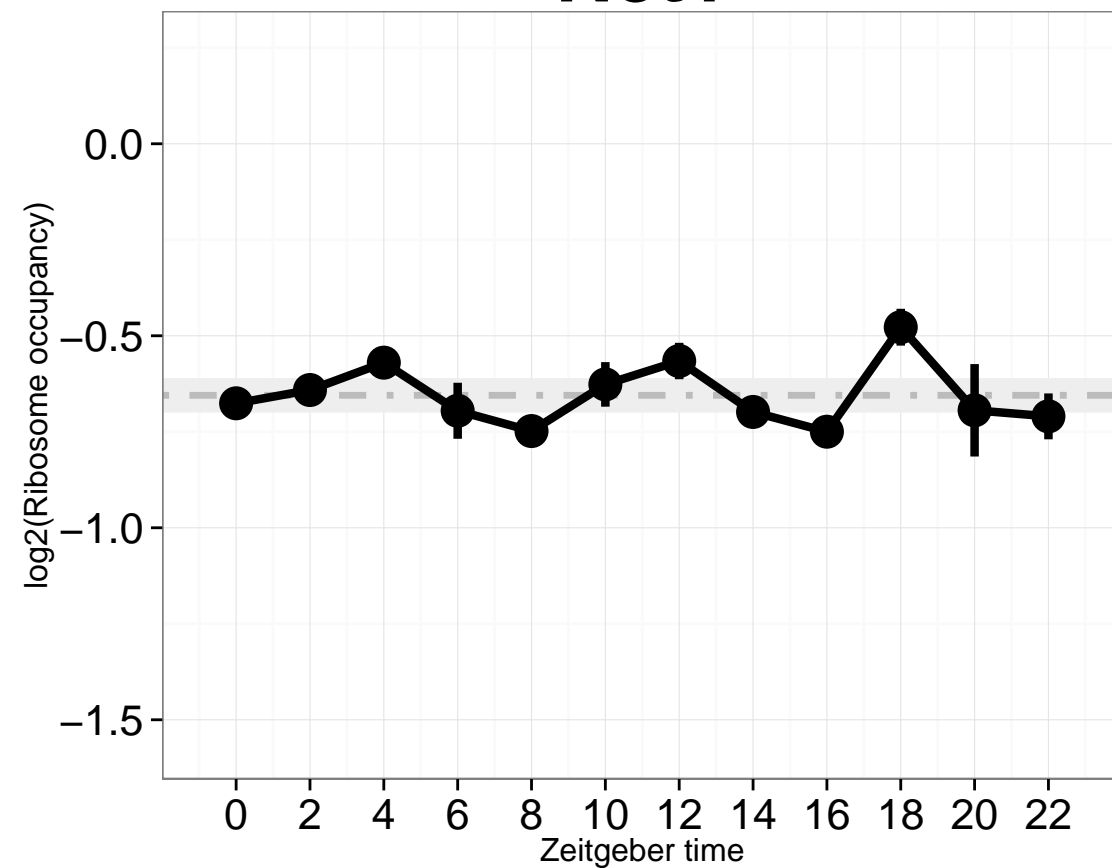

Supplement: Supplementary file 303 [file 1]

# Psmd12

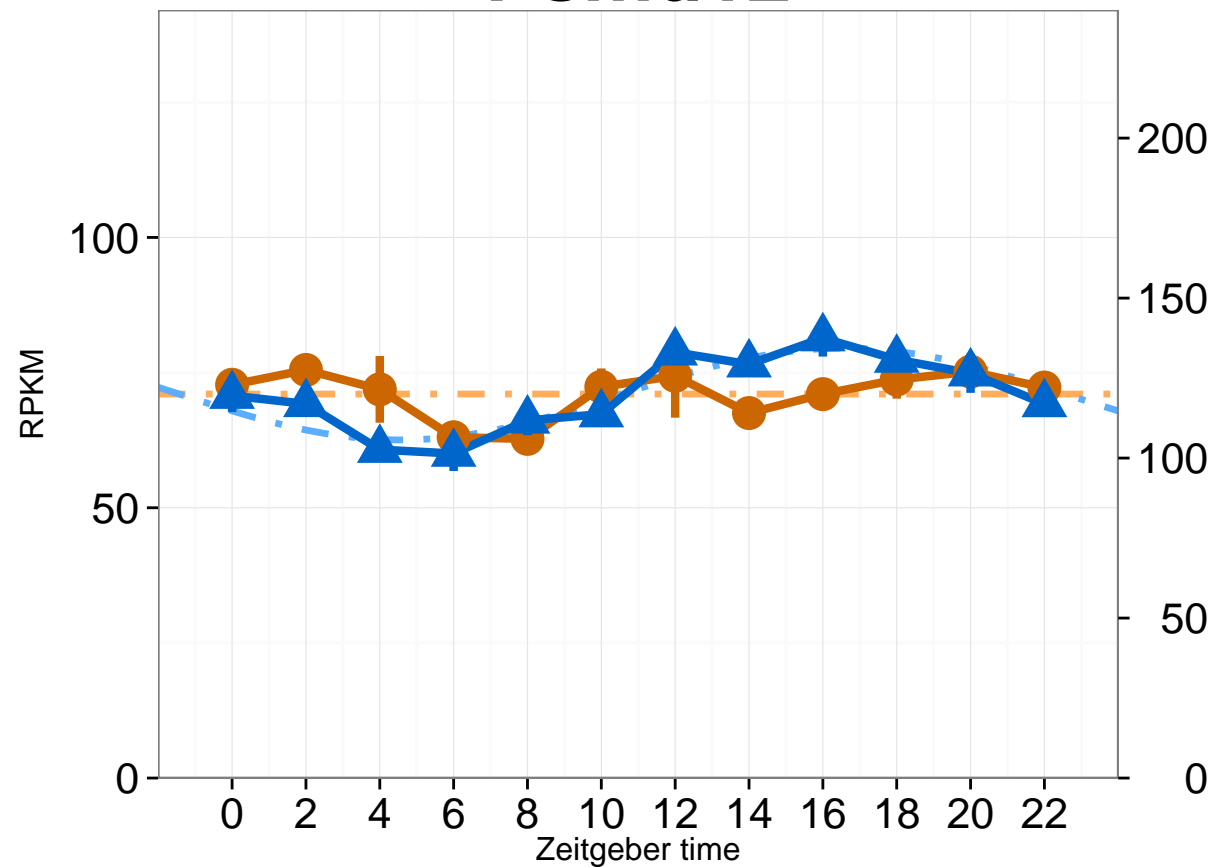

# Psmd12

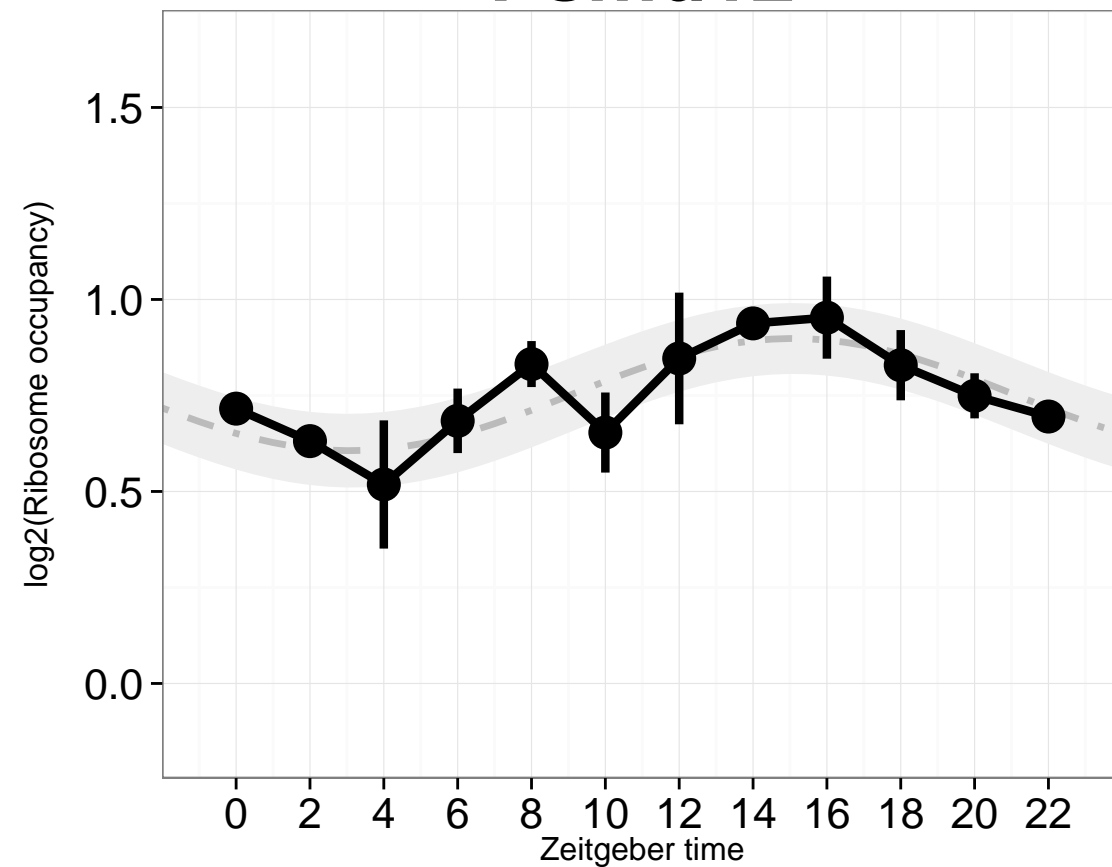

Supplement: Supplementary file 304 [file 1]

## Zcrb1

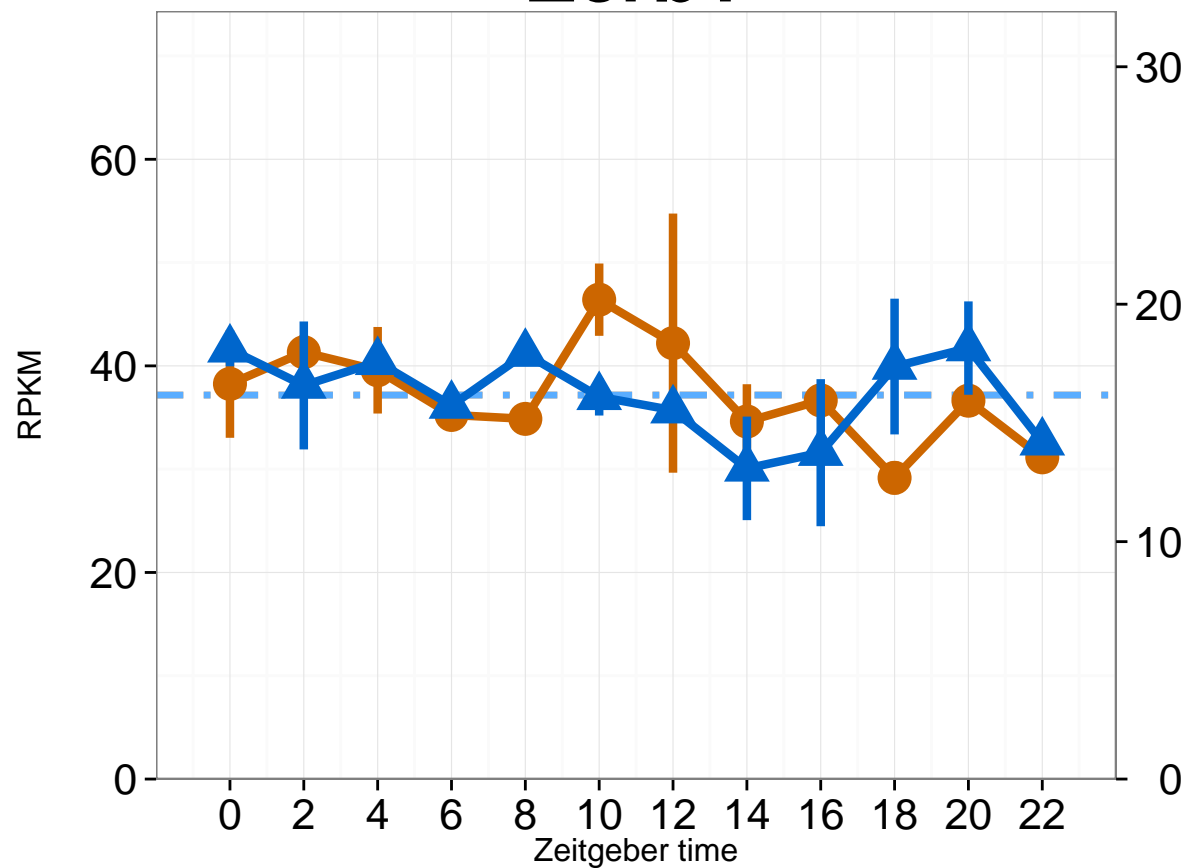

## Zcrb1

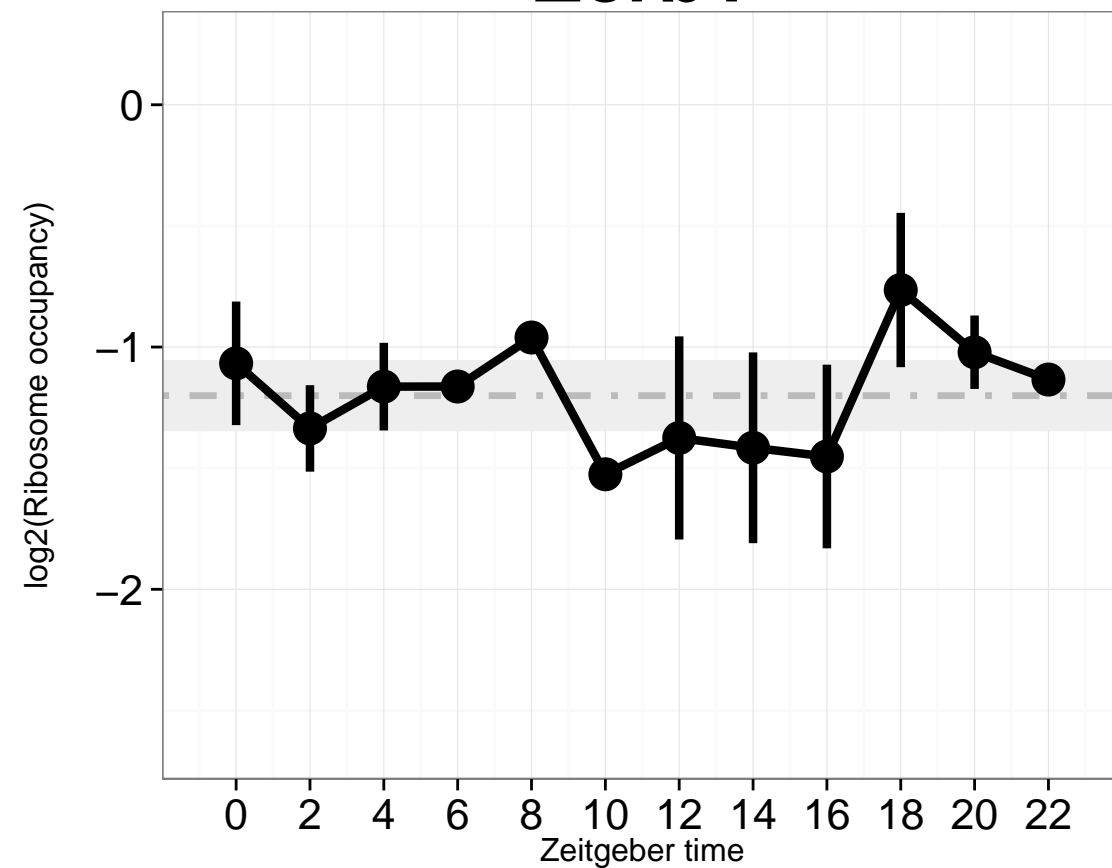

Supplement: Supplementary file 305 [file 1]

## Ep400

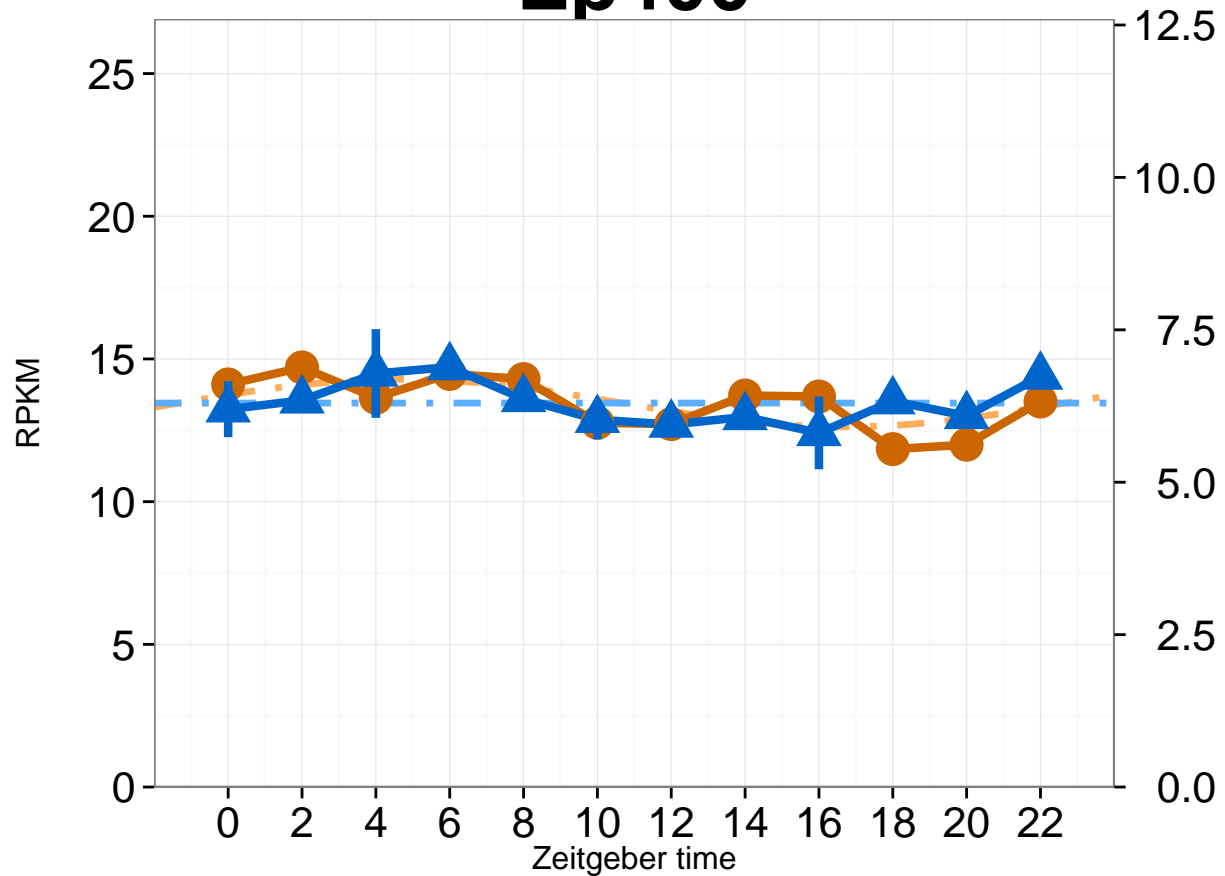

## Ep400

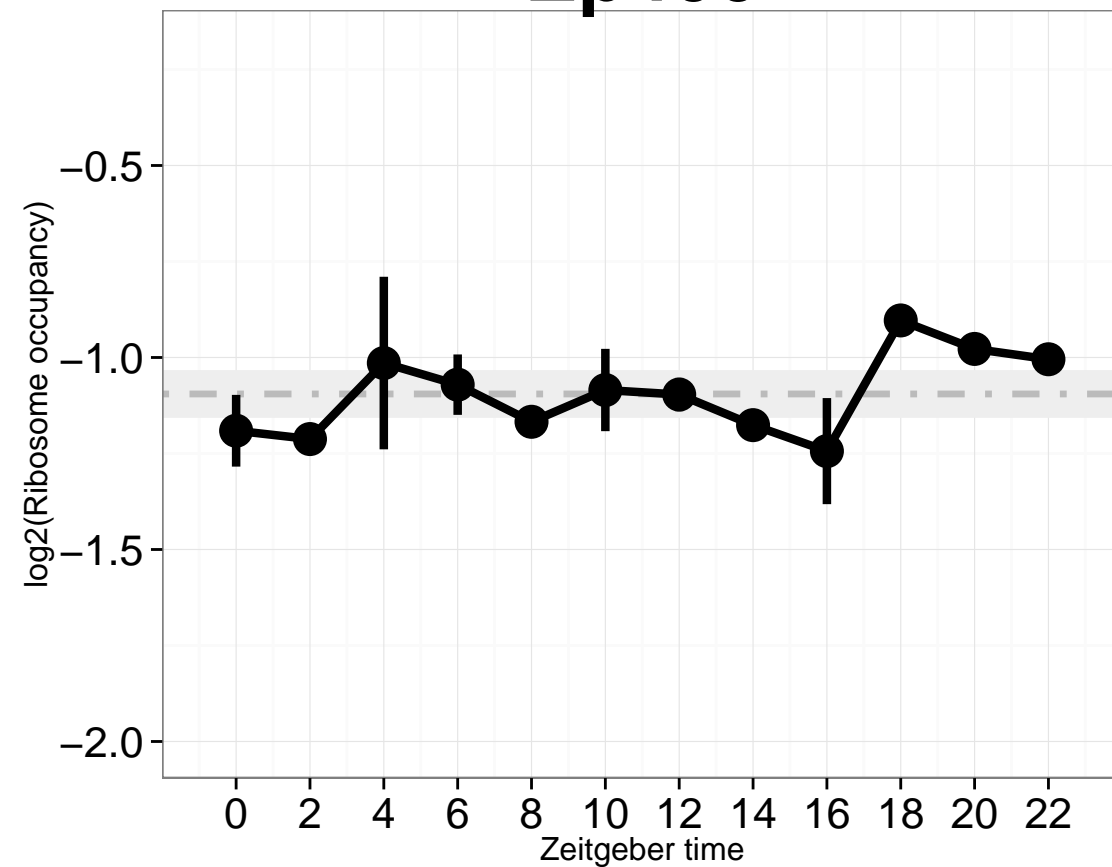

Supplement: Supplementary file 306 [file 1]

## Taf5

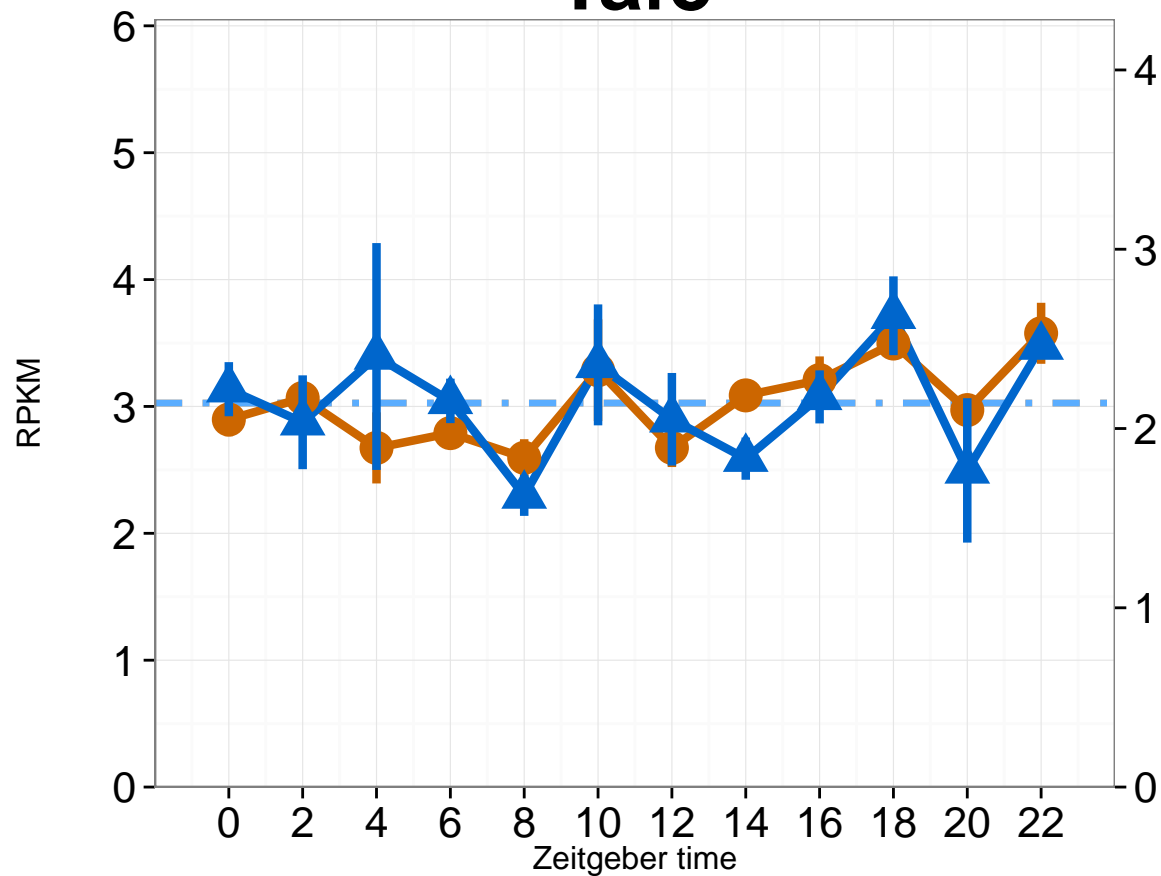

## Taf5

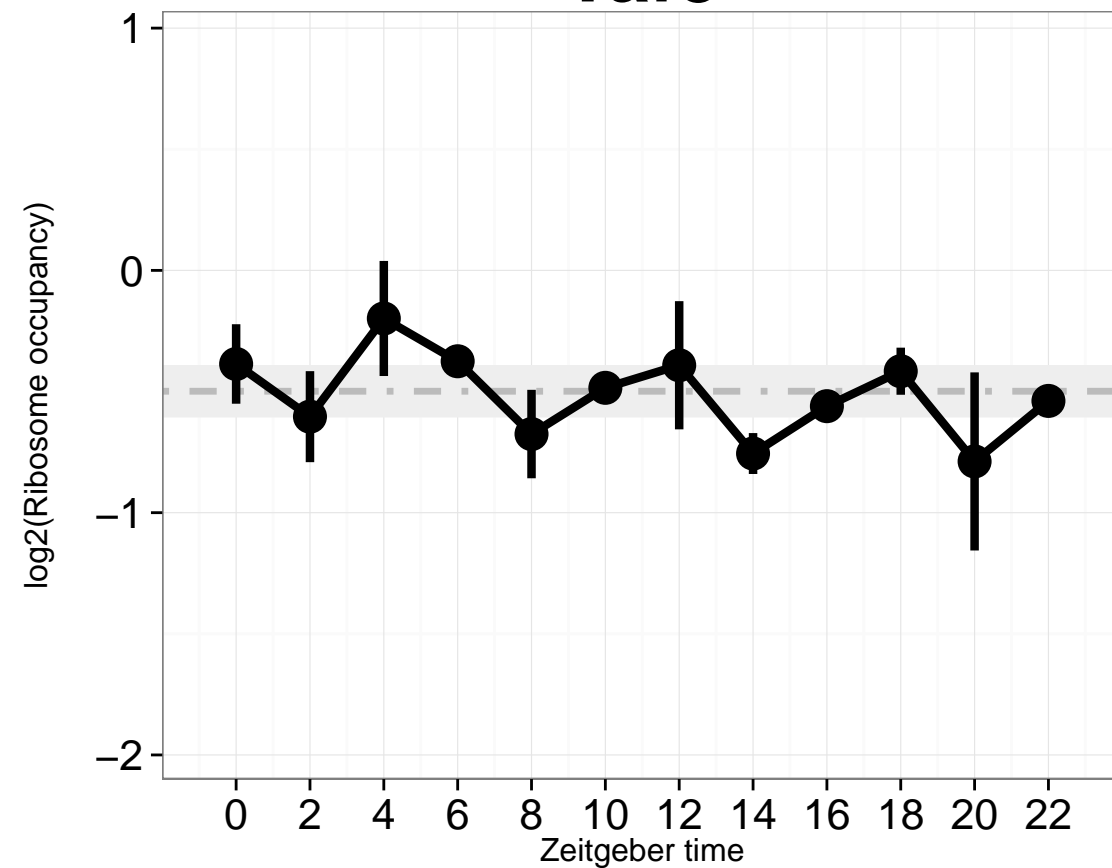

Supplement: Supplementary file 307 [file 1]

# Ccnb2

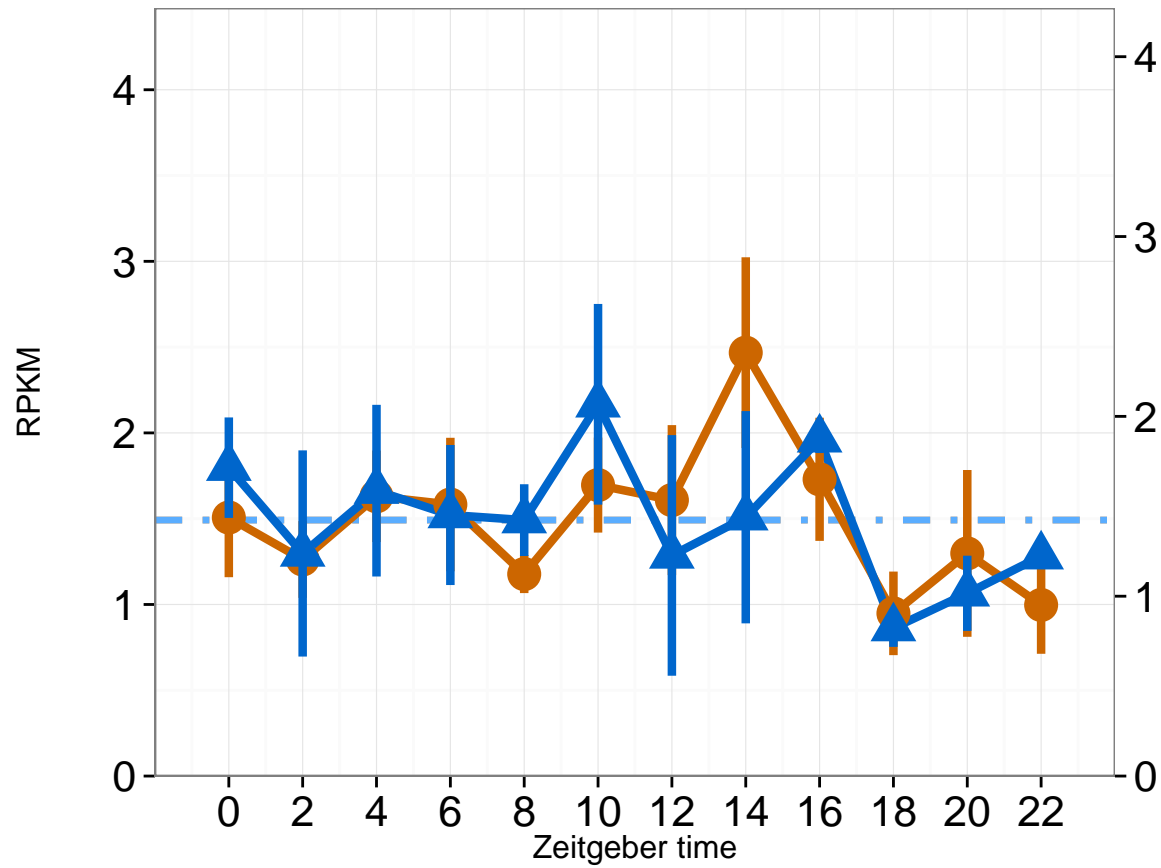

# Ccnb2

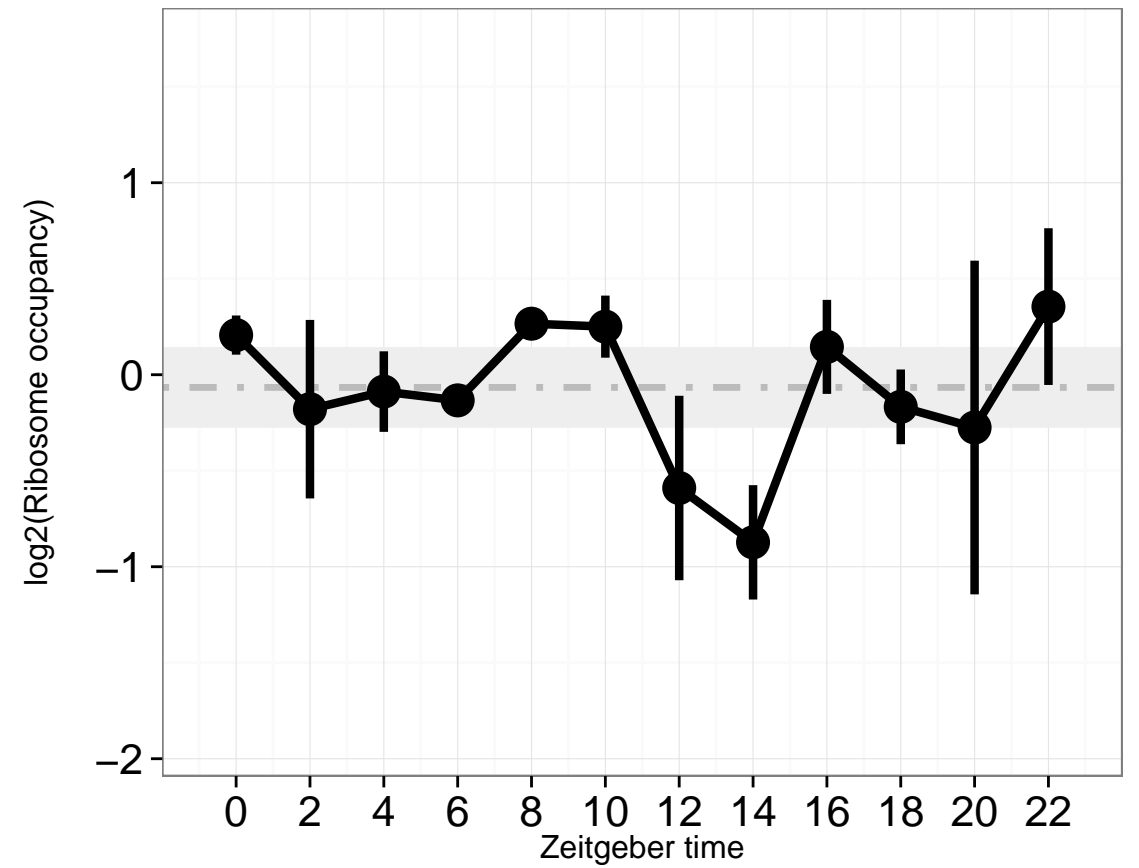

Supplement: Supplementary file 308 [file 1]

# Acp6

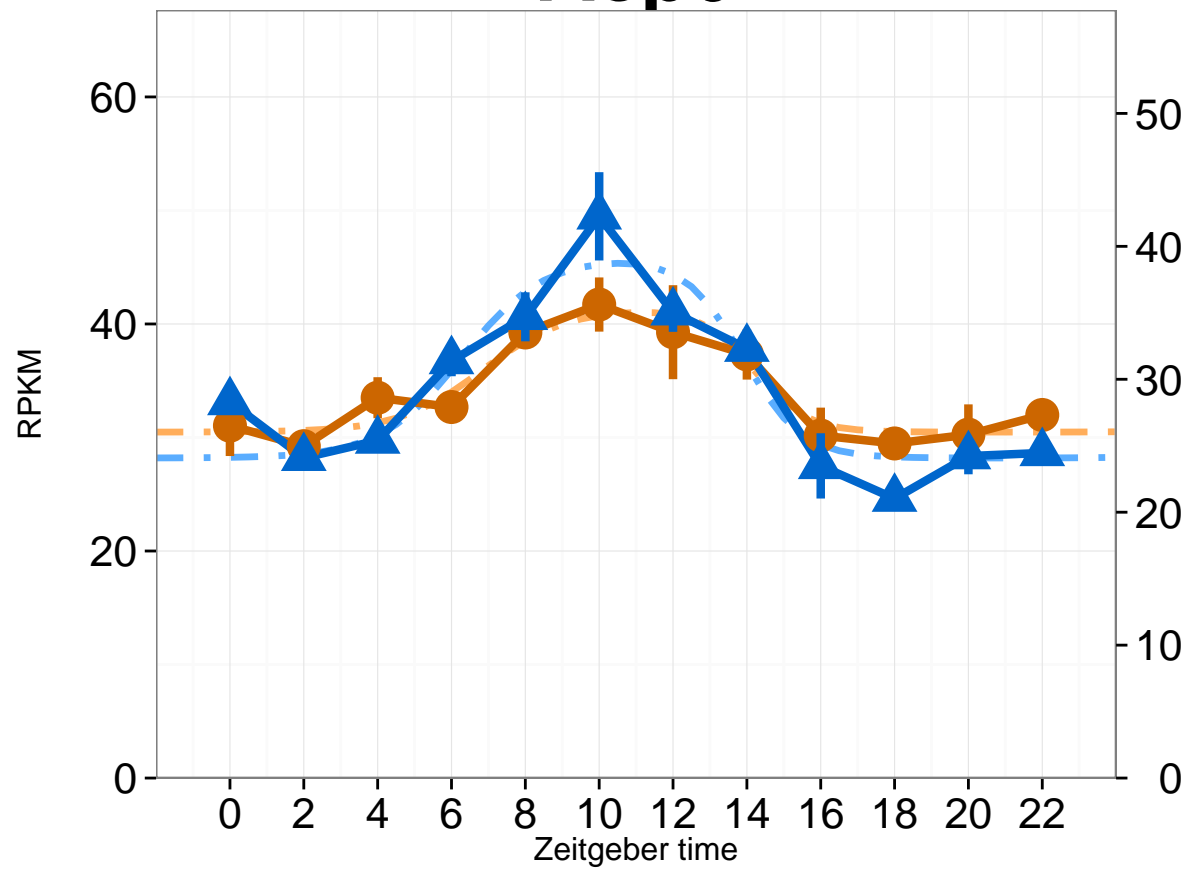

# Acp6

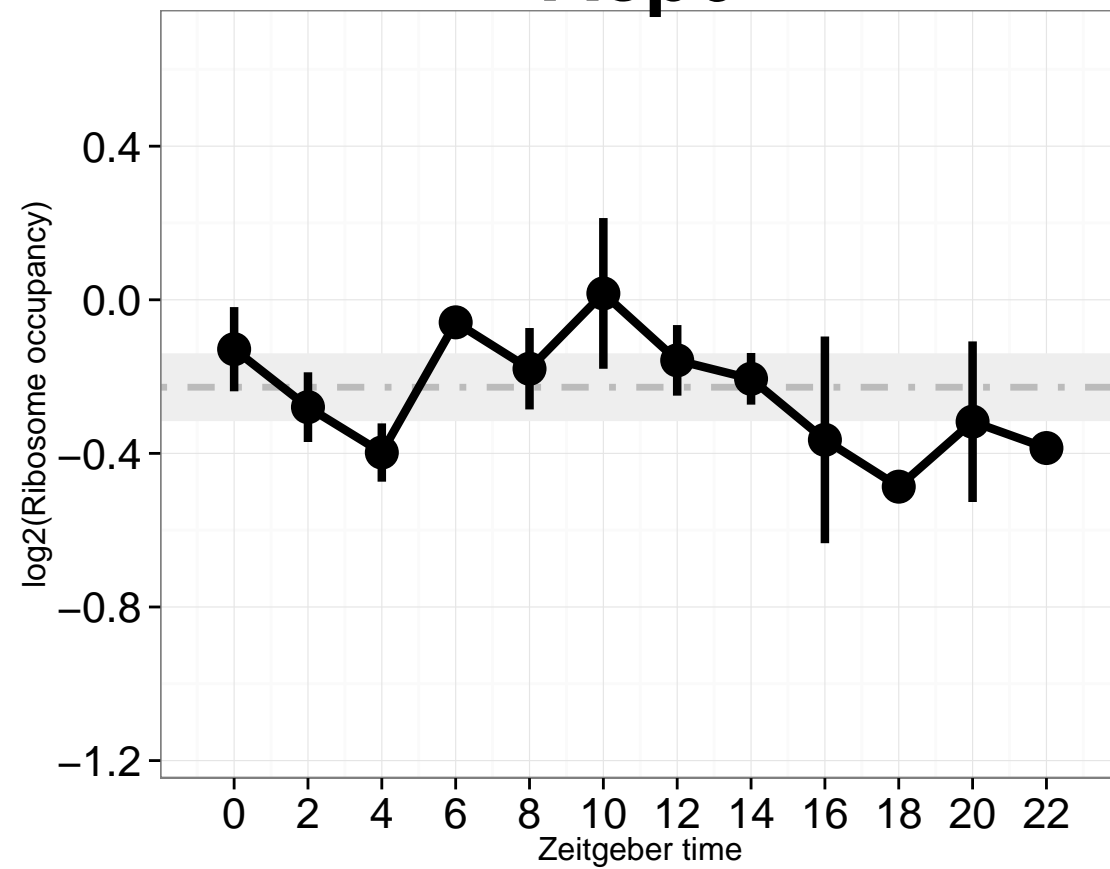

Supplement: Supplementary file 309 [file 1]

# Gtdc1

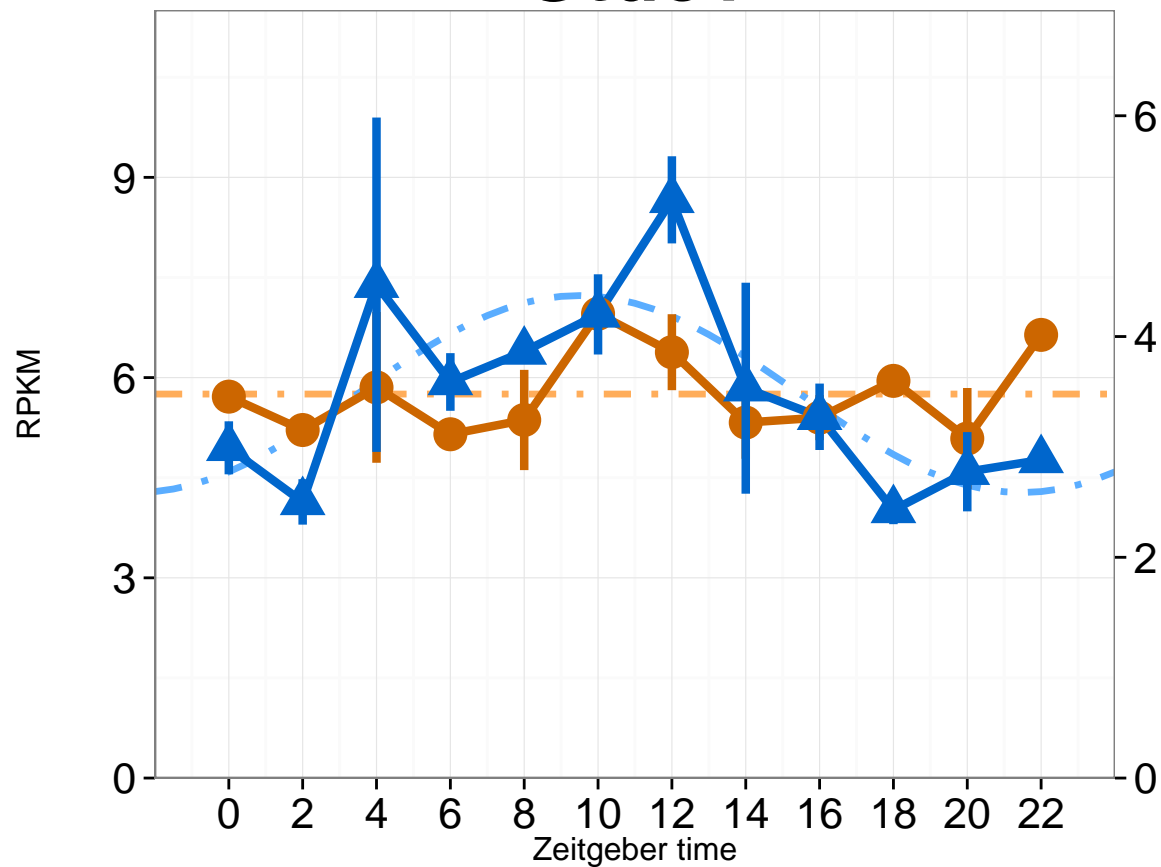

# Gtdc1

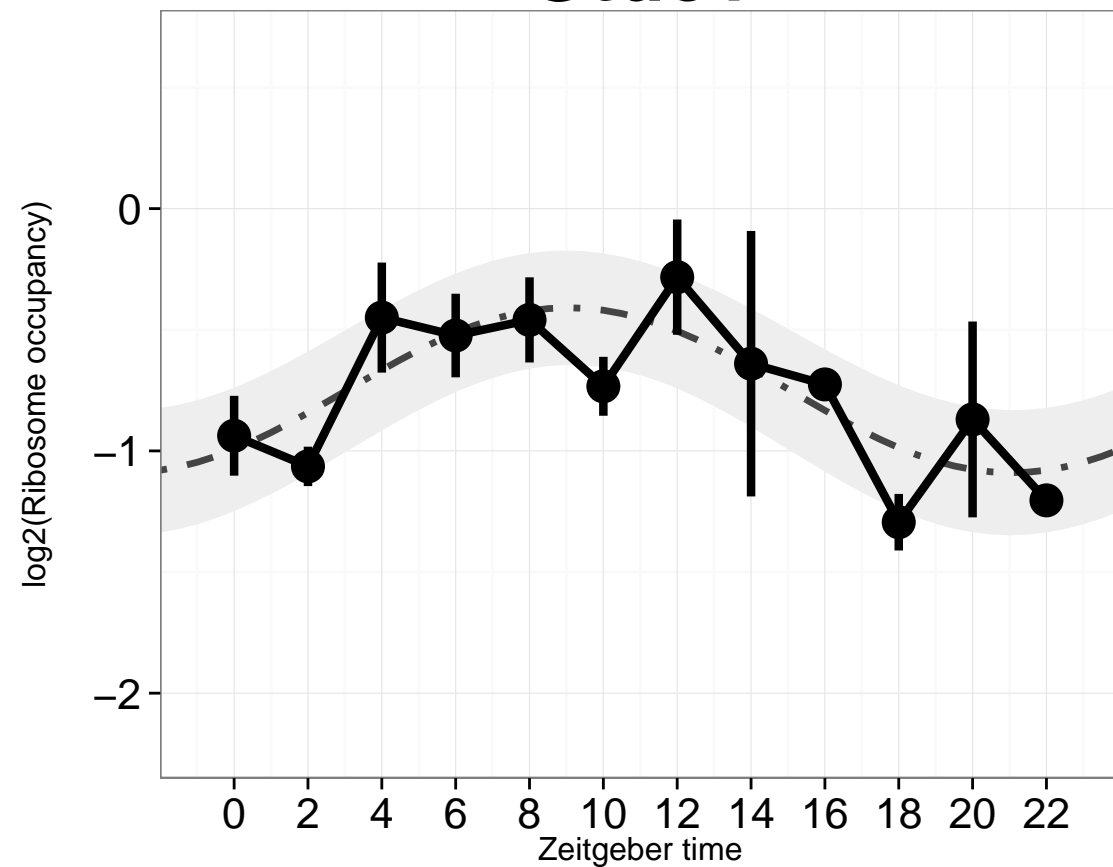

Supplement: Supplementary file 310 [file 1]

# Atp6v1g1

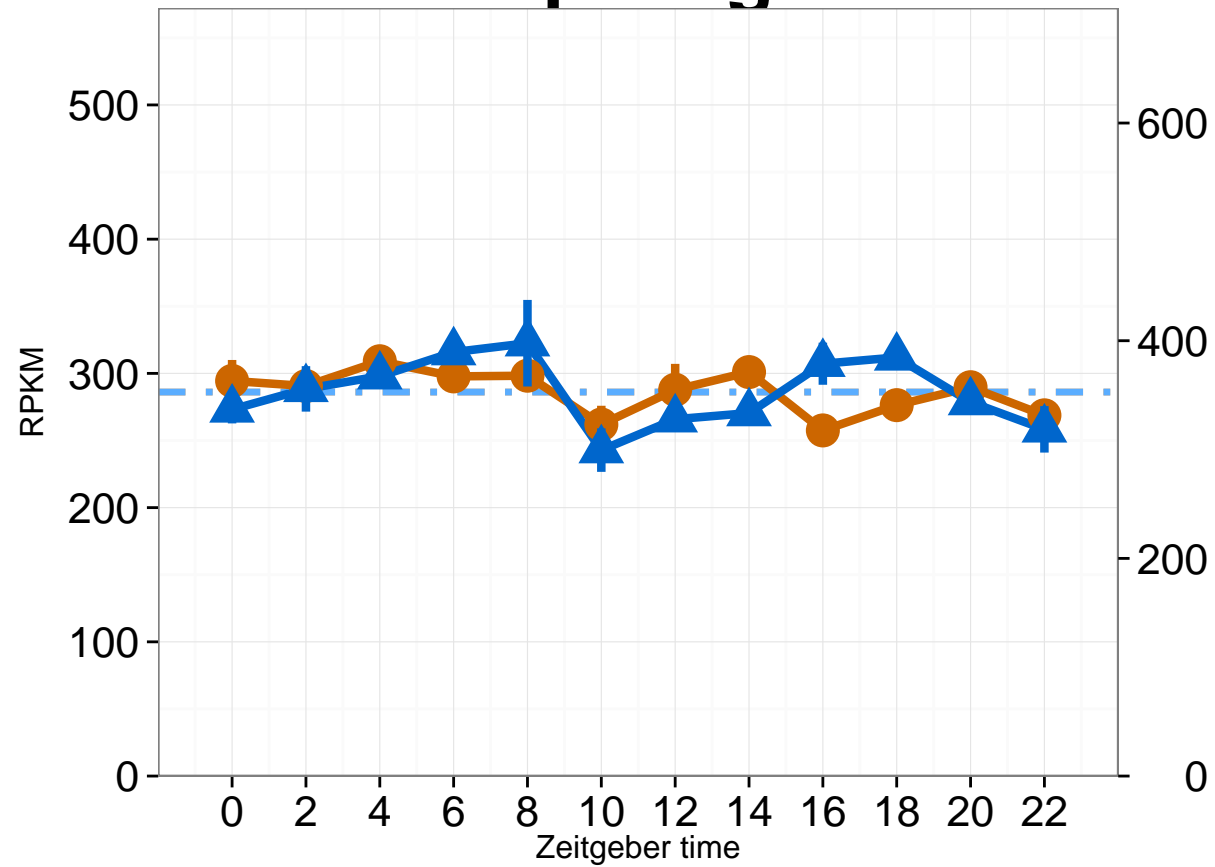

# Atp6v1g1

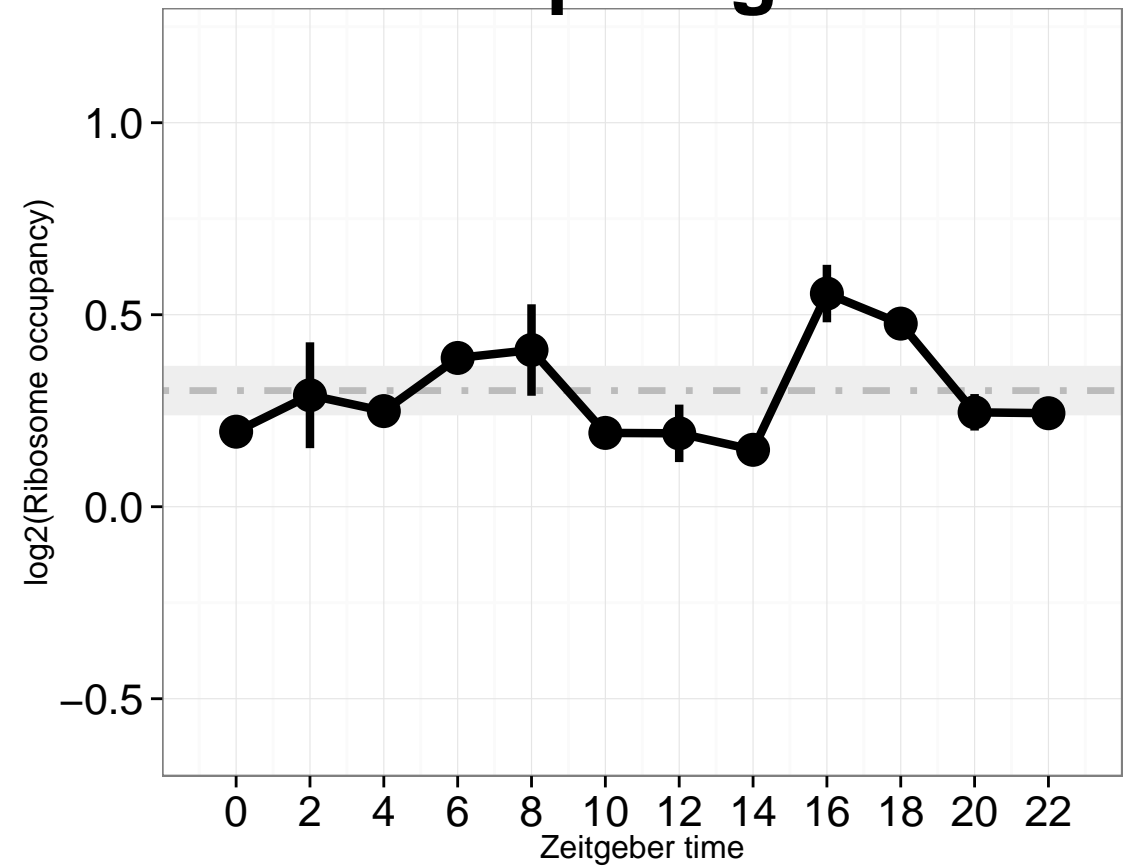

Supplement: Supplementary file 311 [file 1]

## Srcin1

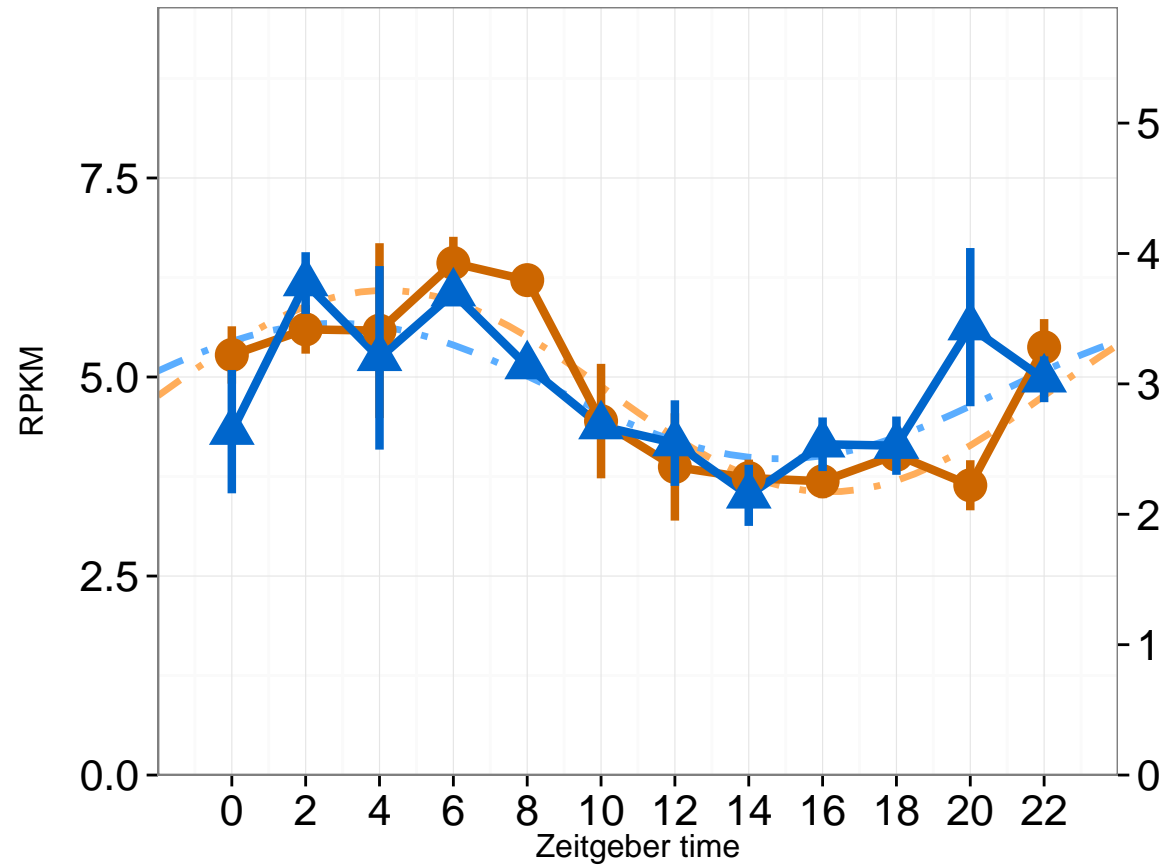

## Srcin1

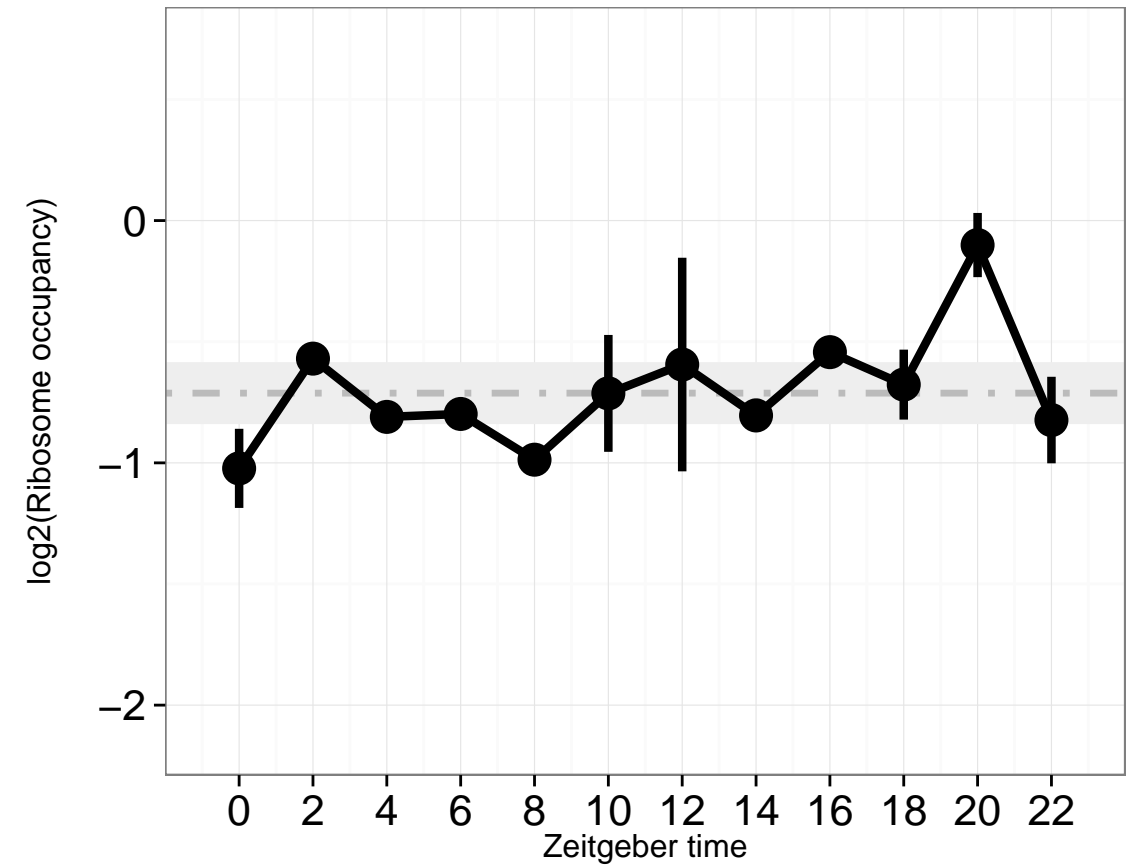

Supplement: Supplementary file 312 [file 1]

## Gpr155

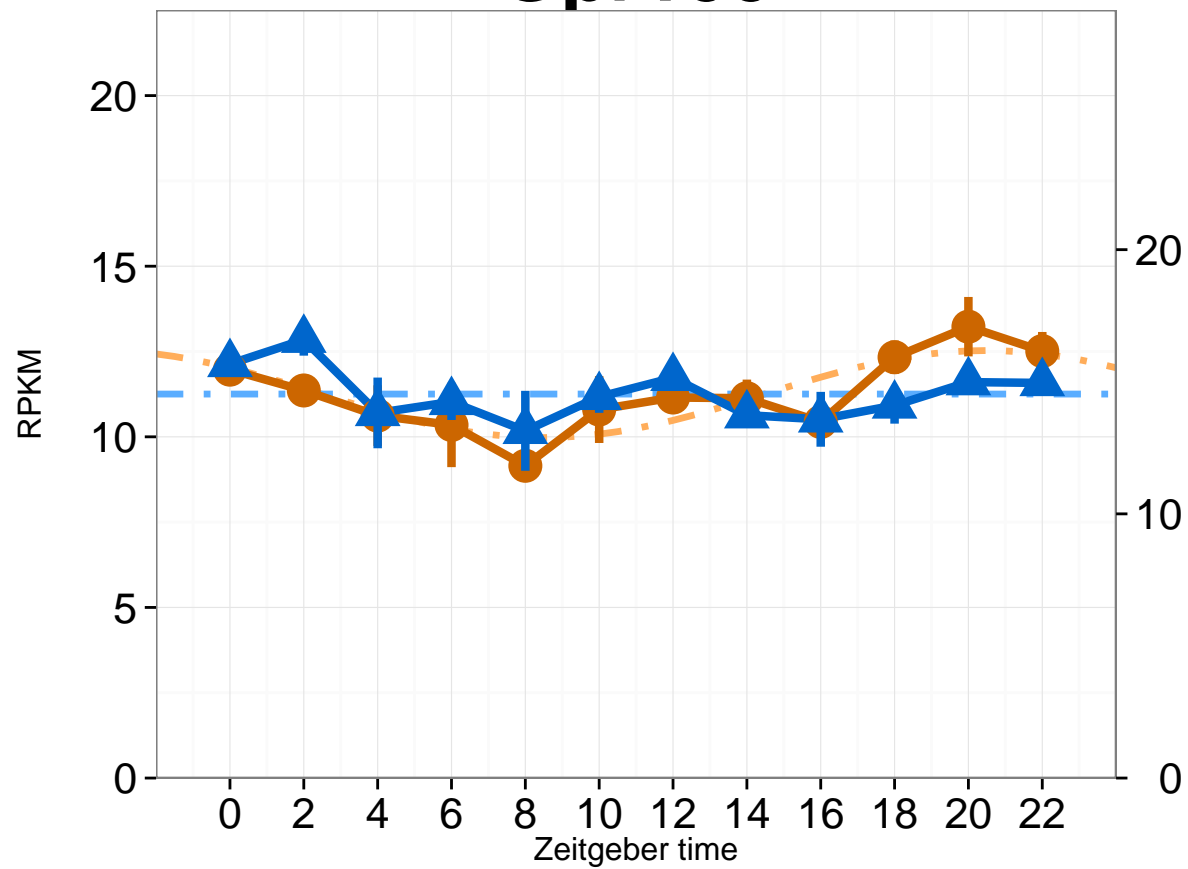

## Gpr155

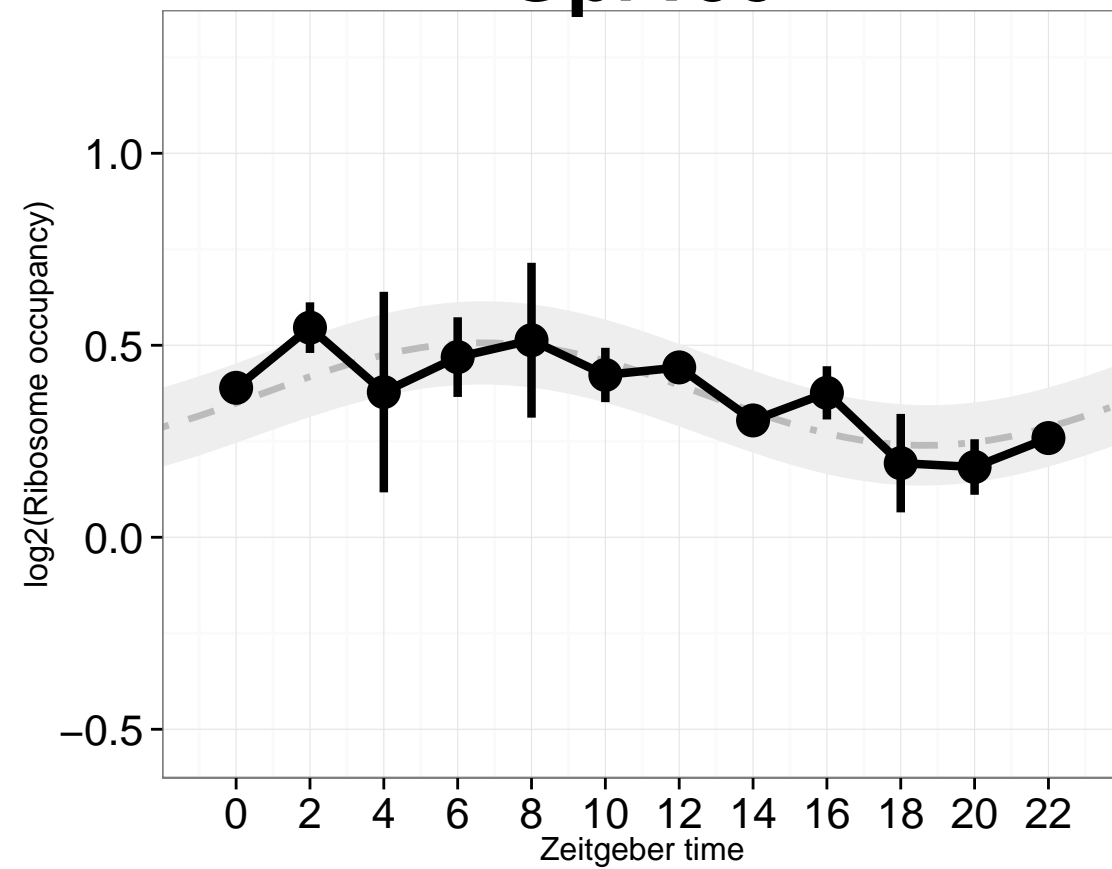

Supplement: Supplementary file 313 [file 1]

## Rab17

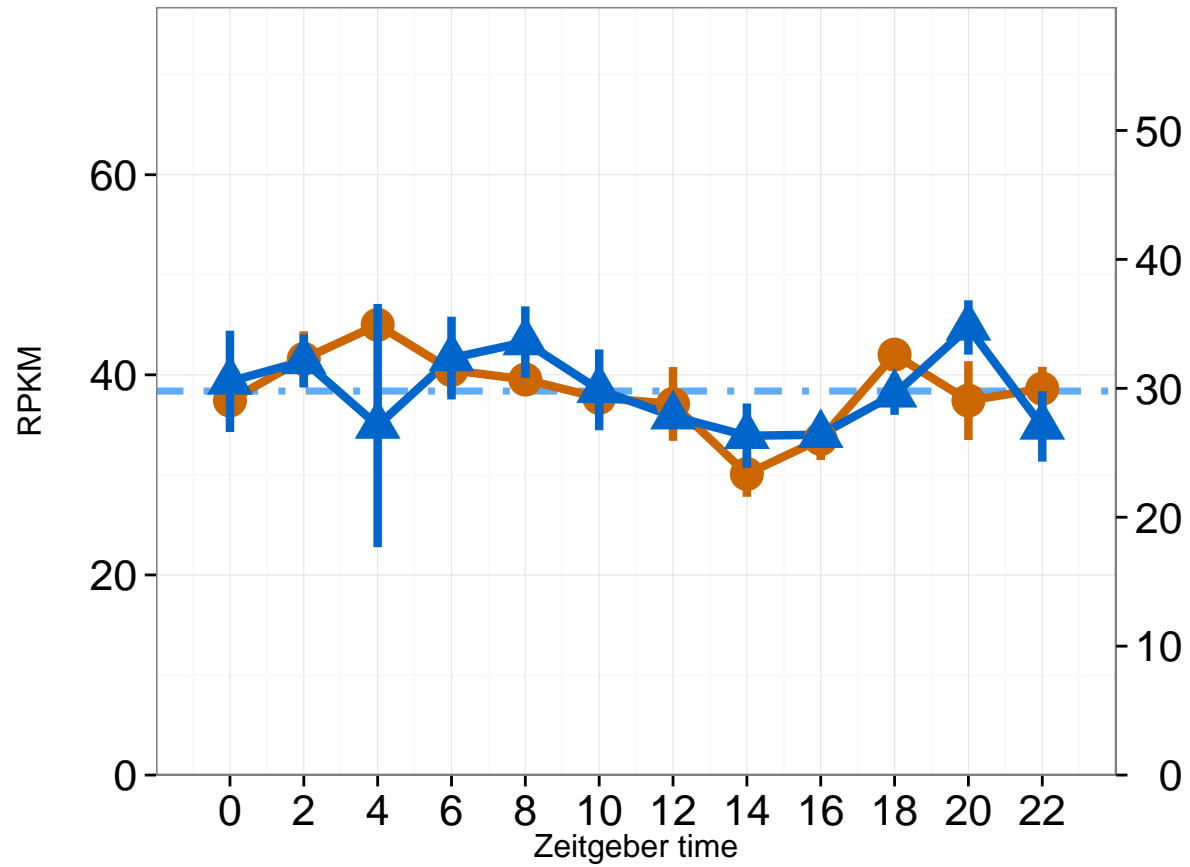

## Rab17

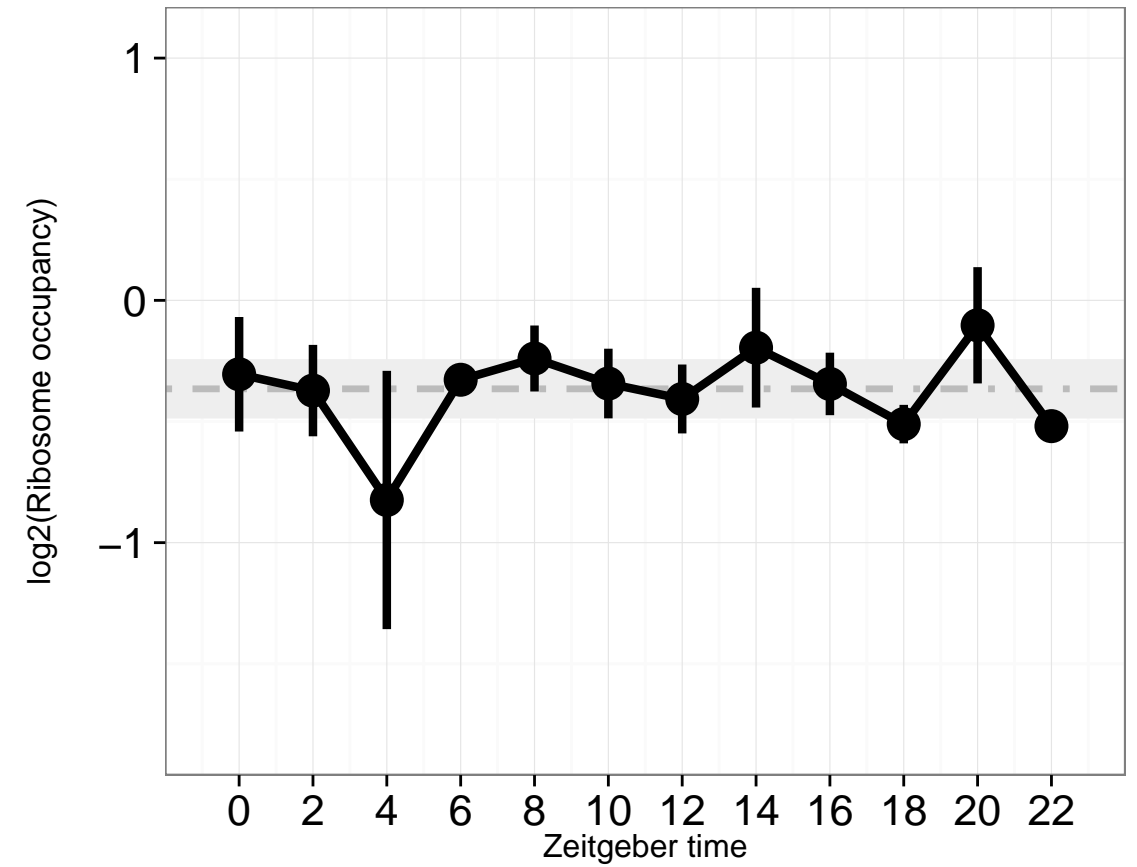

Supplement: Supplementary file 314 [file 1]

## Rnaseh1

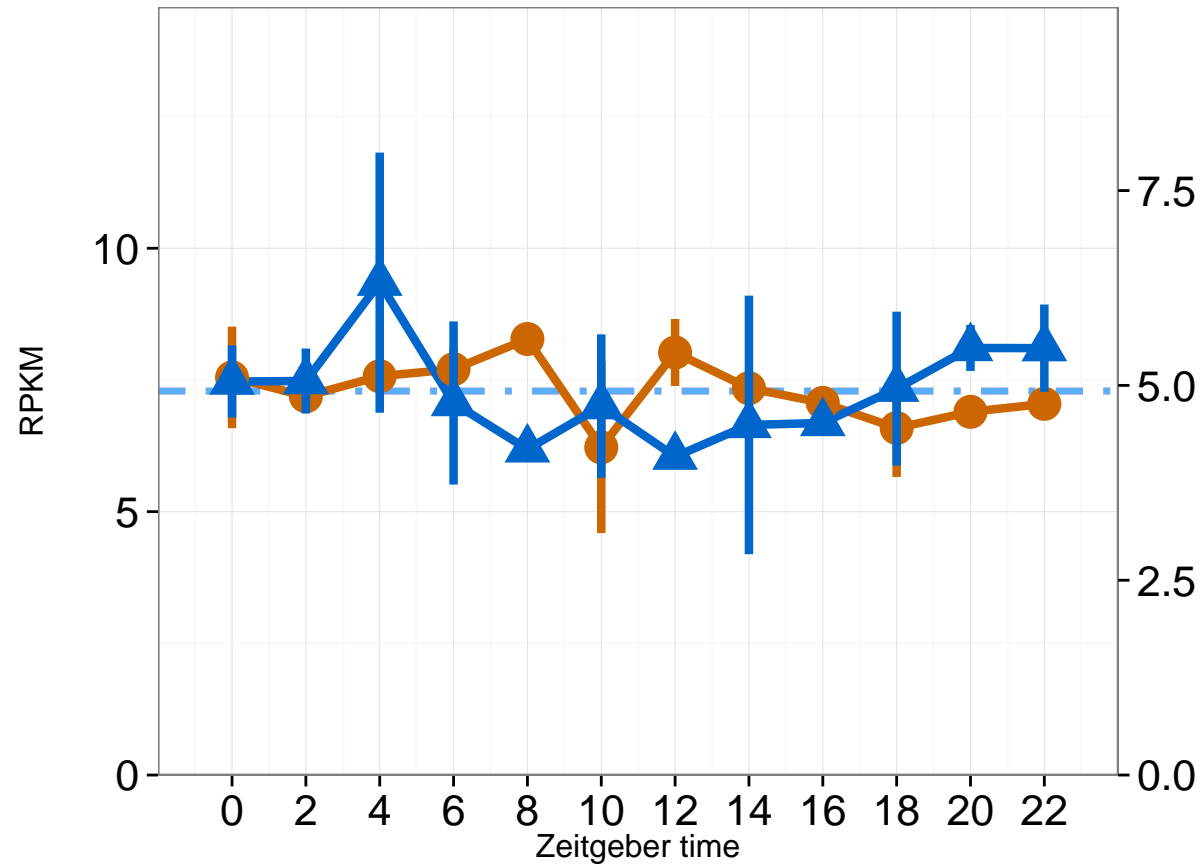

## Rnaseh1

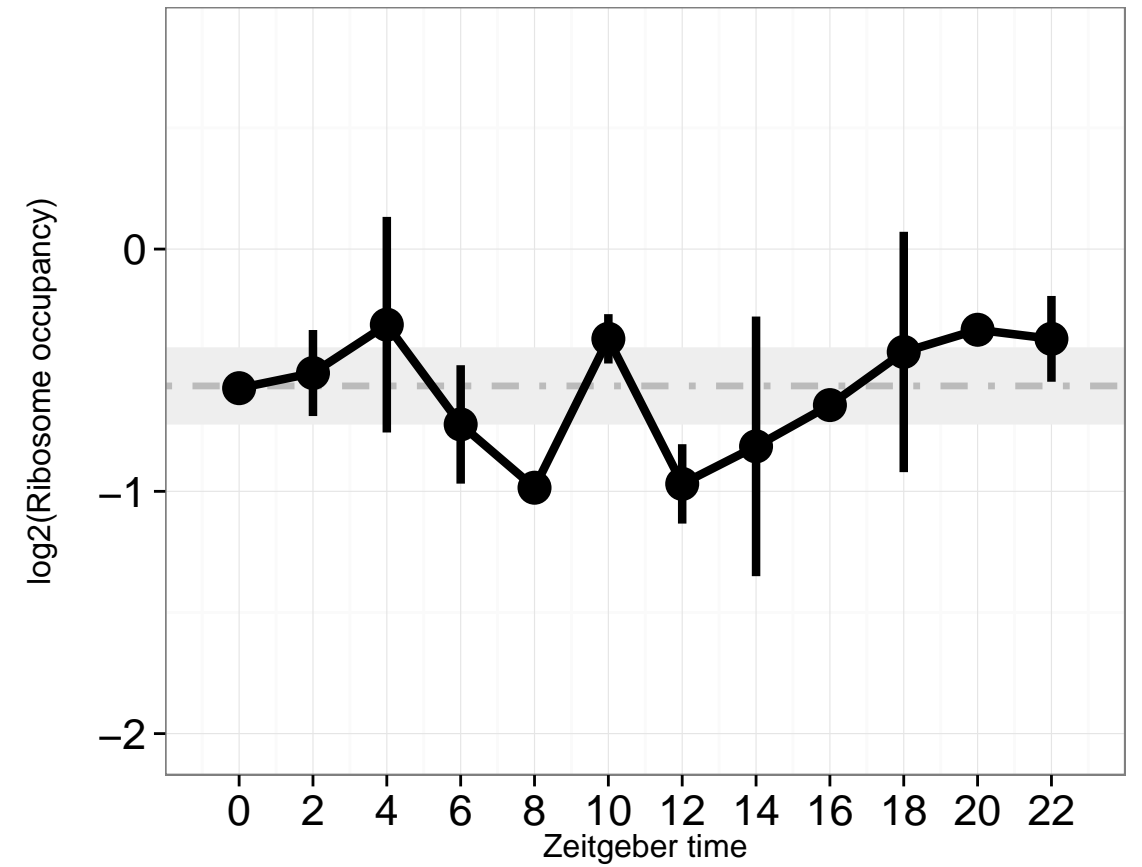

Supplement: Supplementary file 315 [file 1]

## Tsen15

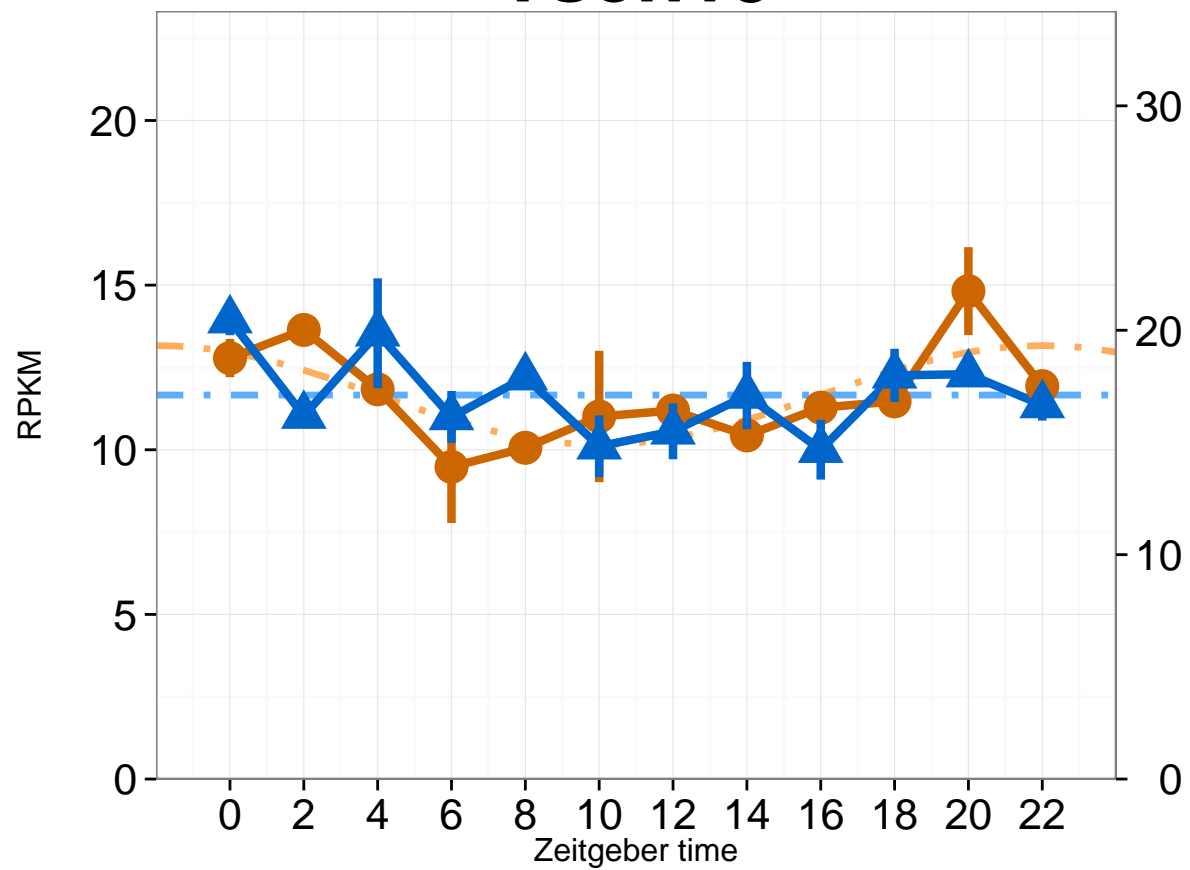

## Tsen15

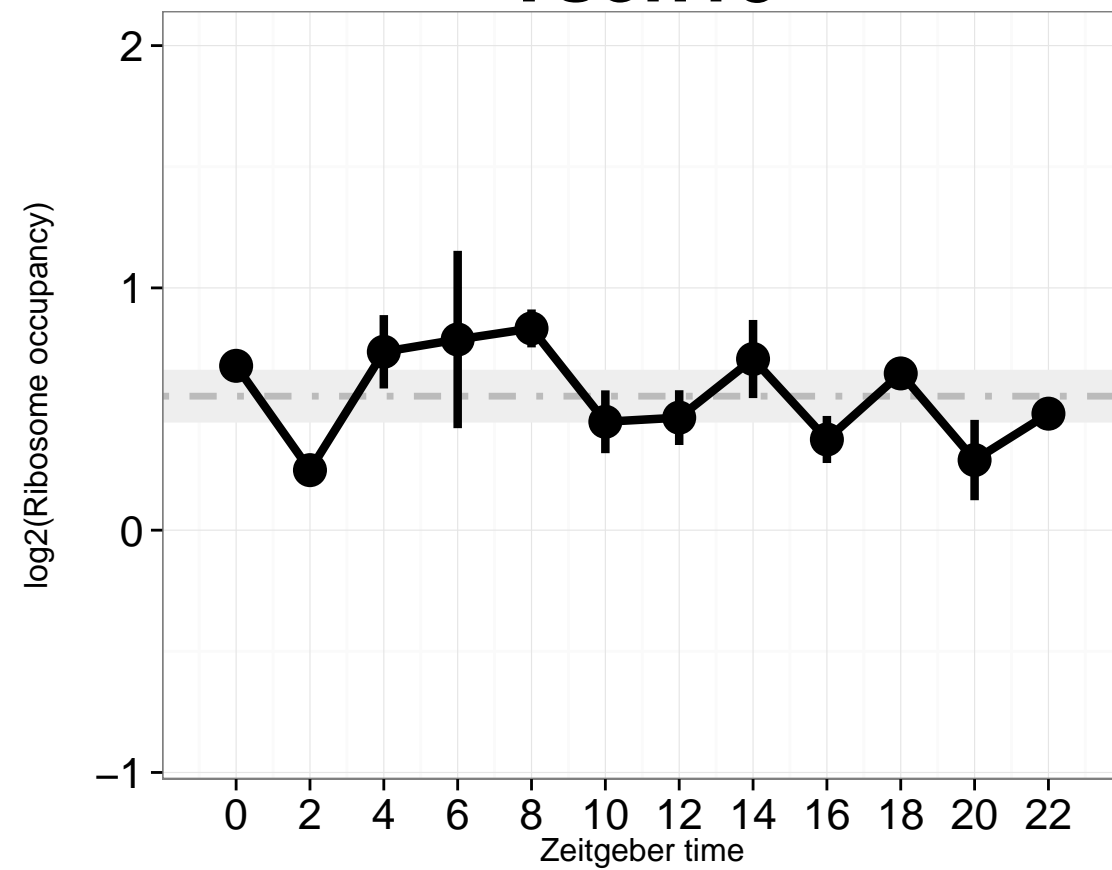

Supplement: Supplementary file 316 [file 1]

## Hist2h3c2

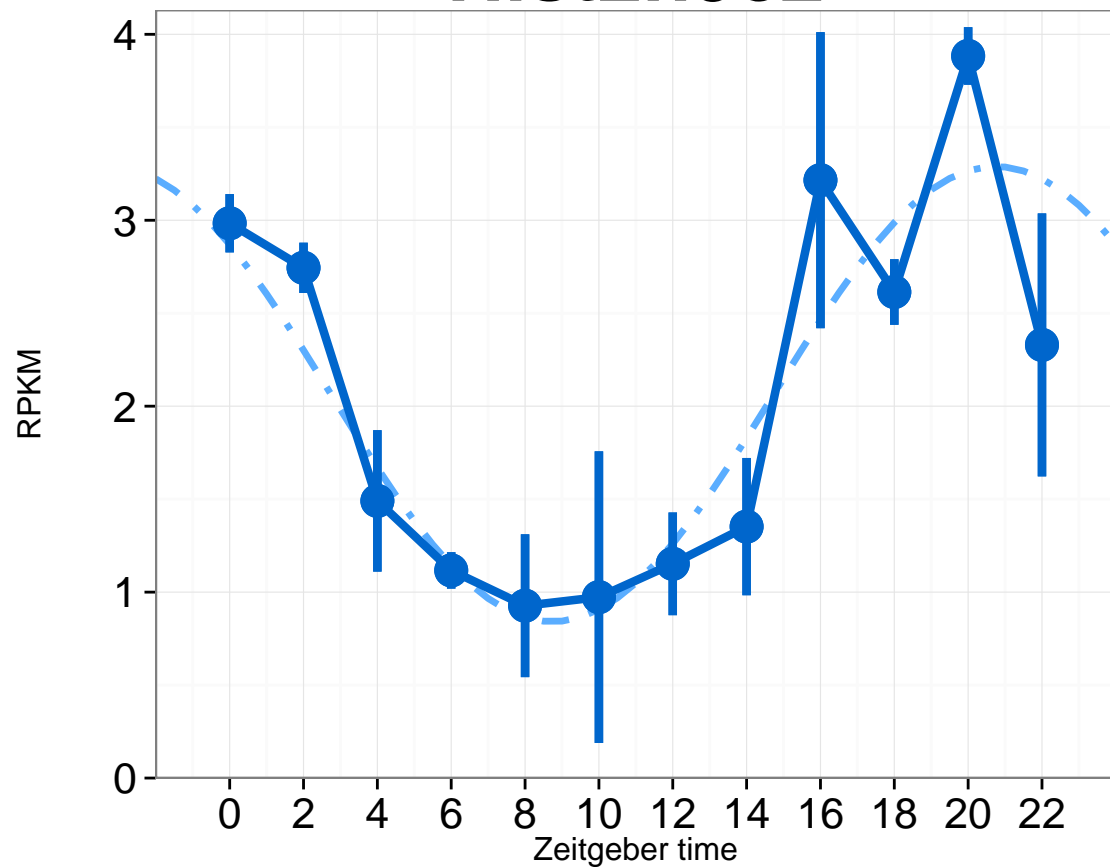

## Hist2h3c2 log<sub>2</sub>(Ribosome occupancy)

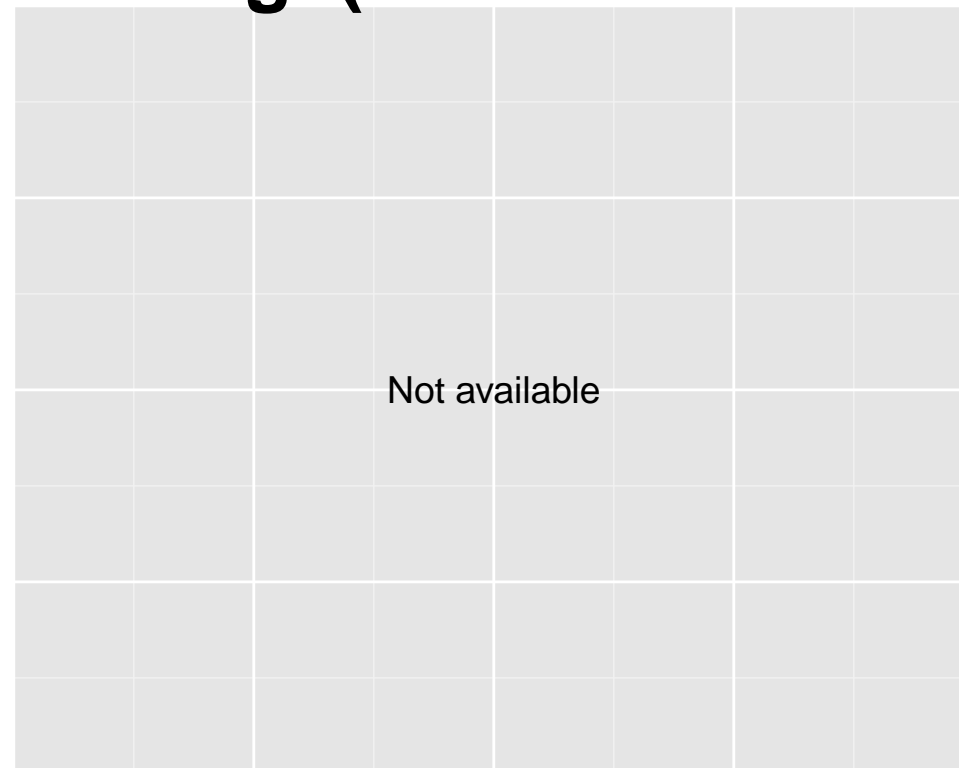

Supplement: Supplementary file 317 [file 1]

# Zdhhc23

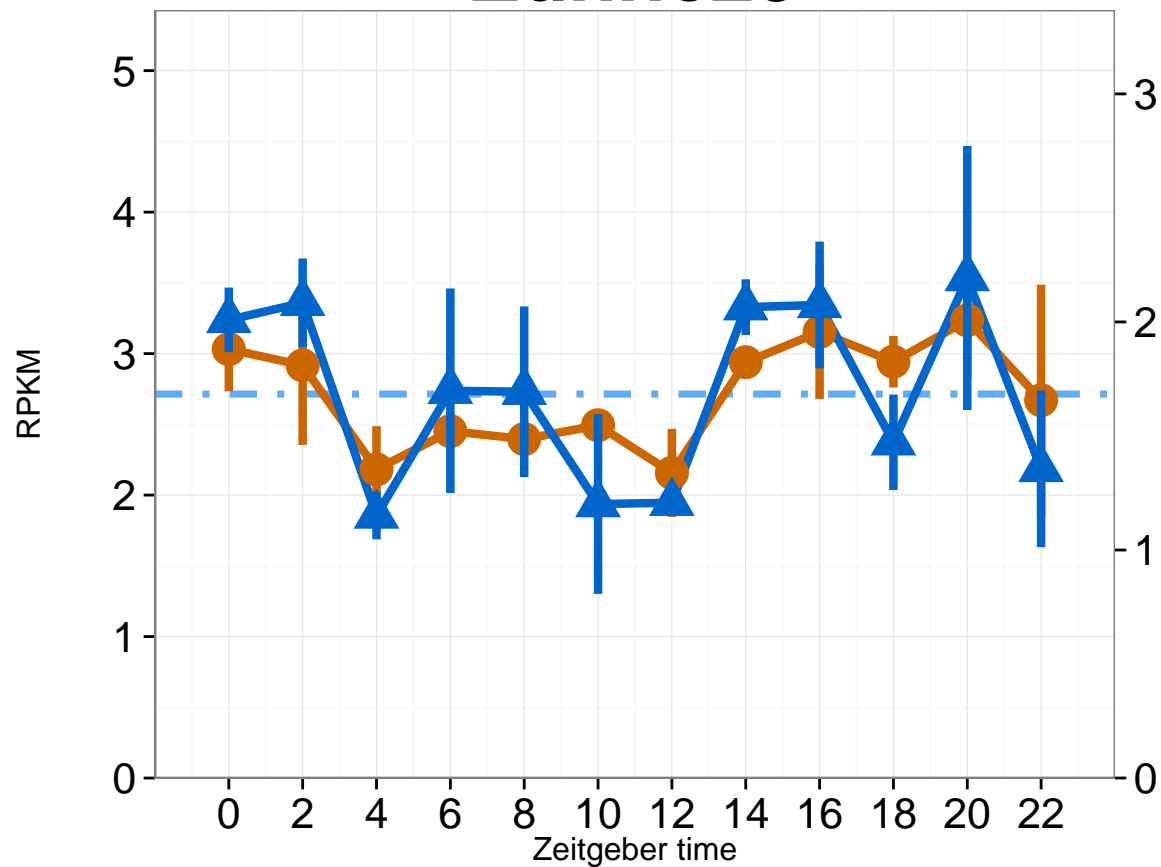

# Zdhhc23

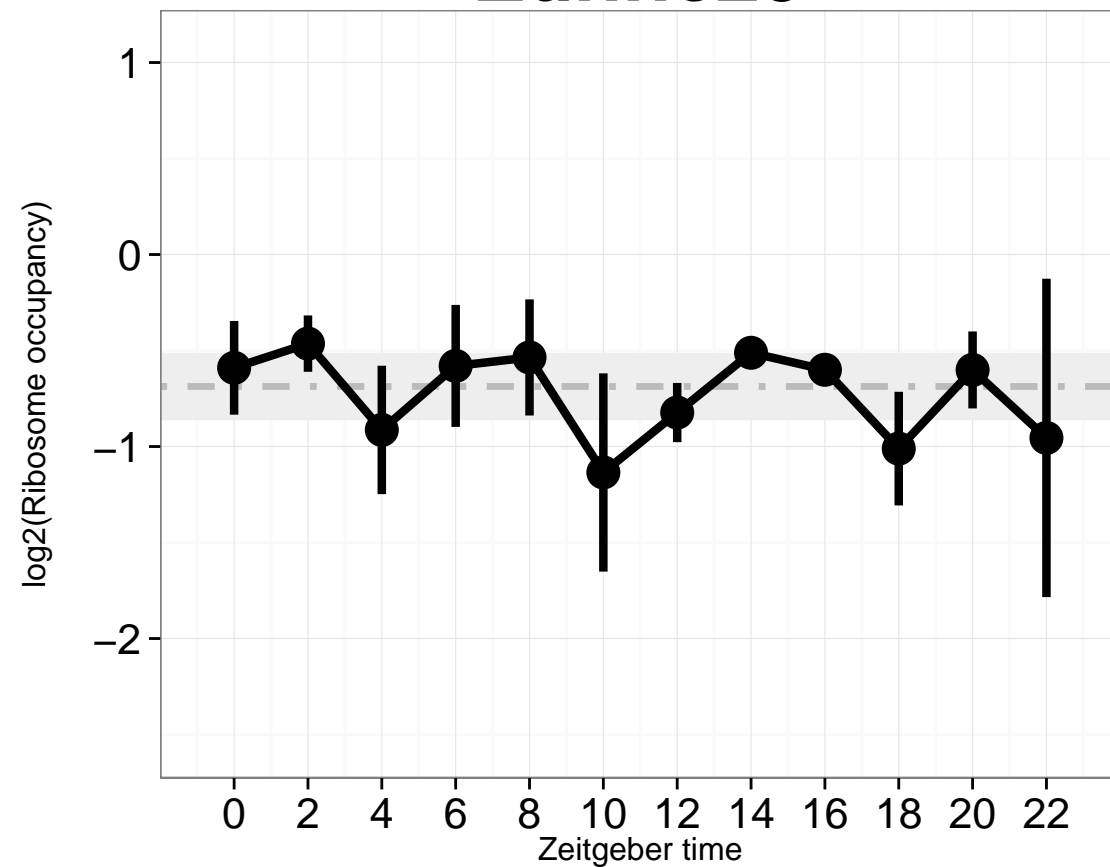

Supplement: Supplementary file 318 [file 1]

## Slc17a4

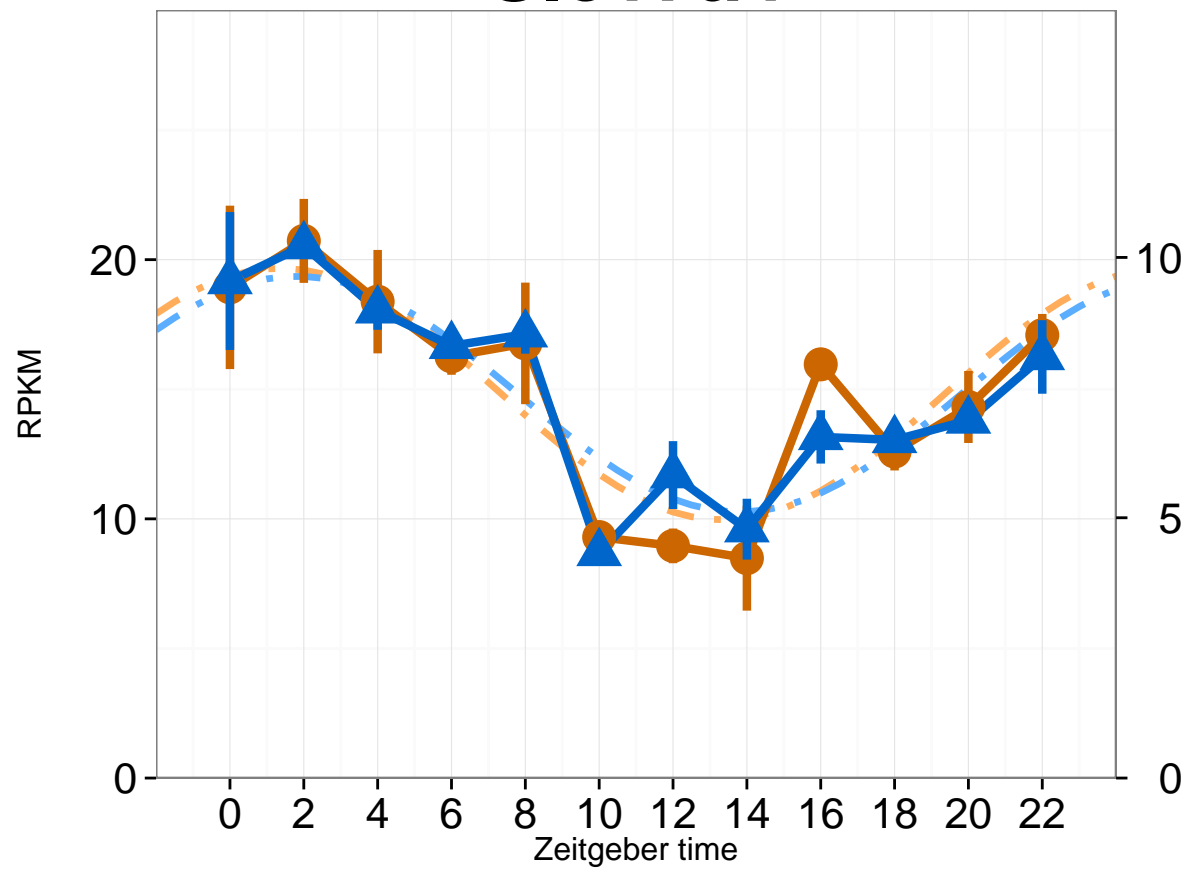

## Slc17a4

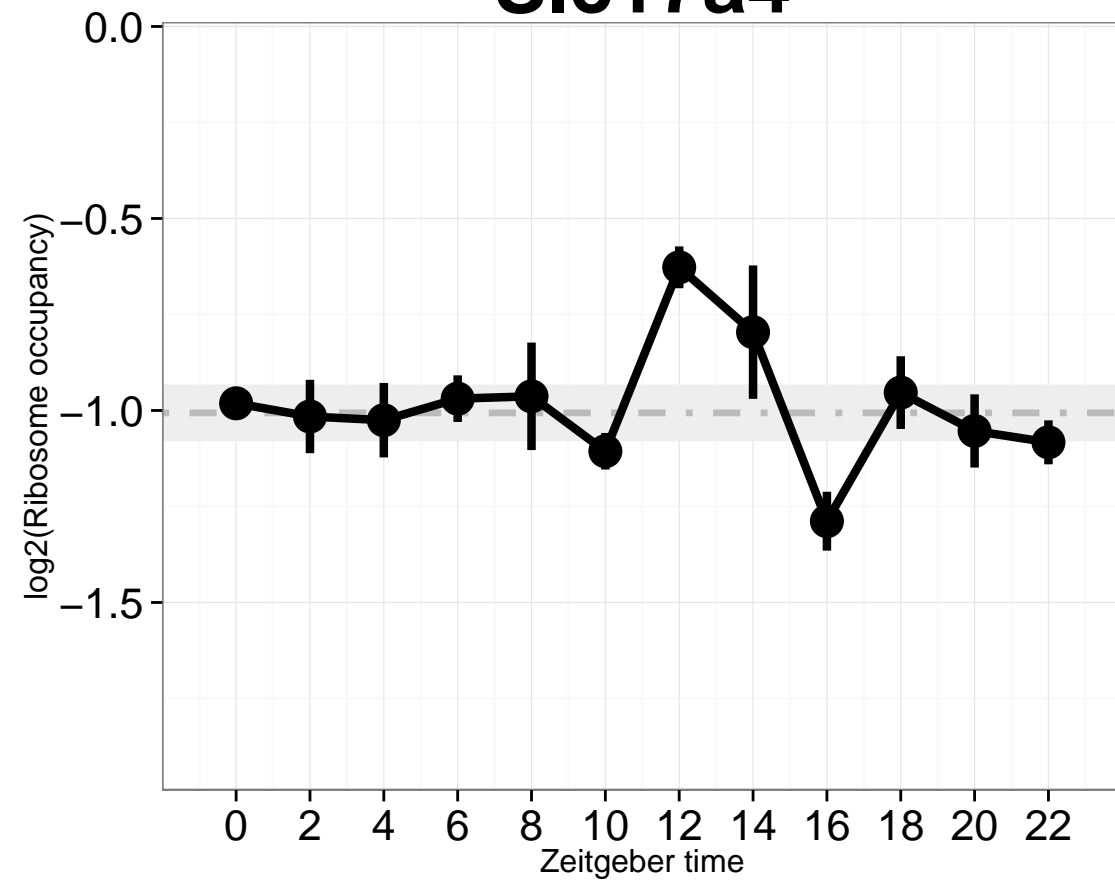

Supplement: Supplementary file 319 [file 1]

# Gfod2

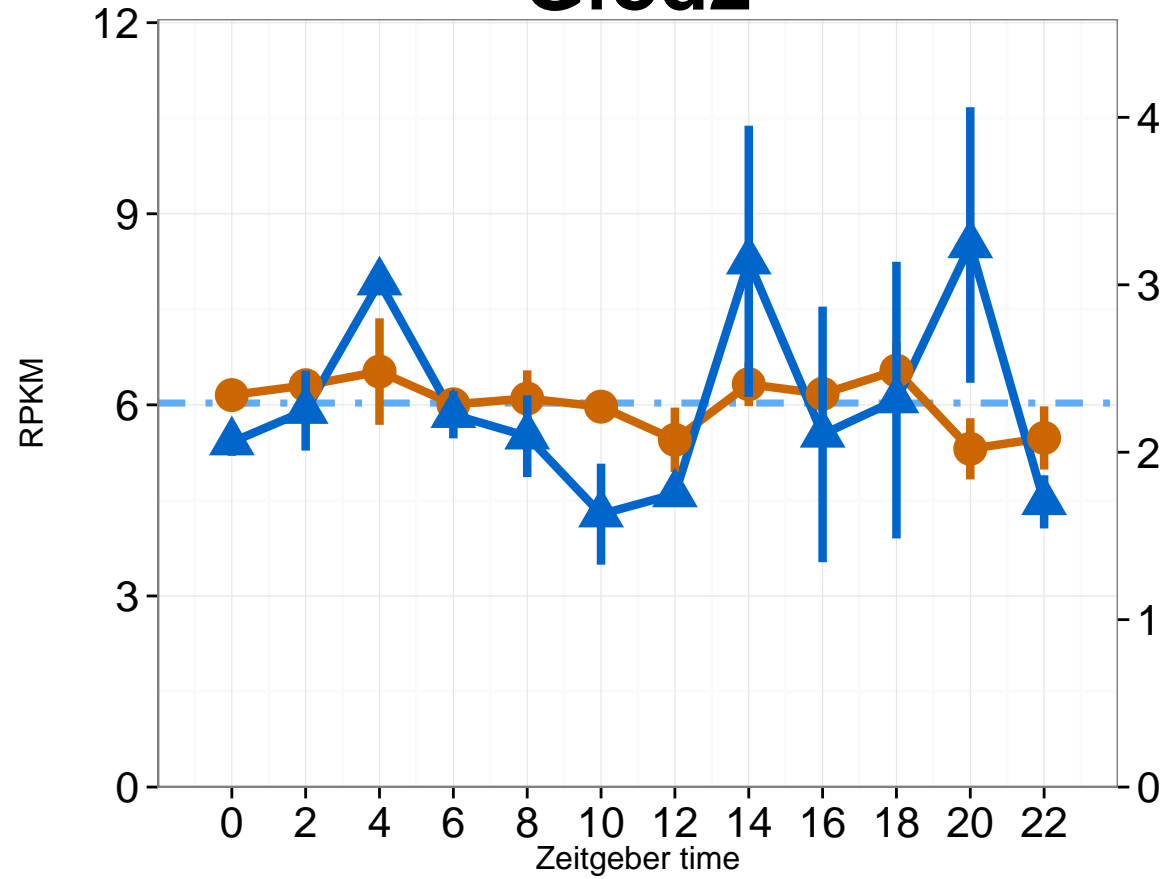

# Gfod2

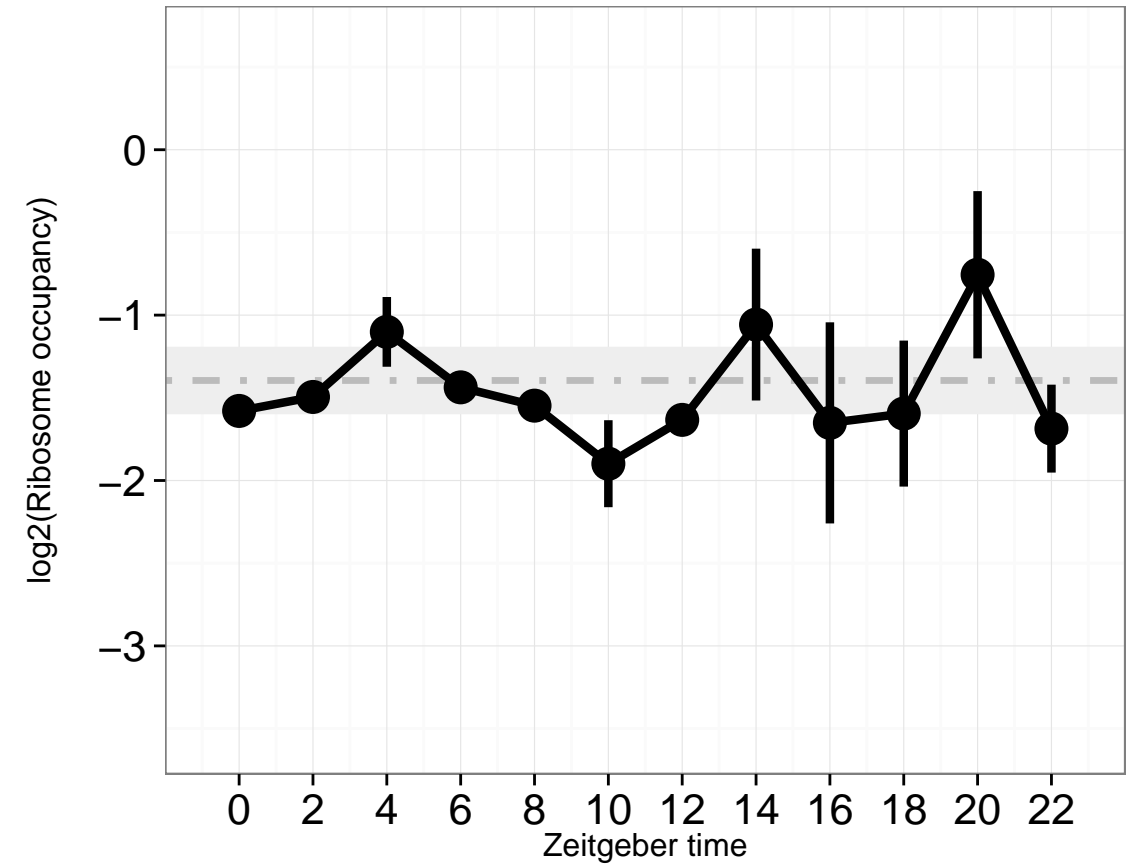

Supplement: Supplementary file 320 [file 1]

## Cdip1

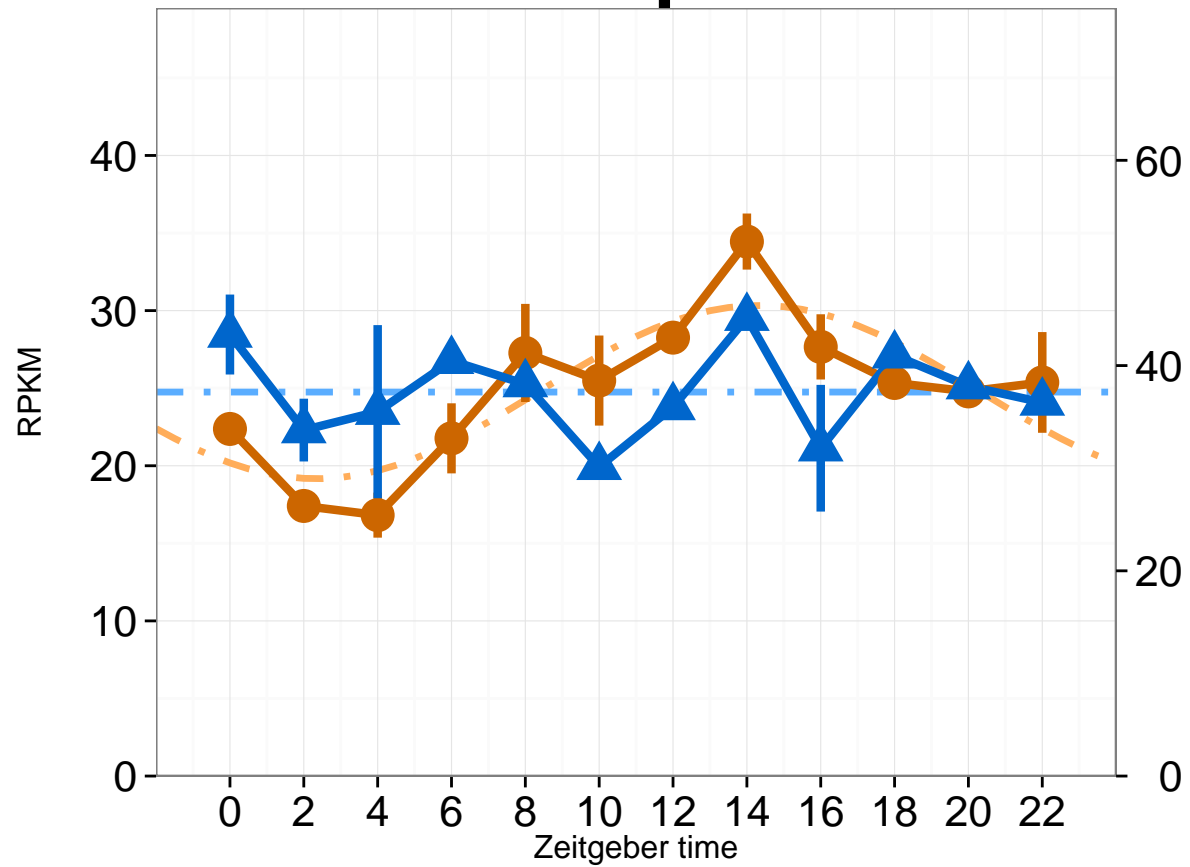

## Cdip1

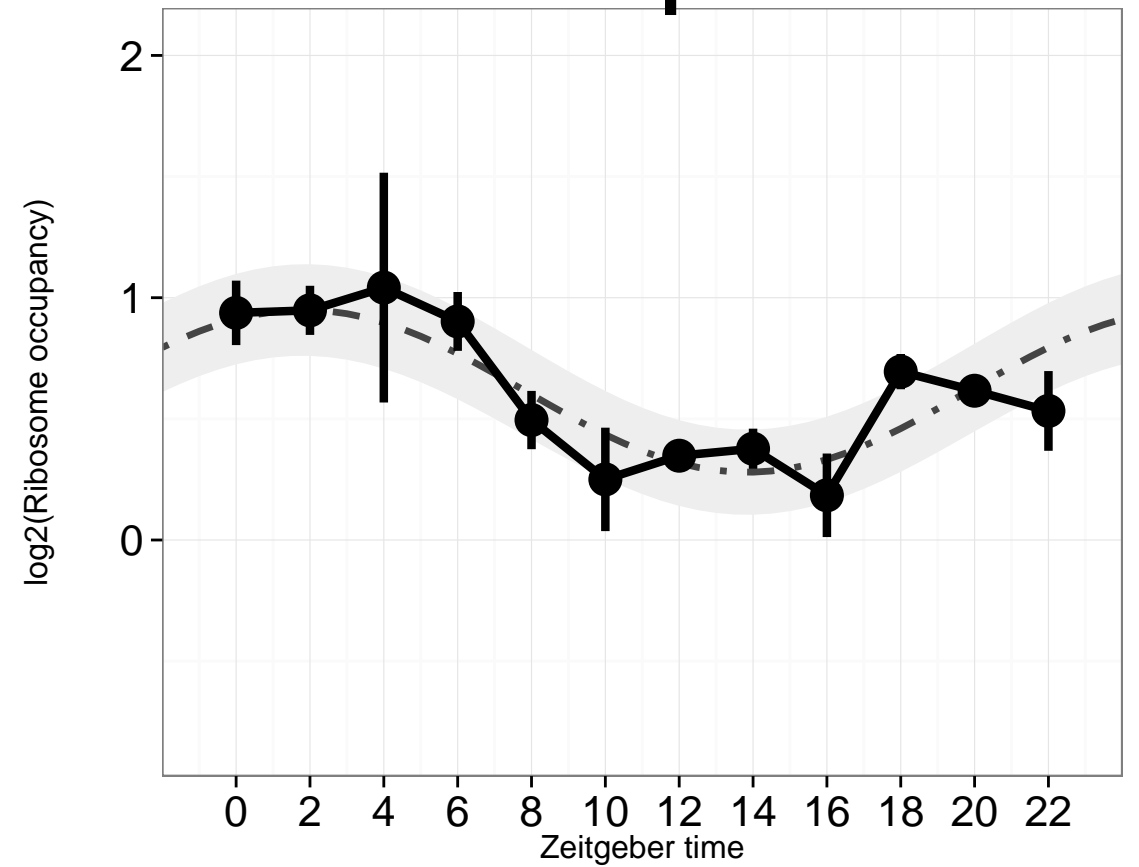

Supplement: Supplementary file 321 [file 1]

# Sh3glb1

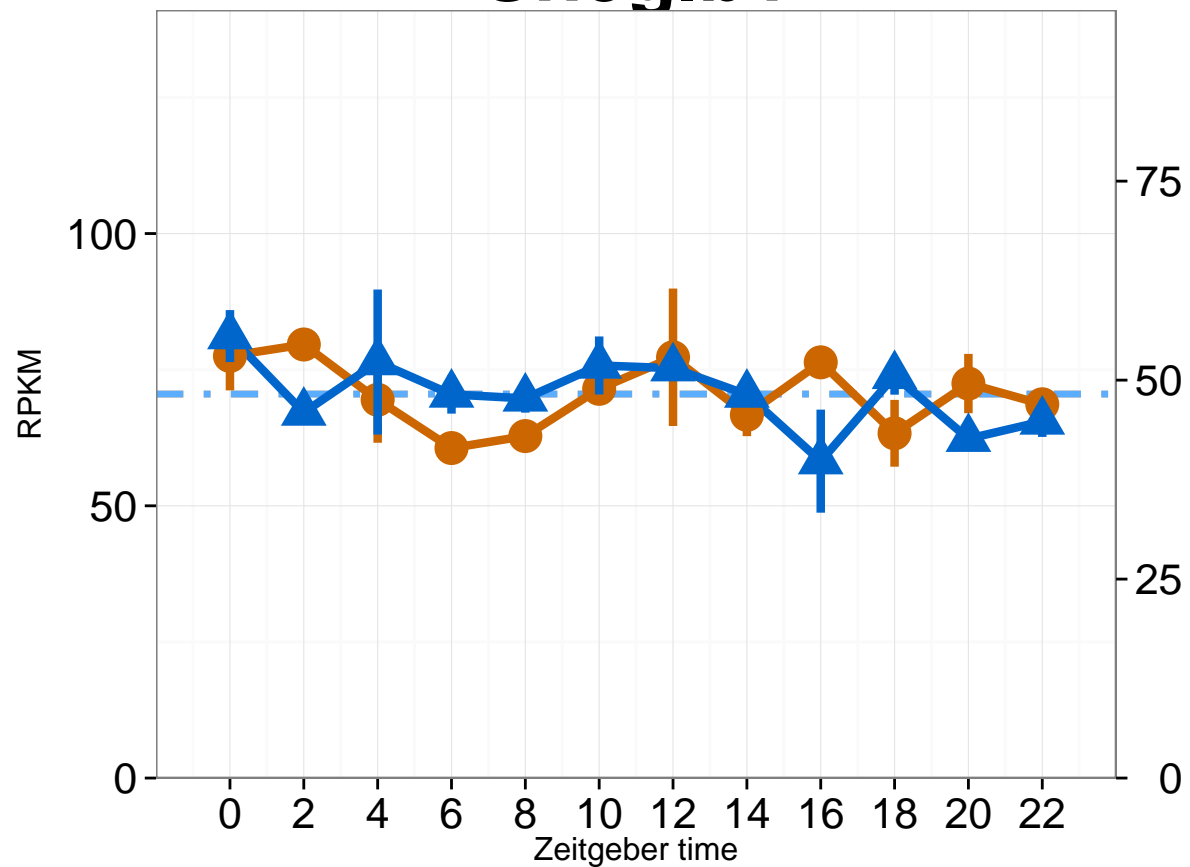

# Sh3glb1

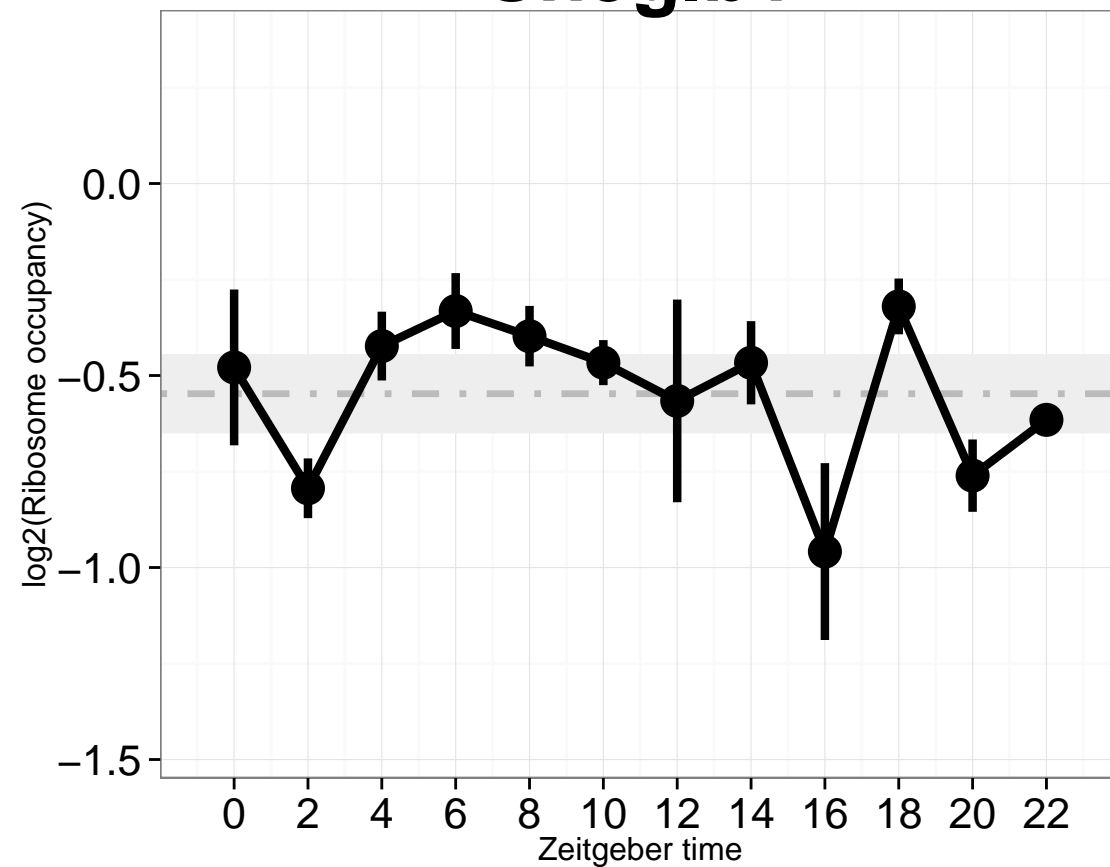

Supplement: Supplementary file 322 [file 1]

## Adamts9

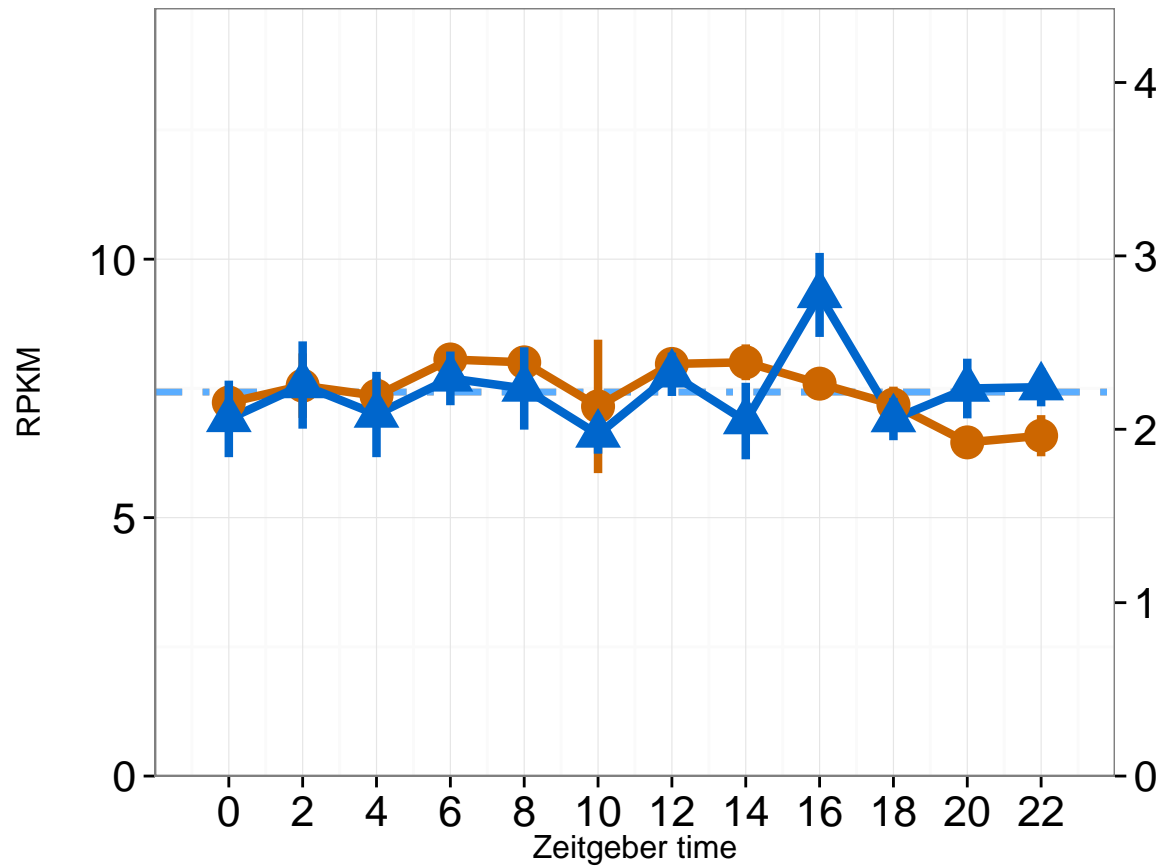

## Adamts9

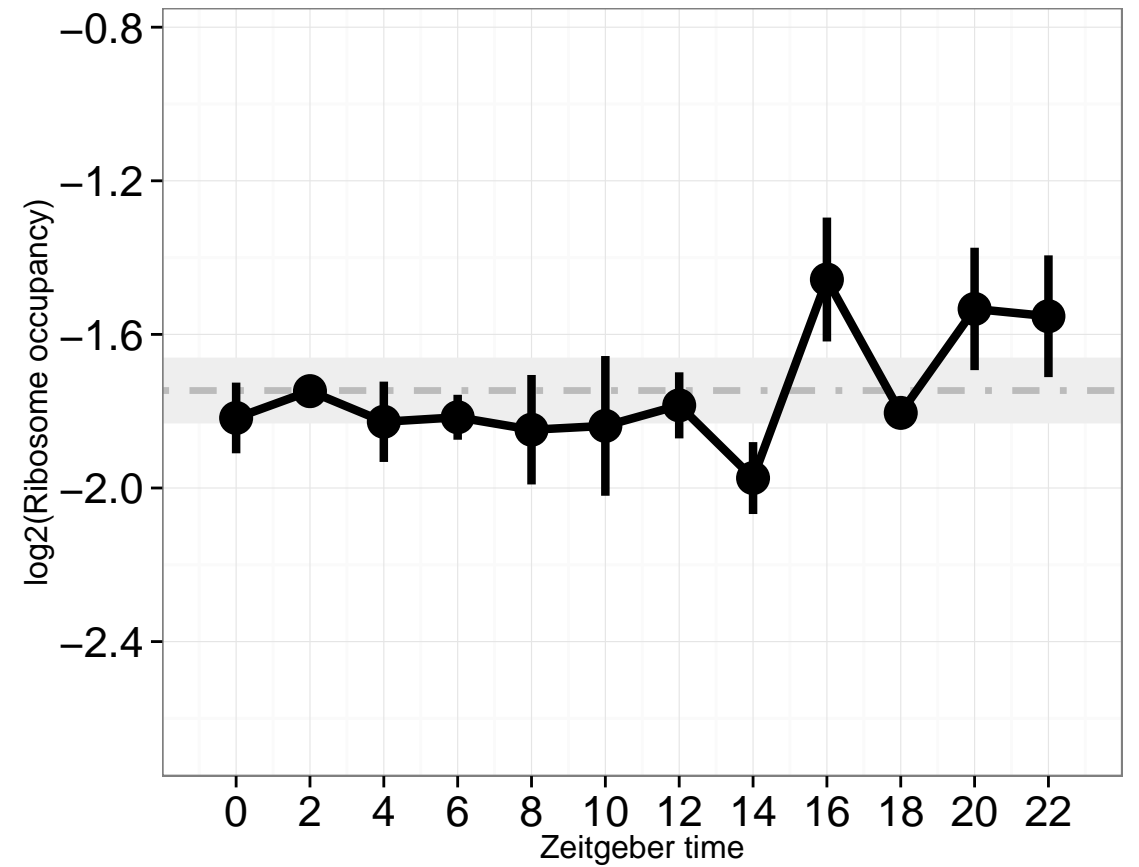

Supplement: Supplementary file 323 [file 1]

# Xpnpep2

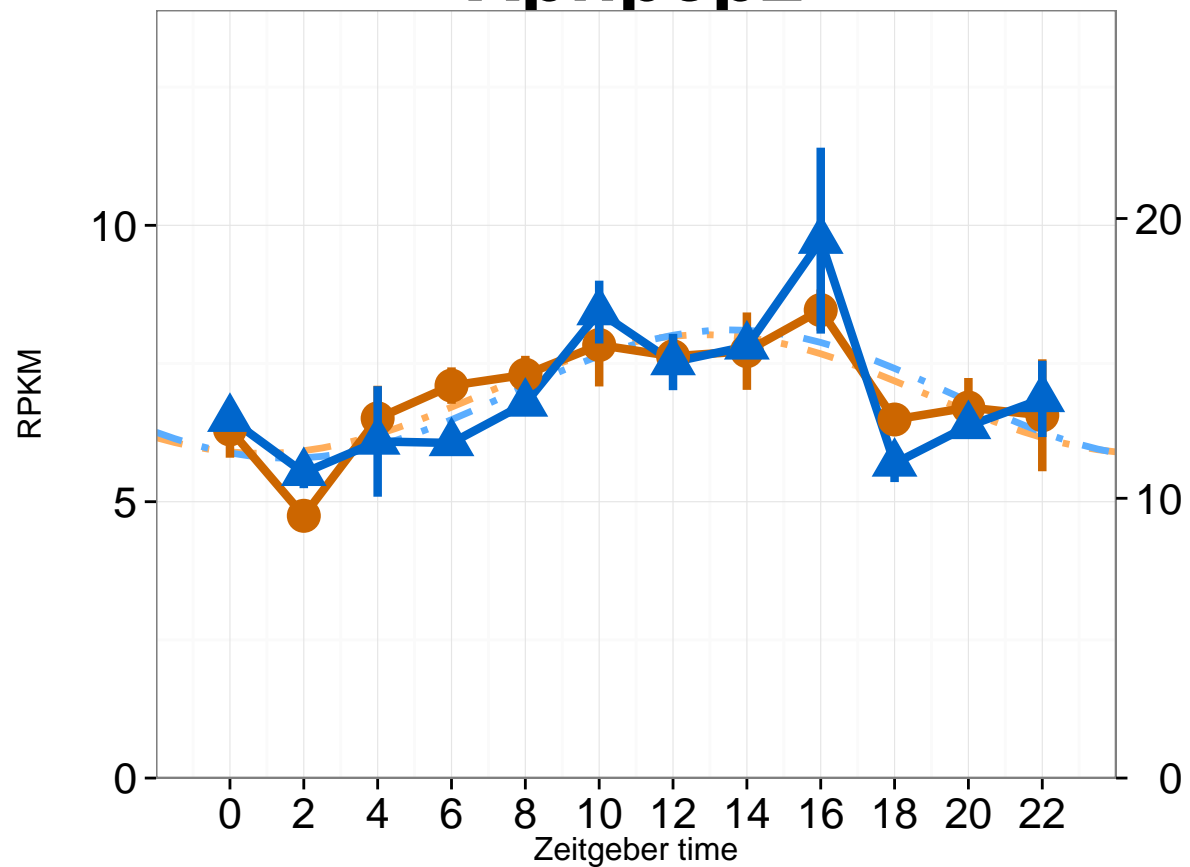

# Xpnpep2

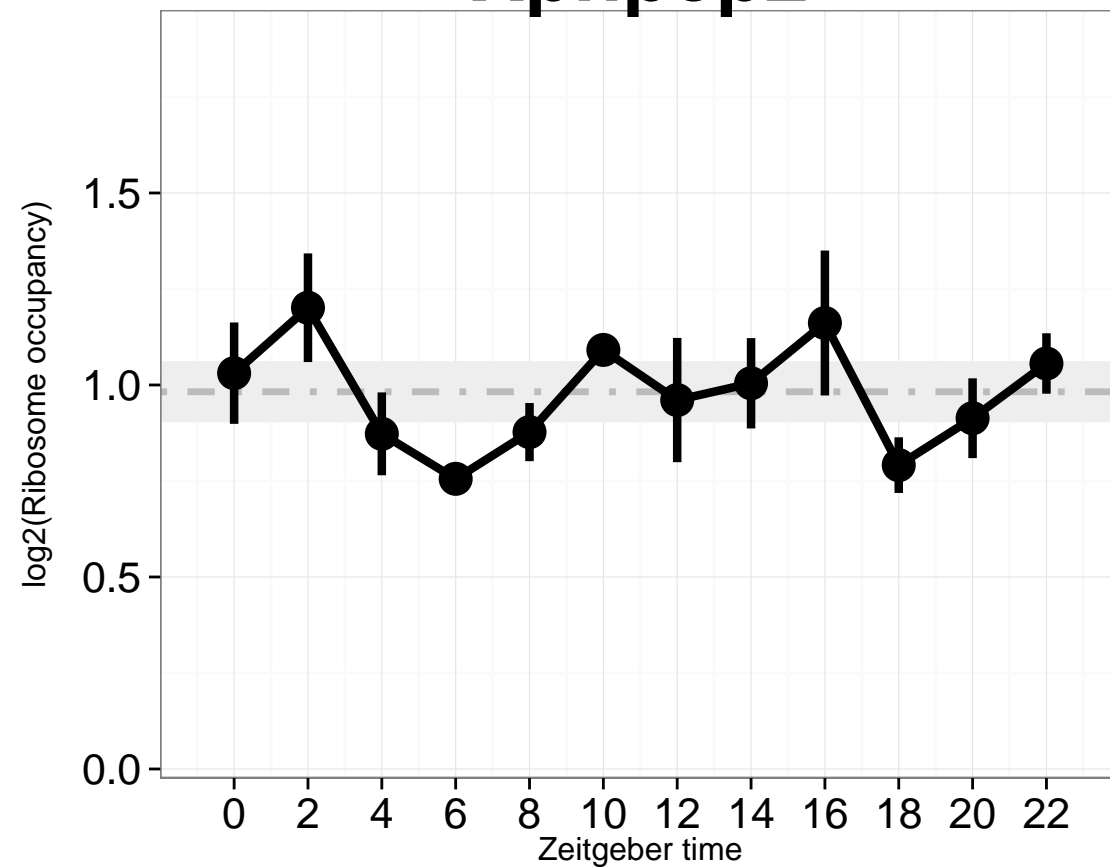

Supplement: Supplementary file 324 [file 1]

# Zfp622

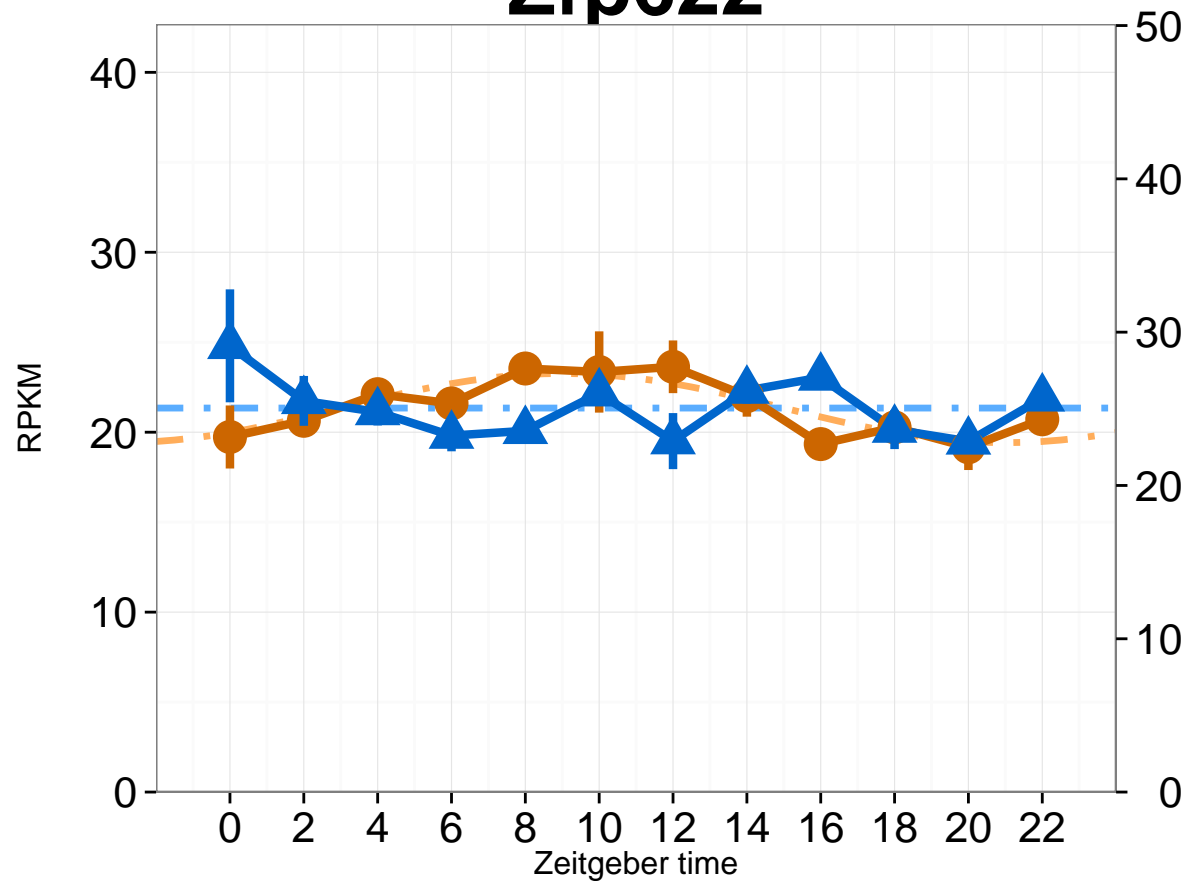

# Zfp622

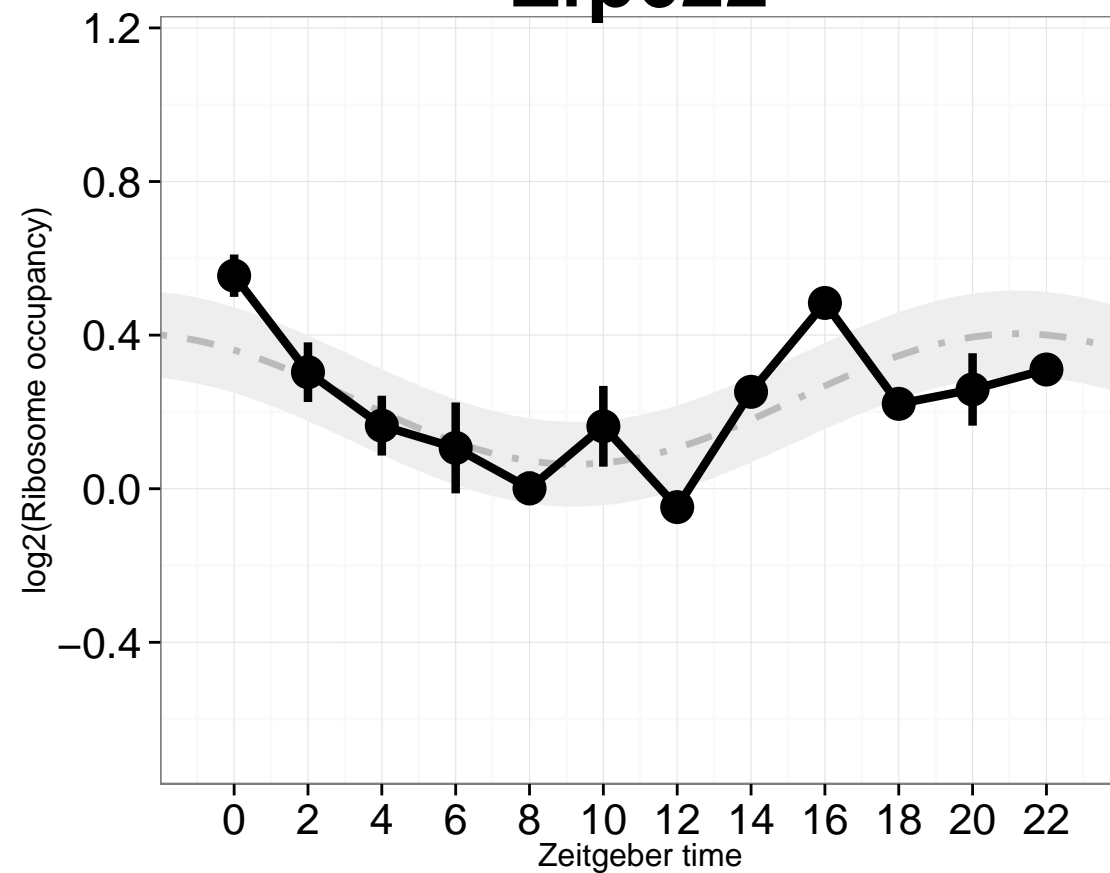

Supplement: Supplementary file 325 [file 1]

# Fam126b

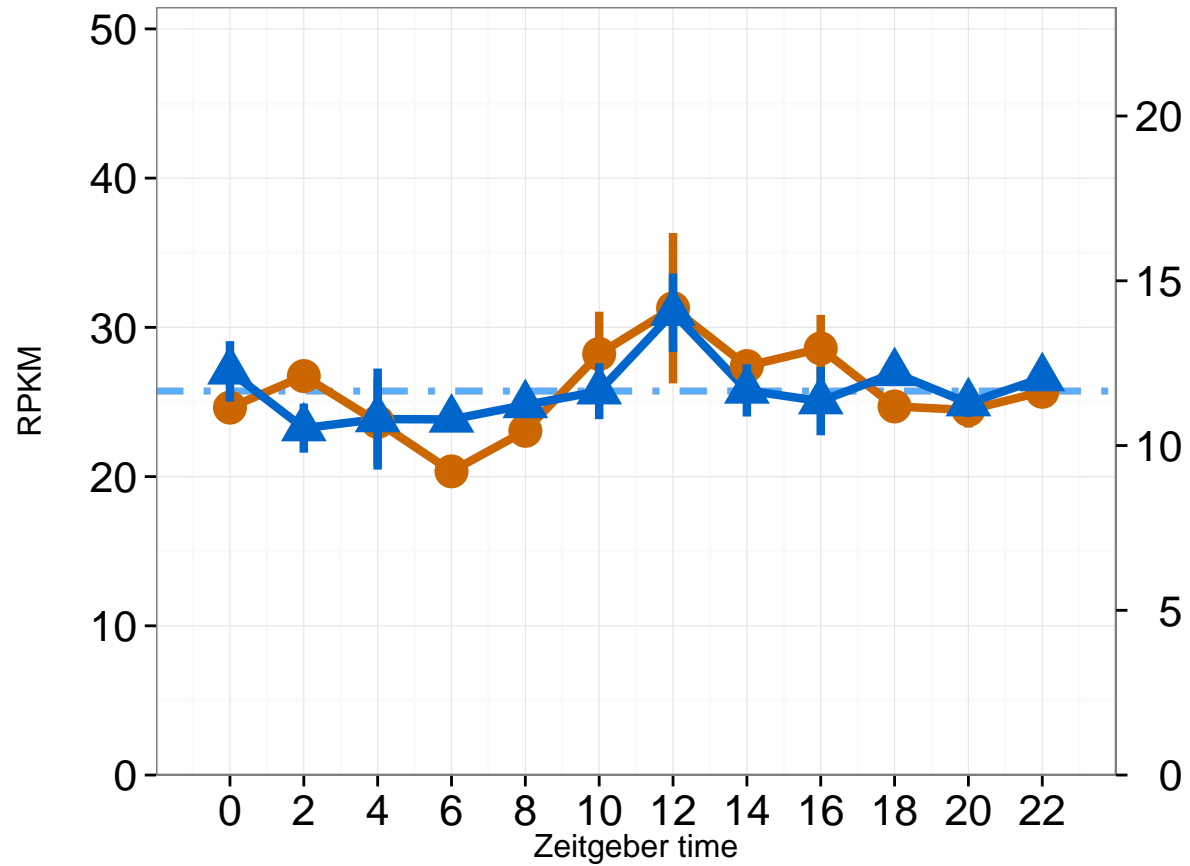

# Fam126b

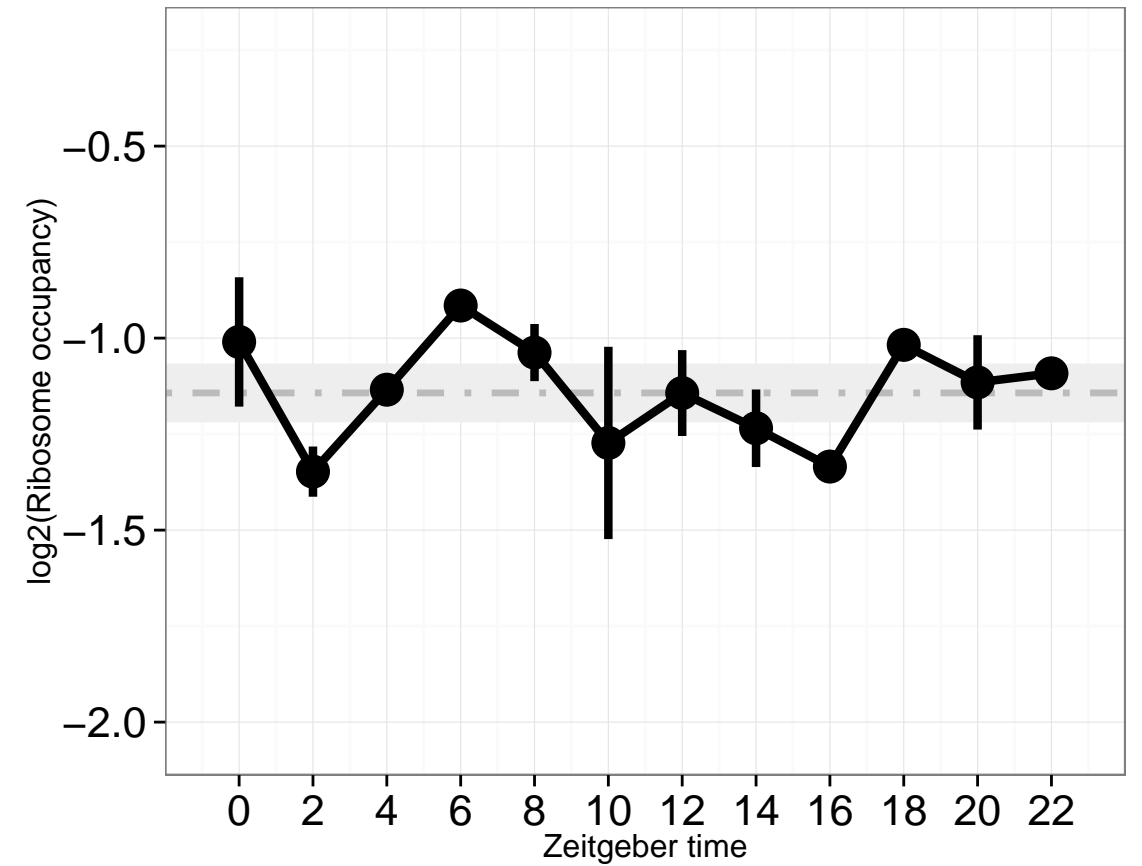

Supplement: Supplementary file 326 [file 1]

# Tmcc1

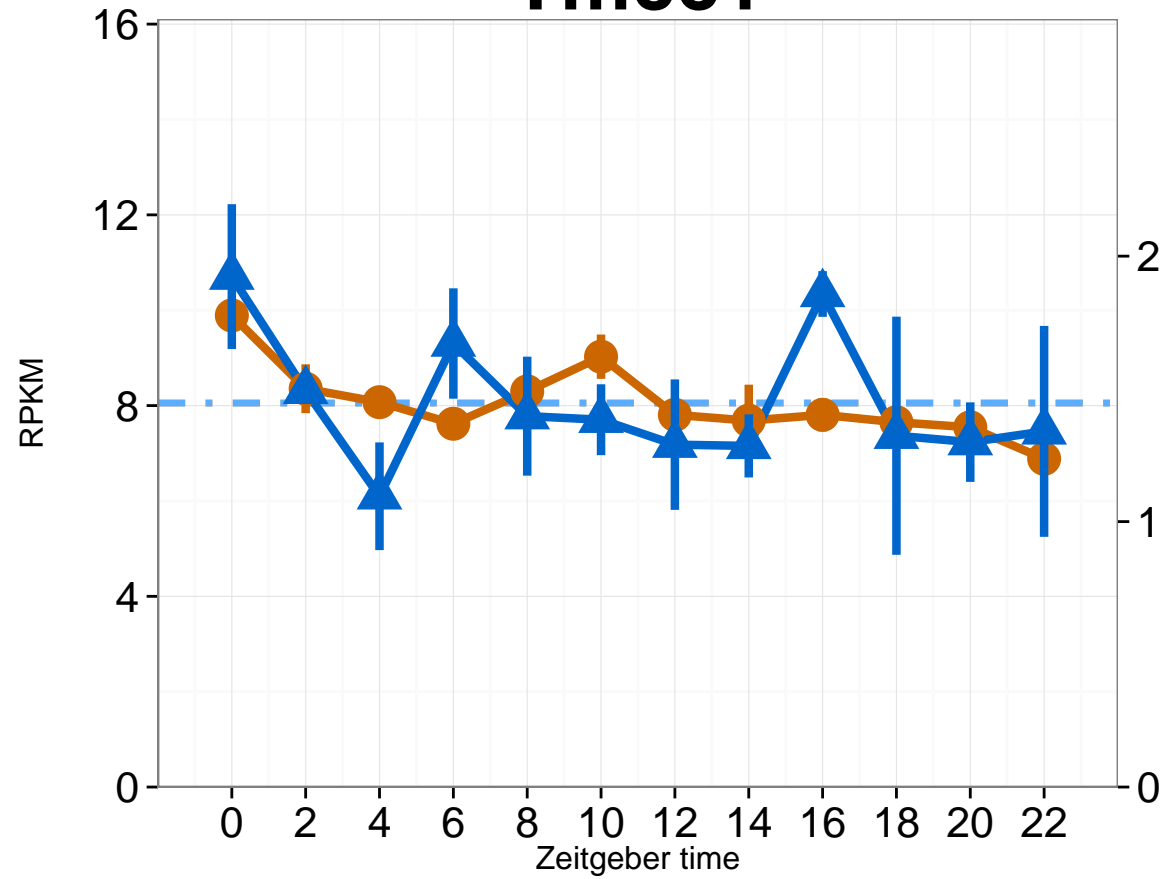

# Tmcc1

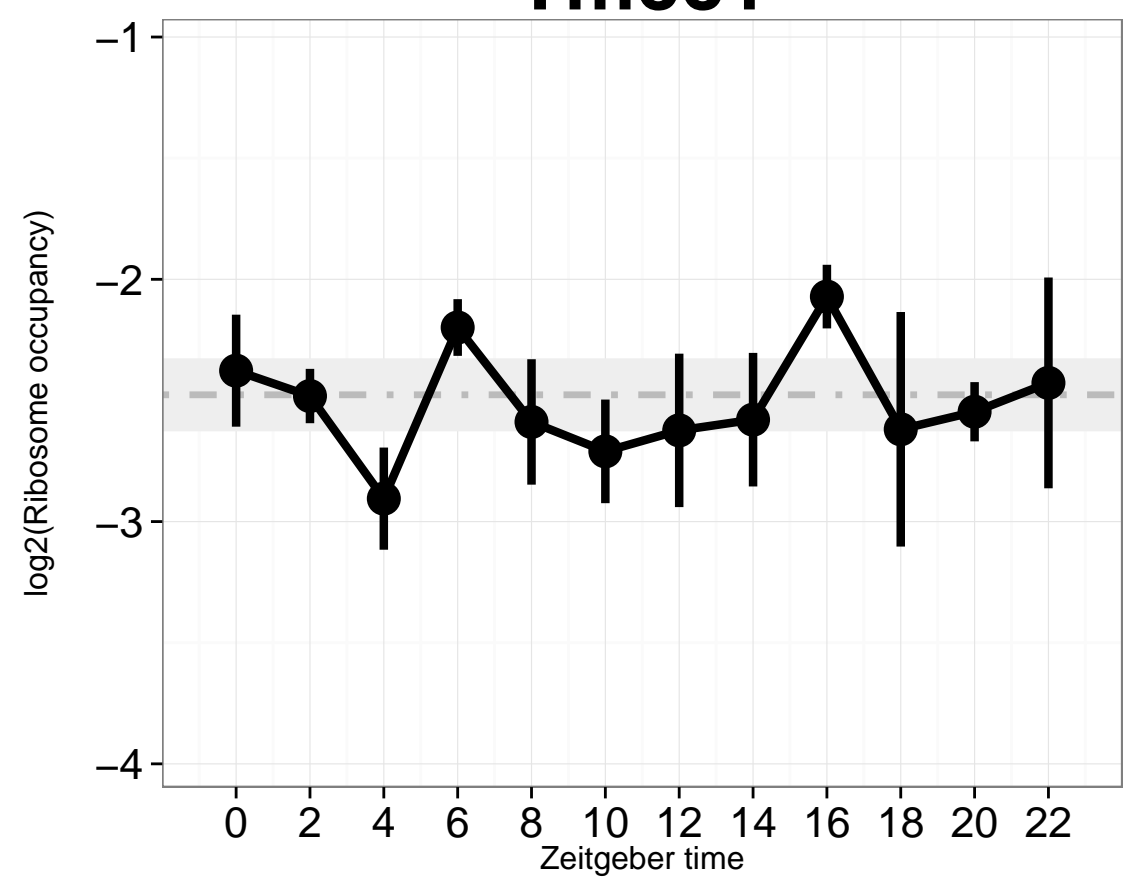

Supplement: Supplementary file 327 [file 1]

## Mmp13

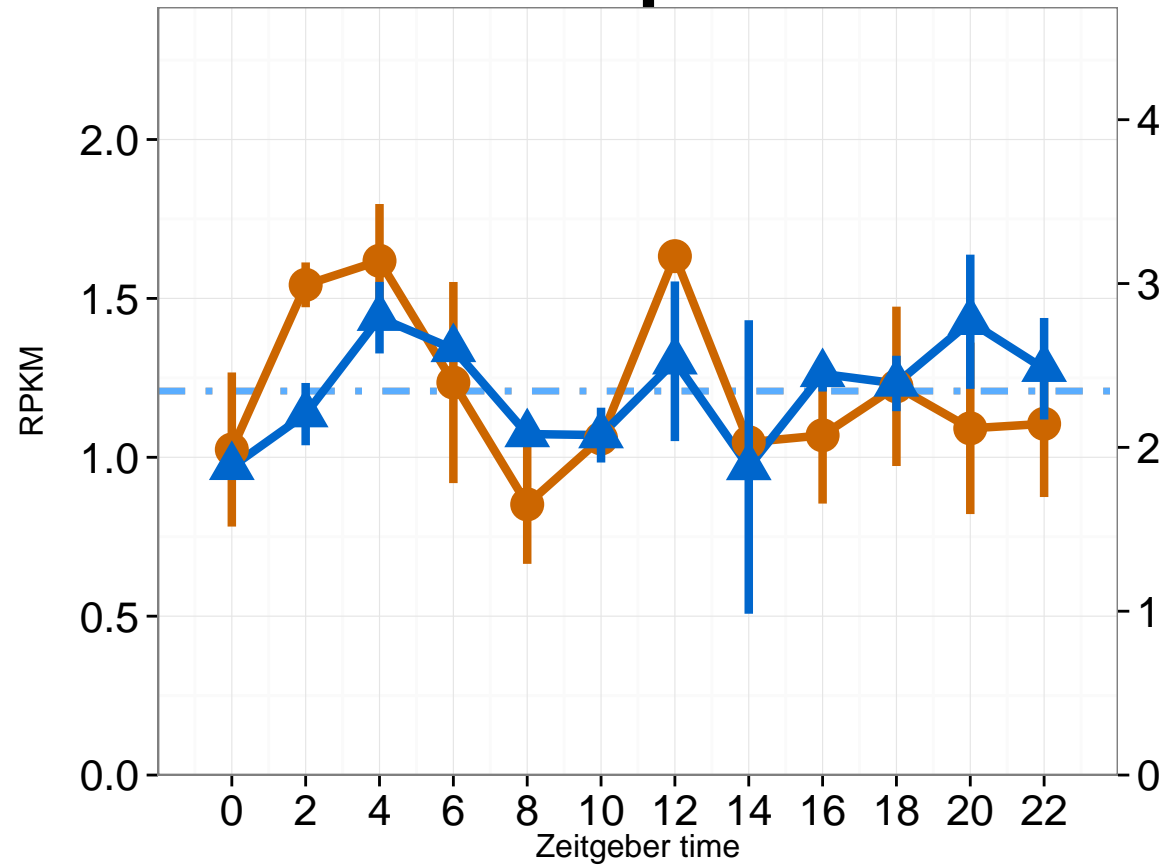

## Mmp13

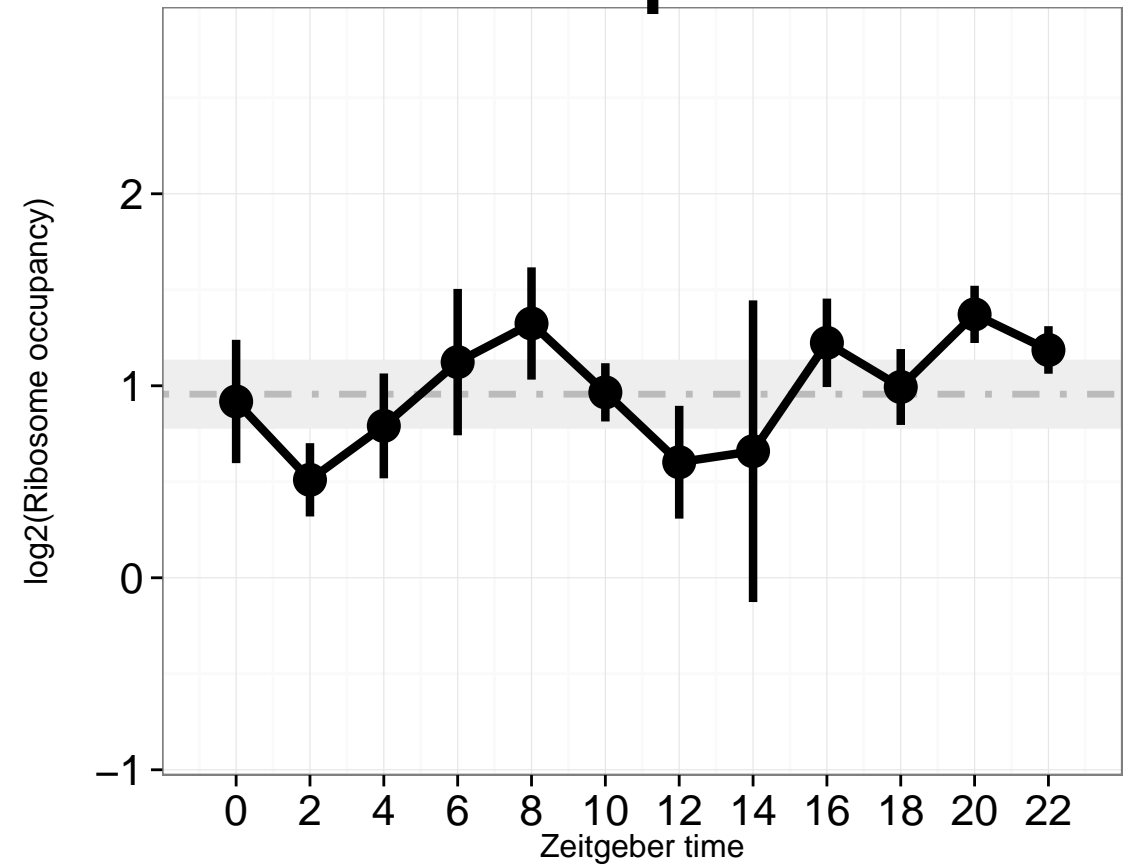

Supplement: Supplementary file 328 [file 1]

# Fut11

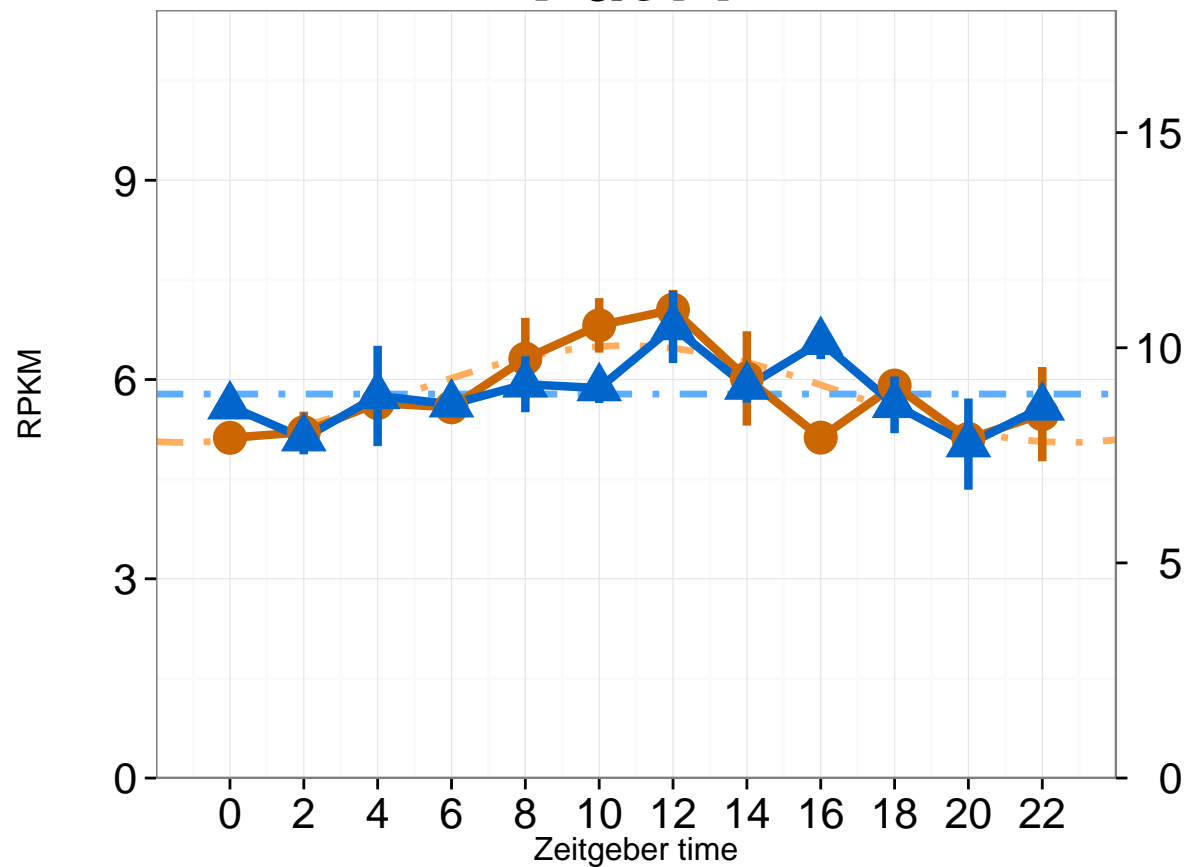

# Fut11

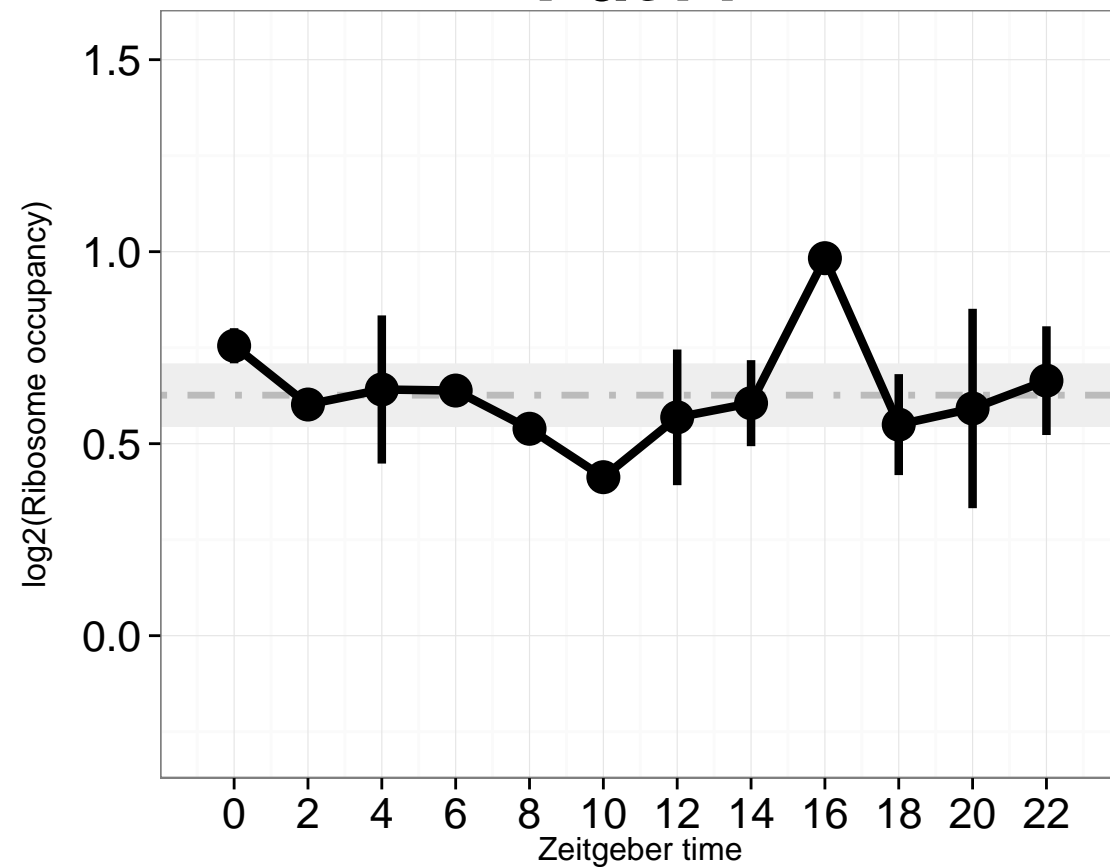

Supplement: Supplementary file 329 [file 1]

# Timm10

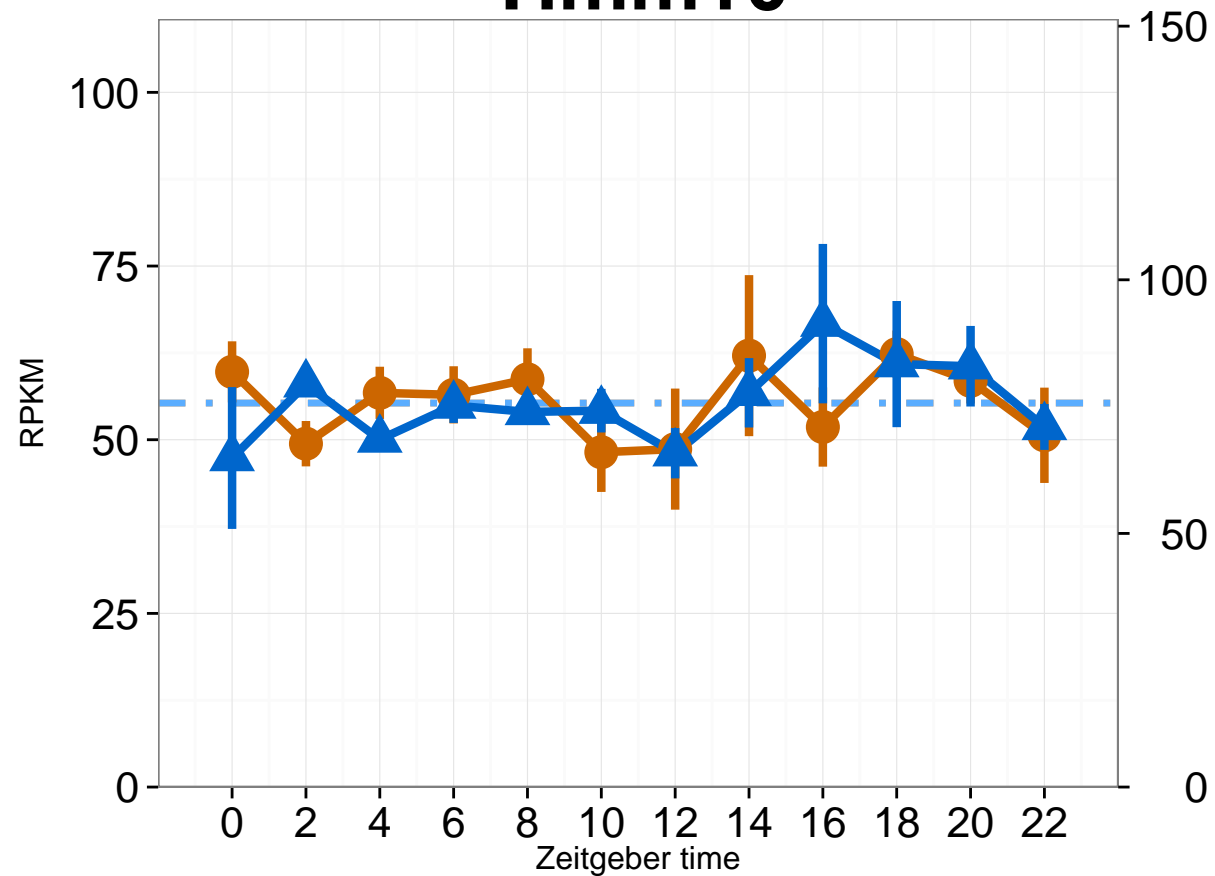

# Timm10

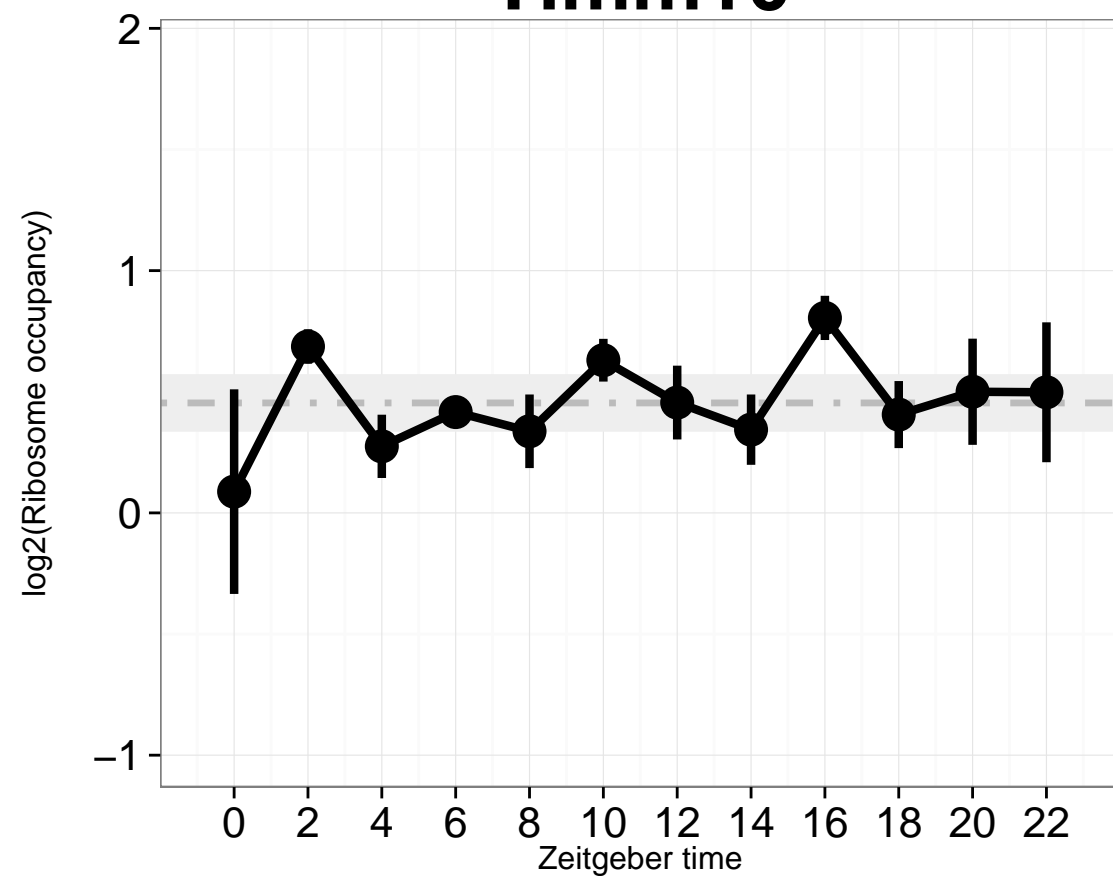

Supplement: Supplementary file 330 [file 1]

# Eif1ax

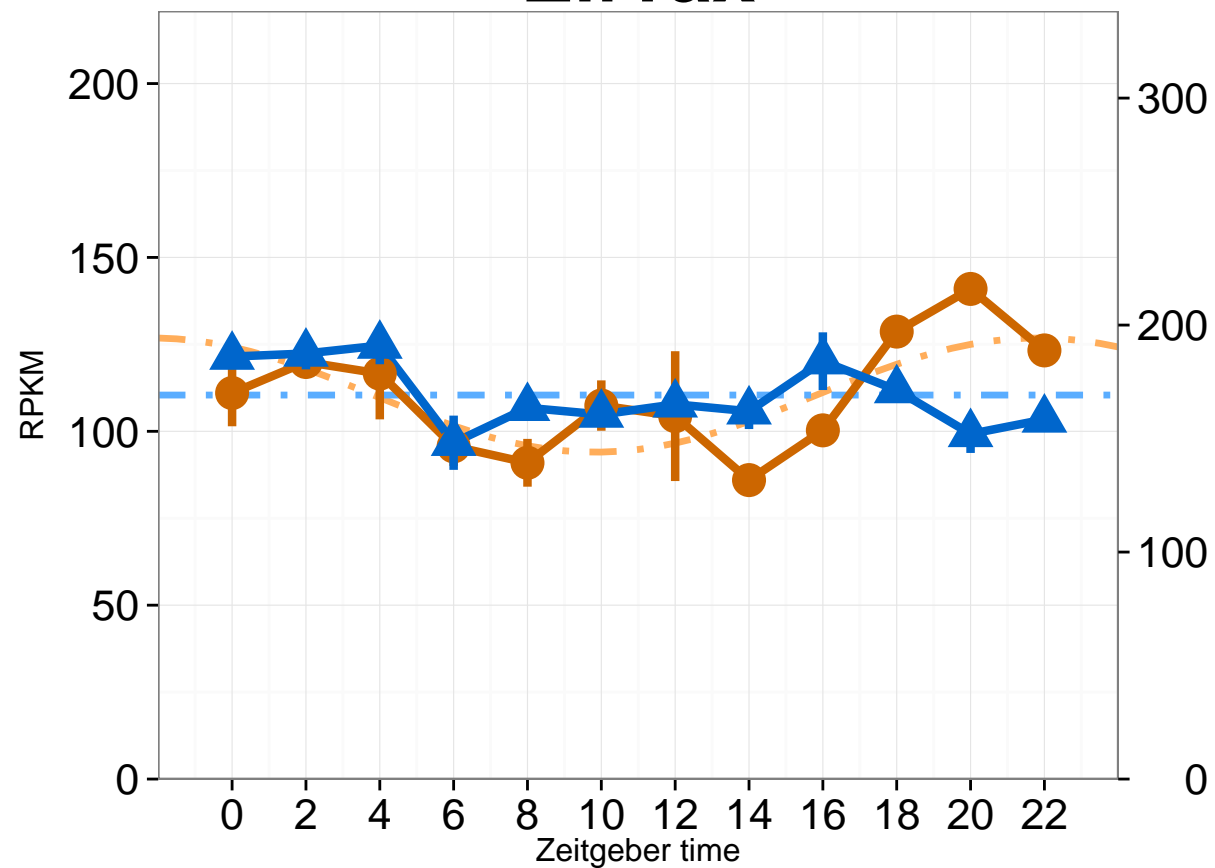

# Eif1ax

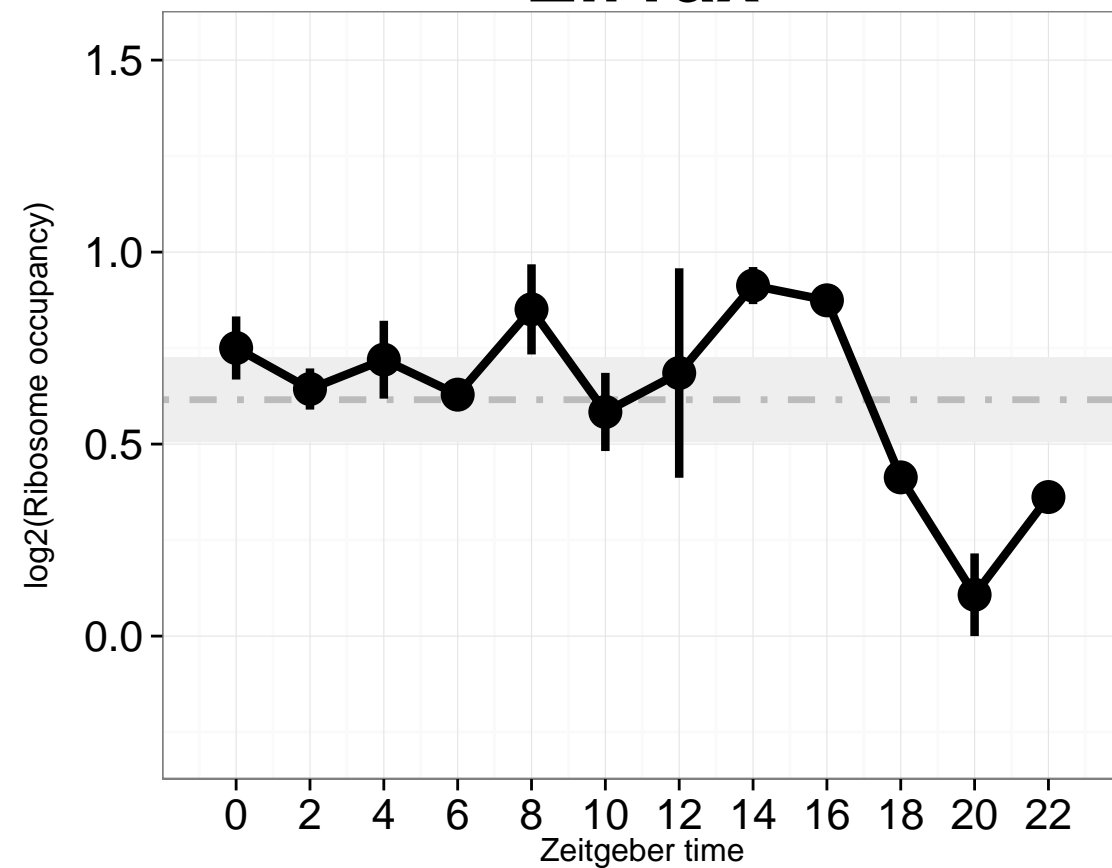

Supplement: Supplementary file 331 [file 1]

# Mmrn1

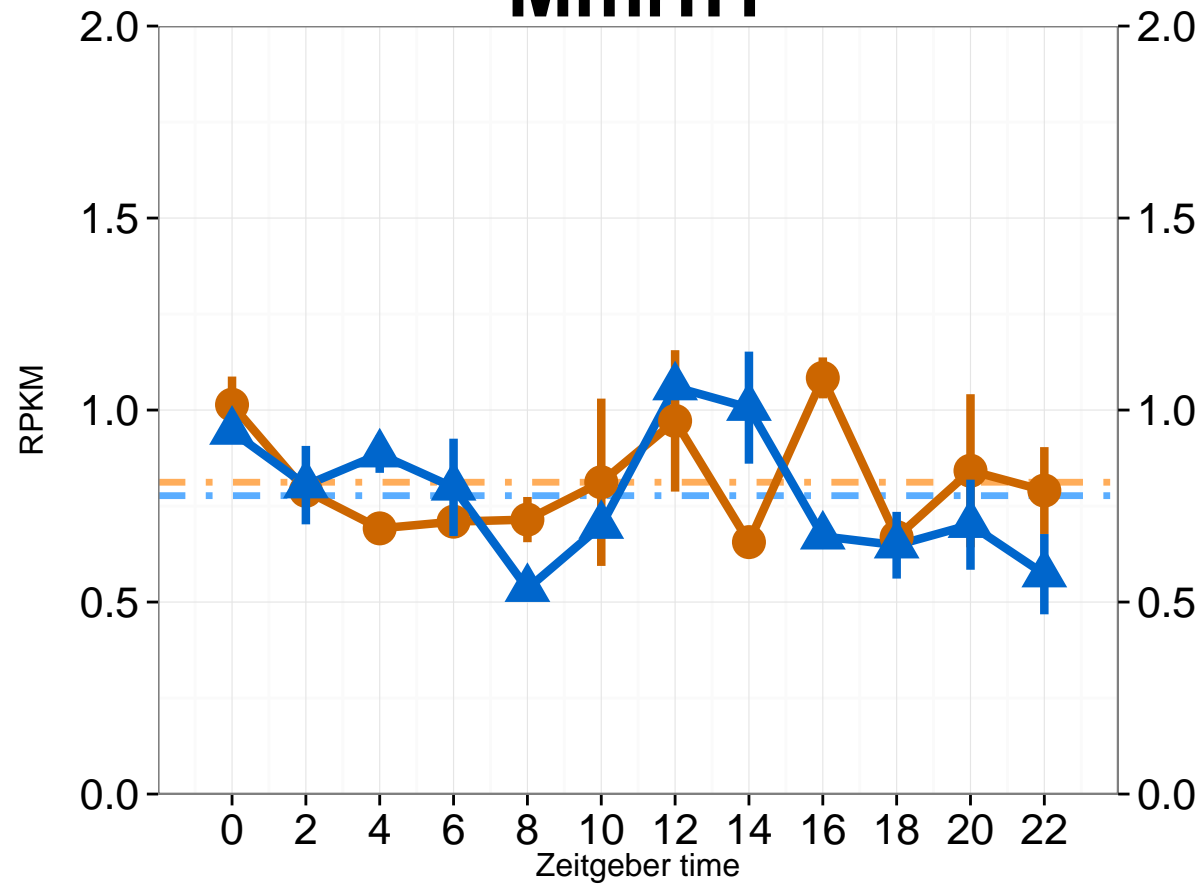

# Mmrn1

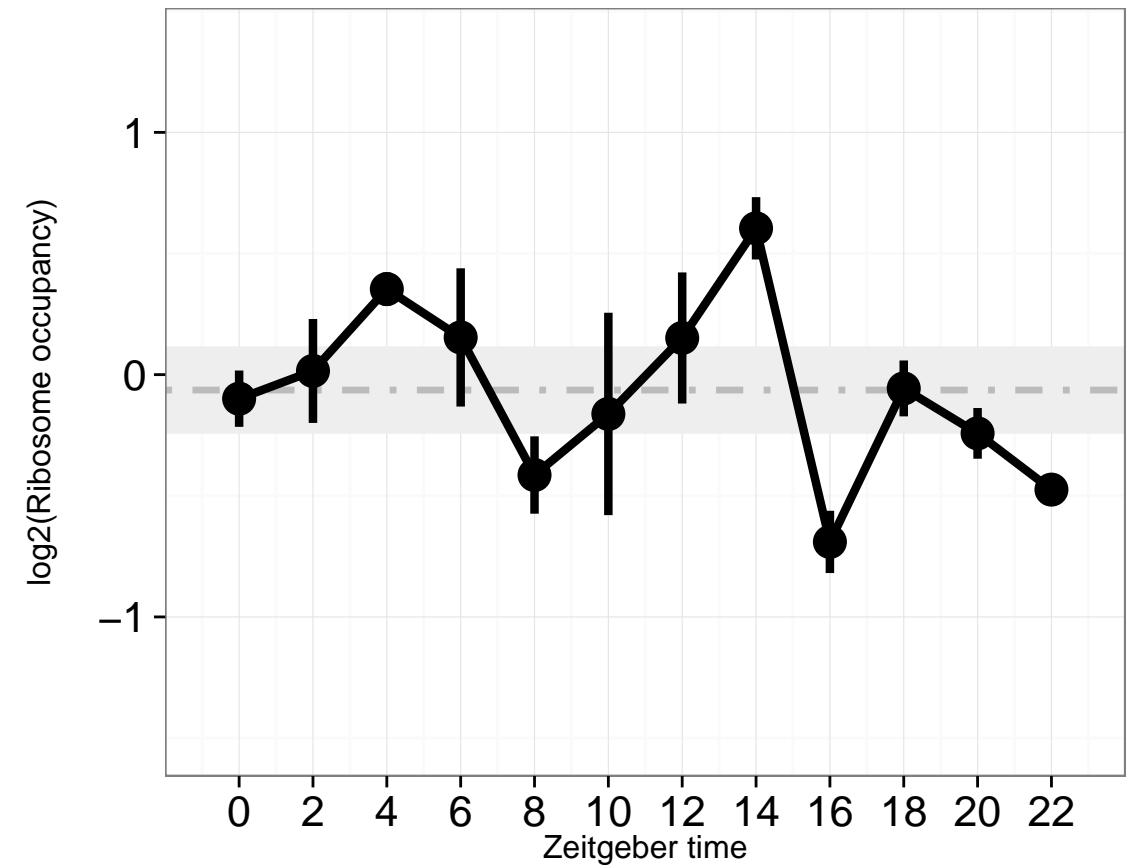

Supplement: Supplementary file 332 [file 1]

## Pafah1b2

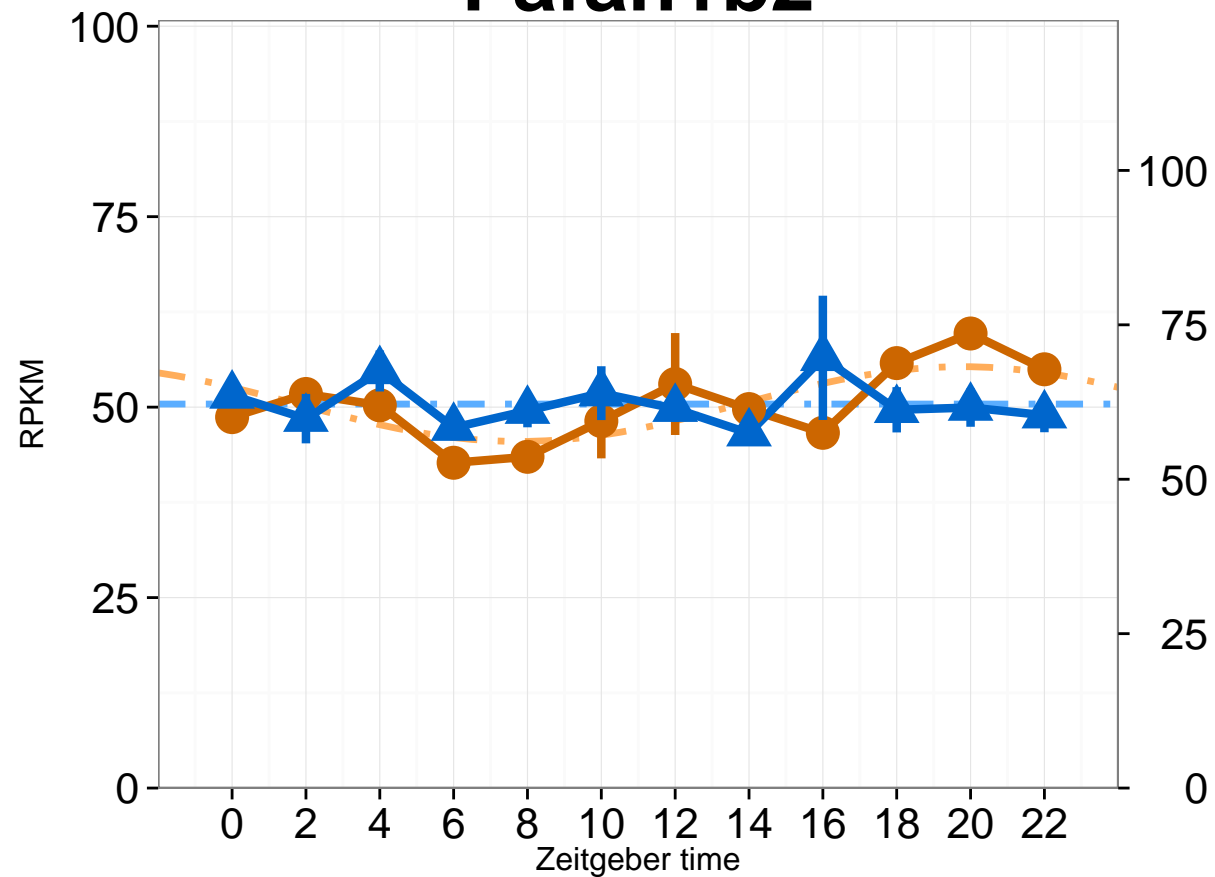

## Pafah1b2

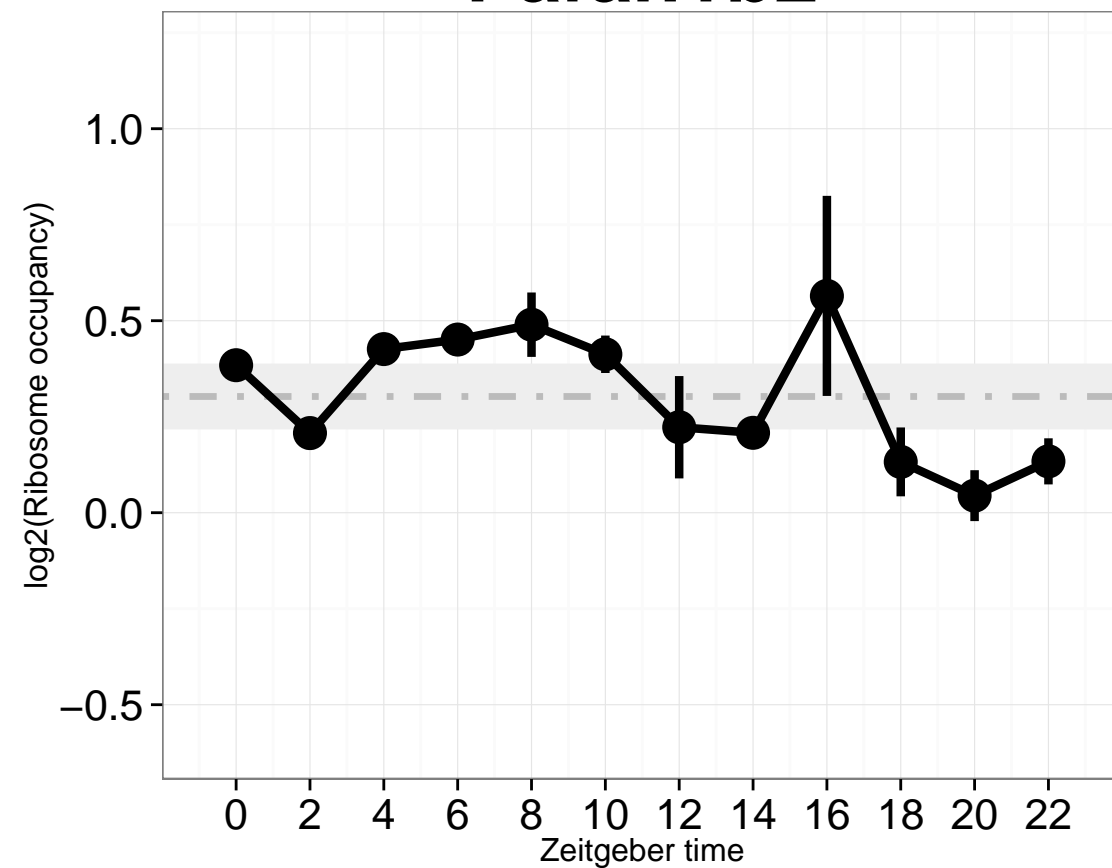

Supplement: Supplementary file 333 [file 1]

## Sulf1

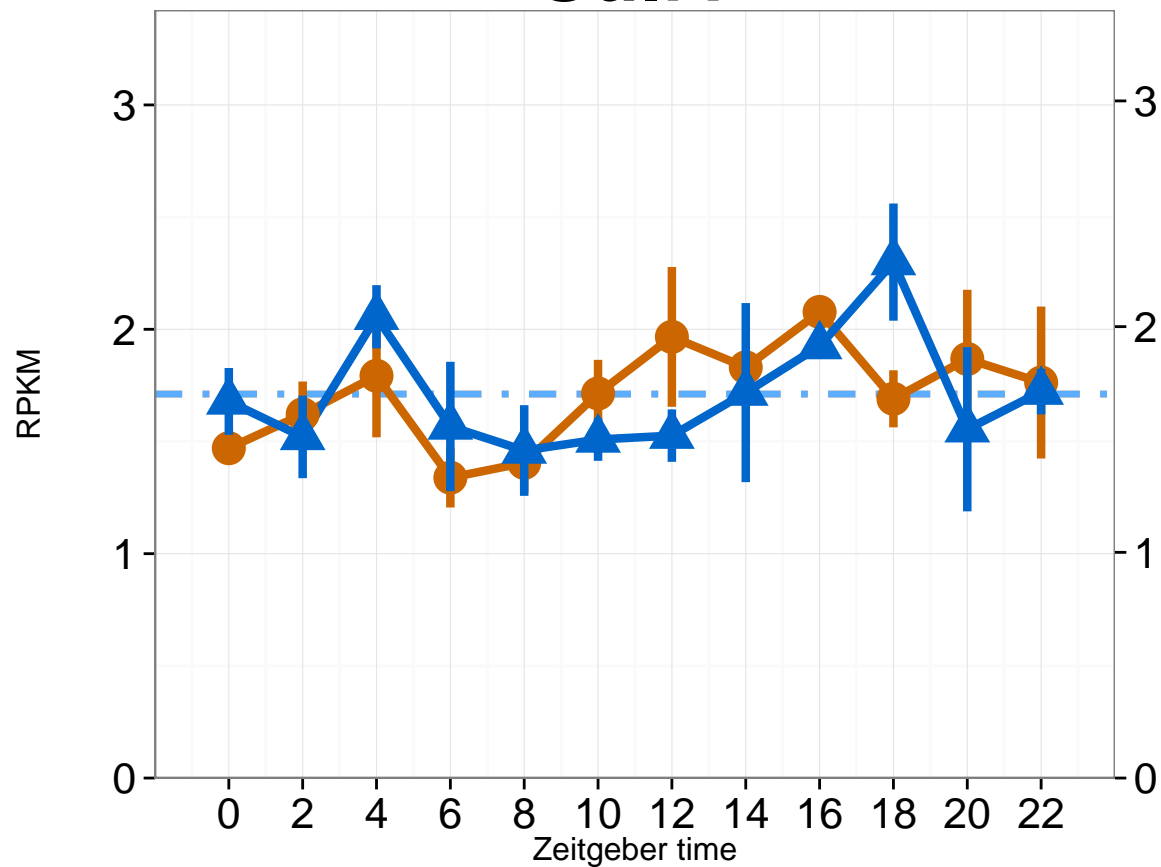

## Sulf1

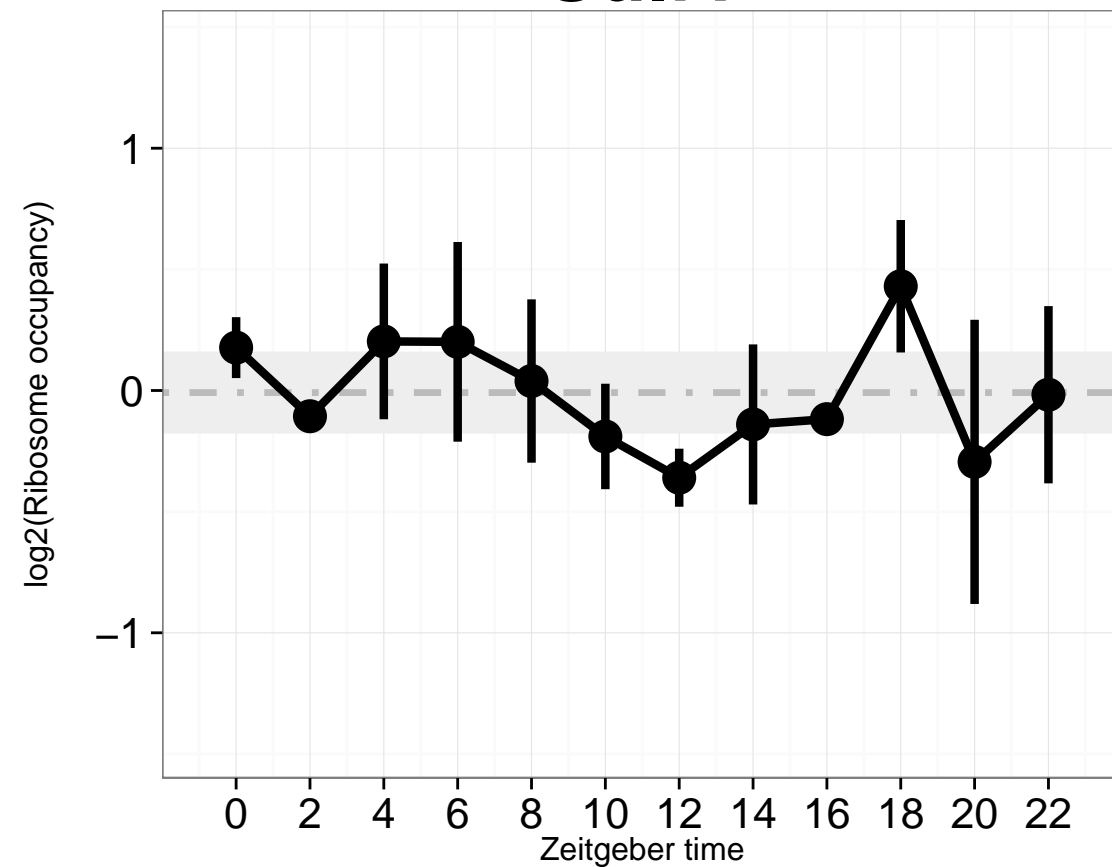

Supplement: Supplementary file 334 [file 1]

# Cnn2

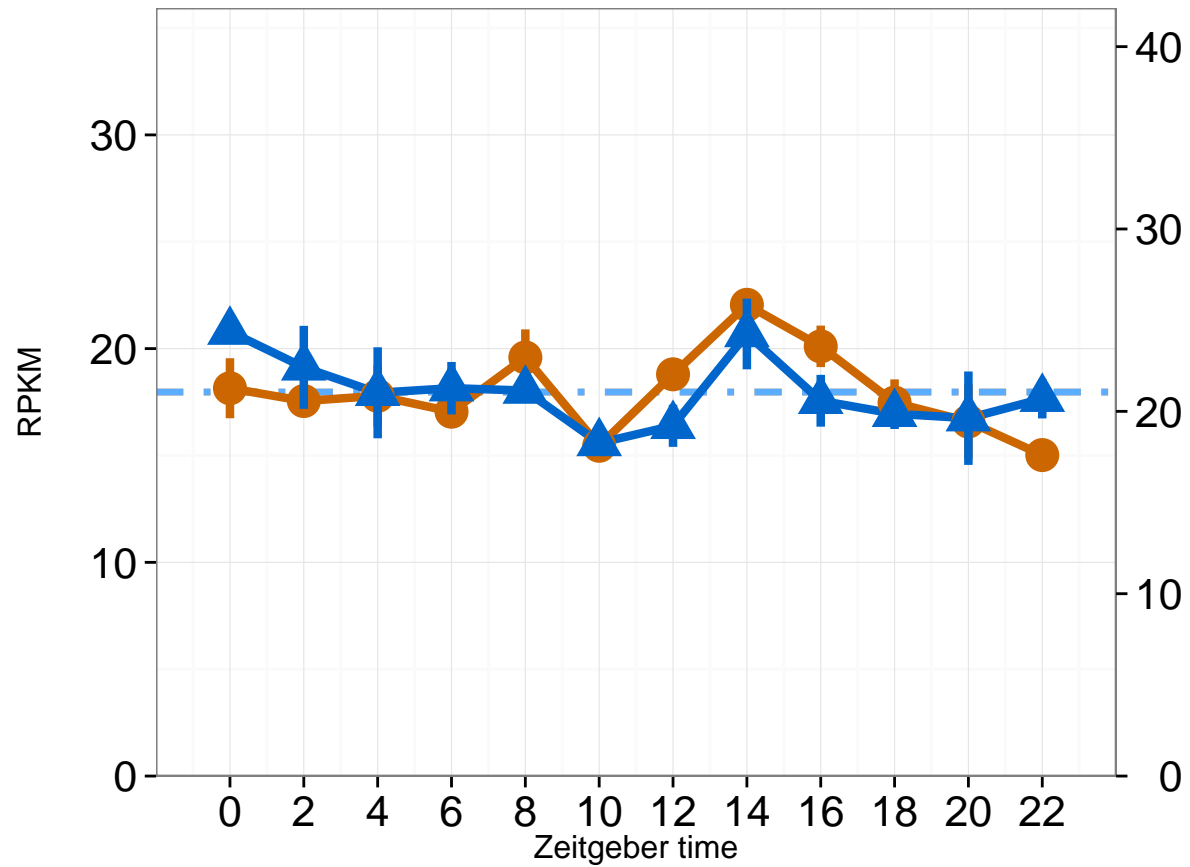

# Cnn2

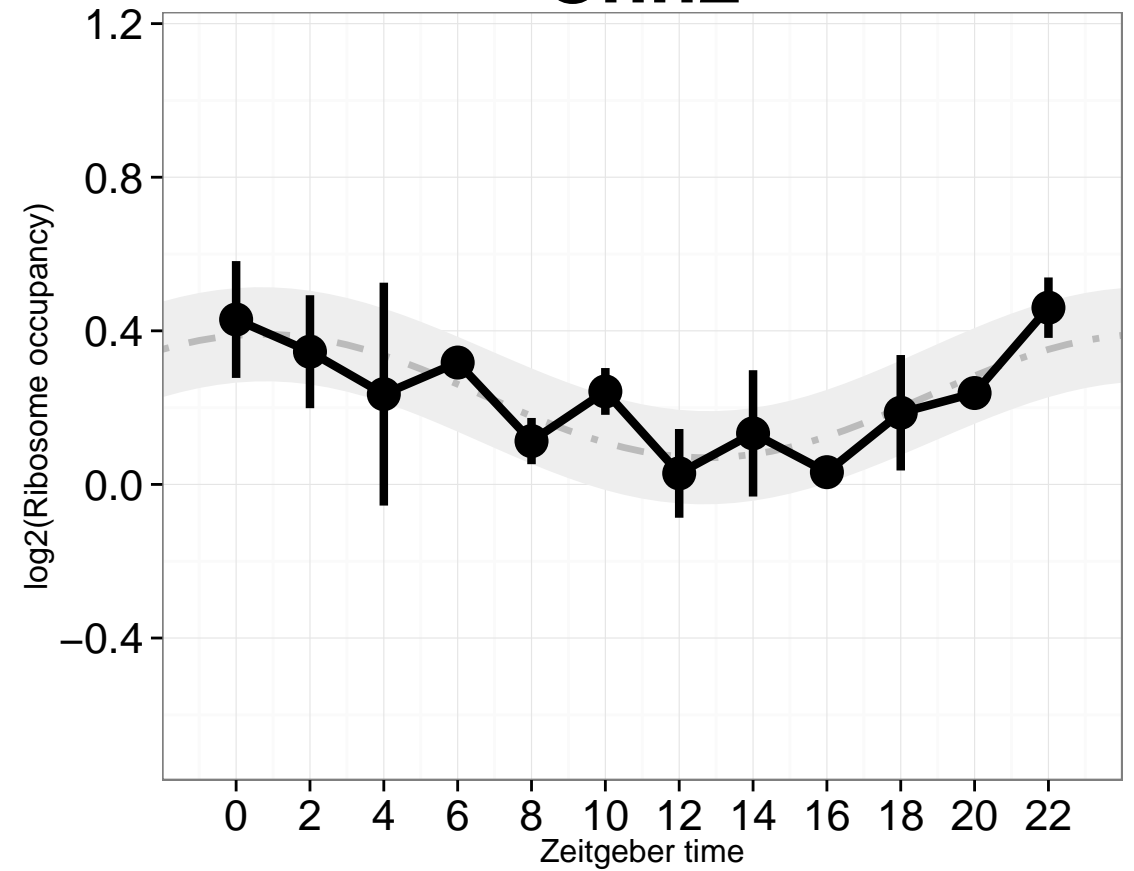

Supplement: Supplementary file 335 [file 1]

## Arl16

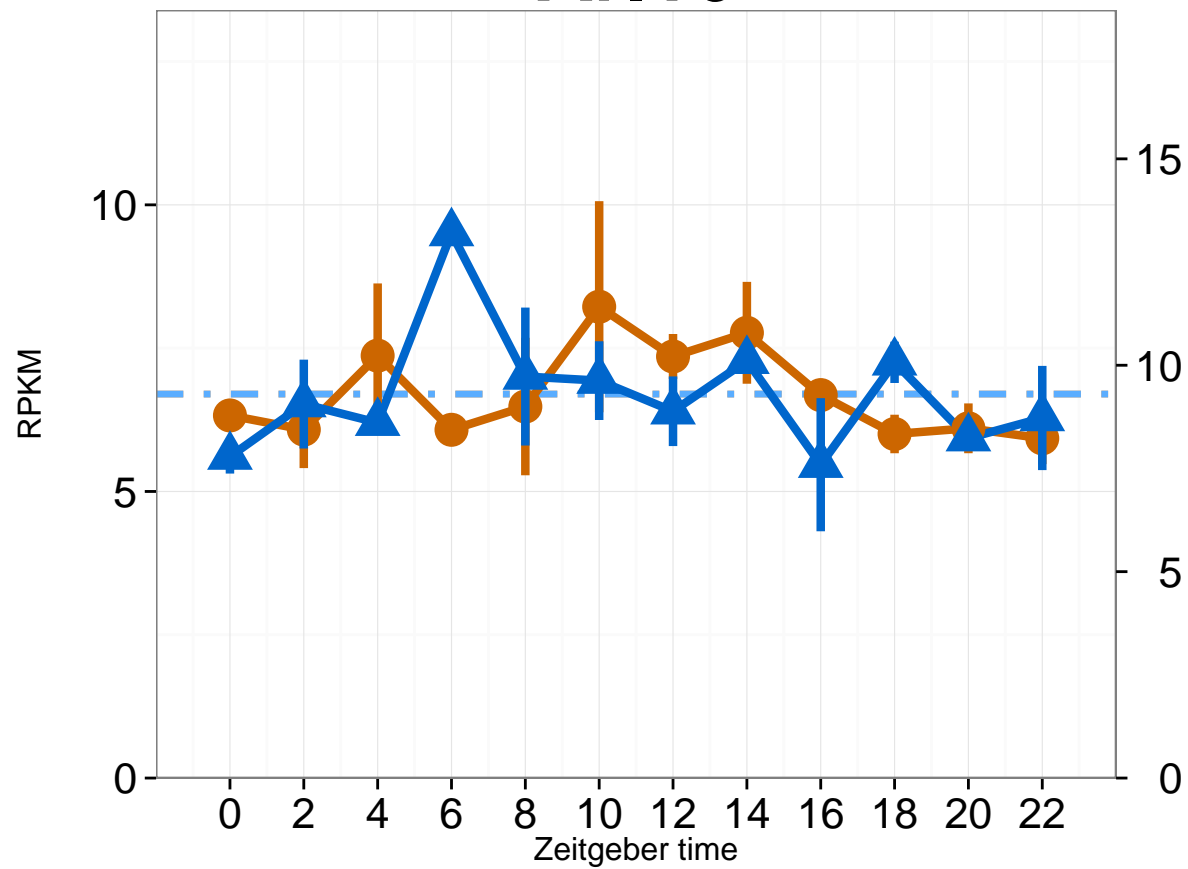

## Arl16

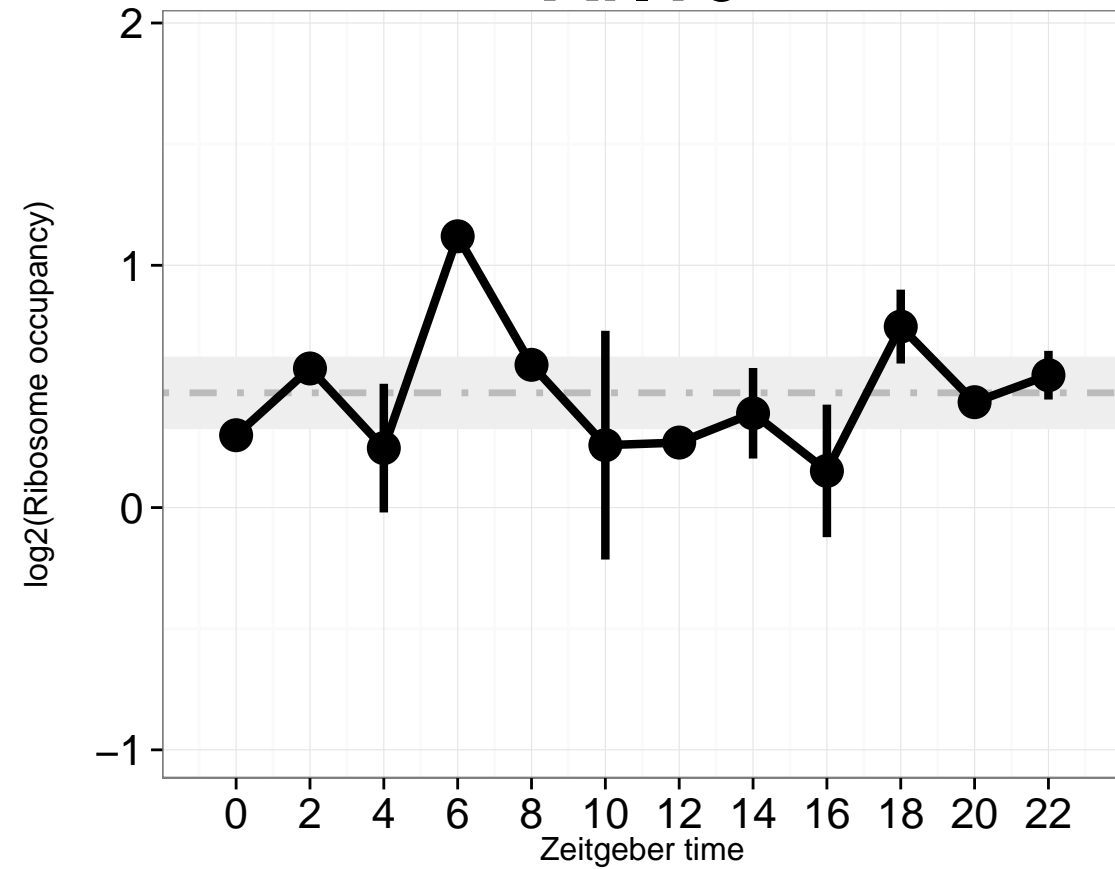

Supplement: Supplementary file 336 [file 1]

# Fgd4

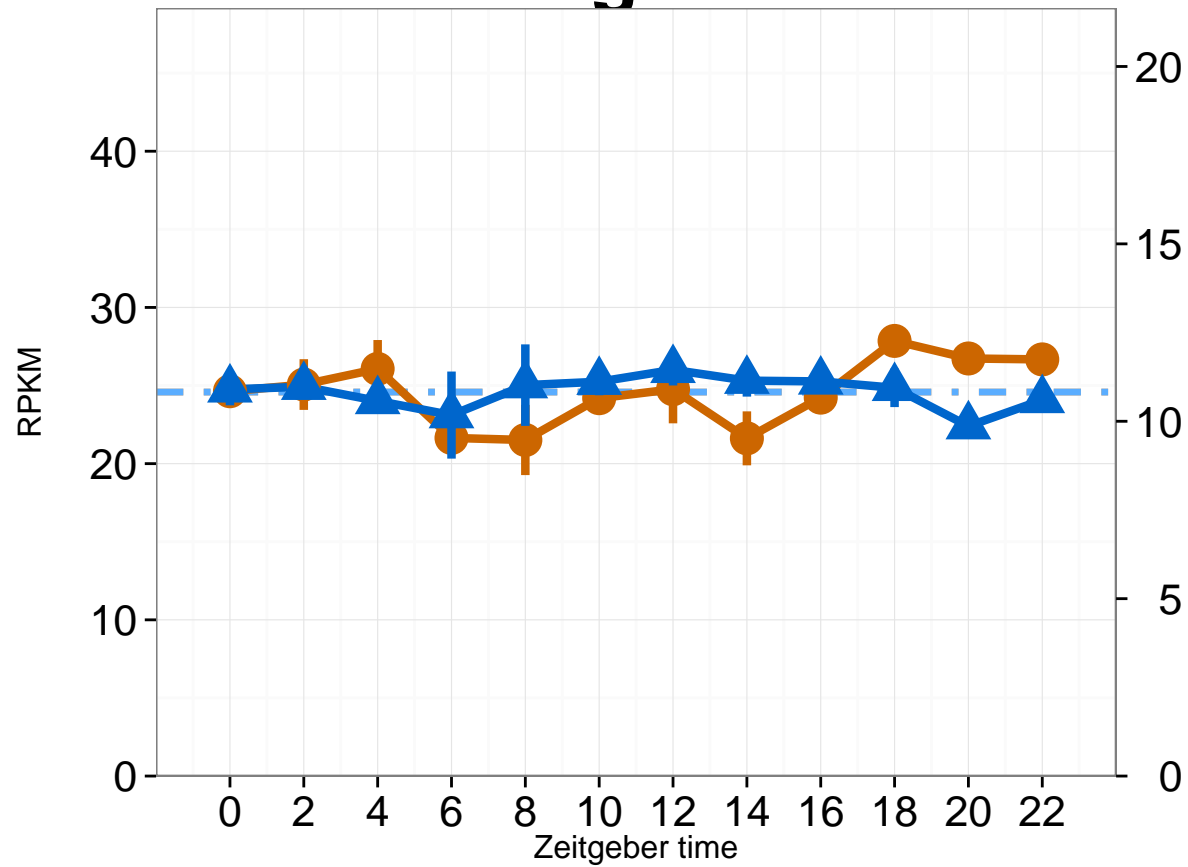

# Fgd4

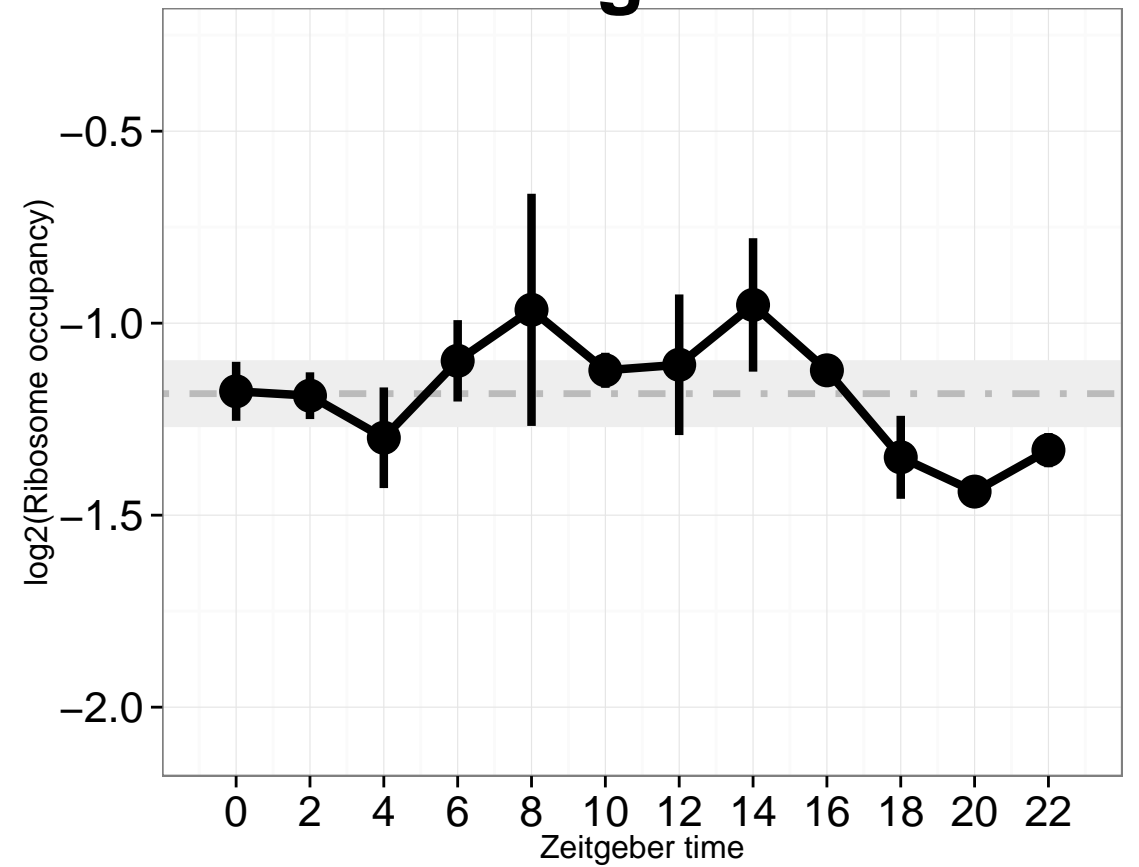

Supplement: Supplementary file 337 [file 1]

## Nme3

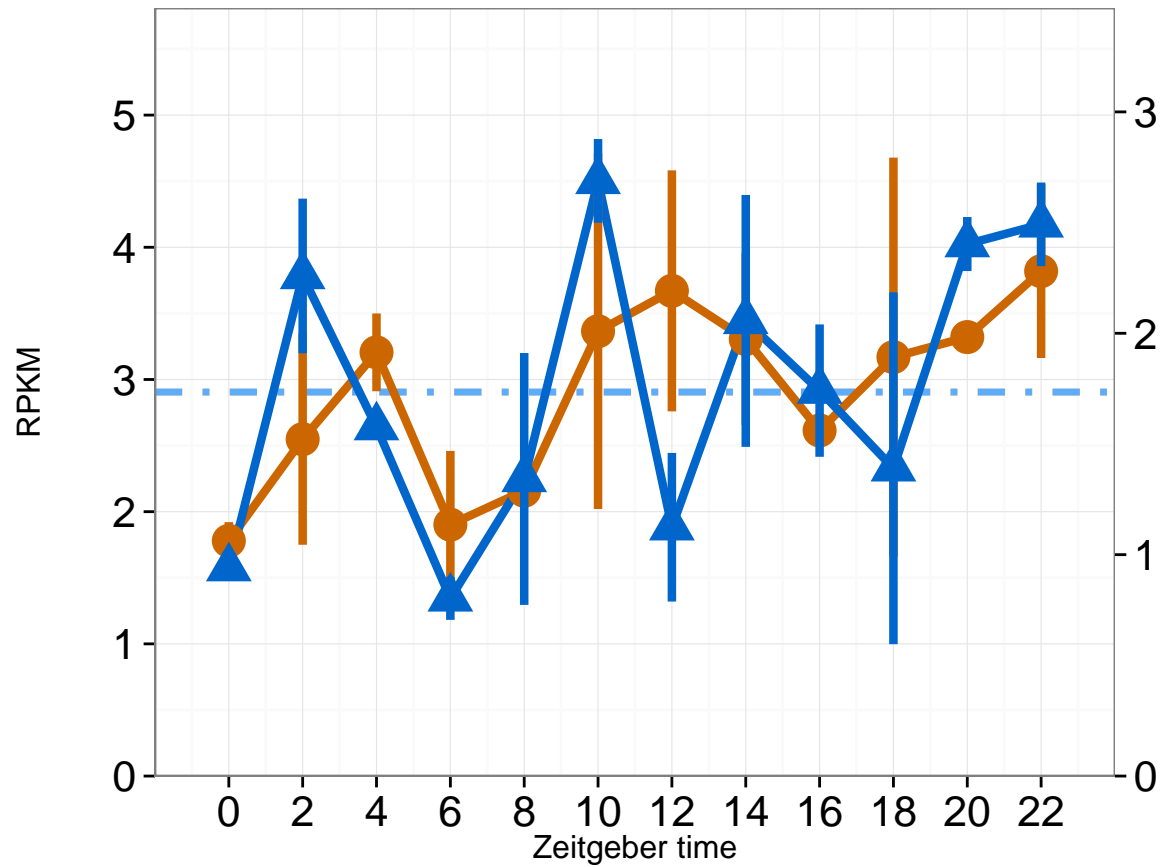

## Nme3

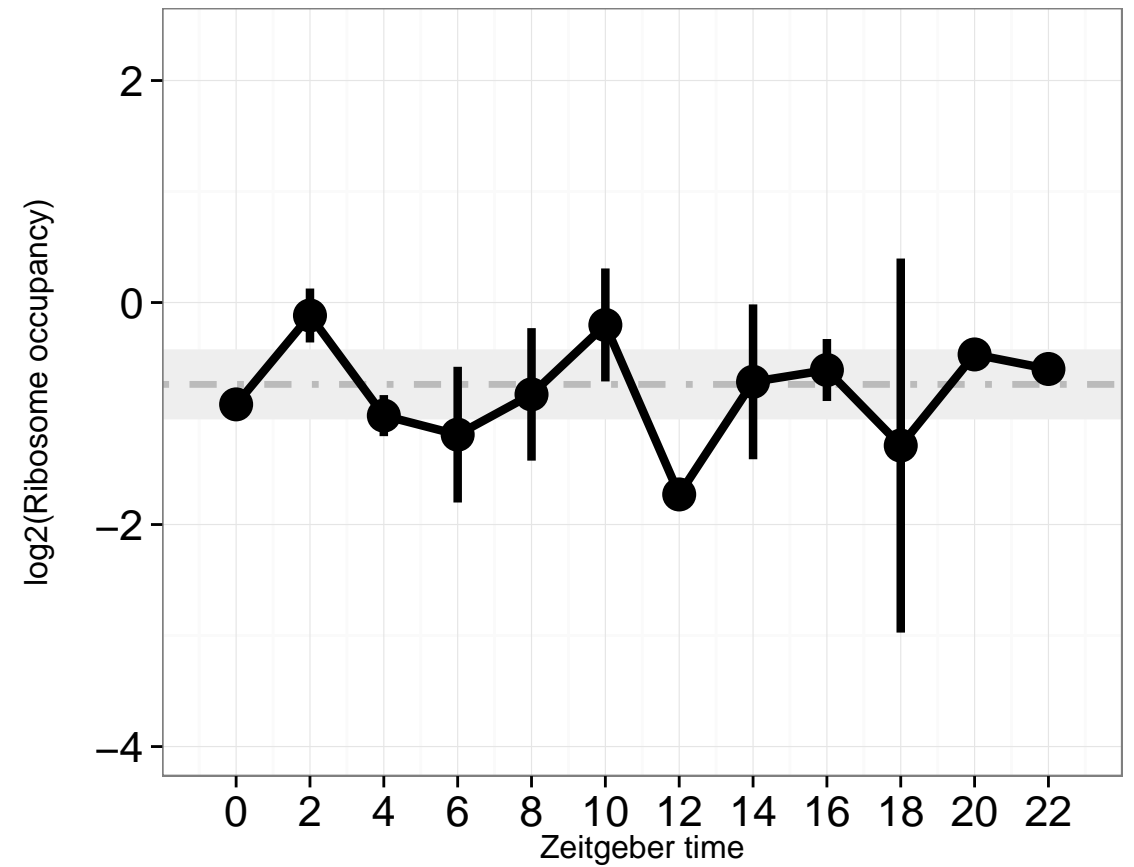

Supplement: Supplementary file 338 [file 1]

# Nupr1

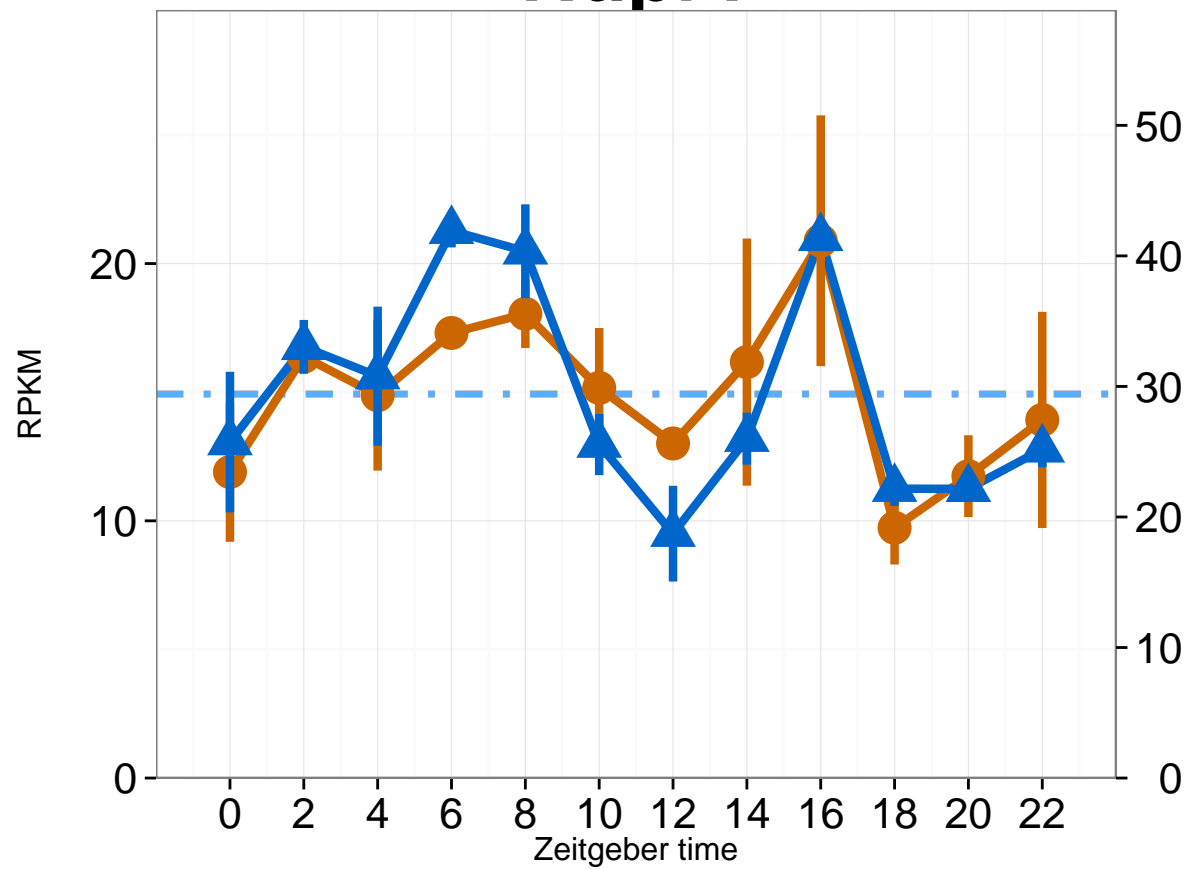

# Nupr1

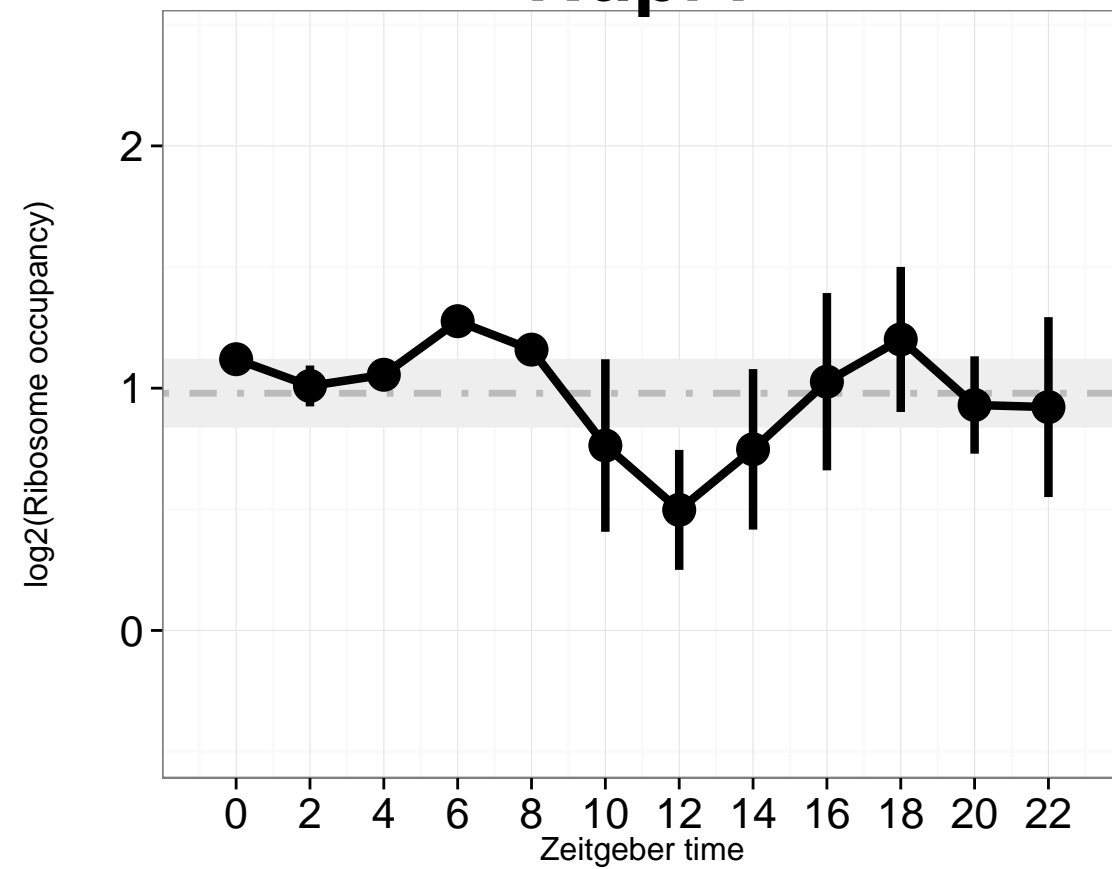

Supplement: Supplementary file 339 [file 1]

## Fxr1

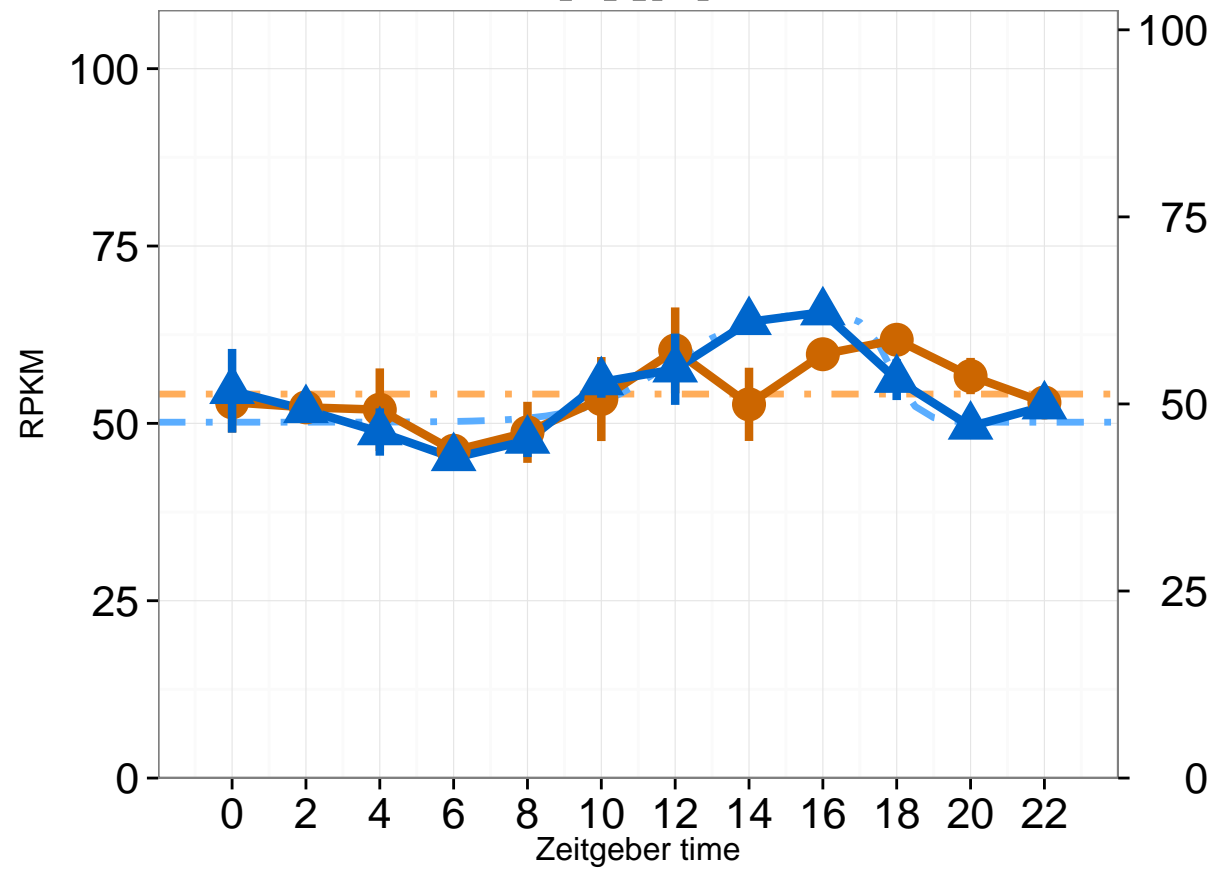

## Fxr1

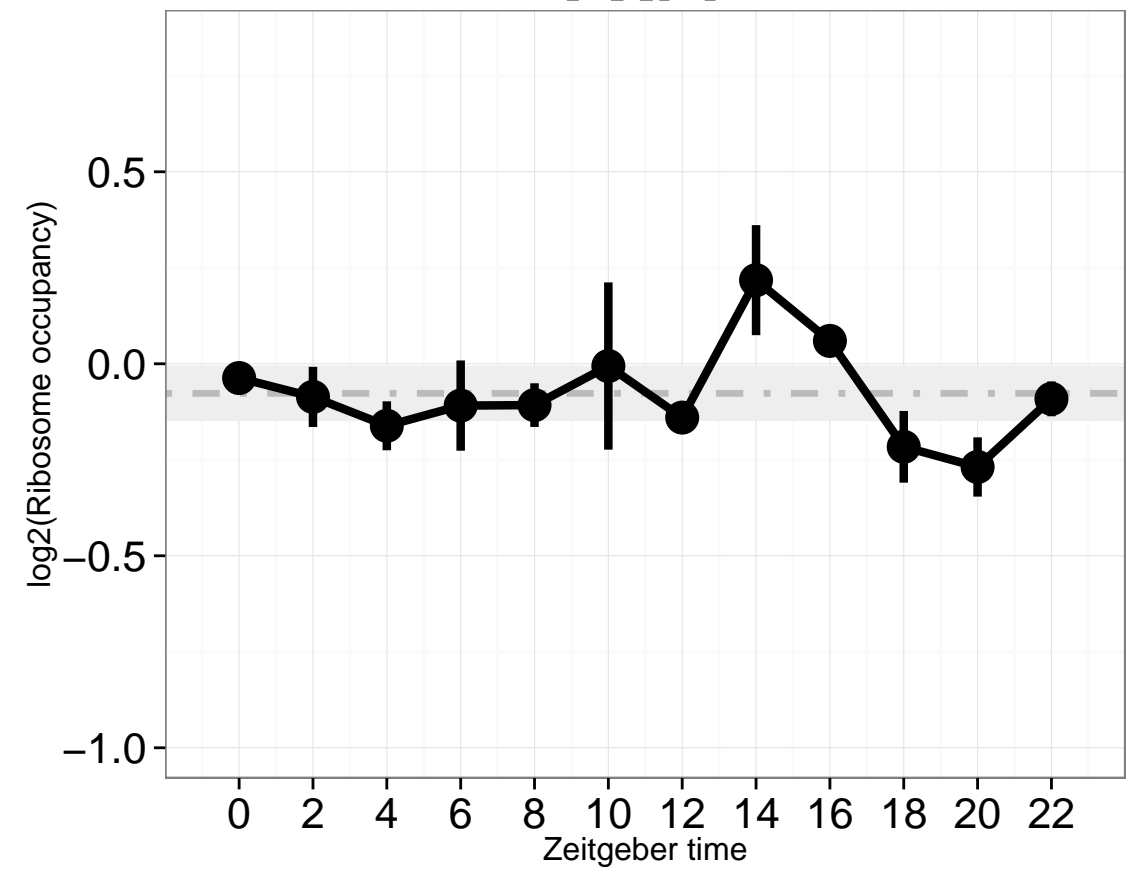

Supplement: Supplementary file 340 [file 1]

## App

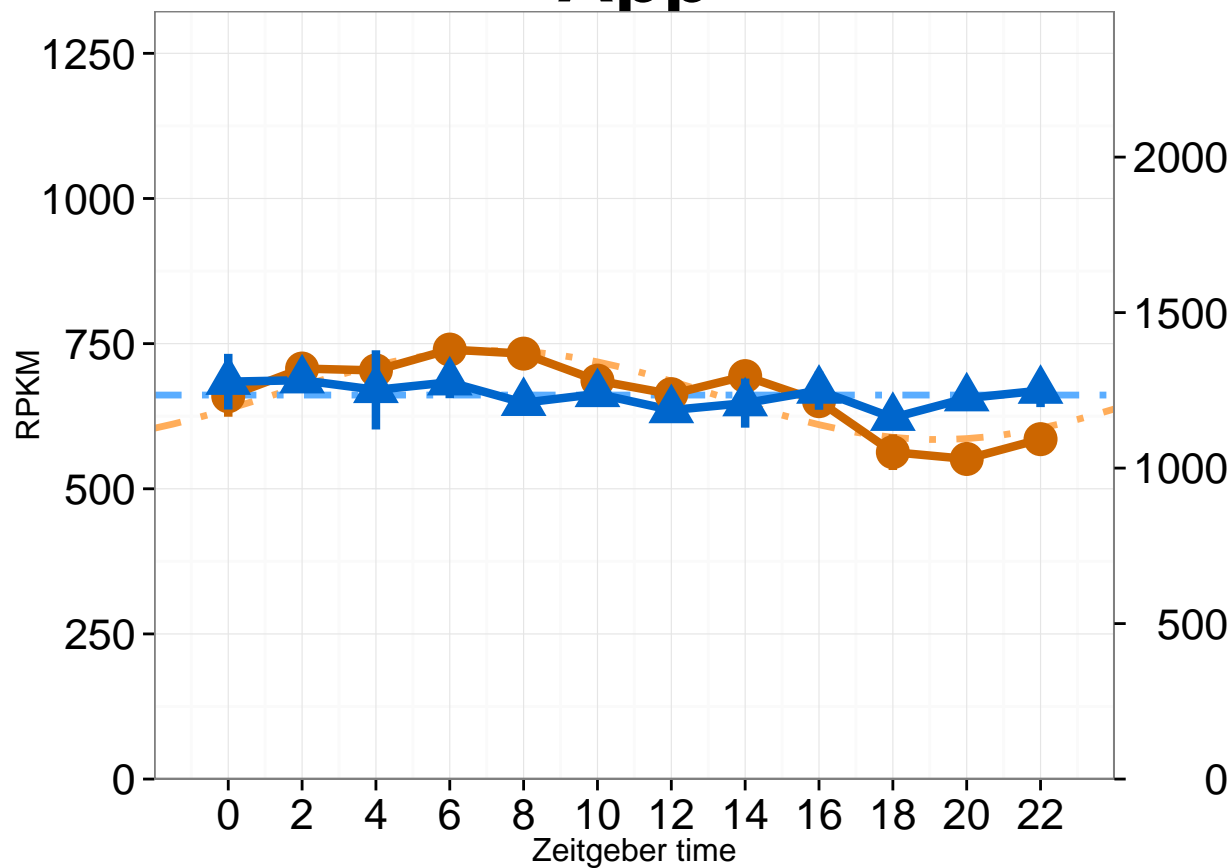

## App

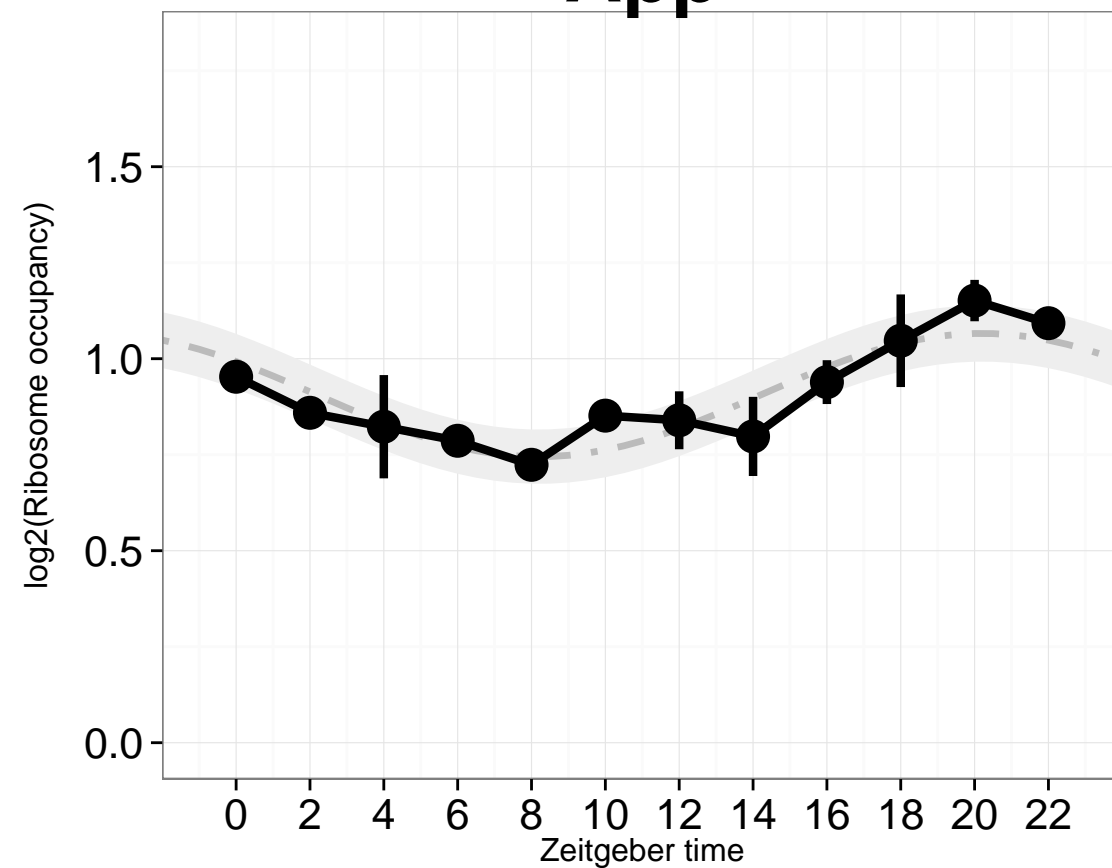

Supplement: Supplementary file 341 [file 1]

# Lrrc46

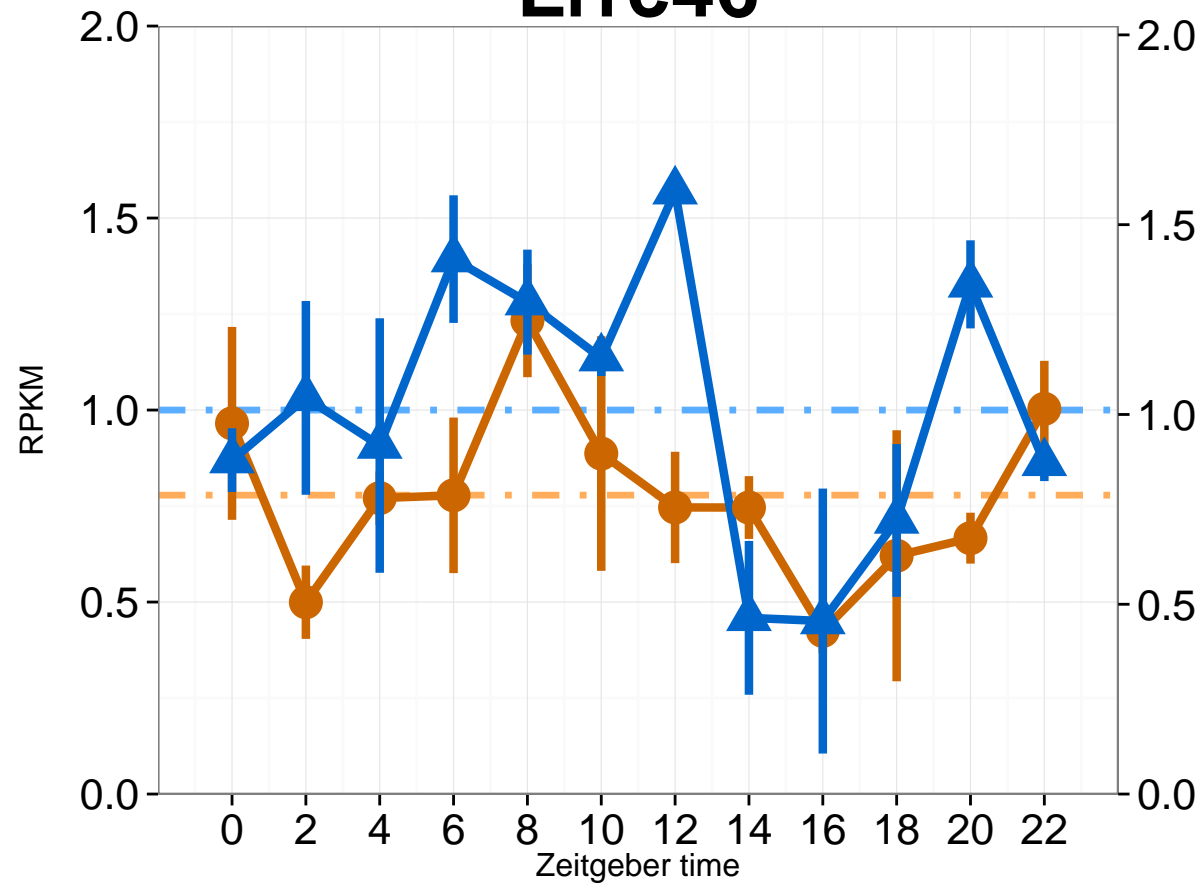

# Lrrc46

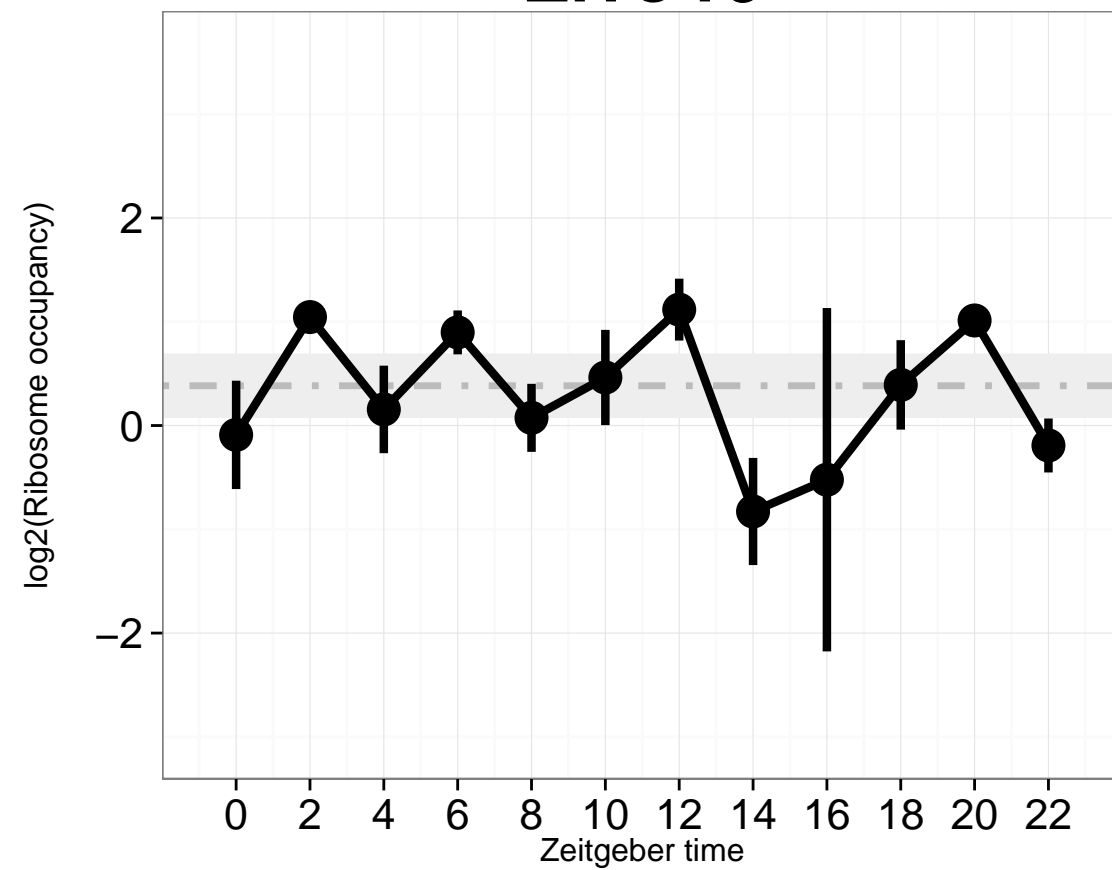

Supplement: Supplementary file 342 [file 1]

## Sdc3

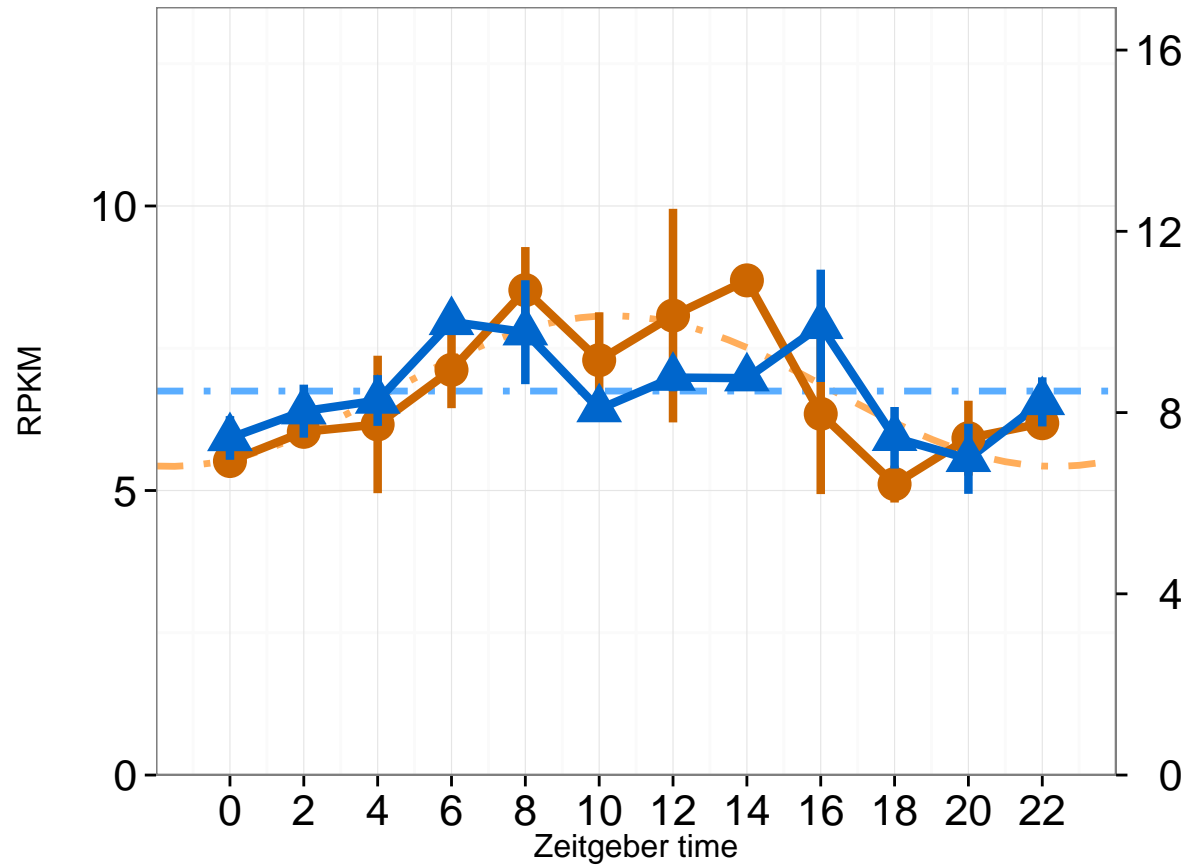

## Sdc3

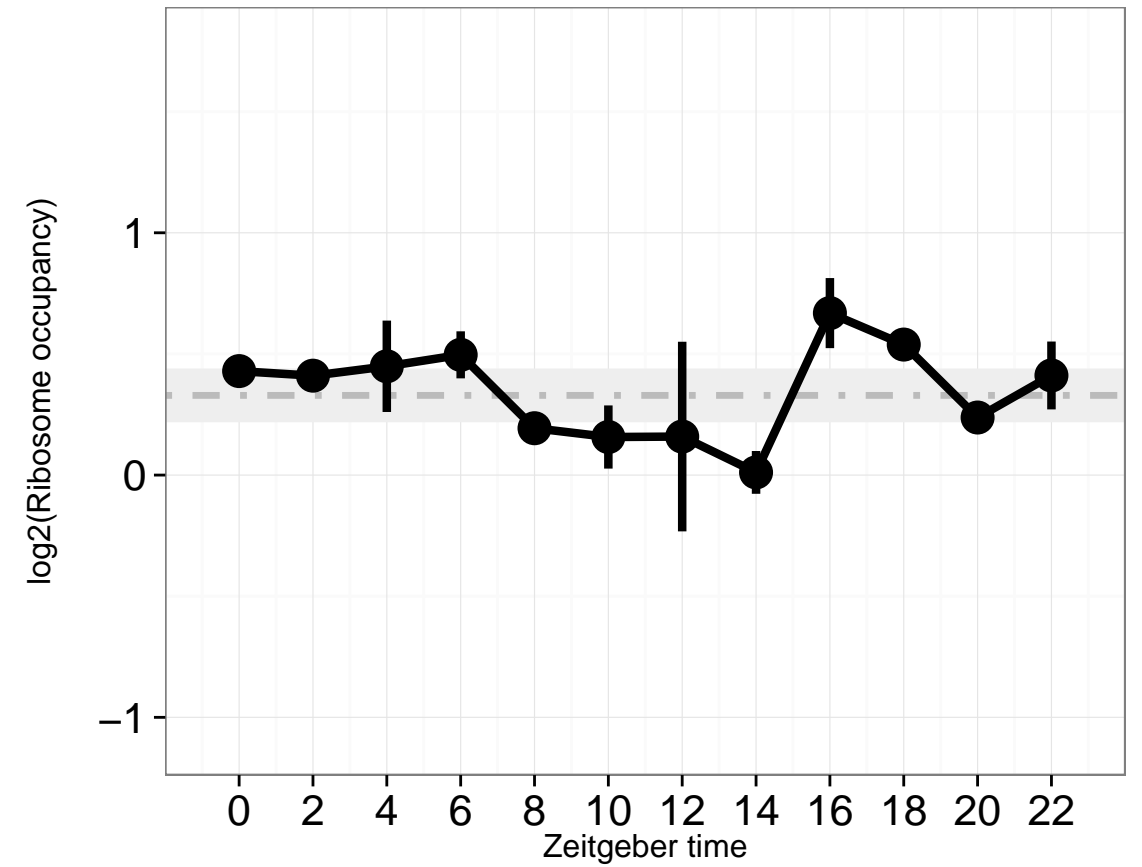

Supplement: Supplementary file 343 [file 1]

## Adipoq

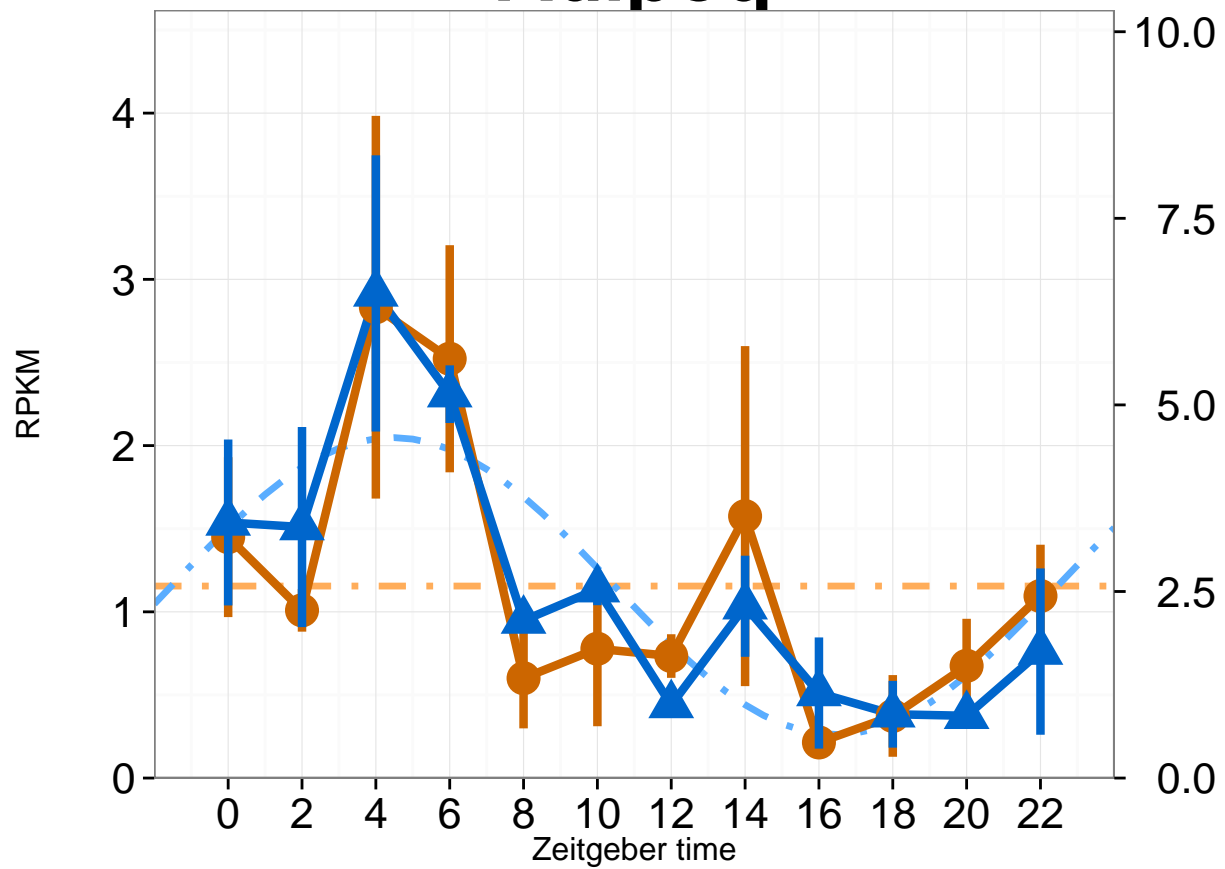

## Adipoq

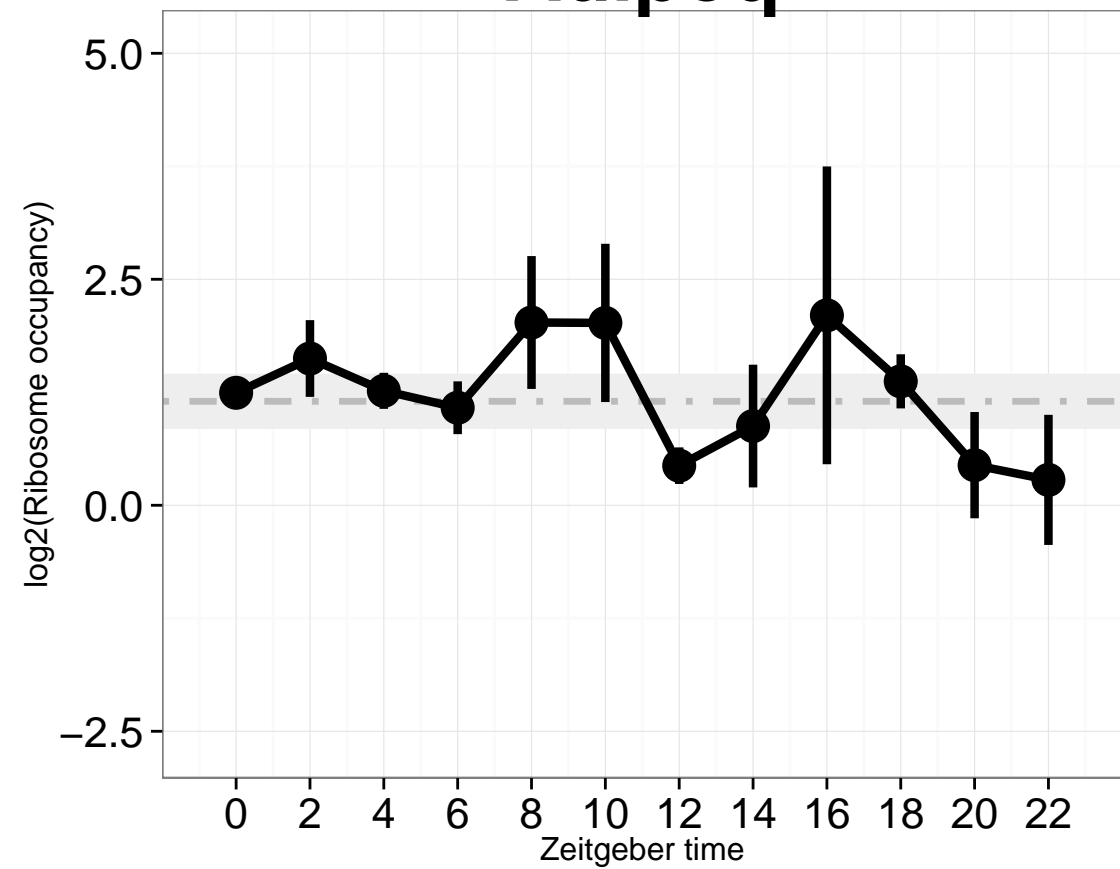

Supplement: Supplementary file 344 [file 1]

## Fbxl12

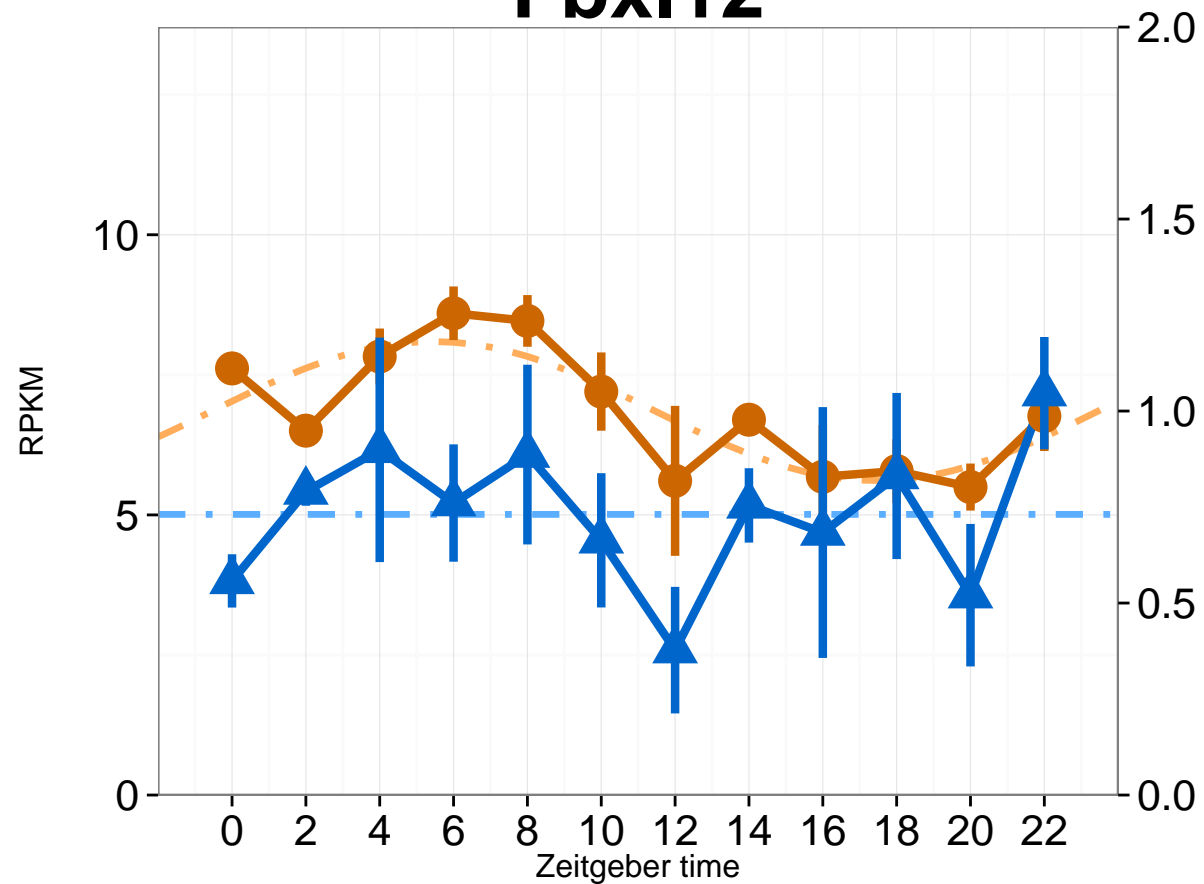

## Fbxl12

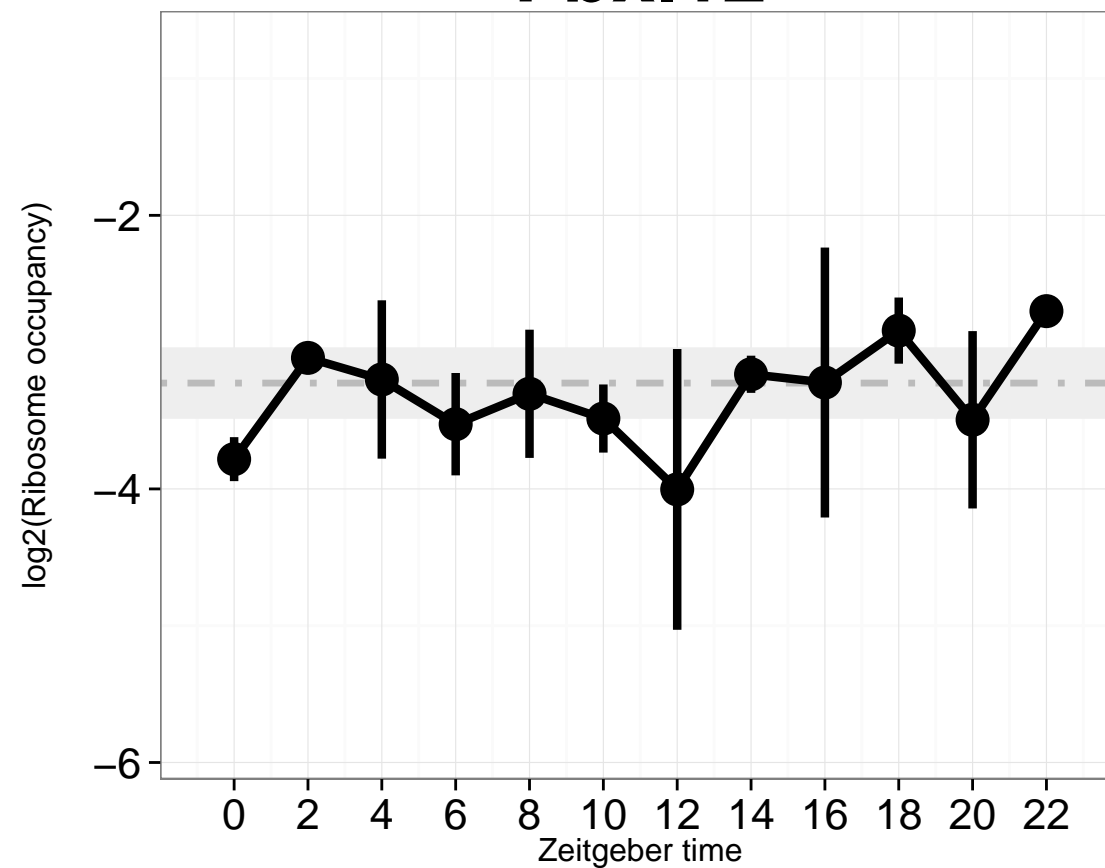

Supplement: Supplementary file 345 [file 1]

## Gjc1

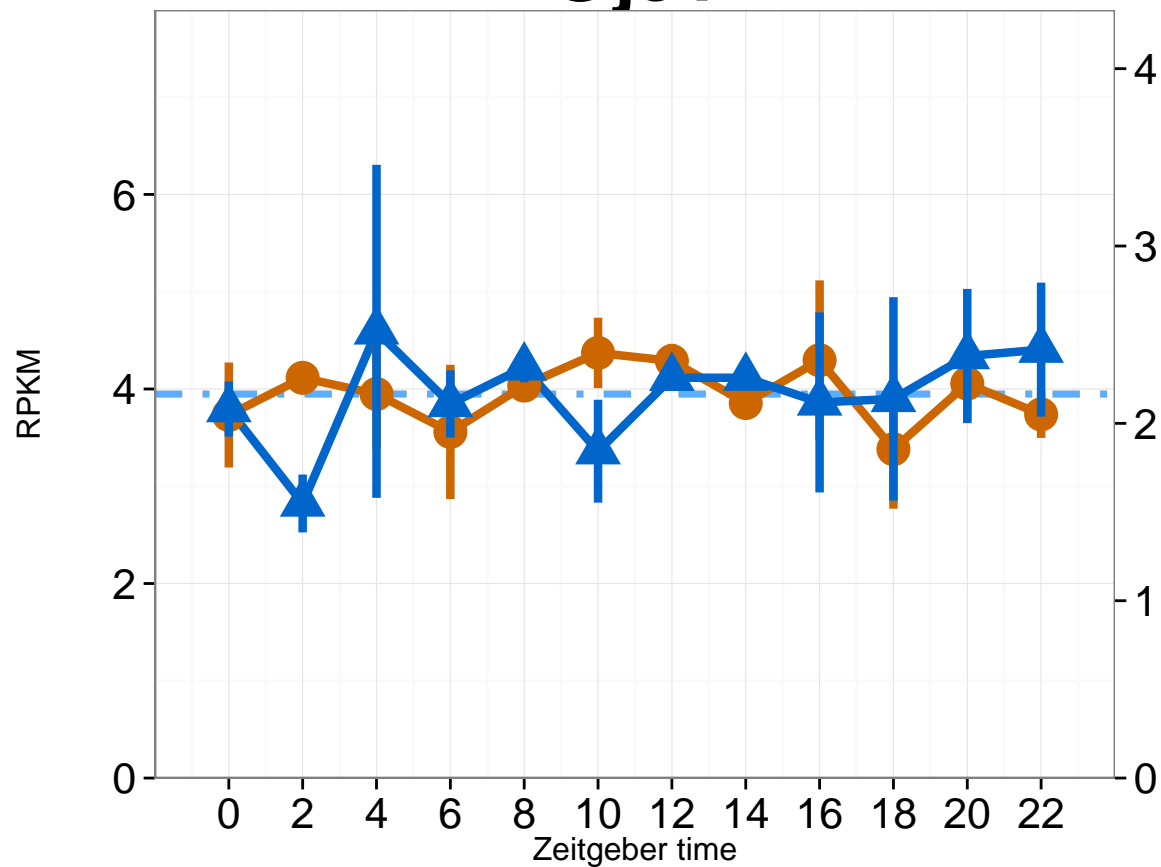

## Gjc1

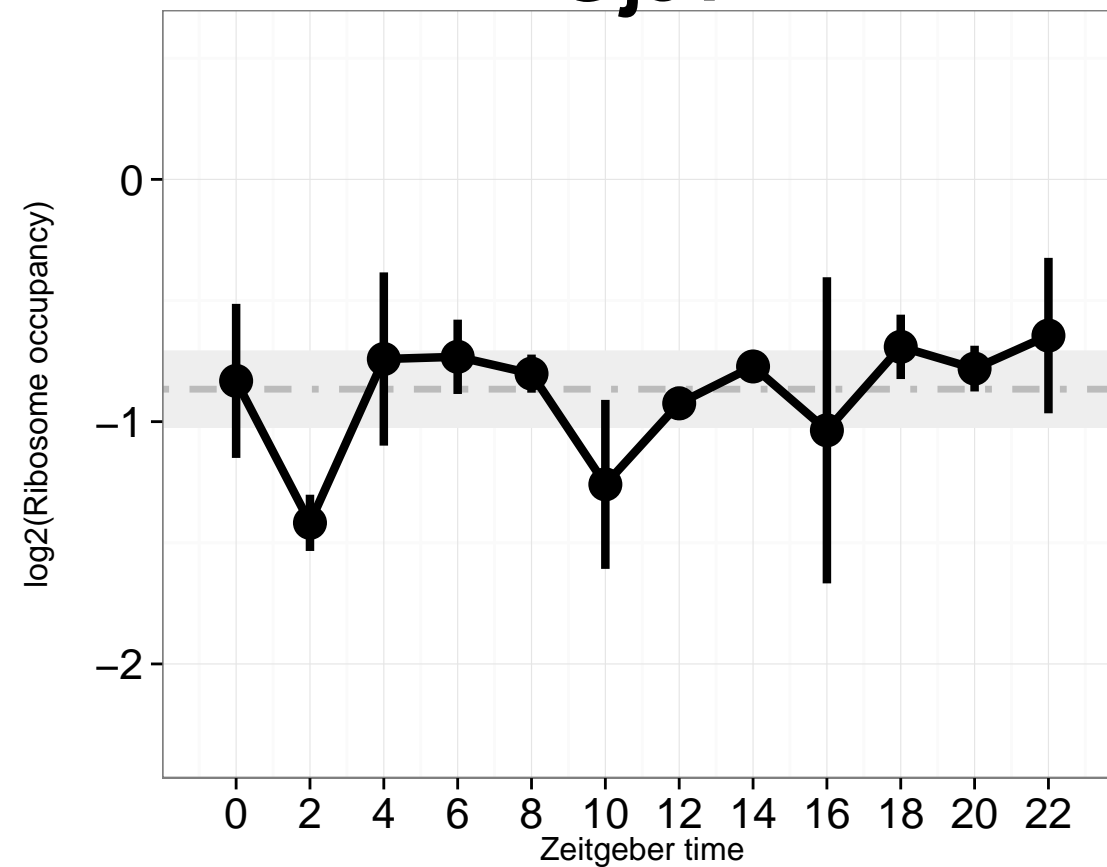

Supplement: Supplementary file 346 [file 1]

# Fam110b

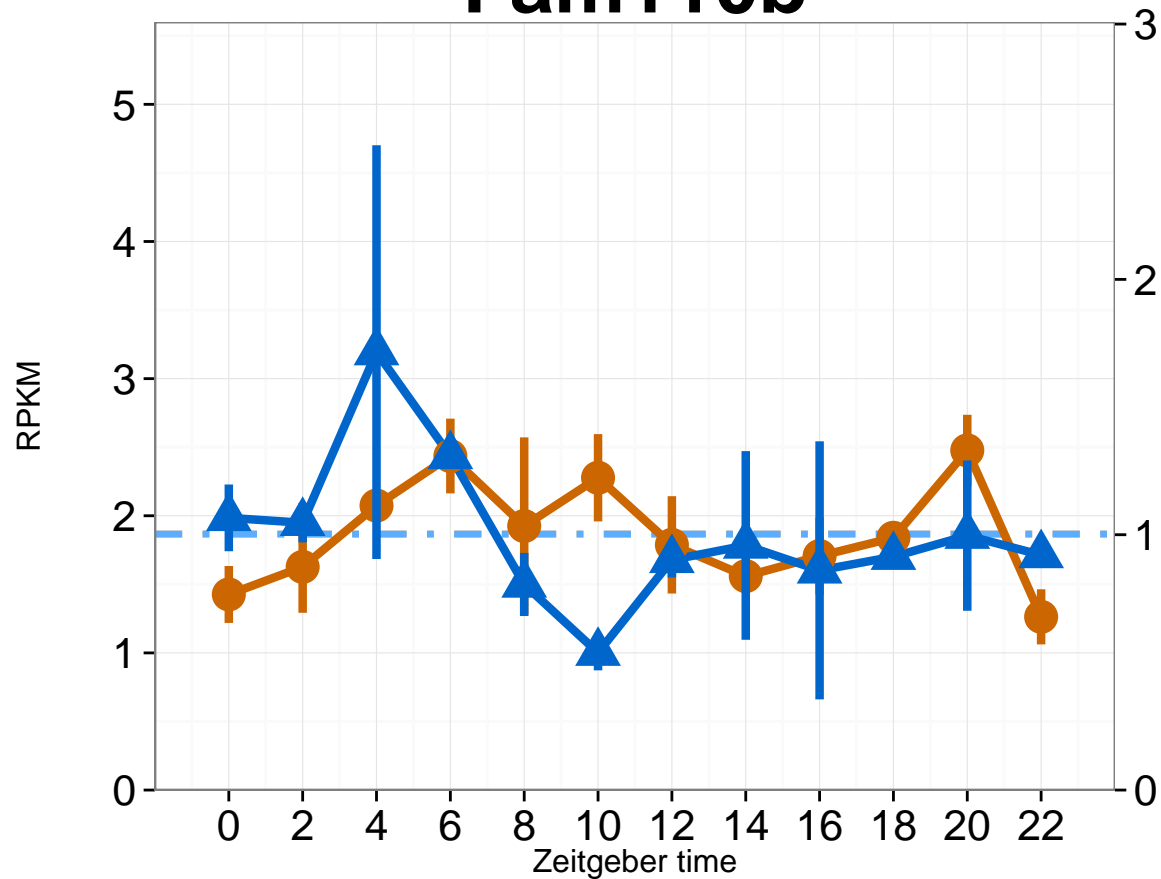

# Fam110b

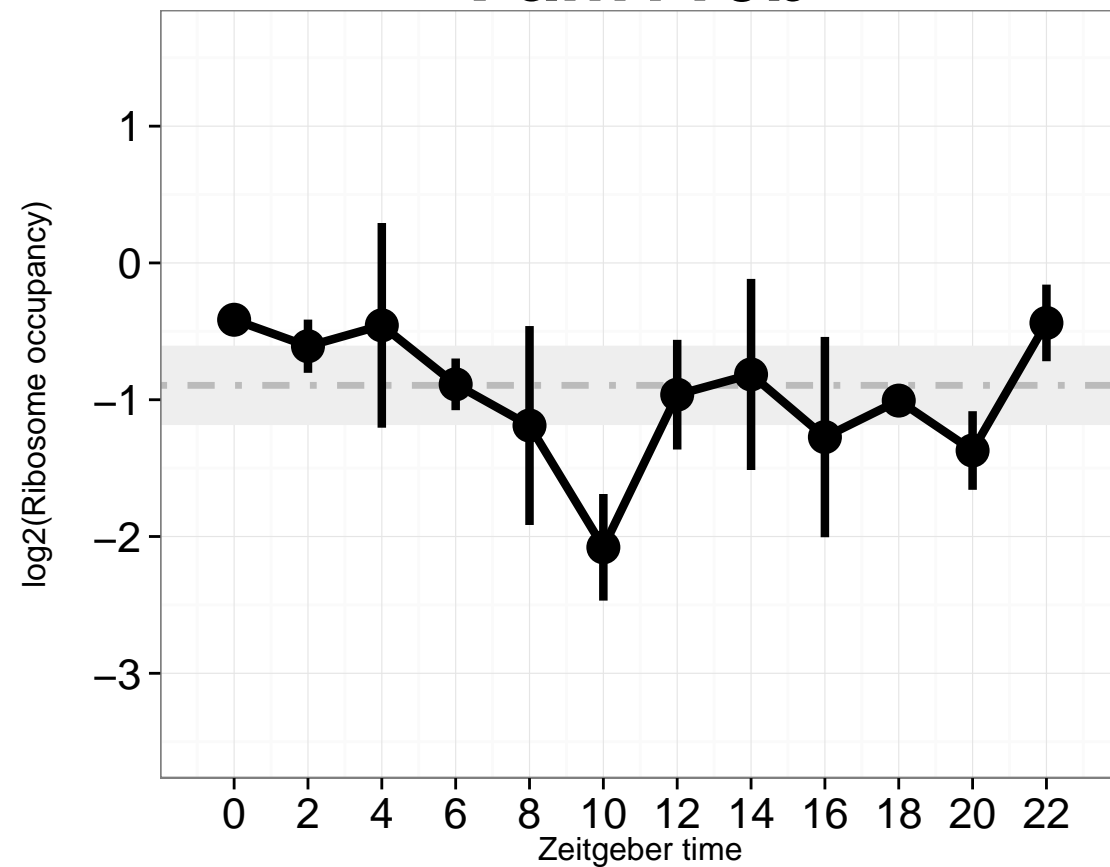

Supplement: Supplementary file 347 [file 1]

# Rsad1

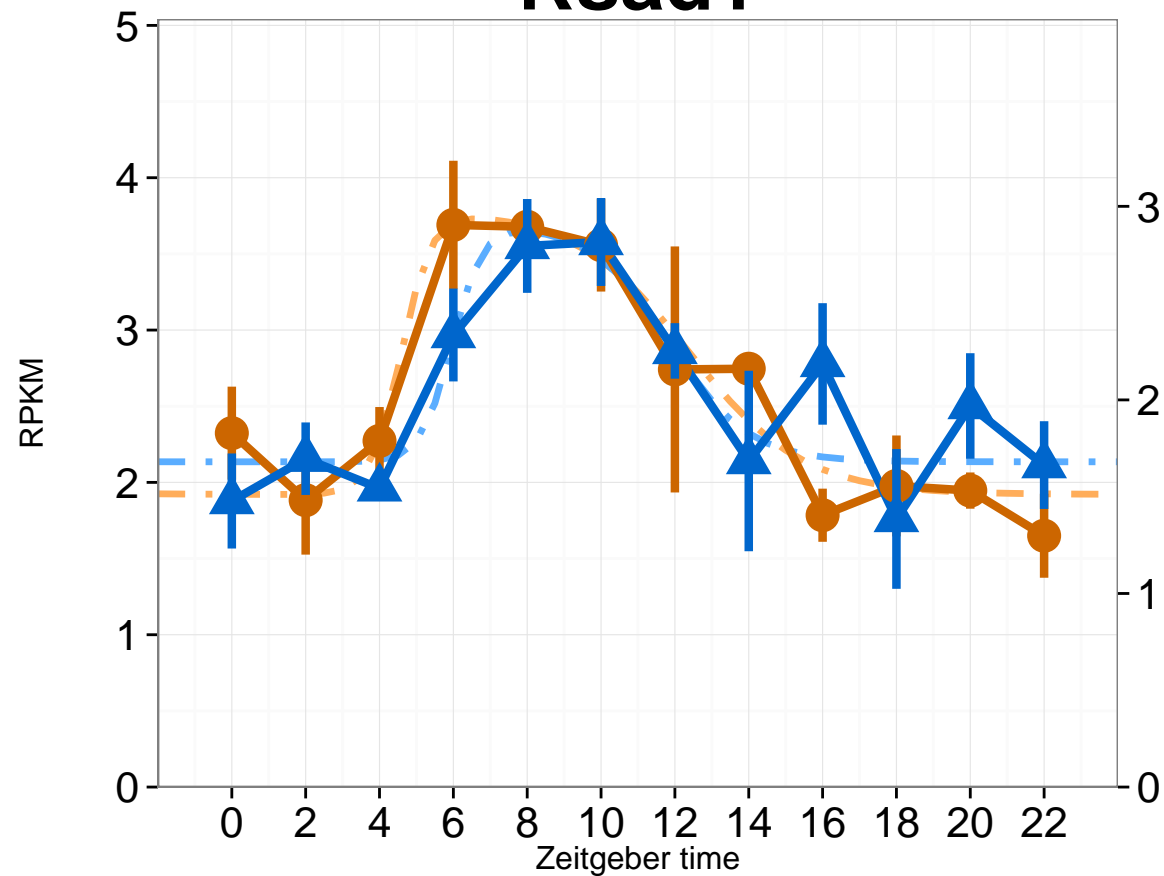

# Rsad1

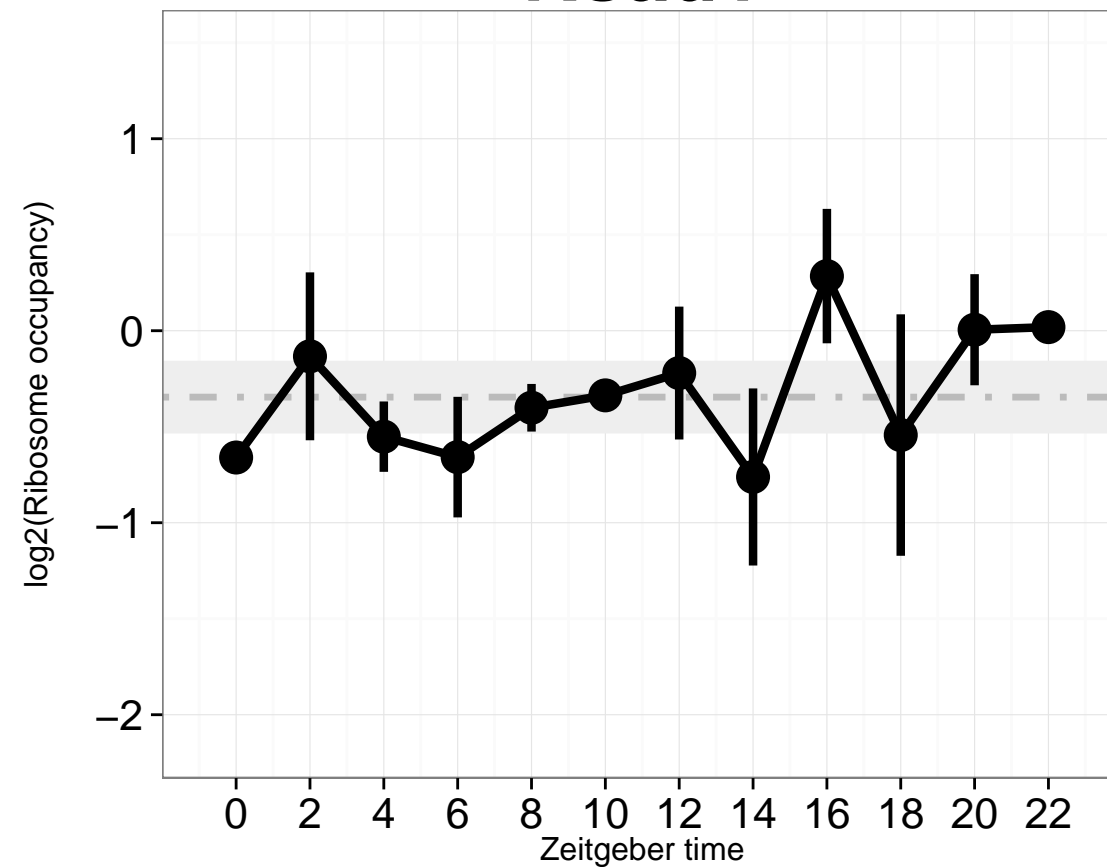

Supplement: Supplementary file 348 [file 1]

# G6pc3

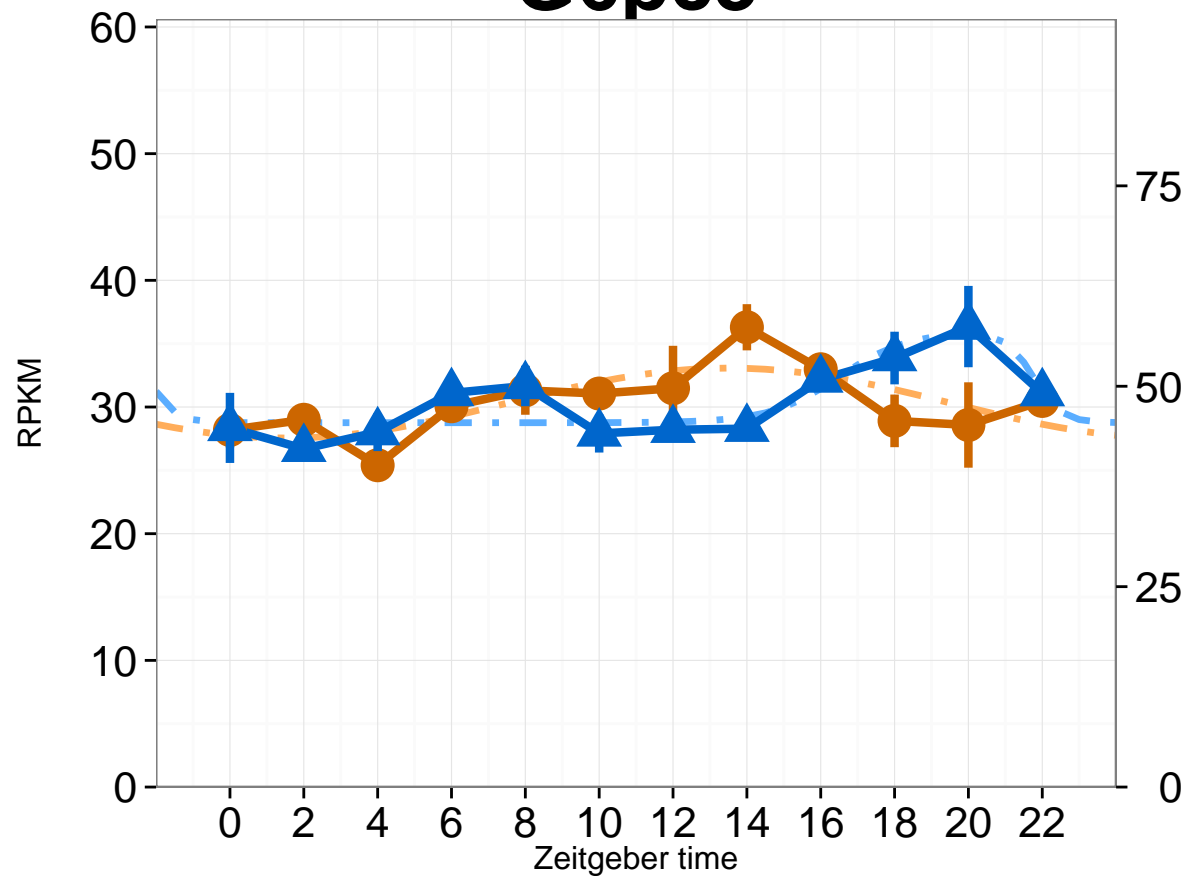

# G6pc3

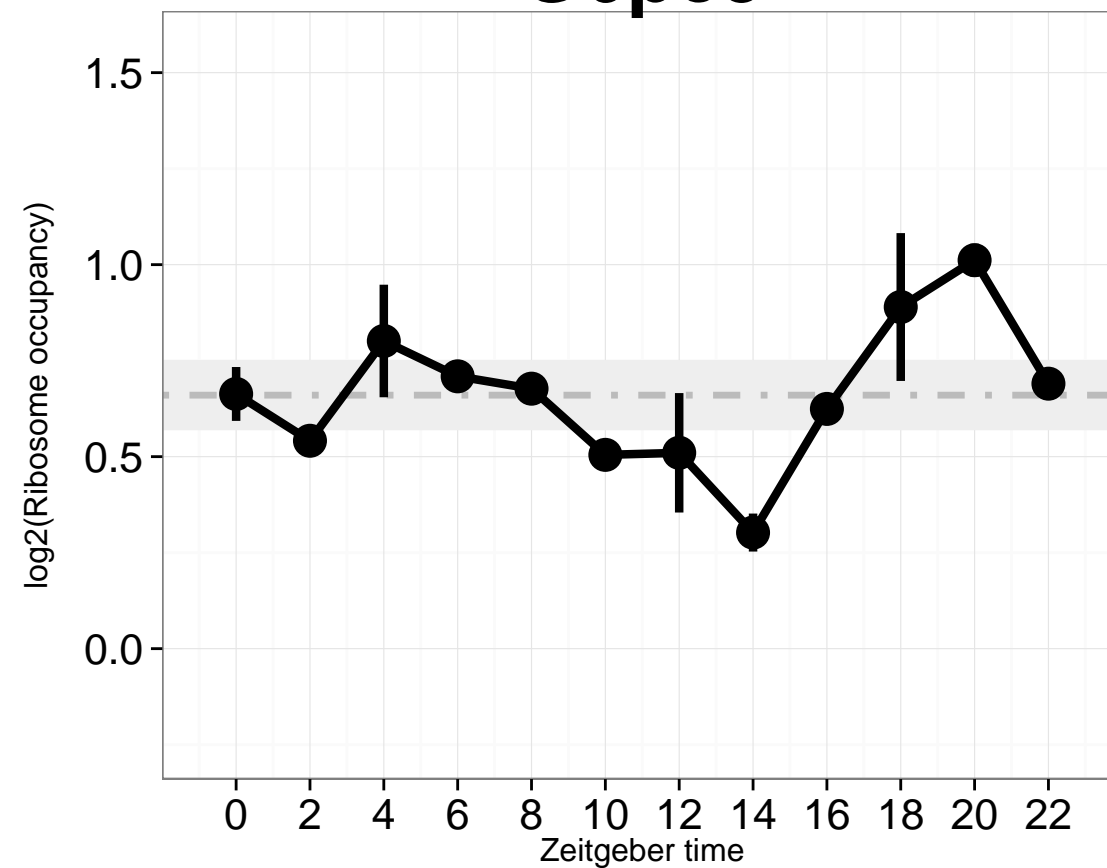

Supplement: Supplementary file 349 [file 1]

## Ldlr

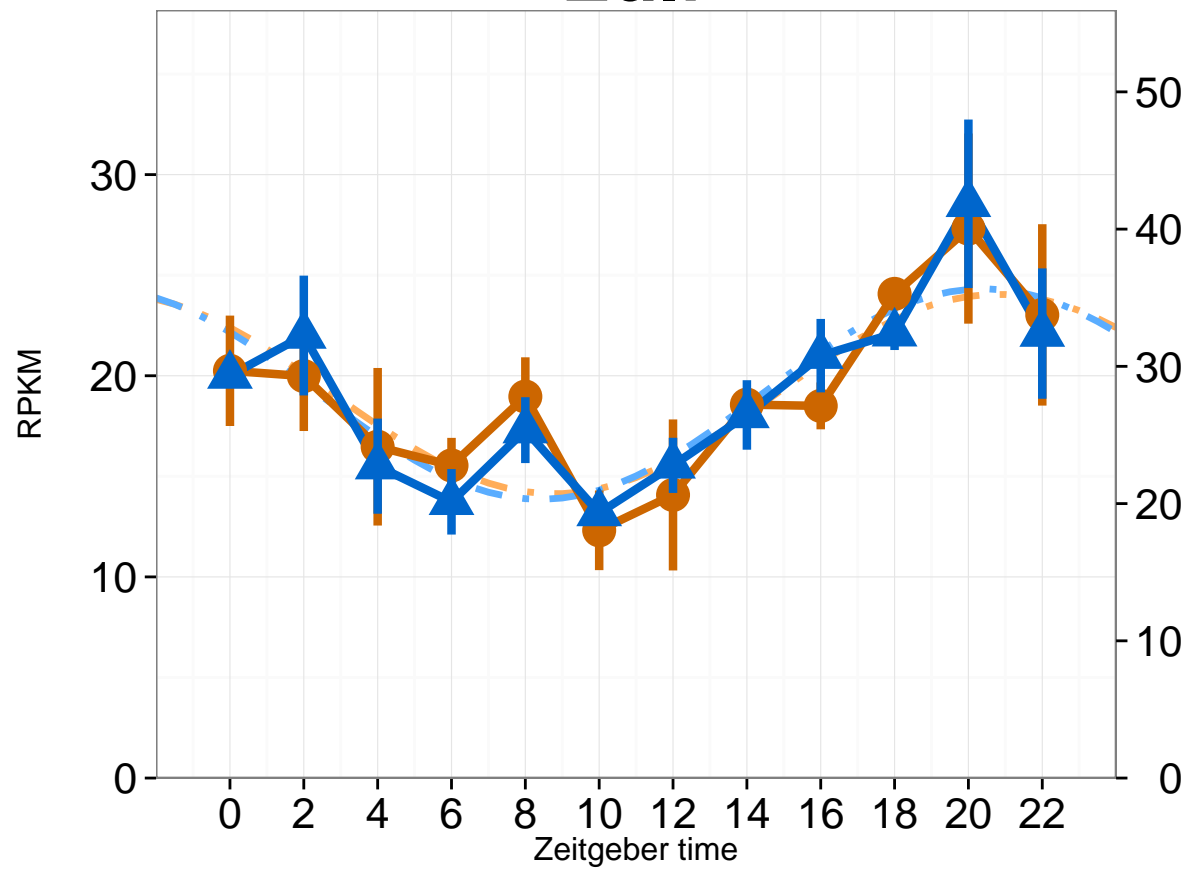

## Ldlr

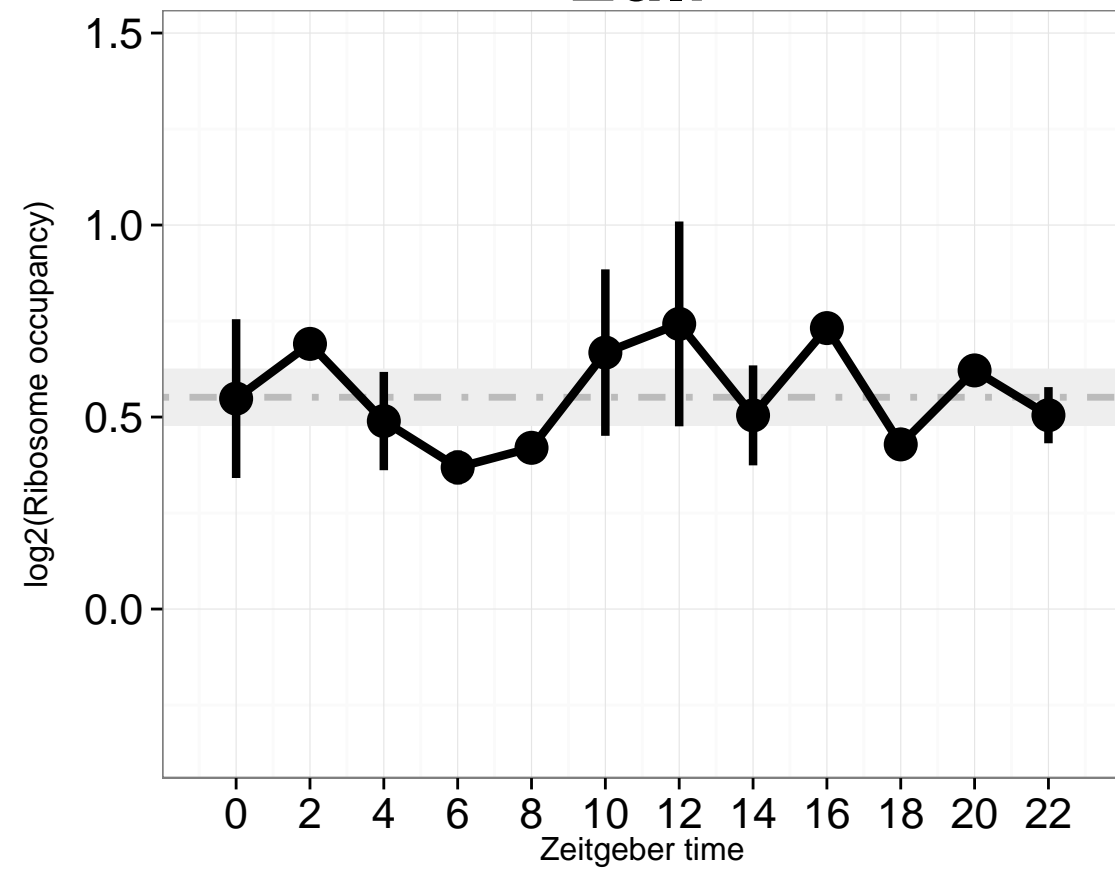

Supplement: Supplementary file 350 [file 1]

## Ip6k2

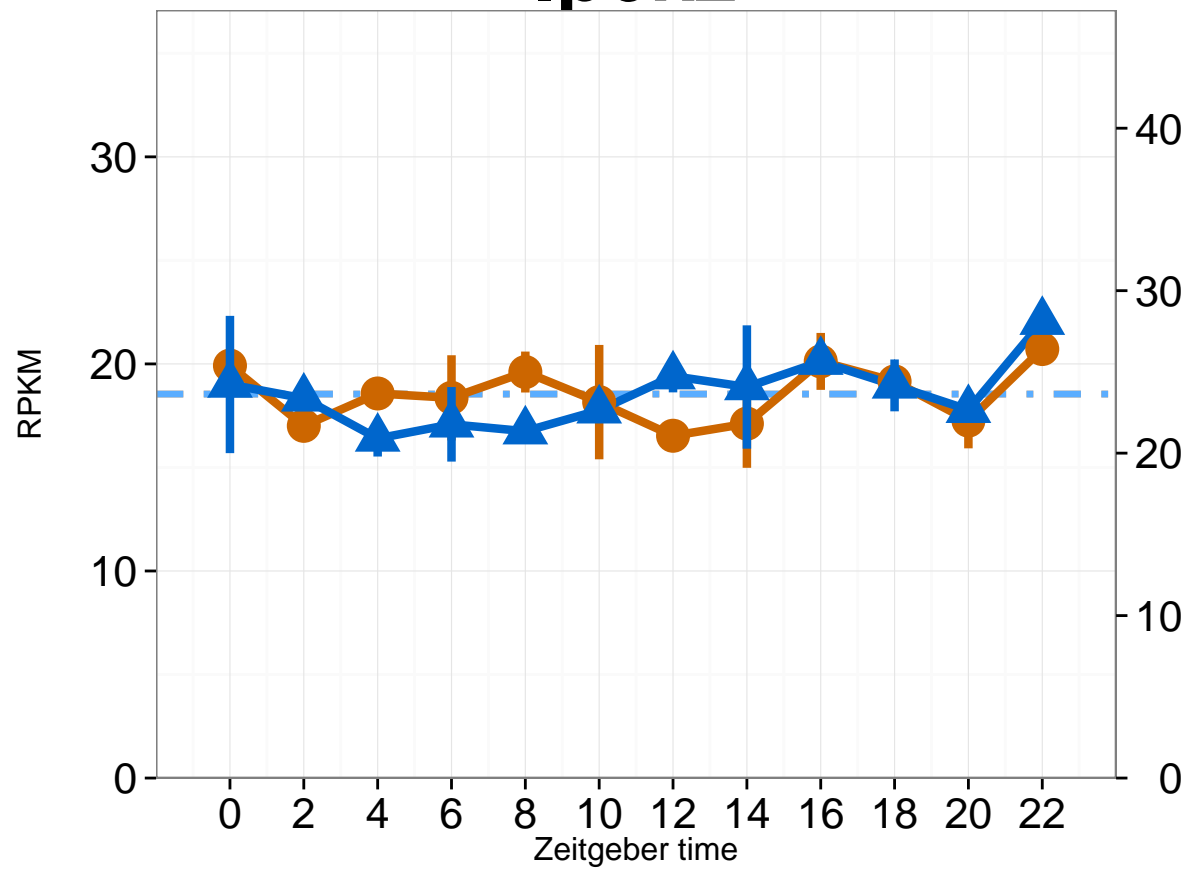

## Ip6k2

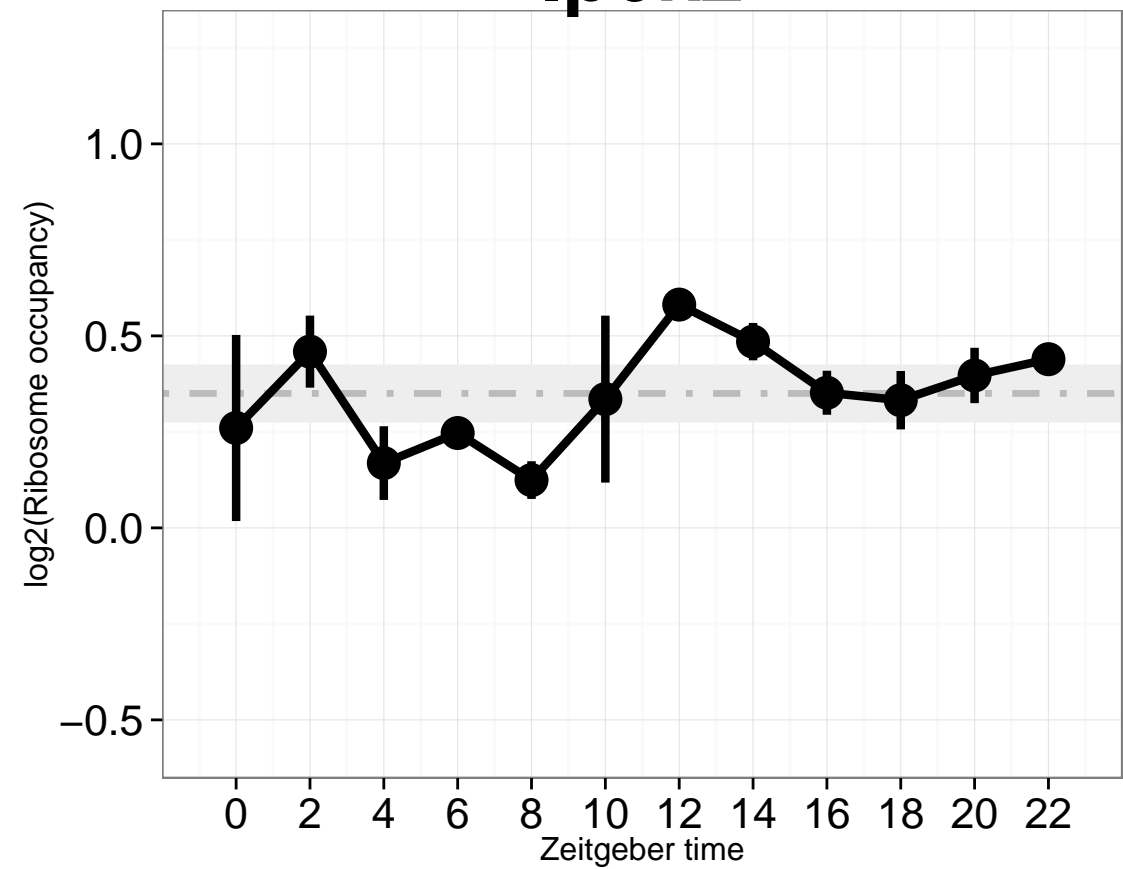

Supplement: Supplementary file 351 [file 1]

## Mia3

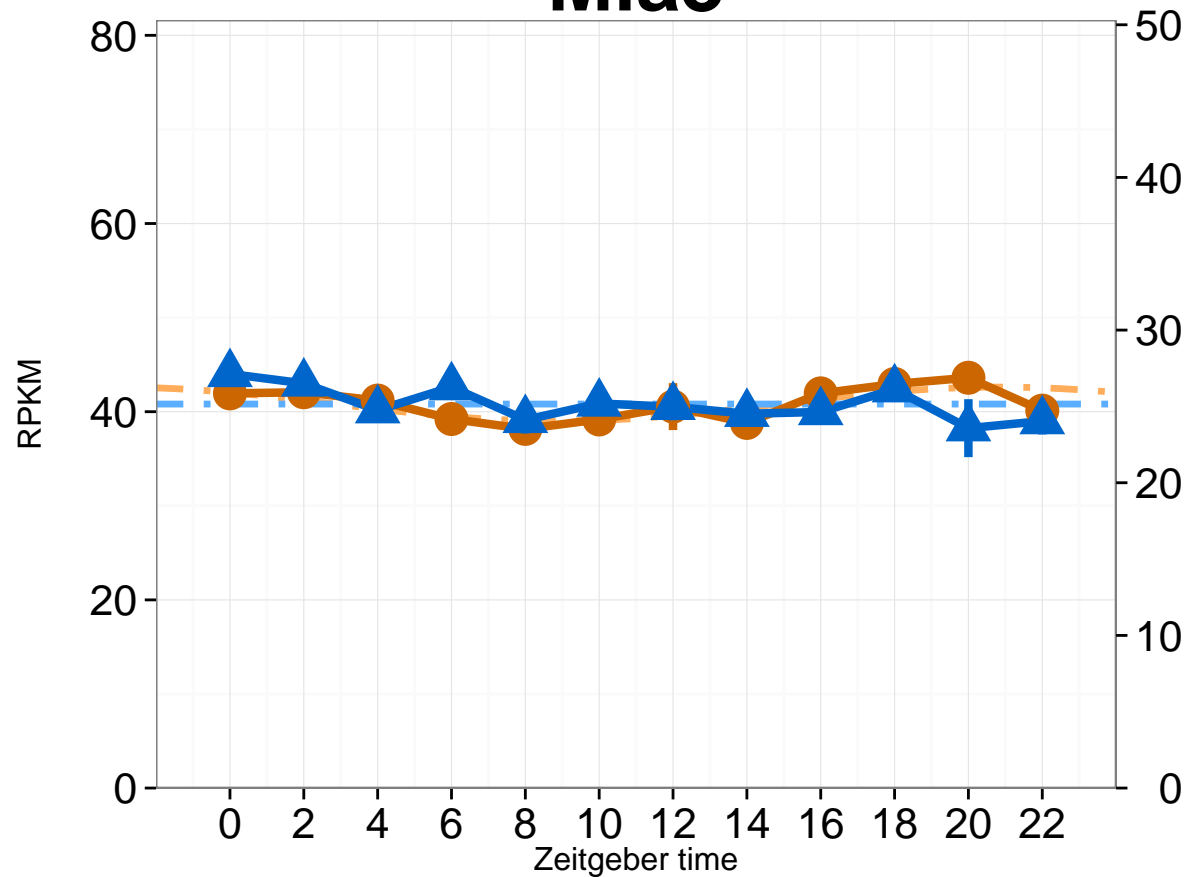

## Mia3

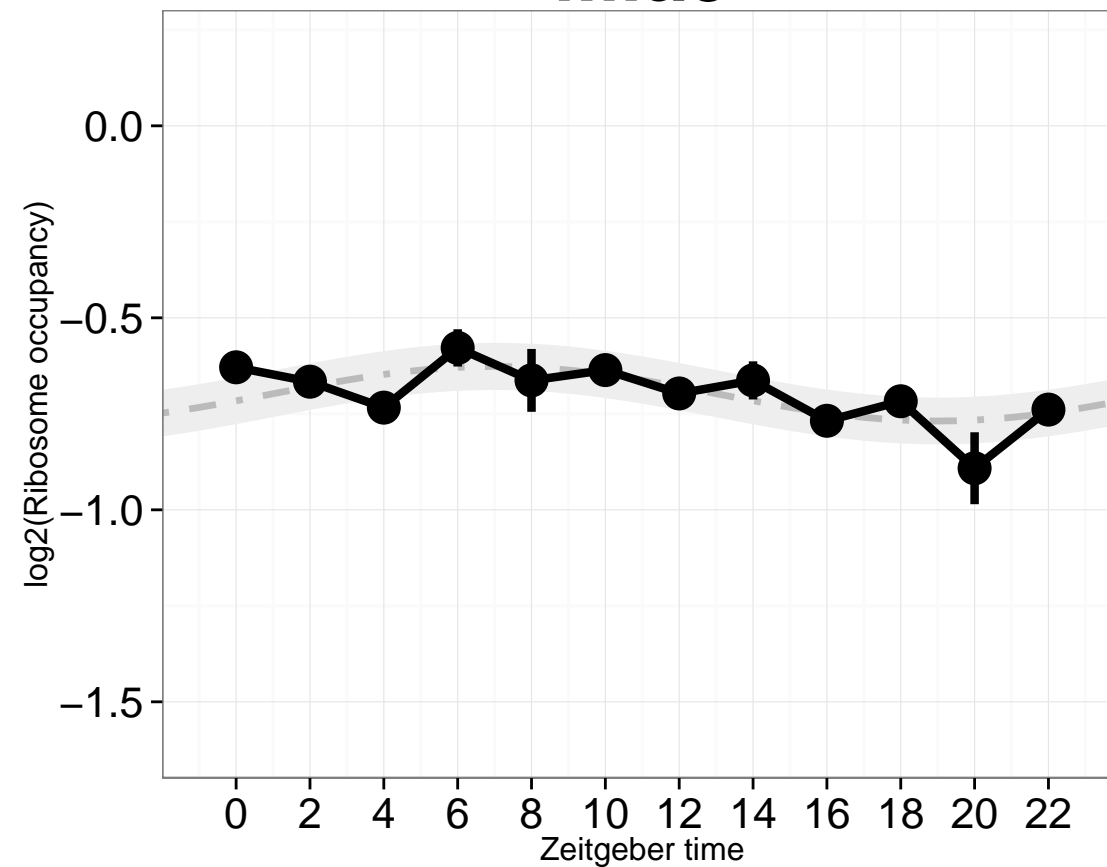

Supplement: Supplementary file 352 [file 1]

## Ldoc1l

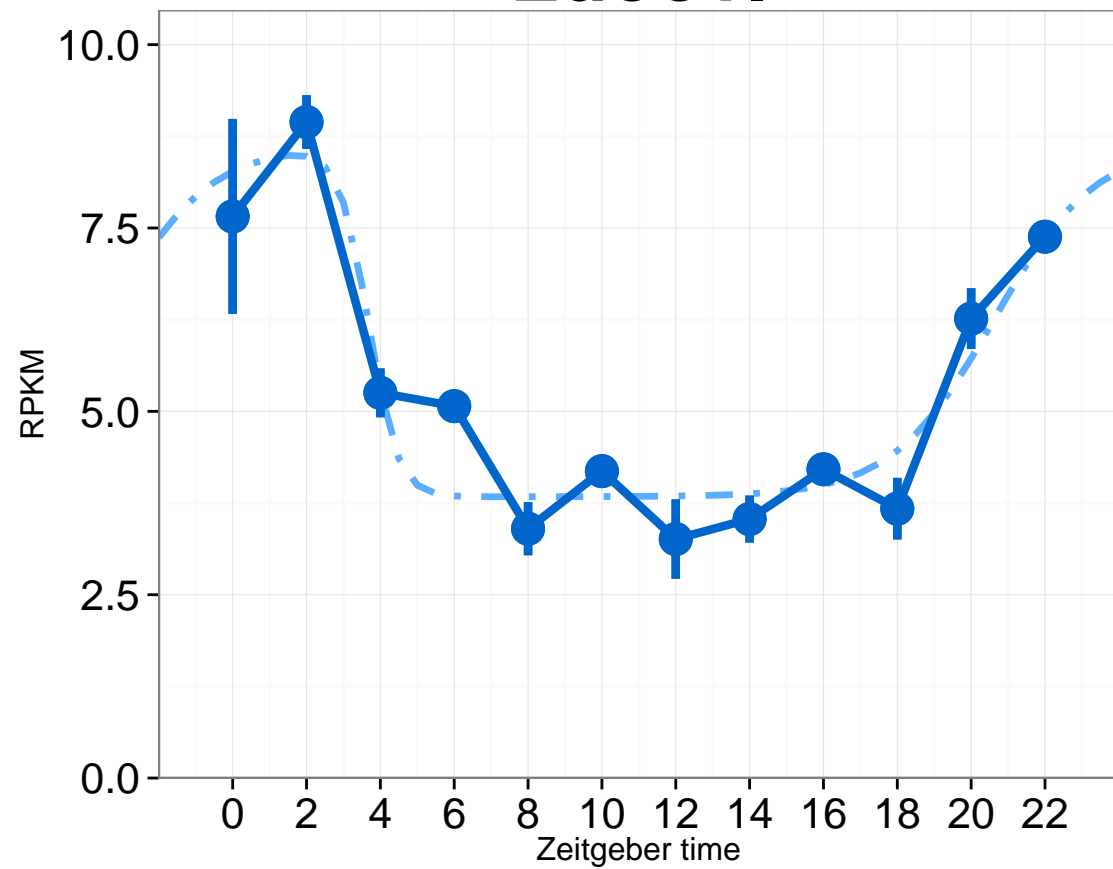

## Ldoc1l log2(Ribosome occupancy

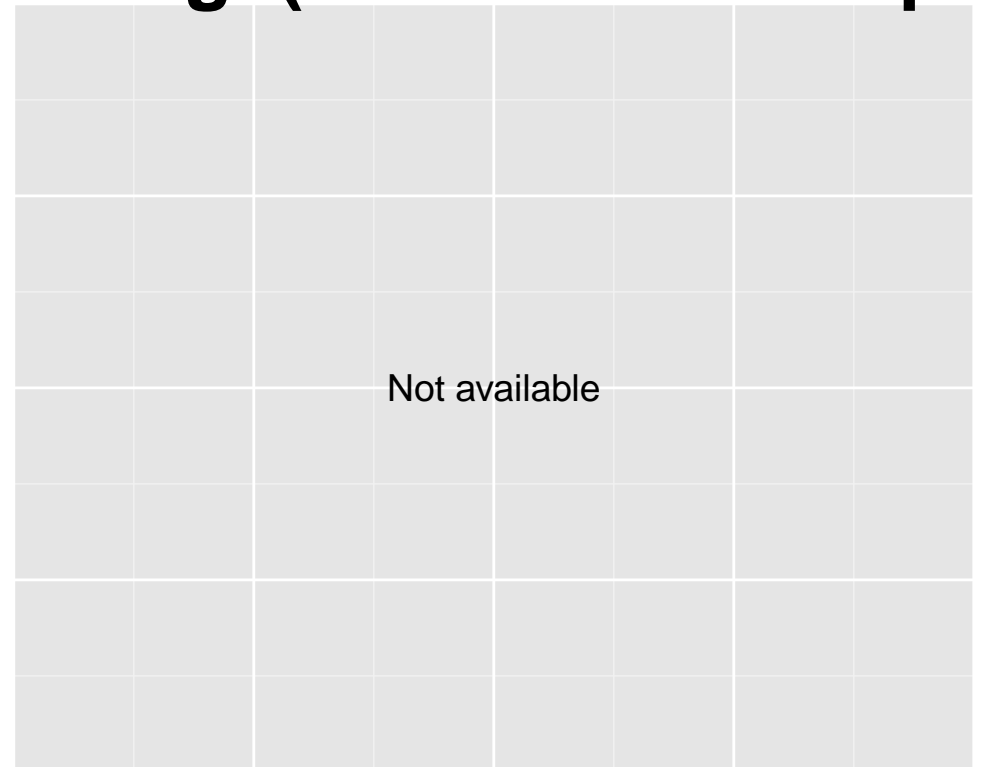

Supplement: Supplementary file 353 [file 1]

# Rrm2b

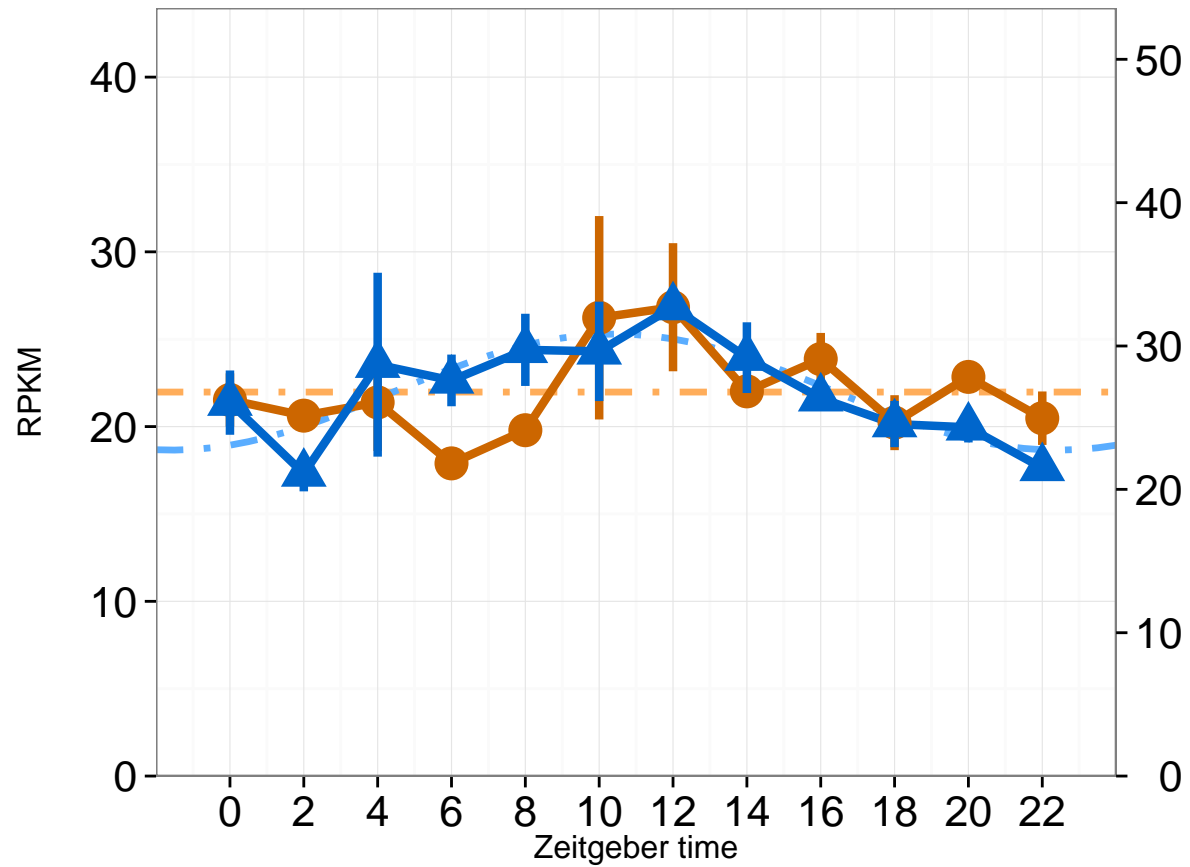

# Rrm2b

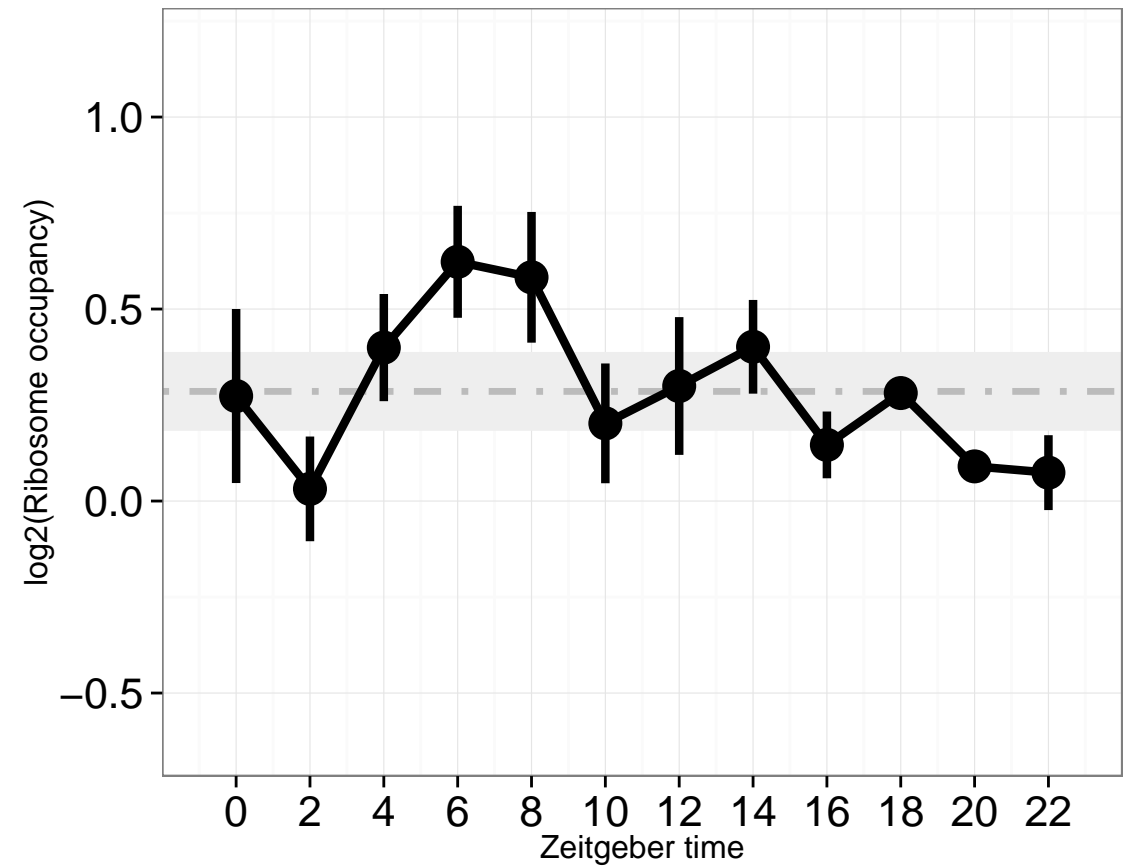

Supplement: Supplementary file 354 [file 1]

## MgII

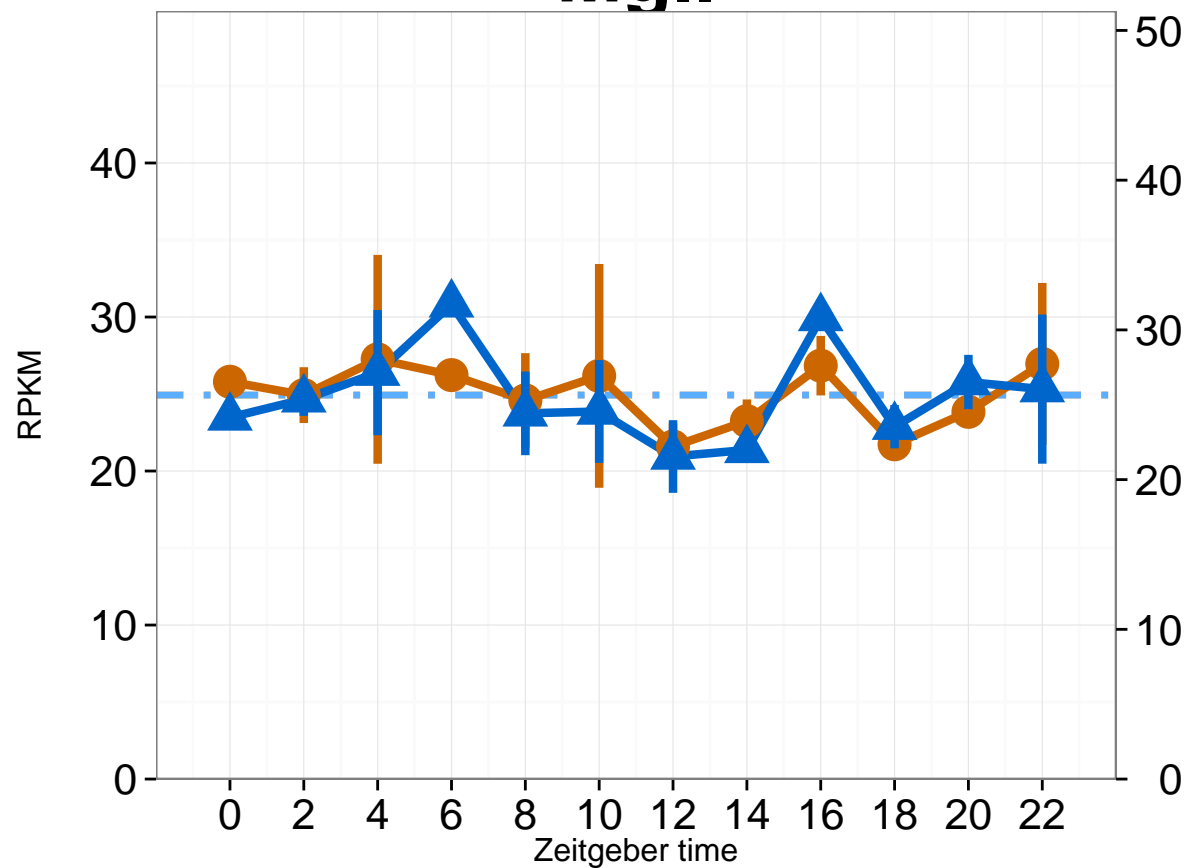

## MgII

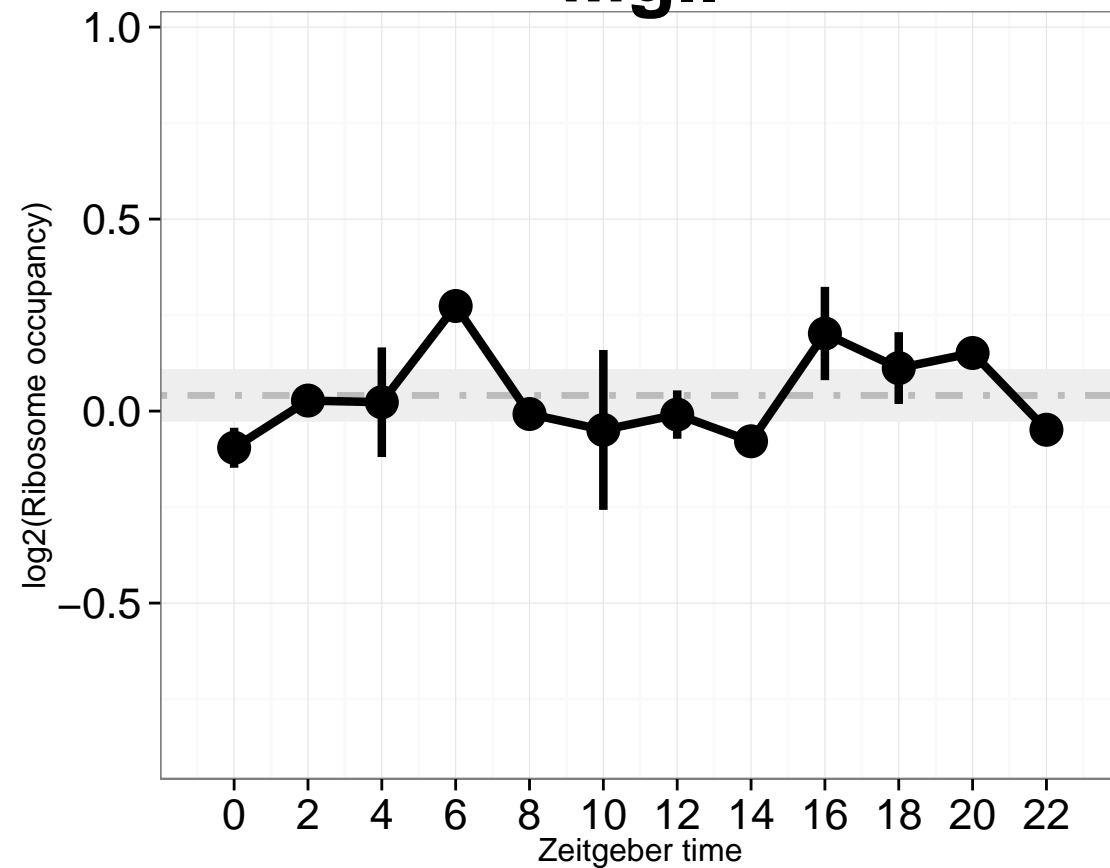

Supplement: Supplementary file 355 [file 1]

## Fdps

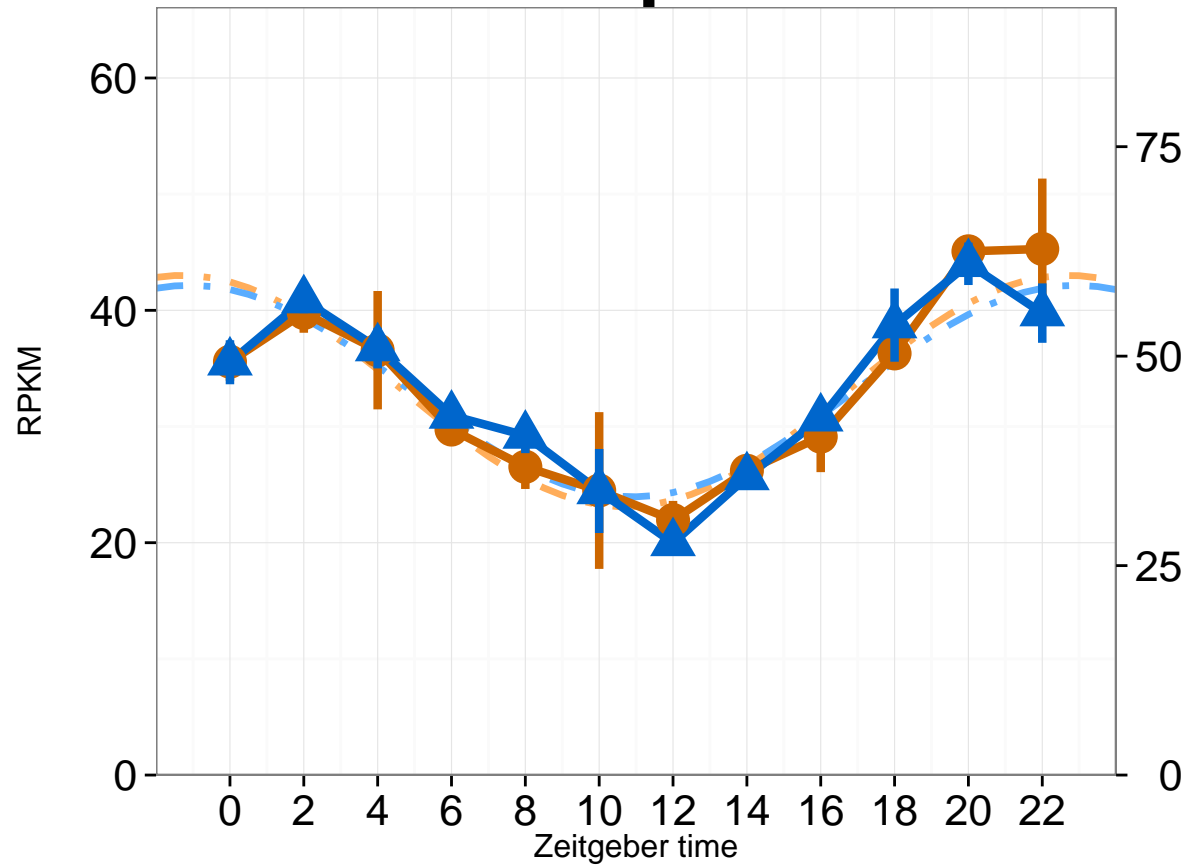

## Fdps

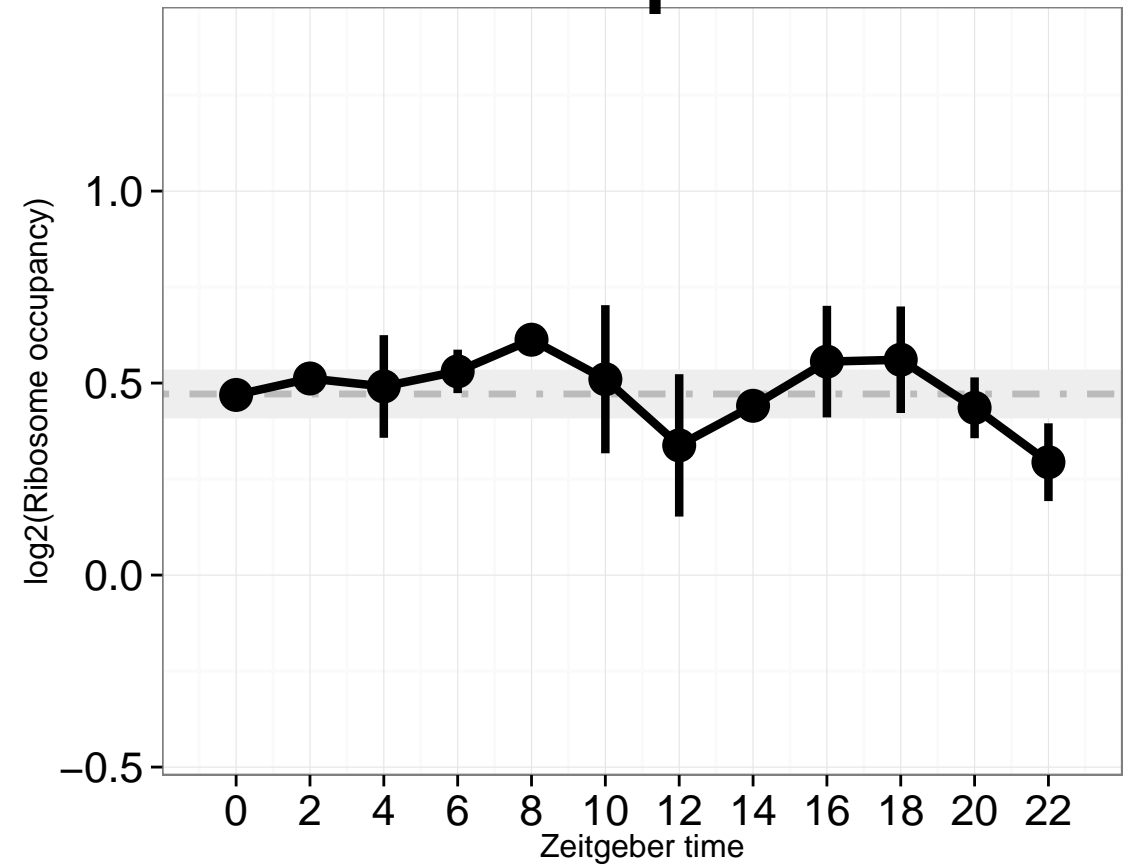

Supplement: Supplementary file 356 [file 1]

## Fbxo22

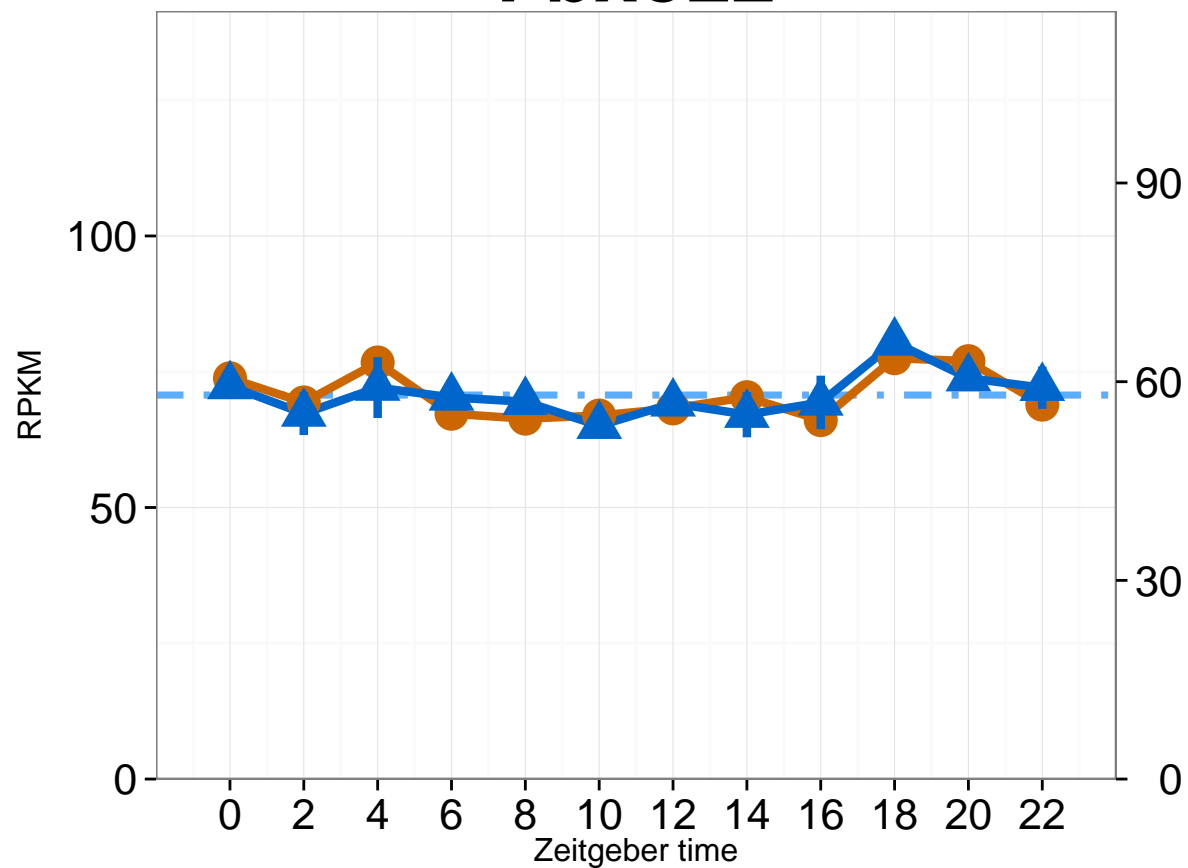

## Fbxo22

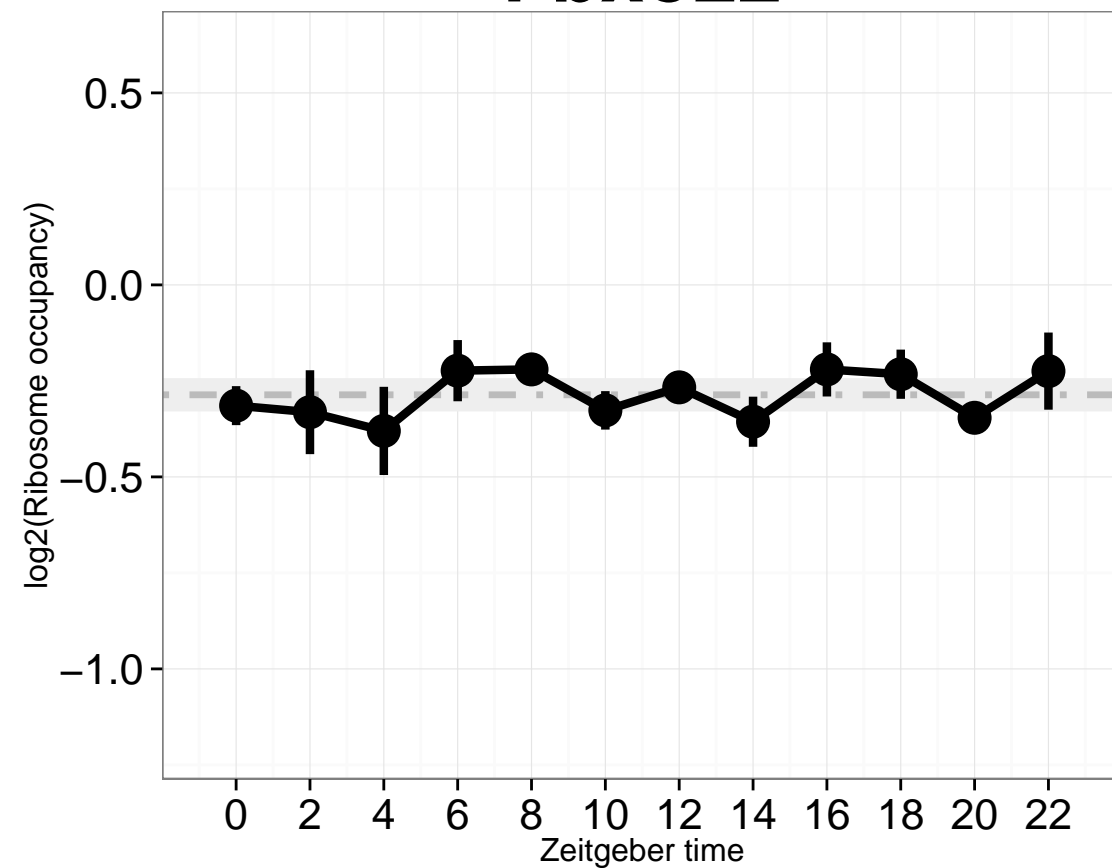

Supplement: Supplementary file 357 [file 1]

## Nr2c1

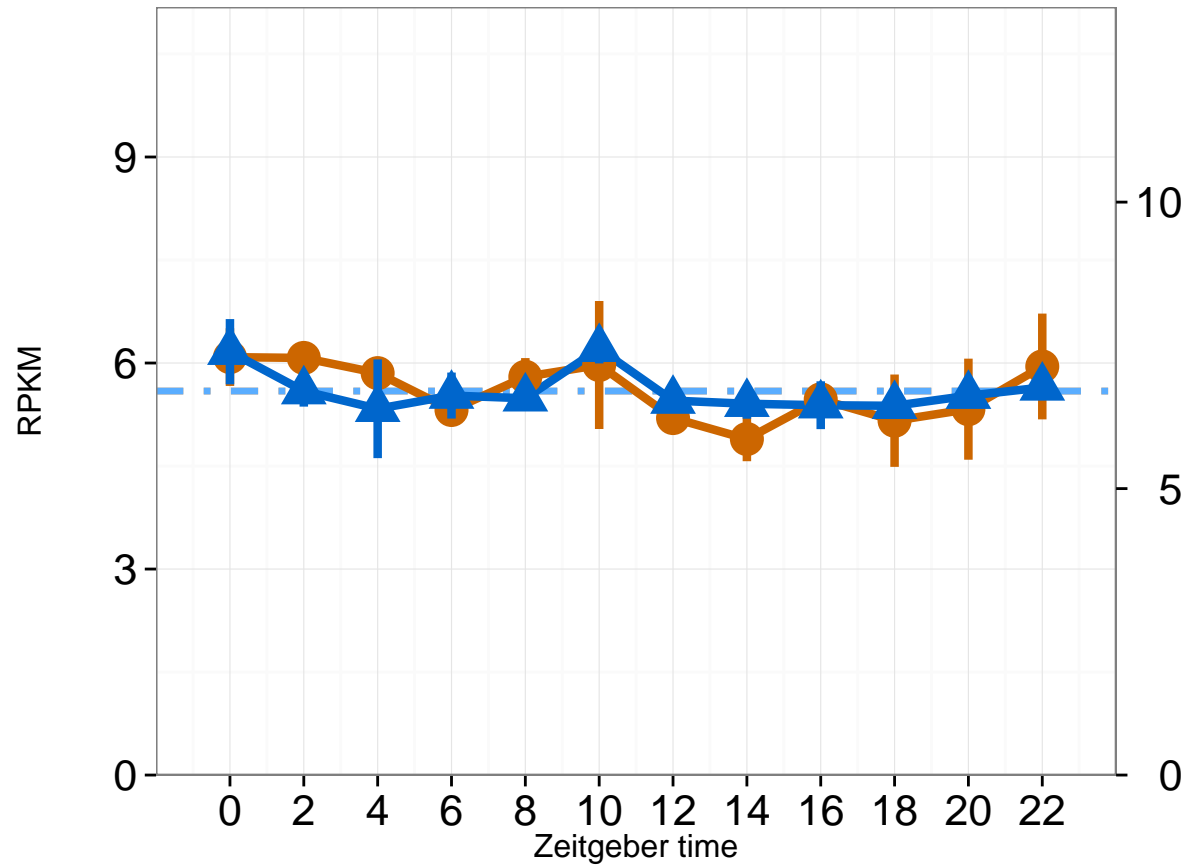

## Nr2c1

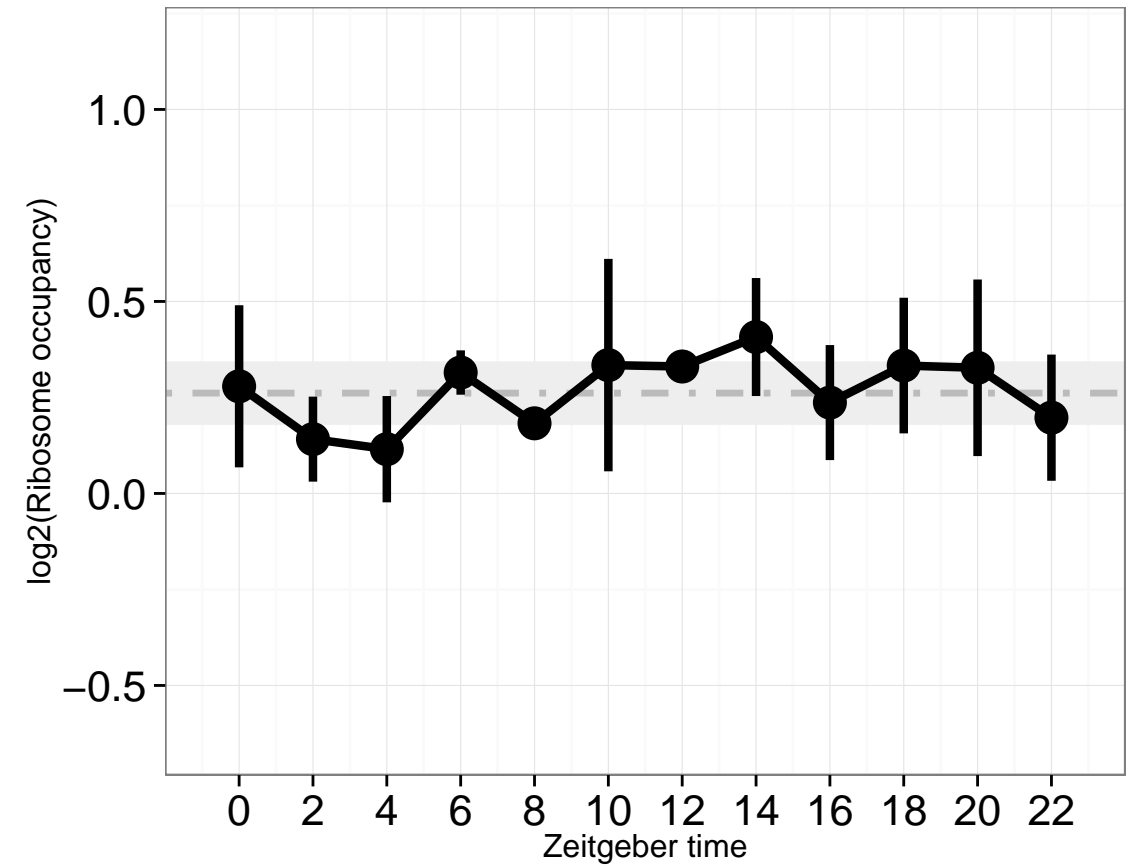

Supplement: Supplementary file 358 [file 1]

## Pld3

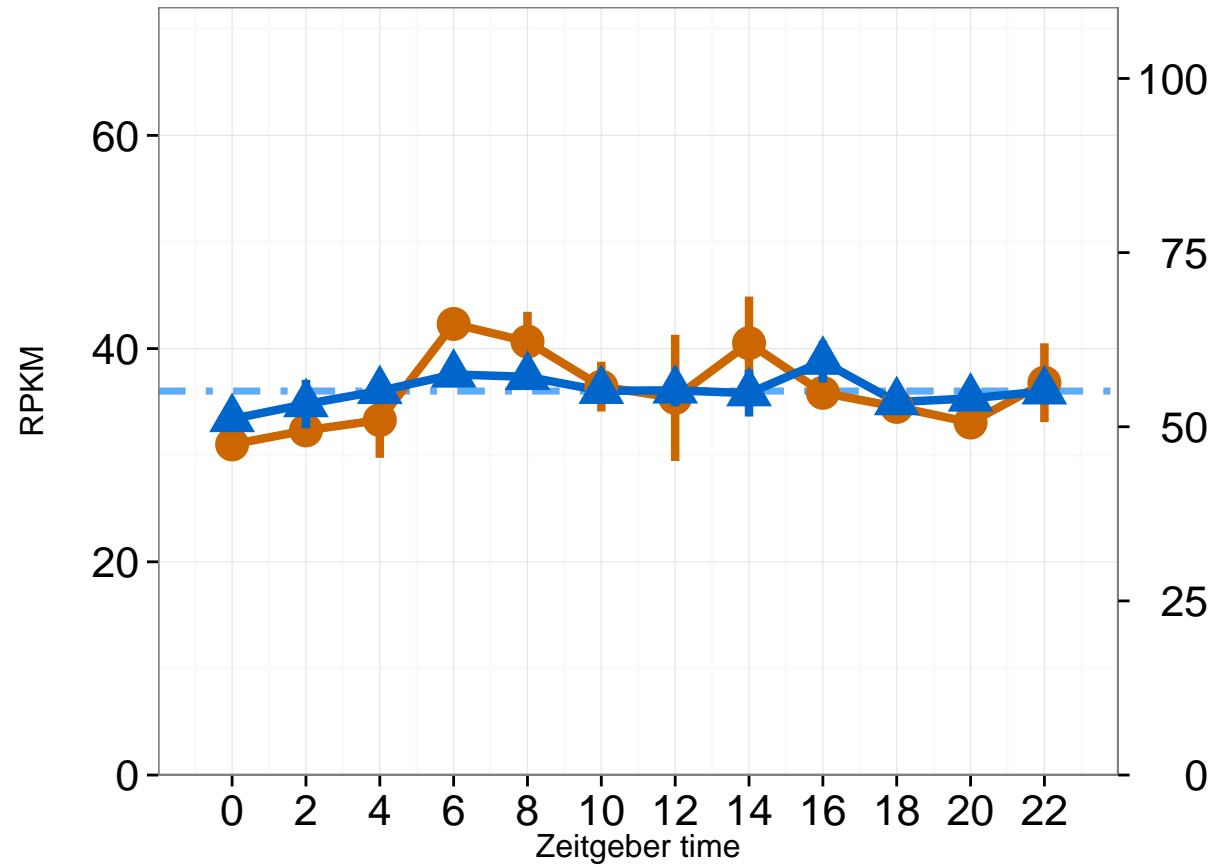

## Pld3

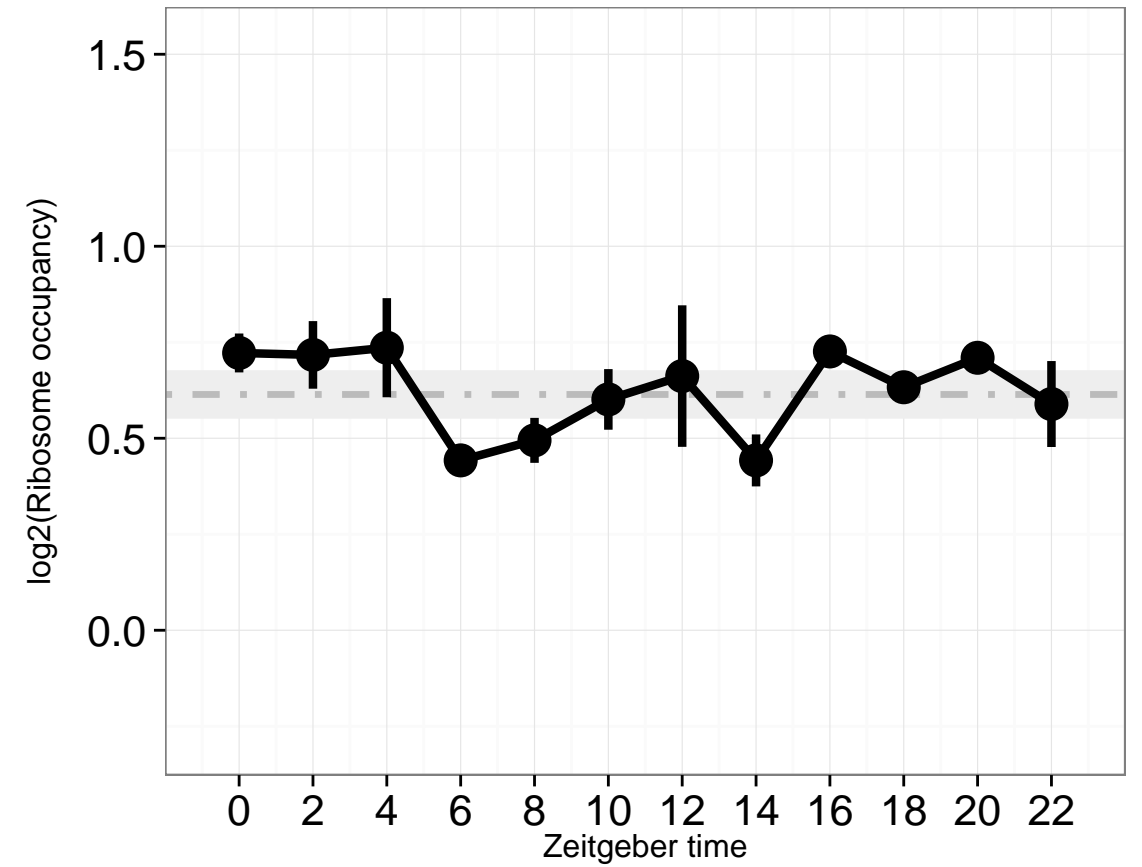

Supplement: Supplementary file 359 [file 1]

## Gas2

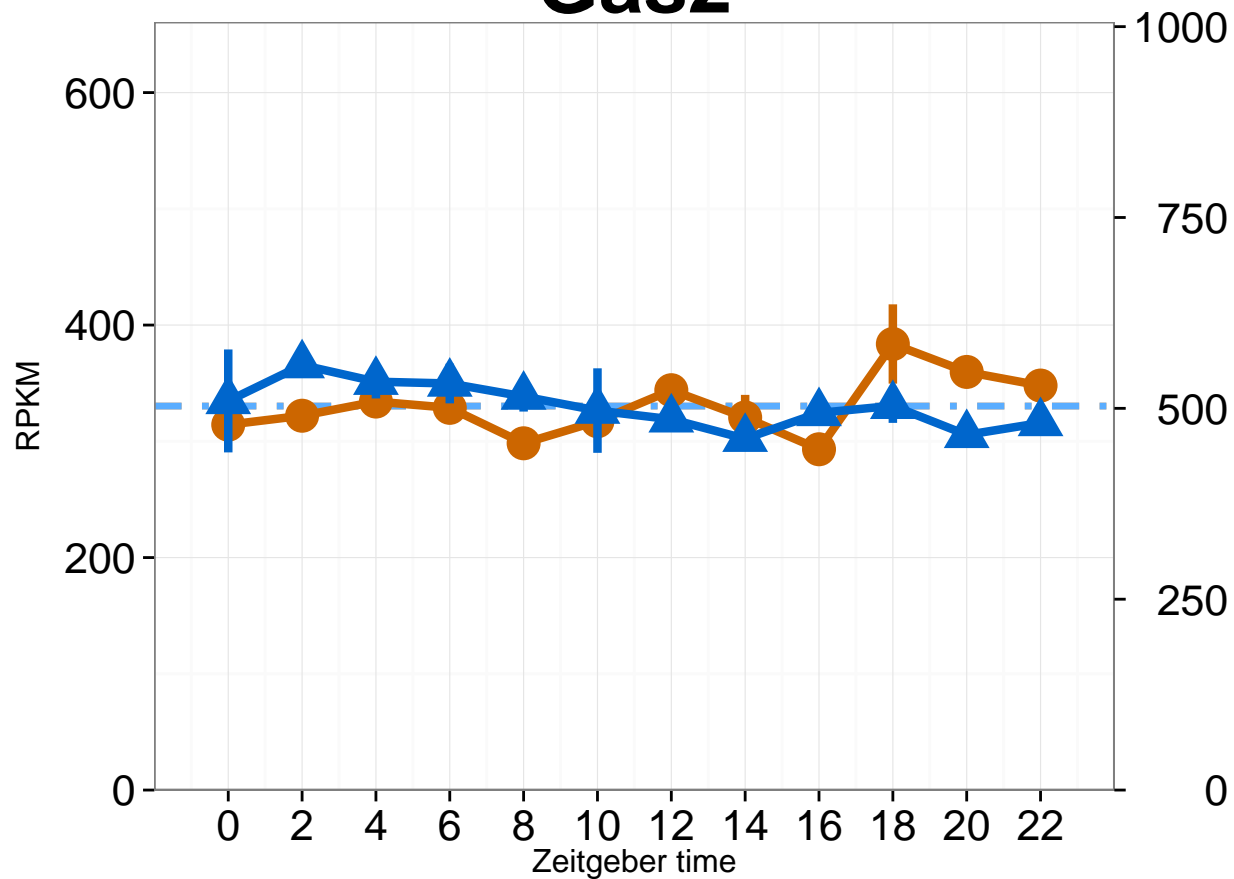

## Gas2

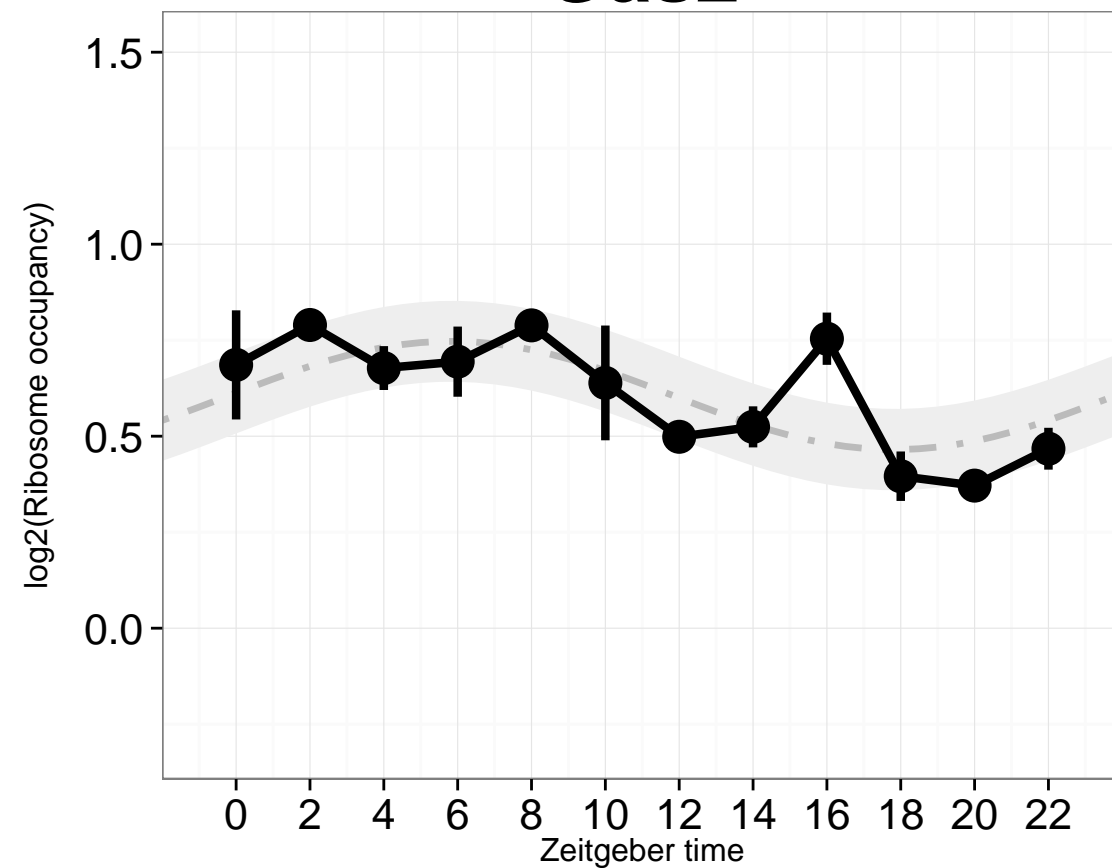

Supplement: Supplementary file 360 [file 1]

# Zfp788

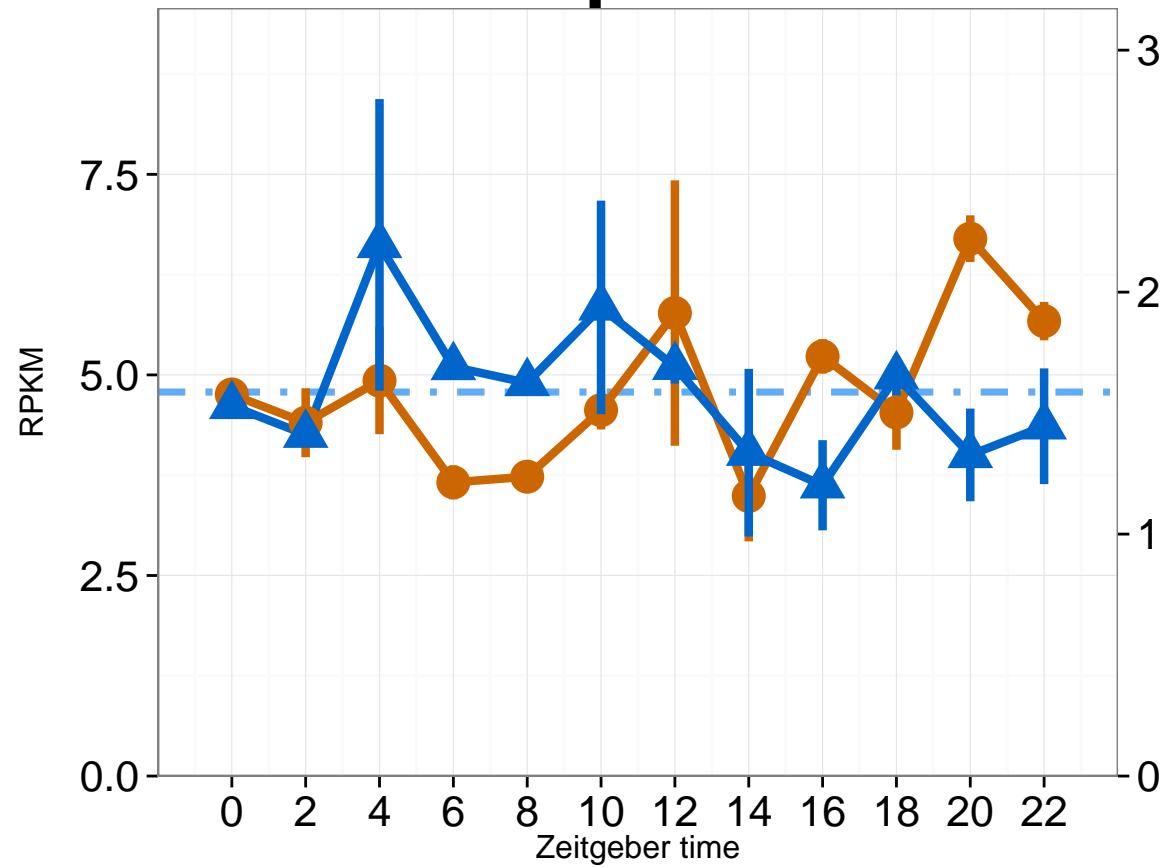

# Zfp788

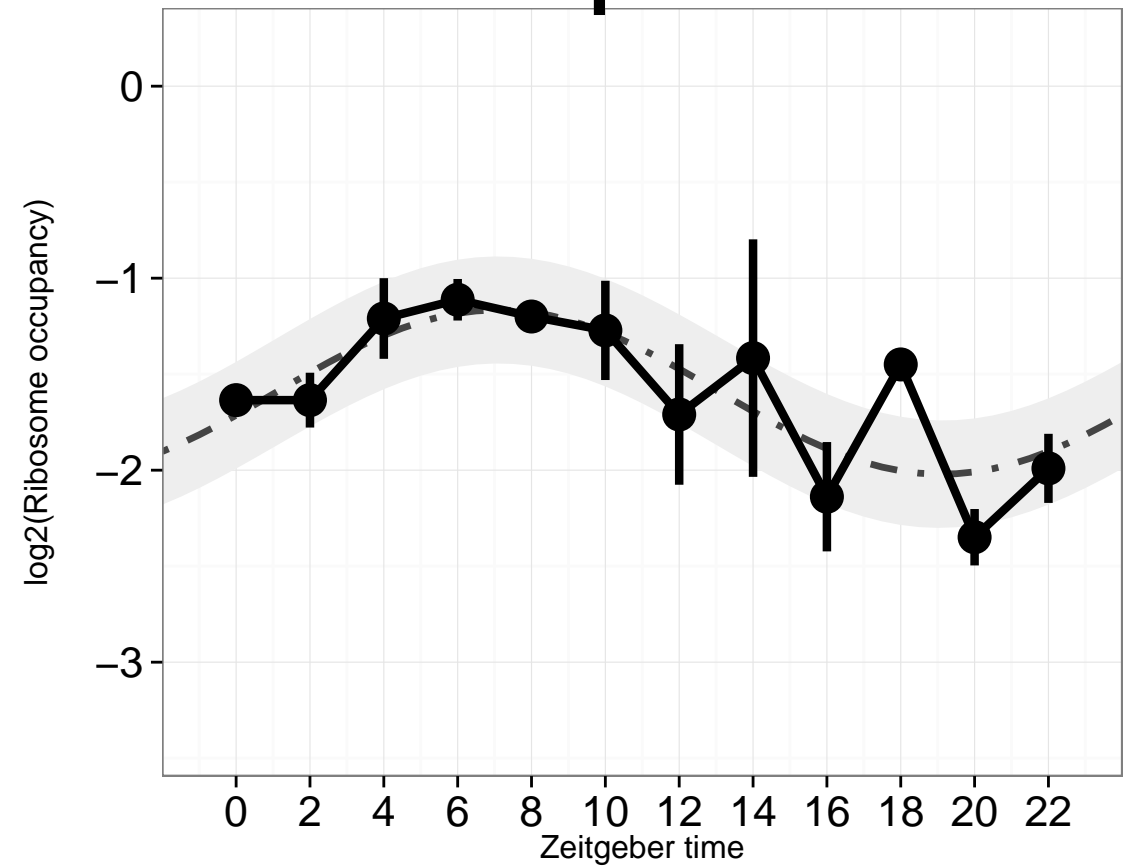

Supplement: Supplementary file 361 [file 1]

# Rundc3b

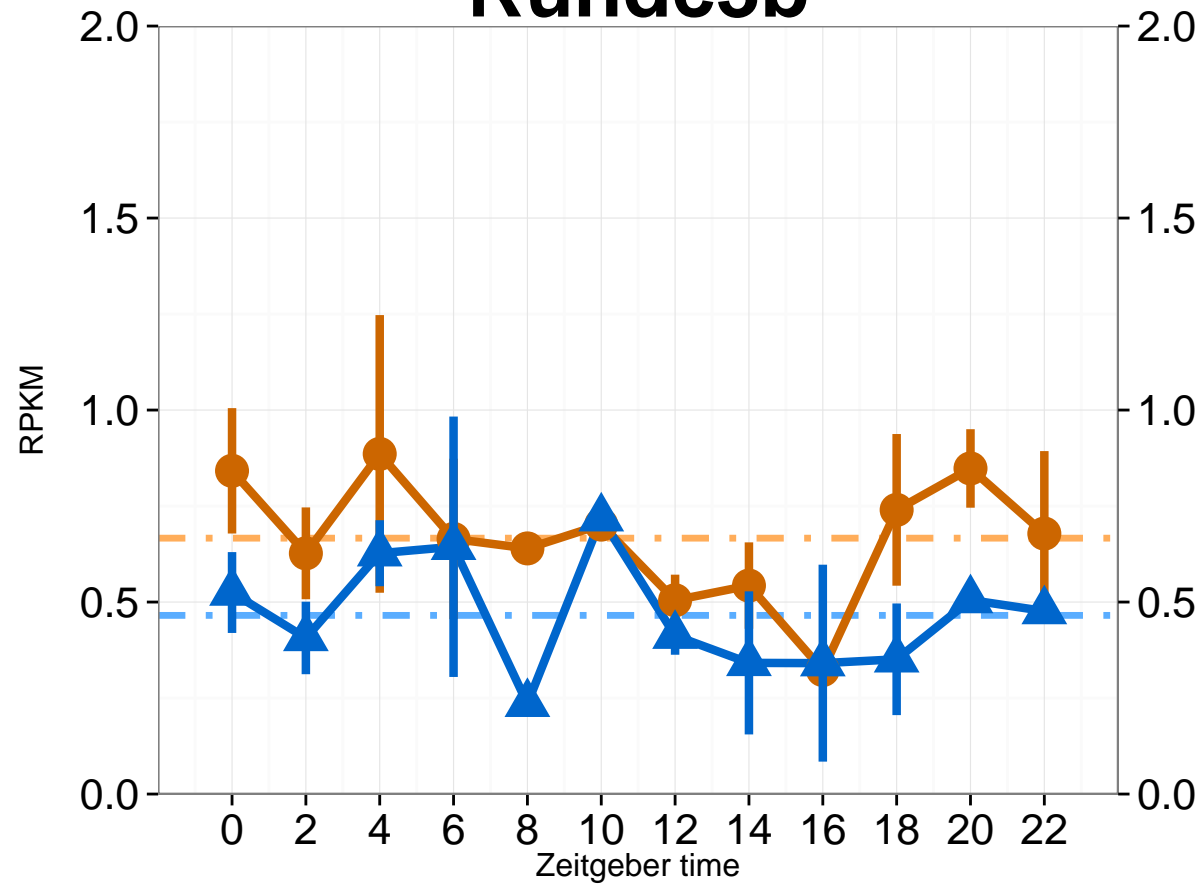

# Rundc3b

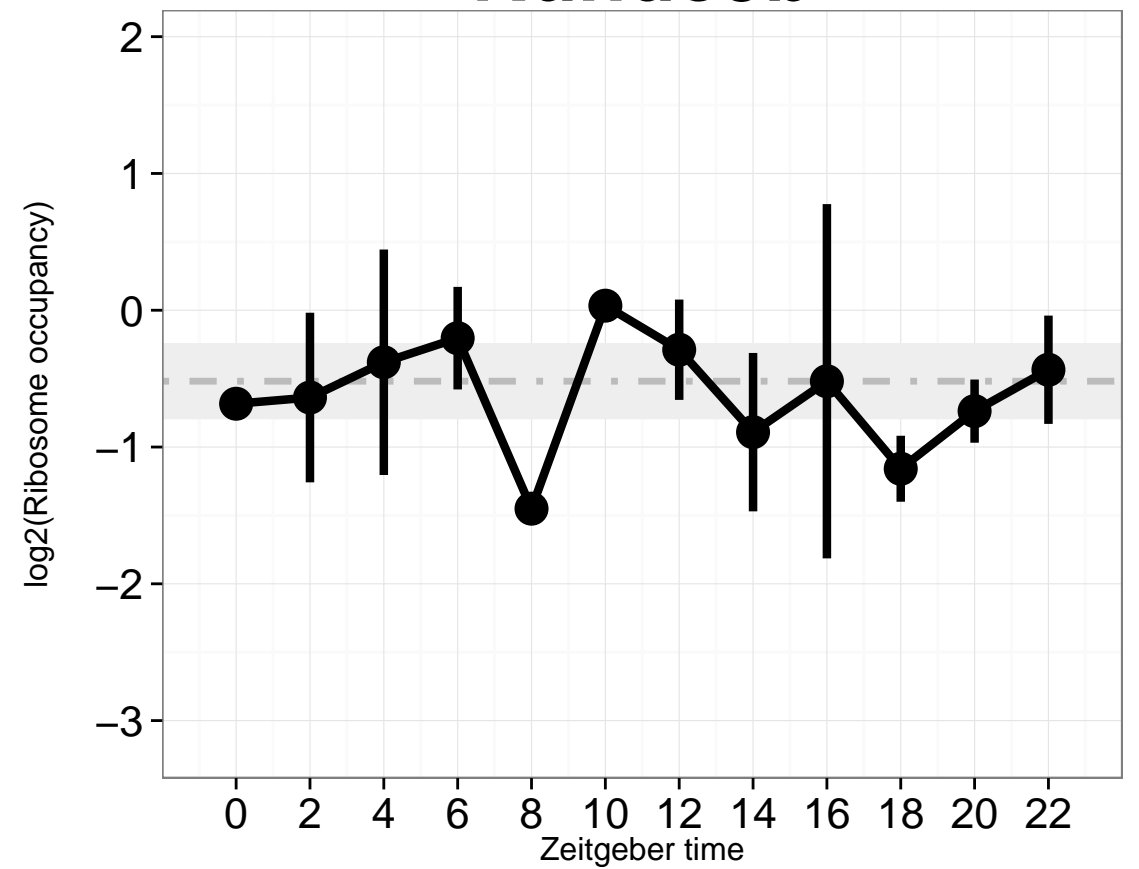

Supplement: Supplementary file 362 [file 1]

**Ms4a4c TR**

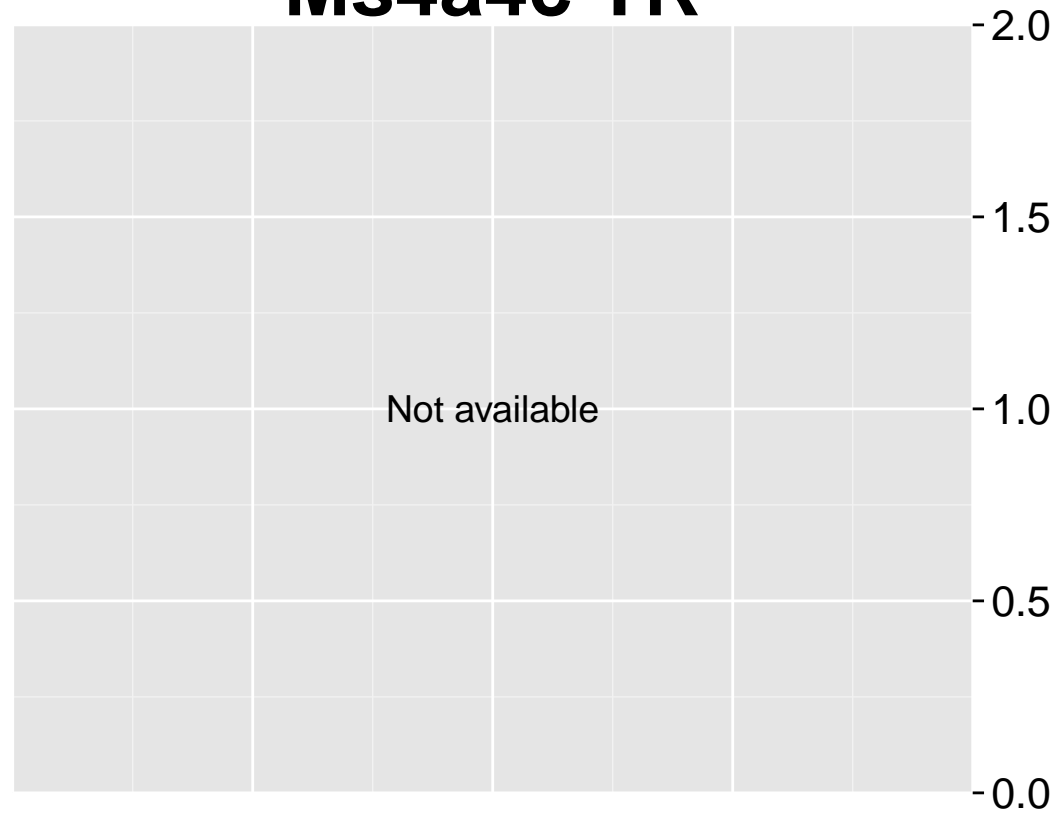

**Ms4a4c log2(Ribosome occupancy**

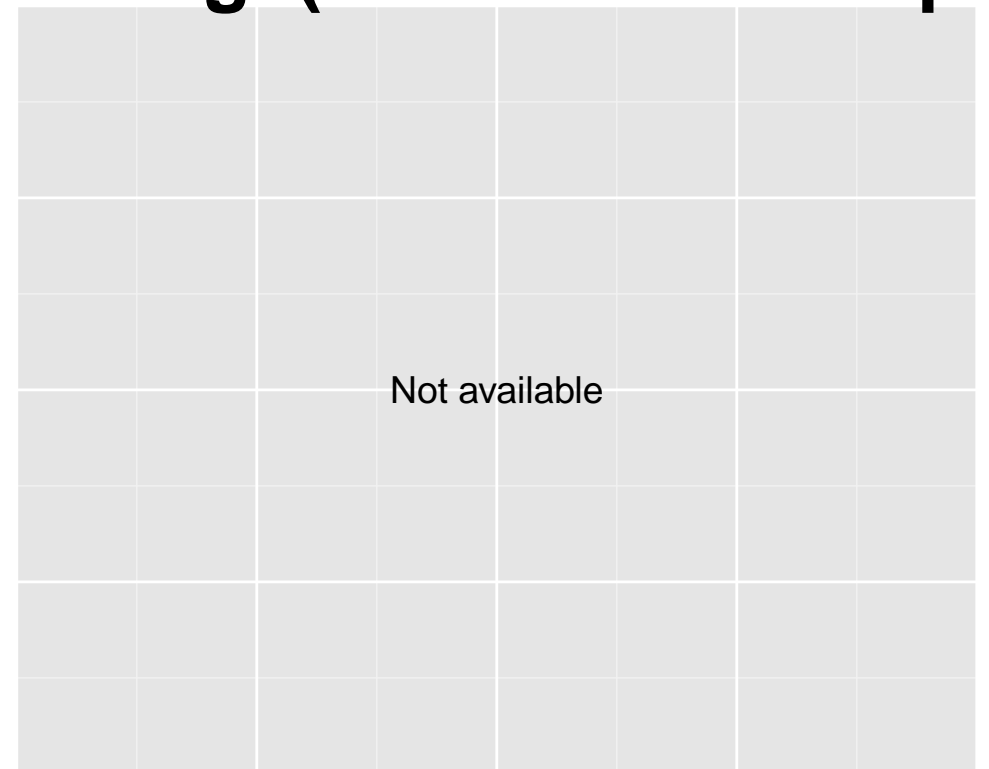

Supplement: Supplementary file 363 [file 1]

## Vapa

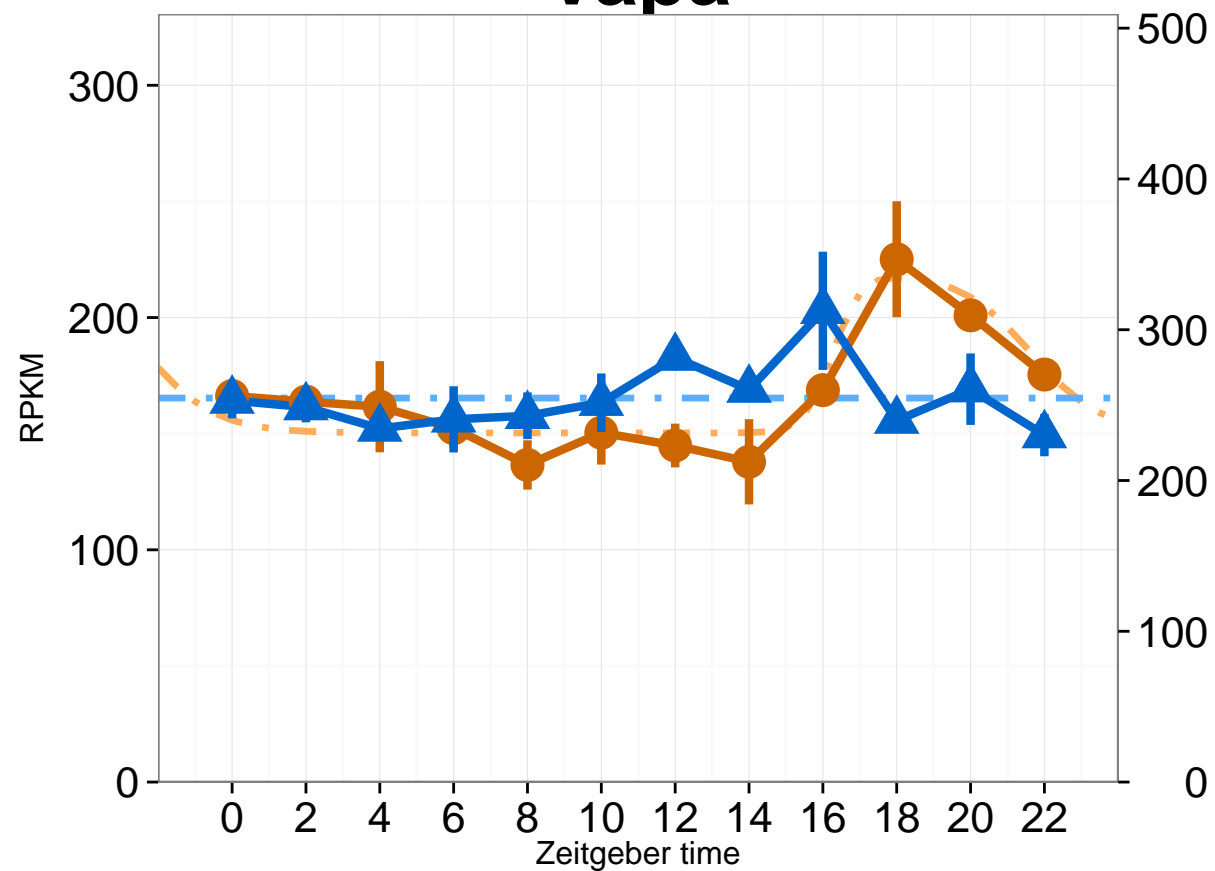

## Vapa

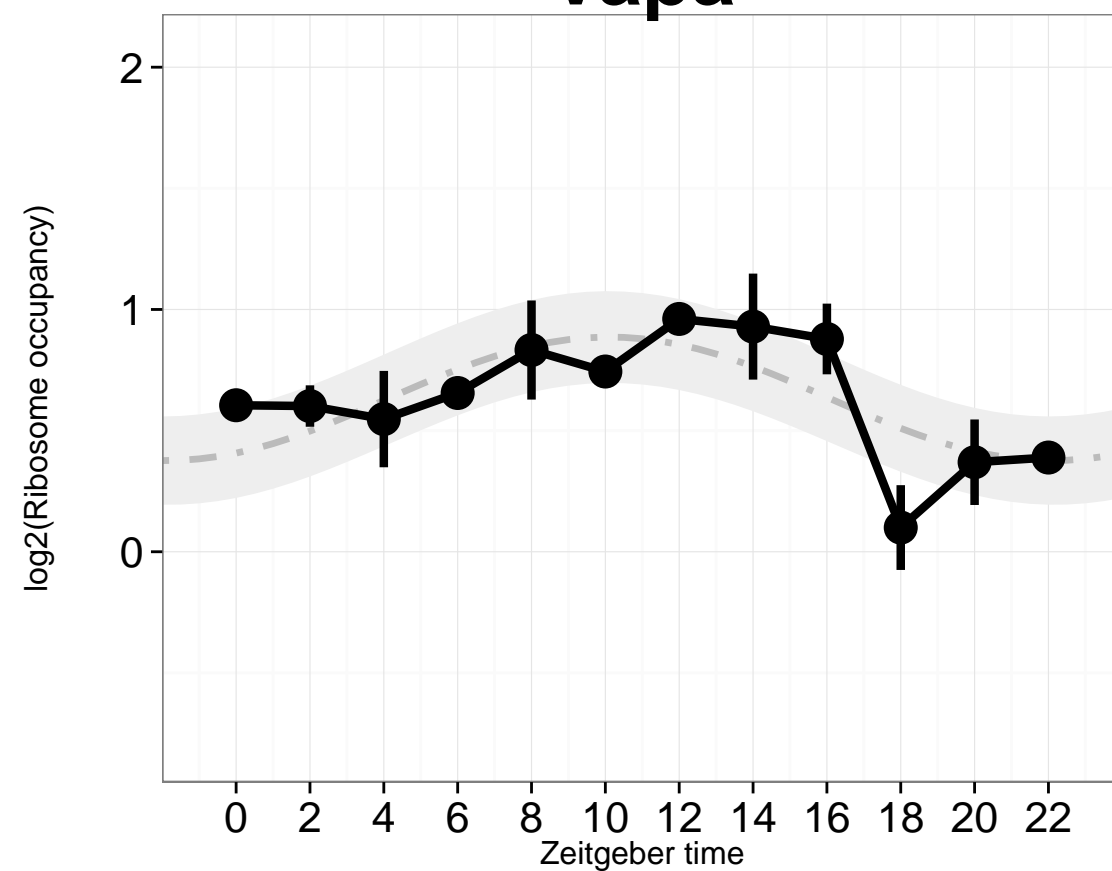

Supplement: Supplementary file 364 [file 1]

# Gm3550

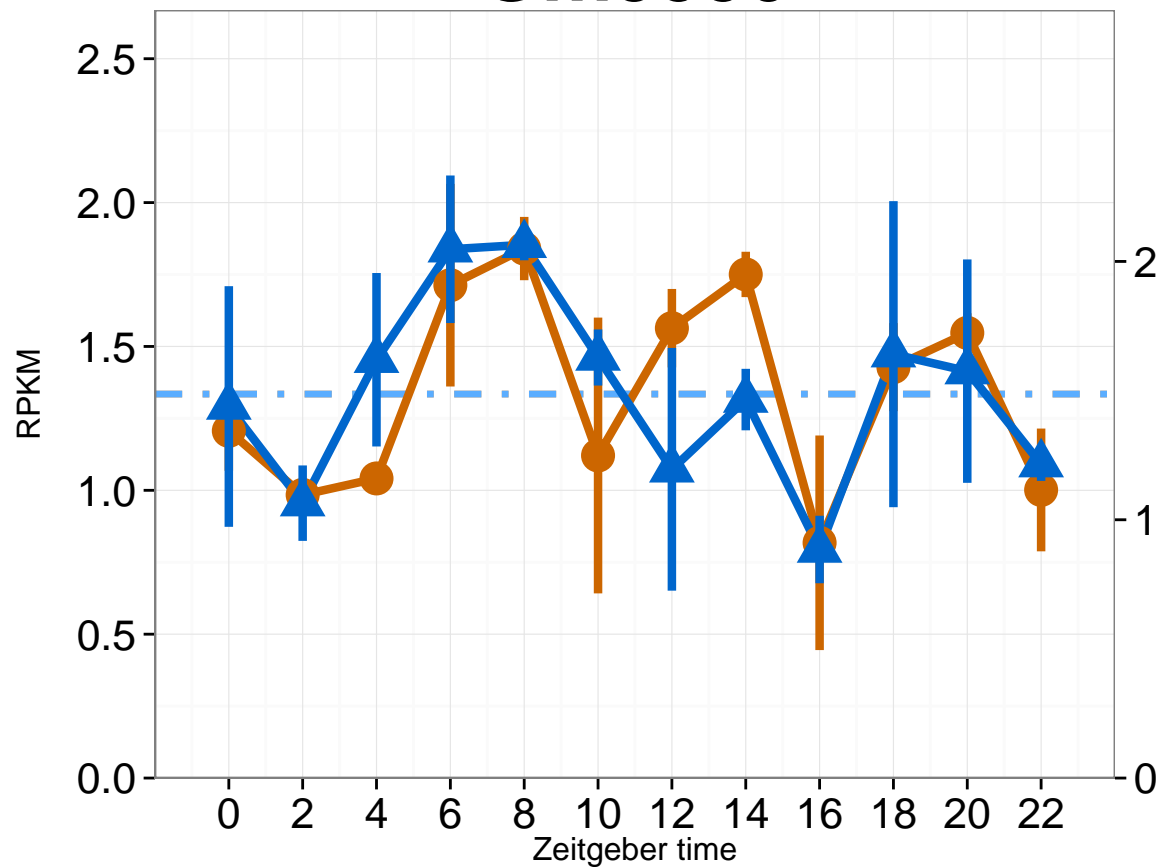

# Gm3550

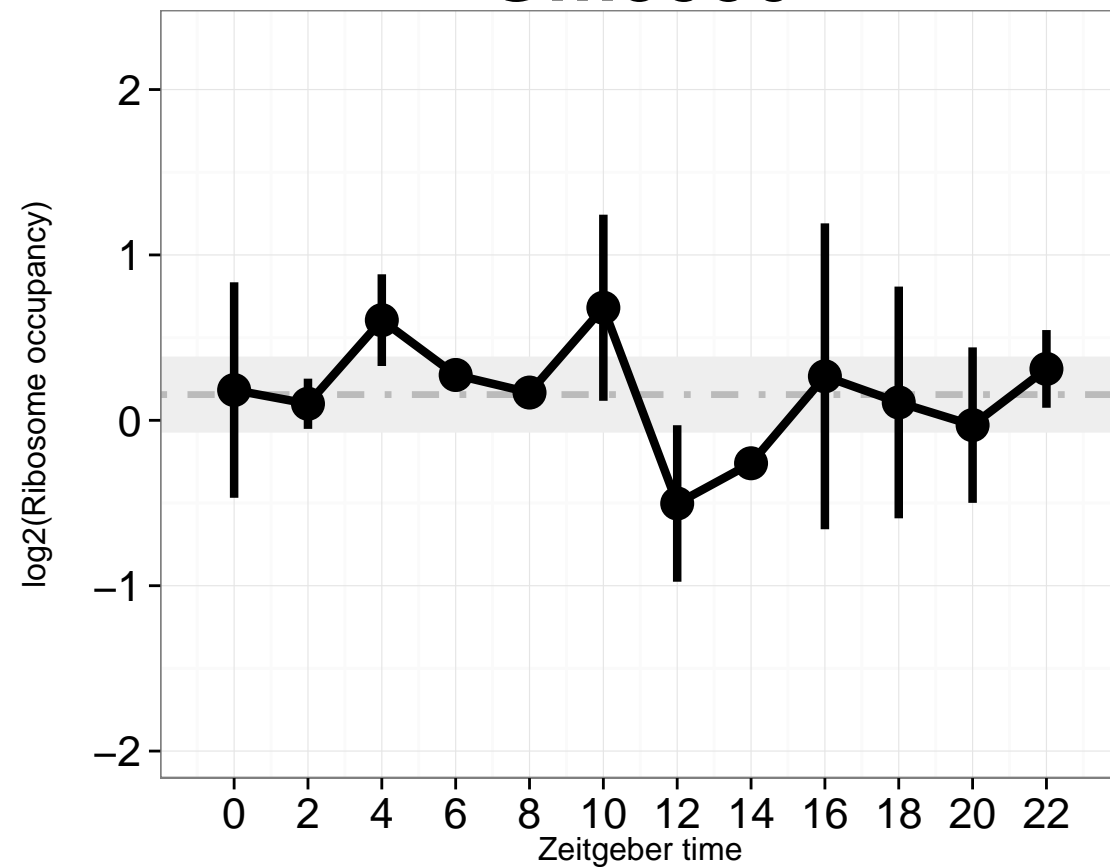

Supplement: Supplementary file 365 [file 1]

# Zbtb37

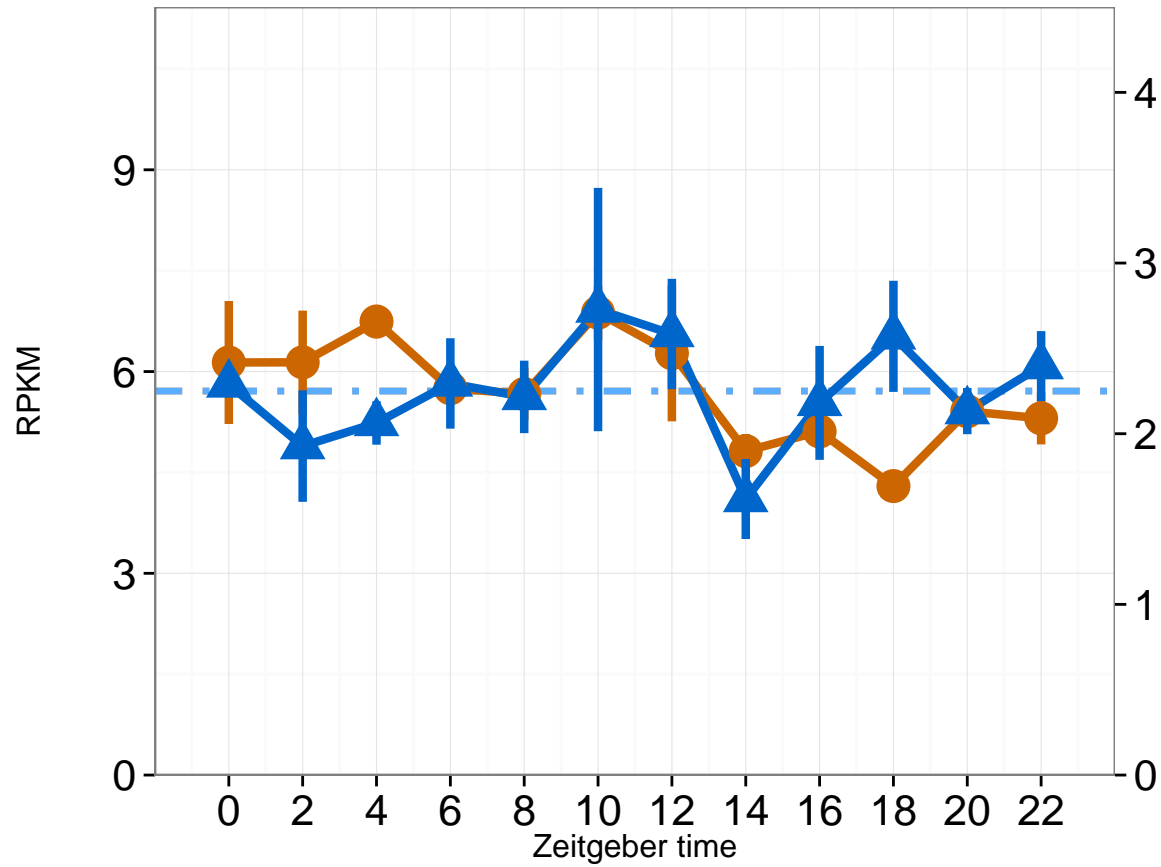

# Zbtb37

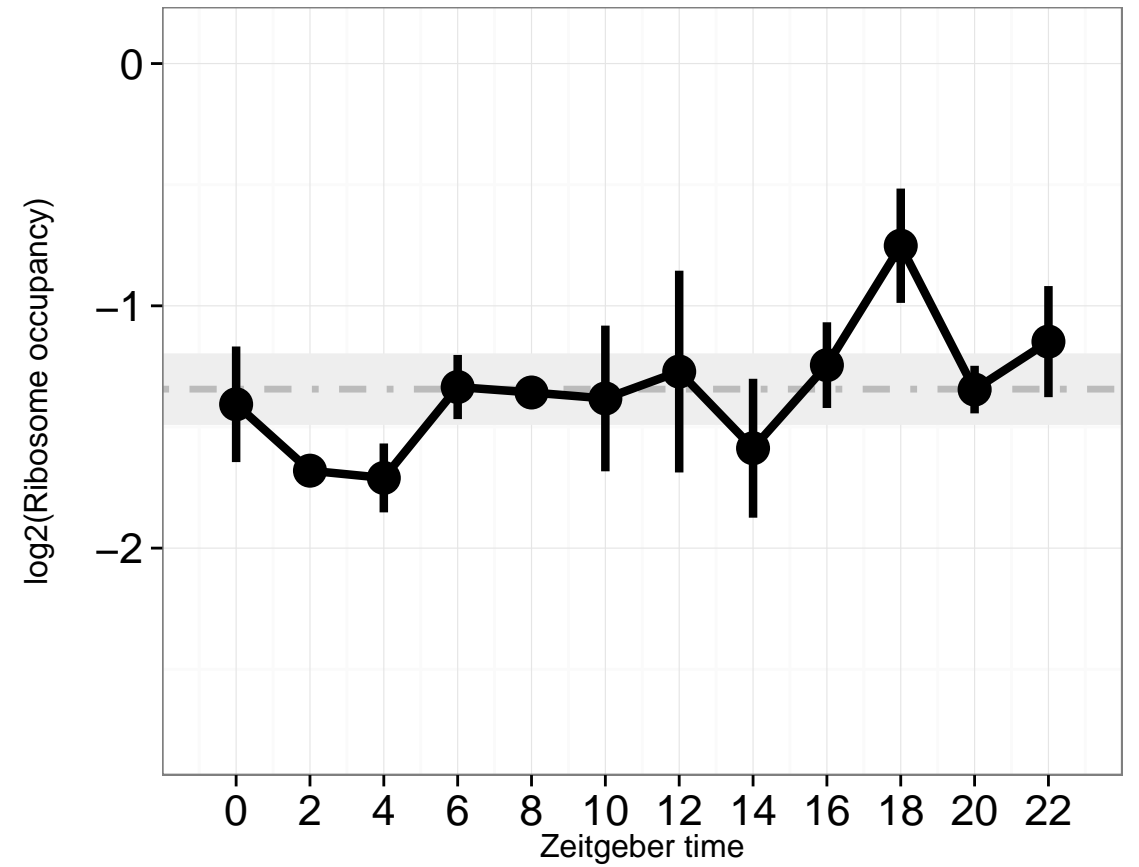

Supplement: Supplementary file 366 [file 1]

## Papss2

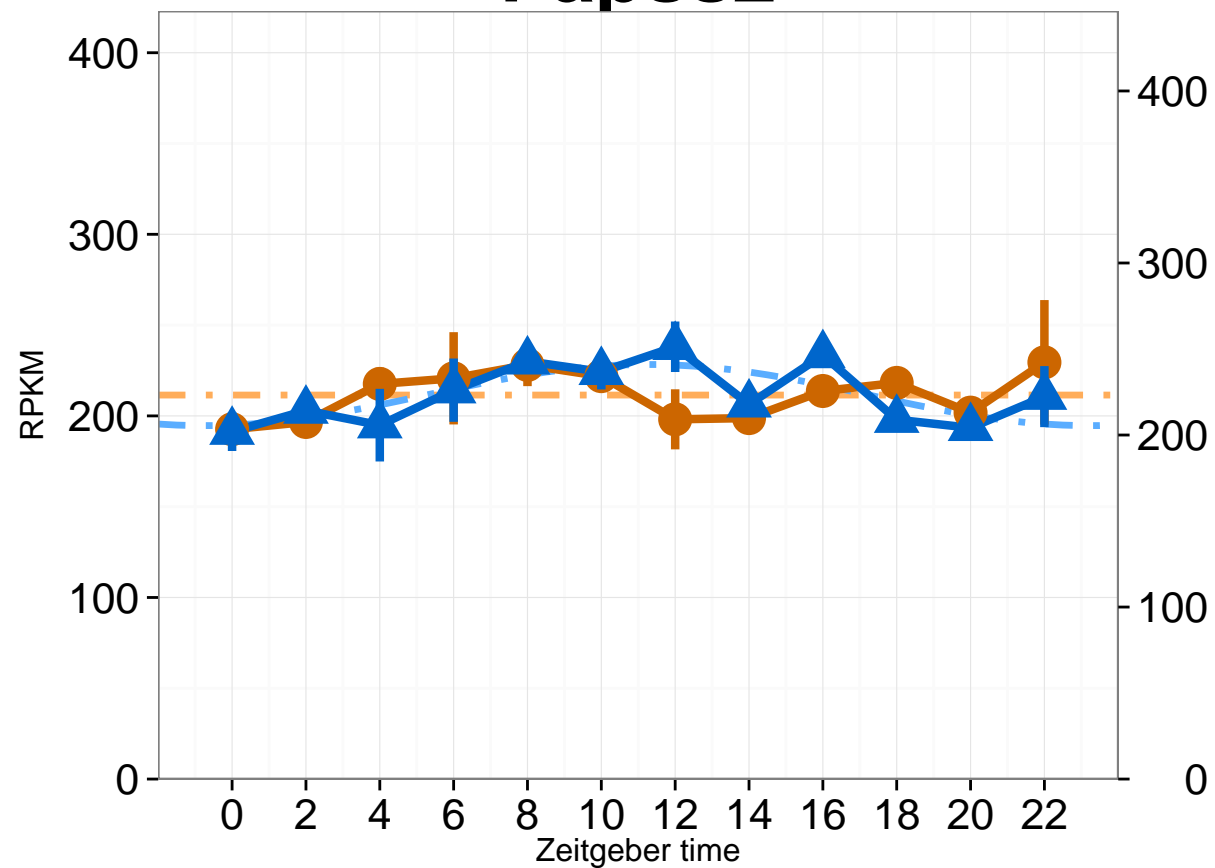

## Papss2

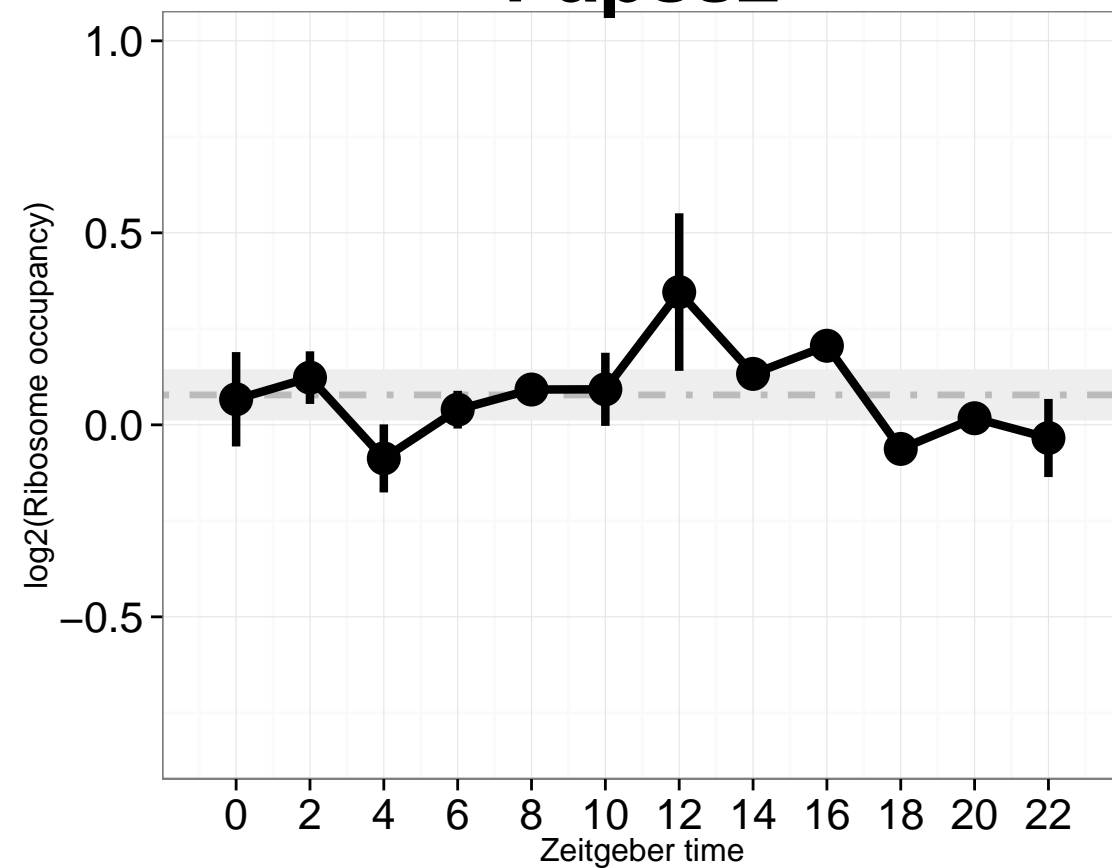

Supplement: Supplementary file 367 [file 1]

# Pomt2

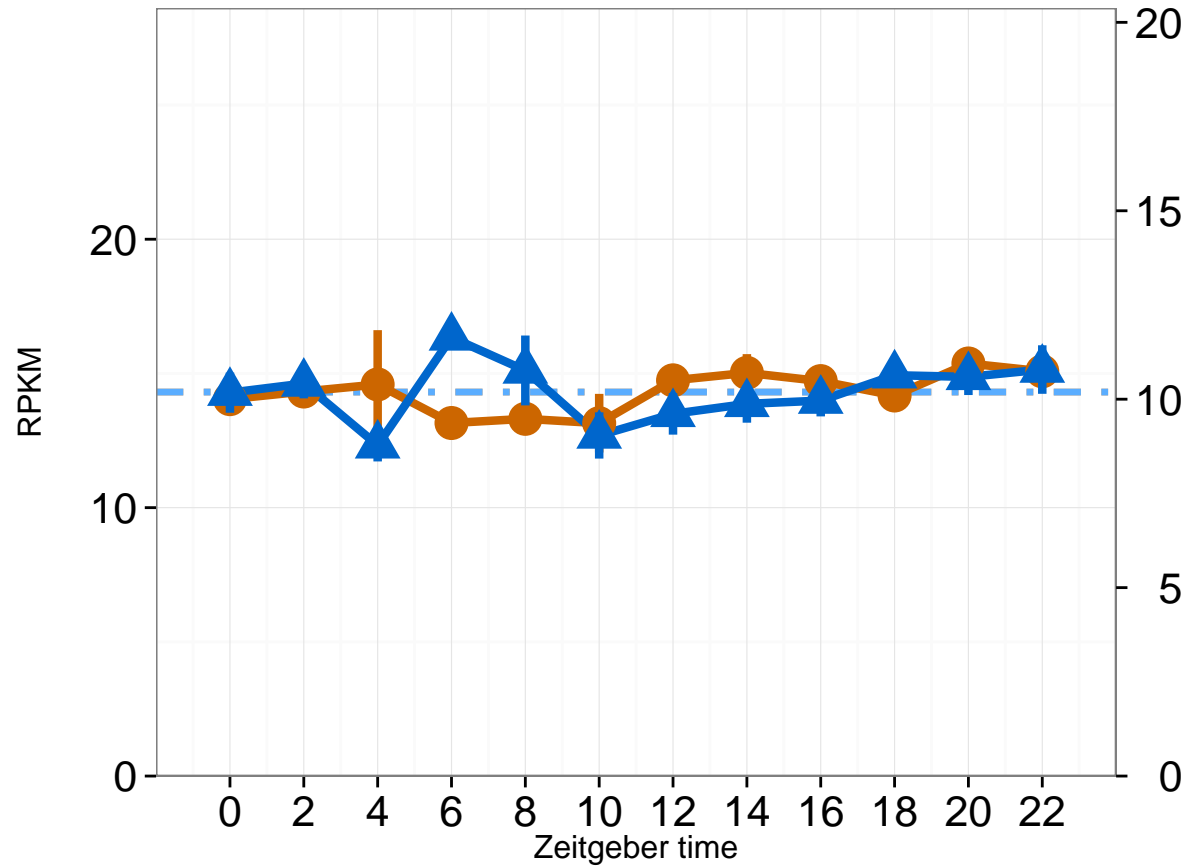

# Pomt2

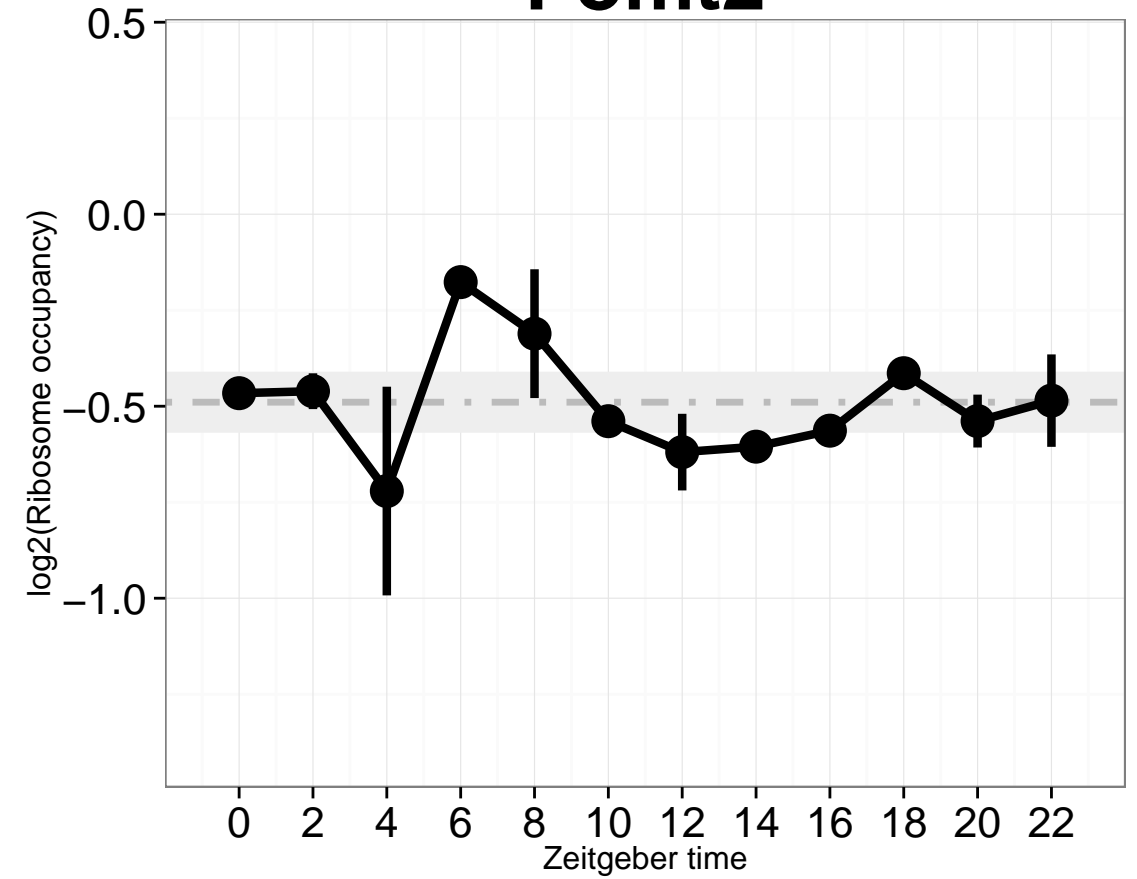

Supplement: Supplementary file 368 [file 1]

# Clic1

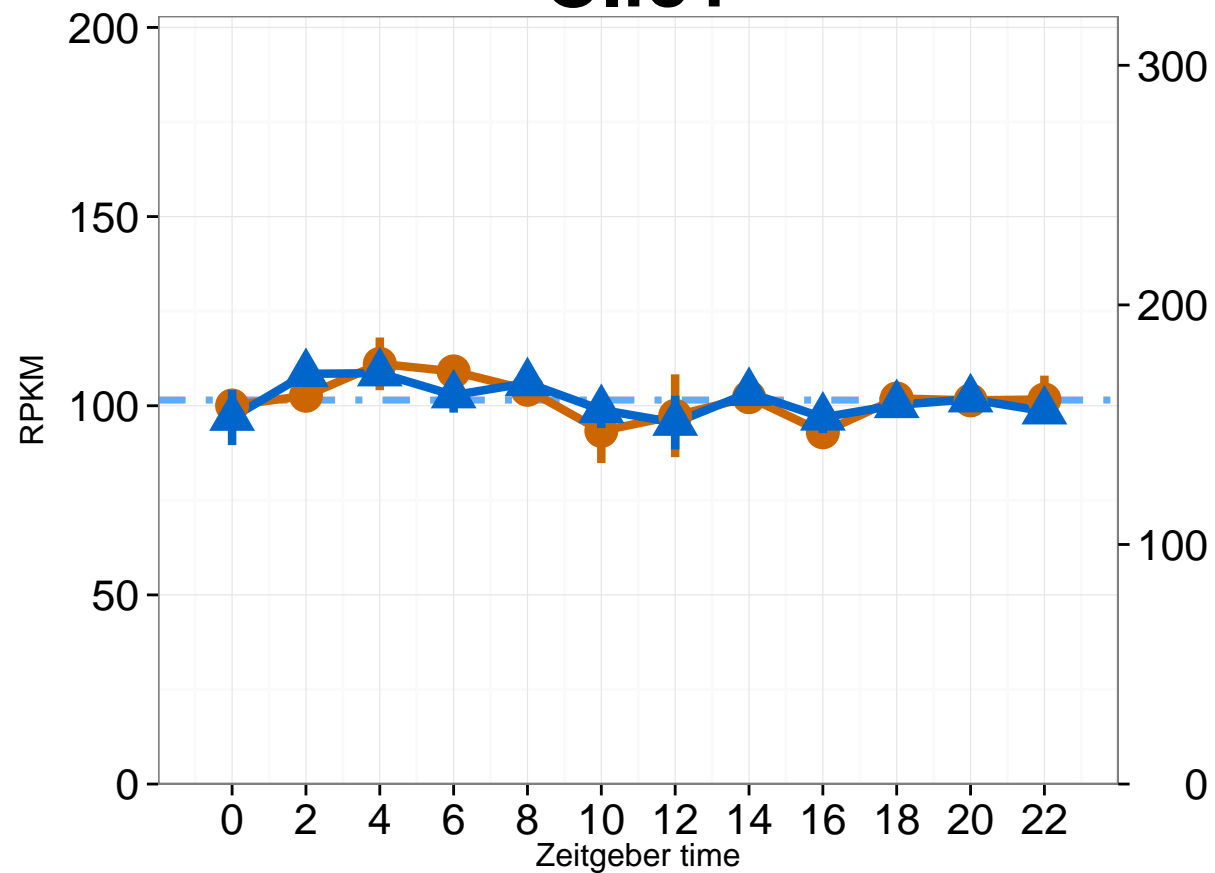

# Clic1

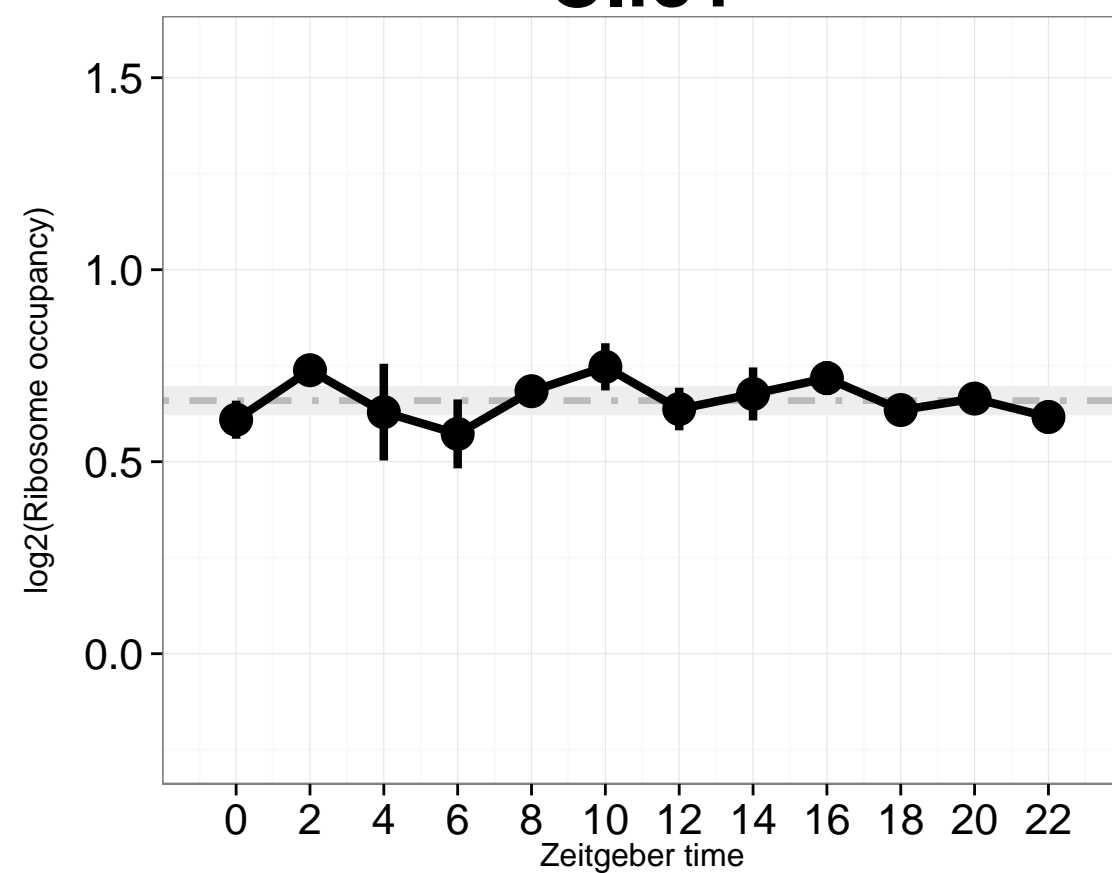

Supplement: Supplementary file 369 [file 1]

## Ypel3

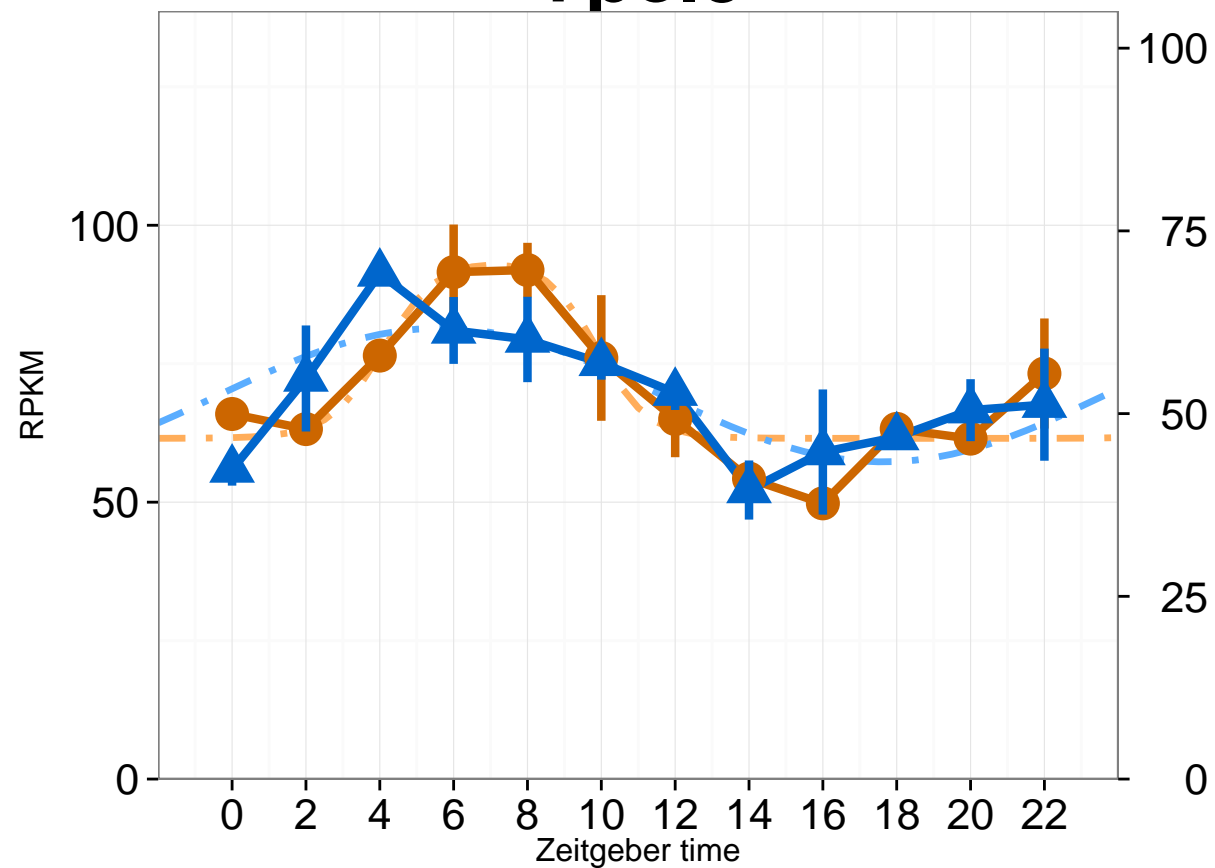

## Ypel3

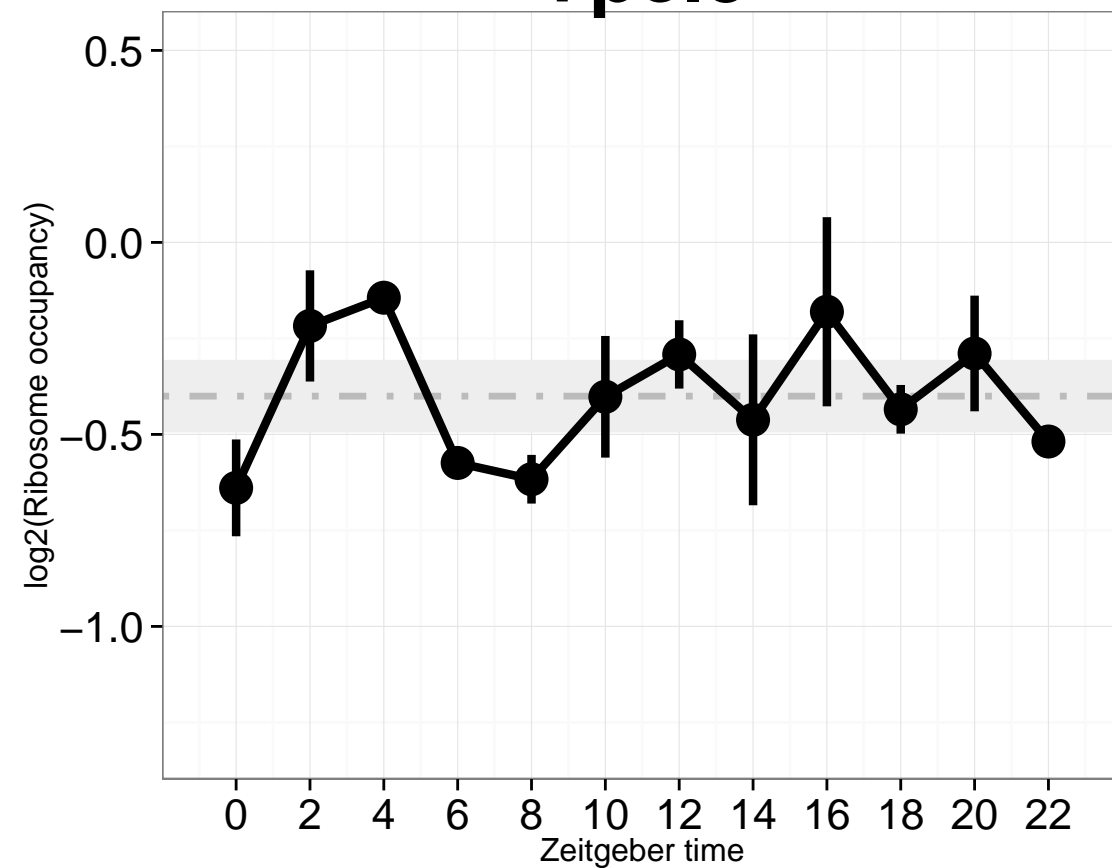

Supplement: Supplementary file 370 [file 1]

# Eef1a1

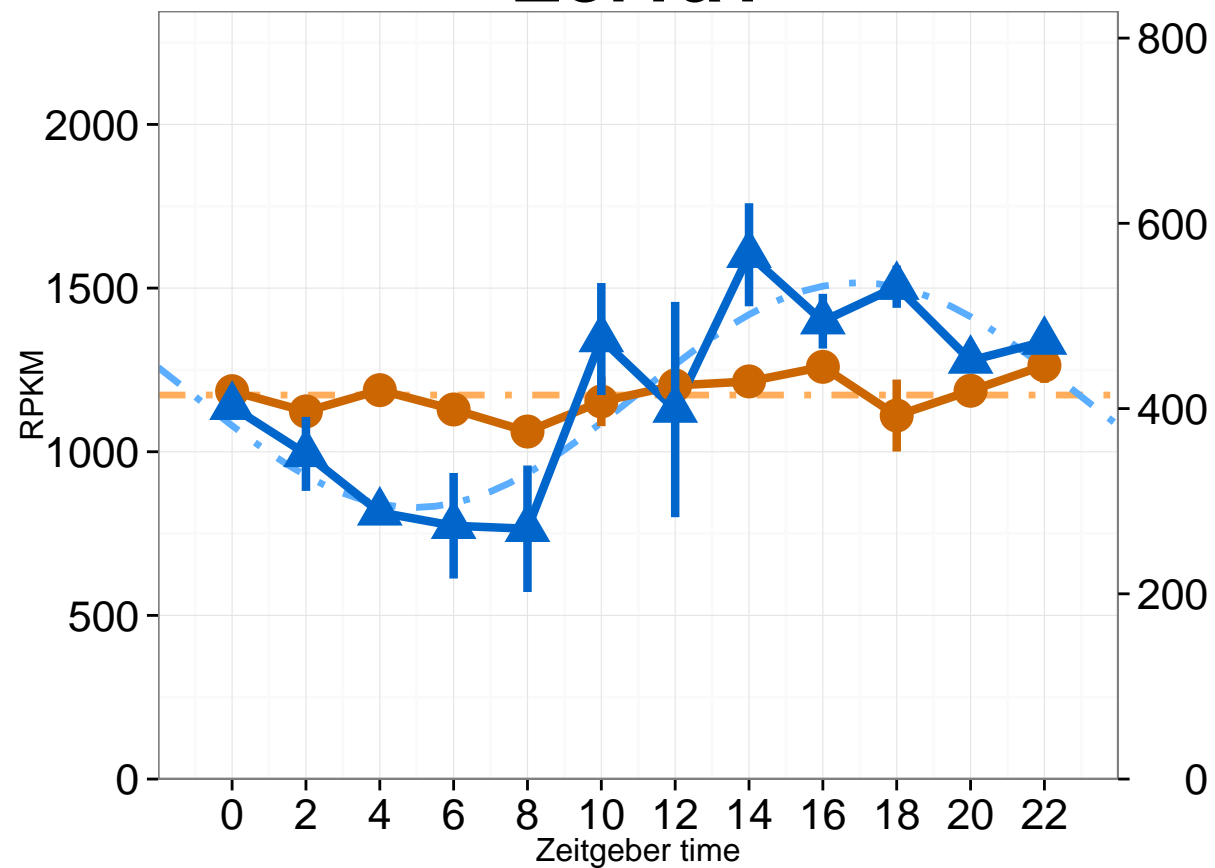

# Eef1a1

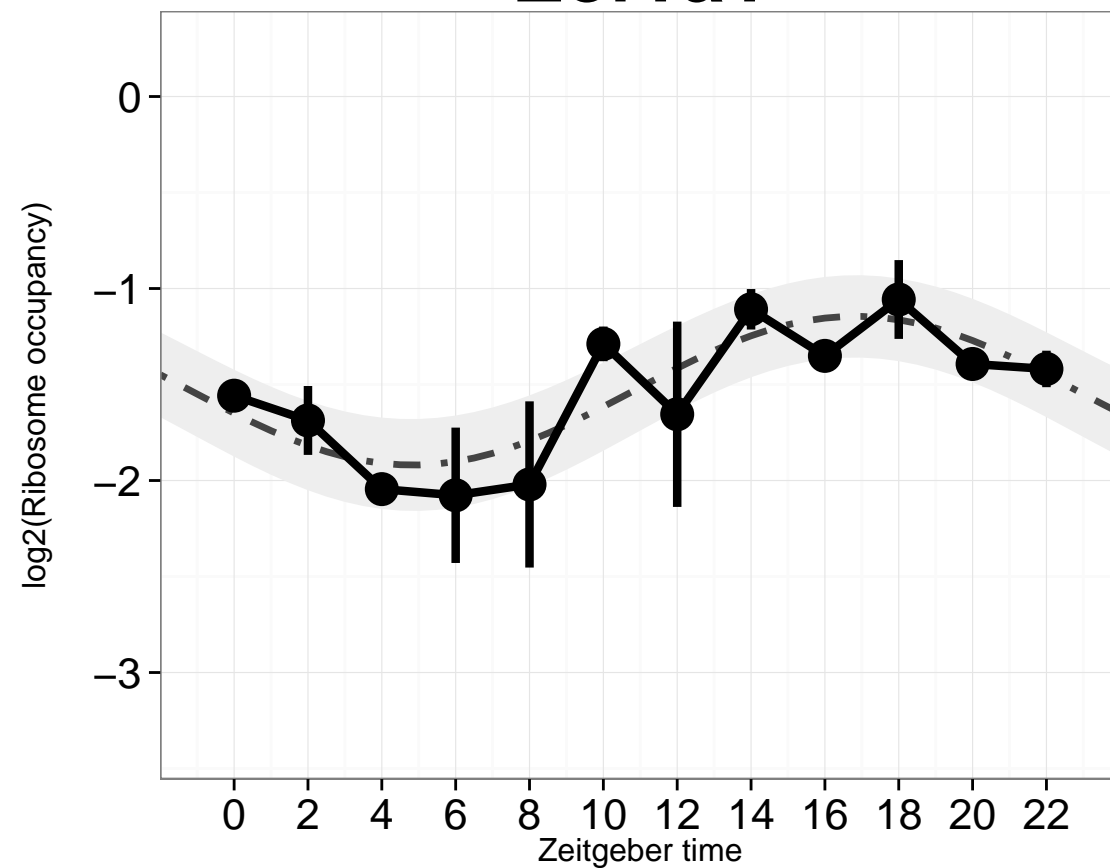

Supplement: Supplementary file 371 [file 1]

# Lsm11

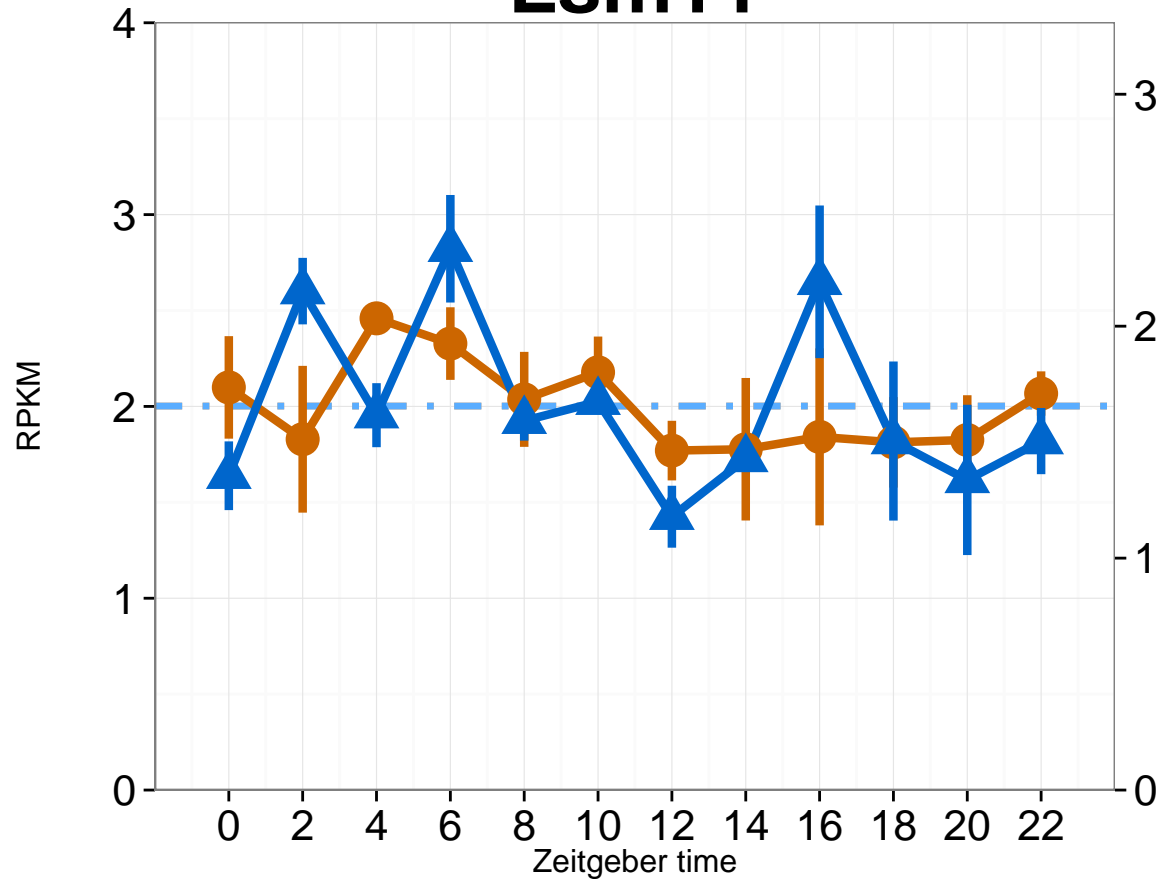

# Lsm11

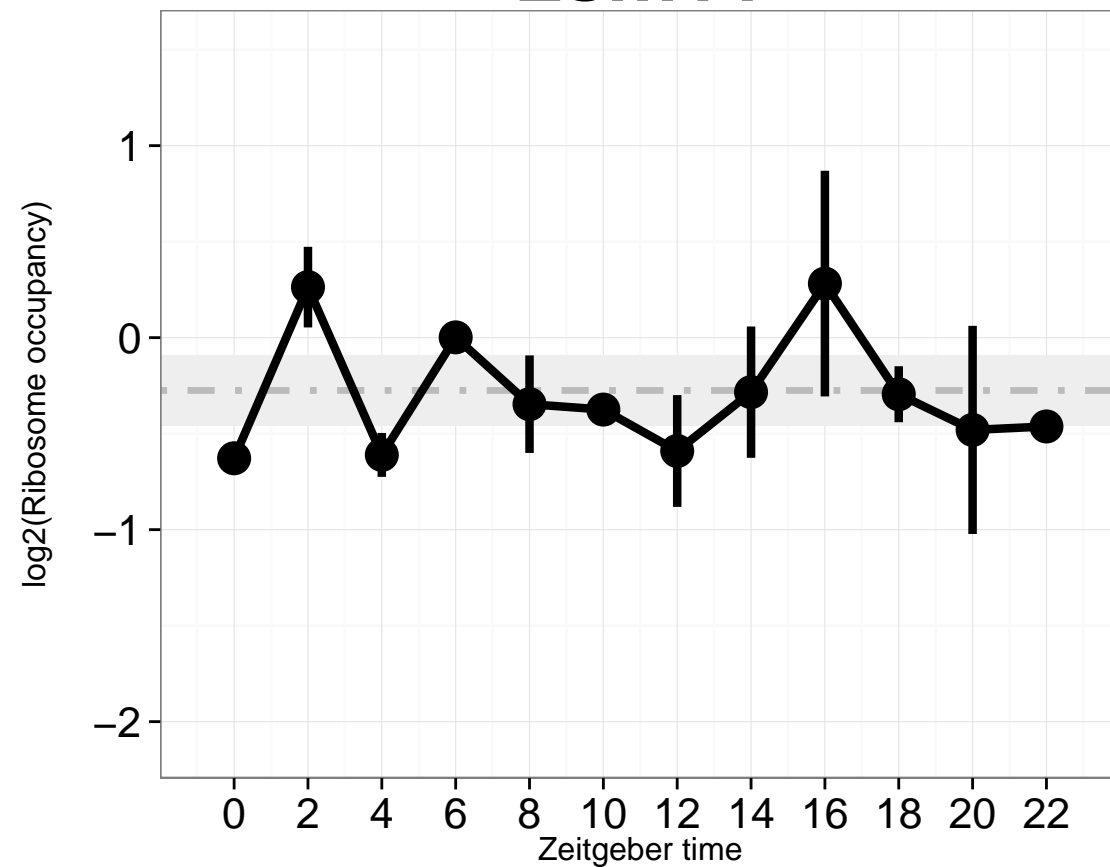

Supplement: Supplementary file 372 [file 1]

## Sh3glb2

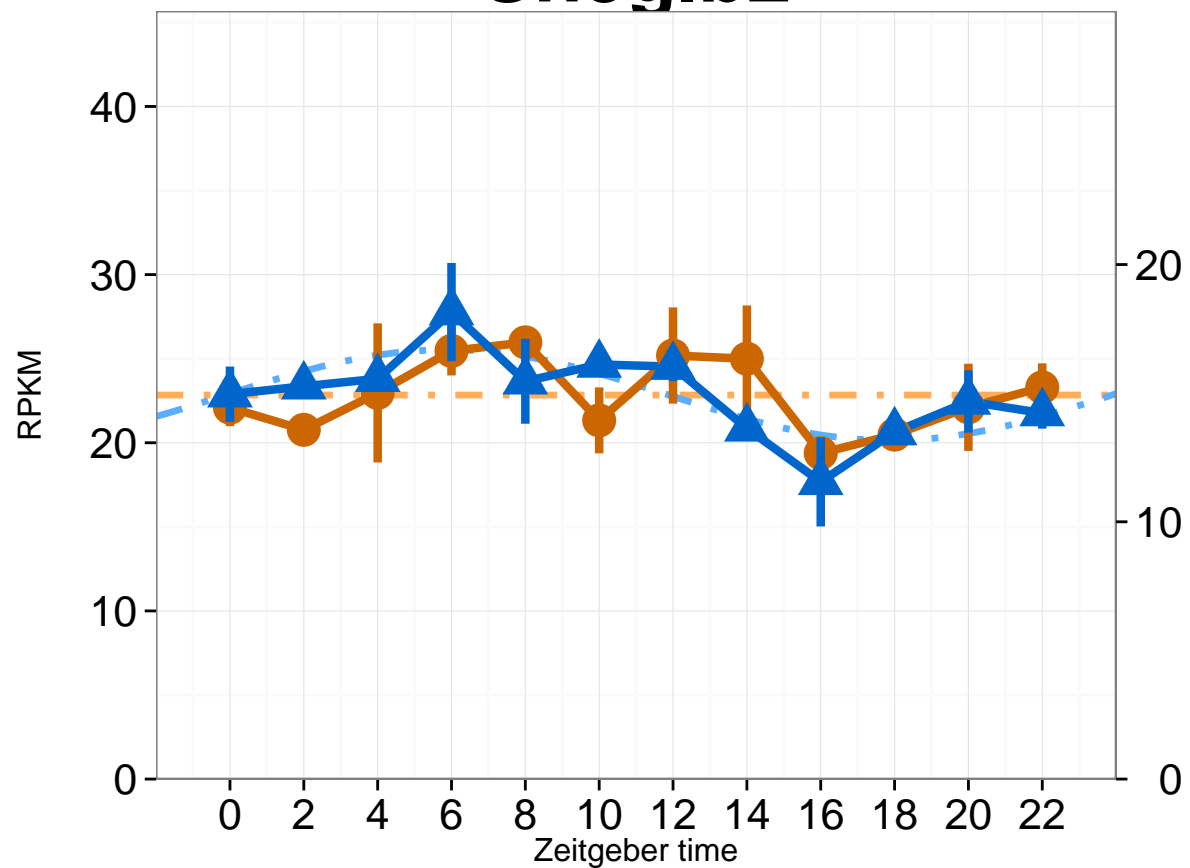

## Sh3glb2

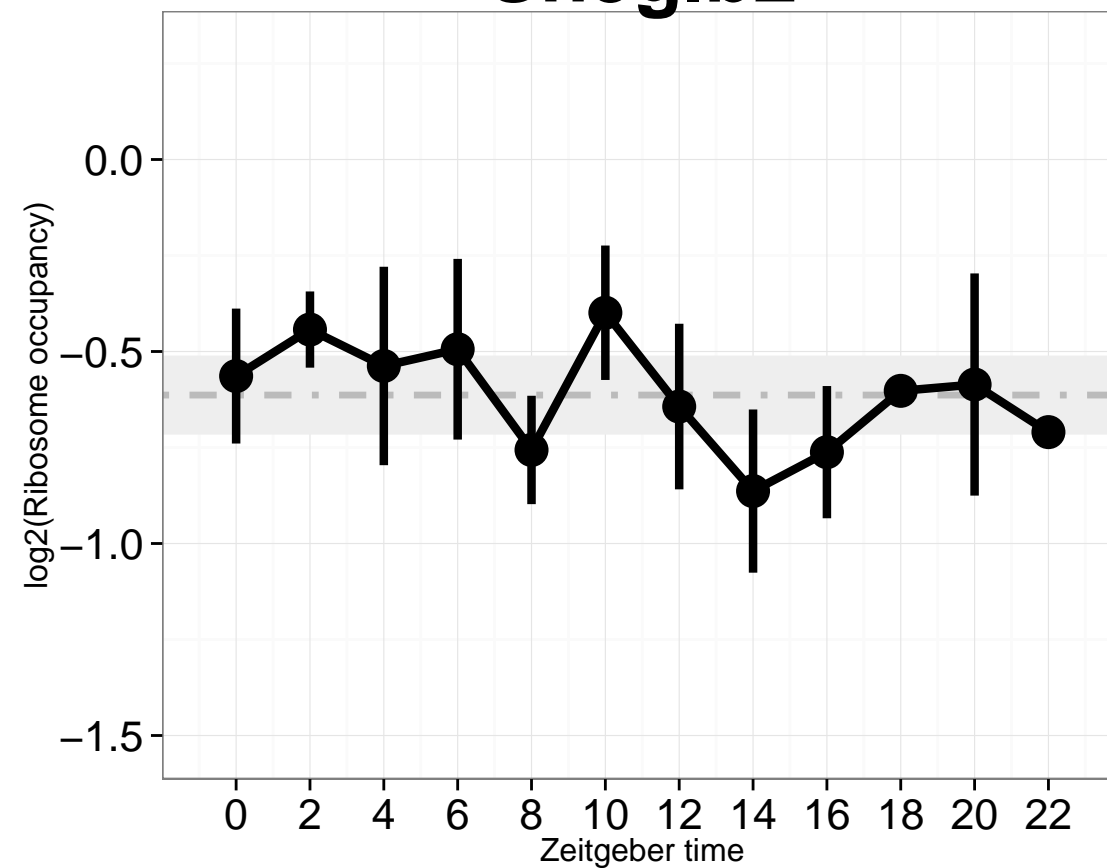

Supplement: Supplementary file 373 [file 1]

# Cyb5d1

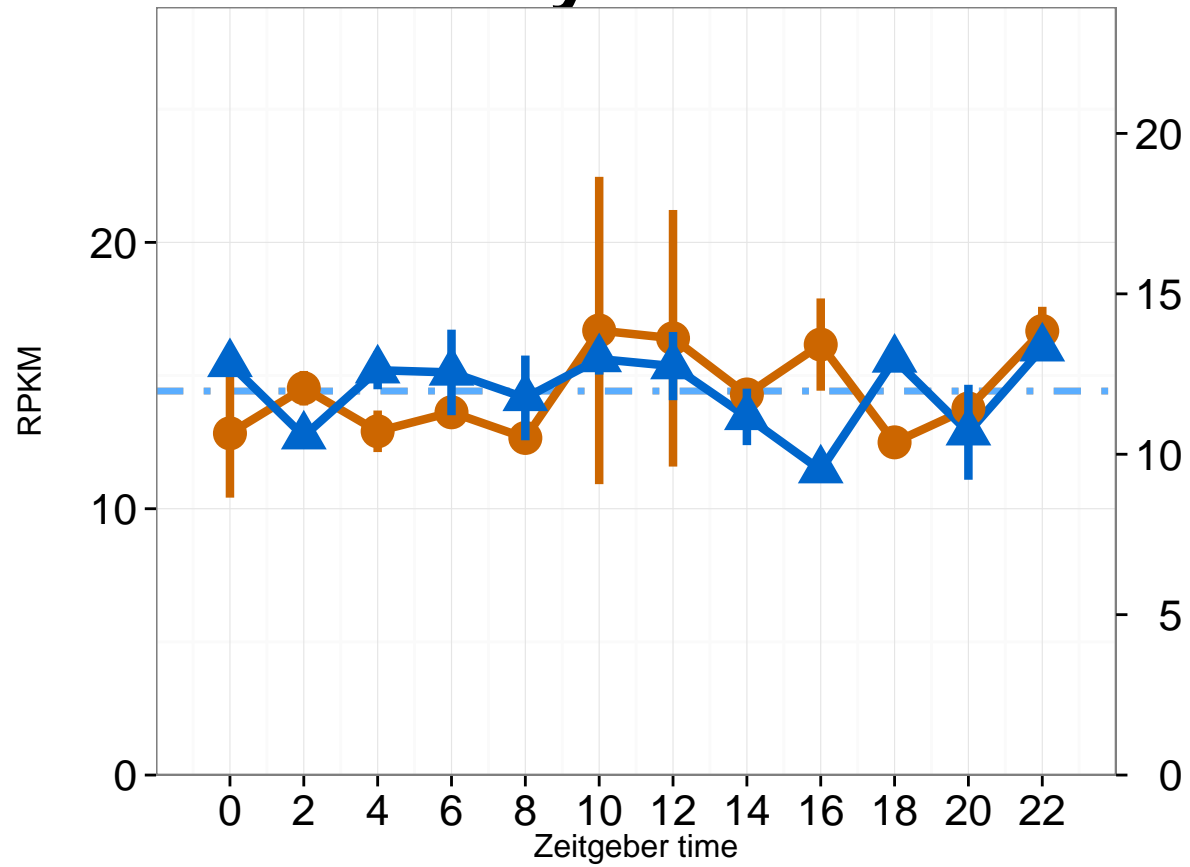

# Cyb5d1

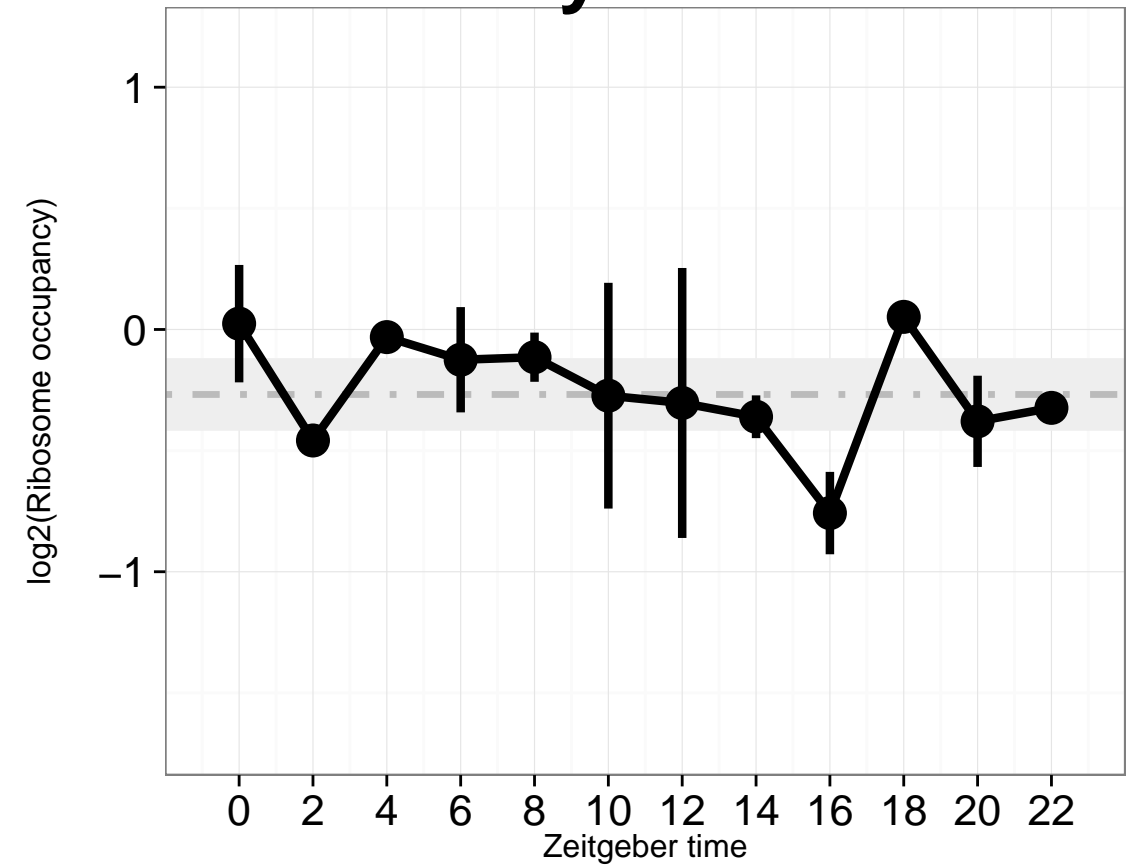

Supplement: Supplementary file 374 [file 1]

## Ifit2

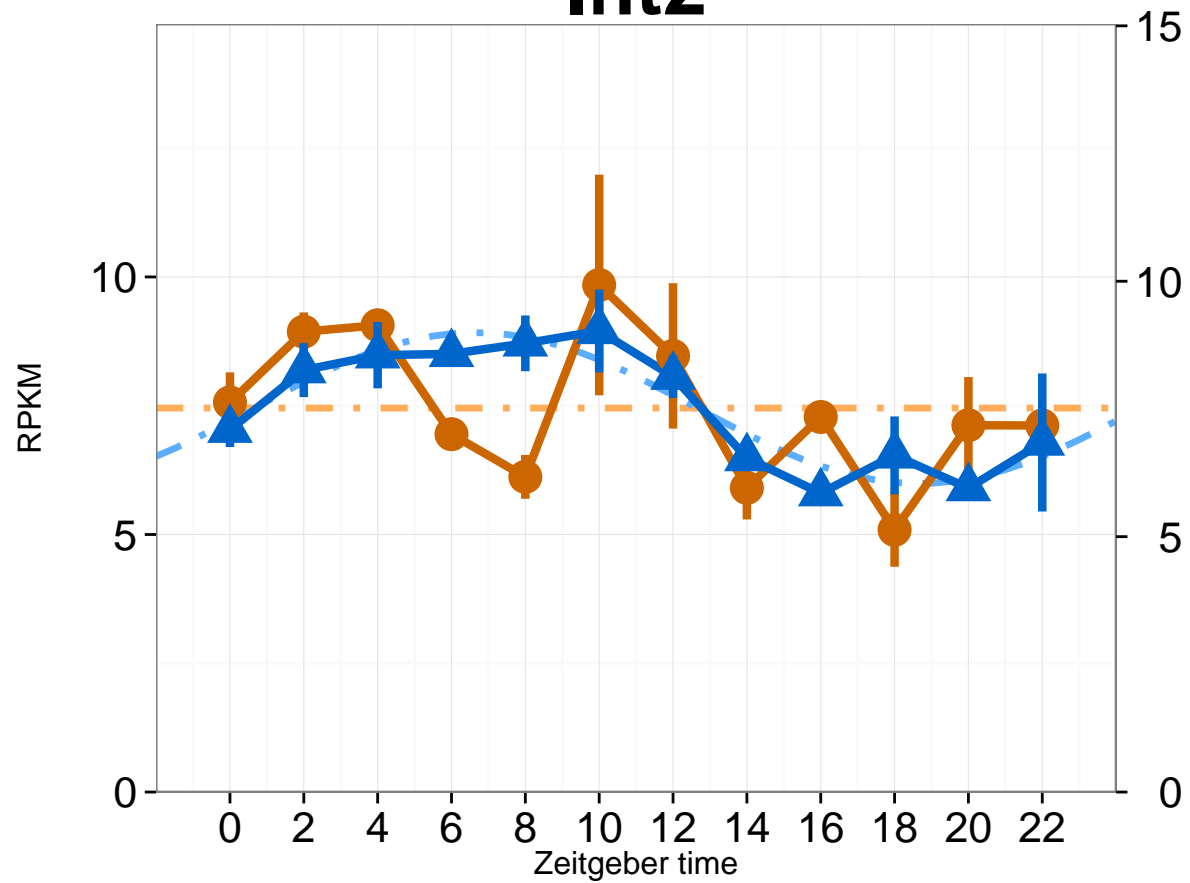

## Ifit2

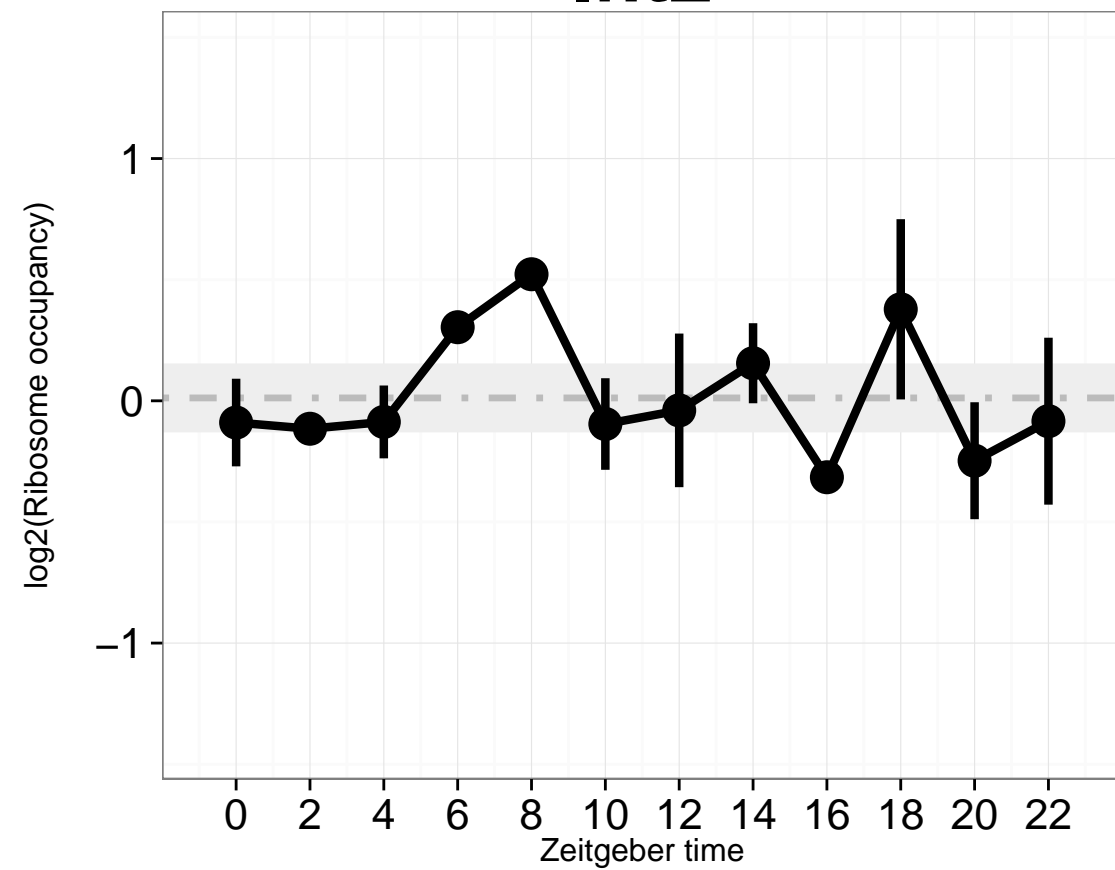

Supplement: Supplementary file 375 [file 1]

# Banf1

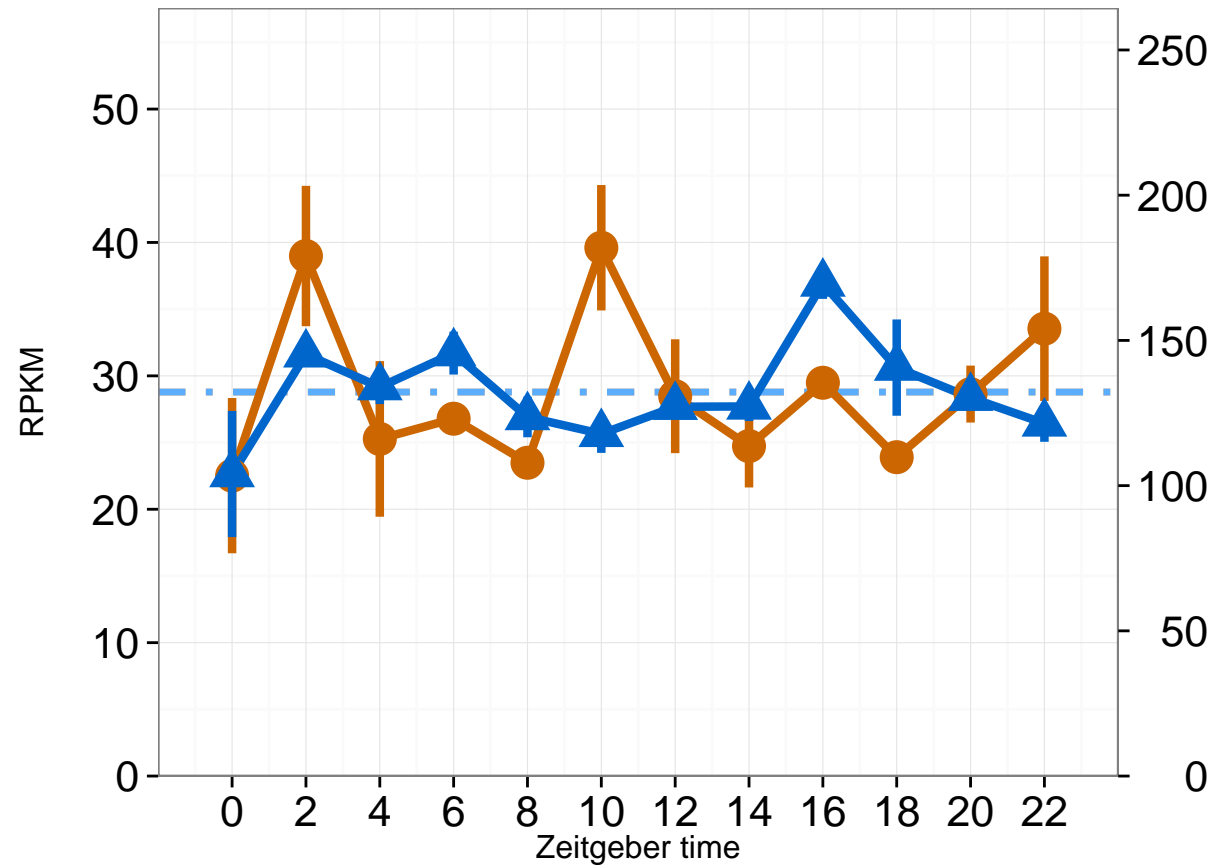

# Banf1

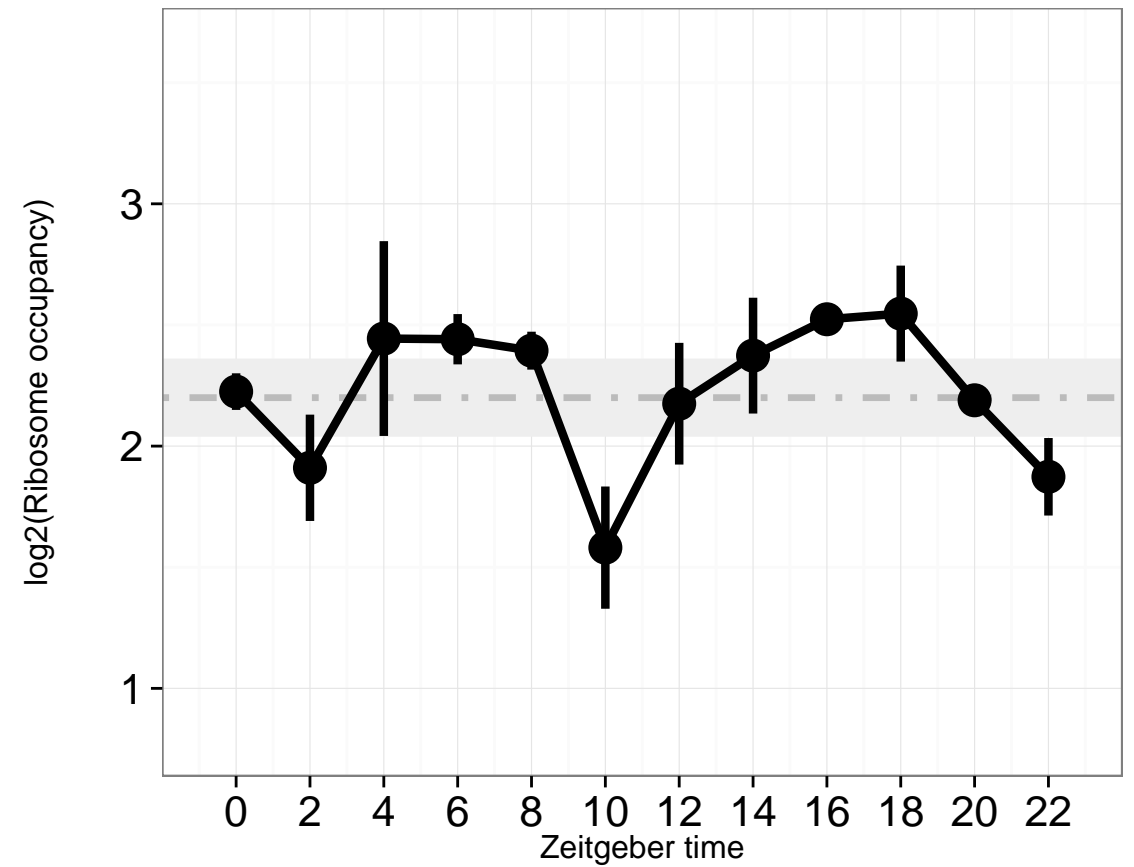

Supplement: Supplementary file 376 [file 1]

## Lrrk2

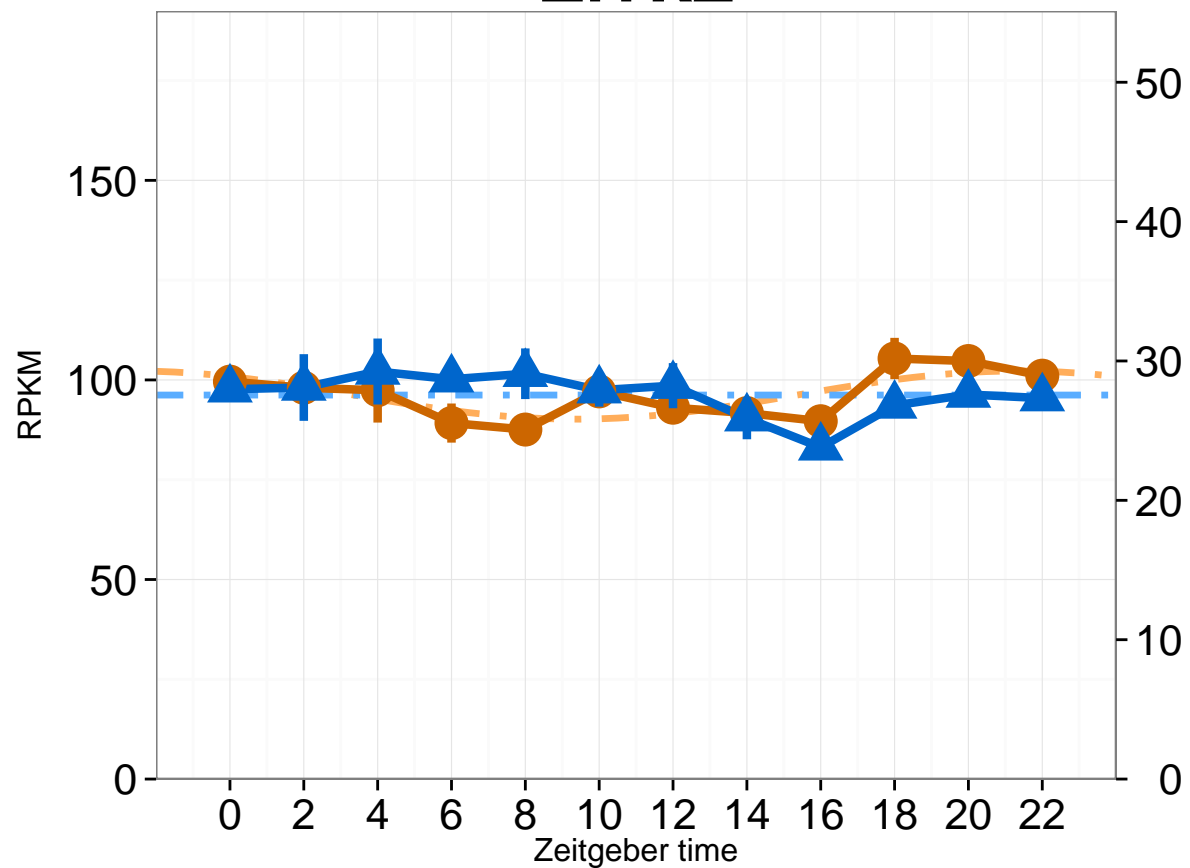

## Lrrk2

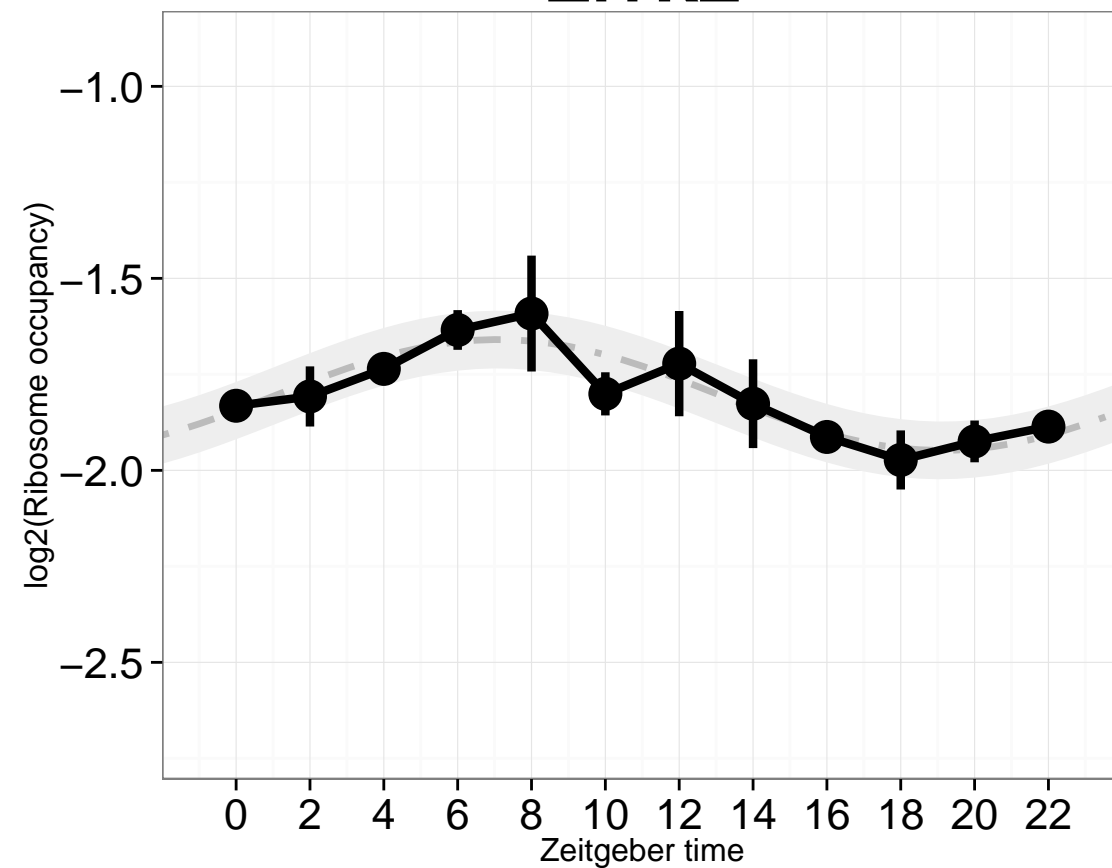

Supplement: Supplementary file 377 [file 1]

## Riok2

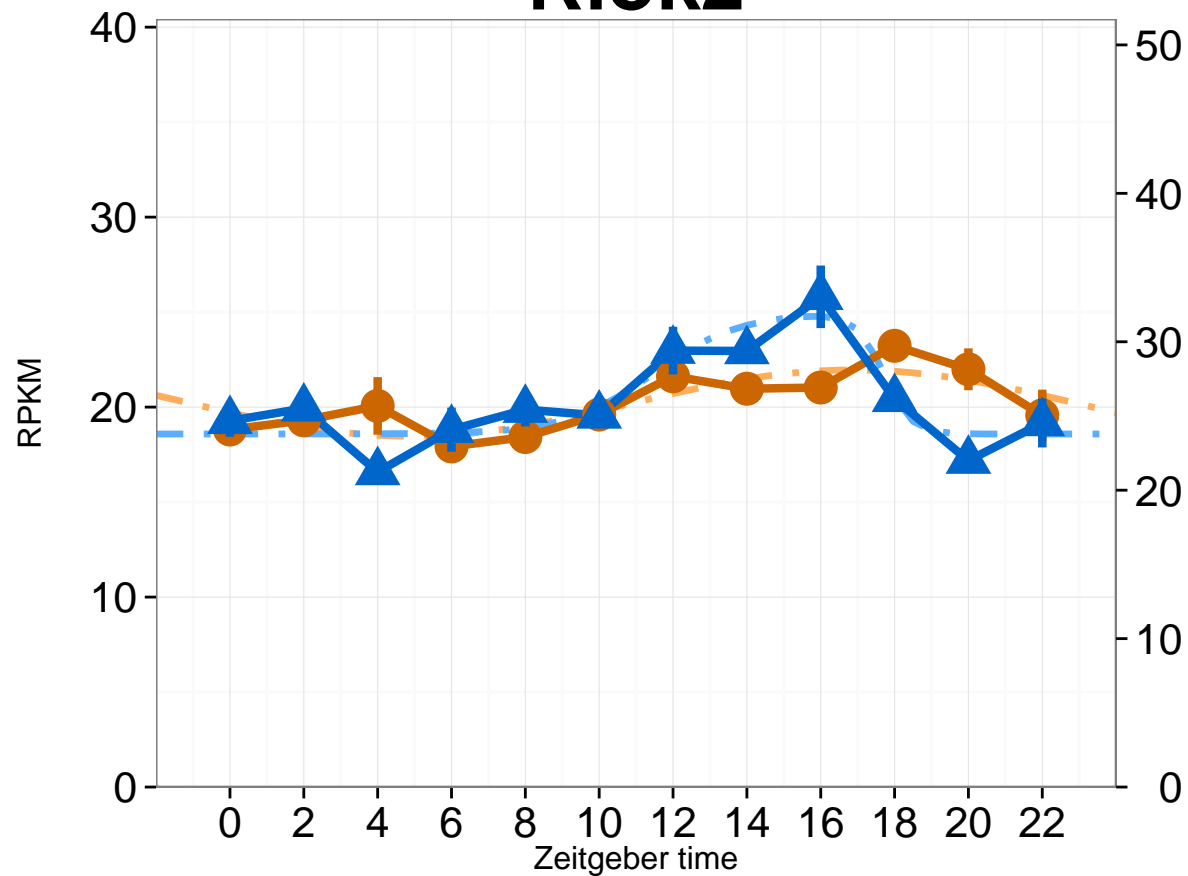

## Riok2

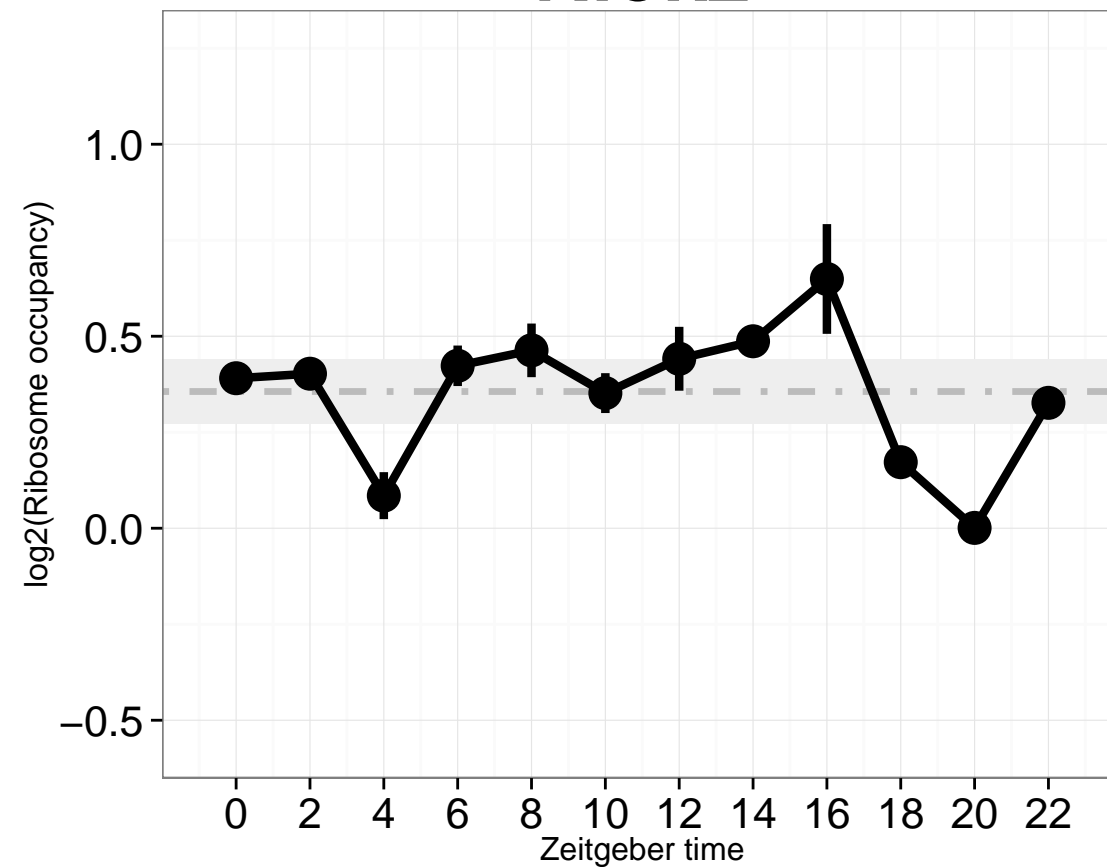

Supplement: Supplementary file 378 [file 1]

## Dctd

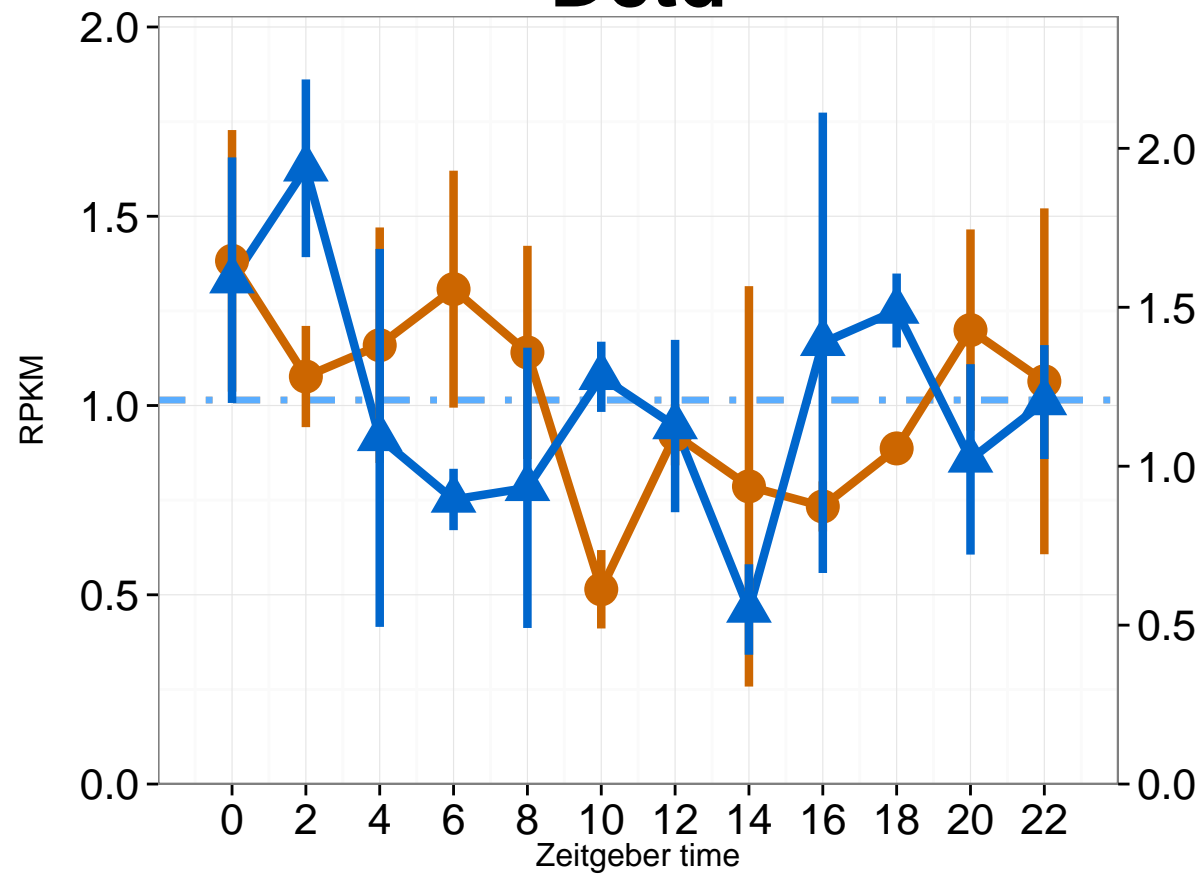

## Dctd

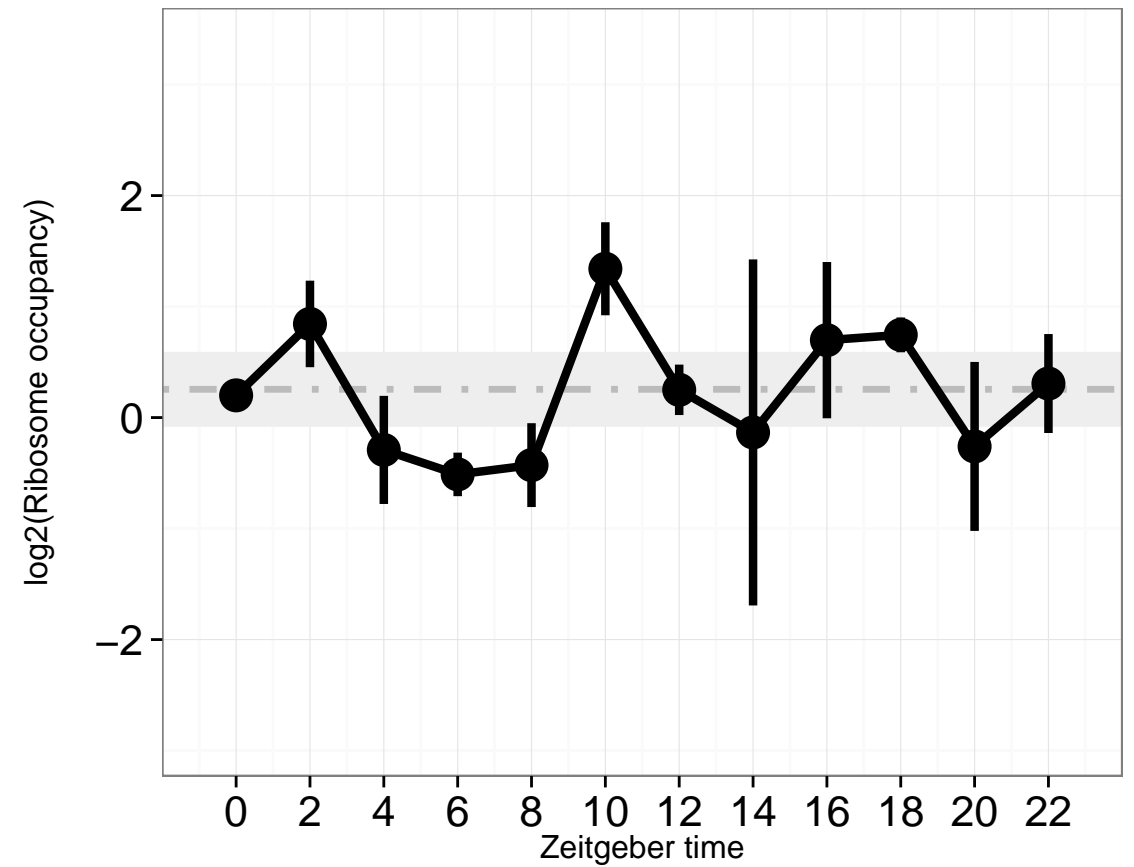

Supplement: Supplementary file 379 [file 1]

# Tmem189

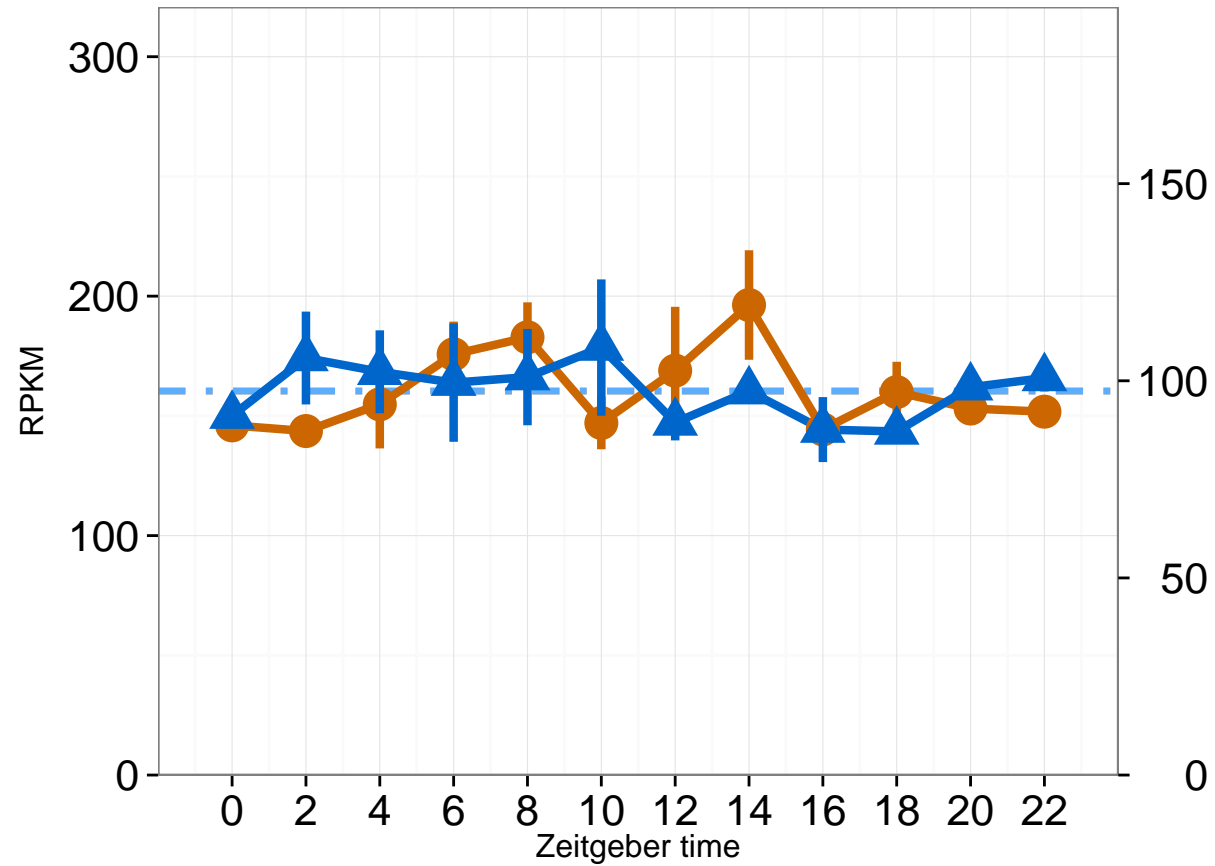

# Tmem189

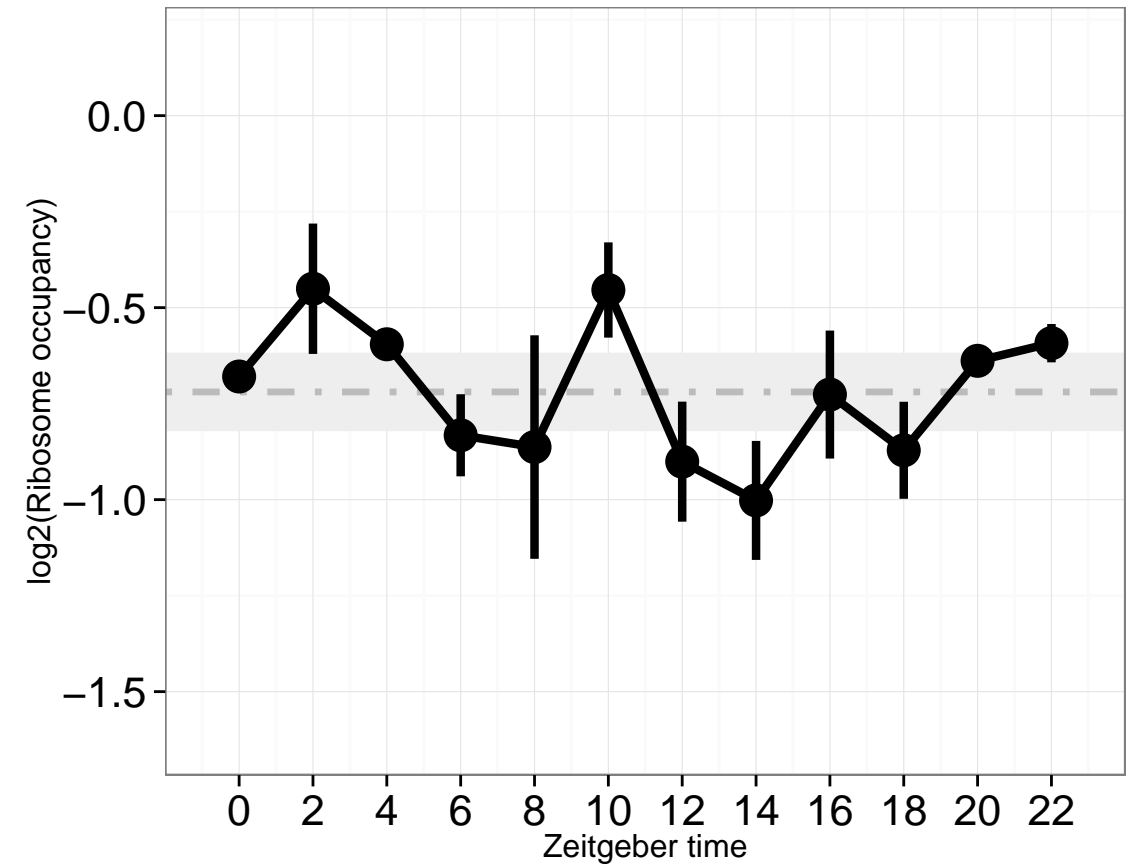

Supplement: Supplementary file 380 [file 1]

# Disp1

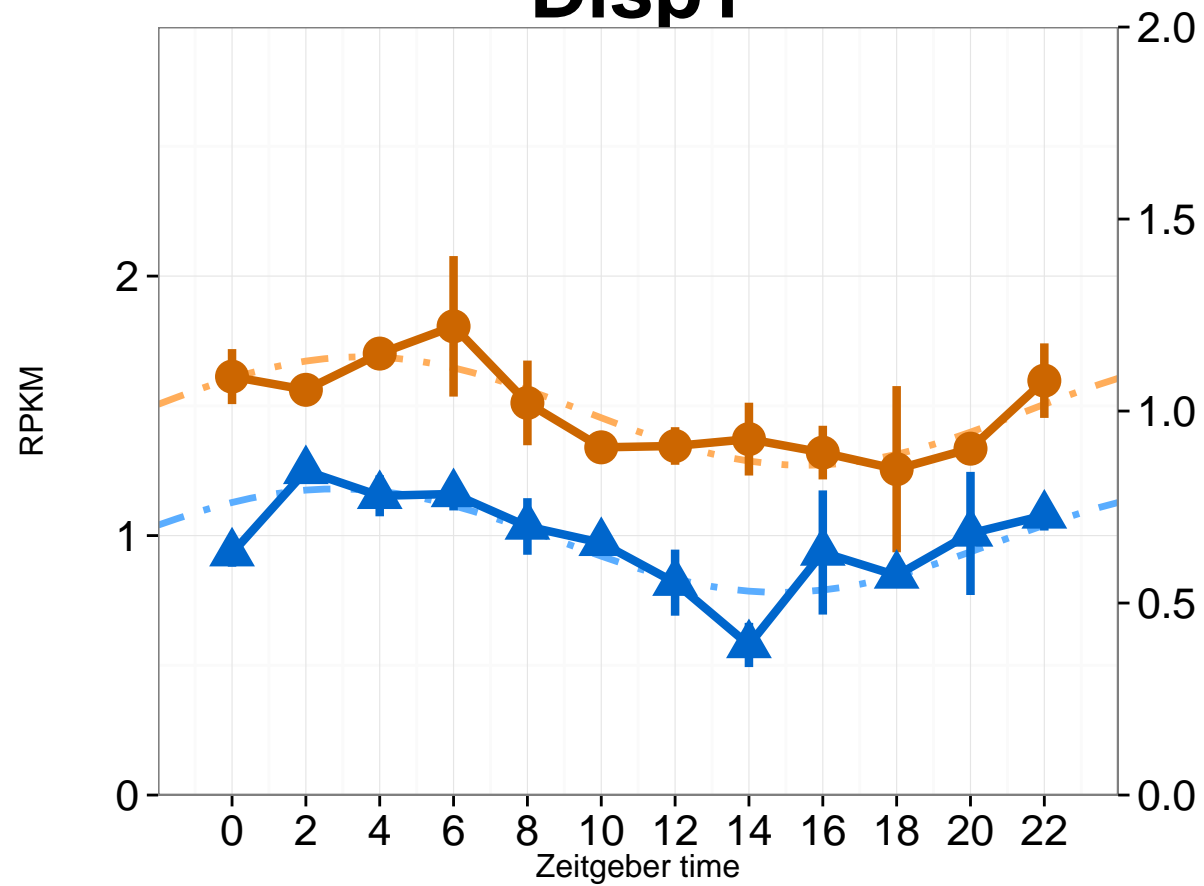

# Disp1

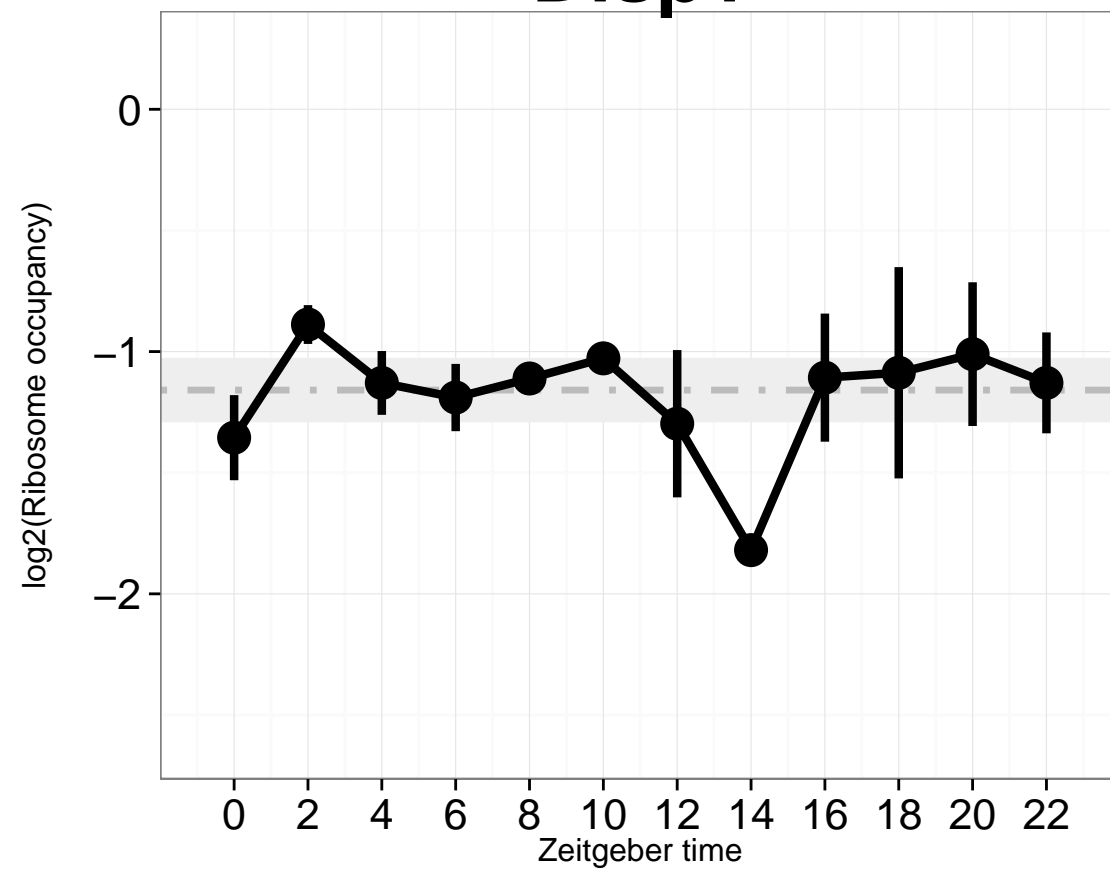

Supplement: Supplementary file 381 [file 1]

## Tnfrsf19

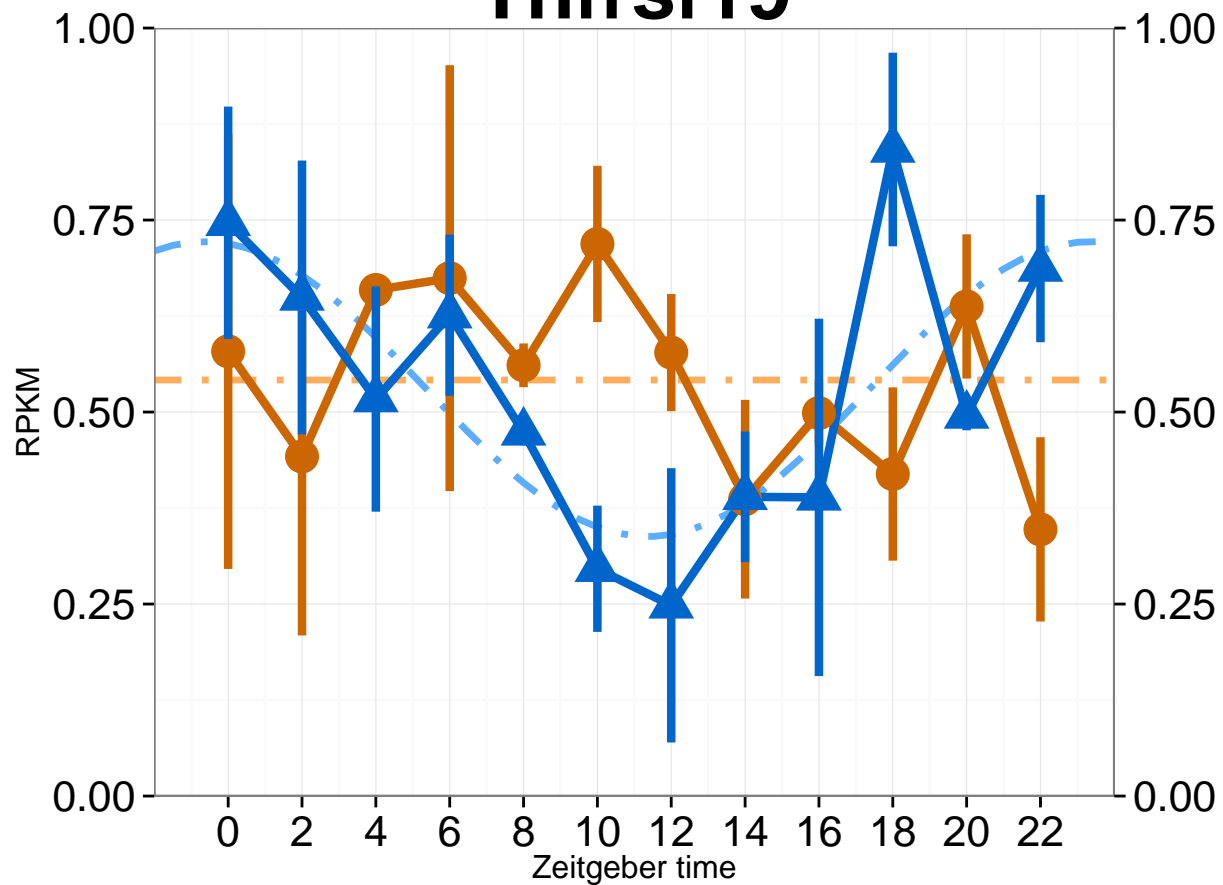

## Tnfrsf19

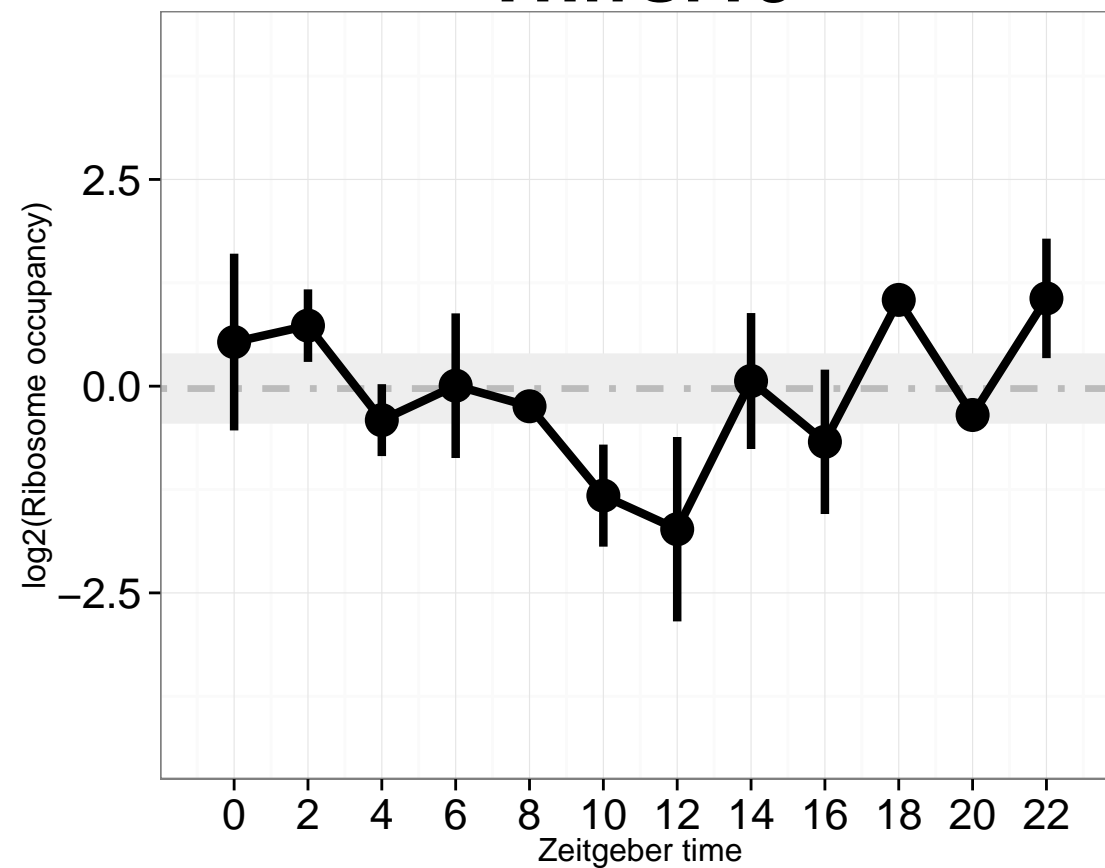

Supplement: Supplementary file 383 [file 1]

# Mmp23

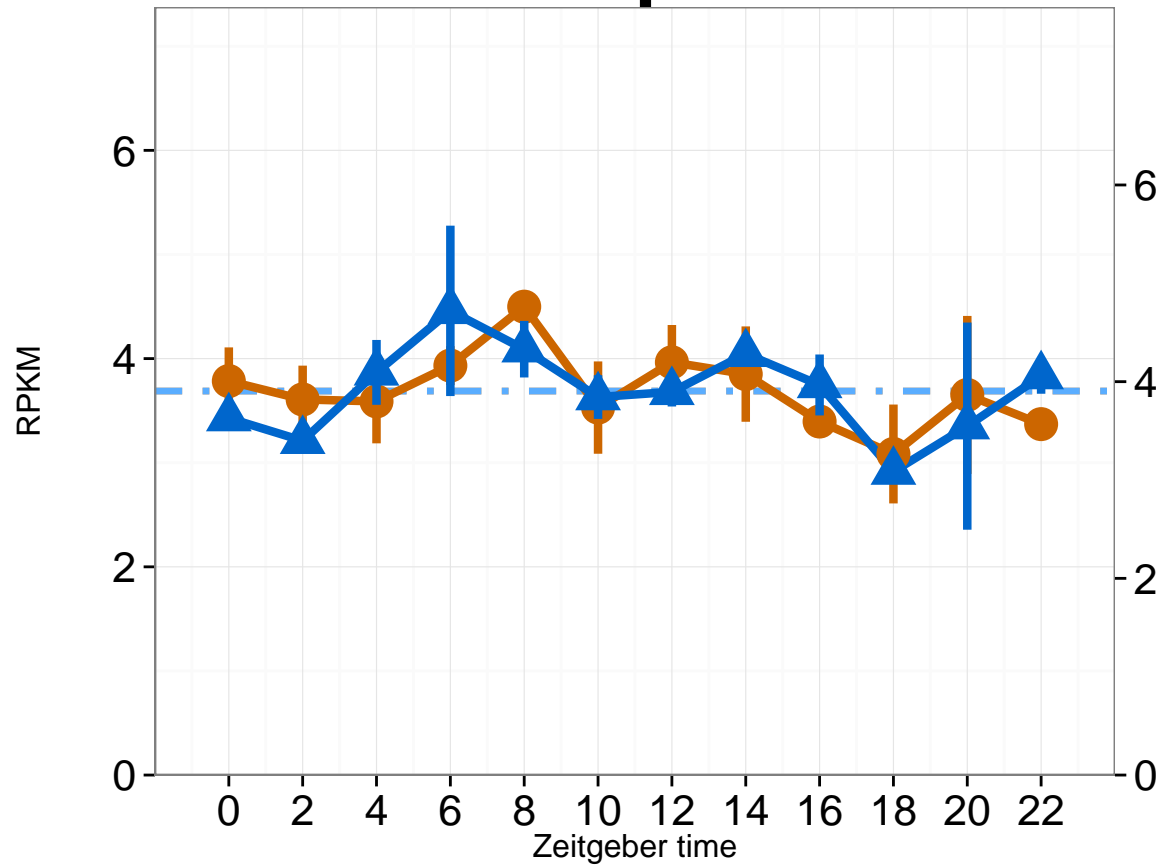

# Mmp23

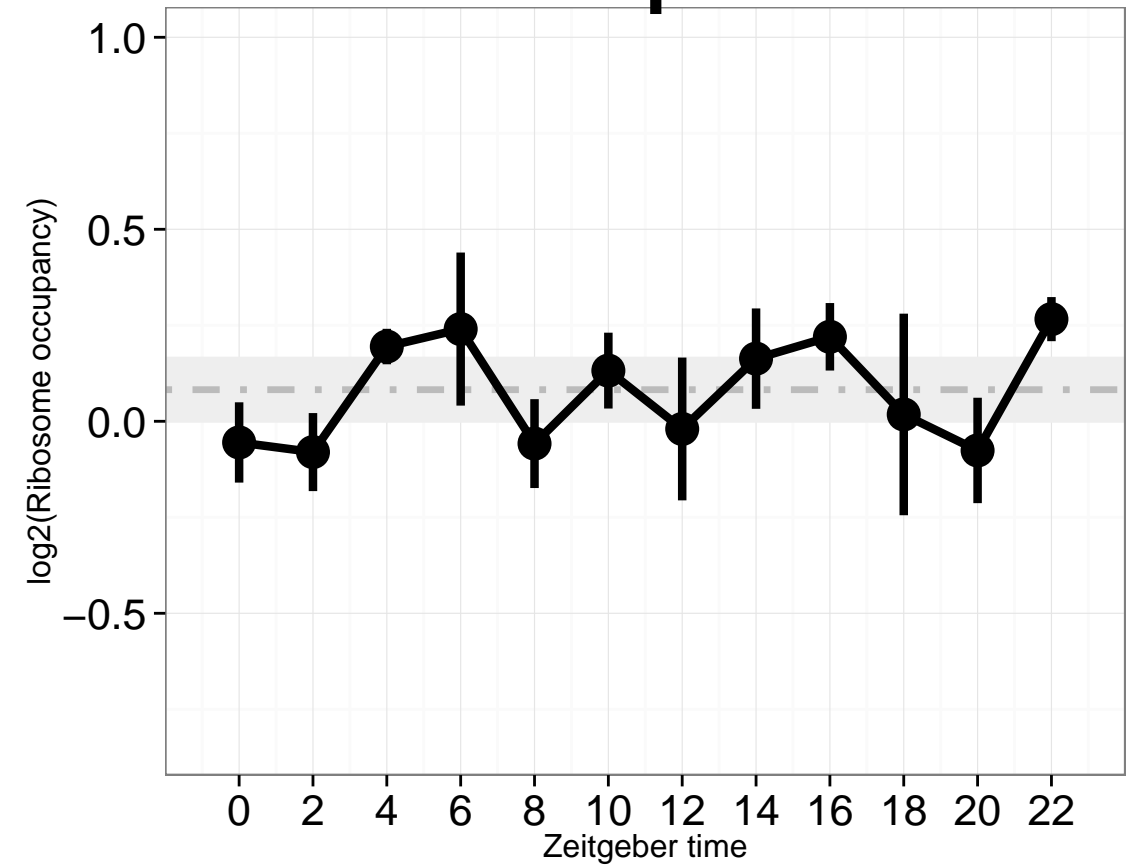

Supplement: Supplementary file 384 [file 1]

# Rab27b

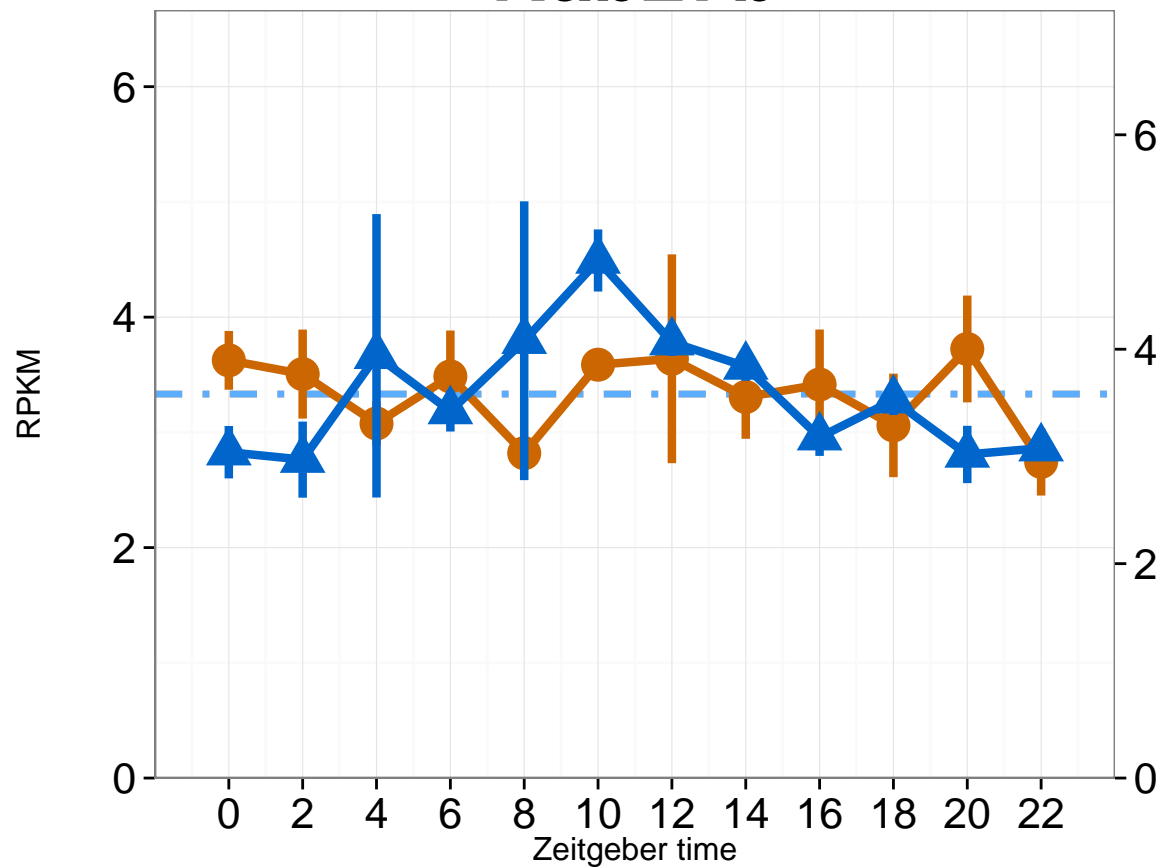

# Rab27b

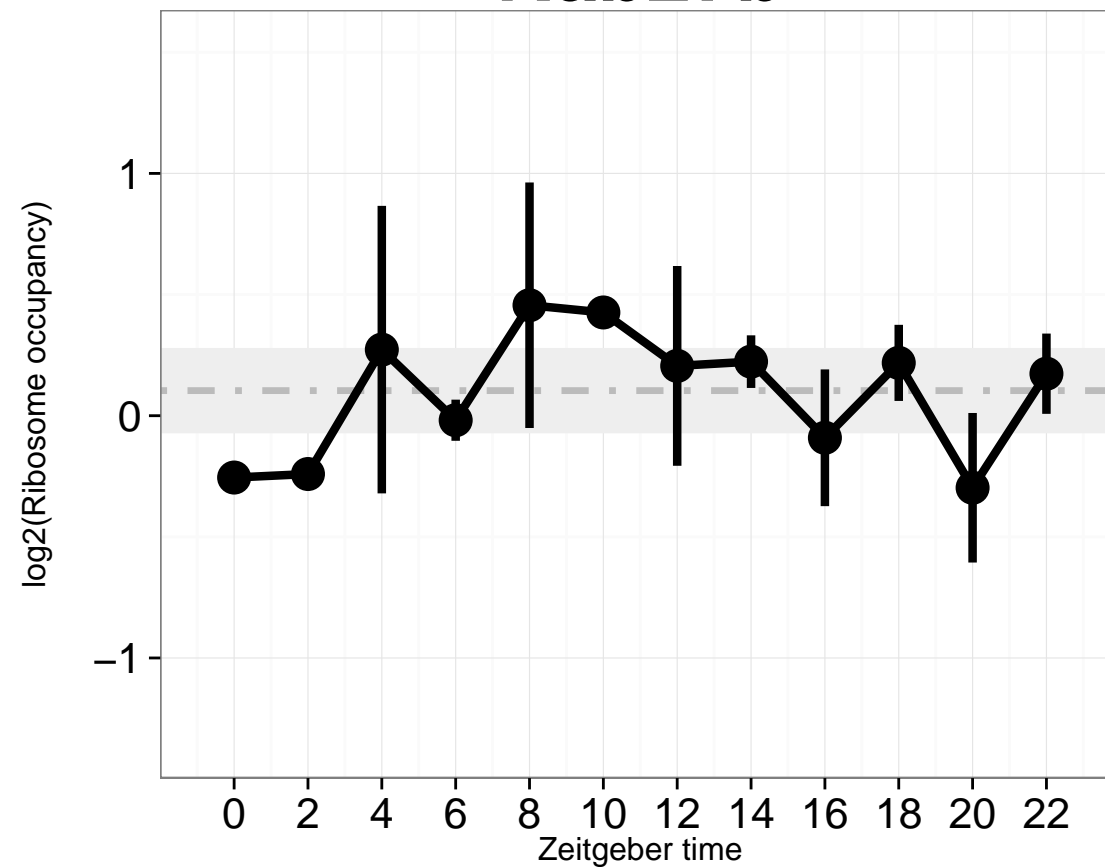

Supplement: Supplementary file 385 [file 1]

# 1110051M20Rik

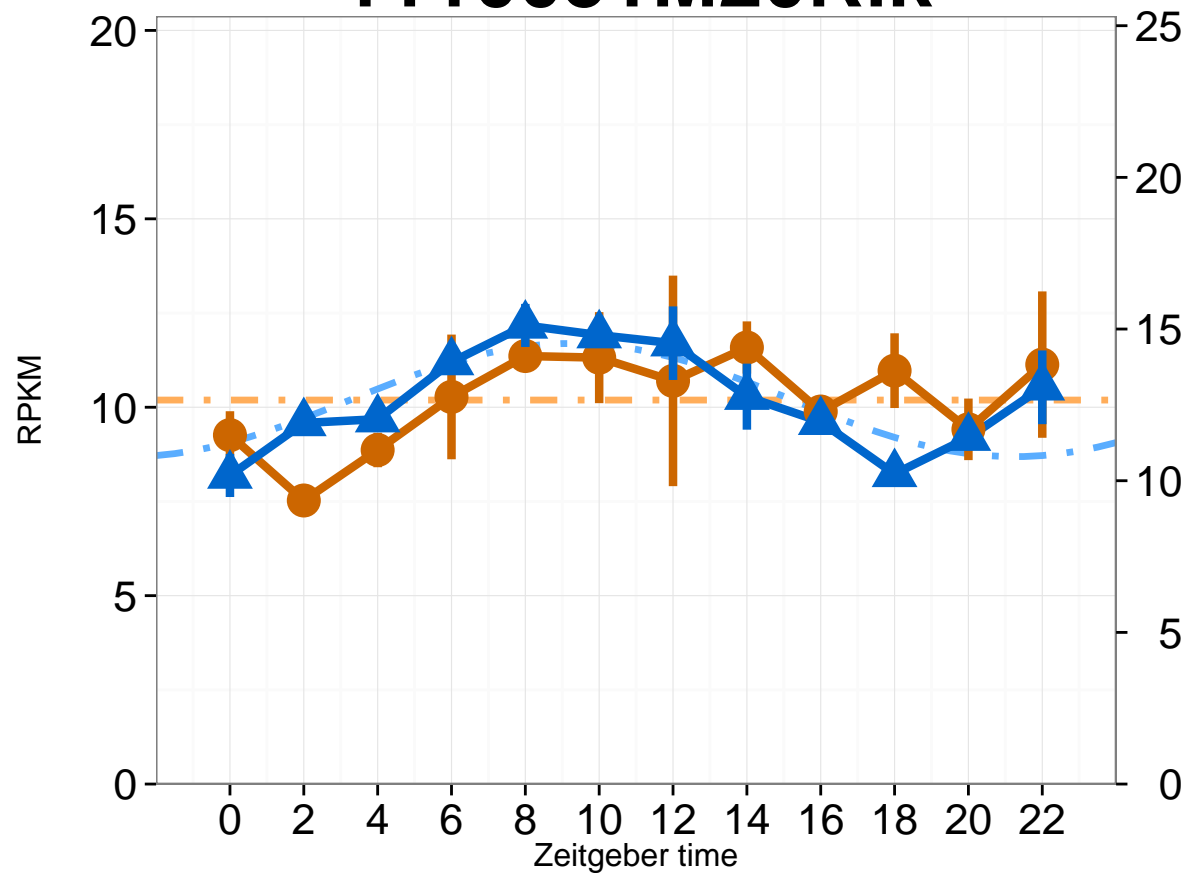

# 1110051M20Rik

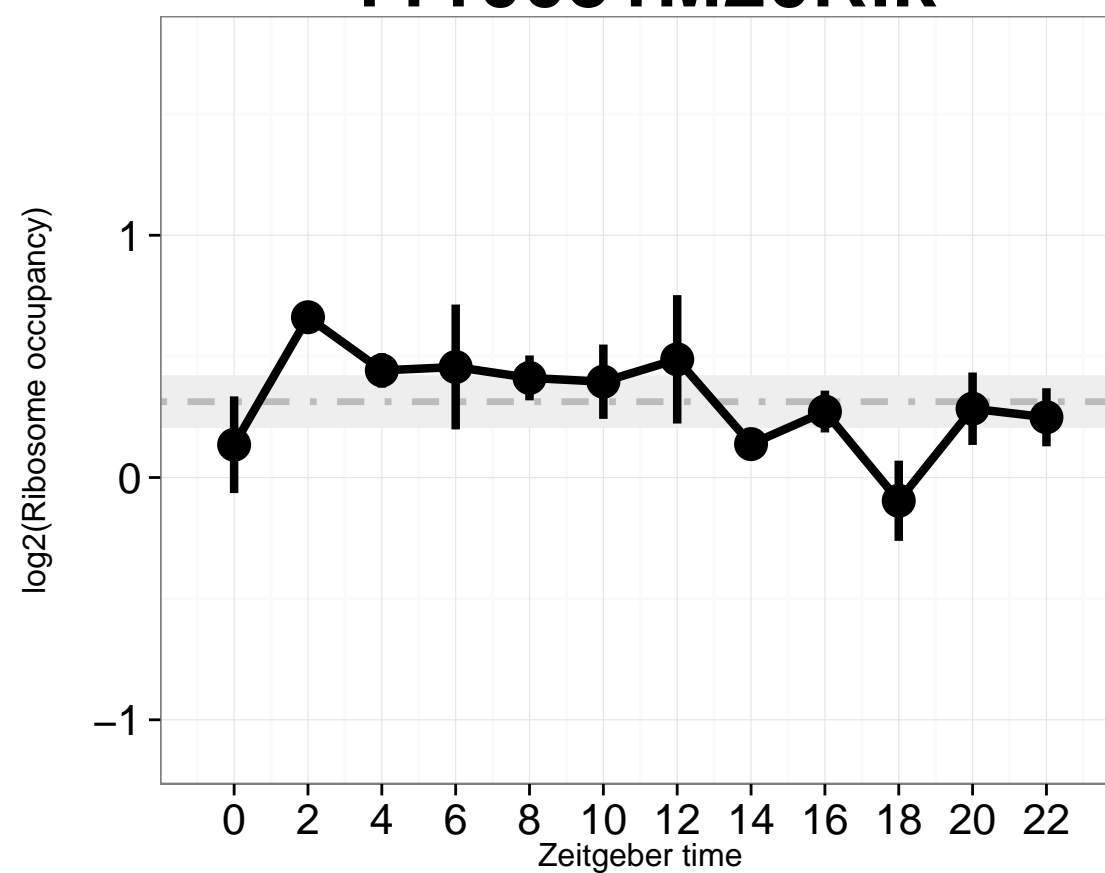

Supplement: Supplementary file 386 [file 1]

# Kpna1

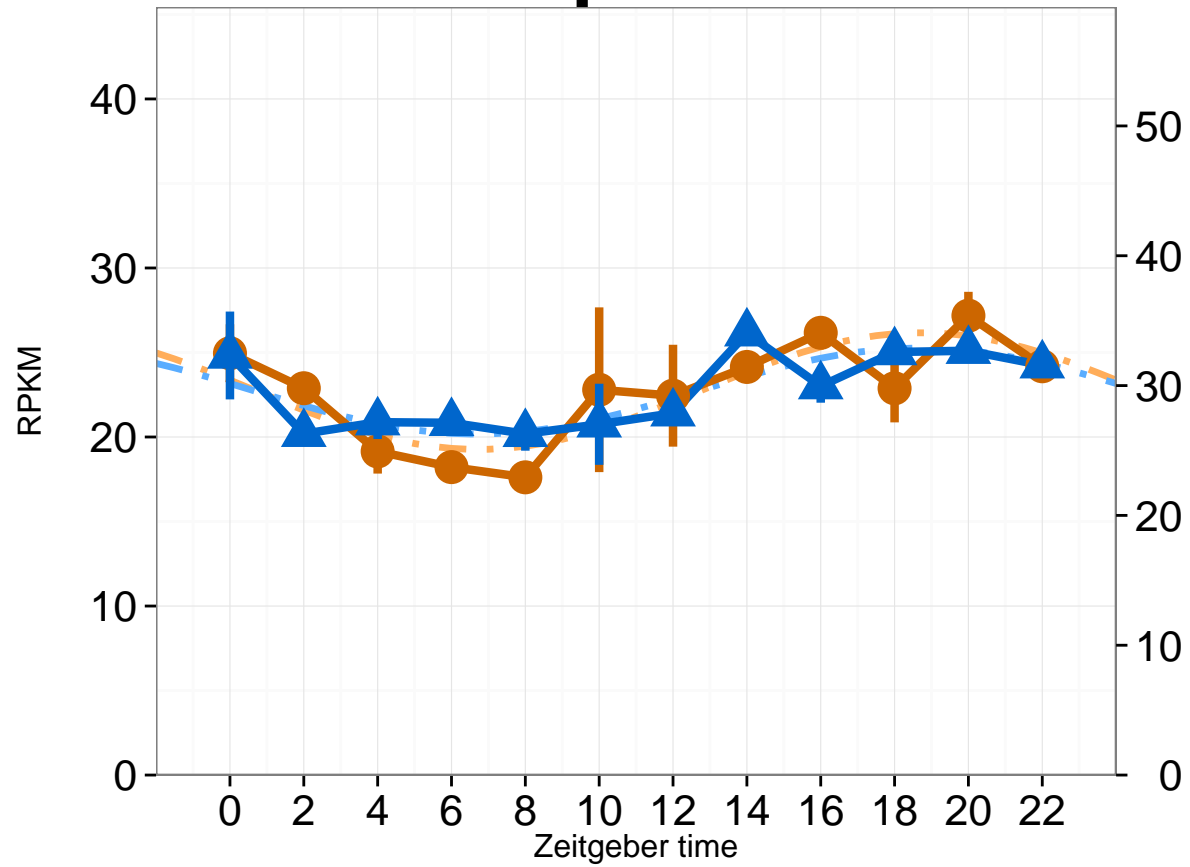

# Kpna1

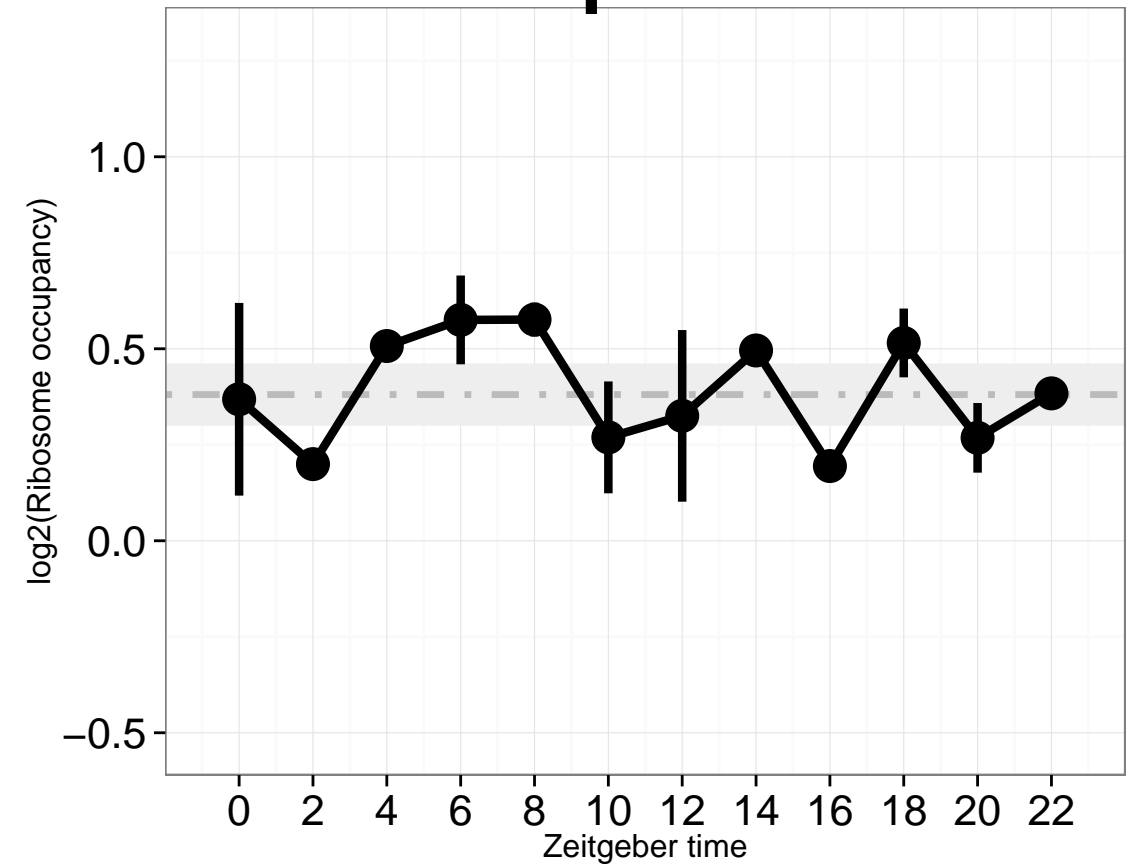

Supplement: Supplementary file 387 [file 1]

## Letmd1

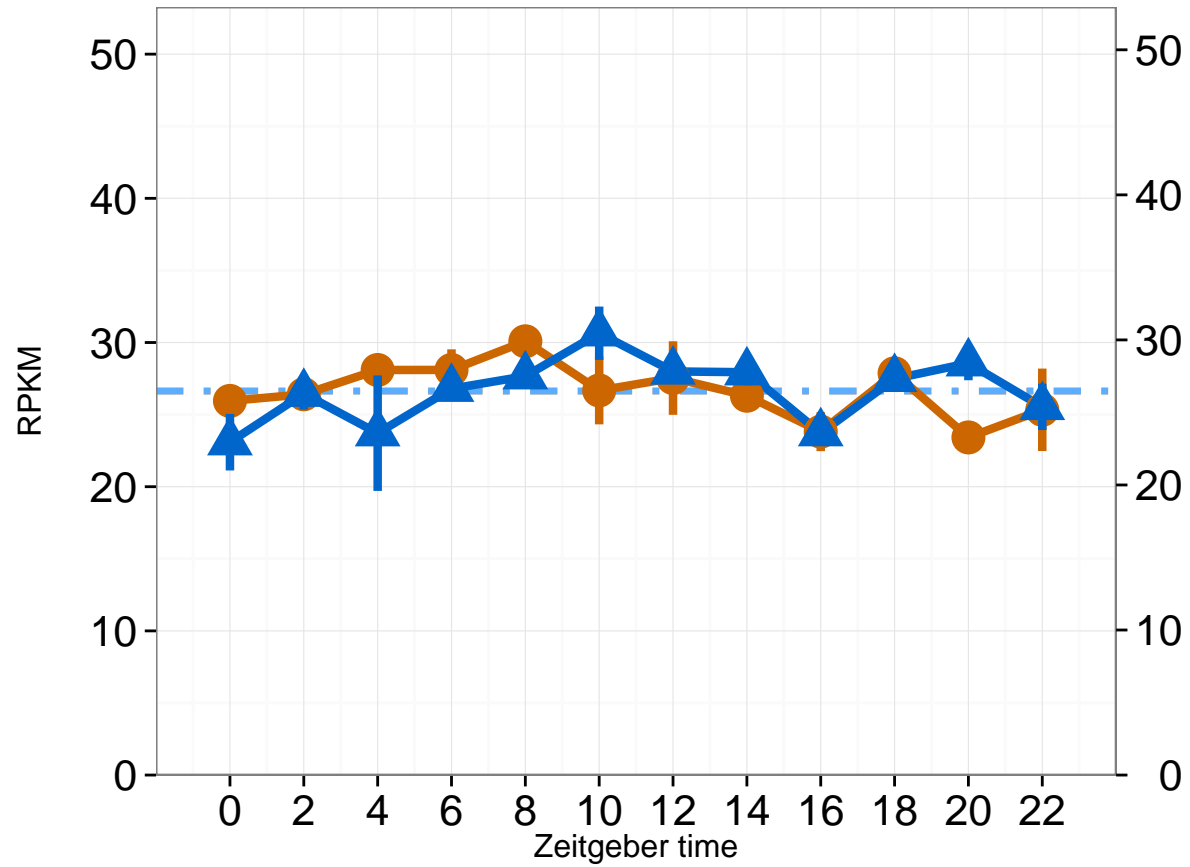

## Letmd1

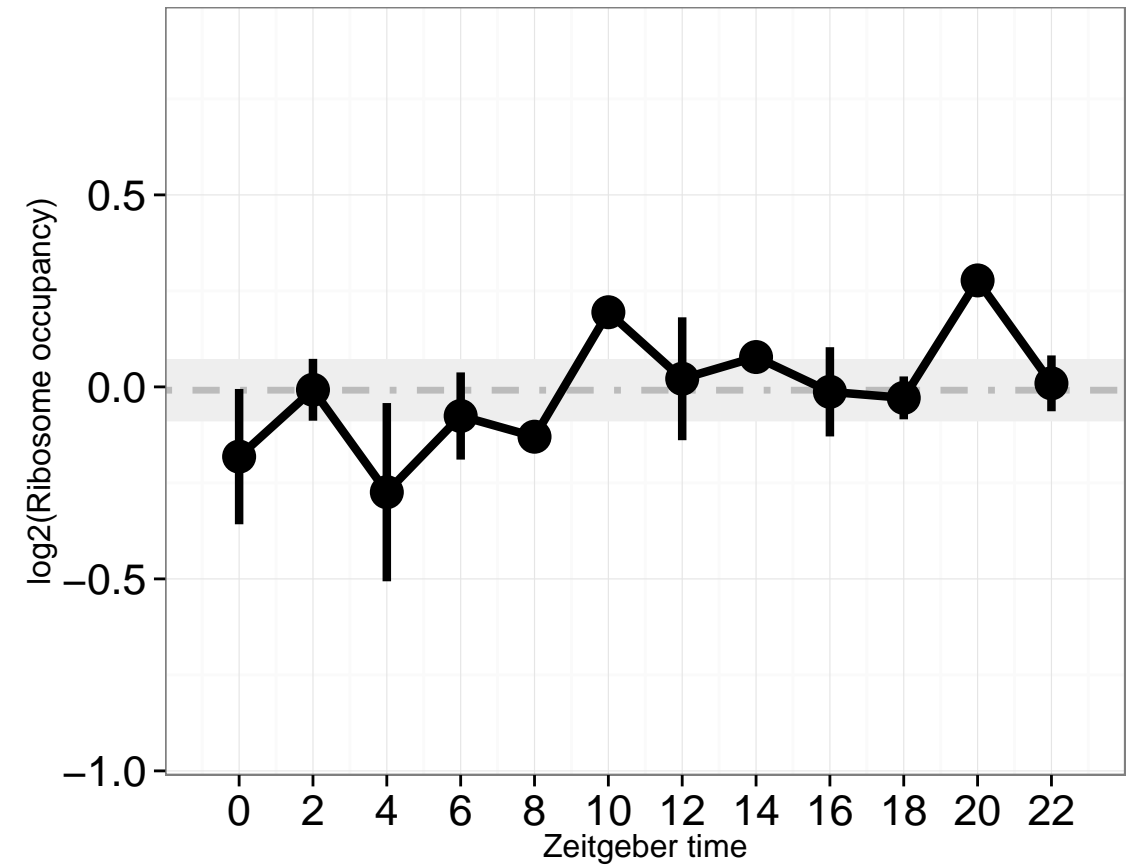

Supplement: Supplementary file 388 [file 1]

# Arpc5

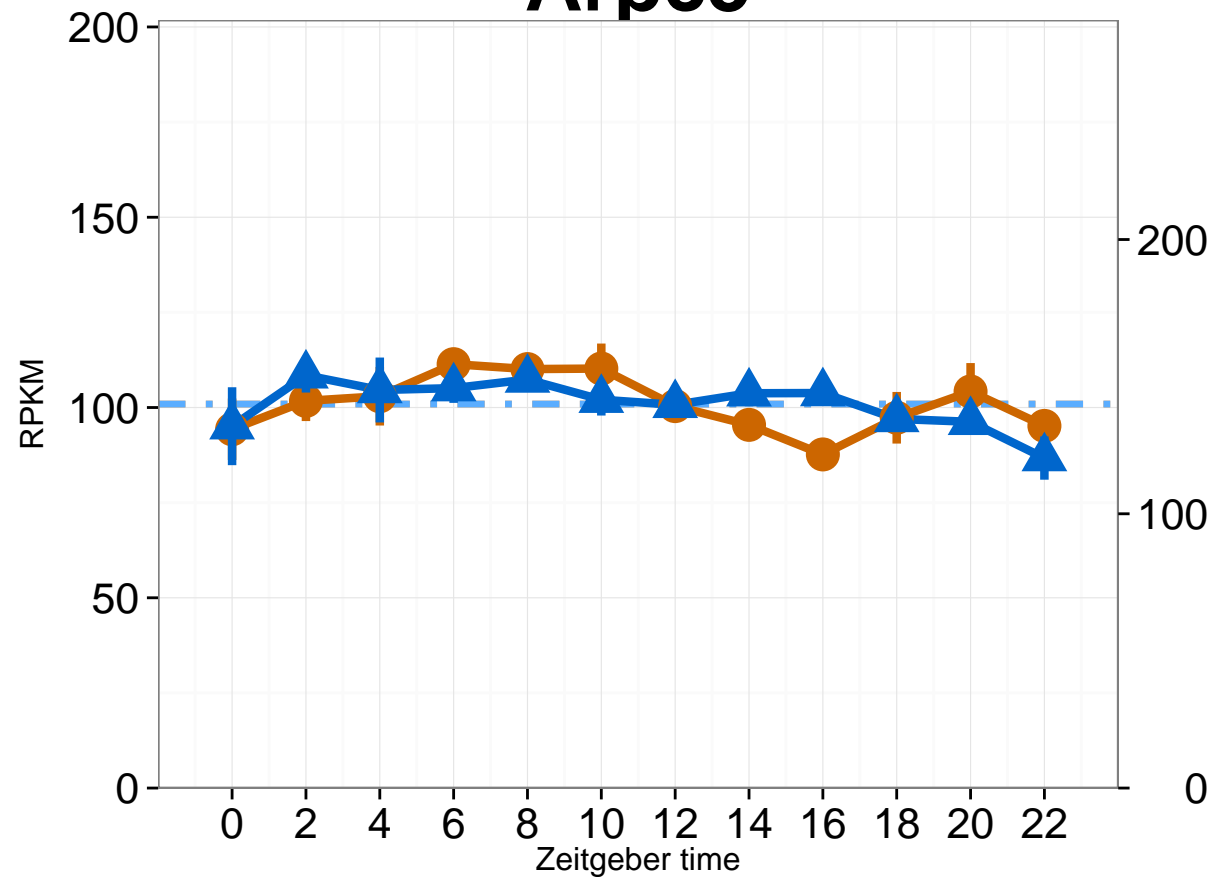

# Arpc5

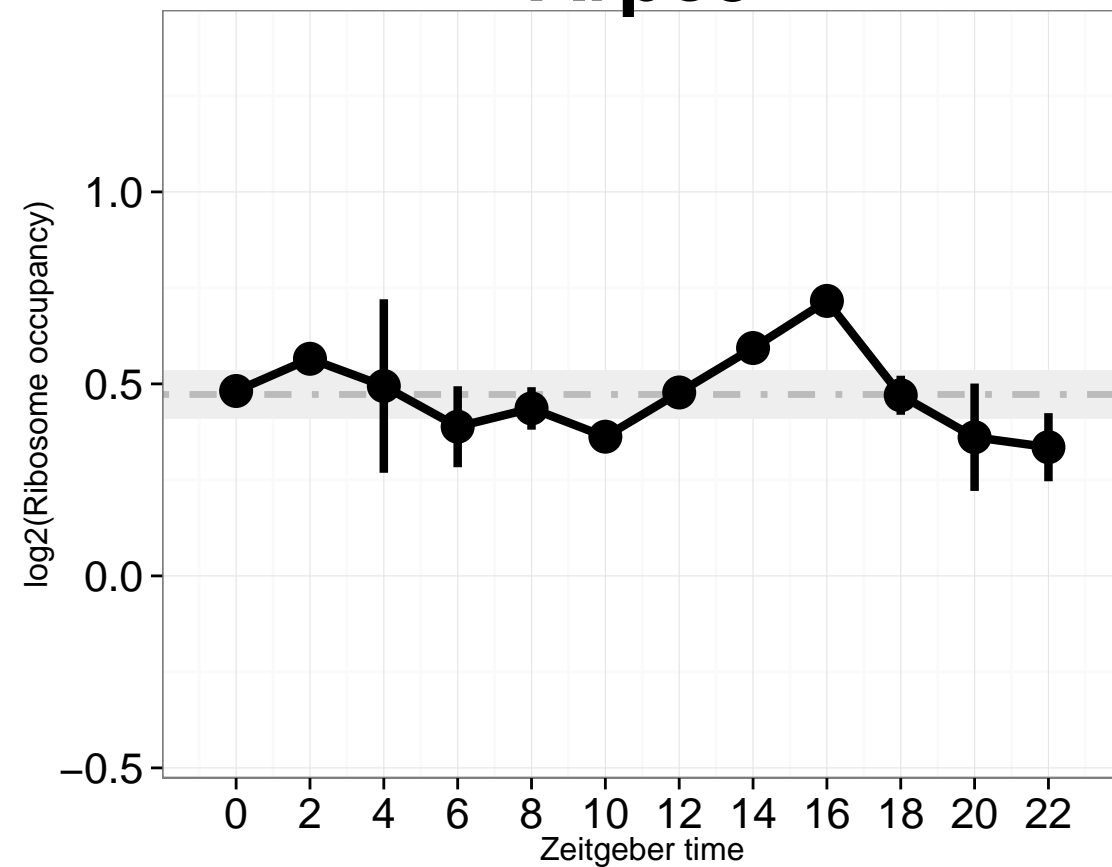

Supplement: Supplementary file 389 [file 1]

# Snrpd1

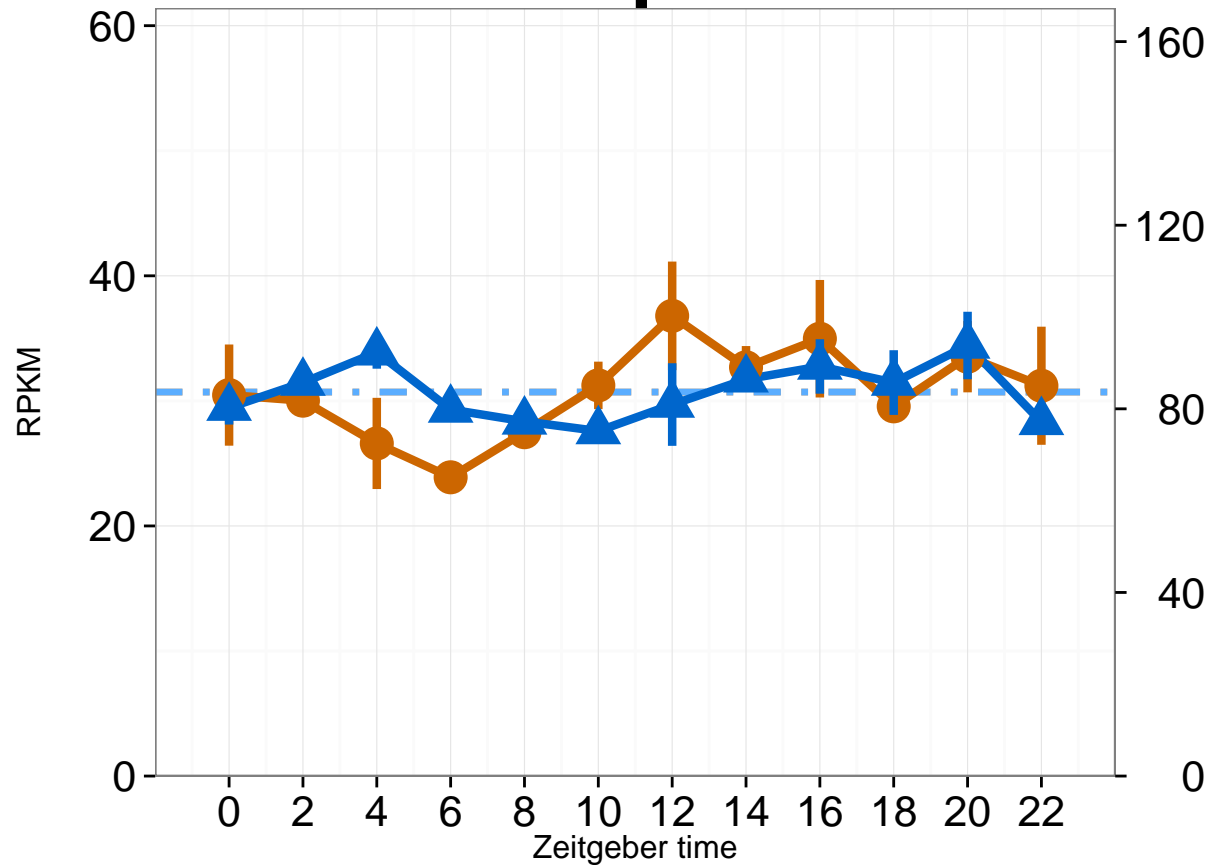

# Snrpd1

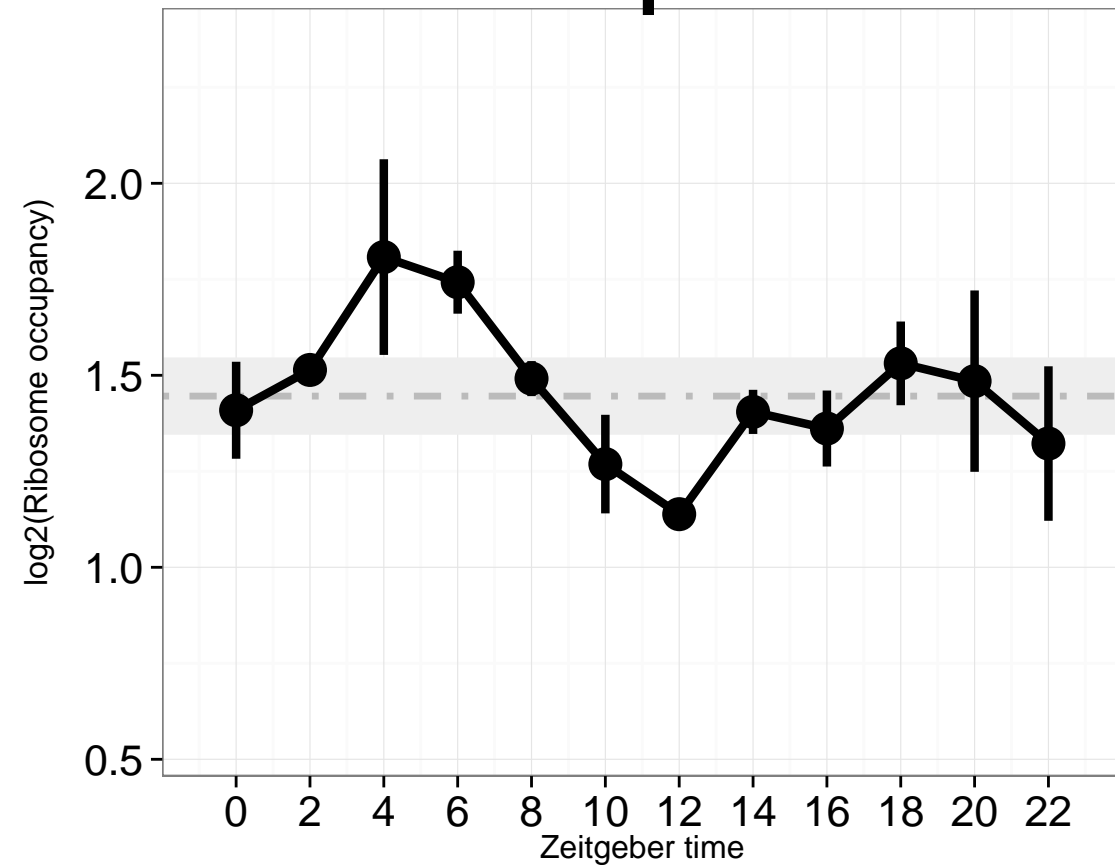

Supplement: Supplementary file 390 [file 1]

# Serpina1a

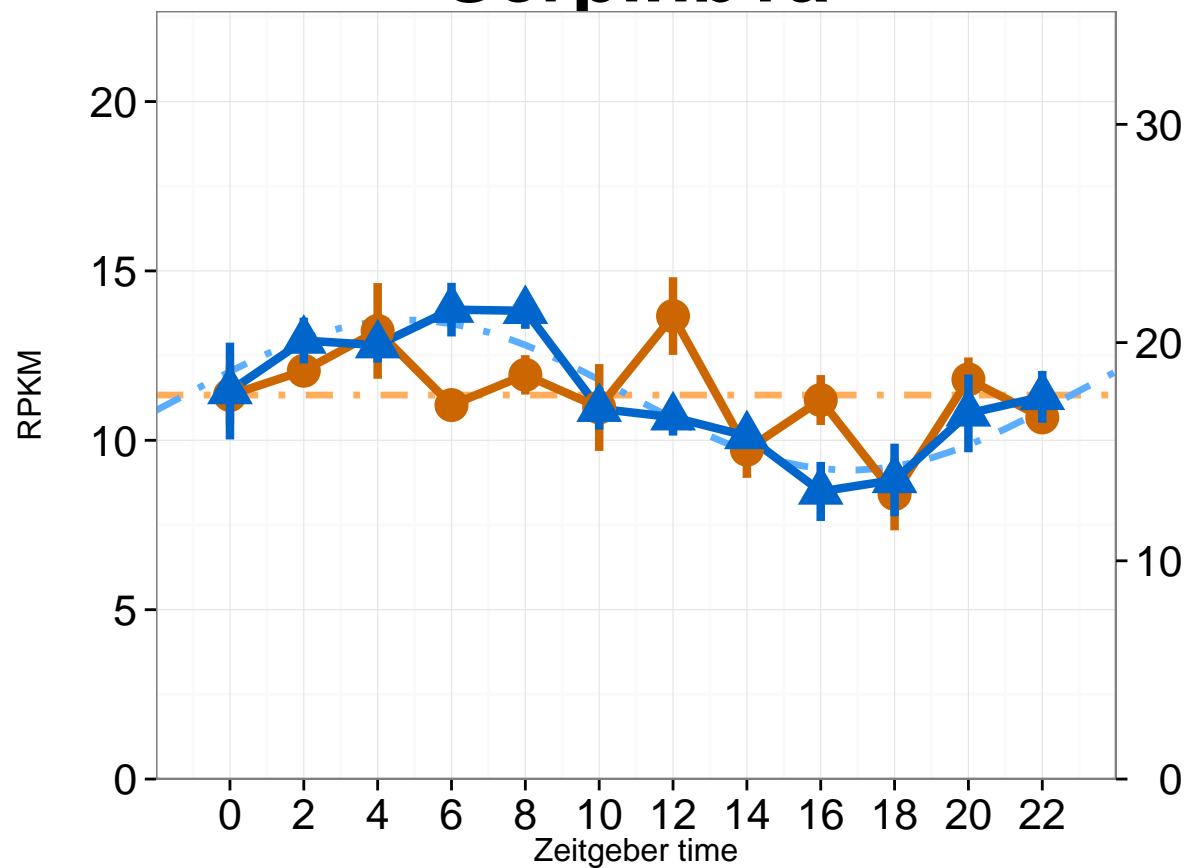

# Serpina1a

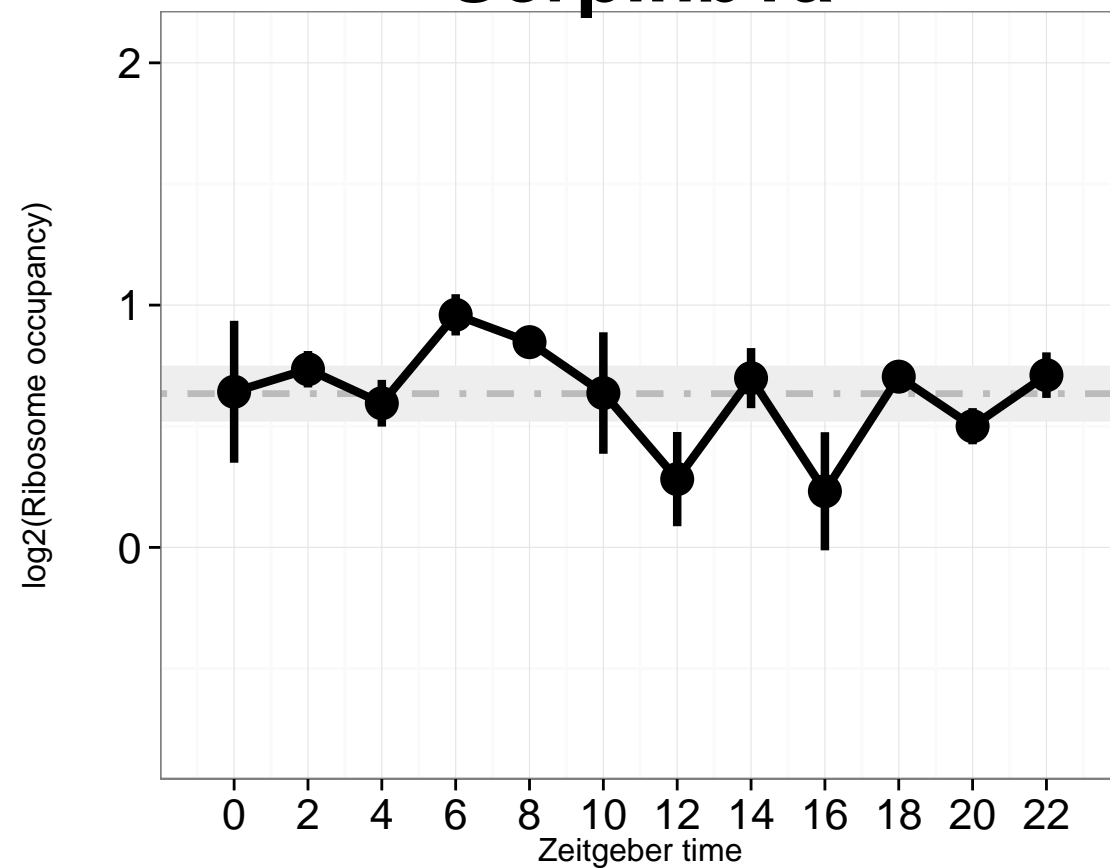

Supplement: Supplementary file 391 [file 1]

## Wdr54

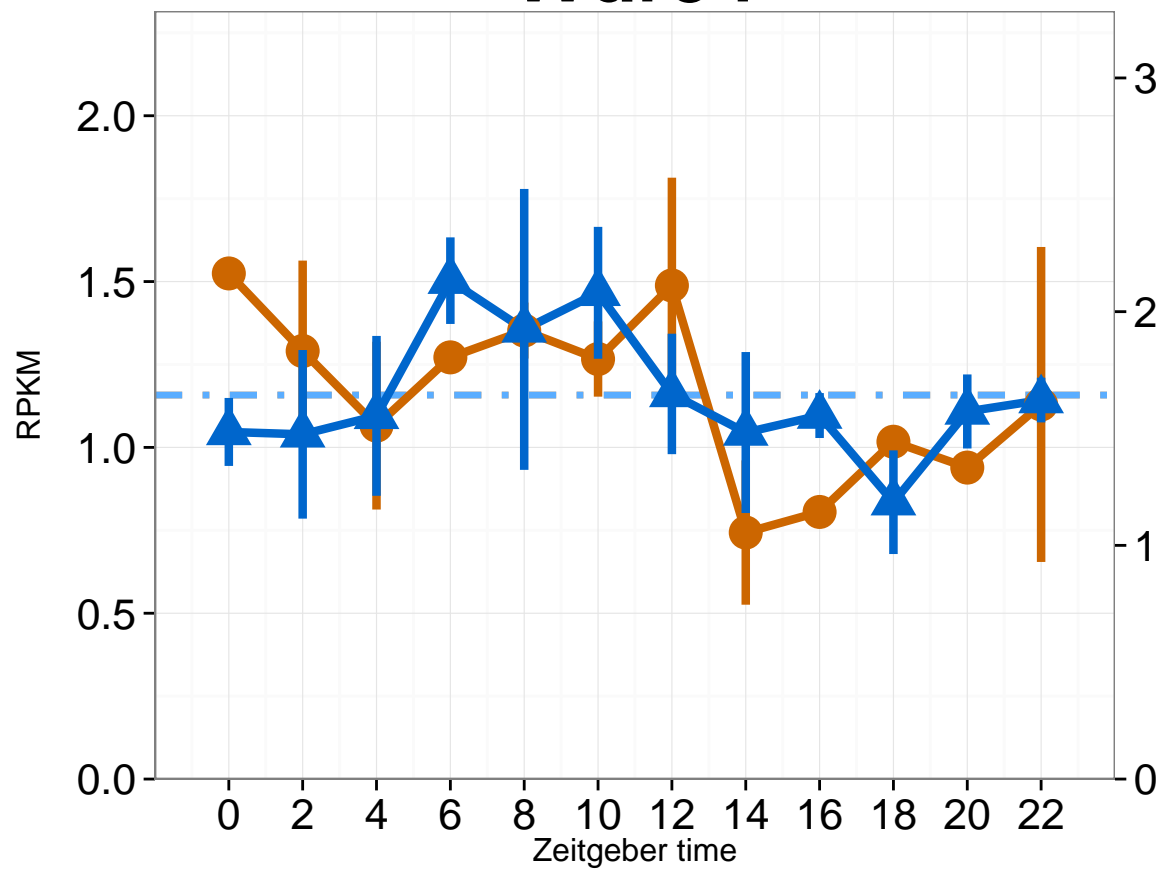

## Wdr54

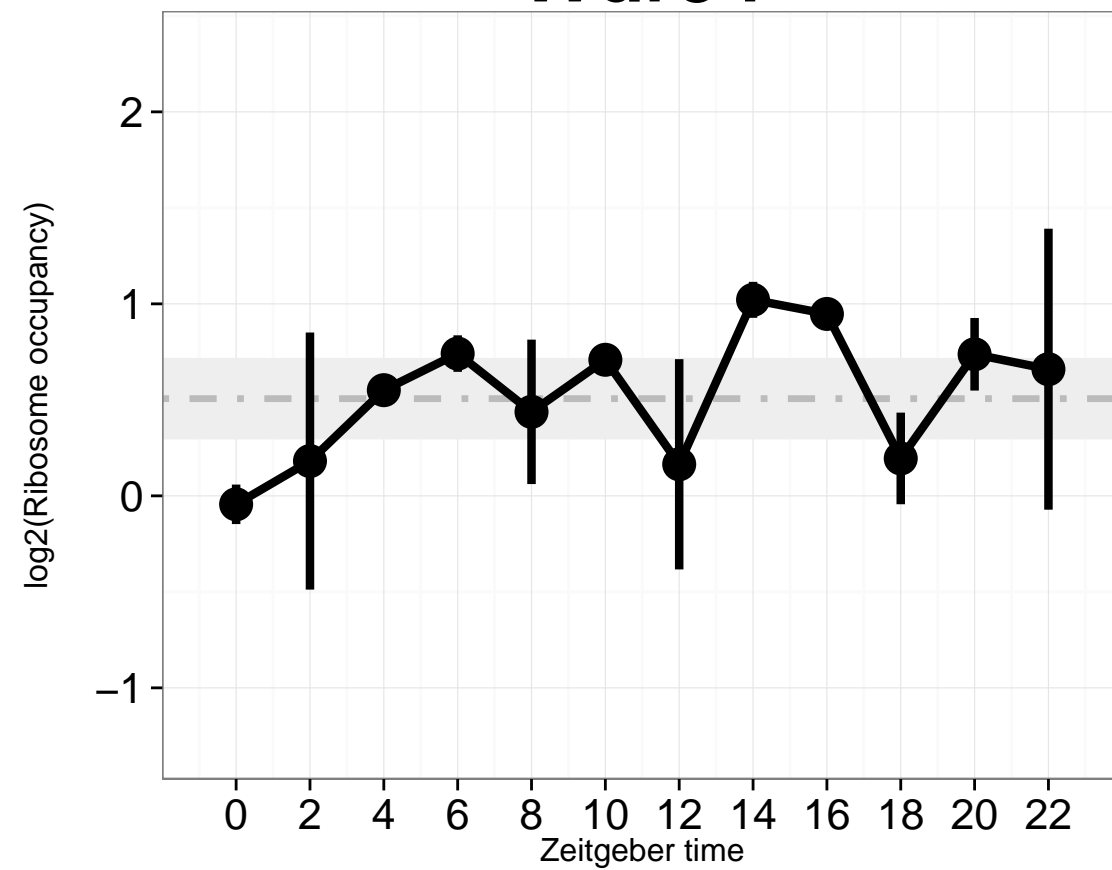

Supplement: Supplementary file 392 [file 1]

# Zfp503

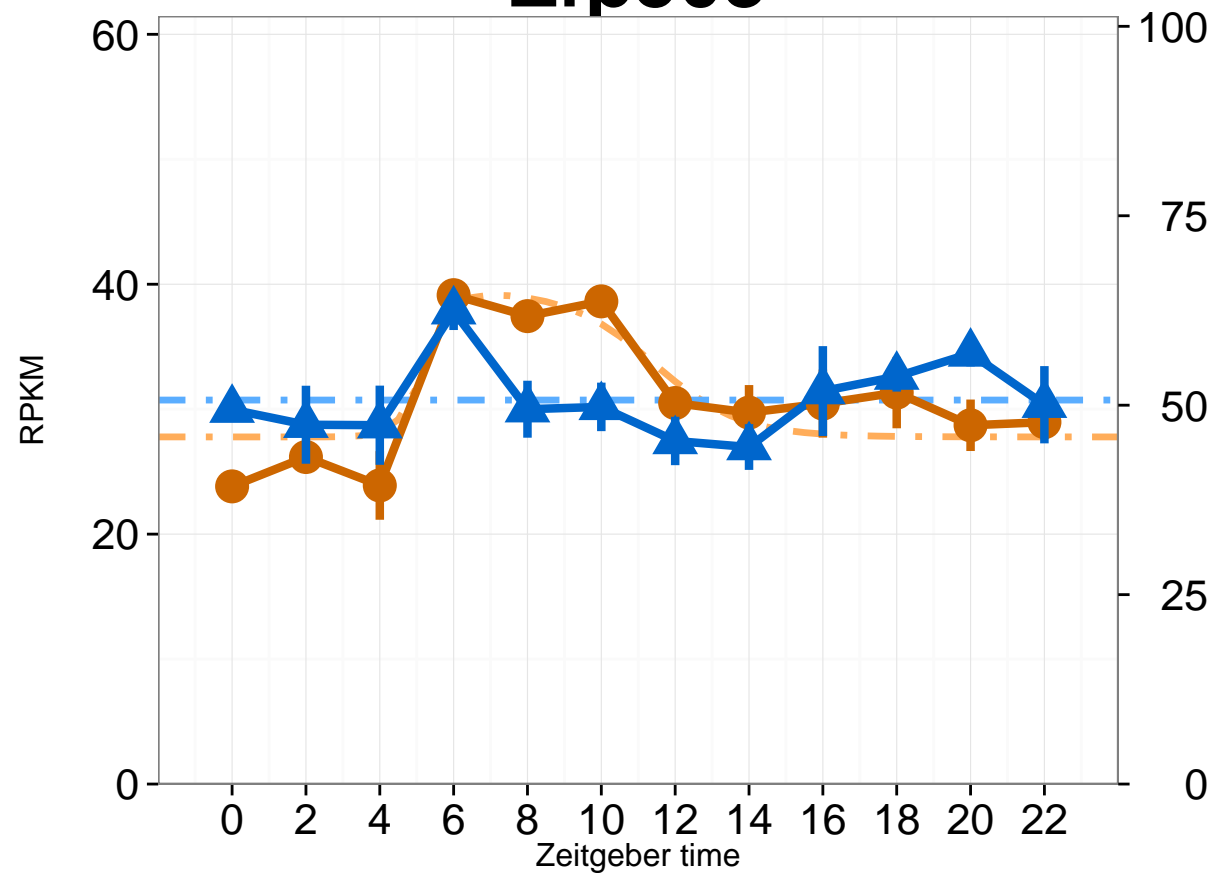

# Zfp503

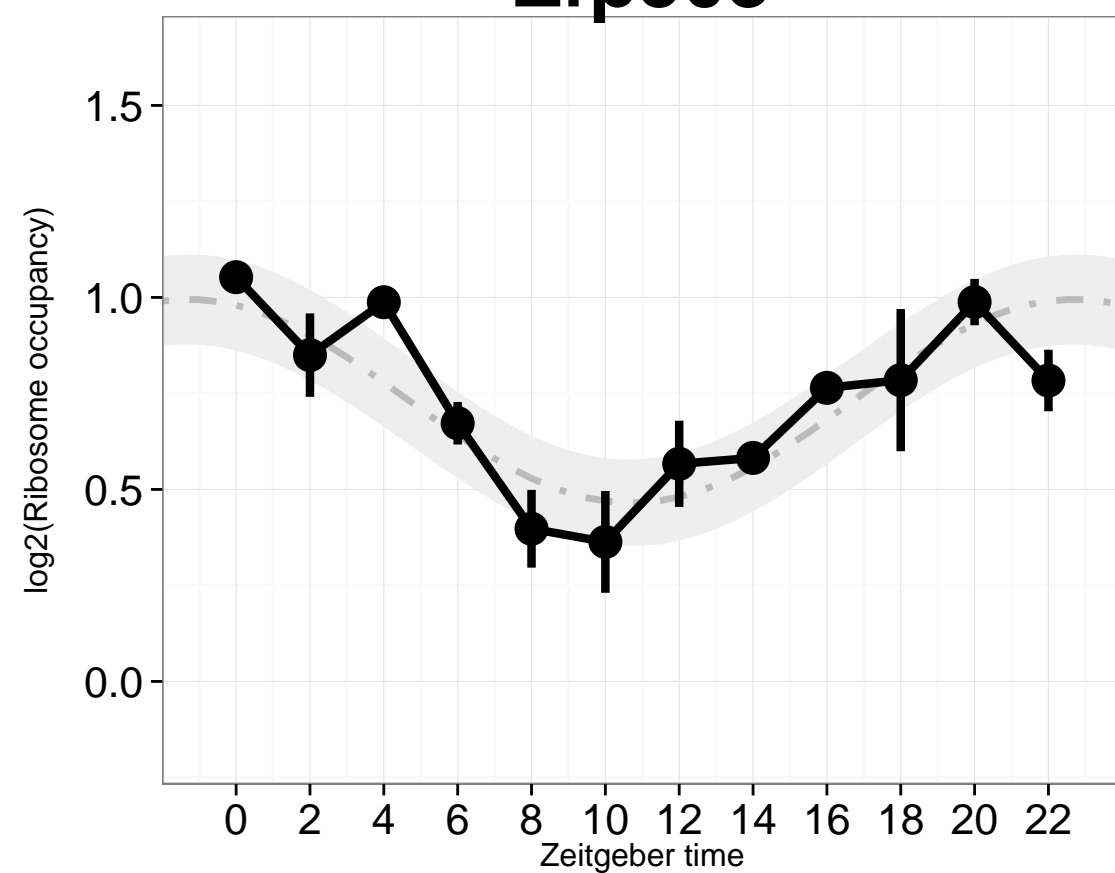

Supplement: Supplementary file 393 [file 1]

## Npl

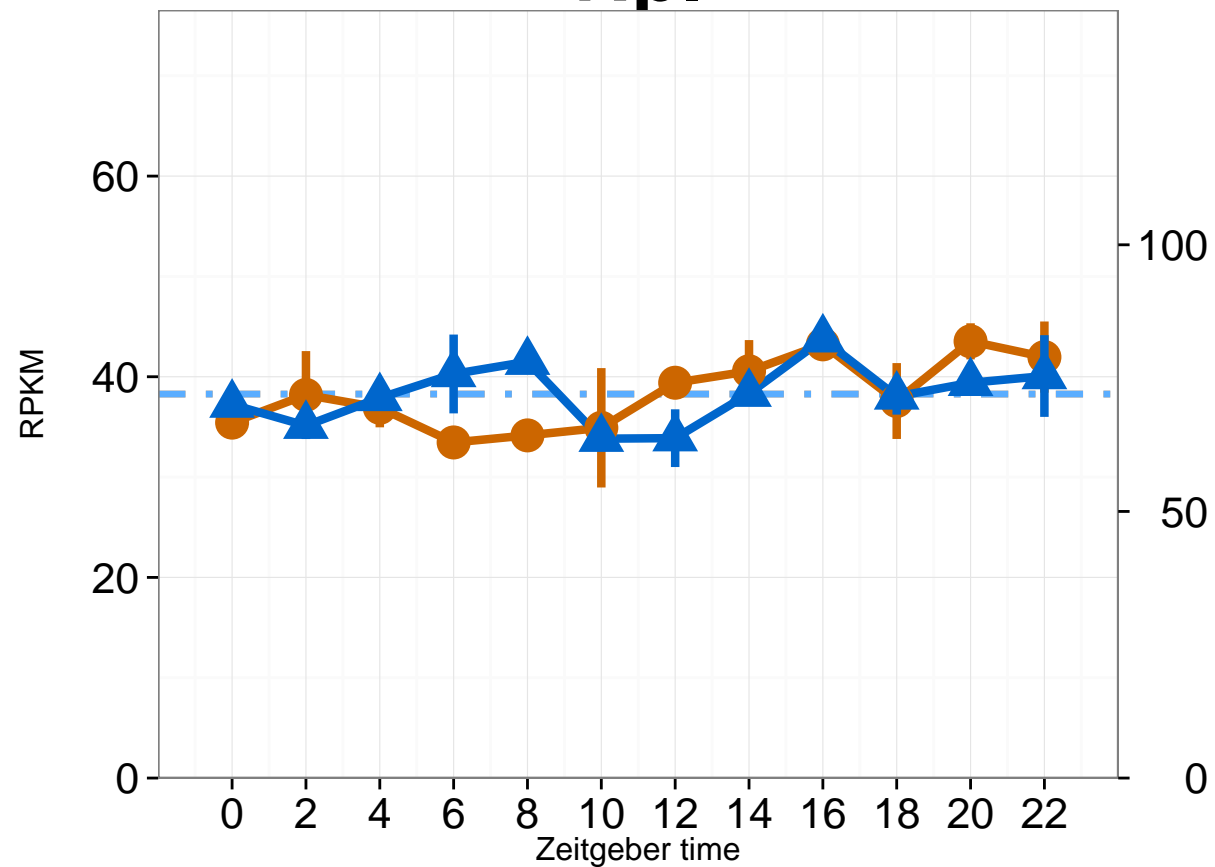

## Npl

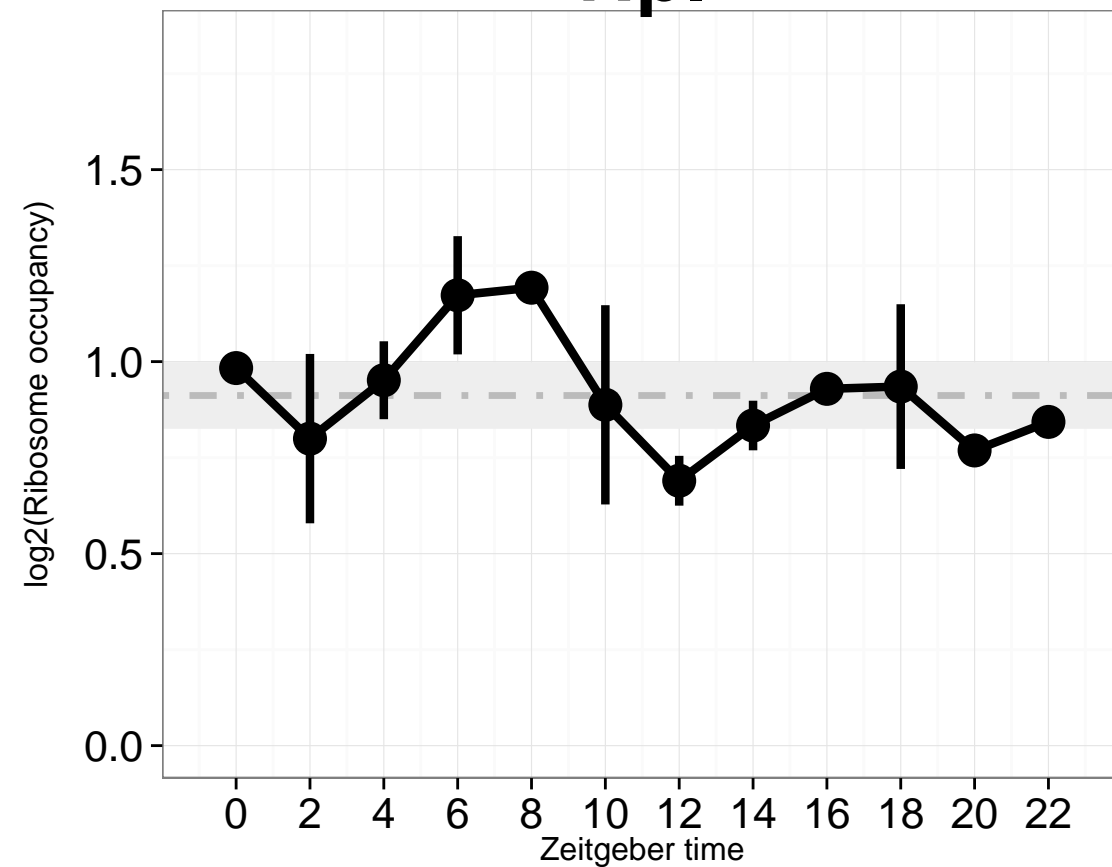

Supplement: Supplementary file 394 [file 1]

# Chst13

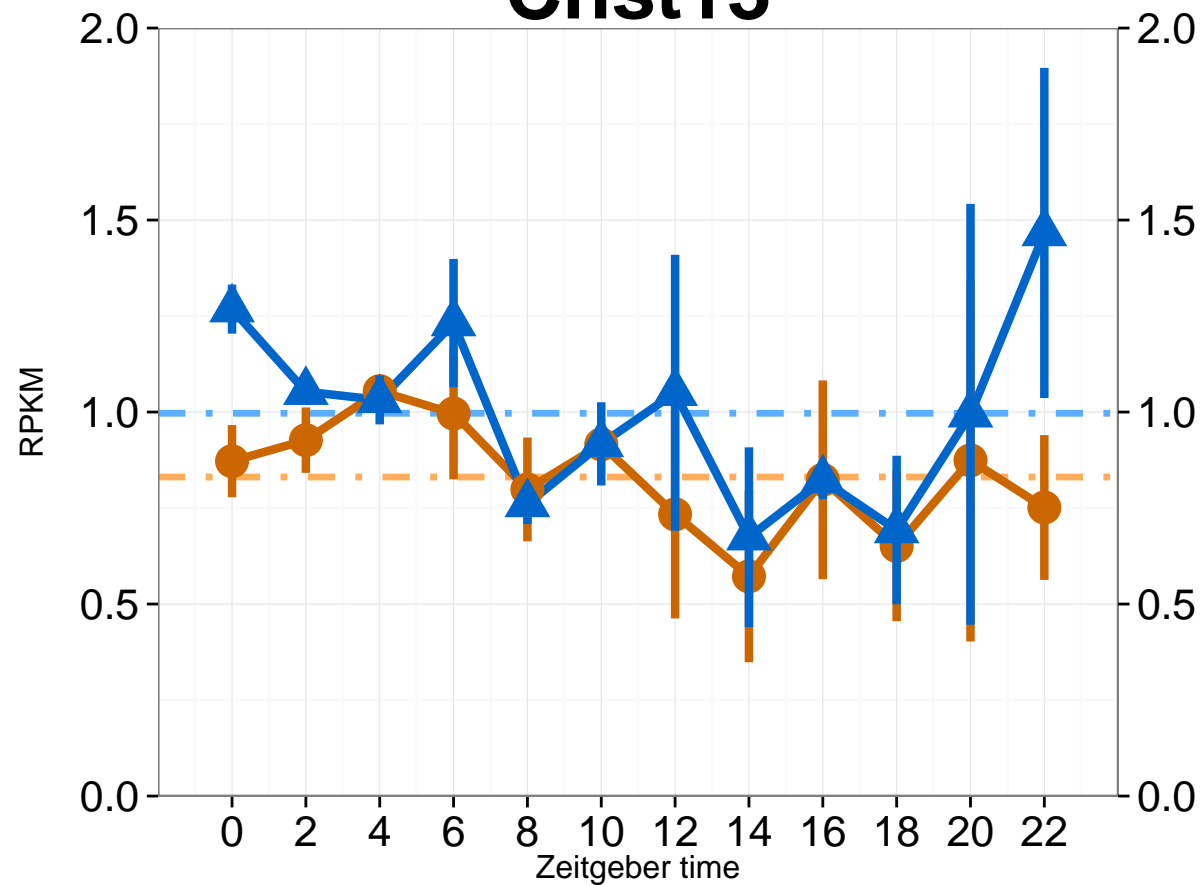

# Chst13

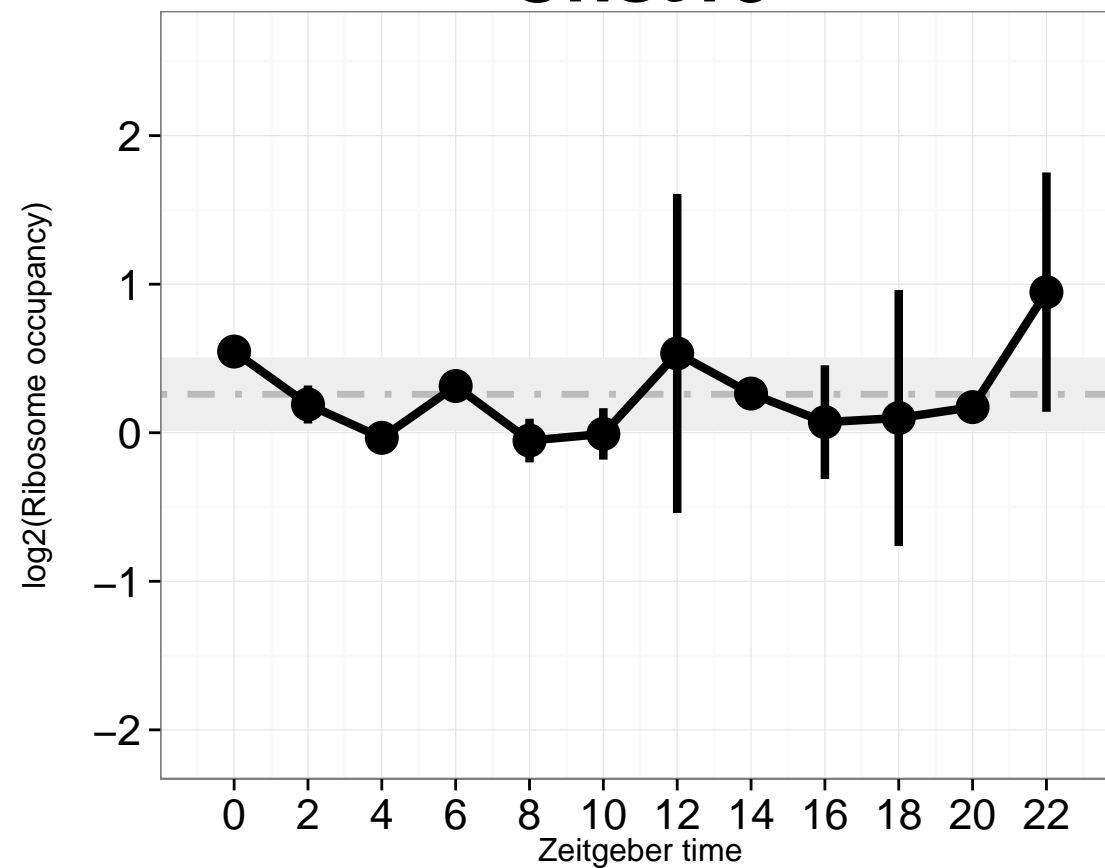

Supplement: Supplementary file 395 [file 1]

## Alkbh4

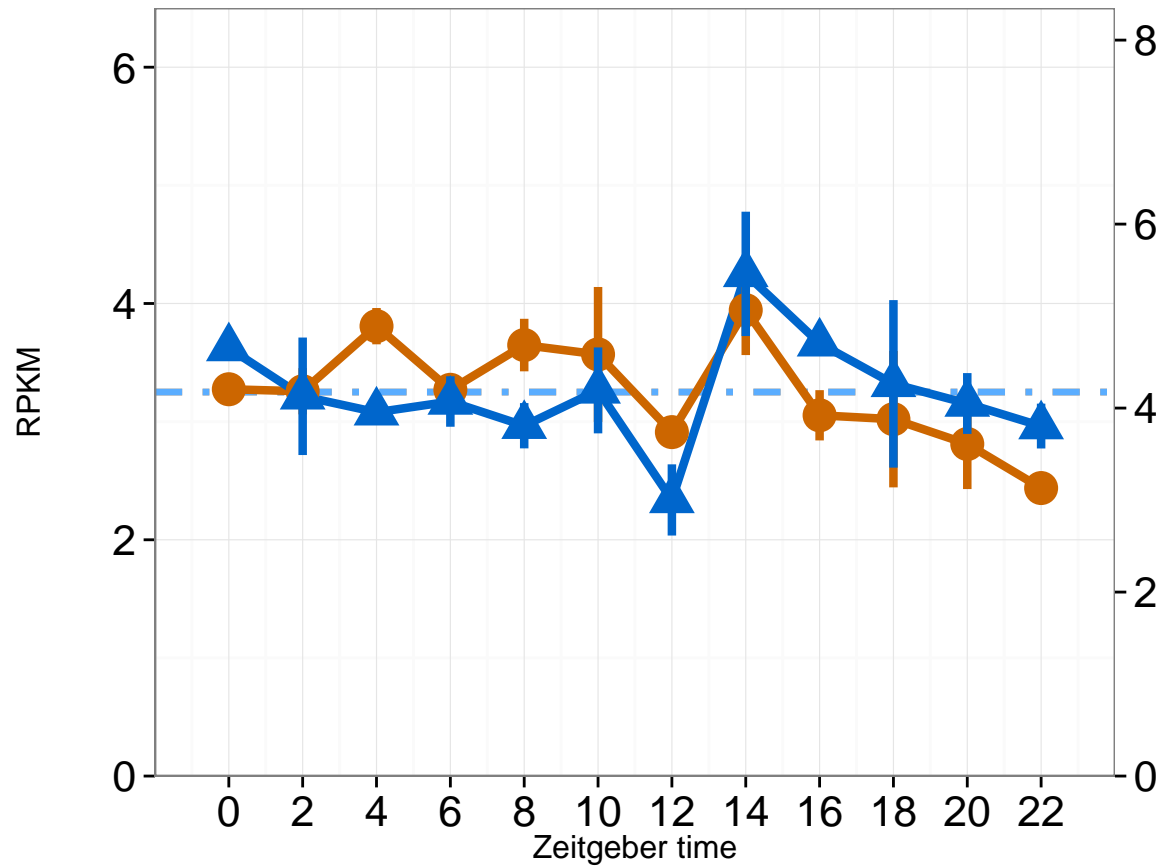

## Alkbh4

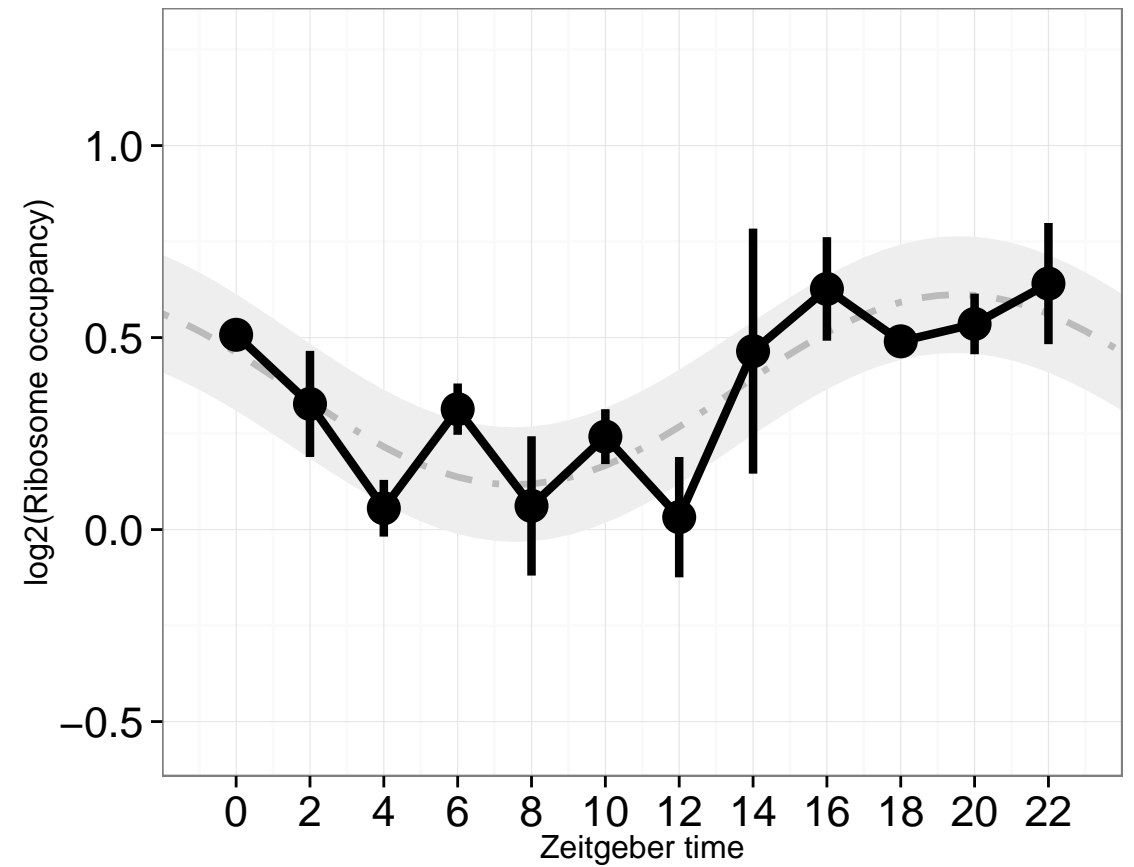

Supplement: Supplementary file 396 [file 1]

## lfi47

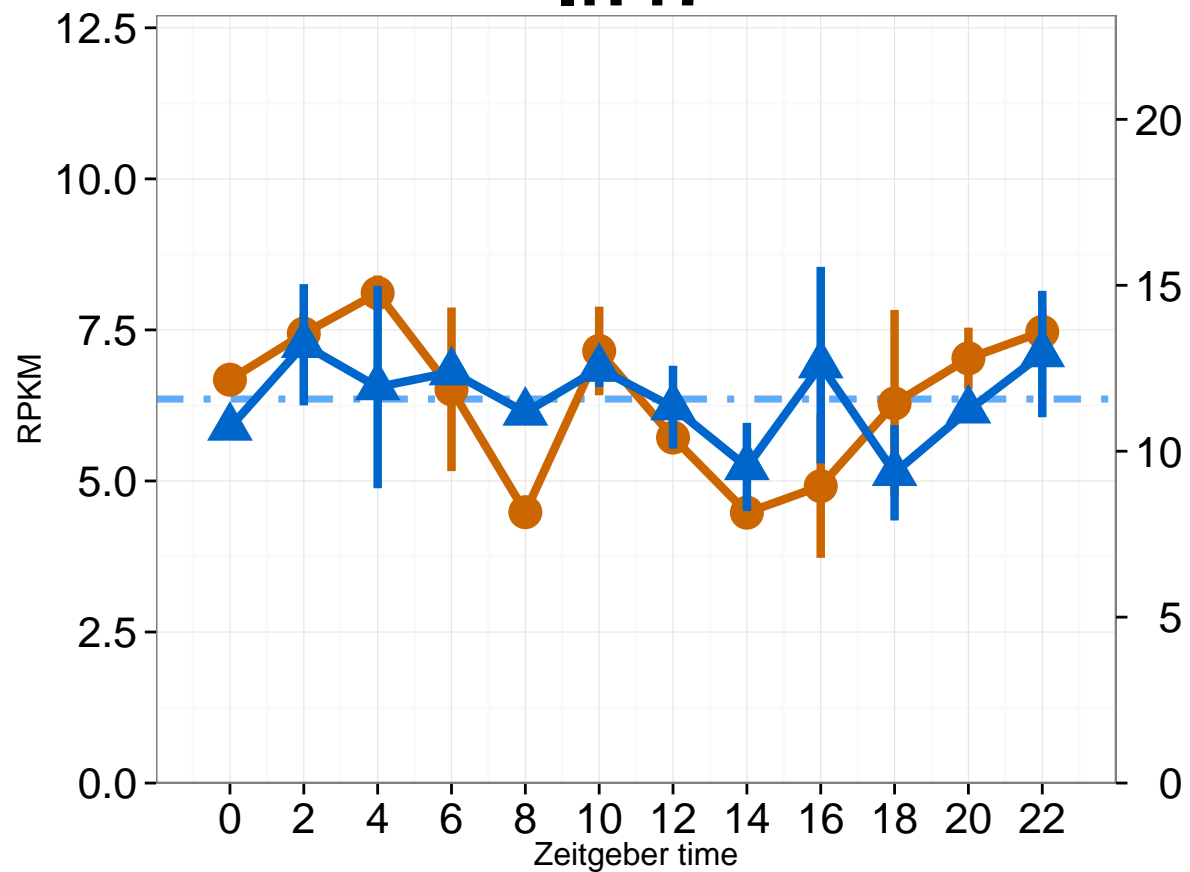

## lfi47

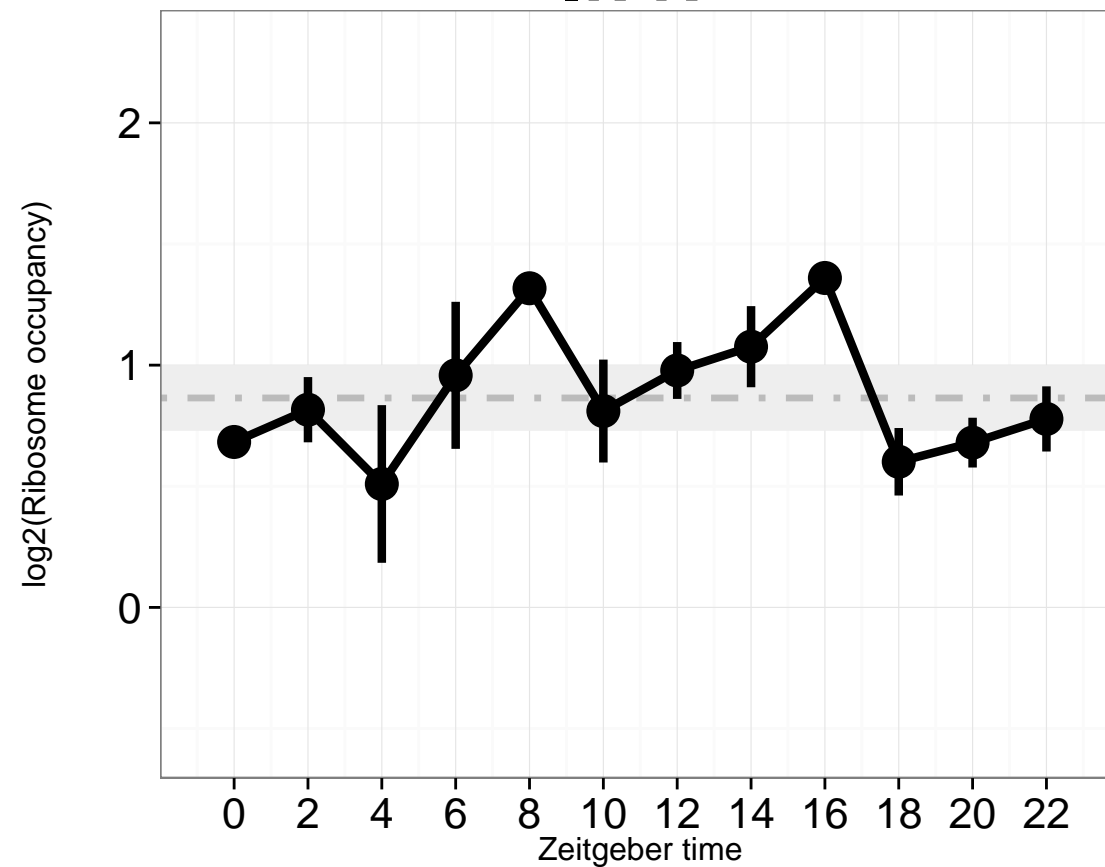

Supplement: Supplementary file 397 [file 1]

## Colgalt1

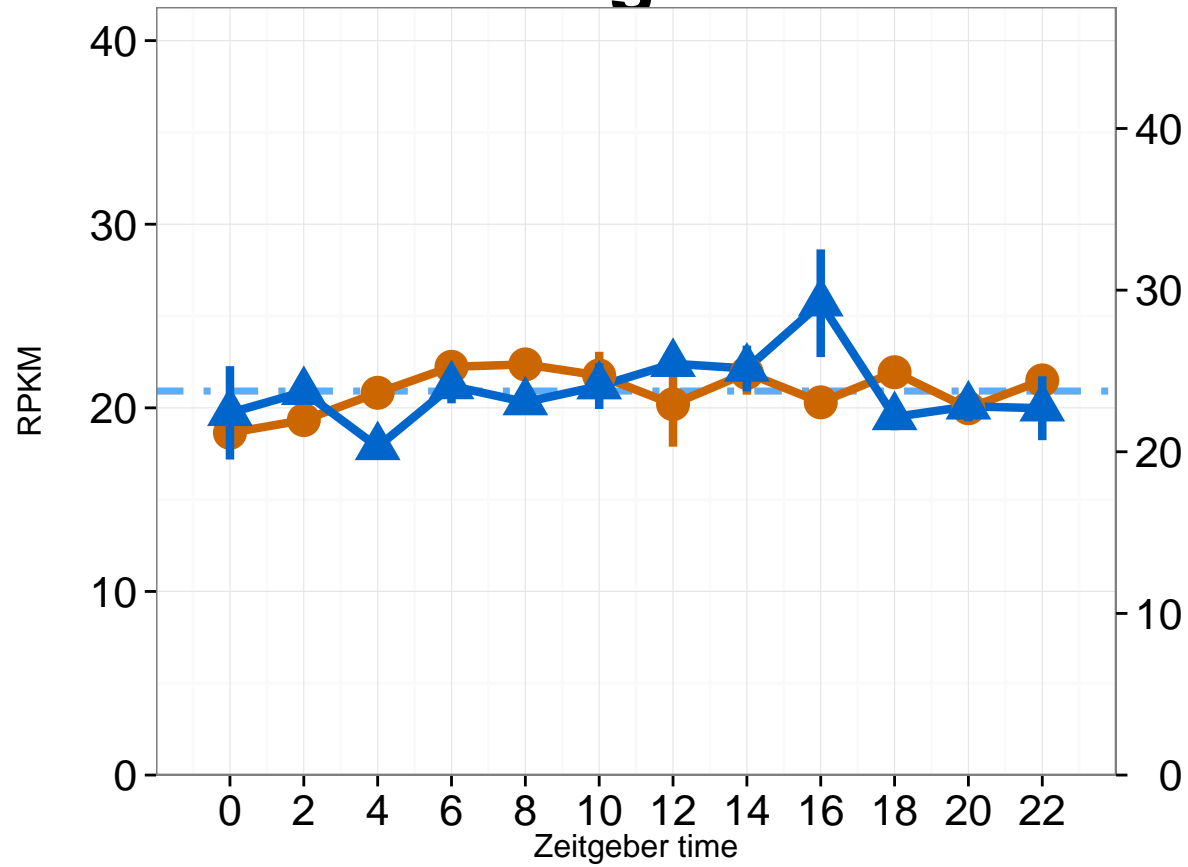

## Colgalt1

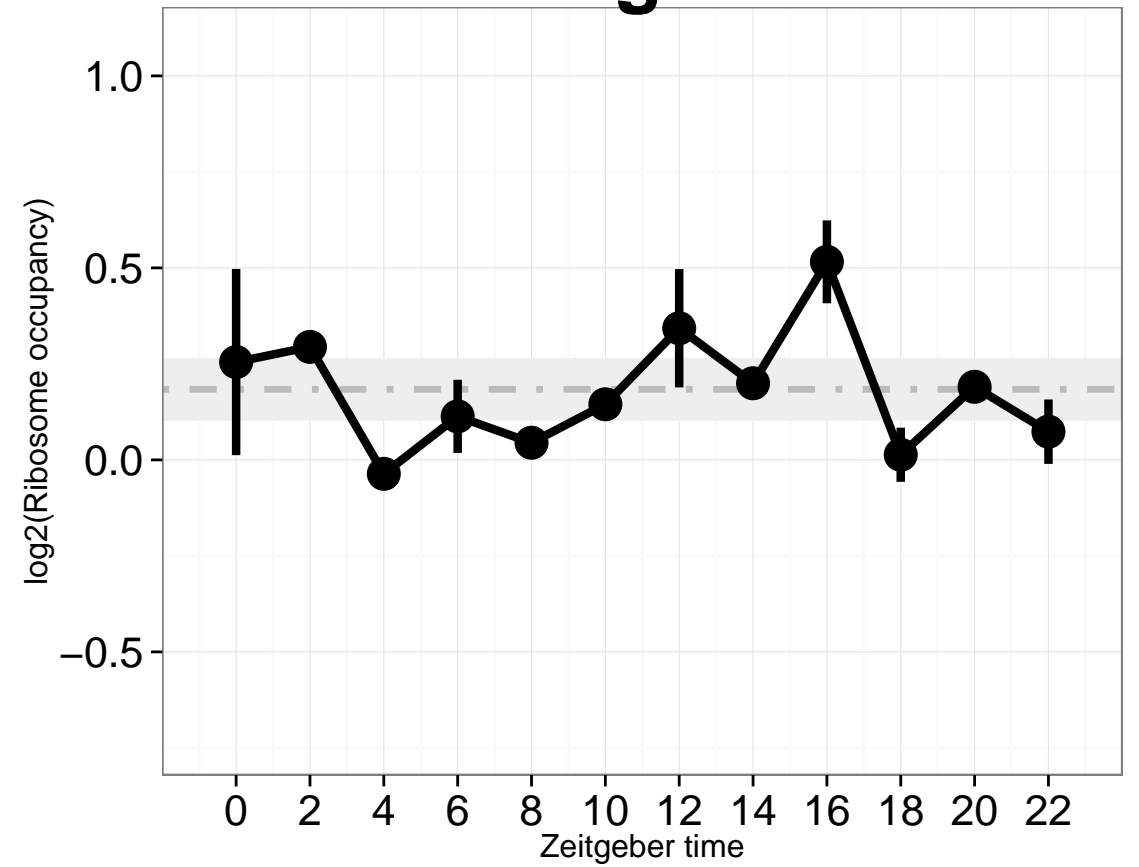

Supplement: Supplementary file 398 [file 1]

## Nol6

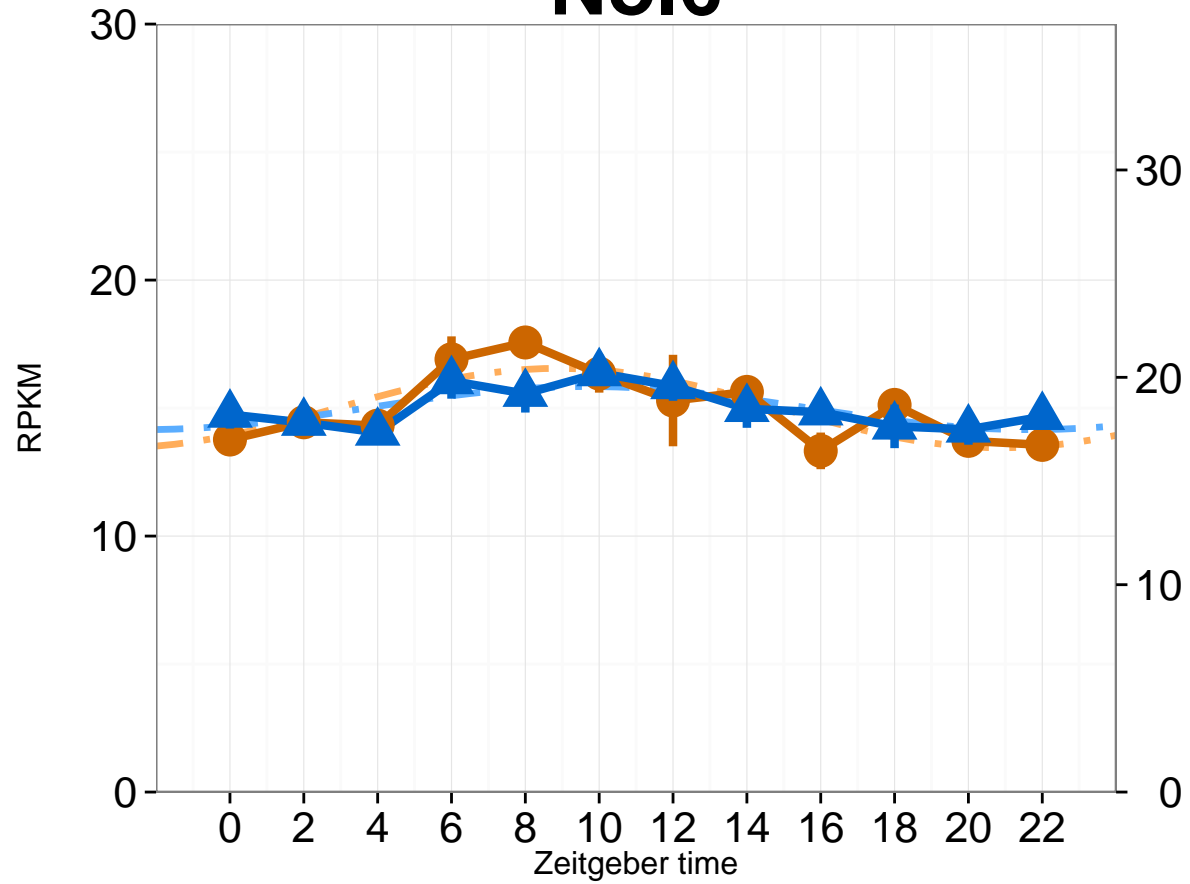

## Nol6

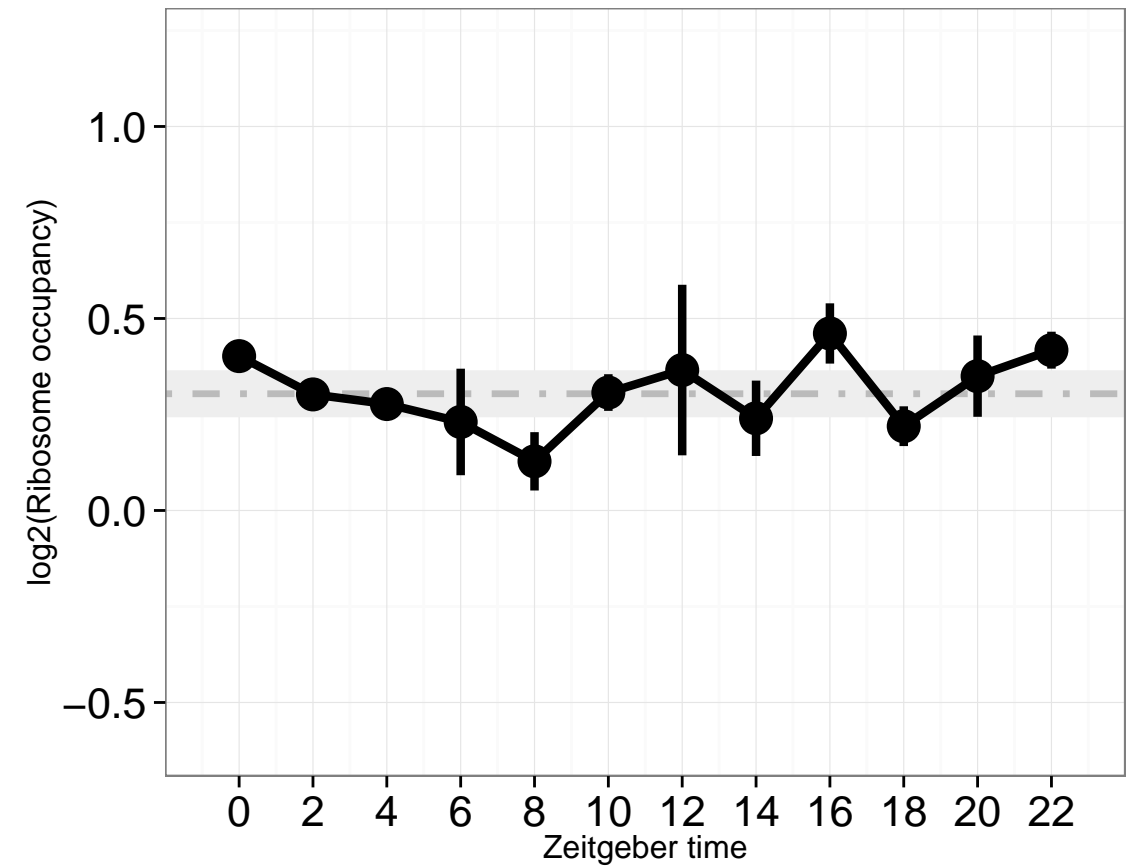

Supplement: Supplementary file 399 [file 1]

# Cenpt

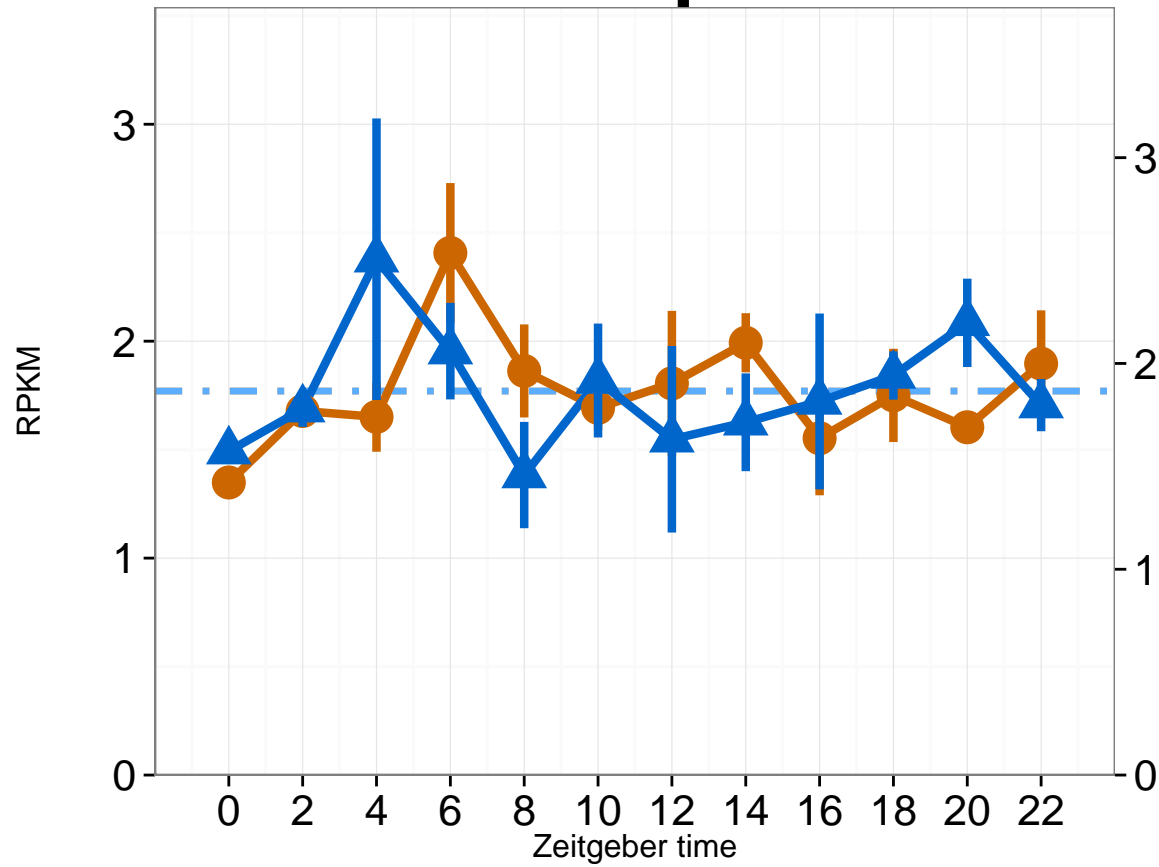

# Cenpt

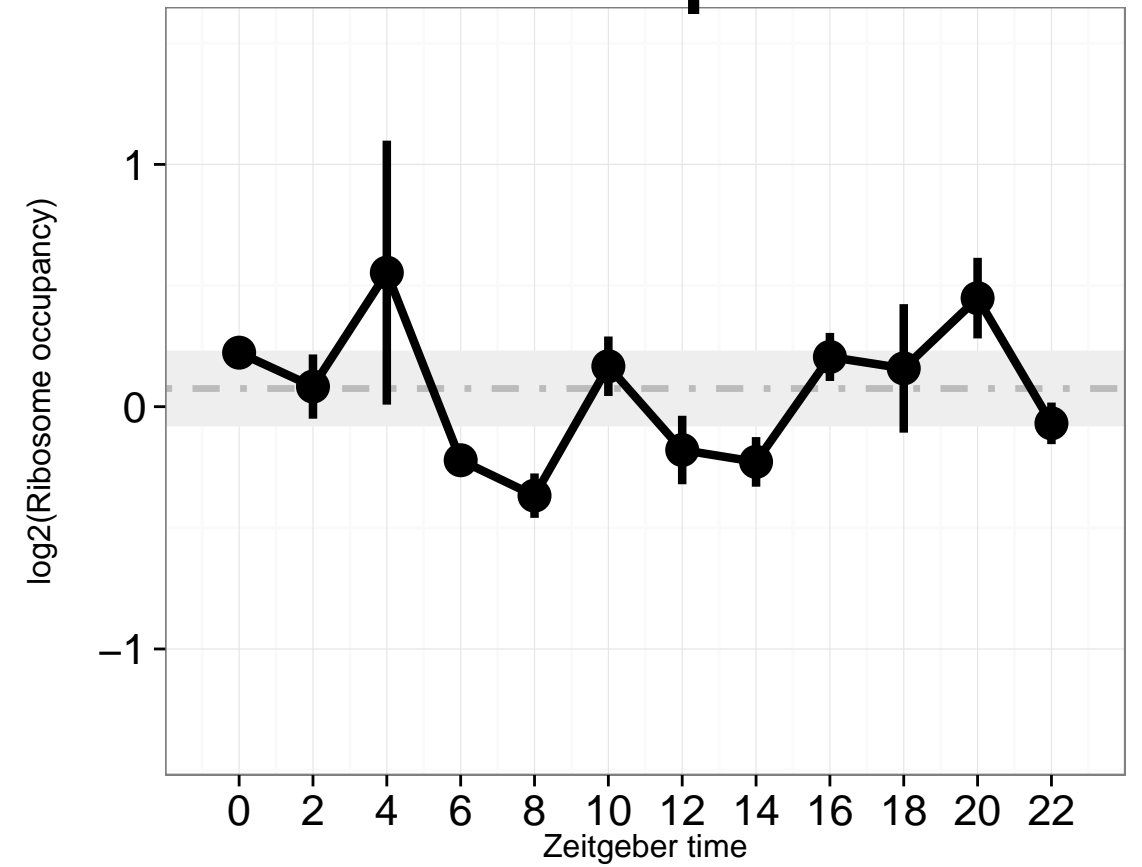

Supplement: Supplementary file 400 [file 1]

## Pitpnb

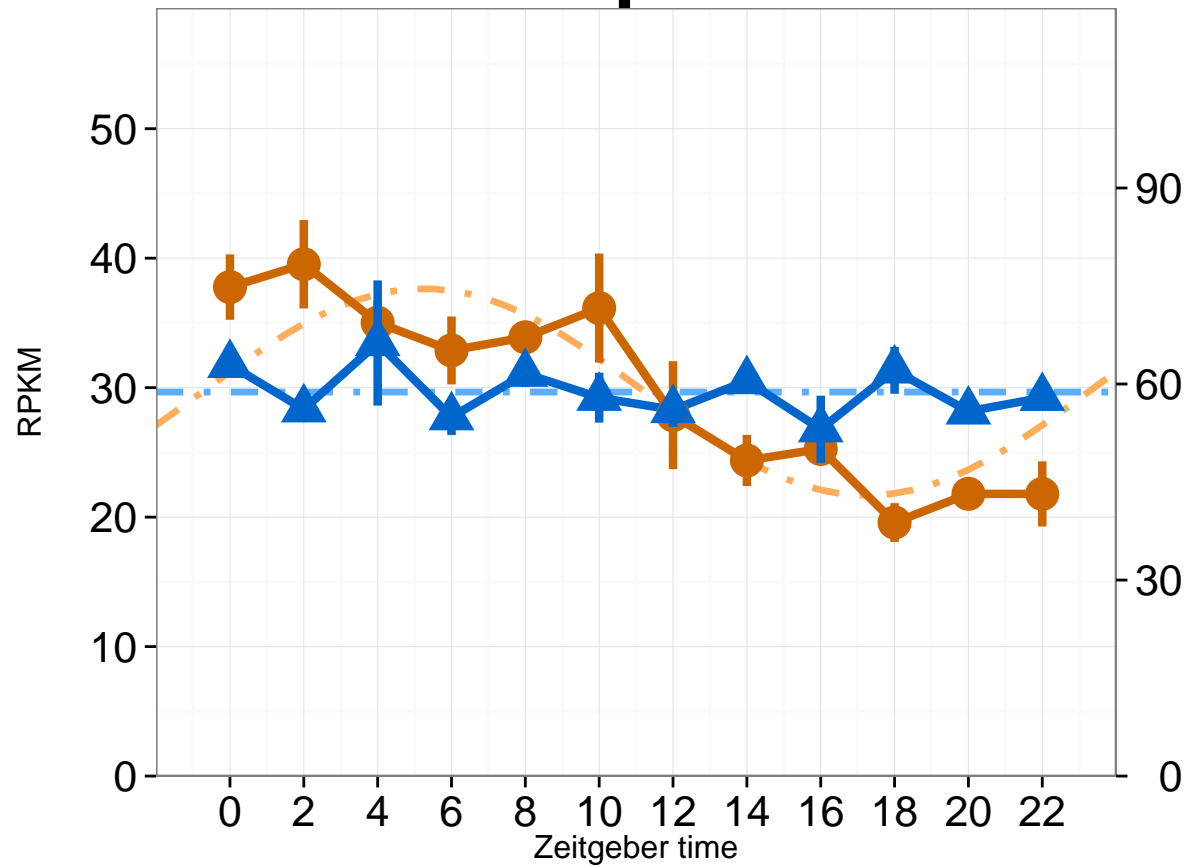

## Pitpnb

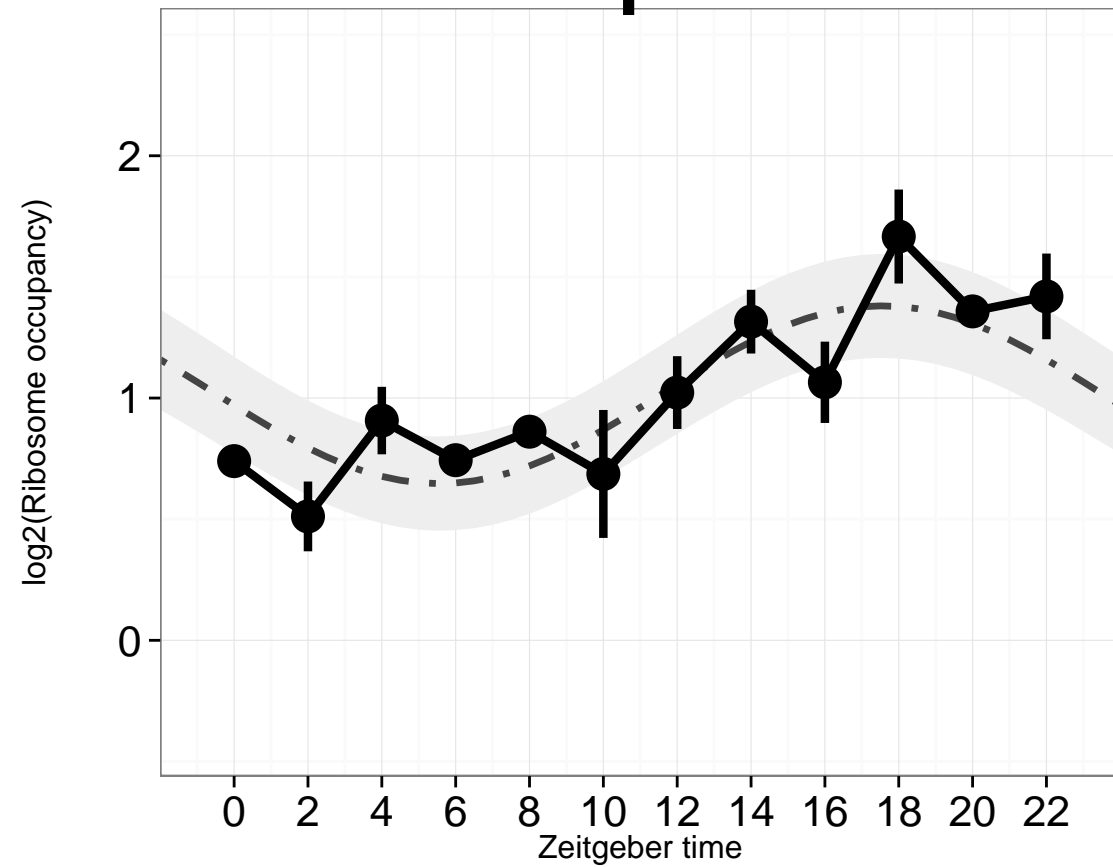

Supplement: Supplementary file 401 [file 1]
