# Supplementary material (part 5 of 133)
Source: publisher figshare collection journal article supplement (https://springernature.figshare.com/articles/dataset/_/4903193)

# Prr15

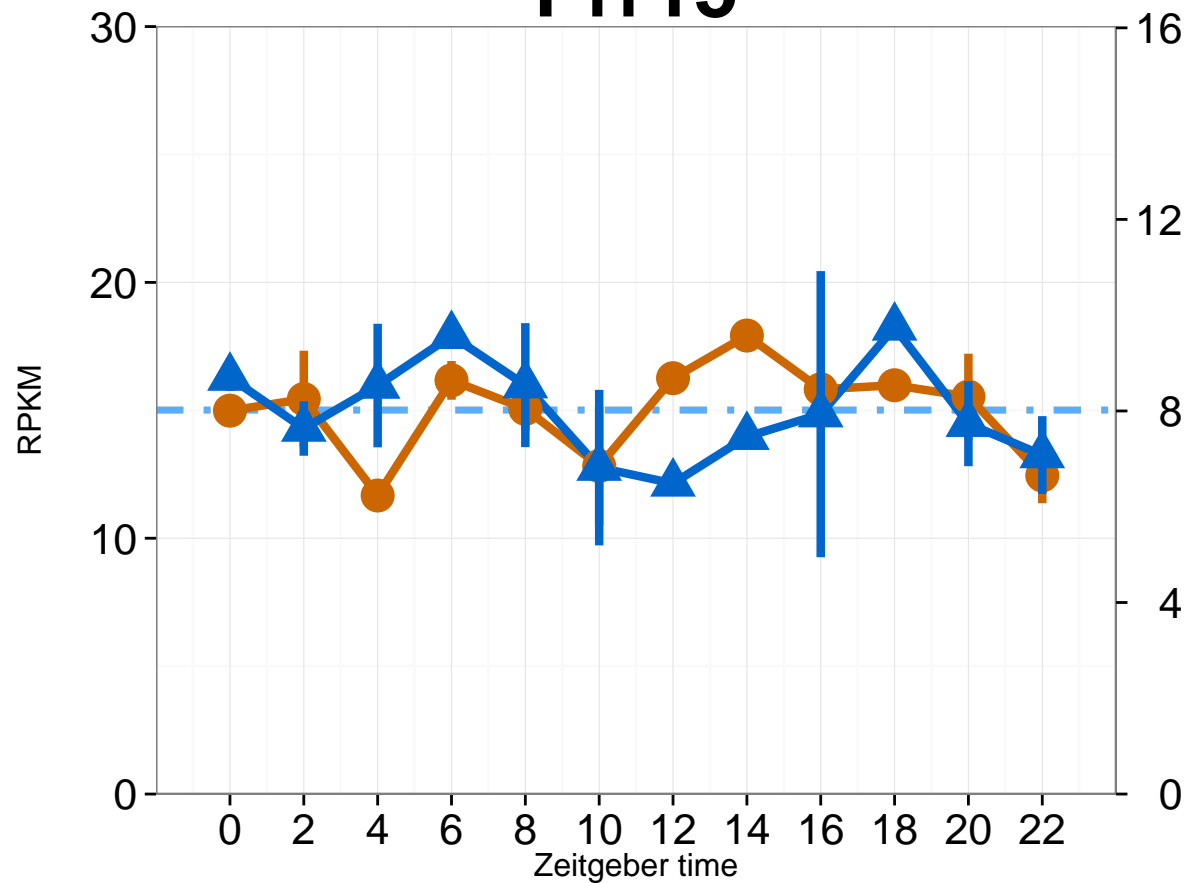

# Prr15

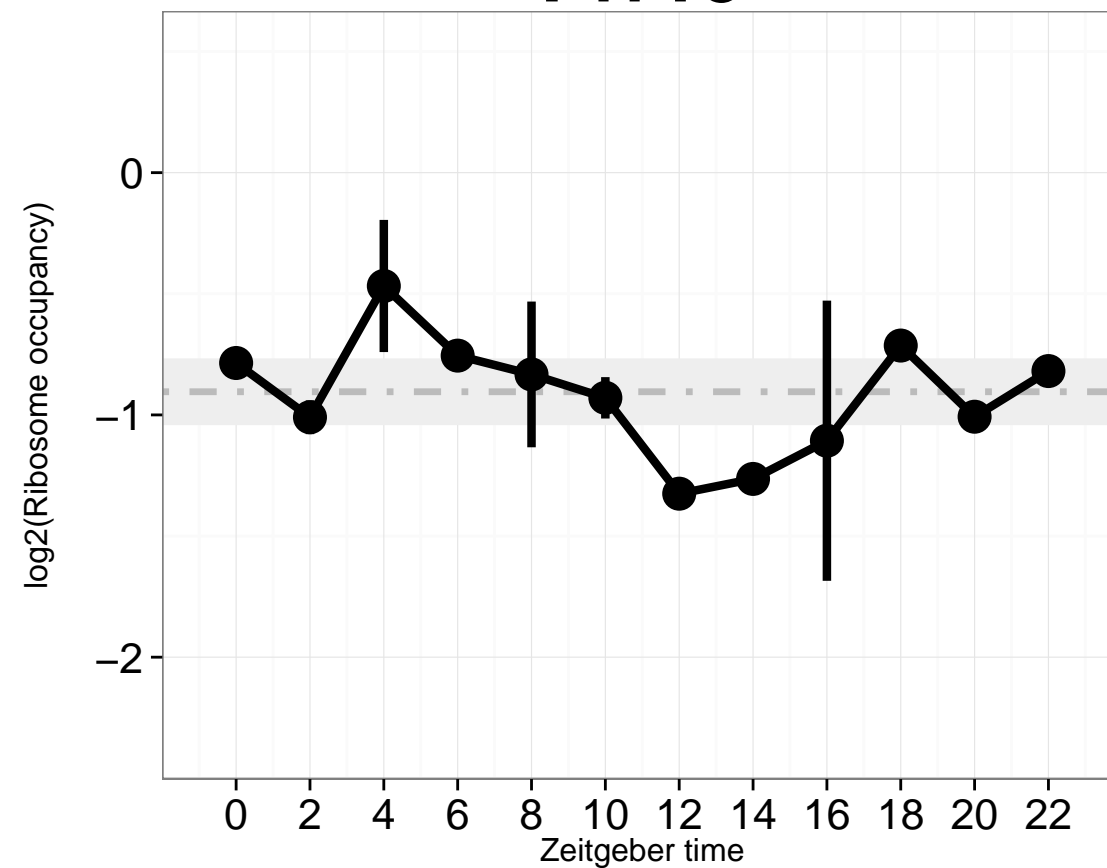

Supplement: Supplementary file 402 [file 1]

# Pstpip1

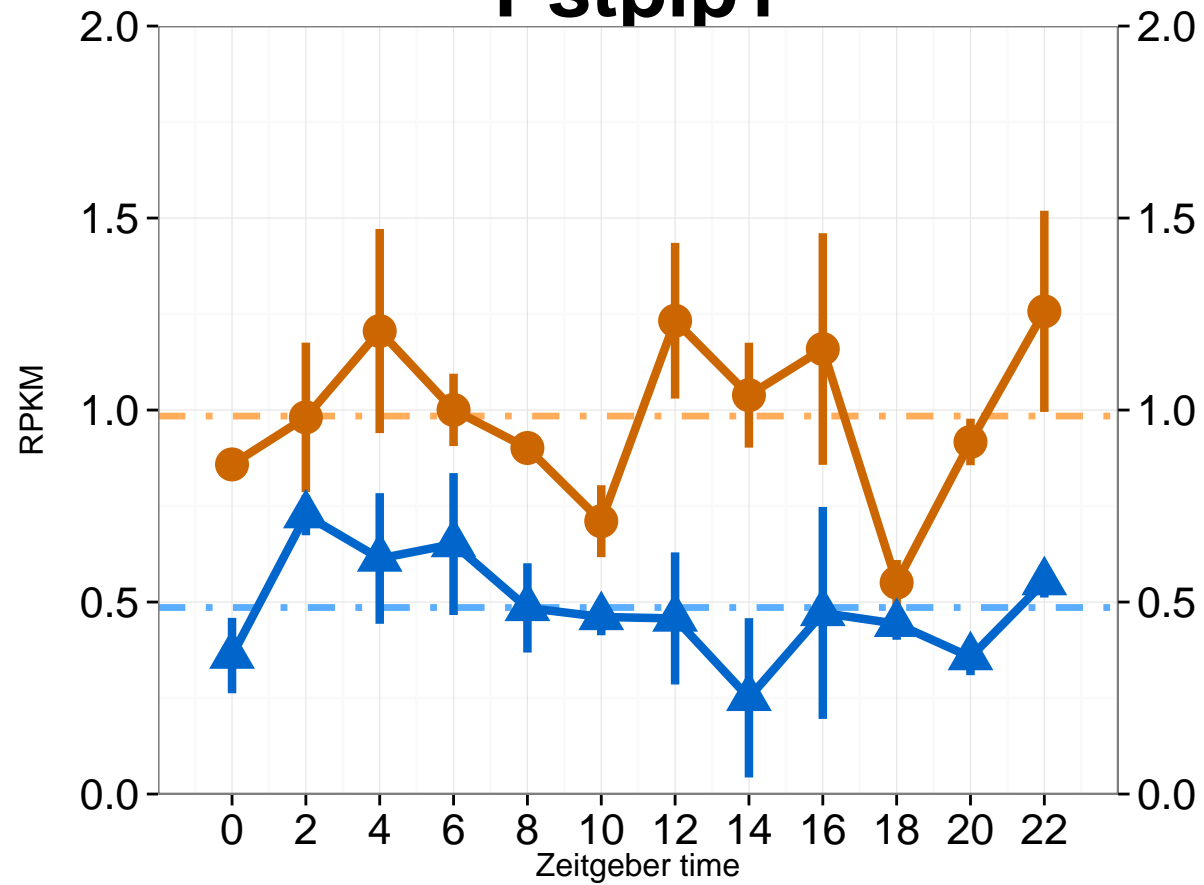

# Pstpip1

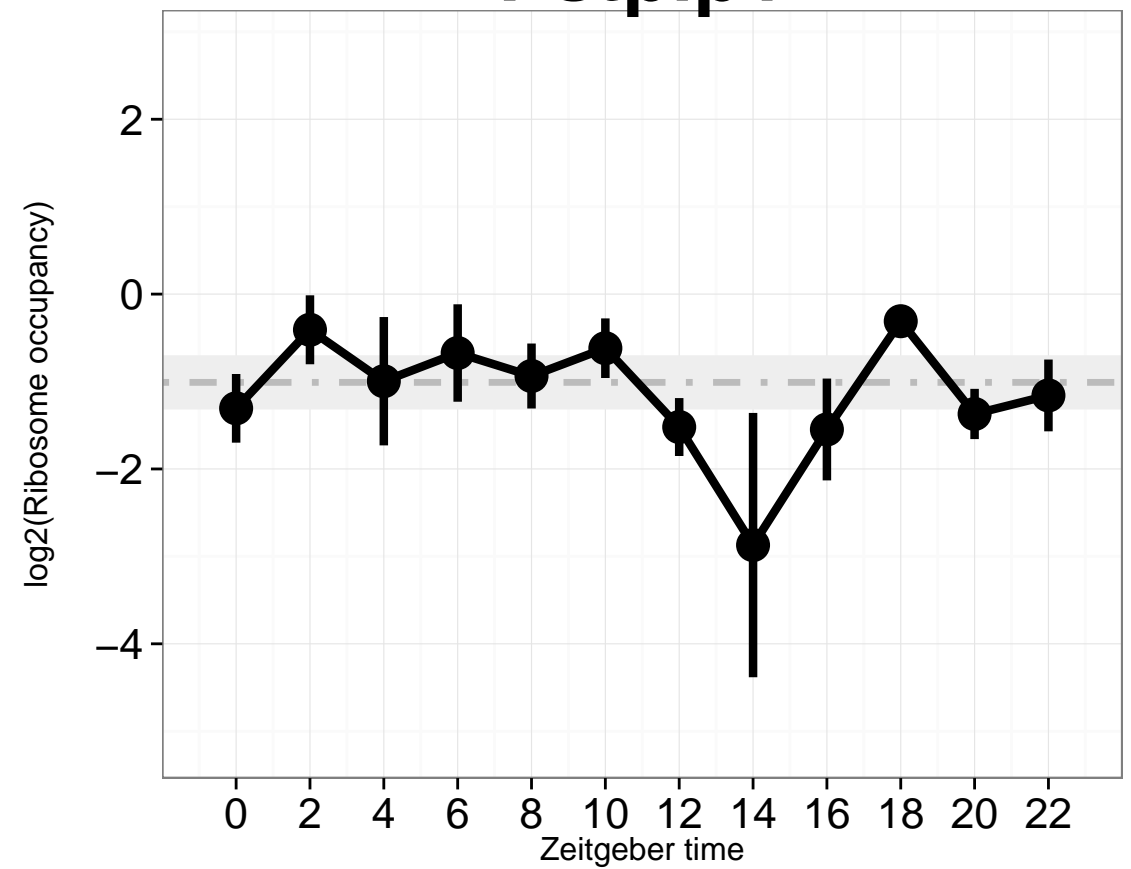

Supplement: Supplementary file 403 [file 1]

## Sun2

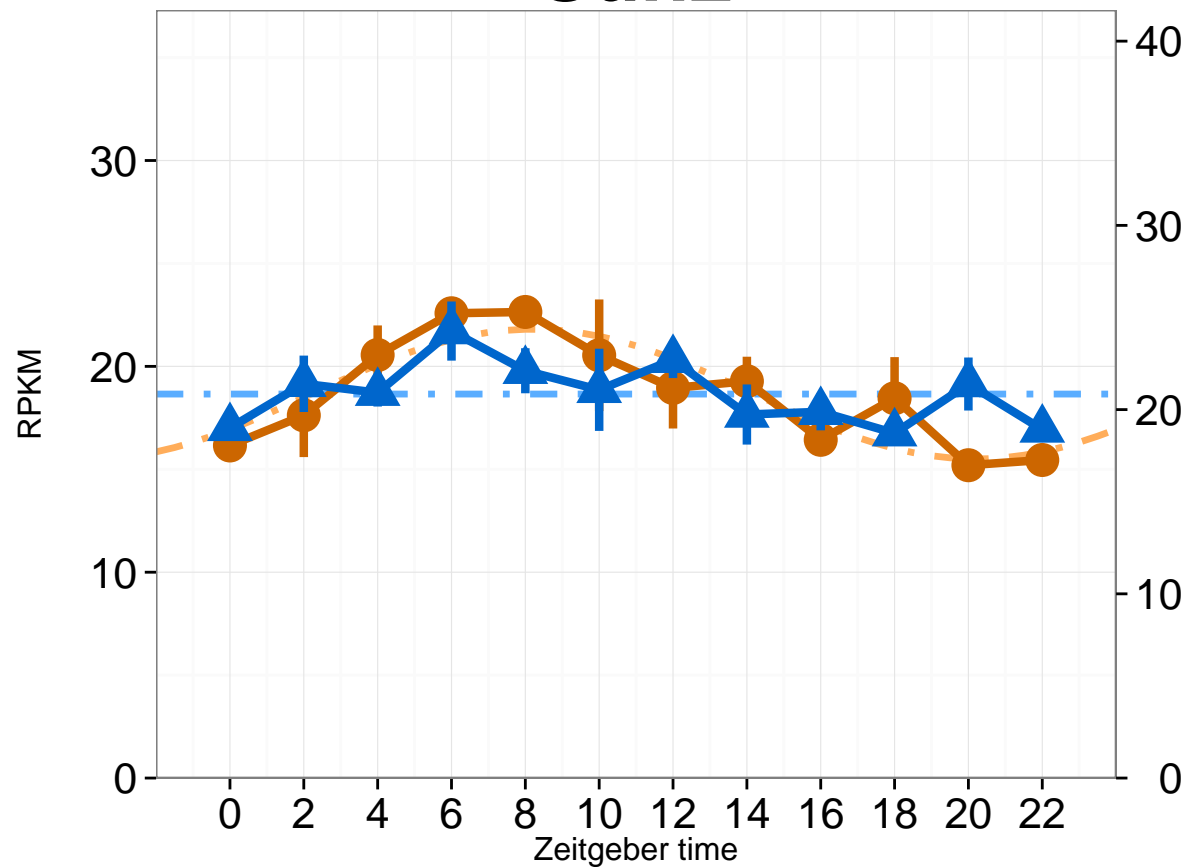

## Sun2

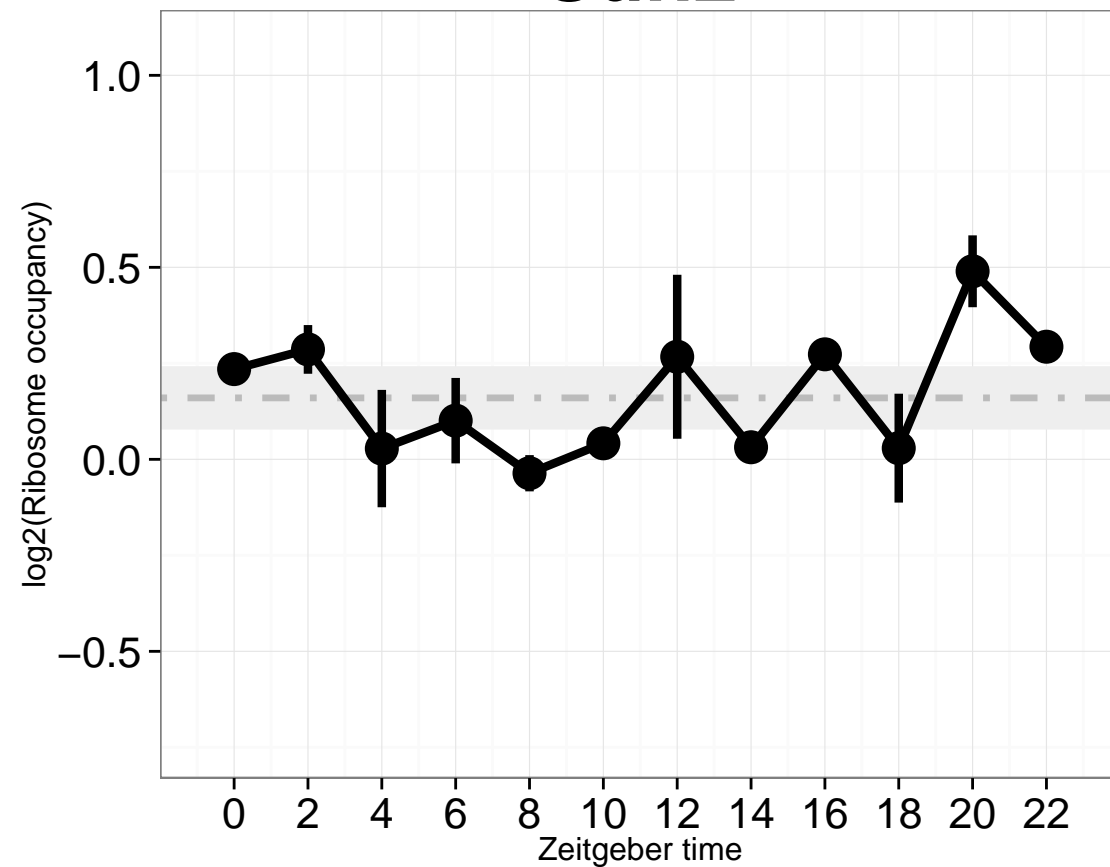

Supplement: Supplementary file 404 [file 1]

## Fntb

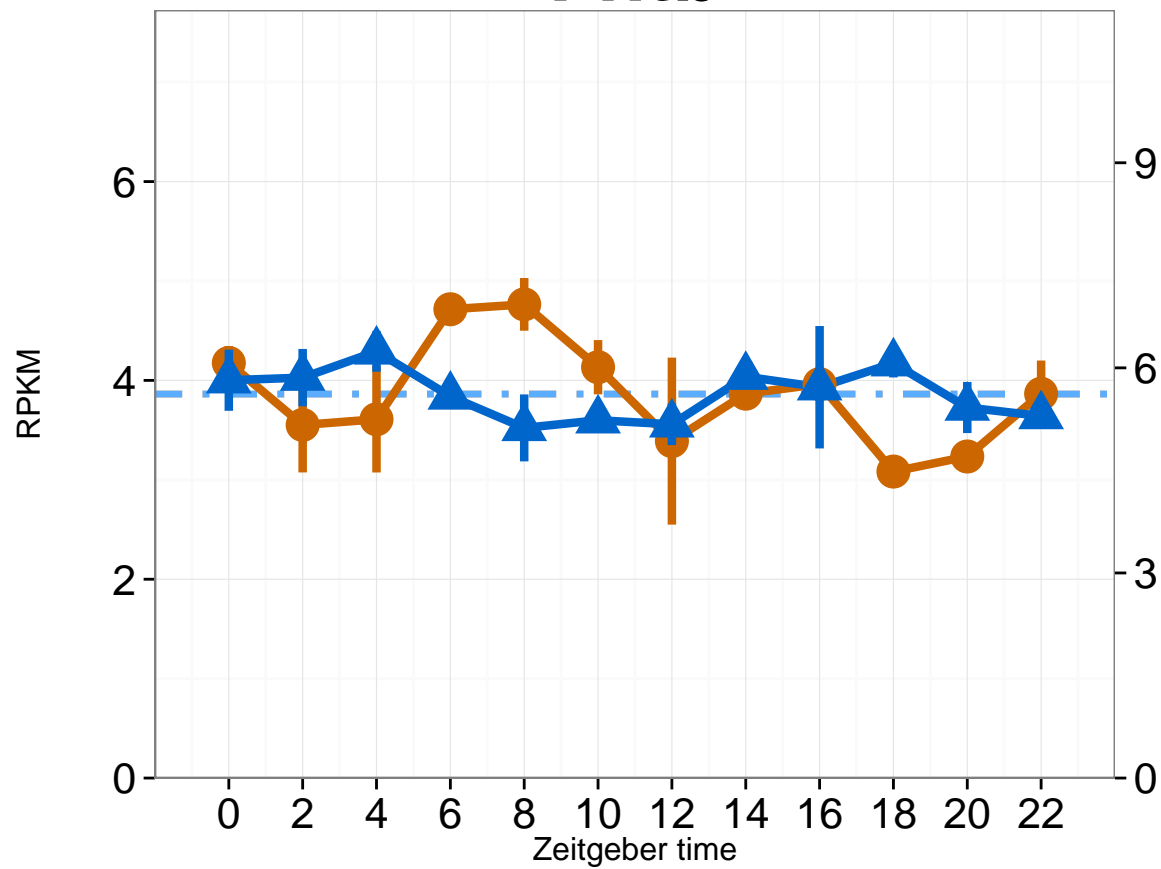

## Fntb

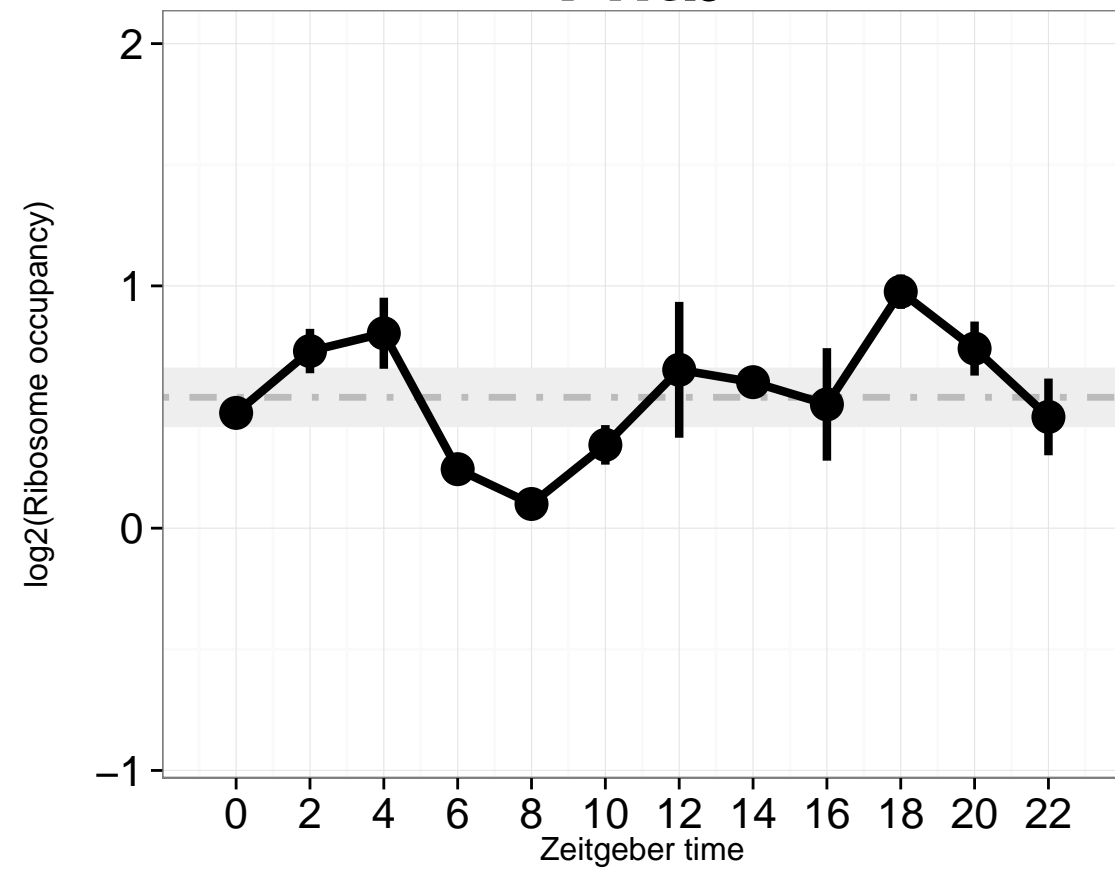

Supplement: Supplementary file 405 [file 1]

## 2510049J12Rik

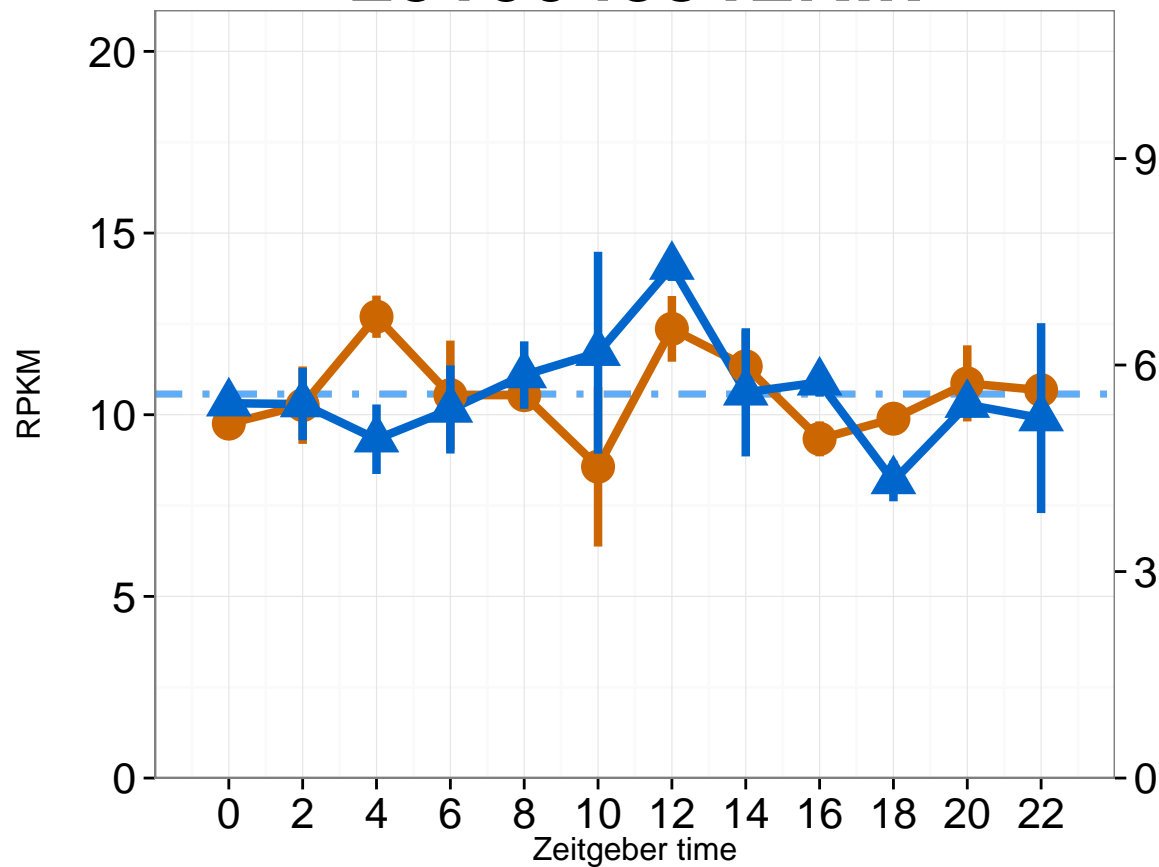

## 2510049J12Rik

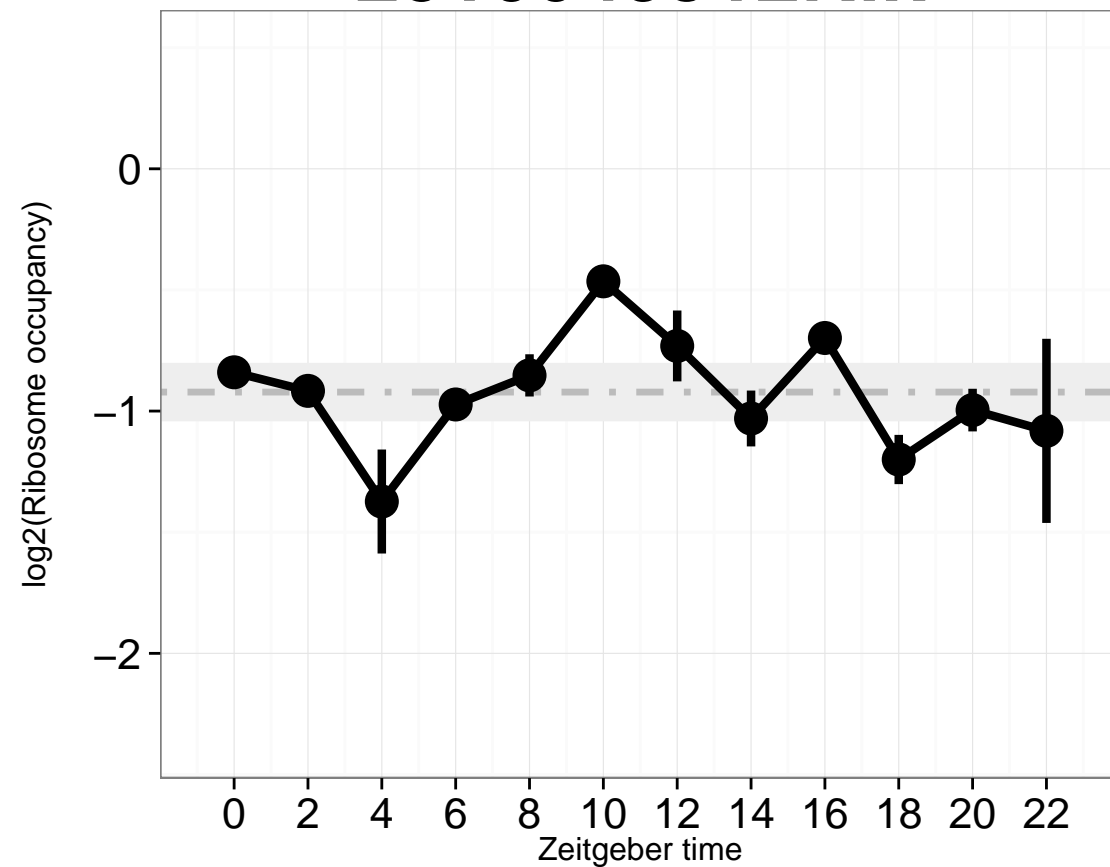

Supplement: Supplementary file 406 [file 1]

## Oplah

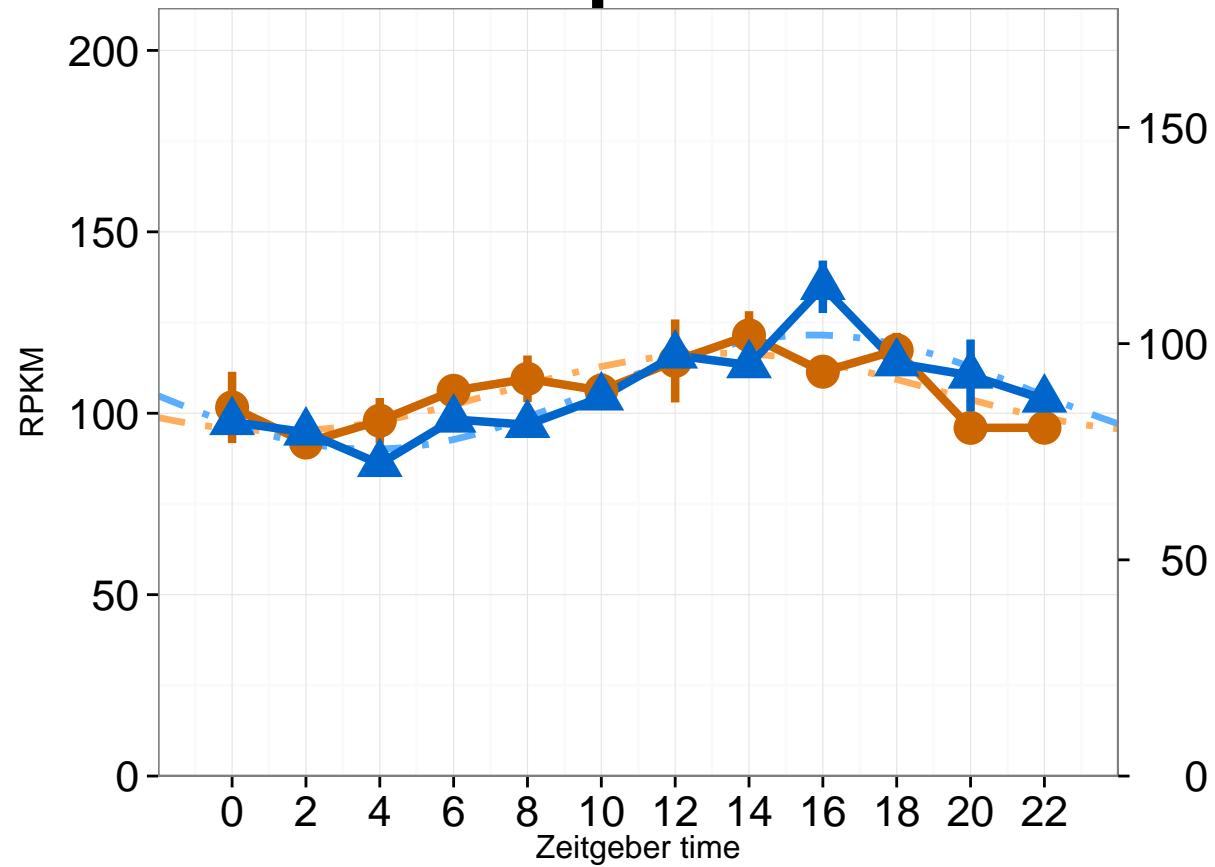

## Oplah

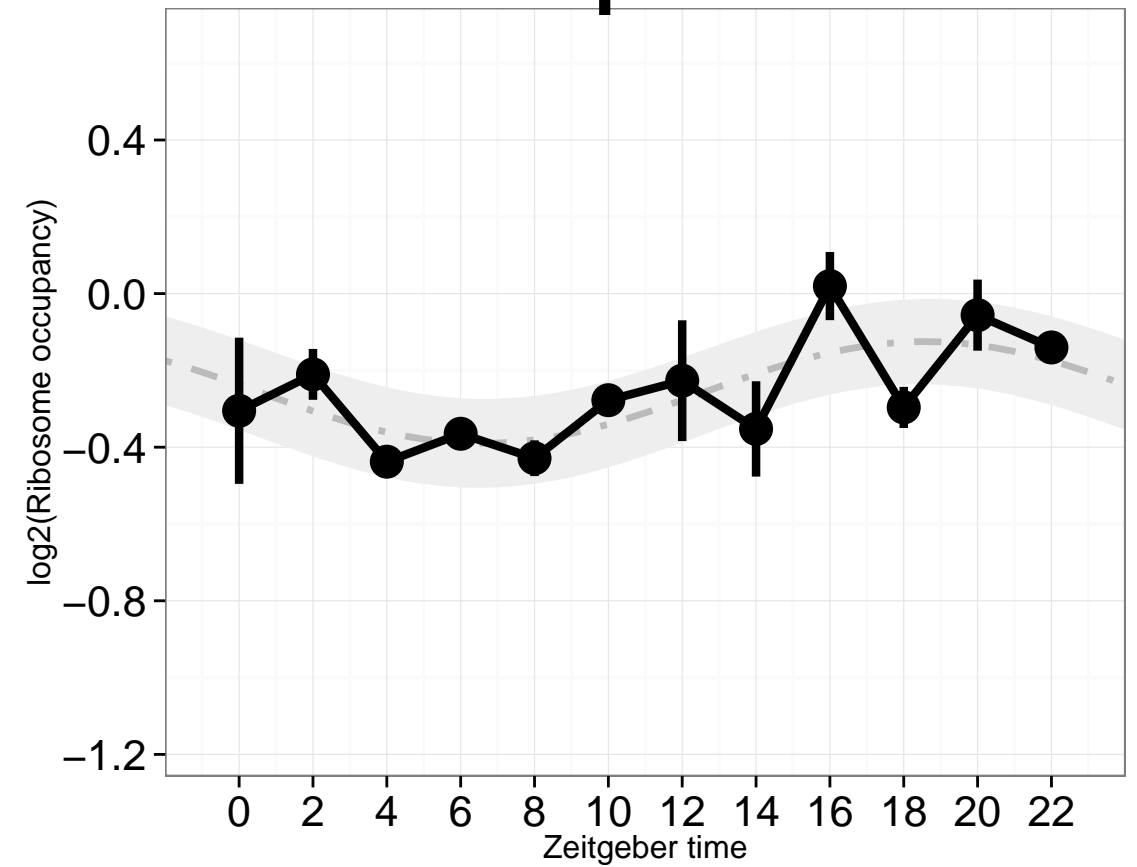

Supplement: Supplementary file 407 [file 1]

## Hagh

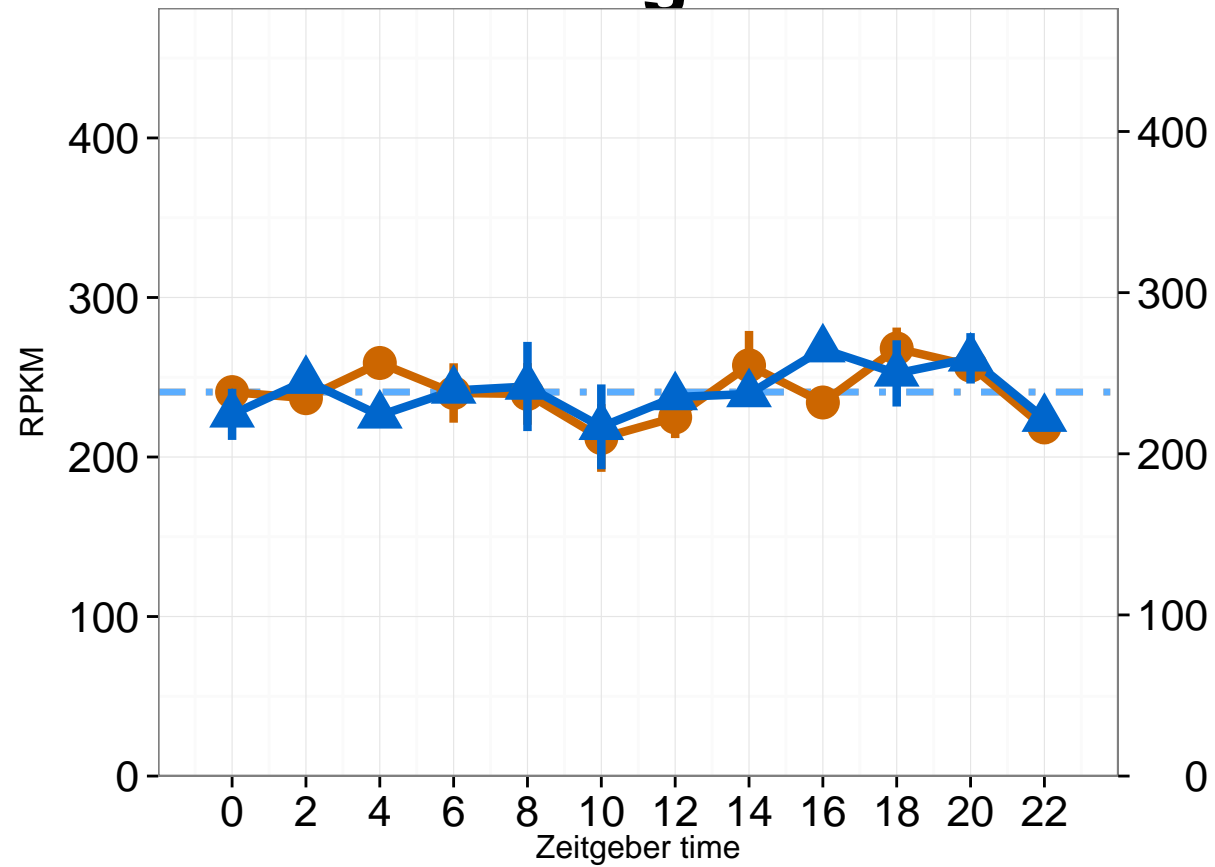

## Hagh

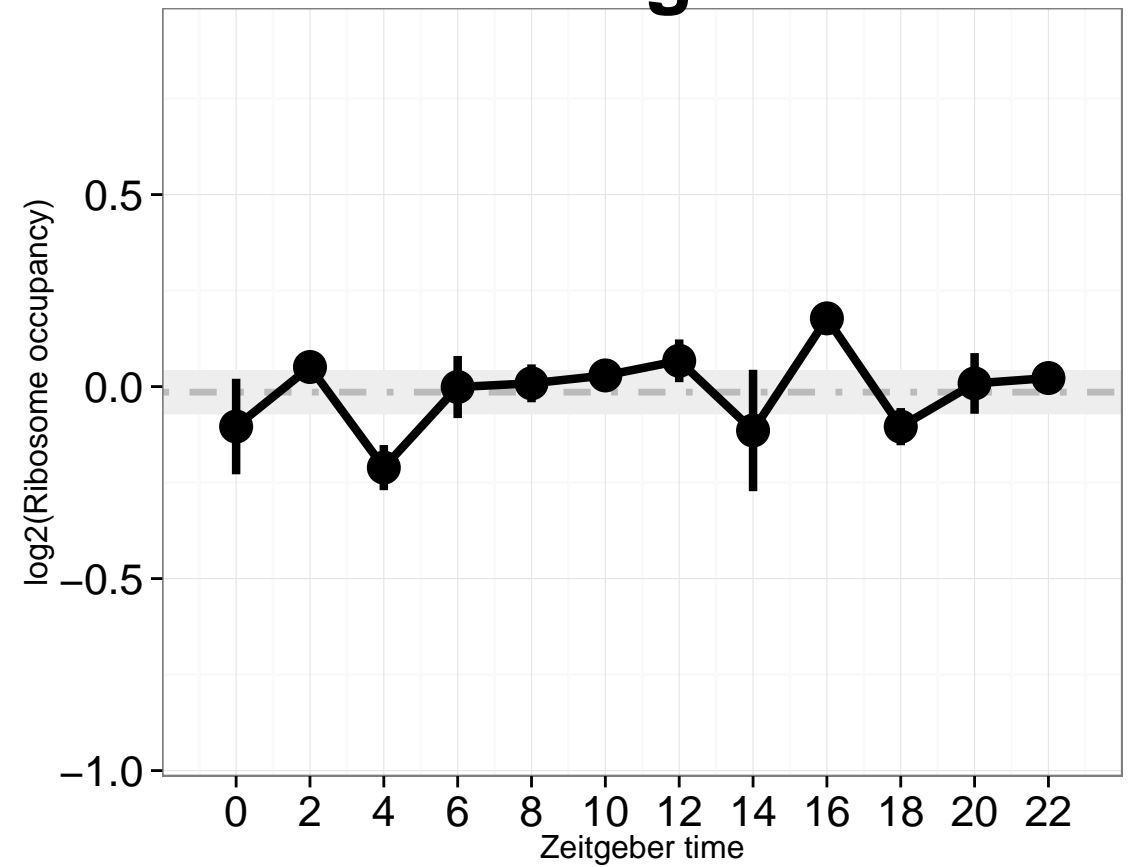

Supplement: Supplementary file 408 [file 1]

## Lad1

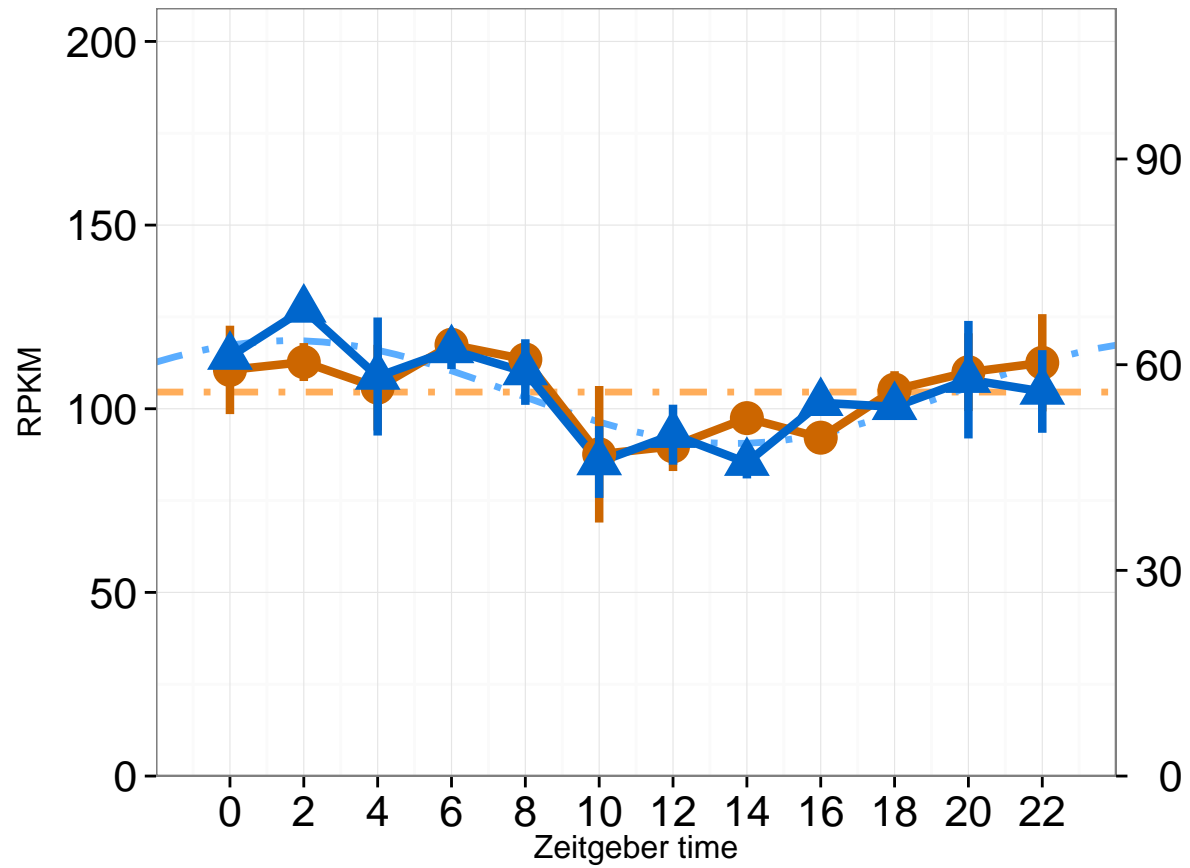

## Lad1

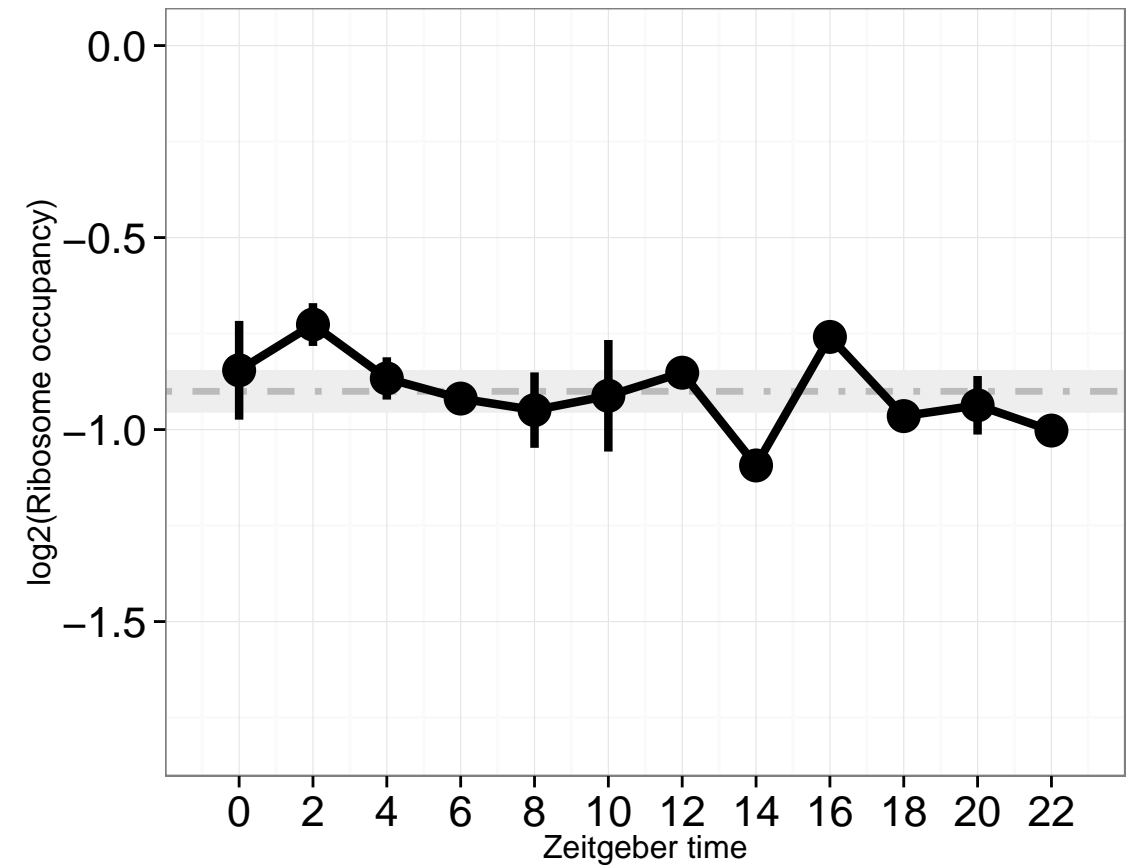

Supplement: Supplementary file 409 [file 1]

# Cyp2j13

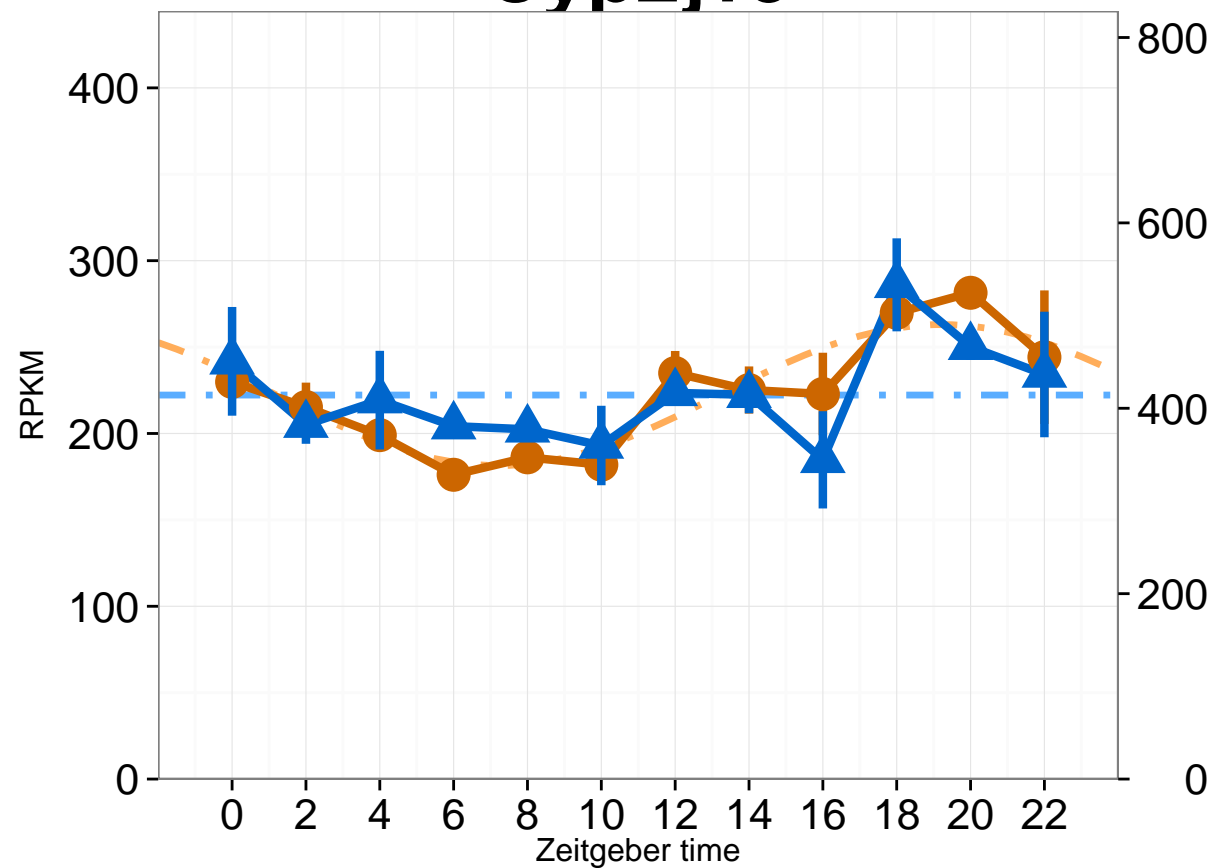

# Cyp2j13

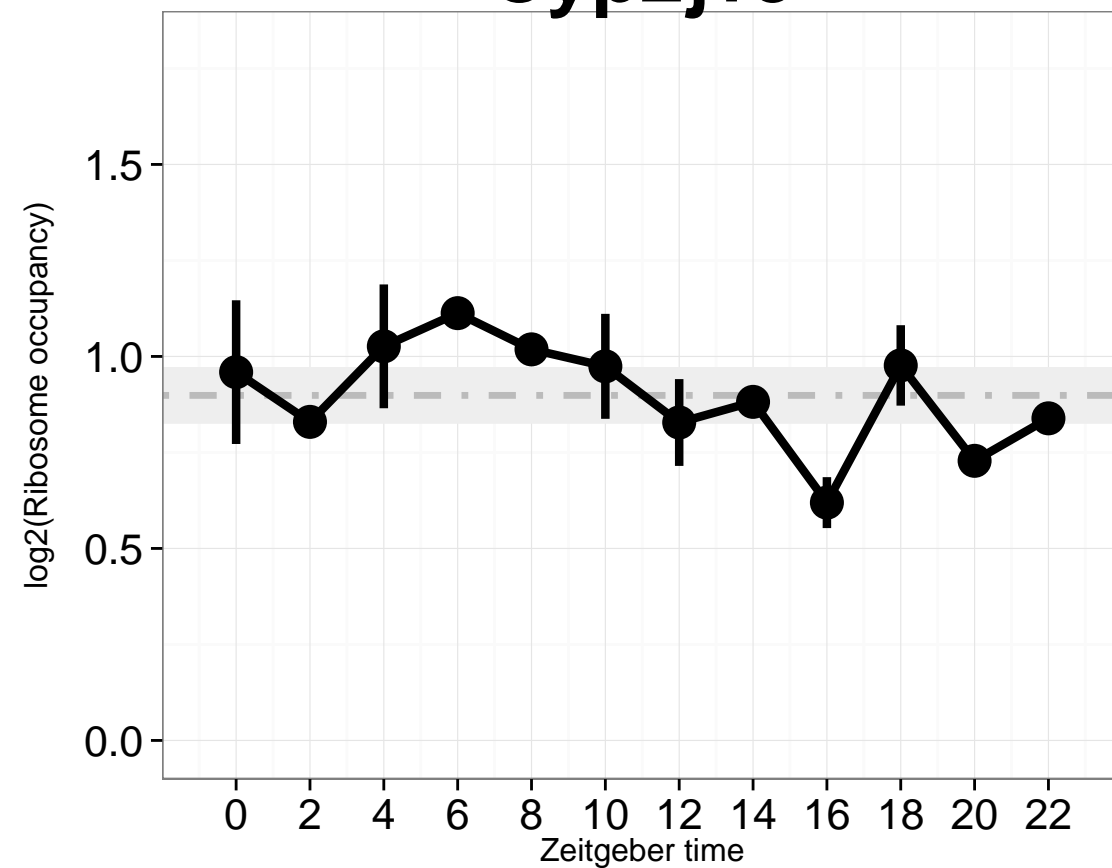

Supplement: Supplementary file 410 [file 1]

## Ssr3

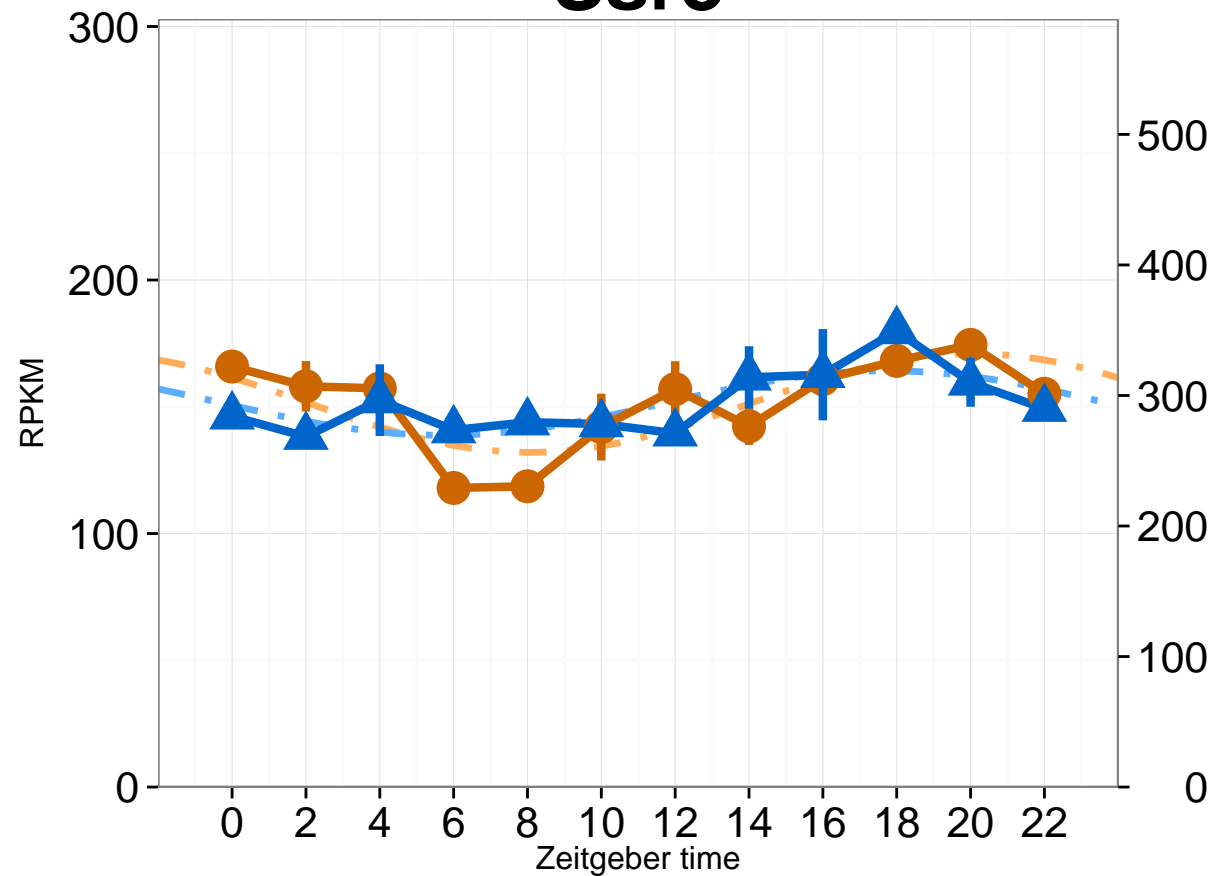

## Ssr3

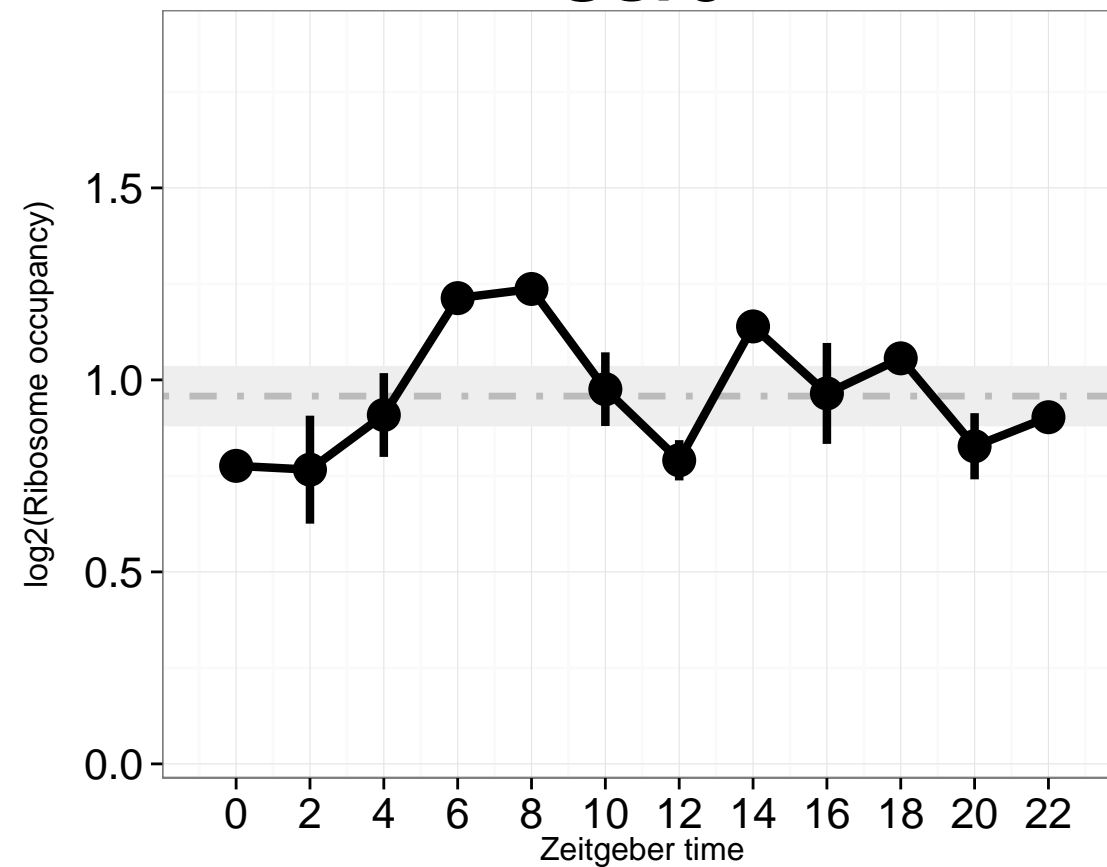

Supplement: Supplementary file 411 [file 1]

## Set

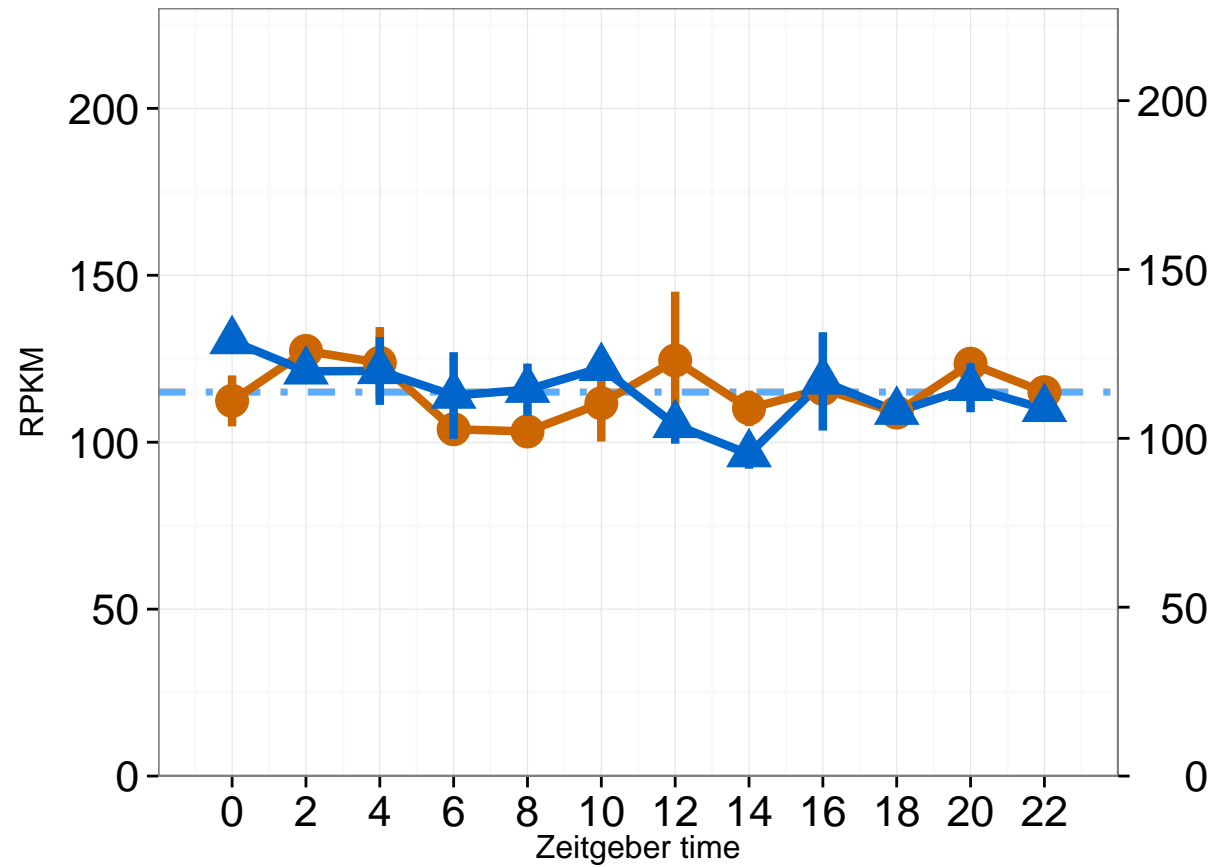

## Set

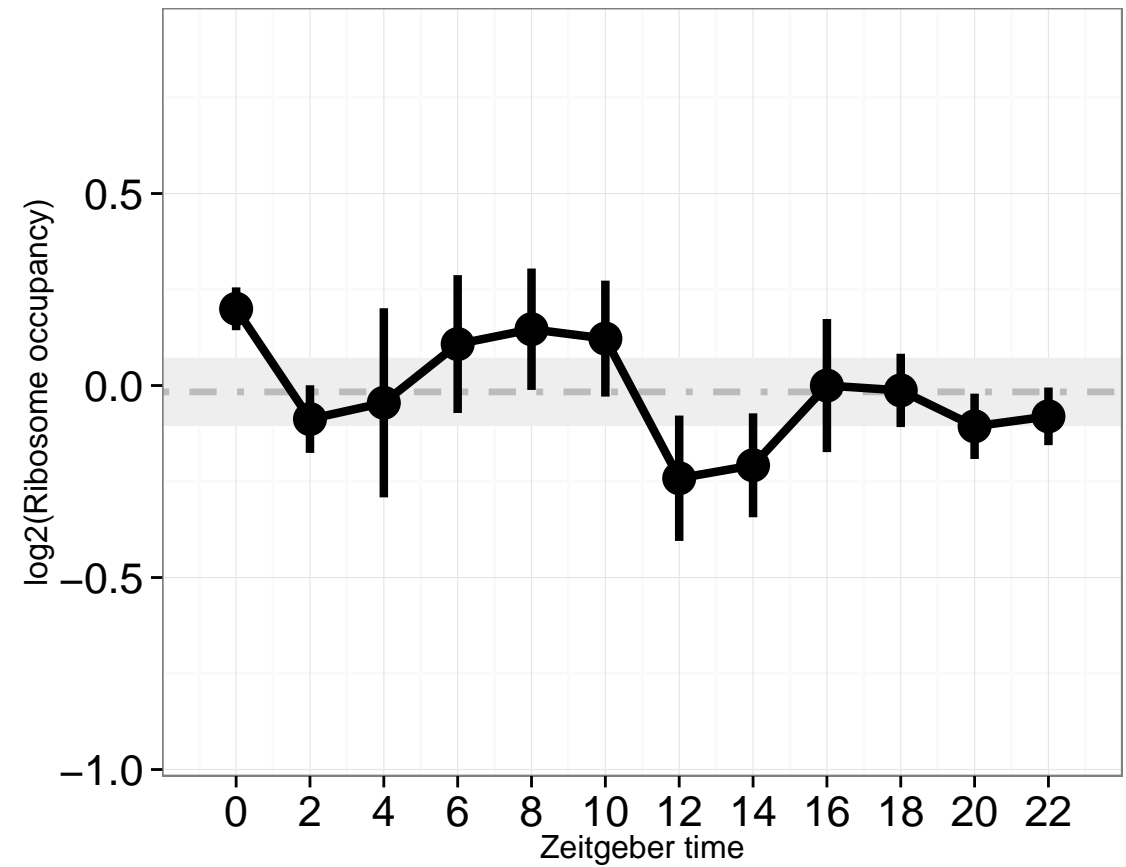

Supplement: Supplementary file 412 [file 1]

## Cmtm4

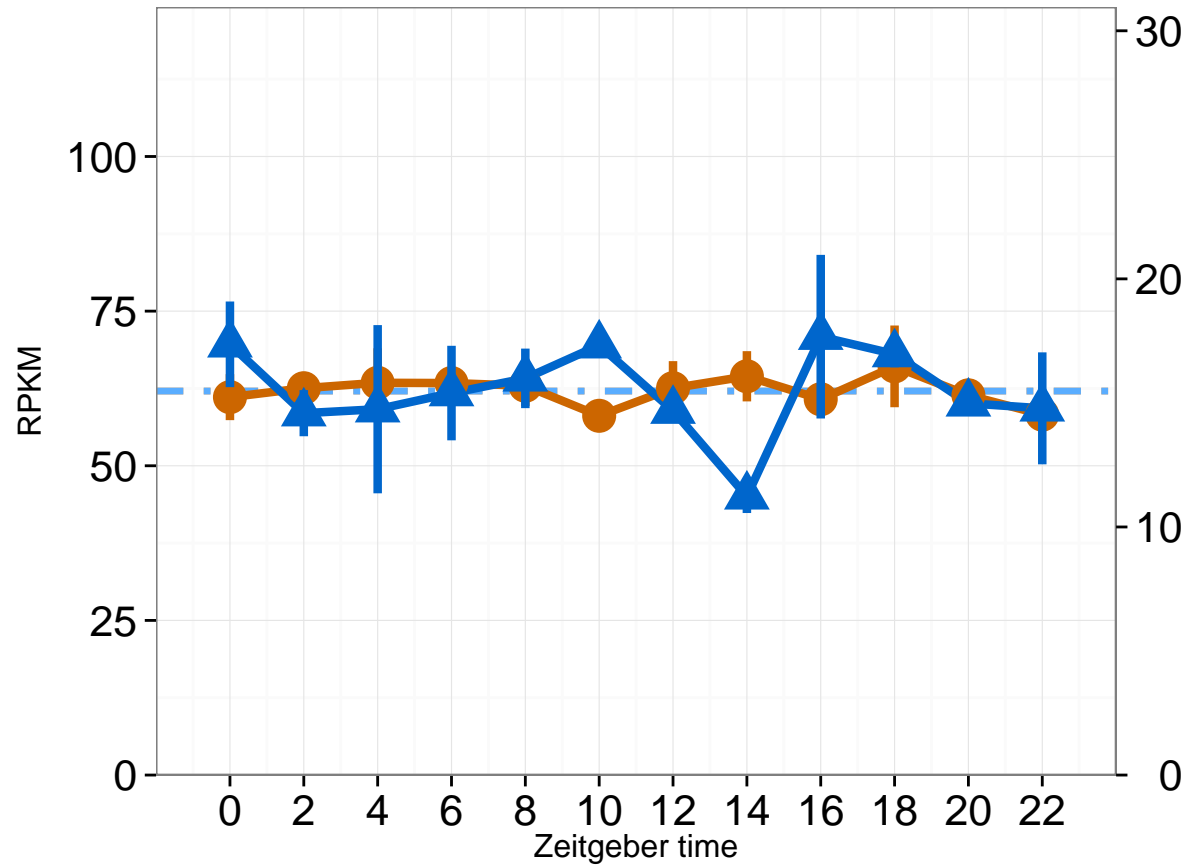

## Cmtm4

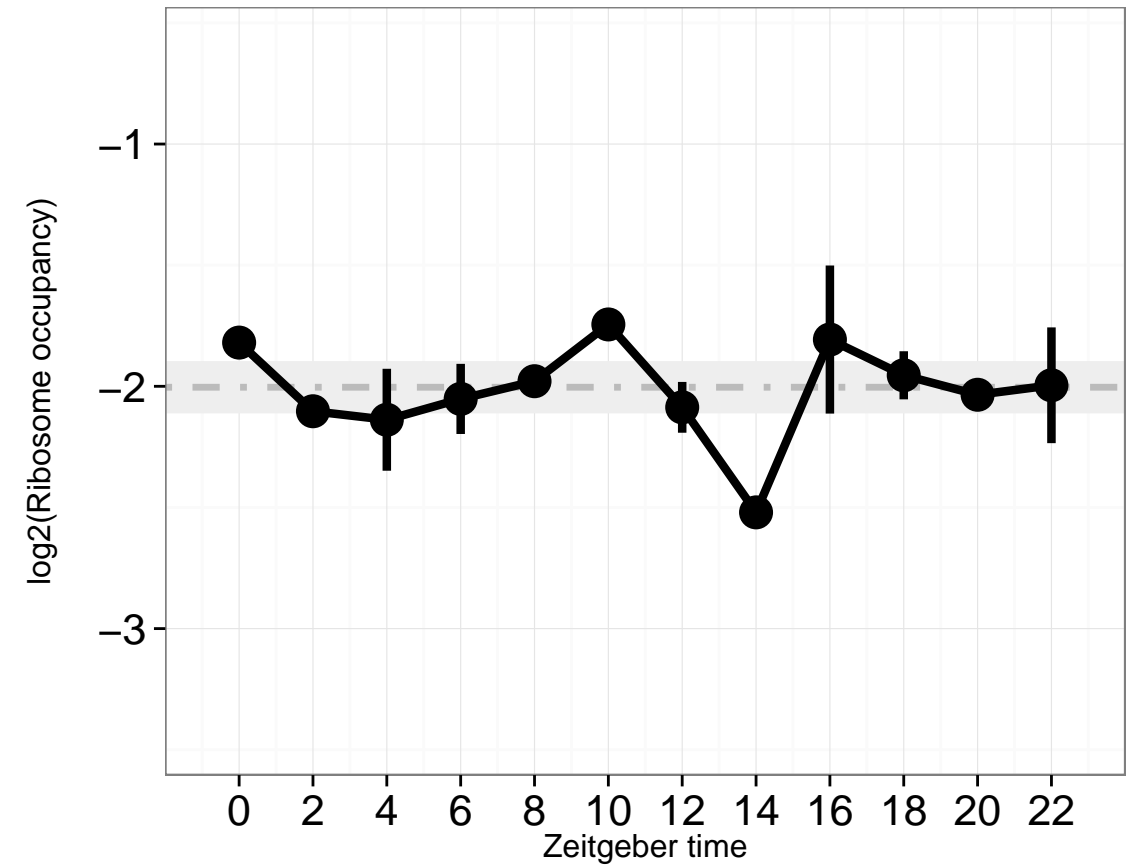

Supplement: Supplementary file 413 [file 1]

# Unc13b

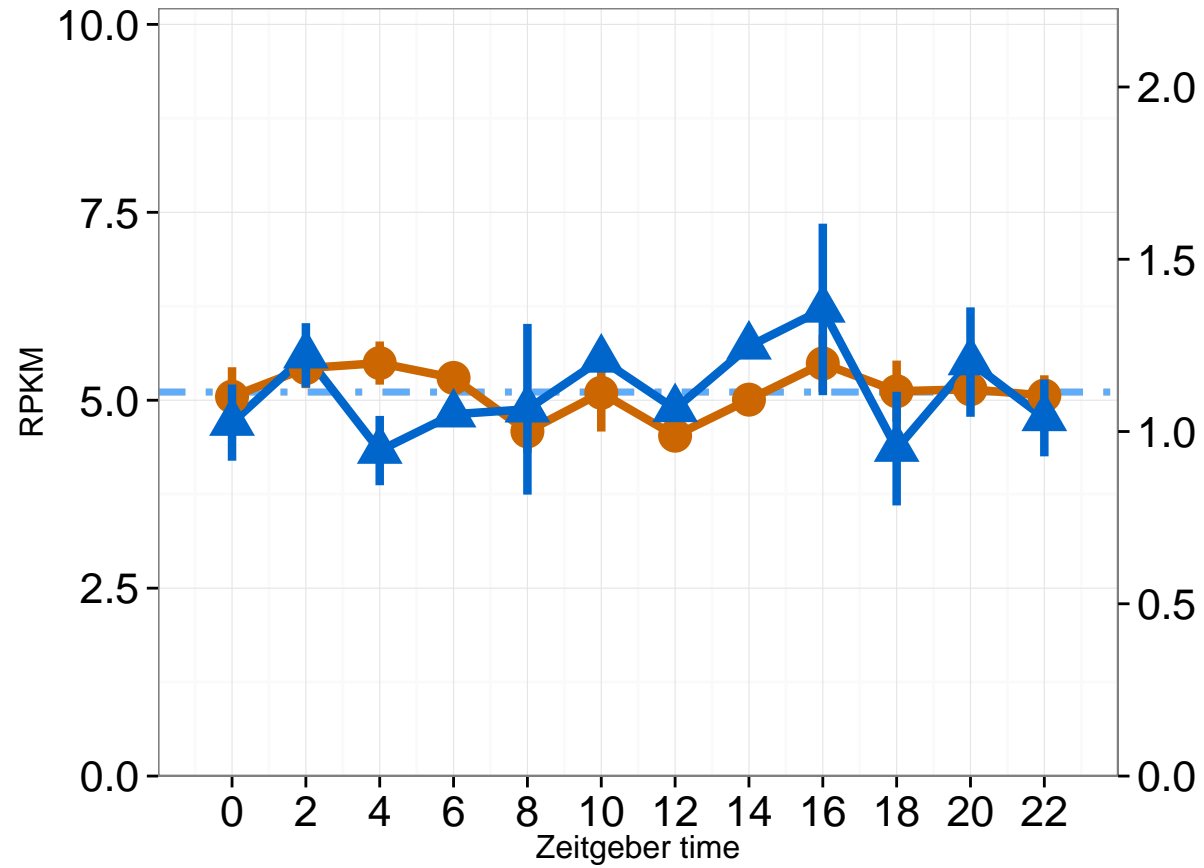

# Unc13b

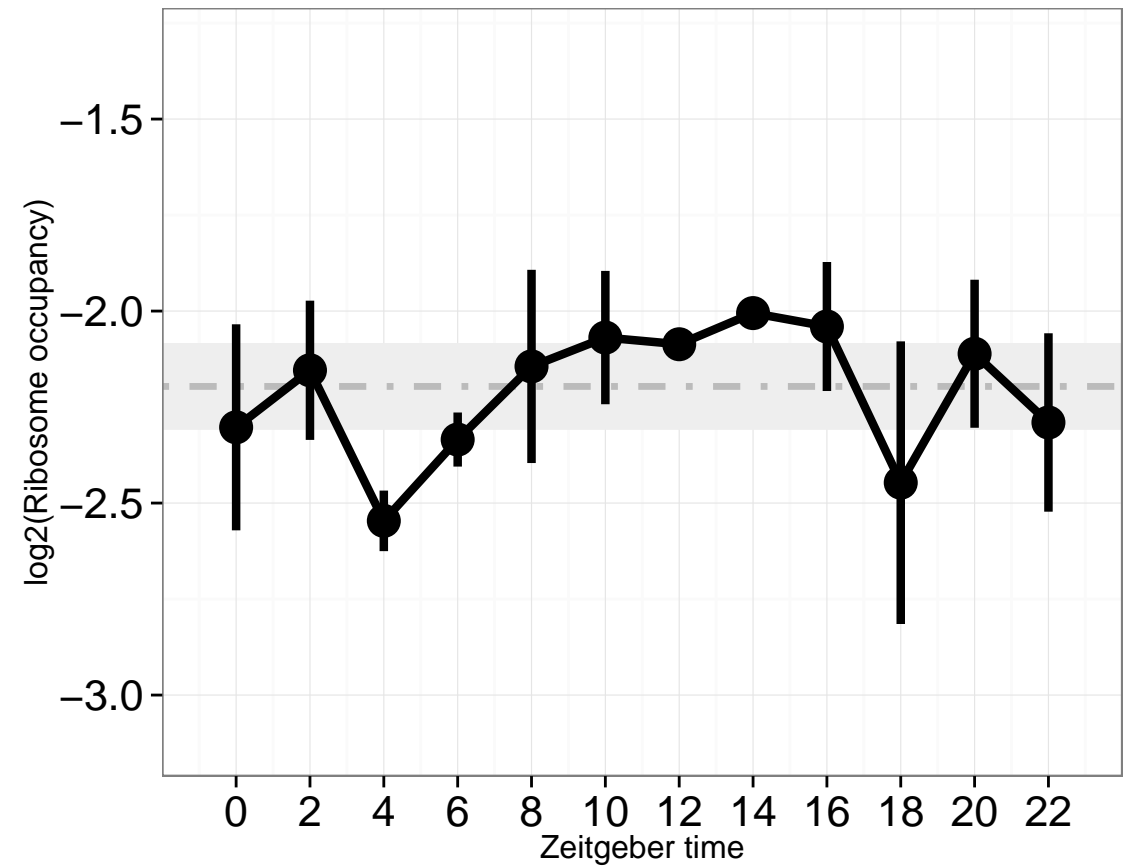

Supplement: Supplementary file 414 [file 1]

## Ttc28

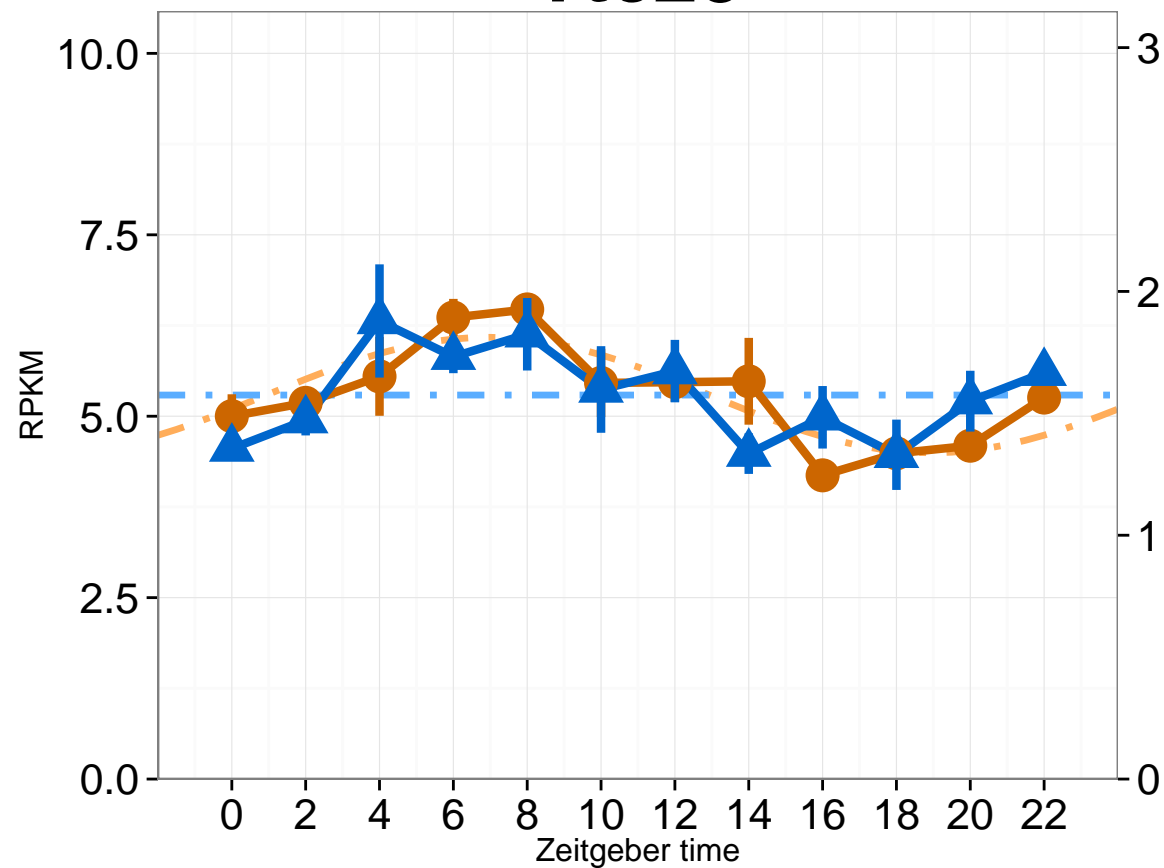

## Ttc28

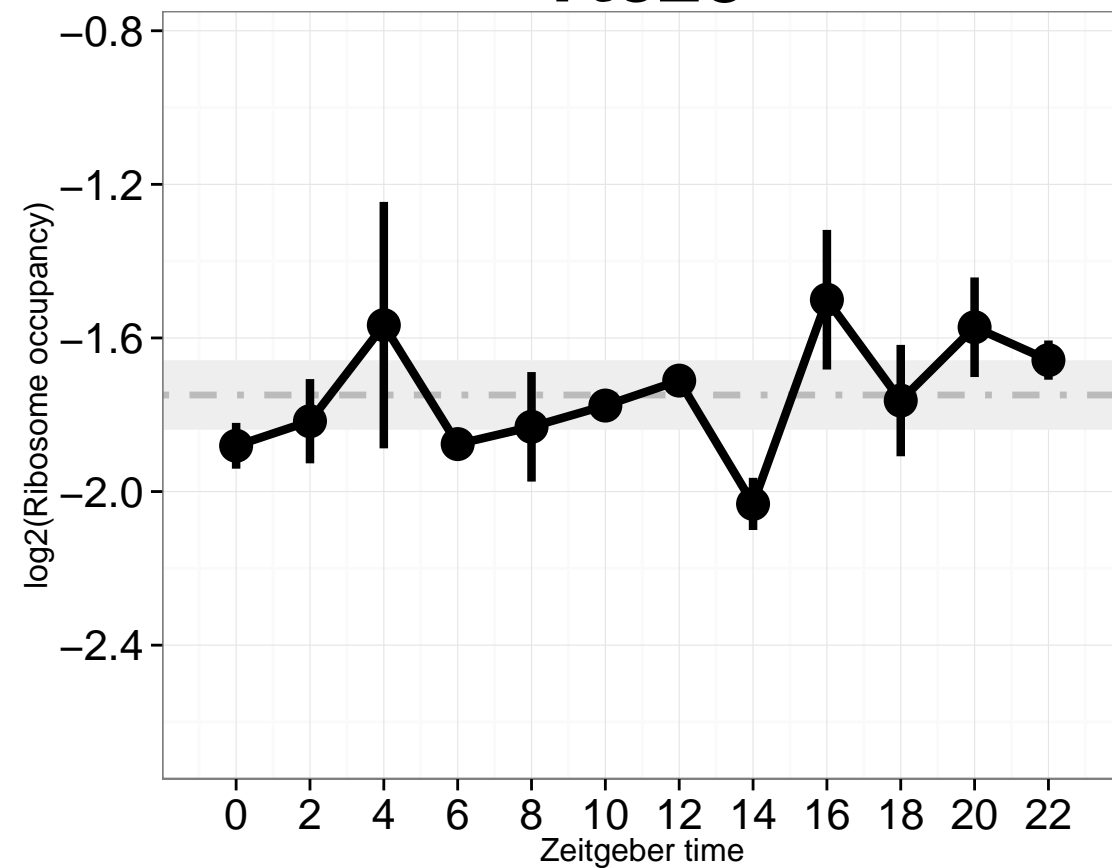

Supplement: Supplementary file 415 [file 1]

## Sos2

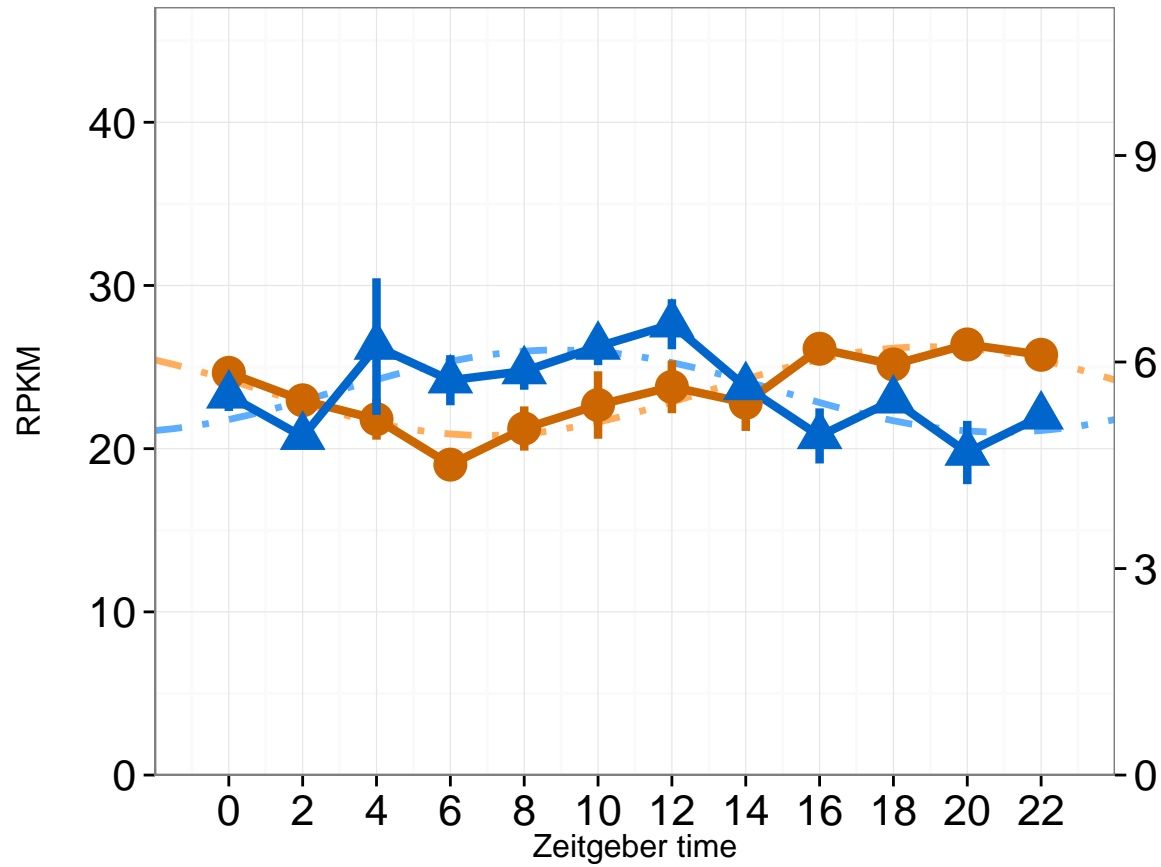

## Sos2

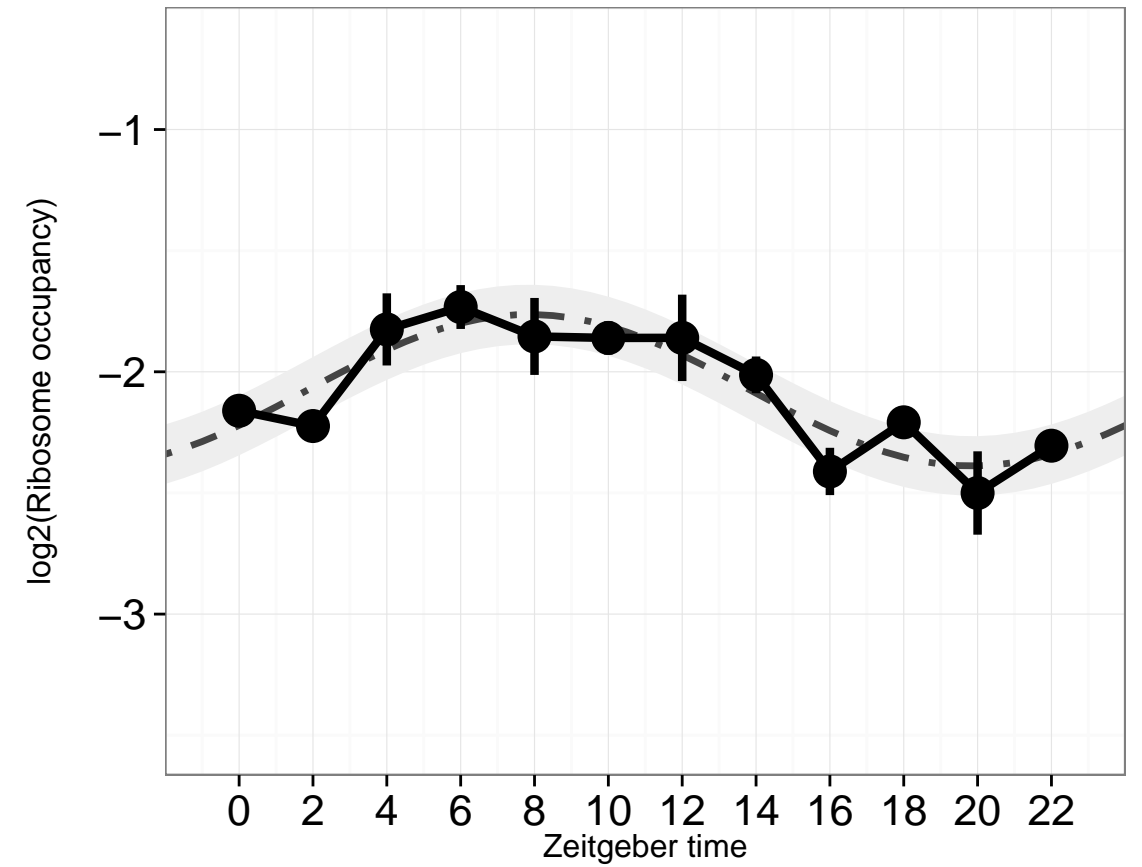

Supplement: Supplementary file 416 [file 1]

# Zfp560

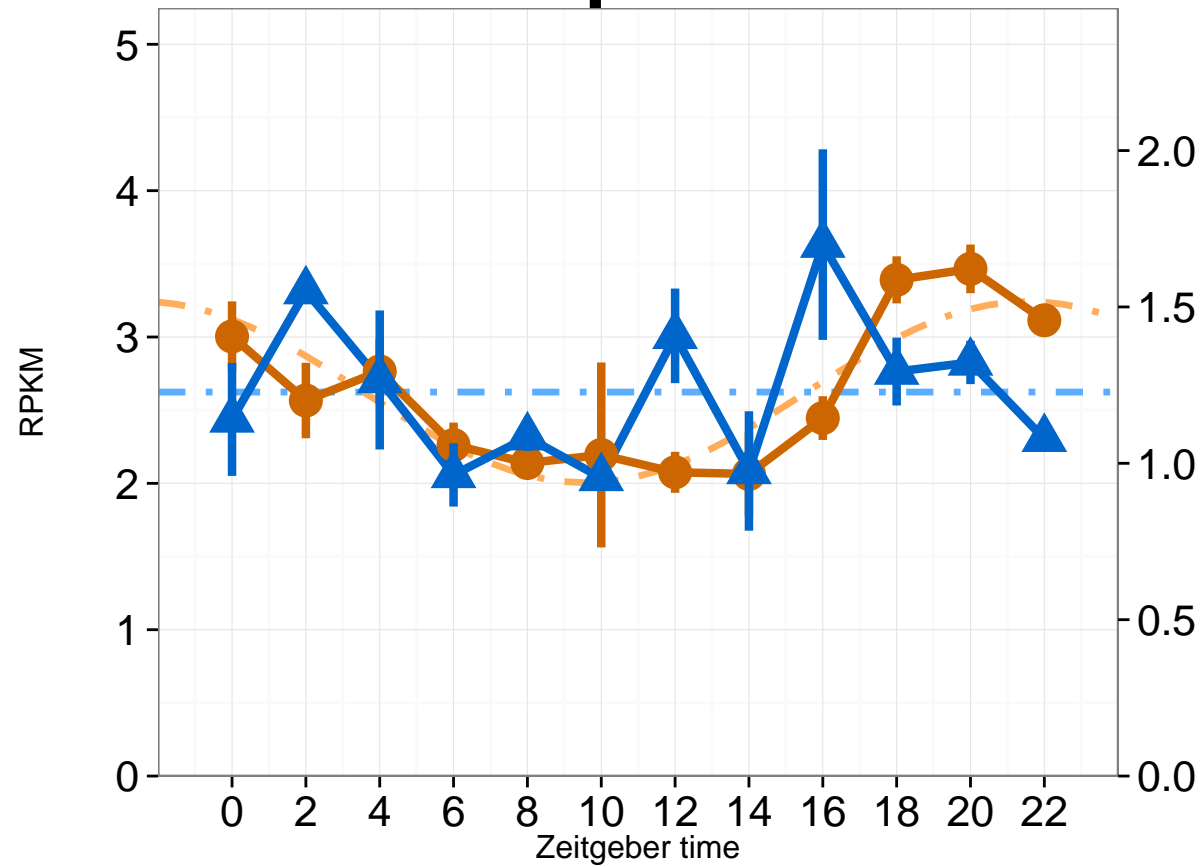

# Zfp560

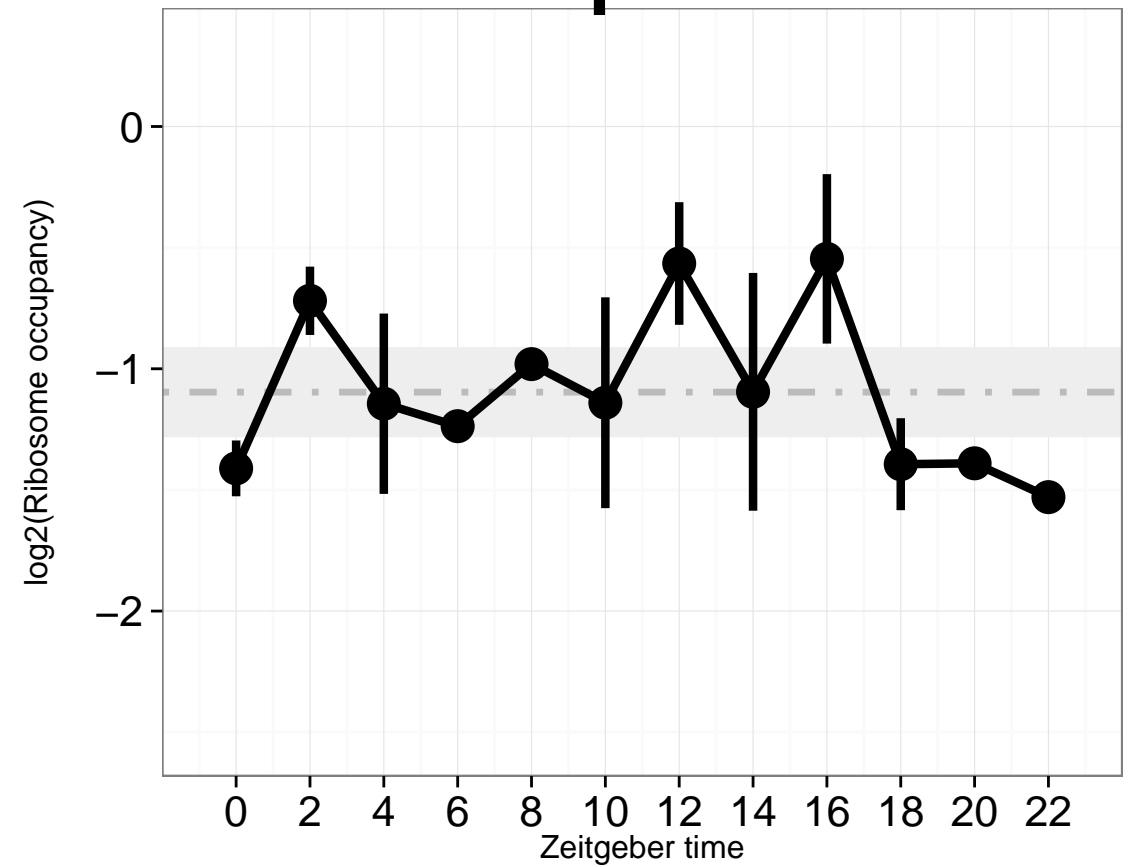

Supplement: Supplementary file 417 [file 1]

## AI317395

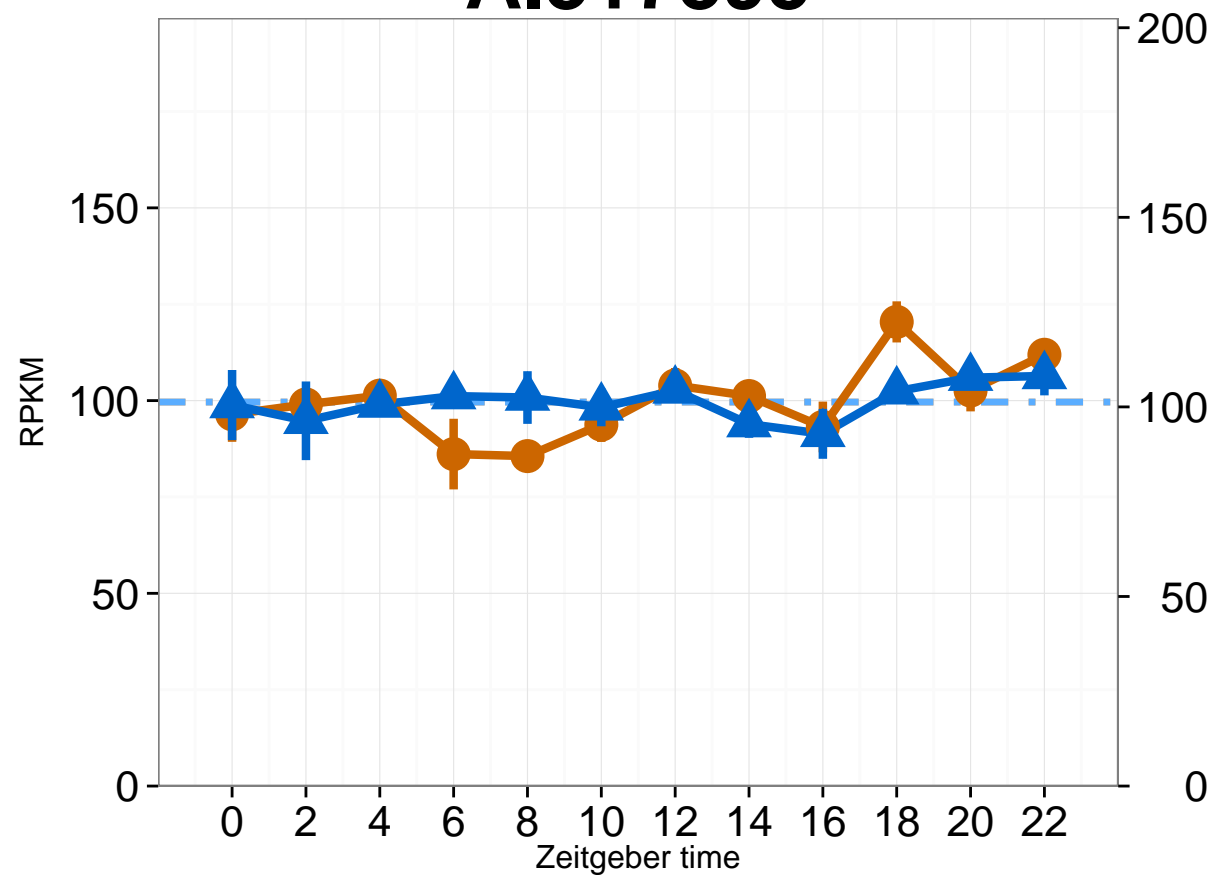

## AI317395

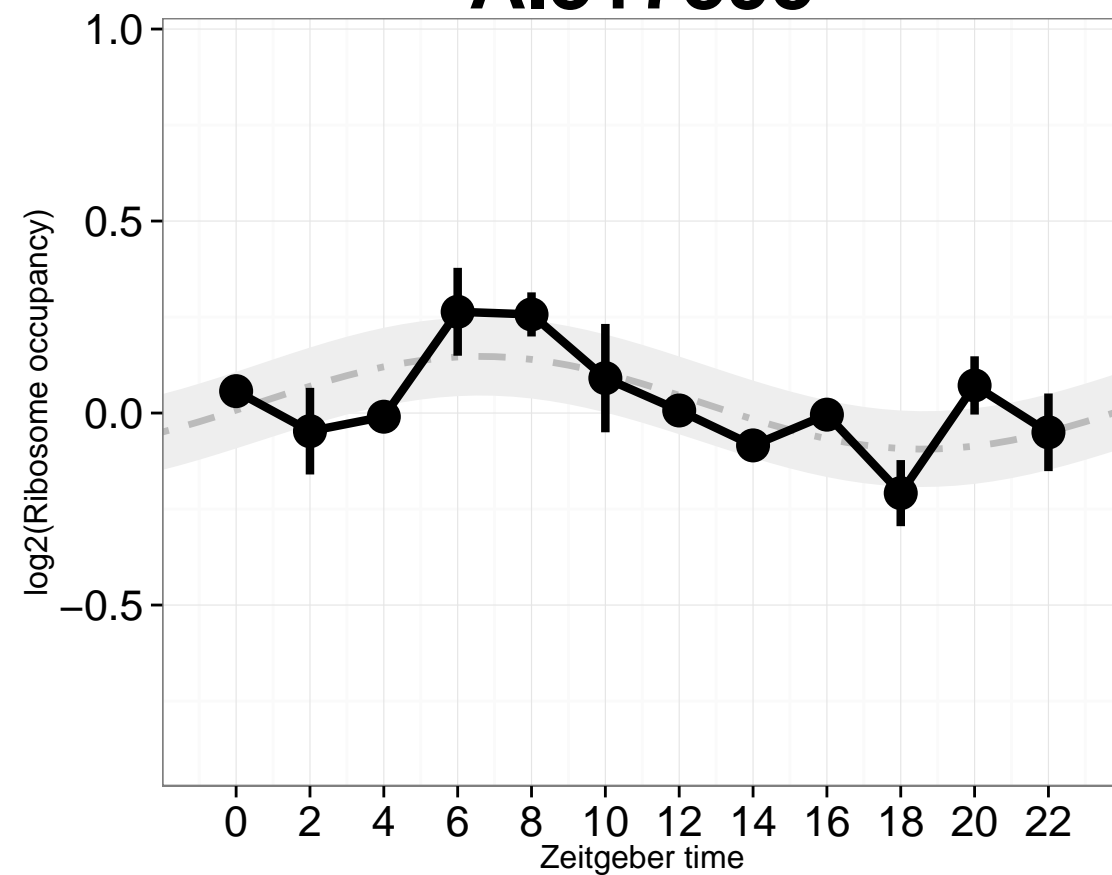

Supplement: Supplementary file 418 [file 1]

## Ckb

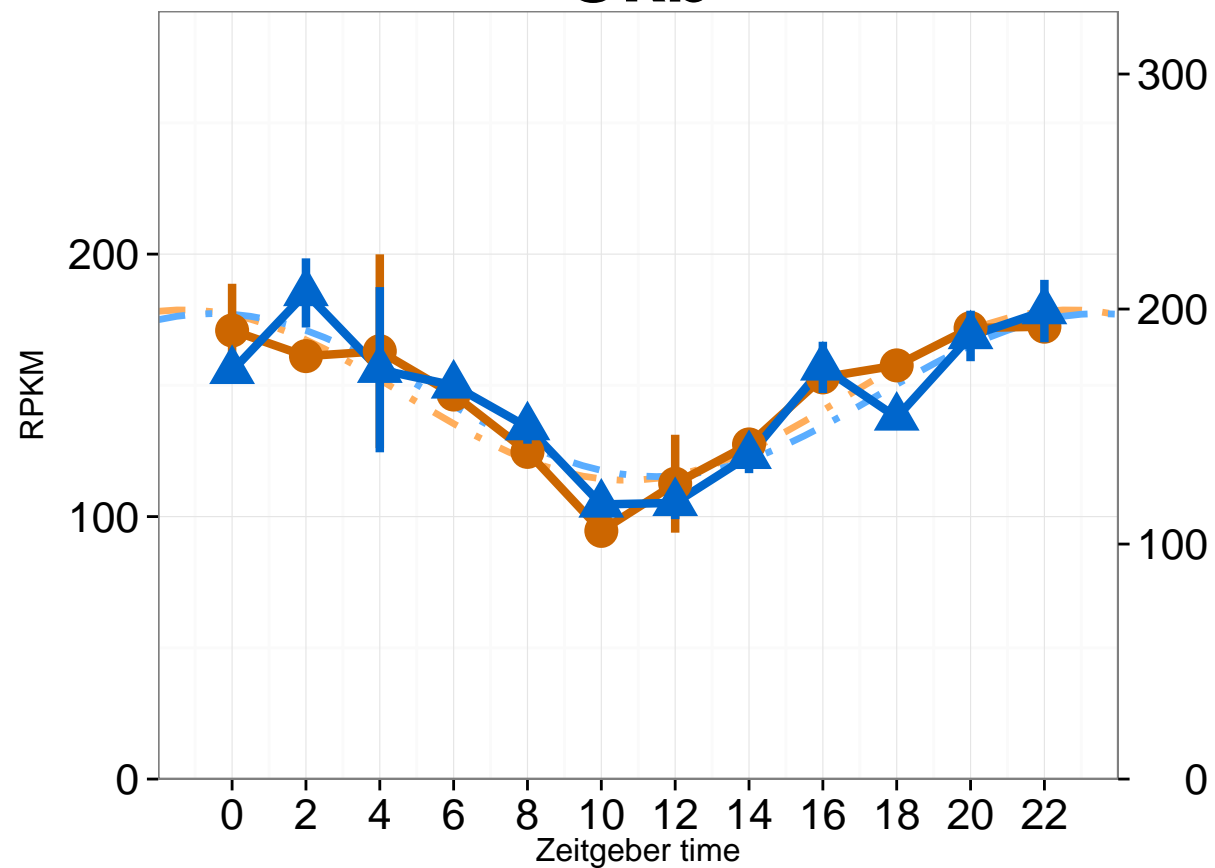

## Ckb

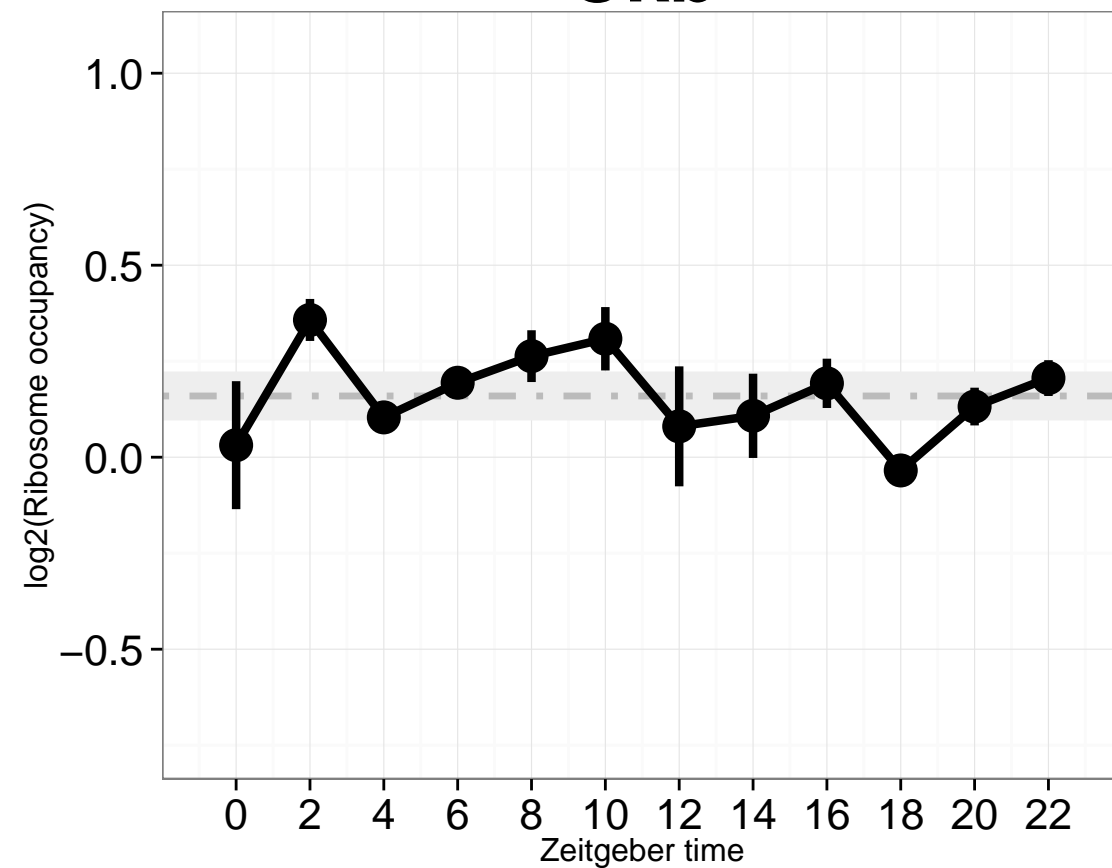

Supplement: Supplementary file 419 [file 1]

# Cep19

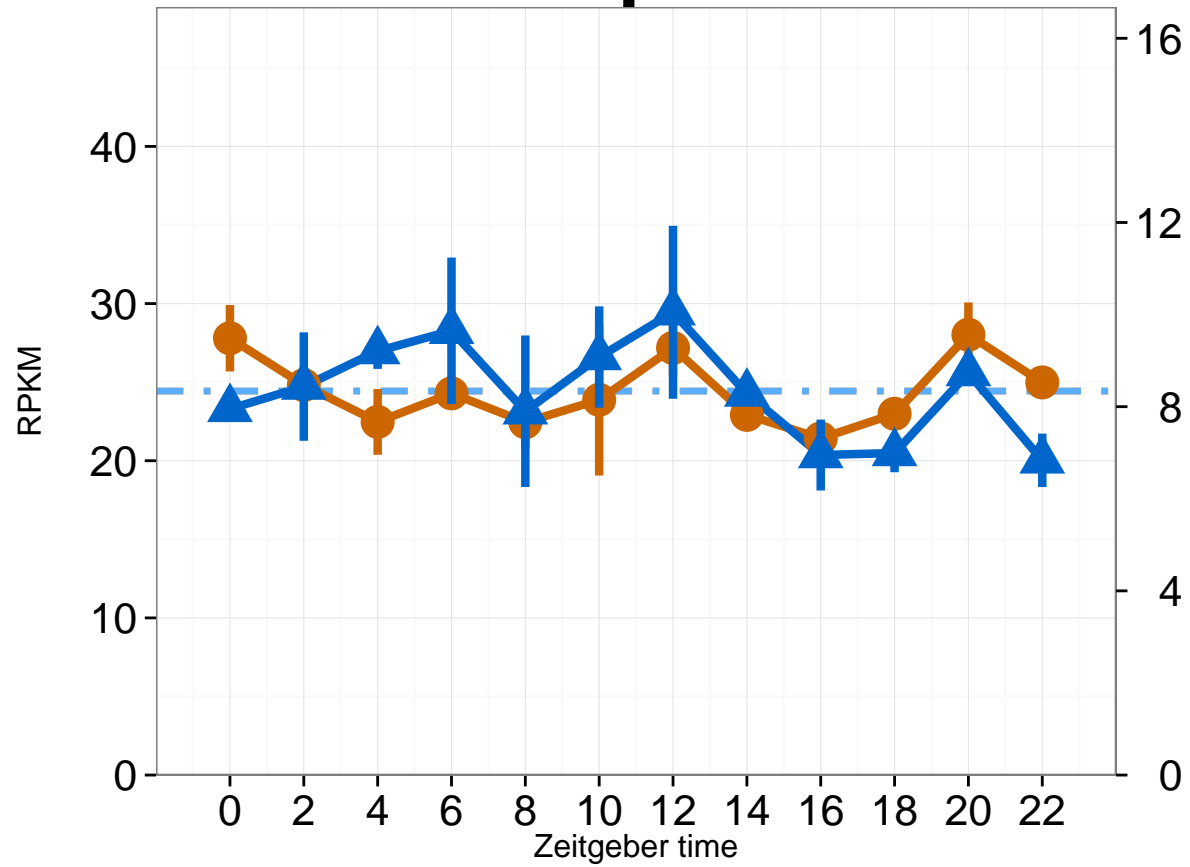

# Cep19

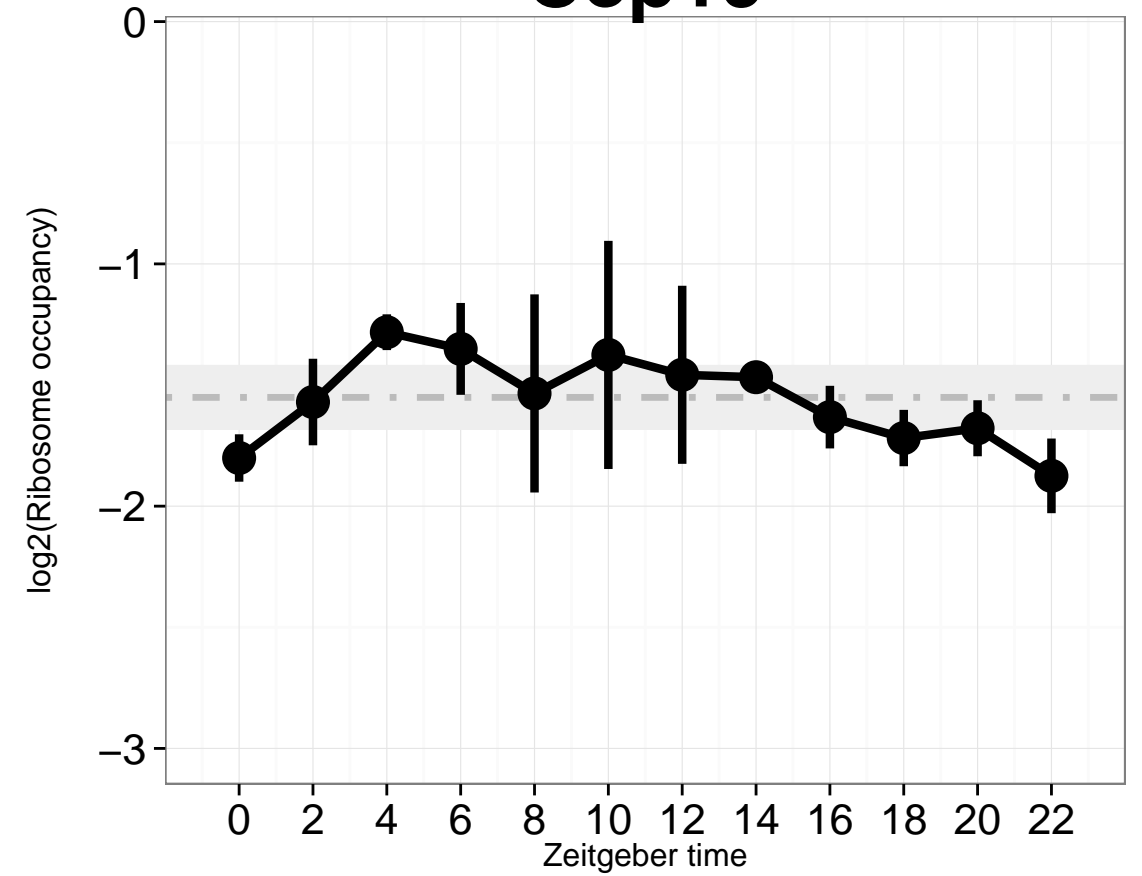

Supplement: Supplementary file 420 [file 1]

## Irak3

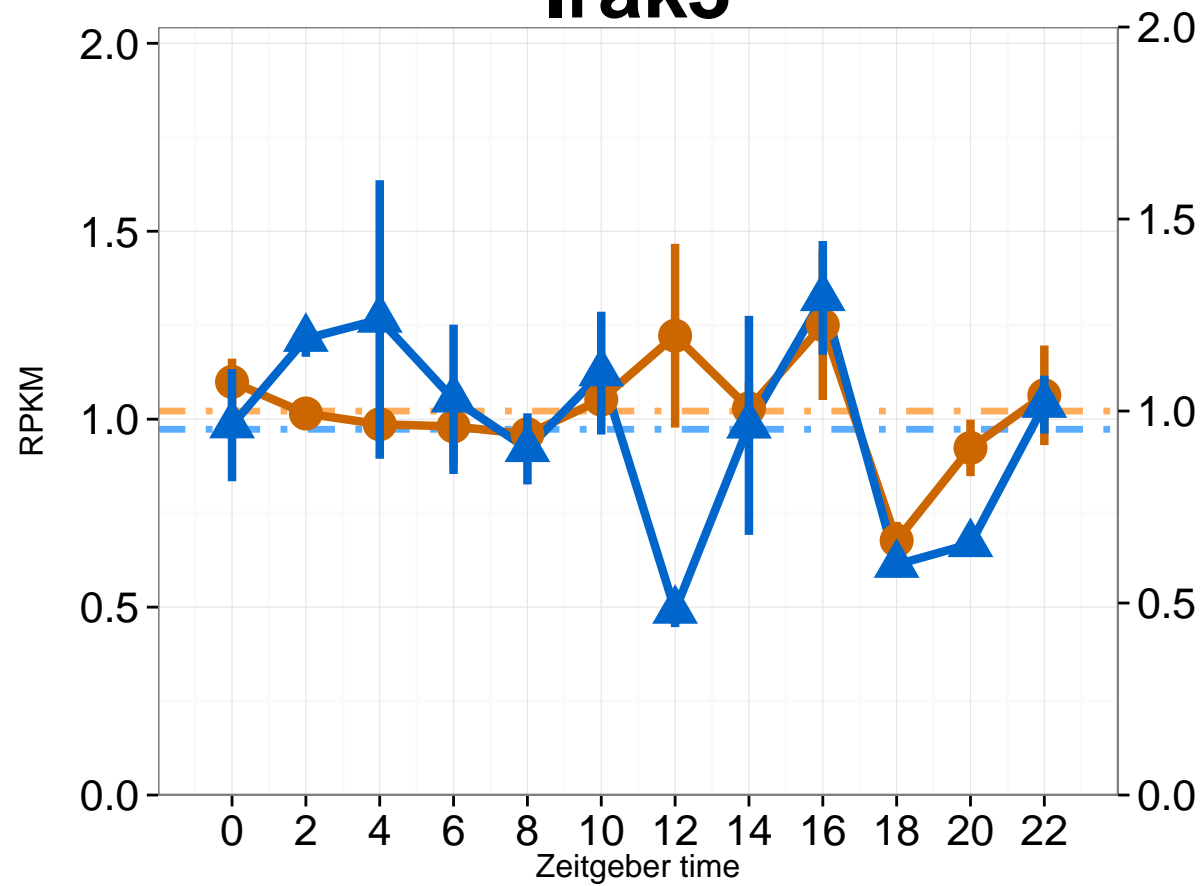

## Irak3

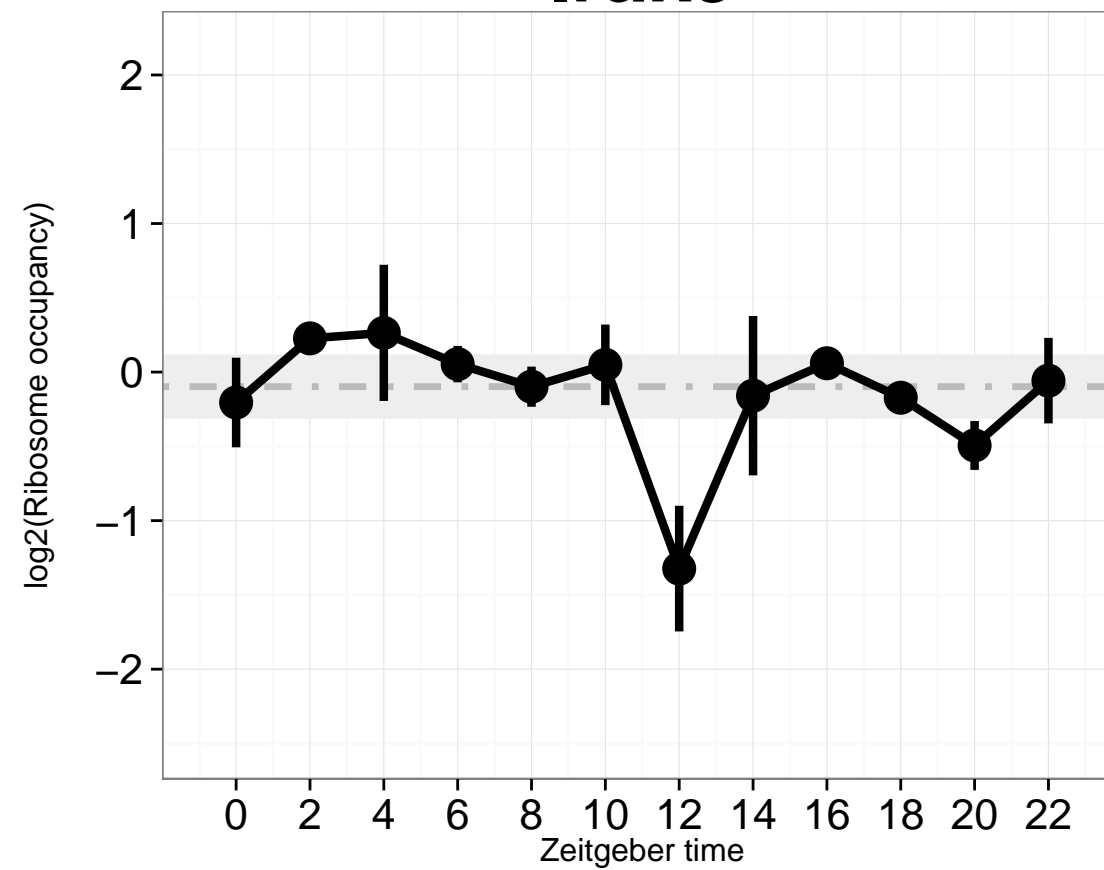

Supplement: Supplementary file 421 [file 1]

# Tmco6

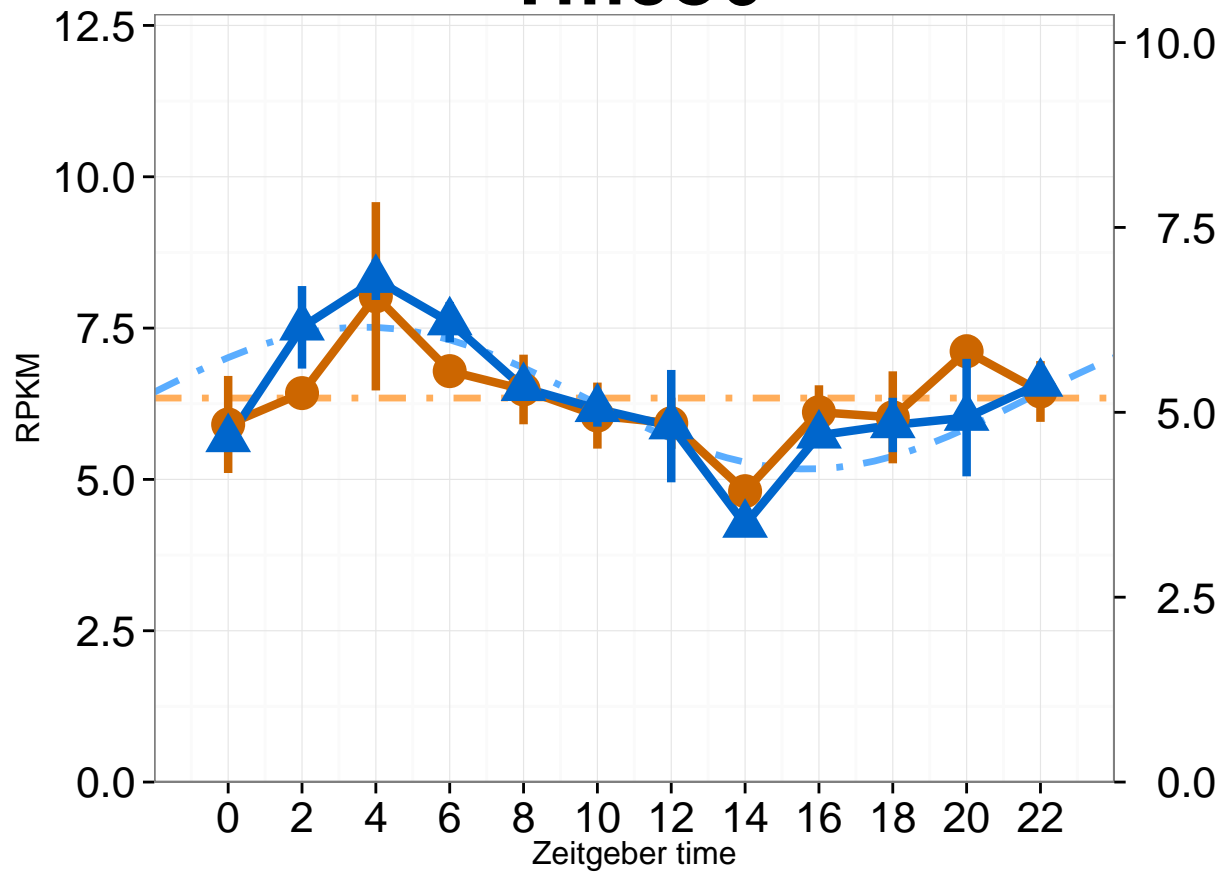

# Tmco6

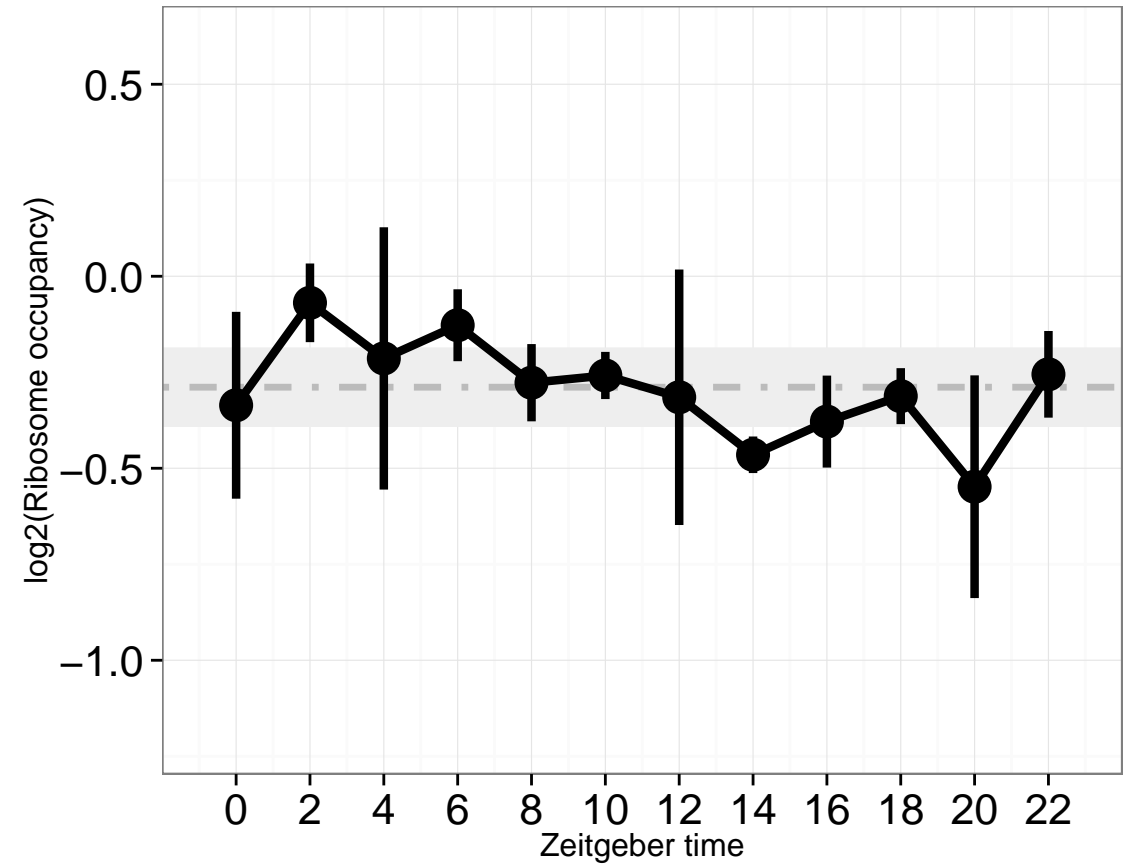

Supplement: Supplementary file 422 [file 1]

# Cyp2r1

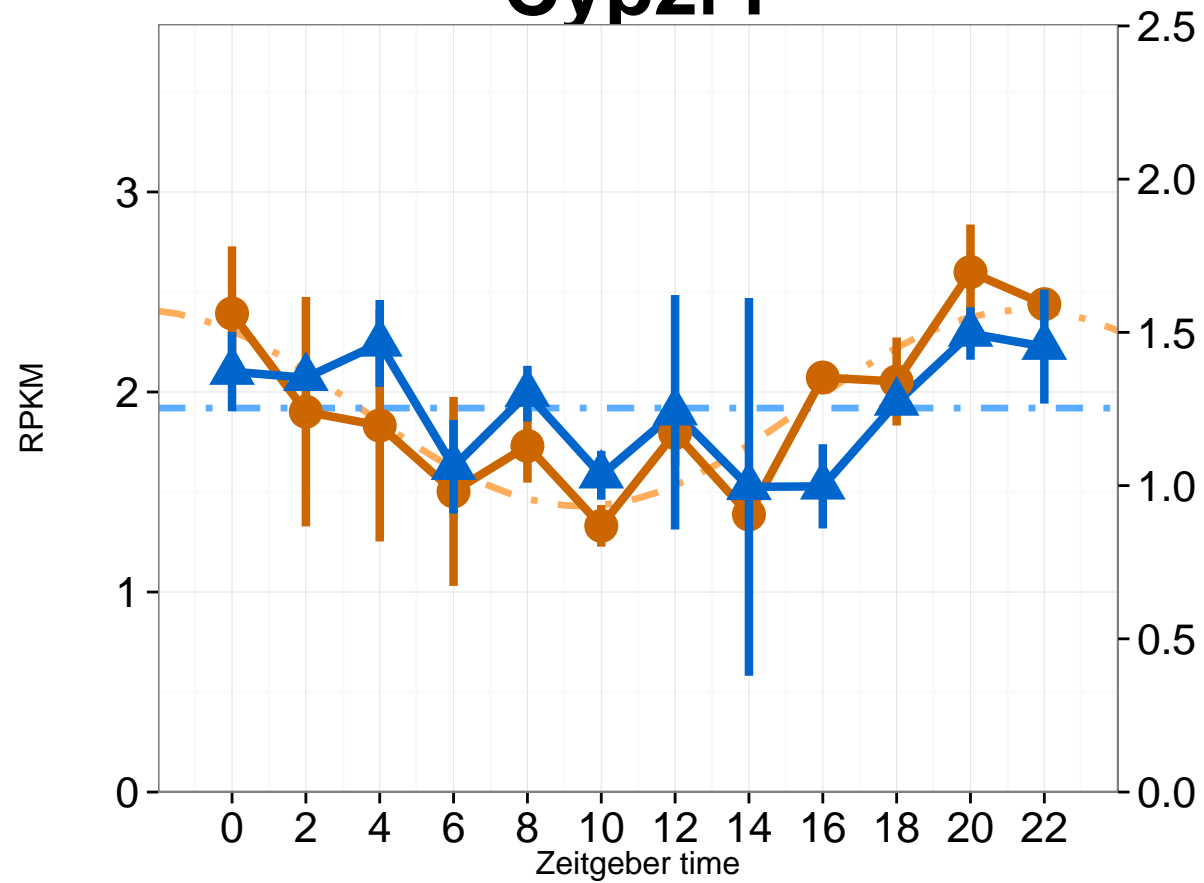

# Cyp2r1

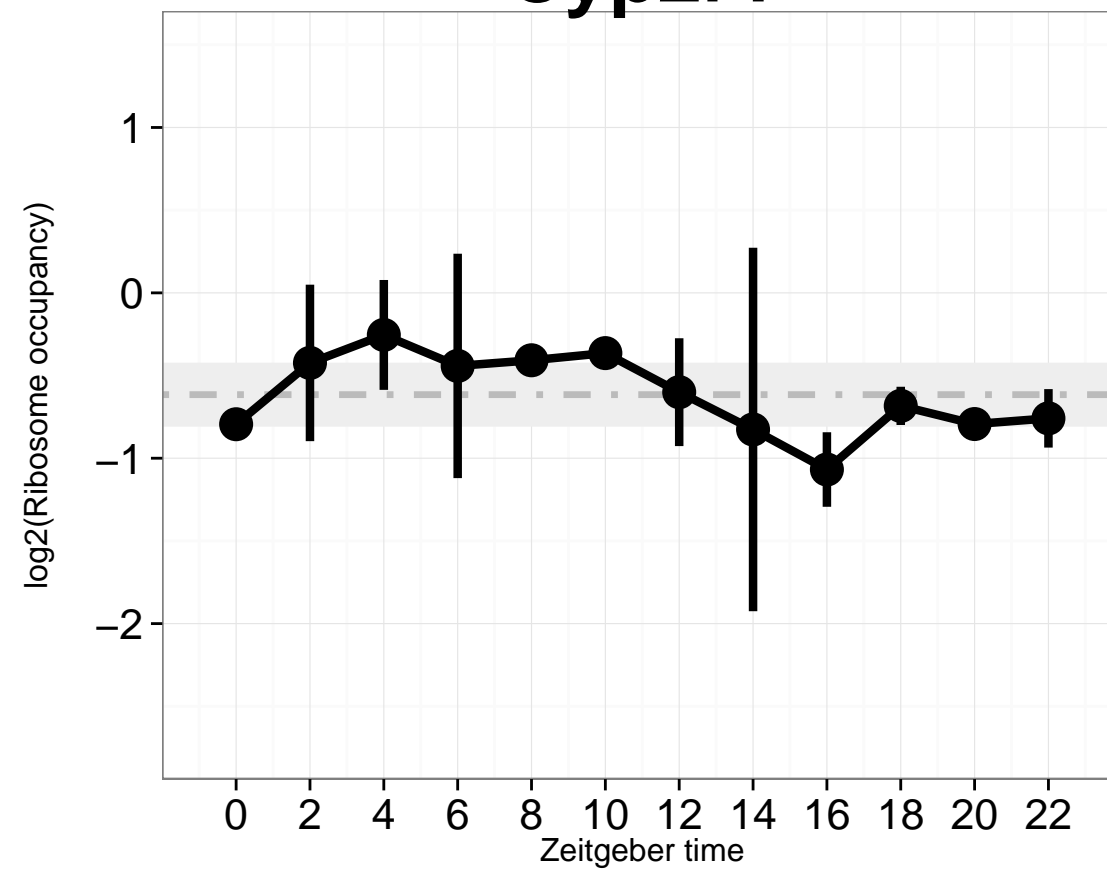

Supplement: Supplementary file 423 [file 1]

# 3010026O09Rik

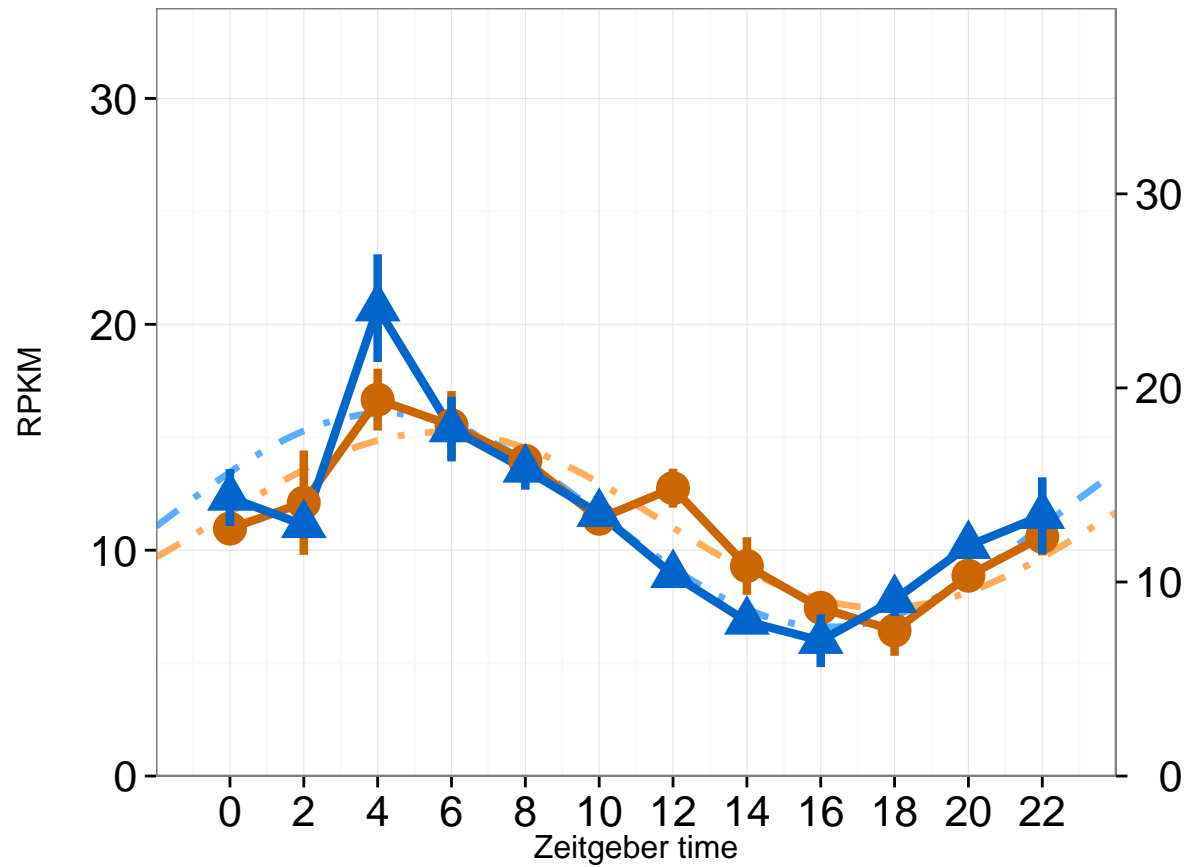

# 3010026O09Rik

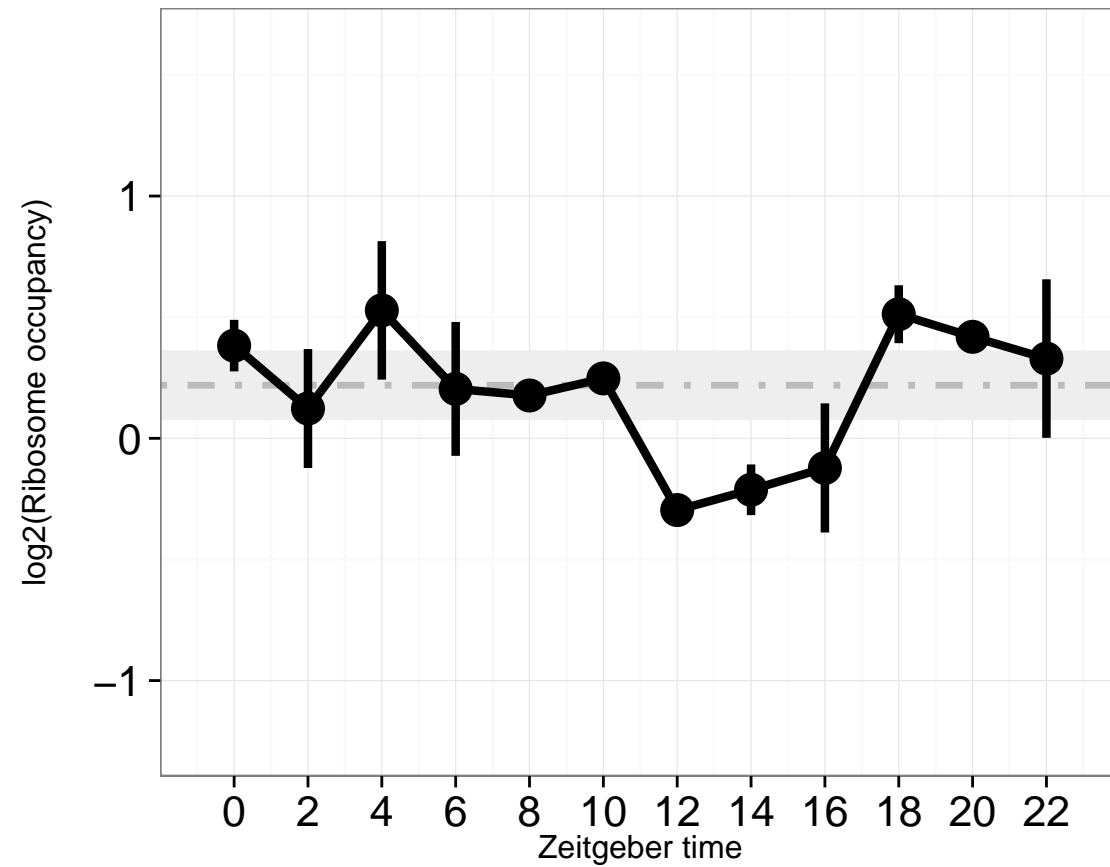

Supplement: Supplementary file 424 [file 1]

## 2700094K13Rik

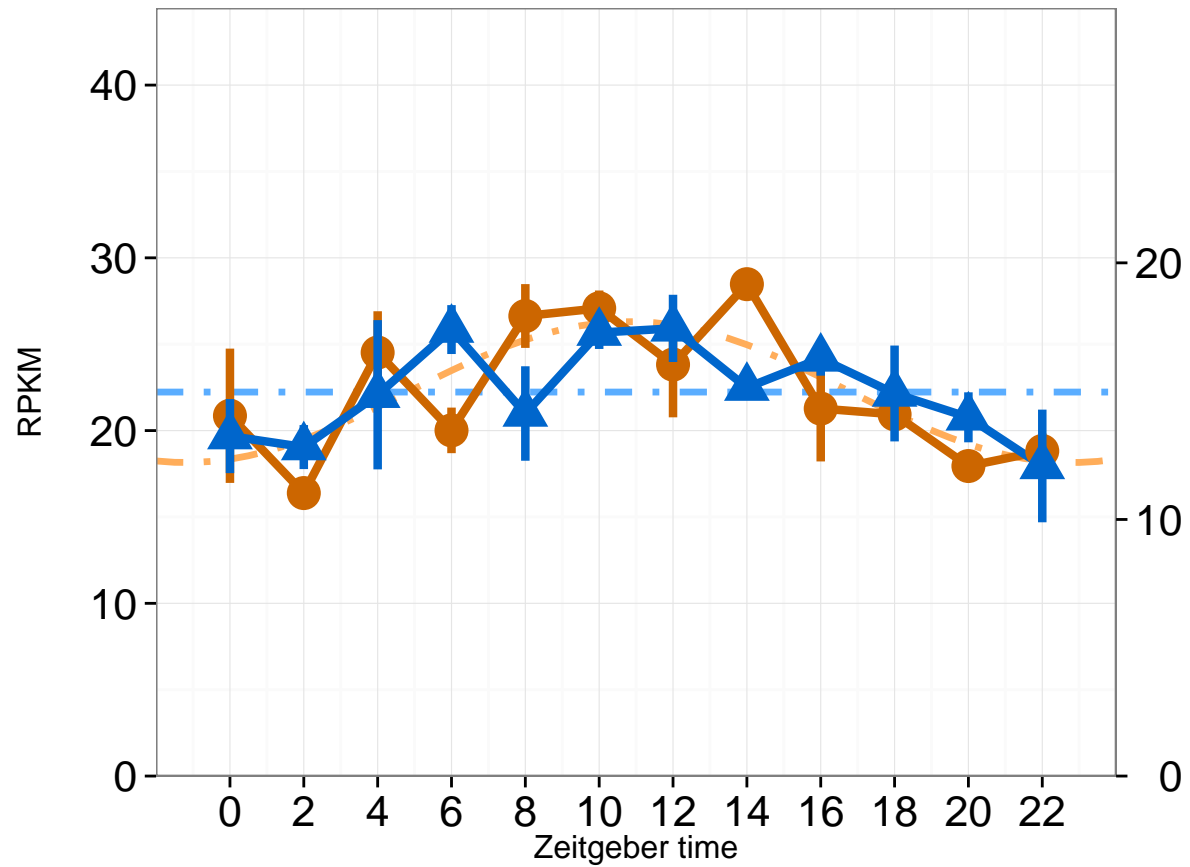

## 2700094K13Rik

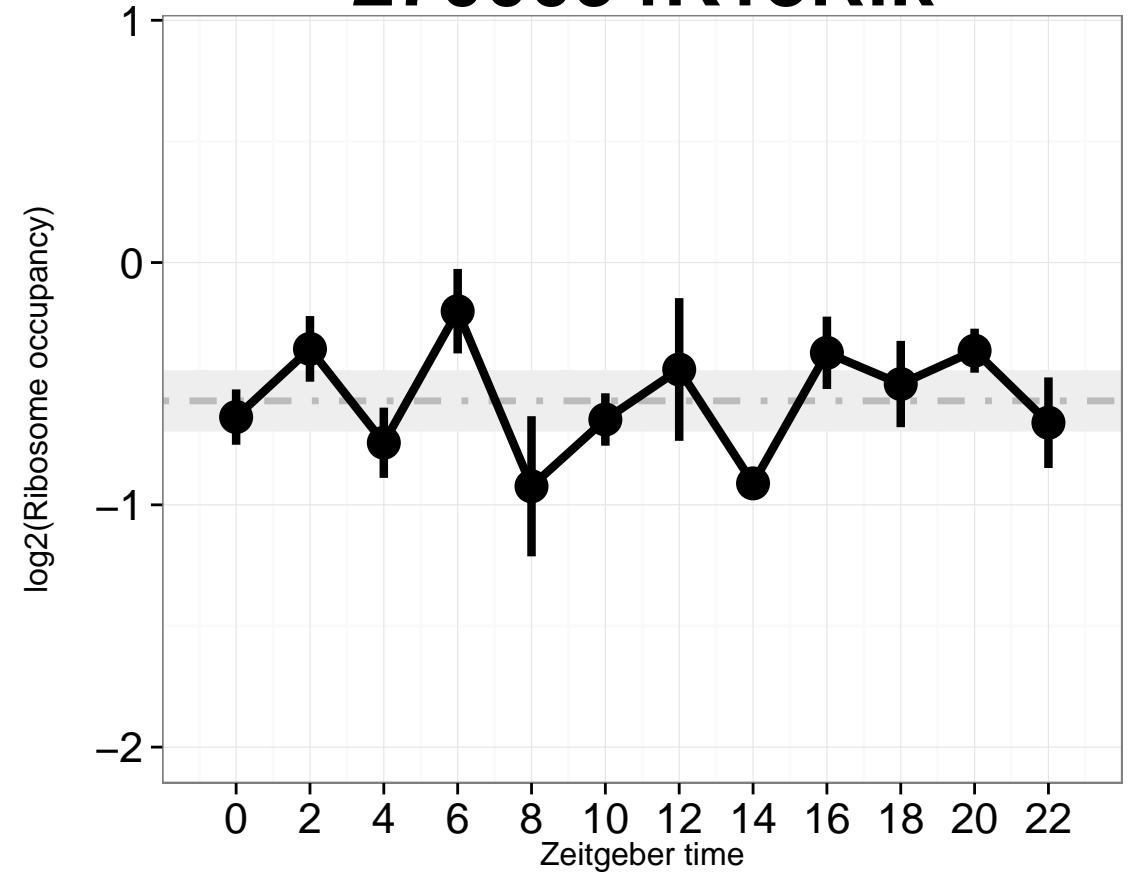

Supplement: Supplementary file 425 [file 1]

# Dgkh

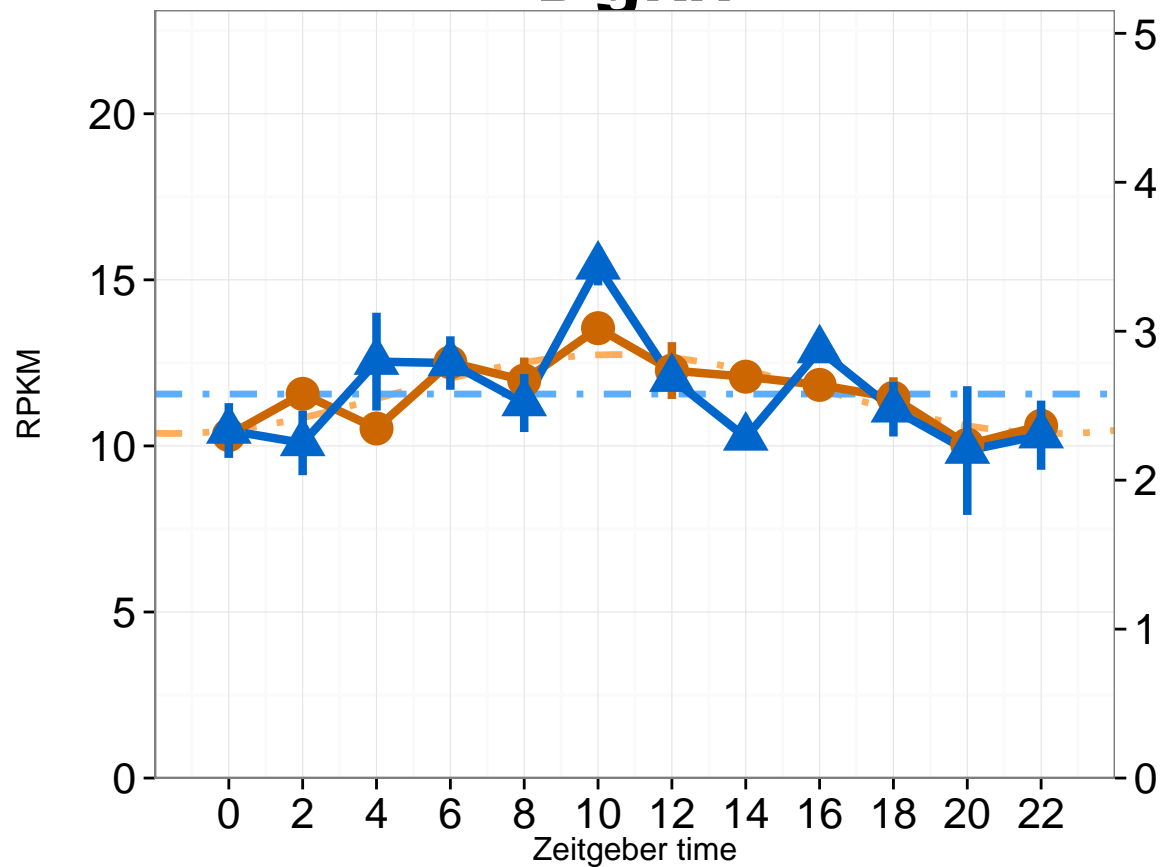

# Dgkh

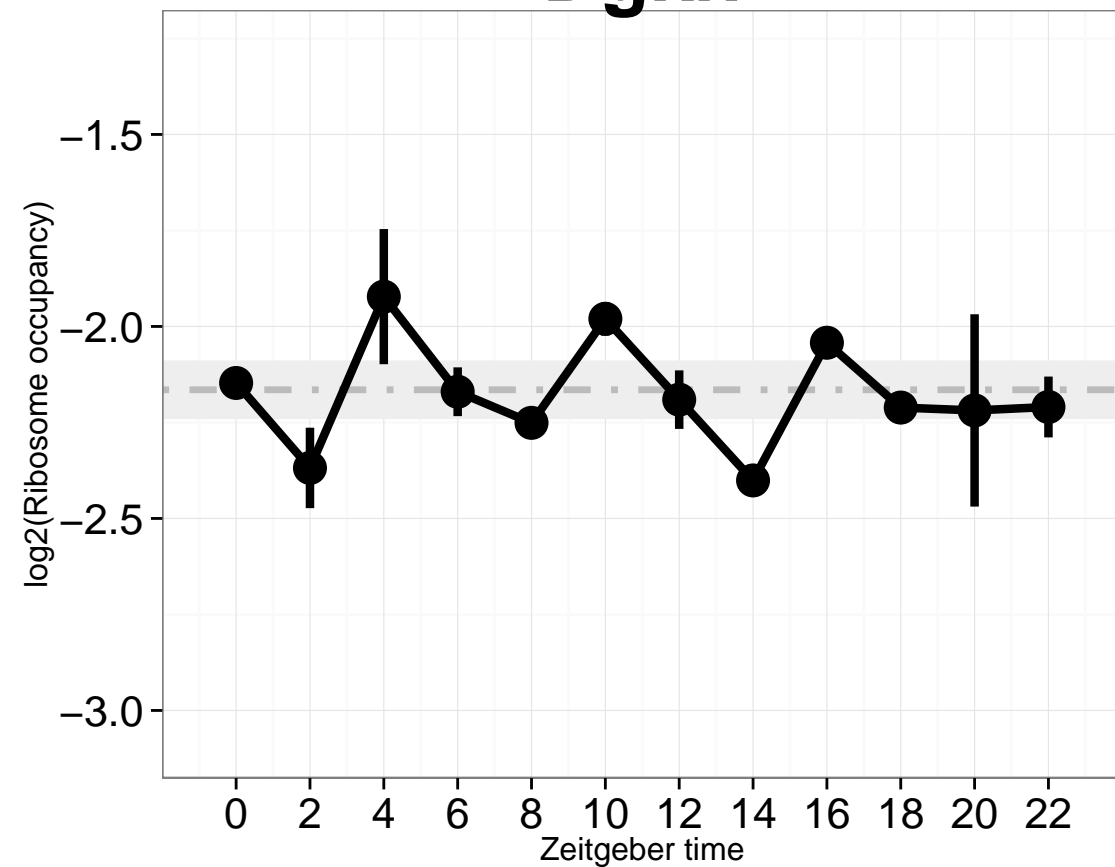

Supplement: Supplementary file 426 [file 1]

## Snrpn

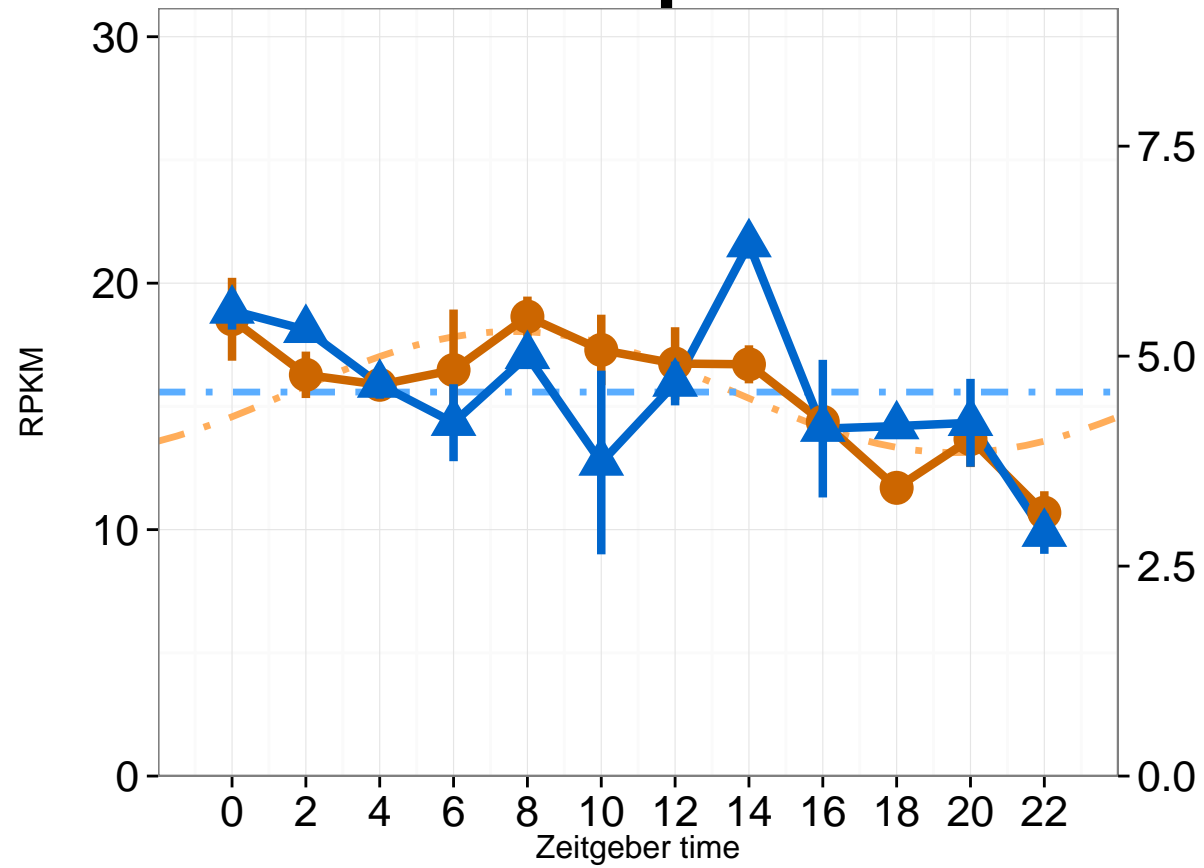

## Snrpn

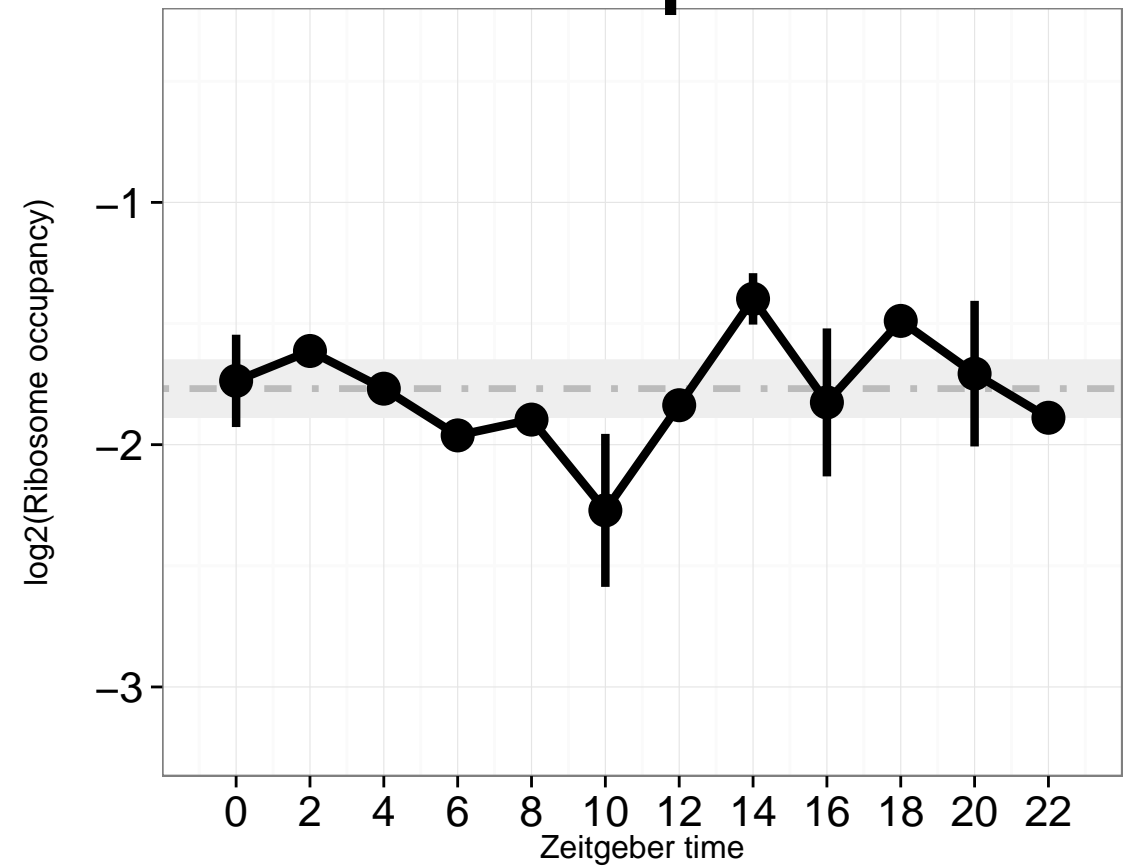

Supplement: Supplementary file 427 [file 1]

## Wrnip1

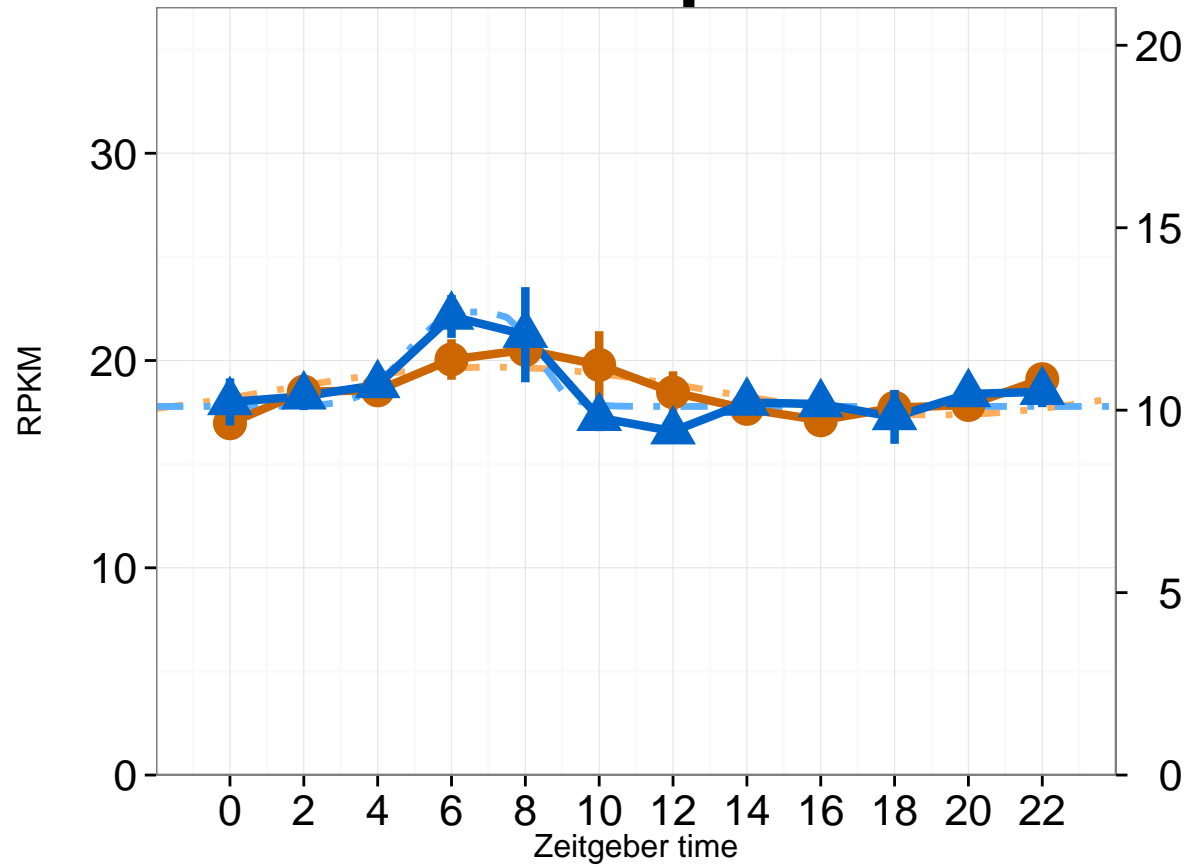

## Wrnip1

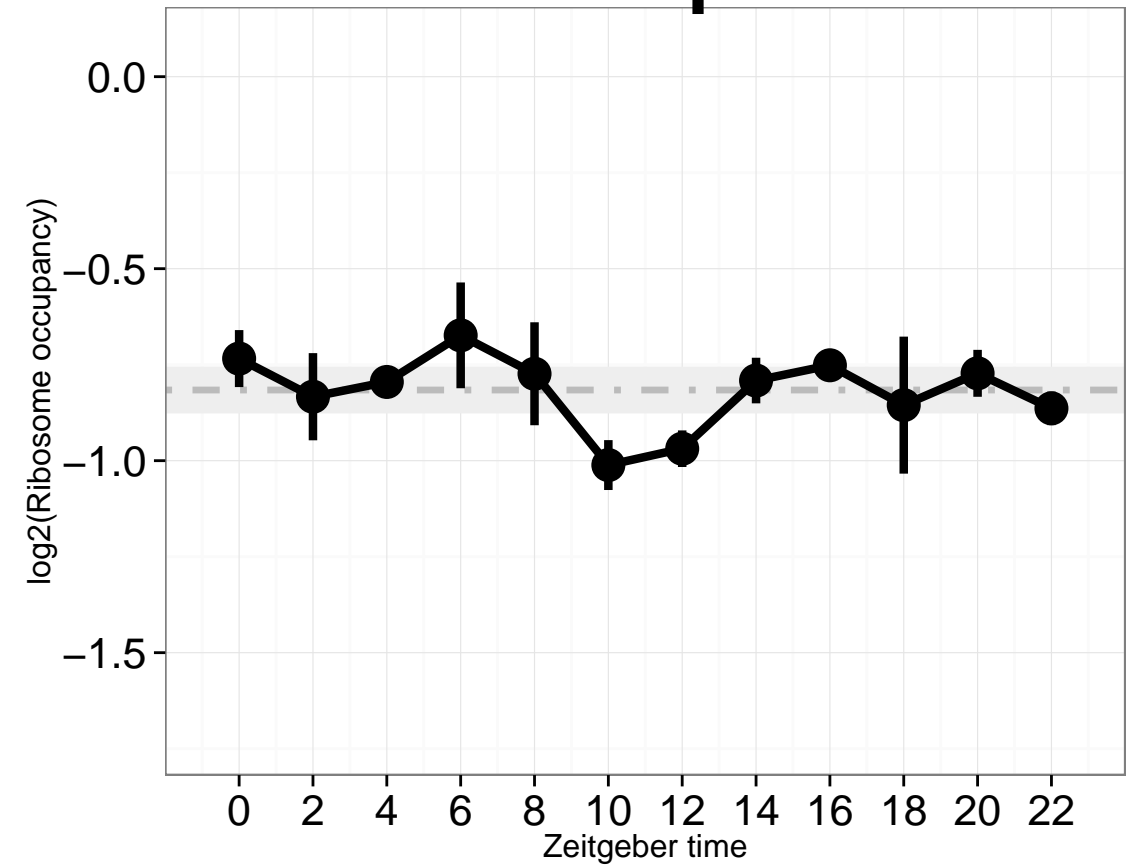

Supplement: Supplementary file 428 [file 1]

# Ttc19

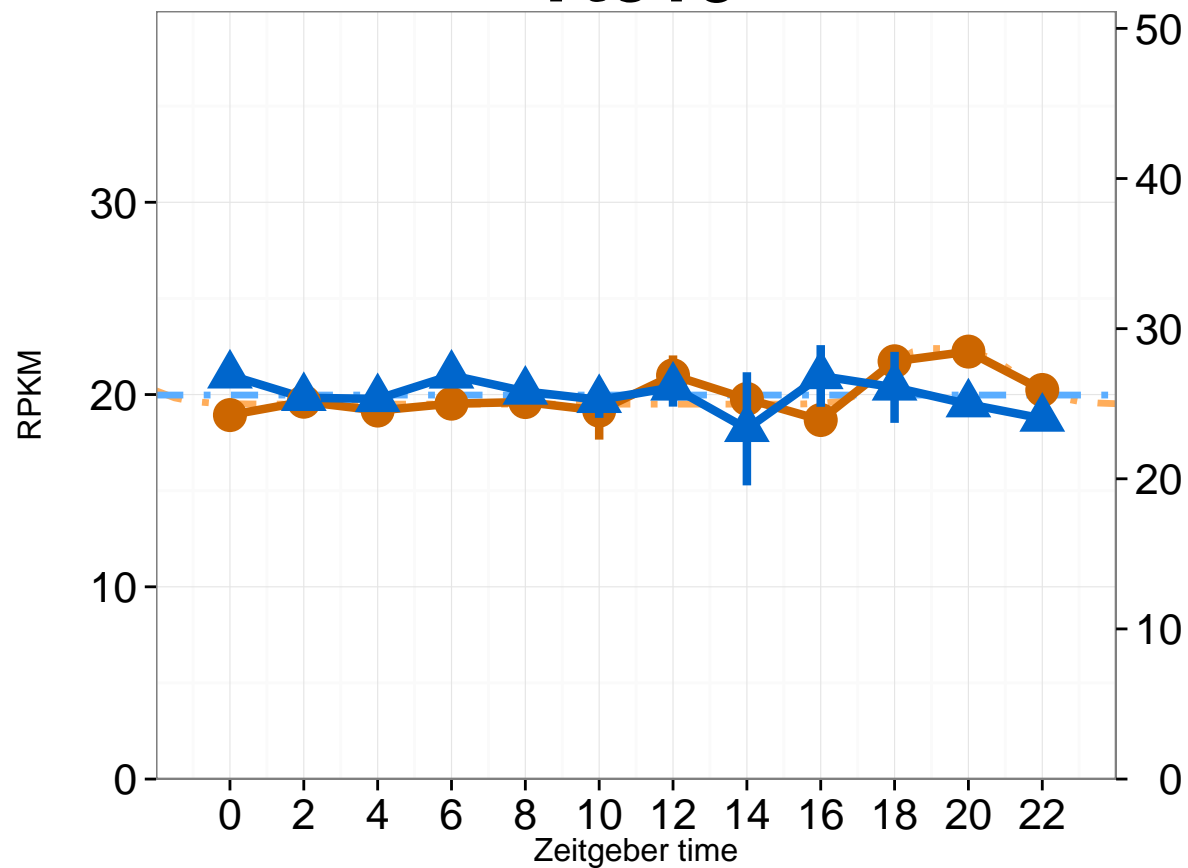

# Ttc19

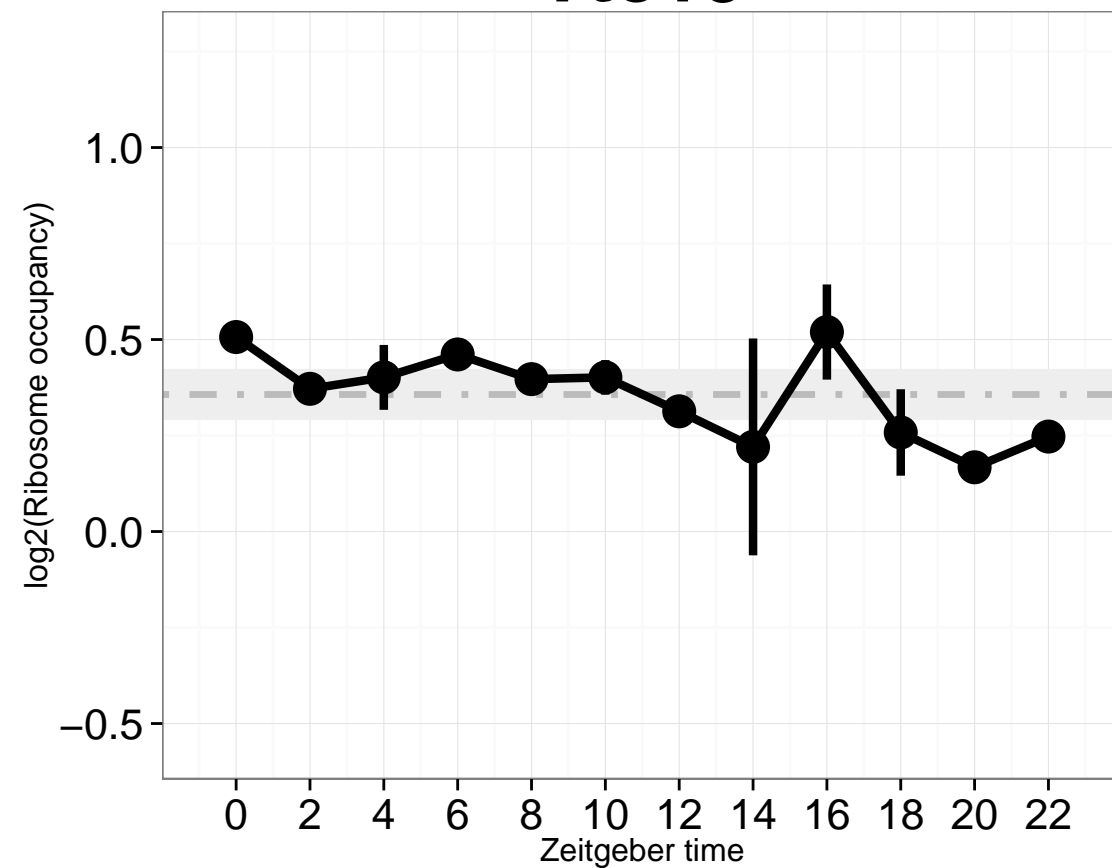

Supplement: Supplementary file 429 [file 1]

## Rps13

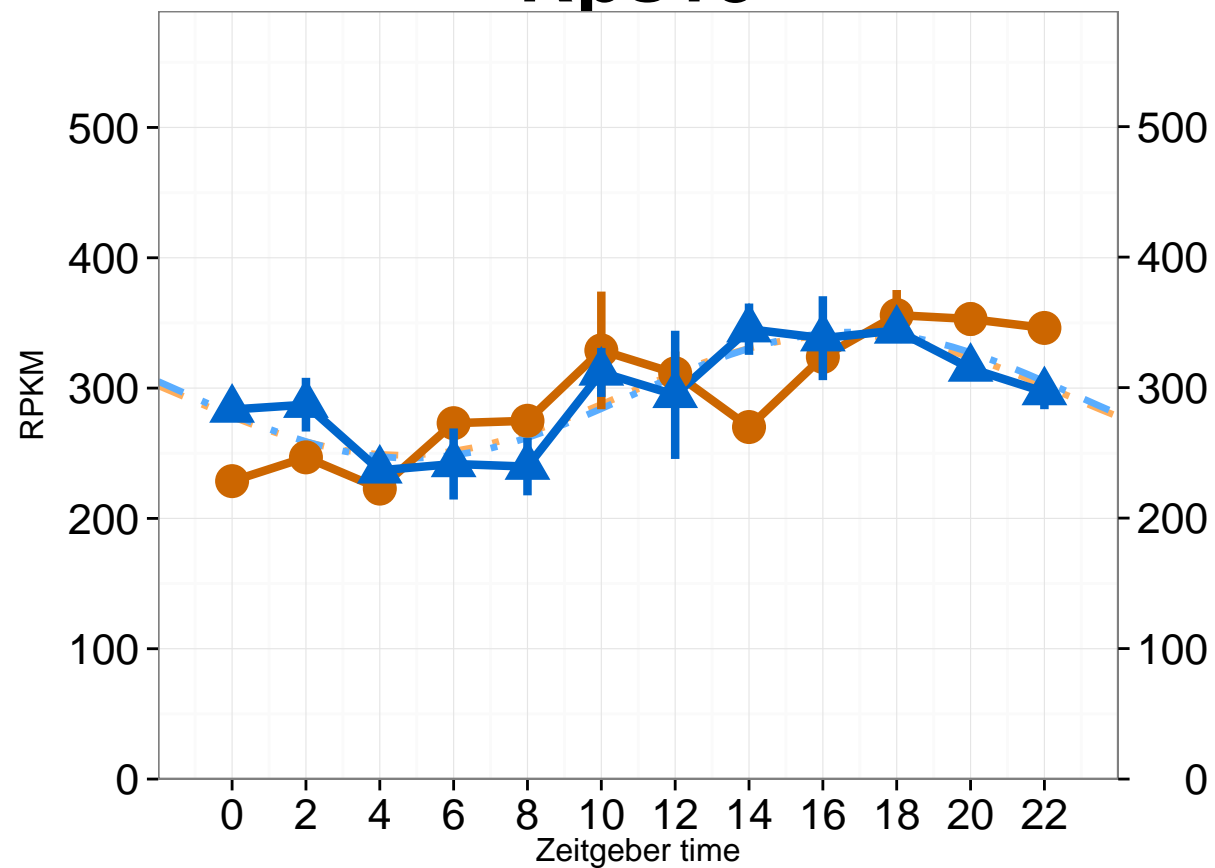

## Rps13

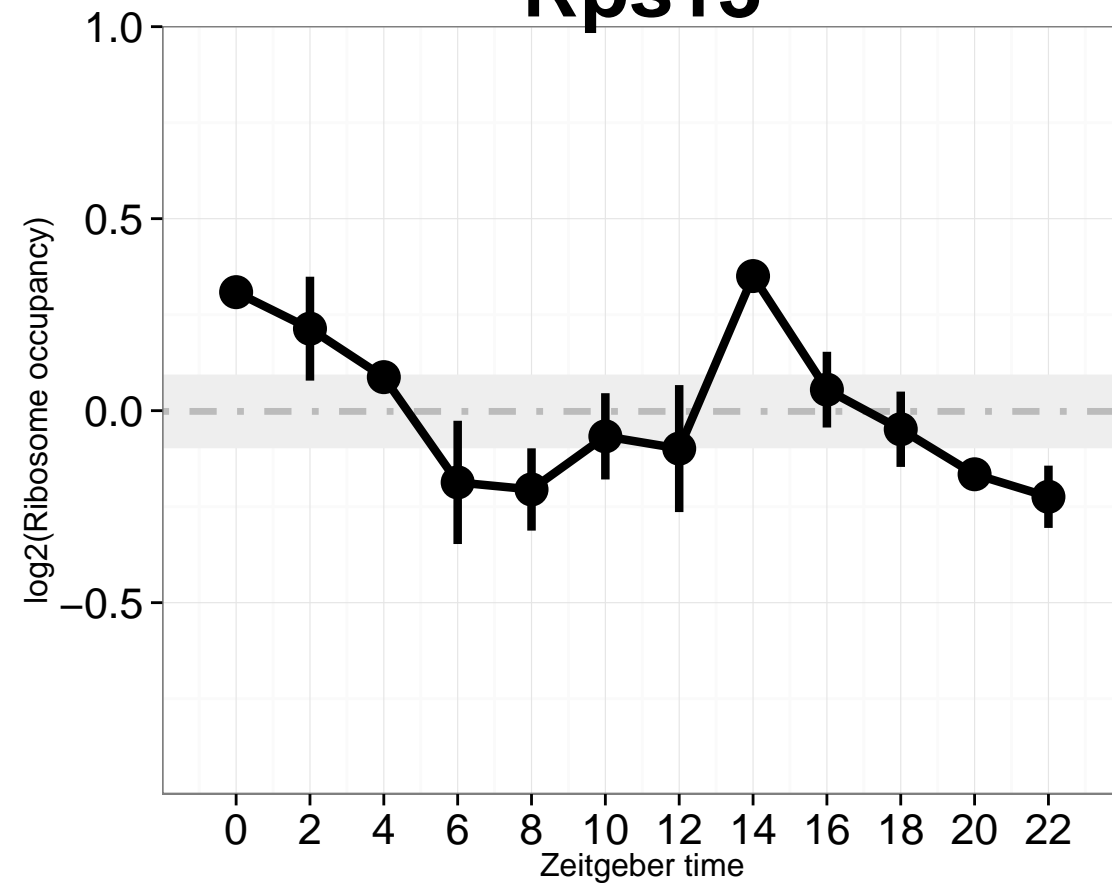

Supplement: Supplementary file 430 [file 1]

# Klhdc10

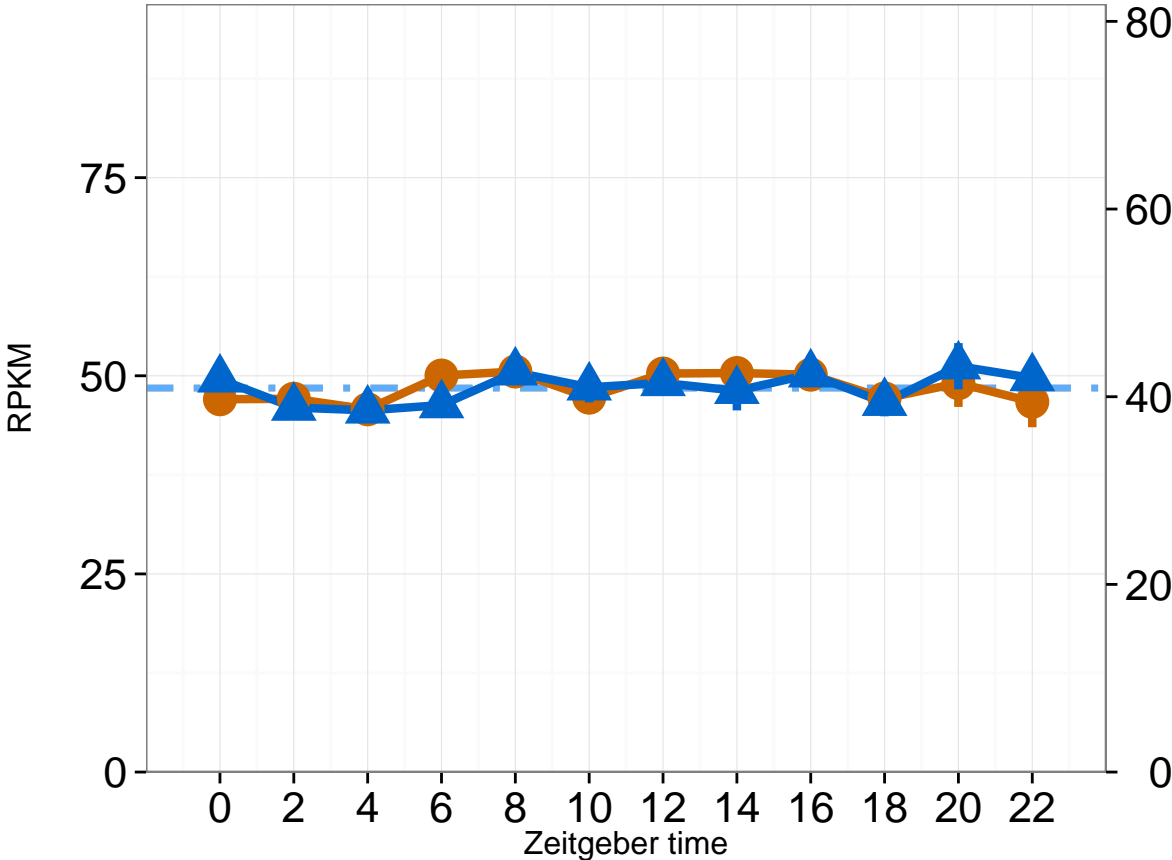

# Klhdc10

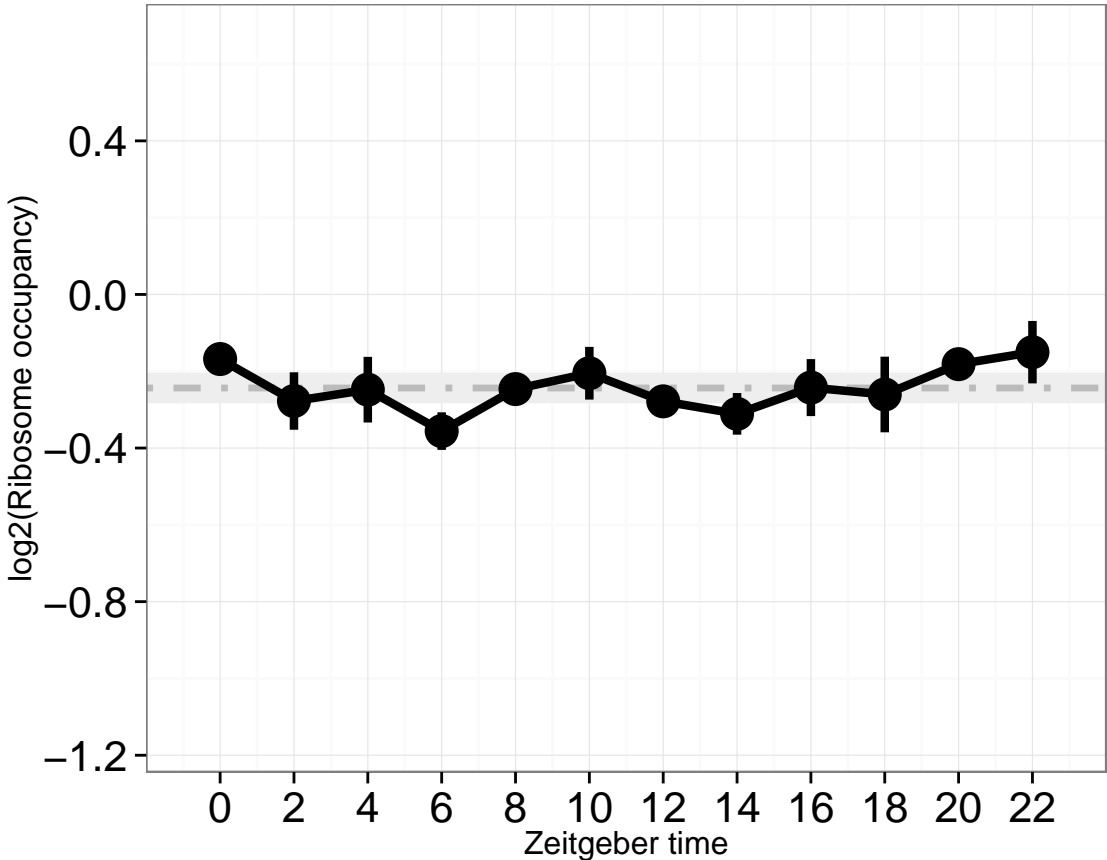

Supplement: Supplementary file 431 [file 1]

## Pdzk1

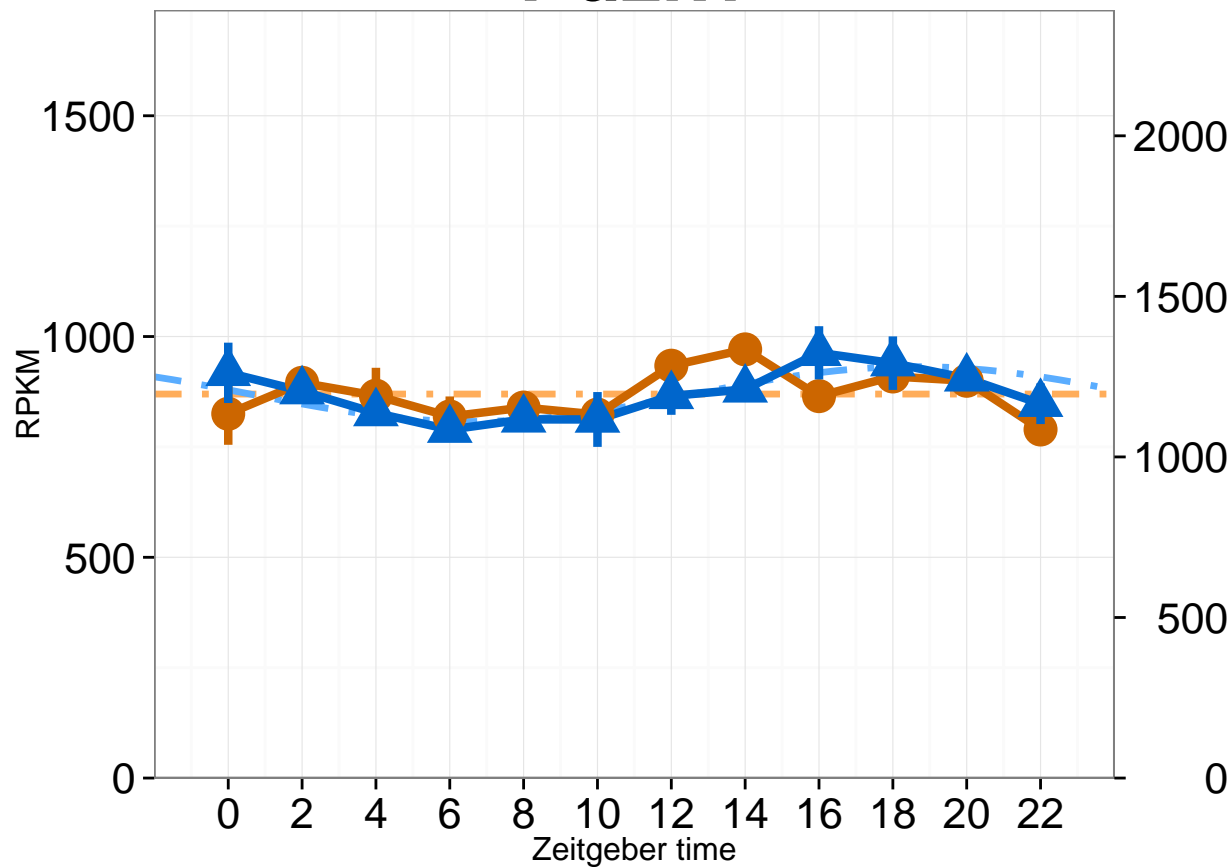

## Pdzk1

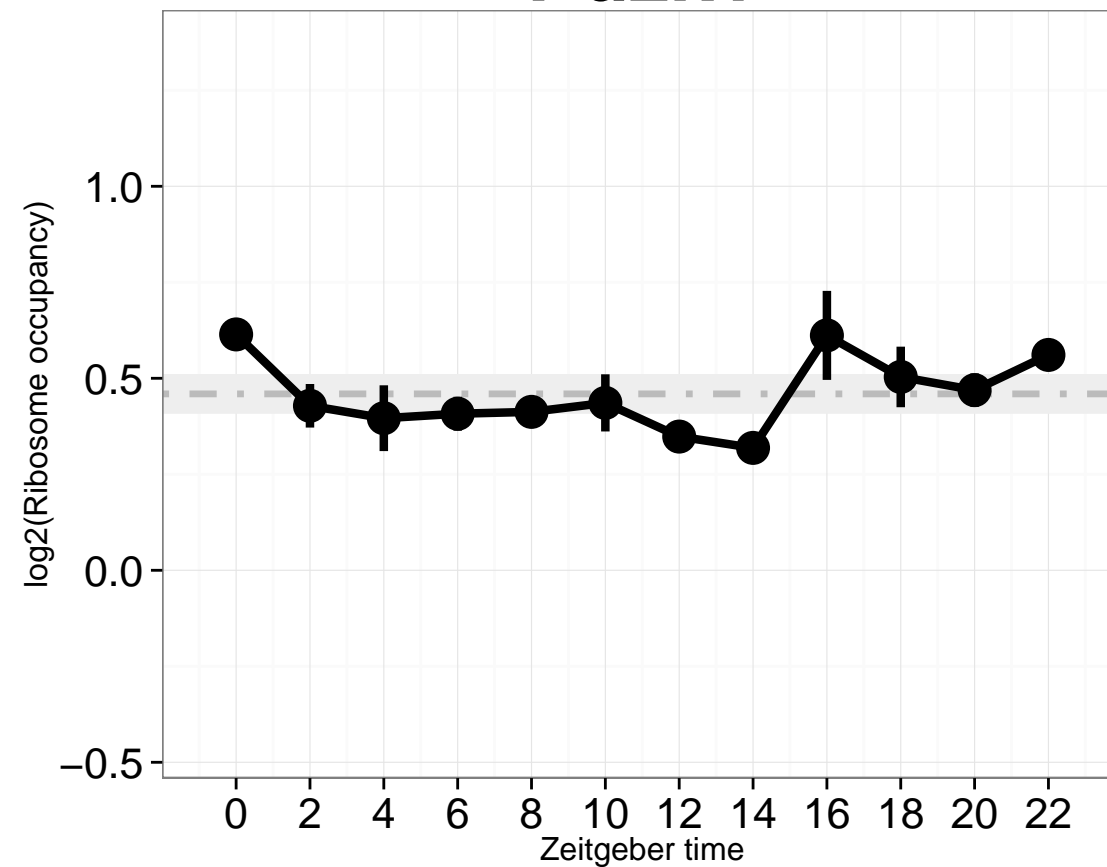

Supplement: Supplementary file 432 [file 1]

## Tdp1

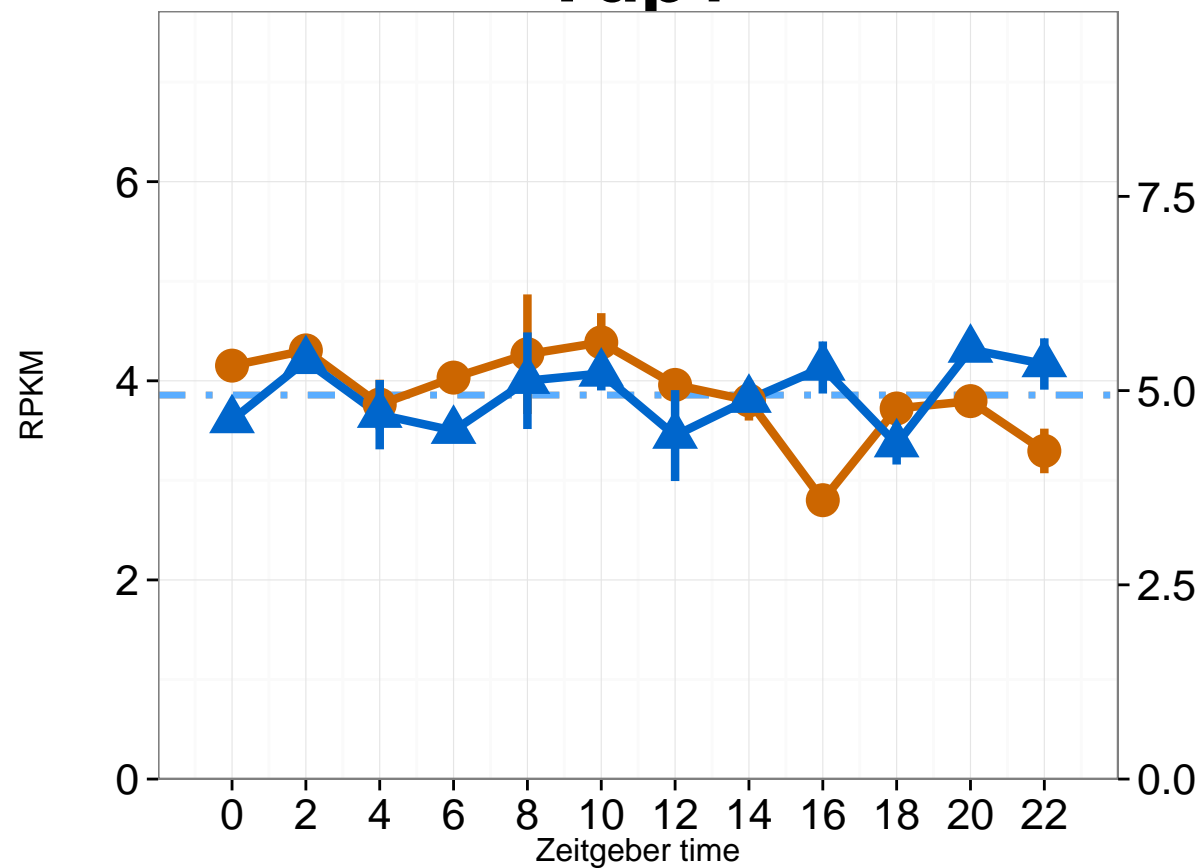

## Tdp1

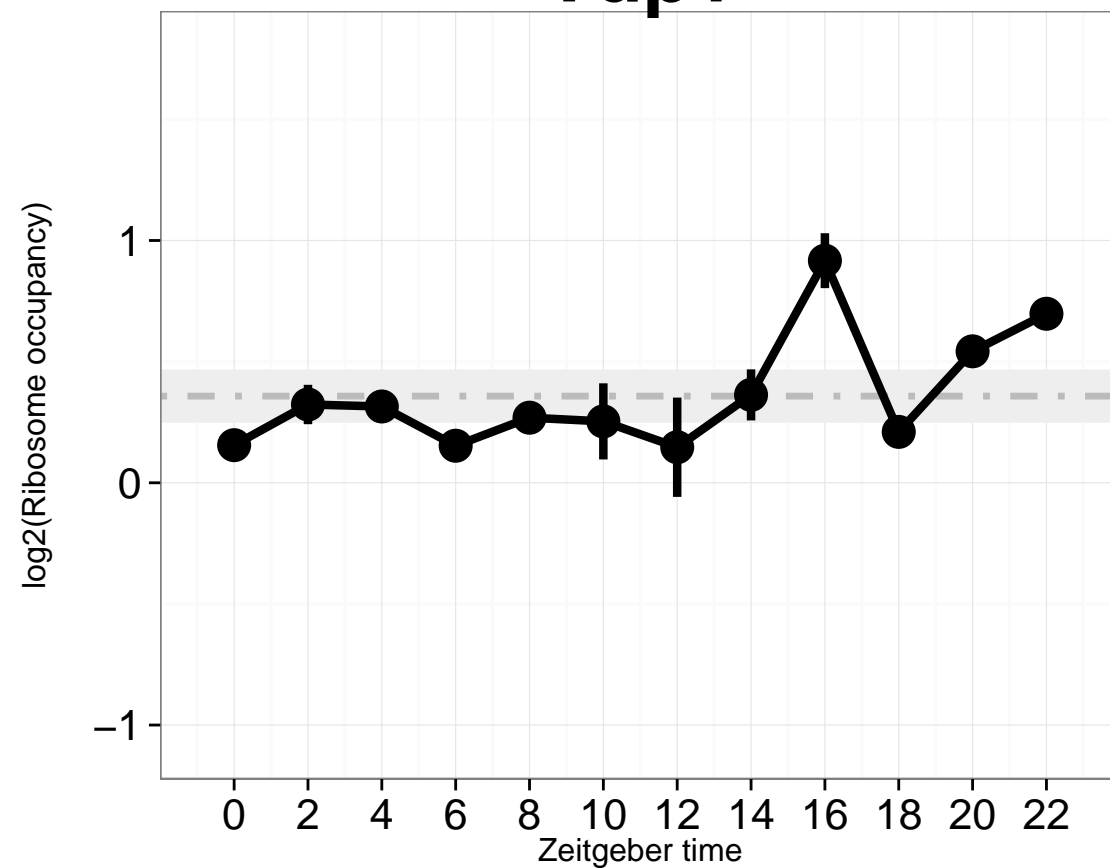

Supplement: Supplementary file 433 [file 1]

## Pigt

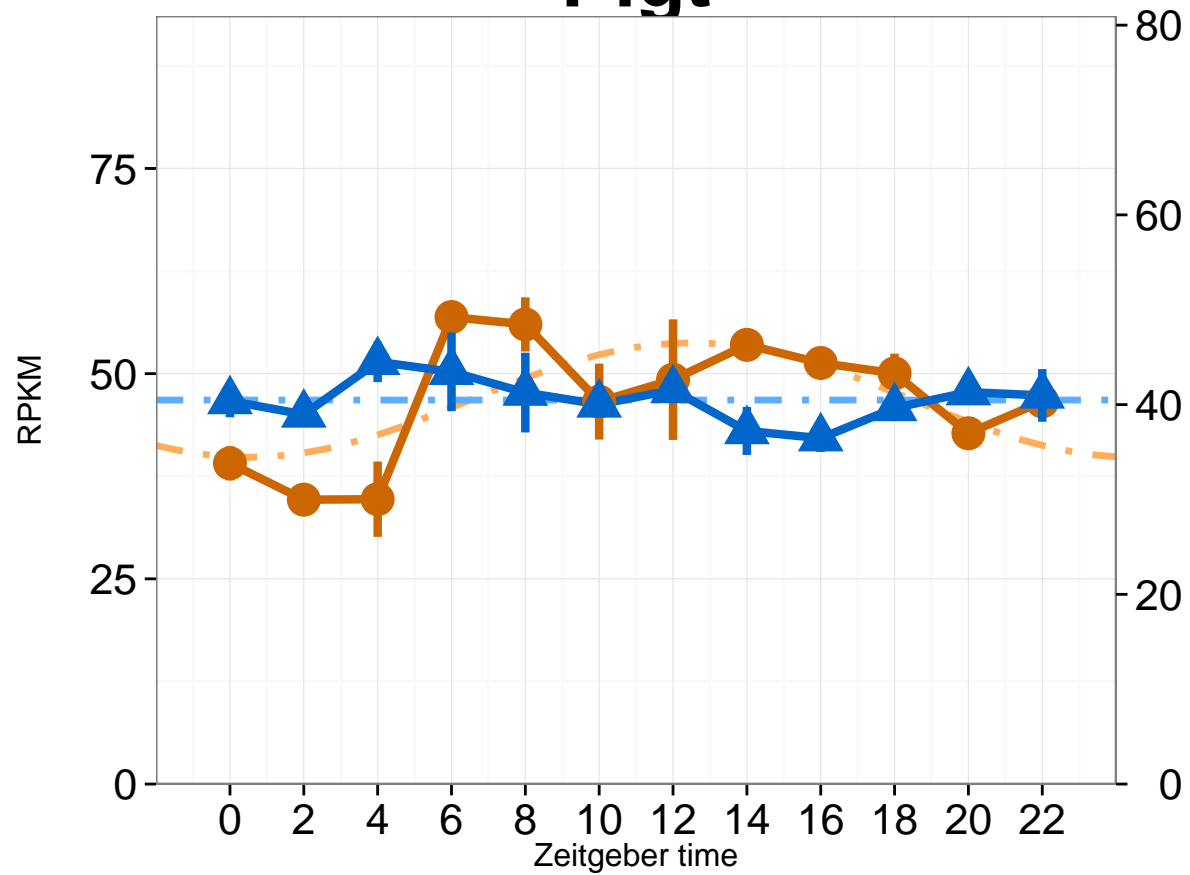

## Pigt

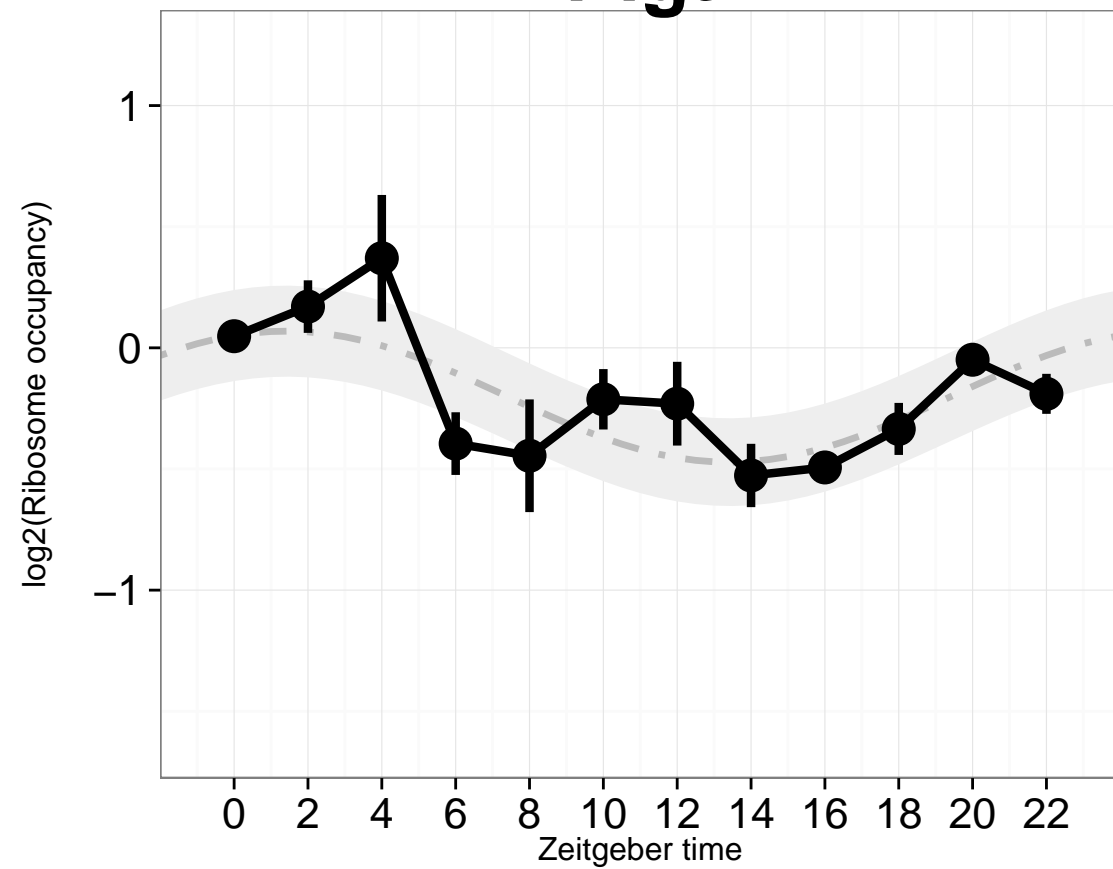

Supplement: Supplementary file 434 [file 1]

# Kcnj8

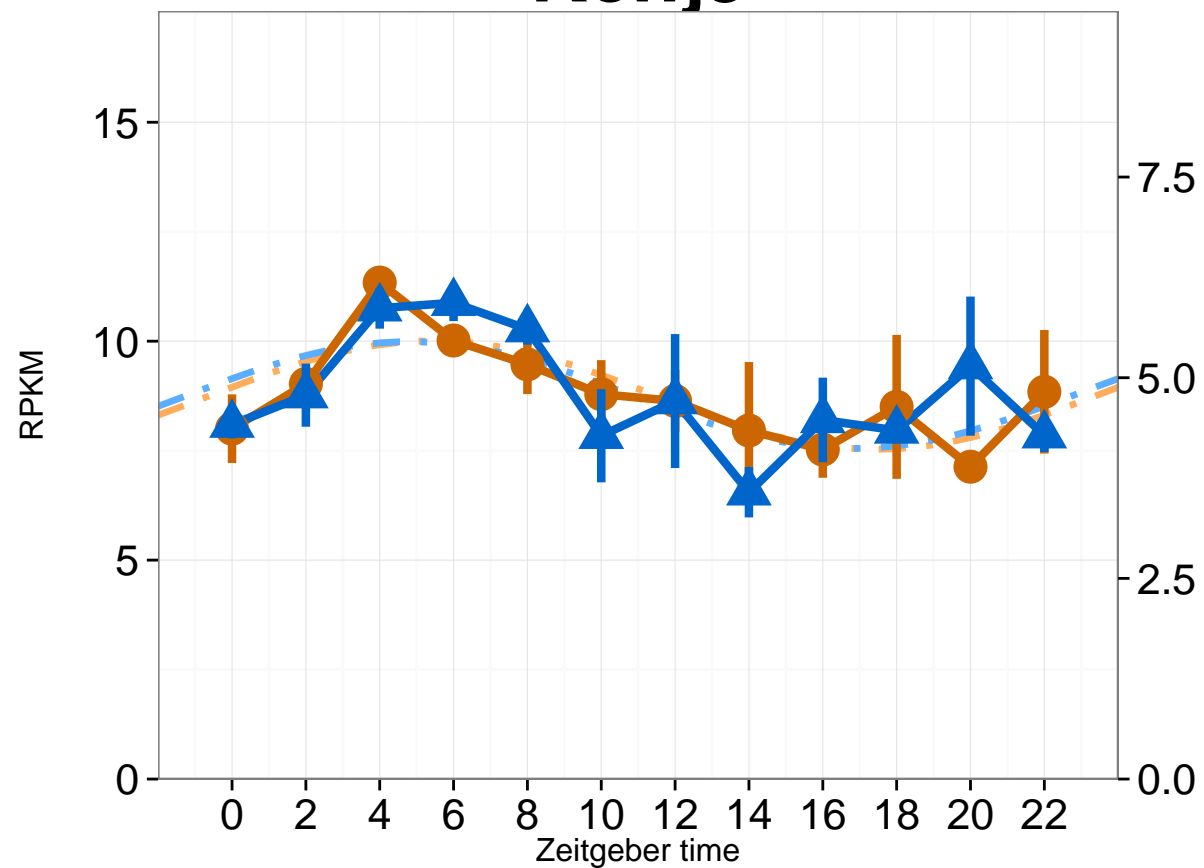

# Kcnj8

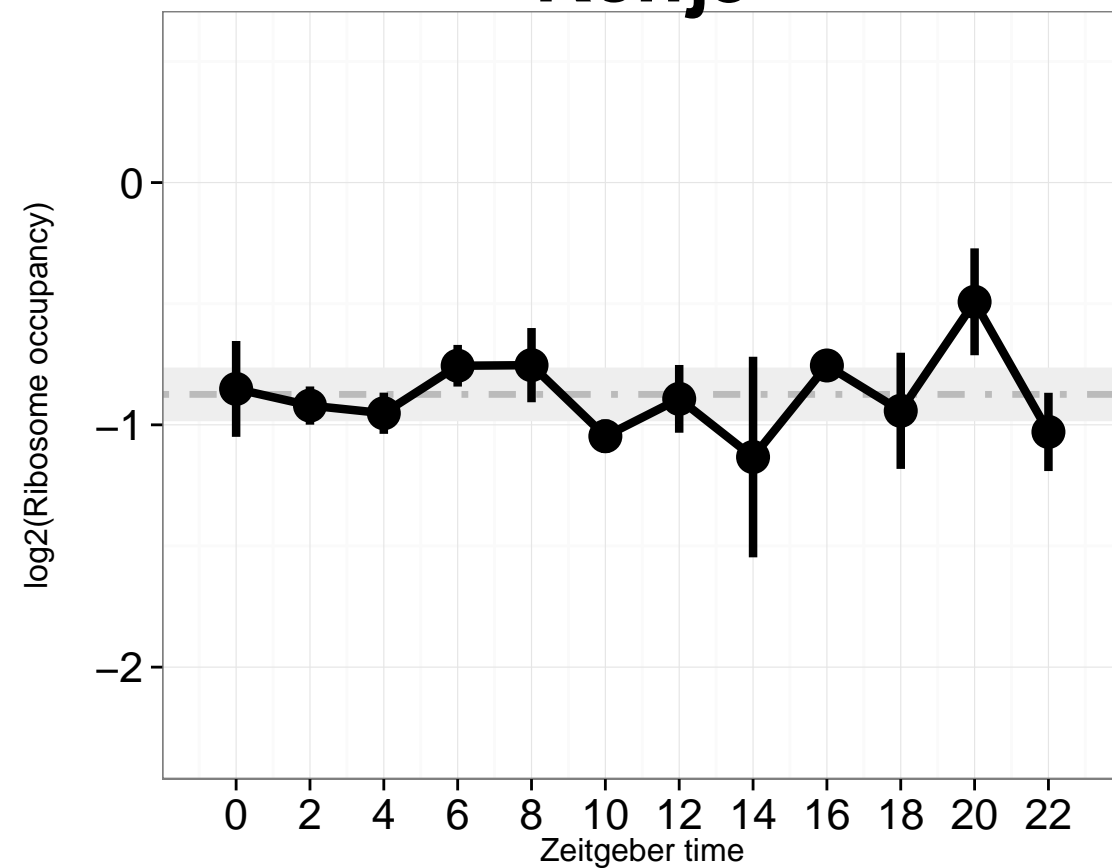

Supplement: Supplementary file 435 [file 1]

## Rbfa

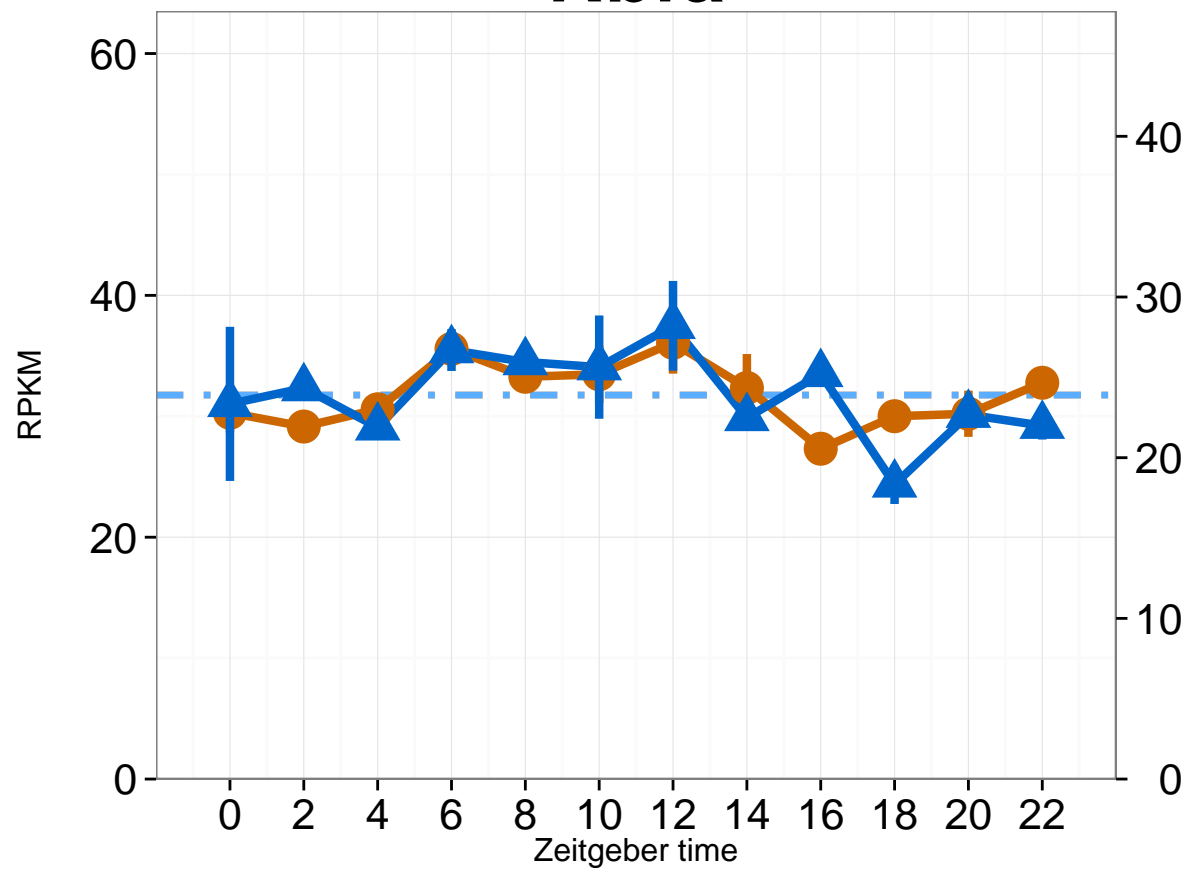

## Rbfa

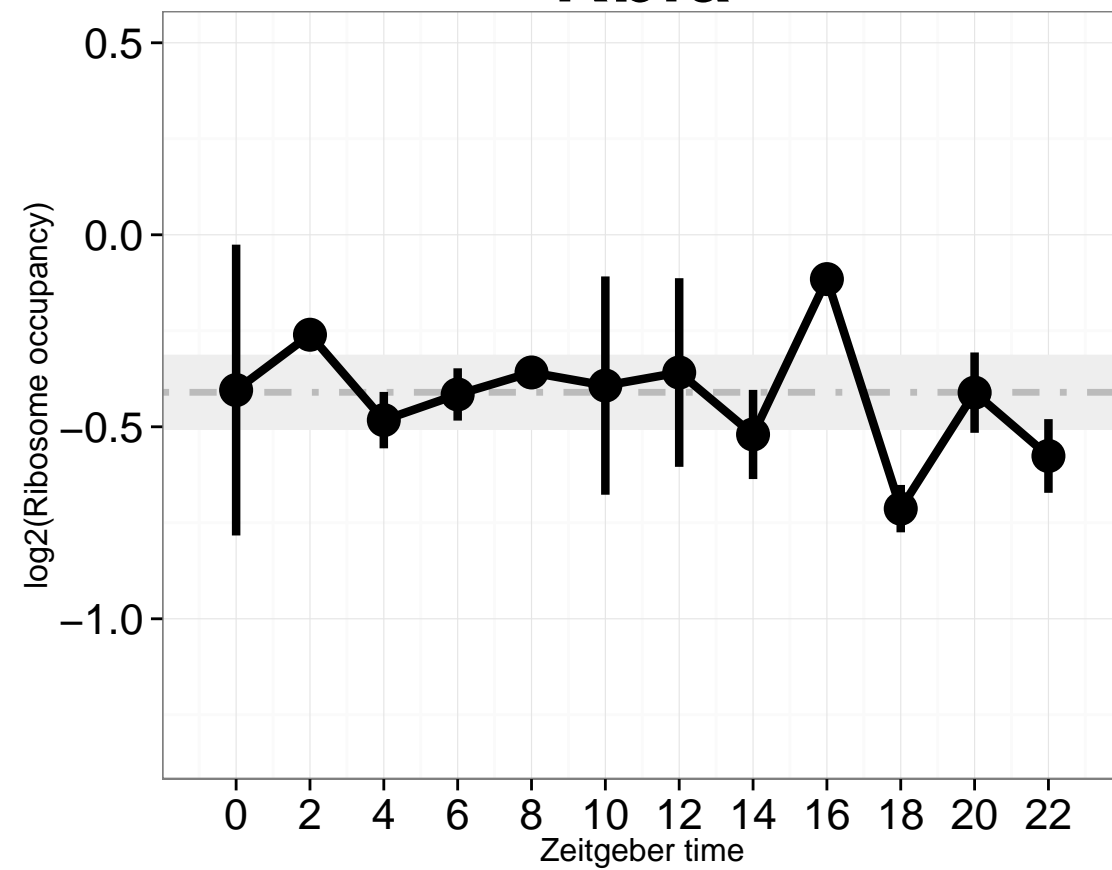

Supplement: Supplementary file 436 [file 1]

# Reps1

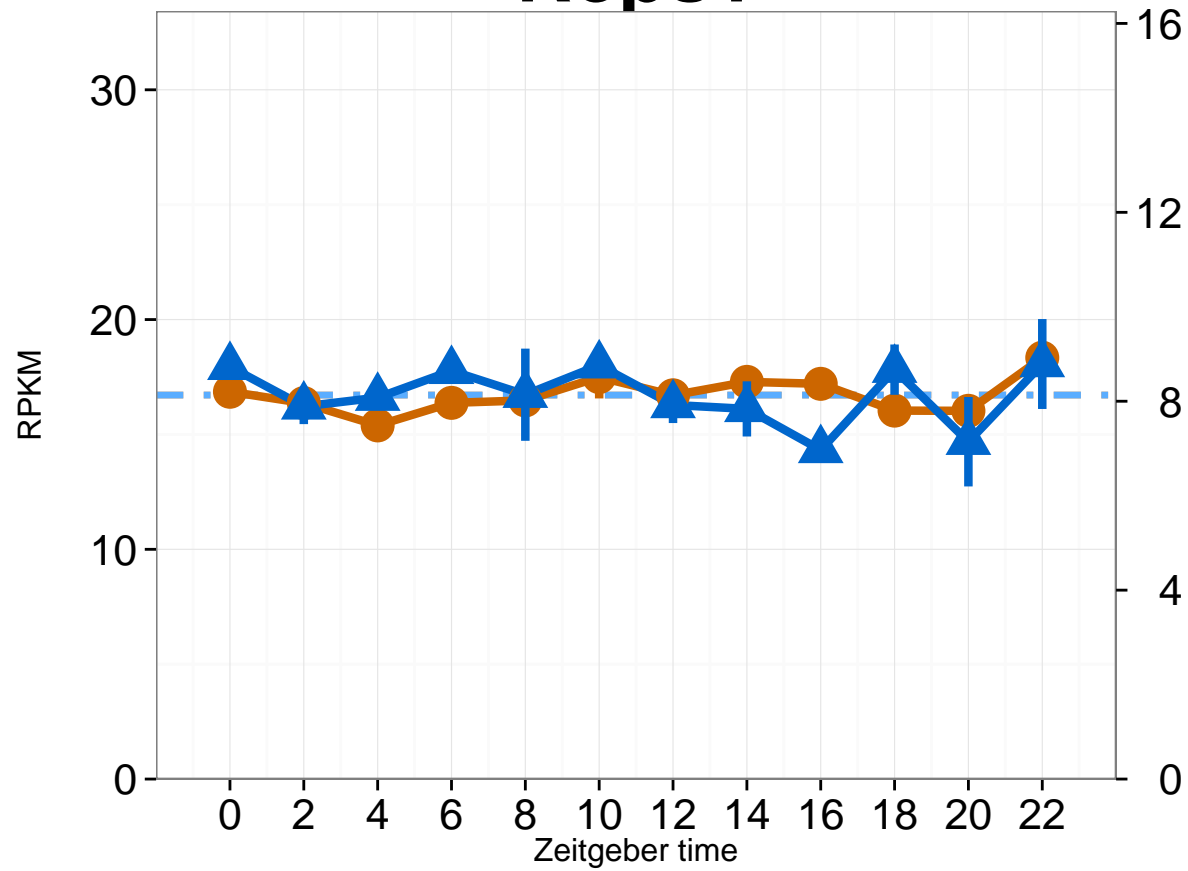

# Reps1

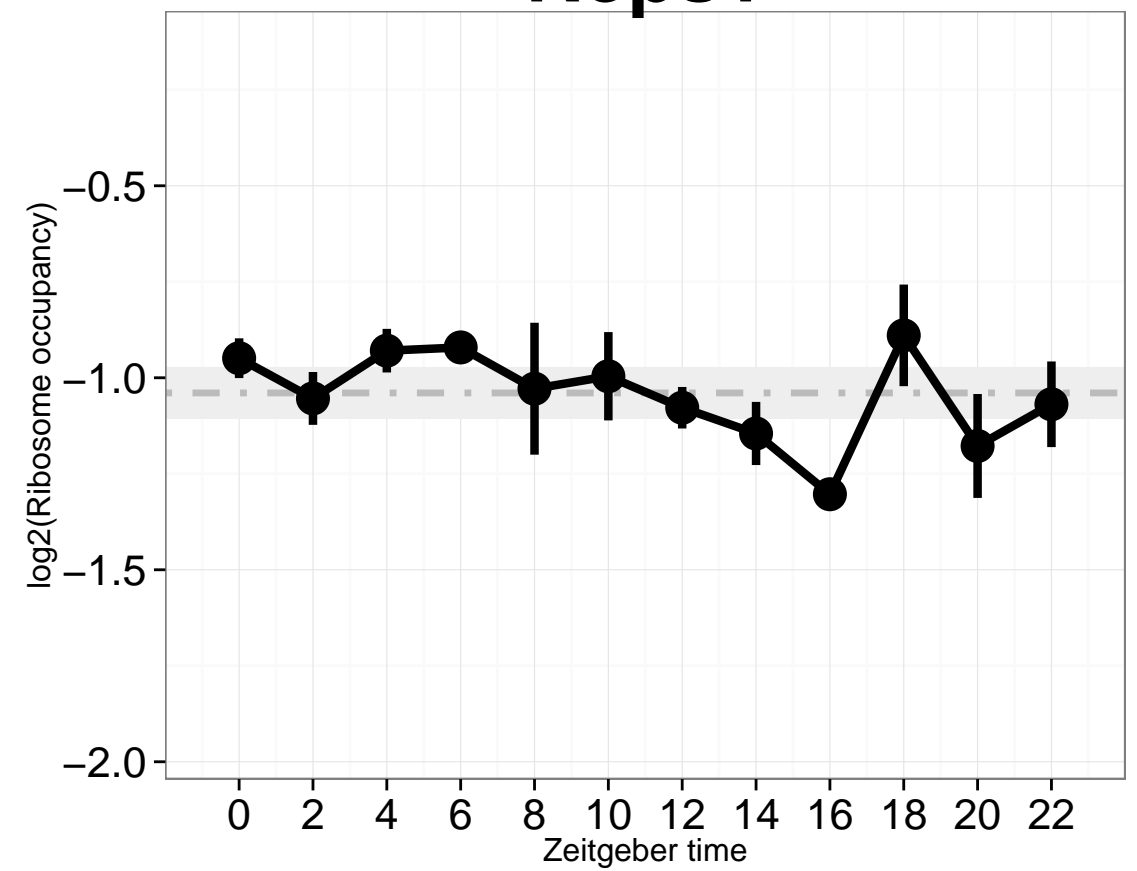

Supplement: Supplementary file 437 [file 1]

## Zmiz1

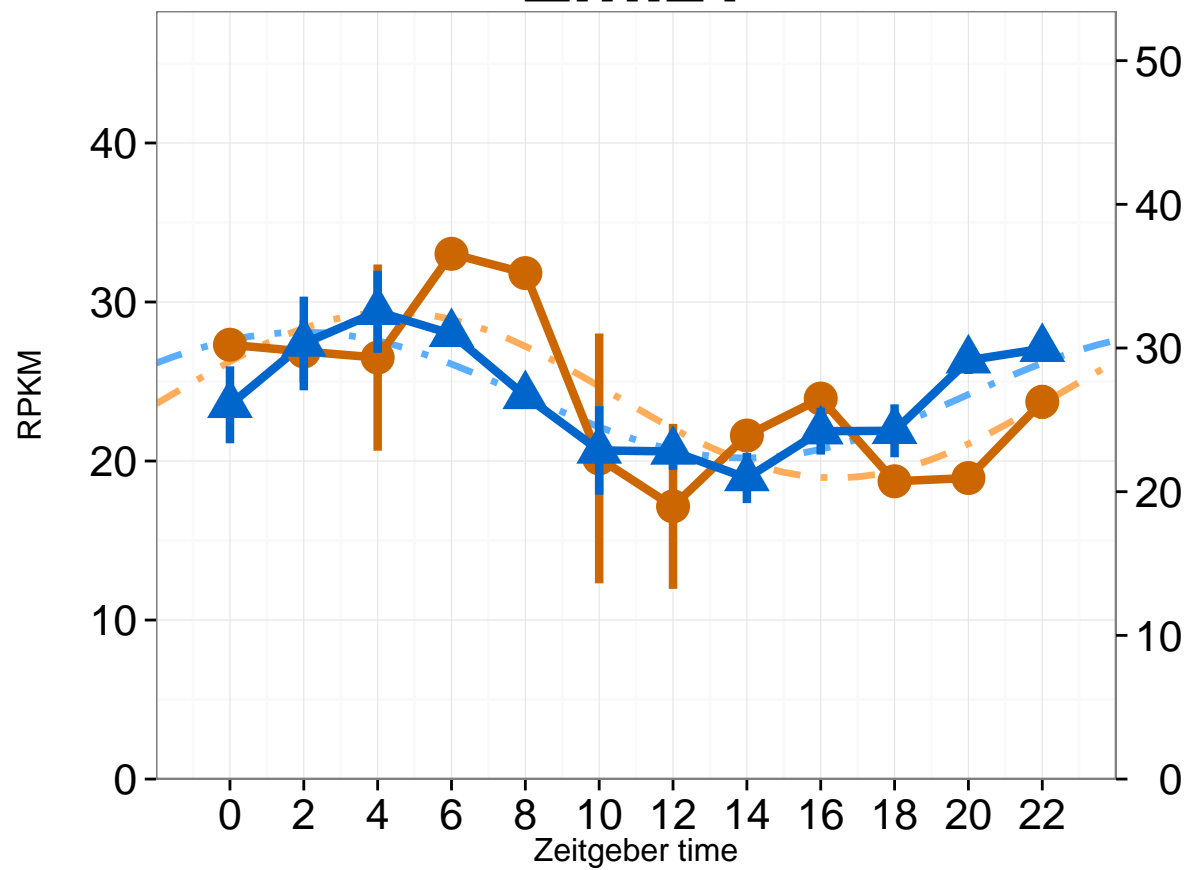

## Zmiz1

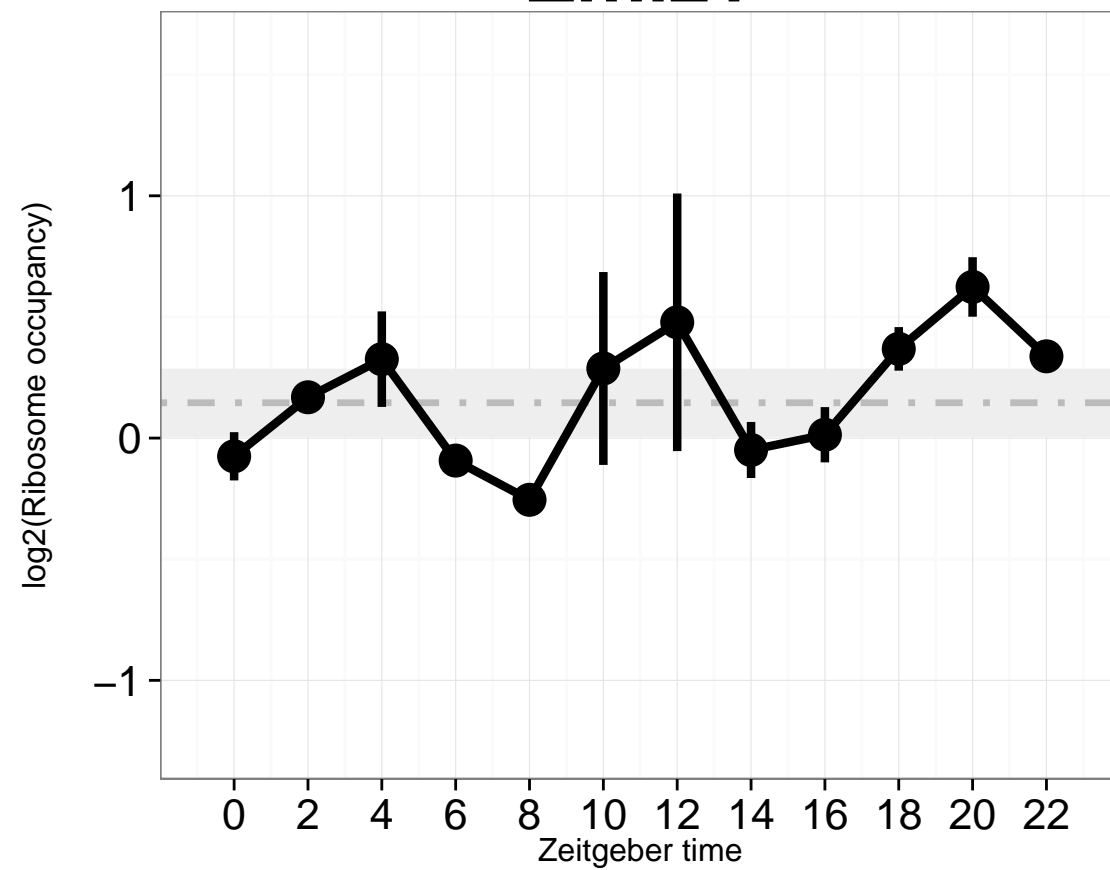

Supplement: Supplementary file 438 [file 1]

## Arid5b

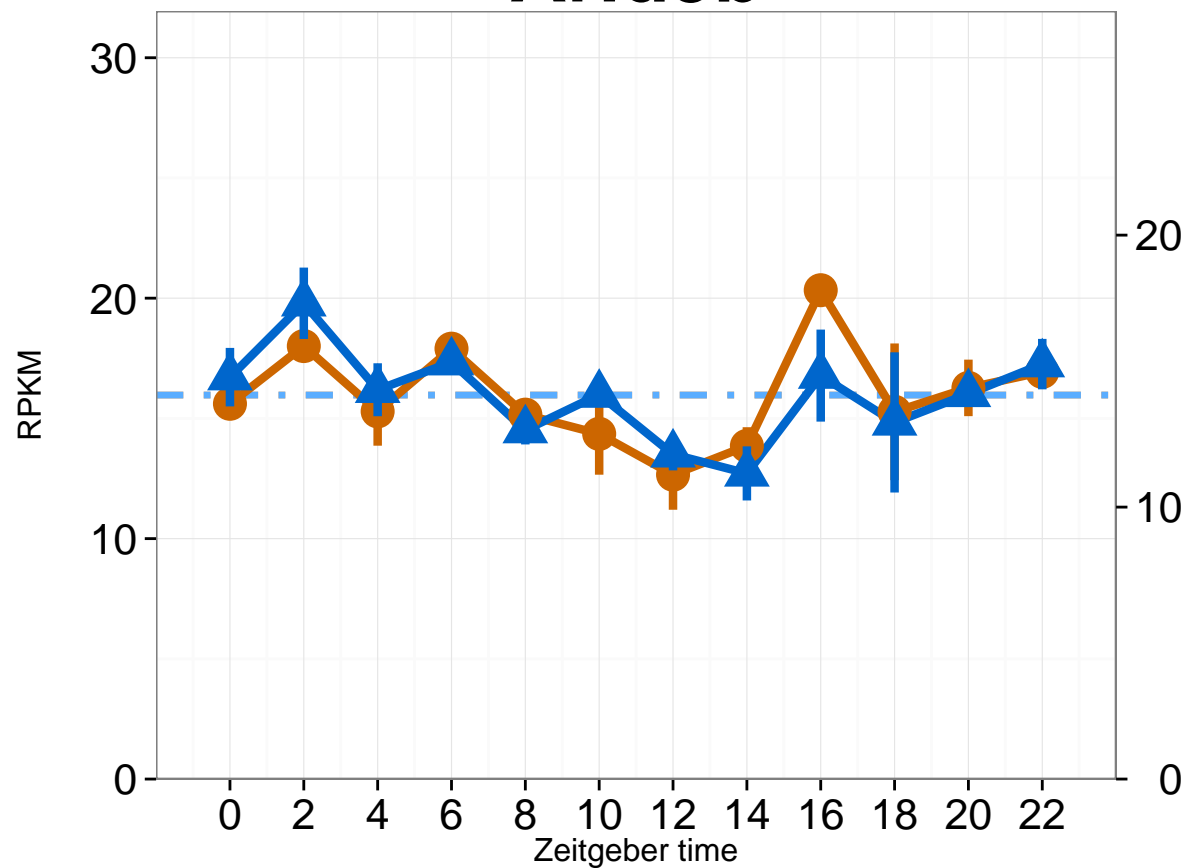

## Arid5b

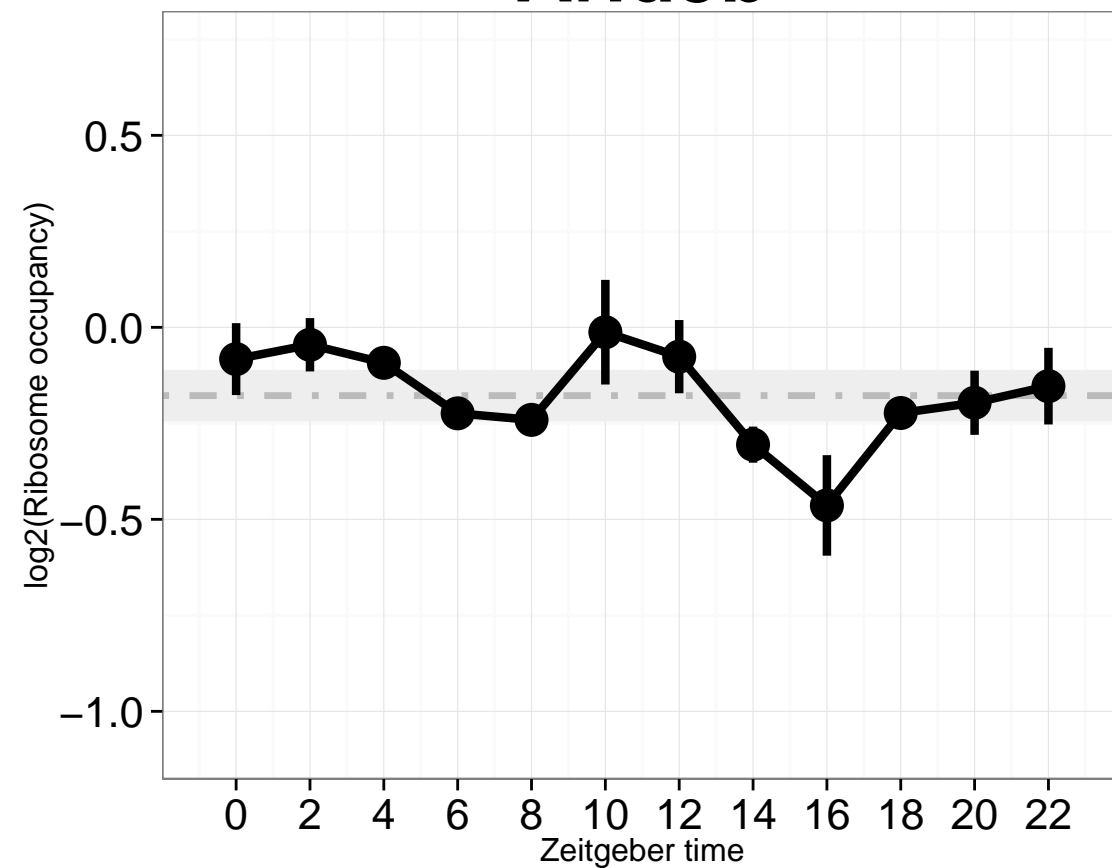

Supplement: Supplementary file 439 [file 1]

## Taf6l

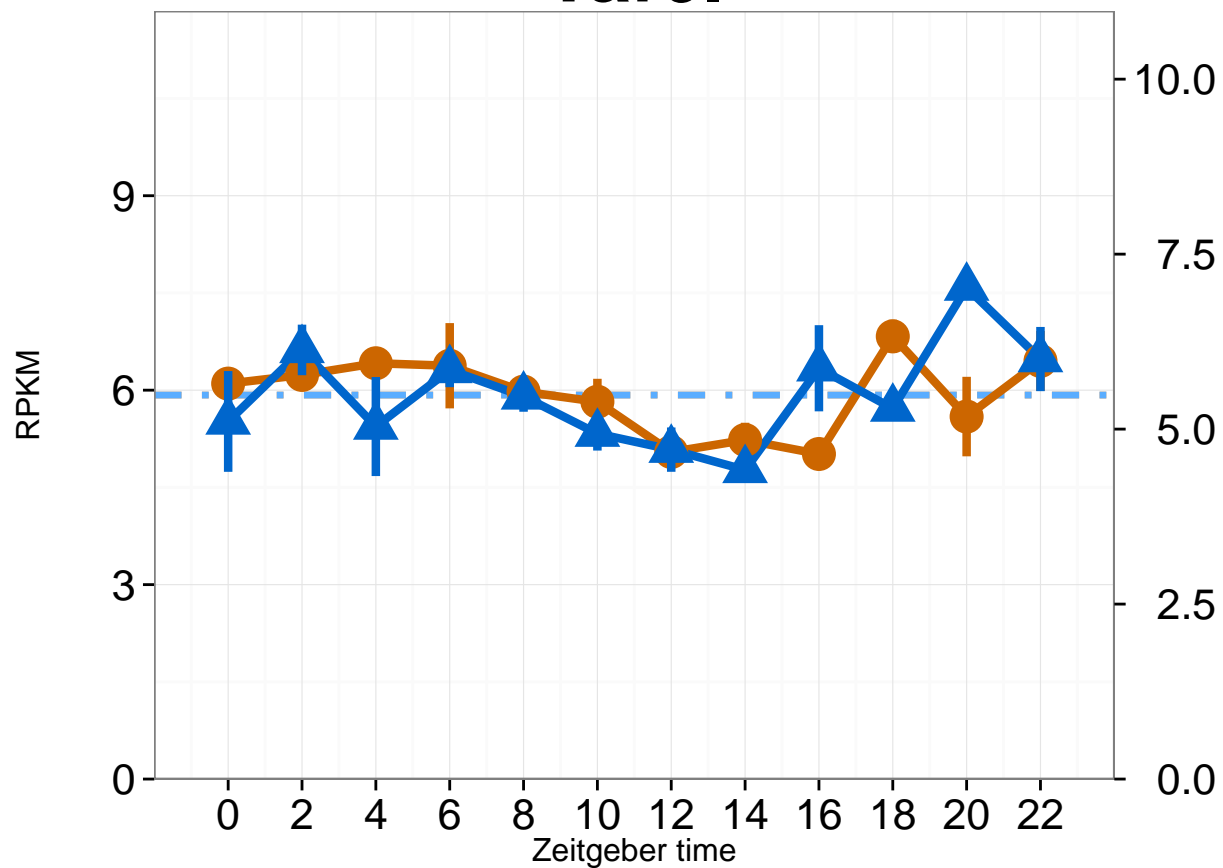

## Taf6l

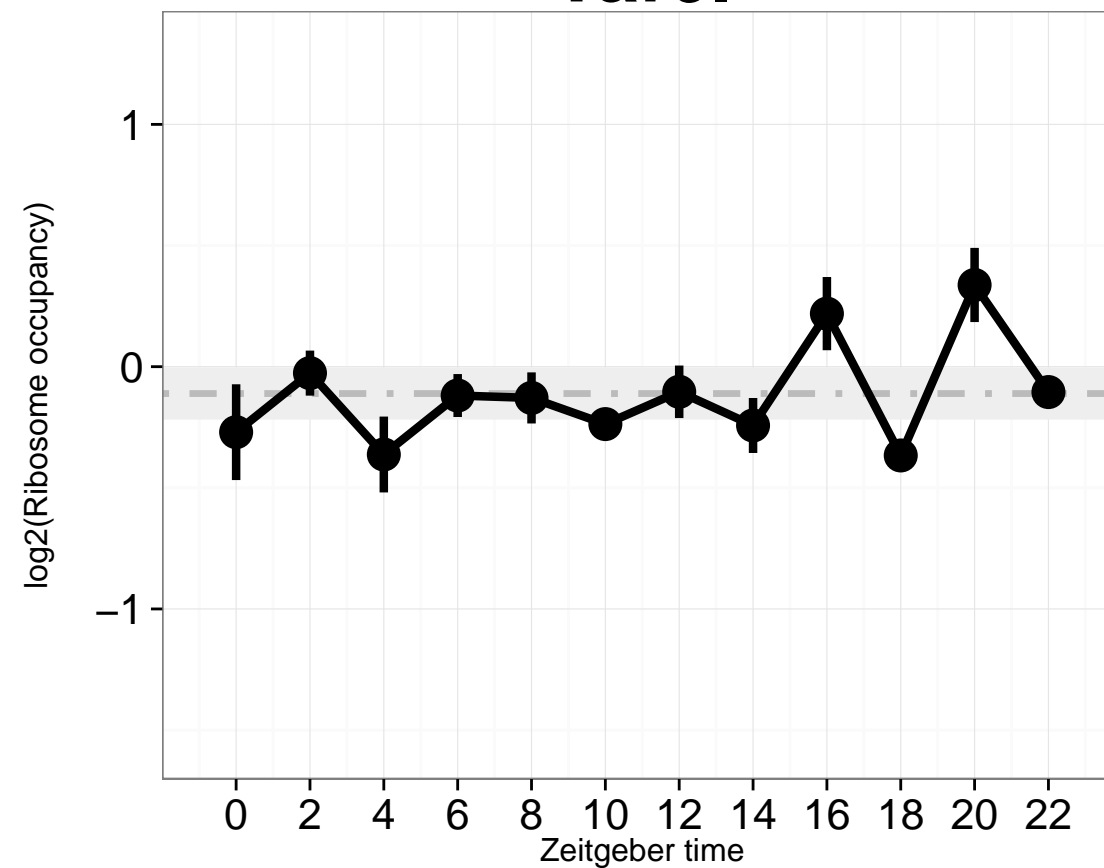

Supplement: Supplementary file 440 [file 1]

## Kdm1b

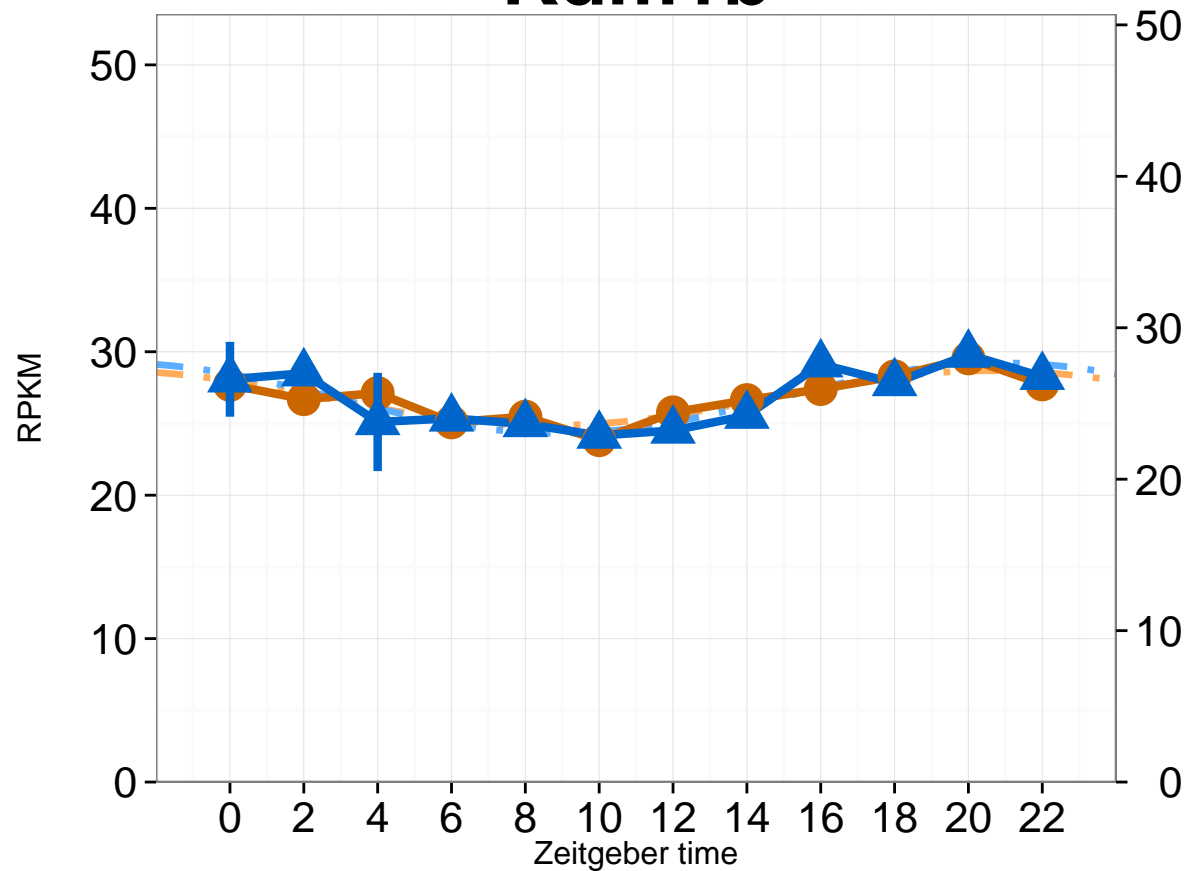

## Kdm1b

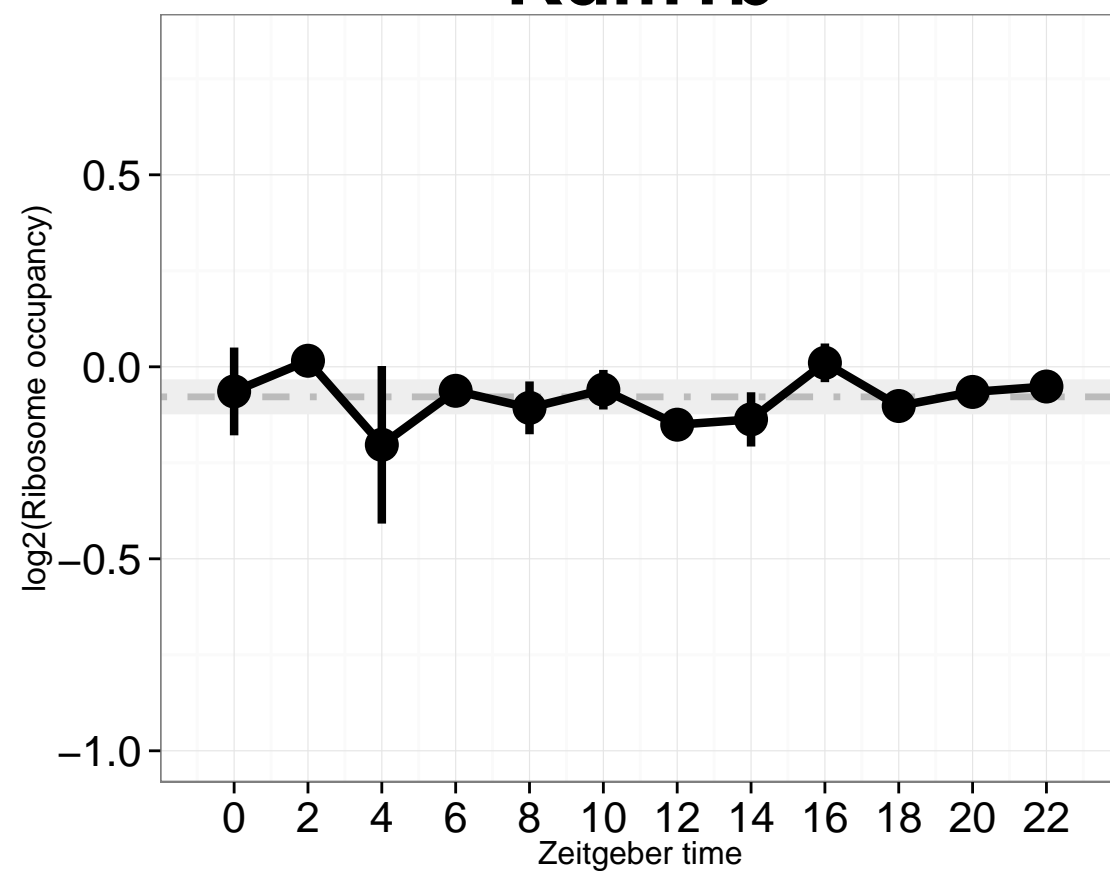

Supplement: Supplementary file 441 [file 1]

## Fpgs

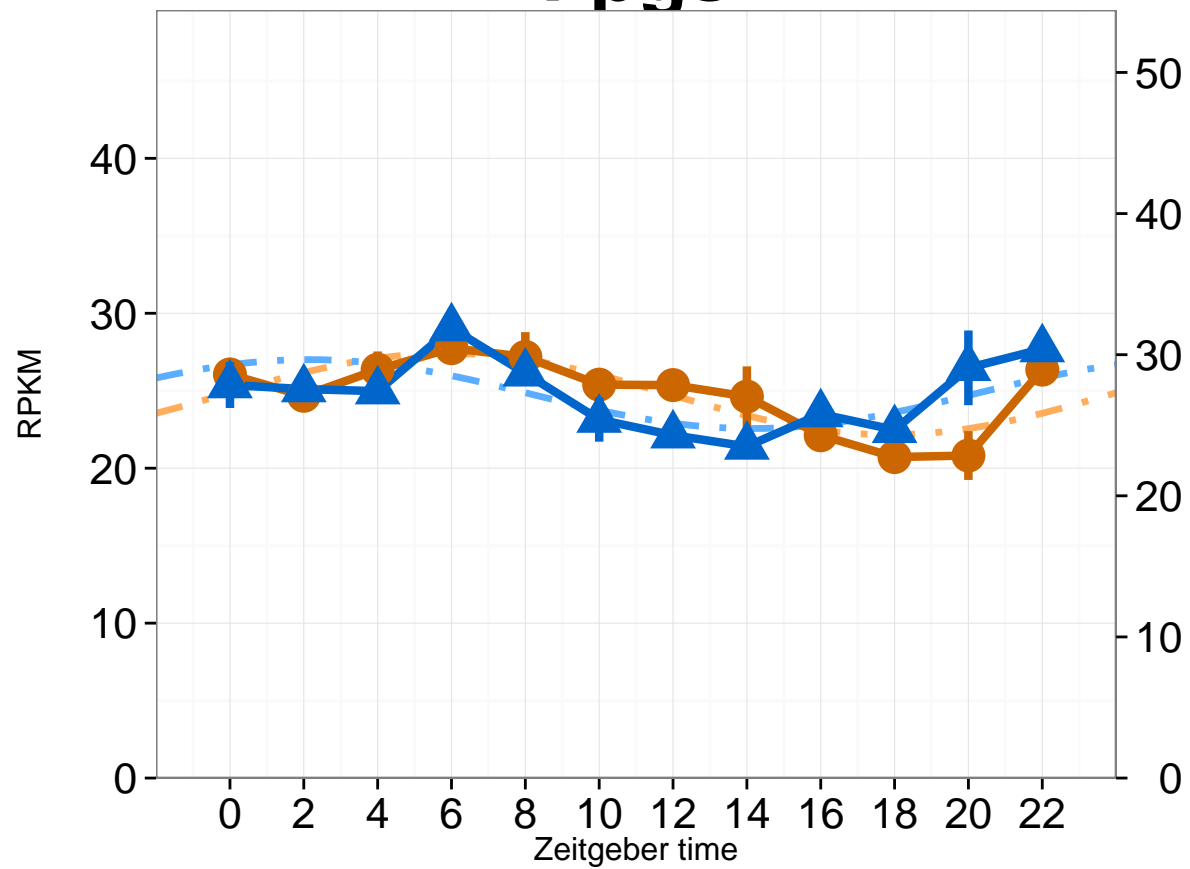

## Fpgs

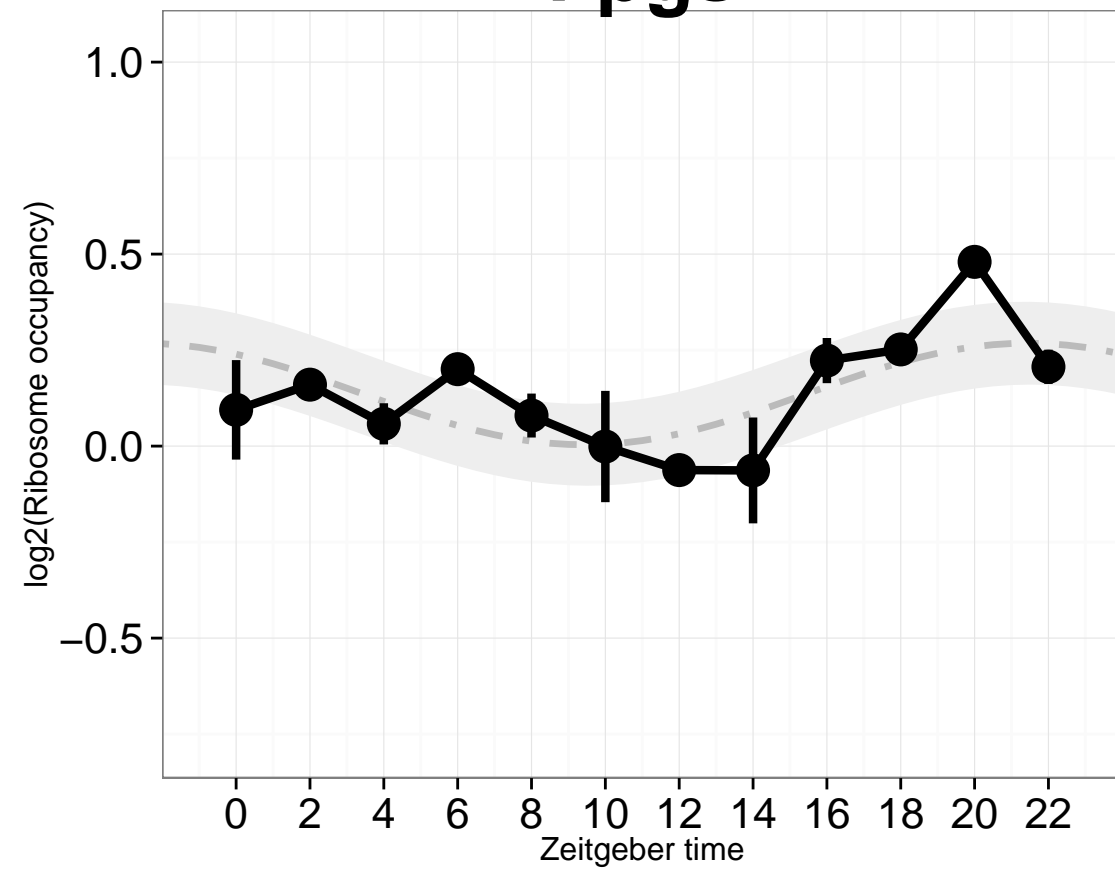

Supplement: Supplementary file 442 [file 1]

## Txndc17

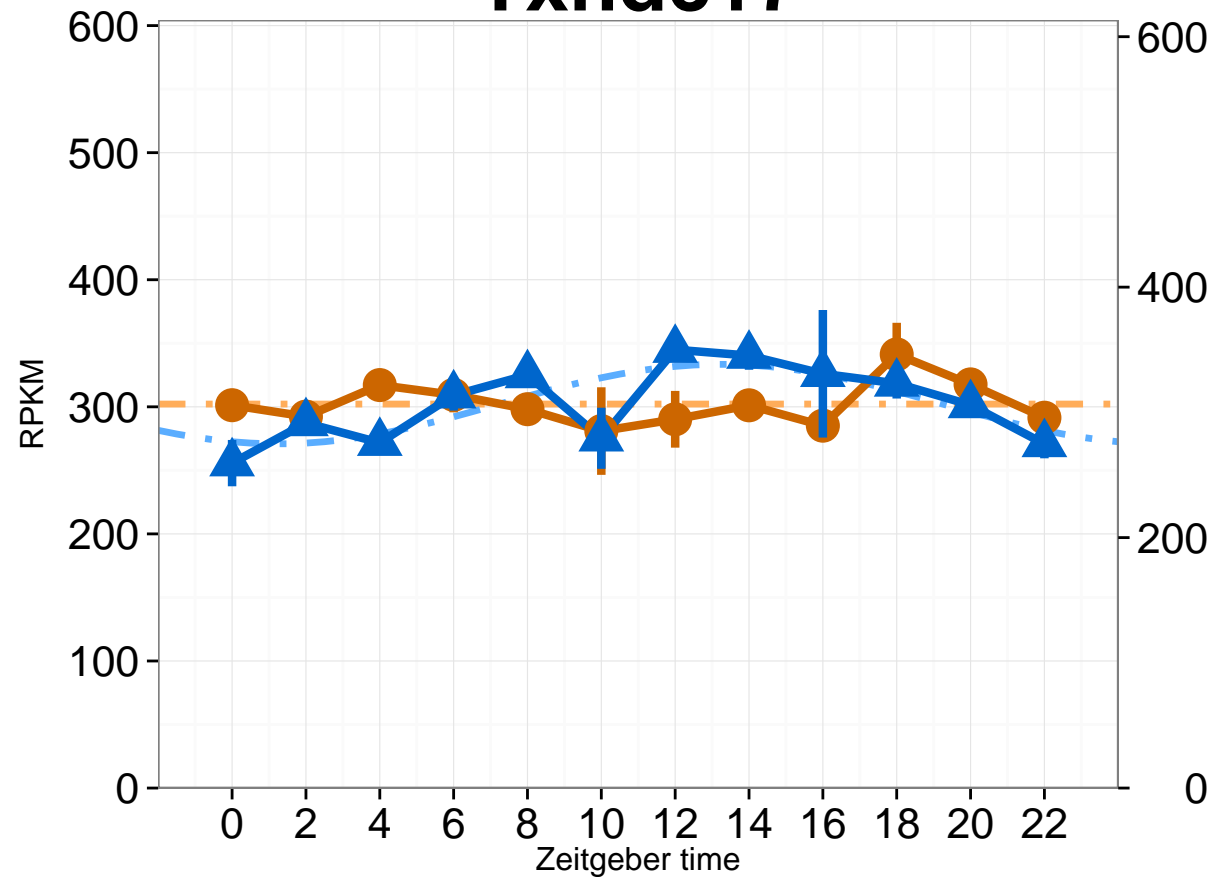

## Txndc17

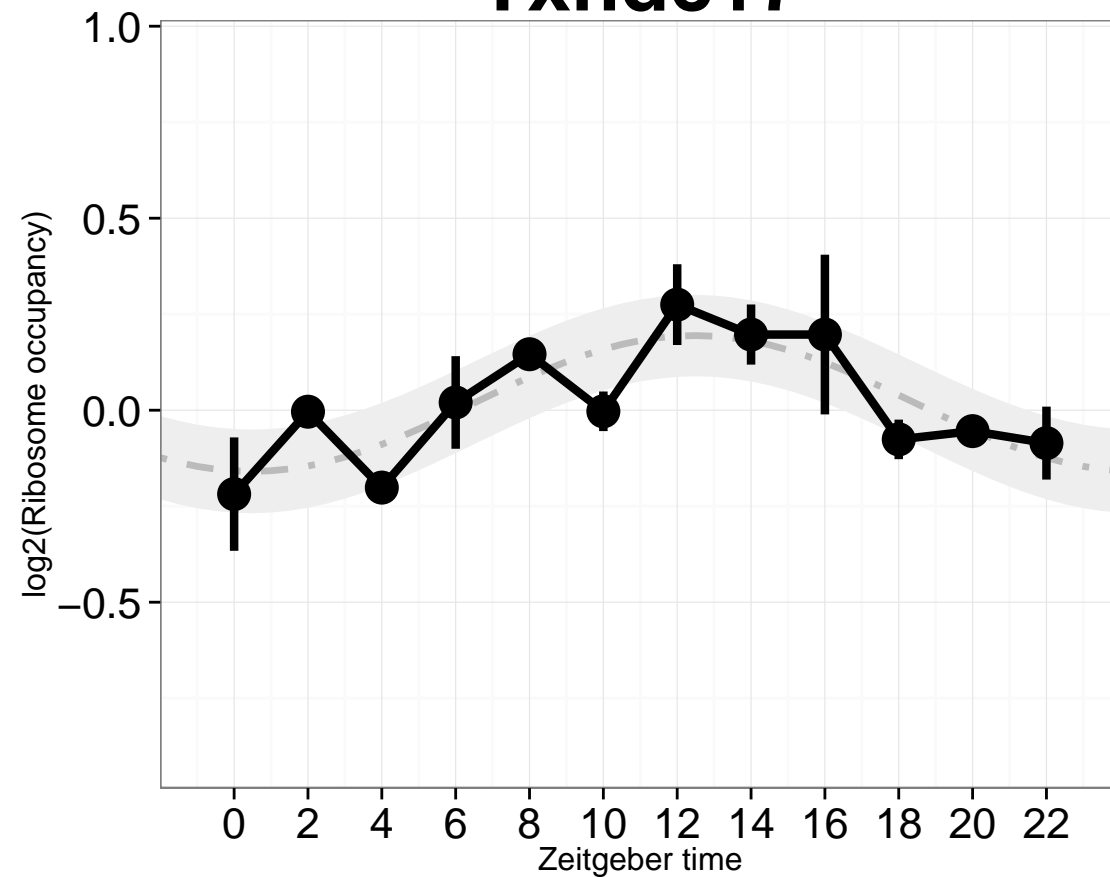

Supplement: Supplementary file 443 [file 1]

# Slc2a8

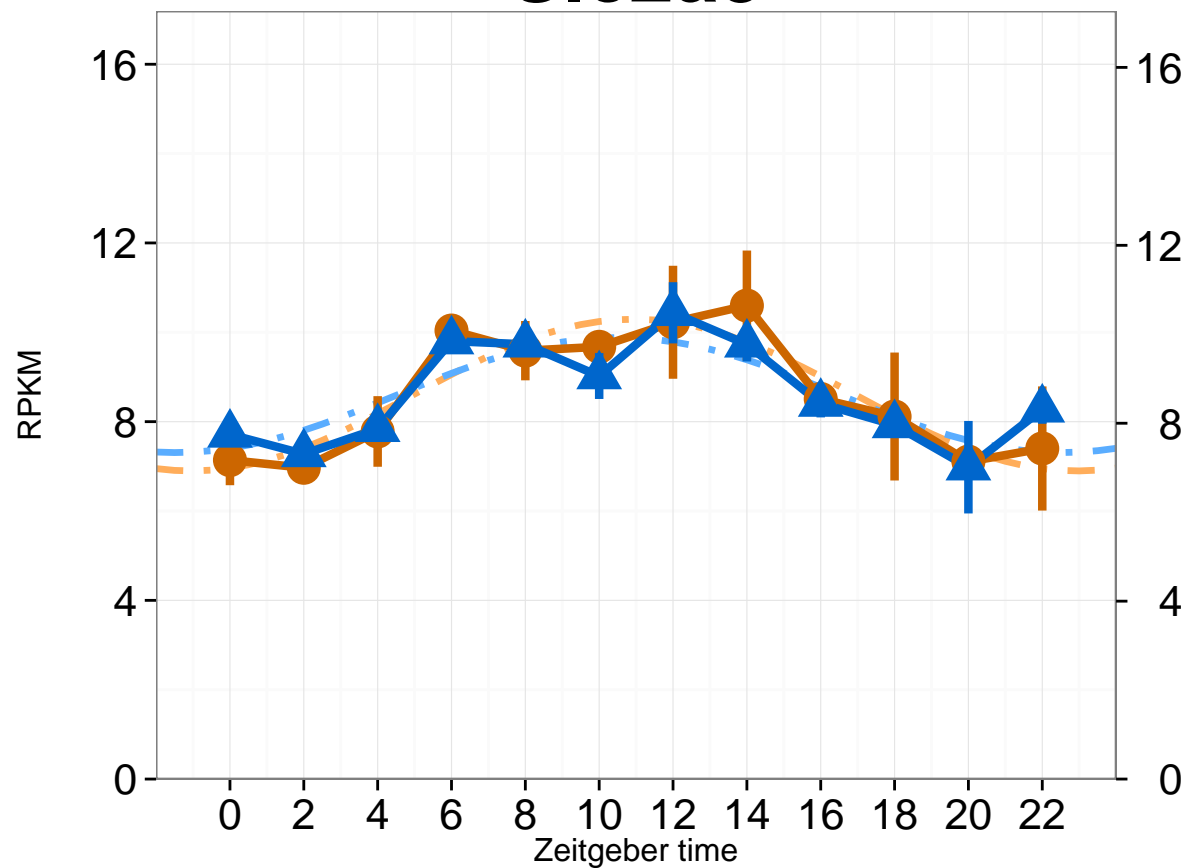

# Slc2a8

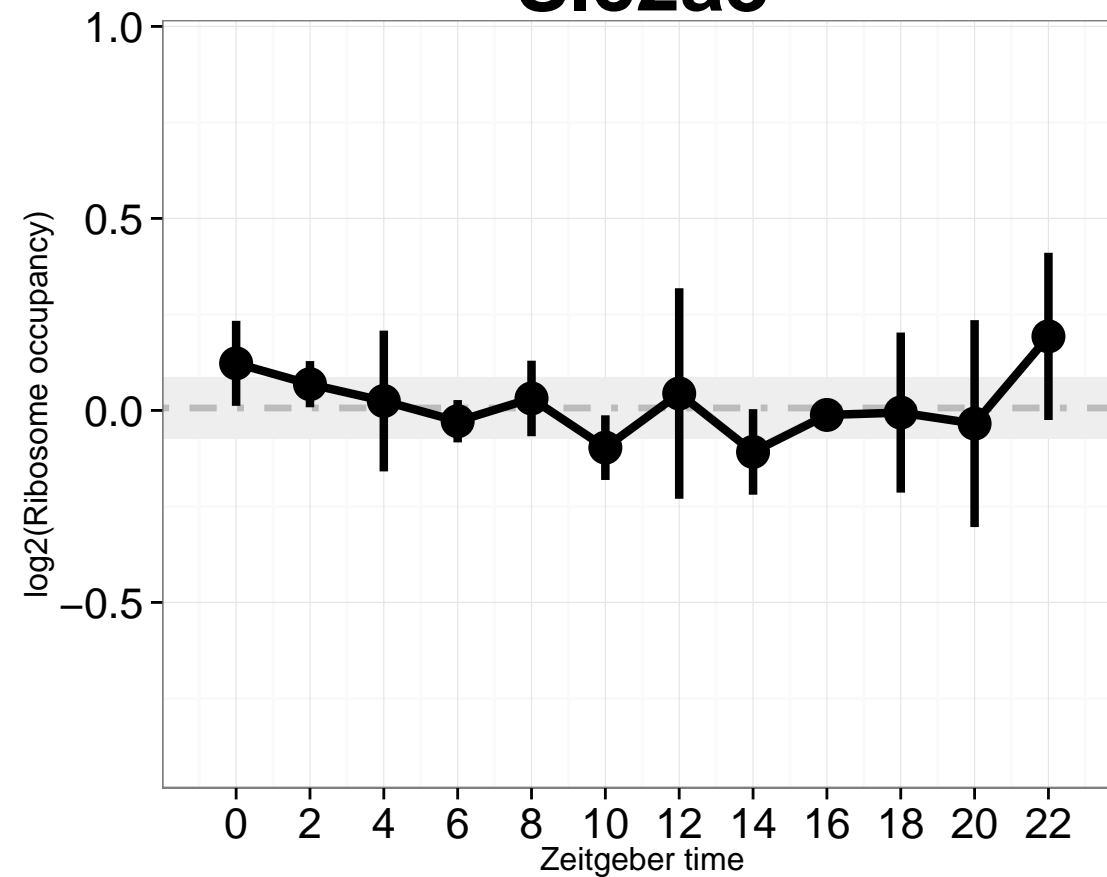

Supplement: Supplementary file 444 [file 1]

## Ccnc

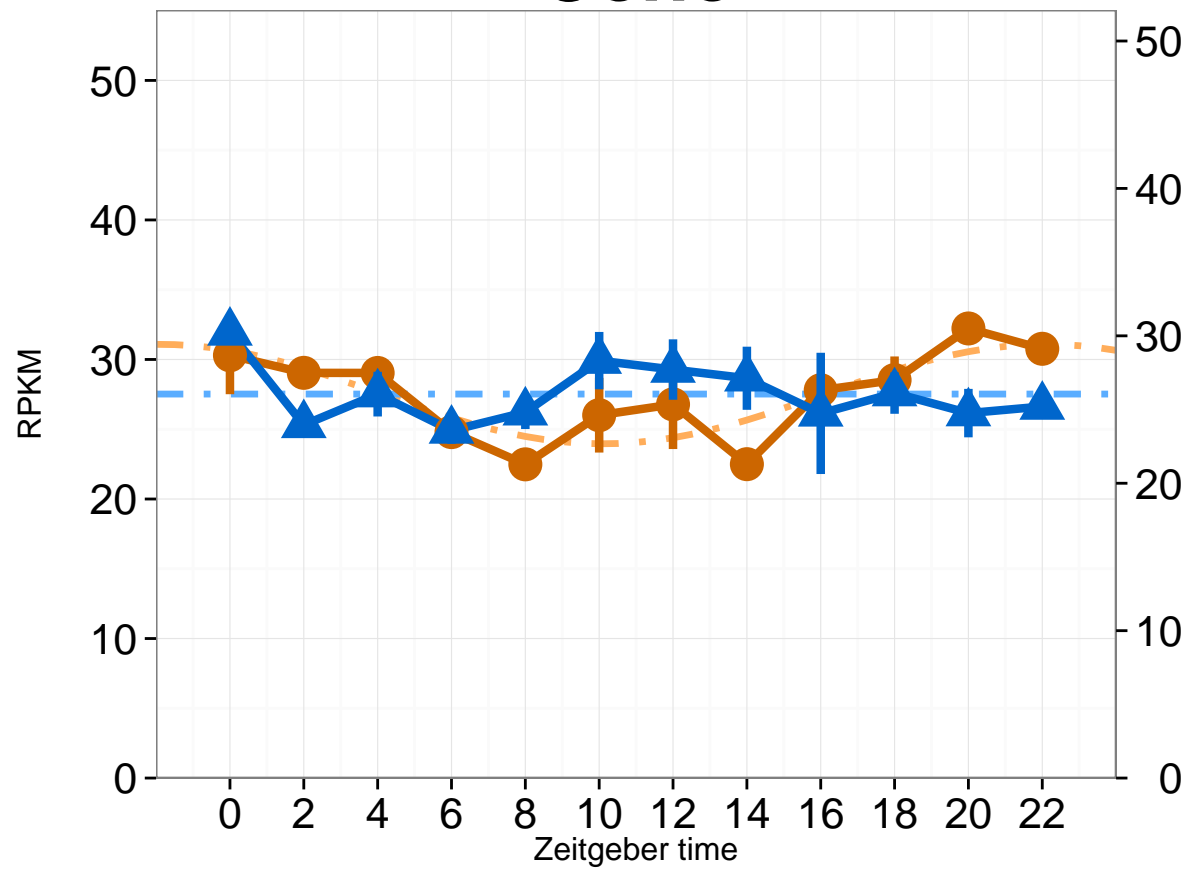

## Ccnc

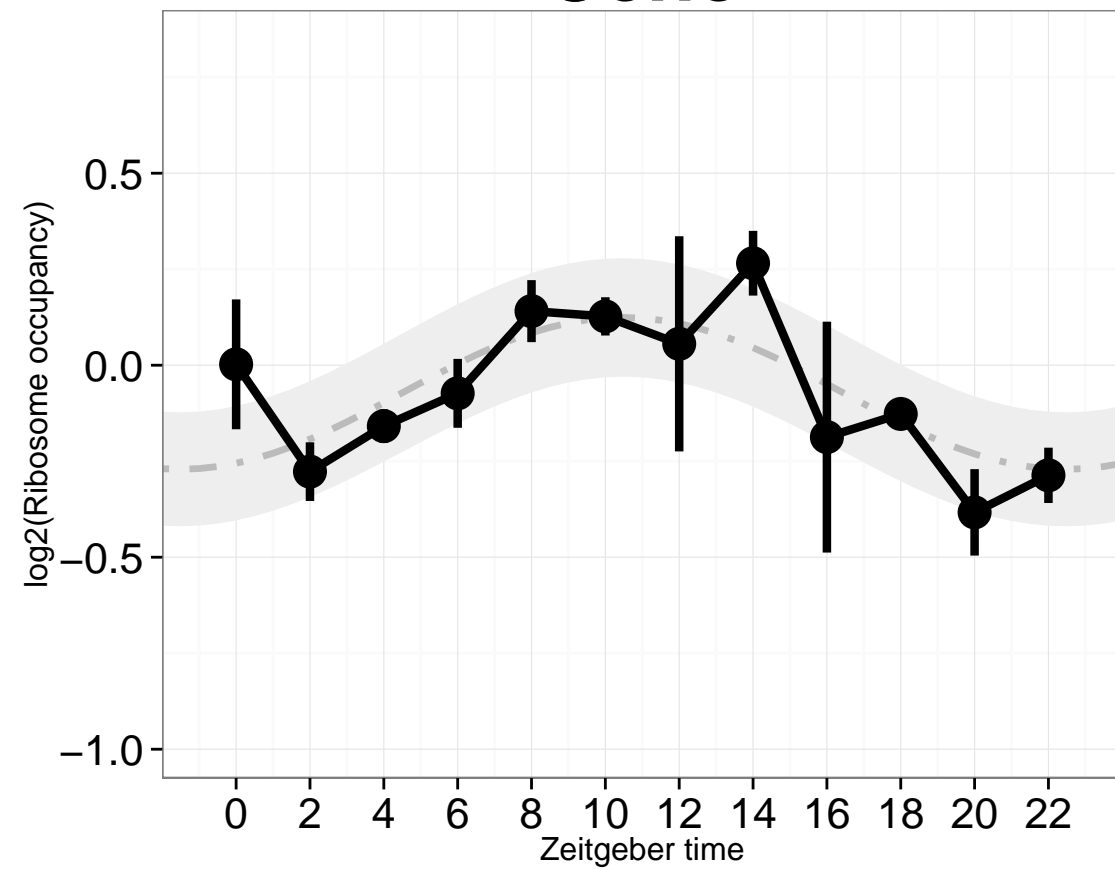

Supplement: Supplementary file 445 [file 1]

## Slc50a1

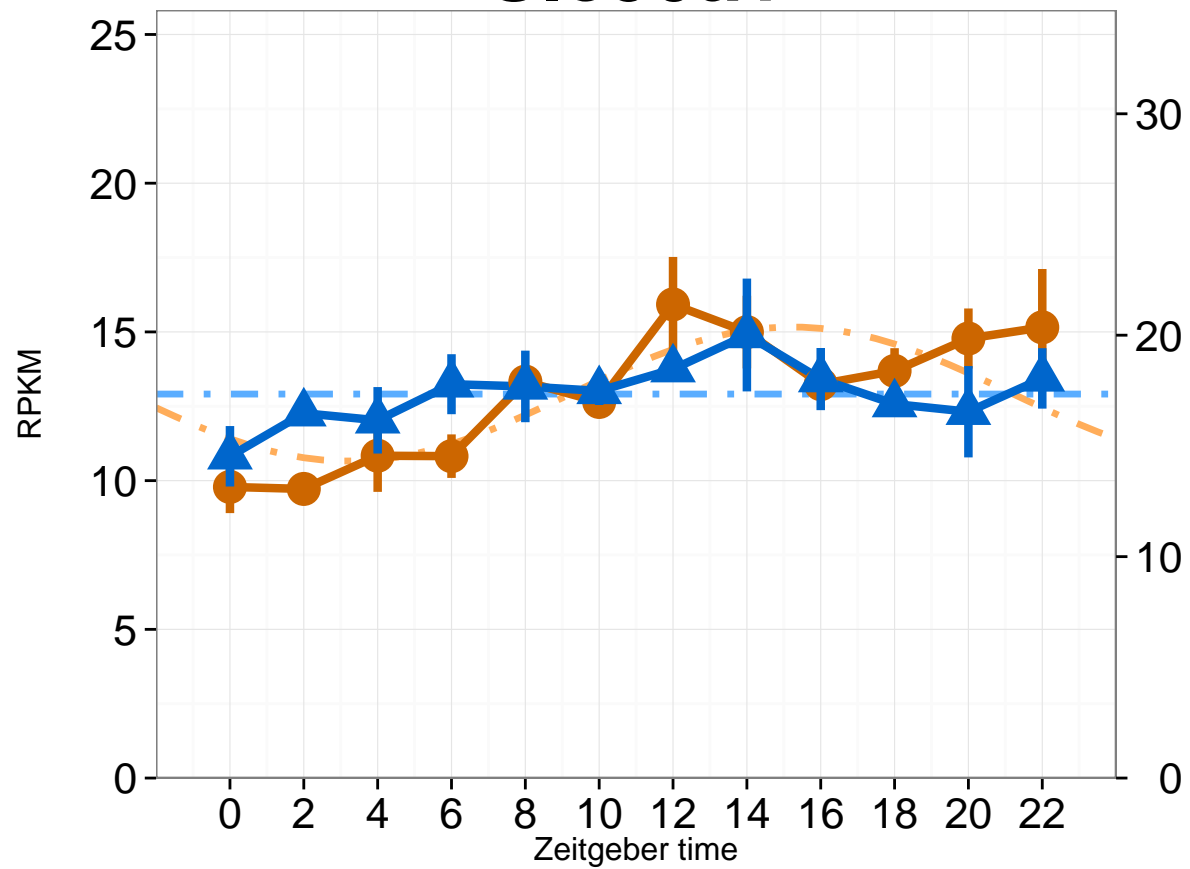

## Slc50a1

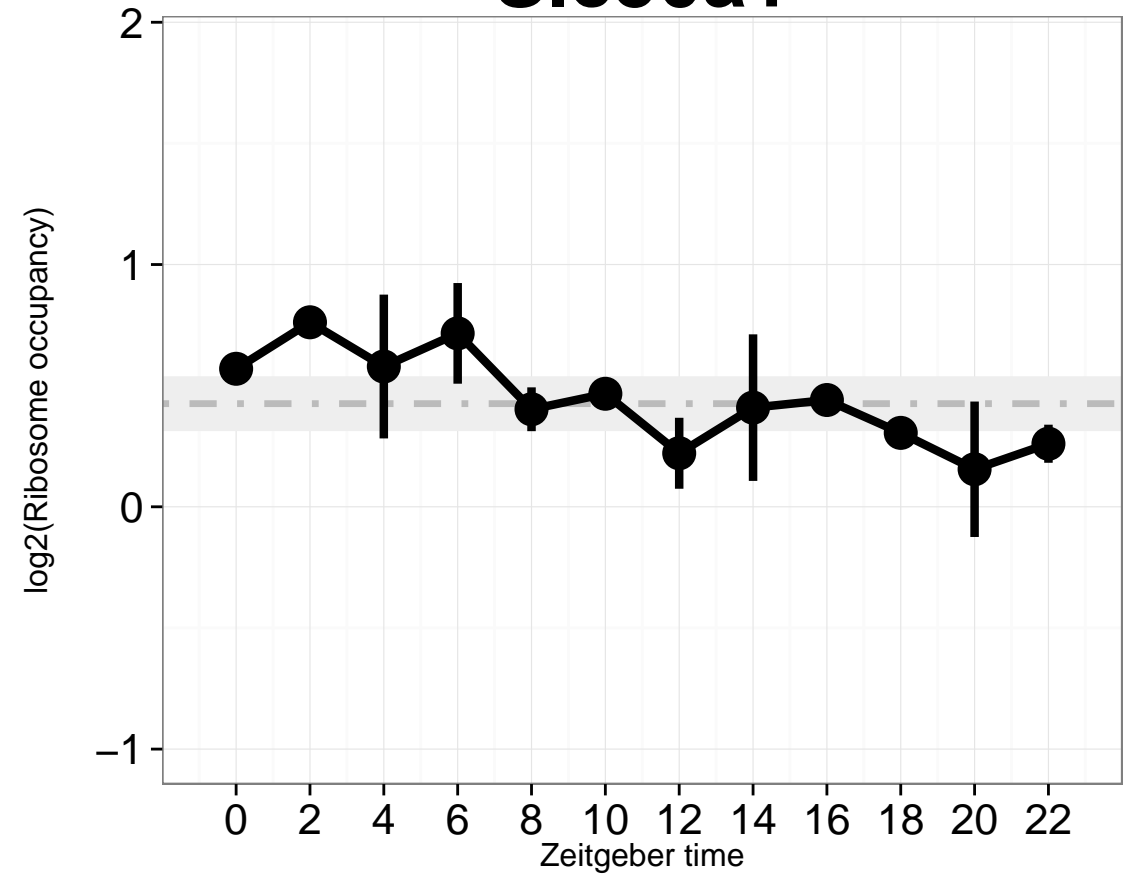

Supplement: Supplementary file 446 [file 1]

# Zfp646

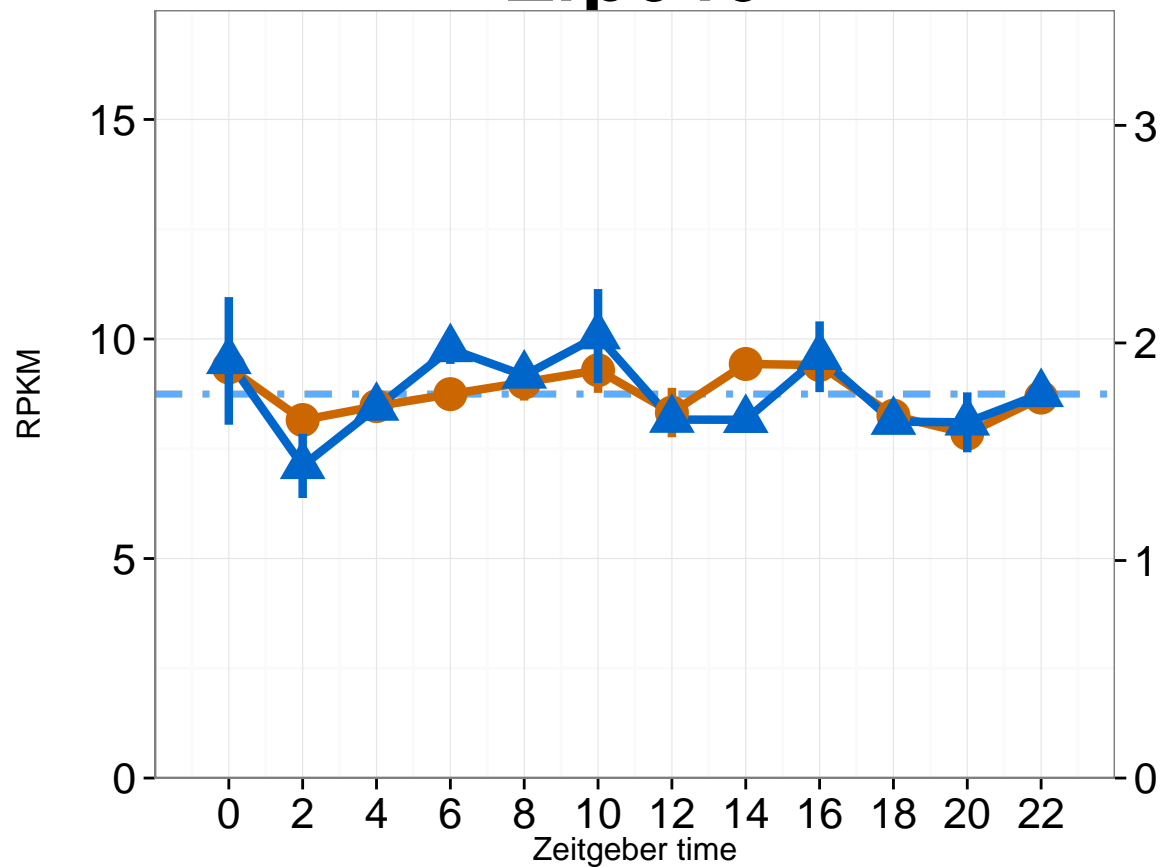

# Zfp646

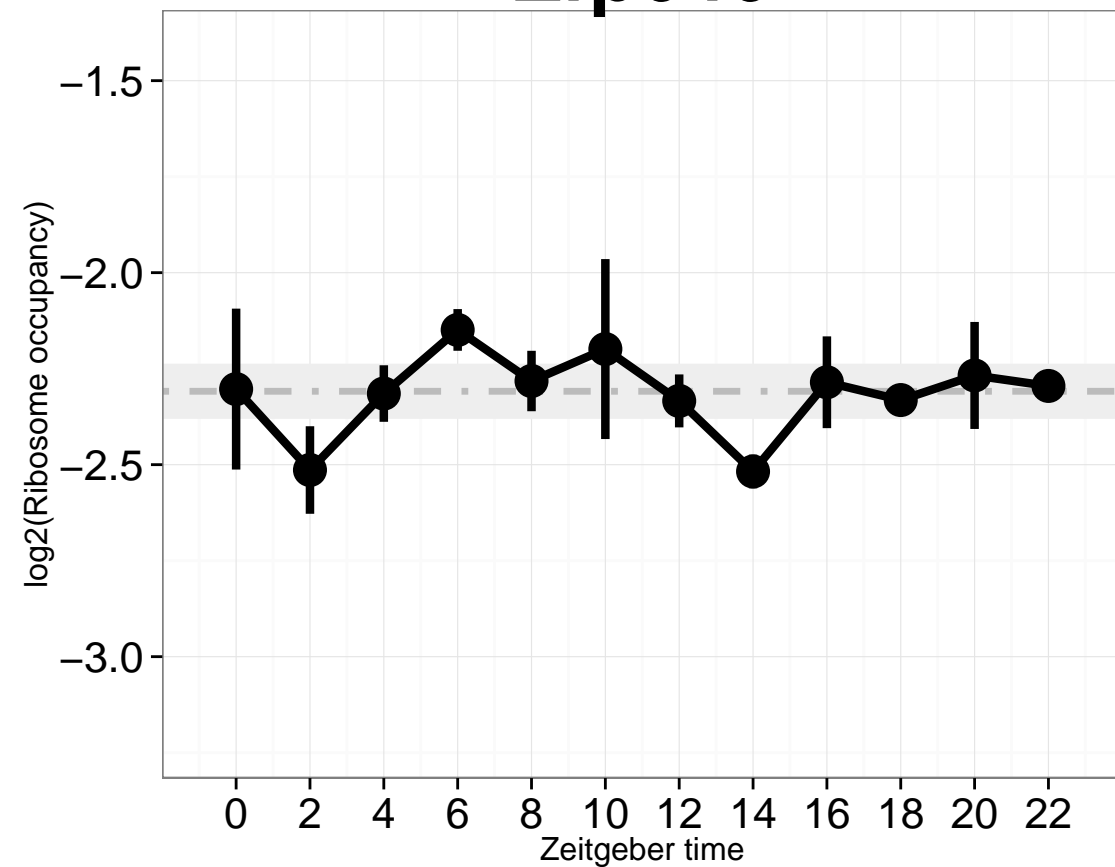

Supplement: Supplementary file 447 [file 1]

## Ehd2

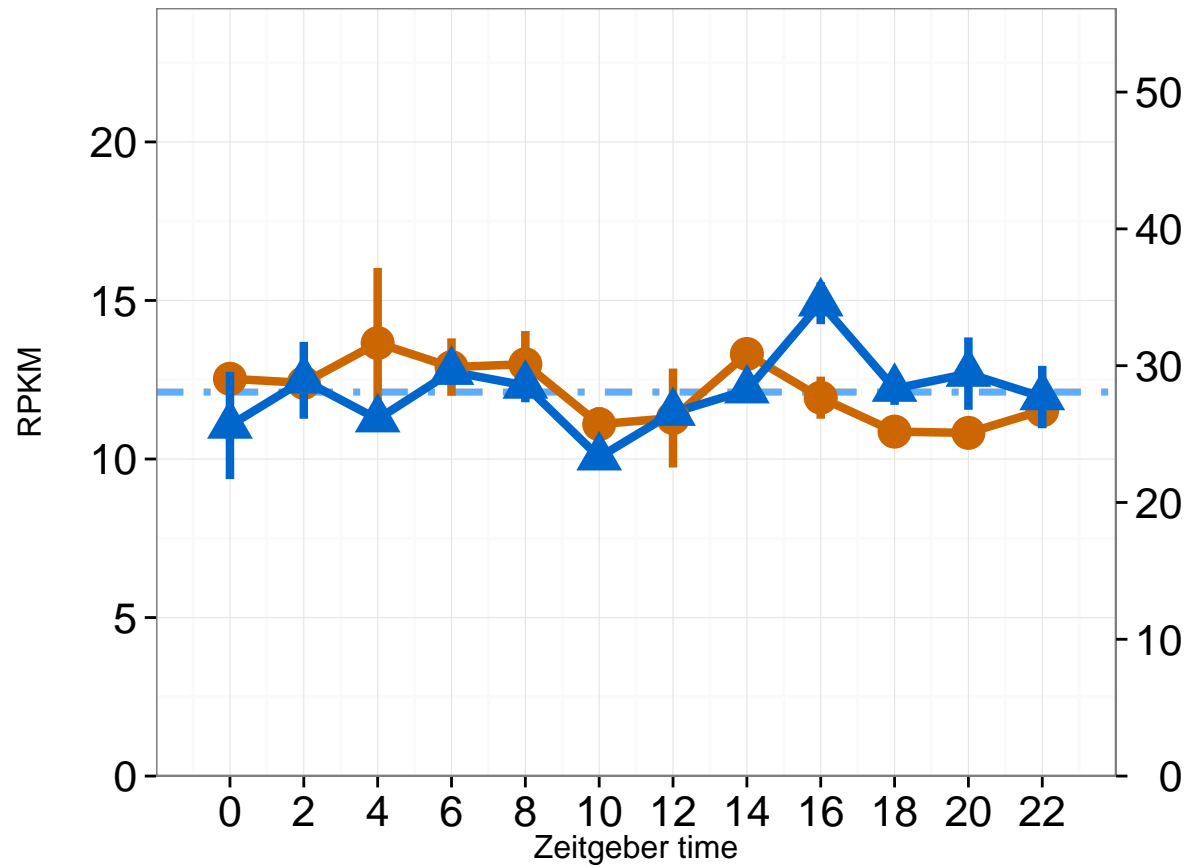

## Ehd2

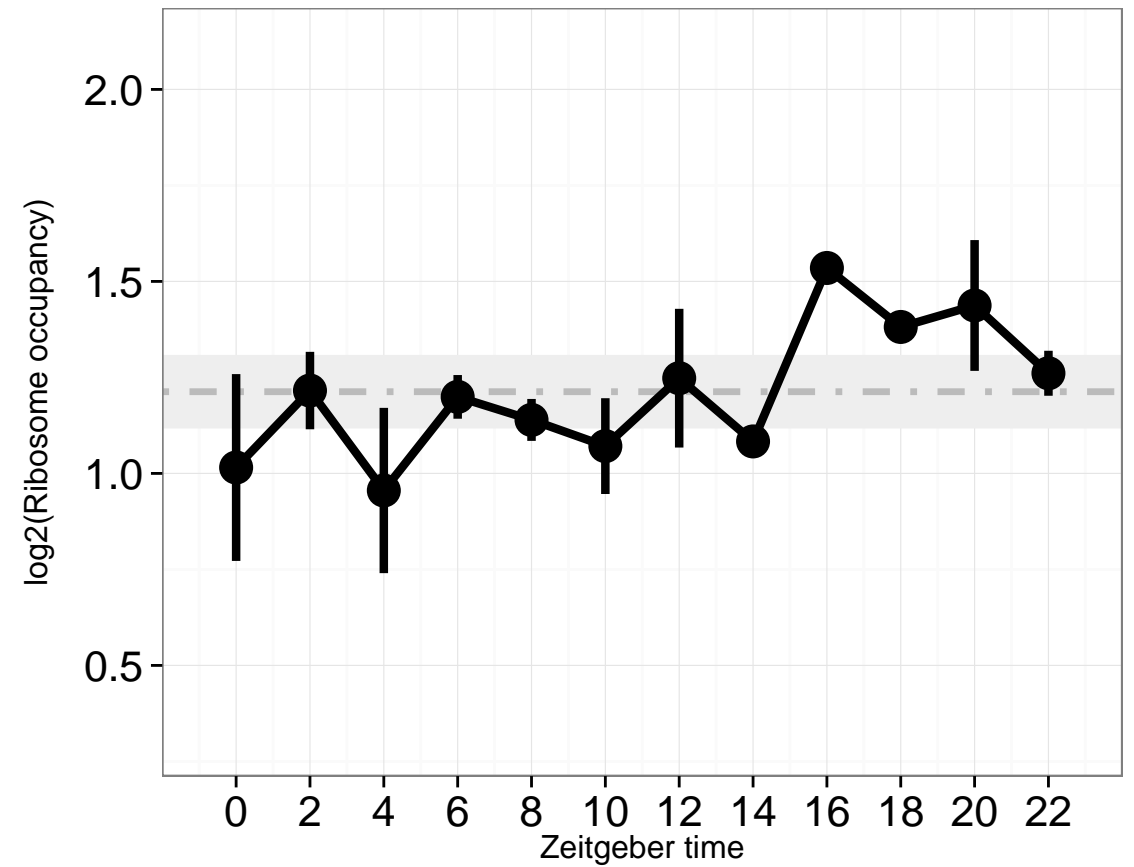

Supplement: Supplementary file 449 [file 1]

## Klrg2

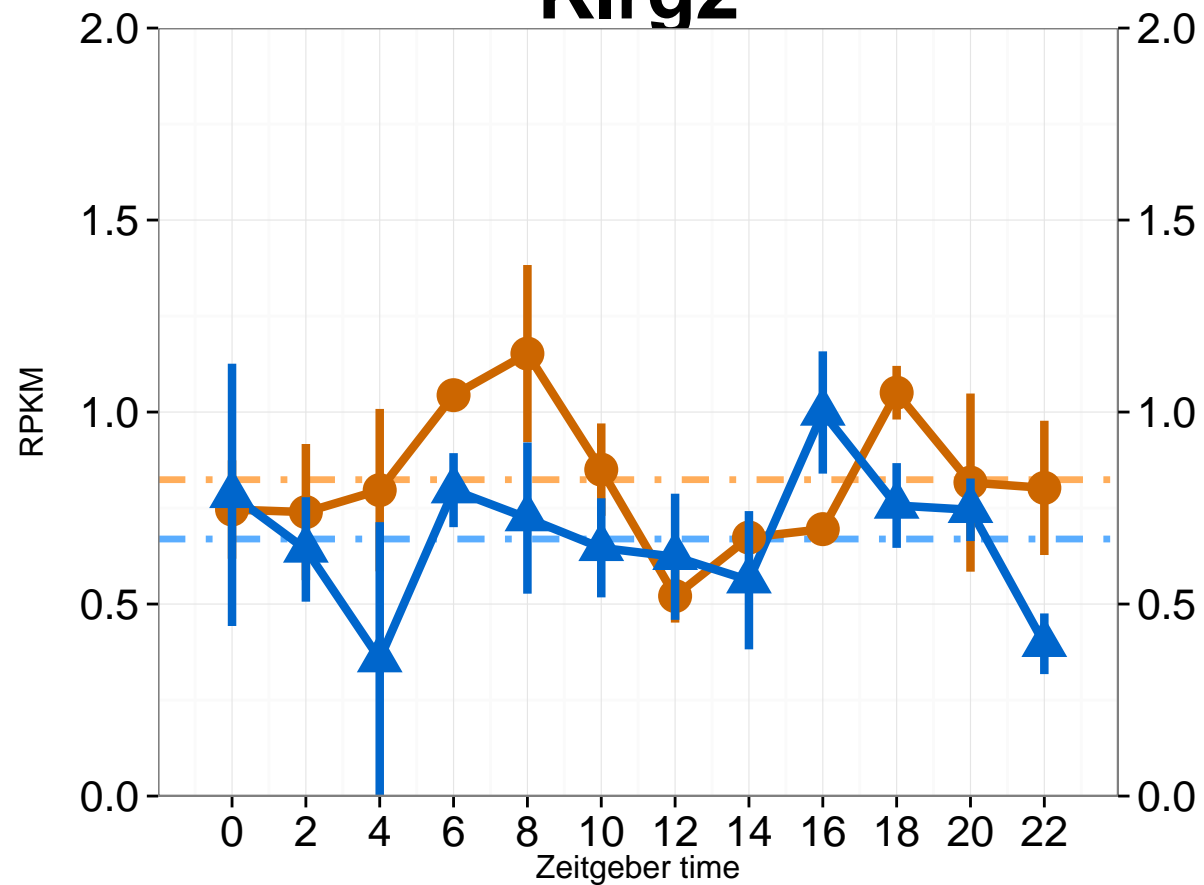

## Klrg2

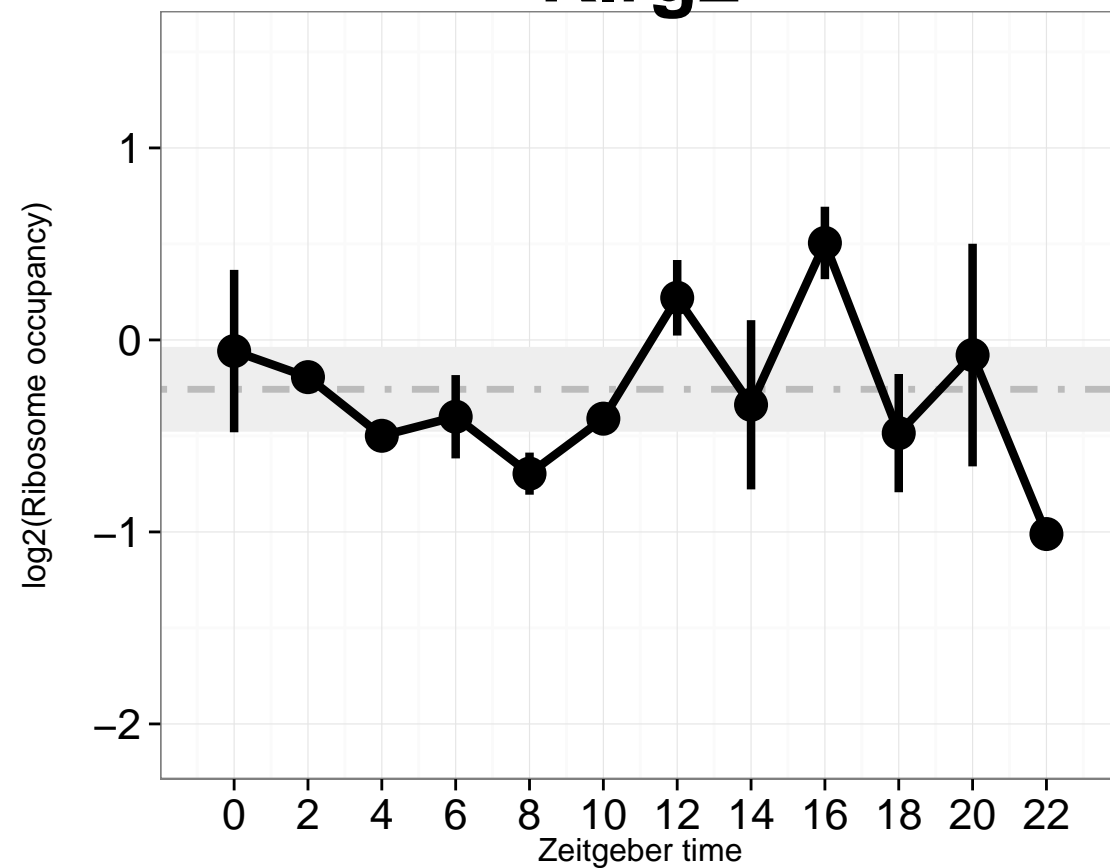

Supplement: Supplementary file 450 [file 1]

# Erp44

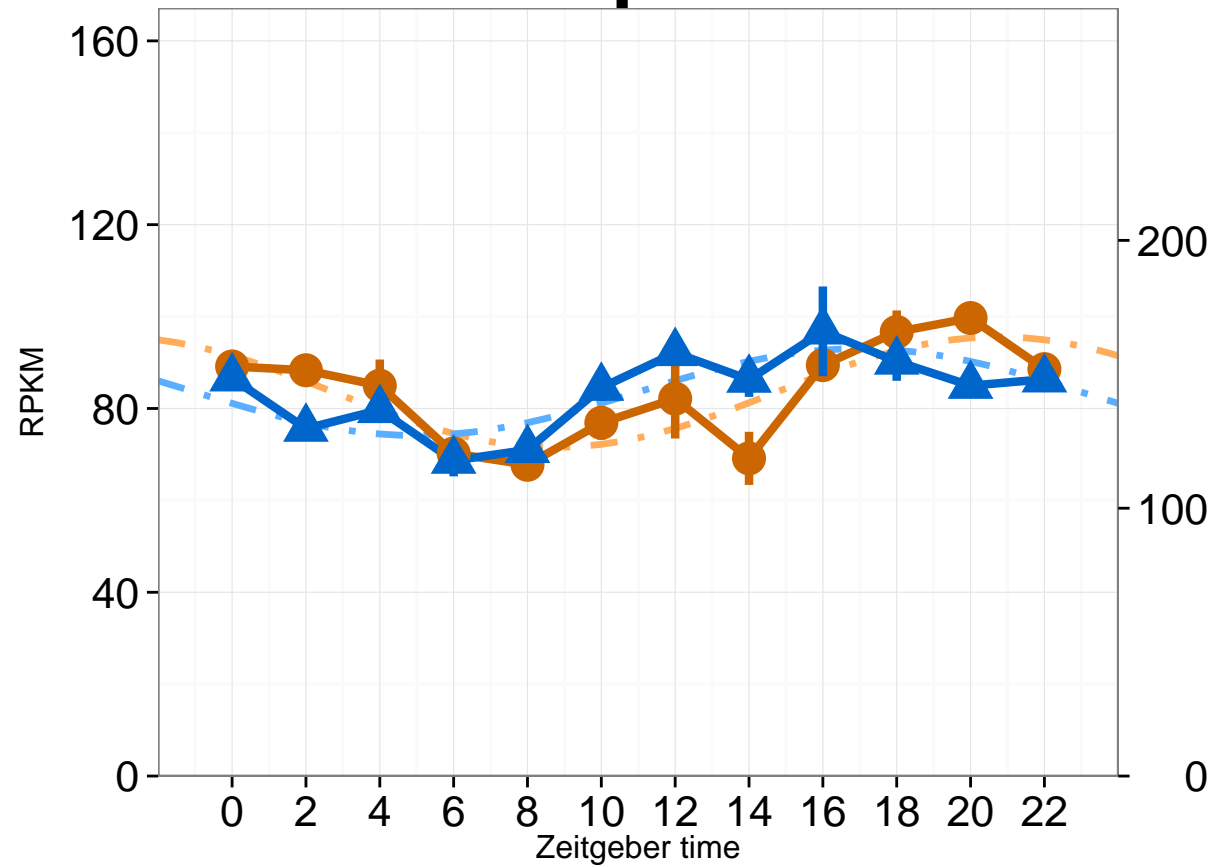

# Erp44

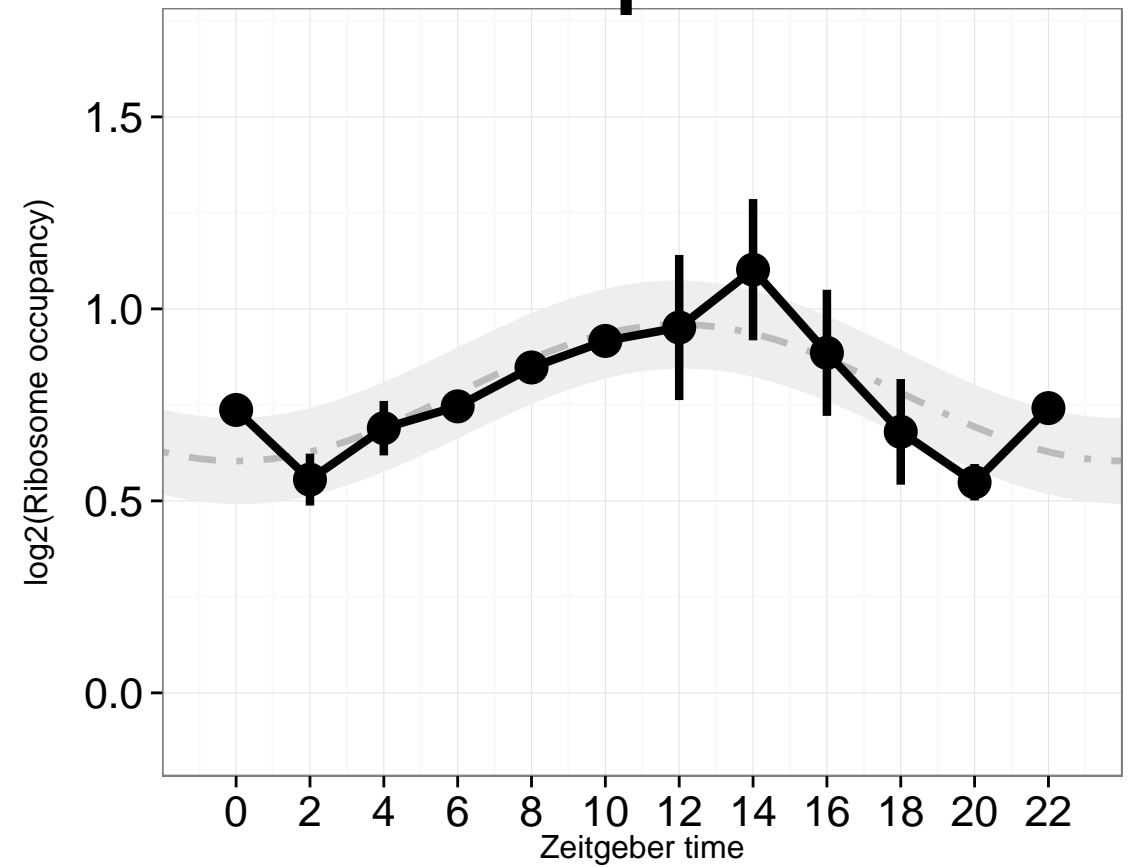

Supplement: Supplementary file 451 [file 1]

## Ranbp3

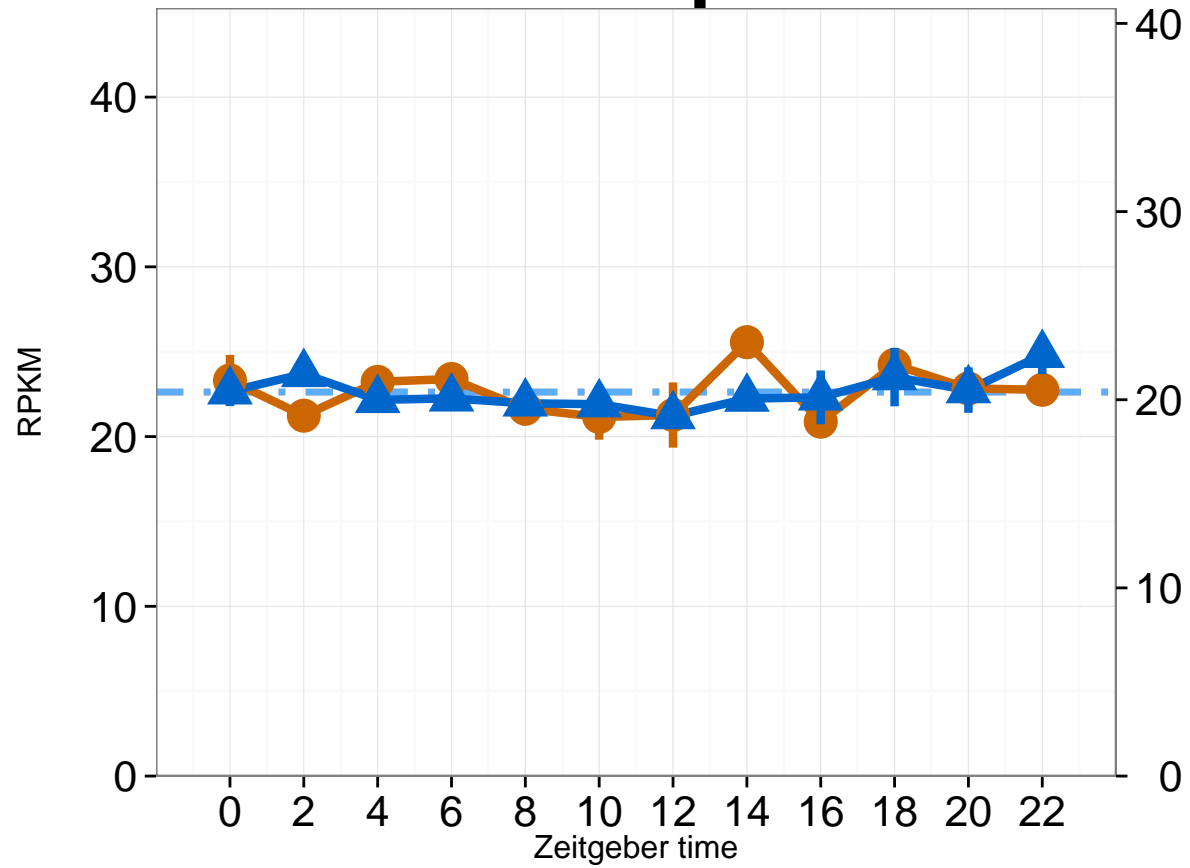

## Ranbp3

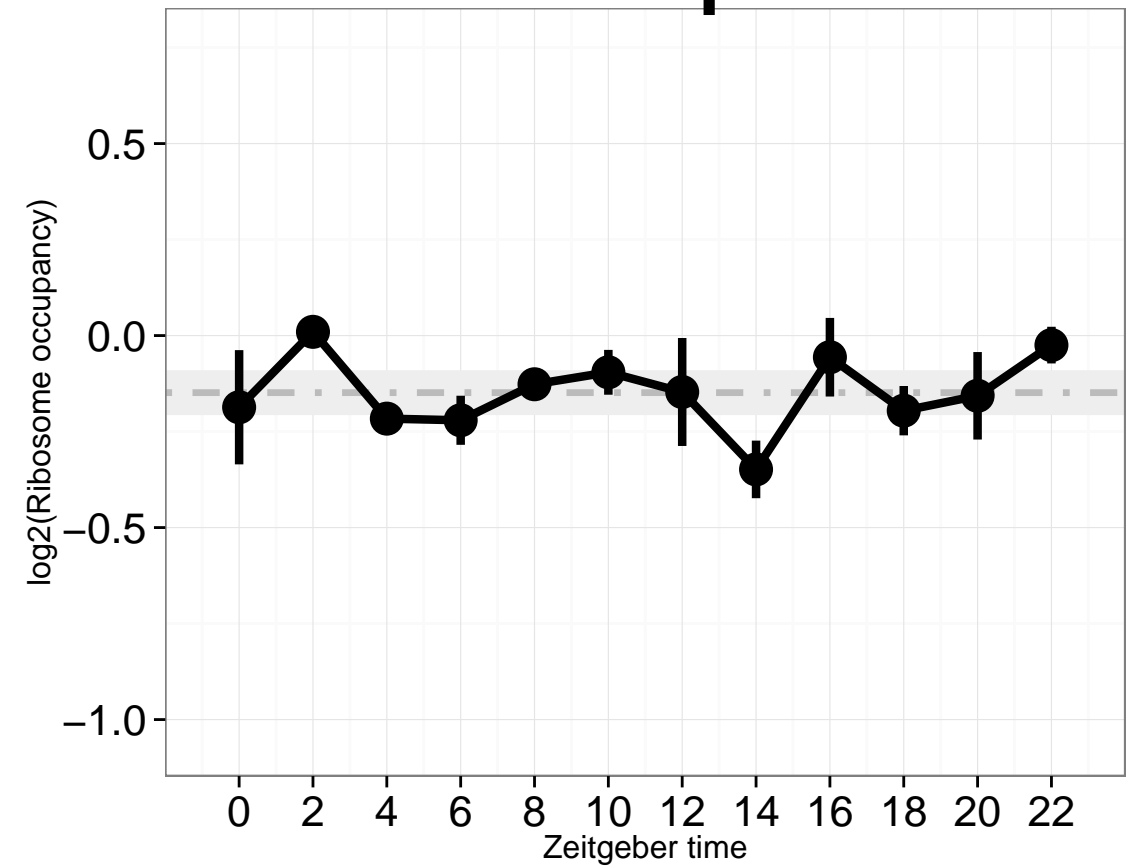

Supplement: Supplementary file 452 [file 1]

## Plgrkt

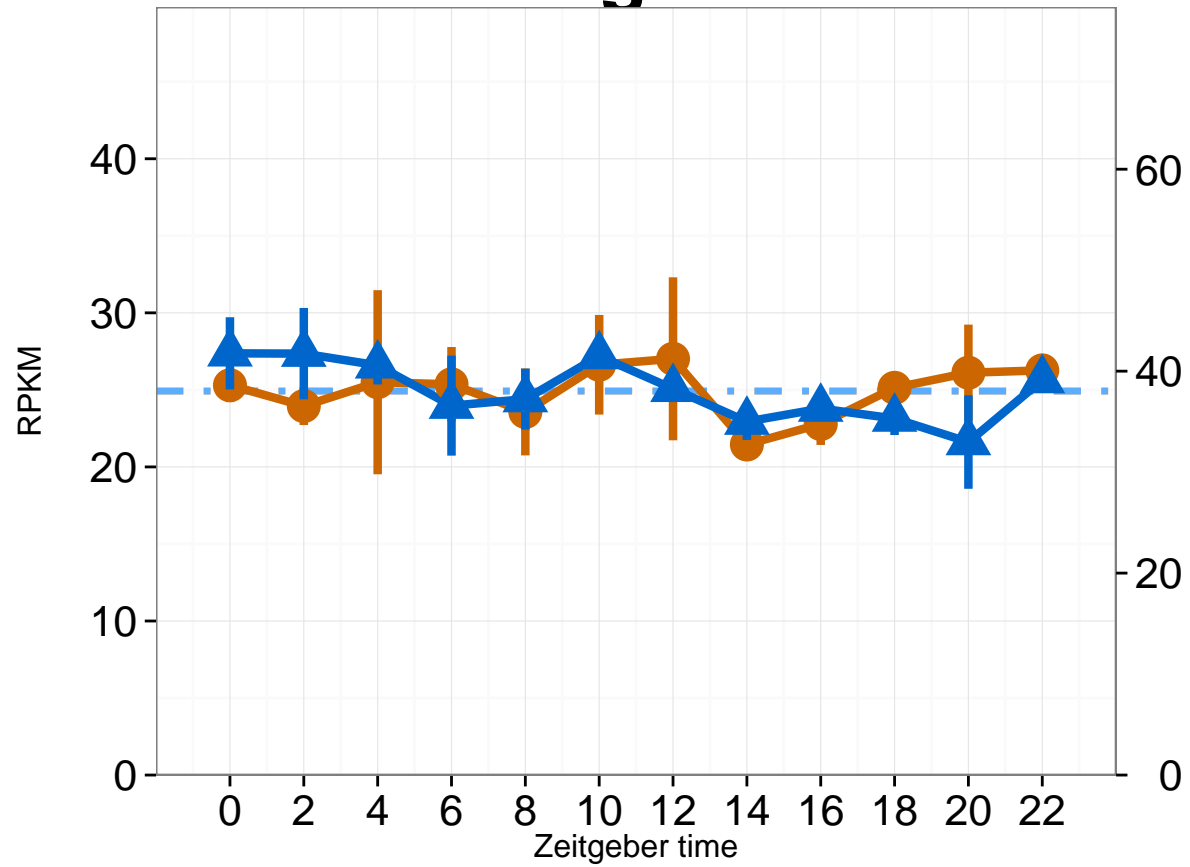

## Plgrkt

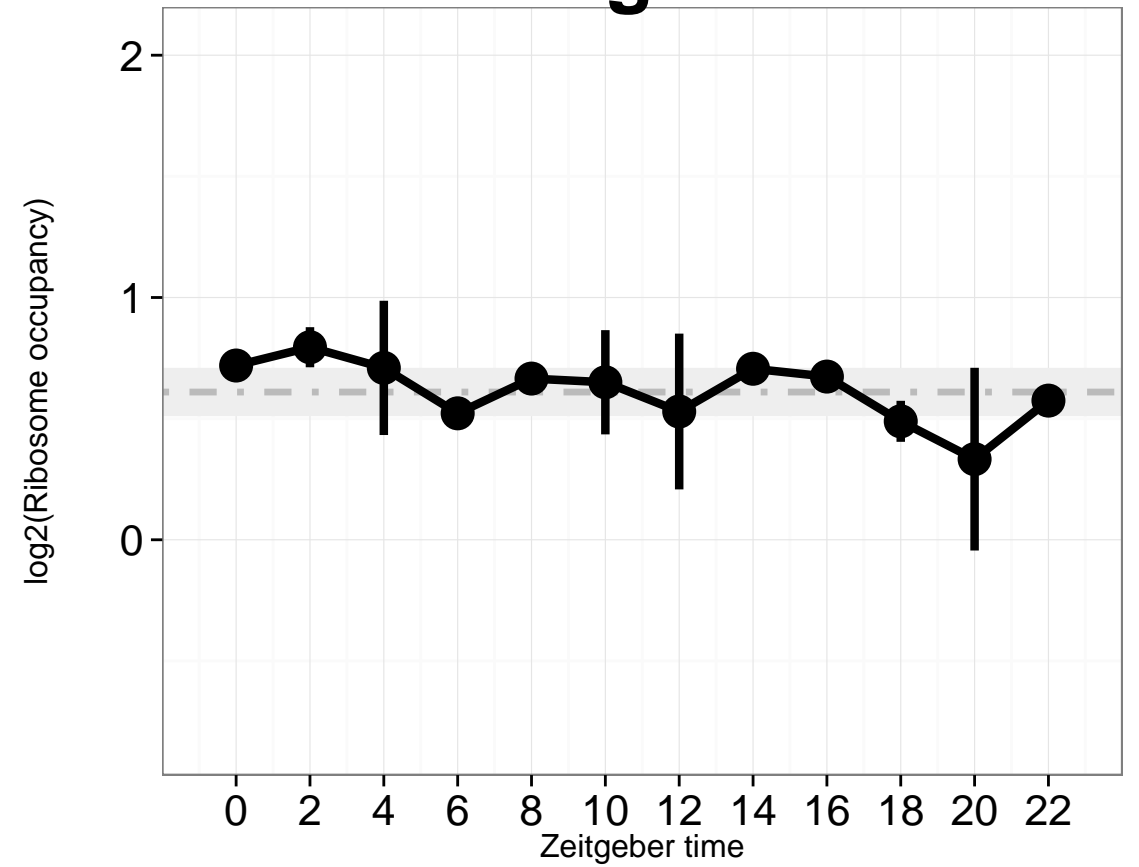

Supplement: Supplementary file 453 [file 1]

# Hist1h3a

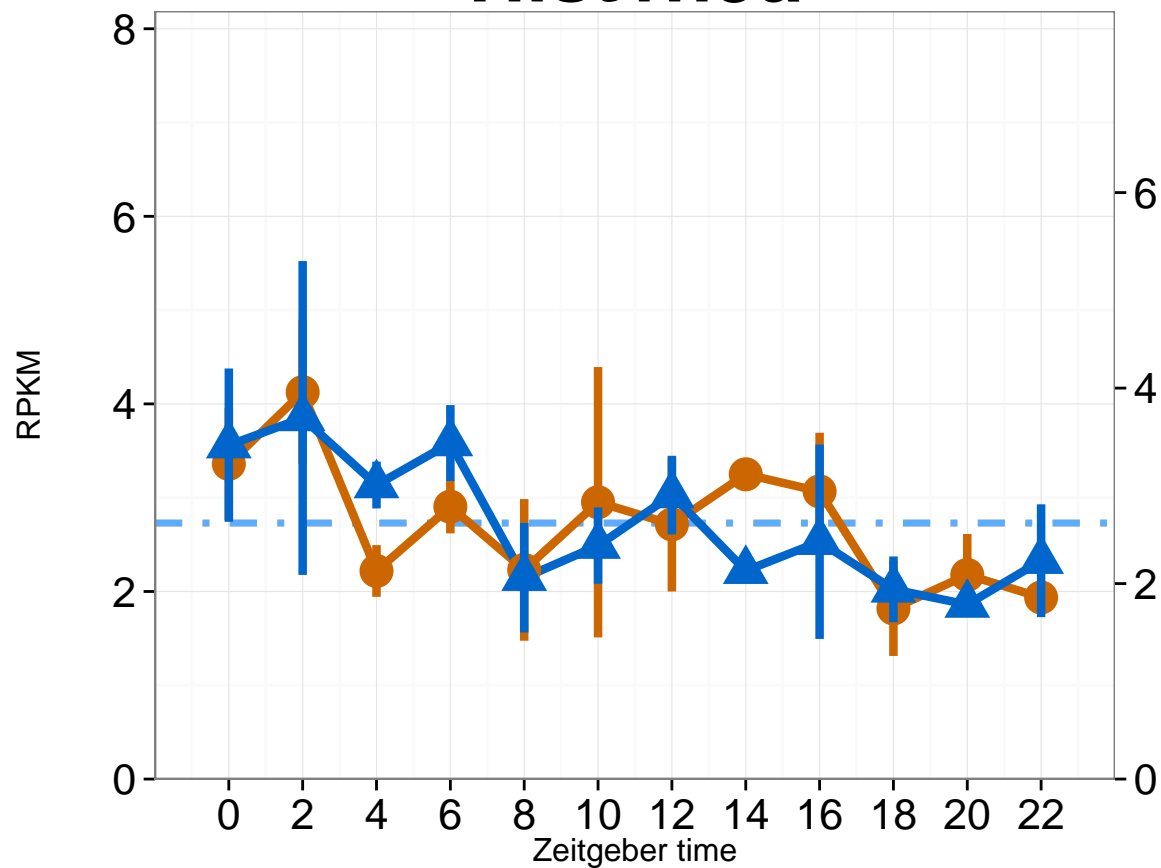

# Hist1h3a

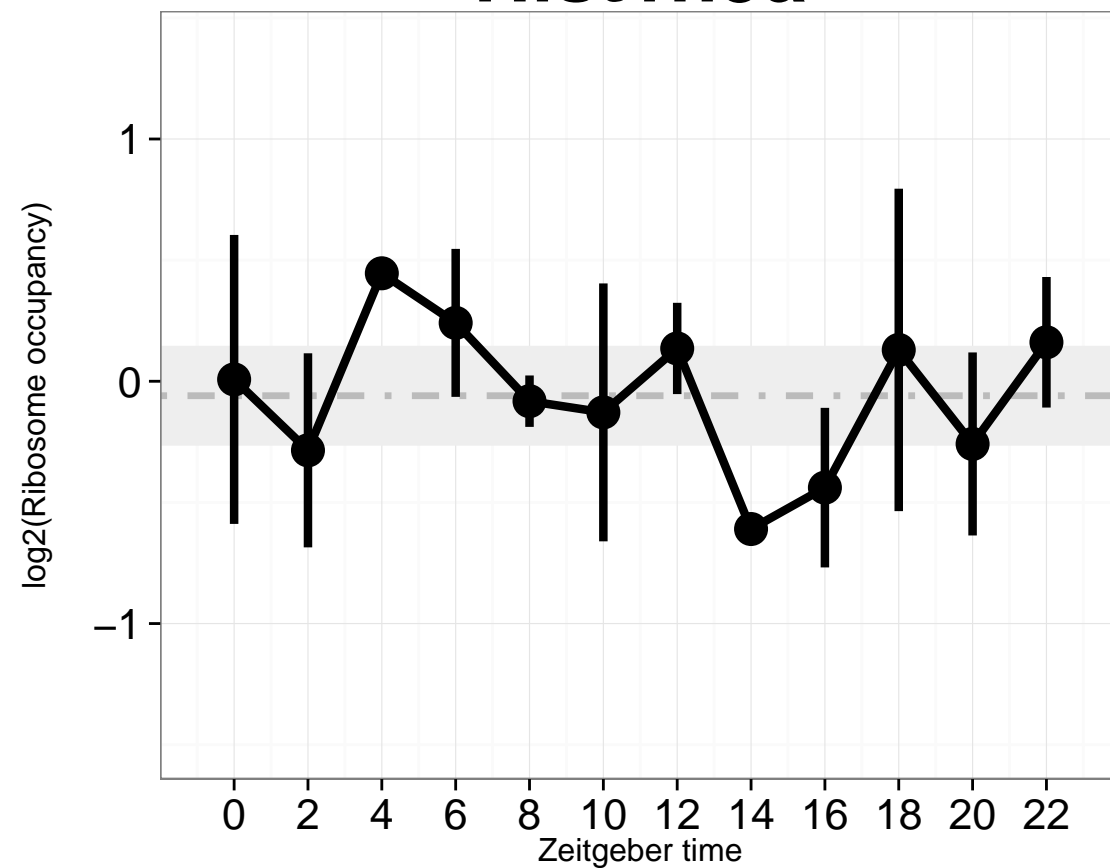

Supplement: Supplementary file 454 [file 1]

# Fam26e

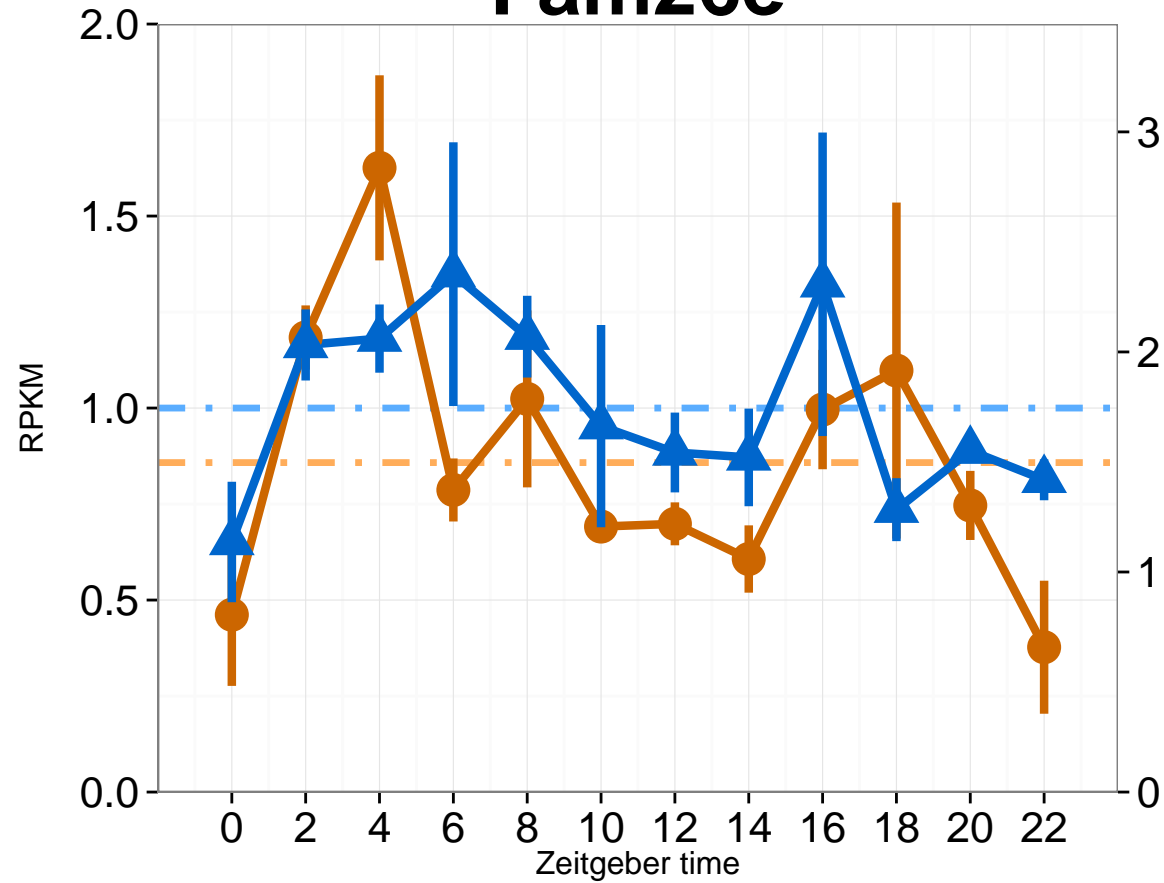

# Fam26e

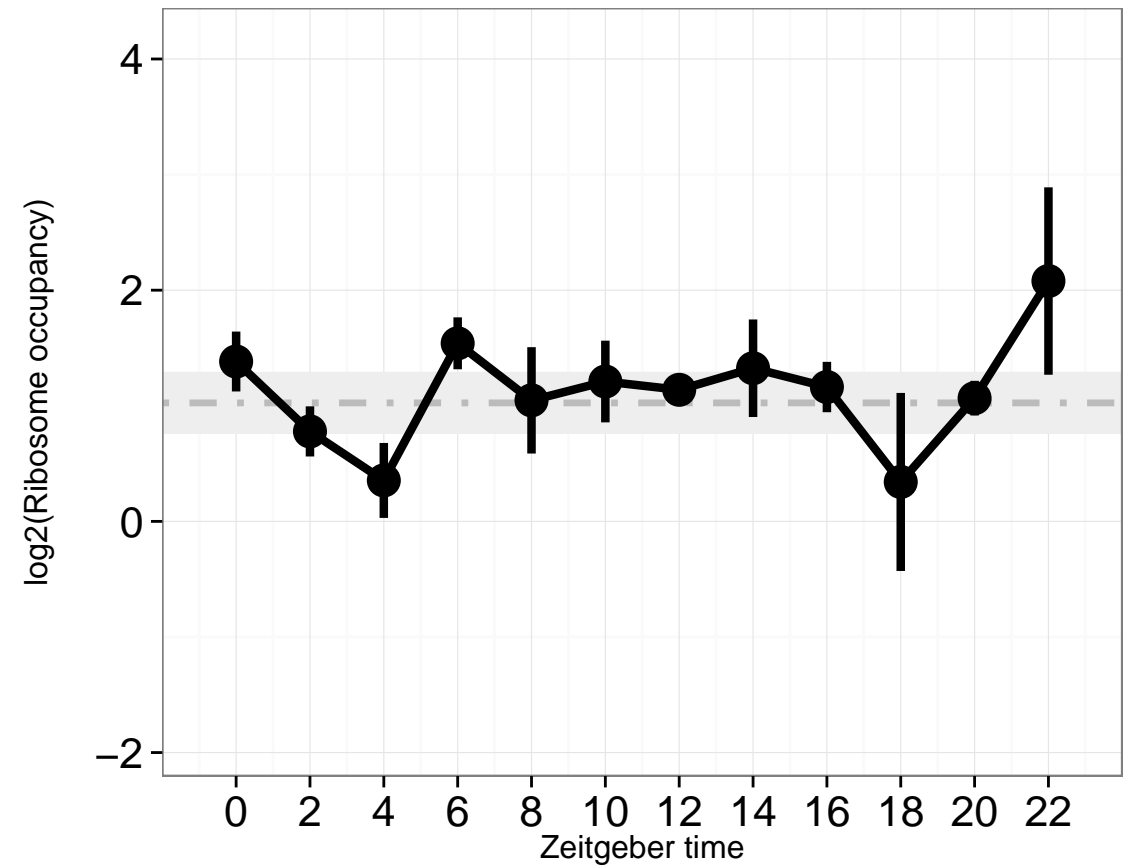

Supplement: Supplementary file 455 [file 1]

# Cc2d1b

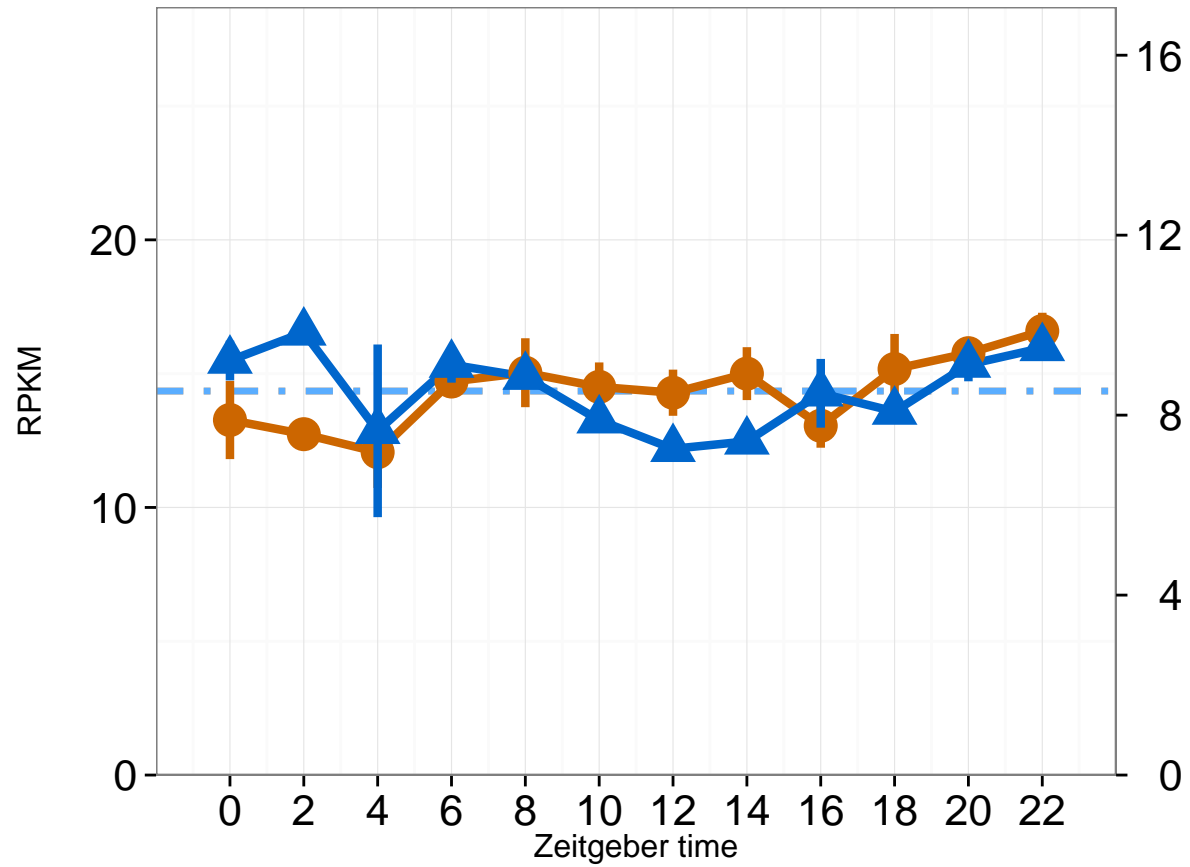

# Cc2d1b

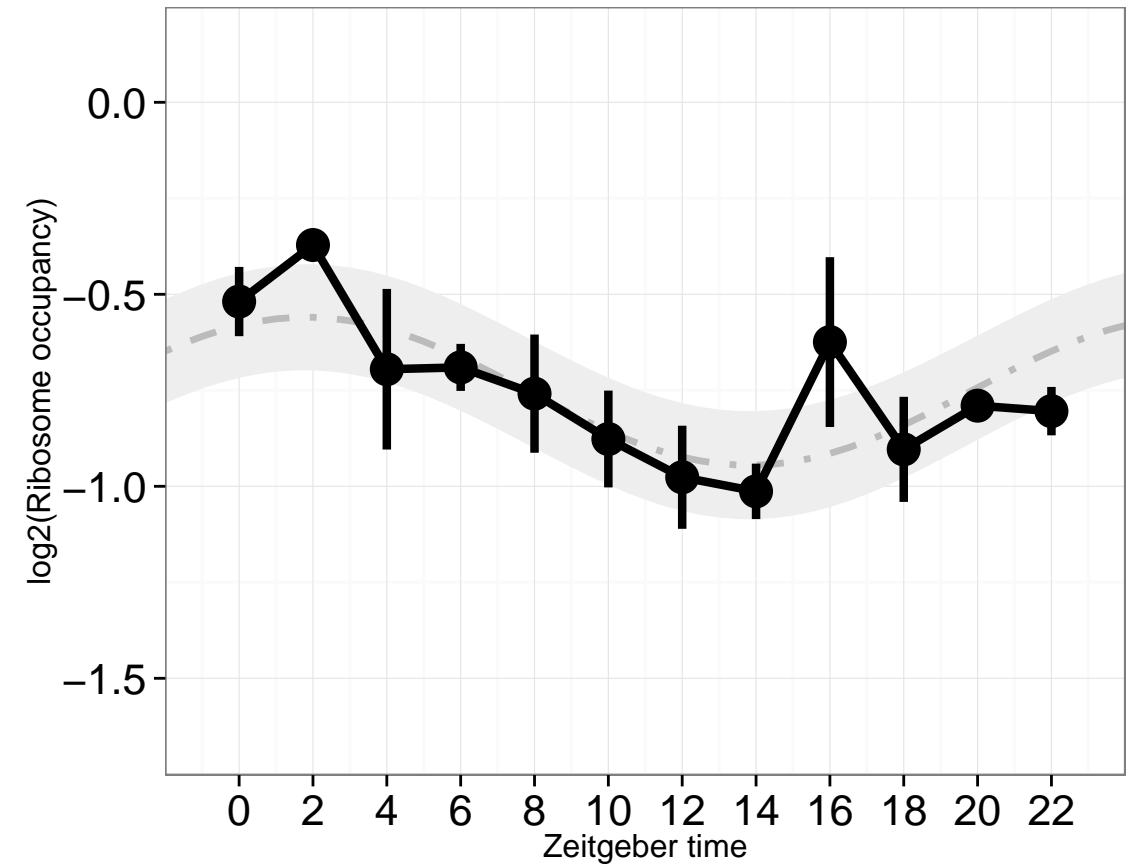

Supplement: Supplementary file 456 [file 1]

## Sdha

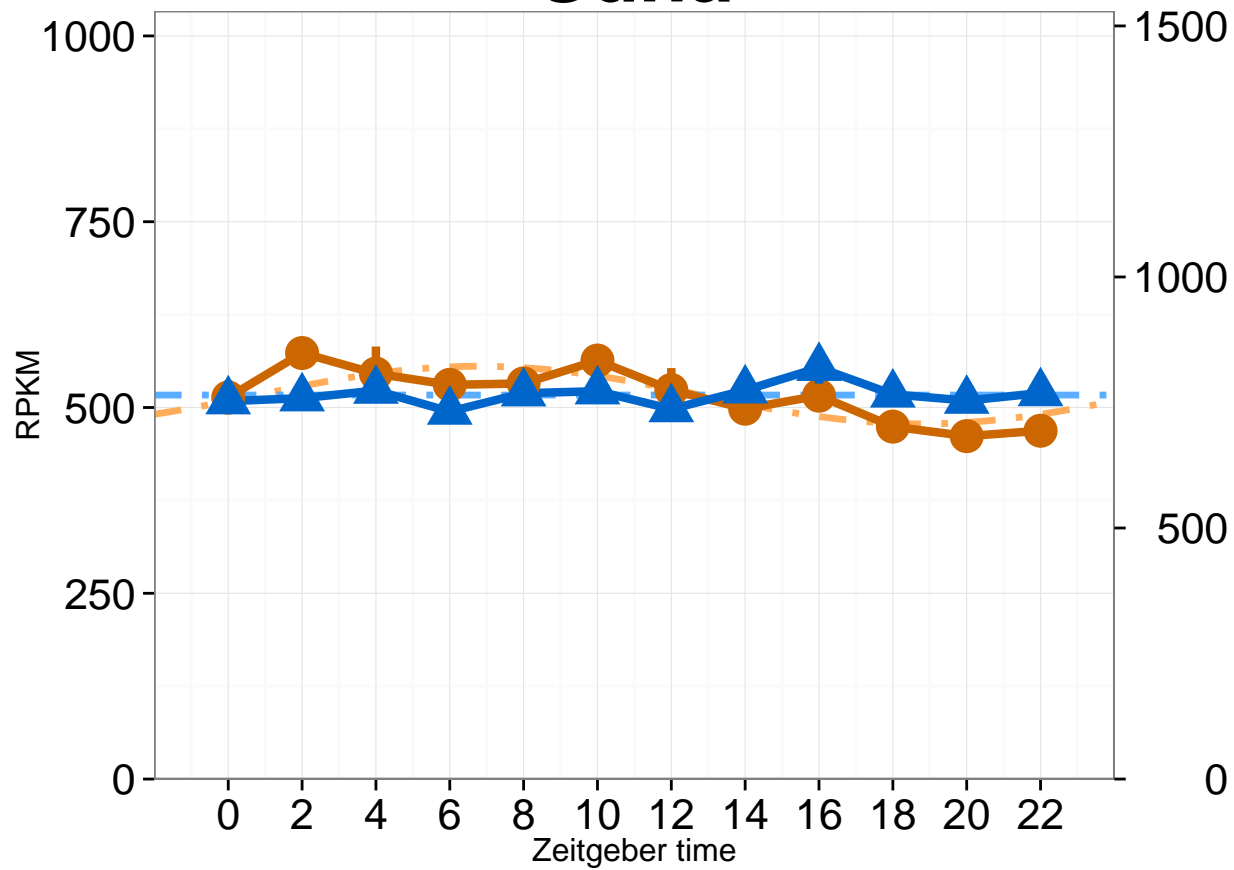

## Sdha

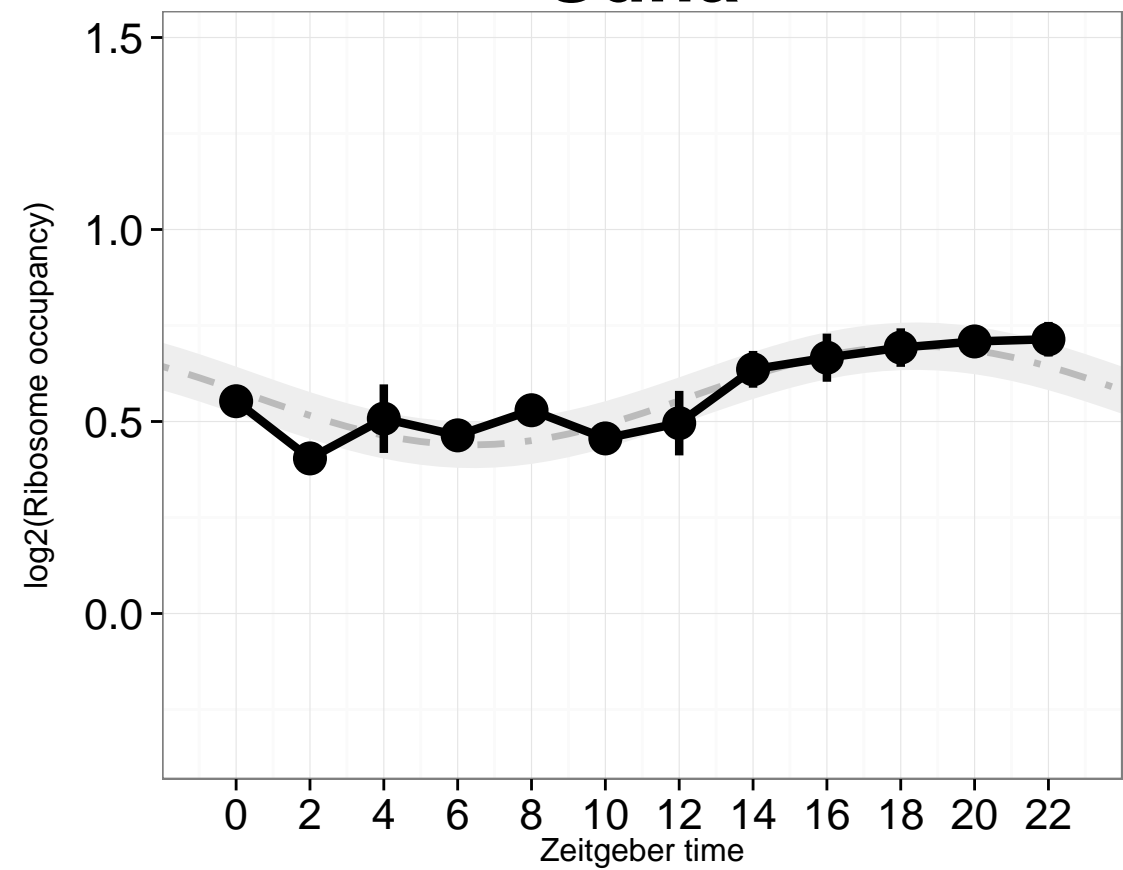

Supplement: Supplementary file 457 [file 1]

# Slc35f3

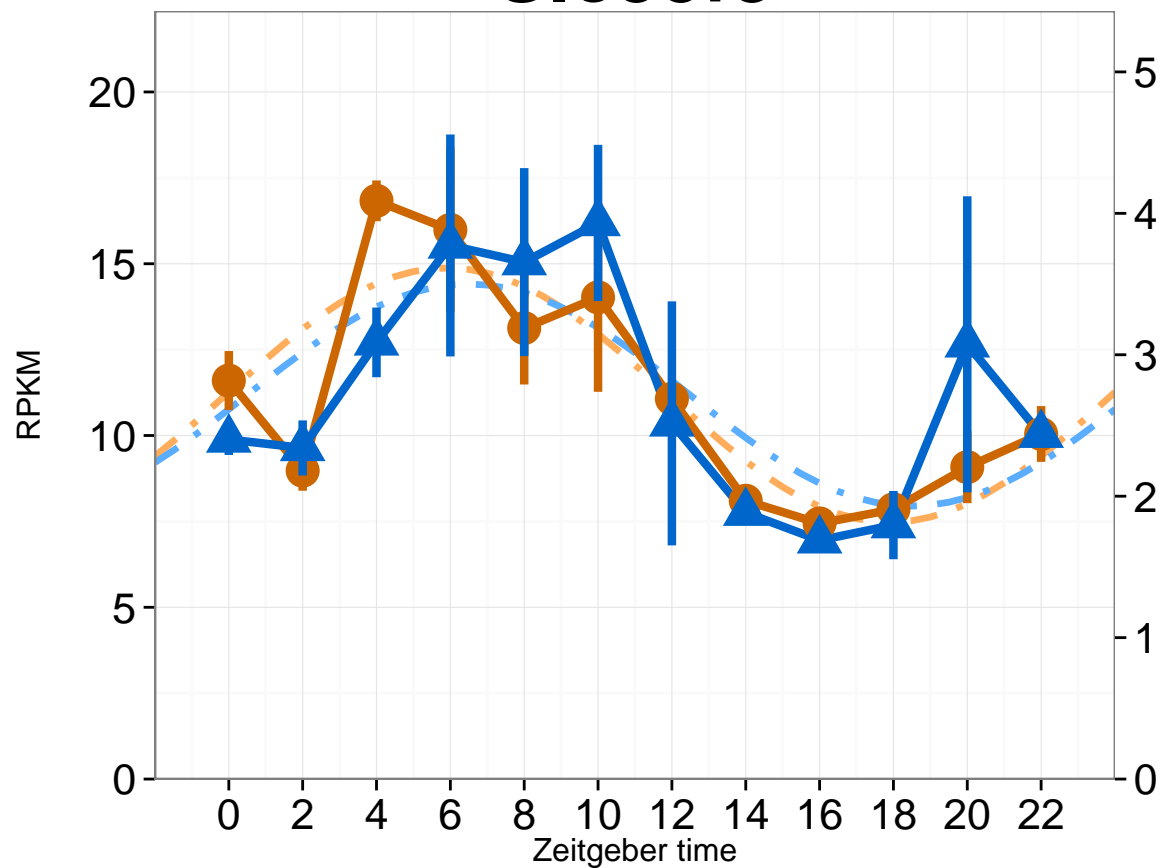

# Slc35f3

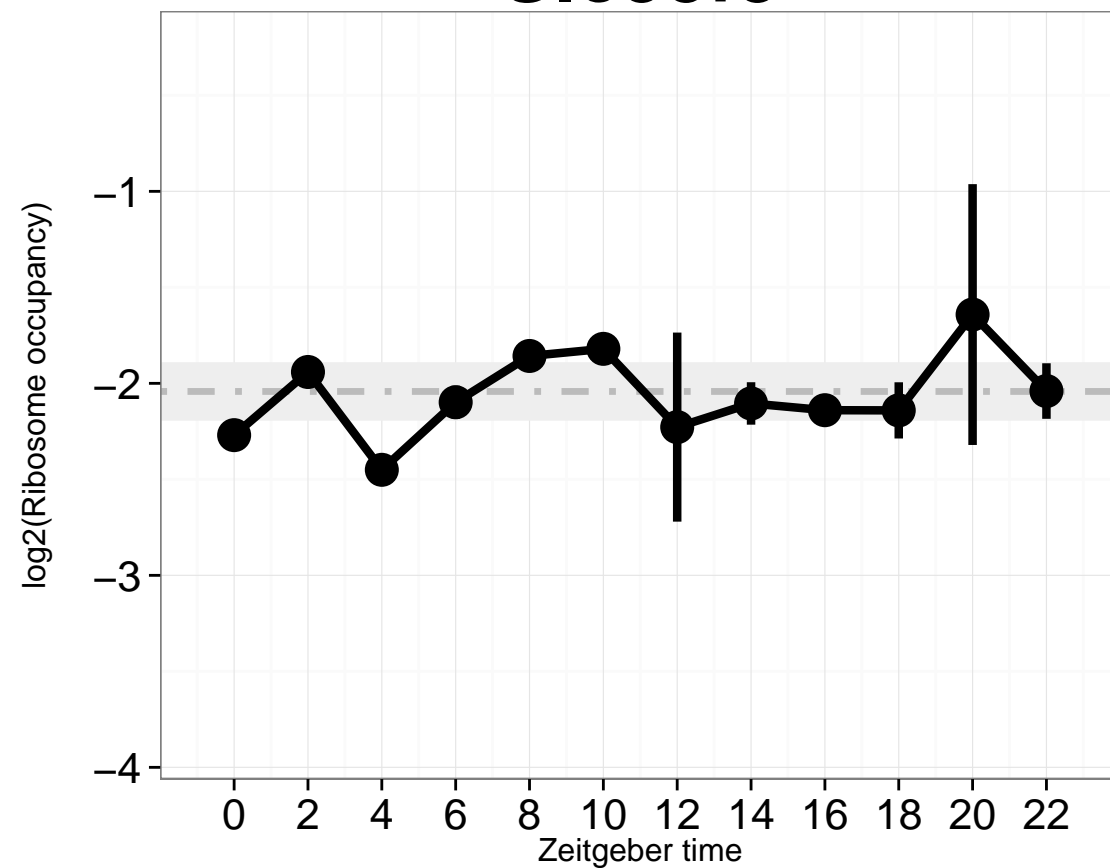

Supplement: Supplementary file 458 [file 1]

# Psmb3

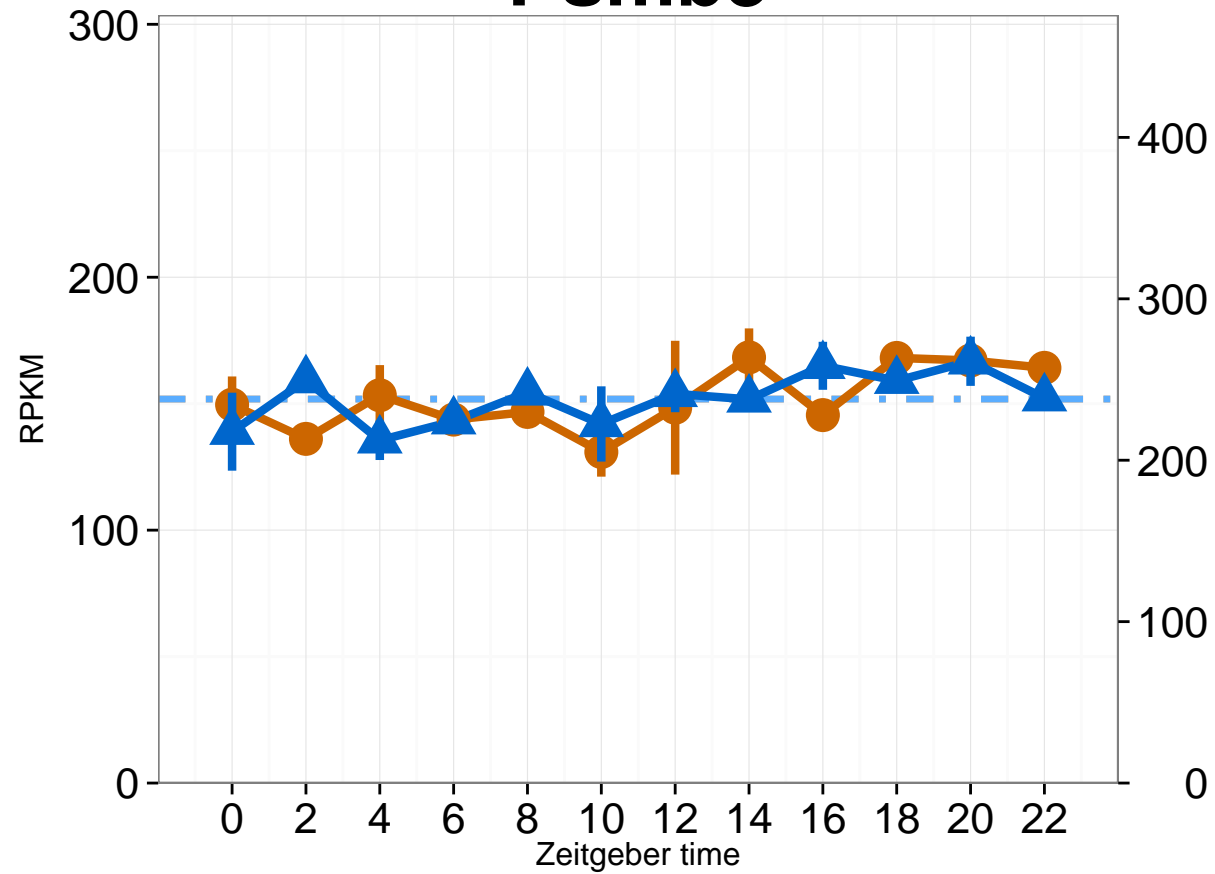

# Psmb3

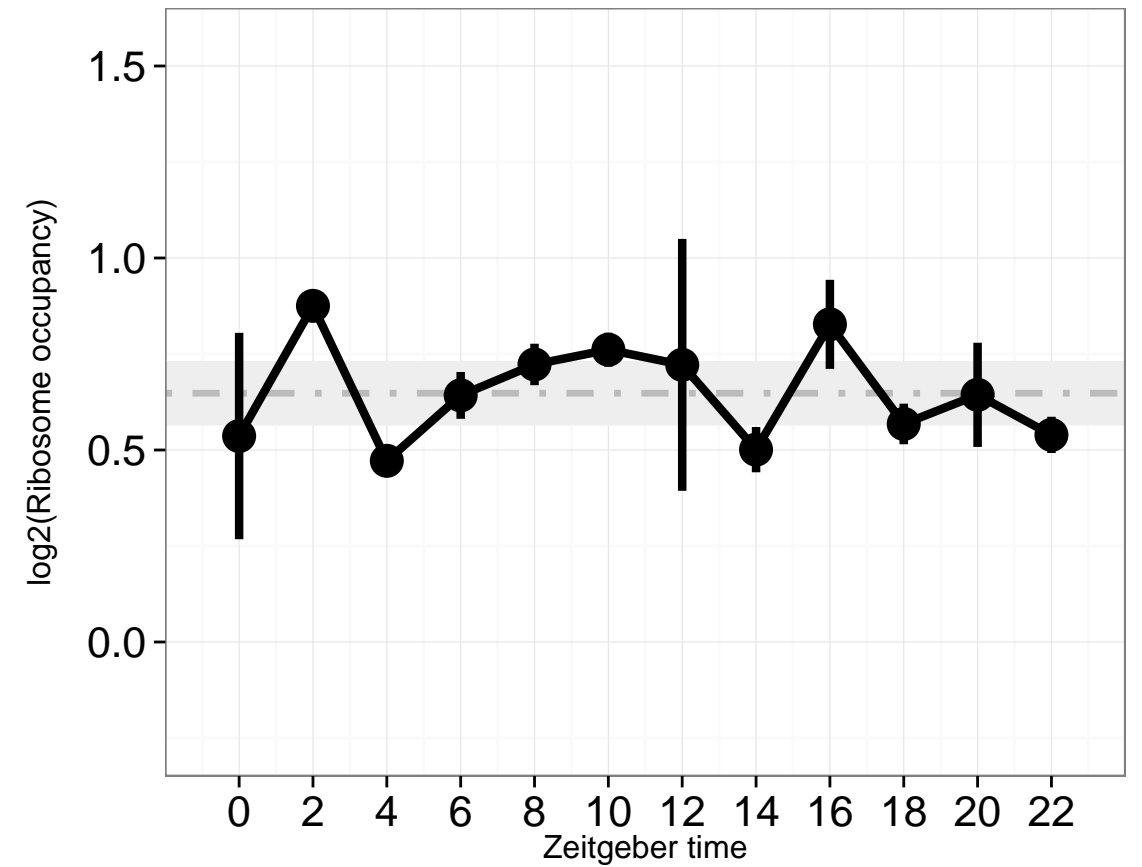

Supplement: Supplementary file 459 [file 1]

## Tmem260

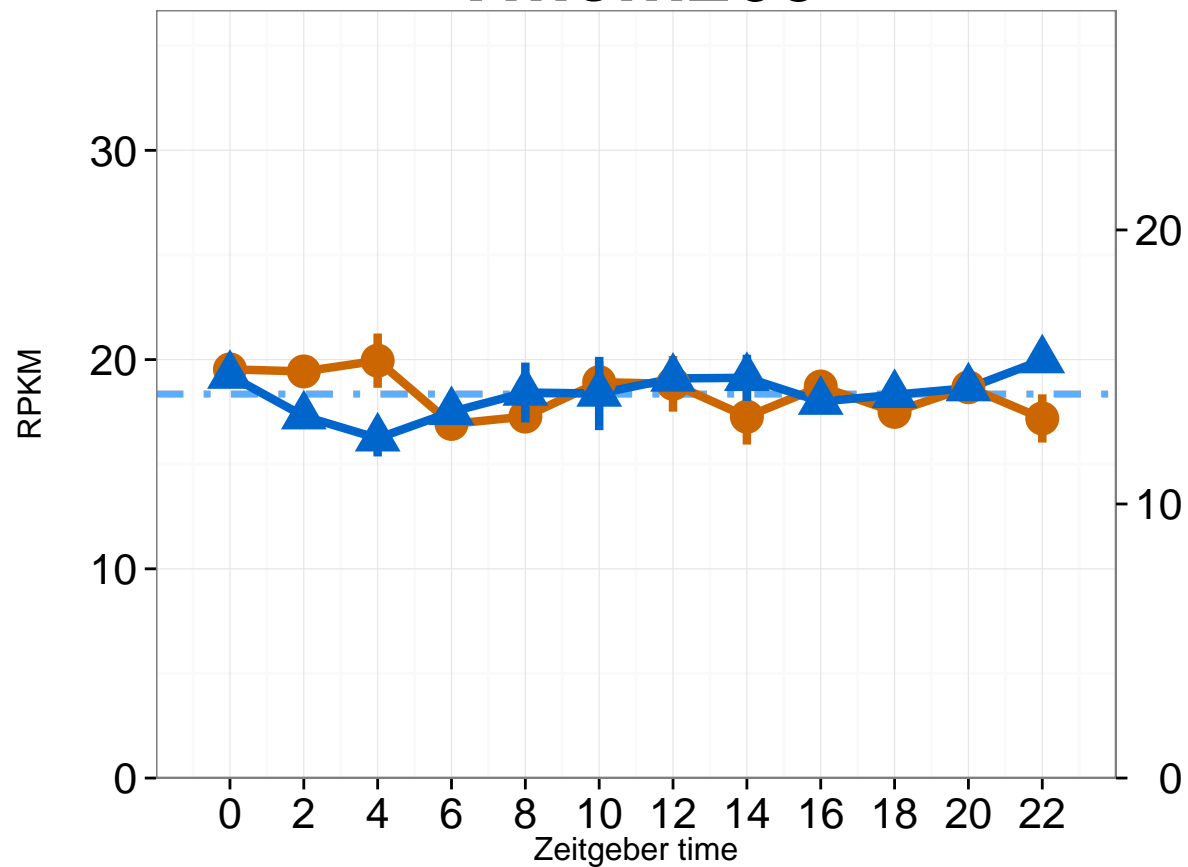

## Tmem260

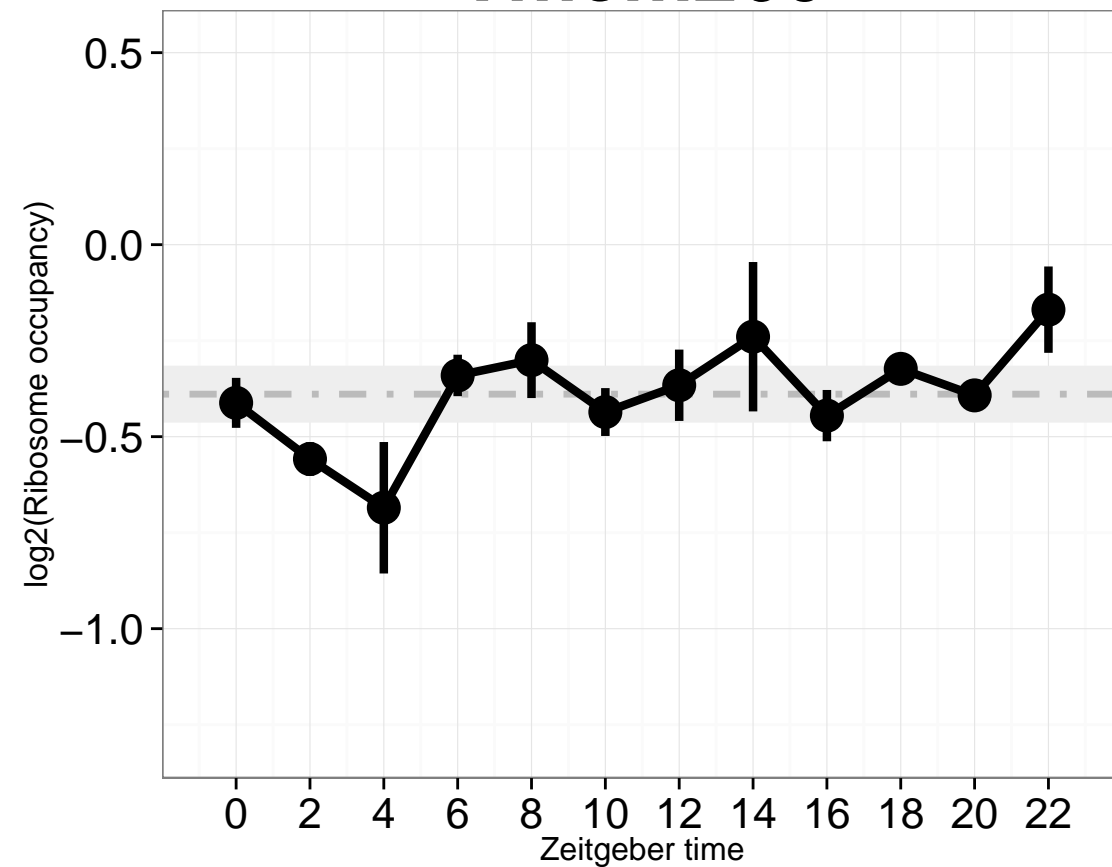

Supplement: Supplementary file 460 [file 1]

# Dtx4

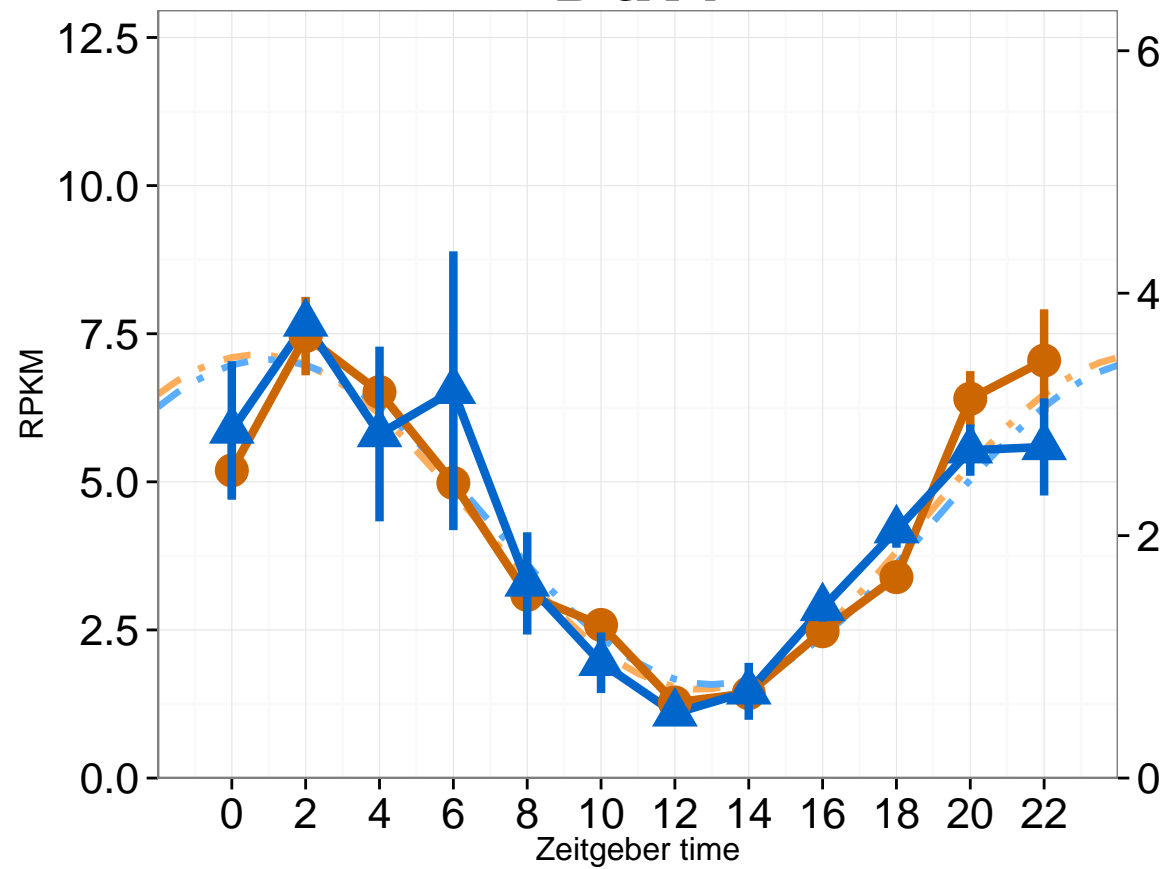

# Dtx4

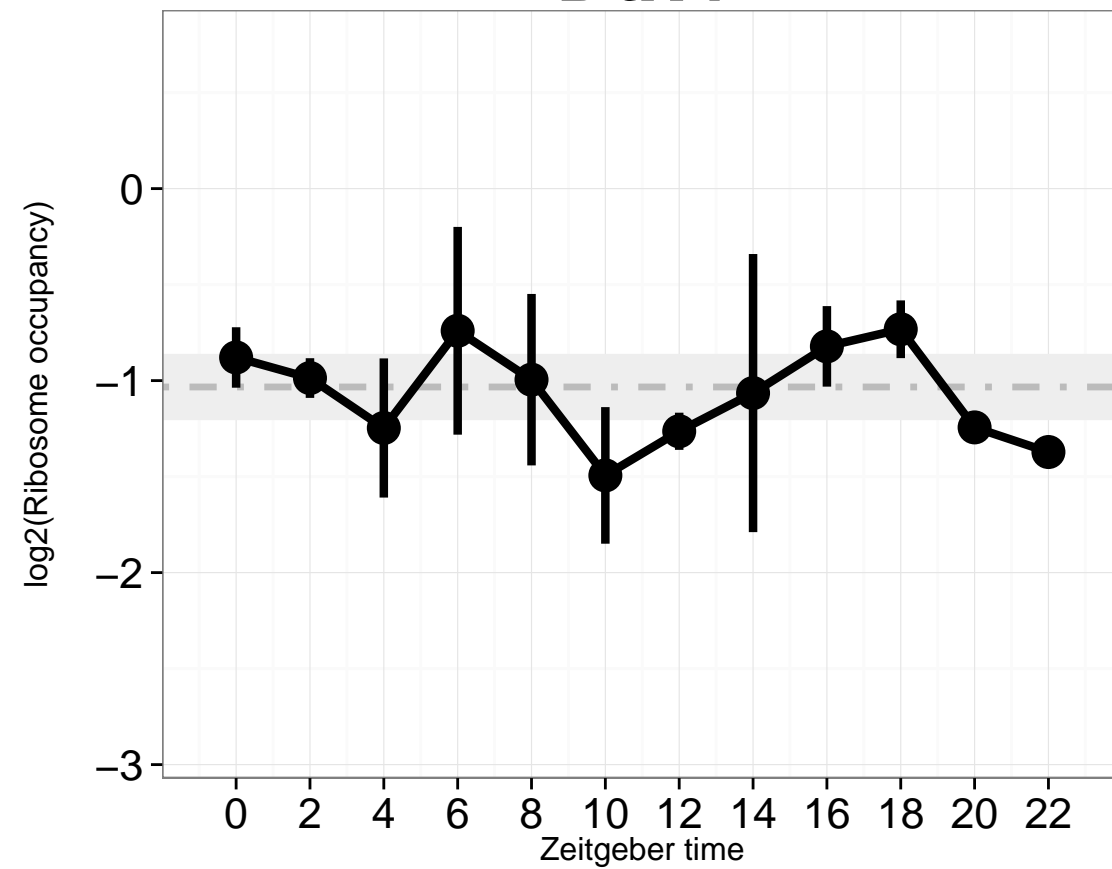

Supplement: Supplementary file 461 [file 1]

# Olfm2

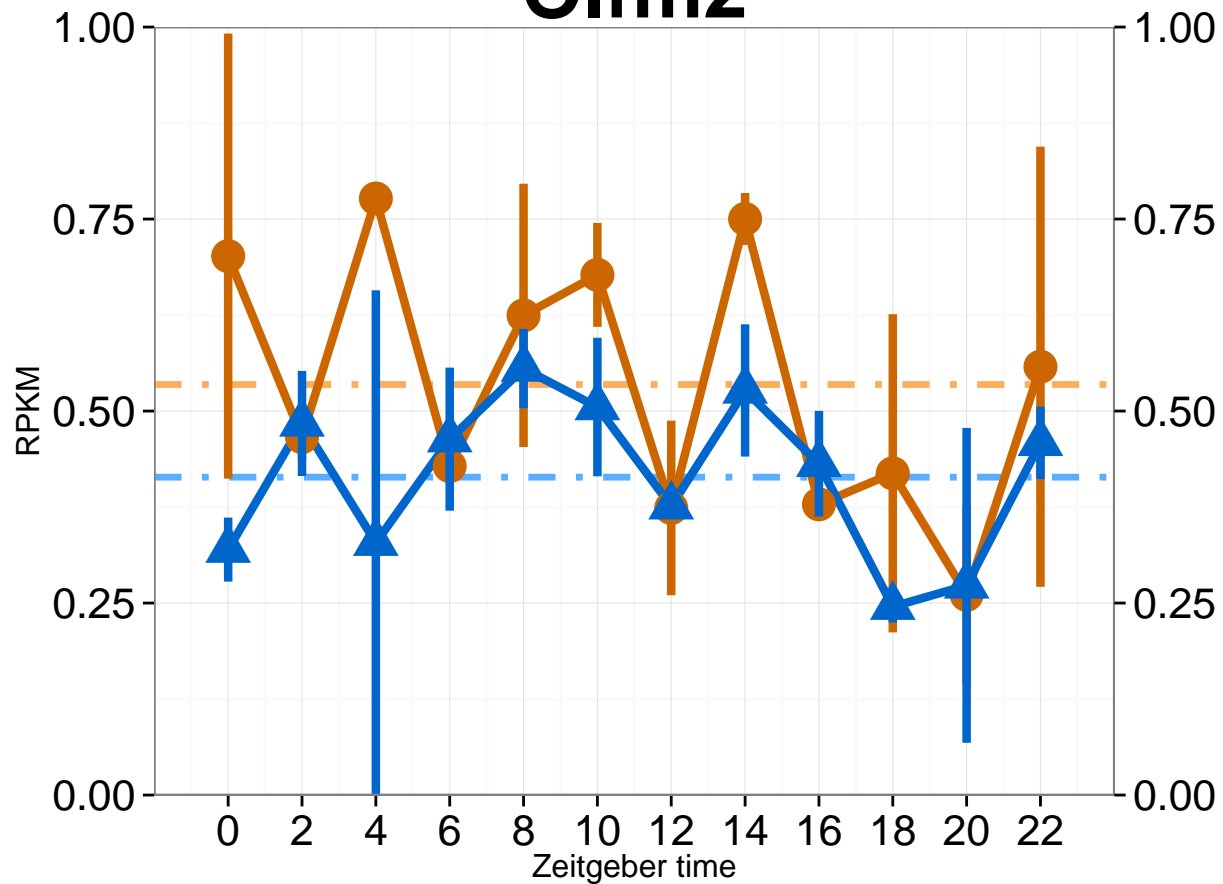

# Olfm2

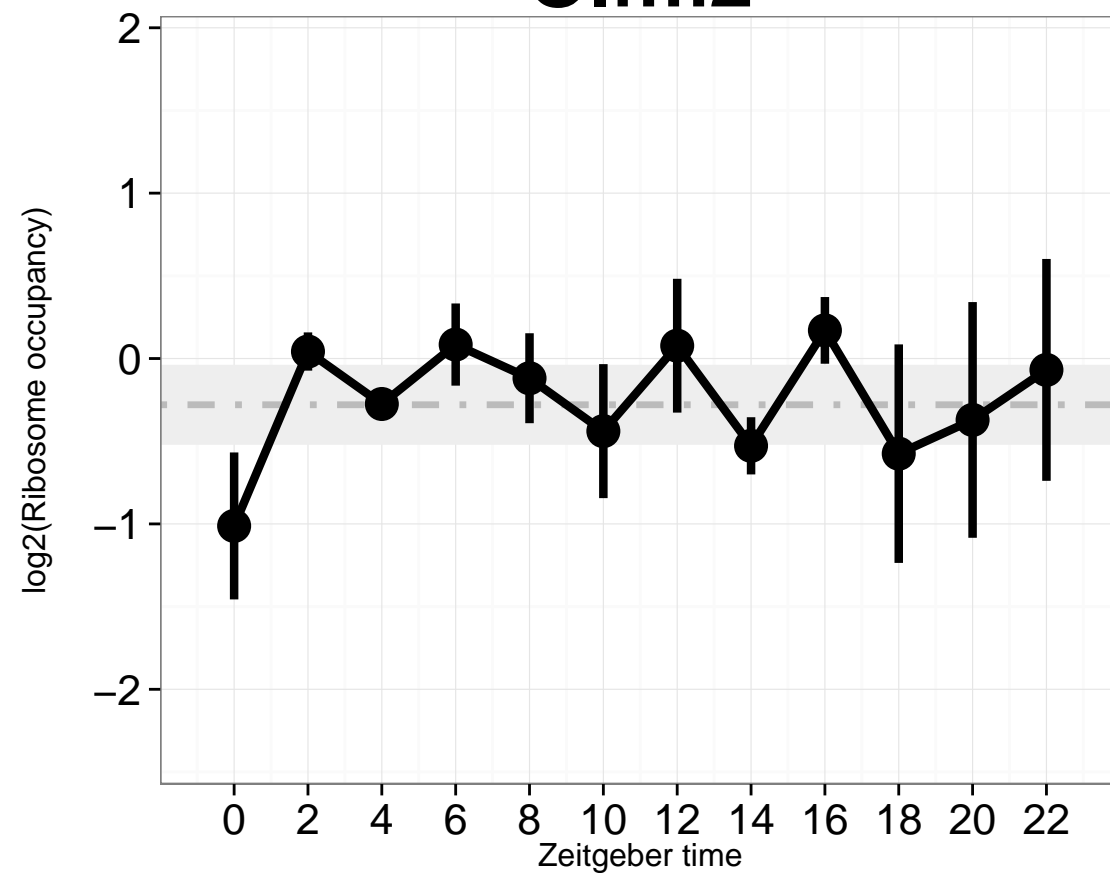

Supplement: Supplementary file 462 [file 1]

## Lrpprc

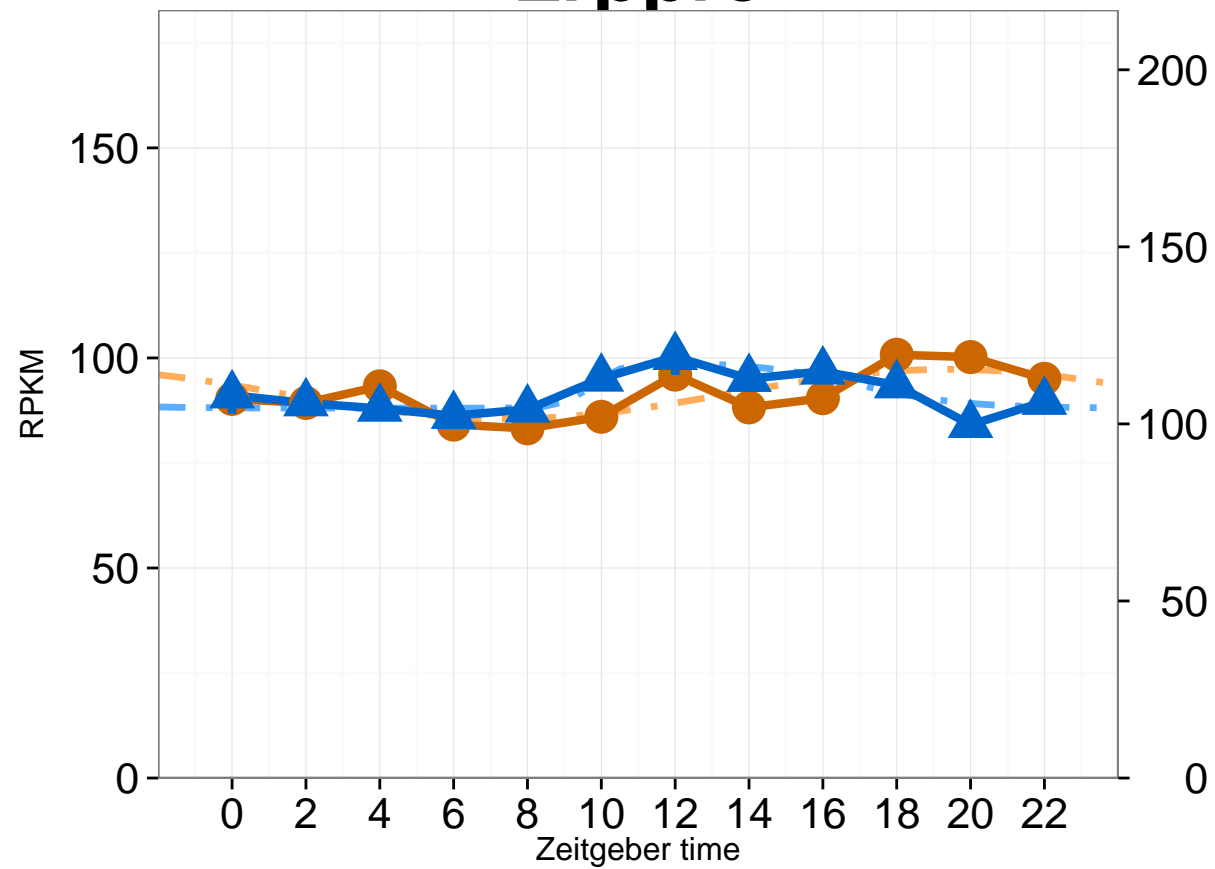

## Lrpprc

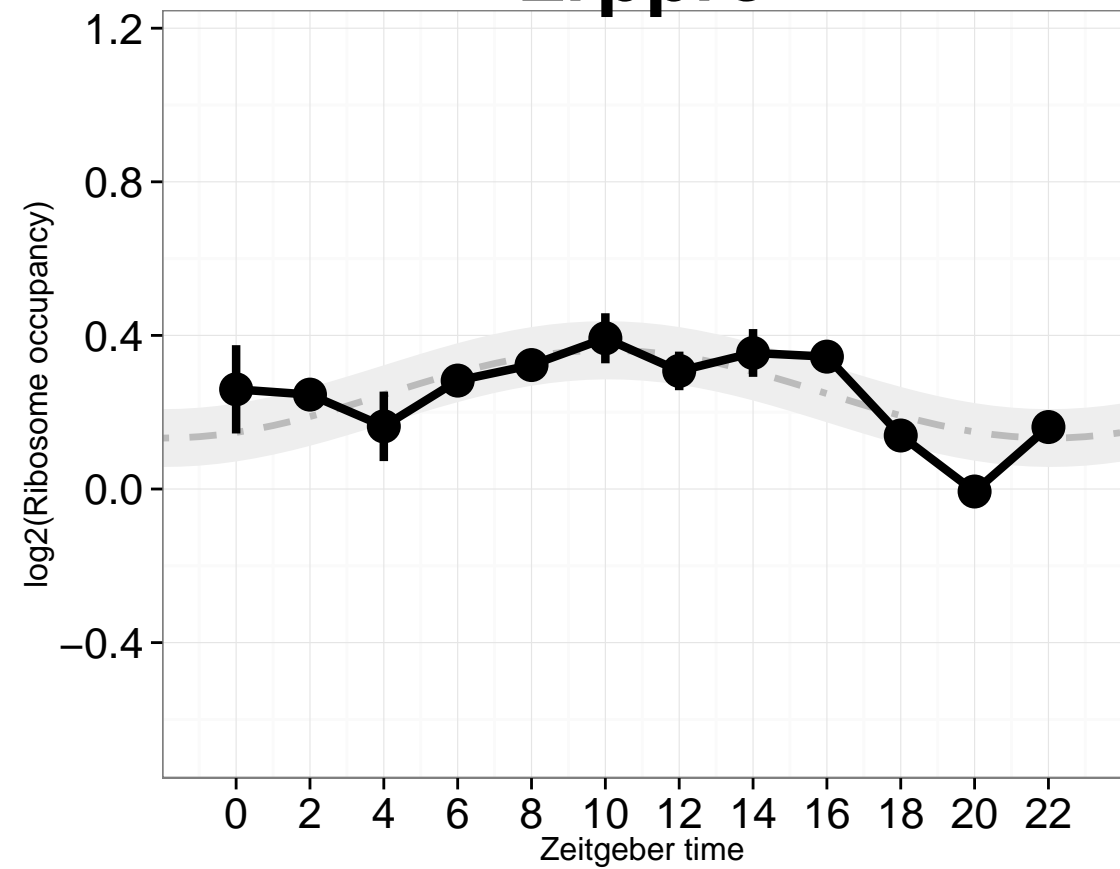

Supplement: Supplementary file 463 [file 1]

## Npm3

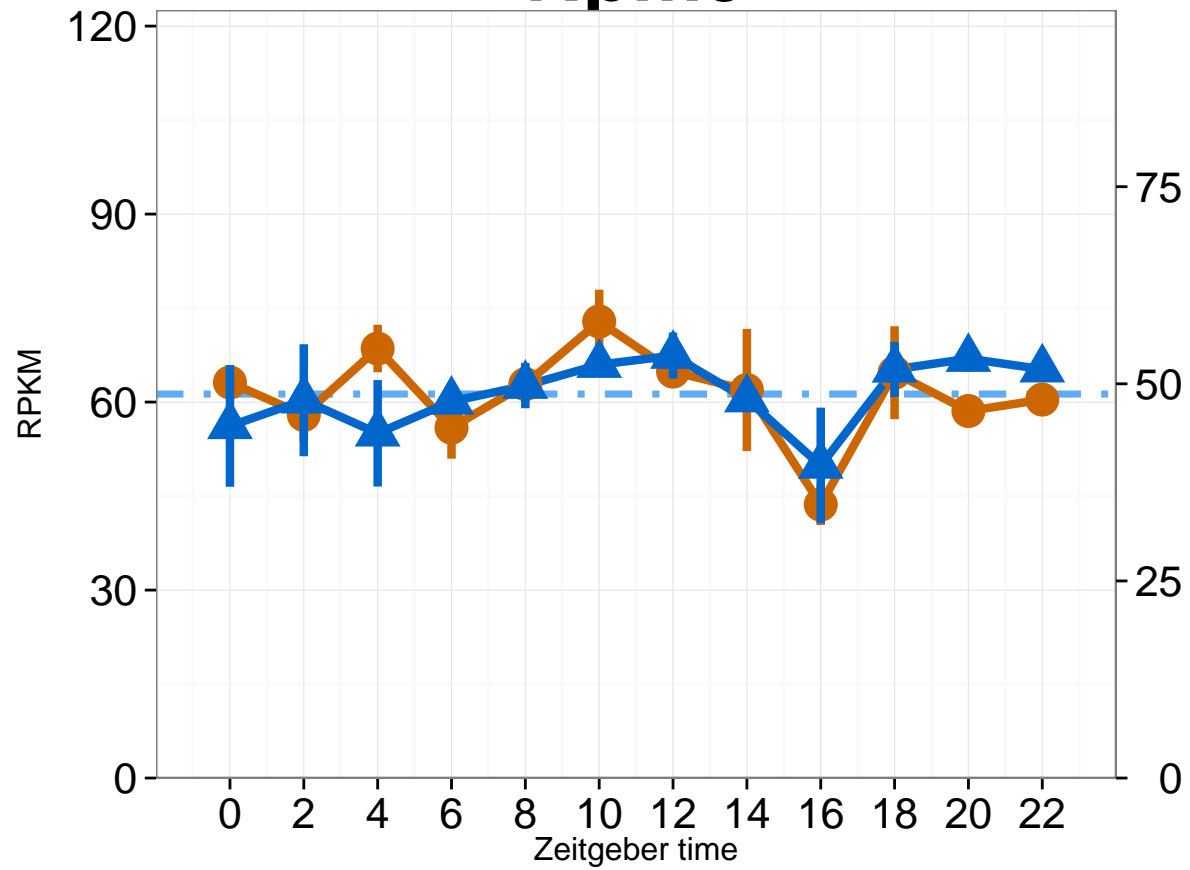

## Npm3

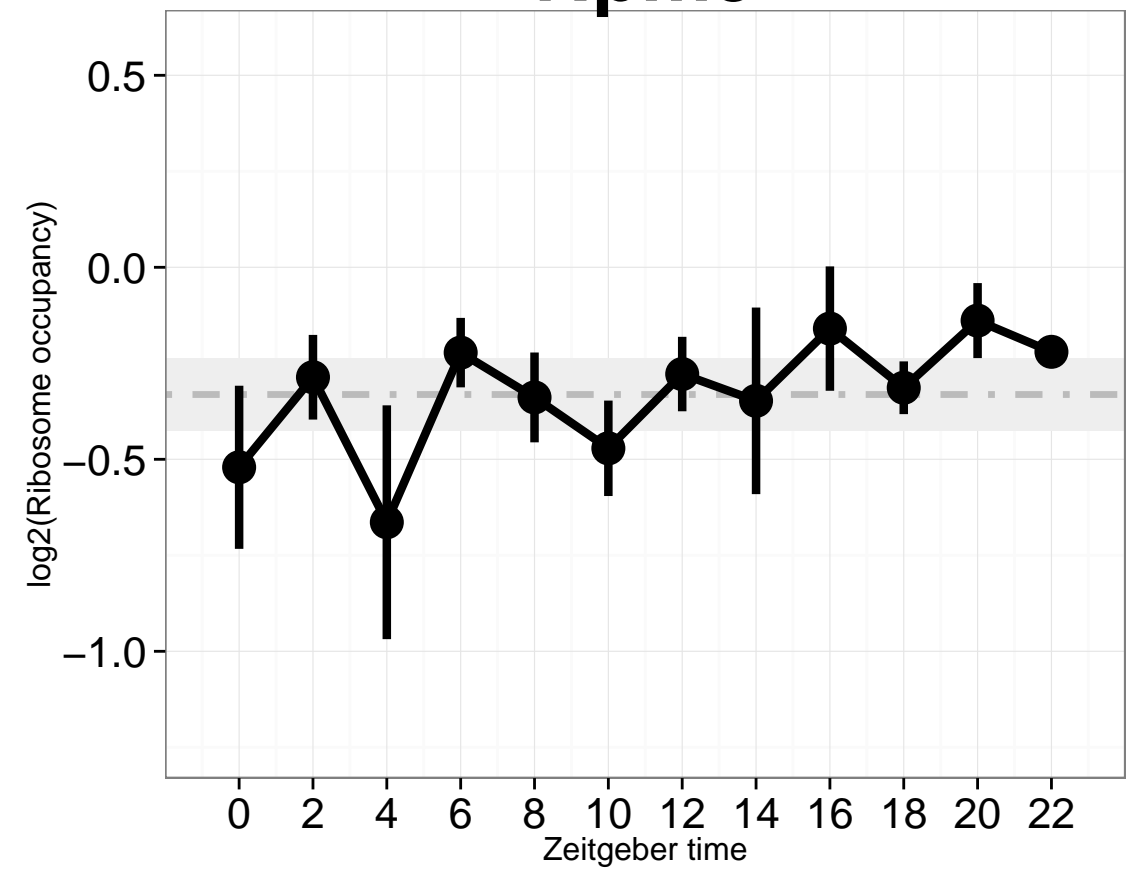

Supplement: Supplementary file 465 [file 1]

## Manba

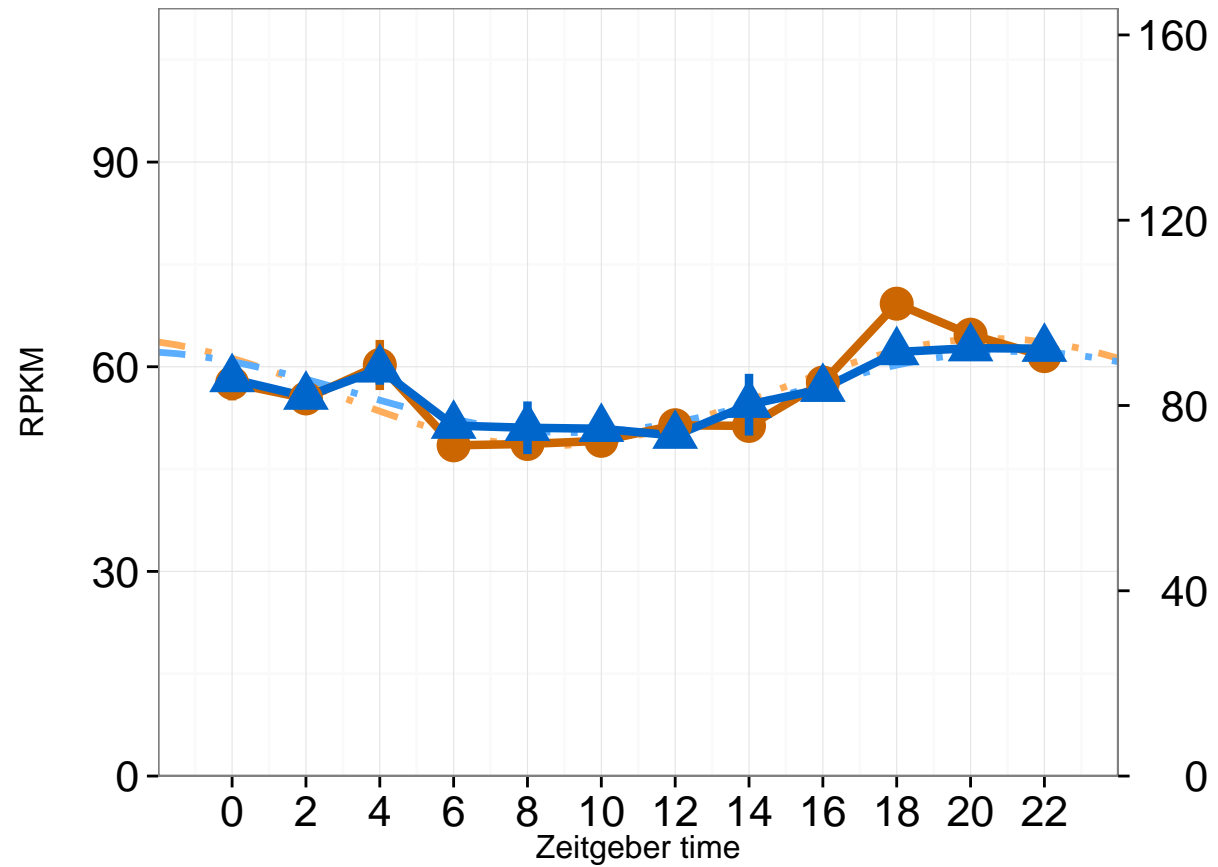

## Manba

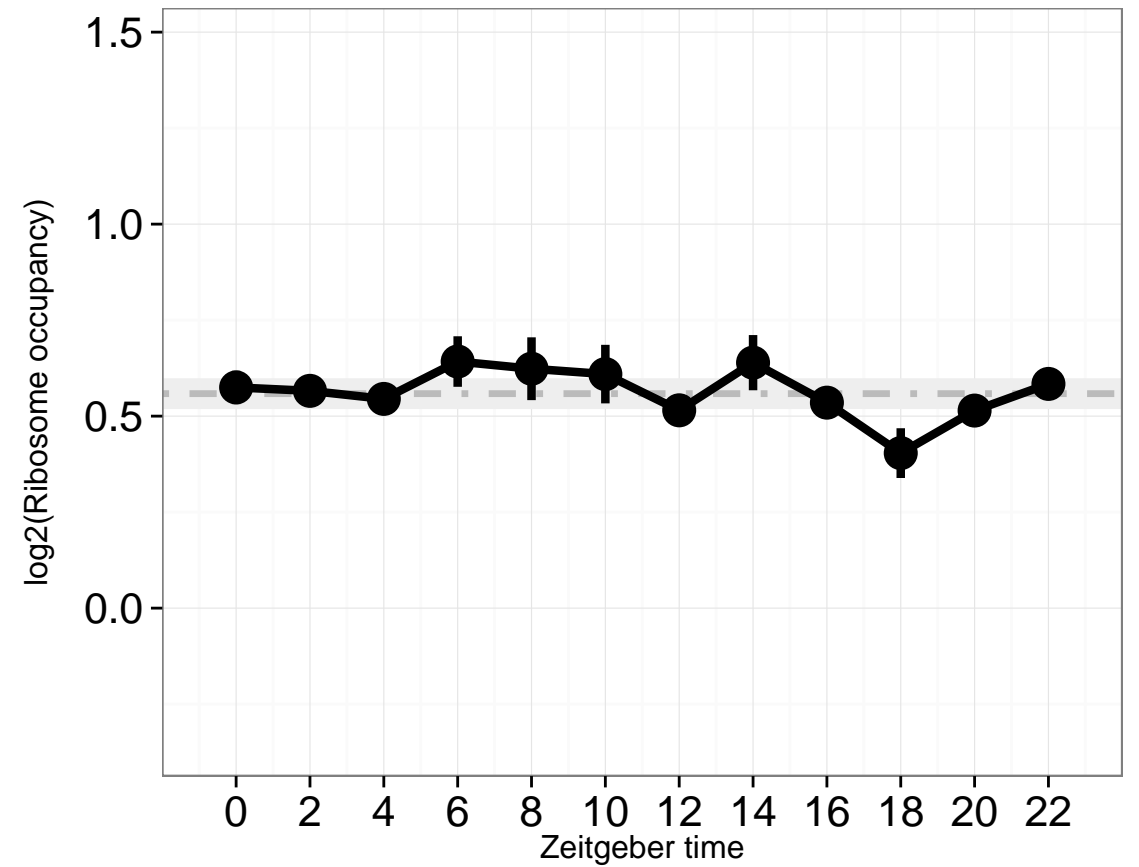

Supplement: Supplementary file 466 [file 1]

## Socs1

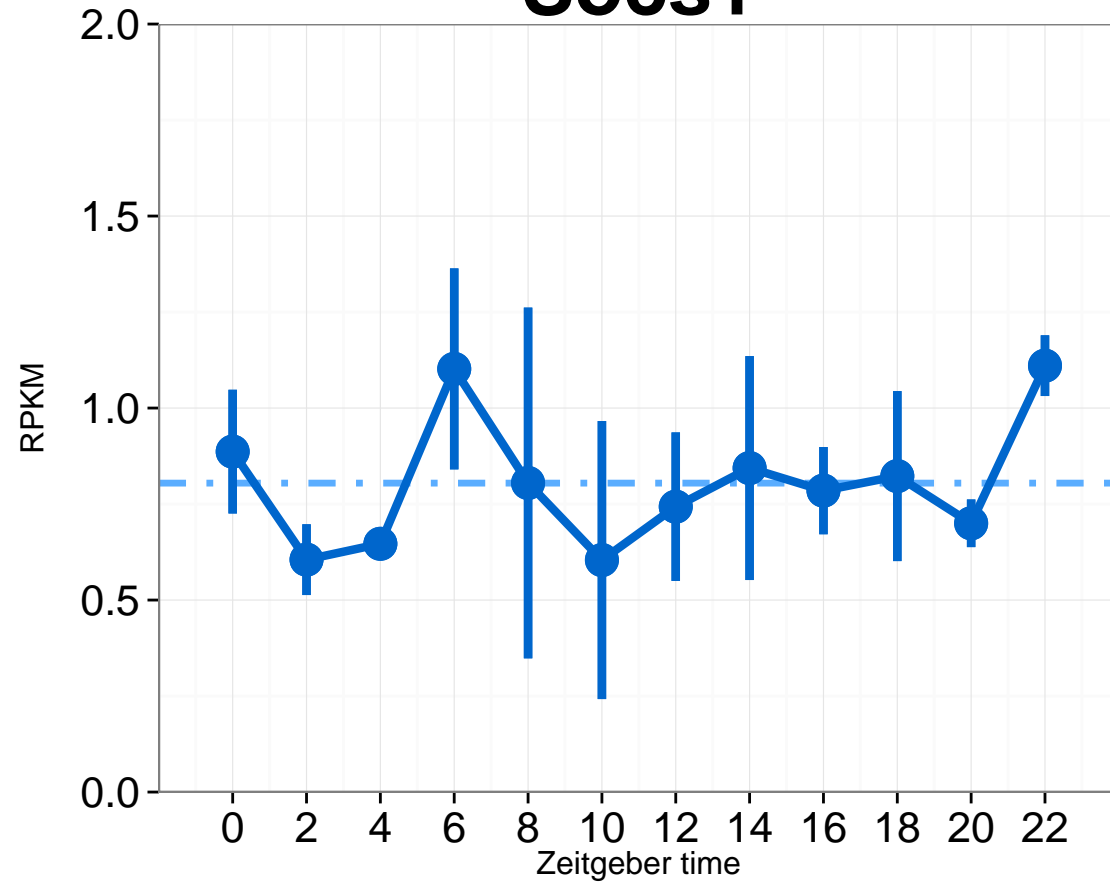

## Socs1 log2(Ribosome occupancy

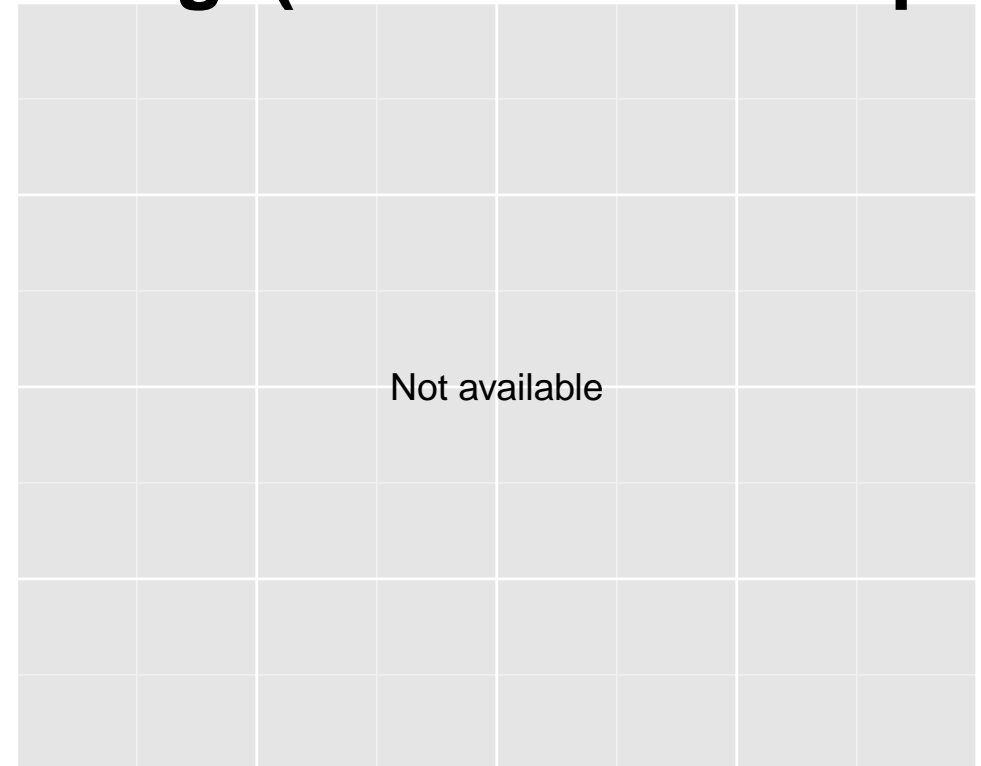

Supplement: Supplementary file 467 [file 1]

# 1700030J22Rik

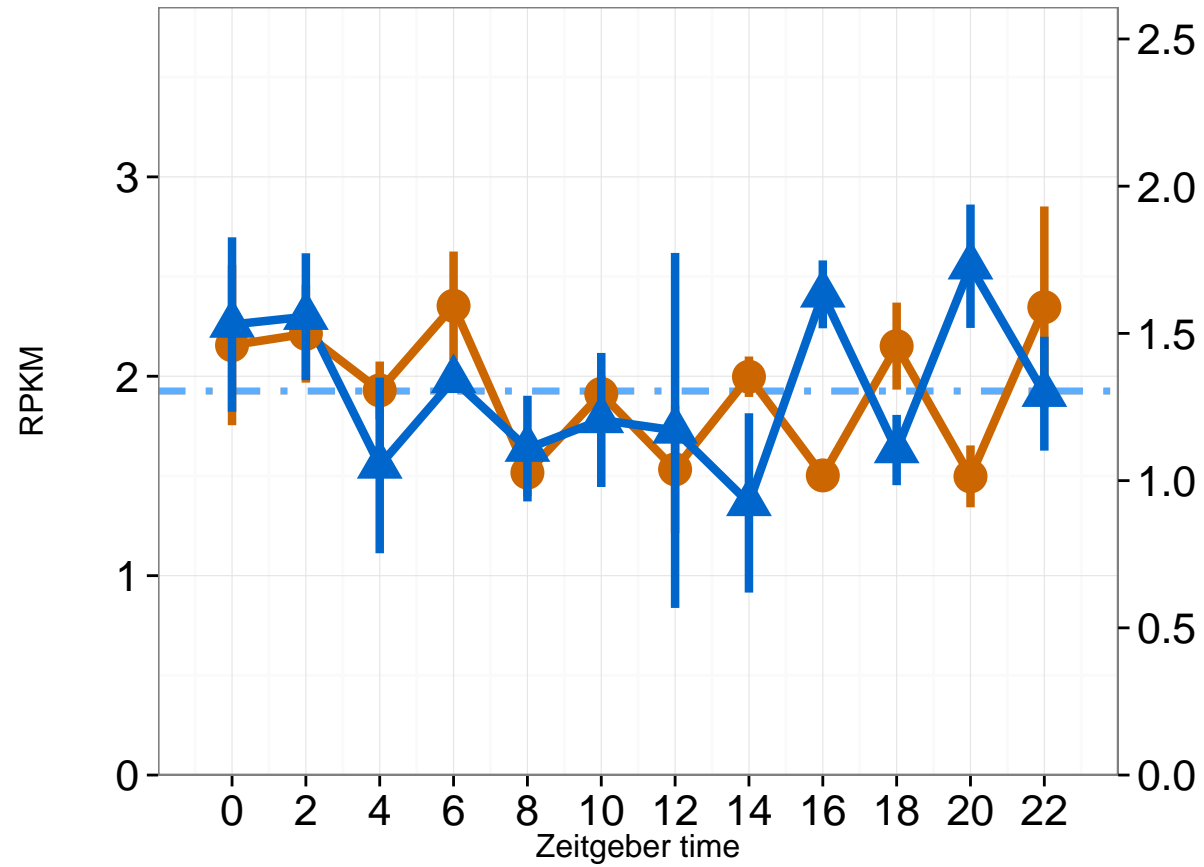

# 1700030J22Rik

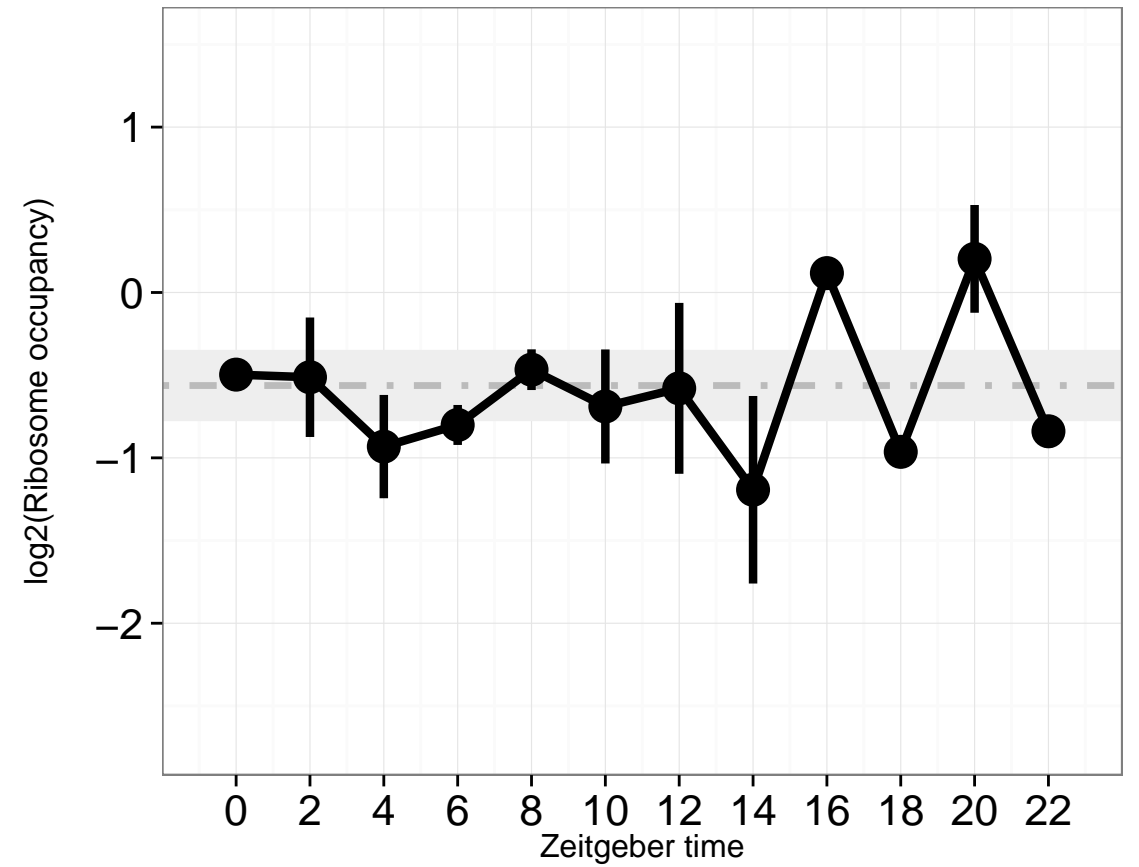

Supplement: Supplementary file 468 [file 1]

## Mpnd

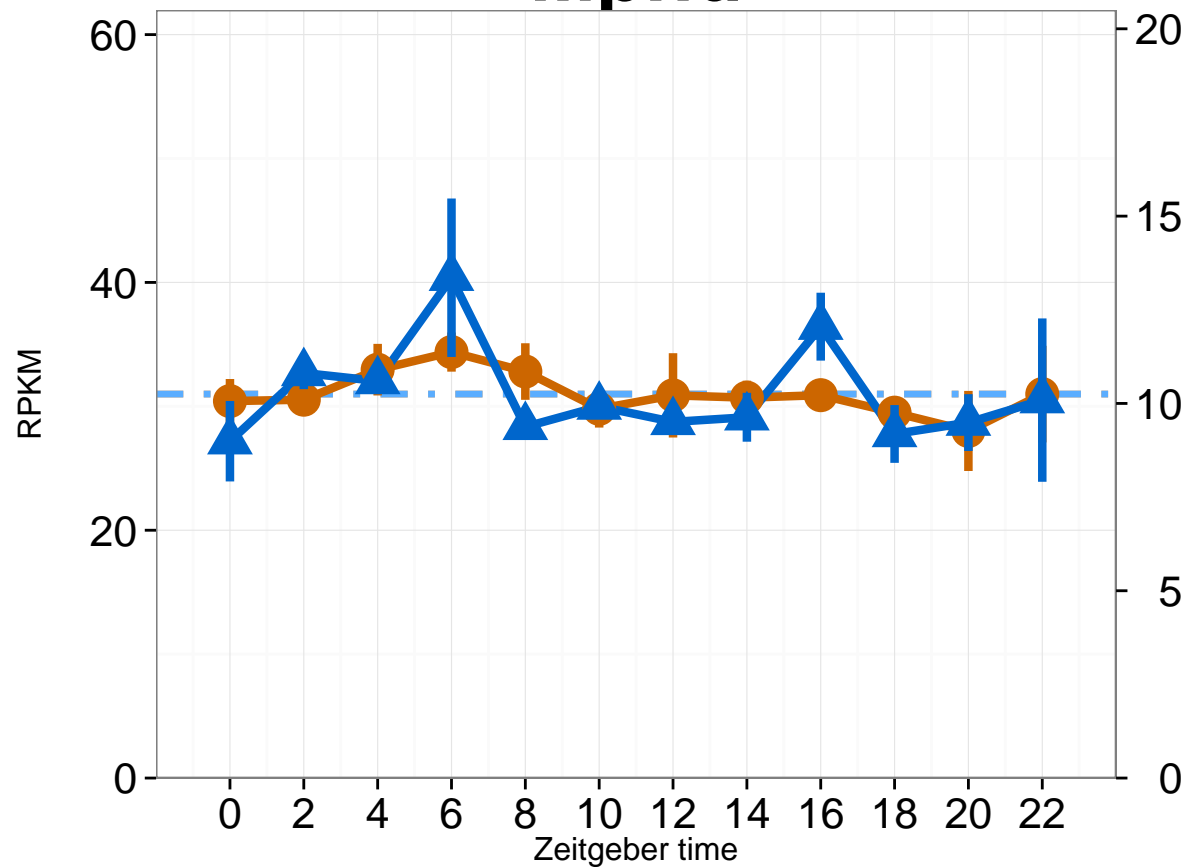

## Mpnd

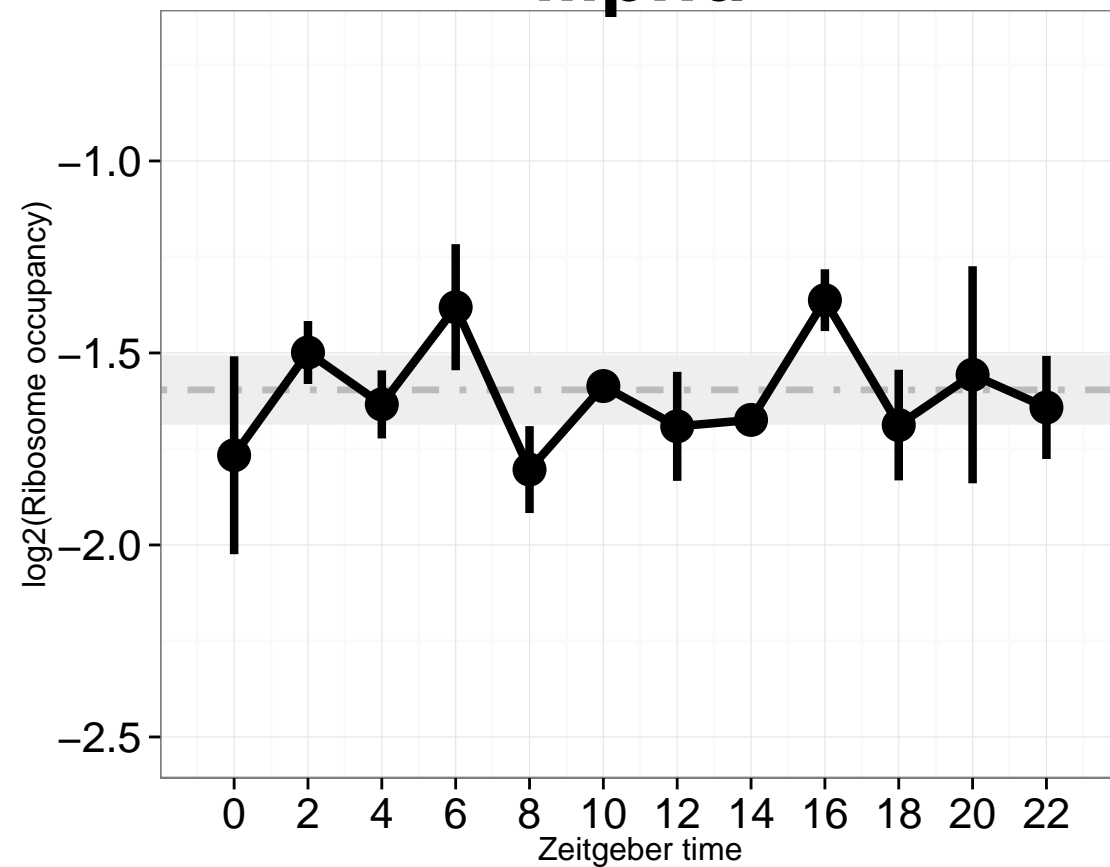

Supplement: Supplementary file 469 [file 1]

## Inpp5b

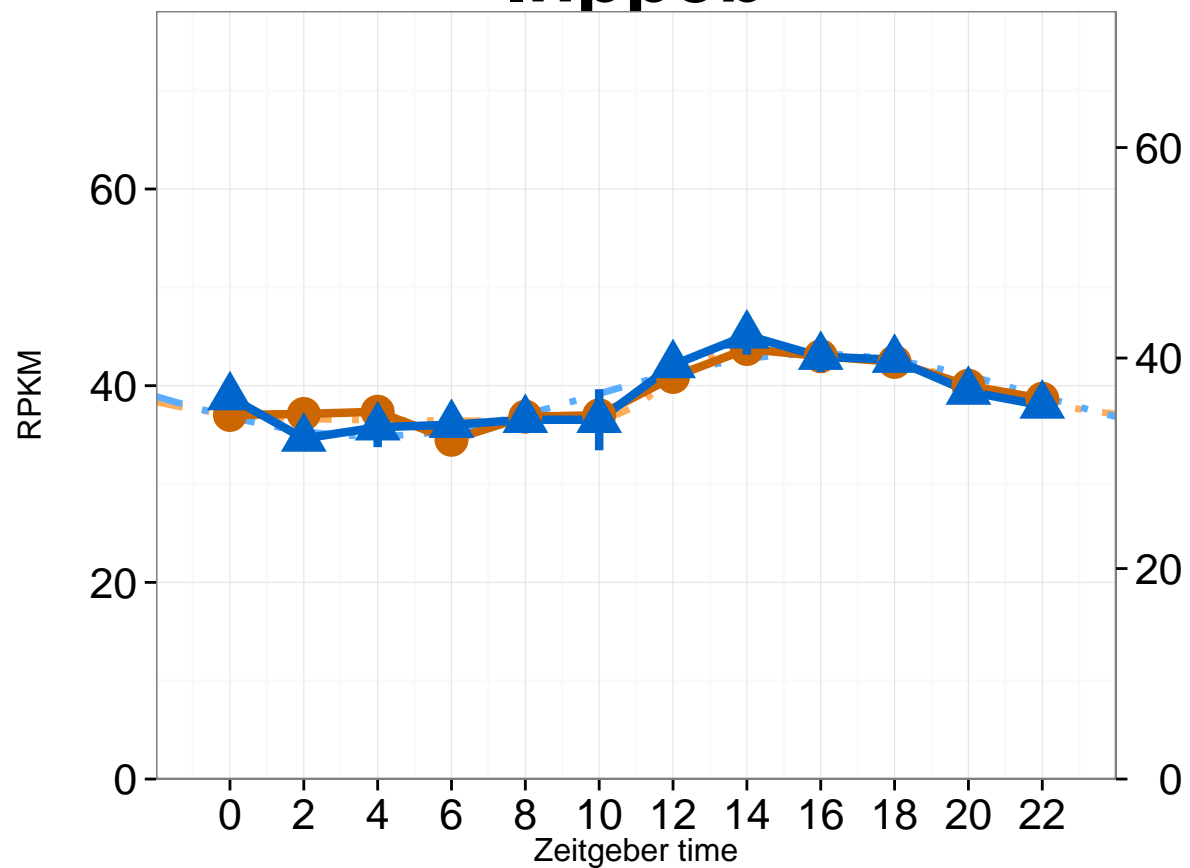

## Inpp5b

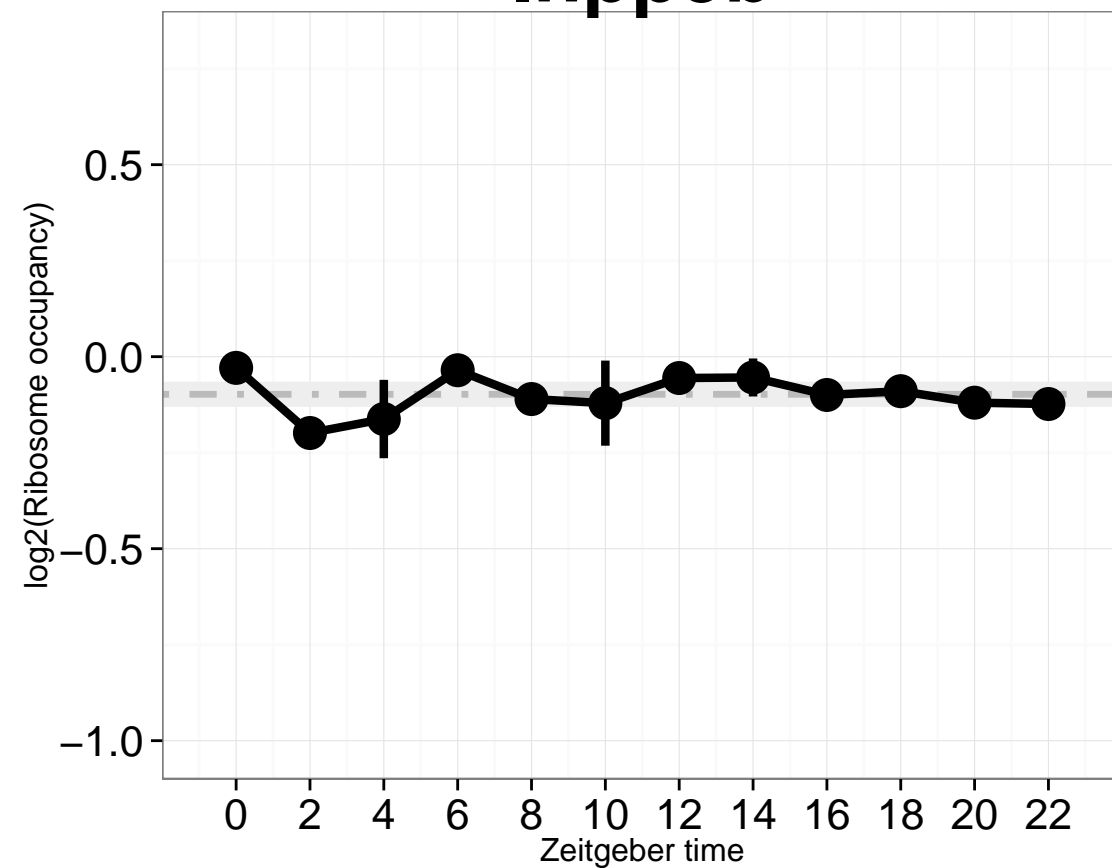

Supplement: Supplementary file 470 [file 1]

## Lamp2

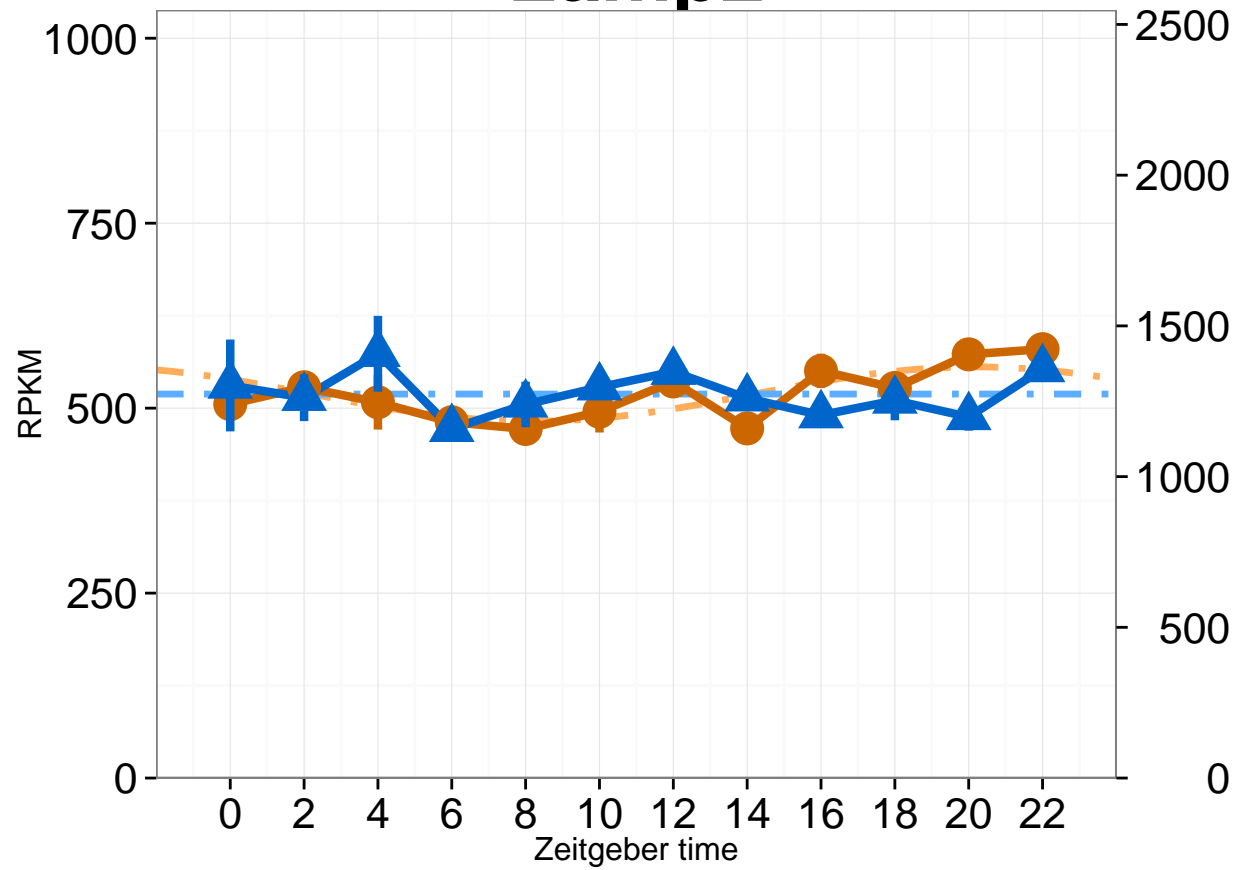

## Lamp2

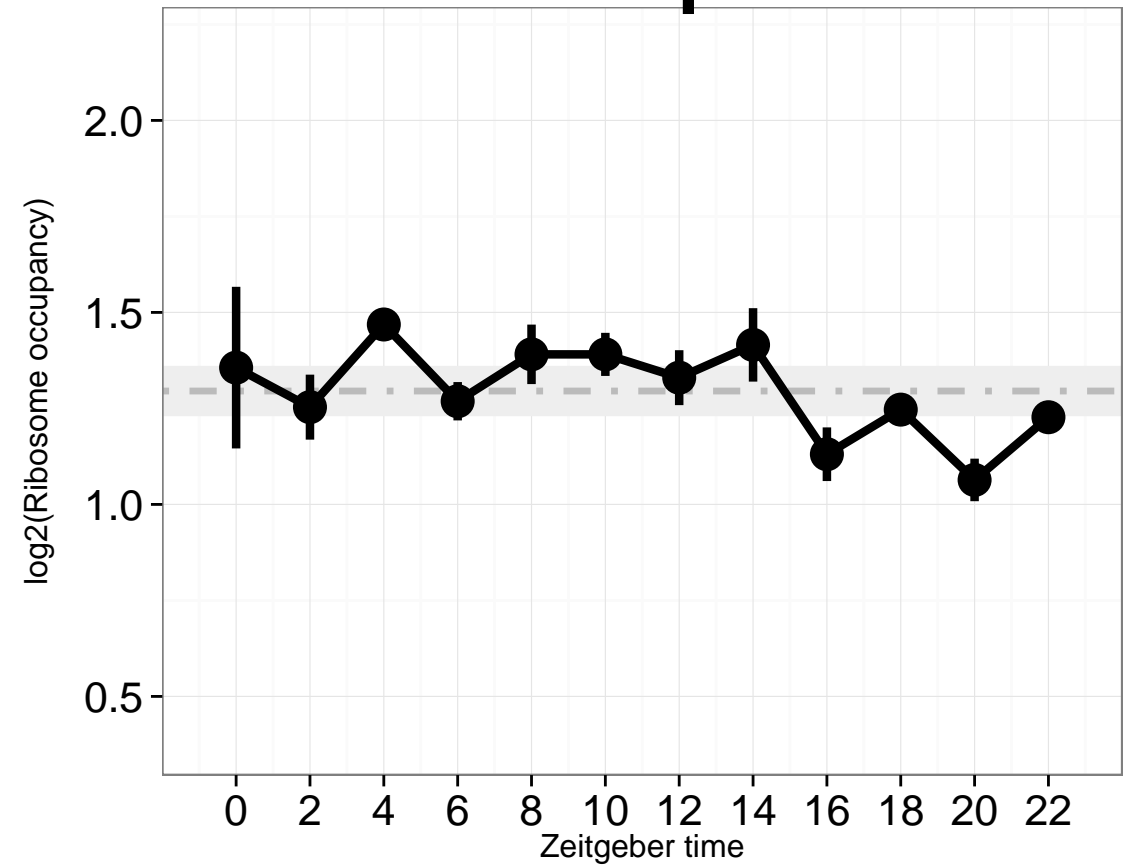

Supplement: Supplementary file 471 [file 1]

## Grina

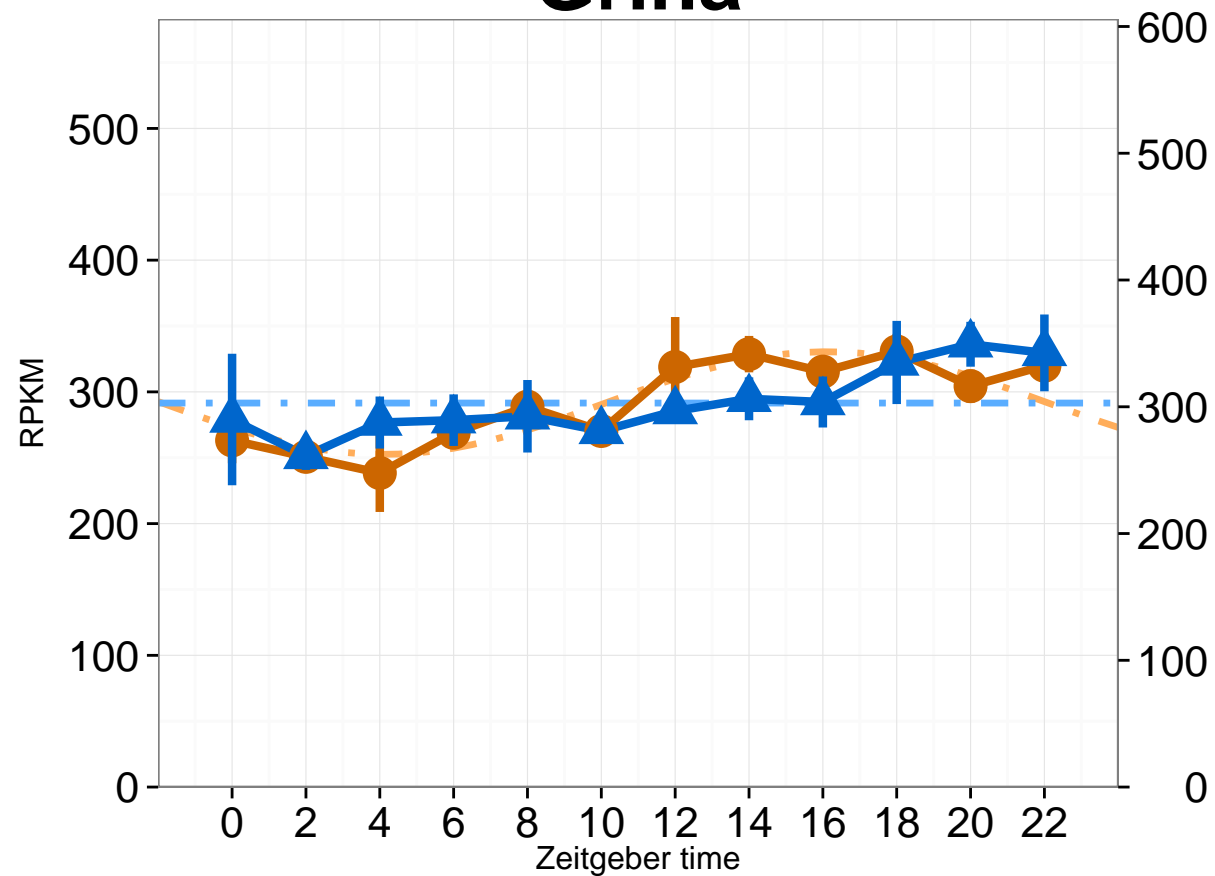

## Grina

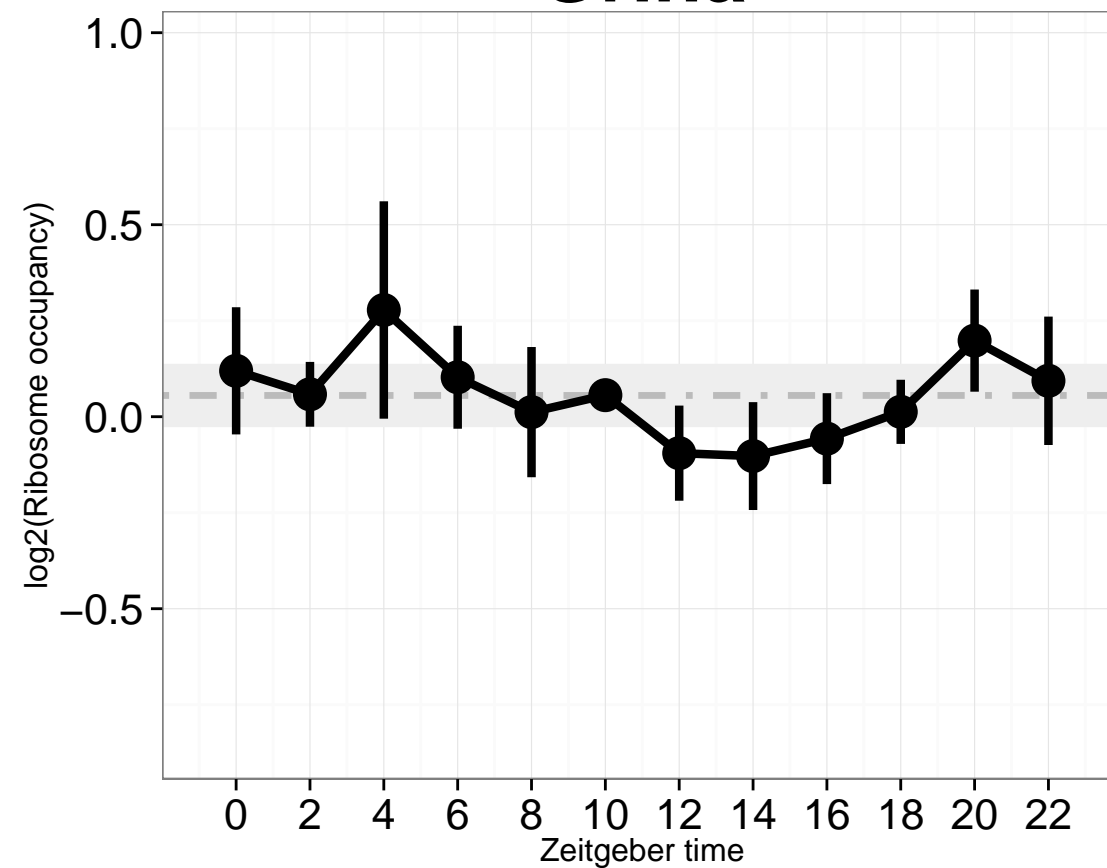

Supplement: Supplementary file 472 [file 1]

# Ccnd1

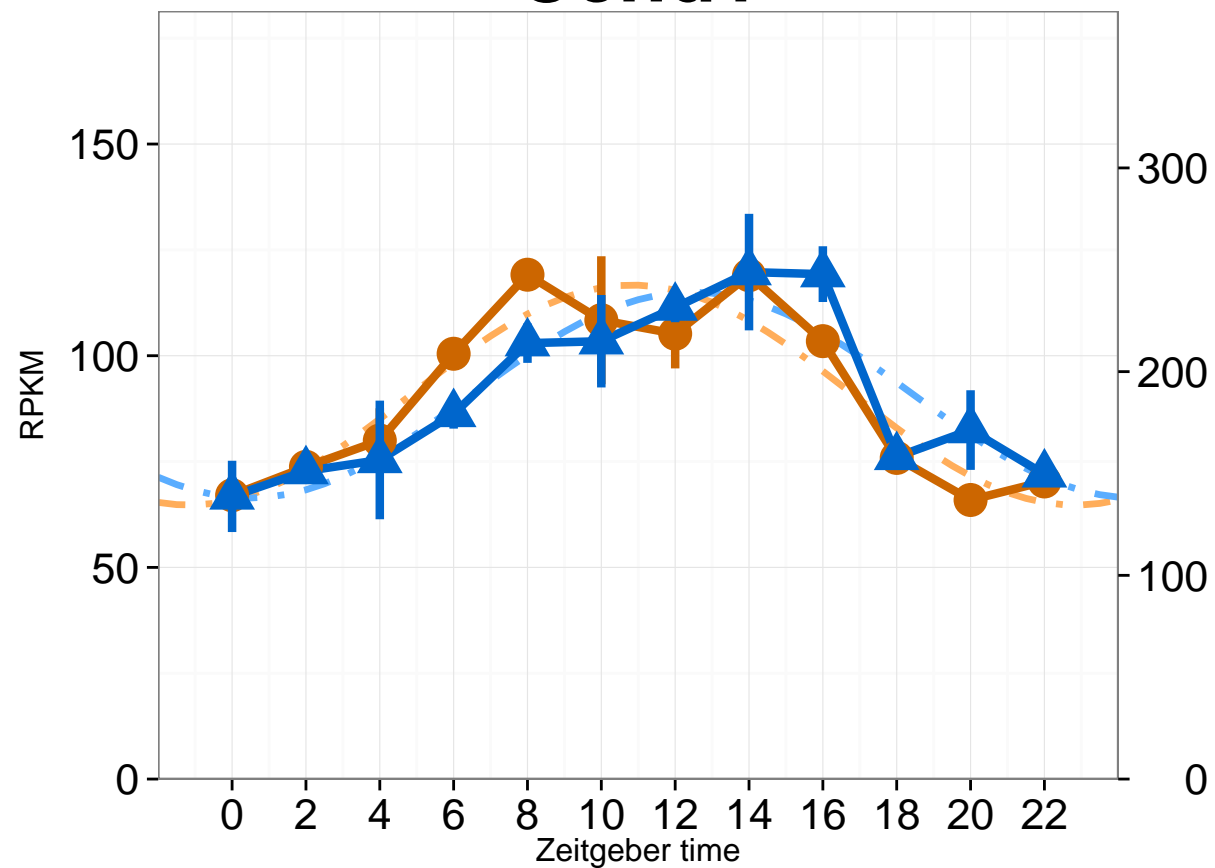

# Ccnd1

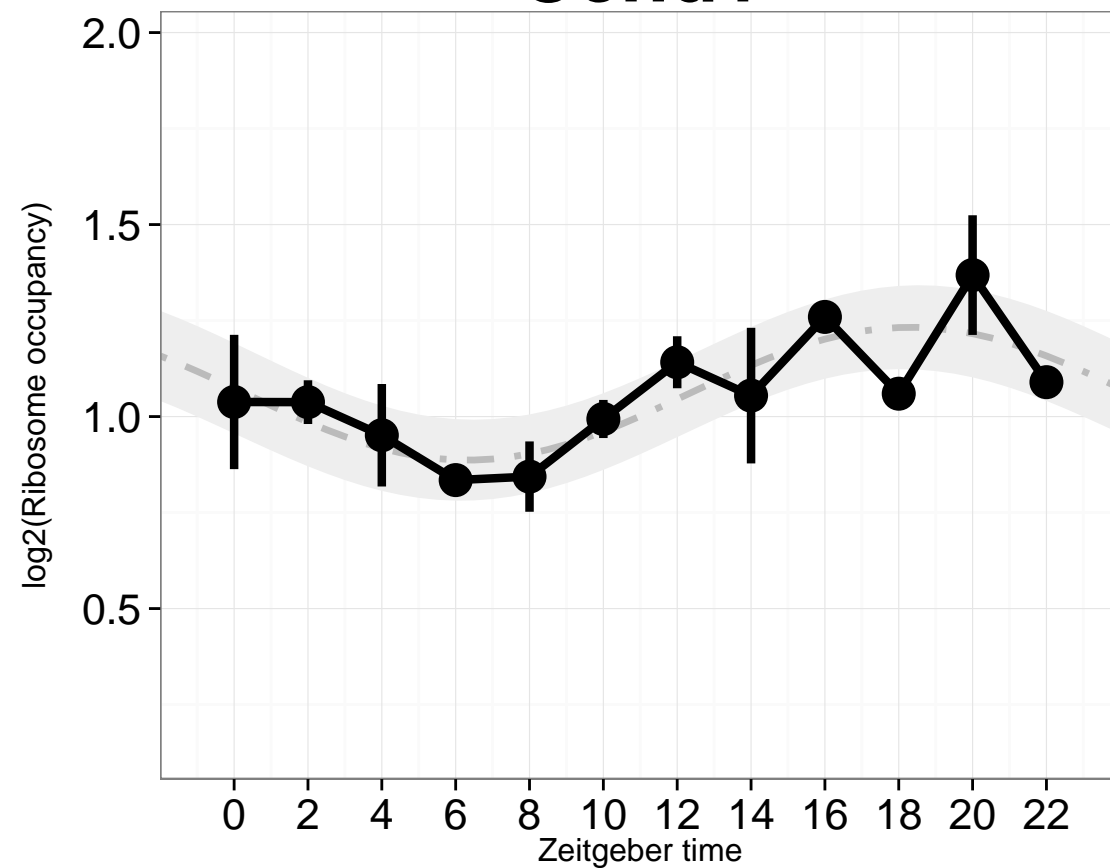

Supplement: Supplementary file 473 [file 1]

## Adm

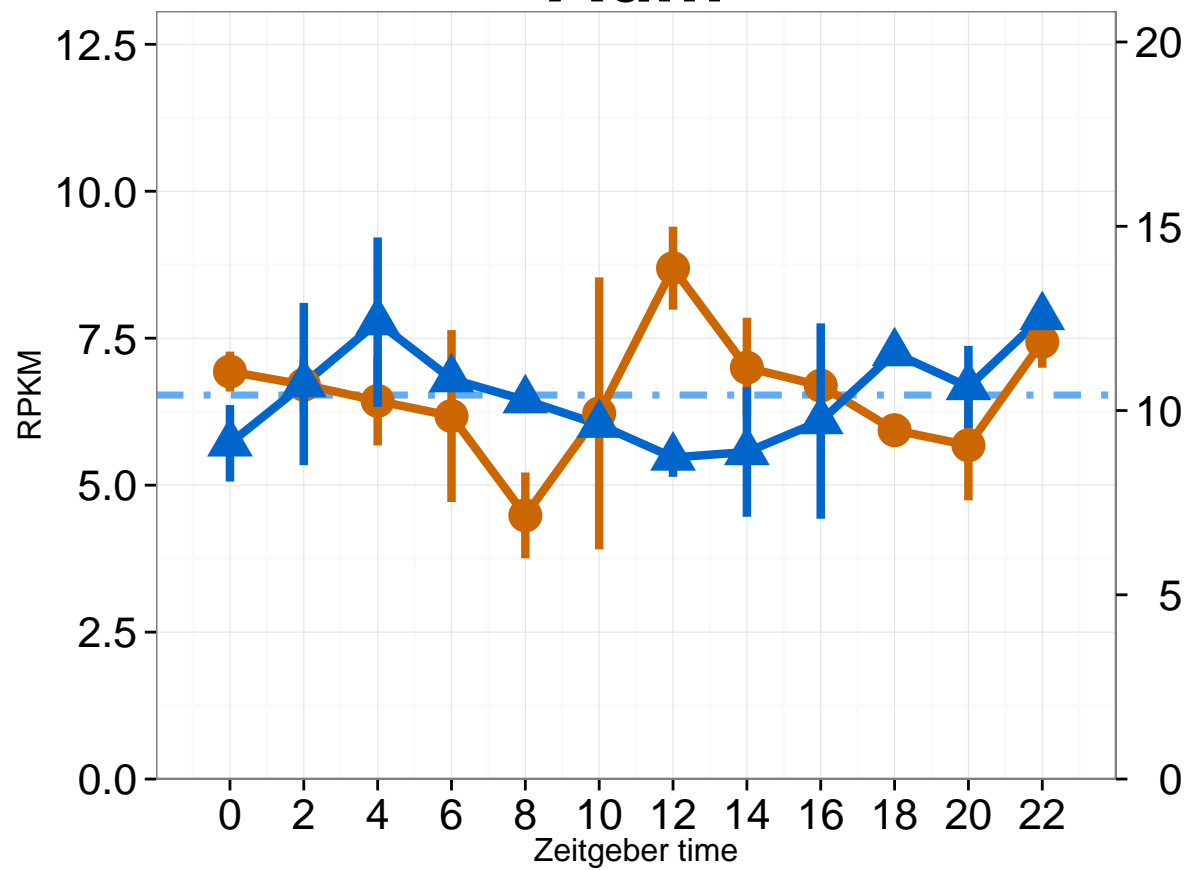

## Adm

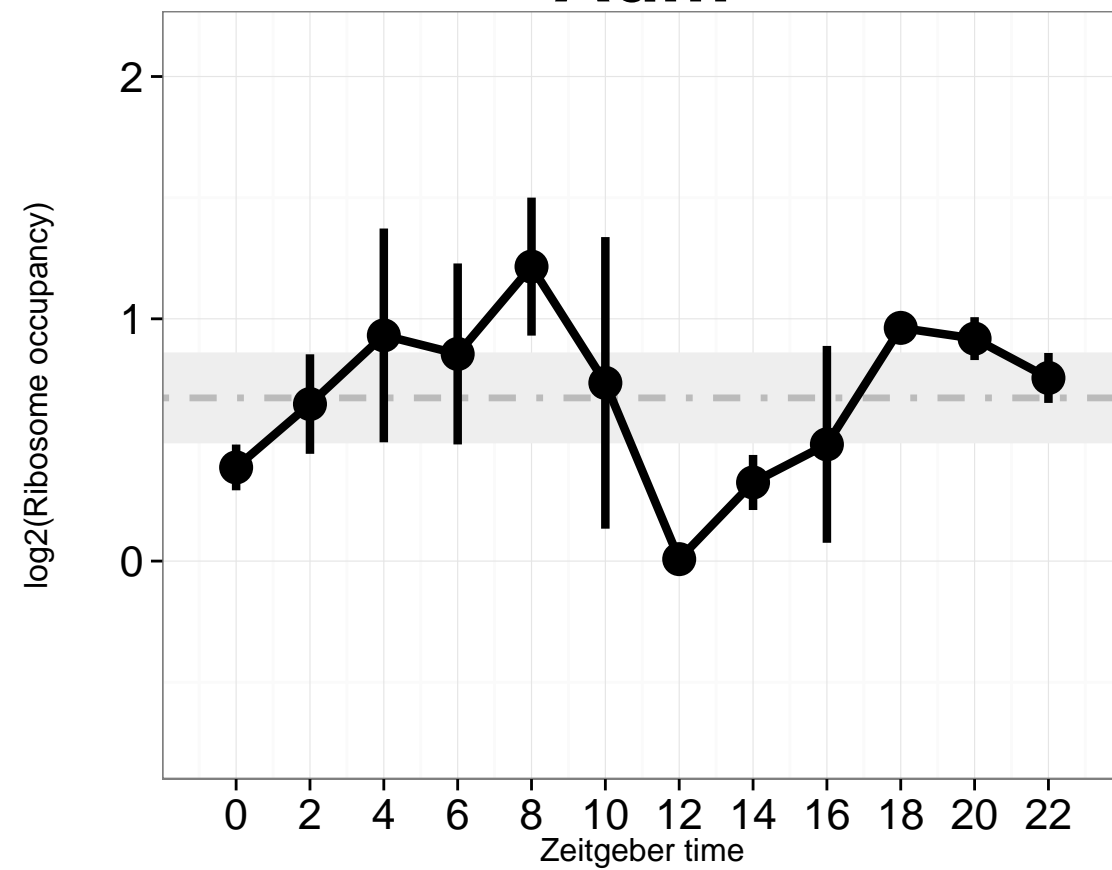

Supplement: Supplementary file 474 [file 1]

# Olfml2a

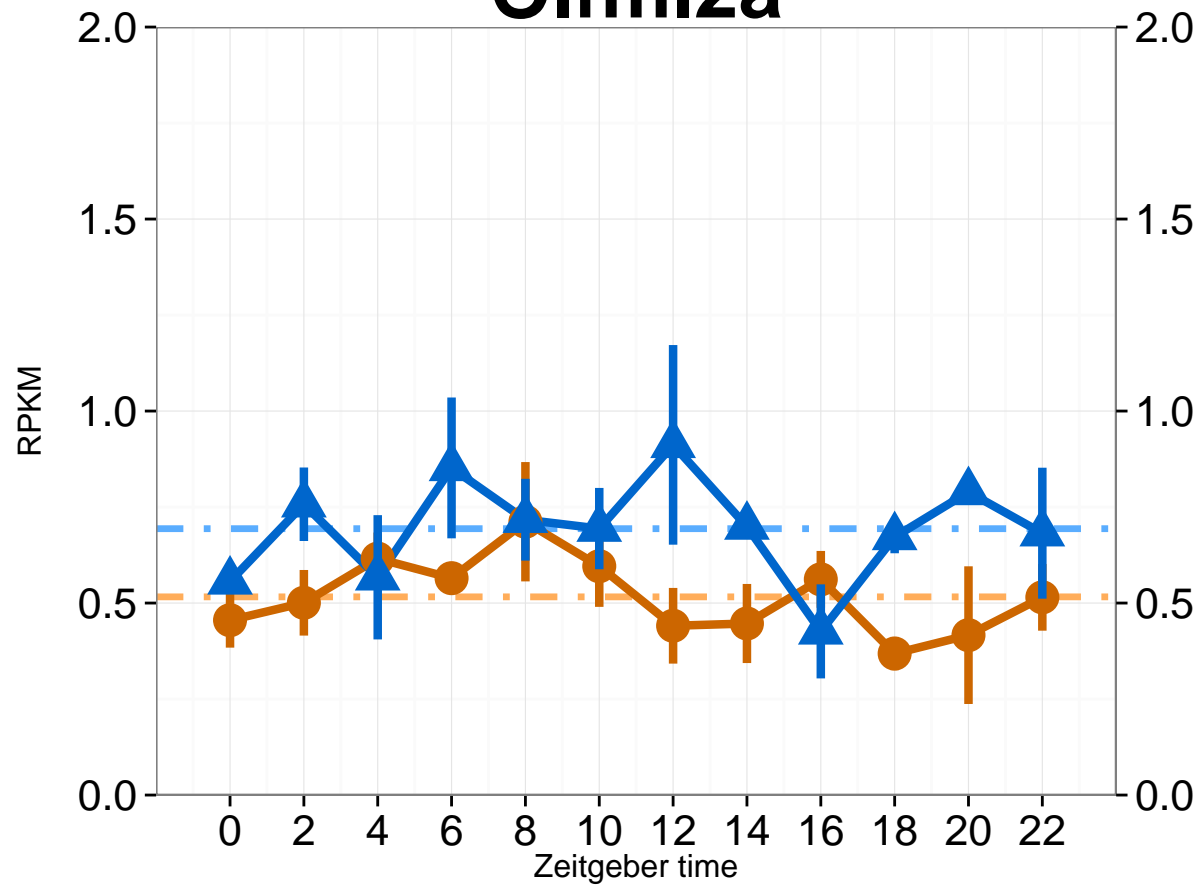

# Olfml2a

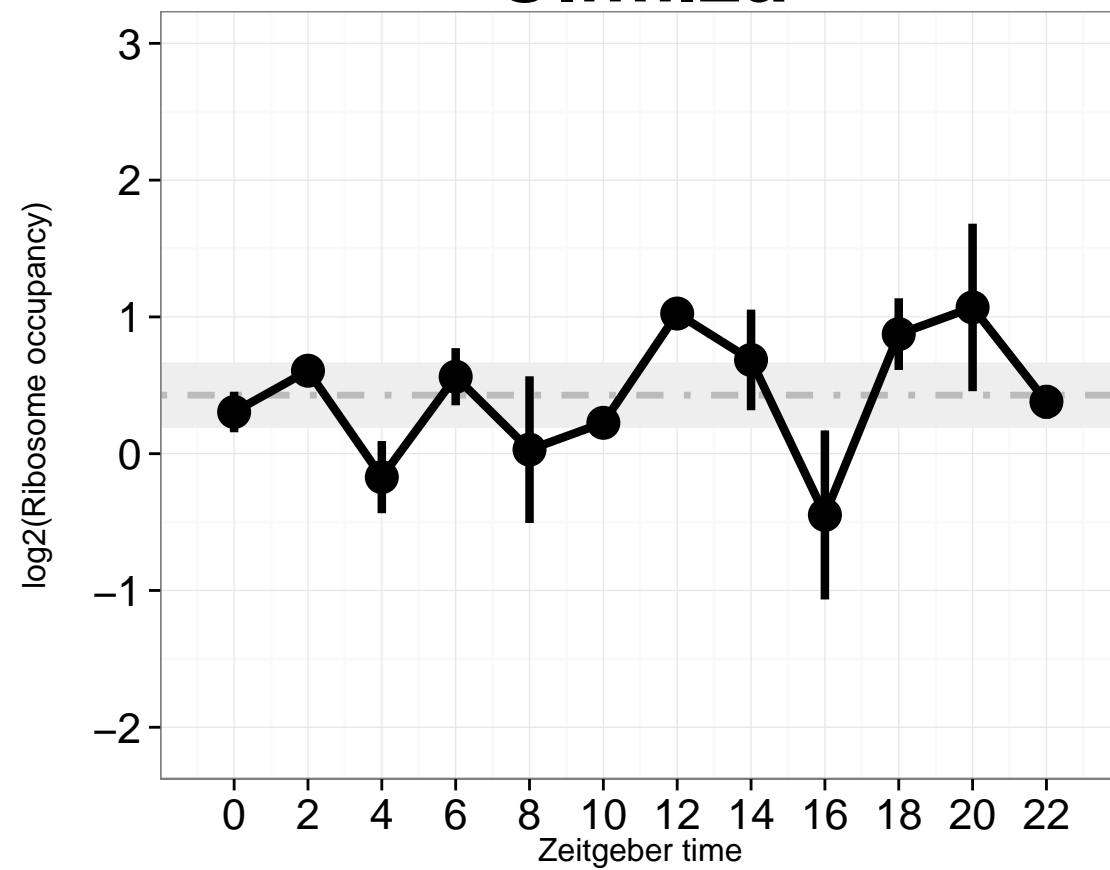

Supplement: Supplementary file 475 [file 1]

# Cyp3a13

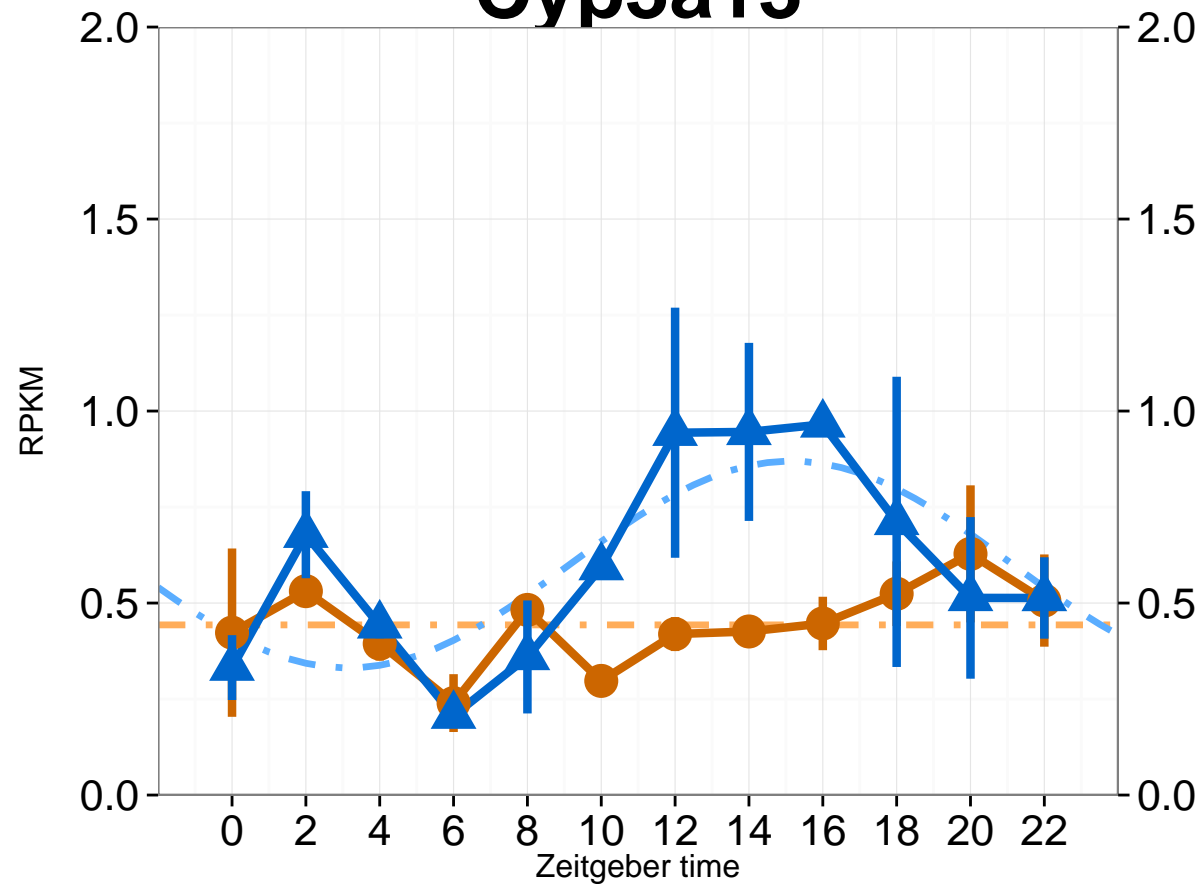

# Cyp3a13

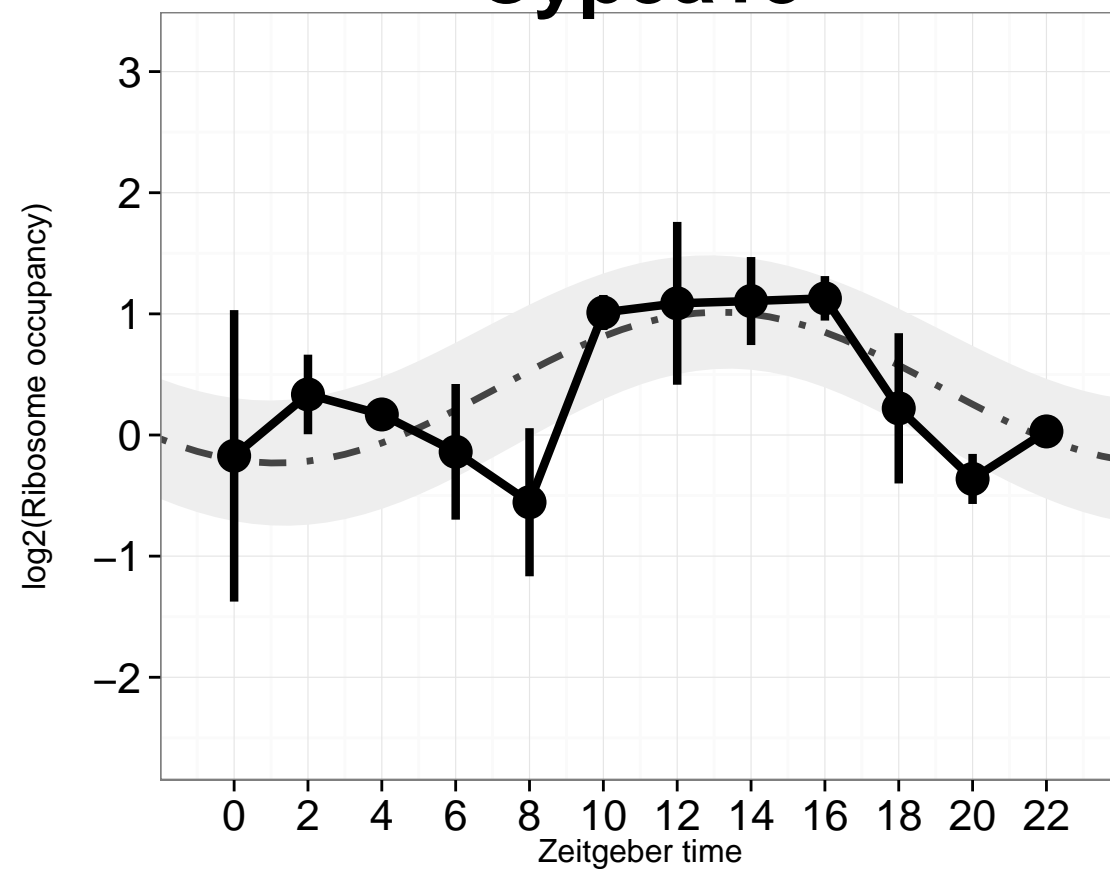

Supplement: Supplementary file 476 [file 1]

## Crcp

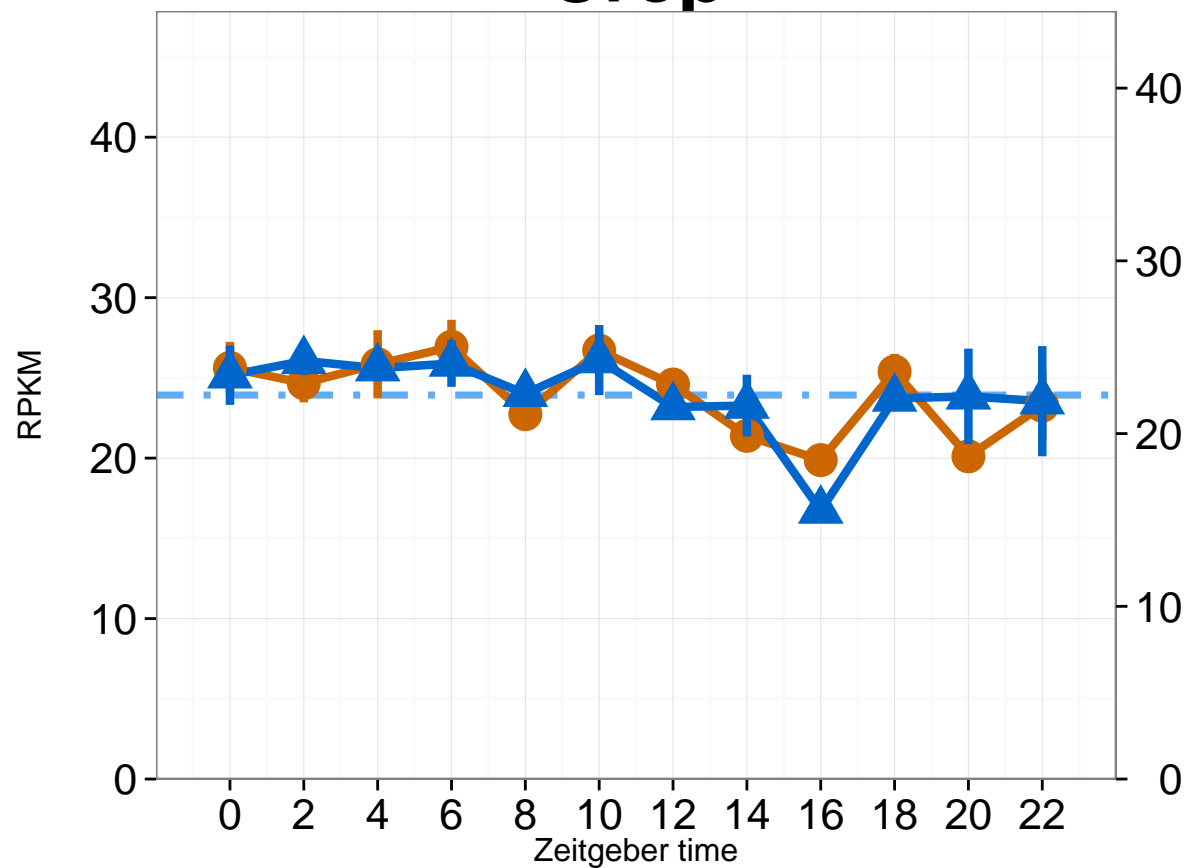

## Crcp

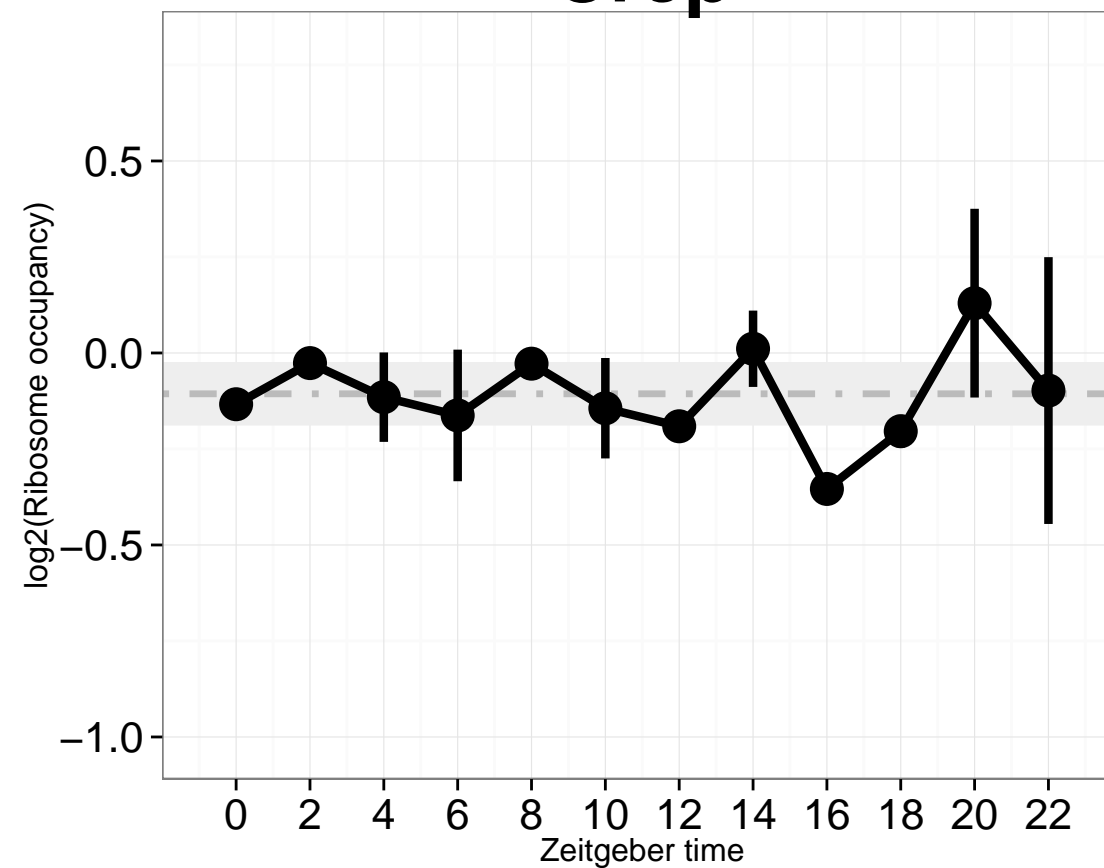

Supplement: Supplementary file 477 [file 1]

# Lipo1

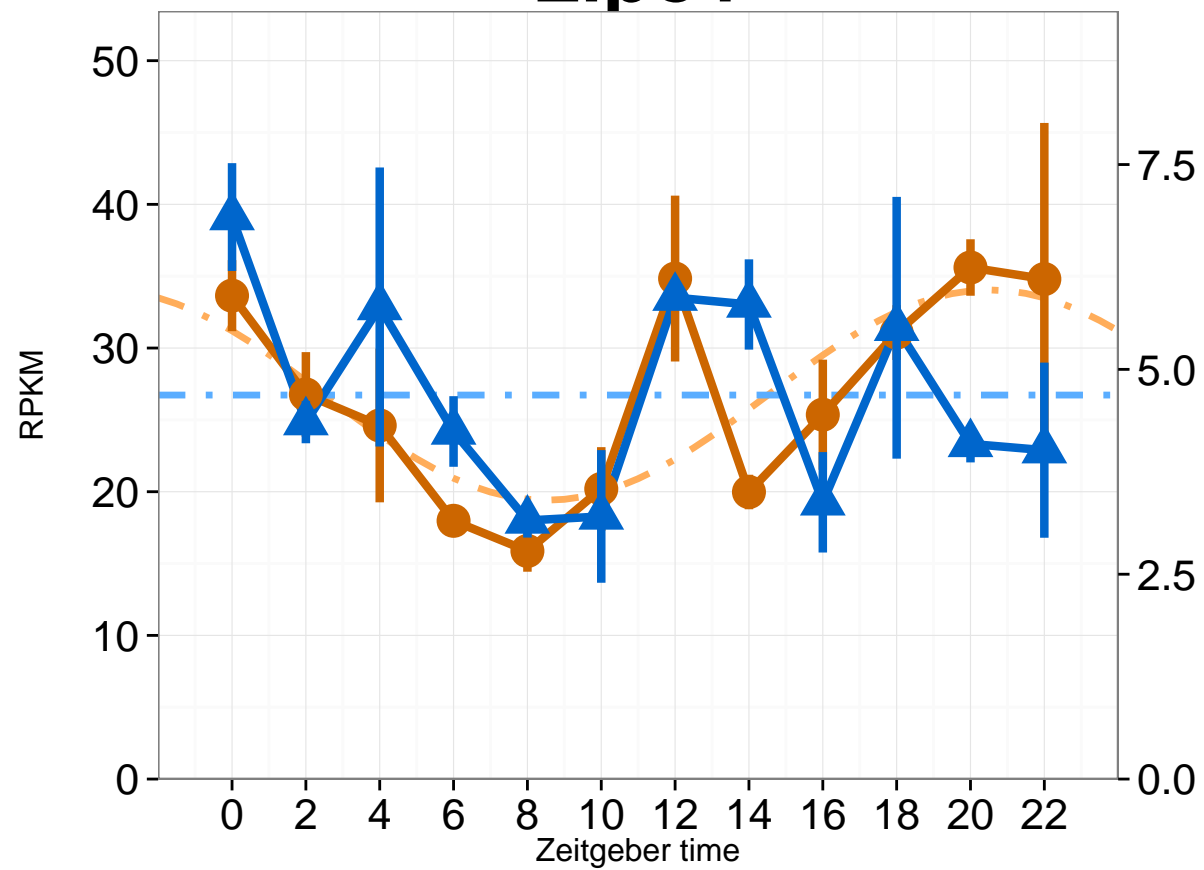

# Lipo1

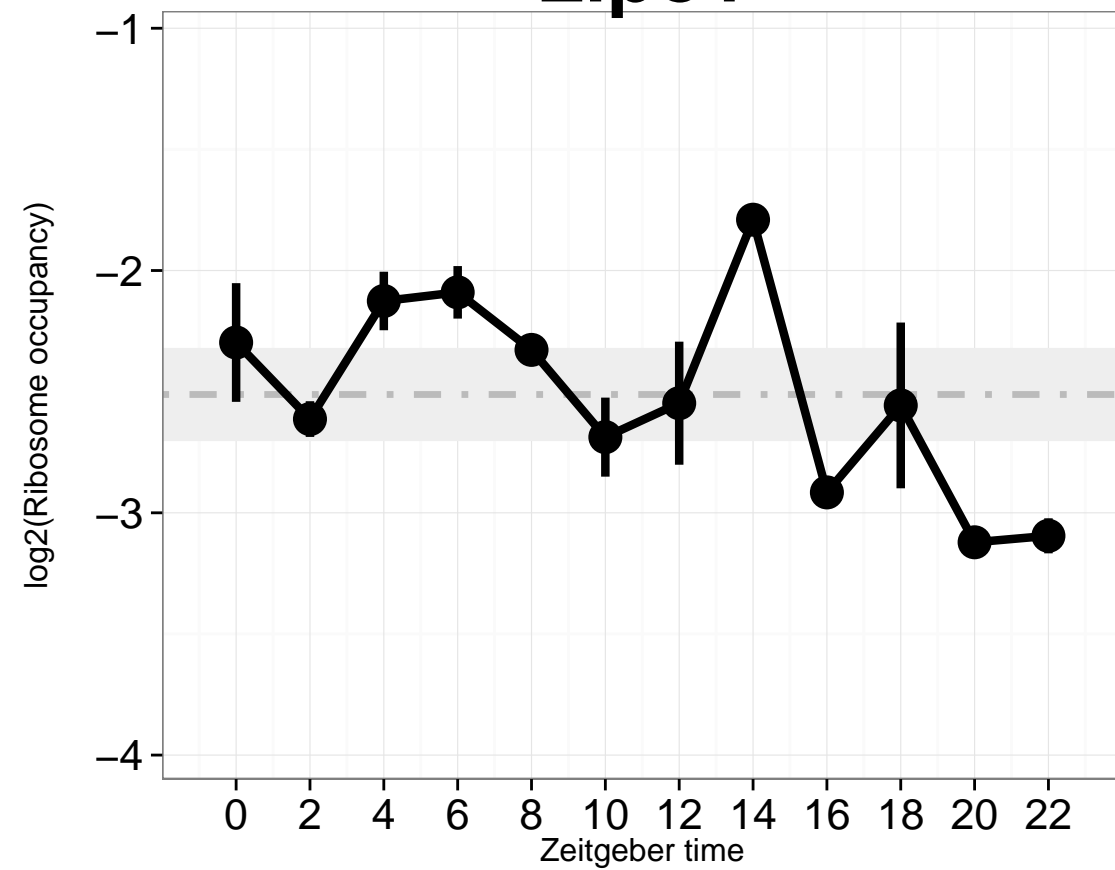

Supplement: Supplementary file 478 [file 1]

## Pdcd2

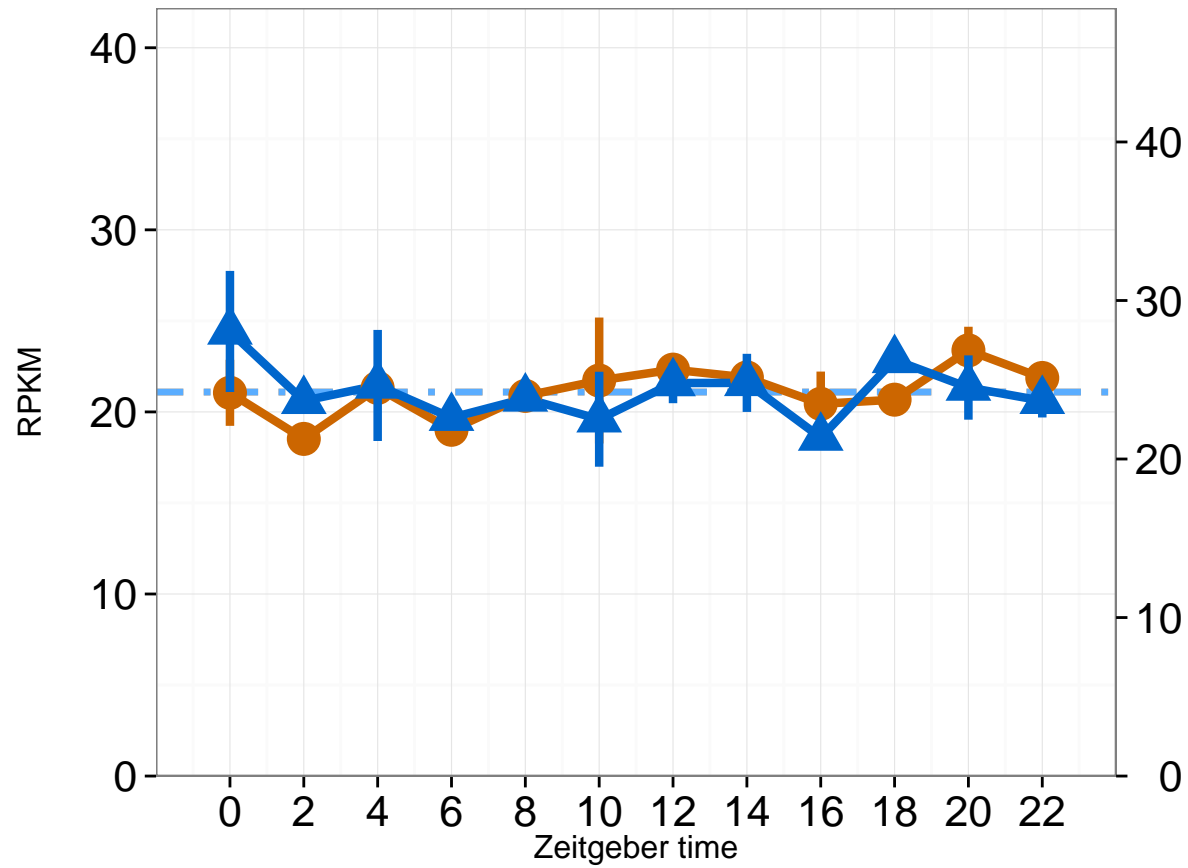

## Pdcd2

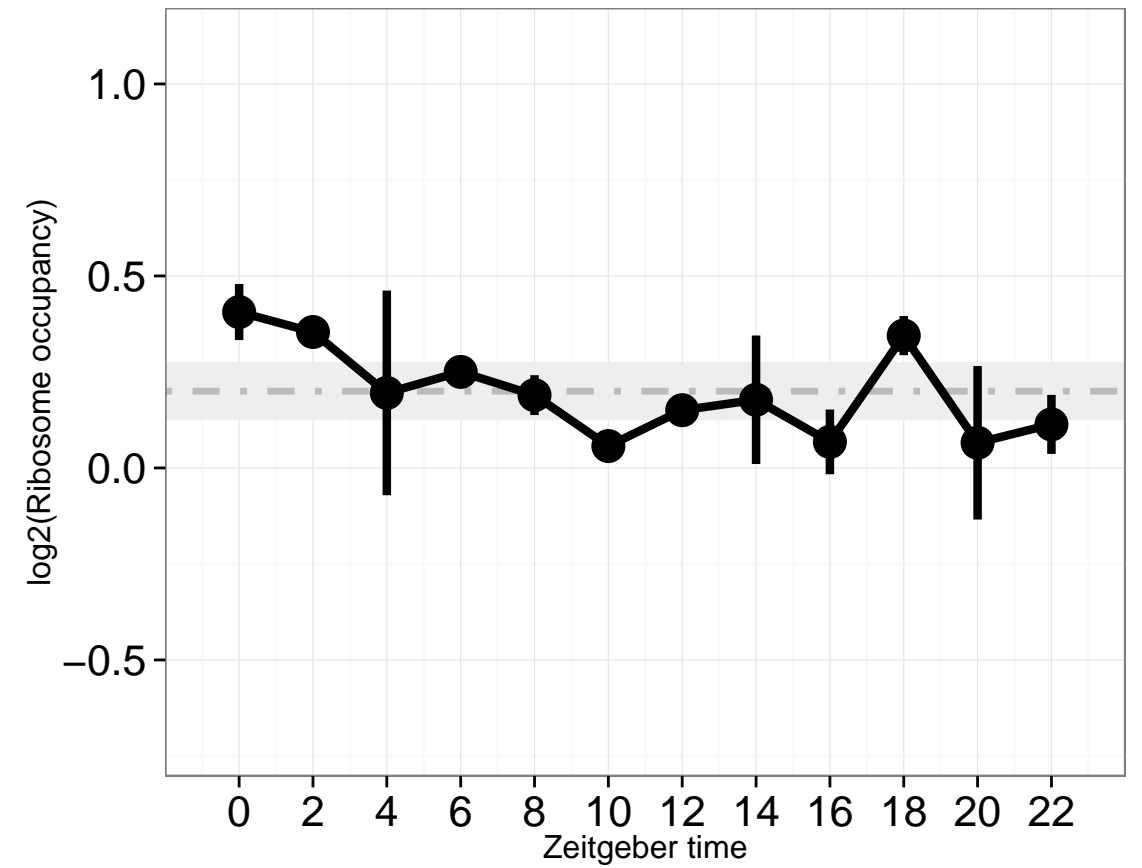

Supplement: Supplementary file 479 [file 1]

## Sec16b

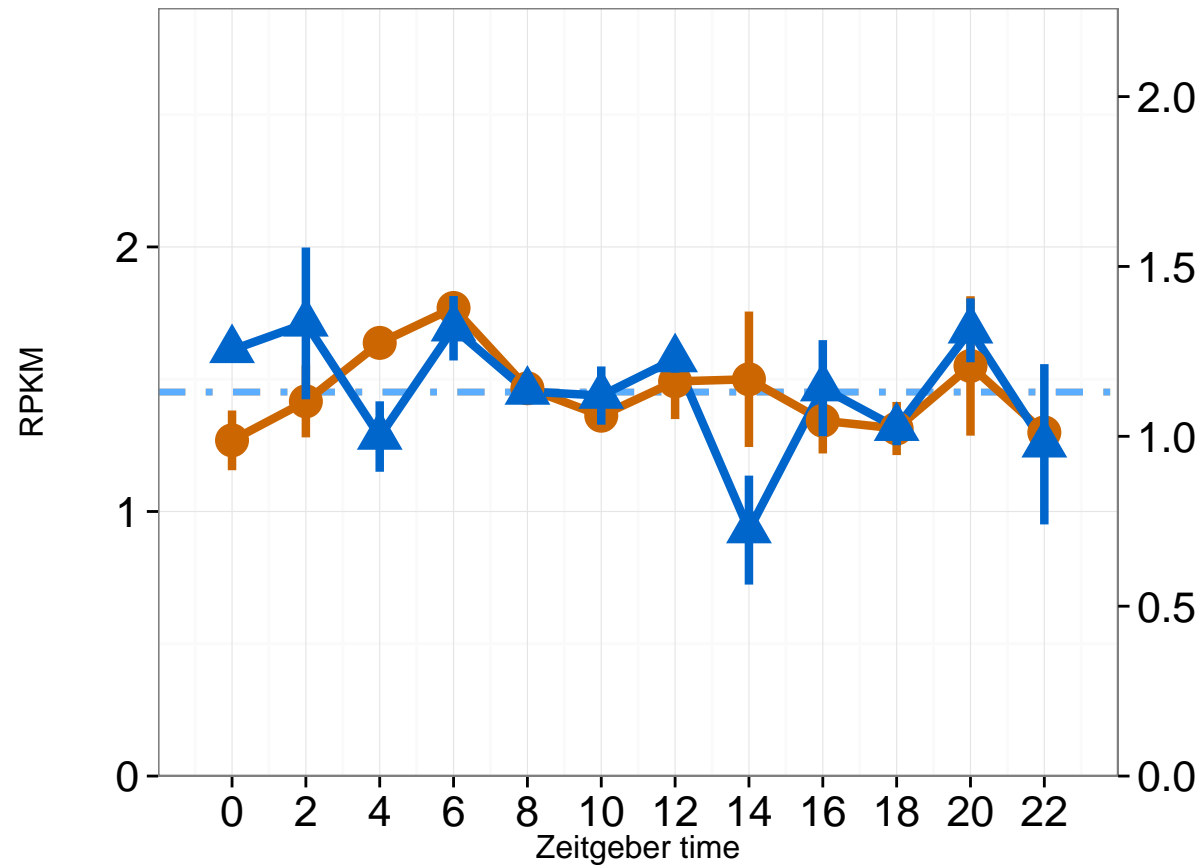

## Sec16b

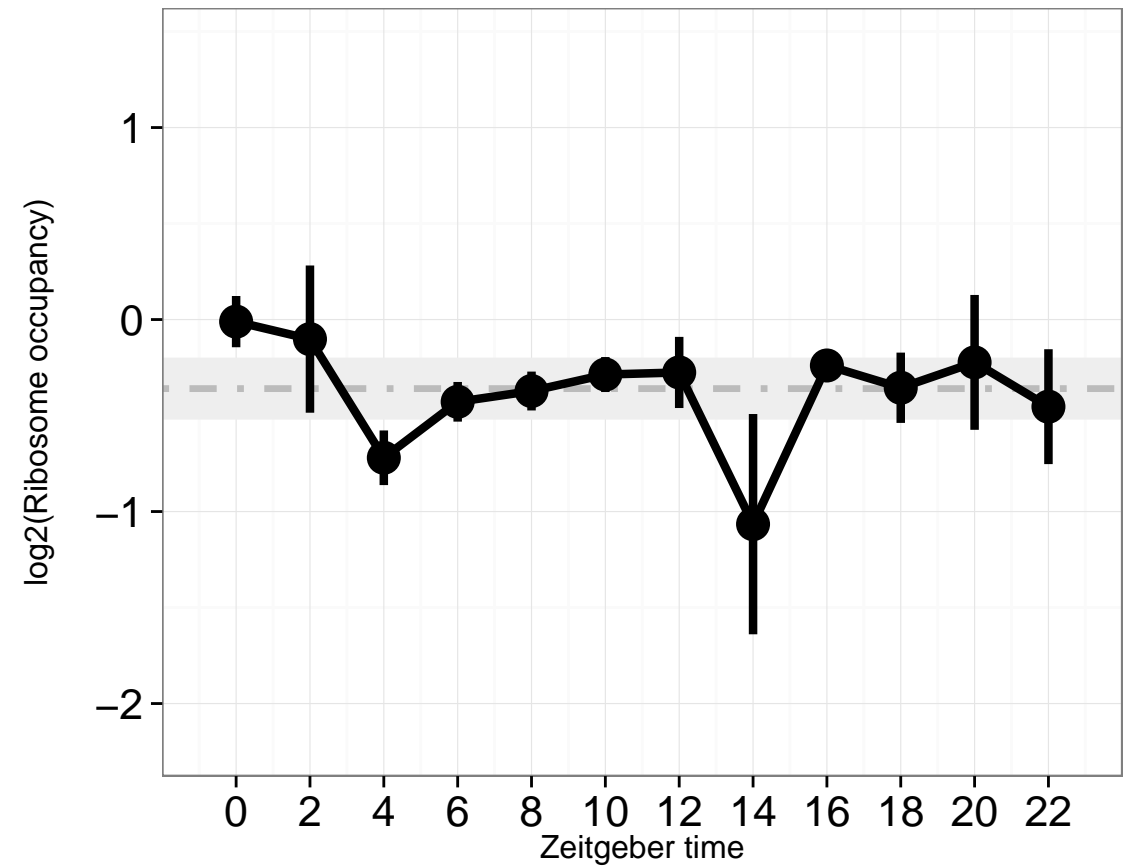

Supplement: Supplementary file 480 [file 1]

**Hist1h2ah TR**

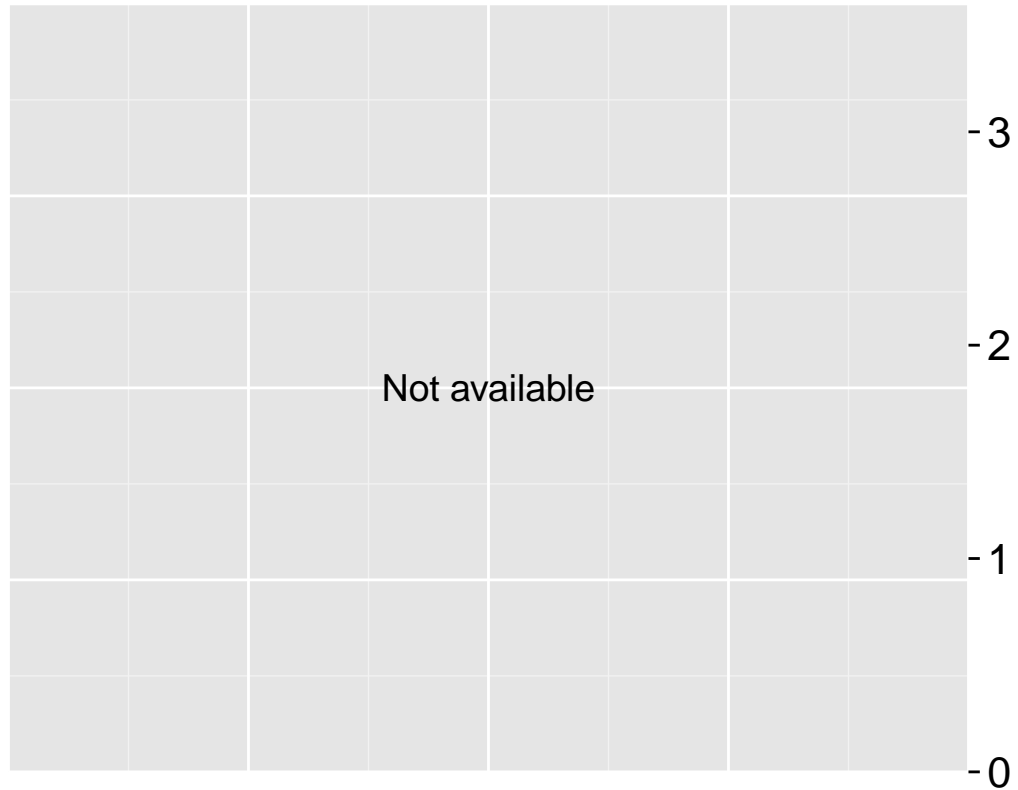

**Hist1h2ah log2(Ribosome occupanc**

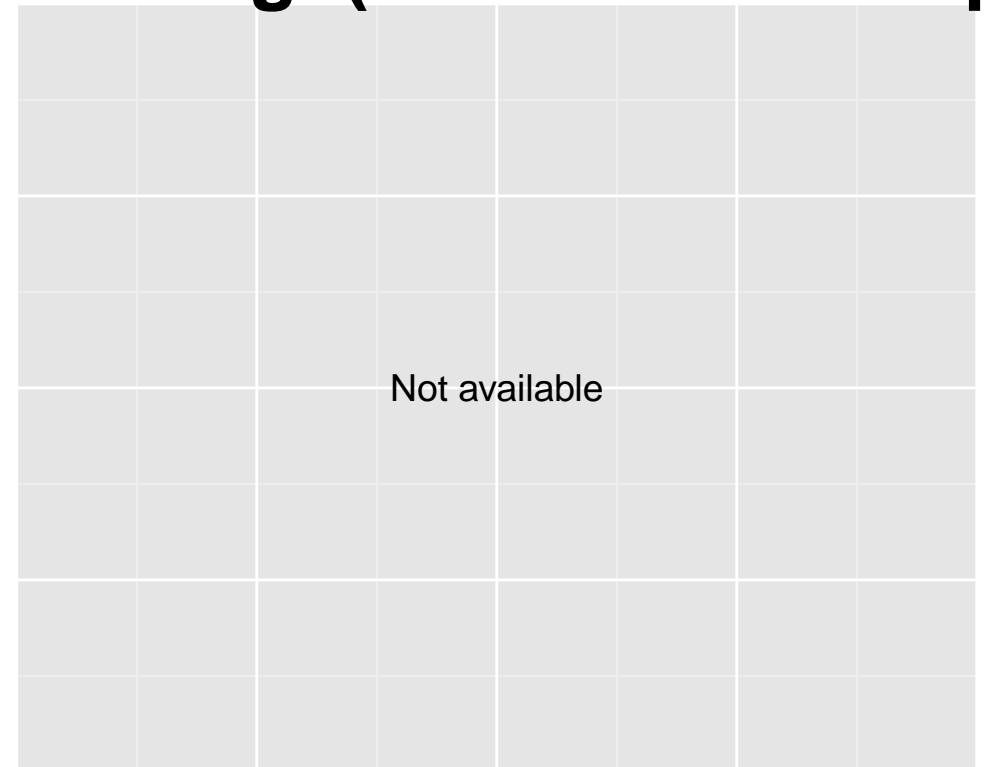

Supplement: Supplementary file 481 [file 1]

## Socs3

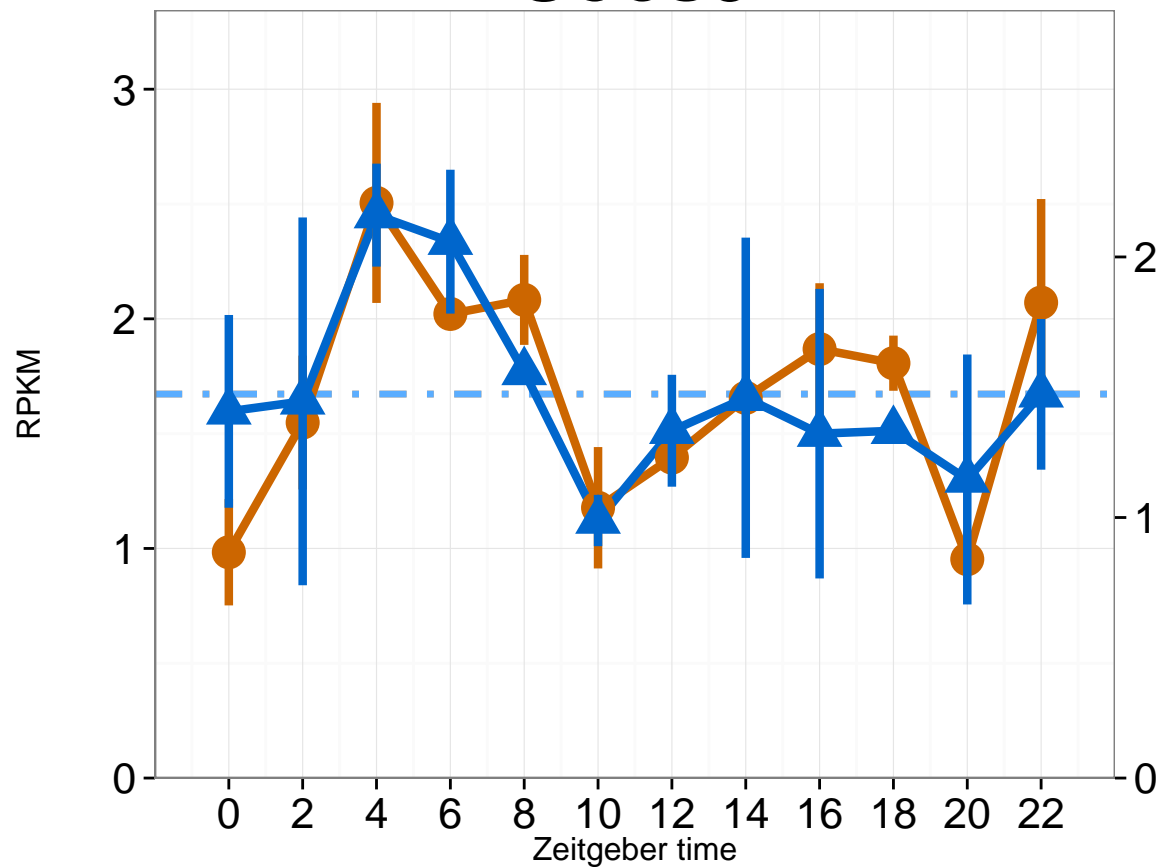

## Socs3

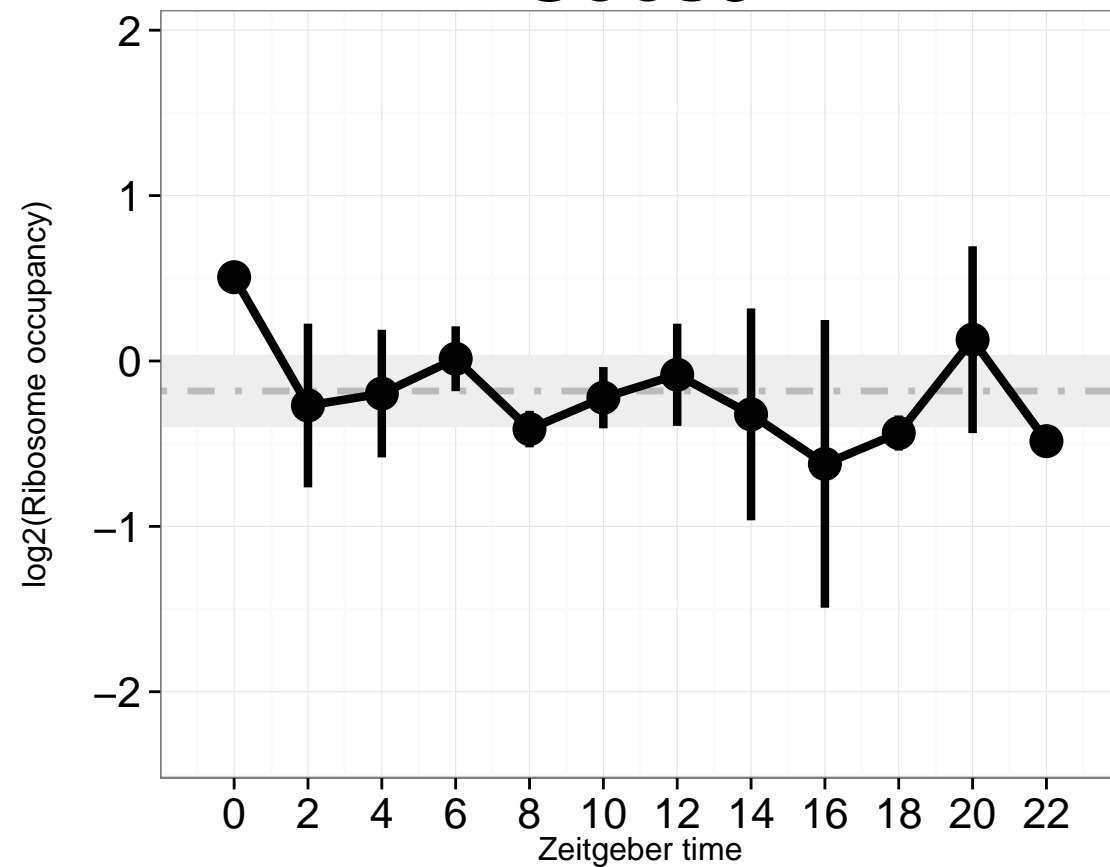

Supplement: Supplementary file 482 [file 1]

## Ranbp6

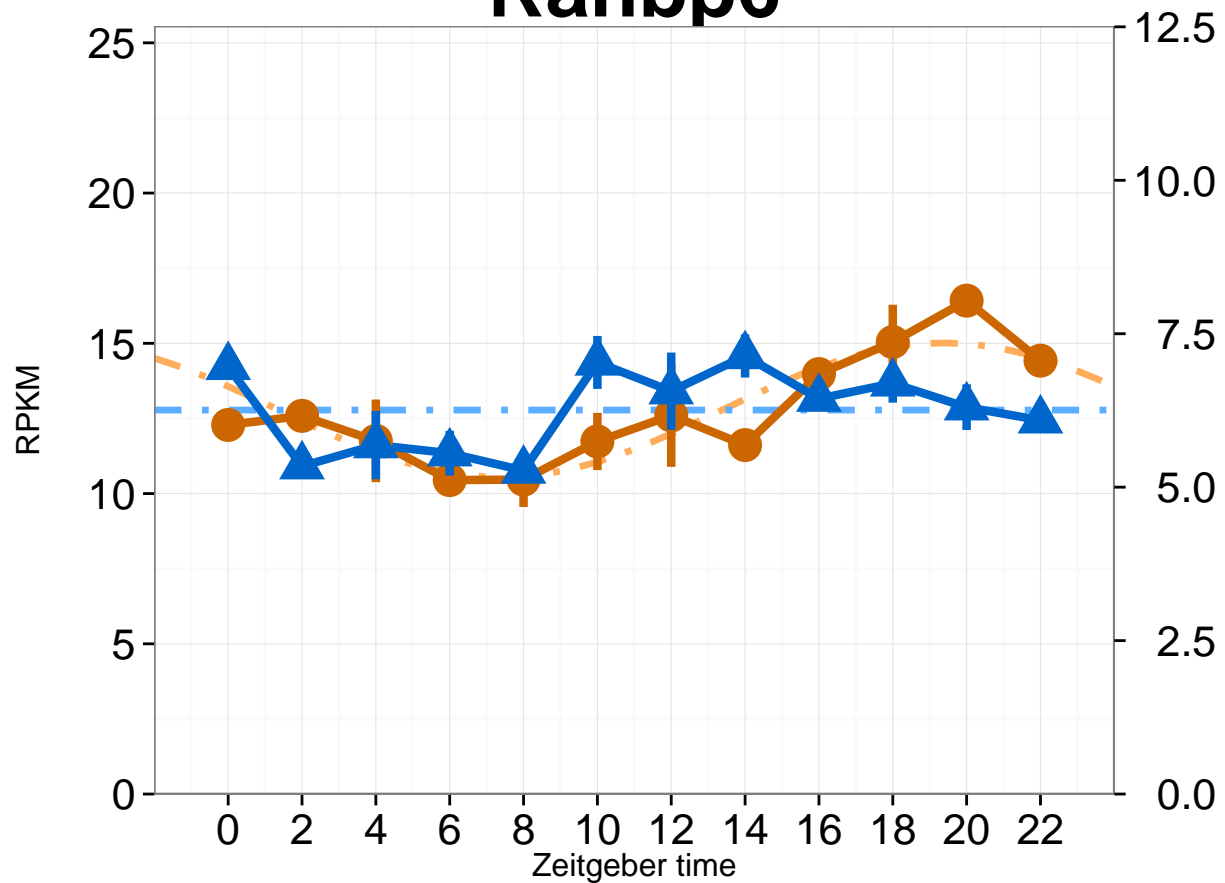

## Ranbp6

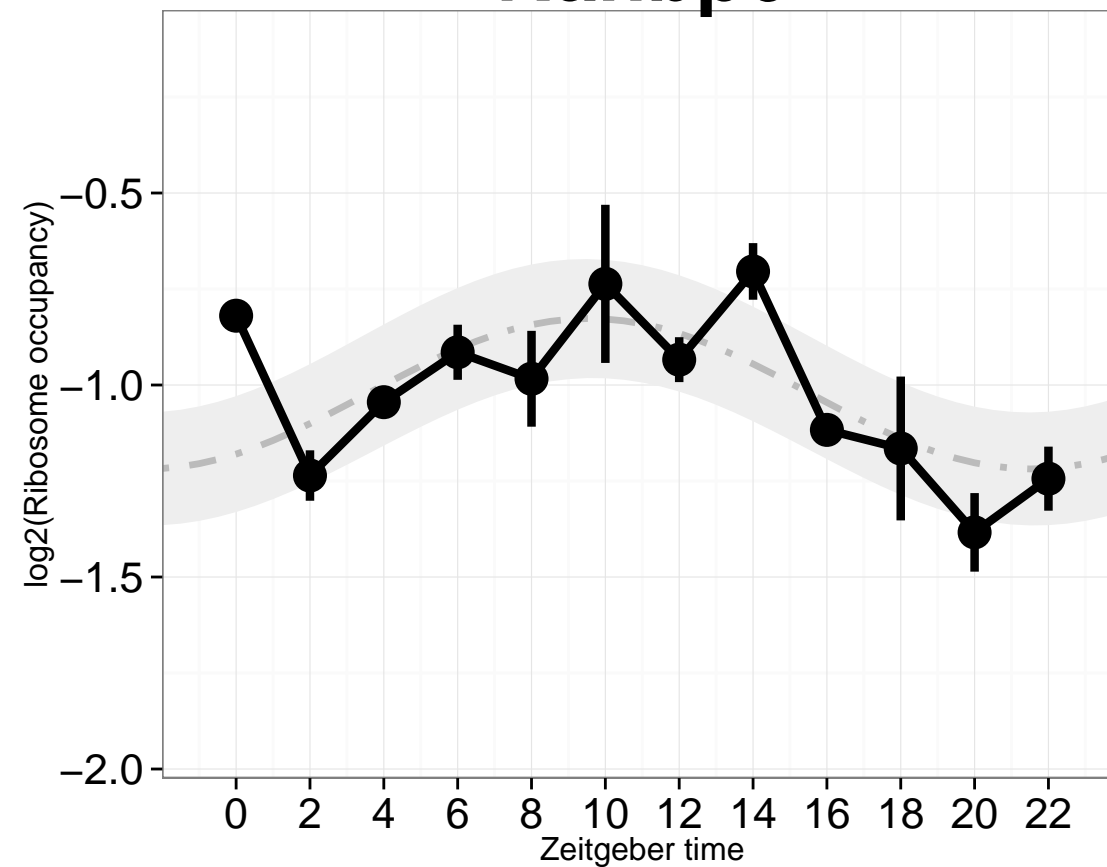

Supplement: Supplementary file 483 [file 1]

# Cox7a1

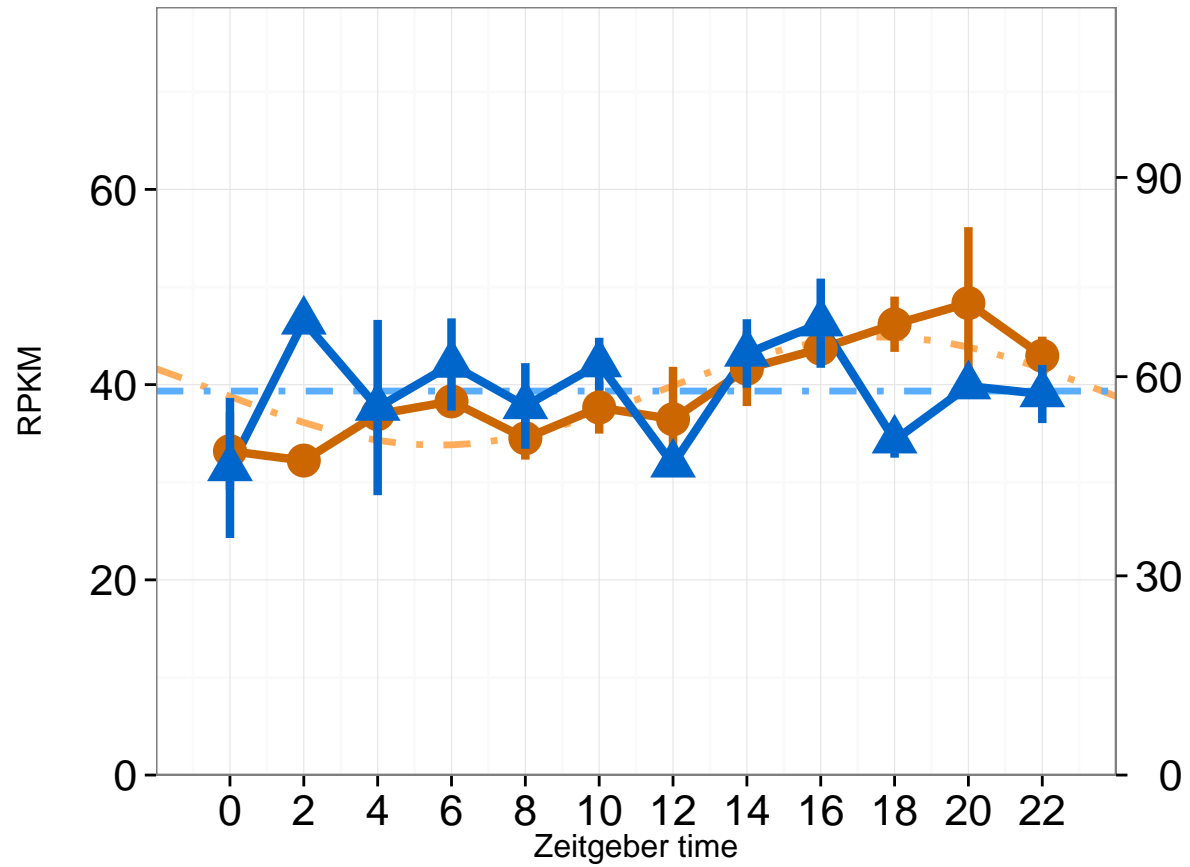

# Cox7a1

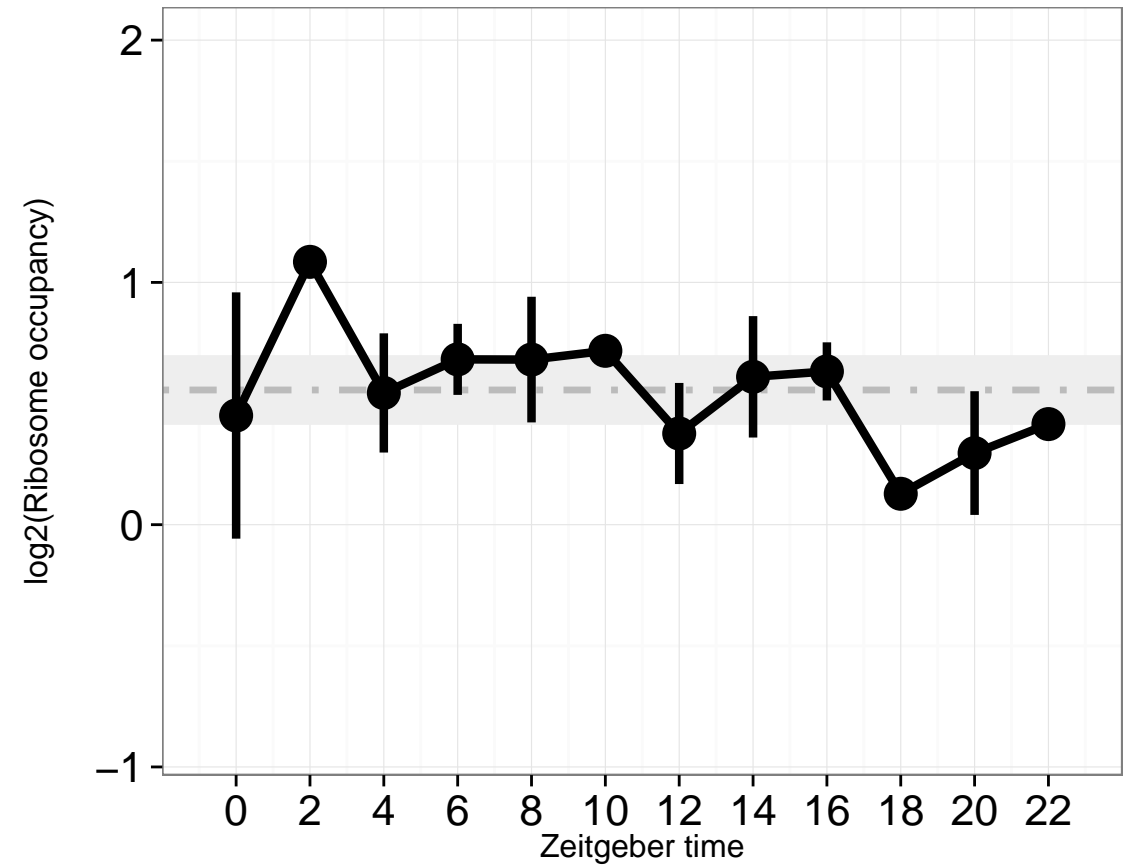

Supplement: Supplementary file 484 [file 1]

# Cox16

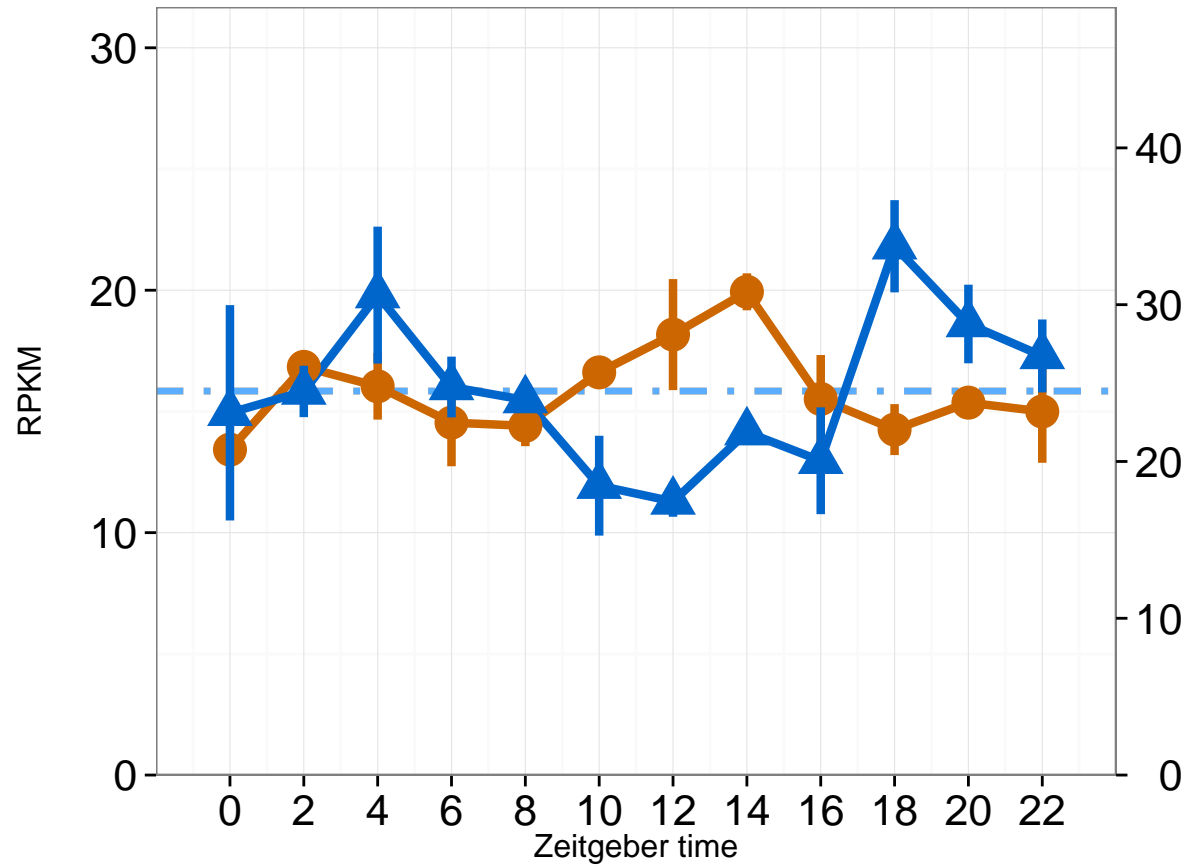

# Cox16

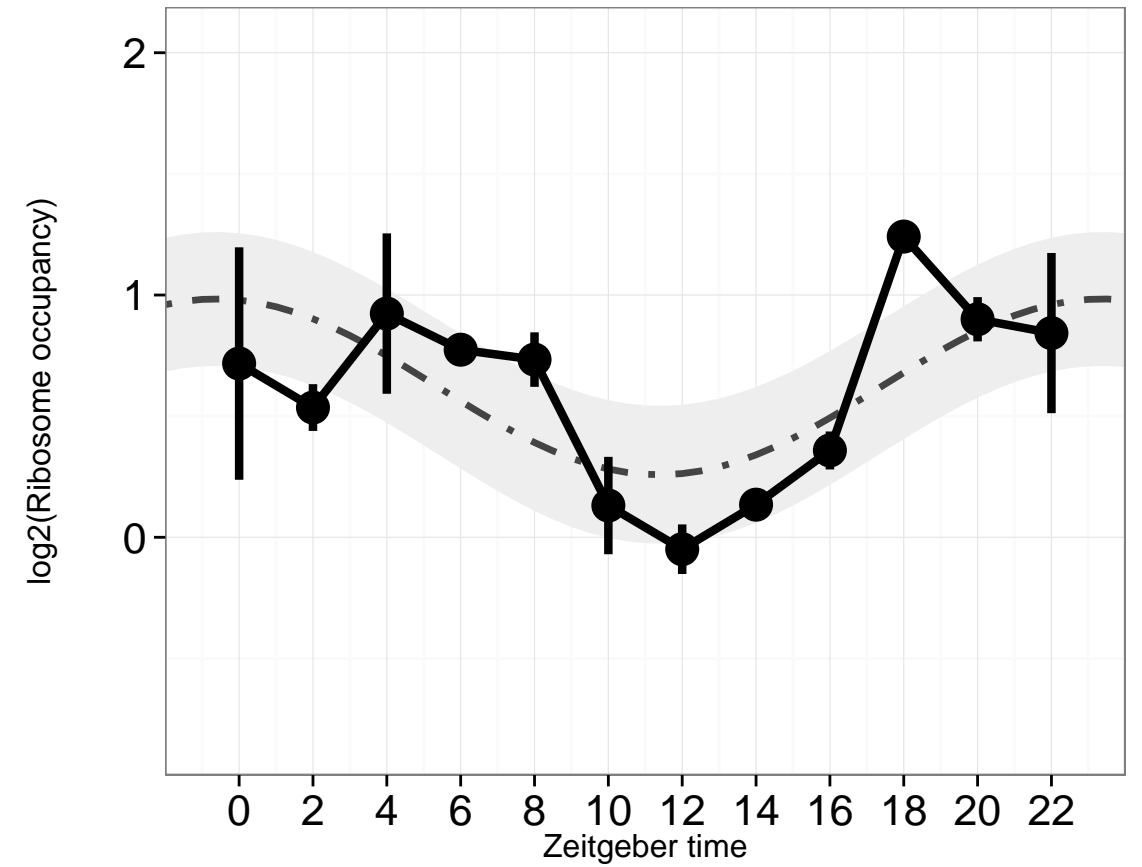

Supplement: Supplementary file 485 [file 1]

# Ptprs

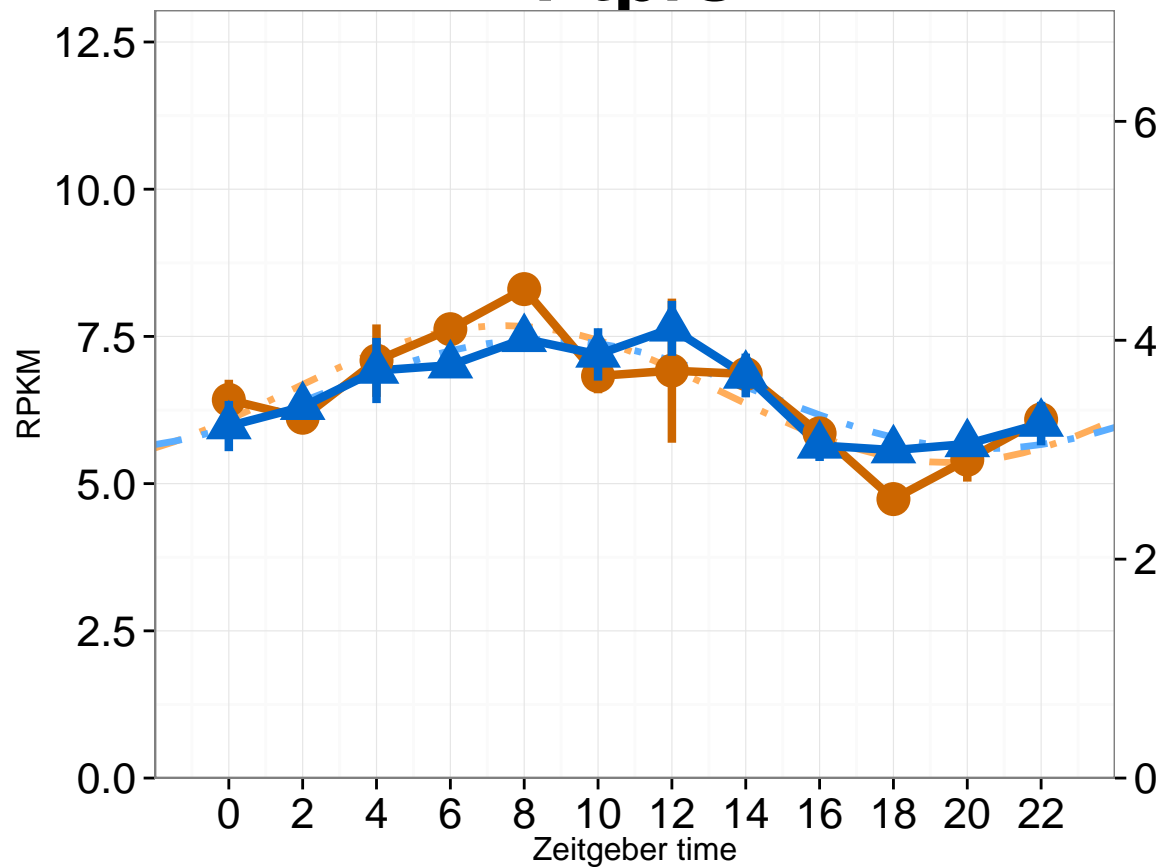

# Ptprs

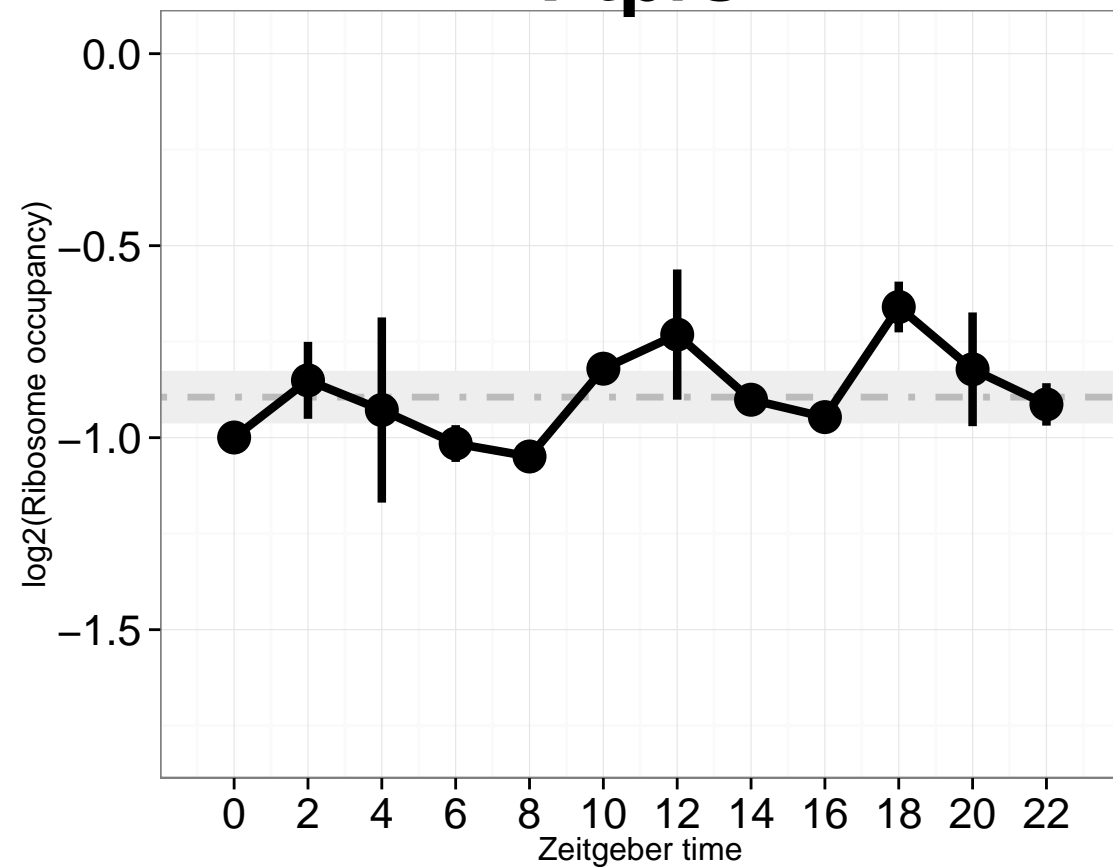

Supplement: Supplementary file 486 [file 1]

# Nmrk1

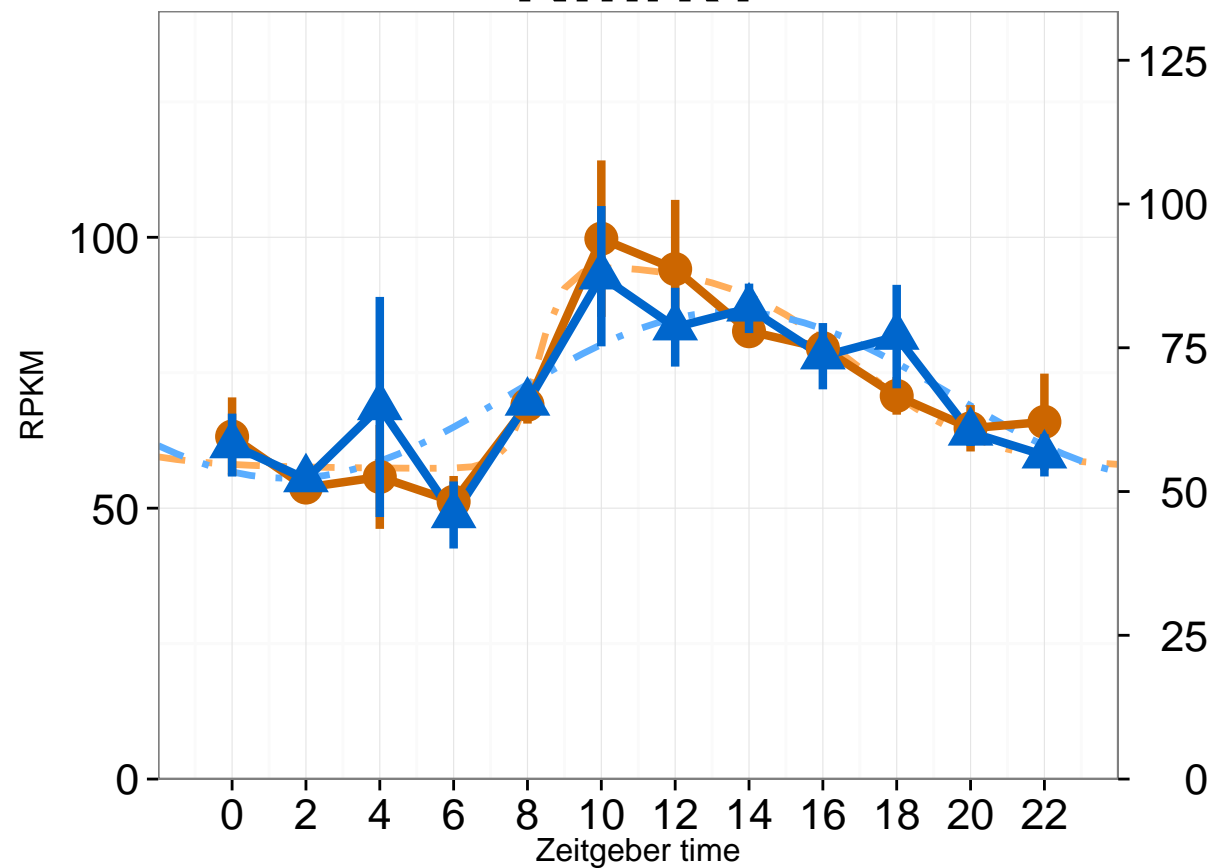

# Nmrk1

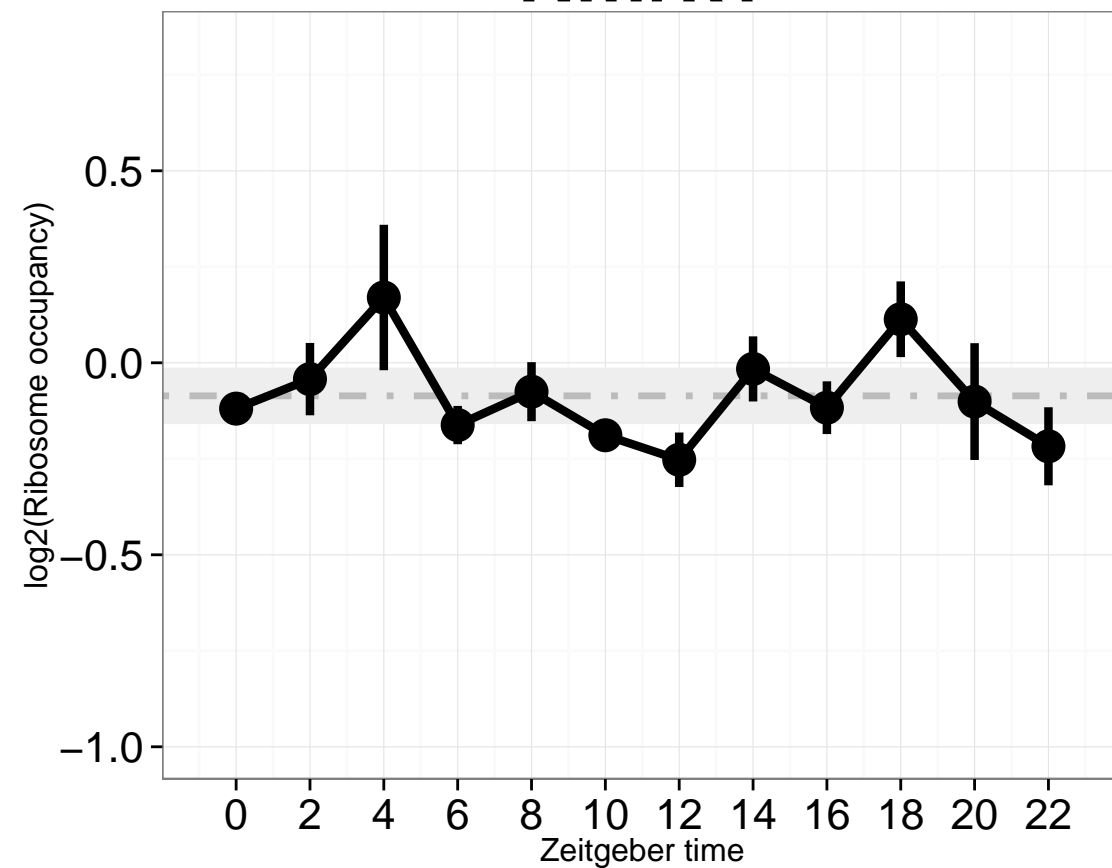

Supplement: Supplementary file 487 [file 1]

# Trappc11

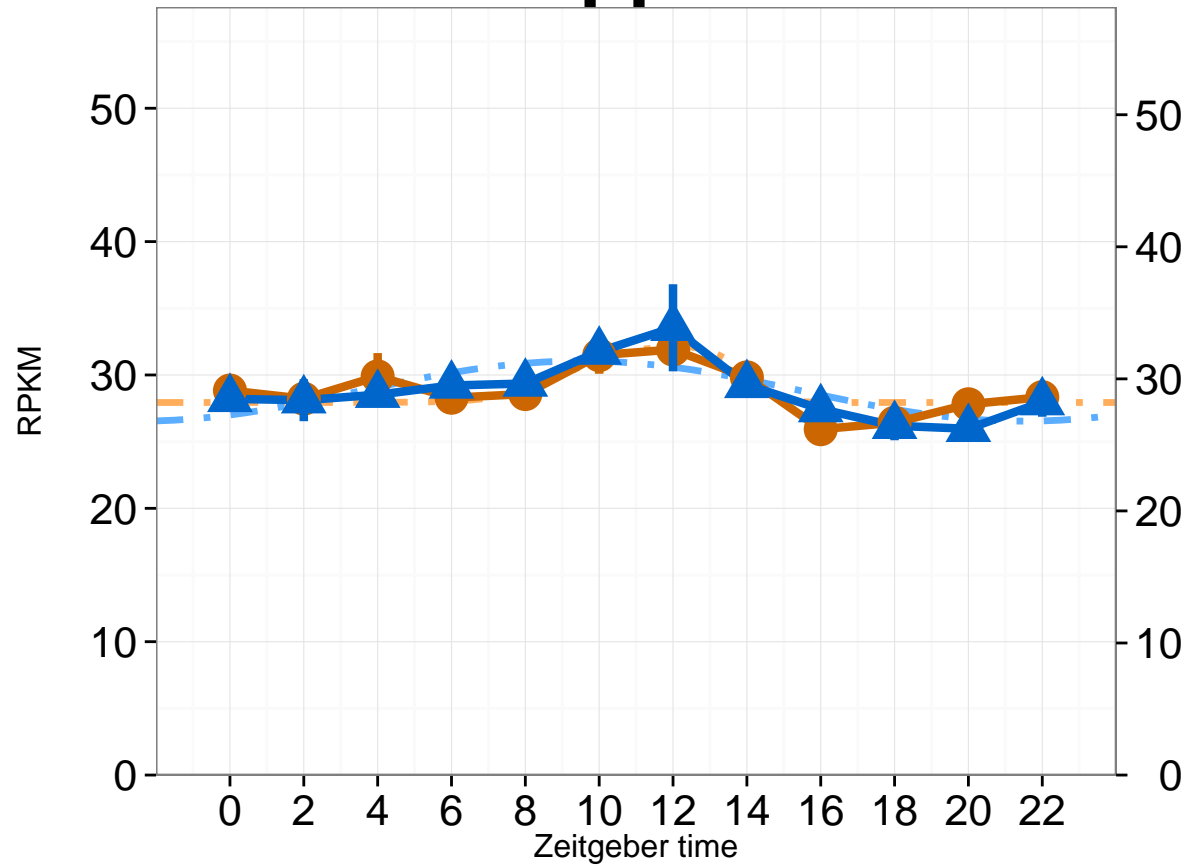

# Trappc11

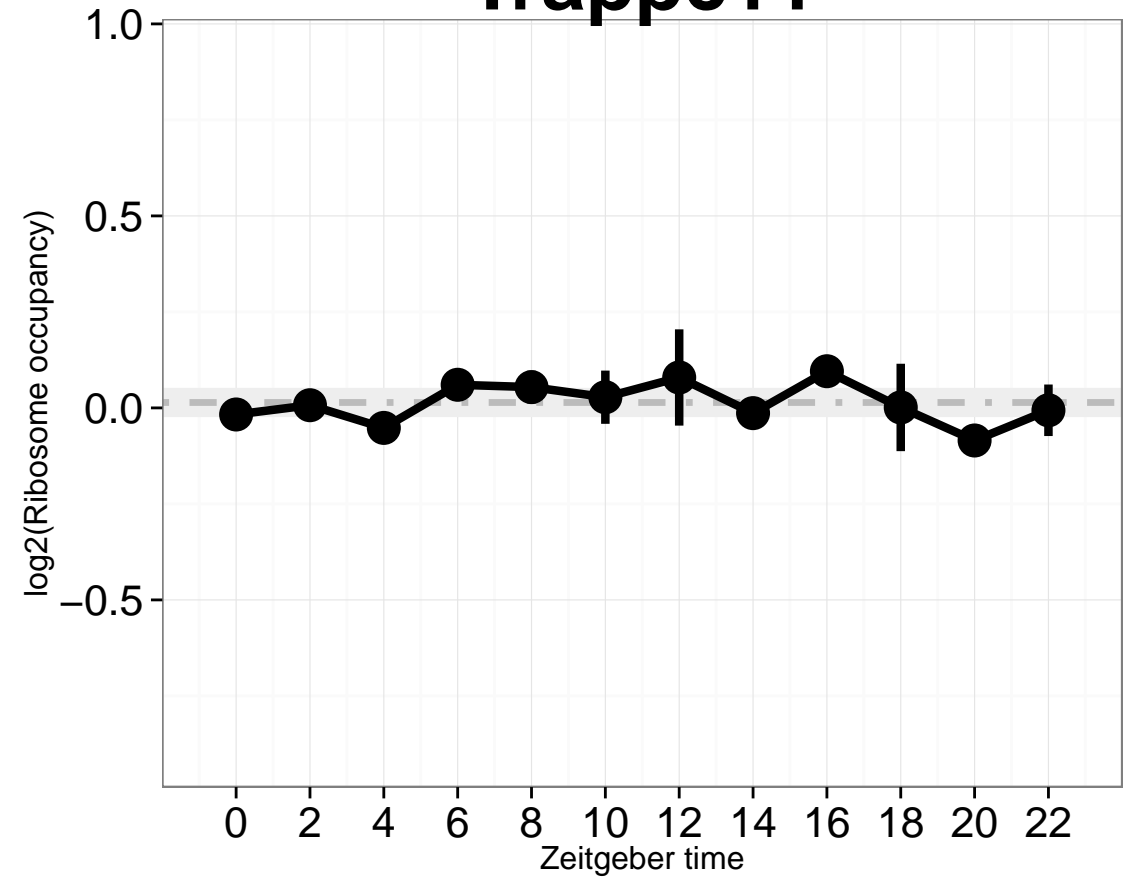

Supplement: Supplementary file 488 [file 1]

## Pole4

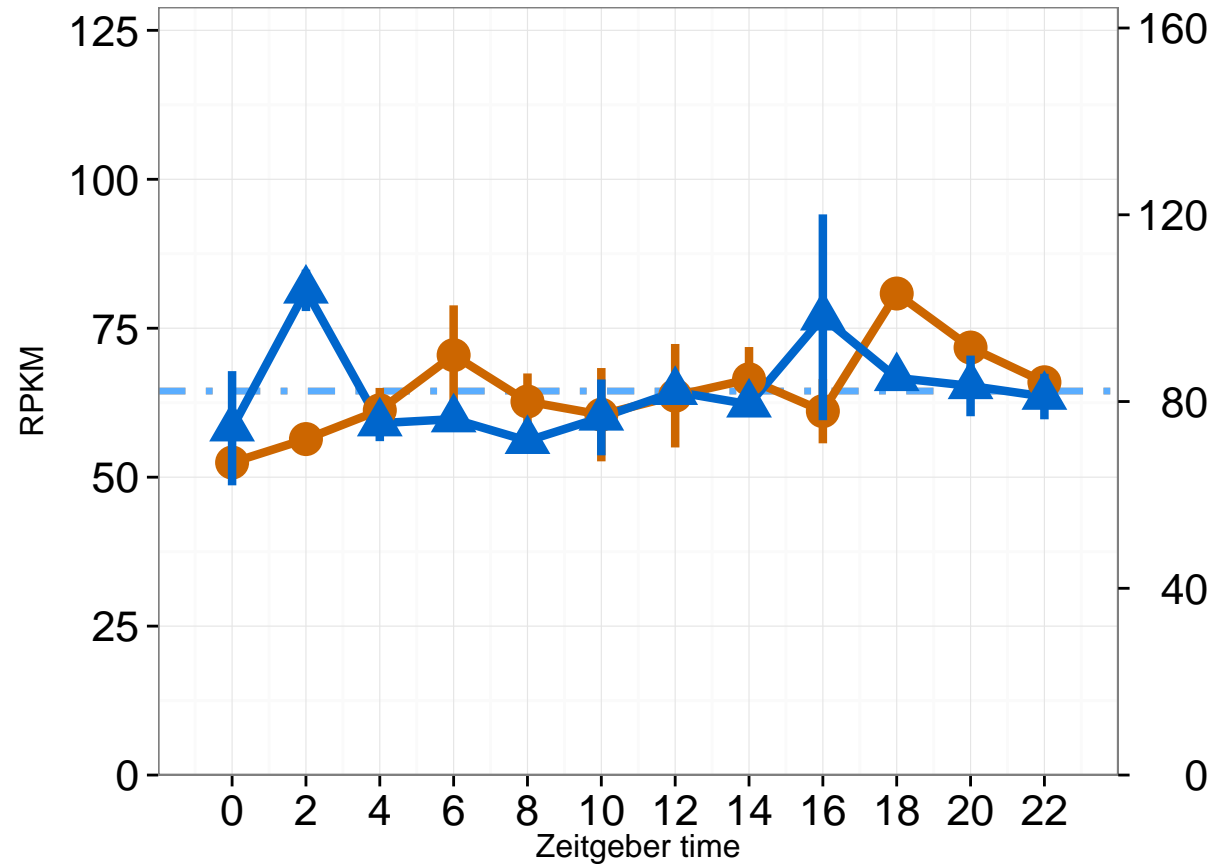

## Pole4

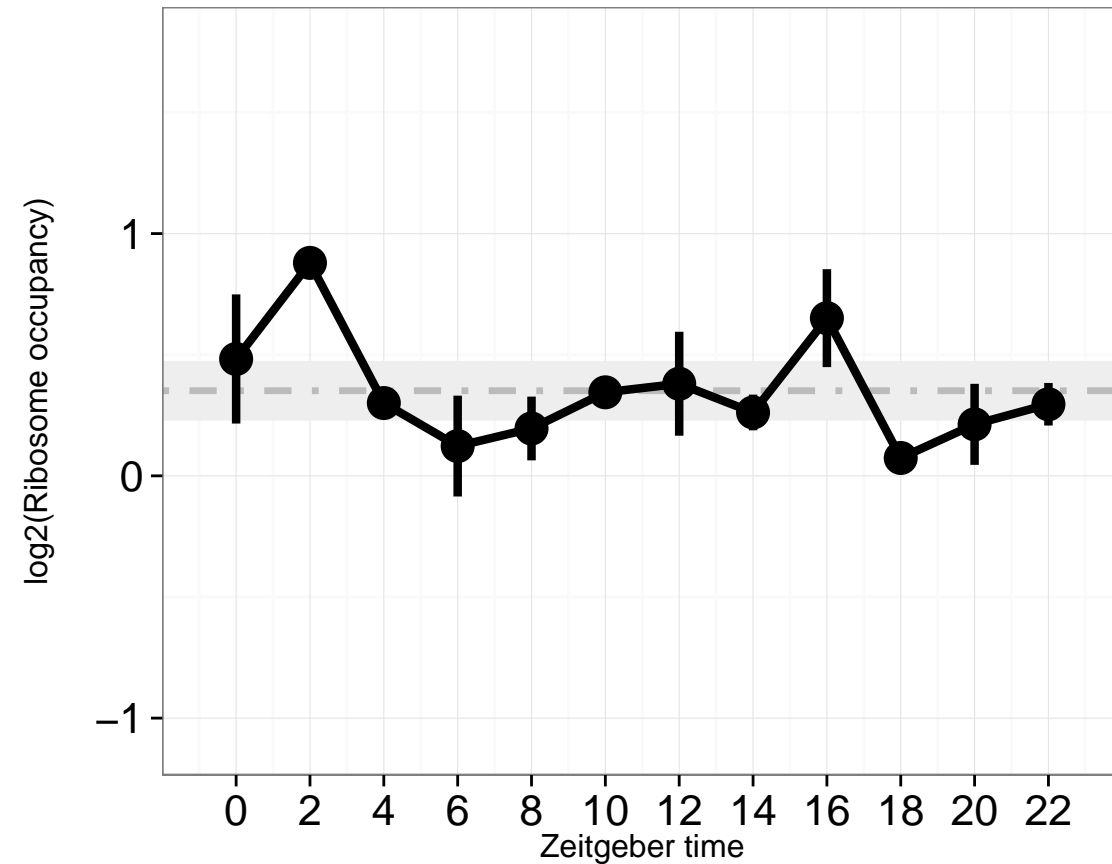

Supplement: Supplementary file 489 [file 1]

## Lrp1

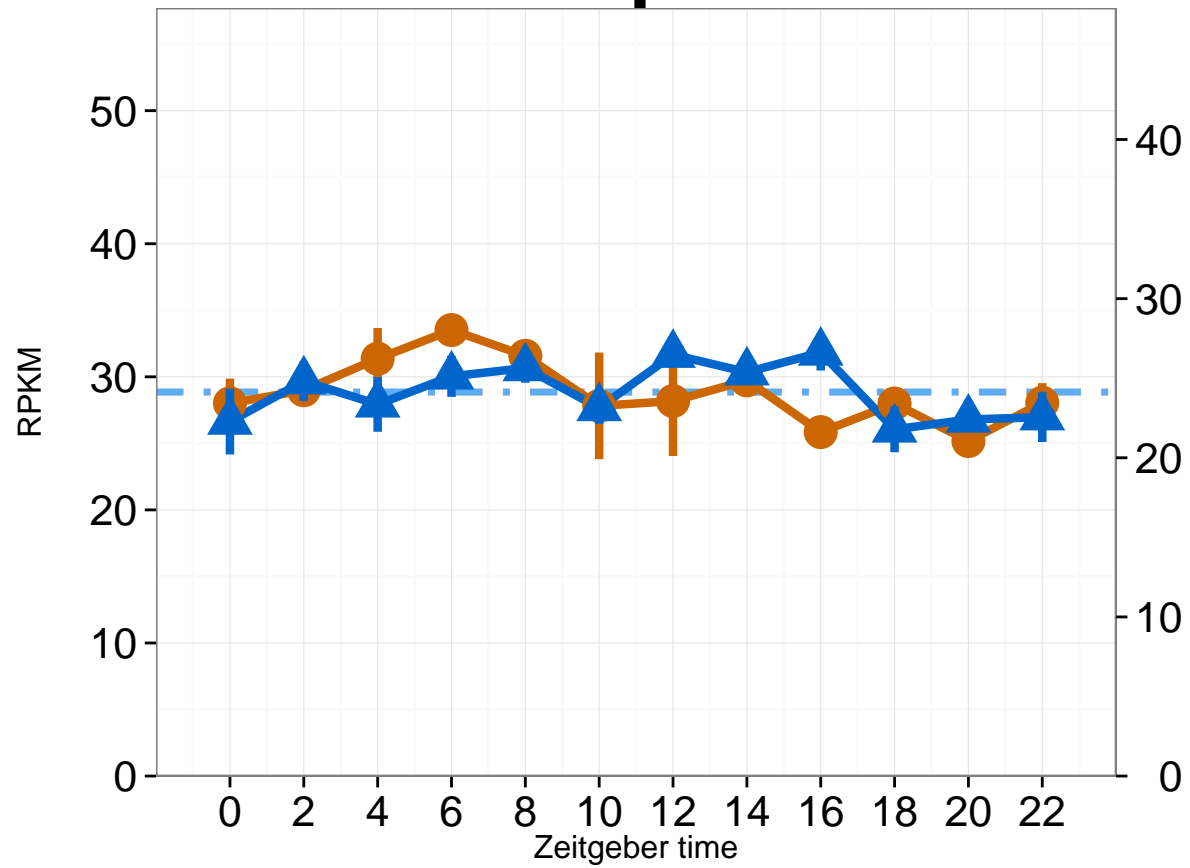

## Lrp1

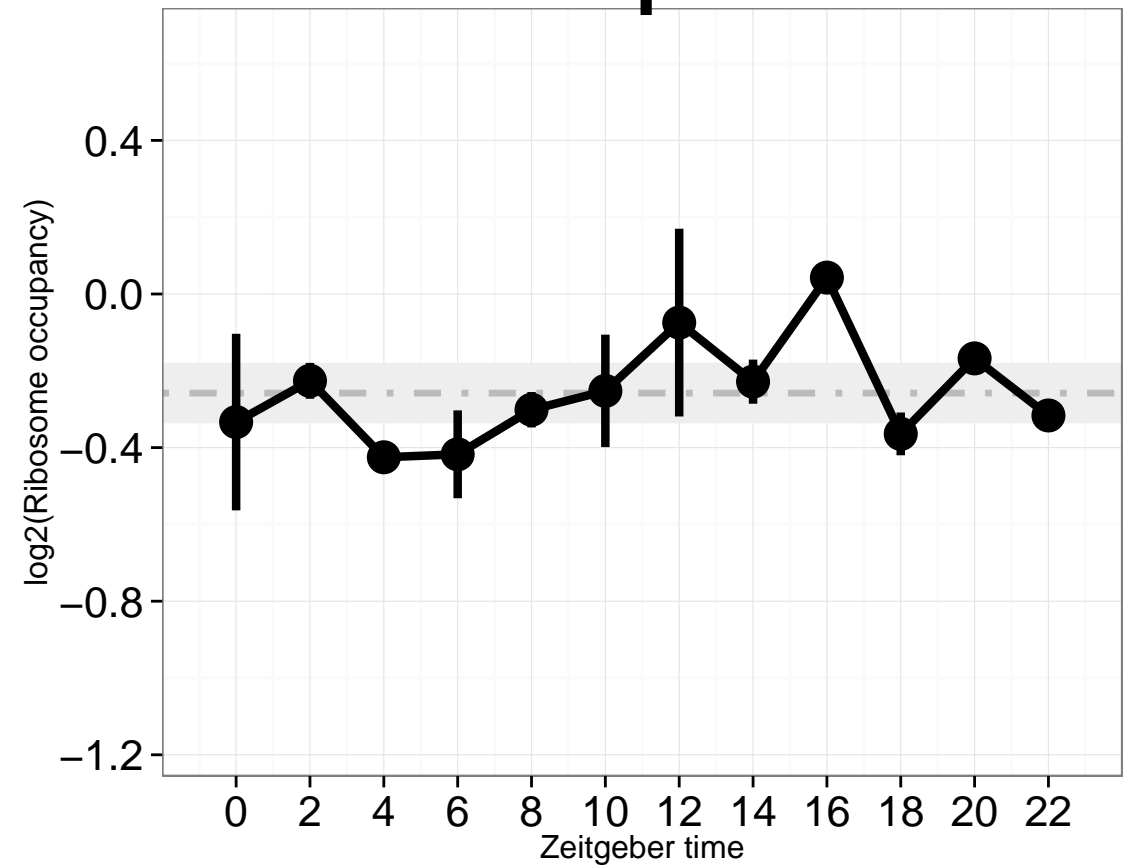

Supplement: Supplementary file 490 [file 1]

## Csf1

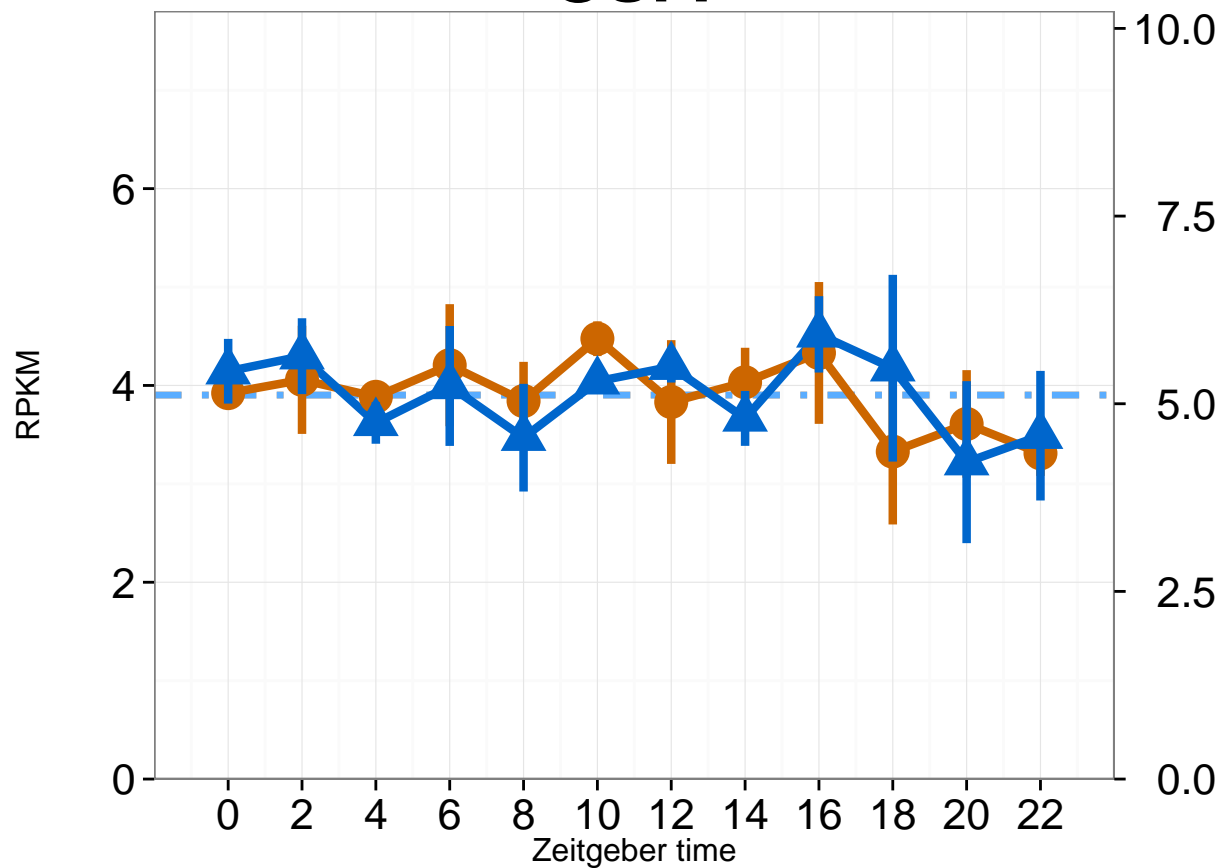

## Csf1

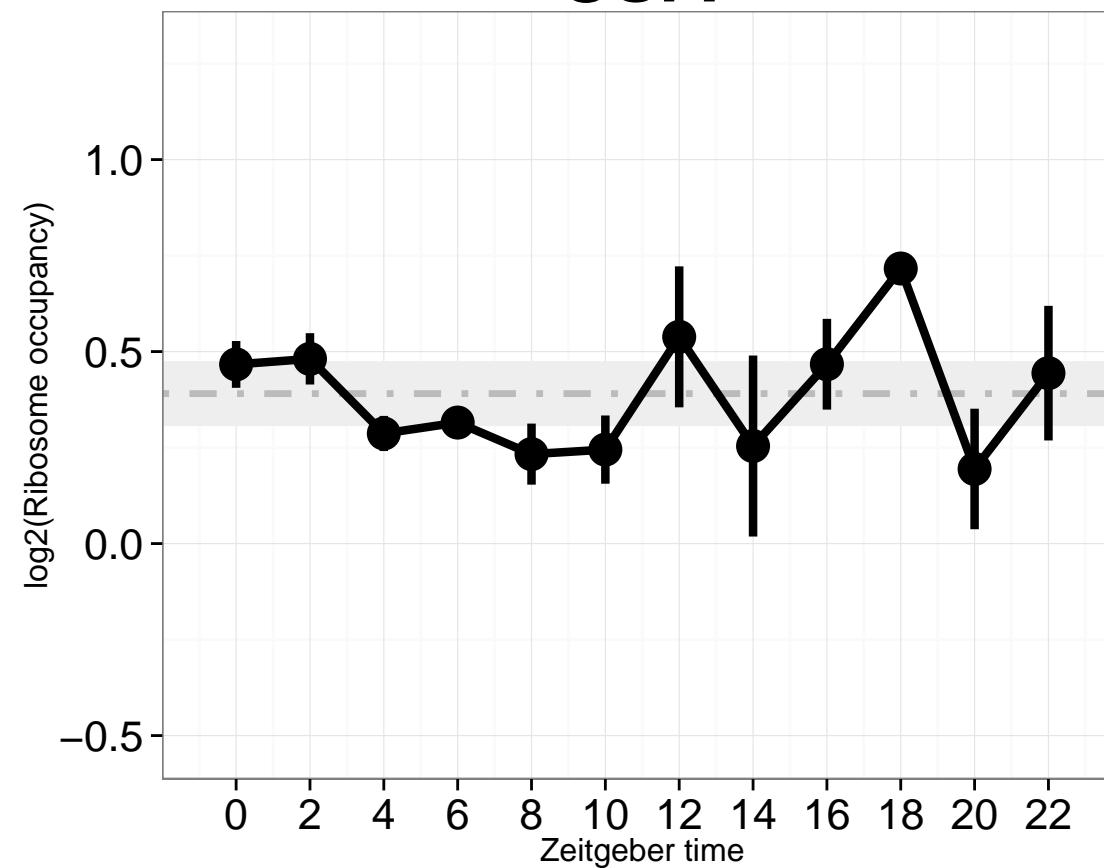

Supplement: Supplementary file 491 [file 1]

# Gosr2

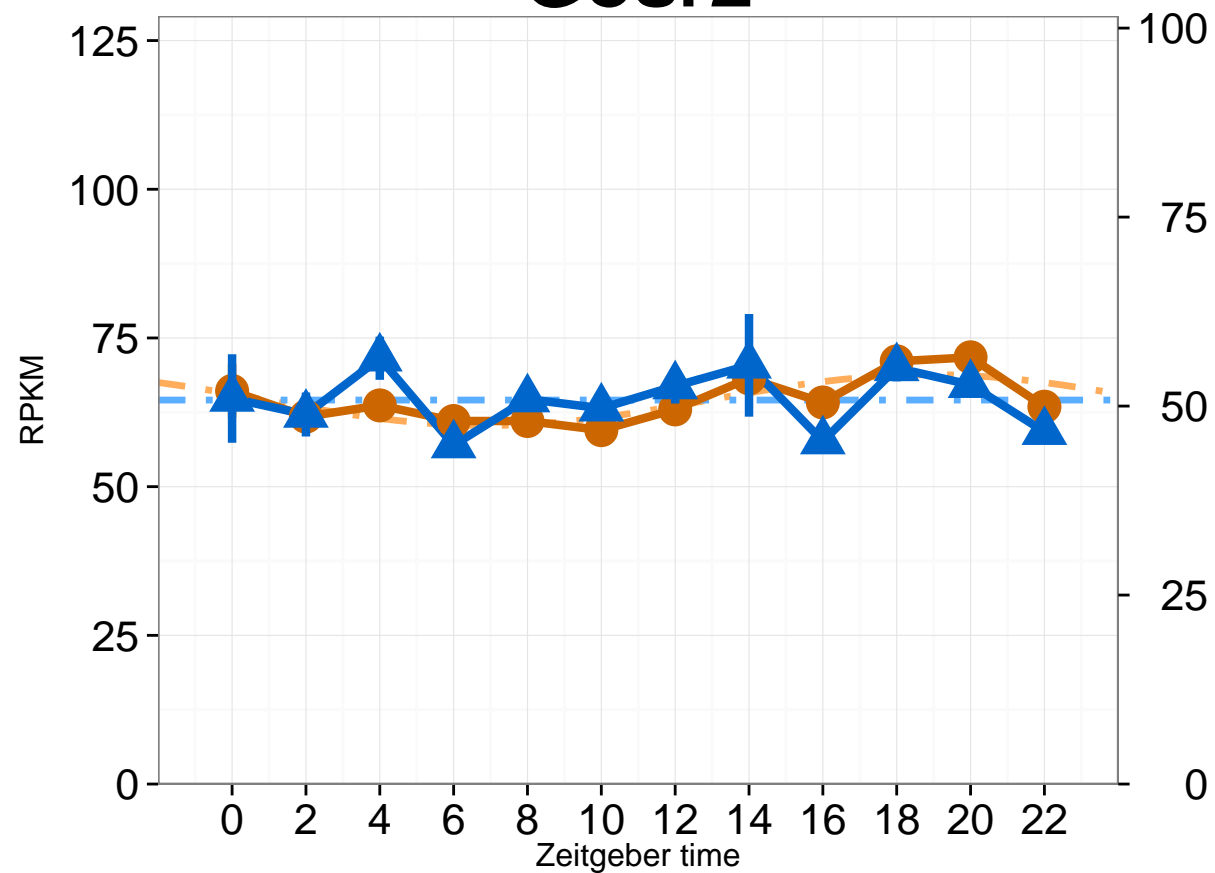

# Gosr2

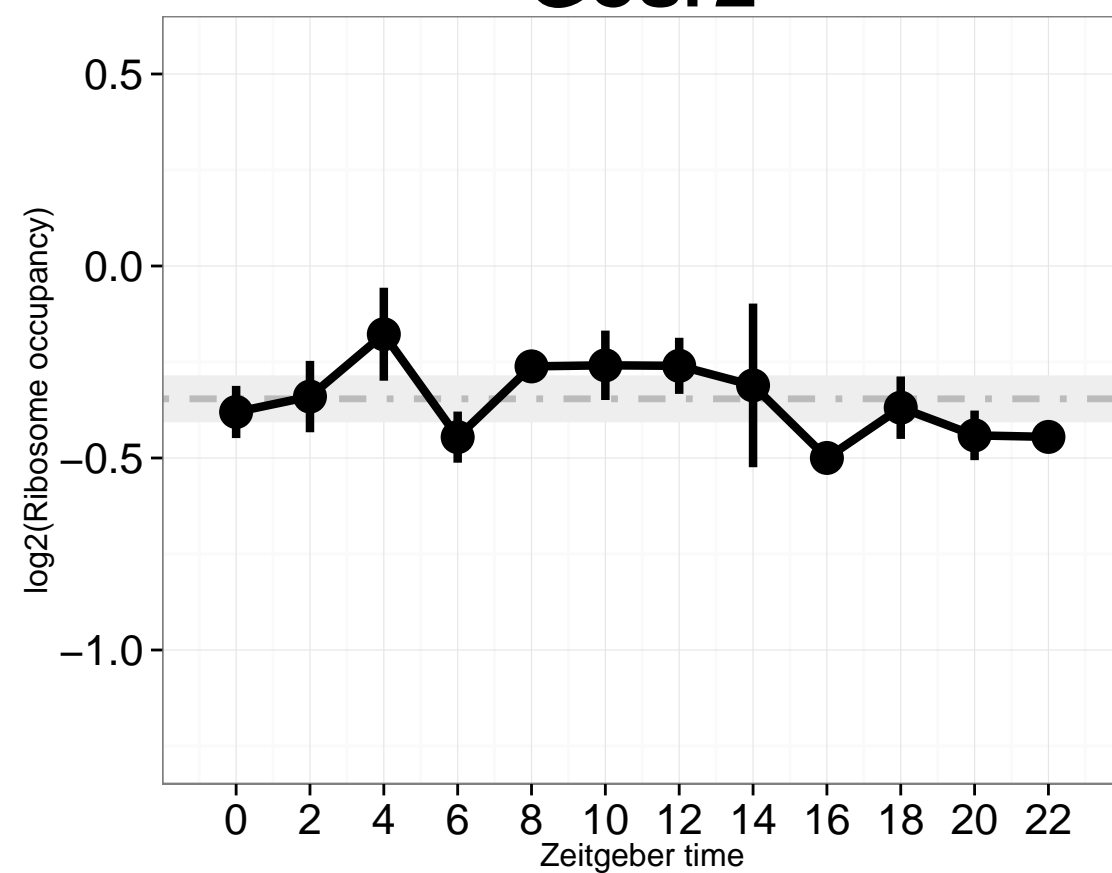

Supplement: Supplementary file 492 [file 1]

# Fam129a

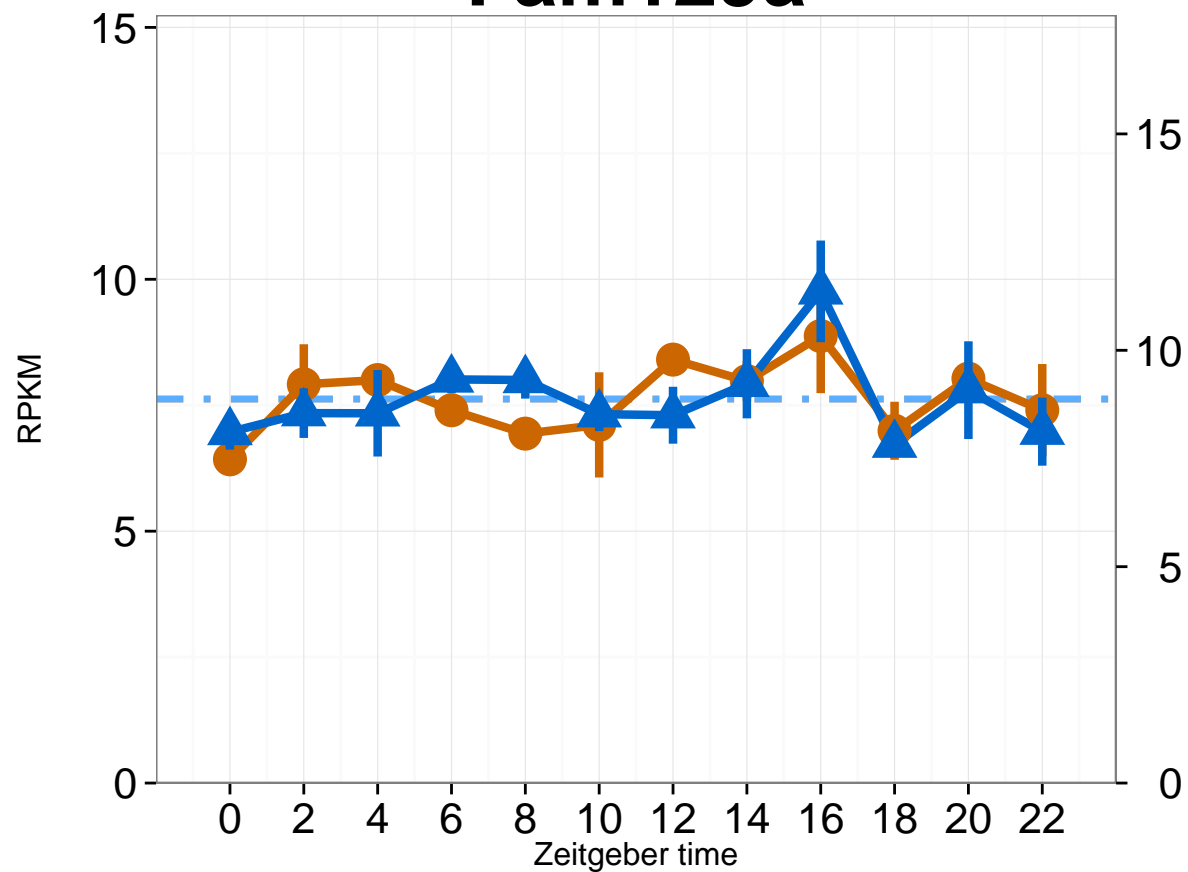

# Fam129a

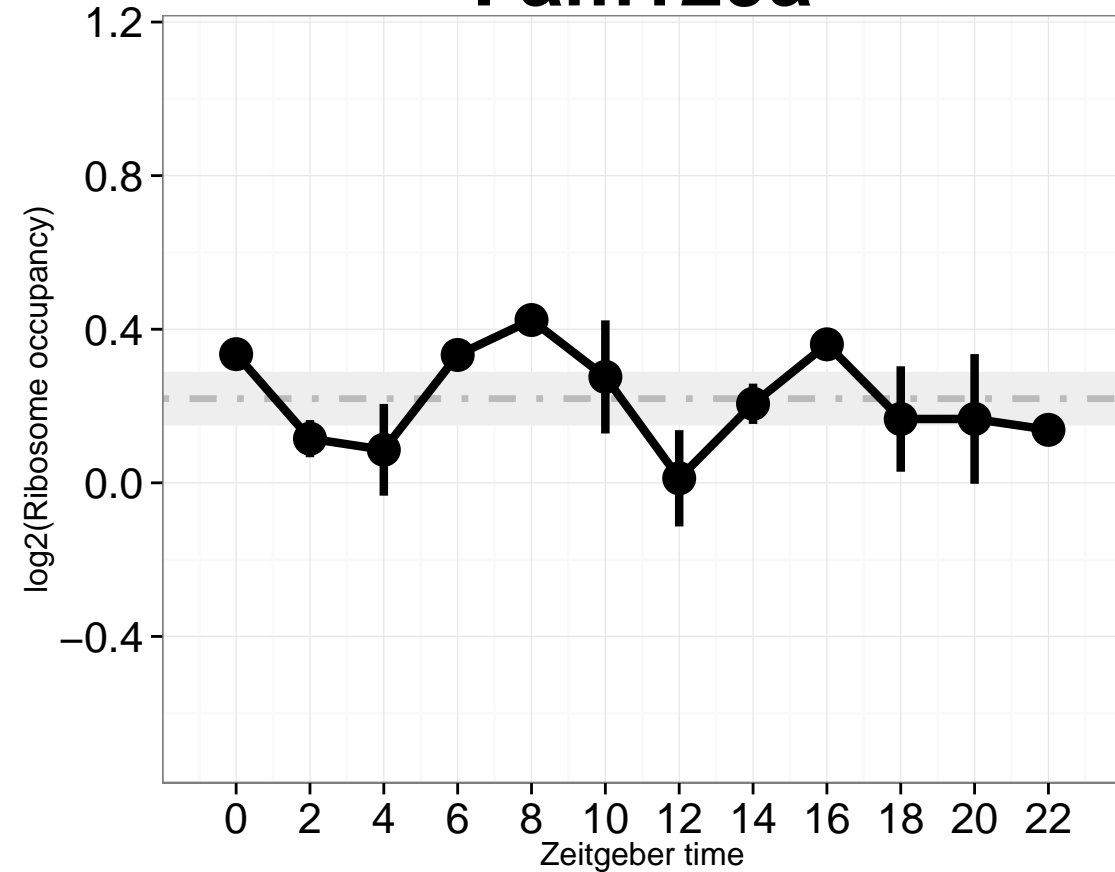

Supplement: Supplementary file 493 [file 1]

## 2310016G11Rik

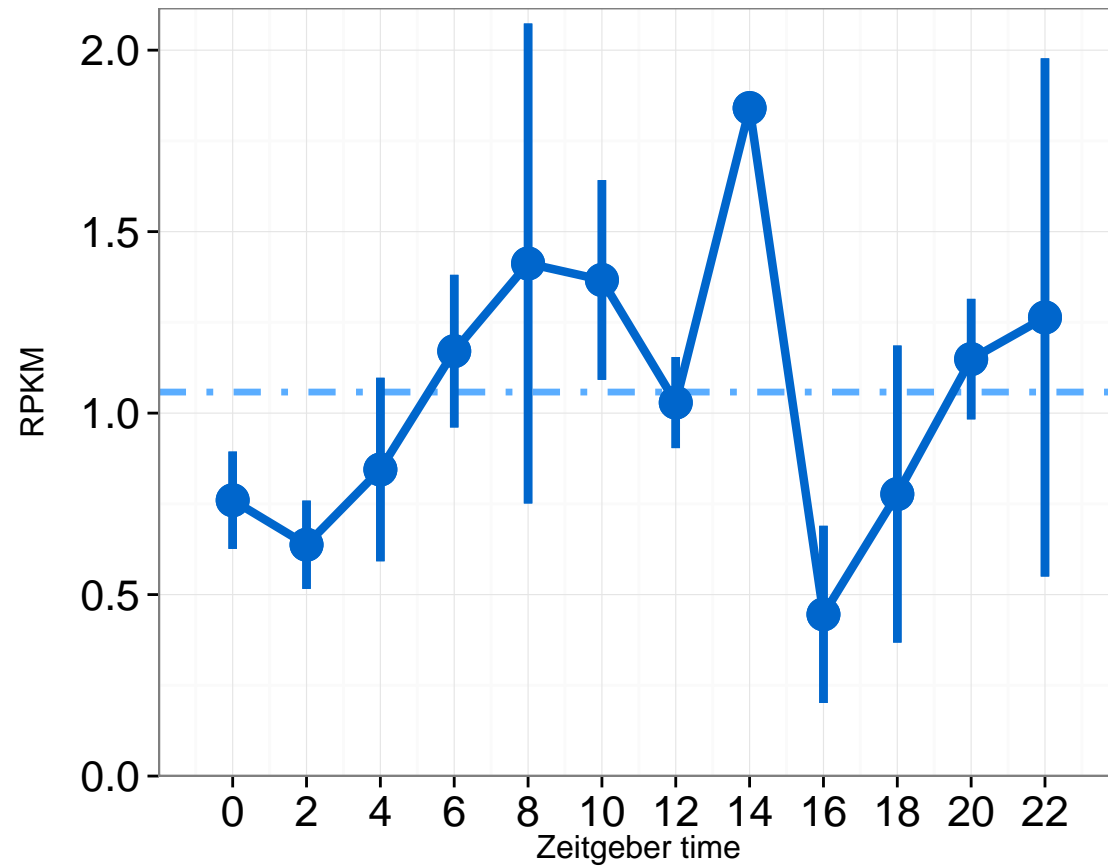

## 2310016G11Rik log2(Ribosome occup

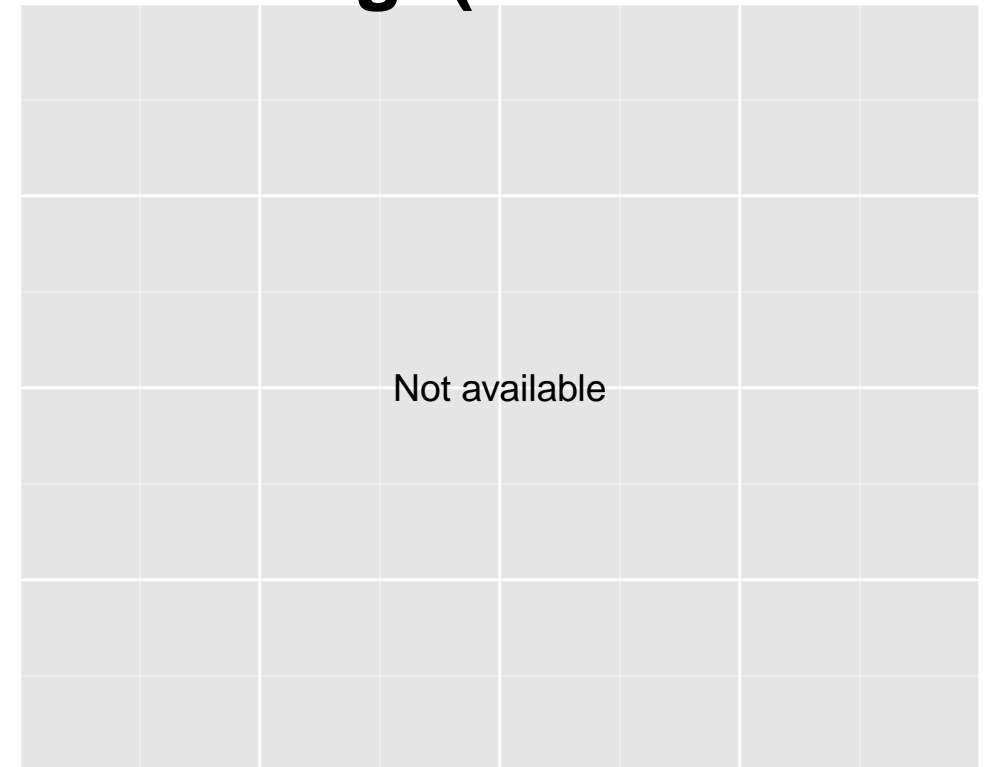

Supplement: Supplementary file 494 [file 1]

# B3galnt1

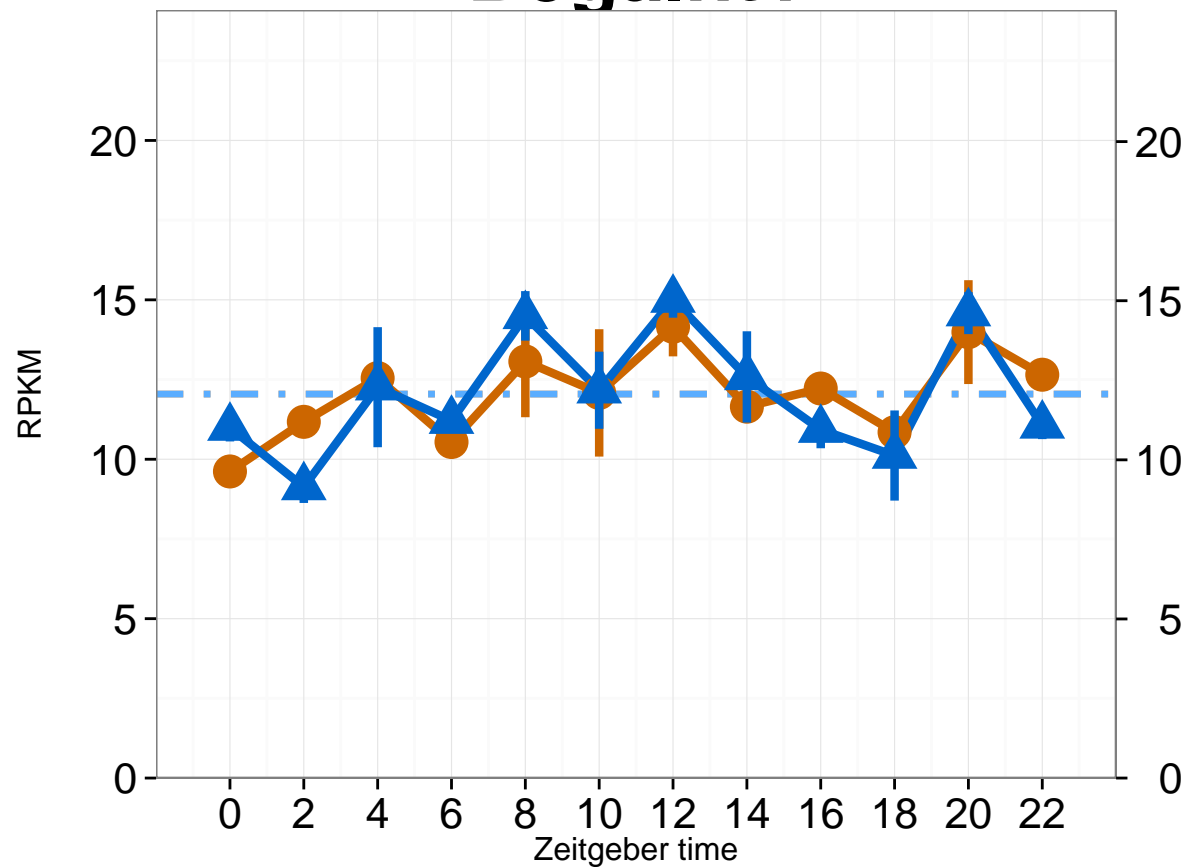

# B3galnt1

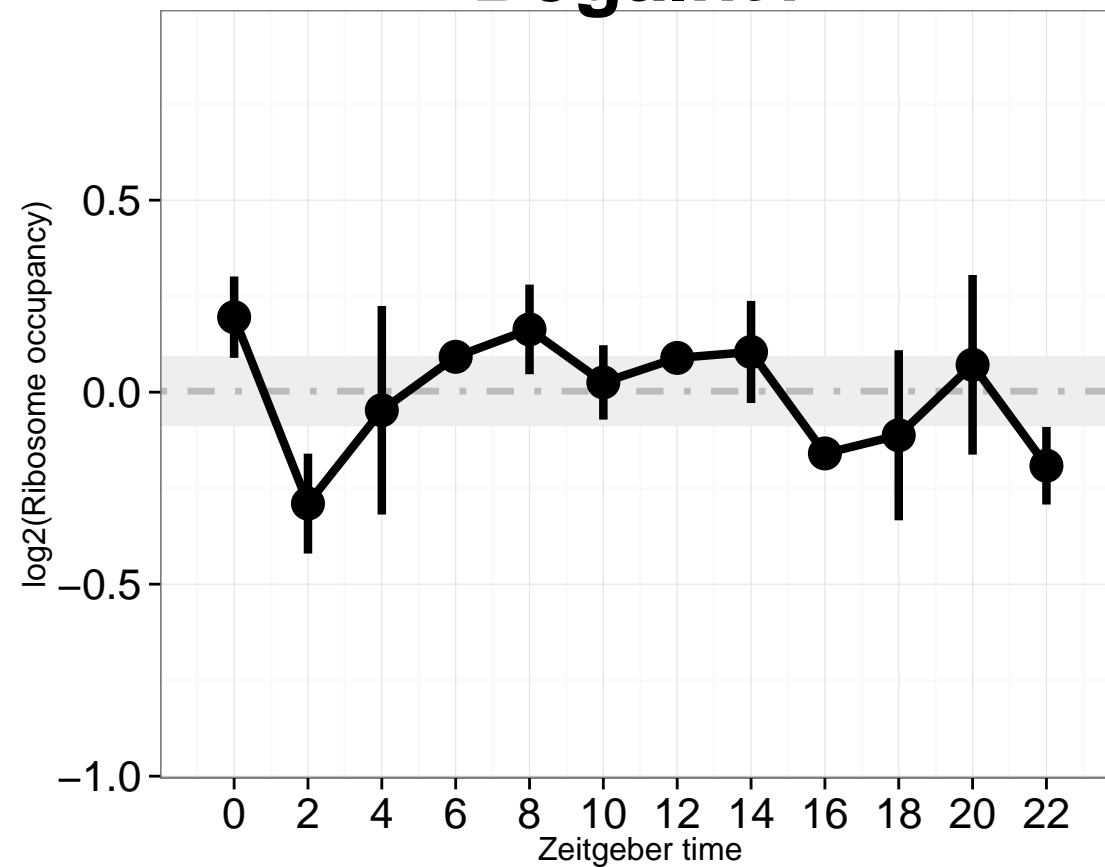

Supplement: Supplementary file 495 [file 1]

## Serpipb9

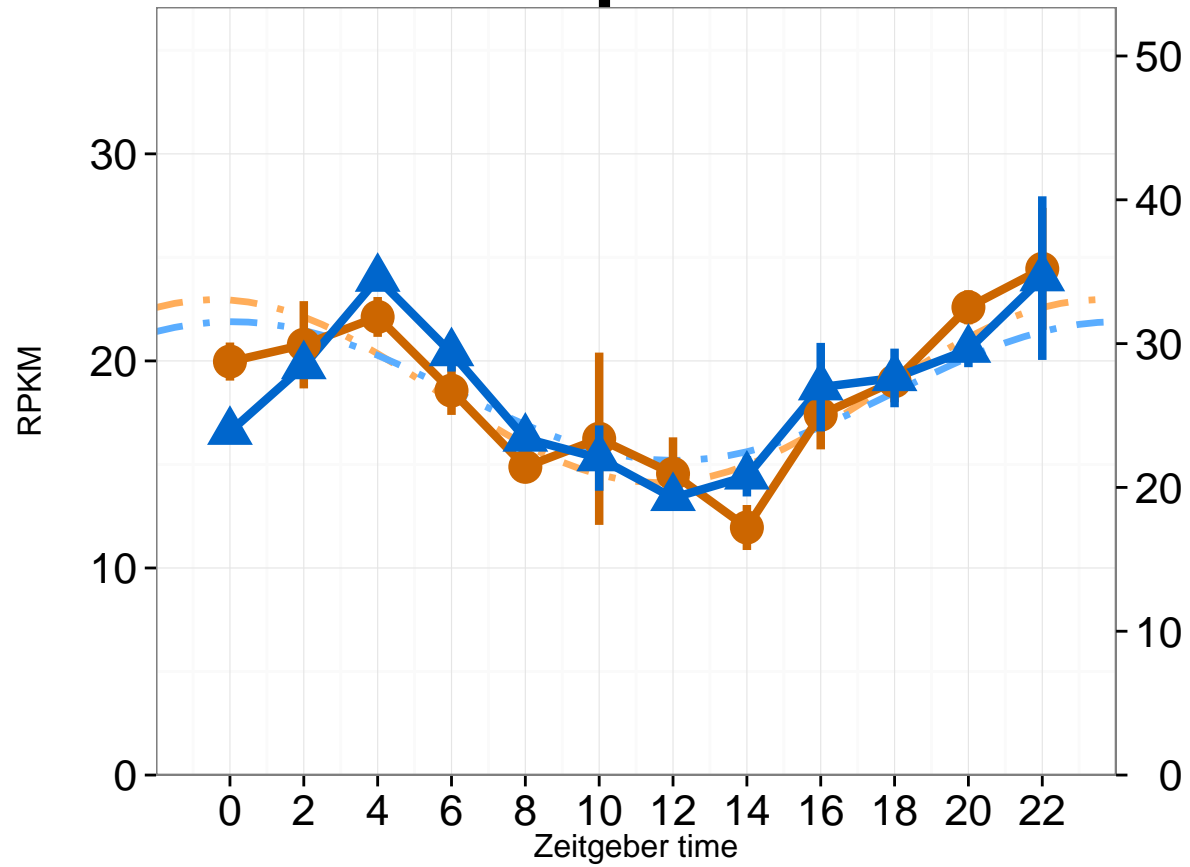

## Serpinb9

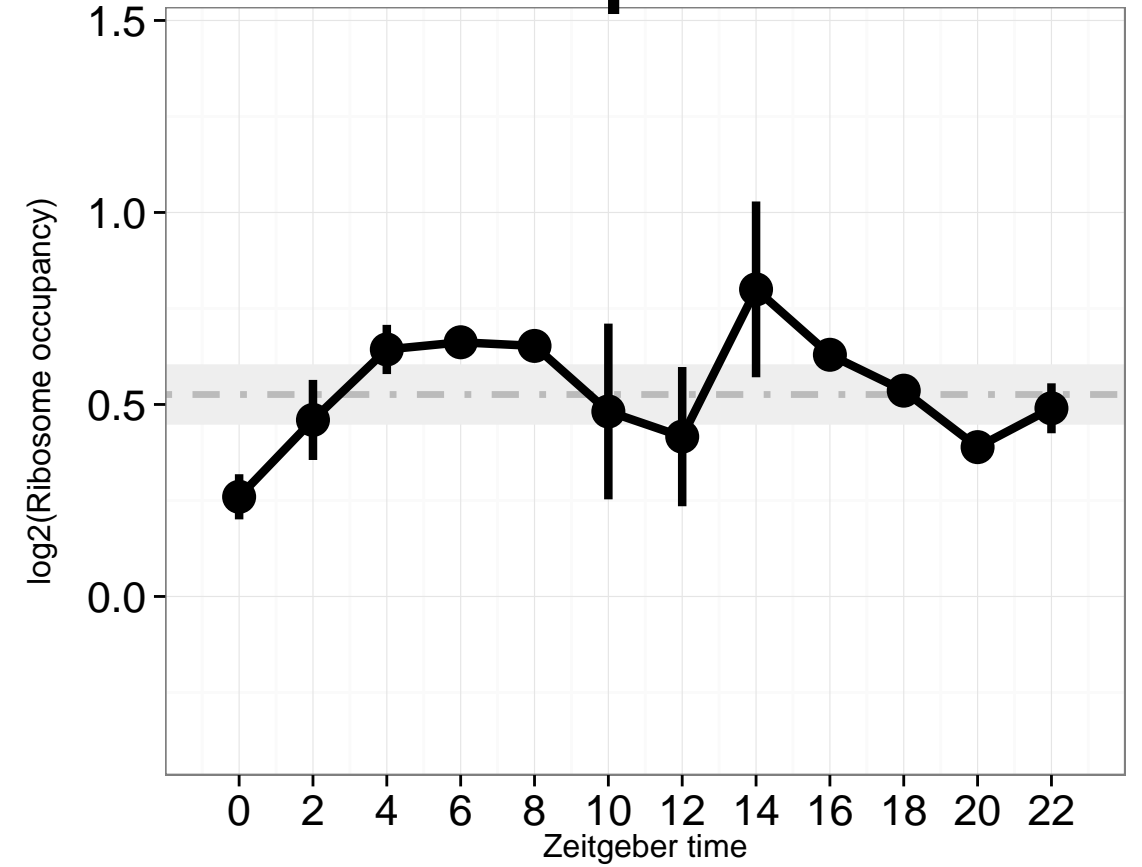

Supplement: Supplementary file 496 [file 1]

## Plat

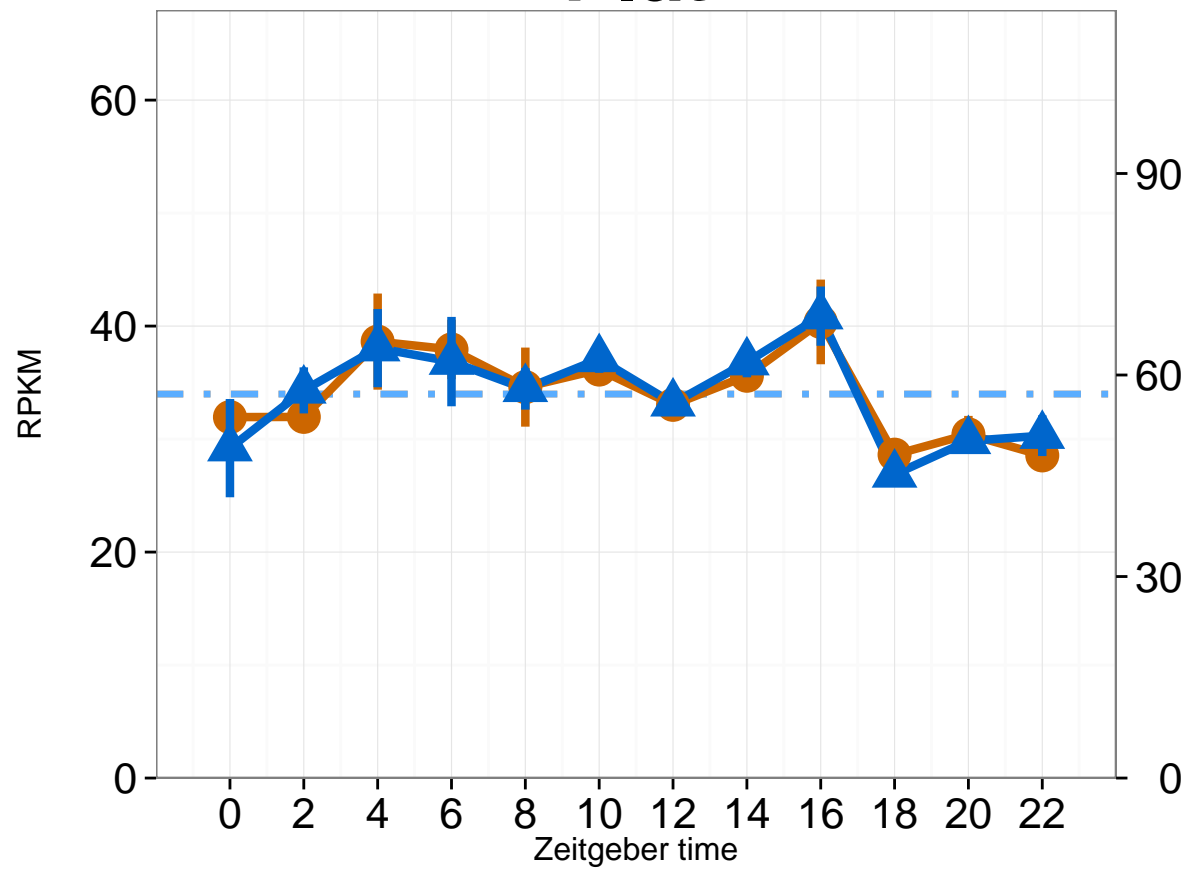

## Plat

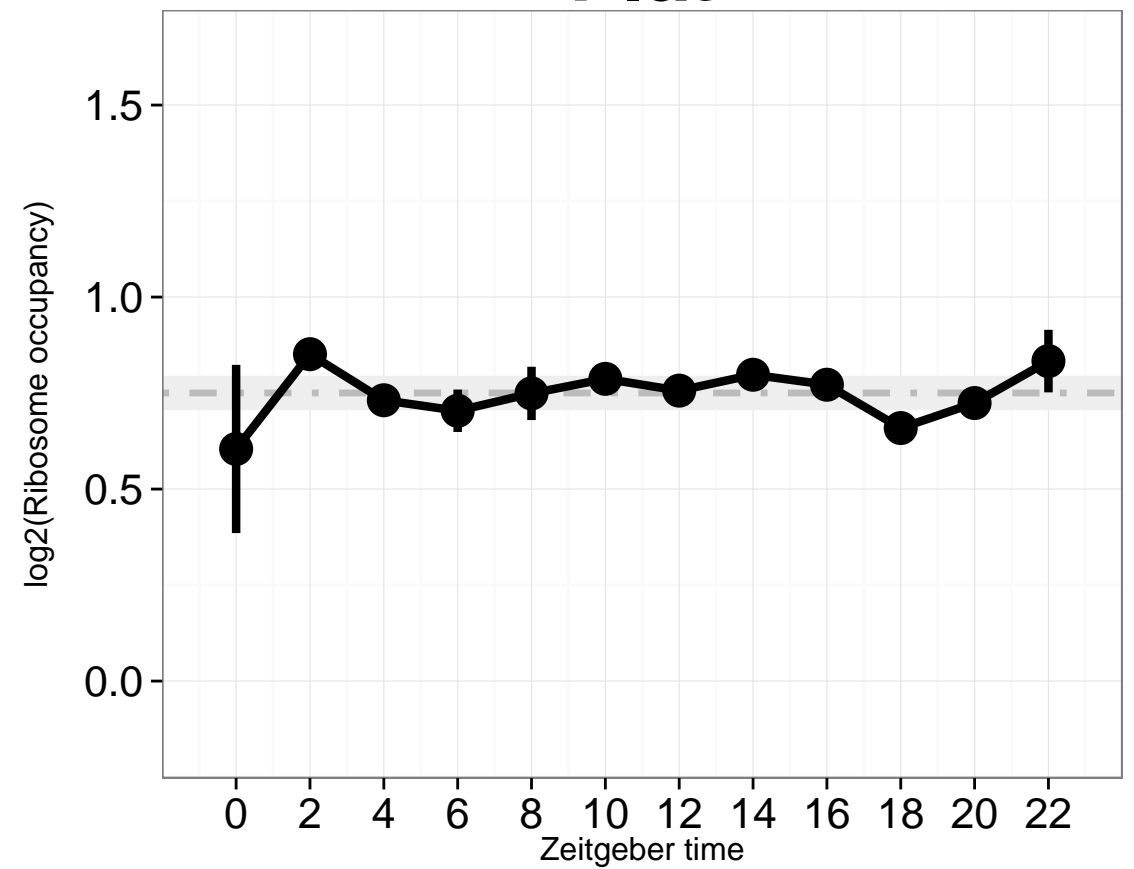

Supplement: Supplementary file 497 [file 1]

## Cenpp

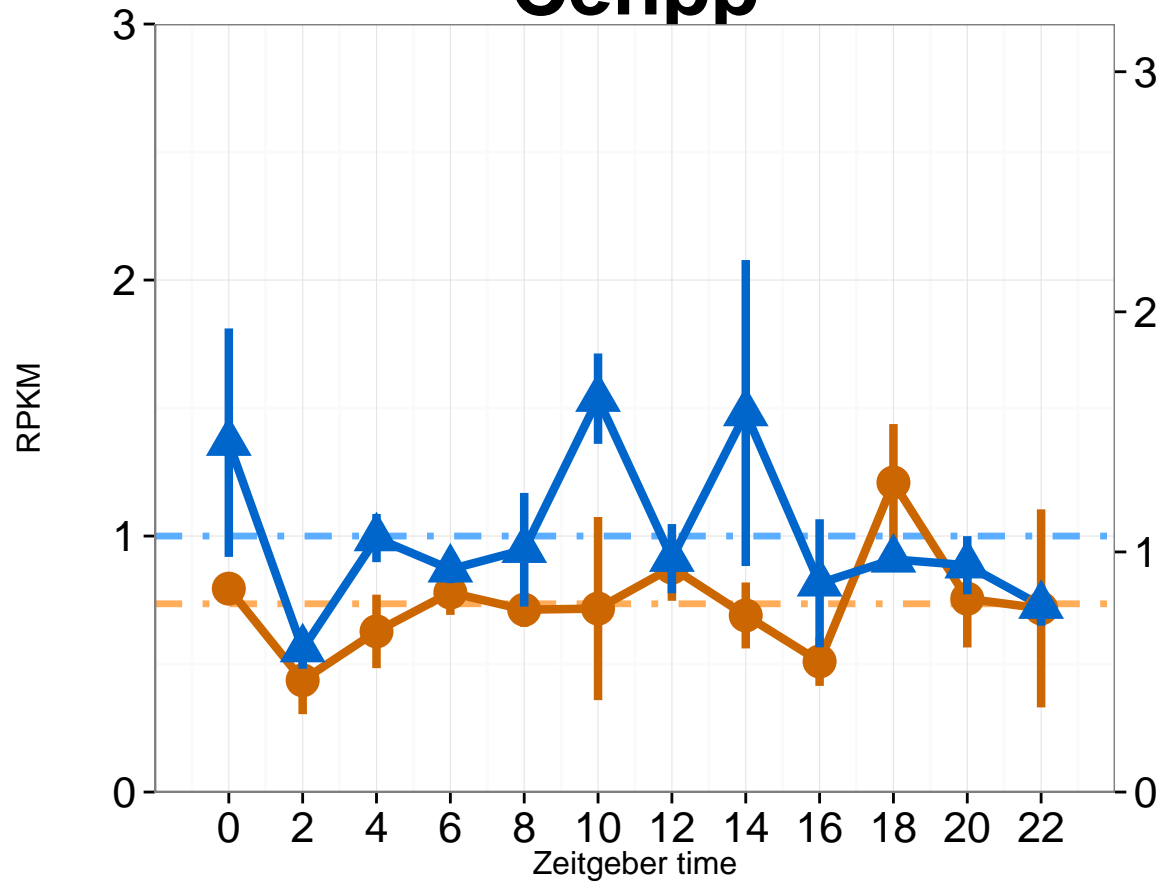

## Cenpp

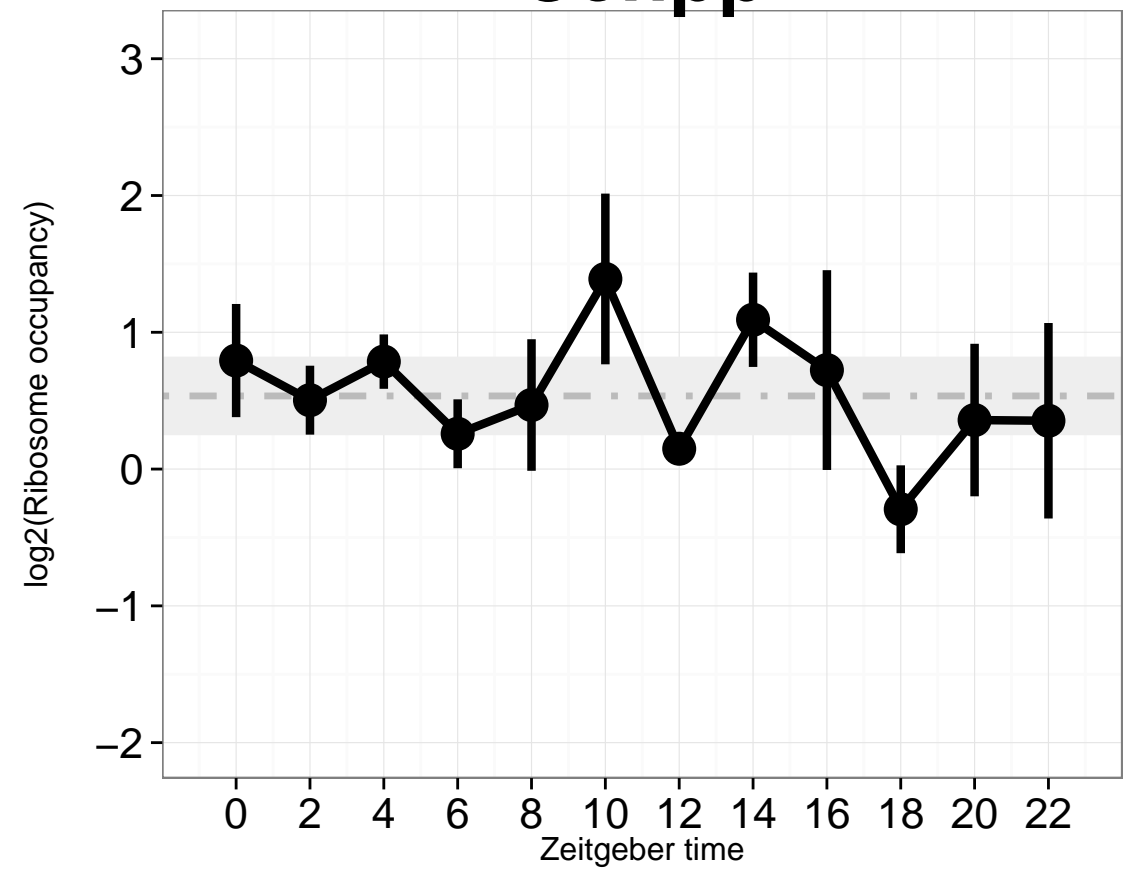

Supplement: Supplementary file 498 [file 1]

## Renbp

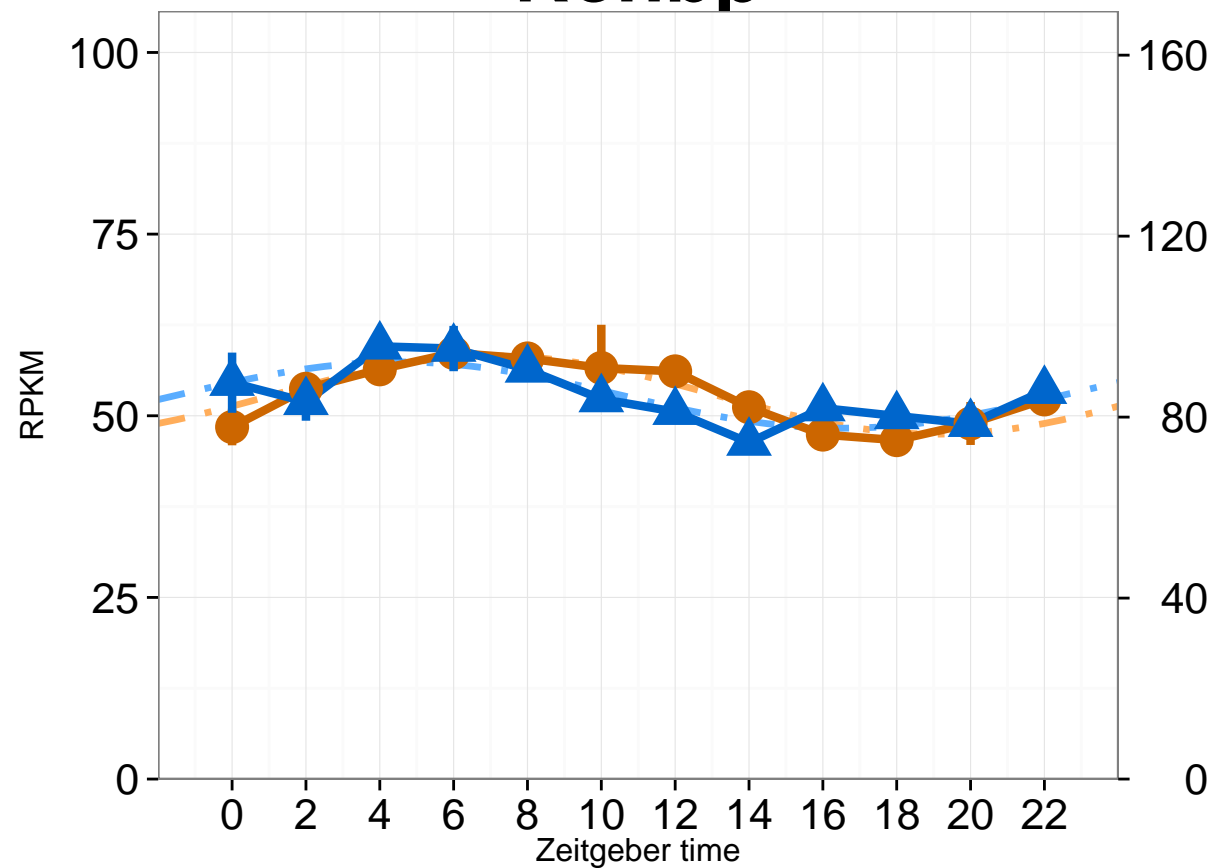

## Renbp

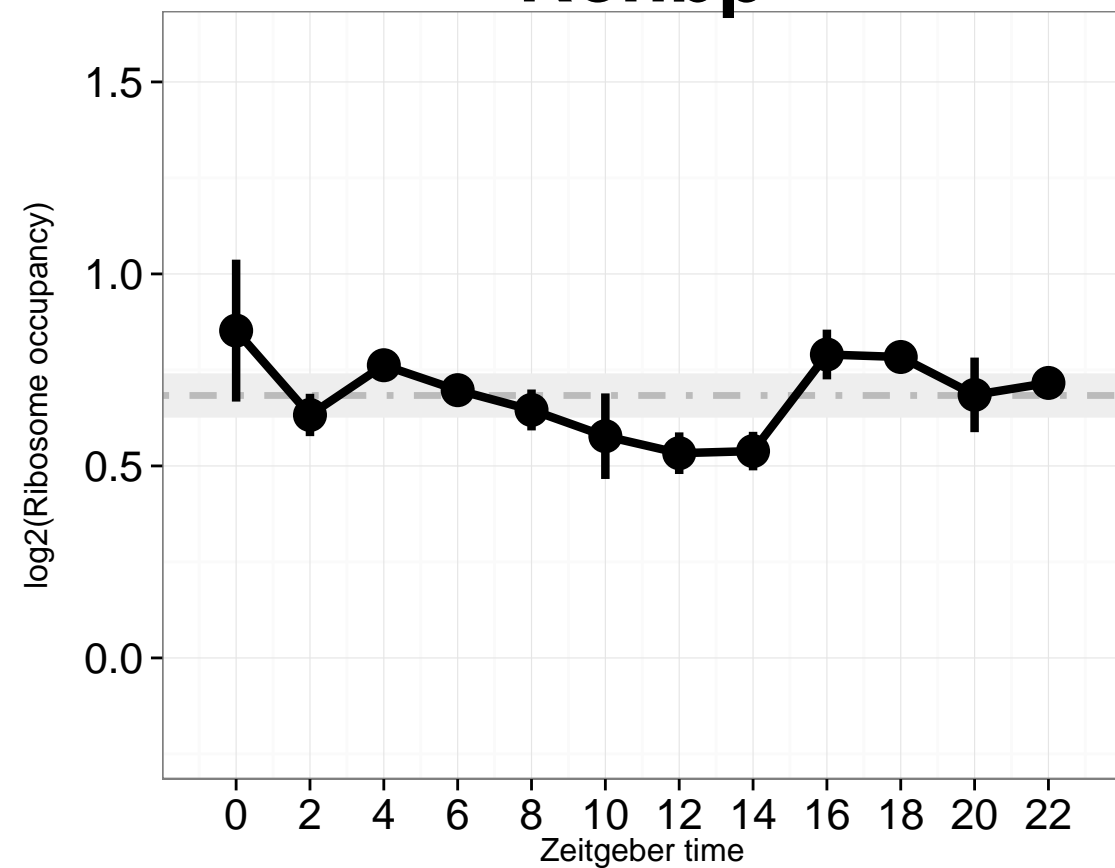

Supplement: Supplementary file 499 [file 1]

# Kmt2b

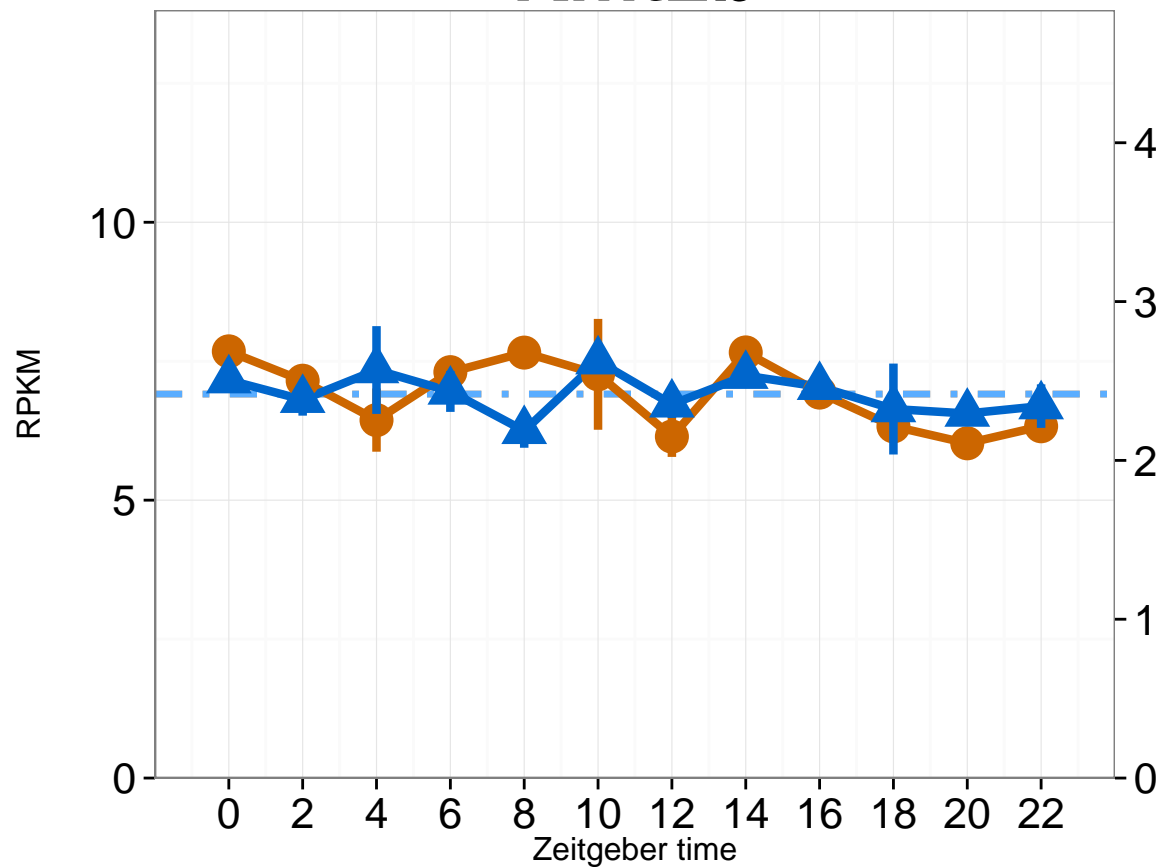

# Kmt2b

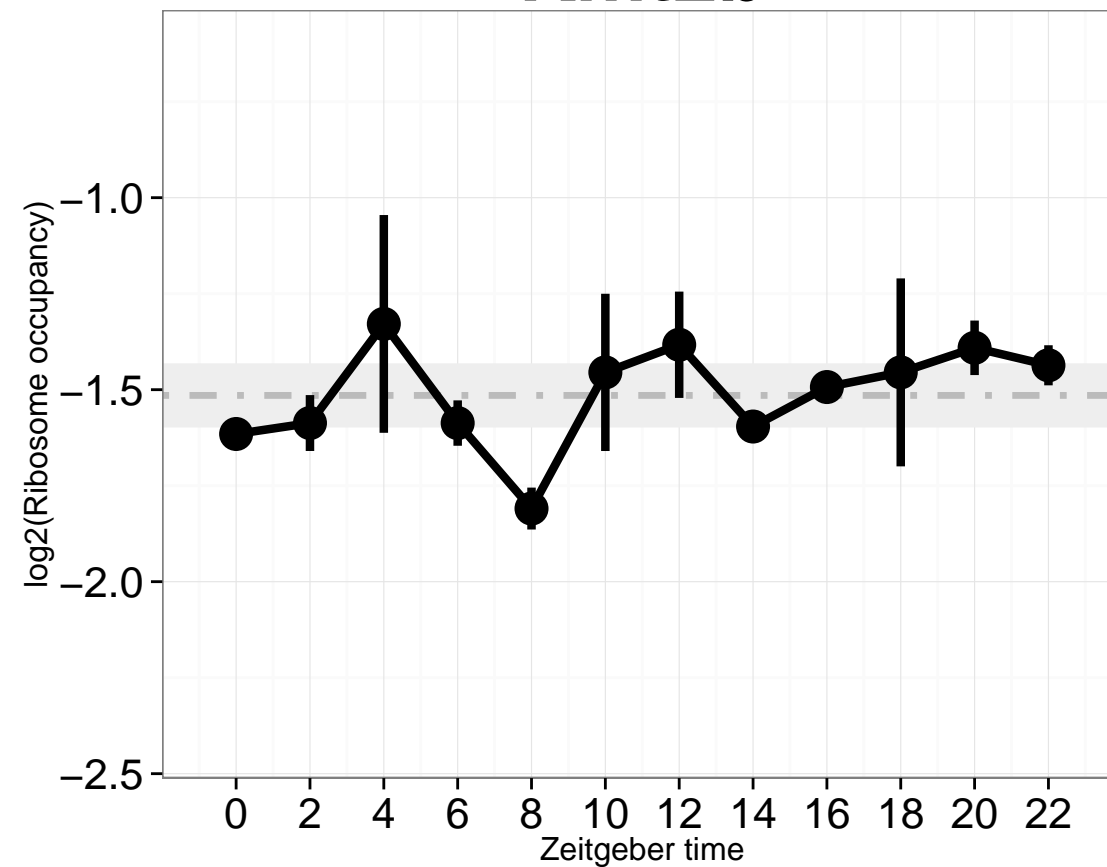

Supplement: Supplementary file 500 [file 1]

## Brpf3

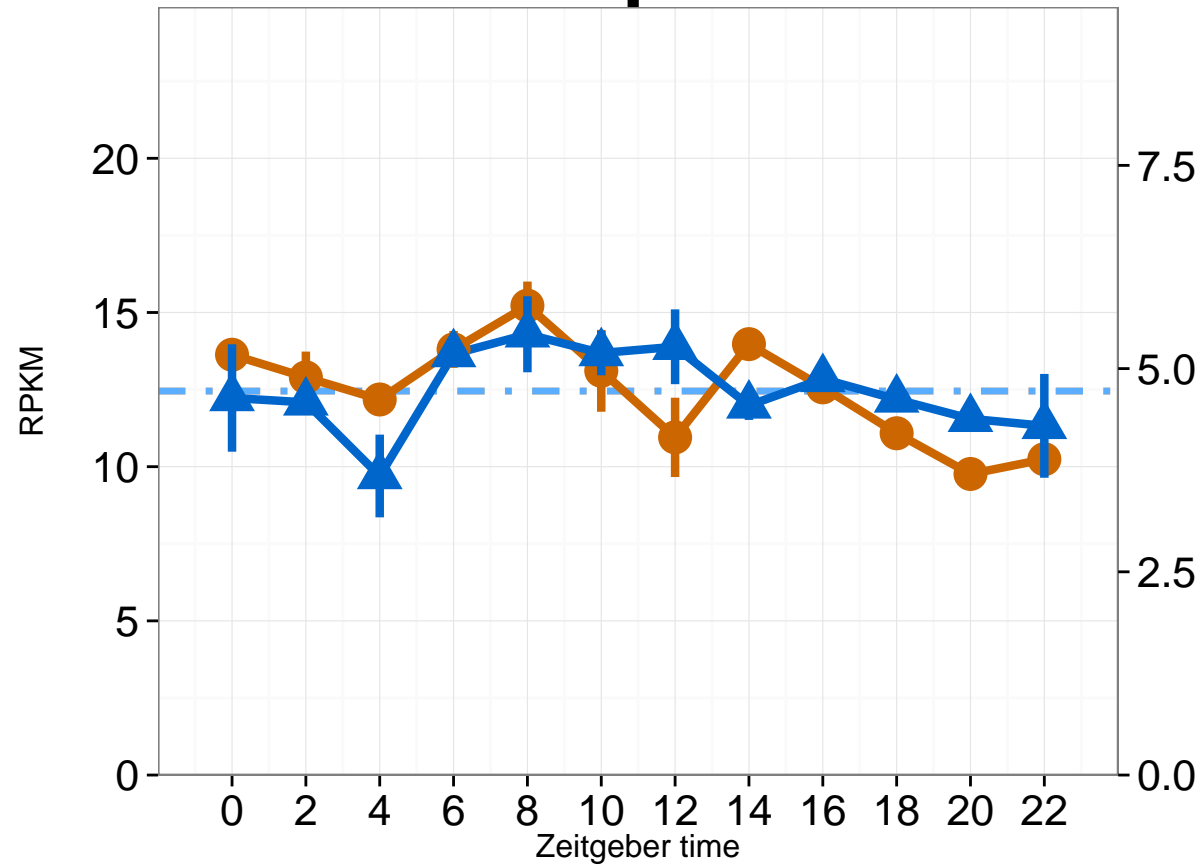

## Brpf3

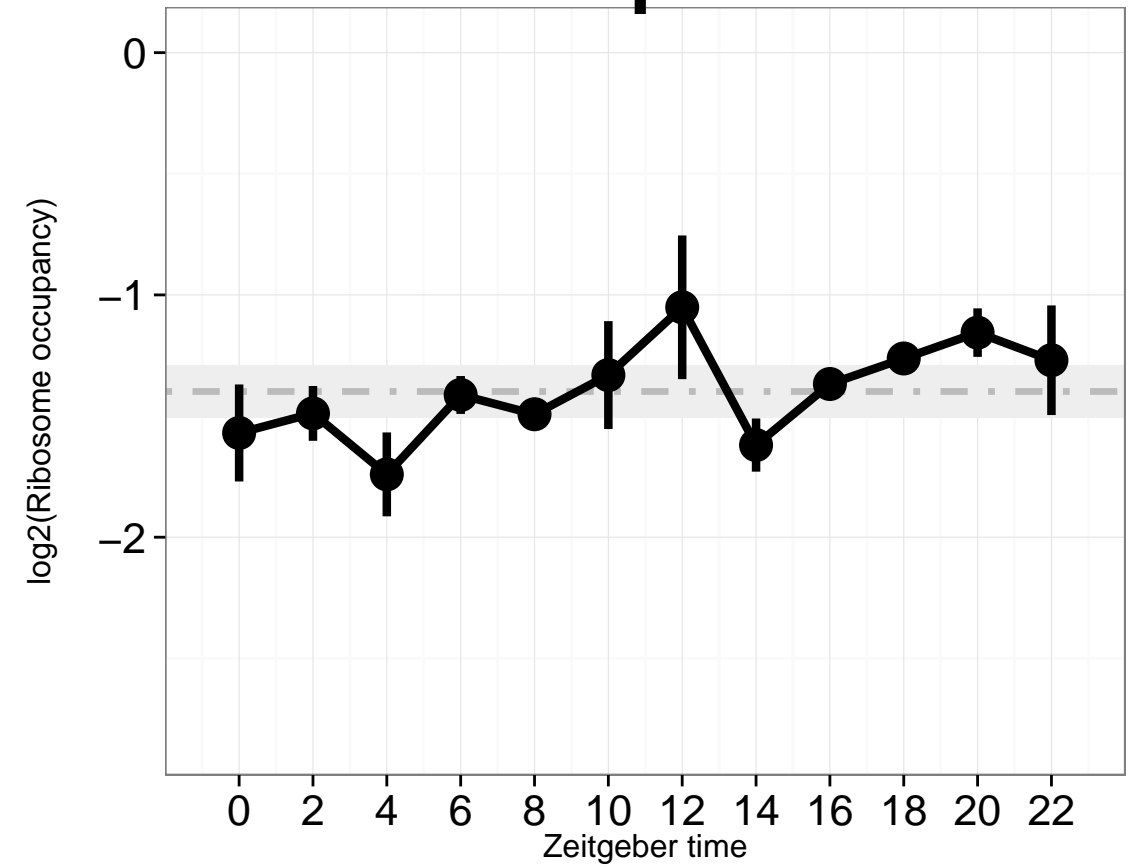

Supplement: Supplementary file 501 [file 1]

## Cth

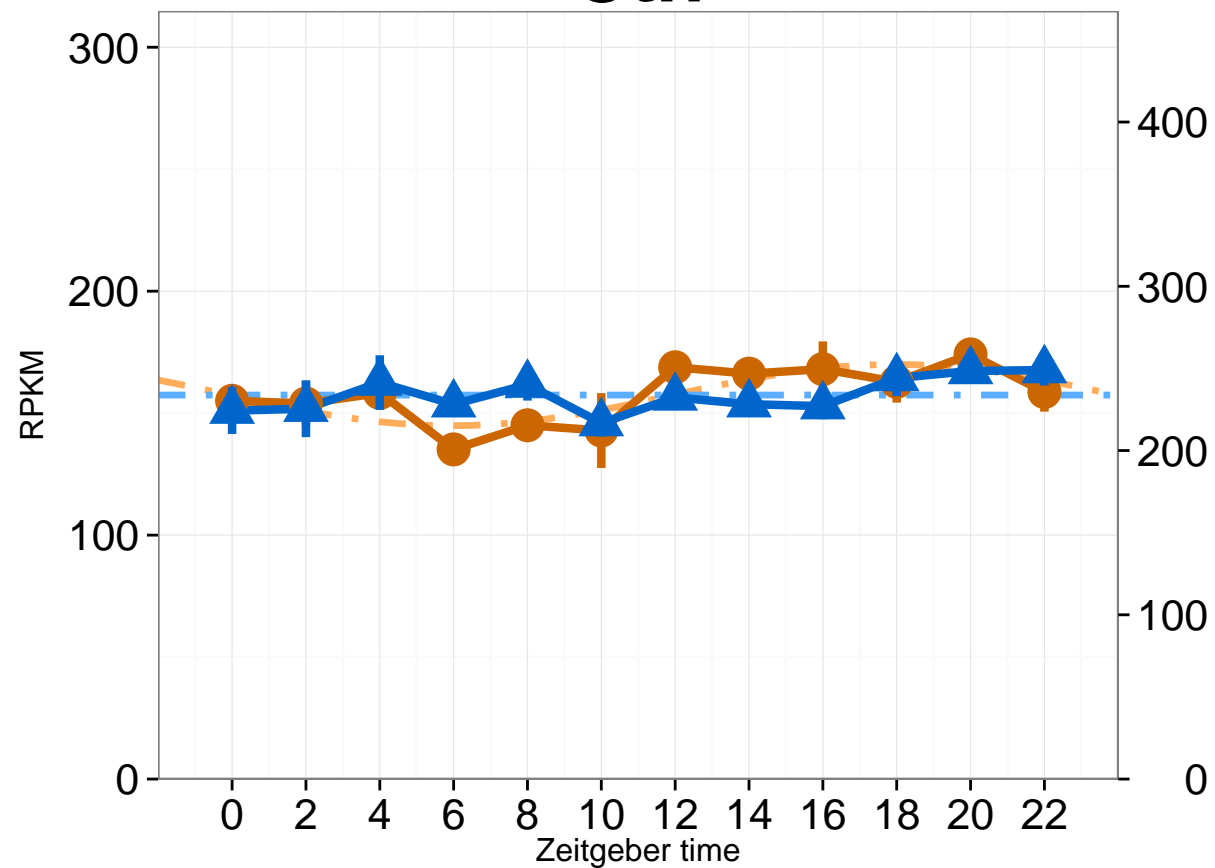

## Cth

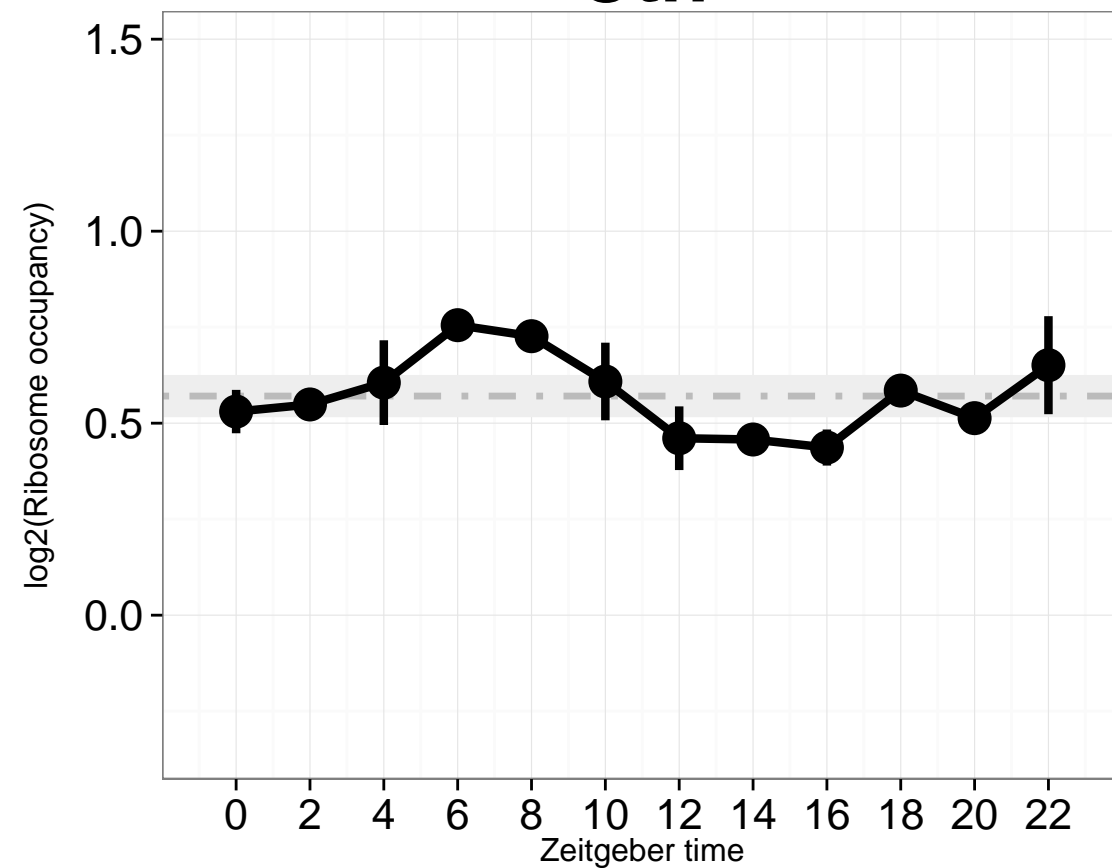

Supplement: Supplementary file 502 [file 1]

## Mthfs

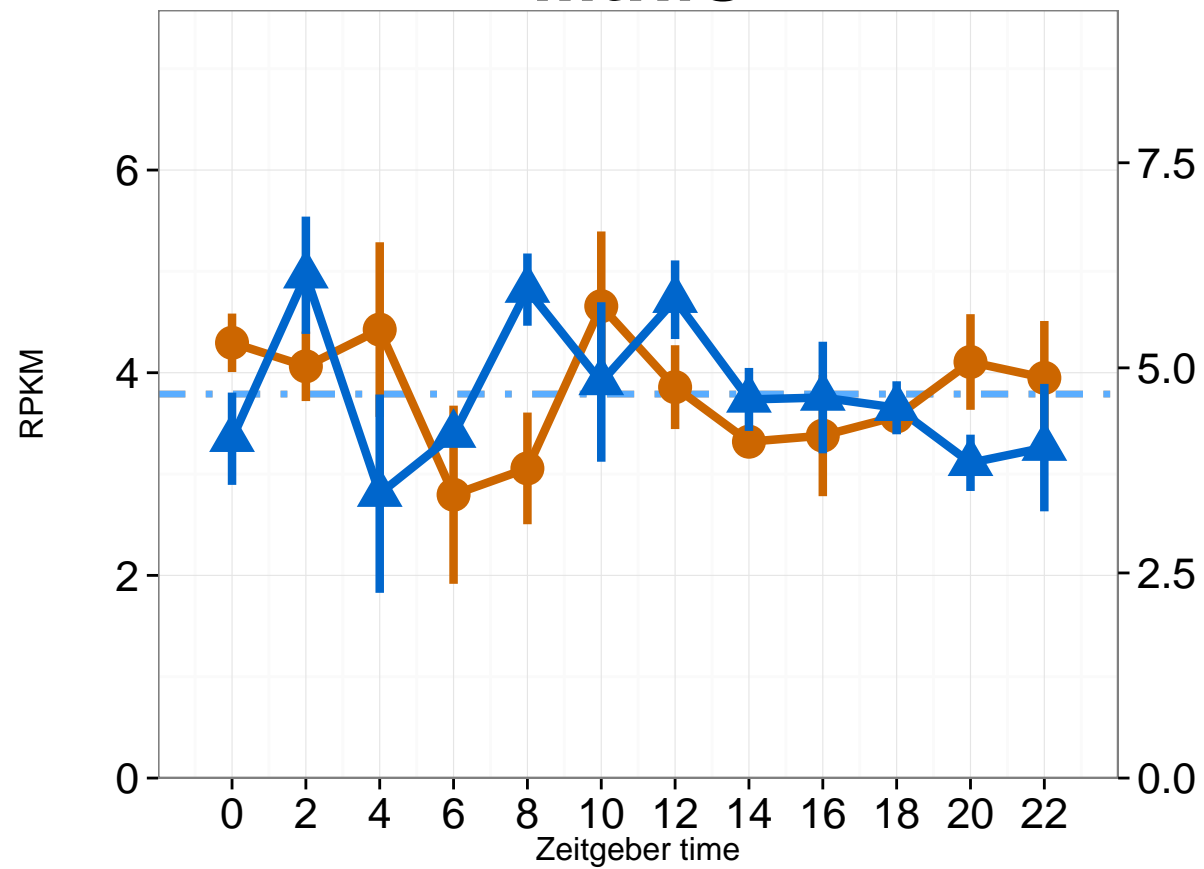

## Mthfs

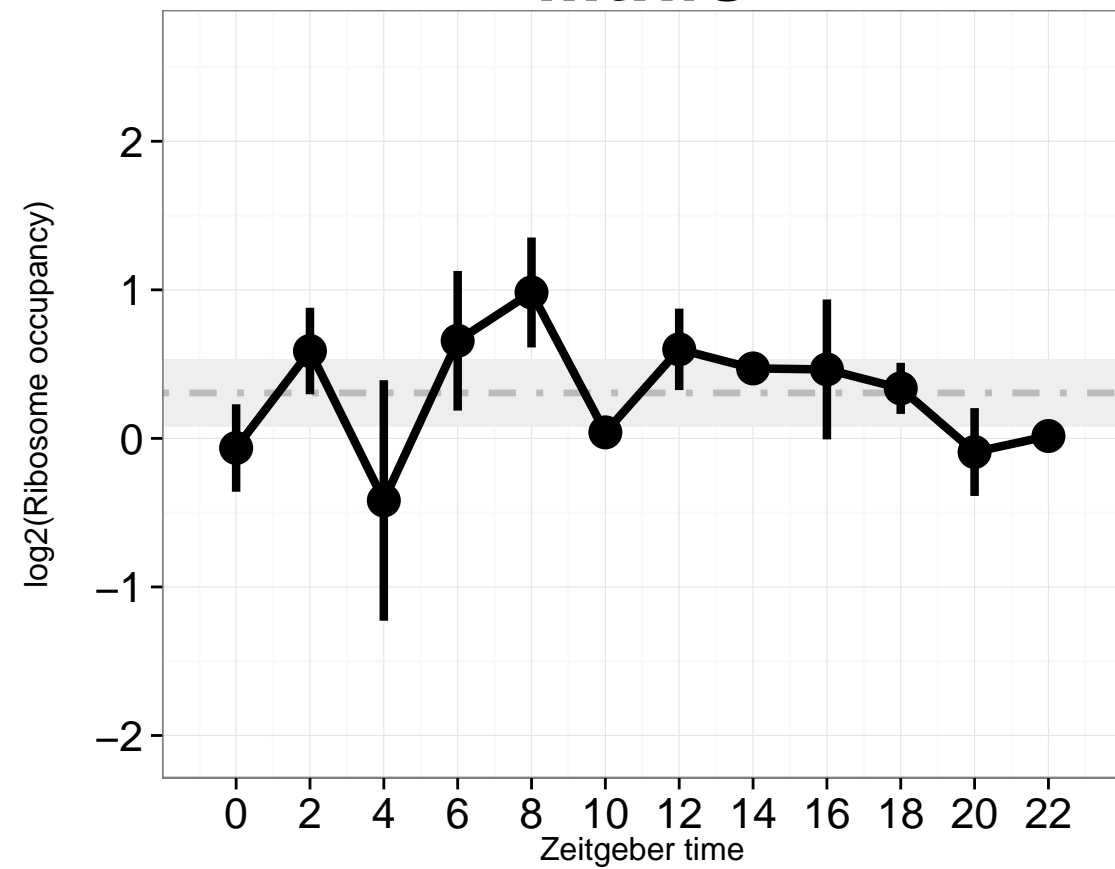

Supplement: Supplementary file 503 [file 1]
