# Supplementary material (part 6 of 133)
Source: publisher figshare collection journal article supplement (https://springernature.figshare.com/articles/dataset/_/4903193)

# Car12

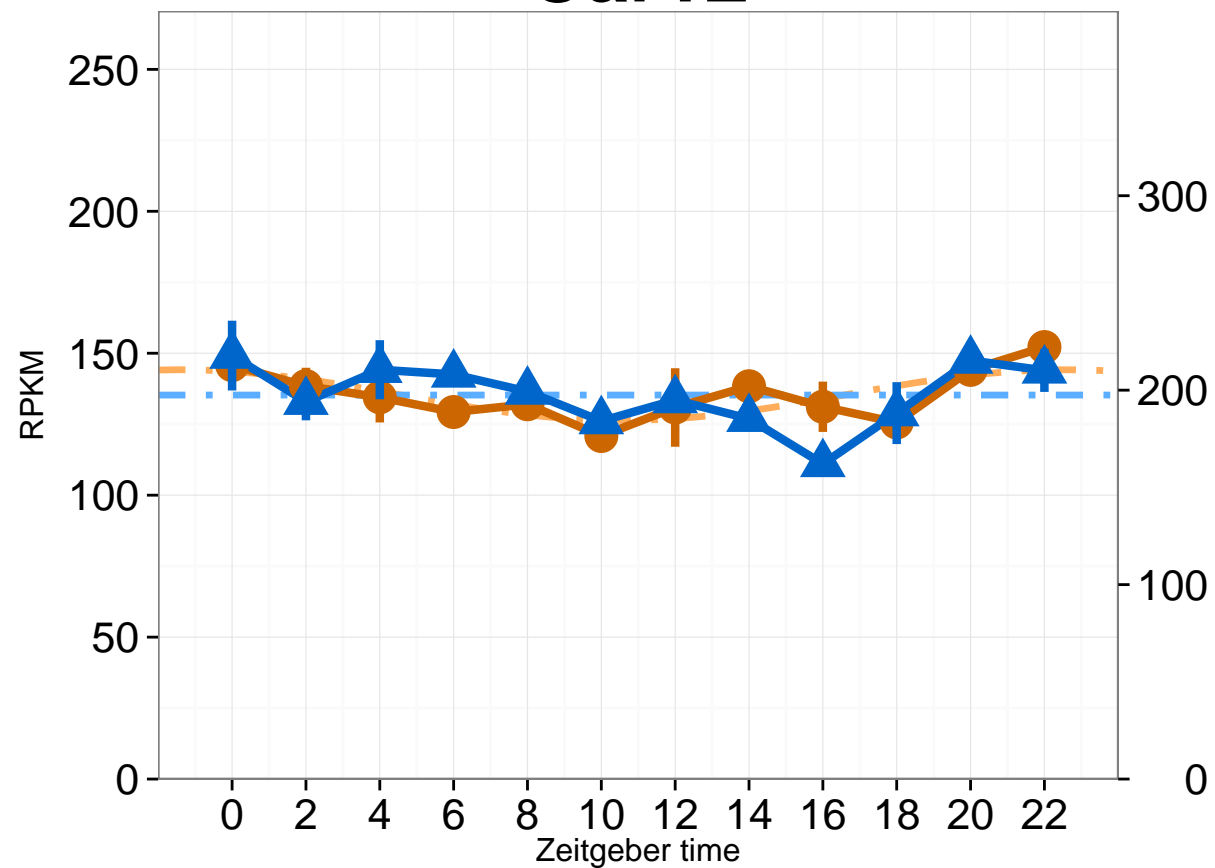

# Car12

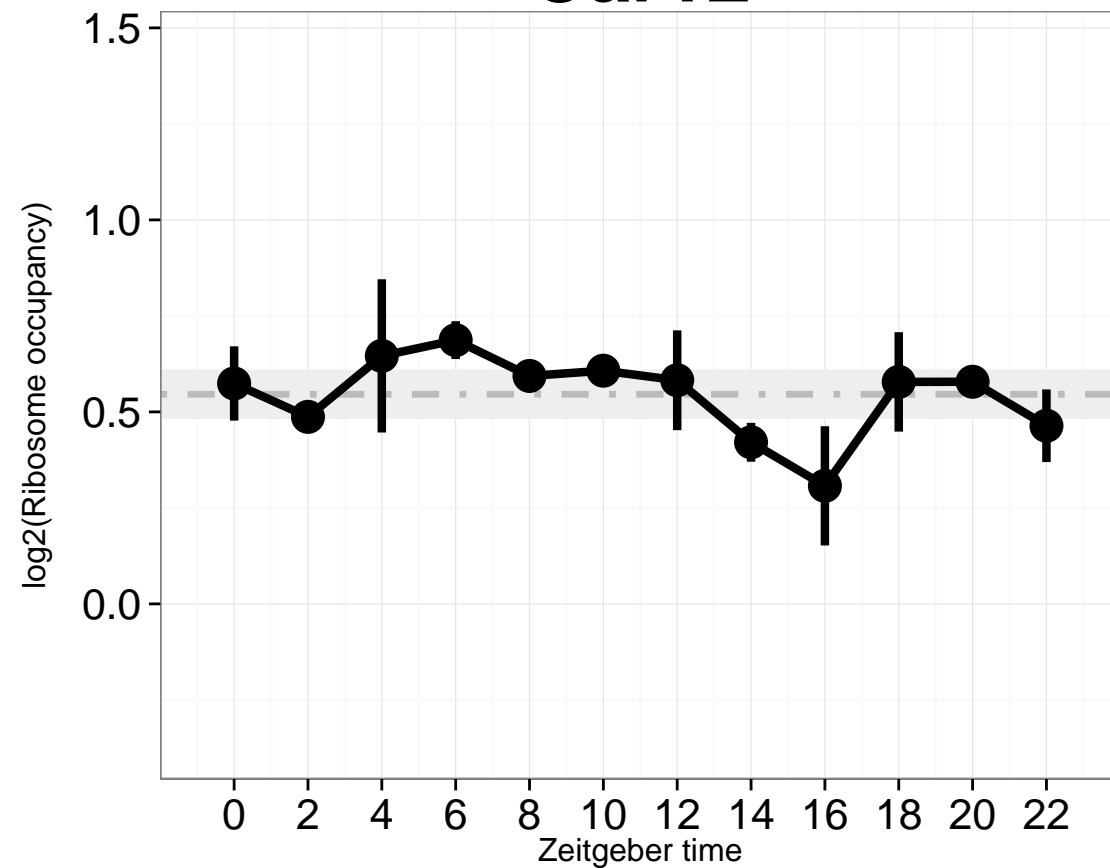

Supplement: Supplementary file 504 [file 1]

# Mrpl22

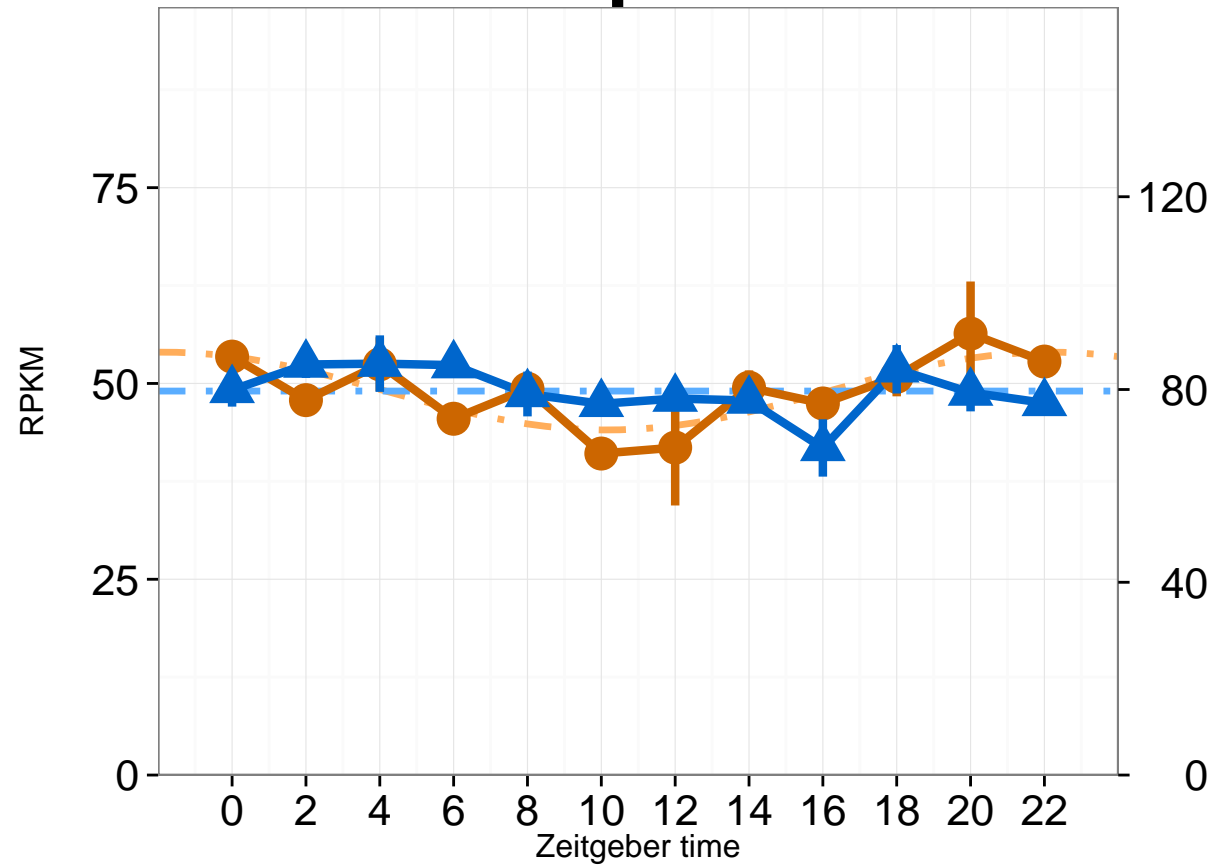

# Mrpl22

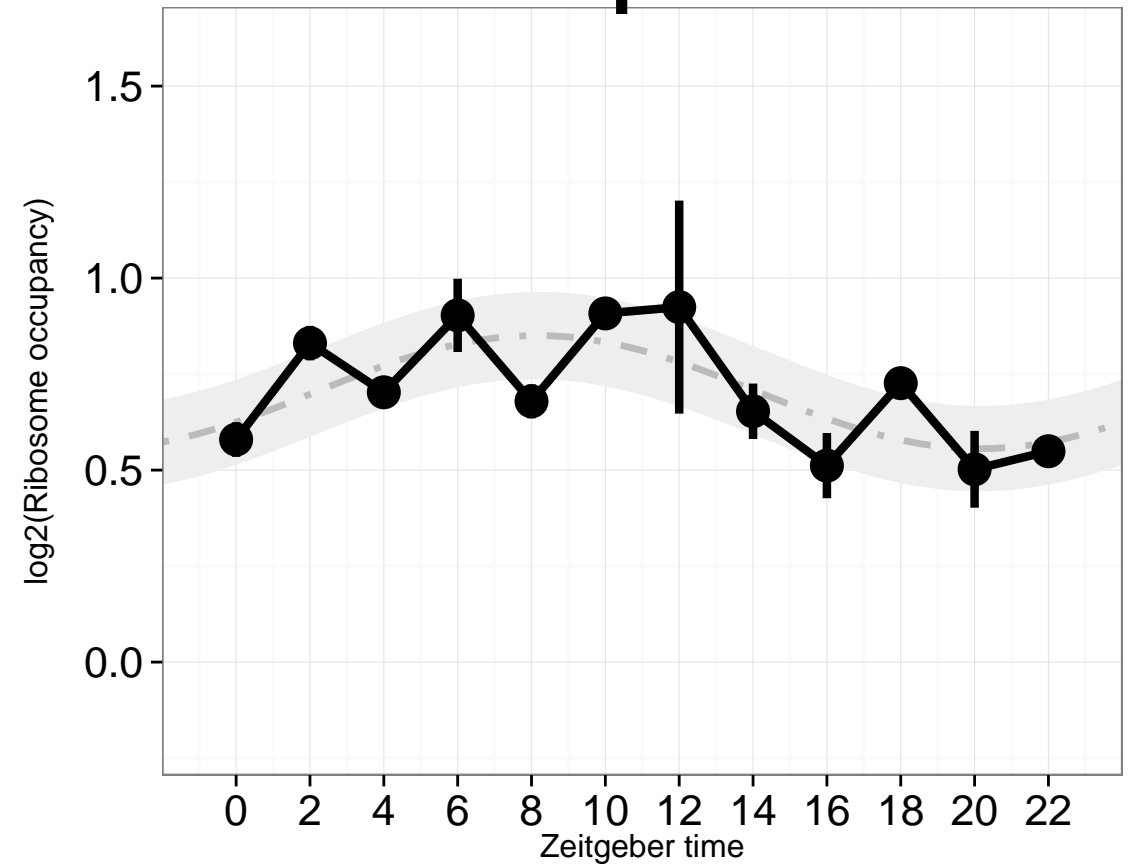

Supplement: Supplementary file 505 [file 1]

# Cntnap1

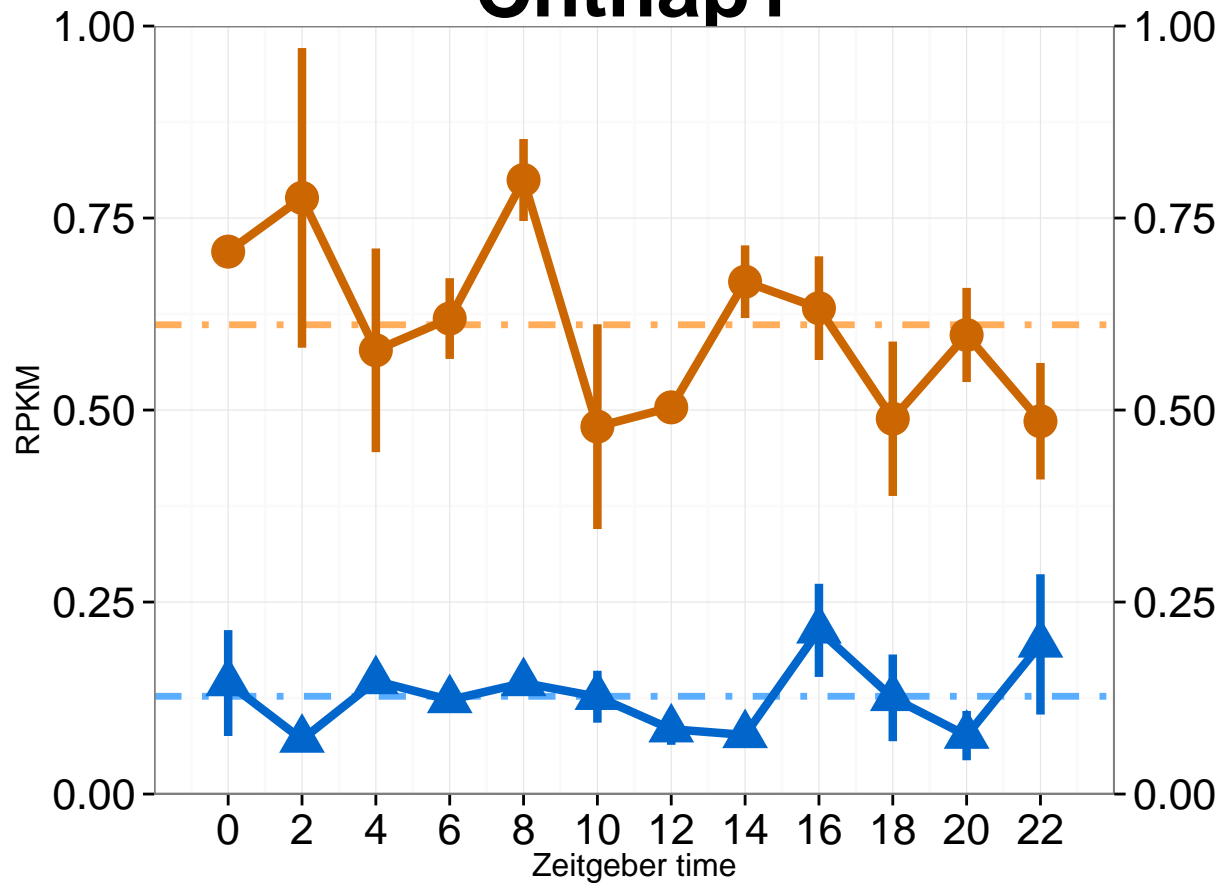

# Cntnap1

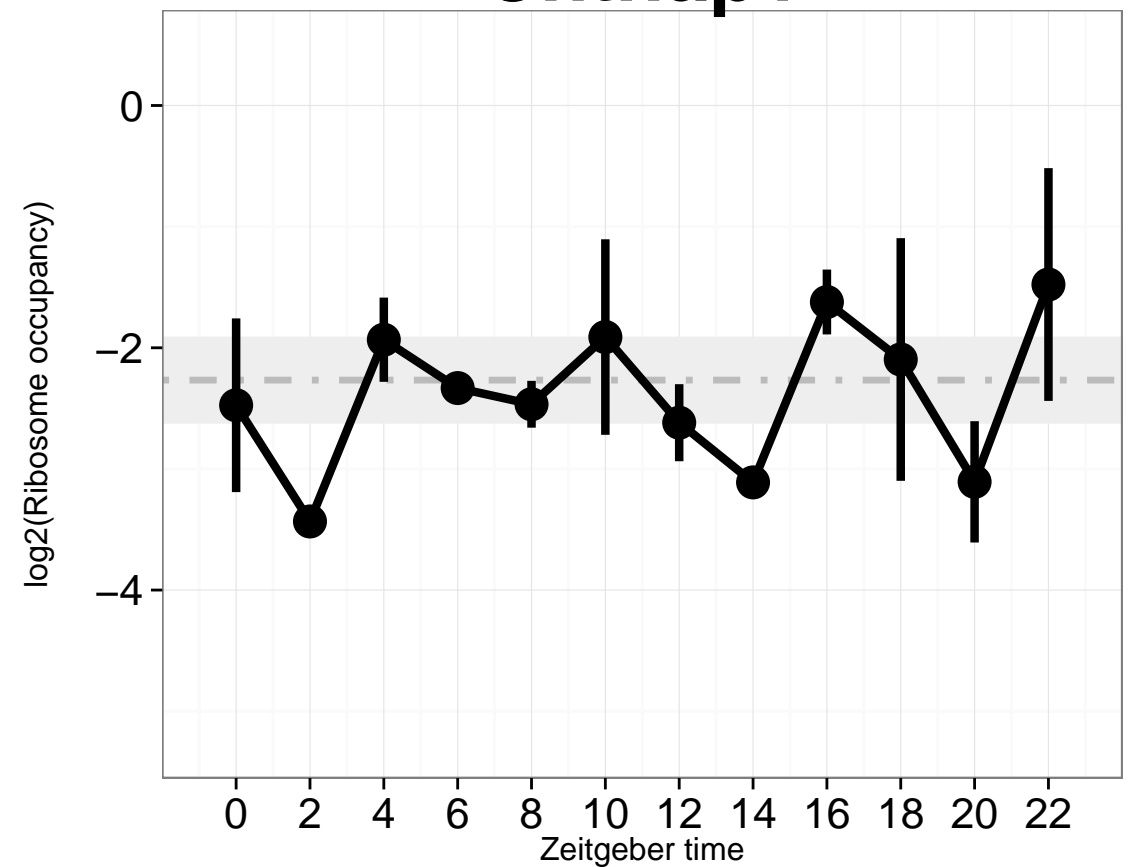

Supplement: Supplementary file 506 [file 1]

## Adat2

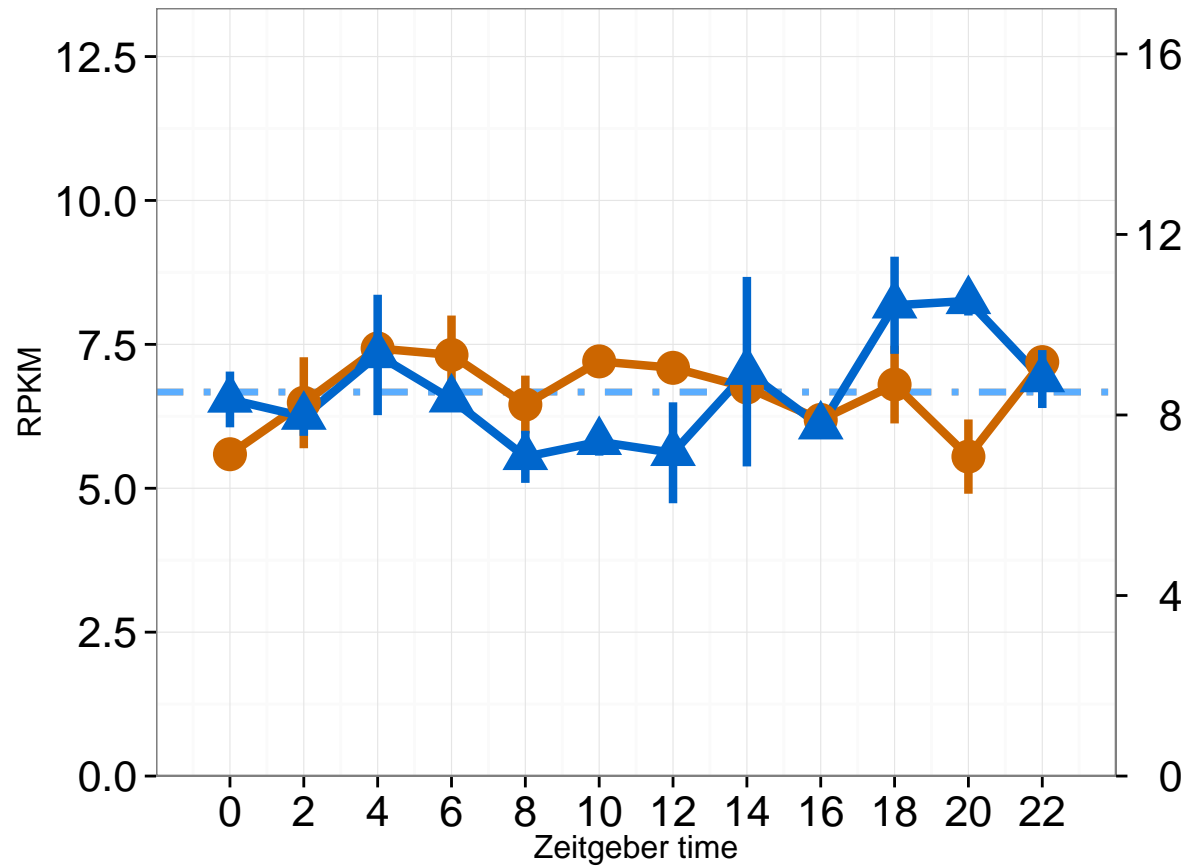

## Adat2

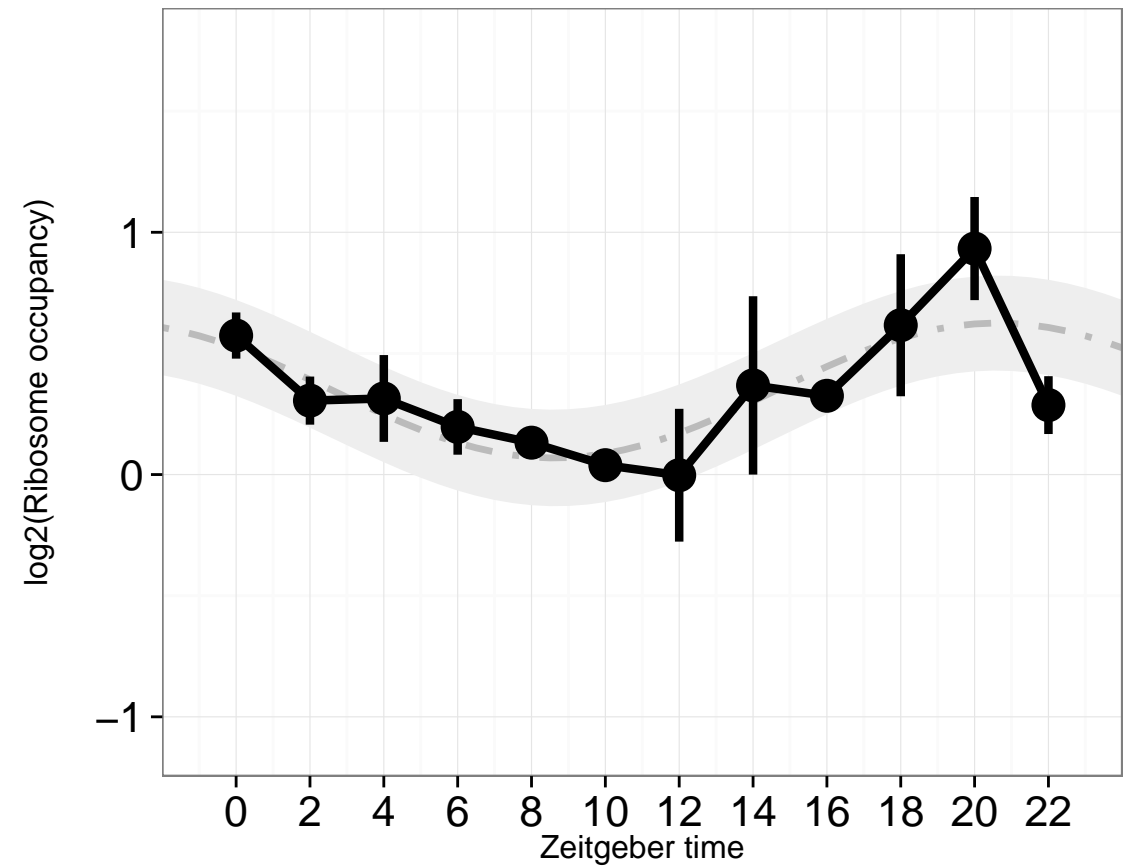

Supplement: Supplementary file 507 [file 1]

# S100a9

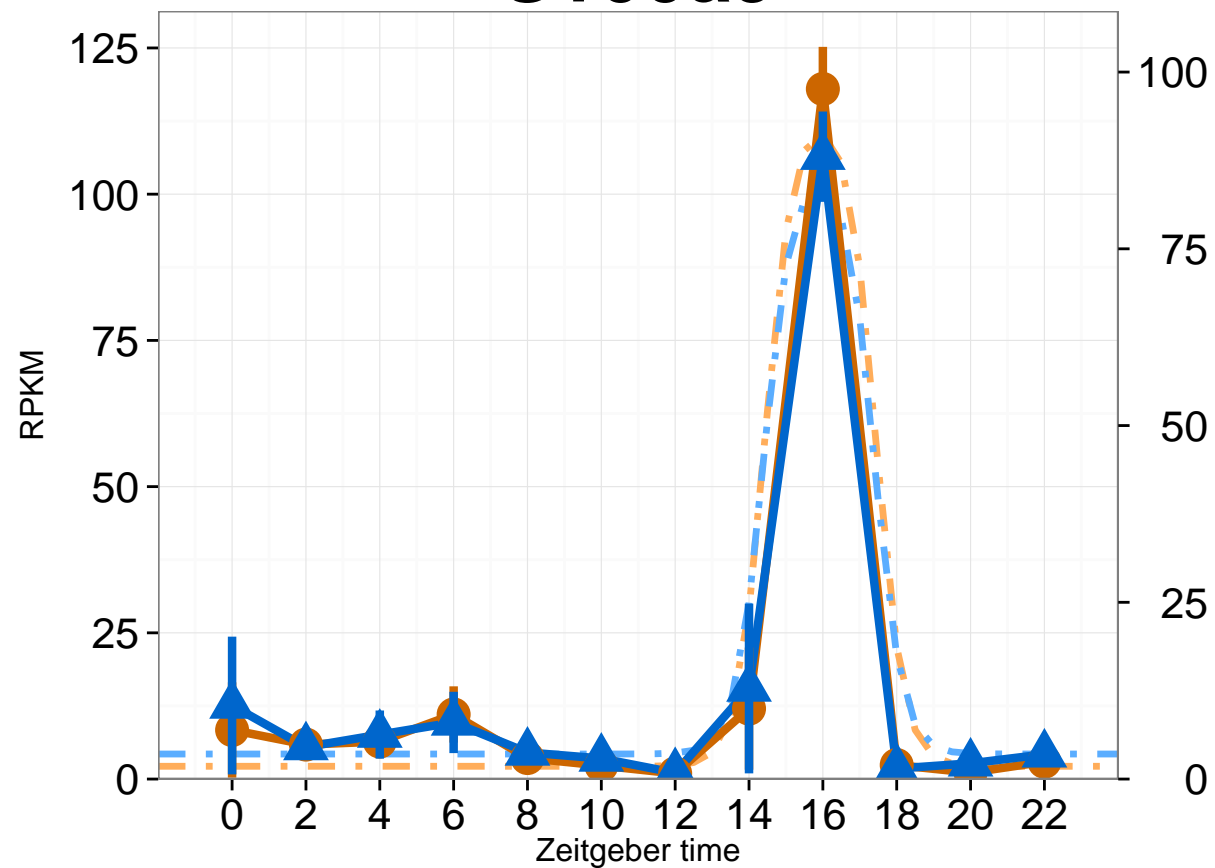

# S100a9

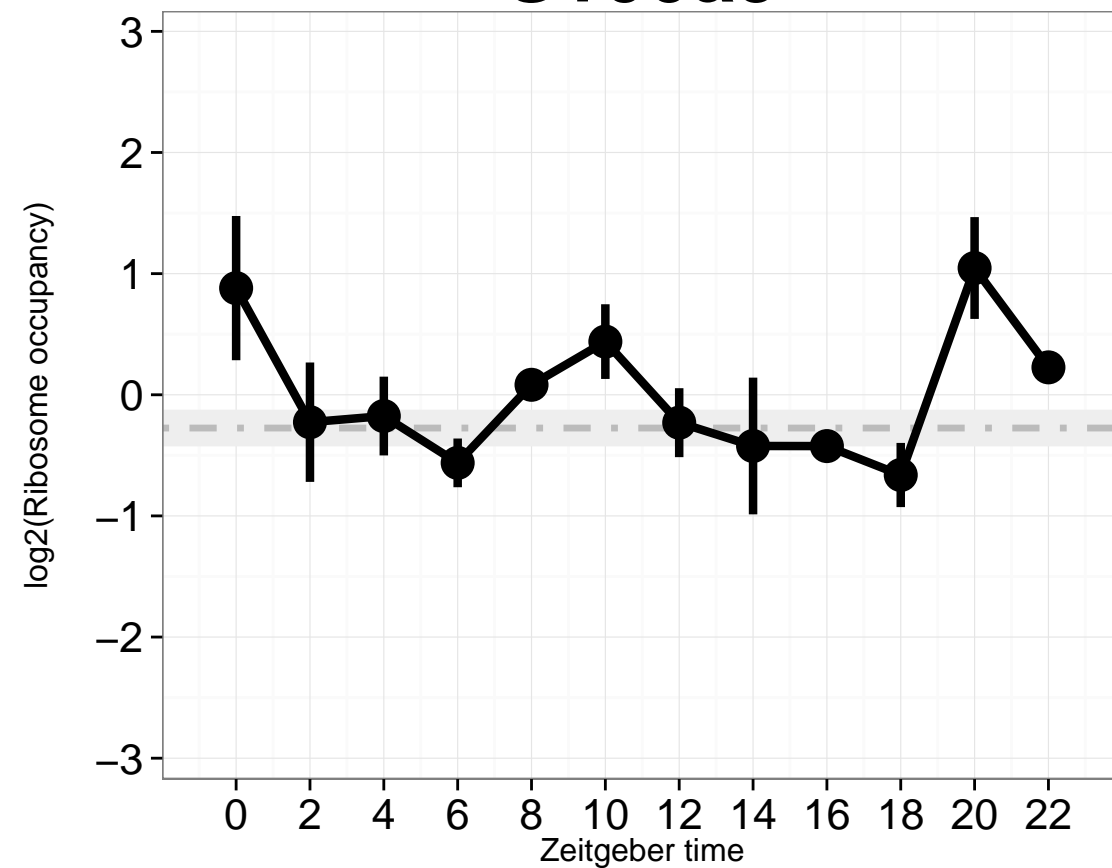

Supplement: Supplementary file 508 [file 1]

# Tnrc18

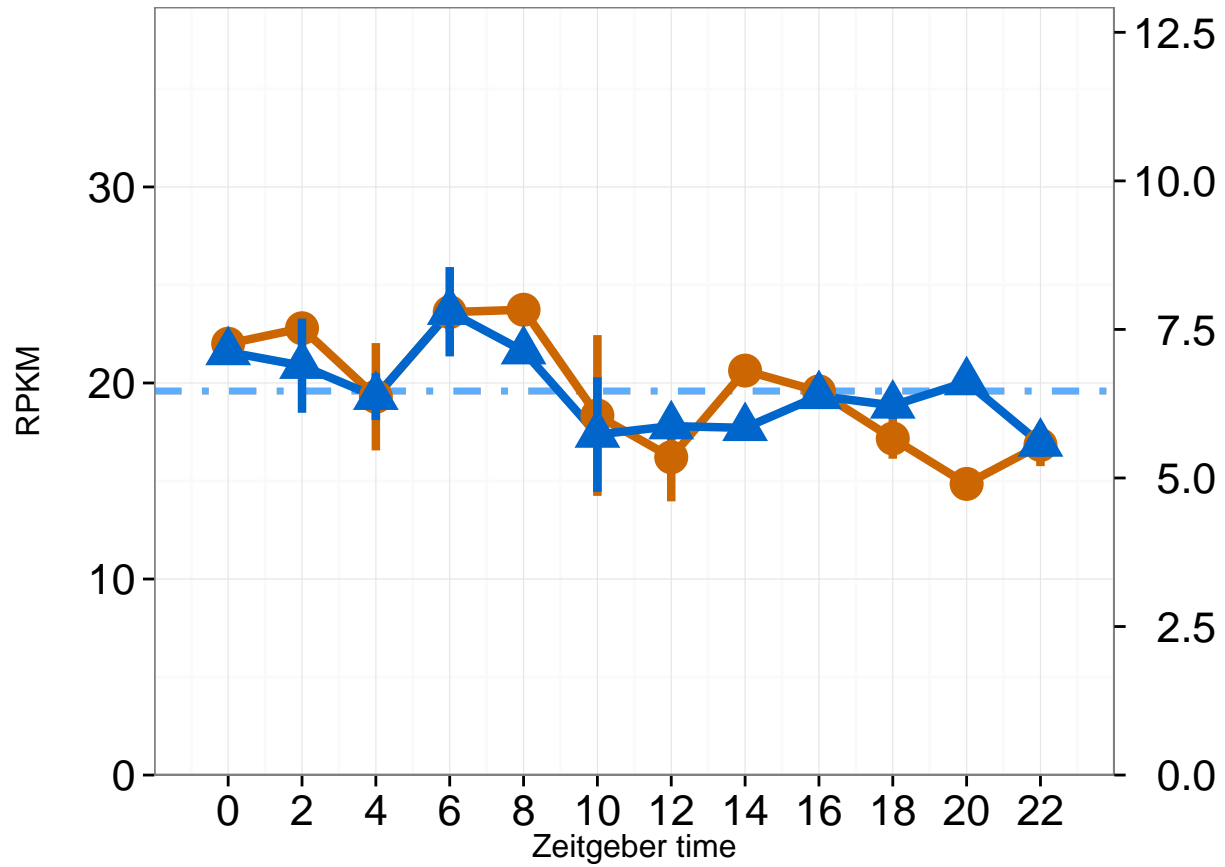

# Tnrc18

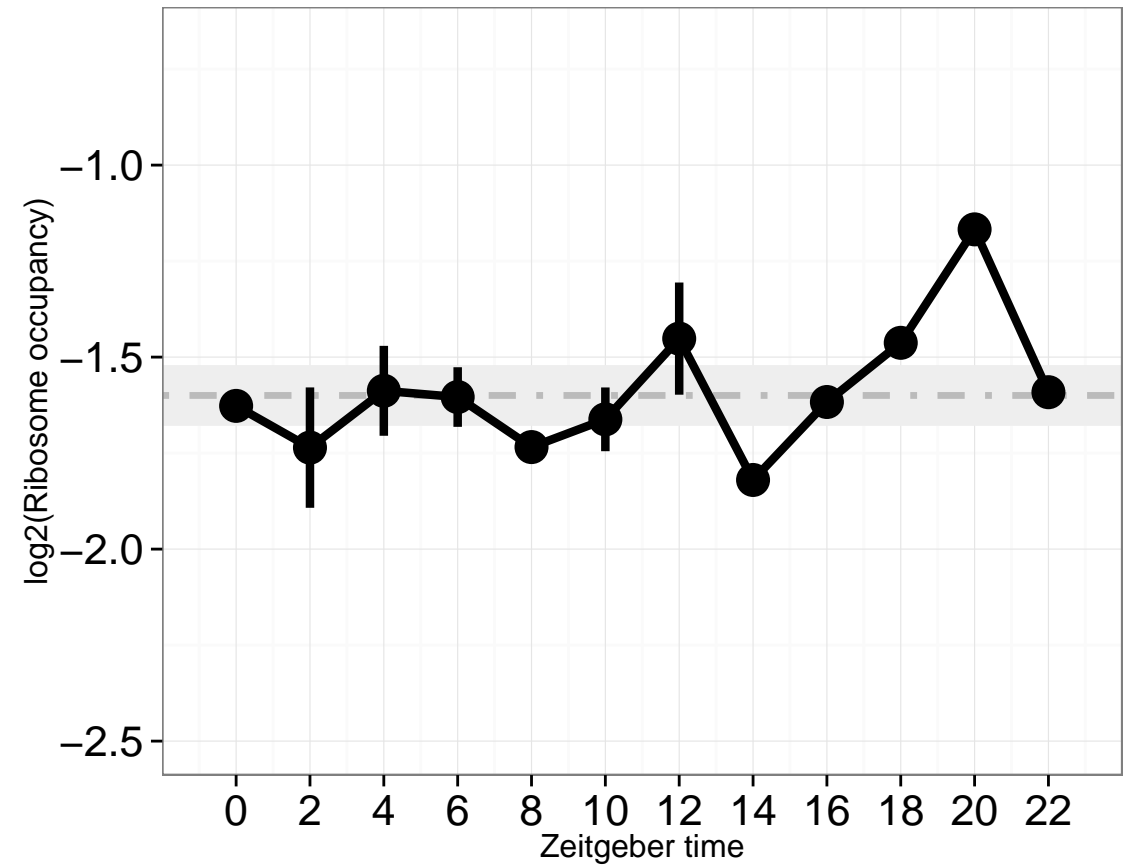

Supplement: Supplementary file 509 [file 1]

## Gmfb

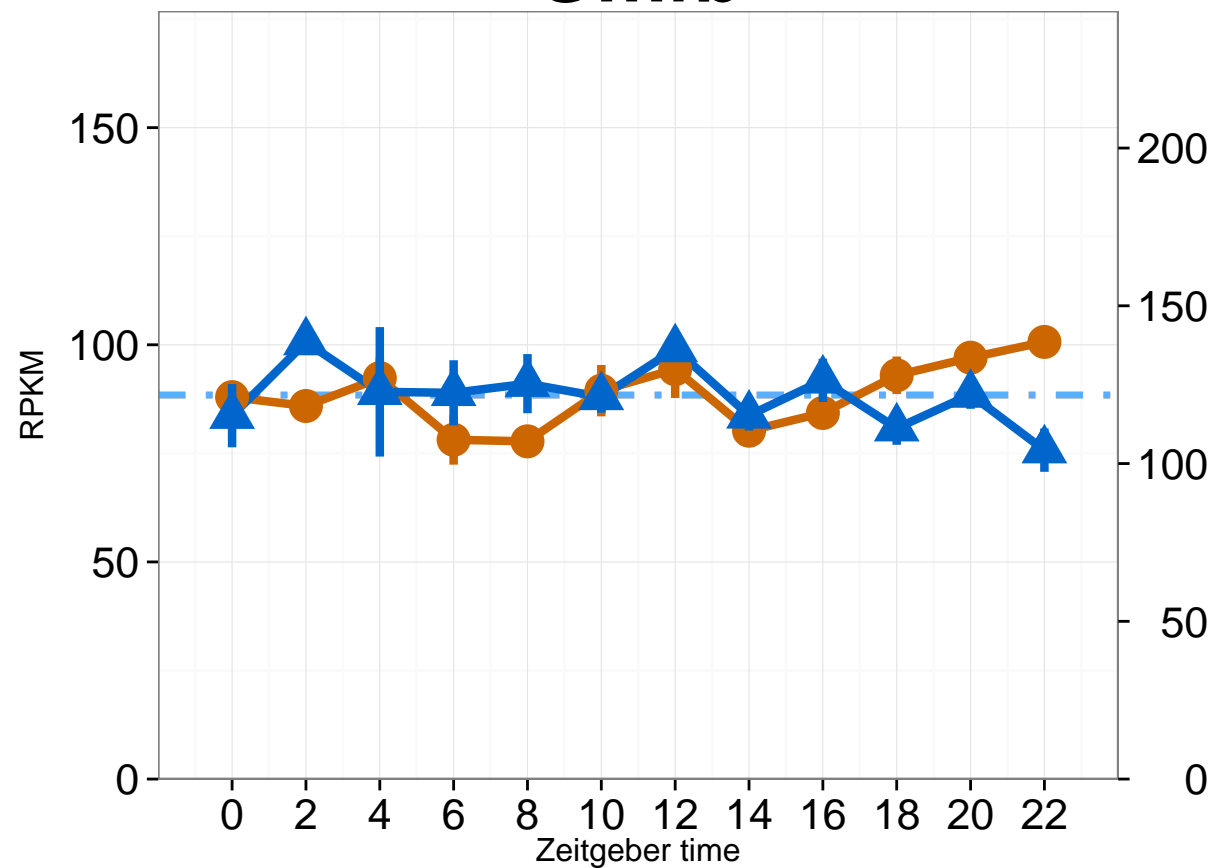

## Gmfb

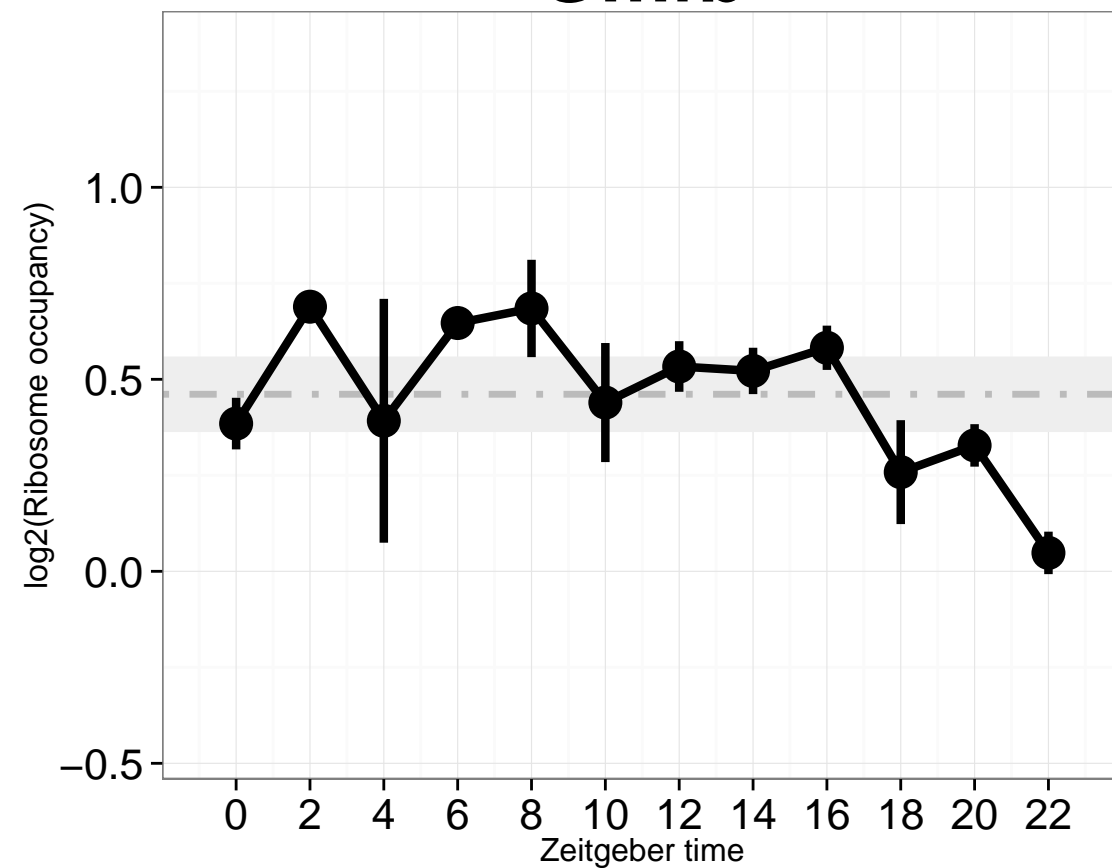

Supplement: Supplementary file 510 [file 1]

## Per2

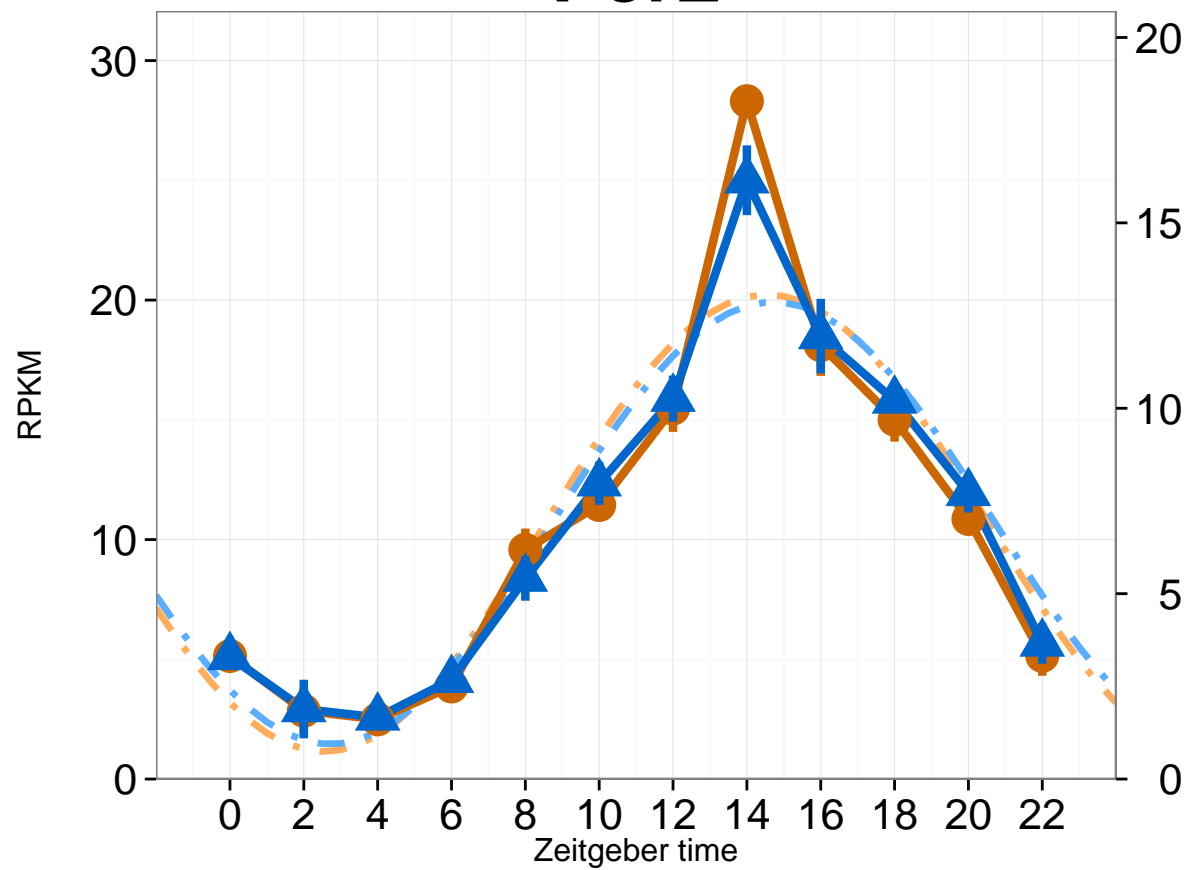

## Per2

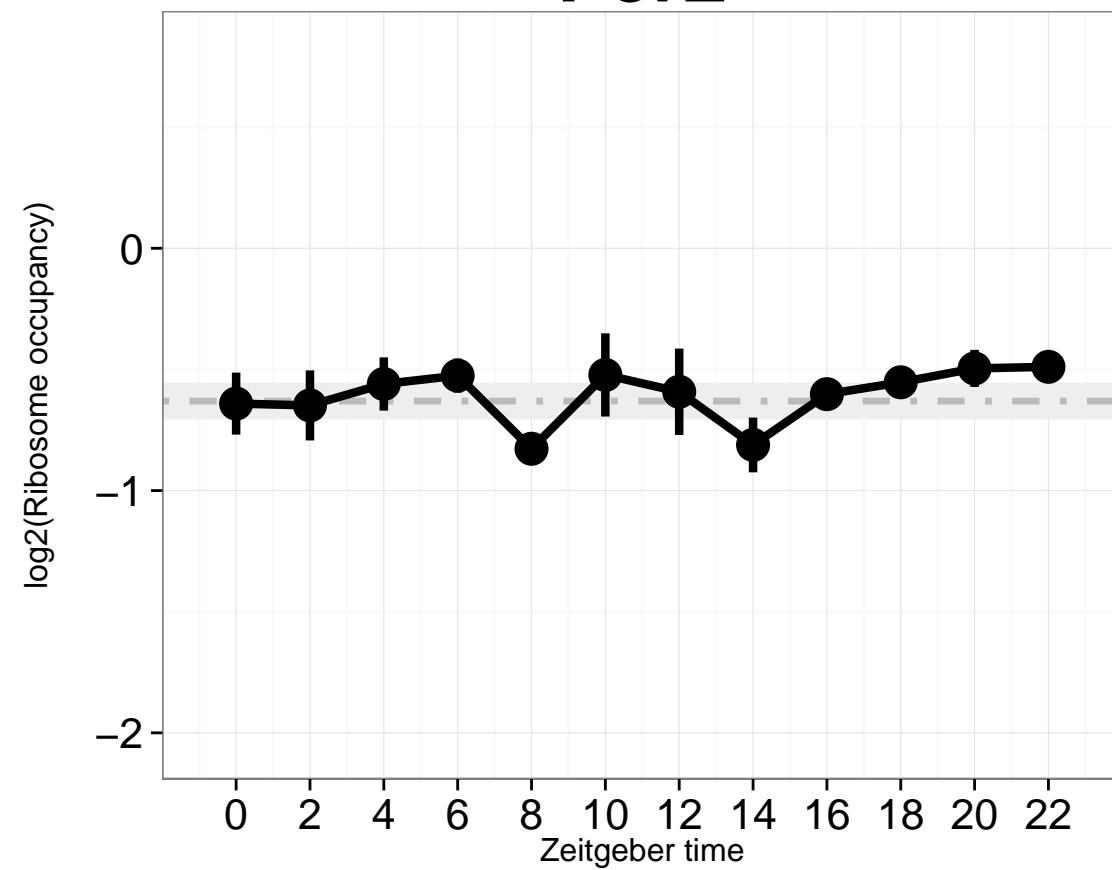

Supplement: Supplementary file 511 [file 1]

# Mthfd2

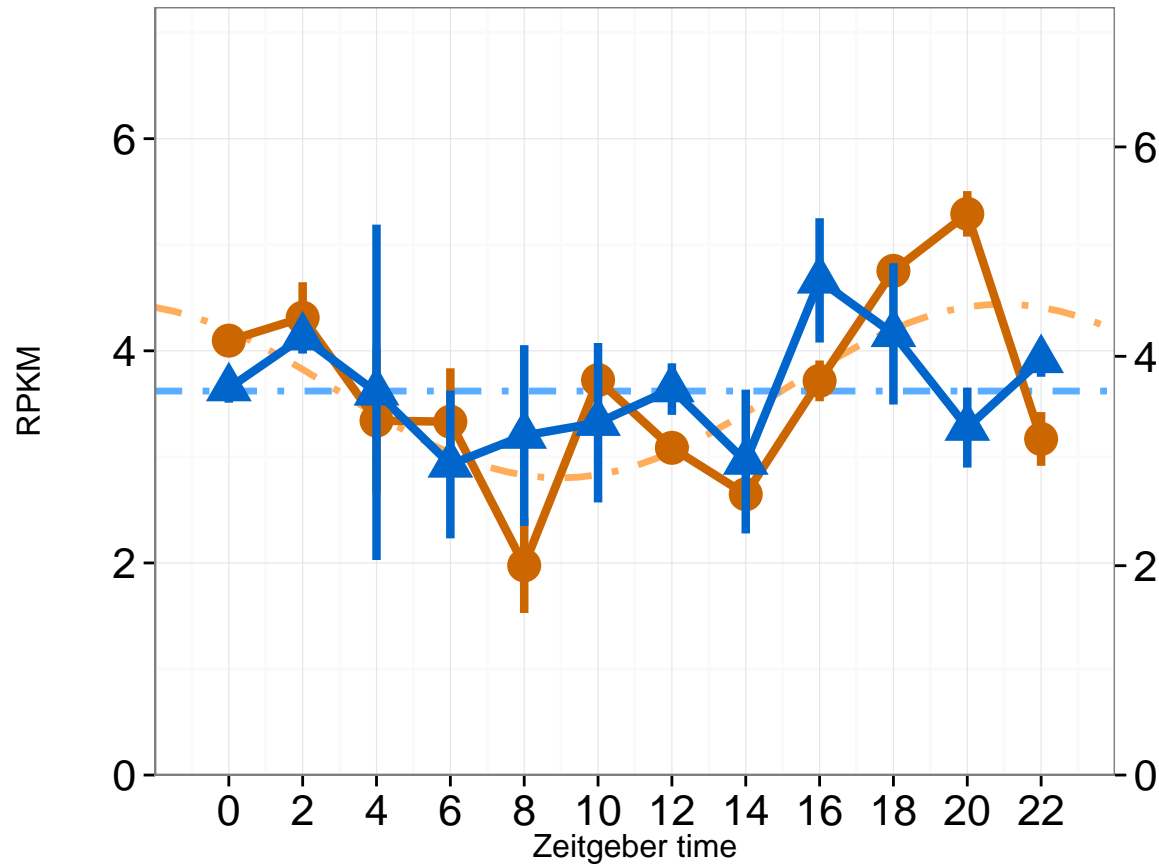

# Mthfd2

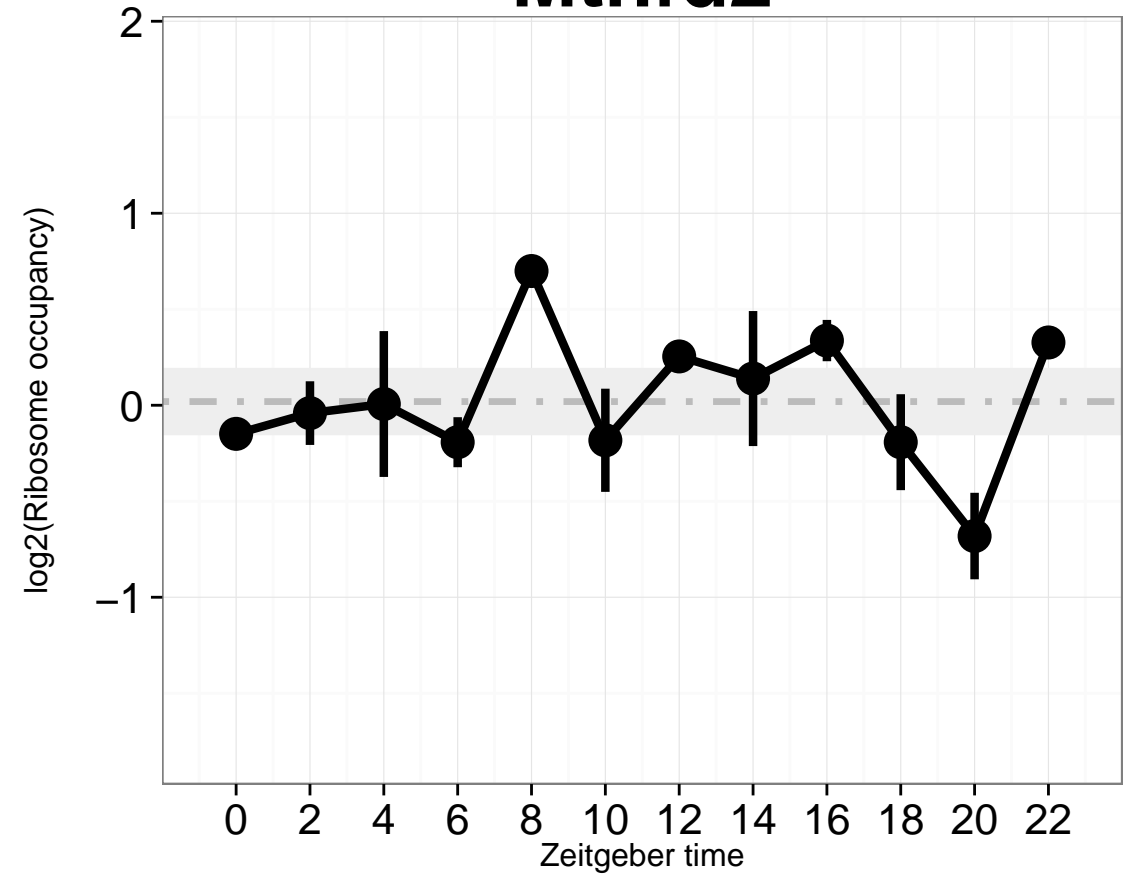

Supplement: Supplementary file 512 [file 1]

# CobII1

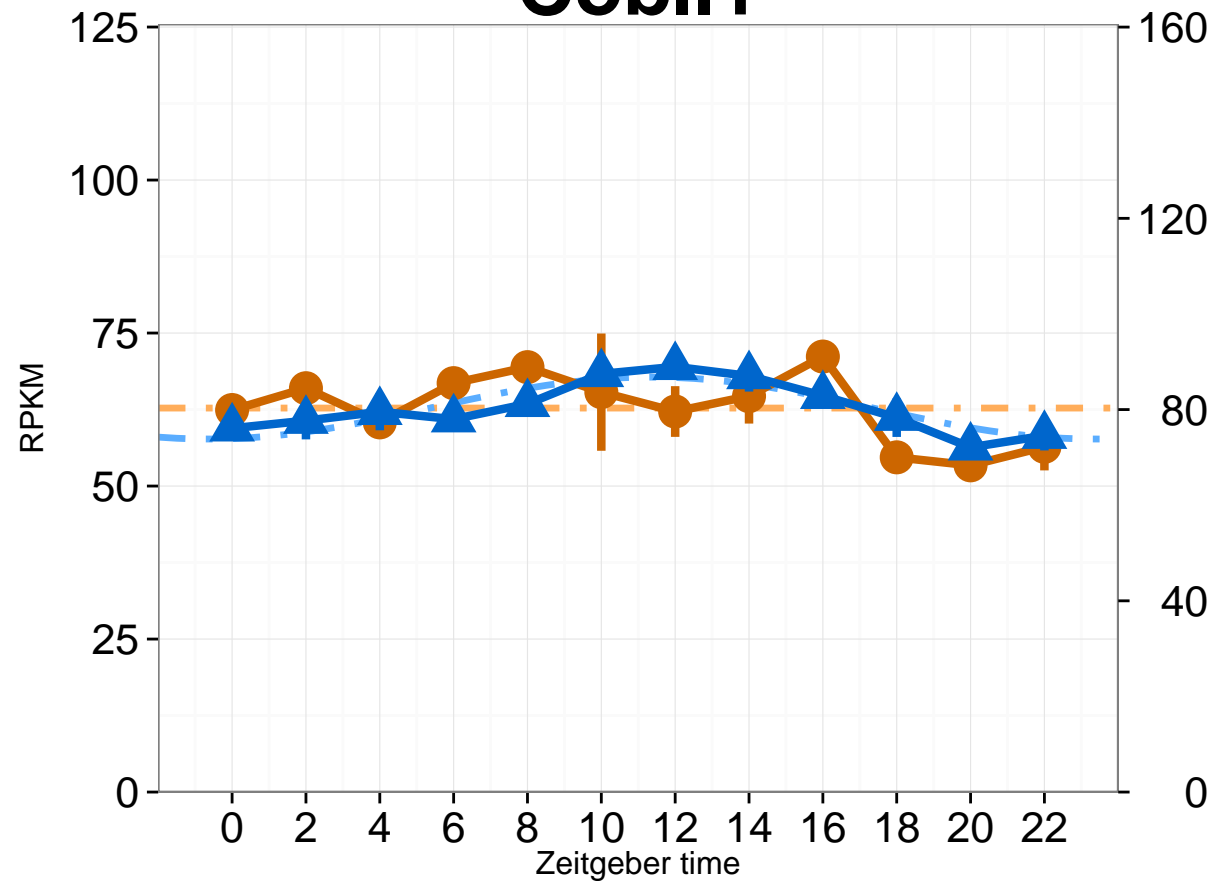

# CobII1

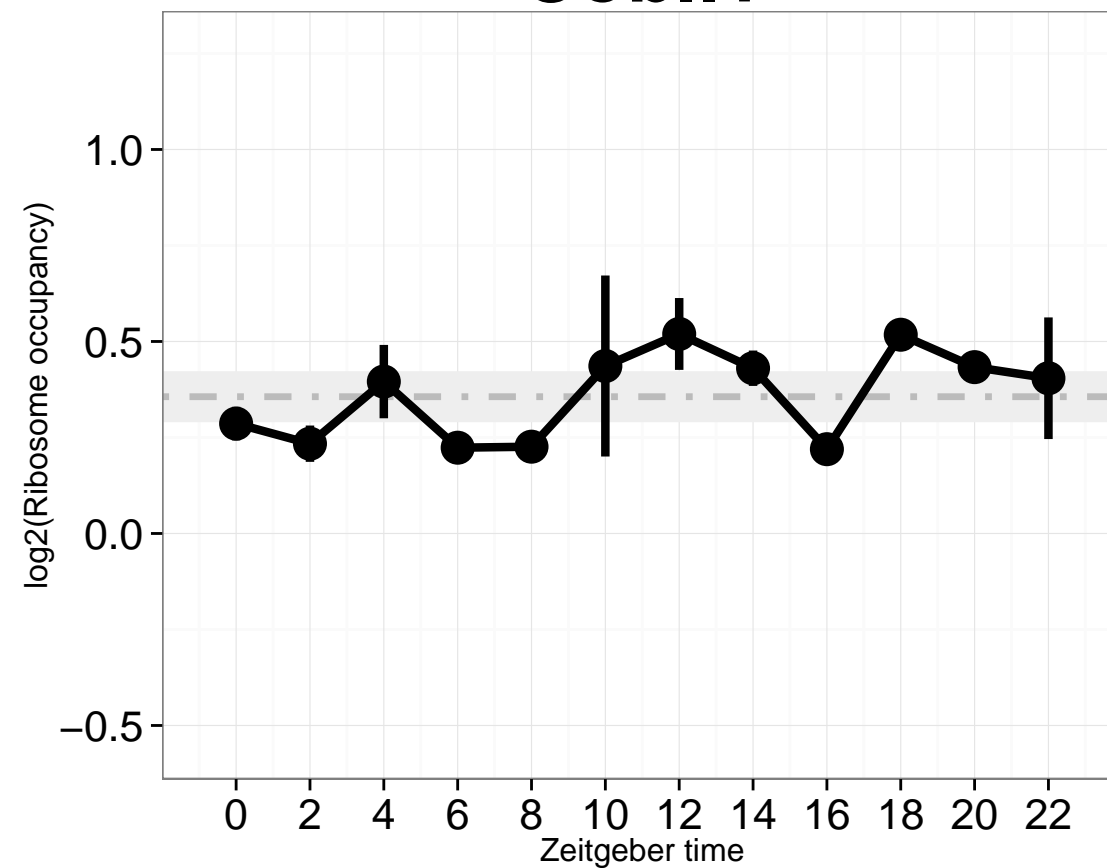

Supplement: Supplementary file 513 [file 1]

## Sap18

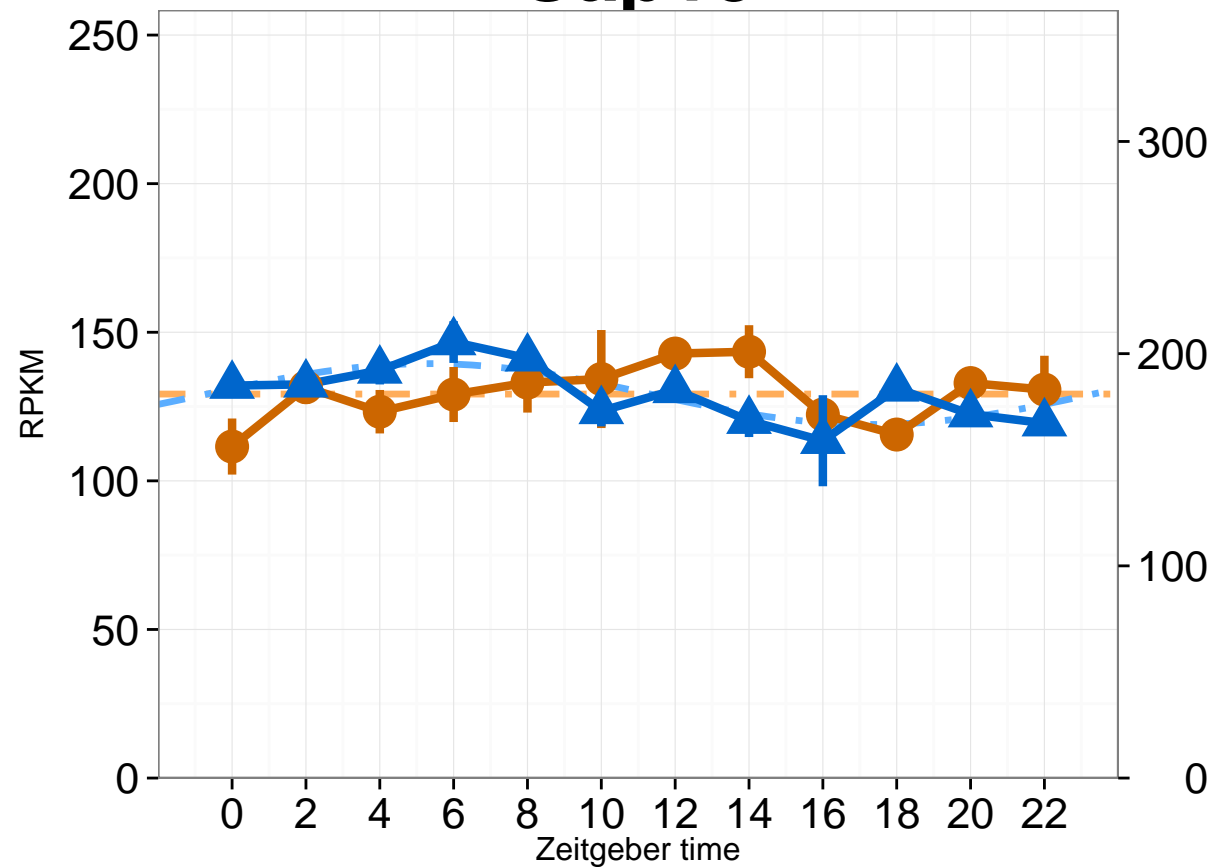

## Sap18

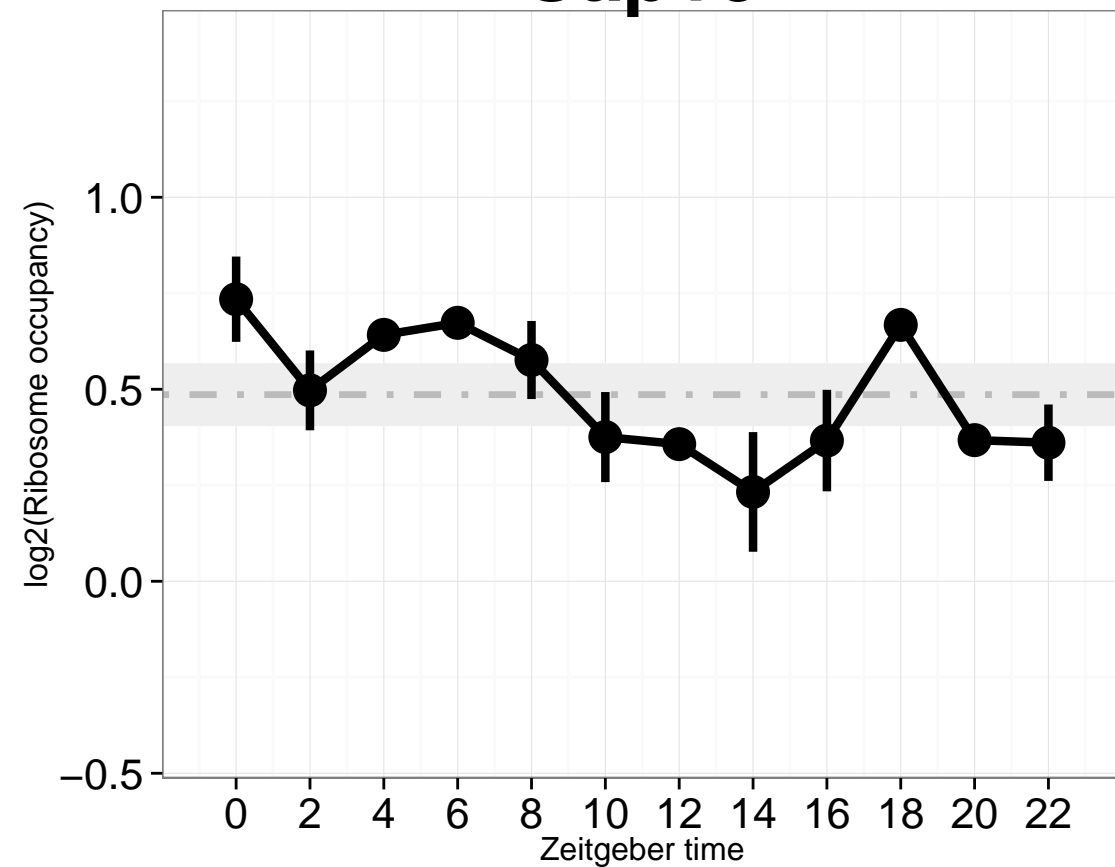

Supplement: Supplementary file 514 [file 1]

## Prrc1

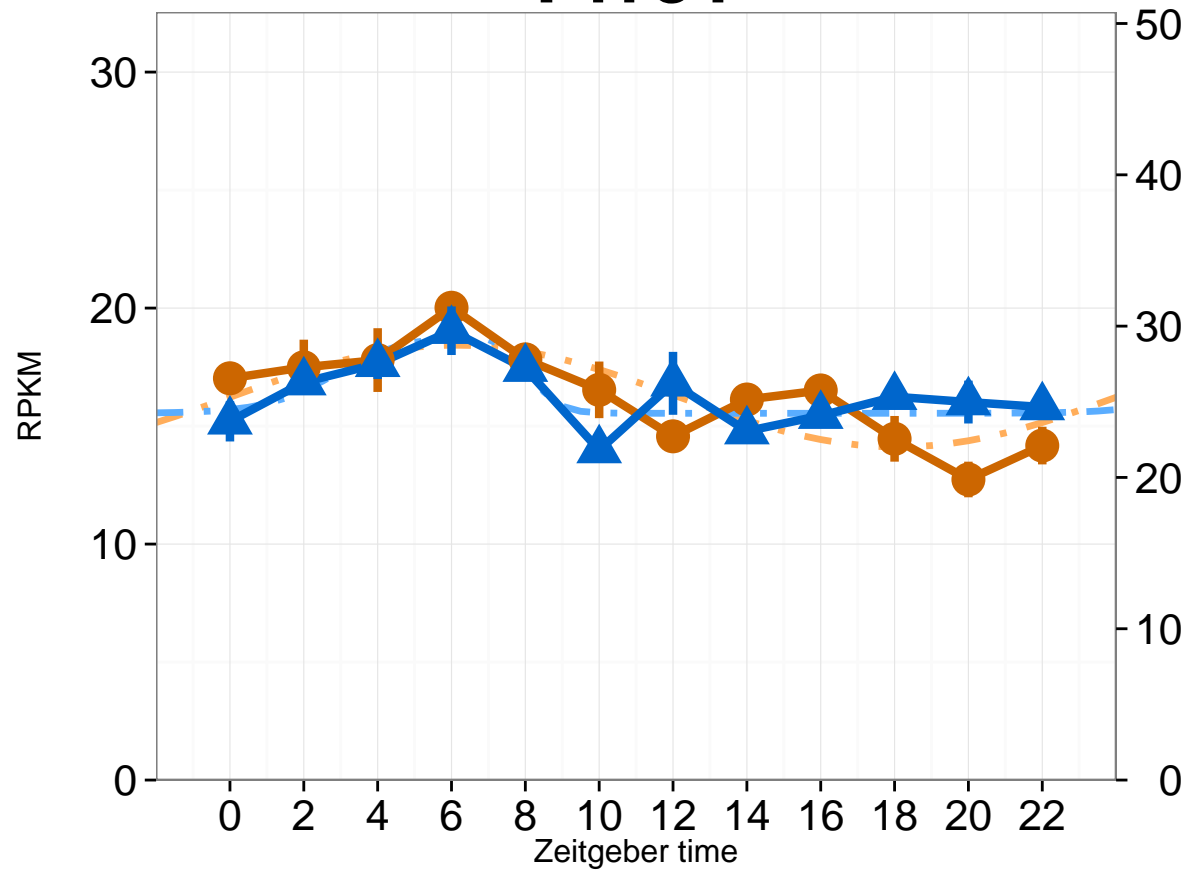

## Prrc1

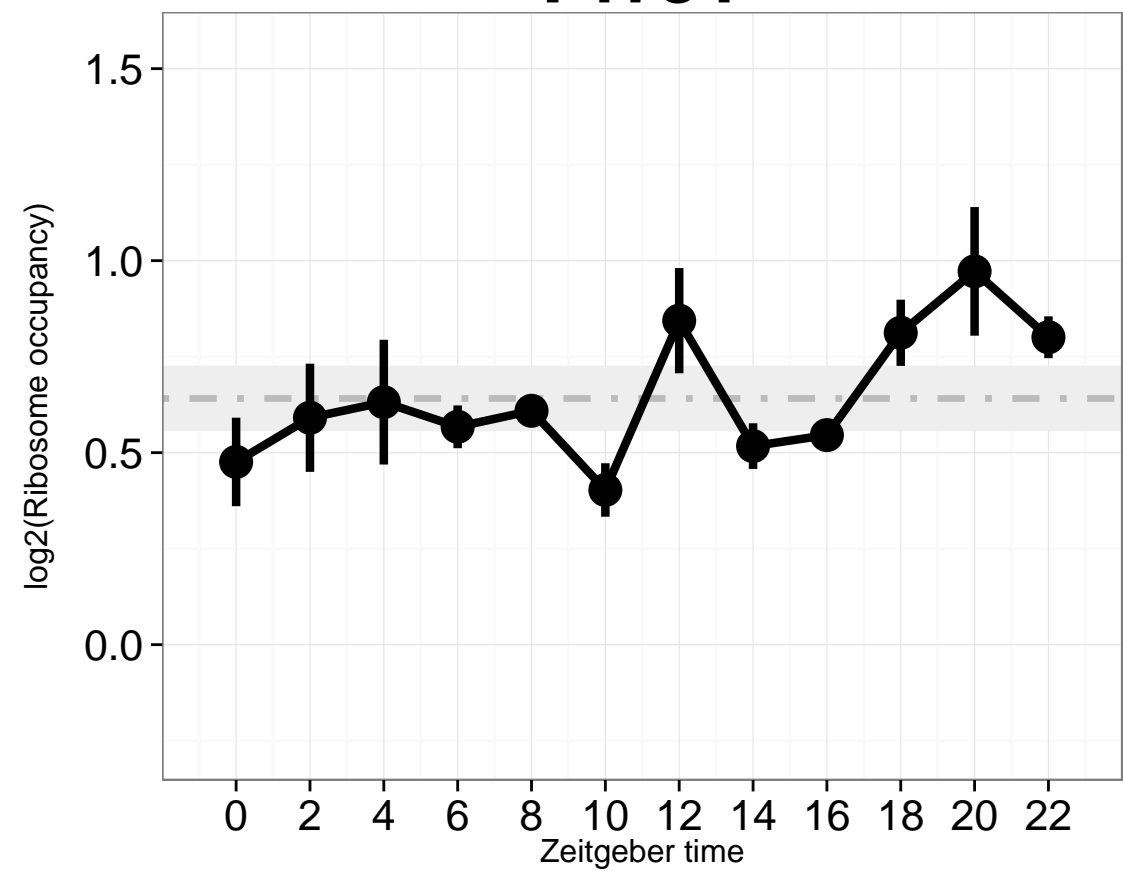

Supplement: Supplementary file 515 [file 1]

# Ndufaf6

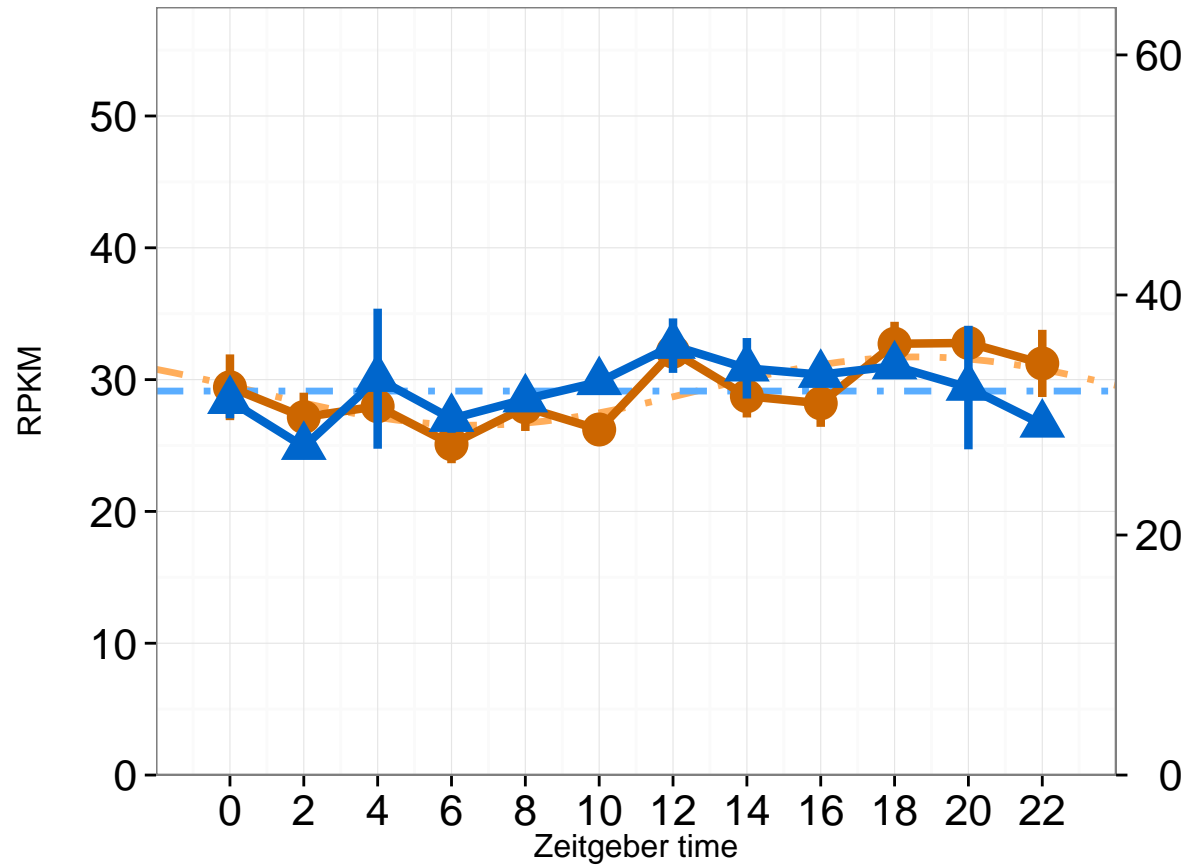

# Ndufaf6

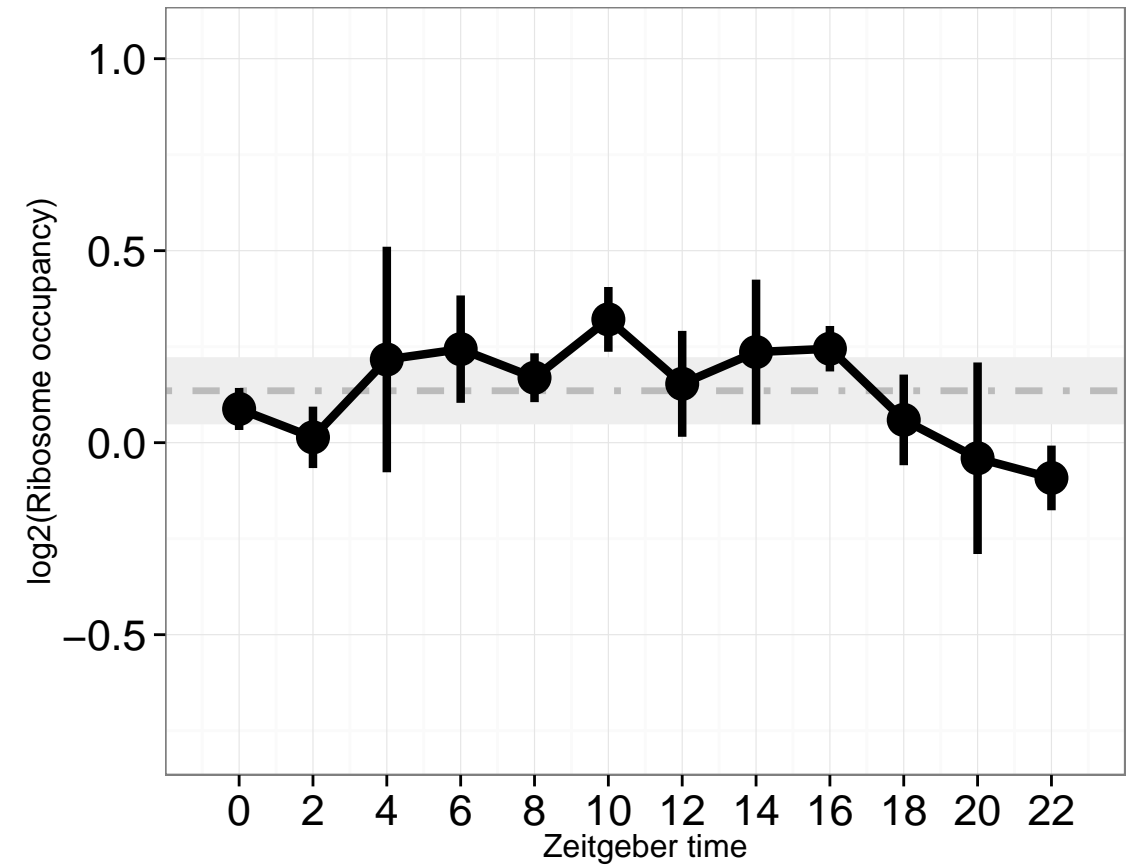

Supplement: Supplementary file 516 [file 1]

## Tcf20

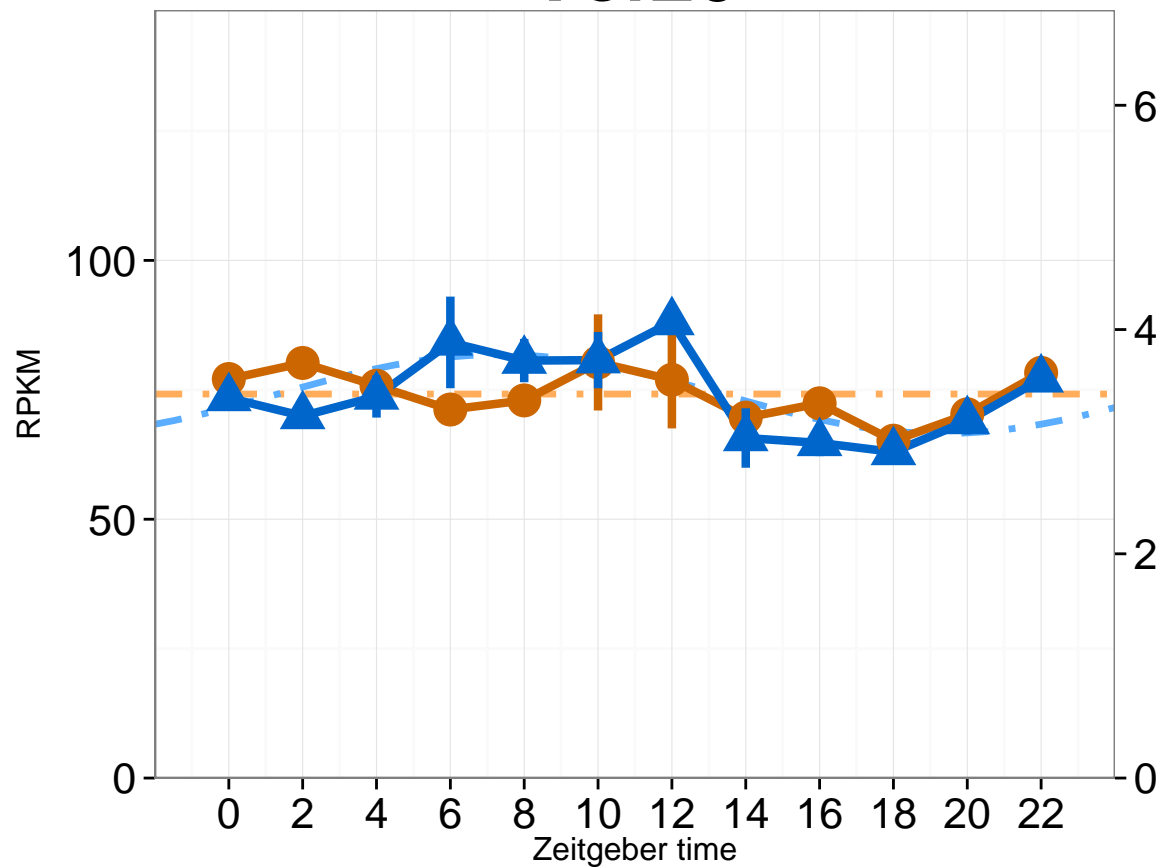

## Tcf20

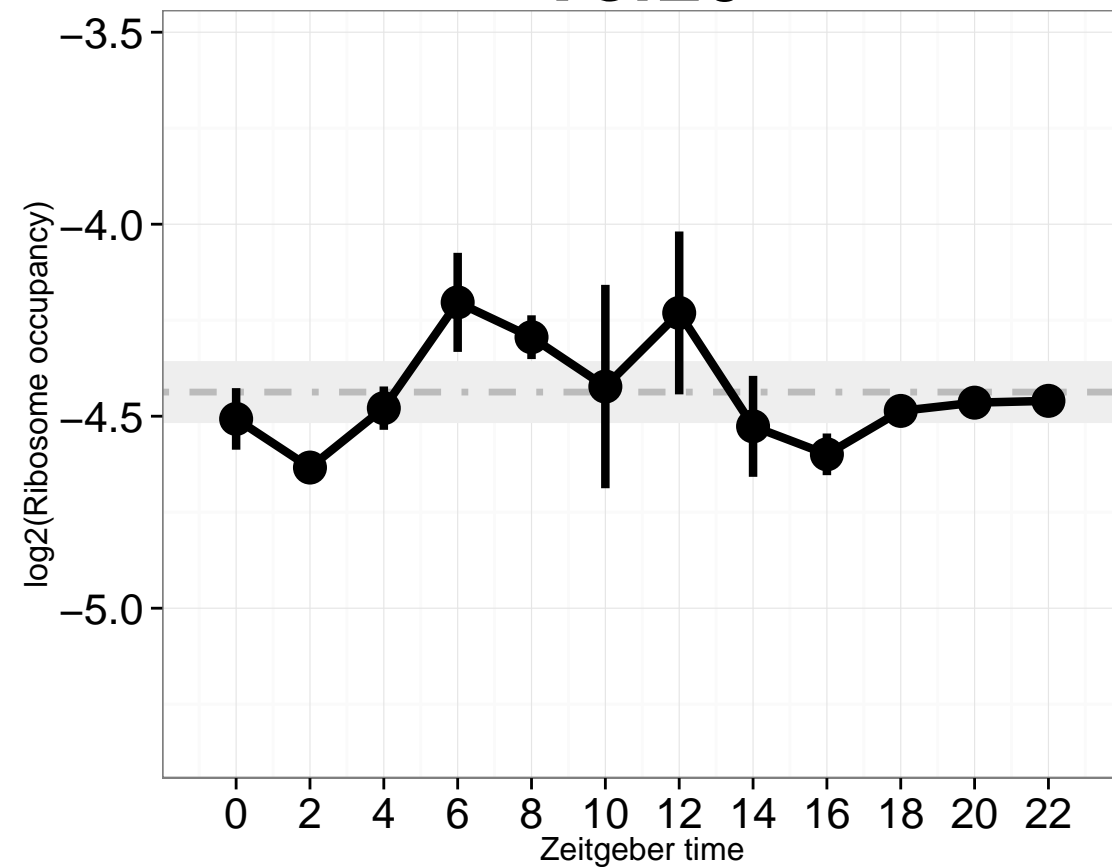

Supplement: Supplementary file 517 [file 1]

## Dhx36

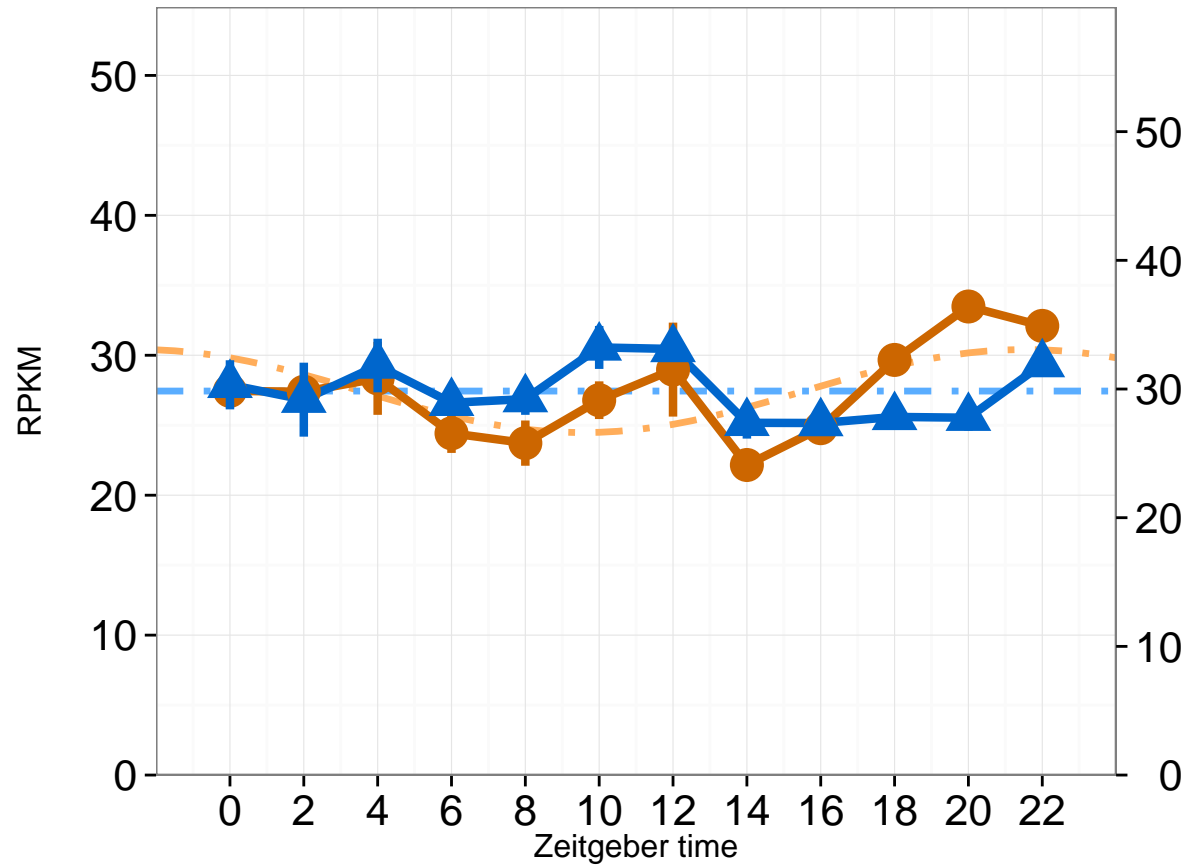

## Dhx36

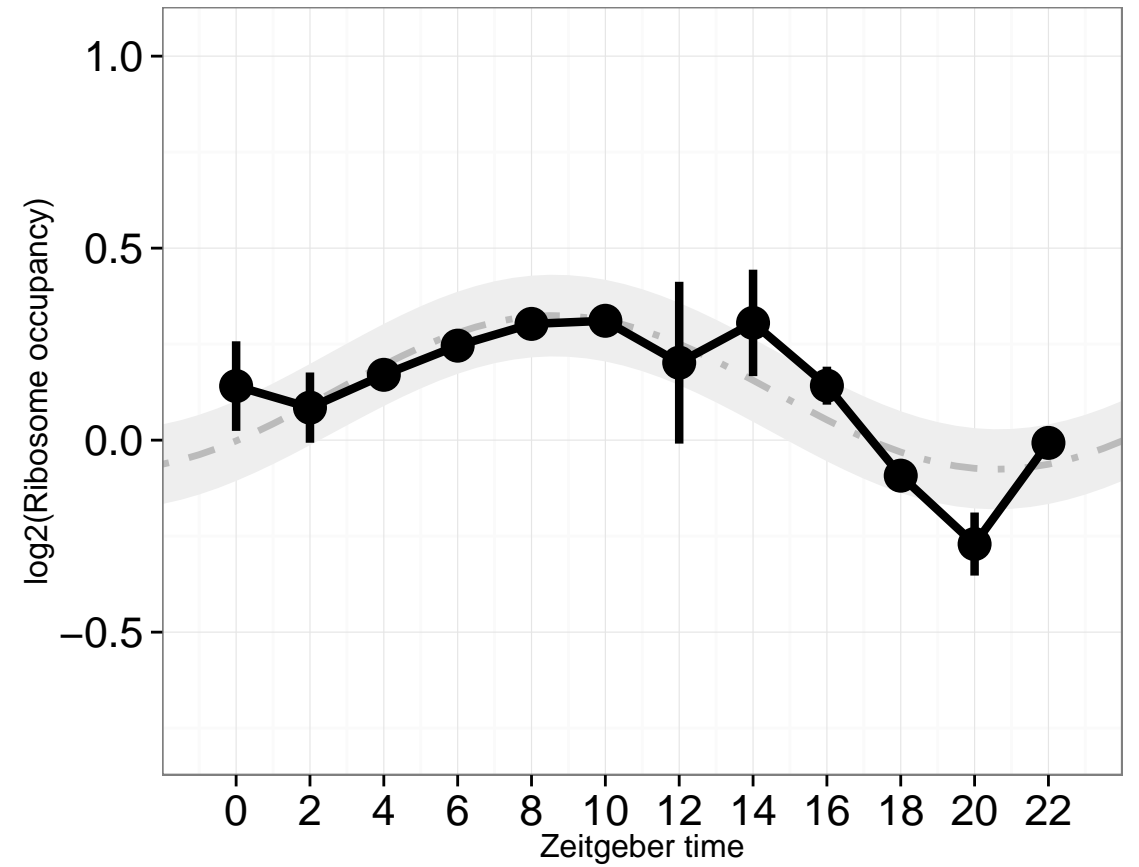

Supplement: Supplementary file 518 [file 1]

# Cmss1

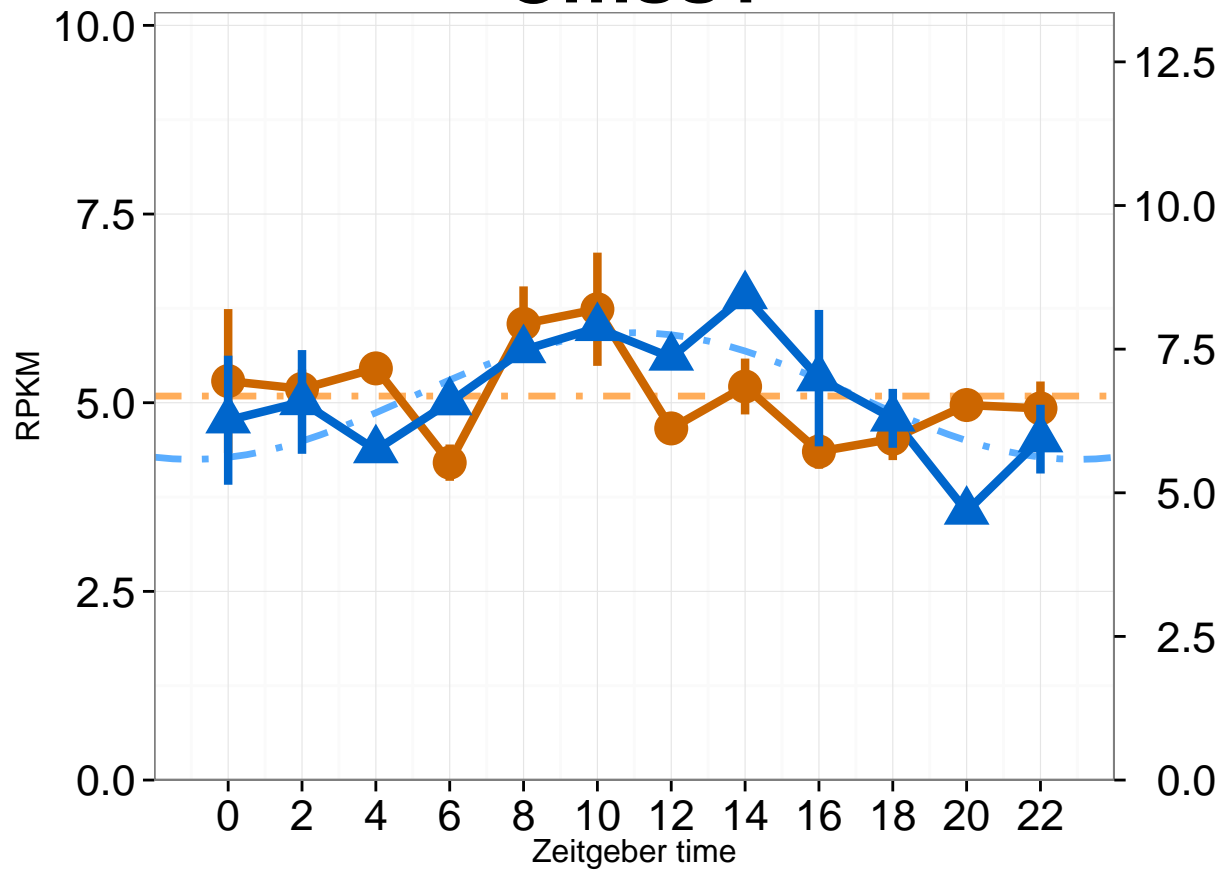

# Cmss1

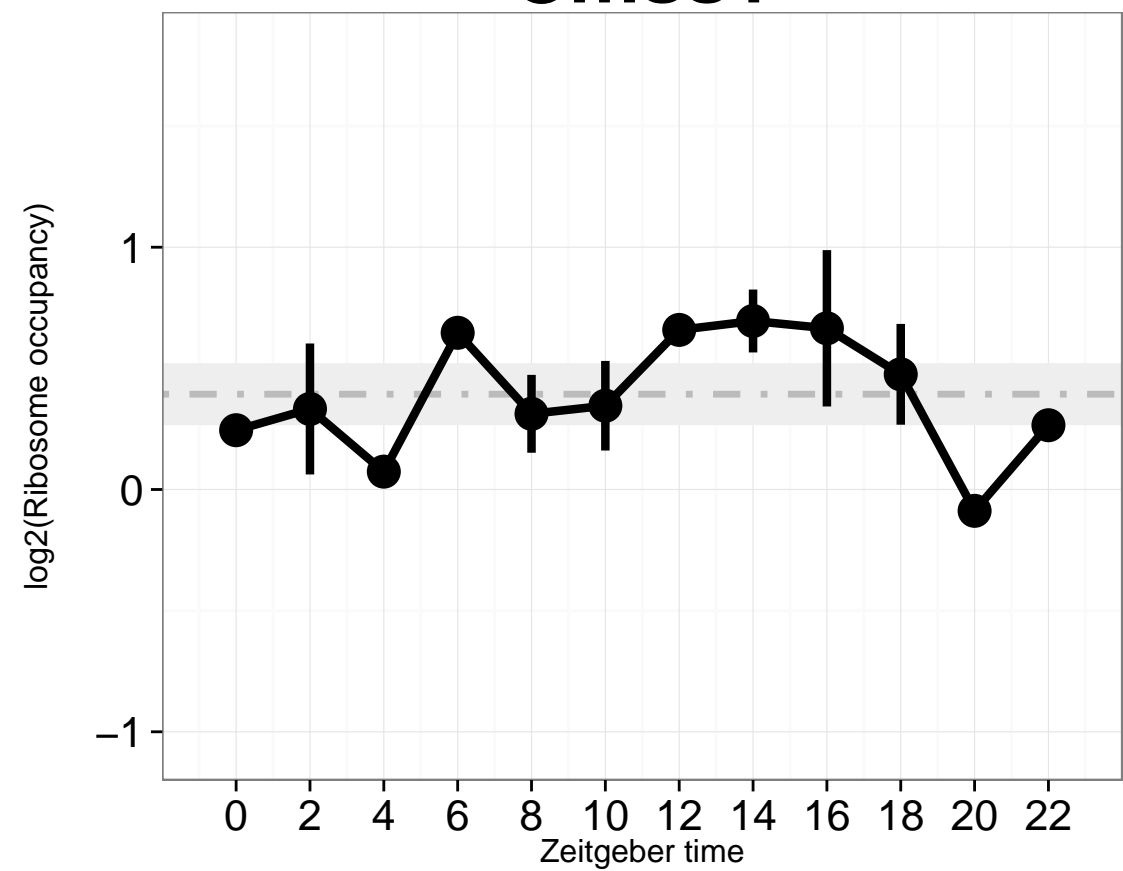

Supplement: Supplementary file 519 [file 1]

# Serpina10

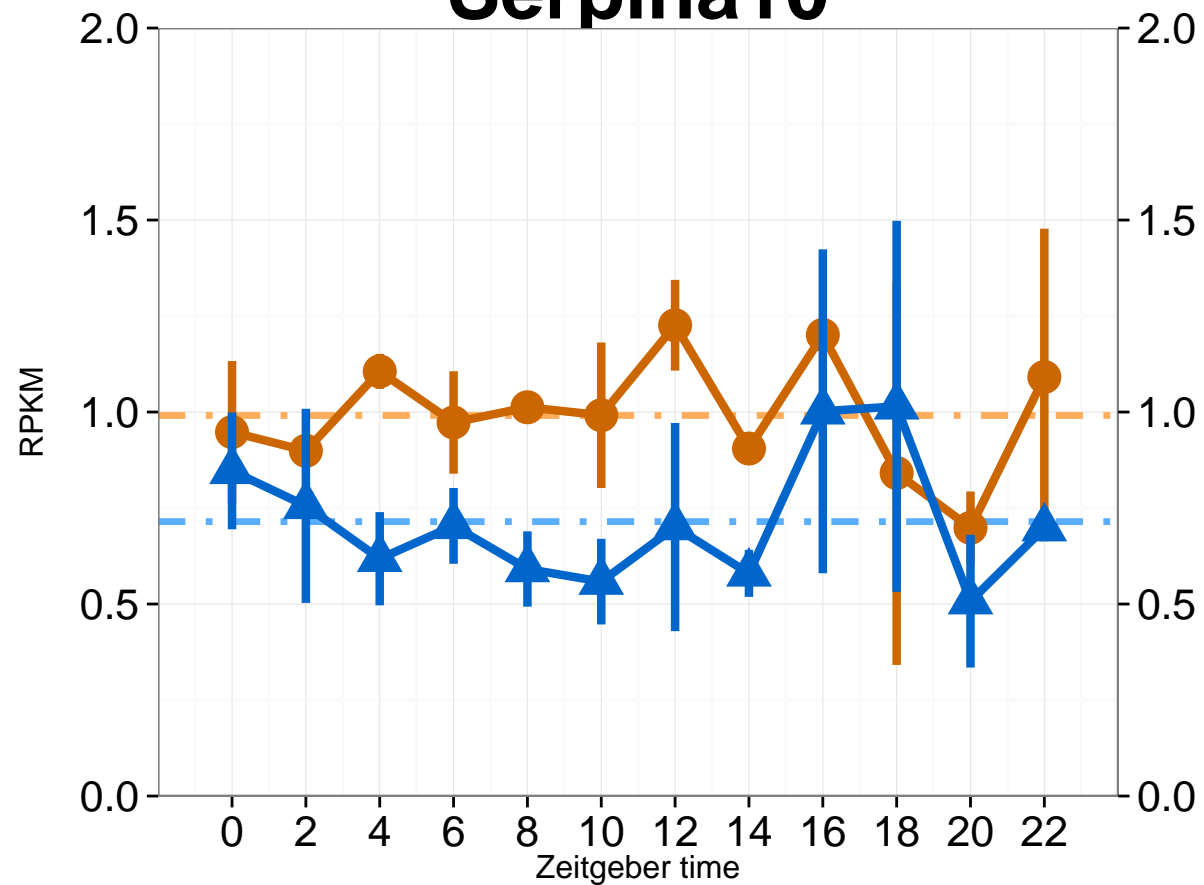

# Serpina10

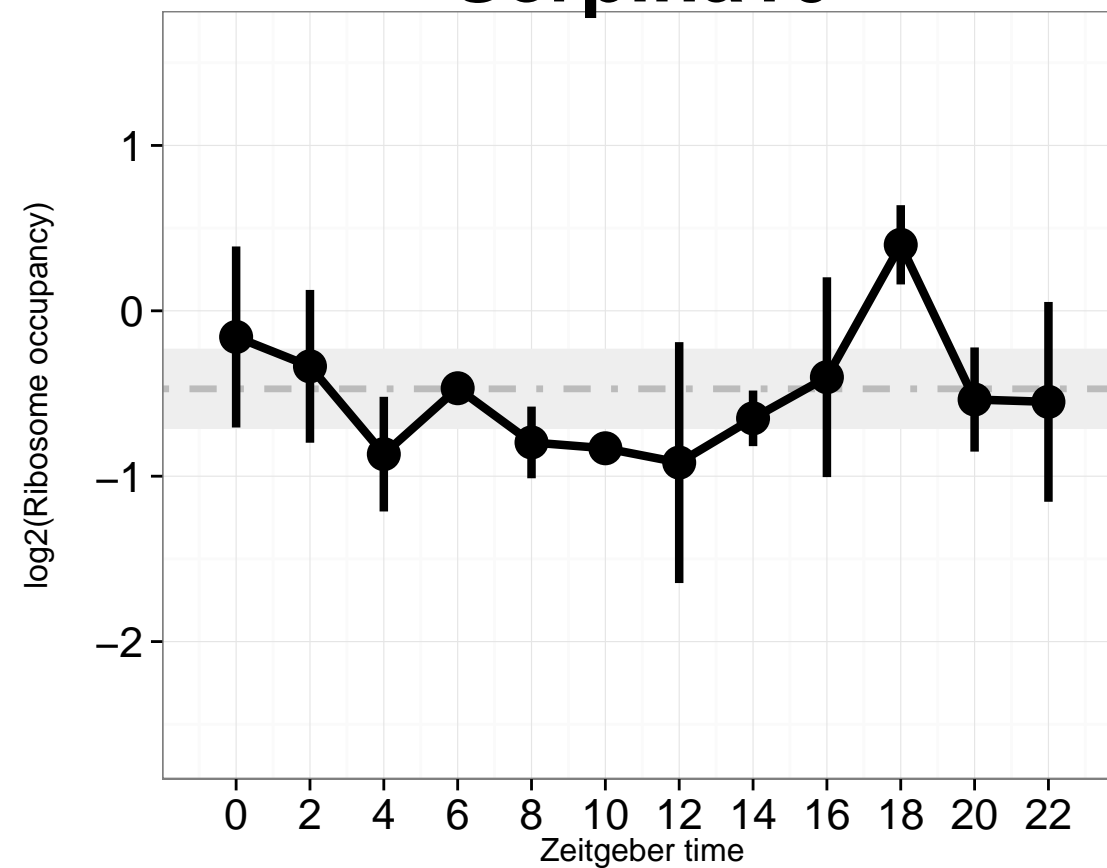

Supplement: Supplementary file 520 [file 1]

## Stk39

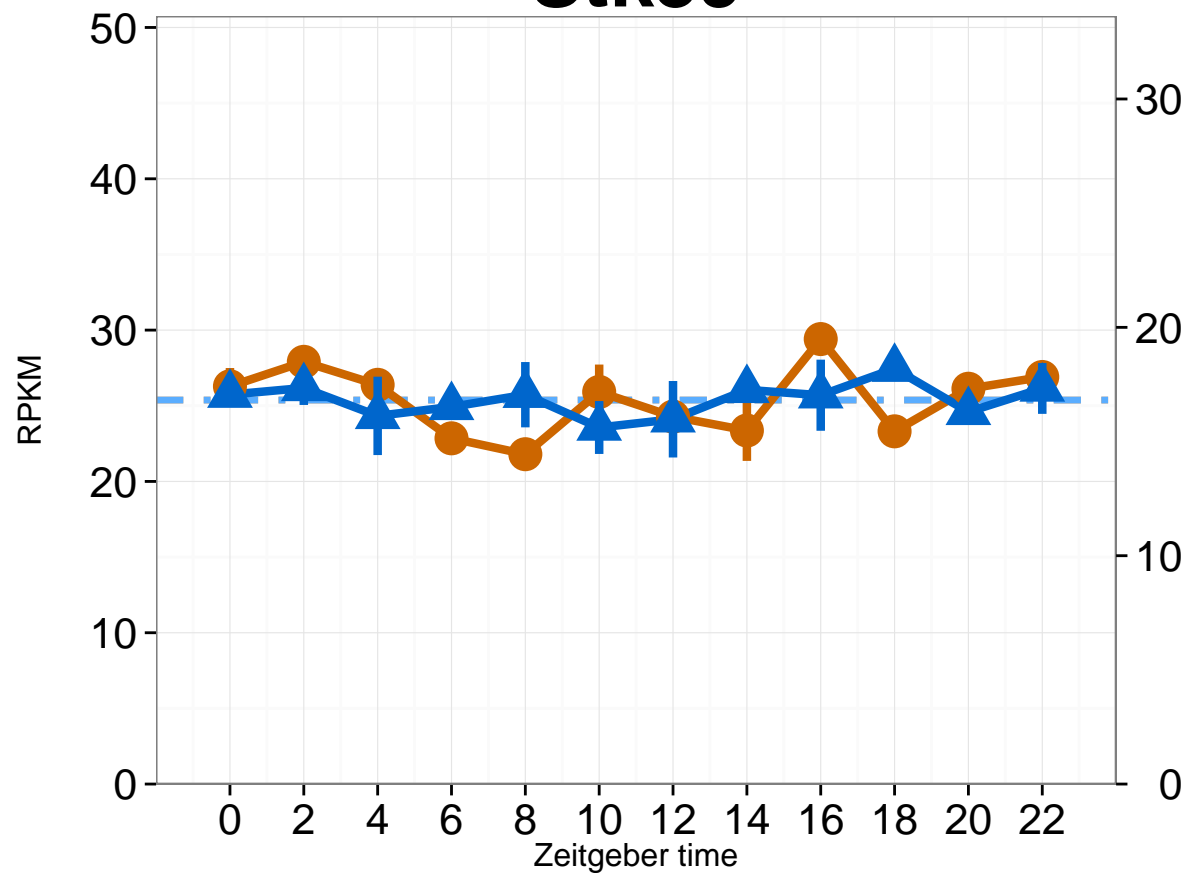

## Stk39

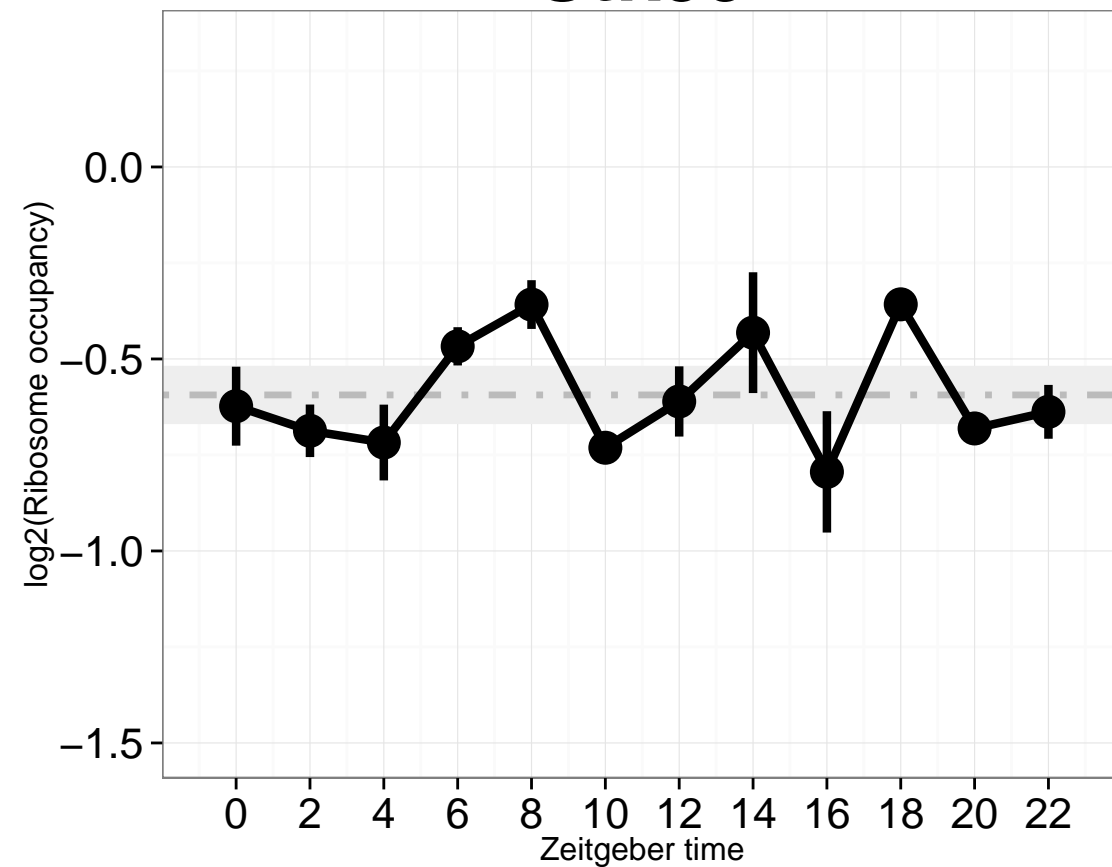

Supplement: Supplementary file 521 [file 1]

# Trpm3

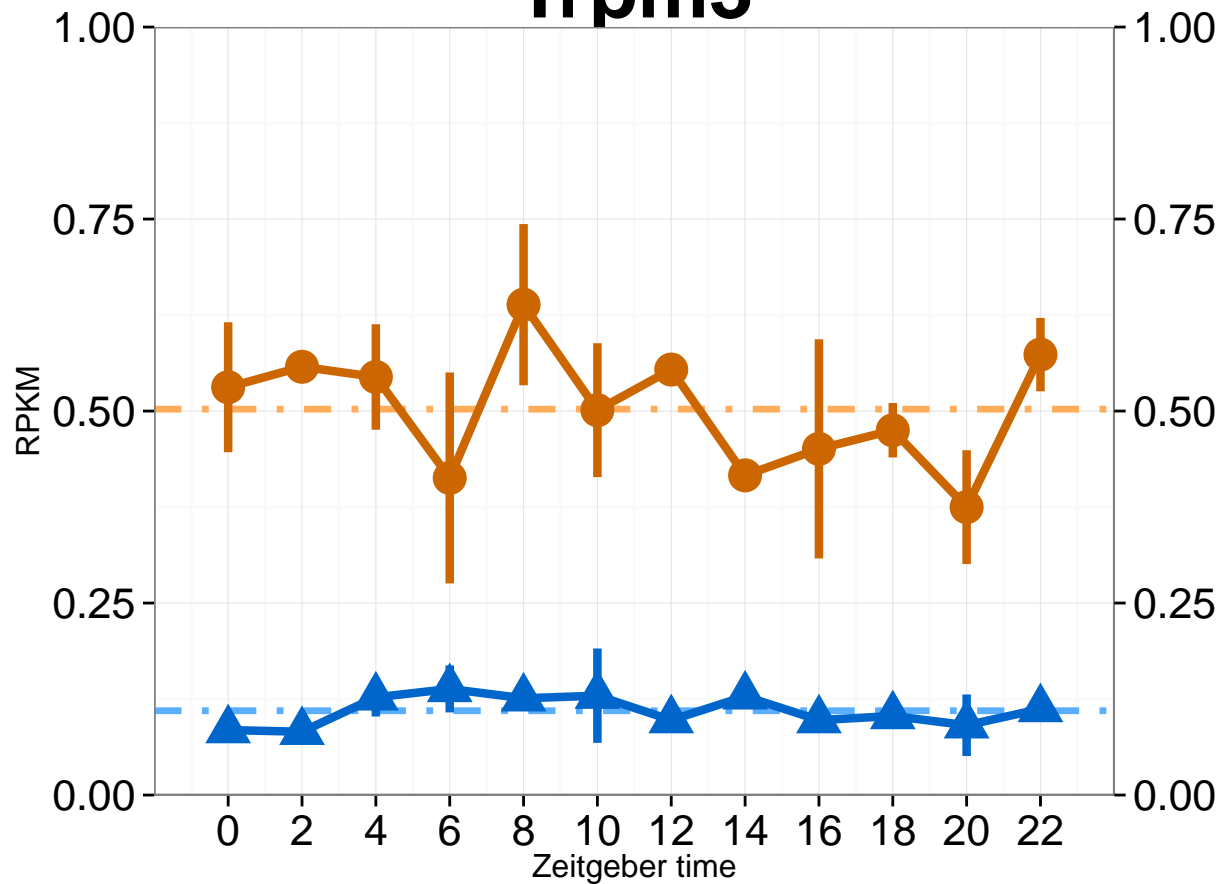

# Trpm3

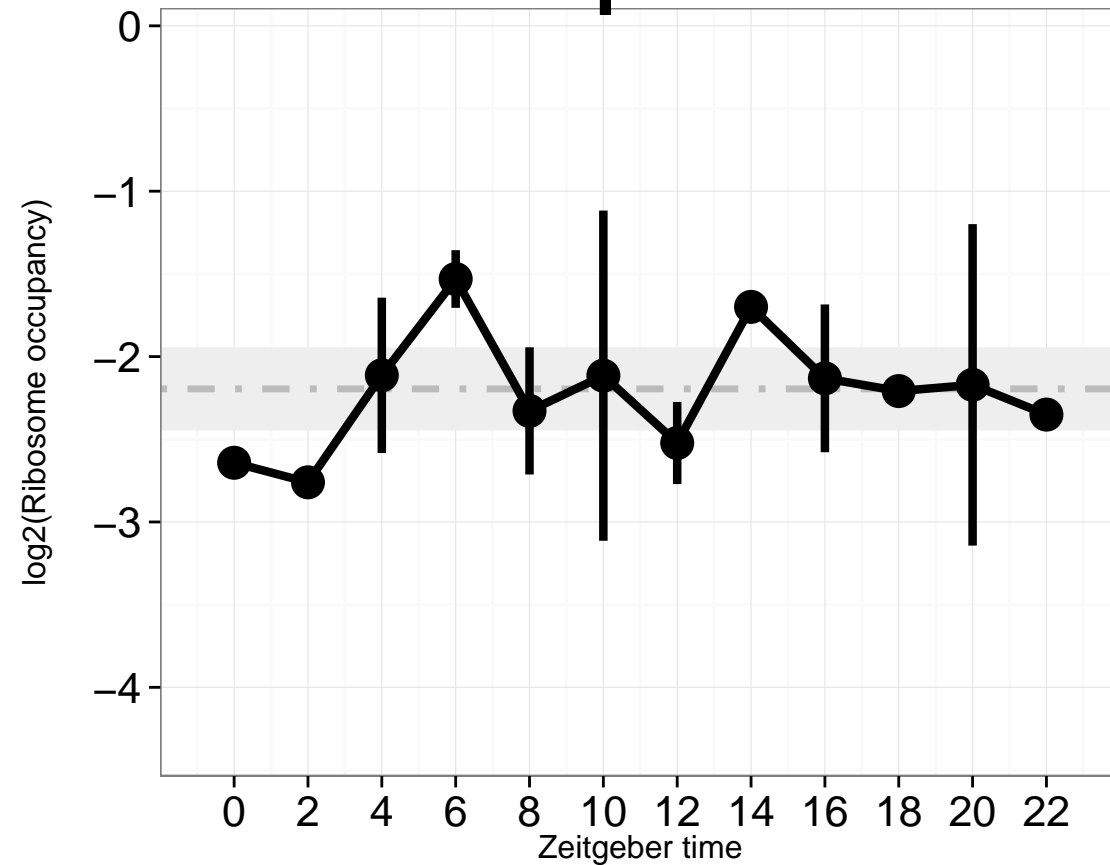

Supplement: Supplementary file 522 [file 1]

# Zfp414

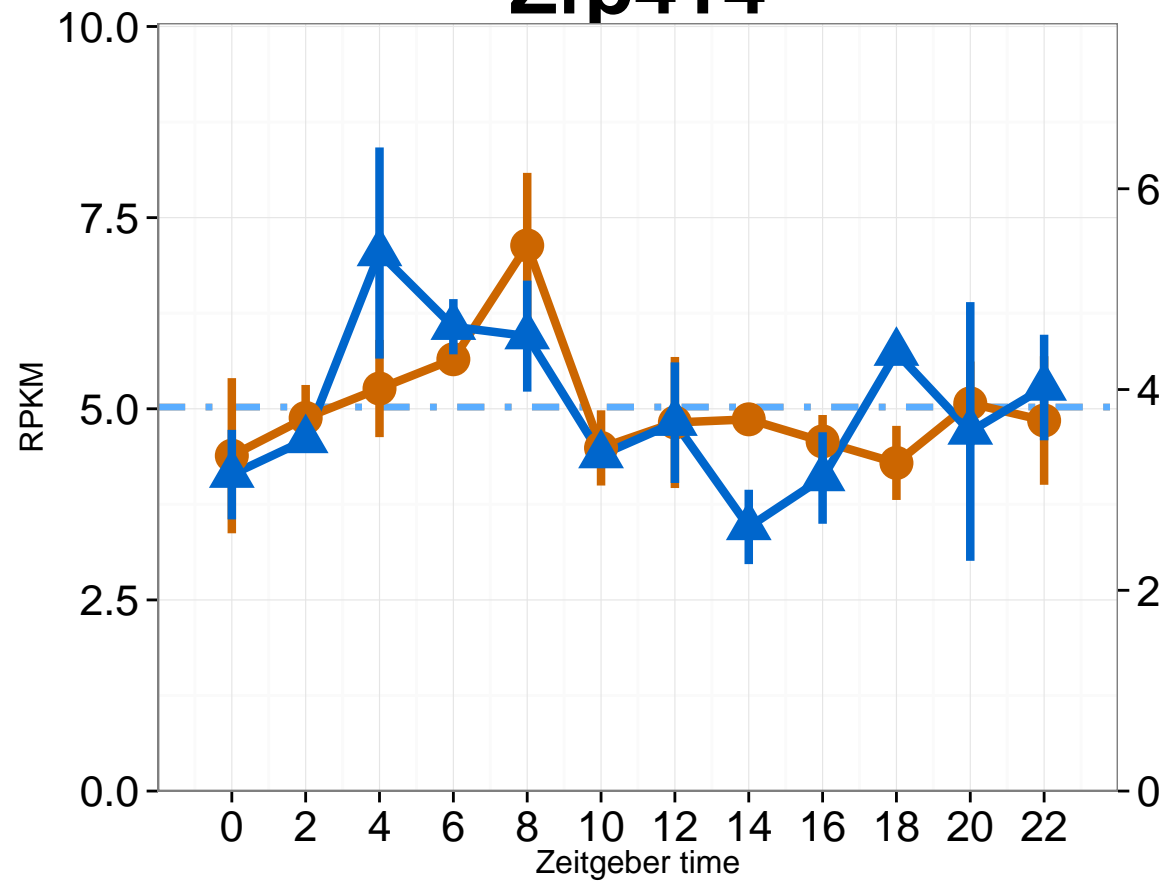

# Zfp414

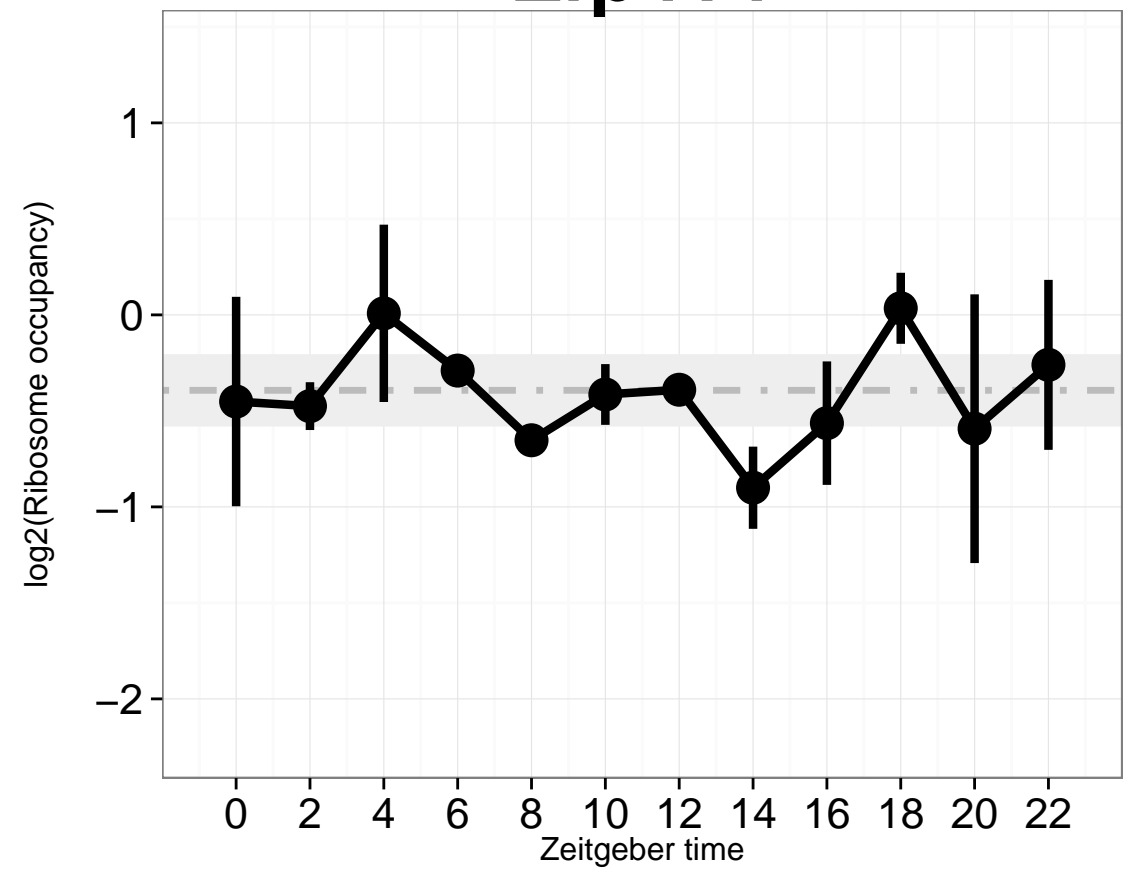

Supplement: Supplementary file 523 [file 1]

## Srsf9

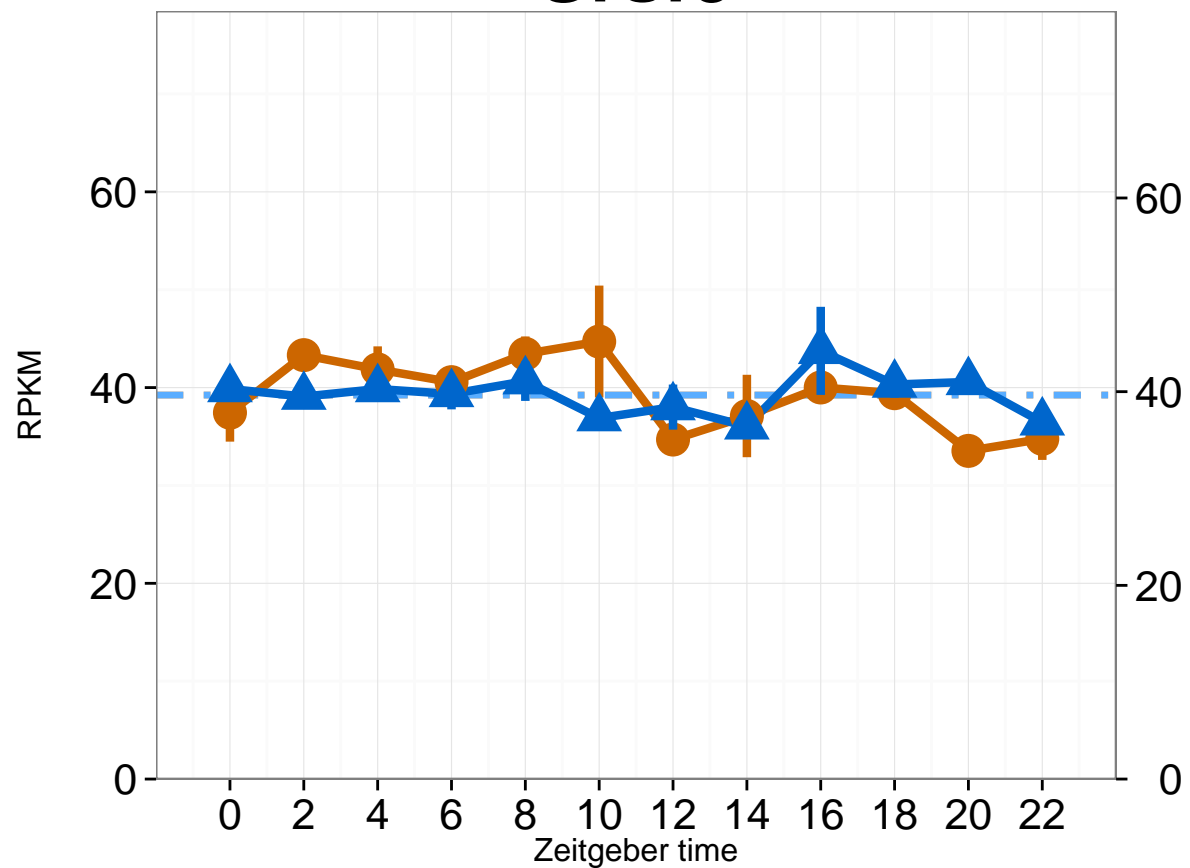

## Srsf9

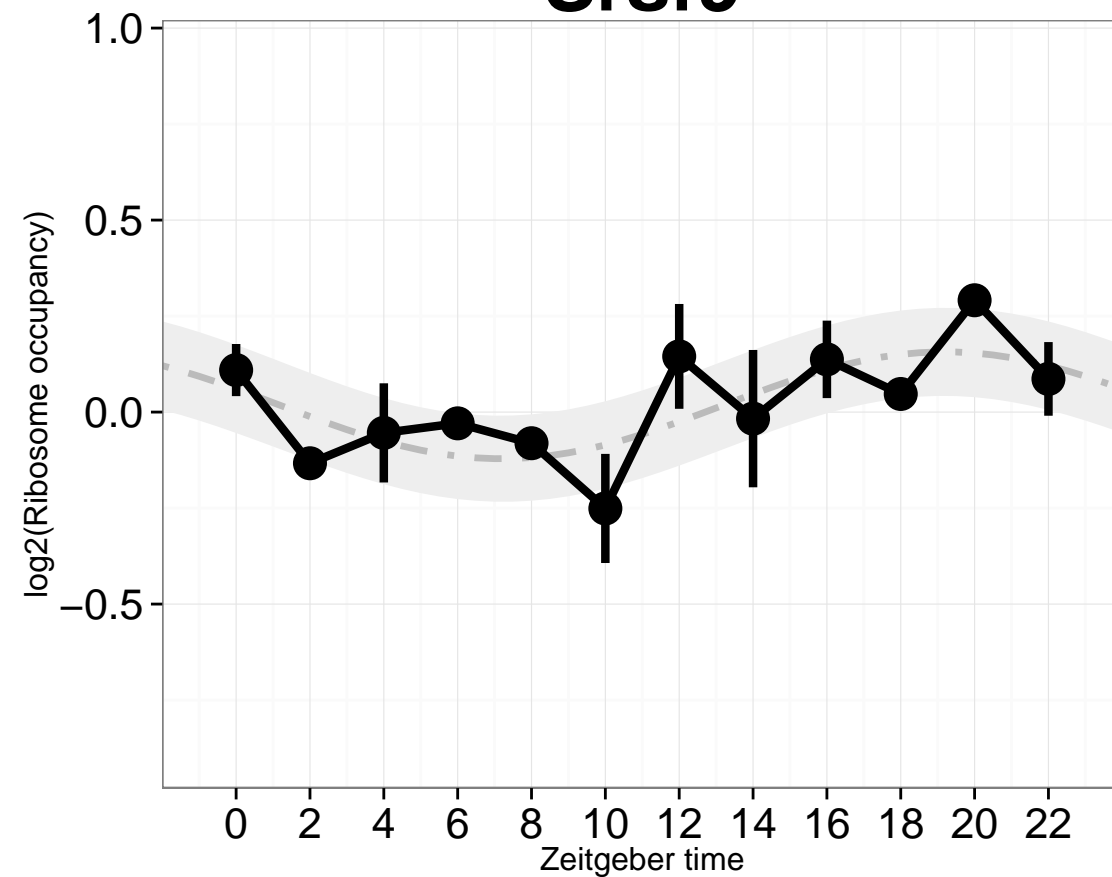

Supplement: Supplementary file 524 [file 1]

# Havcr1

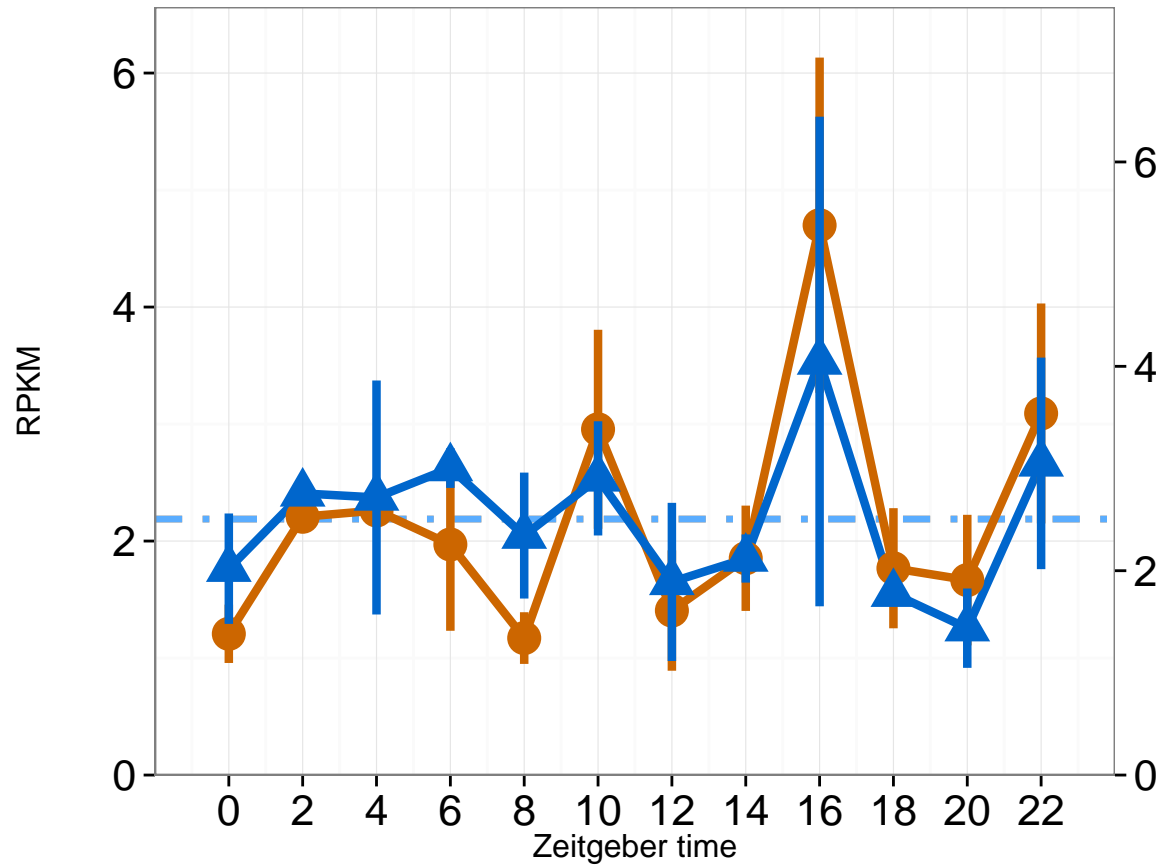

# Havcr1

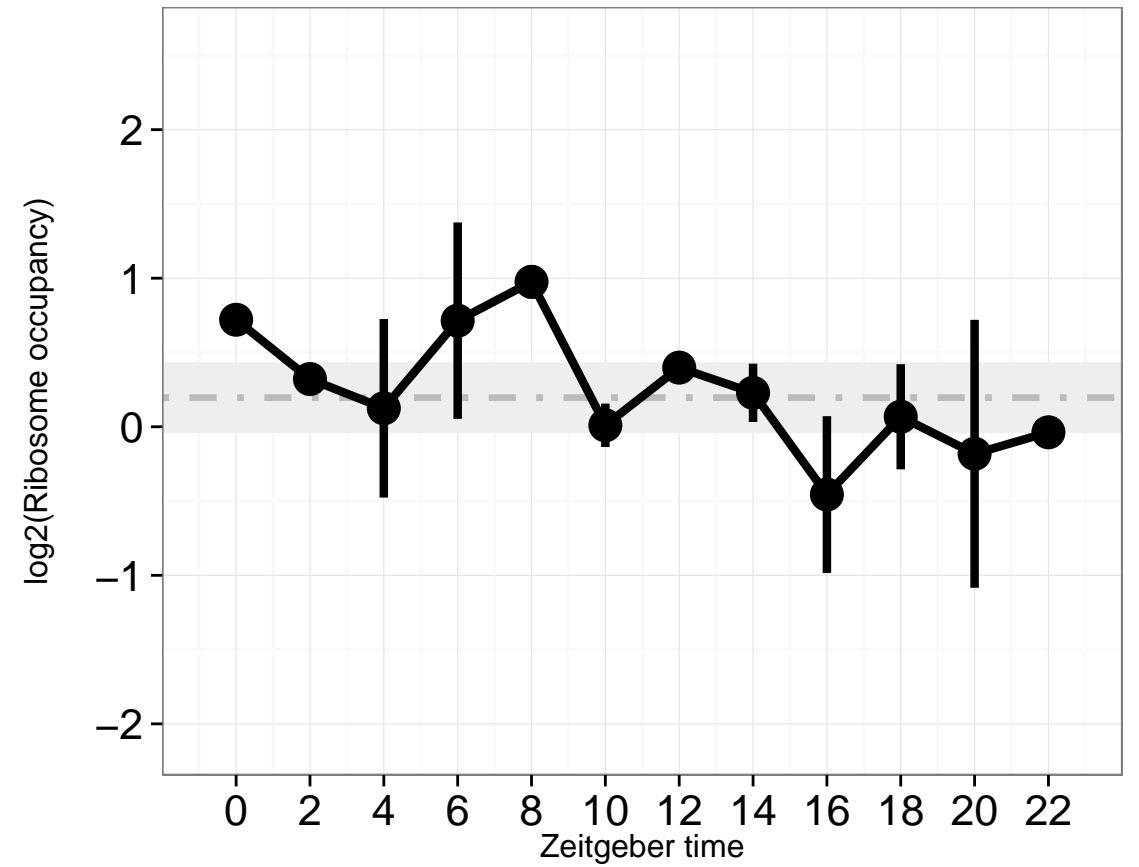

Supplement: Supplementary file 525 [file 1]

## Tspan6

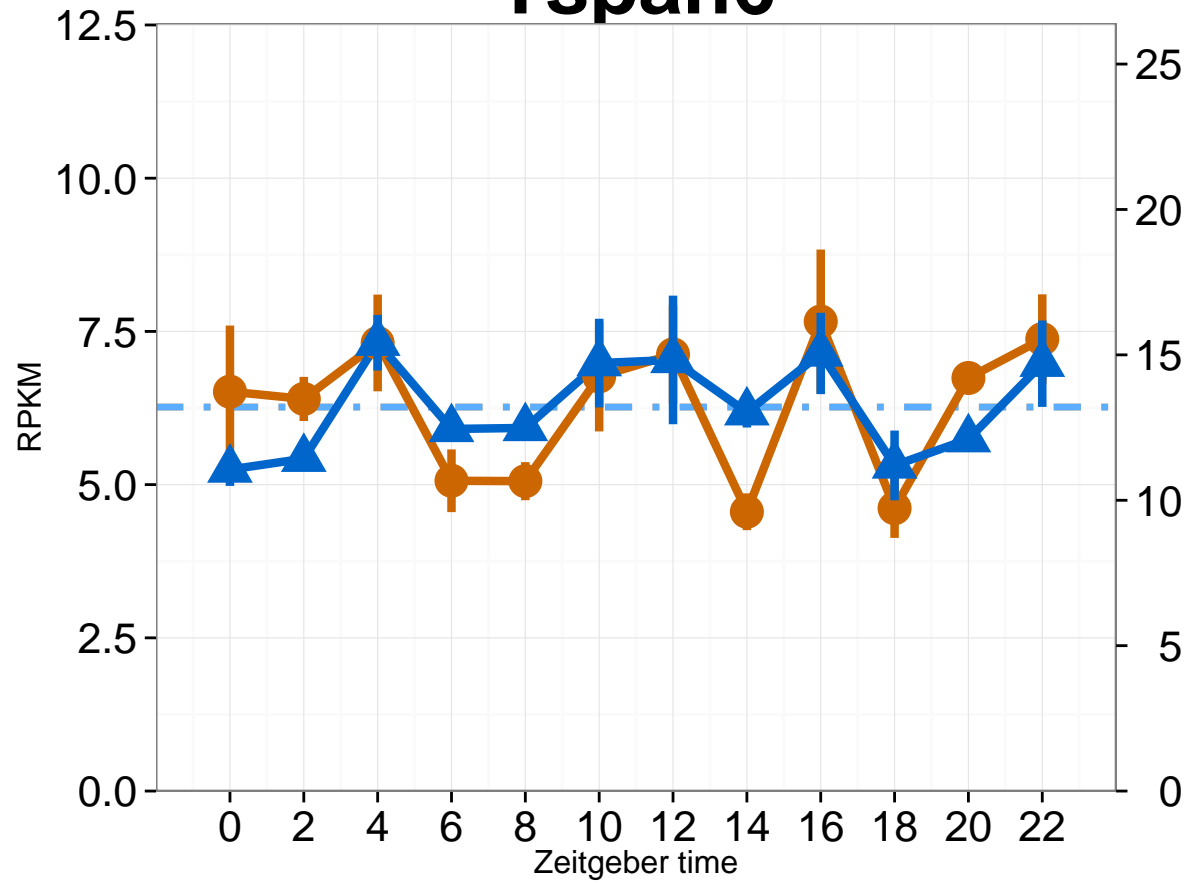

## Tspan6

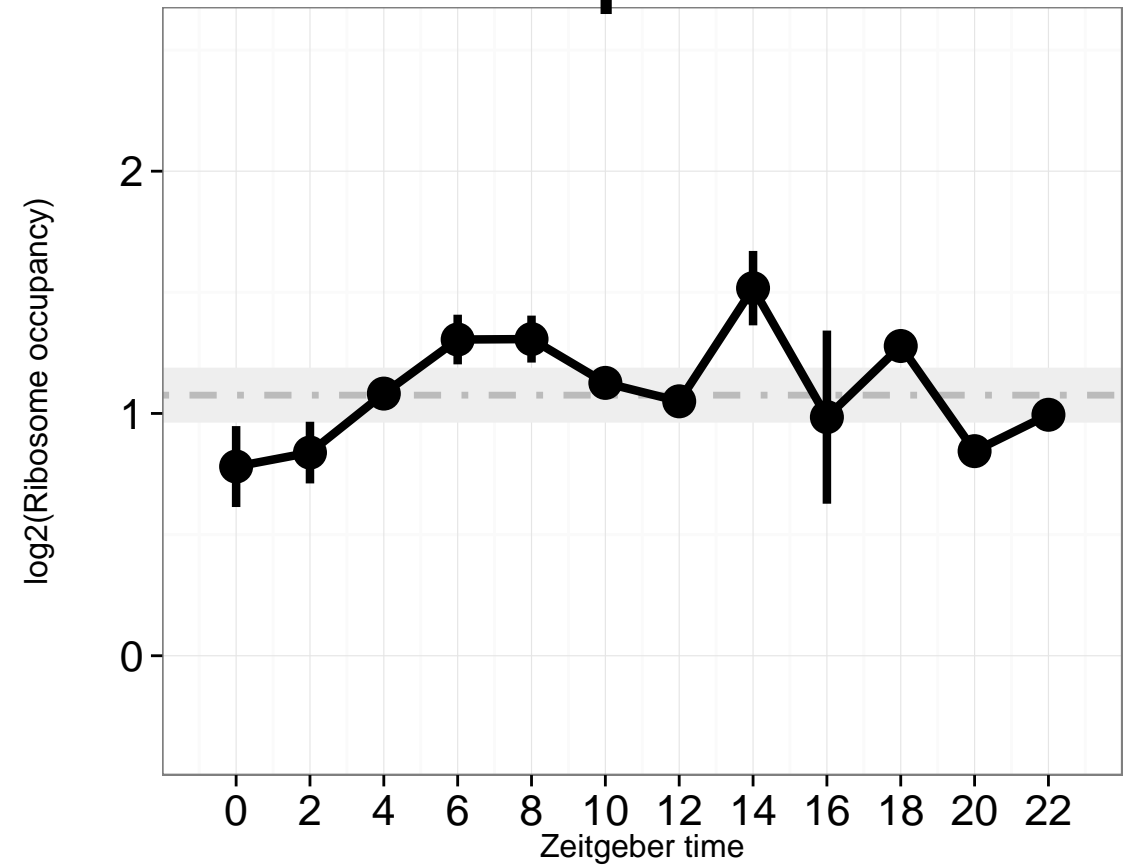

Supplement: Supplementary file 526 [file 1]

## Aga

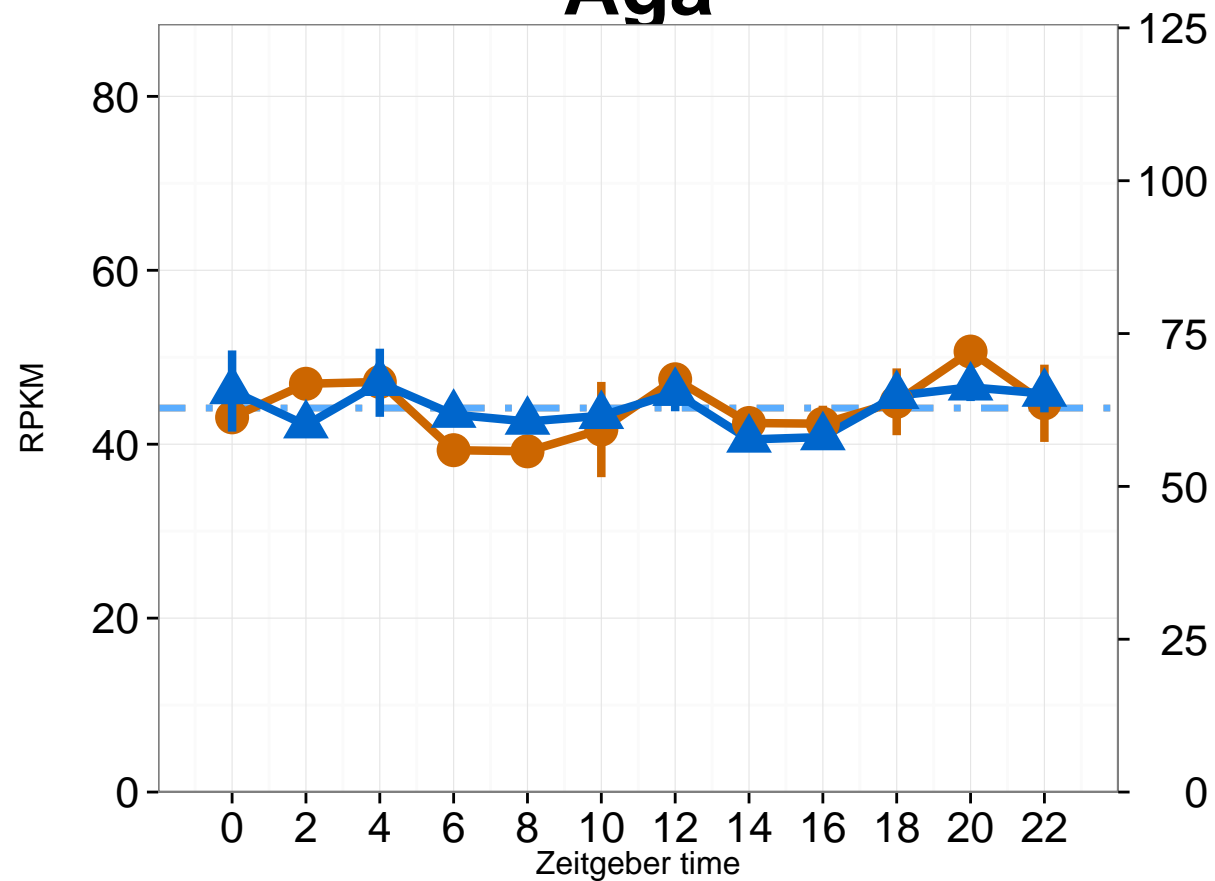

## Aga

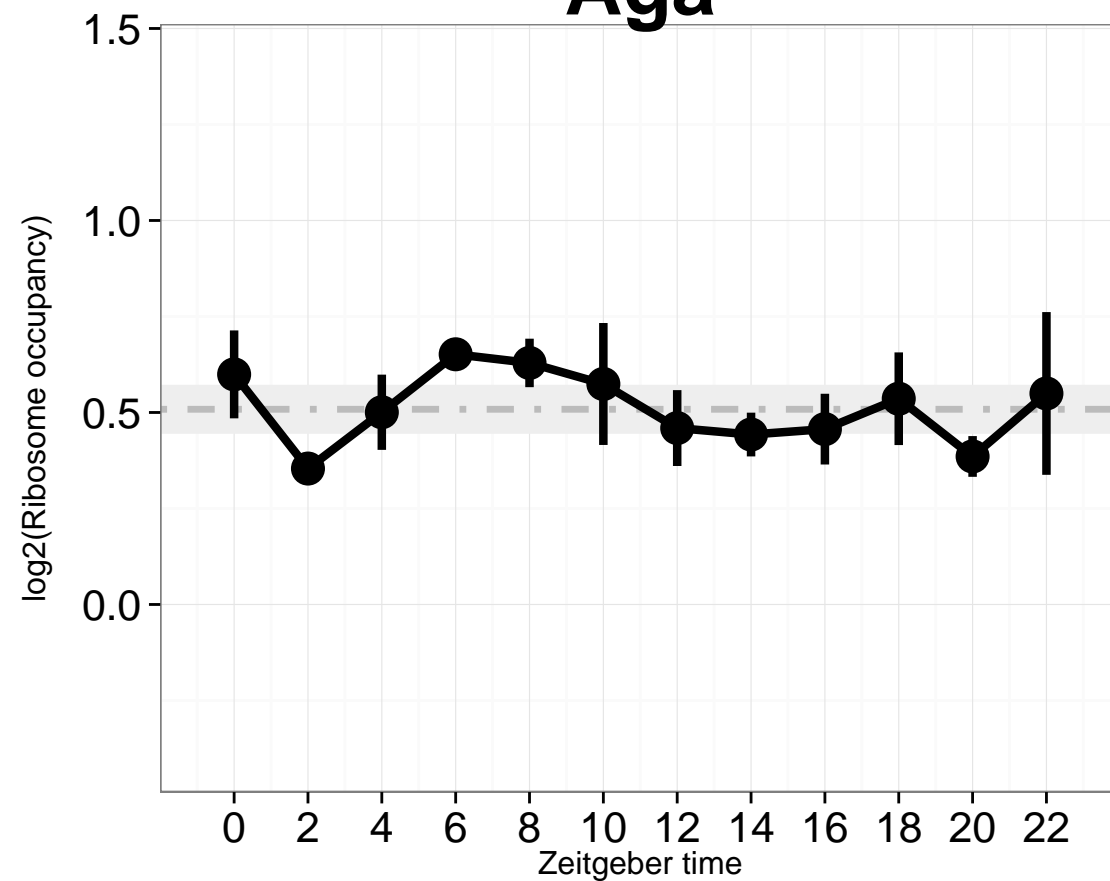

Supplement: Supplementary file 527 [file 1]

## Jag1

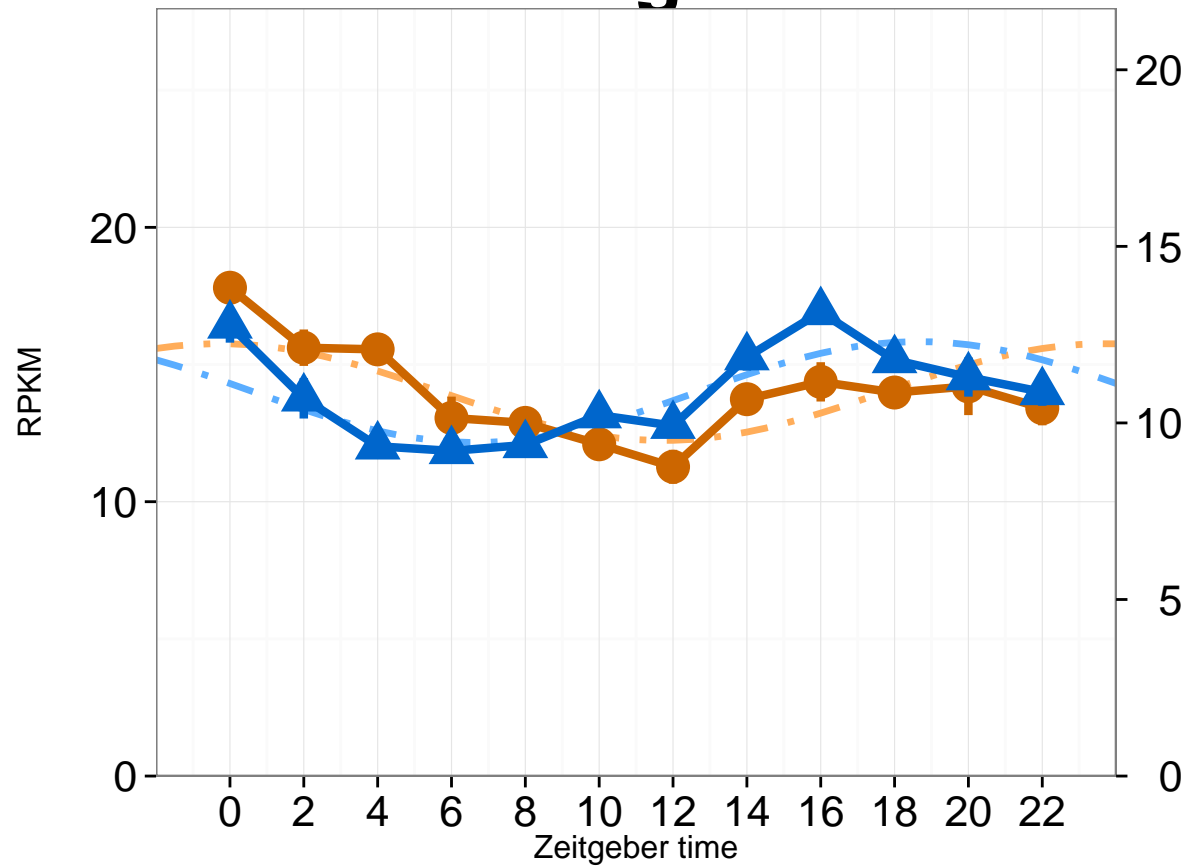

## Jag1

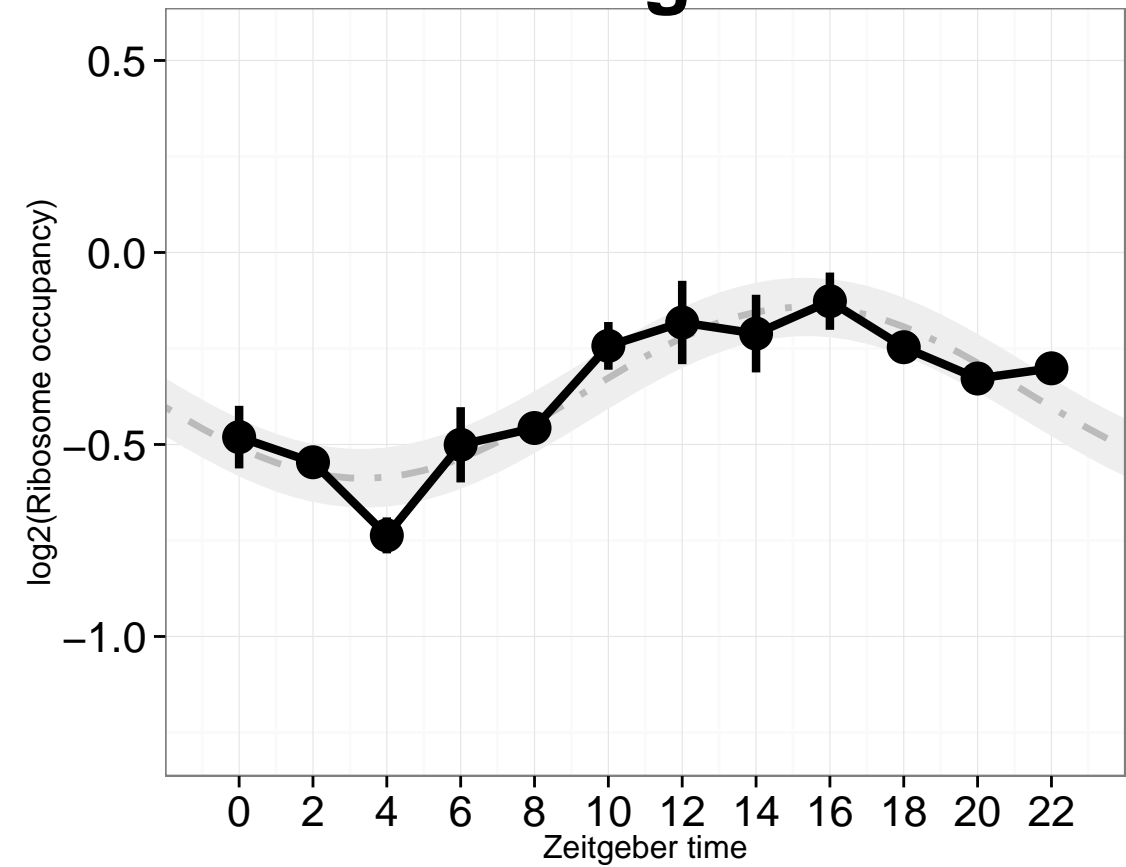

Supplement: Supplementary file 528 [file 1]

# Slc2a10

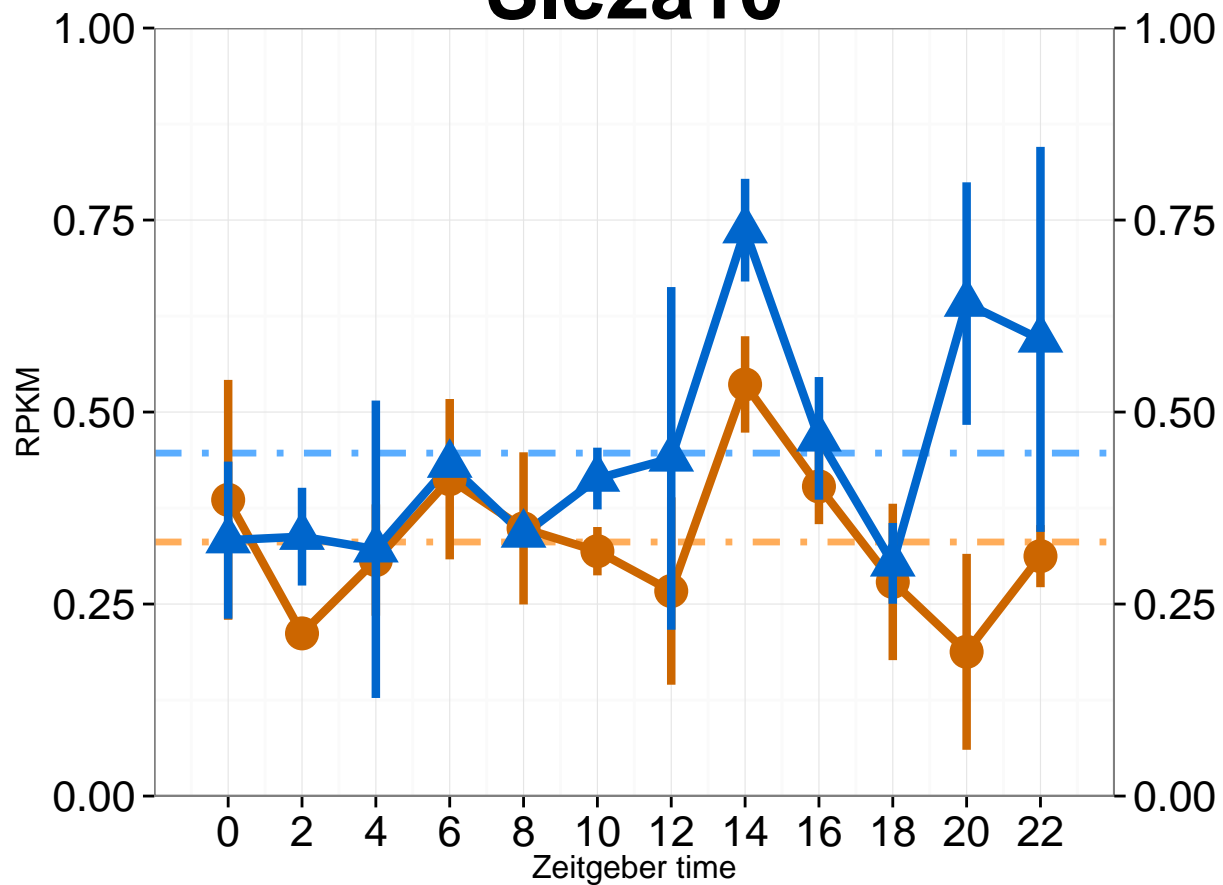

# Slc2a10

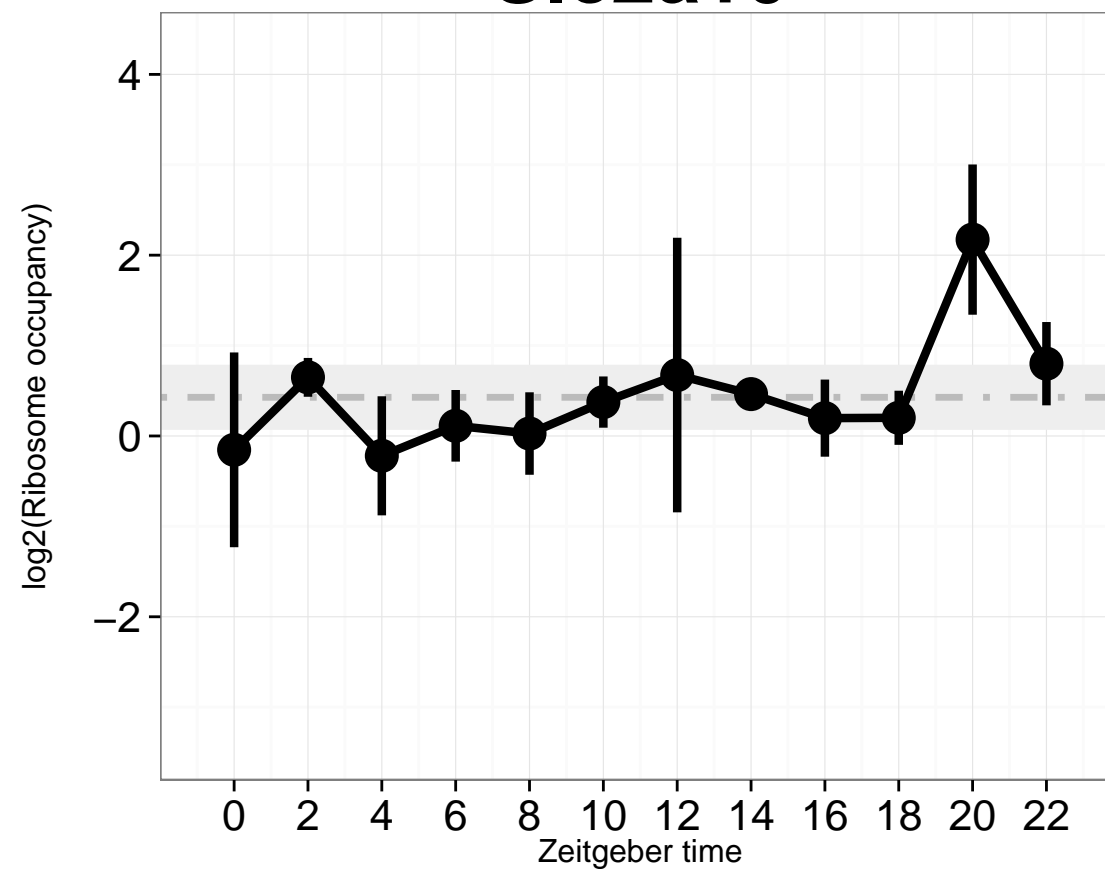

Supplement: Supplementary file 529 [file 1]

## Prodh2

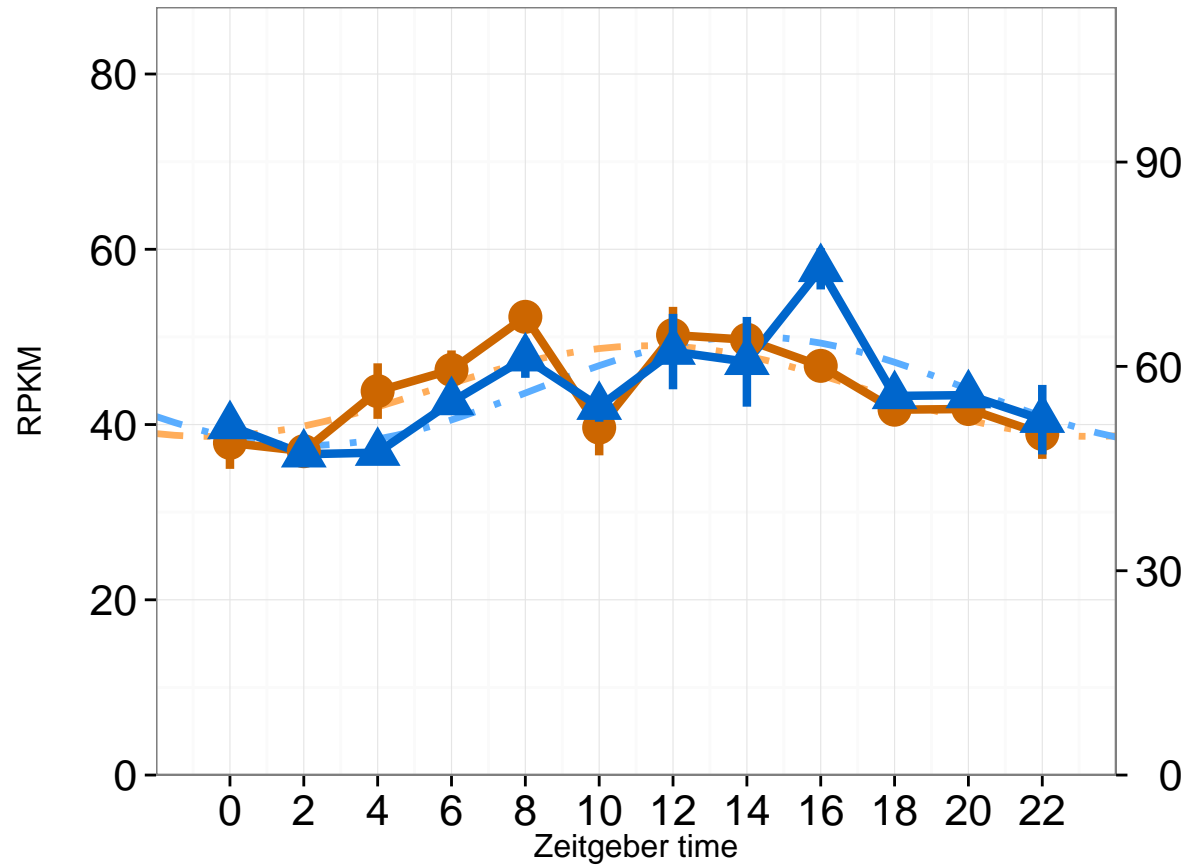

## Prodh2

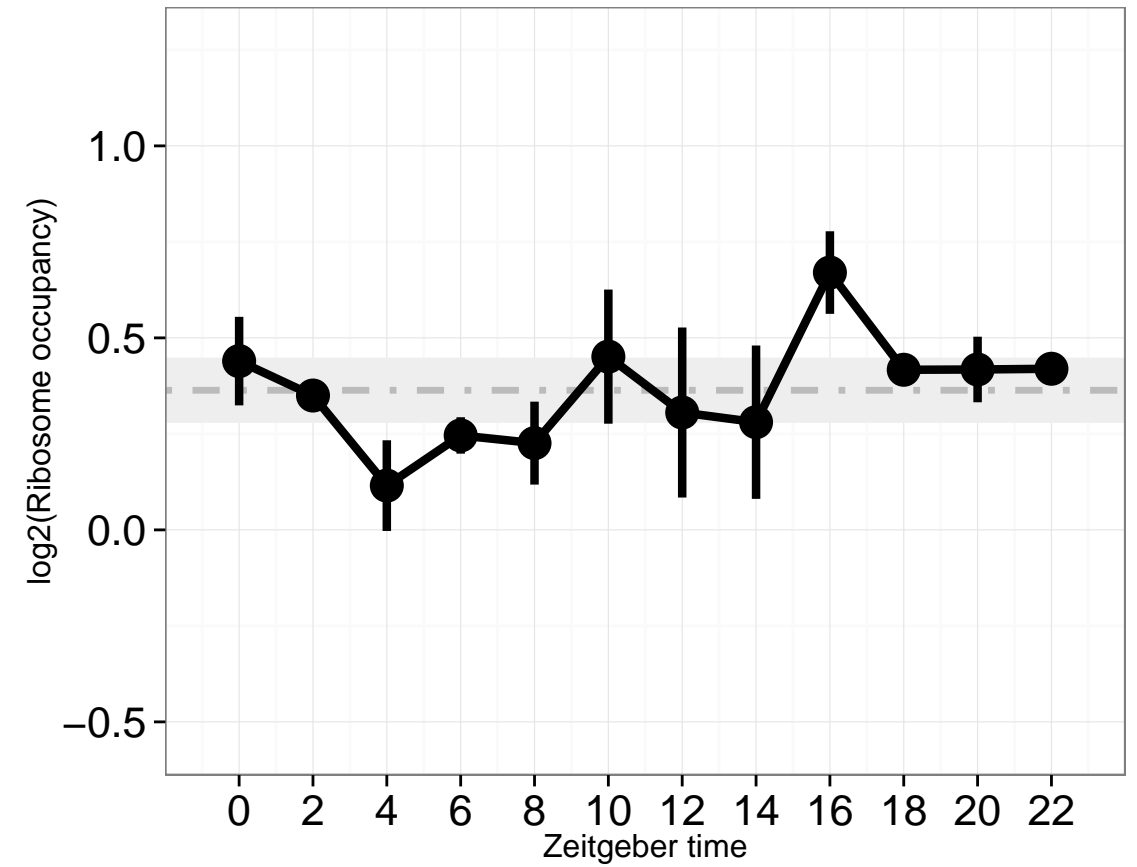

Supplement: Supplementary file 530 [file 1]

## Ubp2

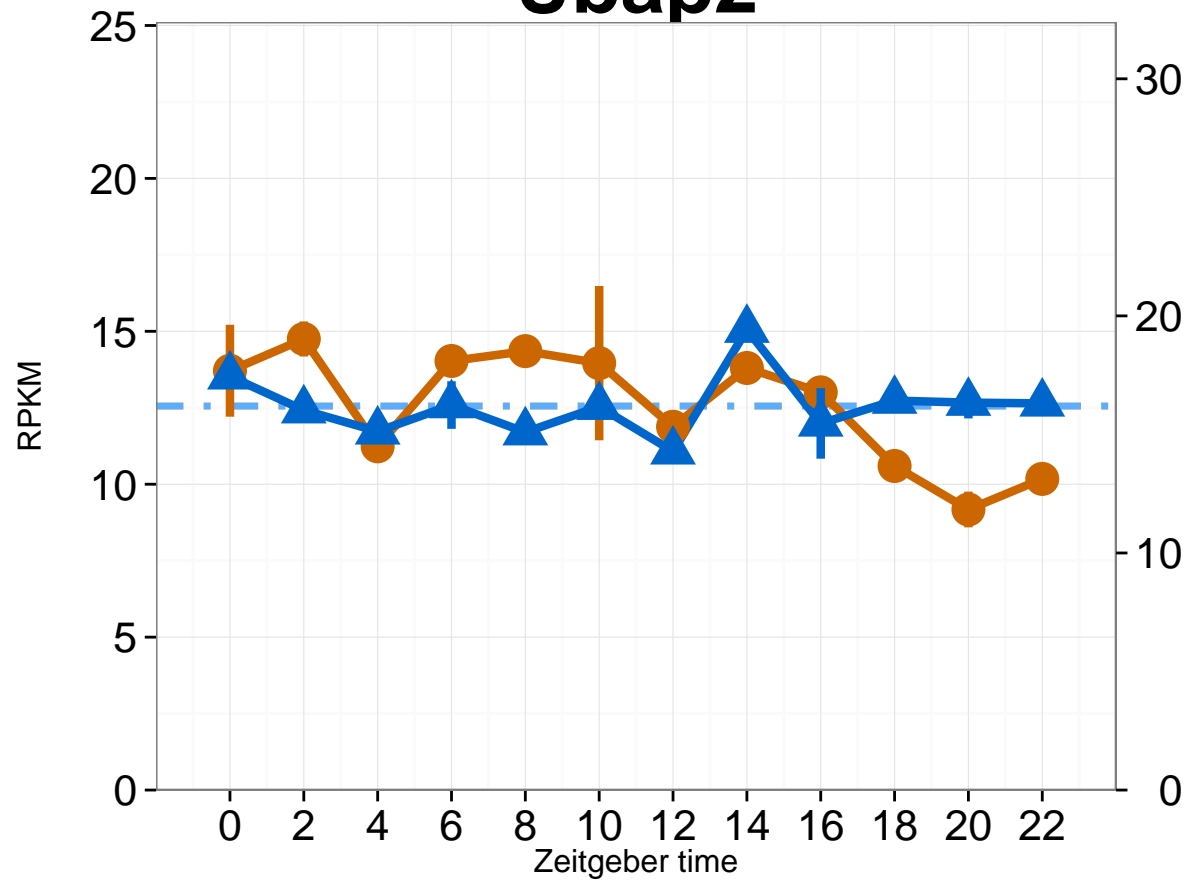

## Ubp2

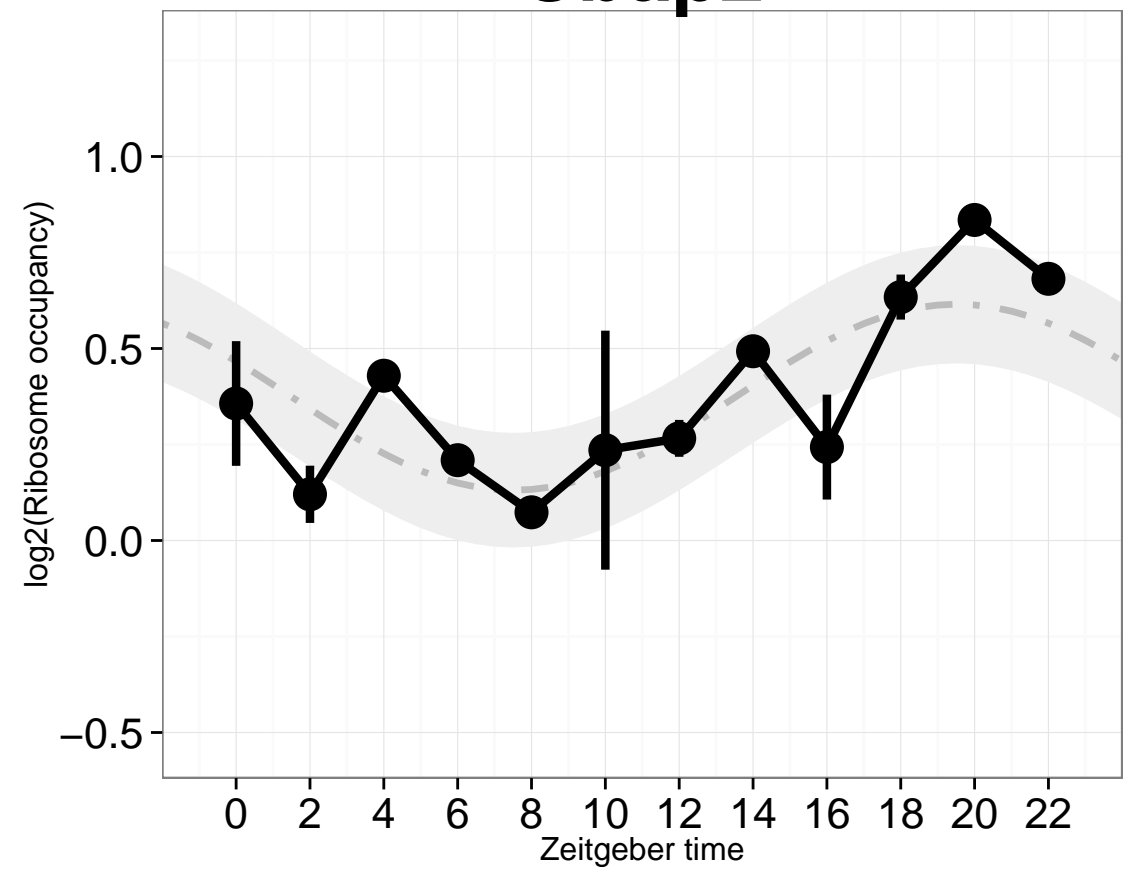

Supplement: Supplementary file 531 [file 1]

# Soat1

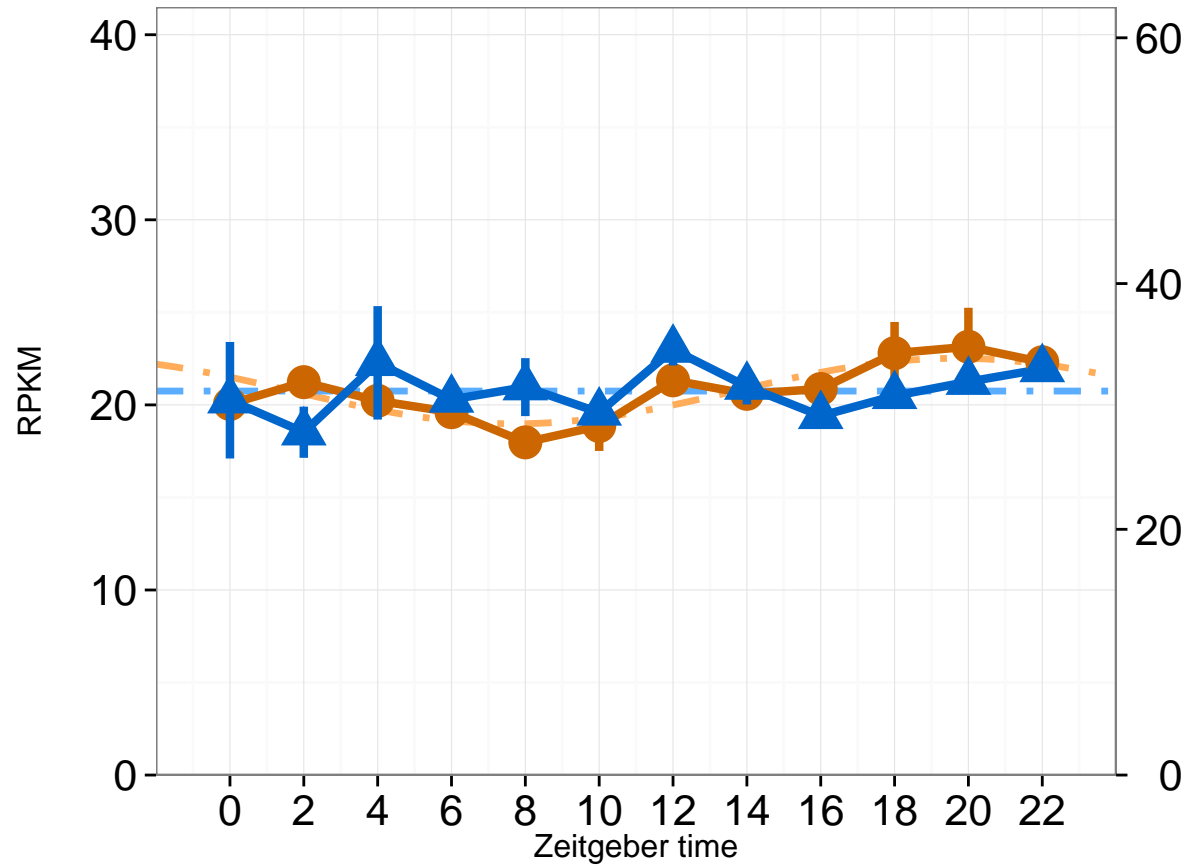

# Soat1

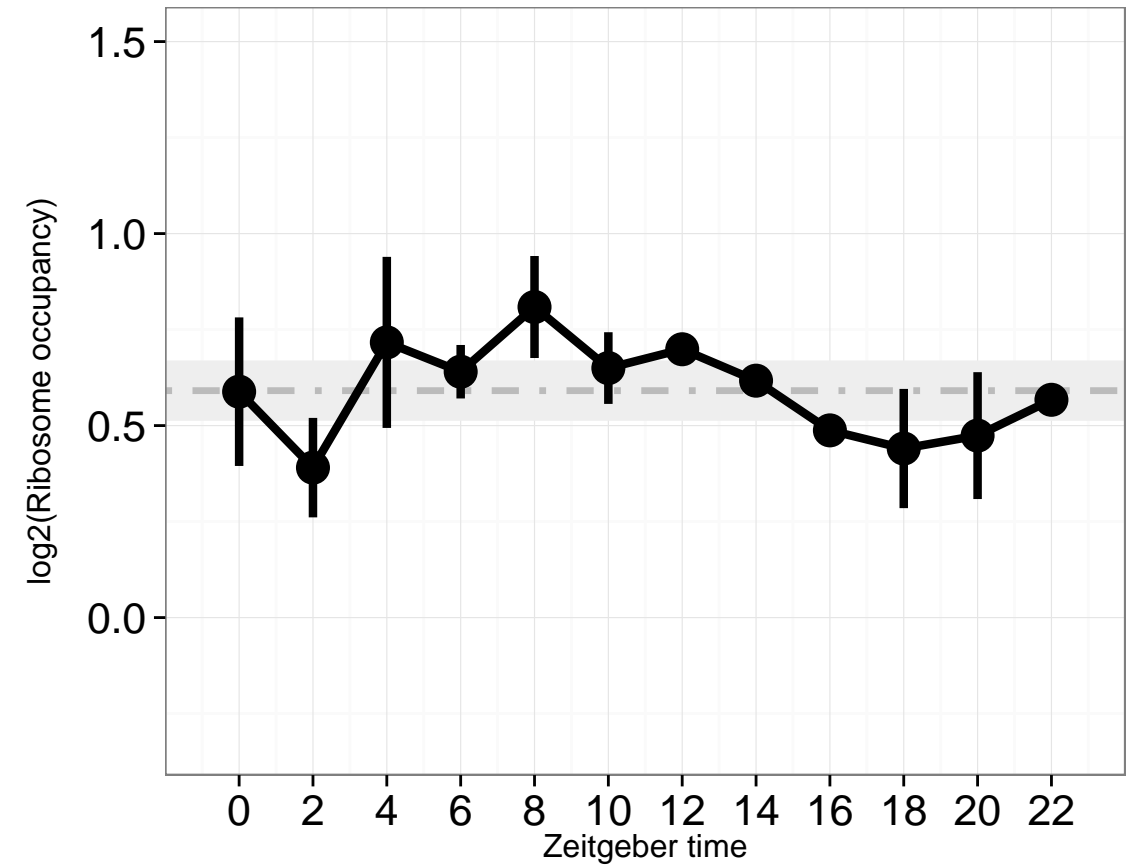

Supplement: Supplementary file 532 [file 1]

## Nae1

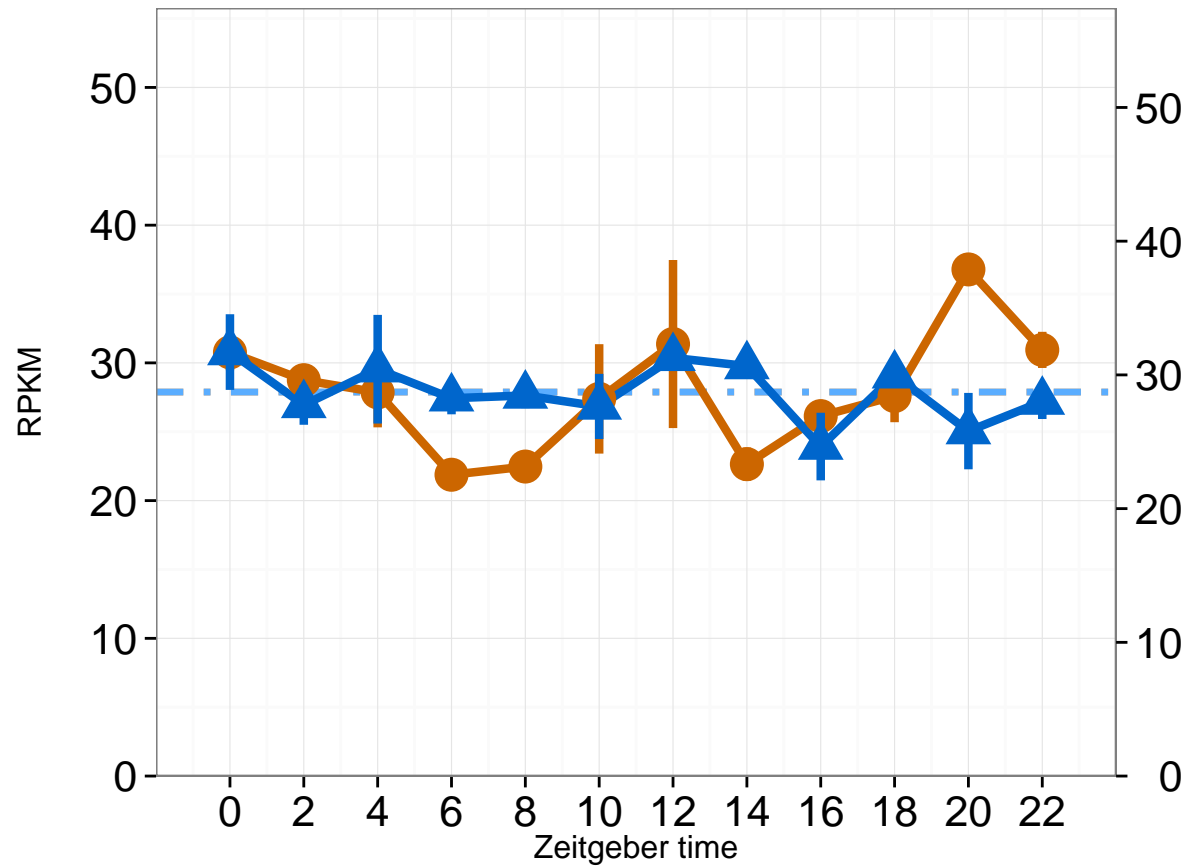

## Nae1

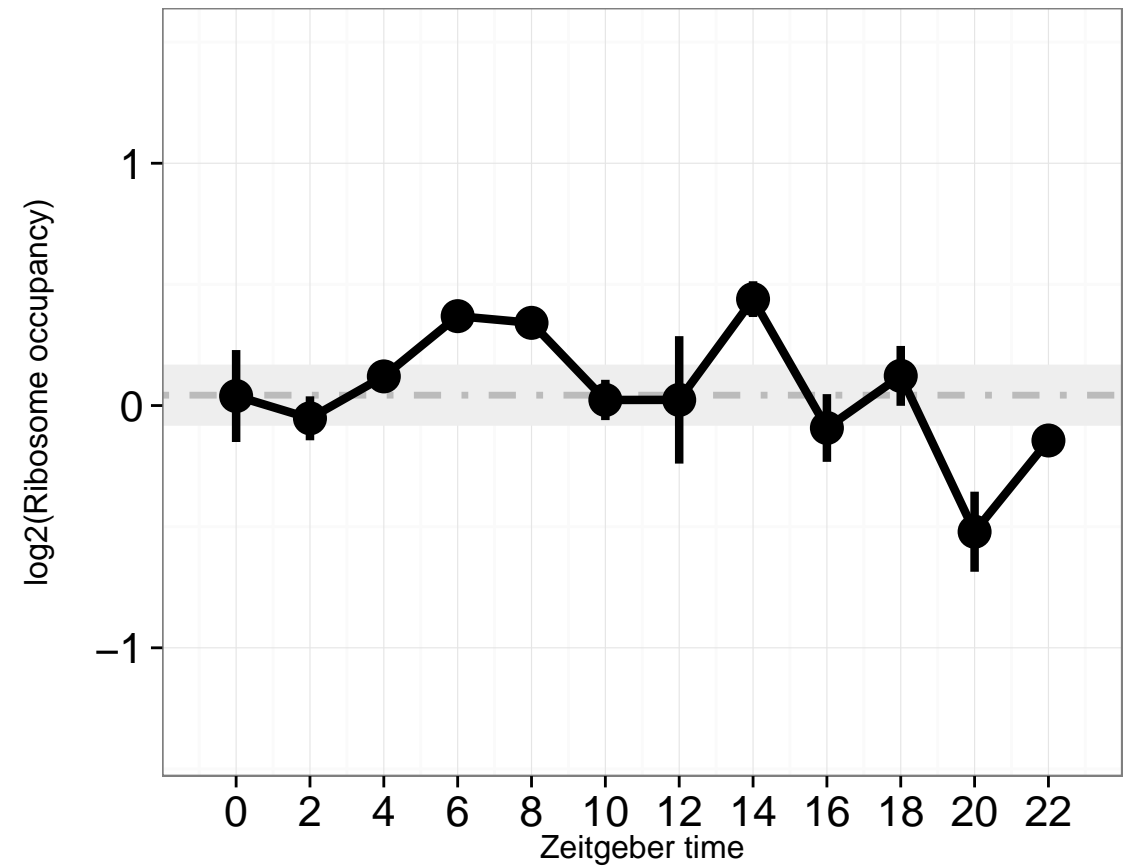

Supplement: Supplementary file 533 [file 1]

# Gm608

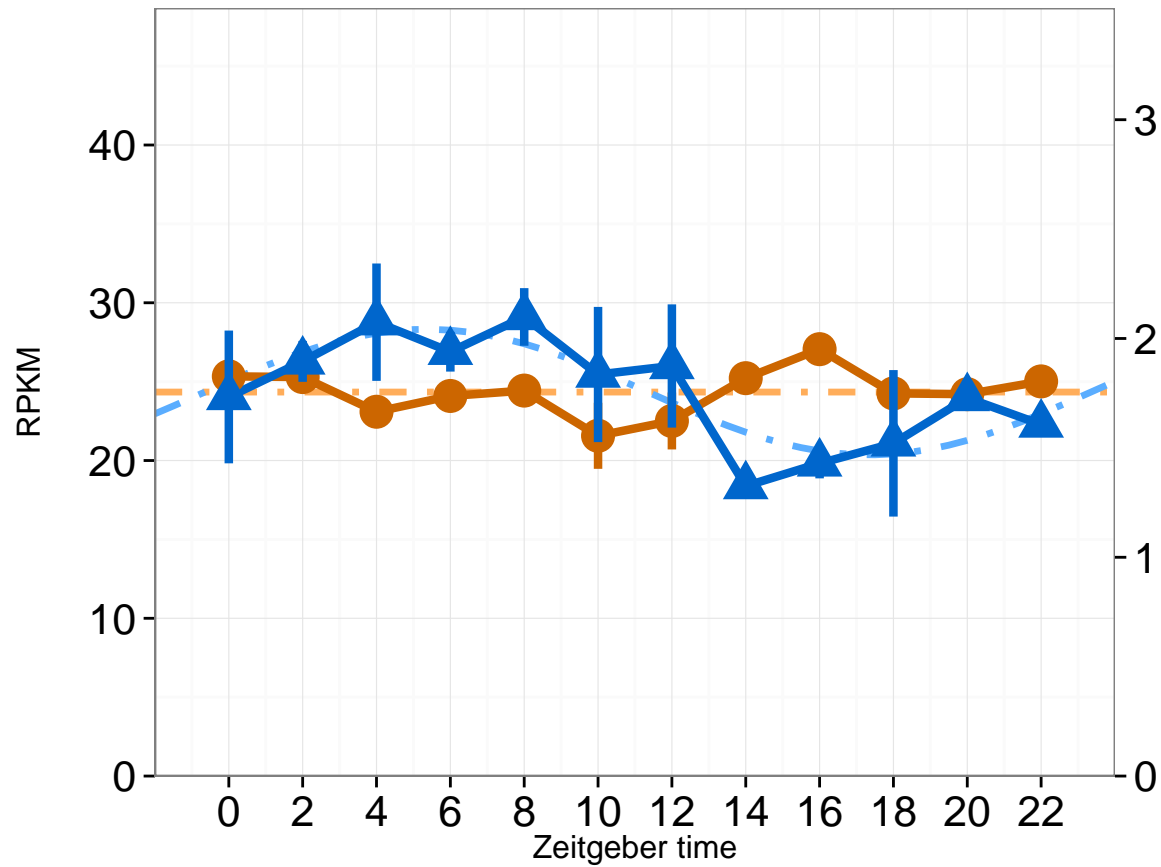

# Gm608

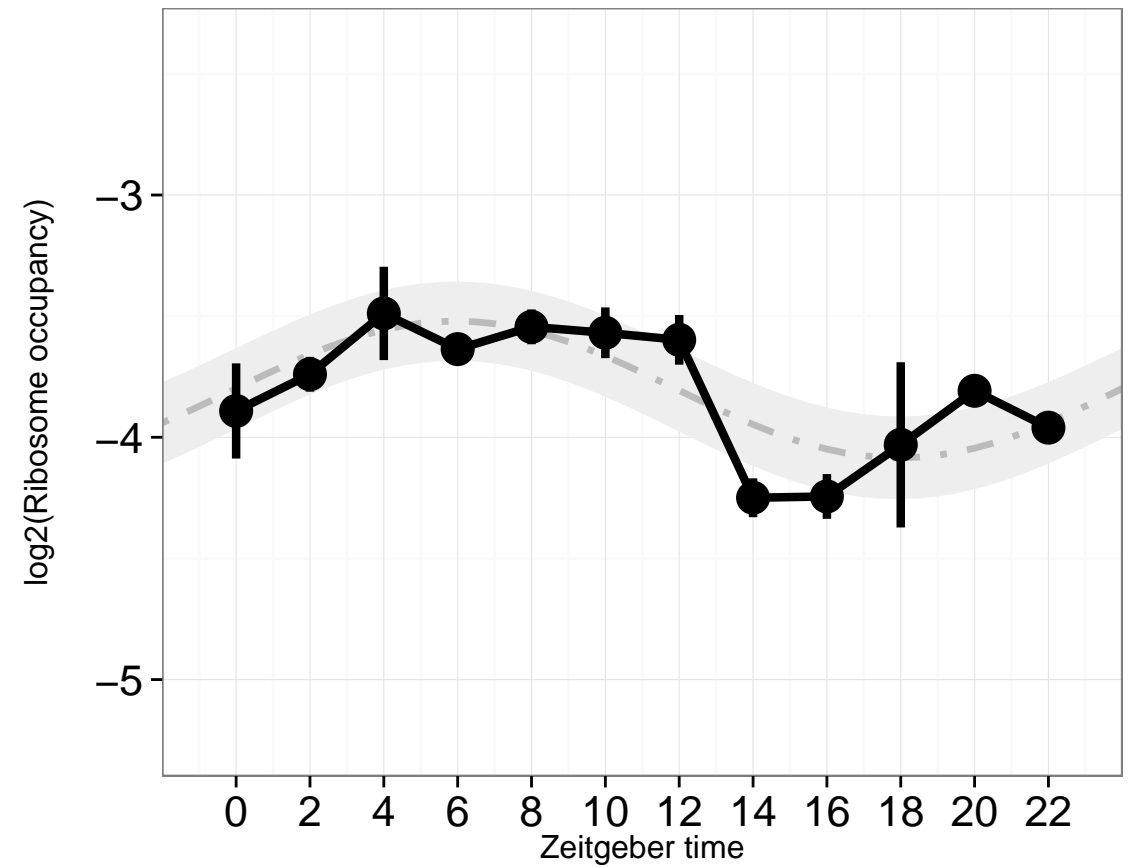

Supplement: Supplementary file 534 [file 1]

# Bbs10

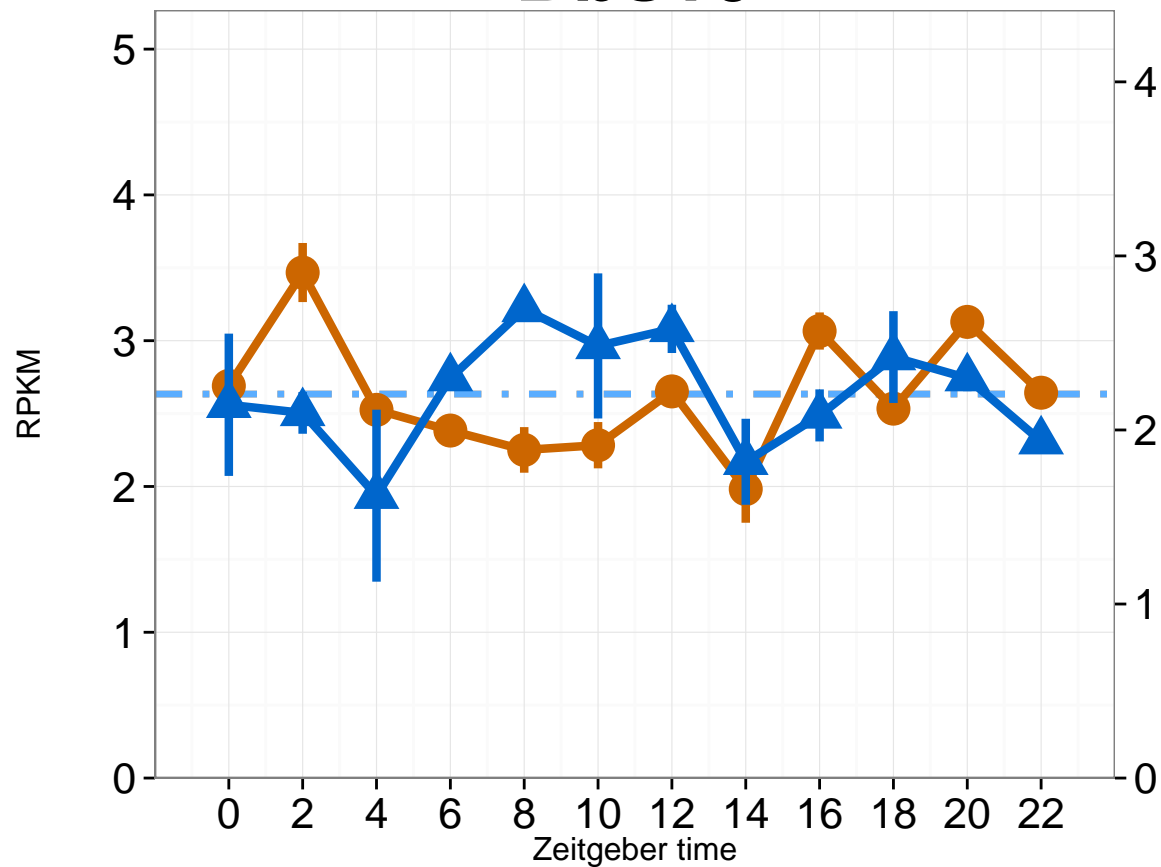

# Bbs10

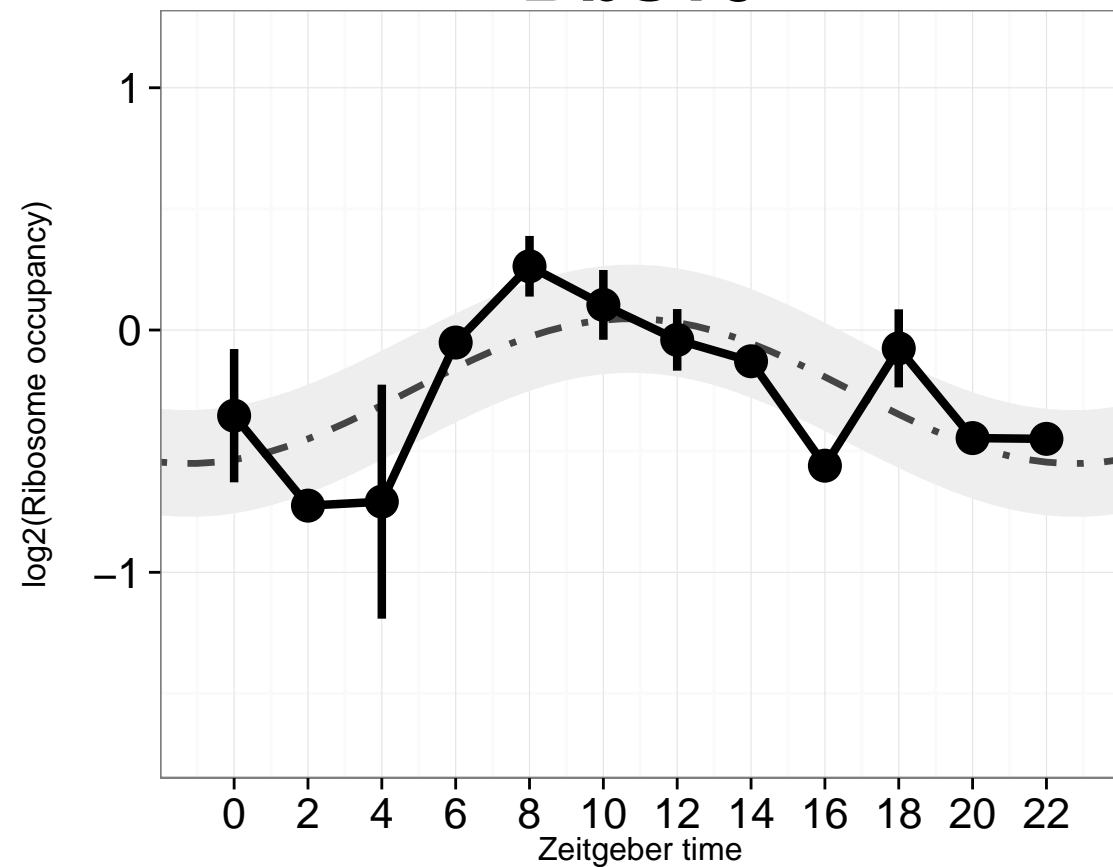

Supplement: Supplementary file 535 [file 1]

## Gldc

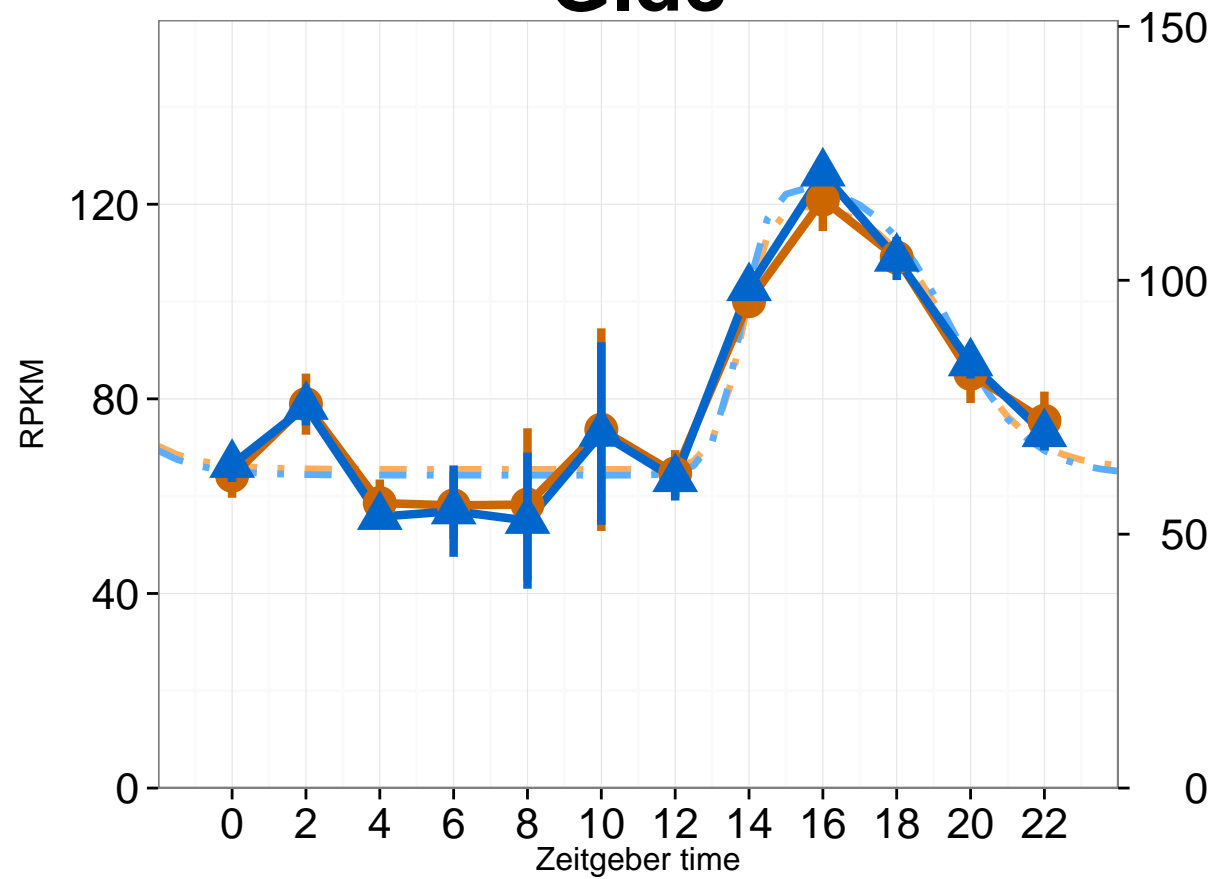

## Gldc

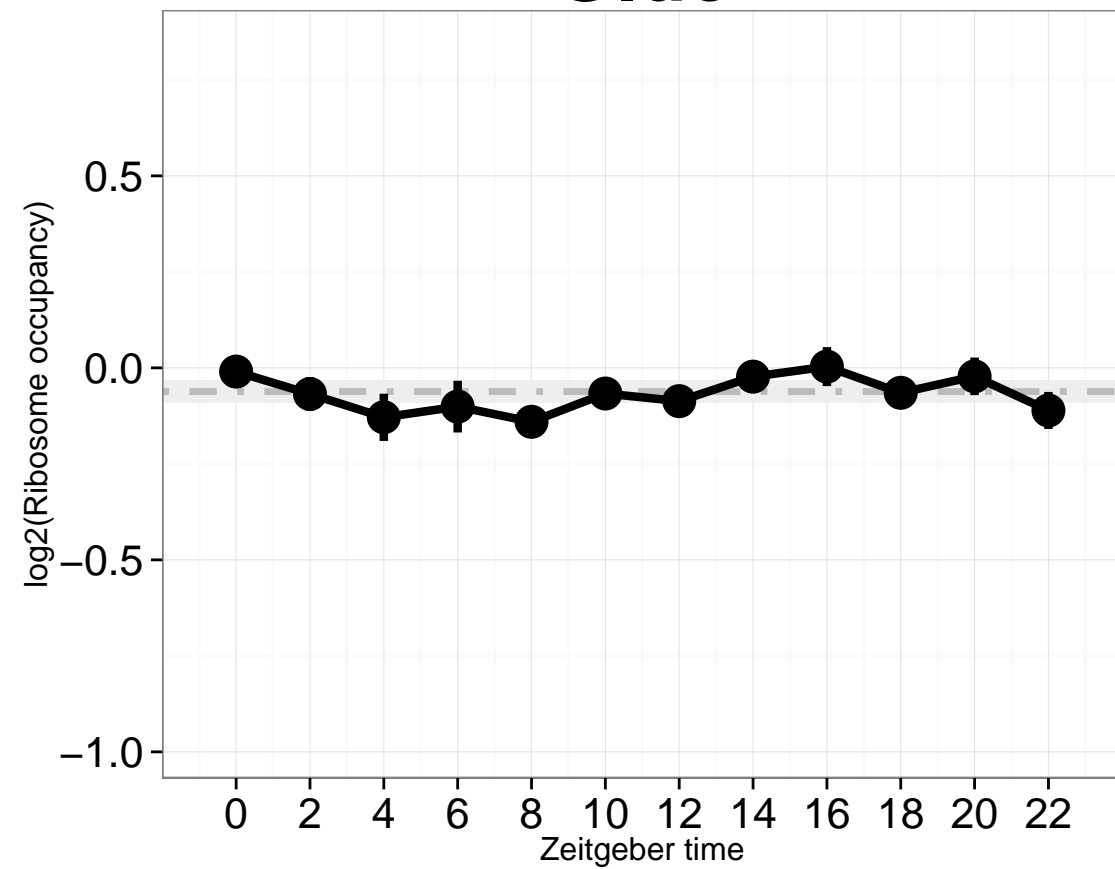

Supplement: Supplementary file 536 [file 1]

## Cd55

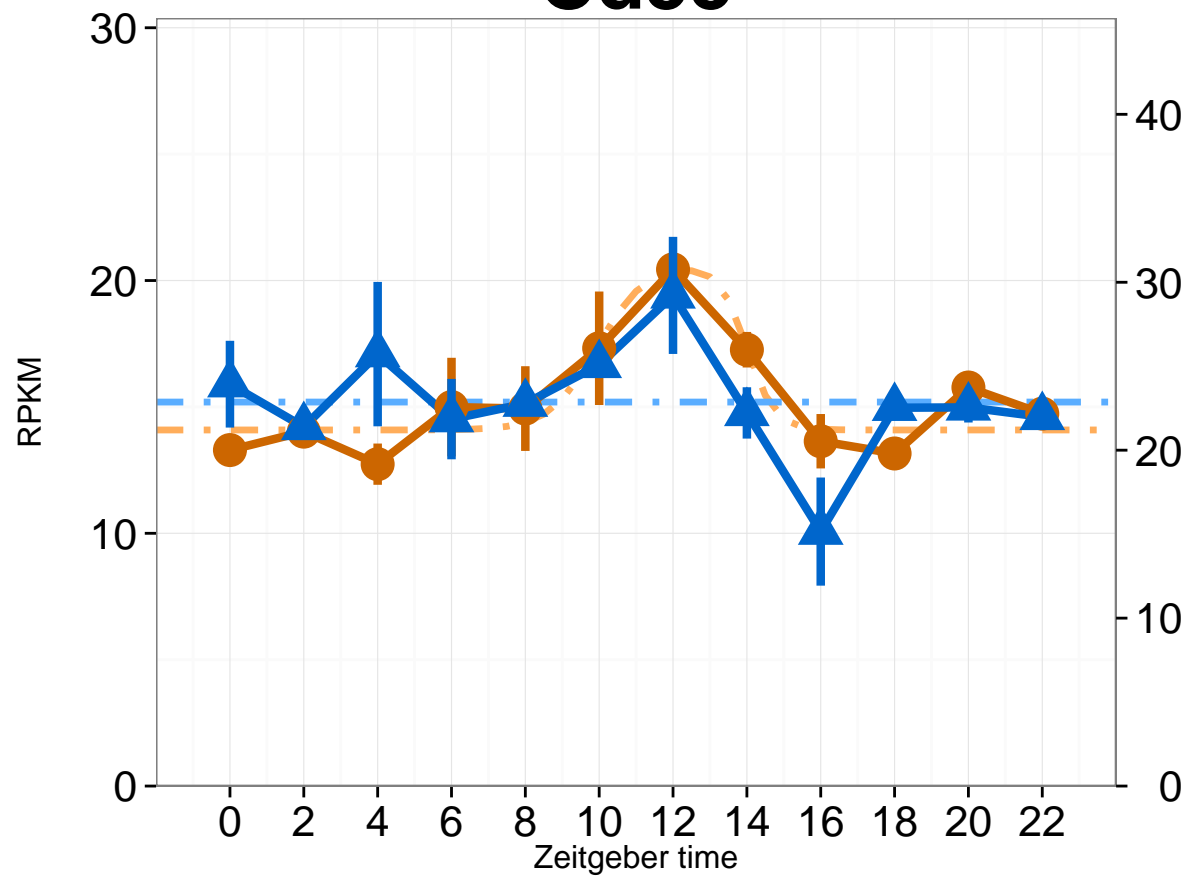

## Cd55

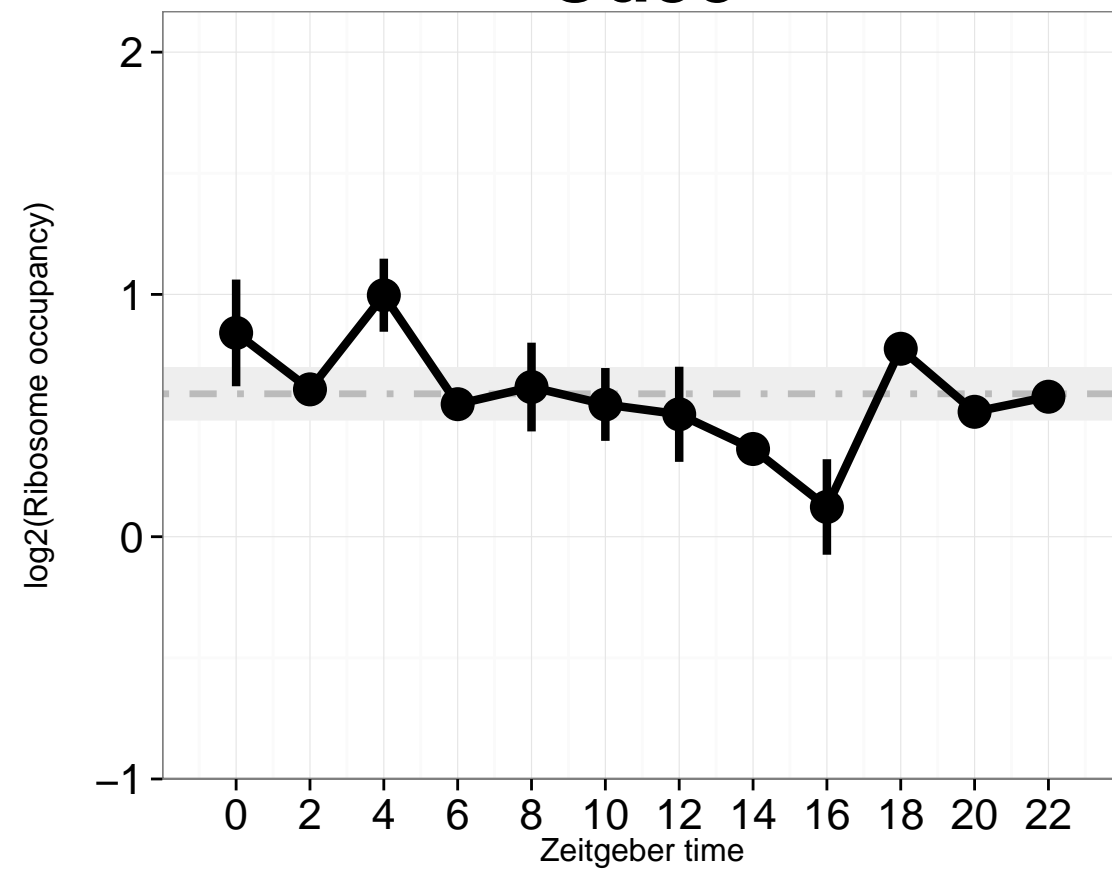

Supplement: Supplementary file 537 [file 1]

# Thg1l

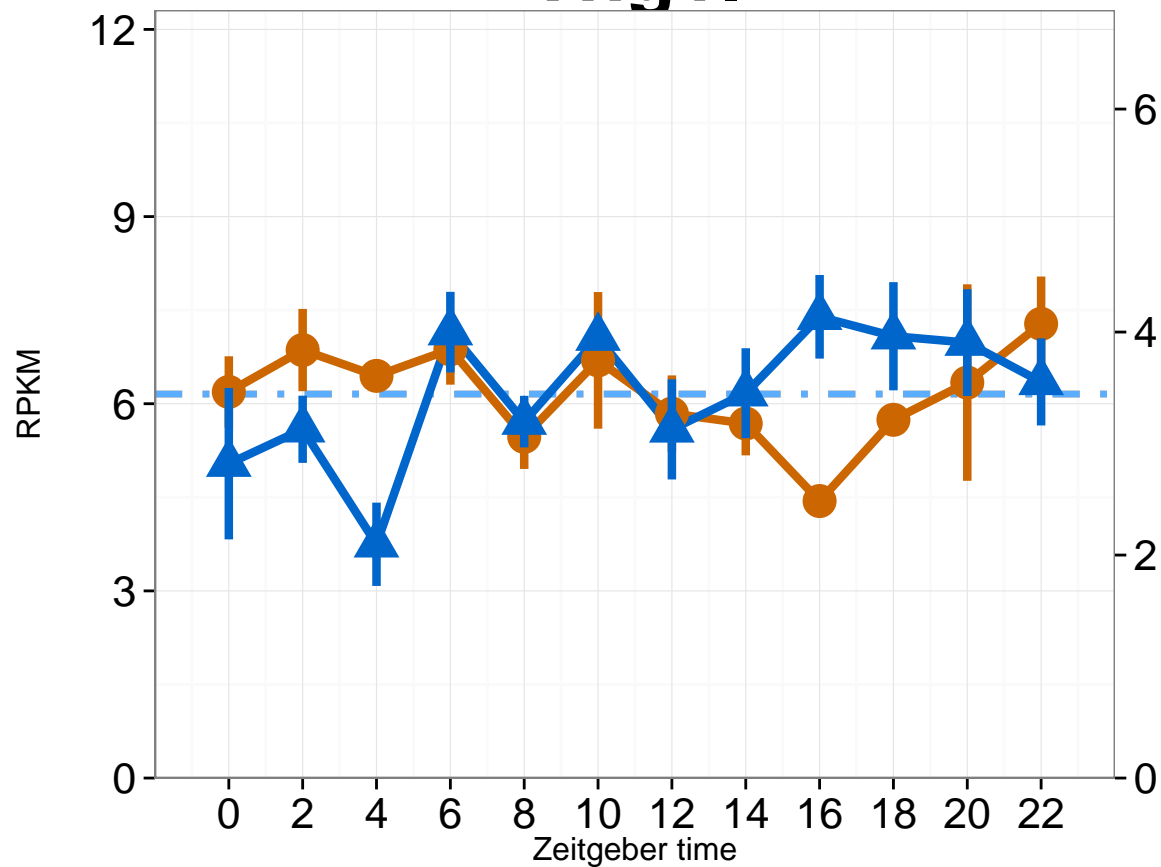

# Thg1l

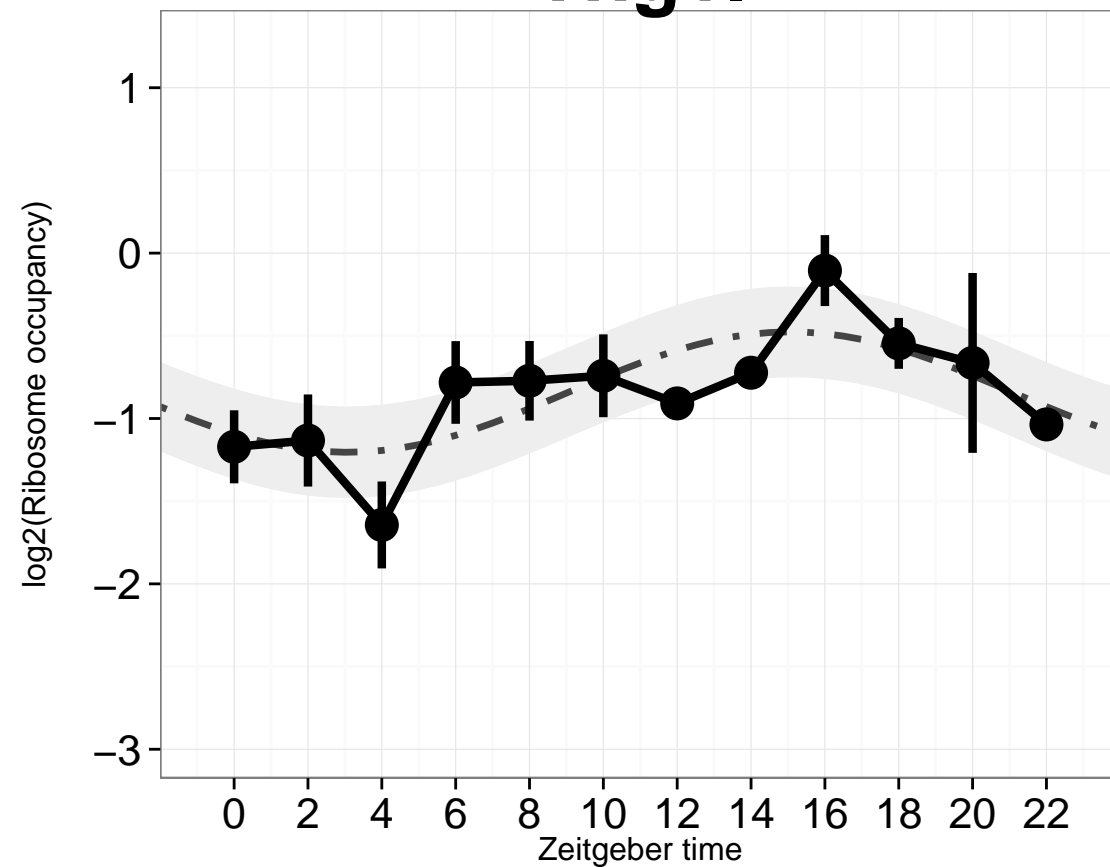

Supplement: Supplementary file 538 [file 1]

**Dbnddd2 TR**

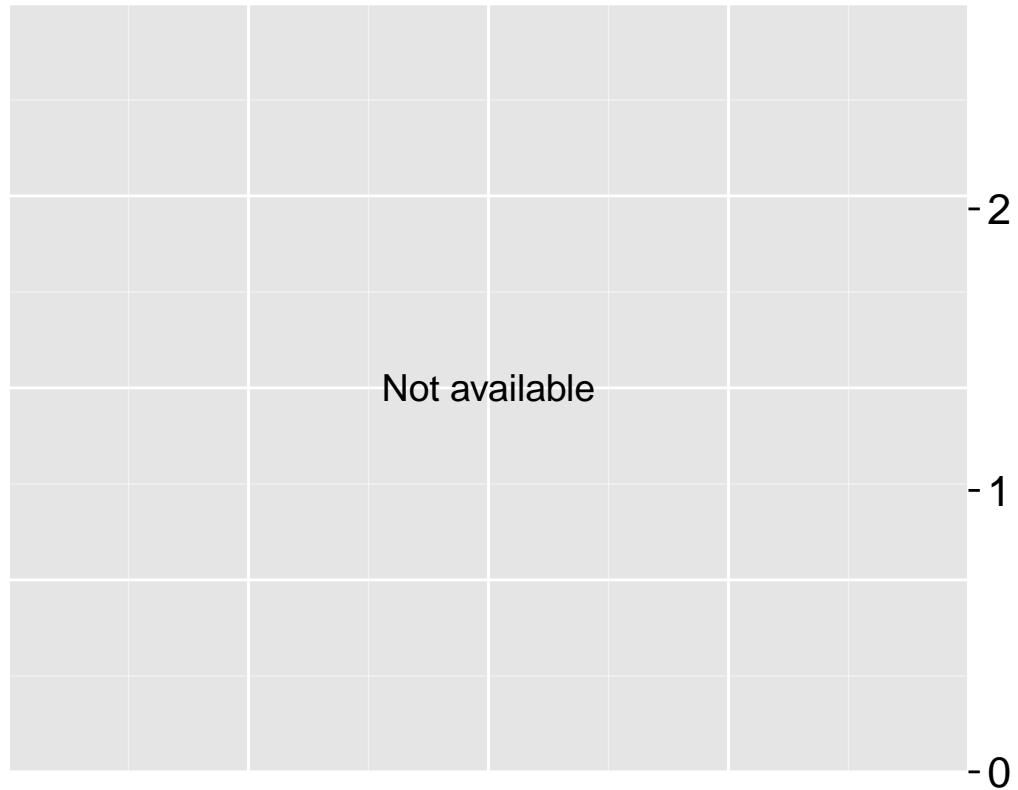

**Dbnddd2 log2(Ribosome occupancy**

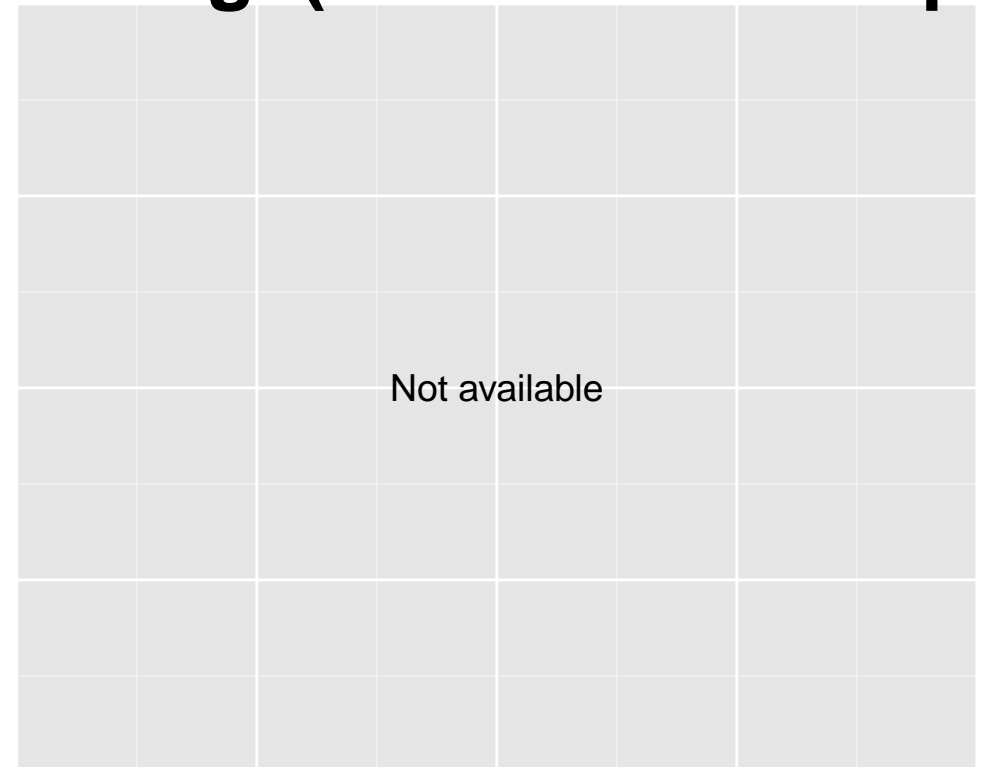

Supplement: Supplementary file 539 [file 1]

# Smim13

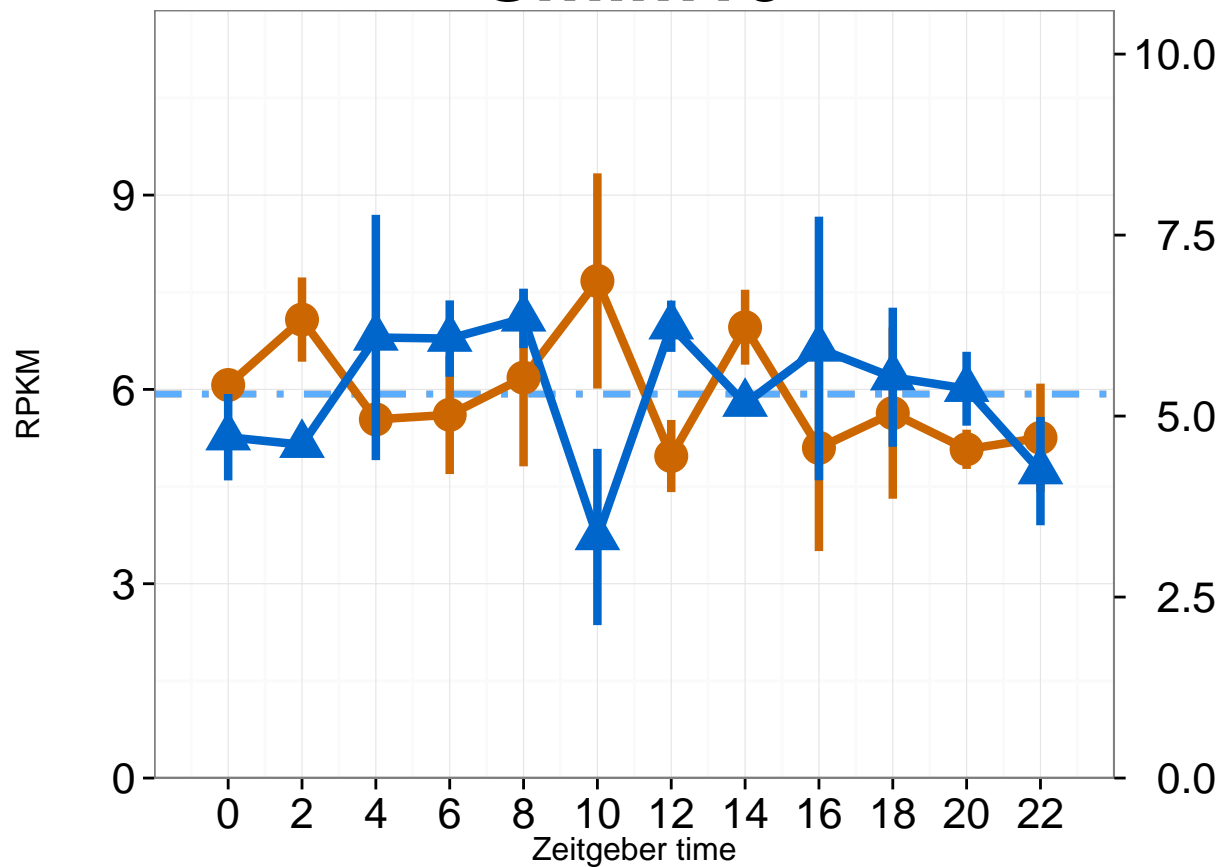

# Smim13

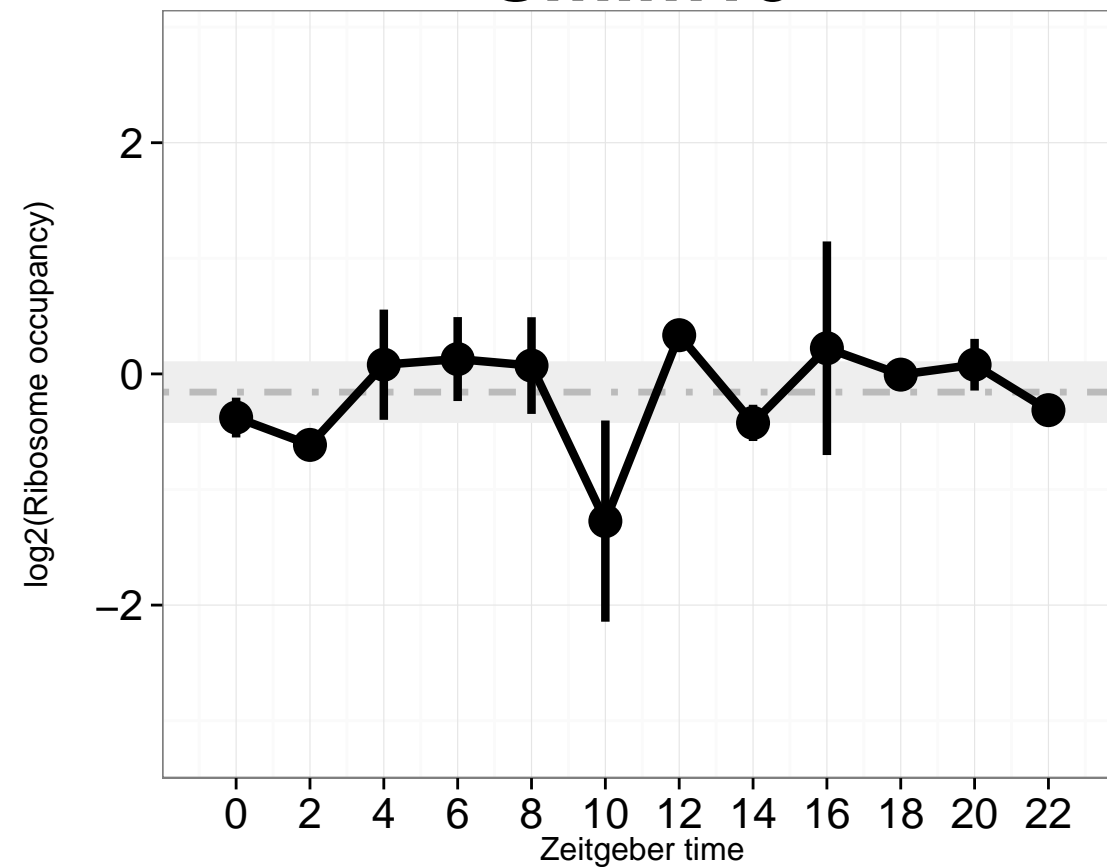

Supplement: Supplementary file 540 [file 1]

# Sipa1l3

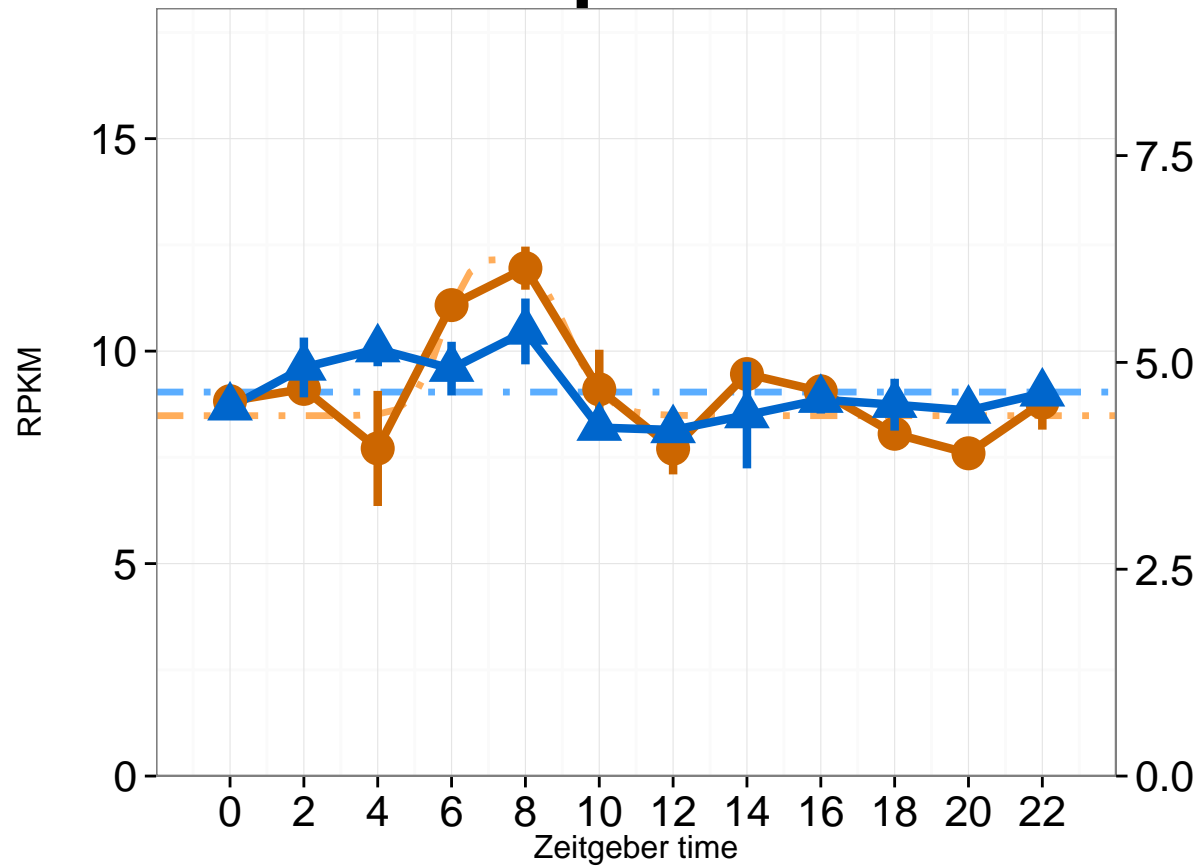

# Sipa1l3

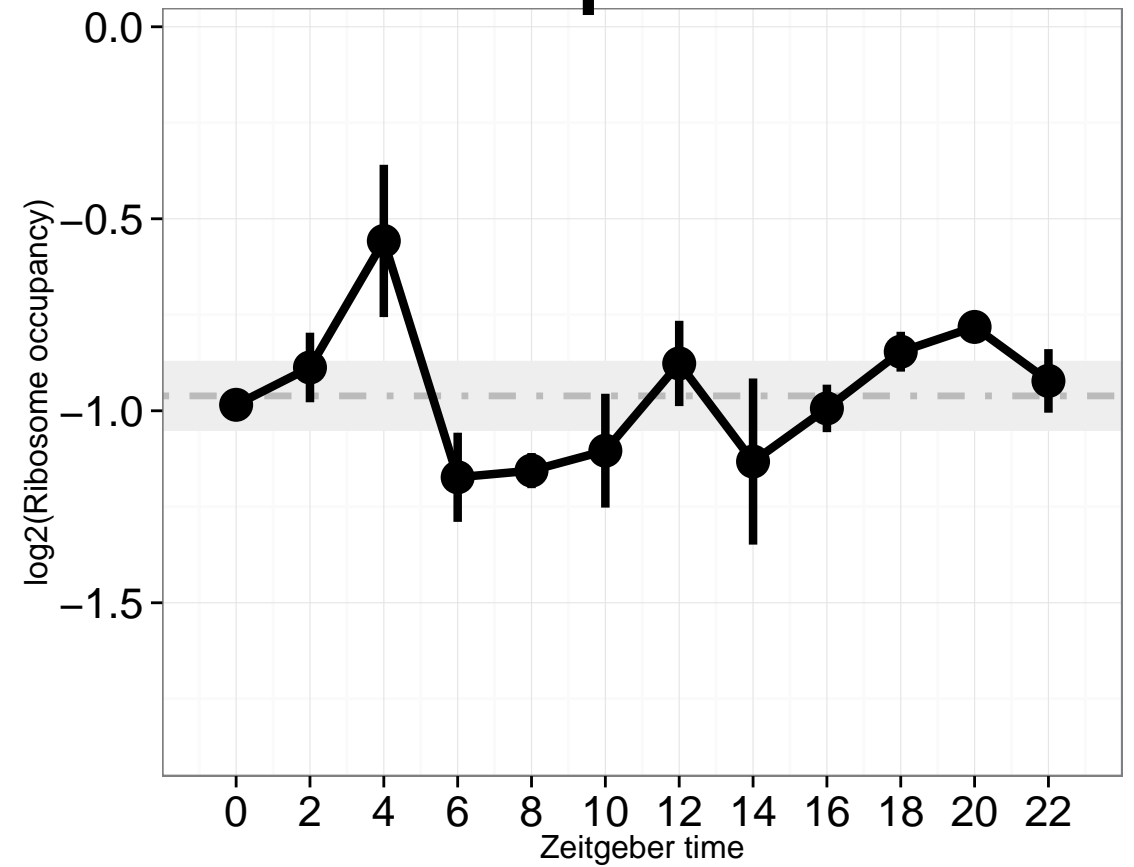

Supplement: Supplementary file 541 [file 1]

## Slc9a5

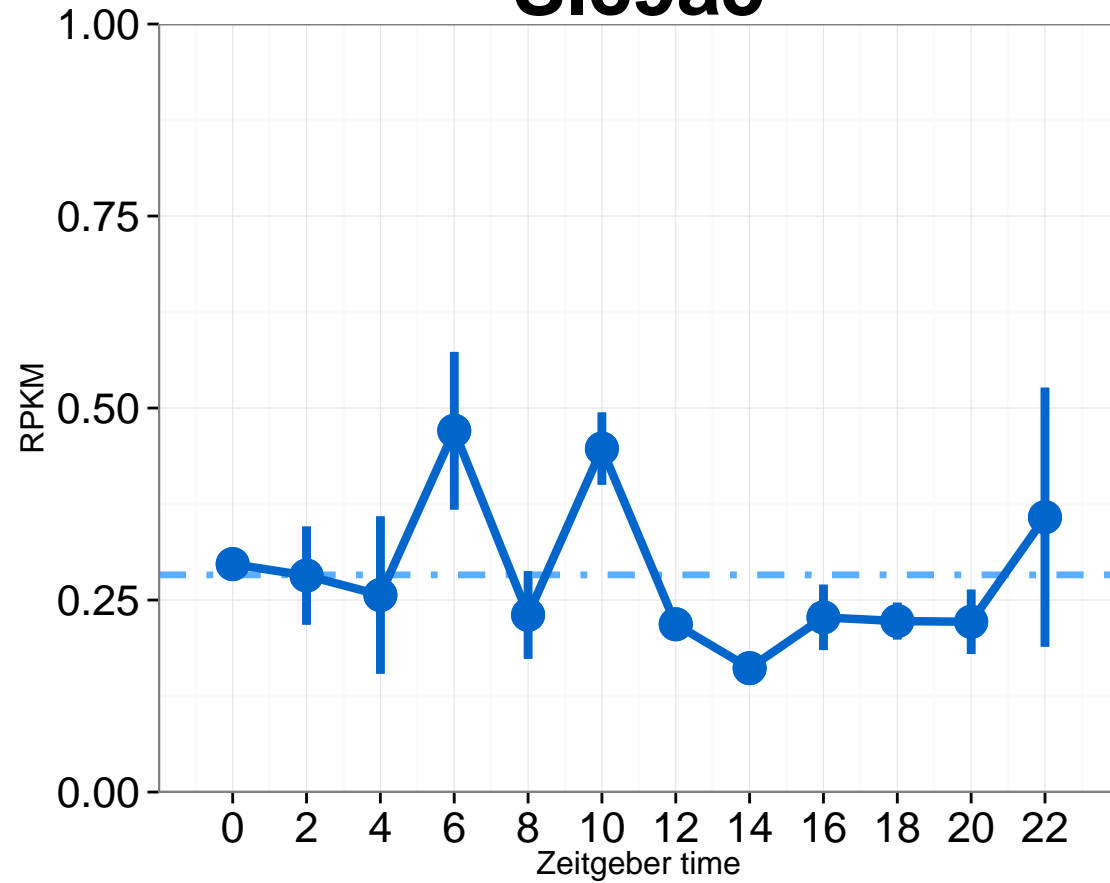

## Slc9a5 log2(Ribosome occupancy

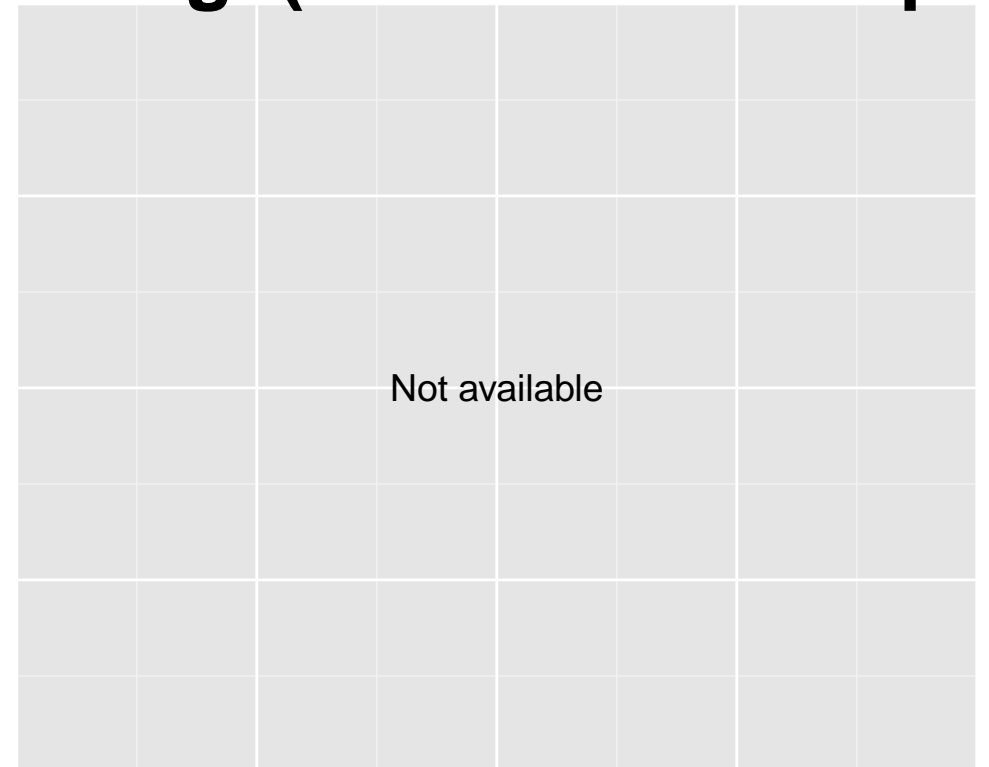

Supplement: Supplementary file 542 [file 1]

## Apobec2

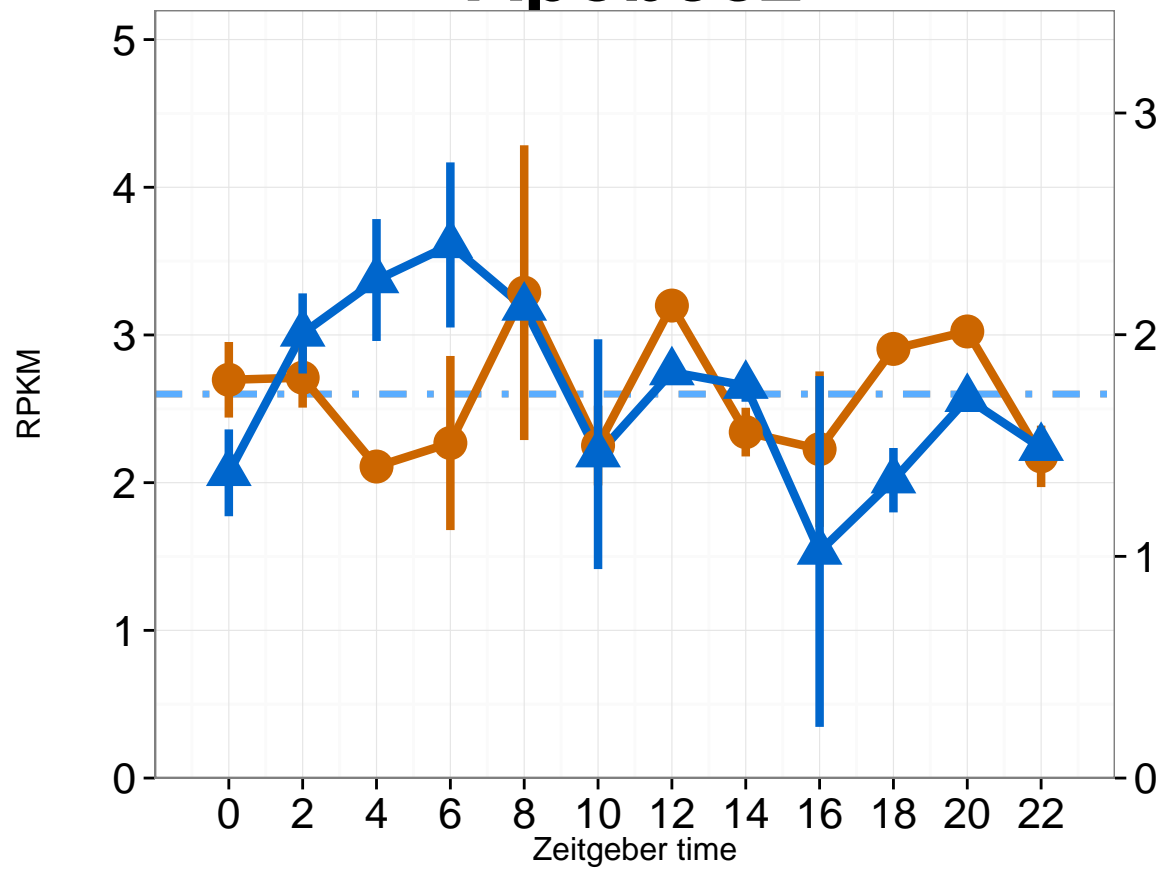

## Apobec2

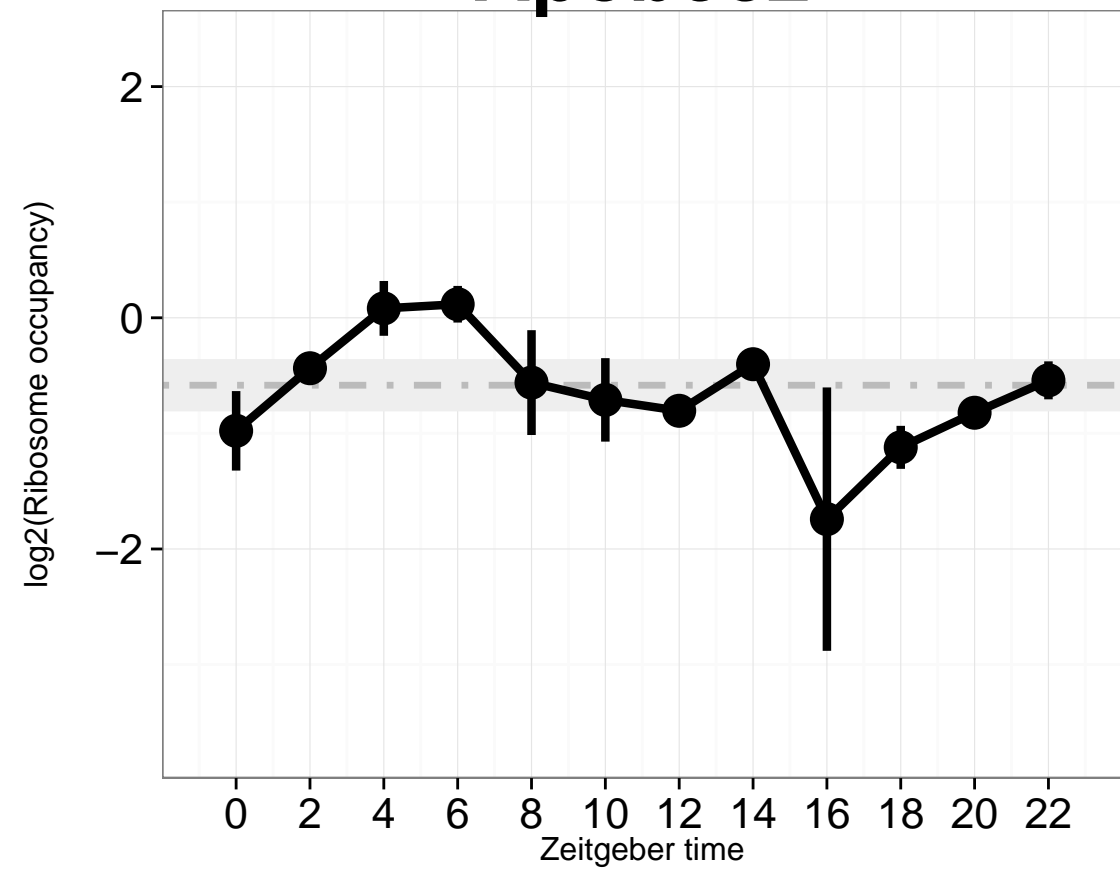

Supplement: Supplementary file 543 [file 1]

# Zfp710

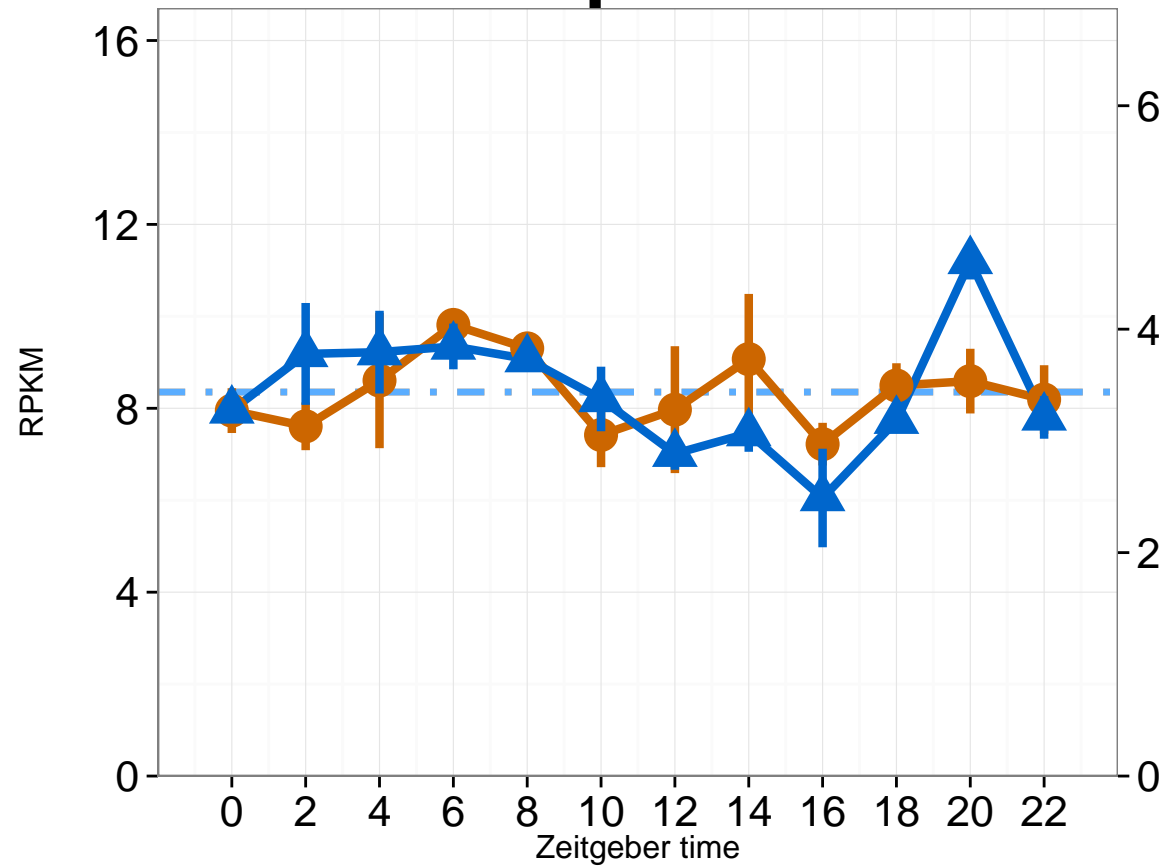

# Zfp710

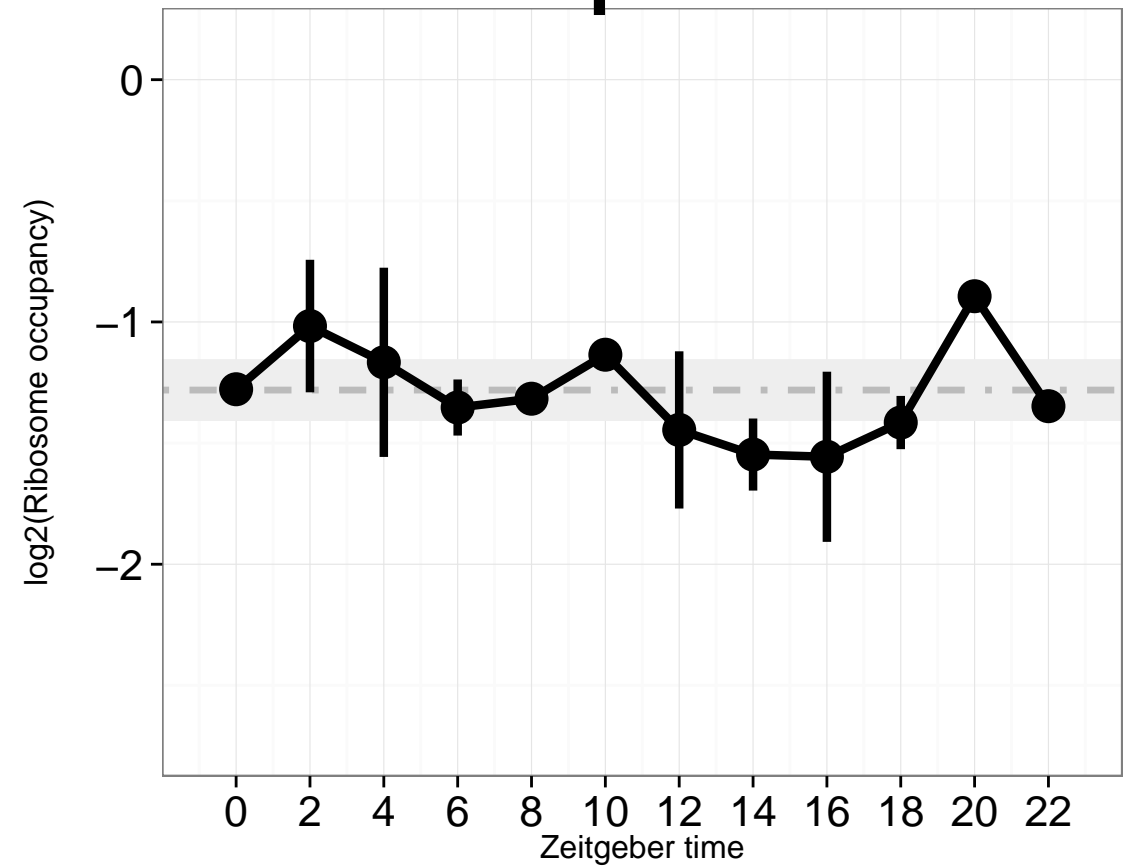

Supplement: Supplementary file 544 [file 1]

## Fmo4

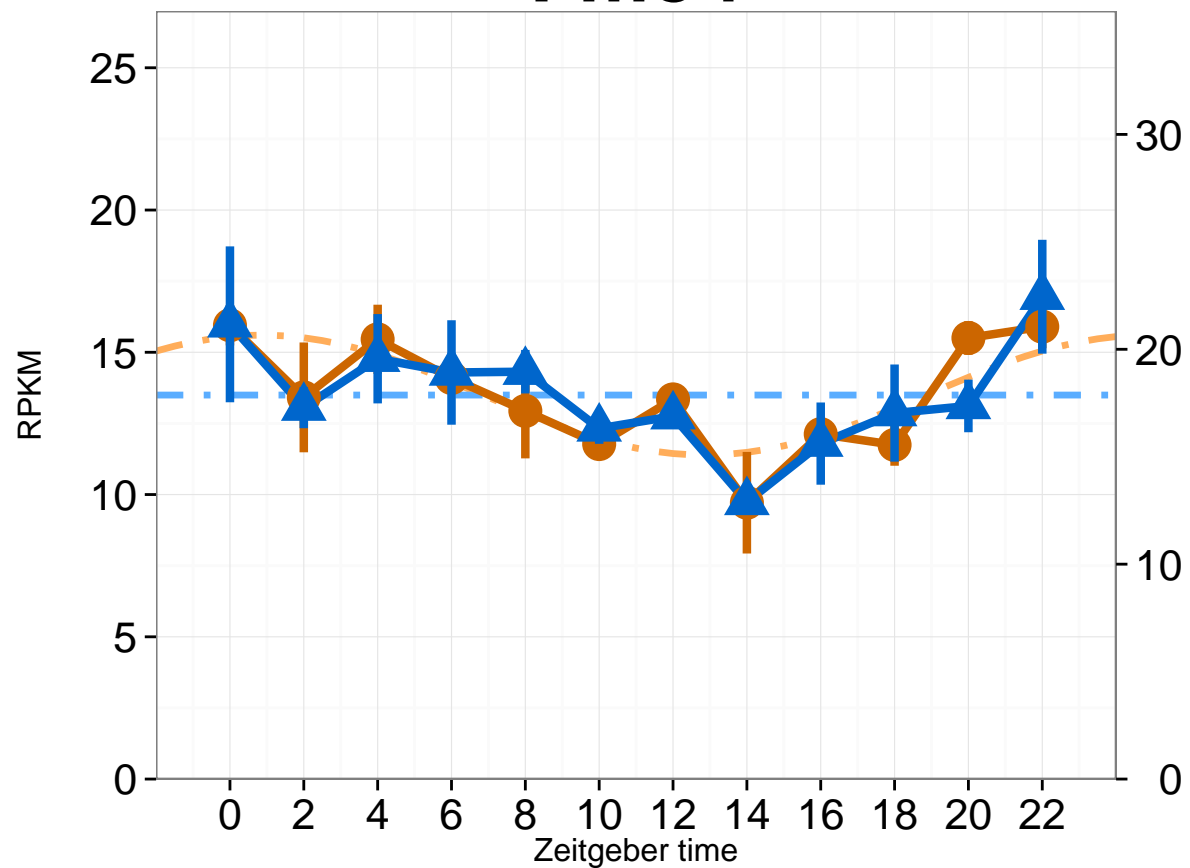

## Fmo4

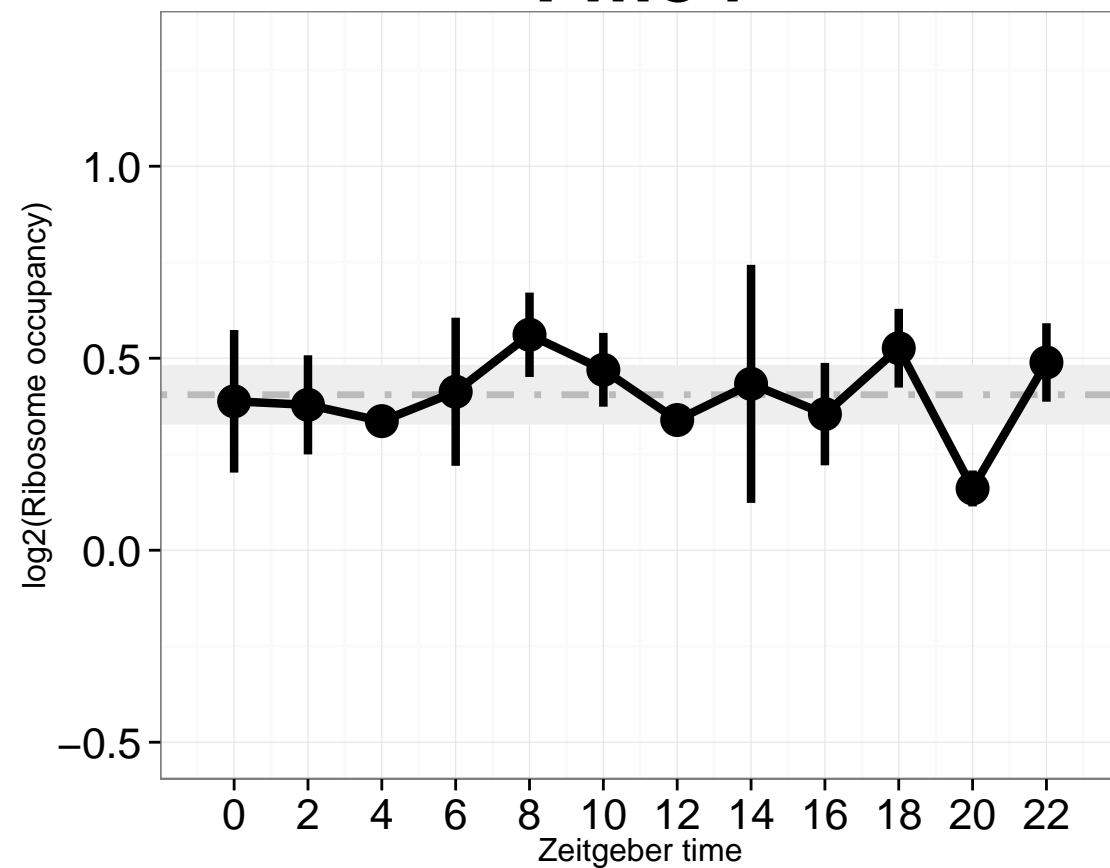

Supplement: Supplementary file 545 [file 1]

## Cbx8

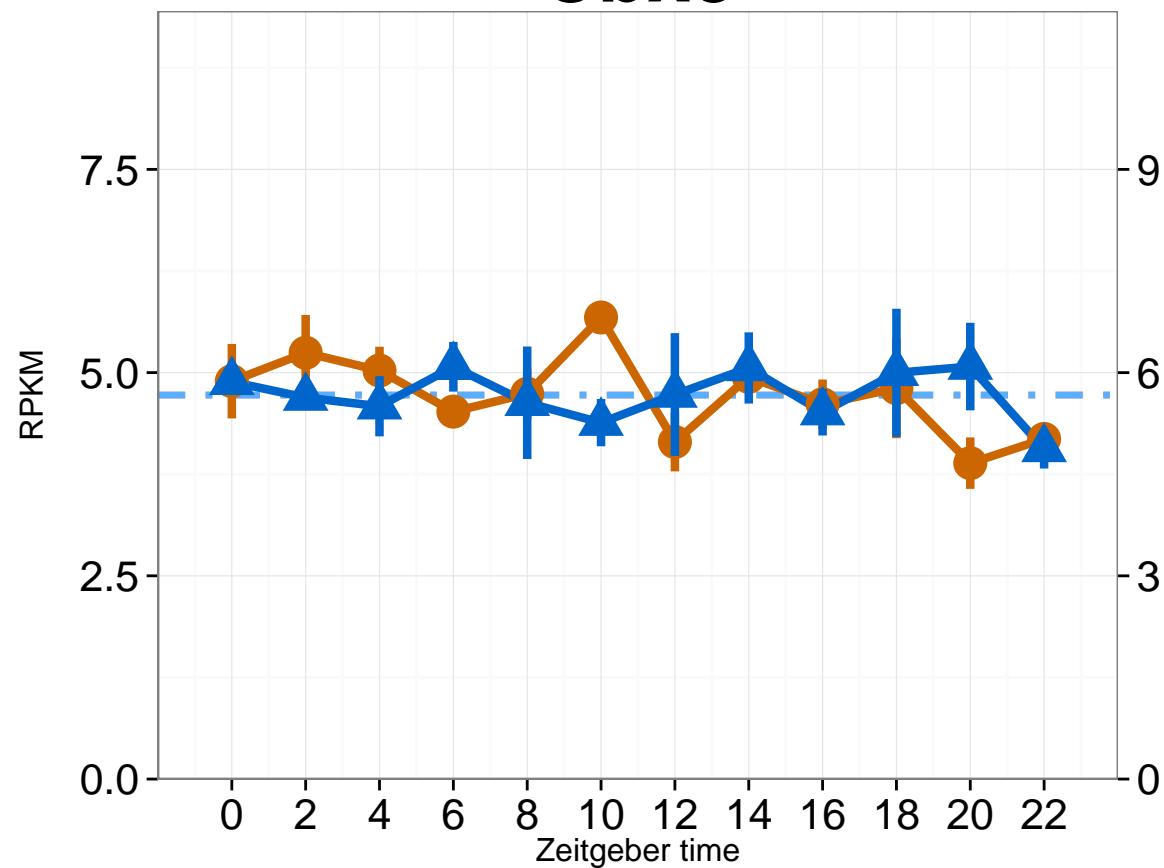

## Cbx8

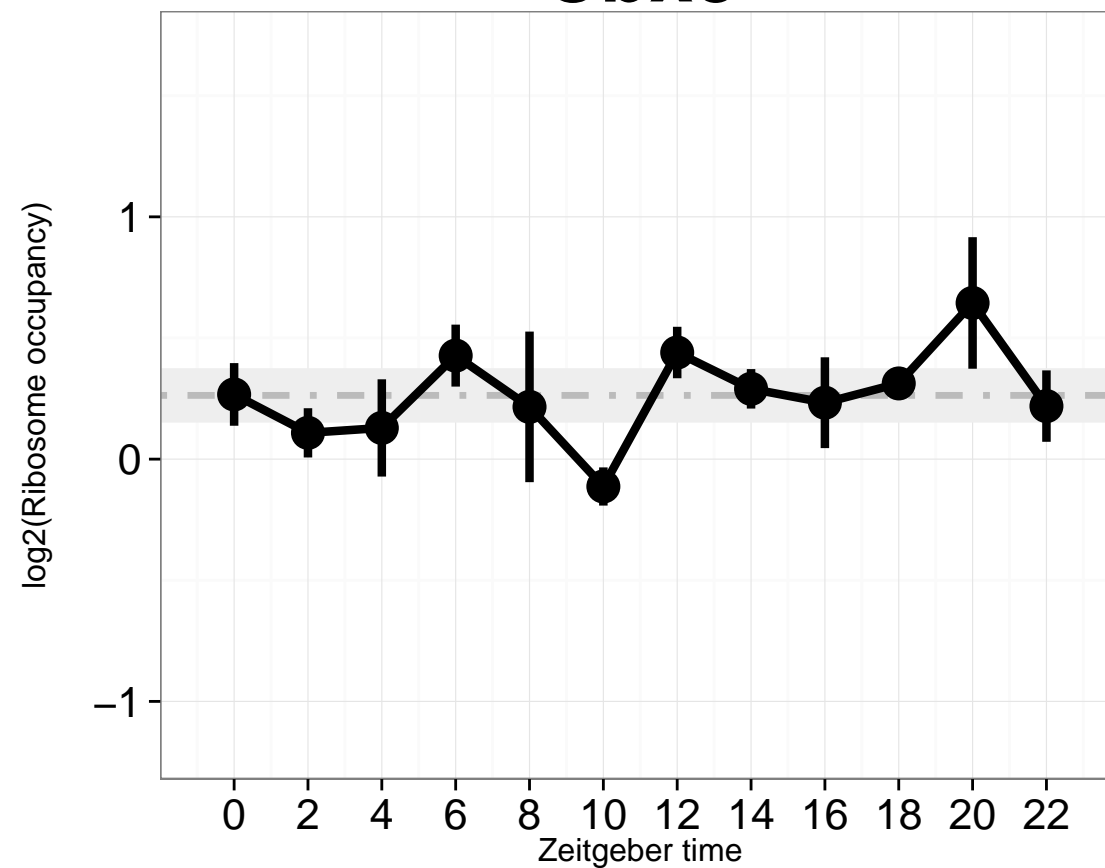

Supplement: Supplementary file 546 [file 1]

## Gsto2

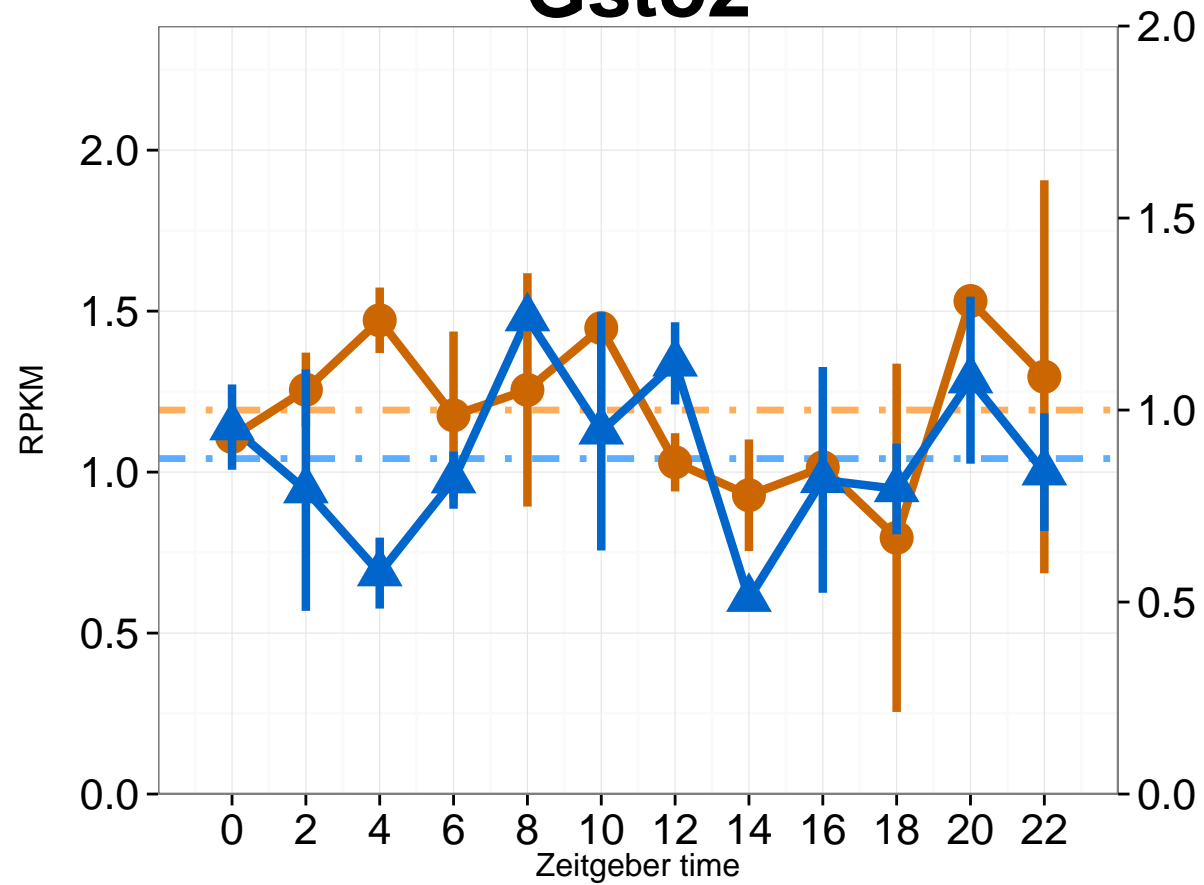

## Gsto2

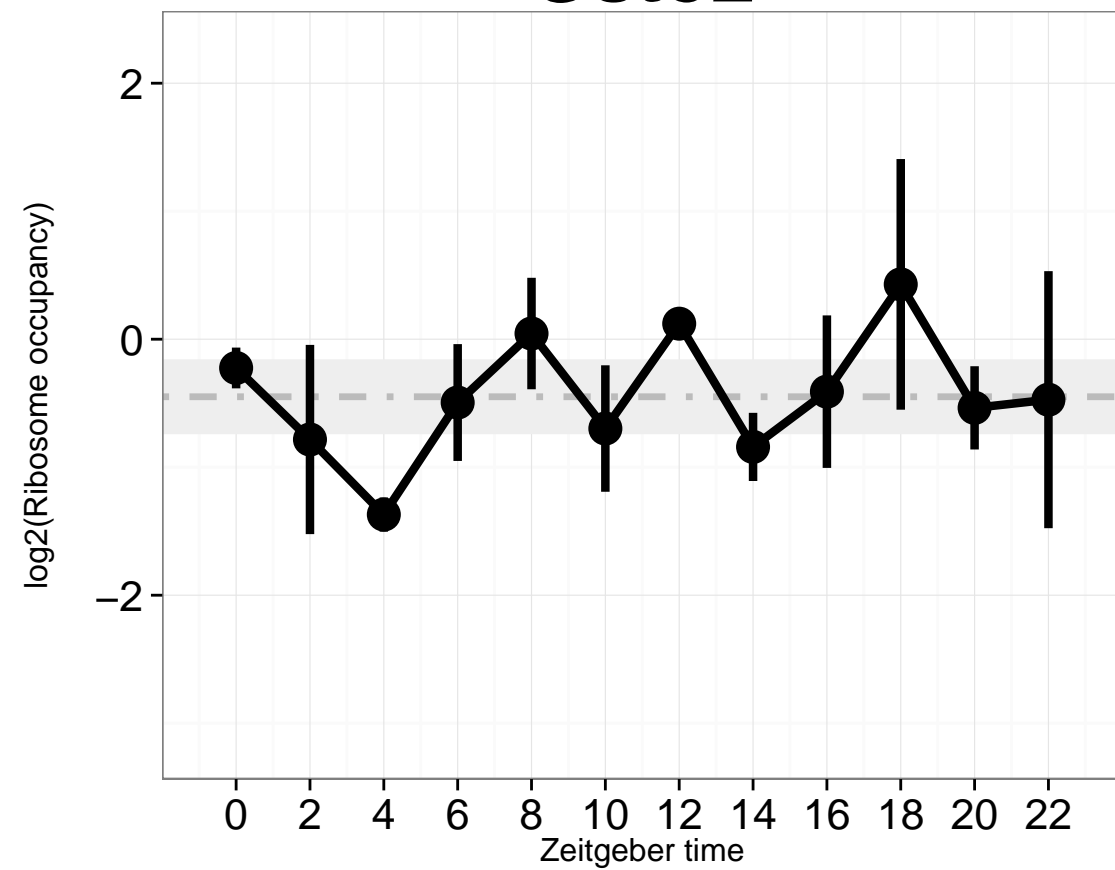

Supplement: Supplementary file 547 [file 1]

# Tpst1

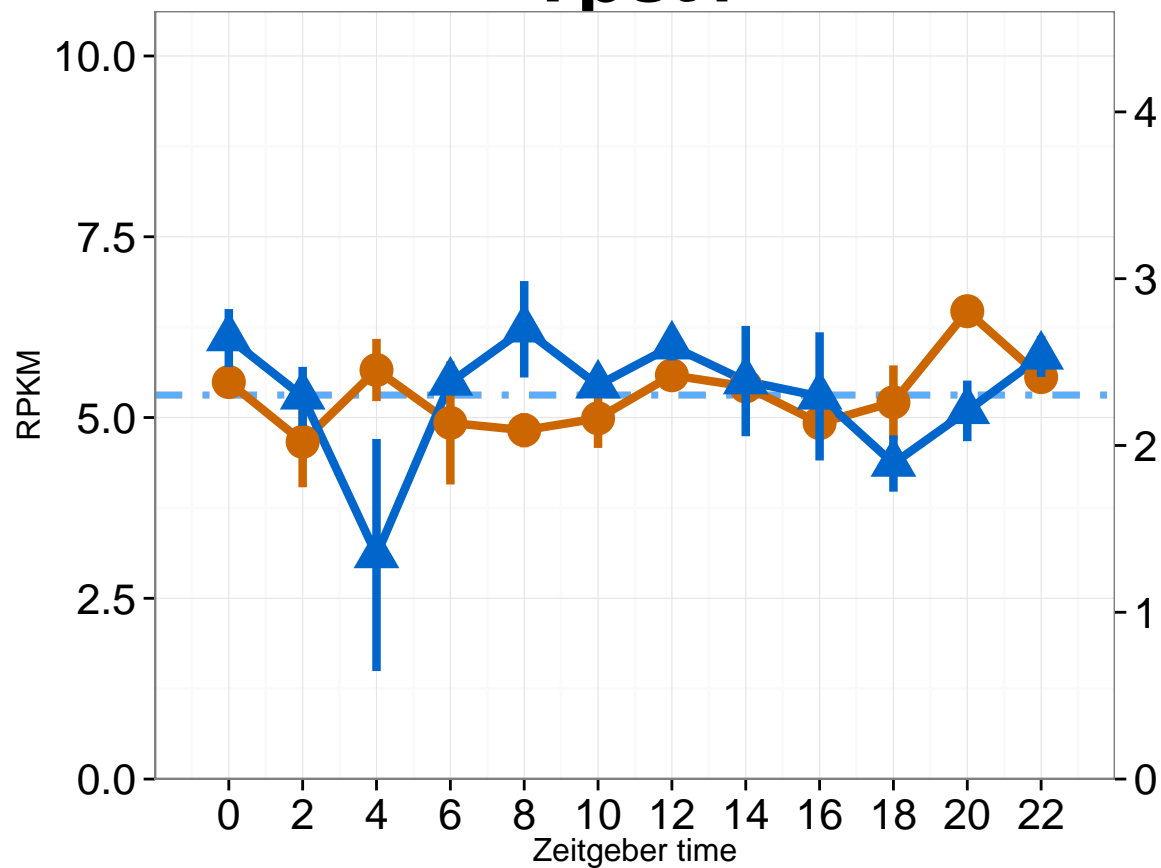

# Tpst1

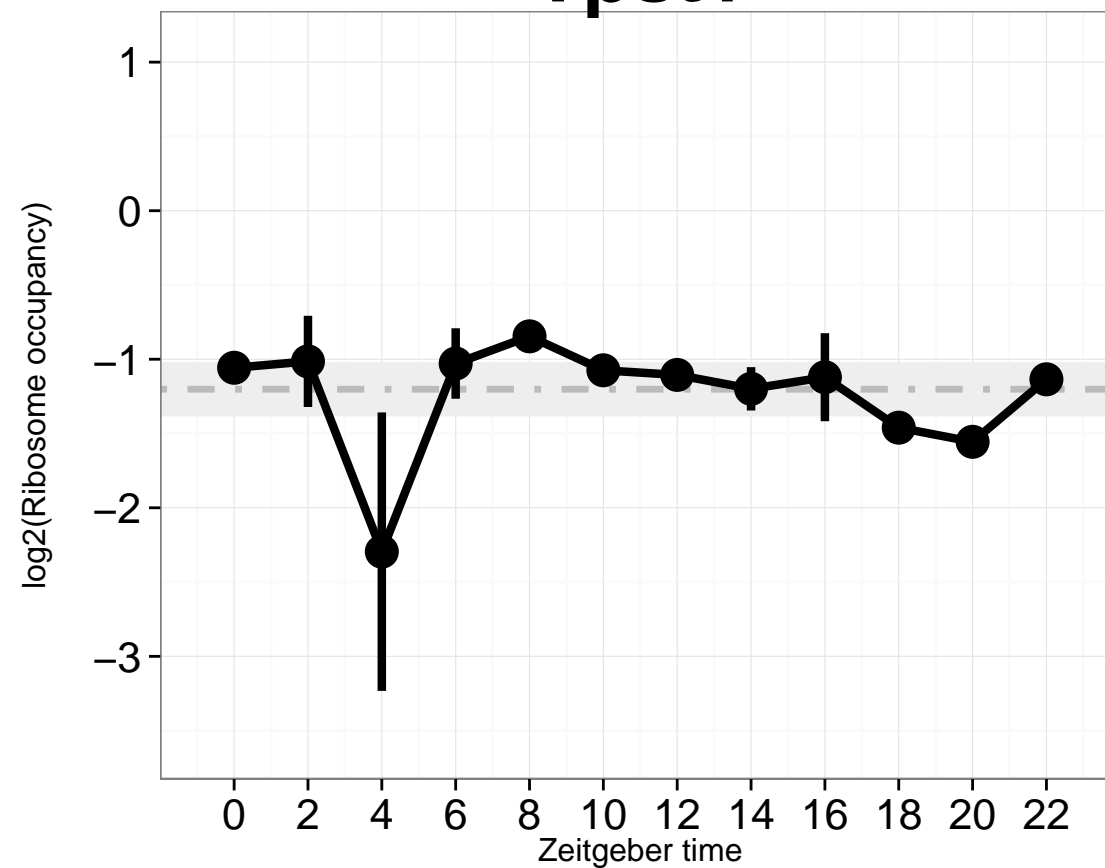

Supplement: Supplementary file 548 [file 1]

## Xpo5

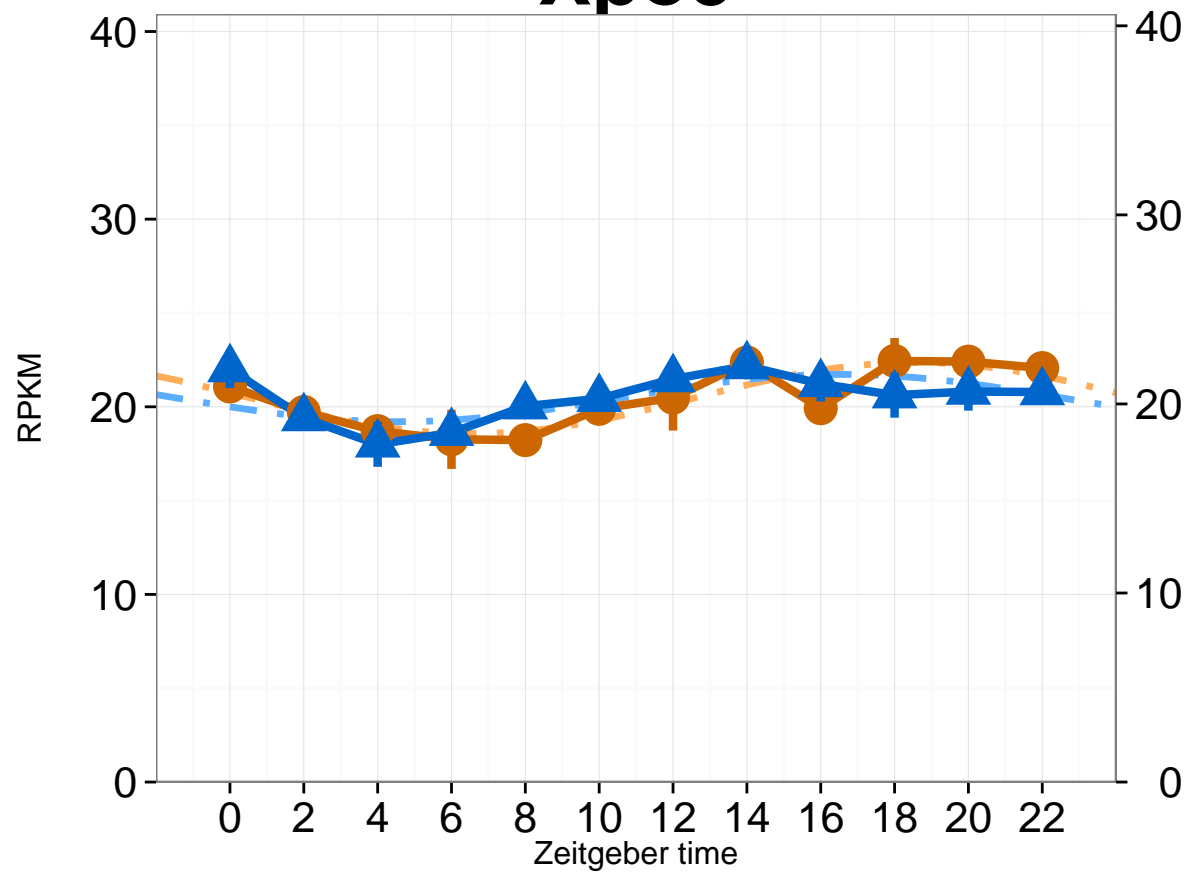

## Xpo5

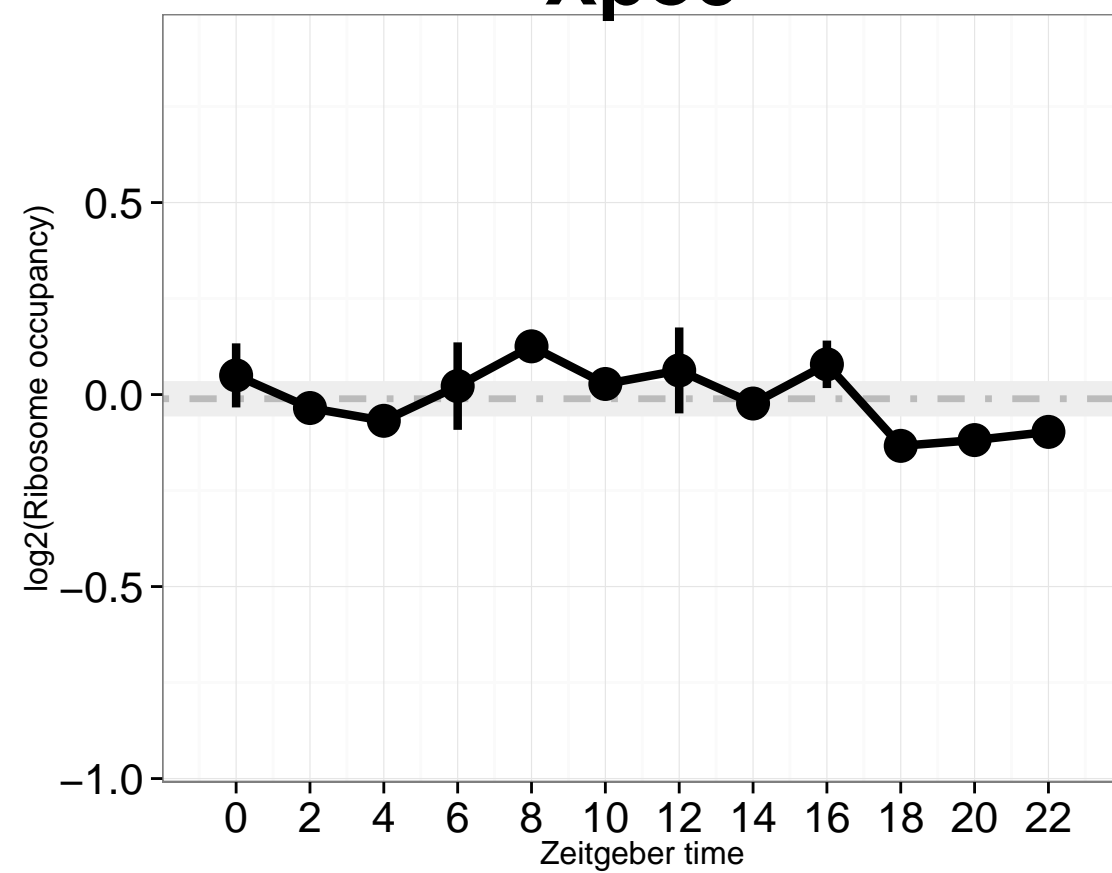

Supplement: Supplementary file 549 [file 1]

# Cox6c

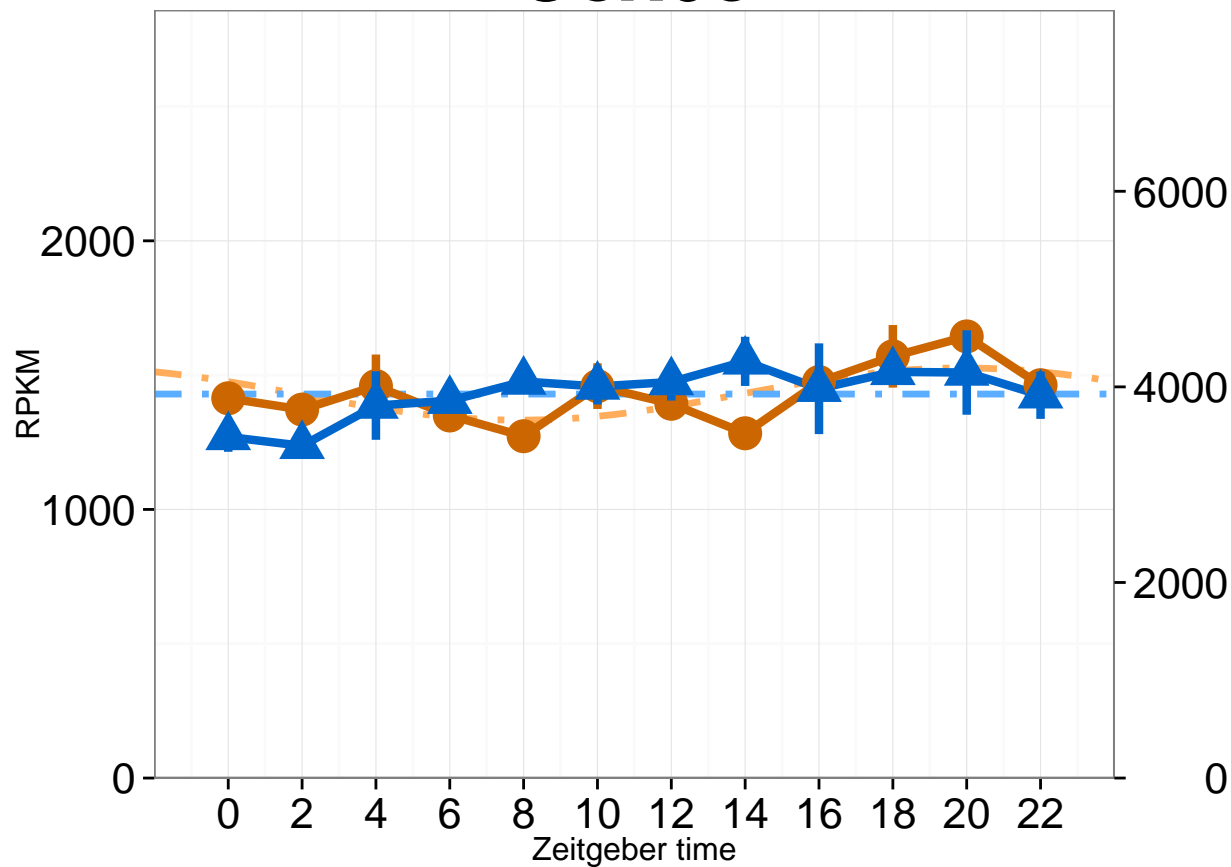

# Cox6c

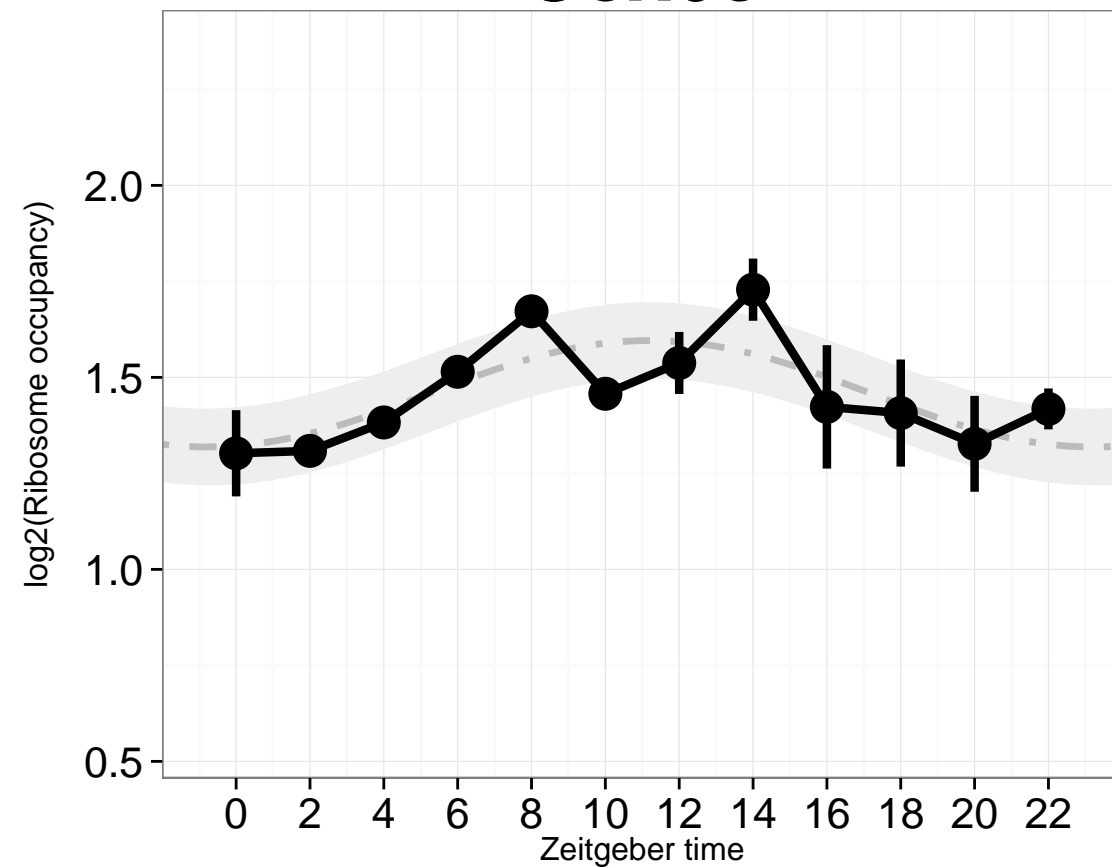

Supplement: Supplementary file 550 [file 1]

# Plekhh1

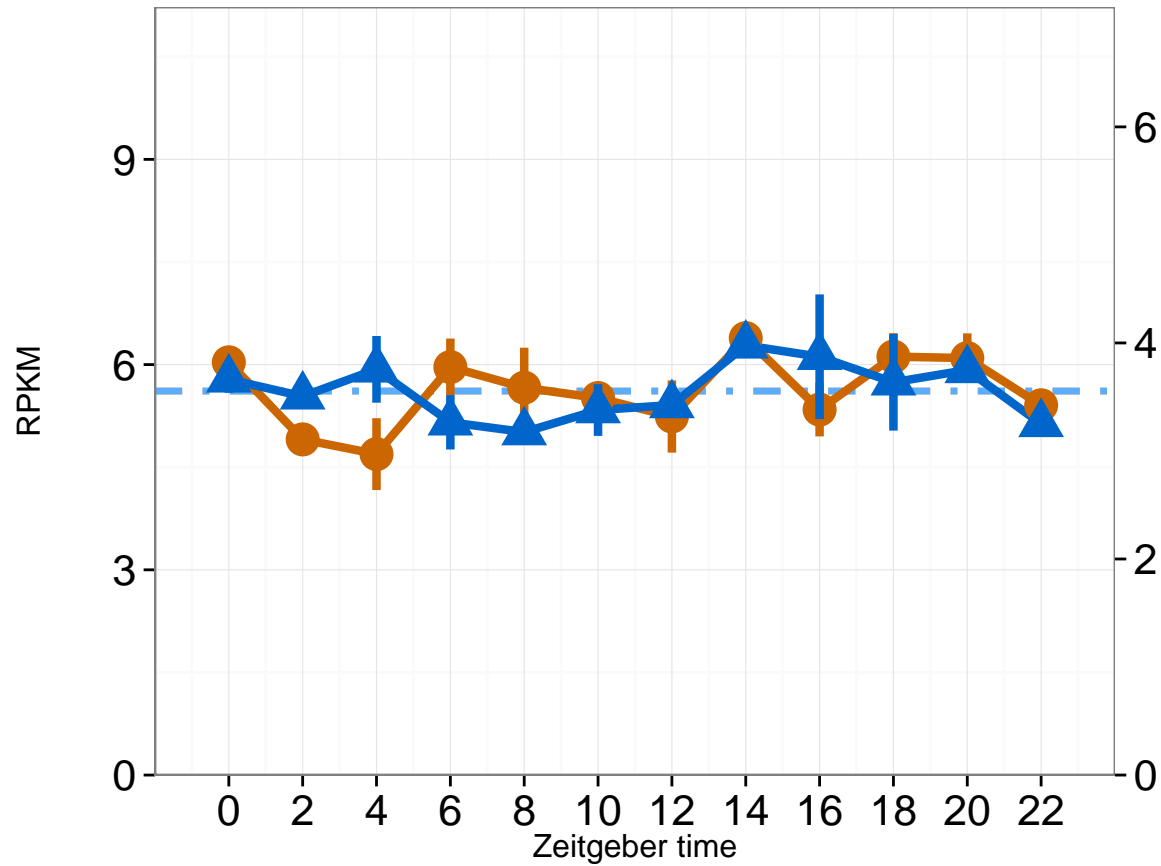

# Plekhh1

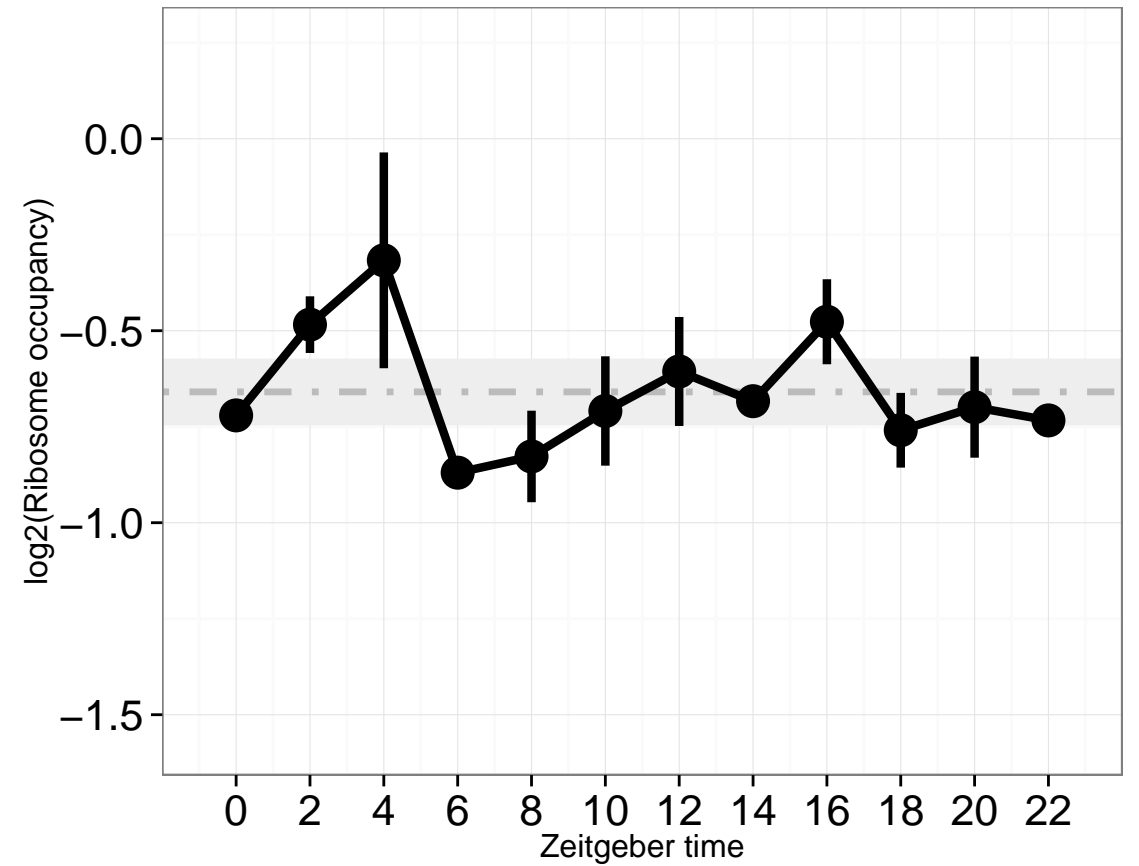

Supplement: Supplementary file 551 [file 1]

# Arhgef19

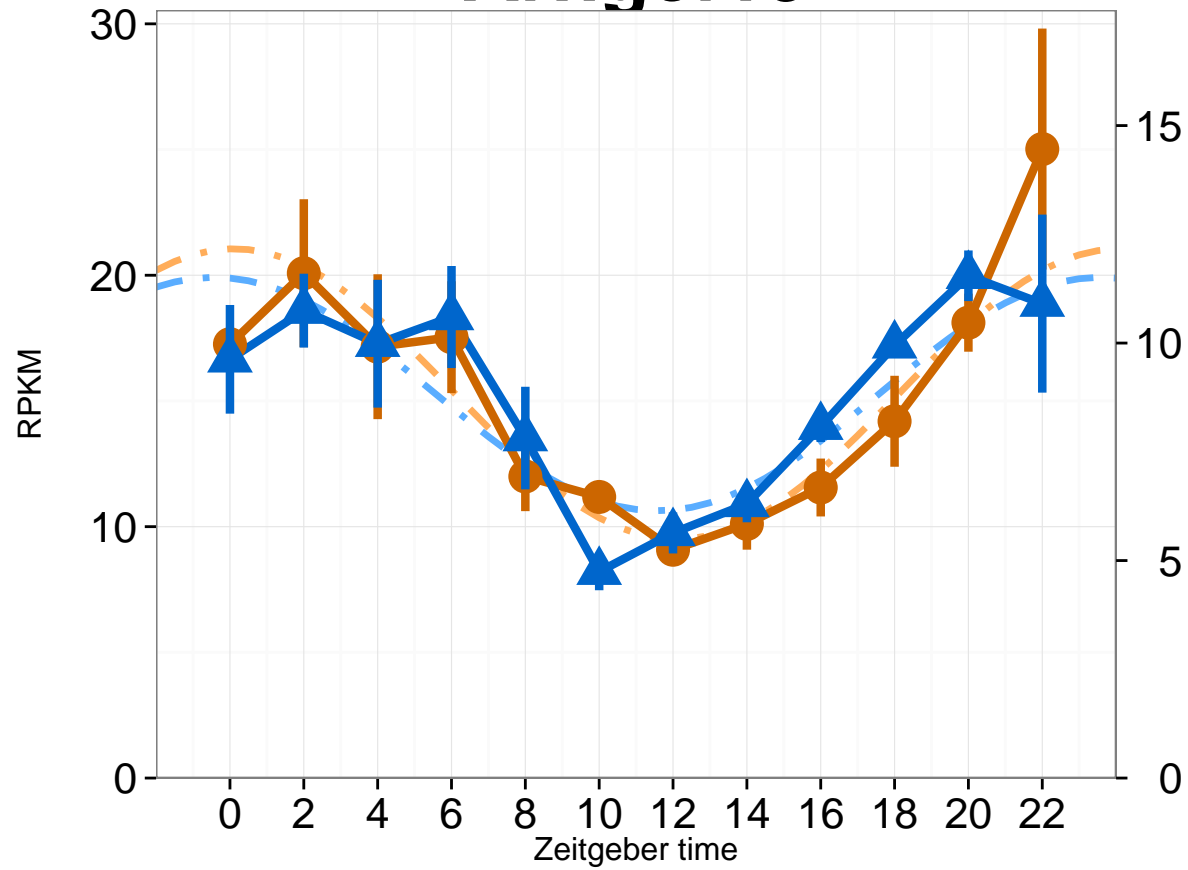

# Arhgef19

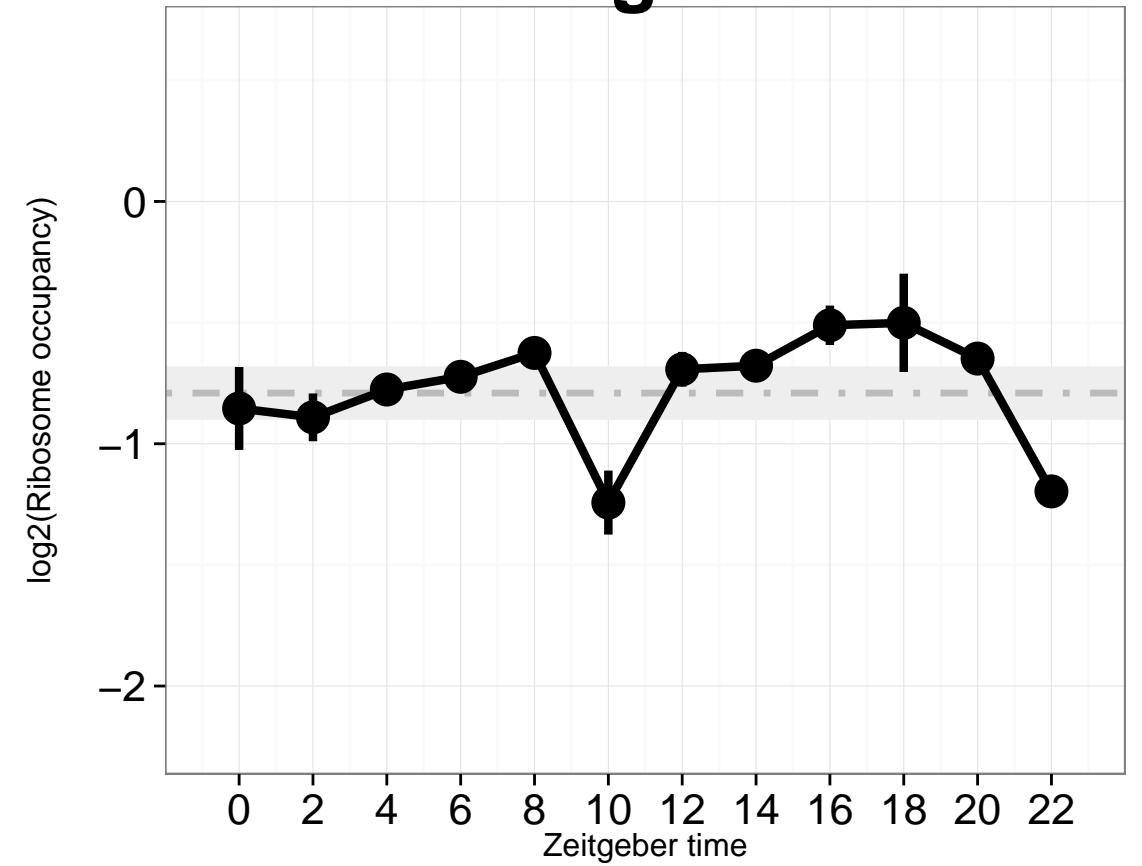

Supplement: Supplementary file 552 [file 1]

## E4f1

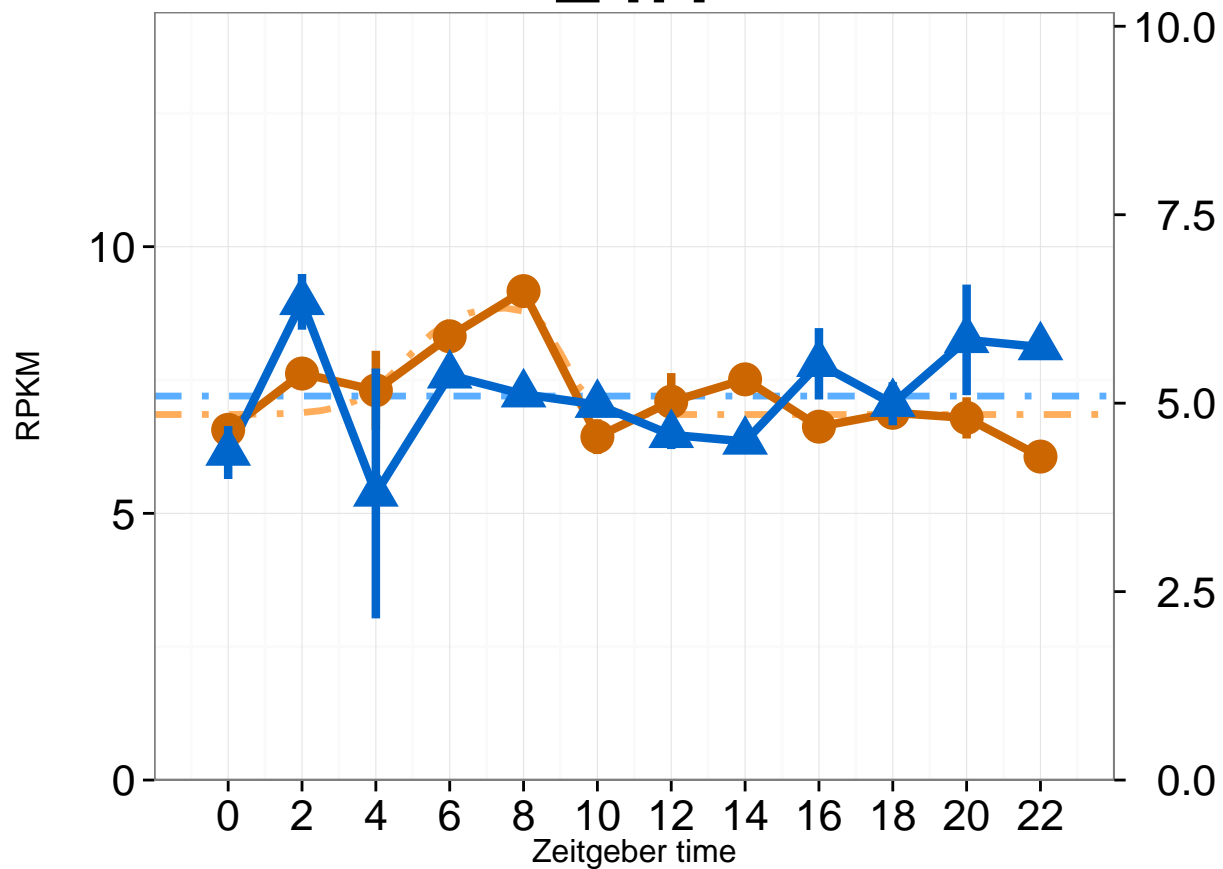

## E4f1

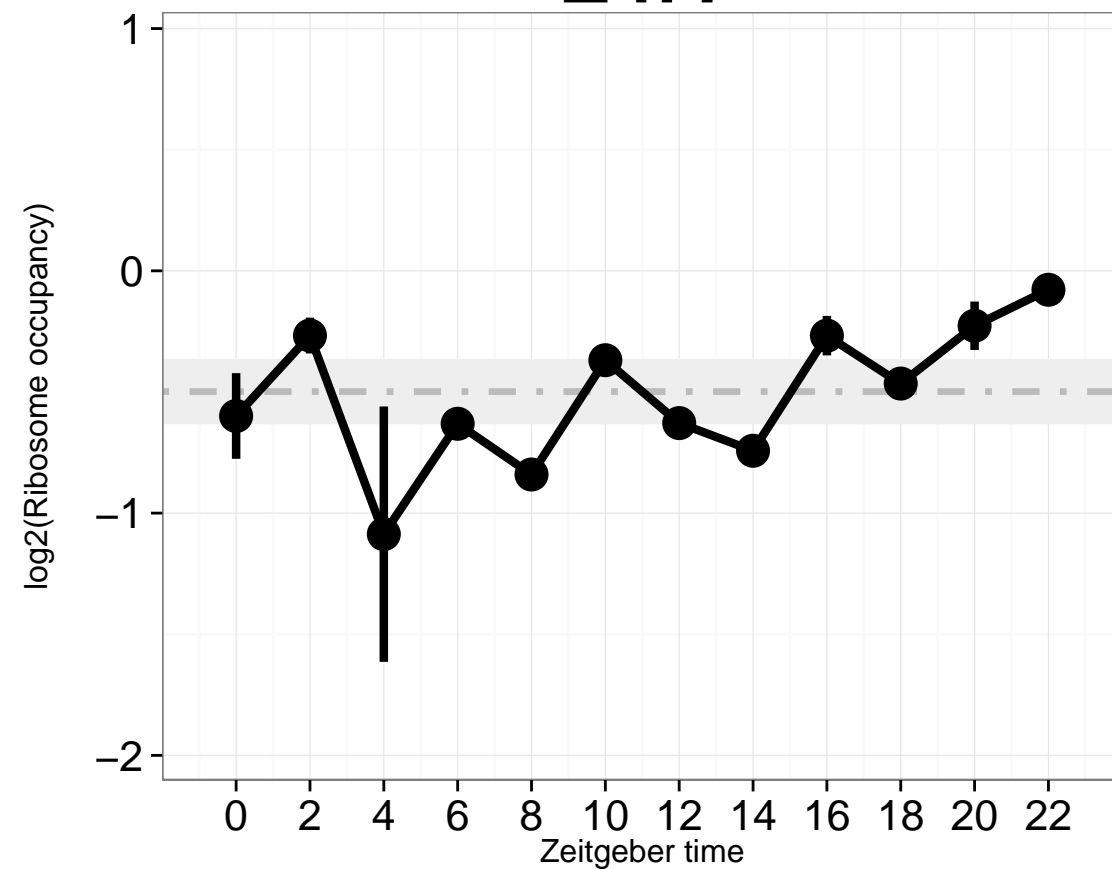

Supplement: Supplementary file 553 [file 1]

## Rnf11

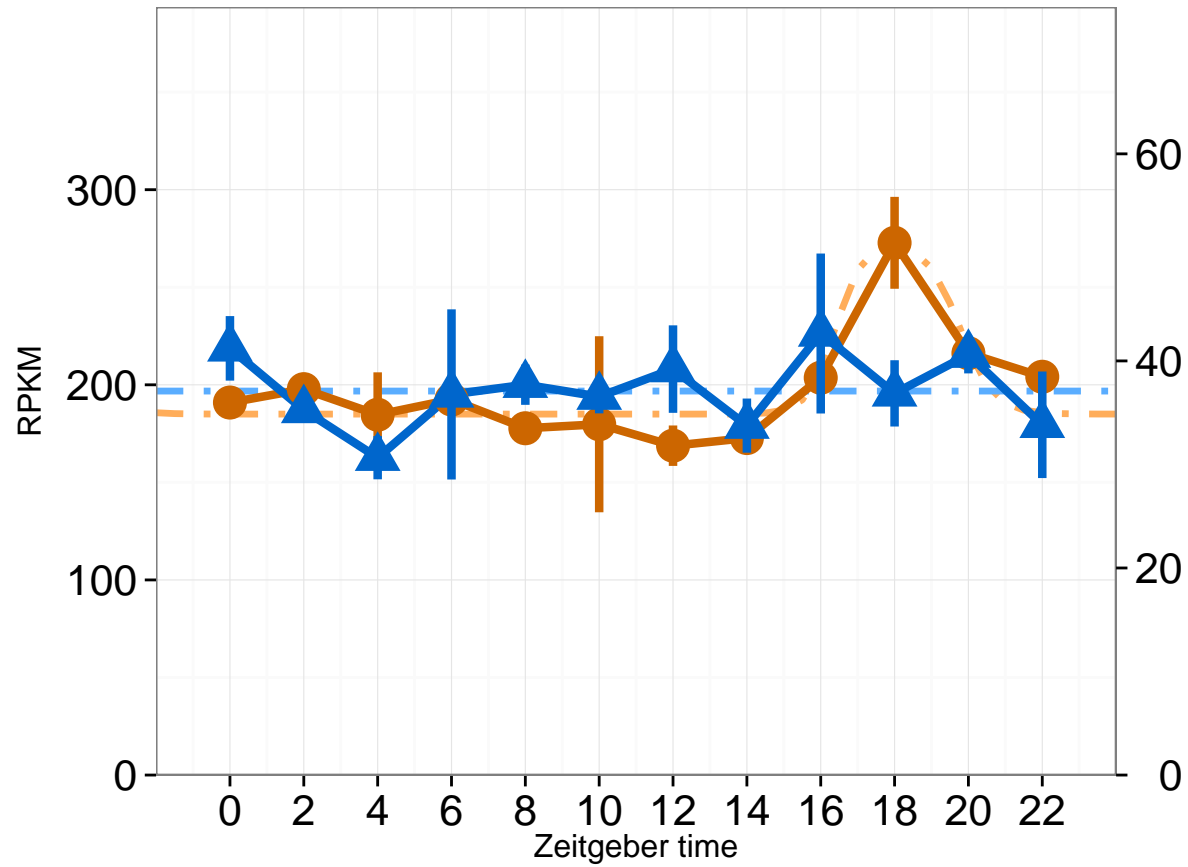

## Rnf11

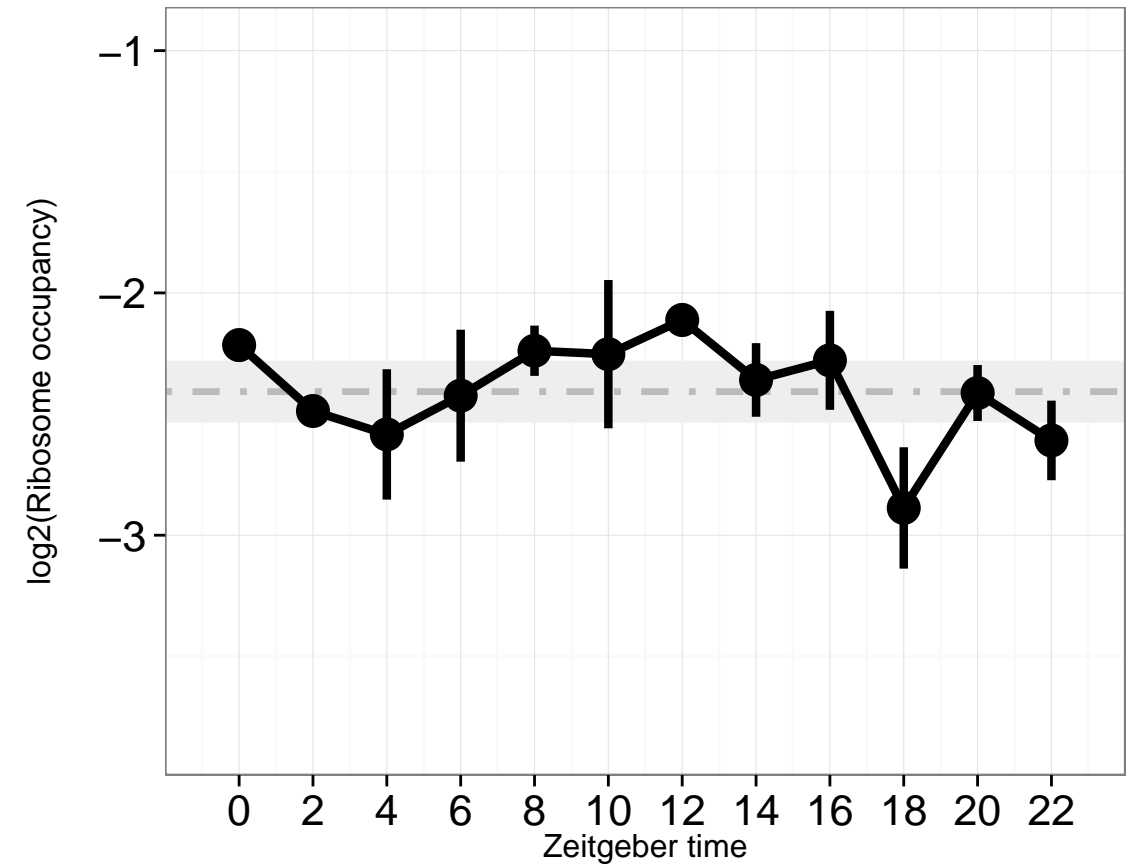

Supplement: Supplementary file 554 [file 1]

# Mrps2

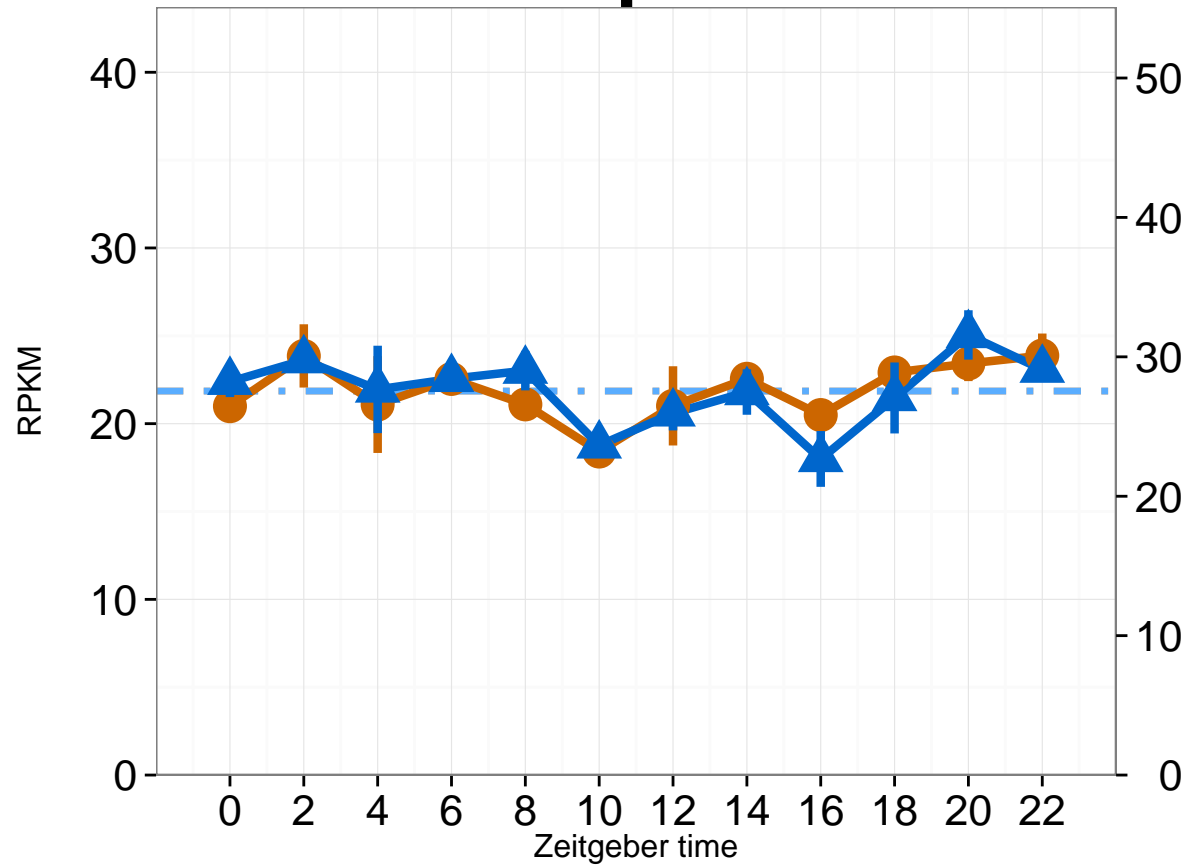

# Mrps2

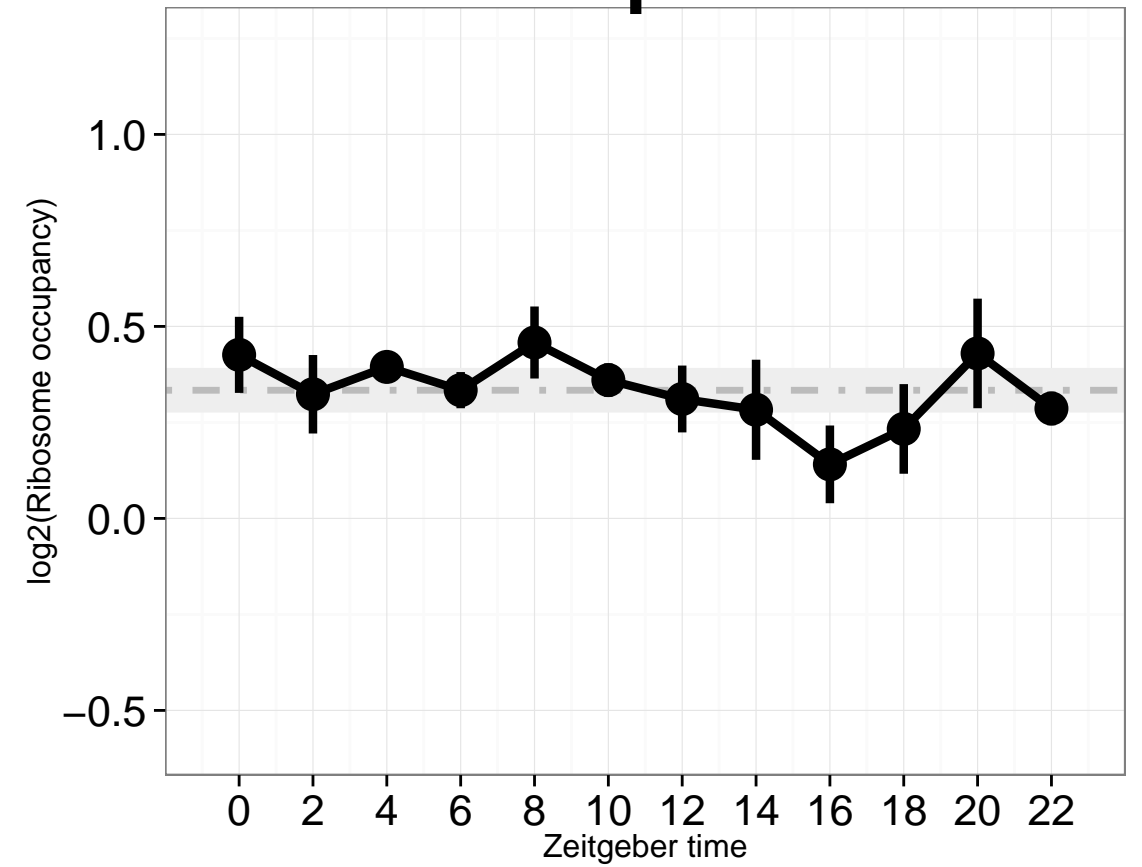

Supplement: Supplementary file 555 [file 1]

## Gpr135

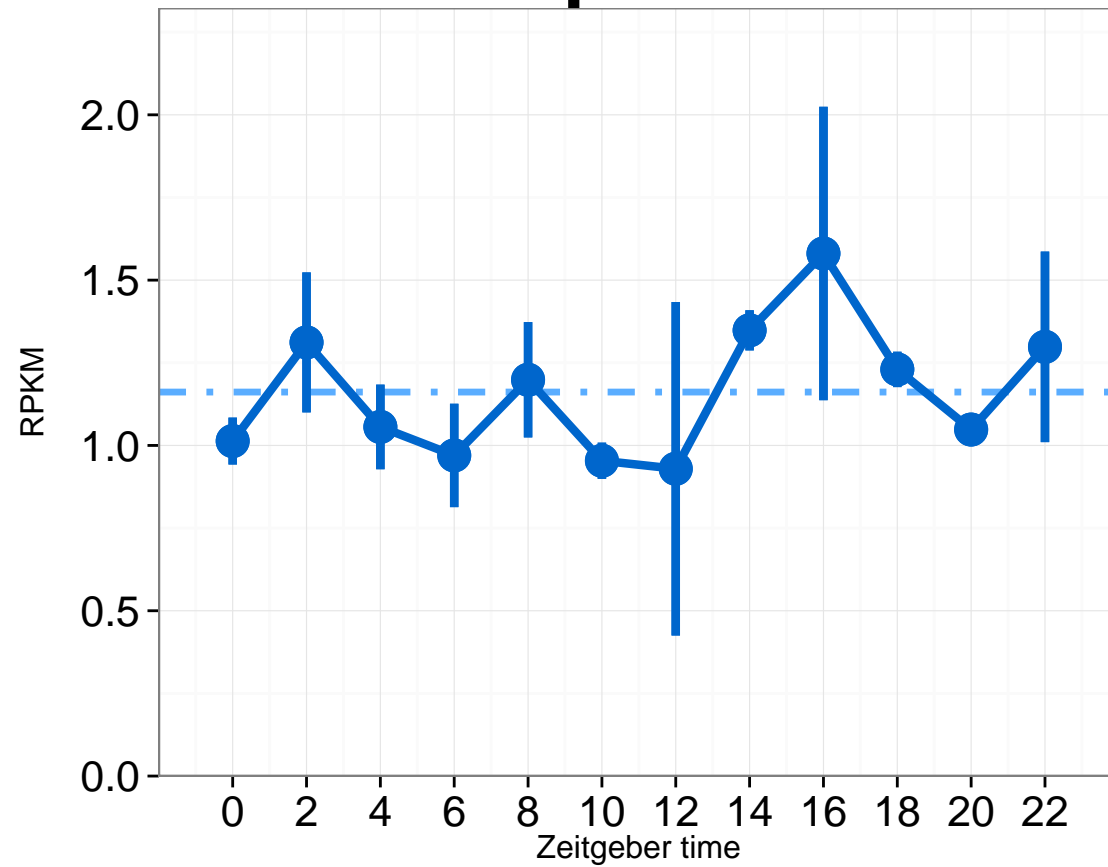

## Gpr135 log2(Ribosome occupancy)

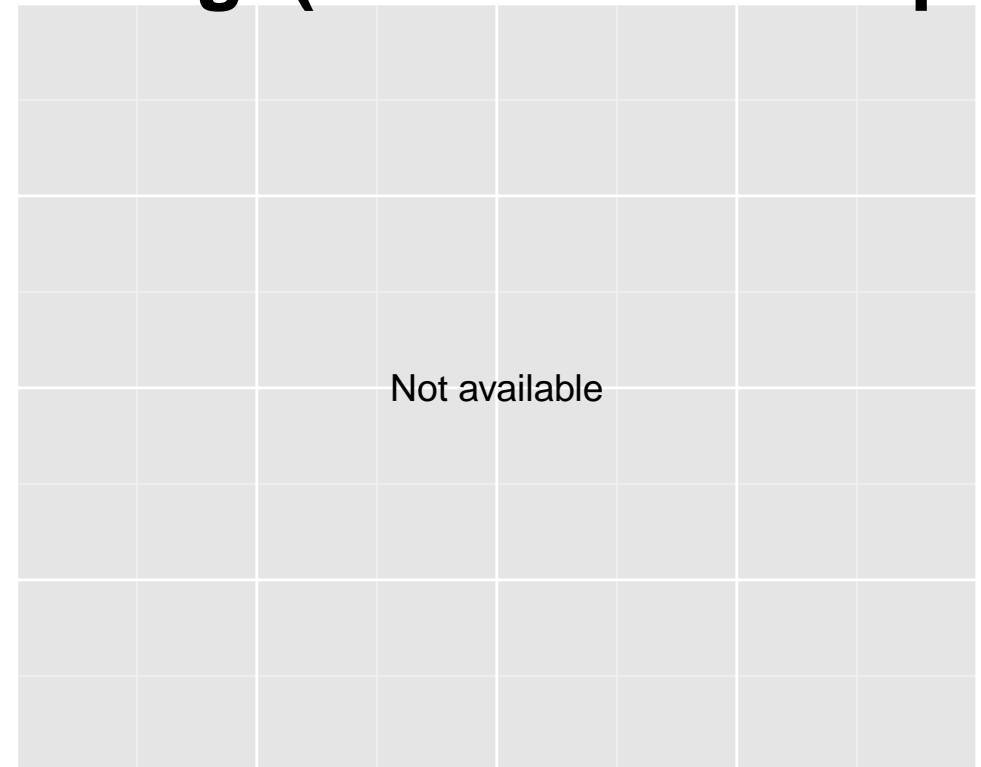

Supplement: Supplementary file 556 [file 1]

## Wls

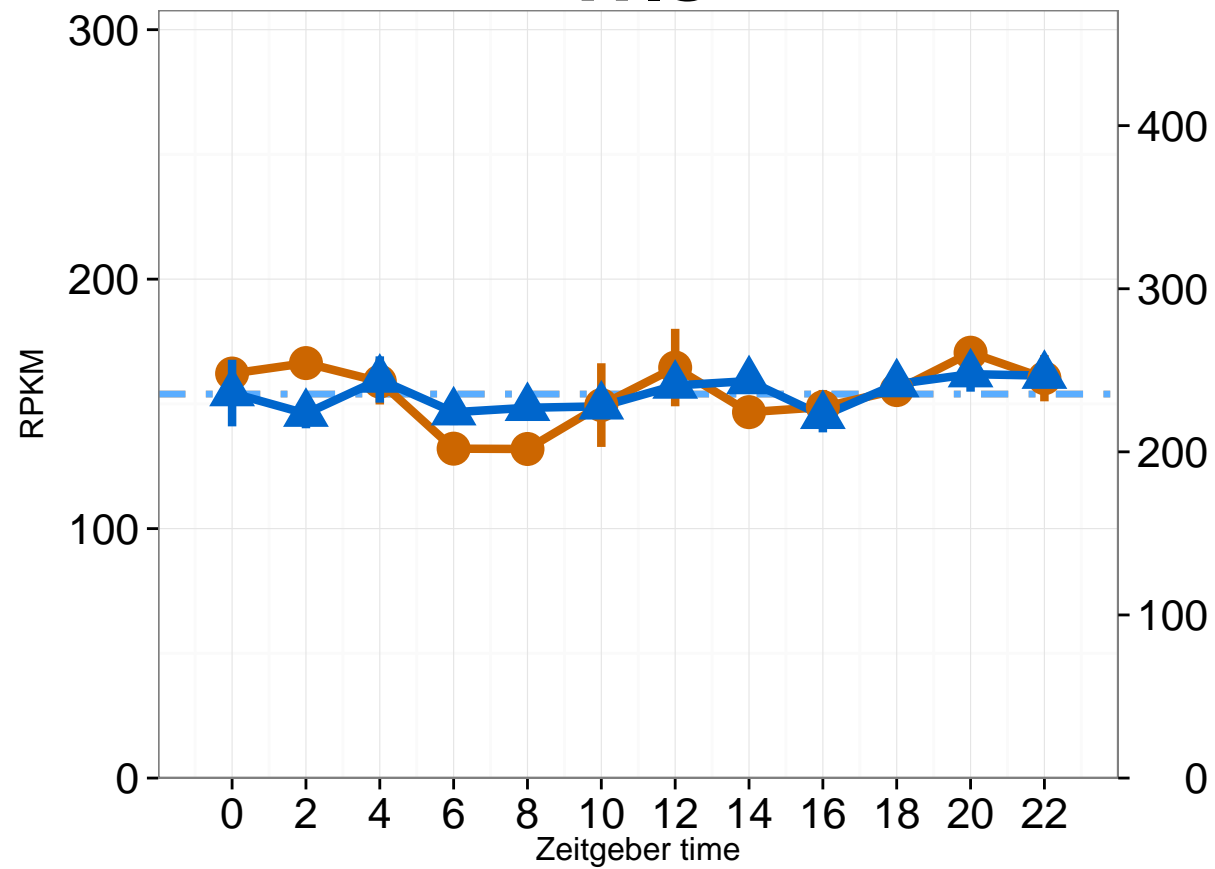

## Wls

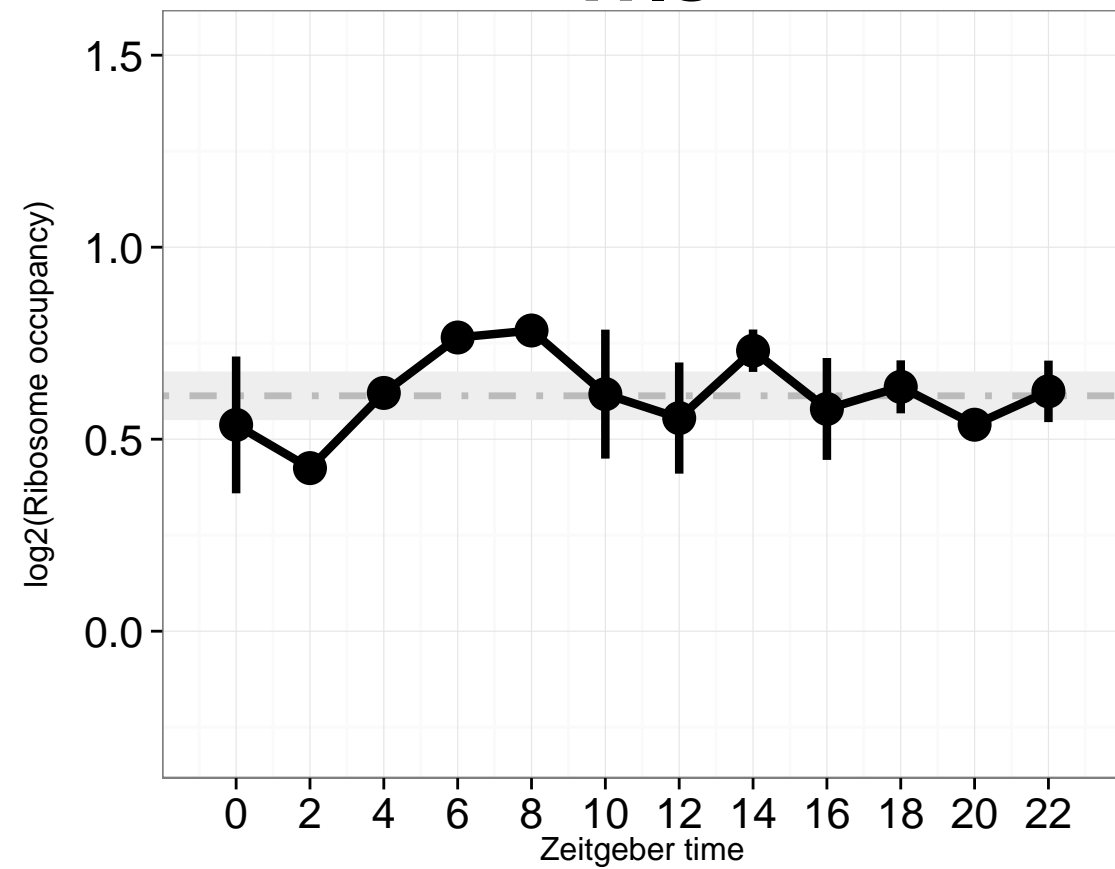

Supplement: Supplementary file 557 [file 1]

## Cbs

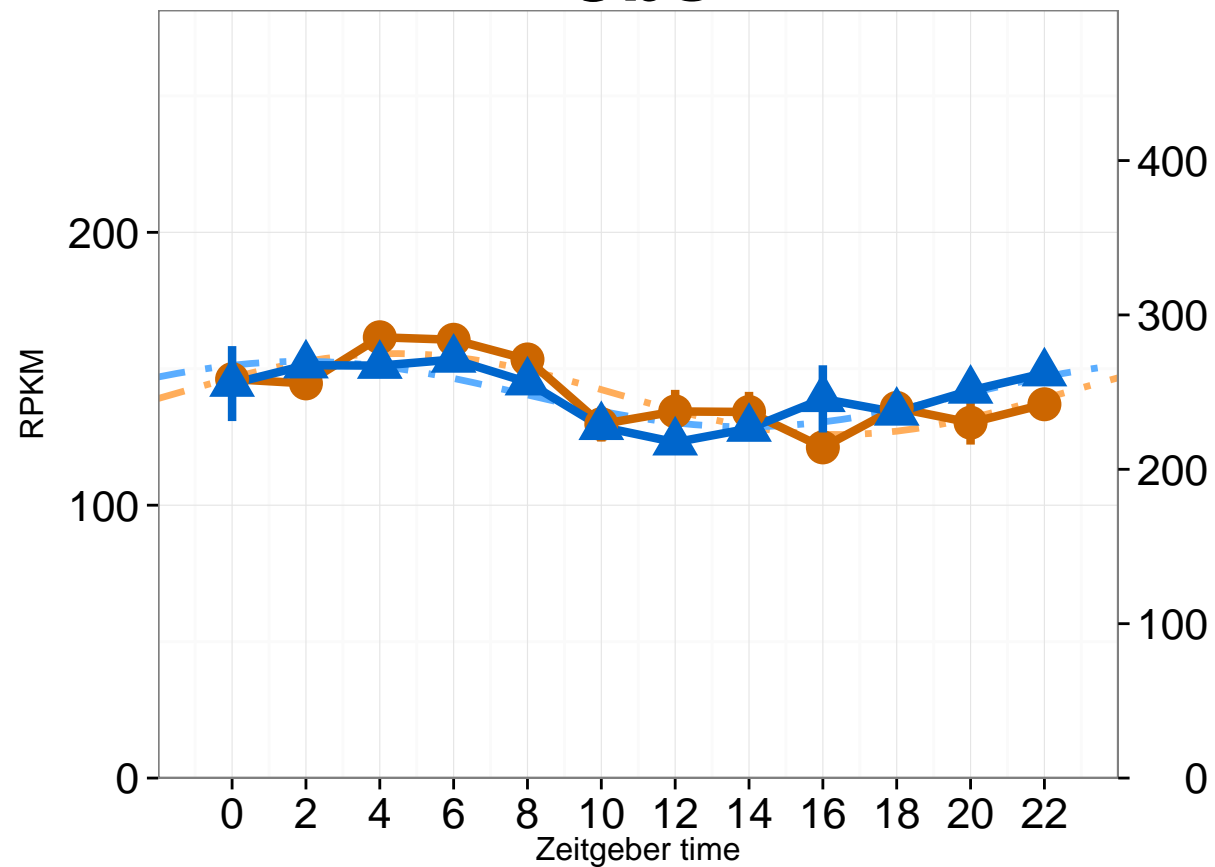

## Cbs

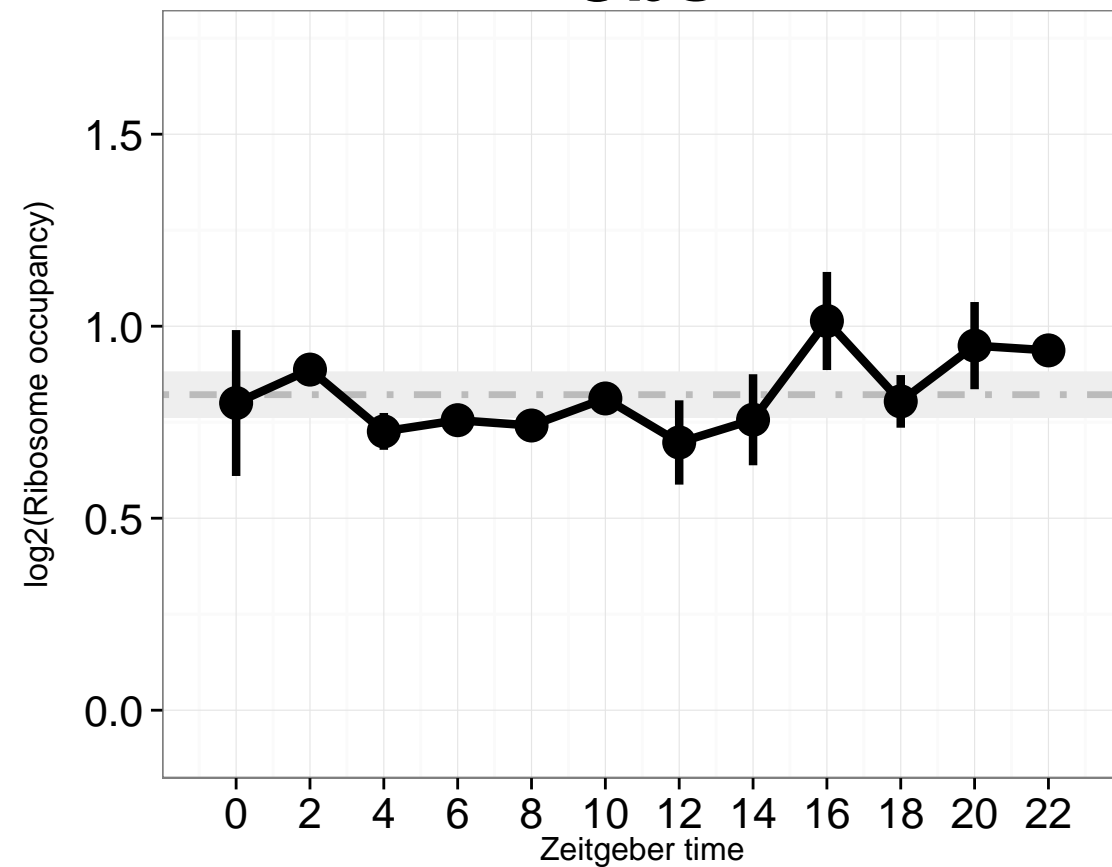

Supplement: Supplementary file 558 [file 1]

# Stx16

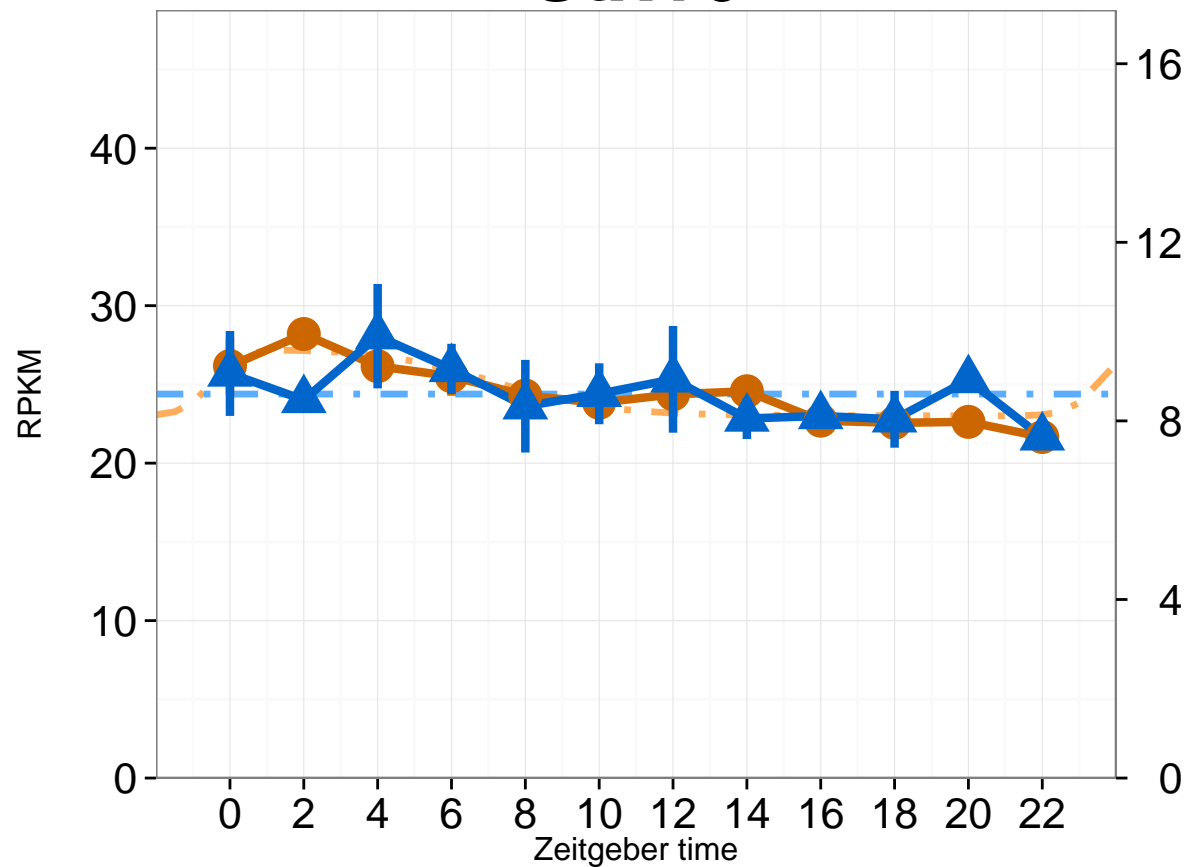

# Stx16

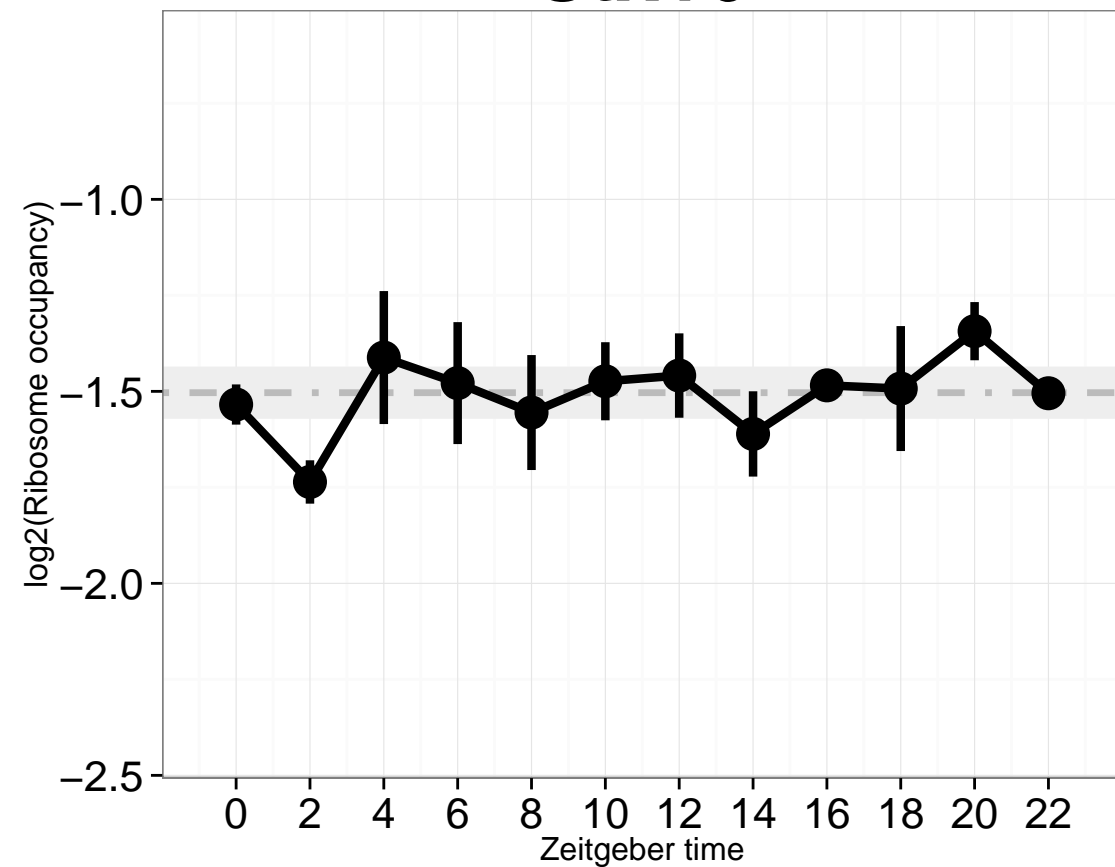

Supplement: Supplementary file 559 [file 1]

## Stat3

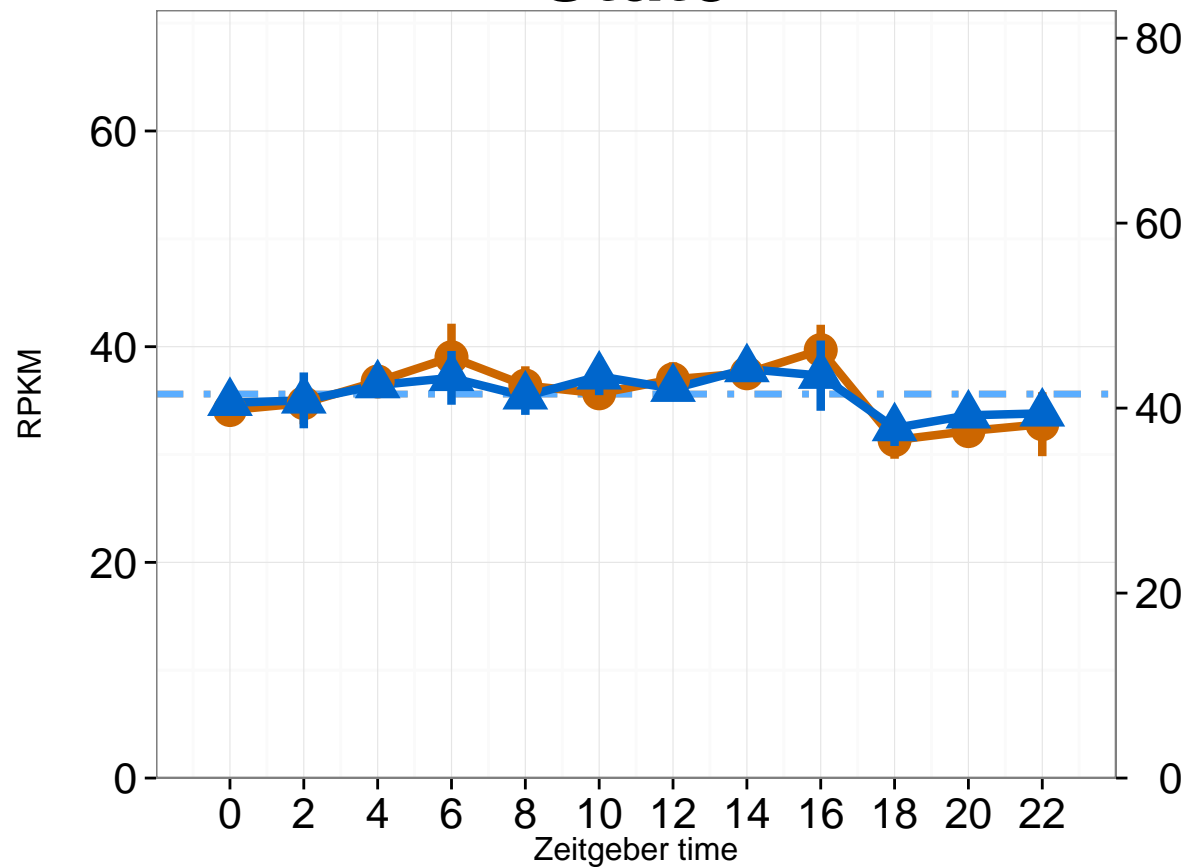

## Stat3

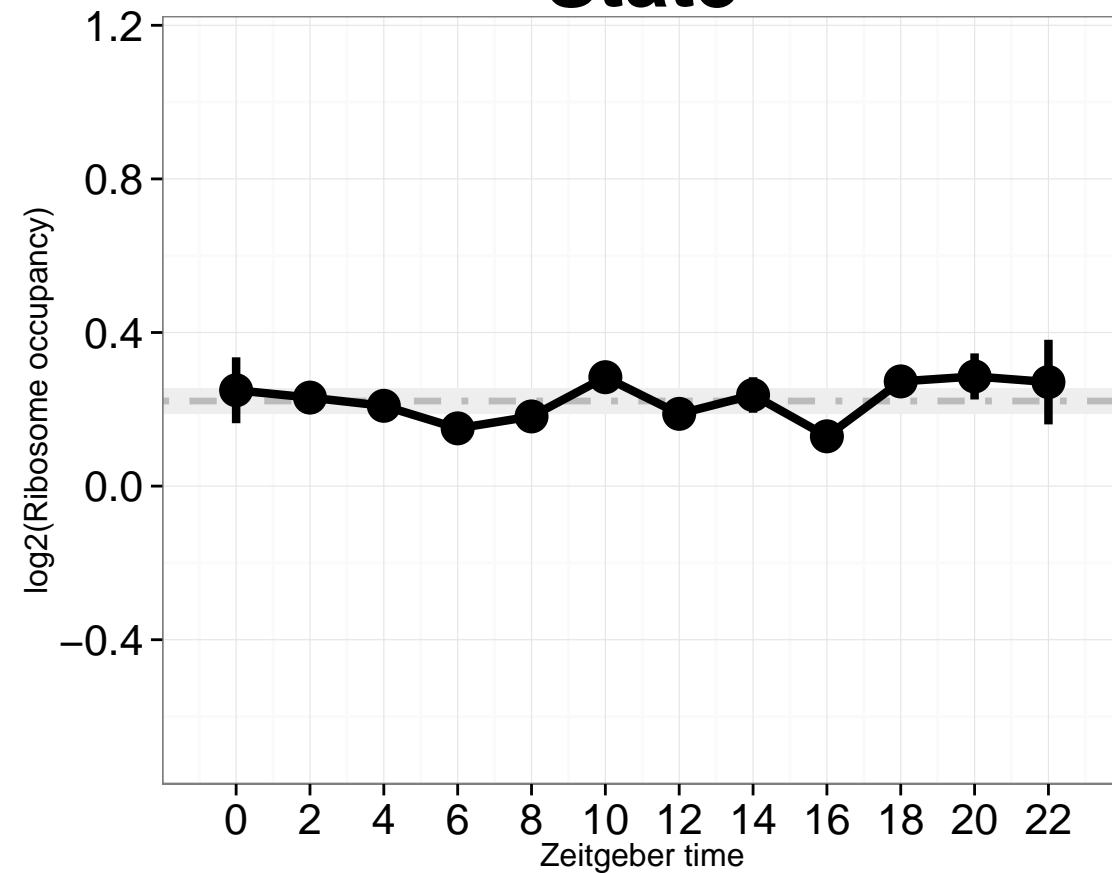

Supplement: Supplementary file 560 [file 1]

# Mmp17

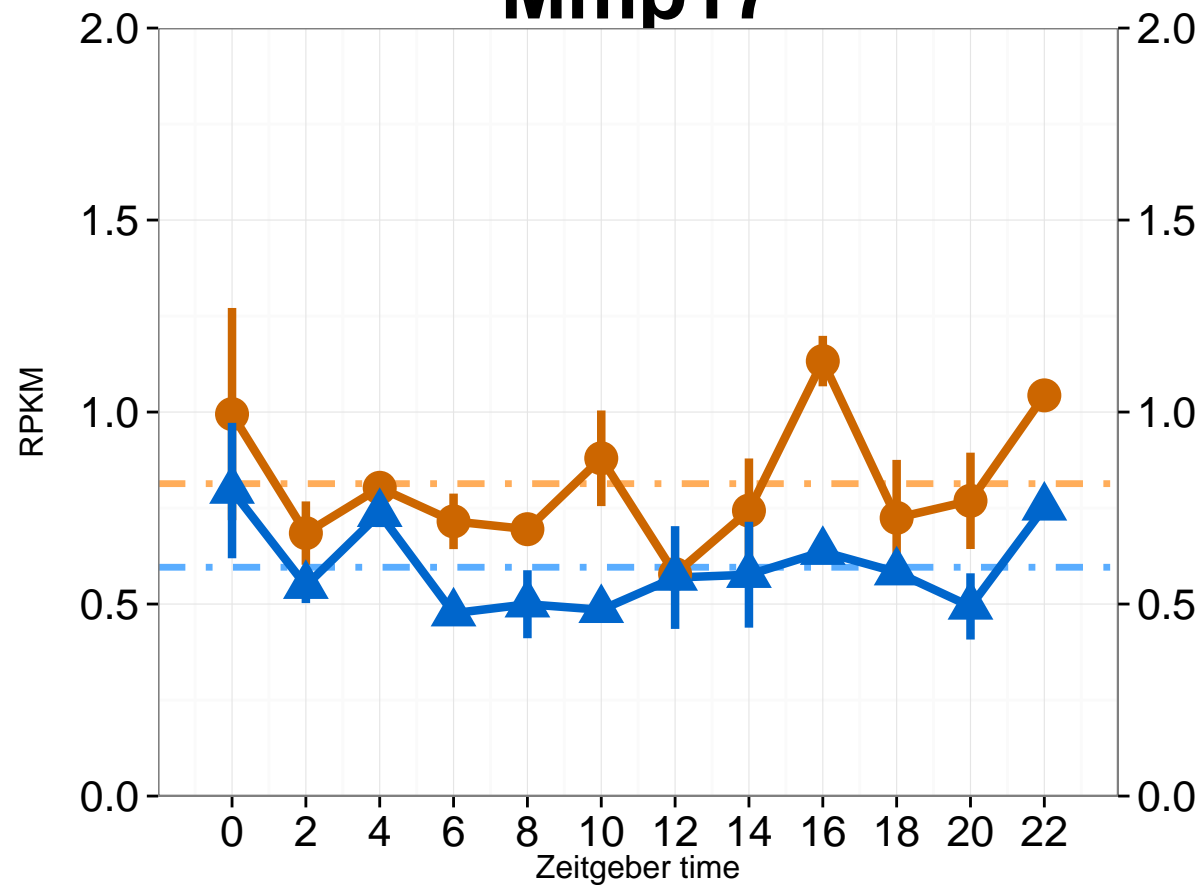

# Mmp17

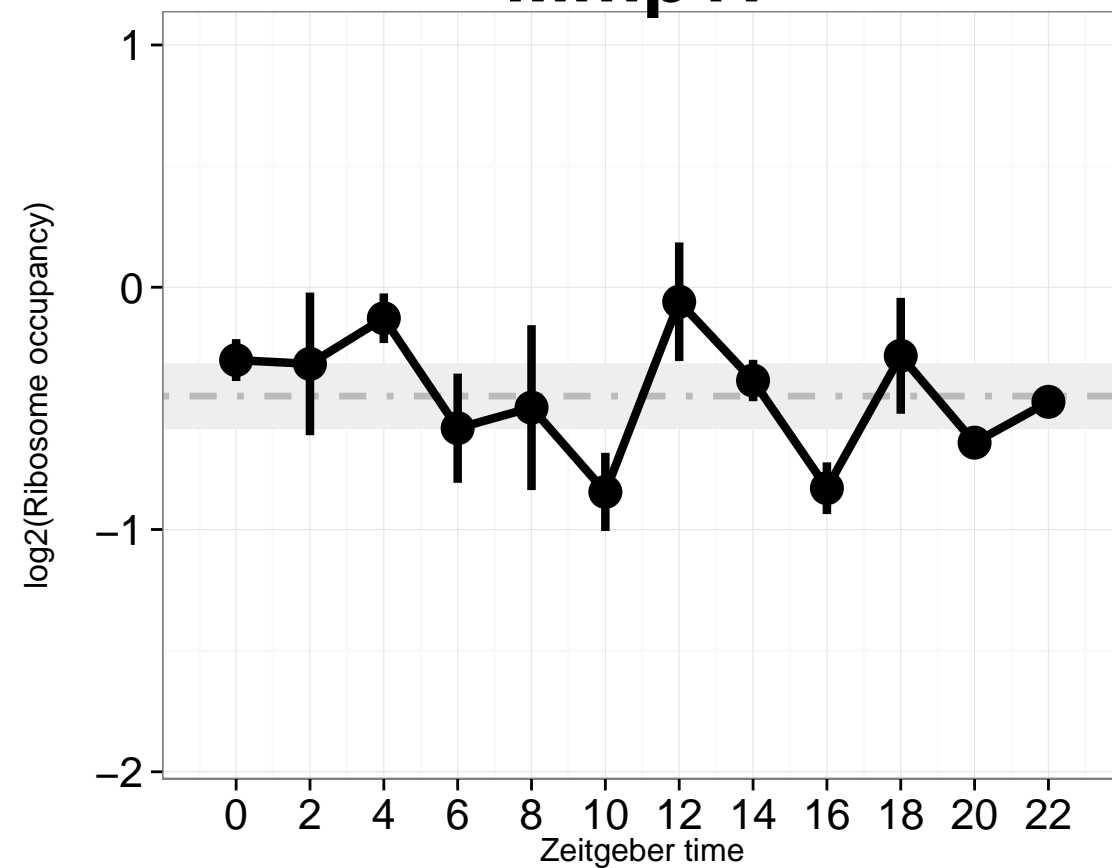

Supplement: Supplementary file 561 [file 1]

## Ubl3

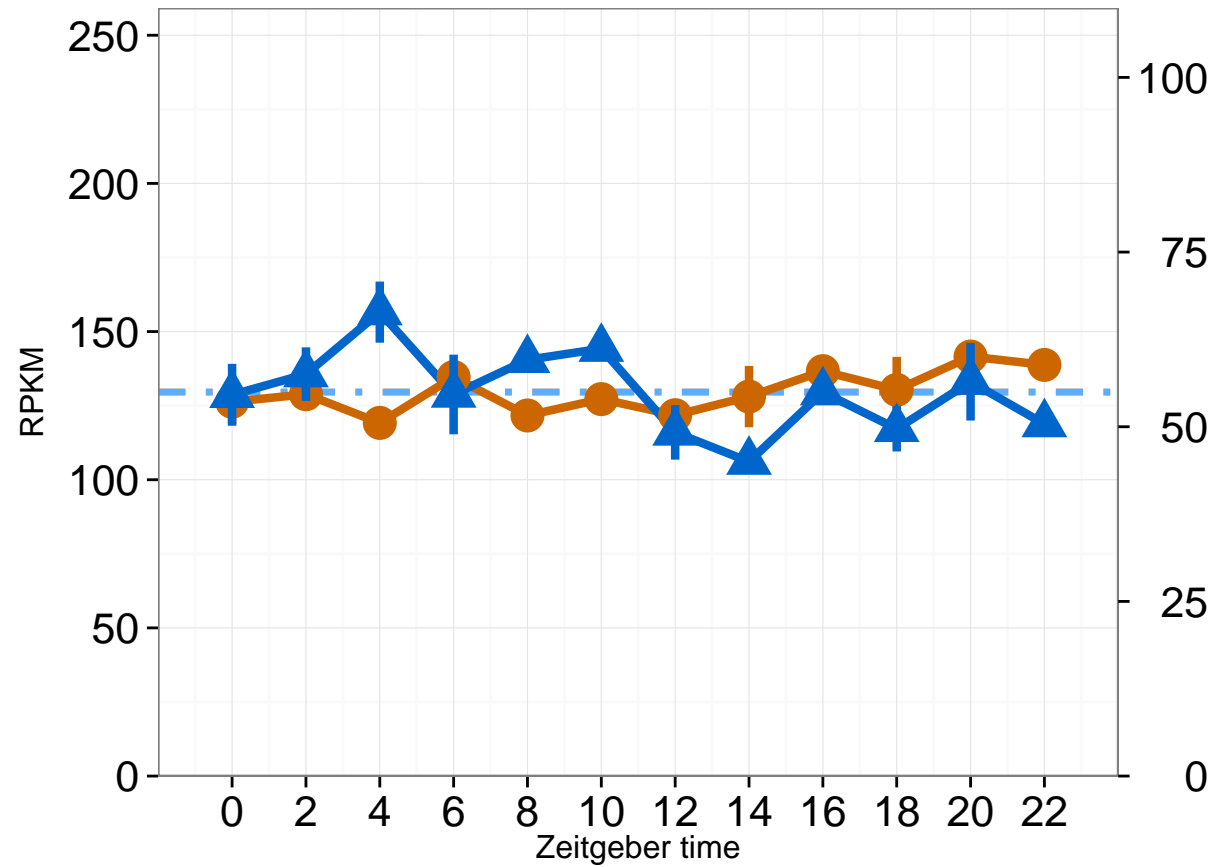

## Ubl3

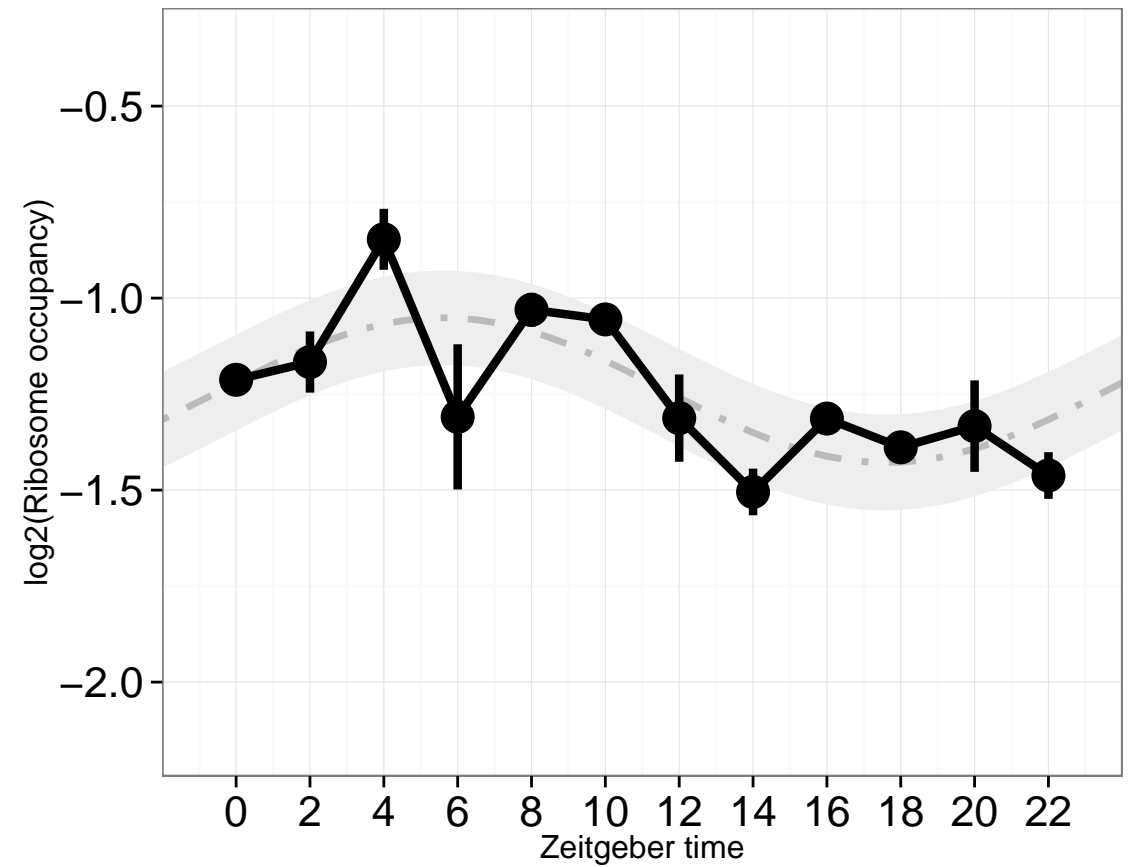

Supplement: Supplementary file 562 [file 1]

# Rtn4rl1

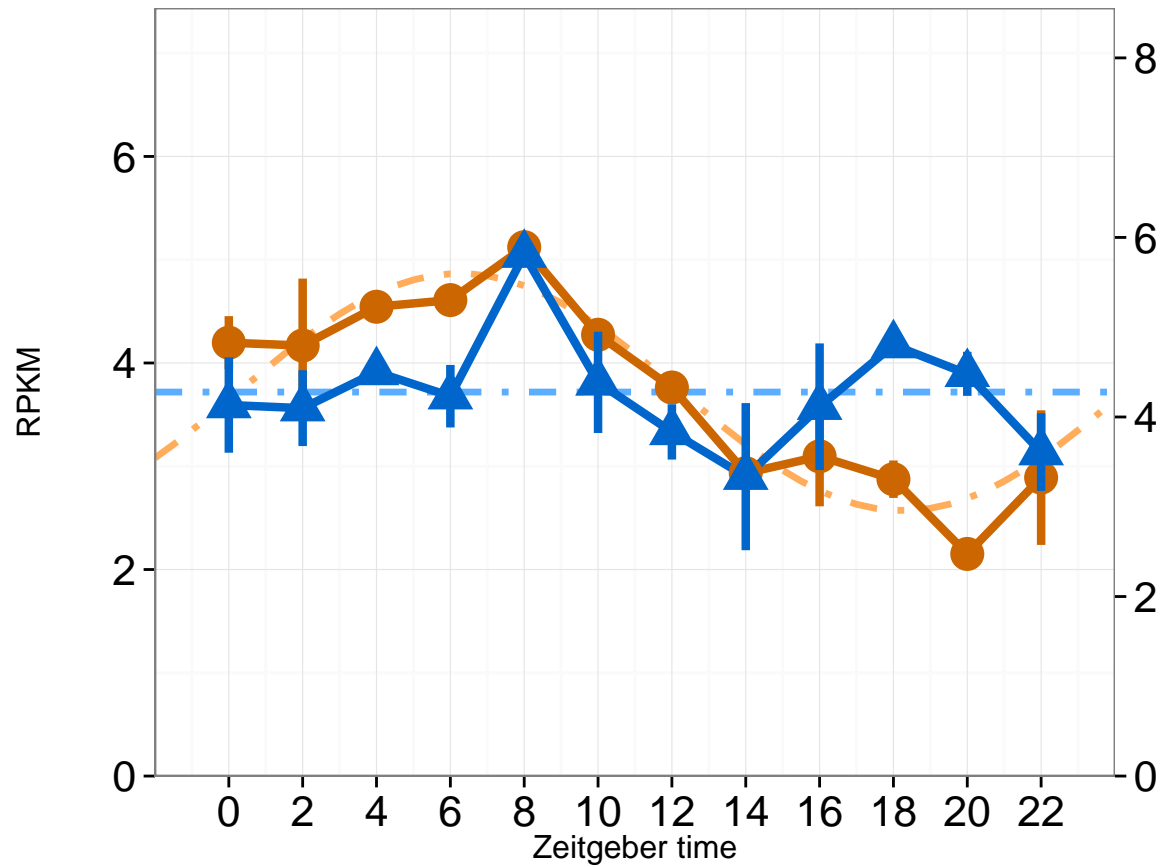

# Rtn4rl1

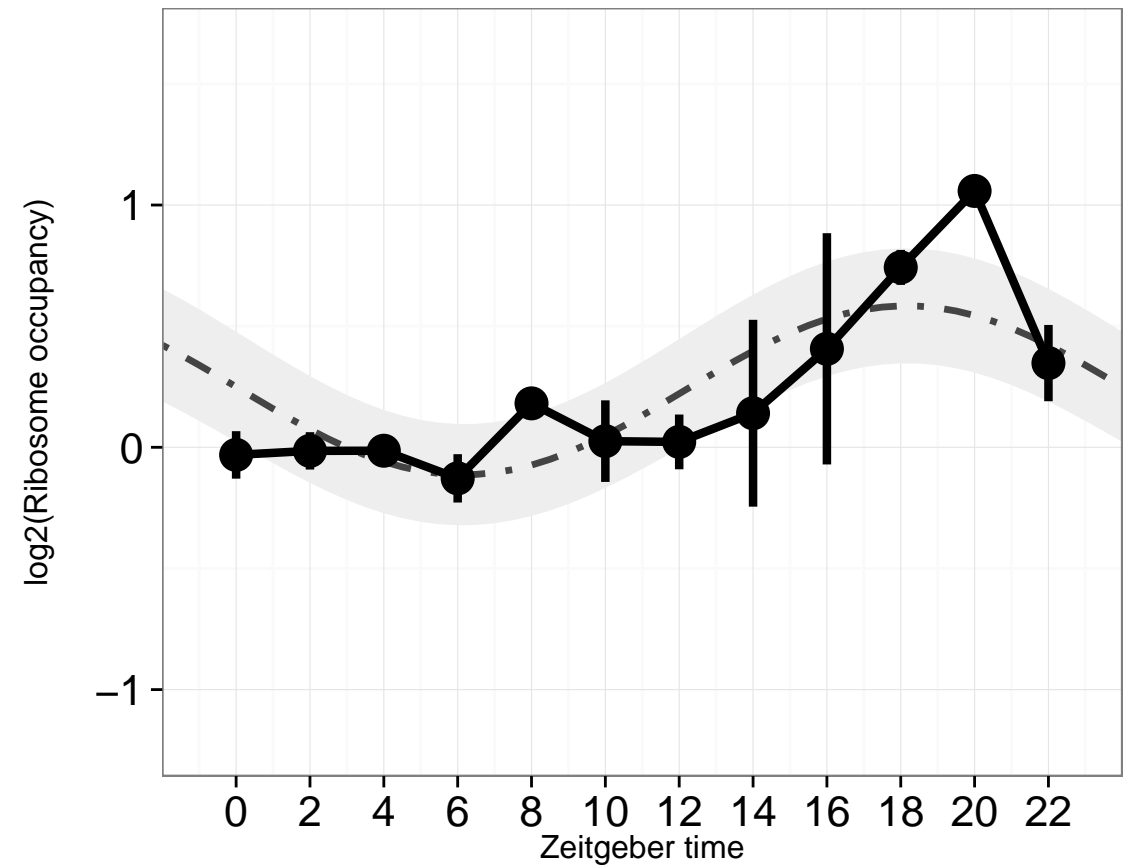

Supplement: Supplementary file 563 [file 1]

# Usmg5

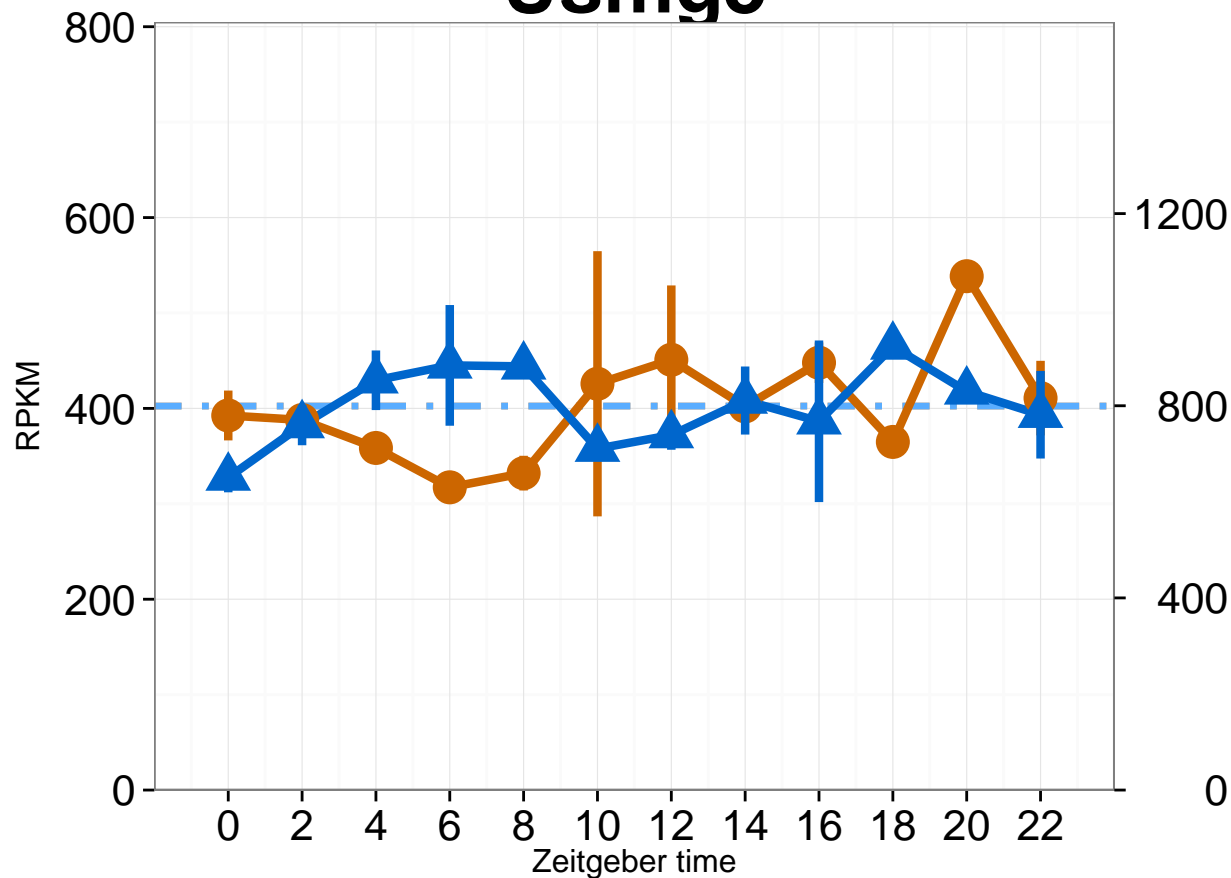

# Usmg5

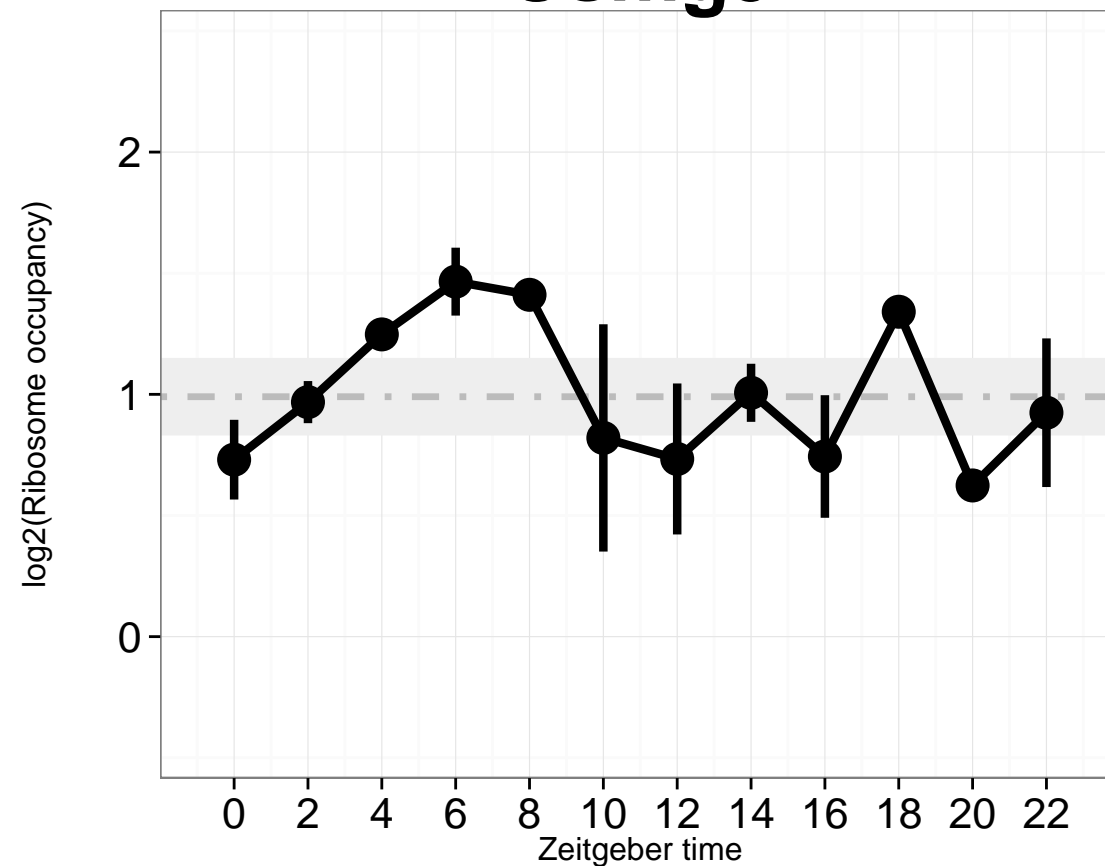

Supplement: Supplementary file 564 [file 1]

**Capsl TR**

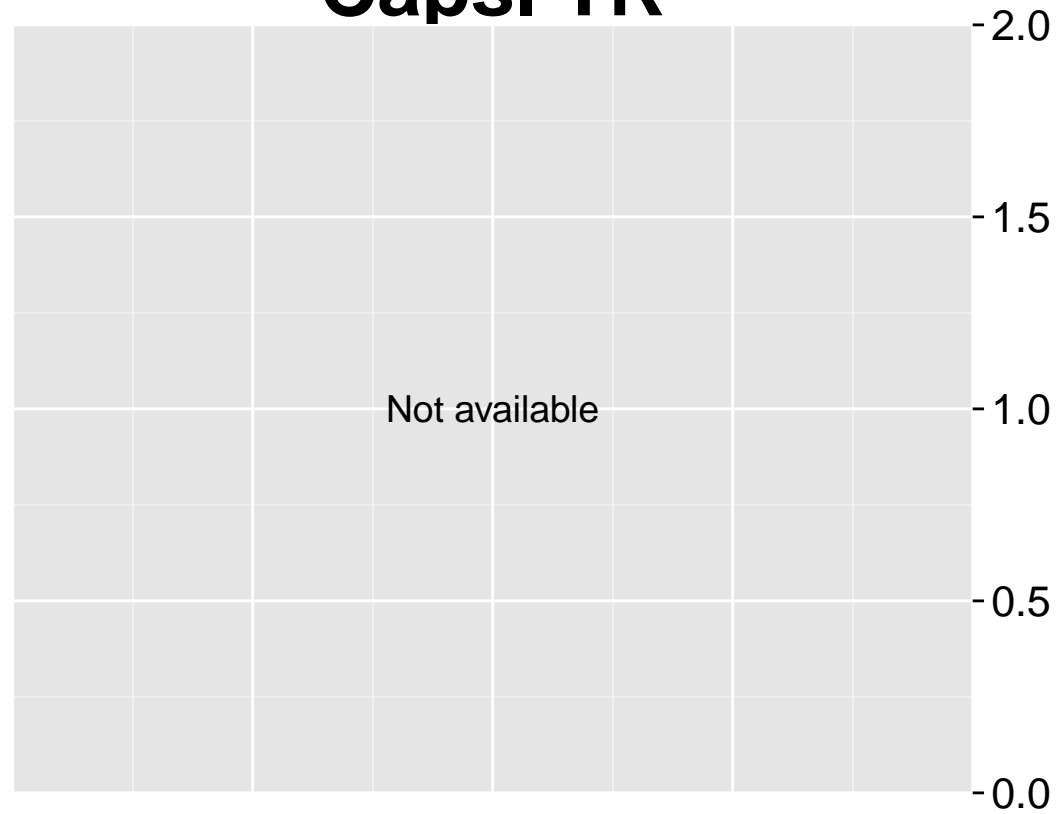

**Capsl log2(Ribosome occupancy)**

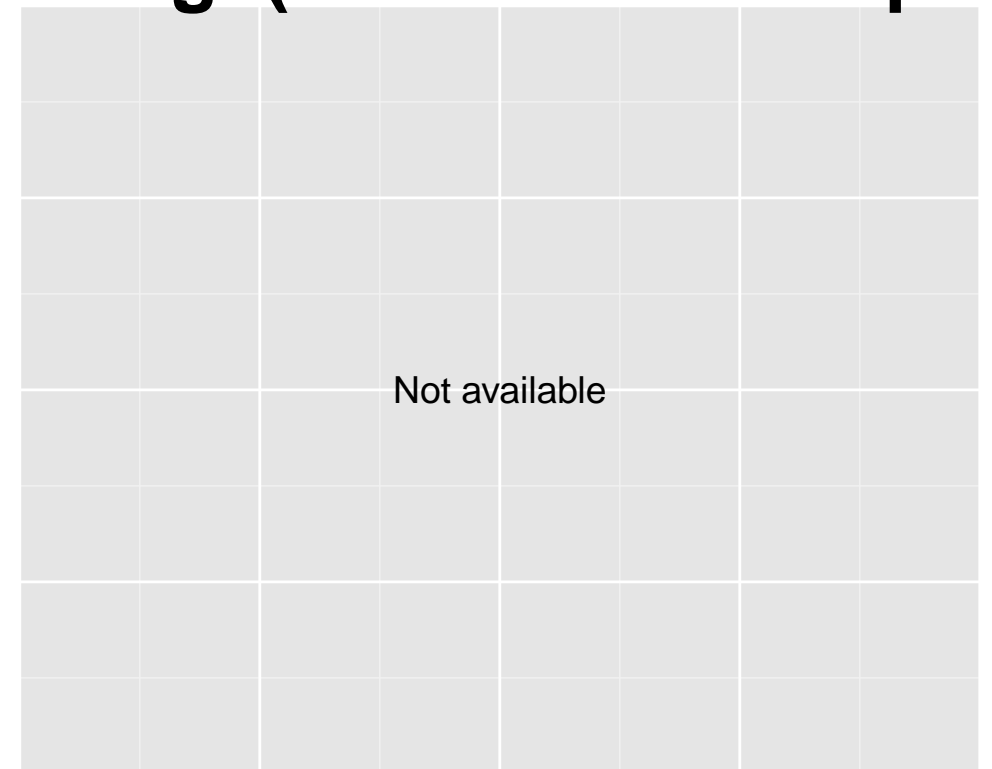

Supplement: Supplementary file 565 [file 1]

# Zfp341

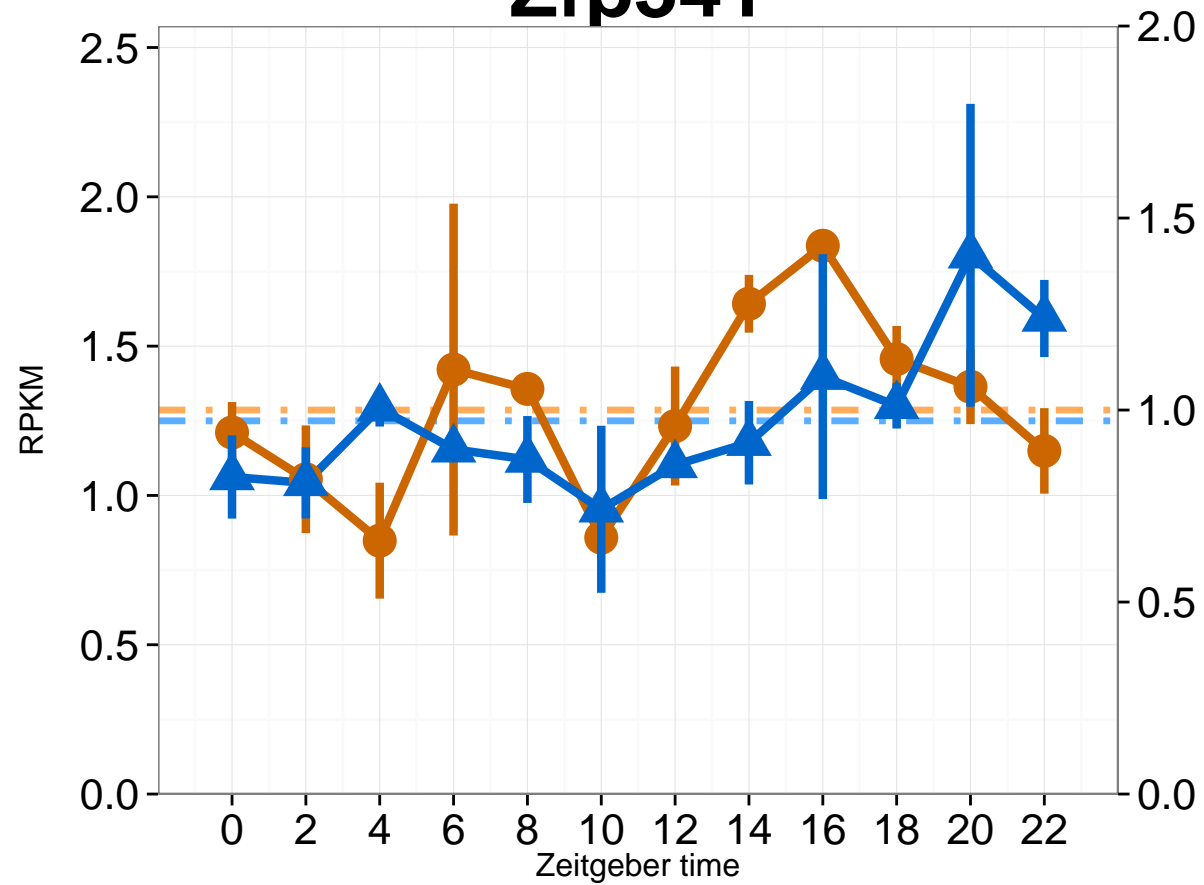

# Zfp341

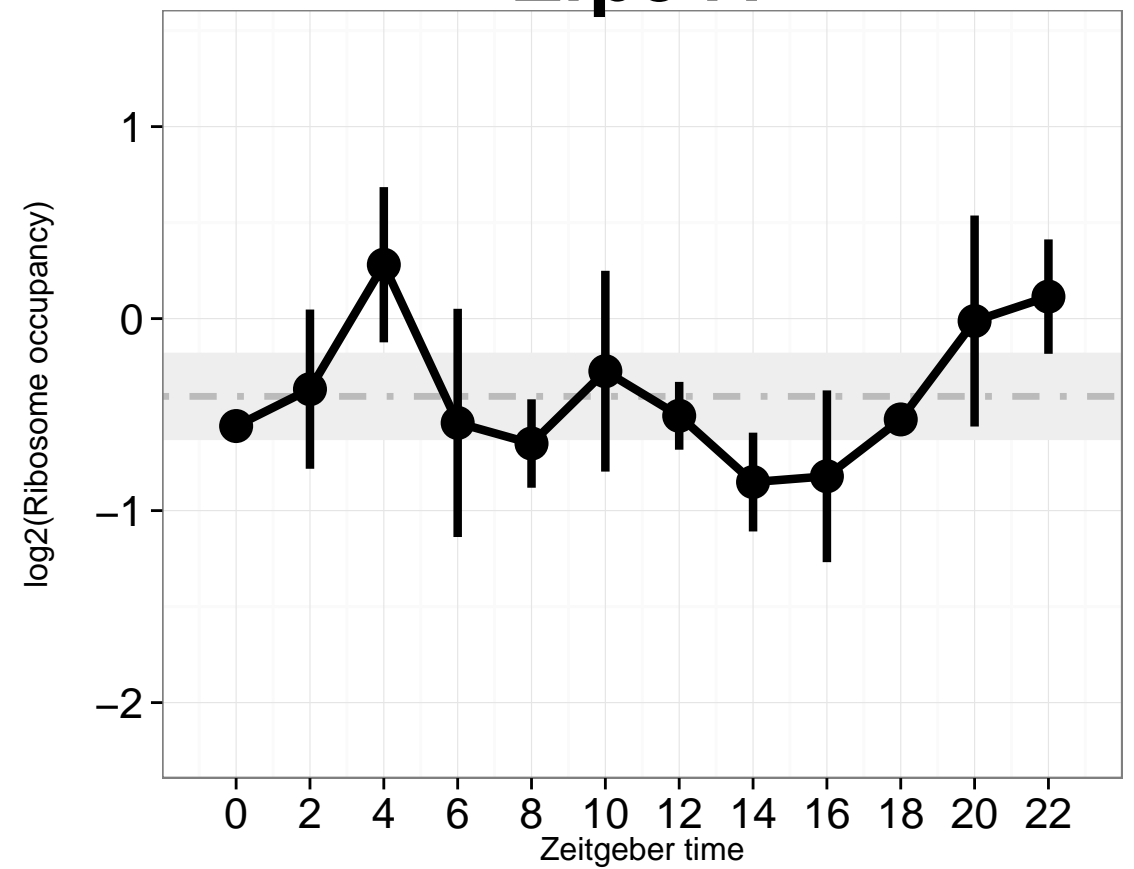

Supplement: Supplementary file 566 [file 1]

## Phf6

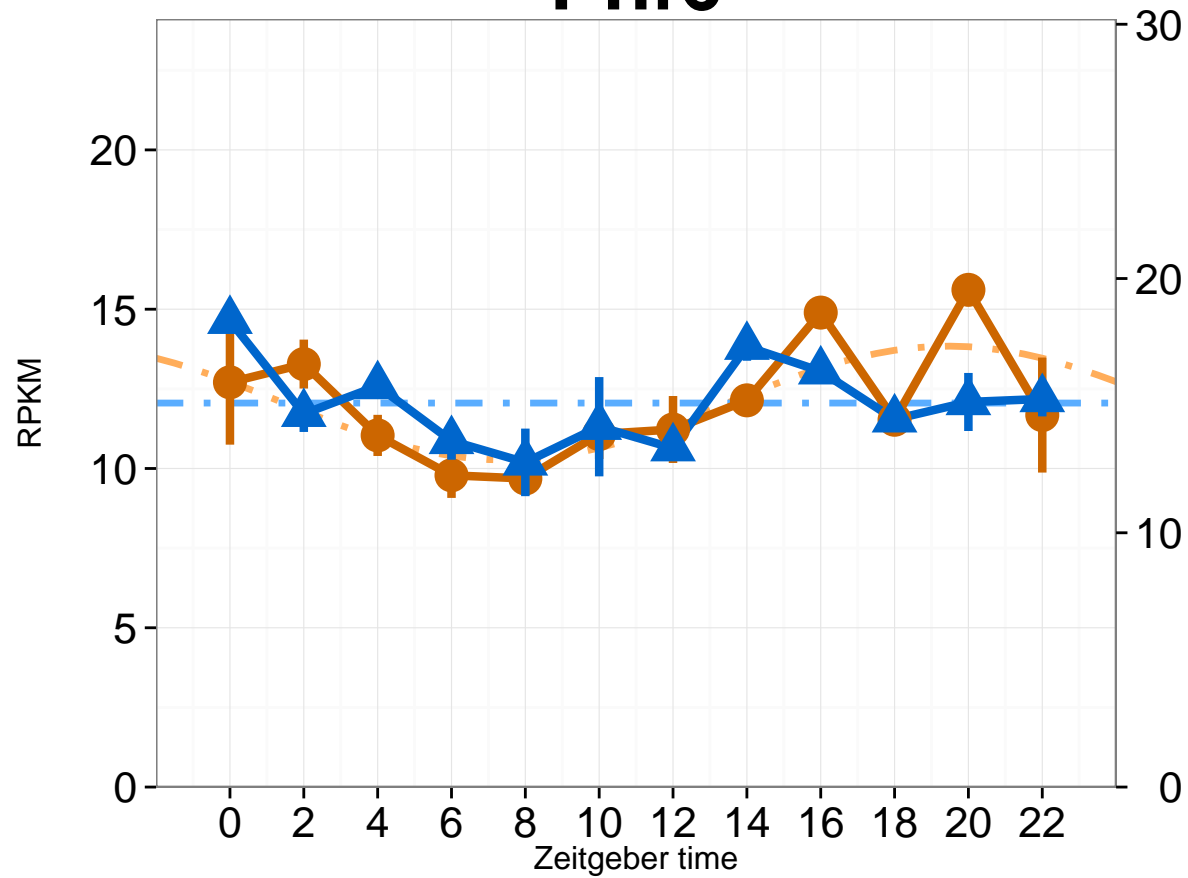

## Phf6

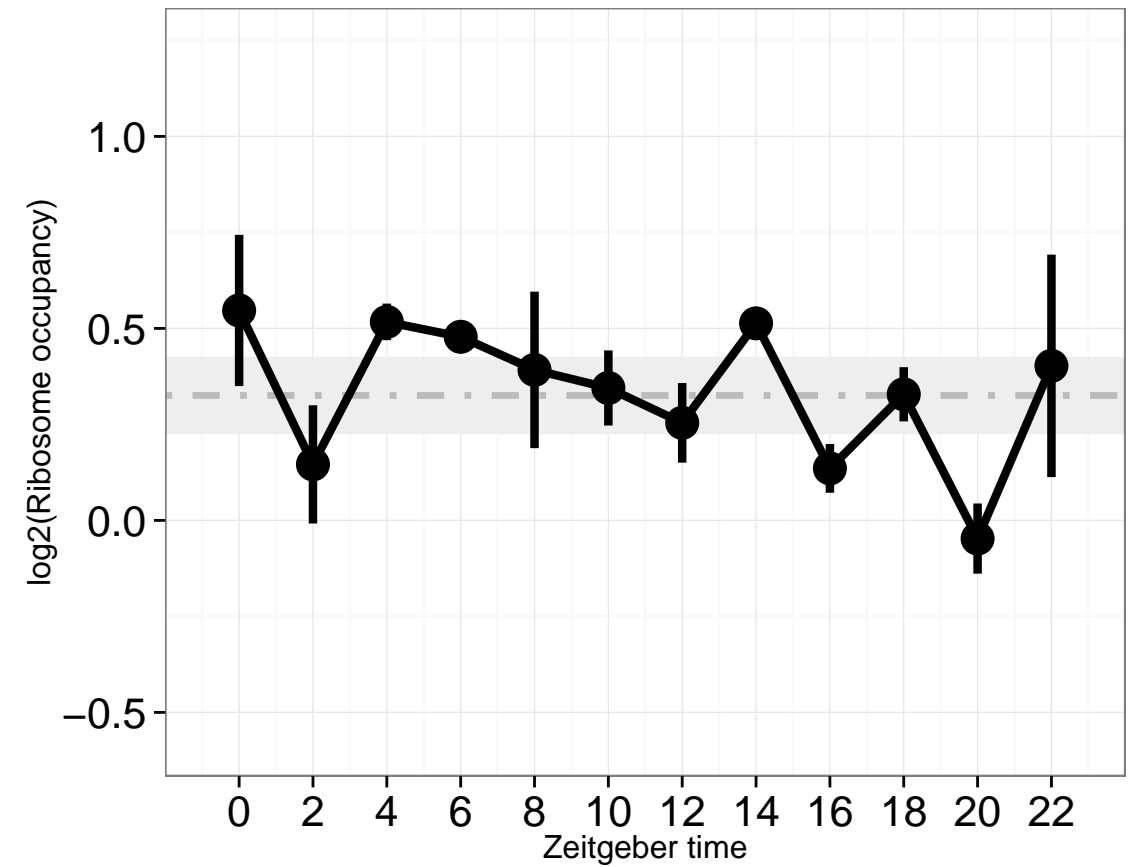

Supplement: Supplementary file 567 [file 1]

# Mapk11

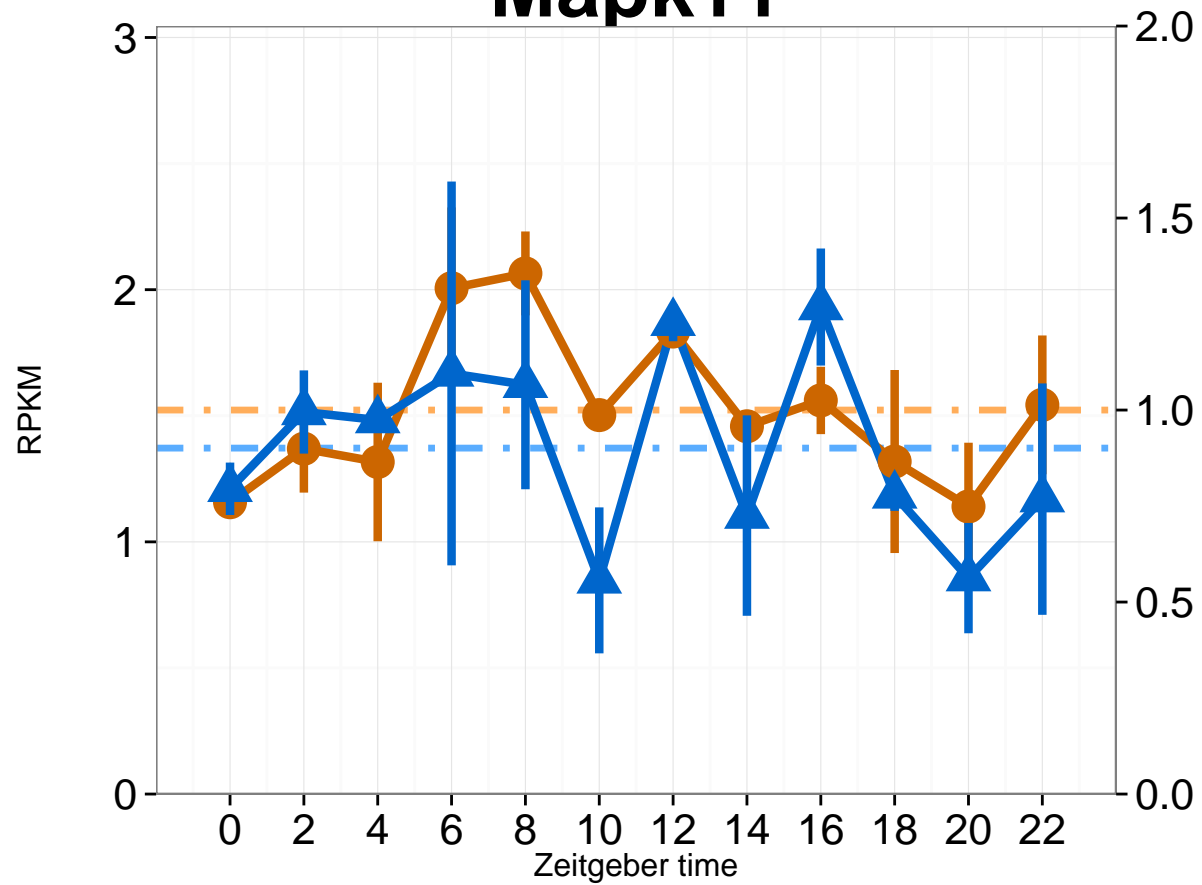

# Mapk11

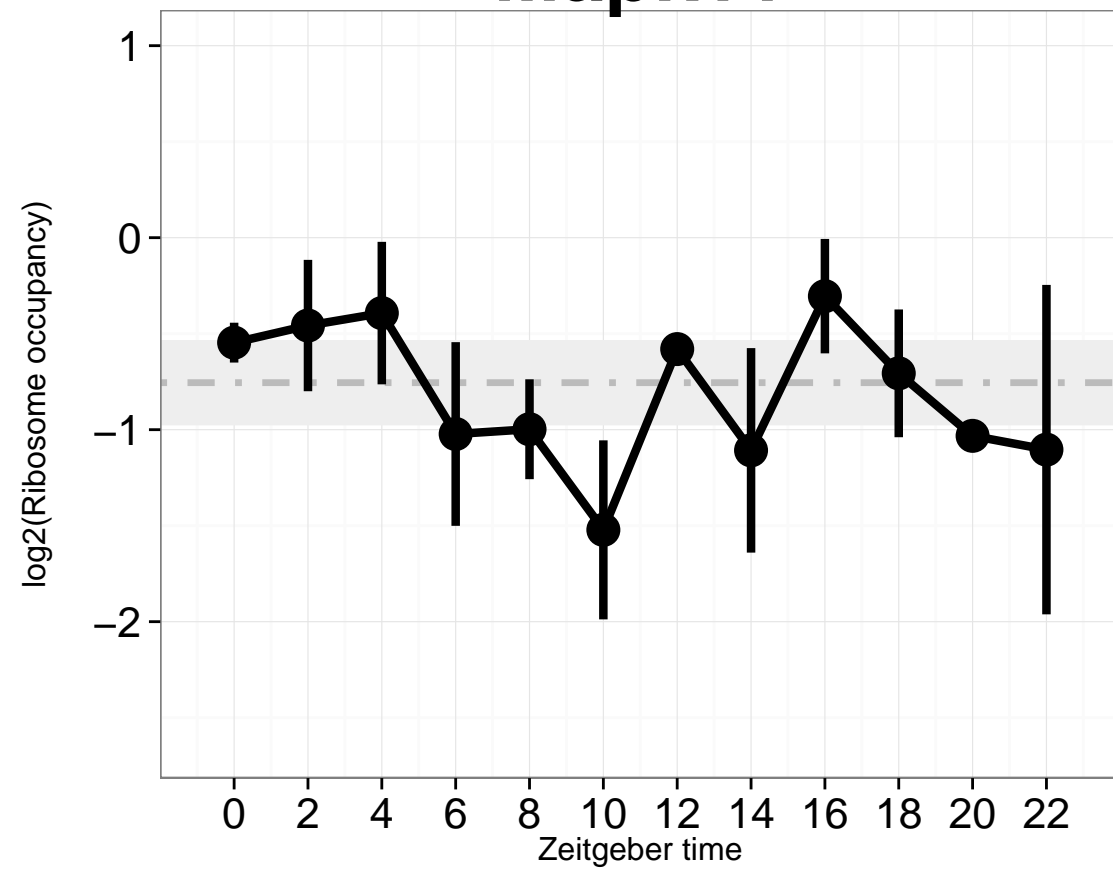

Supplement: Supplementary file 568 [file 1]

## Ubxn8

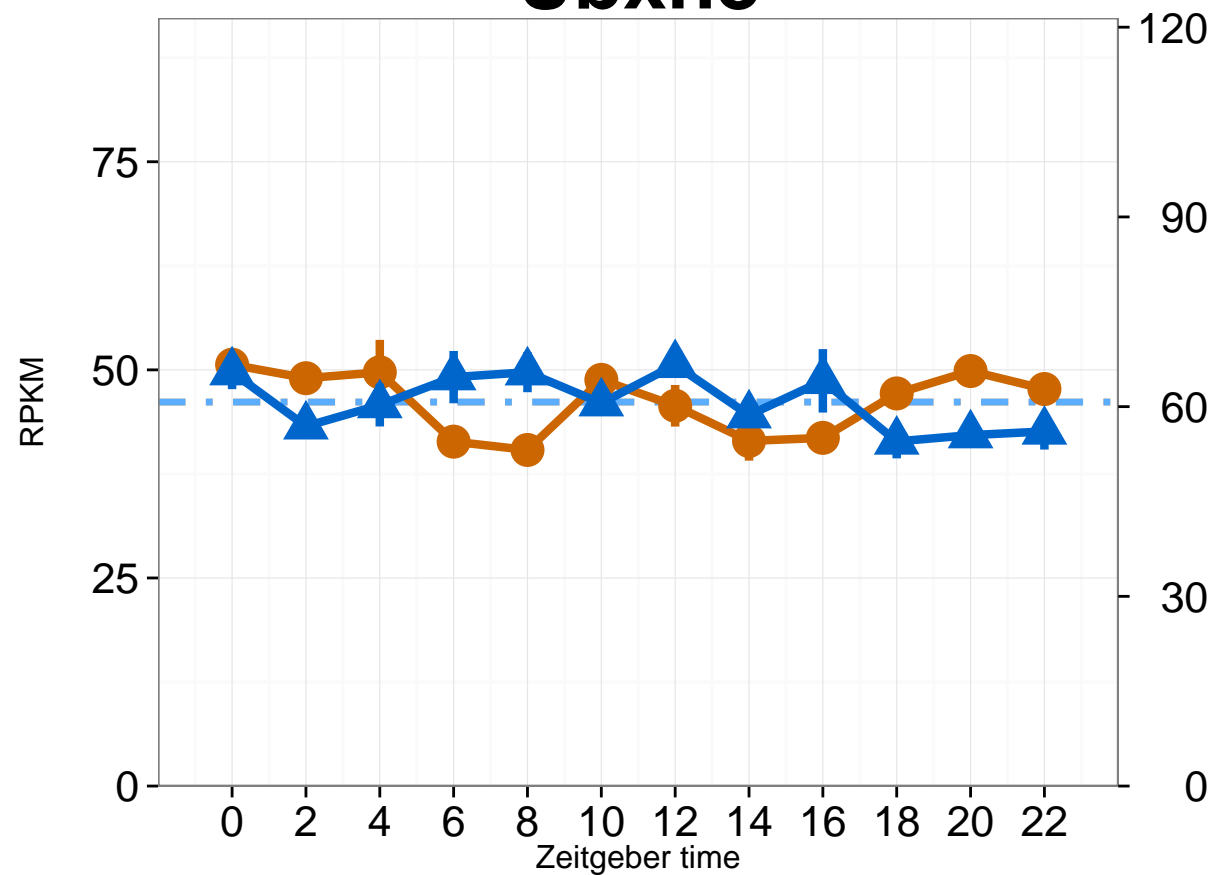

## Ubxn8

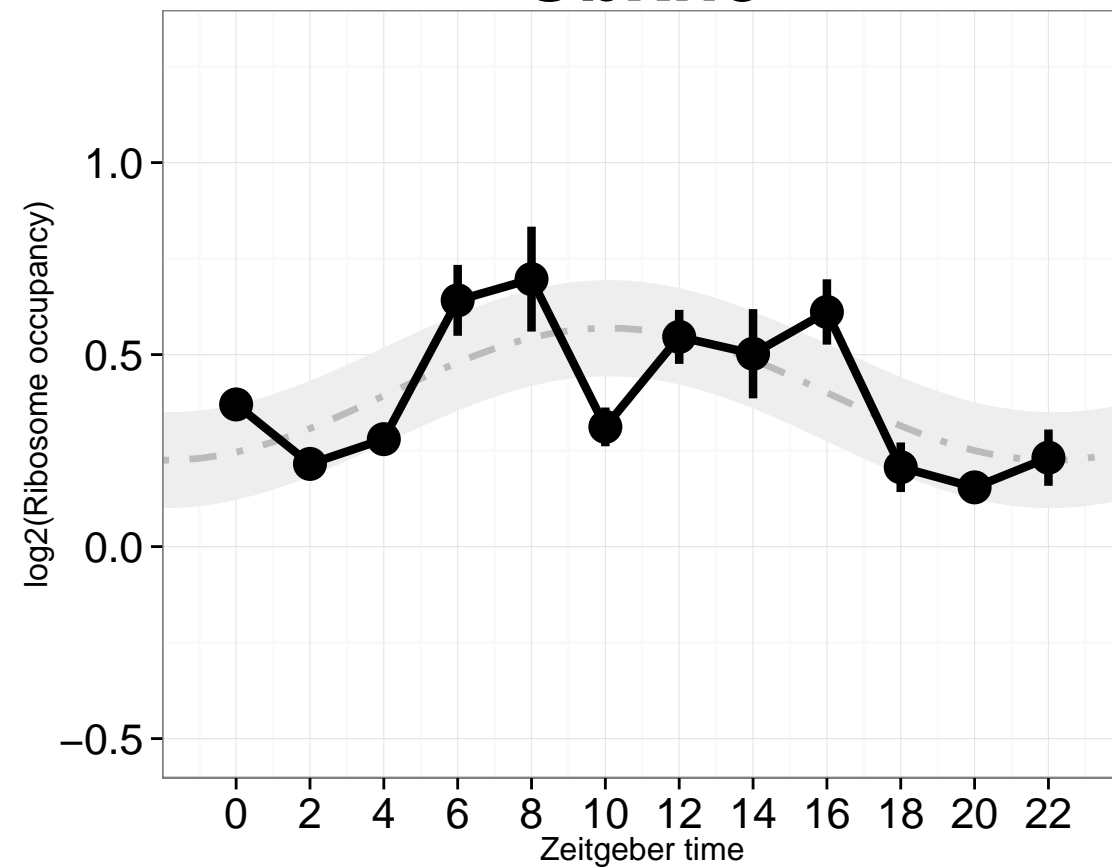

Supplement: Supplementary file 569 [file 1]

# Wdr5b

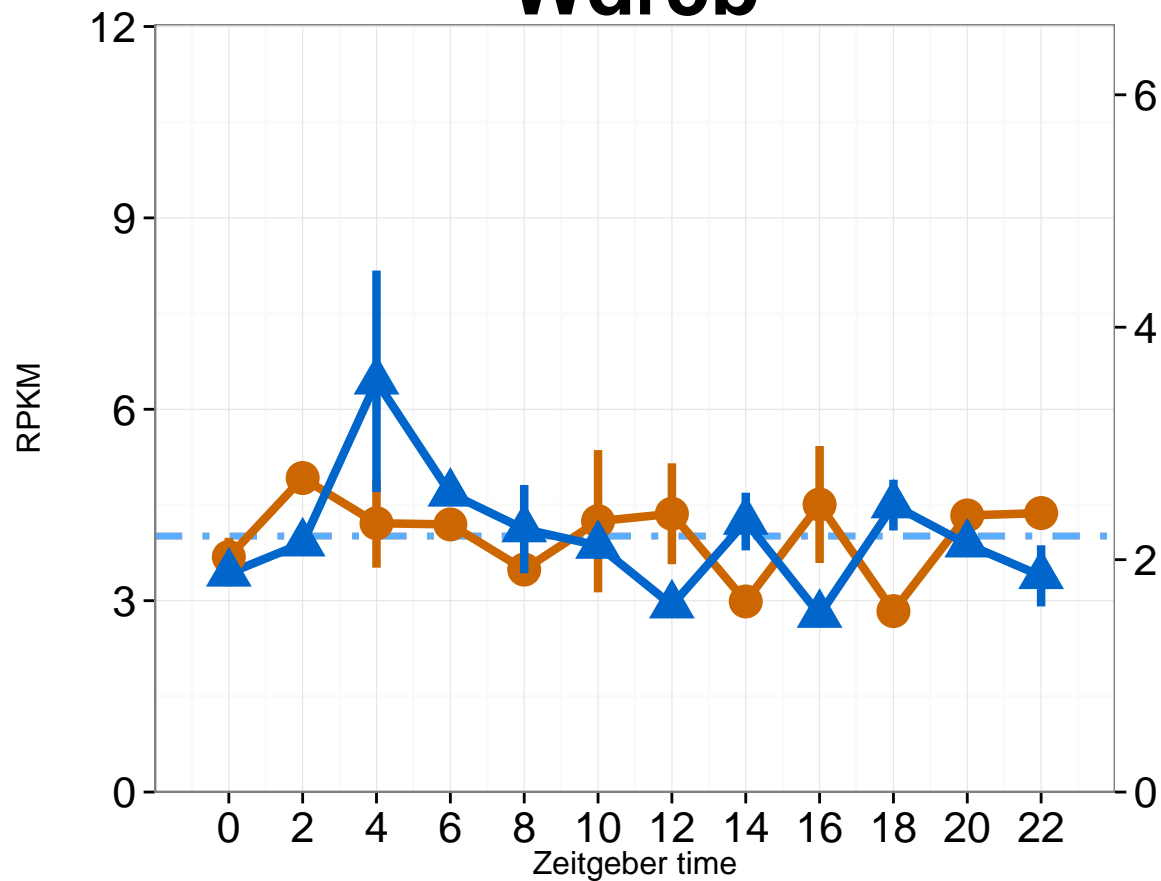

# Wdr5b

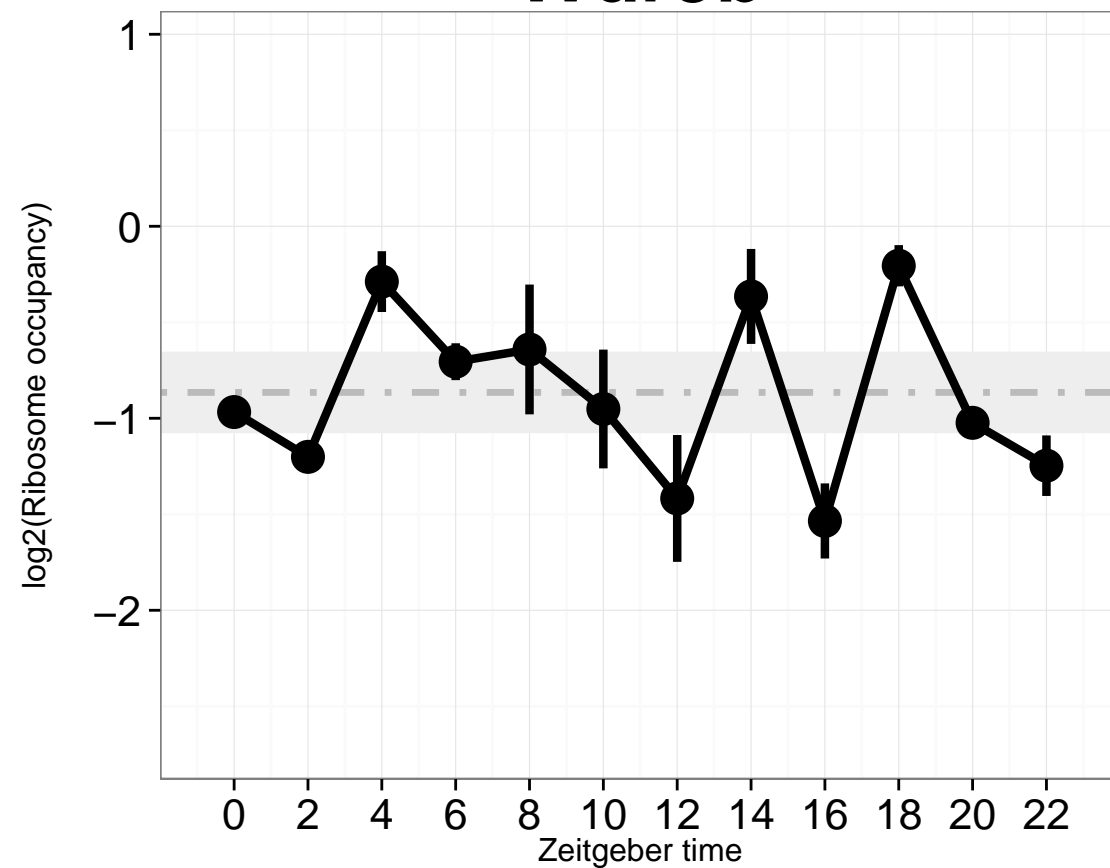

Supplement: Supplementary file 570 [file 1]

## Rapgef5

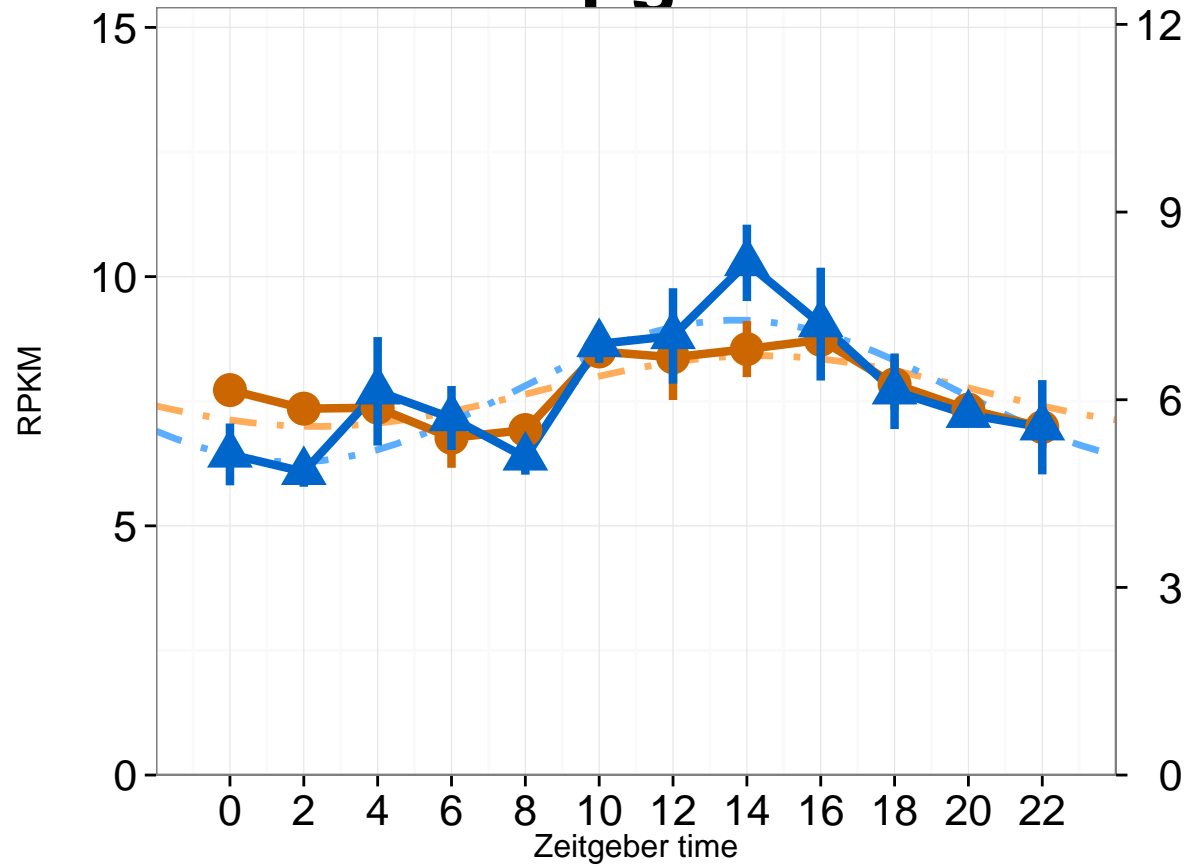

## Rapgef5

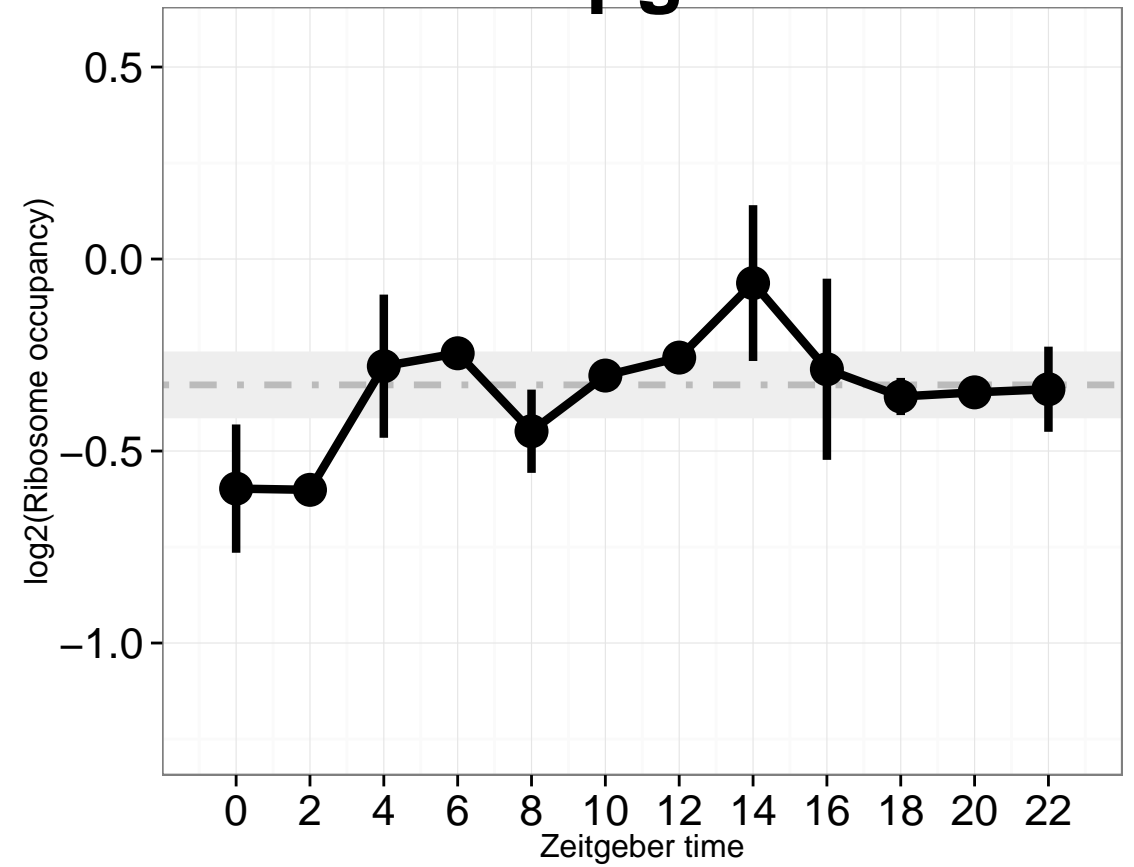

Supplement: Supplementary file 571 [file 1]

# Tsc22d3

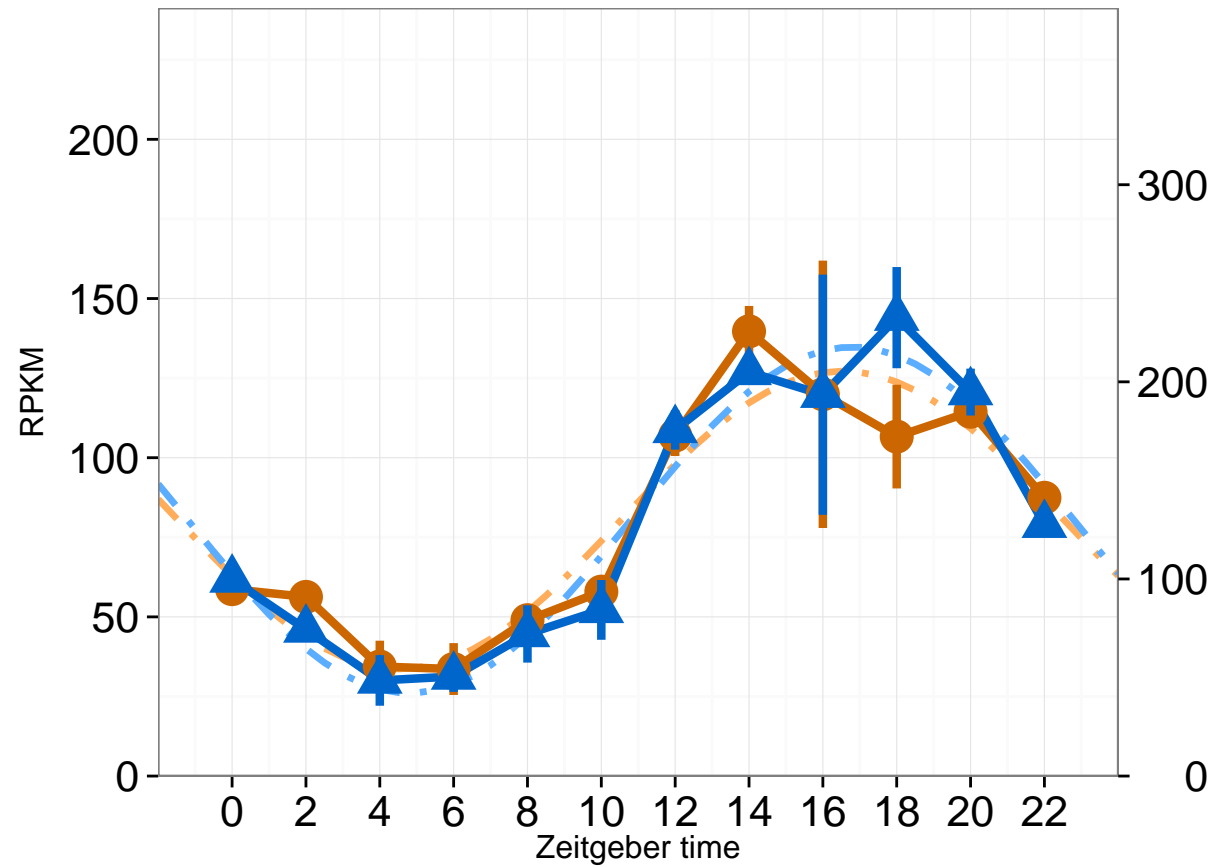

# Tsc22d3

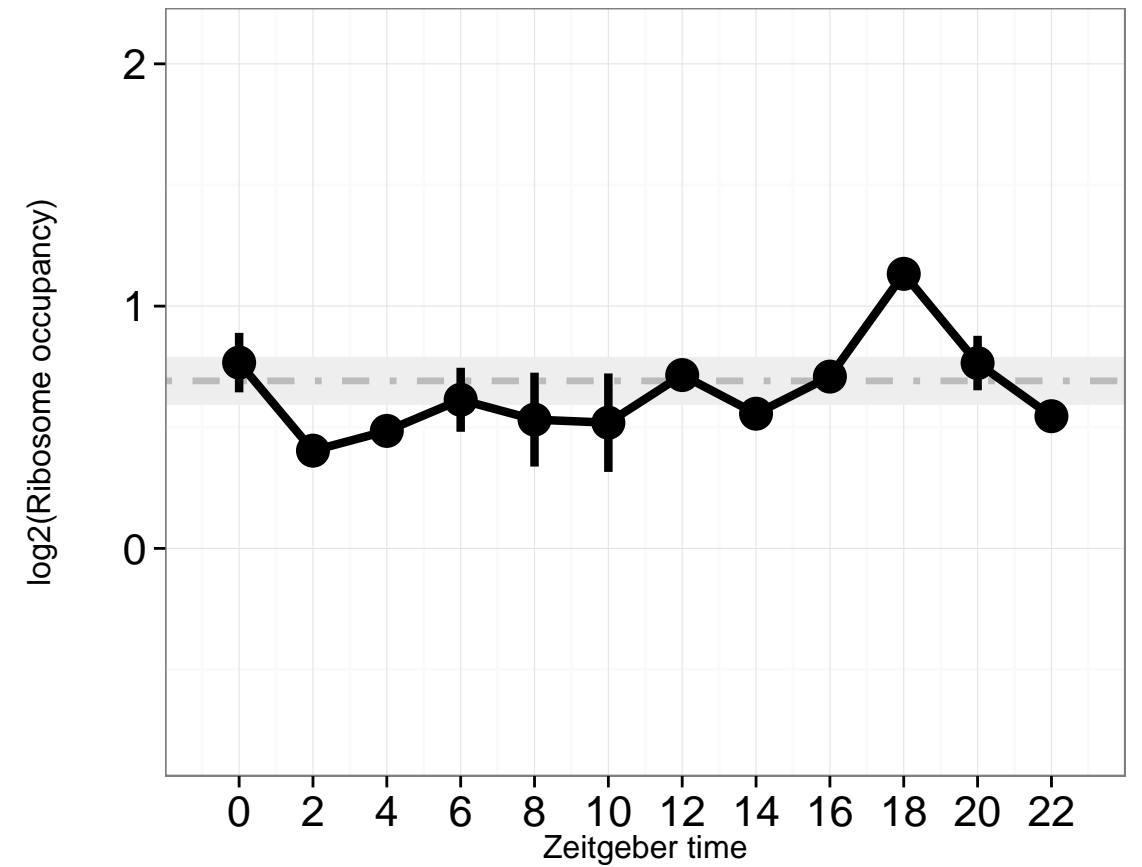

Supplement: Supplementary file 572 [file 1]

## Rars

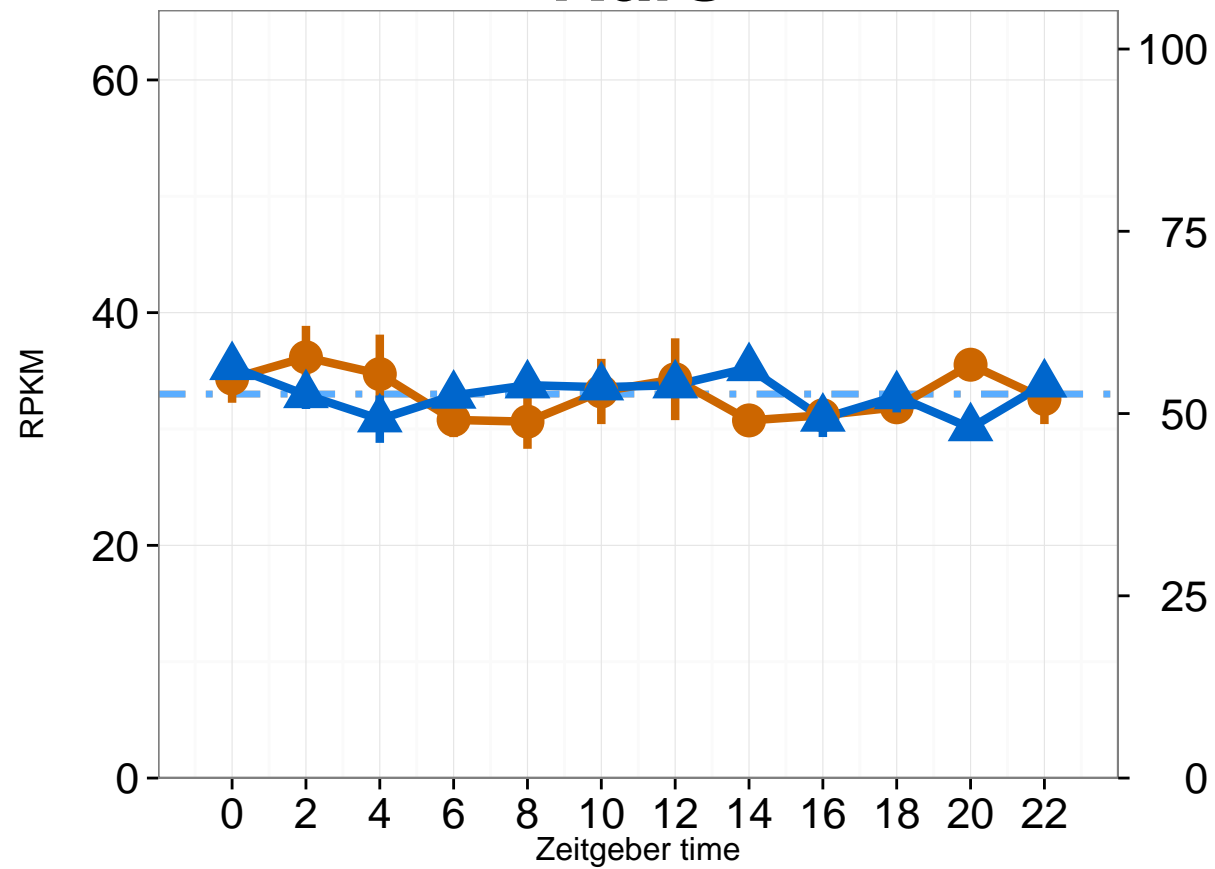

## Rars

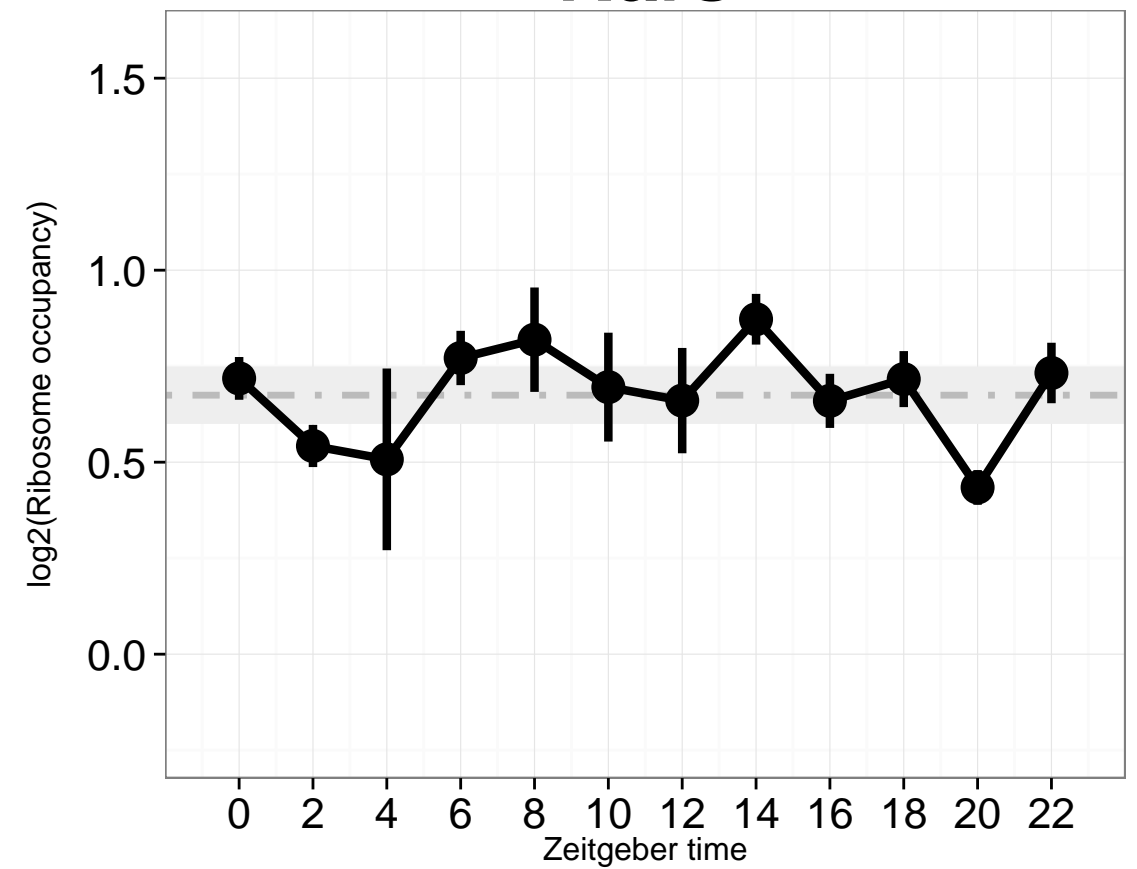

Supplement: Supplementary file 573 [file 1]

## Nuak2

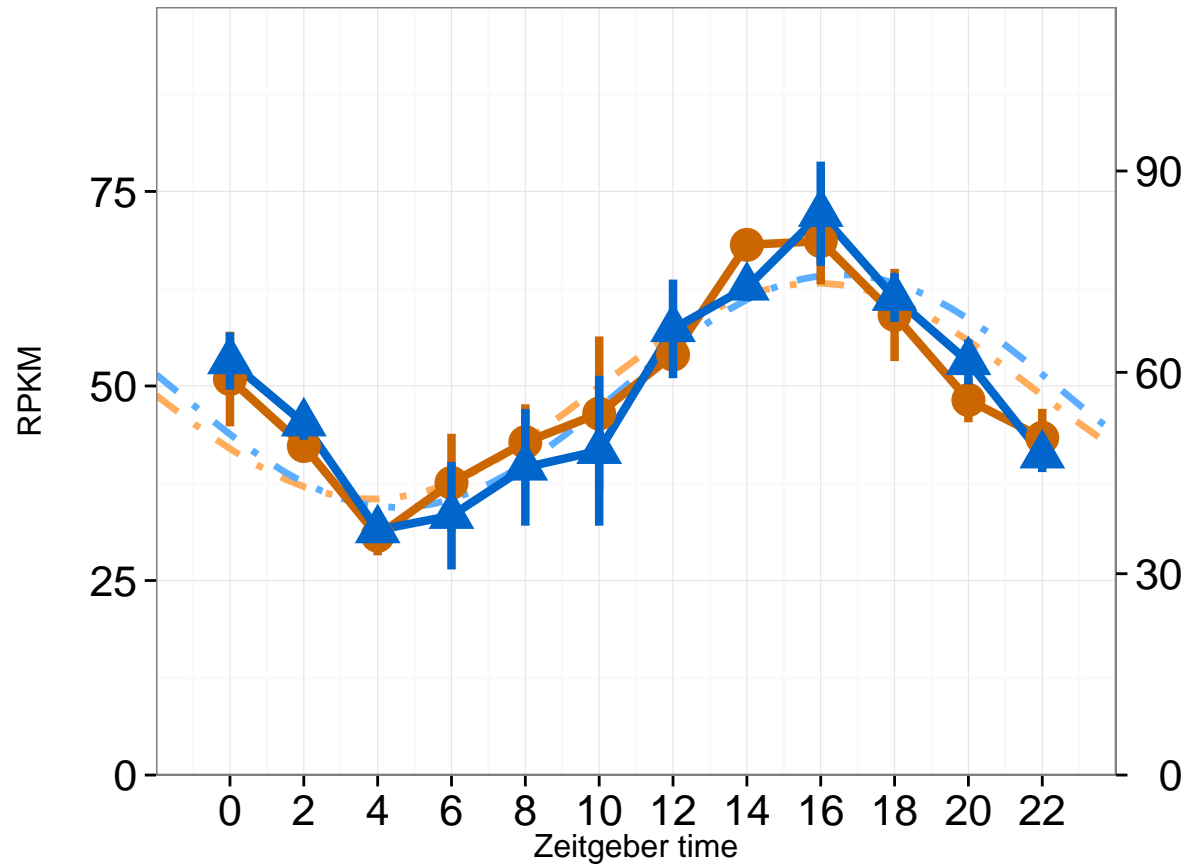

## Nuak2

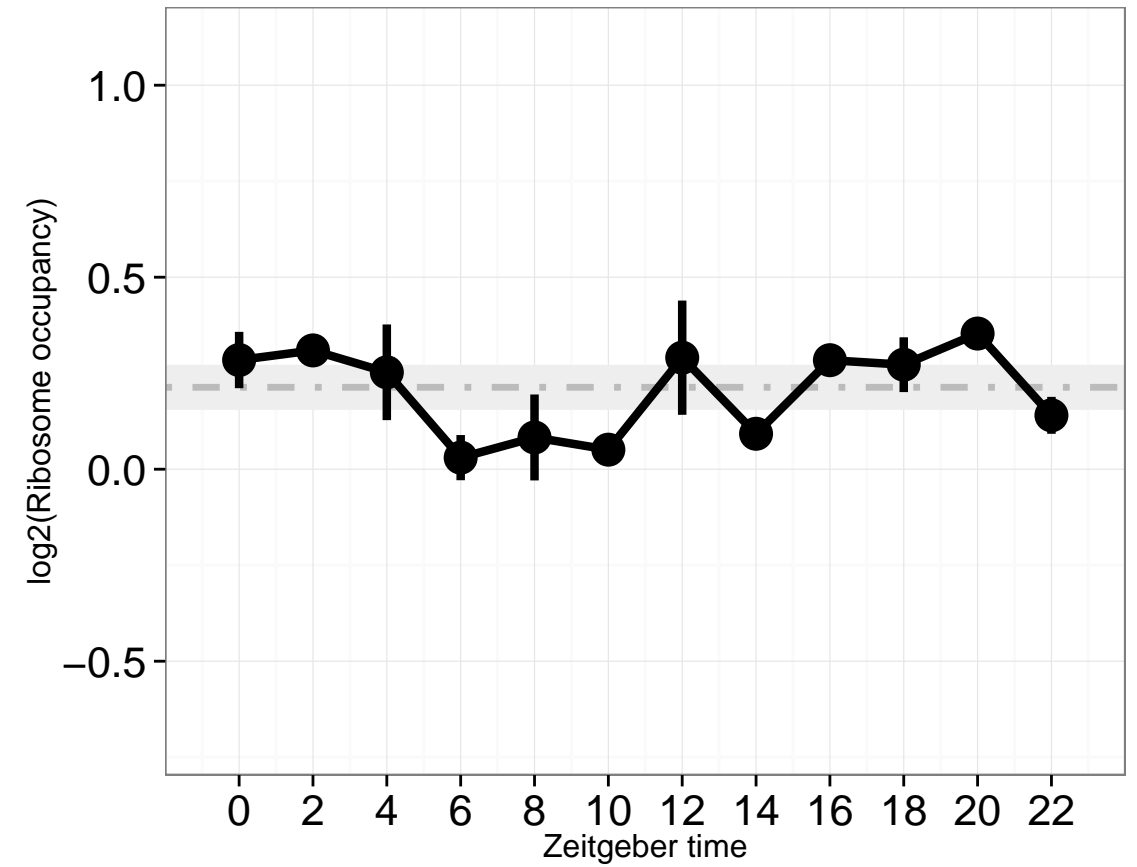

Supplement: Supplementary file 574 [file 1]

## Adamtsl4

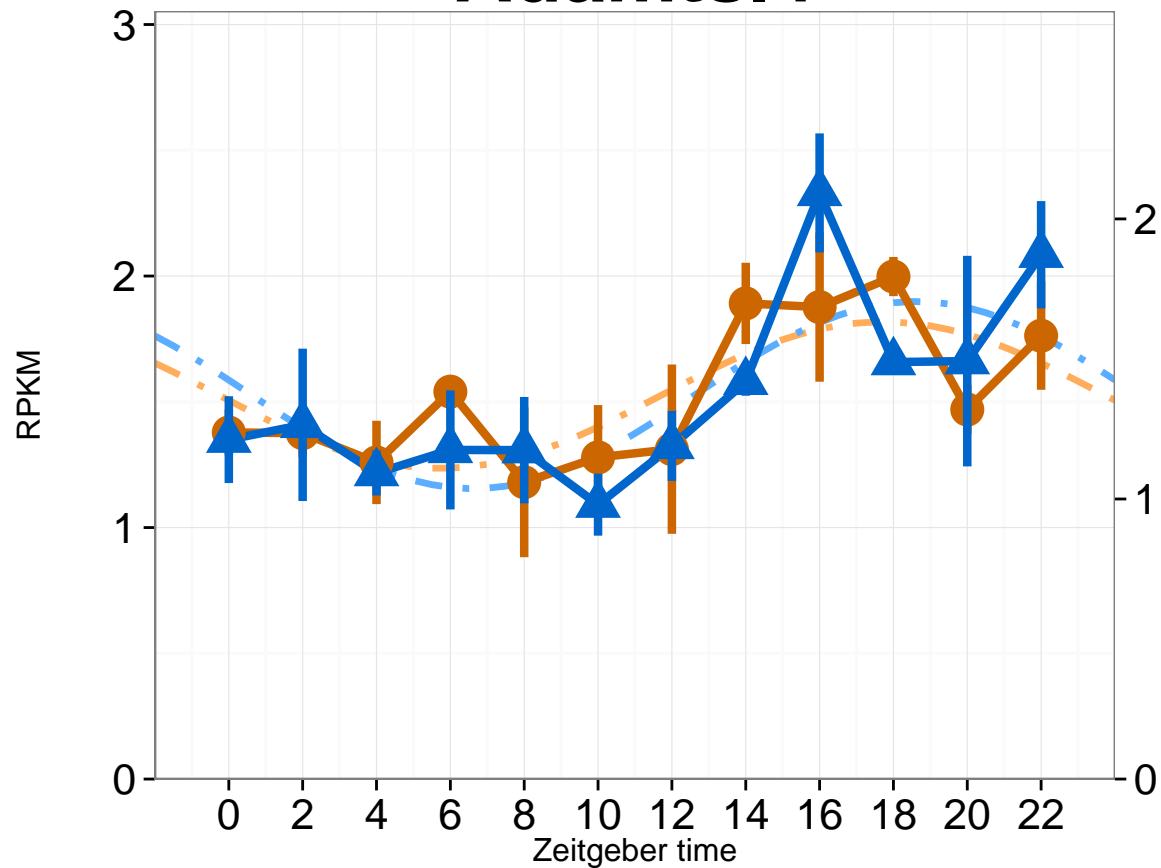

## Adamtsl4

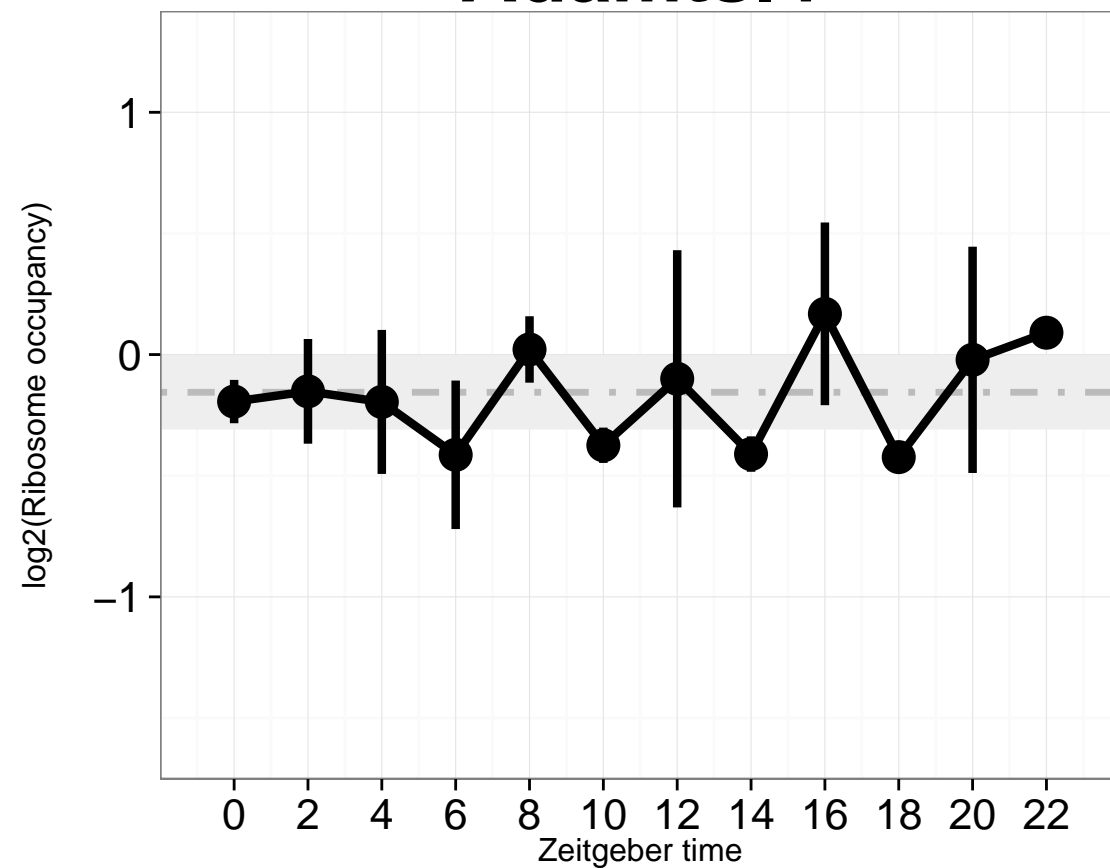

Supplement: Supplementary file 575 [file 1]

## Stard8

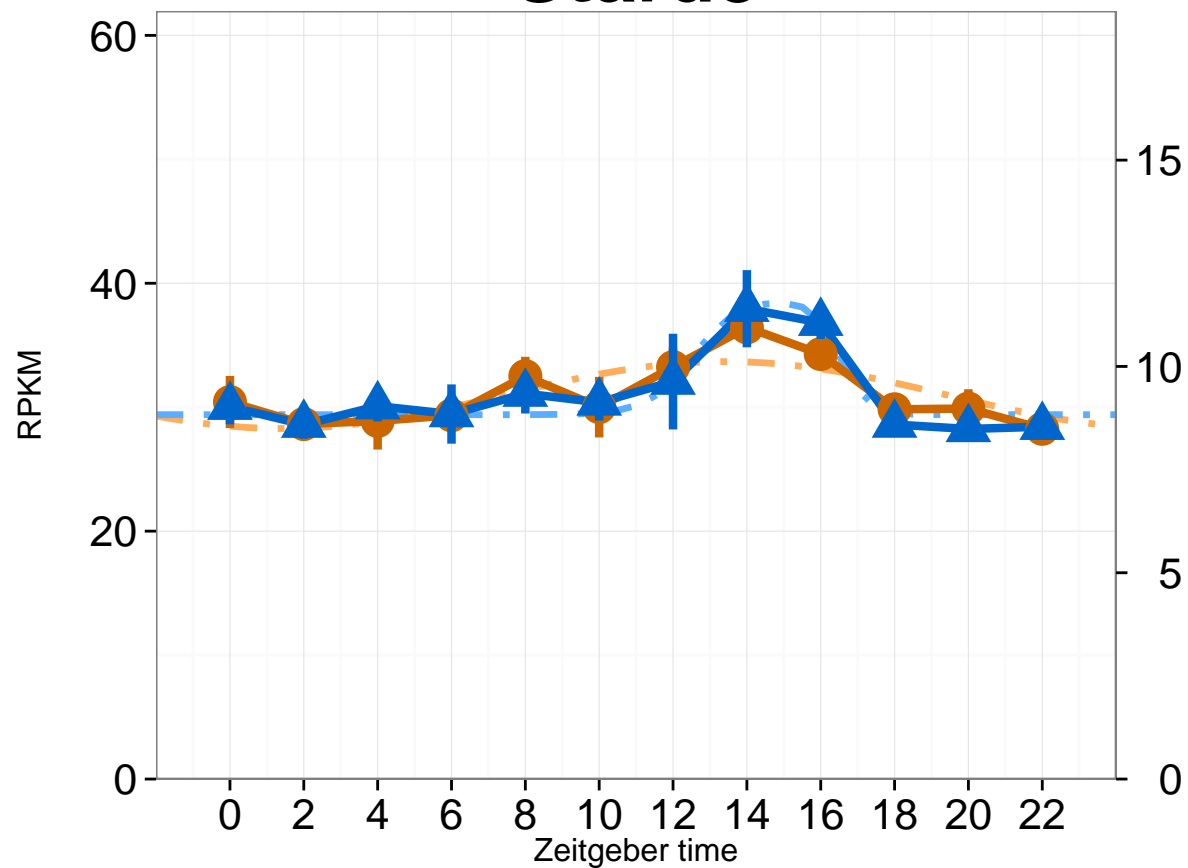

## Stard8

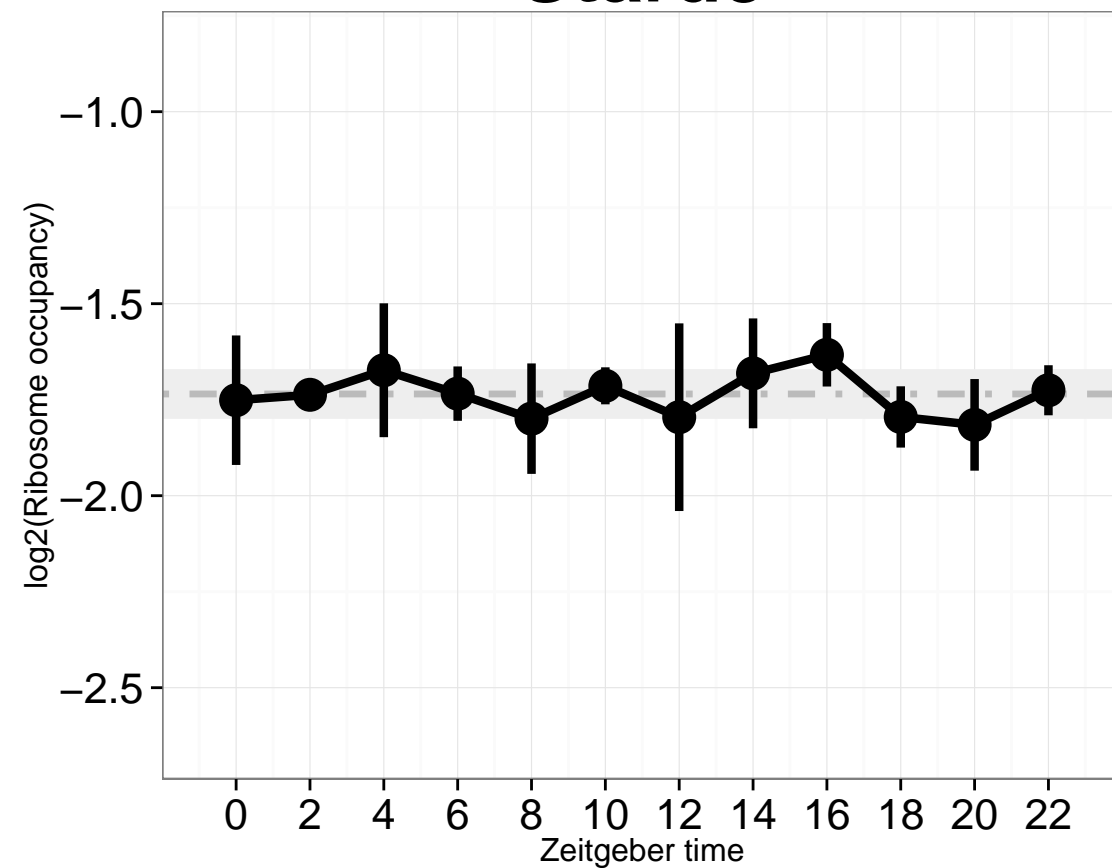

Supplement: Supplementary file 576 [file 1]

**Sept11**

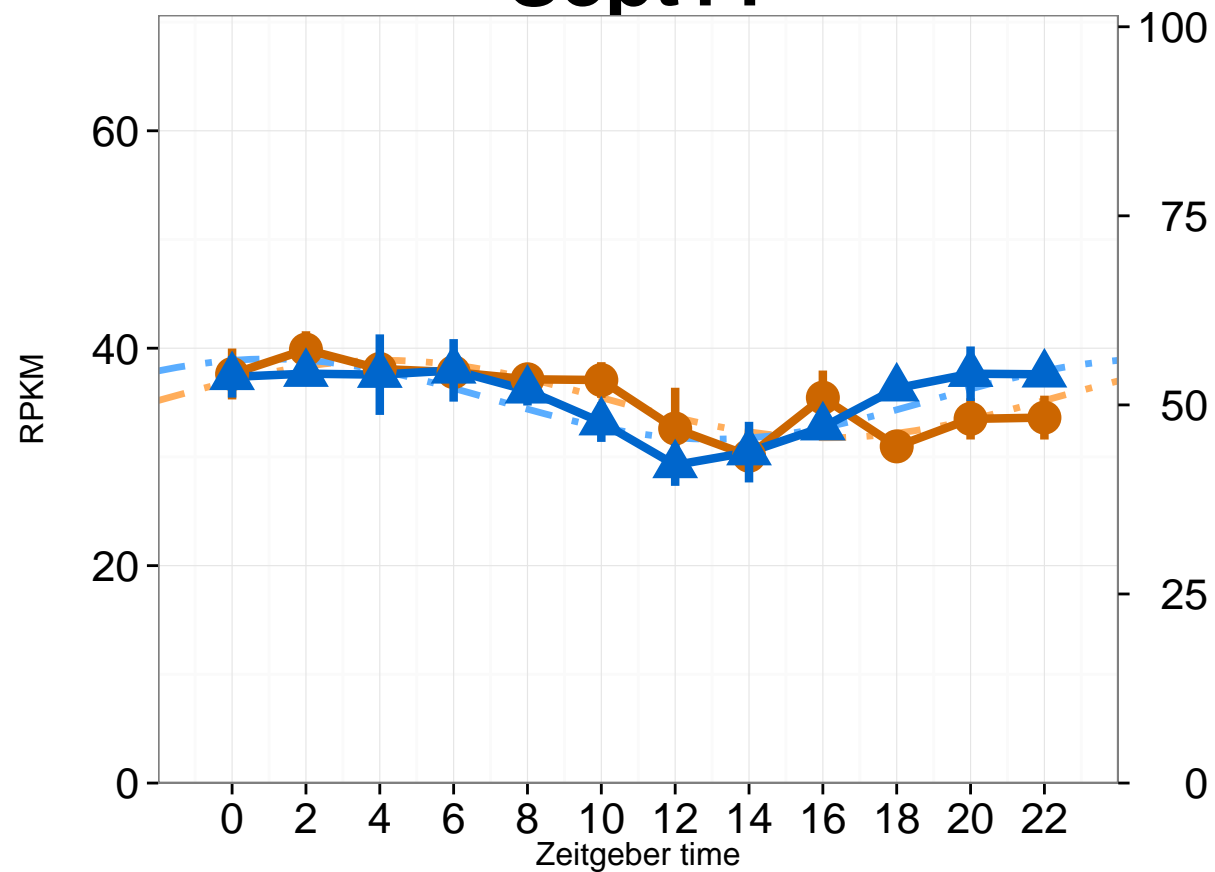

**Sept11**

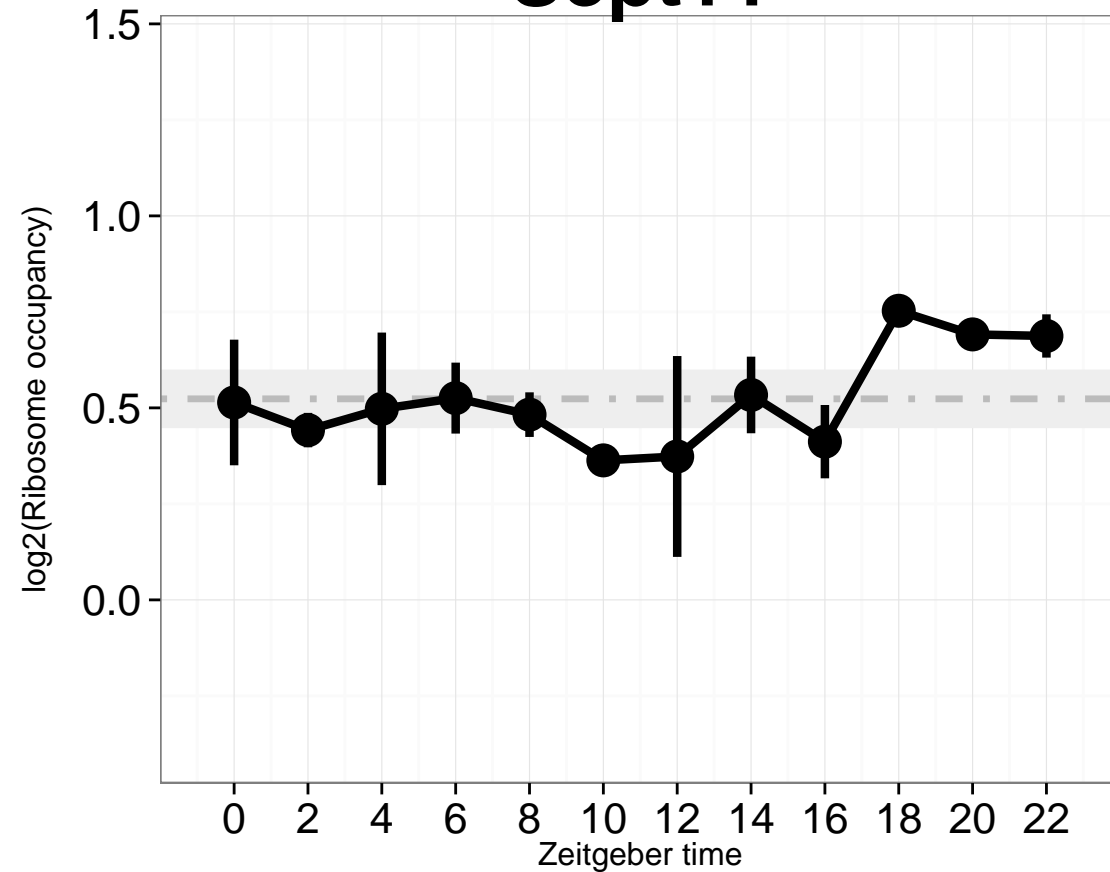

Supplement: Supplementary file 577 [file 1]

## Cdk18

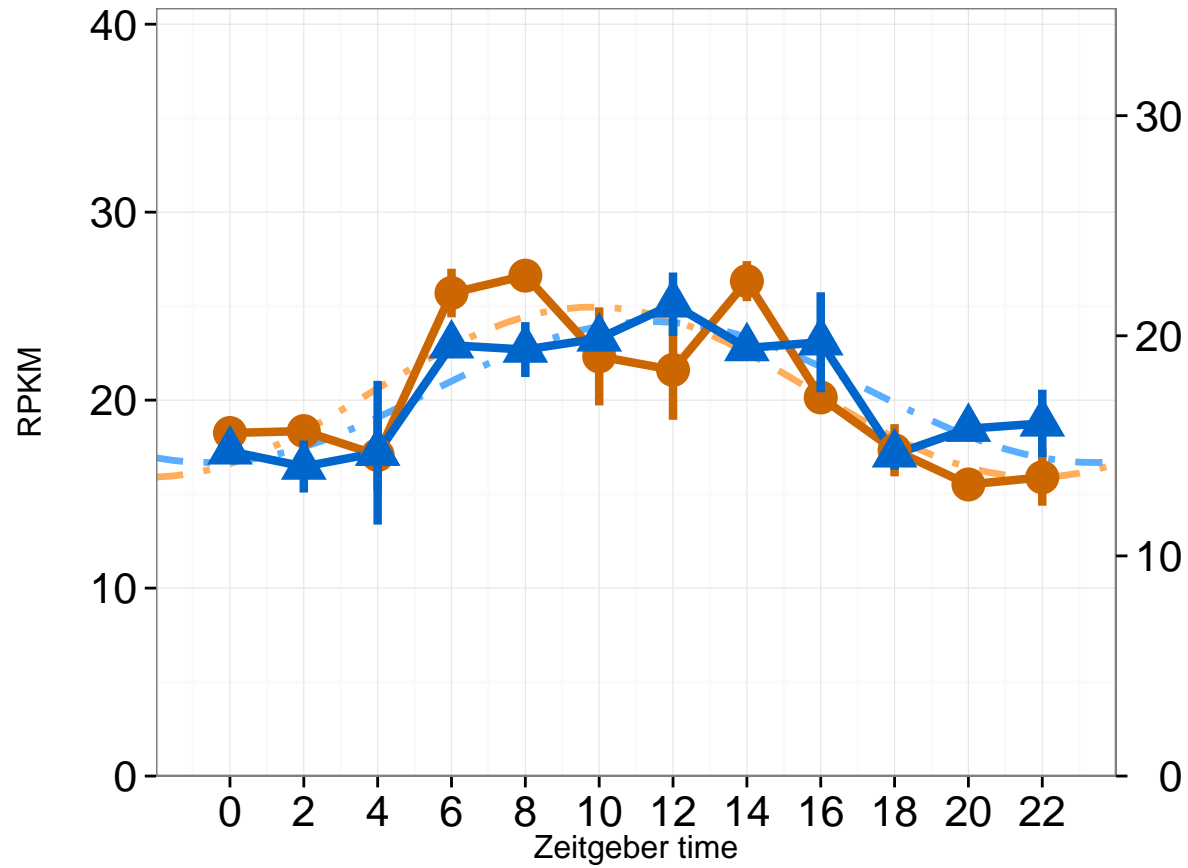

## Cdk18

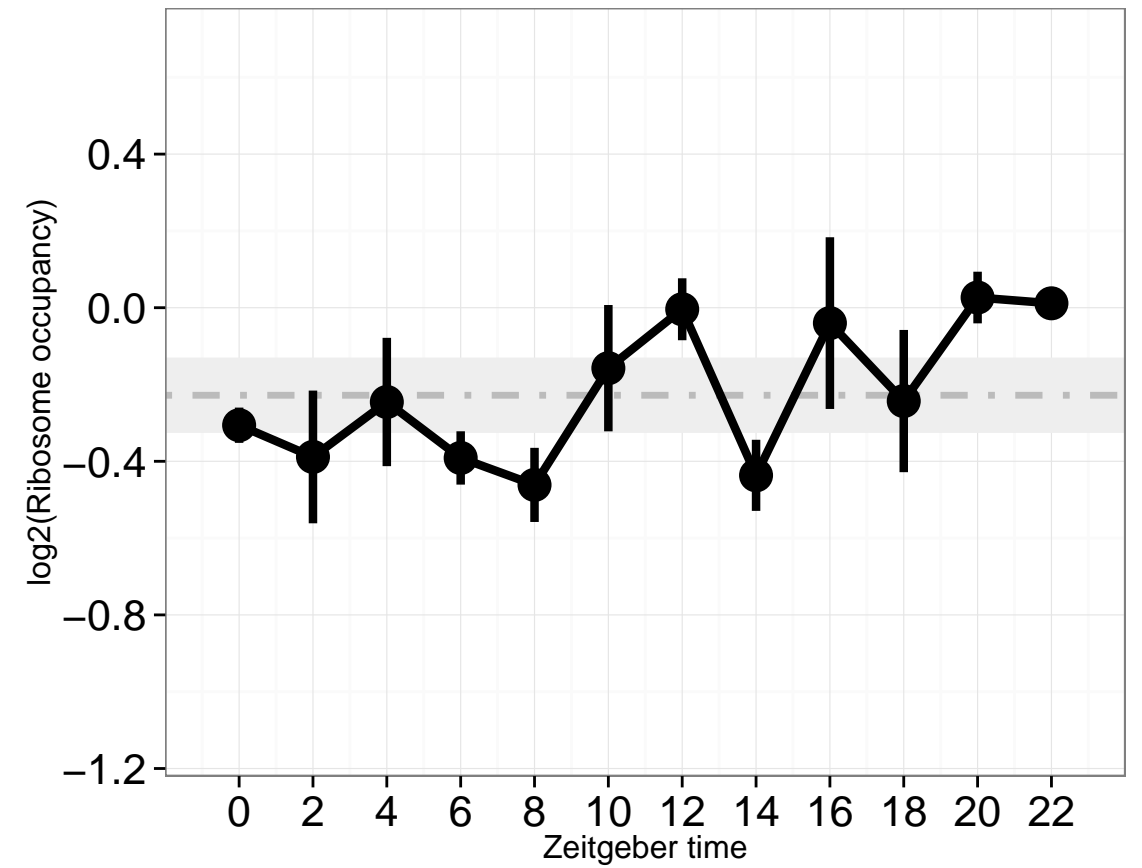

Supplement: Supplementary file 578 [file 1]

# Steap3

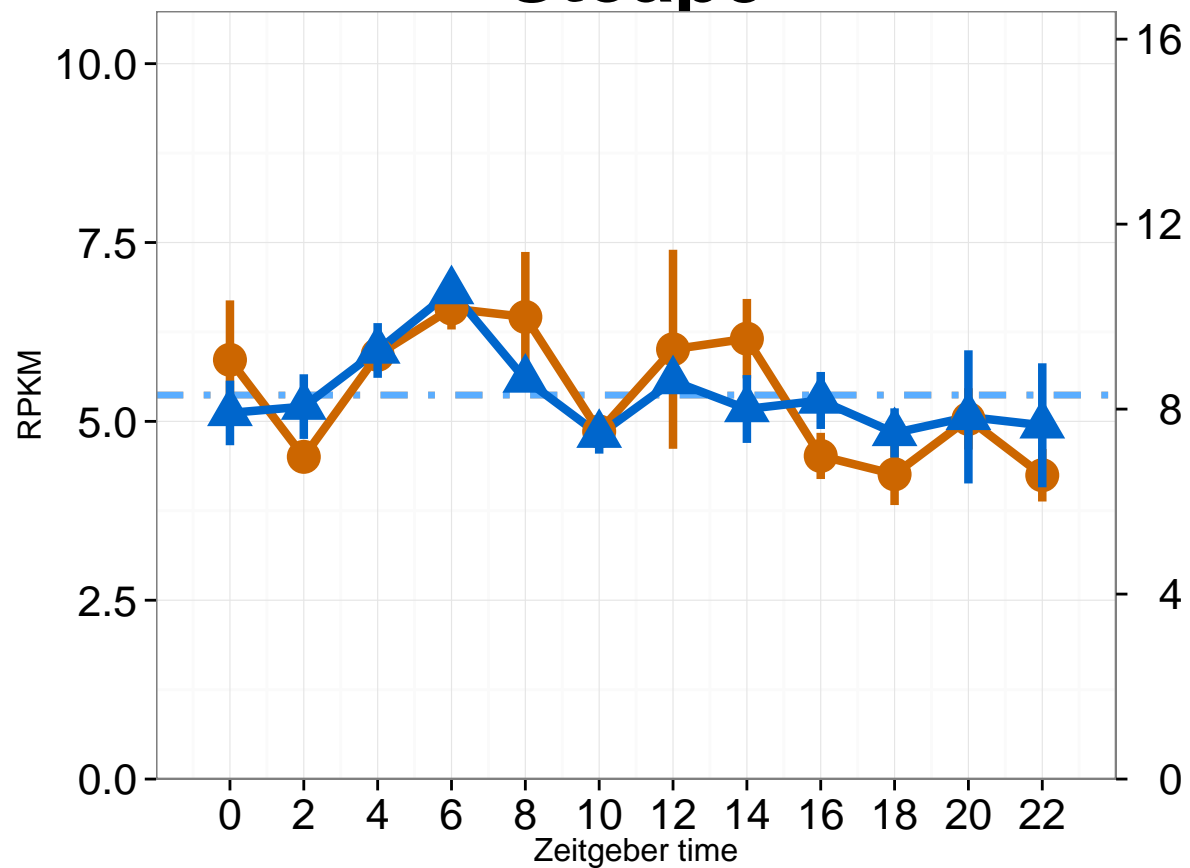

# Steap3

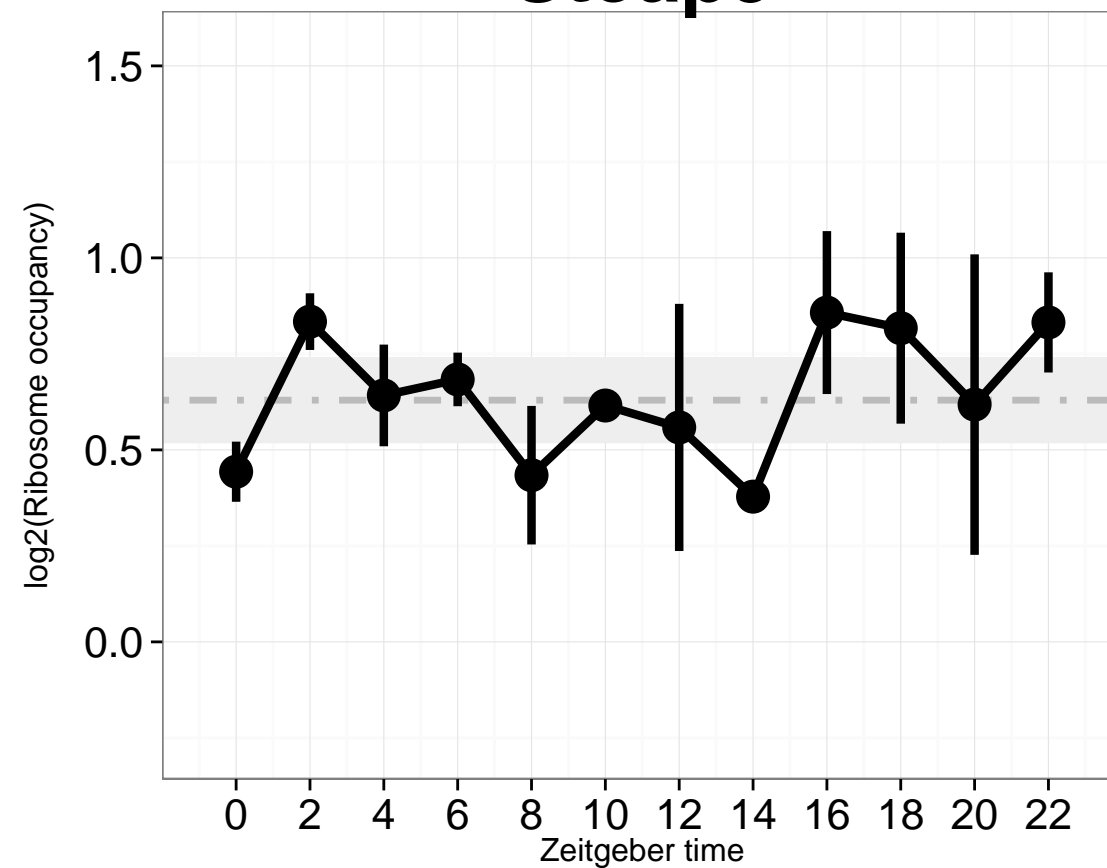

Supplement: Supplementary file 579 [file 1]

## Pisd

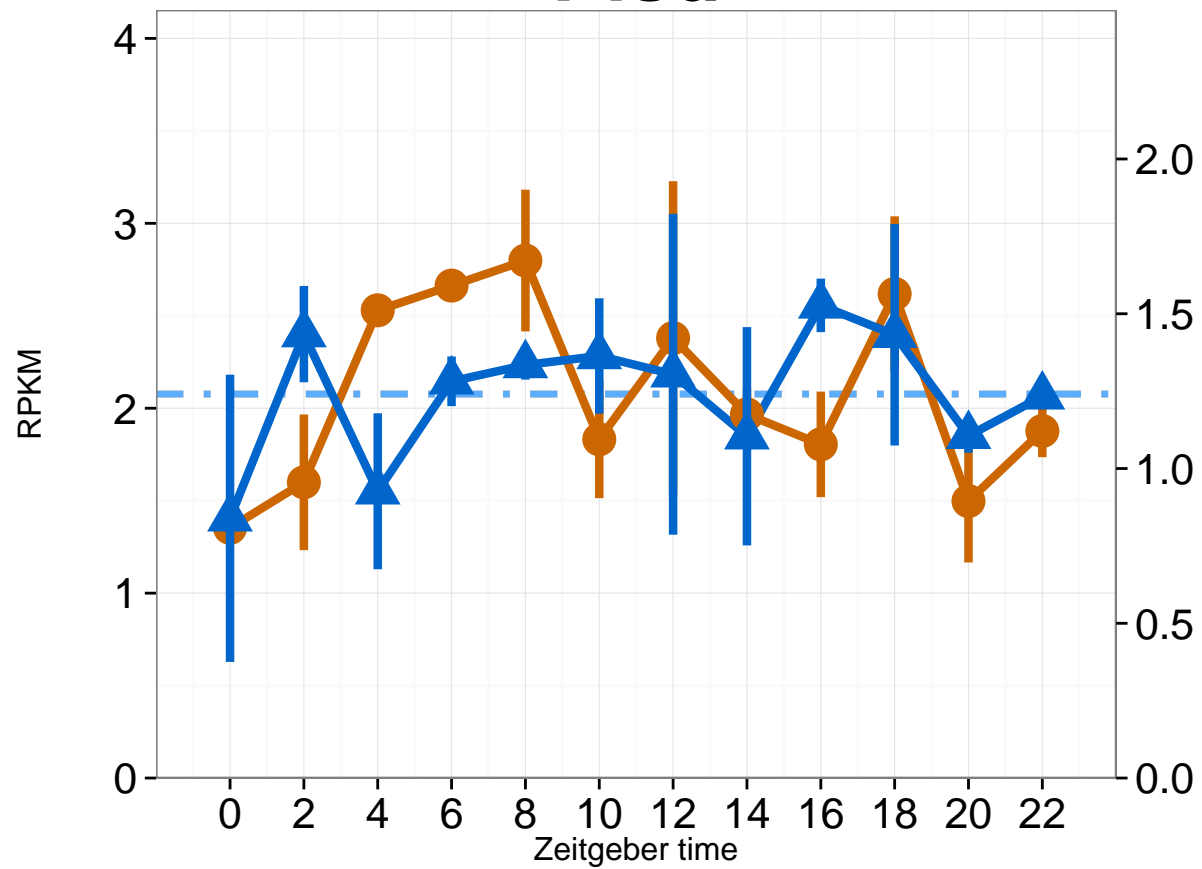

## Pisd

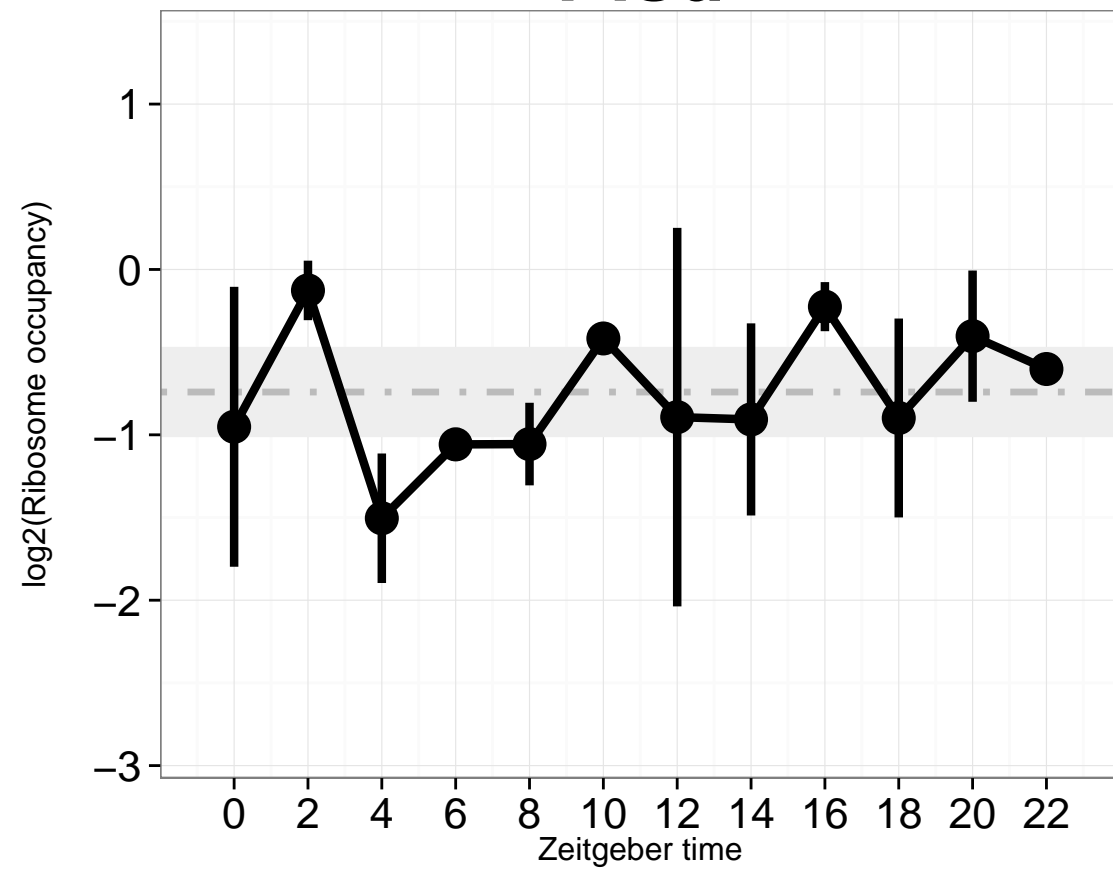

Supplement: Supplementary file 580 [file 1]

# Mcts1

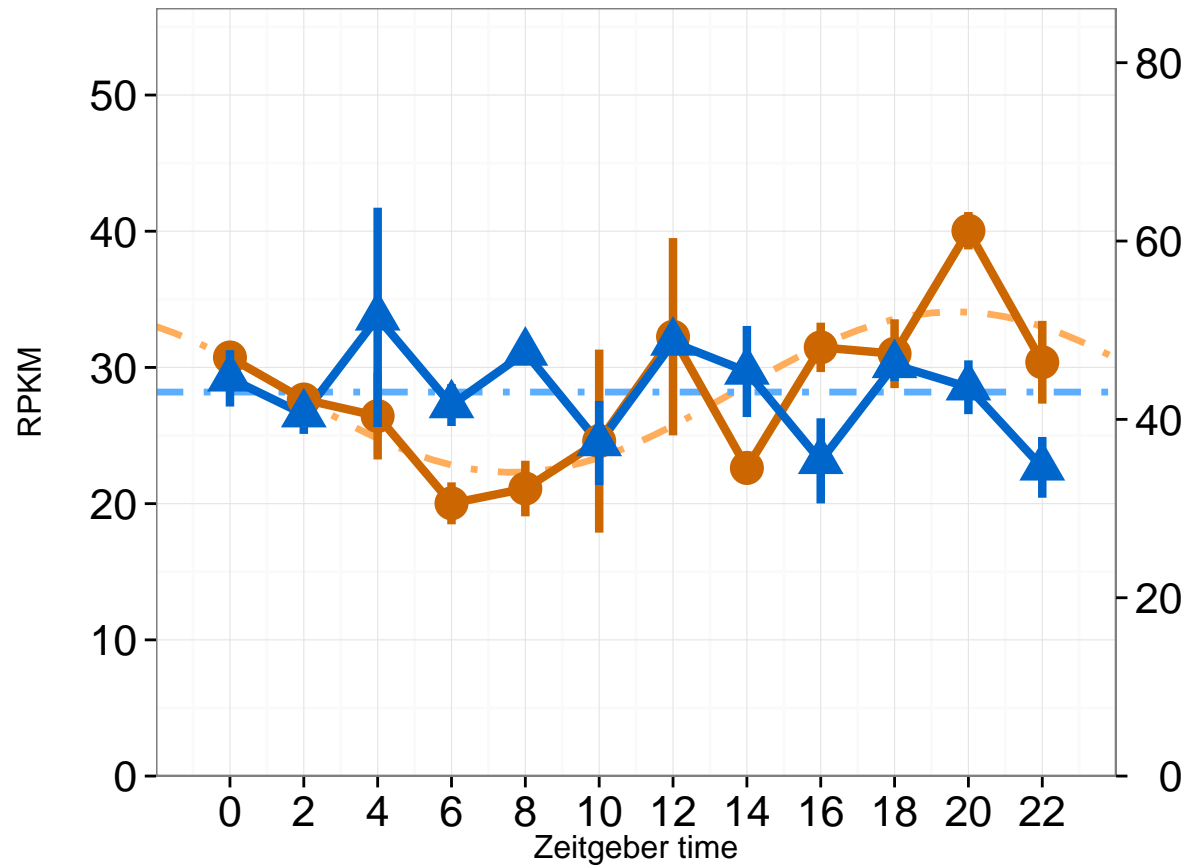

# Mcts1

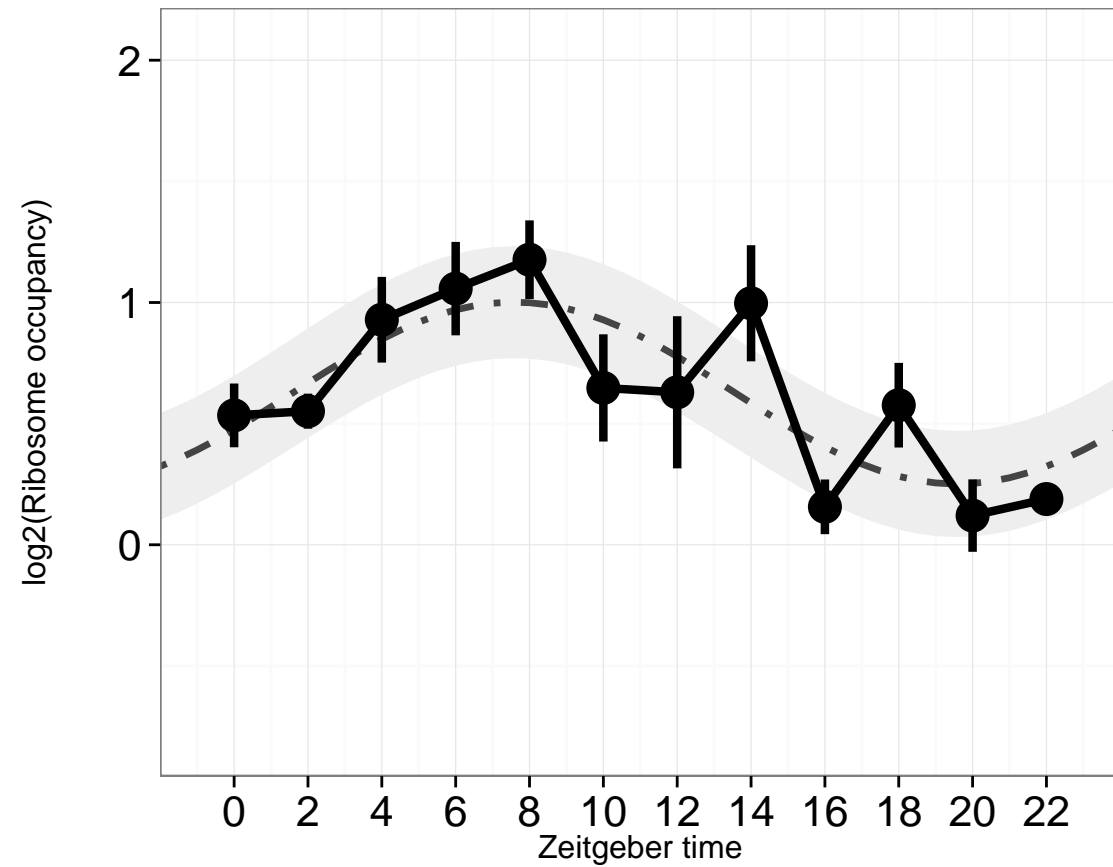

Supplement: Supplementary file 581 [file 1]

## Sco1

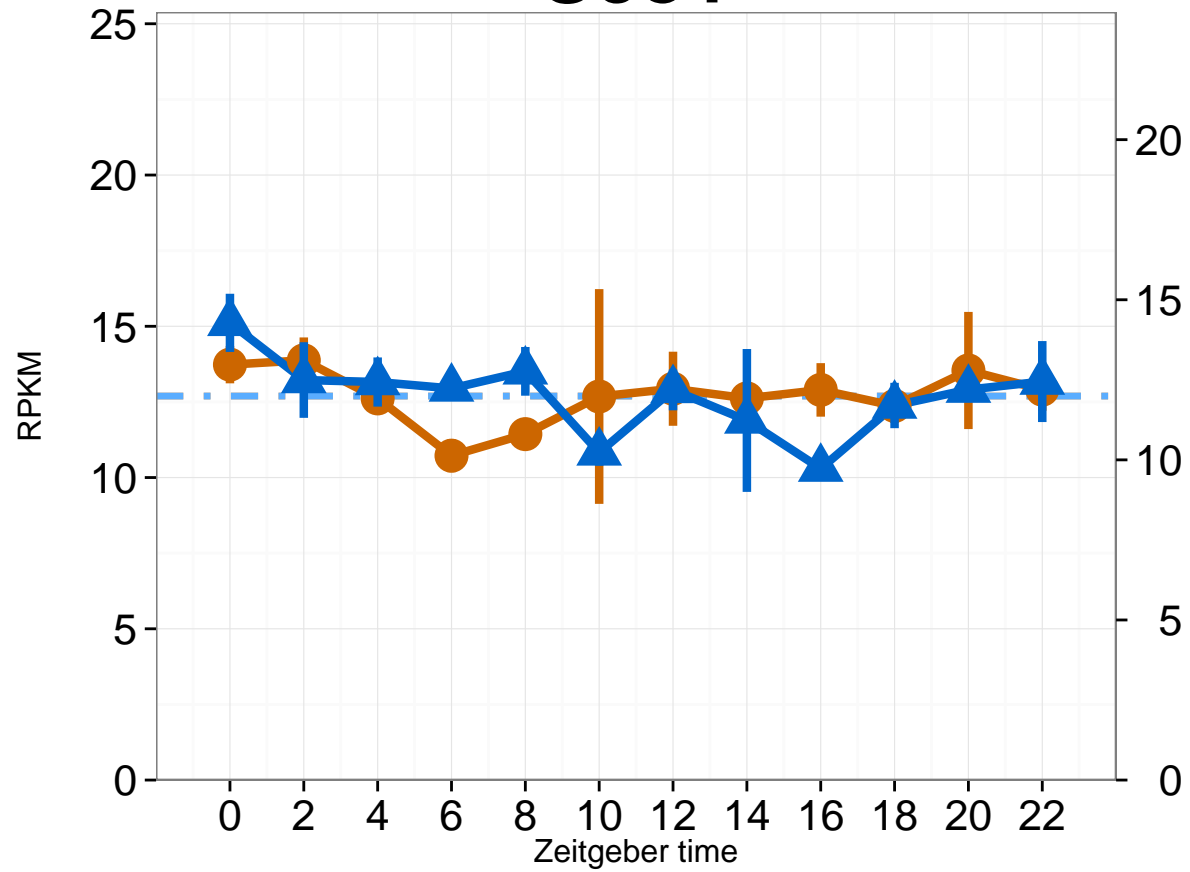

## Sco1

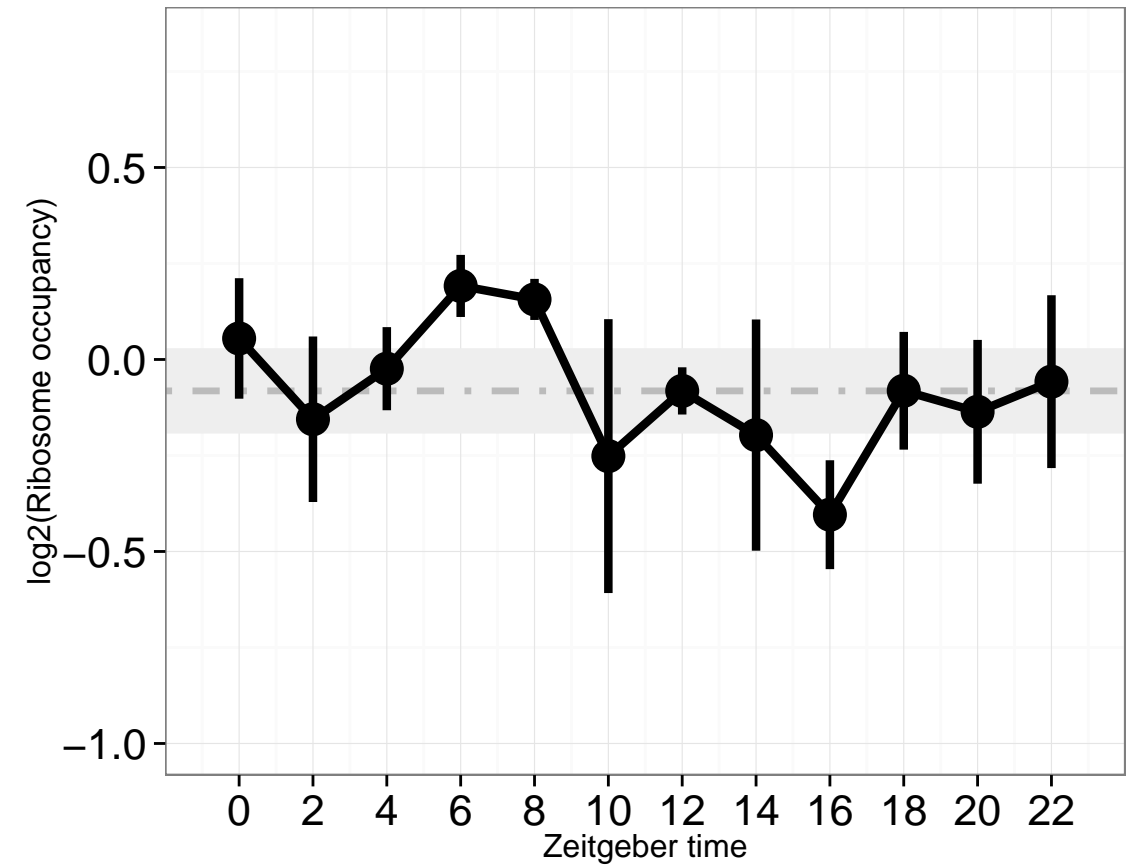

Supplement: Supplementary file 582 [file 1]

## Blcap

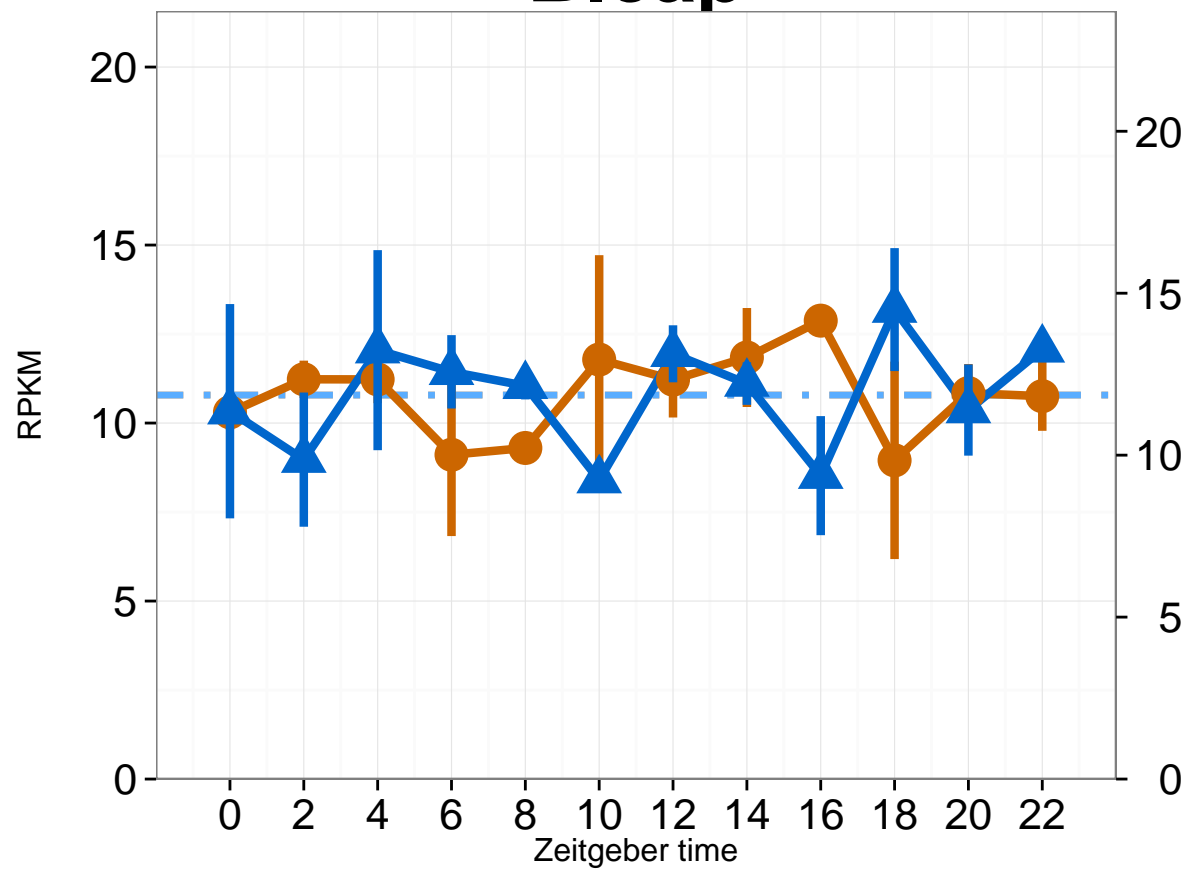

## Blcap

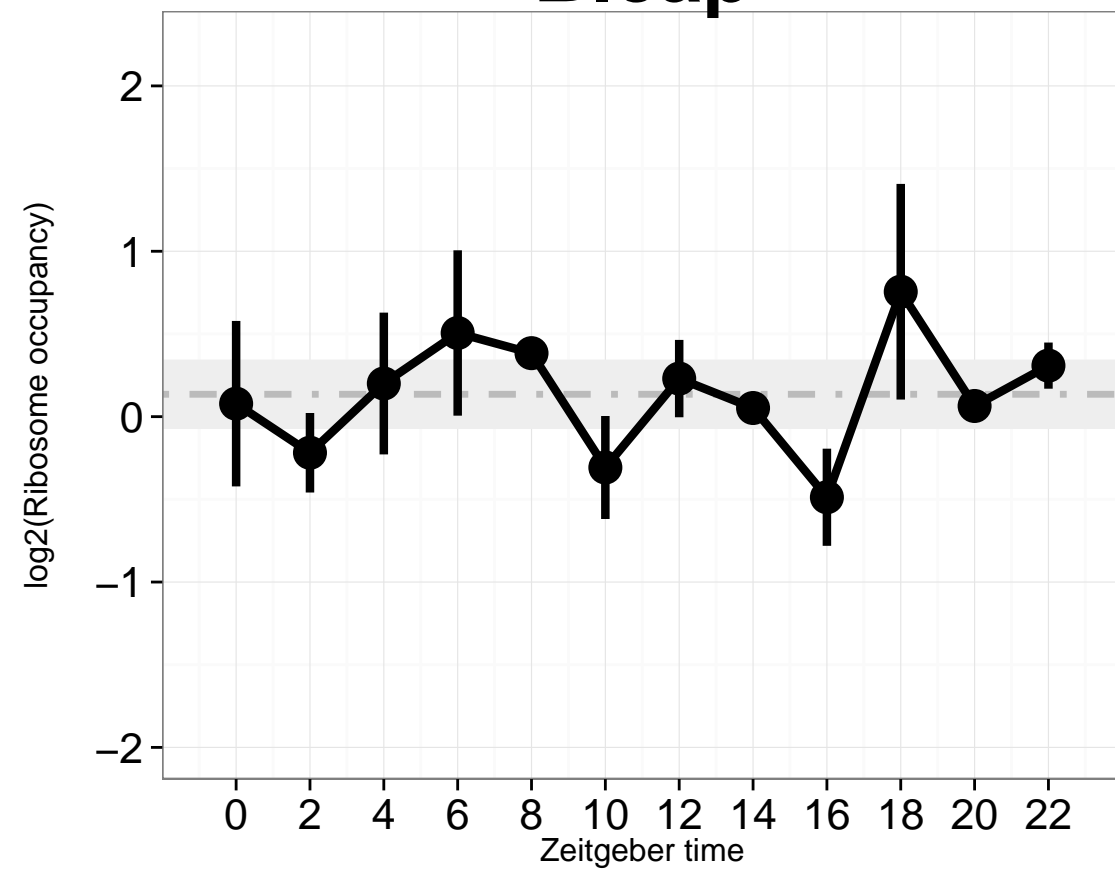

Supplement: Supplementary file 583 [file 1]

# Trps1

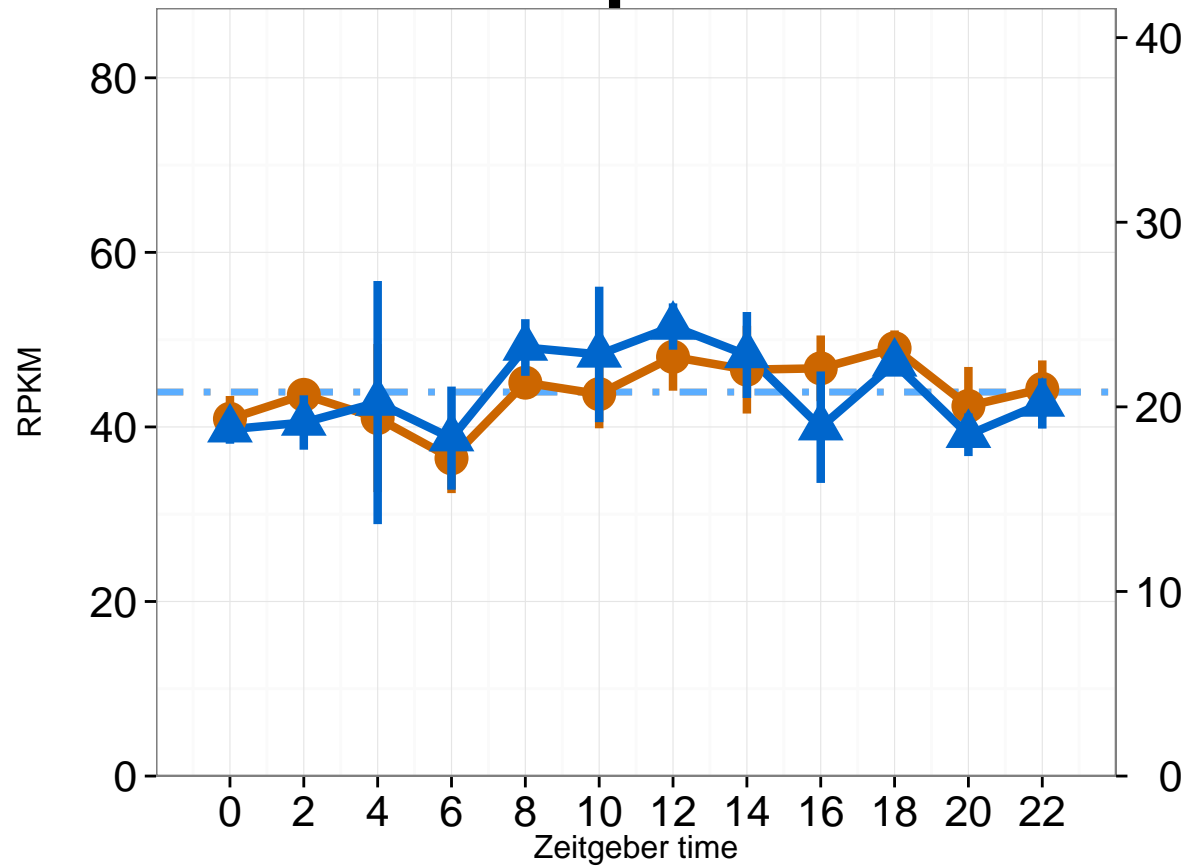

# Trps1

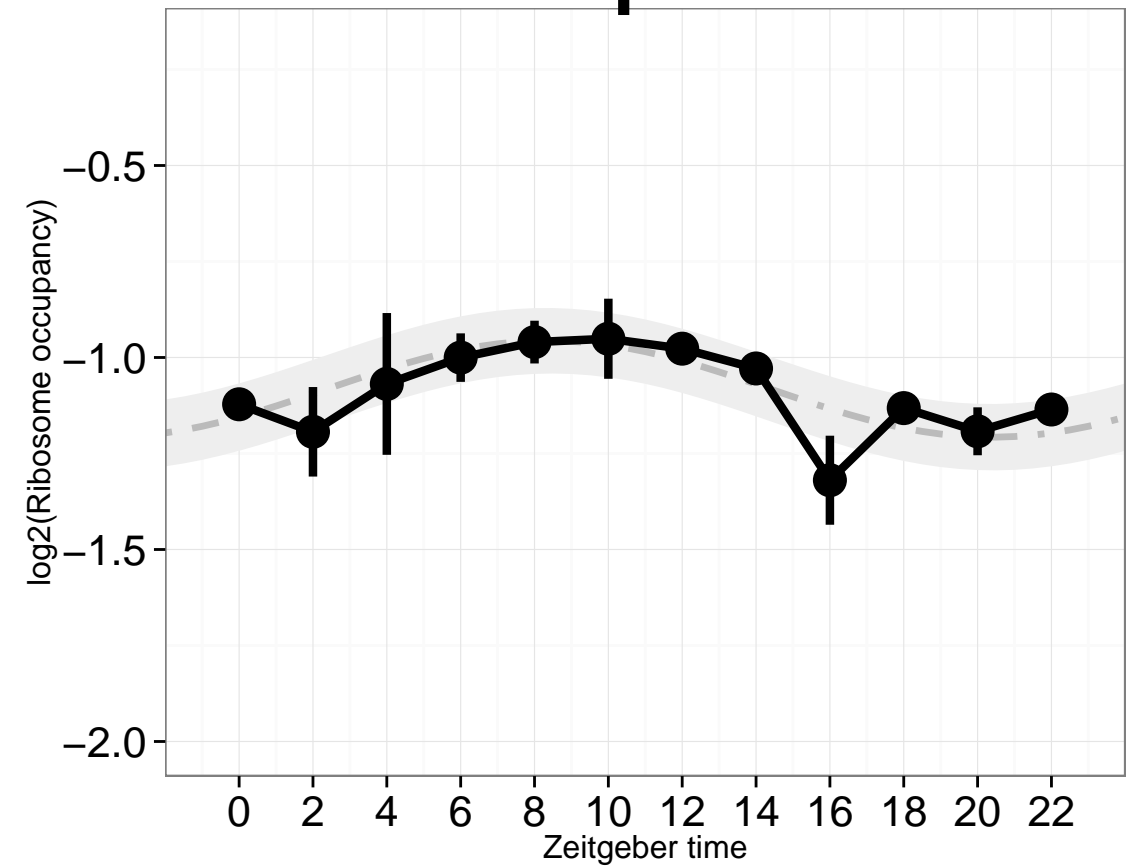

Supplement: Supplementary file 584 [file 1]

# Ccn1

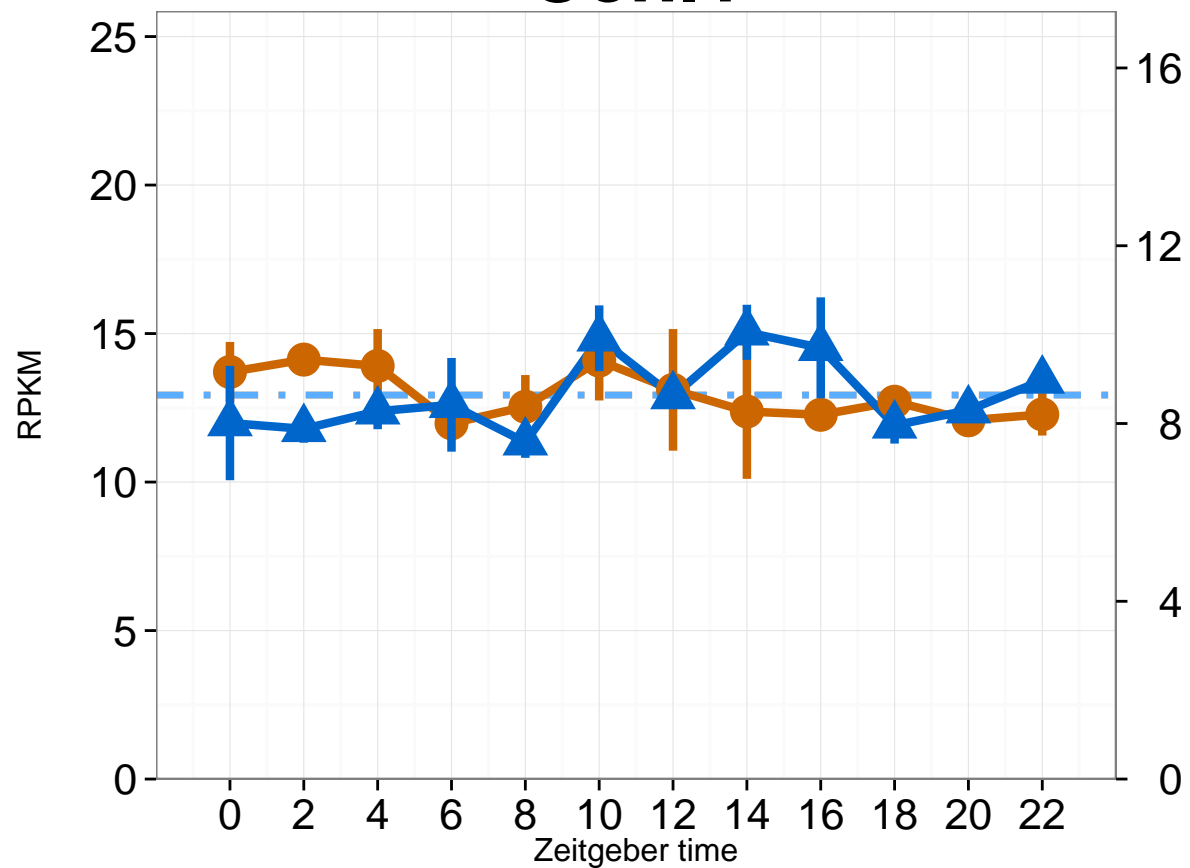

# Ccn1

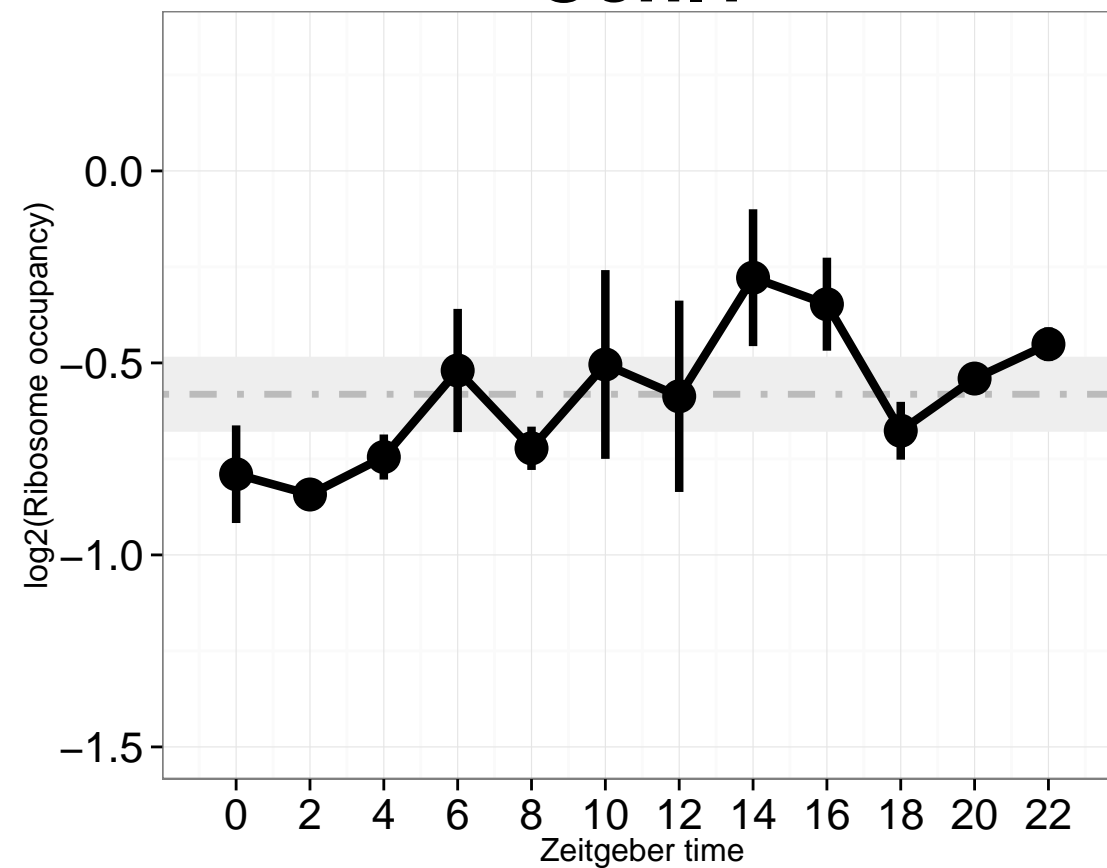

Supplement: Supplementary file 585 [file 1]

# Pih1d2

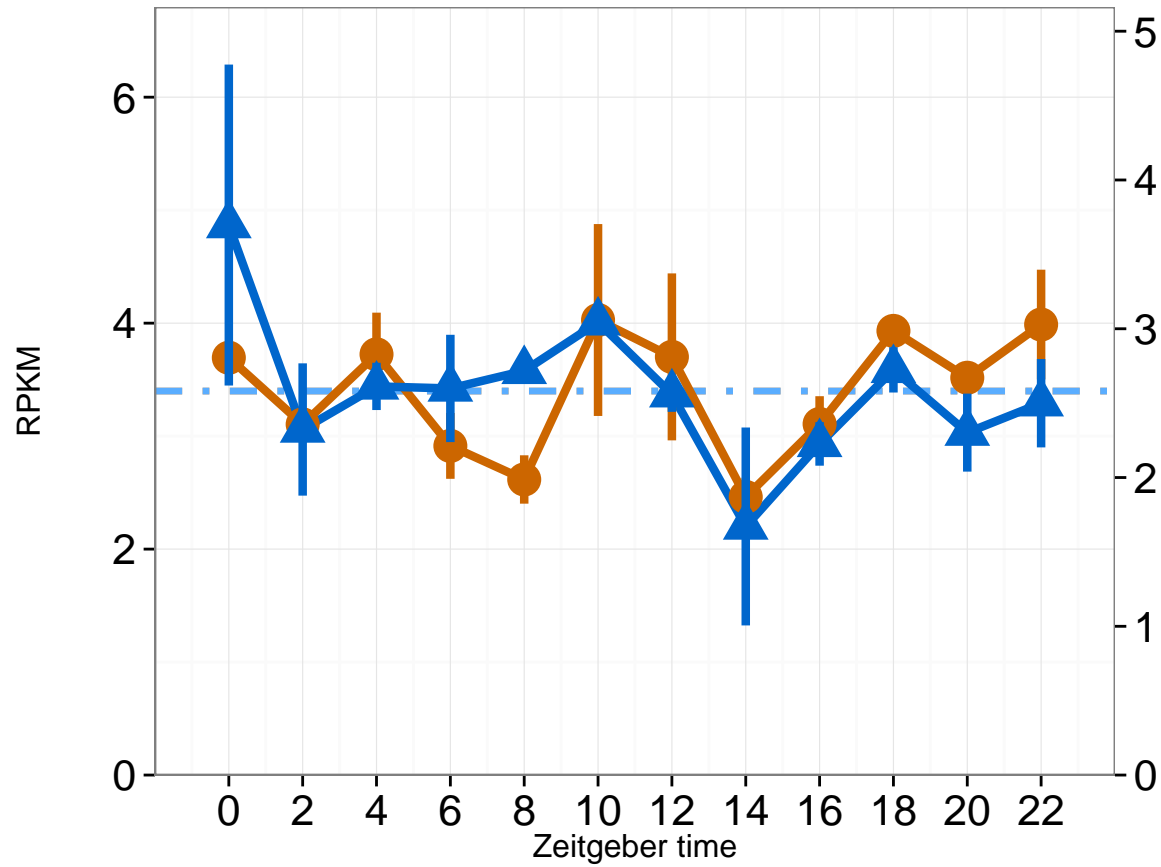

# Pih1d2

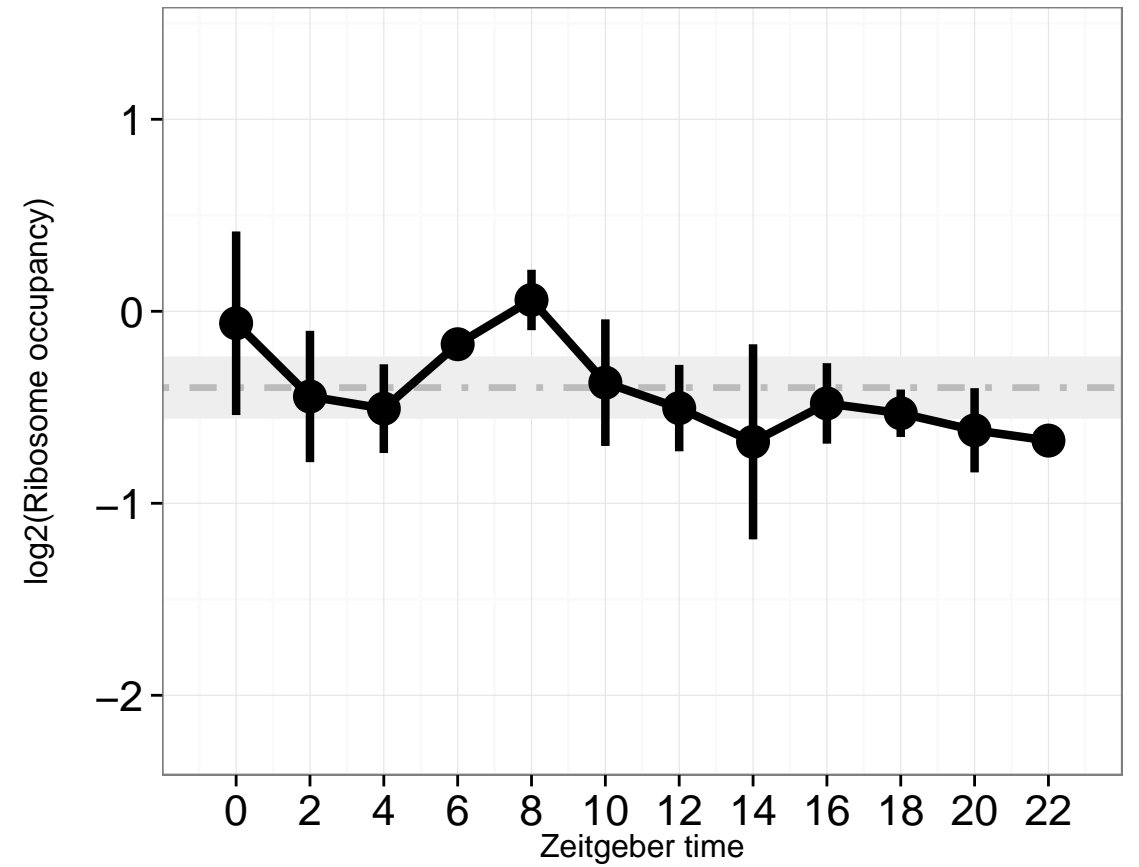

Supplement: Supplementary file 586 [file 1]

# Ddx39b

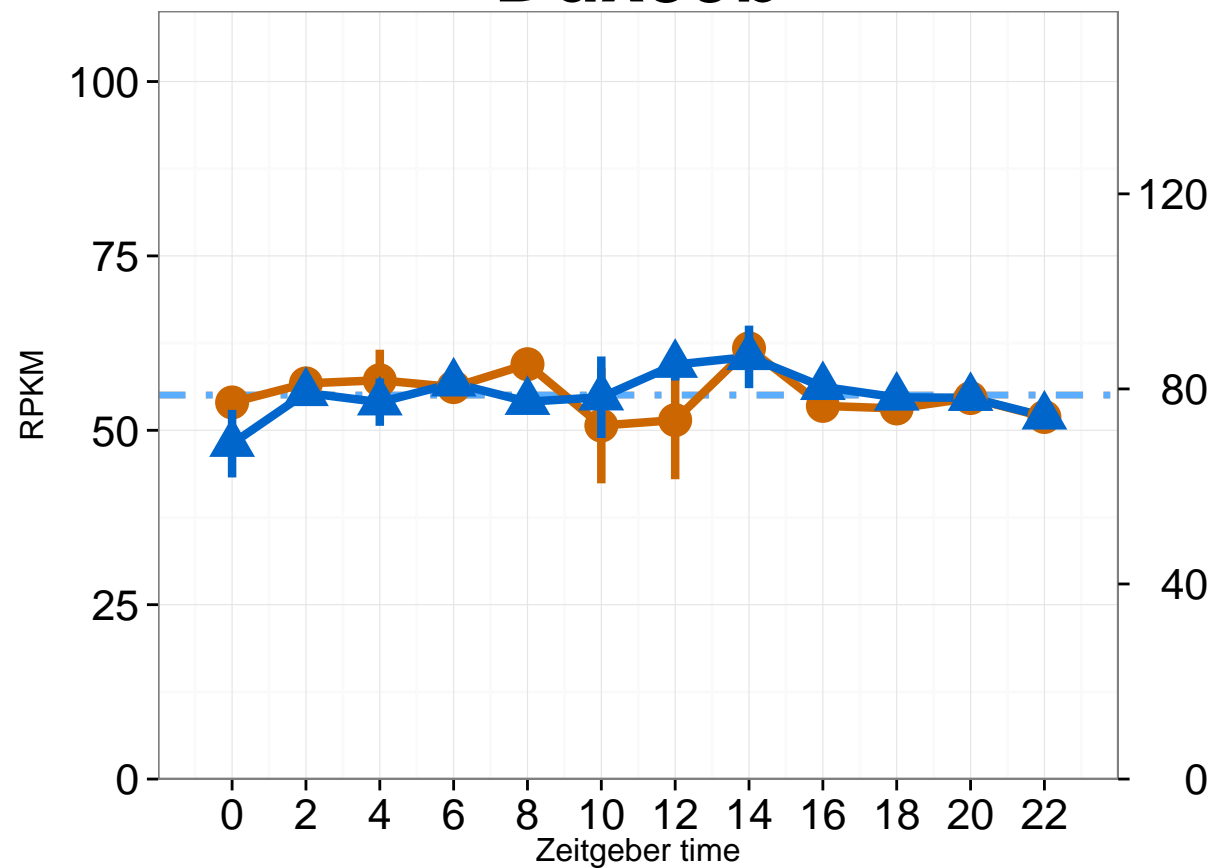

# Ddx39b

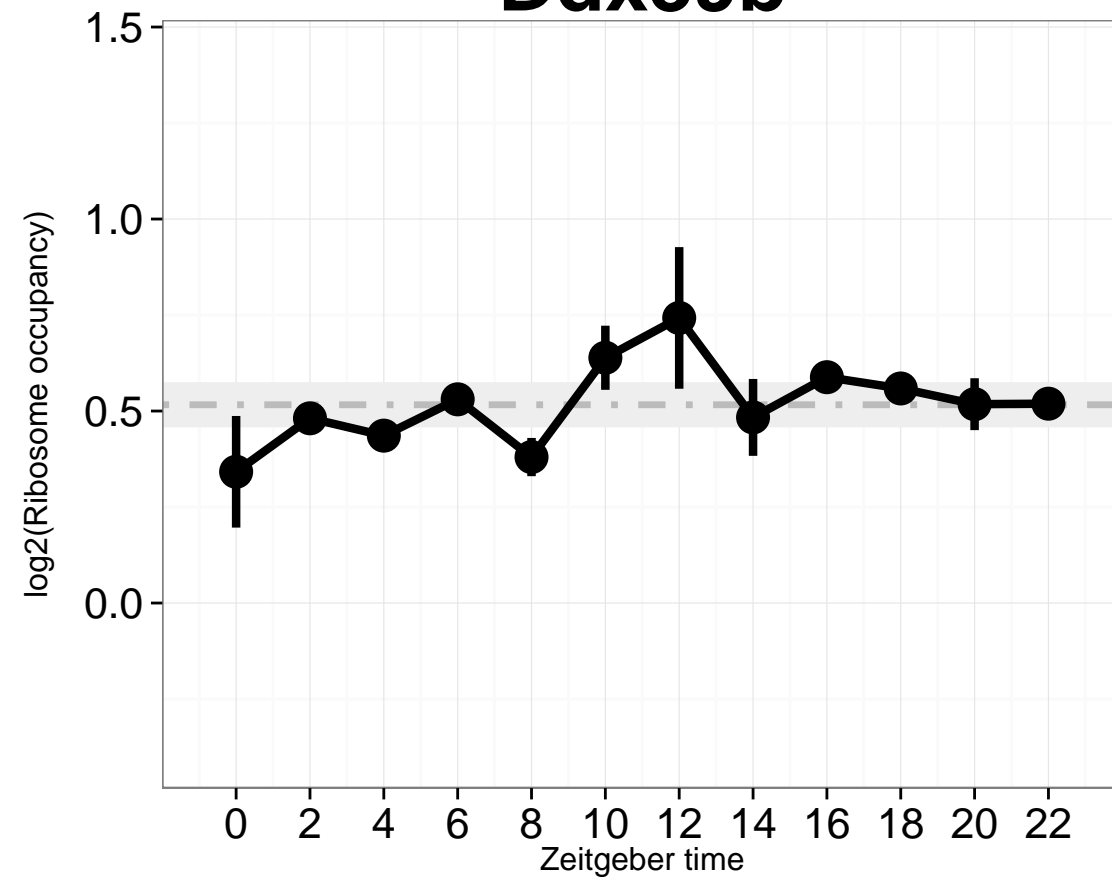

Supplement: Supplementary file 587 [file 1]

## Mga

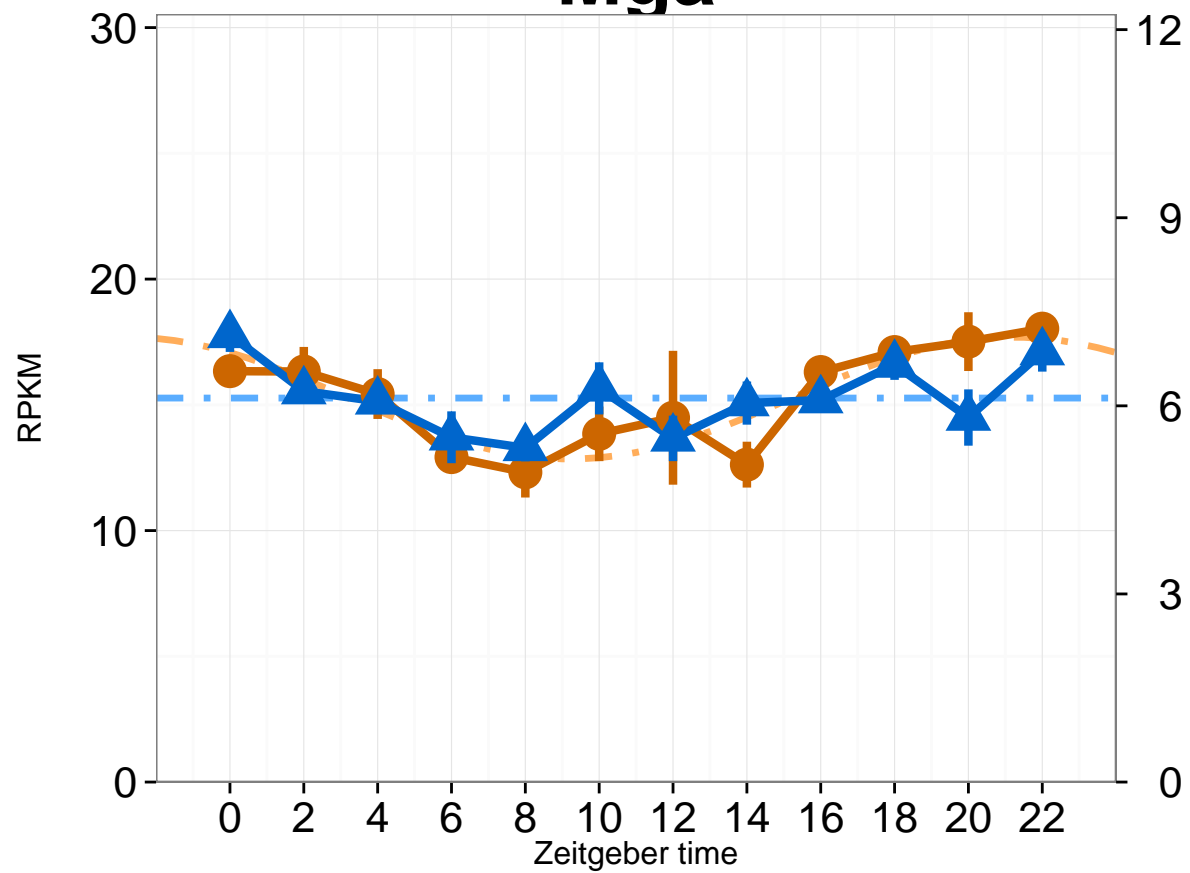

## Mga

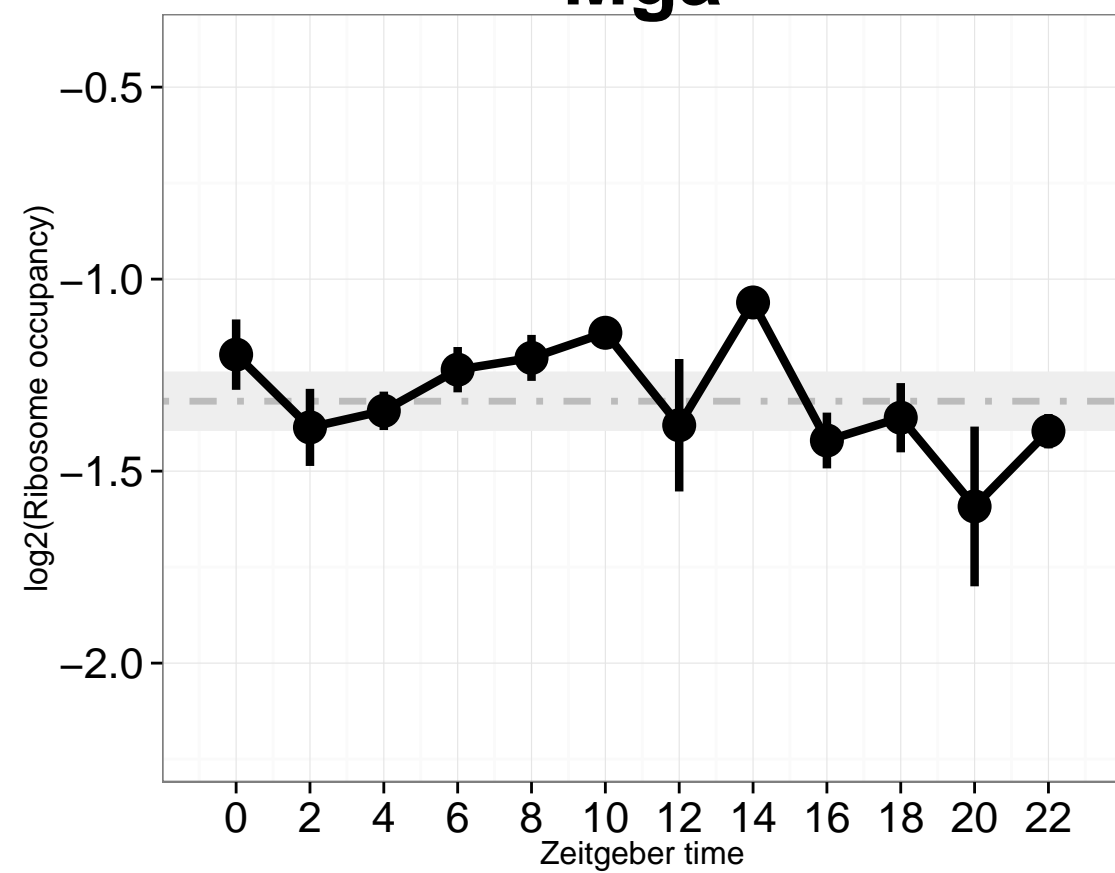

Supplement: Supplementary file 588 [file 1]

# Dnah5

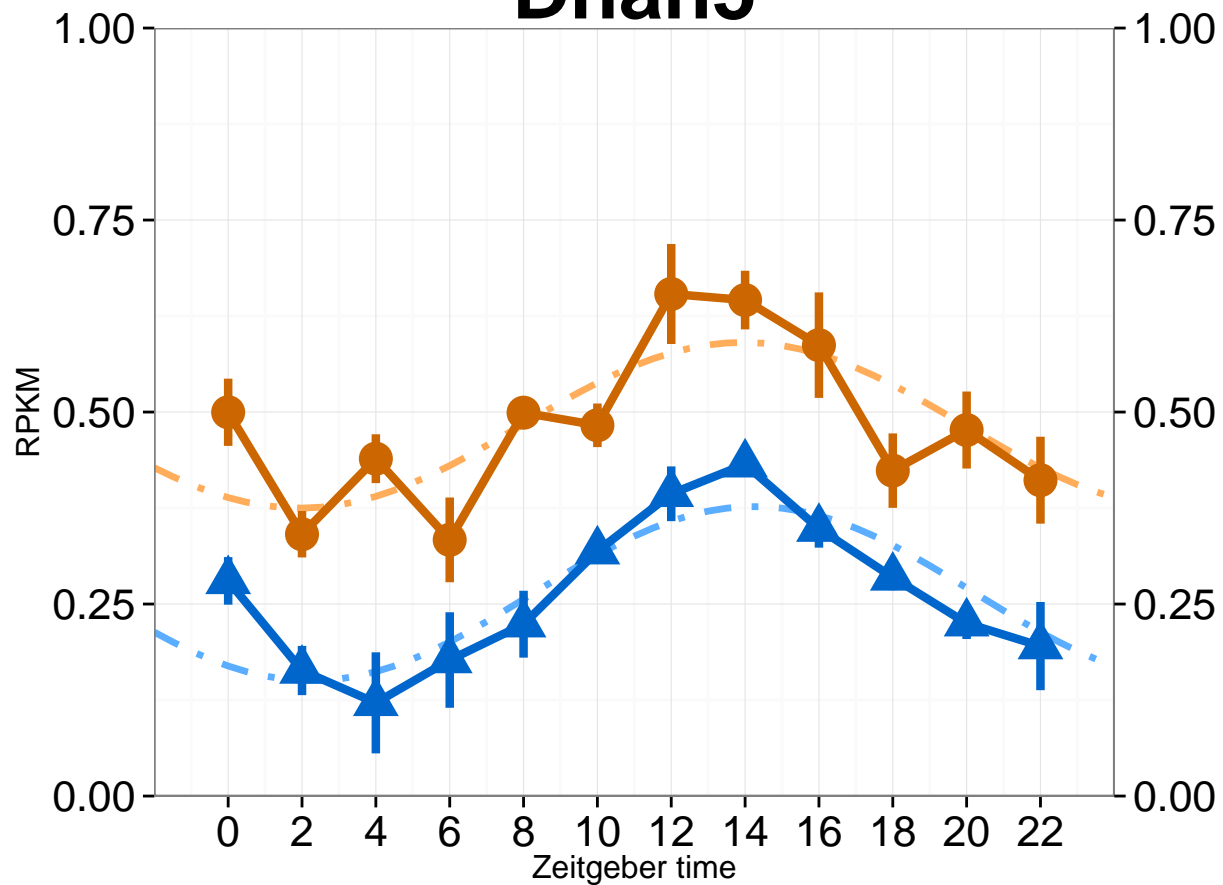

# Dnah5

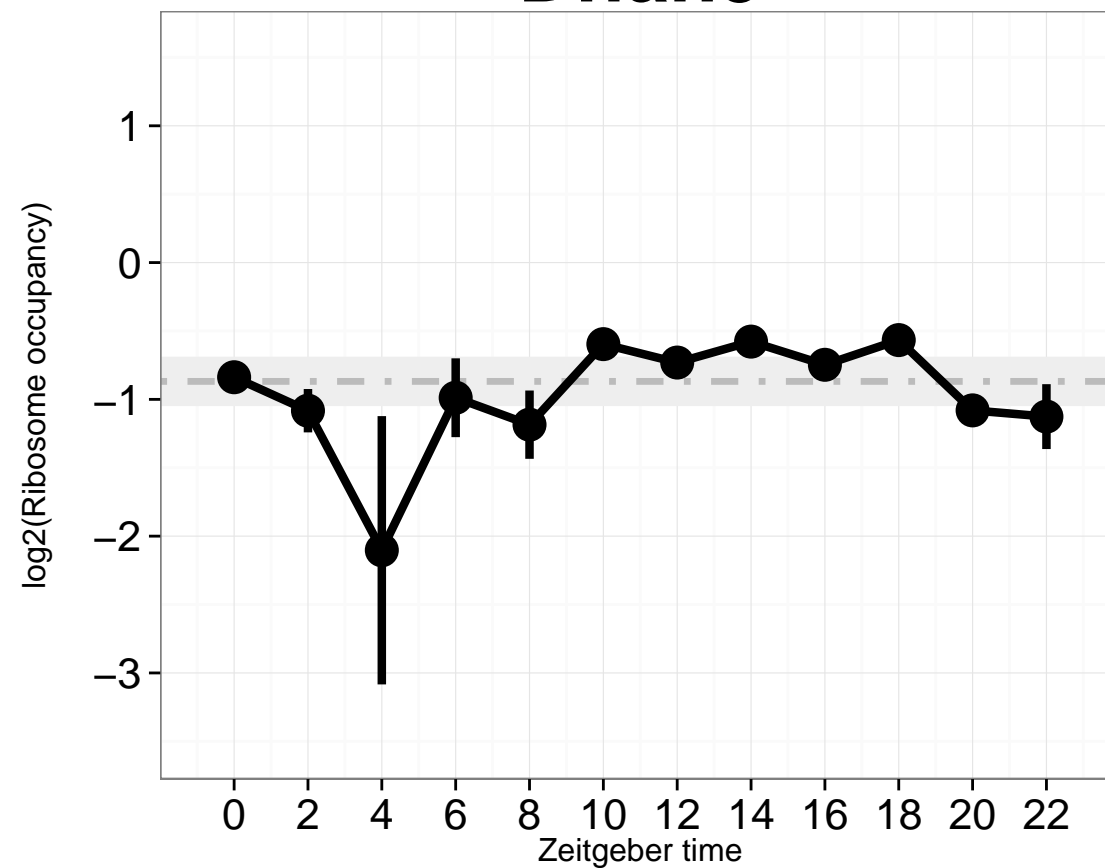

Supplement: Supplementary file 589 [file 1]

# Mvb12b

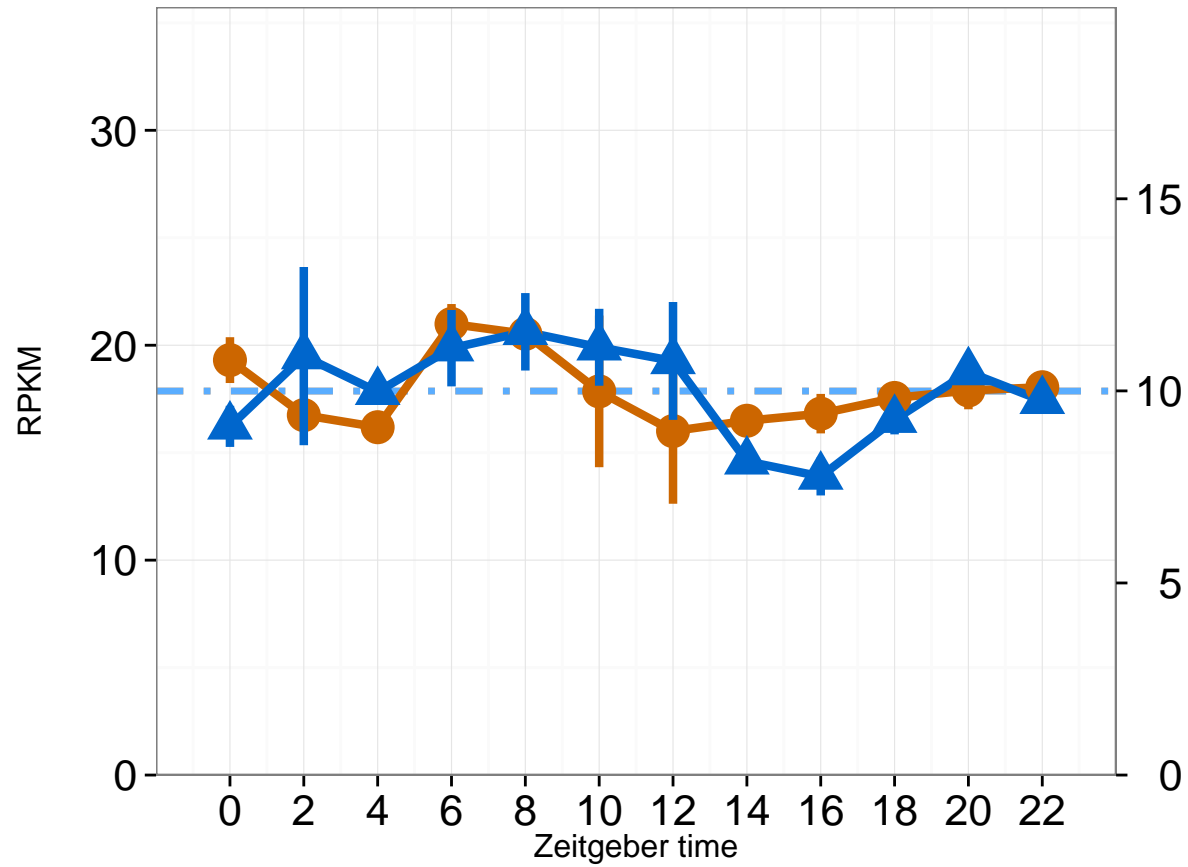

# Mvb12b

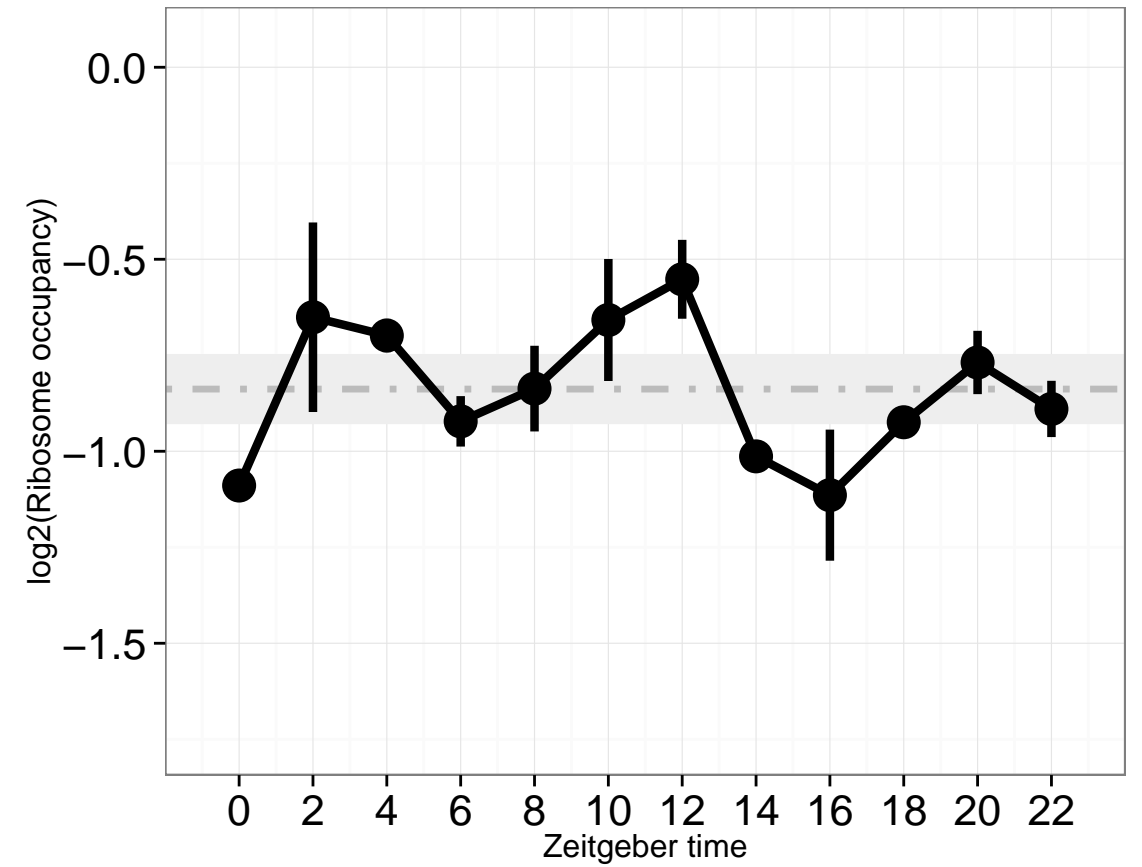

Supplement: Supplementary file 590 [file 1]

# Zfp2

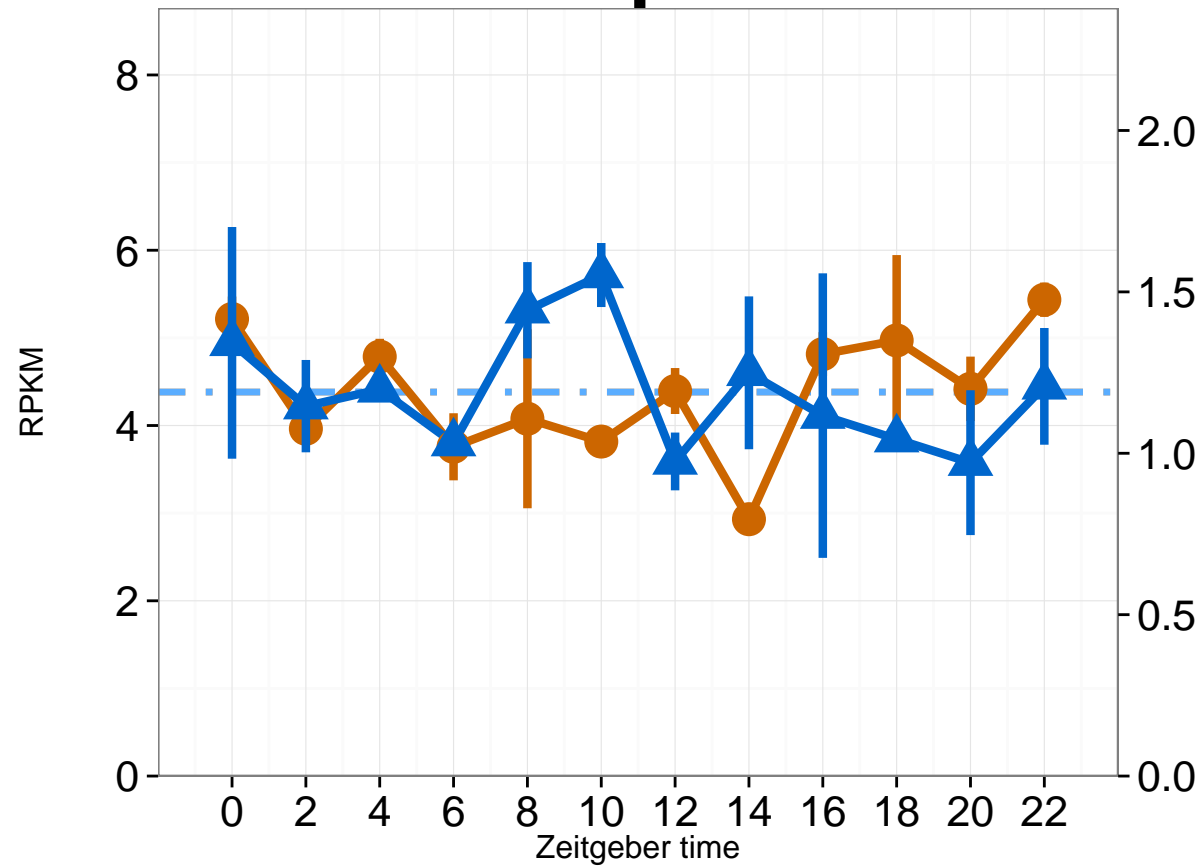

# Zfp2

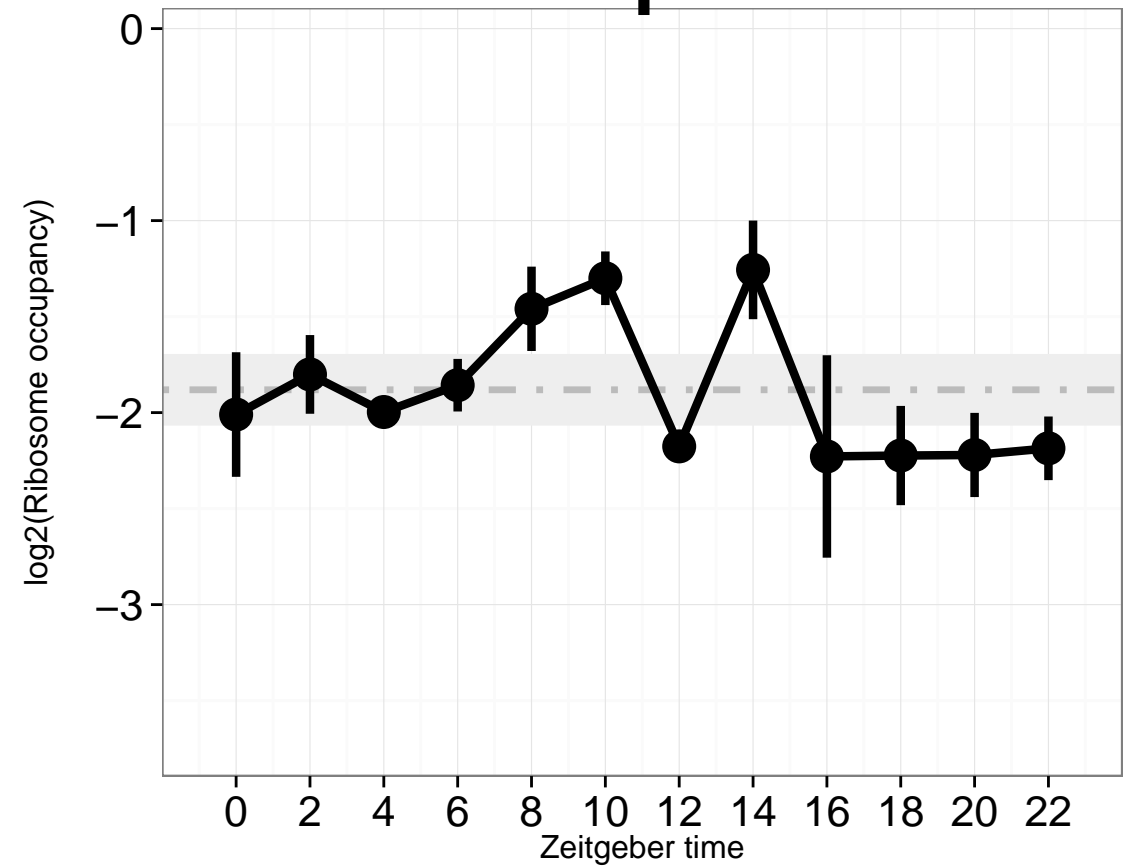

Supplement: Supplementary file 591 [file 1]

## Ebi3 TR

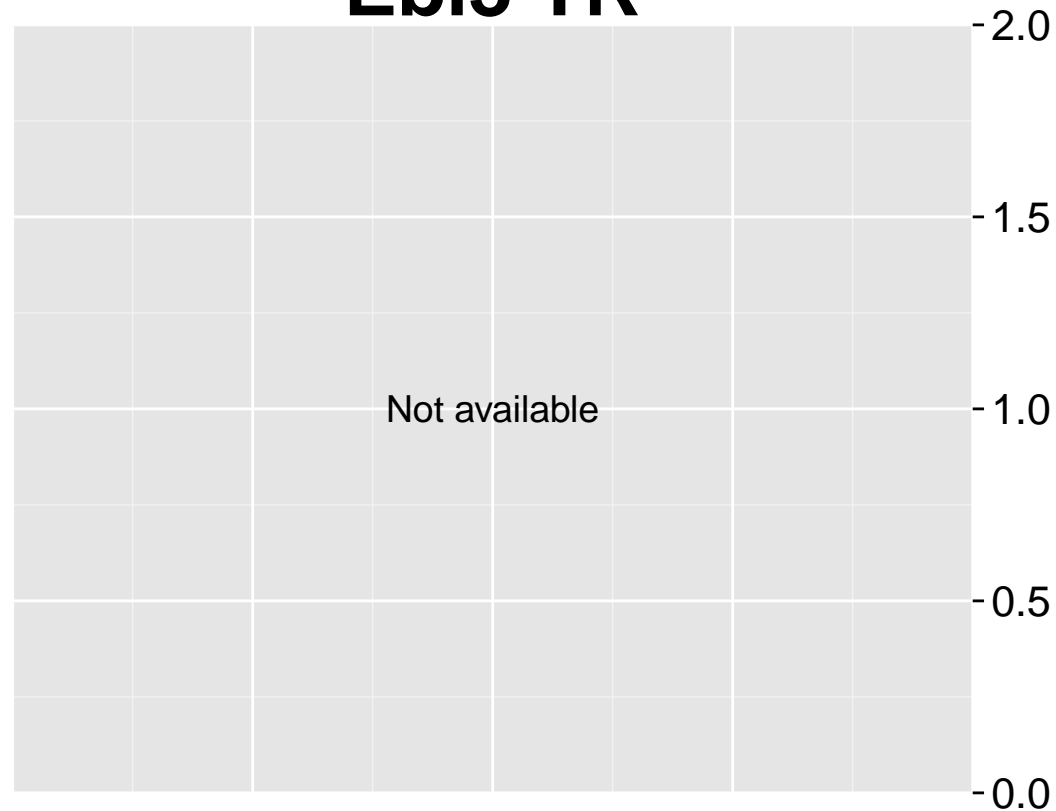

## Ebi3 $\log_2(\text{Ribosome occupancy})$

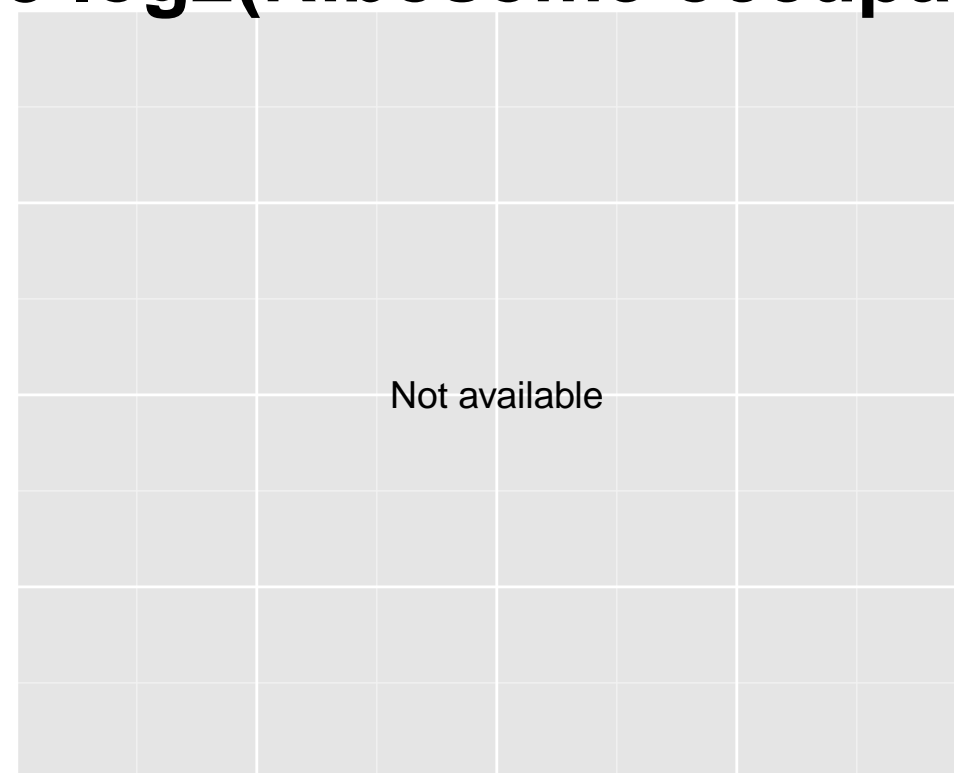

Supplement: Supplementary file 592 [file 1]

## Arl2bp

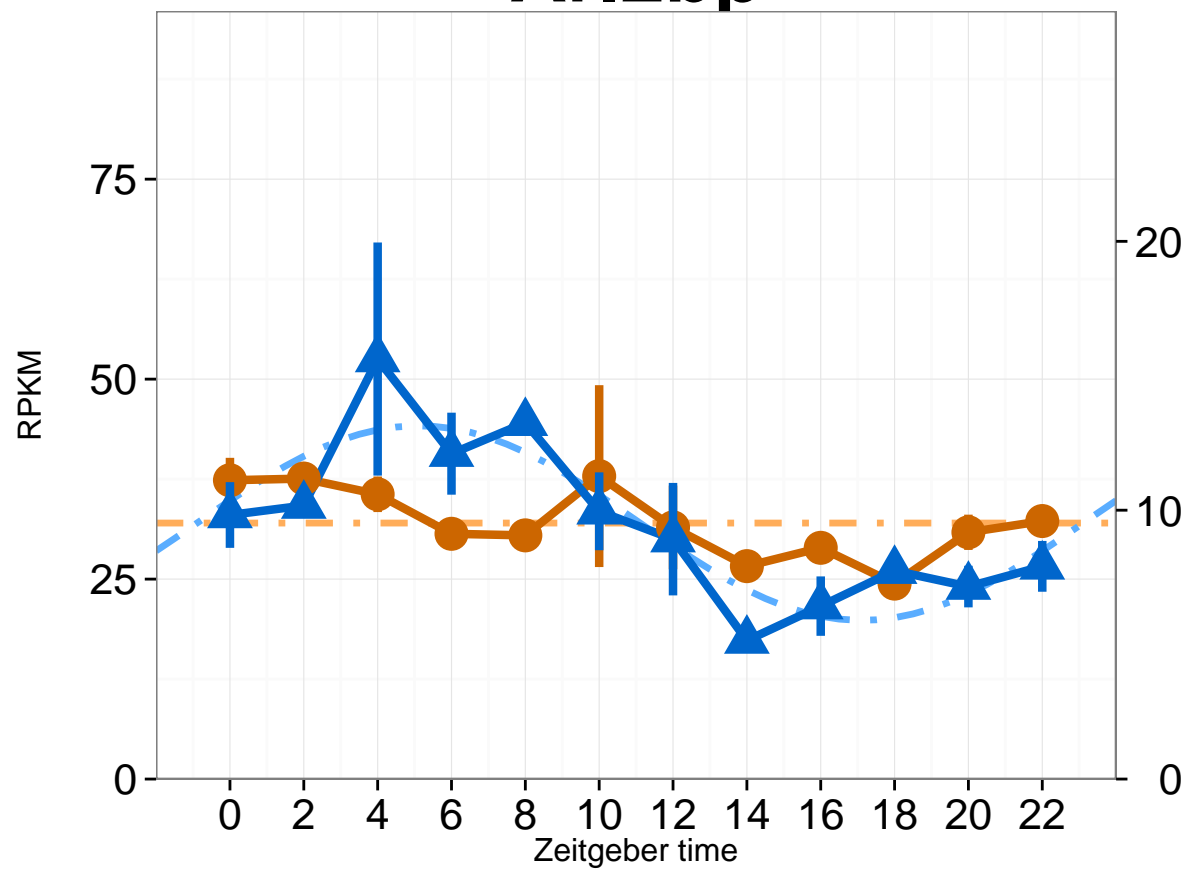

## Arl2bp

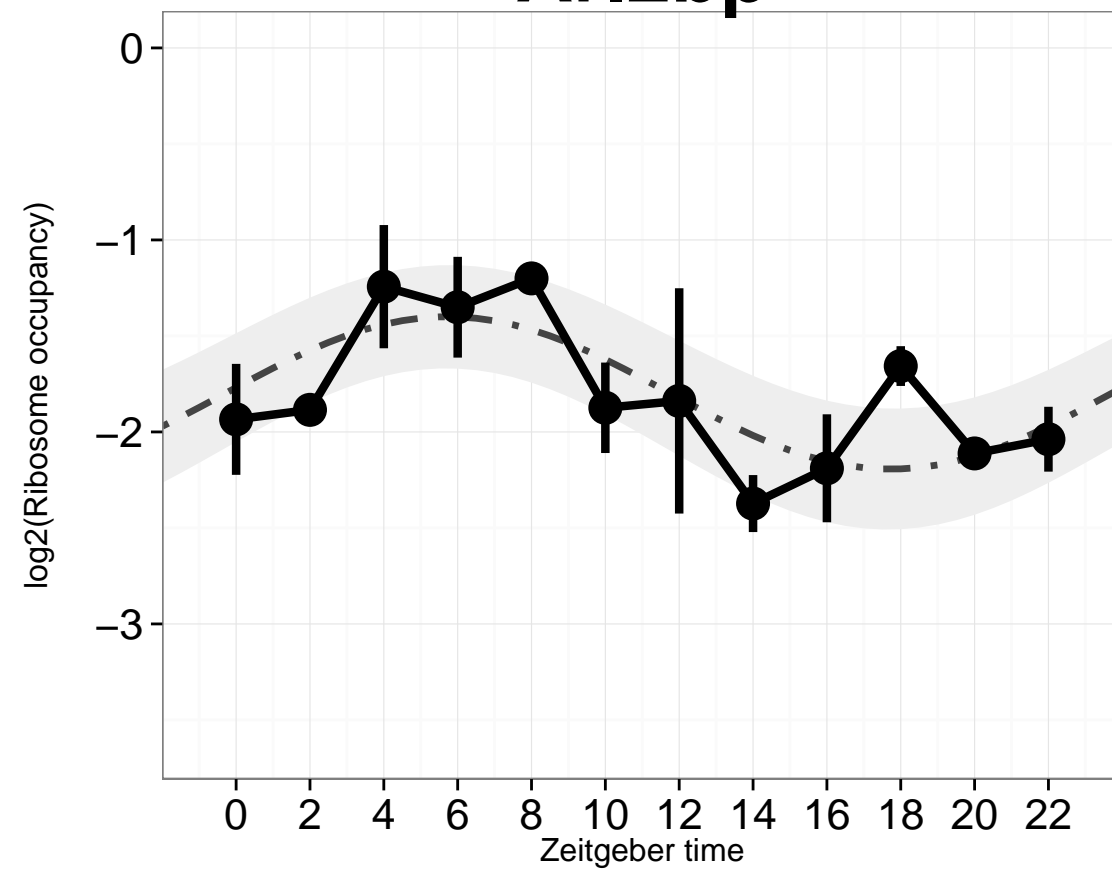

Supplement: Supplementary file 593 [file 1]

# BC025446

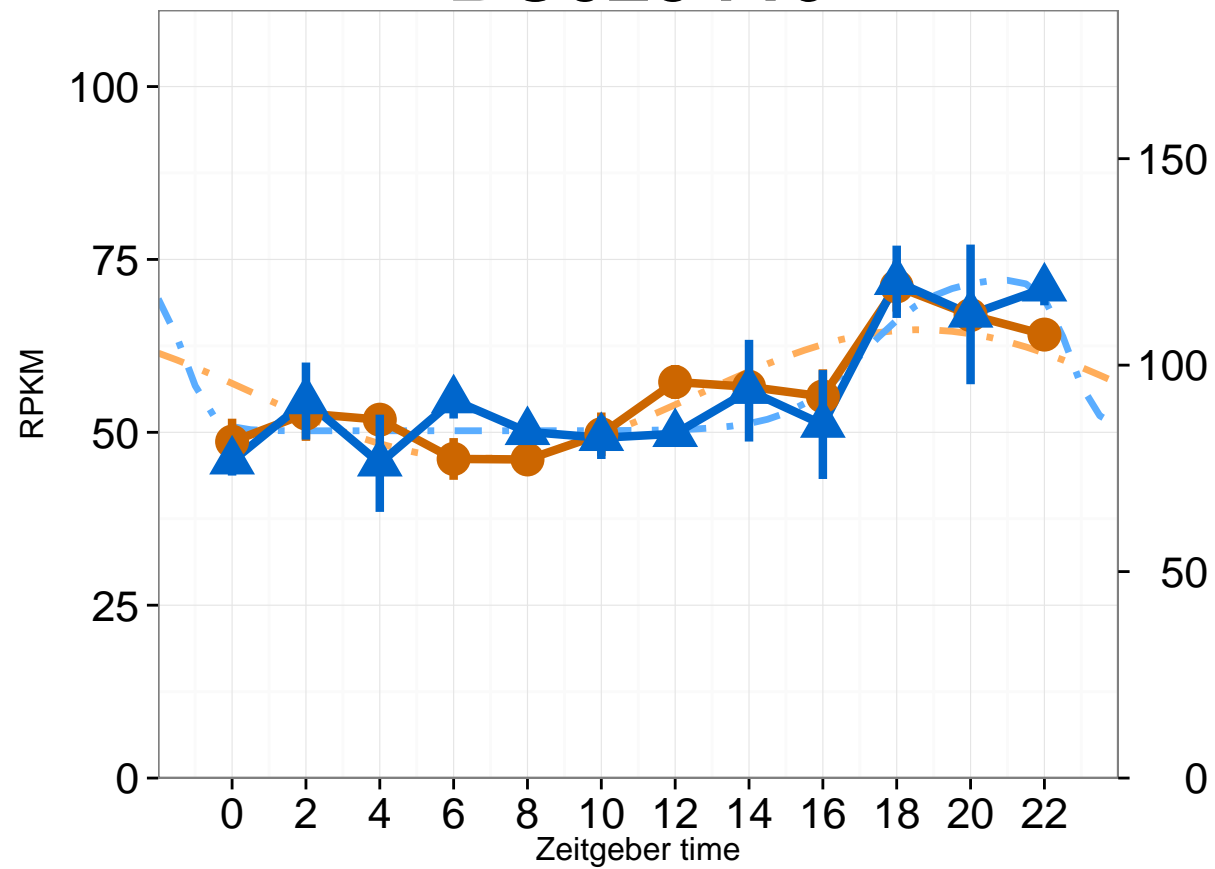

# BC025446

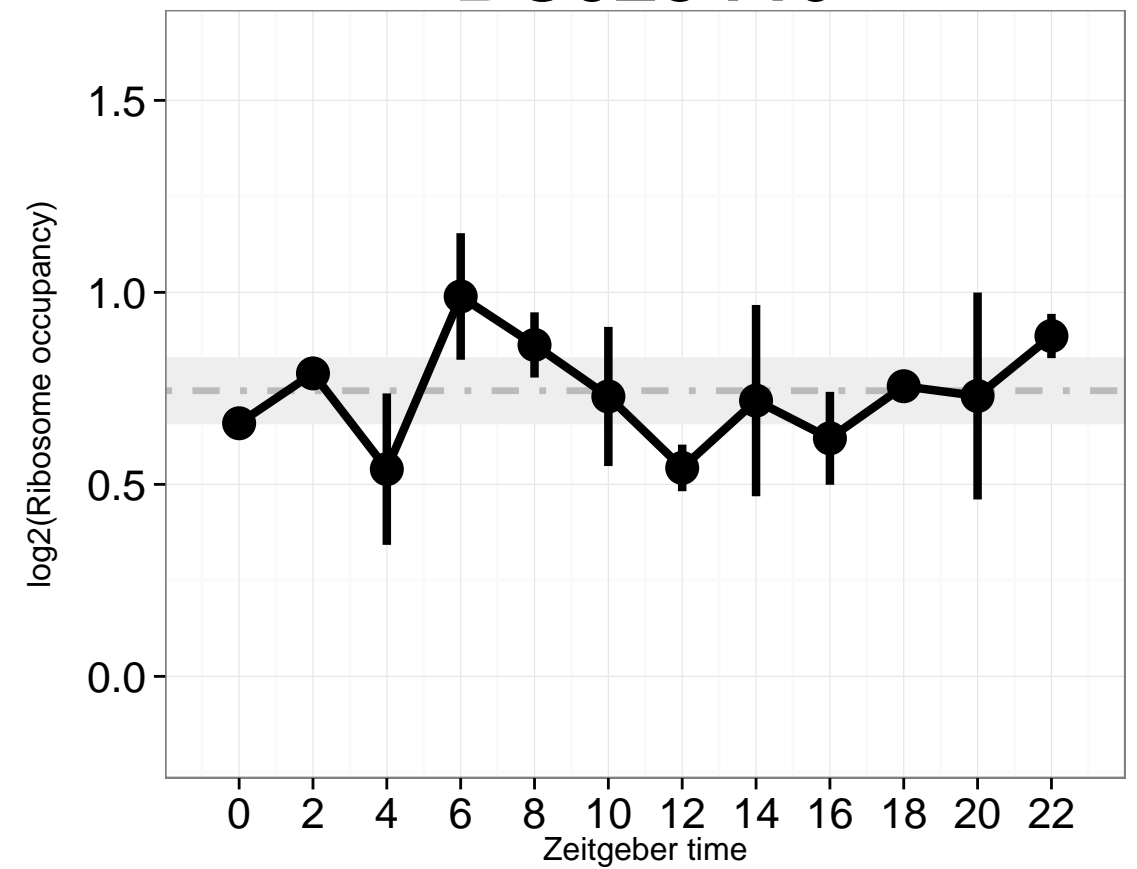

Supplement: Supplementary file 594 [file 1]

## Epsti1

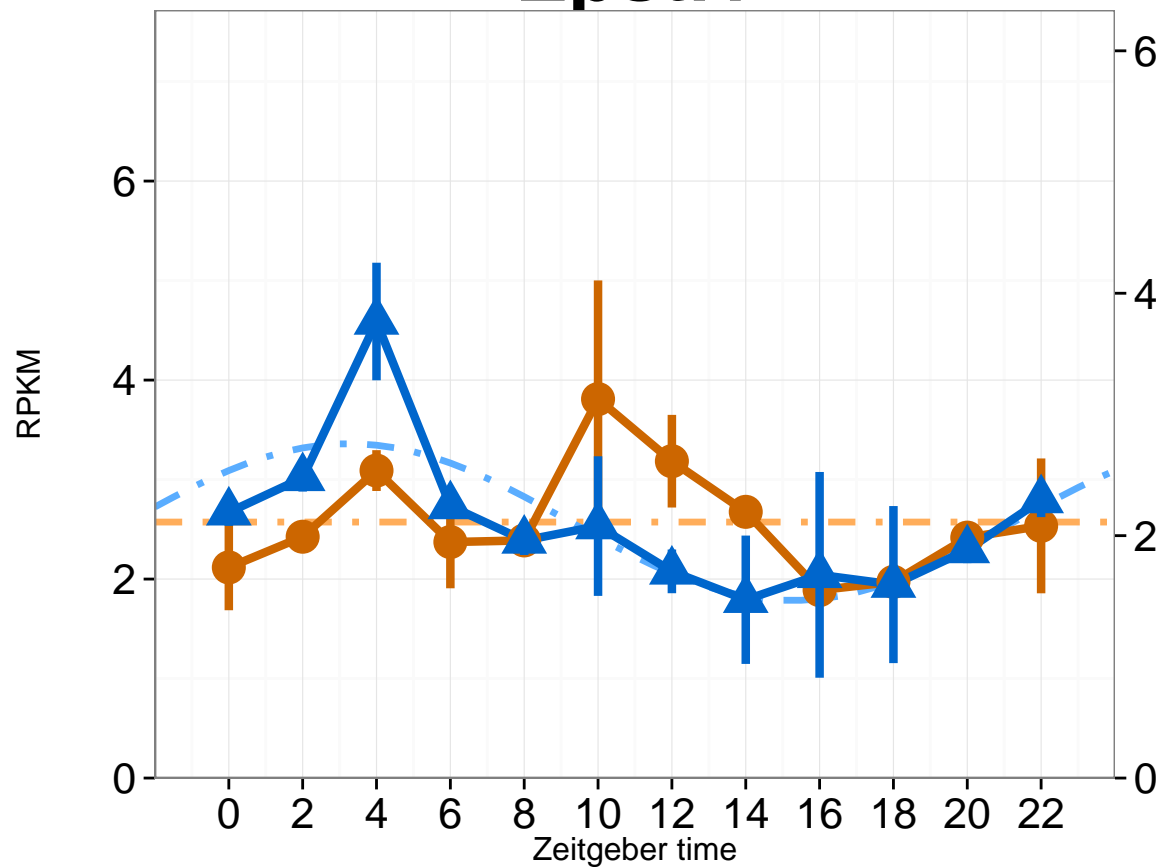

## Epsti1

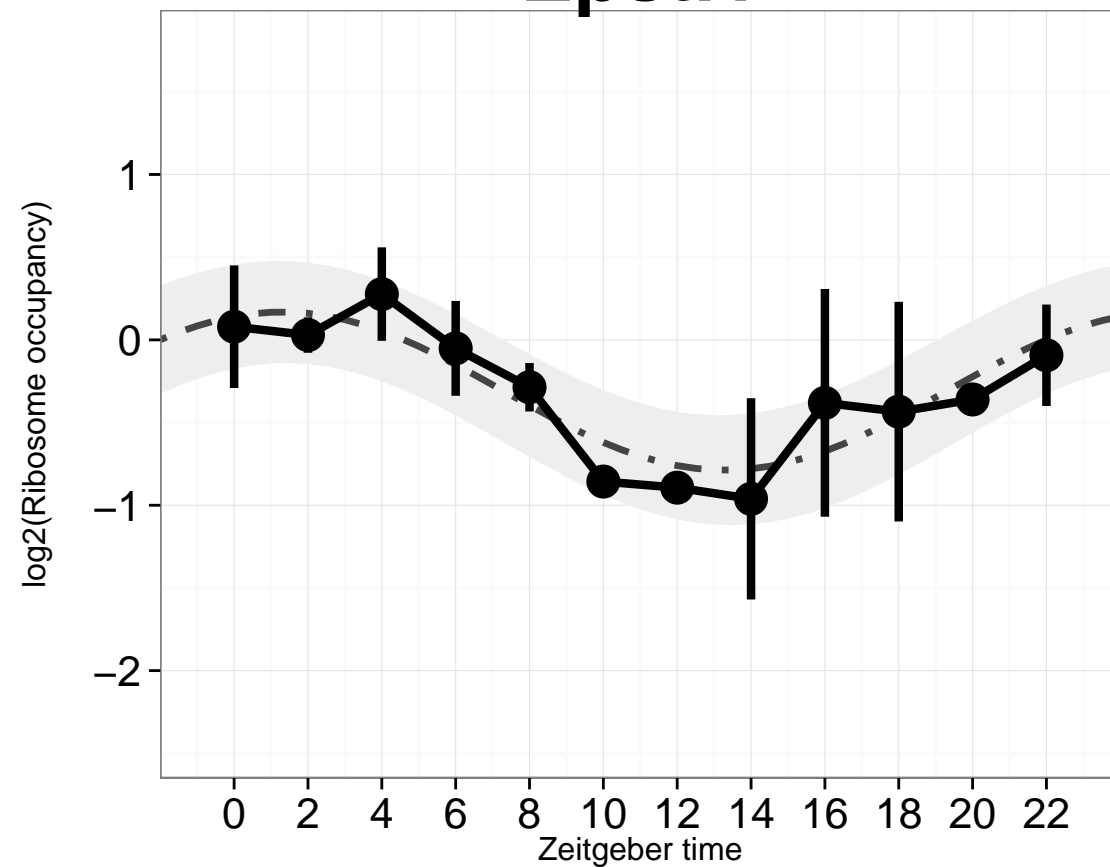

Supplement: Supplementary file 595 [file 1]

# Tmem47

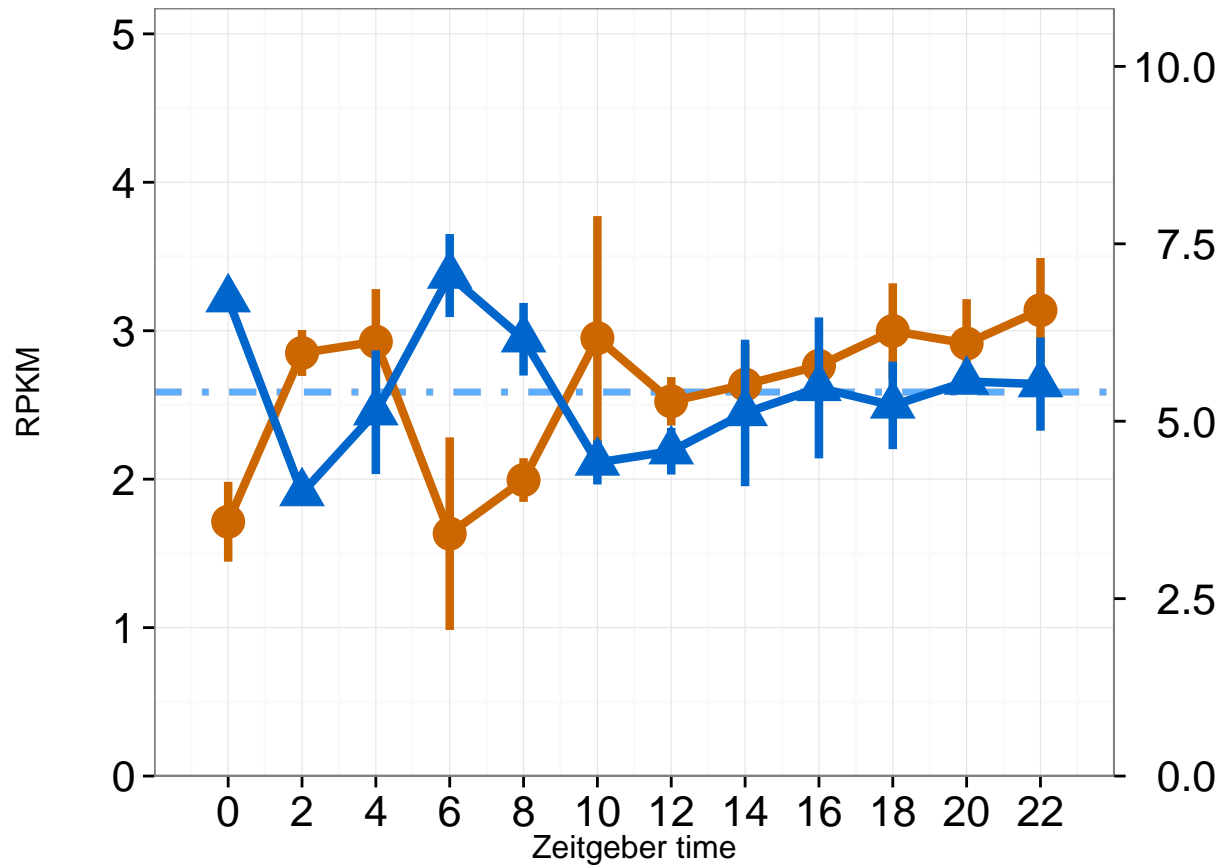

# Tmem47

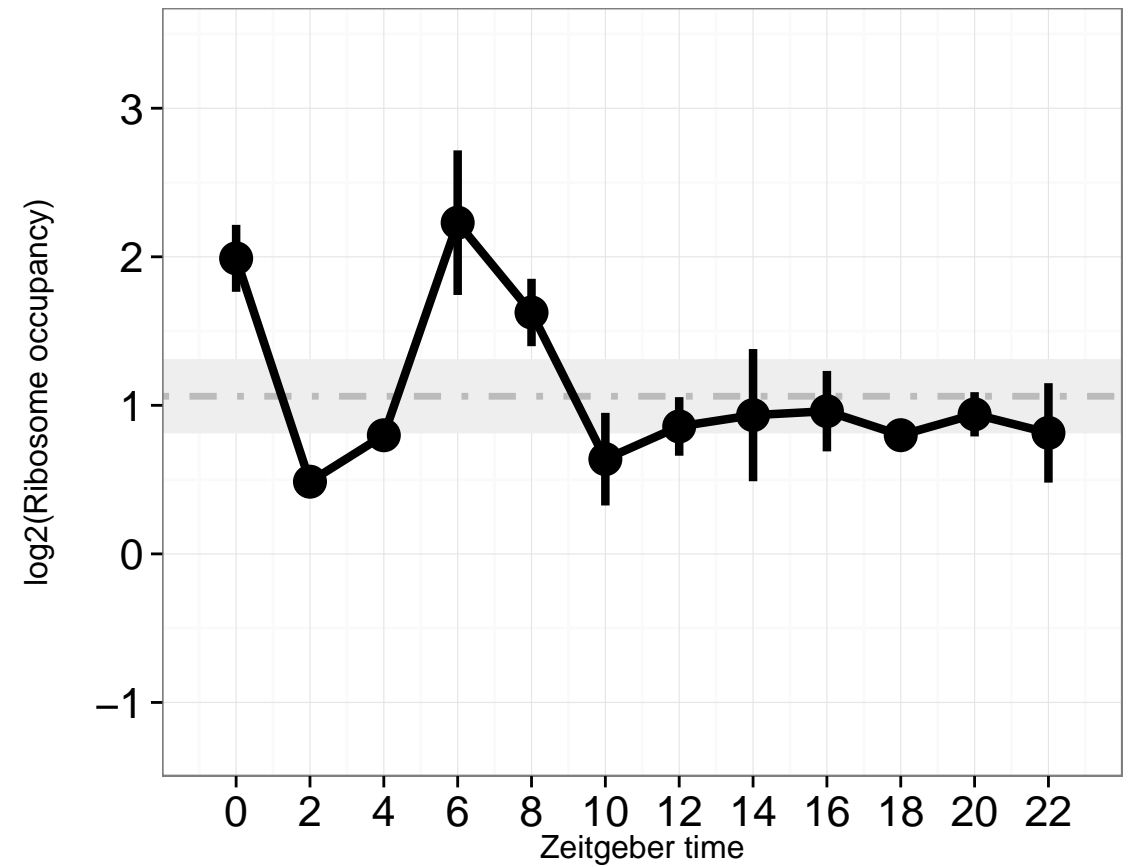

Supplement: Supplementary file 596 [file 1]

# Prpf38b

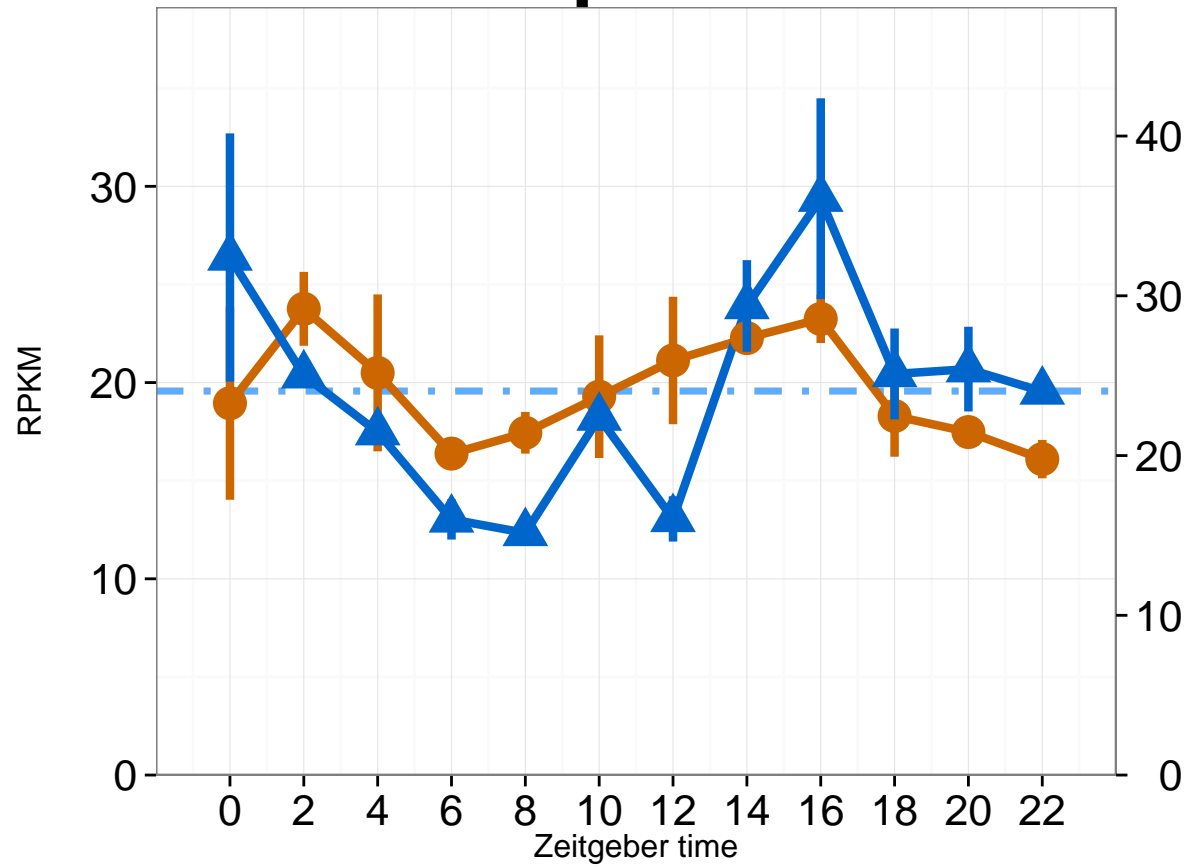

# Prpf38b

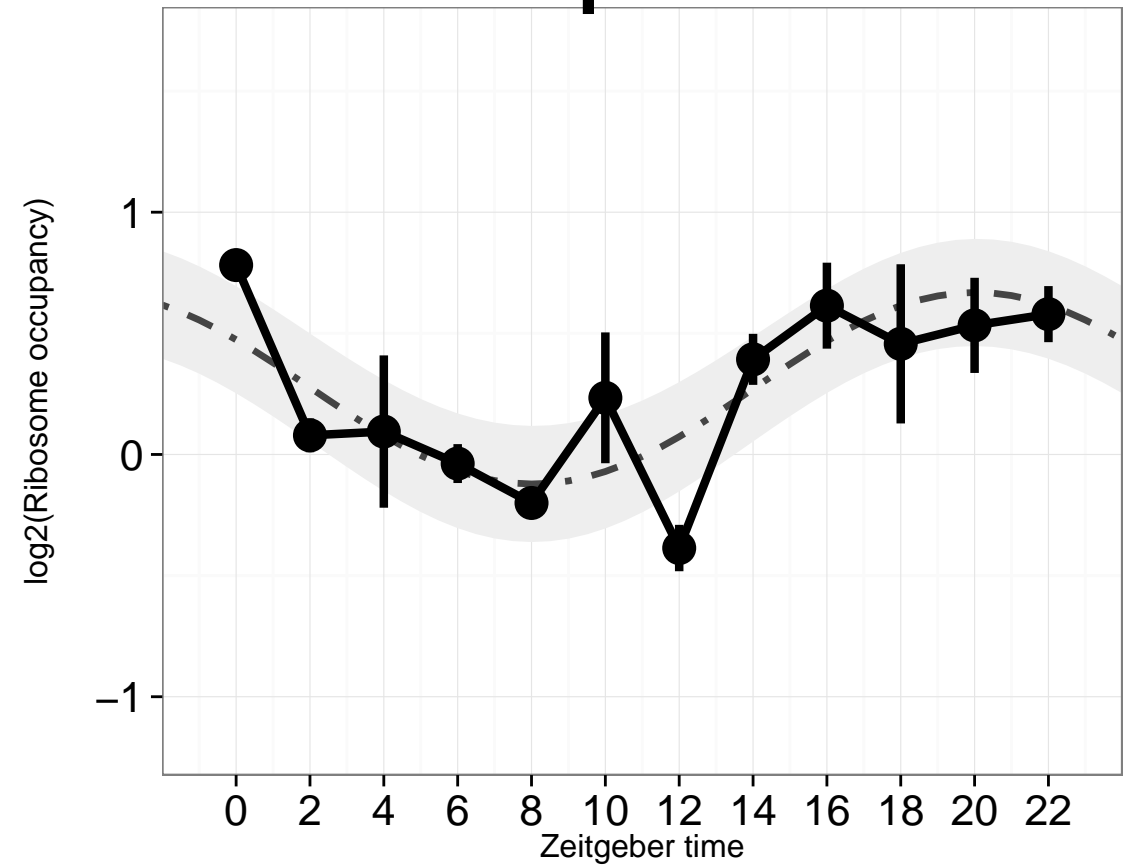

Supplement: Supplementary file 597 [file 1]

## Rnf128

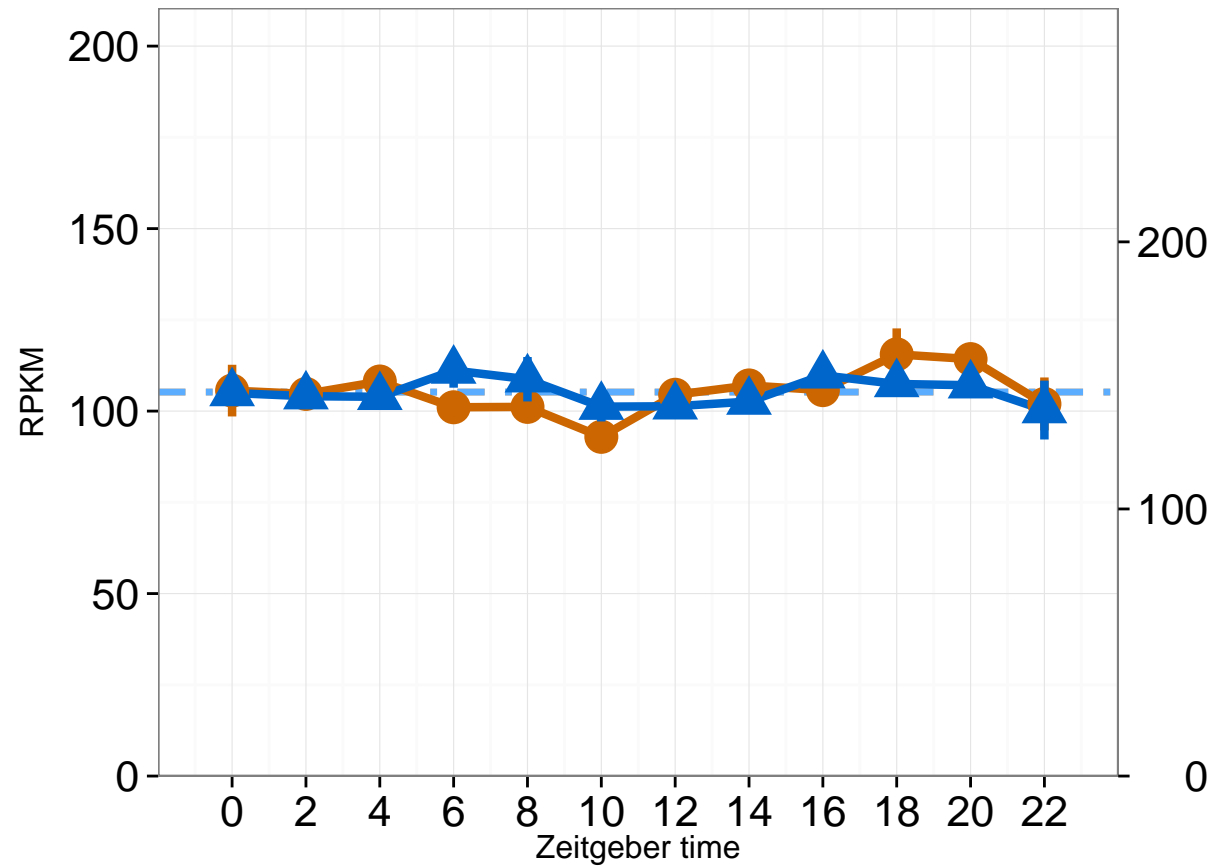

## Rnf128

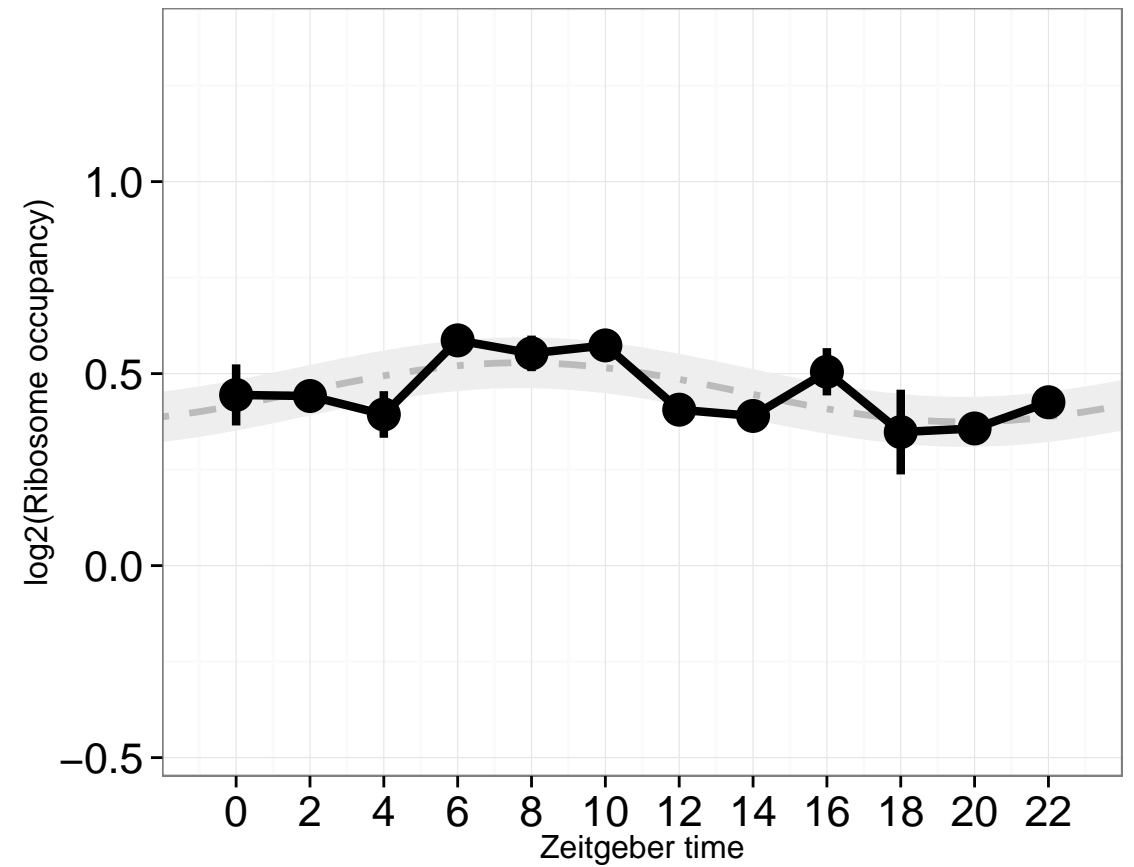

Supplement: Supplementary file 598 [file 1]

# Zfp619

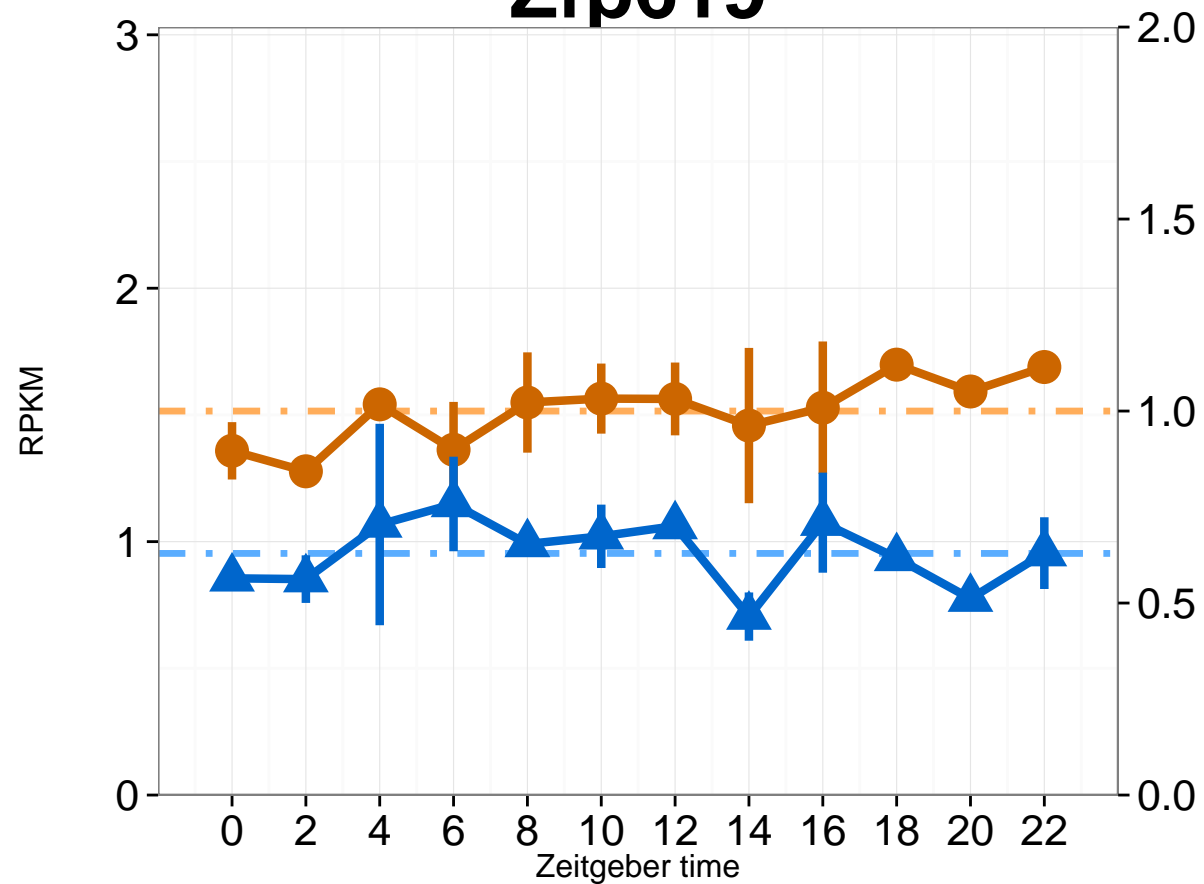

# Zfp619

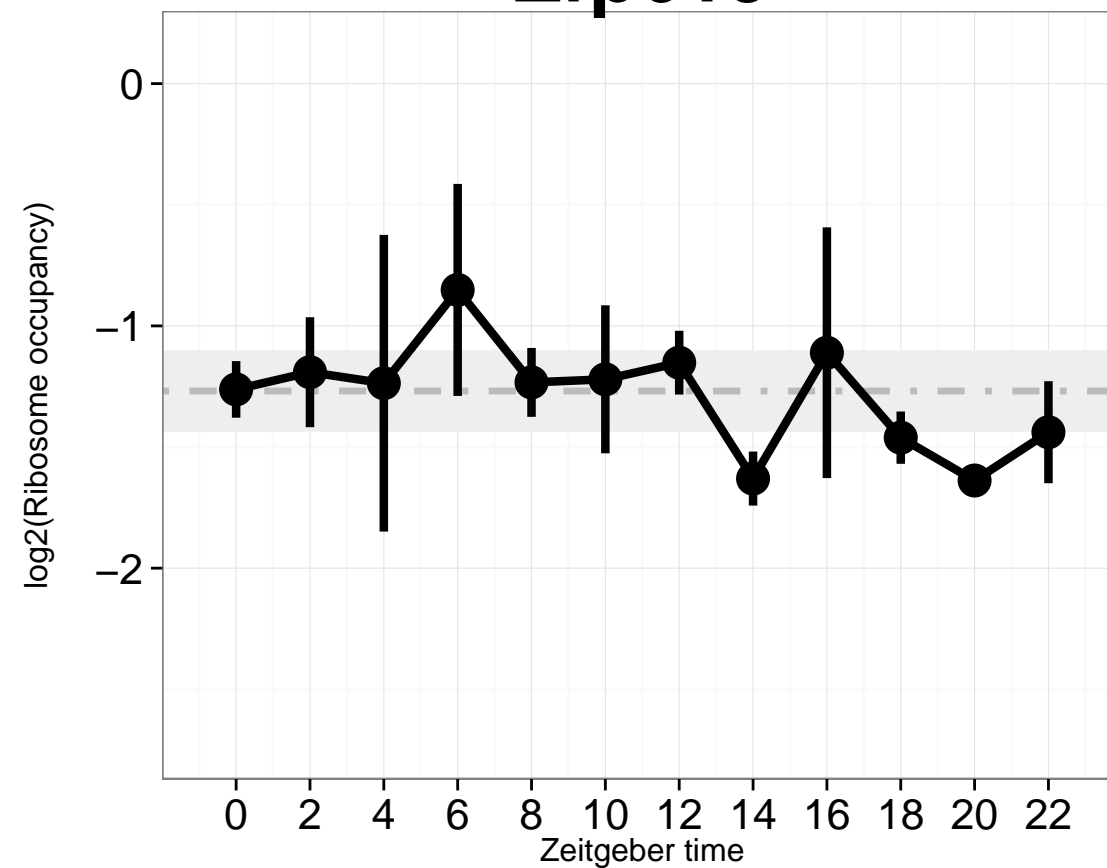

Supplement: Supplementary file 599 [file 1]

# Hist1h2bk

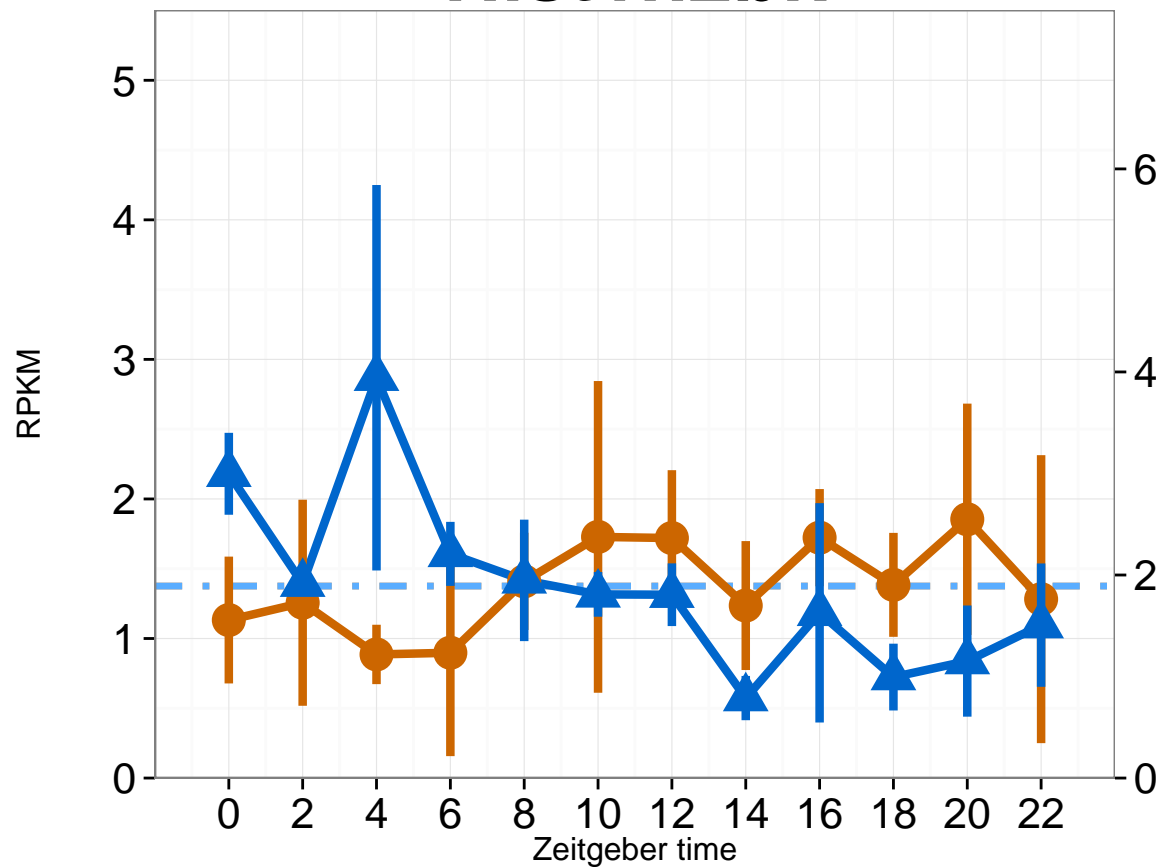

# Hist1h2bk

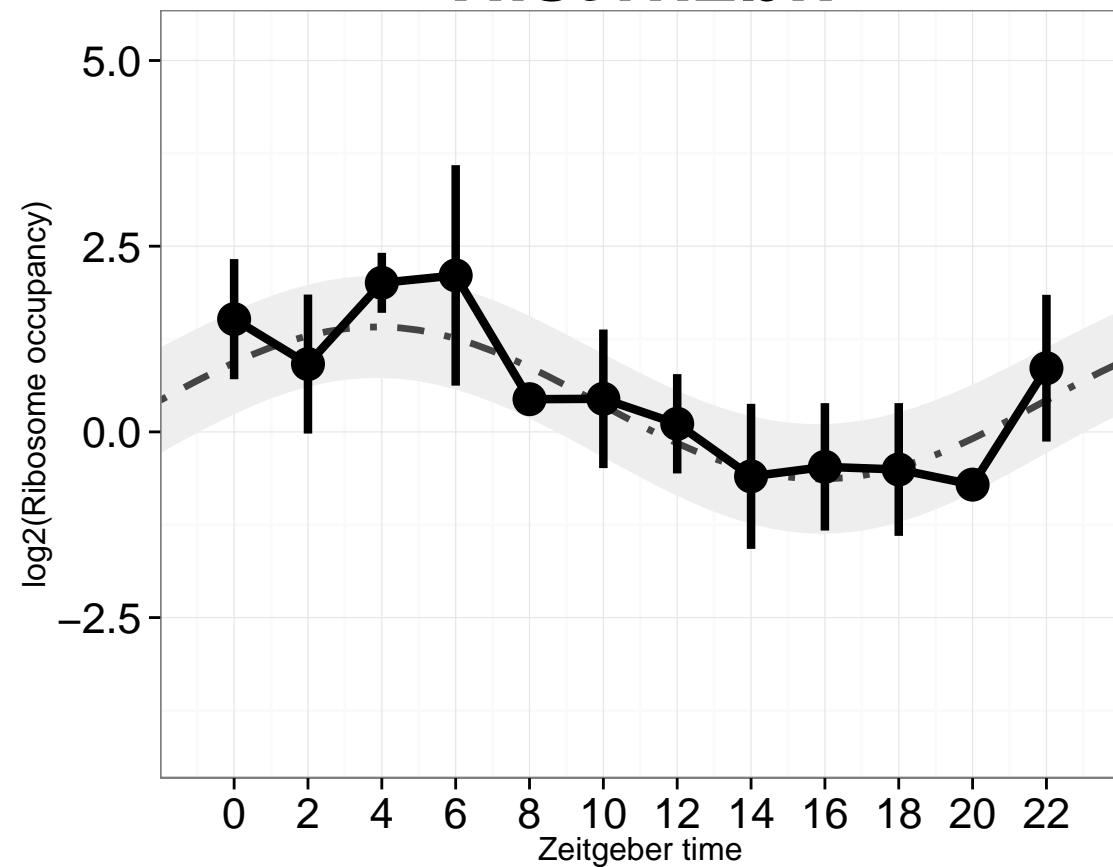

Supplement: Supplementary file 600 [file 1]

## Bcl7b

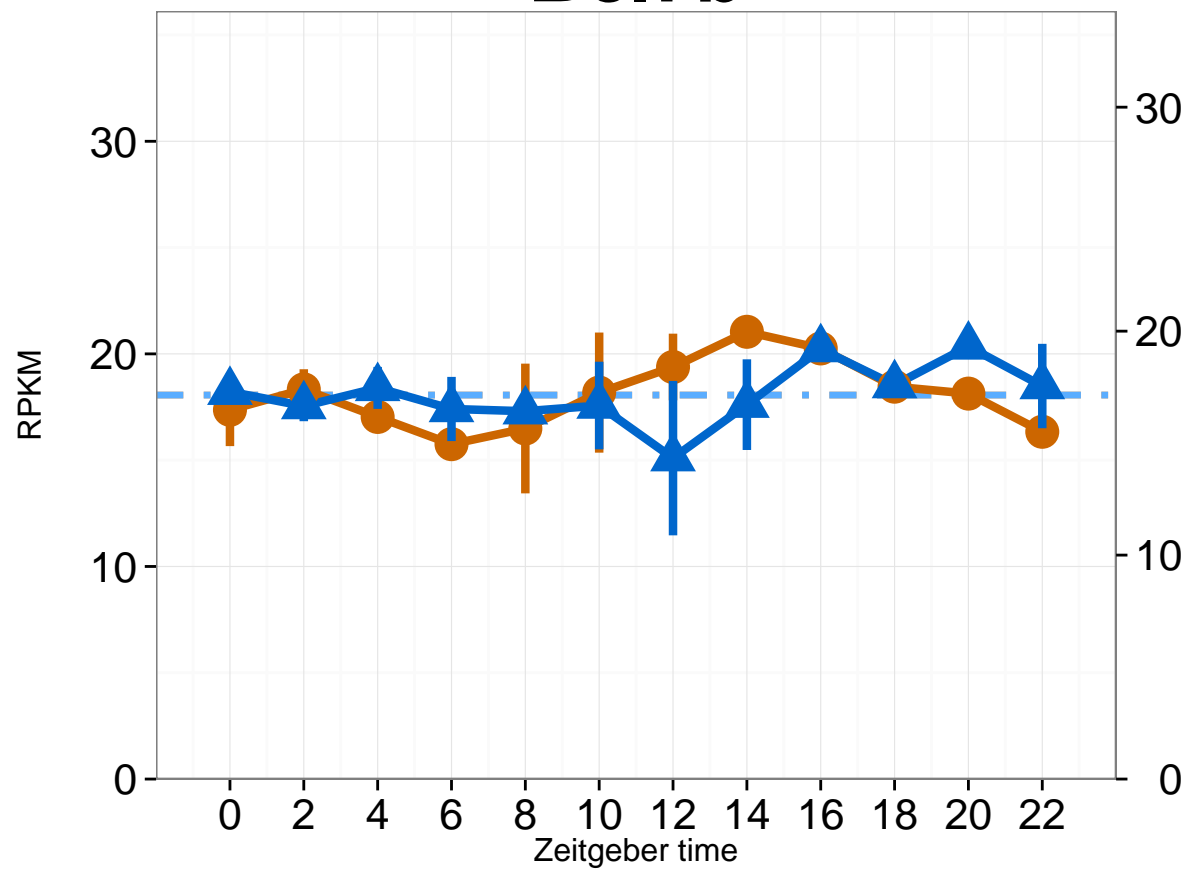

## Bcl7b

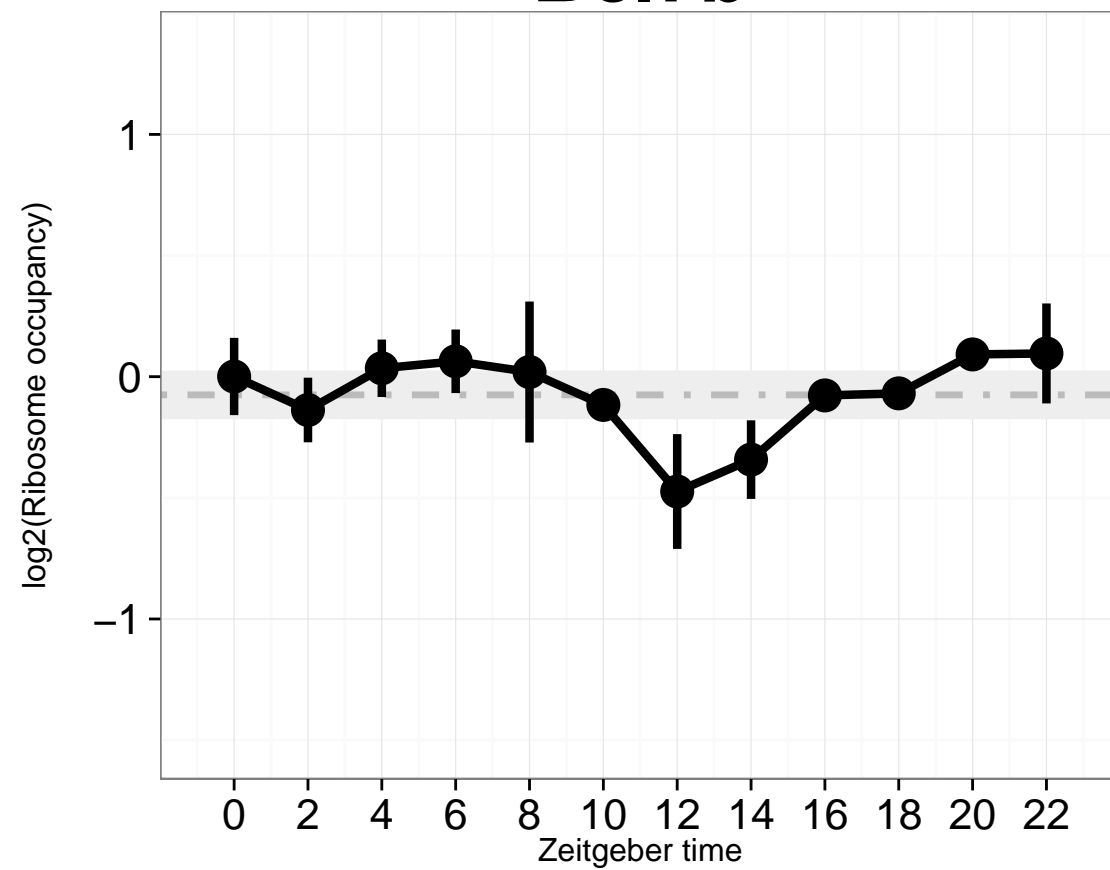

Supplement: Supplementary file 601 [file 1]

## Nkap

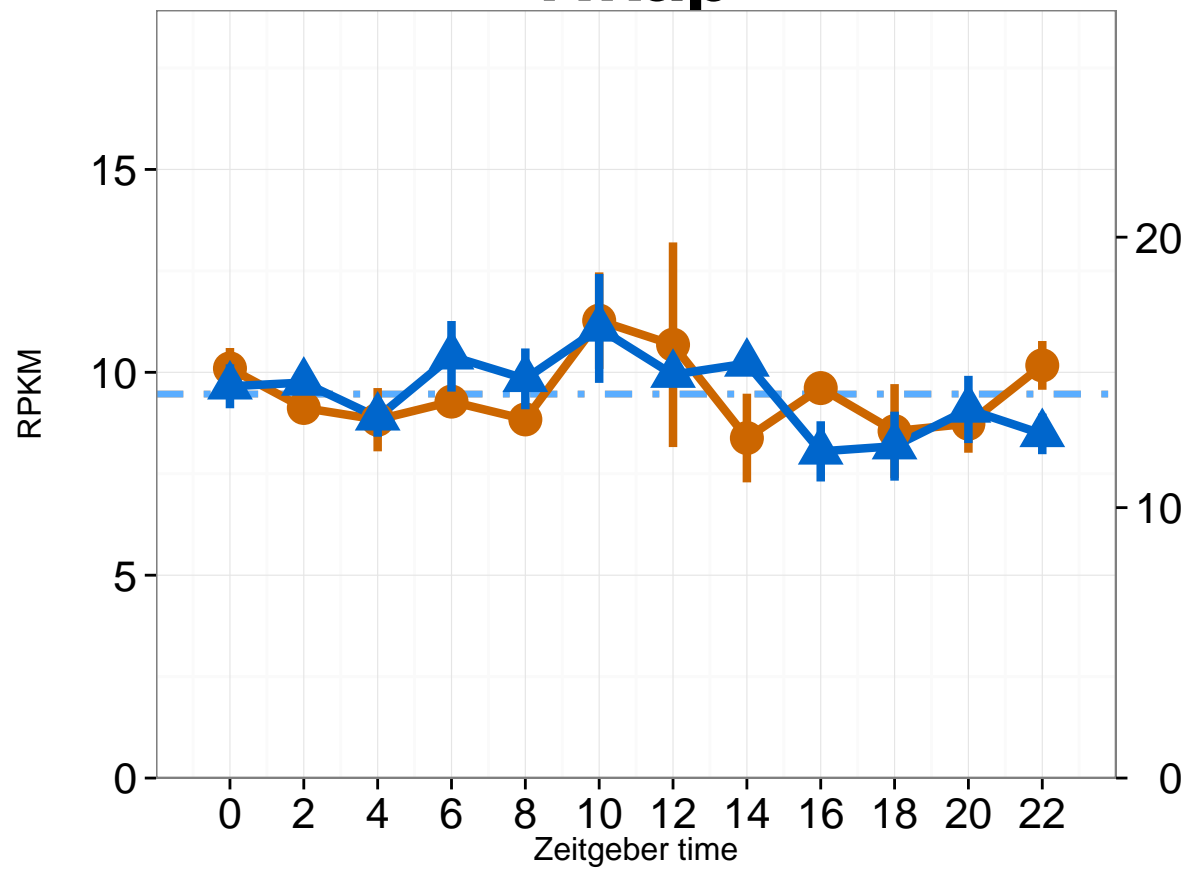

## Nkap

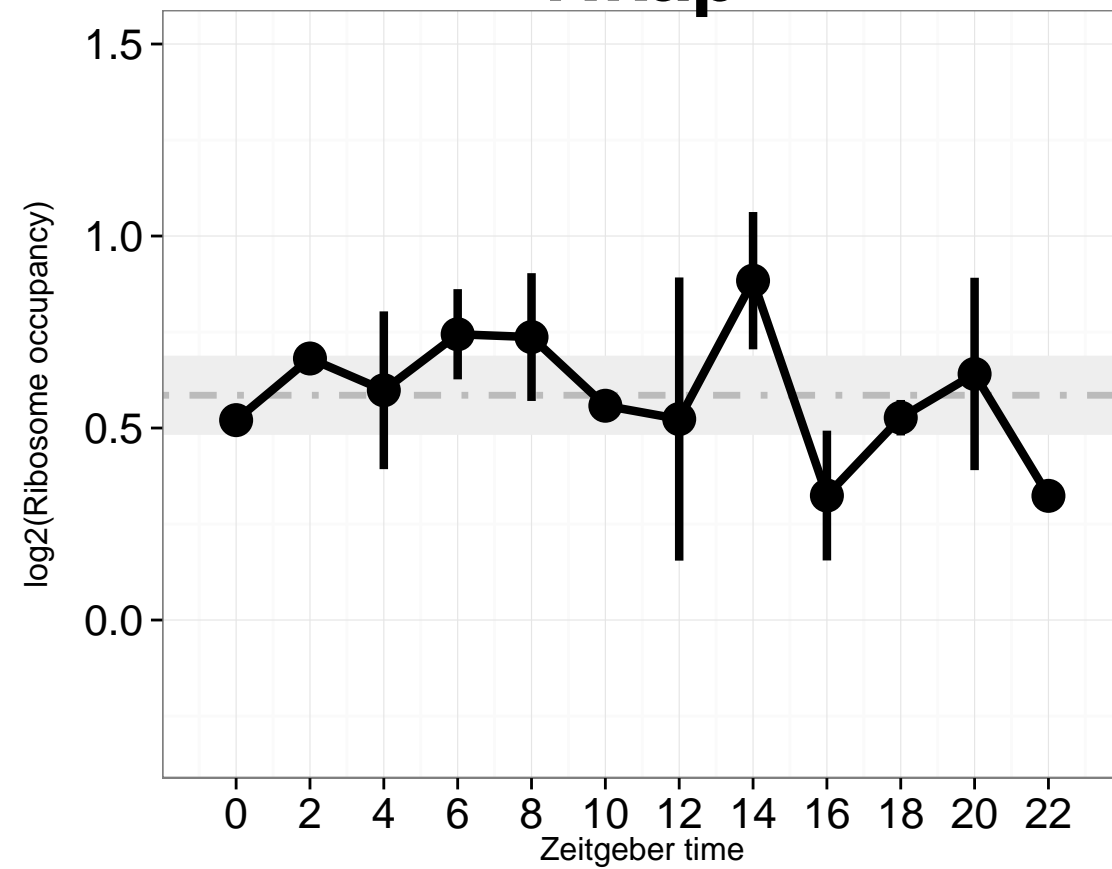

Supplement: Supplementary file 602 [file 1]

## Slc35f6

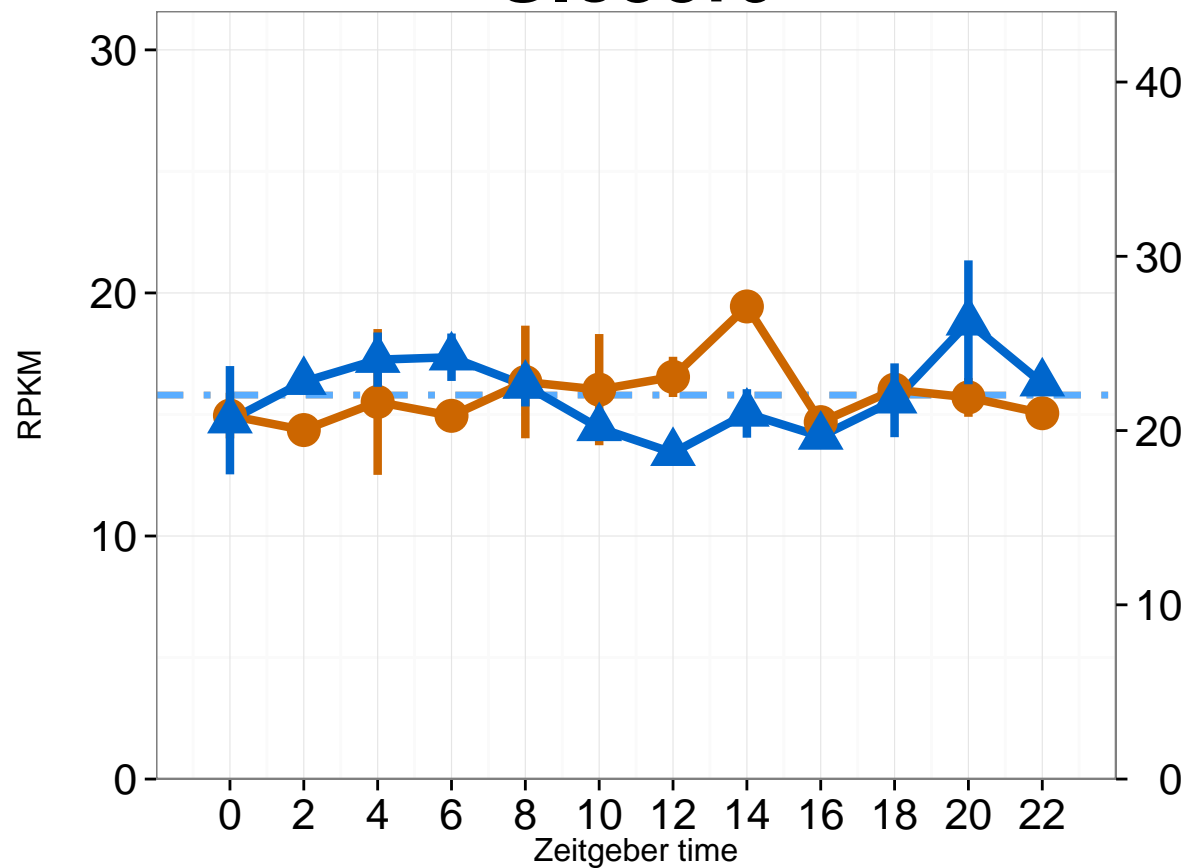

## Slc35f6

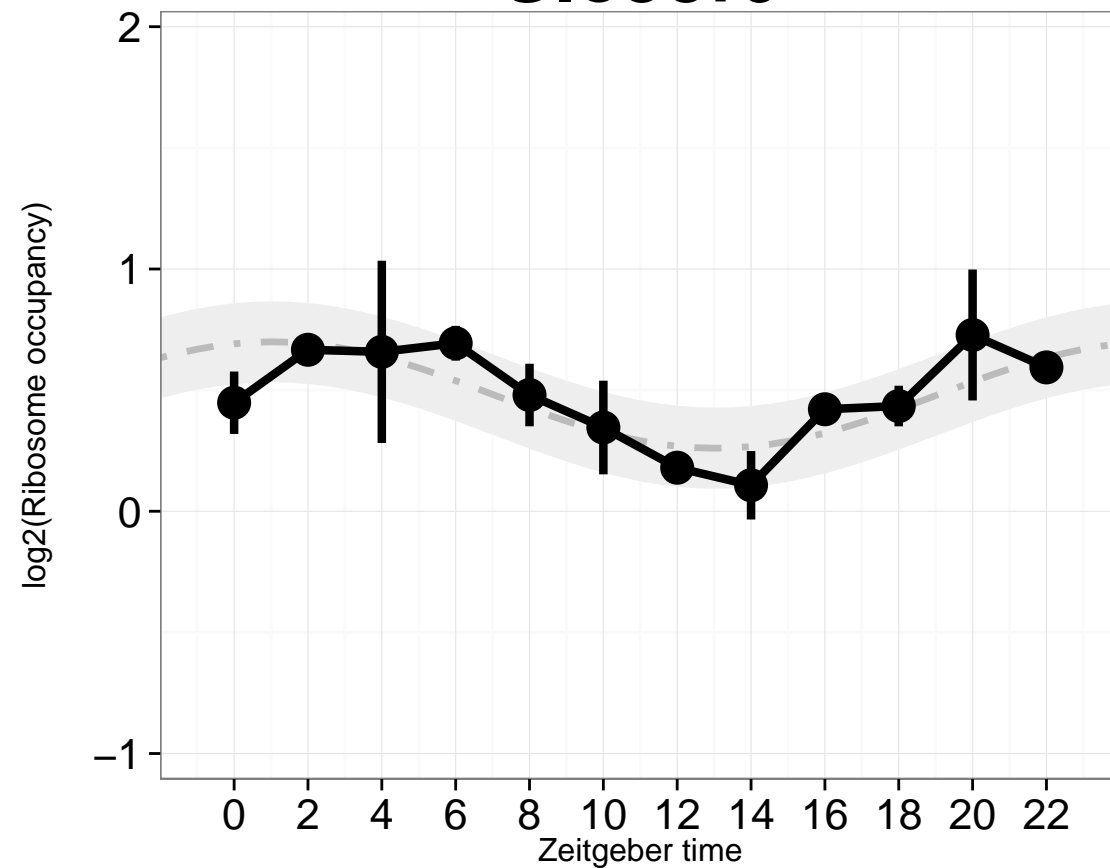

Supplement: Supplementary file 603 [file 1]
