# Supplementary material (part 7 of 133)
Source: publisher figshare collection journal article supplement (https://springernature.figshare.com/articles/dataset/_/4903193)

# Tram1

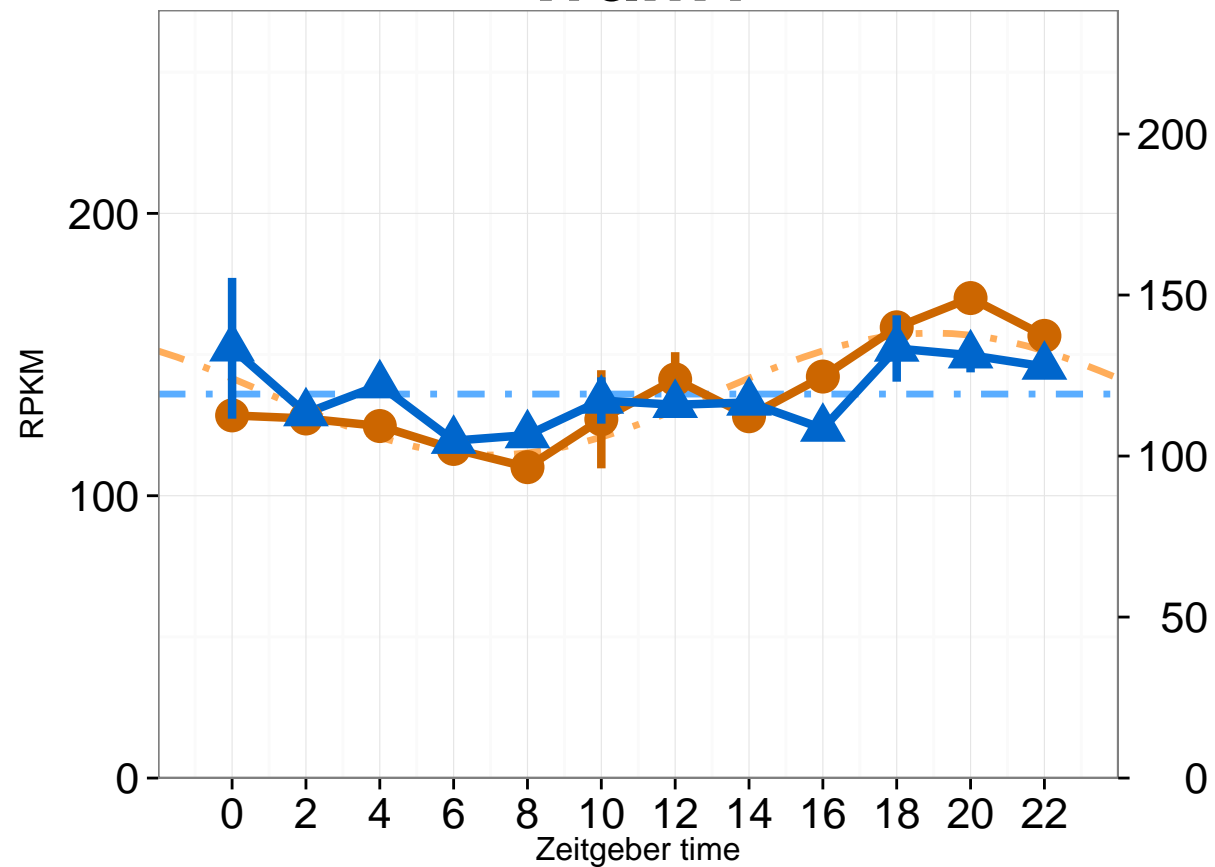

# Tram1

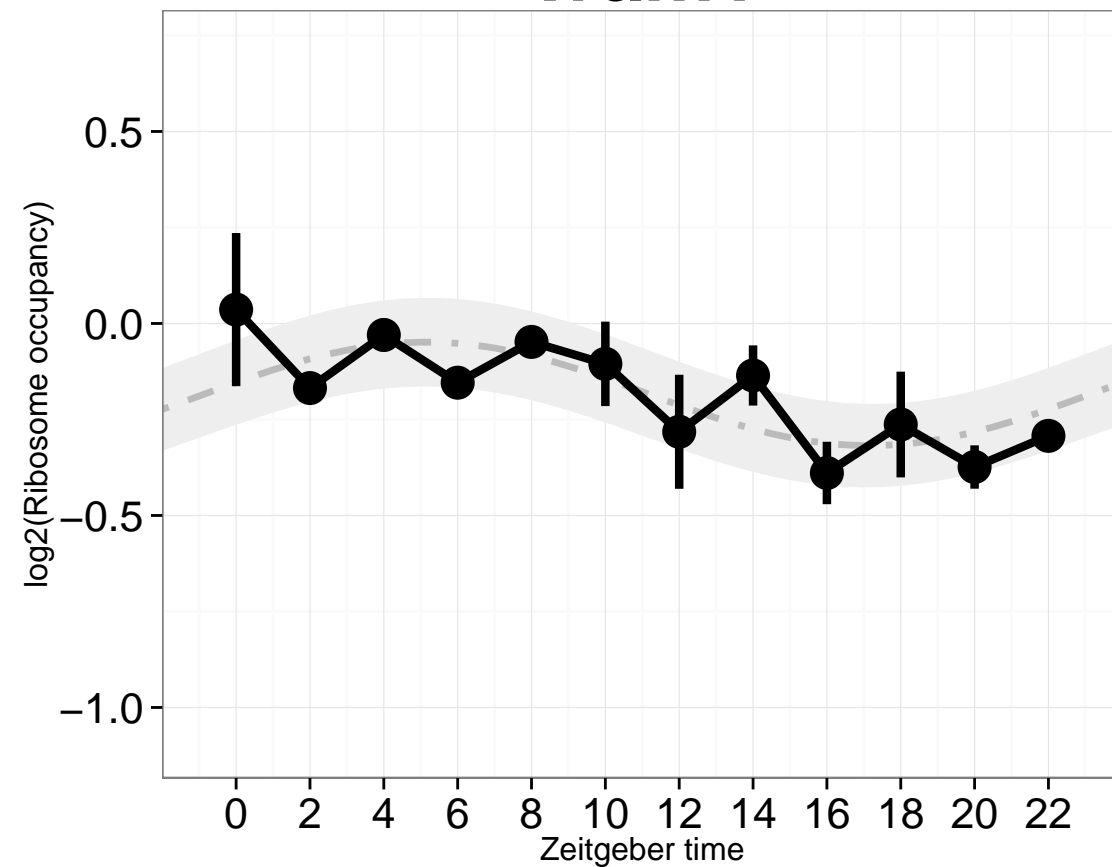

Supplement: Supplementary file 604 [file 1]

## Baiap2l2

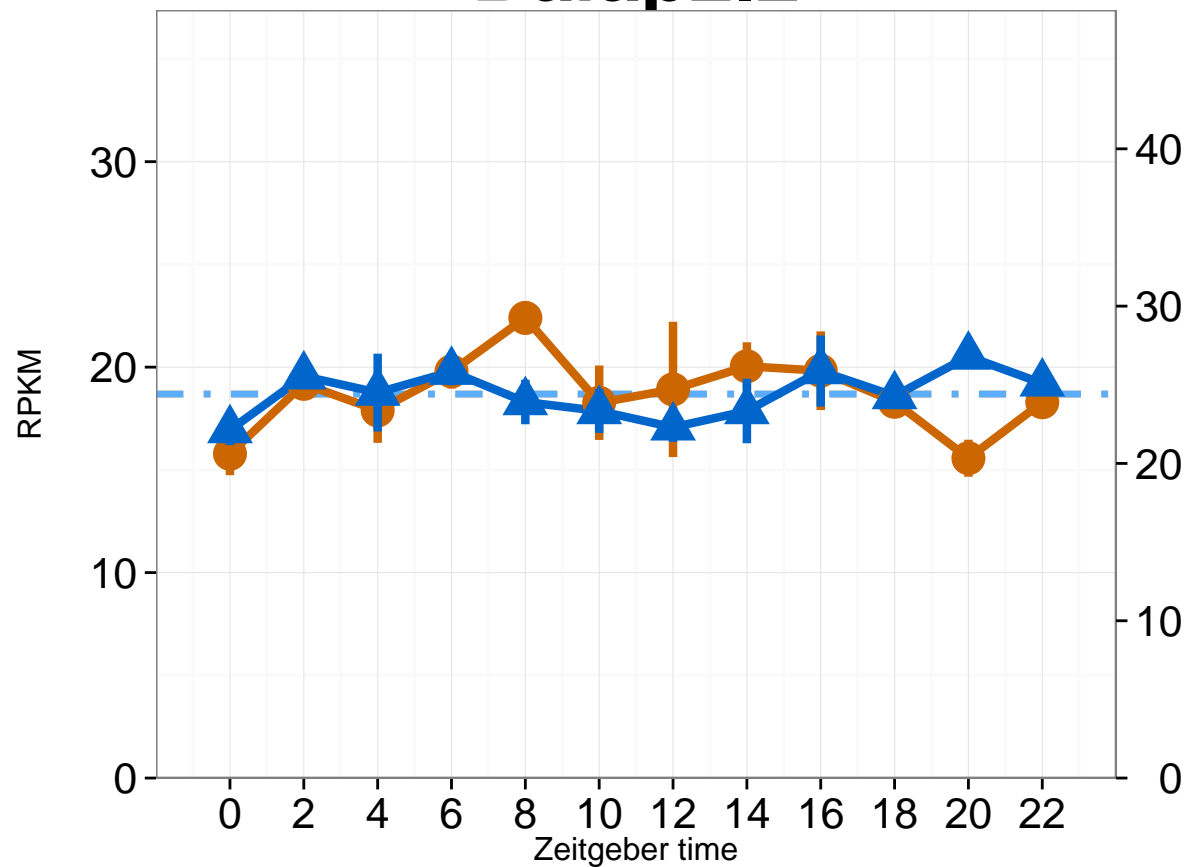

## Baiap2l2

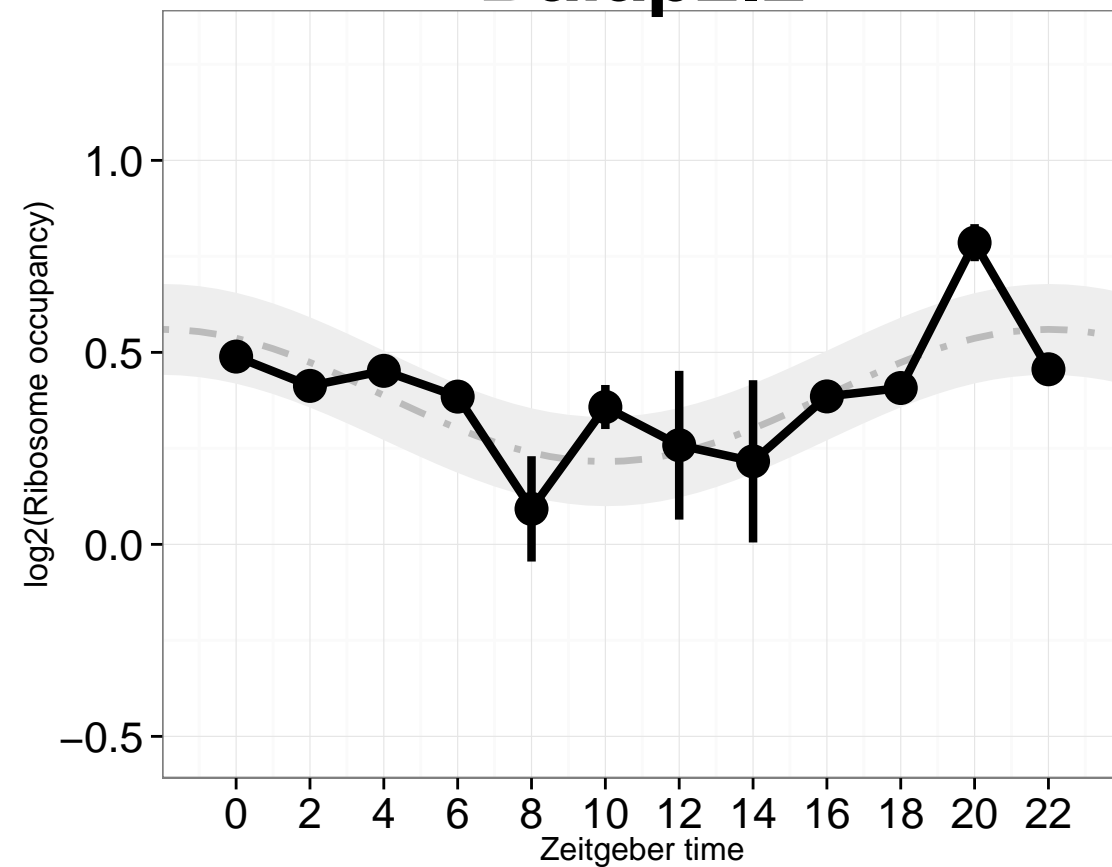

Supplement: Supplementary file 605 [file 1]

## Id4

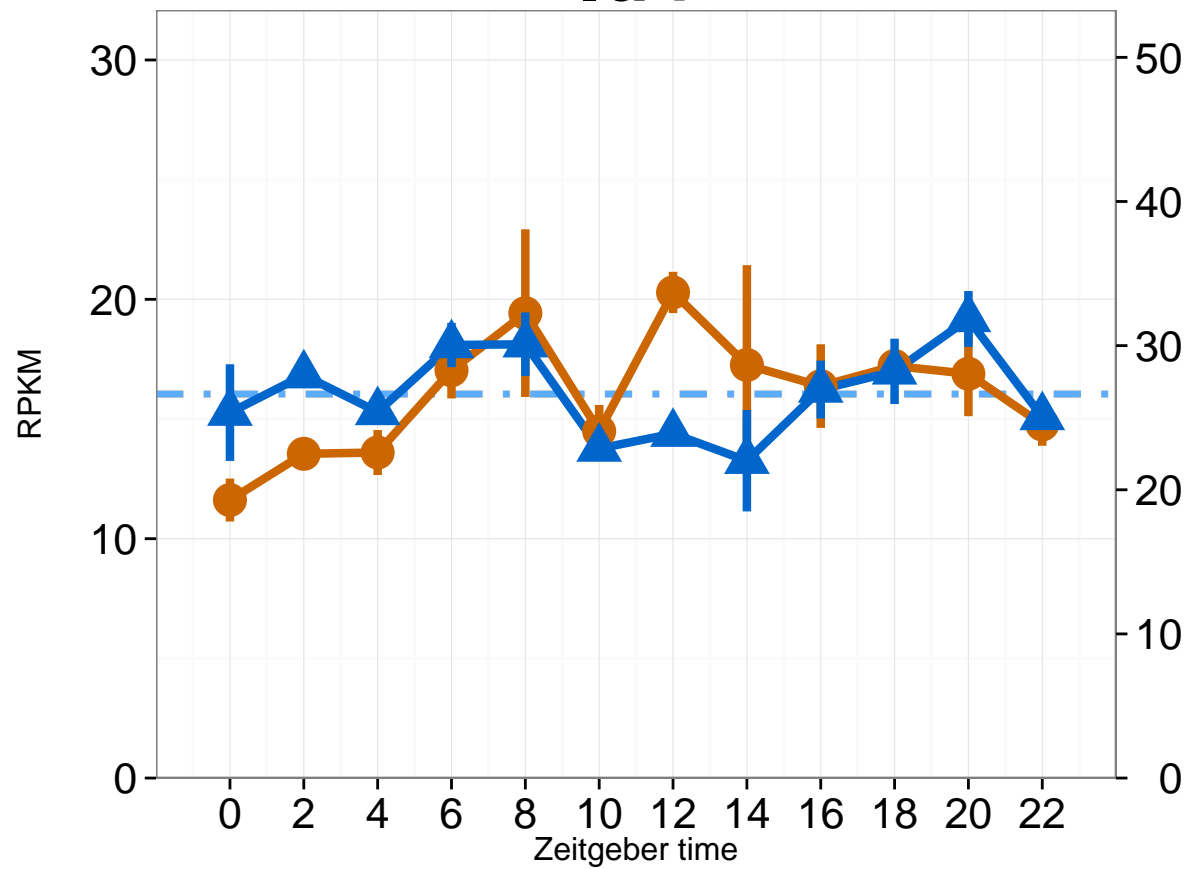

## Id4

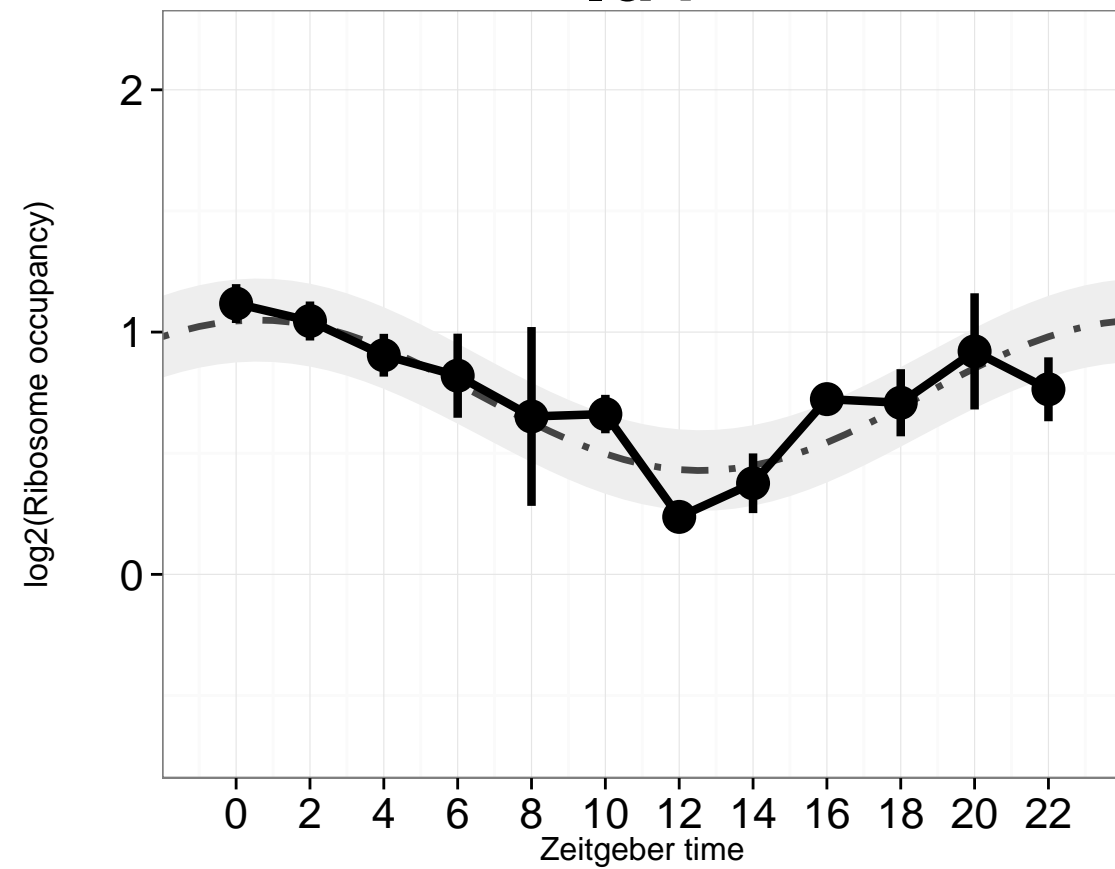

Supplement: Supplementary file 606 [file 1]

# Agbl3

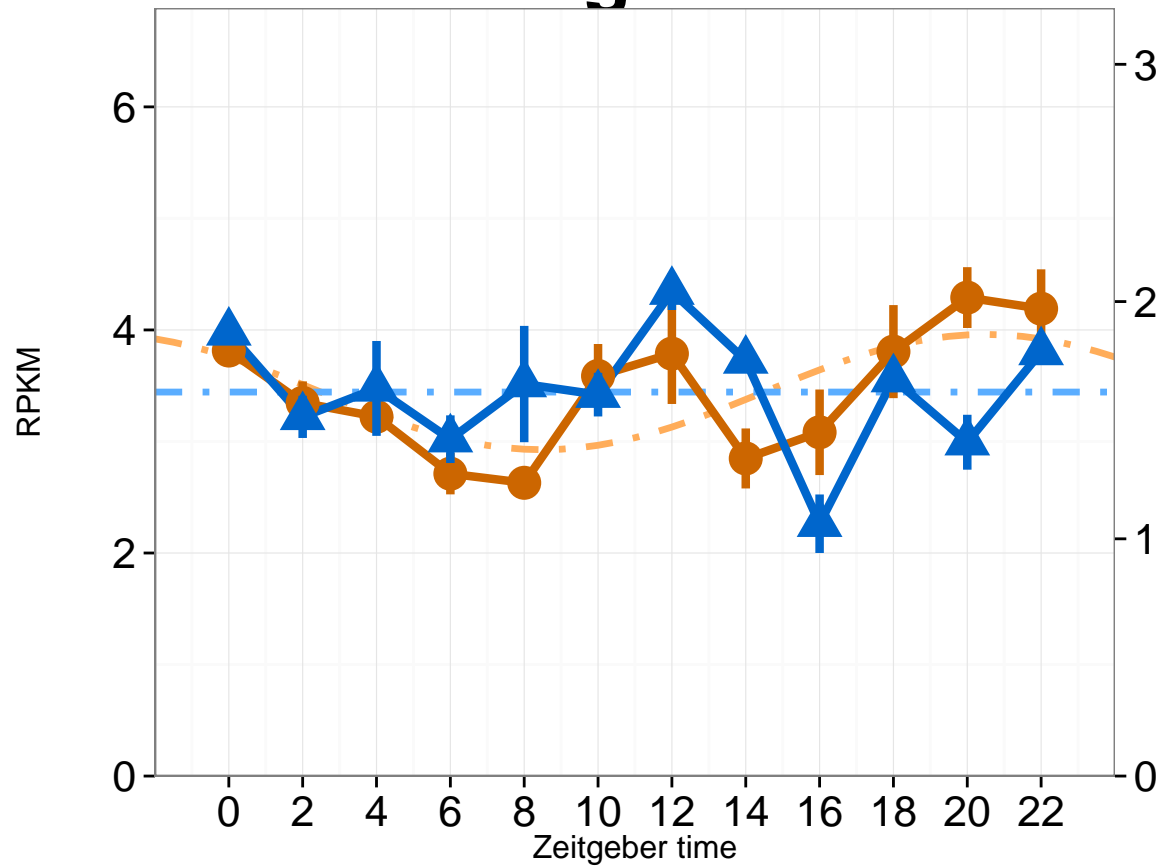

# Agbl3

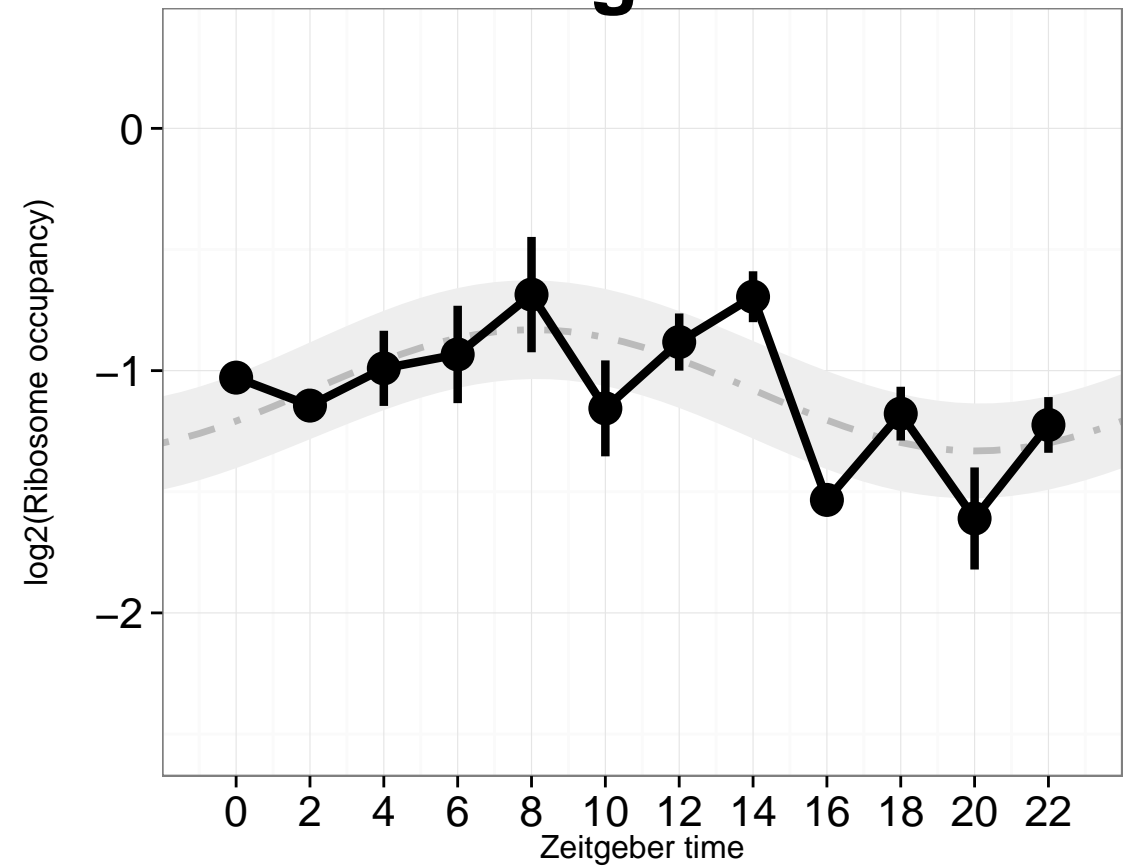

Supplement: Supplementary file 607 [file 1]

# Papd7

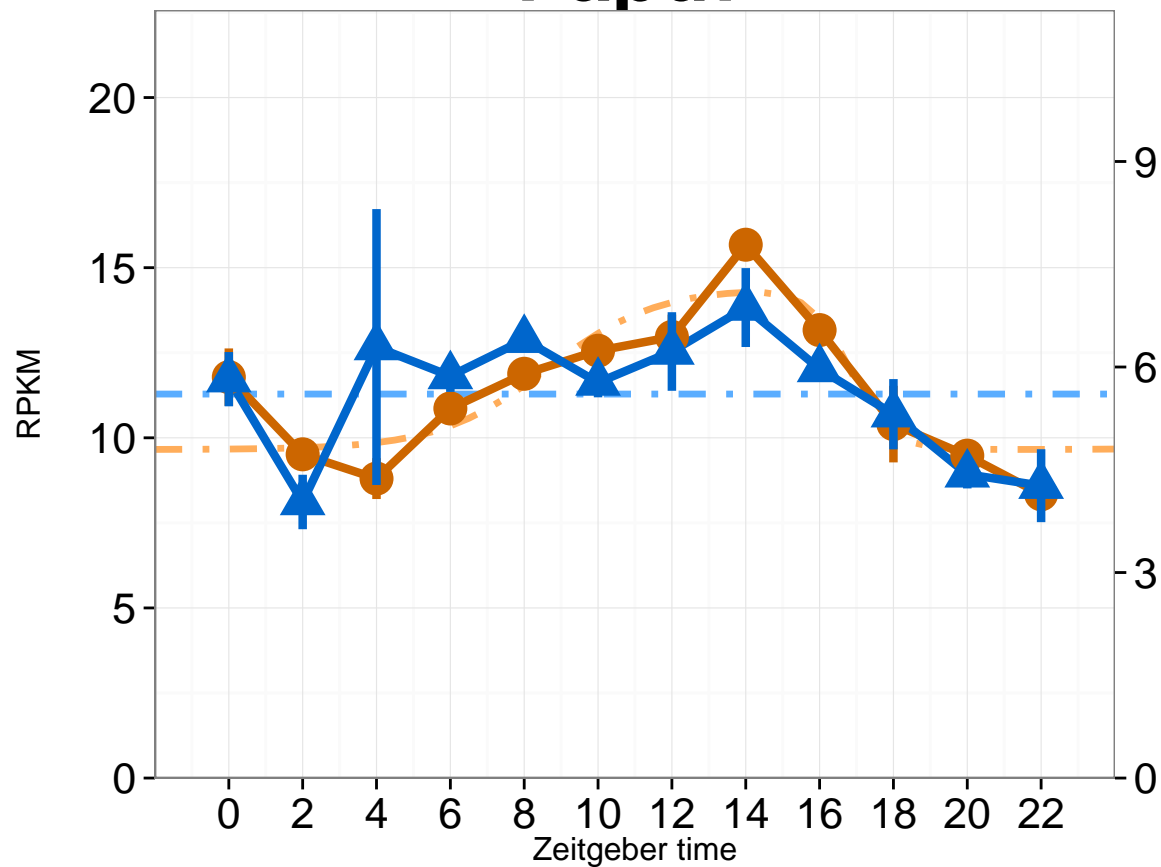

# Papd7

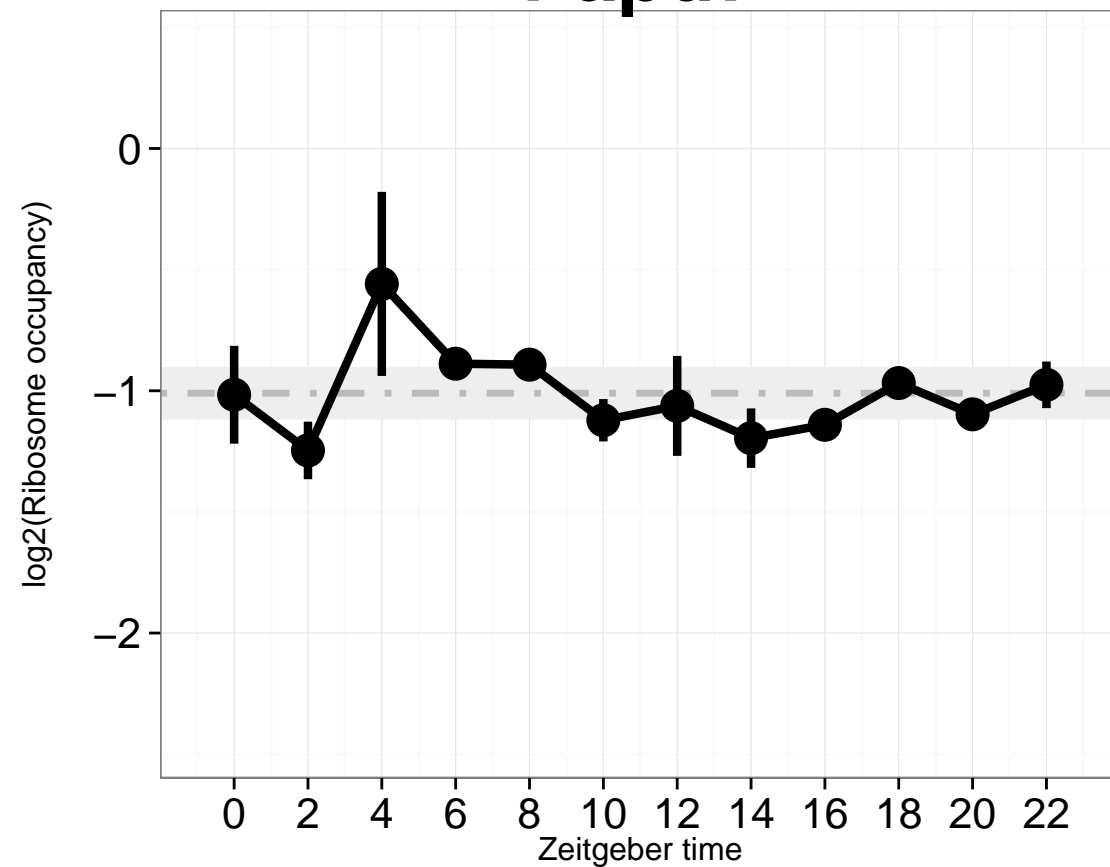

Supplement: Supplementary file 608 [file 1]

## Vamp4

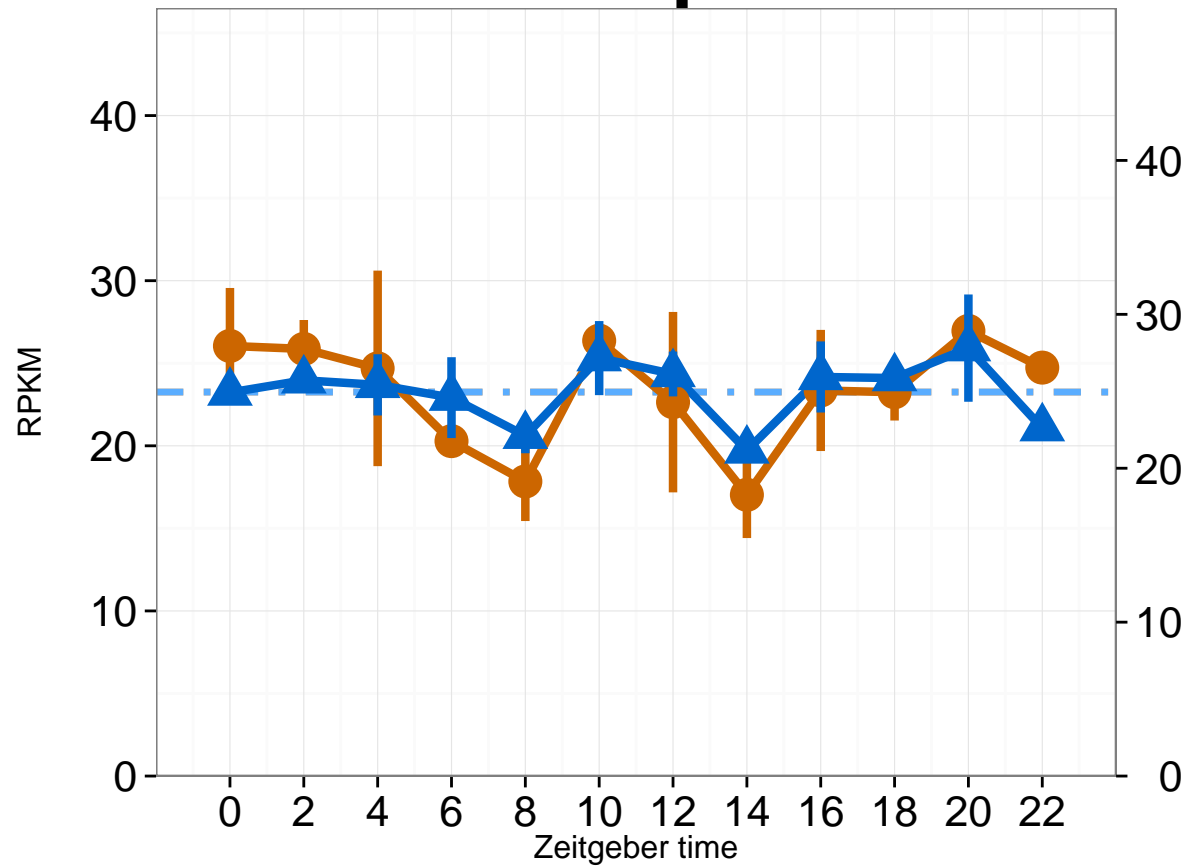

## Vamp4

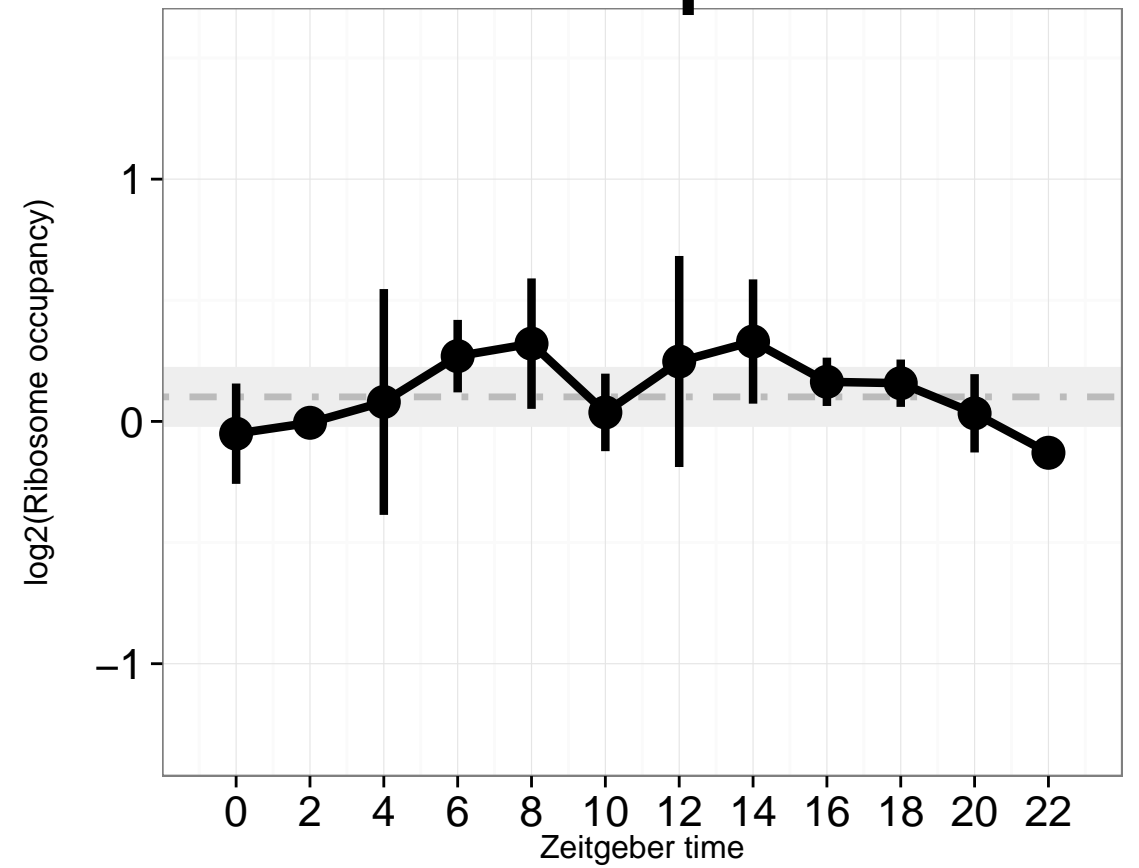

Supplement: Supplementary file 609 [file 1]

## Zzef1

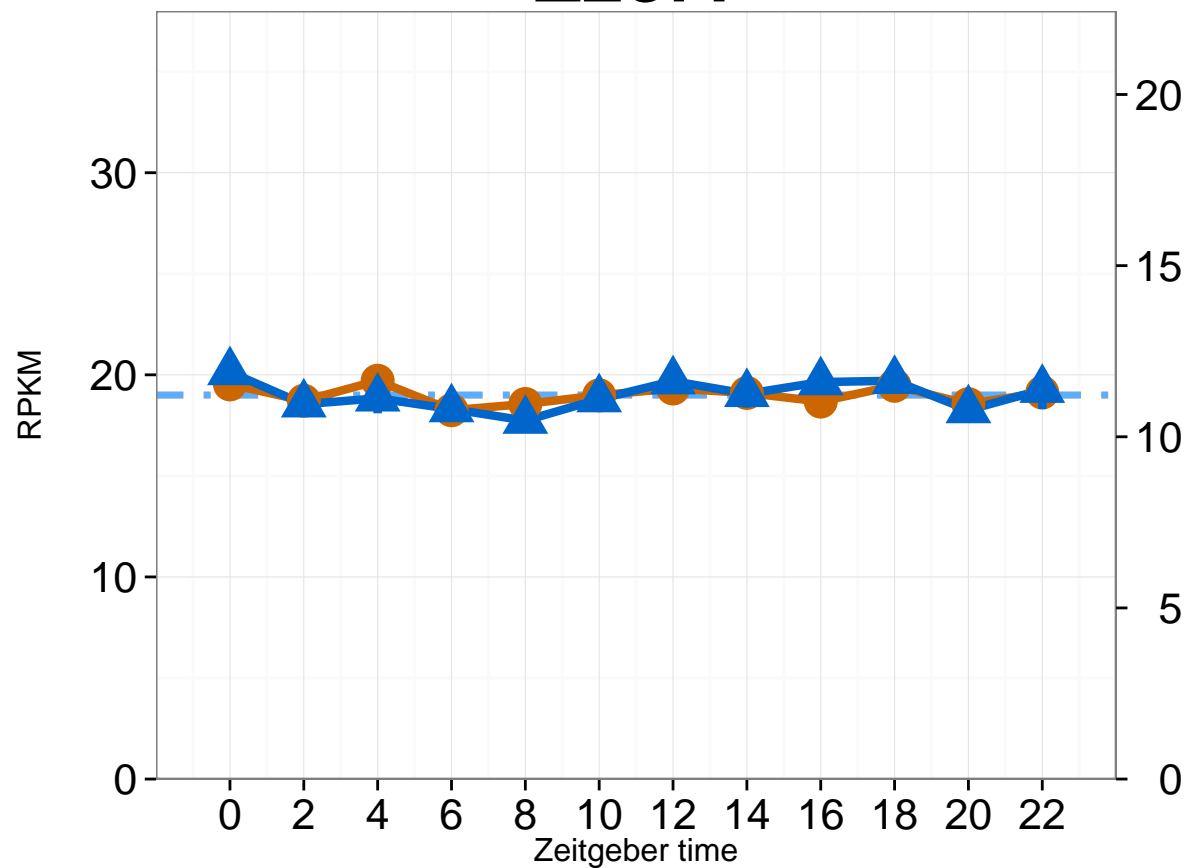

## Zzef1

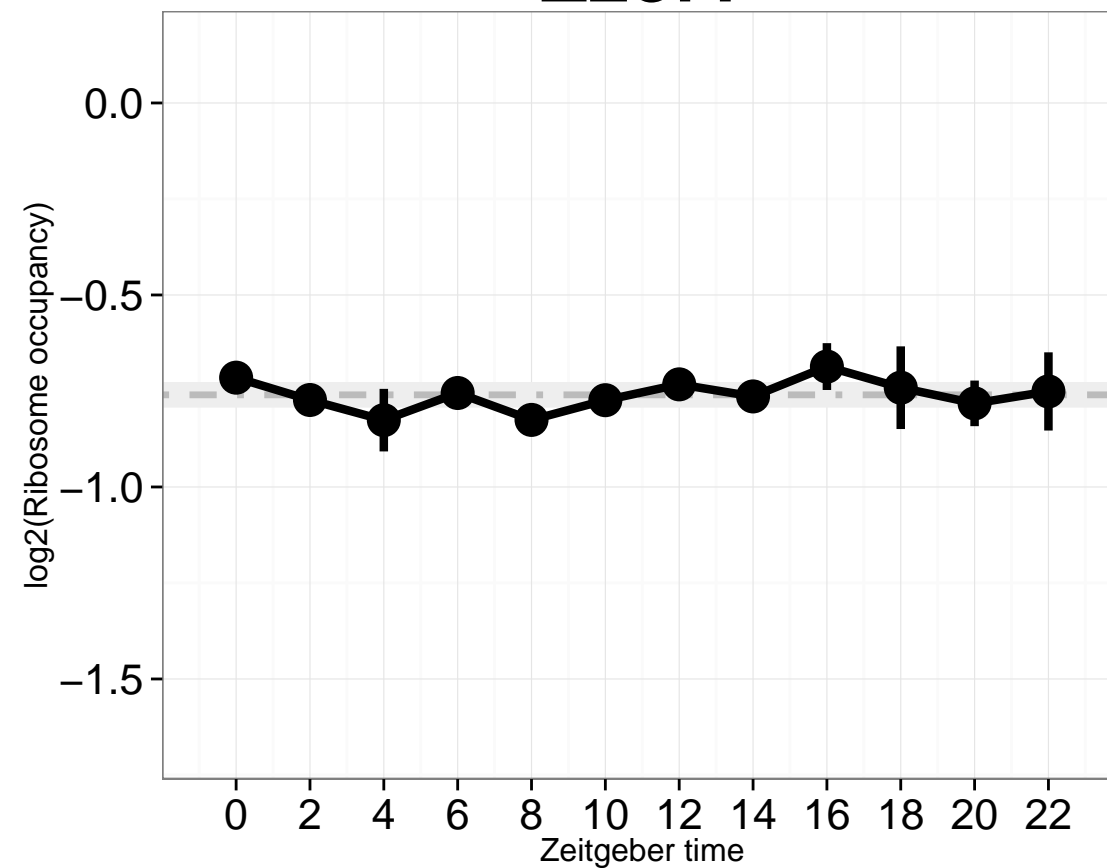

Supplement: Supplementary file 610 [file 1]

## Wwc2

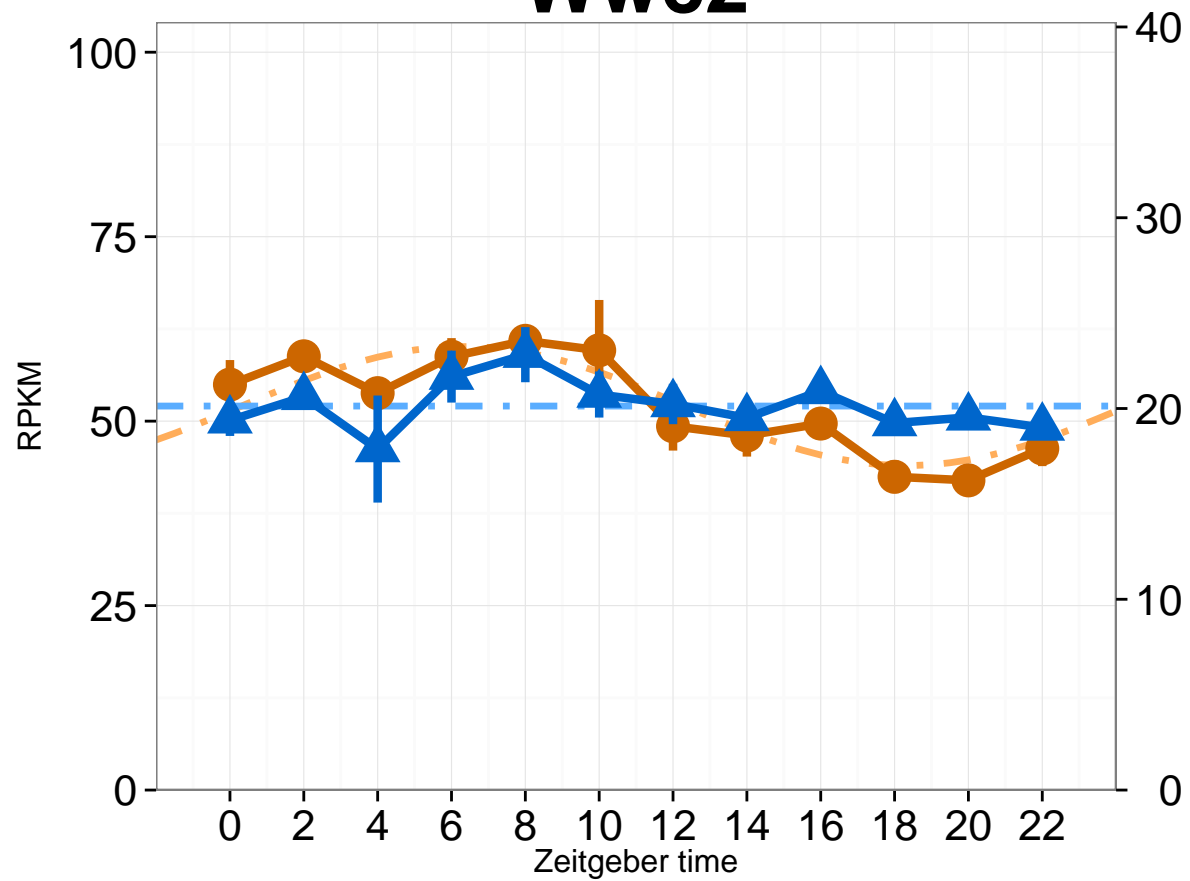

## Wwc2

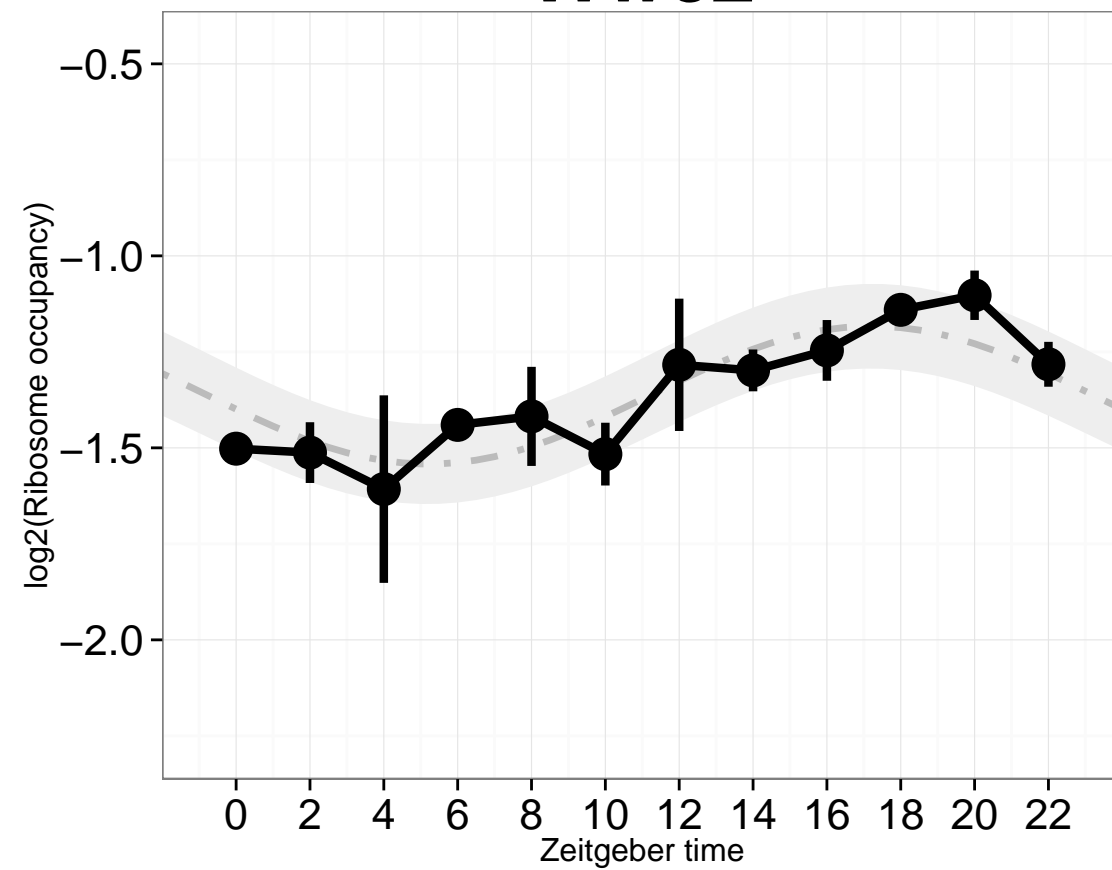

Supplement: Supplementary file 611 [file 1]

# Adrbk2

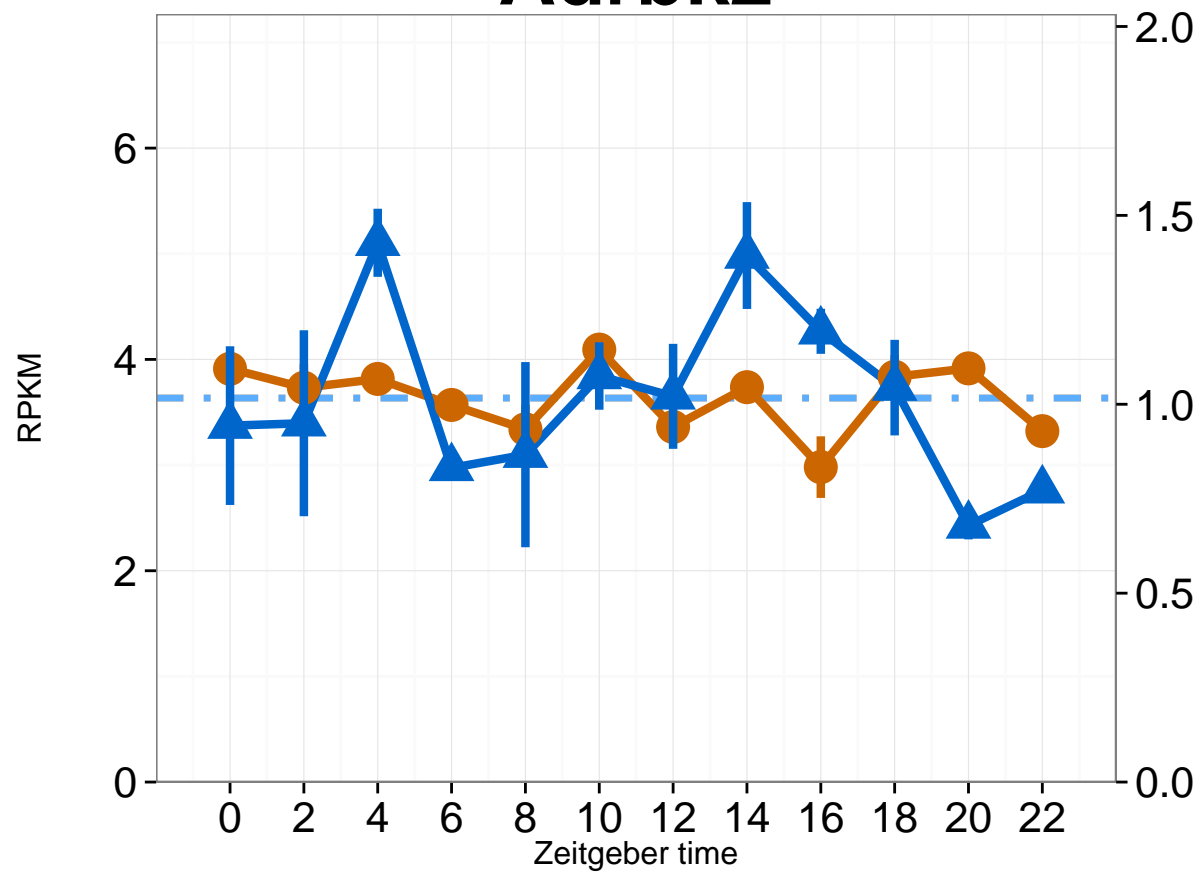

# Adrbk2

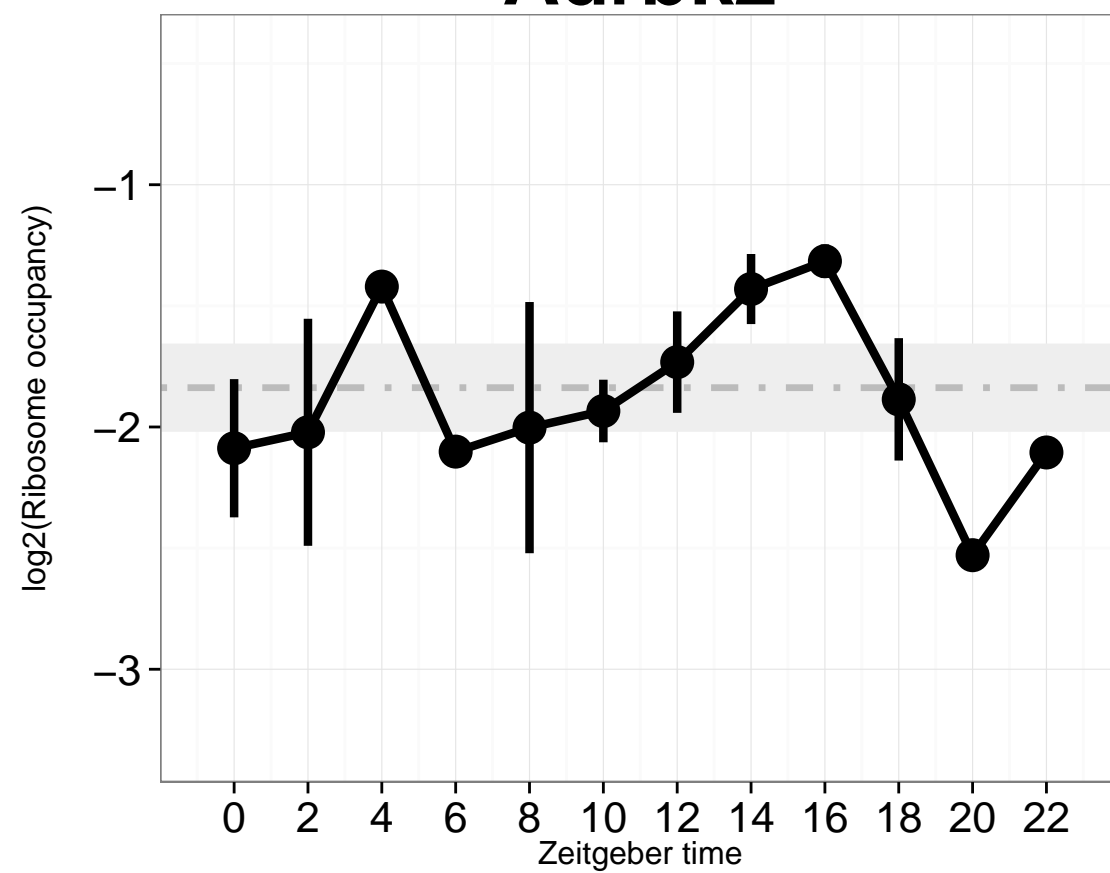

Supplement: Supplementary file 612 [file 1]

# Zfp407

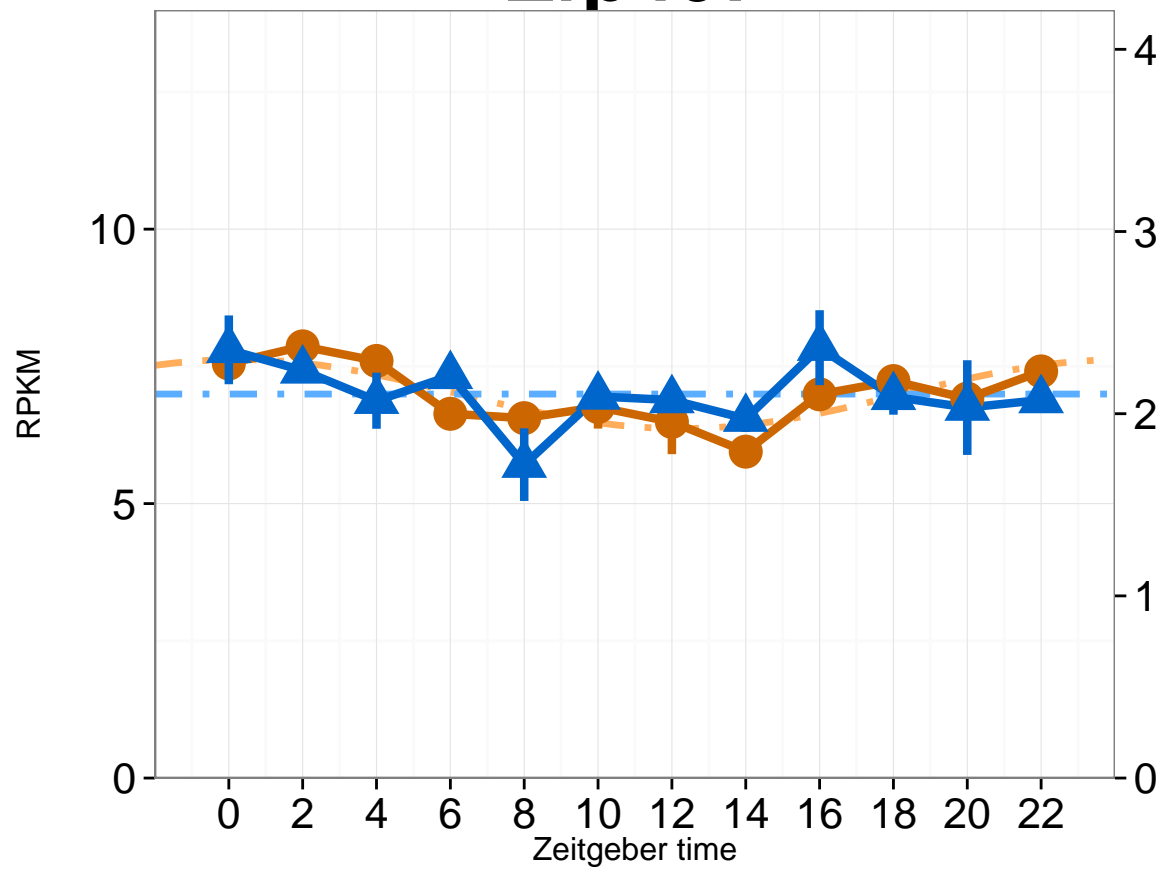

# Zfp407

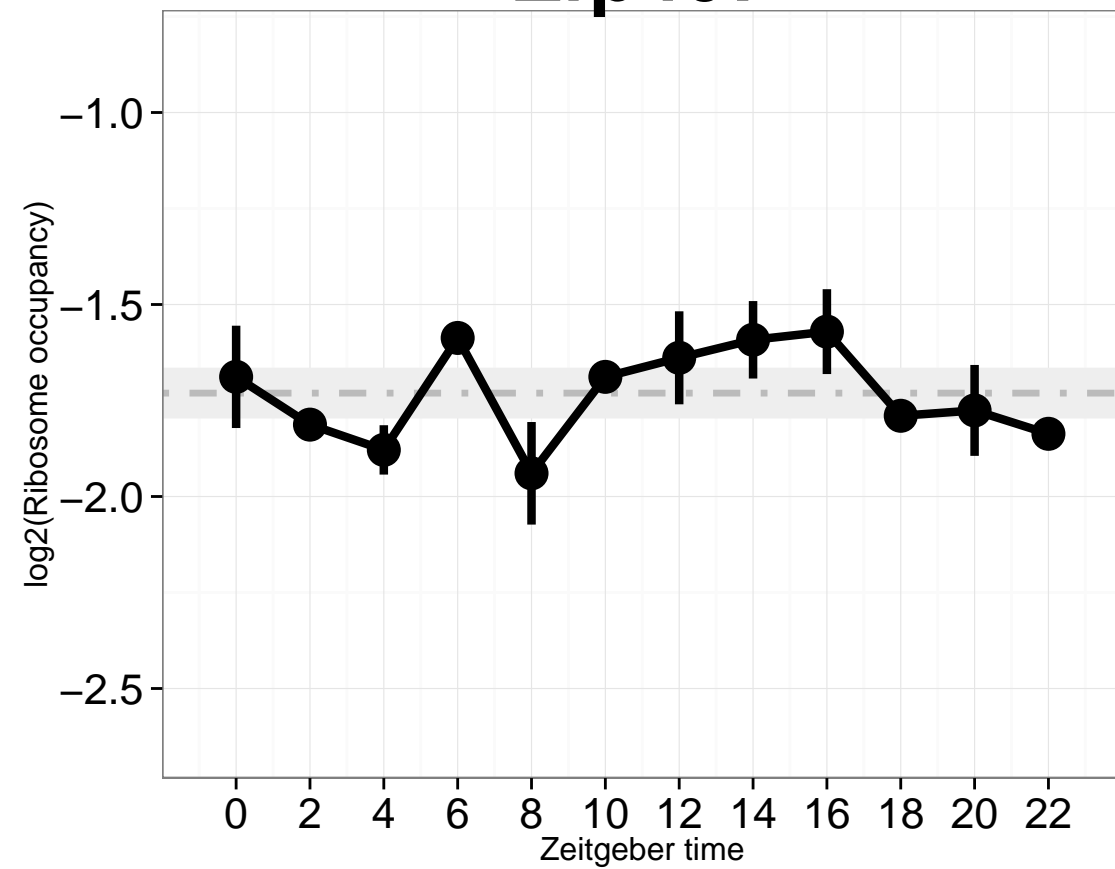

Supplement: Supplementary file 613 [file 1]

## Meis3

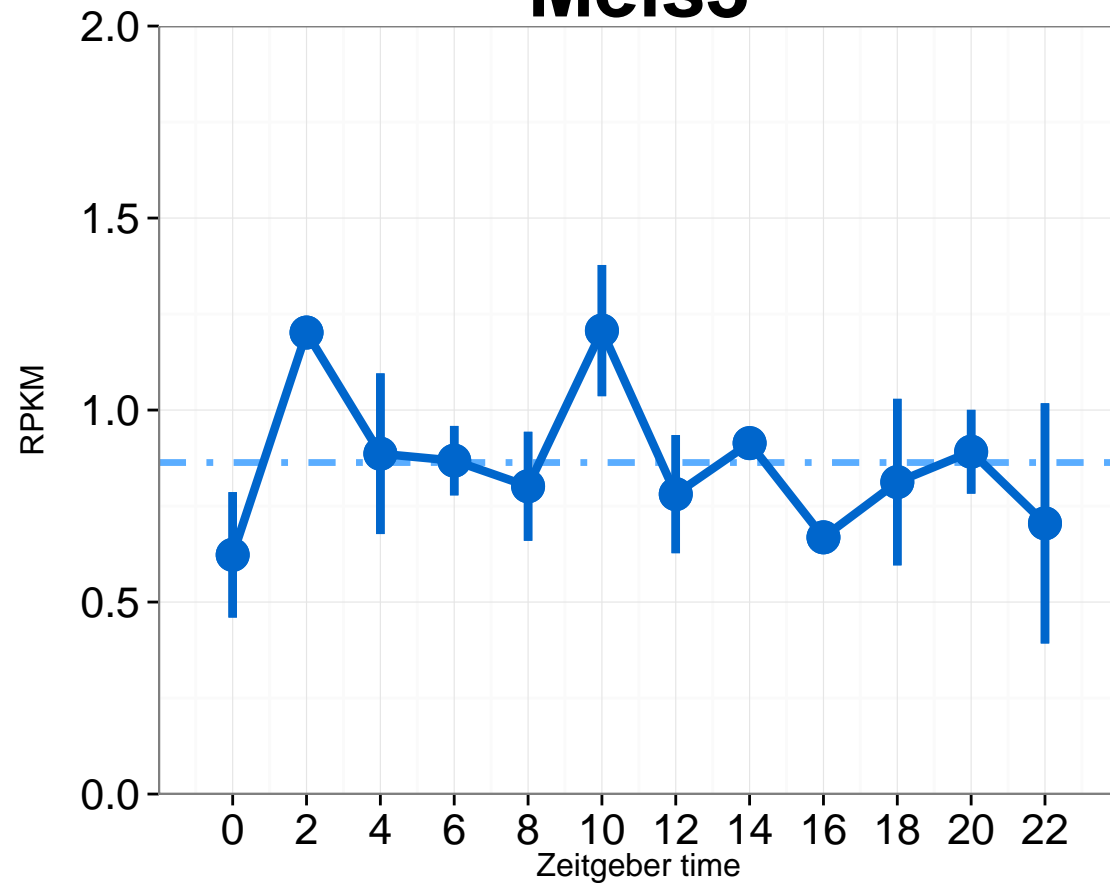

## Meis3 log2(Ribosome occupancy

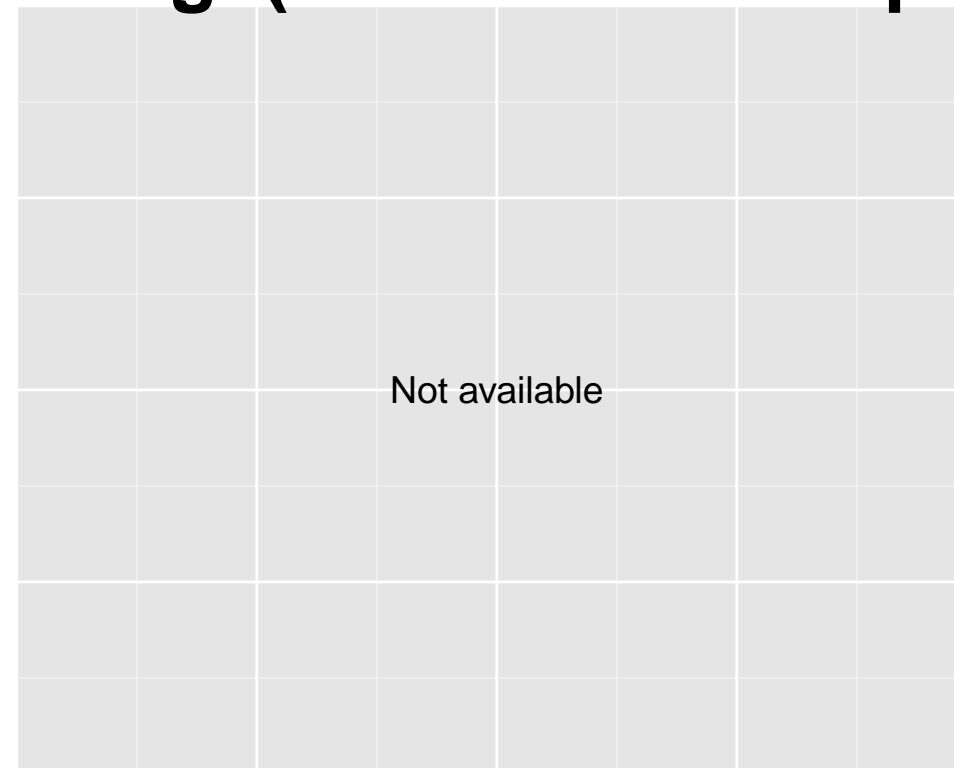

Supplement: Supplementary file 614 [file 1]

# Rtel1

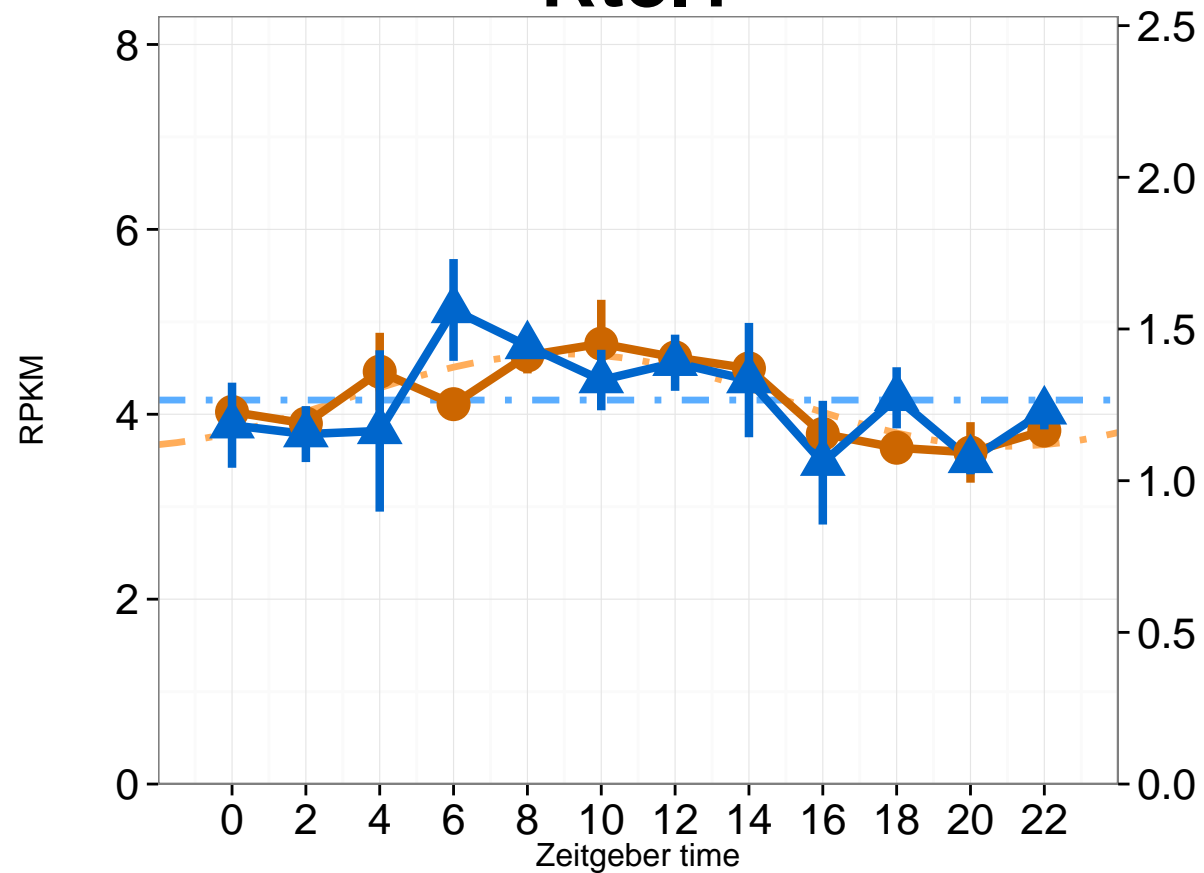

# Rtel1

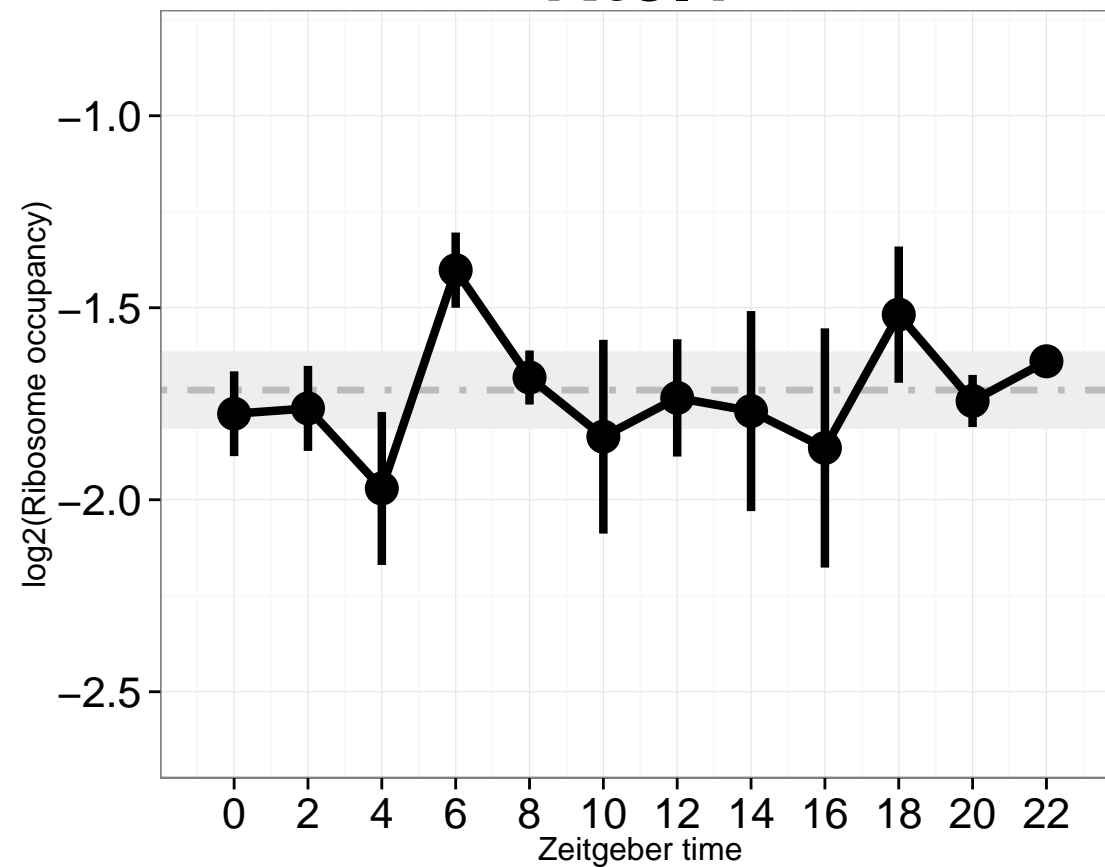

Supplement: Supplementary file 615 [file 1]

## Nsmce4a

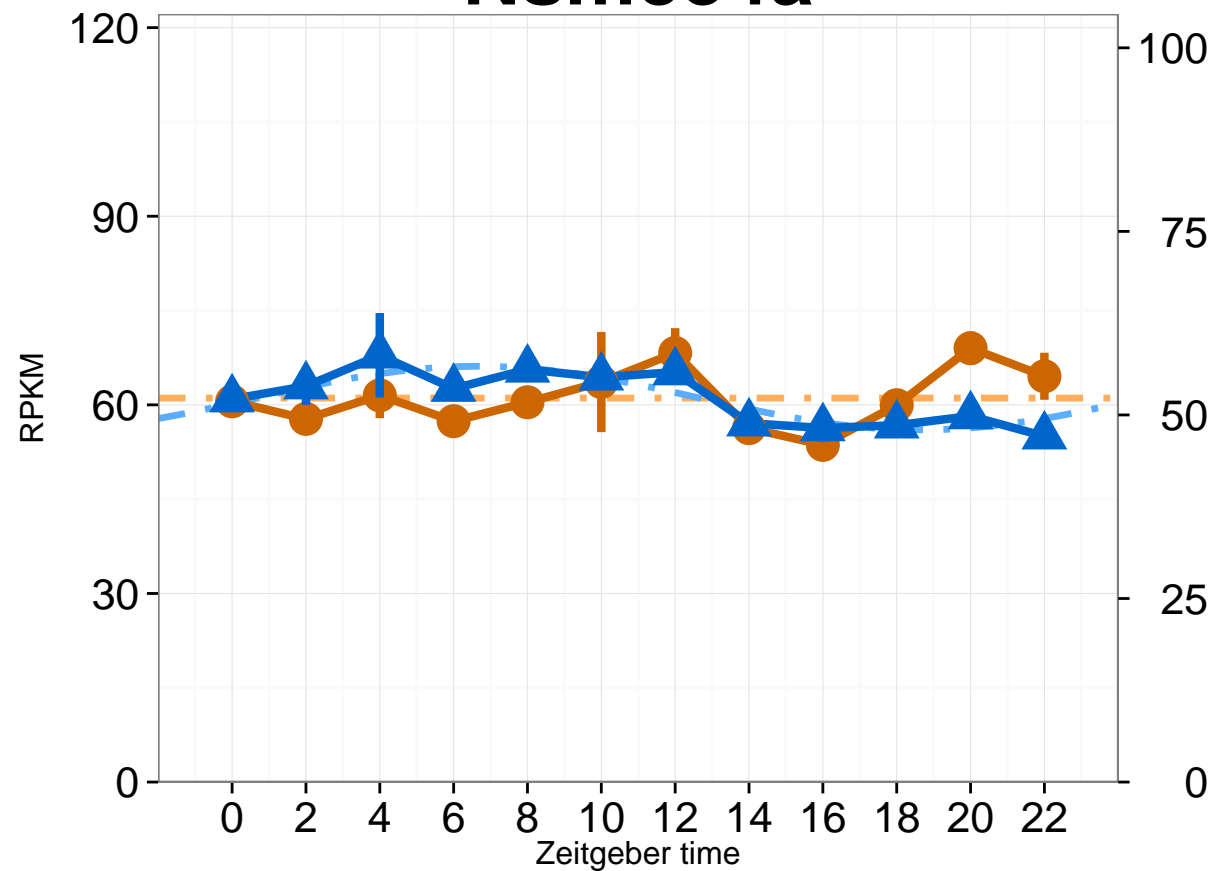

## Nsmce4a

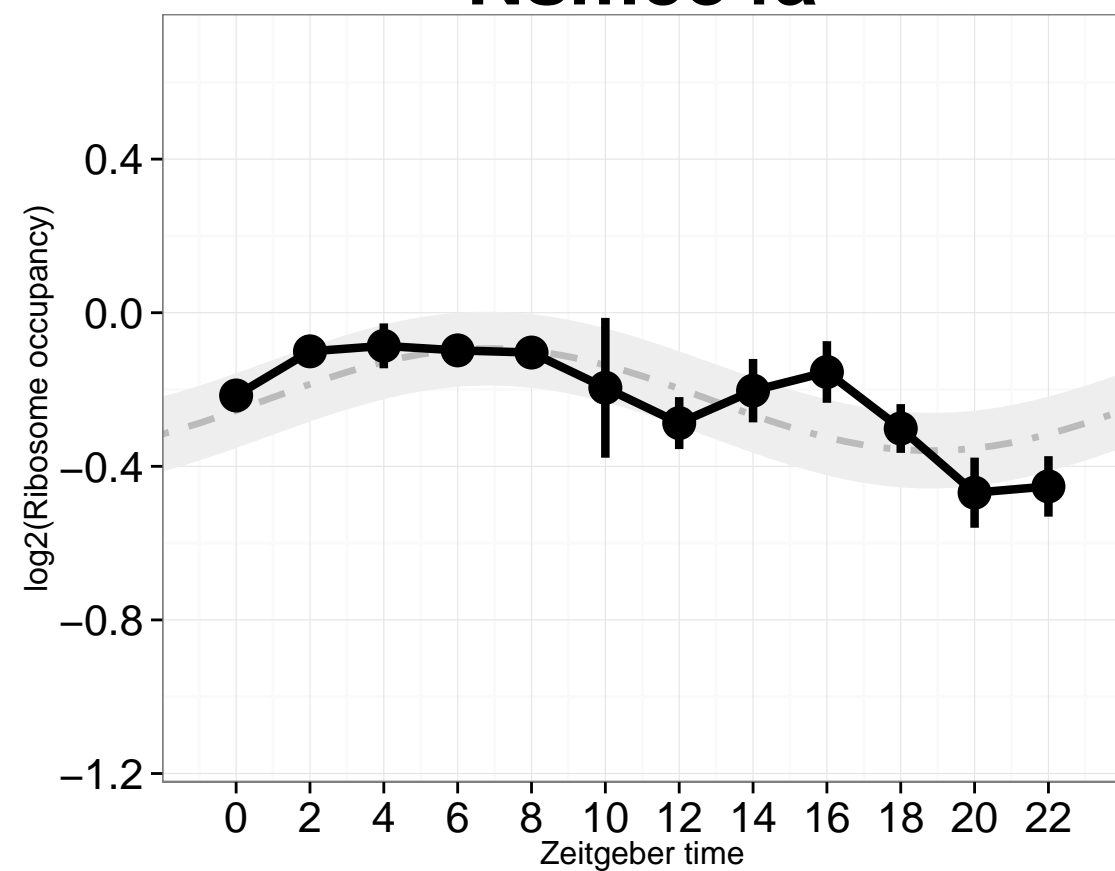

Supplement: Supplementary file 616 [file 1]

# Hist1h4c

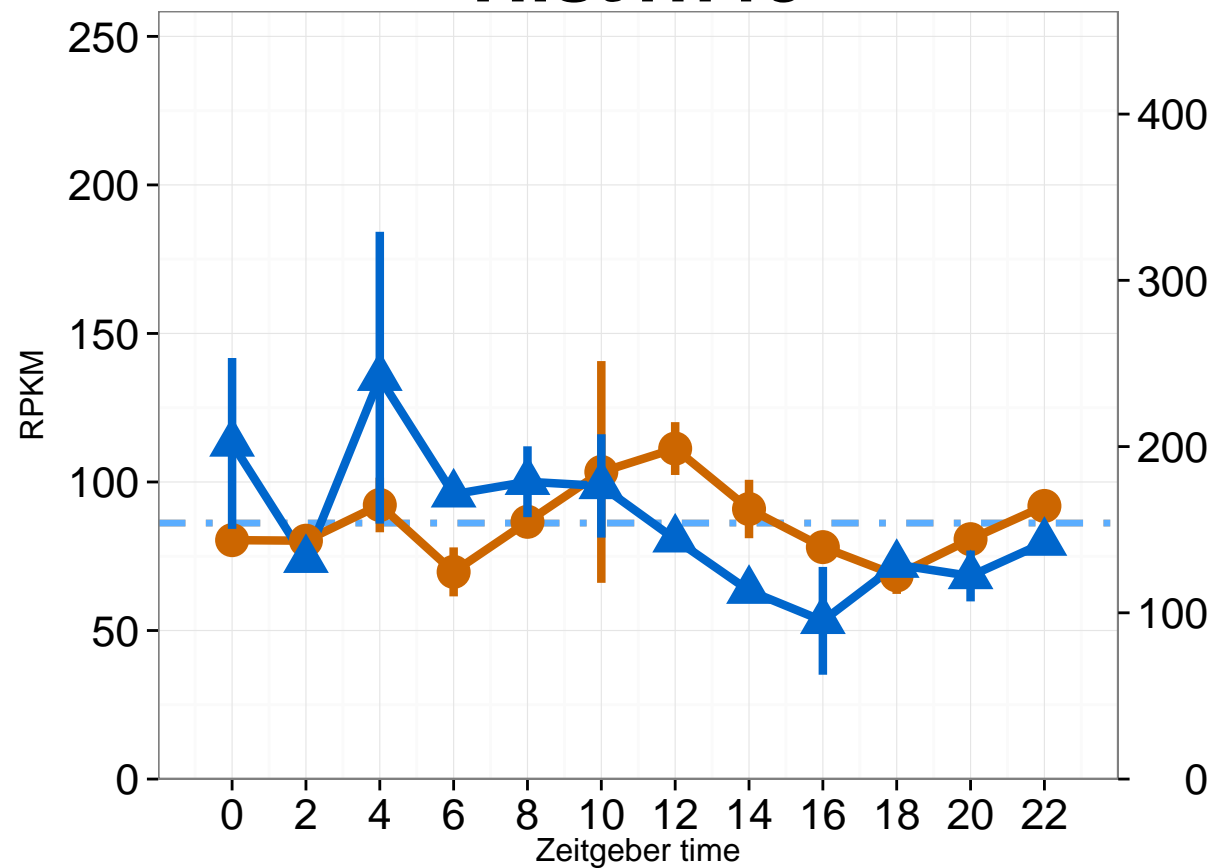

# Hist1h4c

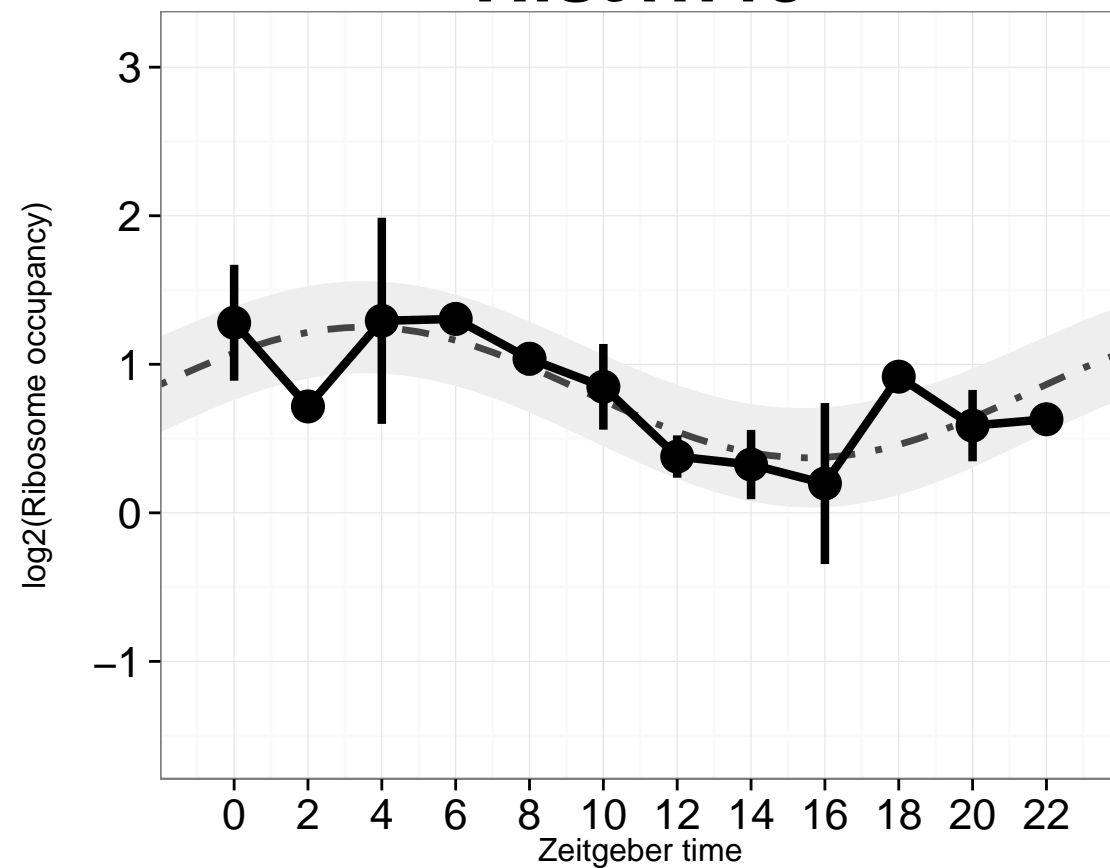

Supplement: Supplementary file 617 [file 1]

## Smarca5

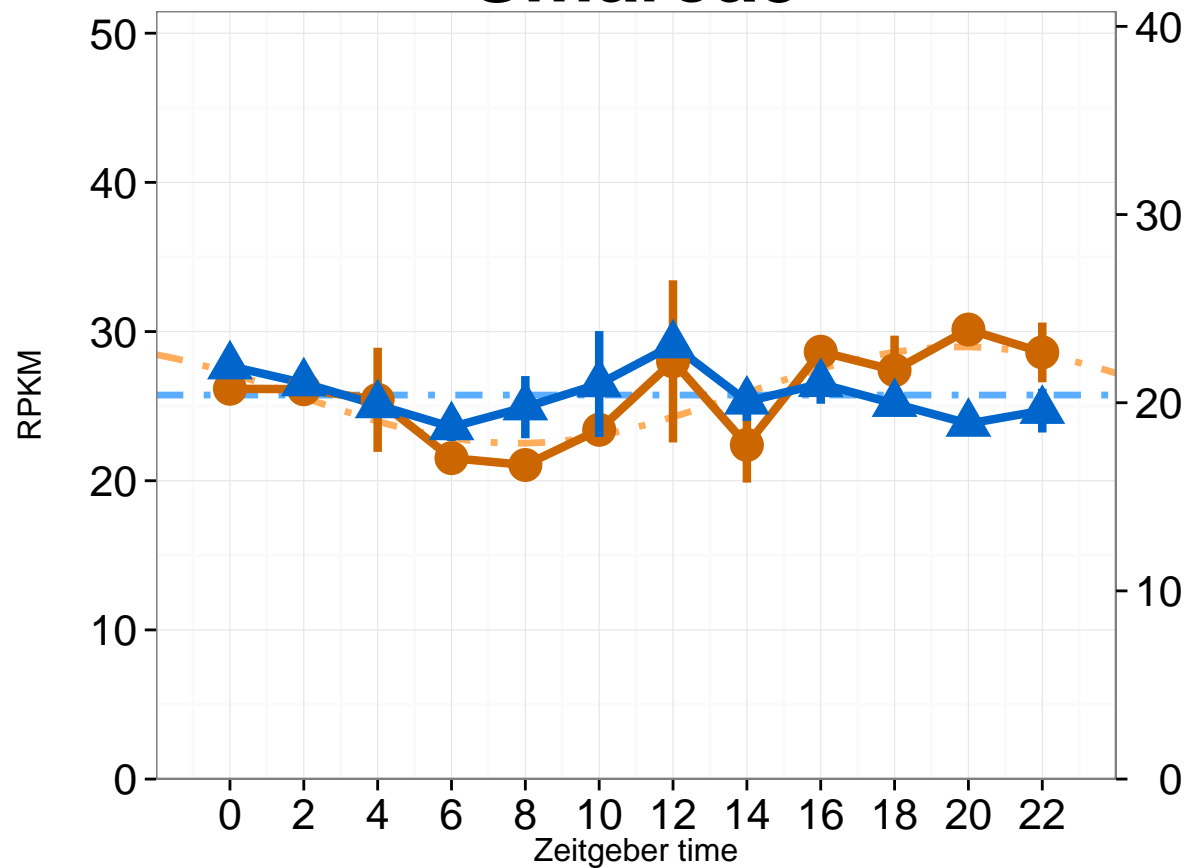

## Smarca5

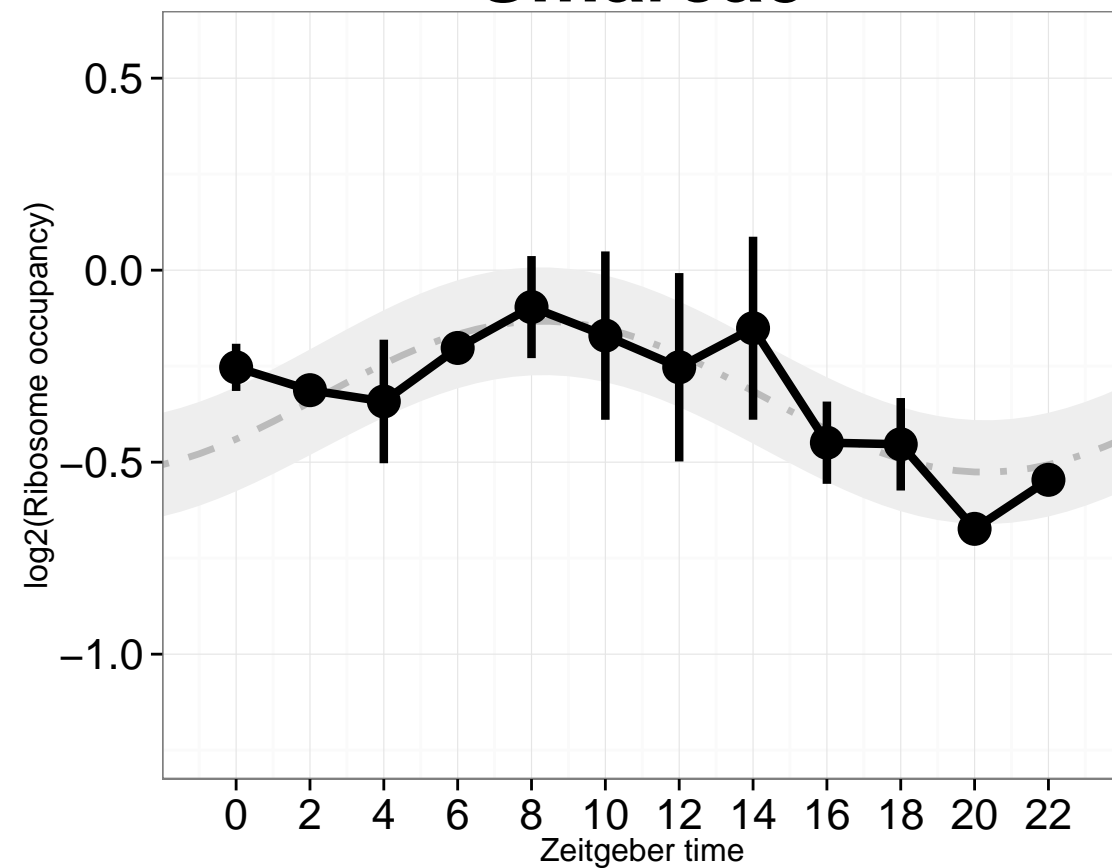

Supplement: Supplementary file 618 [file 1]

## Kansl3

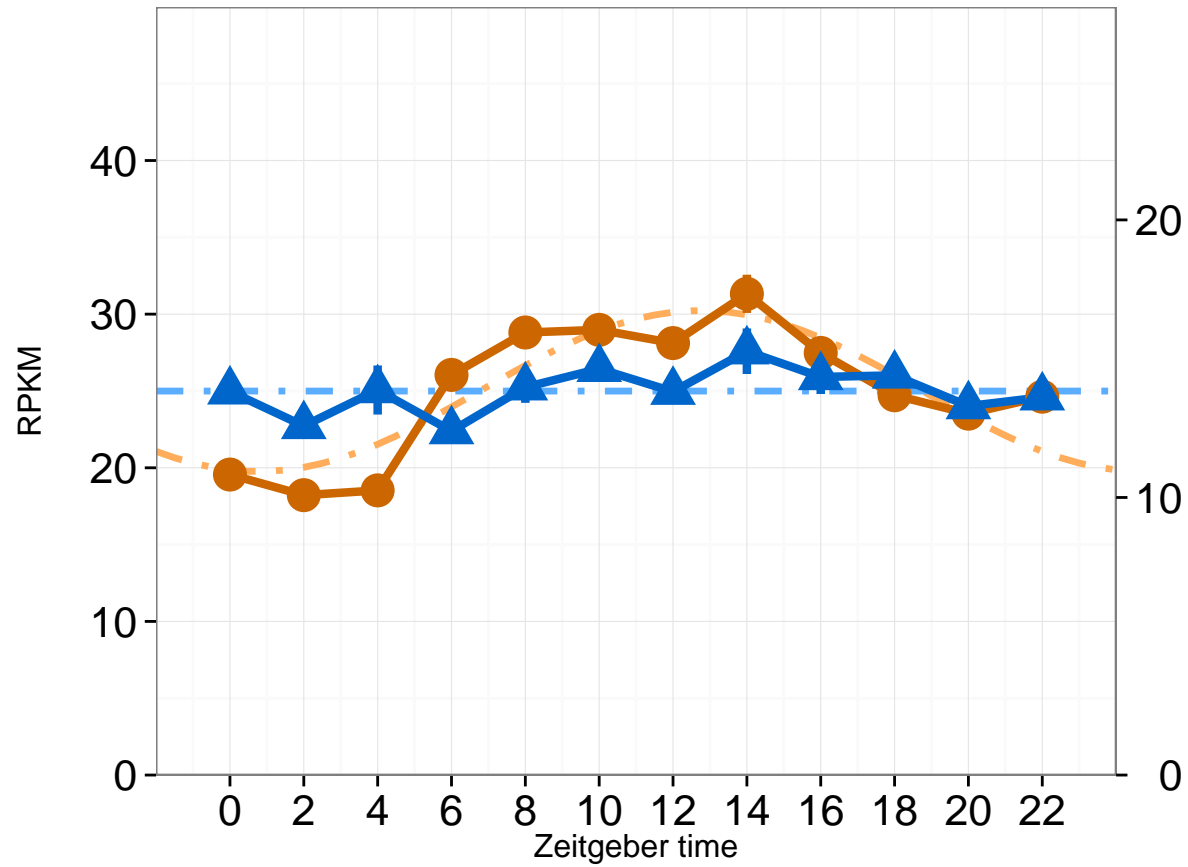

## Kansl3

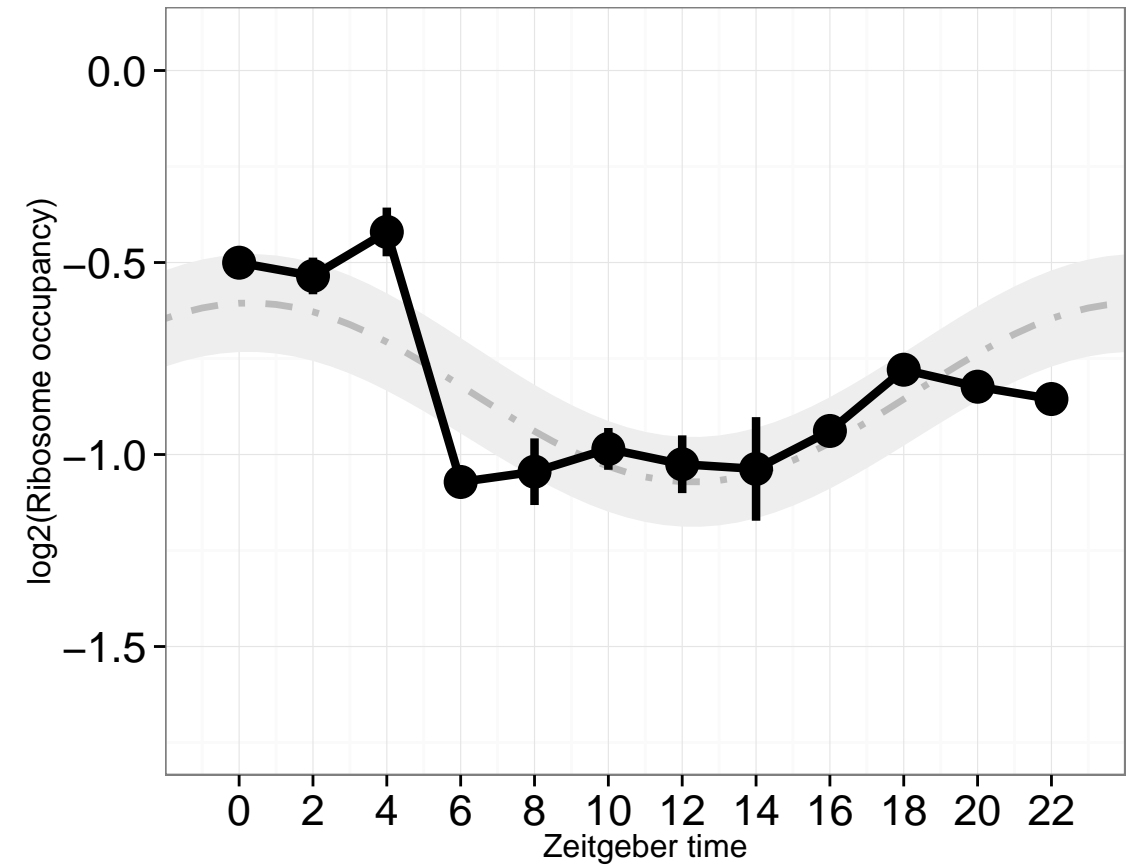

Supplement: Supplementary file 619 [file 1]

## Myo1d

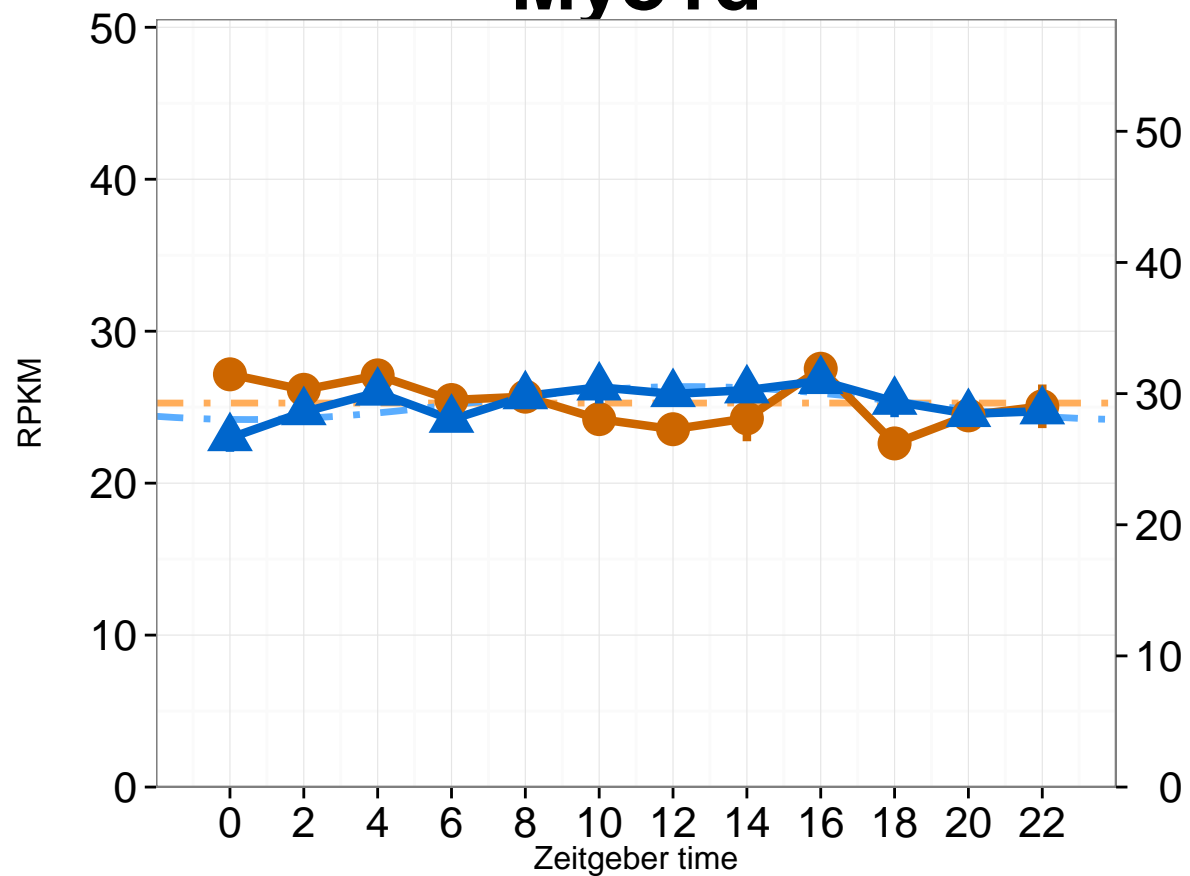

## Myo1d

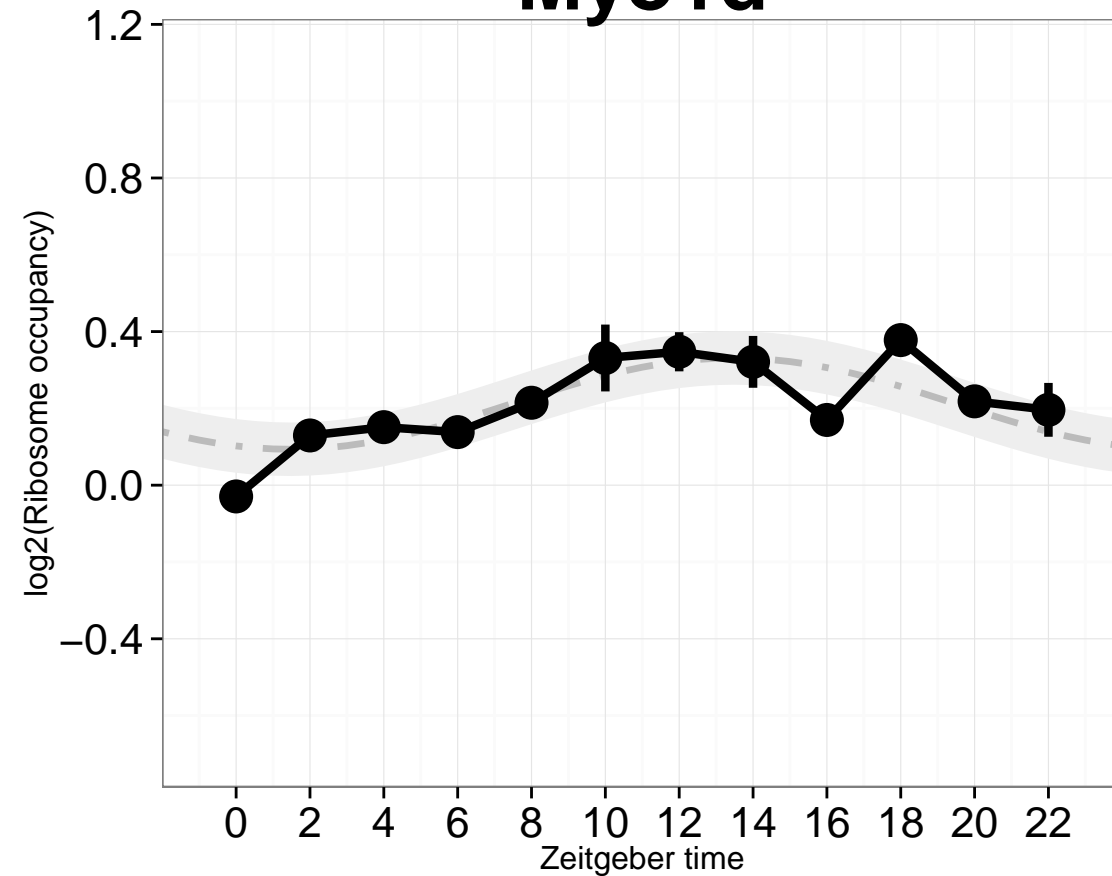

Supplement: Supplementary file 620 [file 1]

# Trmt13

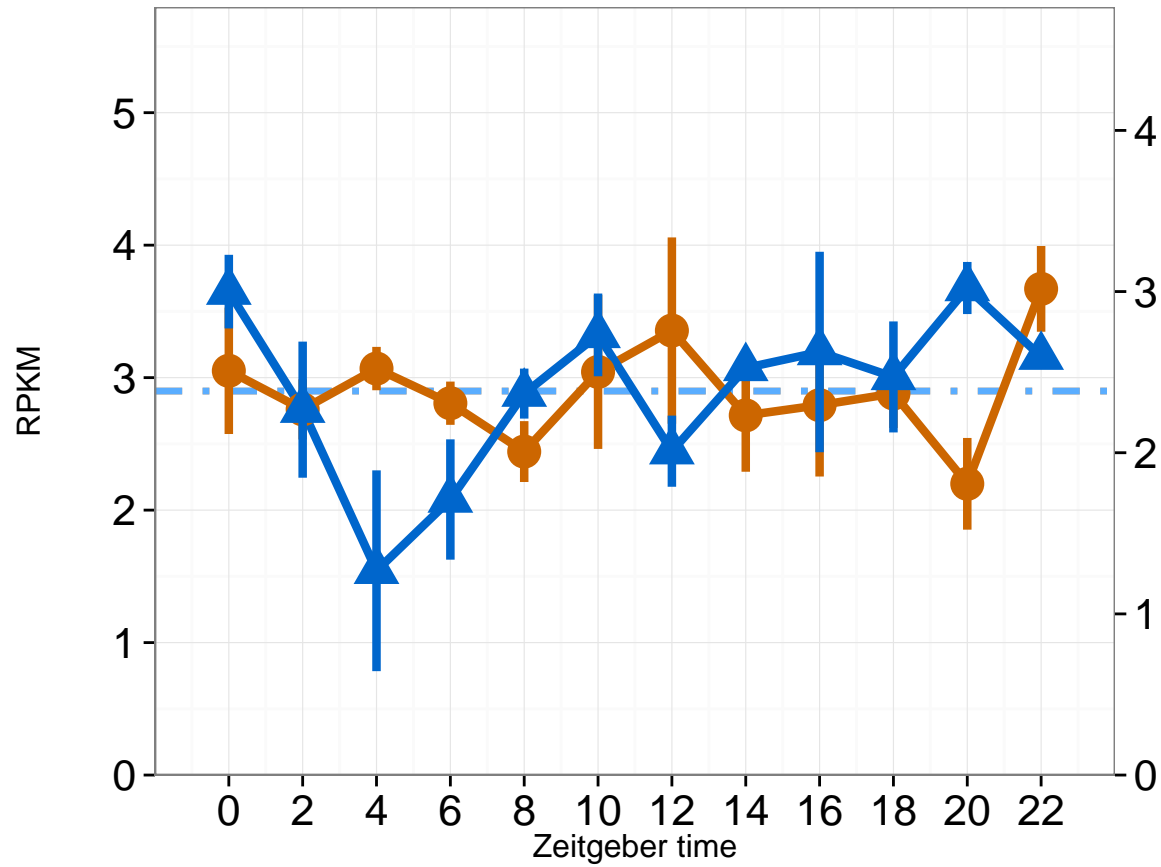

# Trmt13

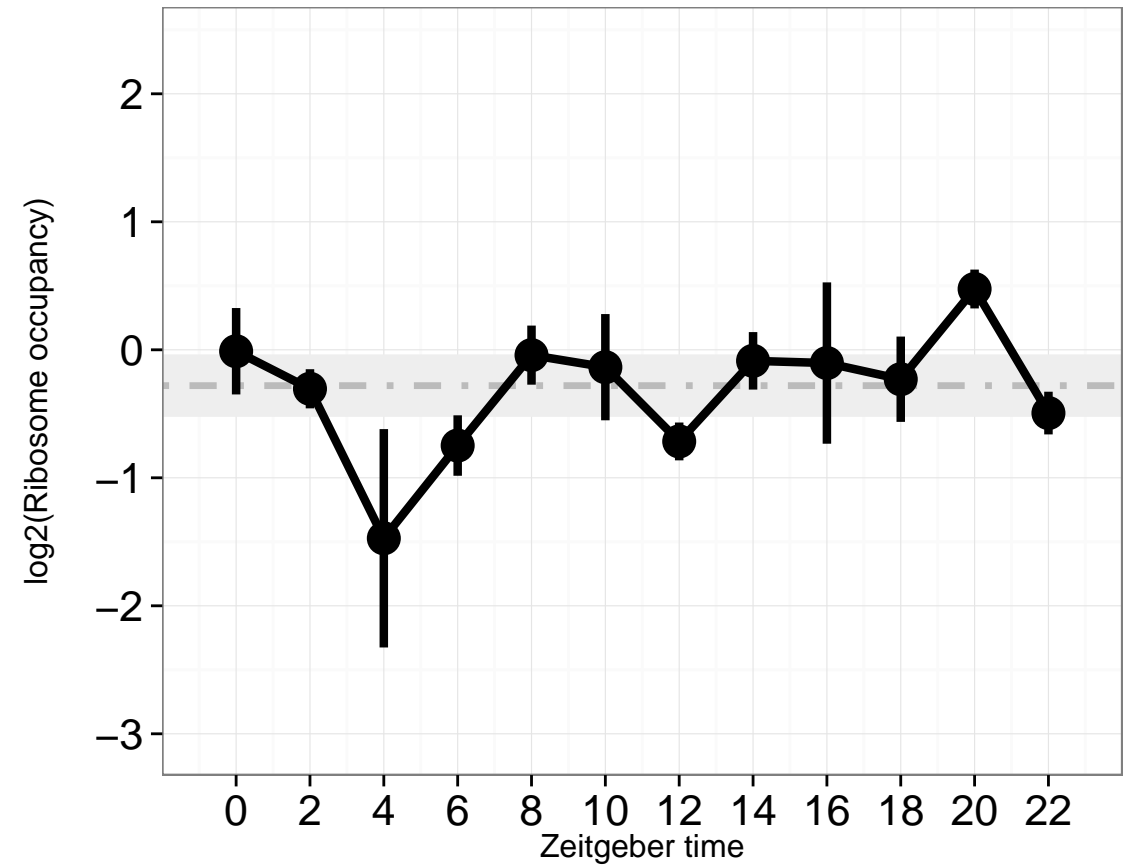

Supplement: Supplementary file 621 [file 1]

## Zfp84

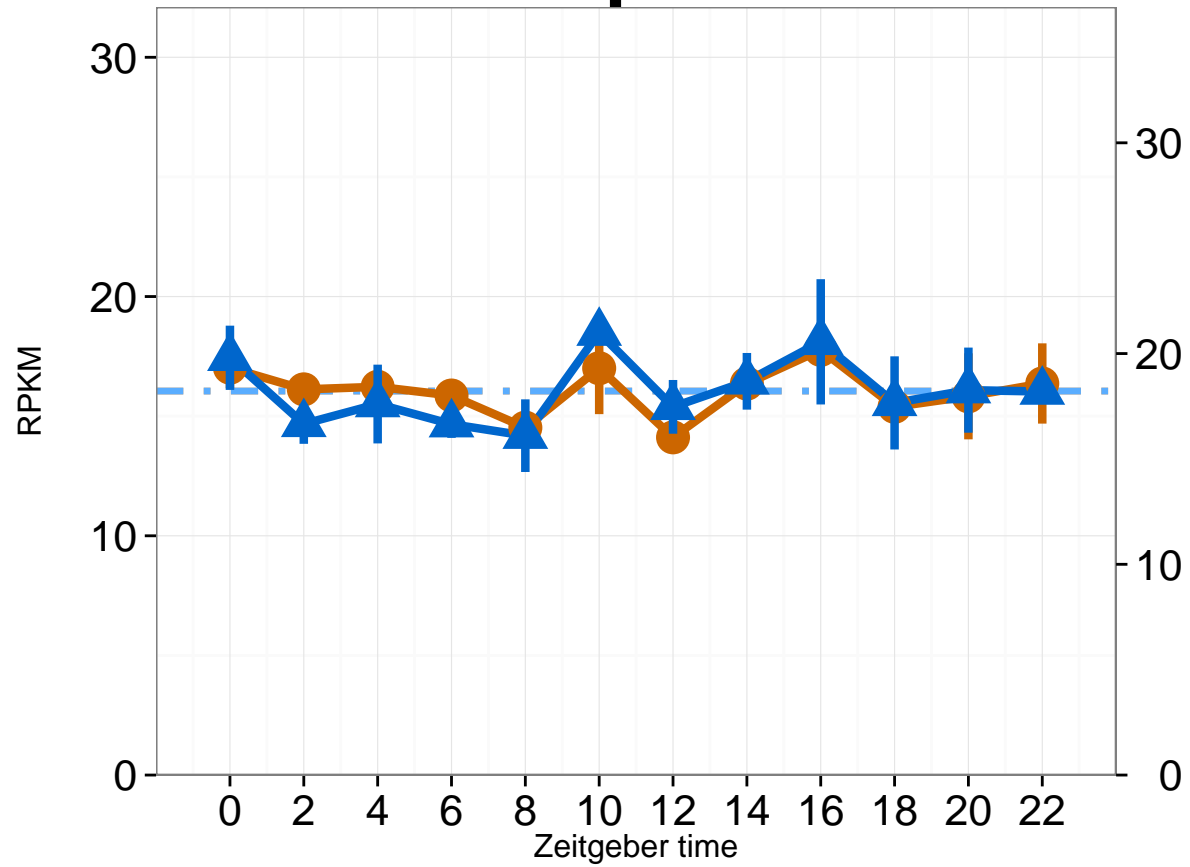

## Zfp84

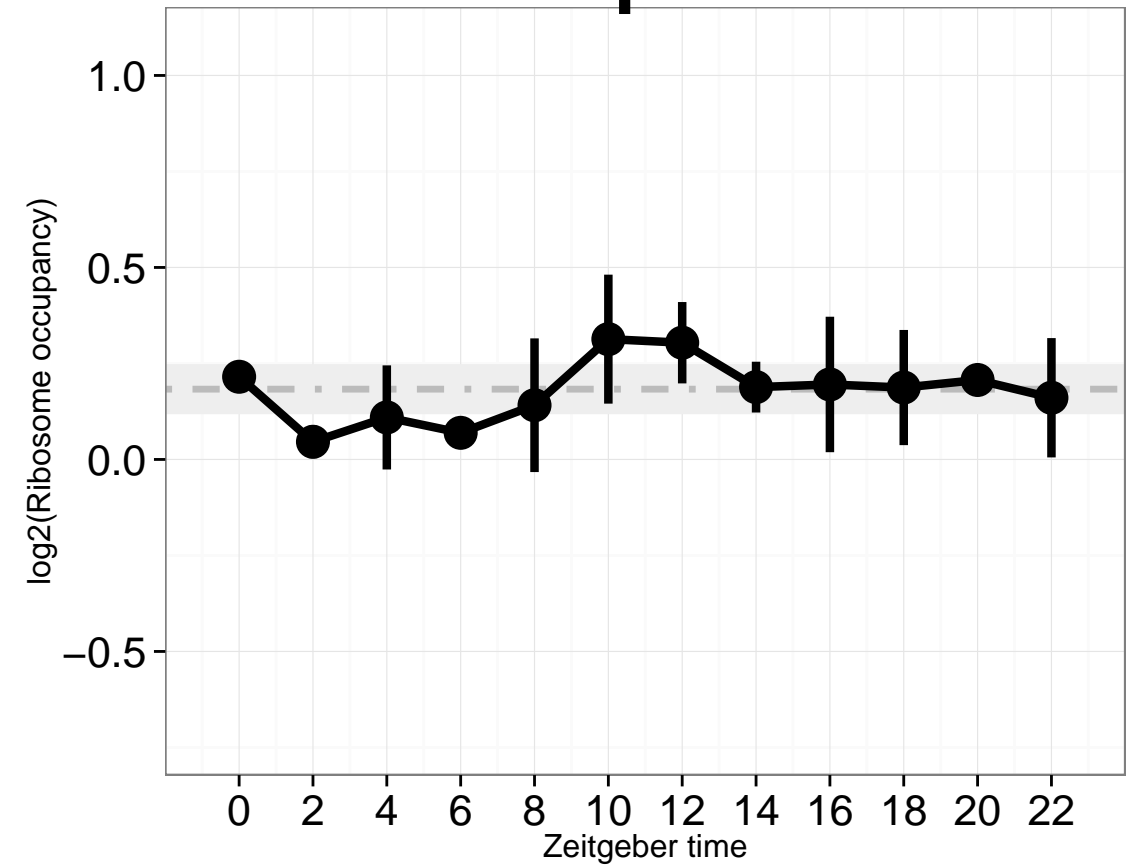

Supplement: Supplementary file 622 [file 1]

## Ube2v2

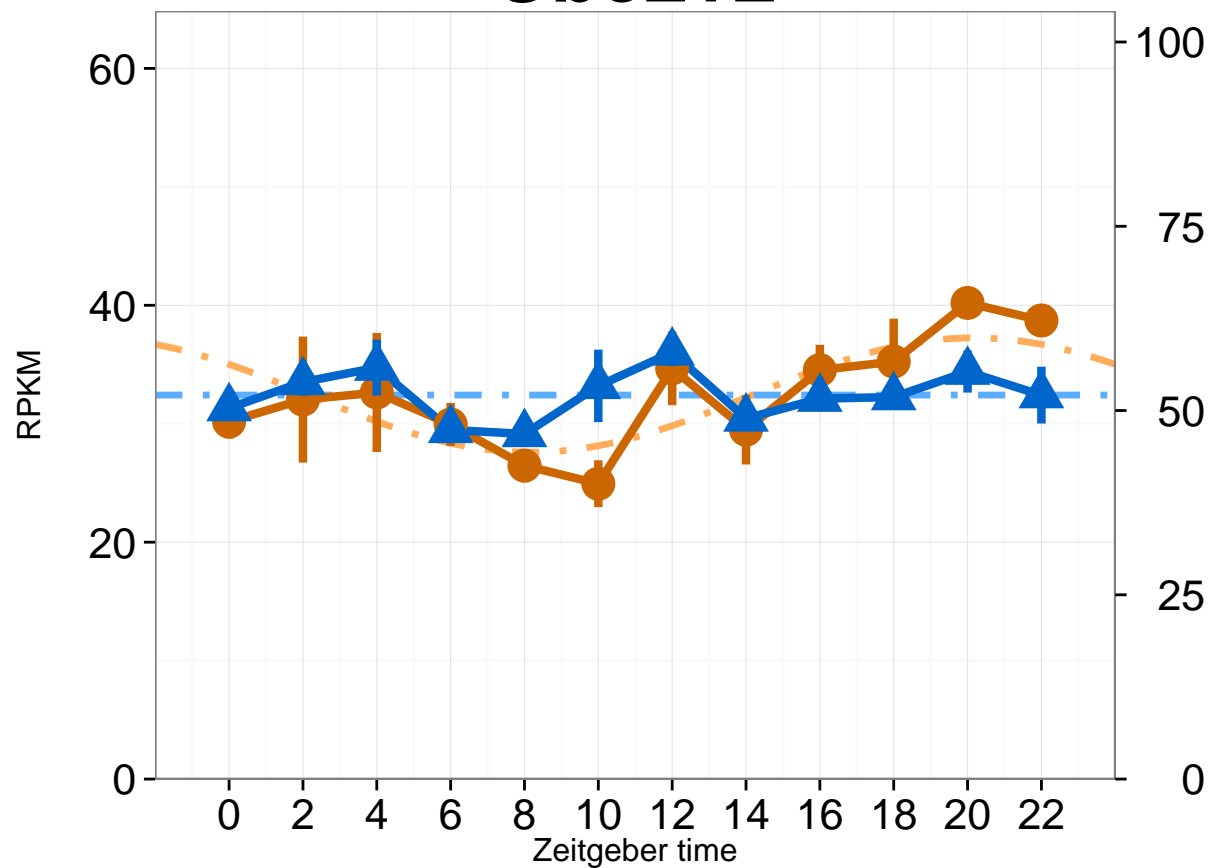

## Ube2v2

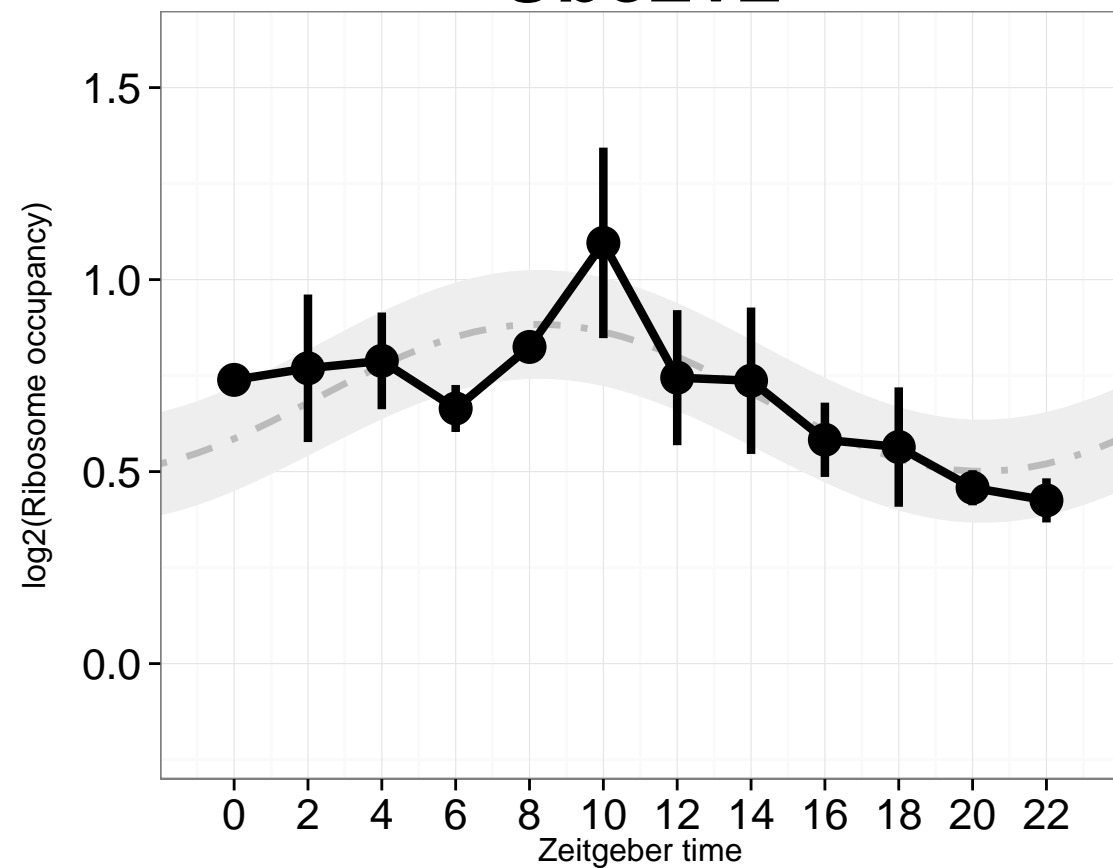

Supplement: Supplementary file 623 [file 1]

# Anxa9

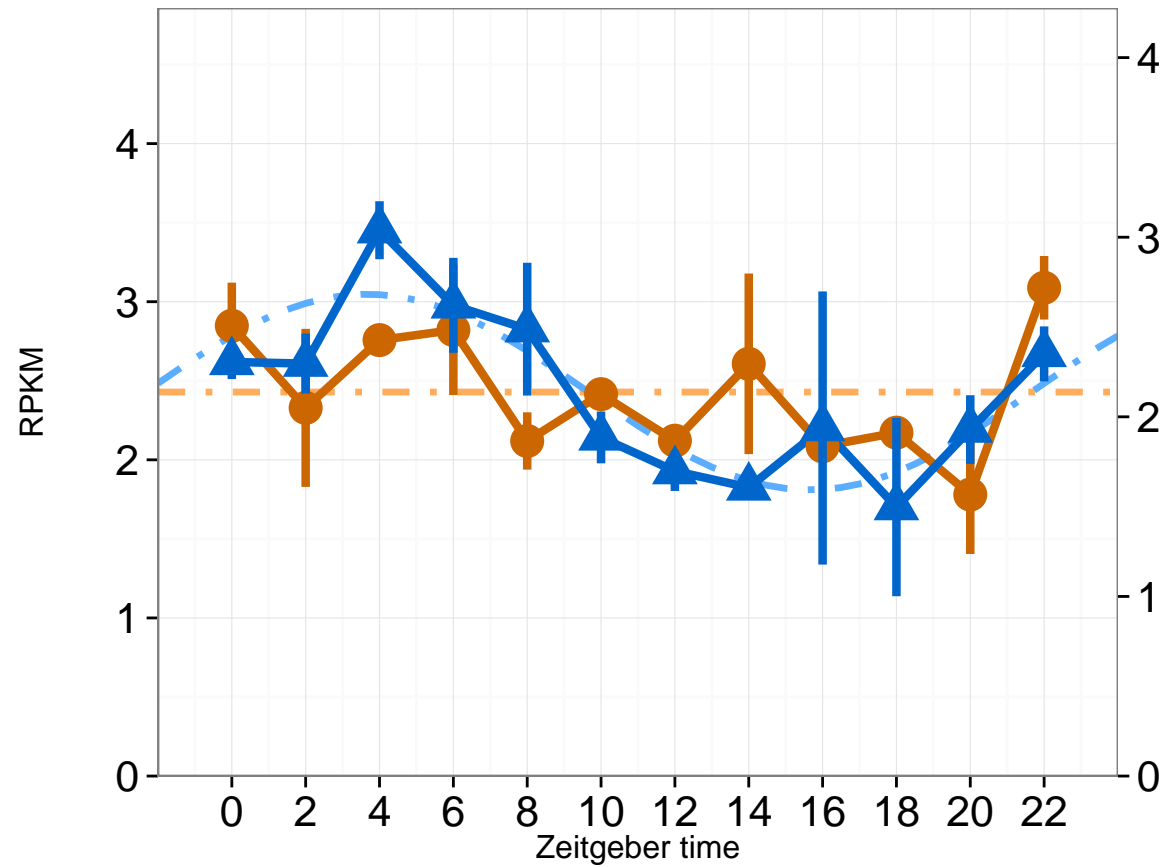

# Anxa9

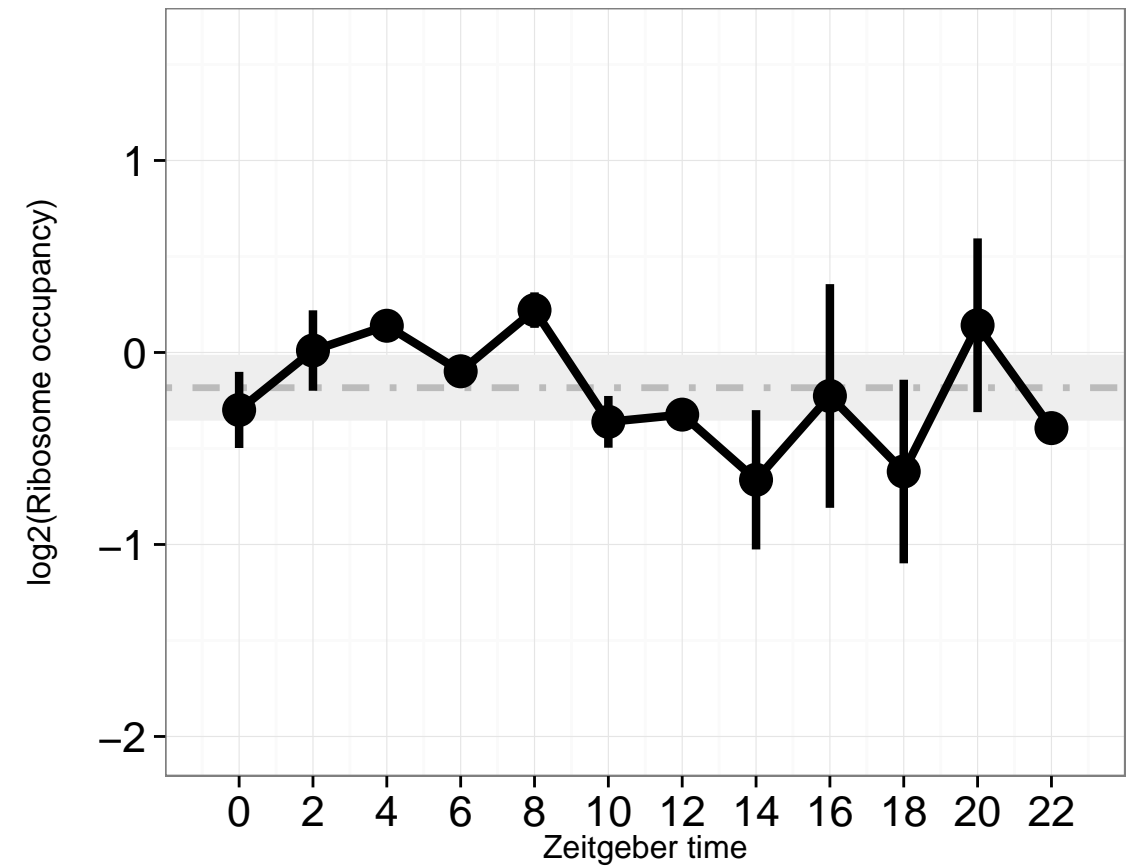

Supplement: Supplementary file 624 [file 1]

# Grsf1

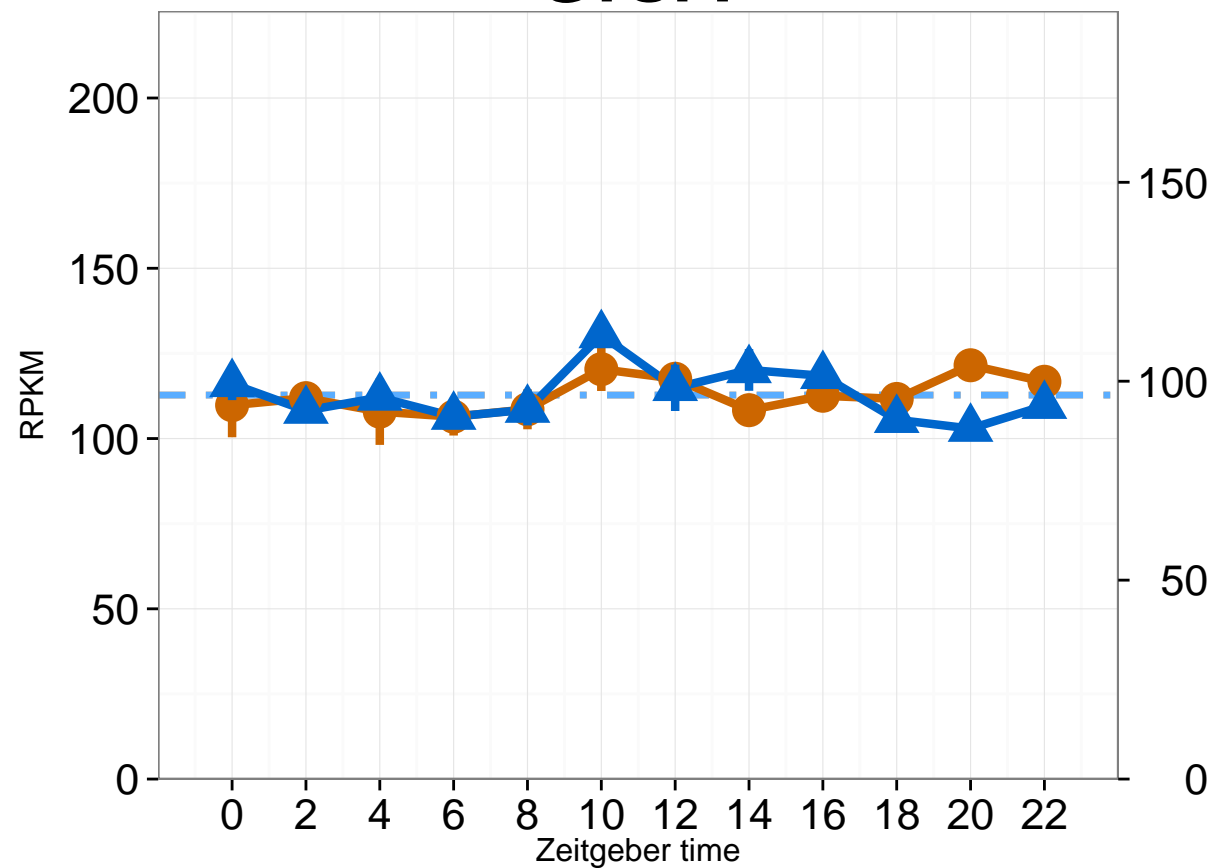

# Grsf1

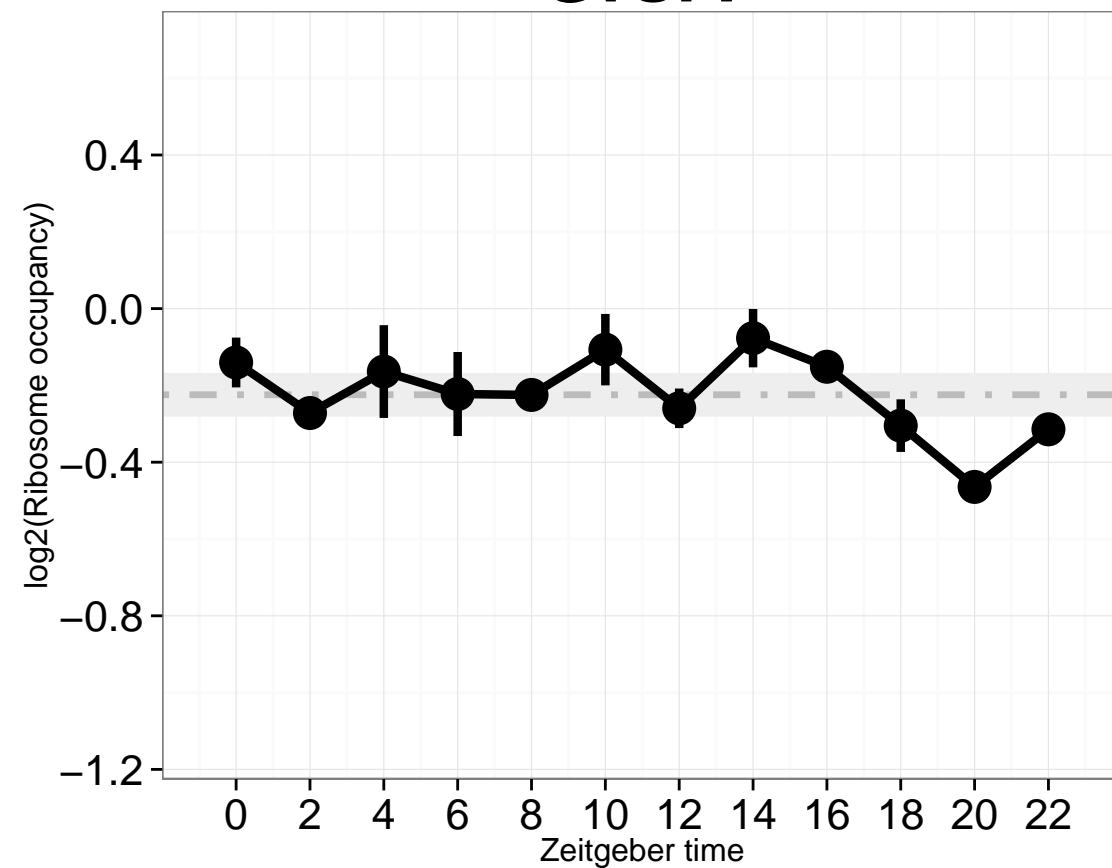

Supplement: Supplementary file 625 [file 1]

## Kctd12b

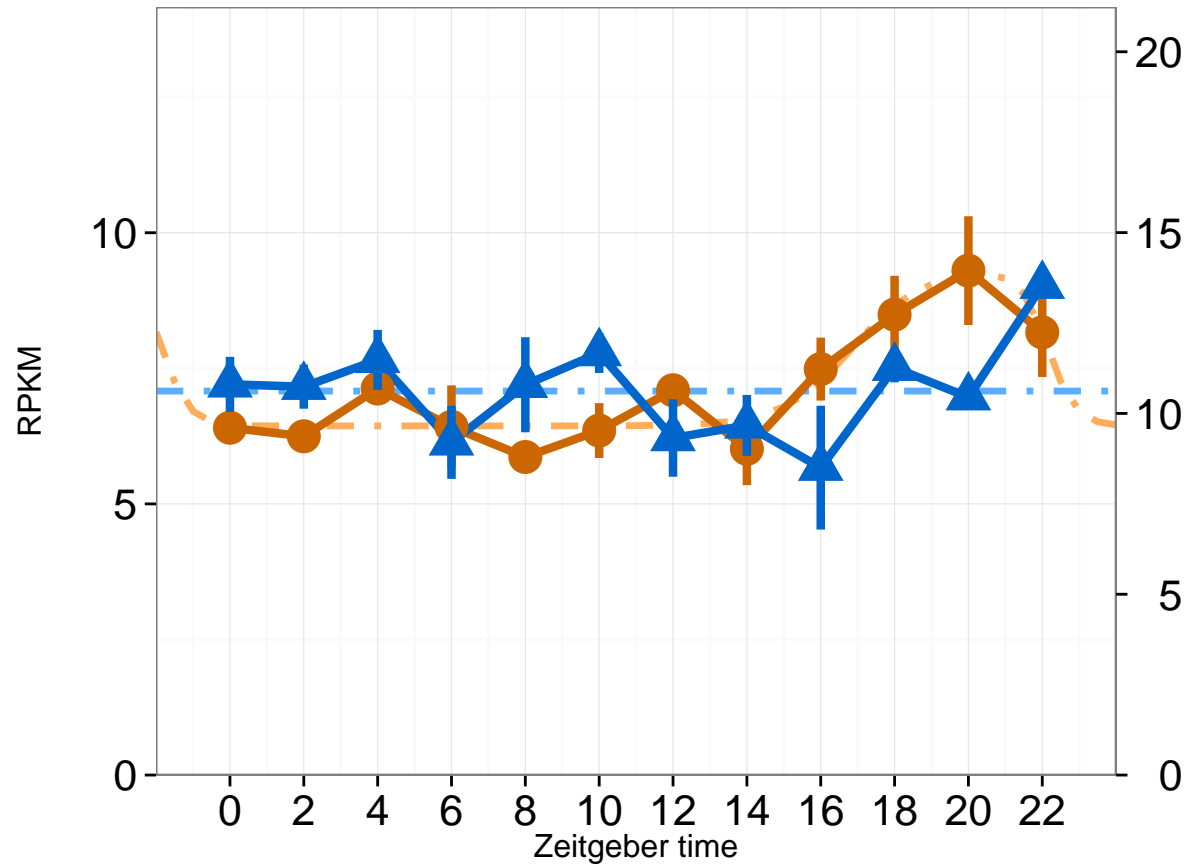

## Kctd12b

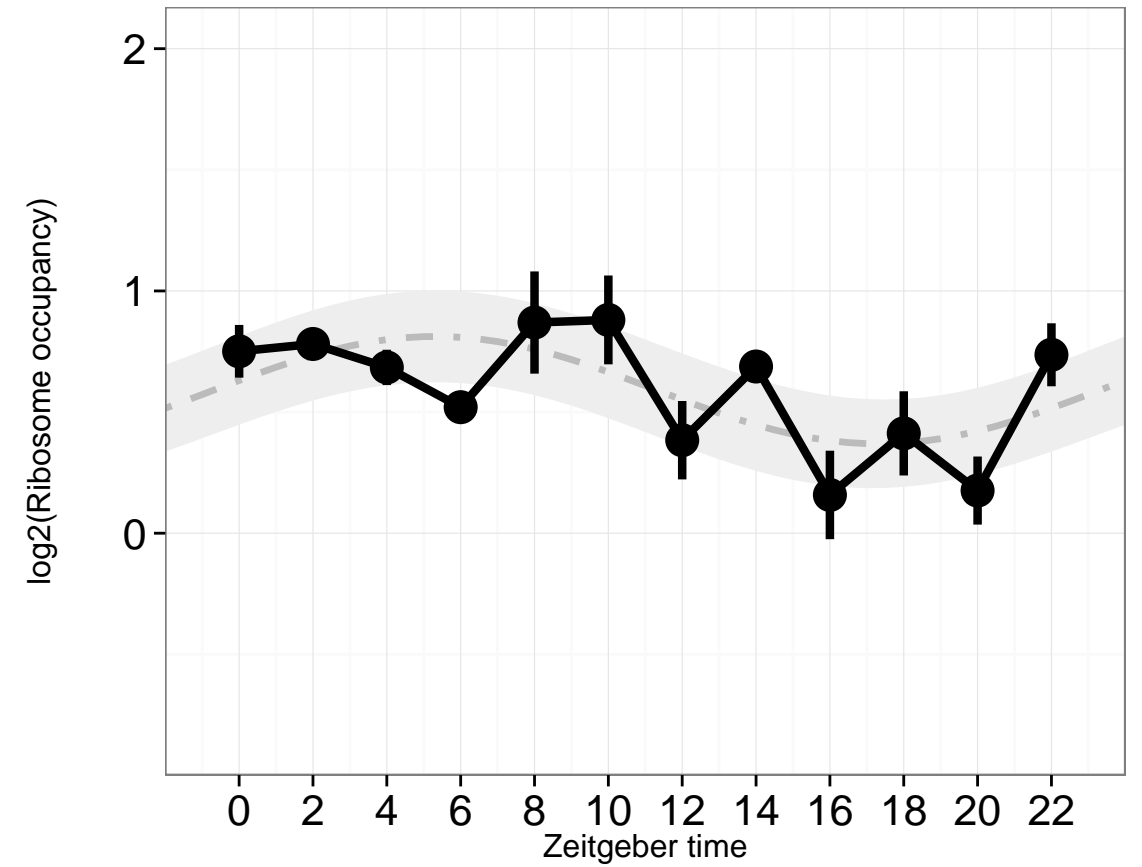

Supplement: Supplementary file 626 [file 1]

# Gm16505

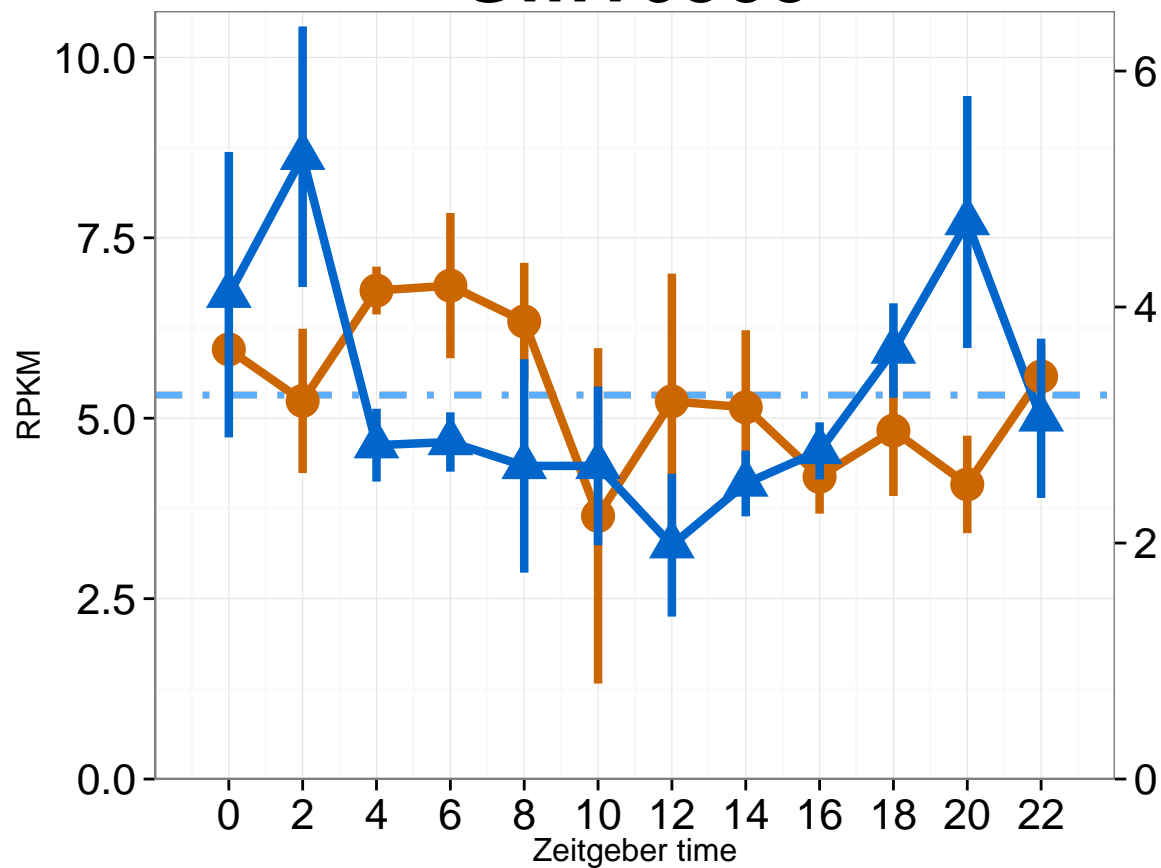

# Gm16505

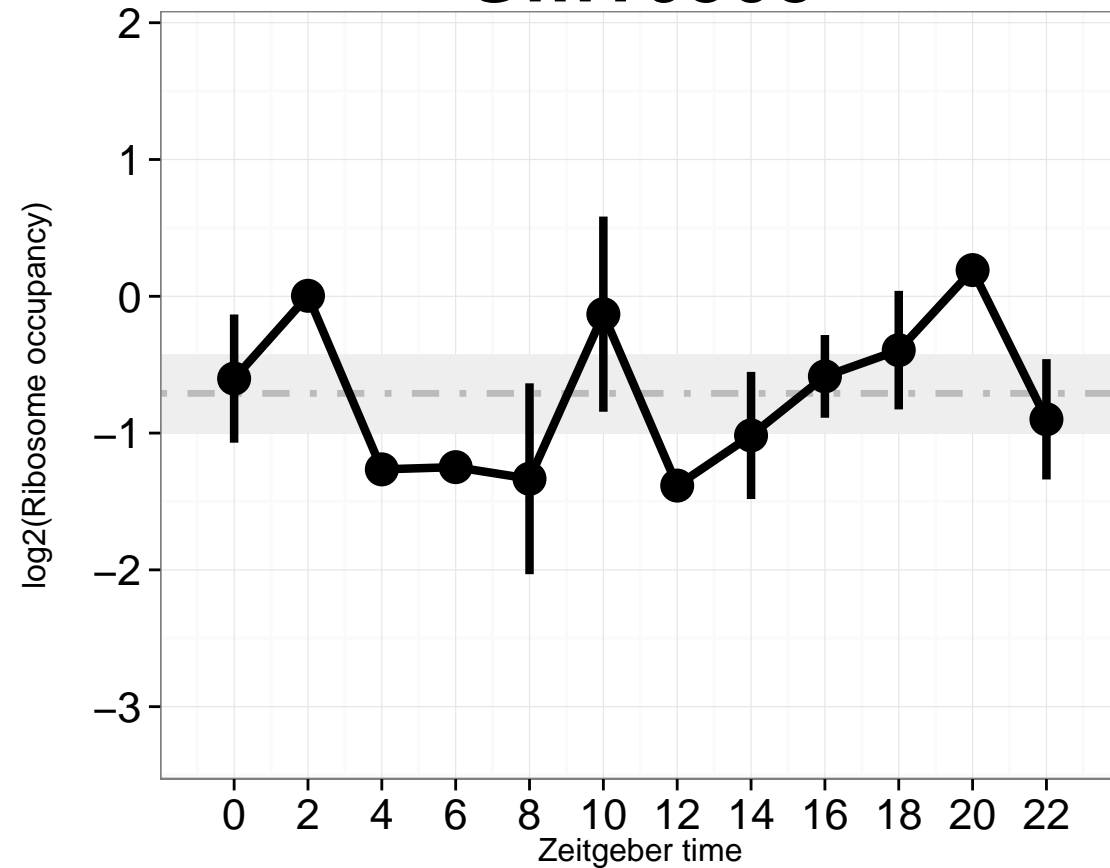

Supplement: Supplementary file 627 [file 1]

## Kdelc1

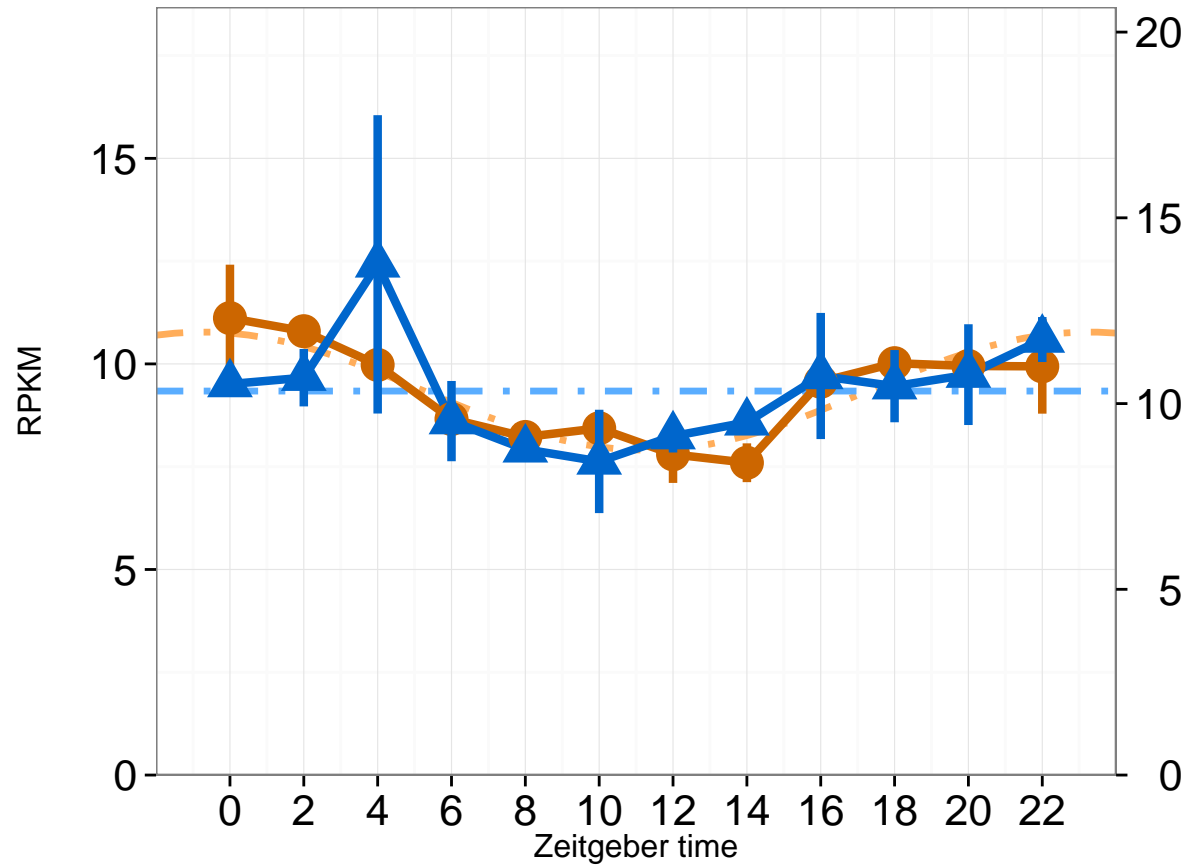

## Kdelc1

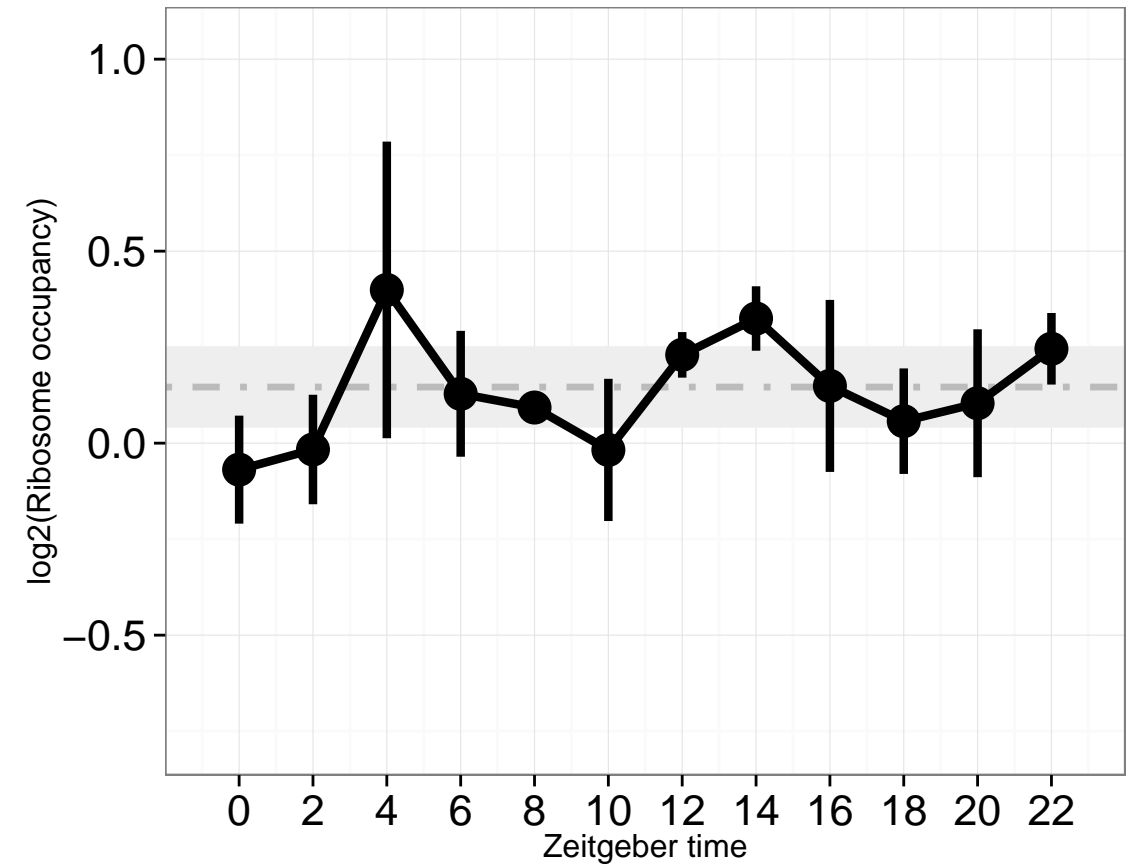

Supplement: Supplementary file 628 [file 1]

# 2010107E04Rik

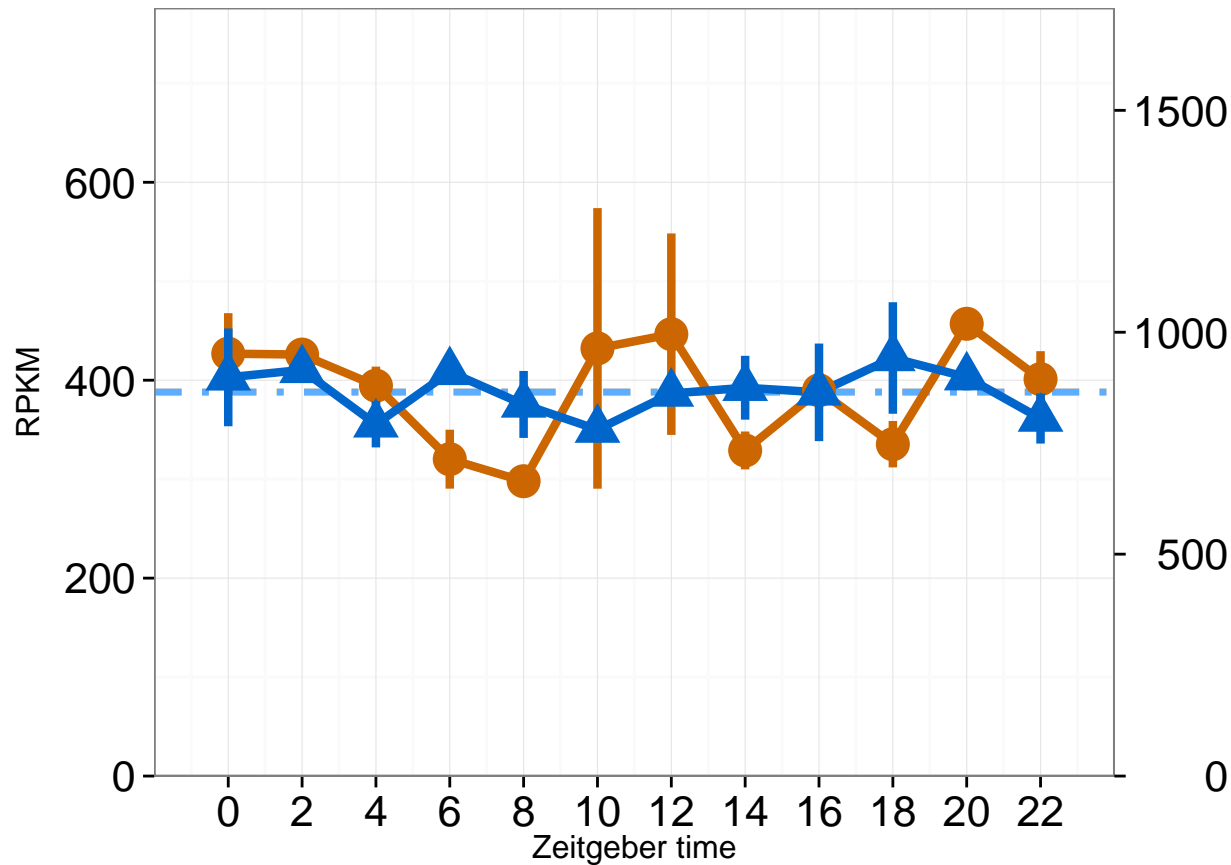

# 2010107E04Rik

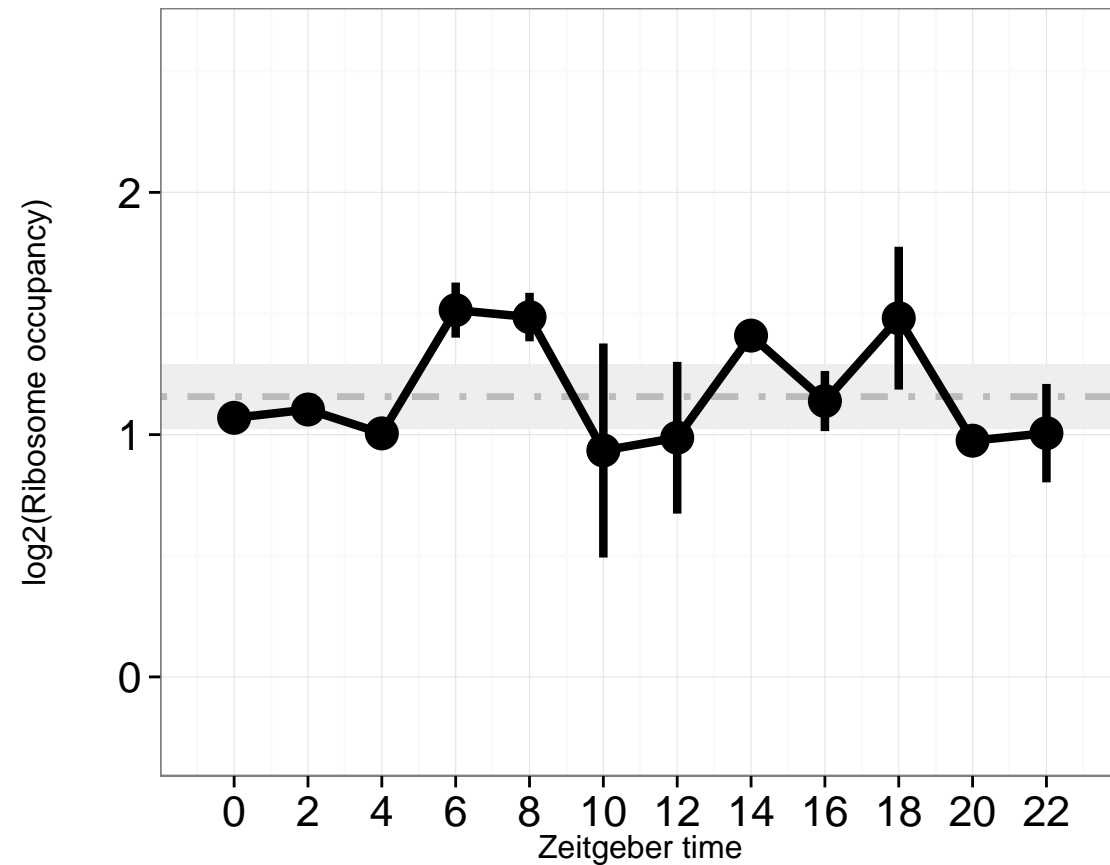

Supplement: Supplementary file 629 [file 1]

## Ppic

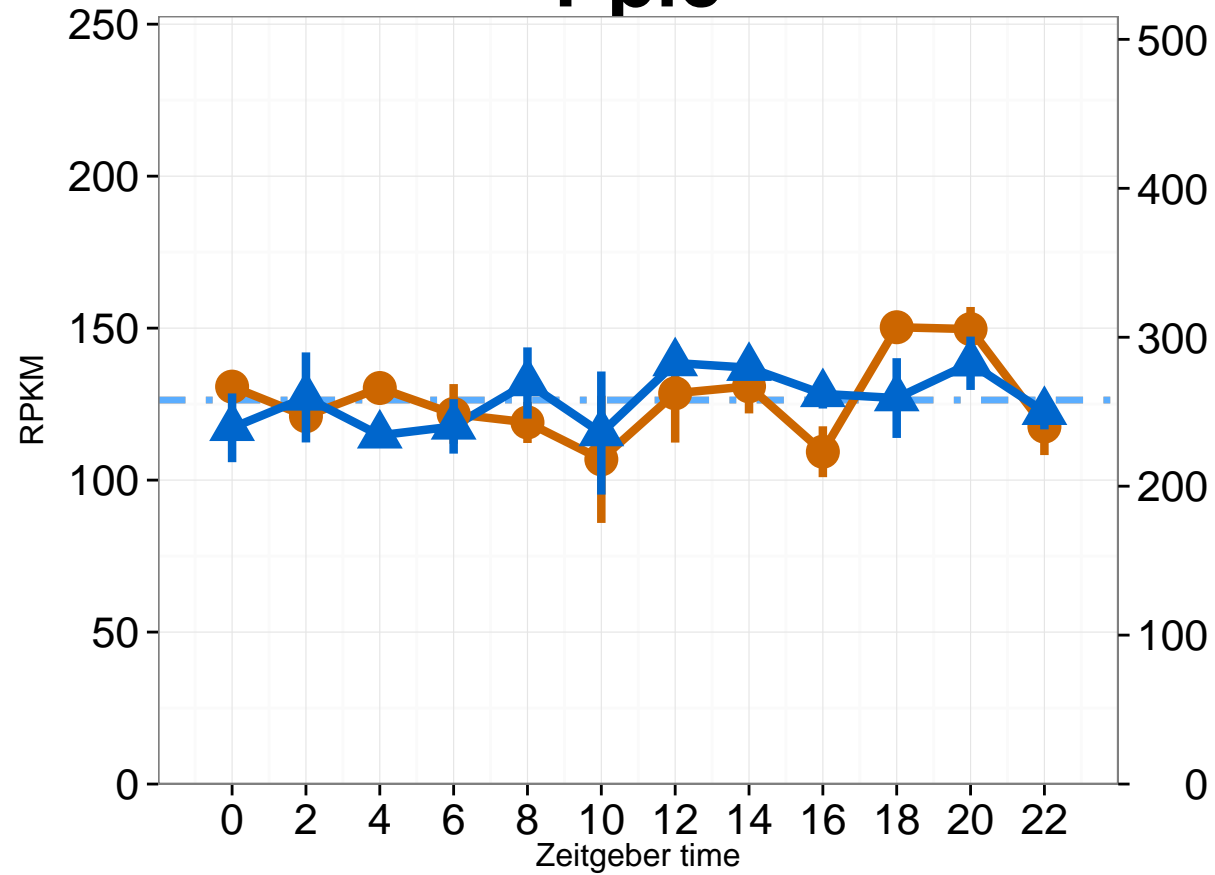

## Ppic

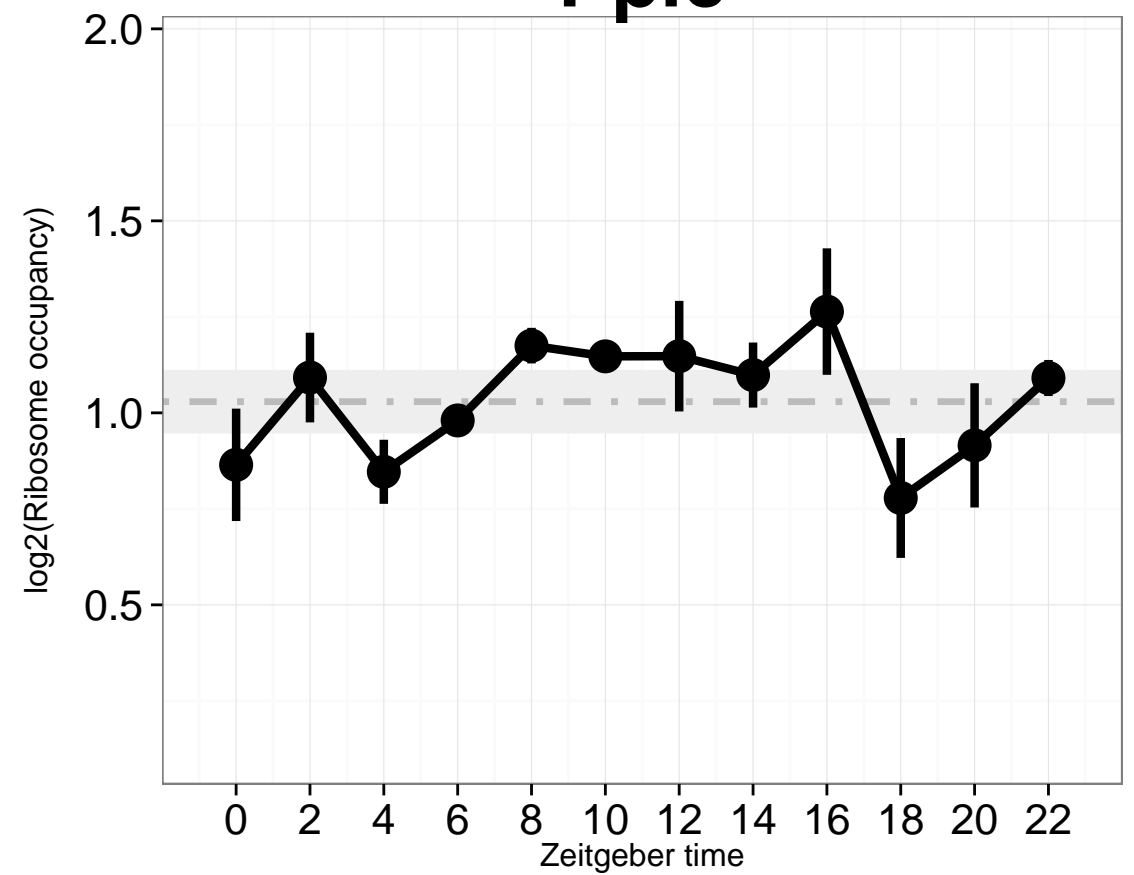

Supplement: Supplementary file 630 [file 1]

## Hnrnpa3

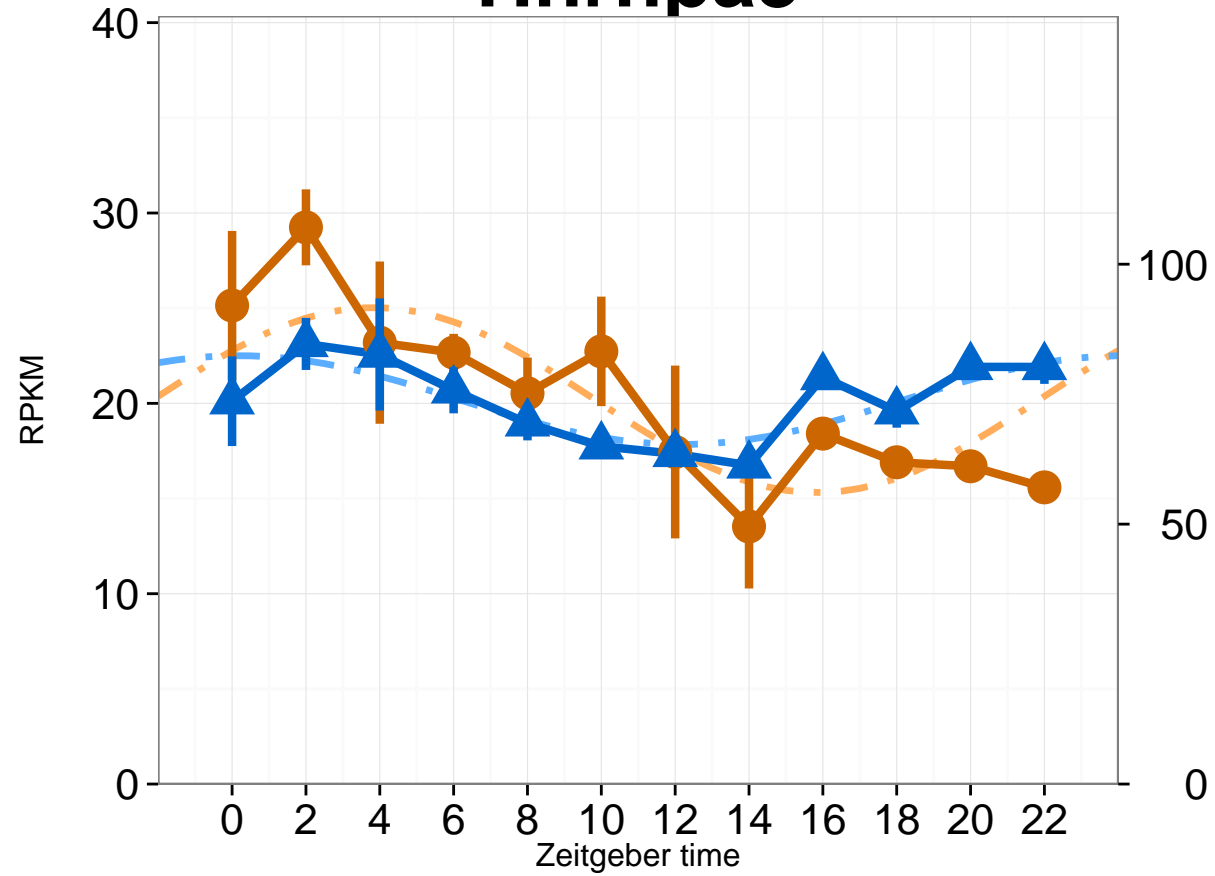

## Hnrnpa3

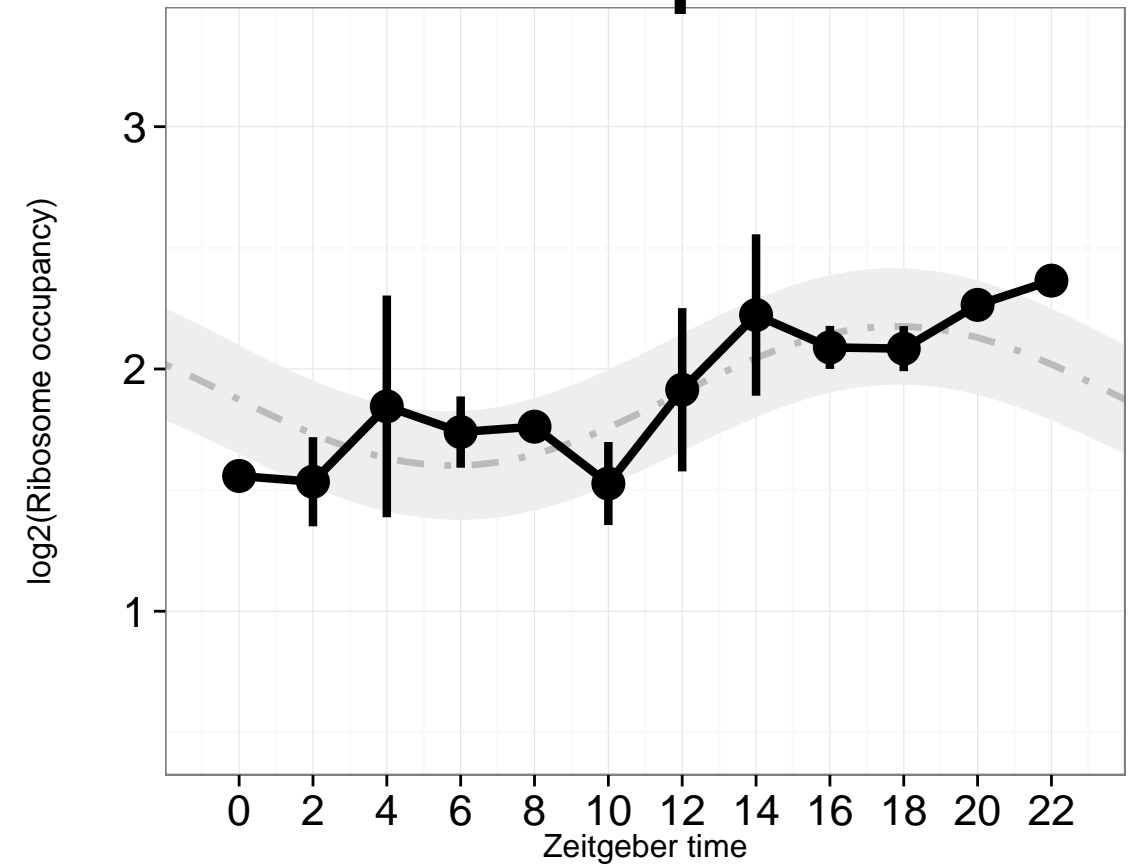

Supplement: Supplementary file 631 [file 1]

# Sytl1

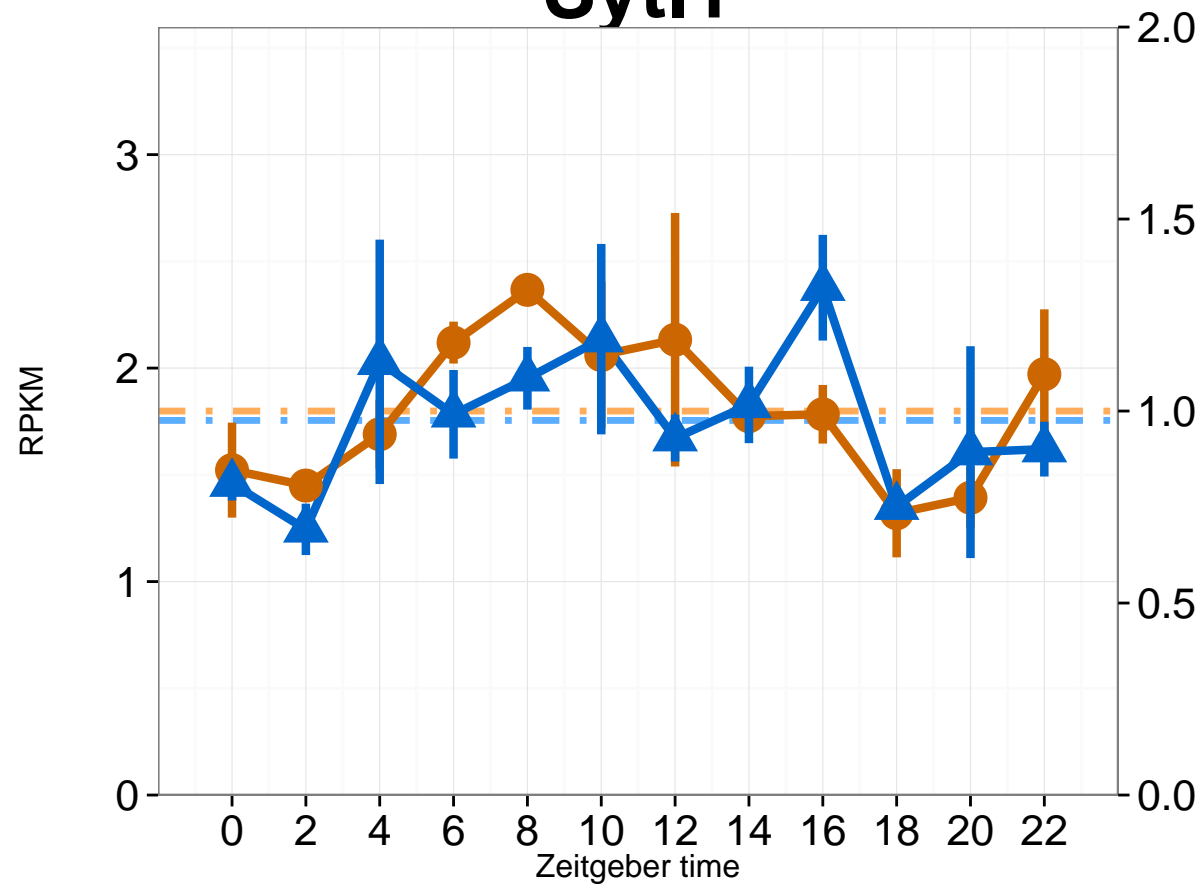

# Sytl1

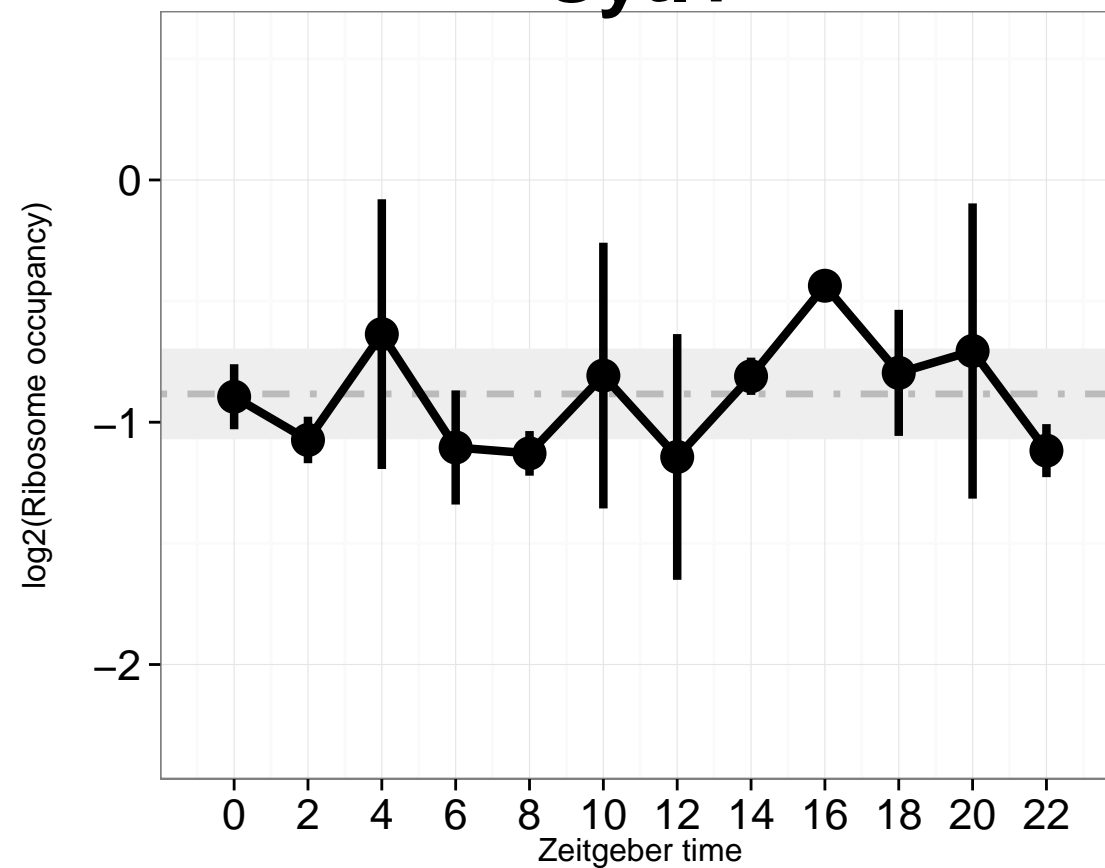

Supplement: Supplementary file 632 [file 1]

# Auh

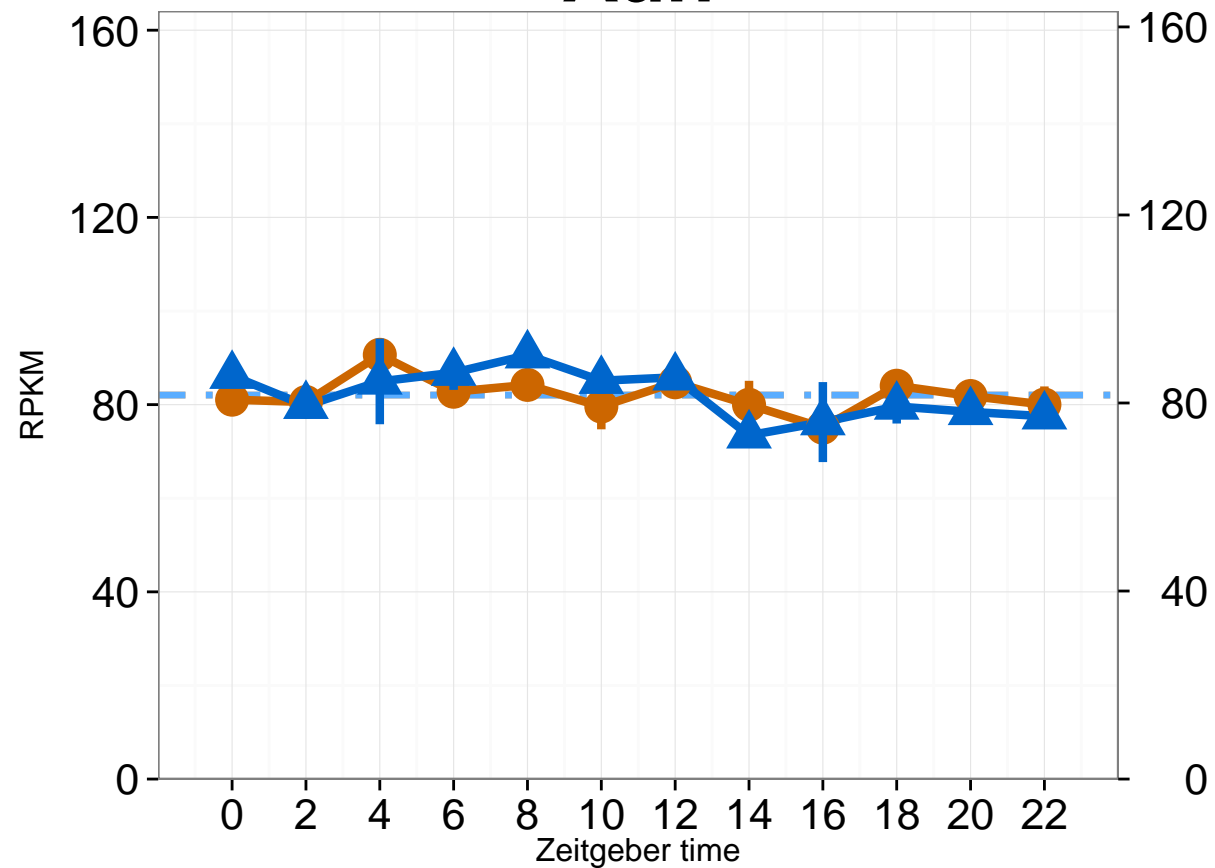

# Auh

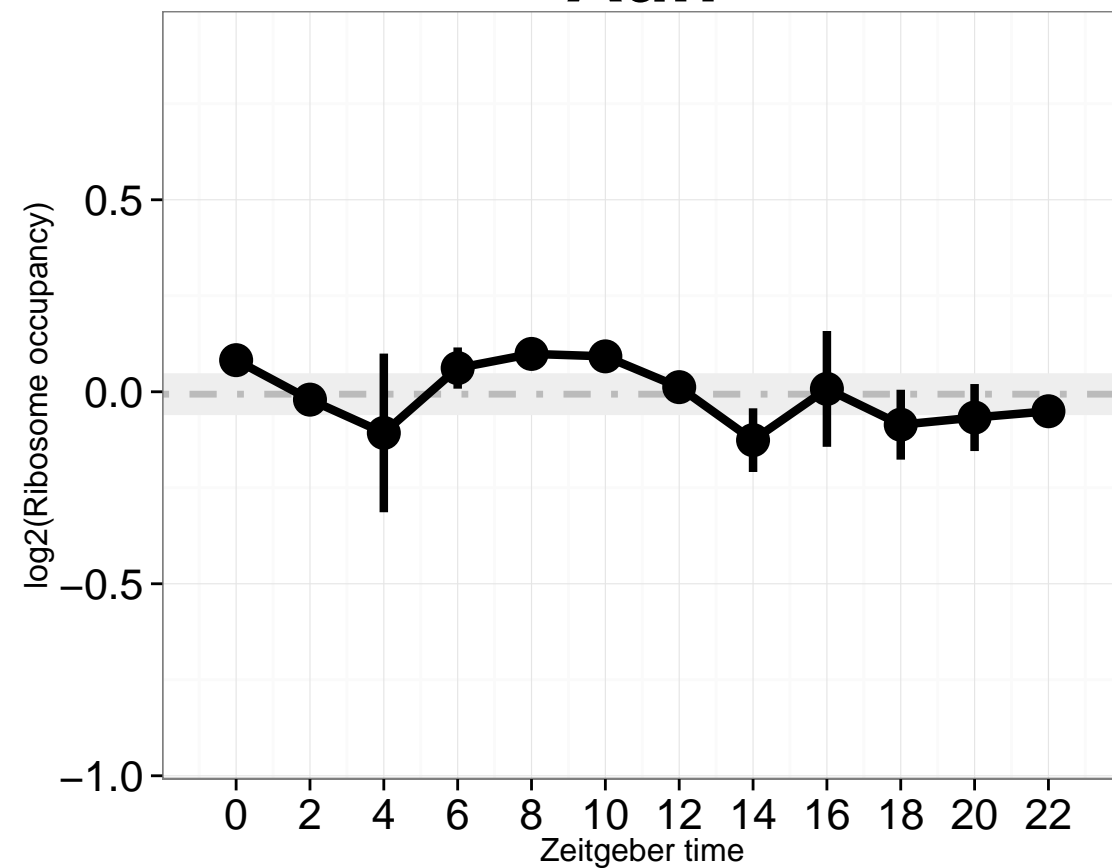

Supplement: Supplementary file 633 [file 1]

# Atp1b3

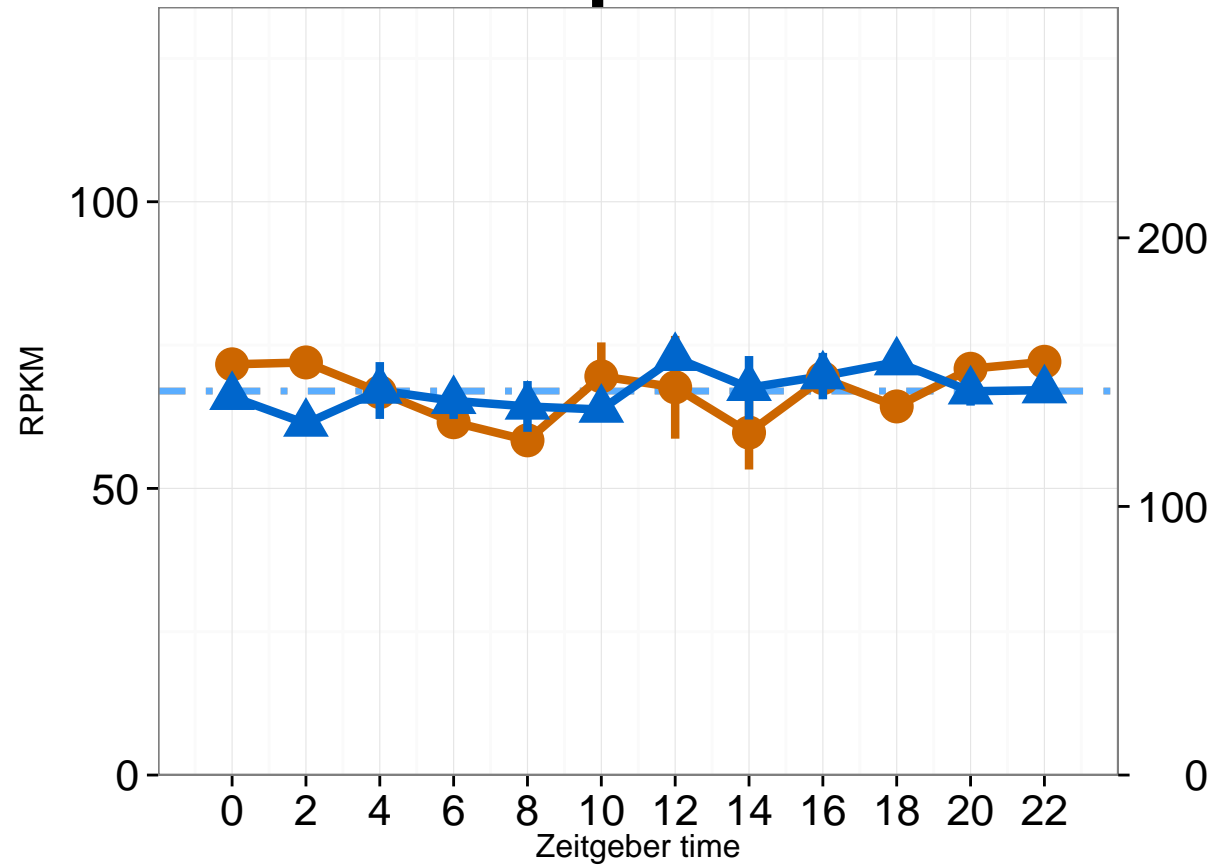

# Atp1b3

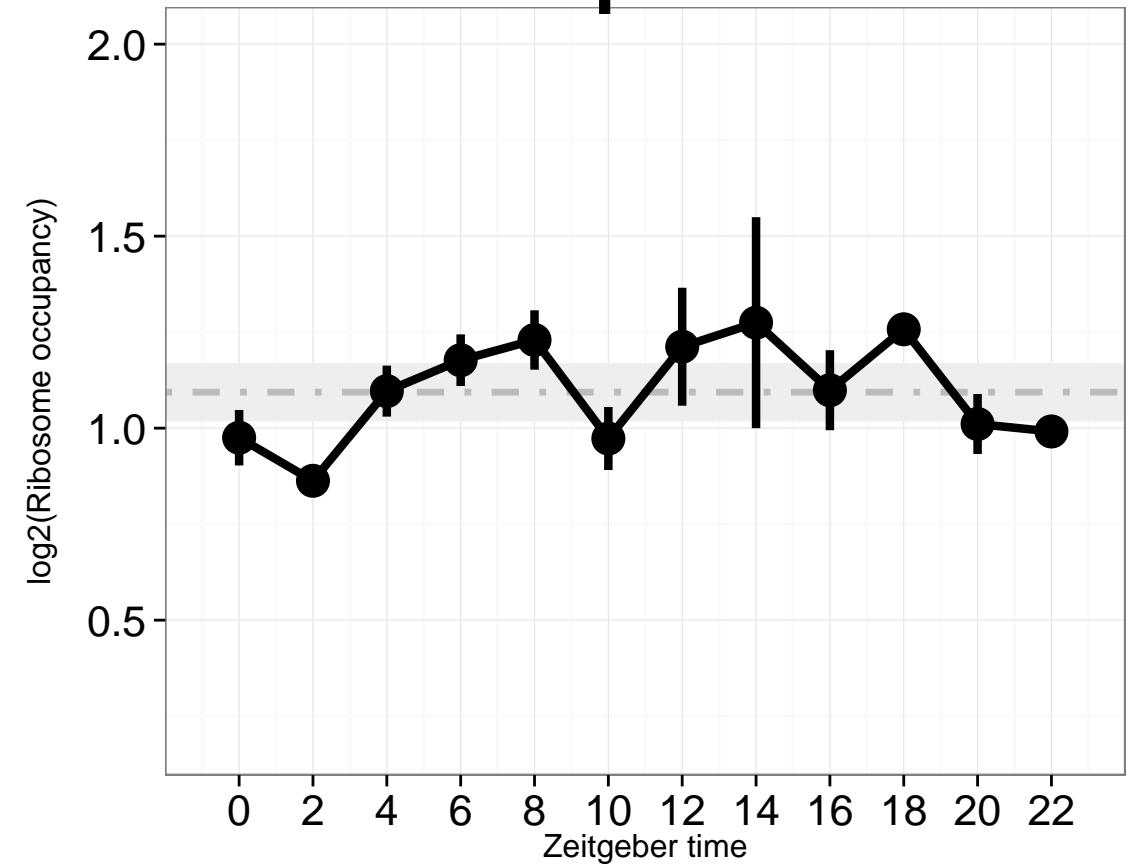

Supplement: Supplementary file 634 [file 1]

# Dennd2a

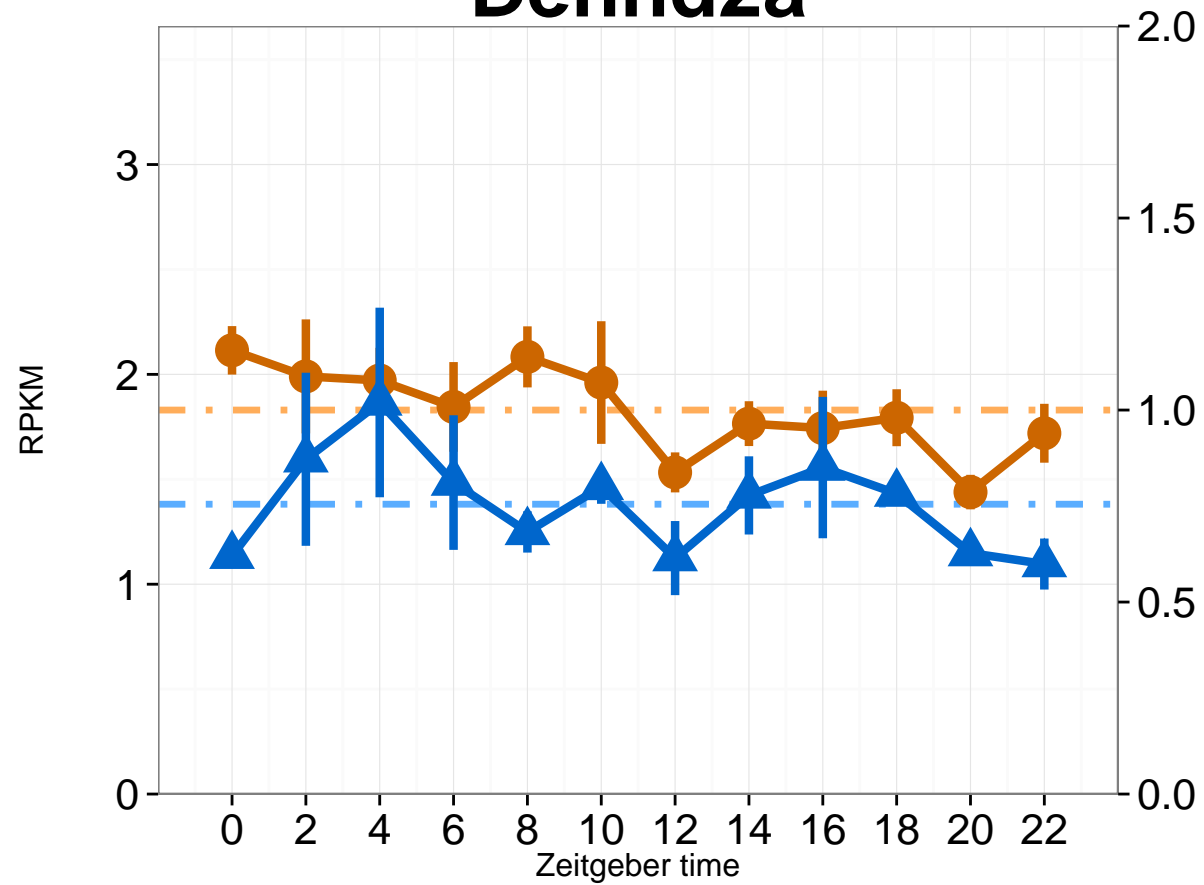

# Dennd2a

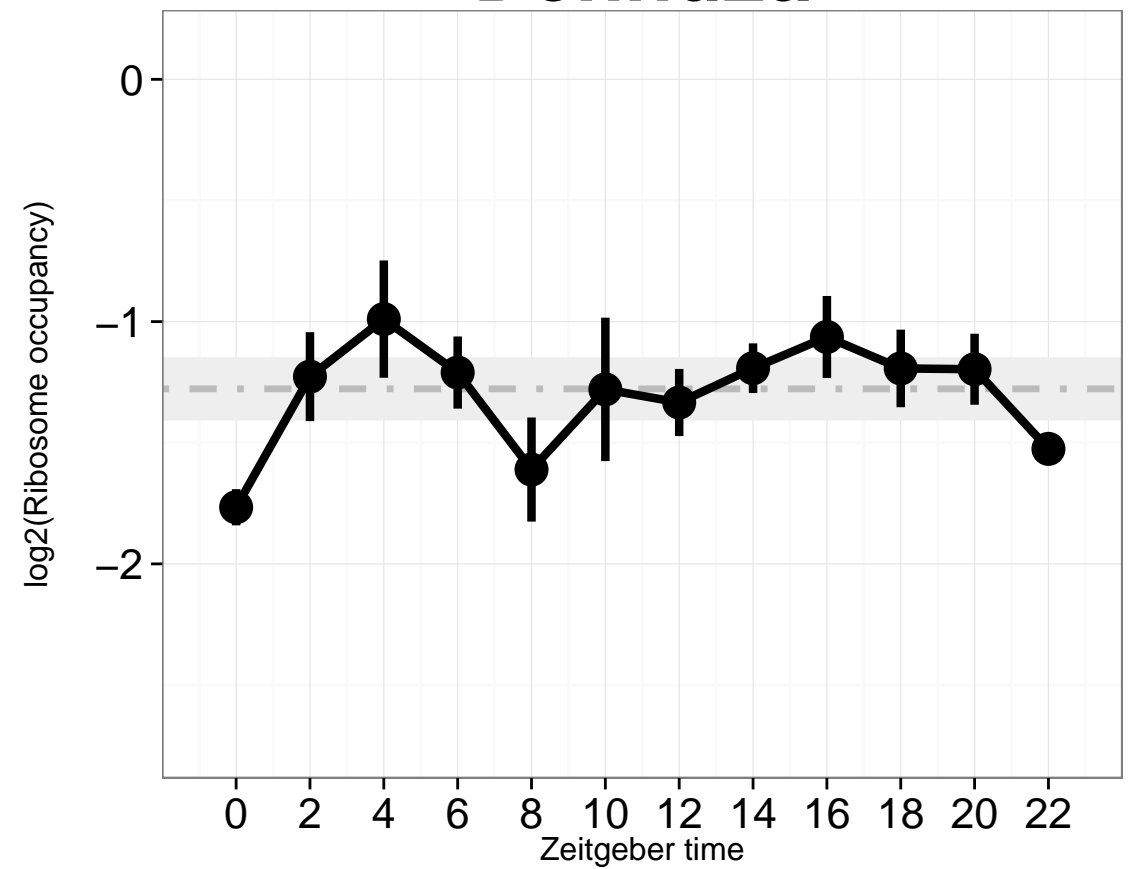

Supplement: Supplementary file 635 [file 1]

## Pkm

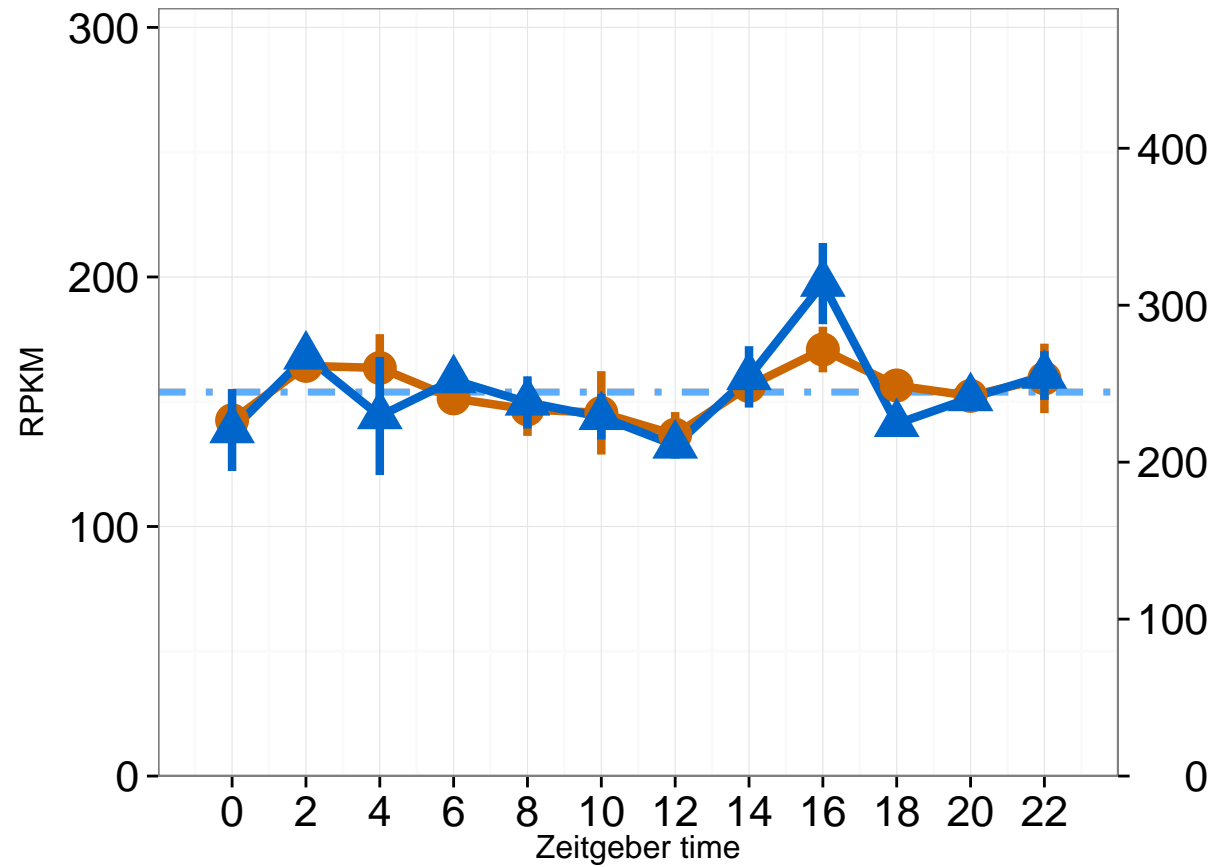

## Pkm

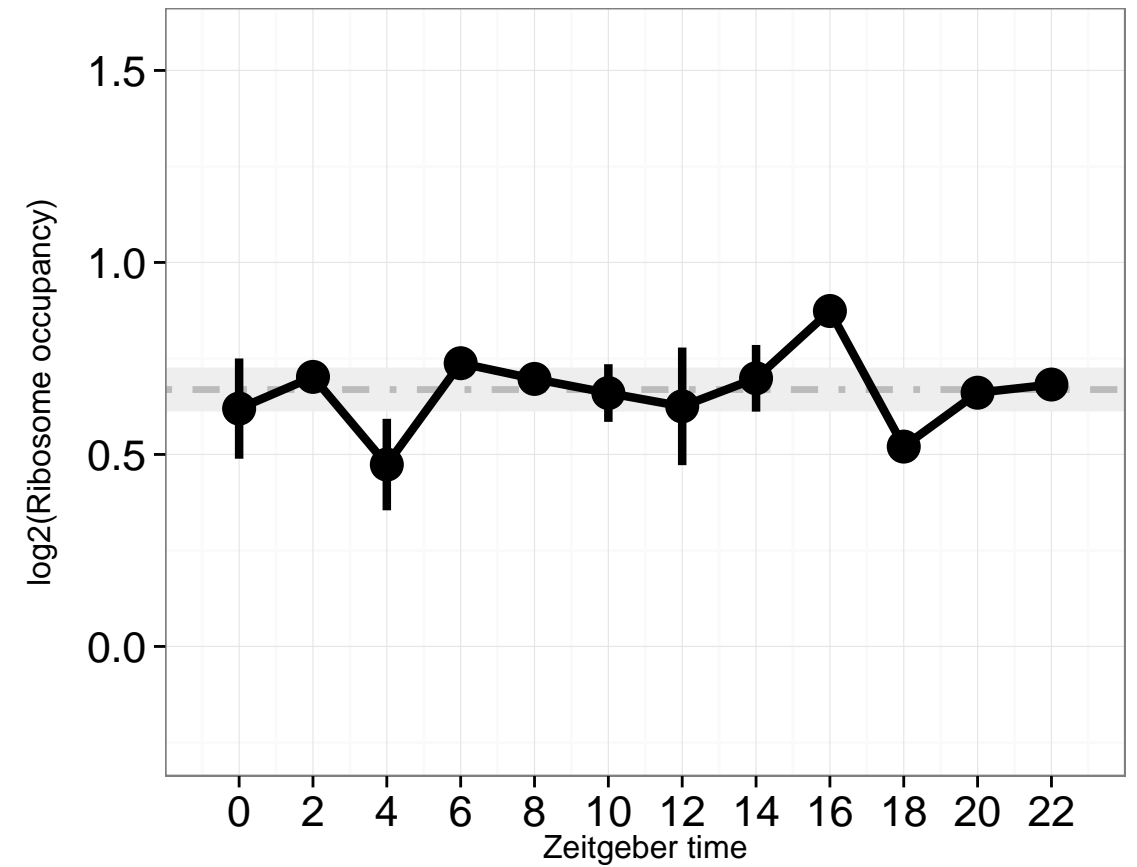

Supplement: Supplementary file 636 [file 1]

# Taf6

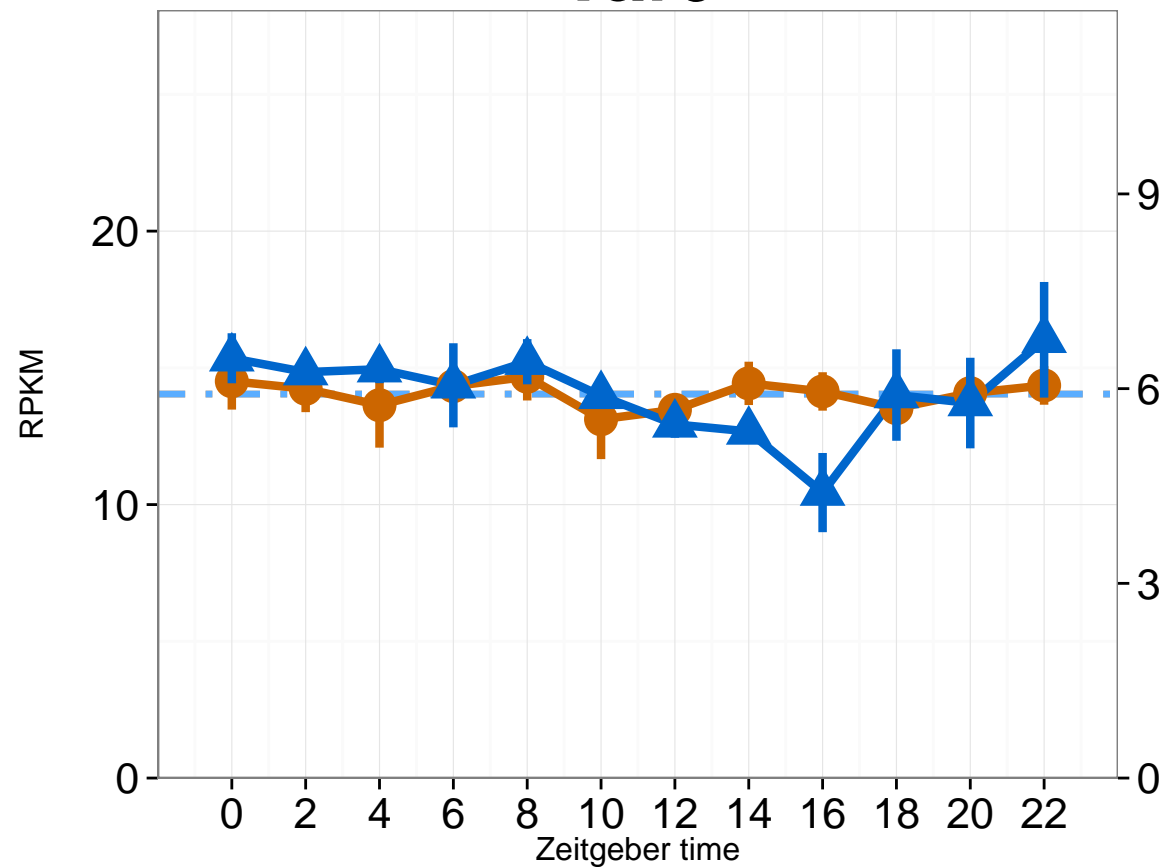

# Taf6

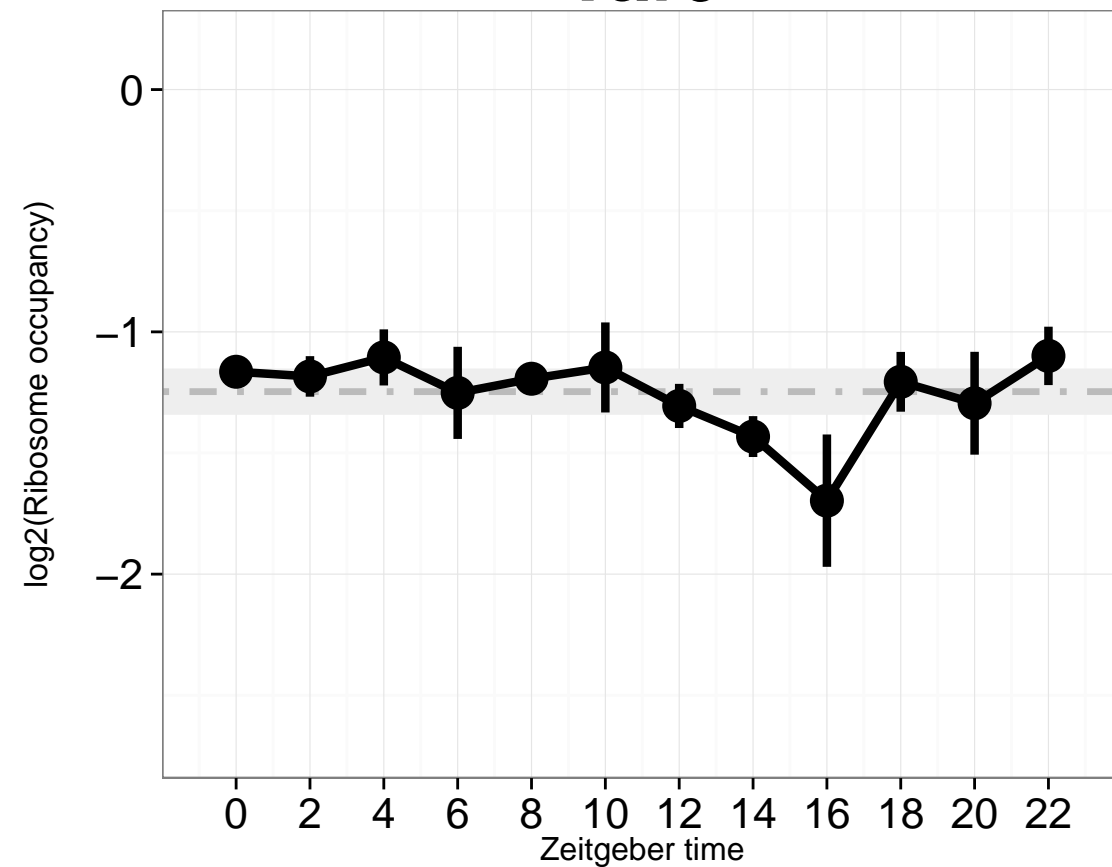

Supplement: Supplementary file 637 [file 1]

# Eif3e

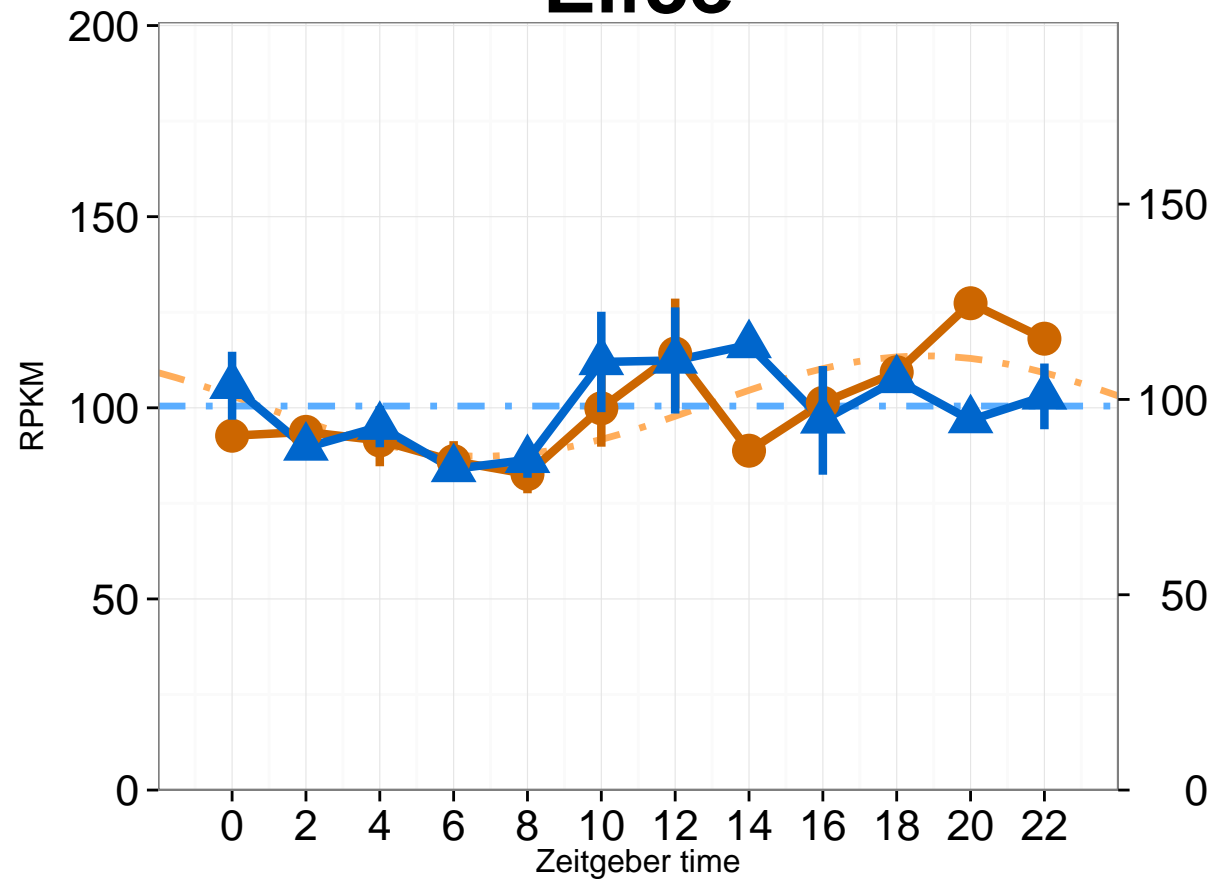

# Eif3e

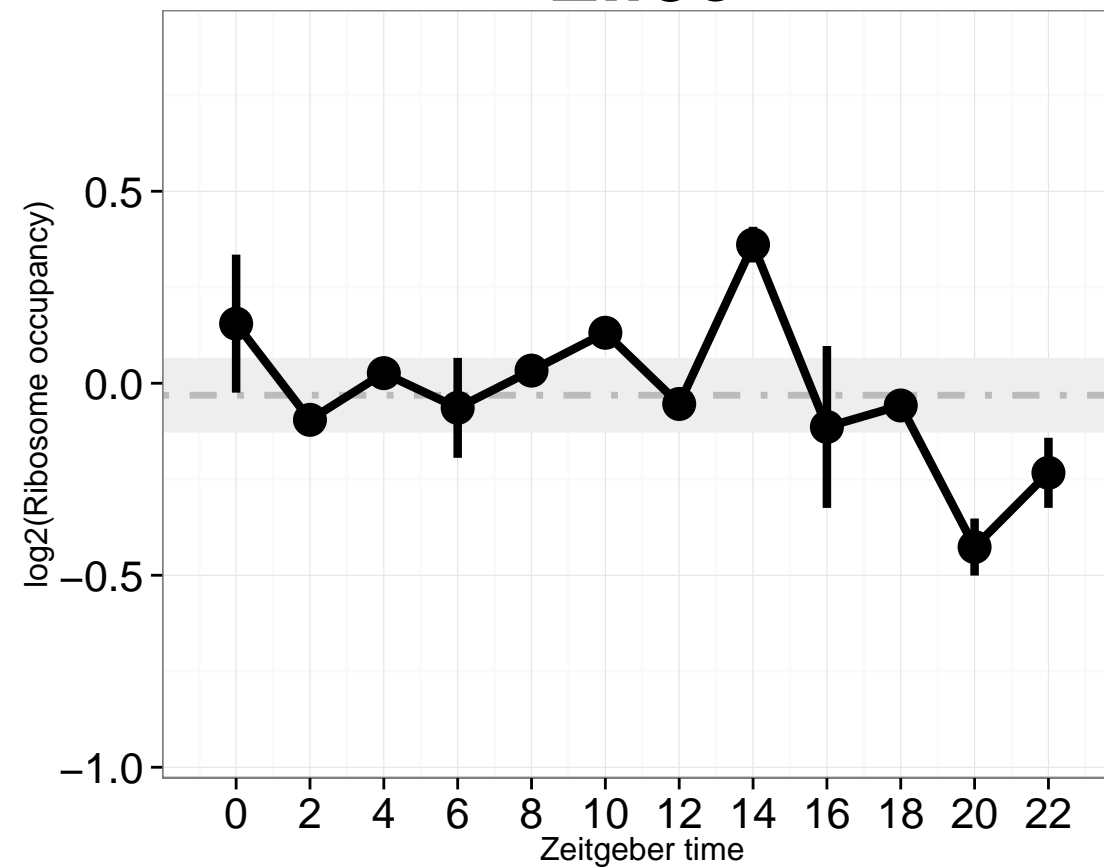

Supplement: Supplementary file 638 [file 1]

# Bard1

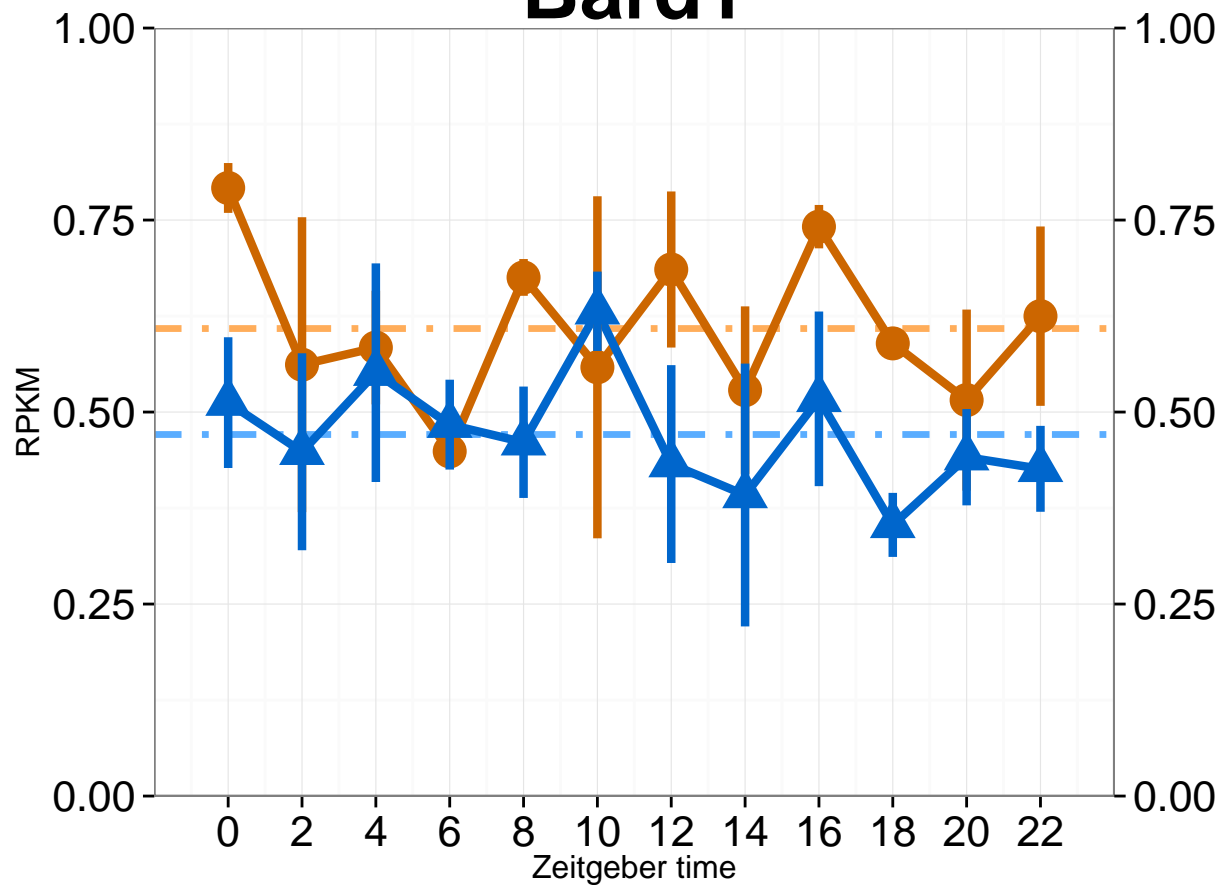

# Bard1

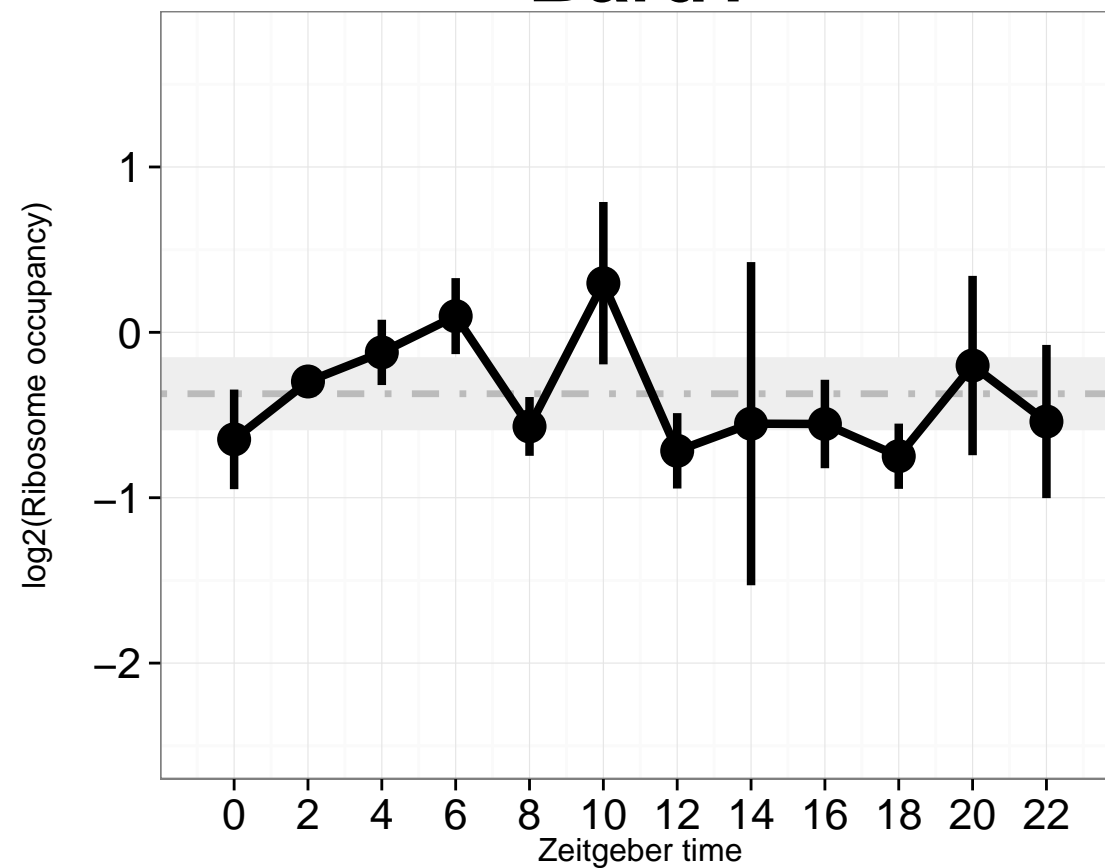

Supplement: Supplementary file 639 [file 1]

## Egfl6

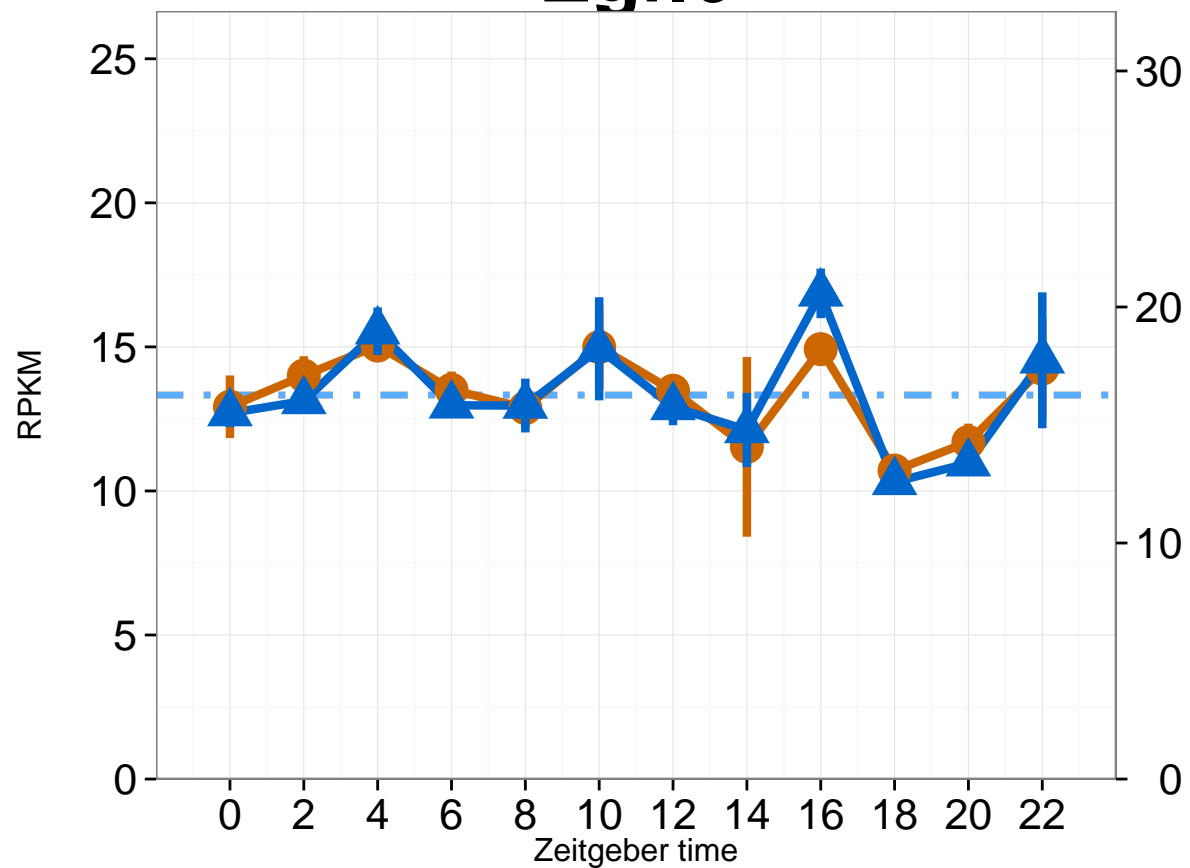

## Egfl6

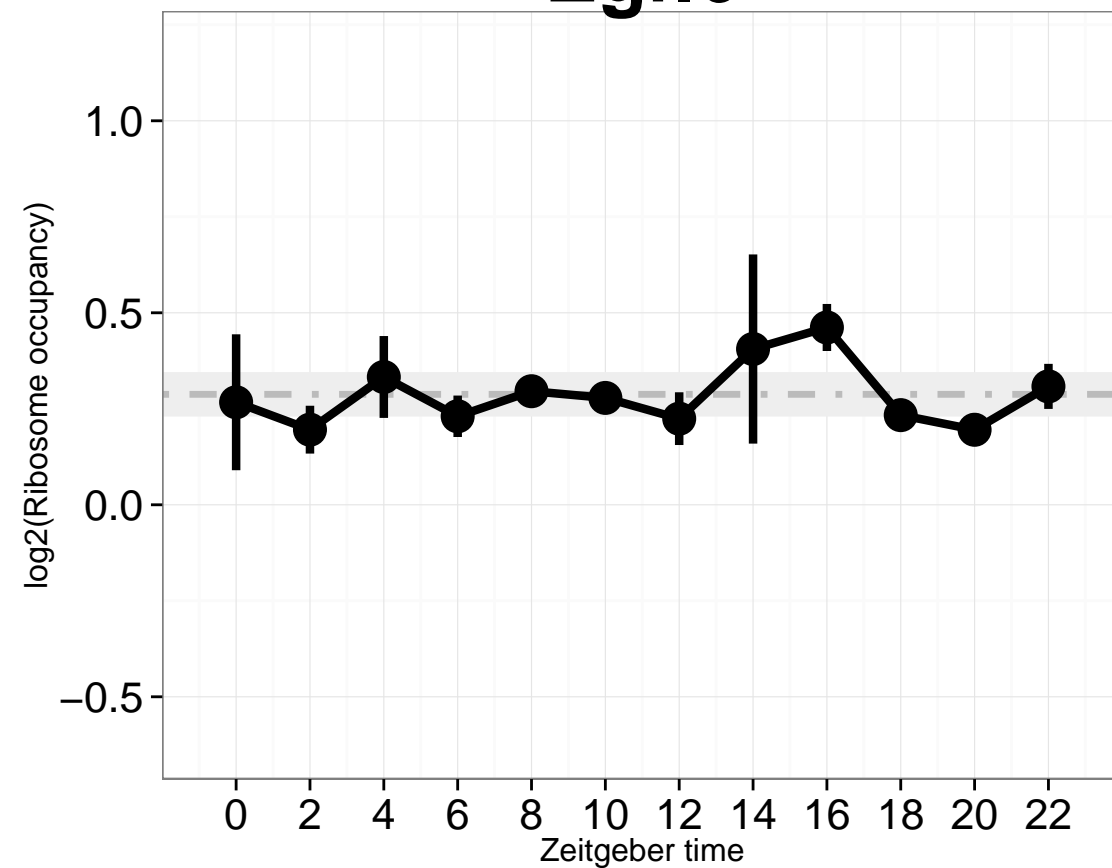

Supplement: Supplementary file 640 [file 1]

## Gpatch8

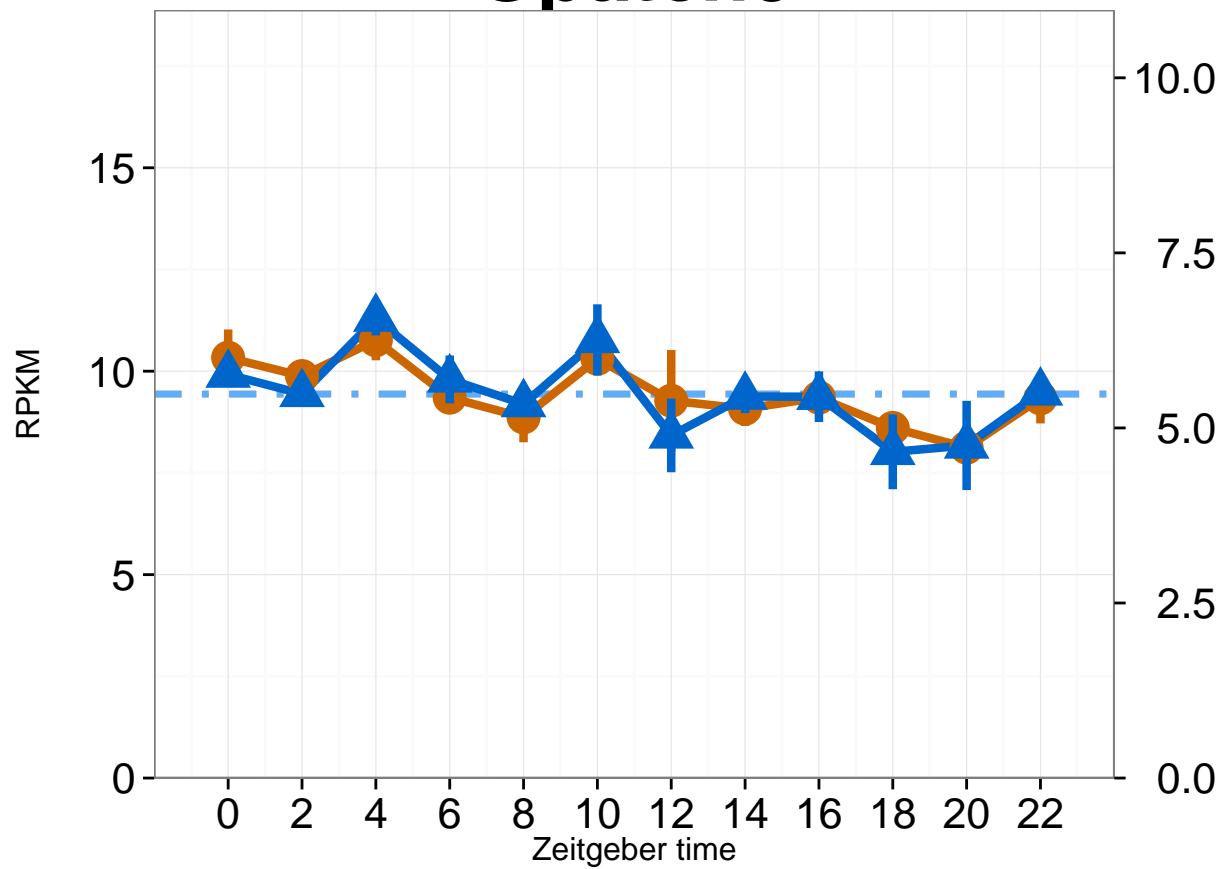

## Gpatch8

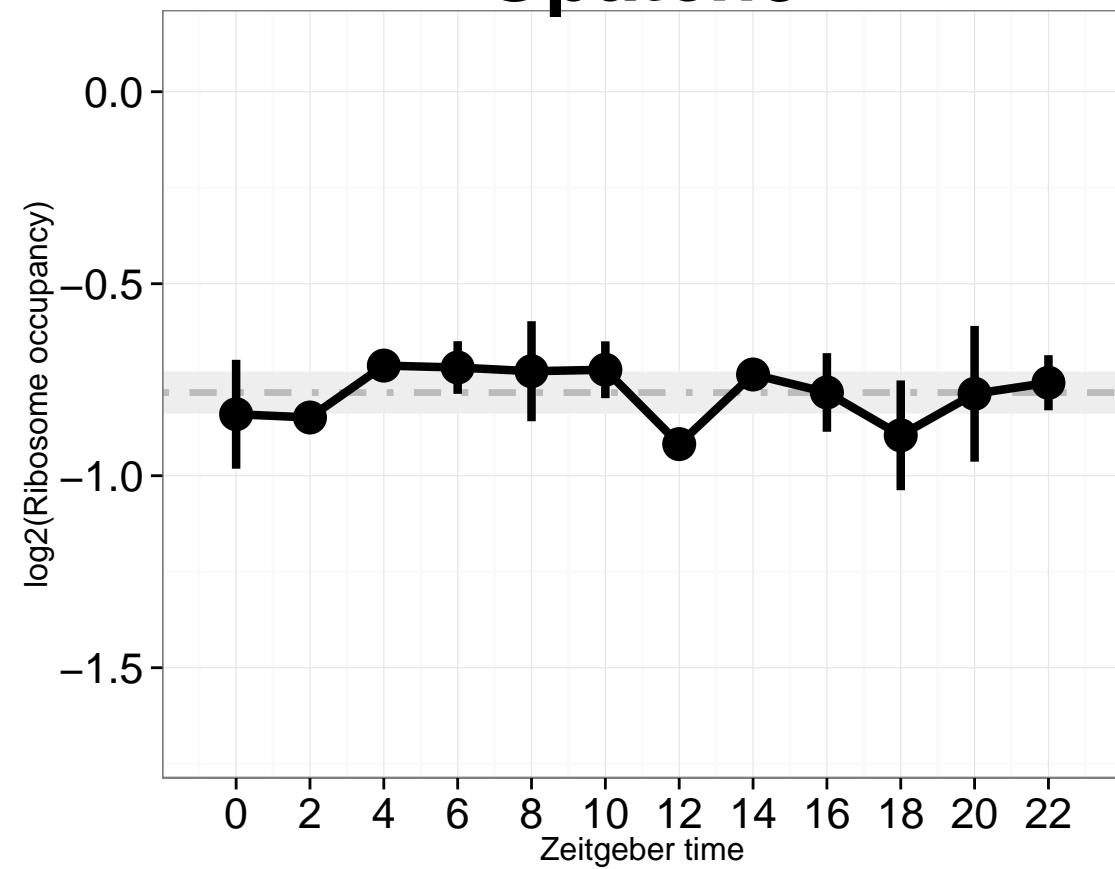

Supplement: Supplementary file 641 [file 1]

# Med14

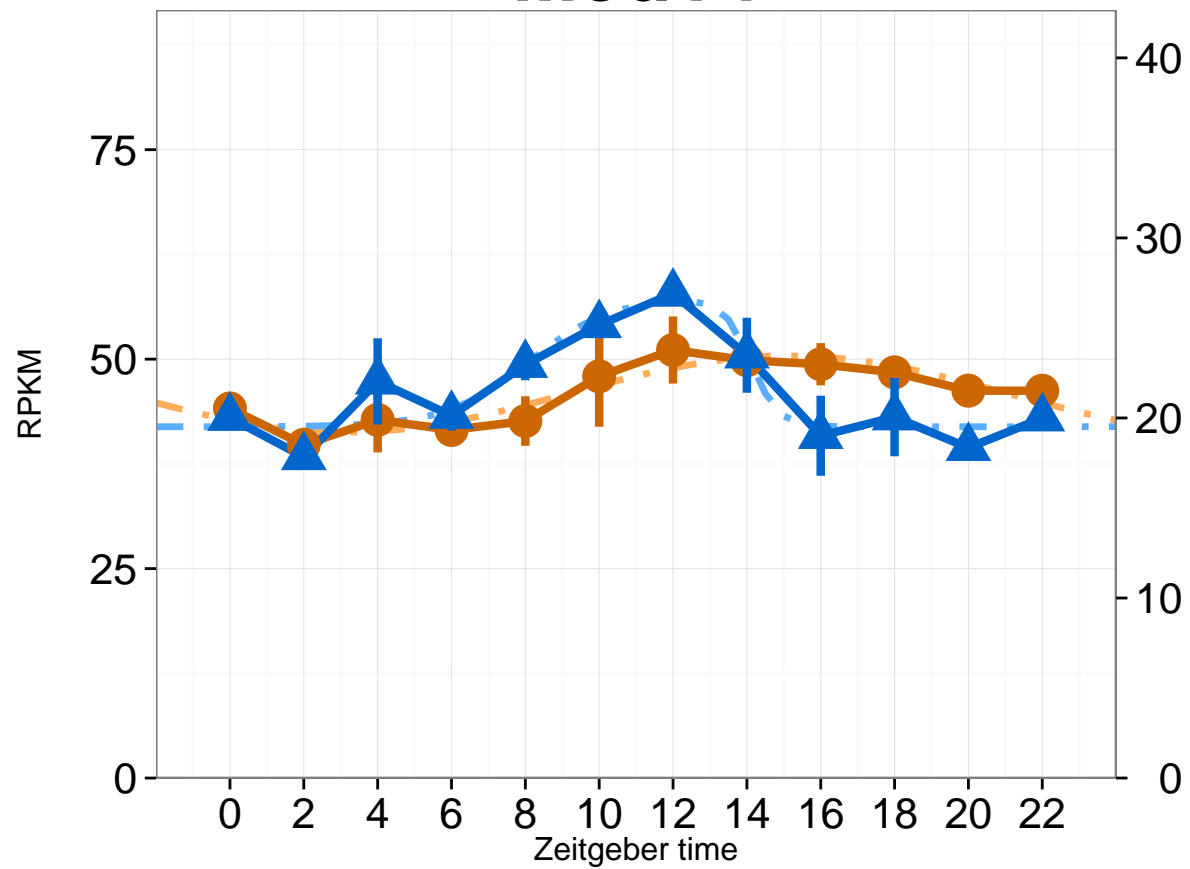

# Med14

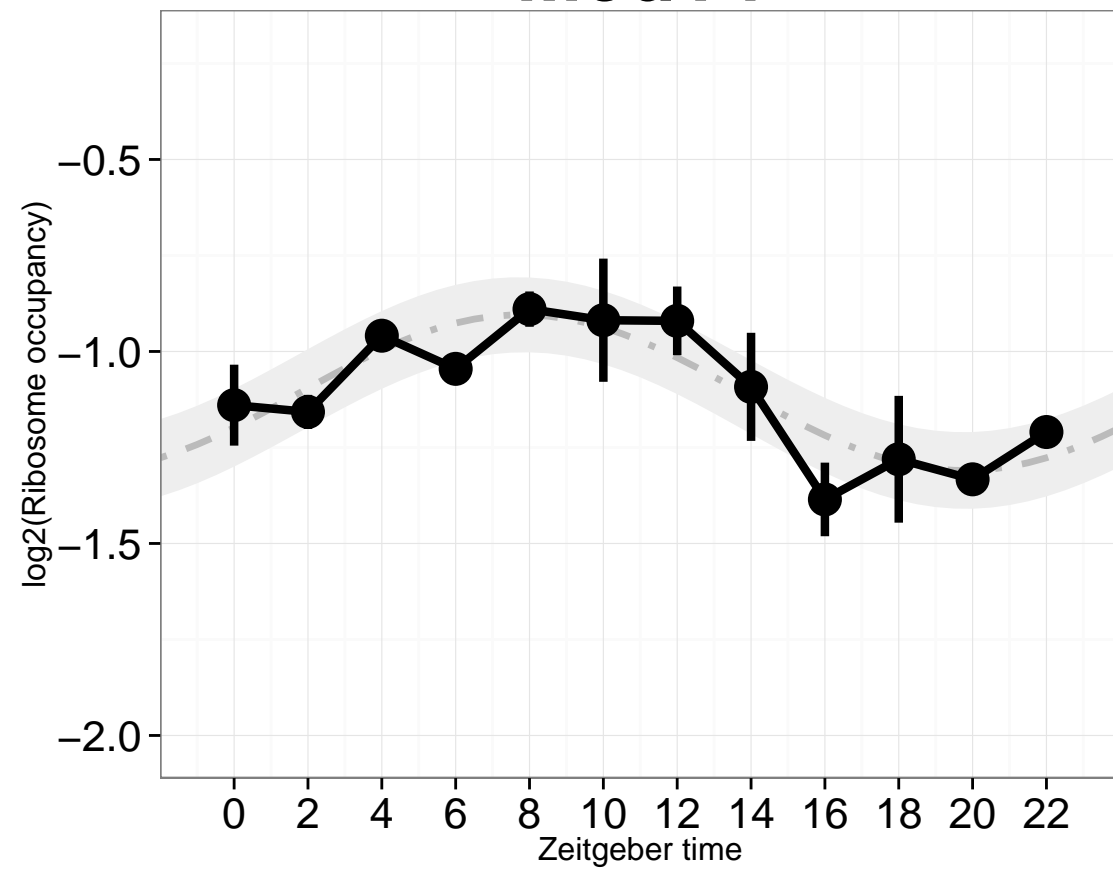

Supplement: Supplementary file 642 [file 1]

Cp

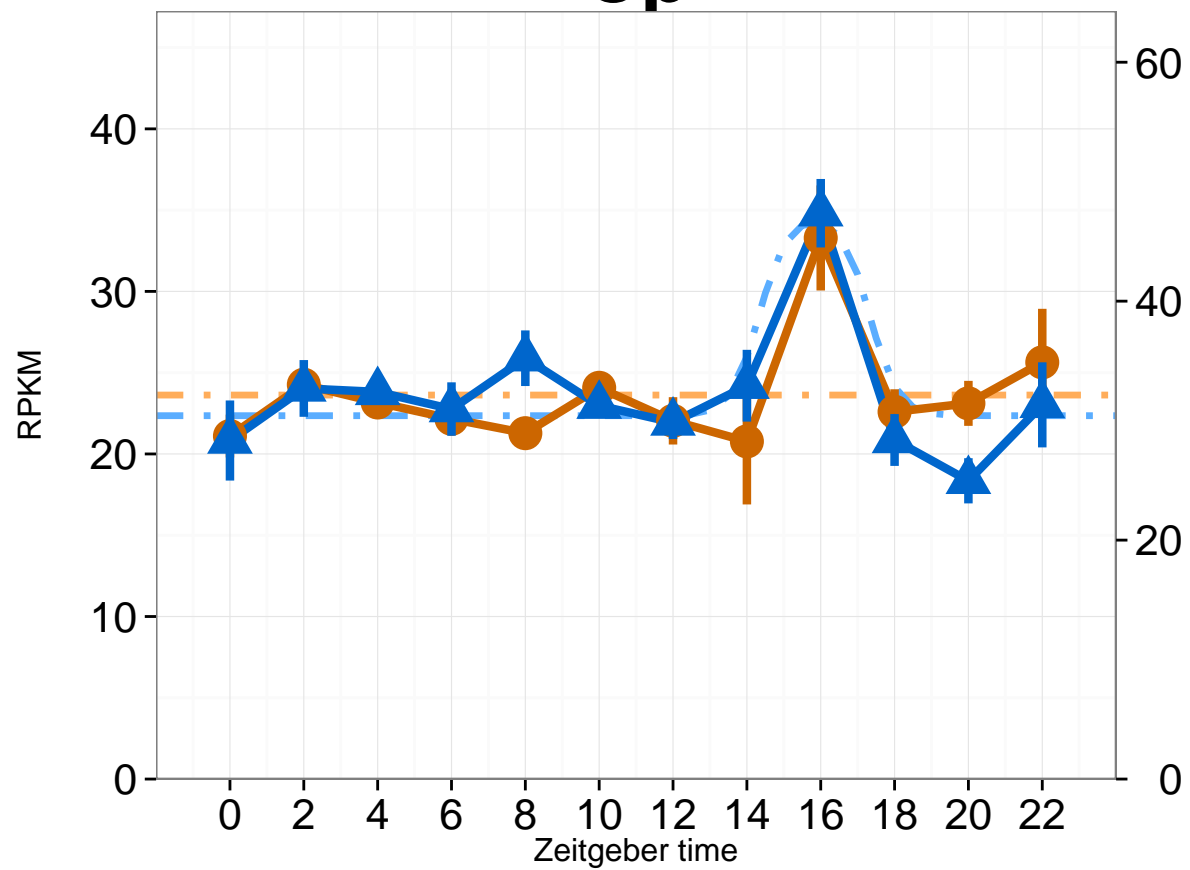

Cp

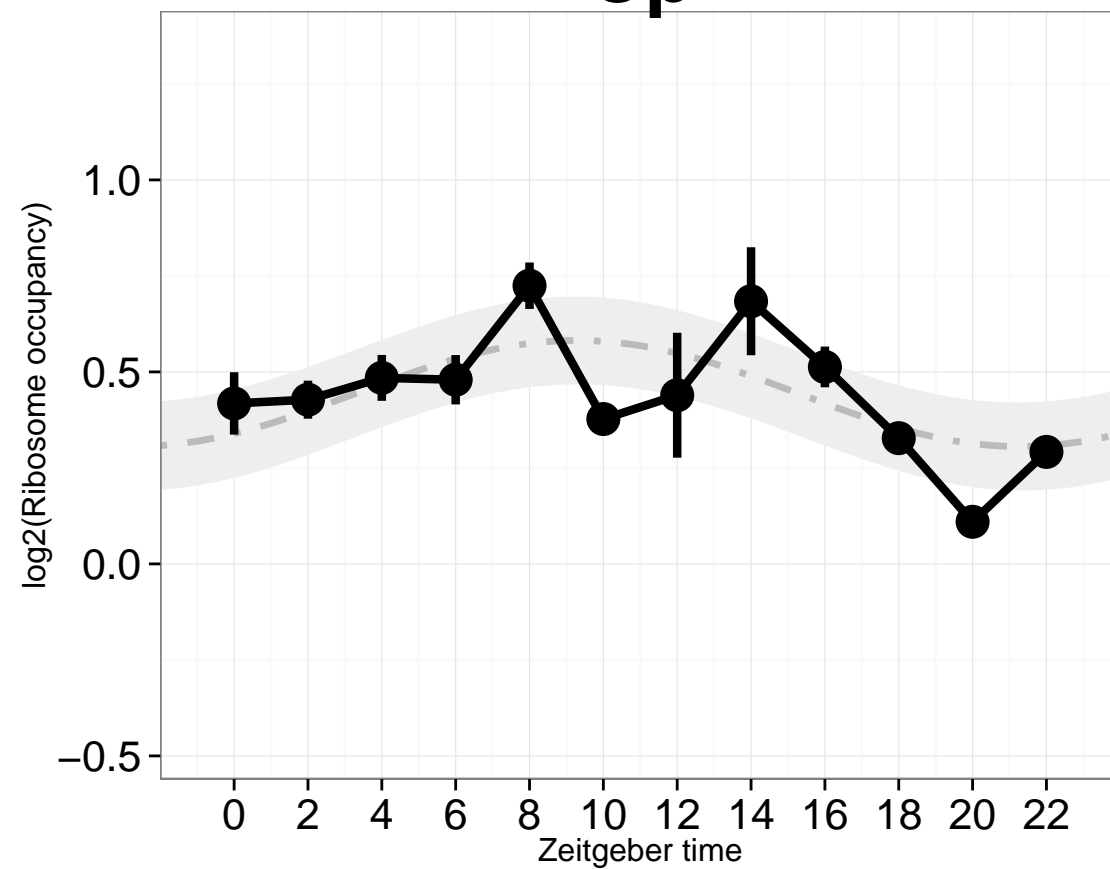

Supplement: Supplementary file 643 [file 1]

## Hmbs

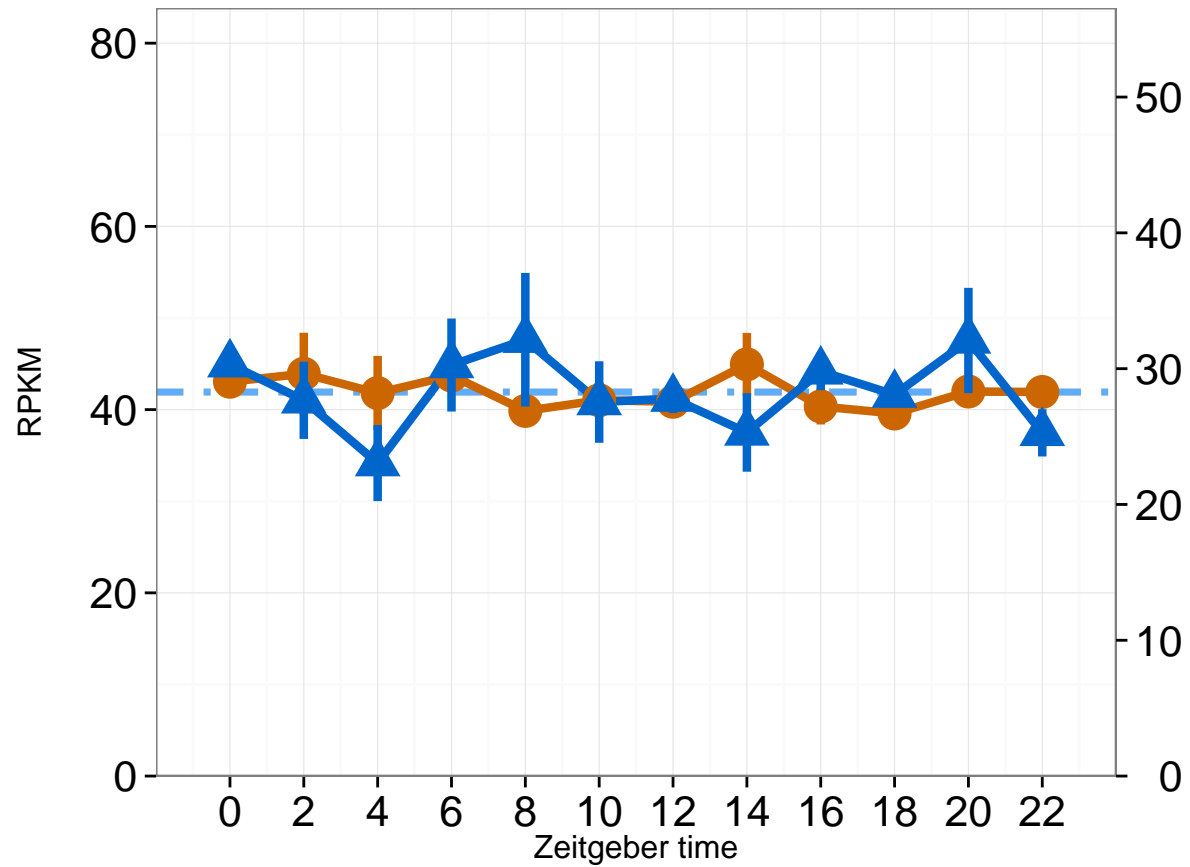

## Hmbs

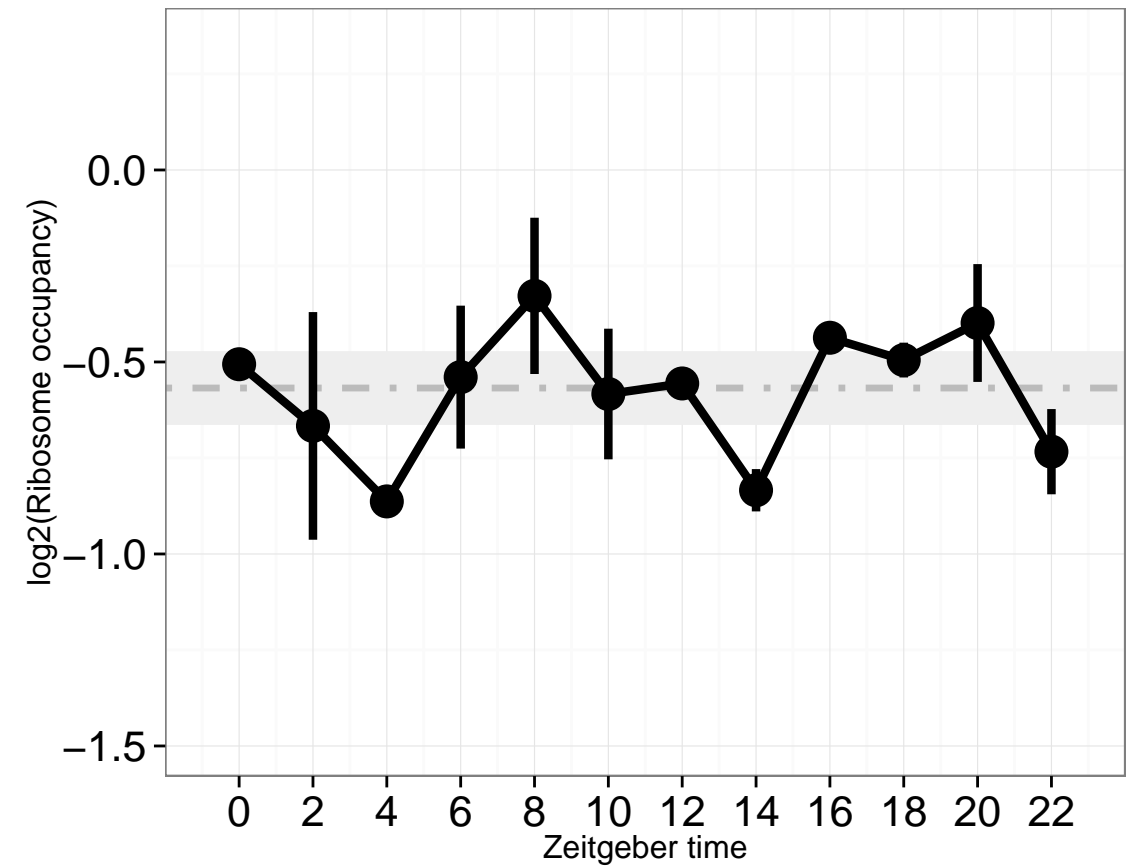

Supplement: Supplementary file 644 [file 1]

# Spry1

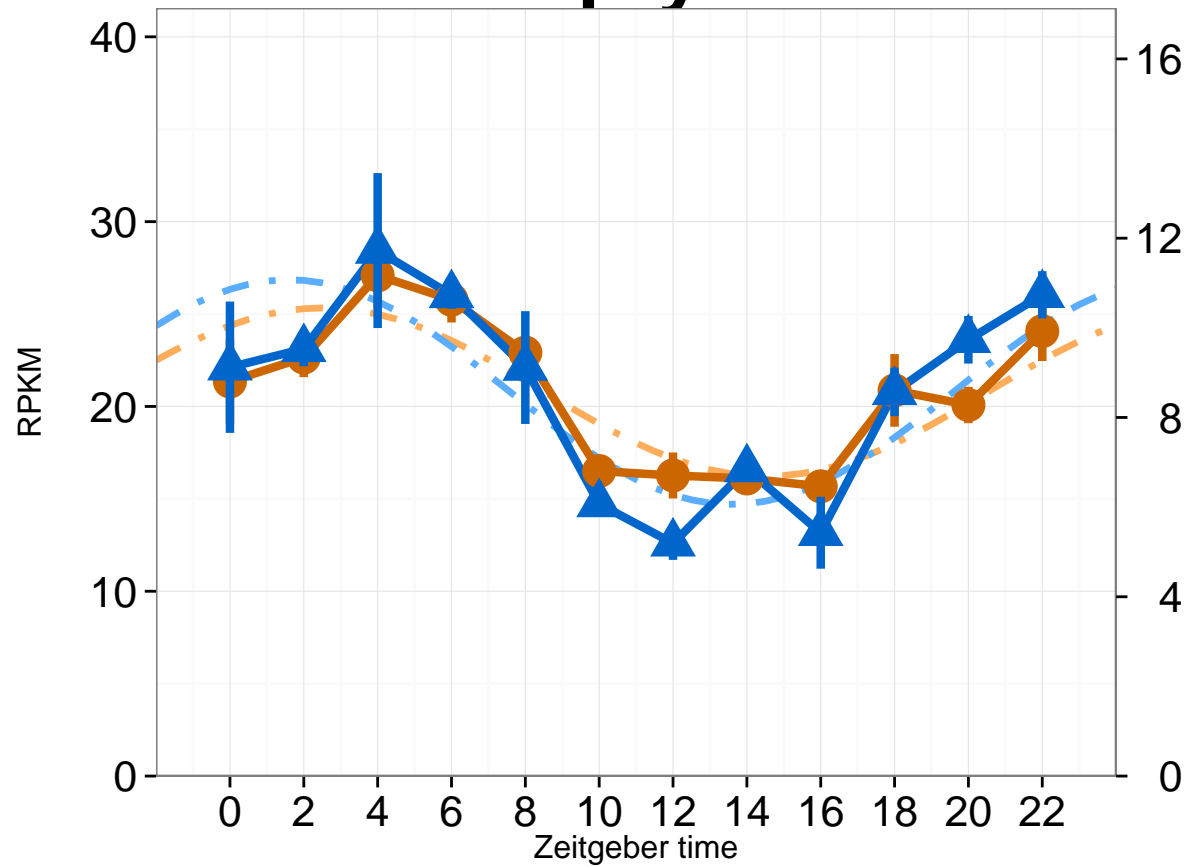

# Spry1

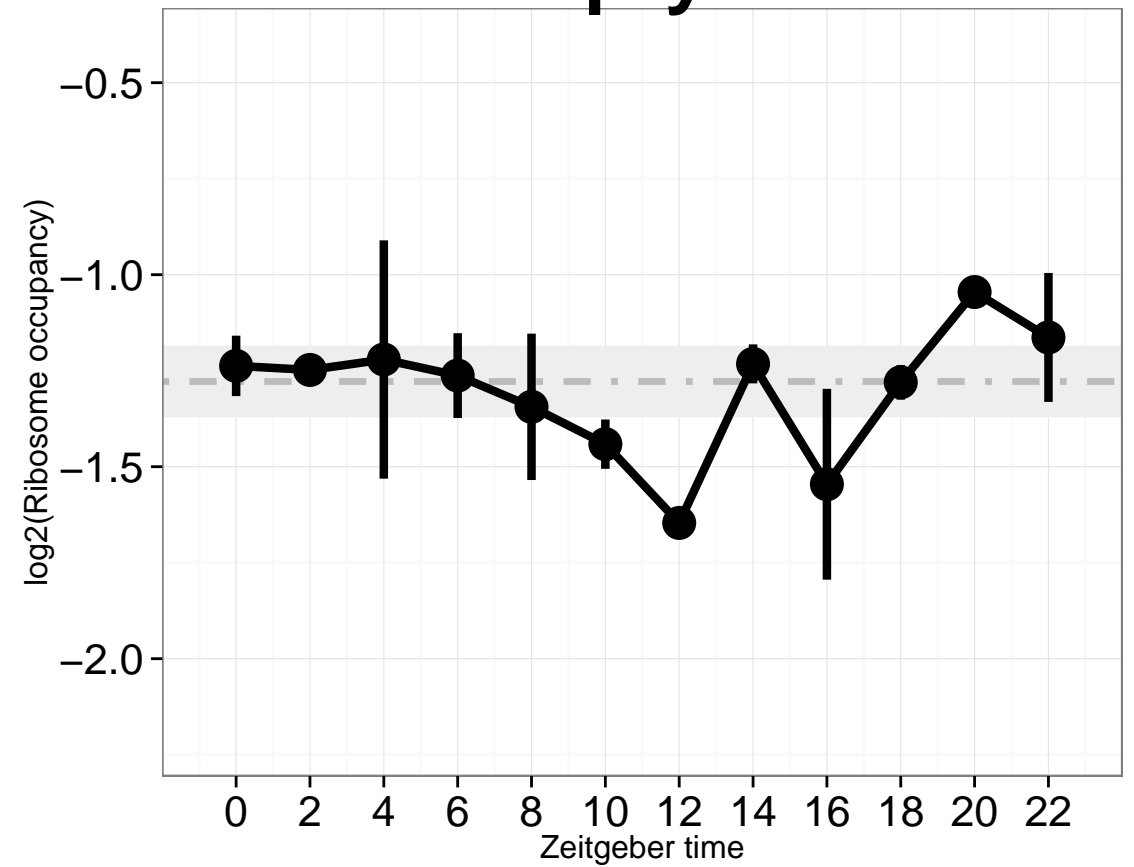

Supplement: Supplementary file 645 [file 1]

## Ankzf1

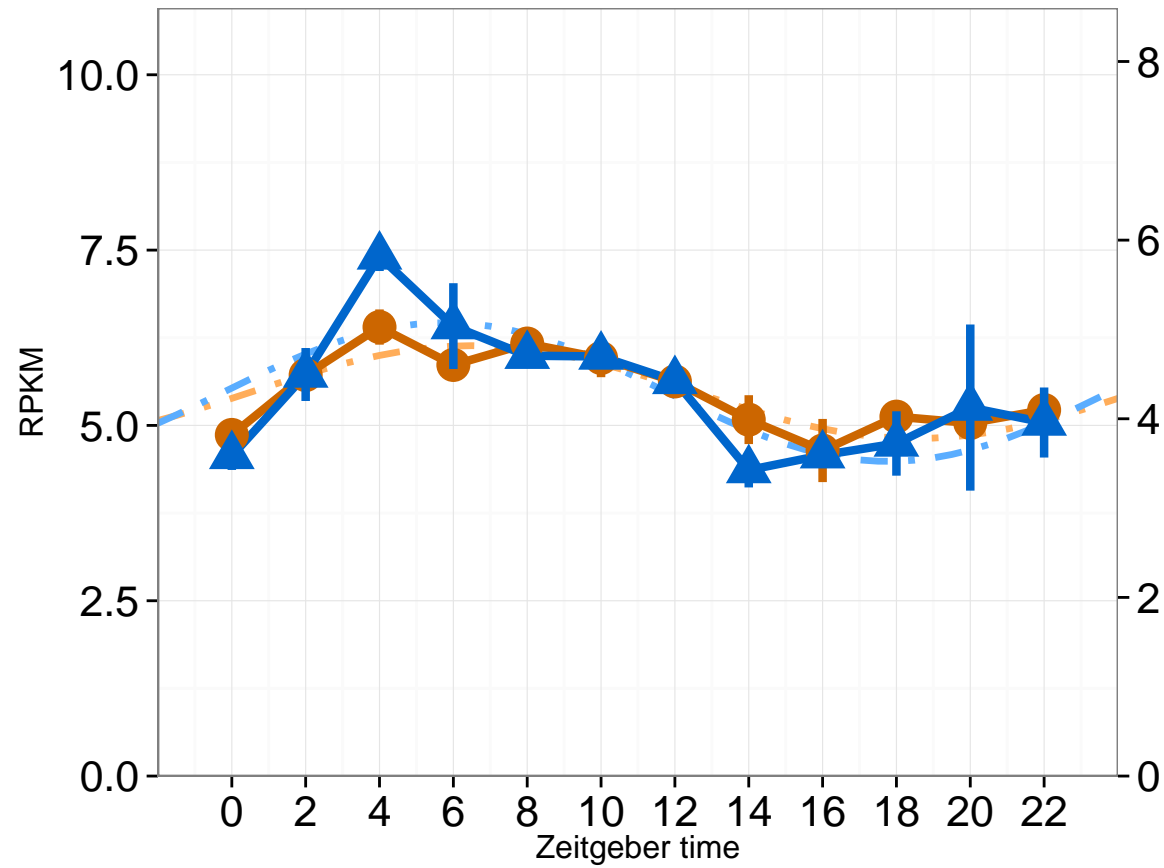

## Ankzf1

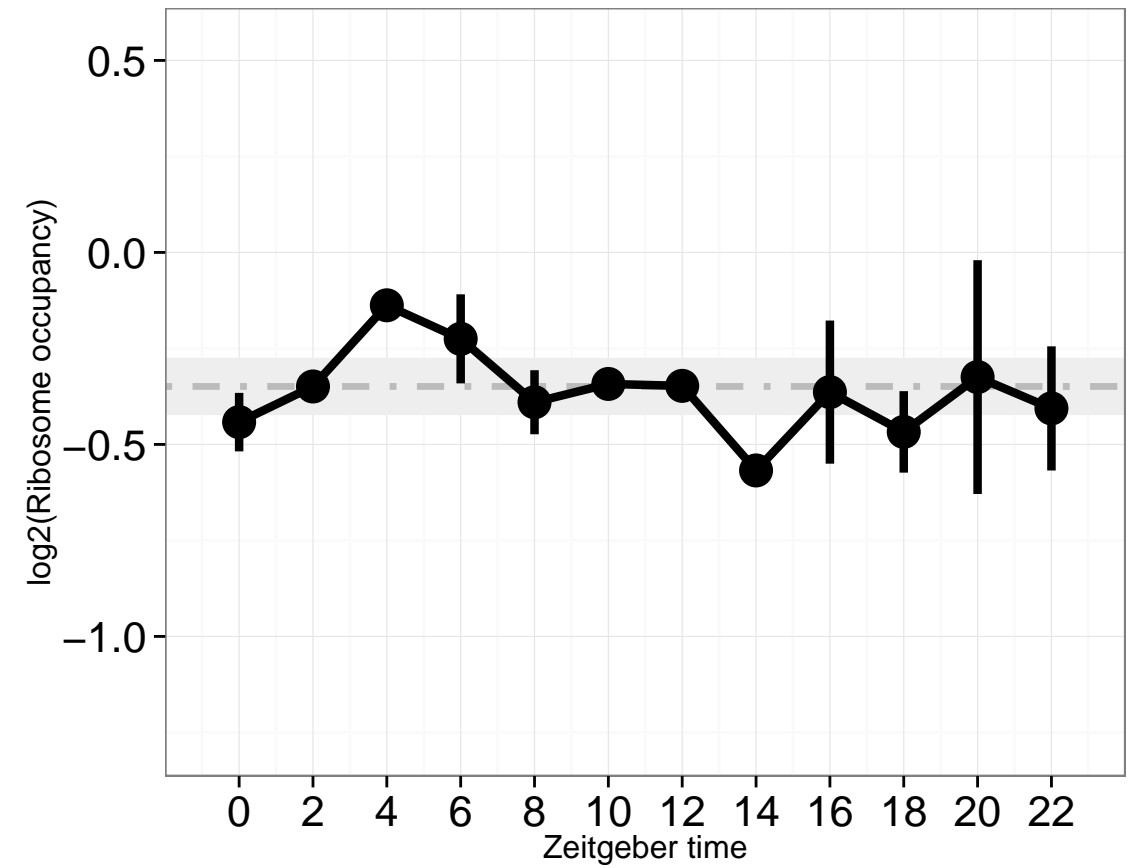

Supplement: Supplementary file 646 [file 1]

## Srm

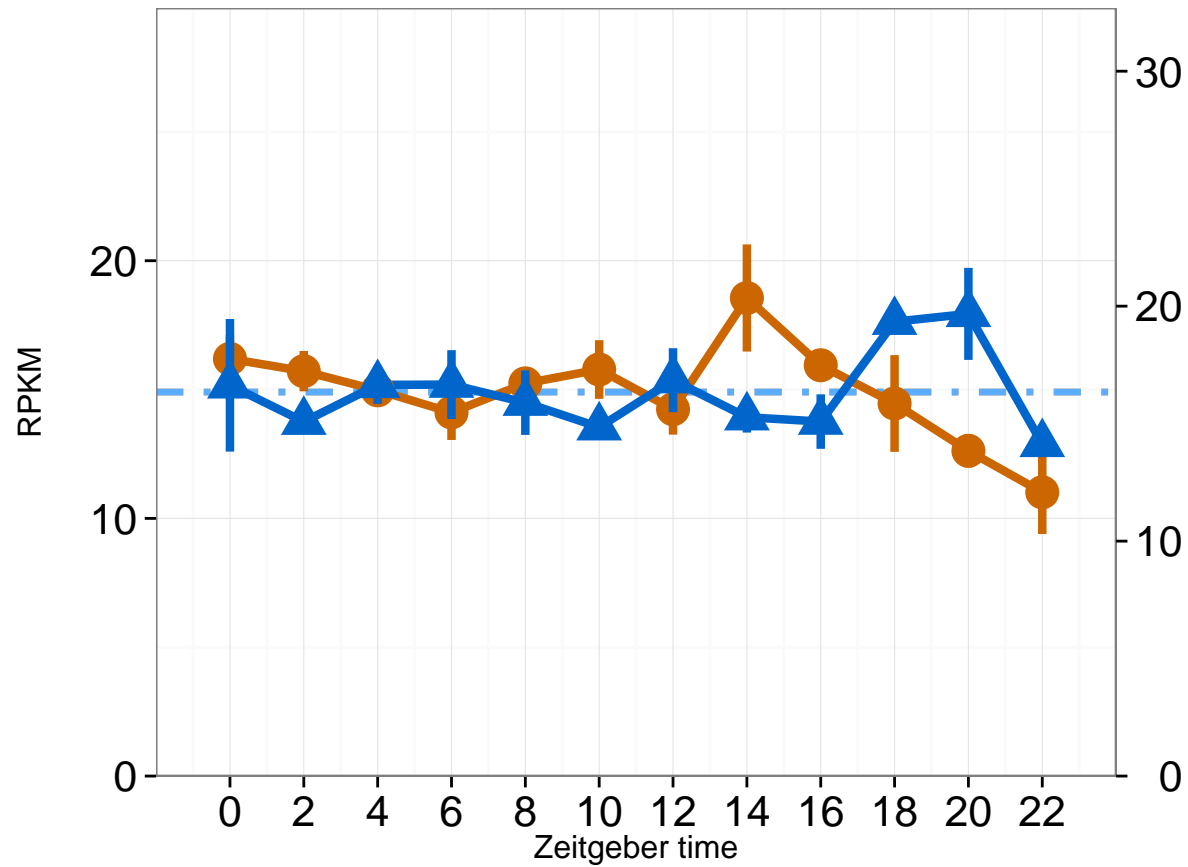

## Srm

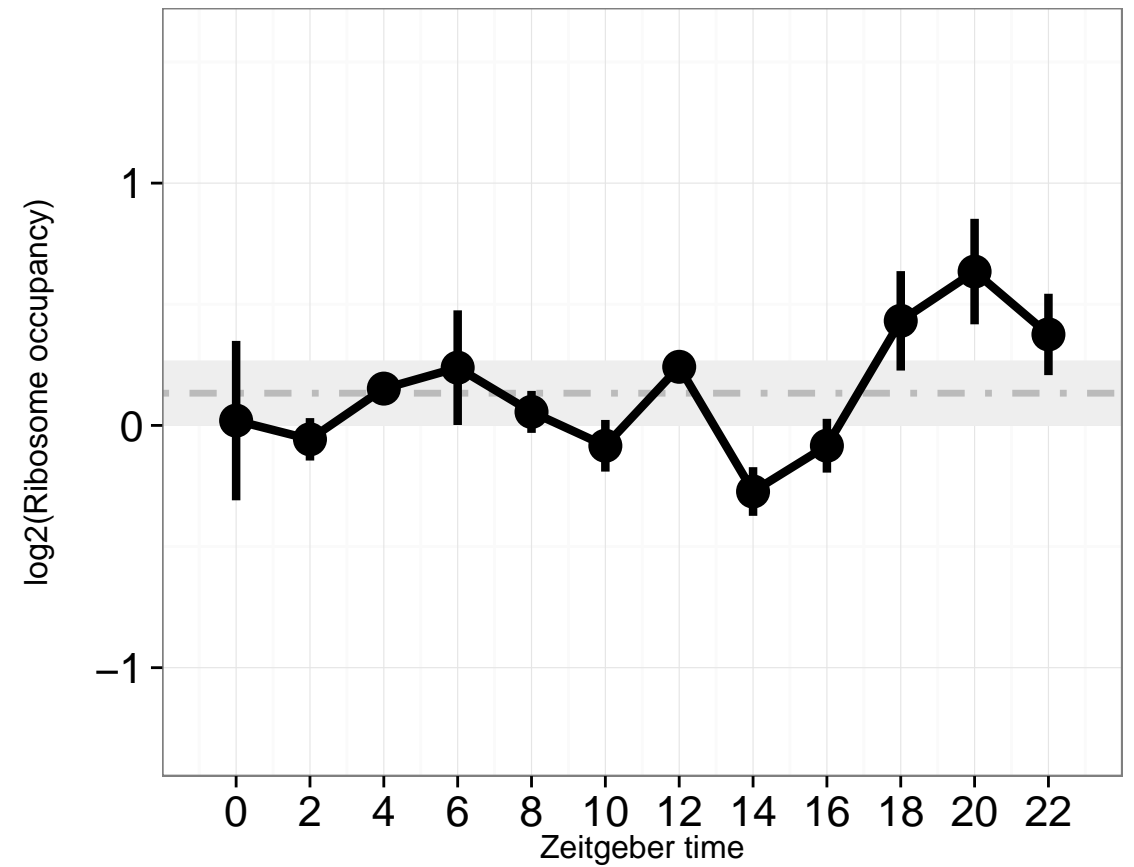

Supplement: Supplementary file 647 [file 1]

## Epha2

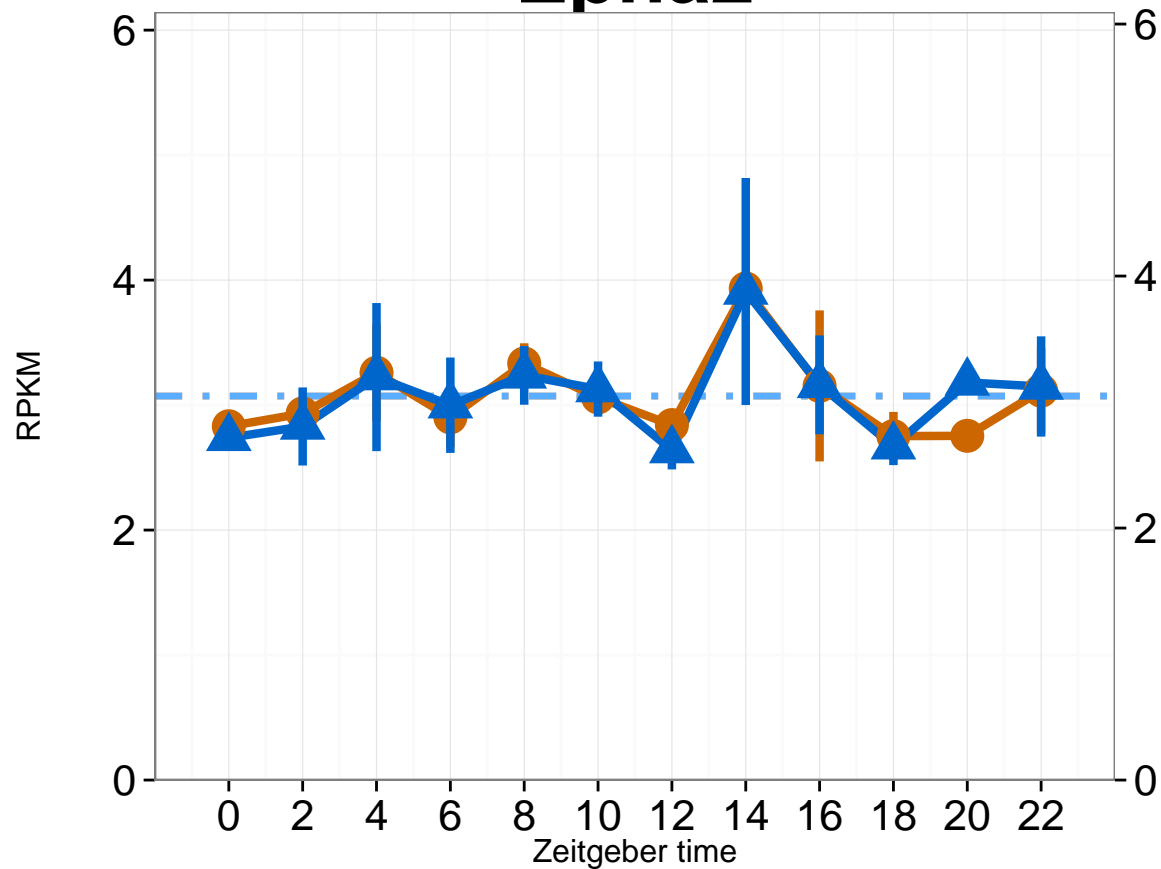

## Epha2

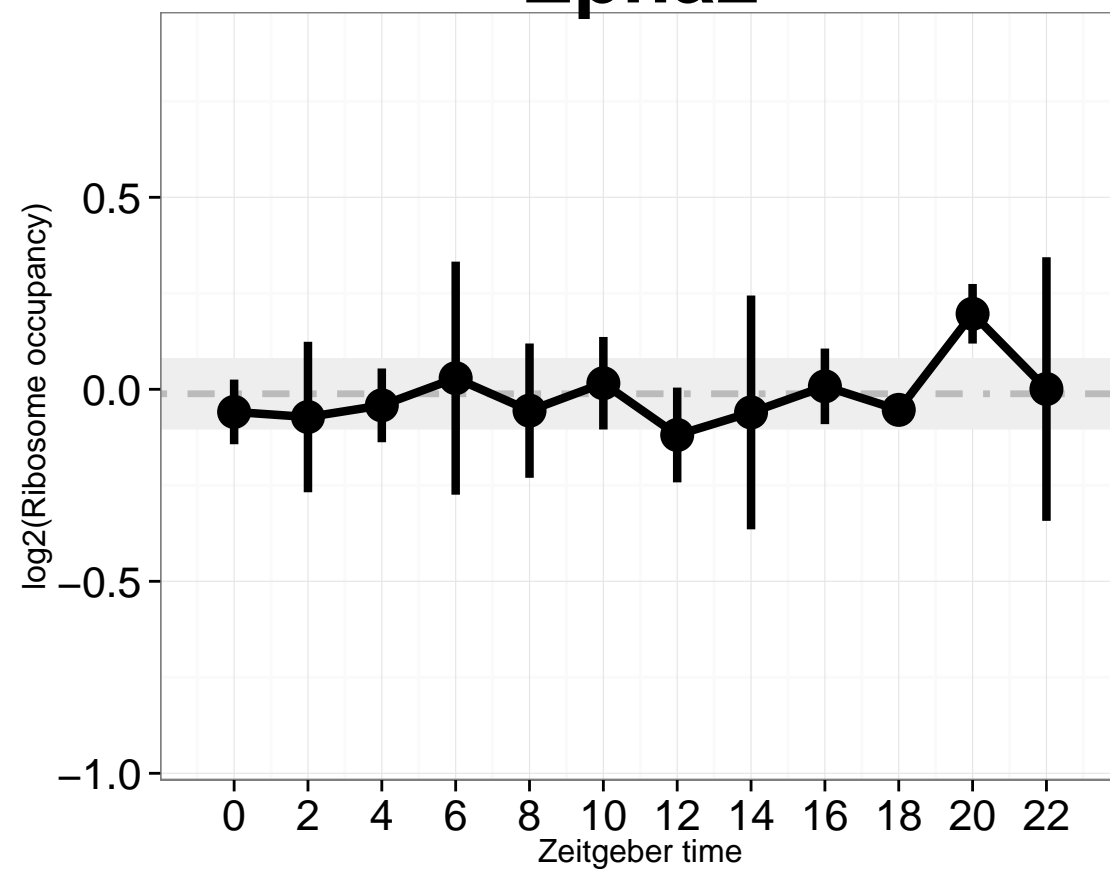

Supplement: Supplementary file 648 [file 1]

# Etnk2

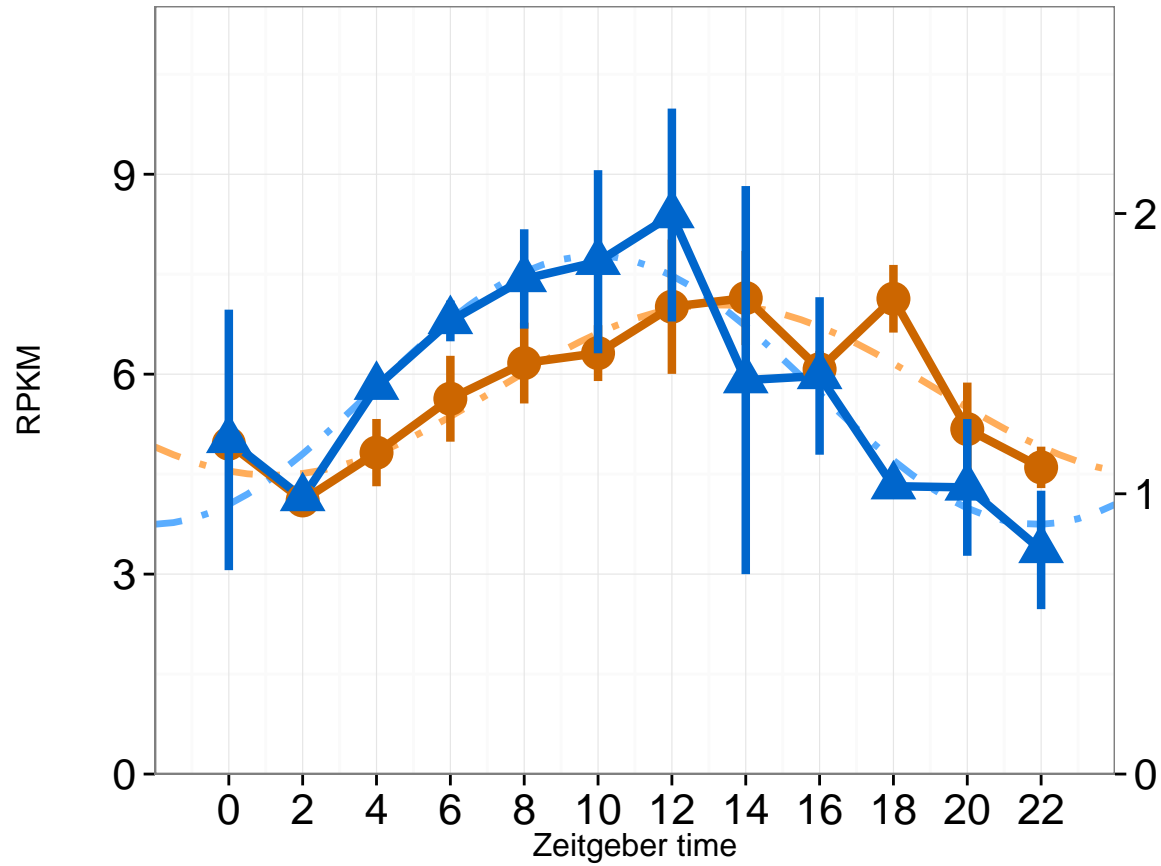

# Etnk2

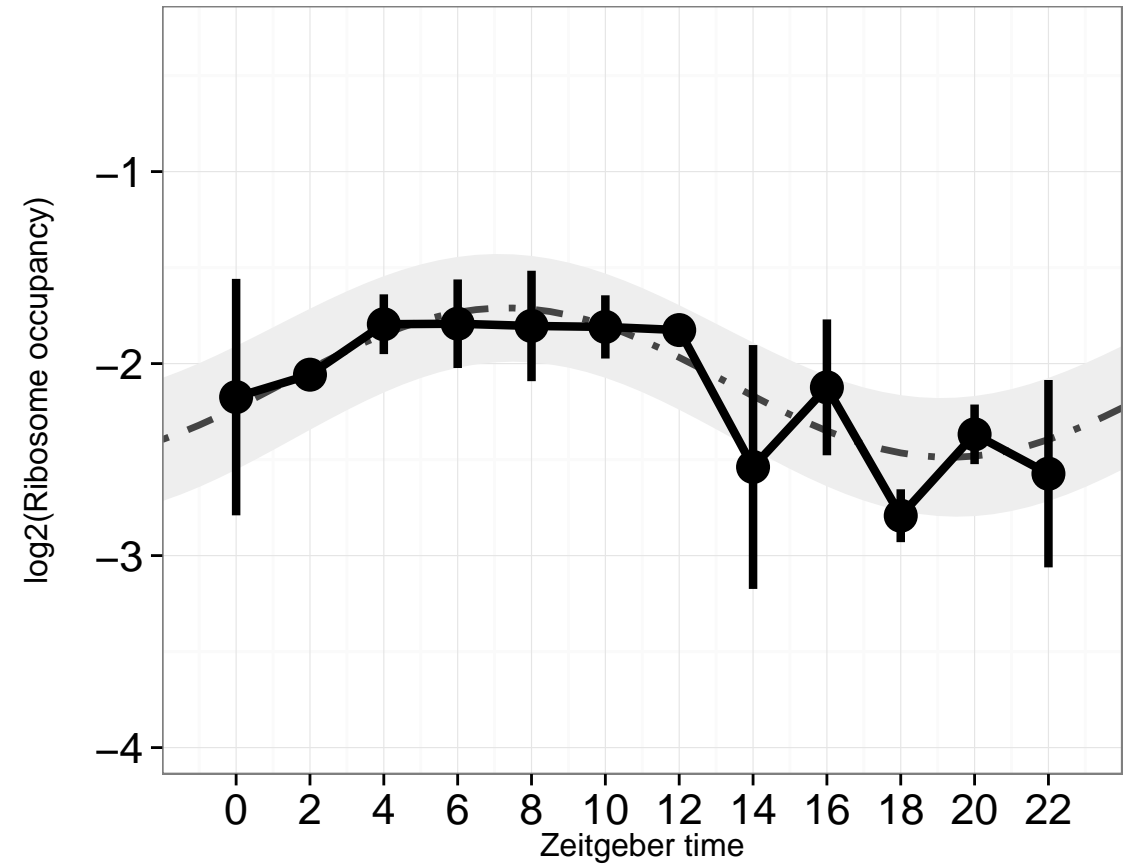

Supplement: Supplementary file 649 [file 1]

## Alkbh5

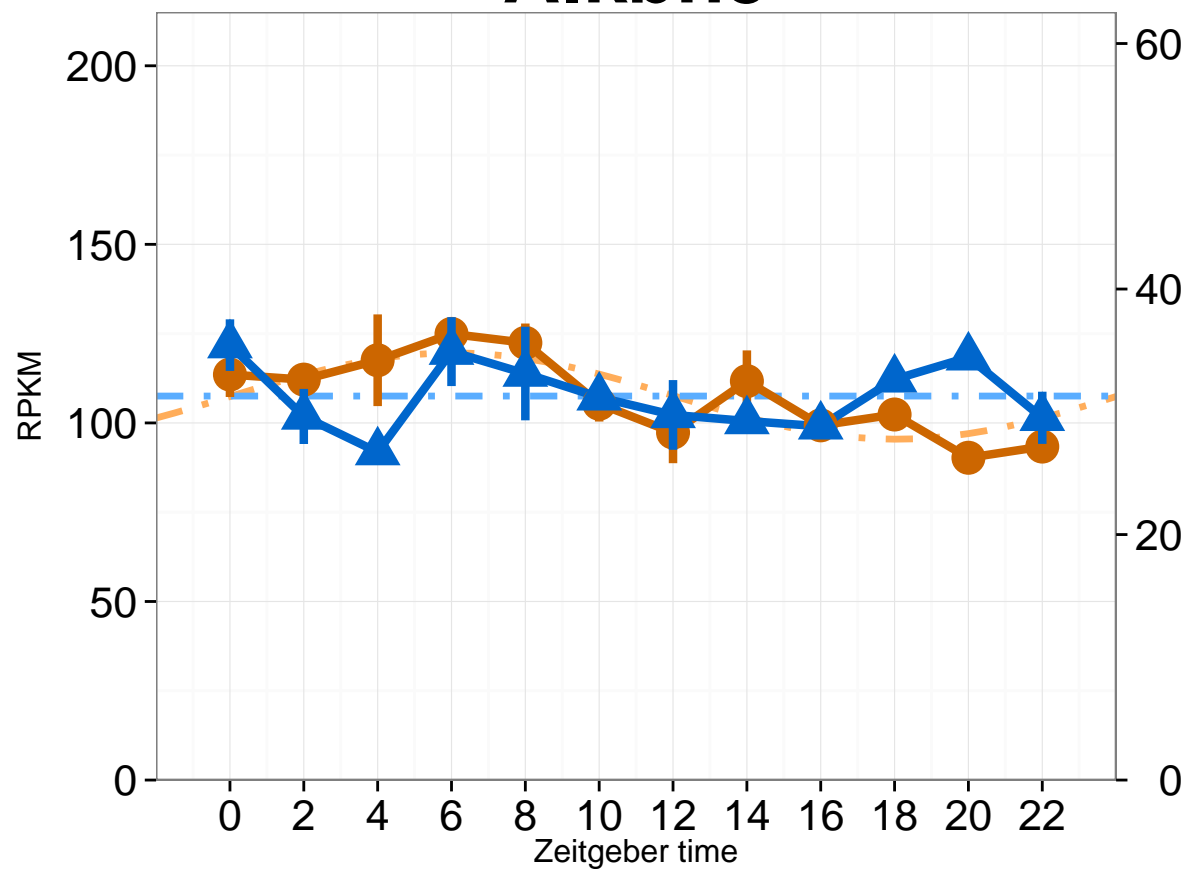

## Alkbh5

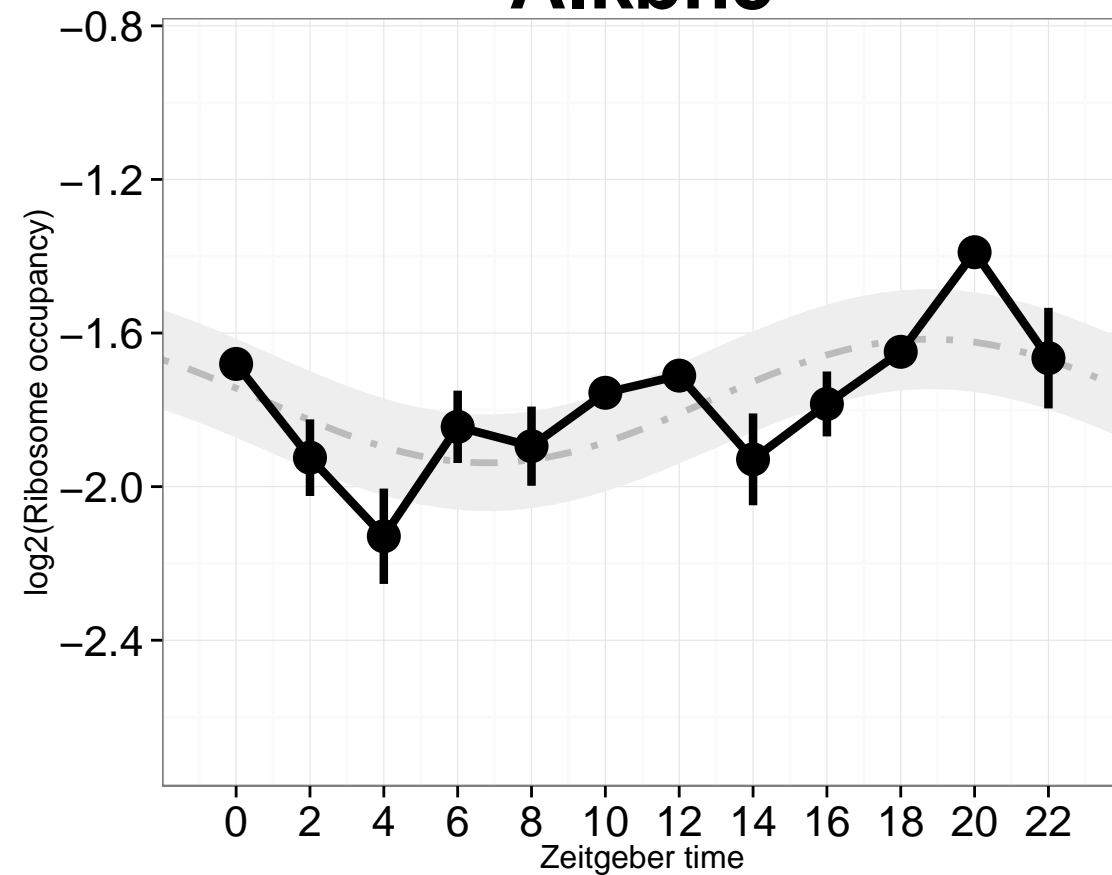

Supplement: Supplementary file 650 [file 1]

# Cyp39a1

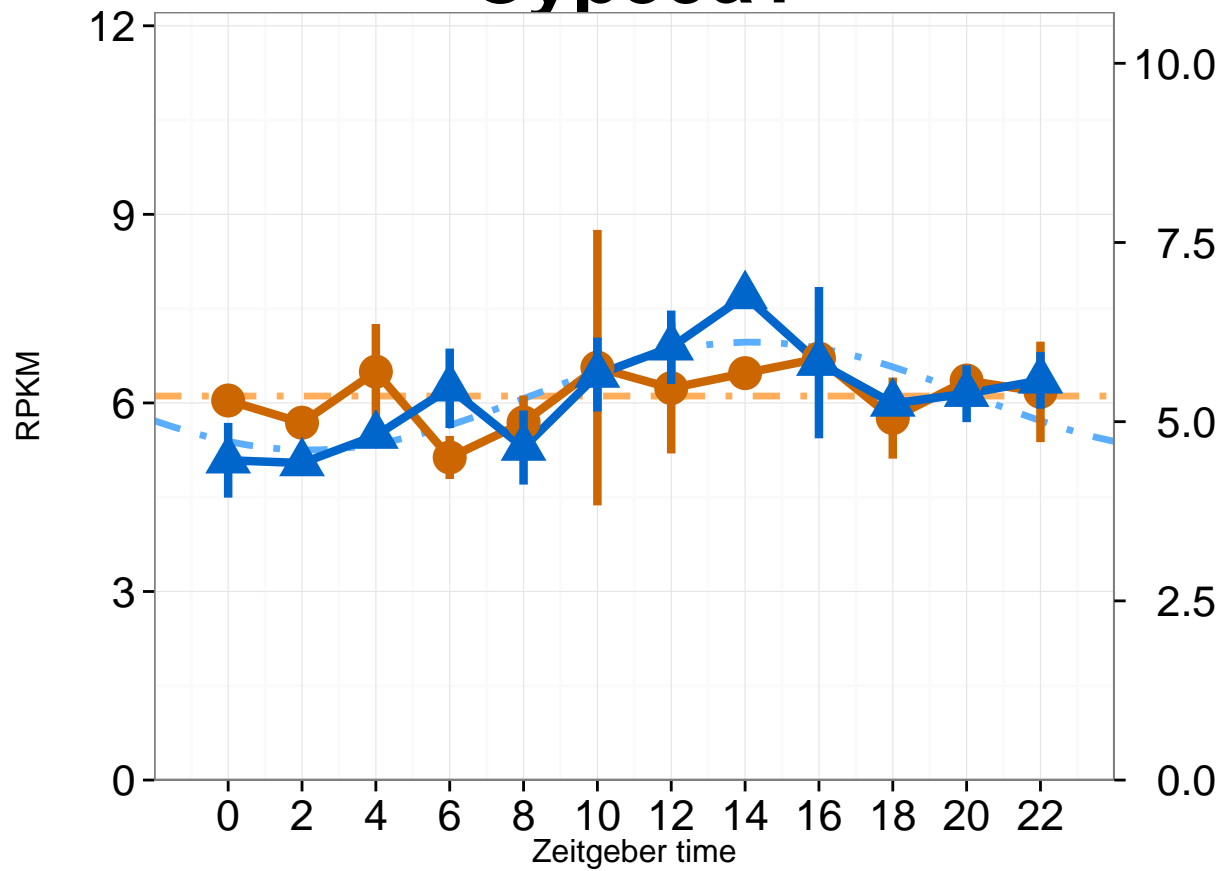

# Cyp39a1

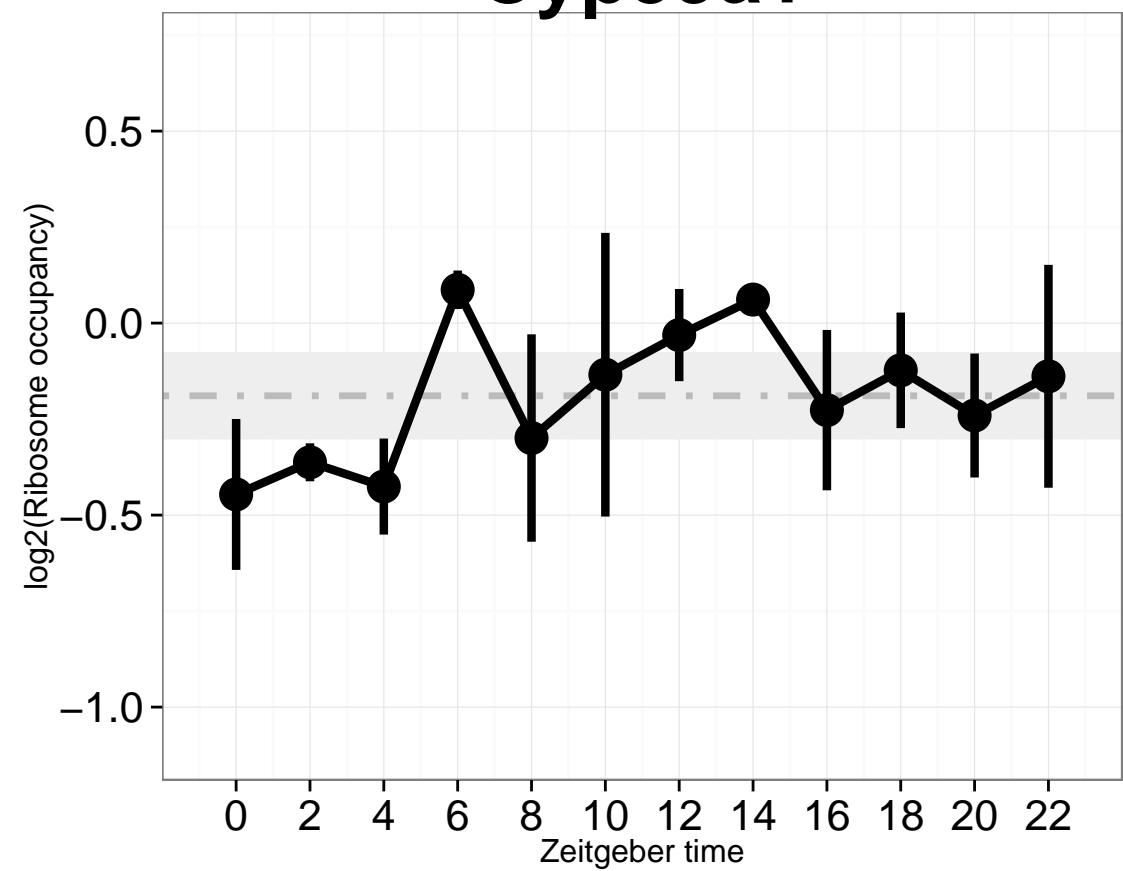

Supplement: Supplementary file 651 [file 1]

## Gtf2a1

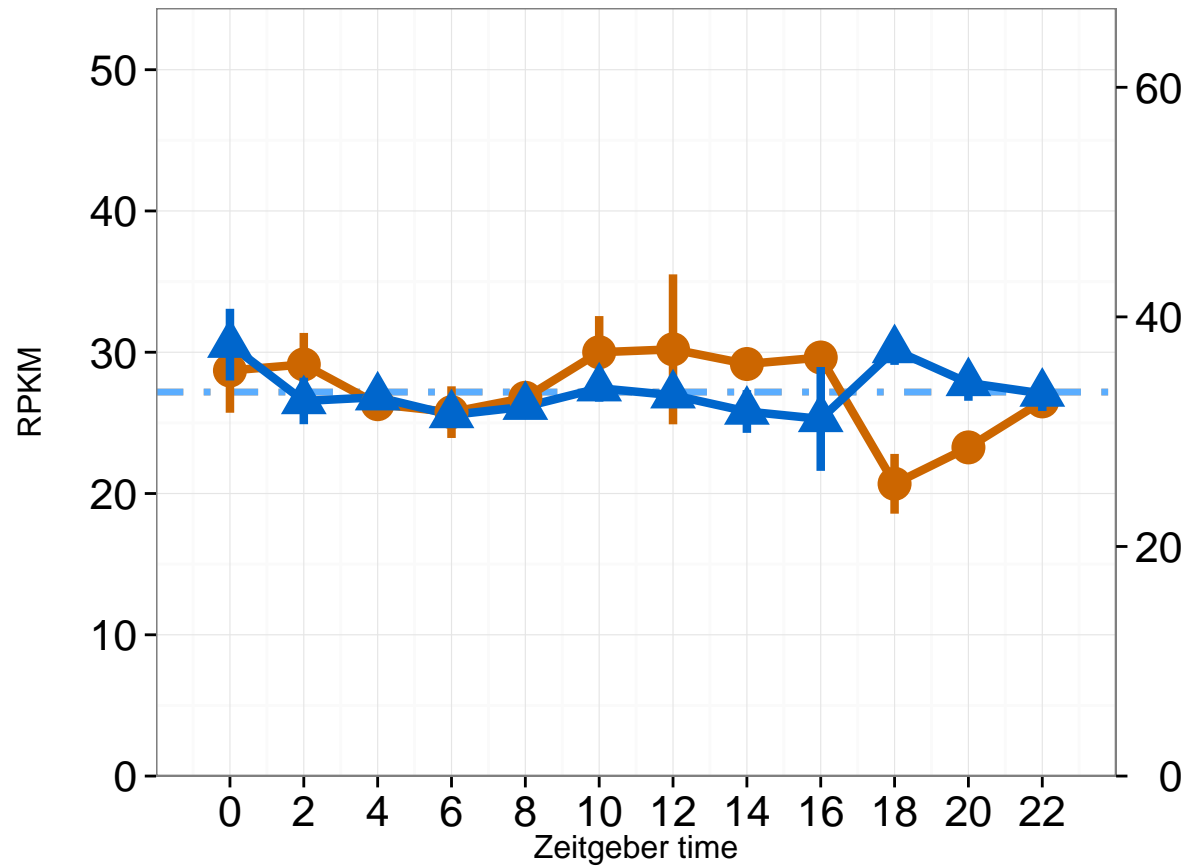

## Gtf2a1

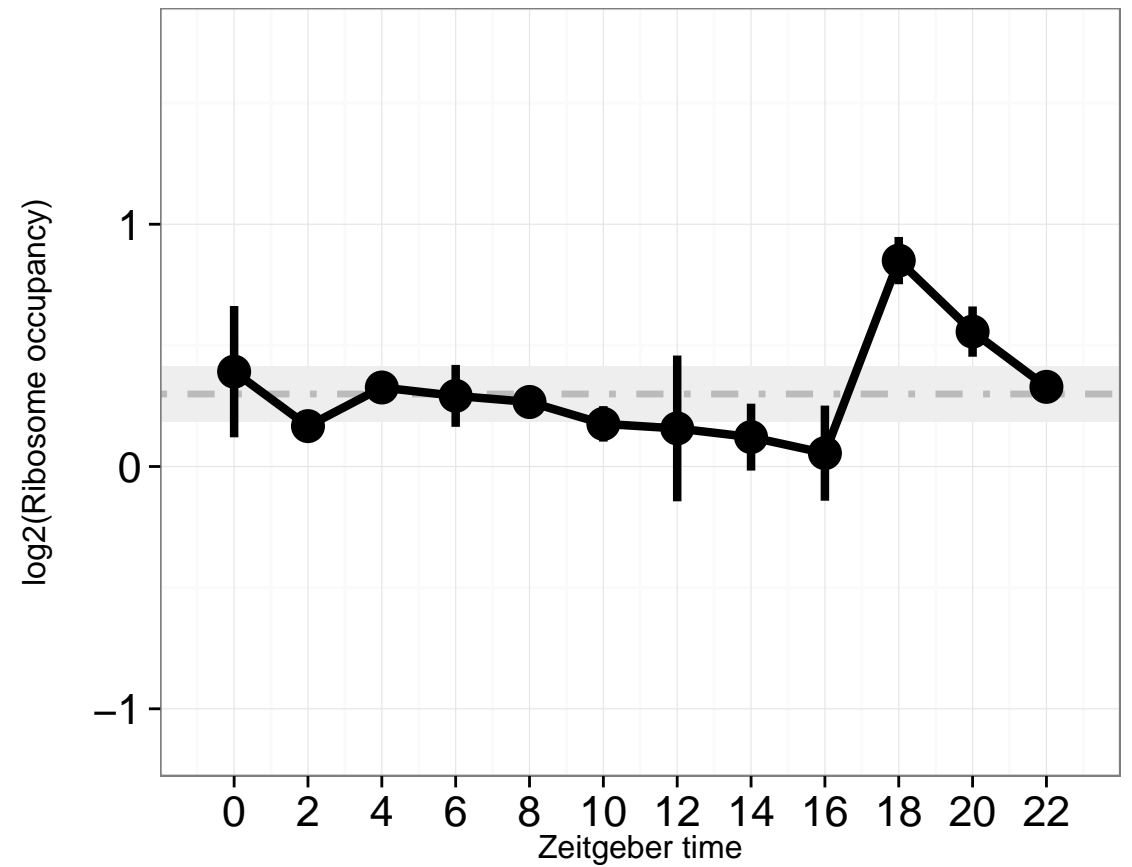

Supplement: Supplementary file 652 [file 1]

## Gatm

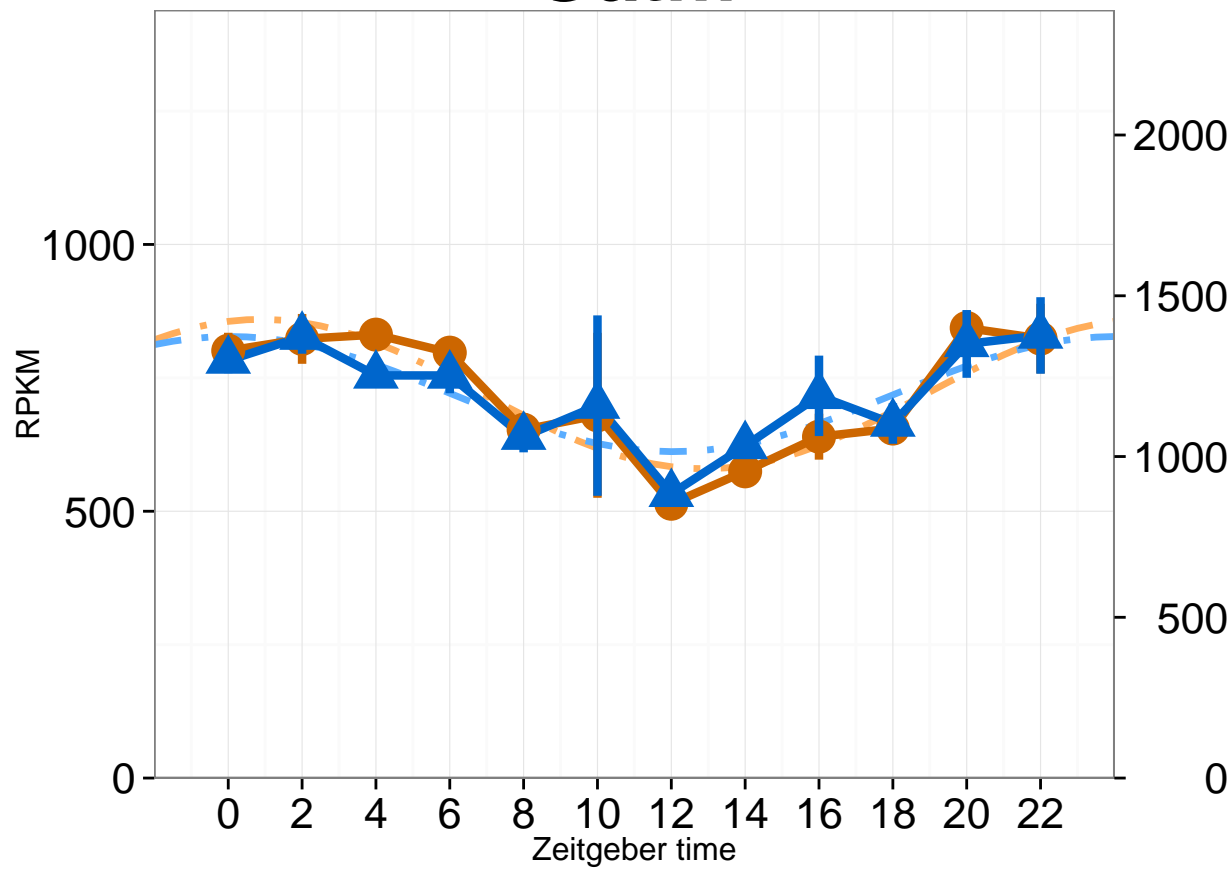

## Gatm

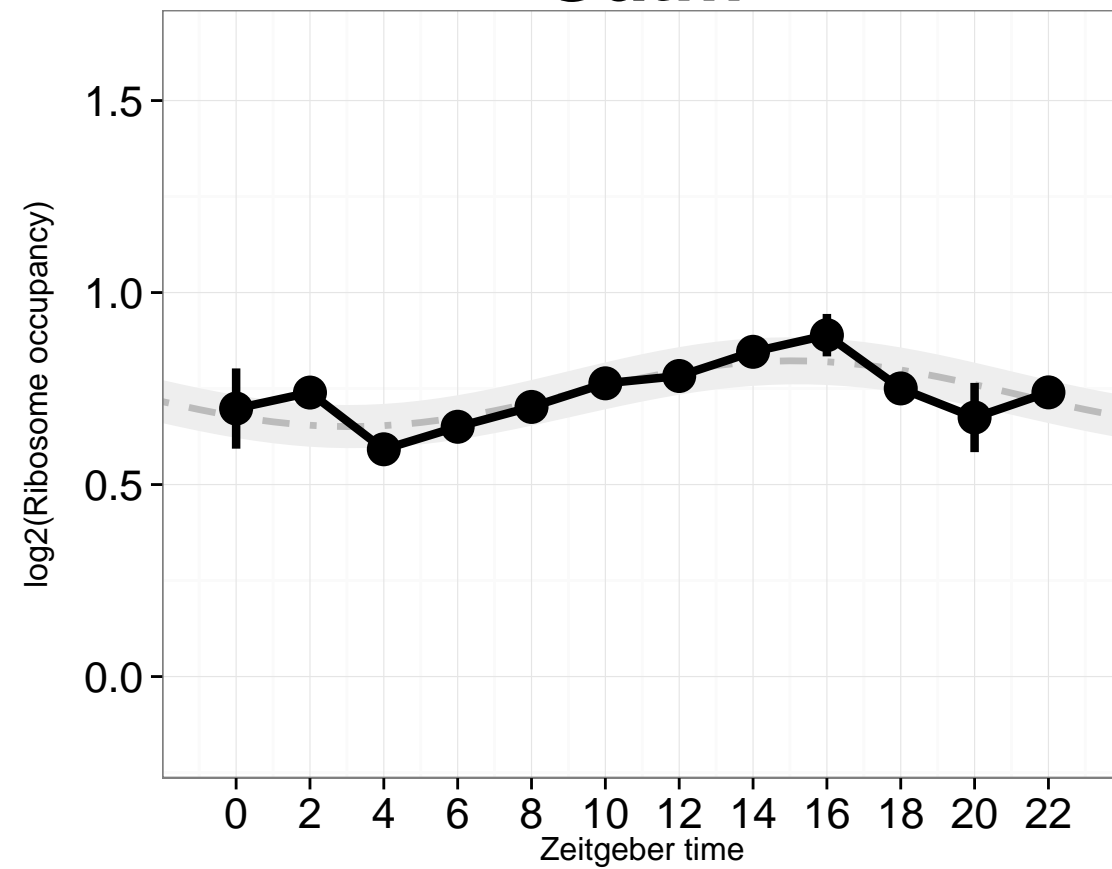

Supplement: Supplementary file 653 [file 1]

# Ftsj1

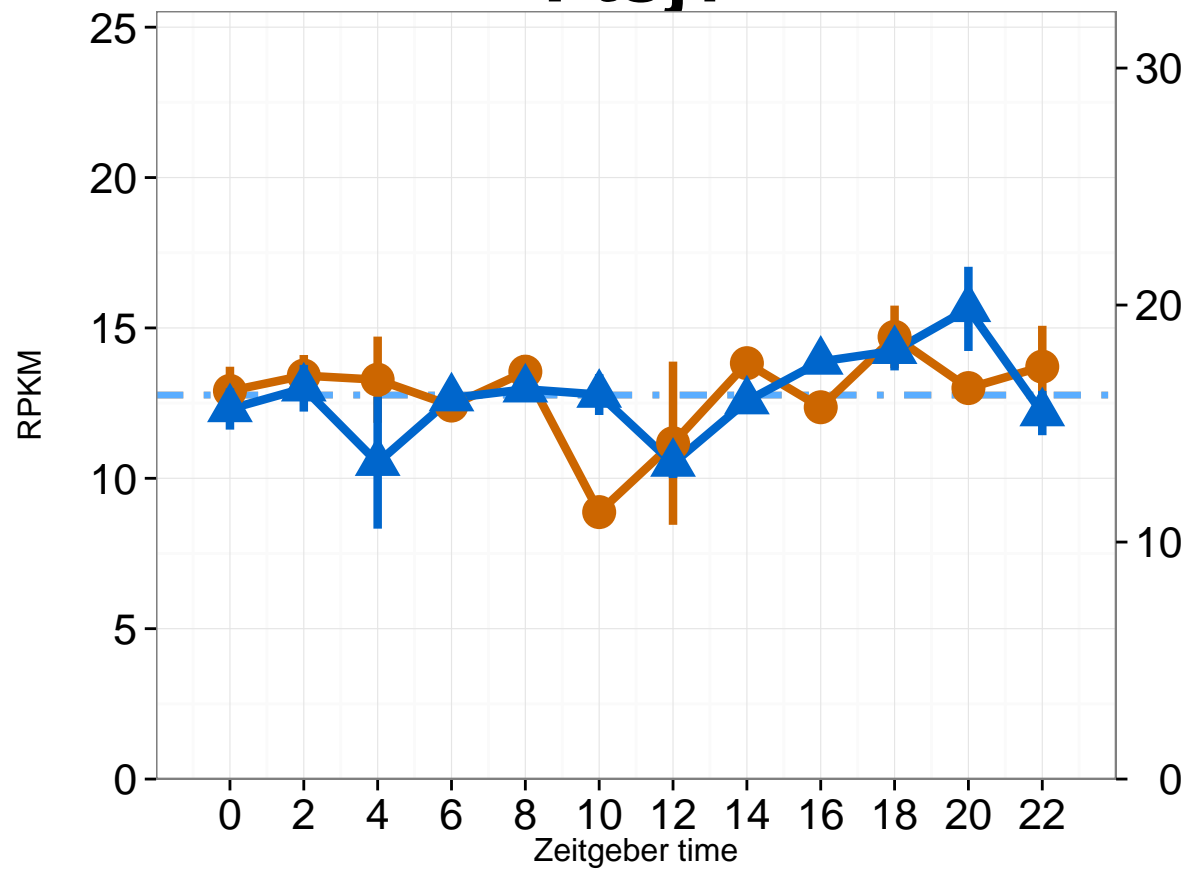

# Ftsj1

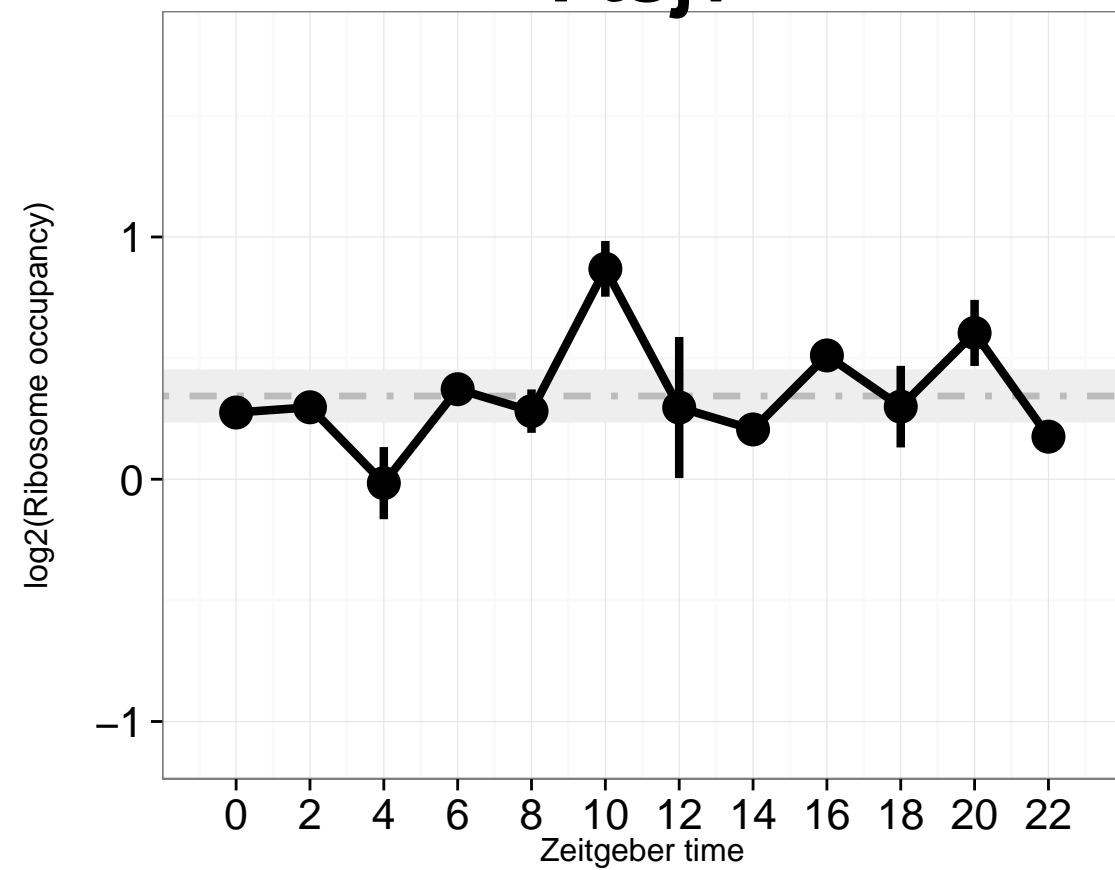

Supplement: Supplementary file 654 [file 1]

## Spata5

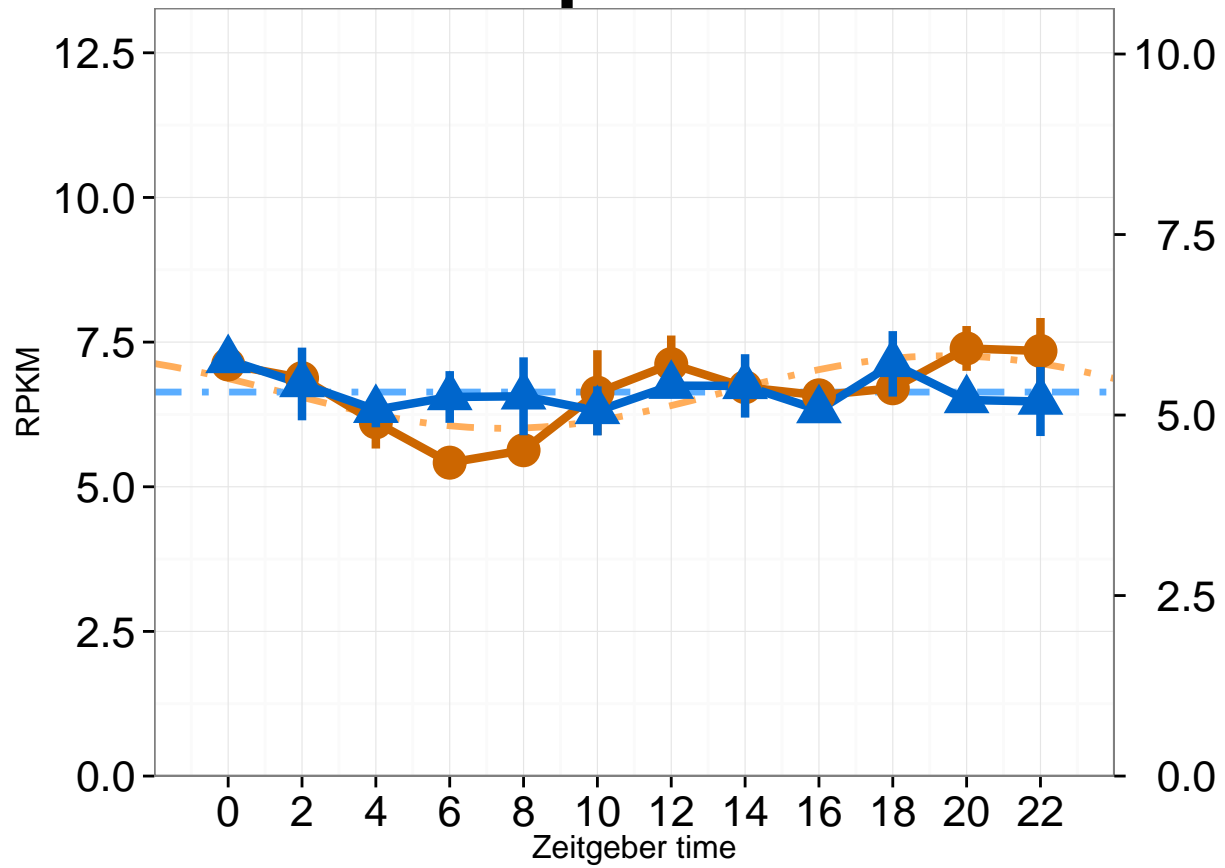

## Spata5

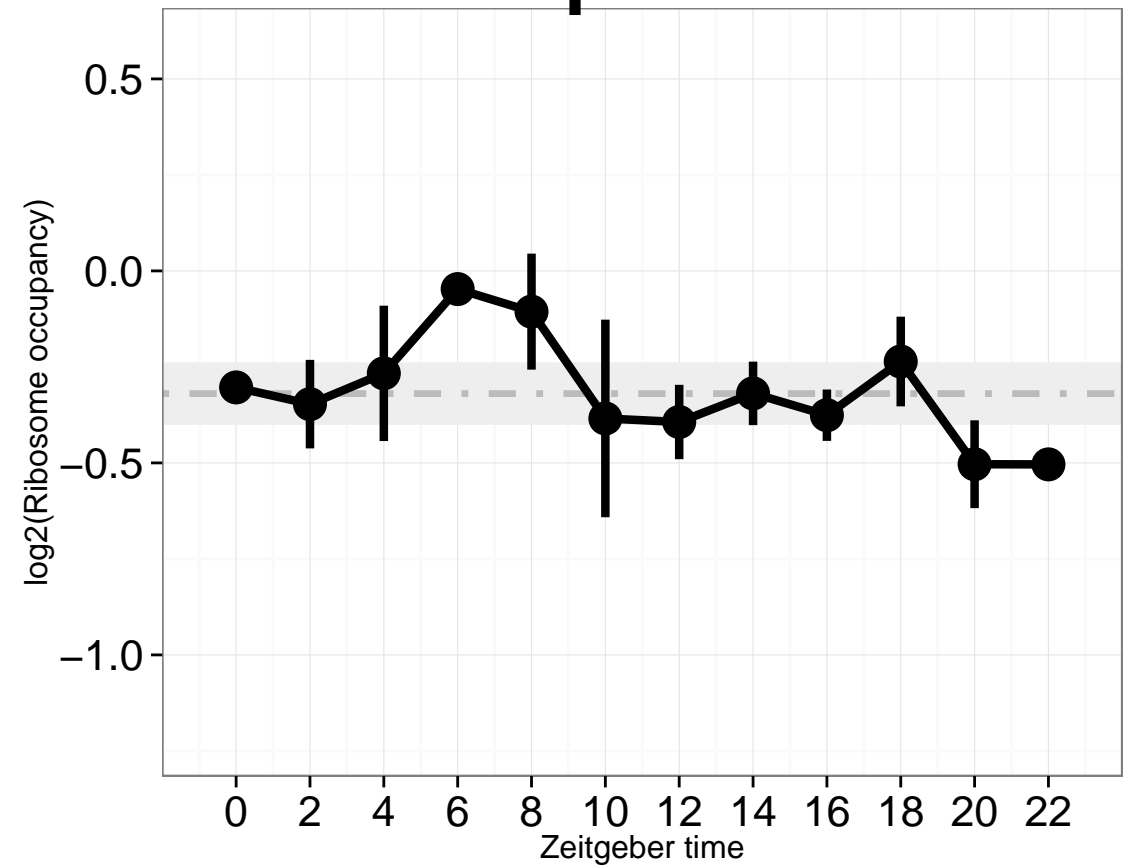

Supplement: Supplementary file 655 [file 1]

## Eaf2

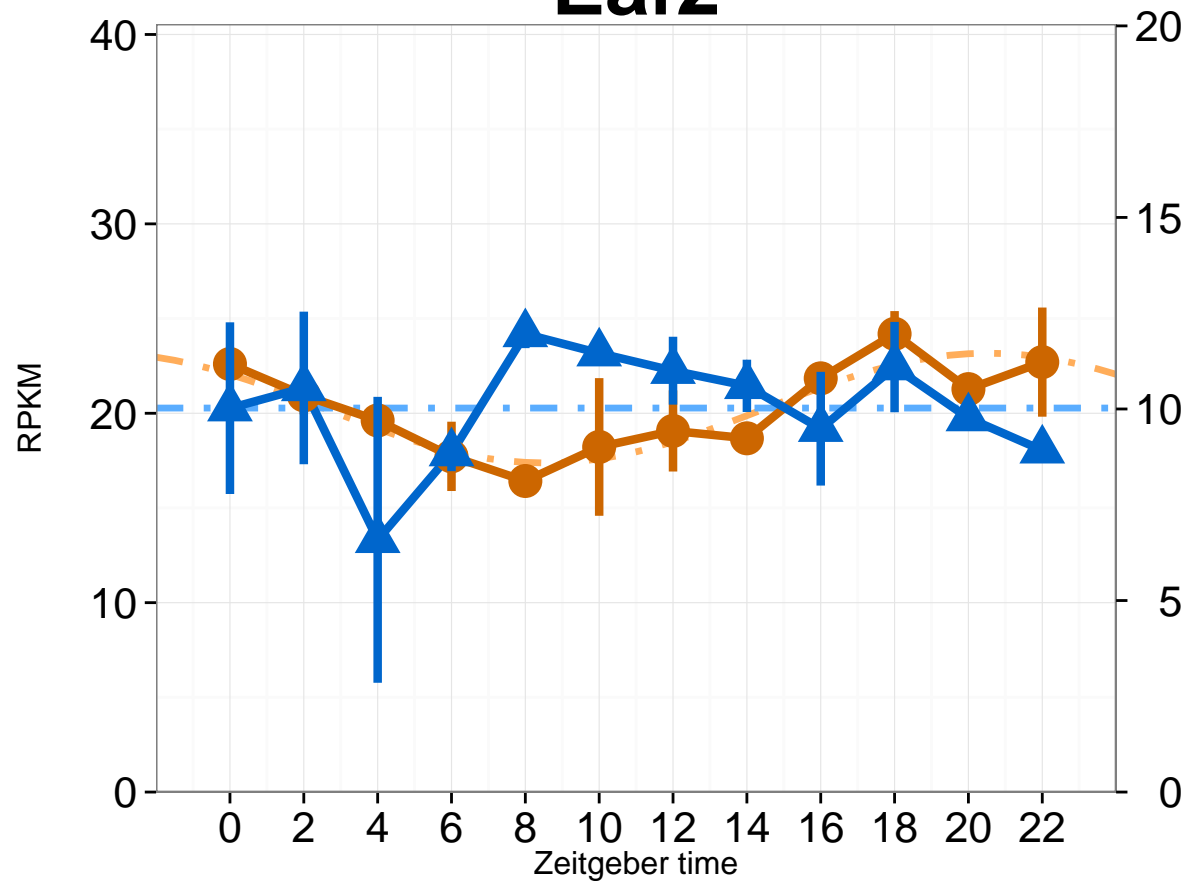

## Eaf2

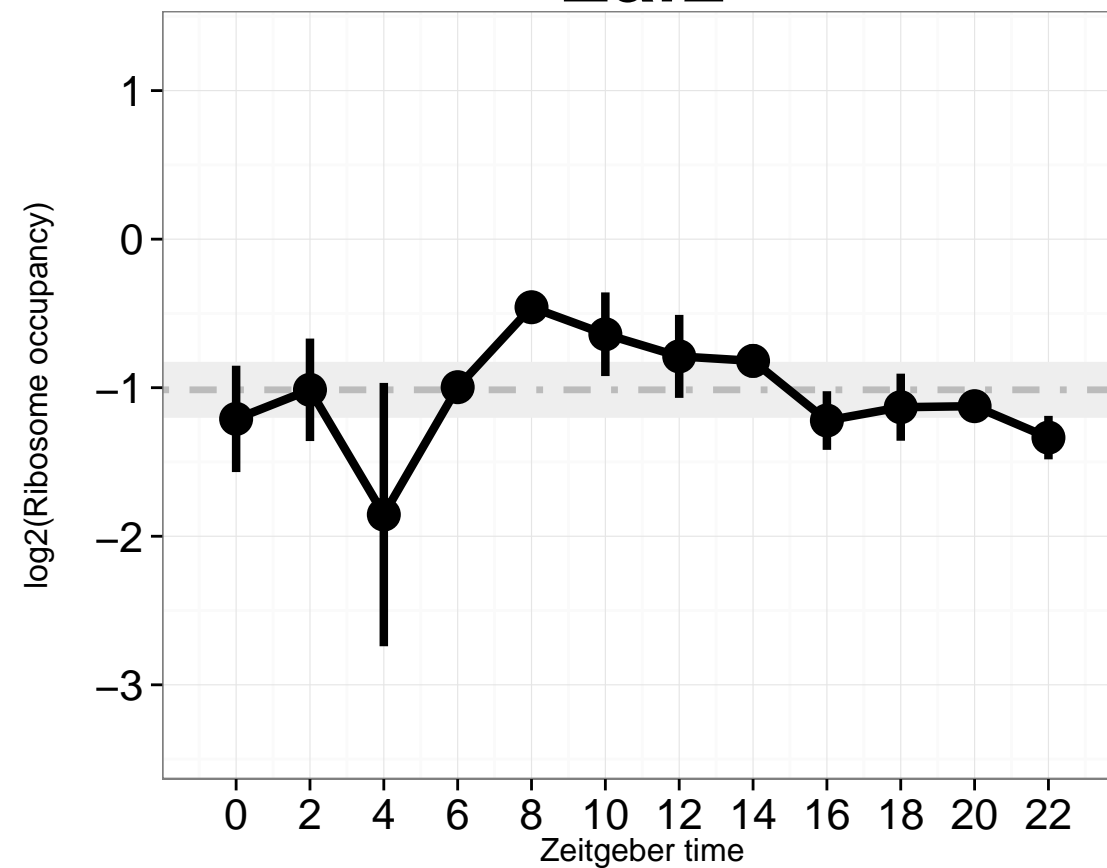

Supplement: Supplementary file 656 [file 1]

# Fastkd3

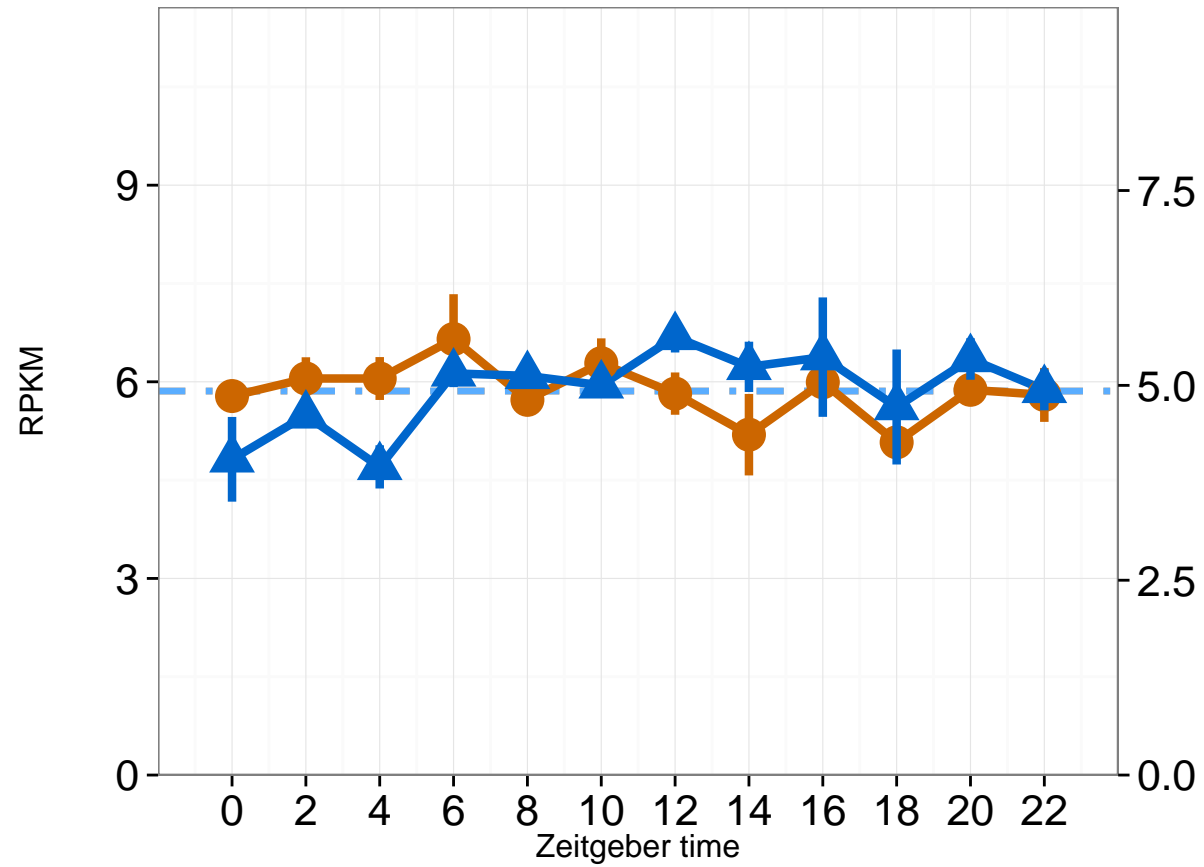

# Fastkd3

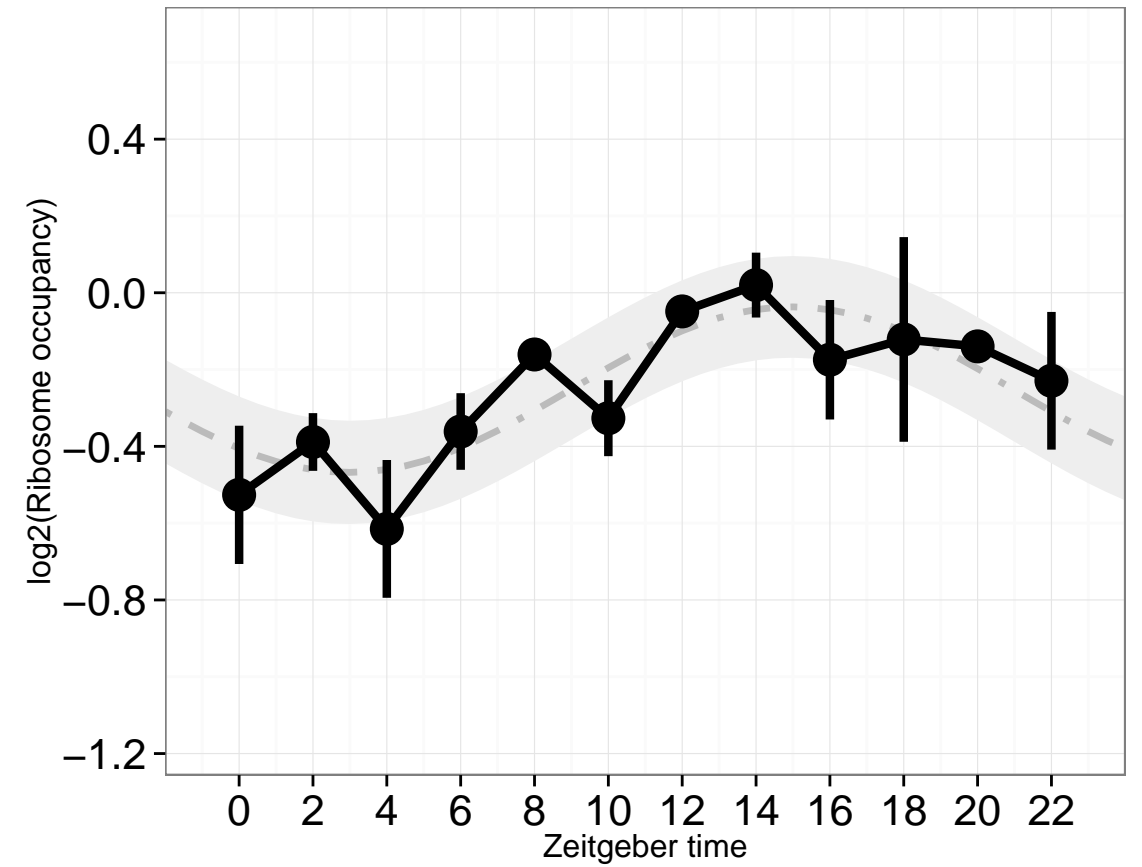

Supplement: Supplementary file 657 [file 1]

## Dda1

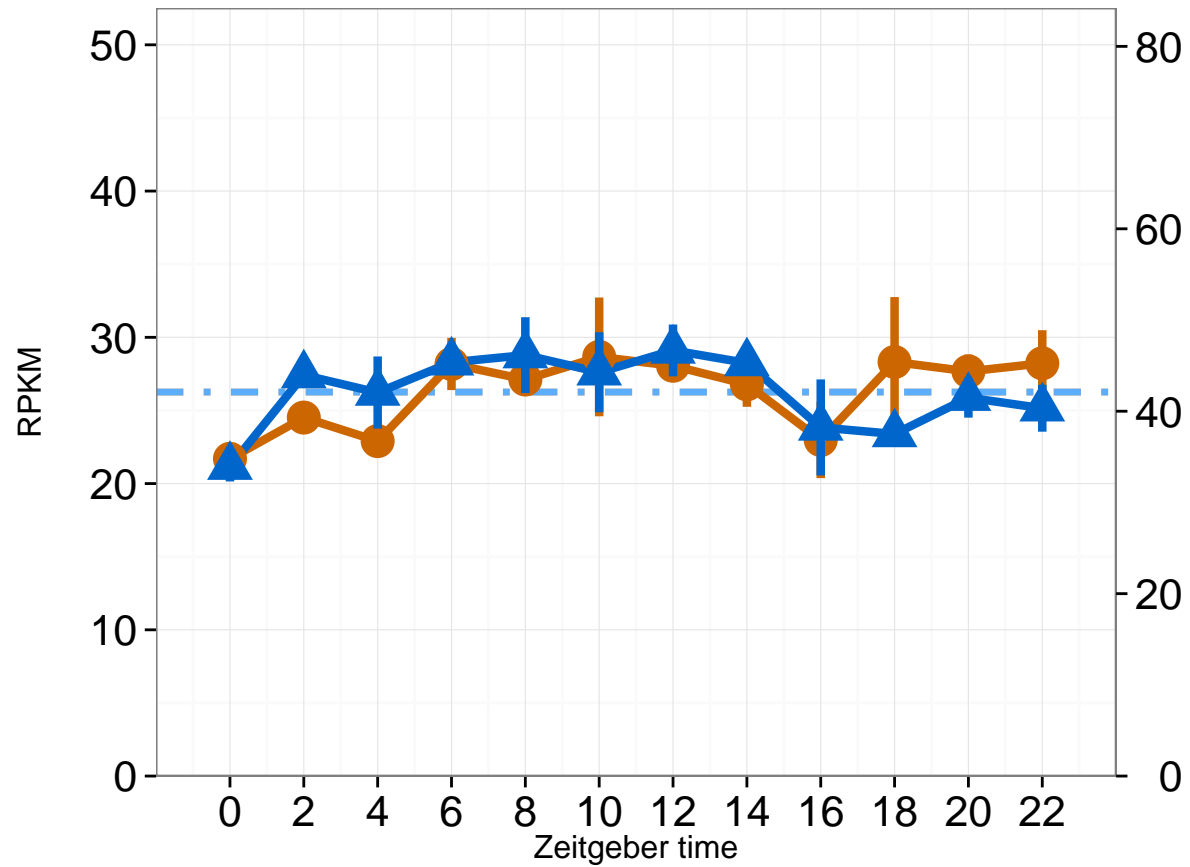

## Dda1

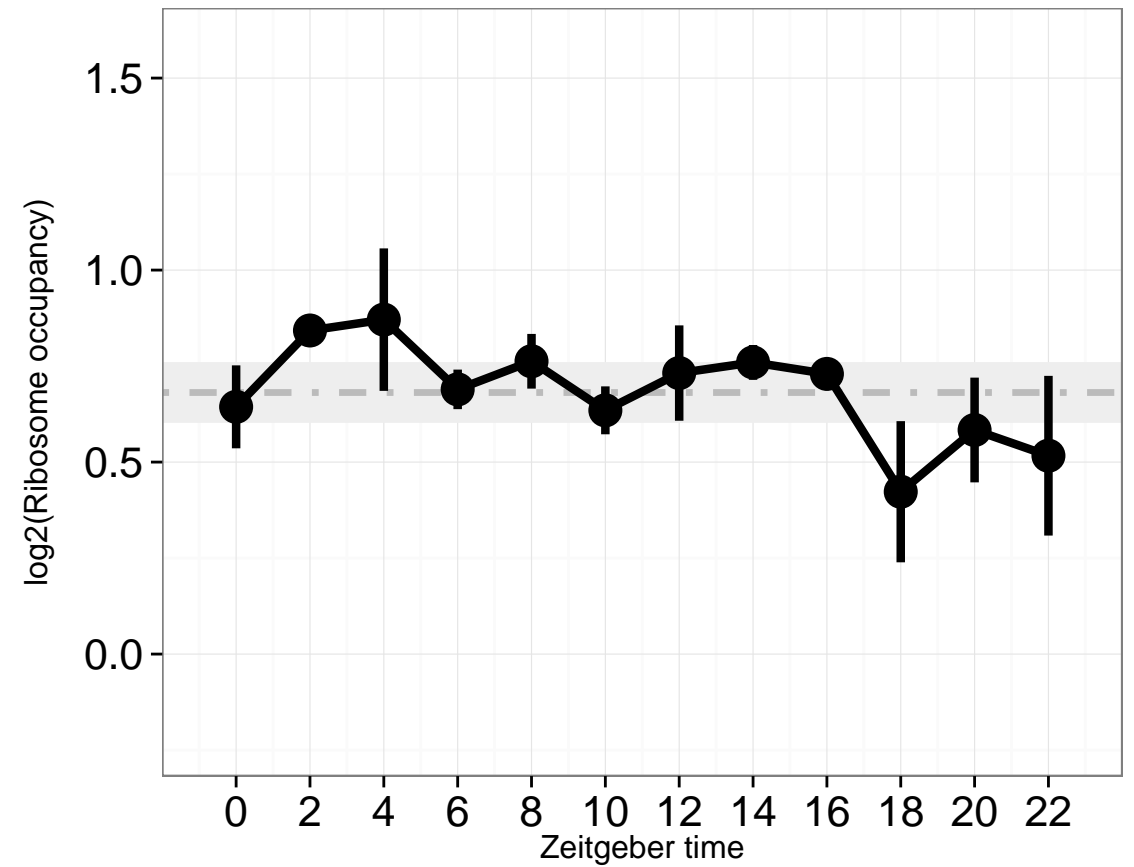

Supplement: Supplementary file 658 [file 1]

## Myc

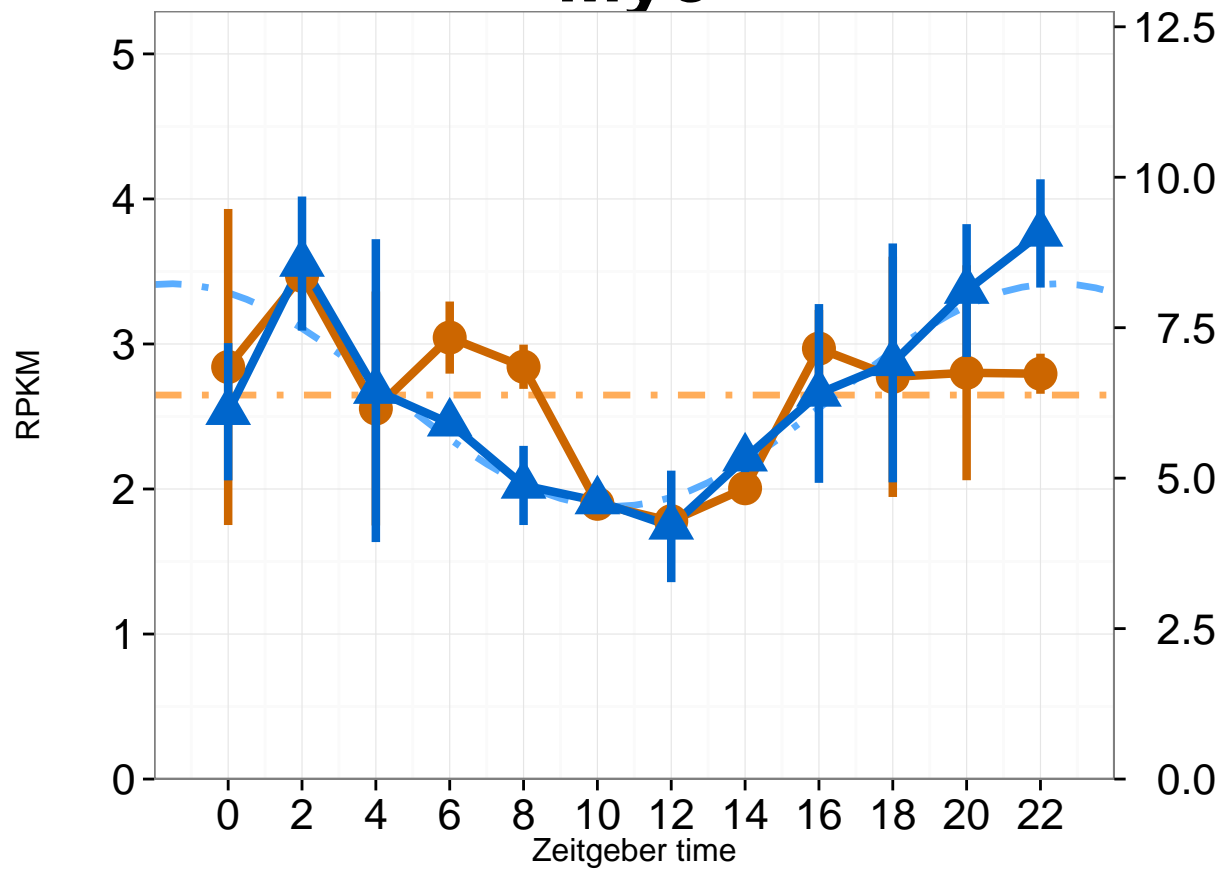

## Myc

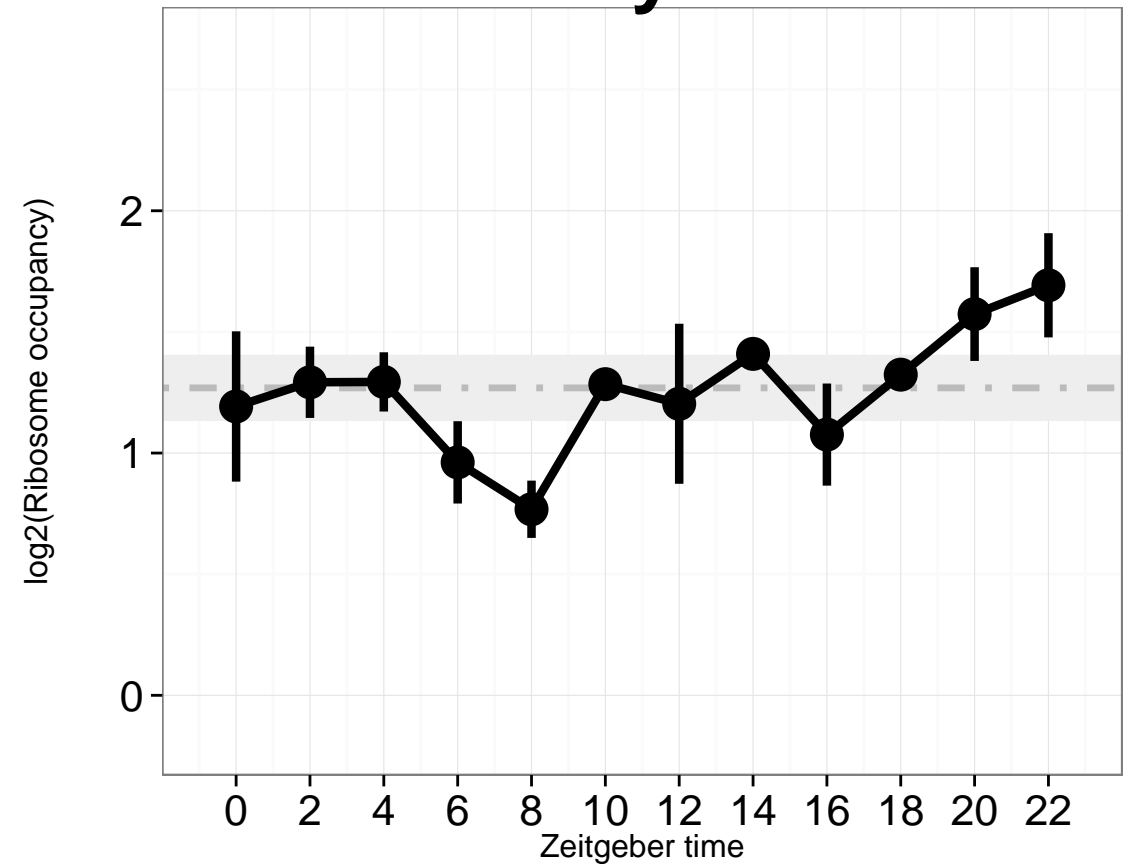

Supplement: Supplementary file 659 [file 1]

# Gimap8

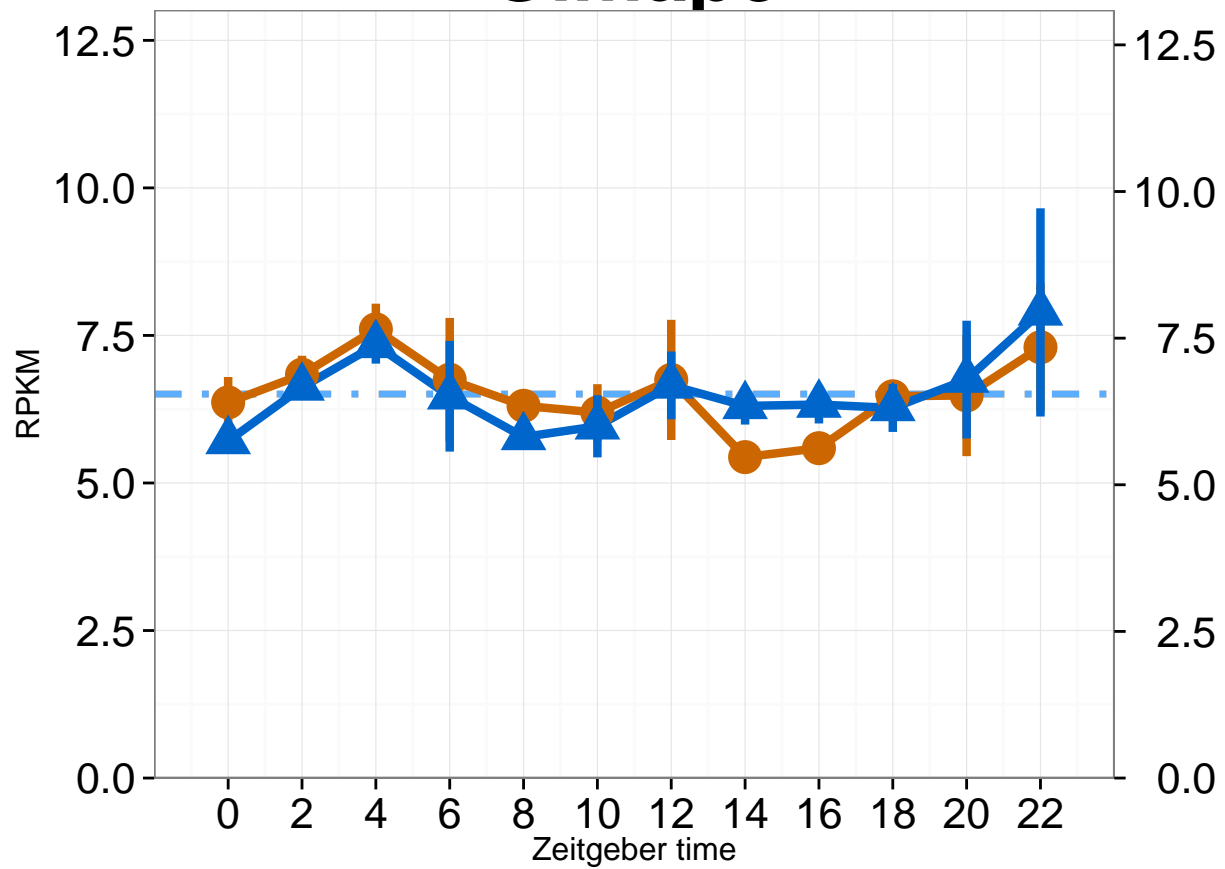

# Gimap8

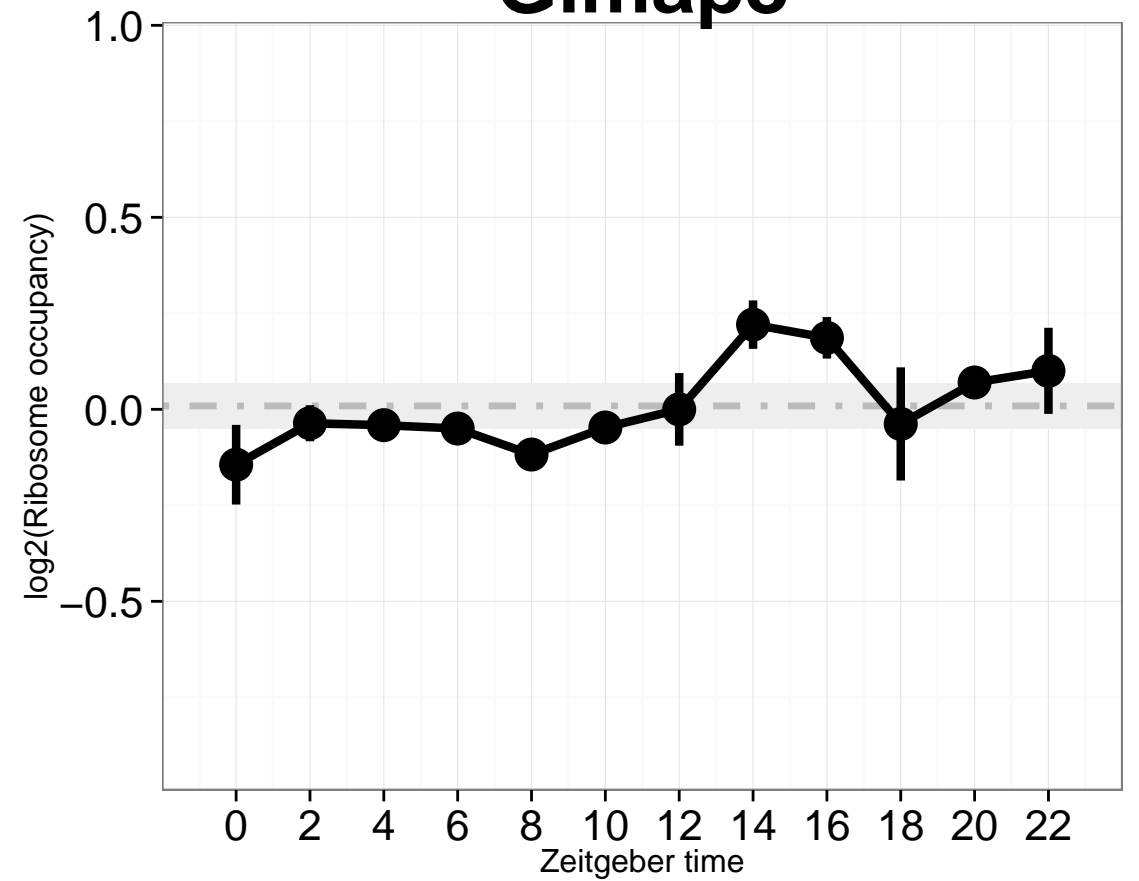

Supplement: Supplementary file 660 [file 1]

## Nfil3

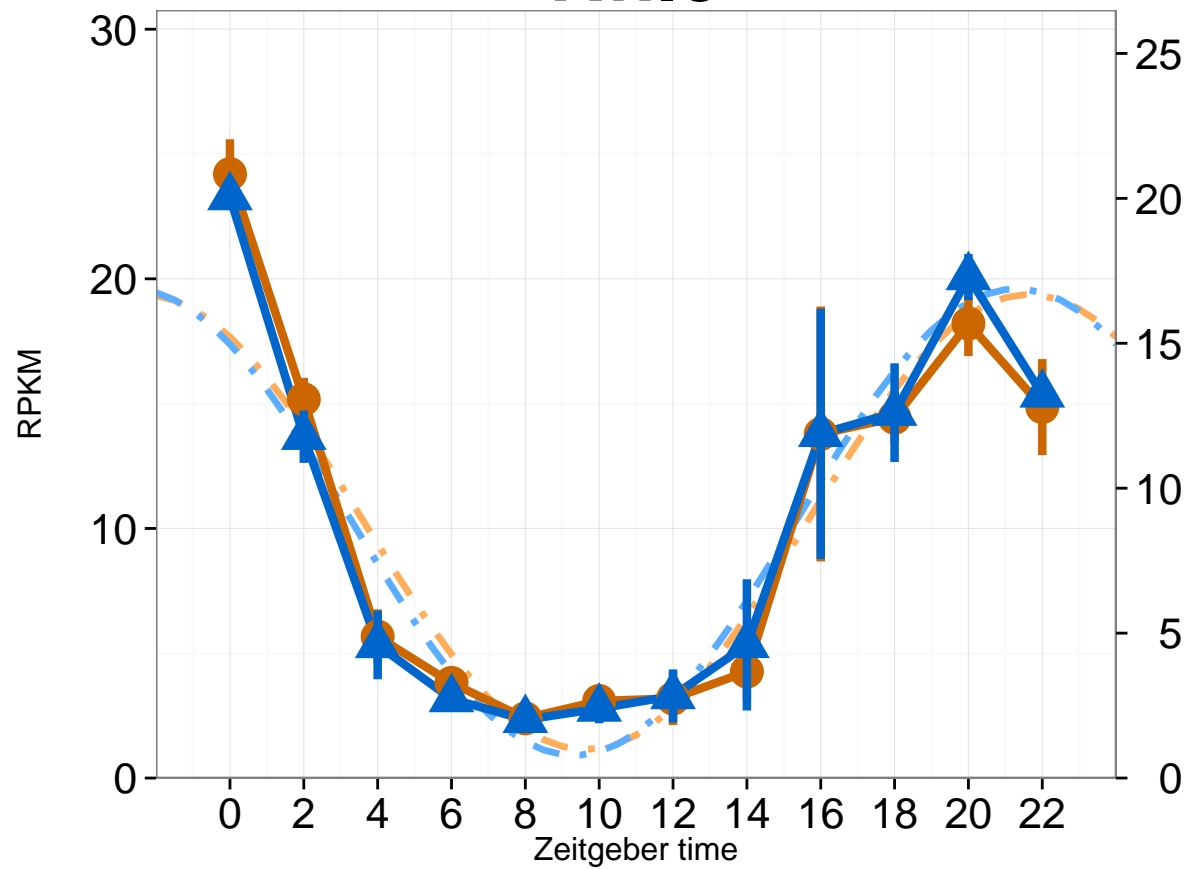

## Nfil3

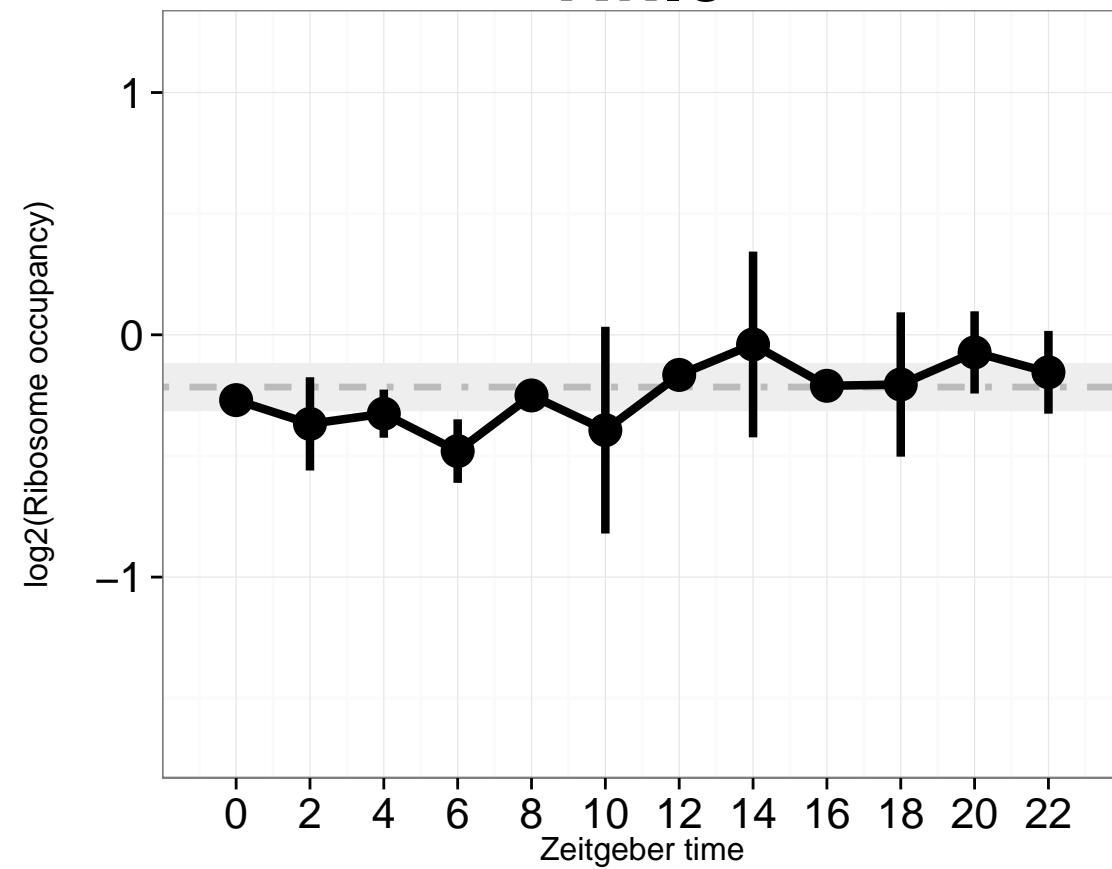

Supplement: Supplementary file 661 [file 1]

## Rnf214

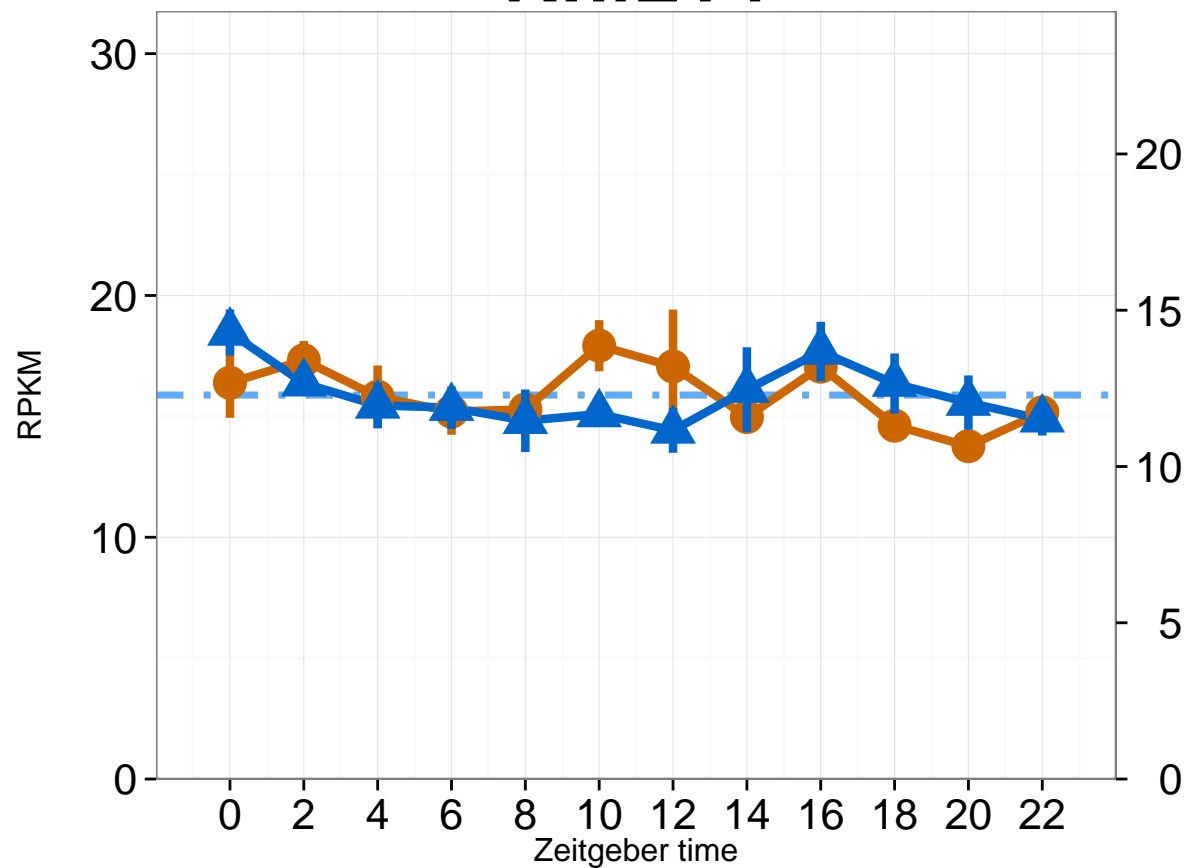

## Rnf214

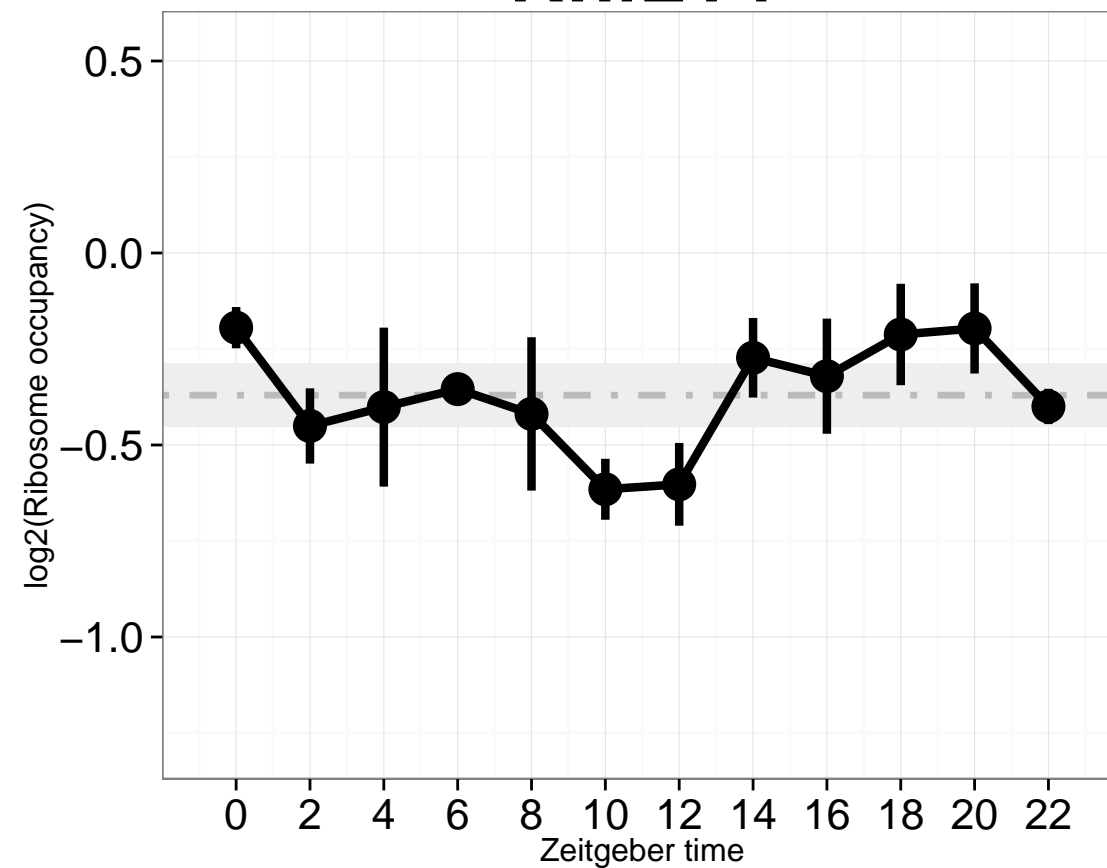

Supplement: Supplementary file 662 [file 1]

# Heatr5a

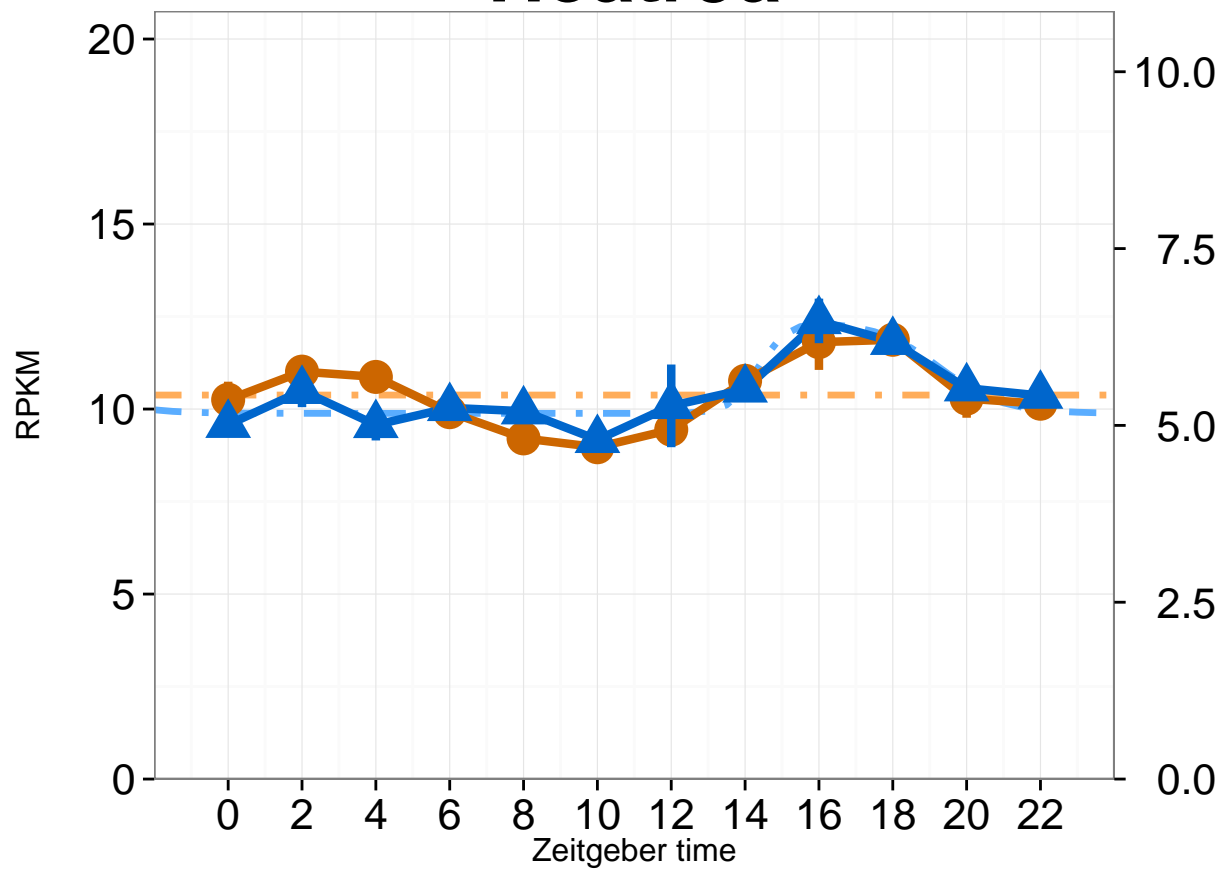

# Heatr5a

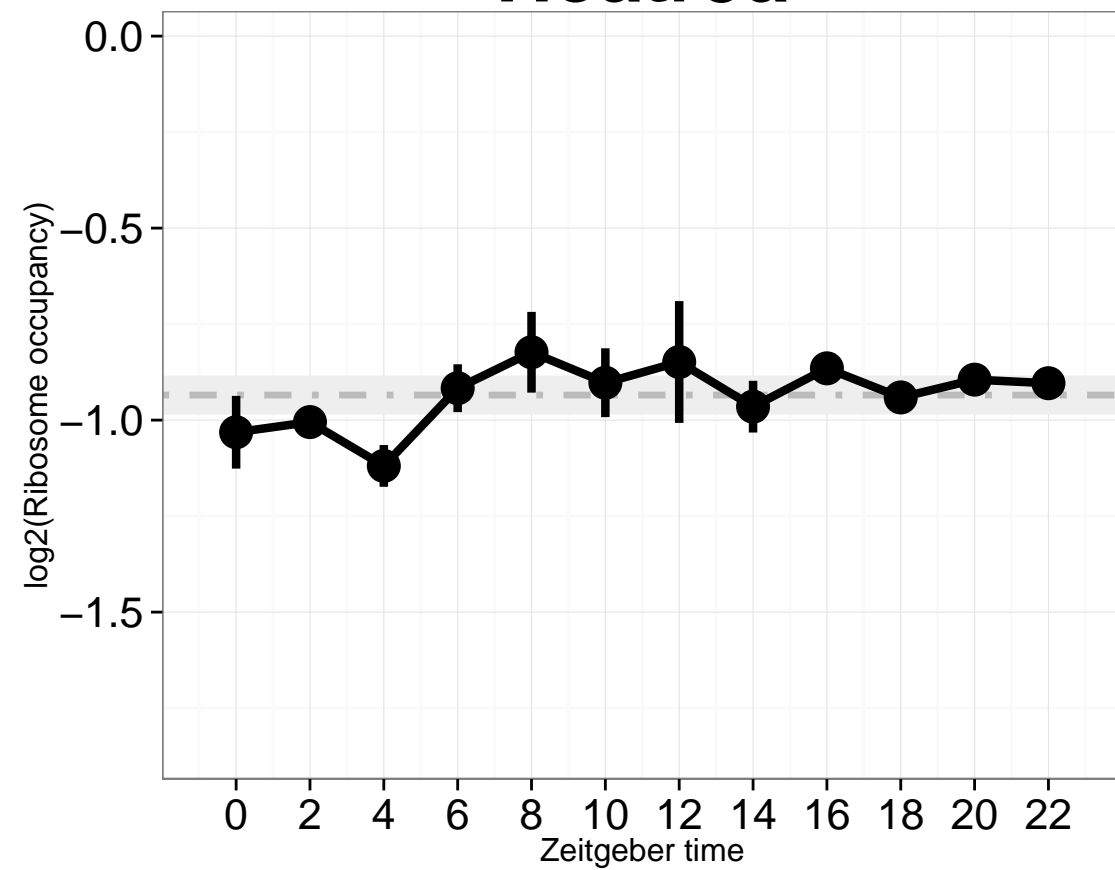

Supplement: Supplementary file 663 [file 1]

## Snca

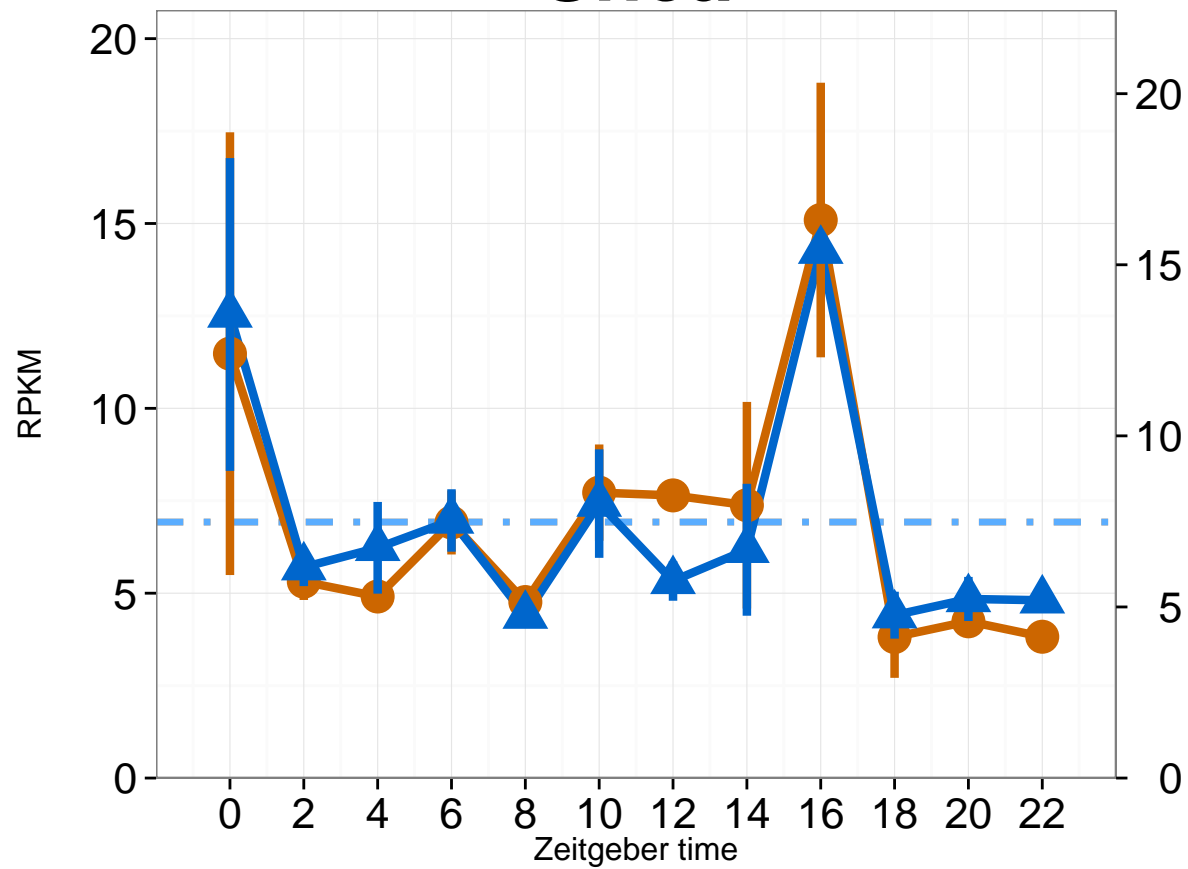

## Snca

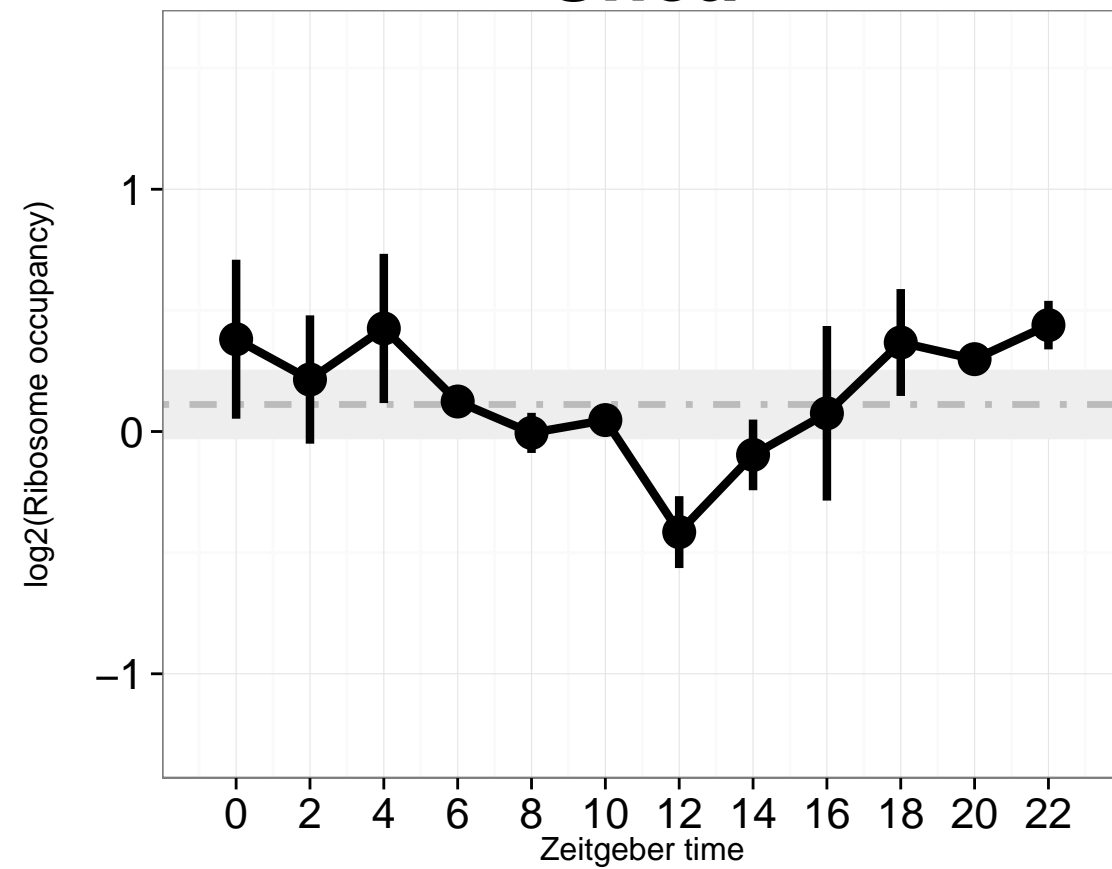

Supplement: Supplementary file 664 [file 1]

## Mettl8

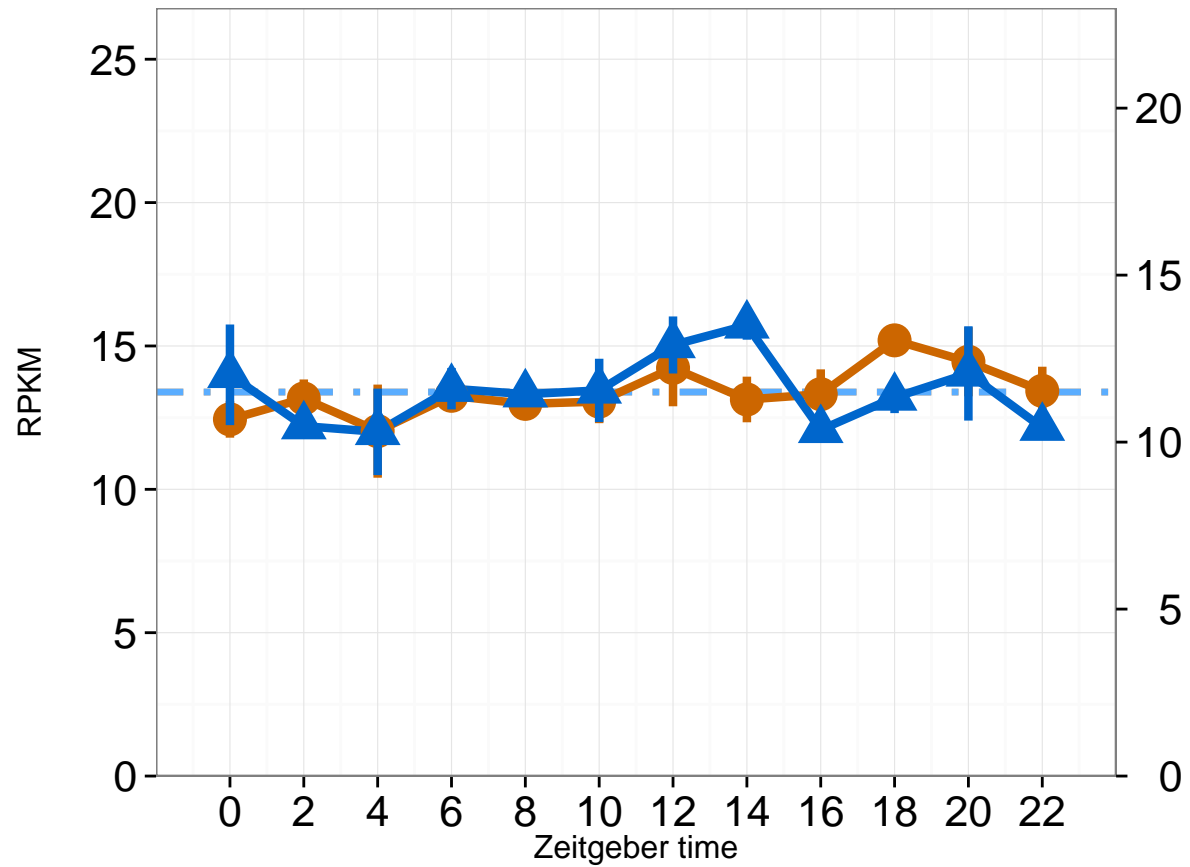

## Mettl8

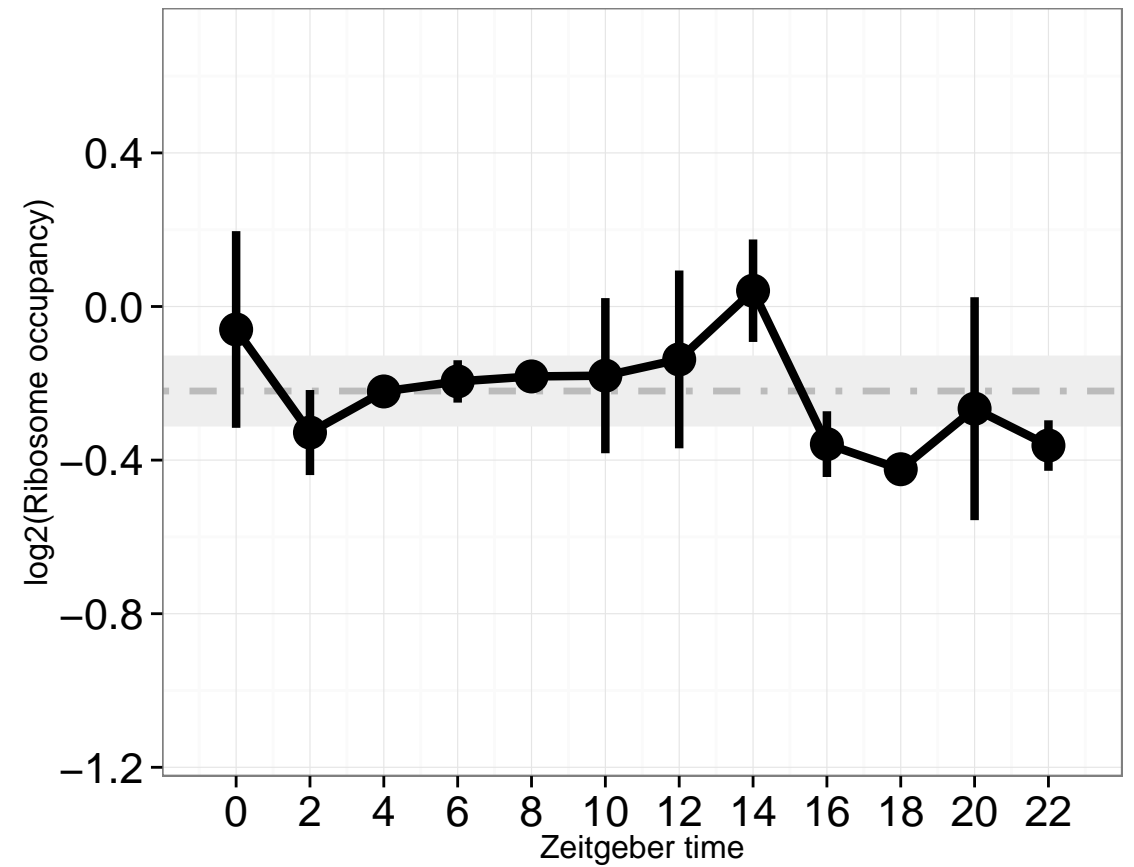

Supplement: Supplementary file 665 [file 1]

# Leprel1

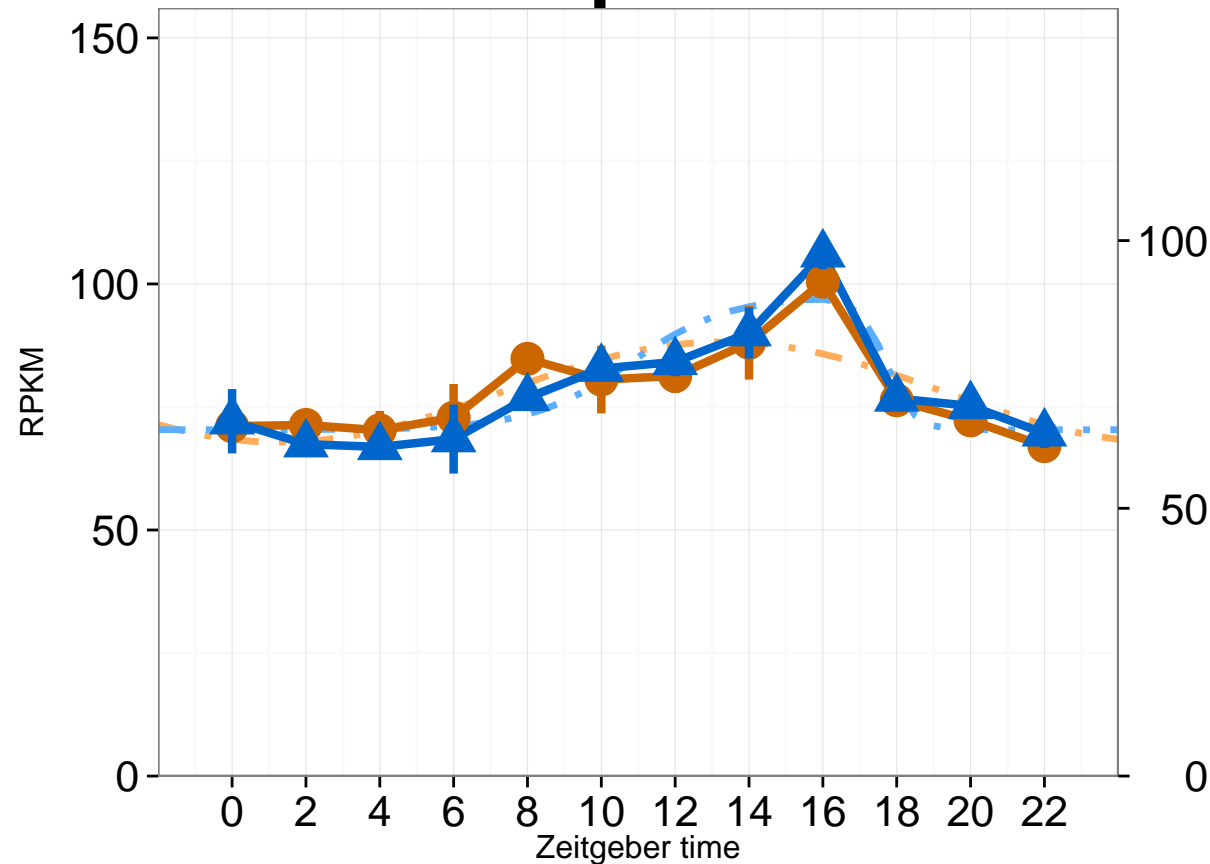

# Leprel1

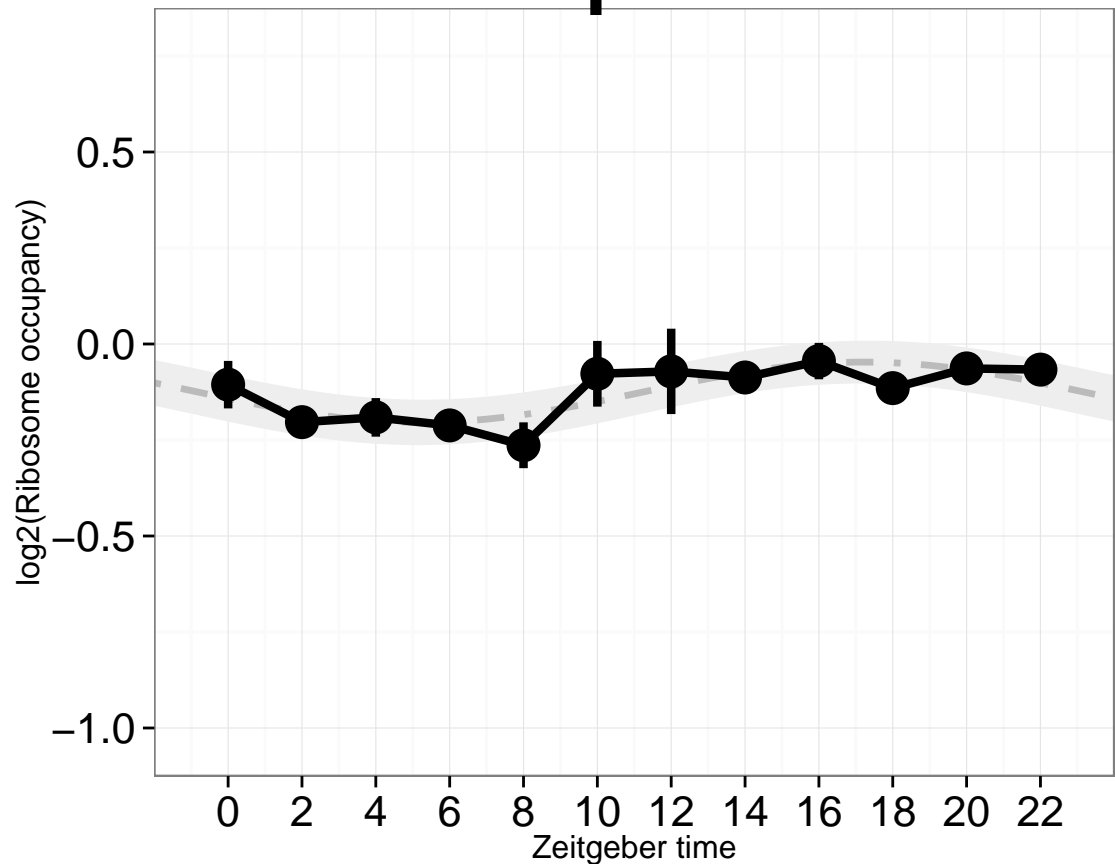

Supplement: Supplementary file 666 [file 1]

# Kat6b

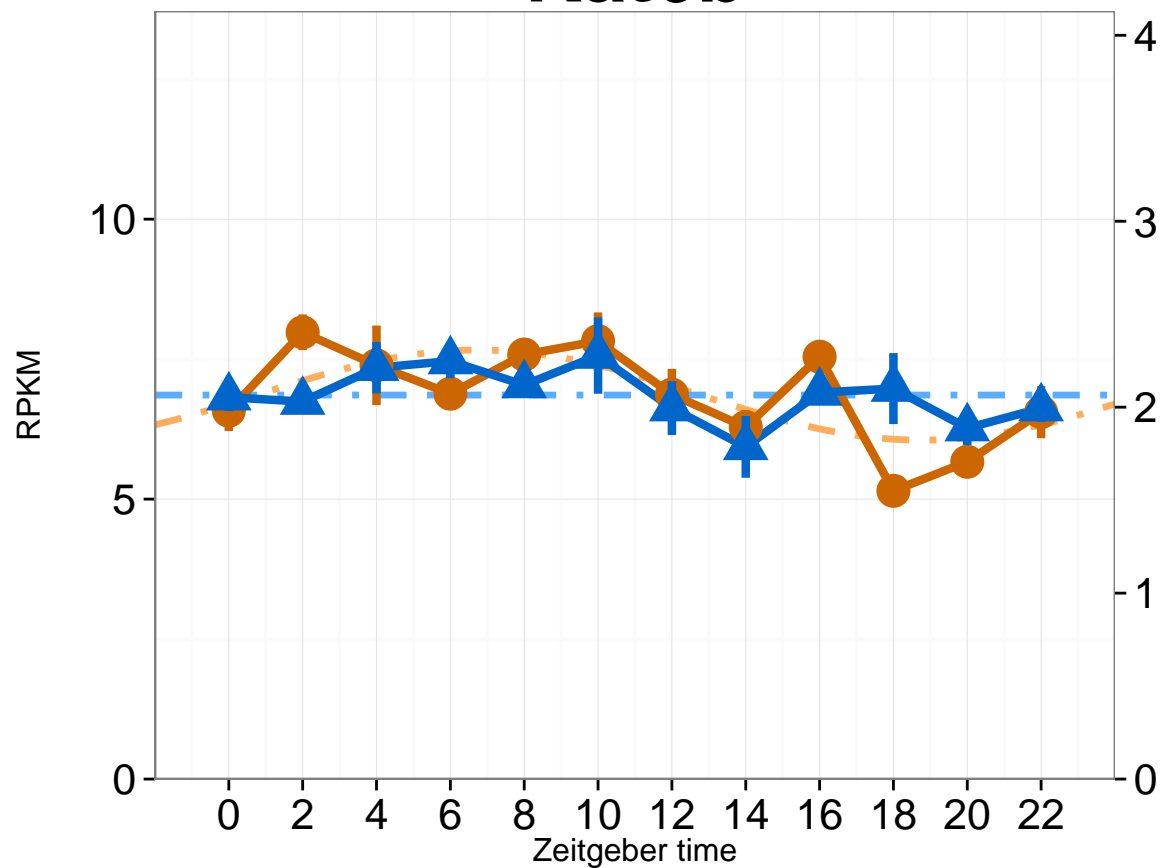

# Kat6b

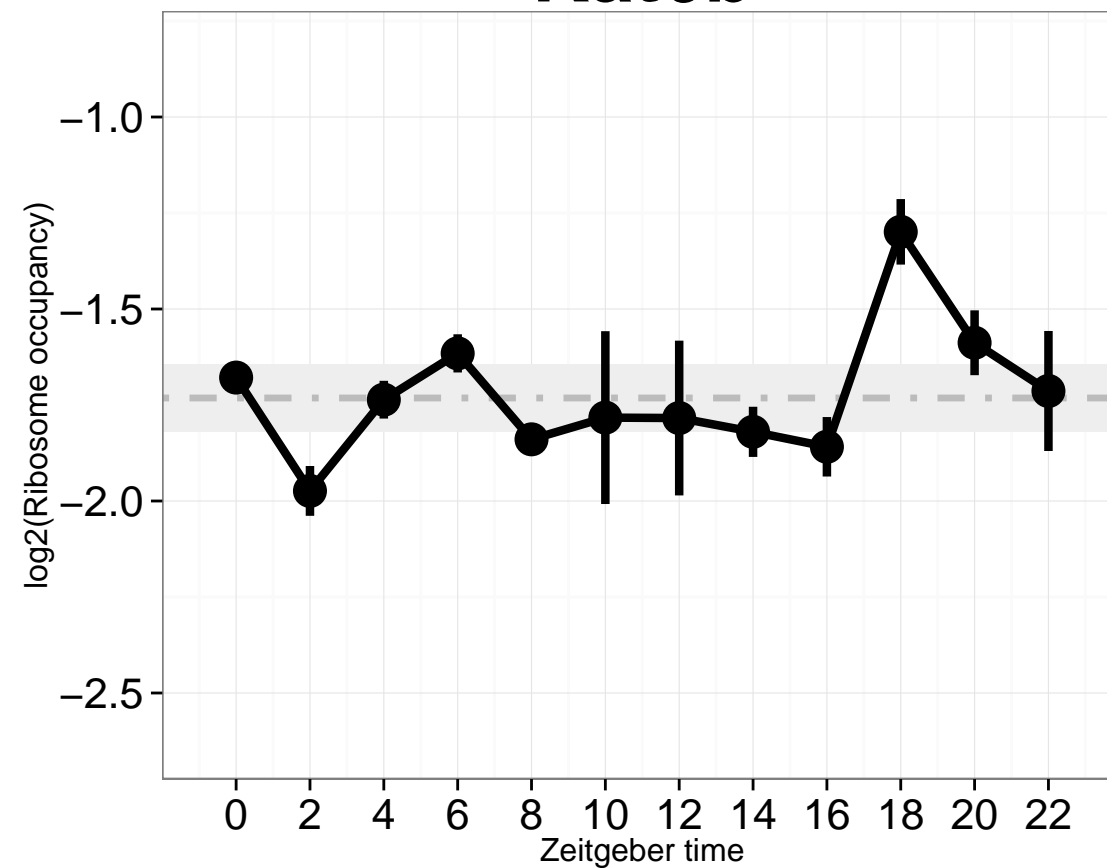

Supplement: Supplementary file 667 [file 1]

# Dyrk1b

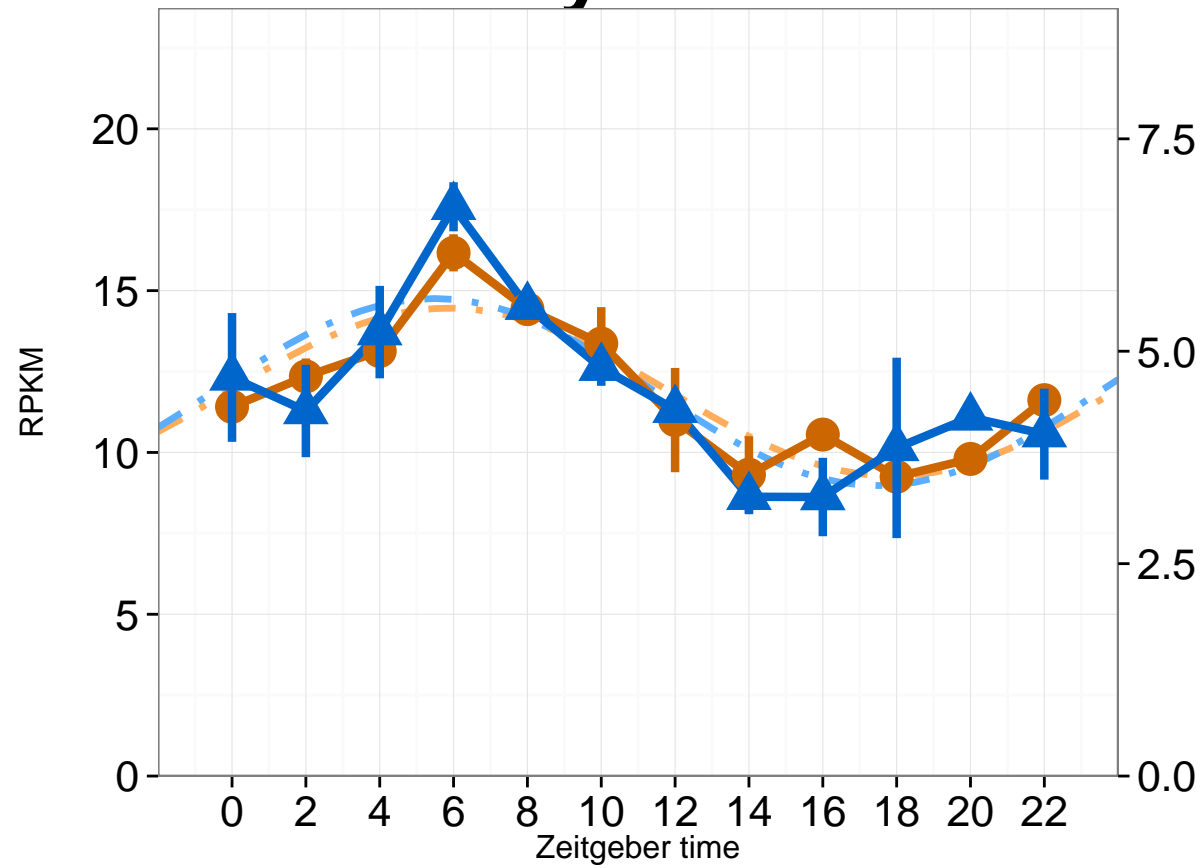

# Dyrk1b

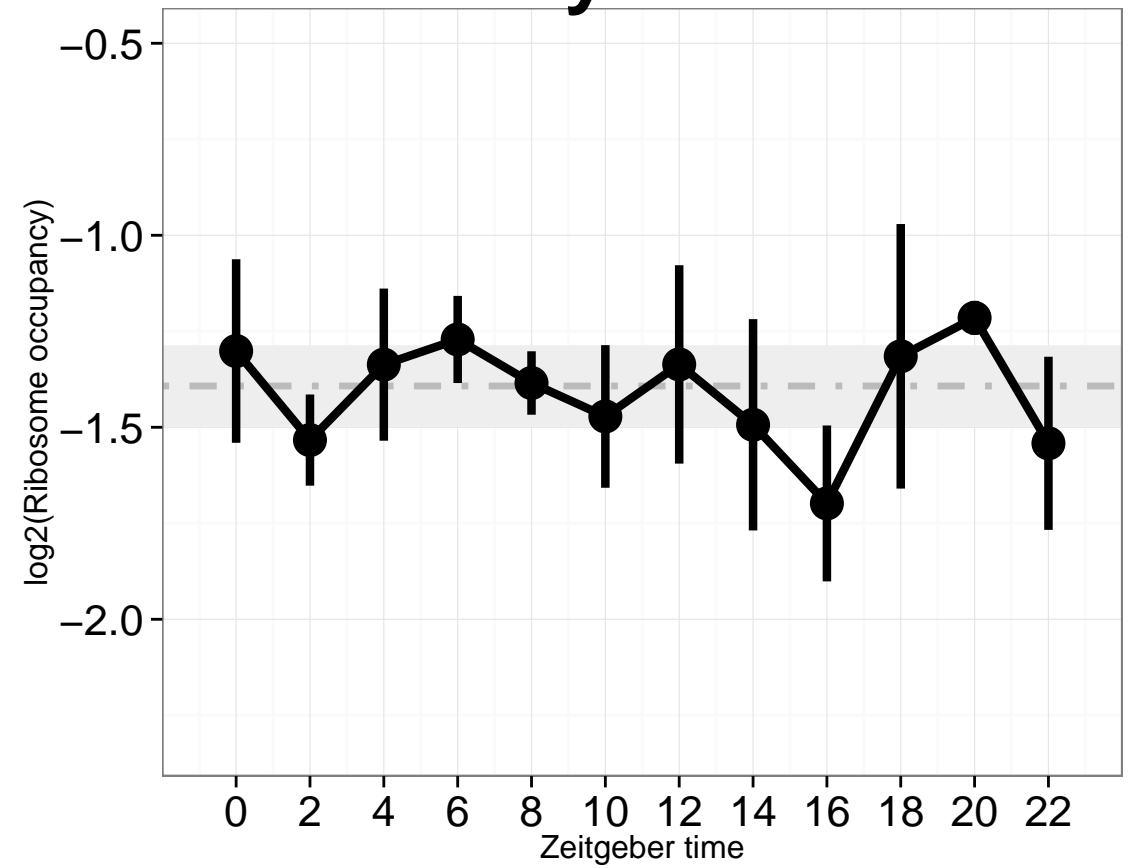

Supplement: Supplementary file 668 [file 1]

# Ctage5

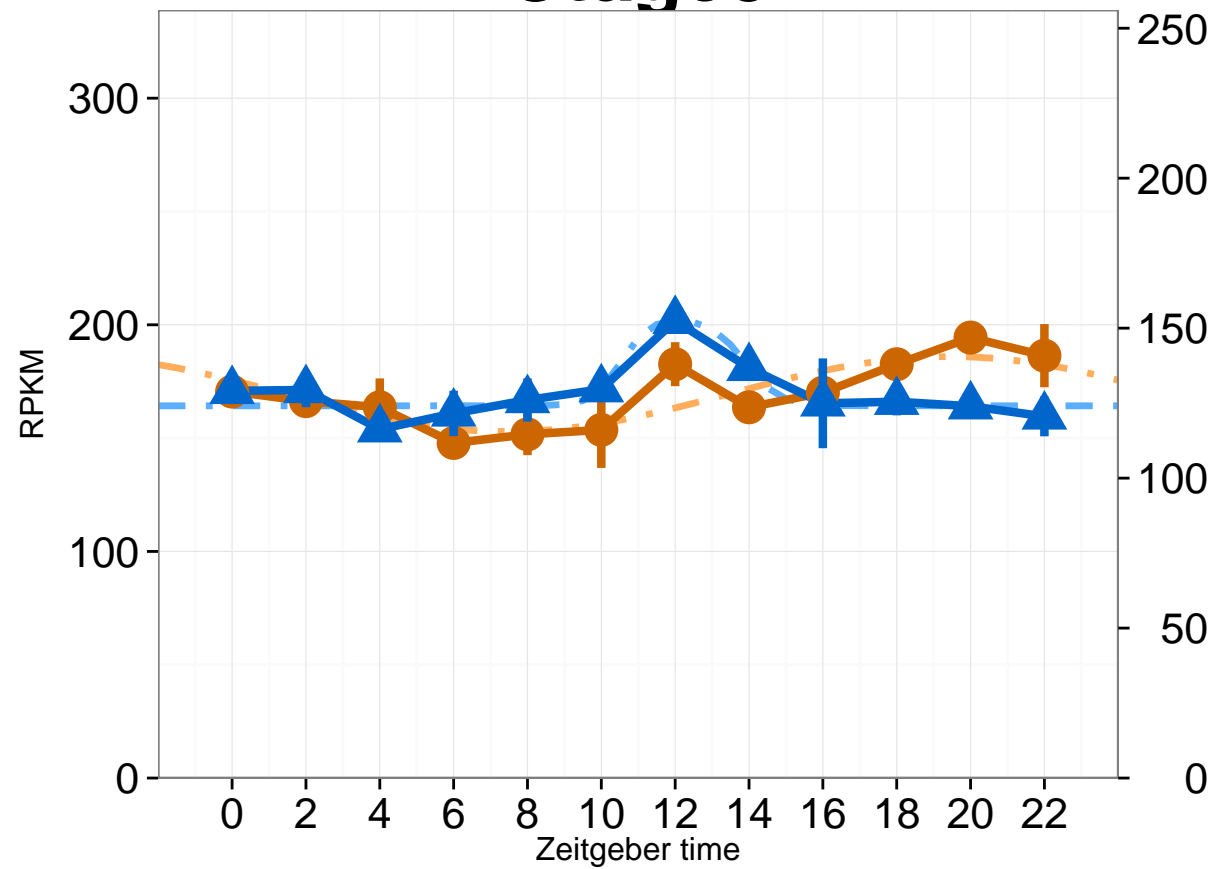

# Ctage5

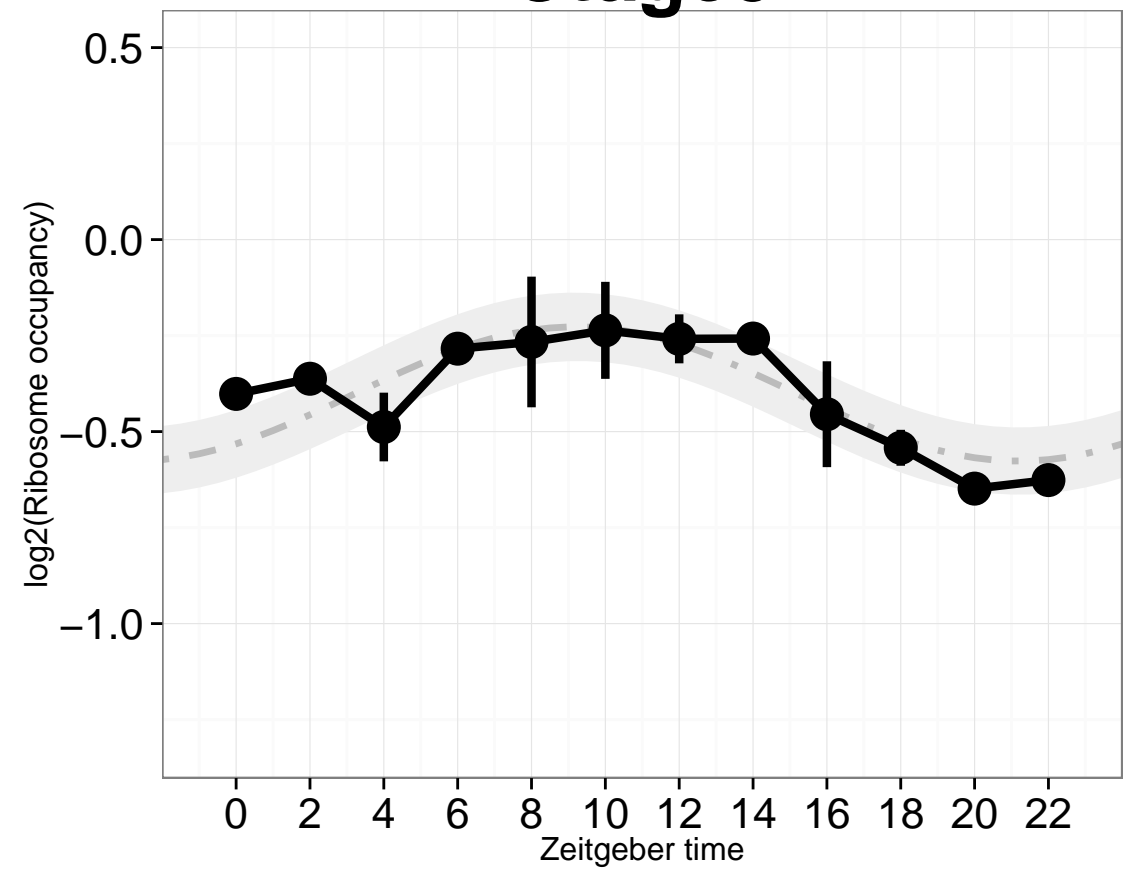

Supplement: Supplementary file 669 [file 1]

# Rasip1

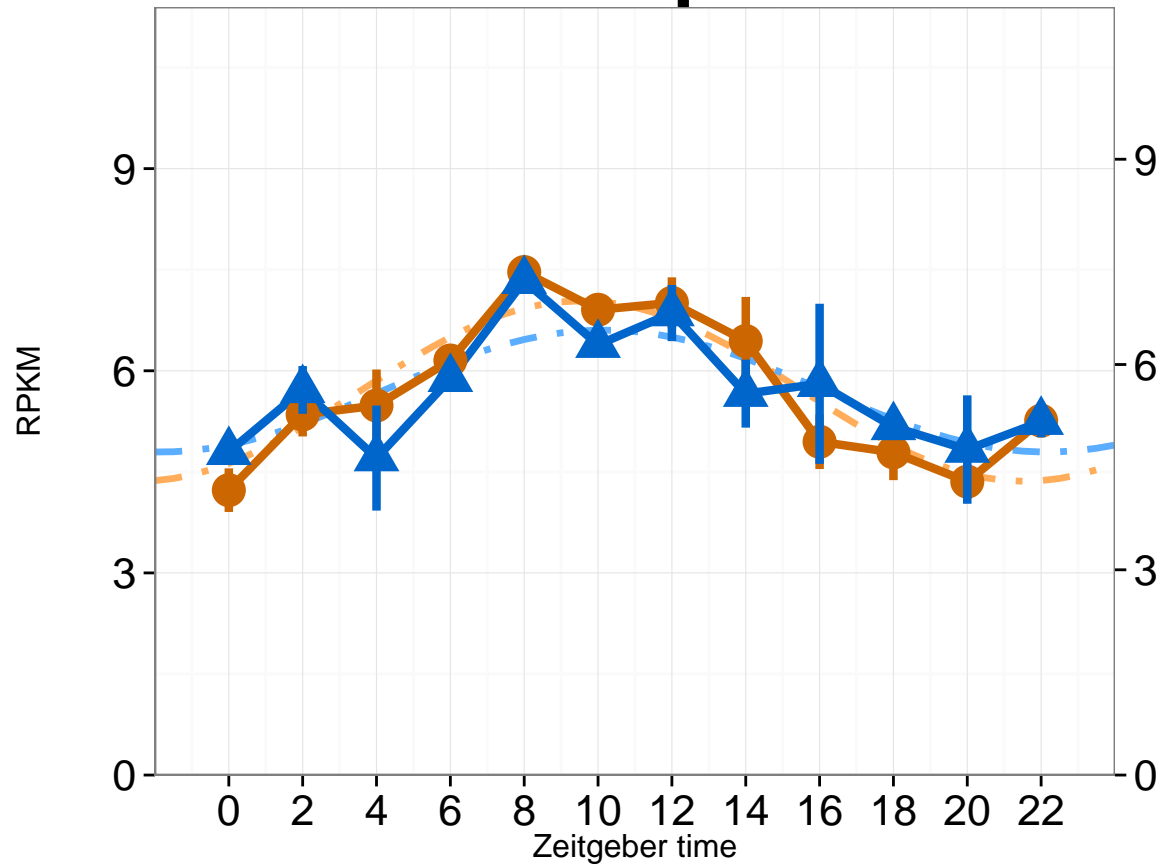

# Rasip1

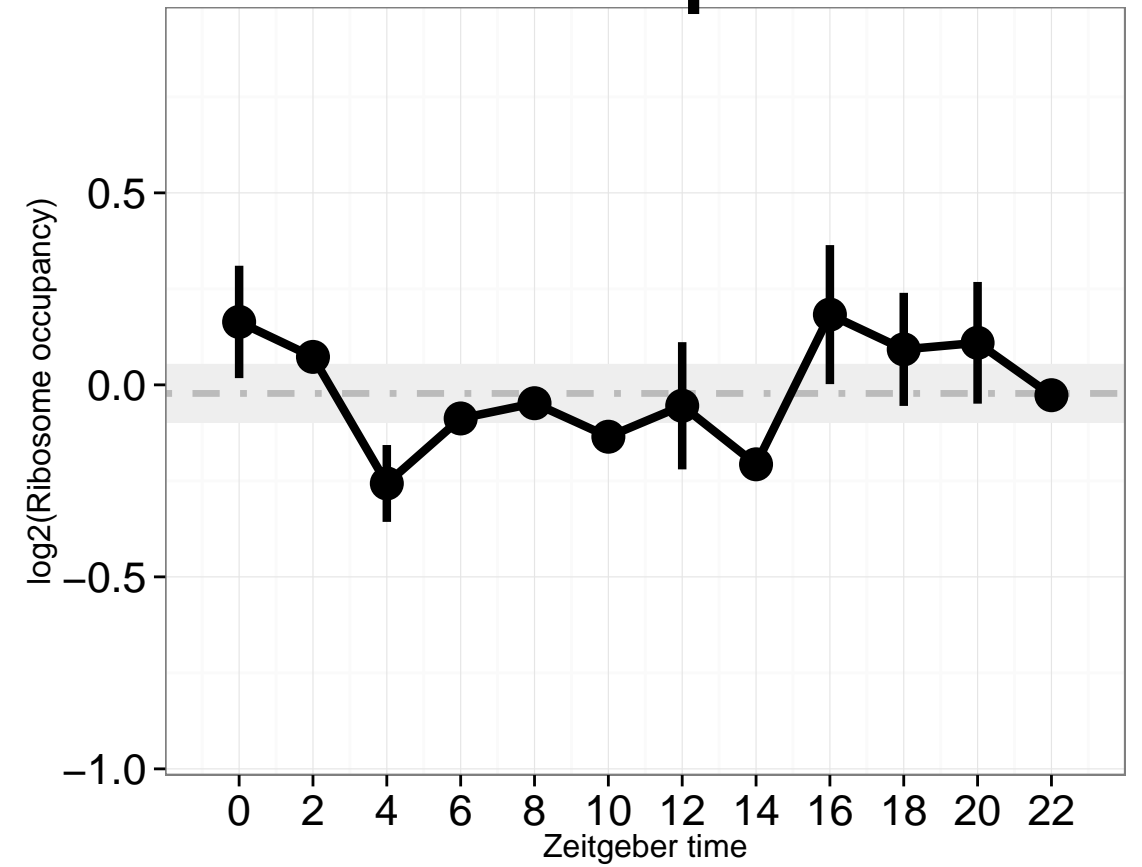

Supplement: Supplementary file 670 [file 1]

## Noc4l

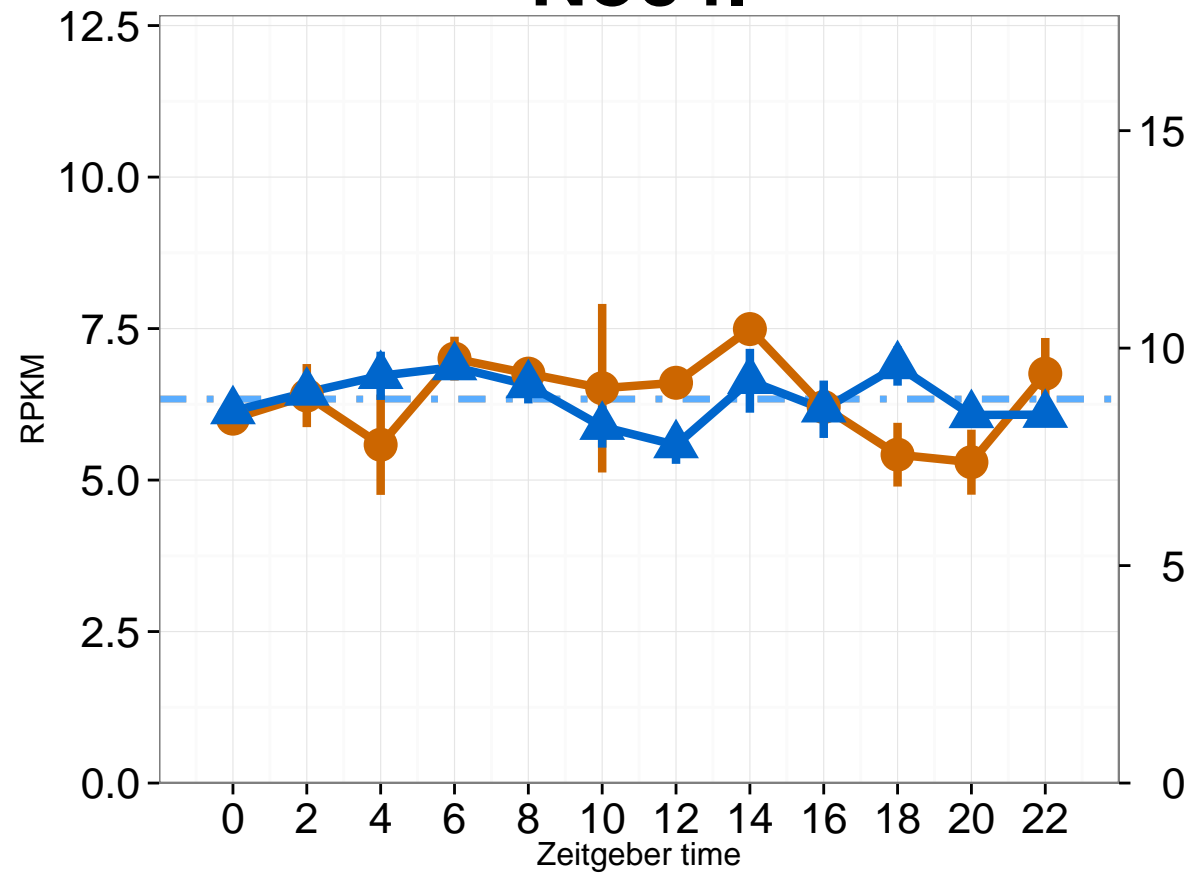

## Noc4l

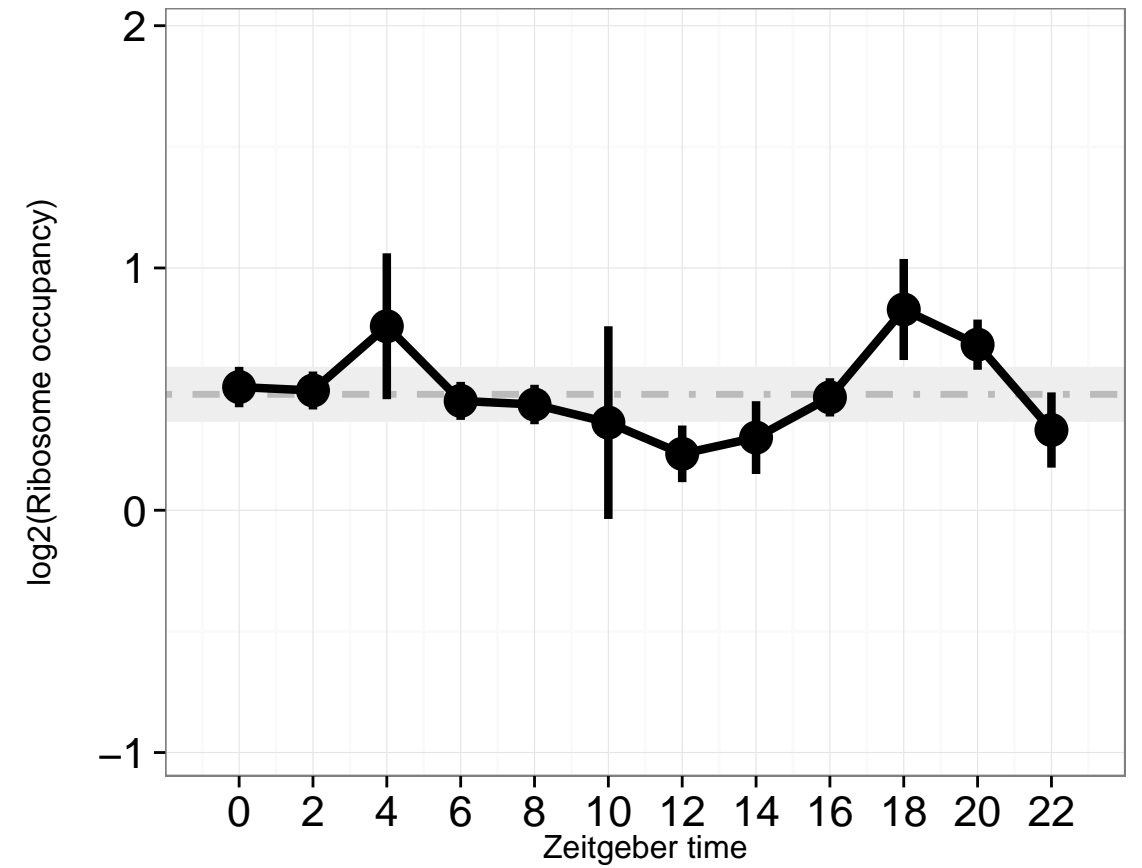

Supplement: Supplementary file 671 [file 1]

# Pmpca

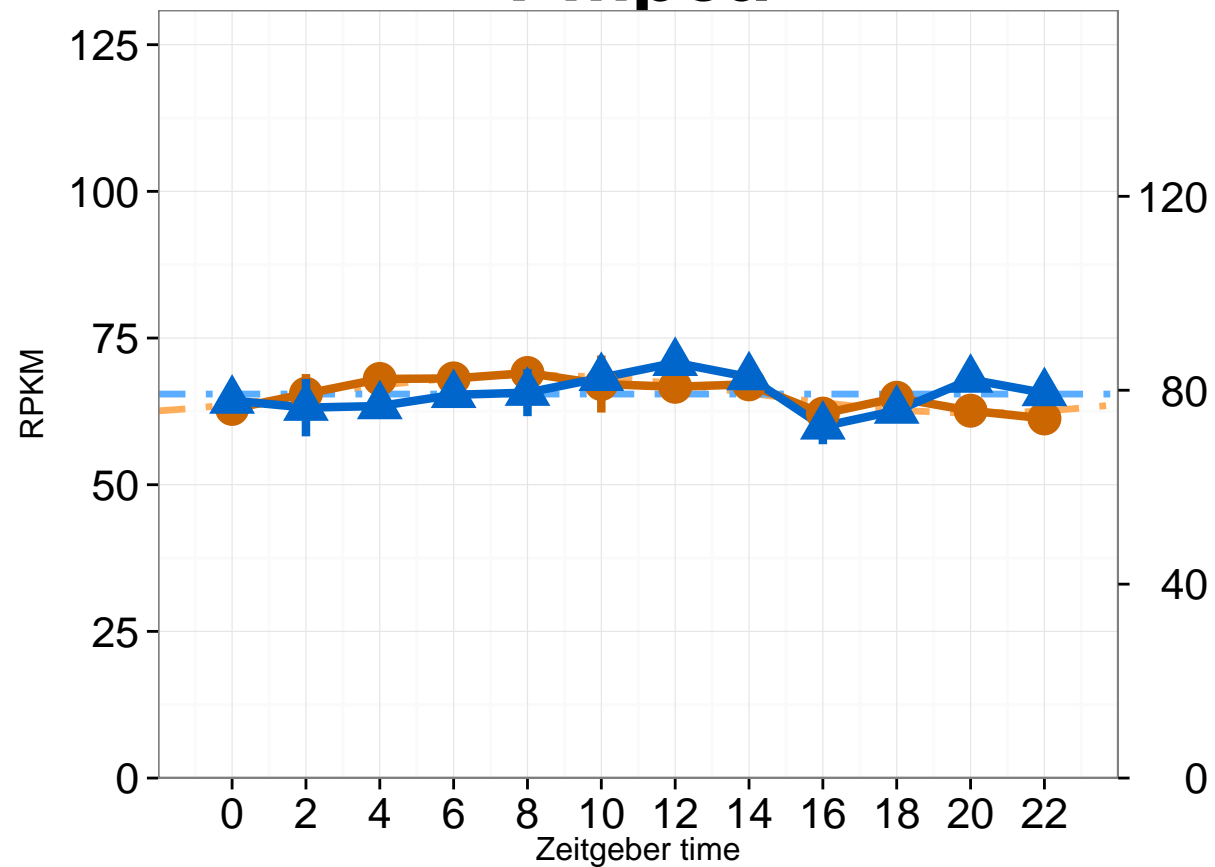

# Pmpca

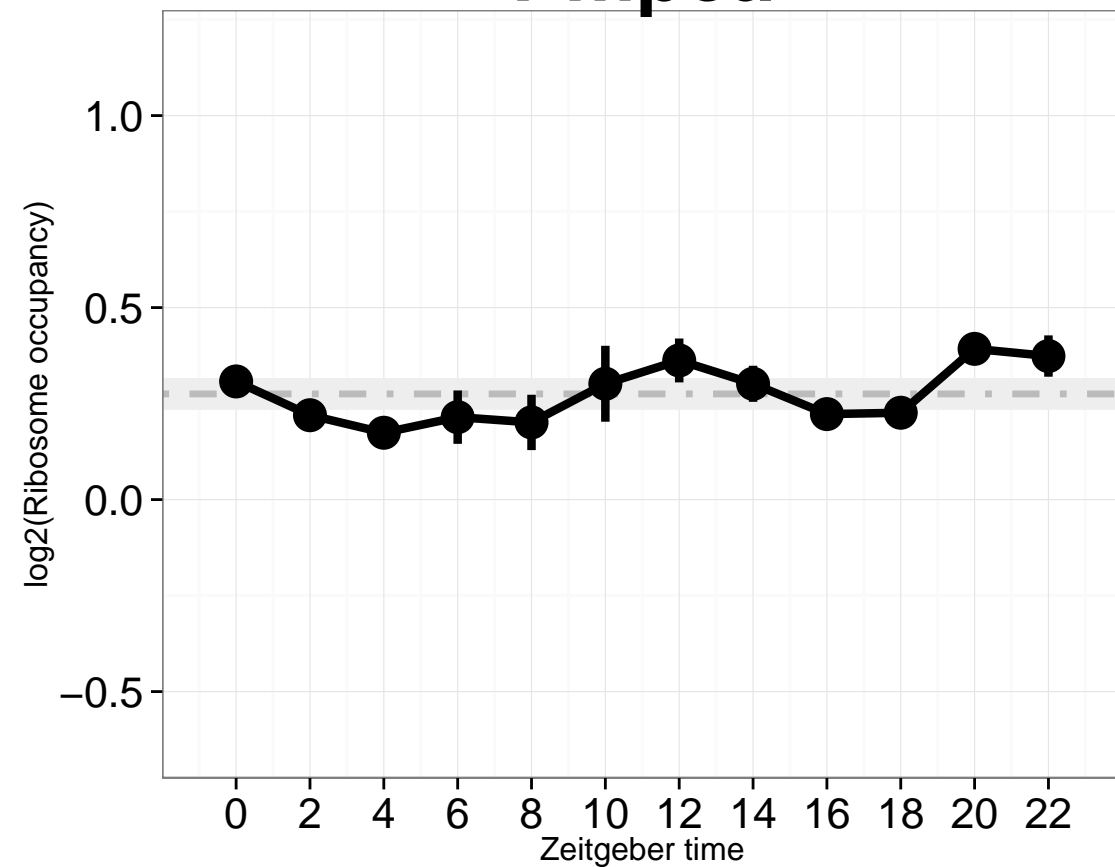

Supplement: Supplementary file 672 [file 1]

## Eps8l1

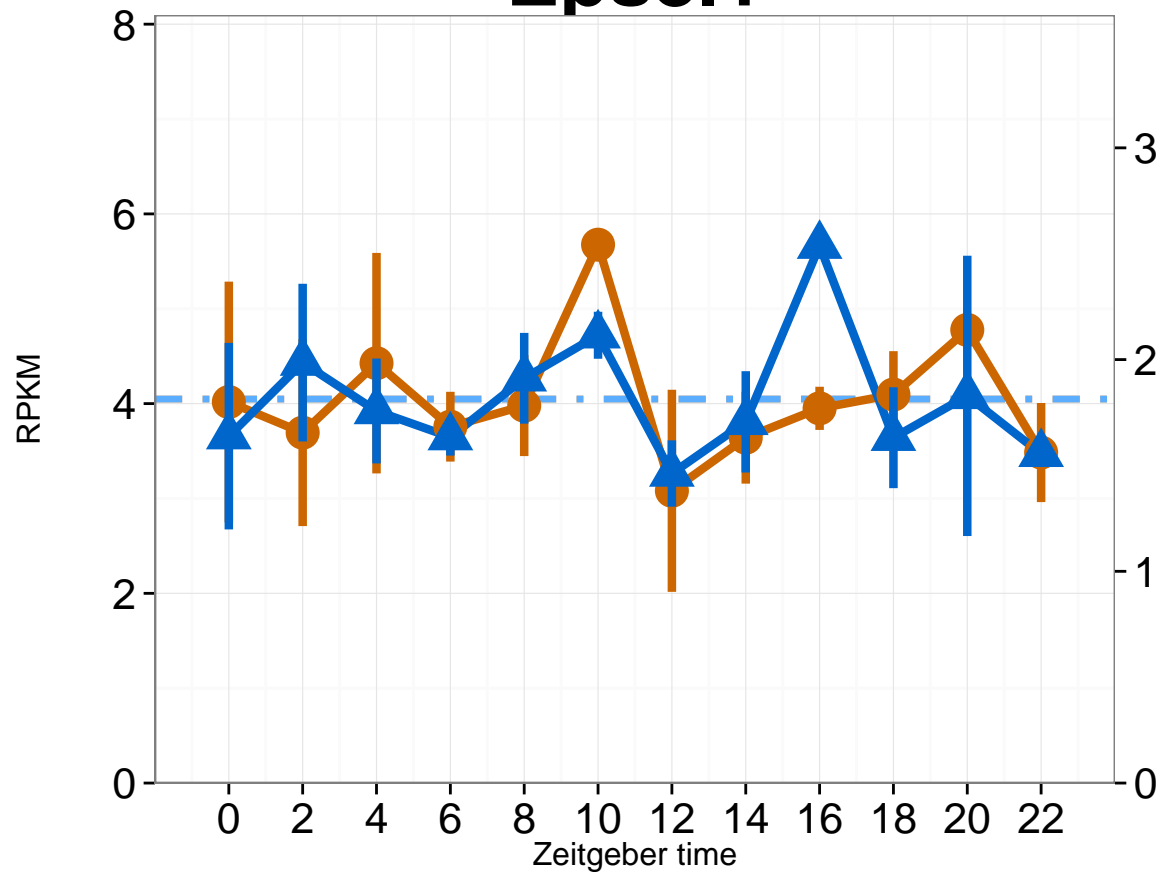

## Eps8l1

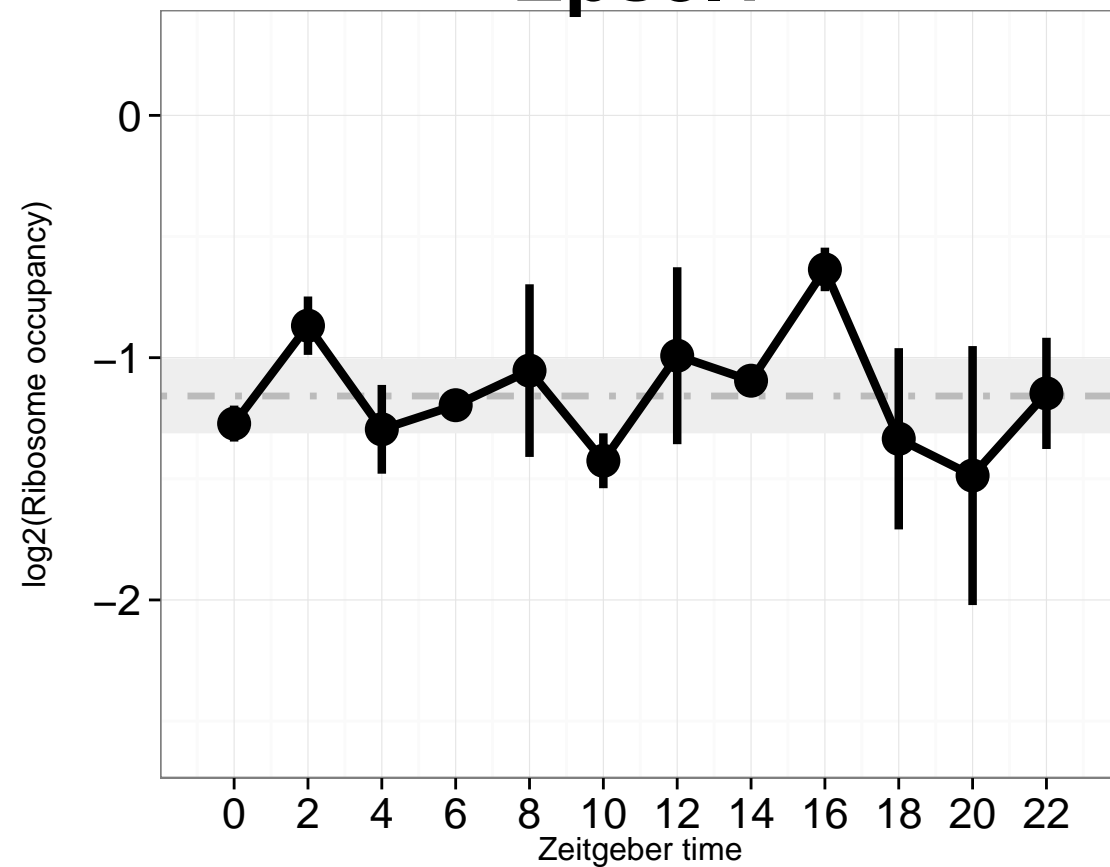

Supplement: Supplementary file 673 [file 1]

## Cxx1b

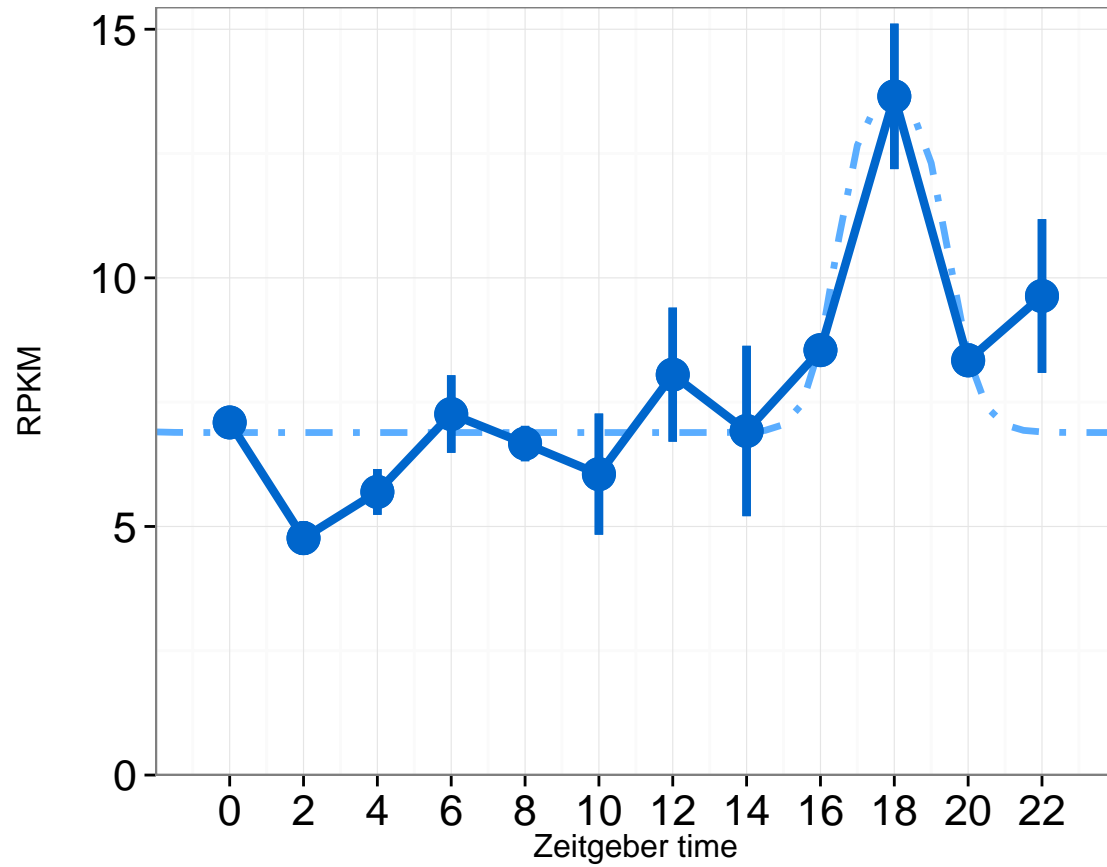

## Cxx1b log2(Ribosome occupancy

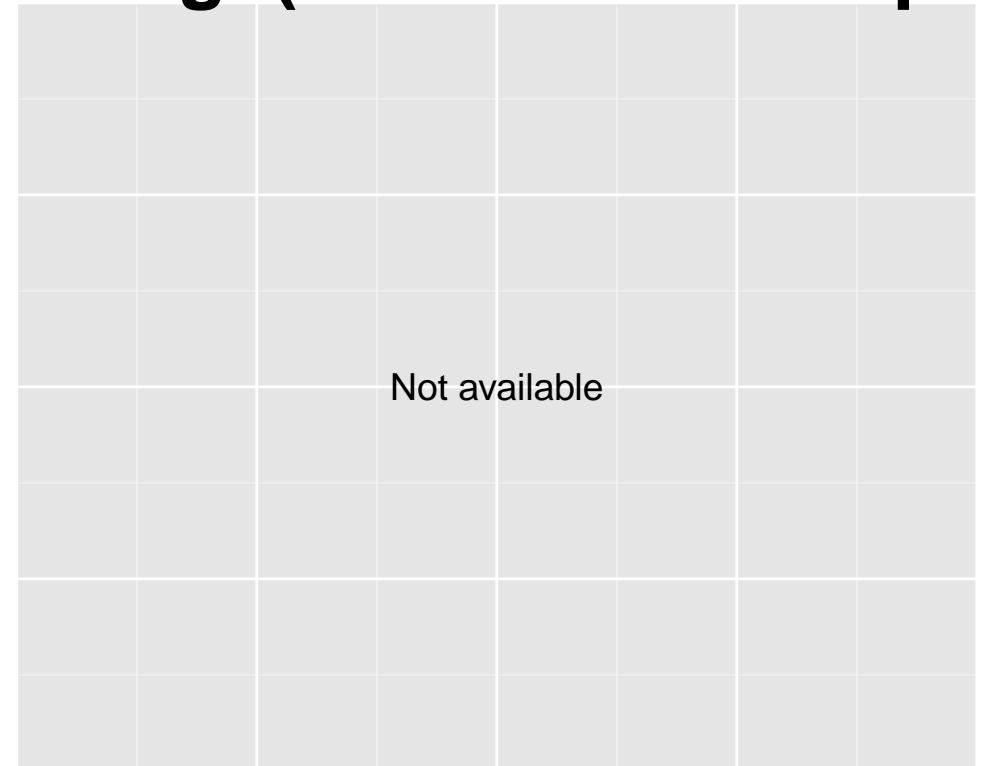

Supplement: Supplementary file 674 [file 1]

## Ndufs2

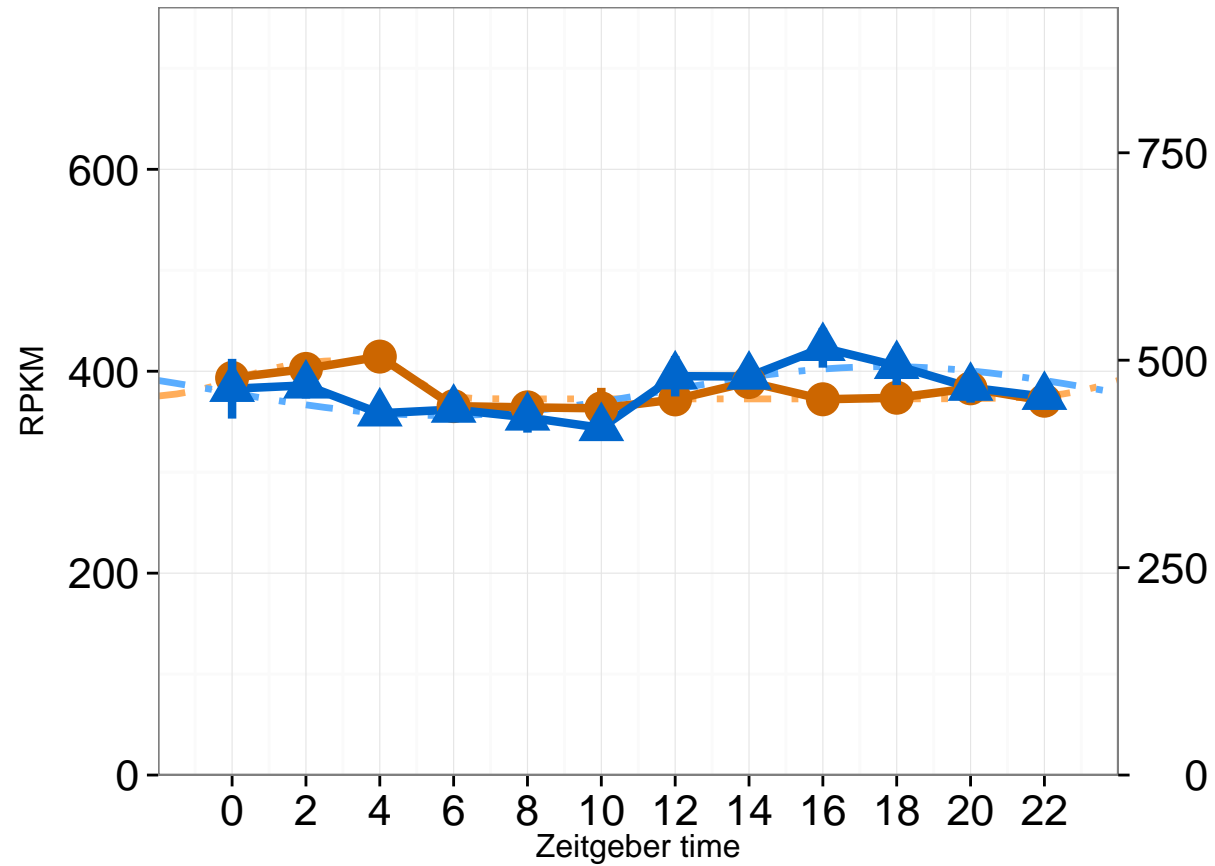

## Ndufs2

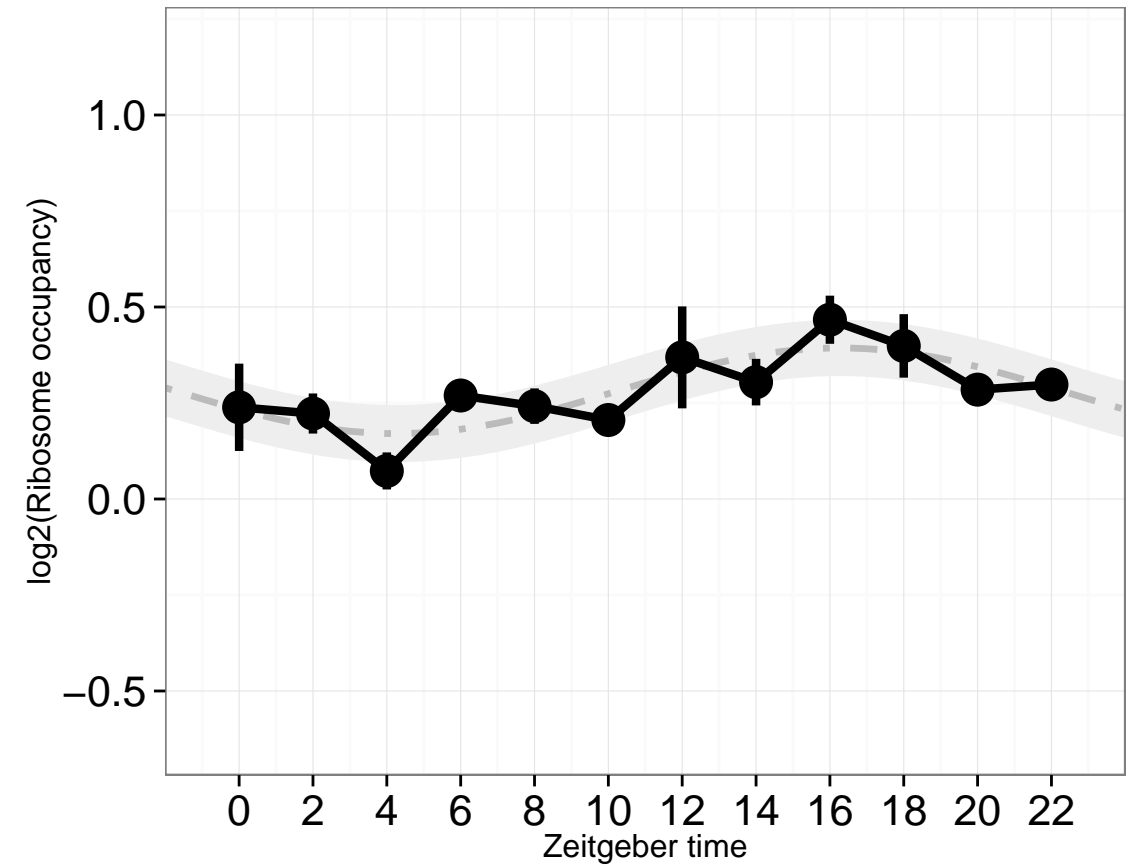

Supplement: Supplementary file 675 [file 1]

## Sowaha

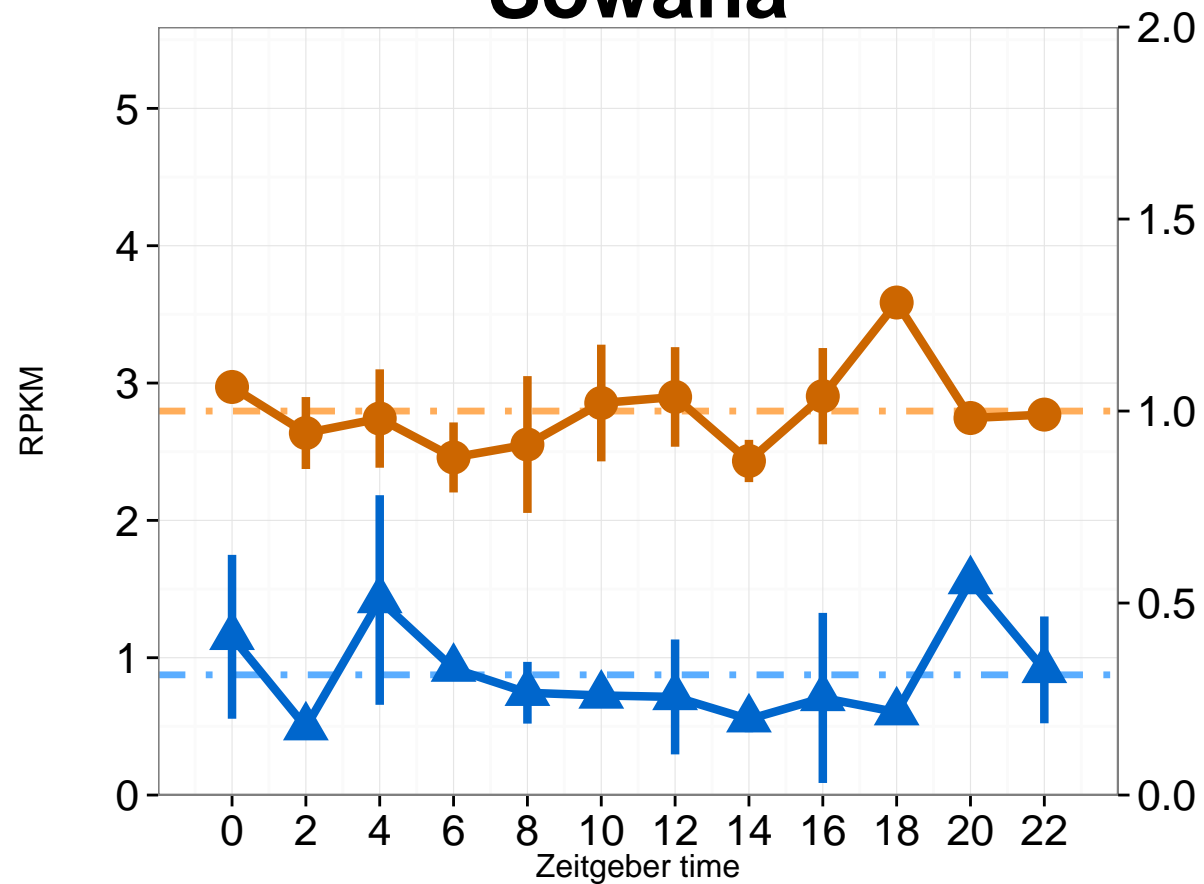

## Sowaha

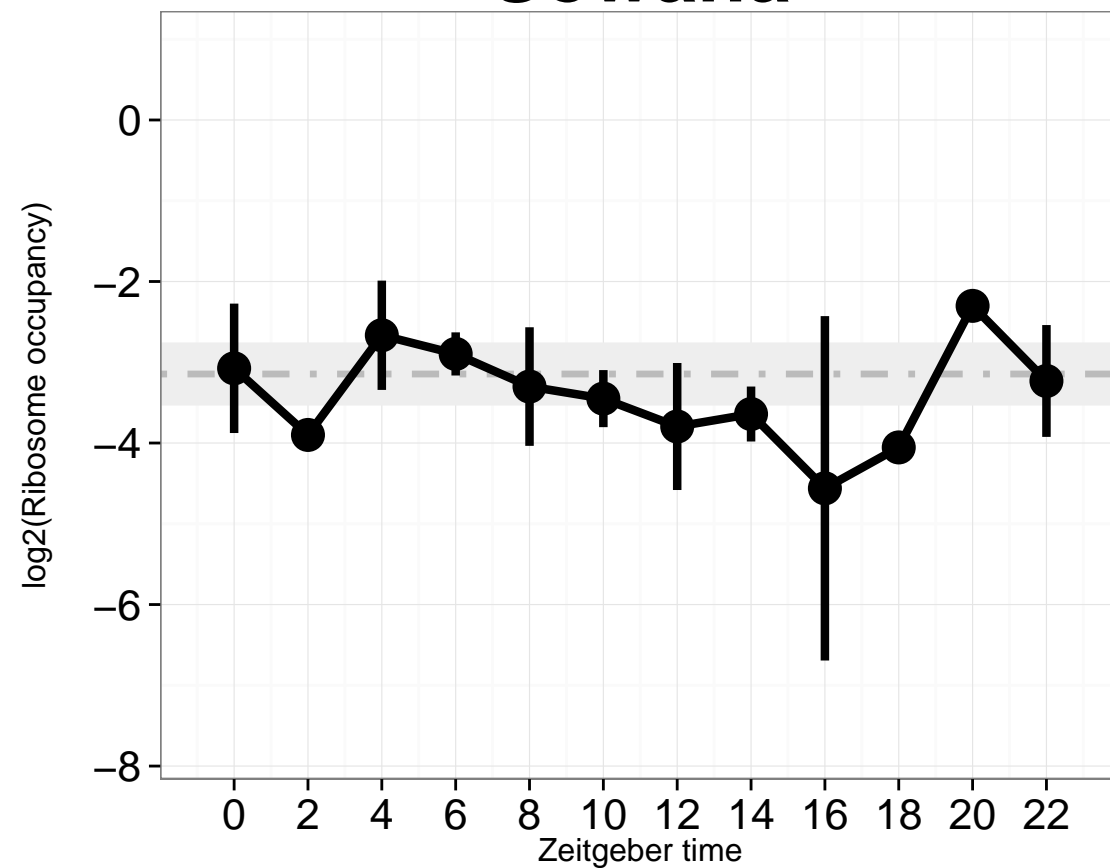

Supplement: Supplementary file 676 [file 1]

## Gpihbp1

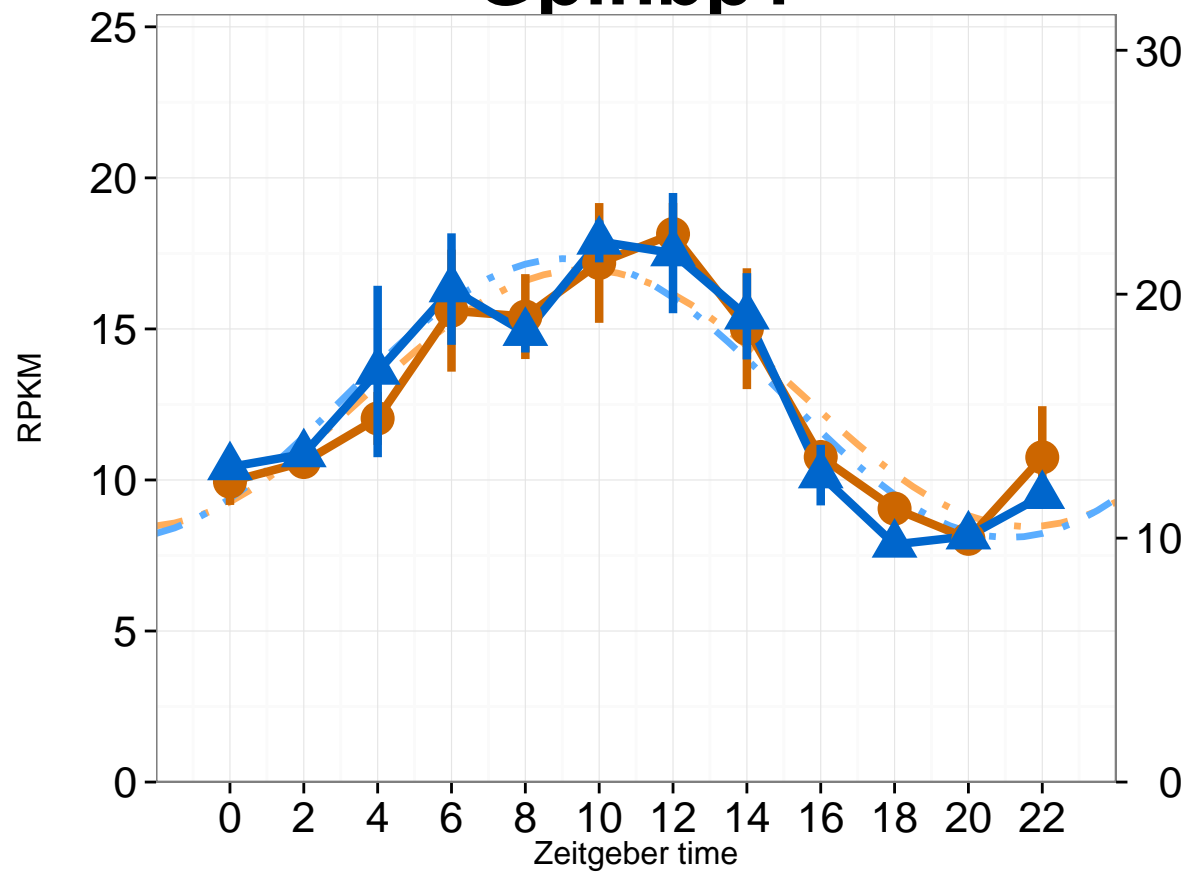

## Gpihbp1

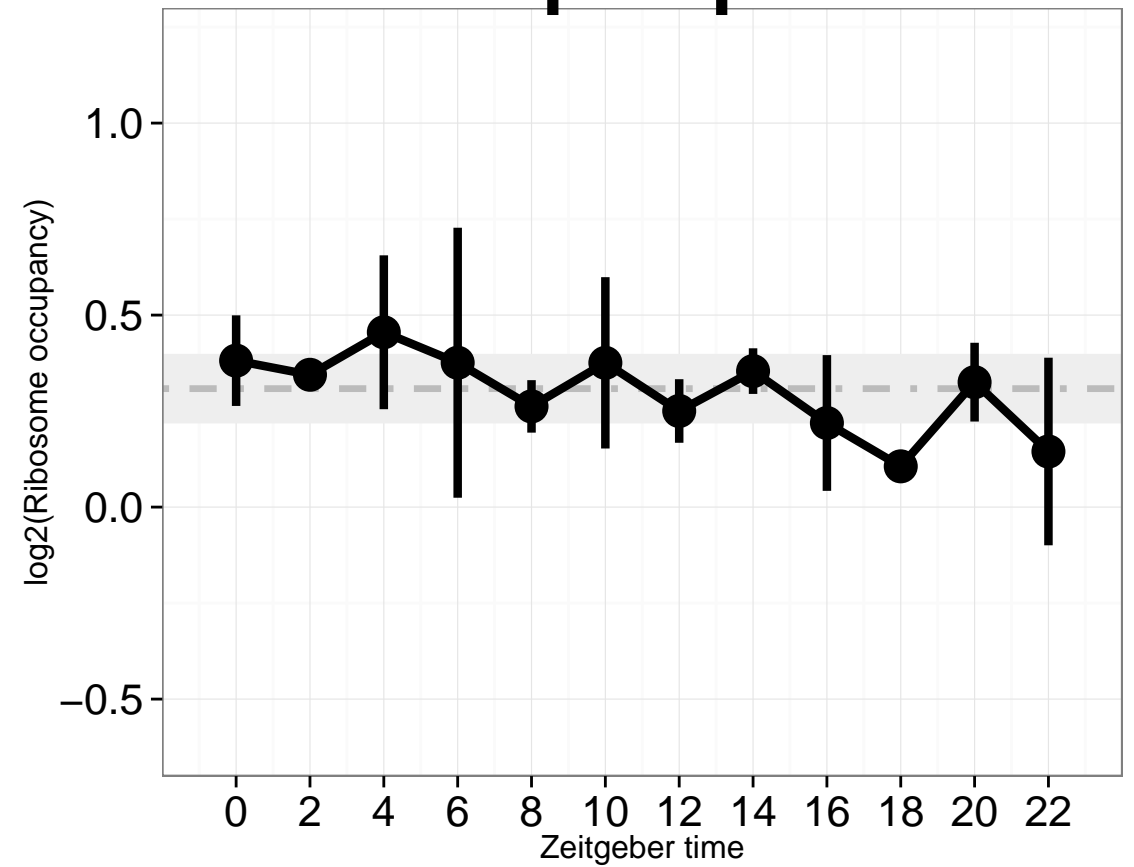

Supplement: Supplementary file 677 [file 1]

## Rmi1

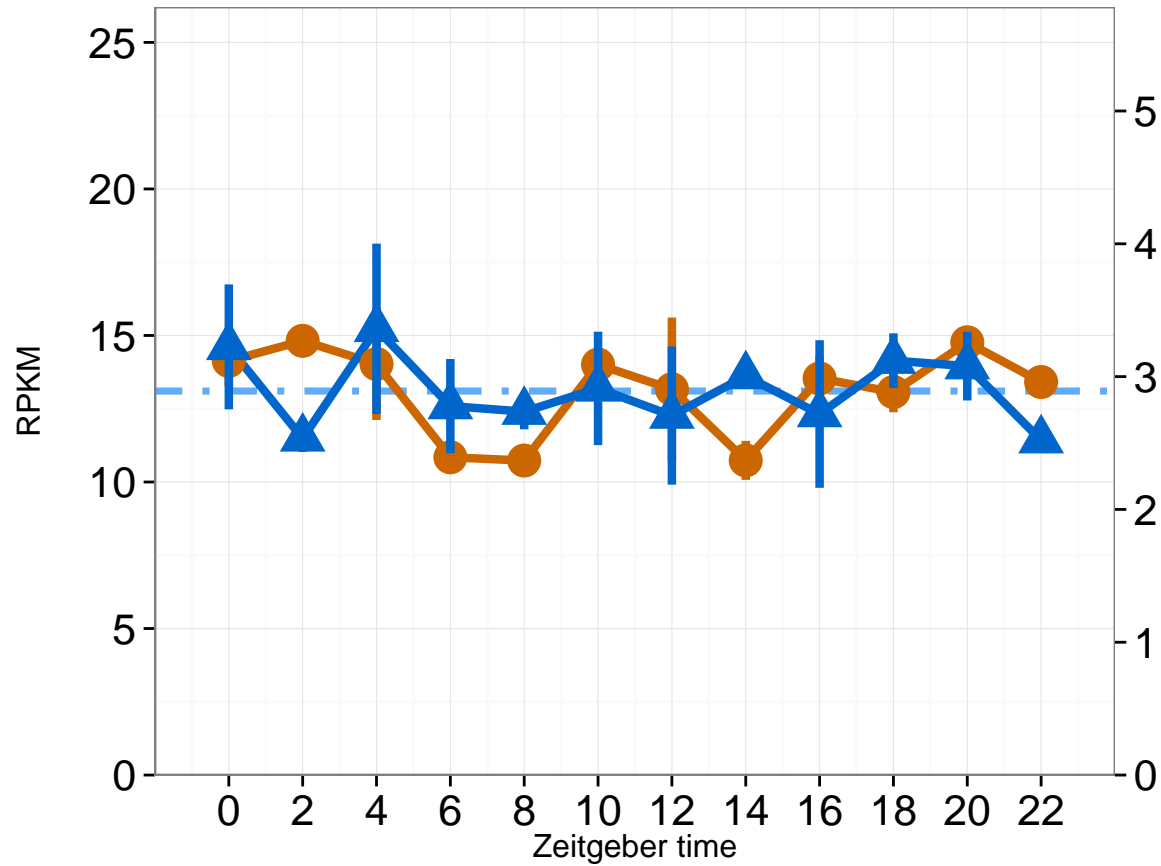

## Rmi1

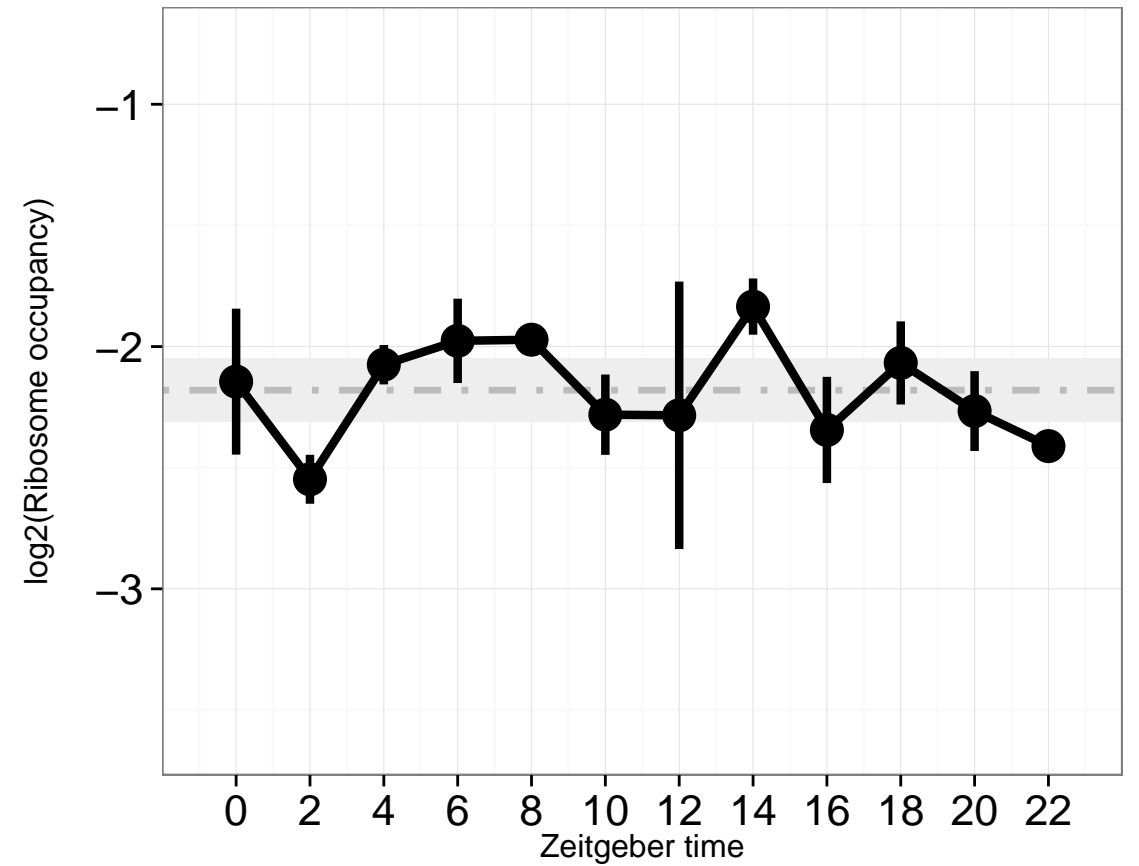

Supplement: Supplementary file 678 [file 1]

# Erdr1

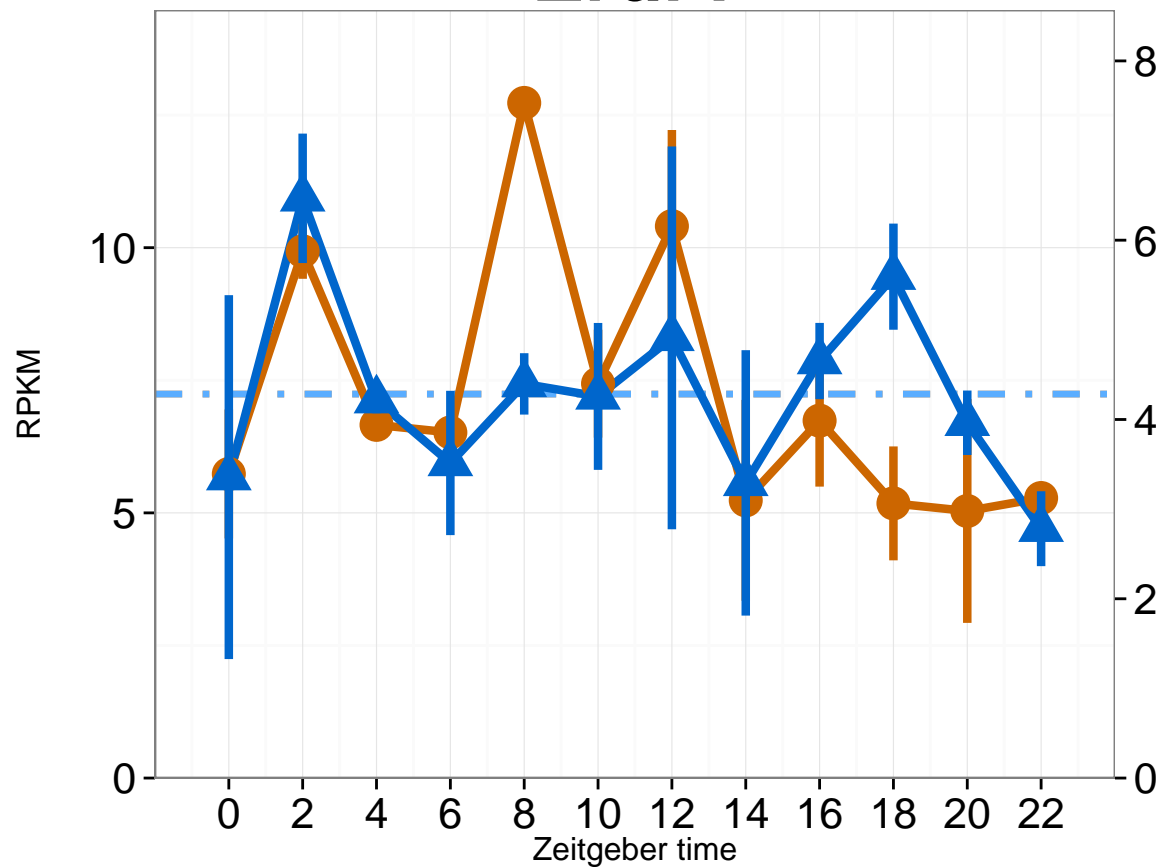

# Erdr1

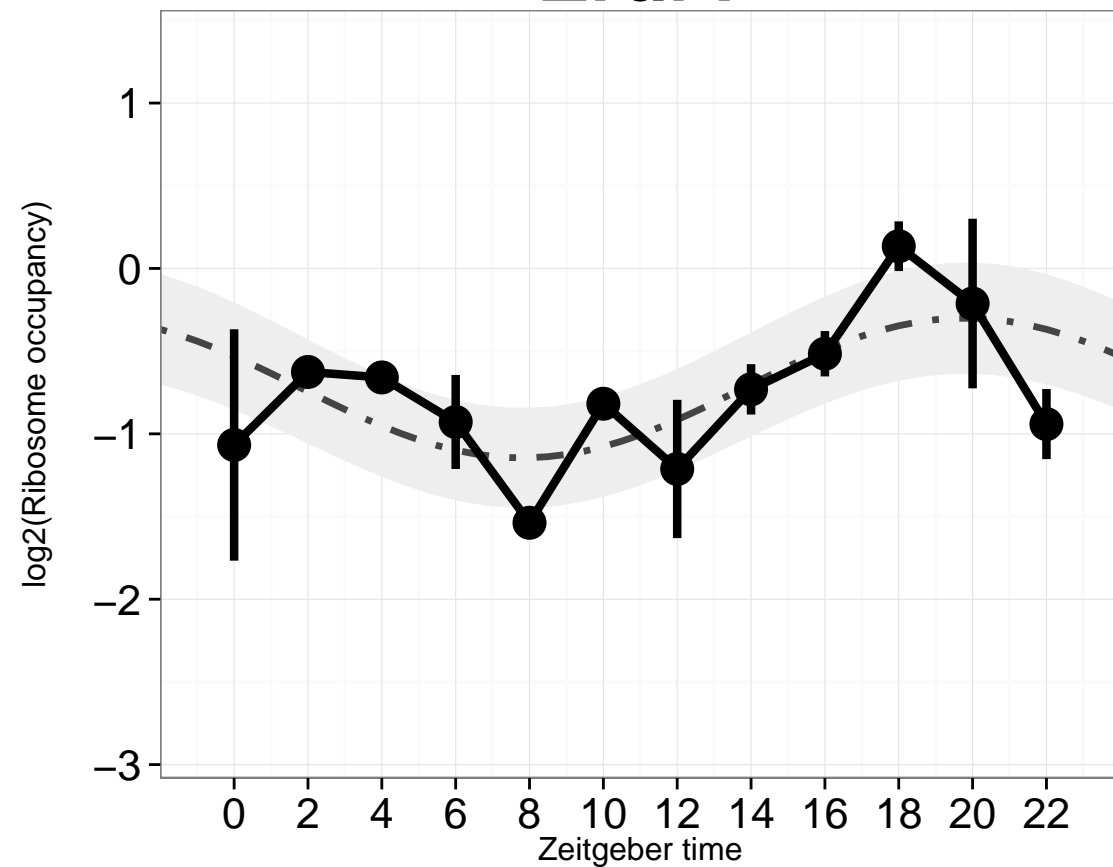

Supplement: Supplementary file 679 [file 1]

# ltpk1

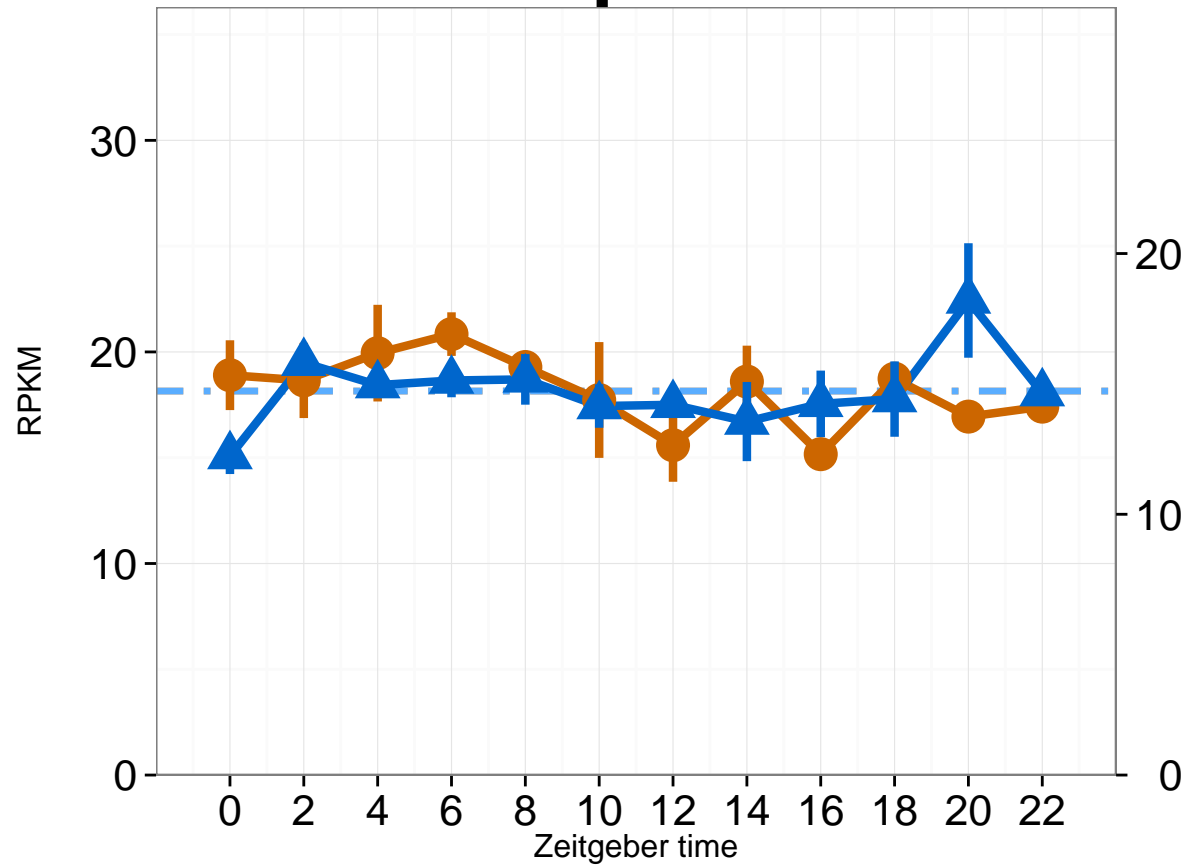

# ltpk1

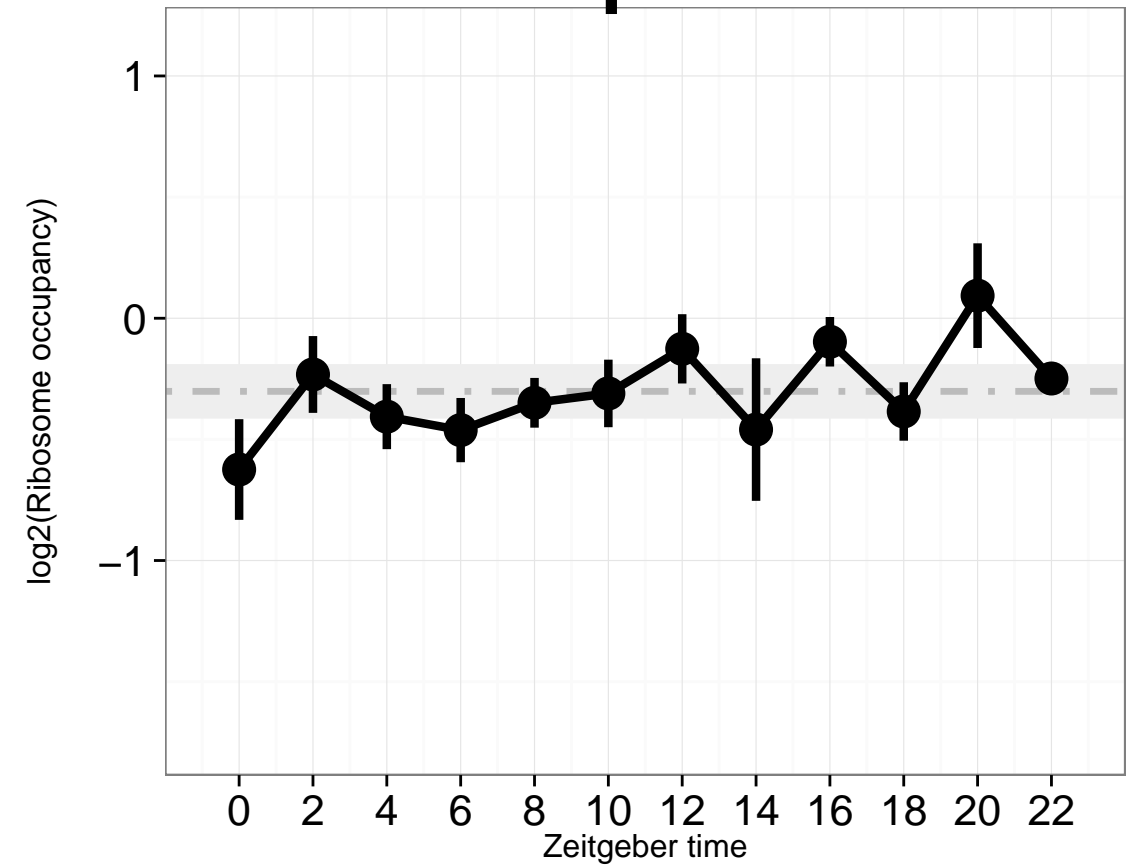

Supplement: Supplementary file 680 [file 1]

## Tmem213

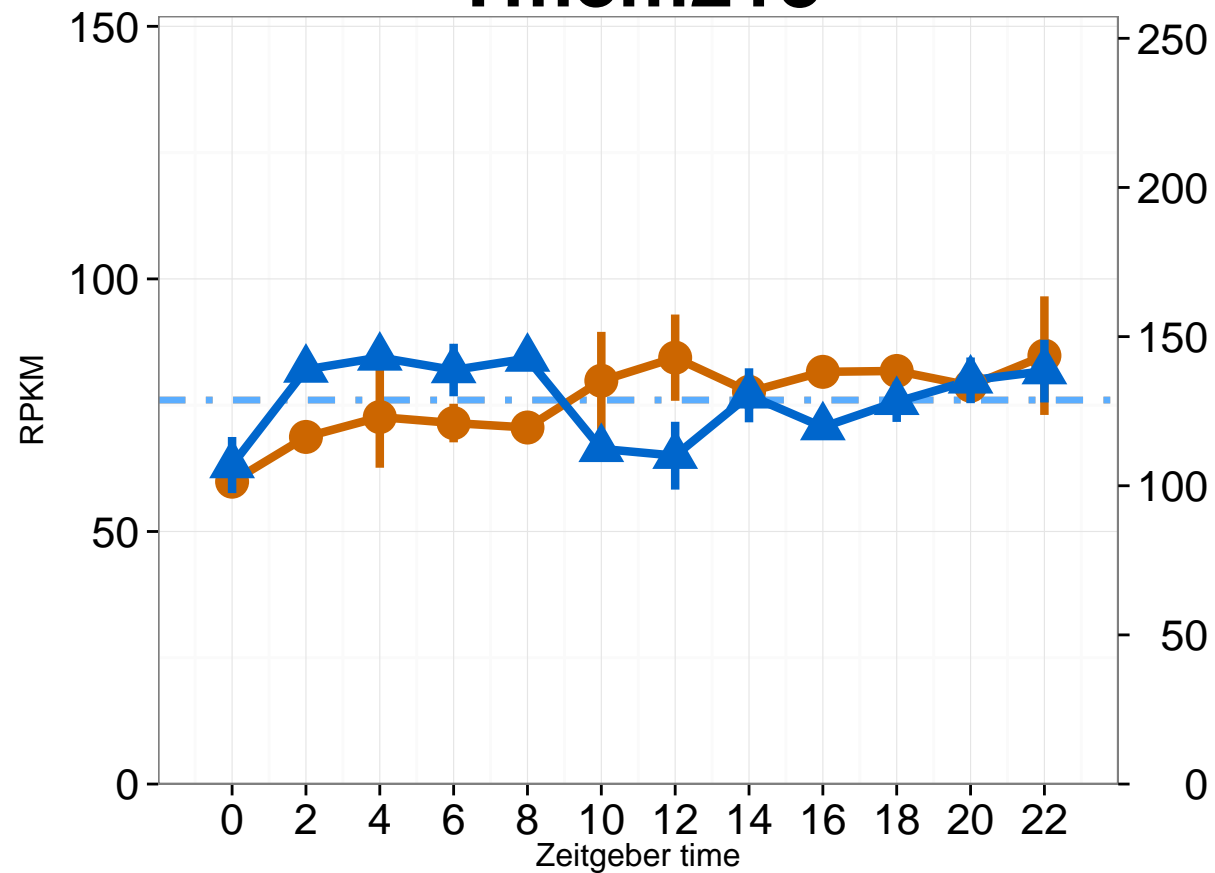

## Tmem213

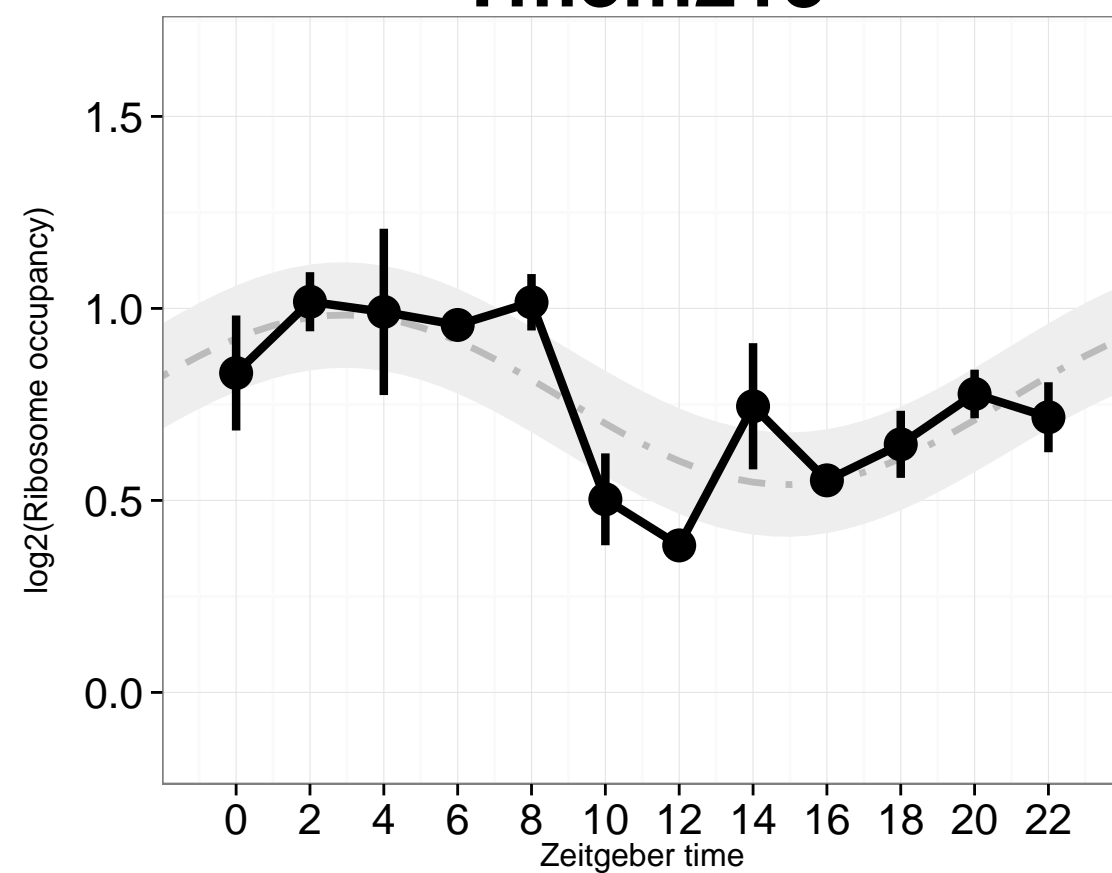

Supplement: Supplementary file 681 [file 1]

## Alkbh1

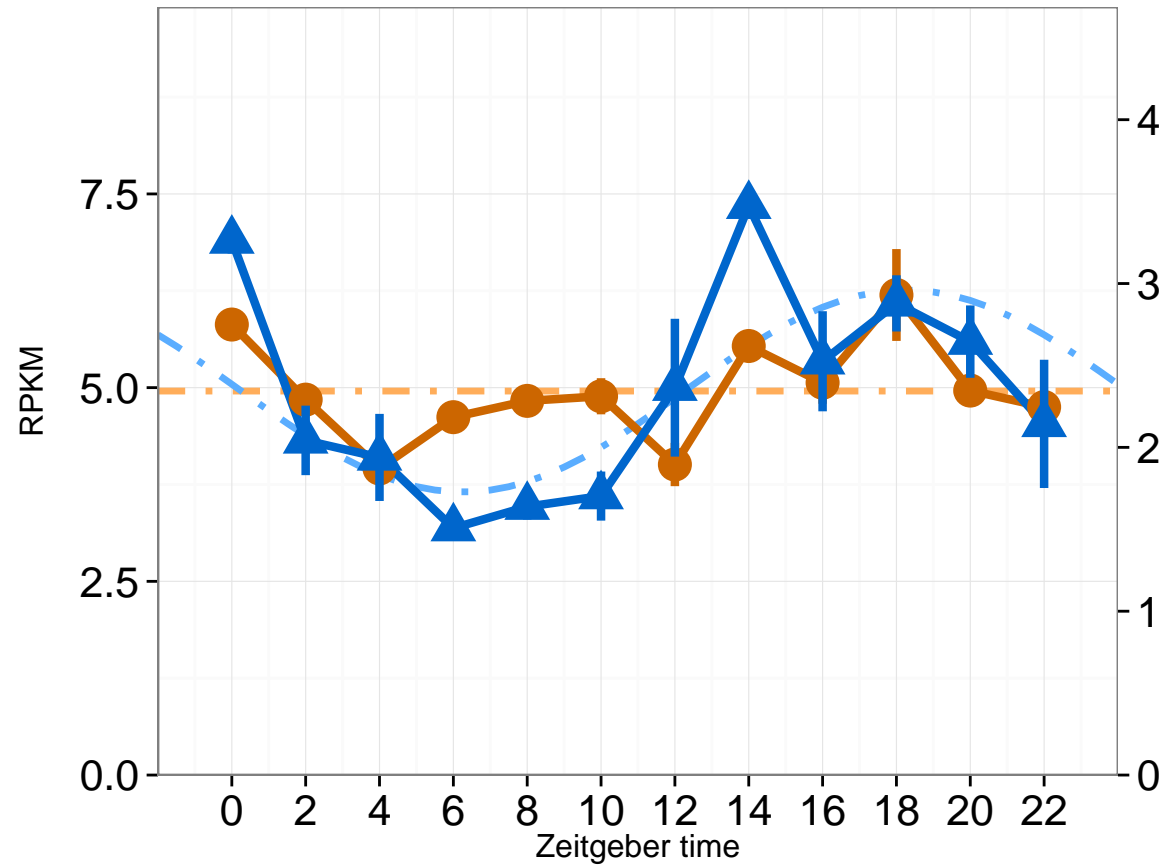

## Alkbh1

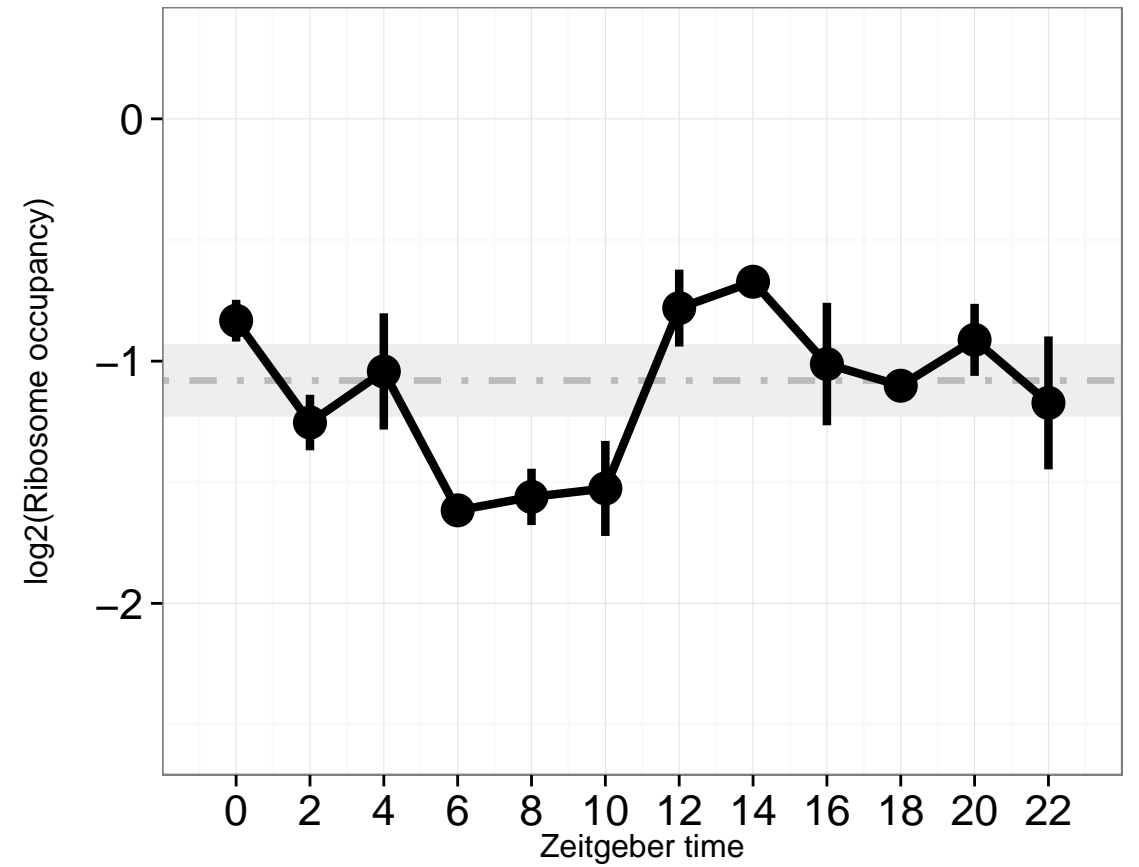

Supplement: Supplementary file 682 [file 1]

## Rnf215

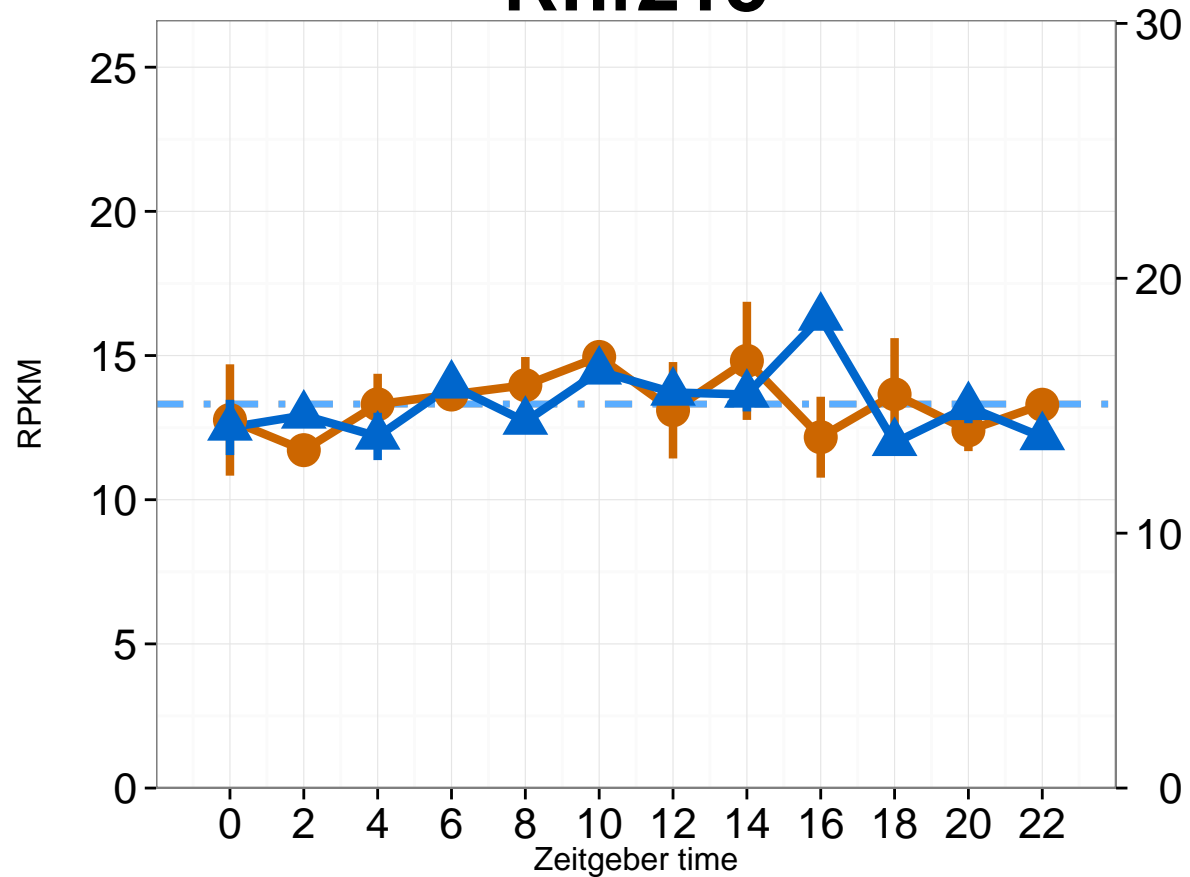

## Rnf215

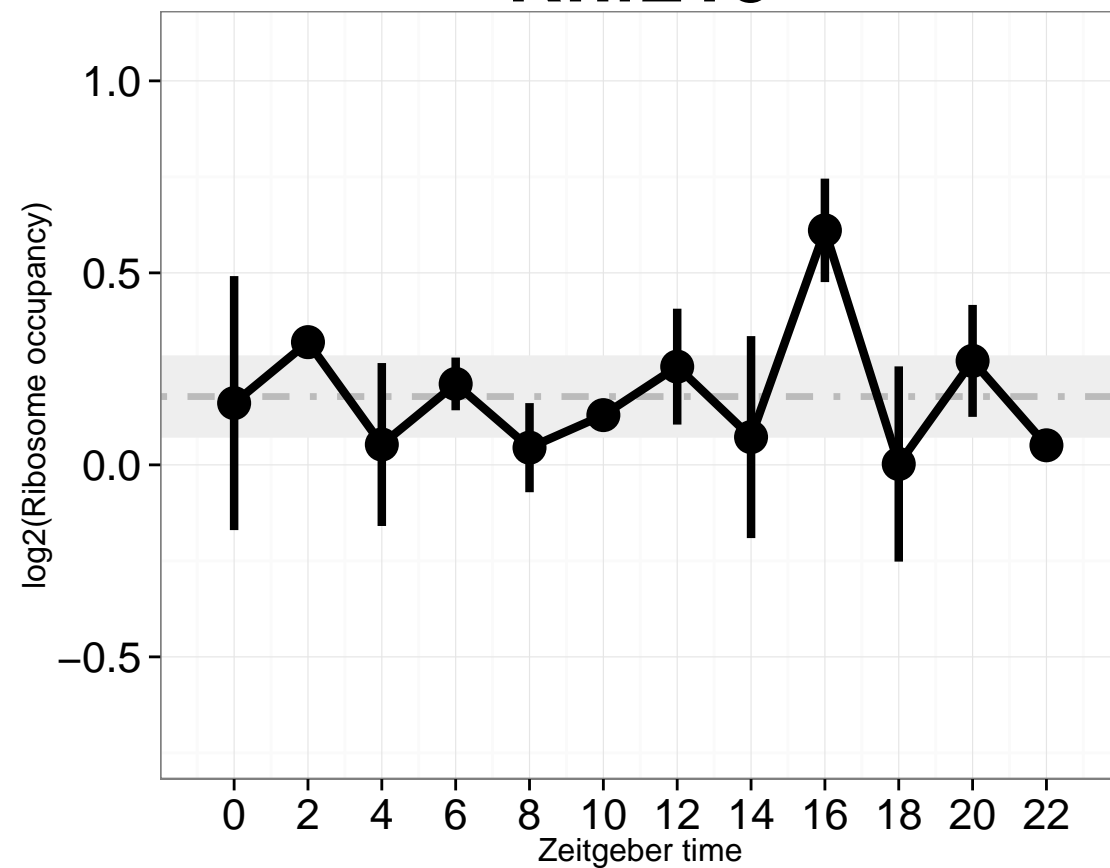

Supplement: Supplementary file 683 [file 1]

# Wrap73

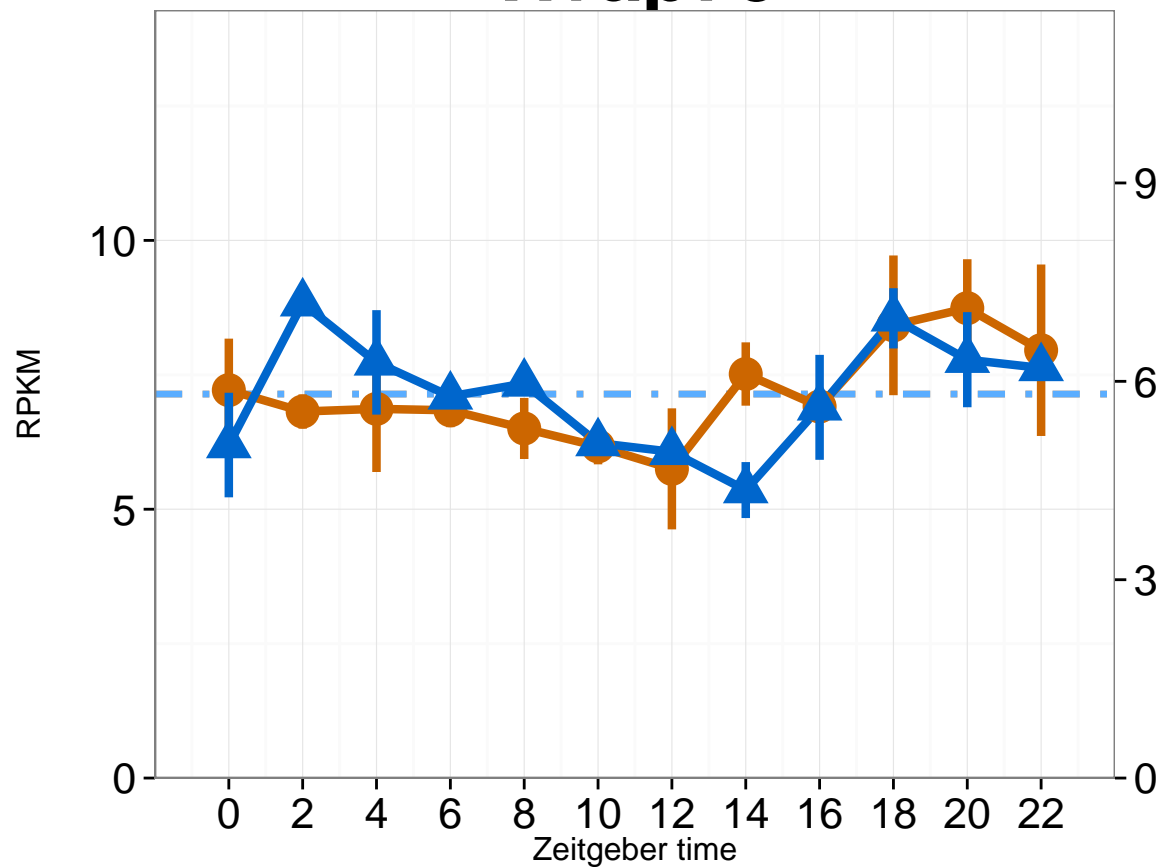

# Wrap73

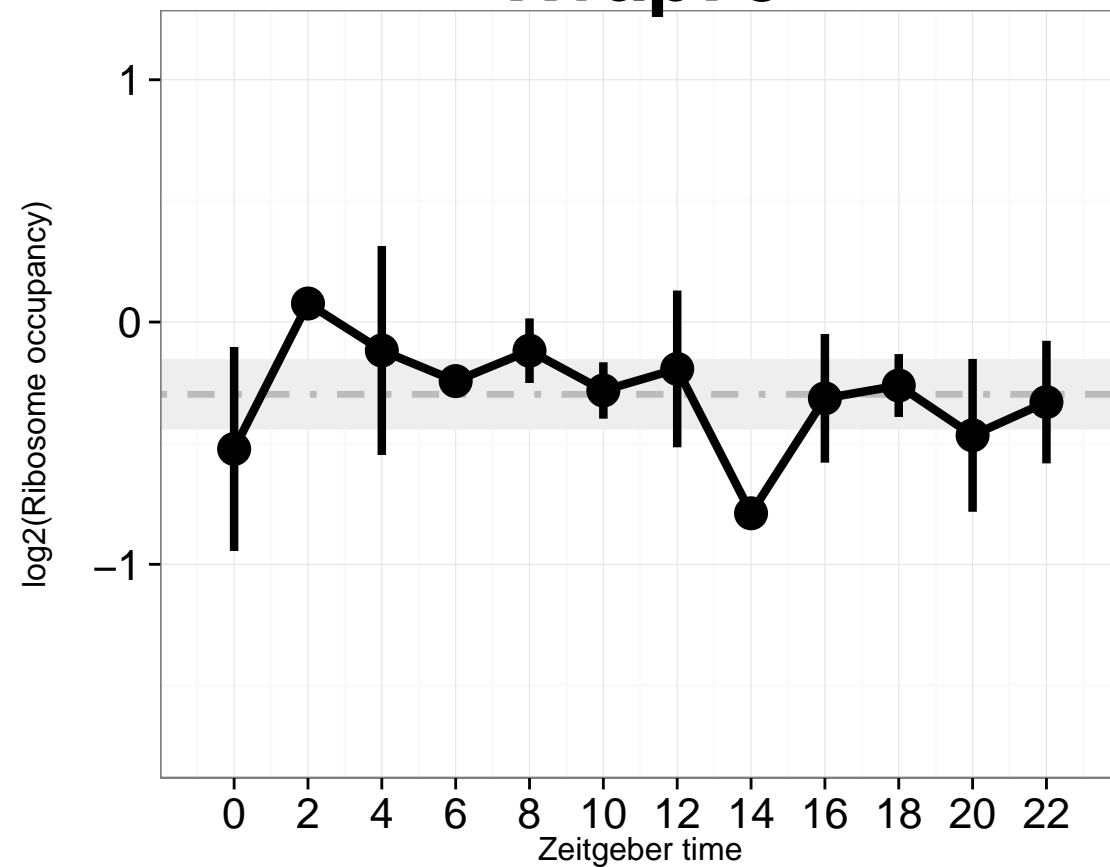

Supplement: Supplementary file 684 [file 1]

# Slc22a22

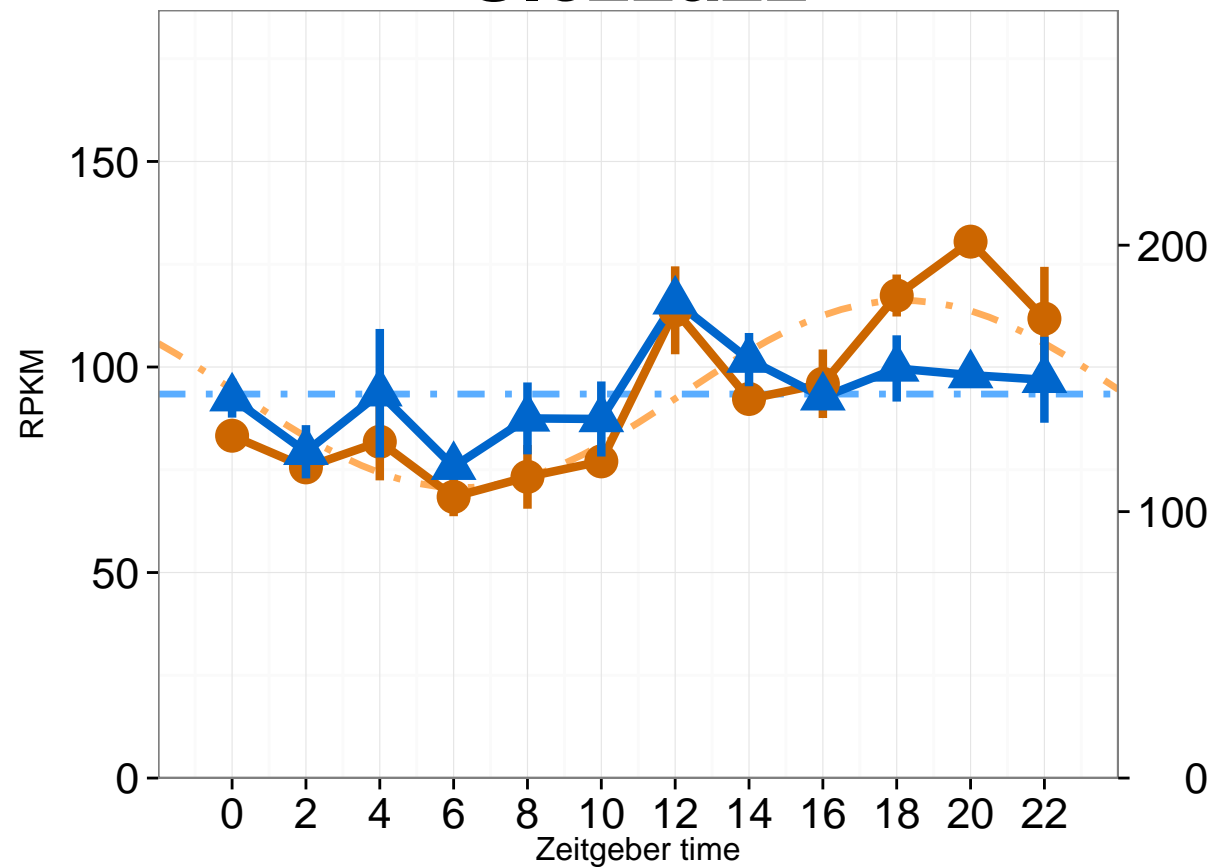

# Slc22a22

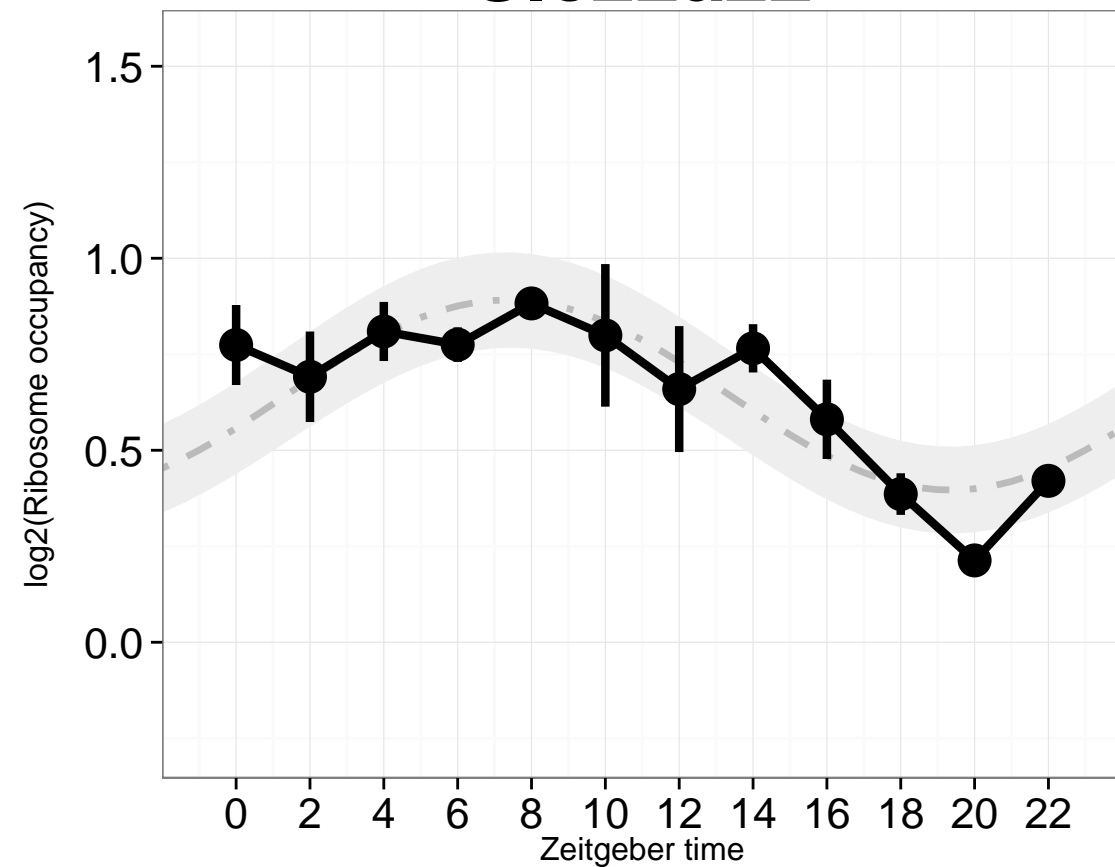

Supplement: Supplementary file 685 [file 1]

# Lzts3

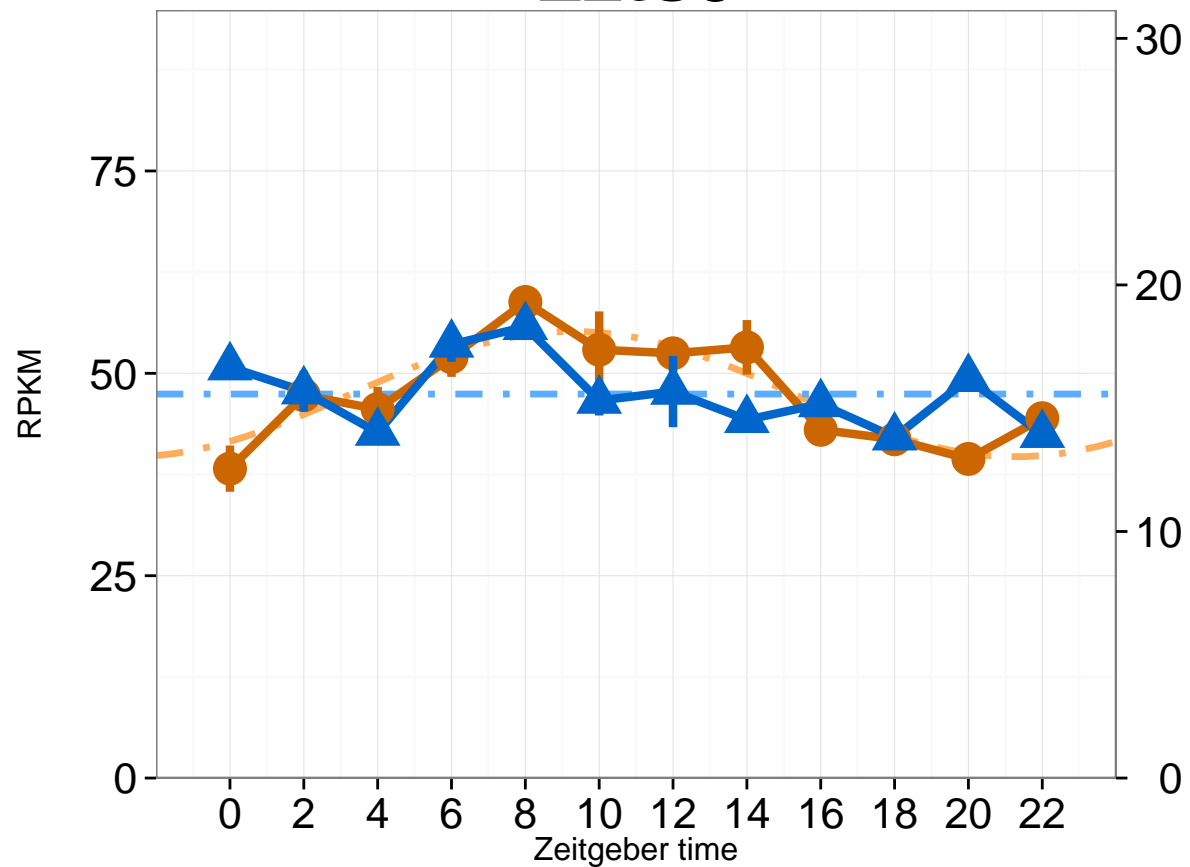

# Lzts3

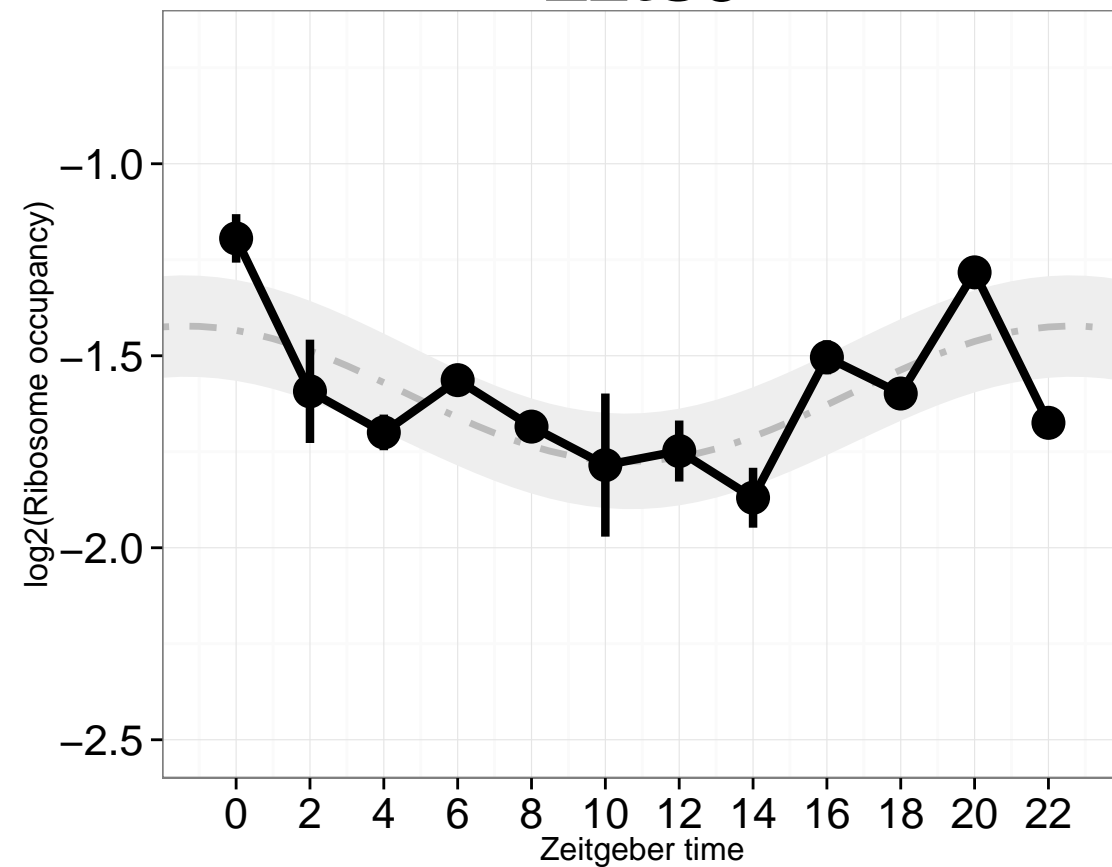

Supplement: Supplementary file 686 [file 1]

# Aqp3

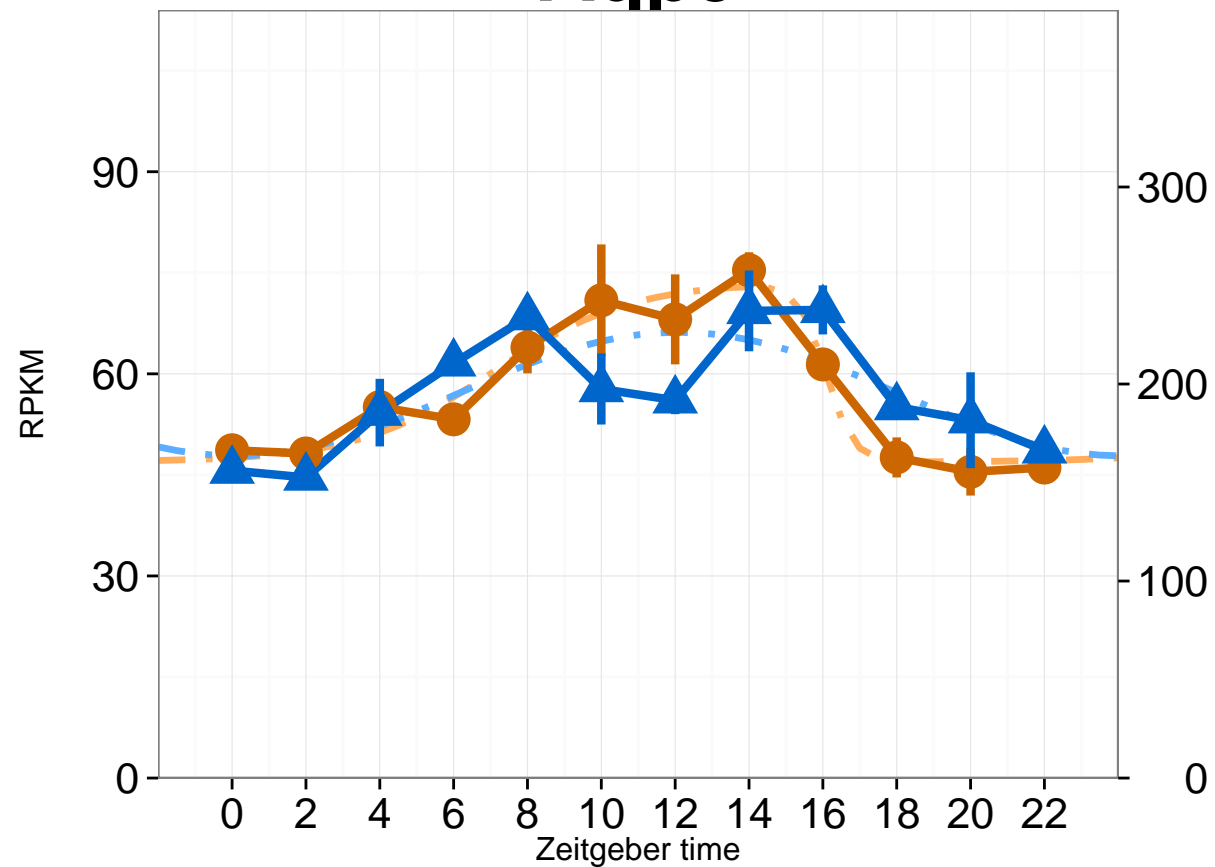

# Aqp3

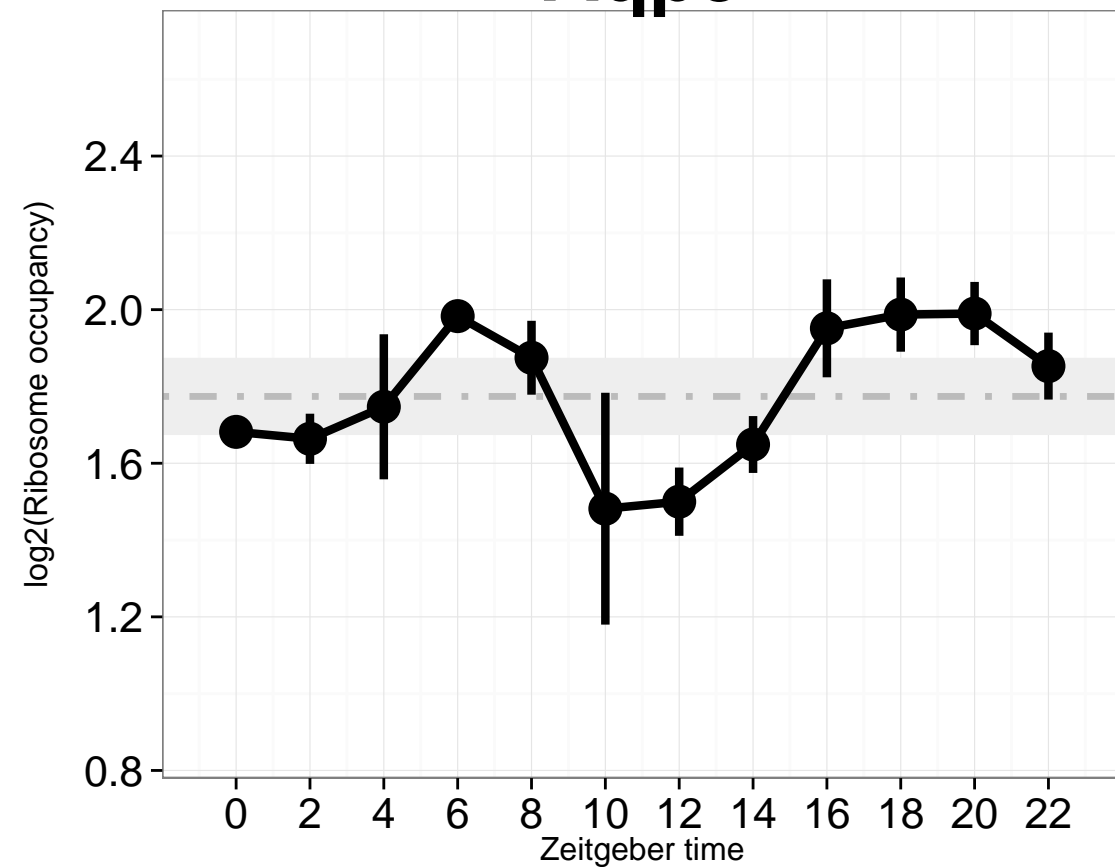

Supplement: Supplementary file 687 [file 1]

# Hdgfrp2

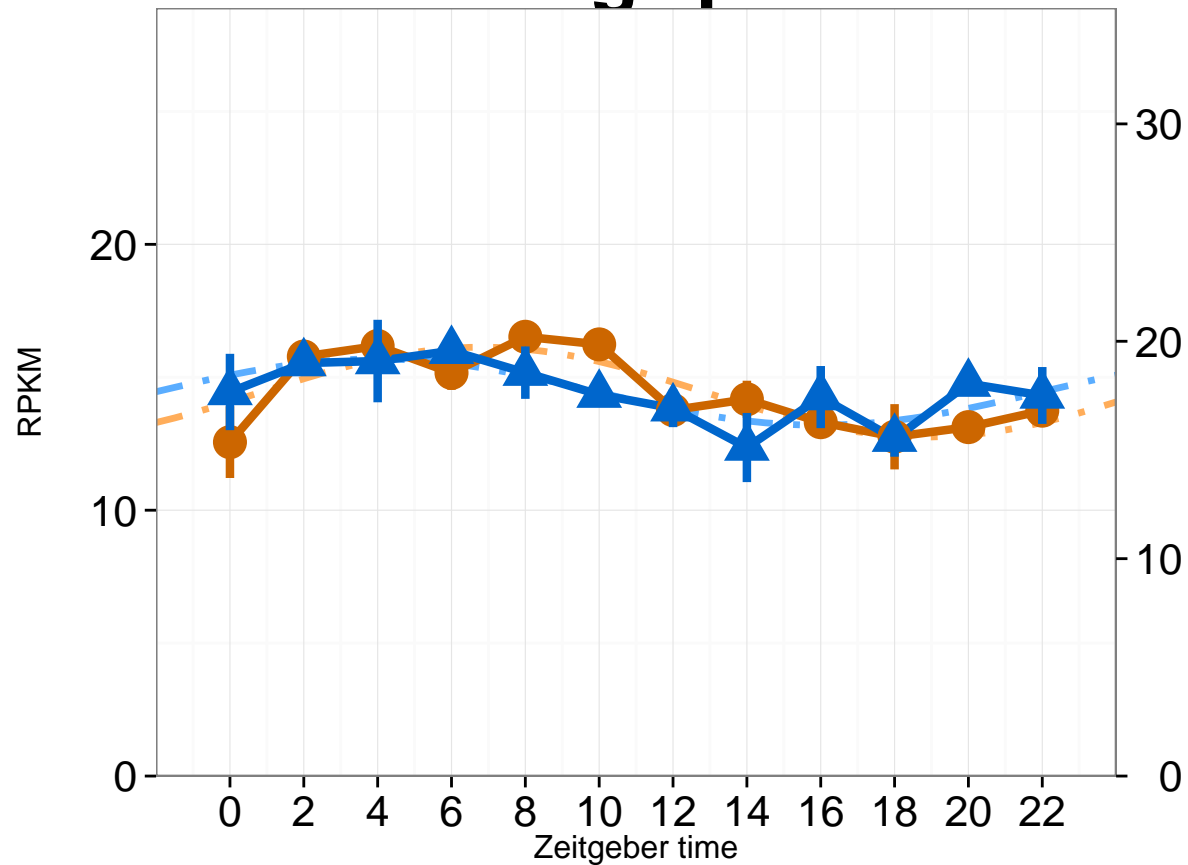

# Hdgfrp2

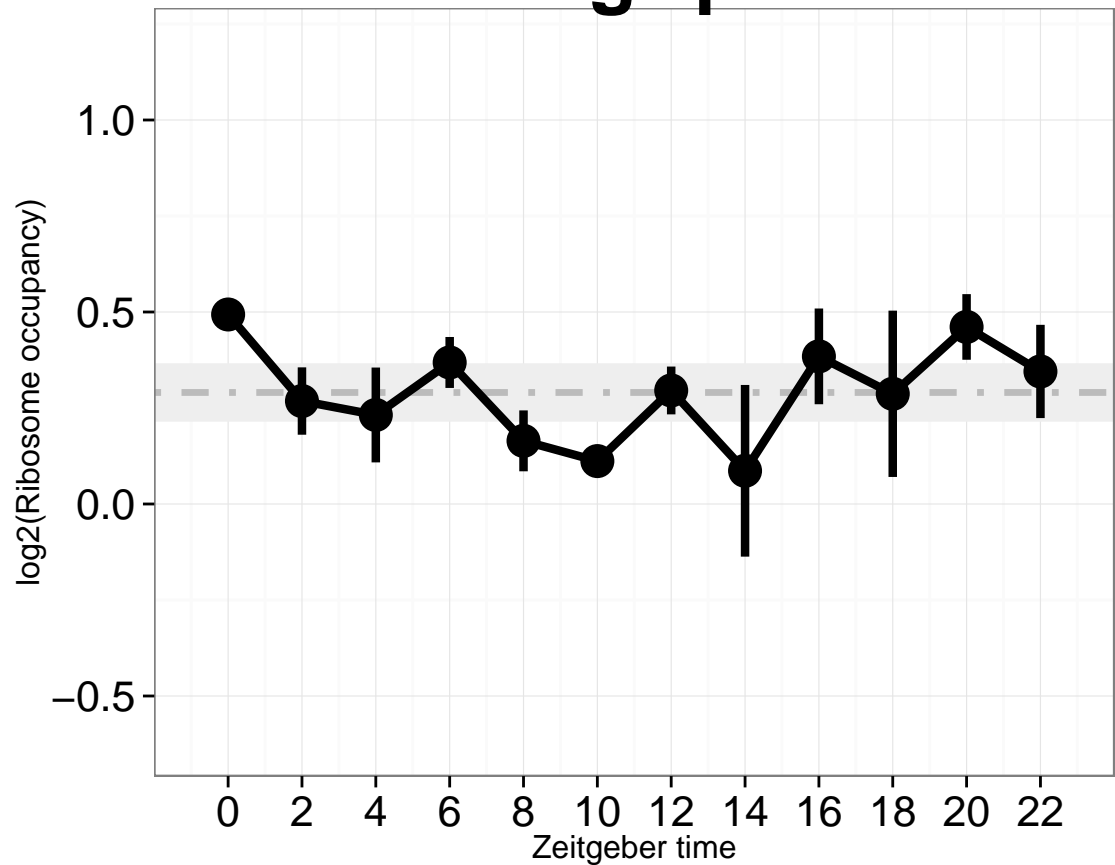

Supplement: Supplementary file 688 [file 1]

# Tpm2

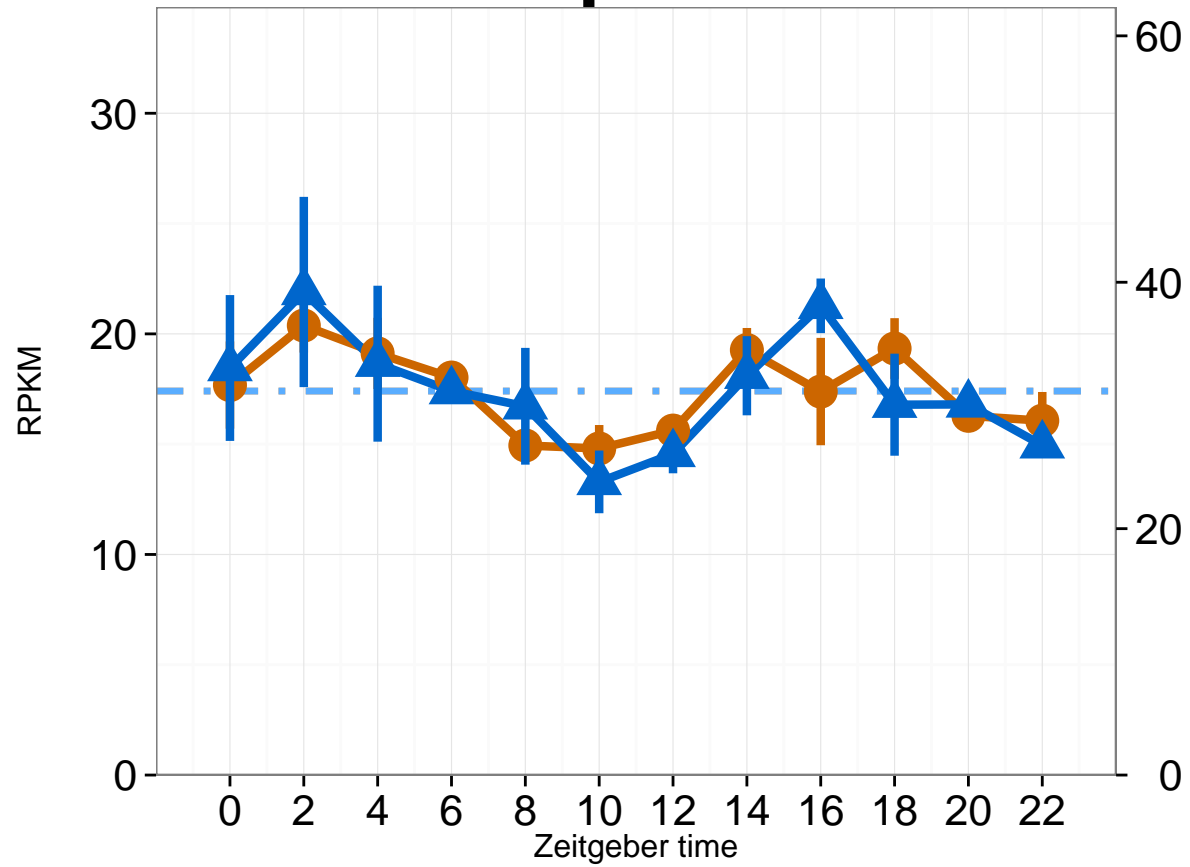

# Tpm2

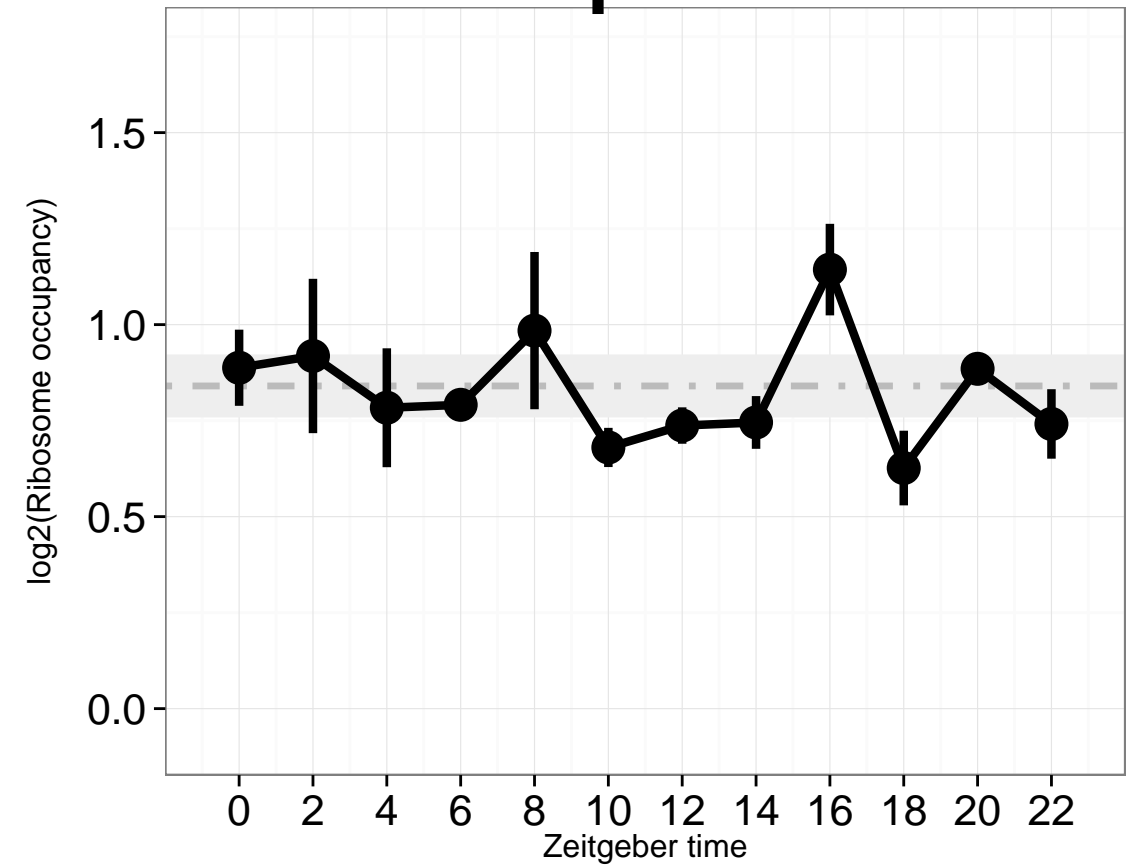

Supplement: Supplementary file 689 [file 1]

## Ildr2

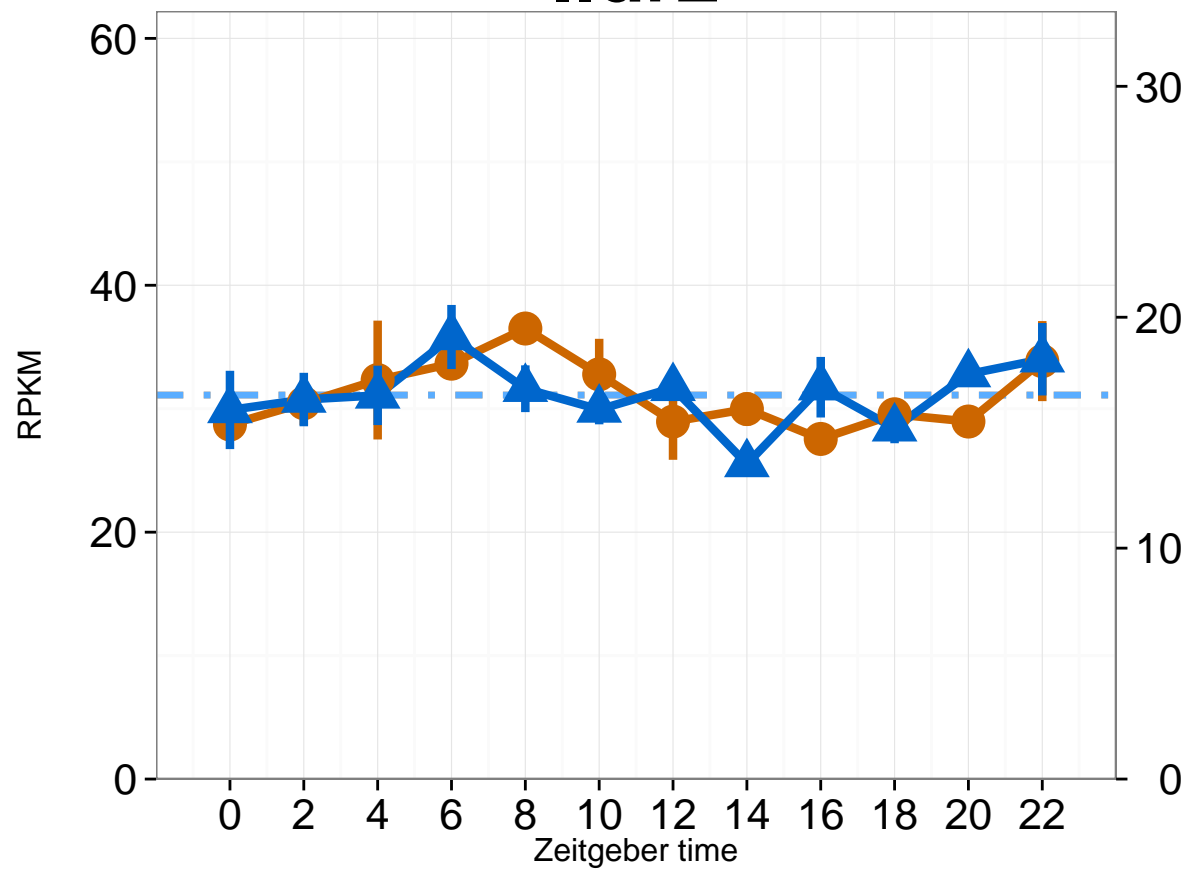

## Ildr2

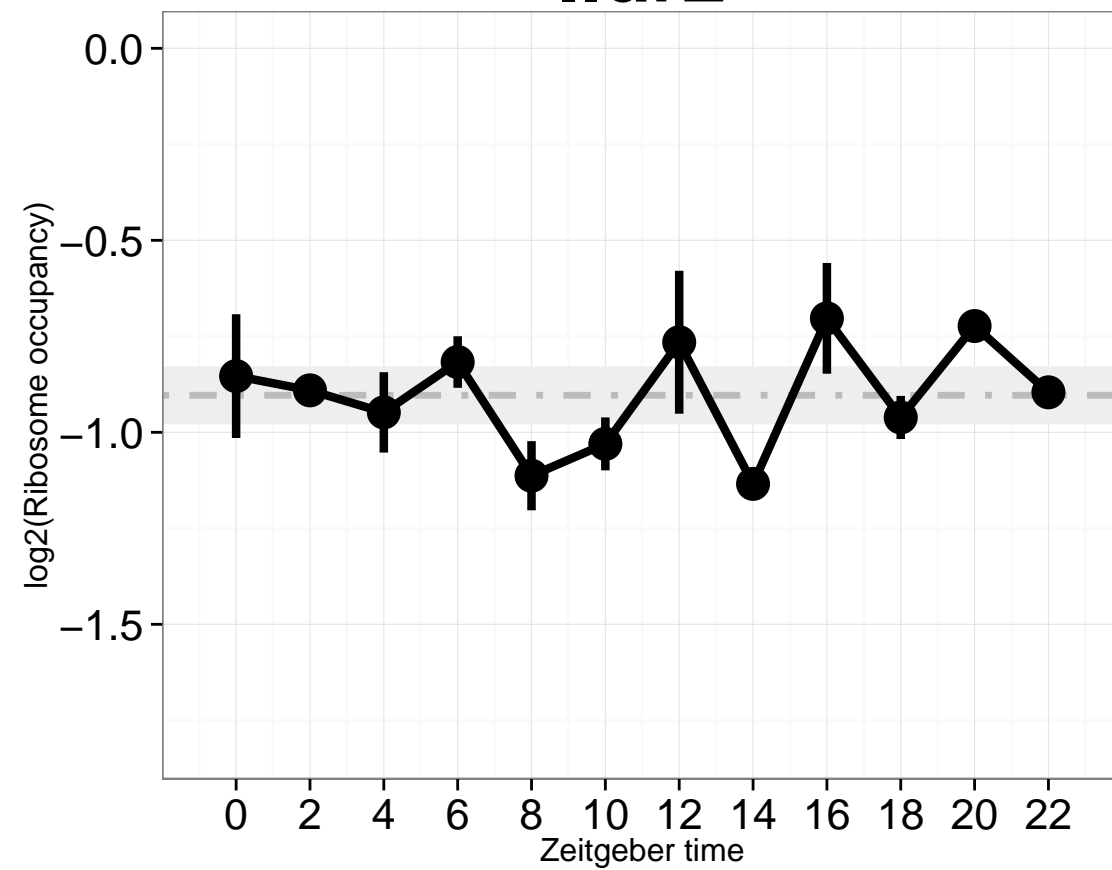

Supplement: Supplementary file 690 [file 1]

# Ddx1

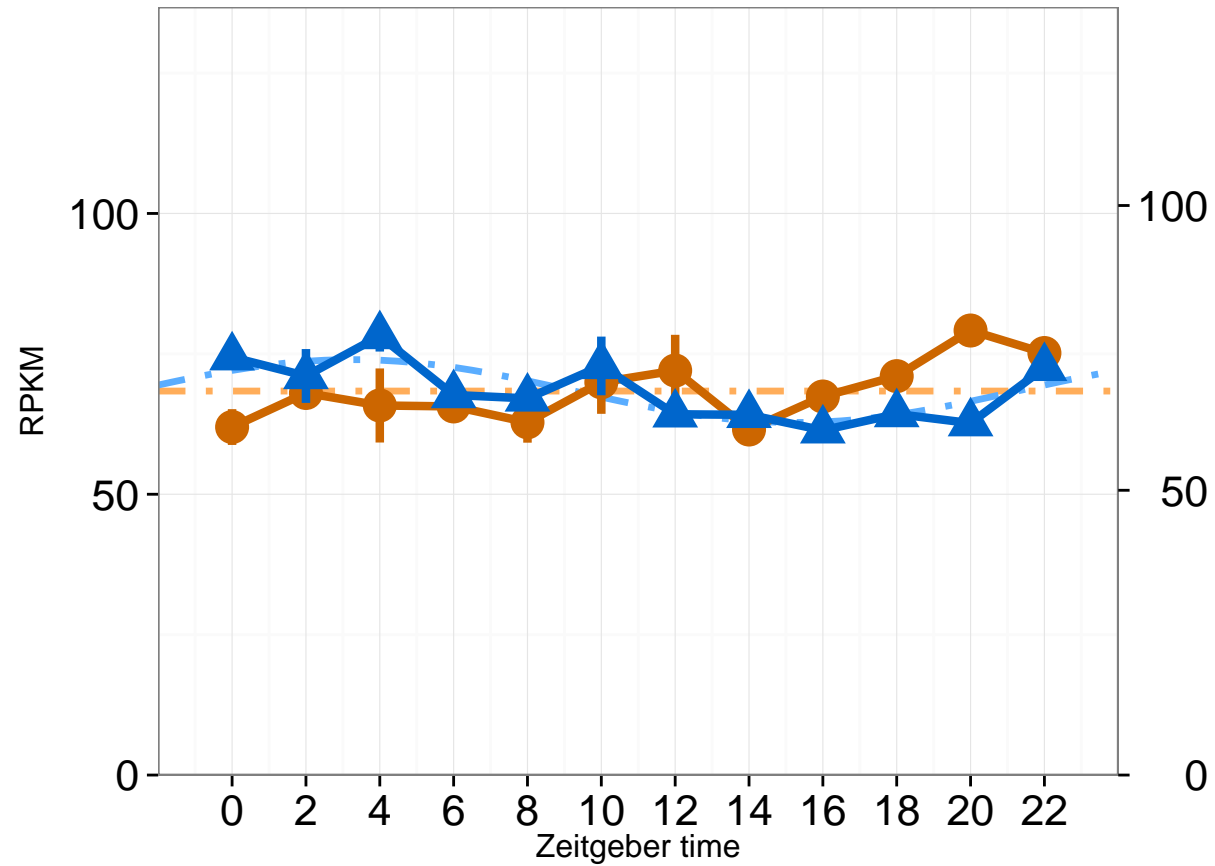

# Ddx1

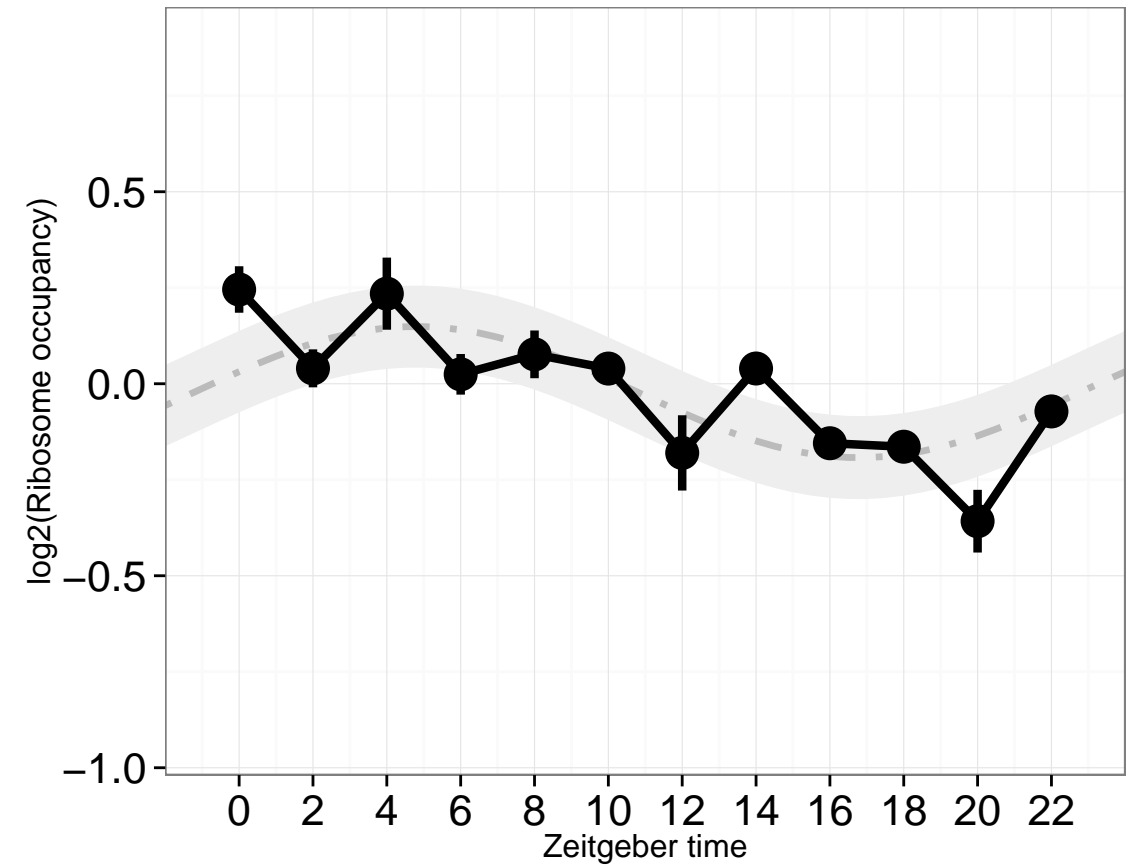

Supplement: Supplementary file 691 [file 1]

# Tymp

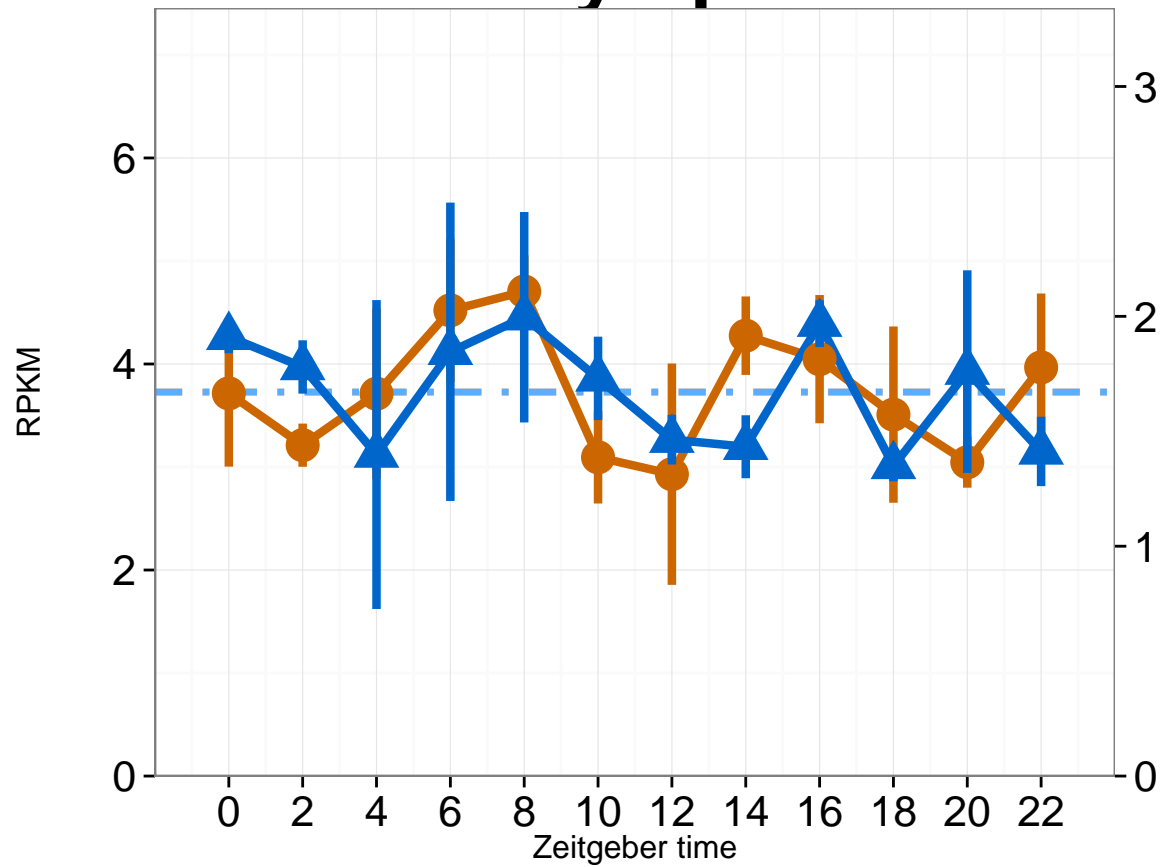

# Tymp

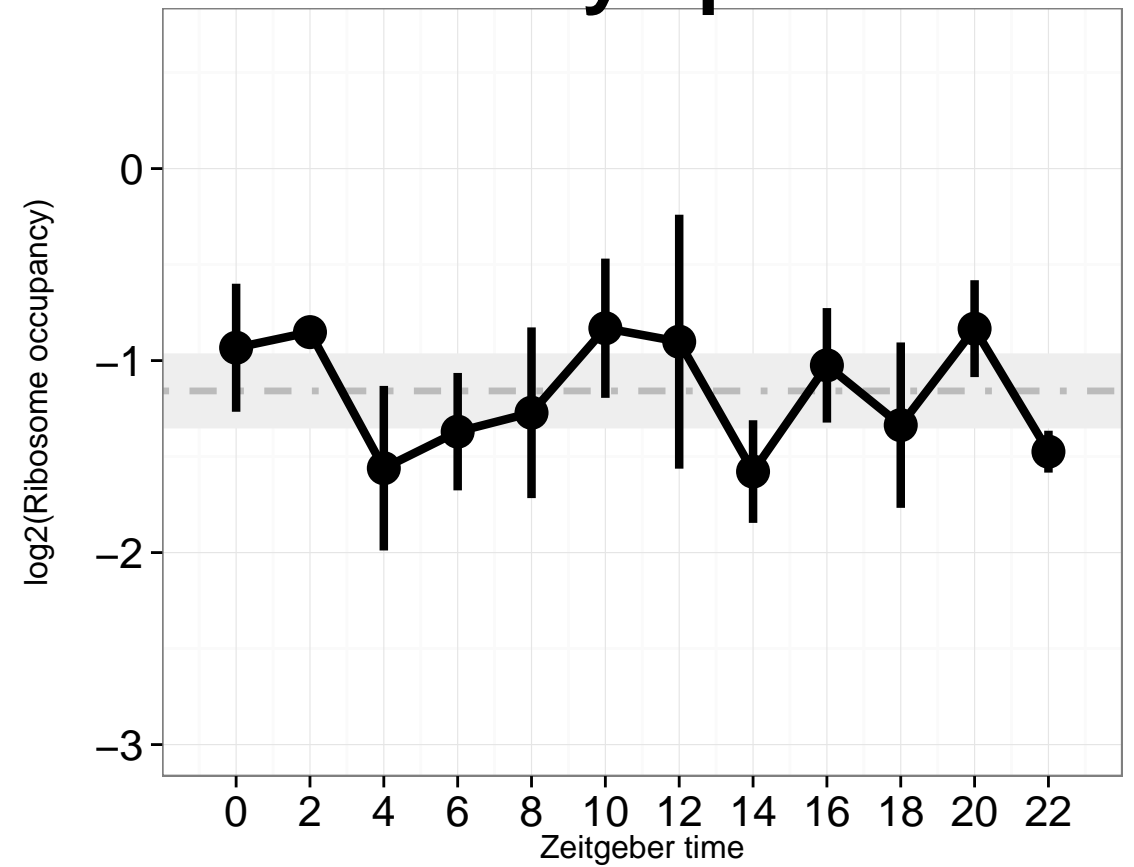

Supplement: Supplementary file 692 [file 1]

## Arhgdia

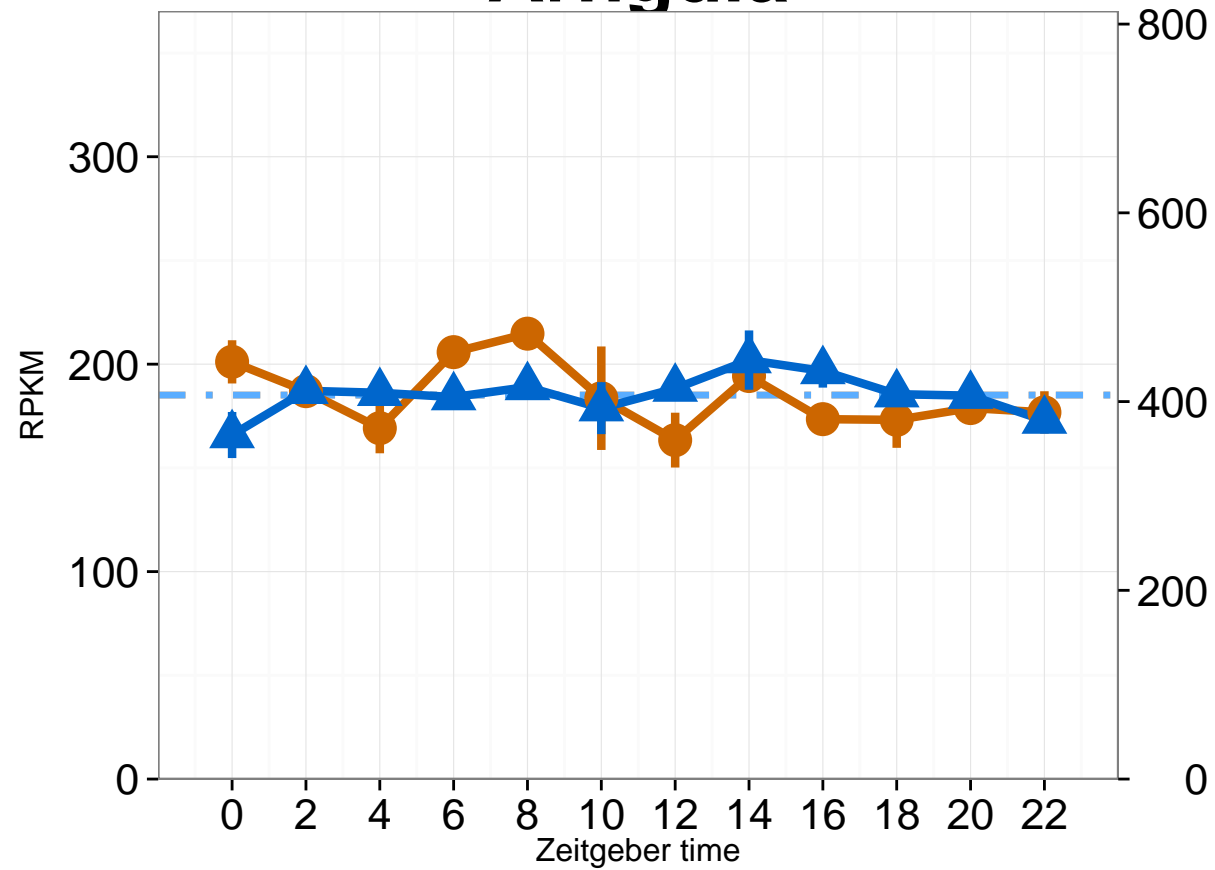

## Arhgdia

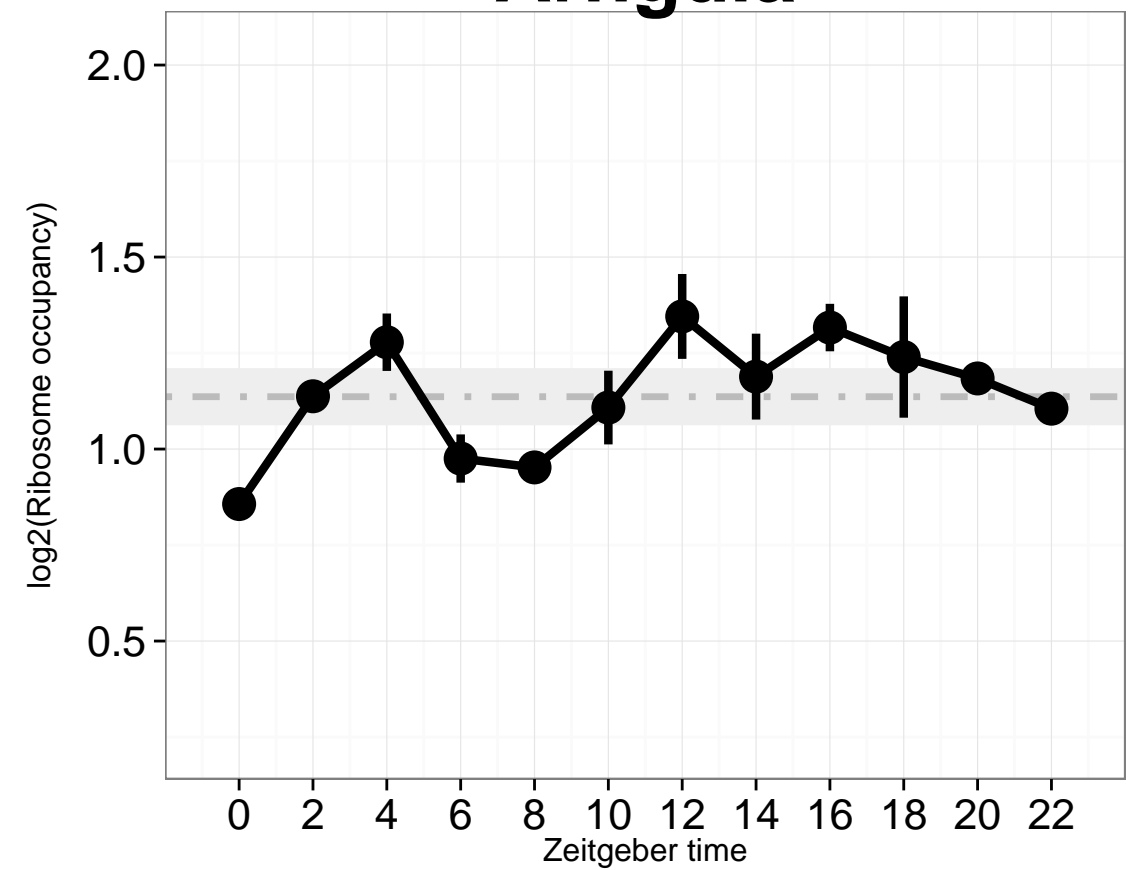

Supplement: Supplementary file 693 [file 1]

## Gstm5

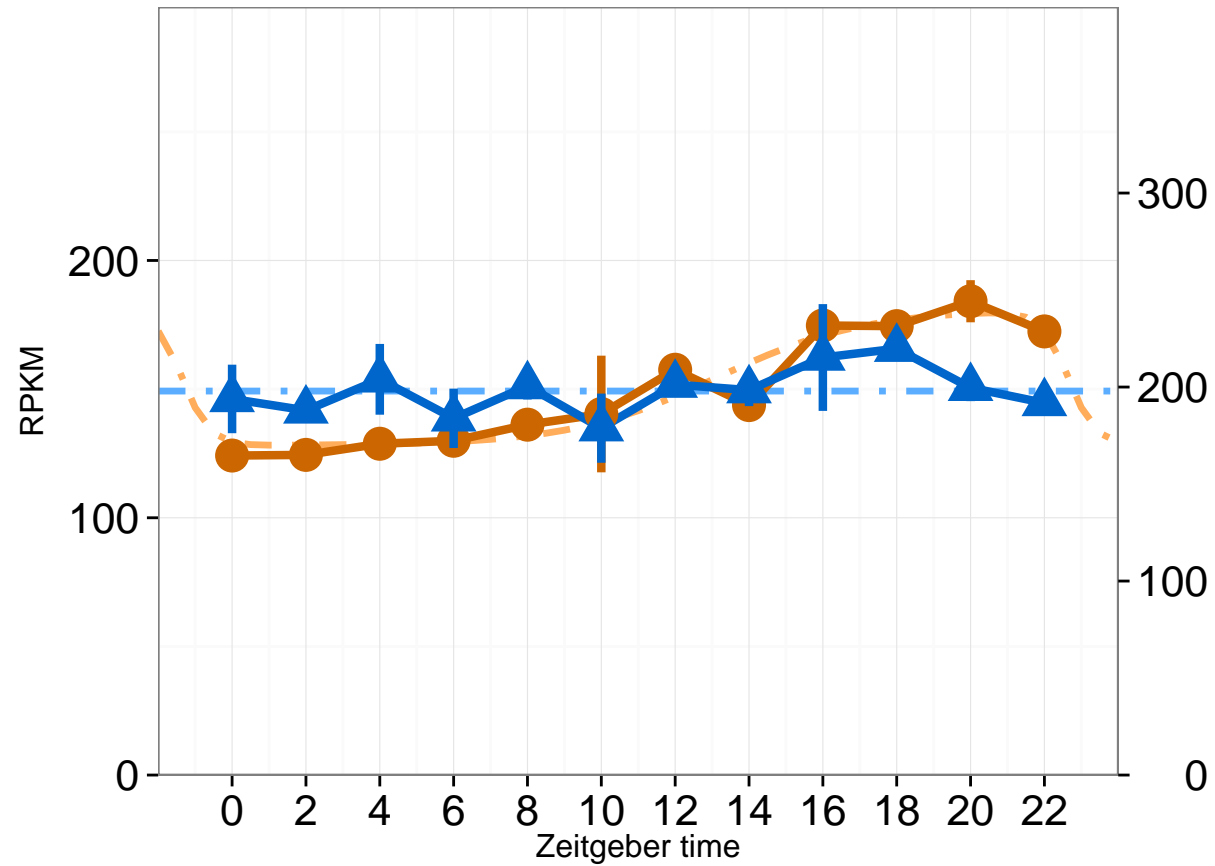

## Gstm5

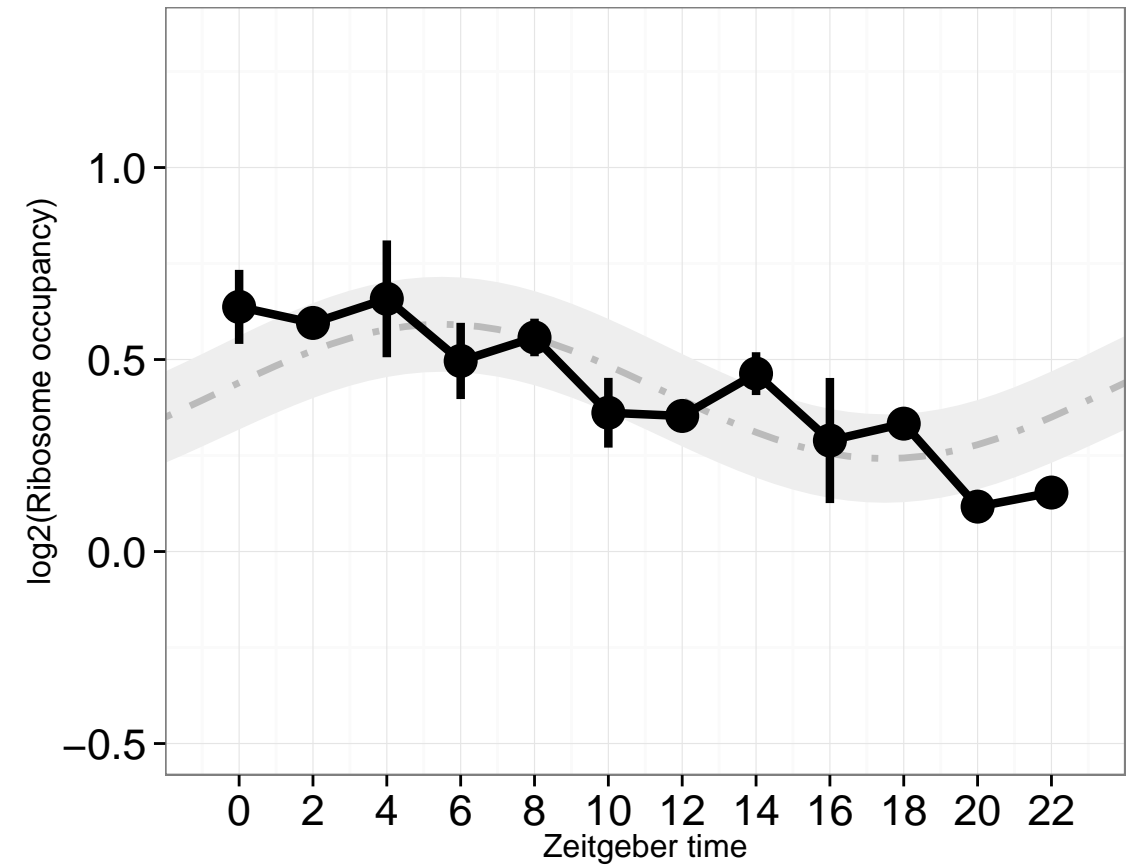

Supplement: Supplementary file 694 [file 1]

# Trim29

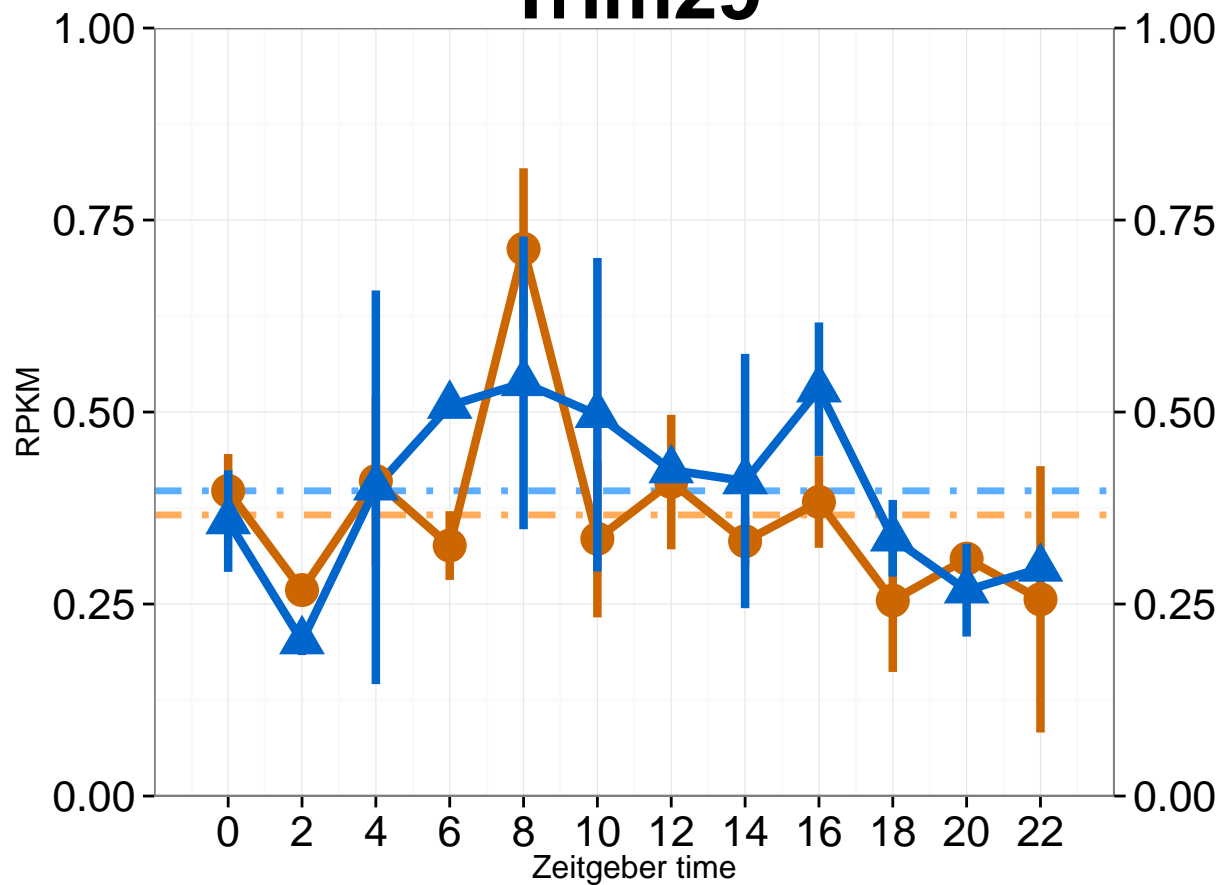

# Trim29

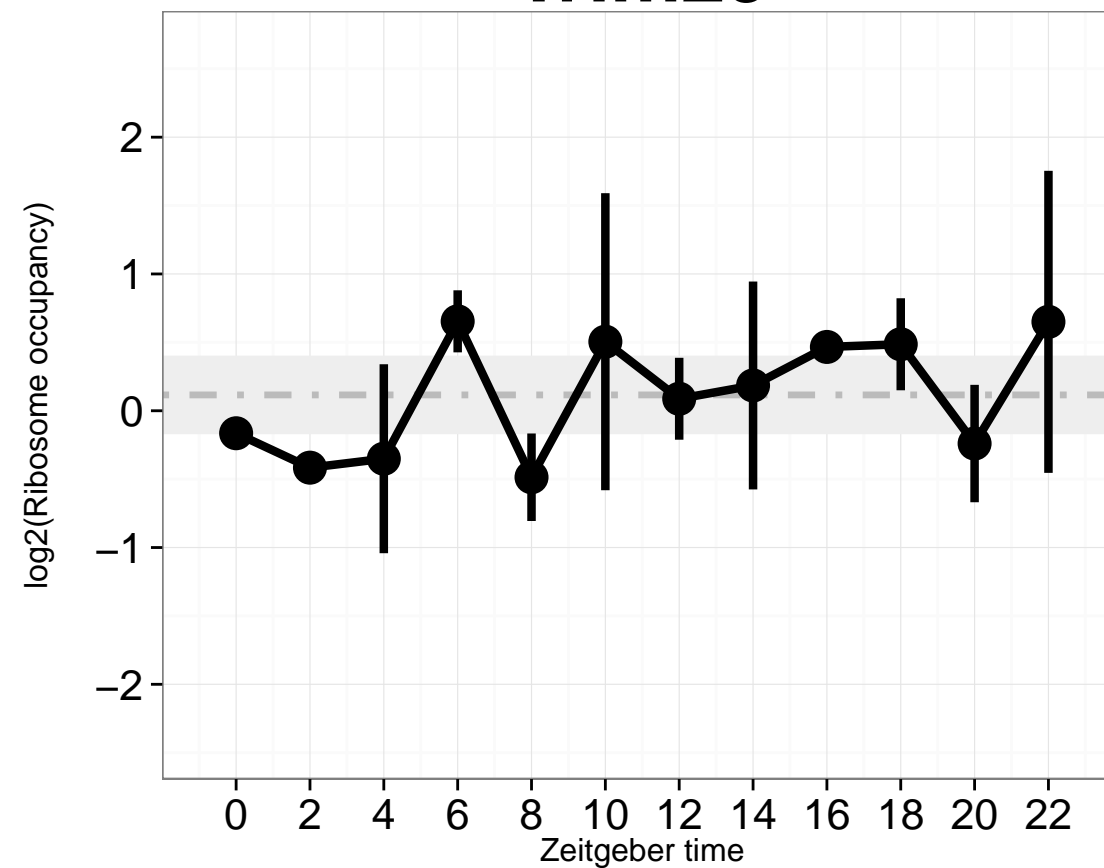

Supplement: Supplementary file 695 [file 1]

# Gfm1

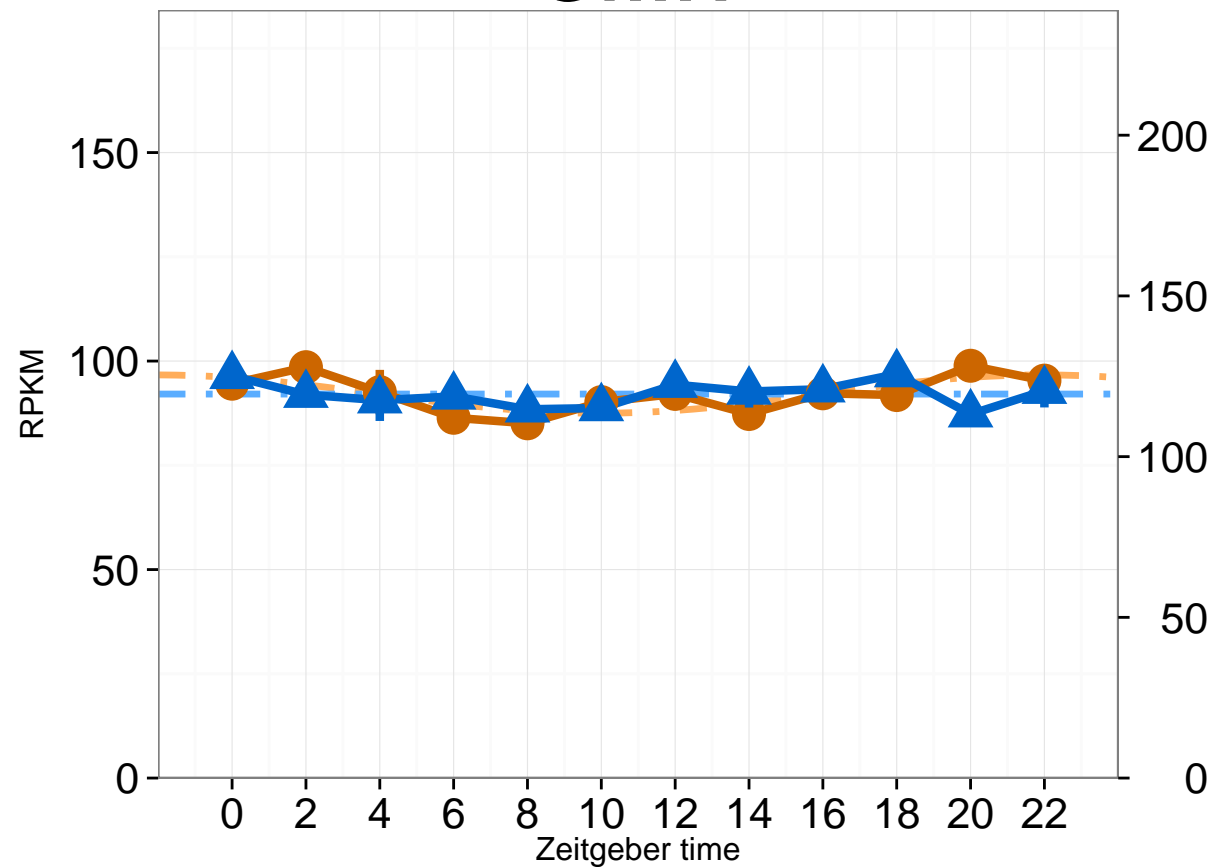

# Gfm1

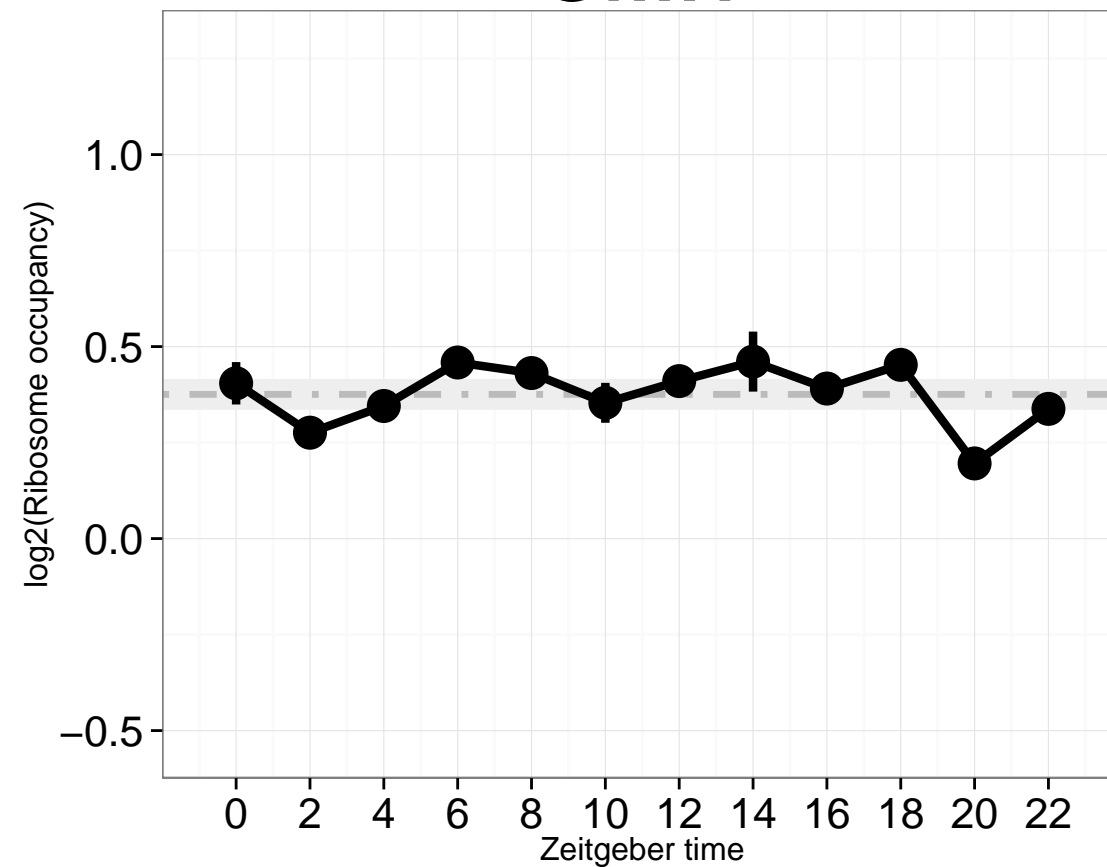

Supplement: Supplementary file 696 [file 1]

# Nr1d2

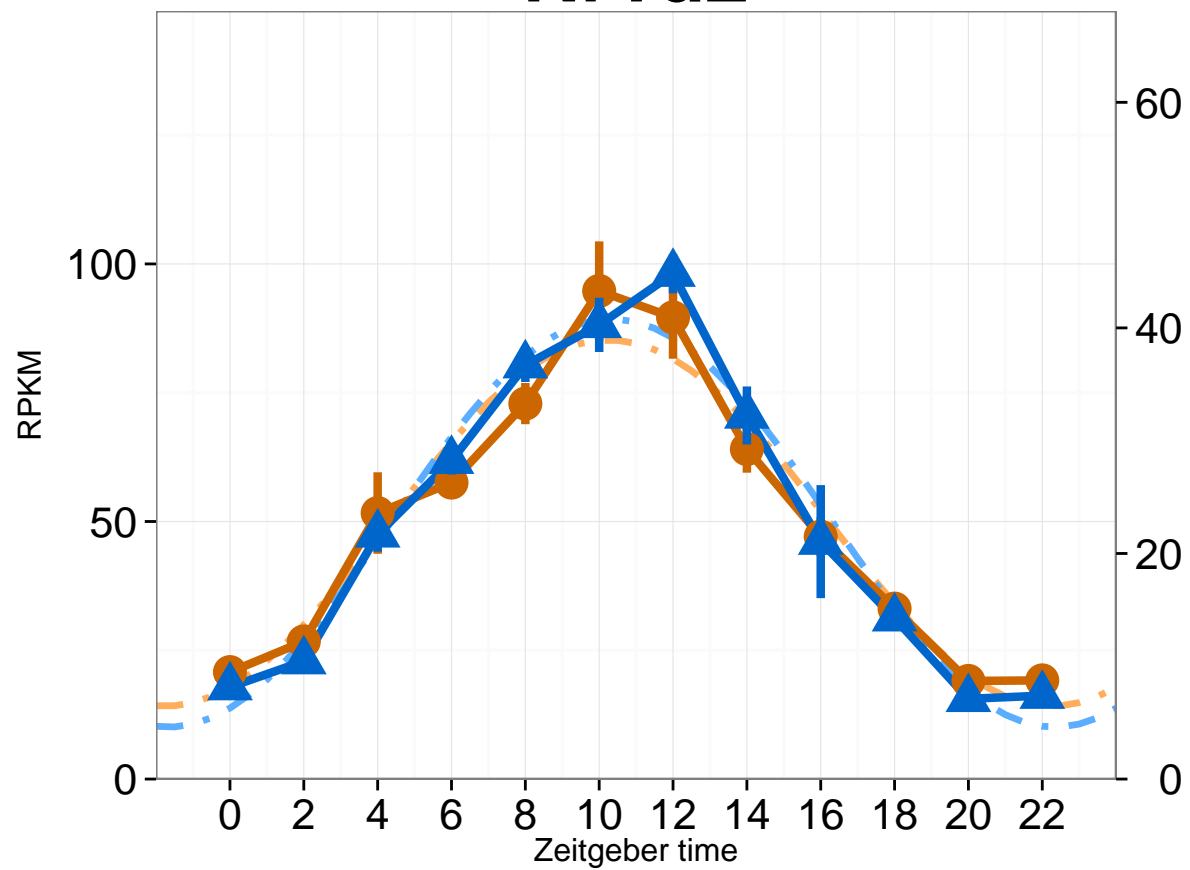

# Nr1d2

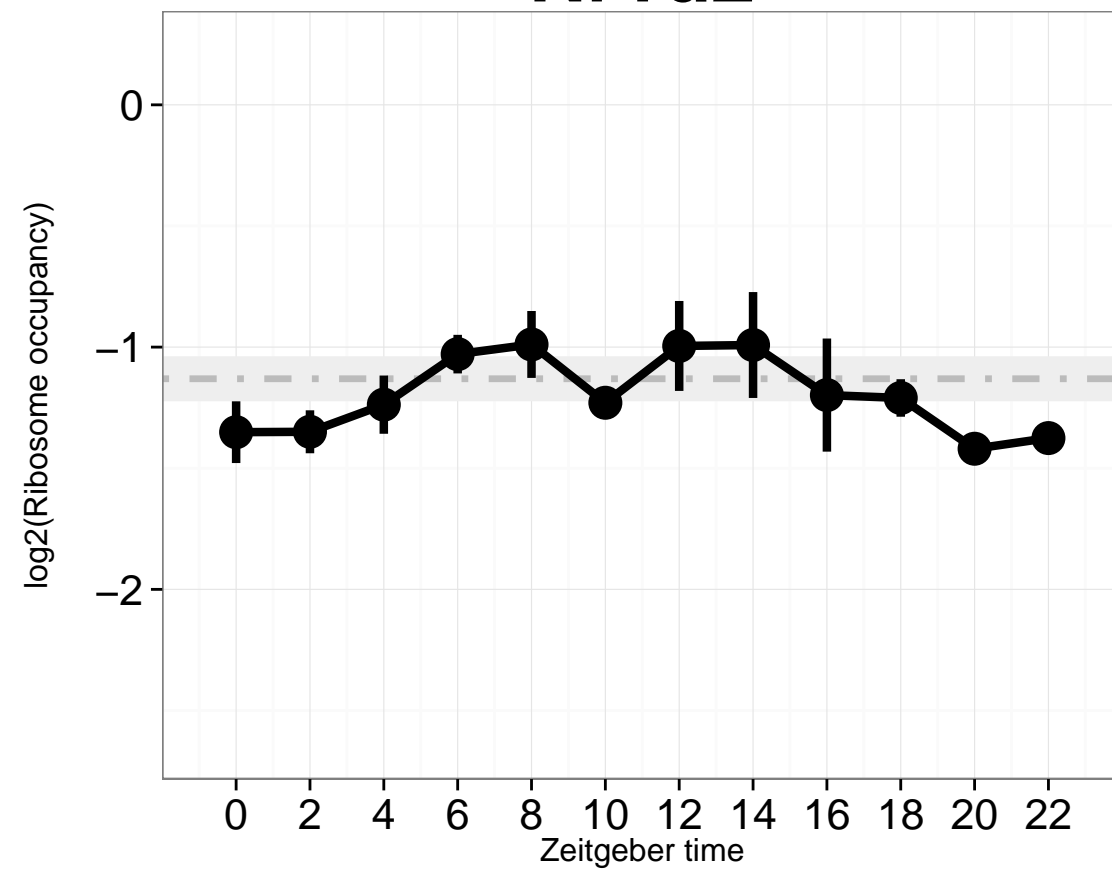

Supplement: Supplementary file 697 [file 1]

## Ccdc138

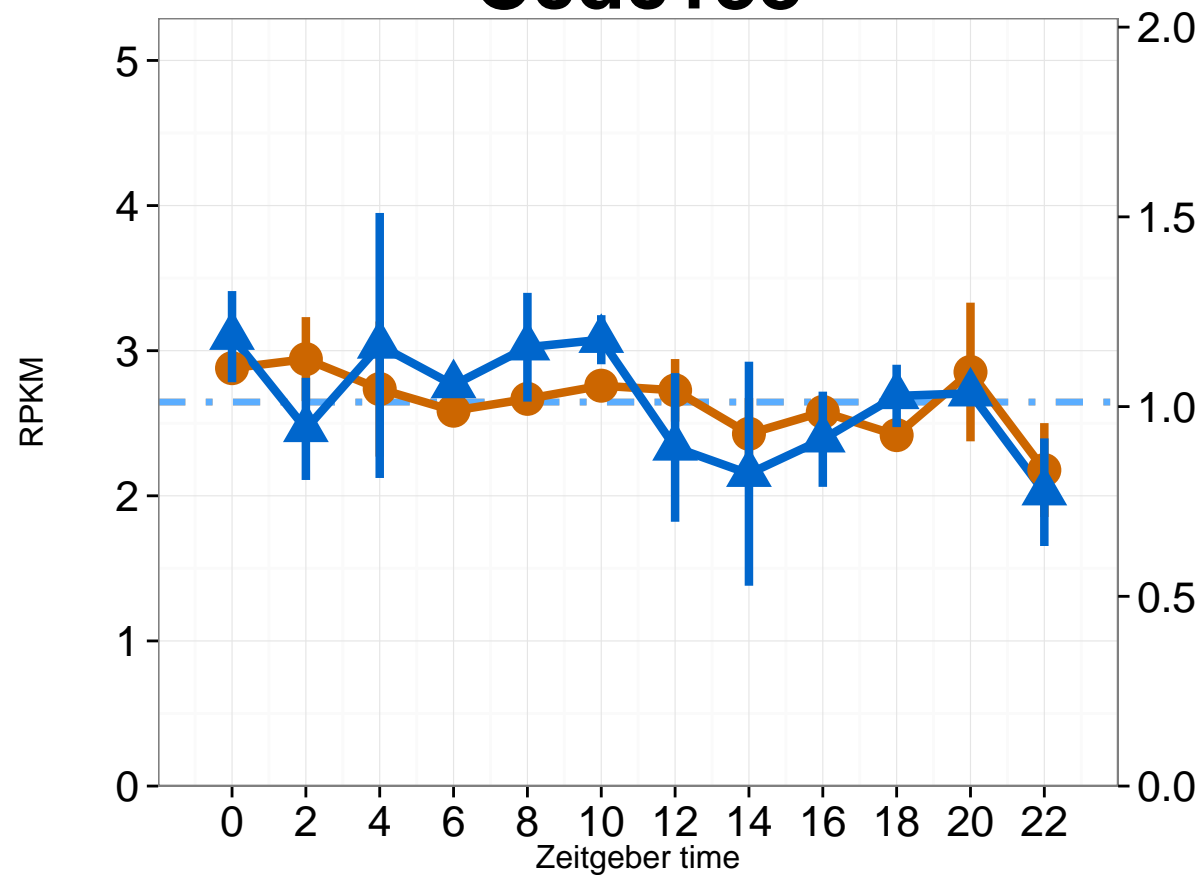

## Ccdc138

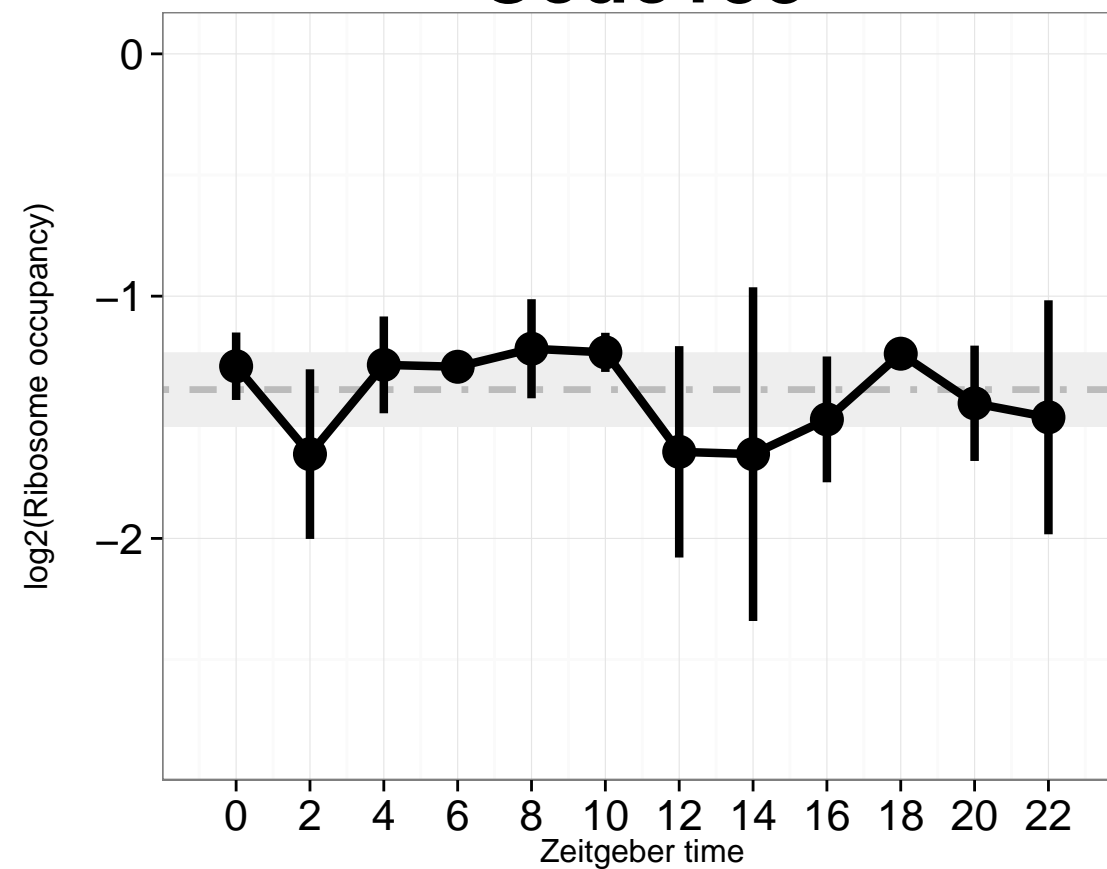

Supplement: Supplementary file 698 [file 1]

## Klhl36

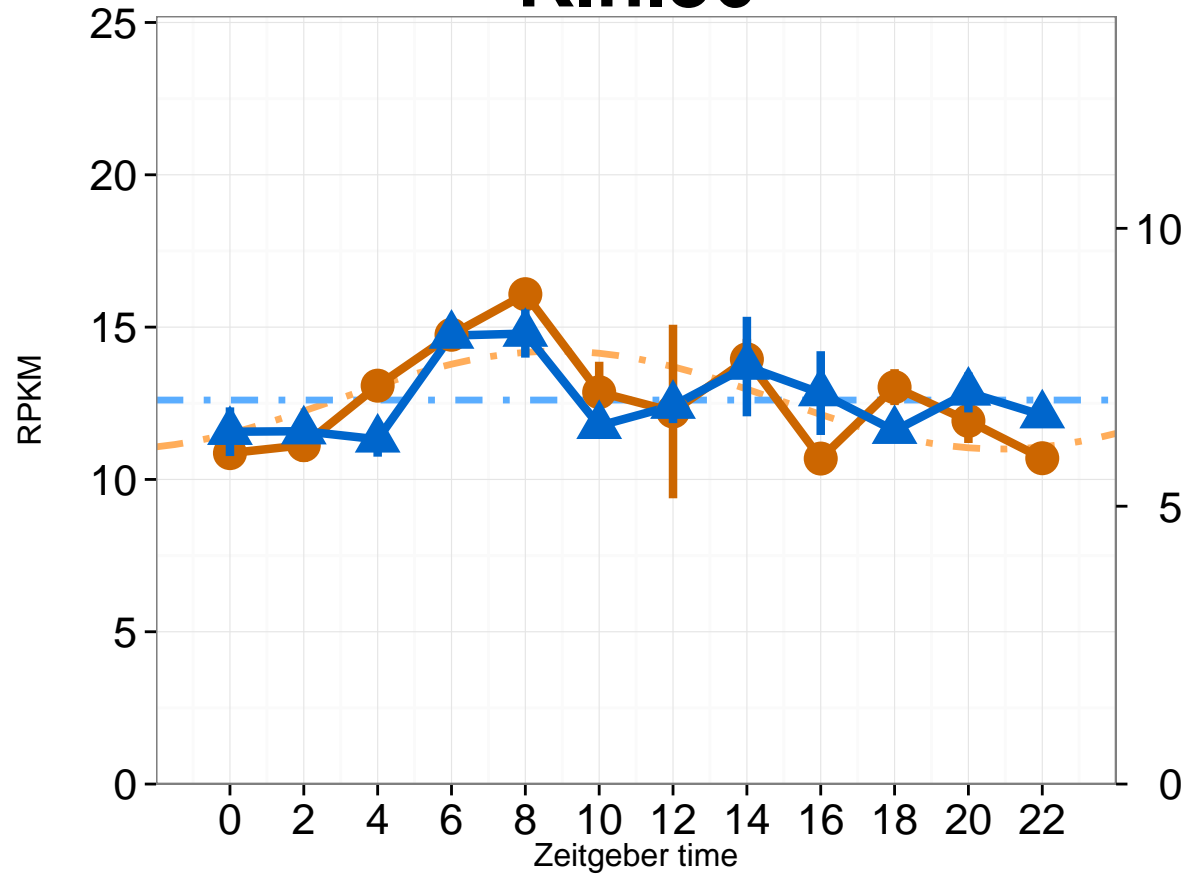

## Klhl36

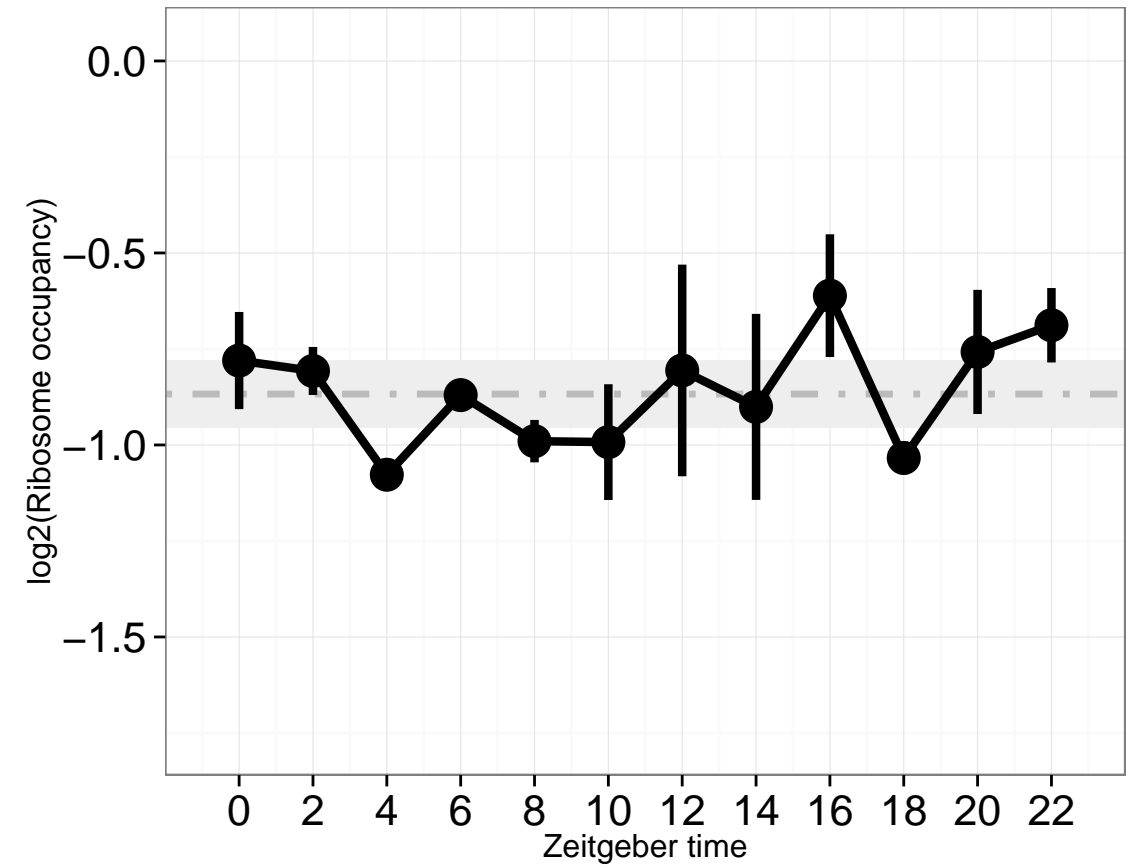

Supplement: Supplementary file 699 [file 1]

# Pfdn1

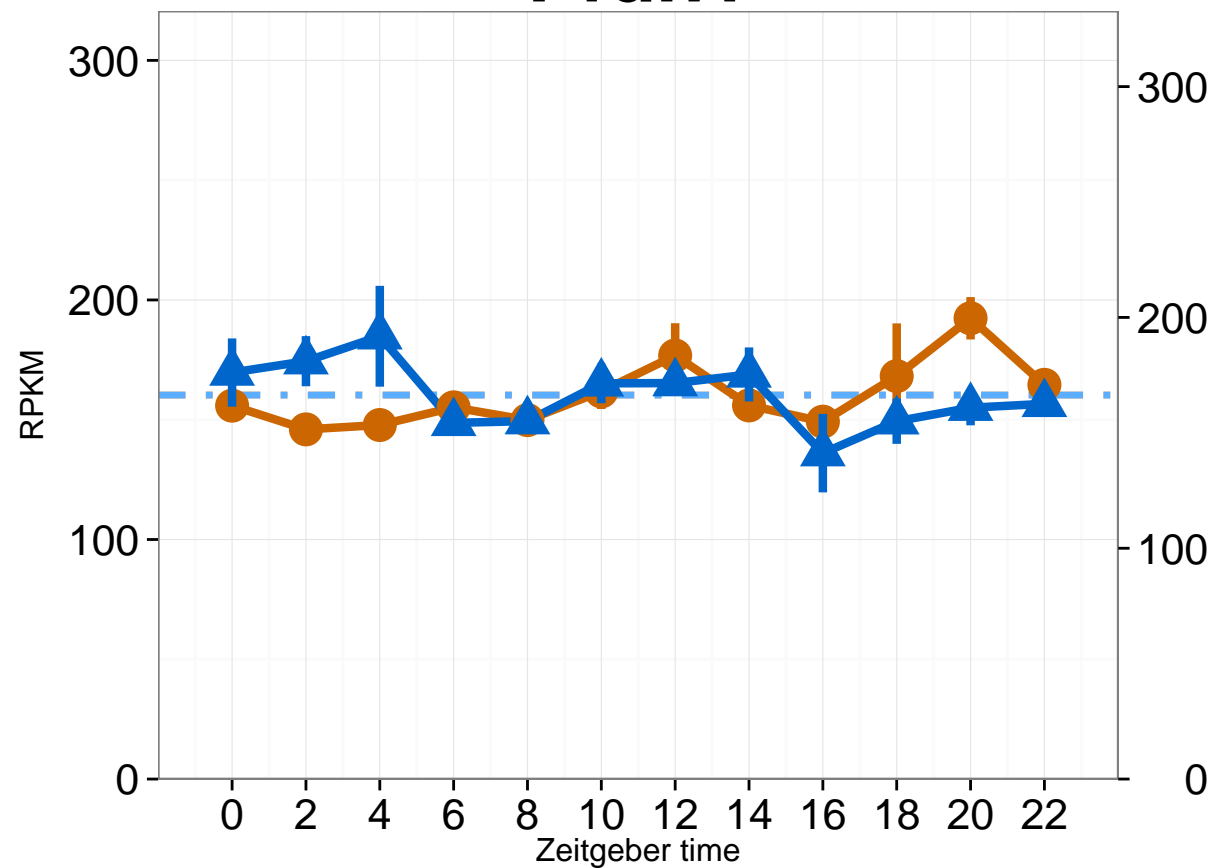

# Pfdn1

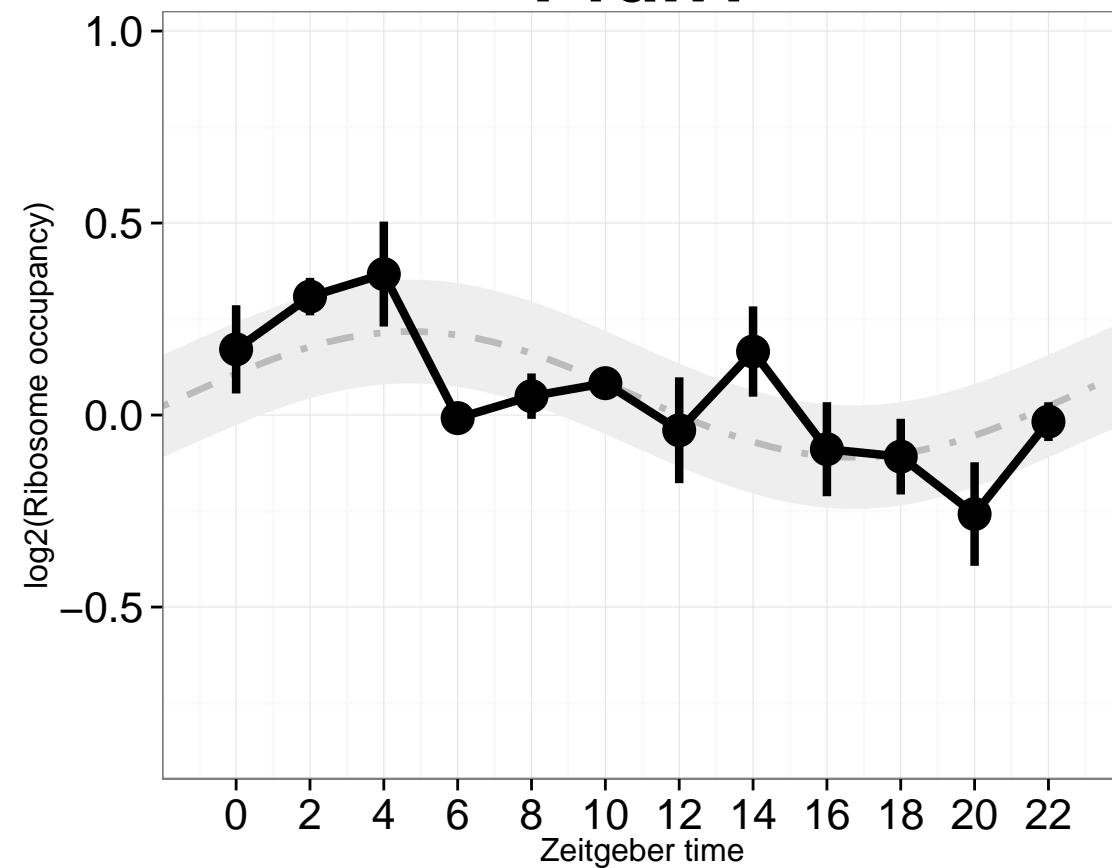

Supplement: Supplementary file 700 [file 1]

# Mrps21

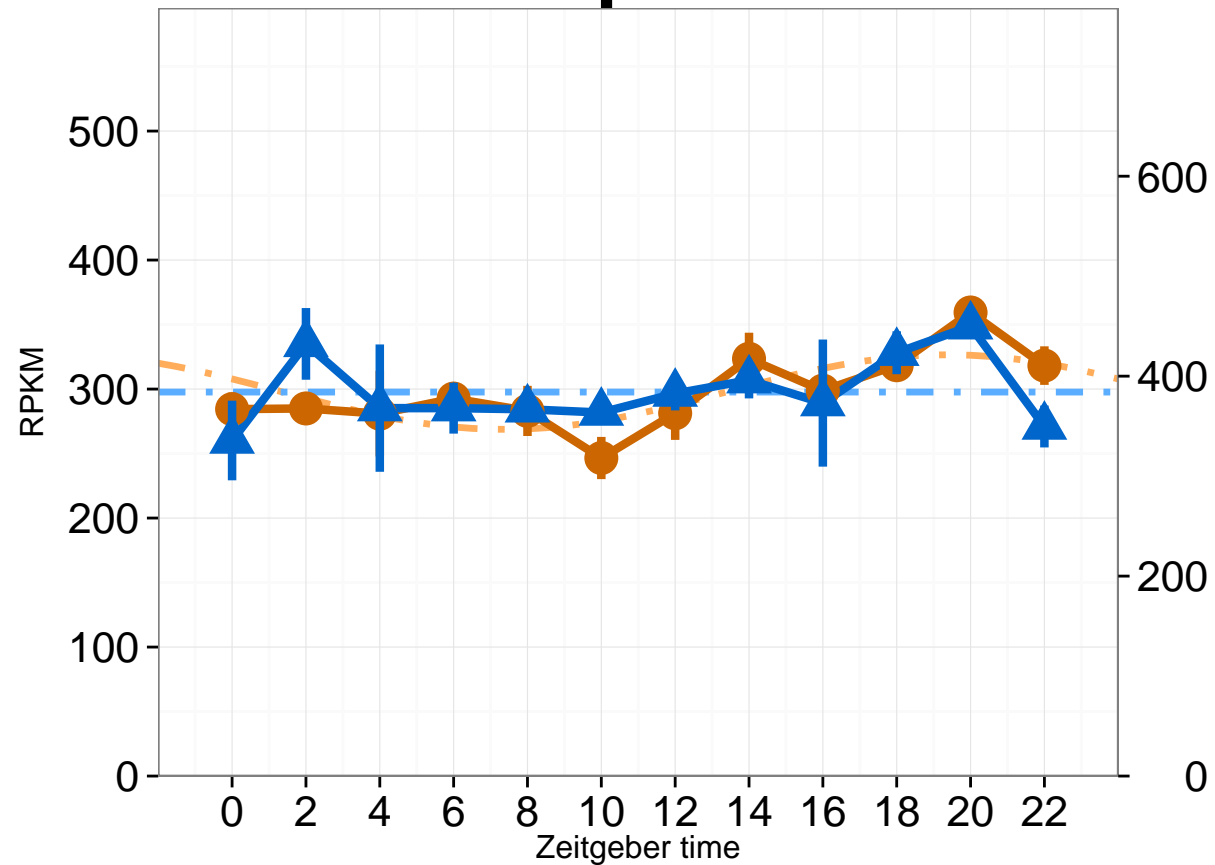

# Mrps21

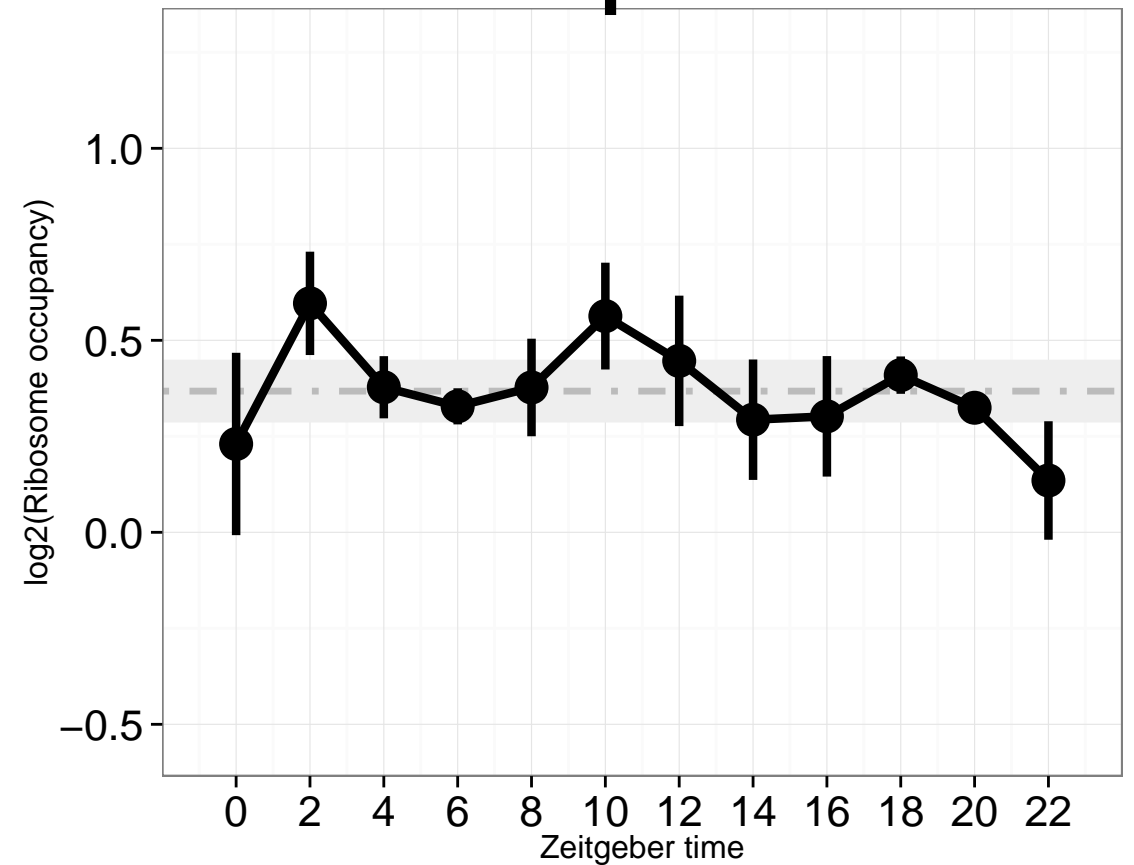

Supplement: Supplementary file 701 [file 1]

## Pax8

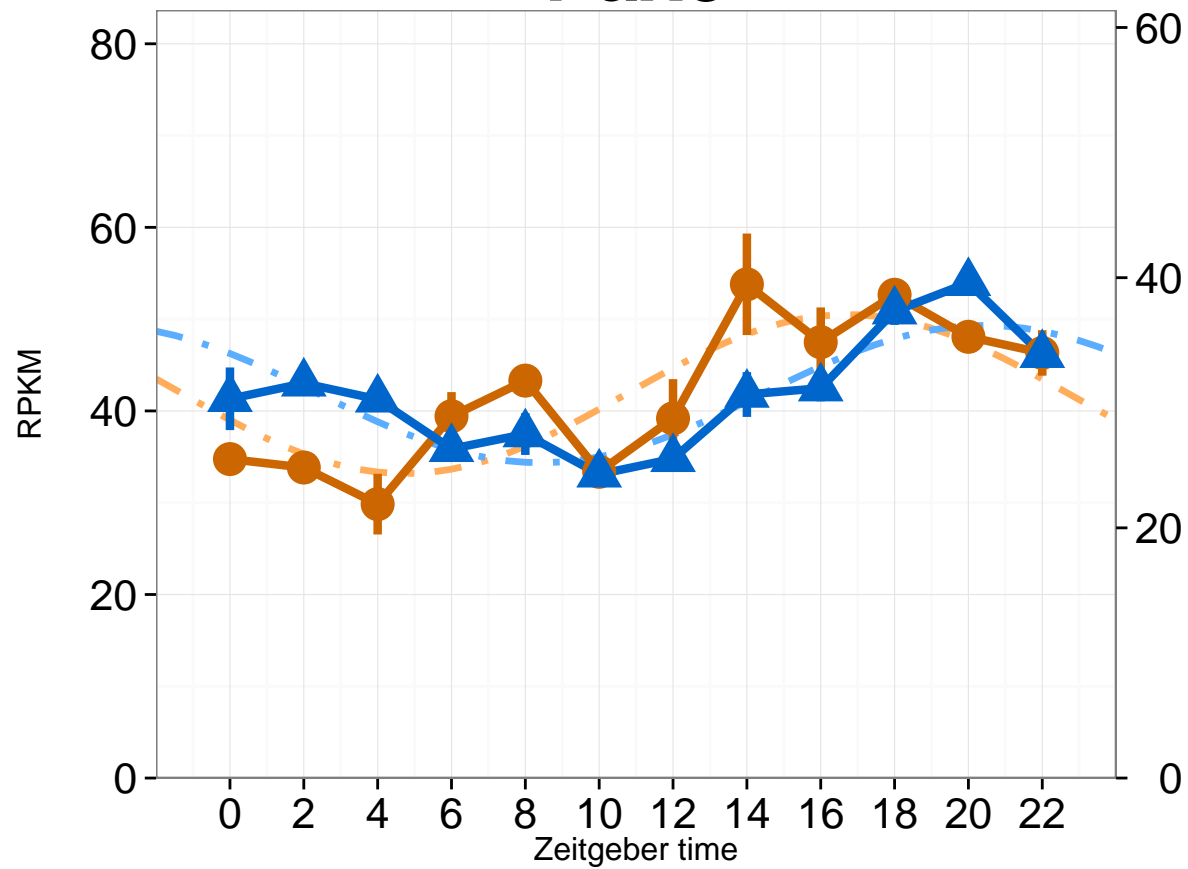

## Pax8

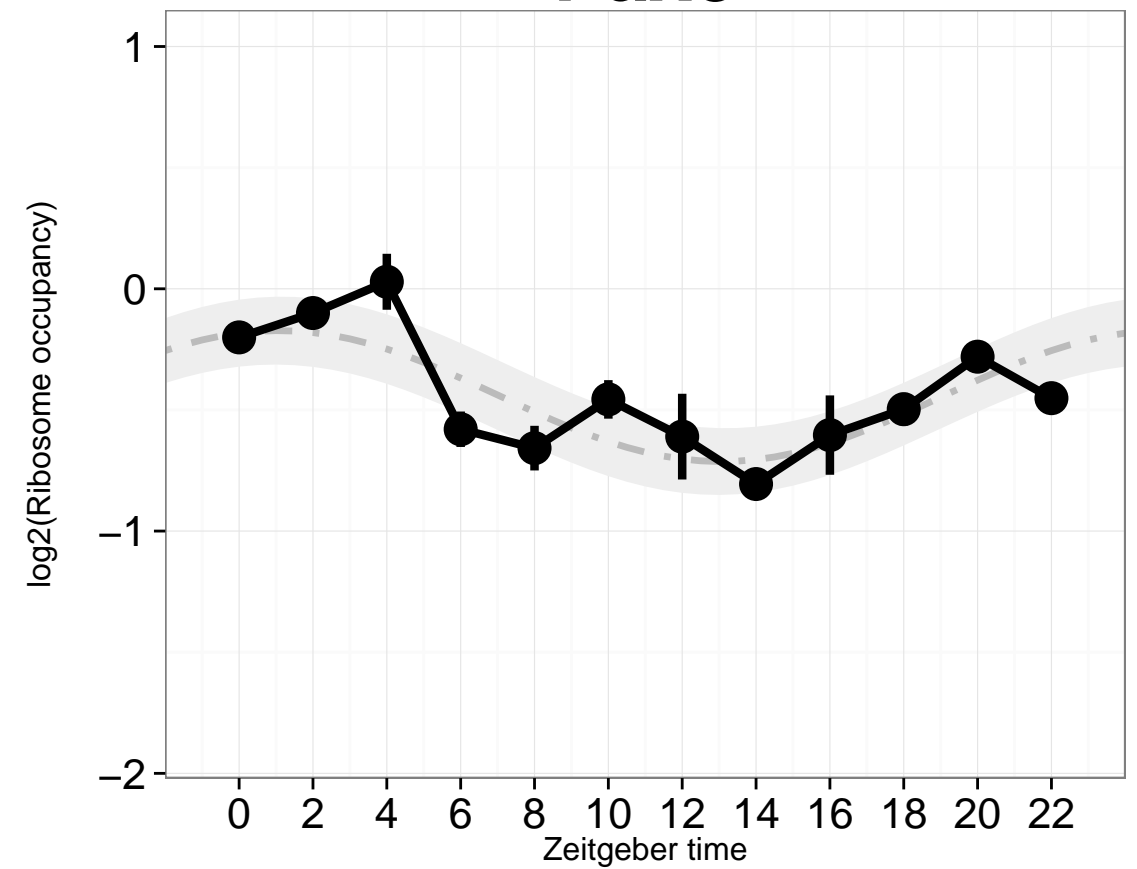

Supplement: Supplementary file 702 [file 1]

## Rnf115

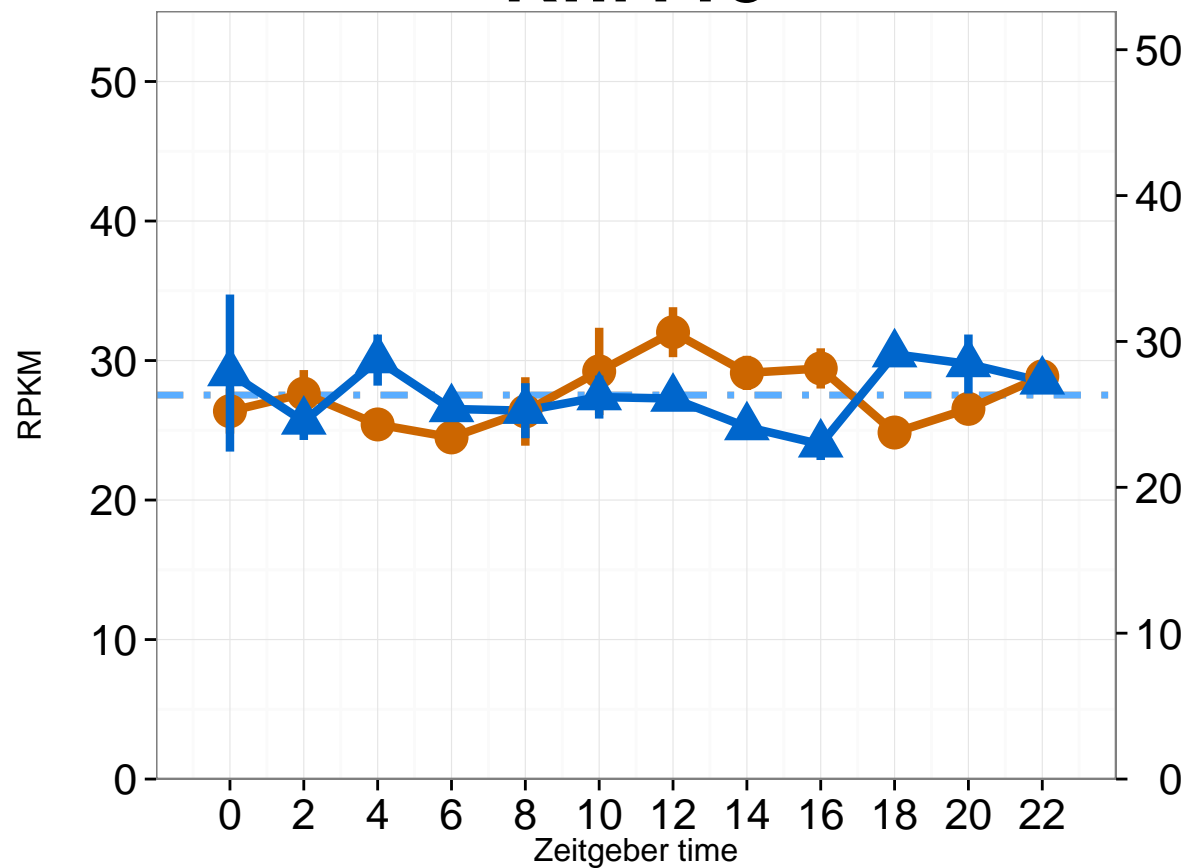

## Rnf115

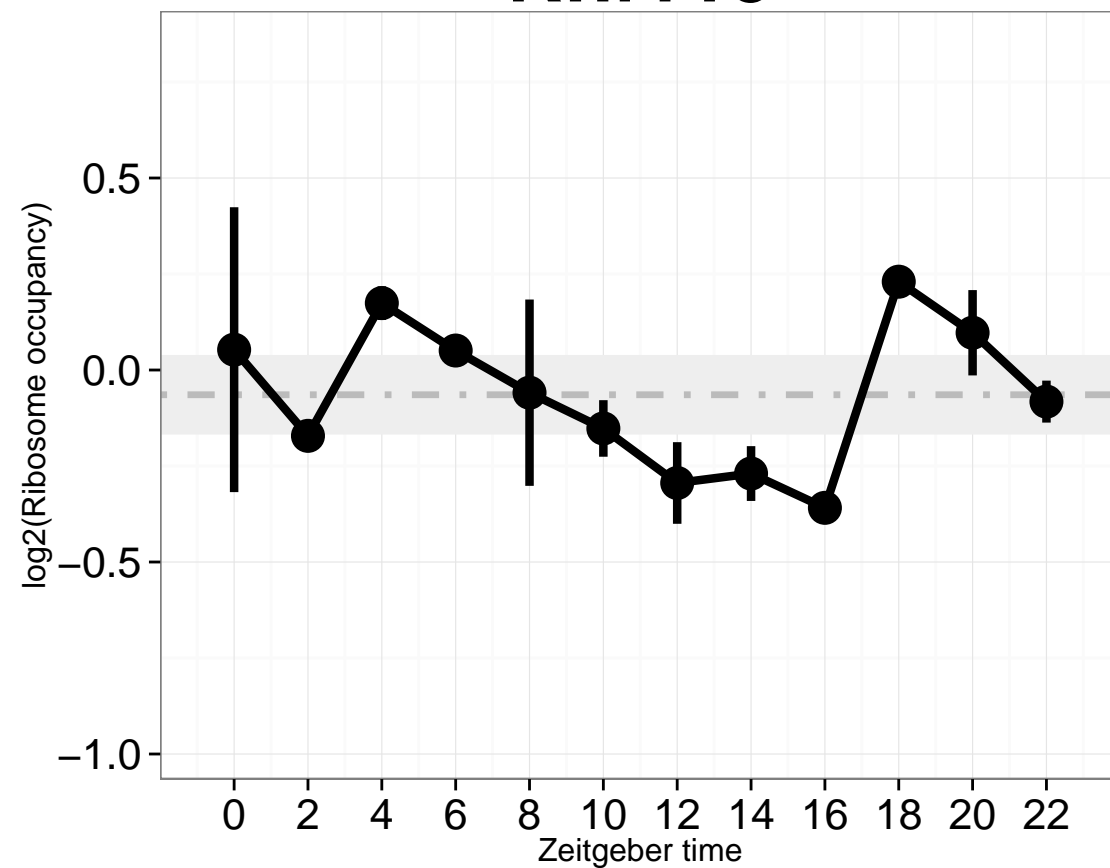

Supplement: Supplementary file 703 [file 1]
