# Supplementary material (part 8 of 133)
Source: publisher figshare collection journal article supplement (https://springernature.figshare.com/articles/dataset/_/4903193)

## Pstk

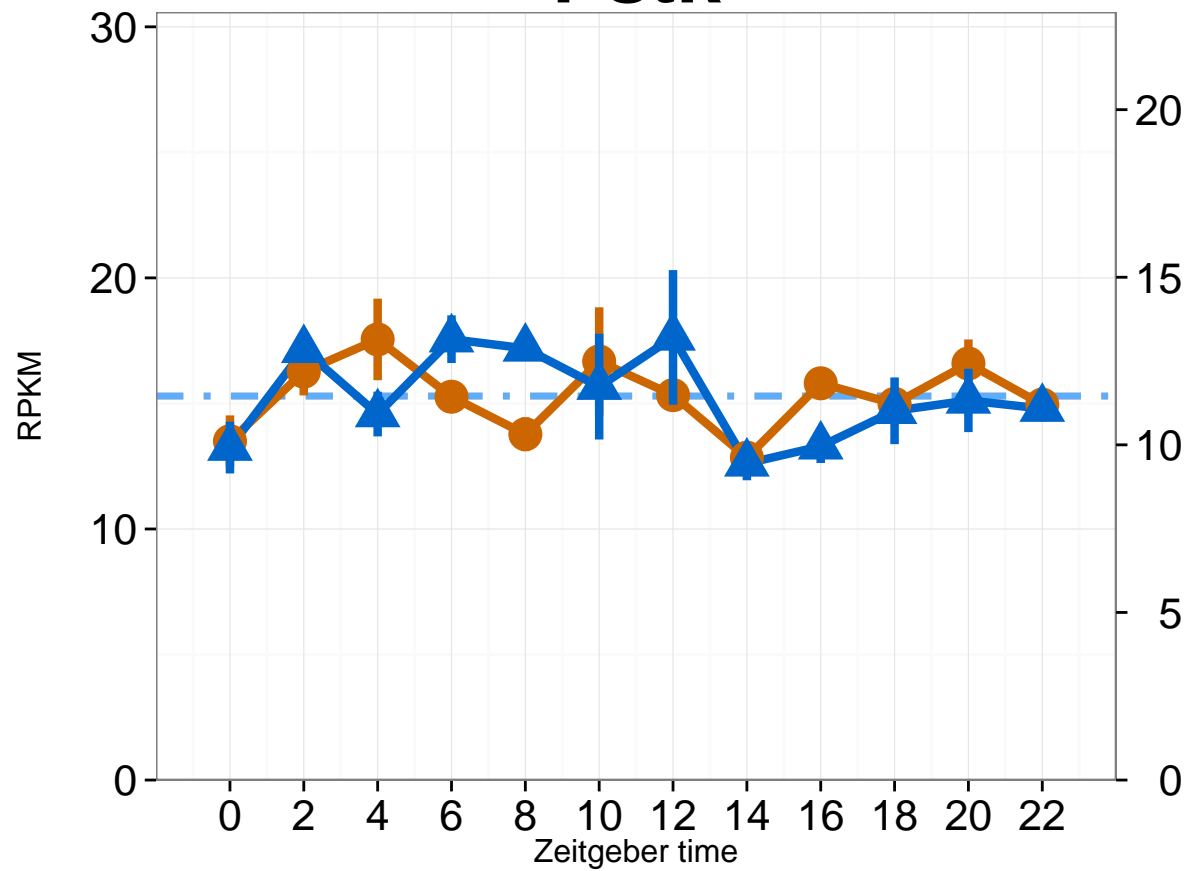

## Pstk

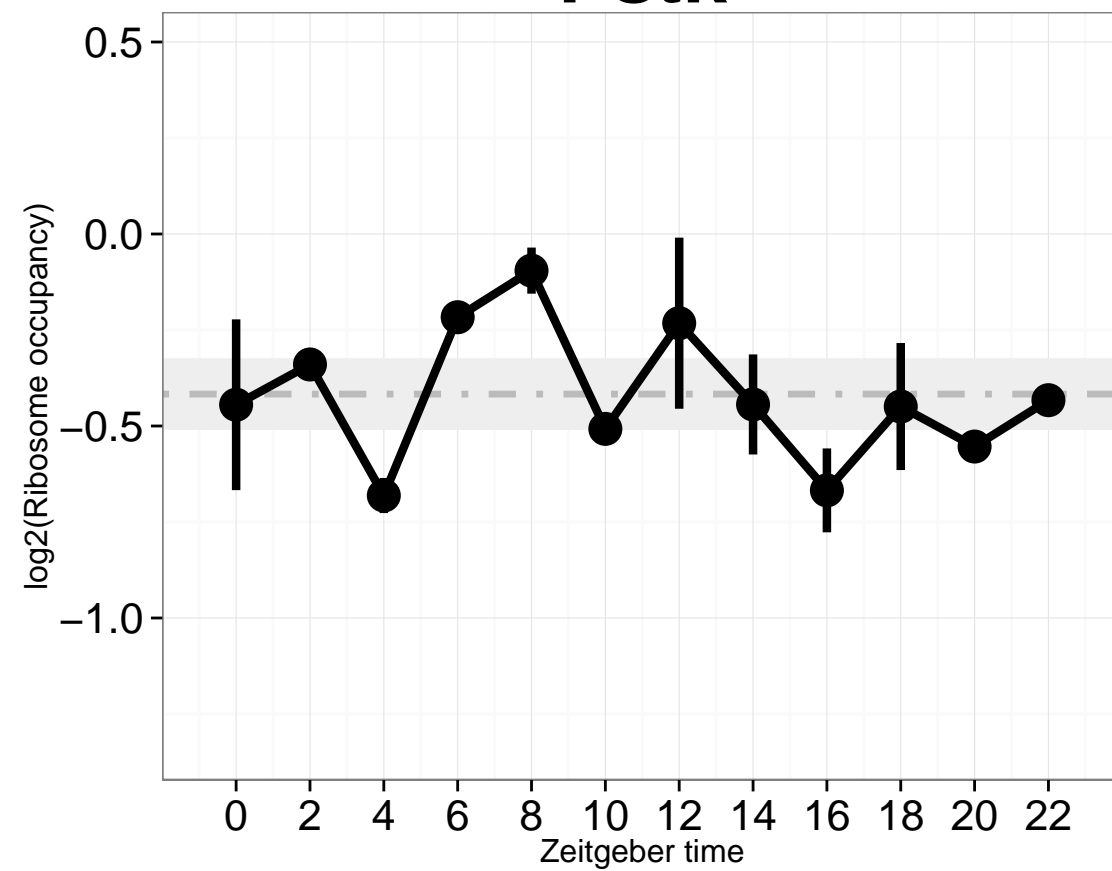

Supplement: Supplementary file 704 [file 1]

# Pgm5

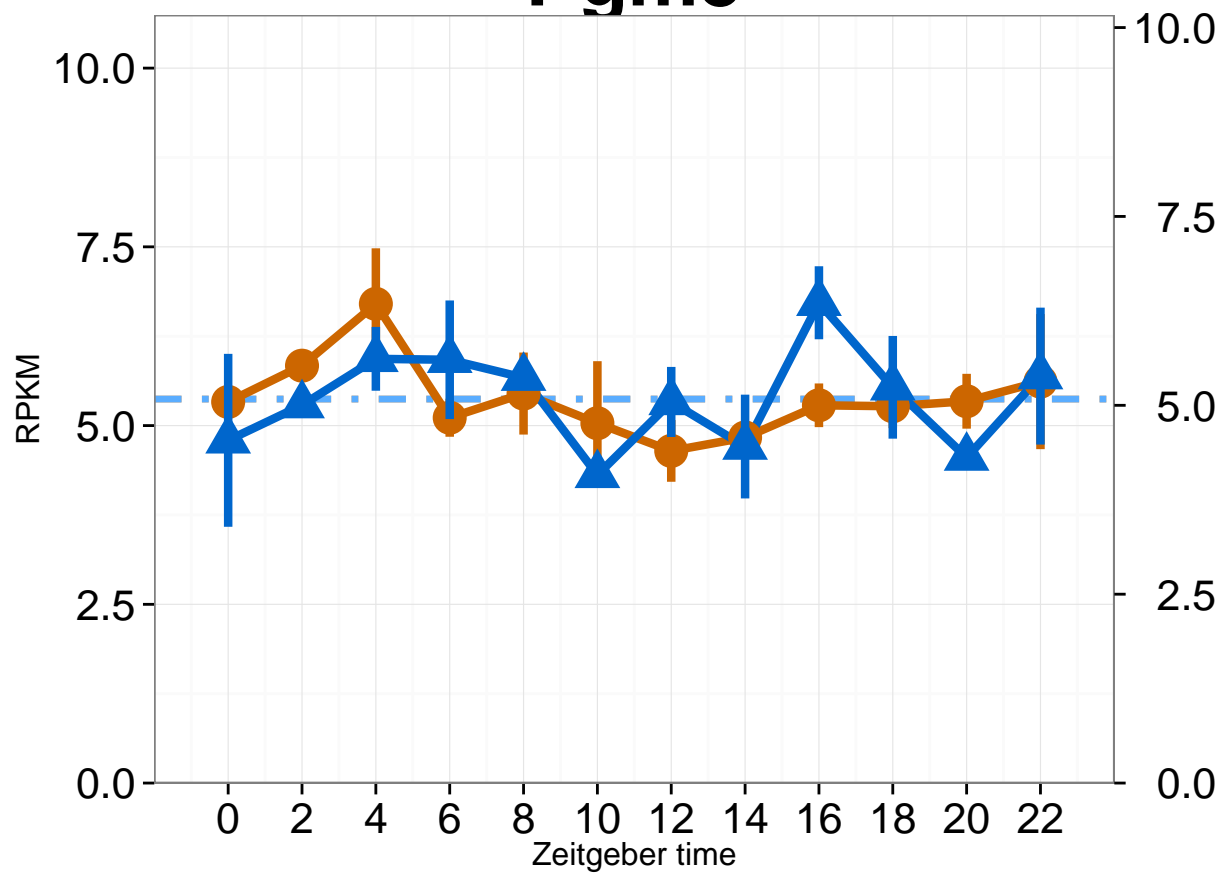

# Pgm5

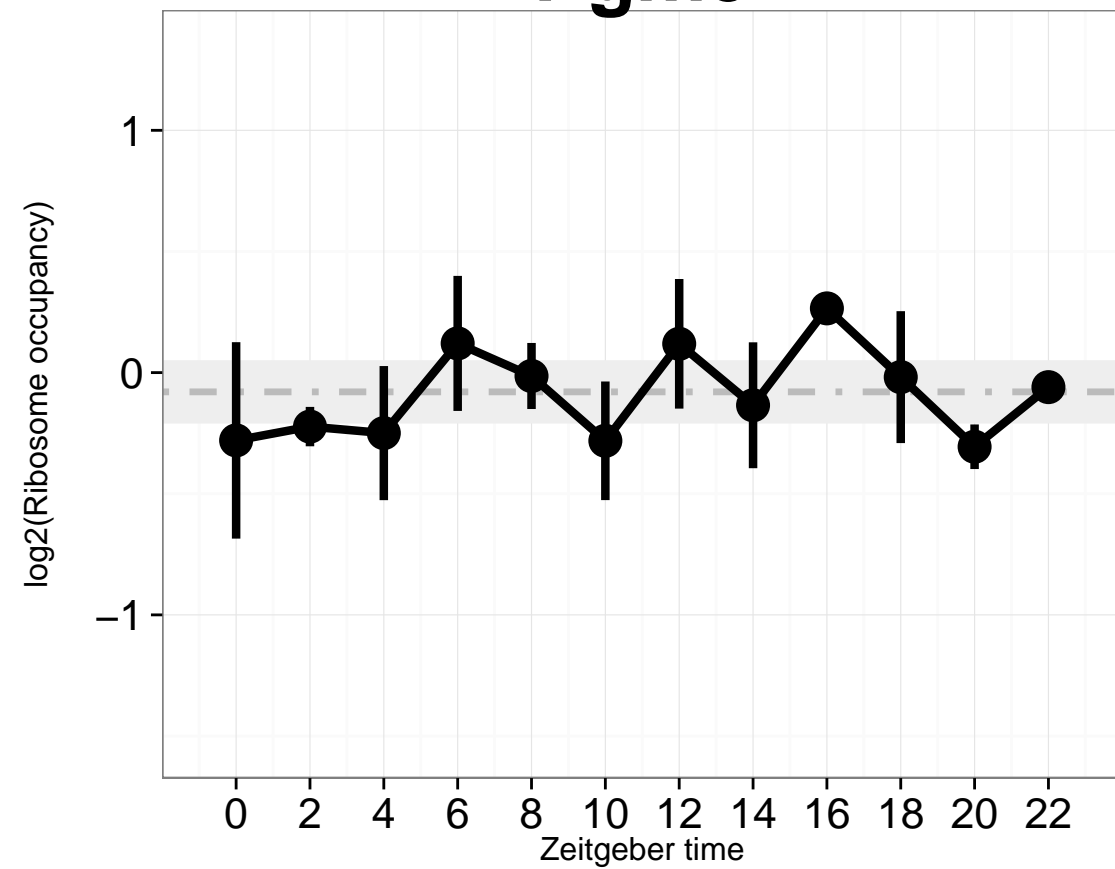

Supplement: Supplementary file 705 [file 1]

# Cyp4f18

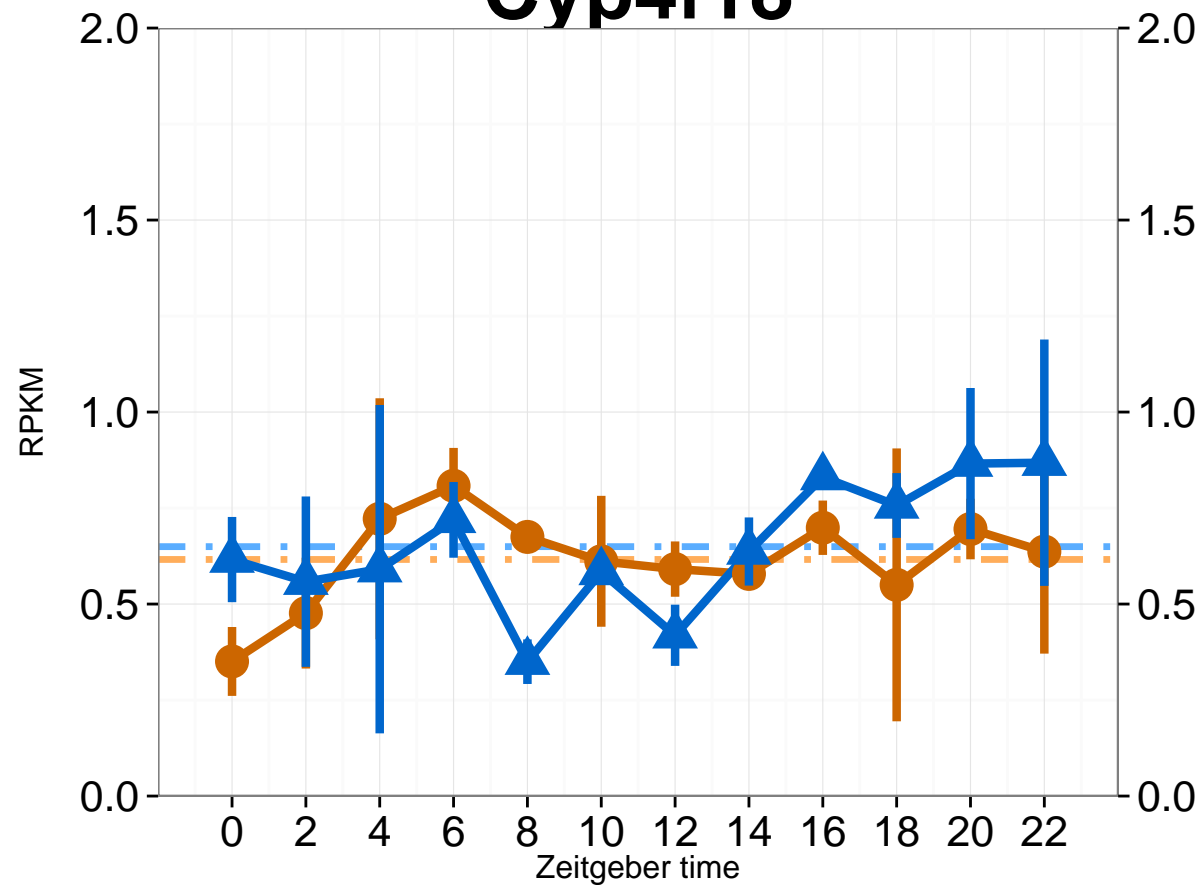

# Cyp4f18

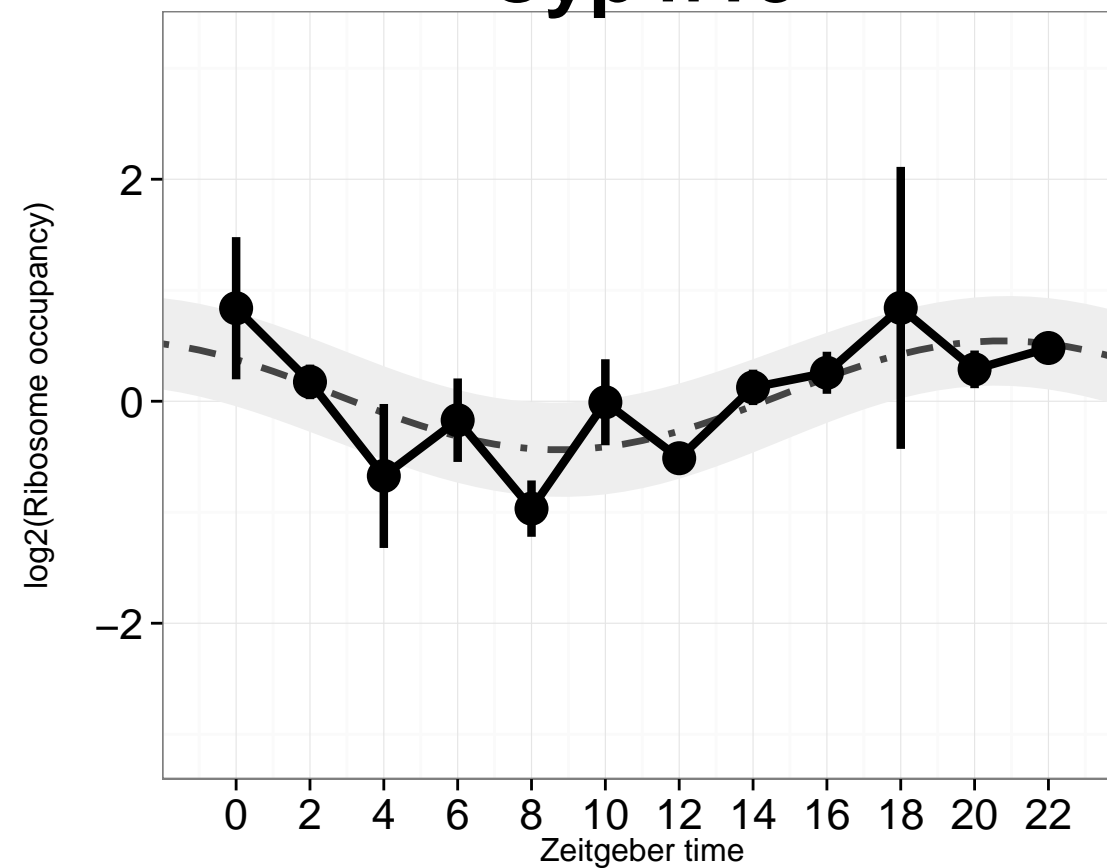

Supplement: Supplementary file 706 [file 1]

## Pex5l

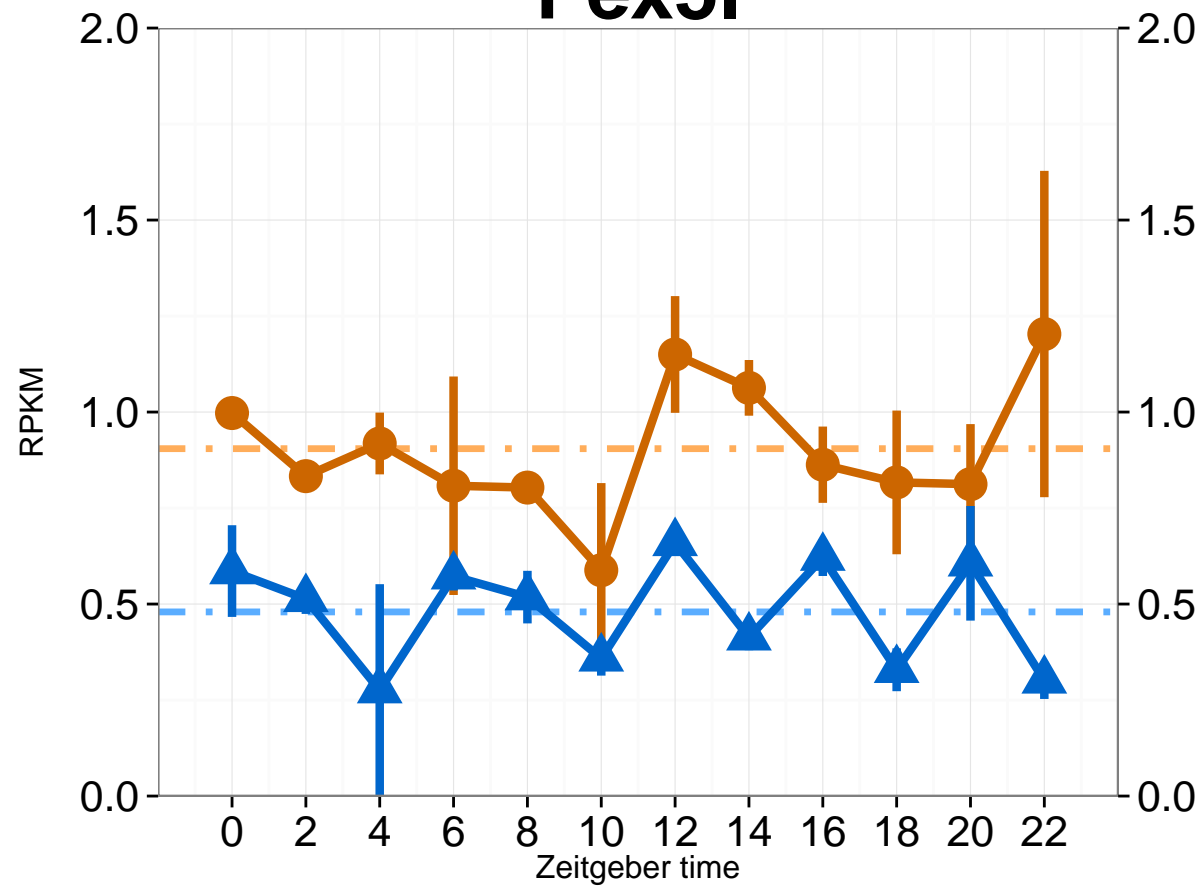

## Pex5l

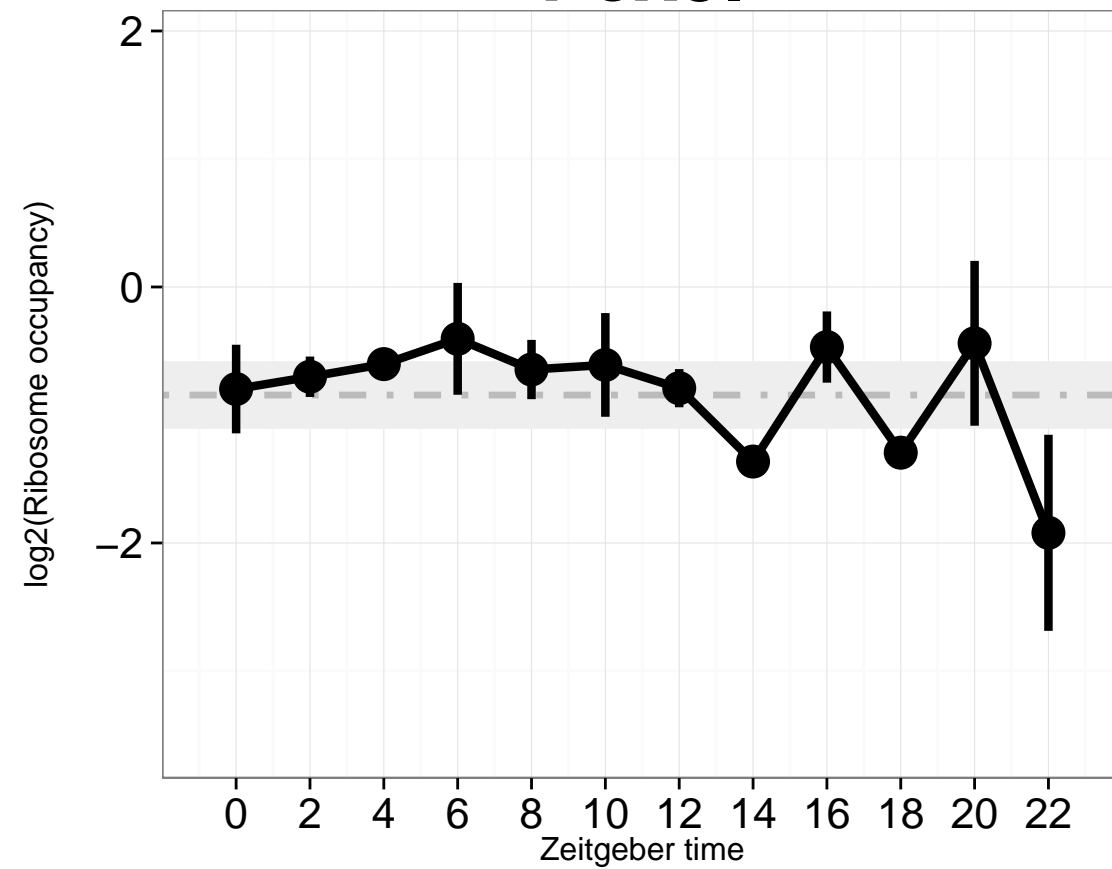

Supplement: Supplementary file 707 [file 1]

## Limd2

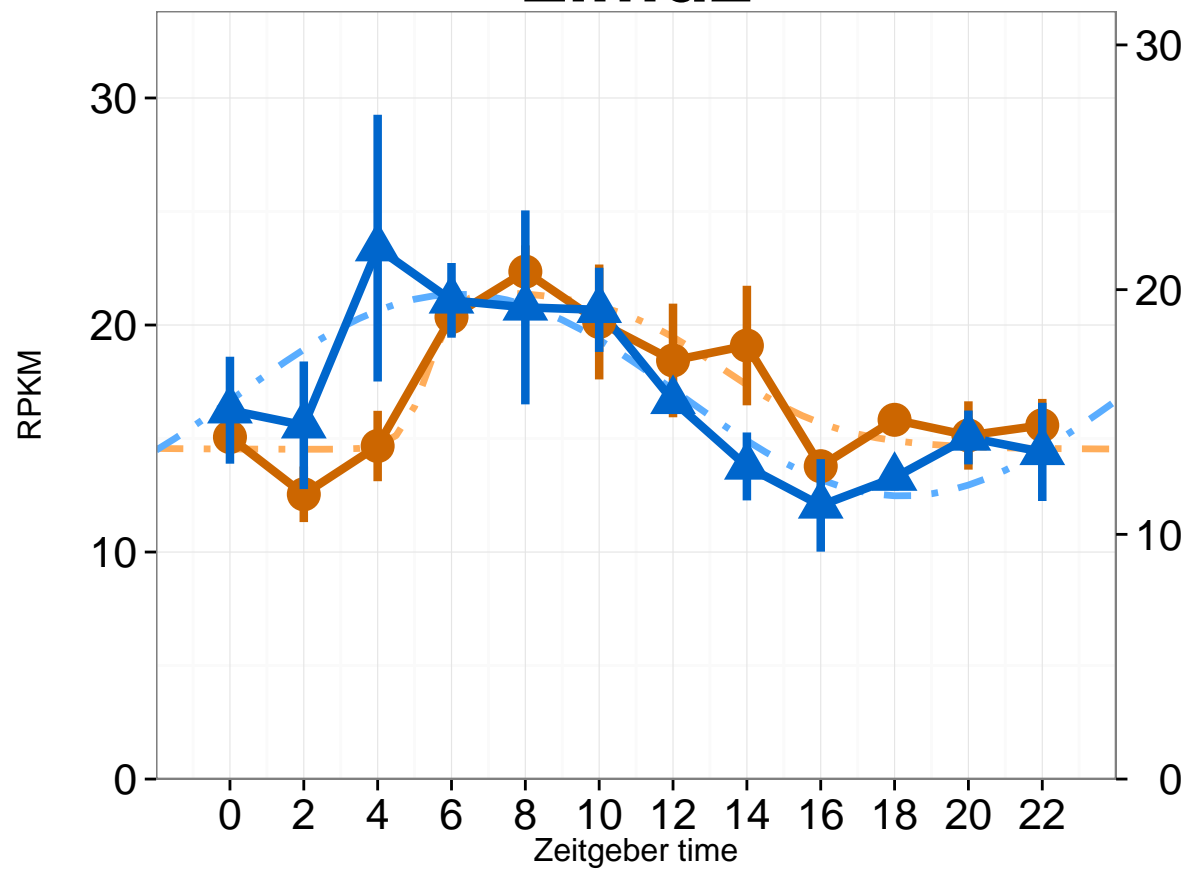

## Limd2

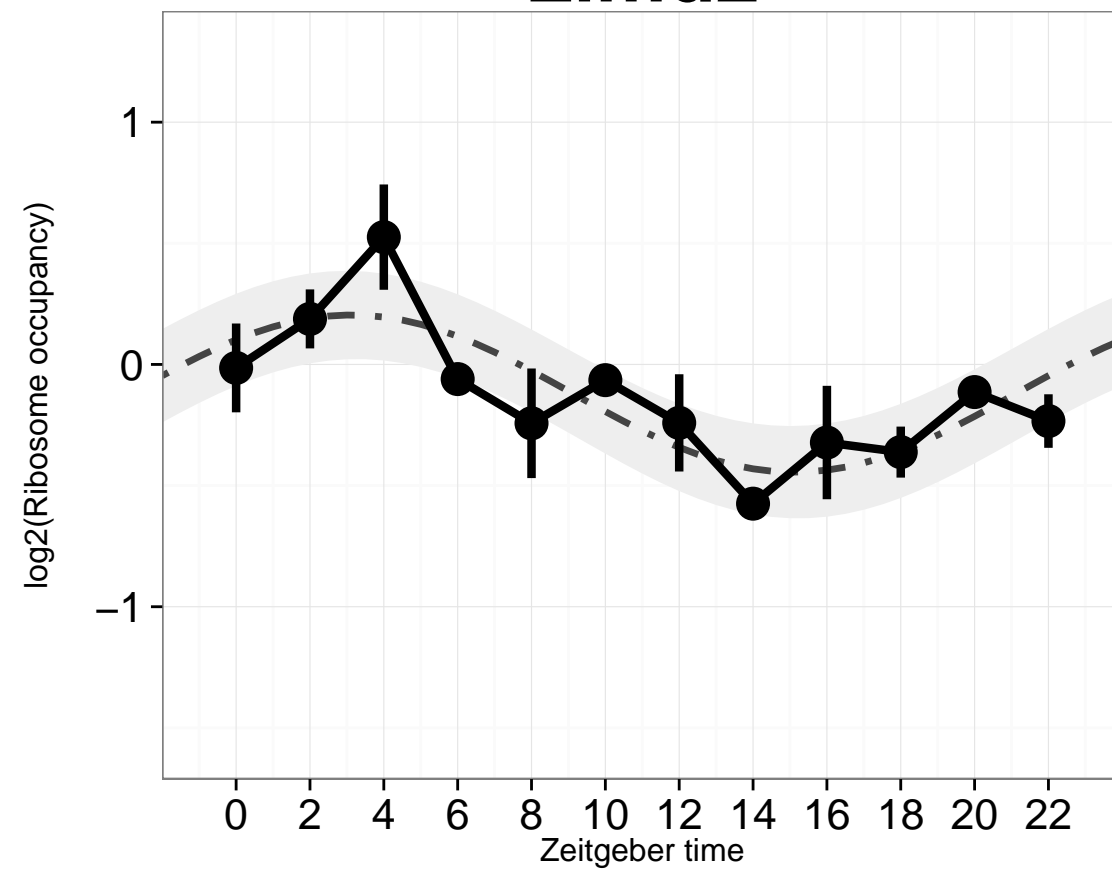

Supplement: Supplementary file 708 [file 1]

# Csnk2a1

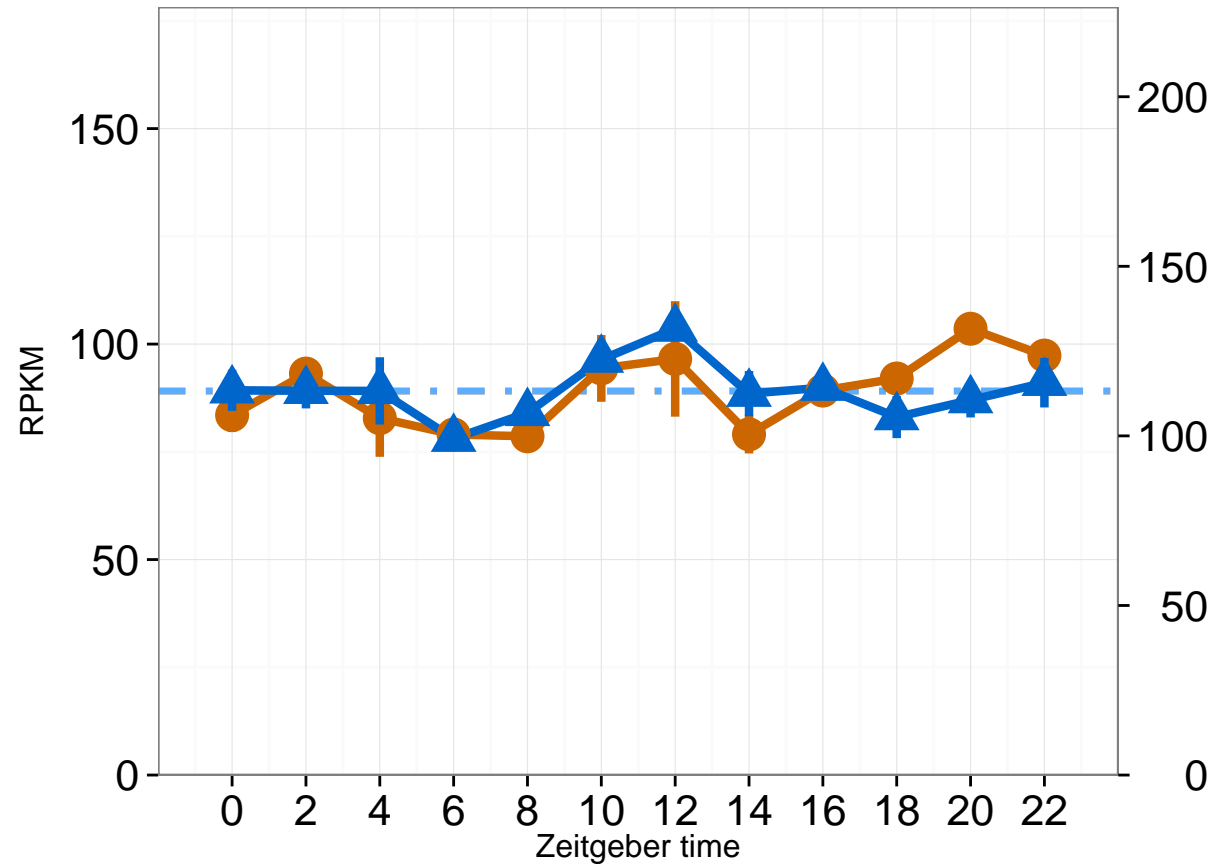

# Csnk2a1

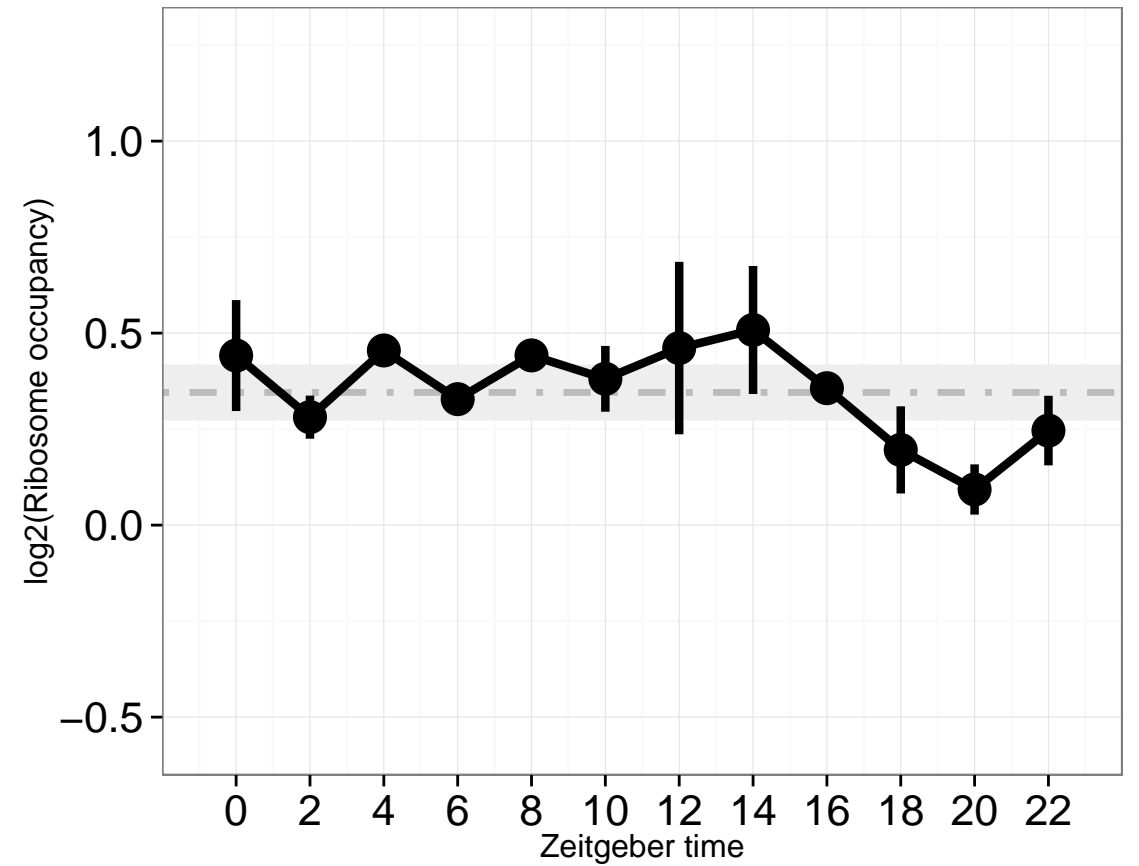

Supplement: Supplementary file 709 [file 1]

## Rcc2

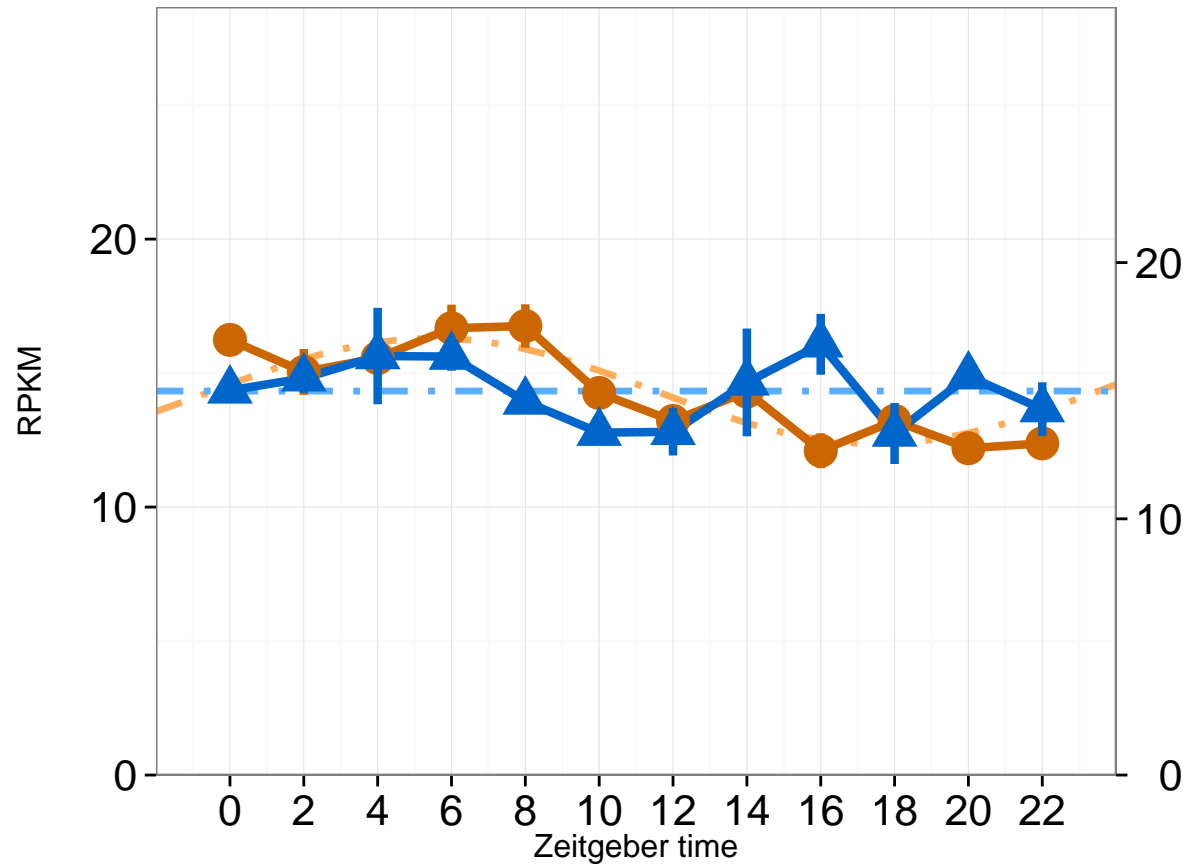

## Rcc2

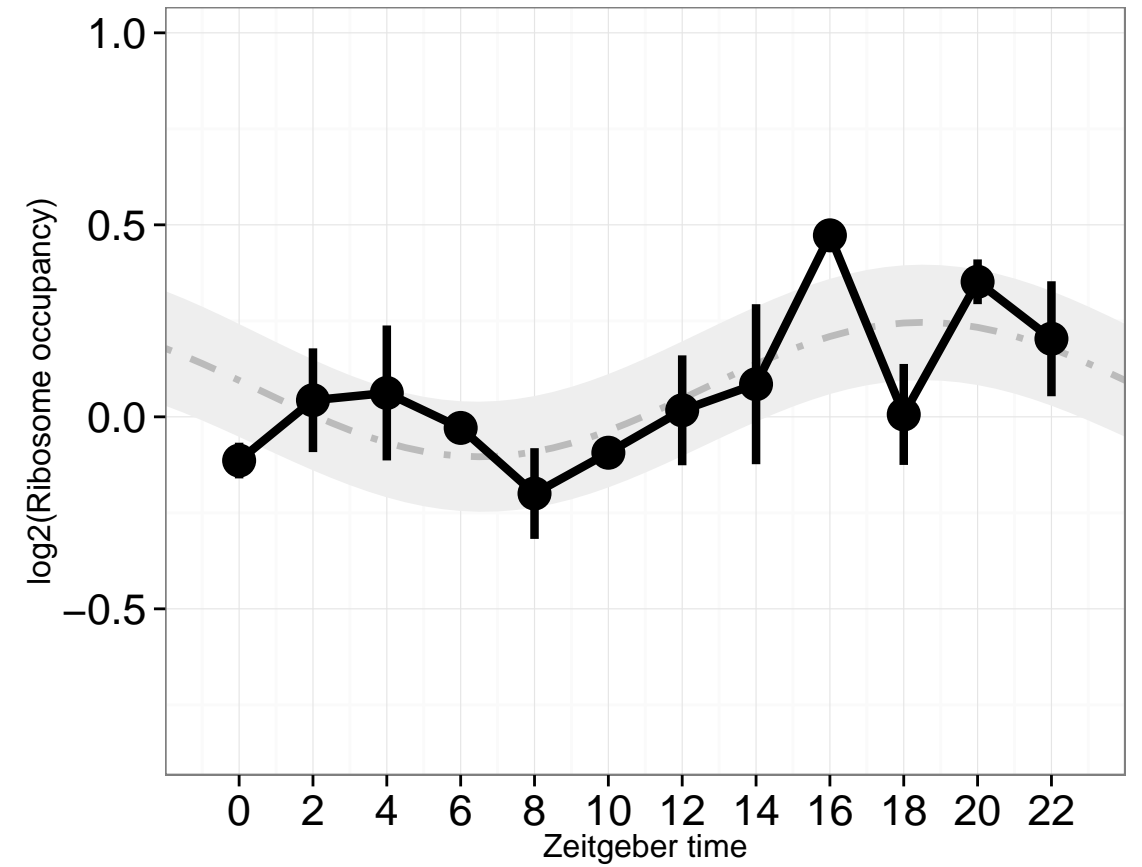

Supplement: Supplementary file 710 [file 1]

**E030037K01Rik TR**

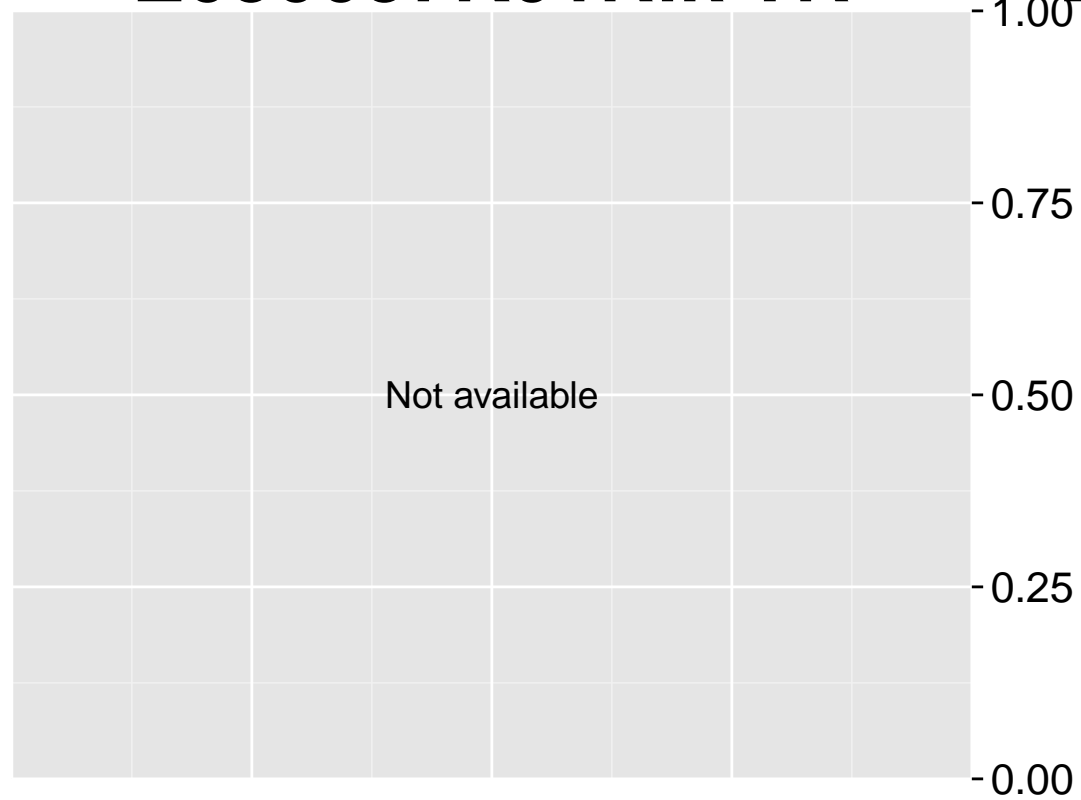

**E030037K01Rik log2(Ribosome occup**

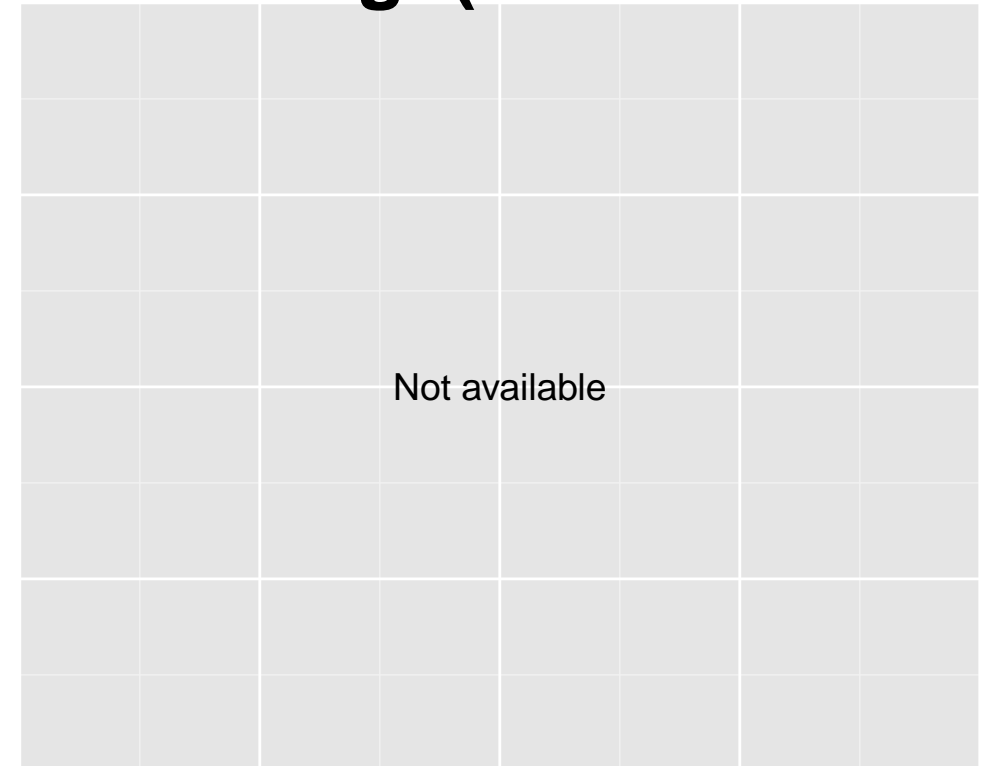

Supplement: Supplementary file 711 [file 1]

# Zbed4

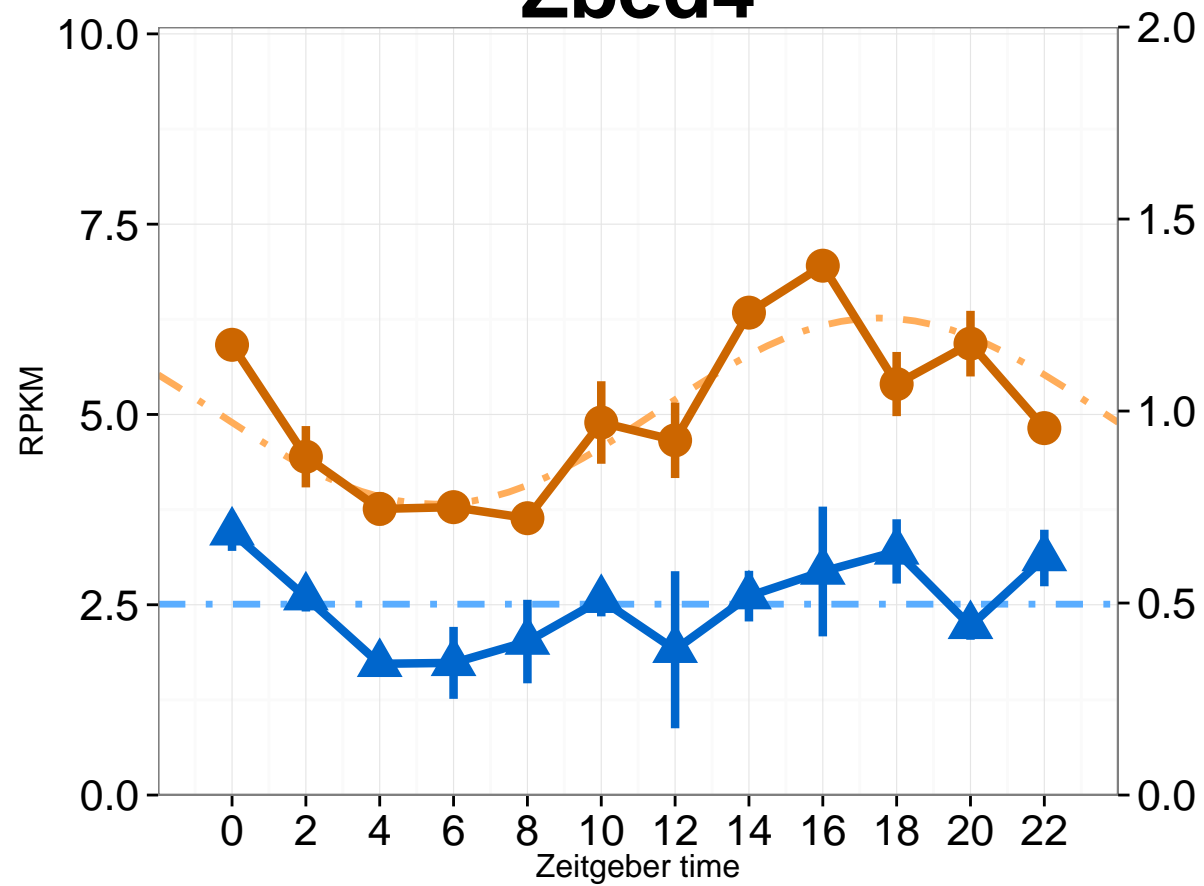

# Zbed4

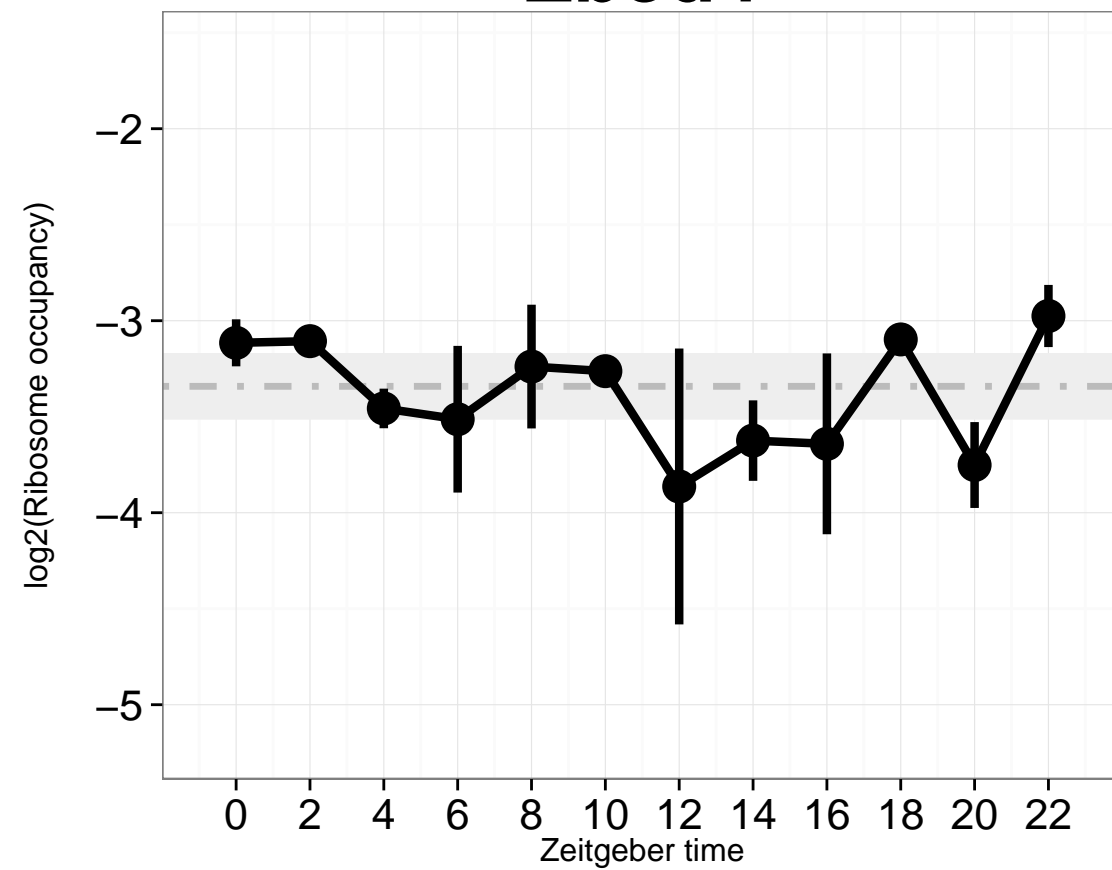

Supplement: Supplementary file 712 [file 1]

## Nfatc2

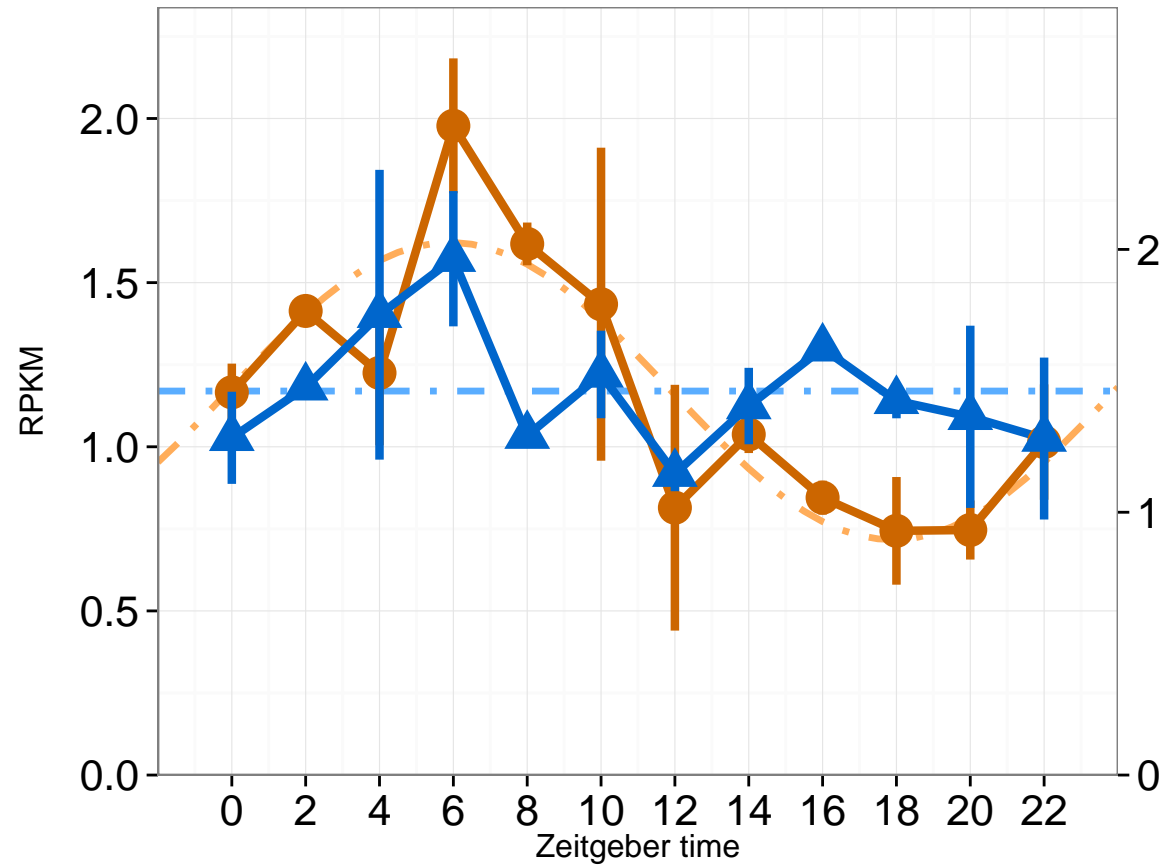

## Nfatc2

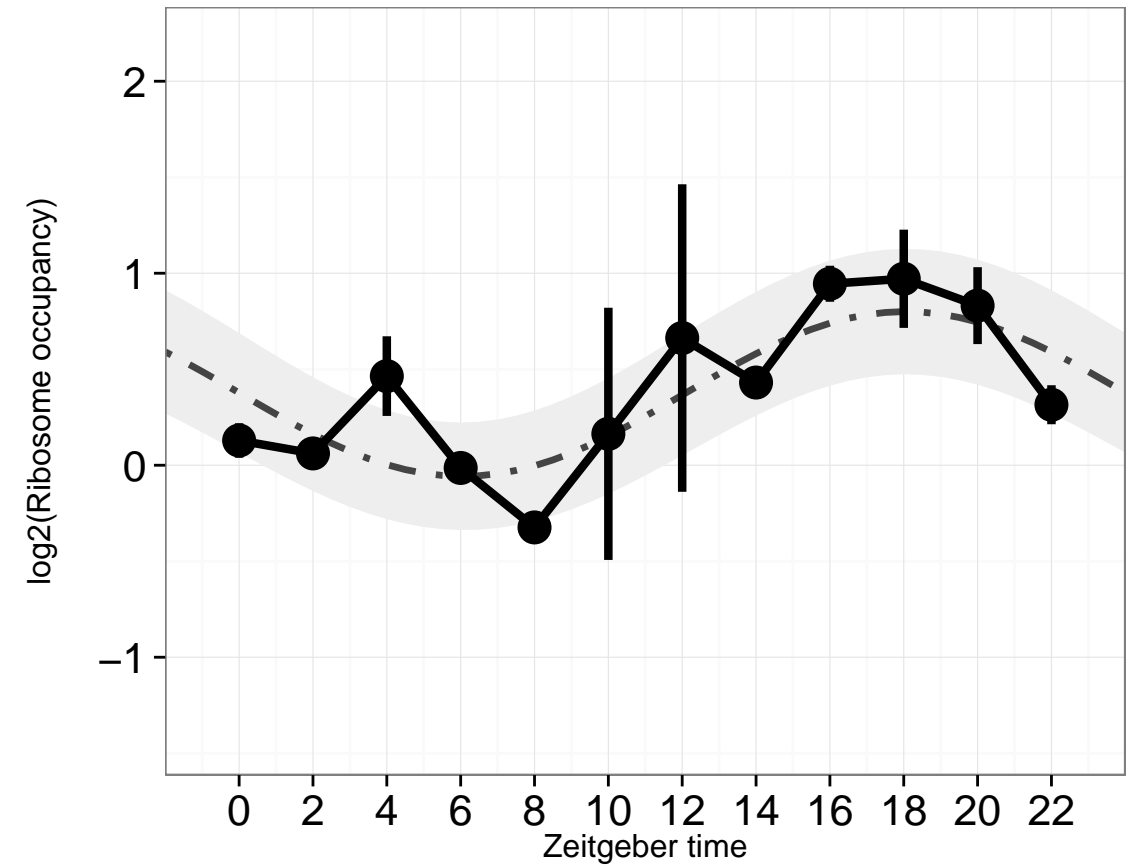

Supplement: Supplementary file 713 [file 1]

## Ccdc120

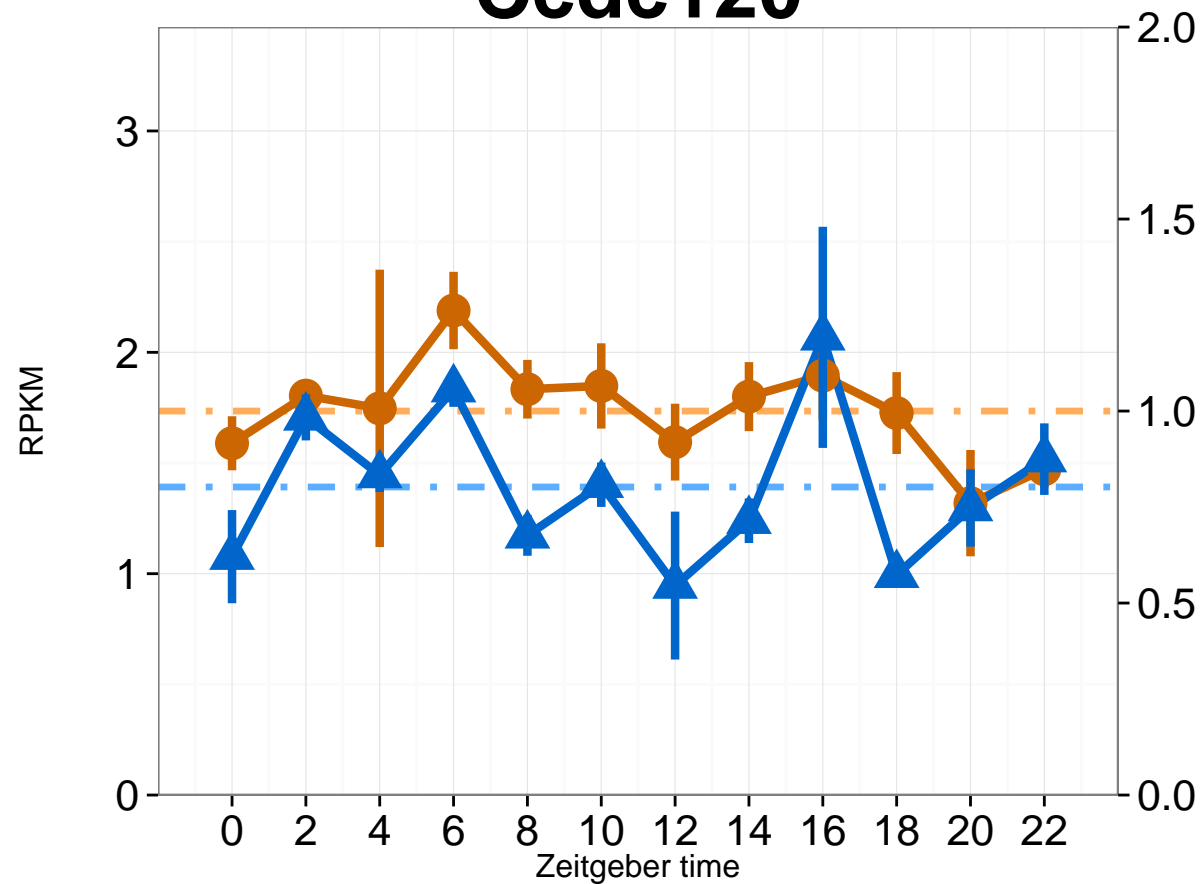

## Ccdc120

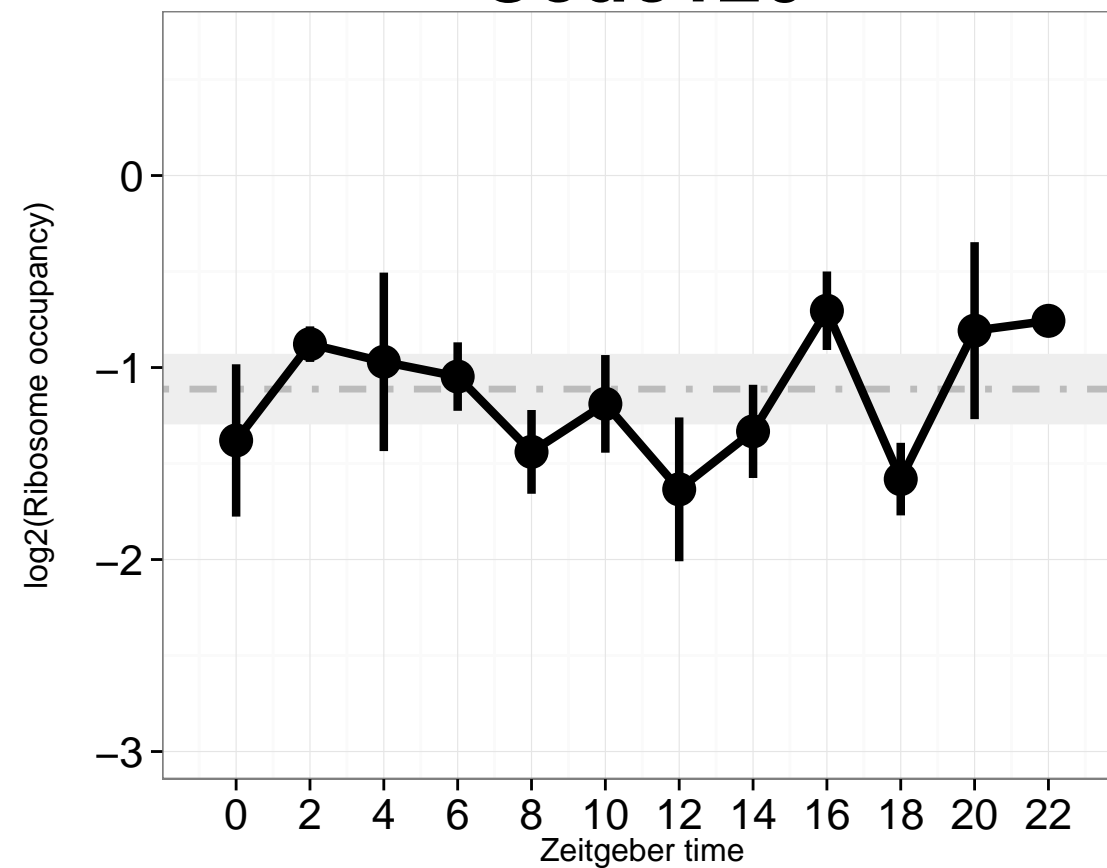

Supplement: Supplementary file 714 [file 1]

# Ppp2cb

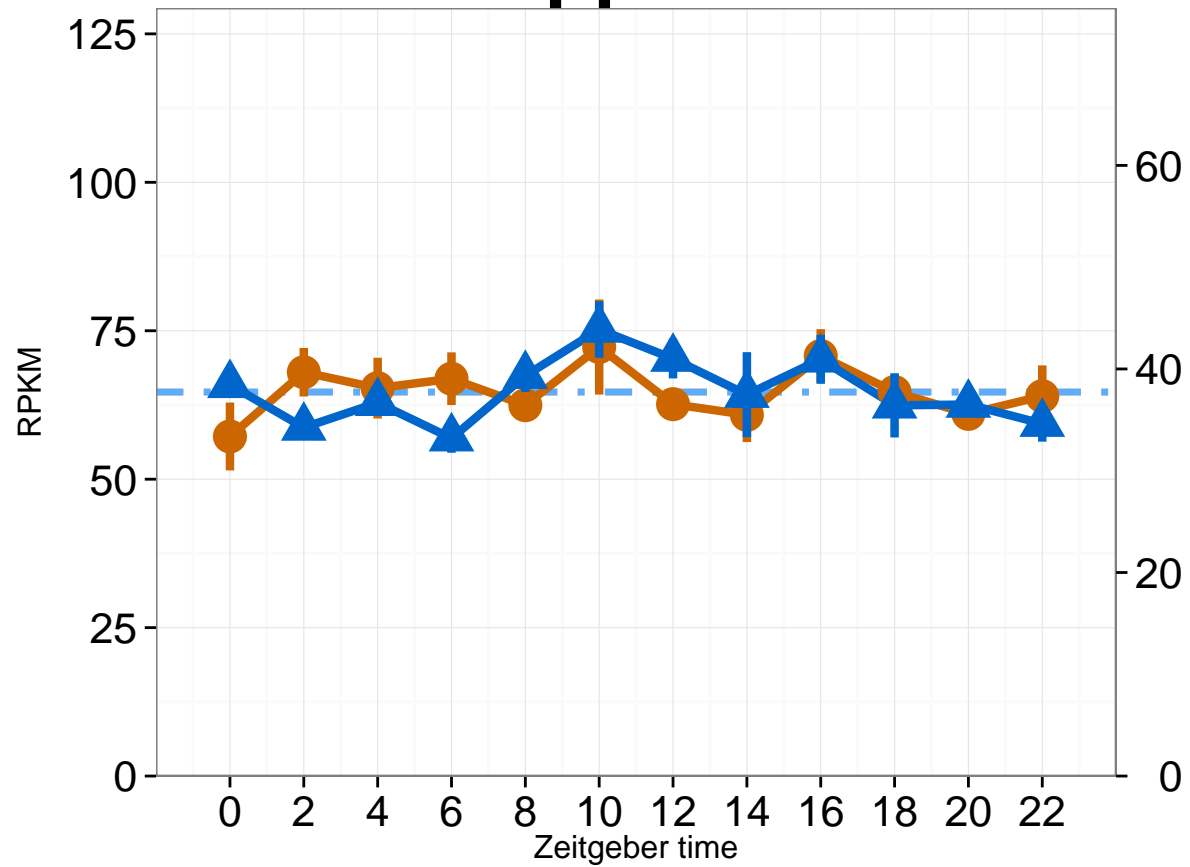

# Ppp2cb

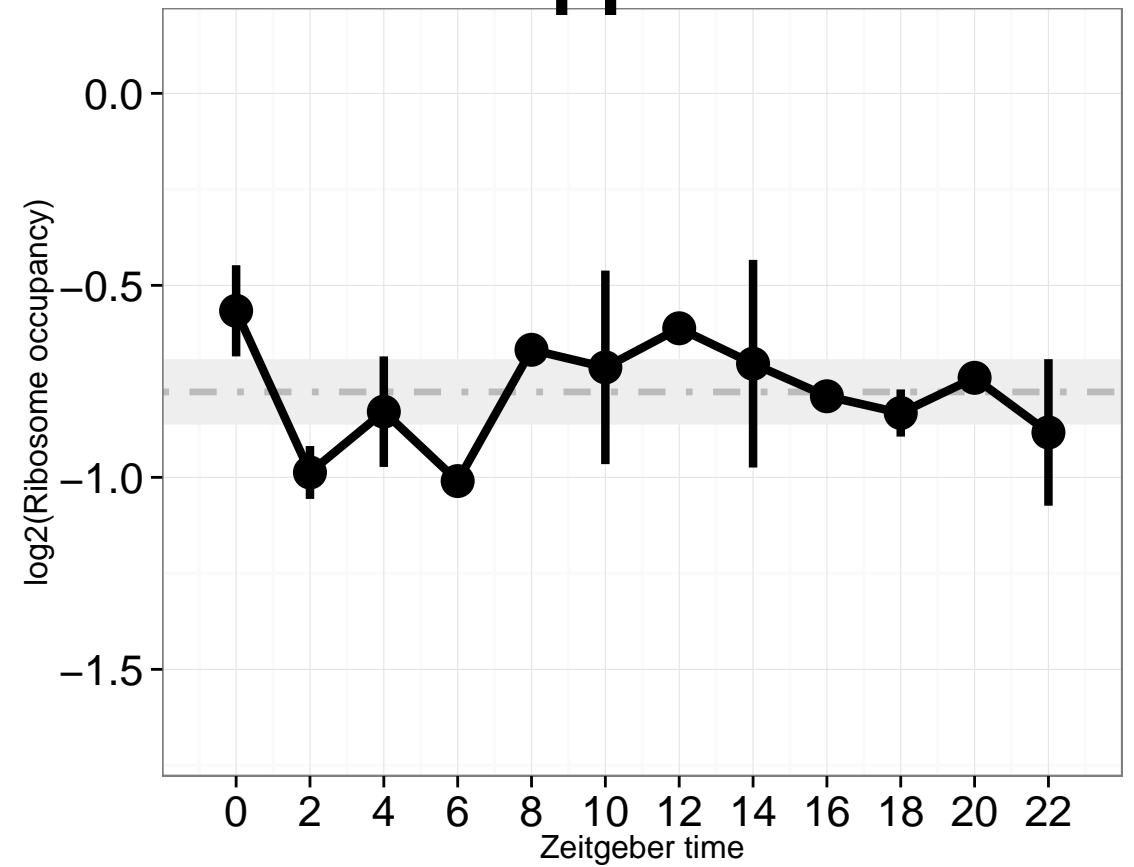

Supplement: Supplementary file 715 [file 1]

## Cmklr1

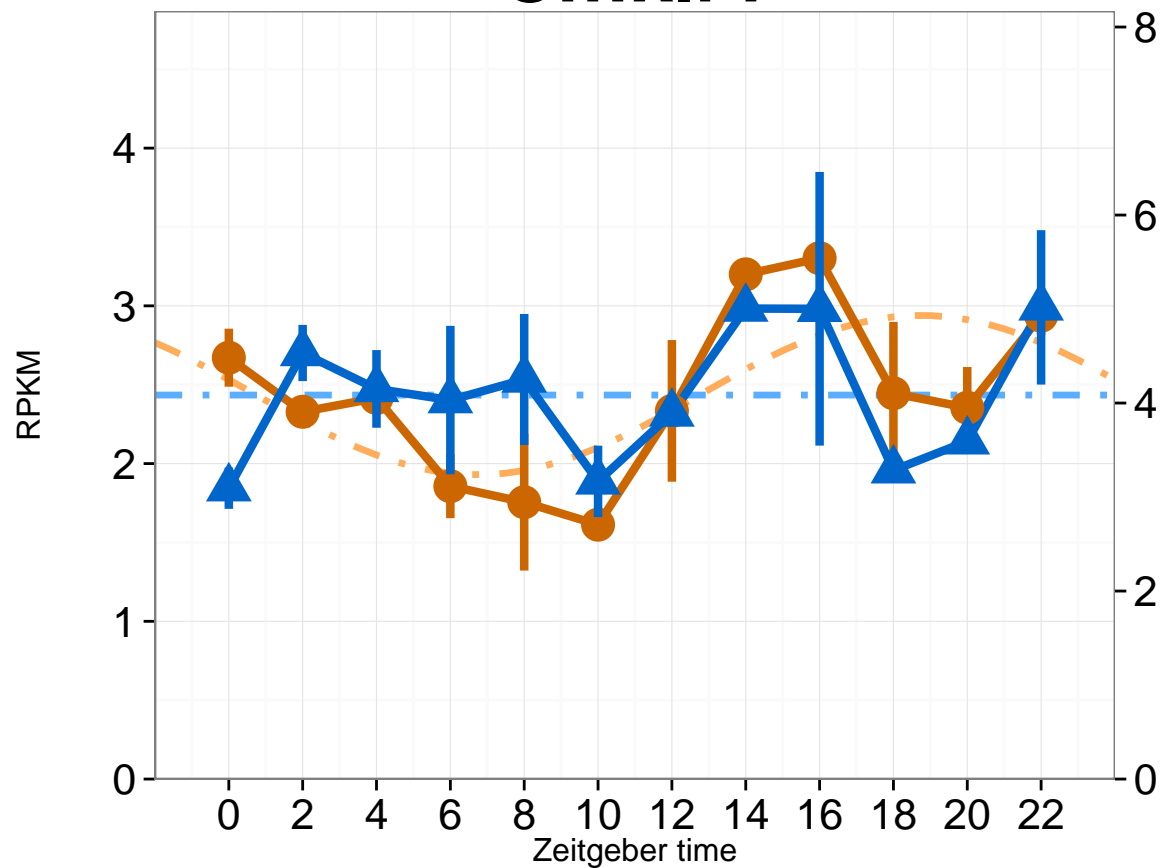

## Cmklr1

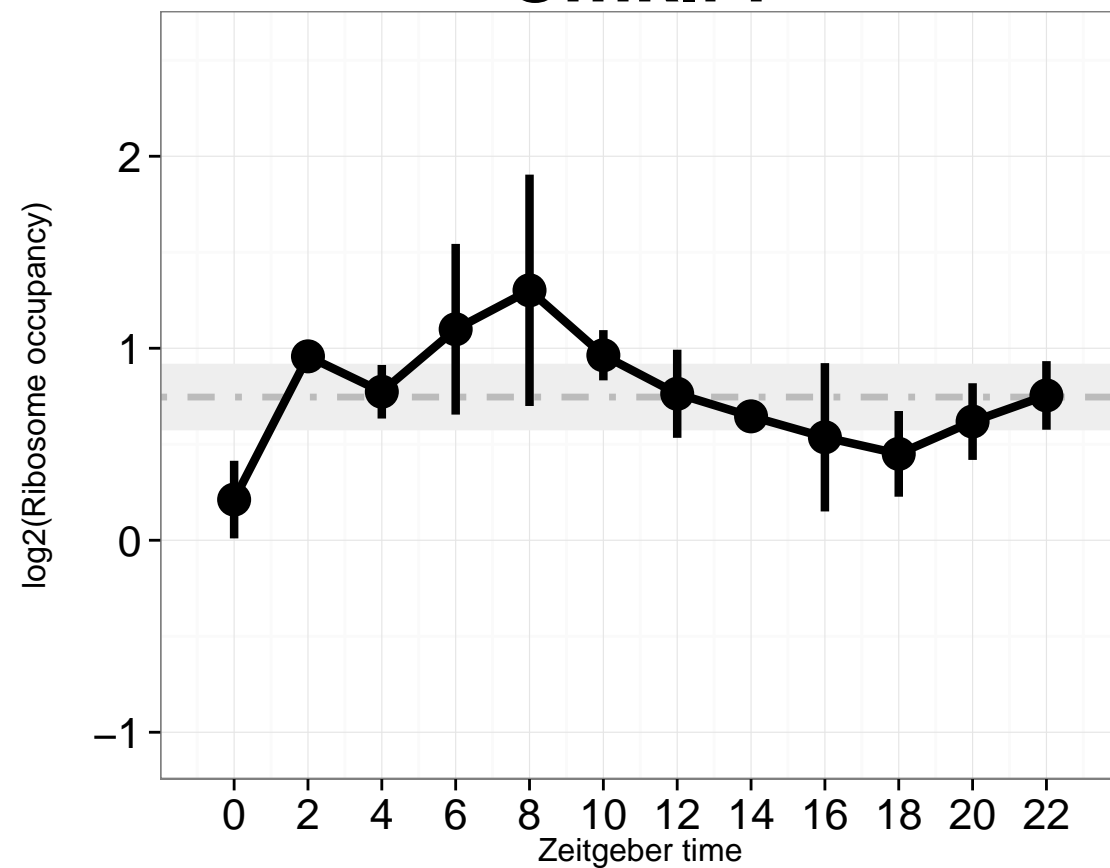

Supplement: Supplementary file 716 [file 1]

# Lrrn3

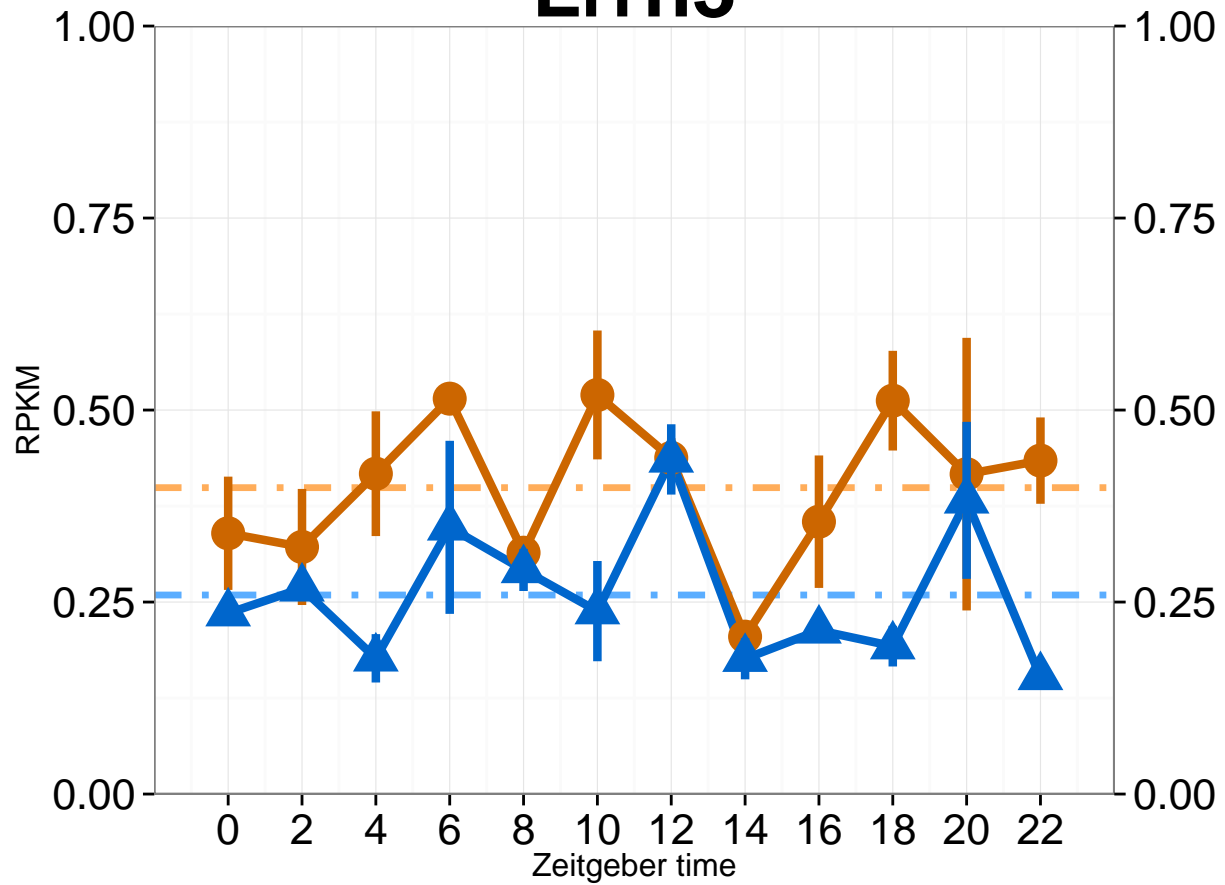

# Lrrn3

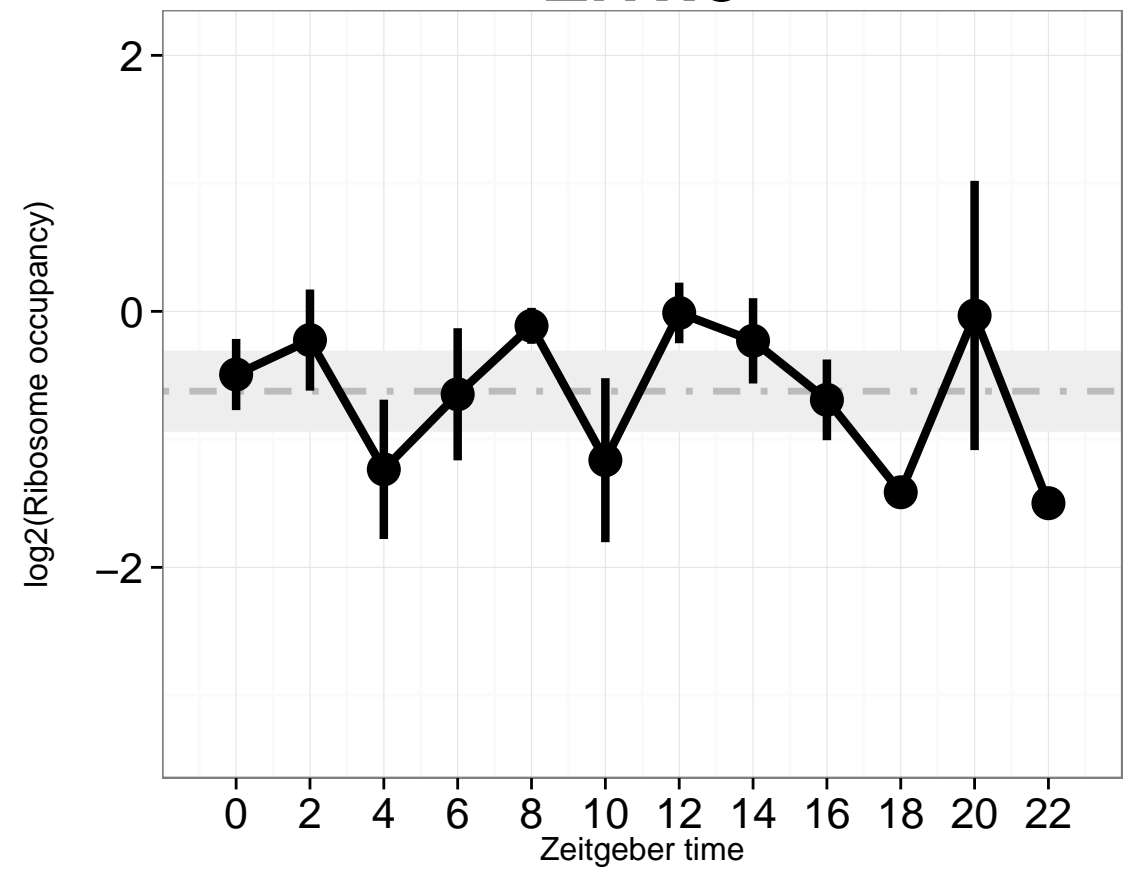

Supplement: Supplementary file 717 [file 1]

## Selt

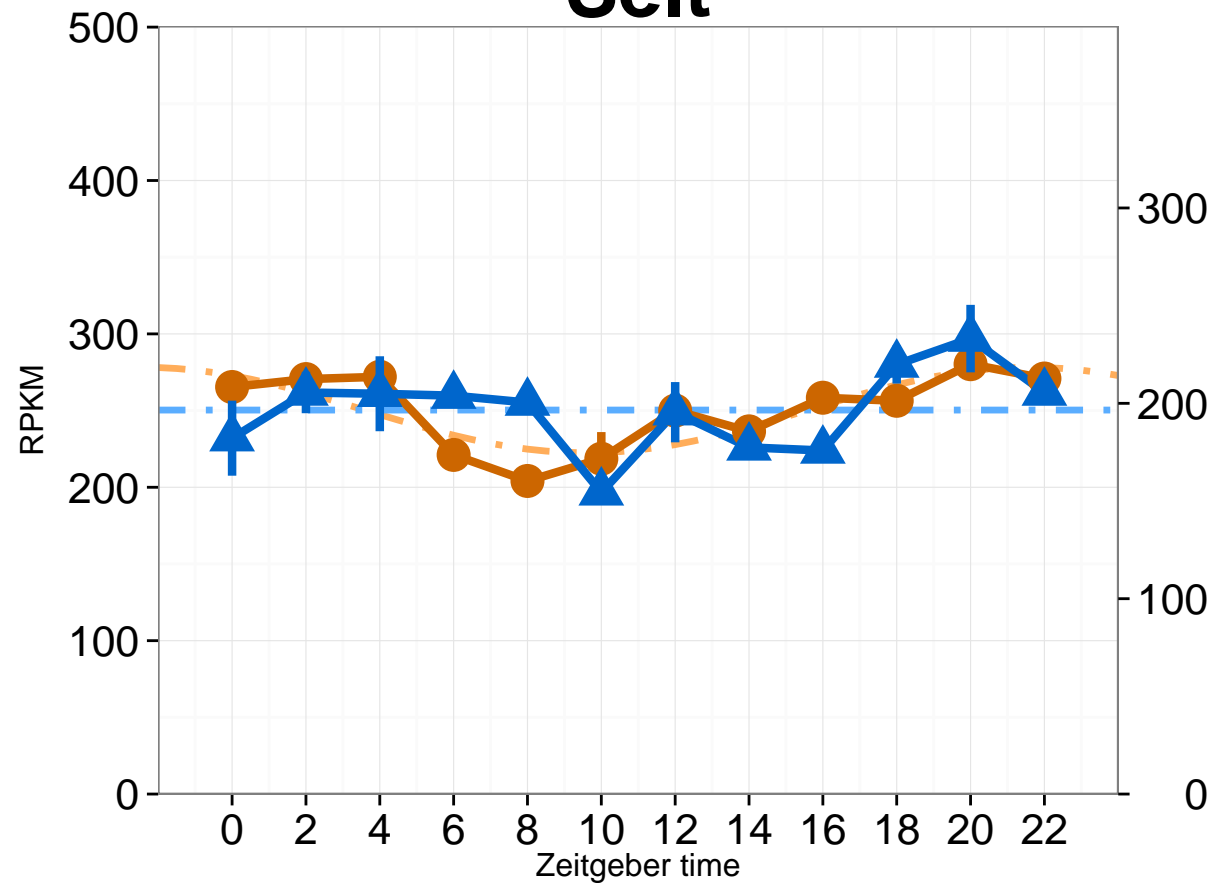

## Selt

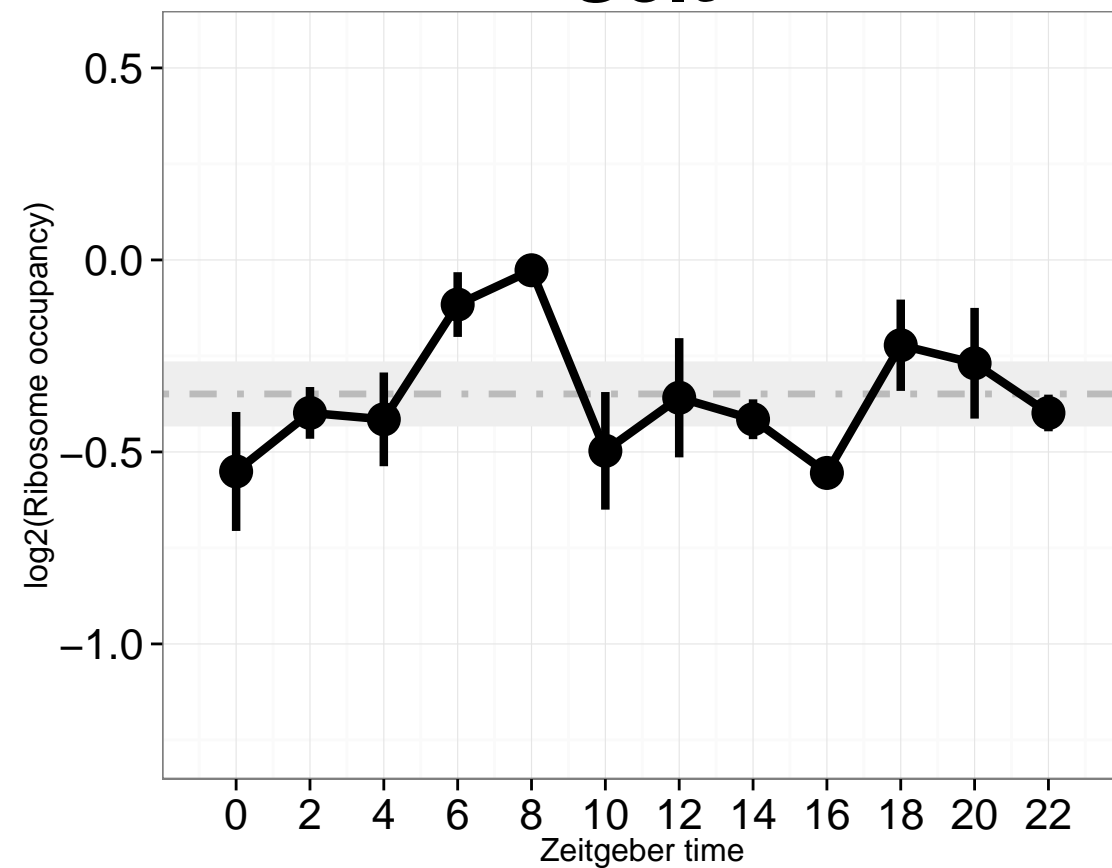

Supplement: Supplementary file 718 [file 1]

## Fbl

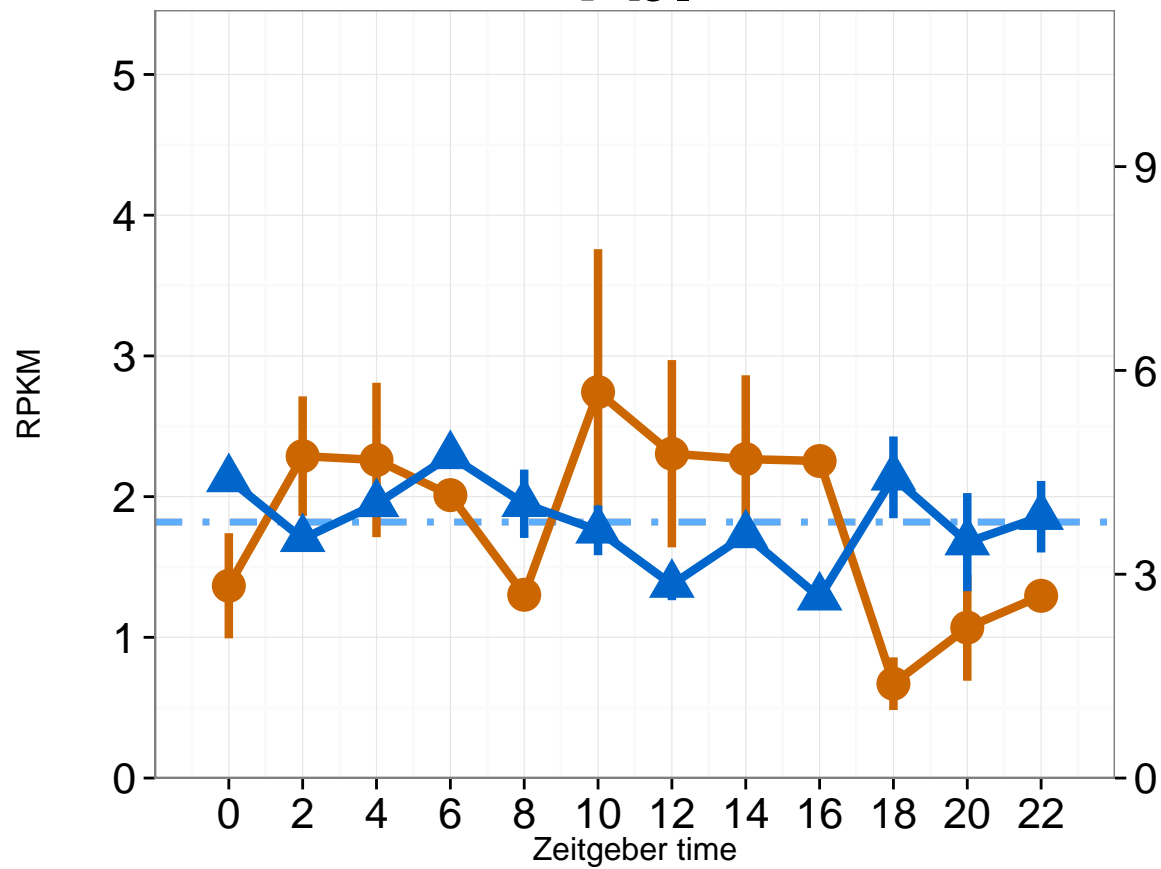

## Fbl

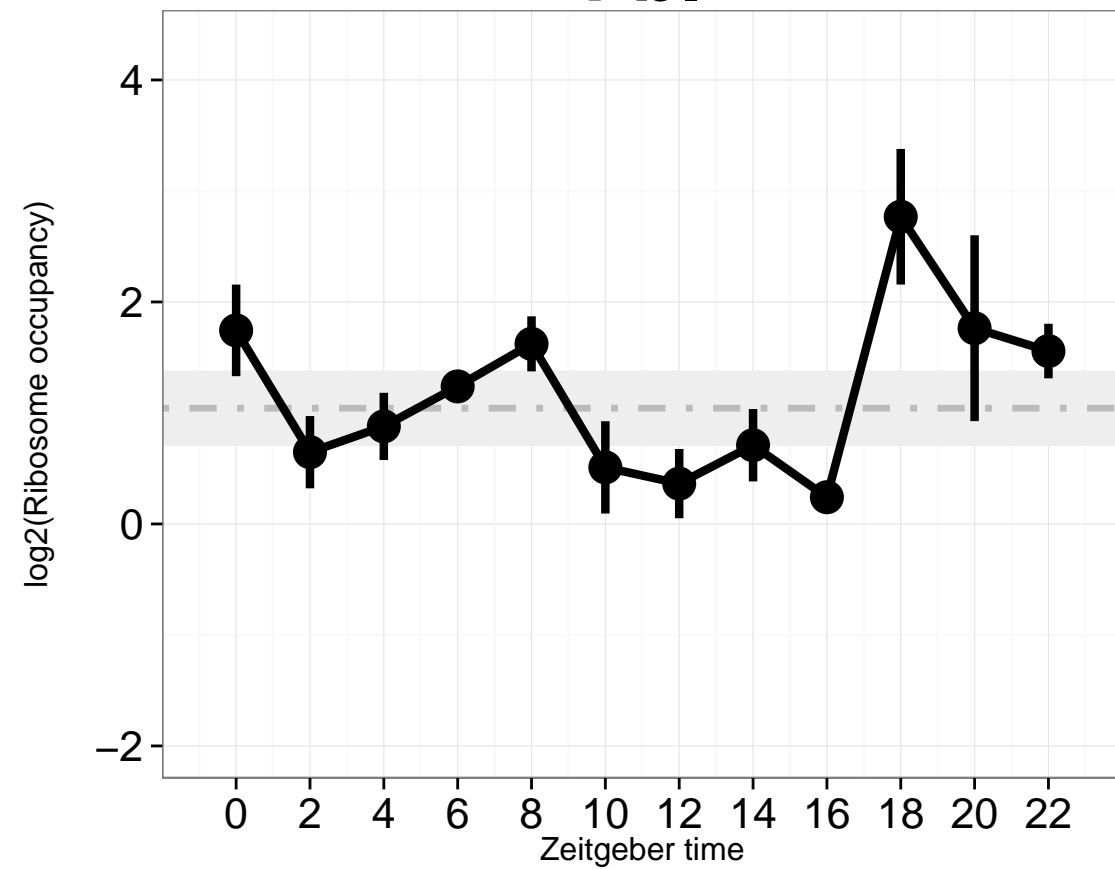

Supplement: Supplementary file 719 [file 1]

## Bag5

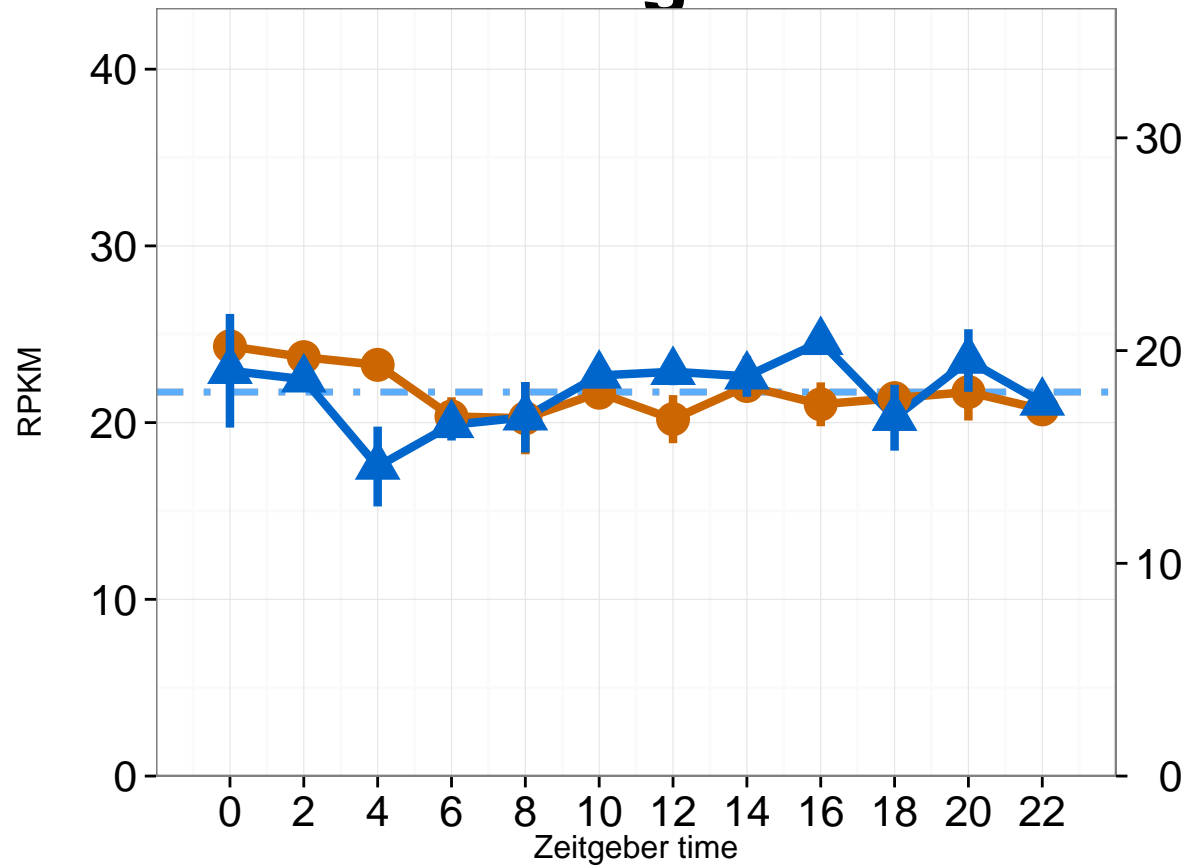

## Bag5

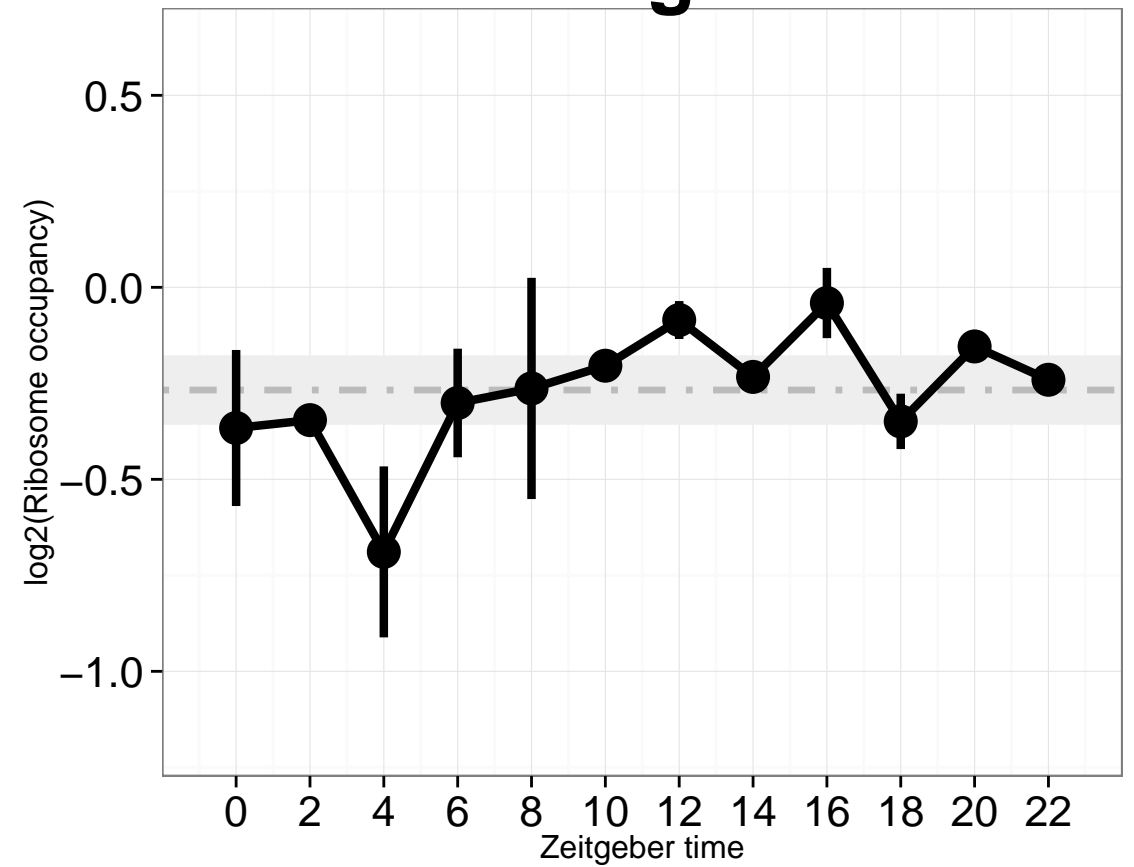

Supplement: Supplementary file 720 [file 1]

## Aldh9a1

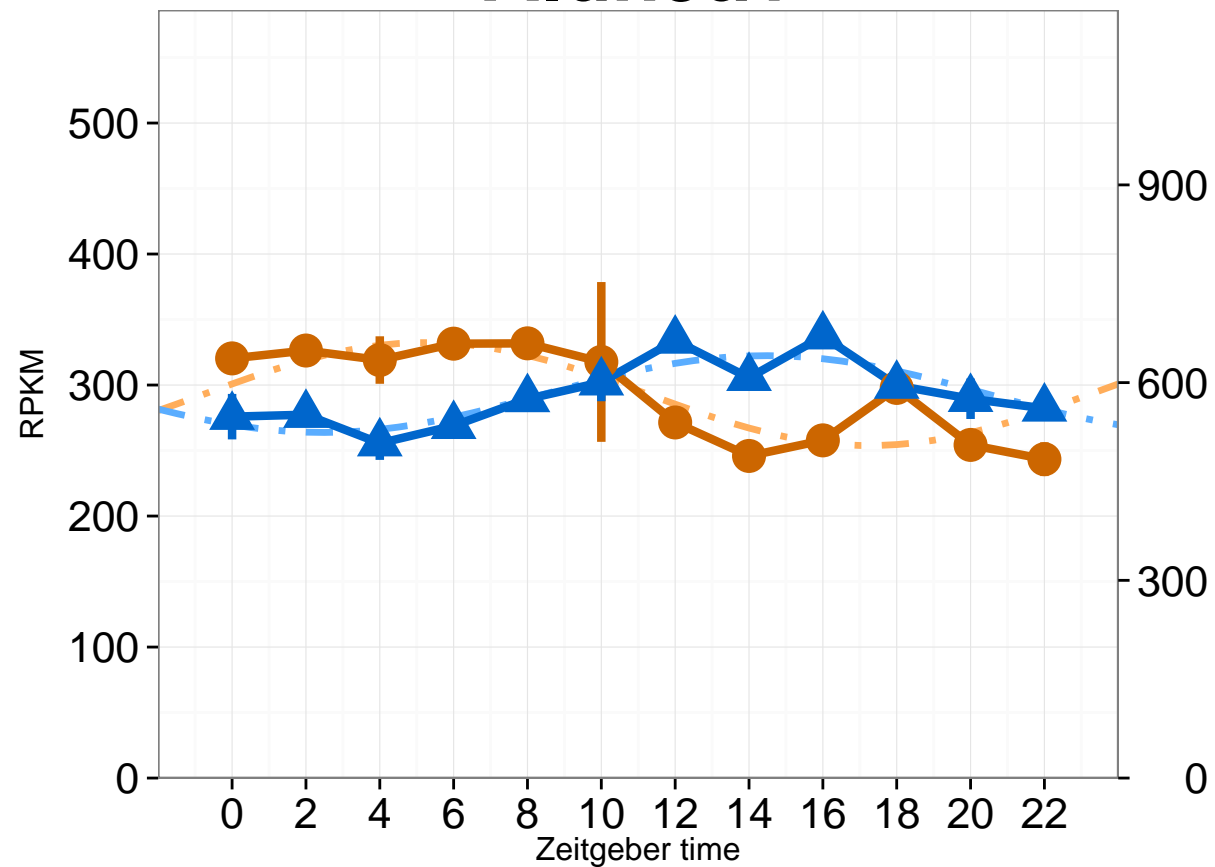

## Aldh9a1

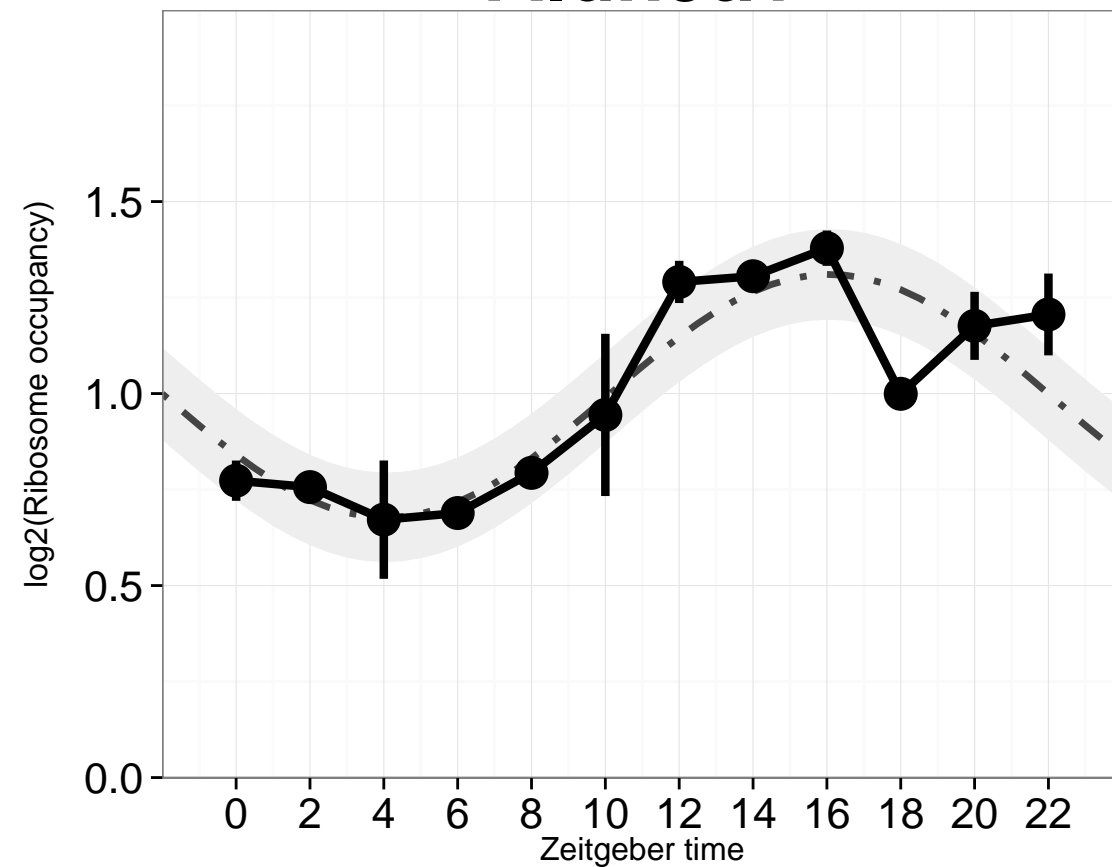

Supplement: Supplementary file 721 [file 1]

## Nup50

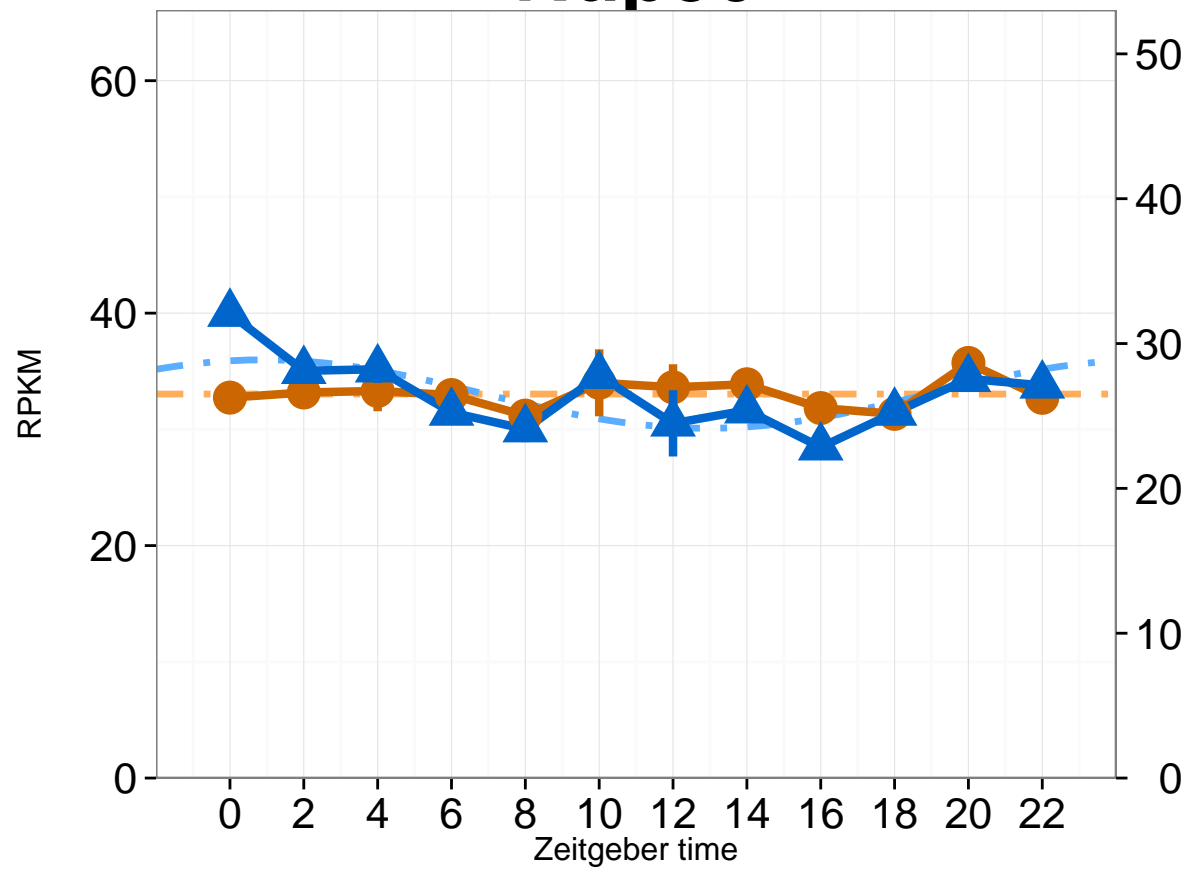

## Nup50

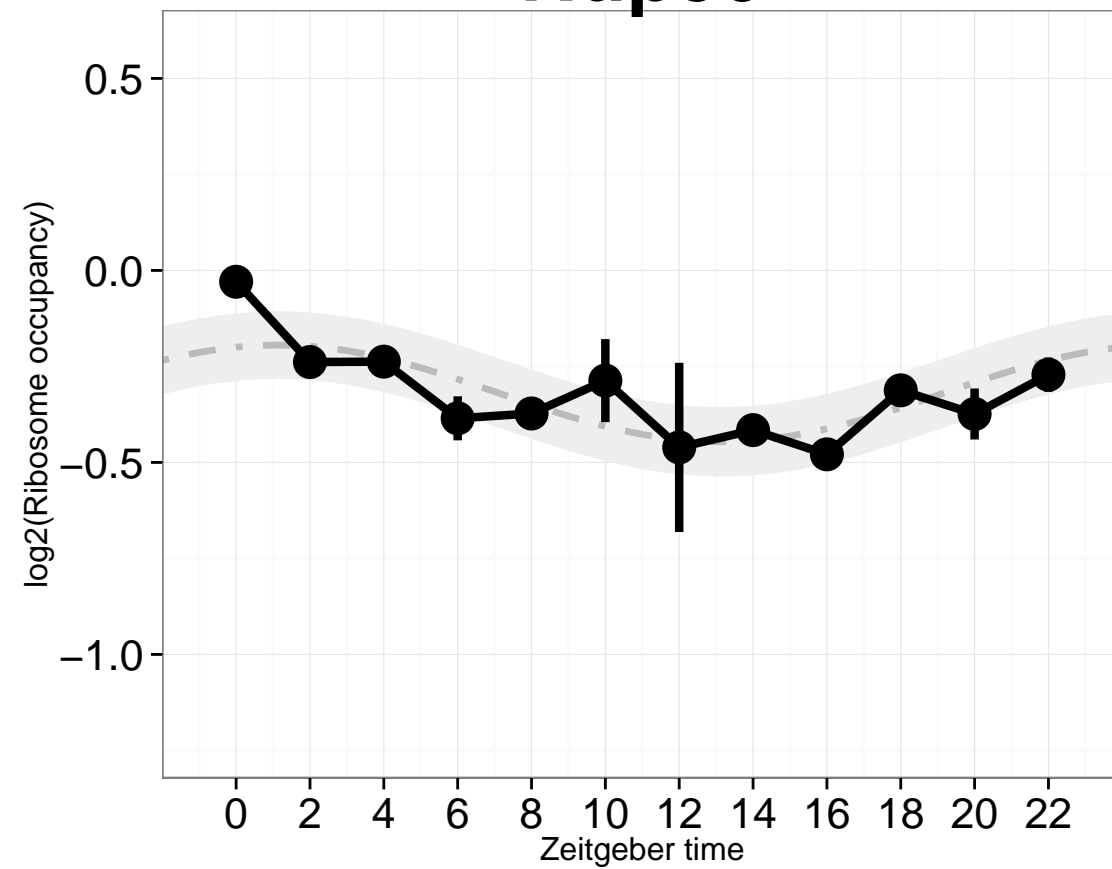

Supplement: Supplementary file 722 [file 1]

## Tmx1

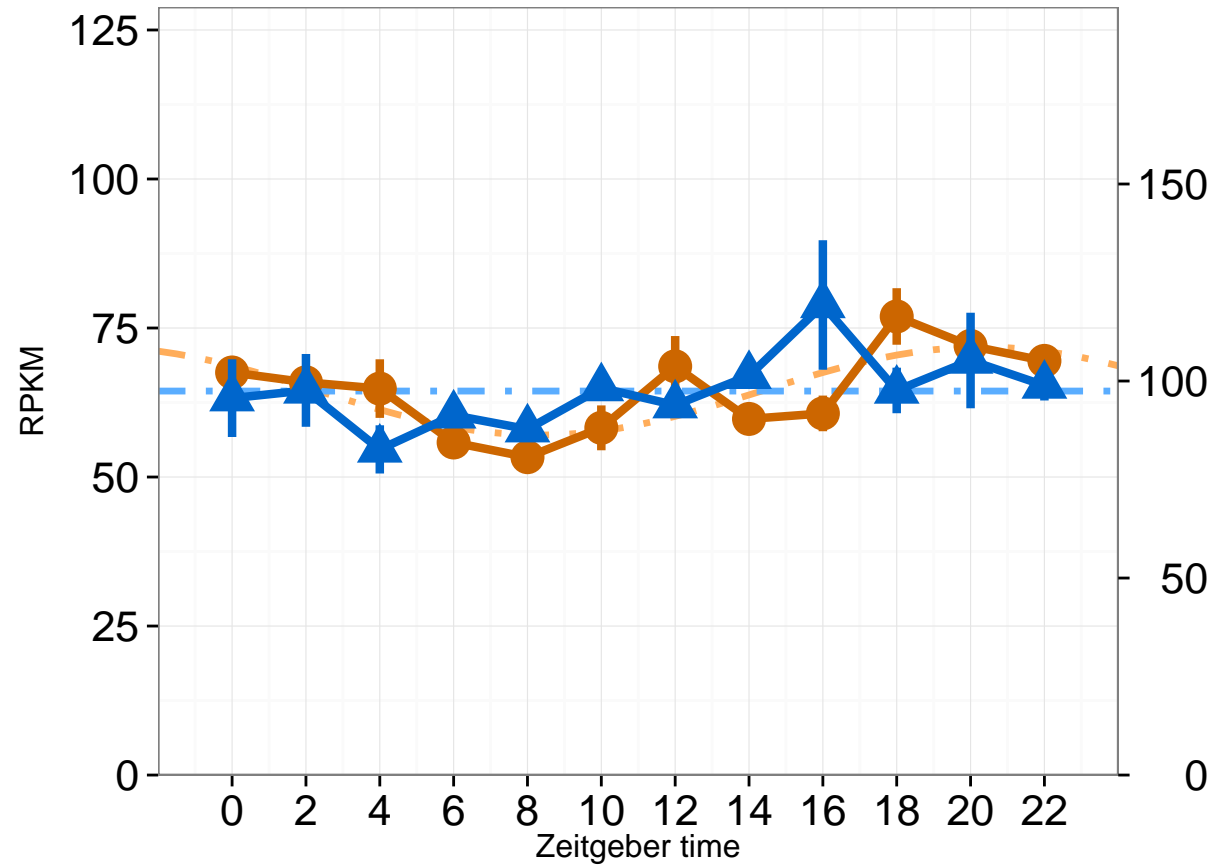

## Tmx1

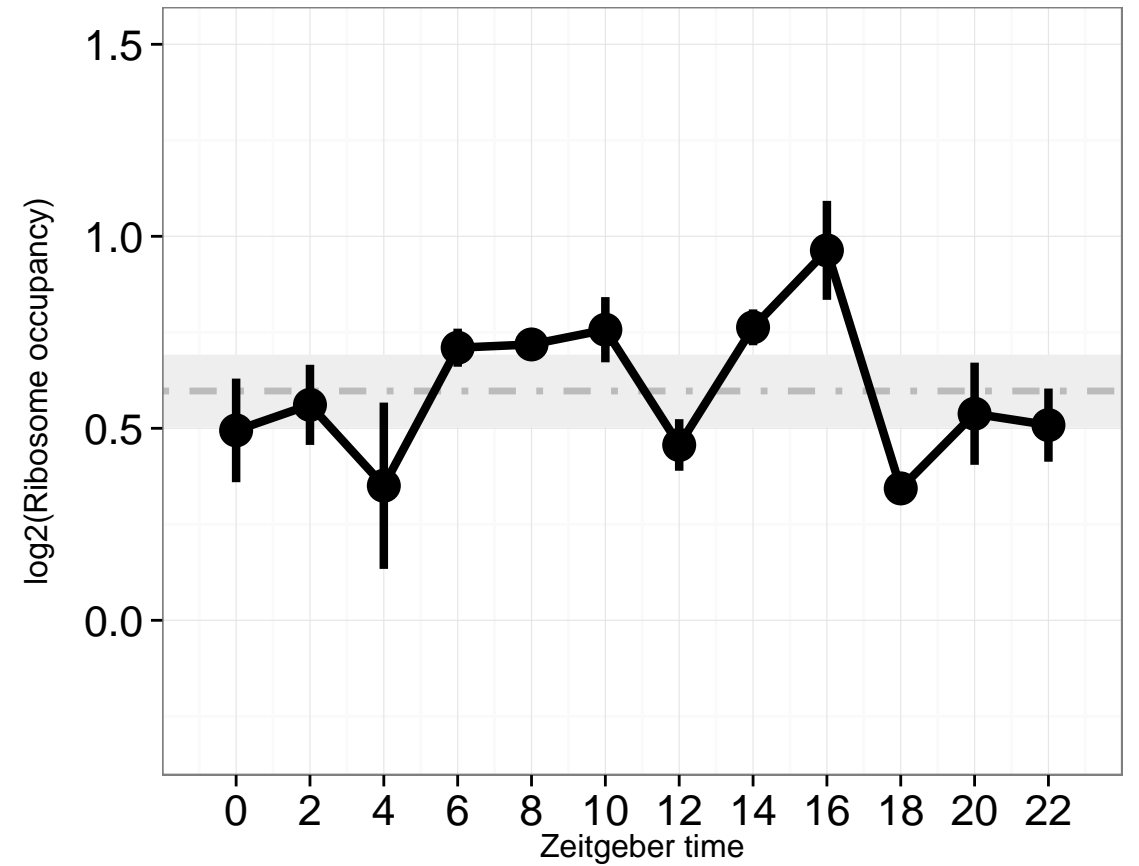

Supplement: Supplementary file 723 [file 1]

## Hhip

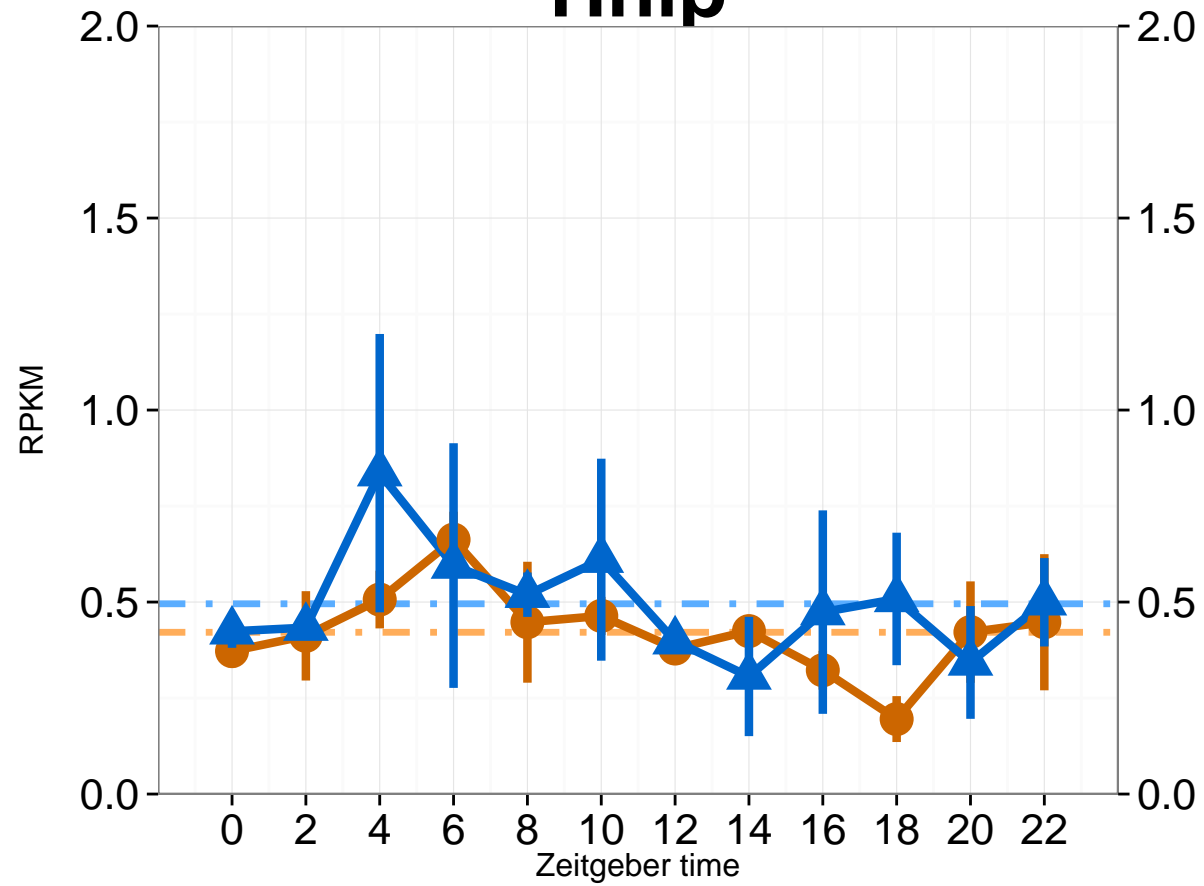

## Hhip

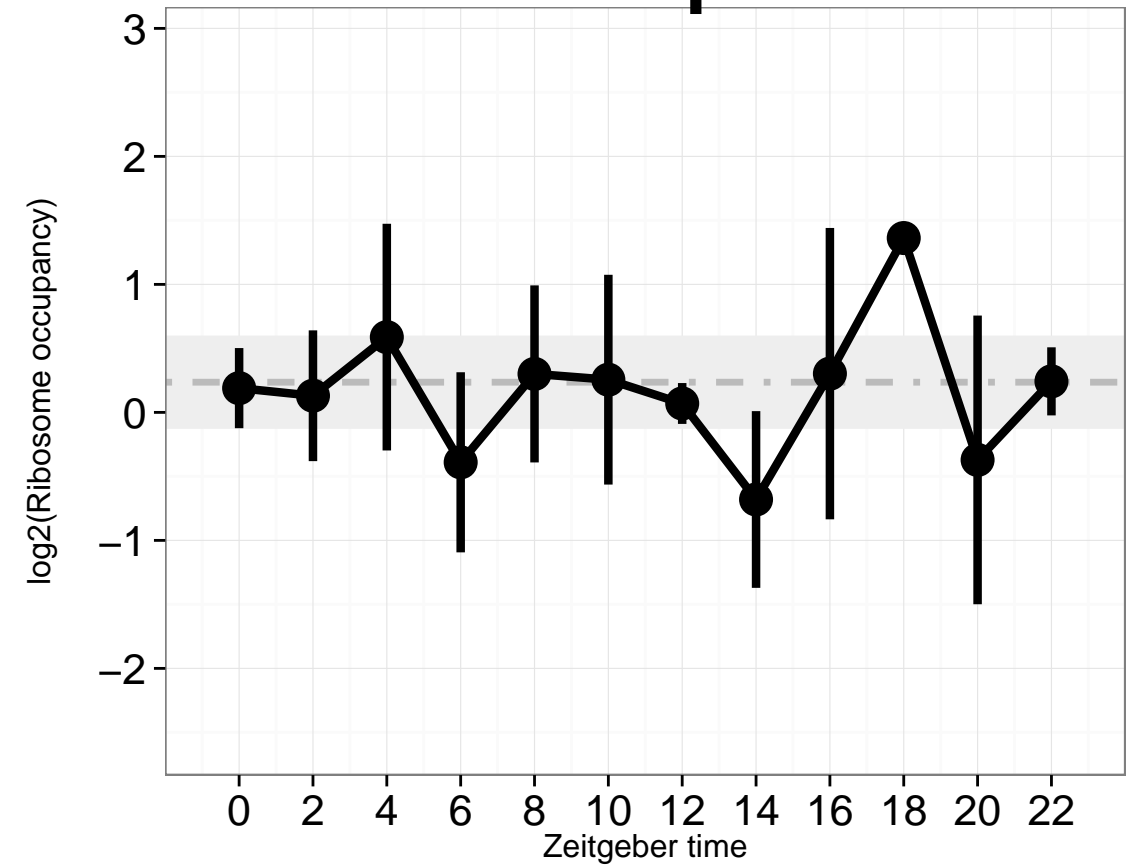

Supplement: Supplementary file 724 [file 1]

# Thns1

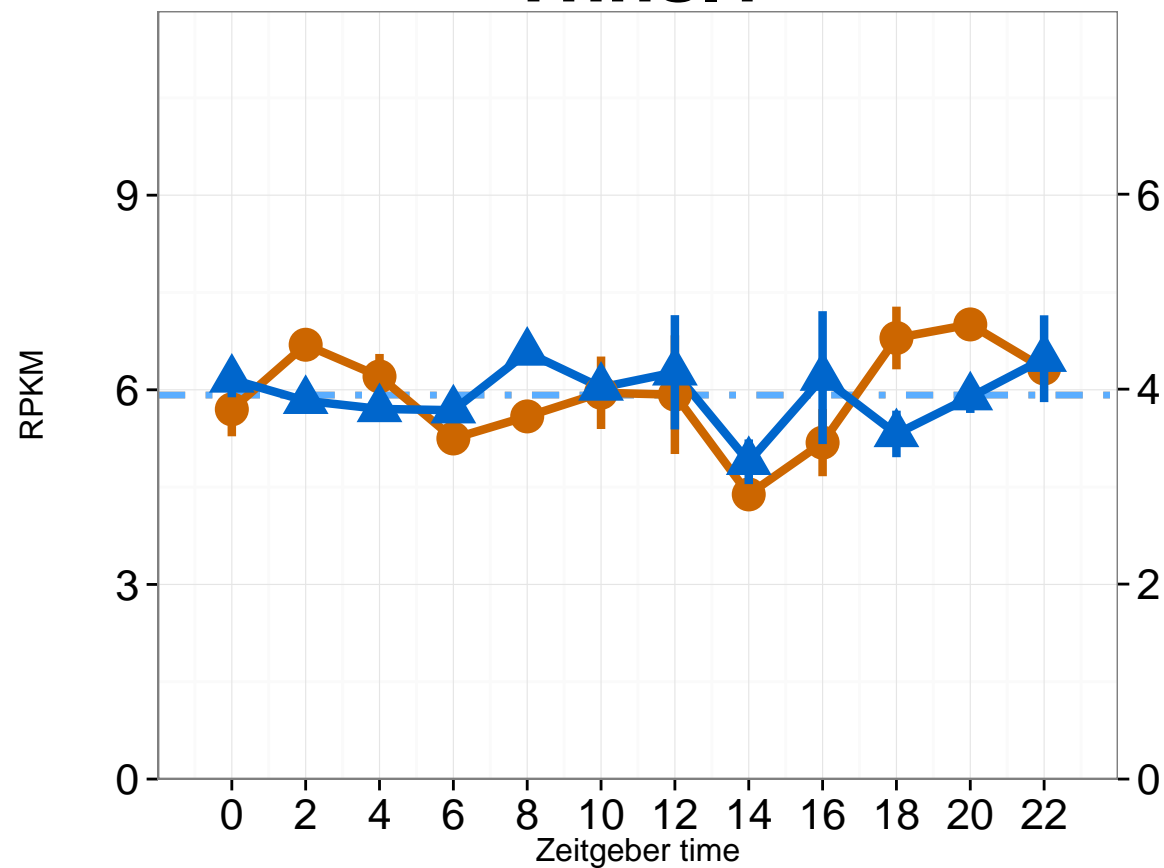

# Thns1

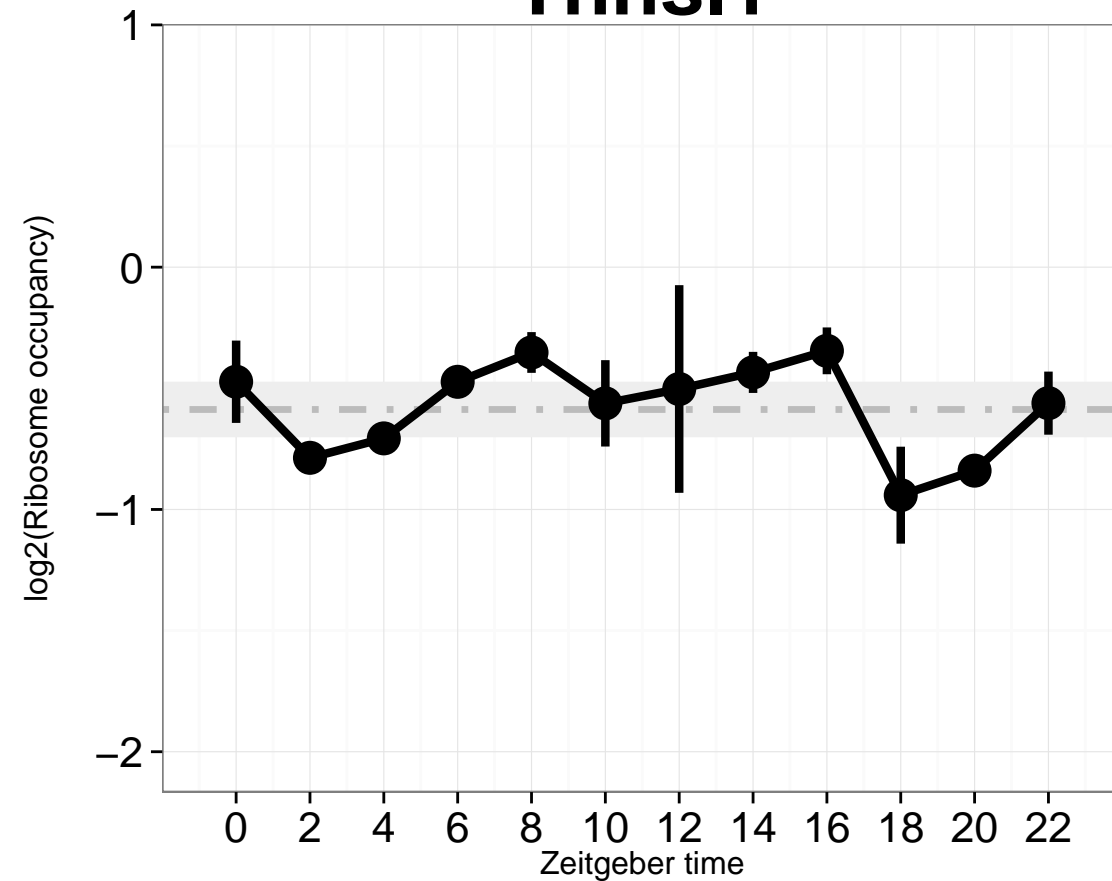

Supplement: Supplementary file 725 [file 1]

## RnaseI

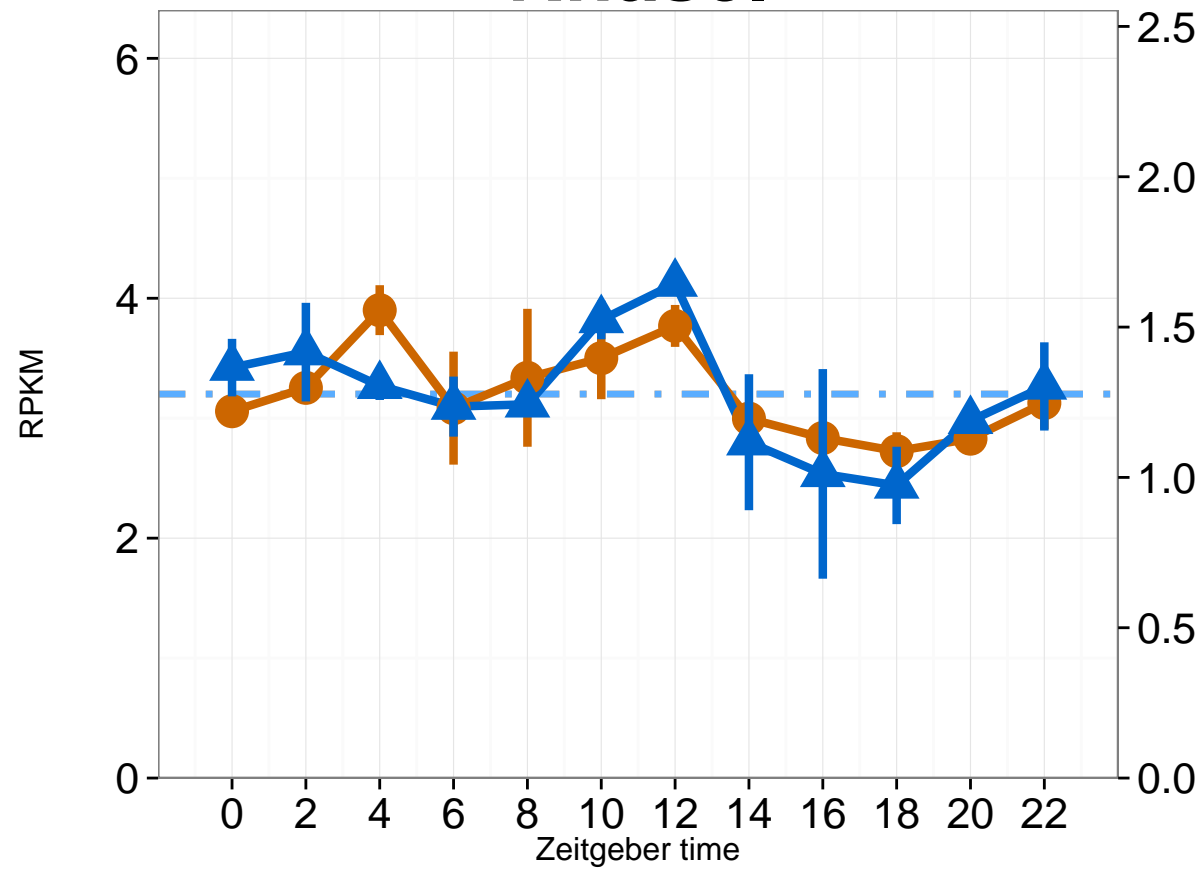

## RnaseI

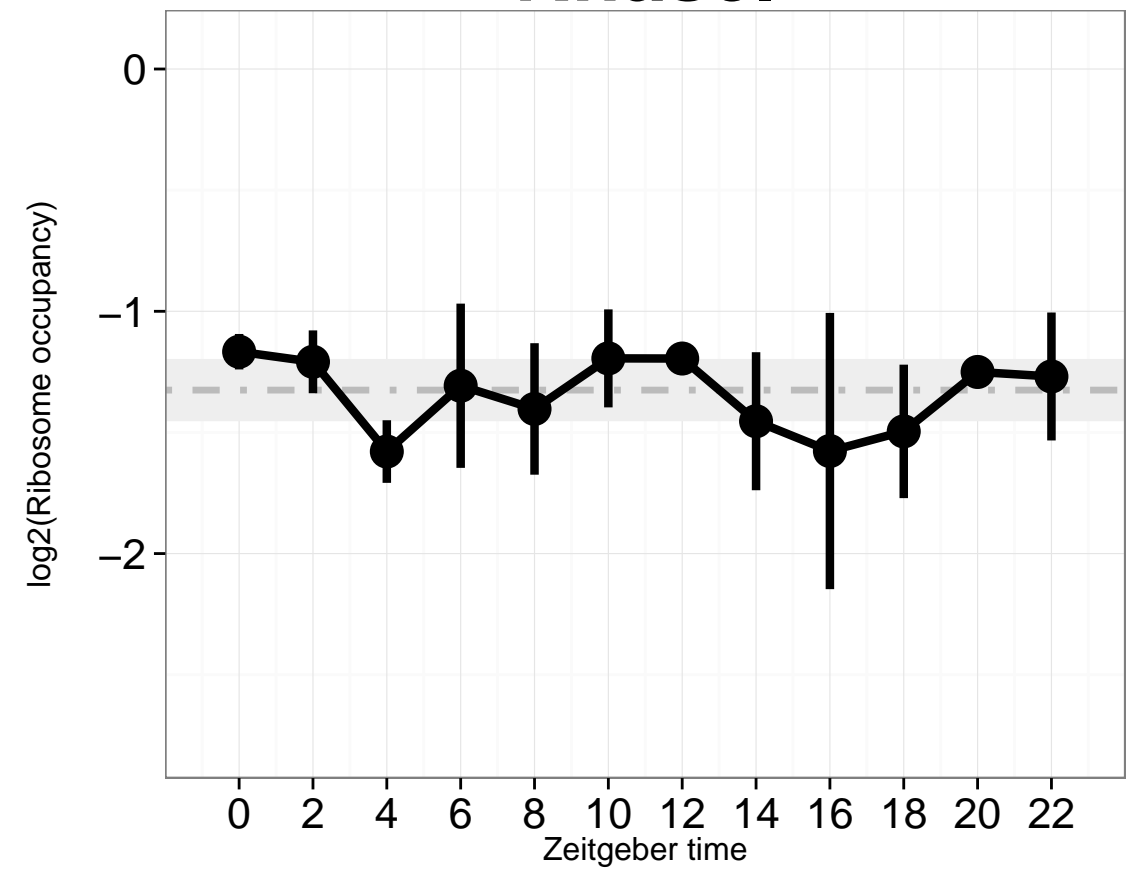

Supplement: Supplementary file 726 [file 1]

# Fam102a

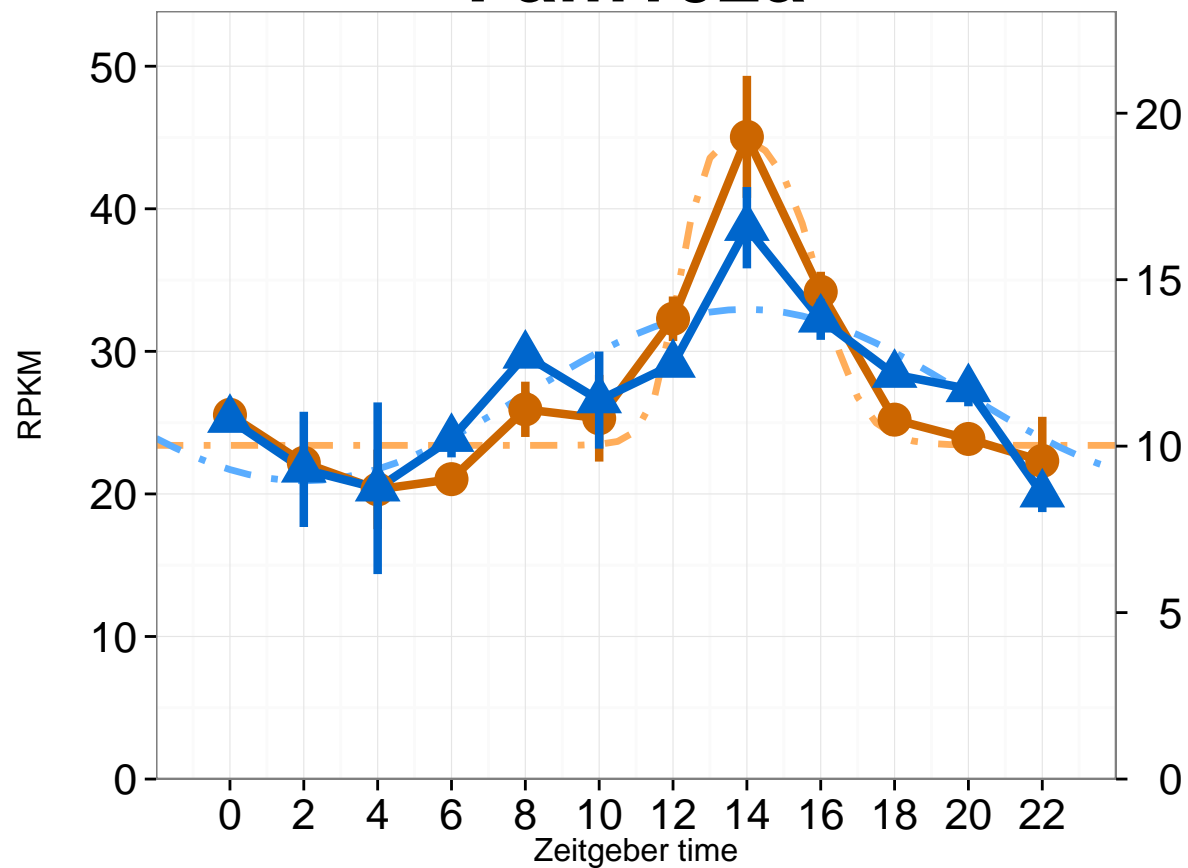

# Fam102a

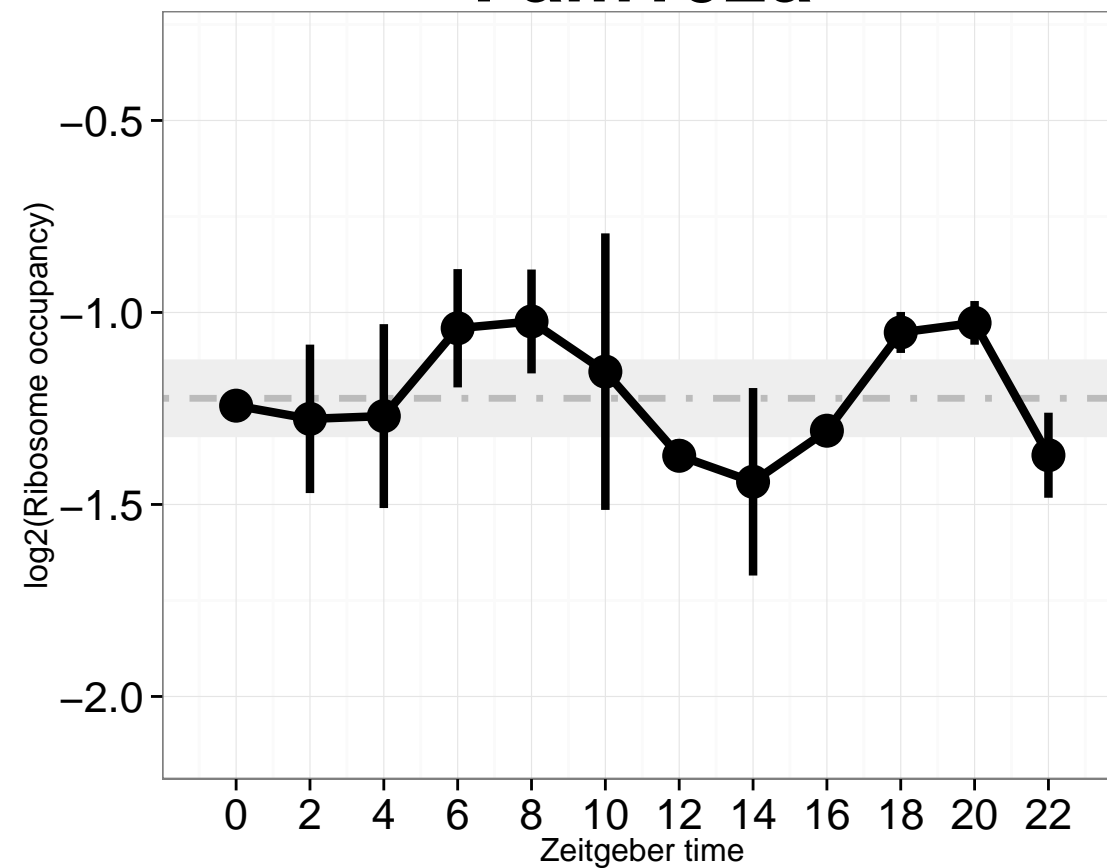

Supplement: Supplementary file 727 [file 1]

# Rnf144a

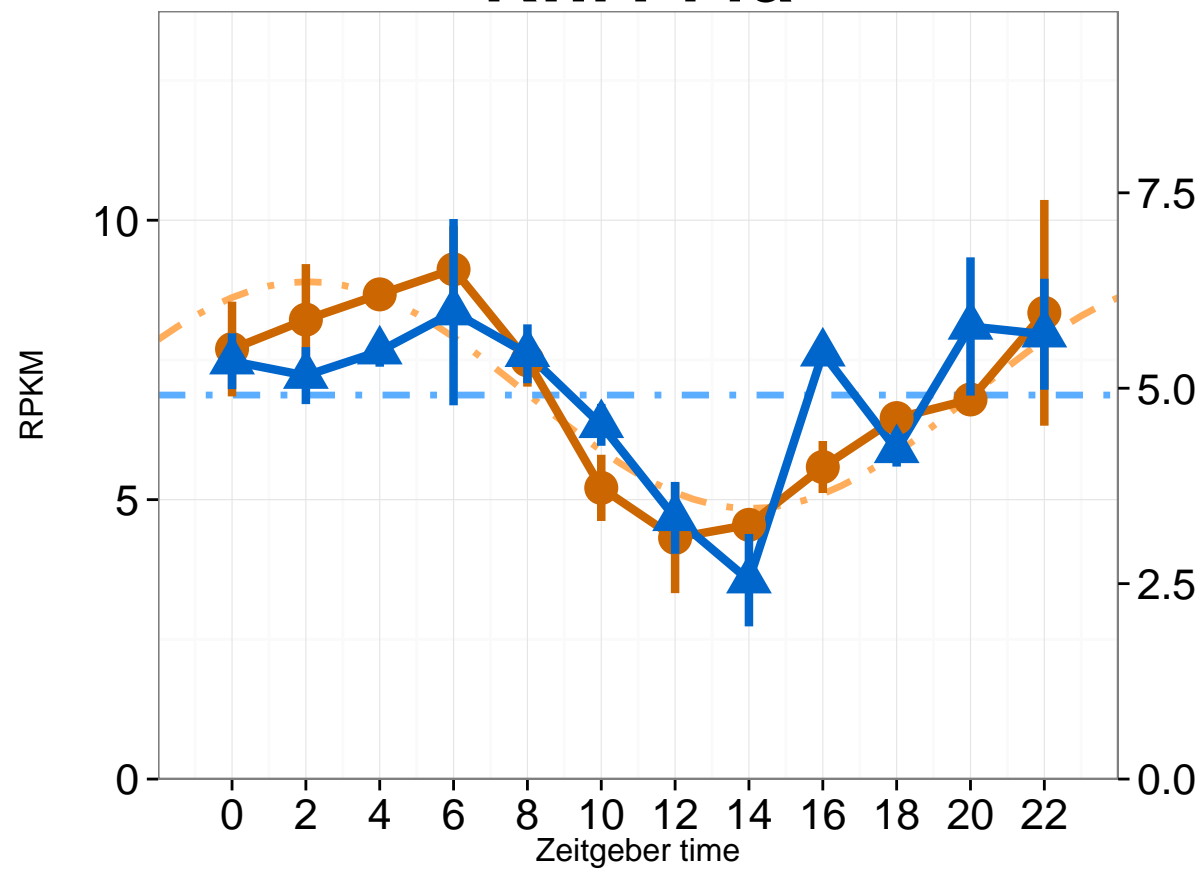

# Rnf144a

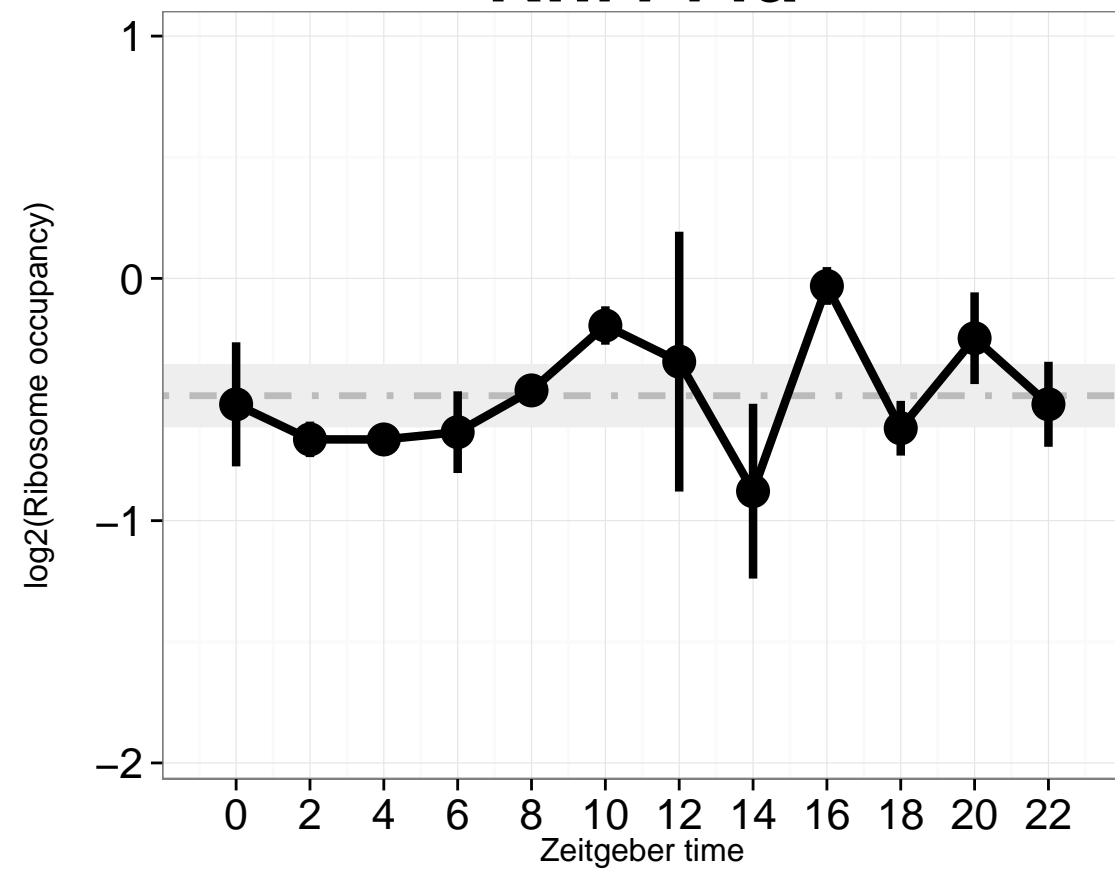

Supplement: Supplementary file 728 [file 1]

## Kctd2

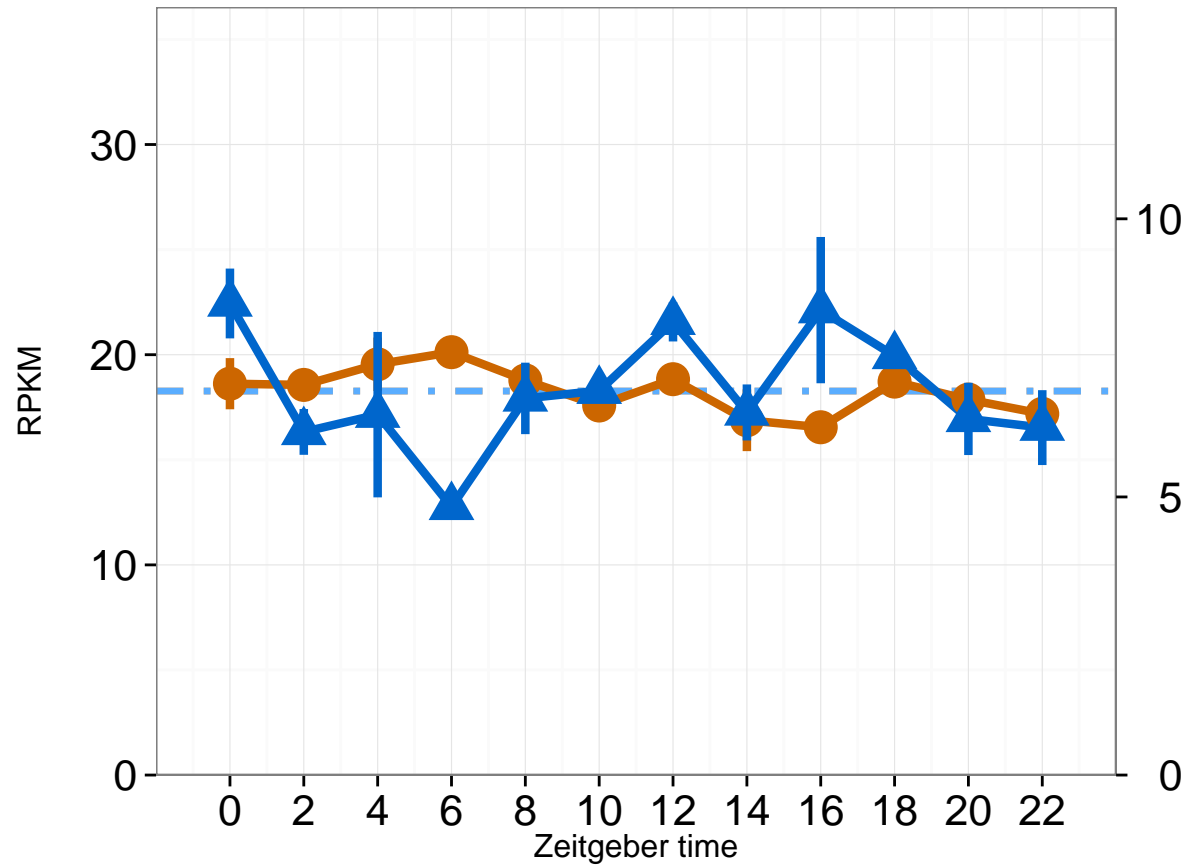

## Kctd2

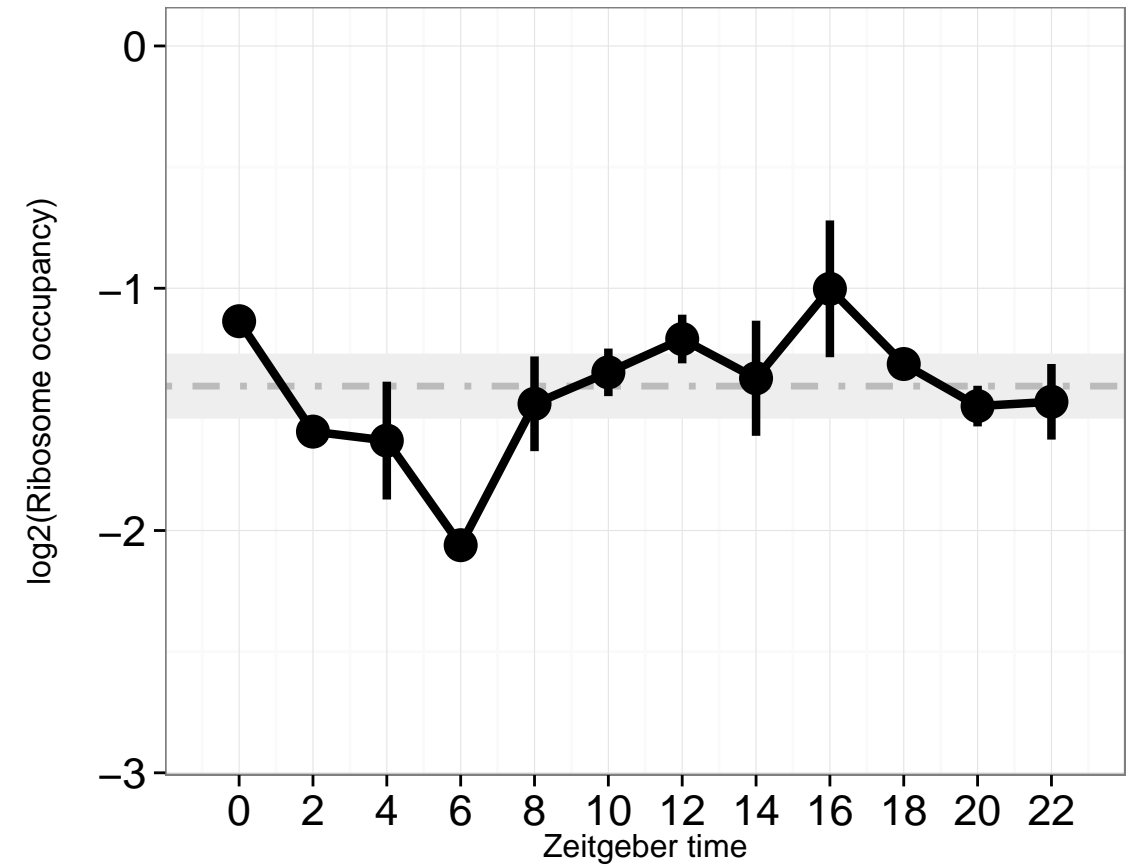

Supplement: Supplementary file 729 [file 1]

# Zscan18

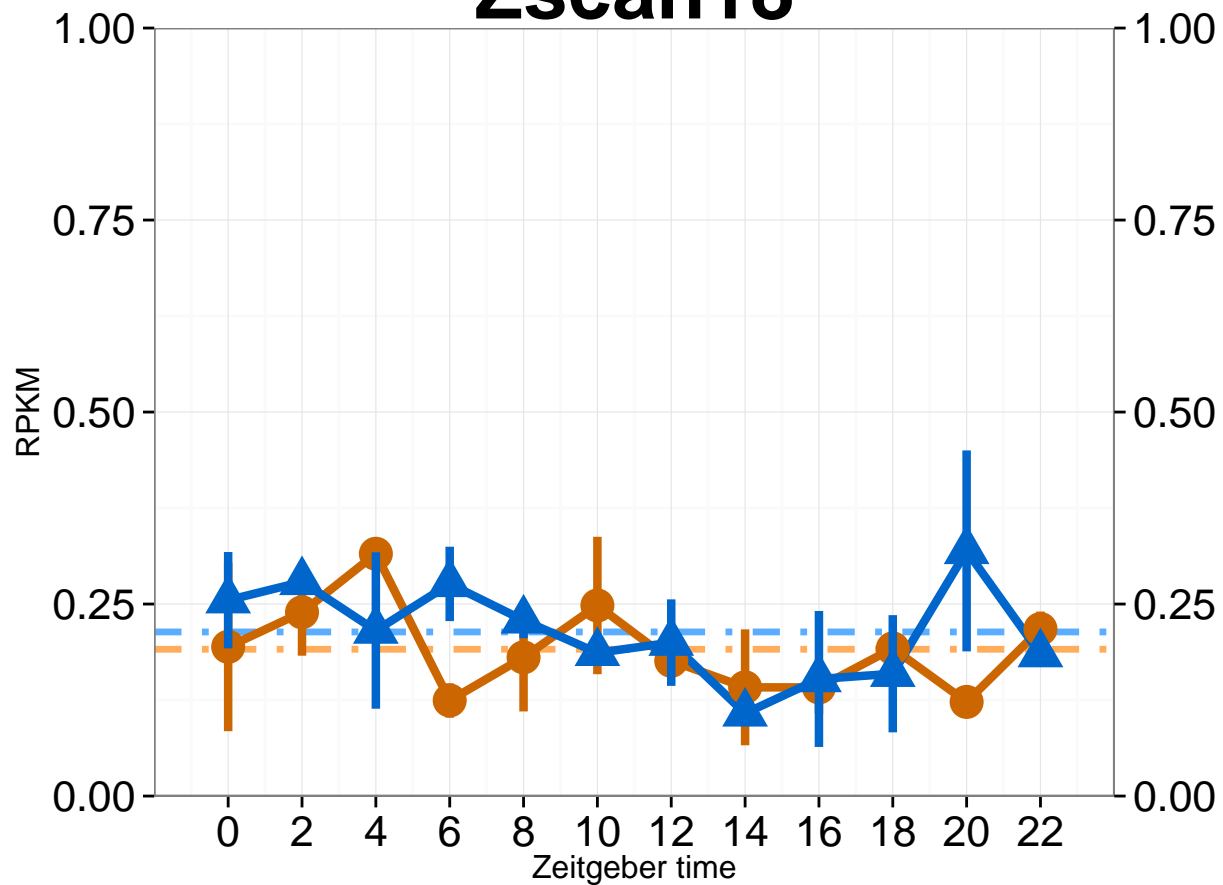

# Zscan18

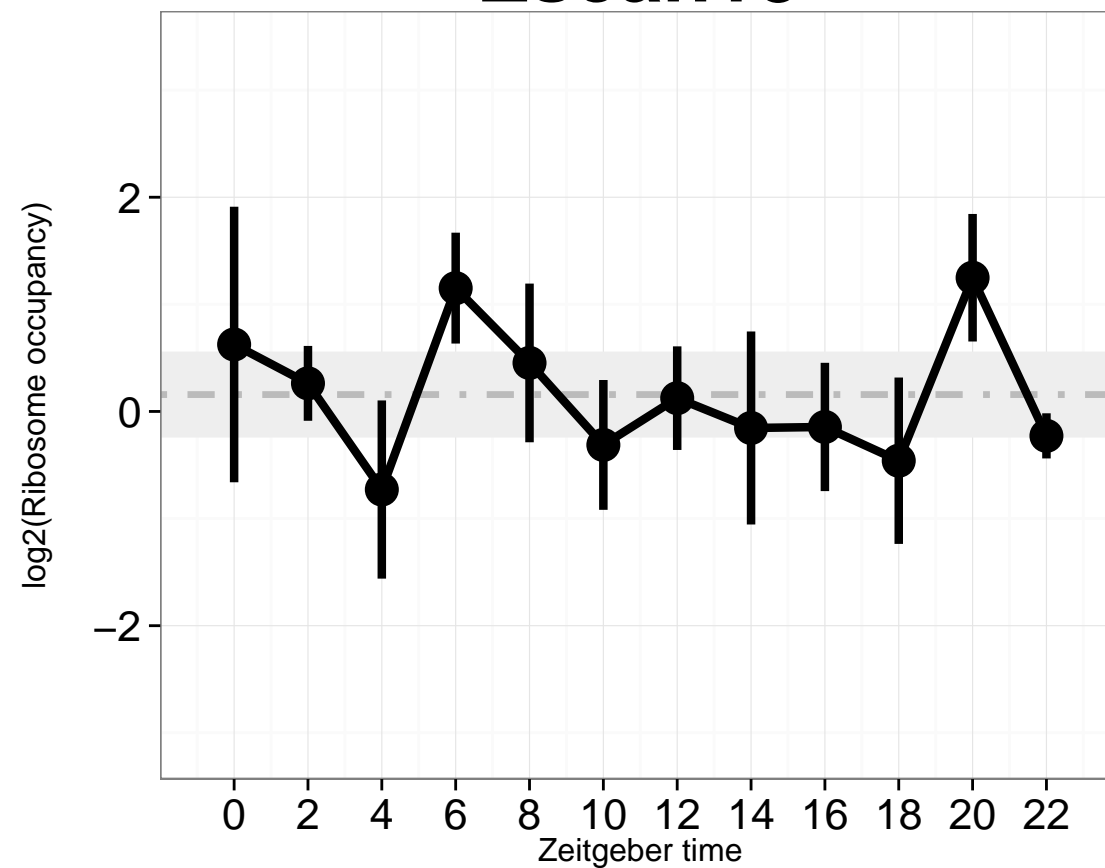

Supplement: Supplementary file 730 [file 1]

## Ccl28

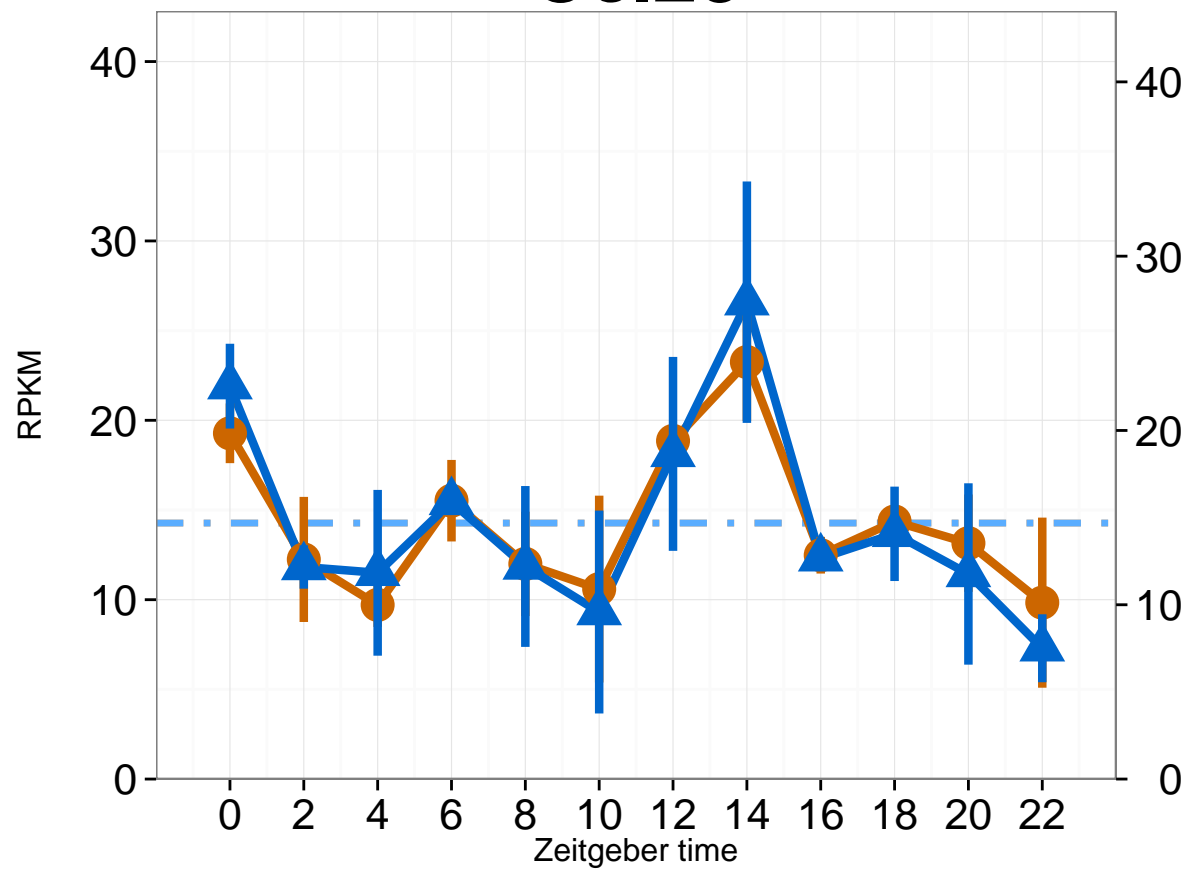

## Ccl28

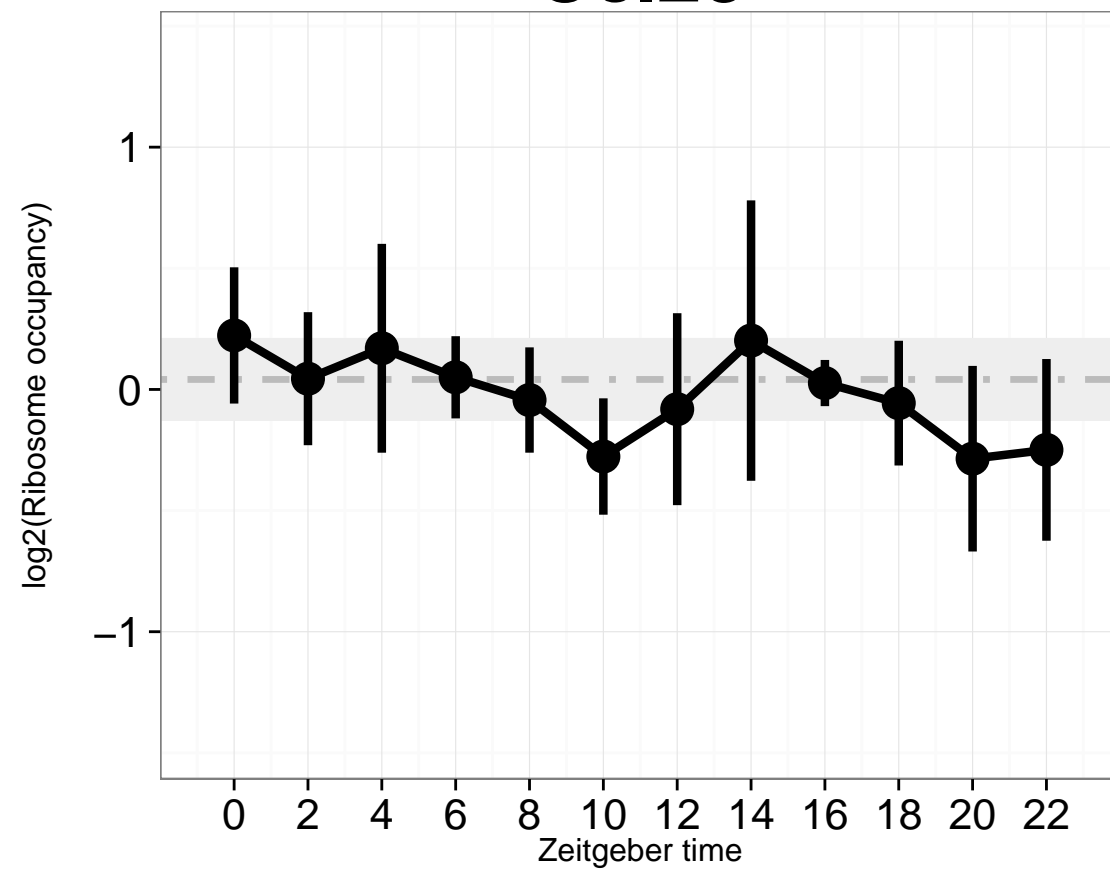

Supplement: Supplementary file 731 [file 1]

## Mitf

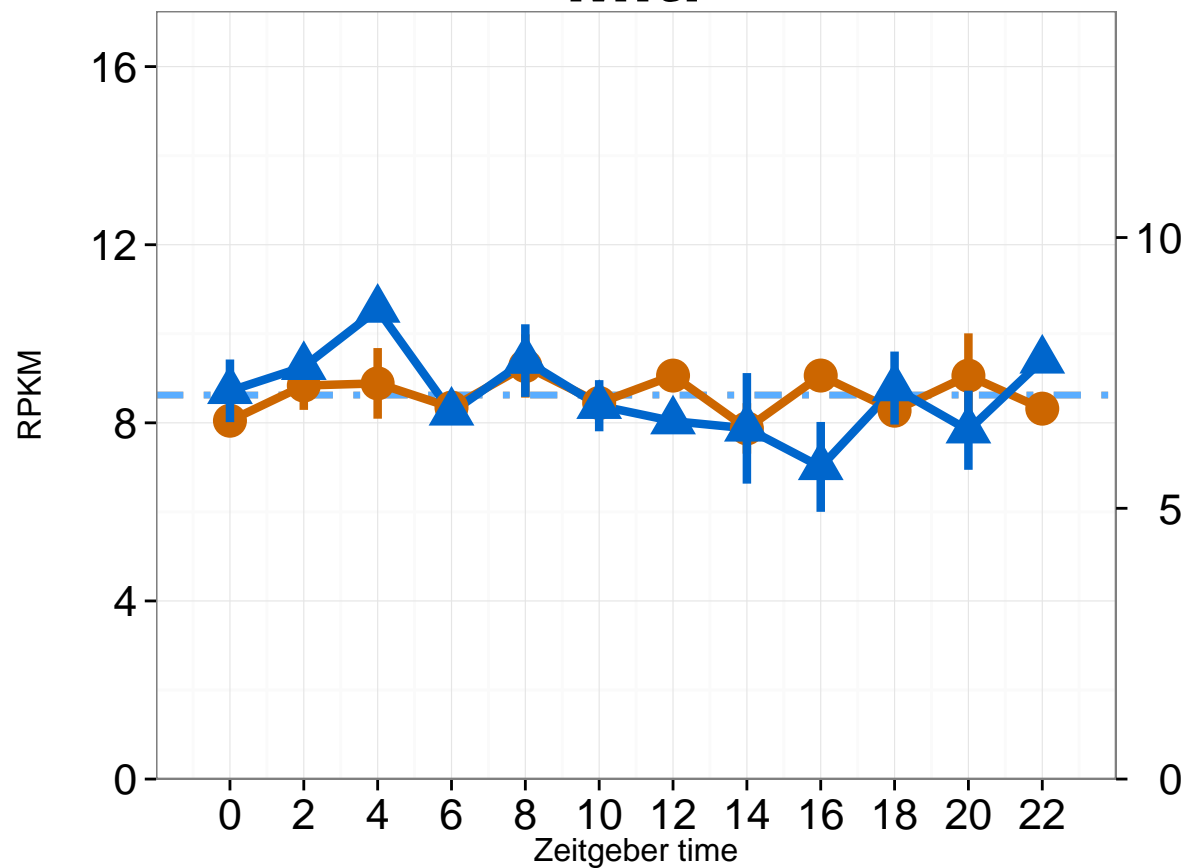

## Mitf

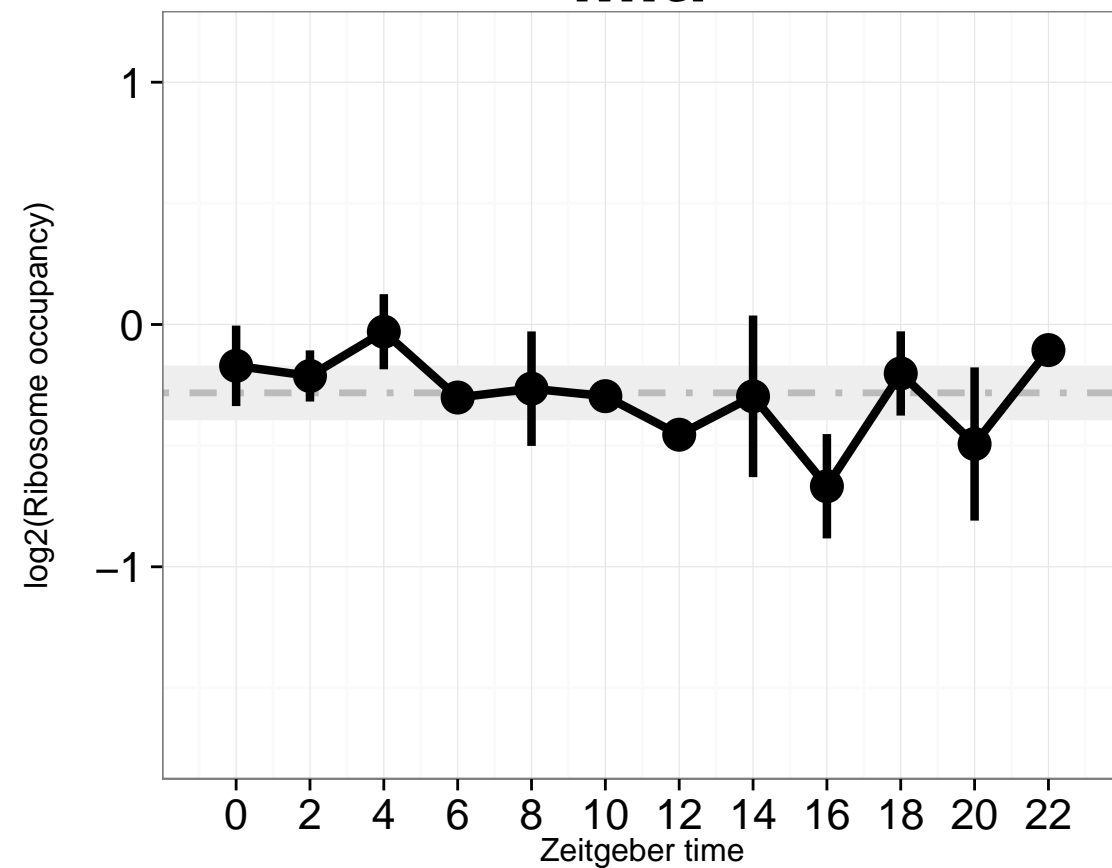

Supplement: Supplementary file 732 [file 1]

## Tdrd7

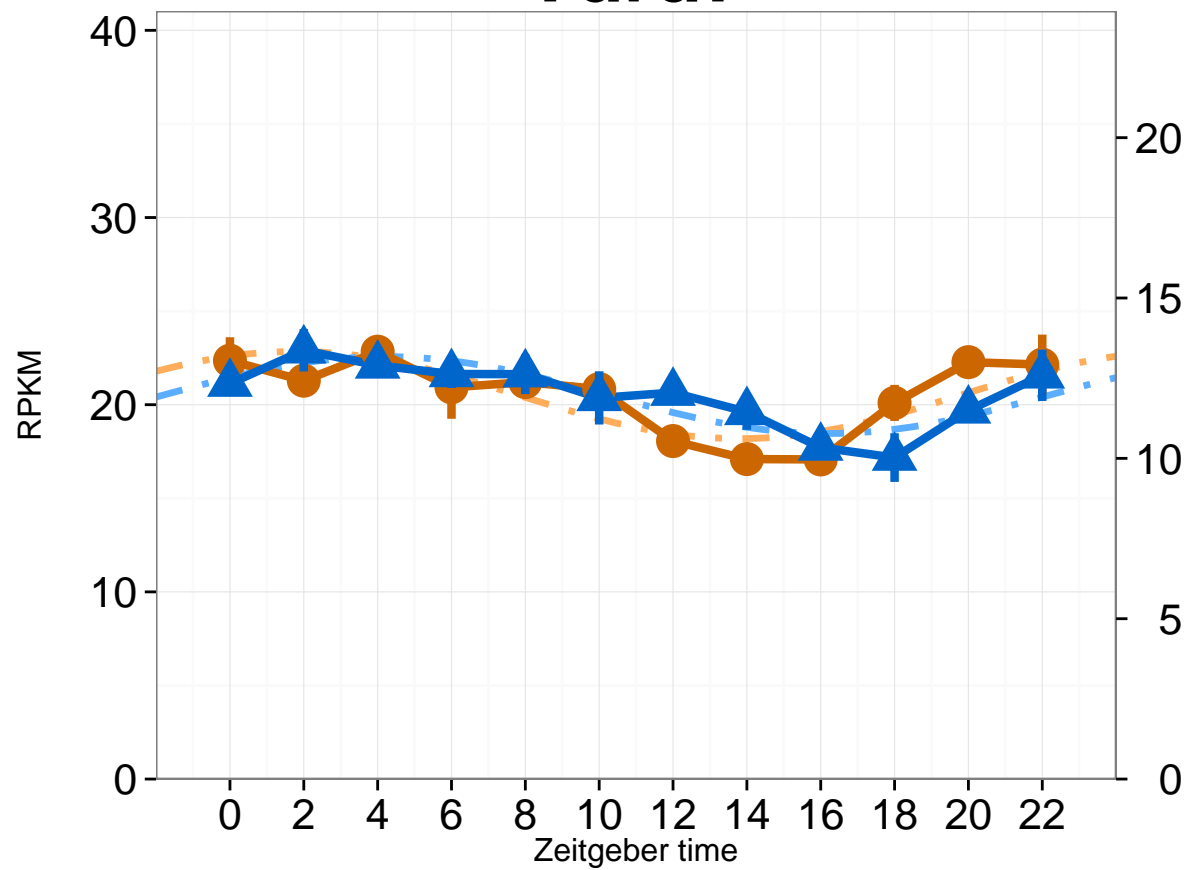

## Tdrd7

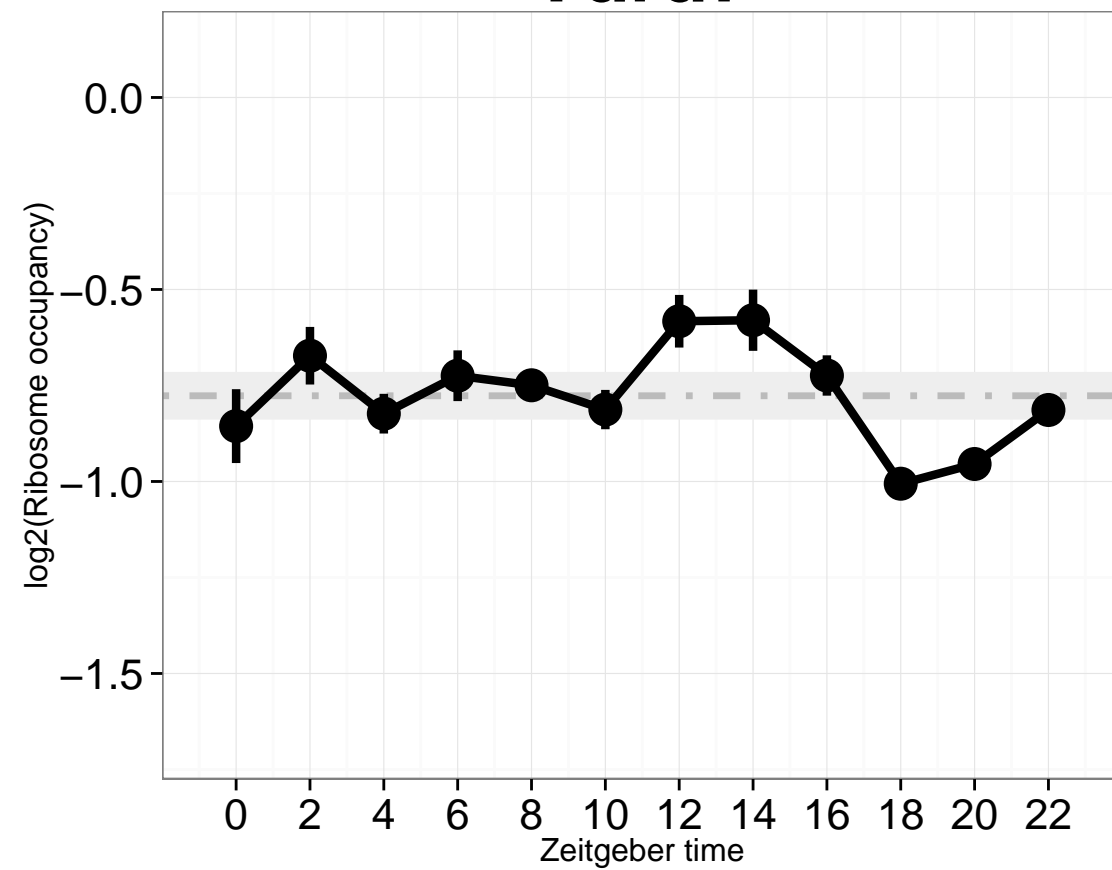

Supplement: Supplementary file 733 [file 1]

## Samd14

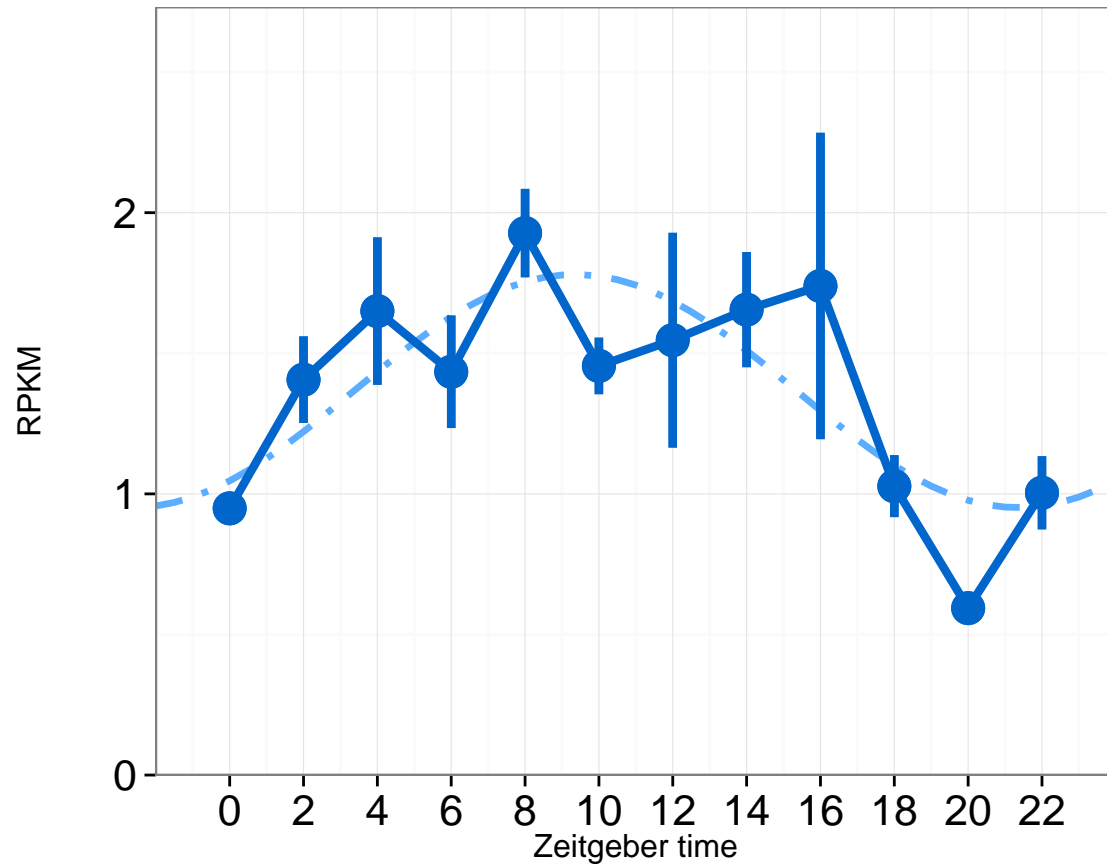

## Samd14 log2(Ribosome occupancy)

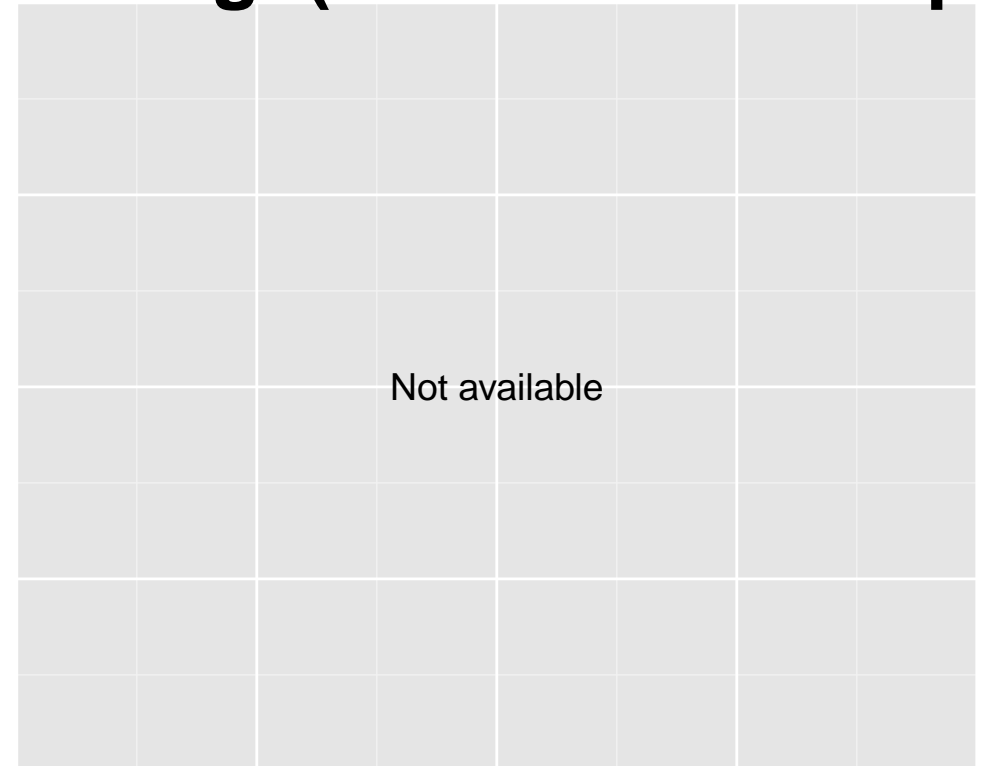

Supplement: Supplementary file 734 [file 1]

# Mr1

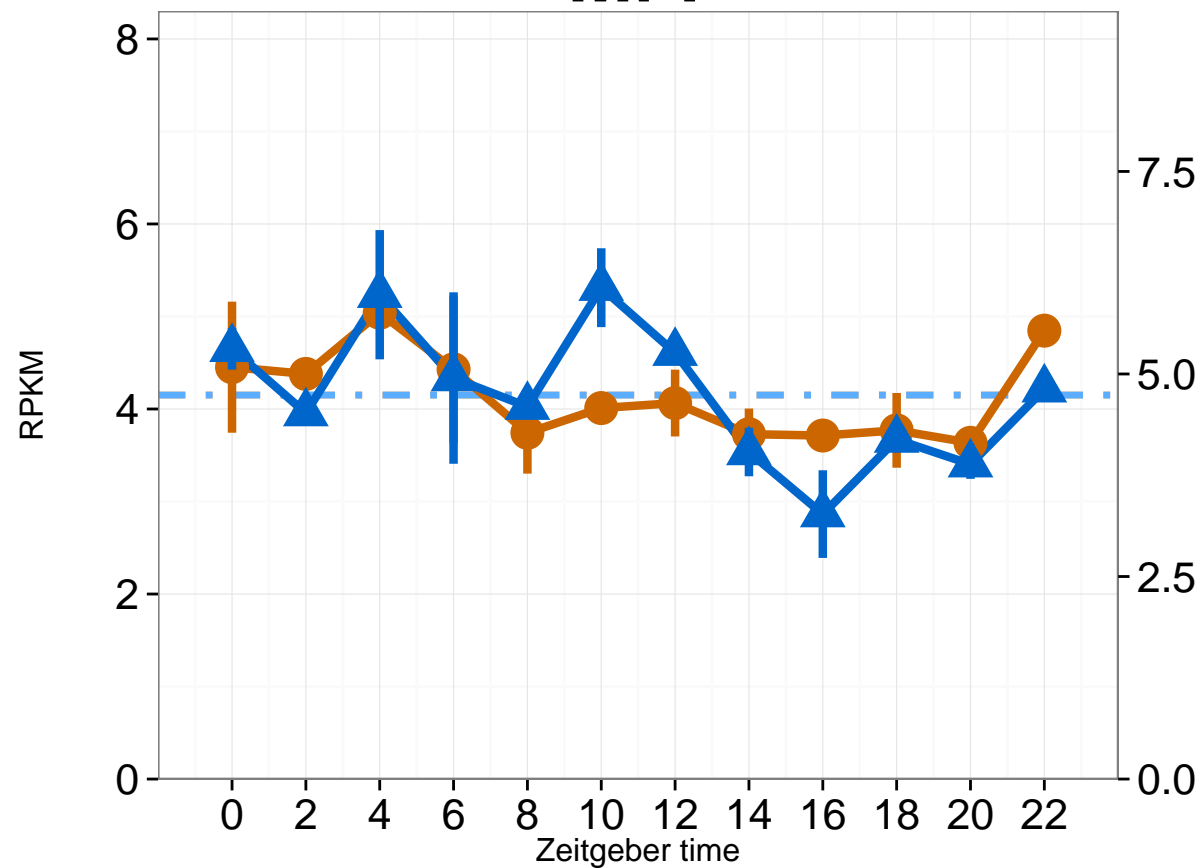

# Mr1

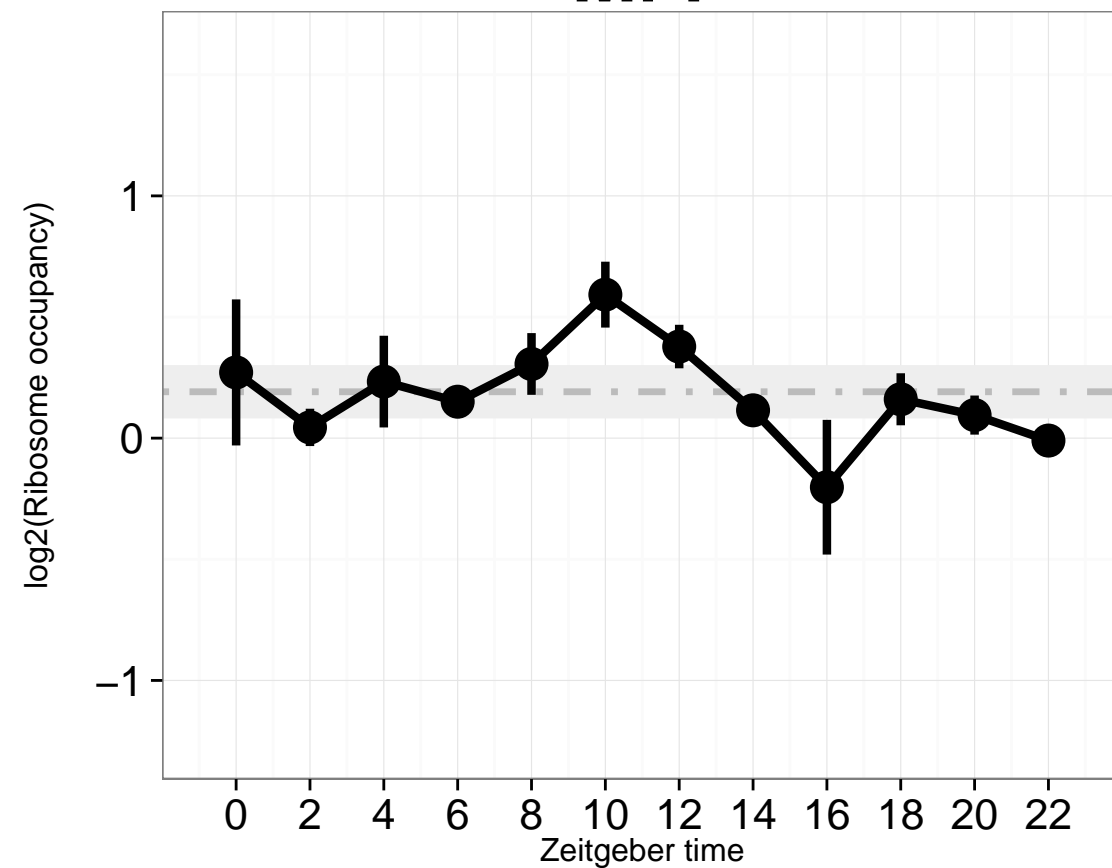

Supplement: Supplementary file 735 [file 1]

# Tmem223

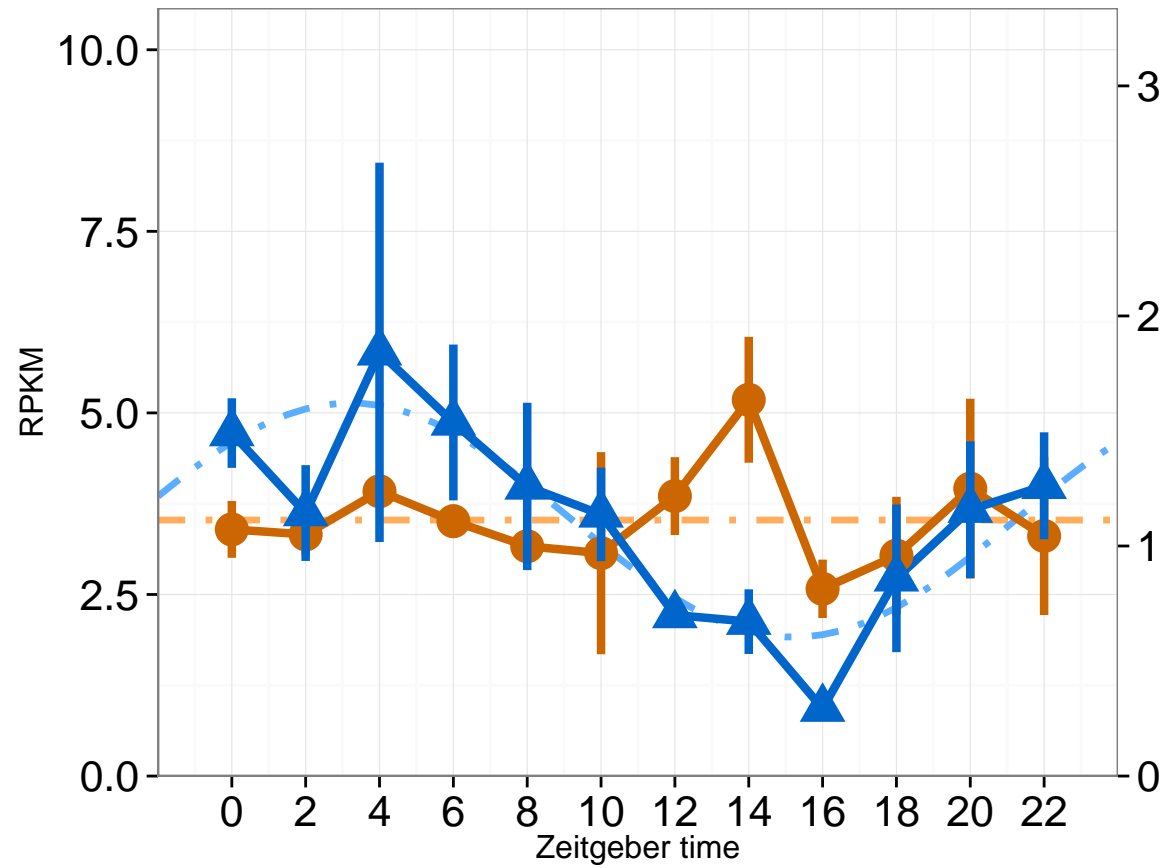

# Tmem223

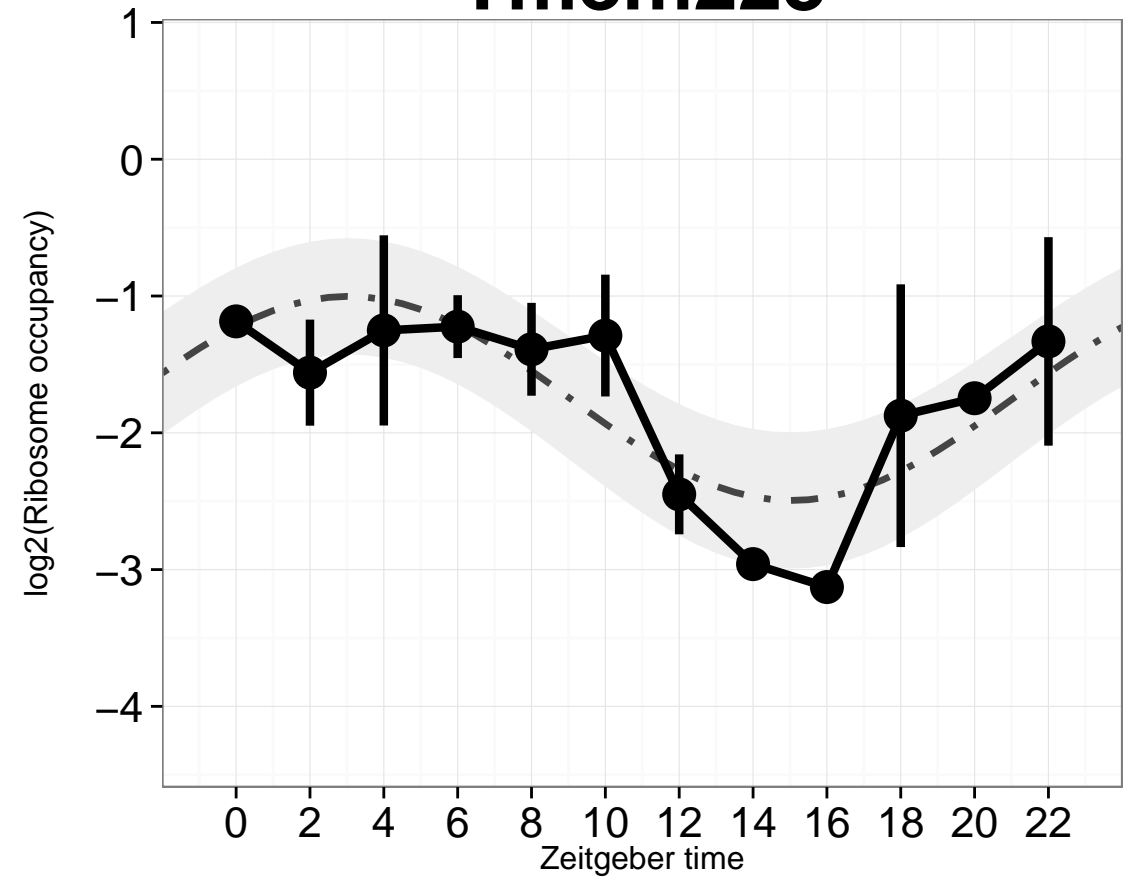

Supplement: Supplementary file 736 [file 1]

## Anxa6

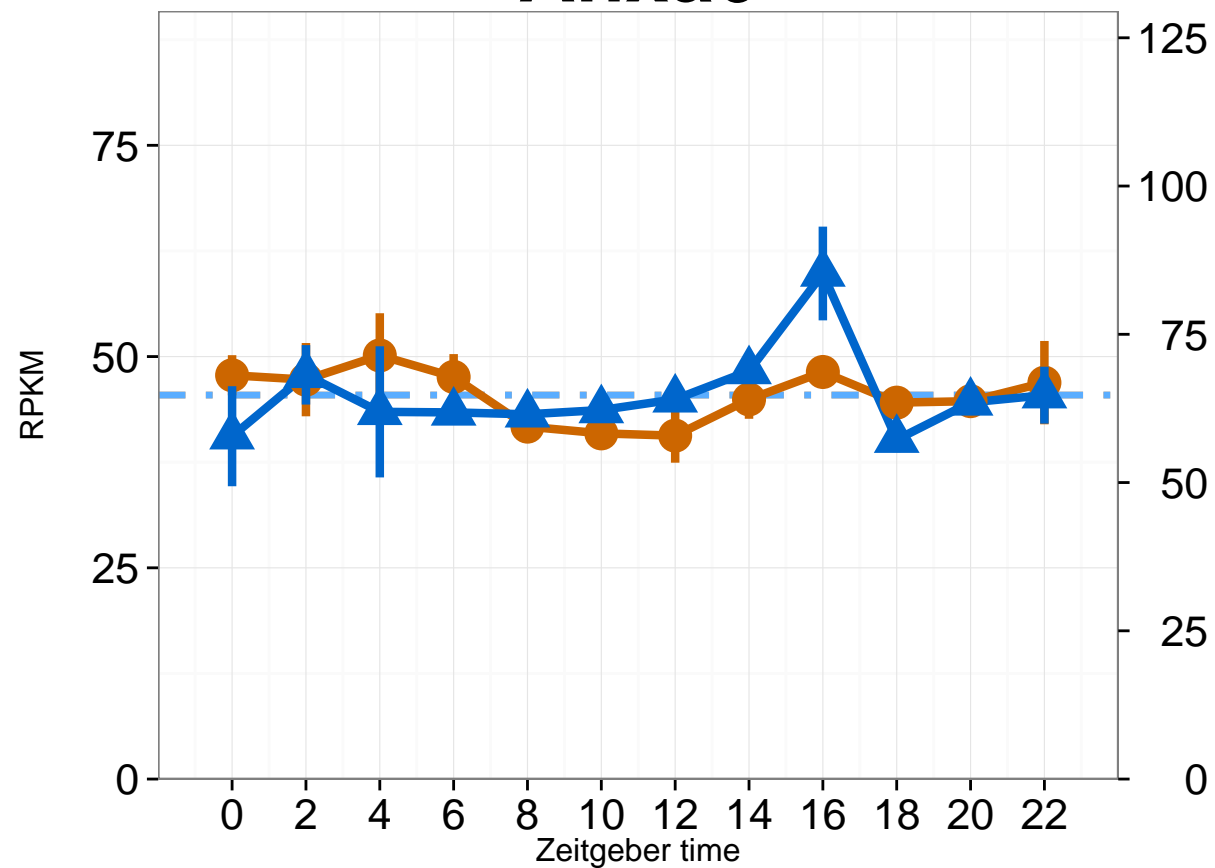

## Anxa6

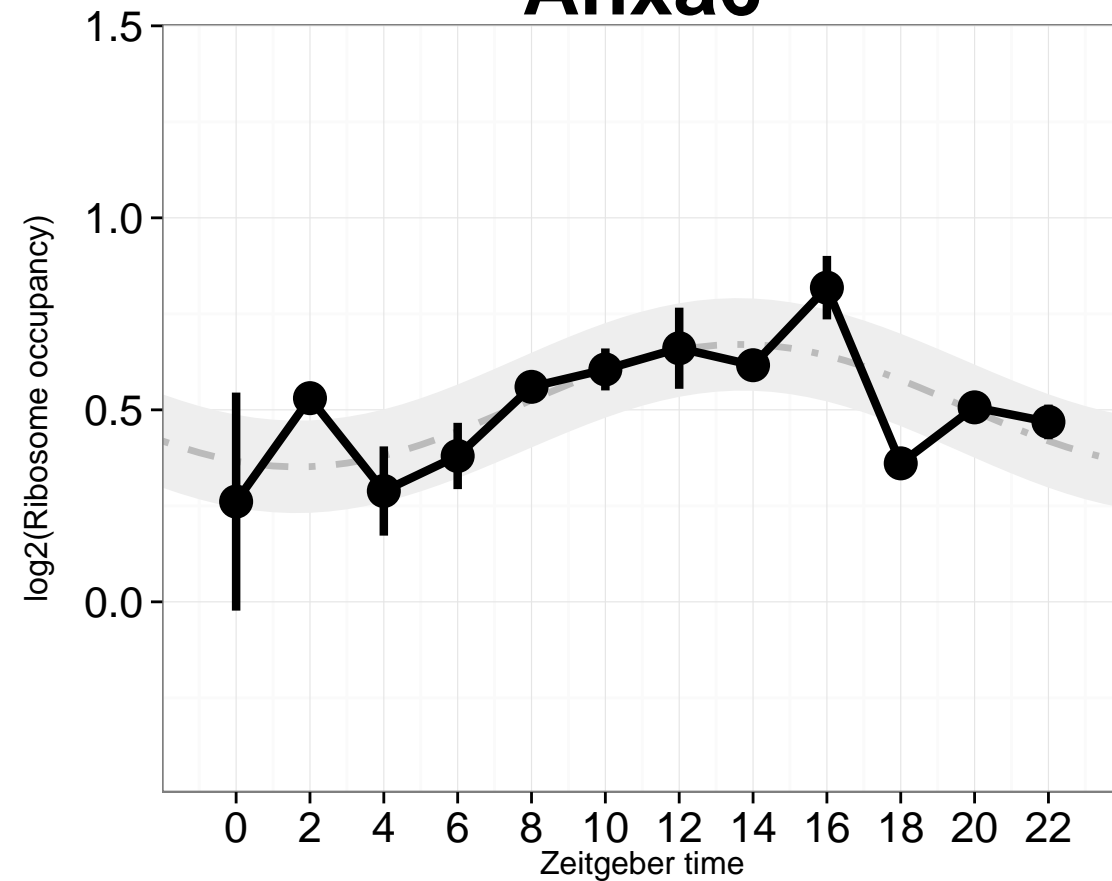

Supplement: Supplementary file 737 [file 1]

# Zfp160

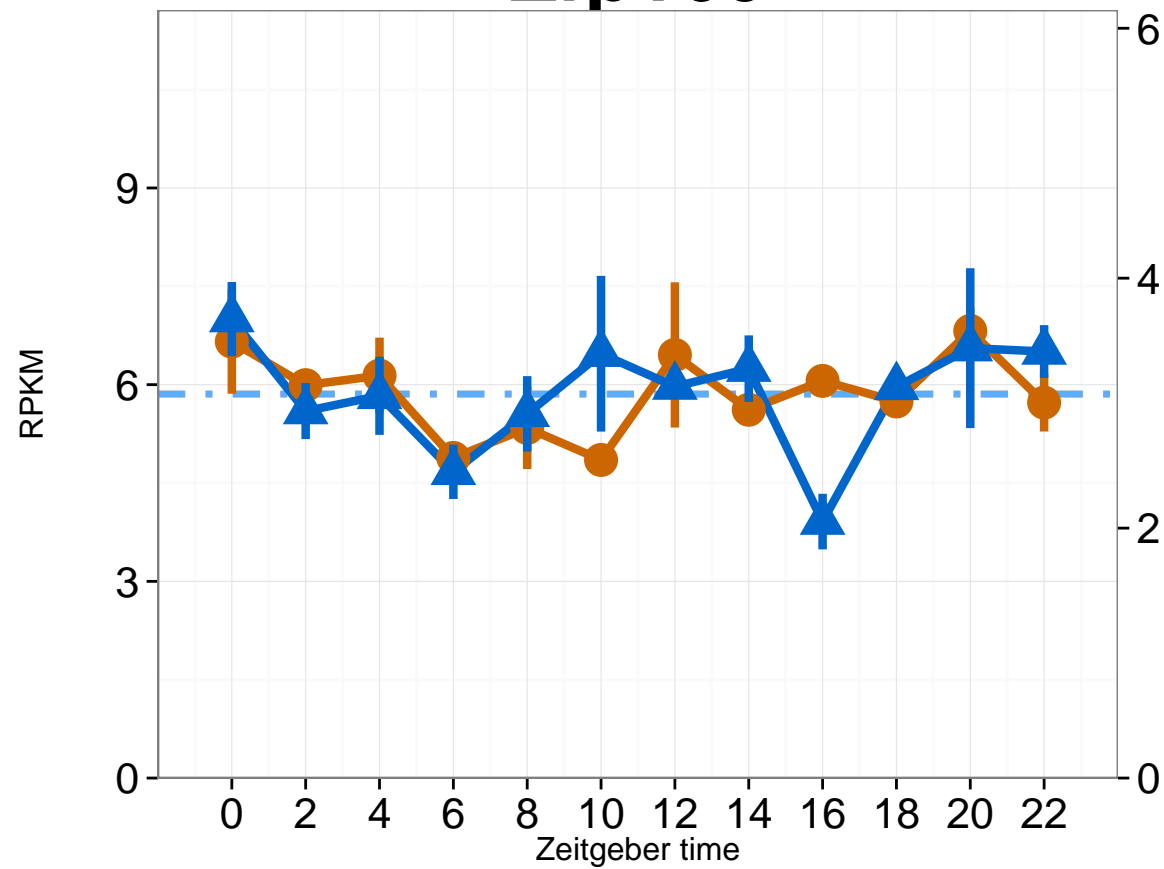

# Zfp160

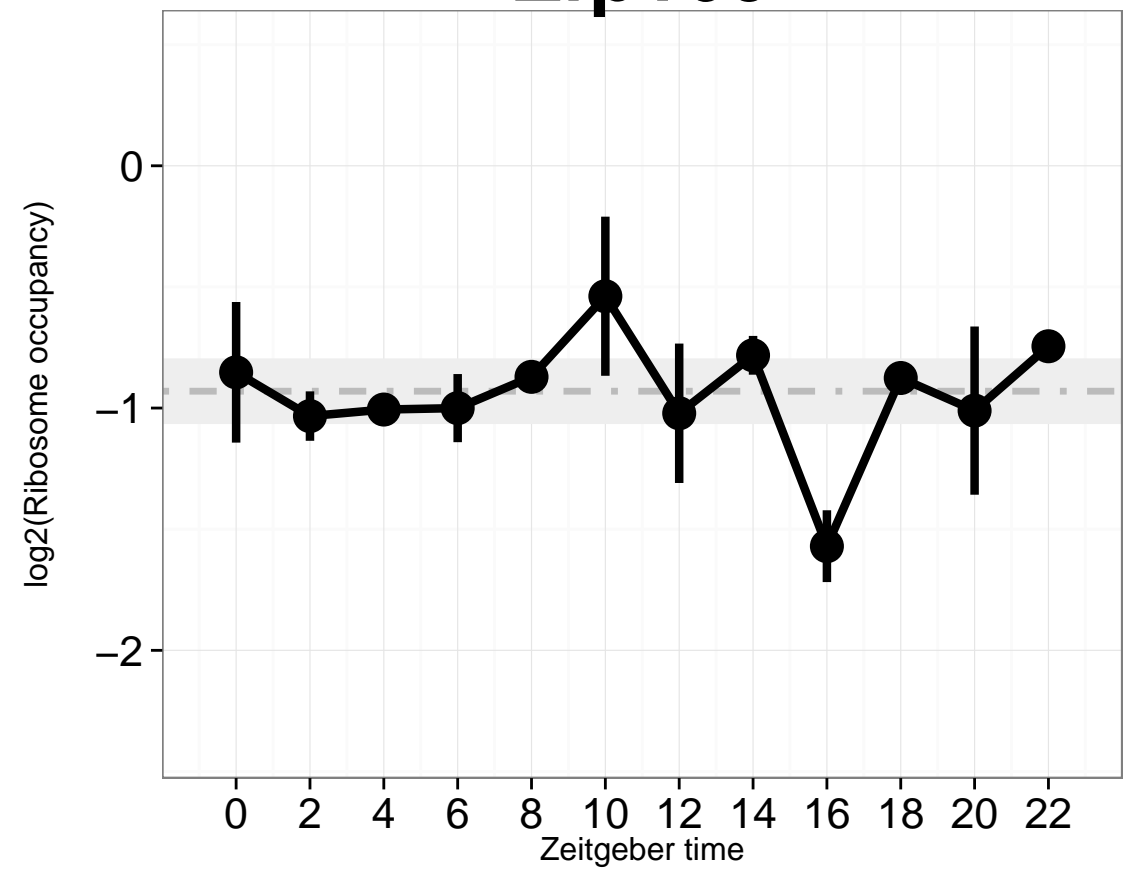

Supplement: Supplementary file 738 [file 1]

# Nsun6

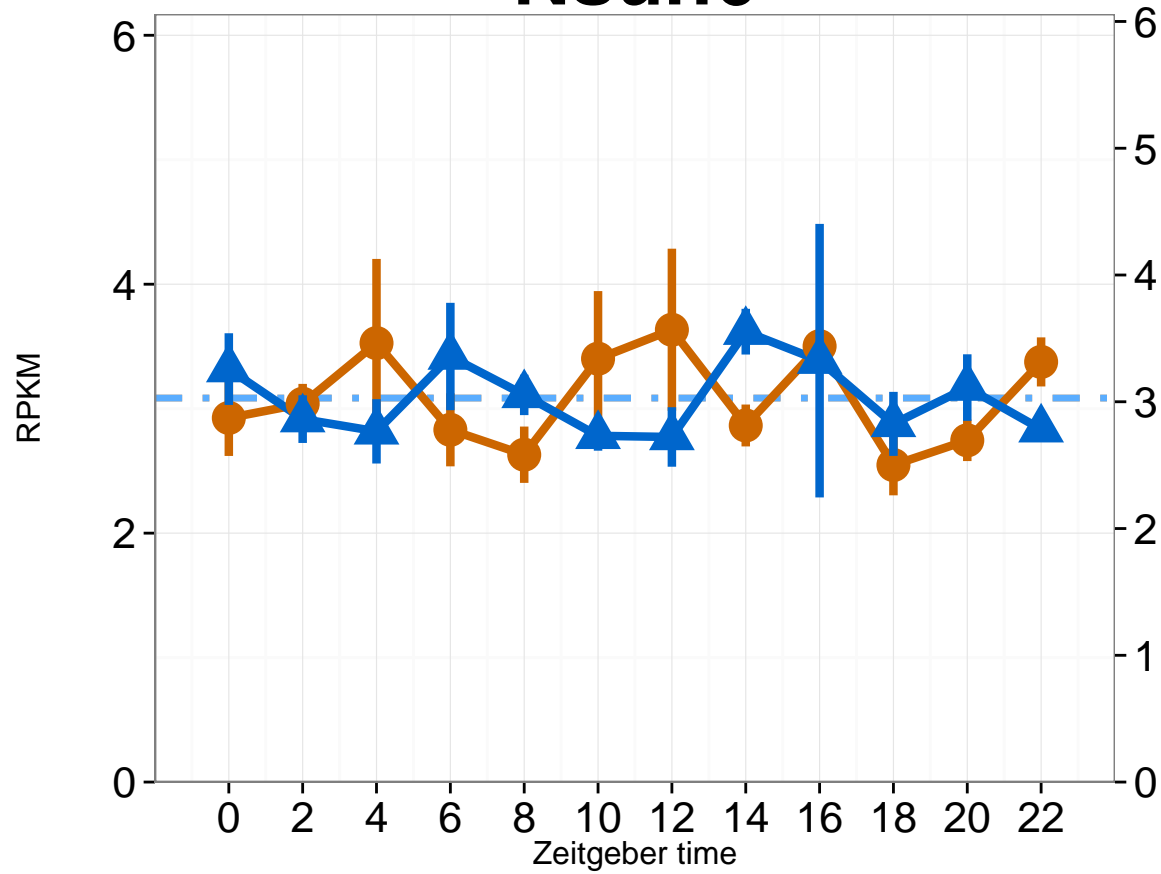

# Nsun6

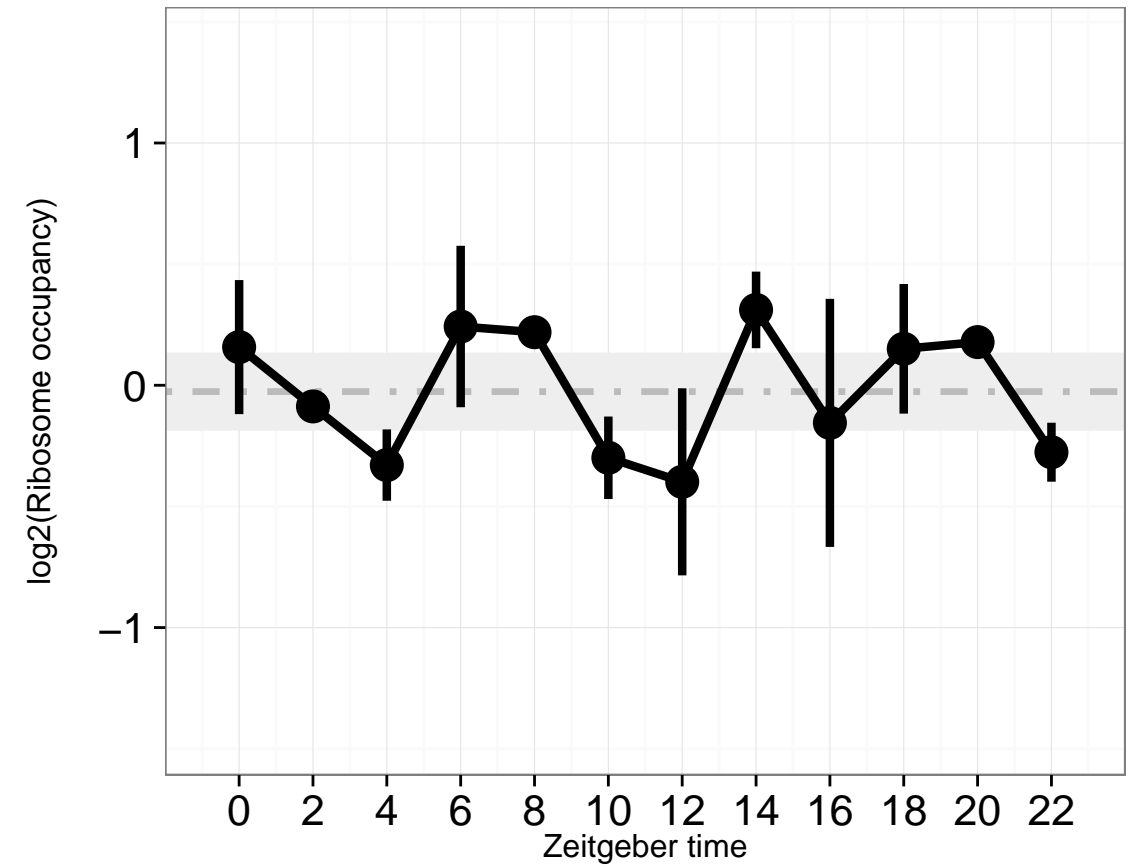

Supplement: Supplementary file 739 [file 1]

# Zfp438

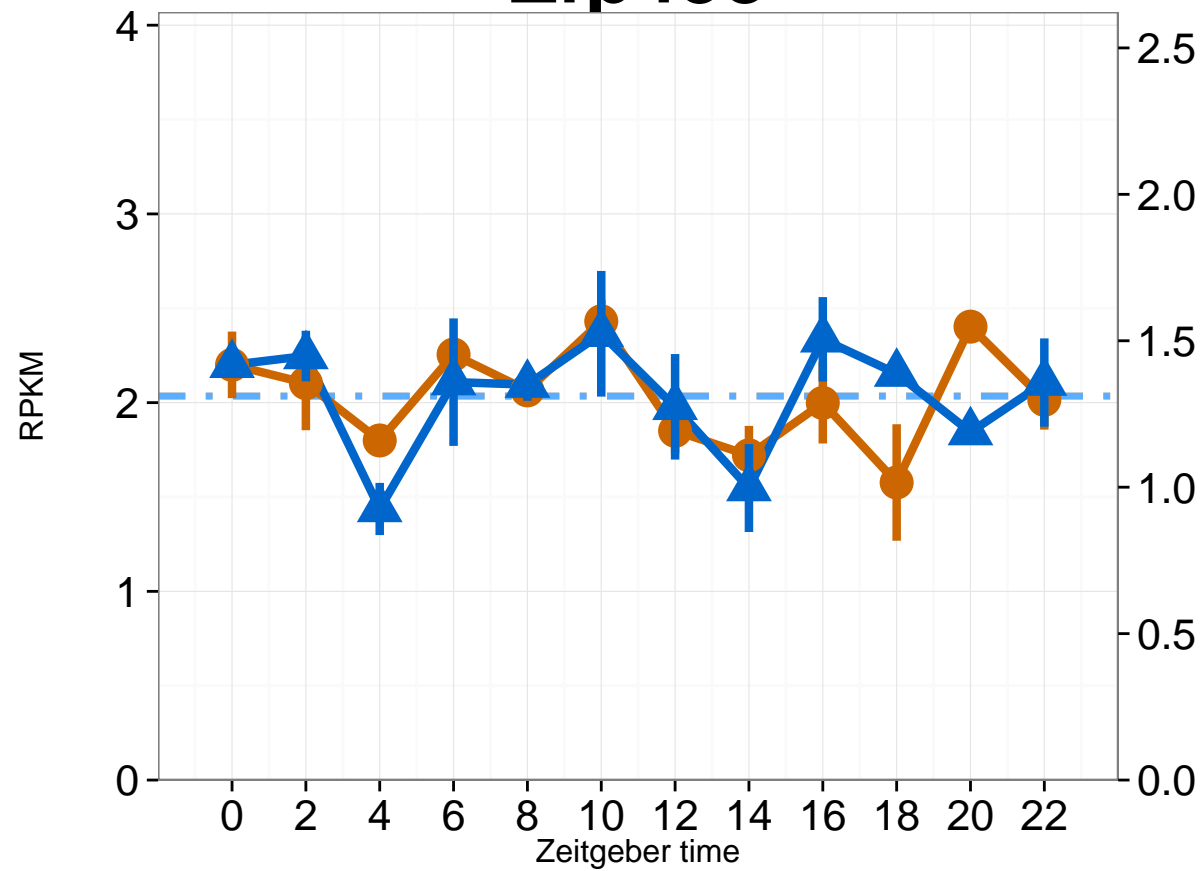

# Zfp438

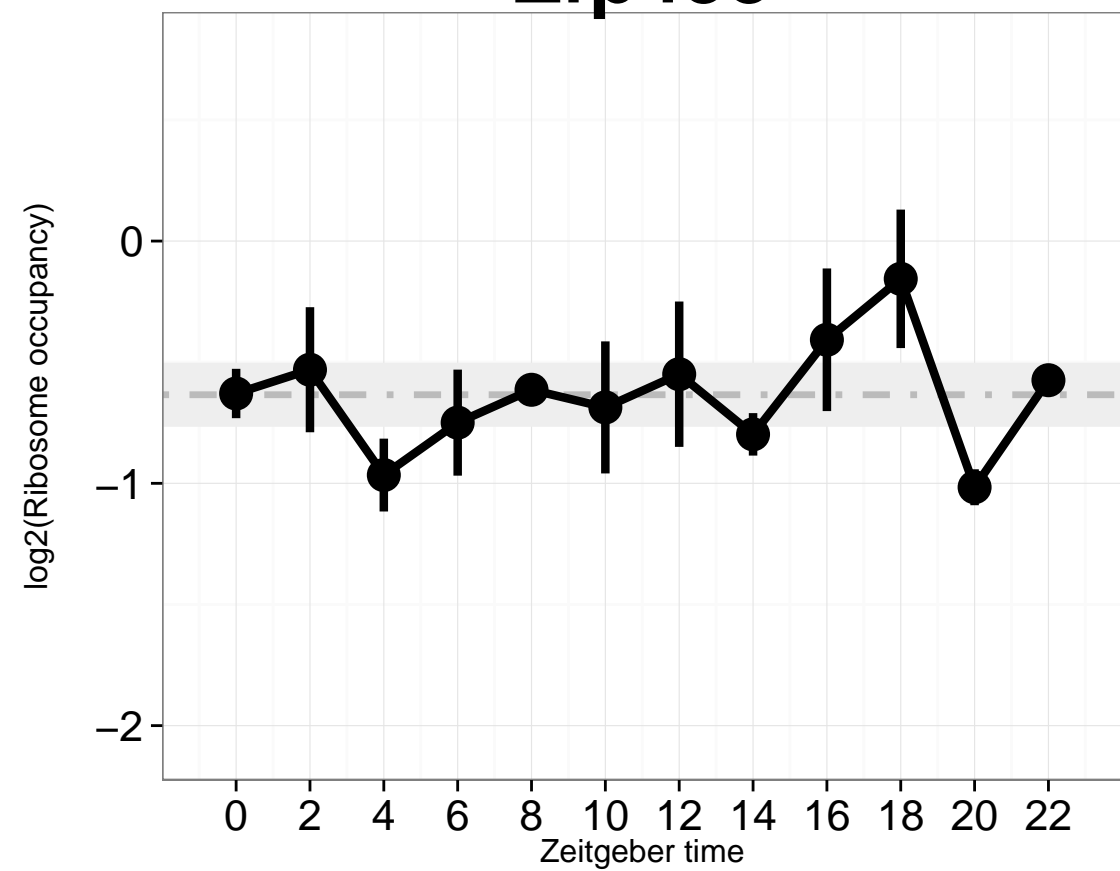

Supplement: Supplementary file 740 [file 1]

## Ctnnd1

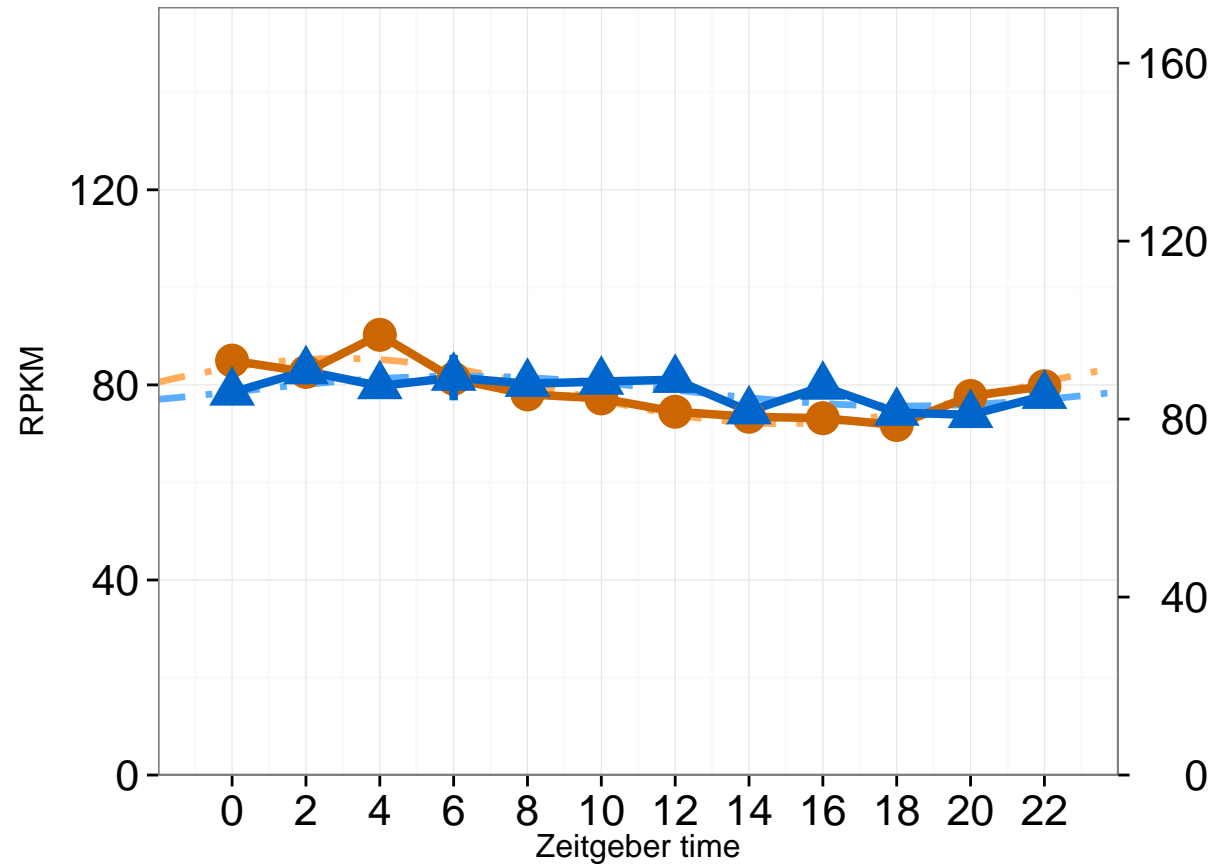

## Ctnnd1

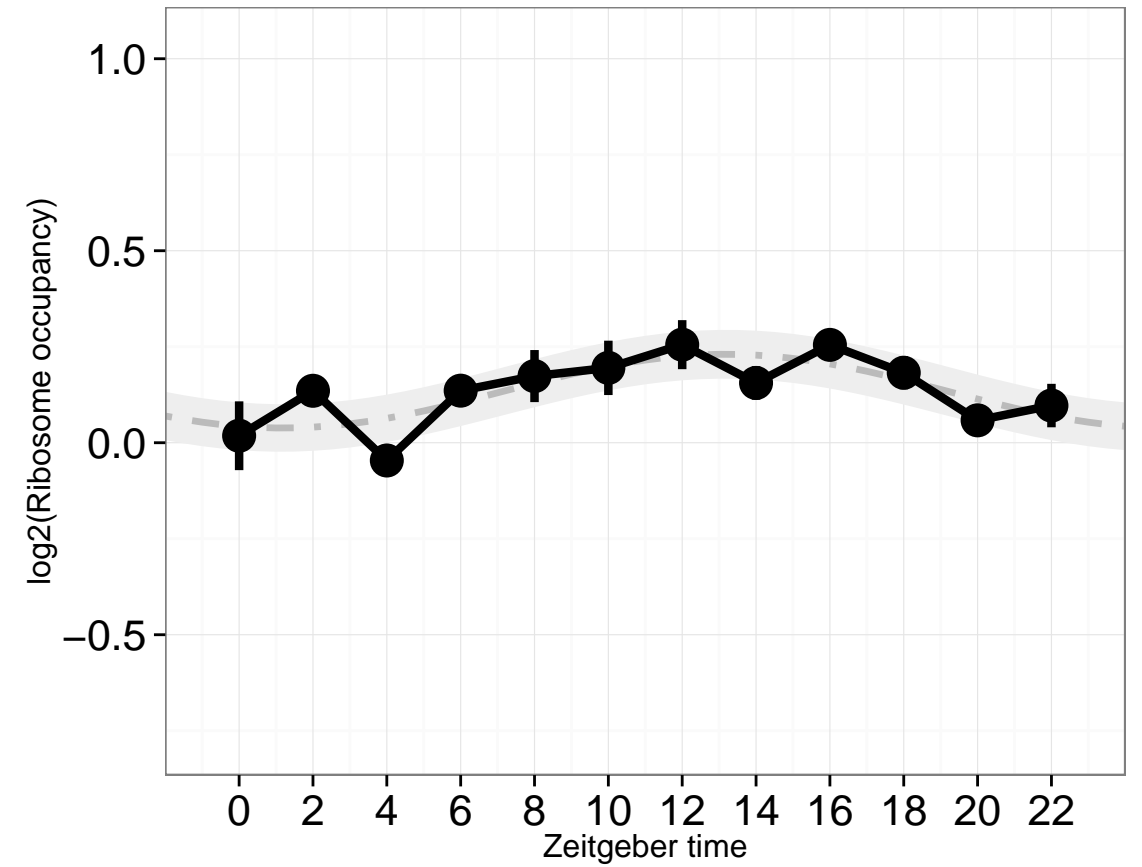

Supplement: Supplementary file 741 [file 1]

## Serping1

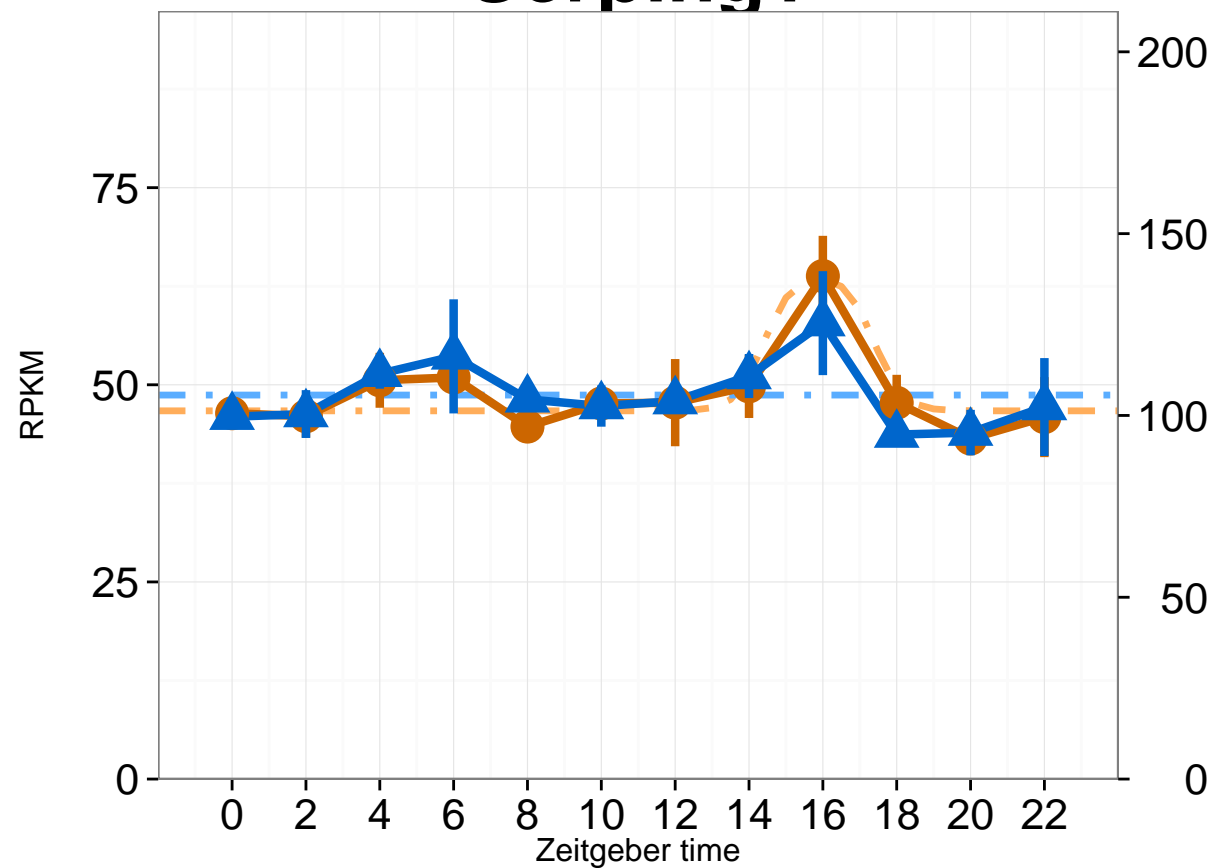

## Serping1

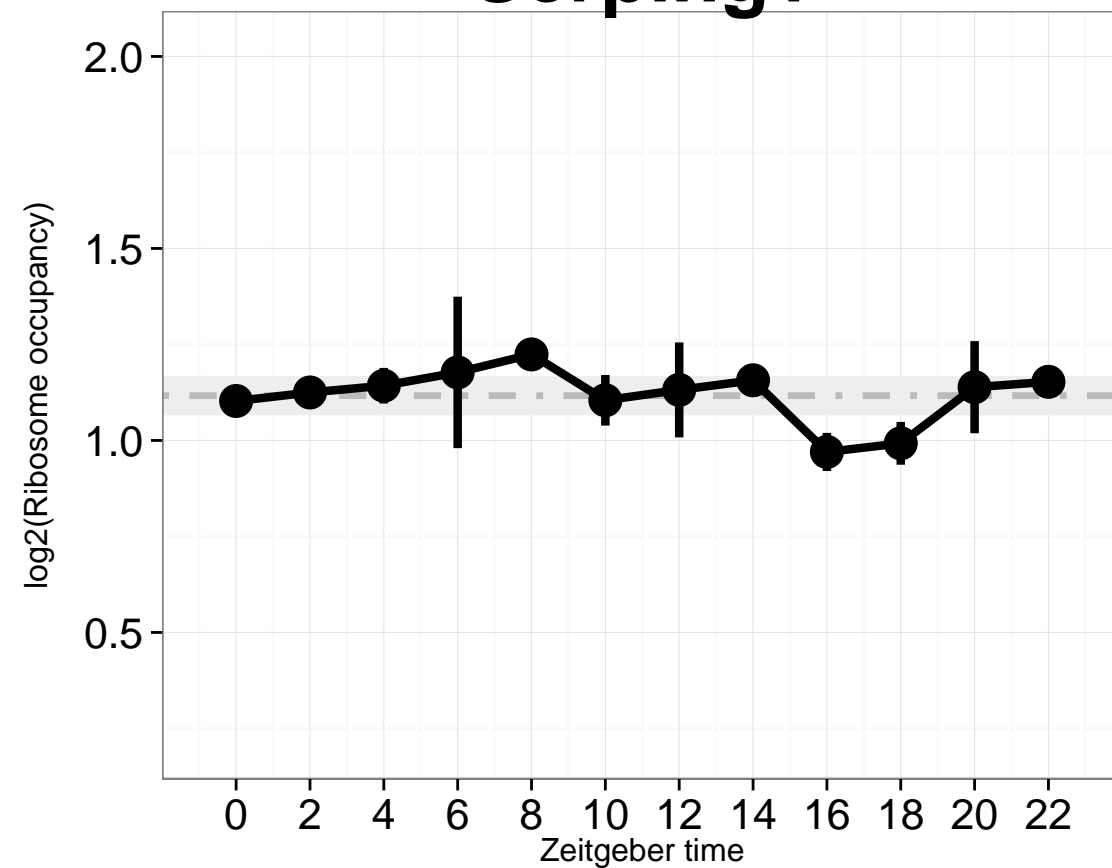

Supplement: Supplementary file 742 [file 1]

# Rnf26

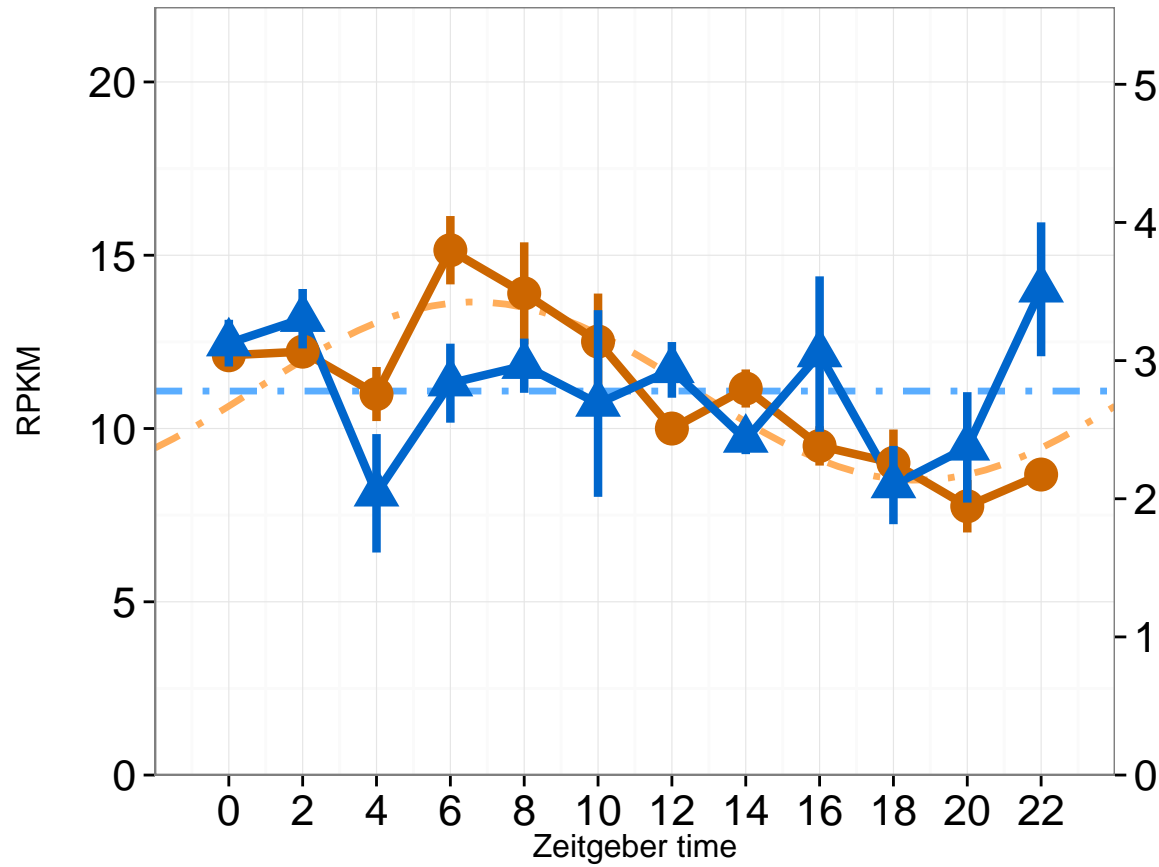

# Rnf26

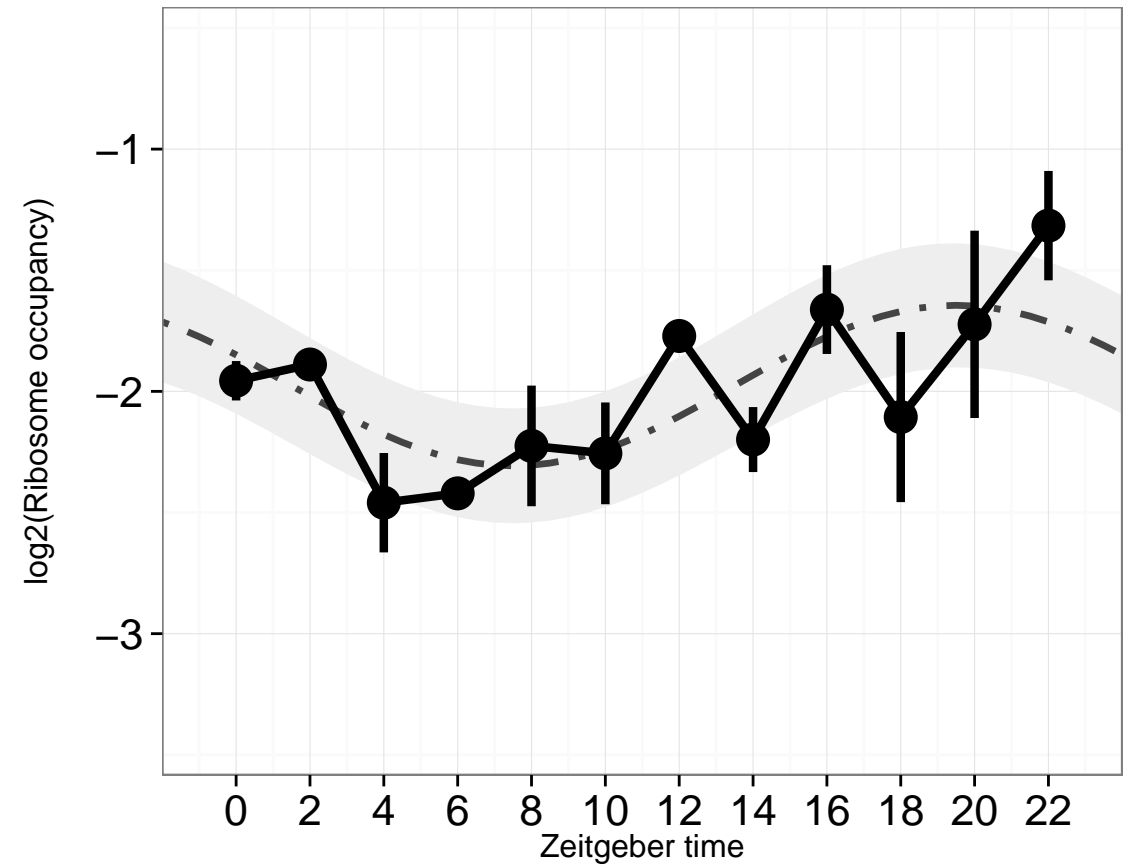

Supplement: Supplementary file 743 [file 1]

# Mrpl15

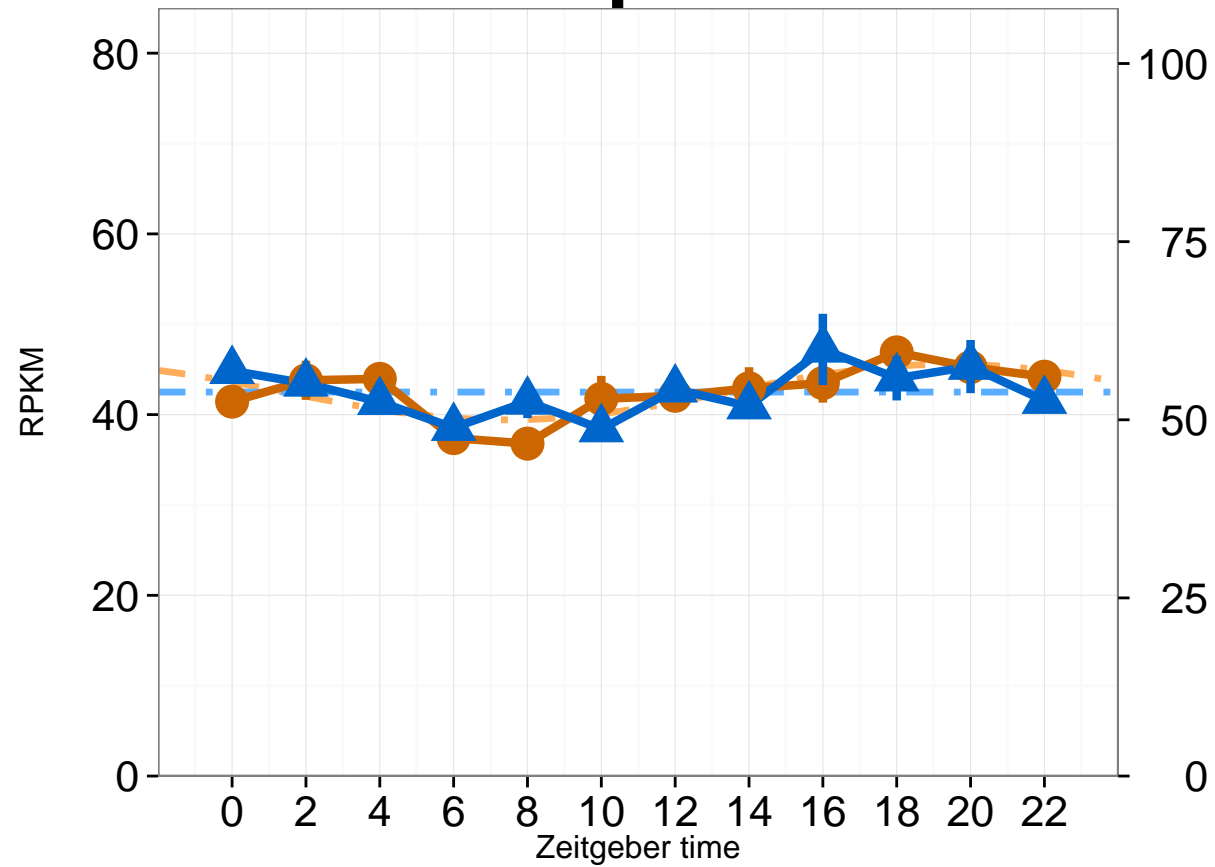

# Mrpl15

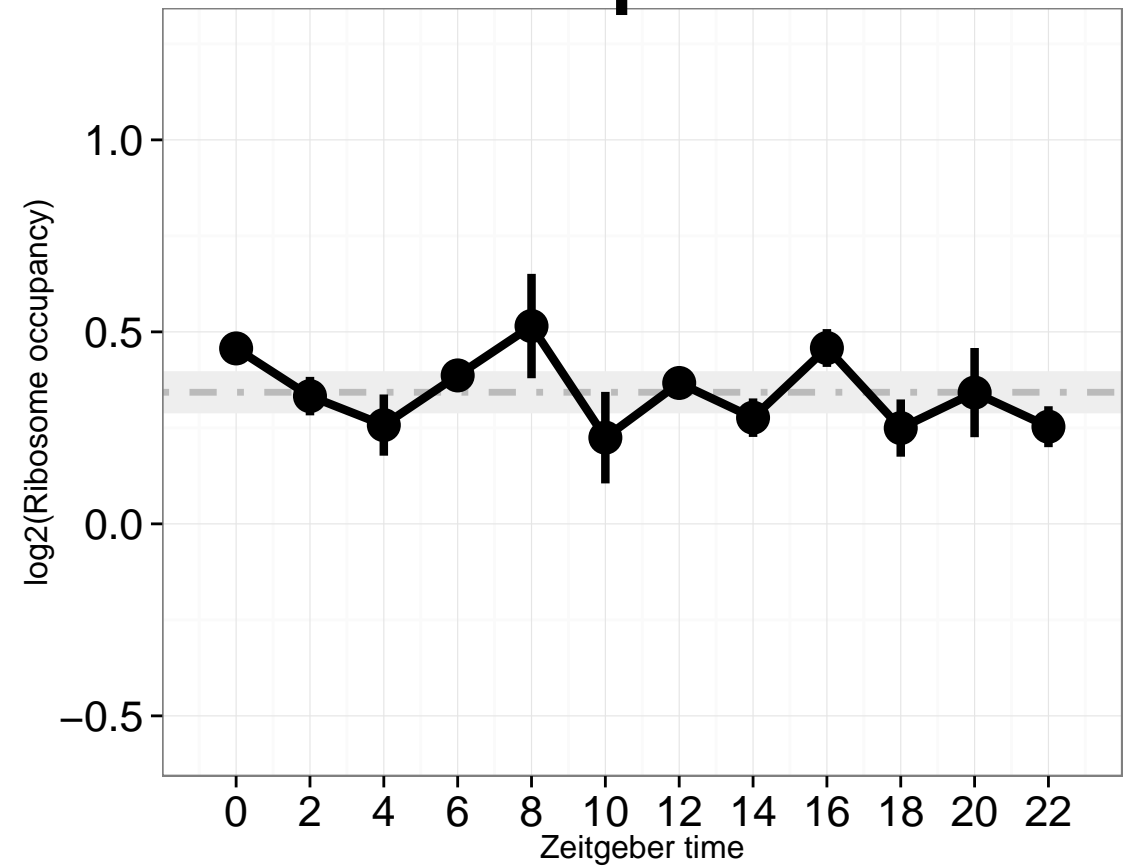

Supplement: Supplementary file 744 [file 1]

## Vps39

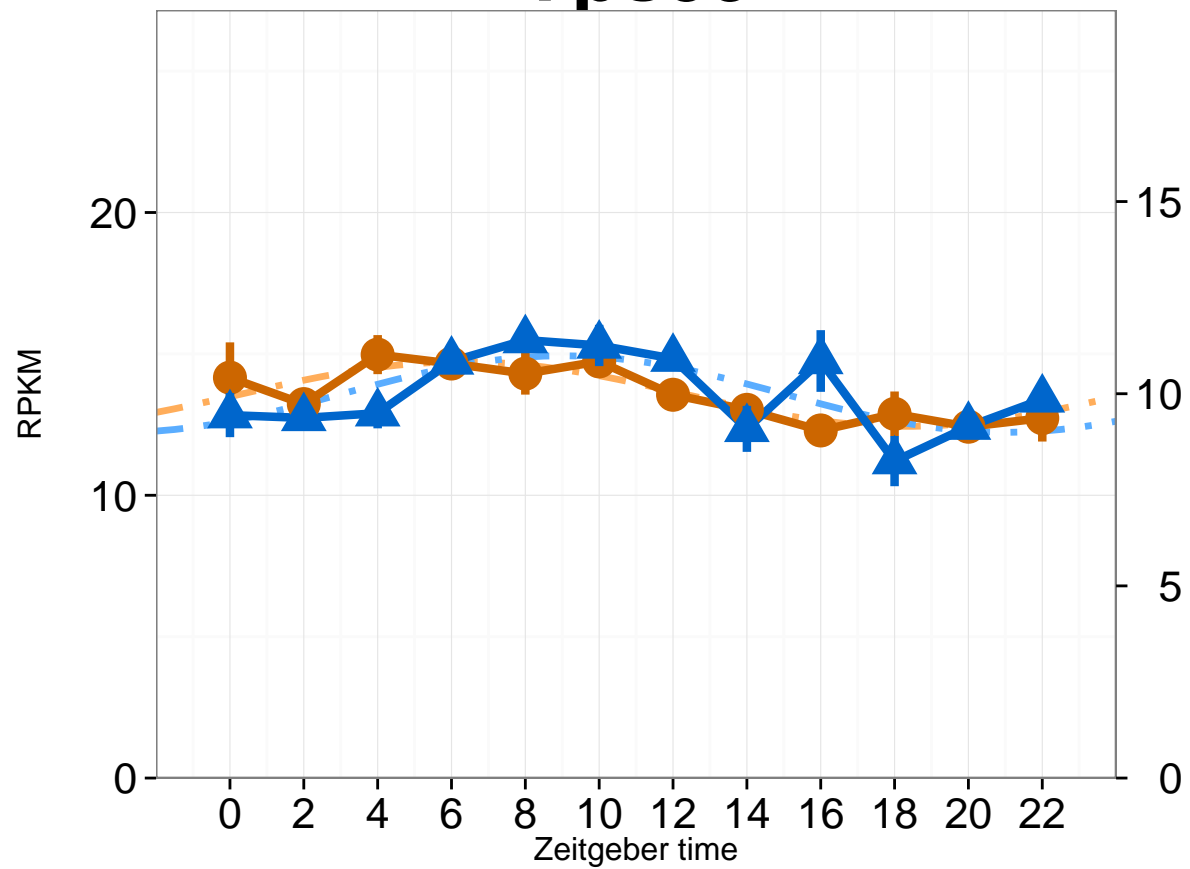

## Vps39

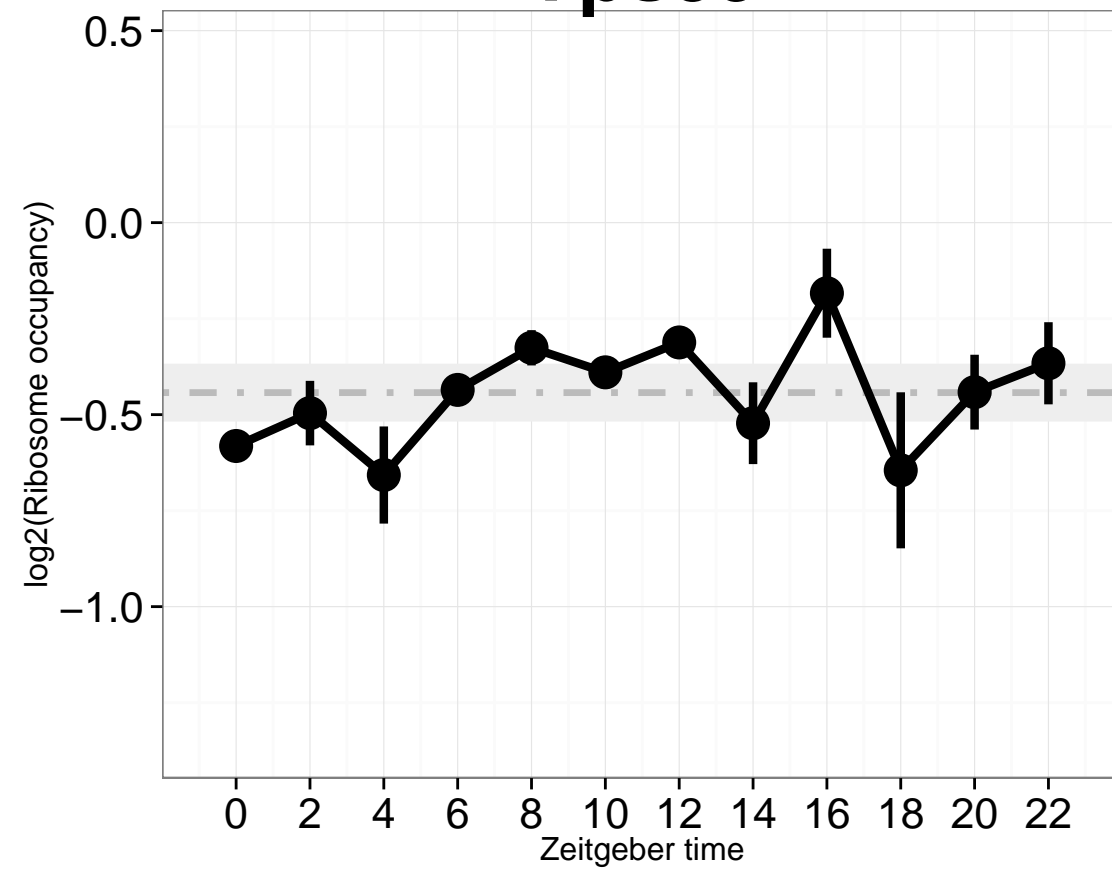

Supplement: Supplementary file 745 [file 1]

# Scpep1

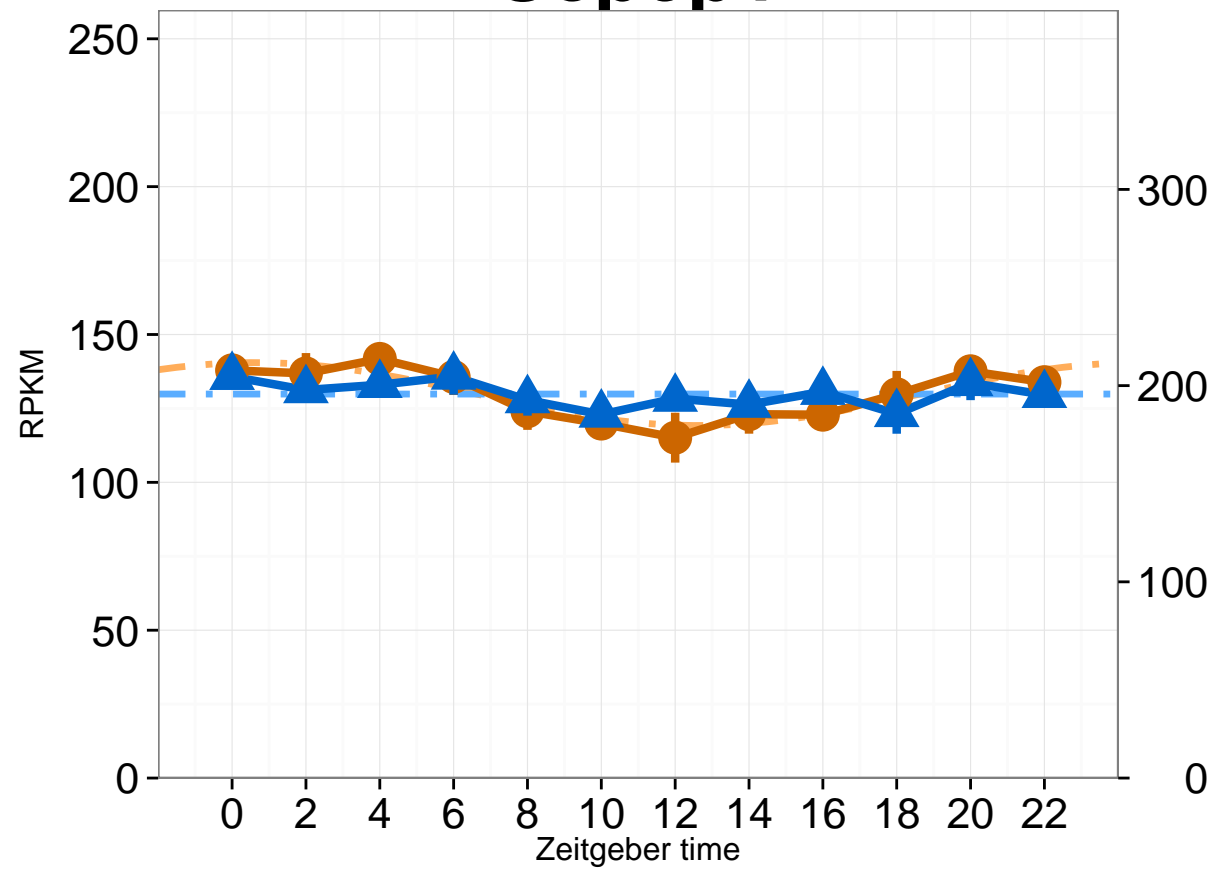

# Scpep1

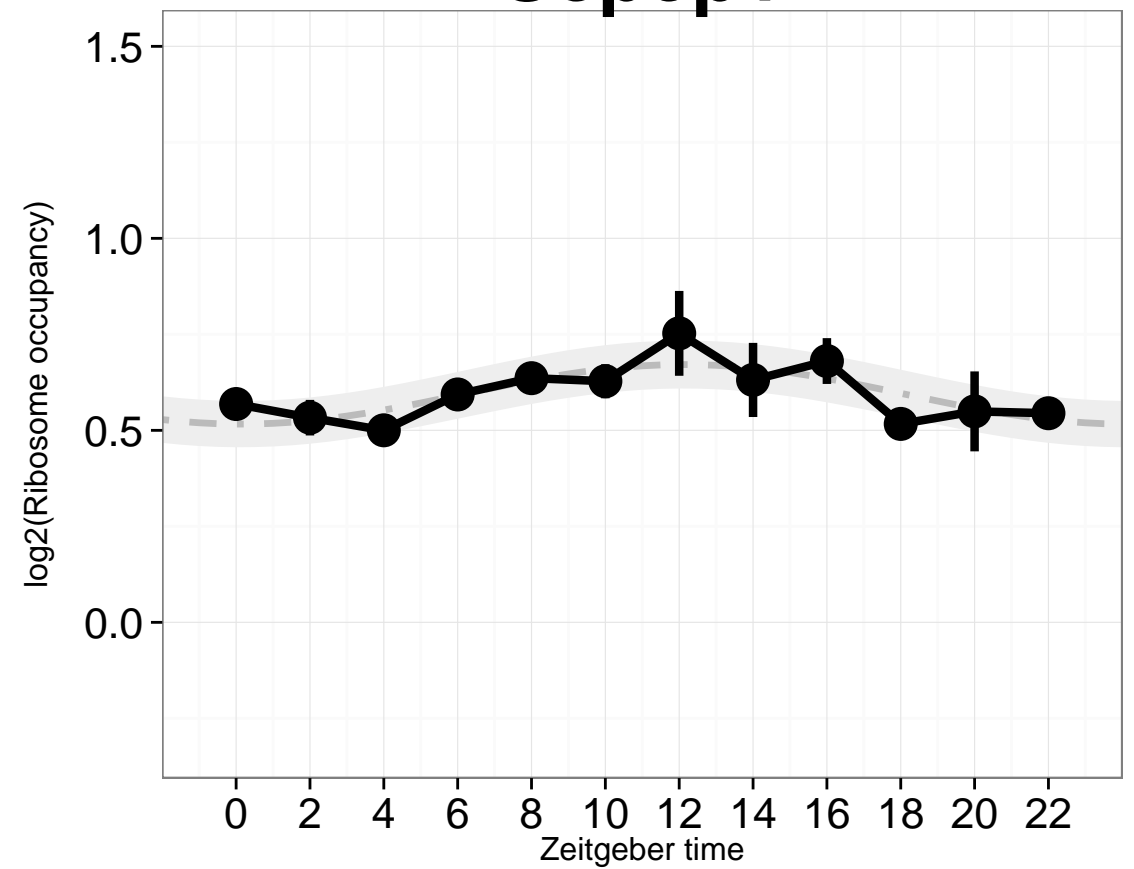

Supplement: Supplementary file 746 [file 1]

# Zfp691

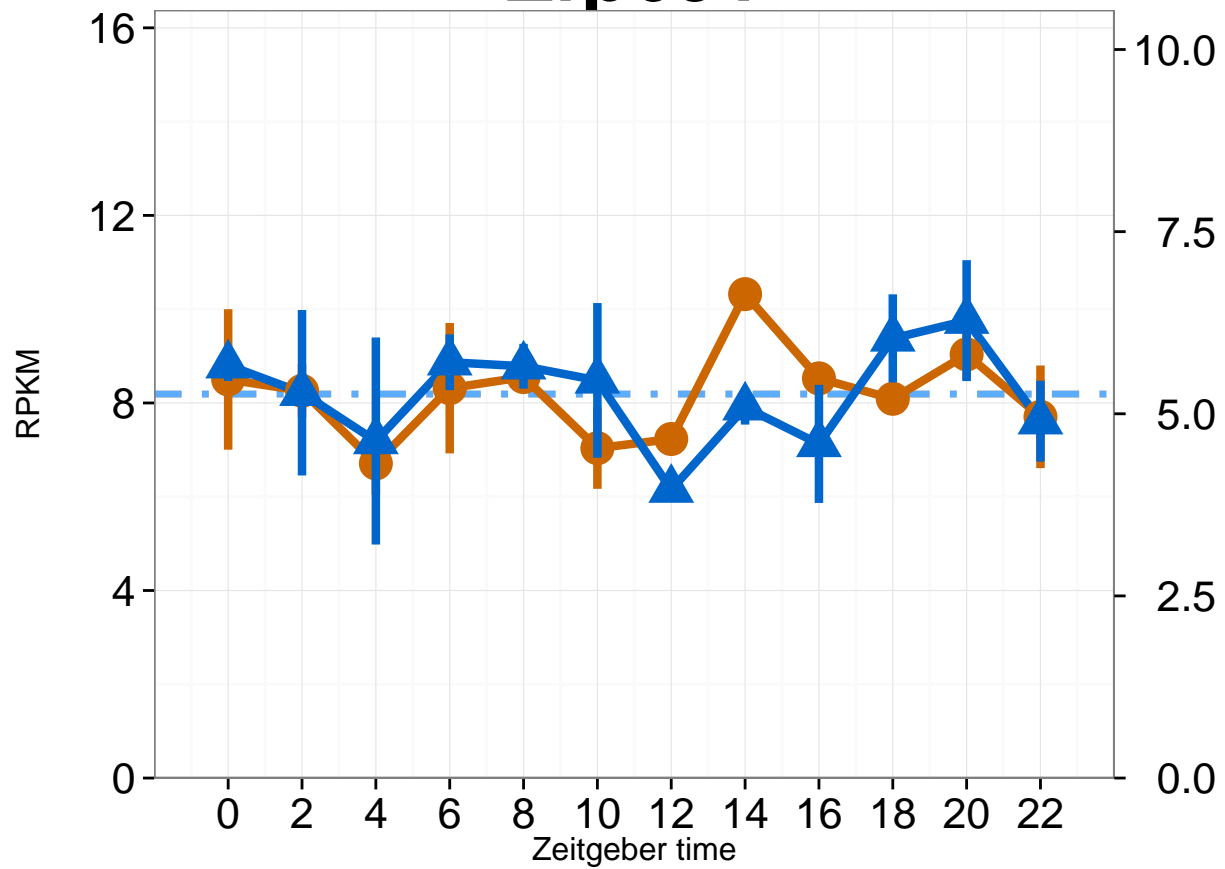

# Zfp691

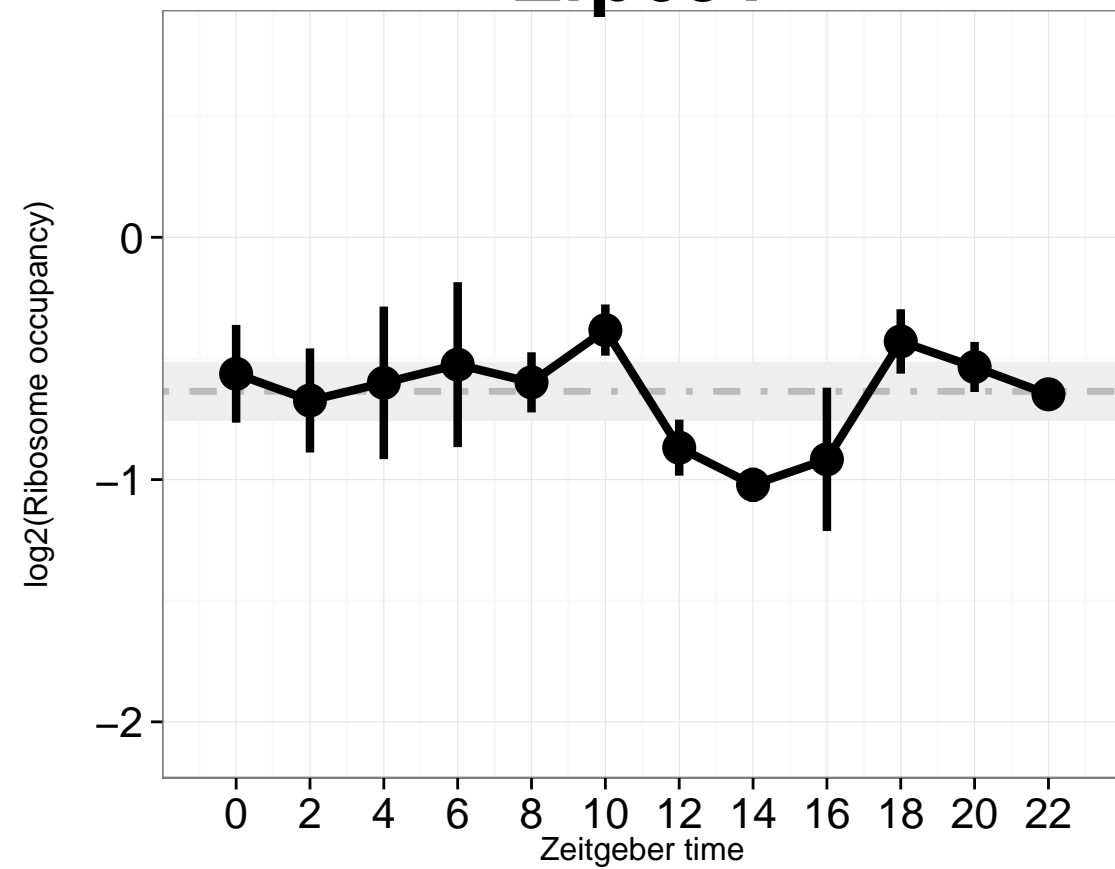

Supplement: Supplementary file 747 [file 1]

# H2-T24

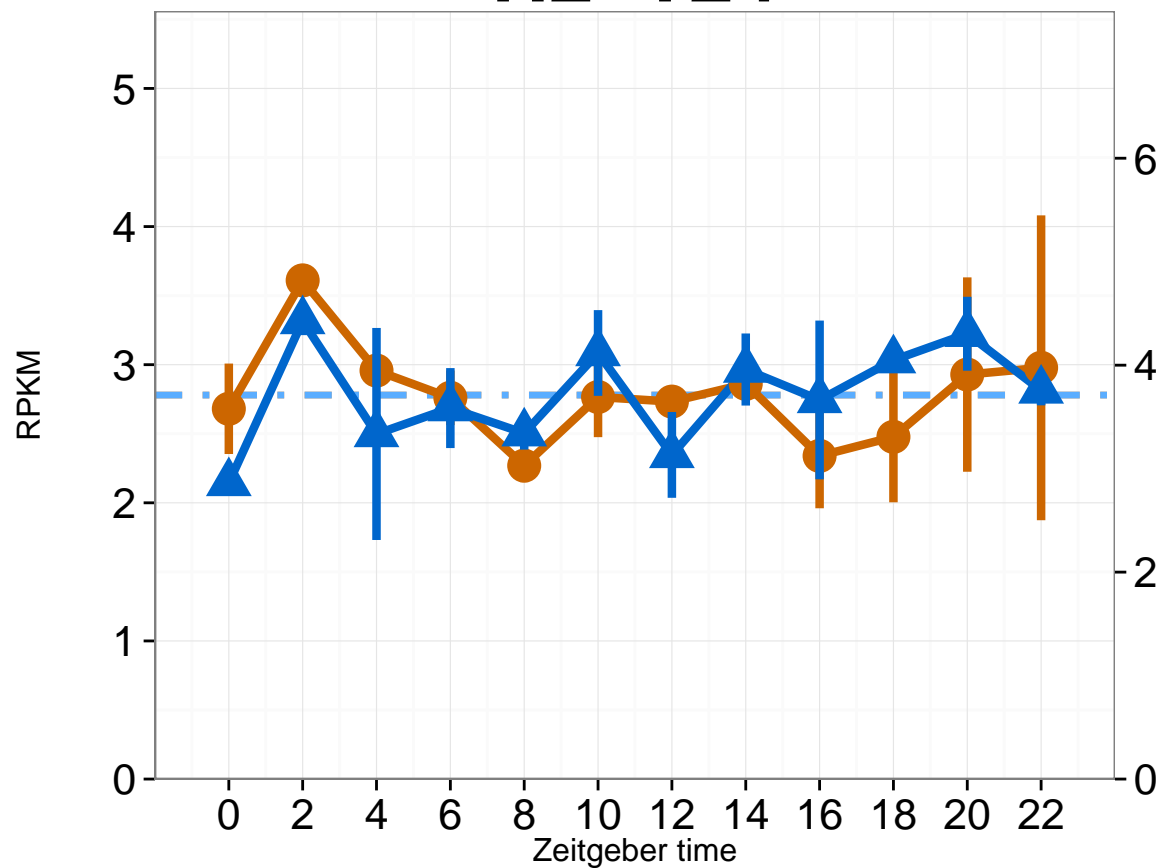

# H2-T24

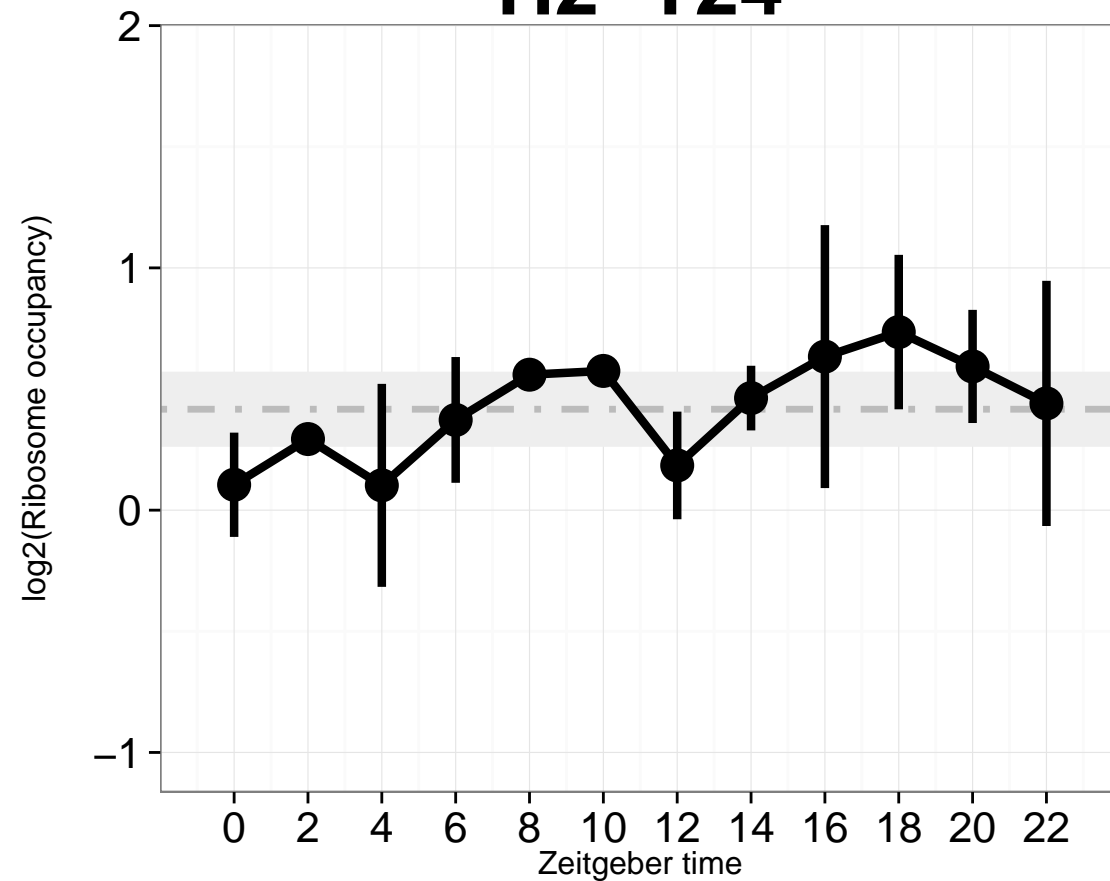

Supplement: Supplementary file 748 [file 1]

## Galnt7

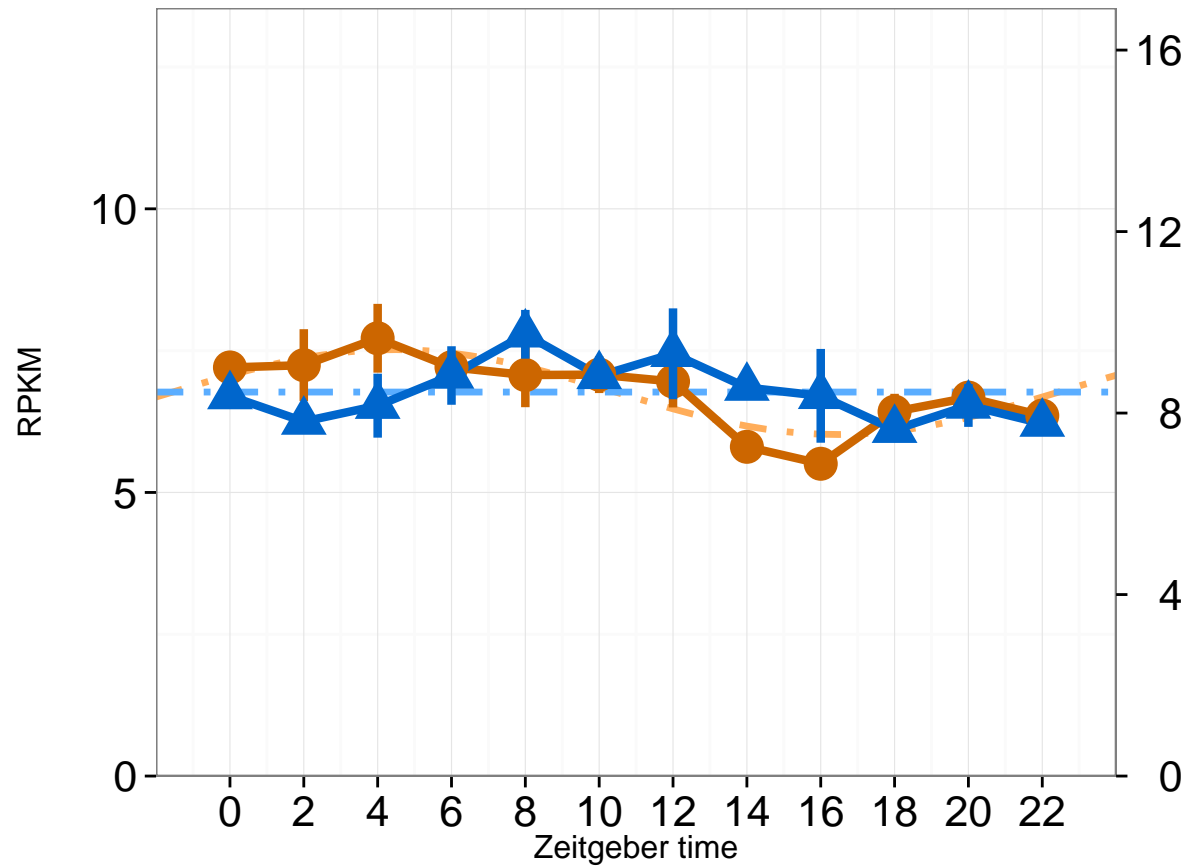

## Galnt7

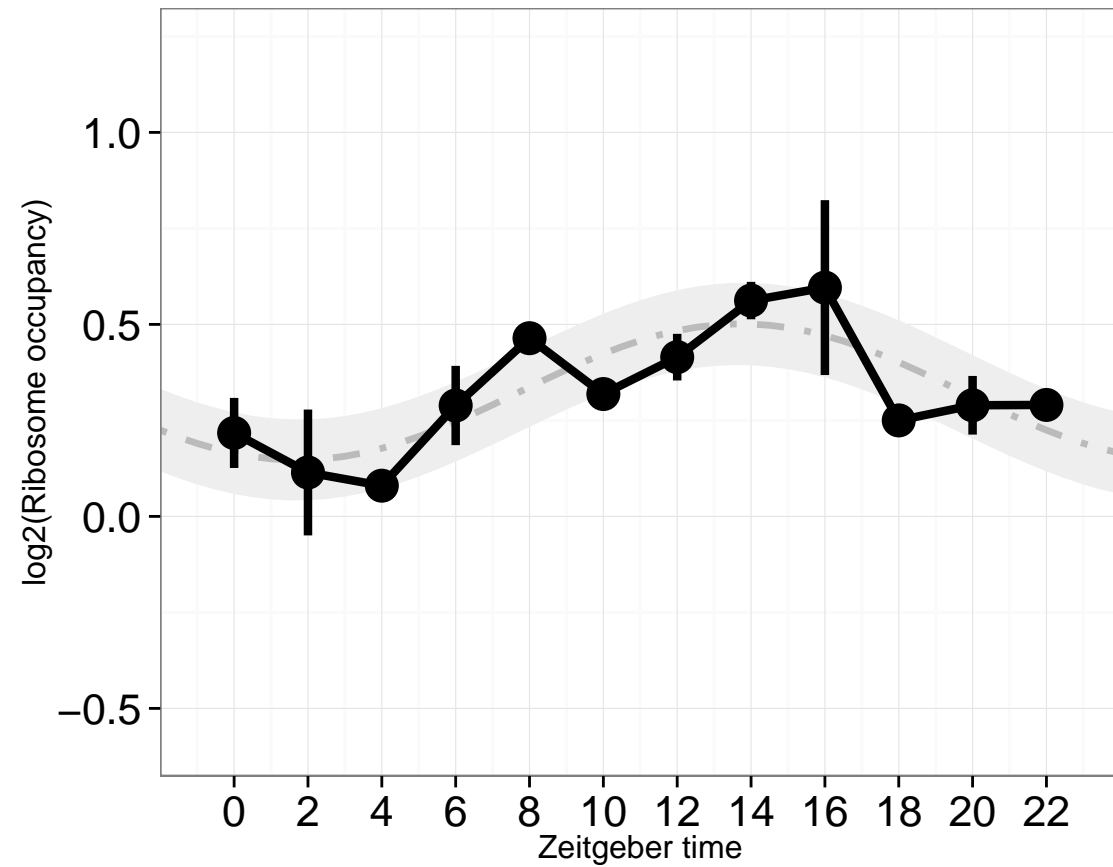

Supplement: Supplementary file 749 [file 1]

# Cmtr2

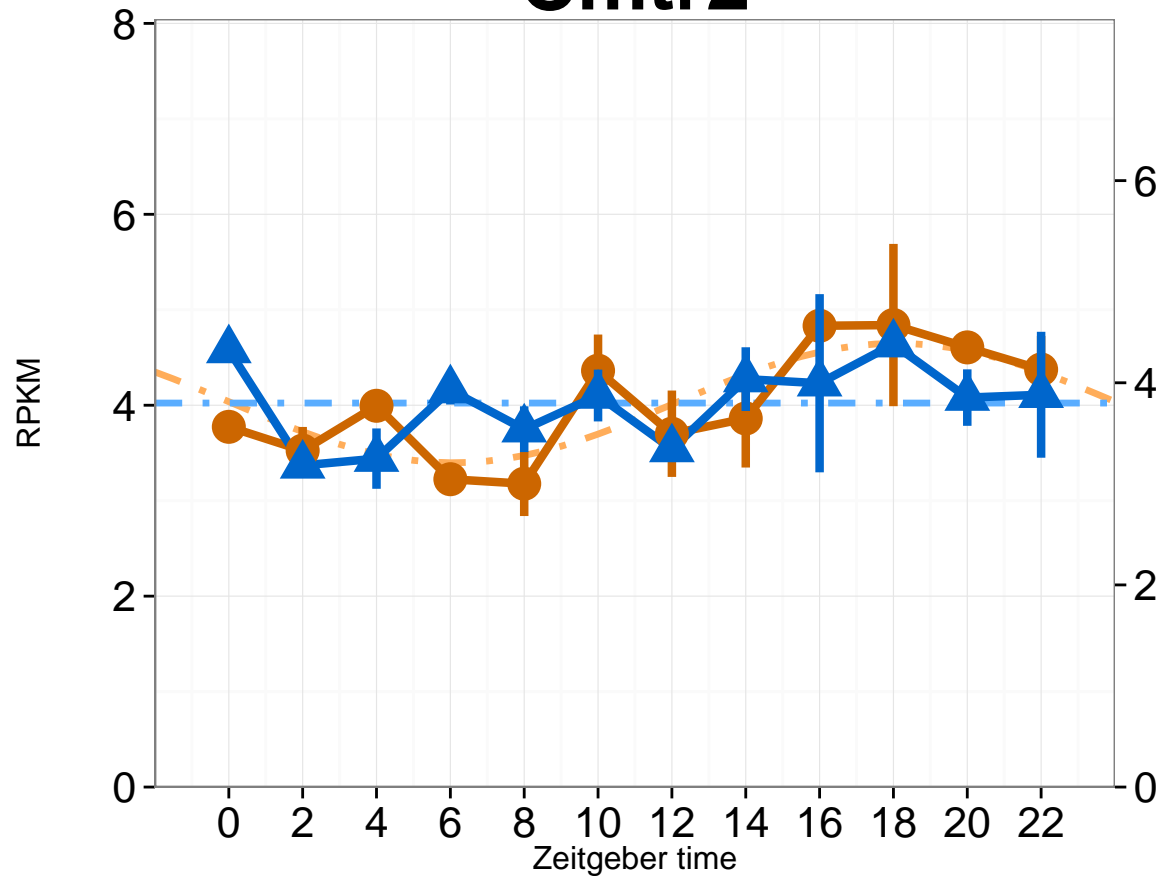

# Cmtr2

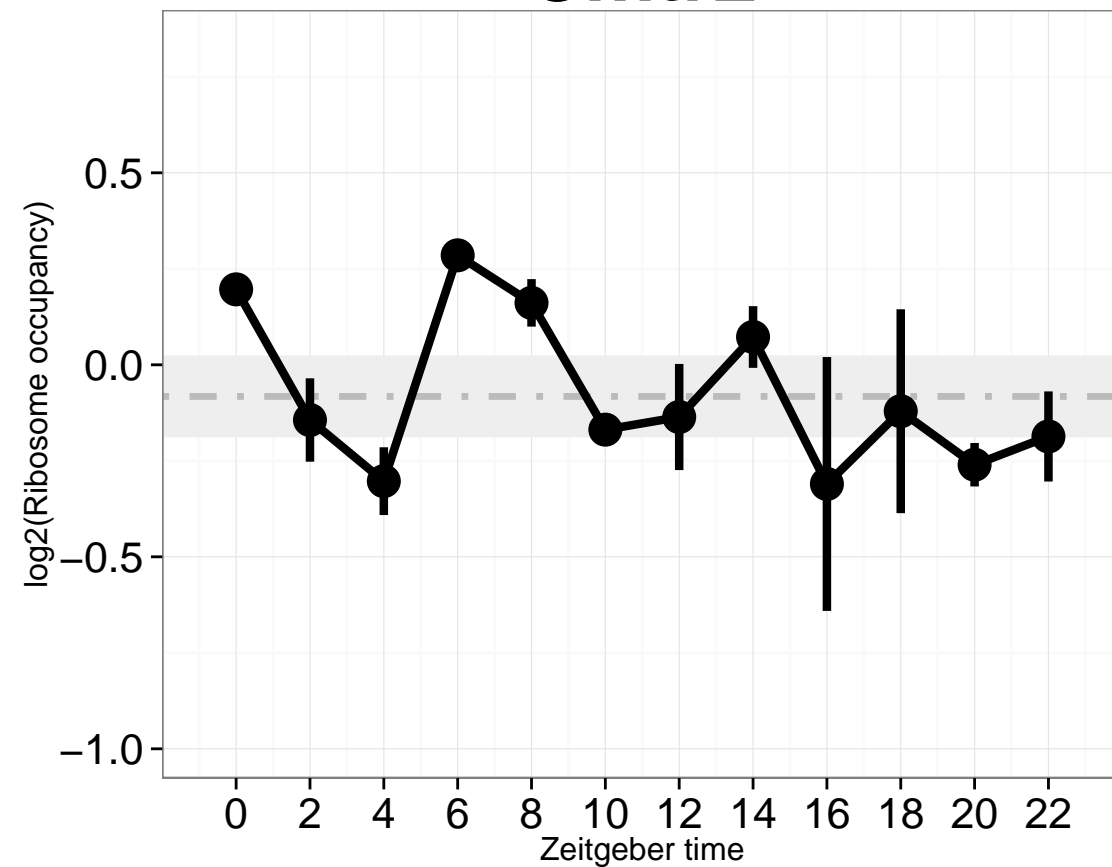

Supplement: Supplementary file 750 [file 1]

## Gde1

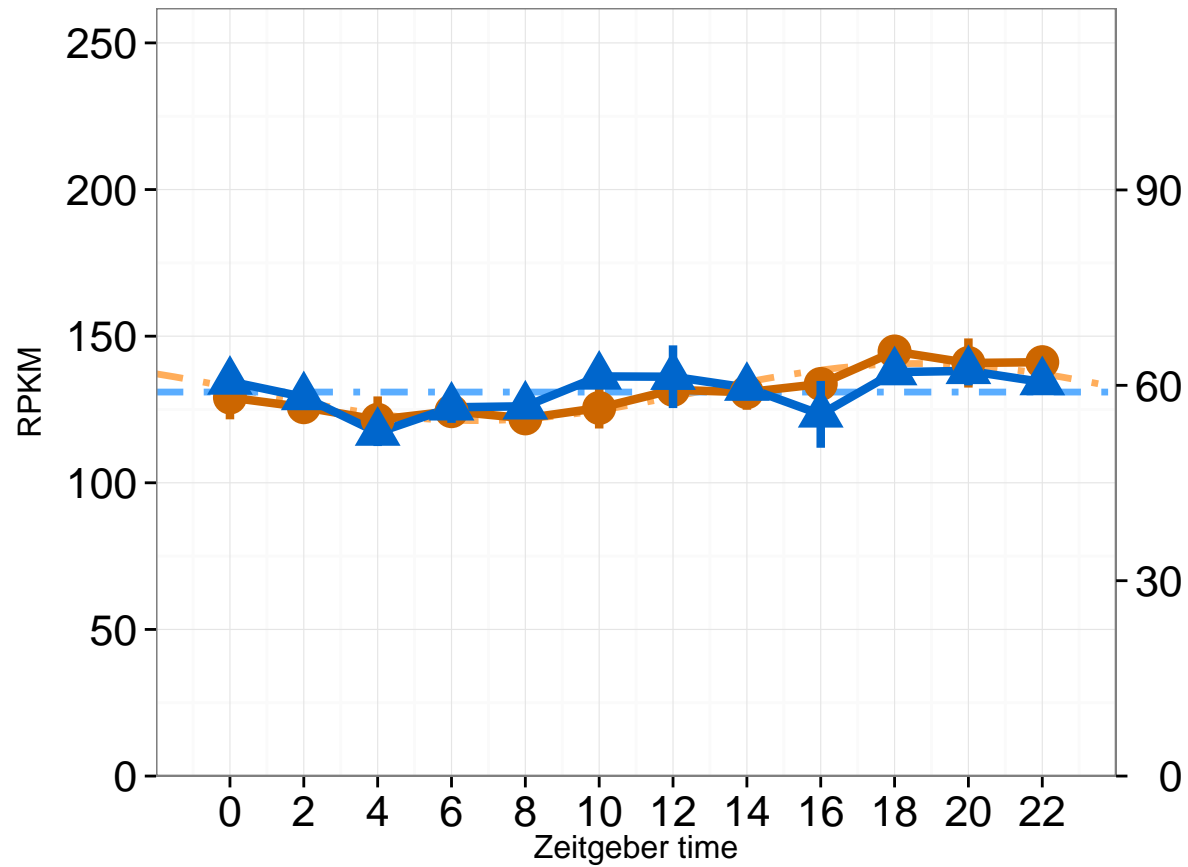

## Gde1

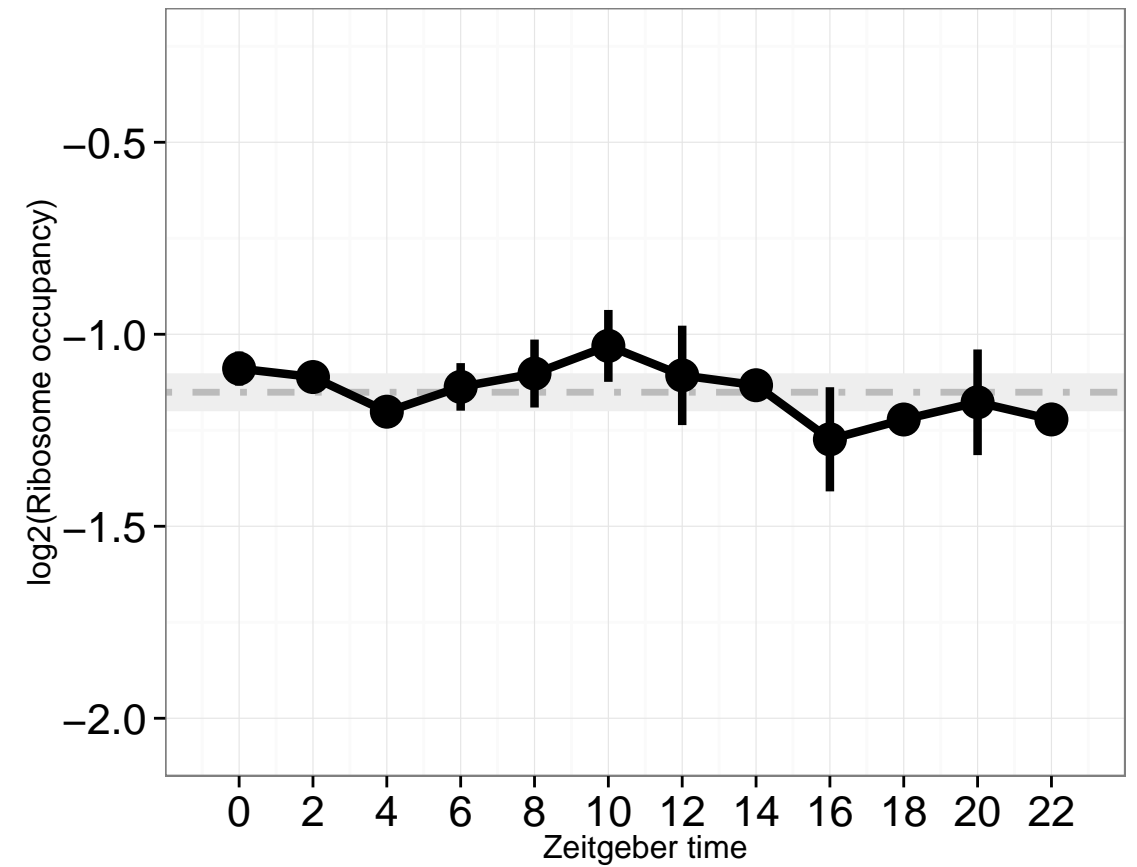

Supplement: Supplementary file 751 [file 1]

# Rabep1

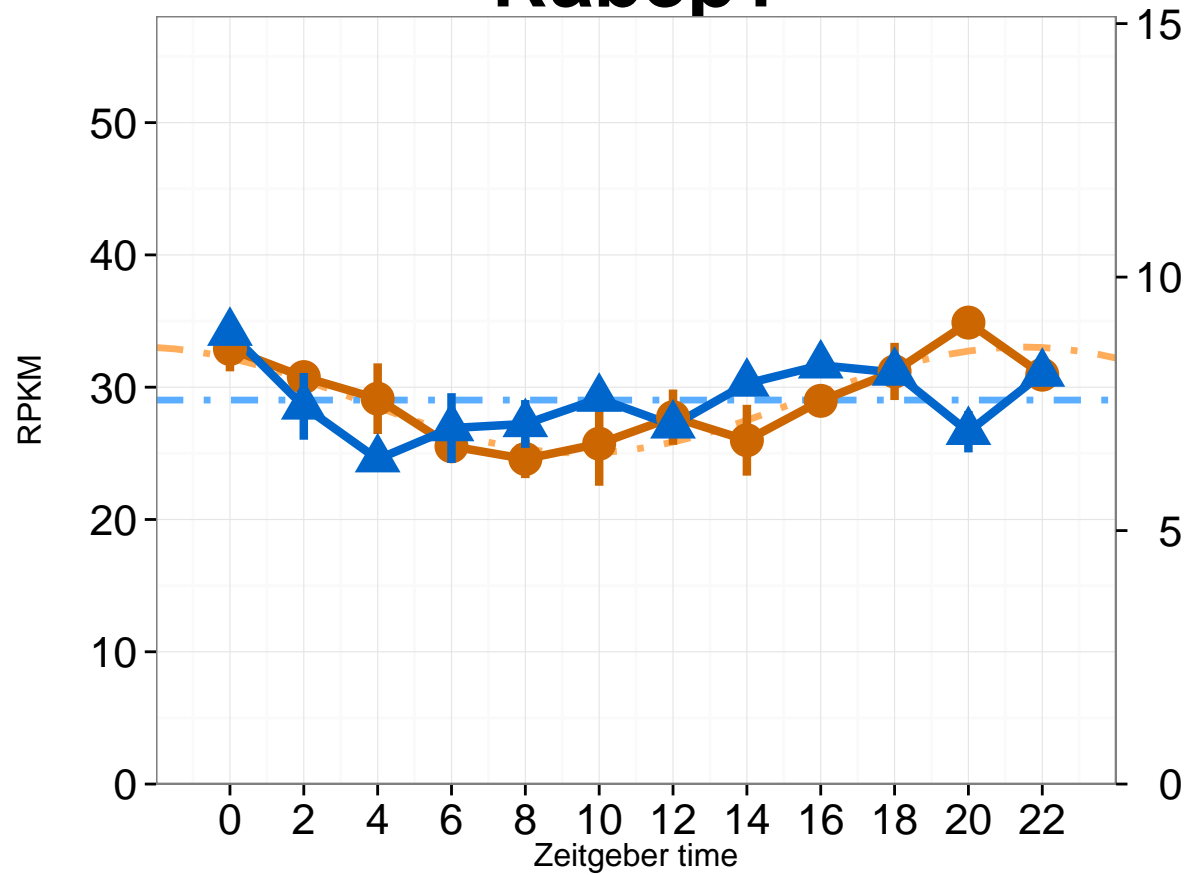

# Rabep1

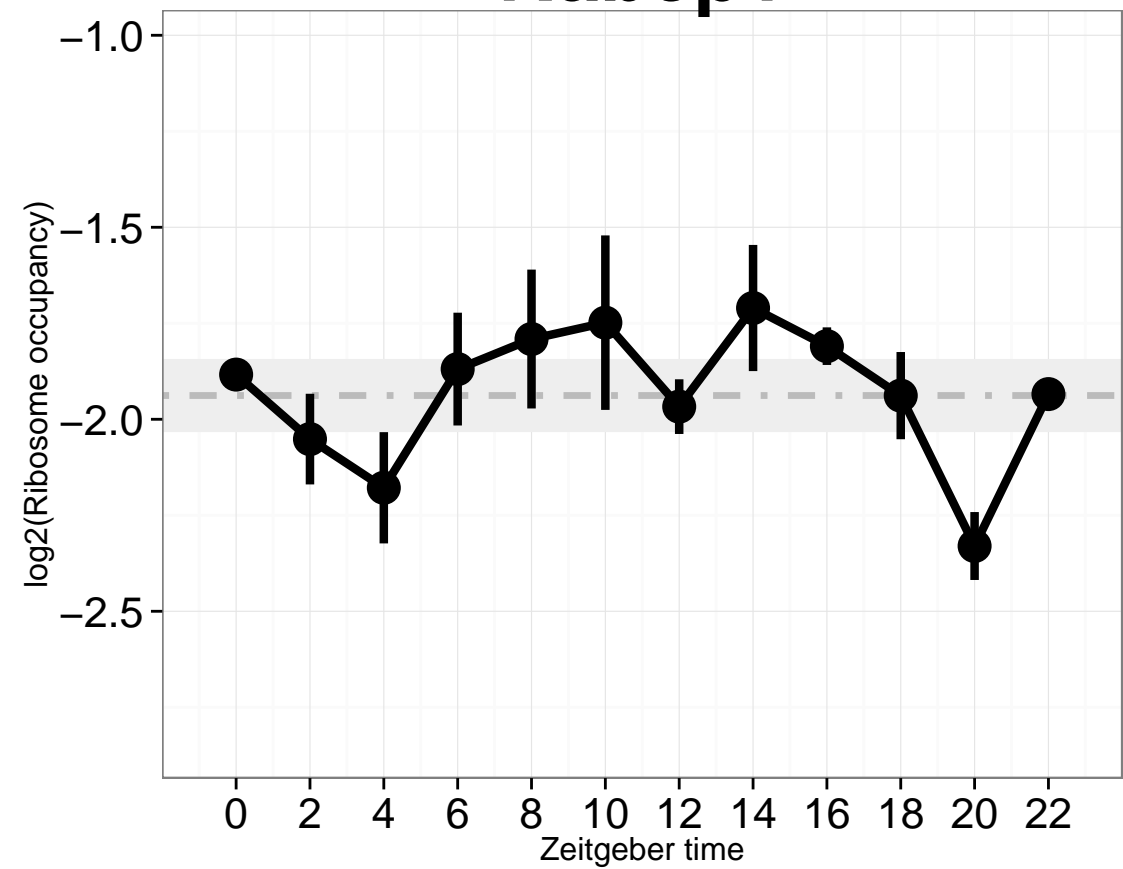

Supplement: Supplementary file 752 [file 1]

# Zfp941

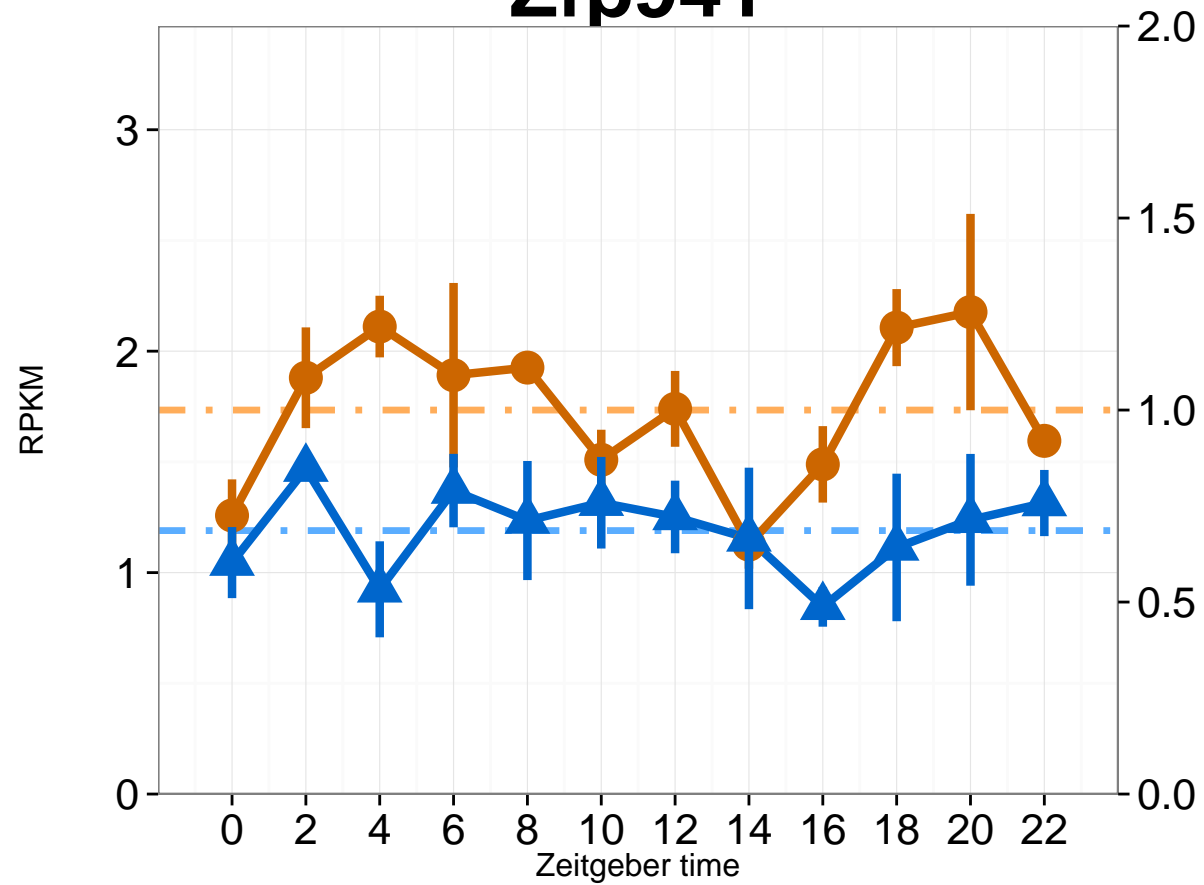

# Zfp941

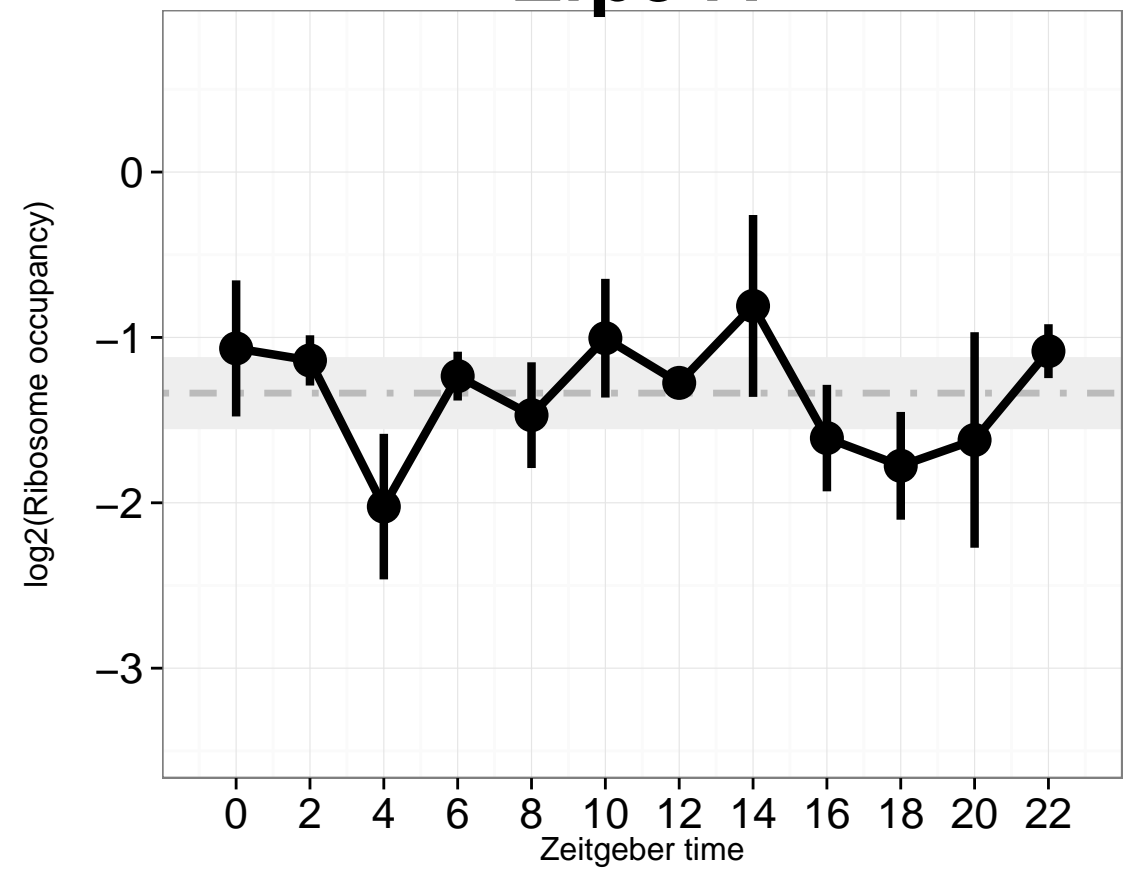

Supplement: Supplementary file 753 [file 1]

# Fxyd6

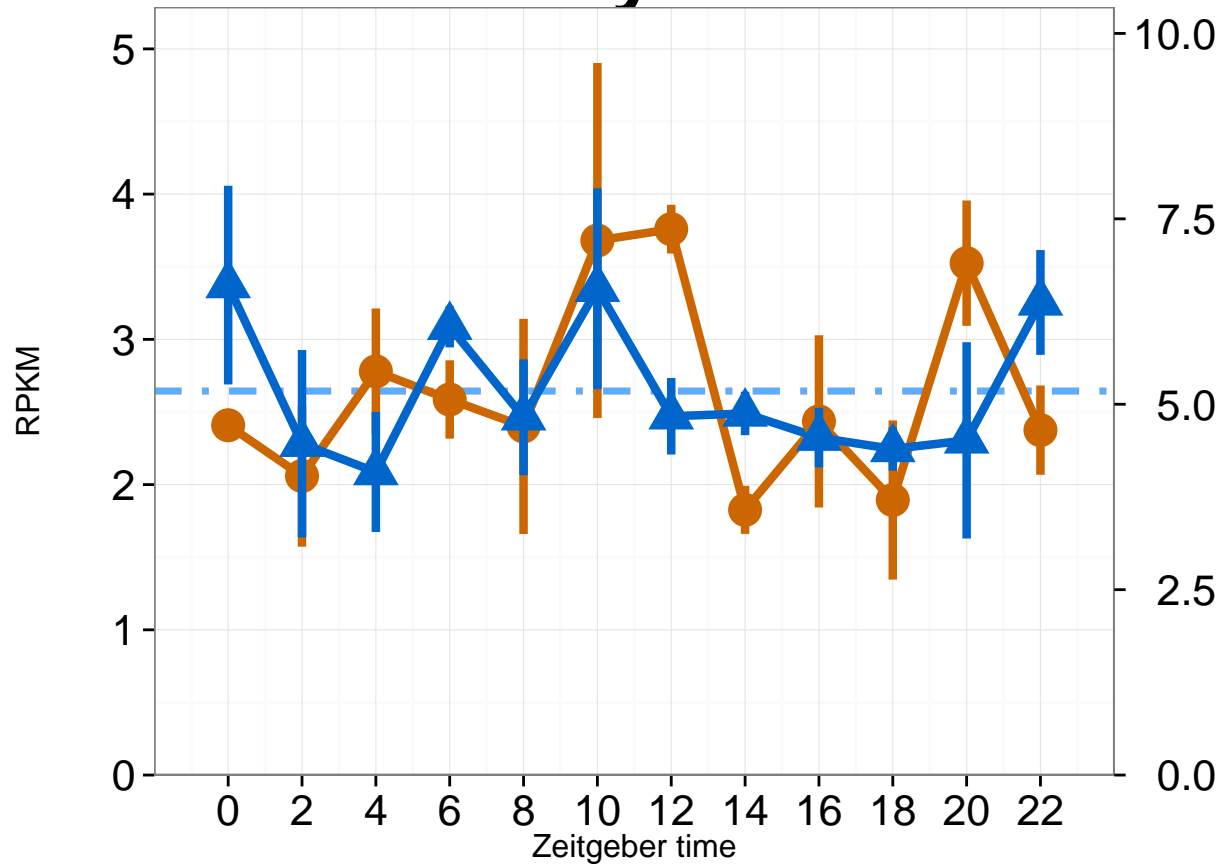

# Fxyd6

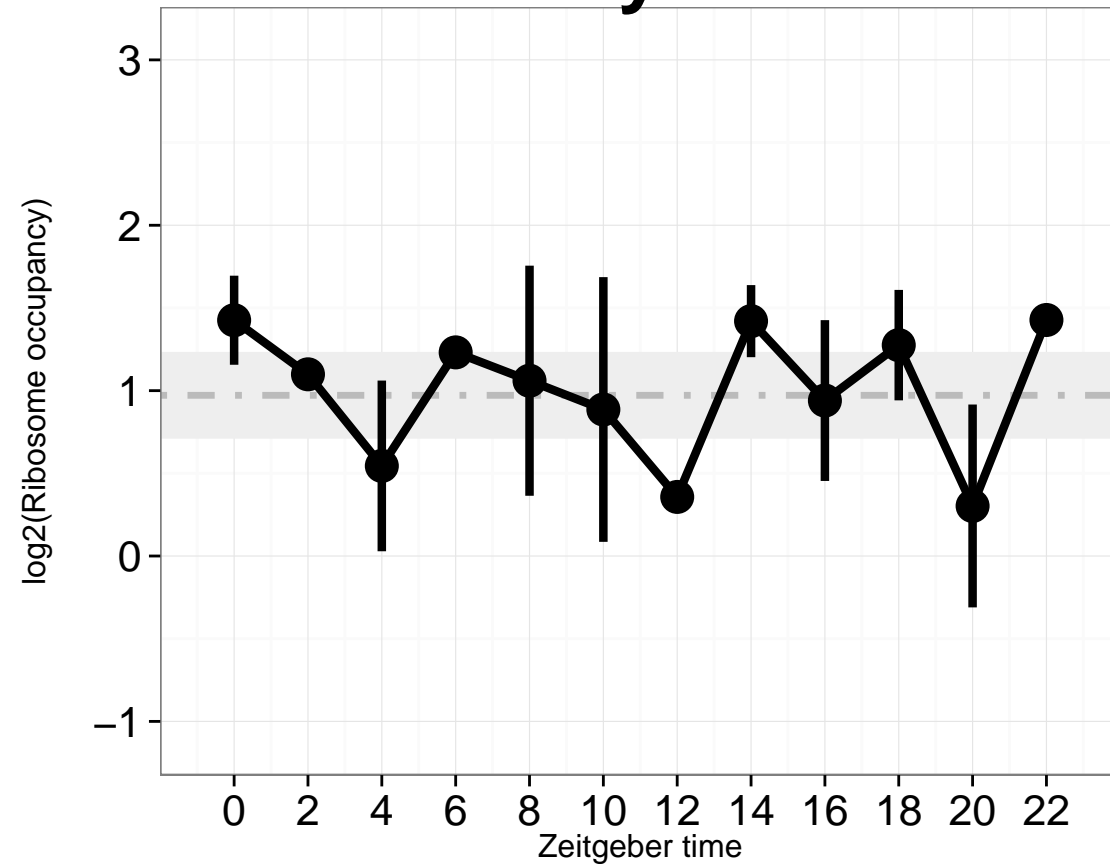

Supplement: Supplementary file 754 [file 1]

## Plek

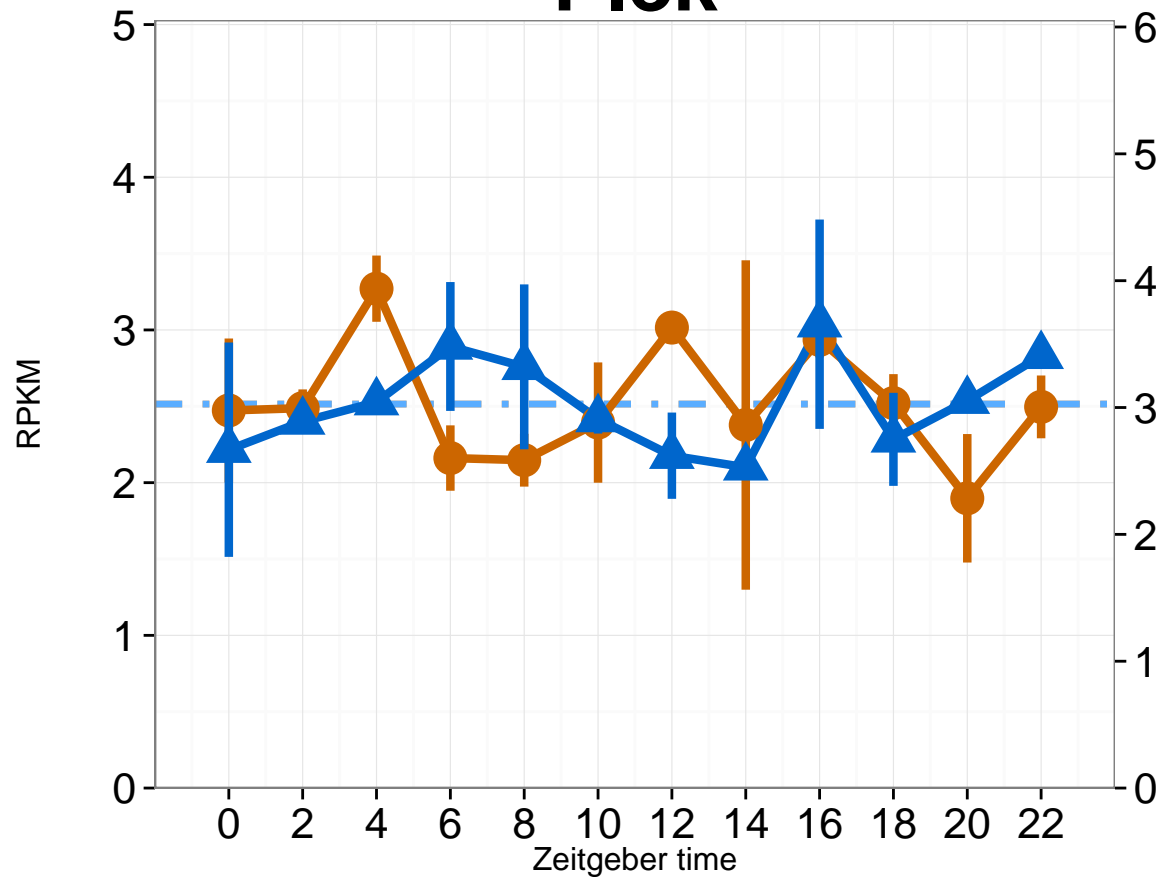

## Plek

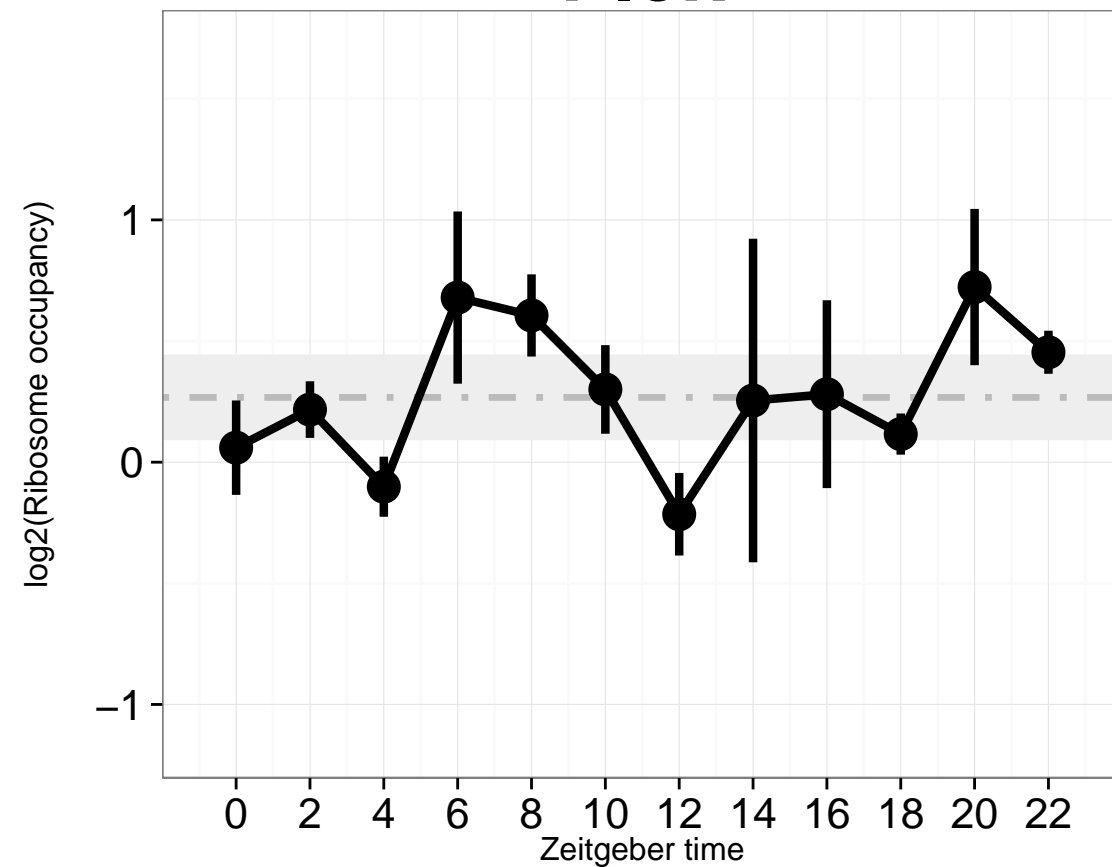

Supplement: Supplementary file 755 [file 1]

## Impact

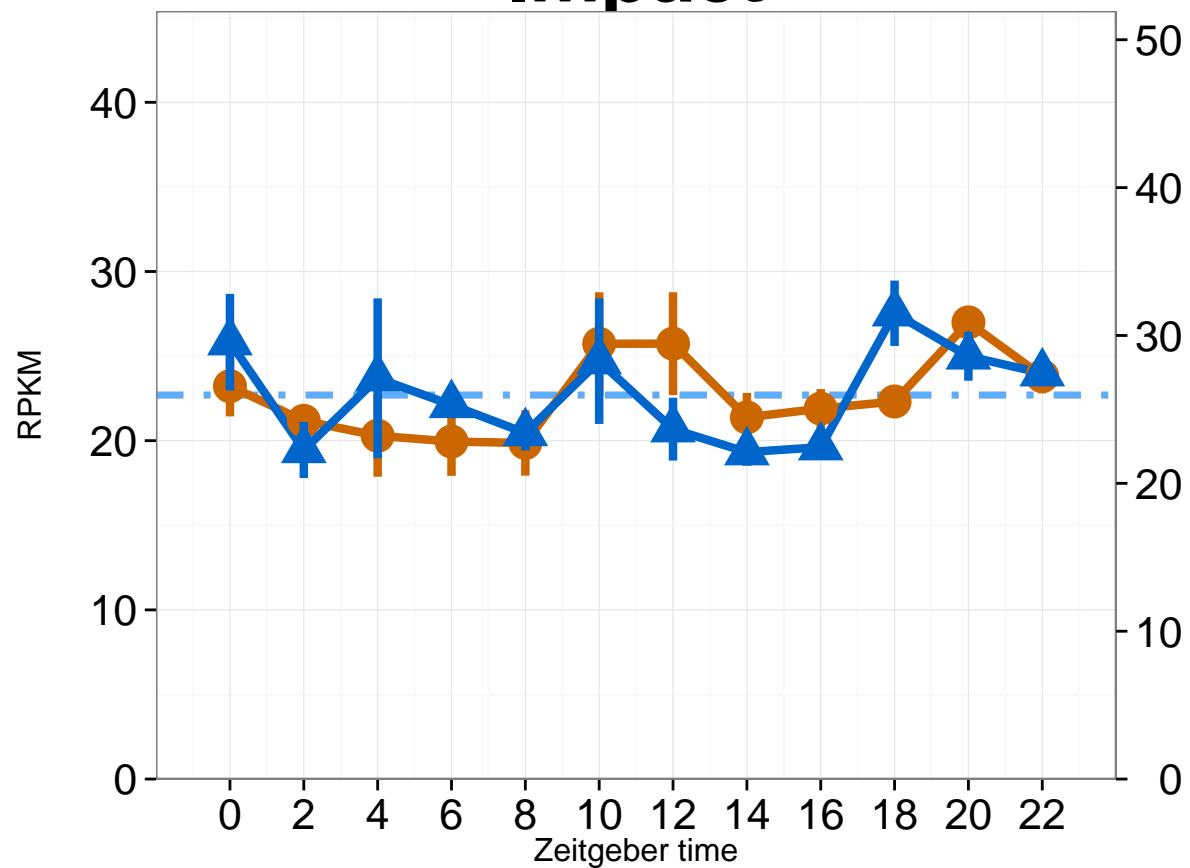

## Impact

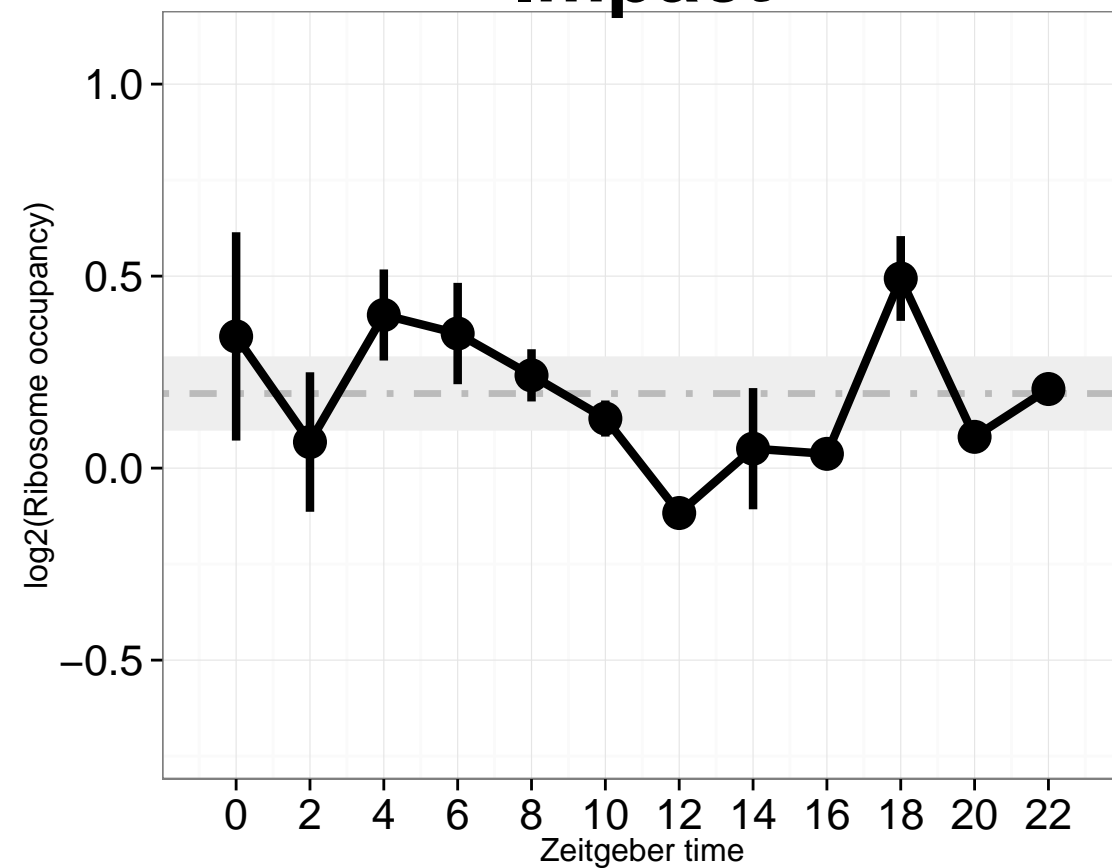

Supplement: Supplementary file 756 [file 1]

# D19Ertd737e

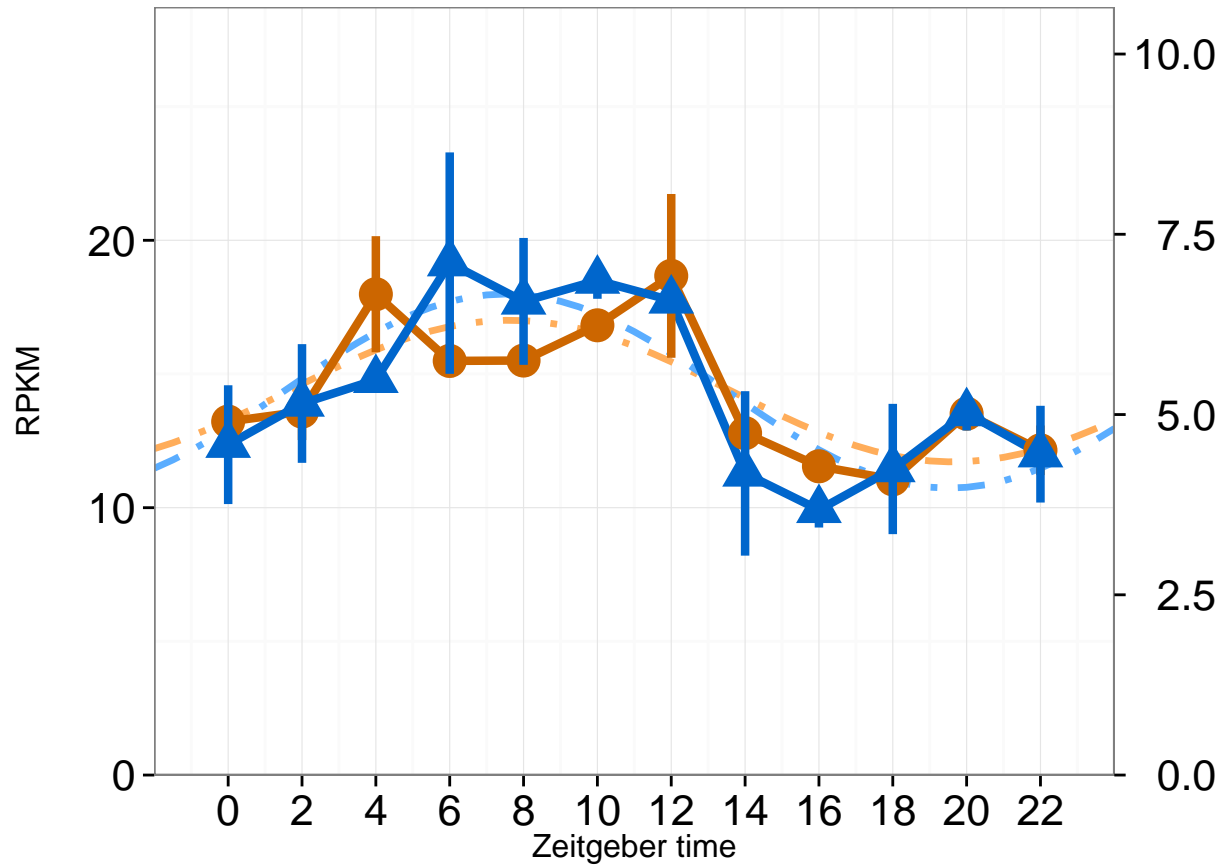

# D19Ertd737e

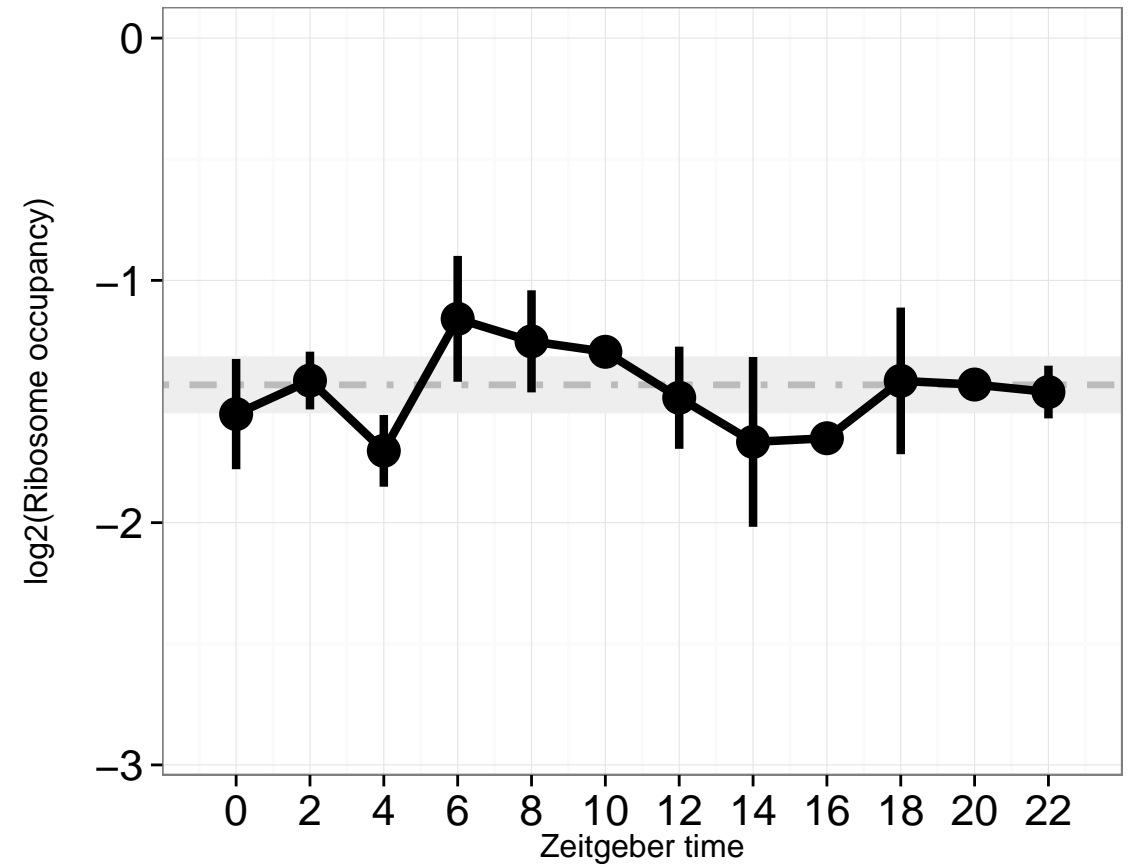

Supplement: Supplementary file 757 [file 1]

## Wasf1

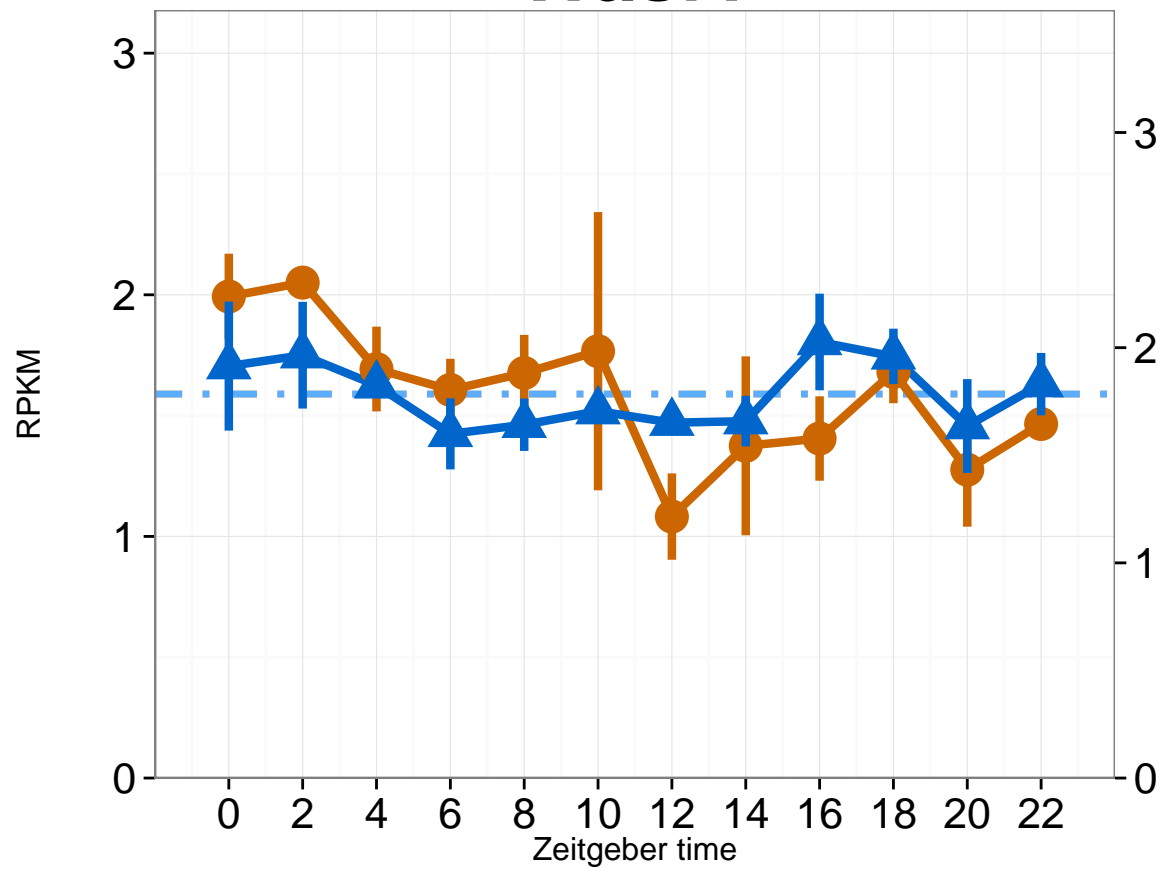

## Wasf1

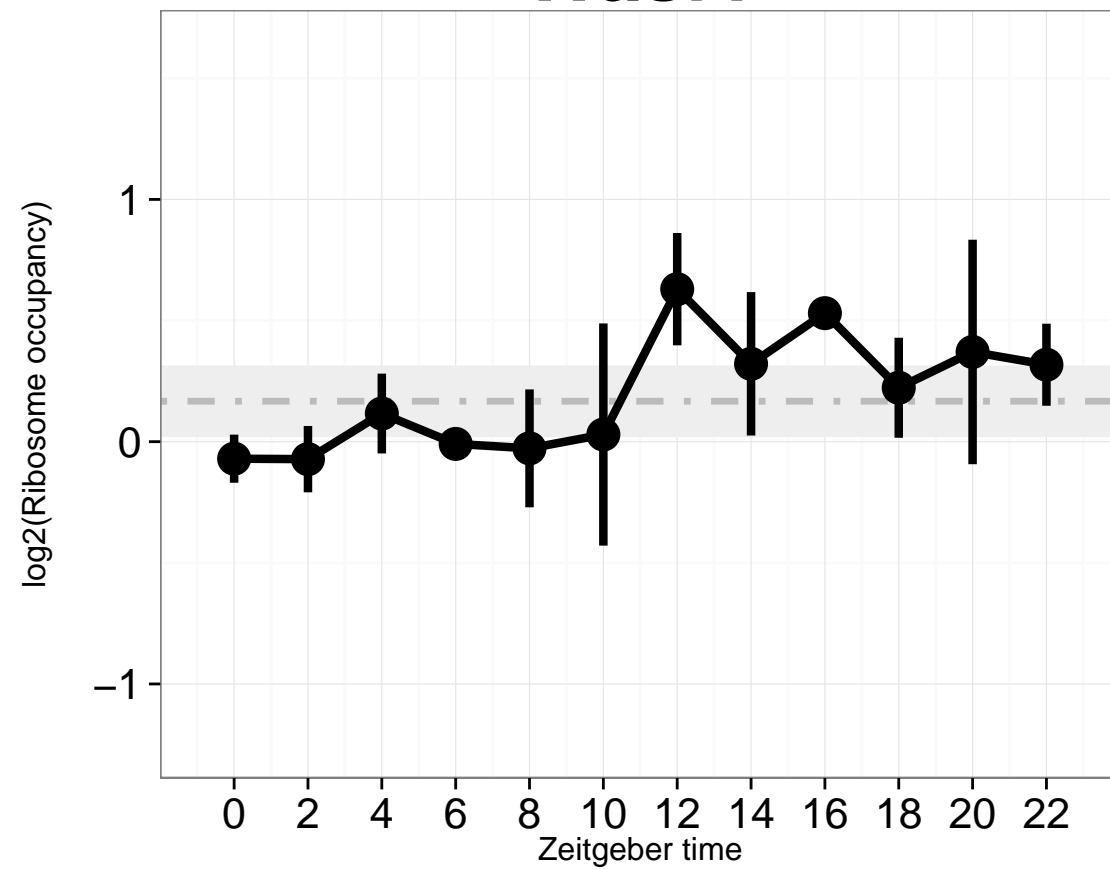

Supplement: Supplementary file 758 [file 1]

## Rnf168

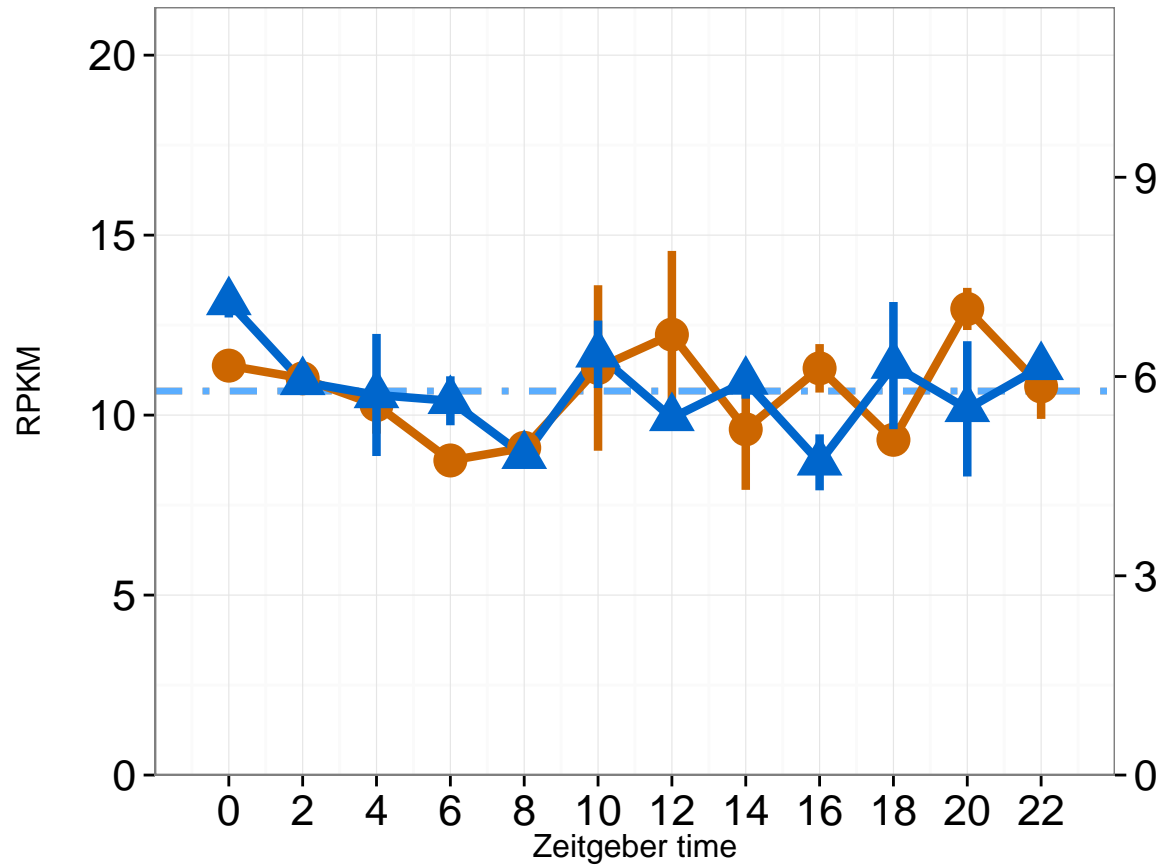

## Rnf168

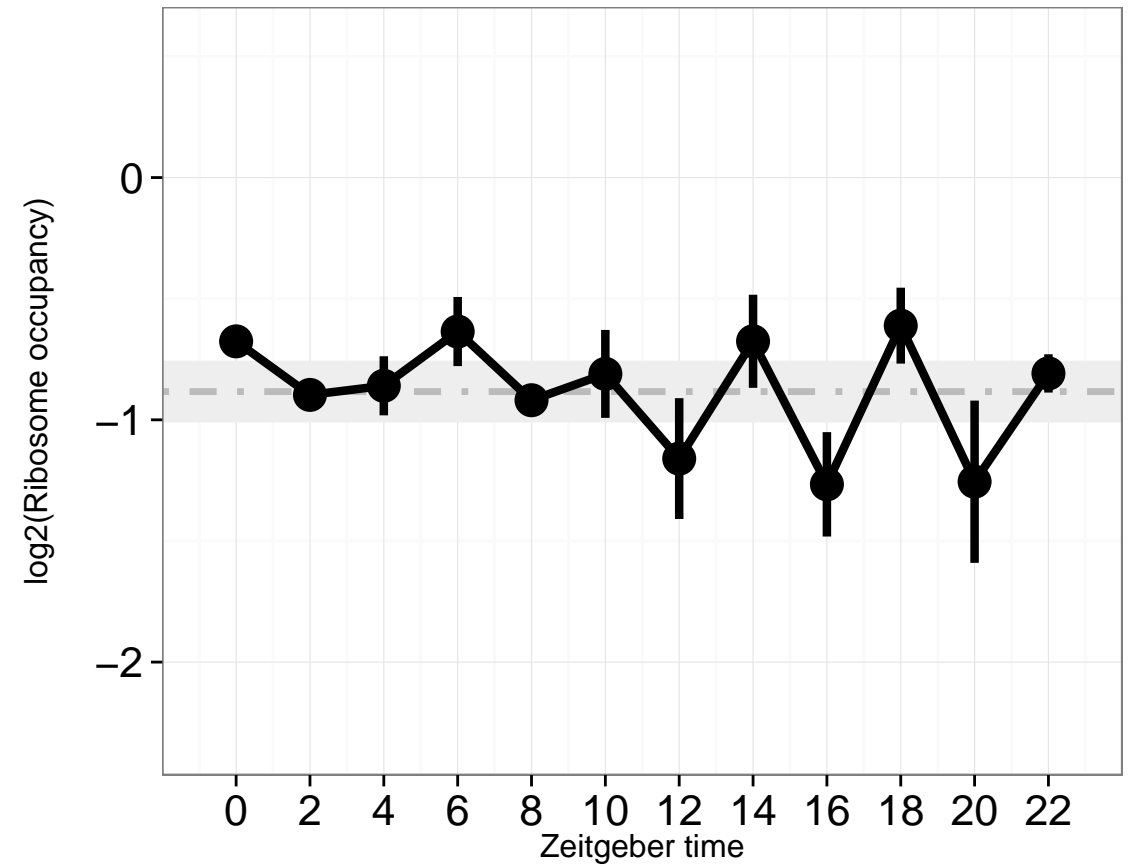

Supplement: Supplementary file 759 [file 1]

# Fig4

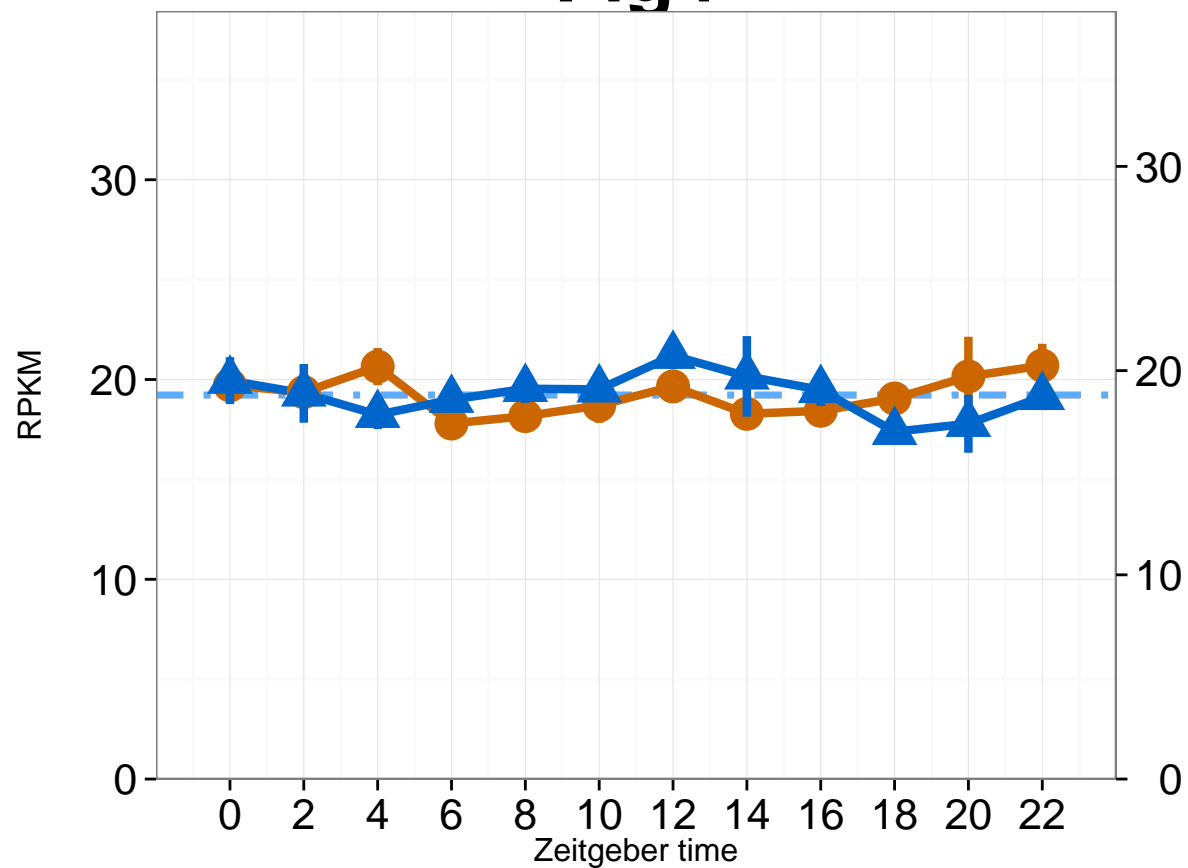

# Fig4

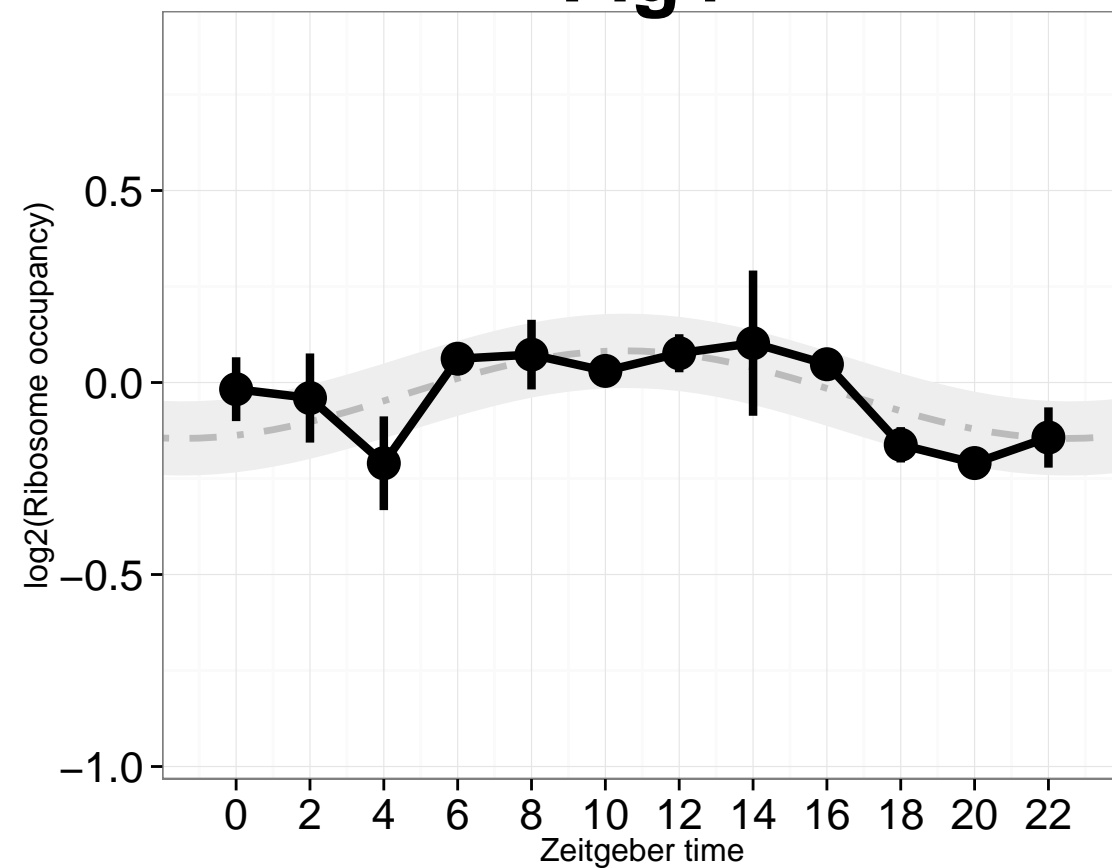

Supplement: Supplementary file 760 [file 1]

## Pgam5

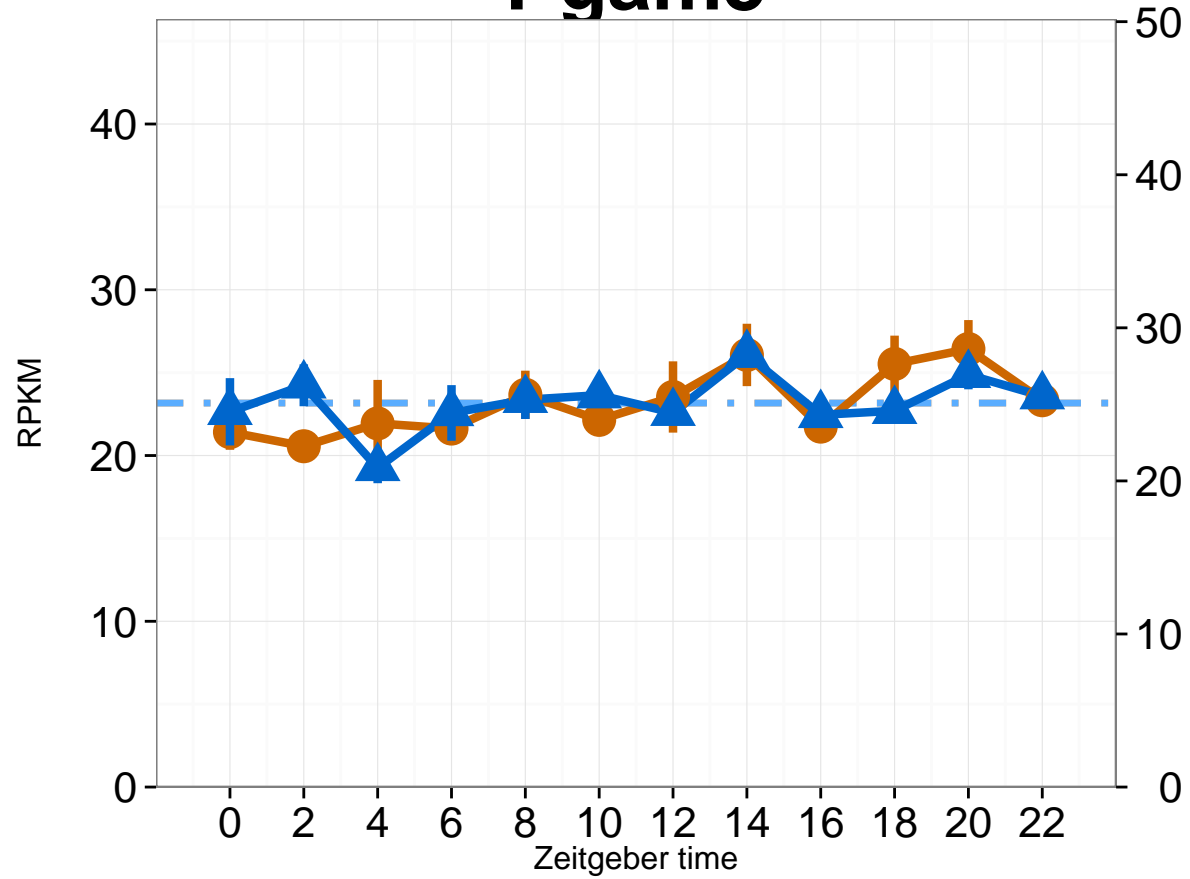

## Pgam5

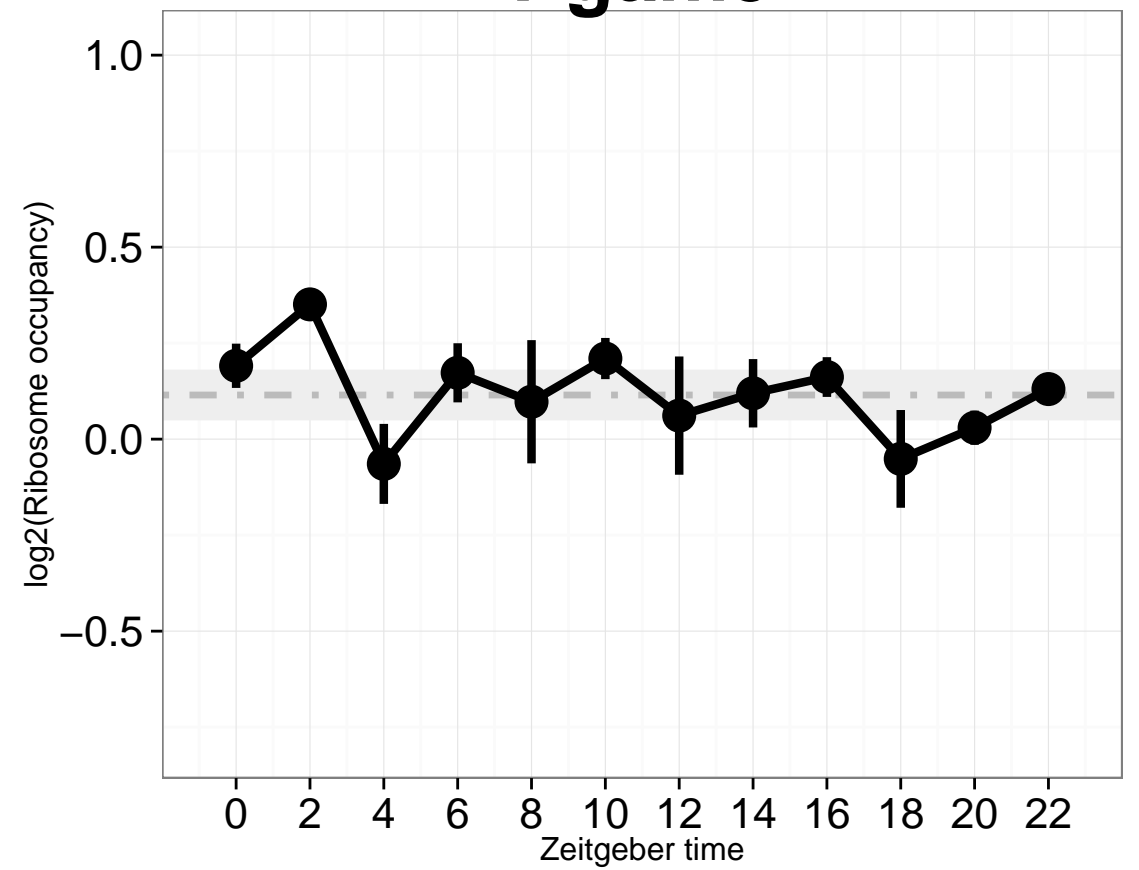

Supplement: Supplementary file 761 [file 1]

# Sptan1

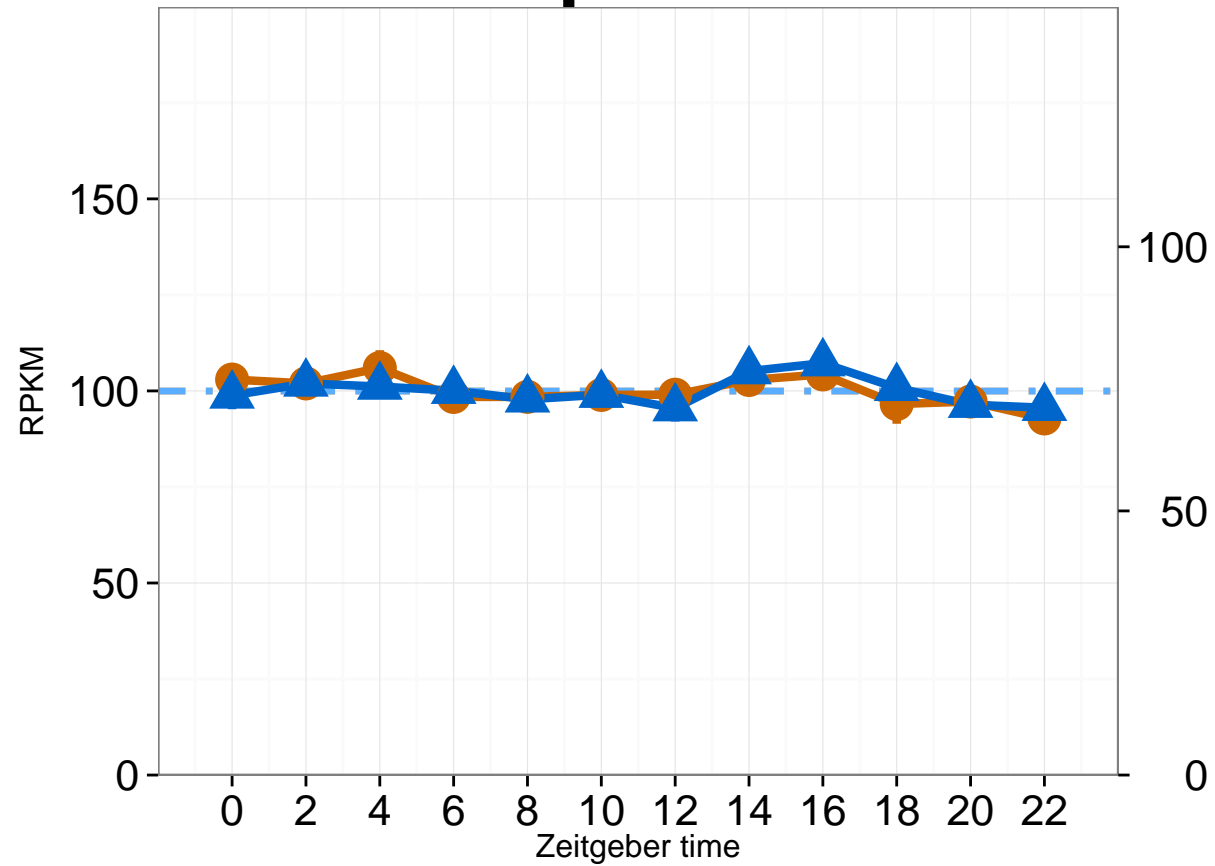

# Sptan1

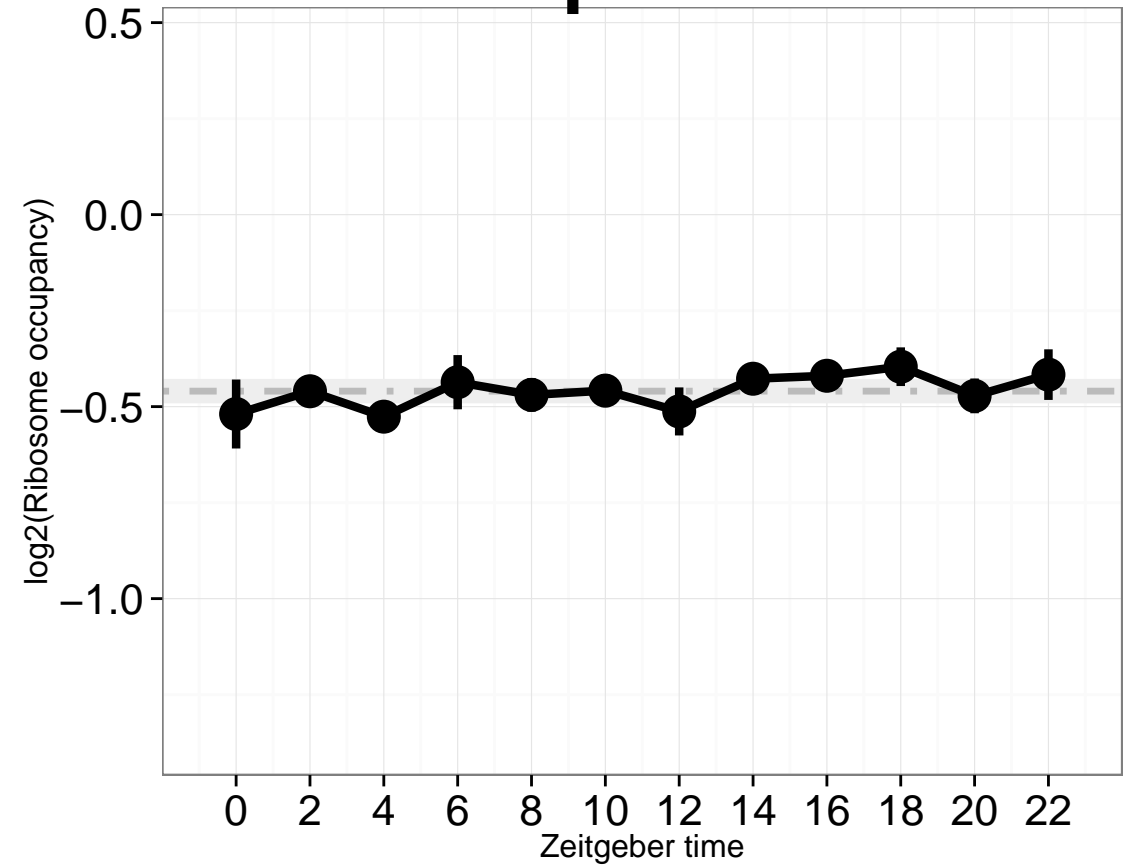

Supplement: Supplementary file 762 [file 1]

# Sectm1b

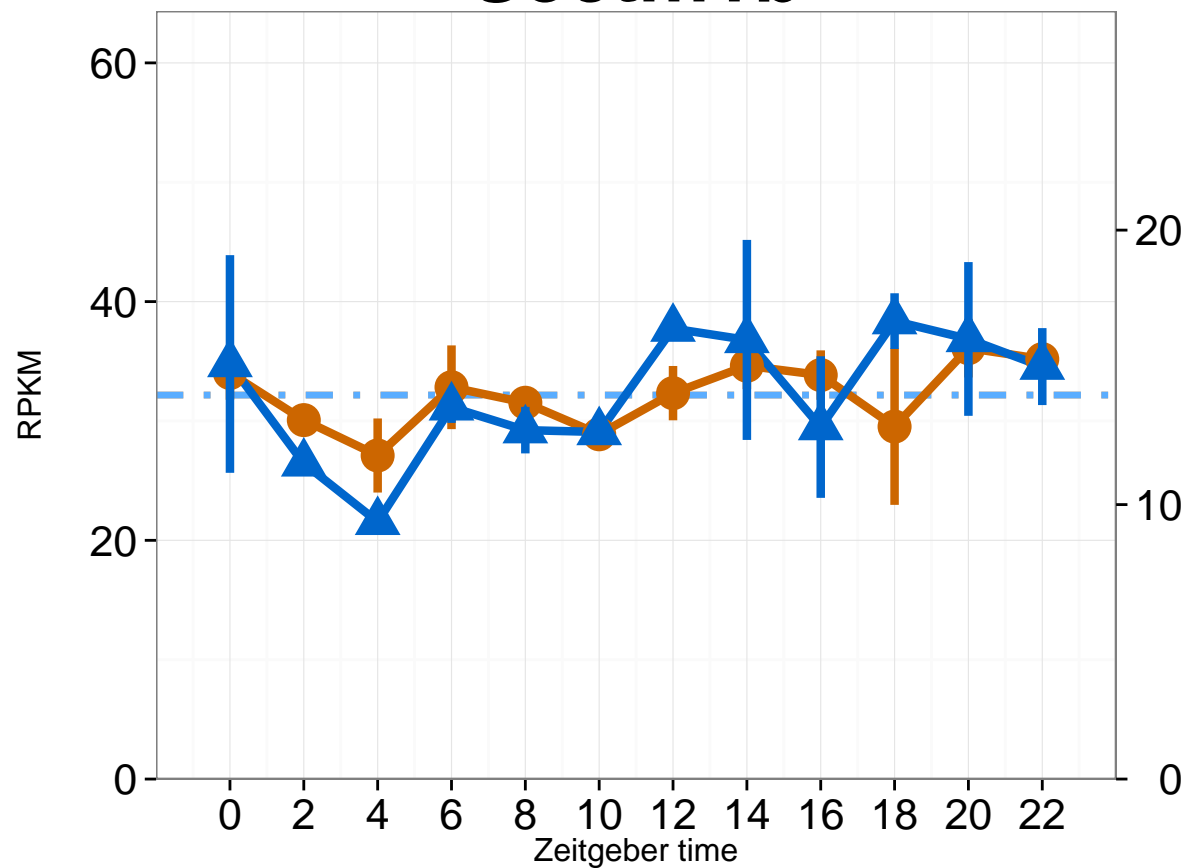

# Sectm1b

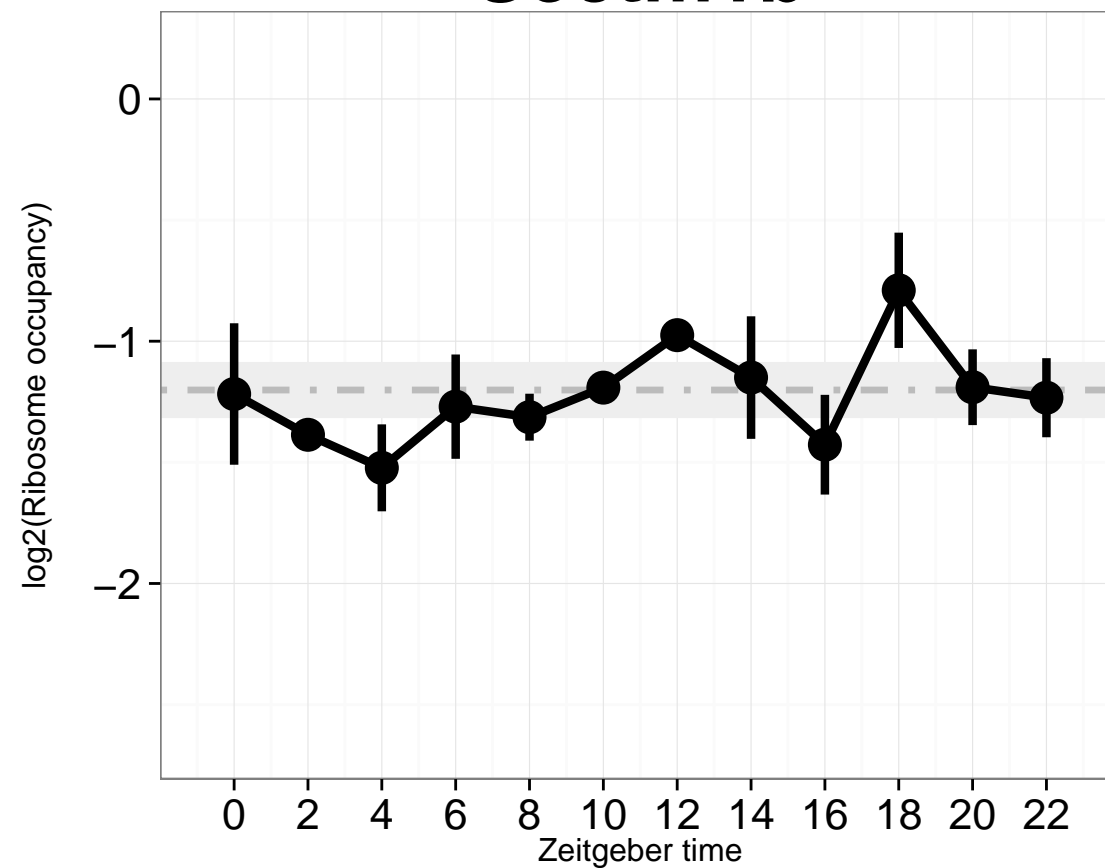

Supplement: Supplementary file 763 [file 1]

## Acot3

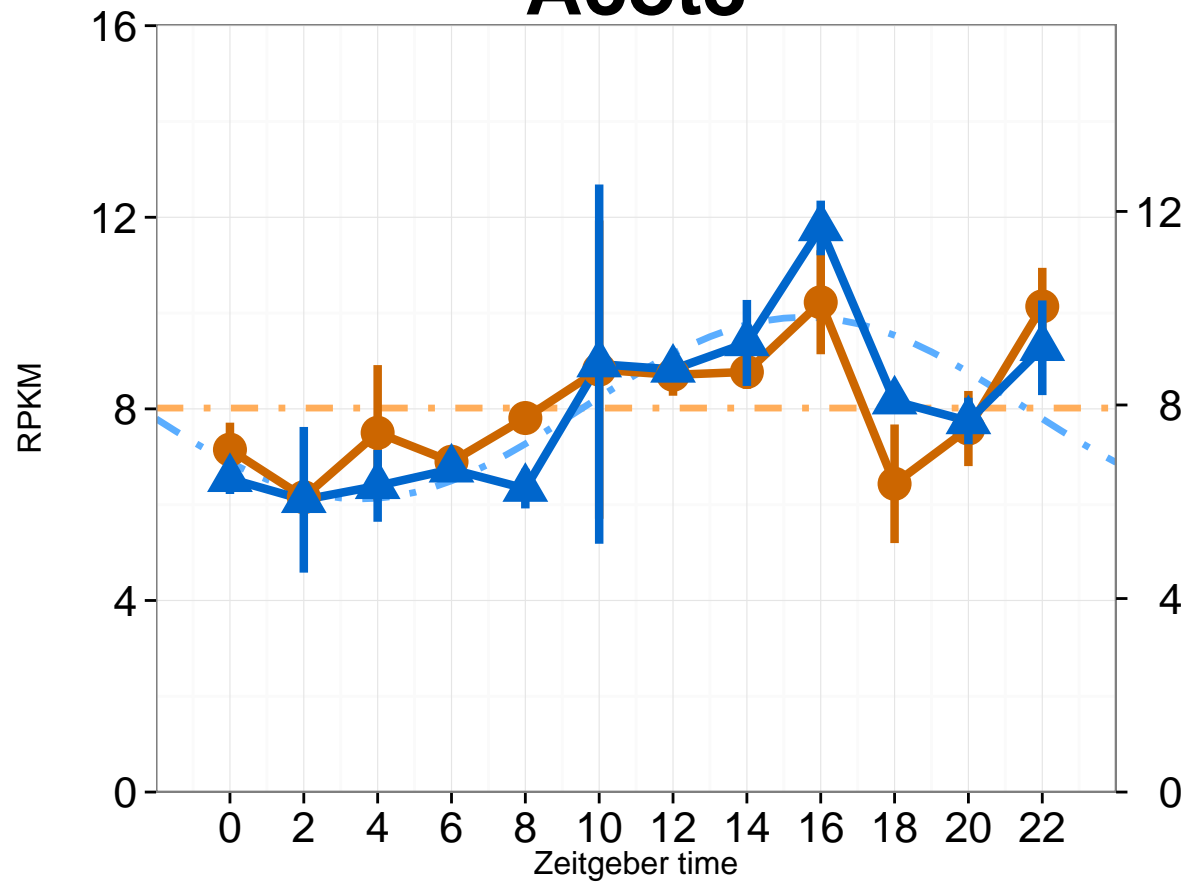

## Acot3

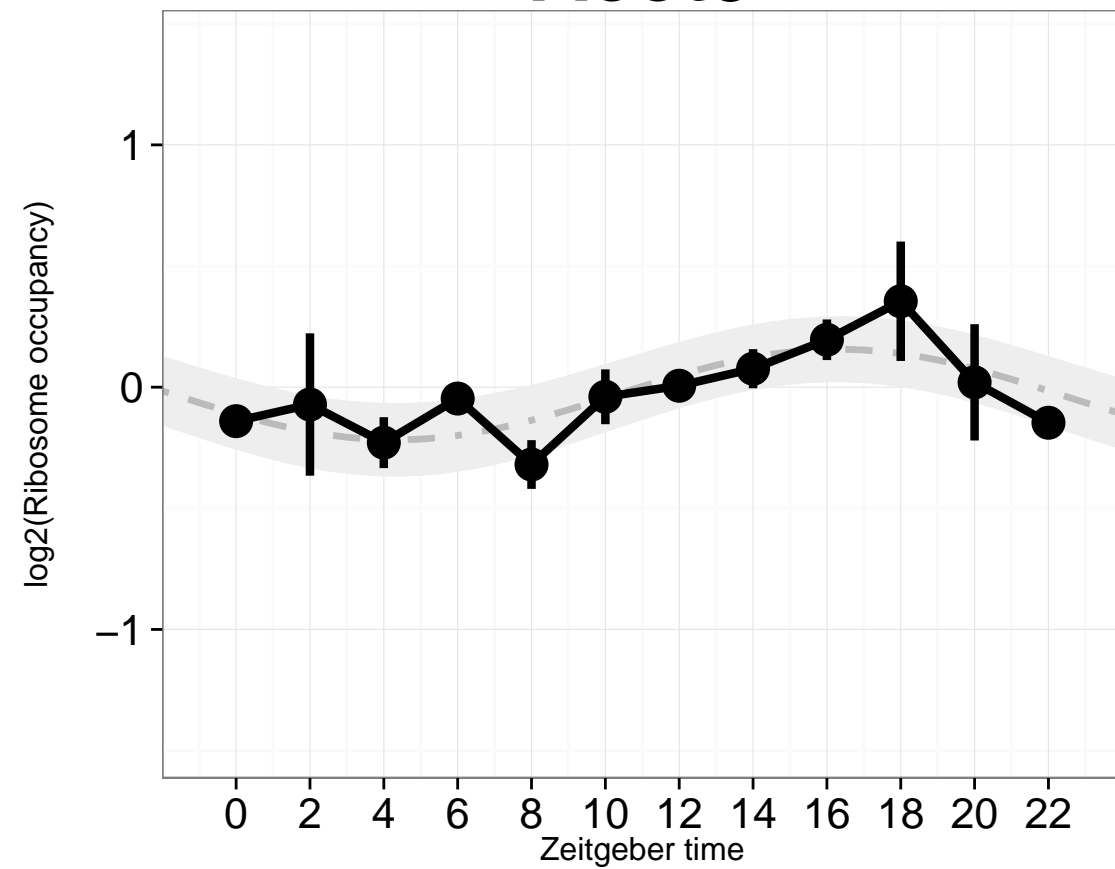

Supplement: Supplementary file 764 [file 1]

## Ubtd2

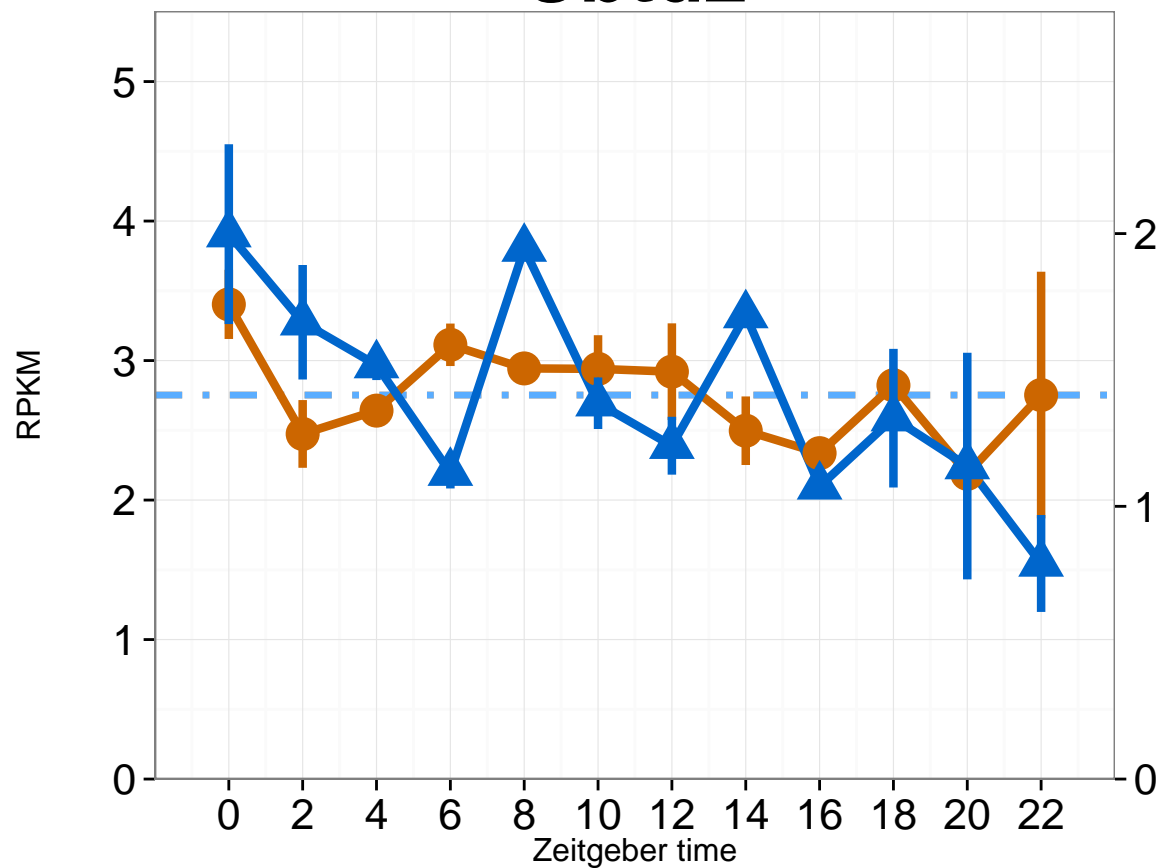

## Ubtd2

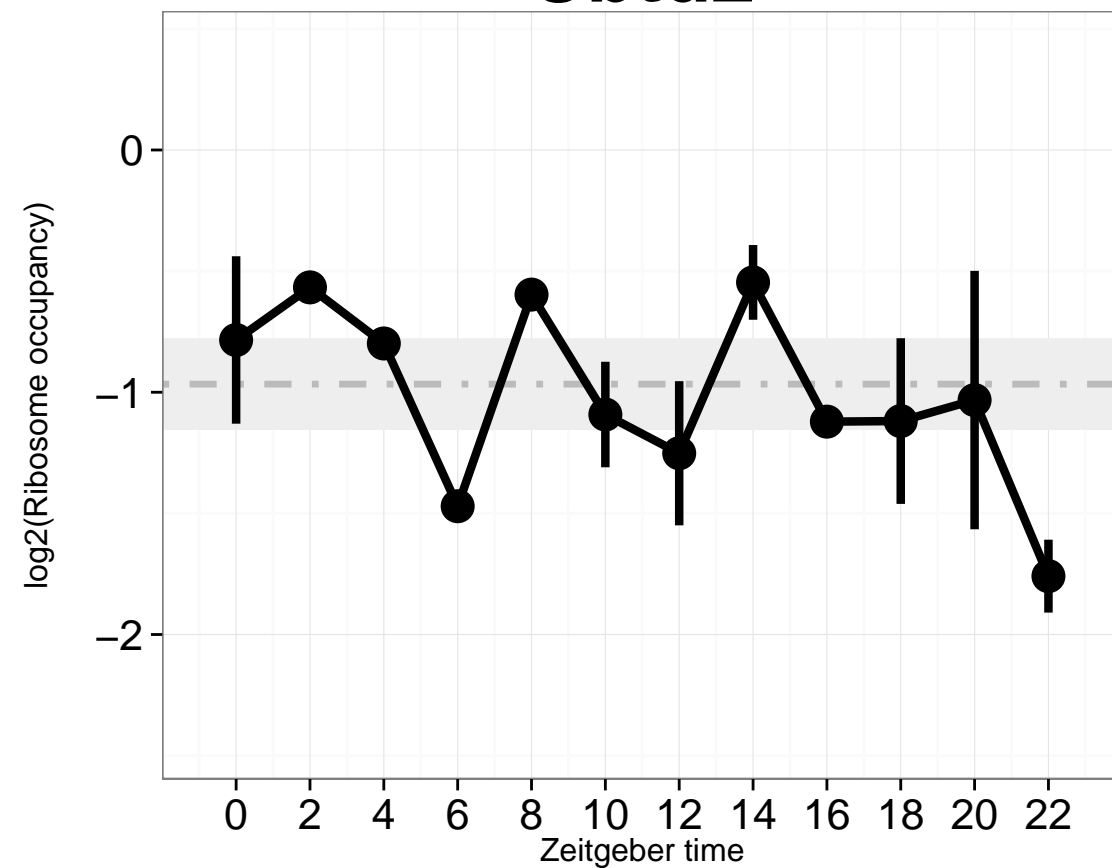

Supplement: Supplementary file 765 [file 1]

## Isg20

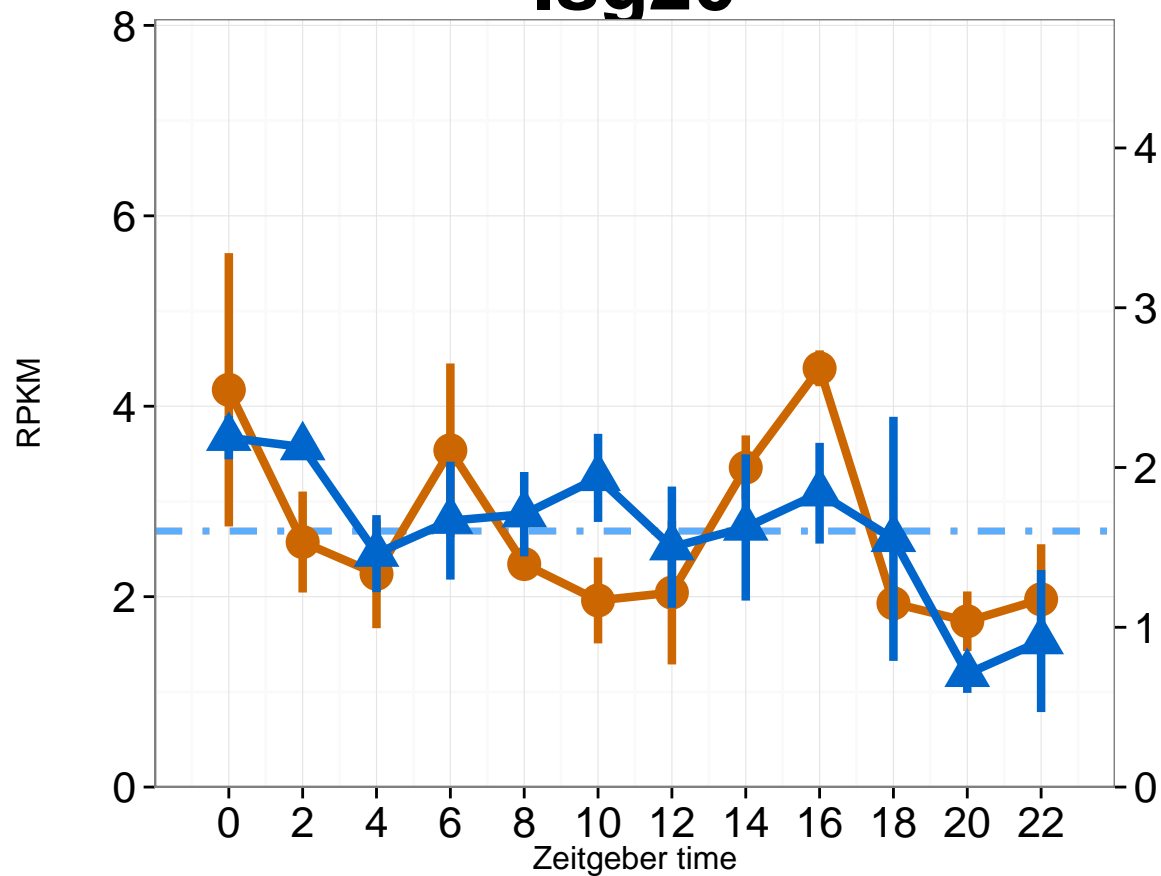

## Isg20

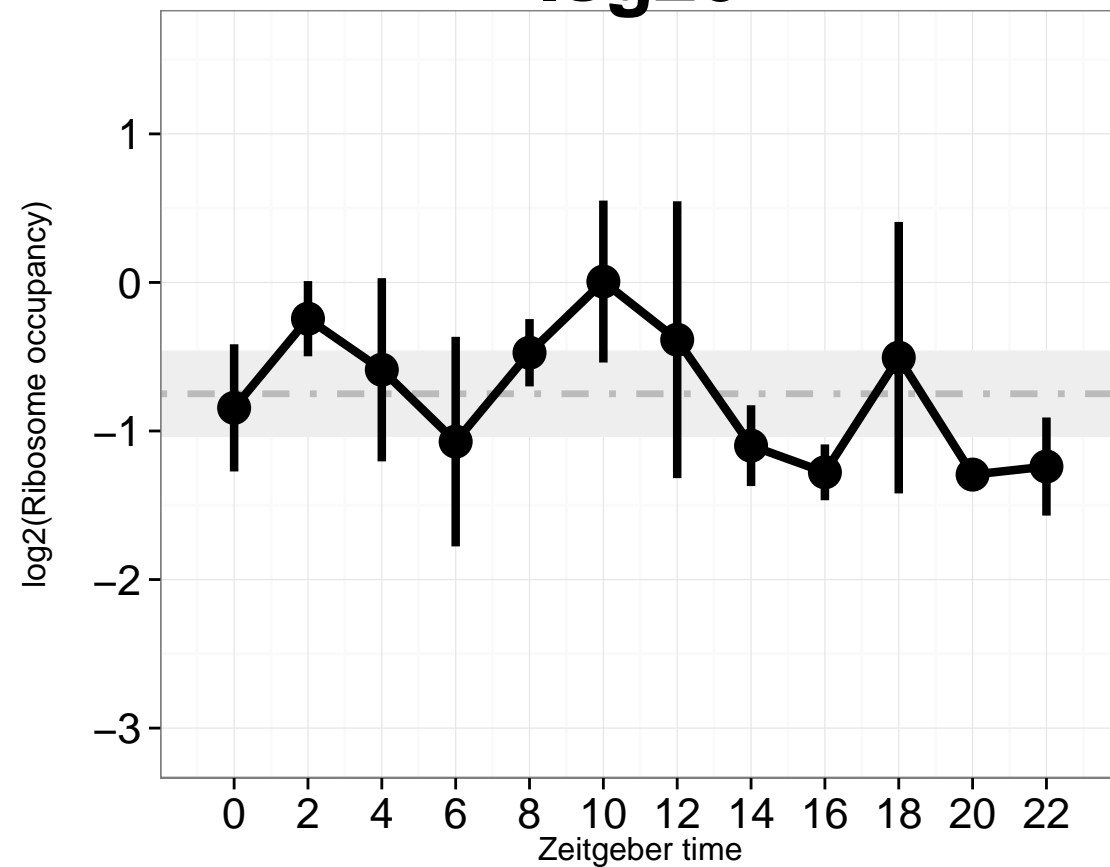

Supplement: Supplementary file 766 [file 1]

# Mpv17l2

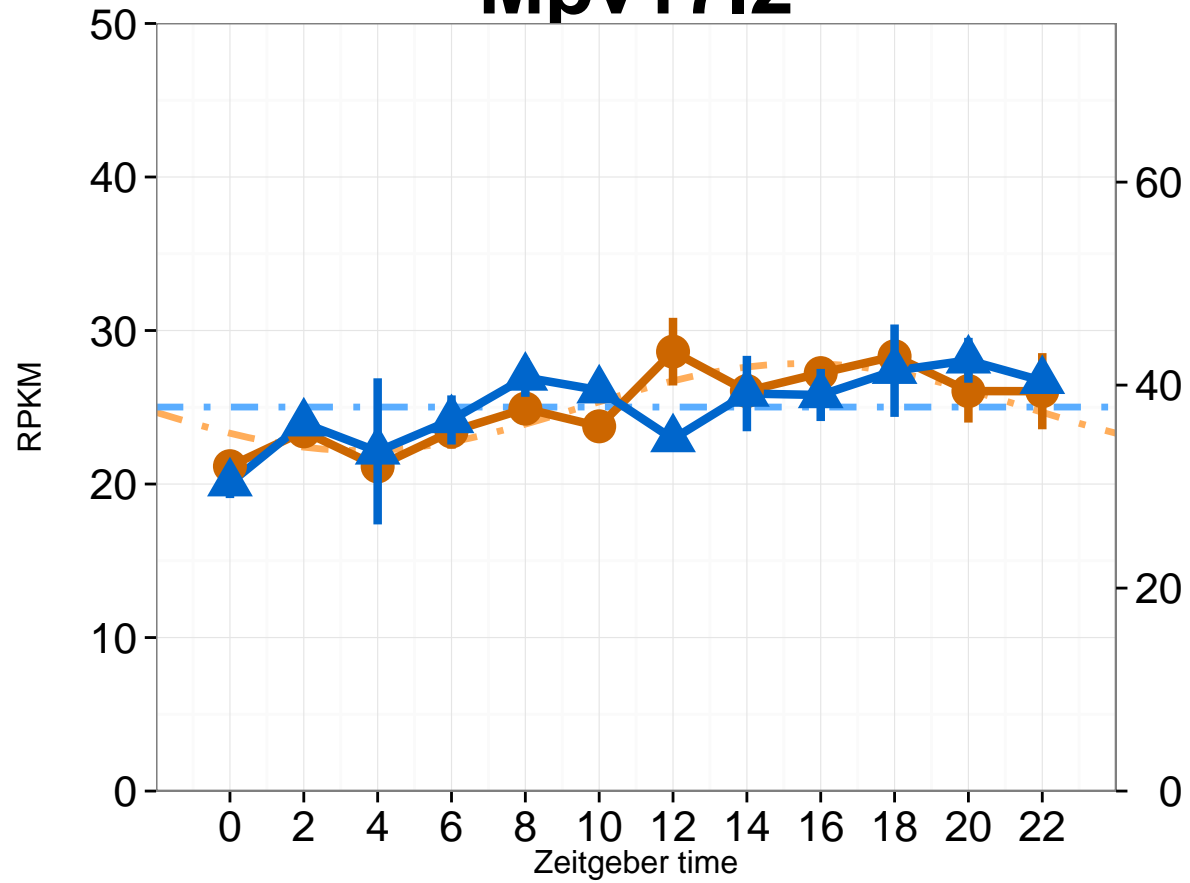

# Mpv17l2

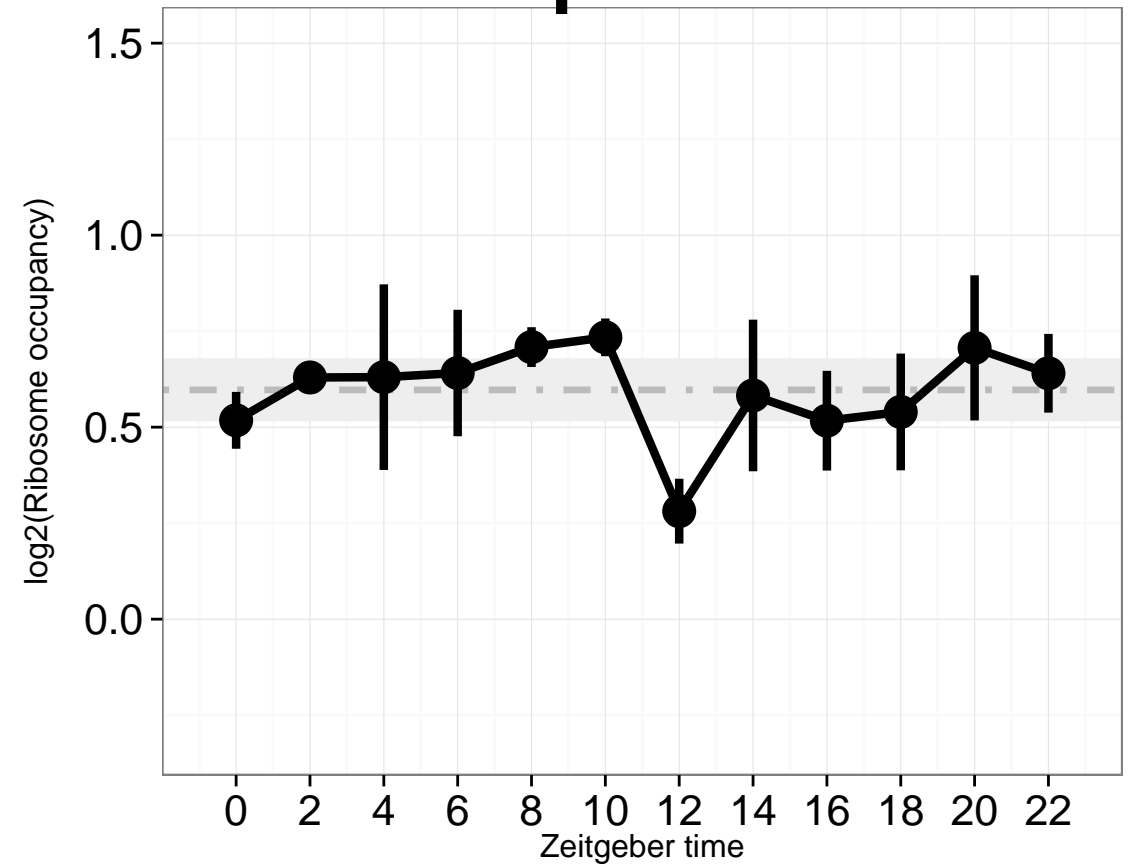

Supplement: Supplementary file 767 [file 1]

## Yaf2

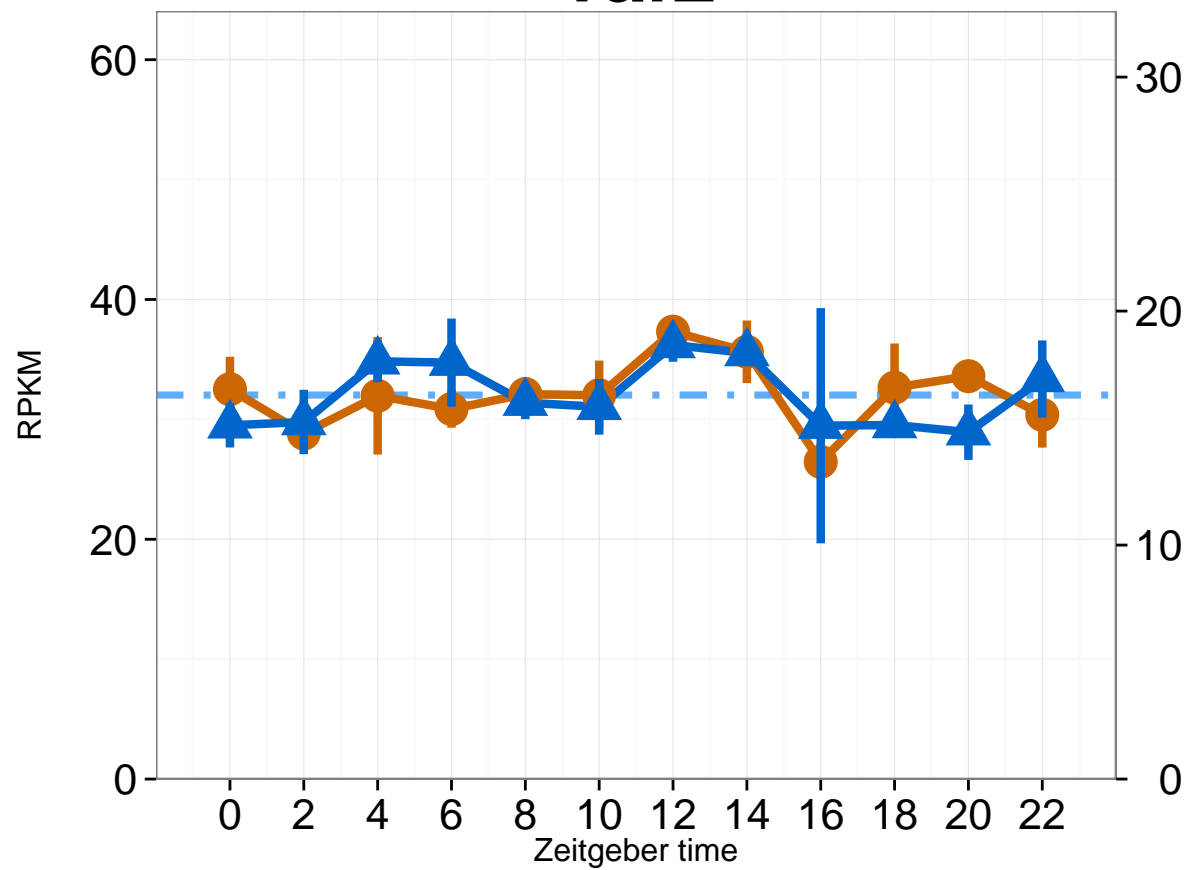

## Yaf2

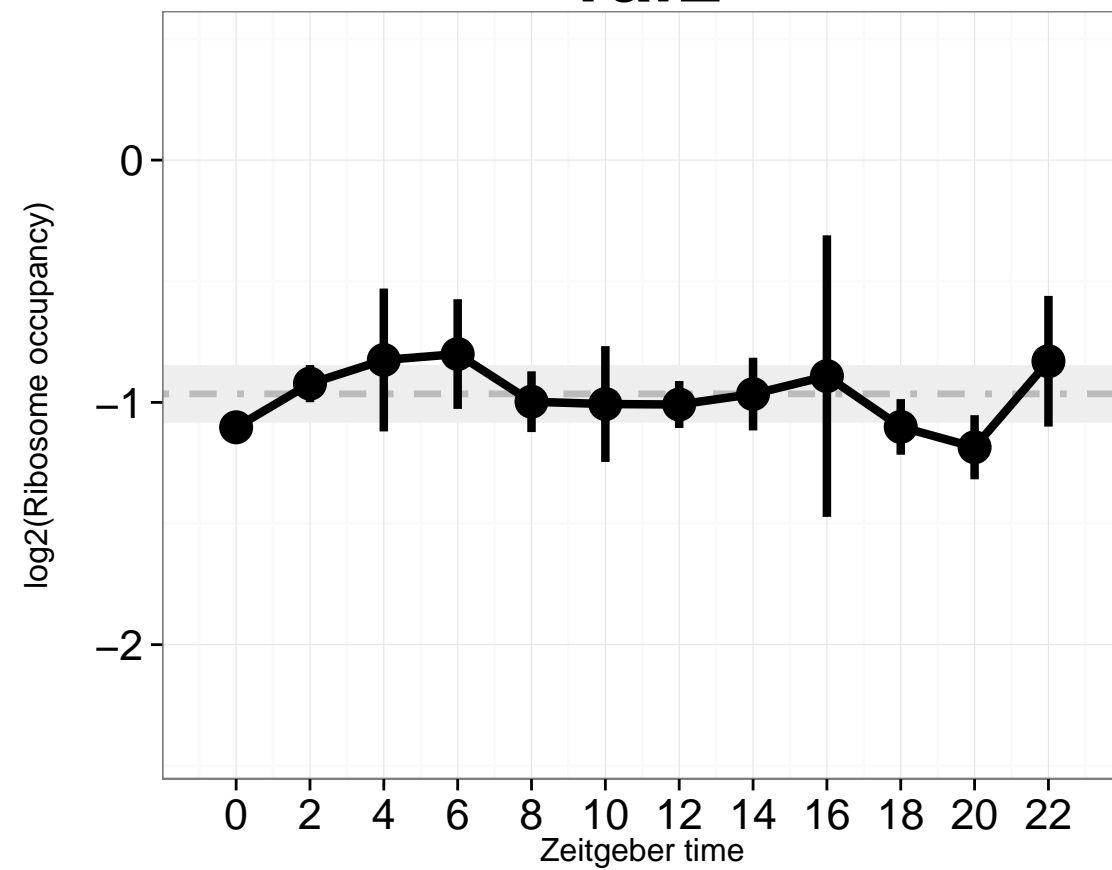

Supplement: Supplementary file 768 [file 1]

# Bhlhe41

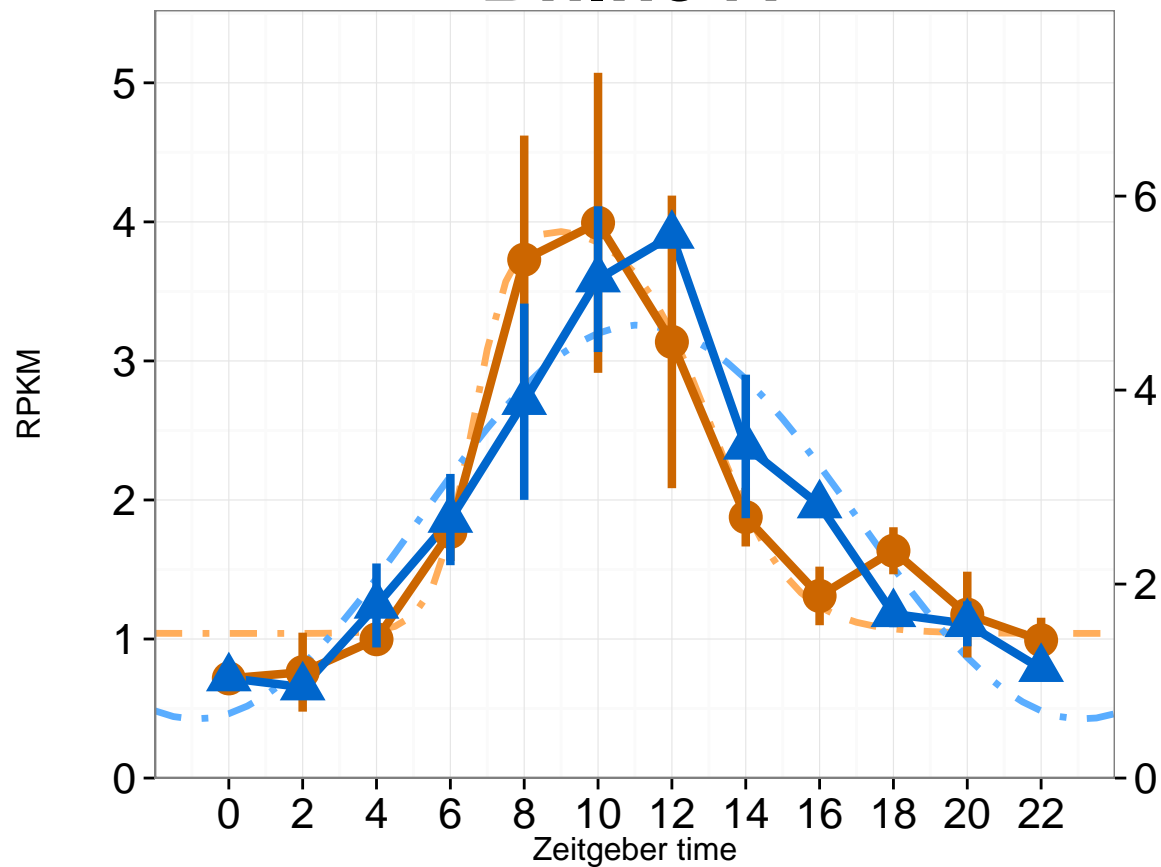

# Bhlhe41

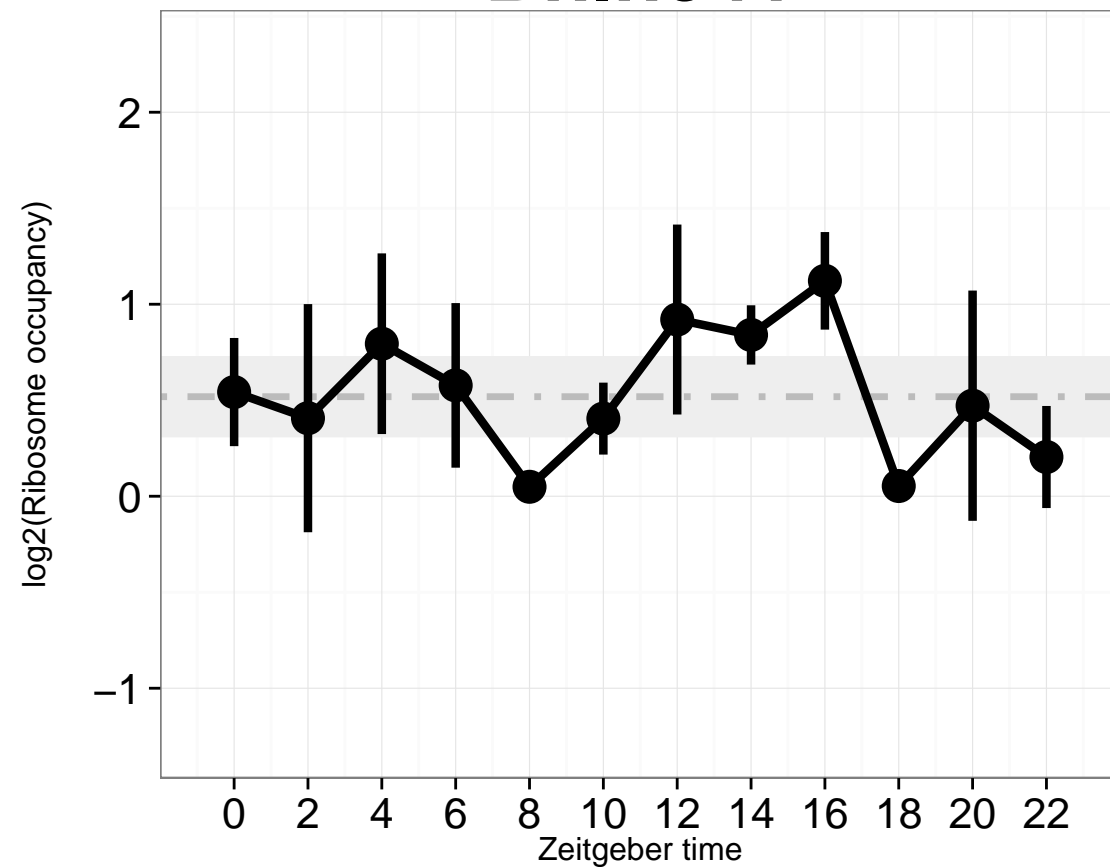

Supplement: Supplementary file 769 [file 1]

## Rasl12

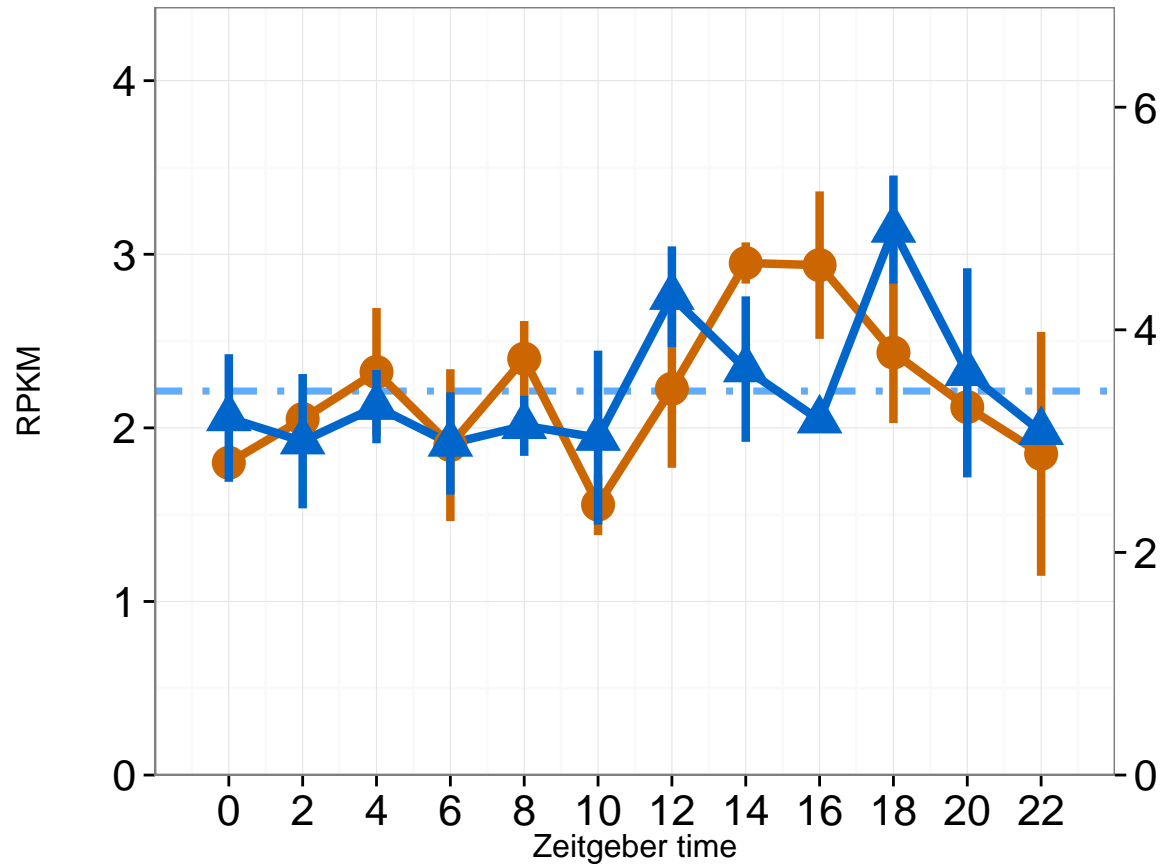

## Rasl12

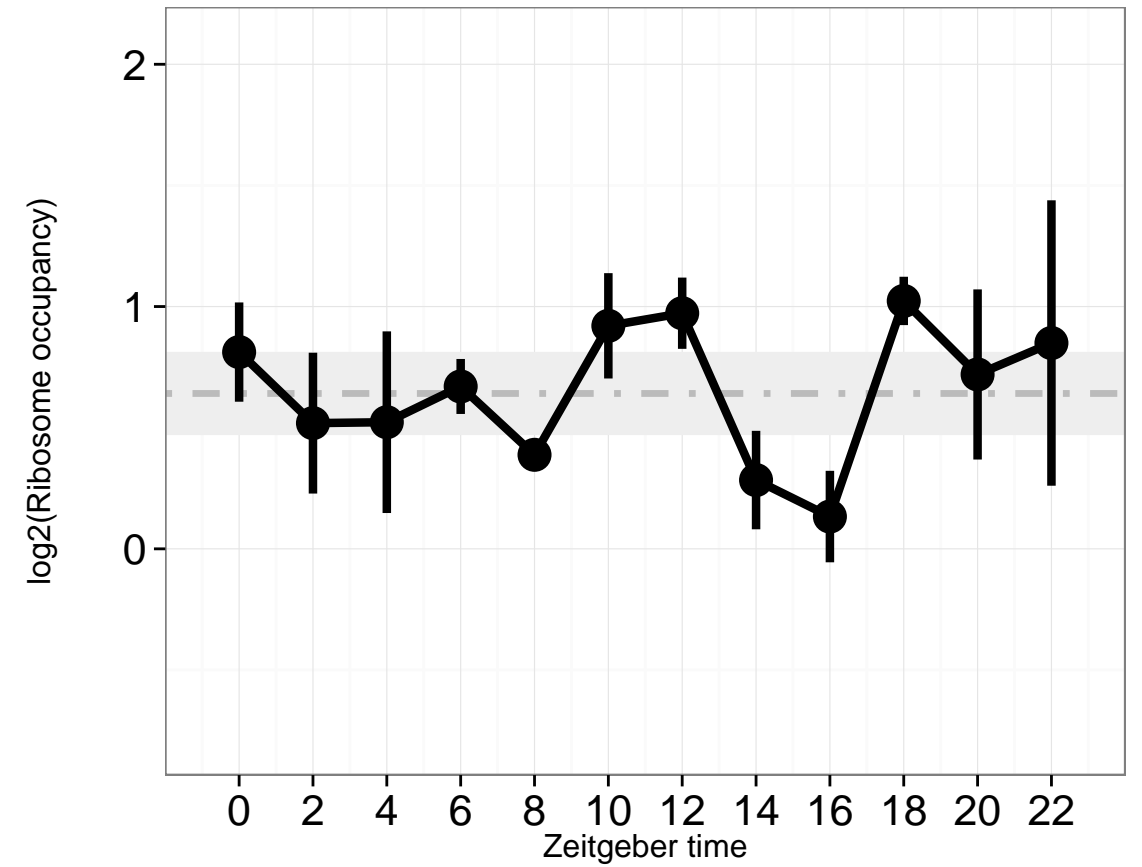

Supplement: Supplementary file 770 [file 1]

## Ormdl2

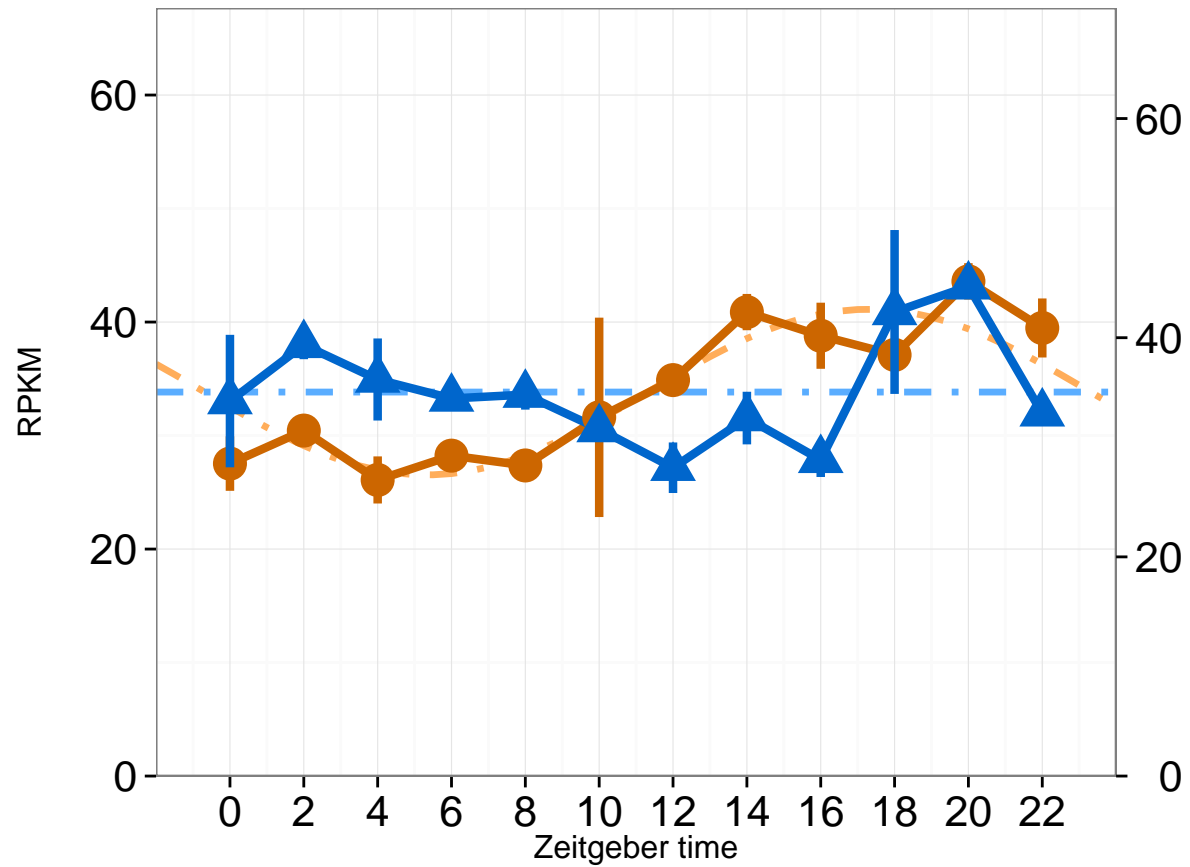

## Ormdl2

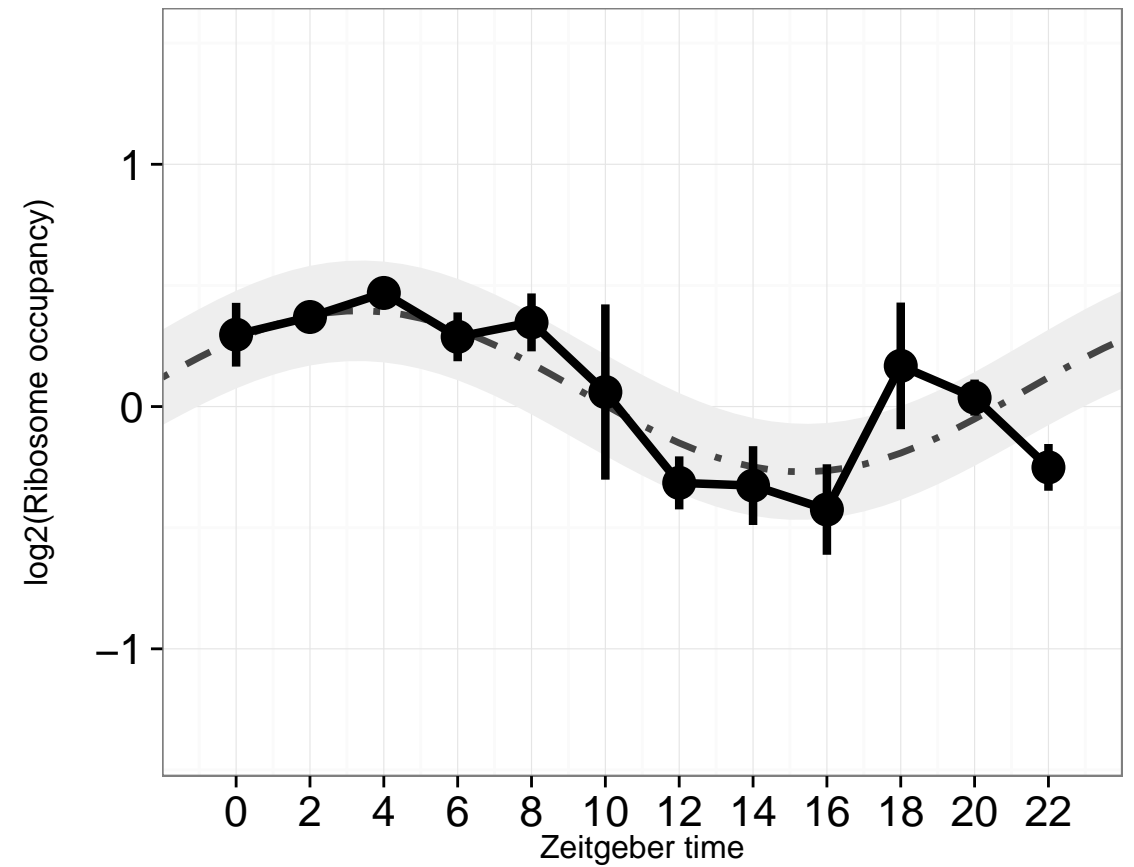

Supplement: Supplementary file 771 [file 1]

## Anxa1

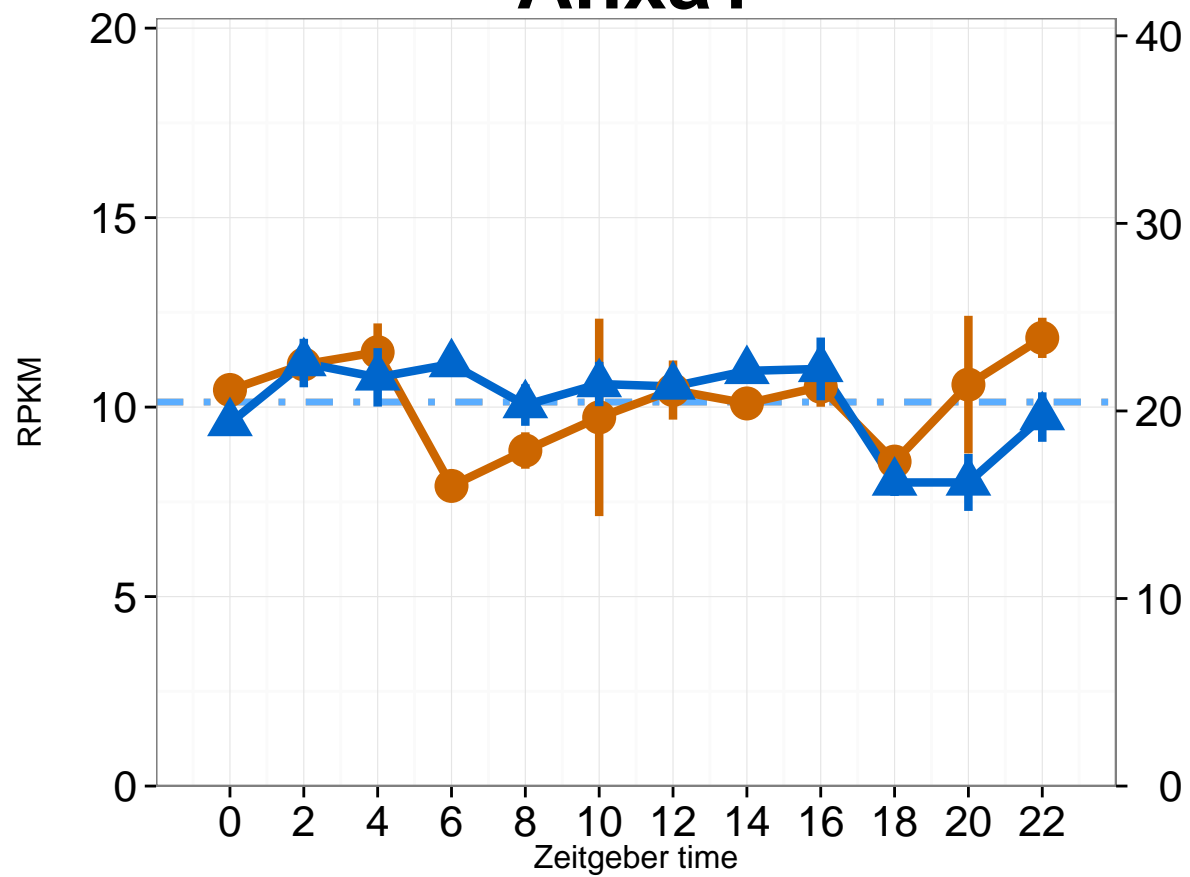

## Anxa1

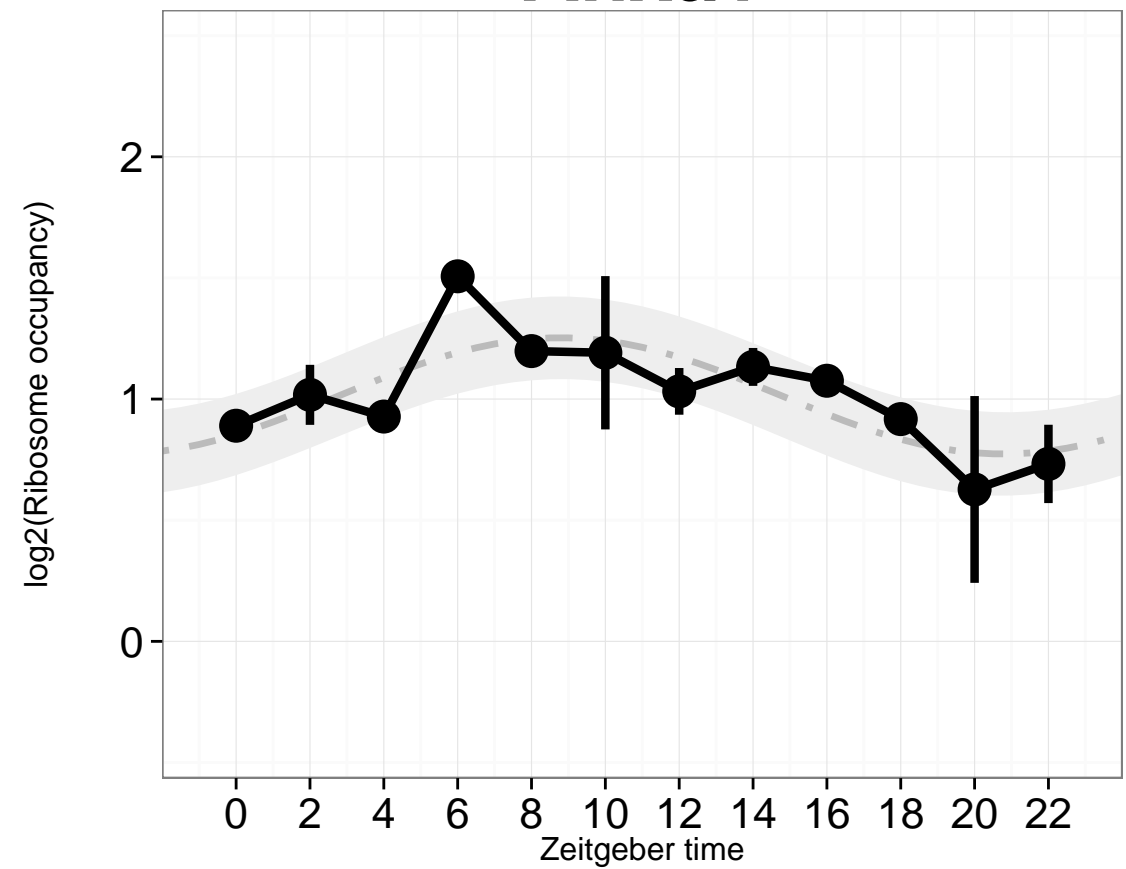

Supplement: Supplementary file 772 [file 1]

# A830010M20Rik

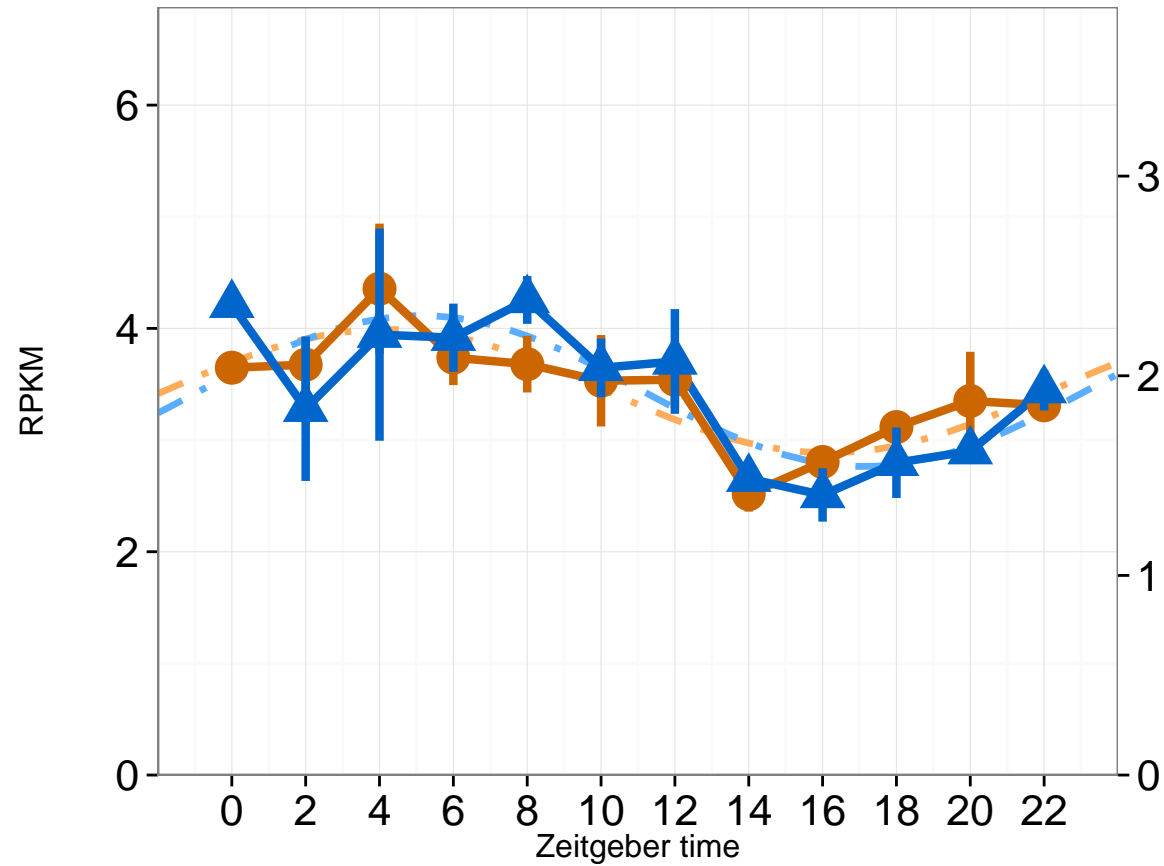

# A830010M20Rik

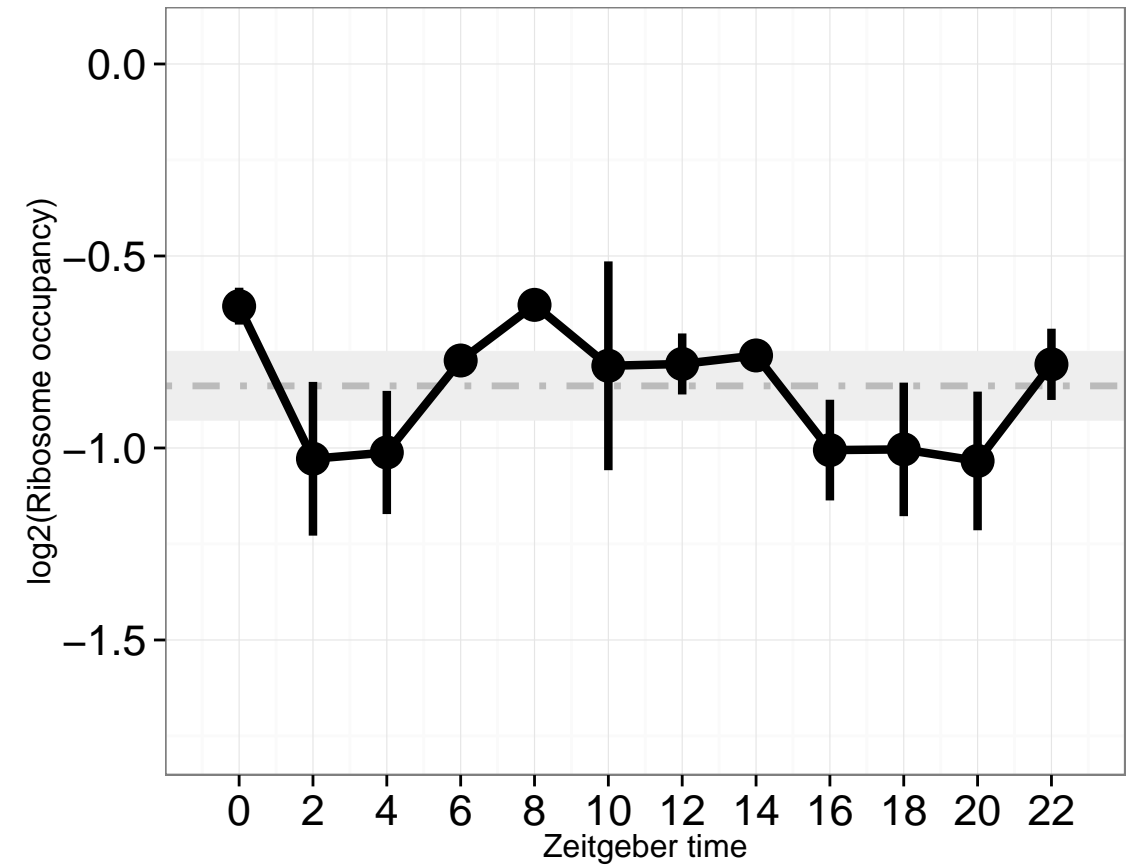

Supplement: Supplementary file 773 [file 1]

## Galnt6

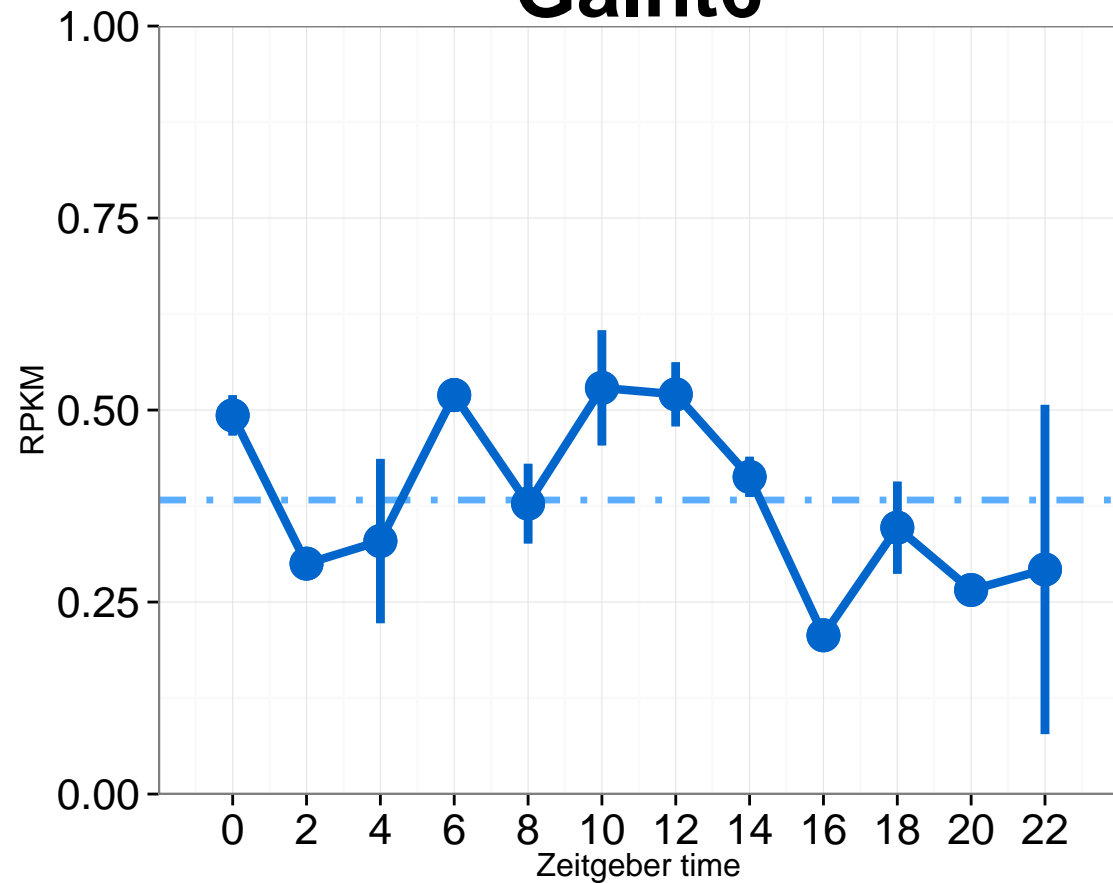

## Galnt6 log2(Ribosome occupancy

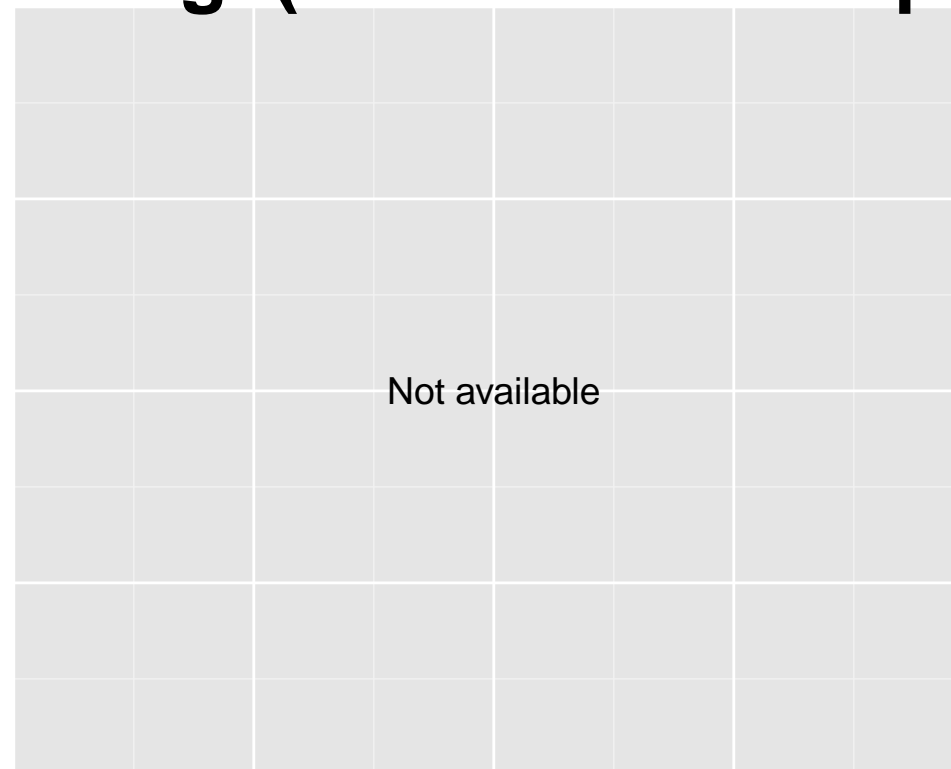

Supplement: Supplementary file 774 [file 1]

## Islr

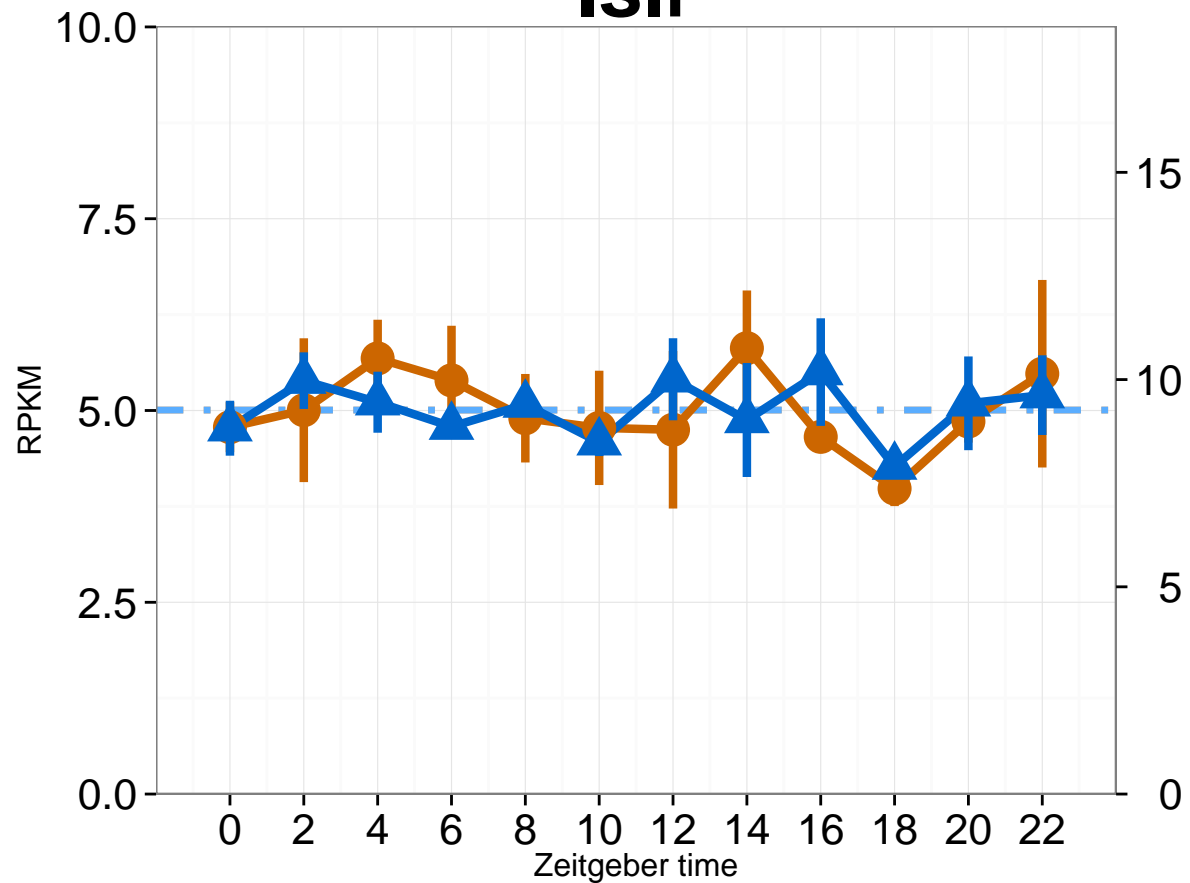

## Islr

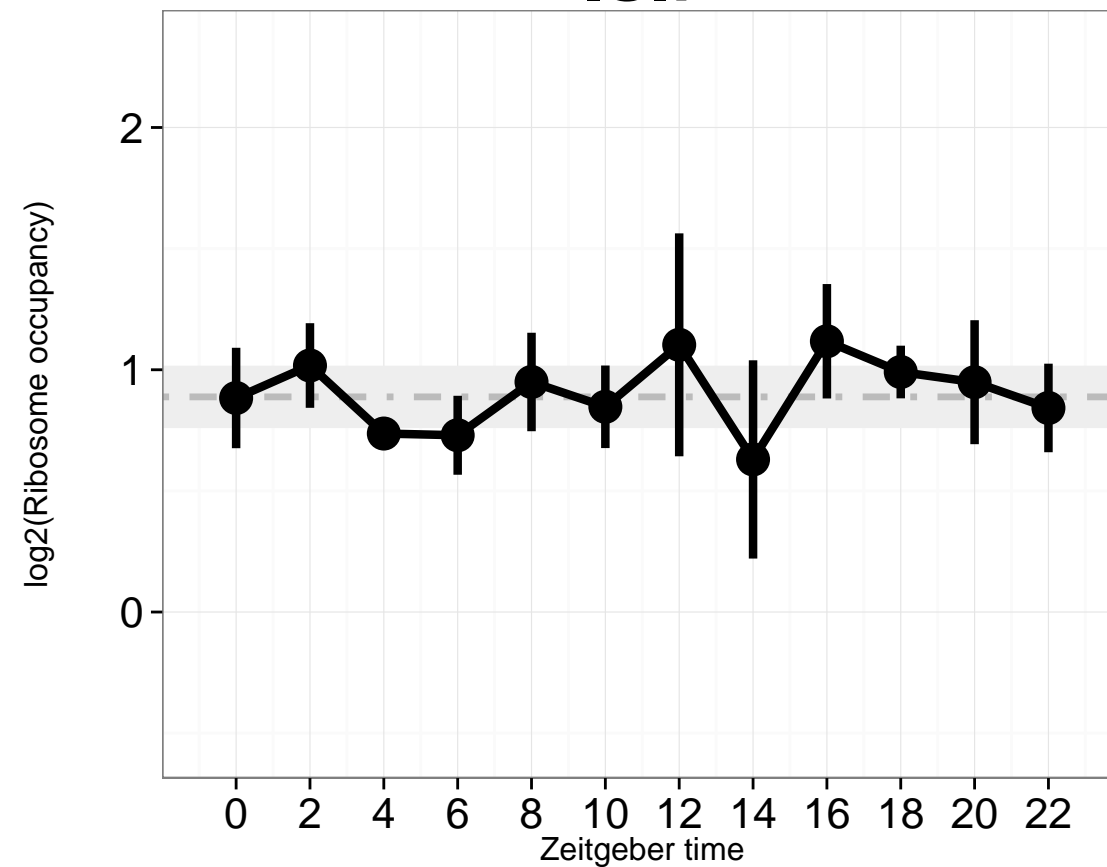

Supplement: Supplementary file 775 [file 1]

## S100pbp

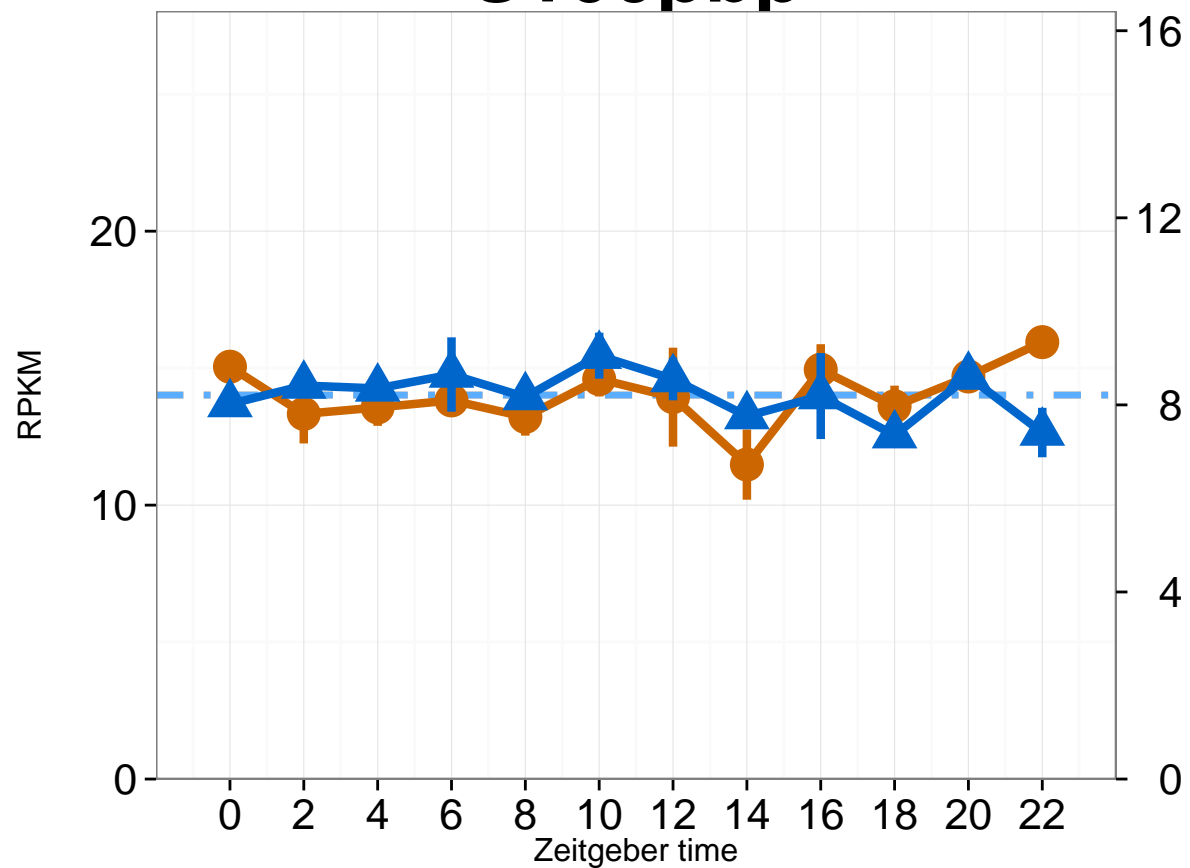

## S100pbp

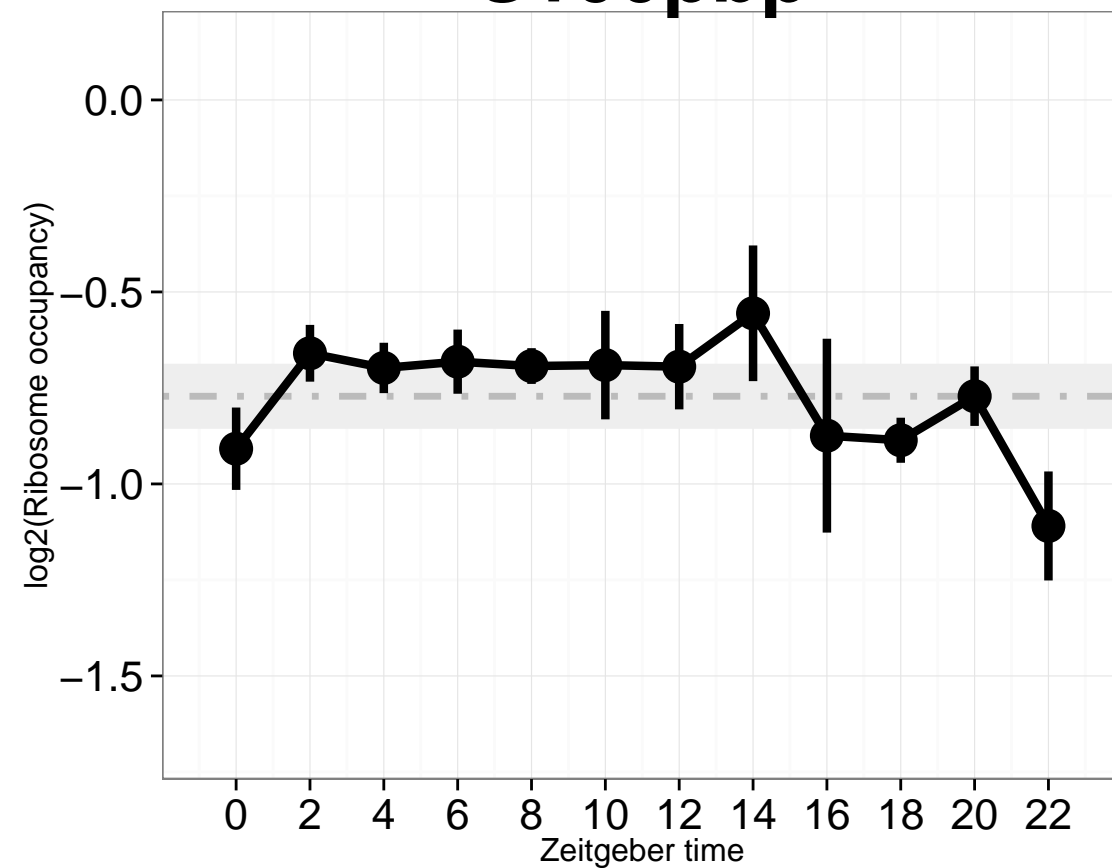

Supplement: Supplementary file 776 [file 1]

# Tfeb

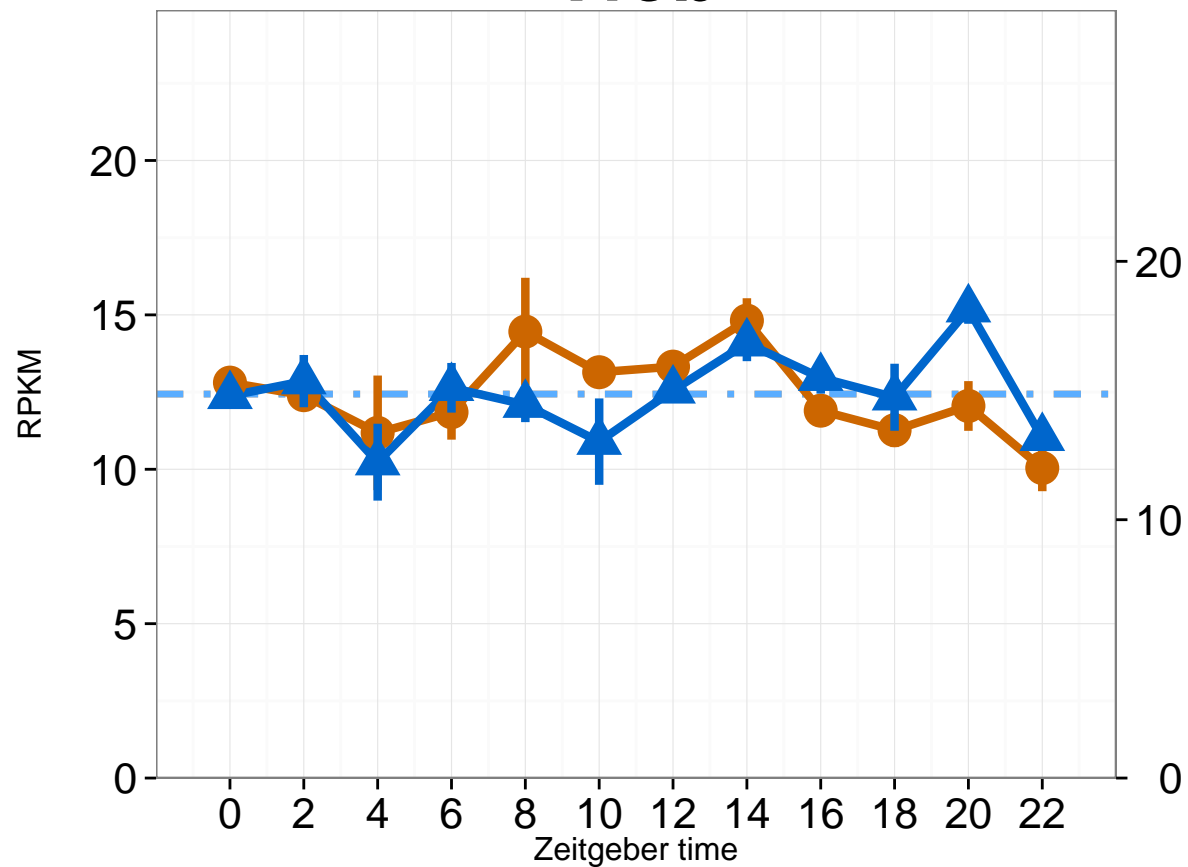

# Tfeb

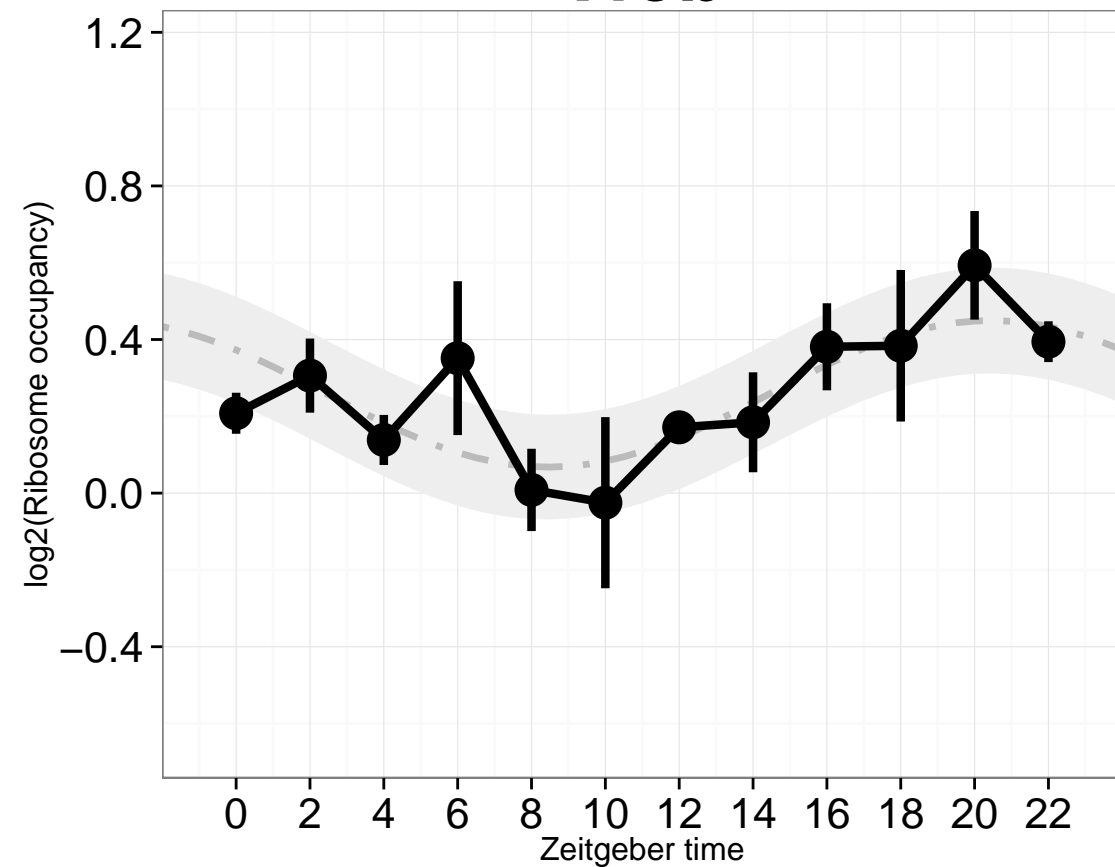

Supplement: Supplementary file 777 [file 1]

## 2310022A10Rik

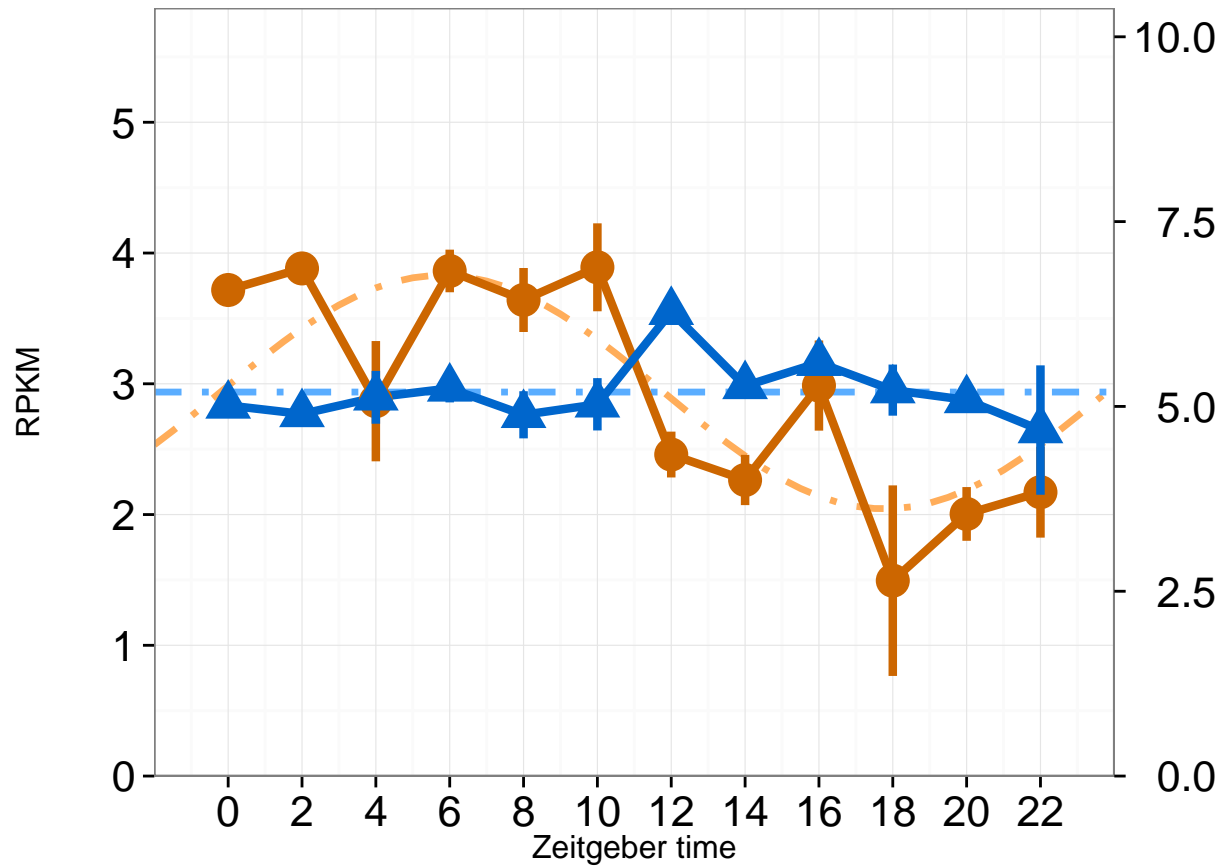

## 2310022A10Rik

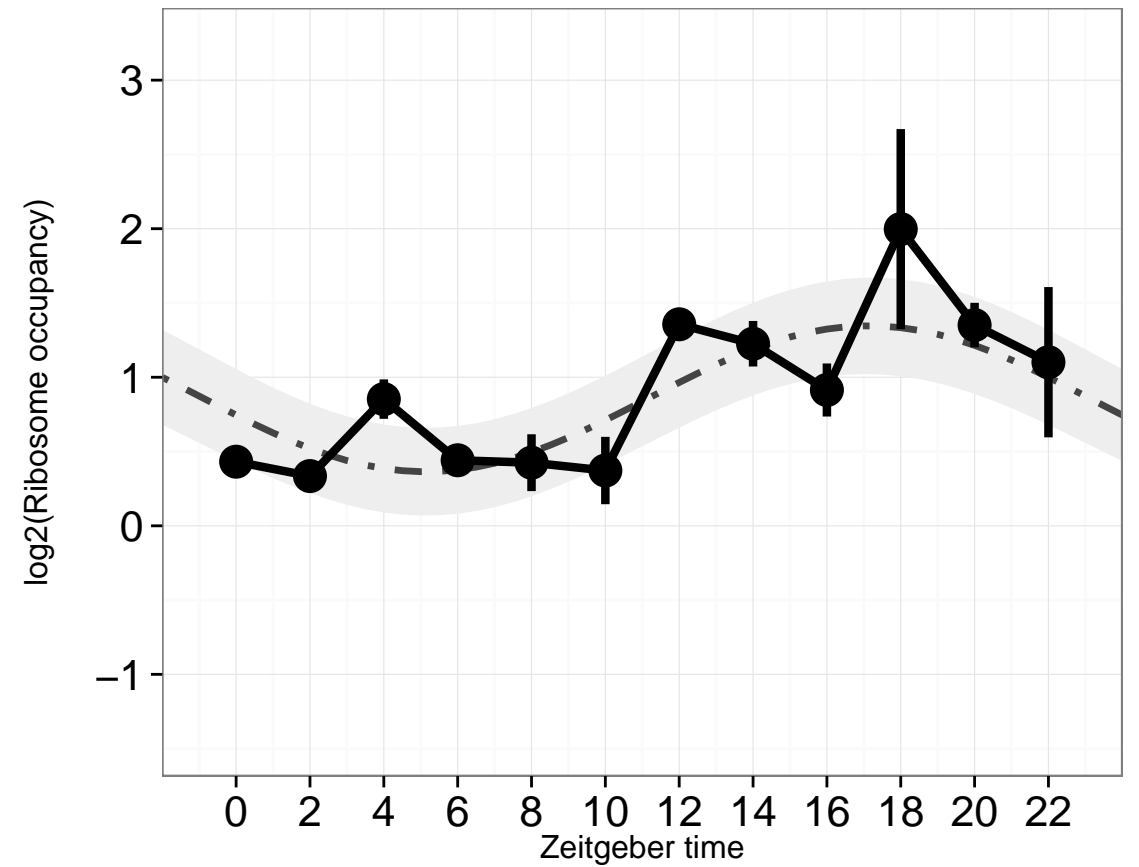

Supplement: Supplementary file 778 [file 1]

# Pfkfb2

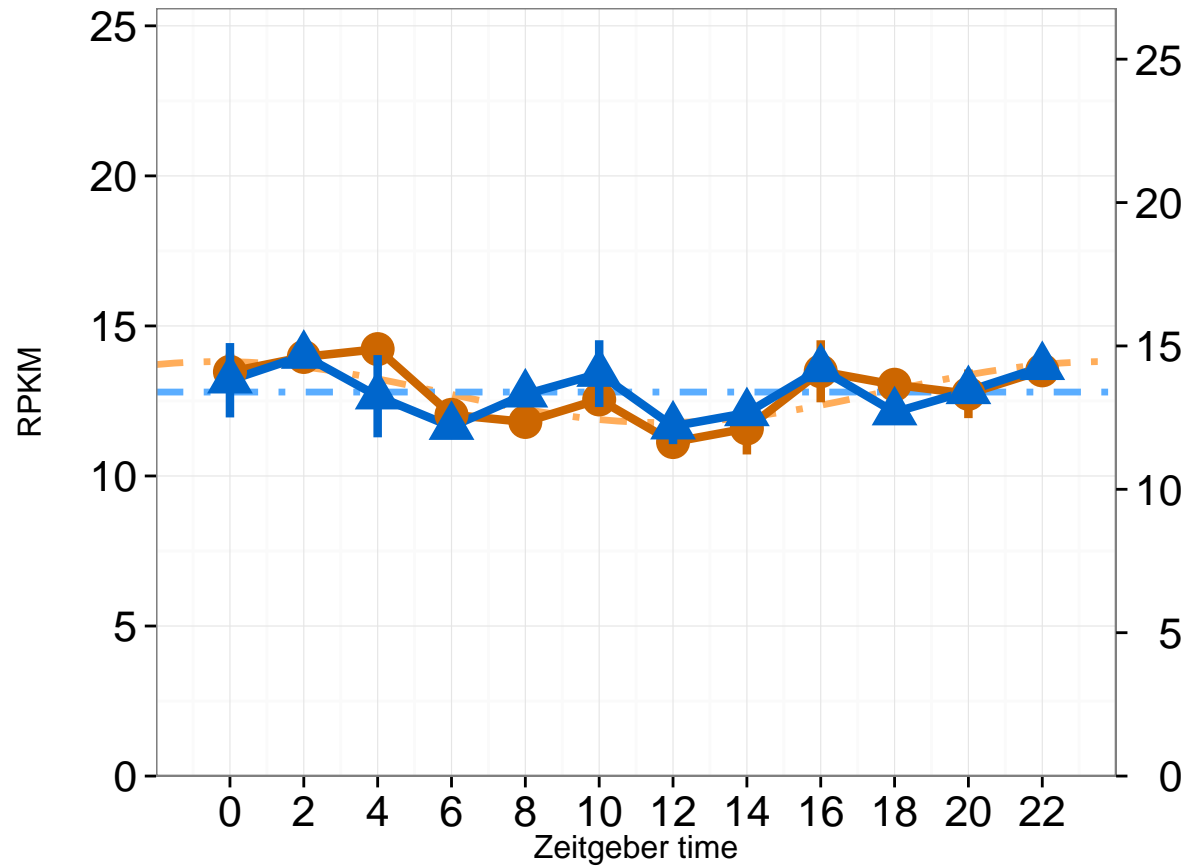

# Pfkfb2

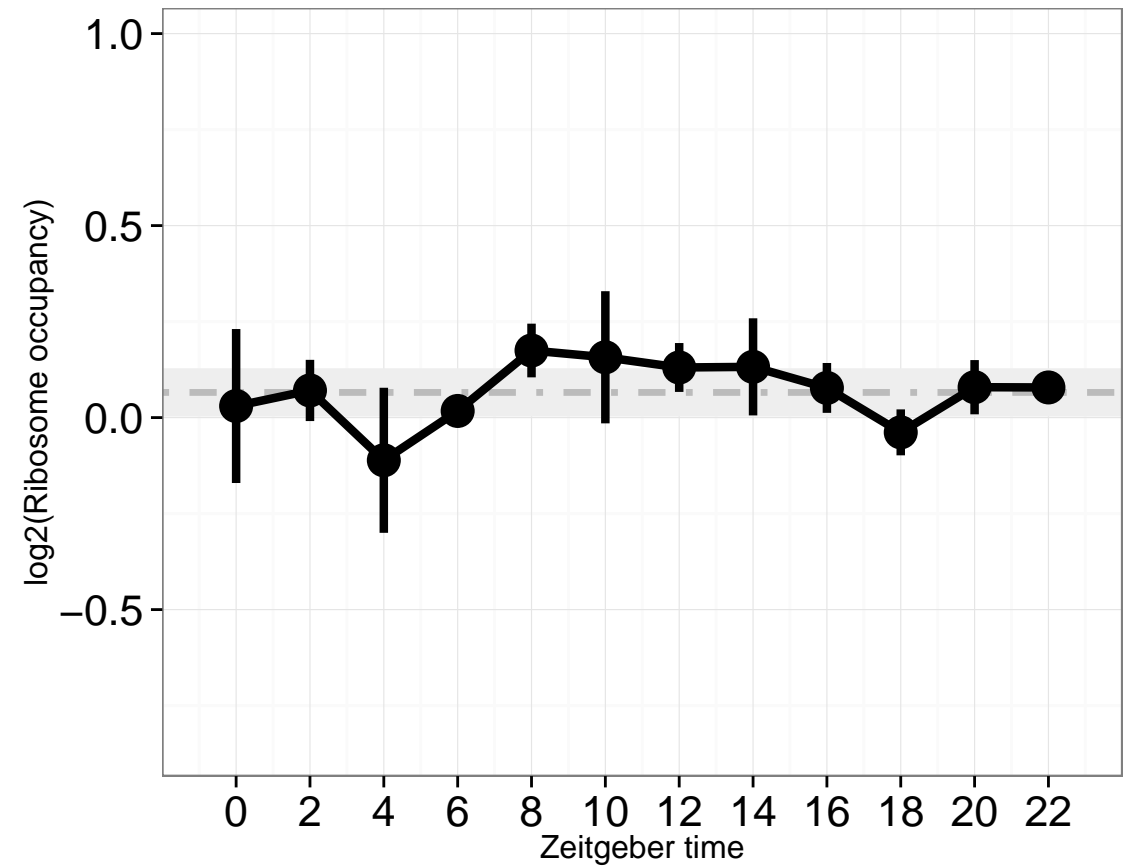

Supplement: Supplementary file 779 [file 1]

## Eci1

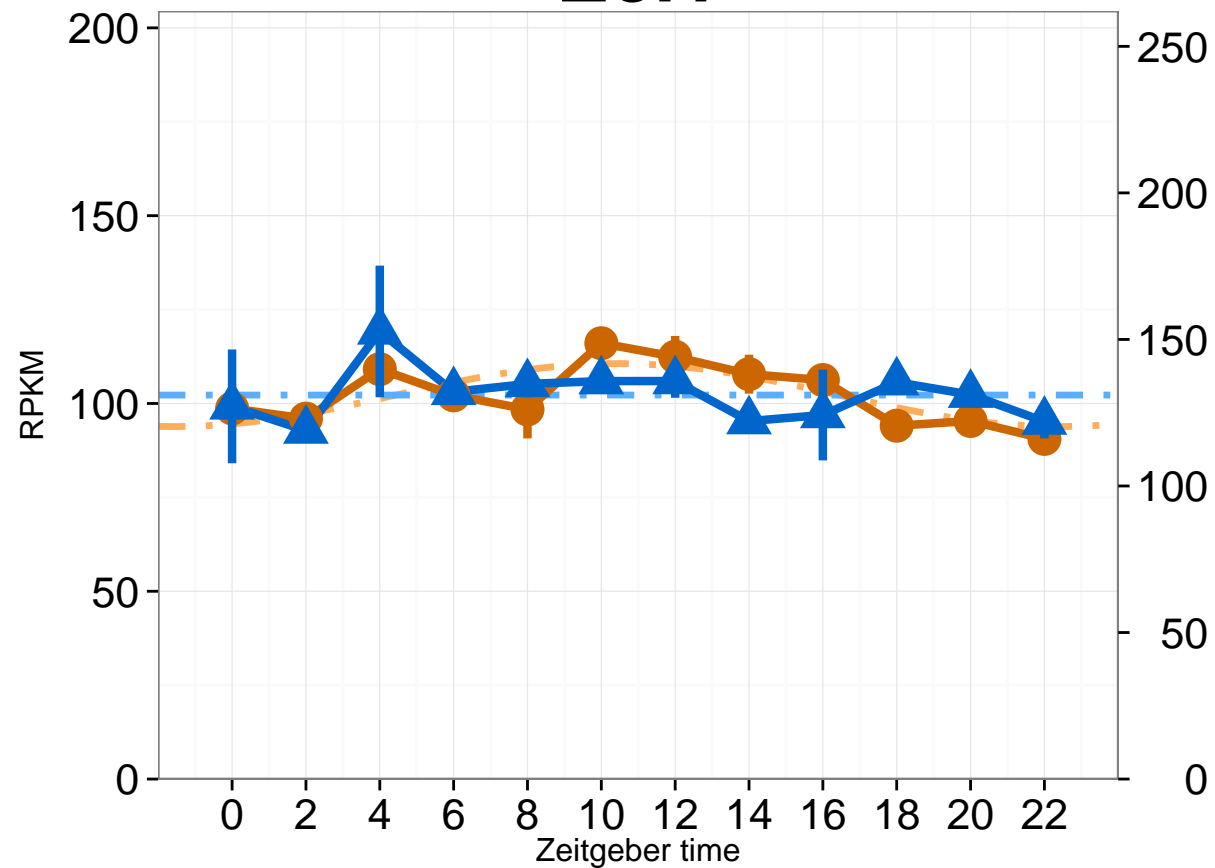

## Eci1

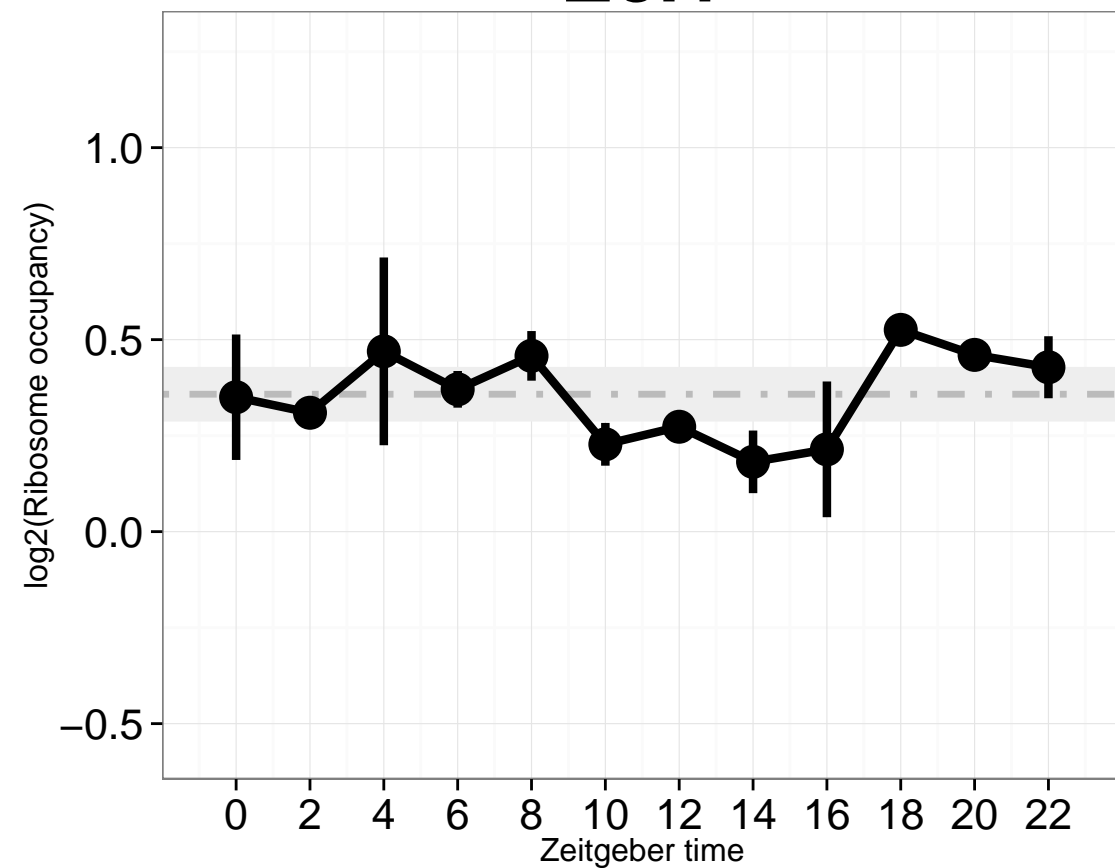

Supplement: Supplementary file 780 [file 1]

## Adam10

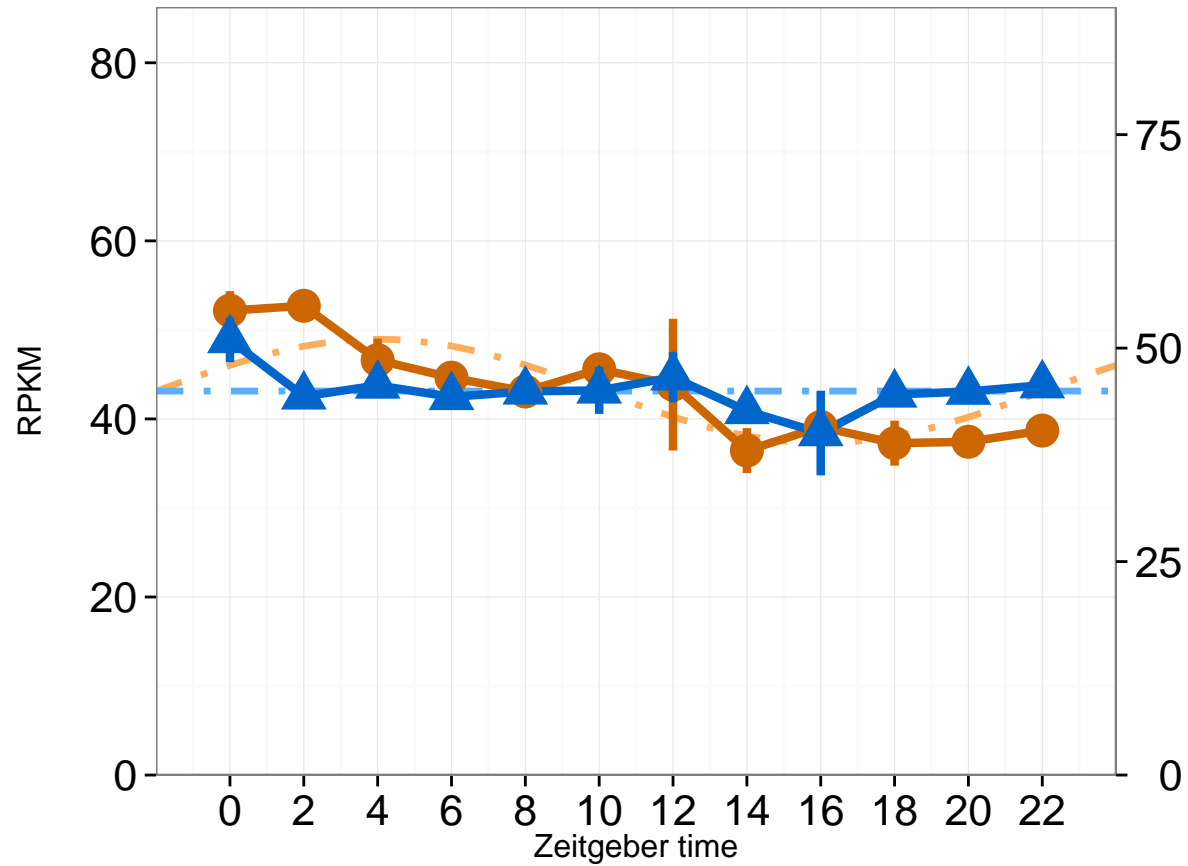

## Adam10

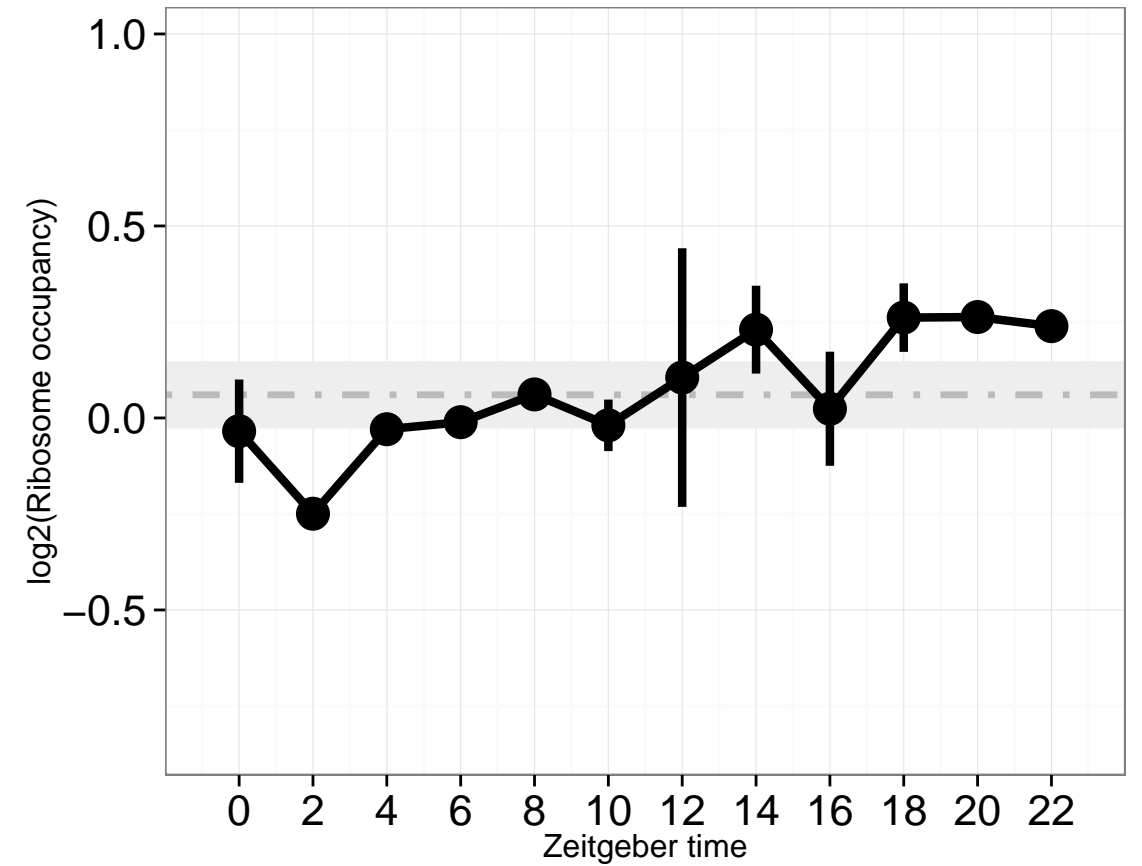

Supplement: Supplementary file 781 [file 1]

## Spa17

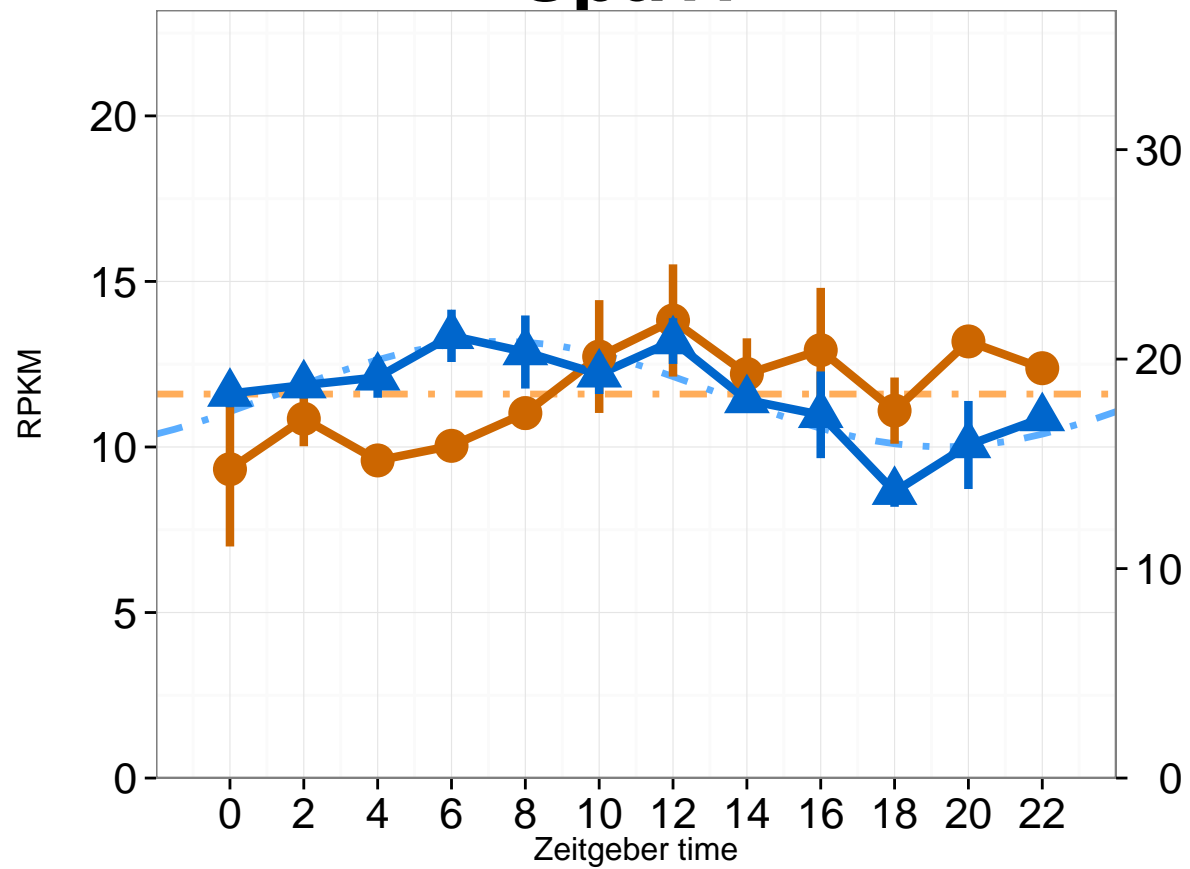

## Spa17

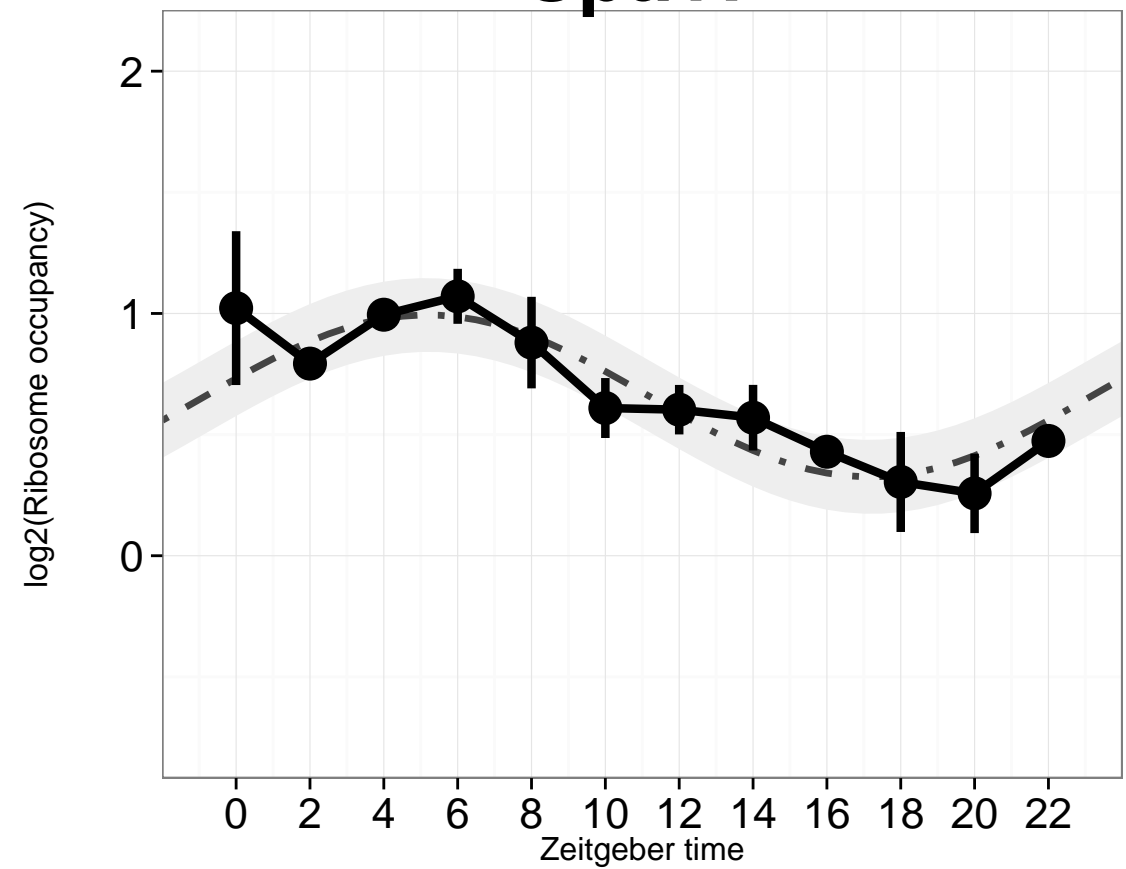

Supplement: Supplementary file 782 [file 1]

# Map1a

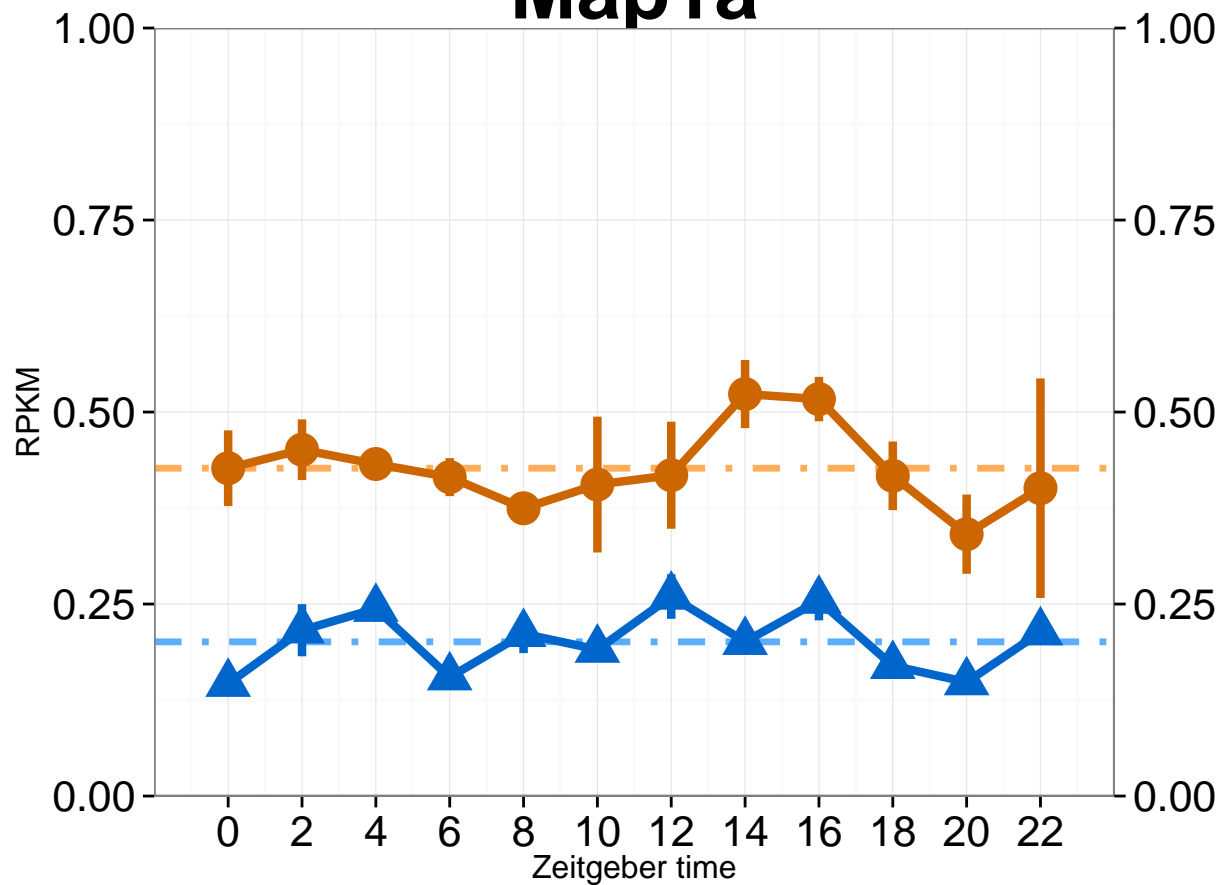

# Map1a

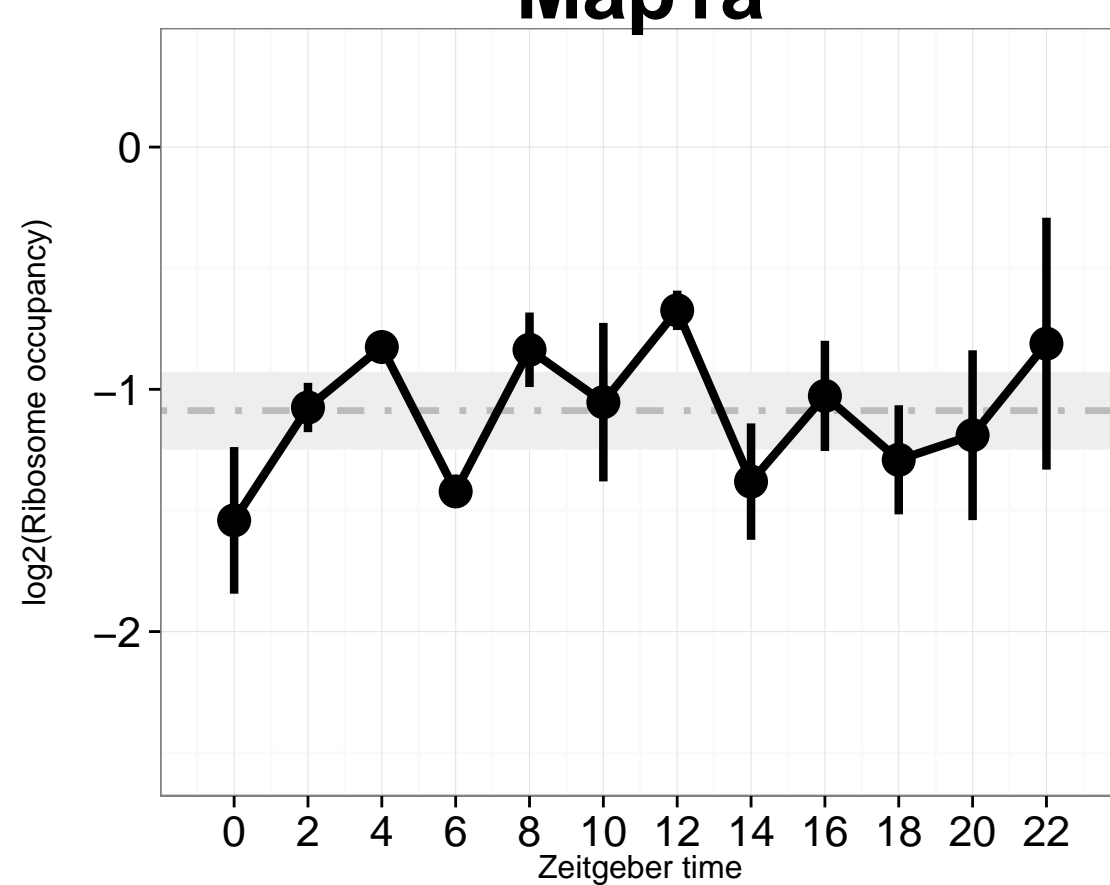

Supplement: Supplementary file 783 [file 1]

## Elk3

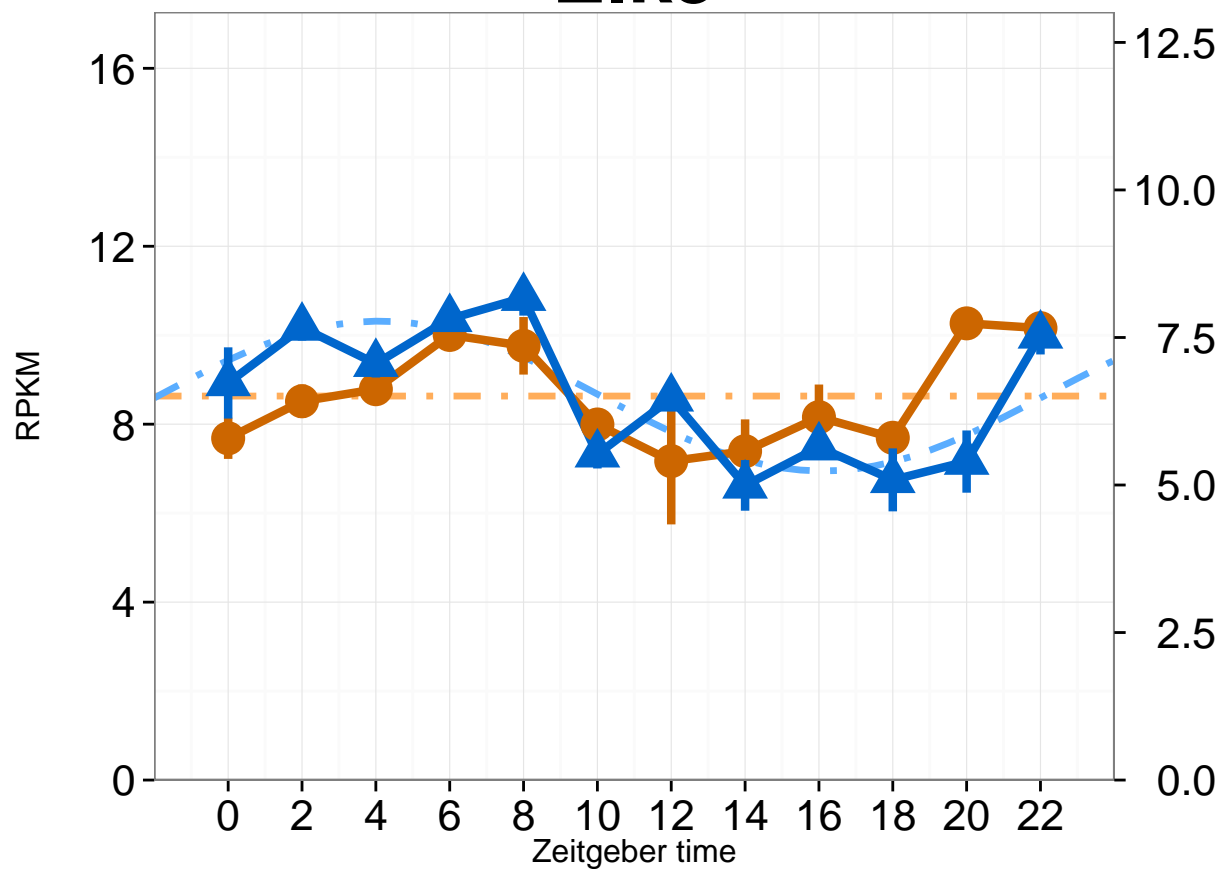

## Elk3

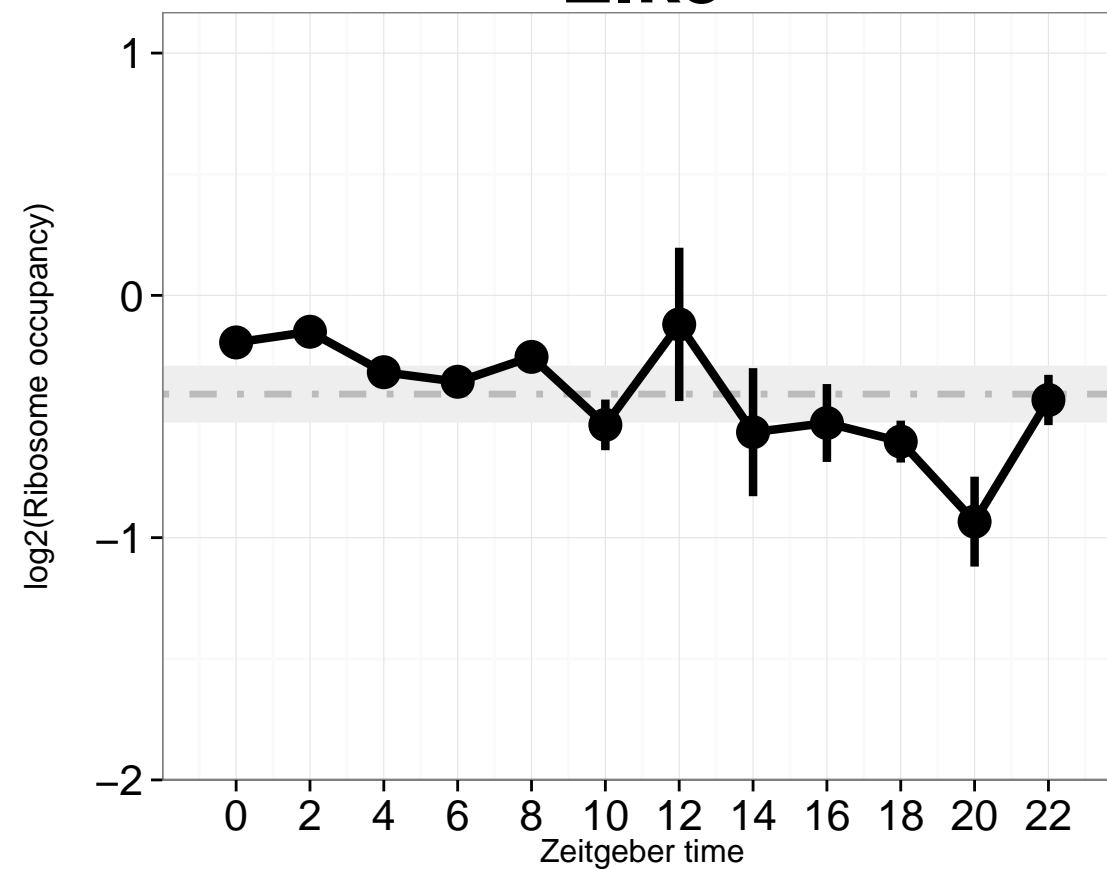

Supplement: Supplementary file 784 [file 1]

## Gpc3

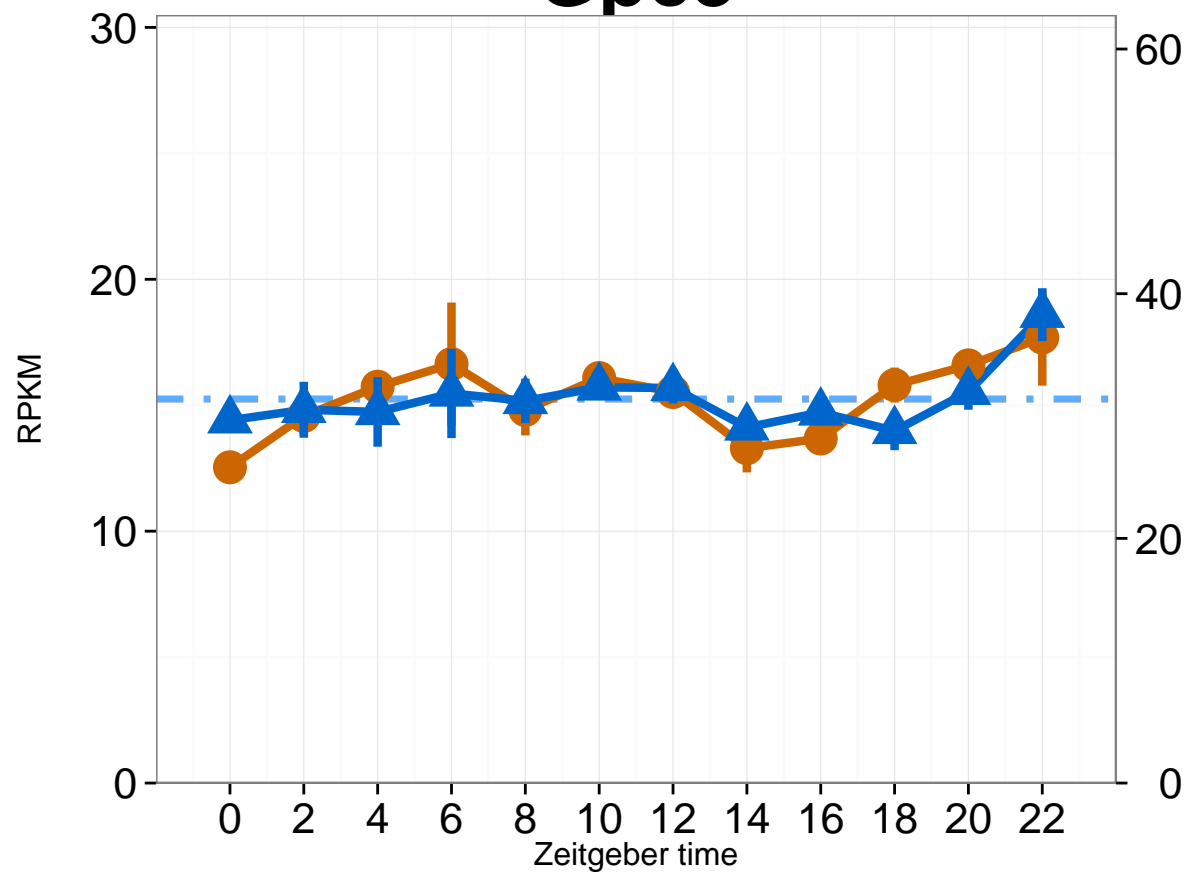

## Gpc3

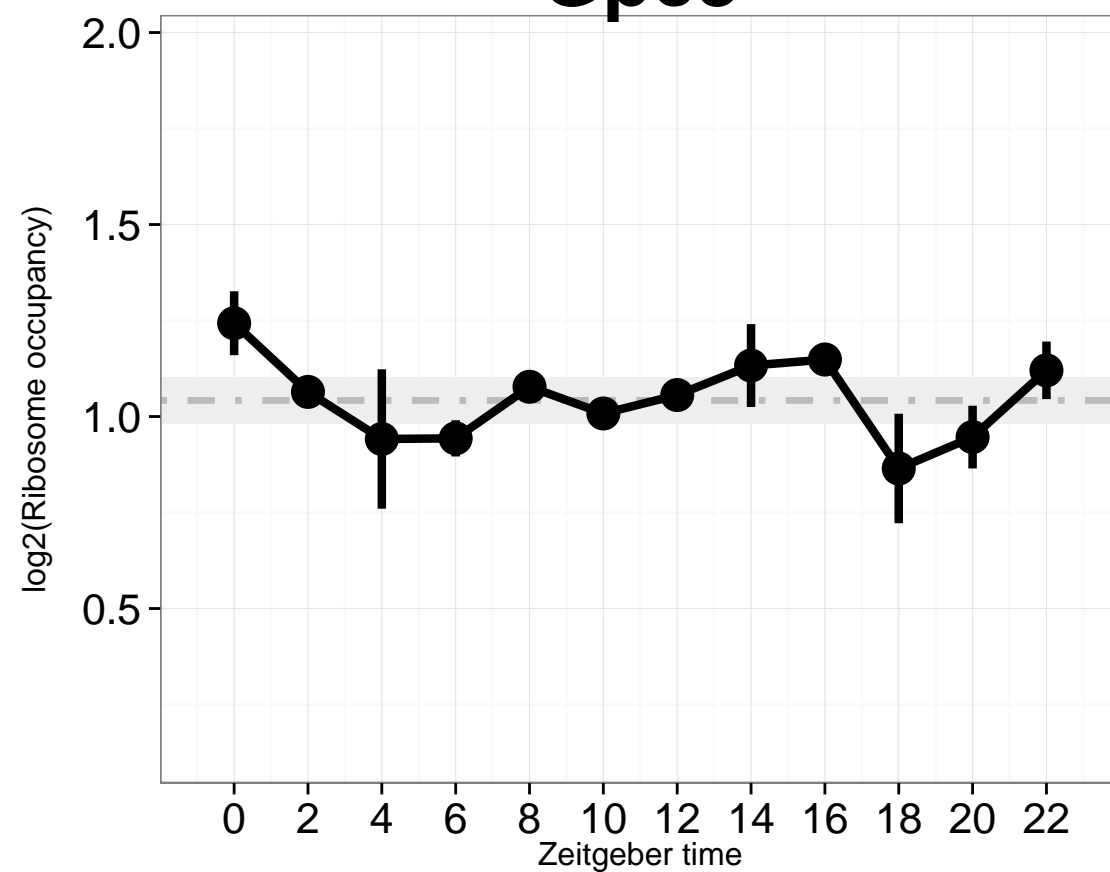

Supplement: Supplementary file 785 [file 1]

## Hps6

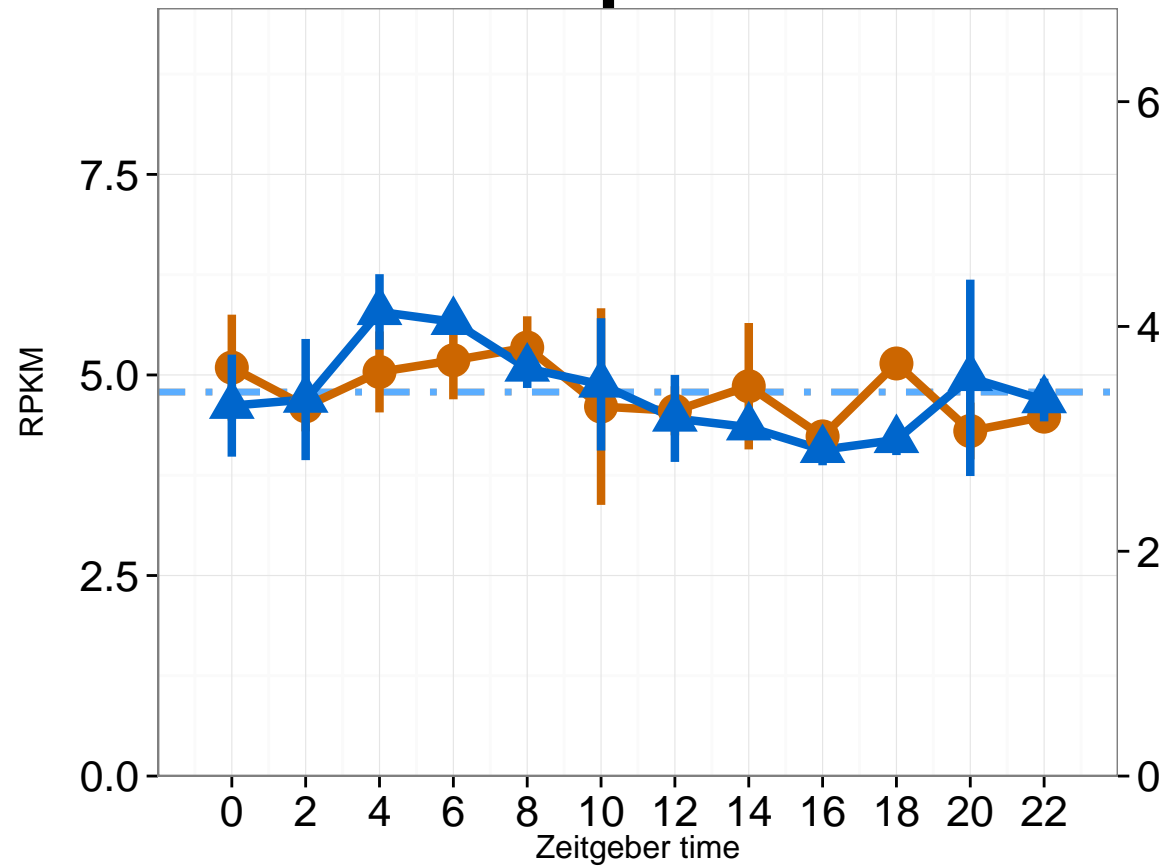

## Hps6

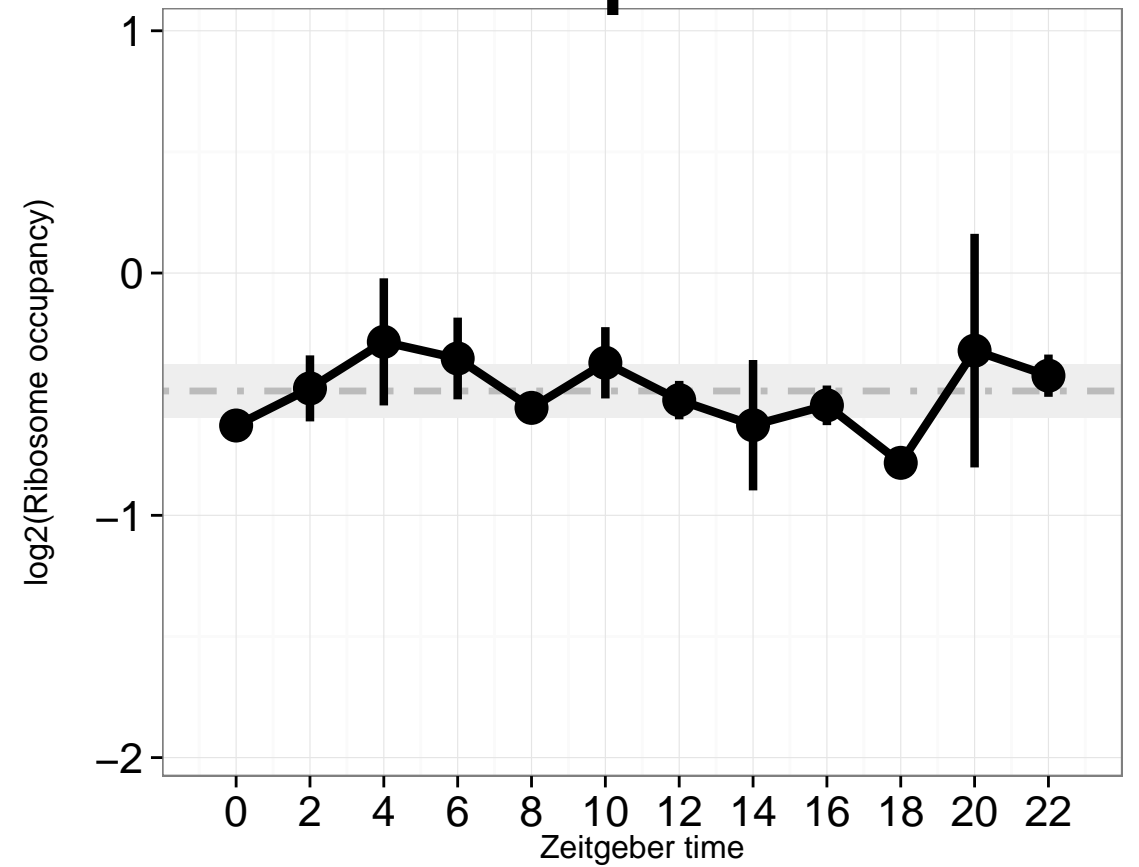

Supplement: Supplementary file 786 [file 1]

# Ap2m1

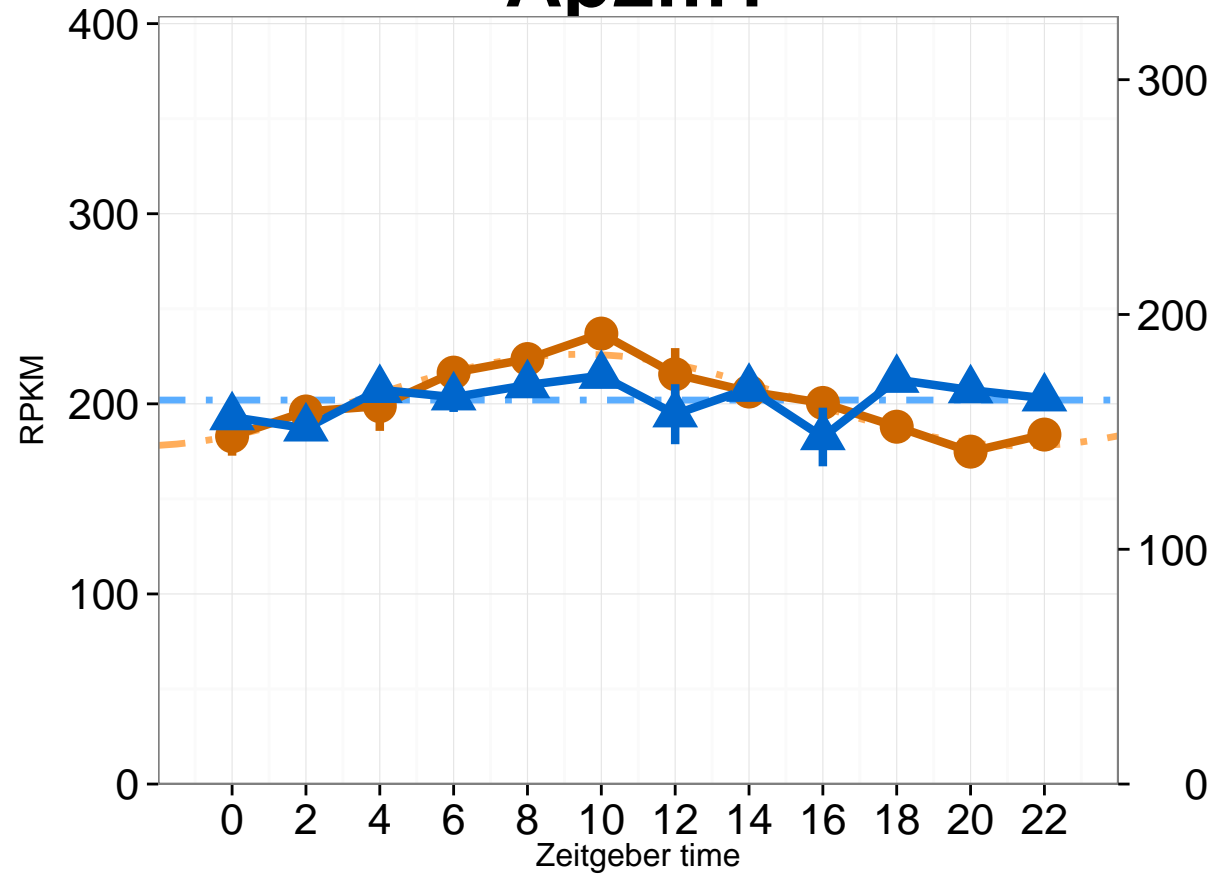

# Ap2m1

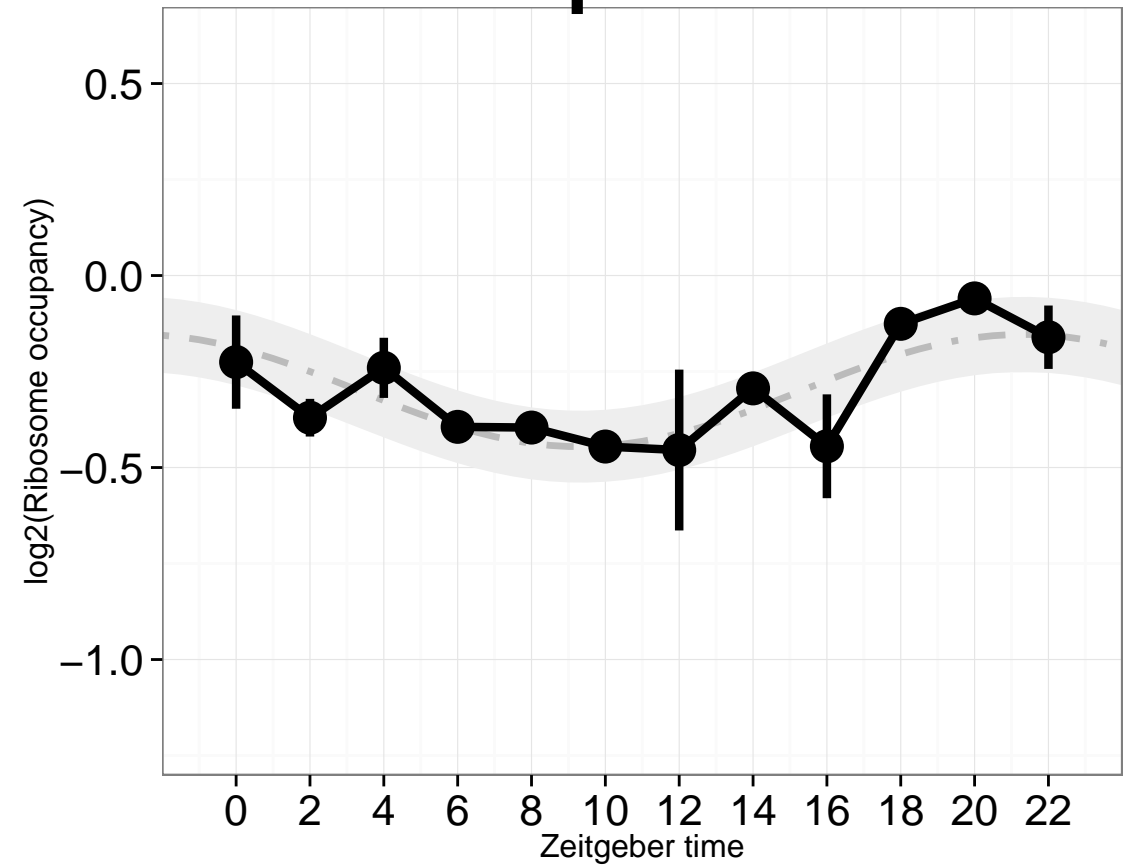

Supplement: Supplementary file 787 [file 1]

# Slc36a1

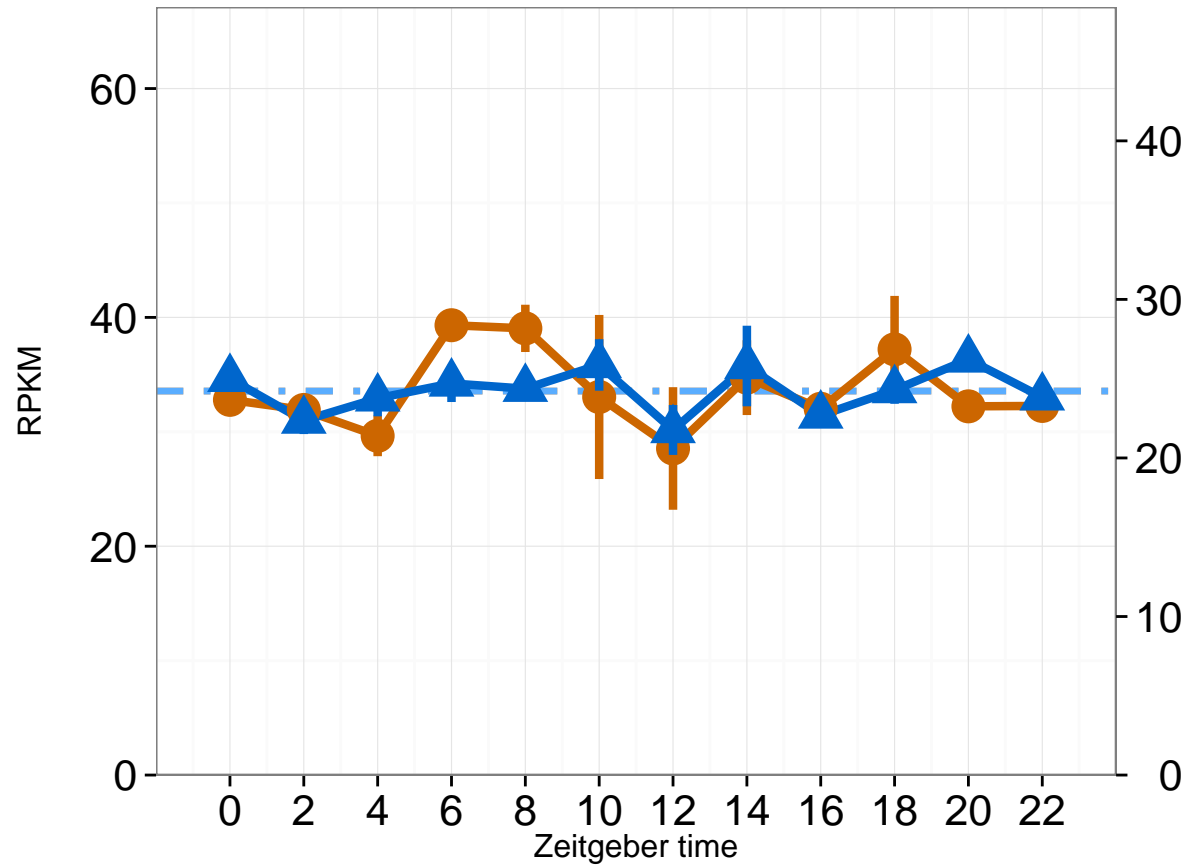

# Slc36a1

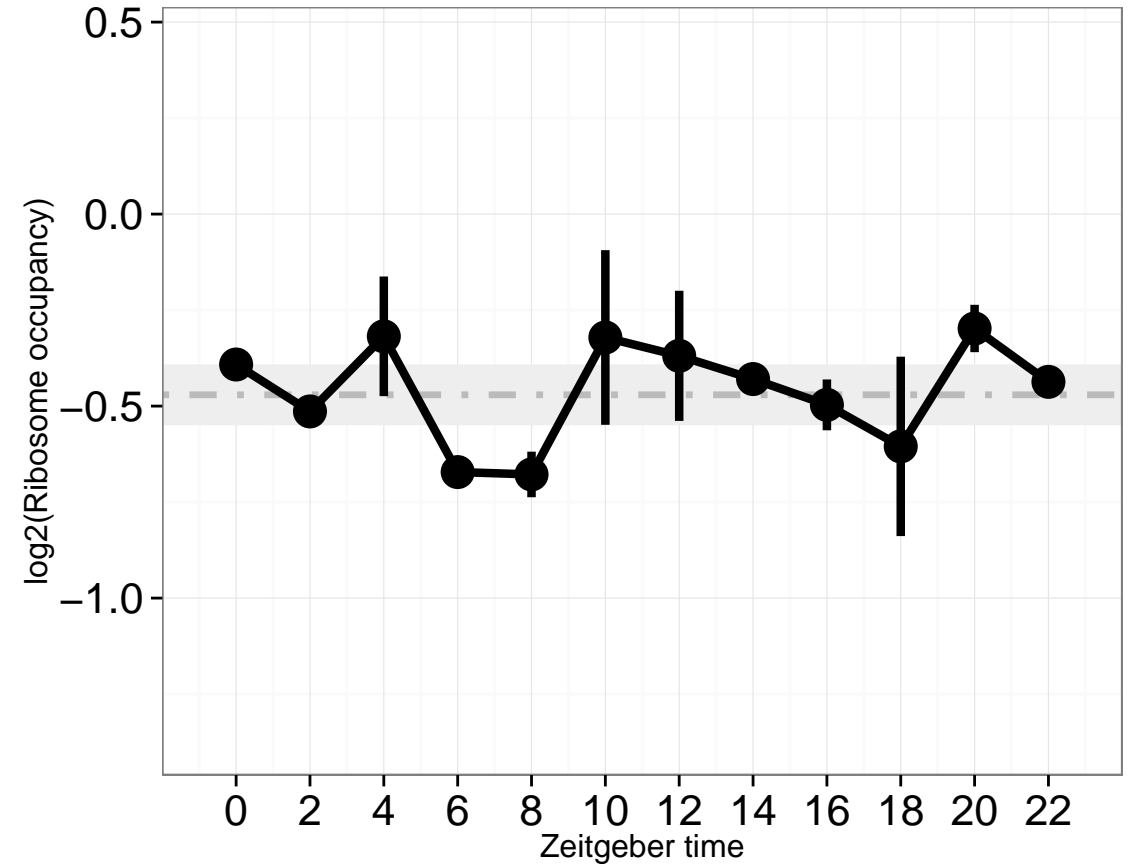

Supplement: Supplementary file 788 [file 1]

**Hhipl1 TR**

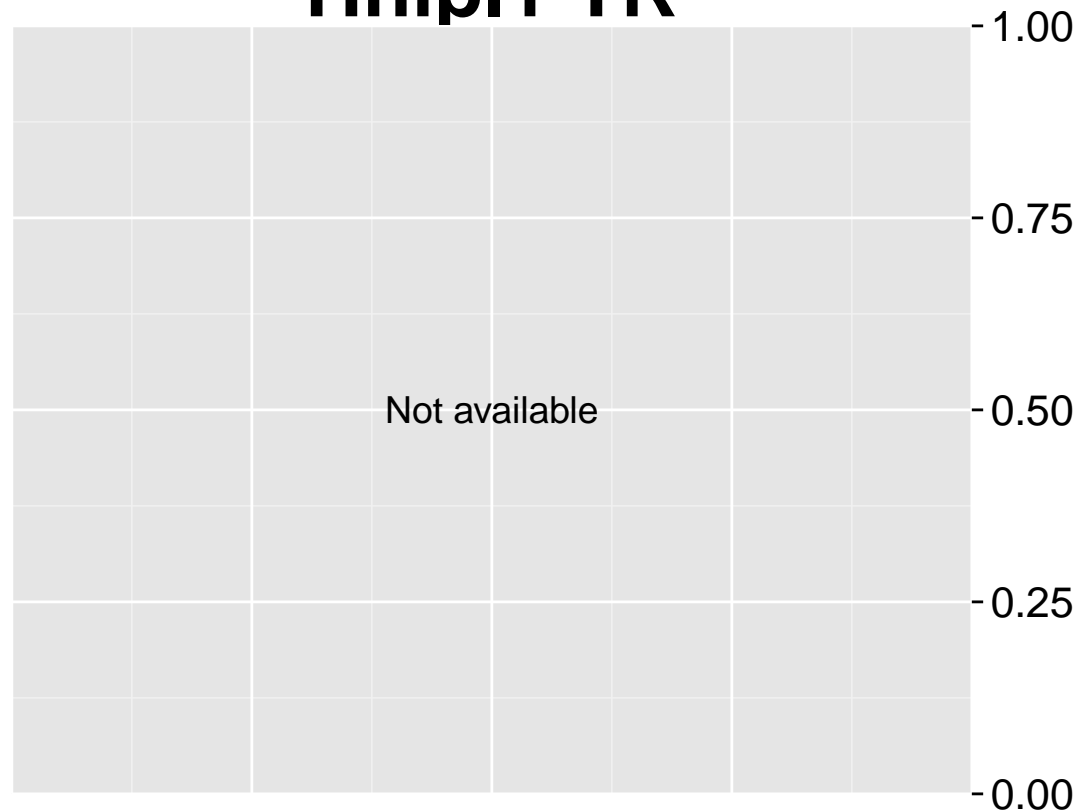

**Hhipl1 log2(Ribosome occupancy**

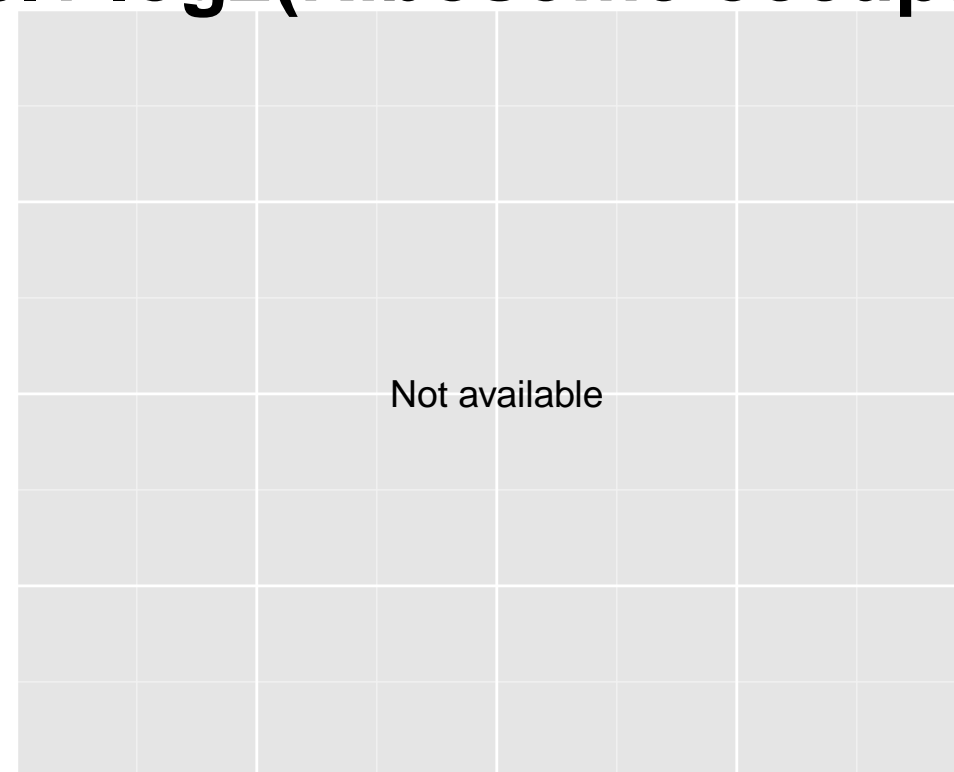

Supplement: Supplementary file 789 [file 1]

## Gnai2

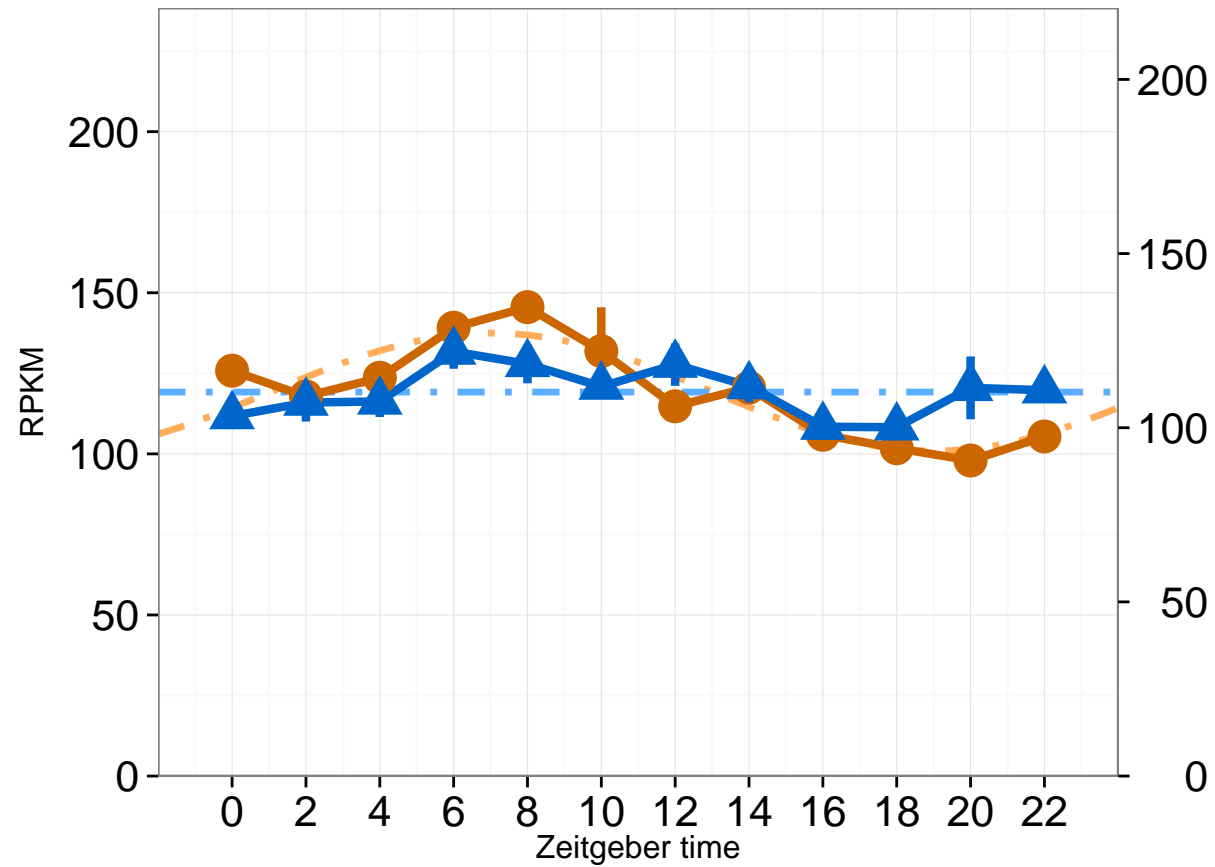

## Gnai2

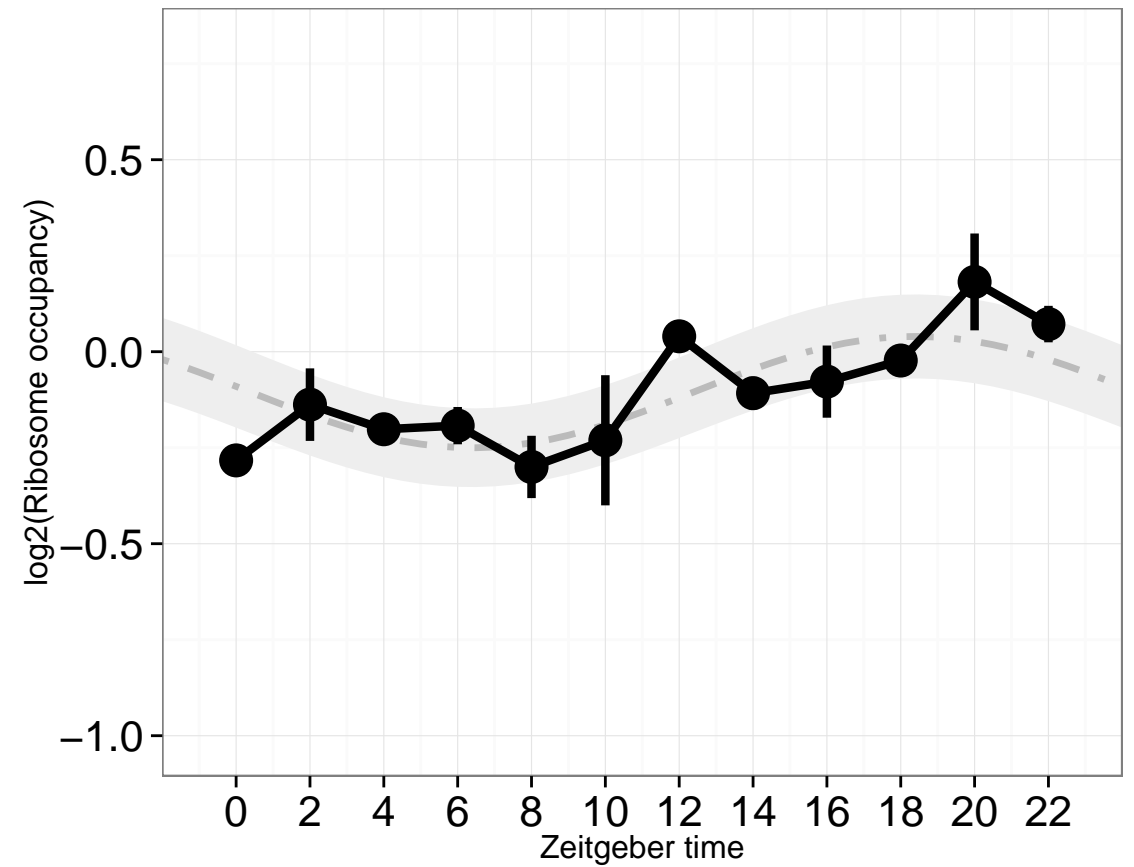

Supplement: Supplementary file 790 [file 1]

# Dram1

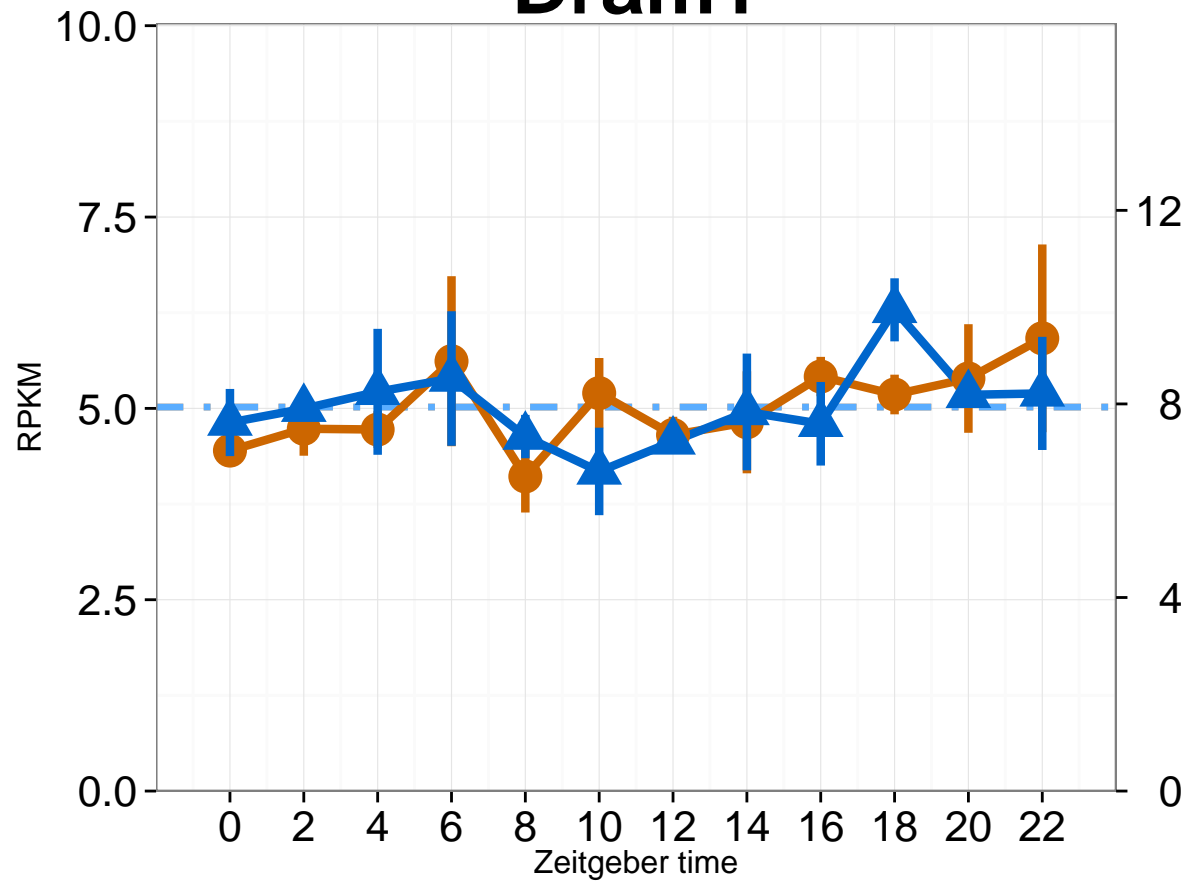

# Dram1

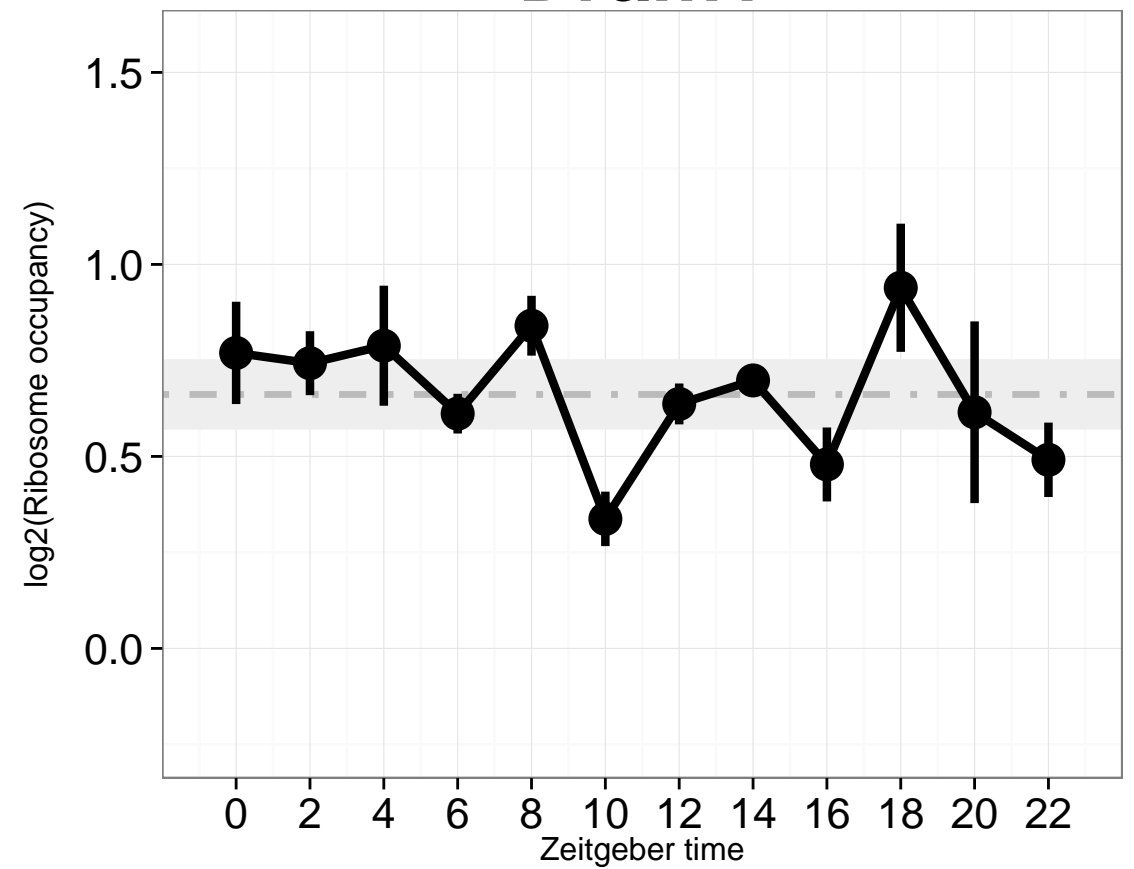

Supplement: Supplementary file 791 [file 1]

## Aatf

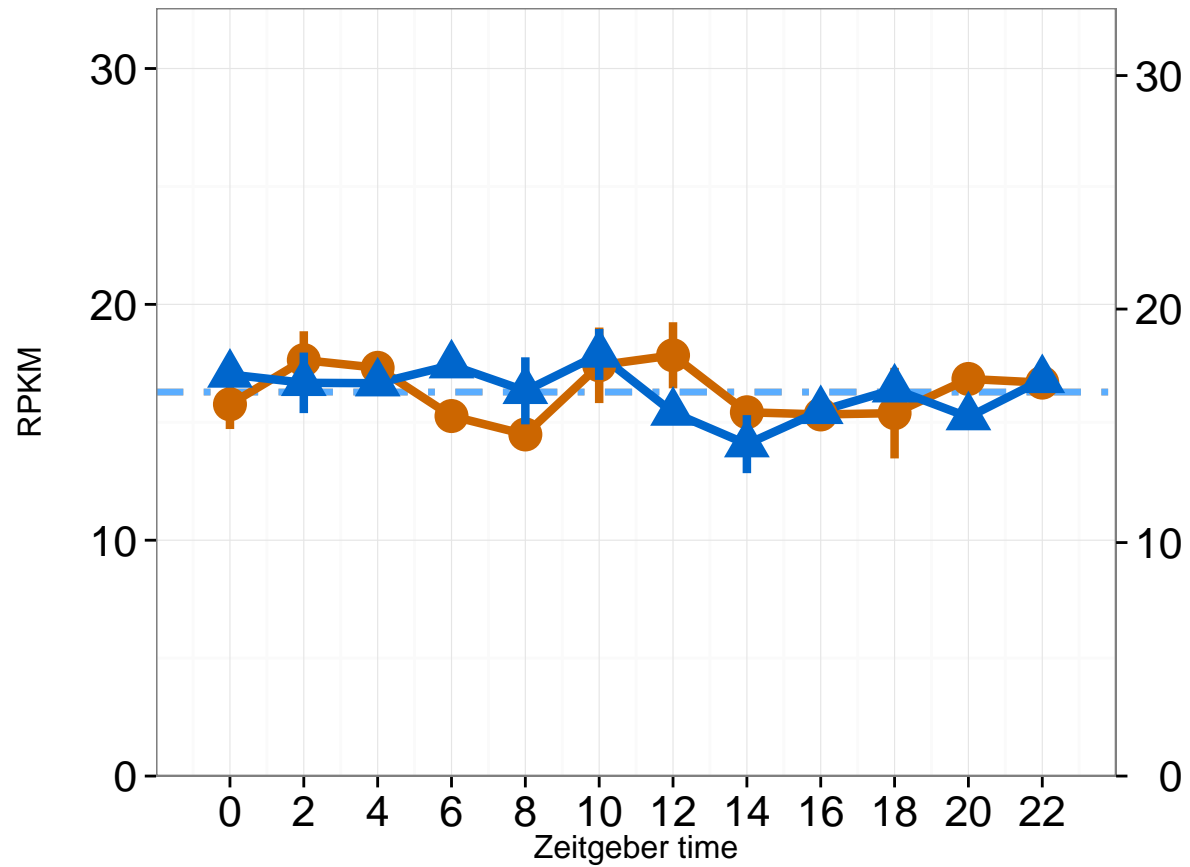

## Aatf

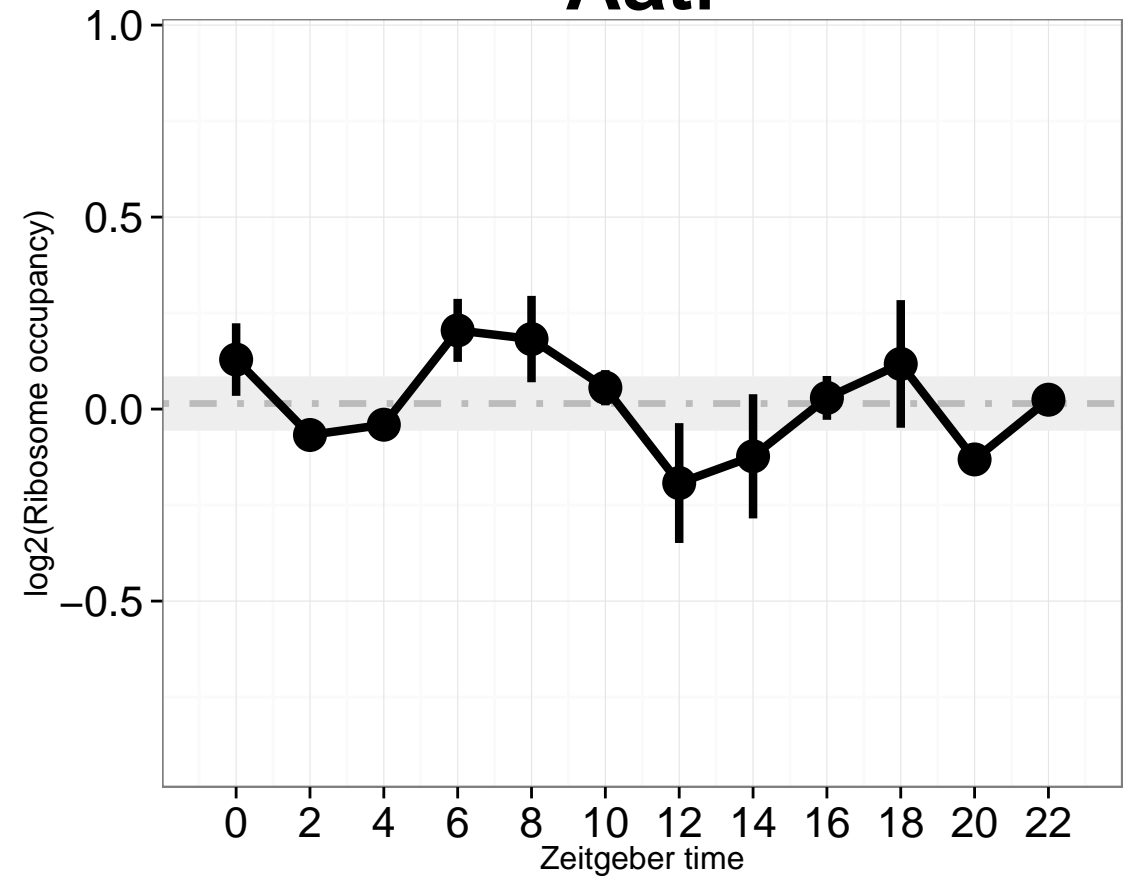

Supplement: Supplementary file 792 [file 1]

## Sec61b

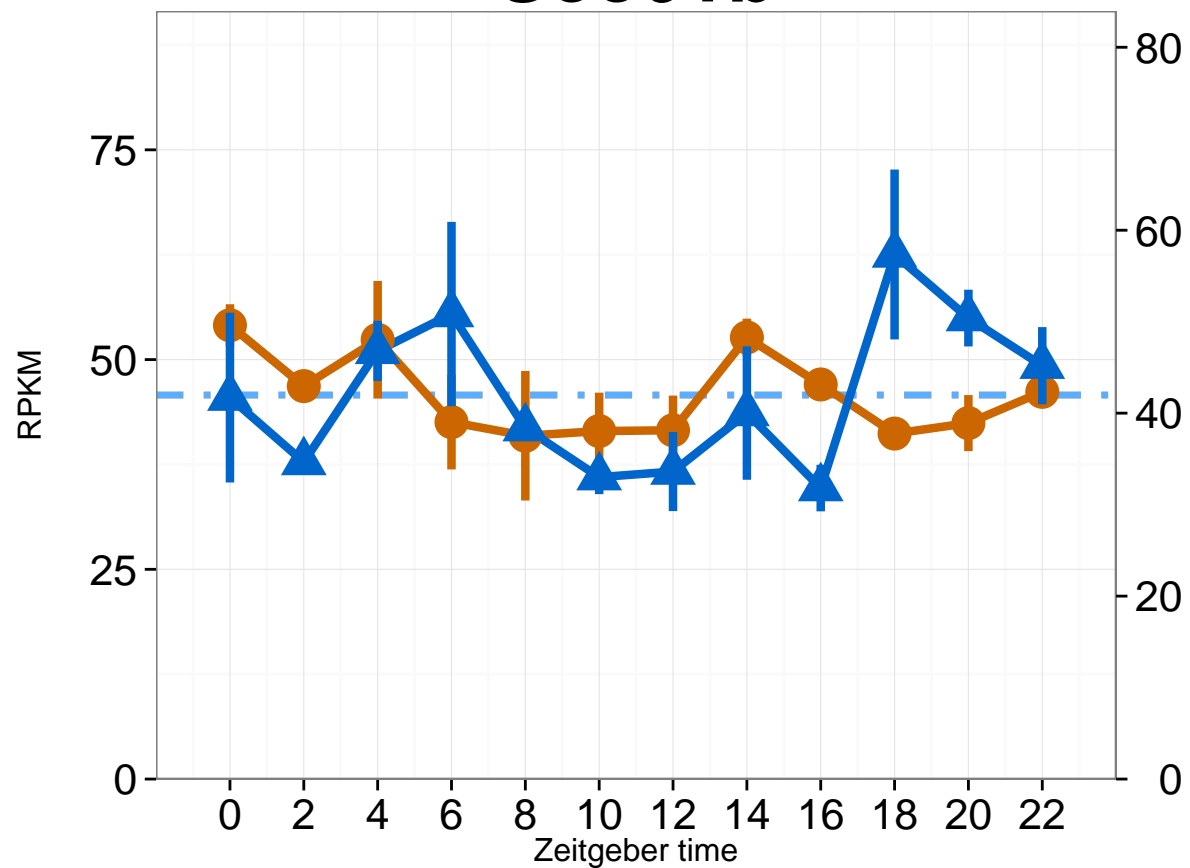

## Sec61b

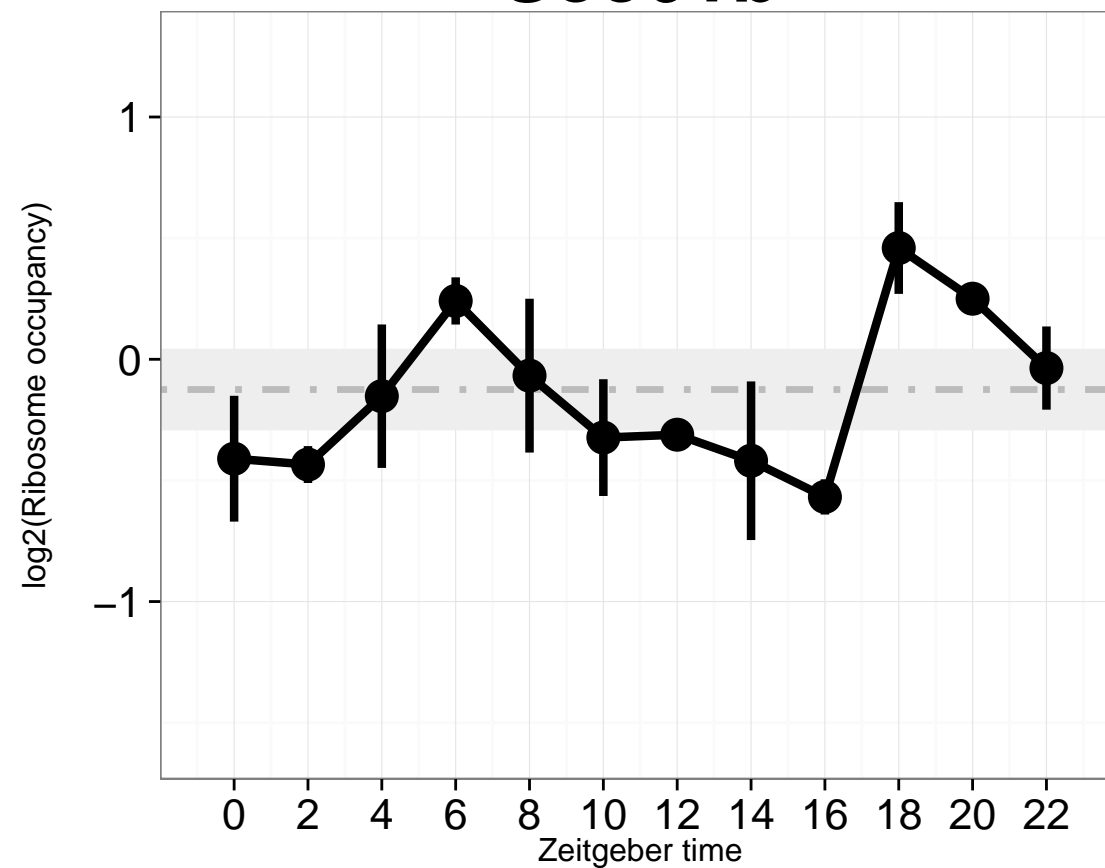

Supplement: Supplementary file 793 [file 1]

# Cmya5

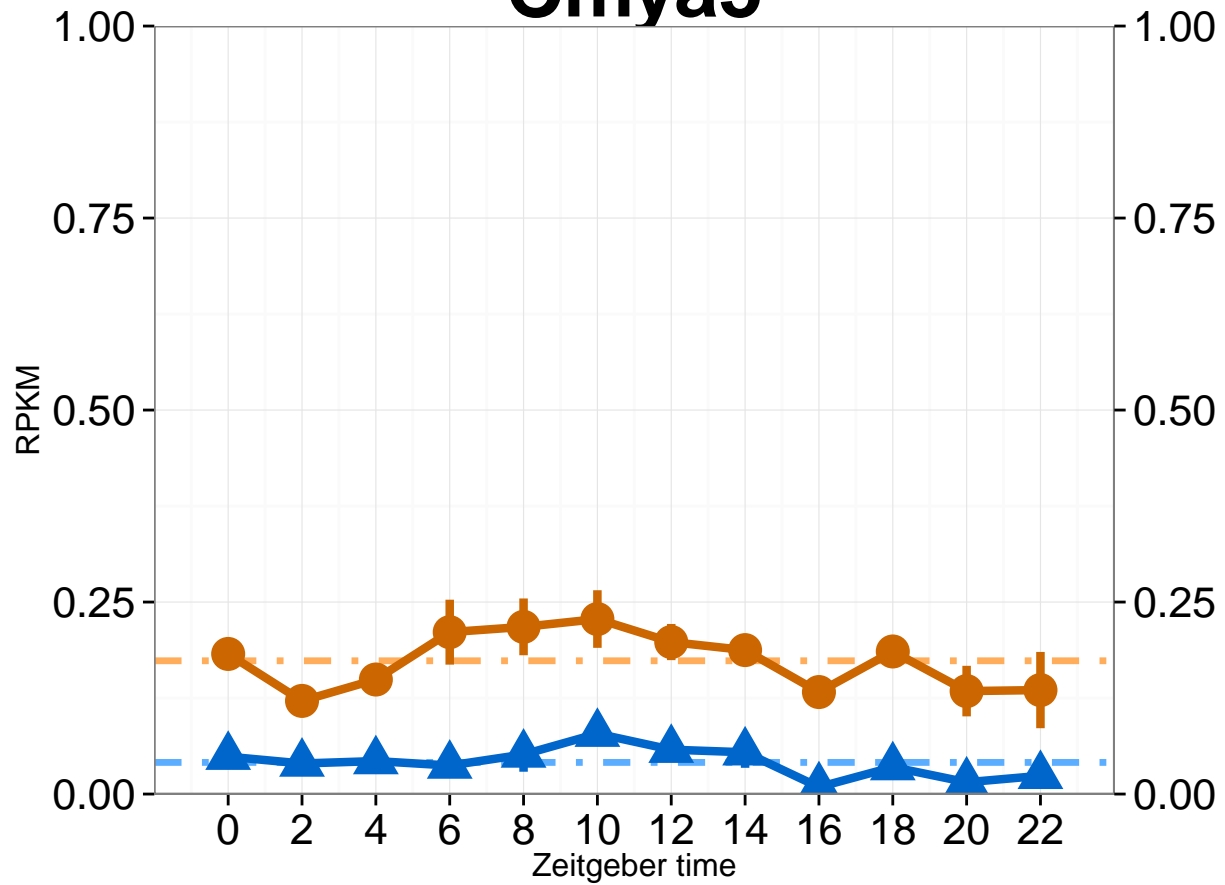

# Cmya5

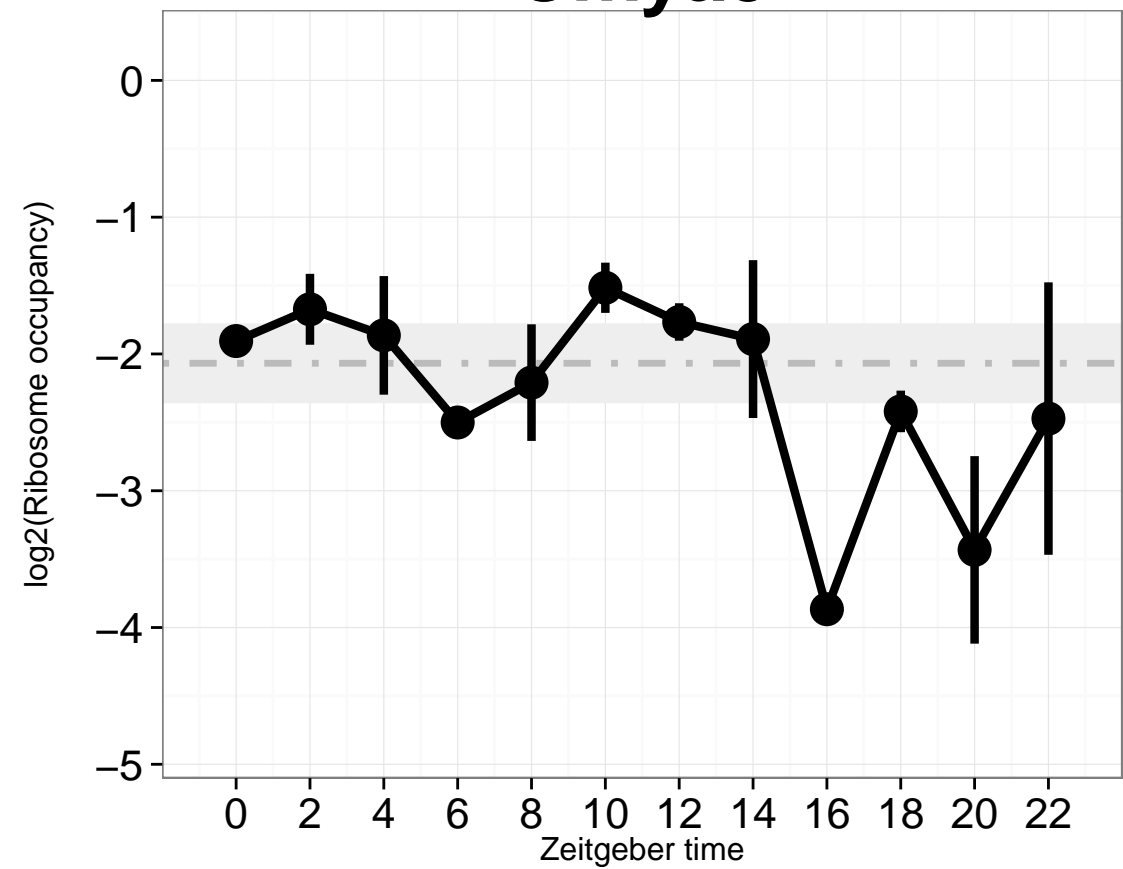

Supplement: Supplementary file 794 [file 1]

## Nol3

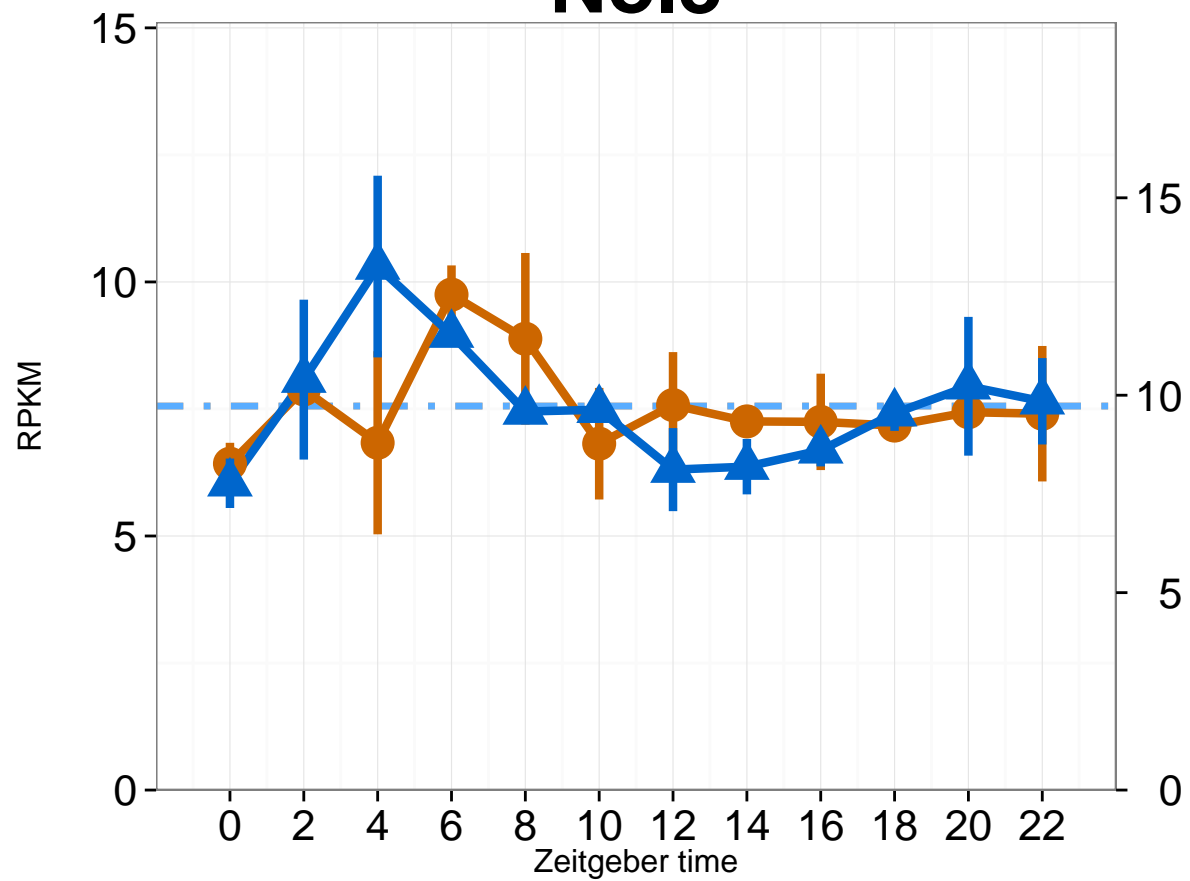

## Nol3

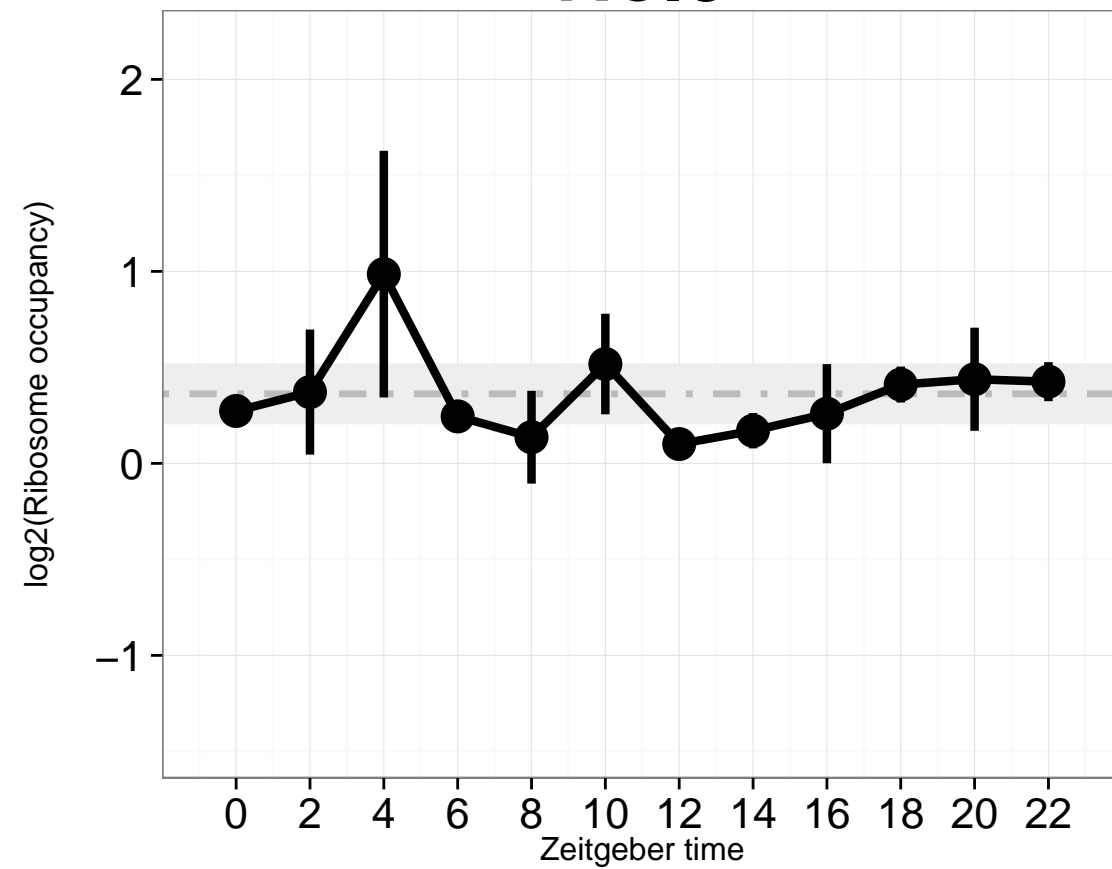

Supplement: Supplementary file 795 [file 1]

## Cd300lg

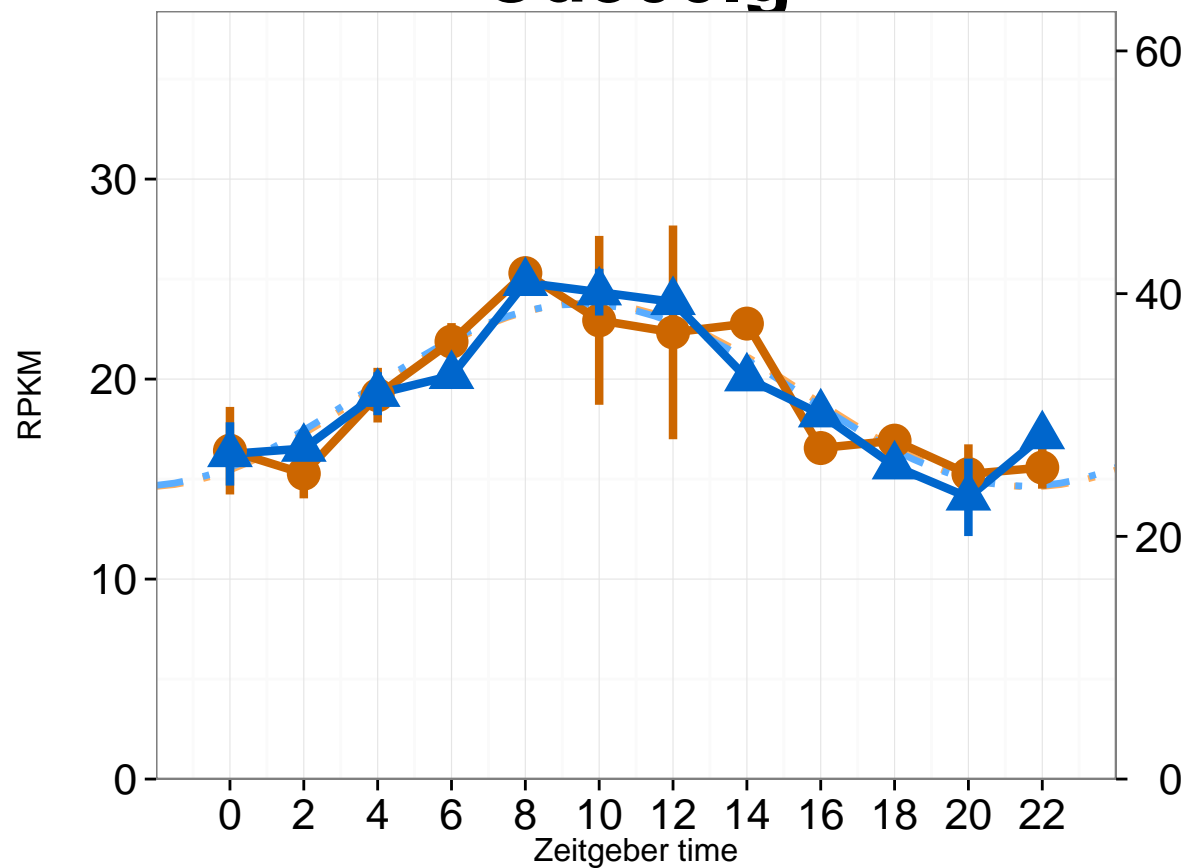

## Cd300lg

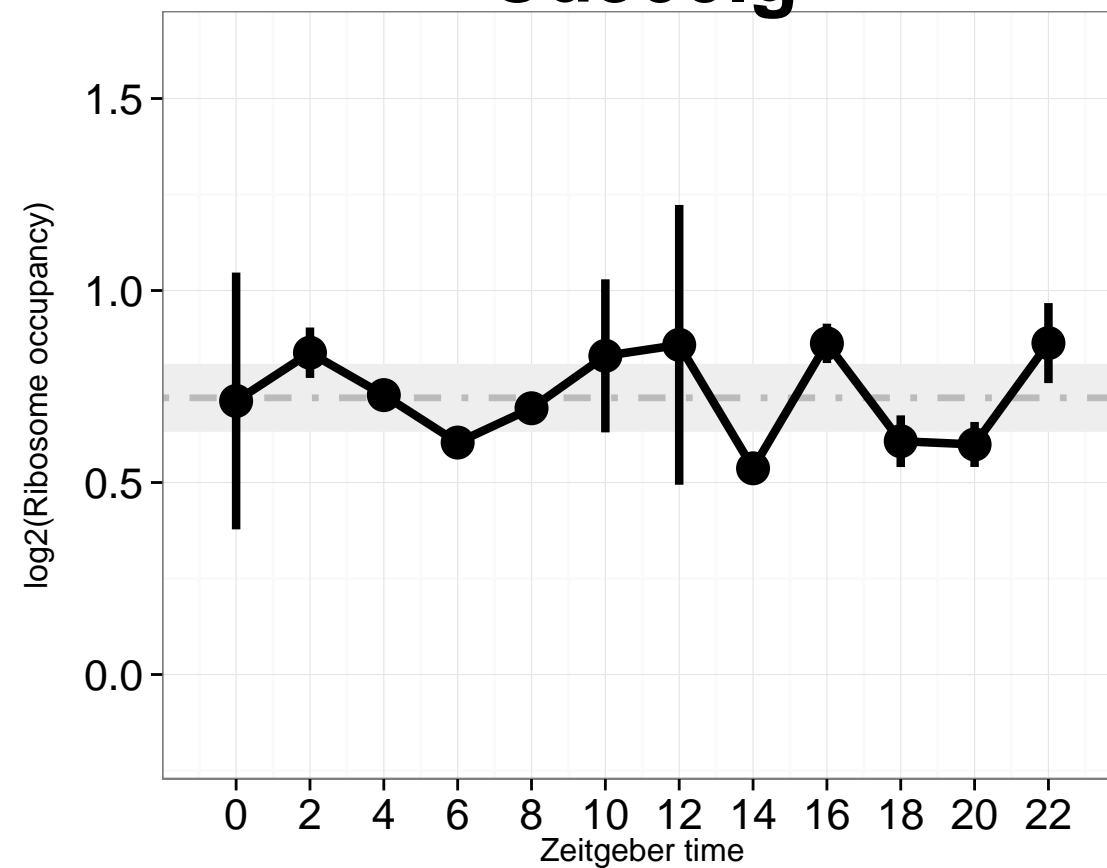

Supplement: Supplementary file 796 [file 1]

# Map3k12

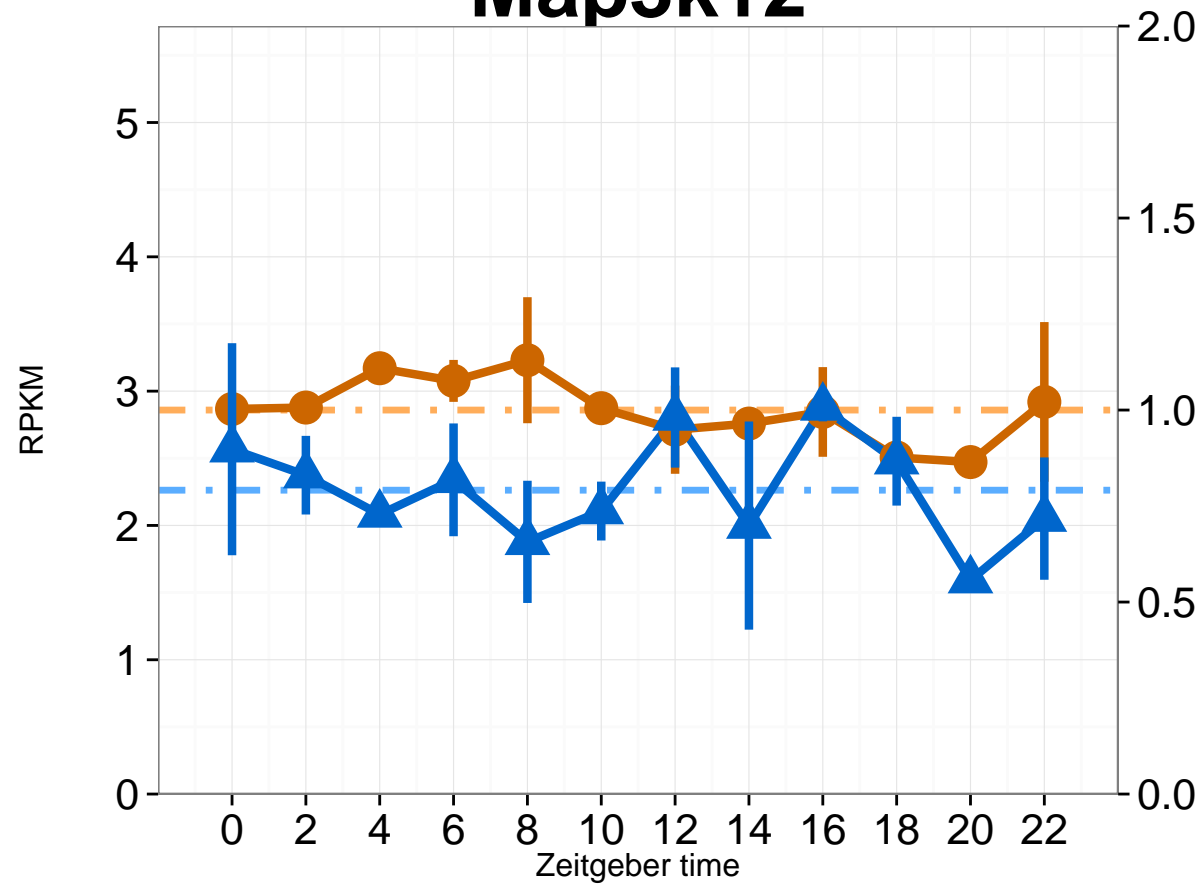

# Map3k12

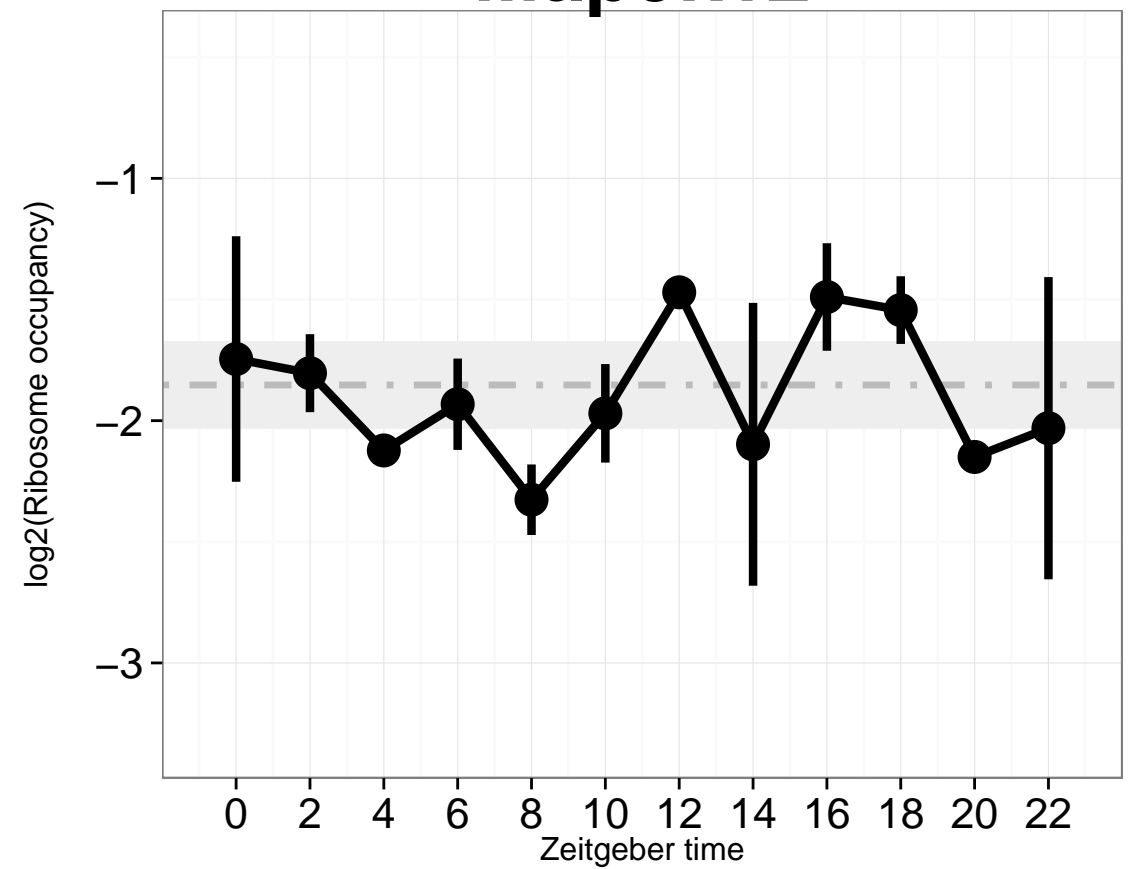

Supplement: Supplementary file 797 [file 1]

## Cars

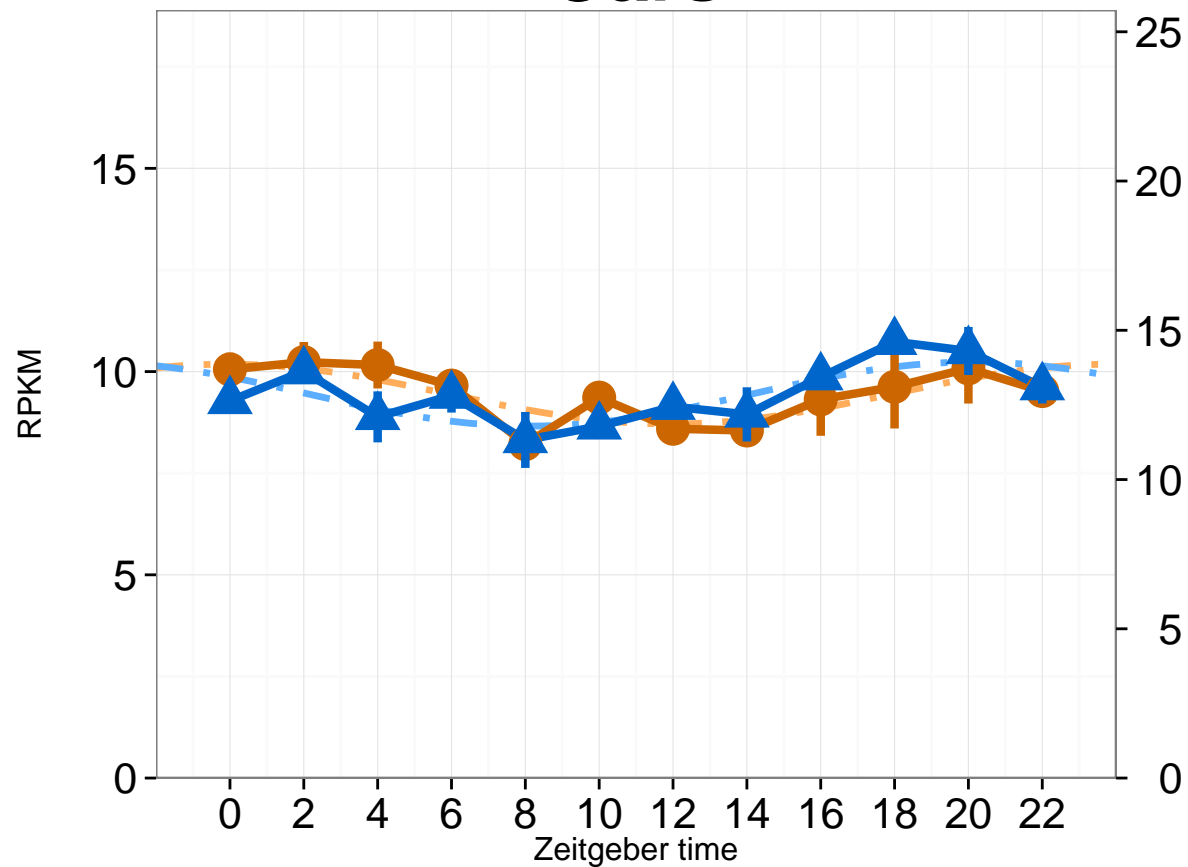

## Cars

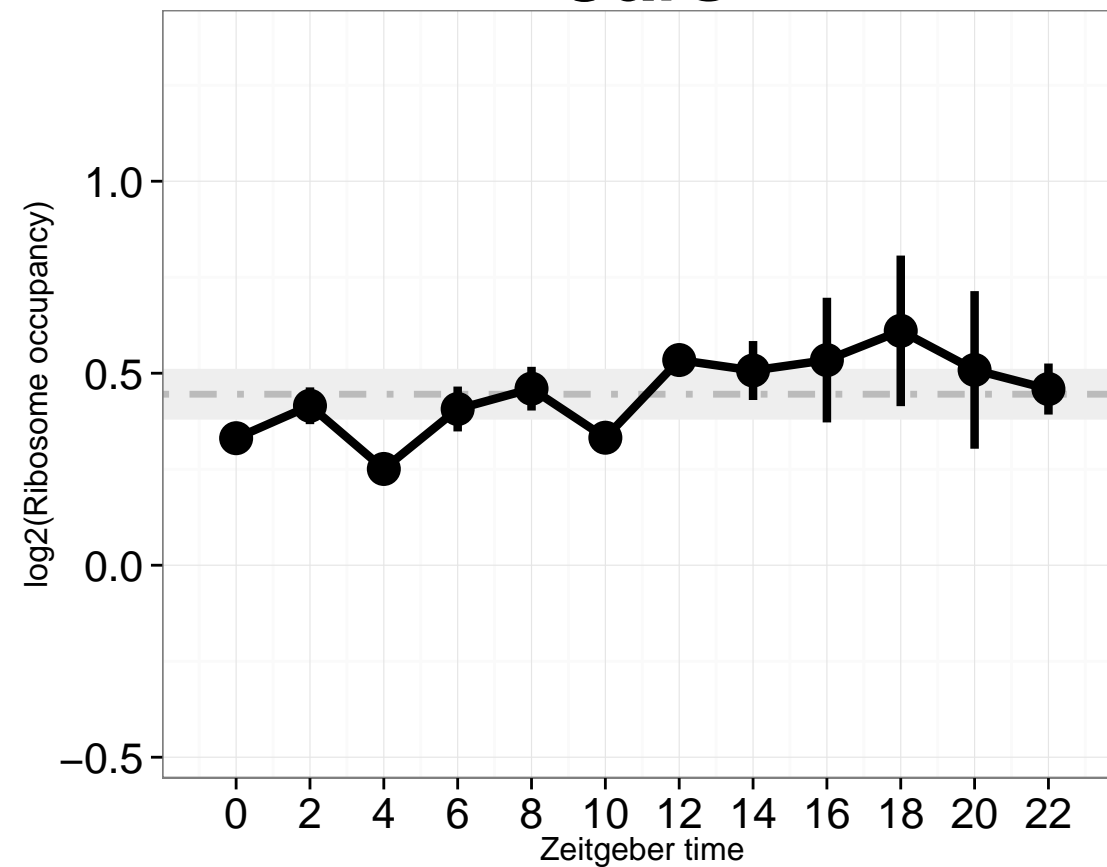

Supplement: Supplementary file 798 [file 1]

## Cbx5

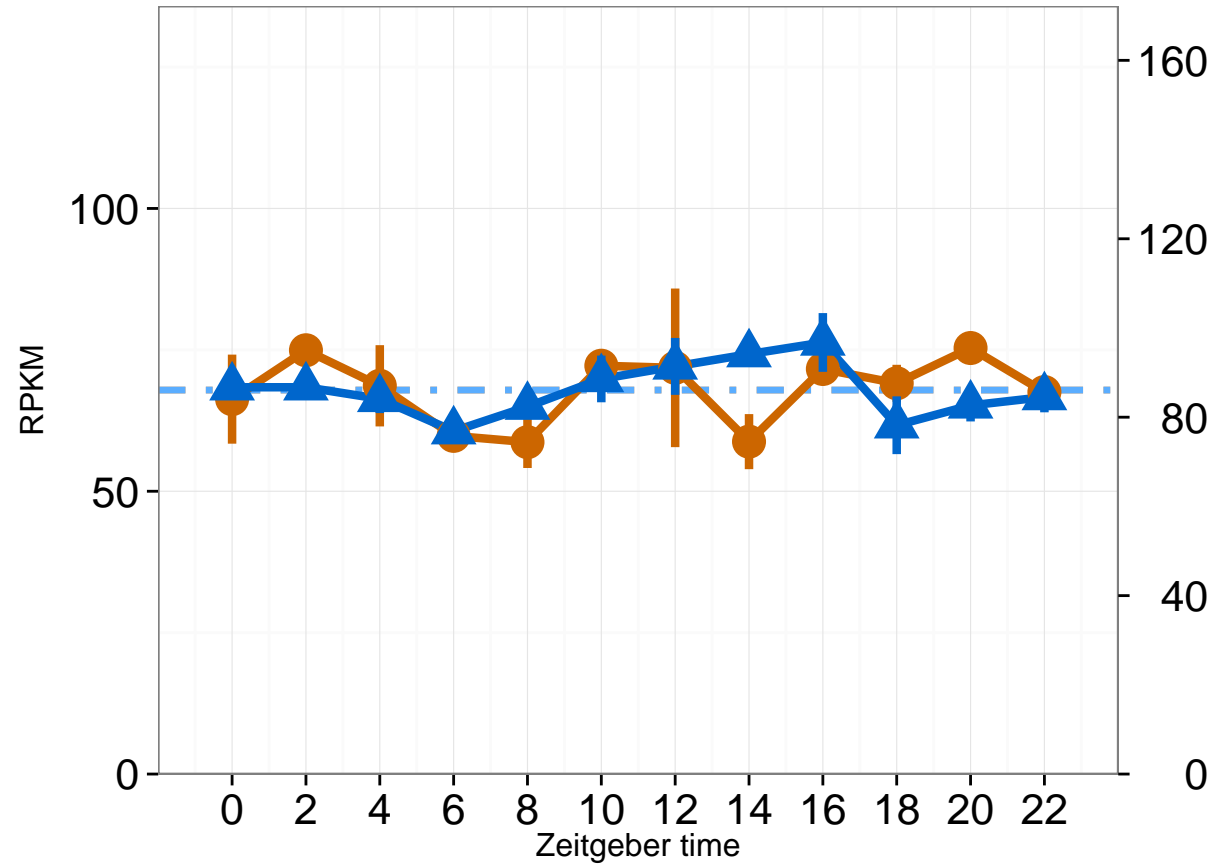

## Cbx5

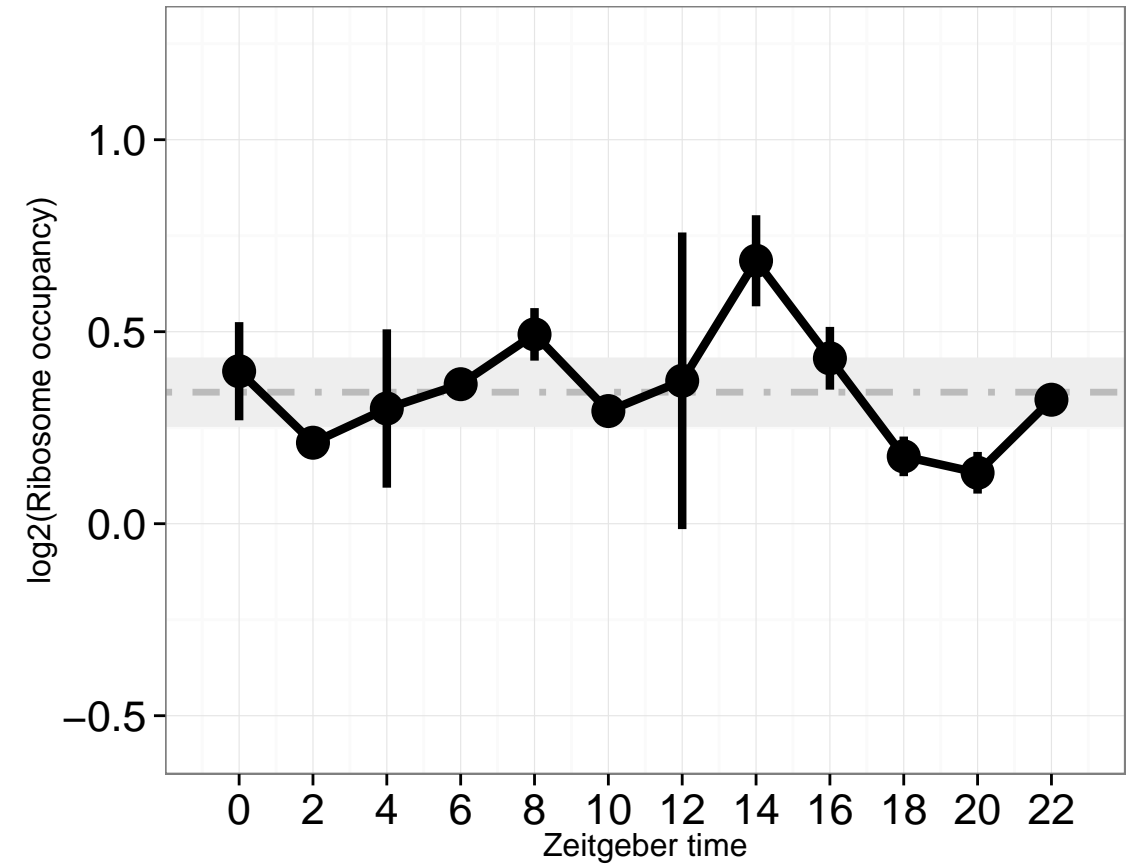

Supplement: Supplementary file 799 [file 1]

# Zfp94

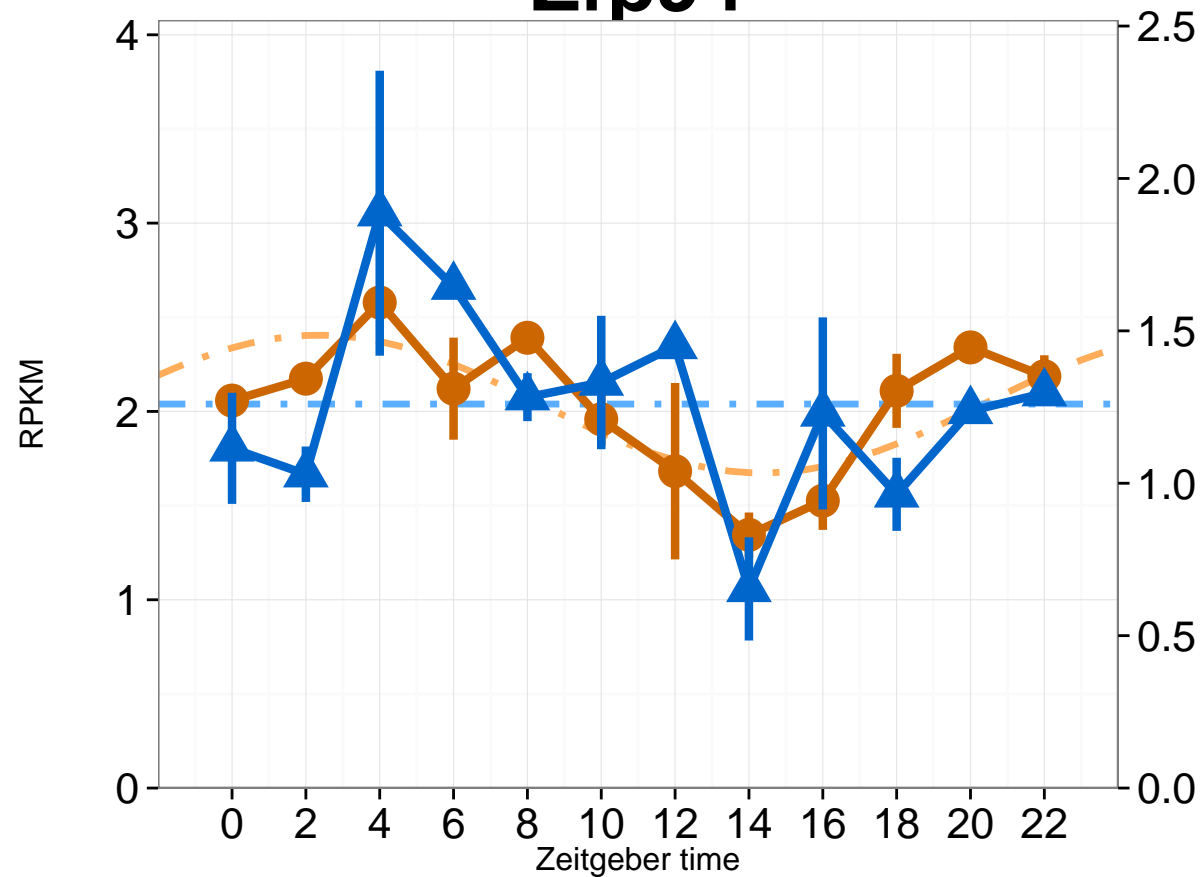

# Zfp94

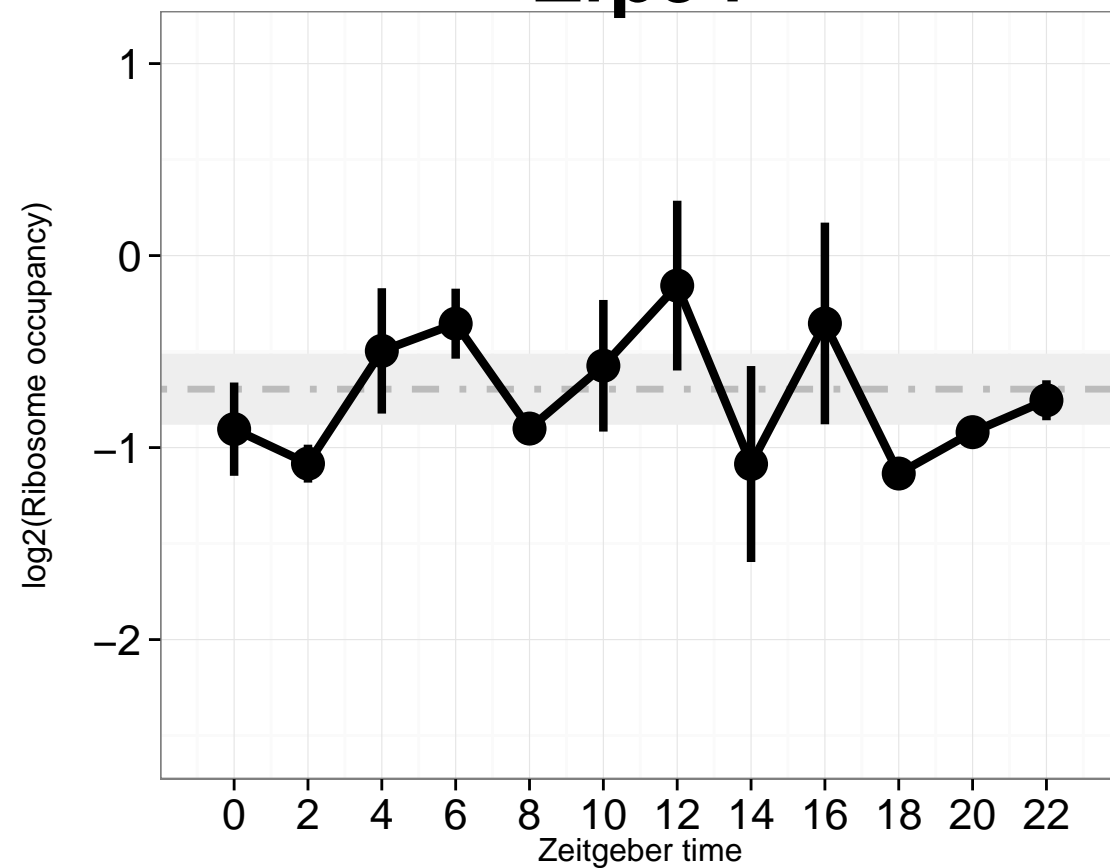

Supplement: Supplementary file 800 [file 1]

# Trmt10b

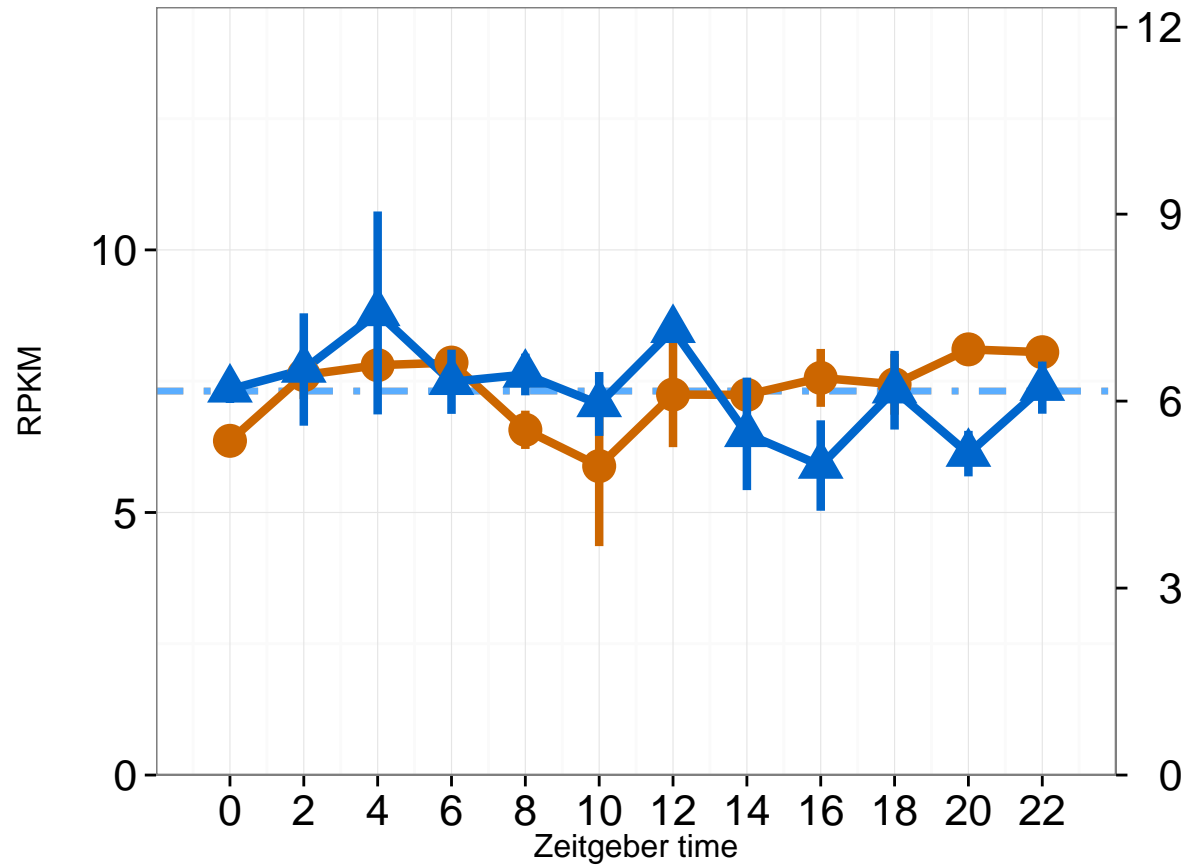

# Trmt10b

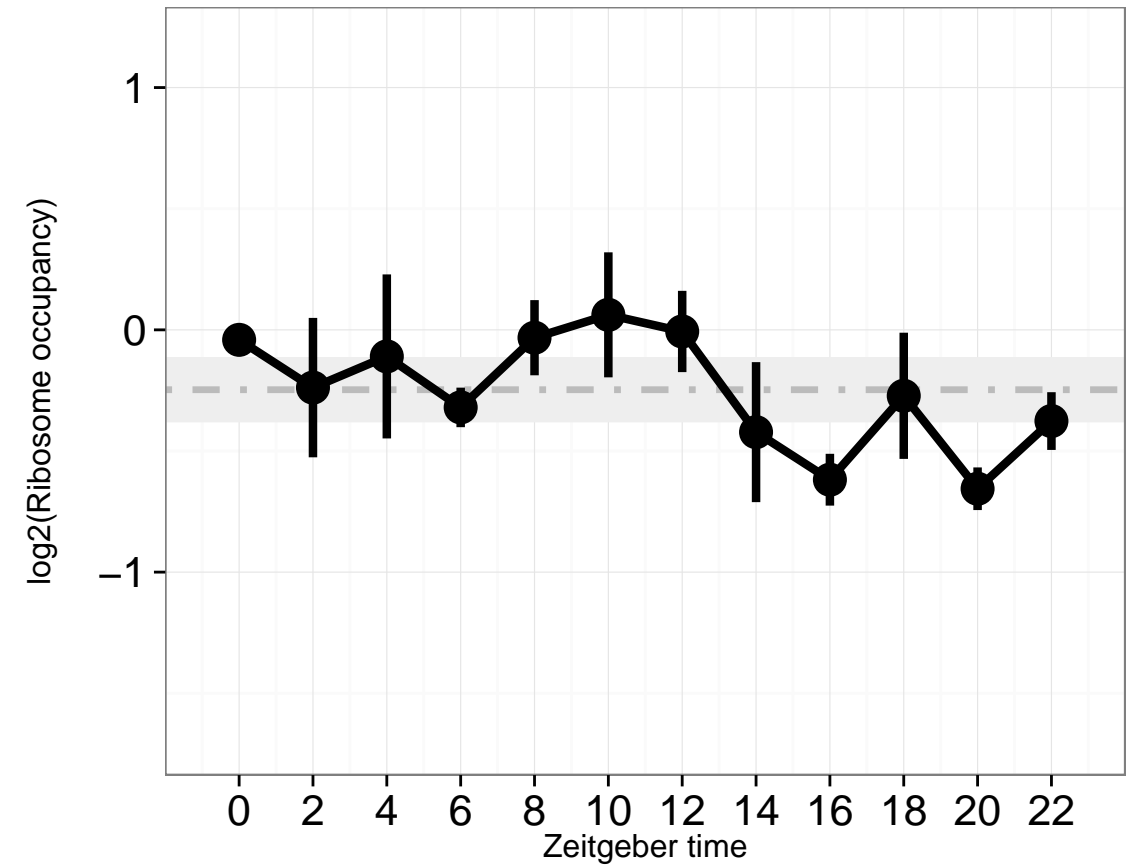

Supplement: Supplementary file 801 [file 1]

## Gstm4

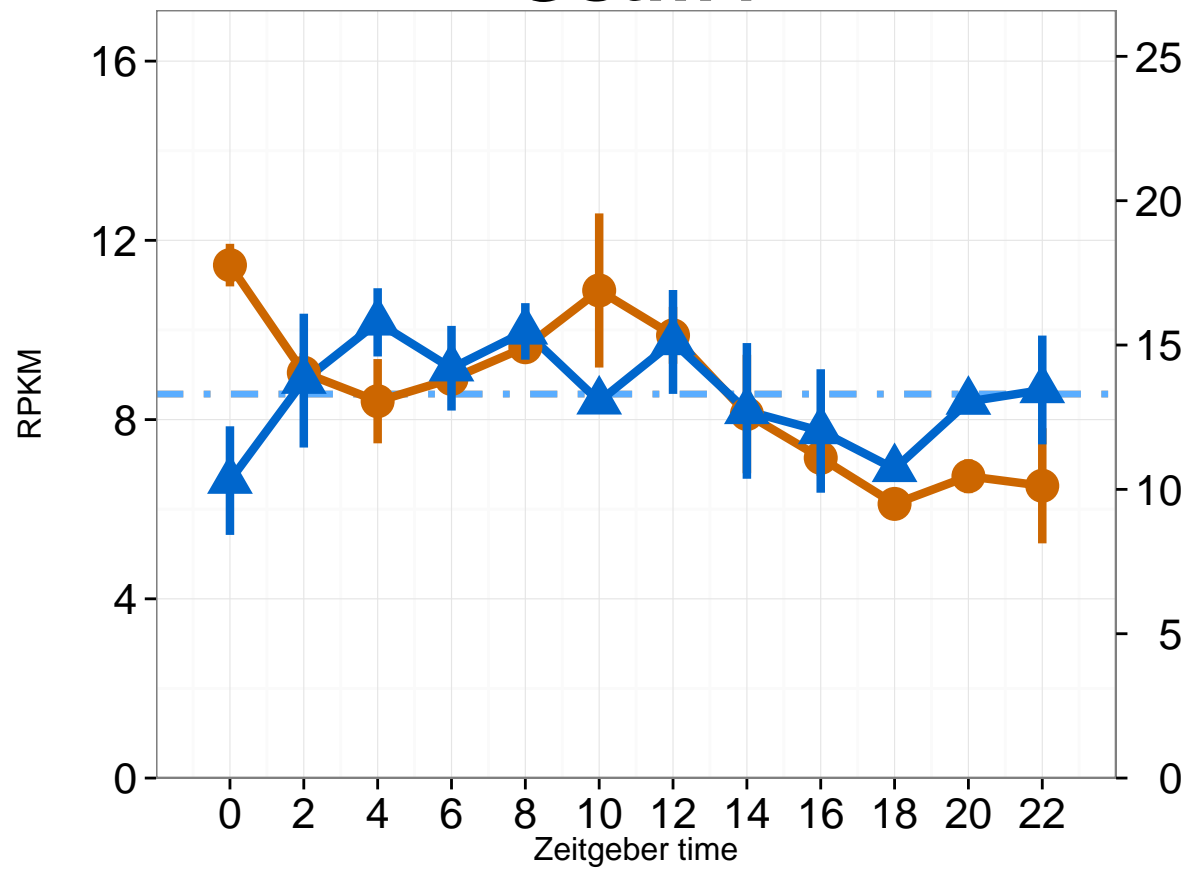

## Gstm4

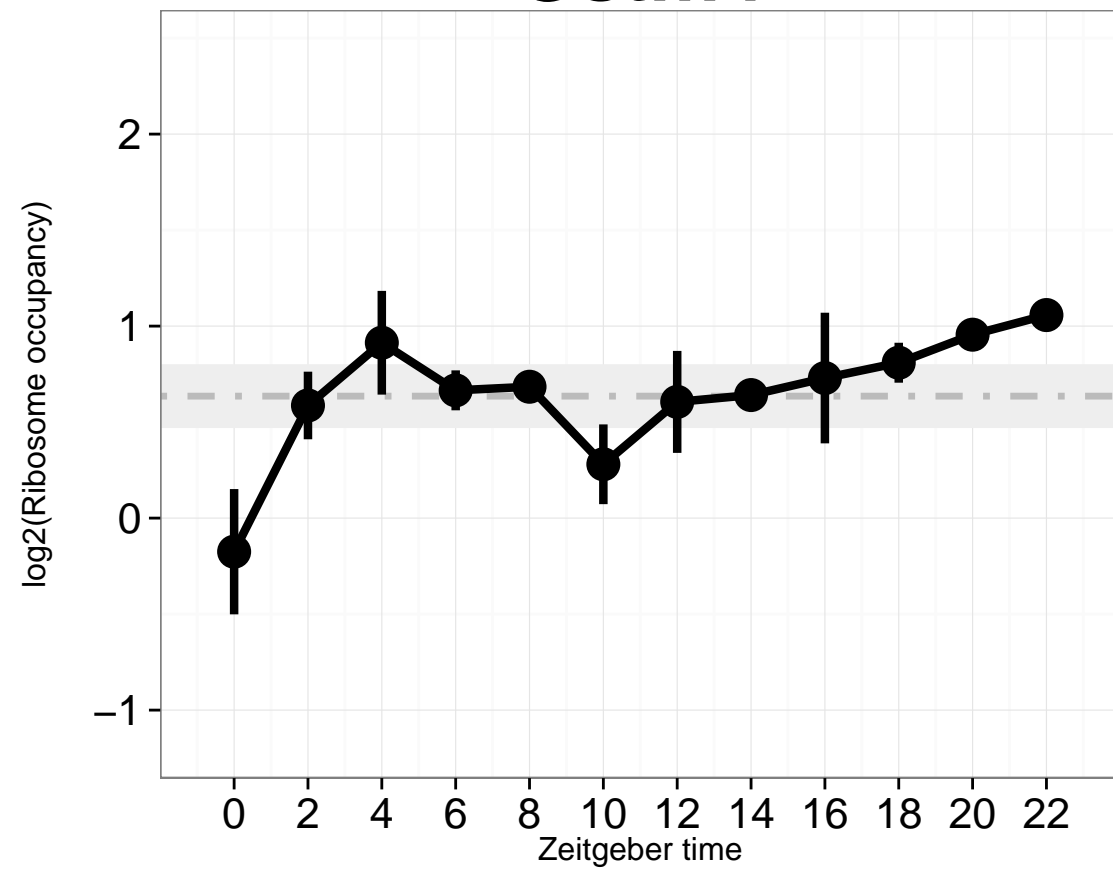

Supplement: Supplementary file 802 [file 1]

## Exosc7

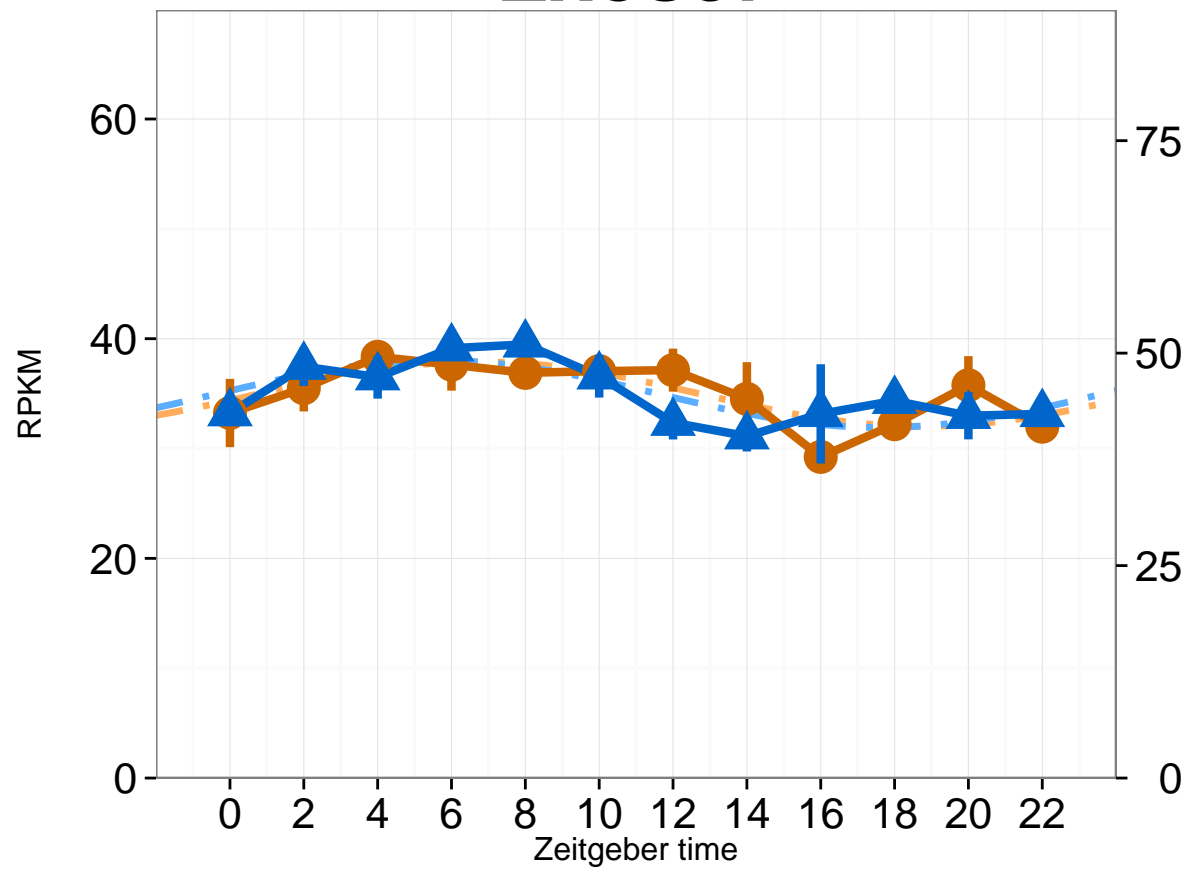

## Exosc7

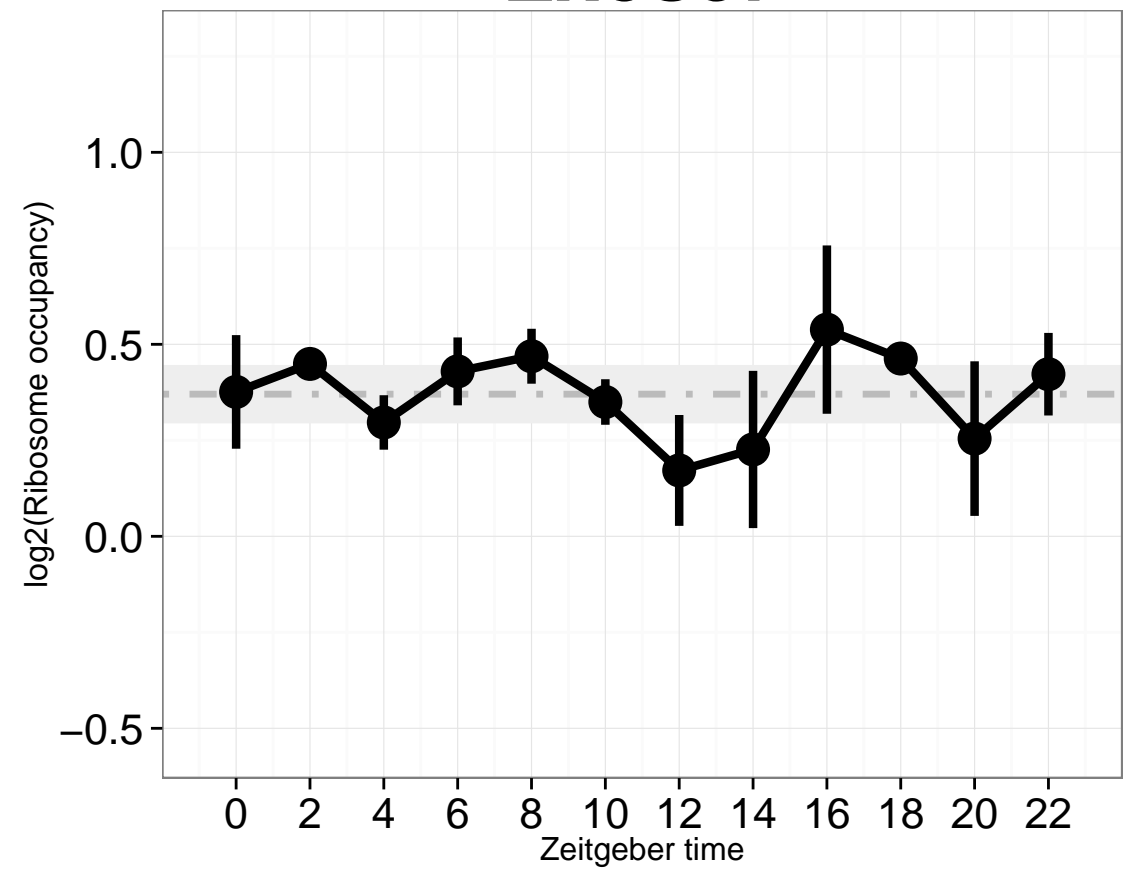

Supplement: Supplementary file 803 [file 1]
