# Supplementary material (part 9 of 133)
Source: publisher figshare collection journal article supplement (https://springernature.figshare.com/articles/dataset/_/4903193)

## Pcsk9

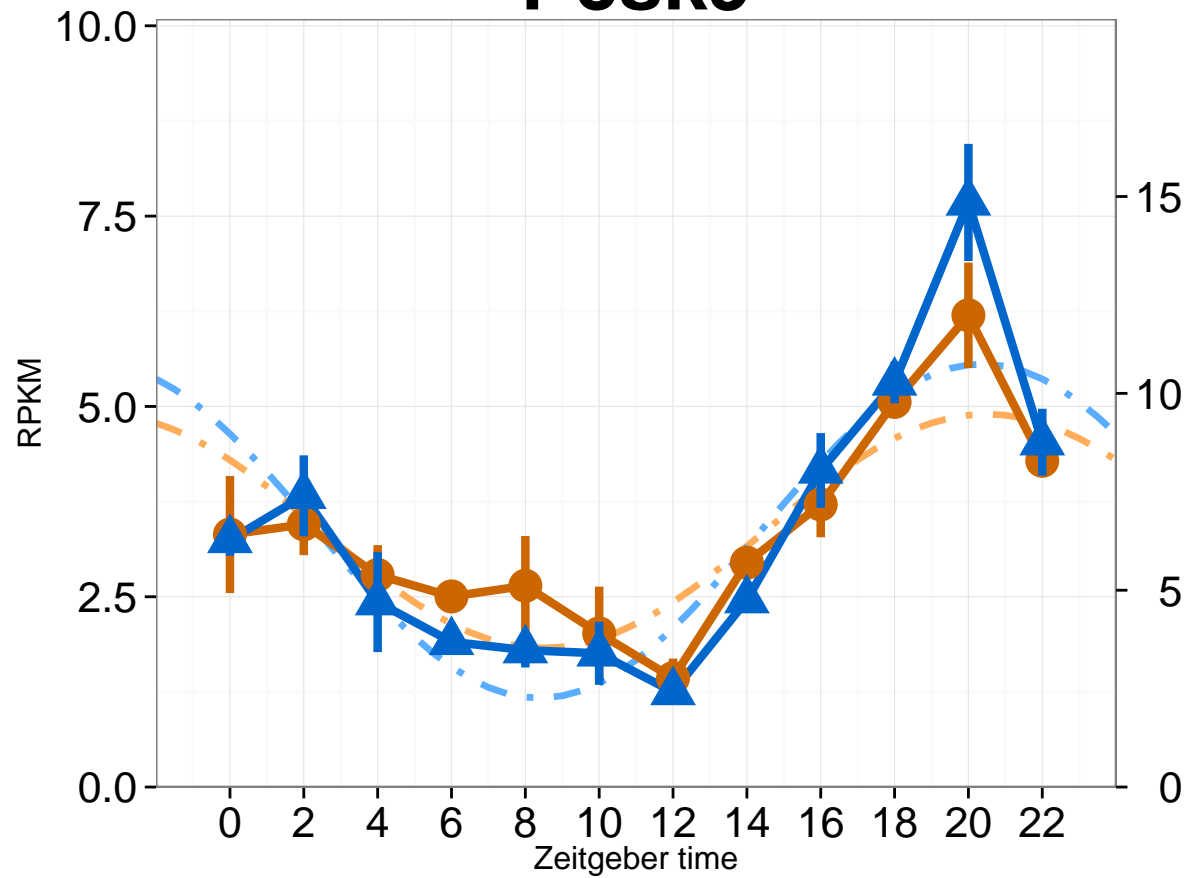

## Pcsk9

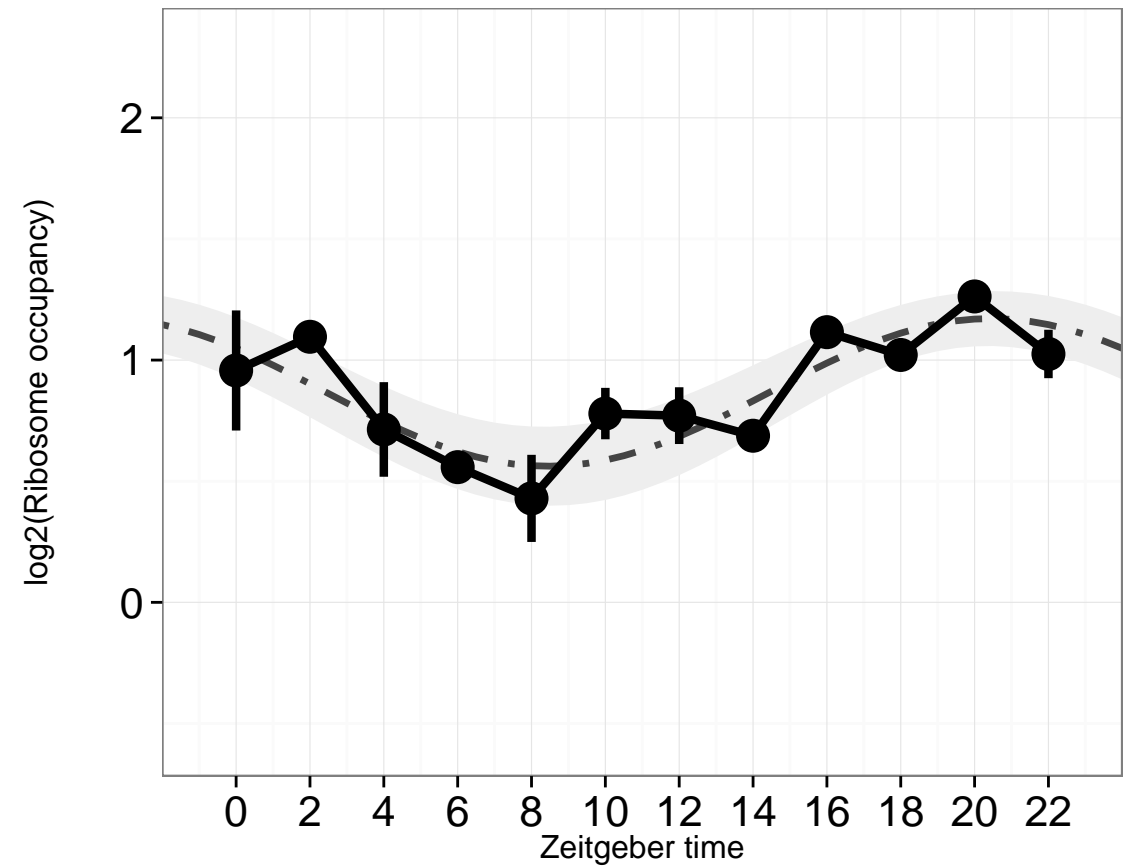

Supplement: Supplementary file 804 [file 1]

## Rilpl1

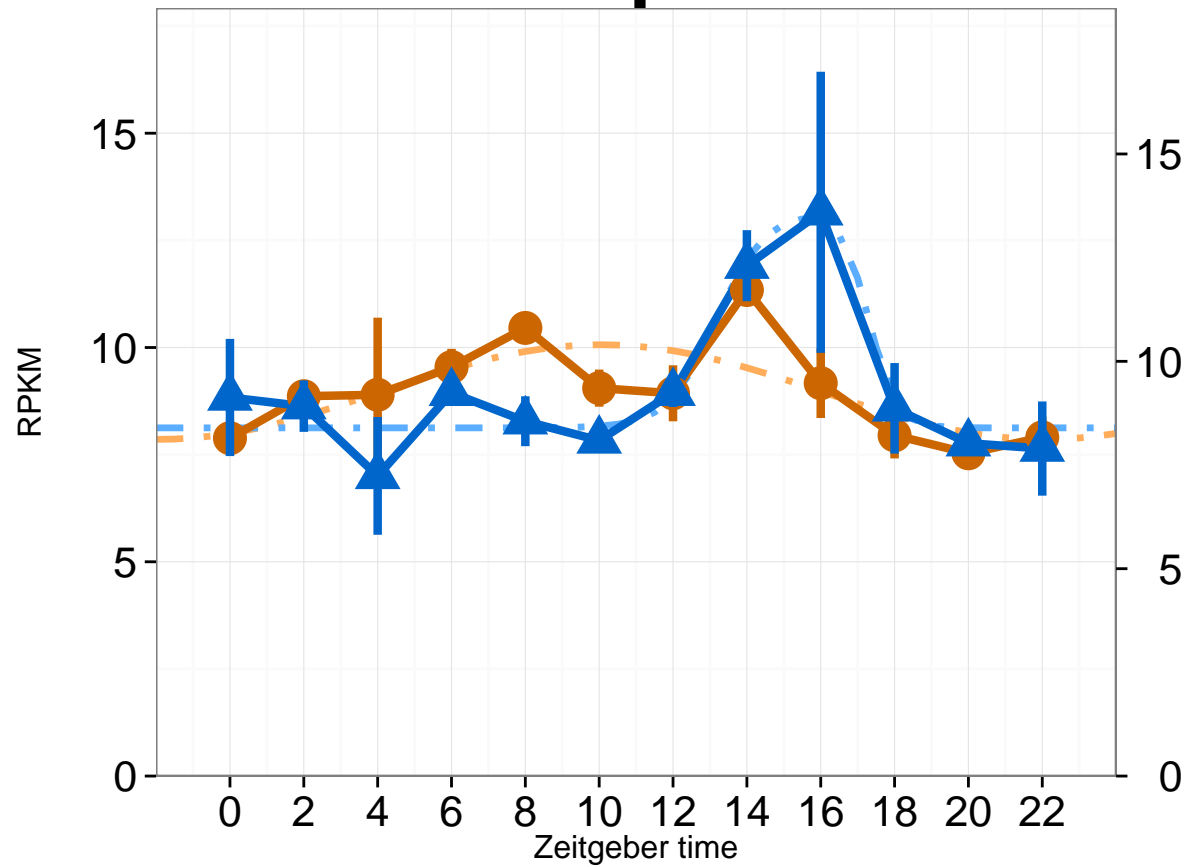

## Rilpl1

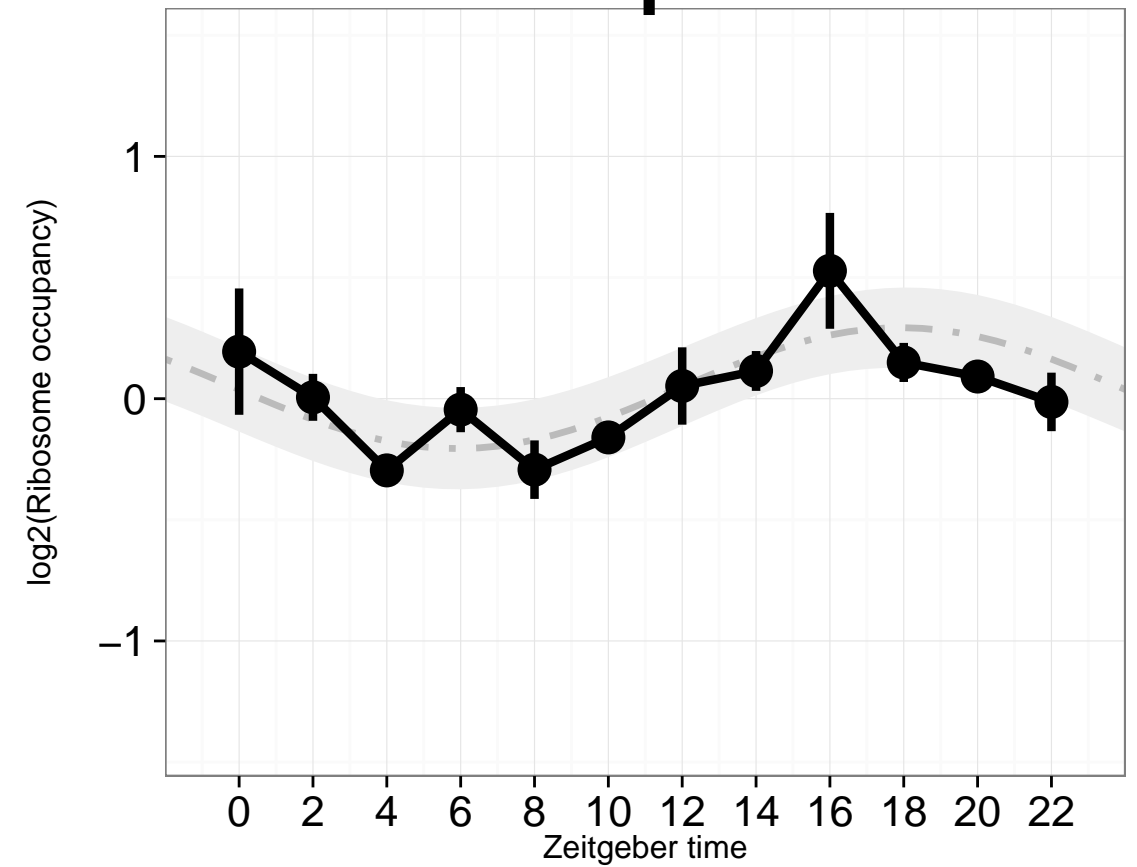

Supplement: Supplementary file 805 [file 1]

# Tead4

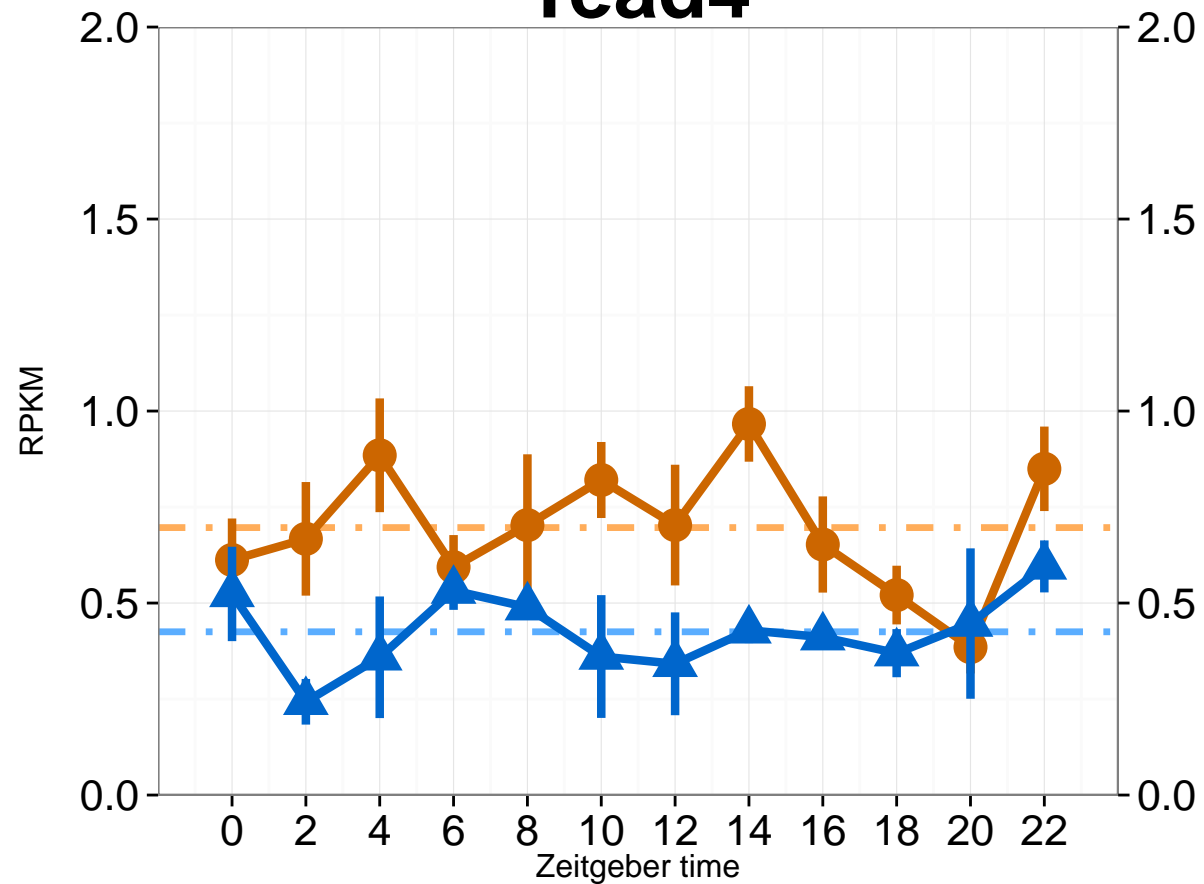

# Tead4

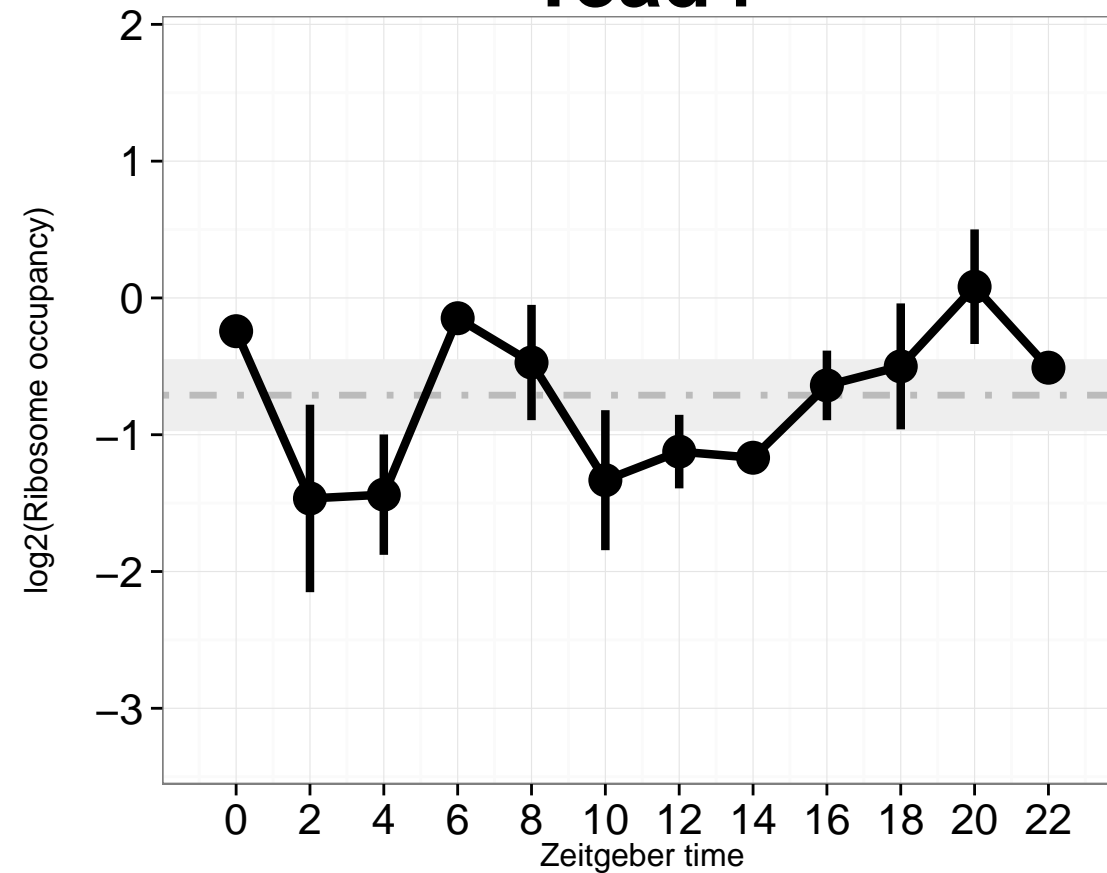

Supplement: Supplementary file 806 [file 1]

## Ttc38

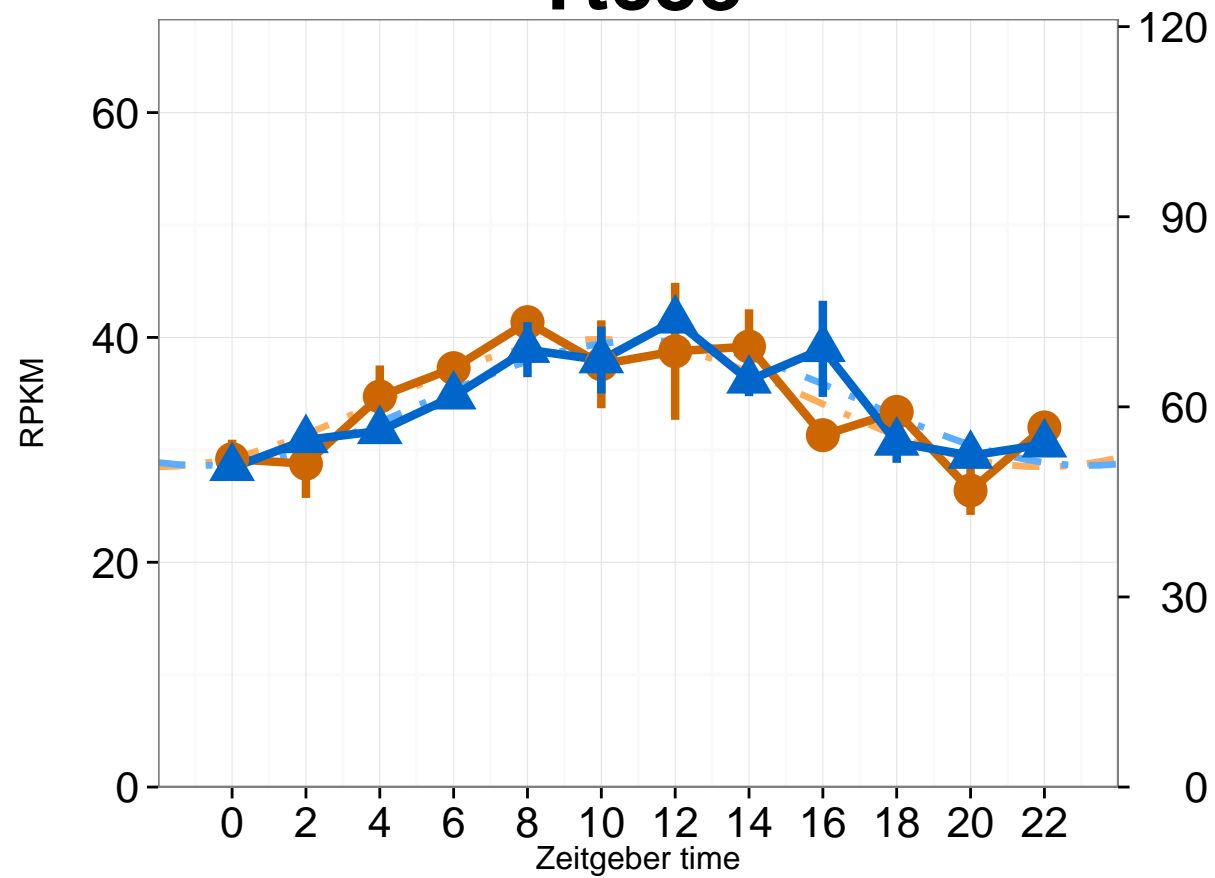

## Ttc38

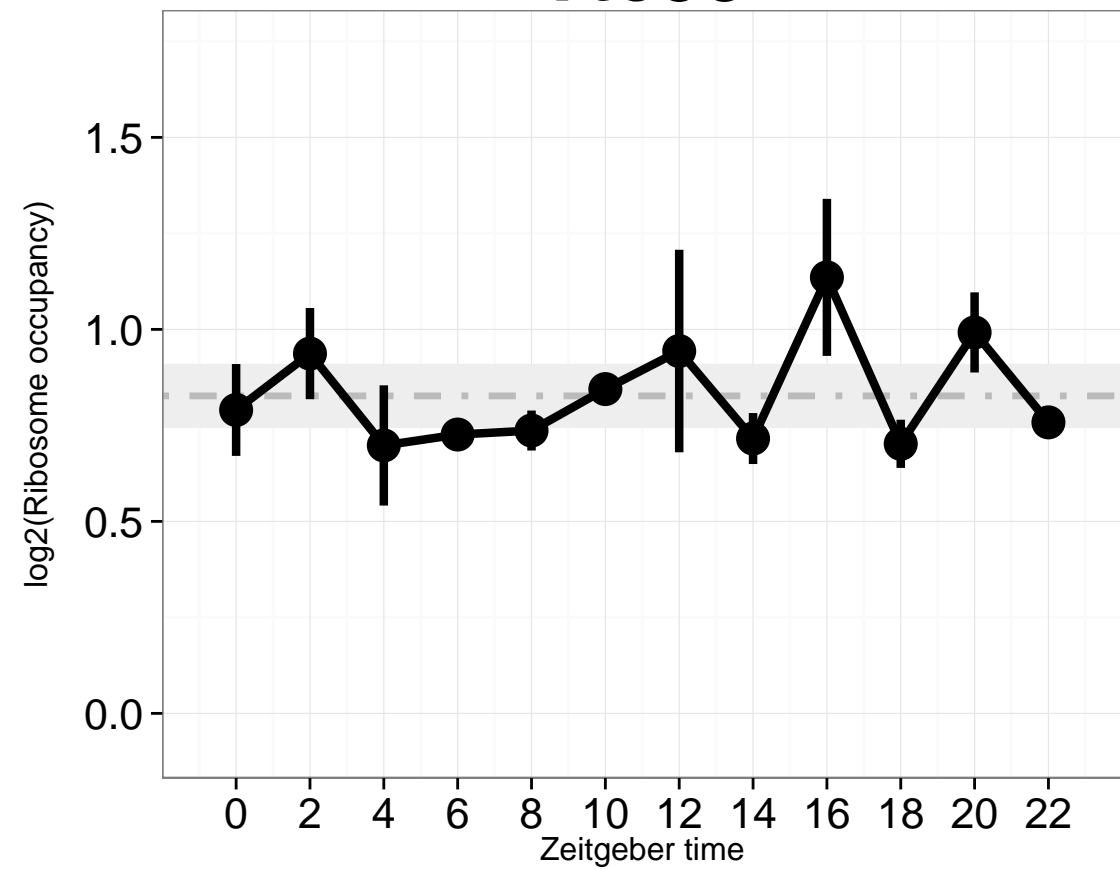

Supplement: Supplementary file 807 [file 1]

# Tmem206

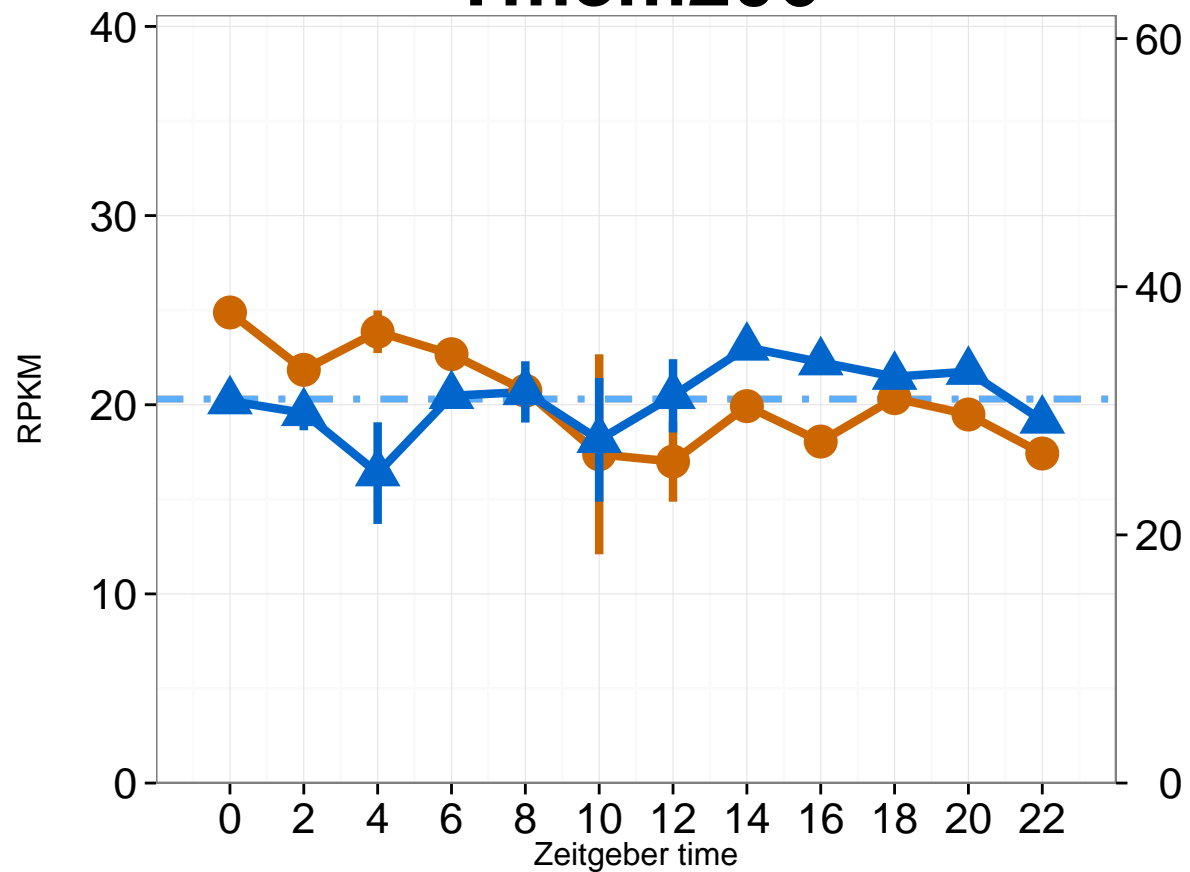

# Tmem206

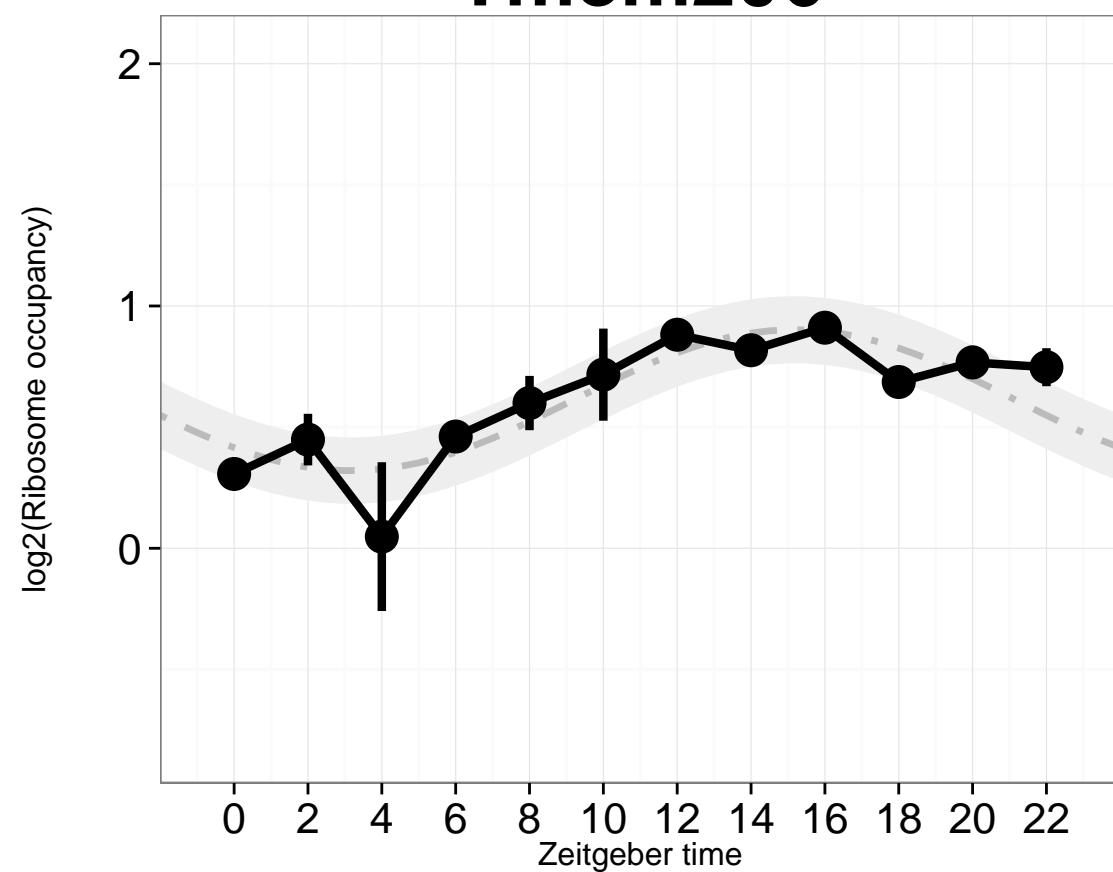

Supplement: Supplementary file 808 [file 1]

## Nedd4l

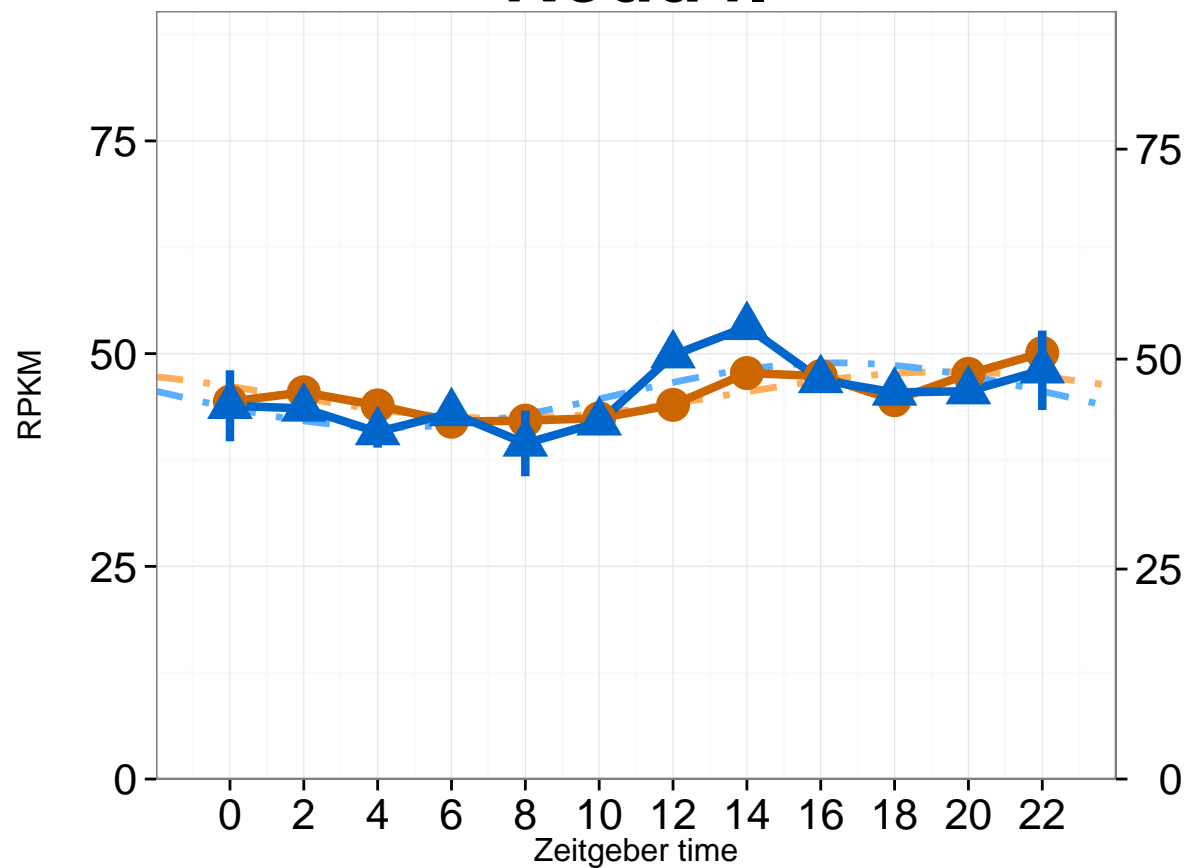

## Nedd4l

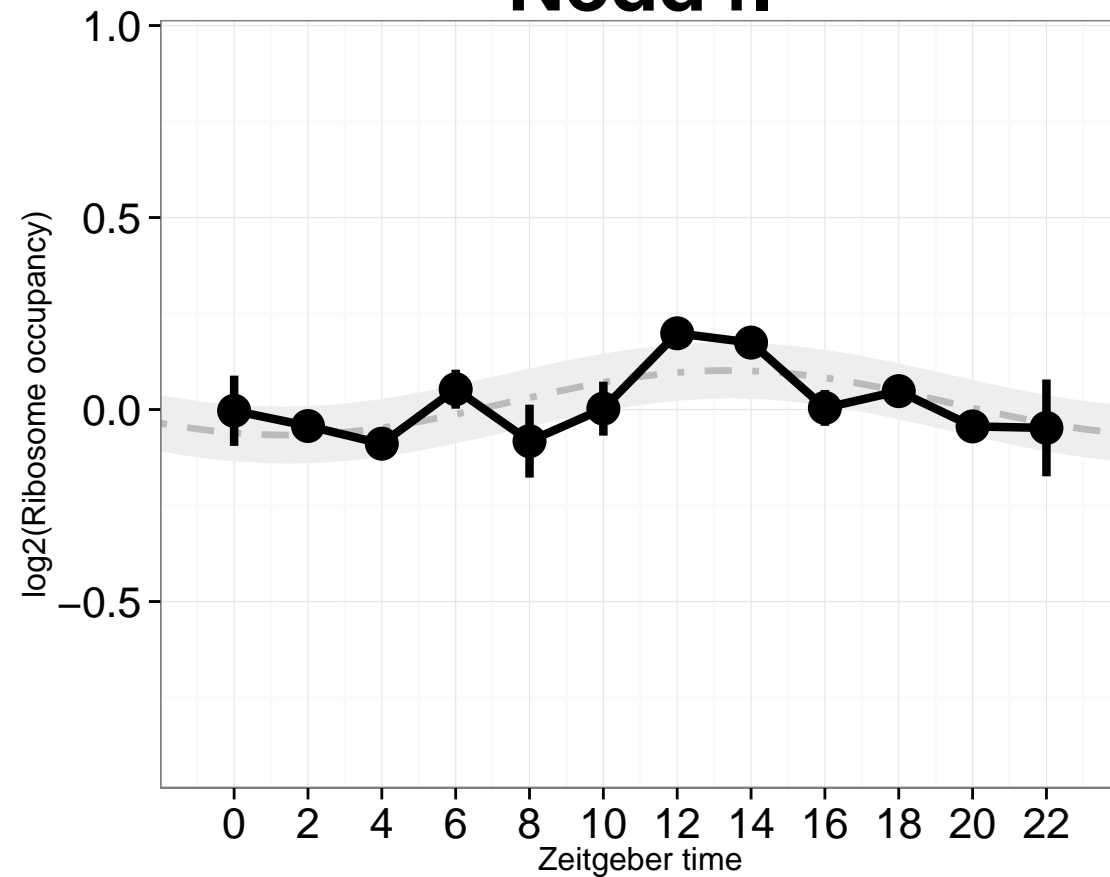

Supplement: Supplementary file 809 [file 1]

# Bend5

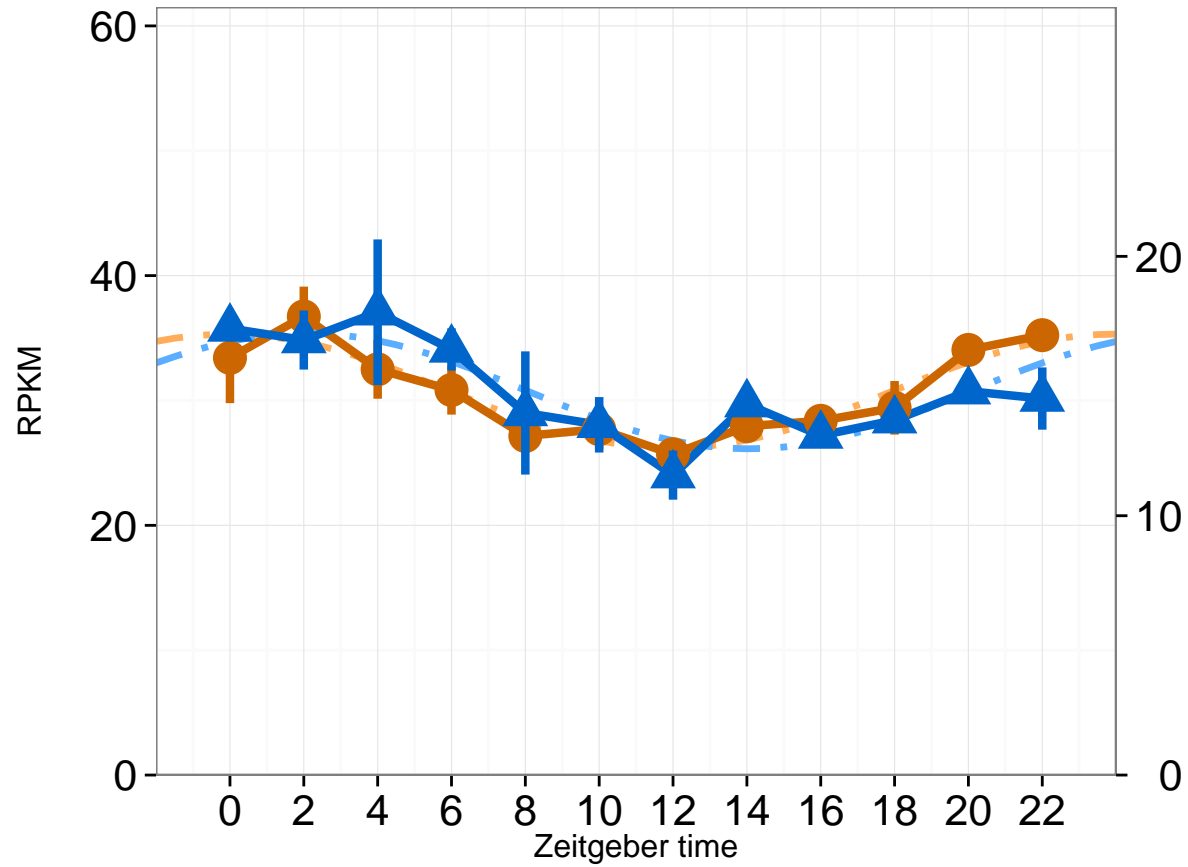

# Bend5

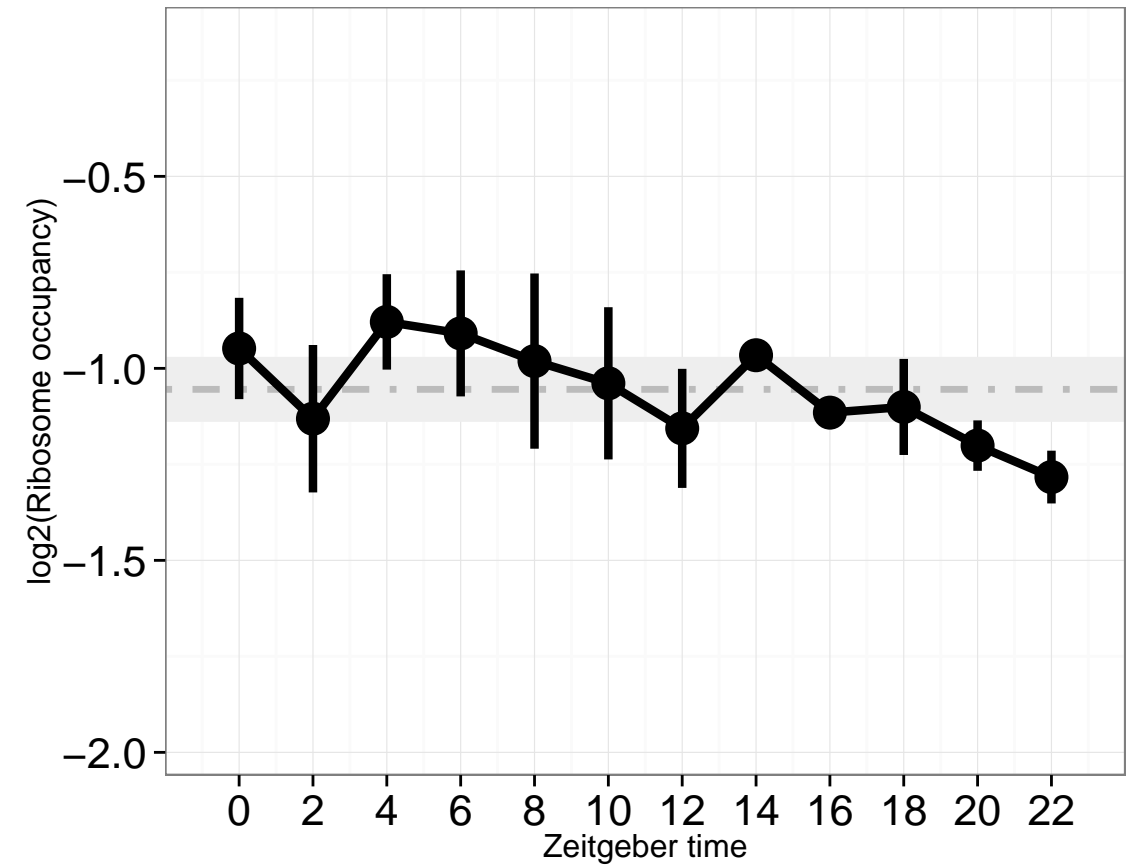

Supplement: Supplementary file 810 [file 1]

## Mbd3

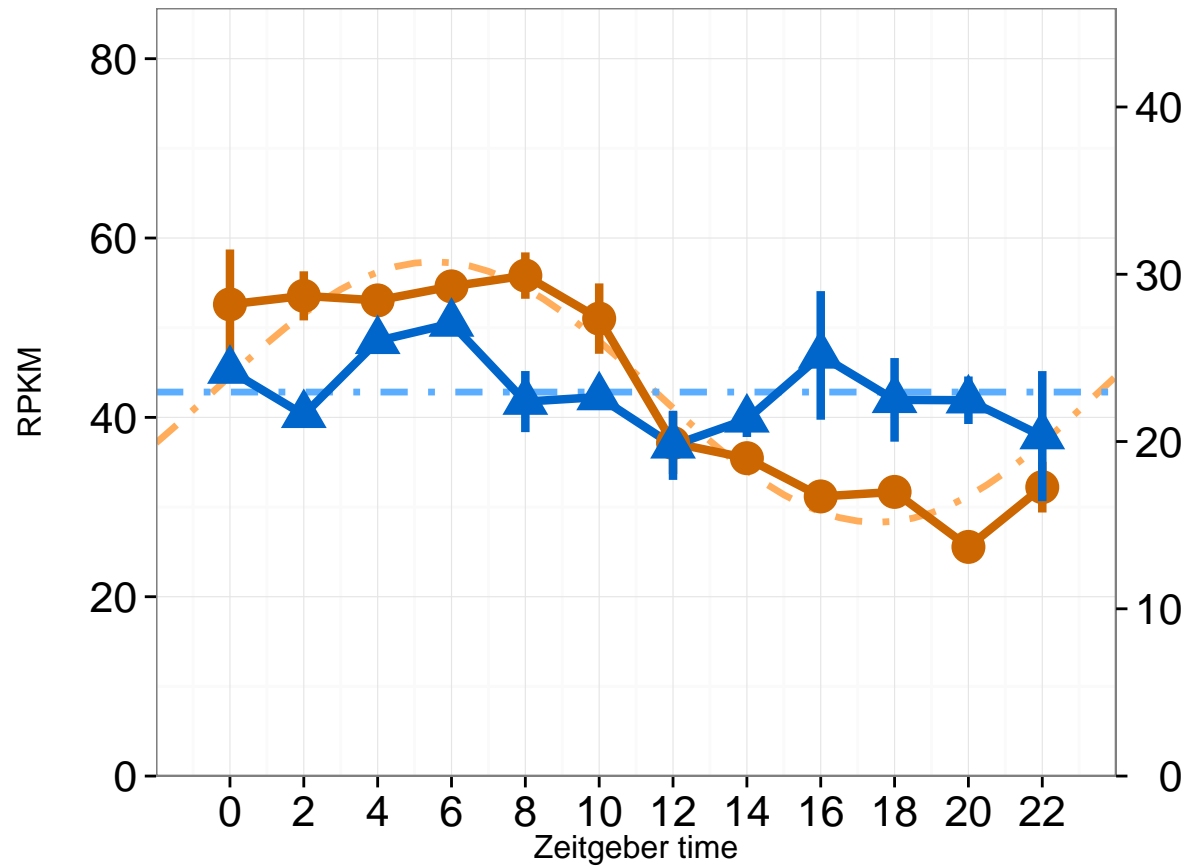

## Mbd3

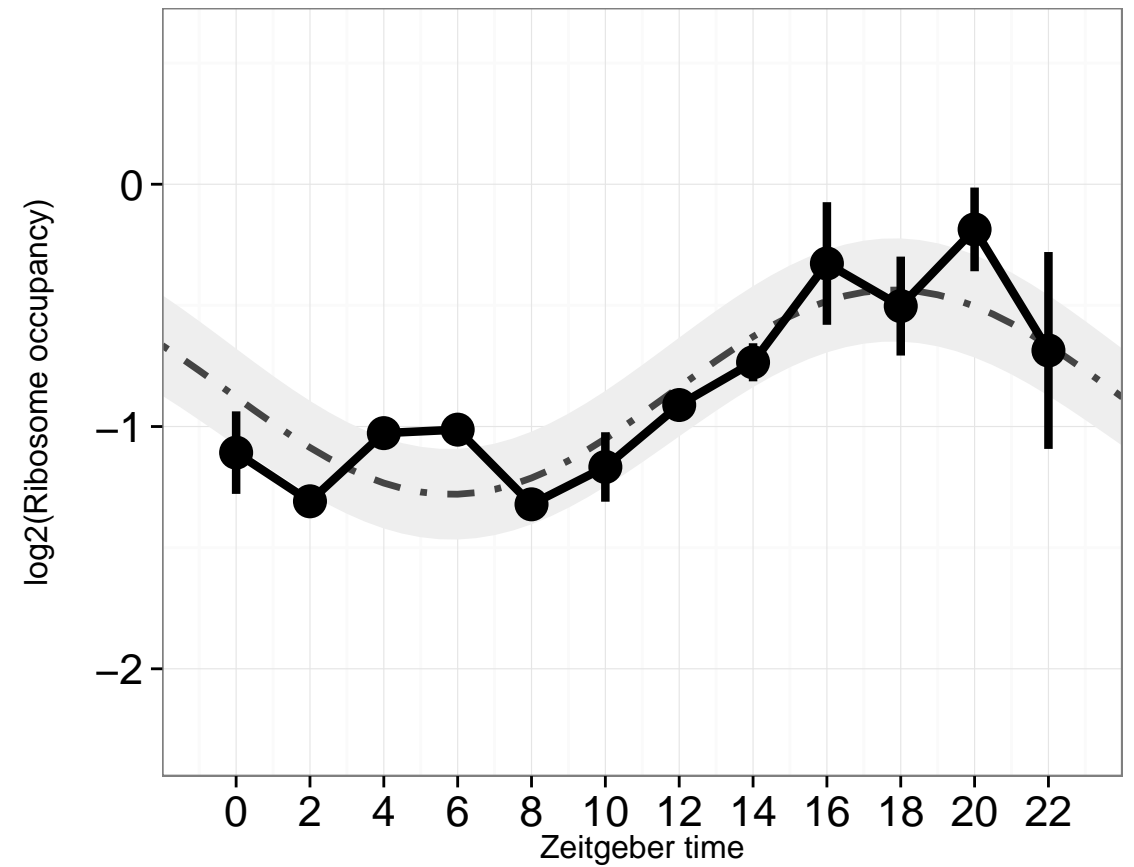

Supplement: Supplementary file 811 [file 1]

## Arhgap25

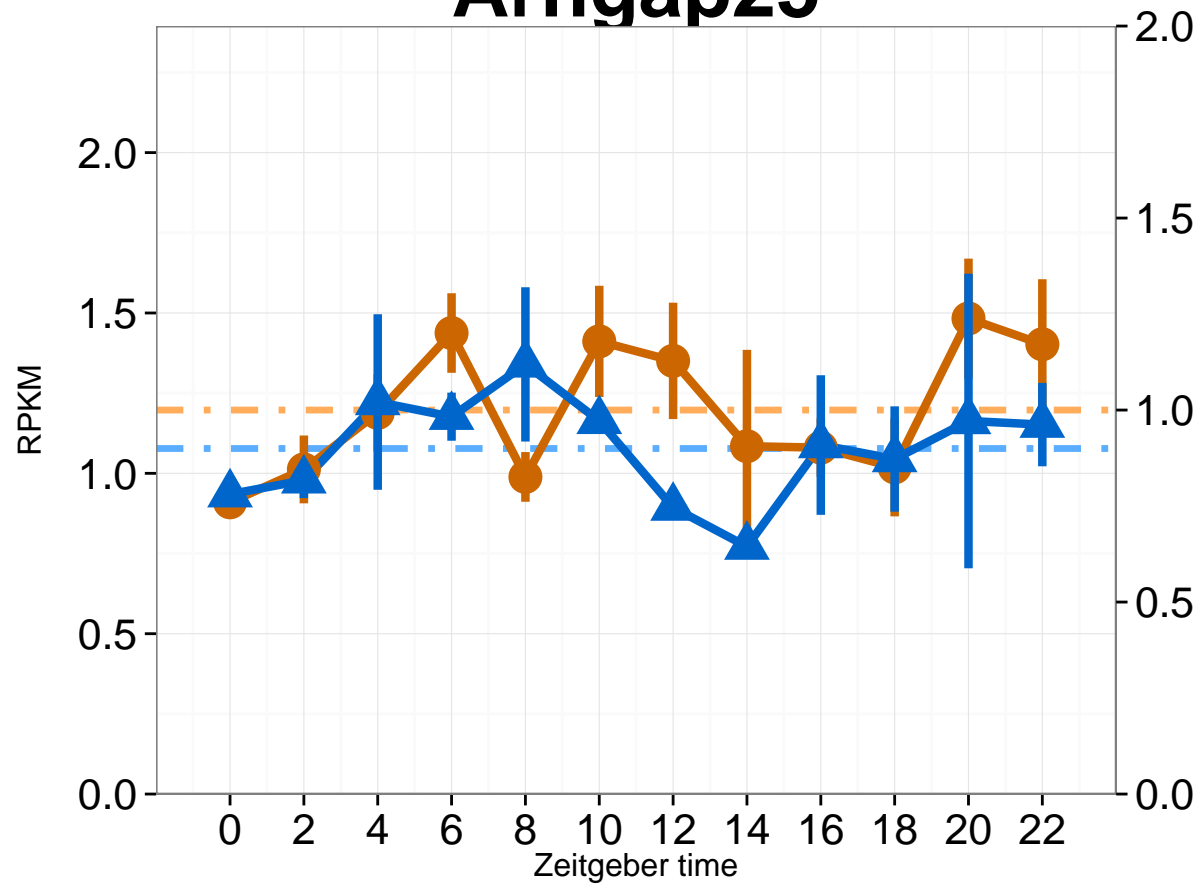

## Arhgap25

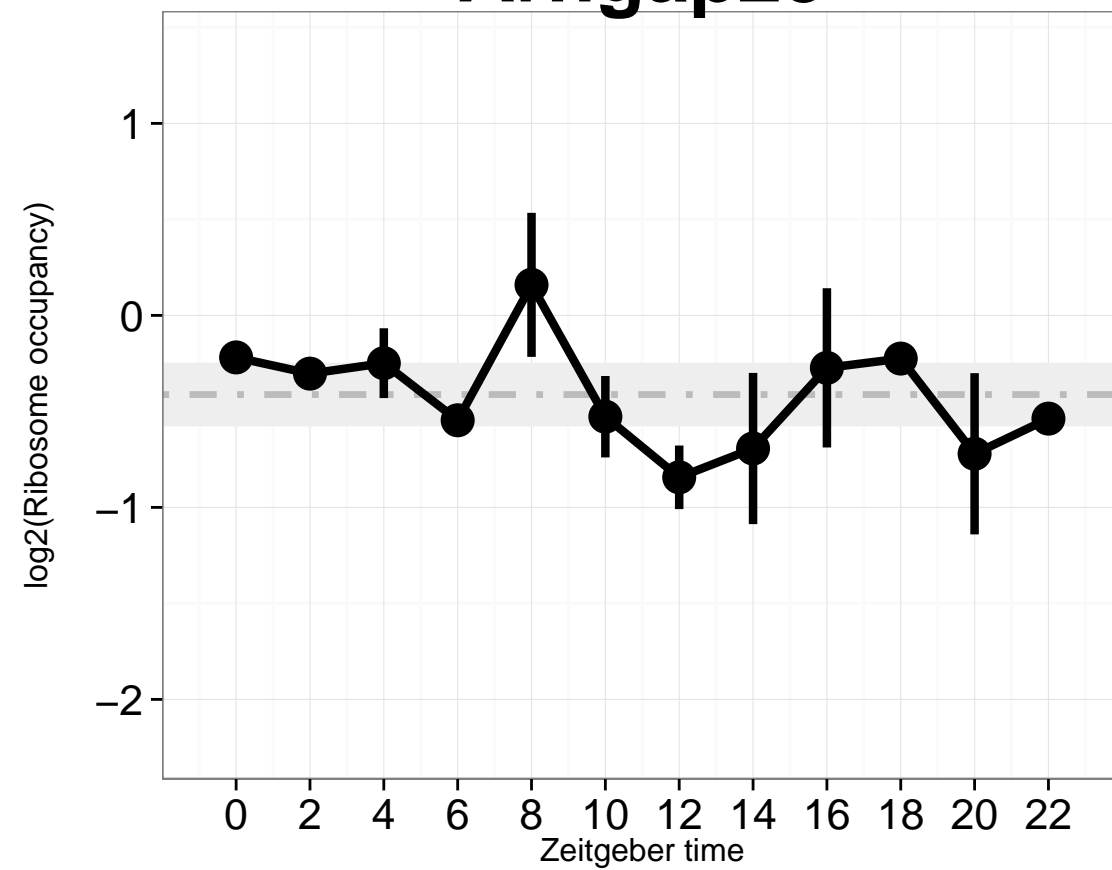

Supplement: Supplementary file 812 [file 1]

# Igsf6

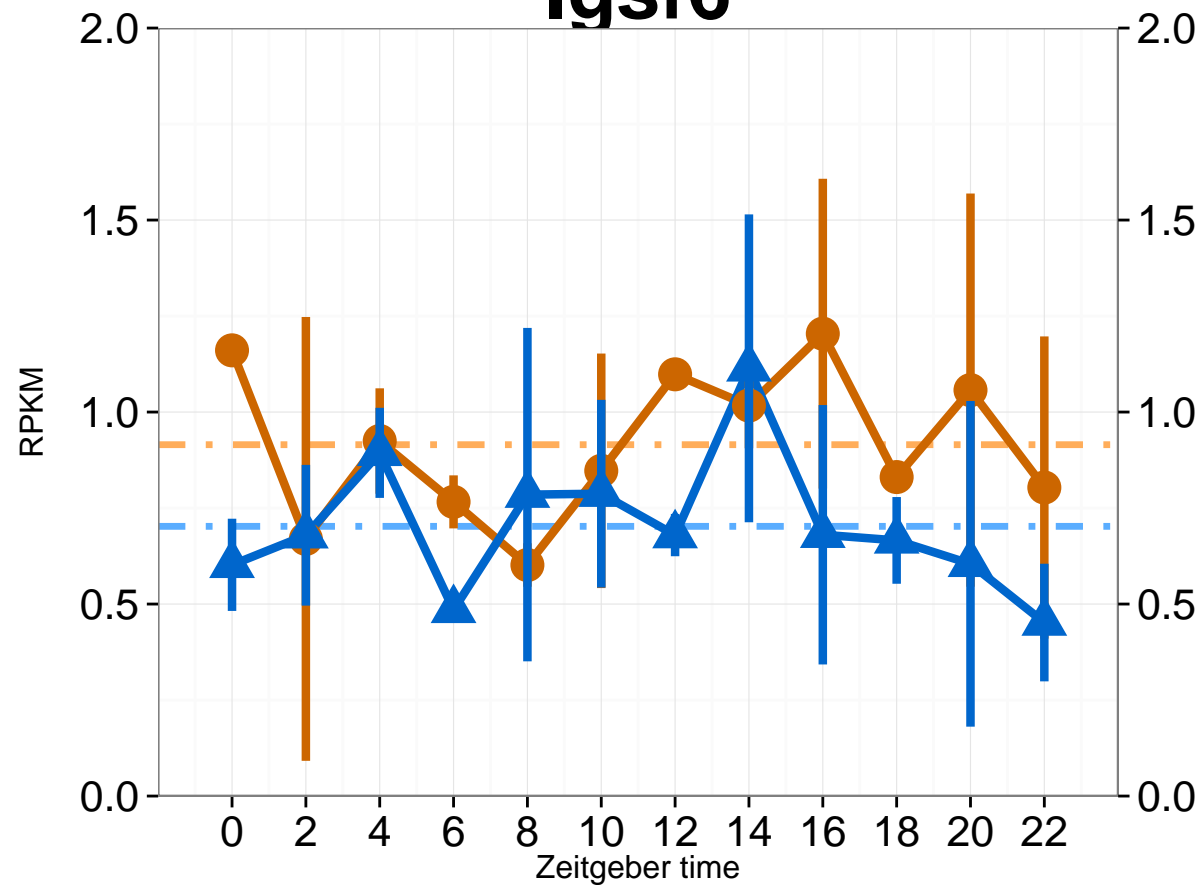

# Igsf6

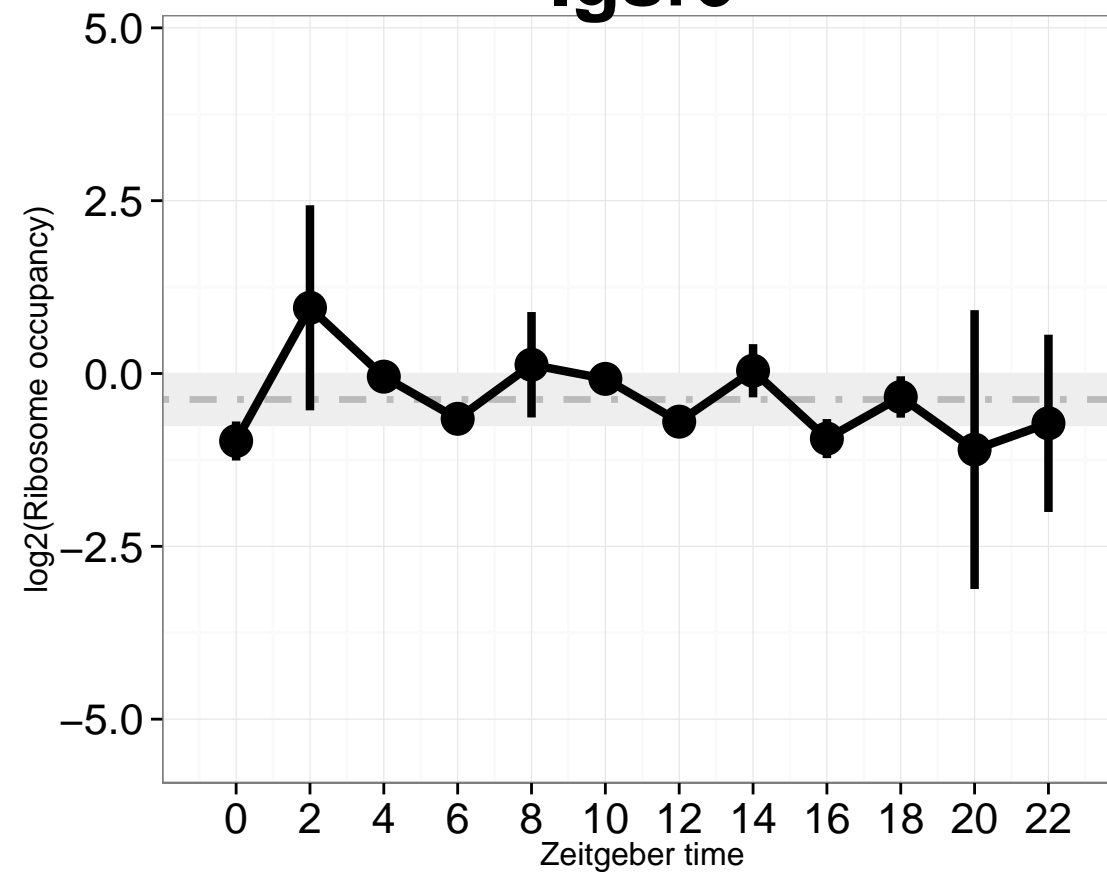

Supplement: Supplementary file 813 [file 1]

## Snrpa

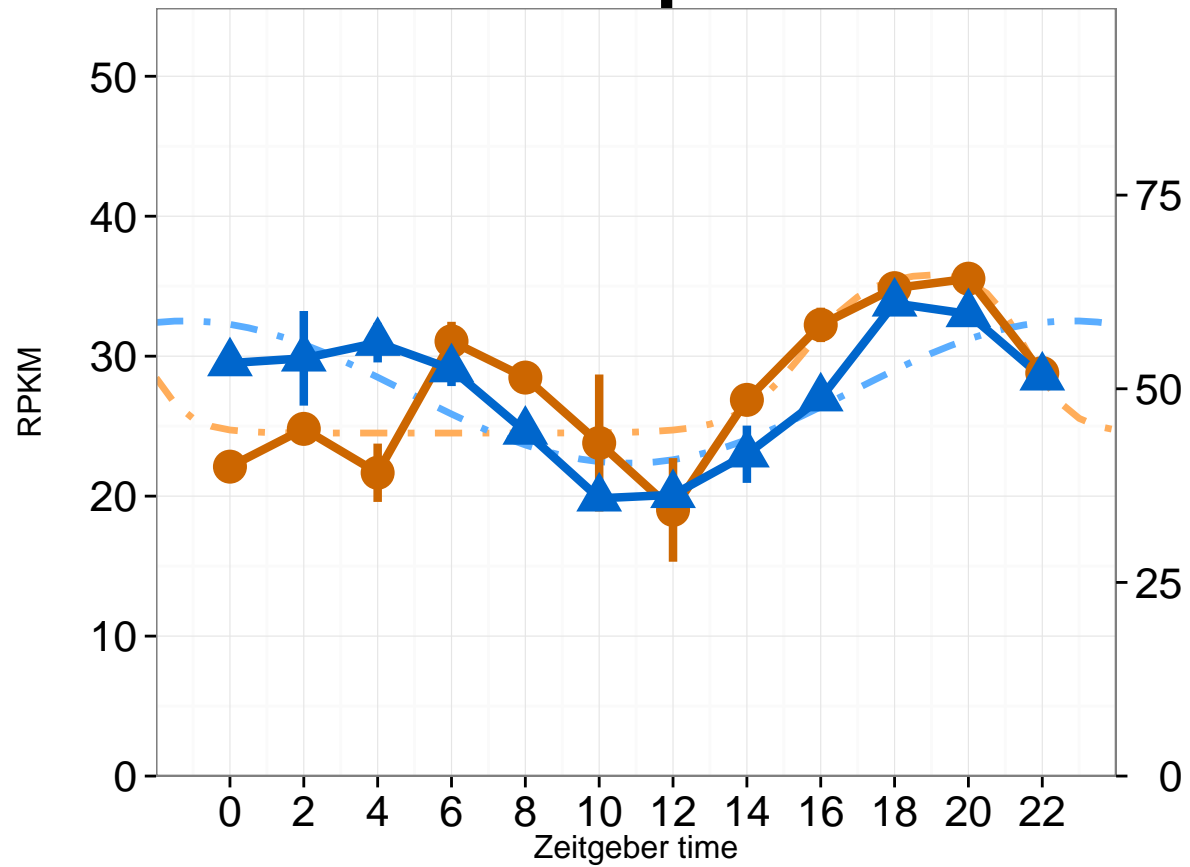

## Snrpa

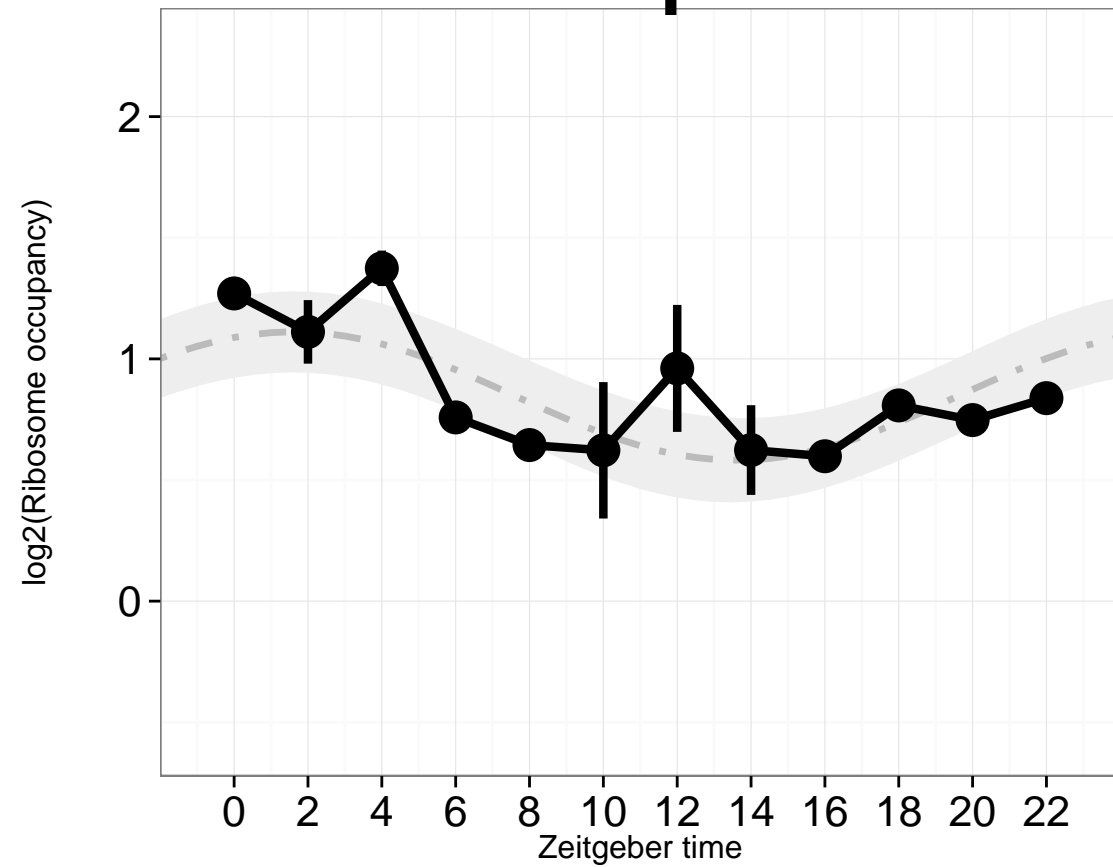

Supplement: Supplementary file 814 [file 1]

## Cln3

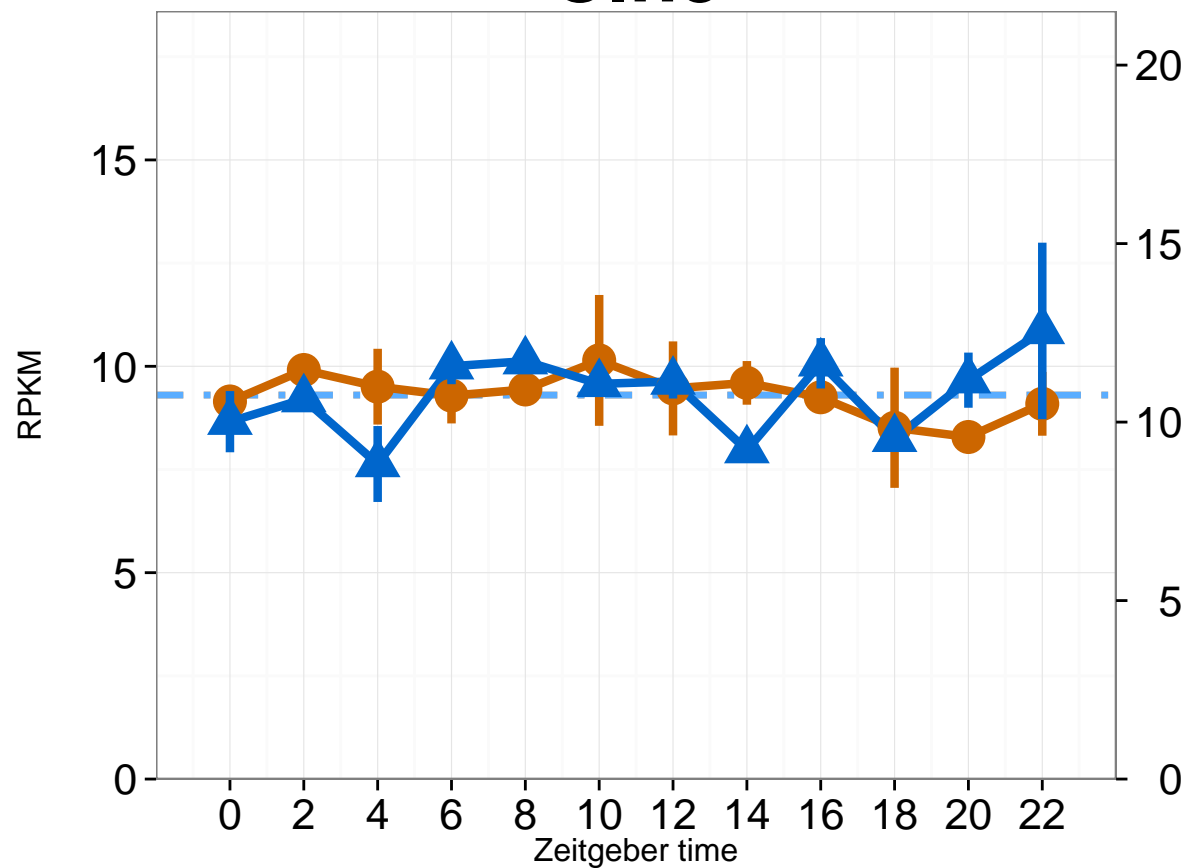

## Cln3

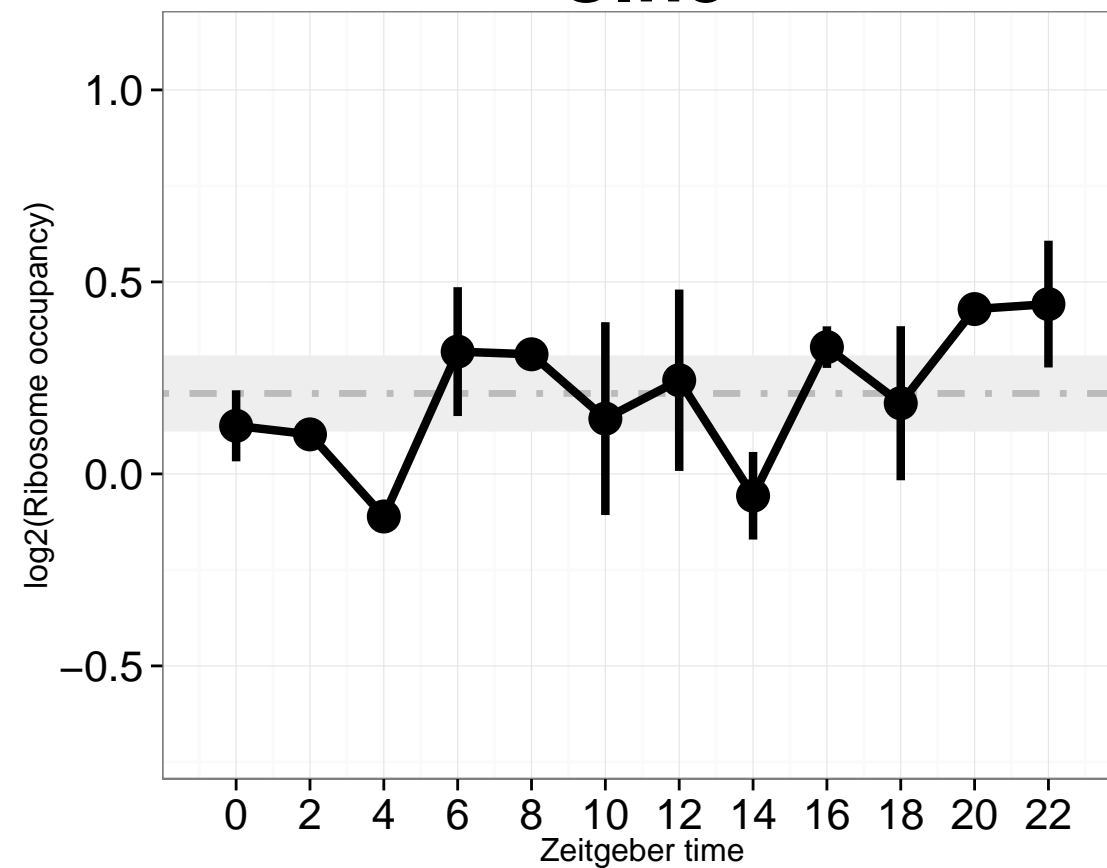

Supplement: Supplementary file 815 [file 1]

## Bap1

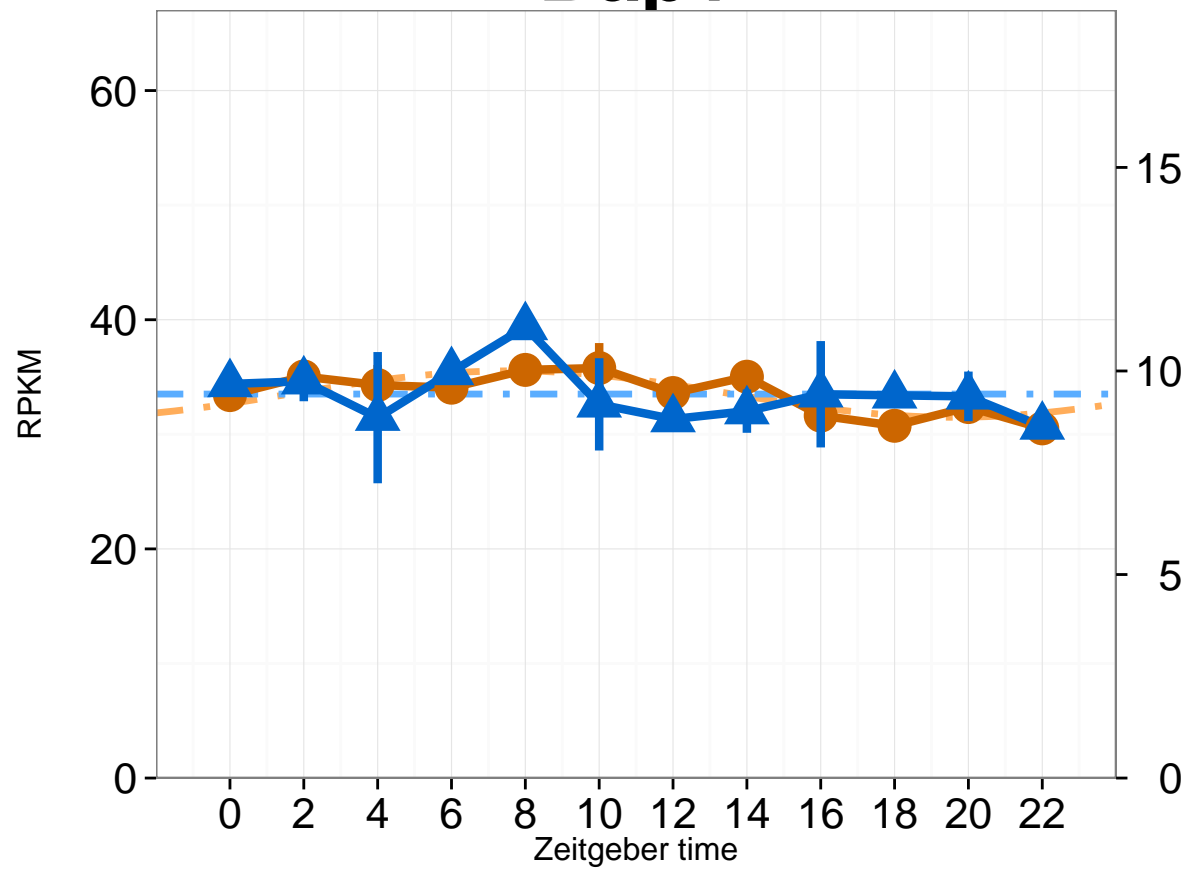

## Bap1

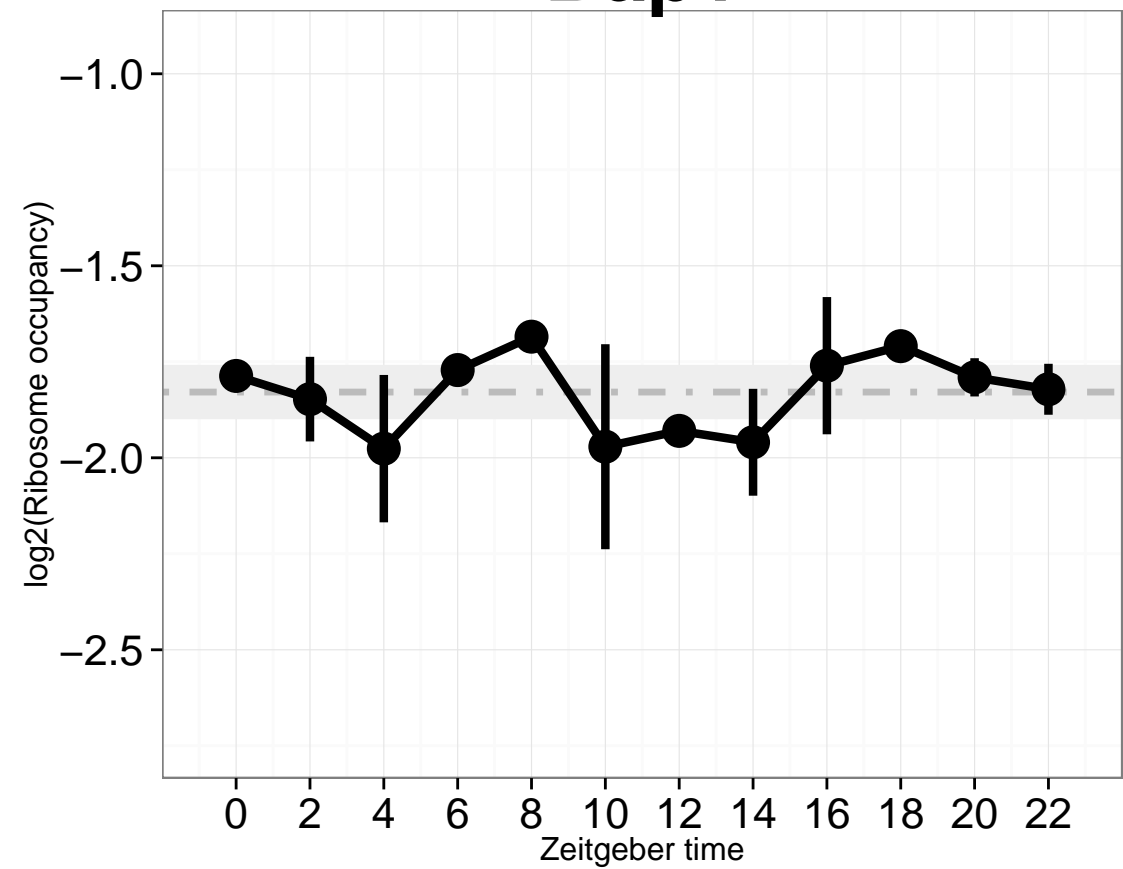

Supplement: Supplementary file 816 [file 1]

## Chpf

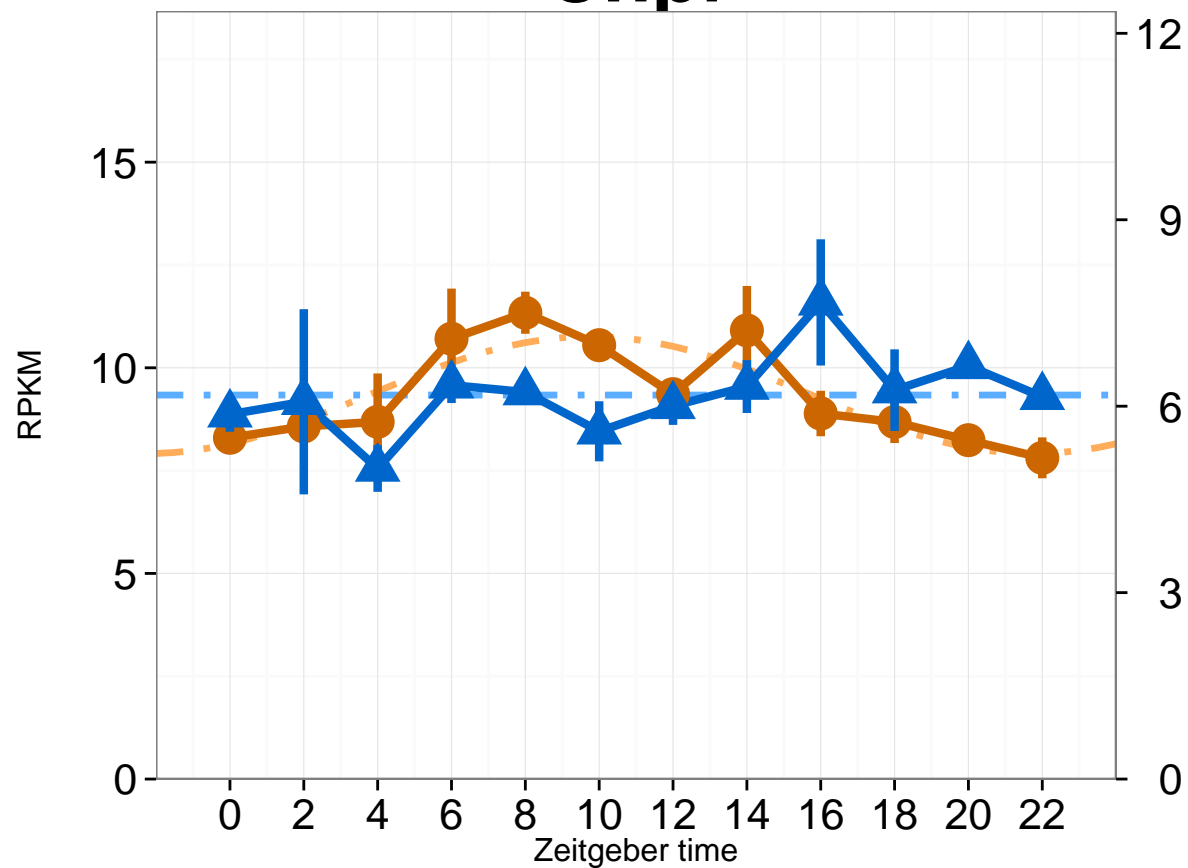

## Chpf

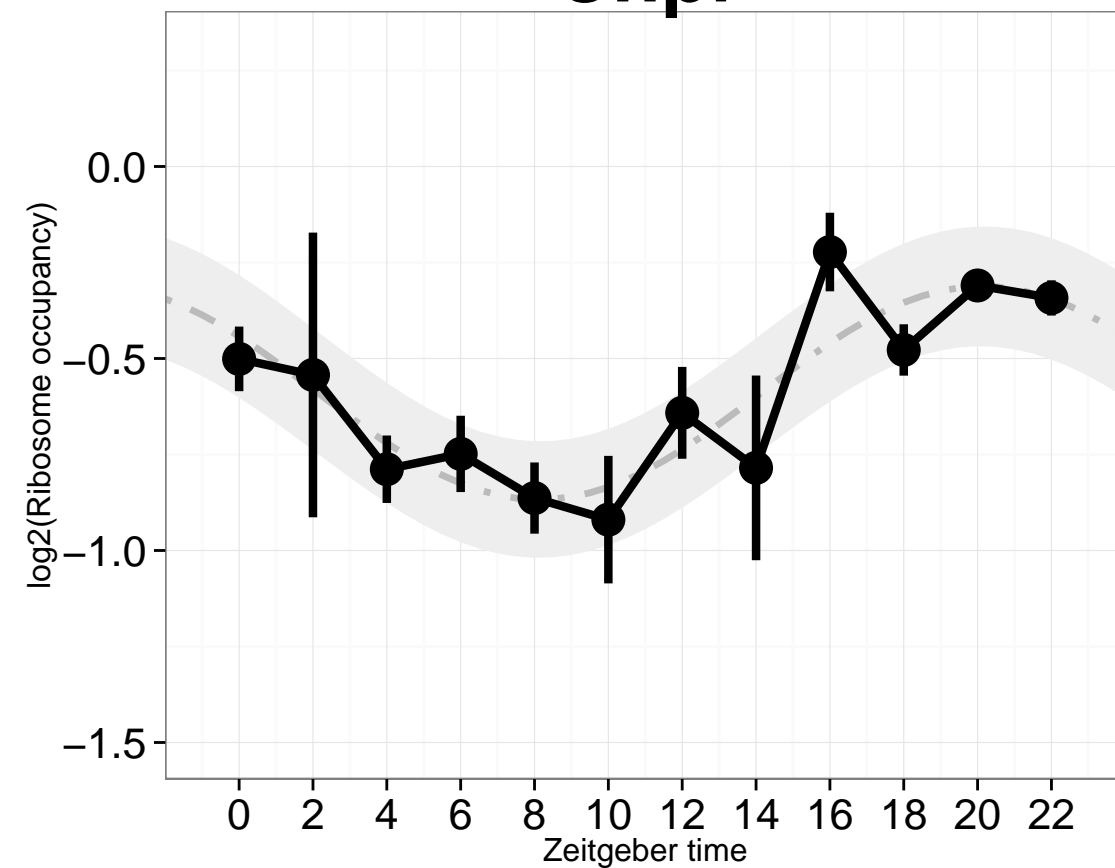

Supplement: Supplementary file 817 [file 1]

## Abhd2

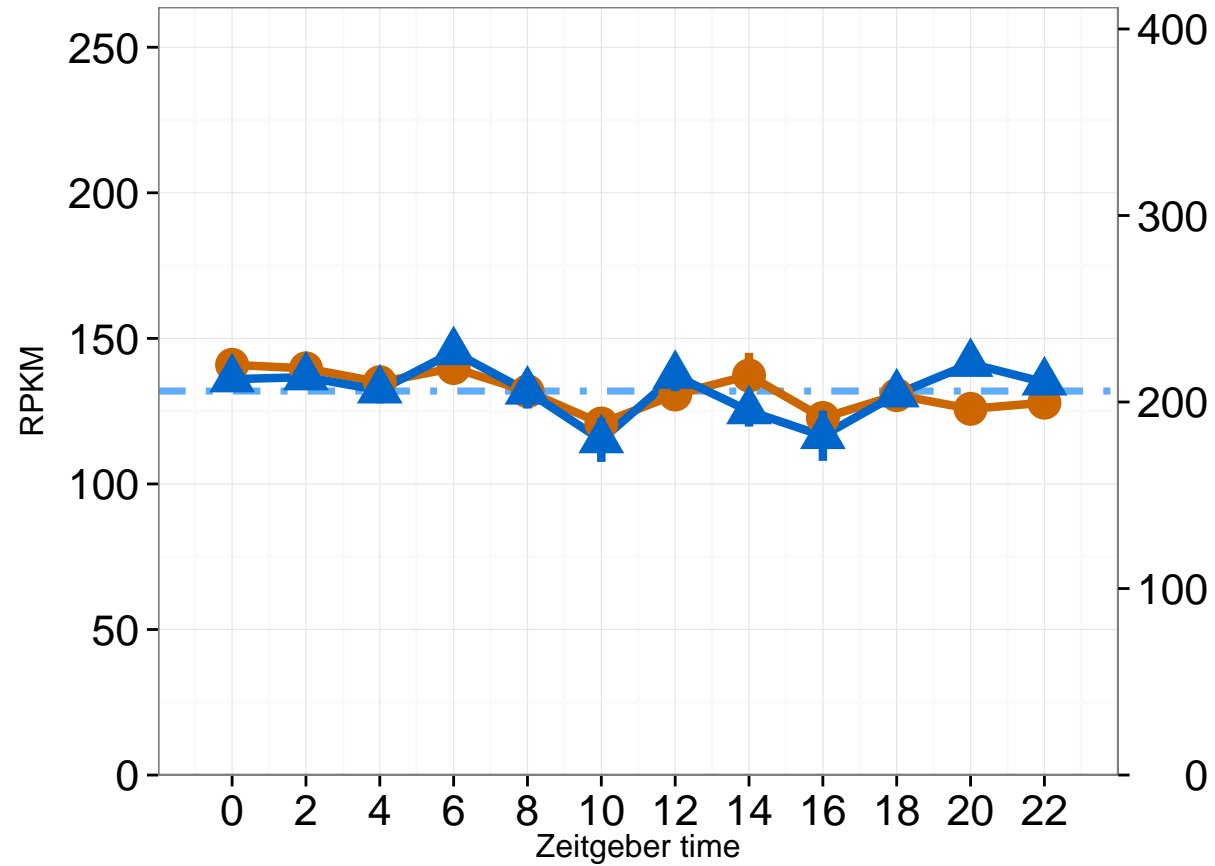

## Abhd2

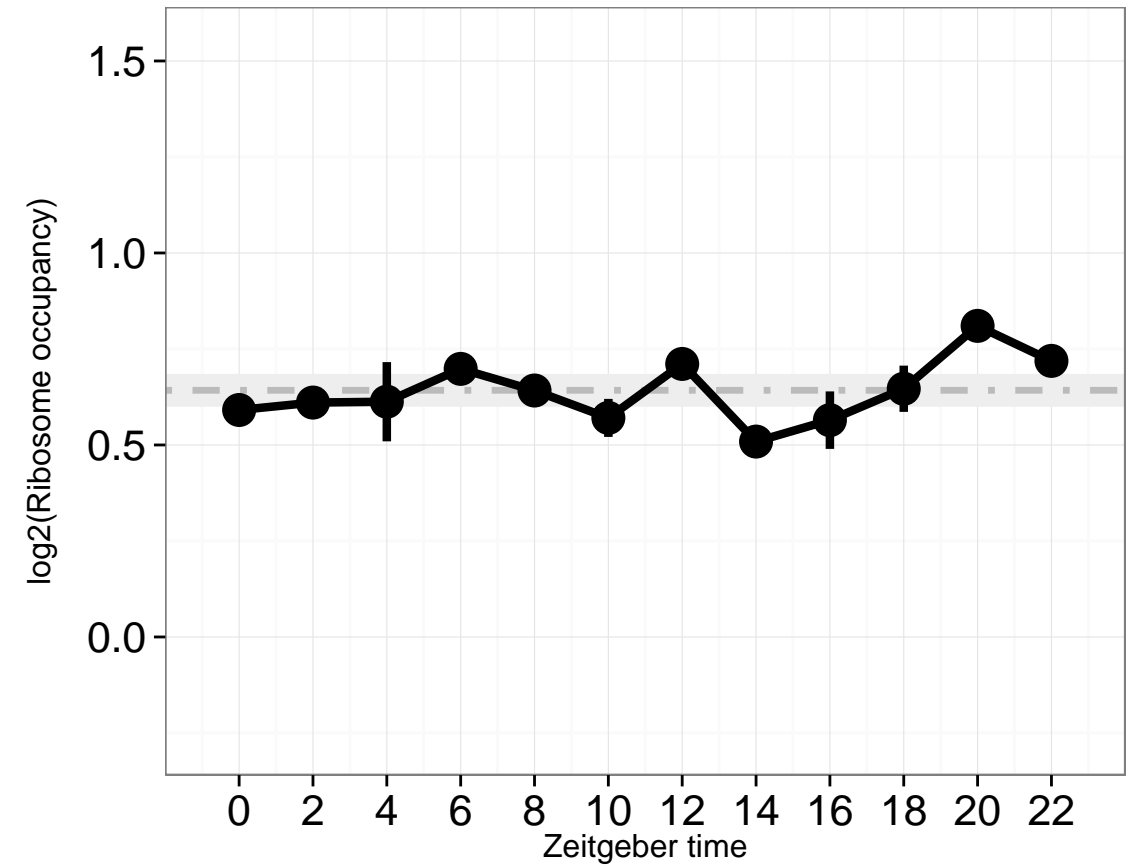

Supplement: Supplementary file 818 [file 1]

# Raph1

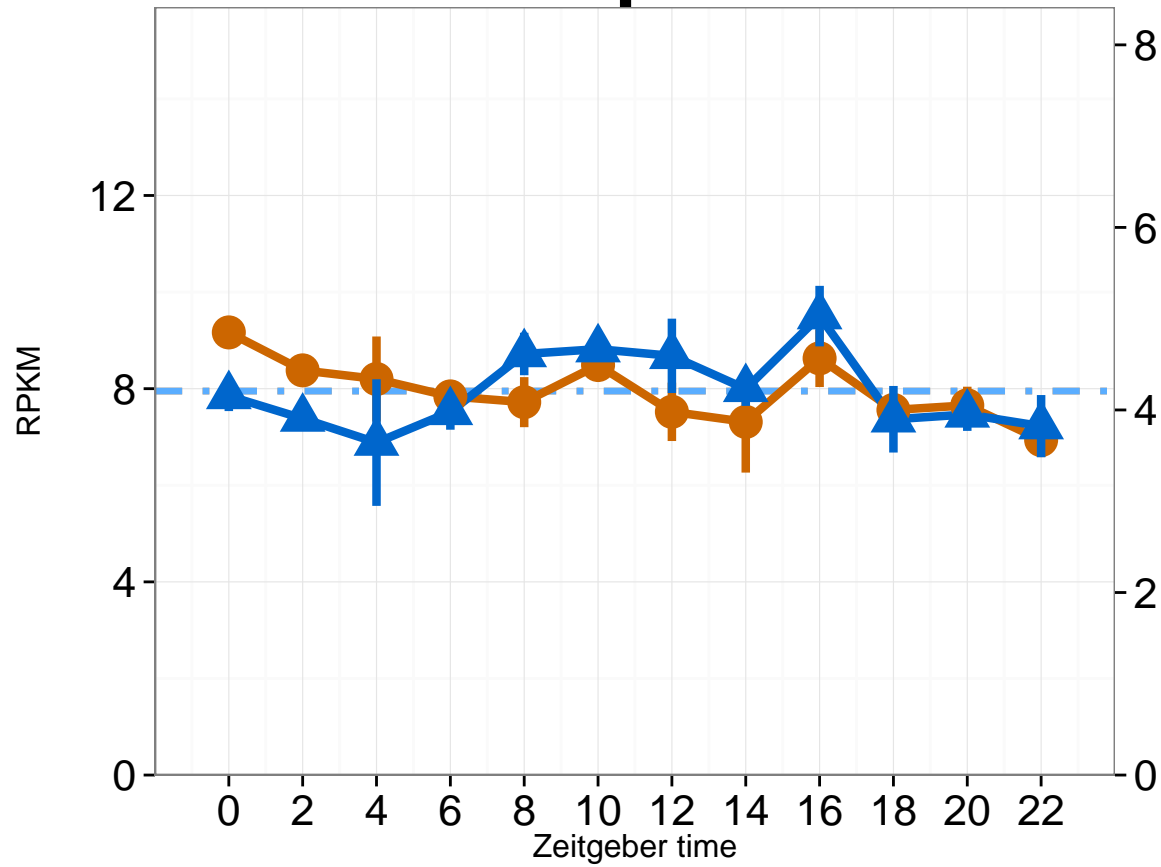

# Raph1

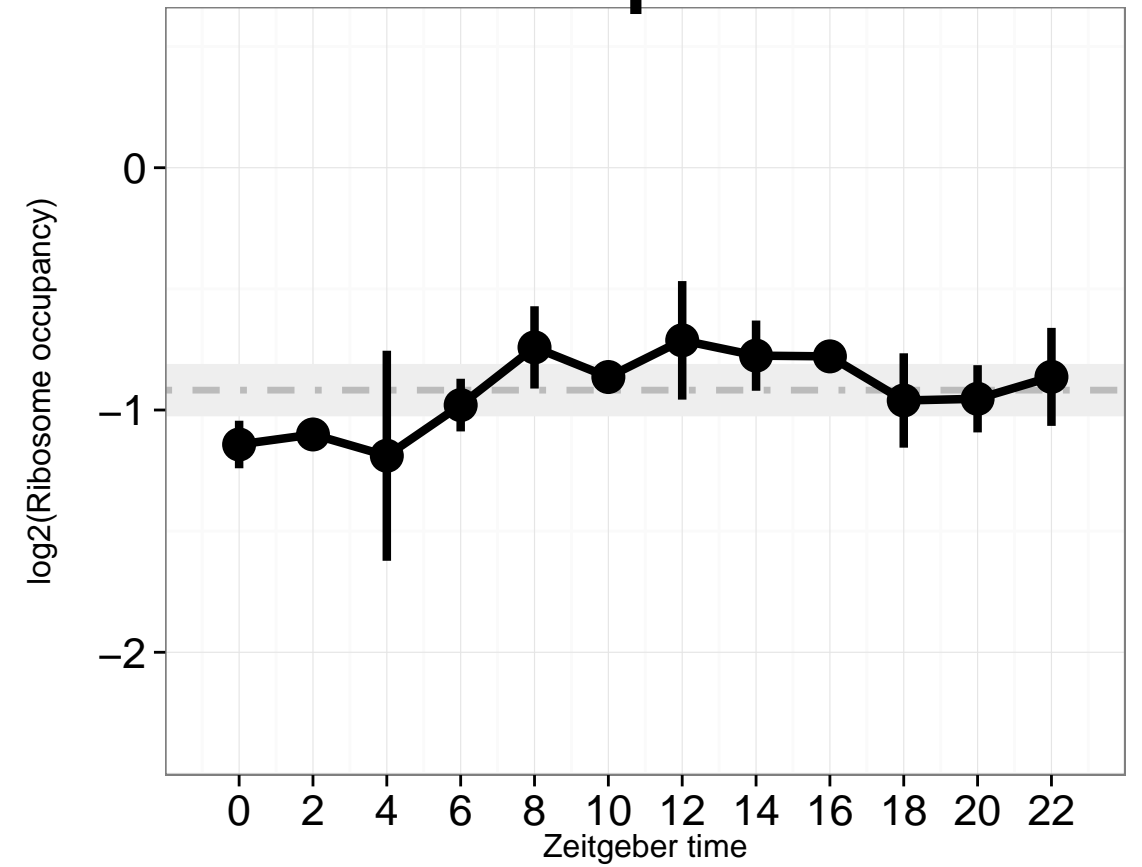

Supplement: Supplementary file 819 [file 1]

# Kcnn2

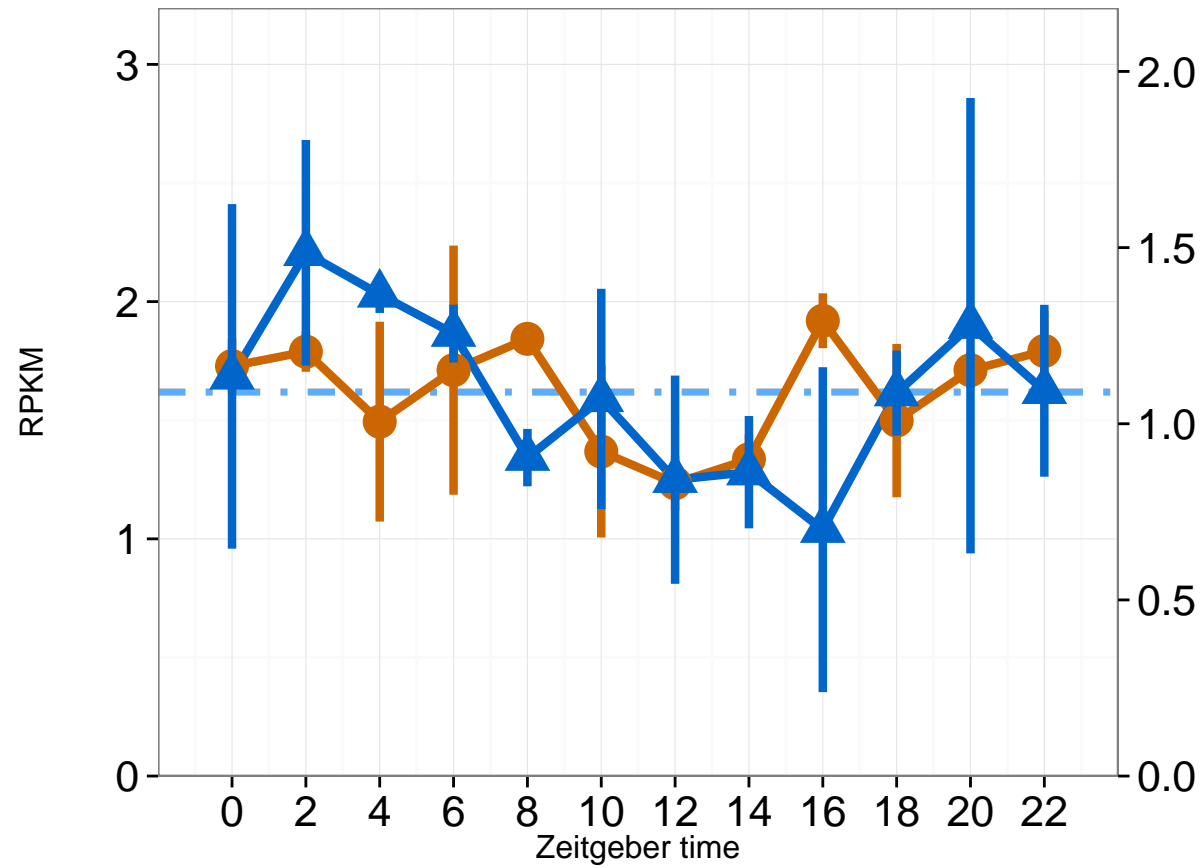

# Kcnn2

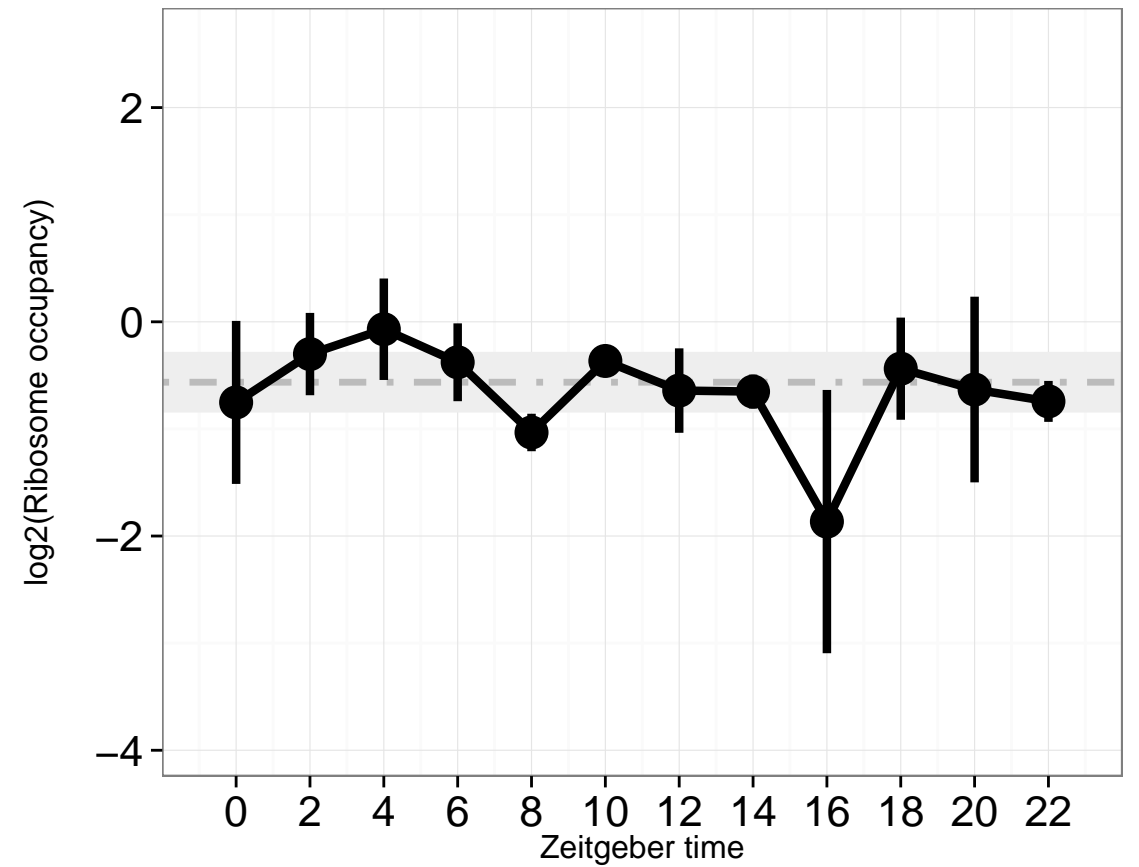

Supplement: Supplementary file 820 [file 1]

# Hoxc6

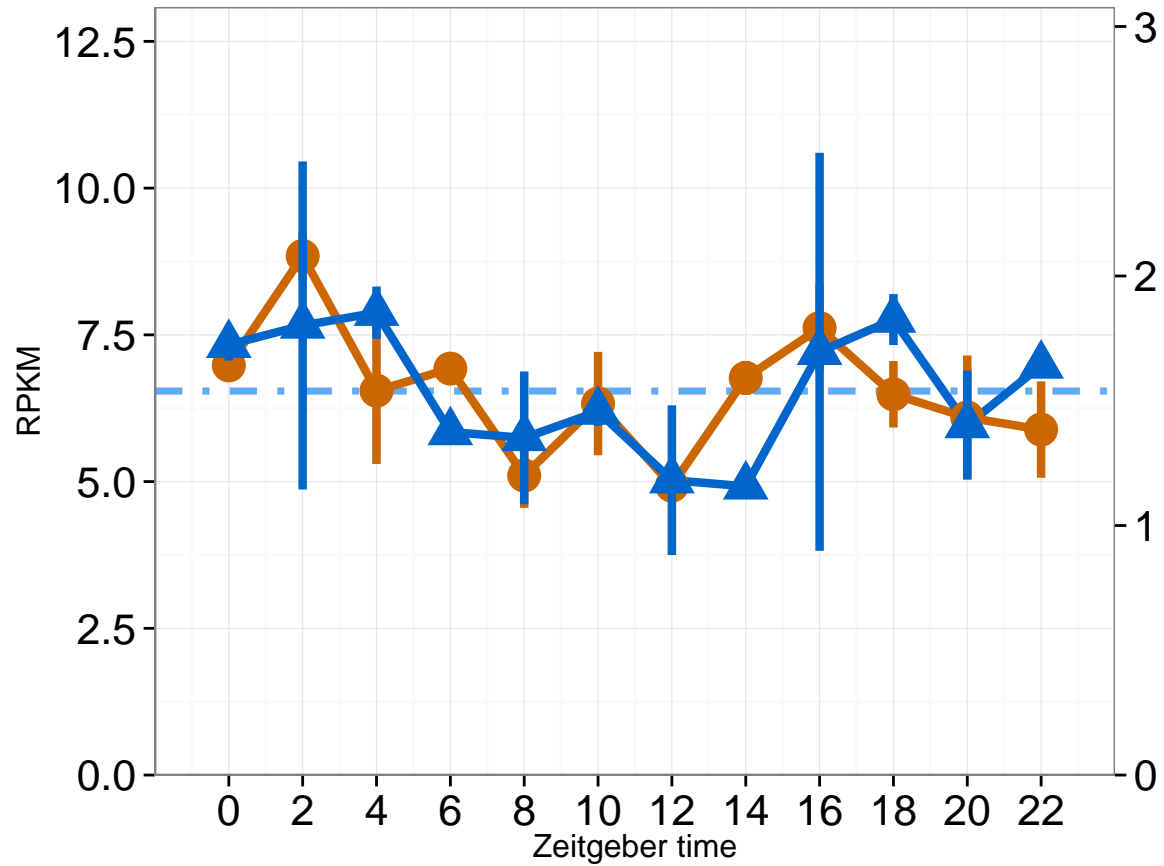

# Hoxc6

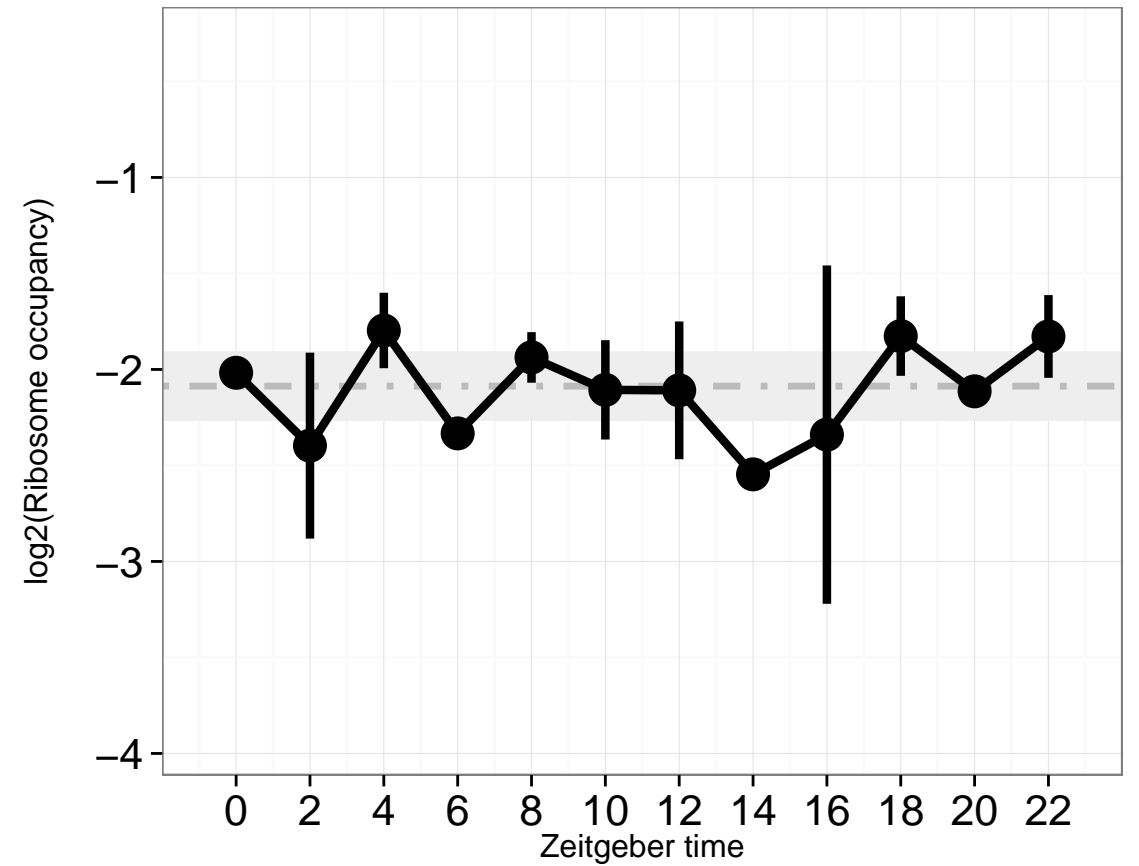

Supplement: Supplementary file 821 [file 1]

## Smad3

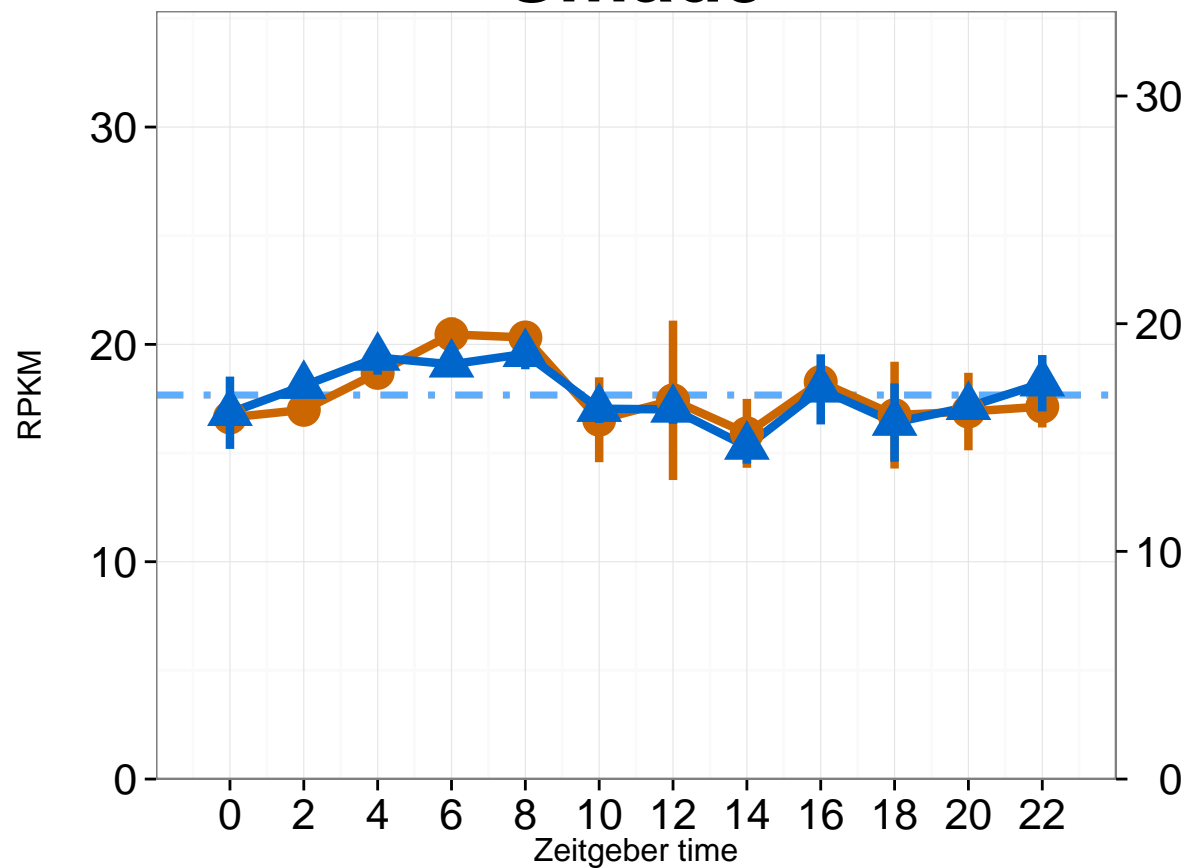

## Smad3

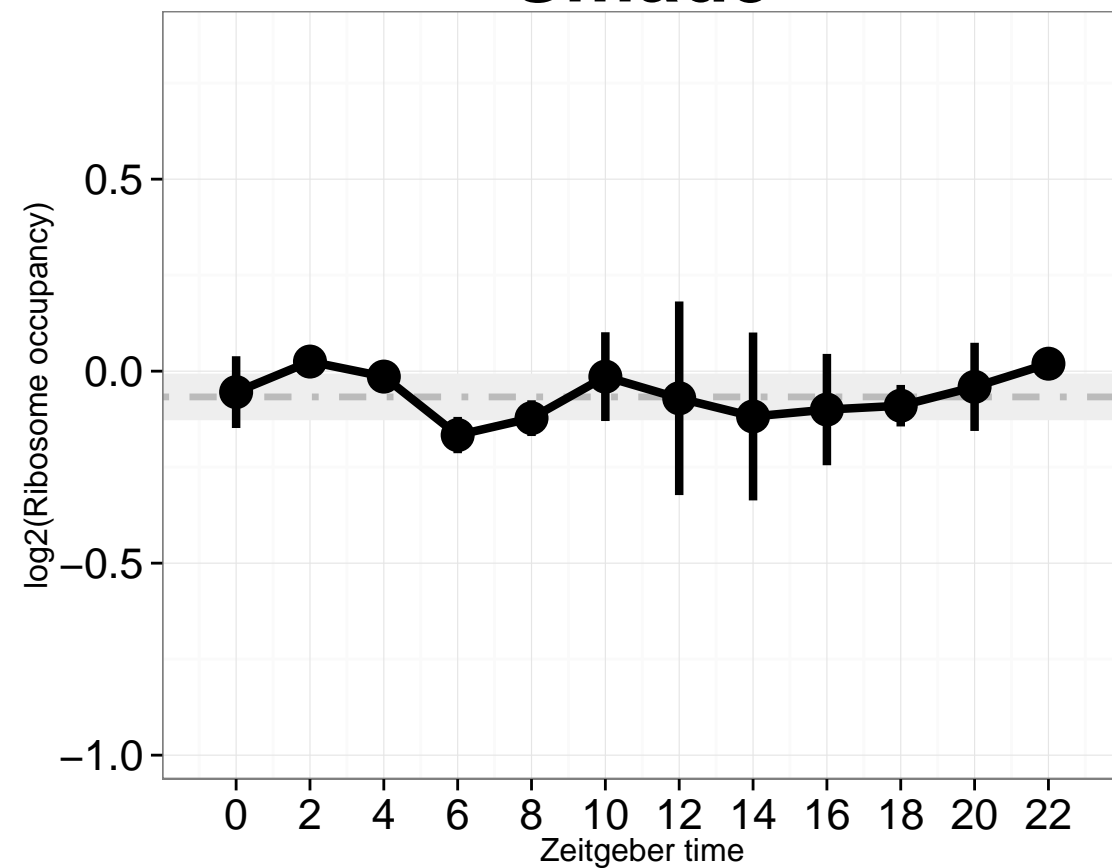

Supplement: Supplementary file 822 [file 1]

# Nipsnap3b

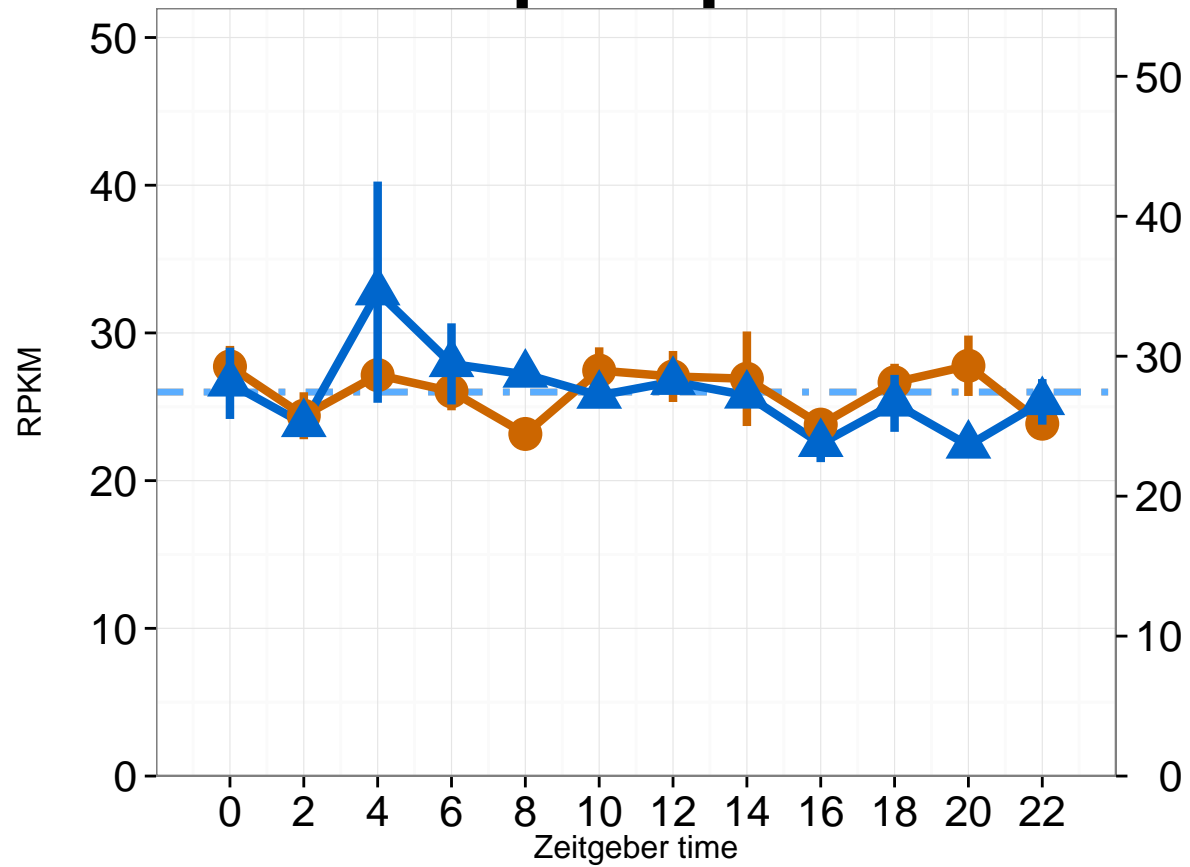

# Nipsnap3b

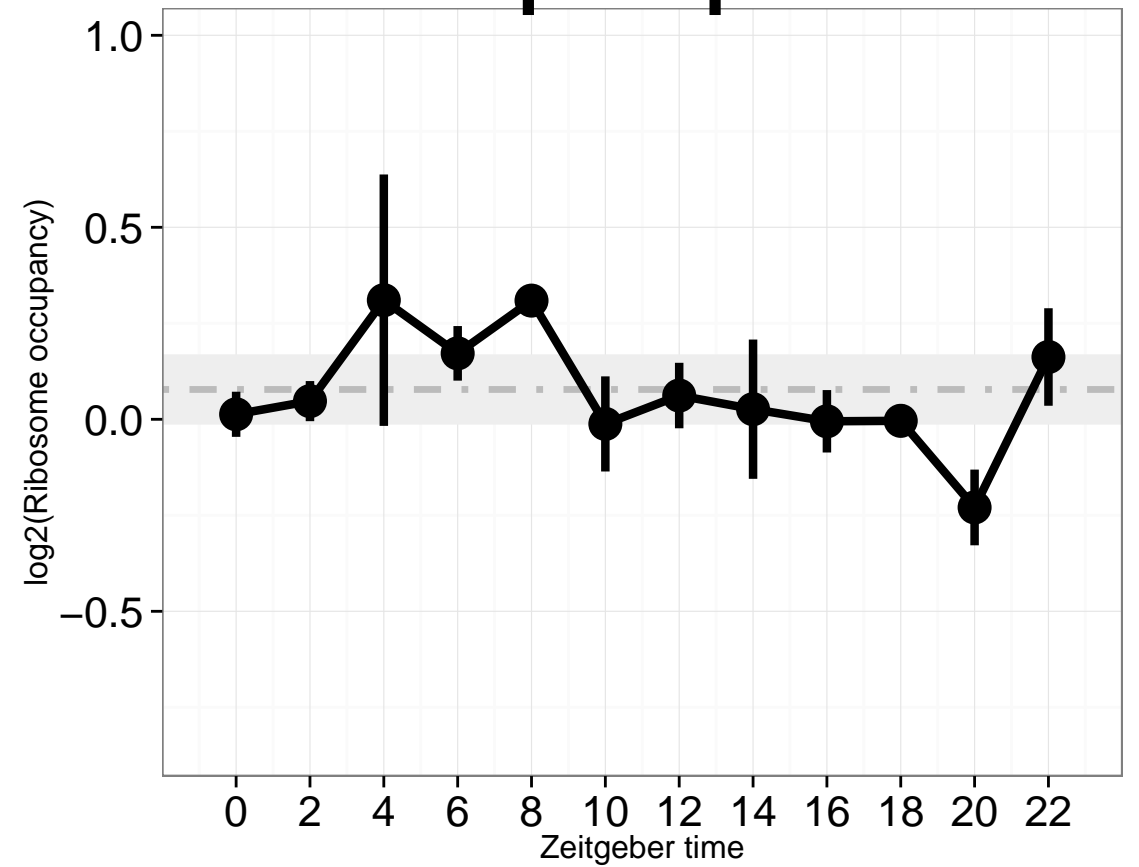

Supplement: Supplementary file 823 [file 1]

# Sfrp2

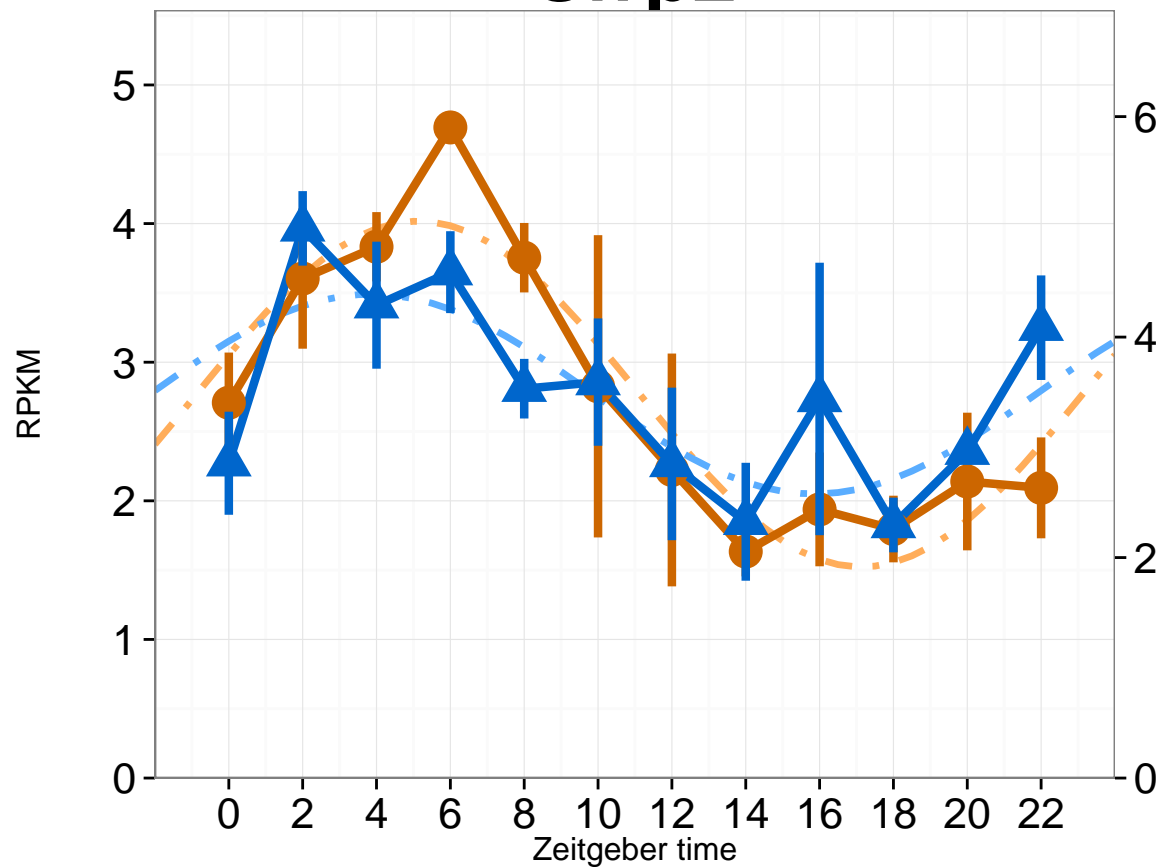

# Sfrp2

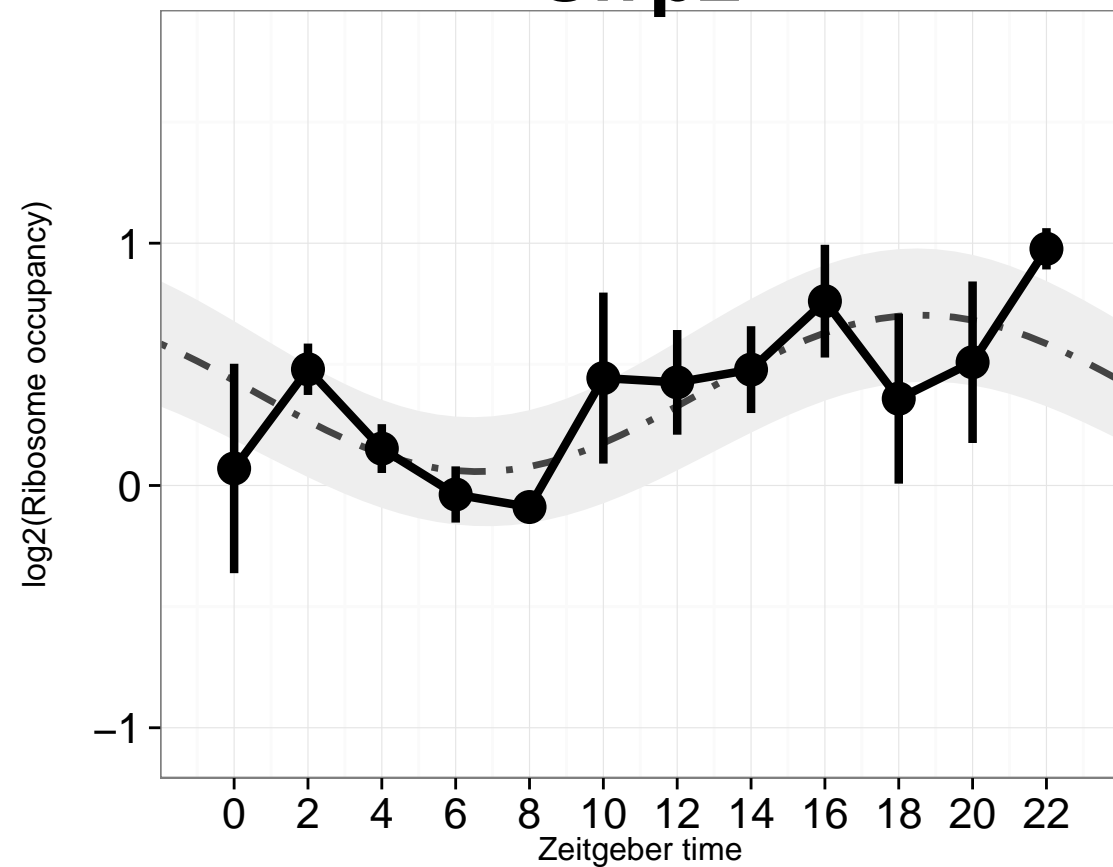

Supplement: Supplementary file 824 [file 1]

## Snap29

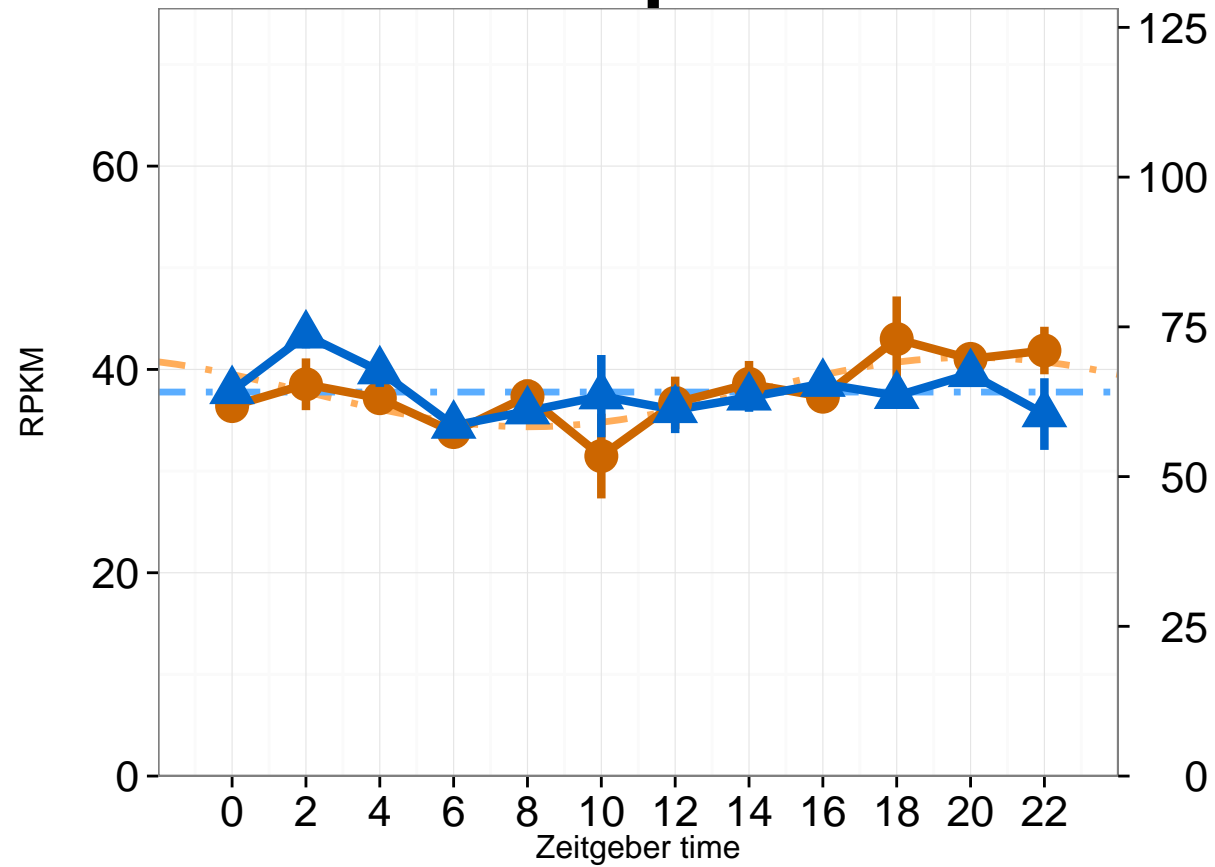

## Snap29

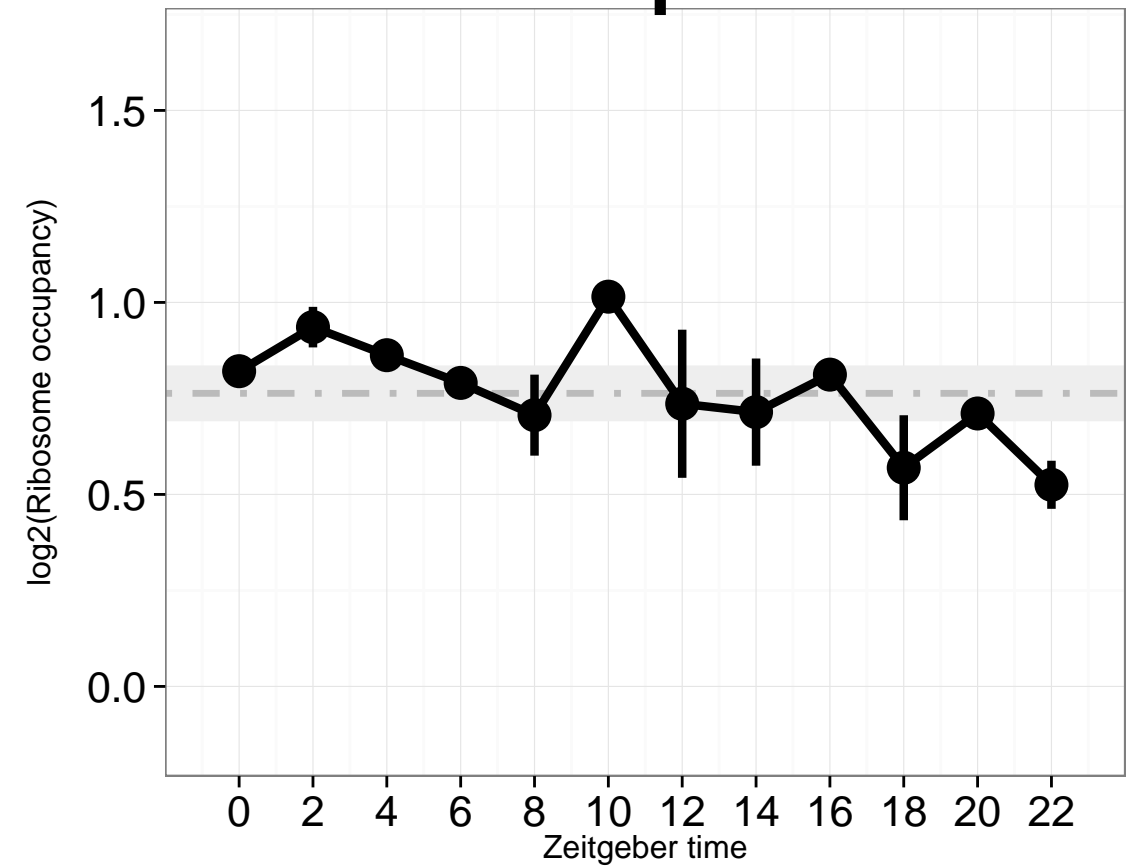

Supplement: Supplementary file 825 [file 1]

## Mlx

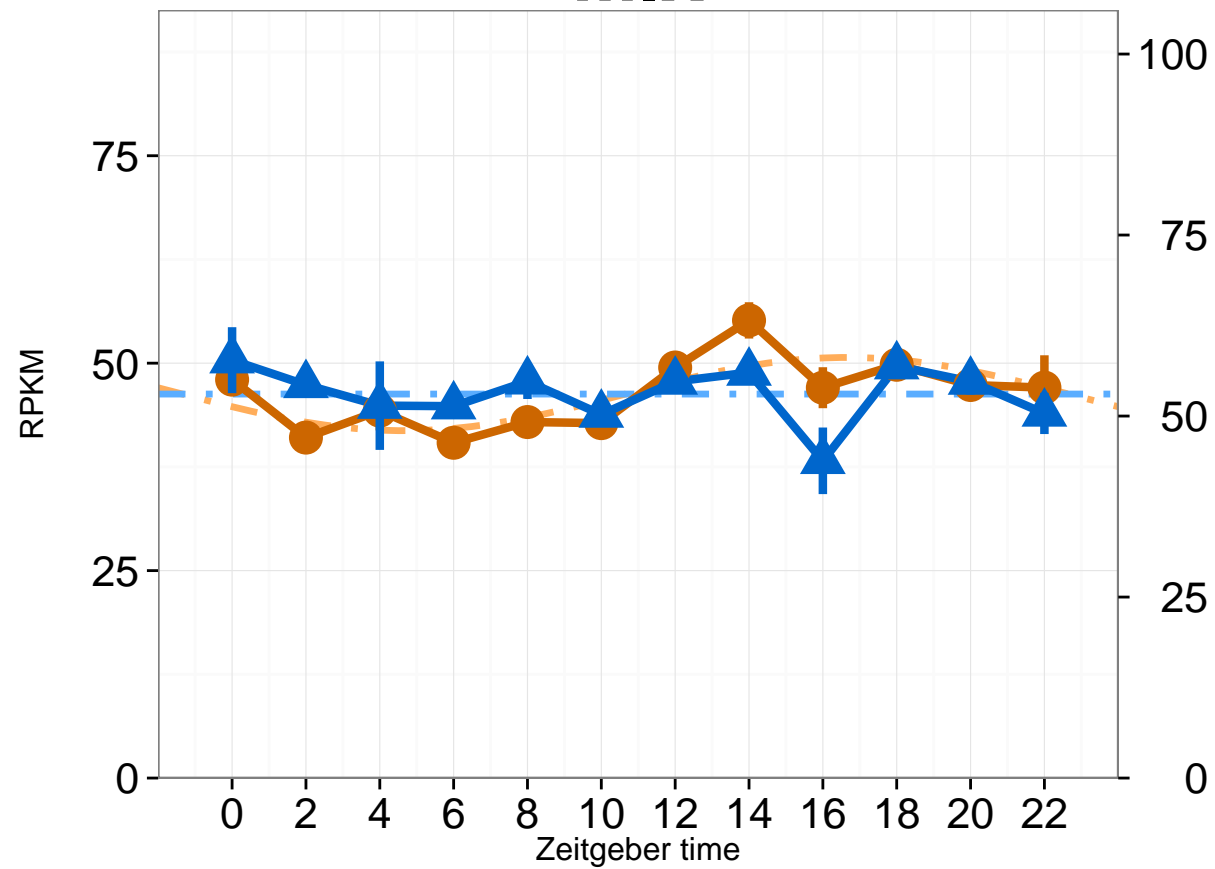

## Mlx

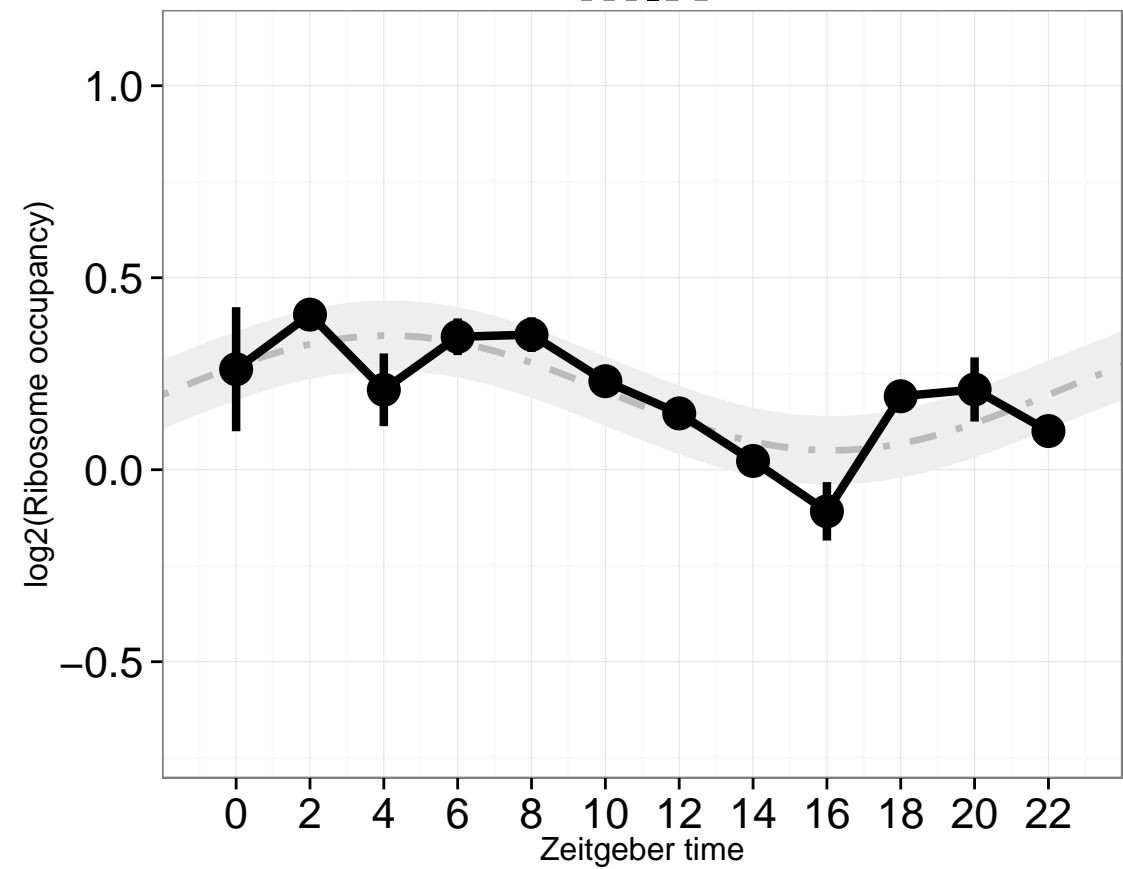

Supplement: Supplementary file 826 [file 1]

## Gm10490

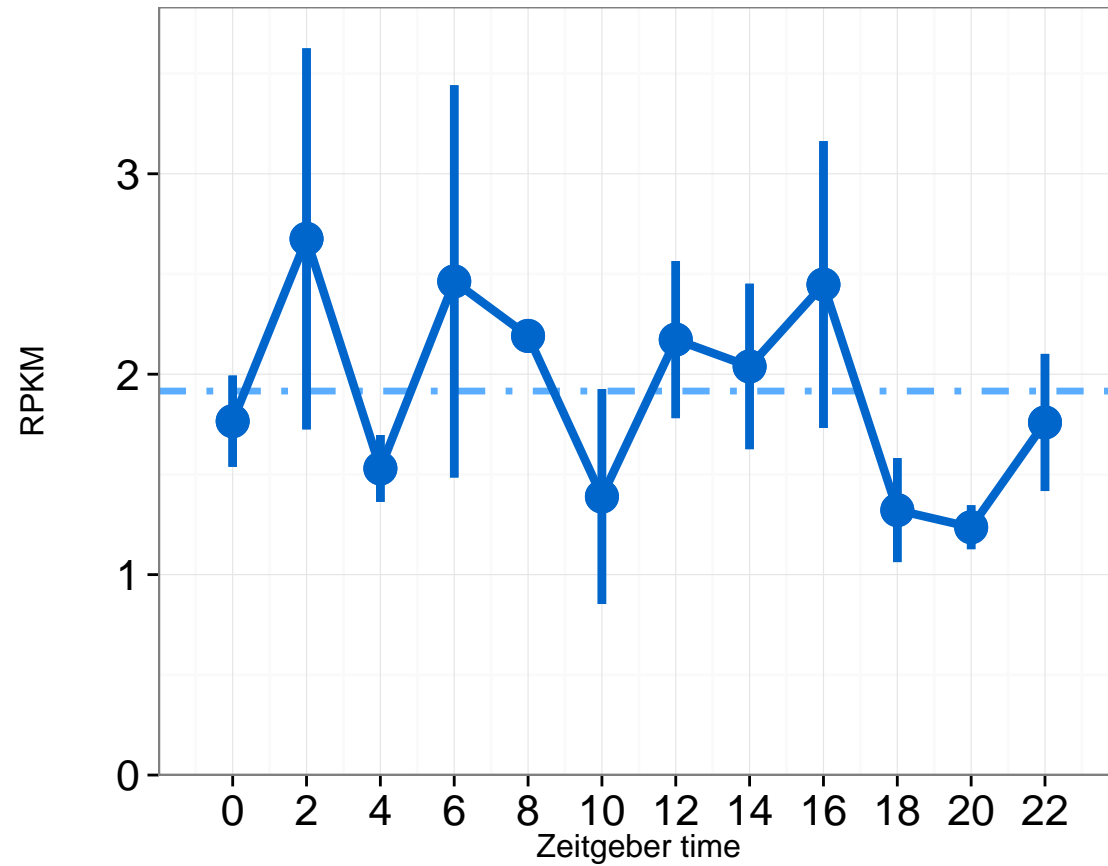

## Gm10490 log2(Ribosome occupanc

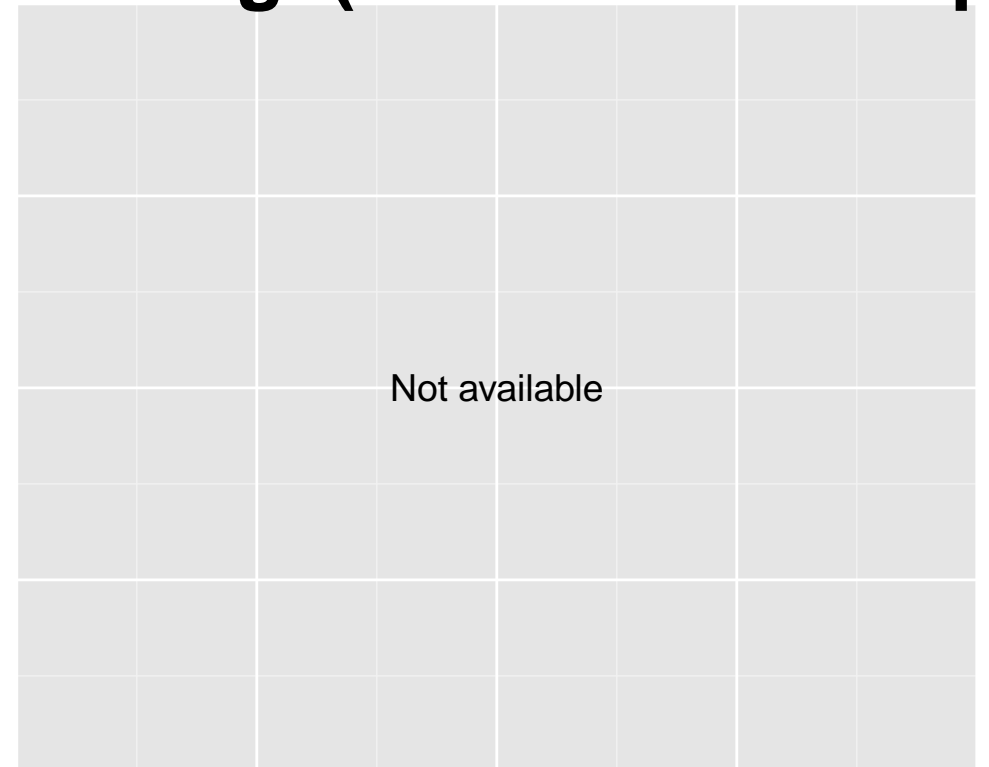

Supplement: Supplementary file 827 [file 1]

# Zbtb48

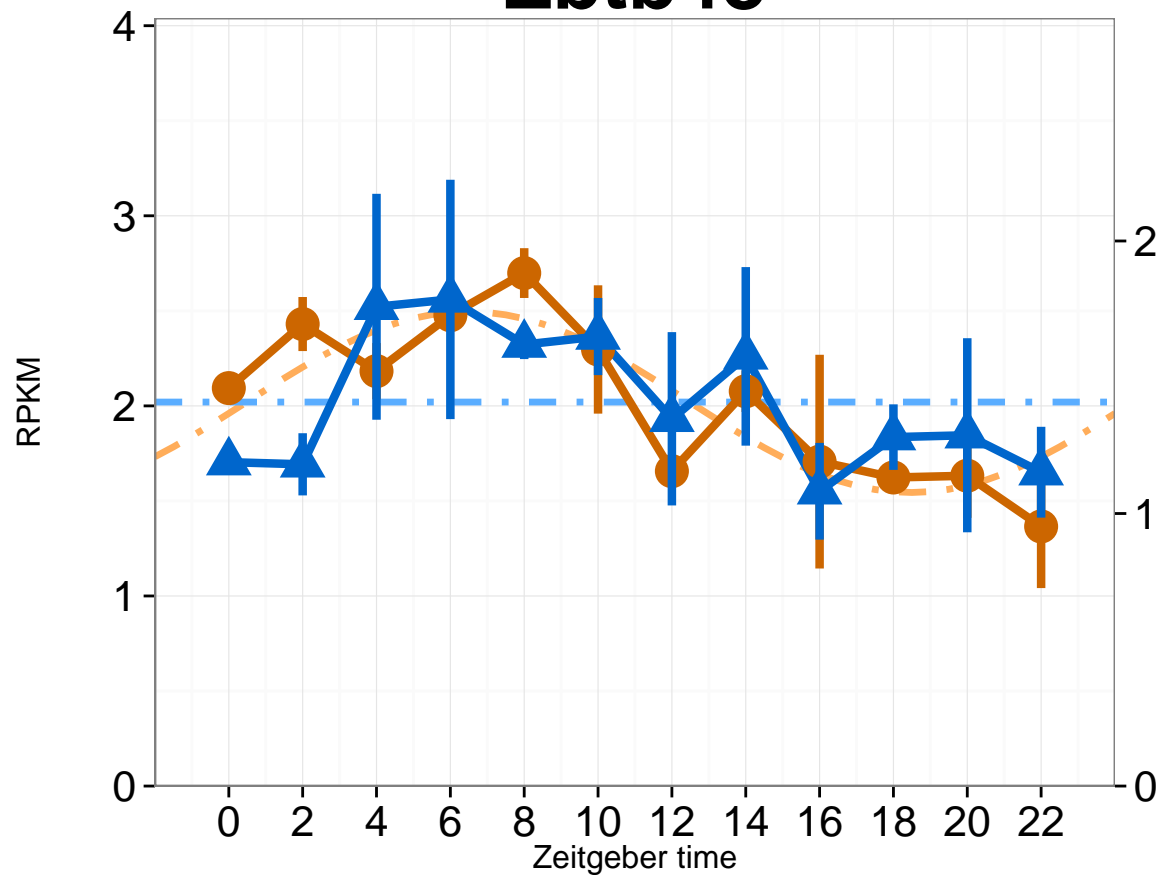

# Zbtb48

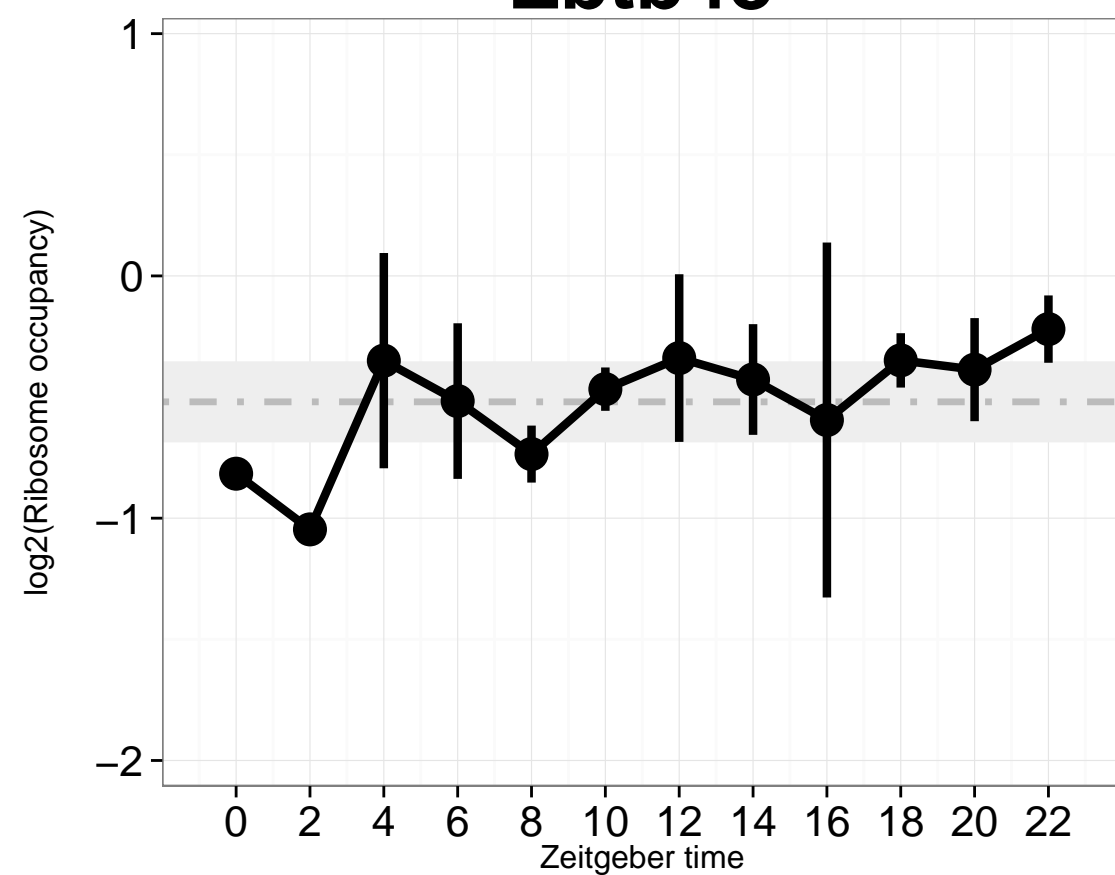

Supplement: Supplementary file 828 [file 1]

## Fzd5

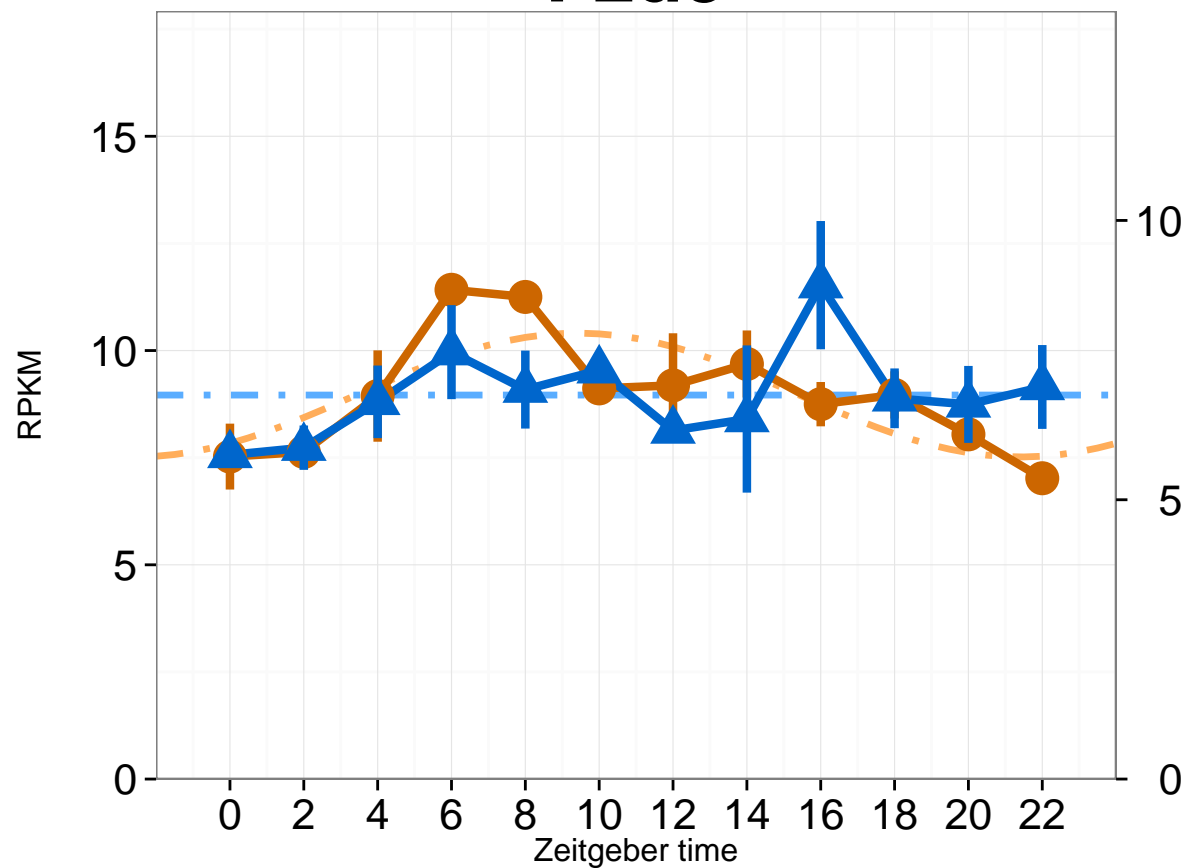

## Fzd5

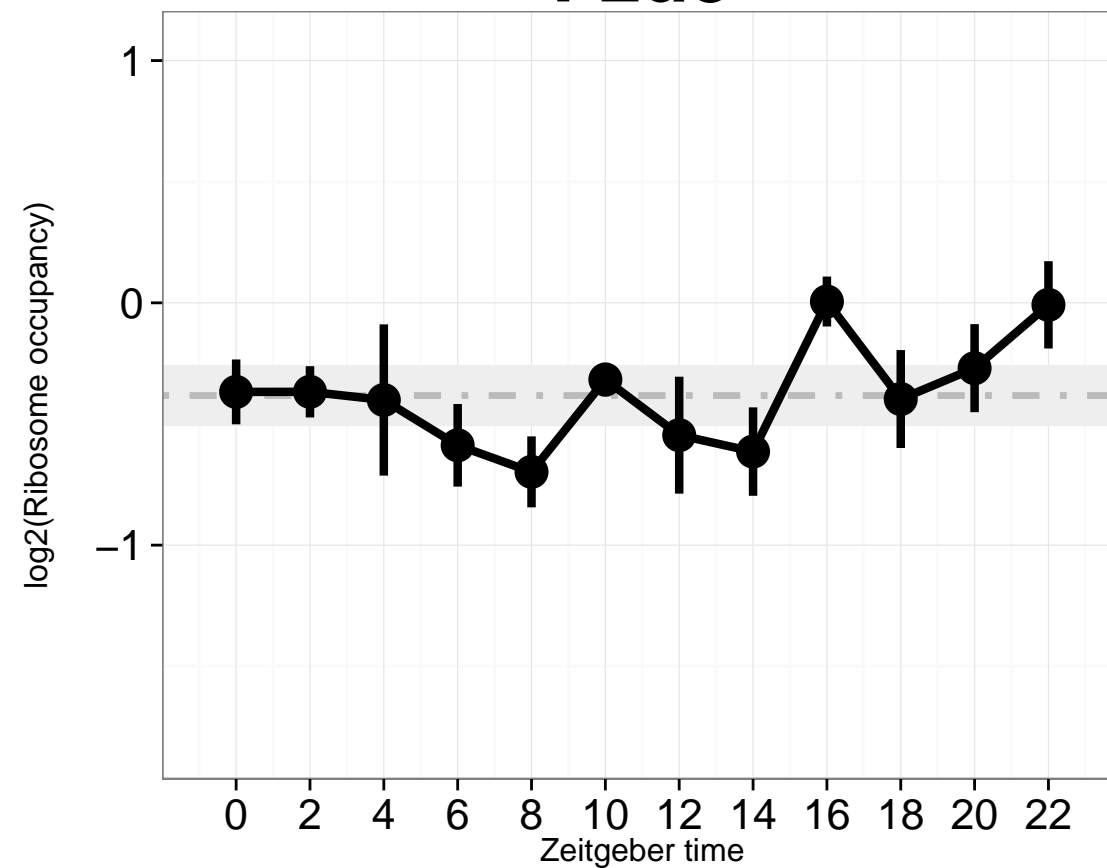

Supplement: Supplementary file 829 [file 1]

# B4galt3

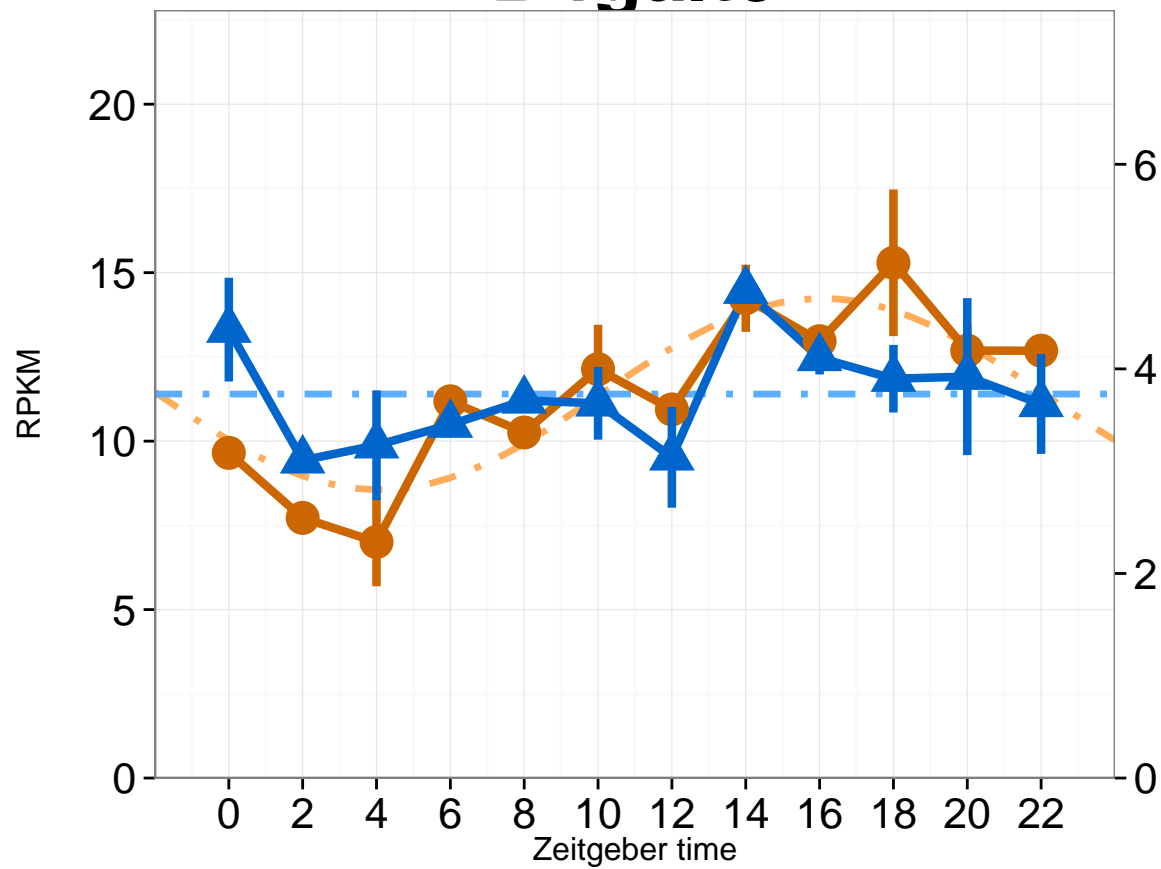

# B4galt3

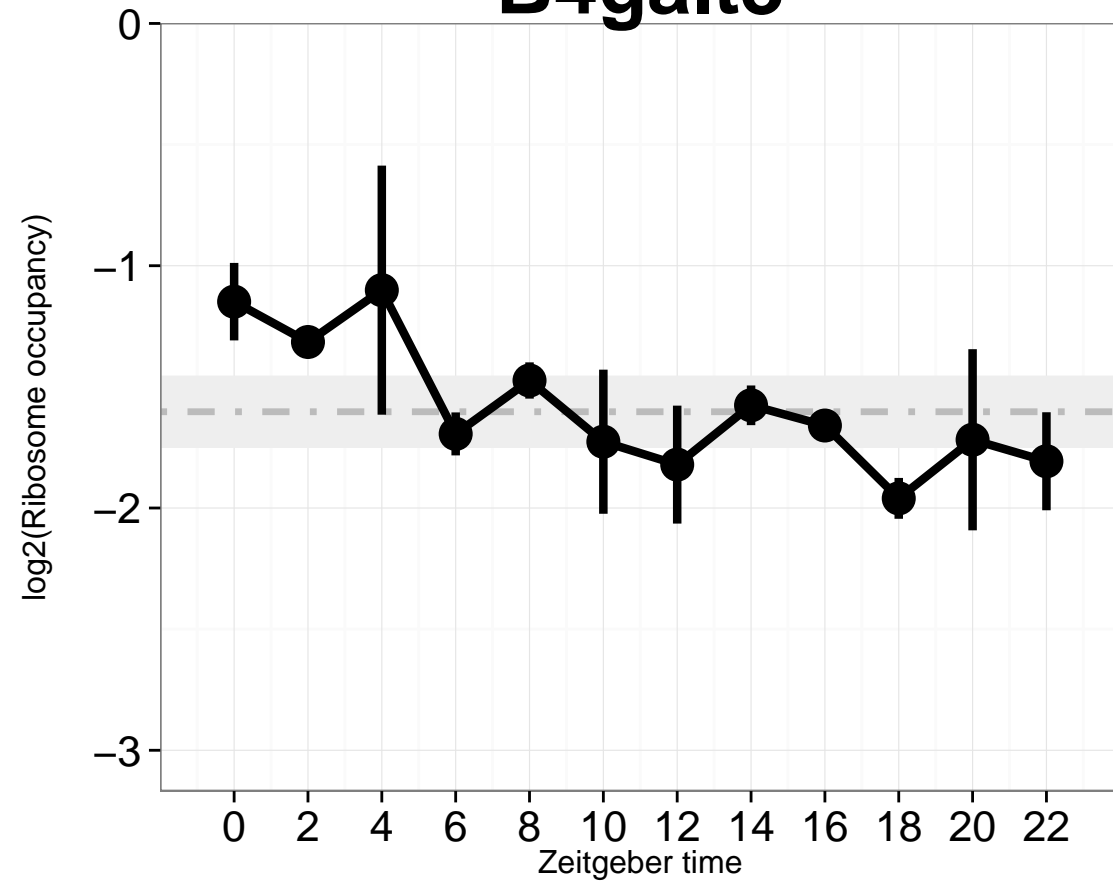

Supplement: Supplementary file 830 [file 1]

## Mcts2

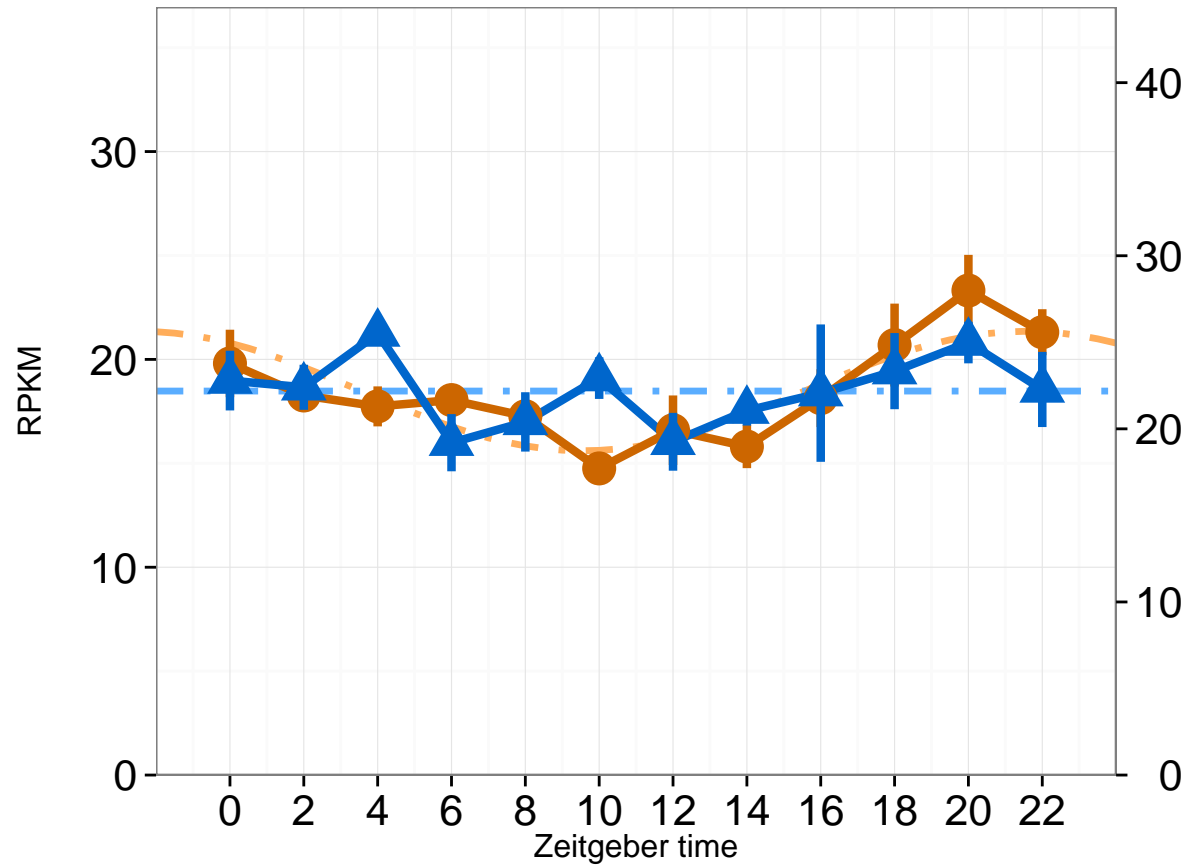

## Mcts2

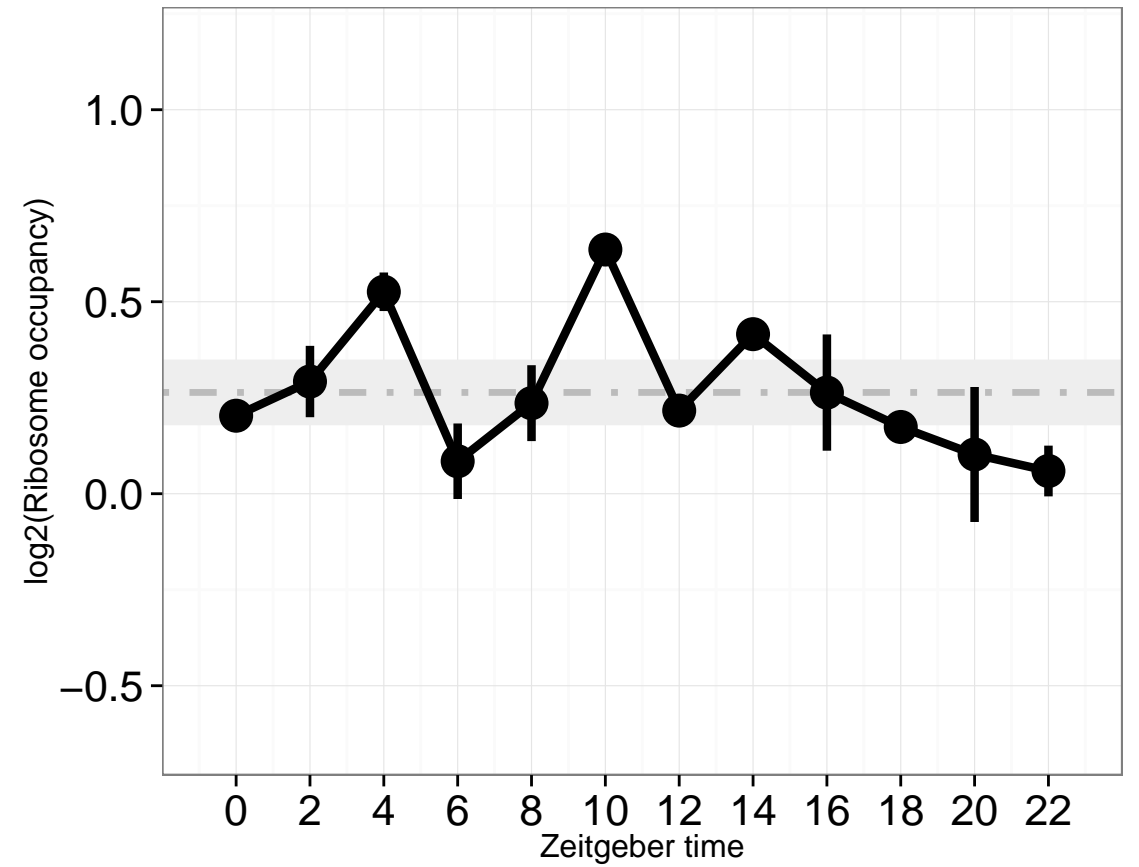

Supplement: Supplementary file 831 [file 1]

# Eif5a

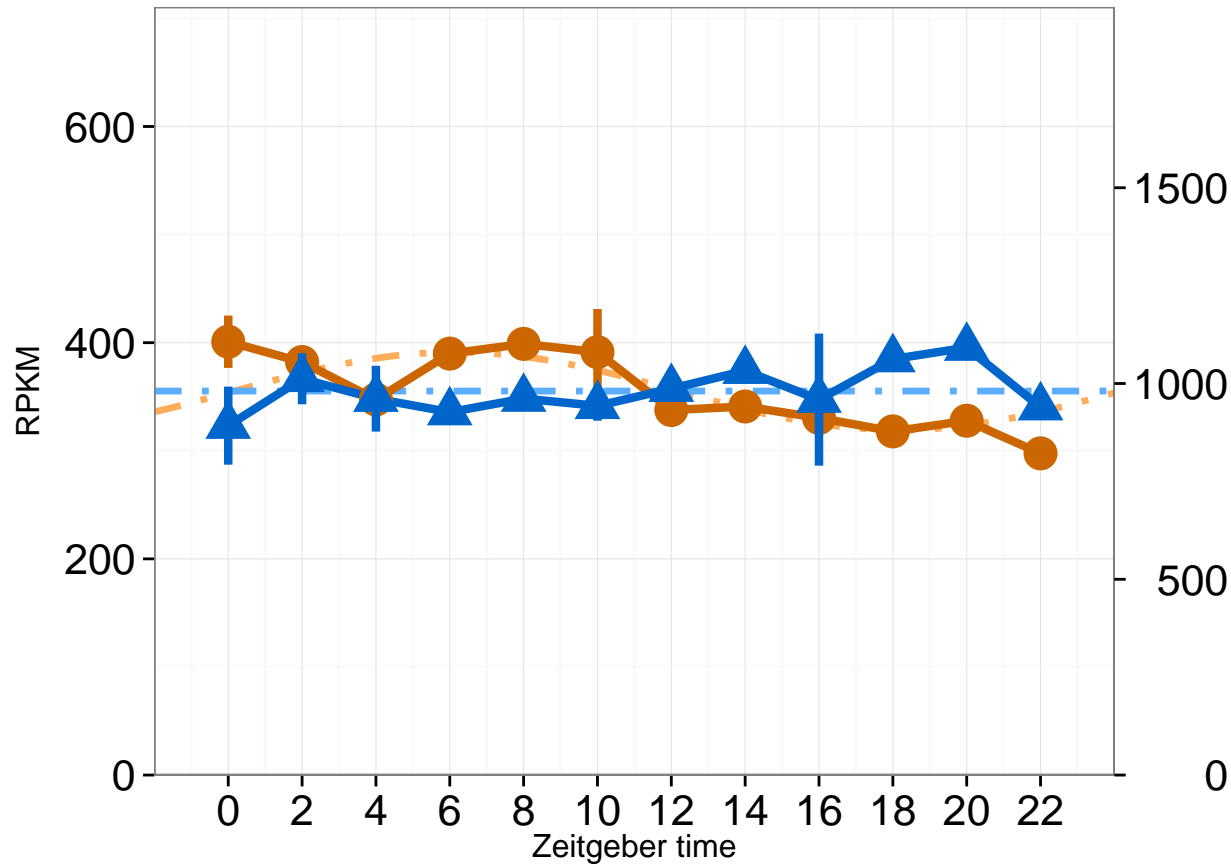

# Eif5a

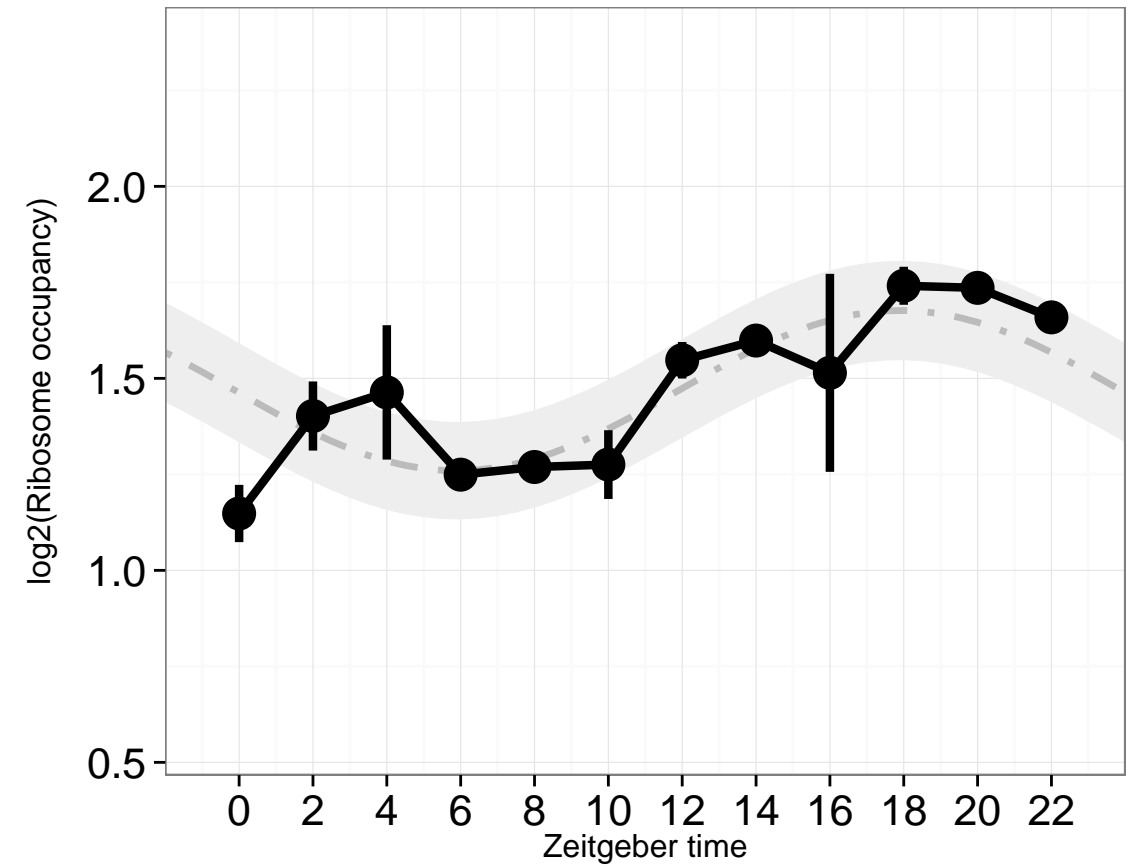

Supplement: Supplementary file 832 [file 1]

## Zdhhc6

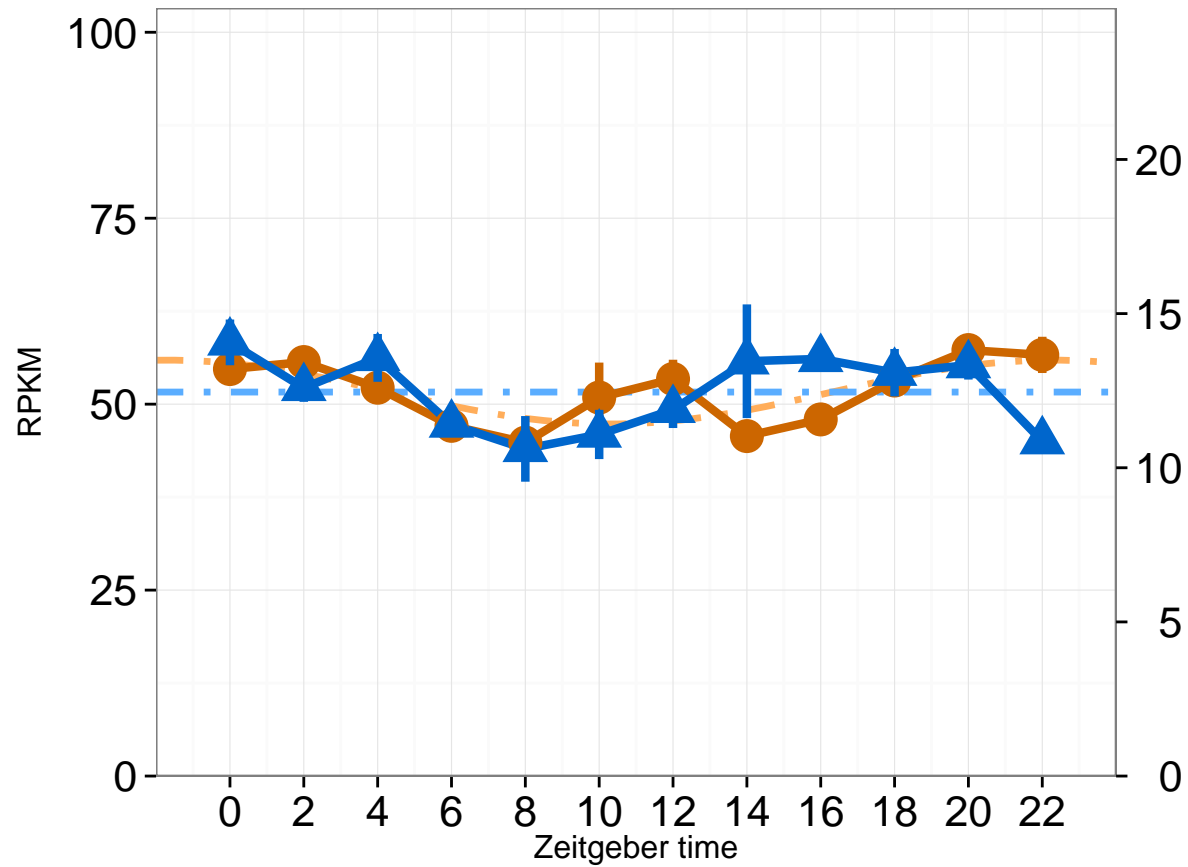

## Zdhhc6

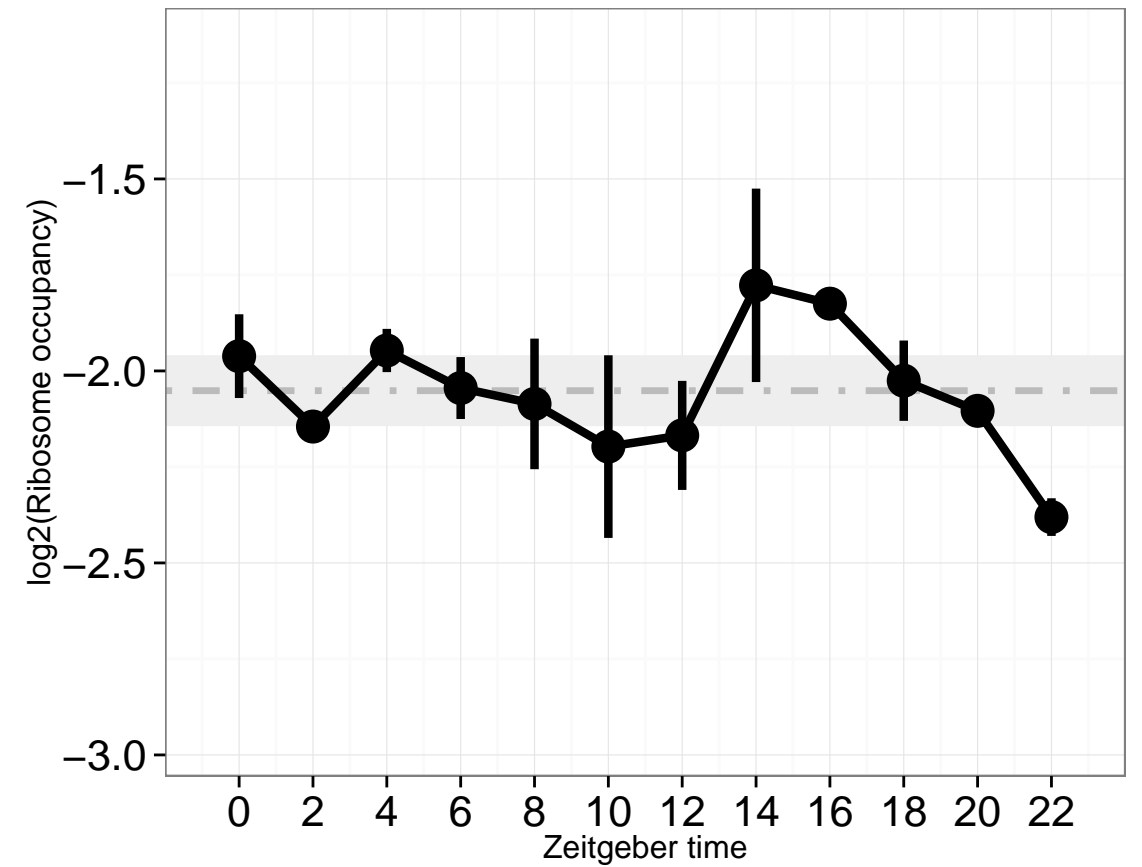

Supplement: Supplementary file 833 [file 1]

## Tm9sf3

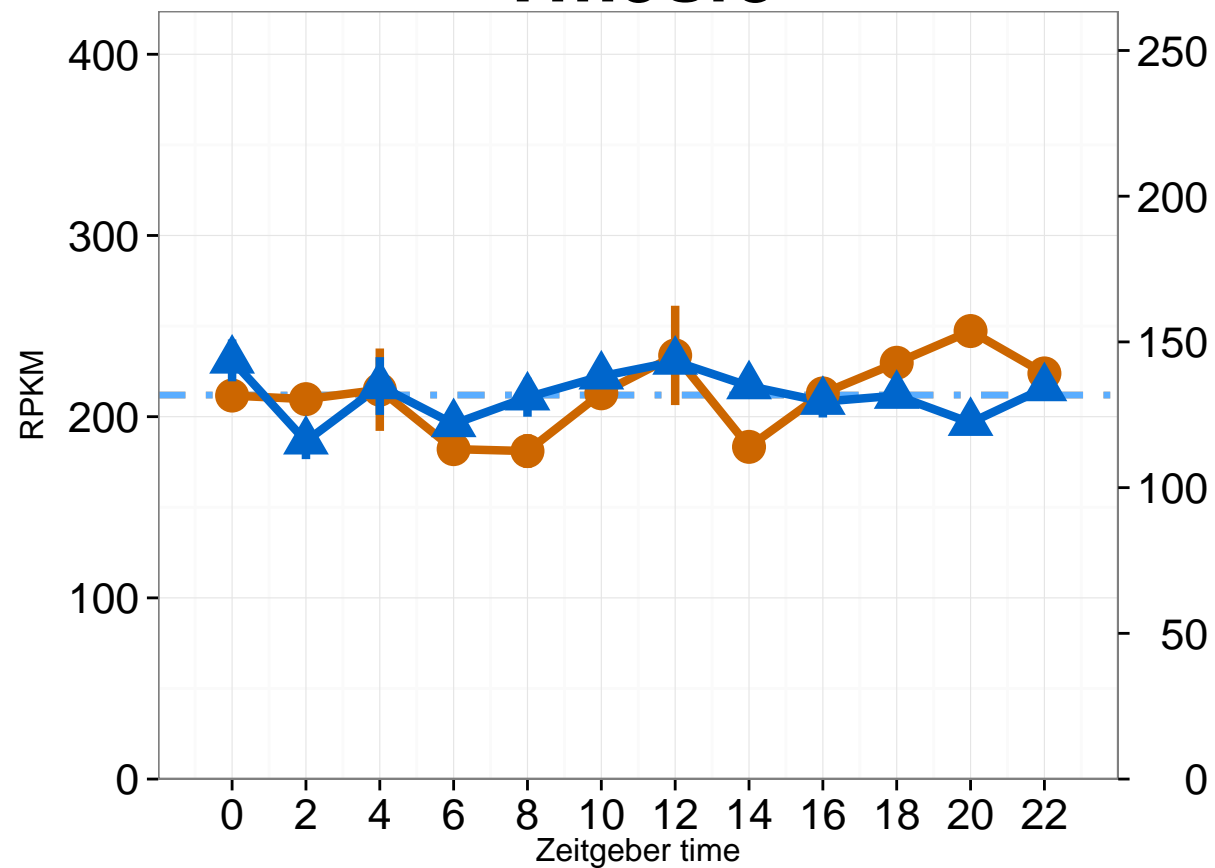

## Tm9sf3

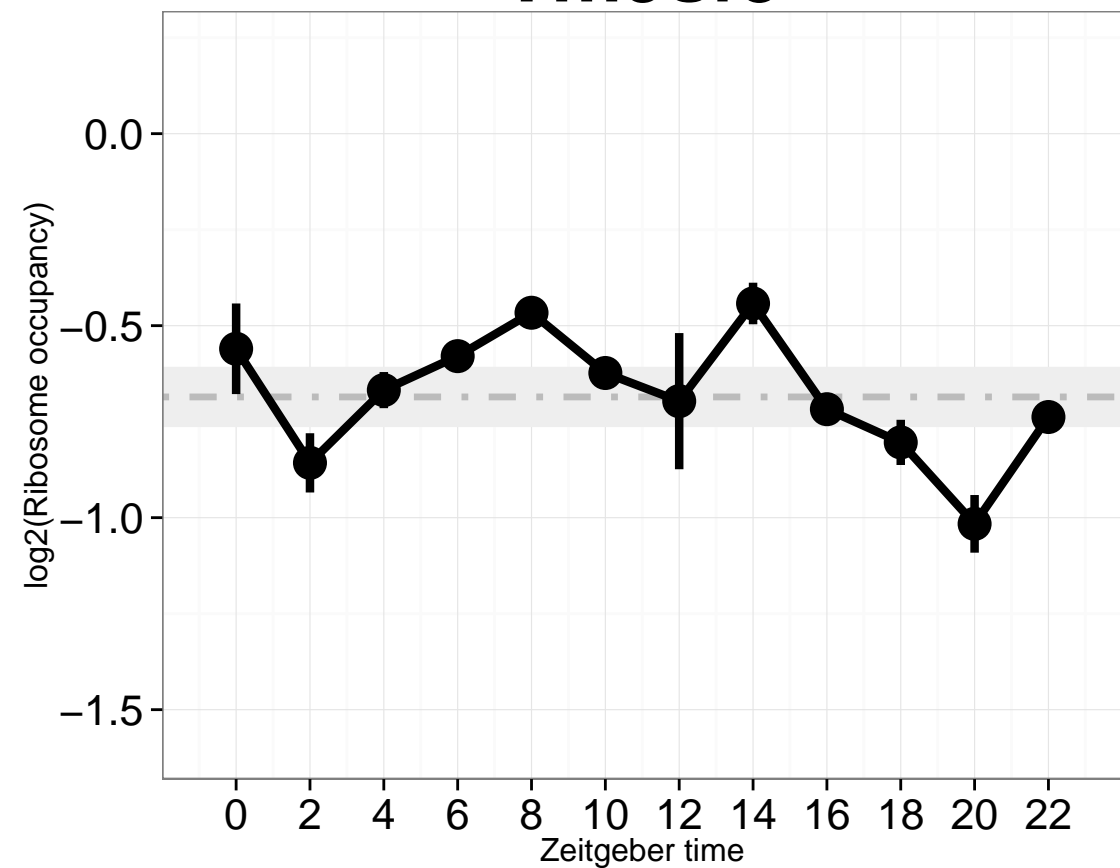

Supplement: Supplementary file 834 [file 1]

# Cdkn2b

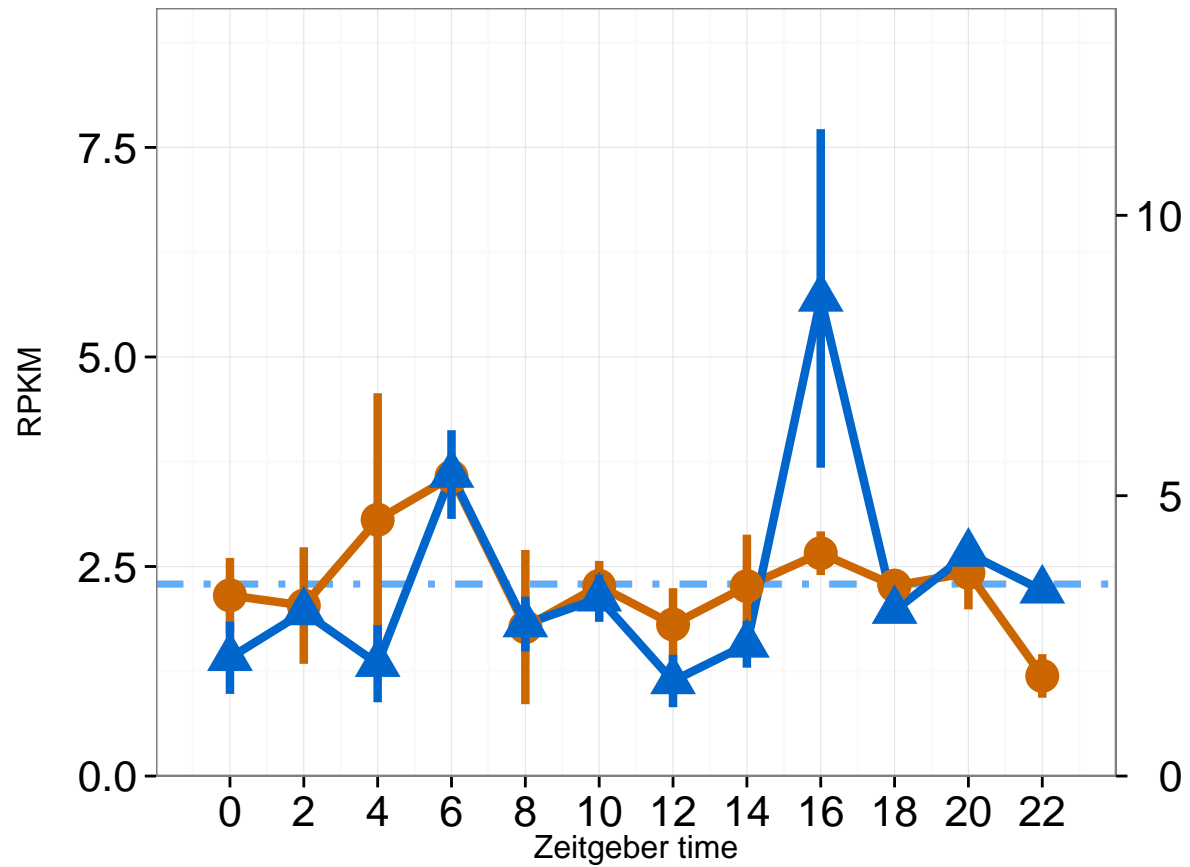

# Cdkn2b

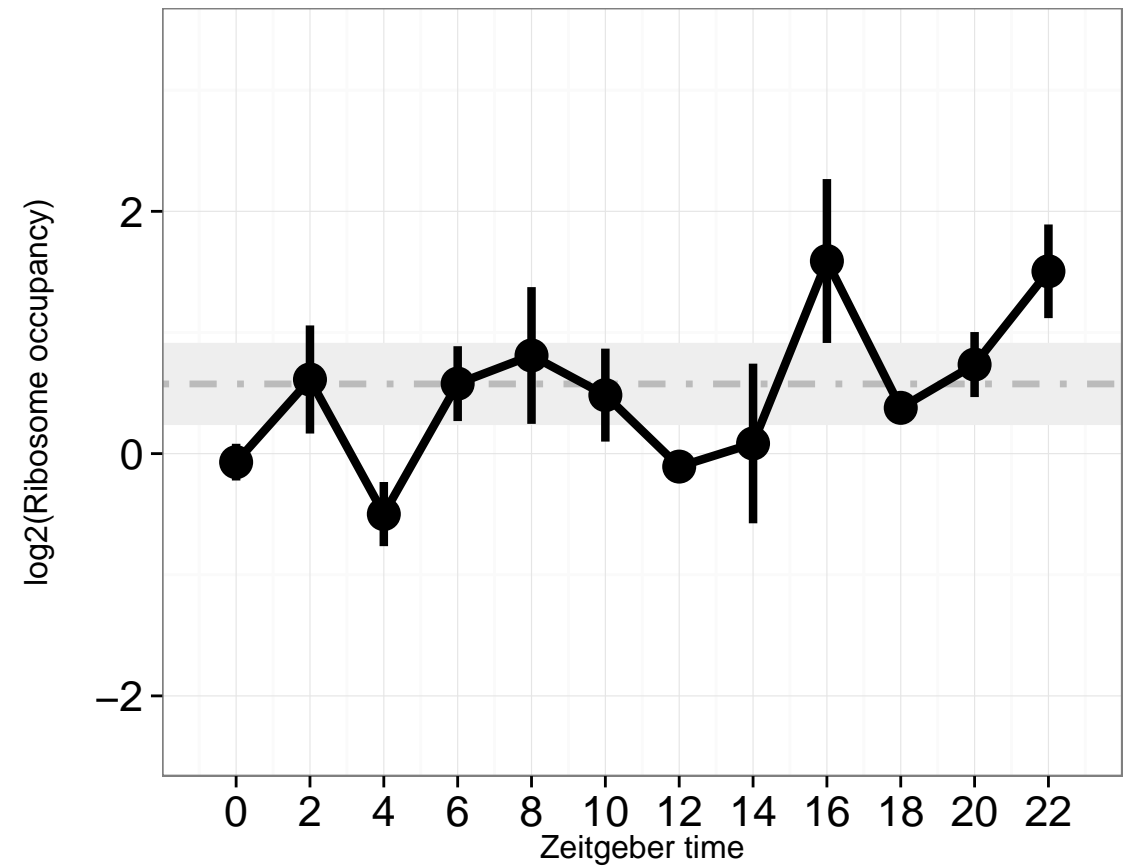

Supplement: Supplementary file 835 [file 1]

## Zim1

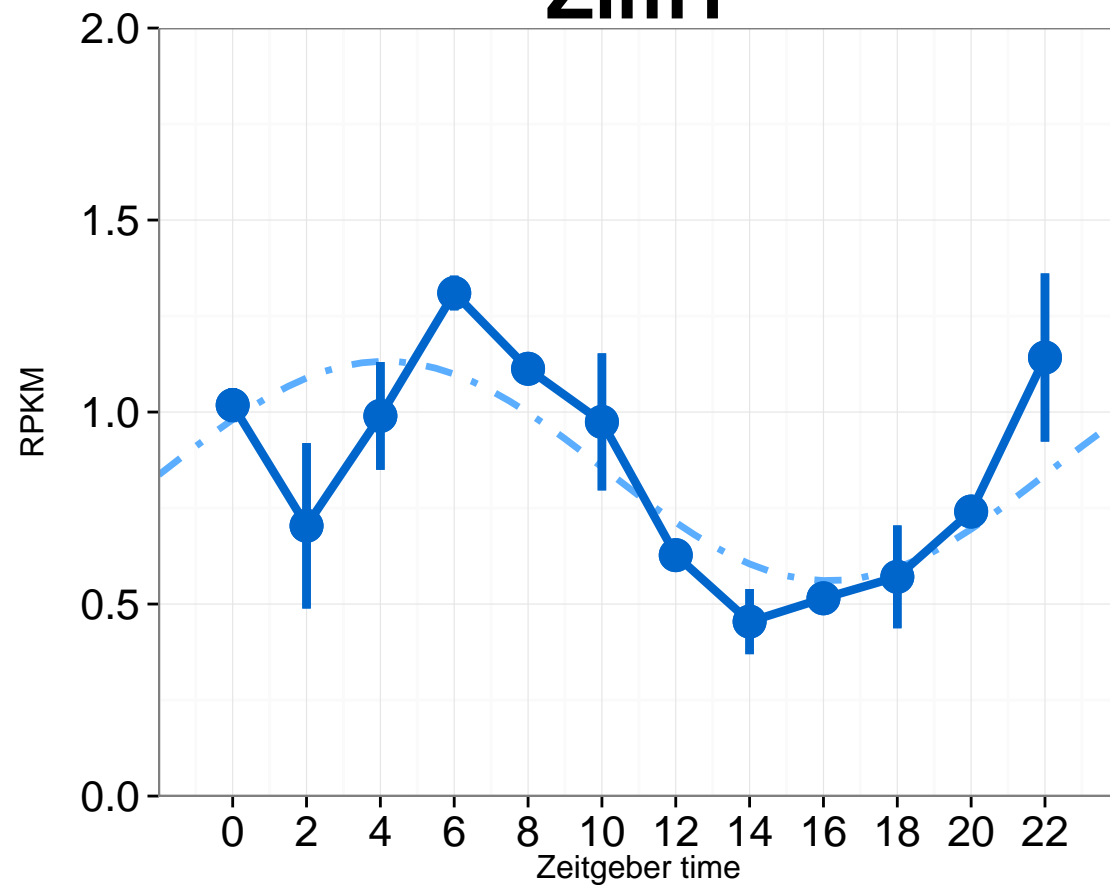

## Zim1 log2(Ribosome occupancy)

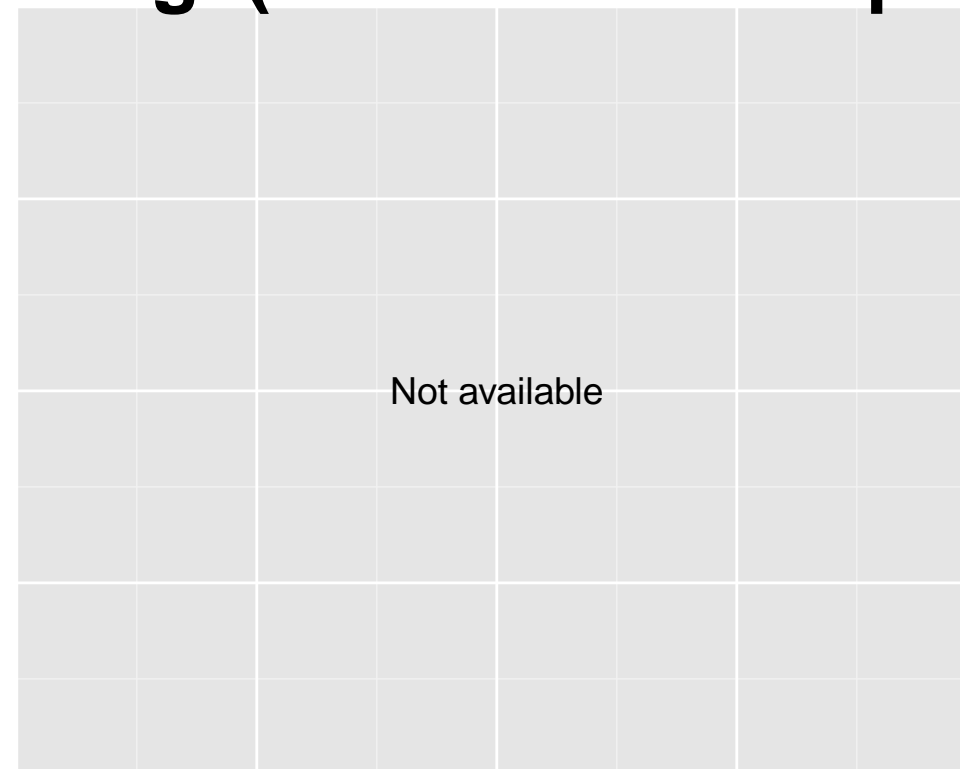

Supplement: Supplementary file 836 [file 1]

## F830104G03Rik

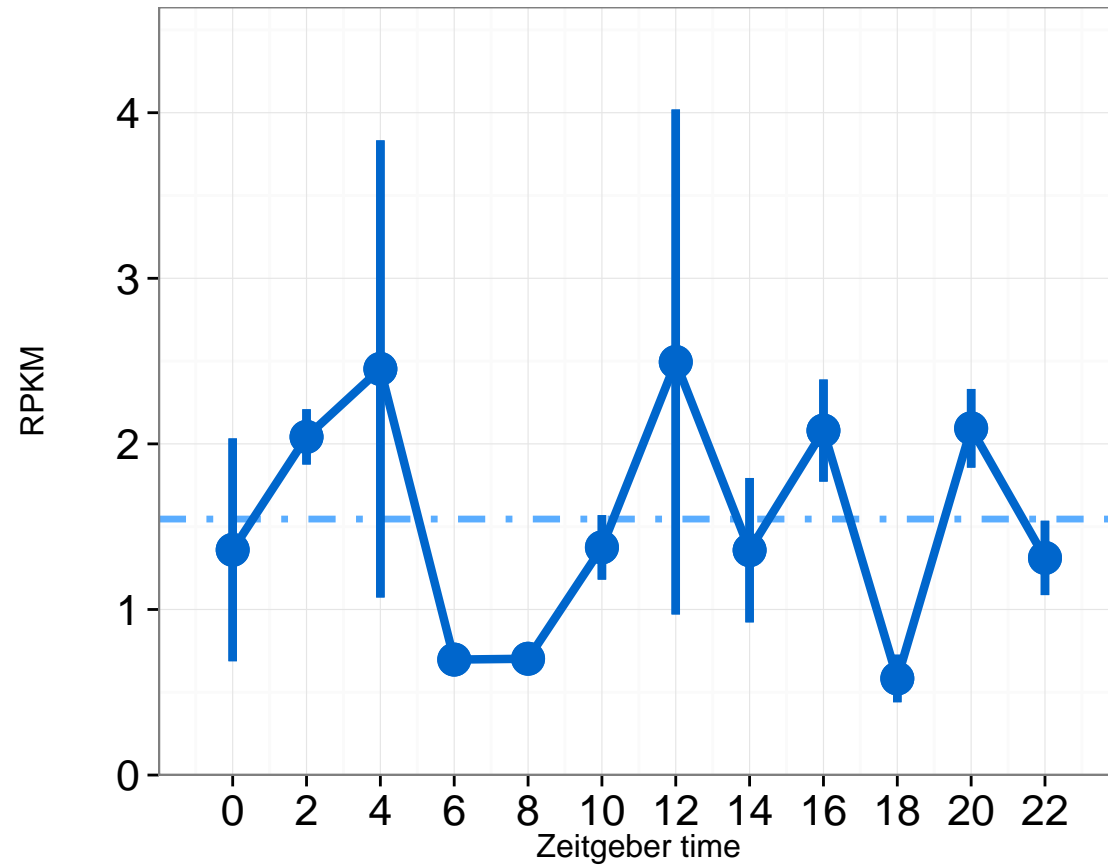

## F830104G03Rik log2(Ribosome occup

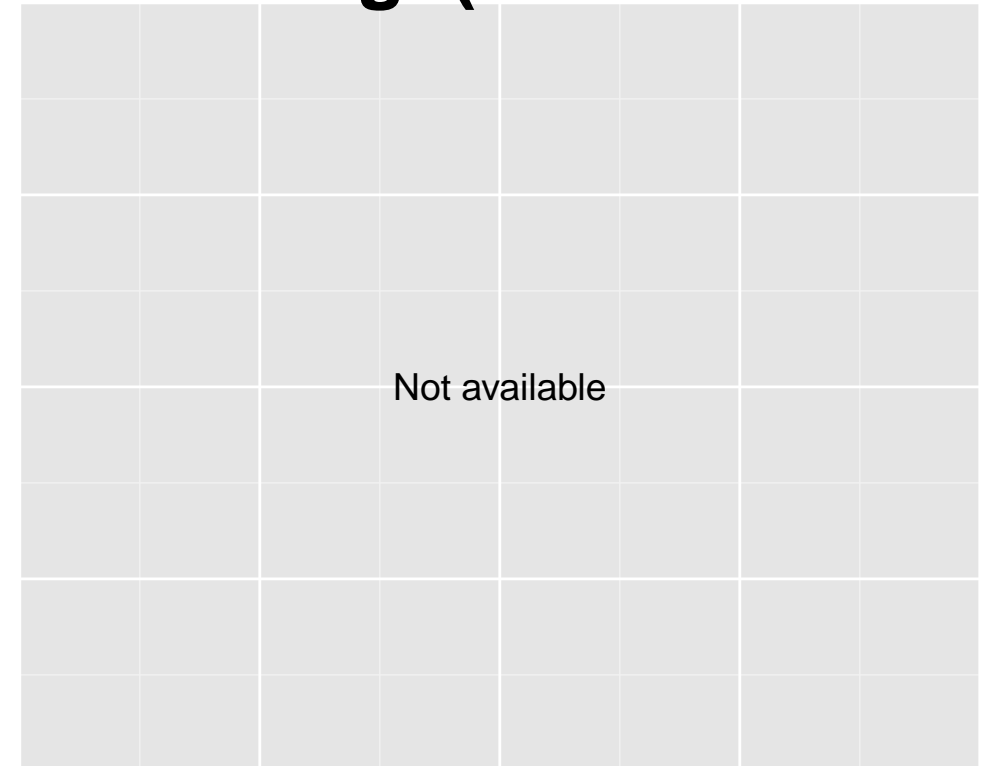

Supplement: Supplementary file 837 [file 1]

## Homer3

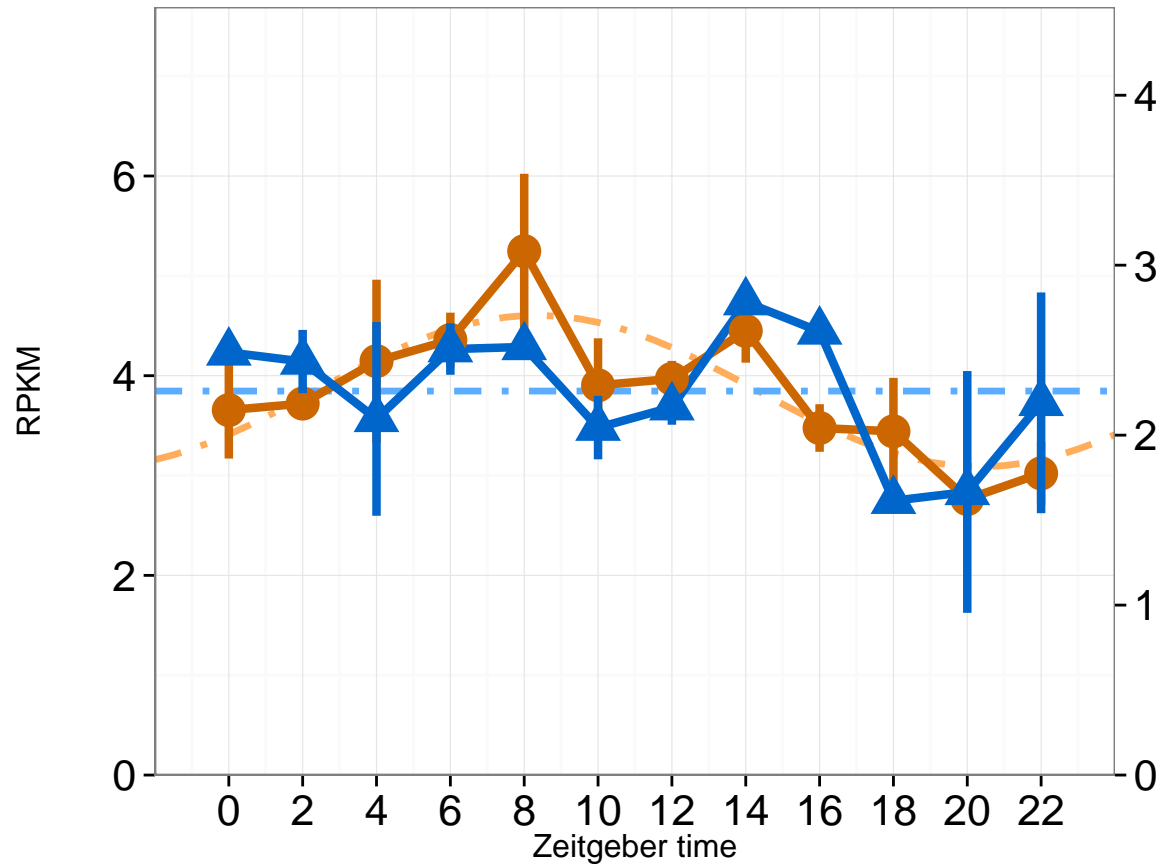

## Homer3

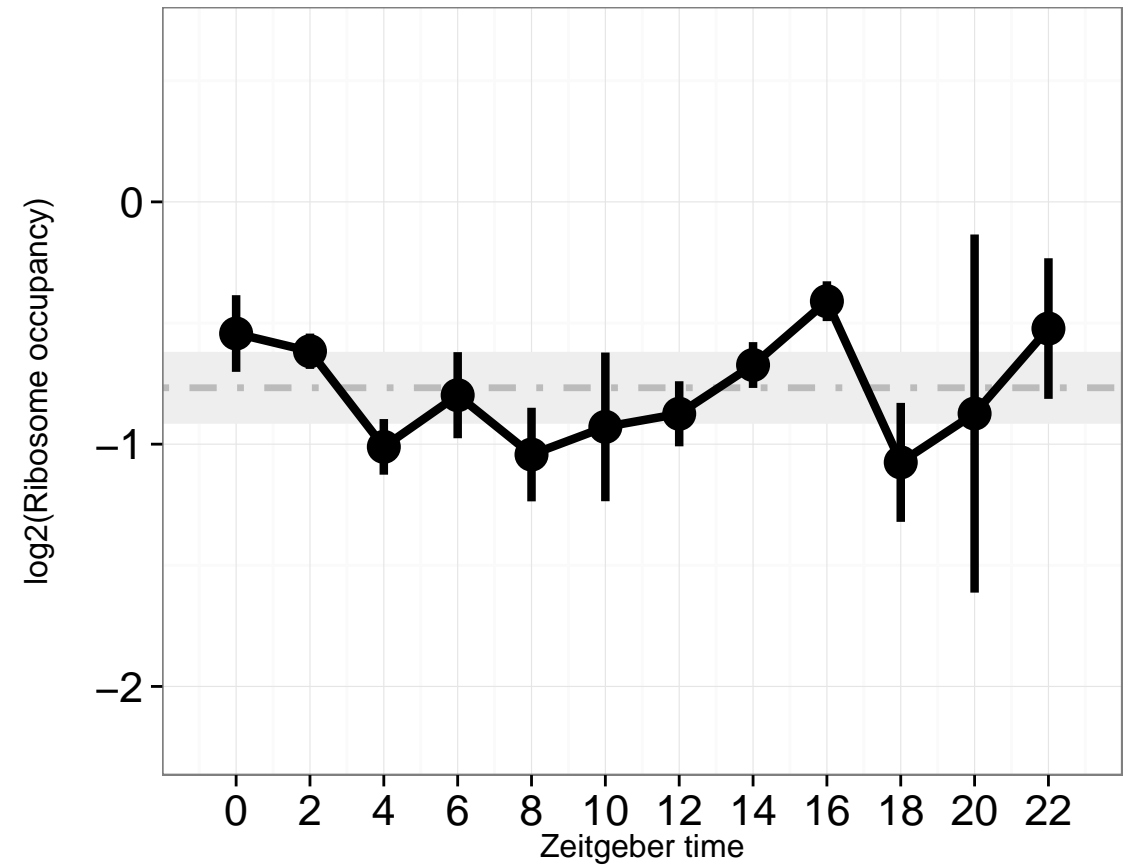

Supplement: Supplementary file 838 [file 1]

## Chic2

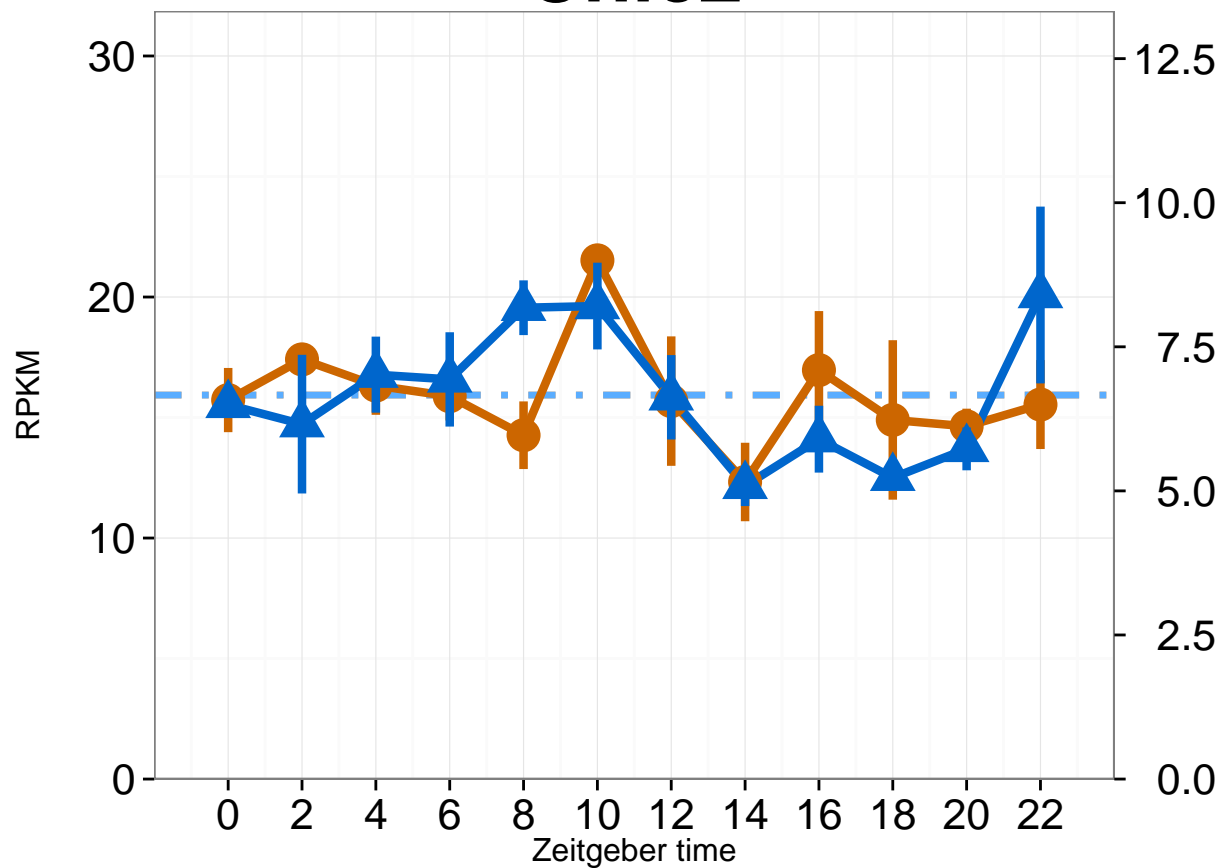

## Chic2

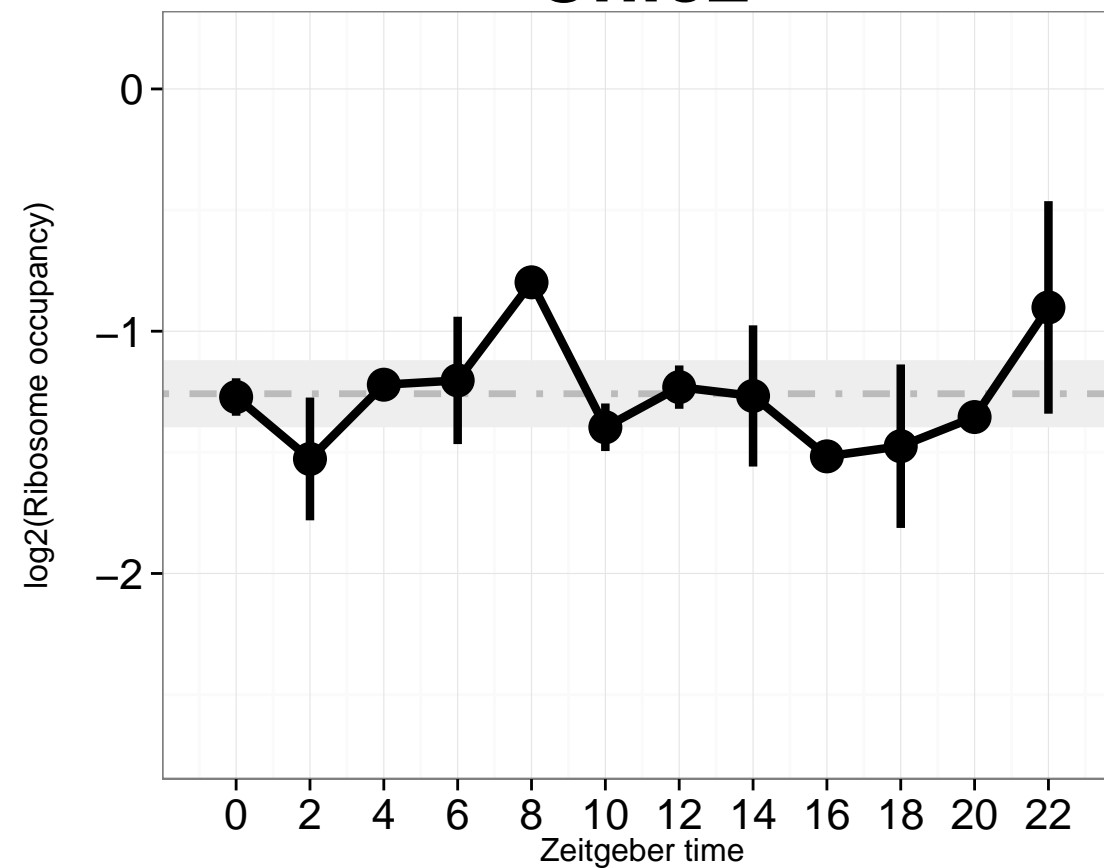

Supplement: Supplementary file 839 [file 1]

# Mrpl2

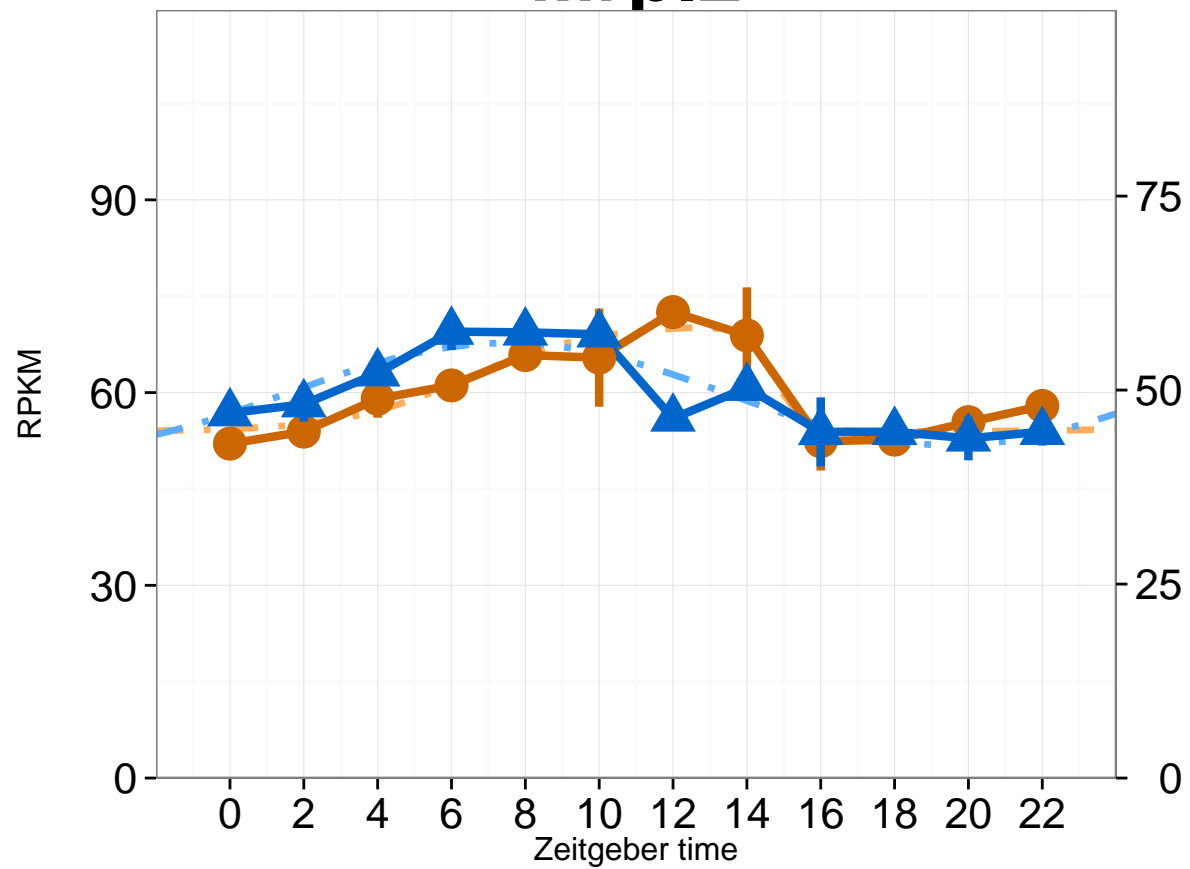

# Mrpl2

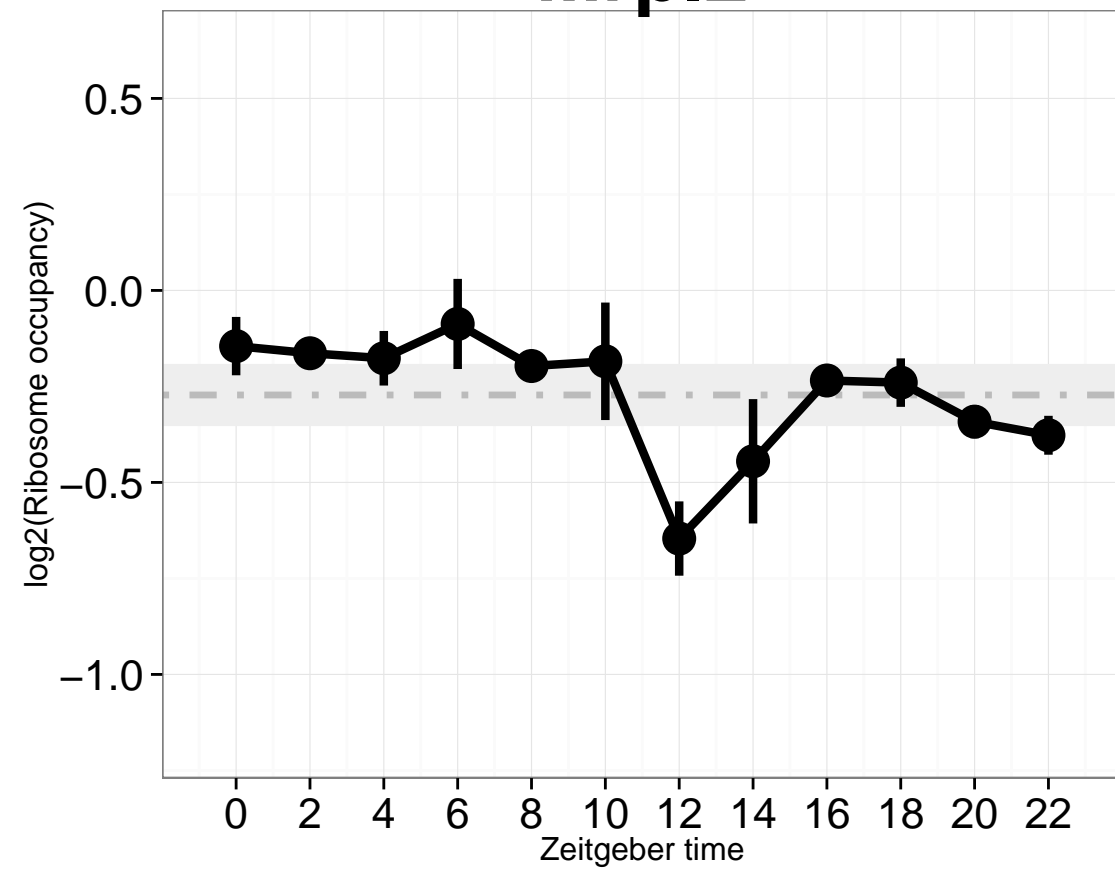

Supplement: Supplementary file 840 [file 1]

# Krt10

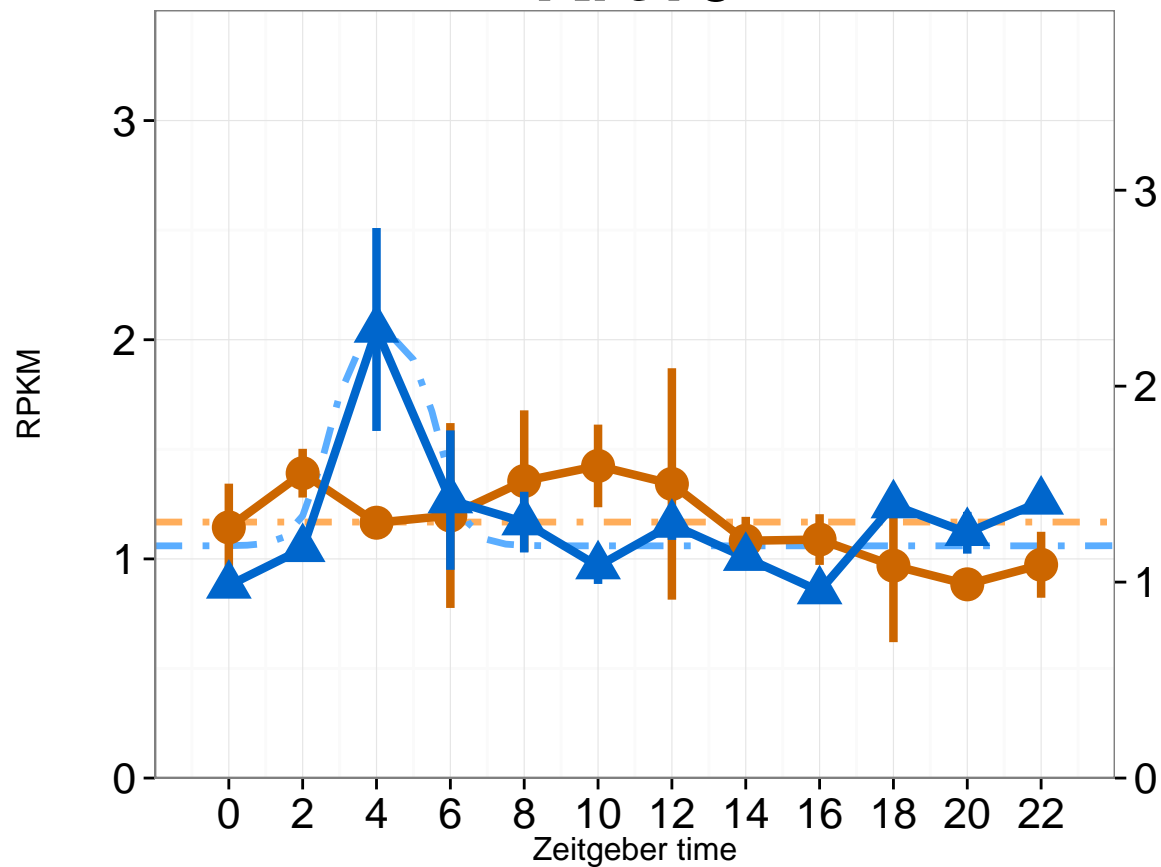

# Krt10

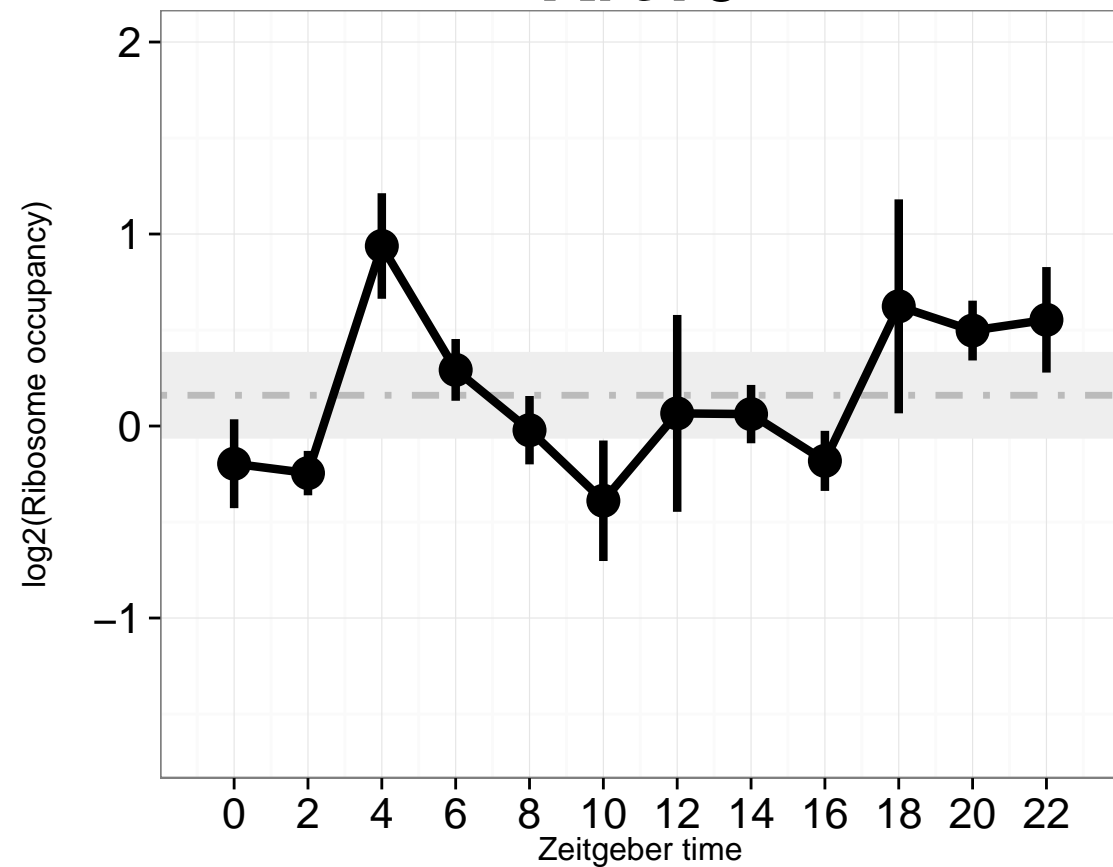

Supplement: Supplementary file 841 [file 1]

# Gtf2a2

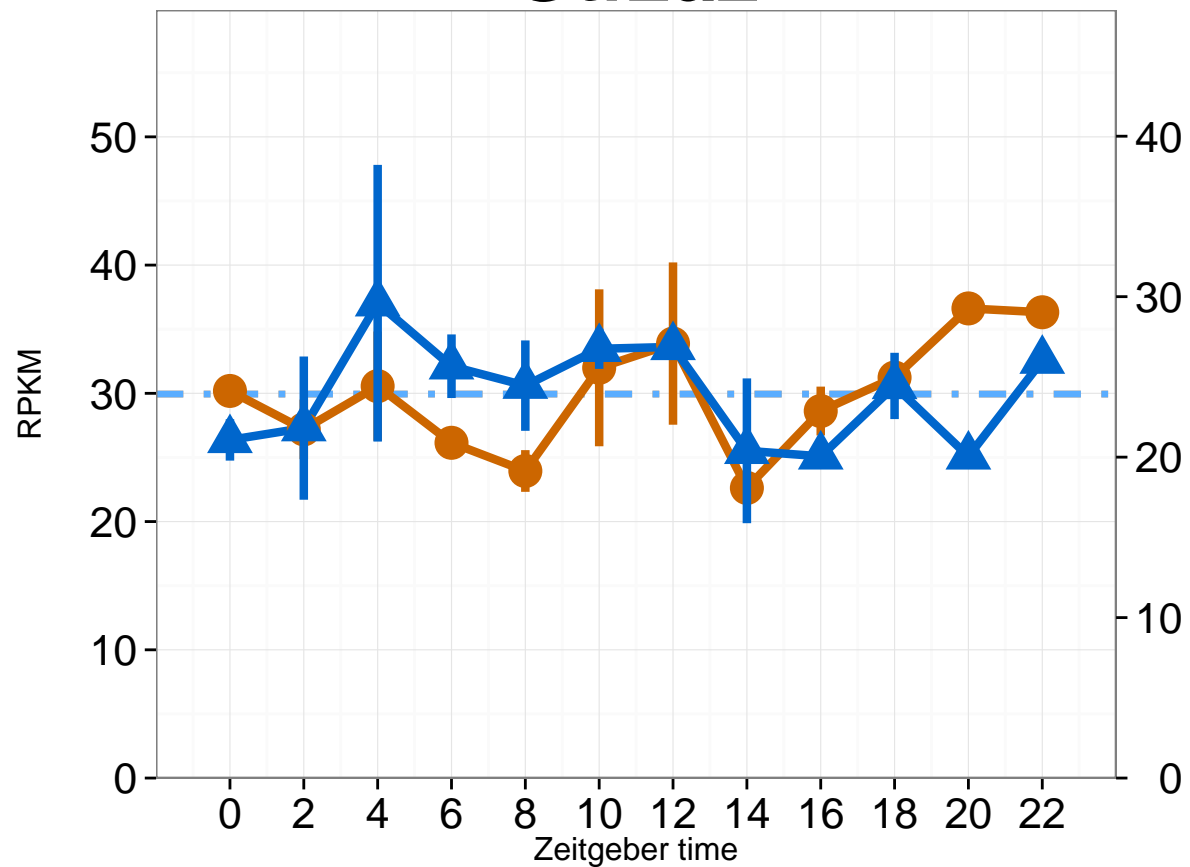

# Gtf2a2

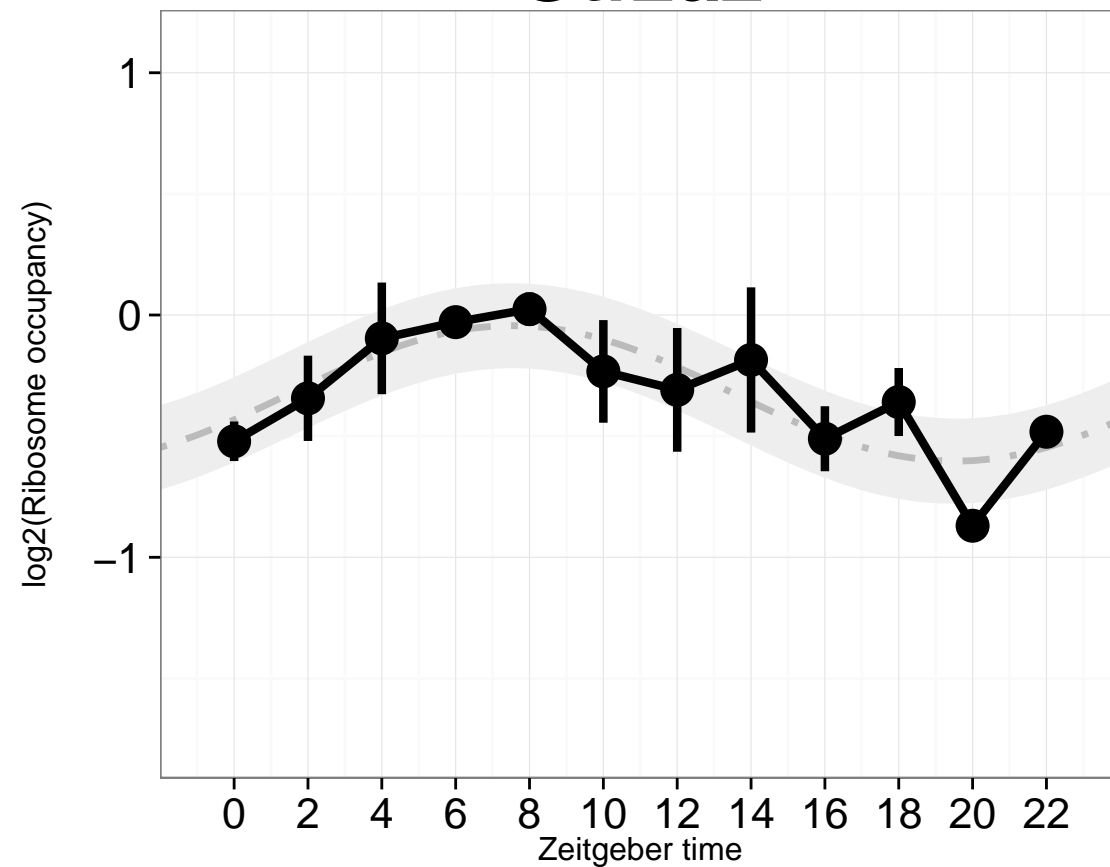

Supplement: Supplementary file 842 [file 1]

## Kdm8

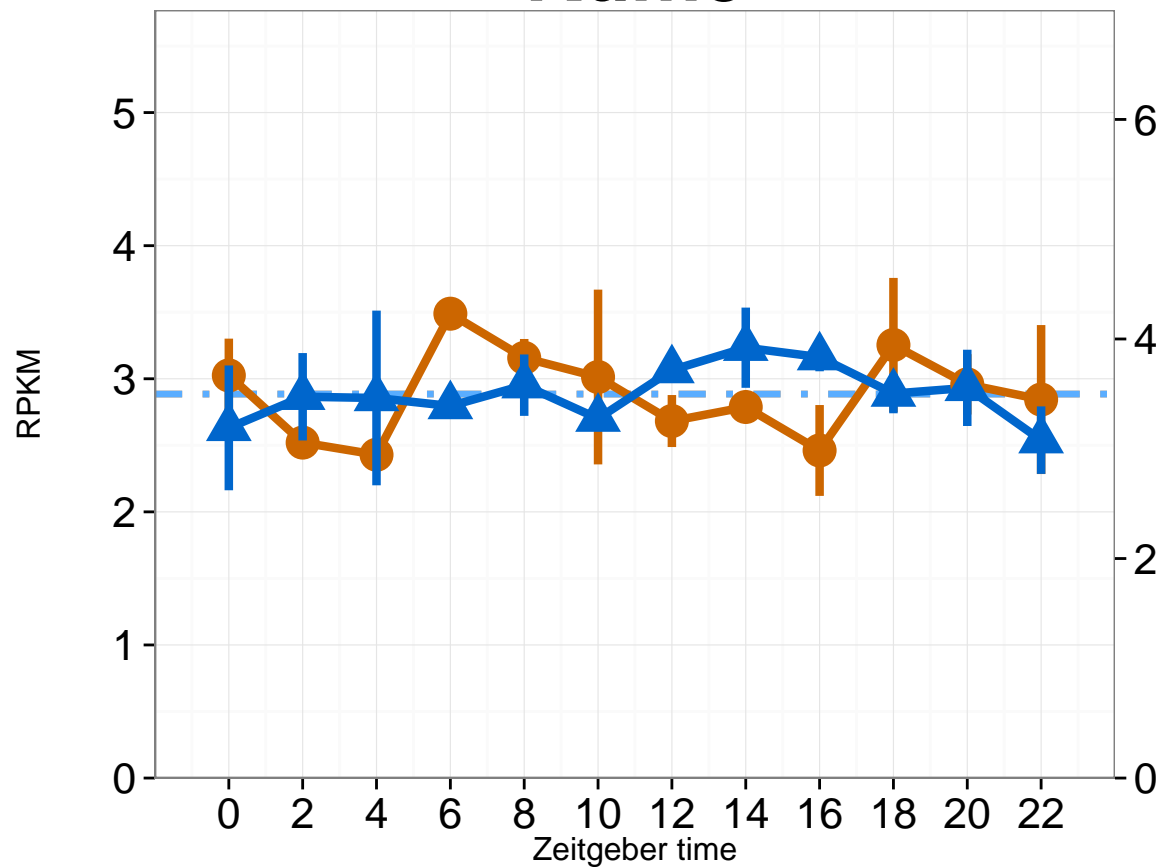

## Kdm8

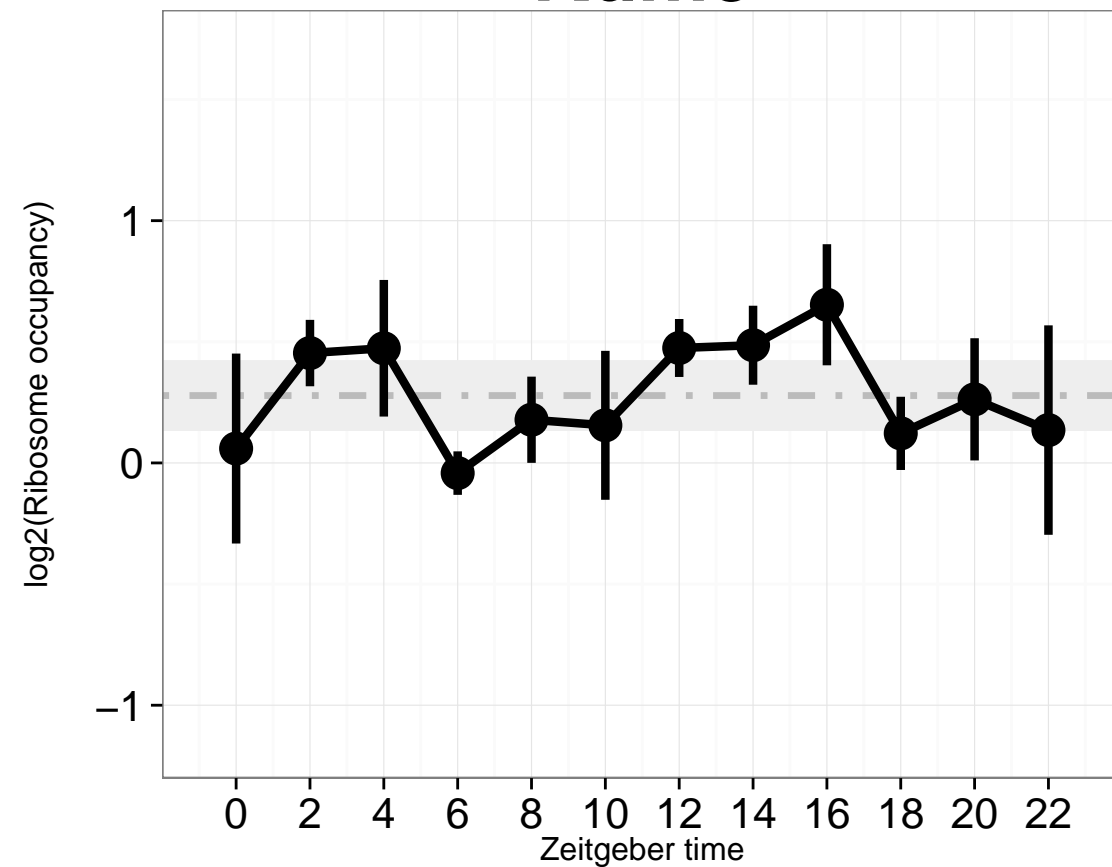

Supplement: Supplementary file 843 [file 1]

## Arl2

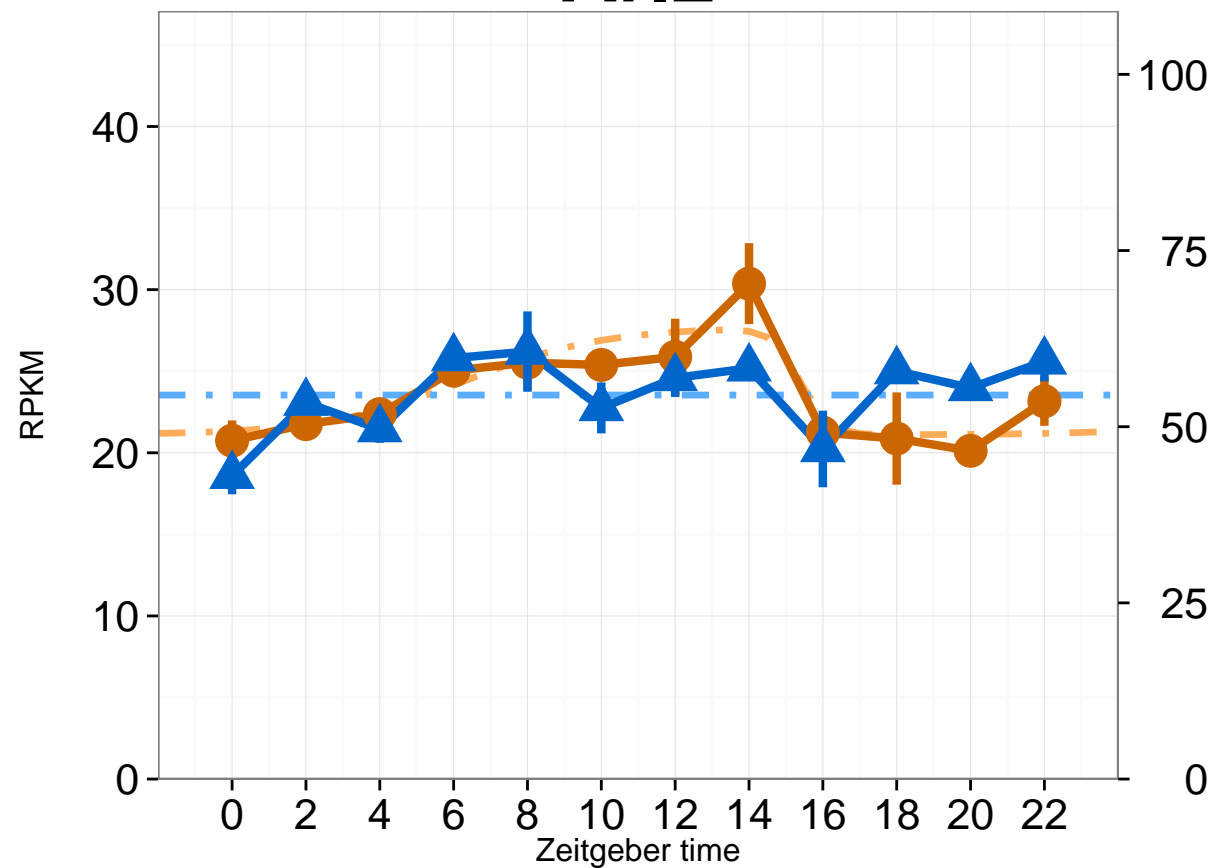

## Arl2

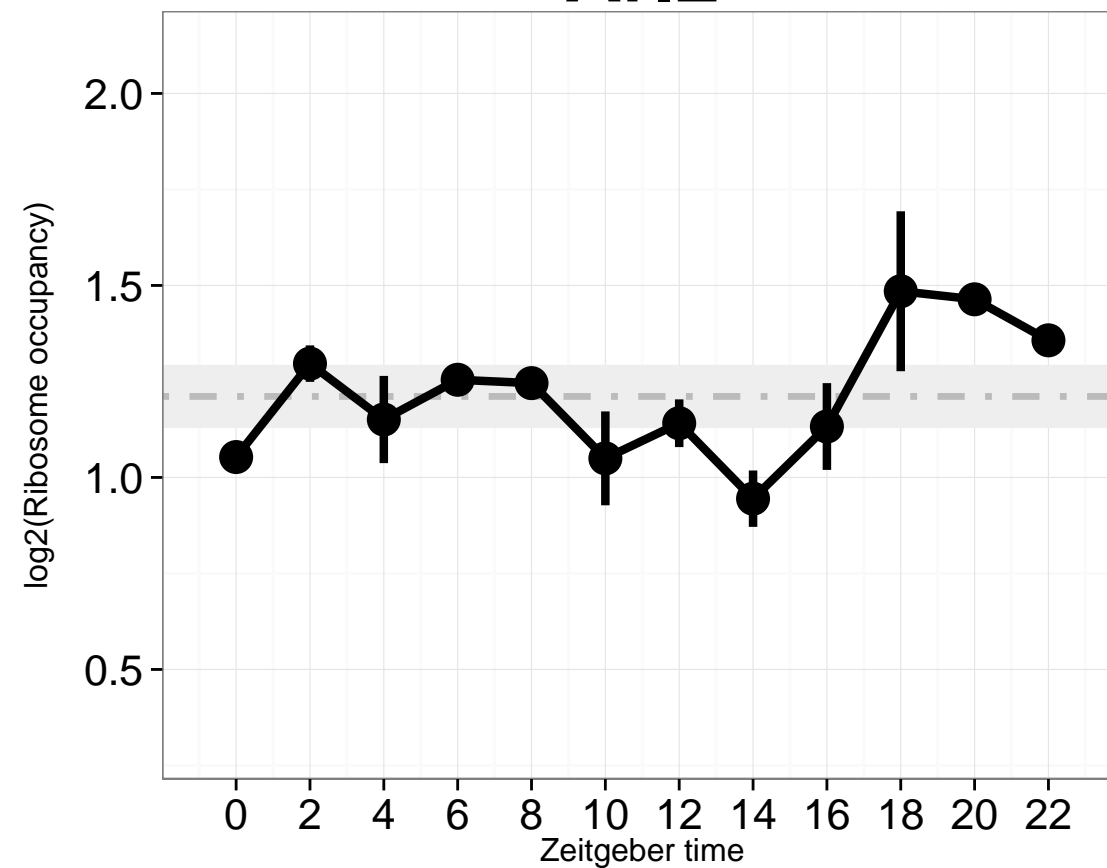

Supplement: Supplementary file 844 [file 1]

## Tmem192

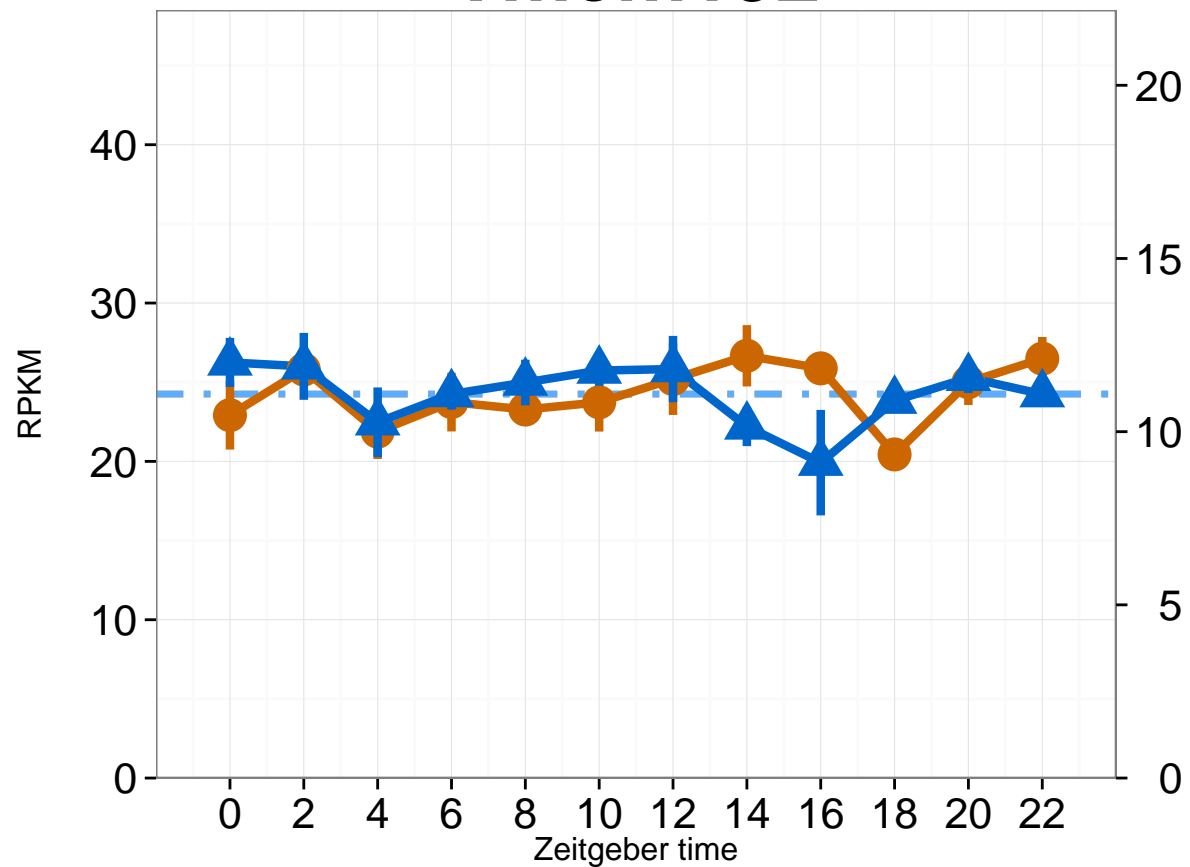

## Tmem192

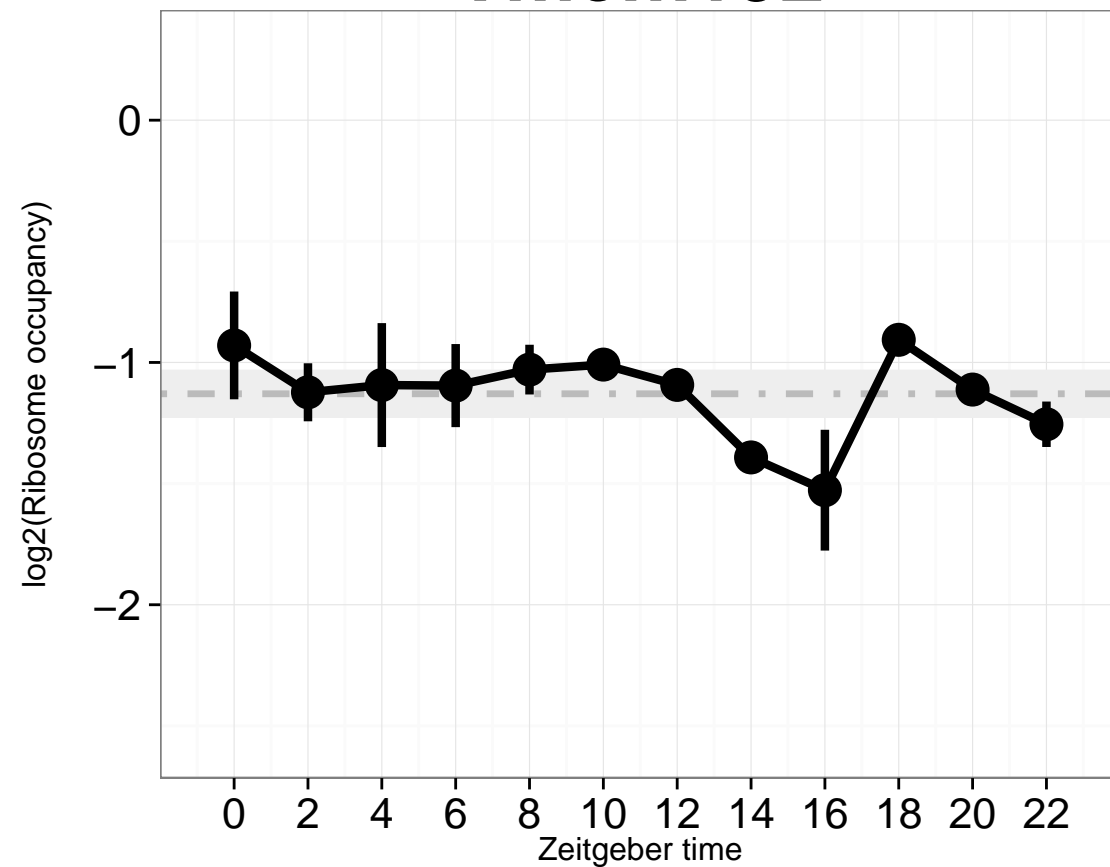

Supplement: Supplementary file 845 [file 1]

## Nup205

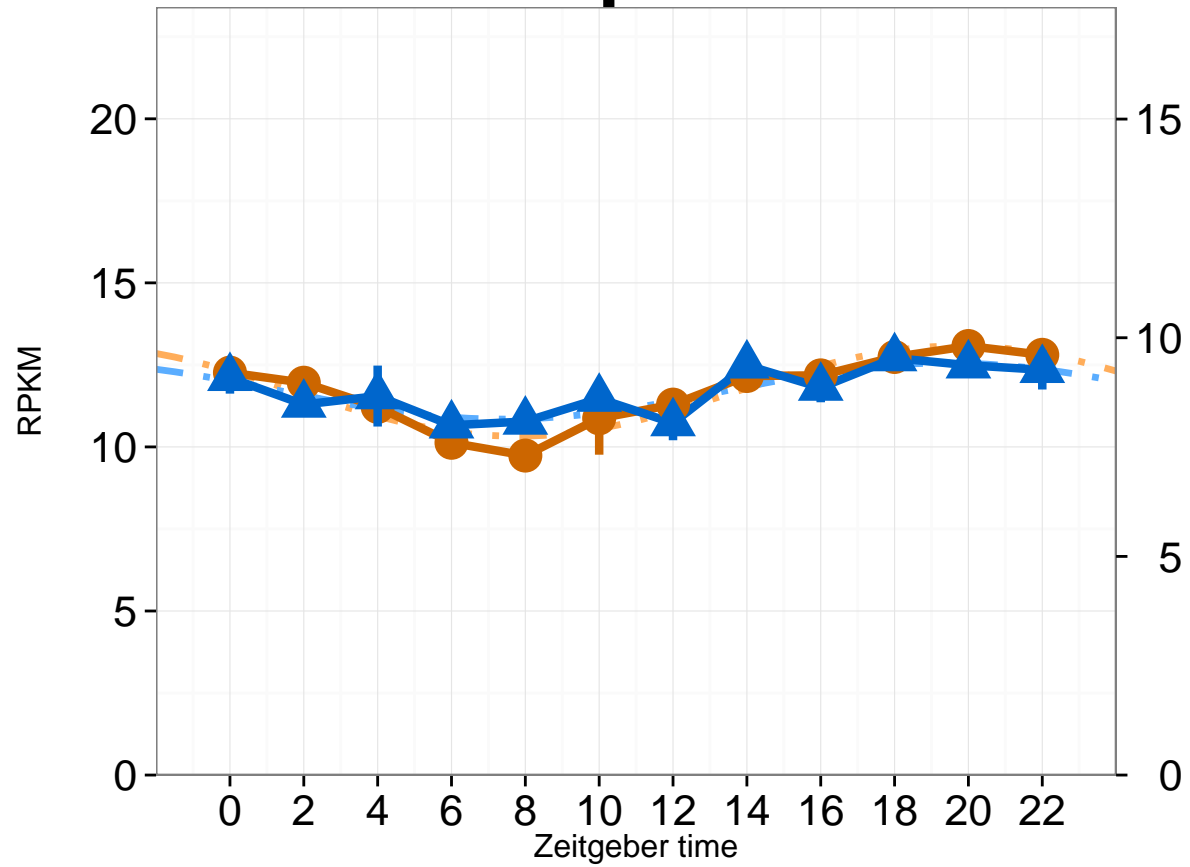

## Nup205

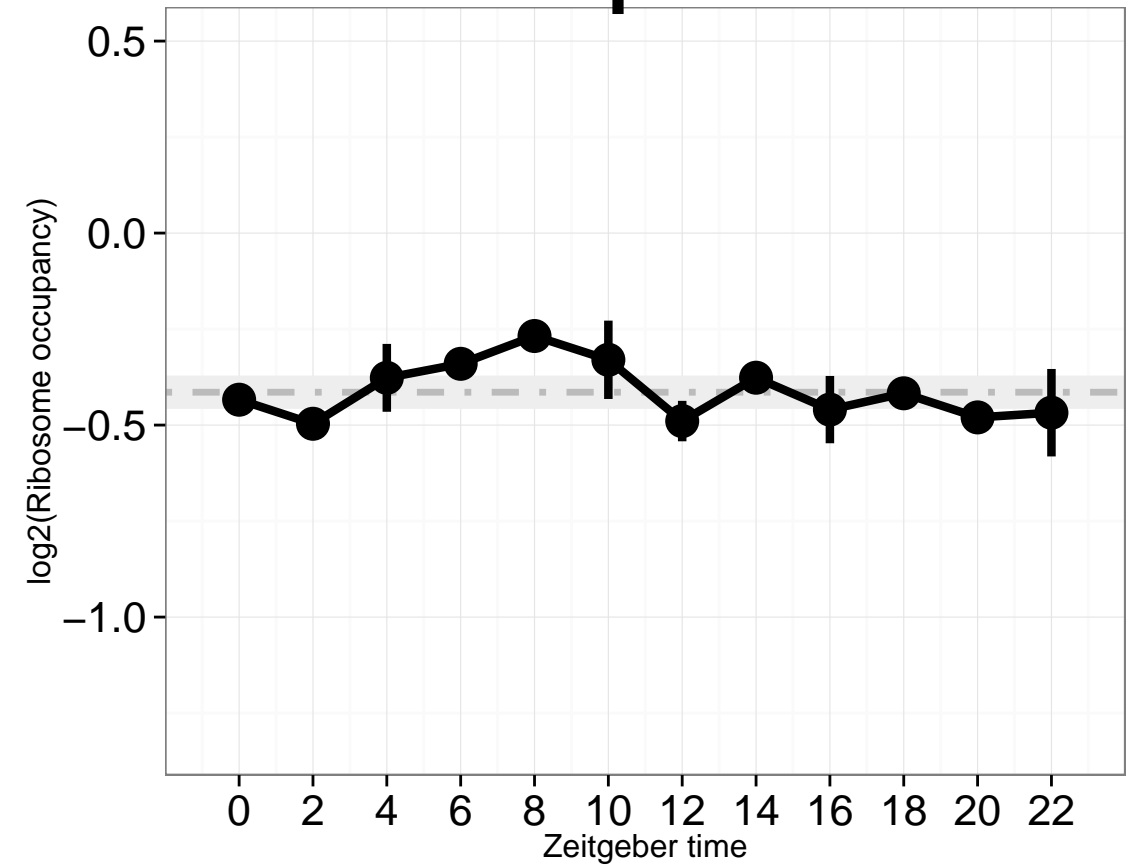

Supplement: Supplementary file 846 [file 1]

# Slc10a2

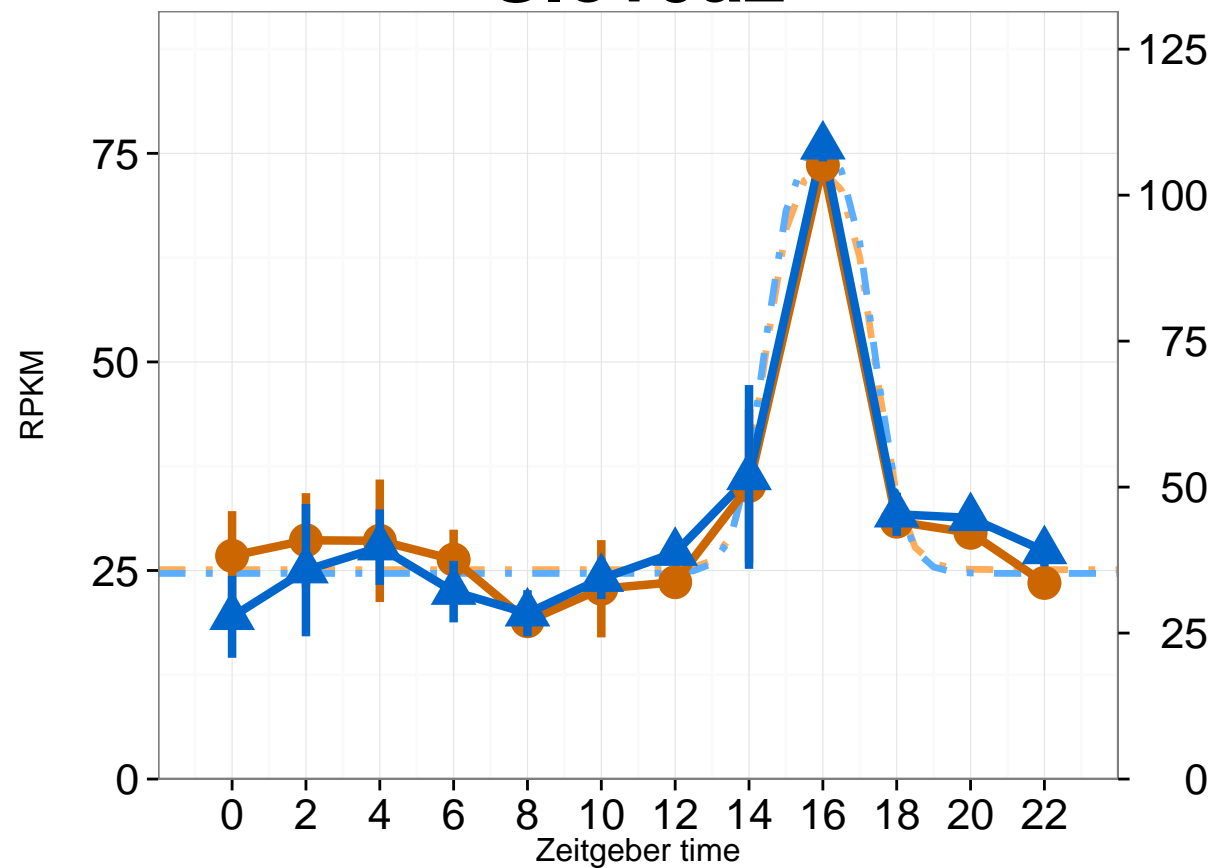

# Slc10a2

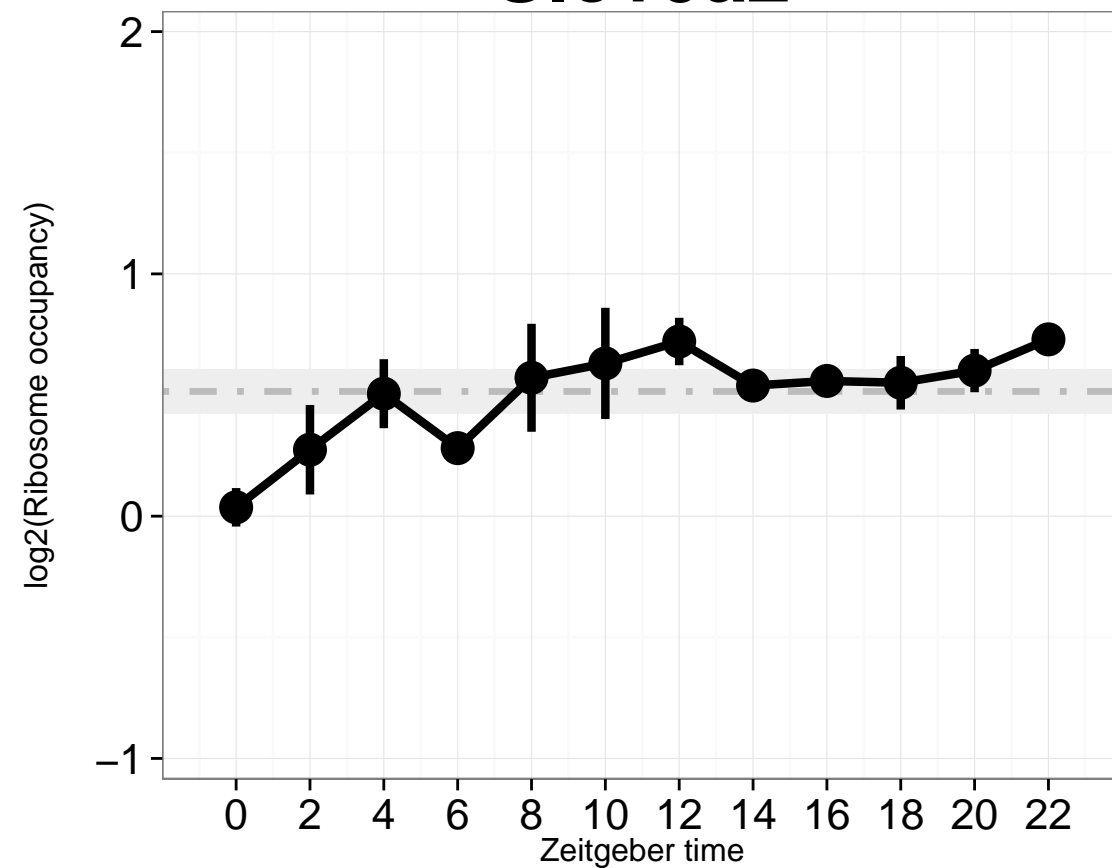

Supplement: Supplementary file 847 [file 1]

## Rptor

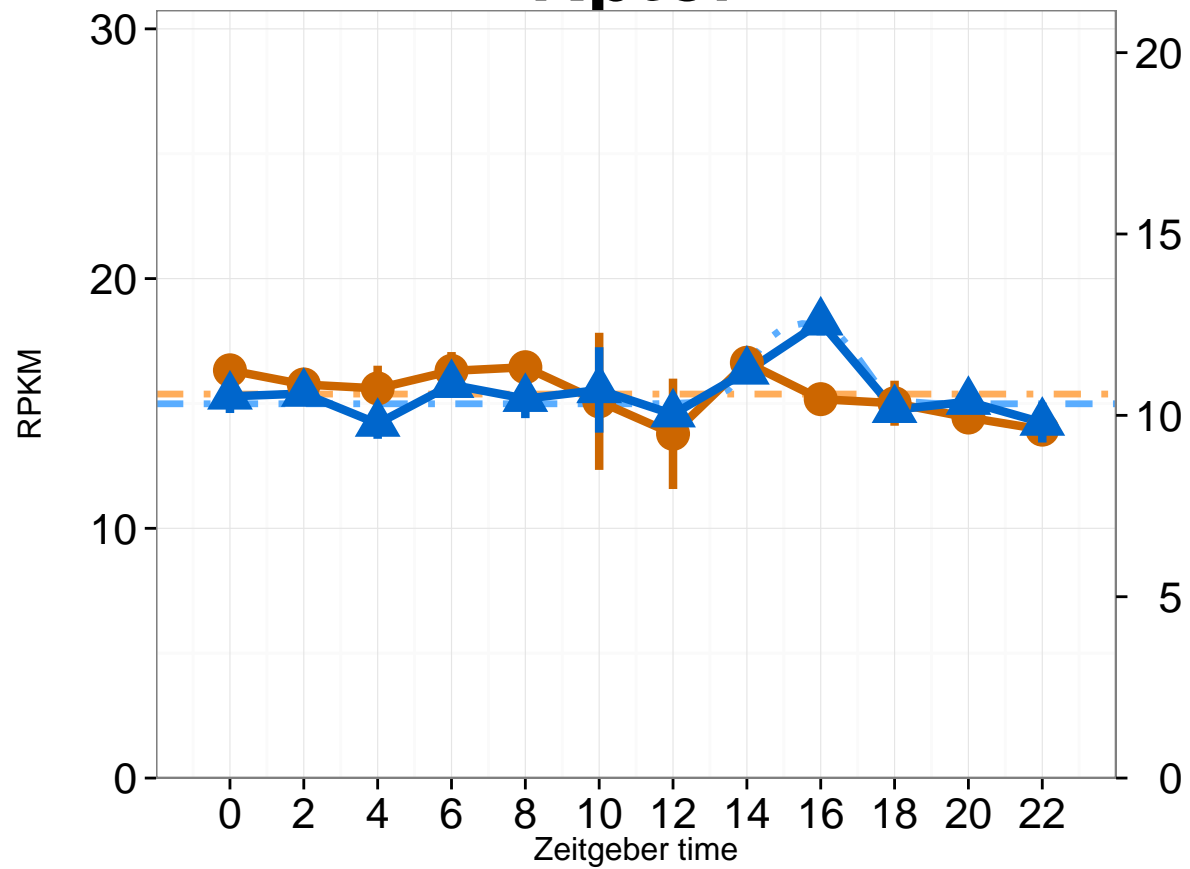

## Rptor

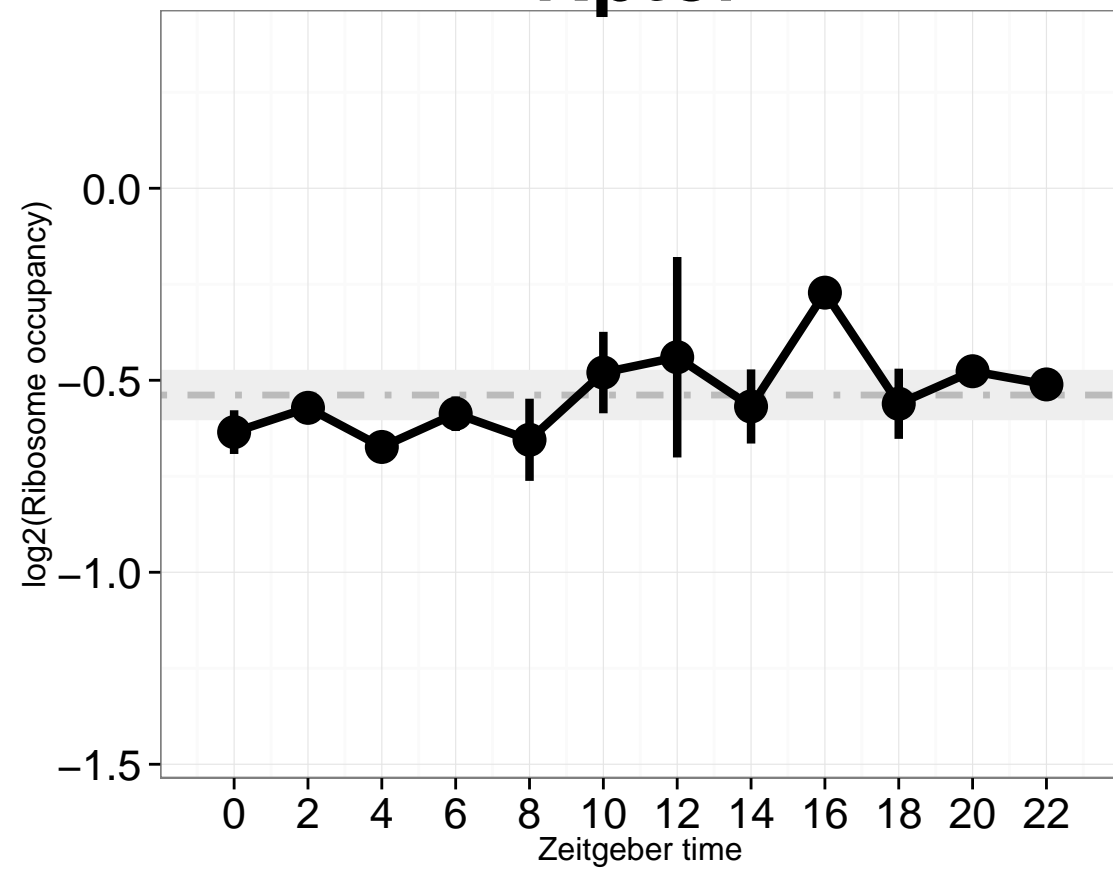

Supplement: Supplementary file 848 [file 1]

# Iba57

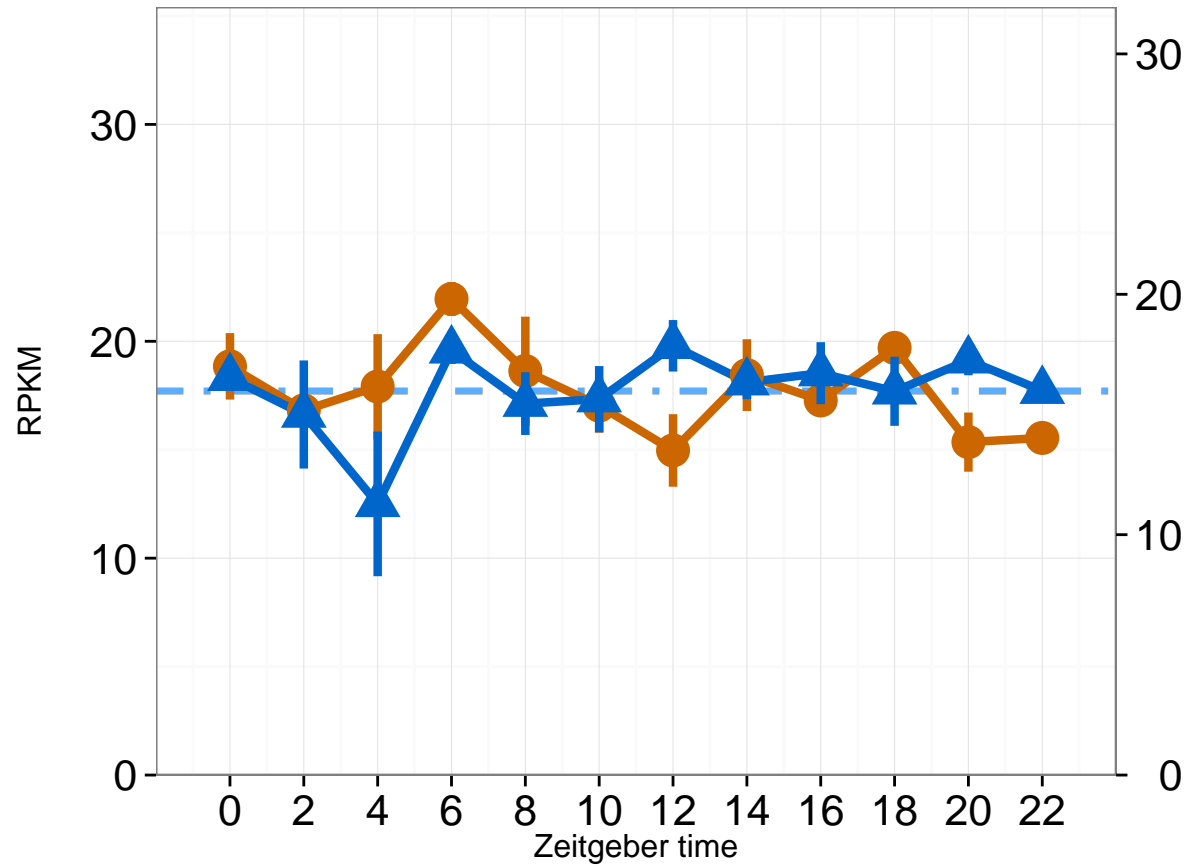

# Iba57

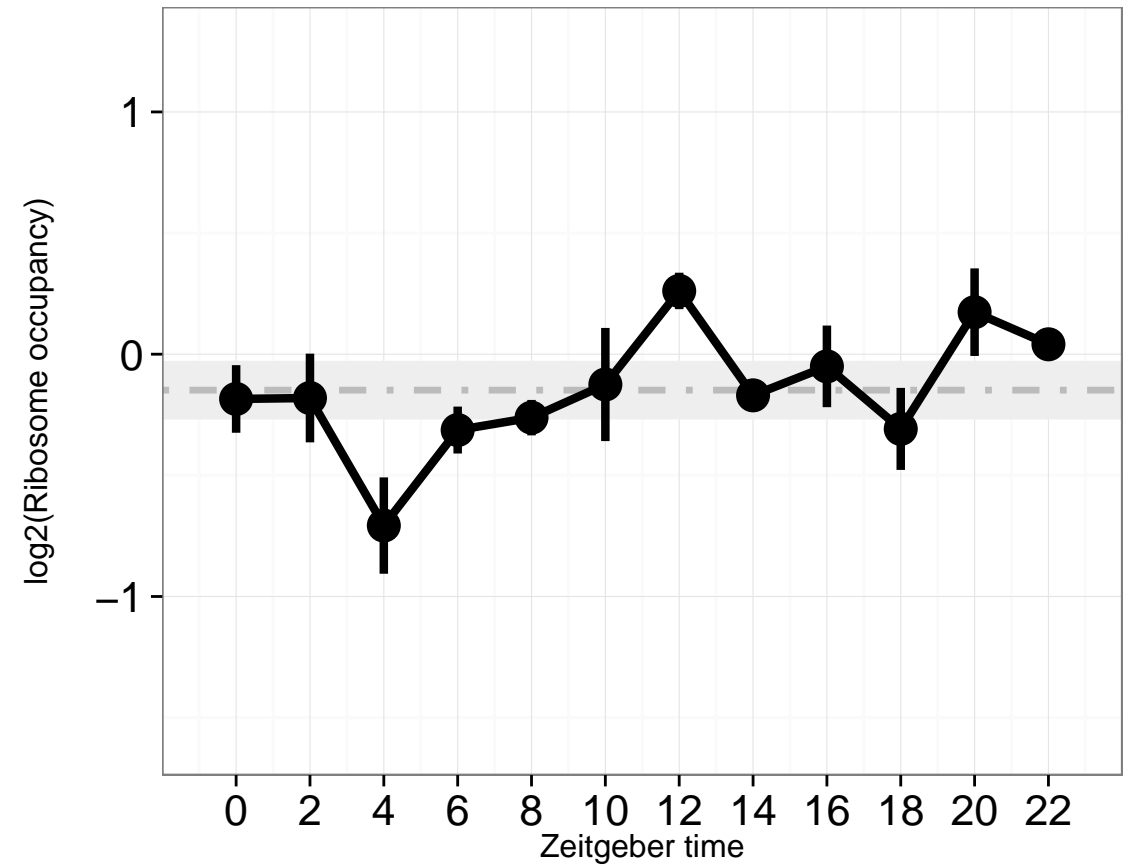

Supplement: Supplementary file 849 [file 1]

## Fancd2os

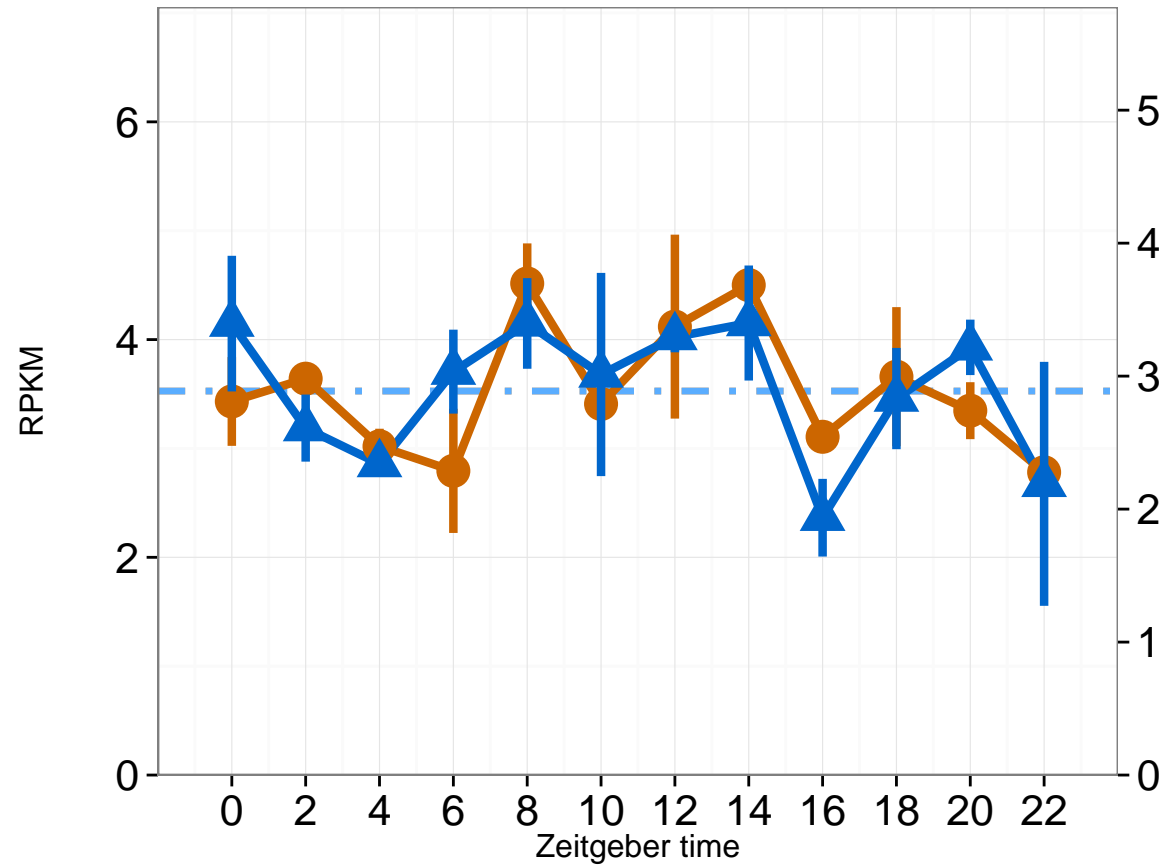

## Fancd2os

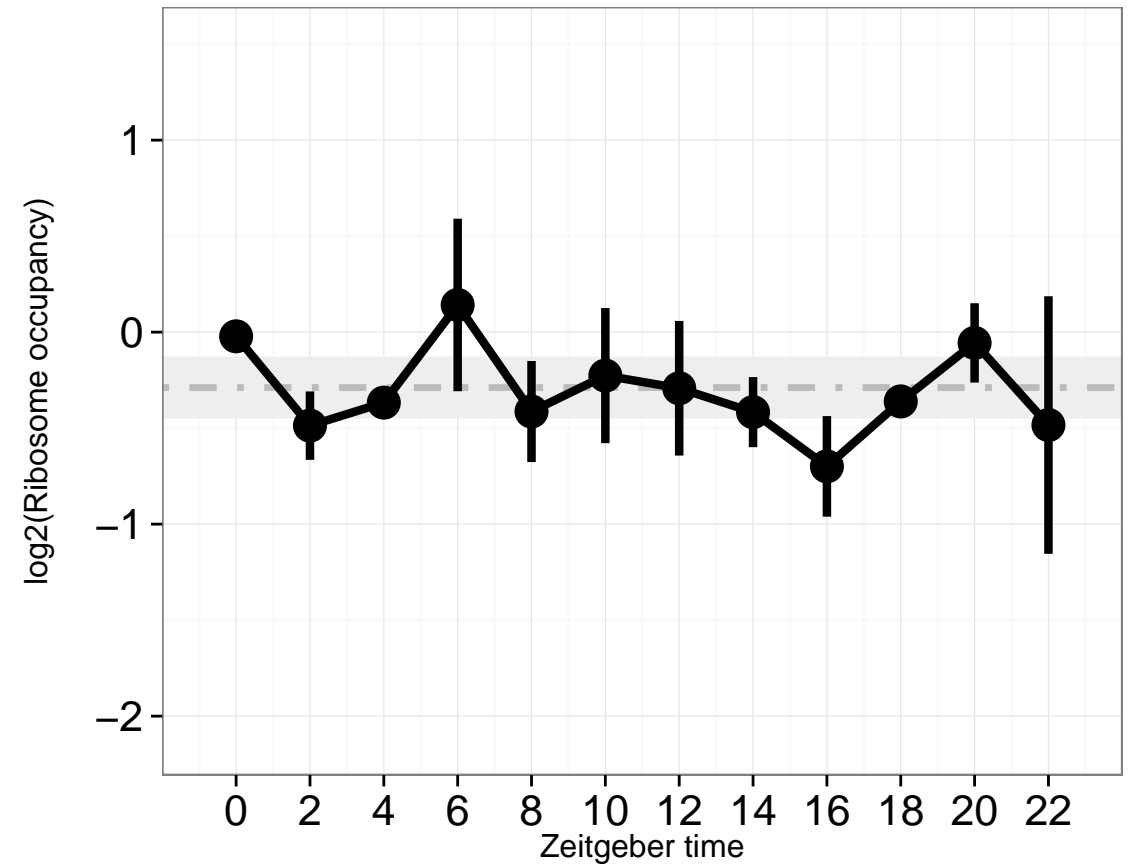

Supplement: Supplementary file 850 [file 1]

# Gpsm3

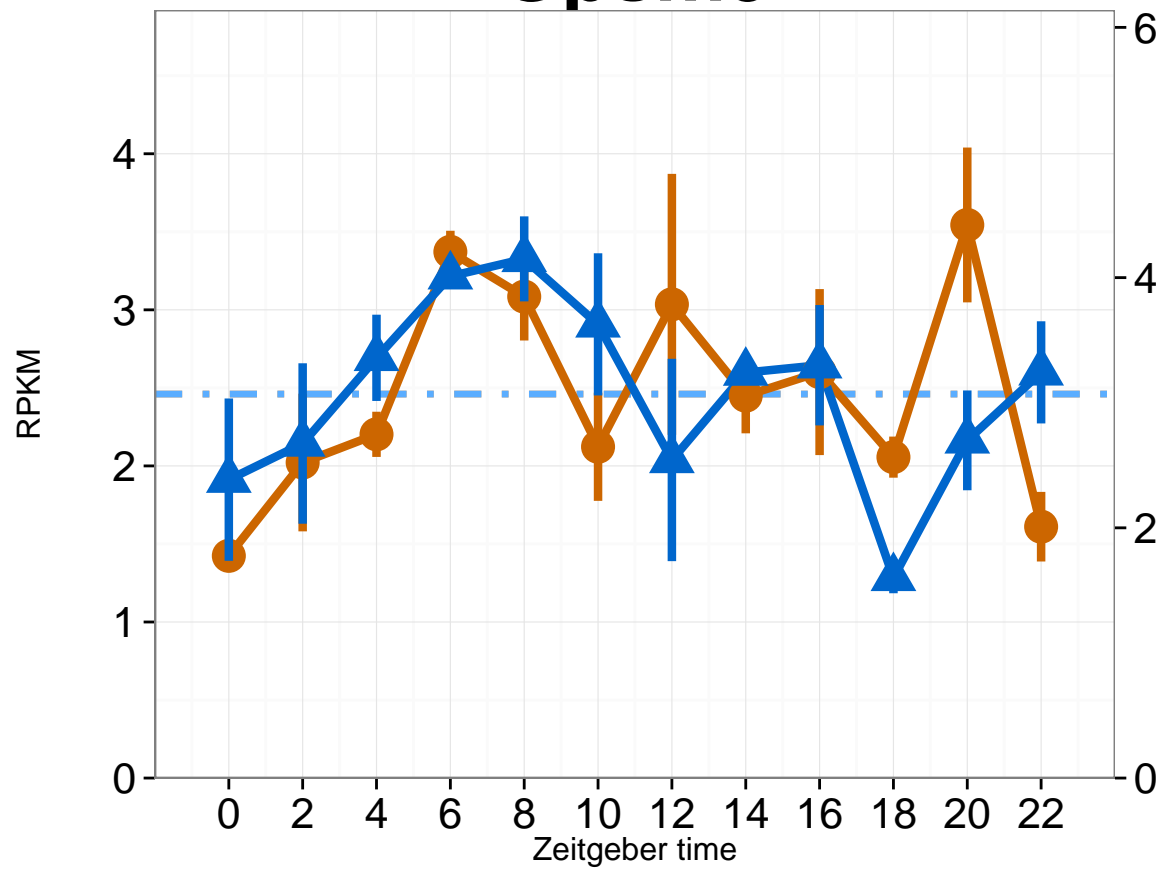

# Gpsm3

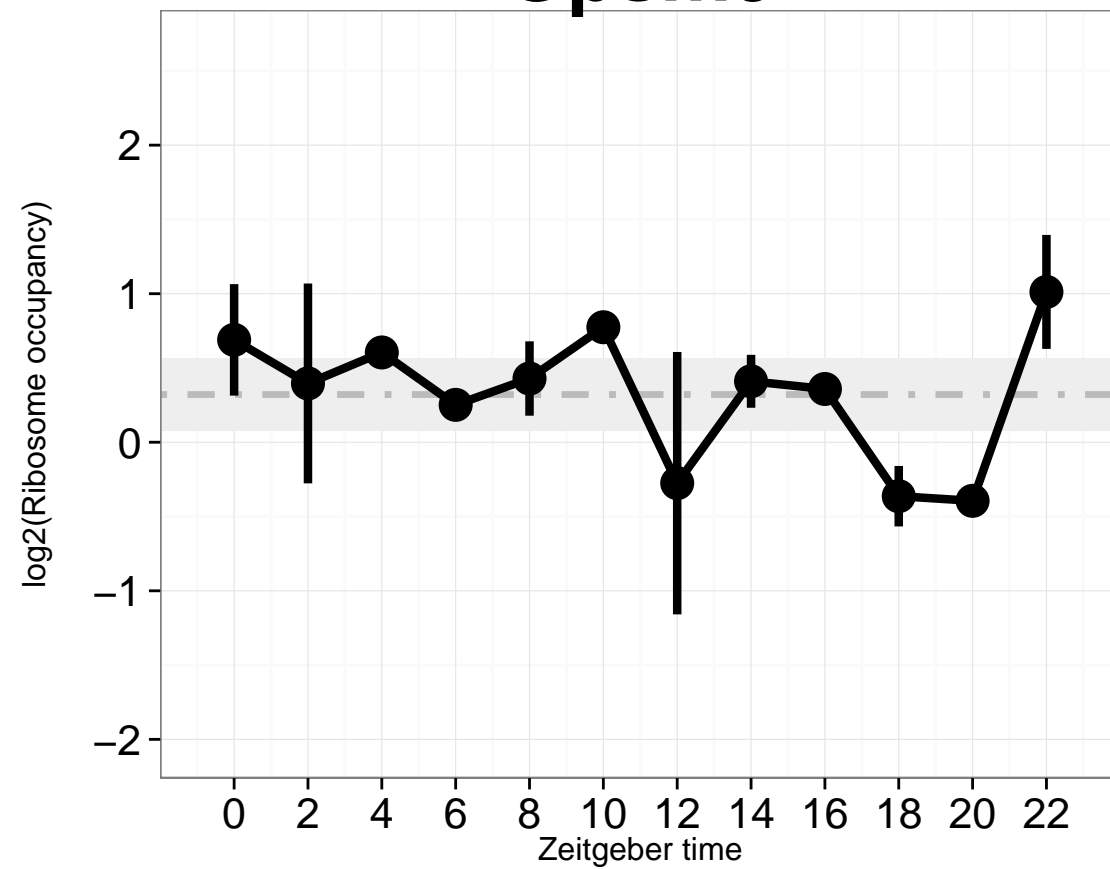

Supplement: Supplementary file 851 [file 1]

# Fkbp8

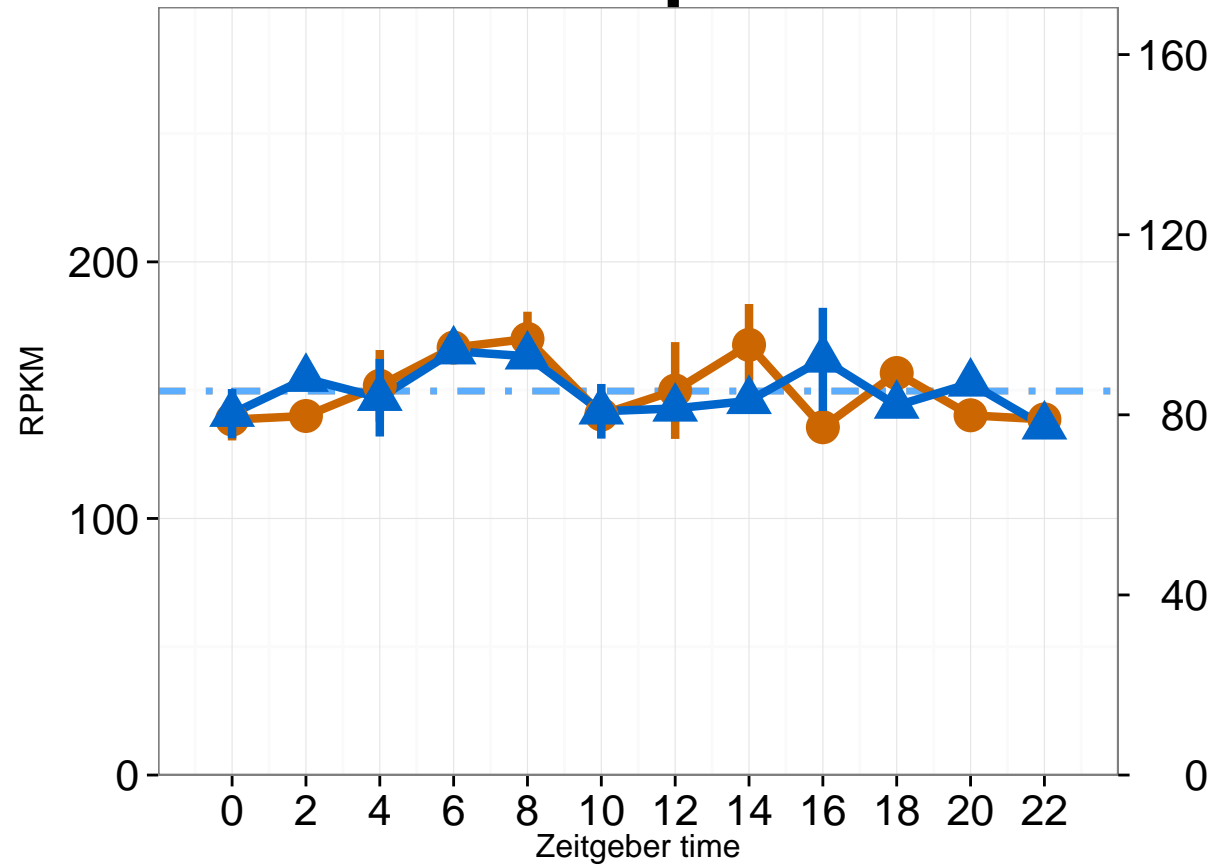

# Fkbp8

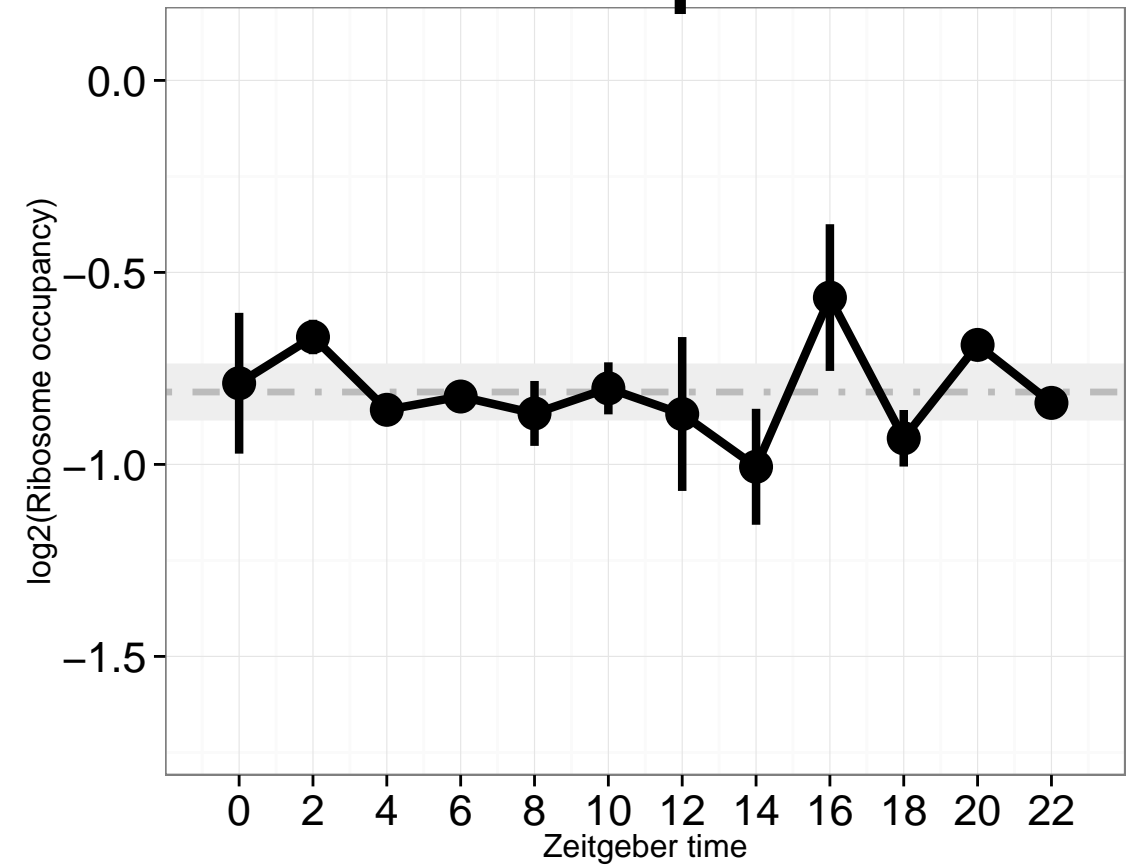

Supplement: Supplementary file 852 [file 1]

# Tomm20

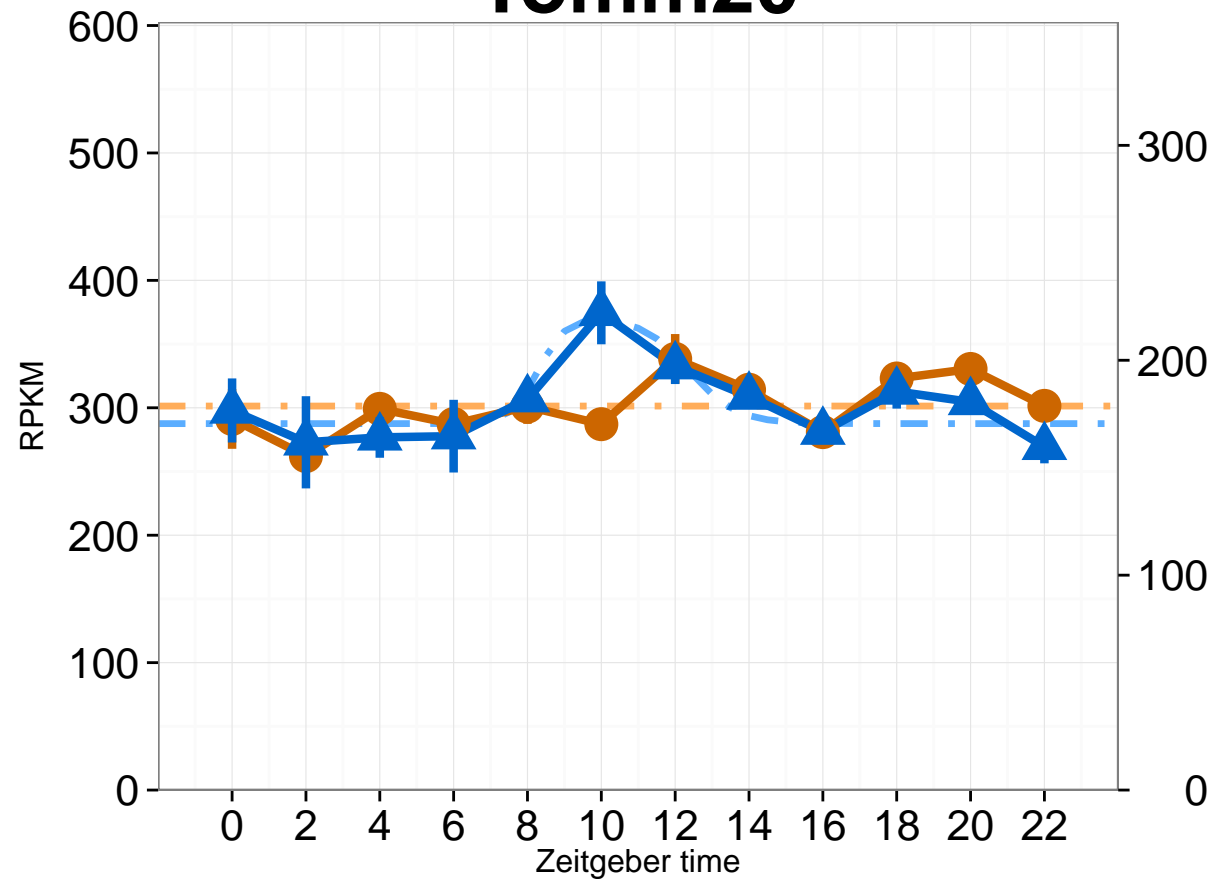

# Tomm20

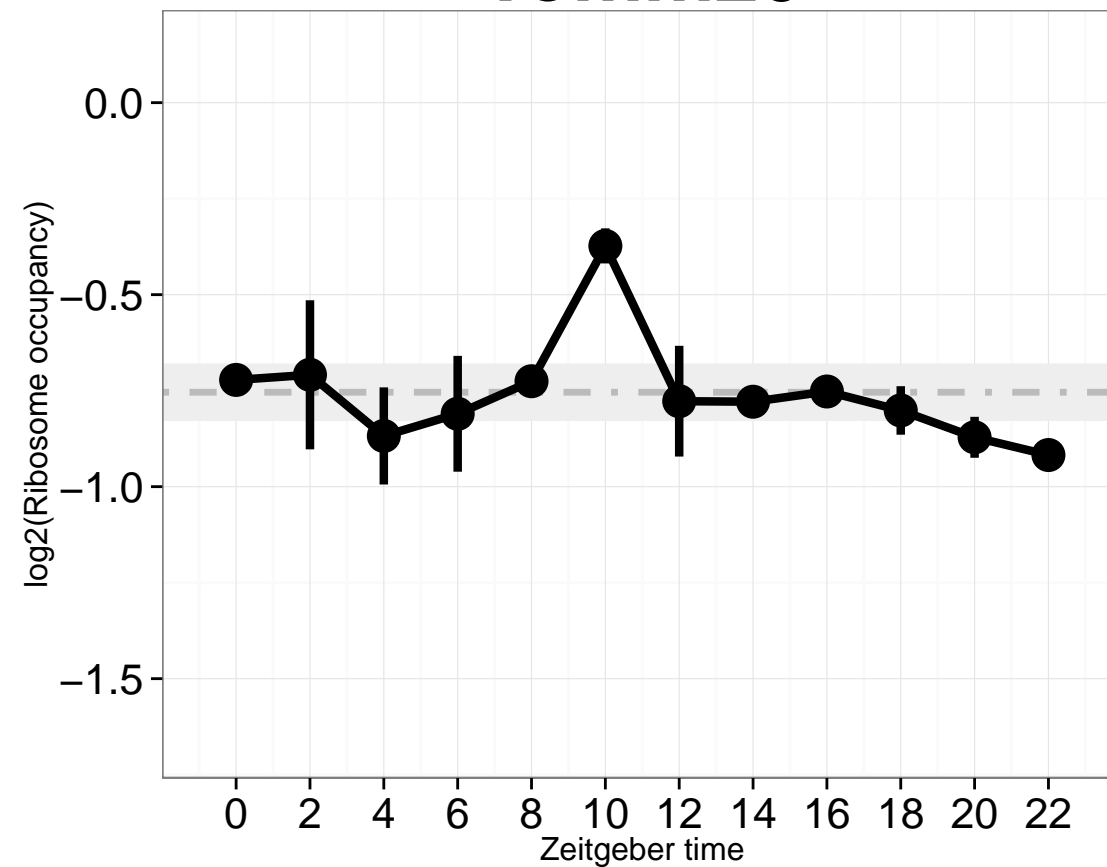

Supplement: Supplementary file 853 [file 1]

## Mad1I1

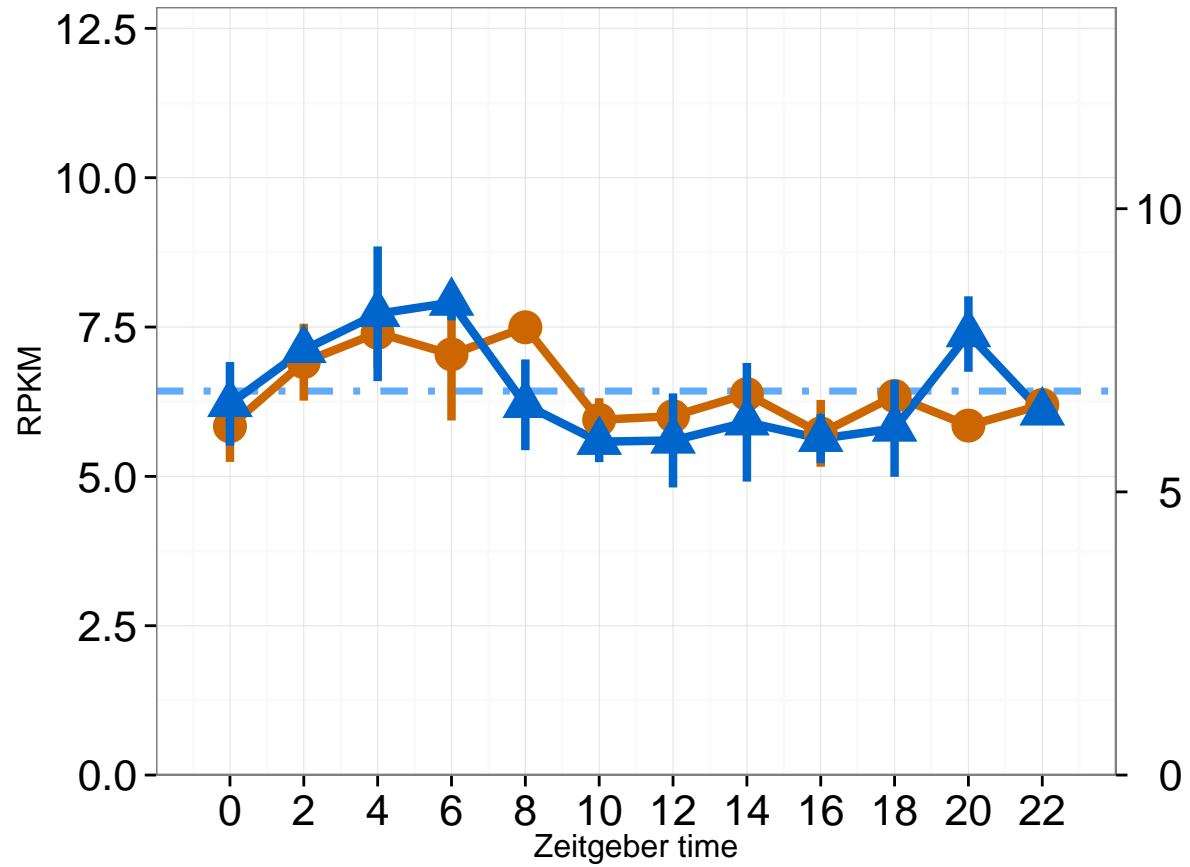

## Mad1I1

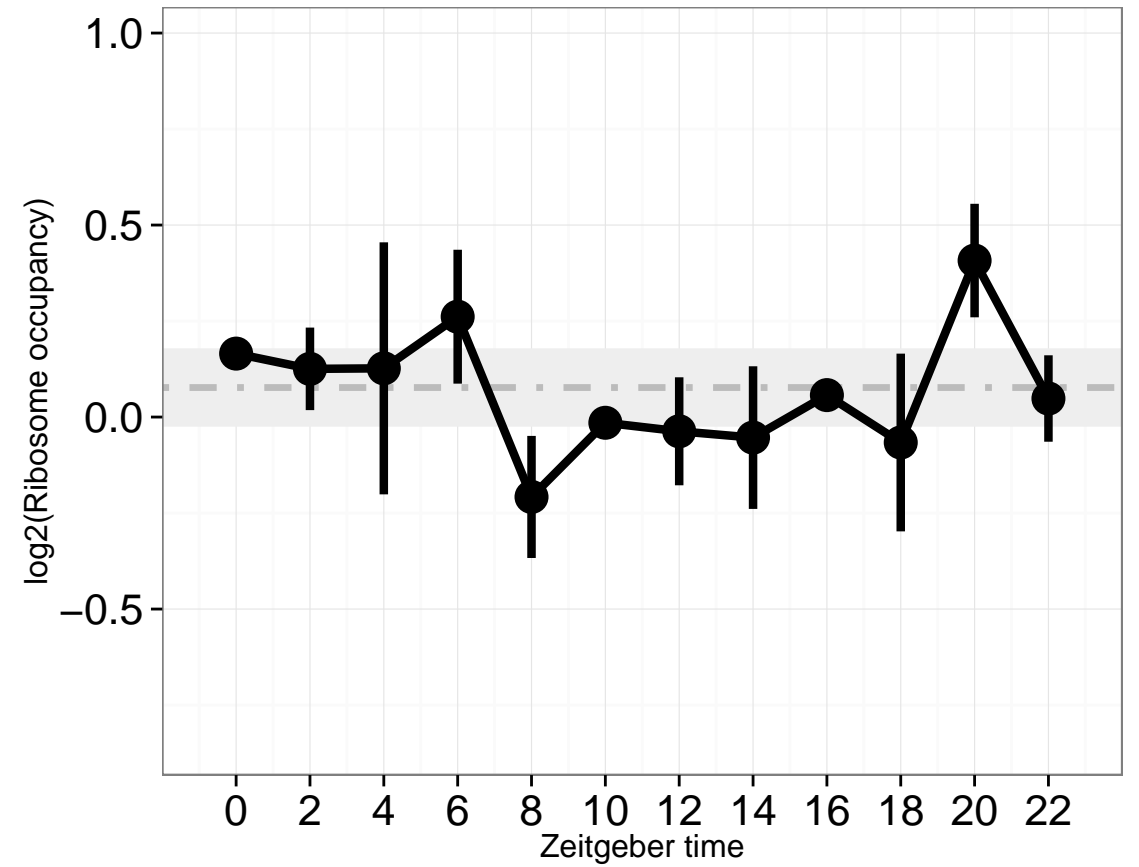

Supplement: Supplementary file 854 [file 1]

## Casc4

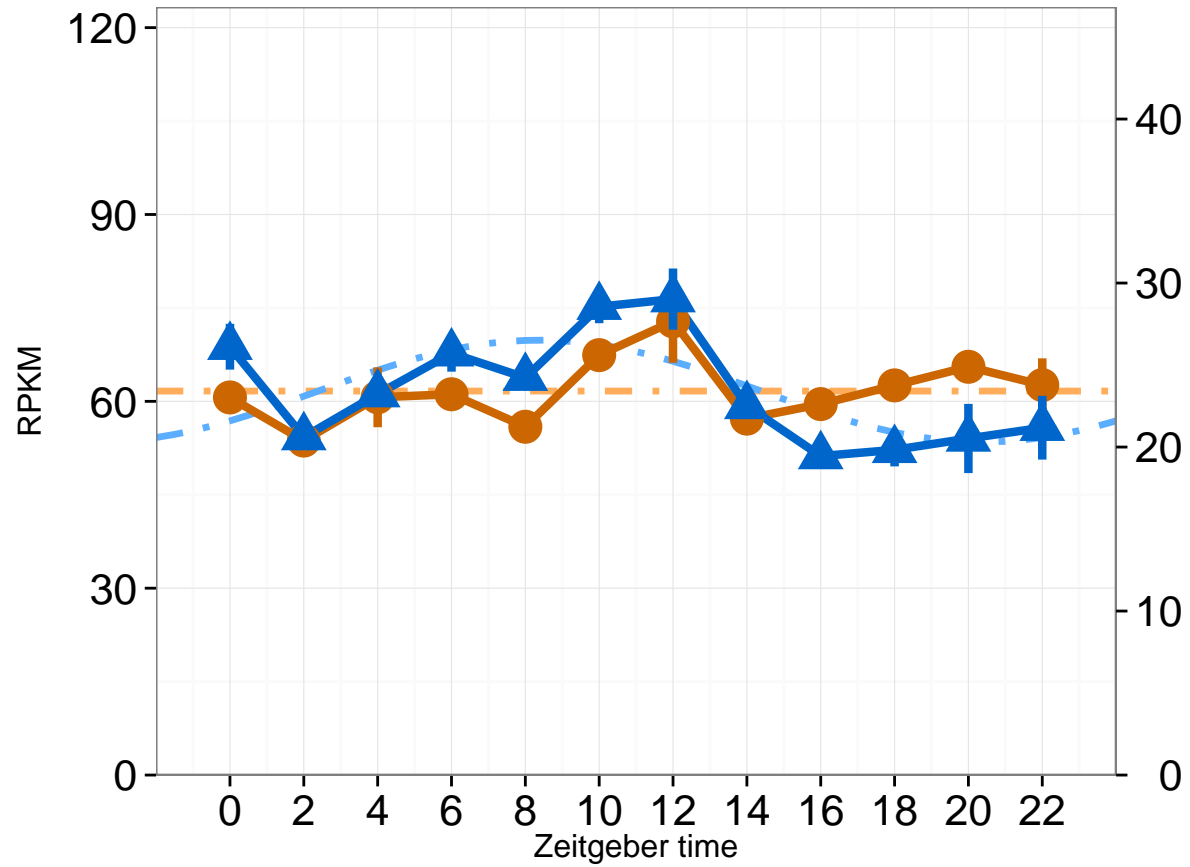

## Casc4

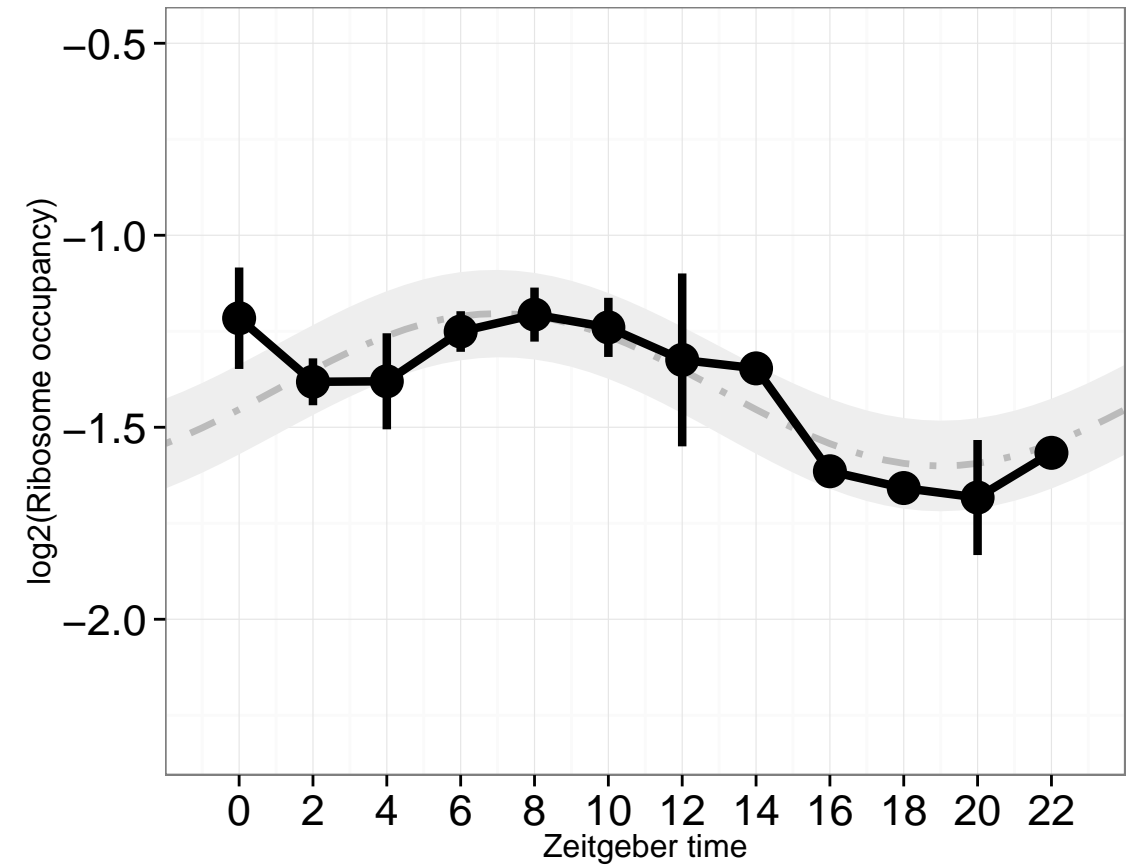

Supplement: Supplementary file 855 [file 1]

# Ppp1r2

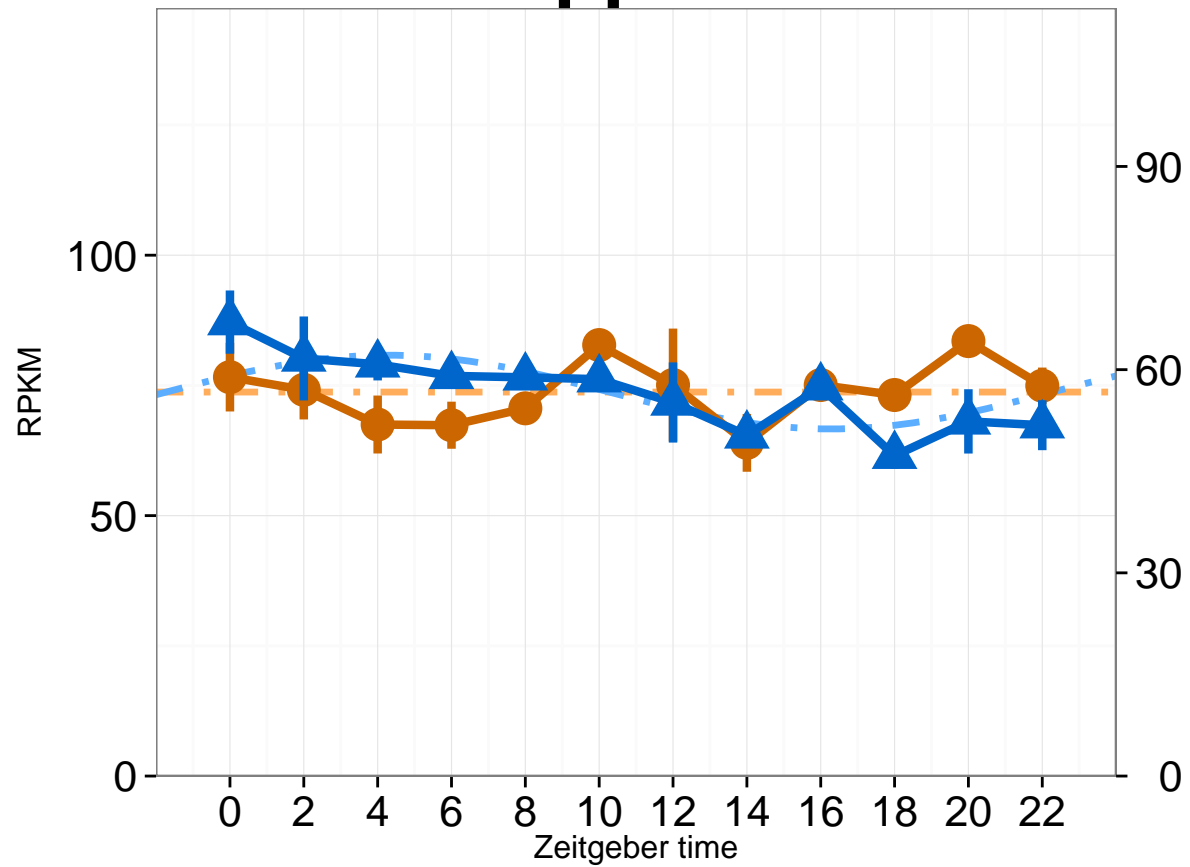

# Ppp1r2

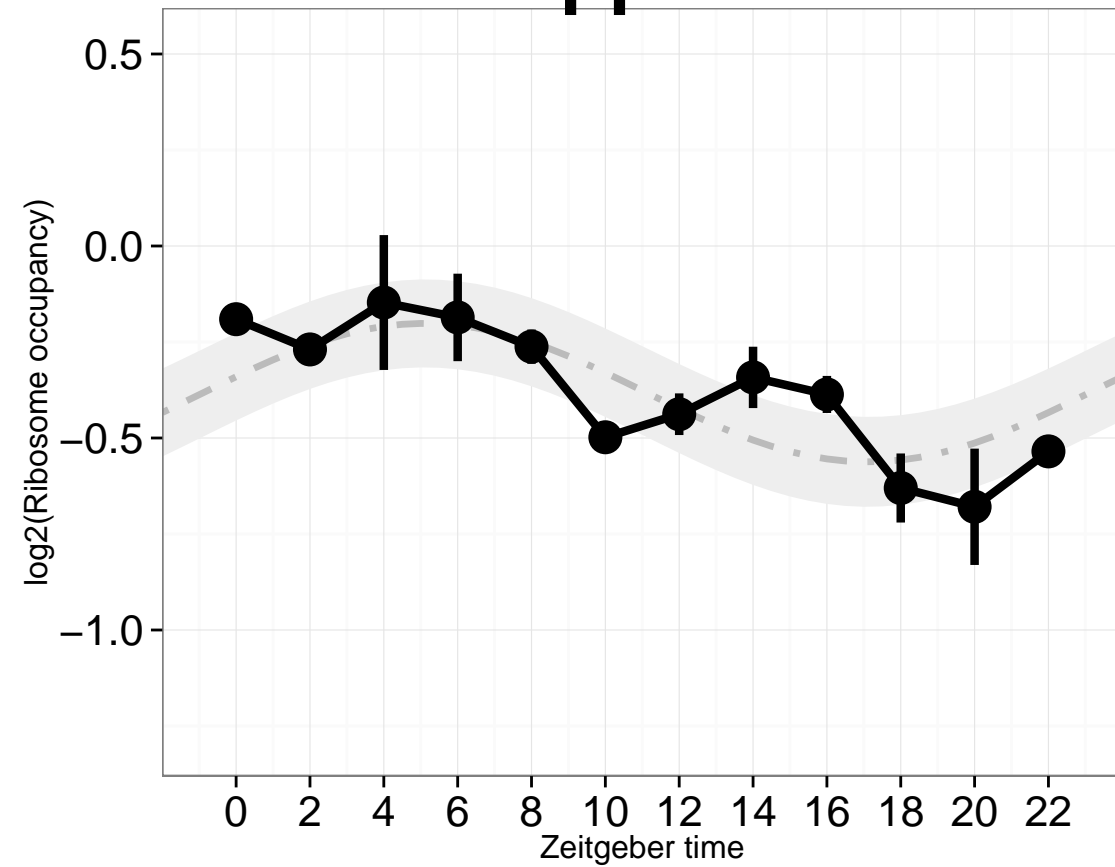

Supplement: Supplementary file 856 [file 1]

## Cflar

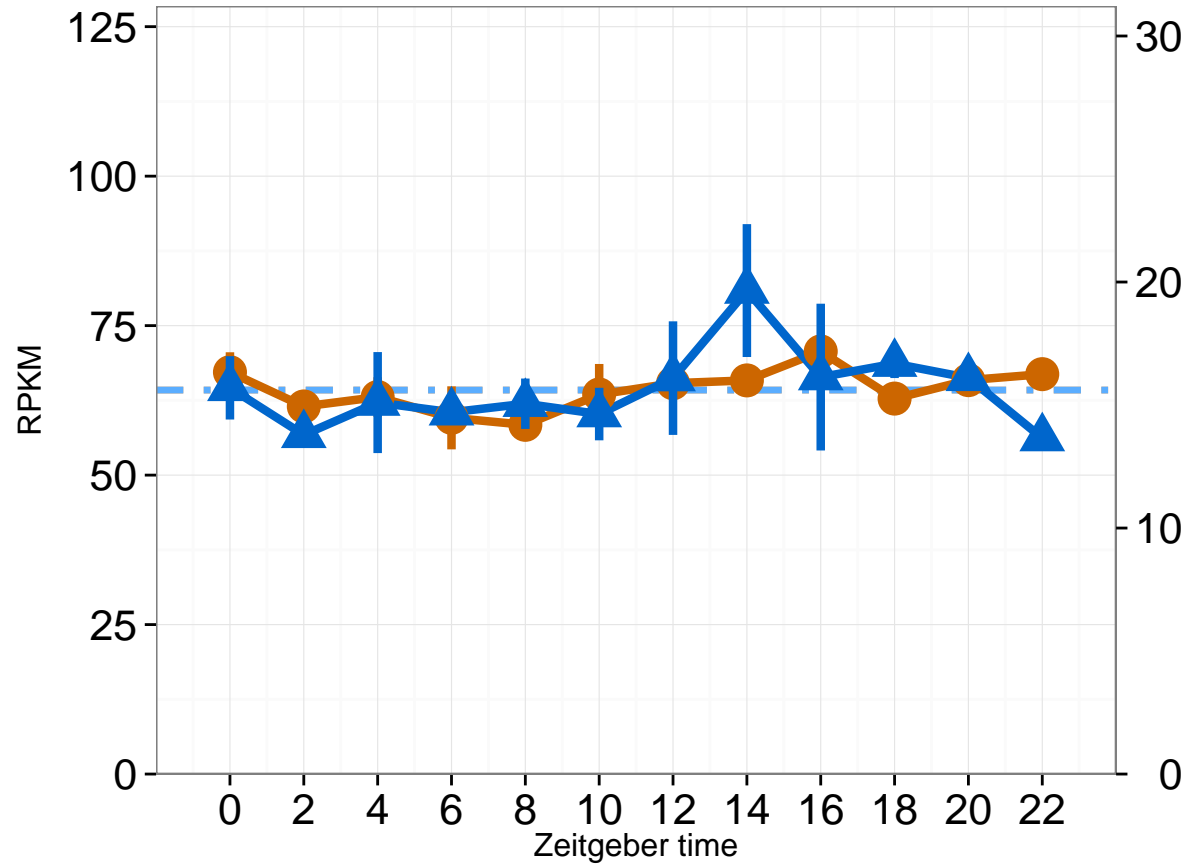

## Cflar

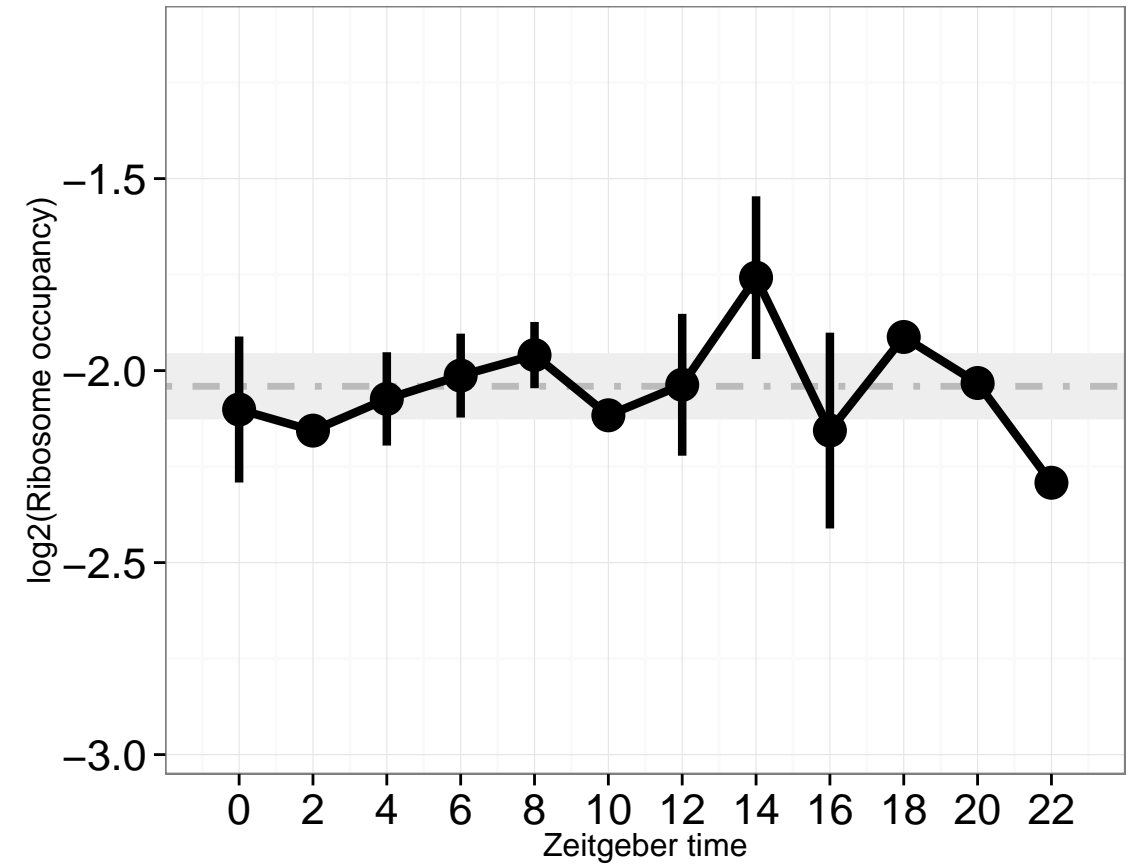

Supplement: Supplementary file 857 [file 1]

## Kif1b

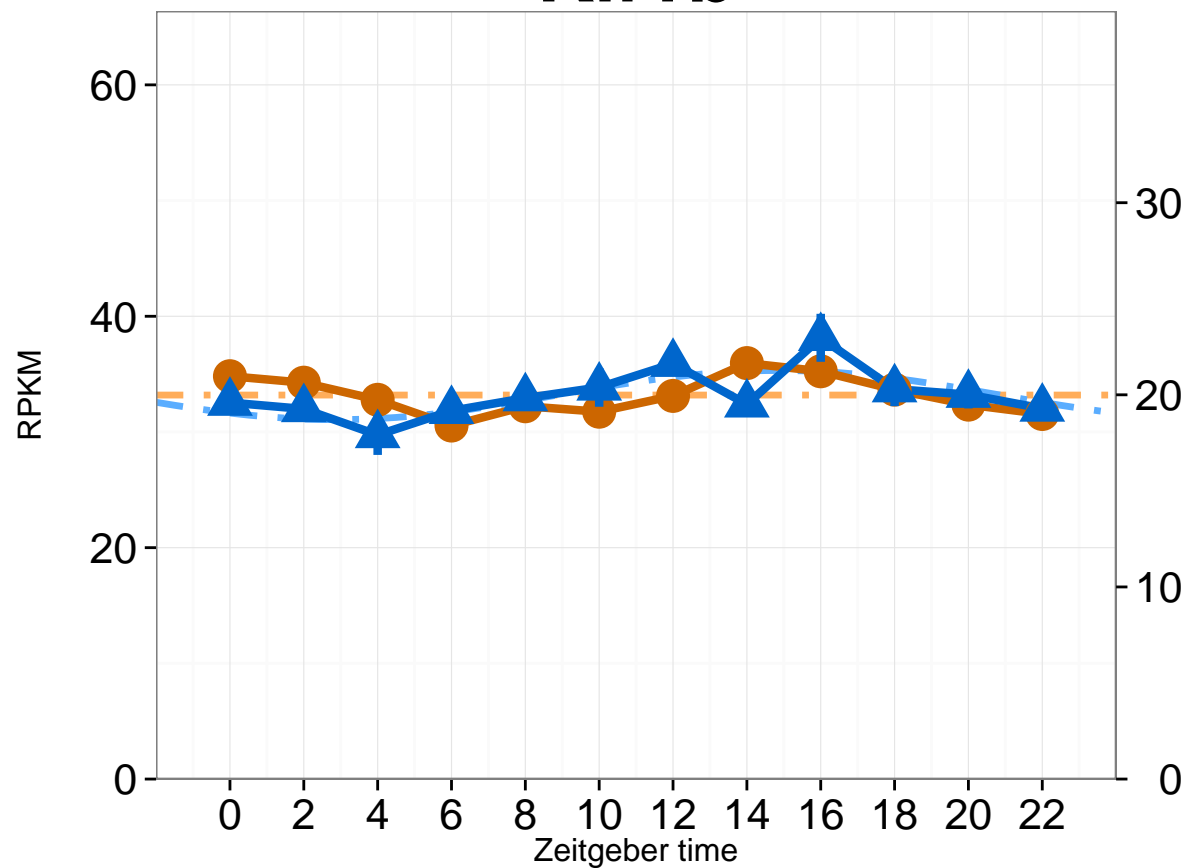

## Kif1b

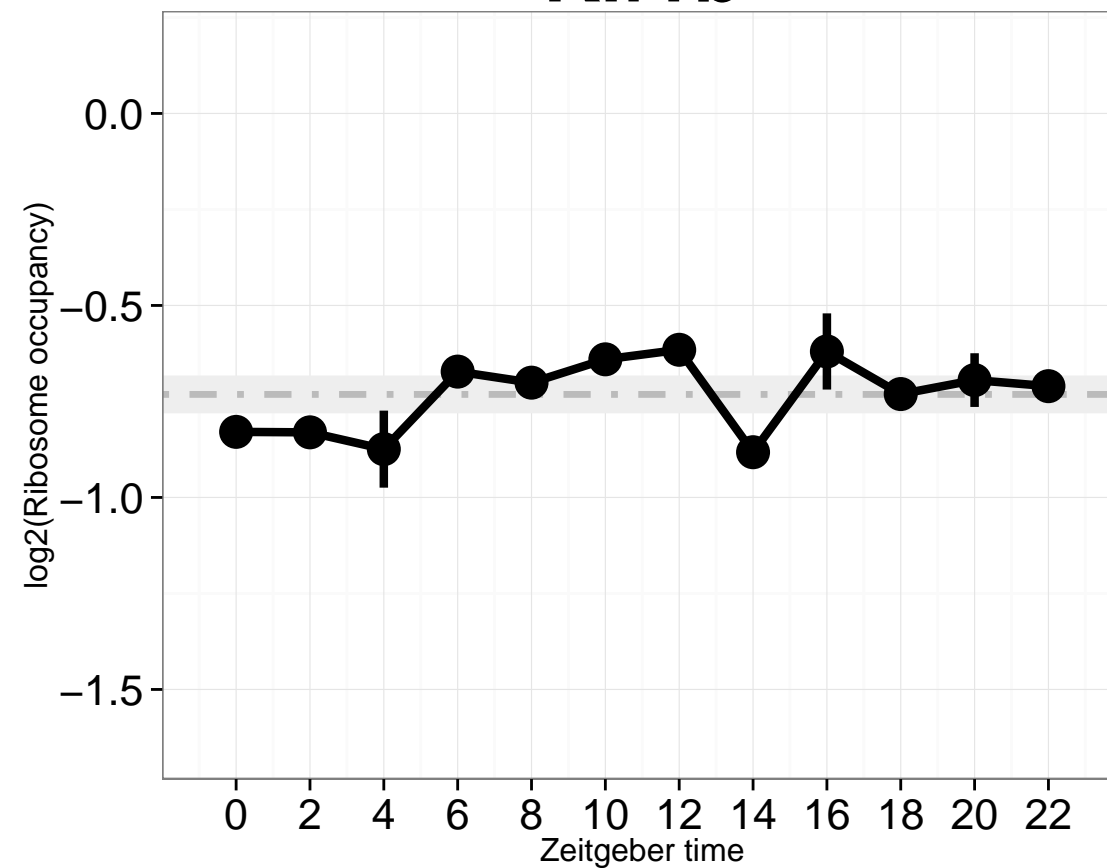

Supplement: Supplementary file 858 [file 1]

# Lats1

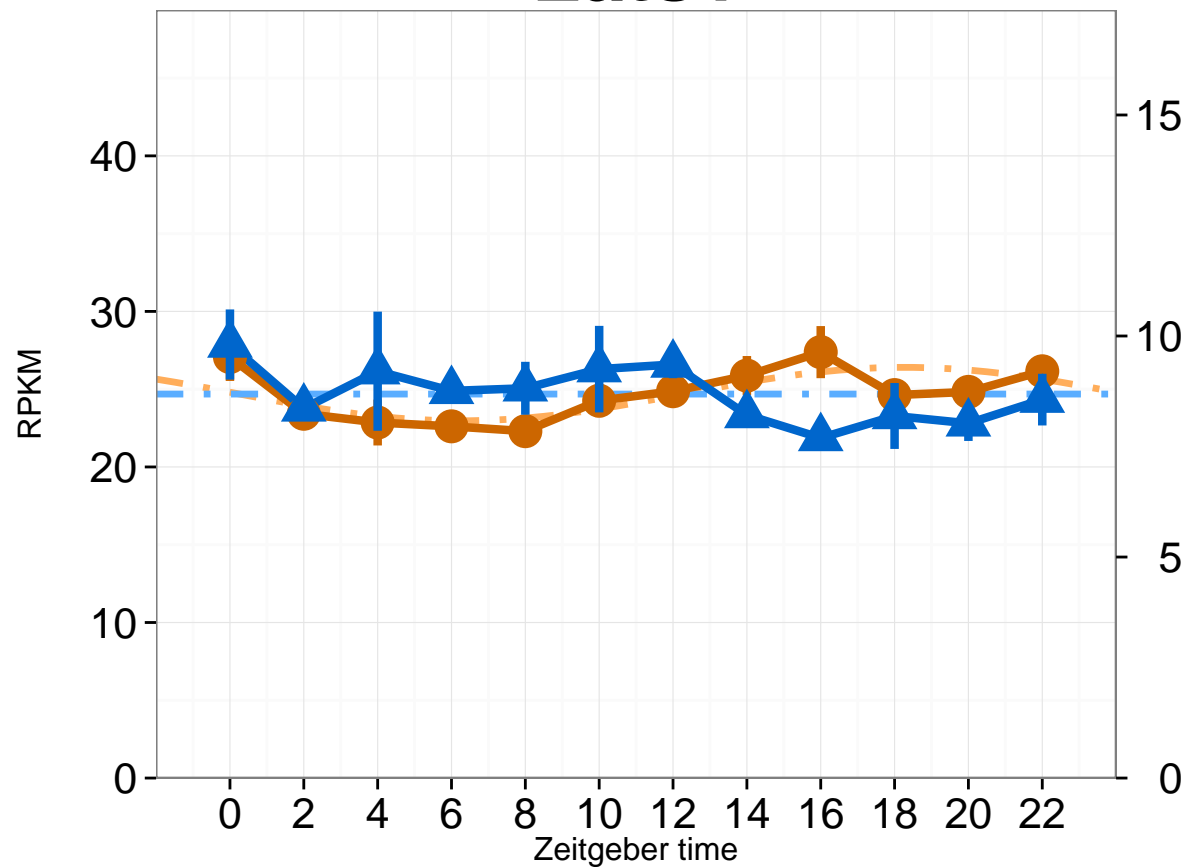

# Lats1

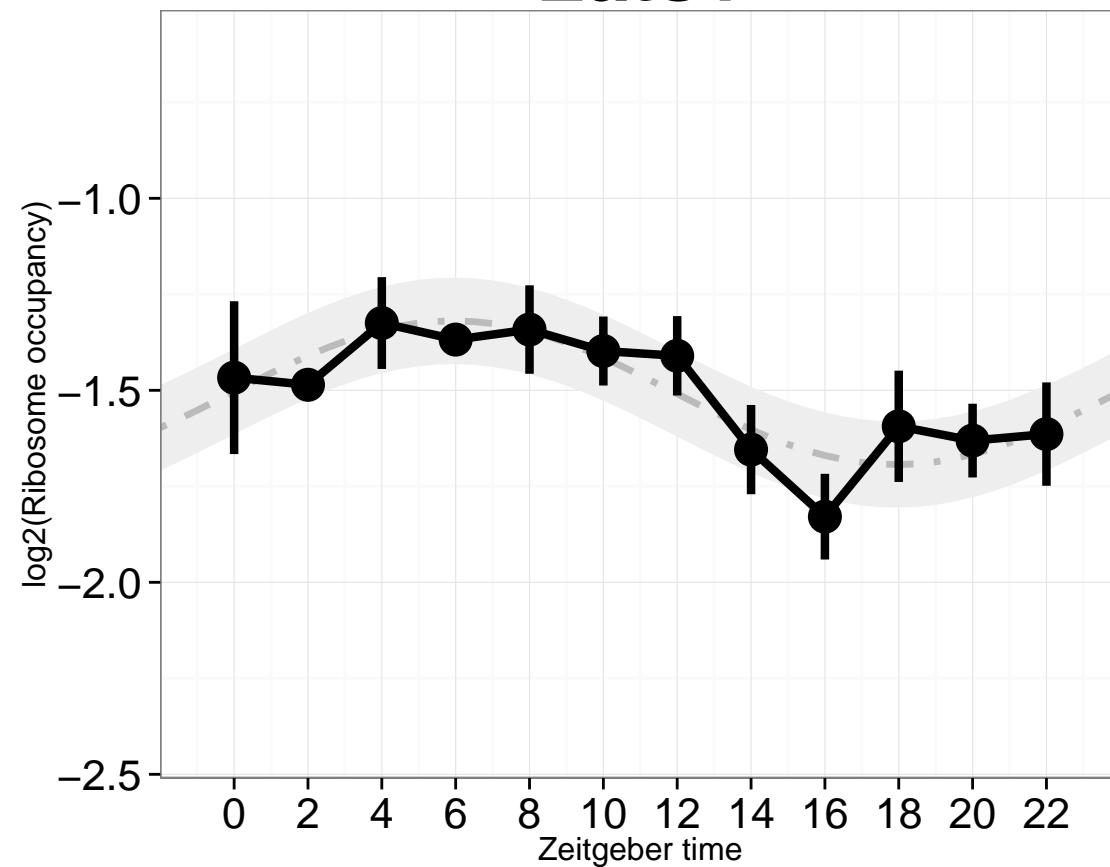

Supplement: Supplementary file 859 [file 1]

# Amz1

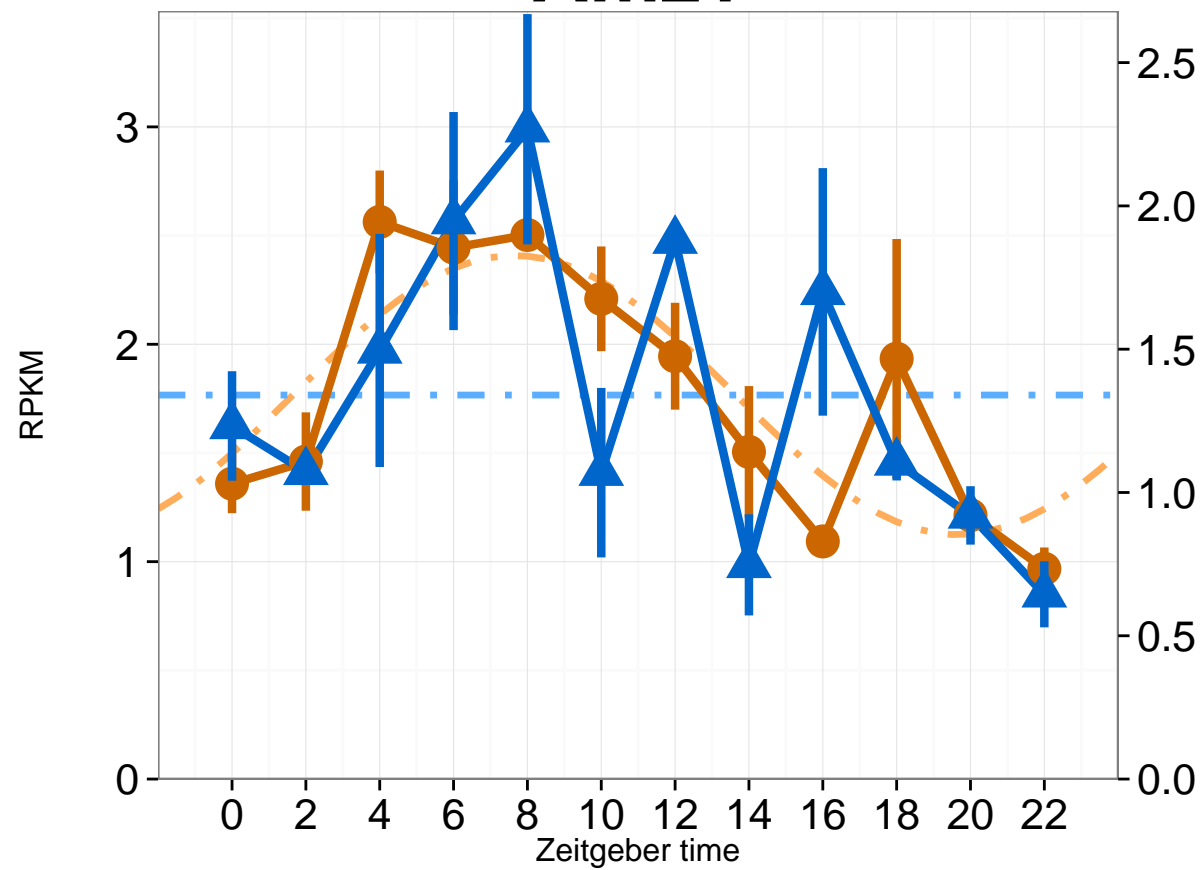

# Amz1

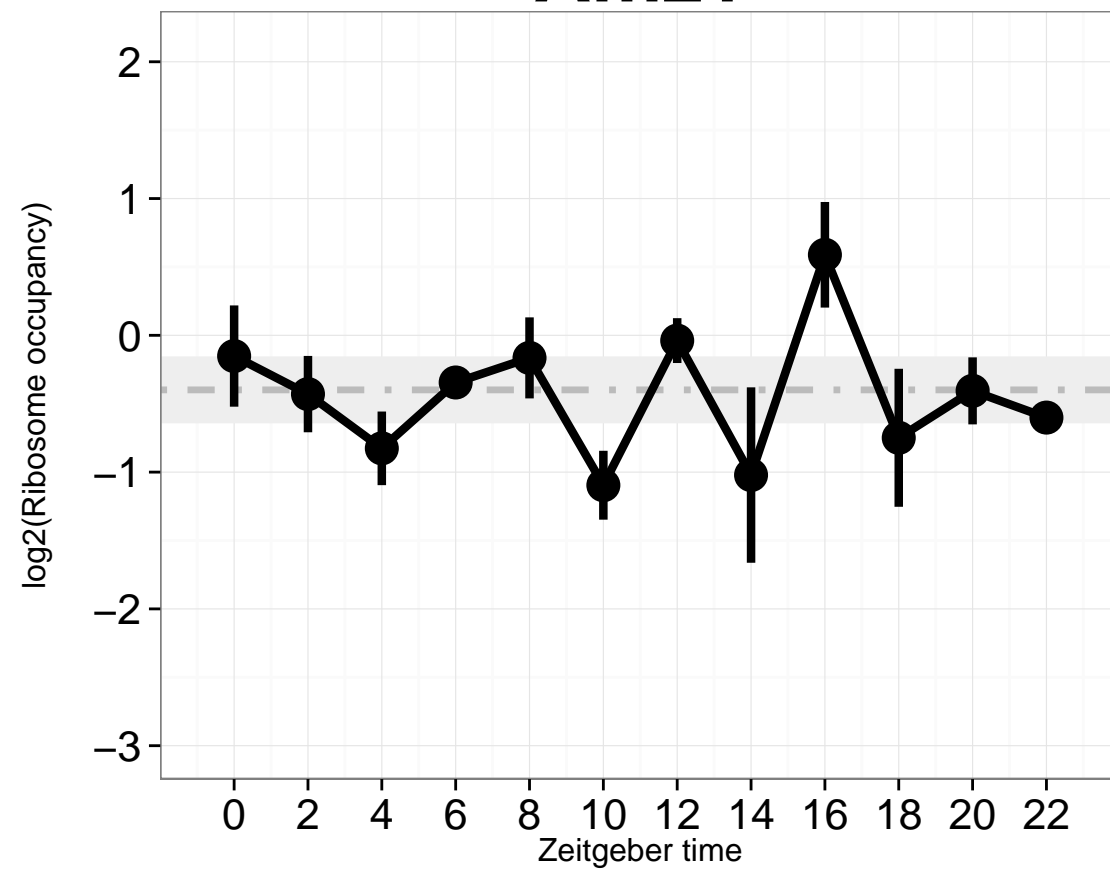

Supplement: Supplementary file 860 [file 1]

## Gm17333

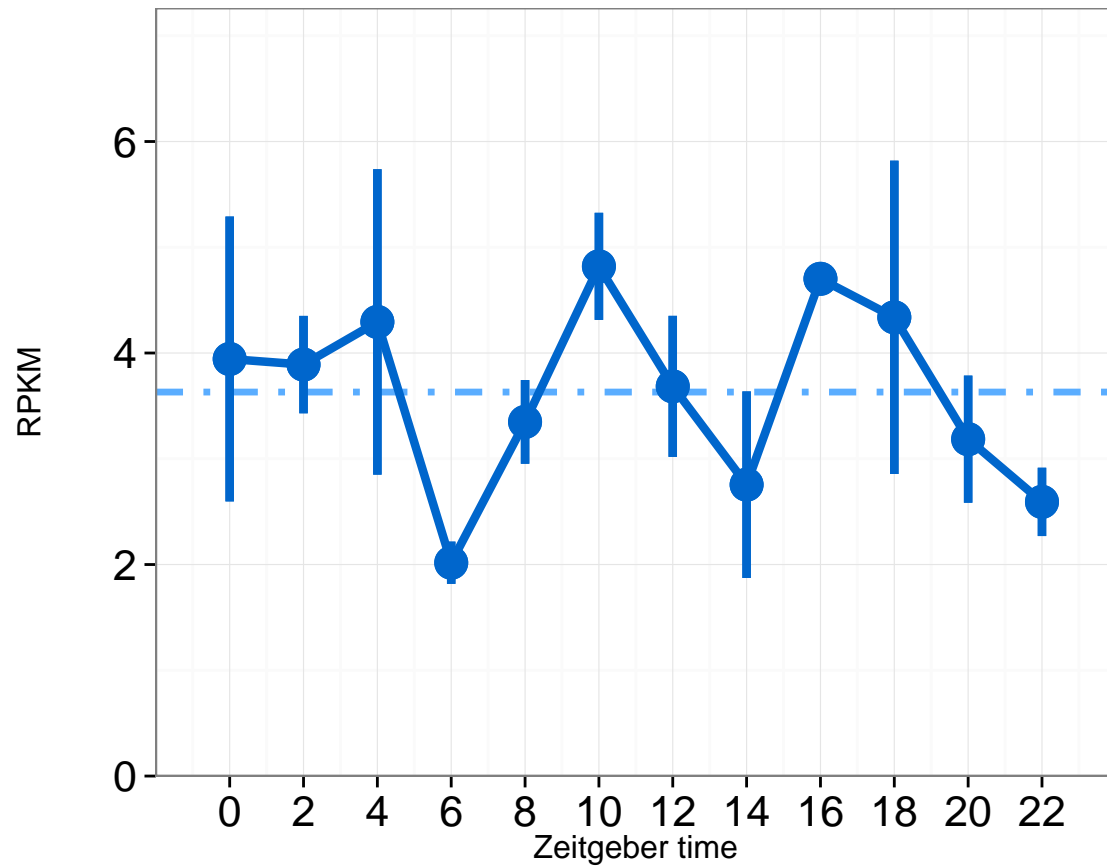

## Gm17333 log2(Ribosome occupanc

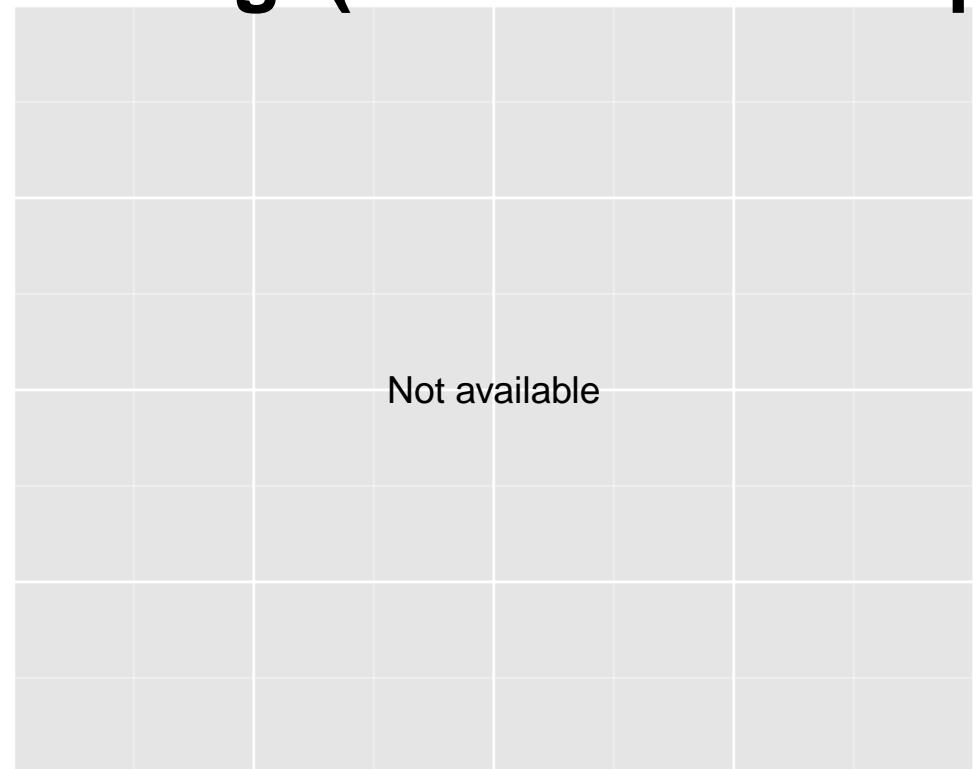

Supplement: Supplementary file 861 [file 1]

## Diap2

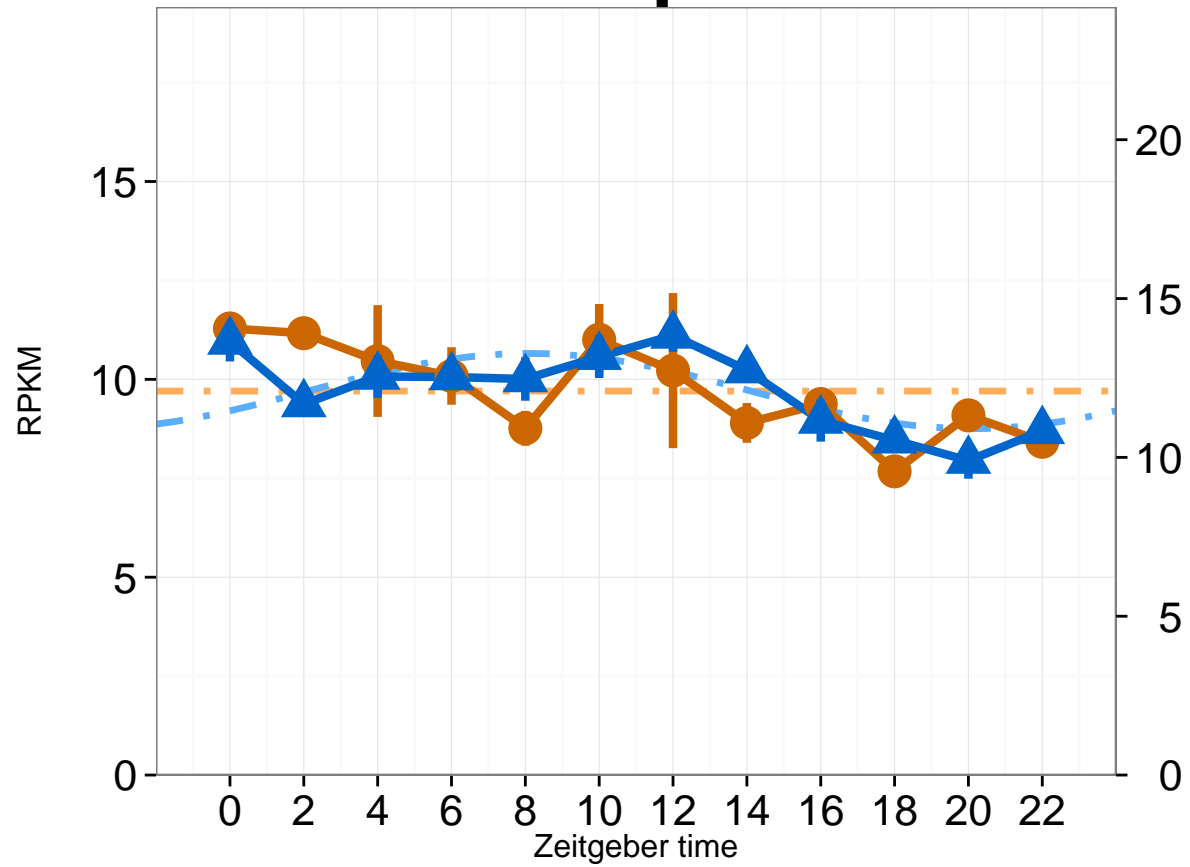

## Diap2

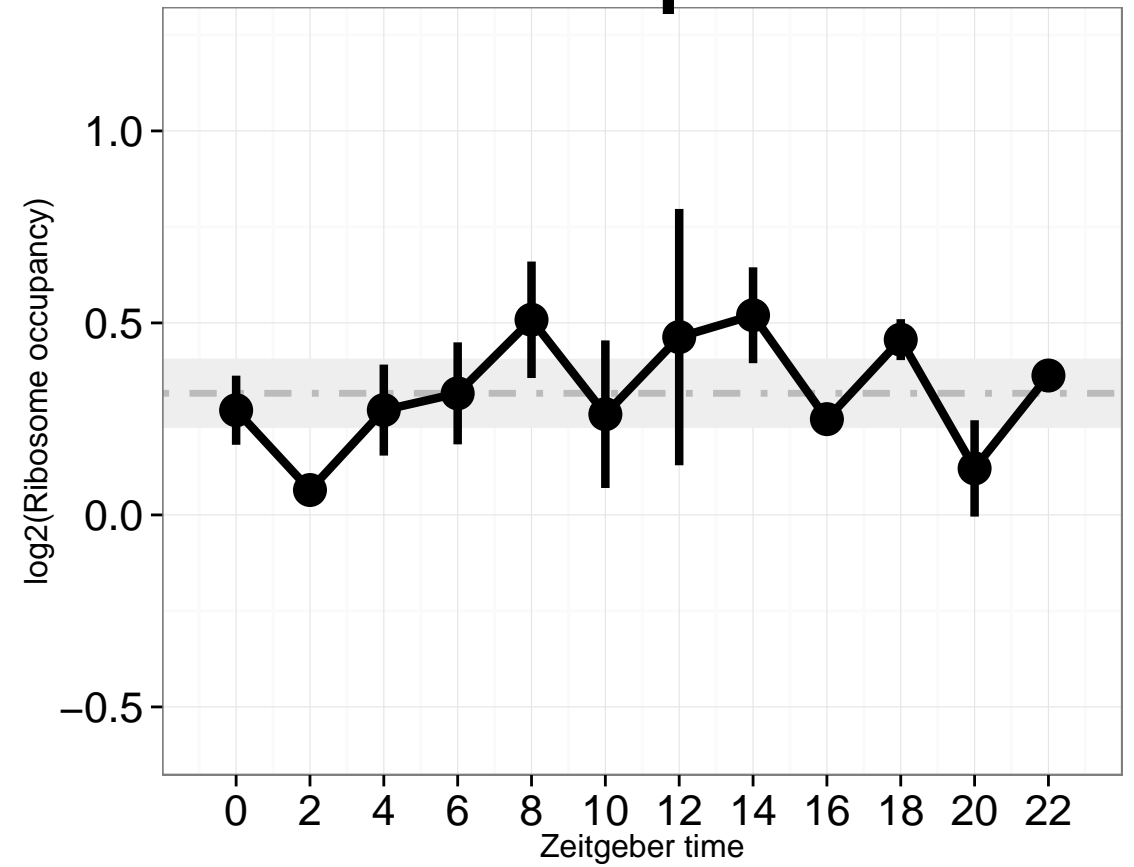

Supplement: Supplementary file 862 [file 1]

# Pla2g7

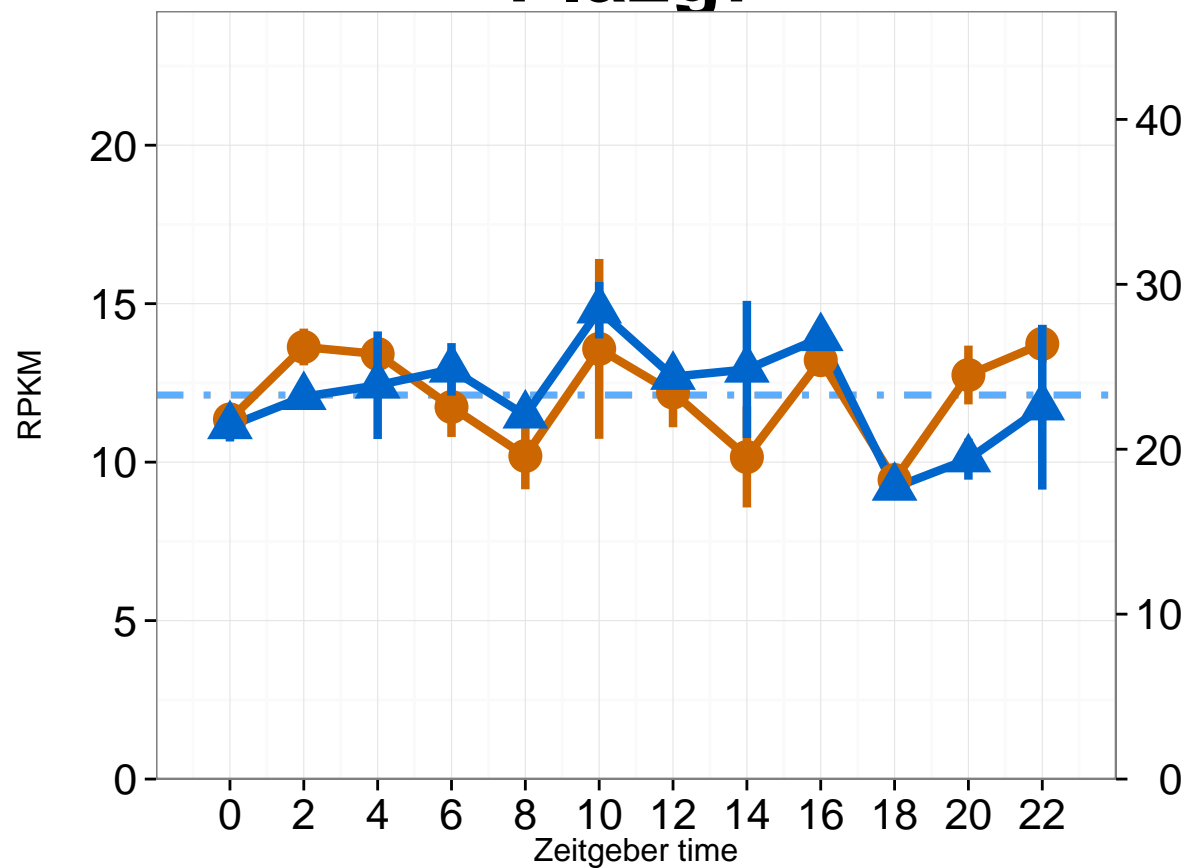

# Pla2g7

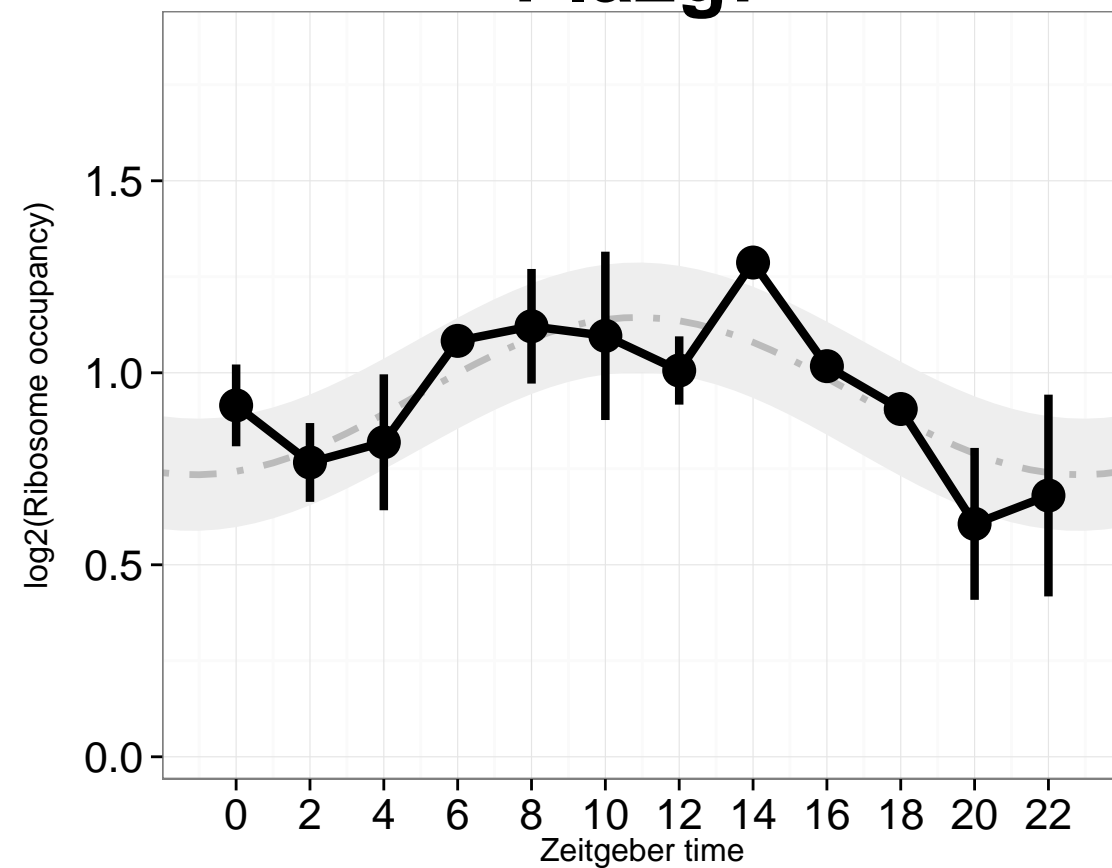

Supplement: Supplementary file 863 [file 1]

# Tuba1c

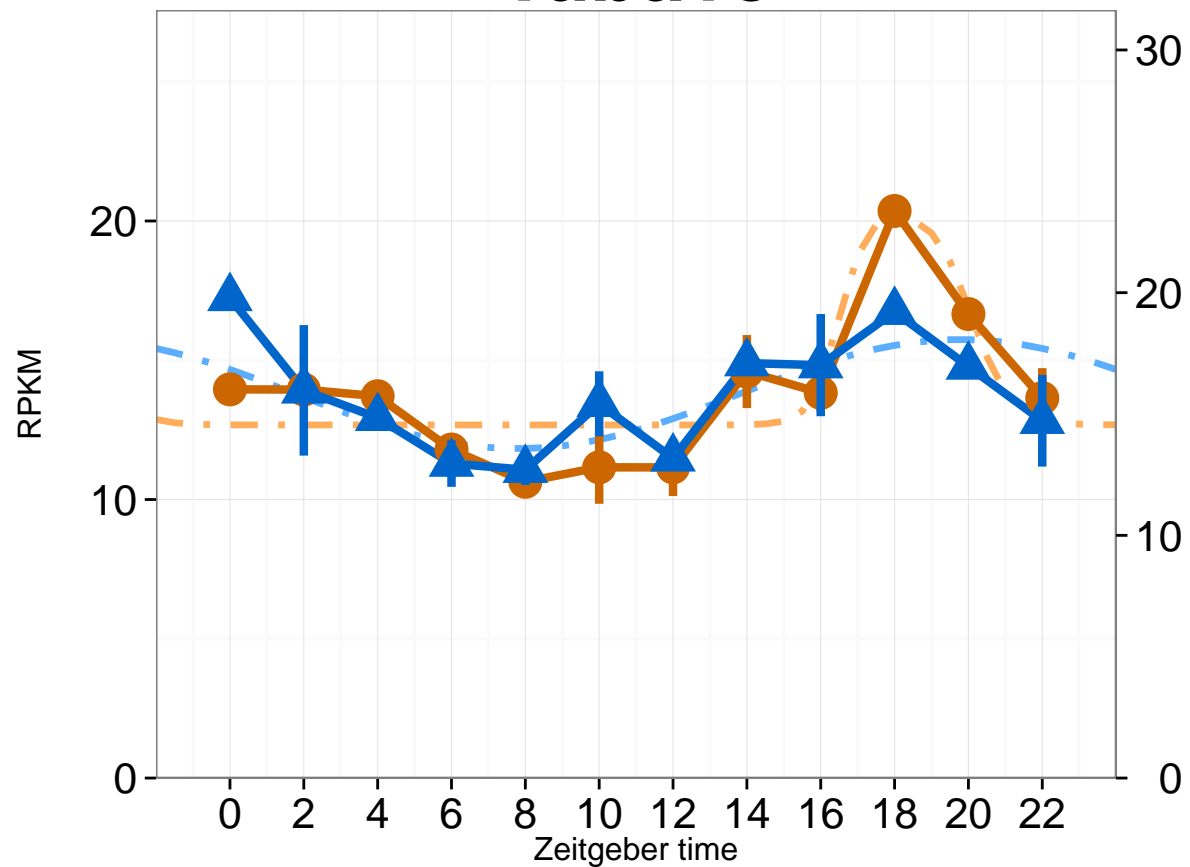

# Tuba1c

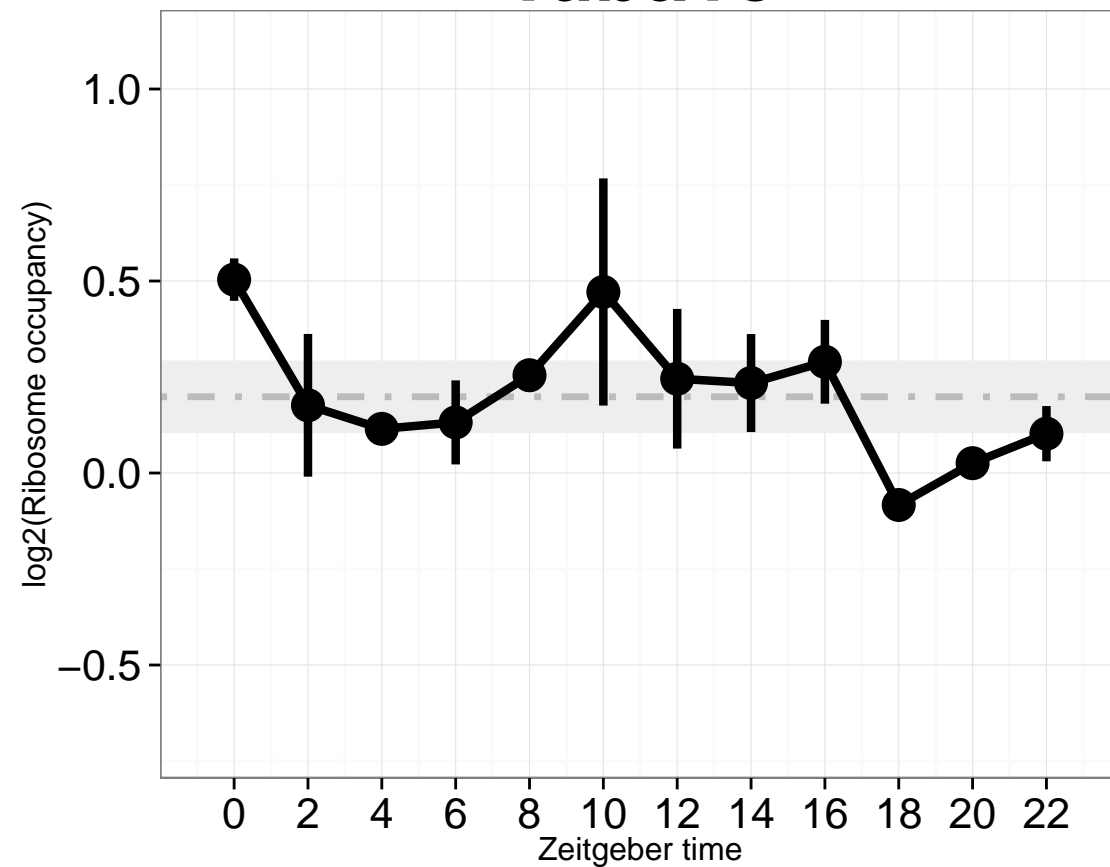

Supplement: Supplementary file 864 [file 1]

## Thoc7

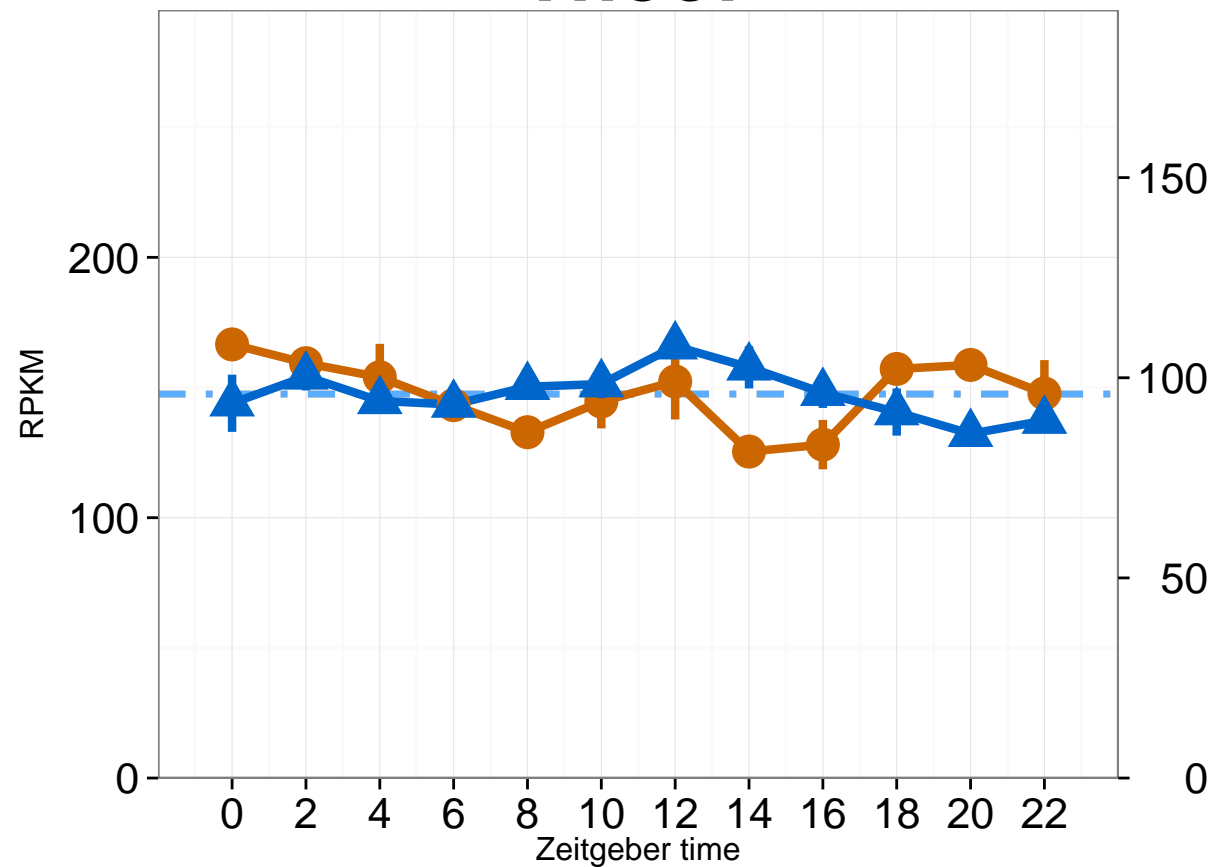

## Thoc7

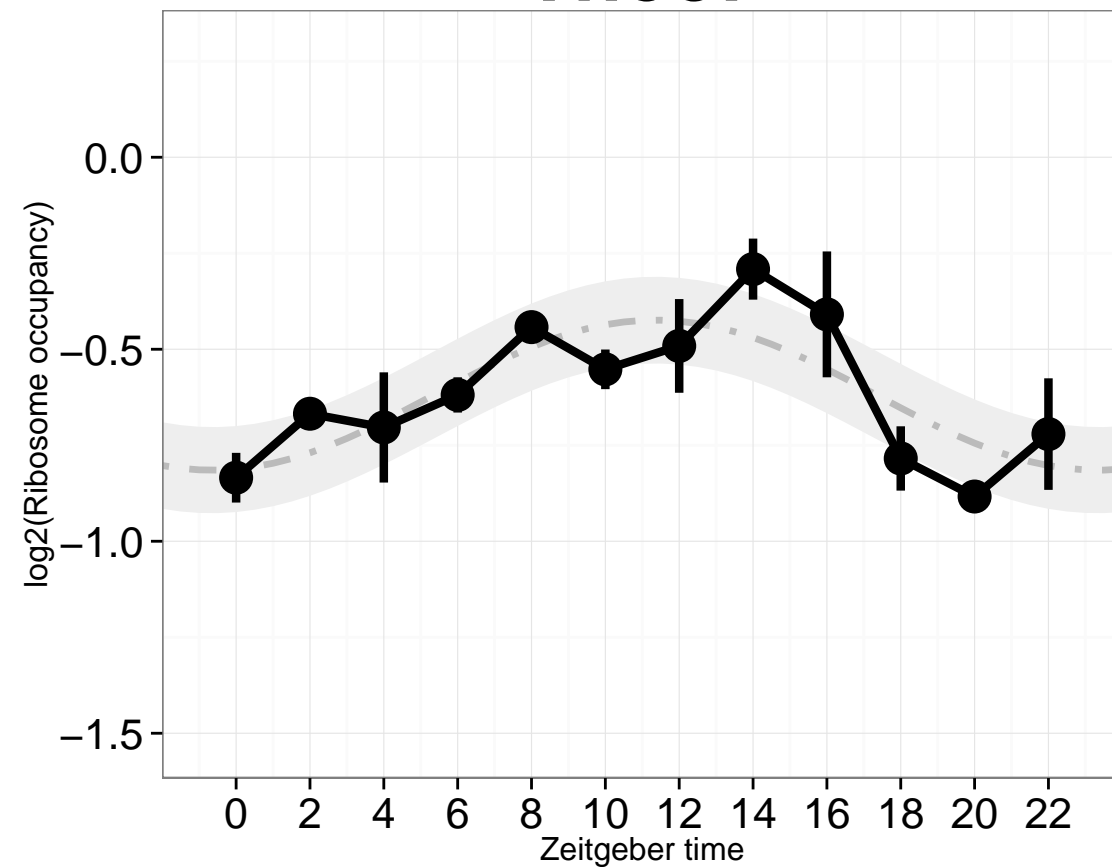

Supplement: Supplementary file 865 [file 1]

## Pdpr

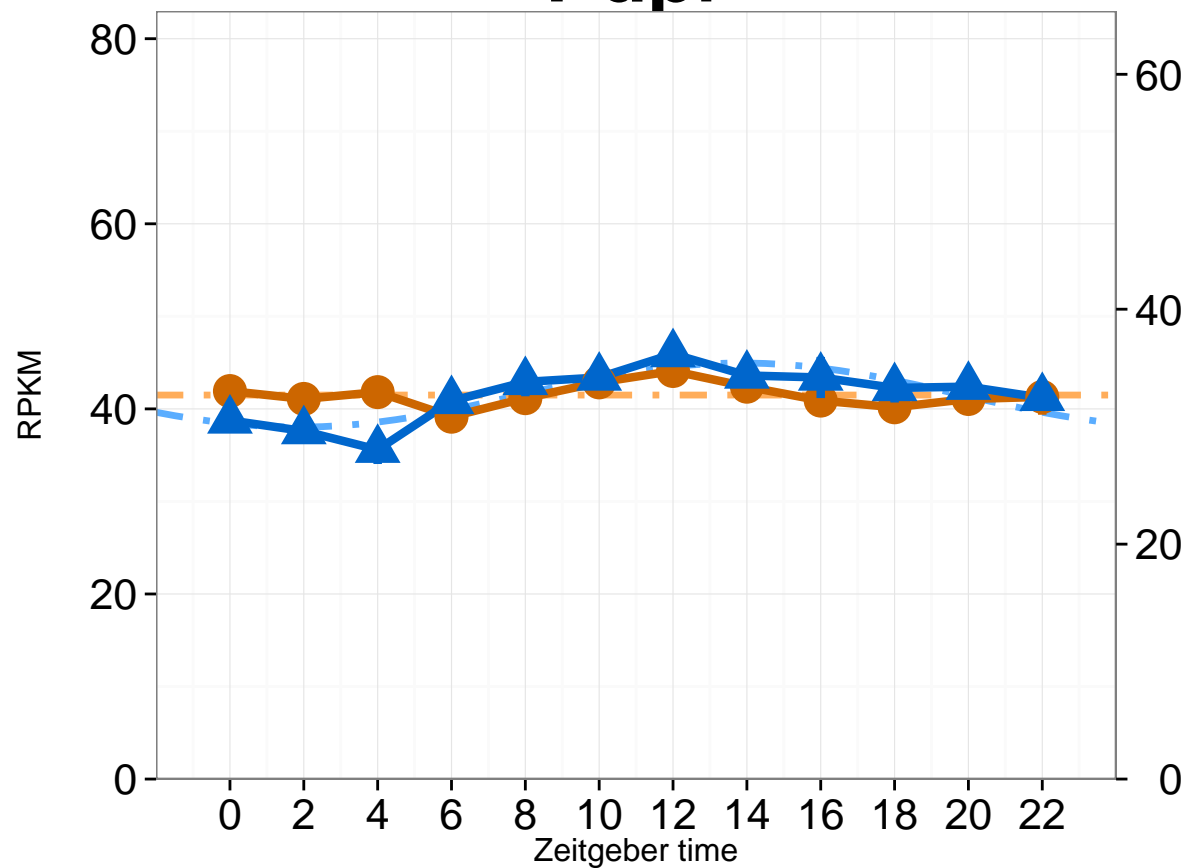

## Pdpr

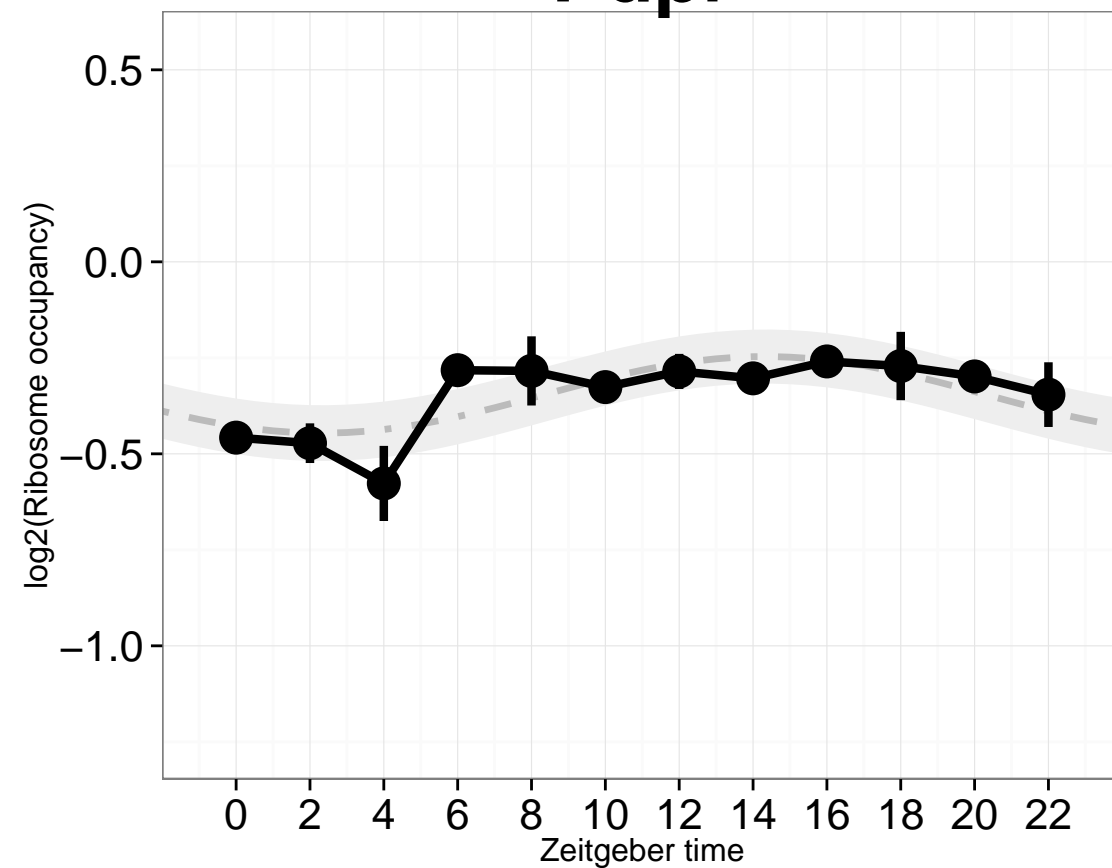

Supplement: Supplementary file 866 [file 1]

## Sybu

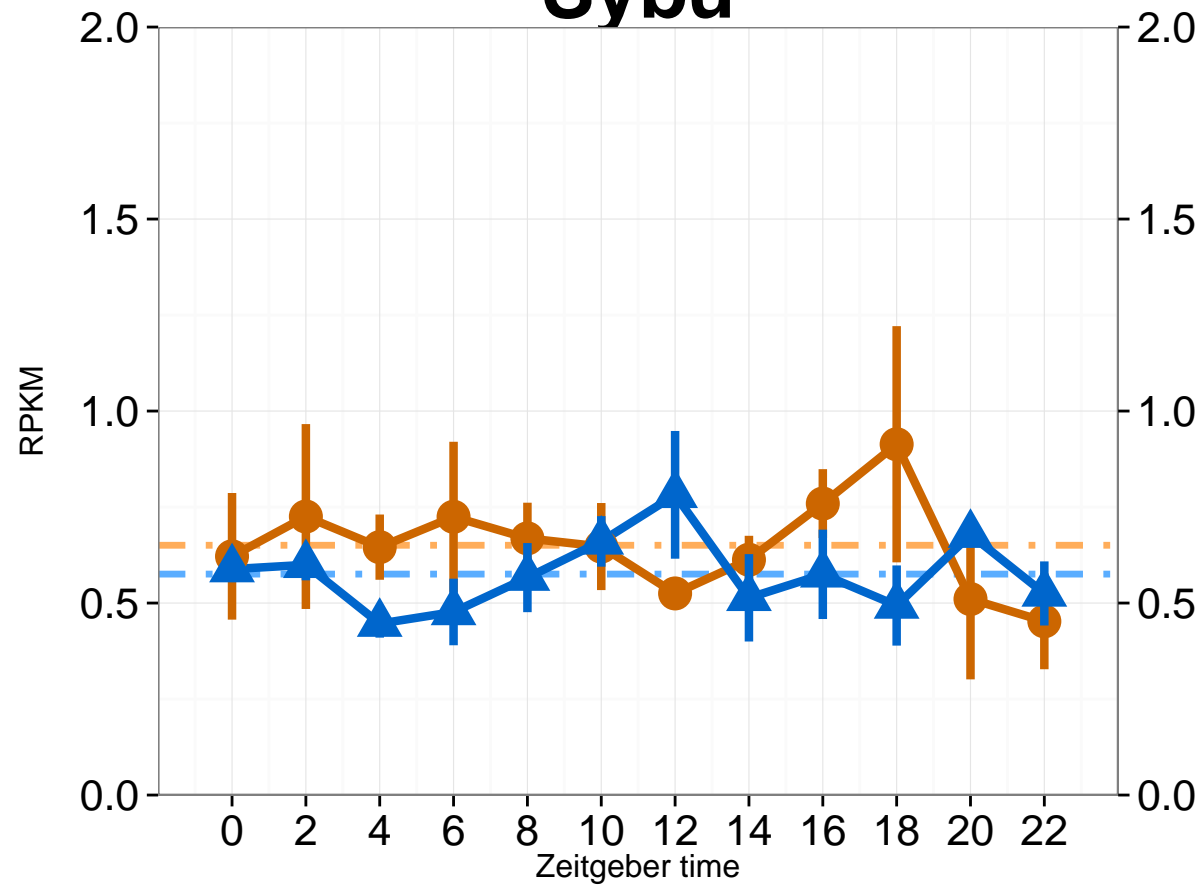

## Sybu

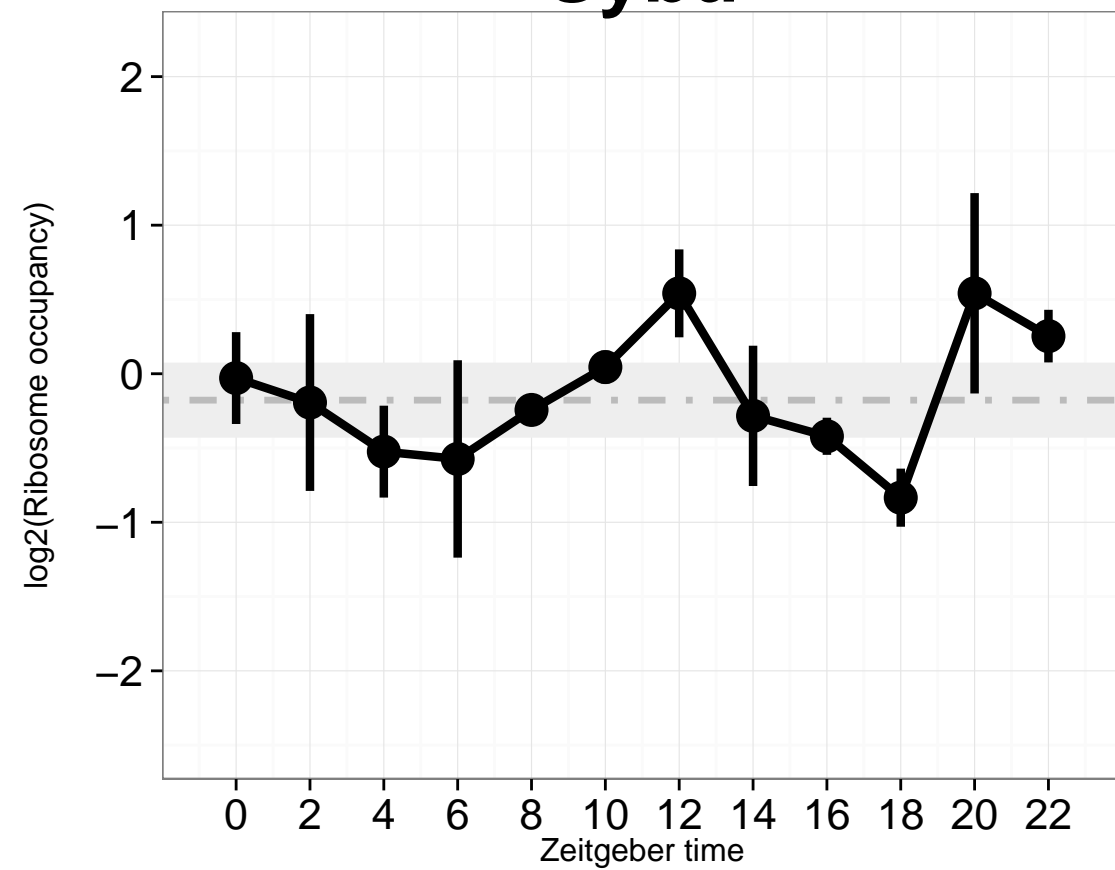

Supplement: Supplementary file 867 [file 1]

# BC017643

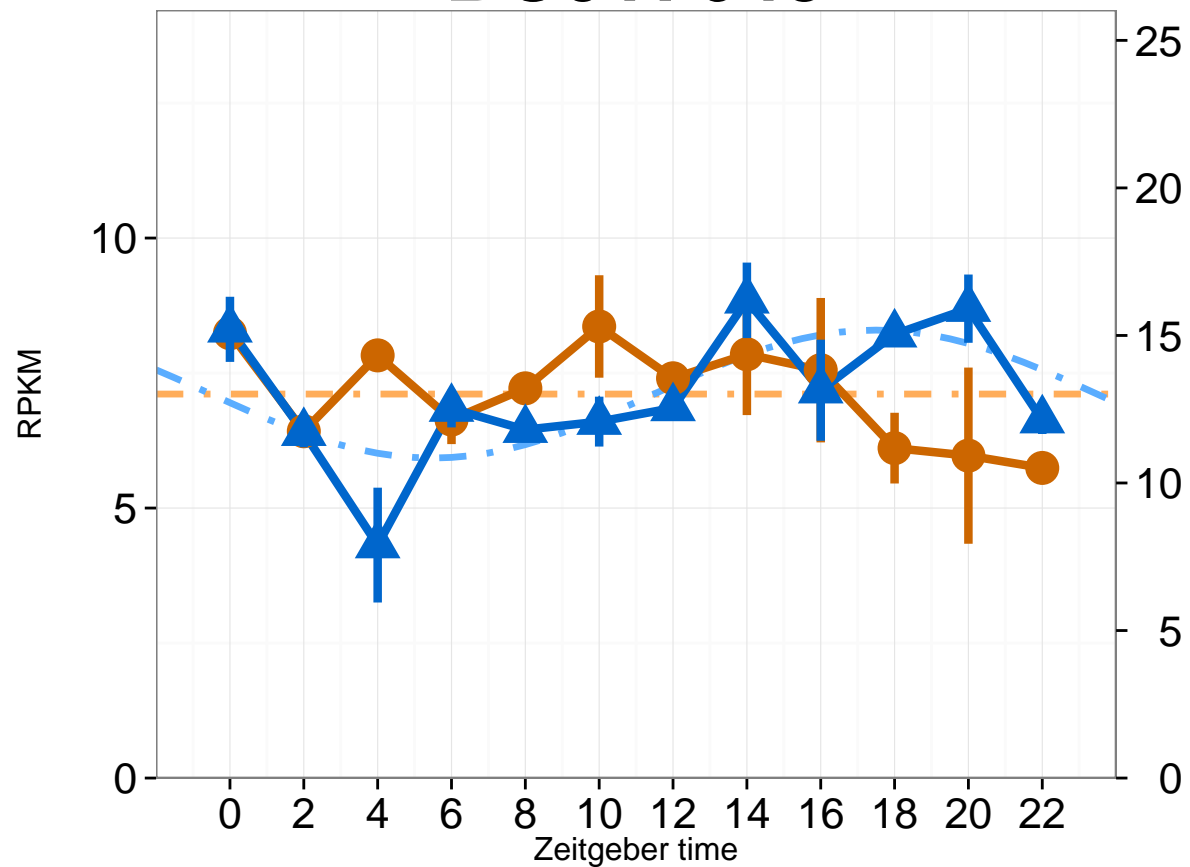

# BC017643

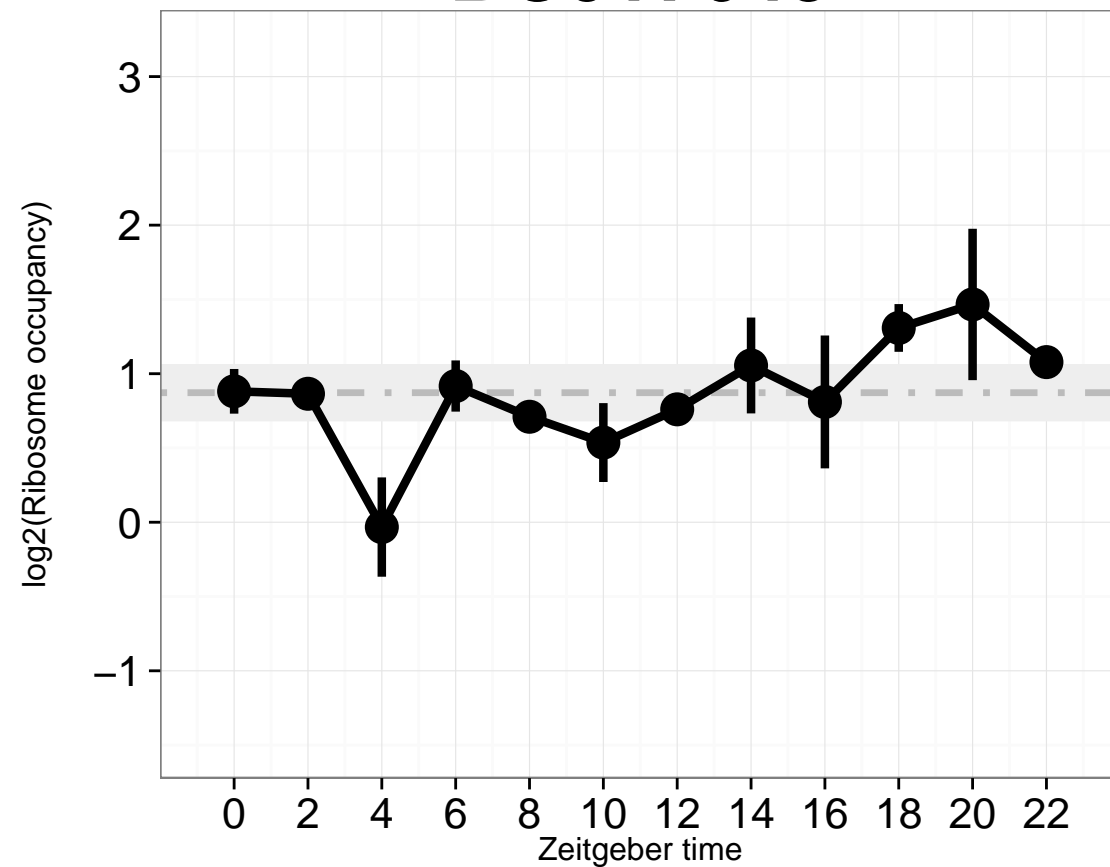

Supplement: Supplementary file 868 [file 1]

# Fam115c

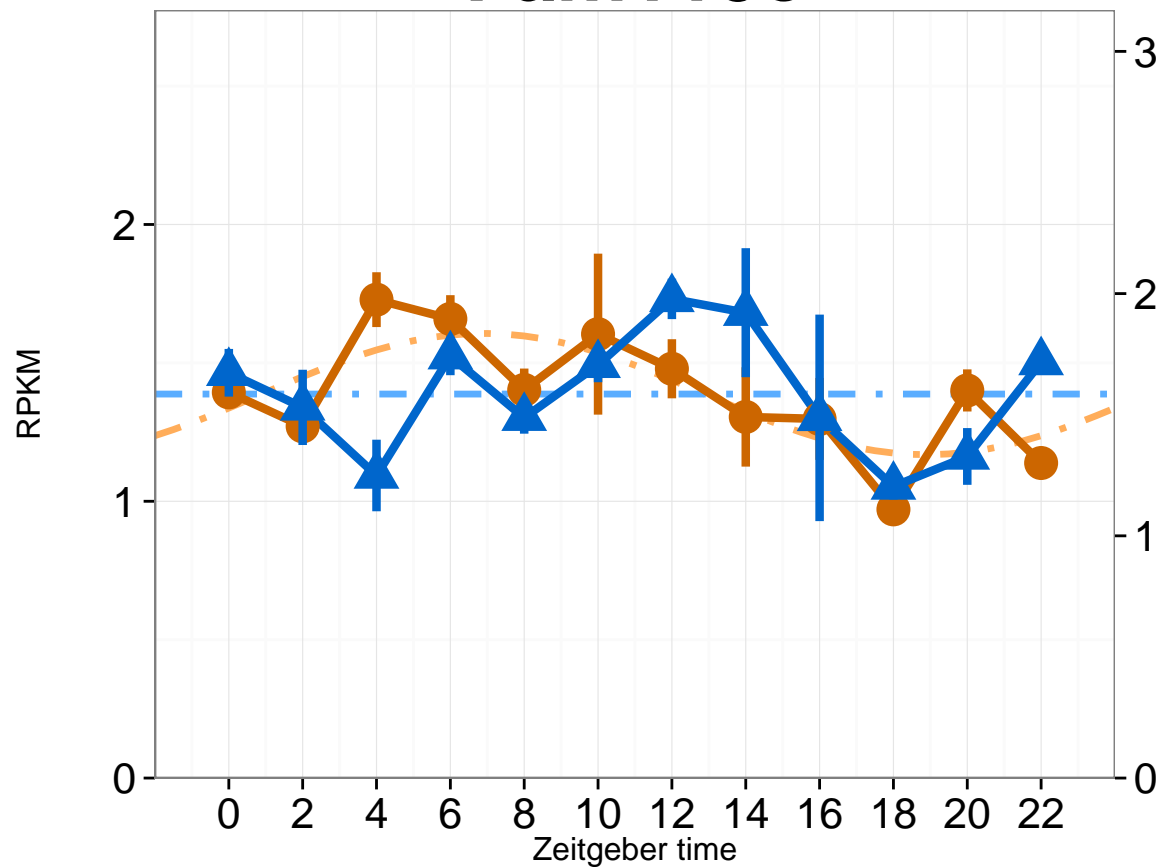

# Fam115c

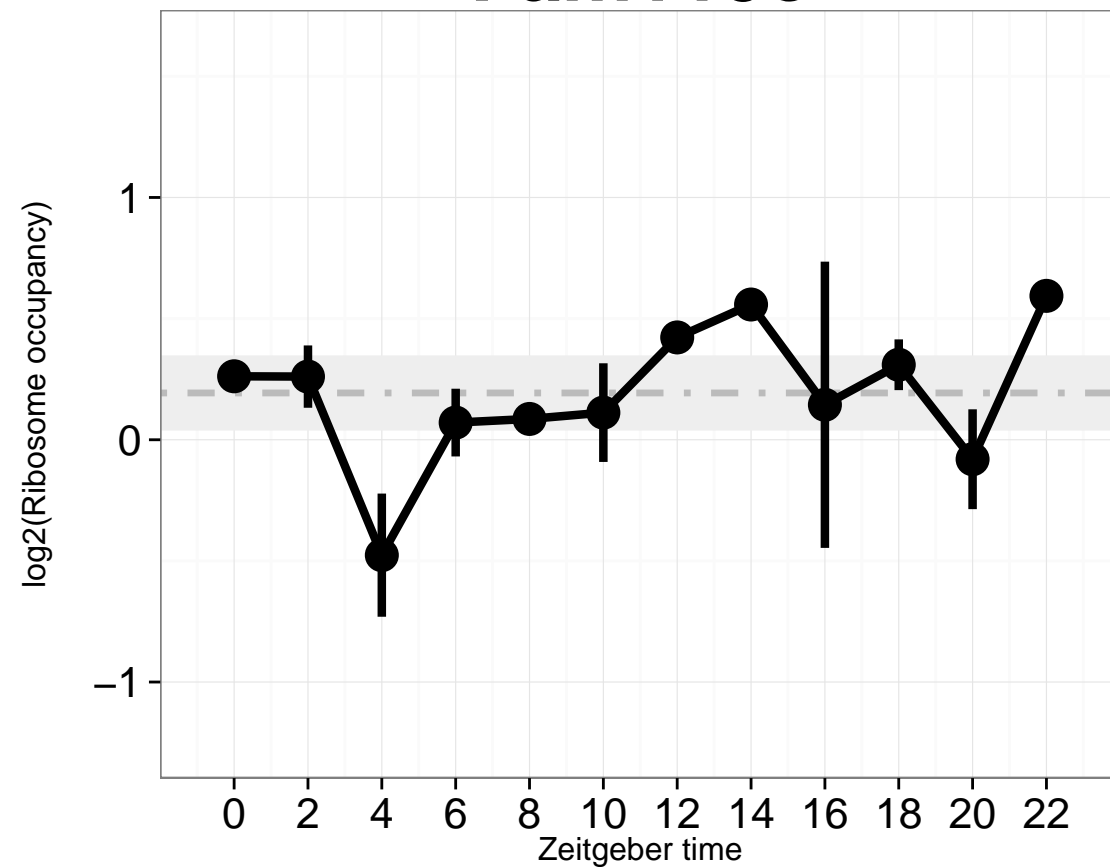

Supplement: Supplementary file 869 [file 1]

## Gabpa

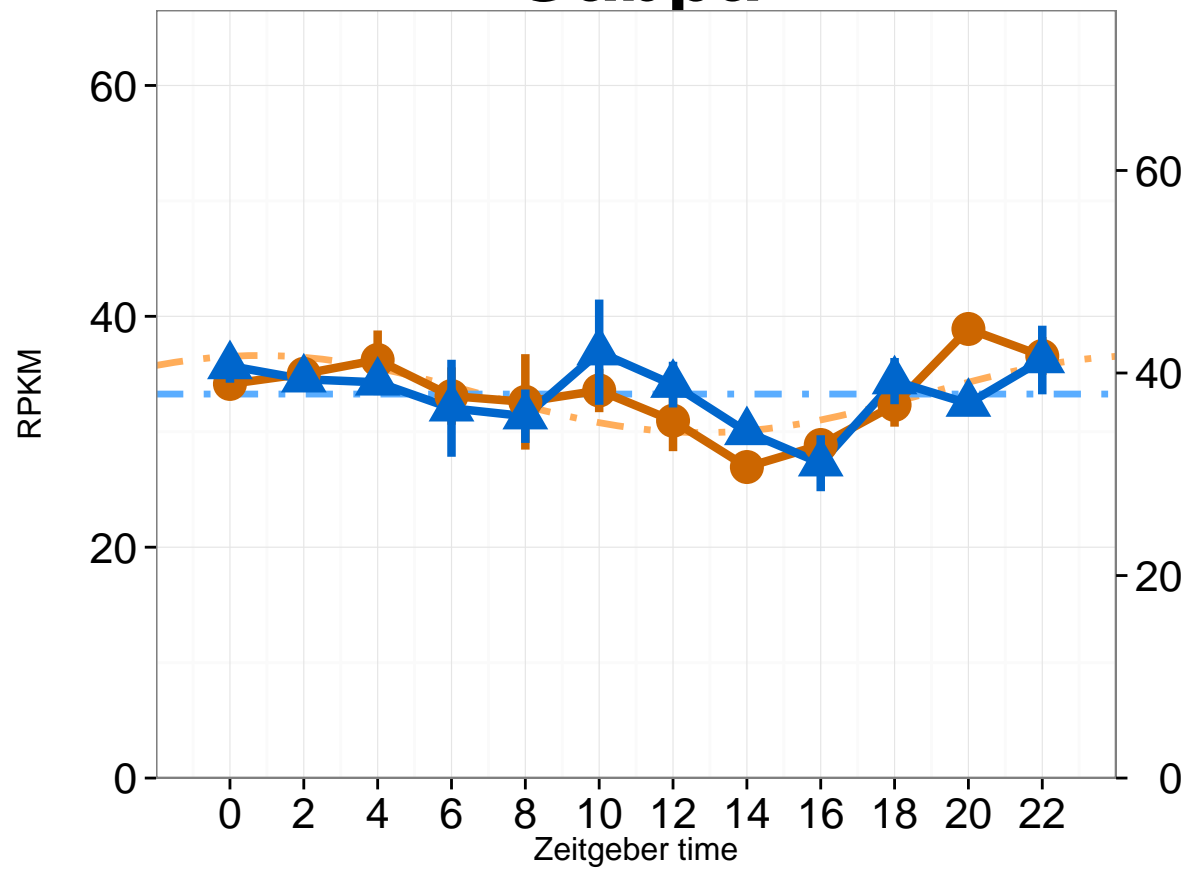

## Gabpa

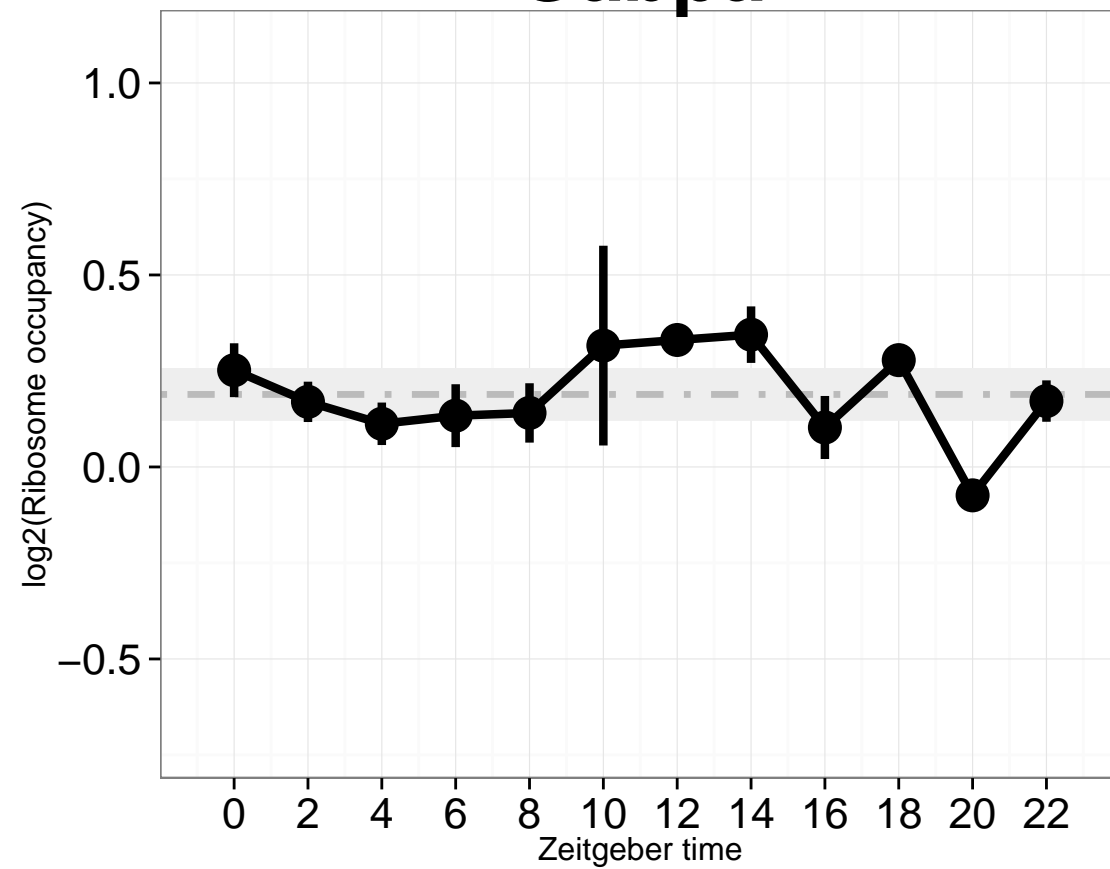

Supplement: Supplementary file 870 [file 1]

# Arhgap29

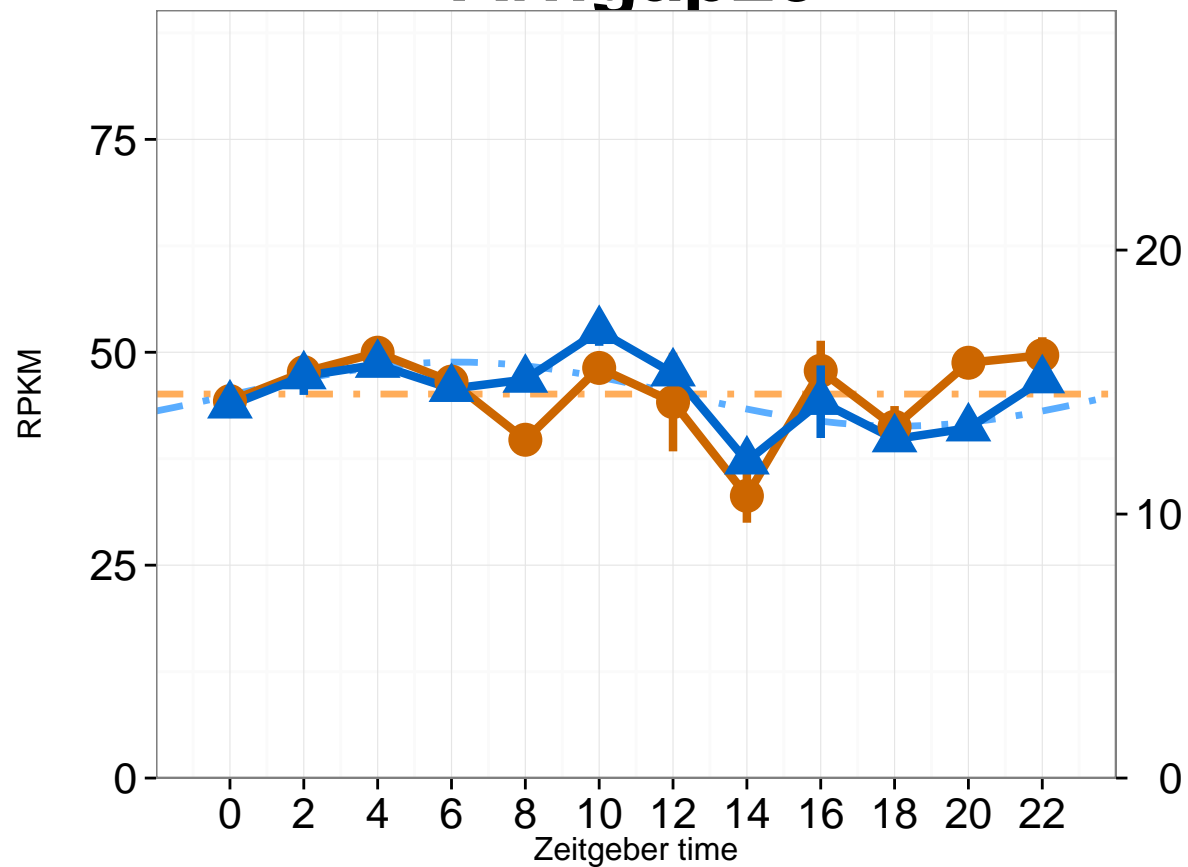

# Arhgap29

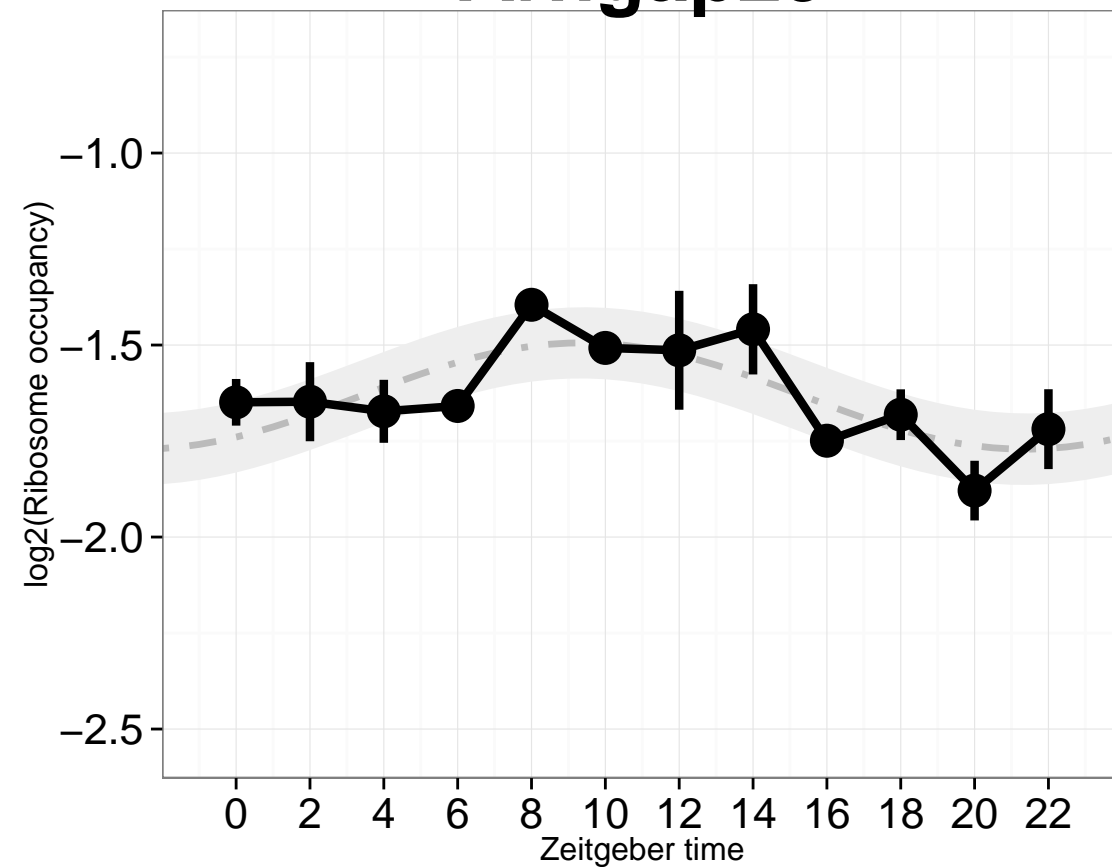

Supplement: Supplementary file 871 [file 1]

# Crtc2

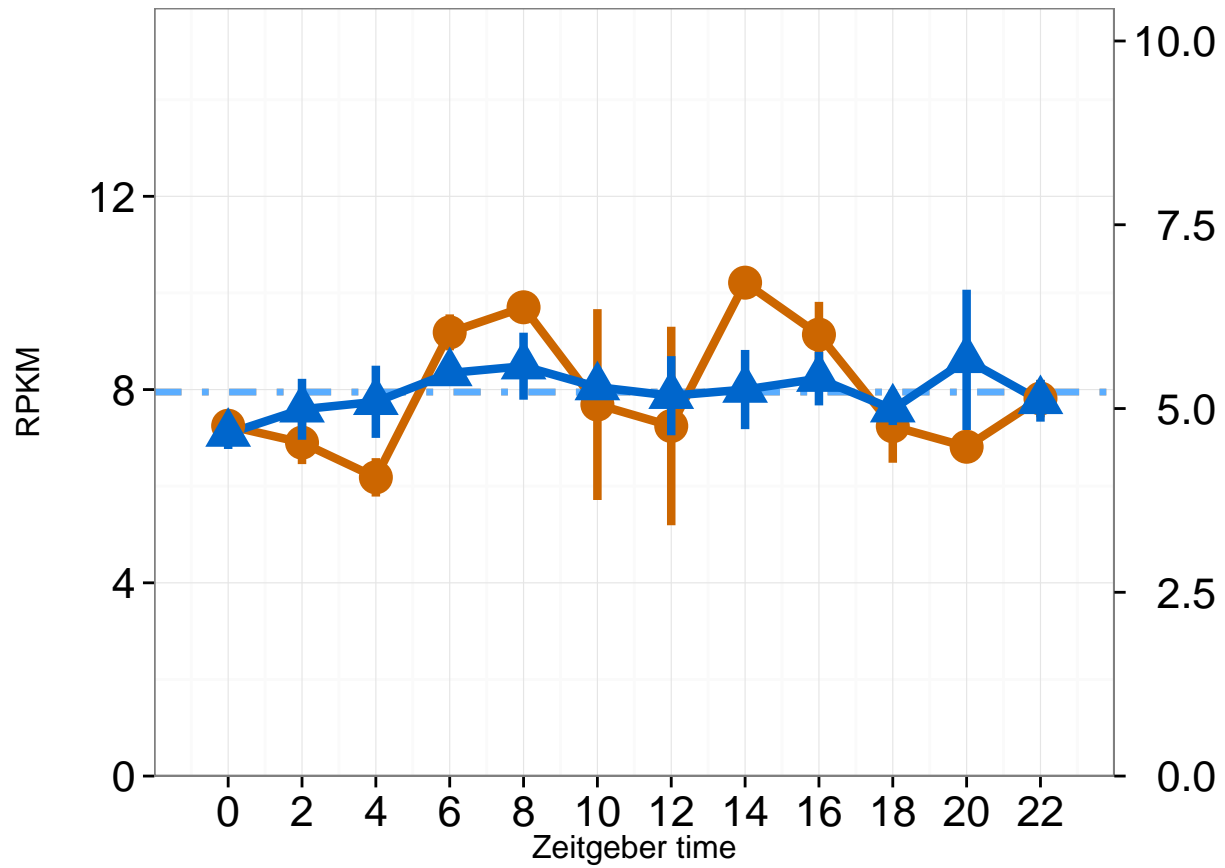

# Crtc2

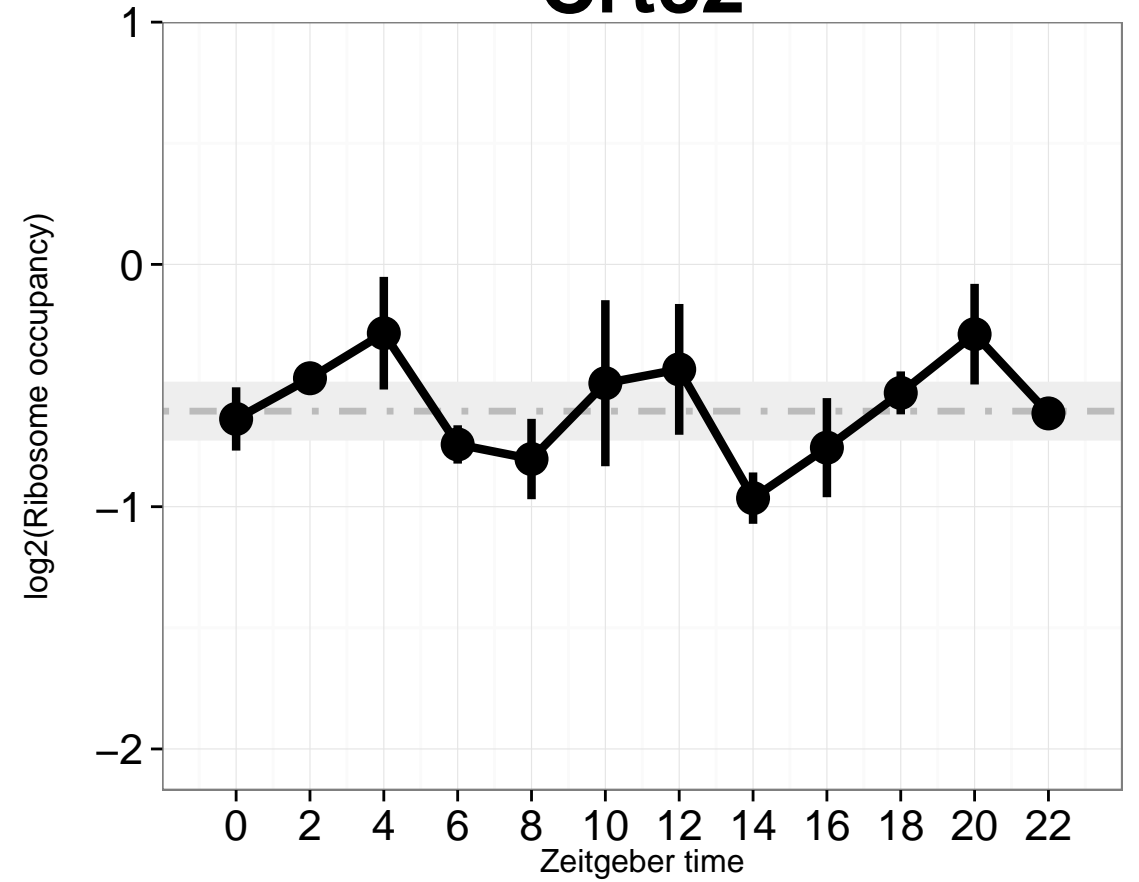

Supplement: Supplementary file 872 [file 1]

# H2-Q4

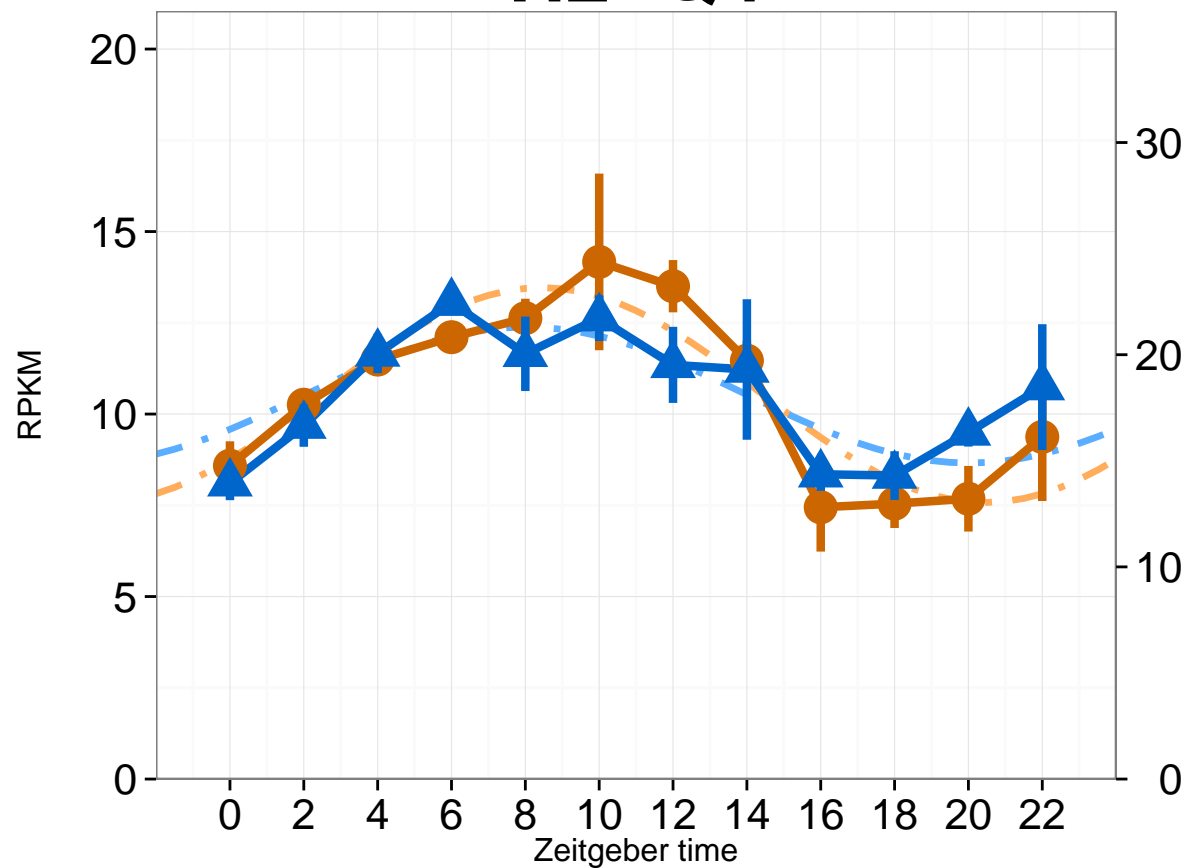

# H2-Q4

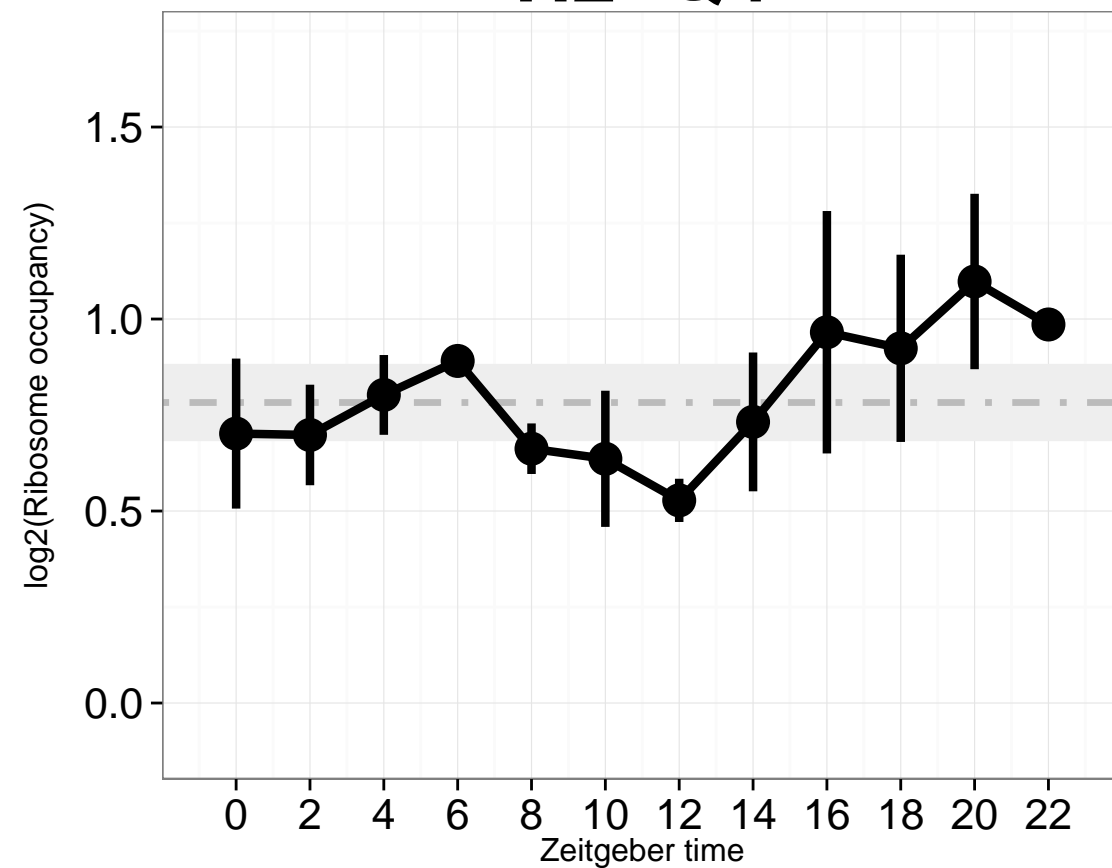

Supplement: Supplementary file 873 [file 1]

# Dpagt1

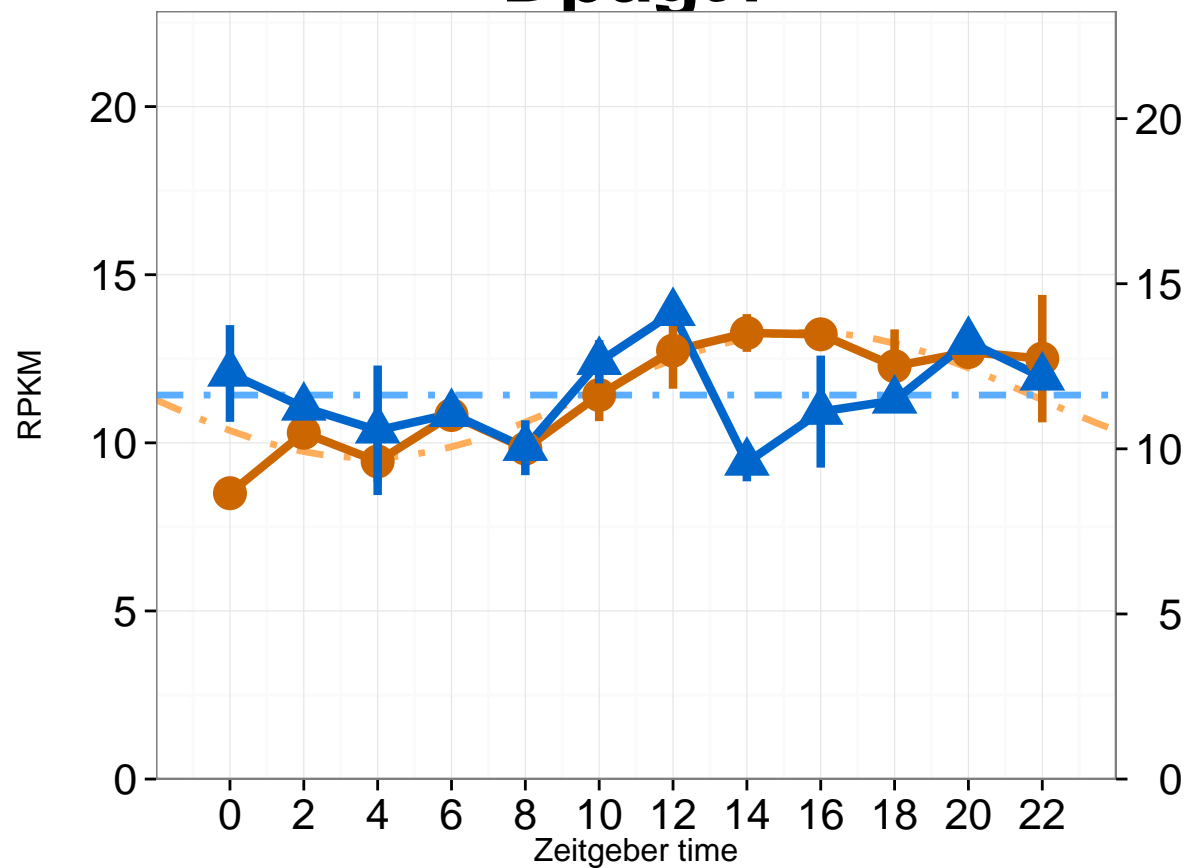

# Dpagt1

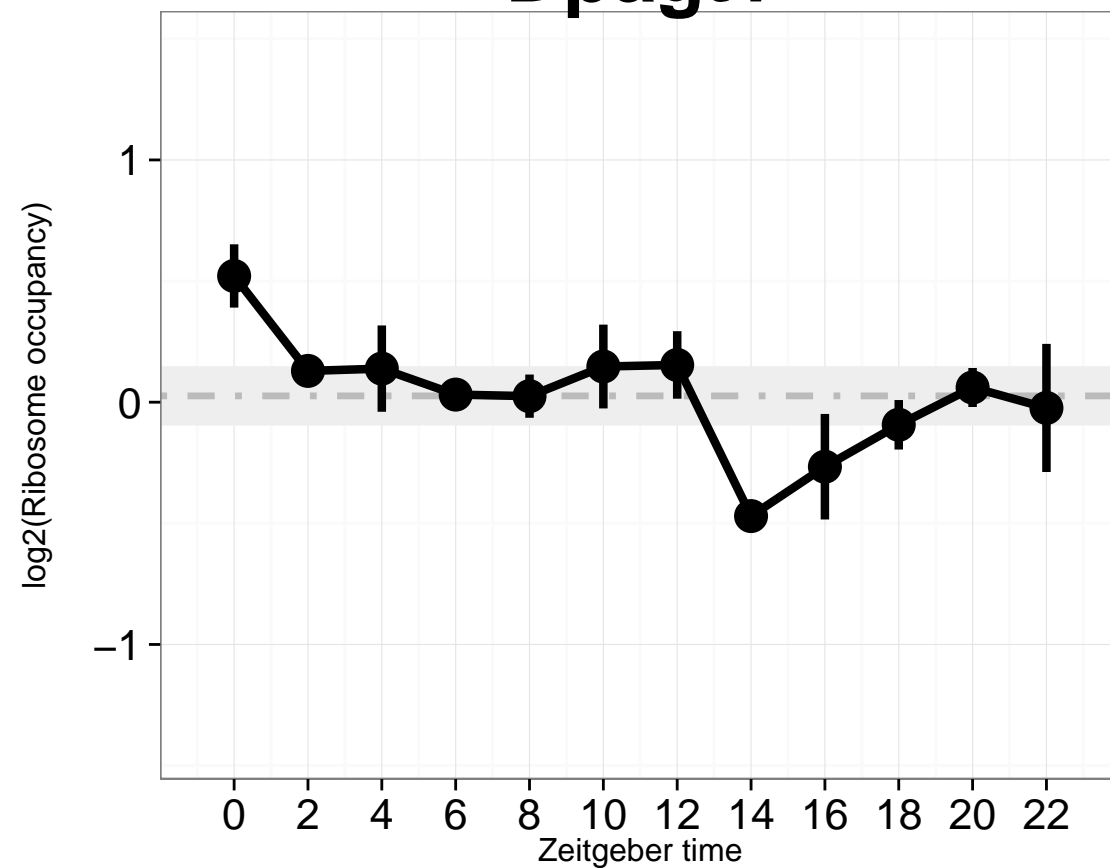

Supplement: Supplementary file 874 [file 1]

## Eif3a

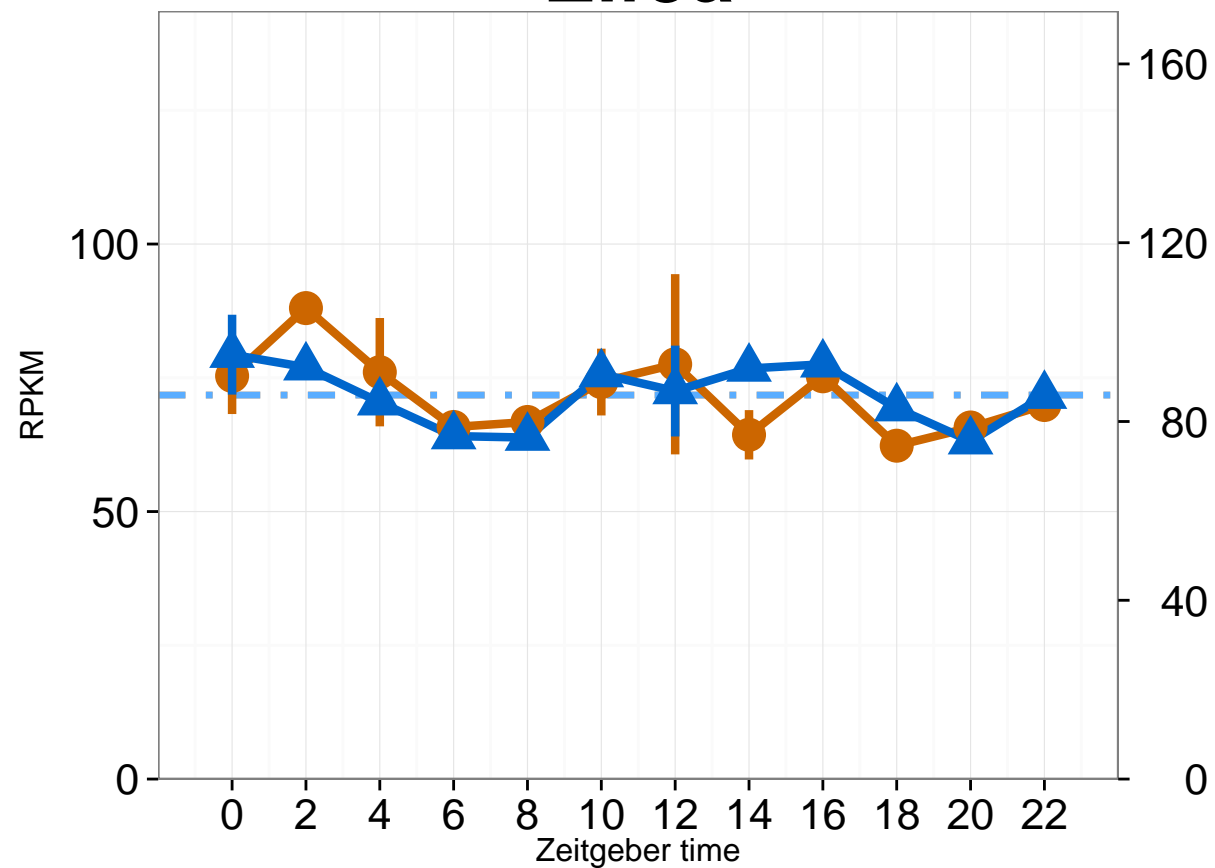

## Eif3a

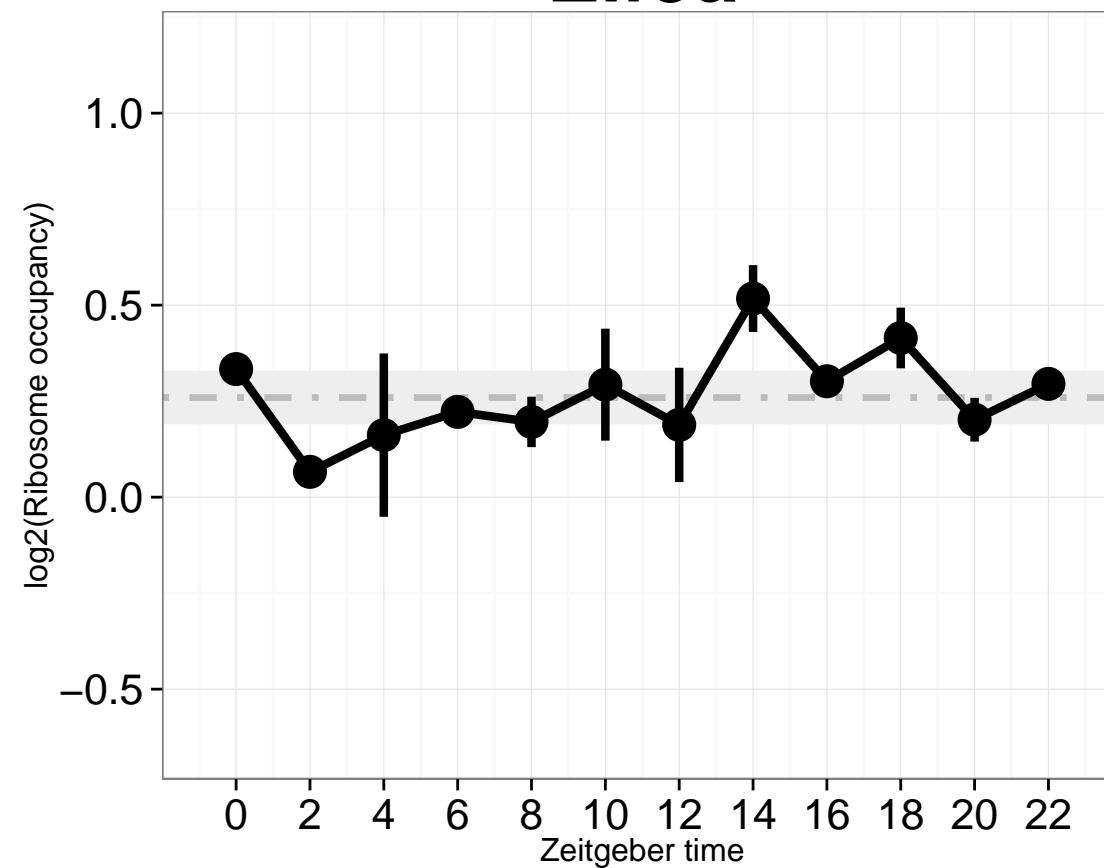

Supplement: Supplementary file 875 [file 1]

## Prss23

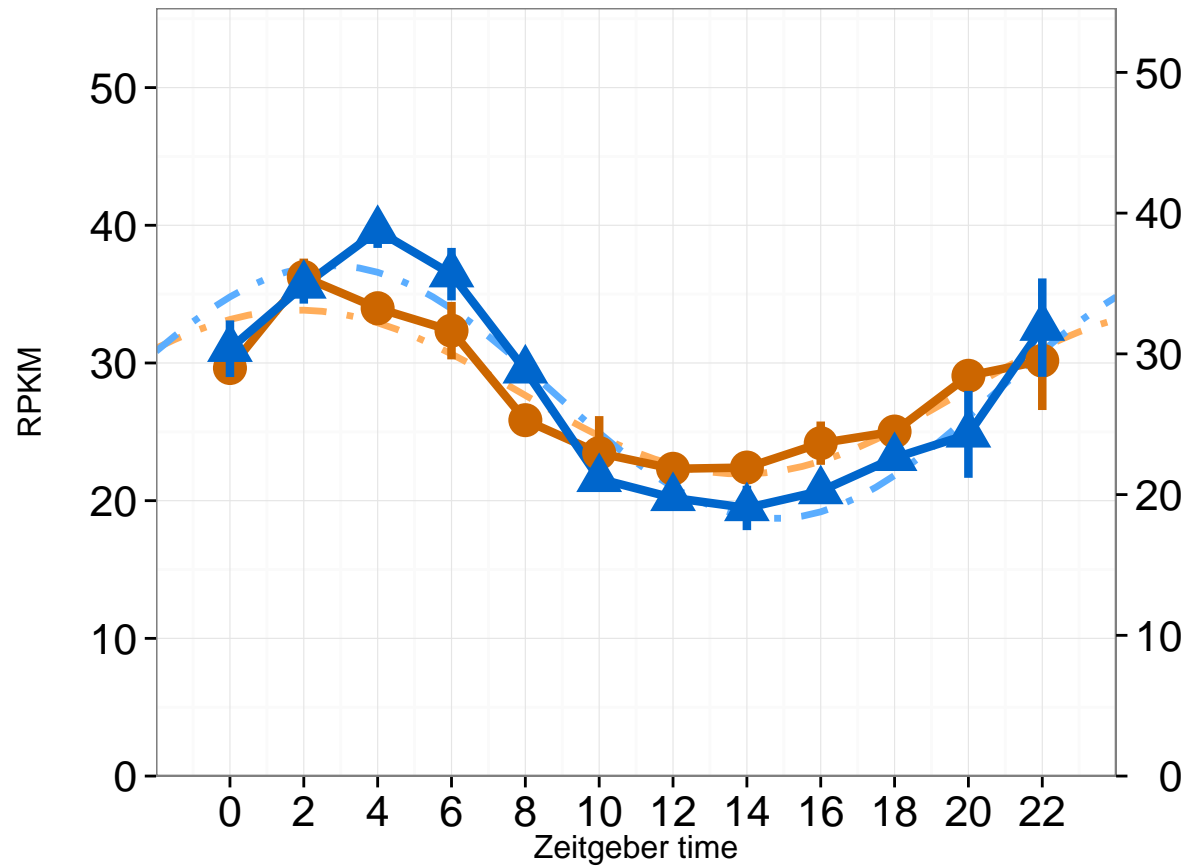

## Prss23

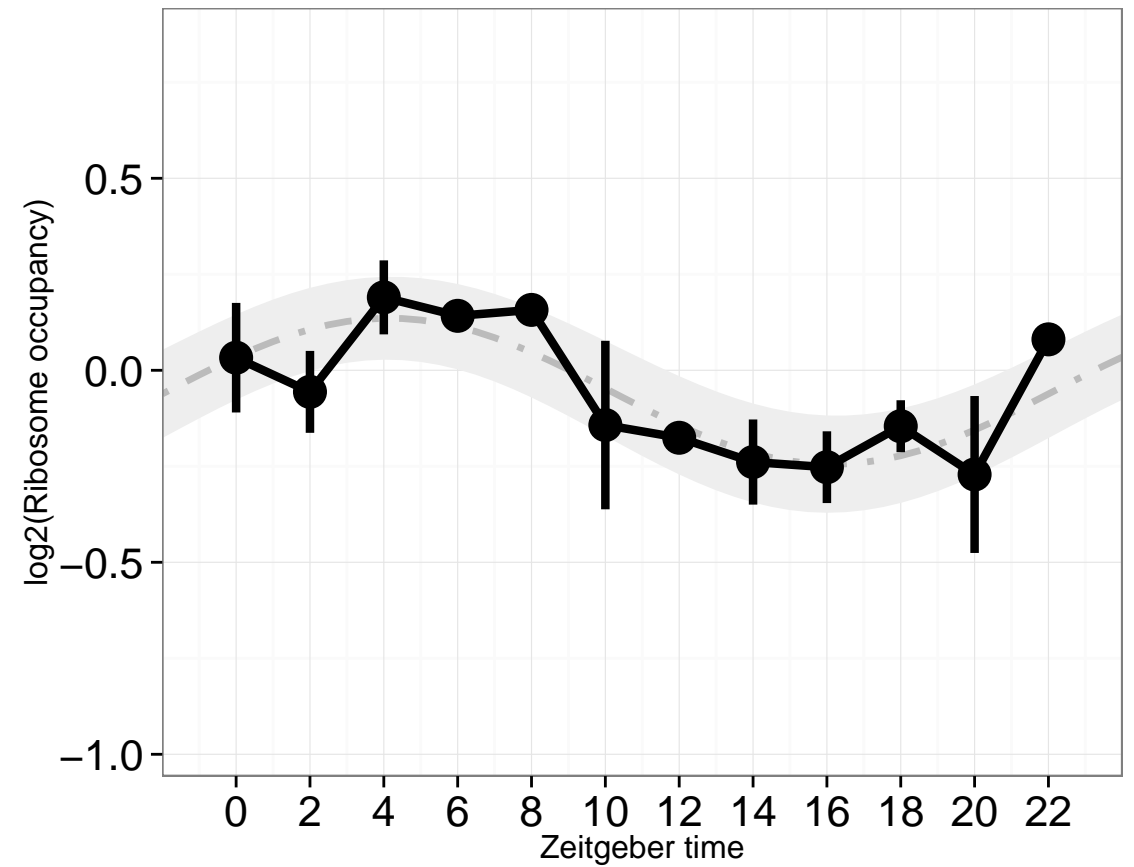

Supplement: Supplementary file 876 [file 1]

## Asph

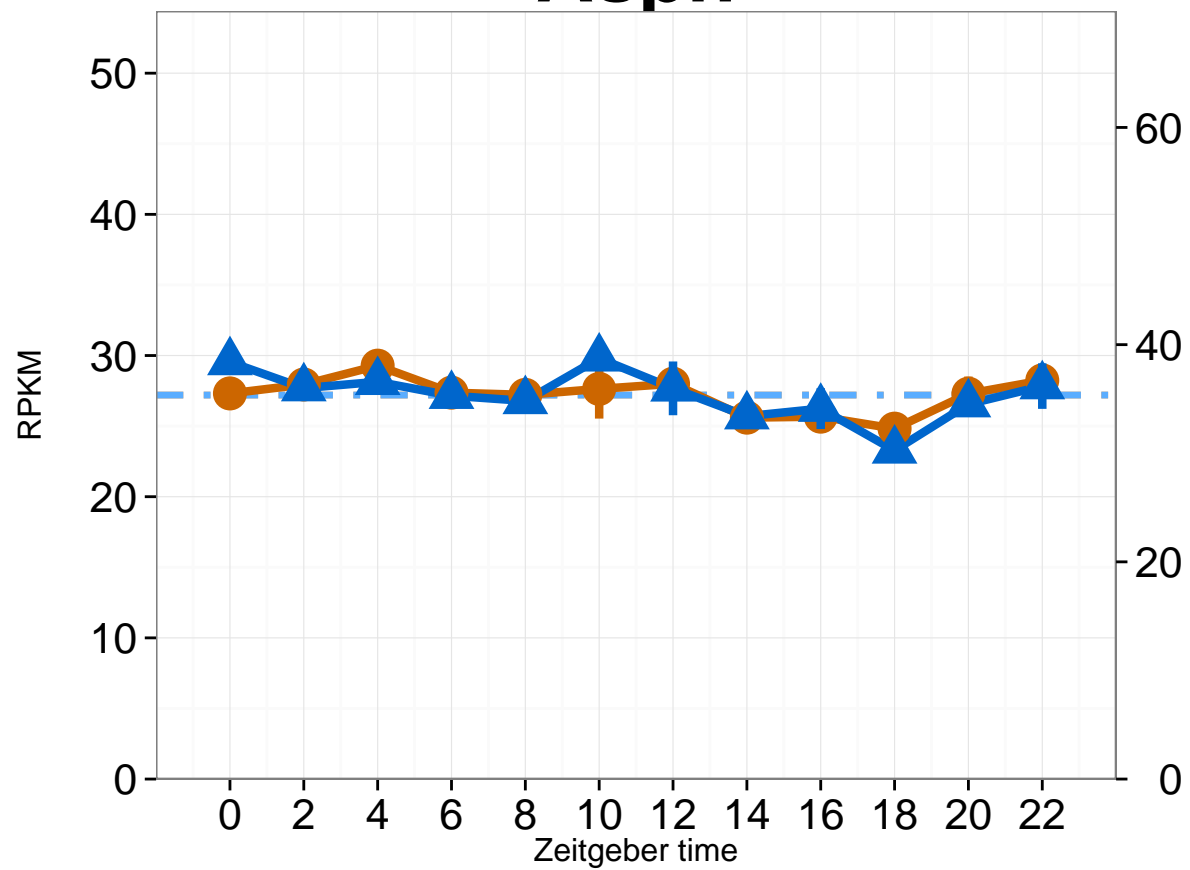

## Asph

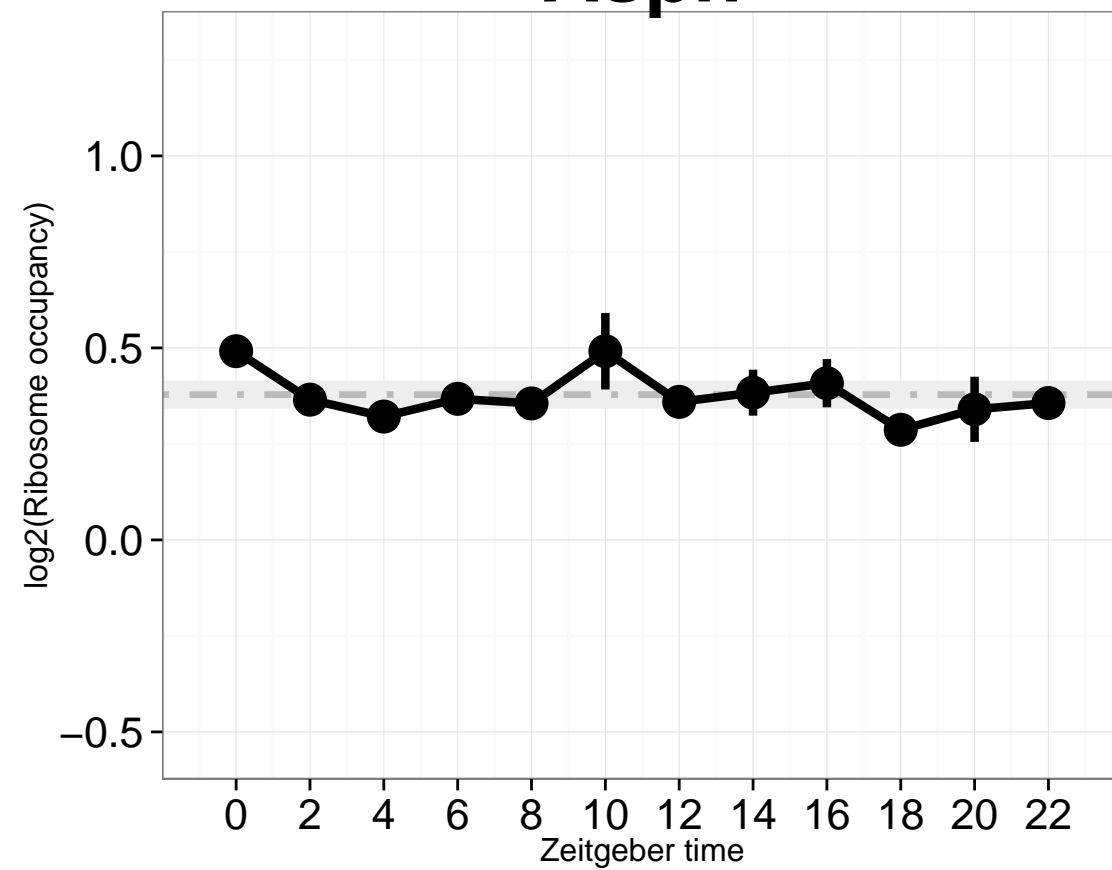

Supplement: Supplementary file 877 [file 1]

# Atp6v1f

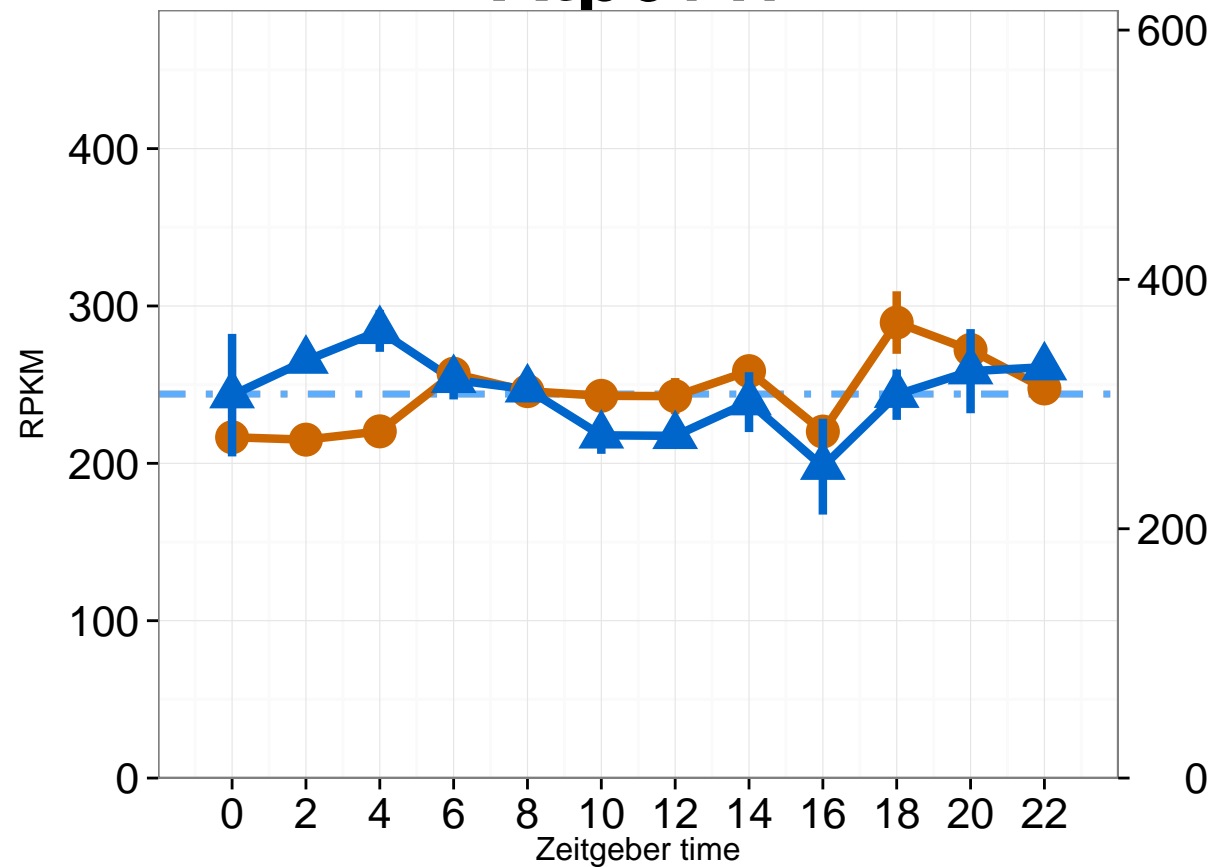

# Atp6v1f

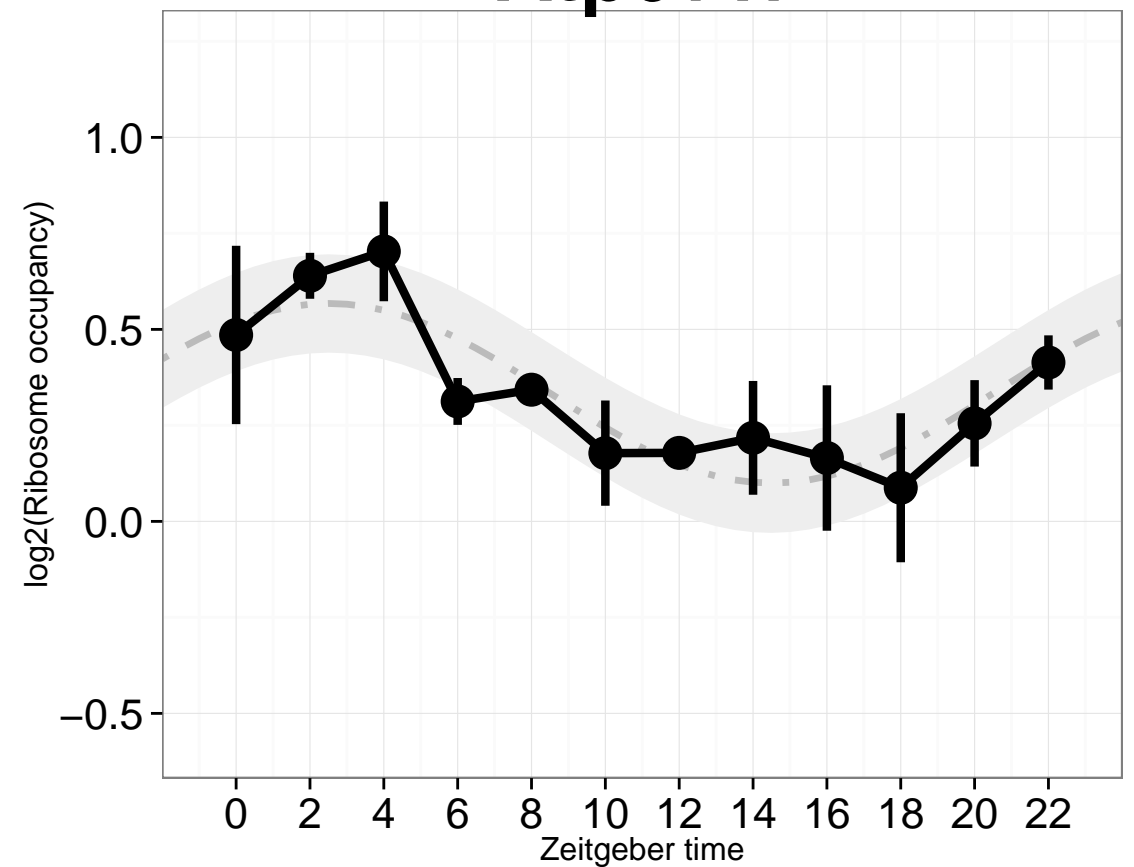

Supplement: Supplementary file 878 [file 1]

# Kif13b

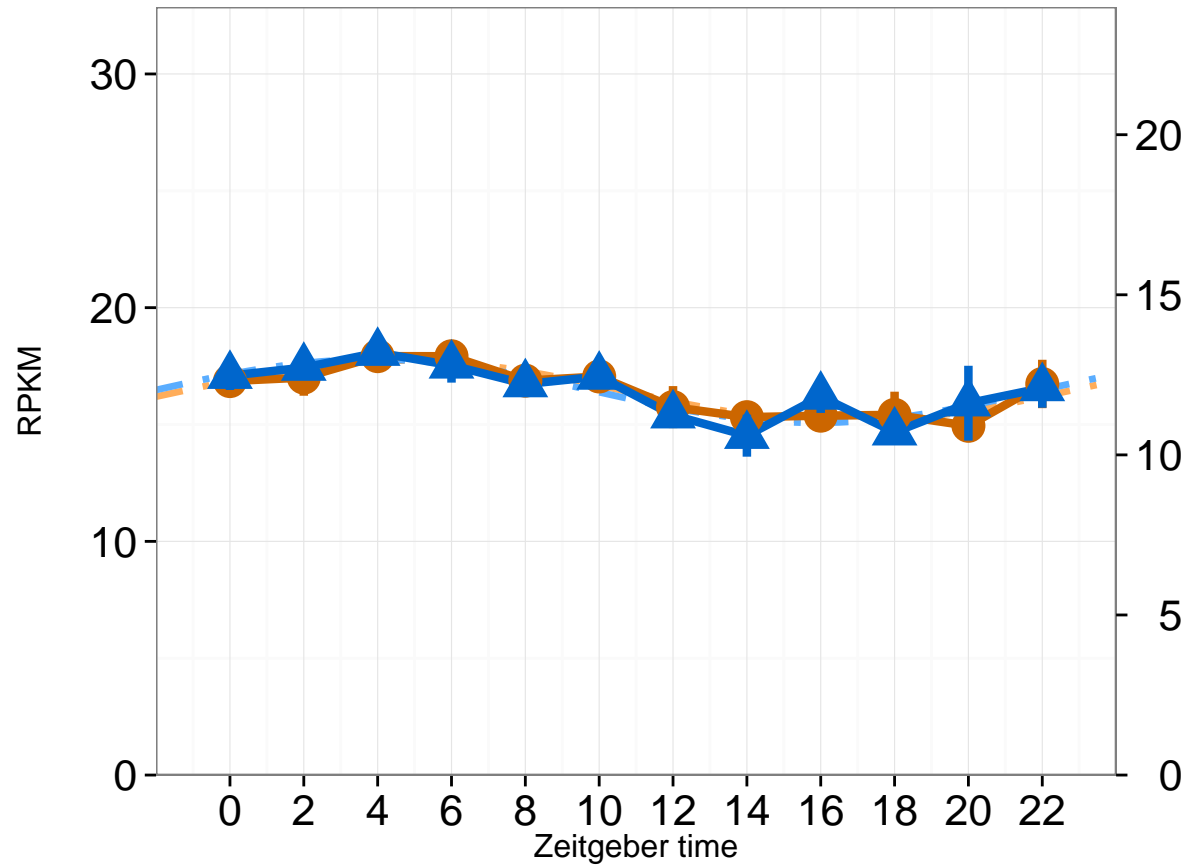

# Kif13b

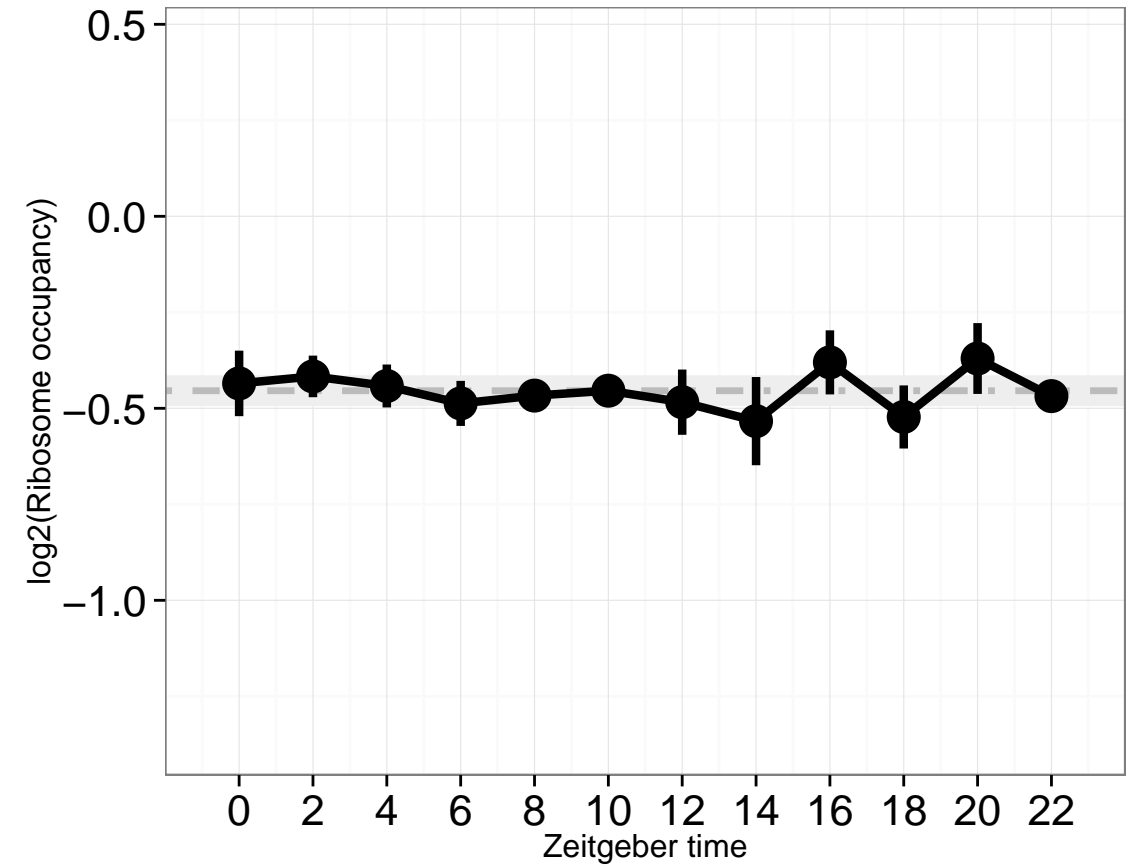

Supplement: Supplementary file 879 [file 1]

## Kcnh5

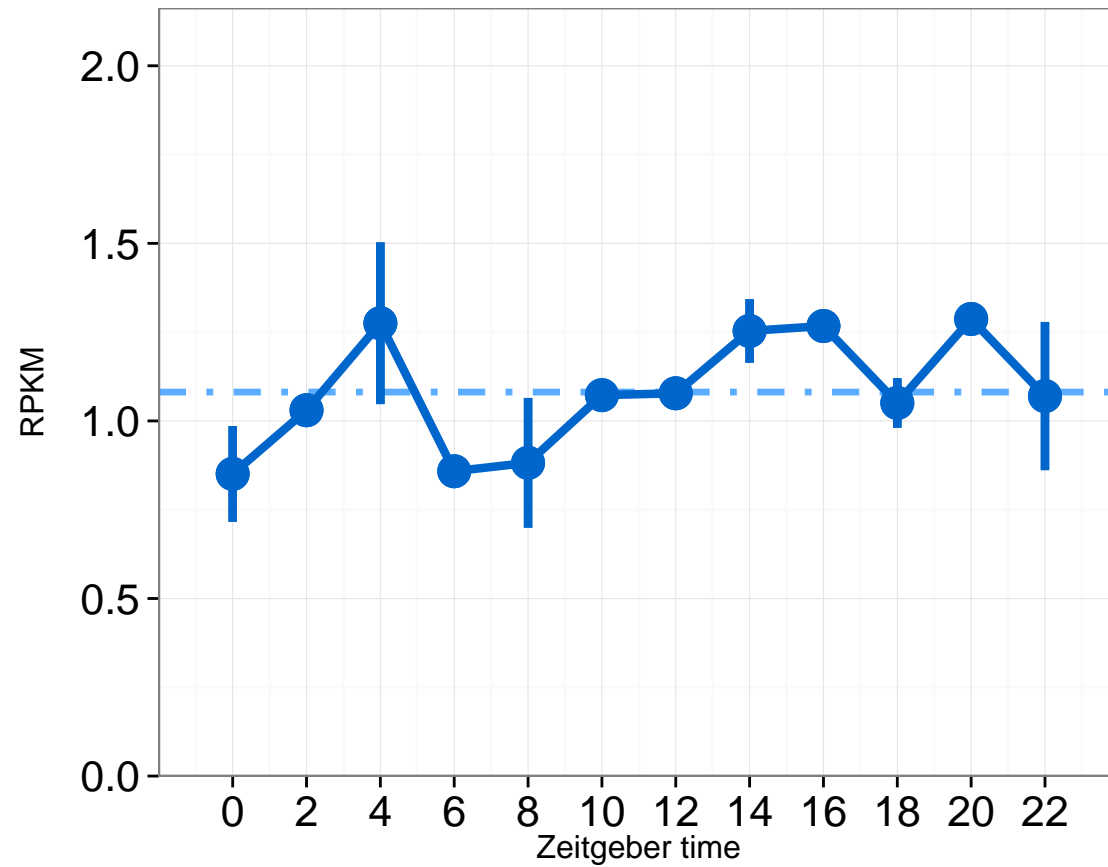

## Kcnh5 log2(Ribosome occupancy

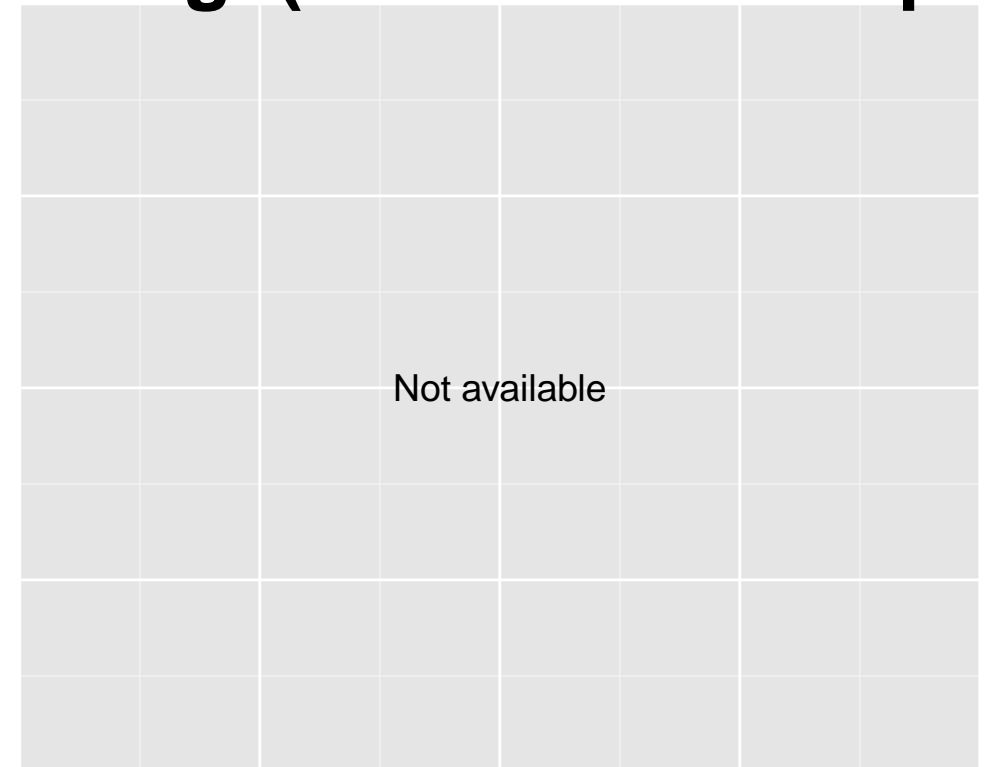

Supplement: Supplementary file 880 [file 1]

# Trmt11

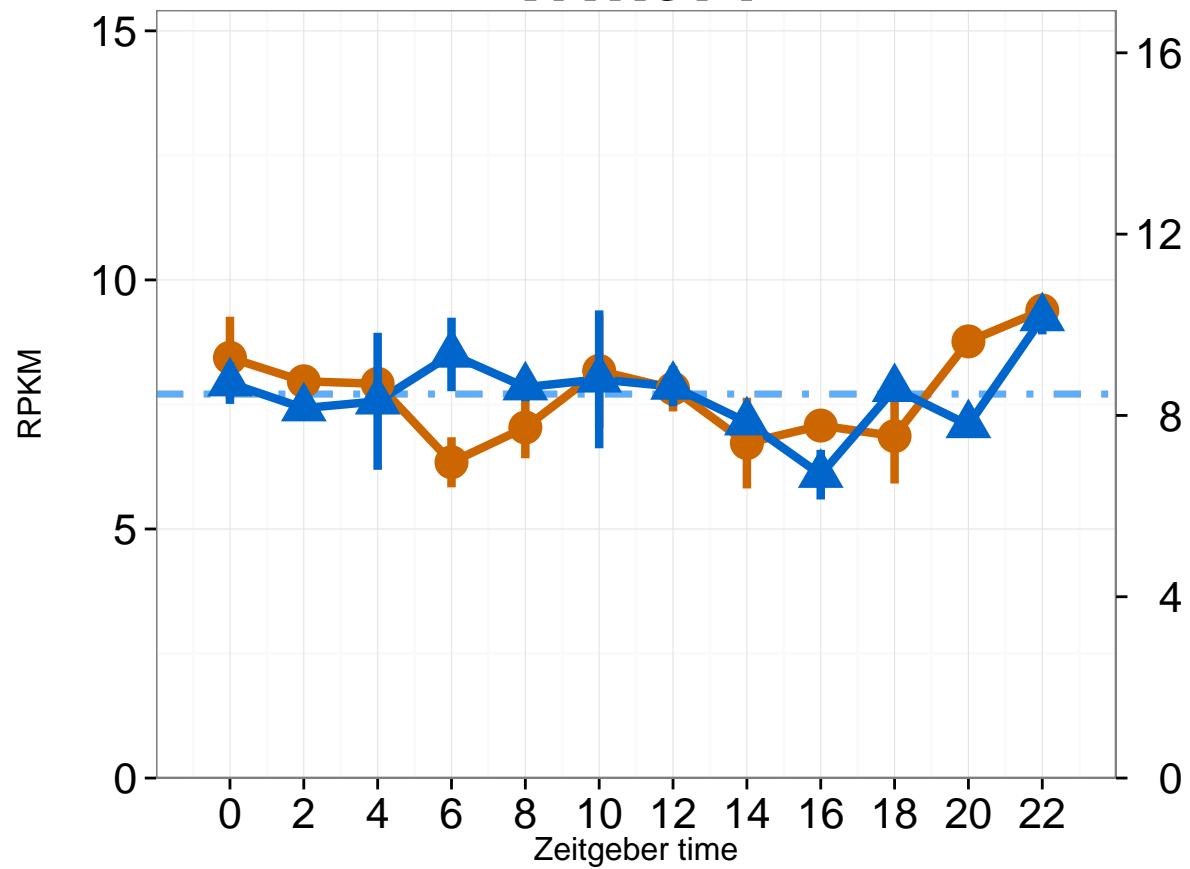

# Trmt11

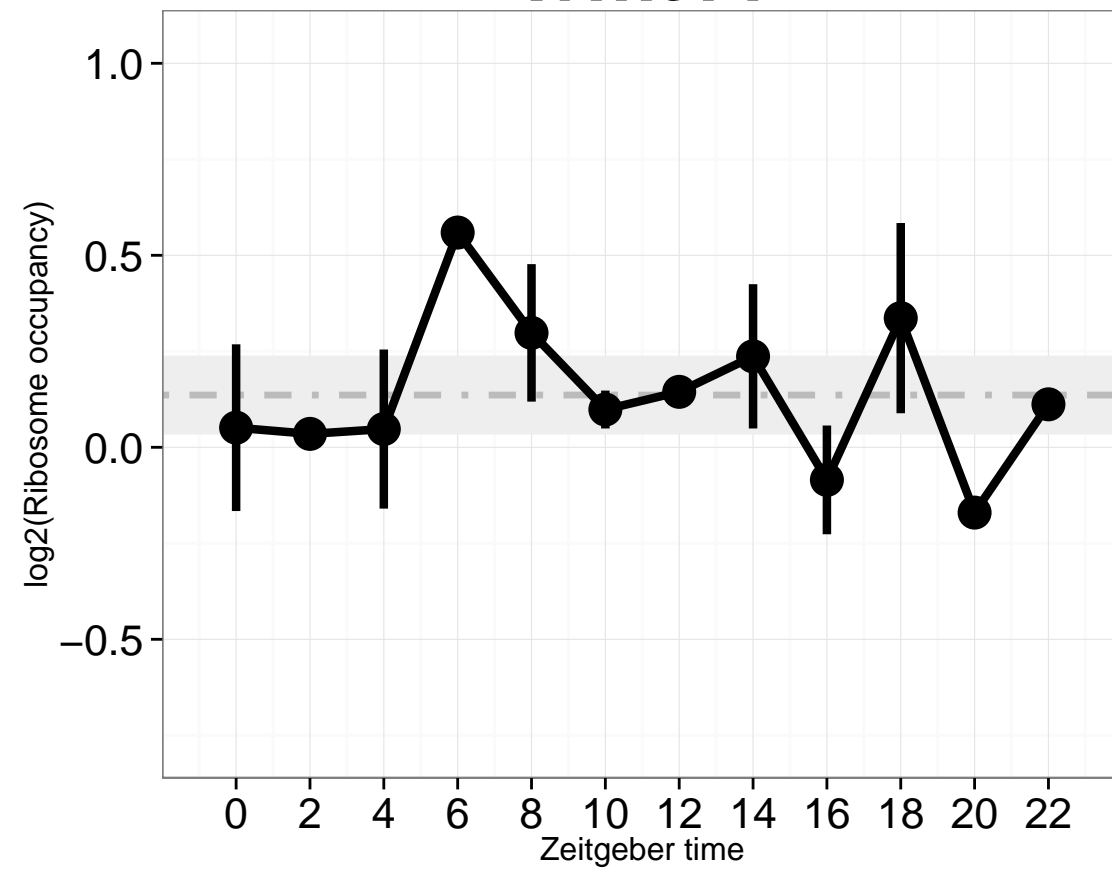

Supplement: Supplementary file 881 [file 1]

# Sipa1

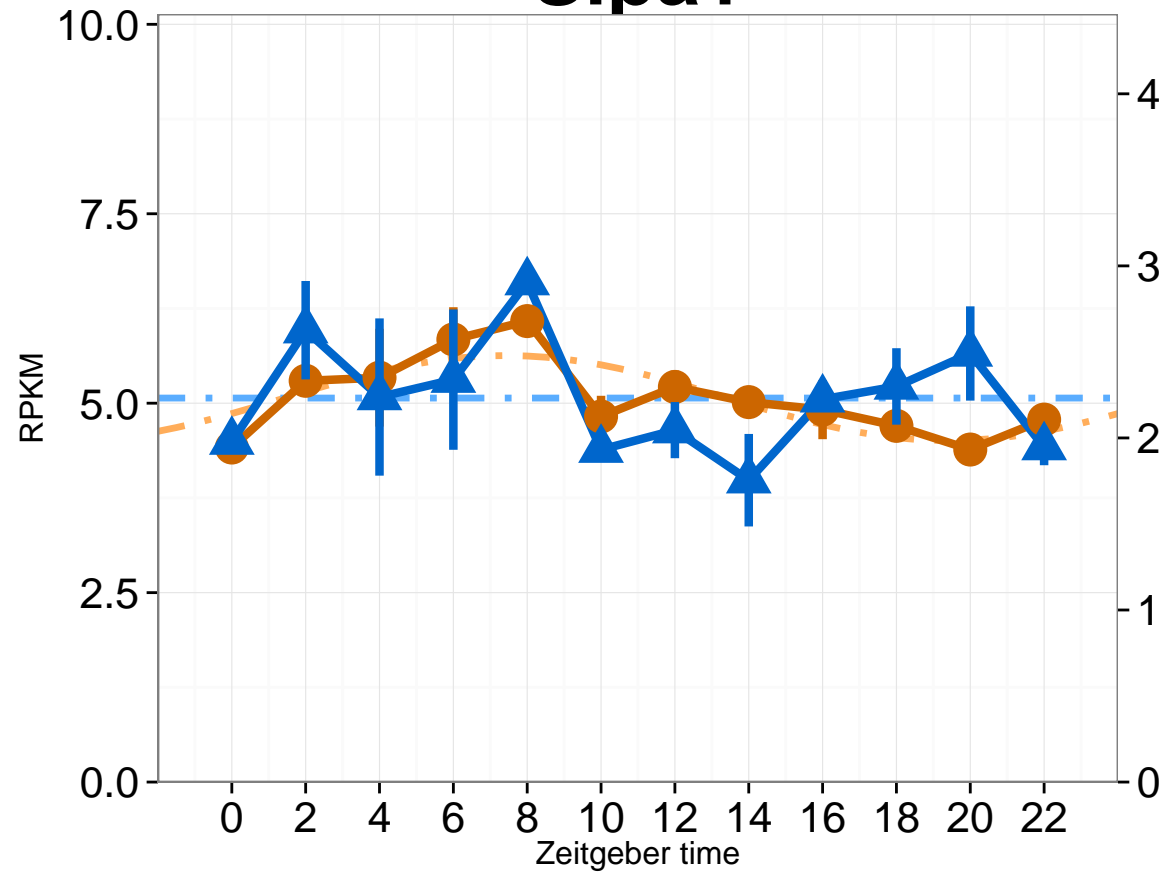

# Sipa1

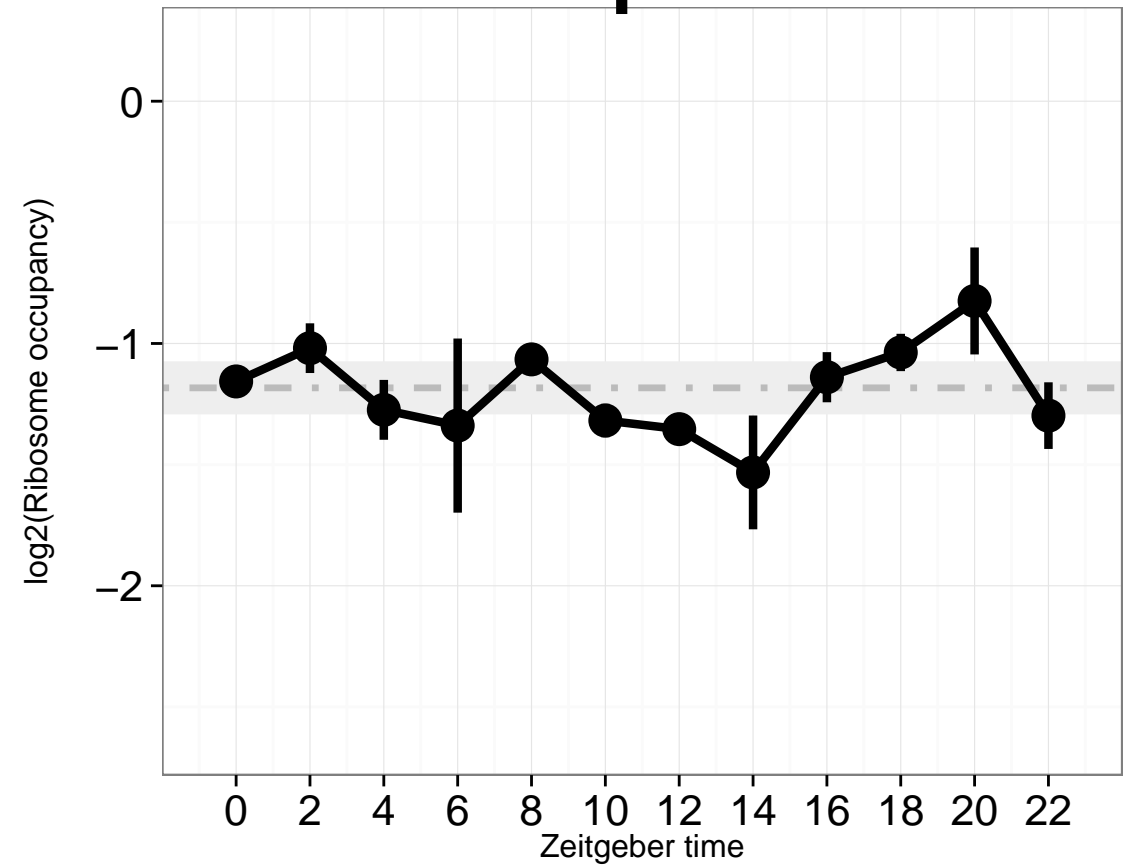

Supplement: Supplementary file 882 [file 1]

# 1700049G17Rik

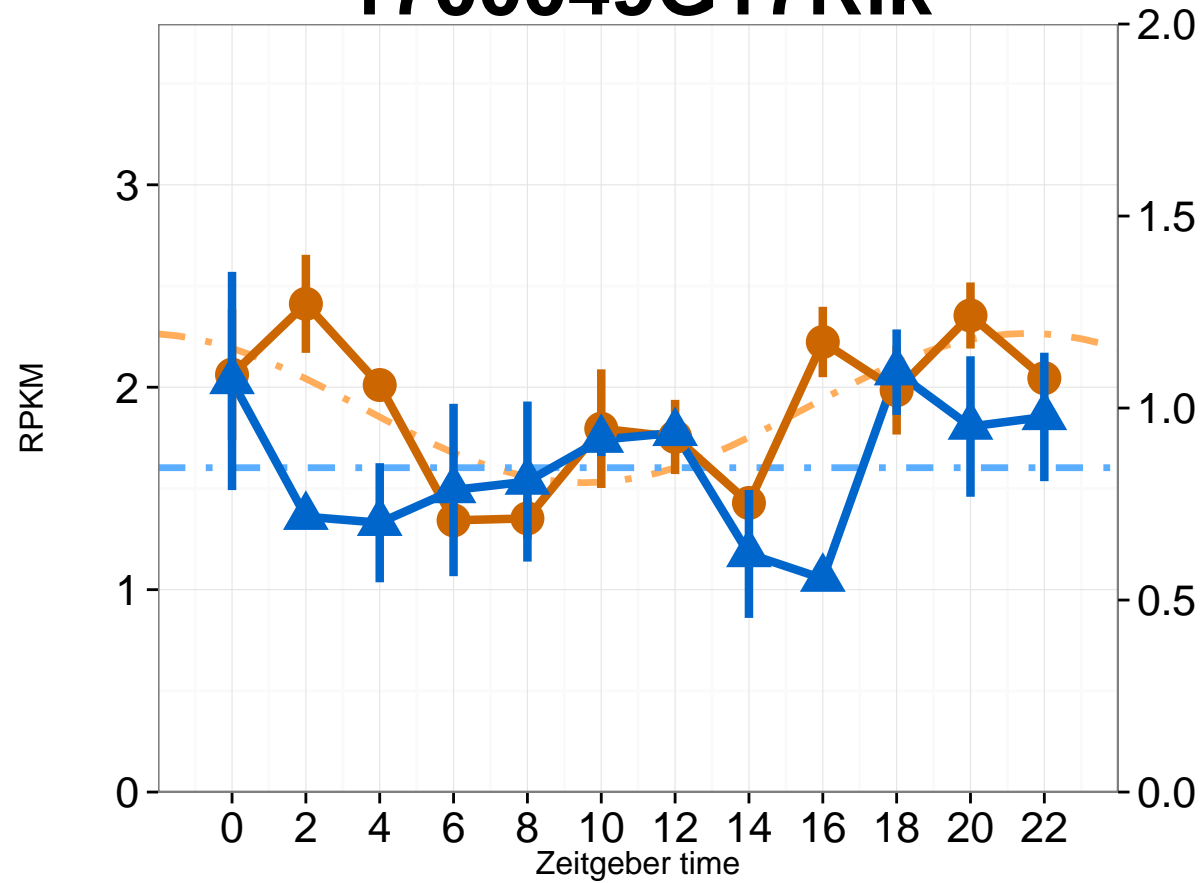

# 1700049G17Rik

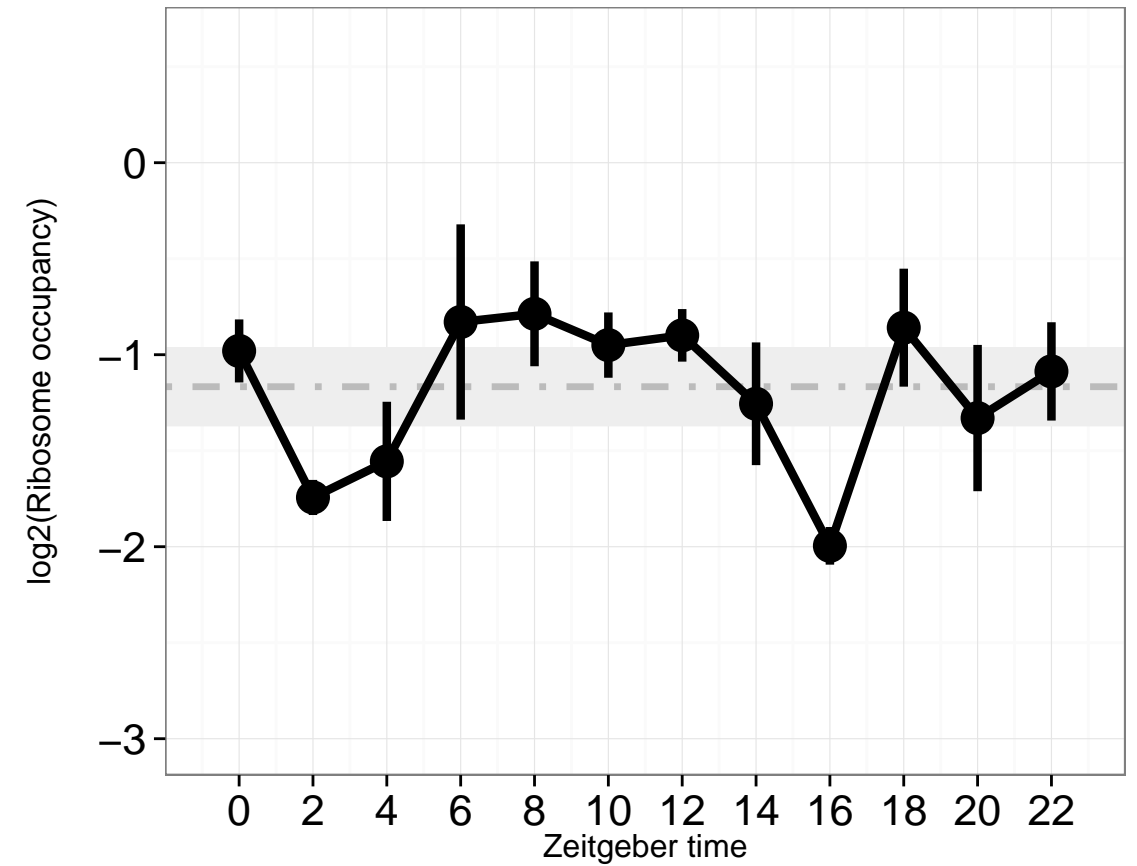

Supplement: Supplementary file 883 [file 1]

# Zfp667

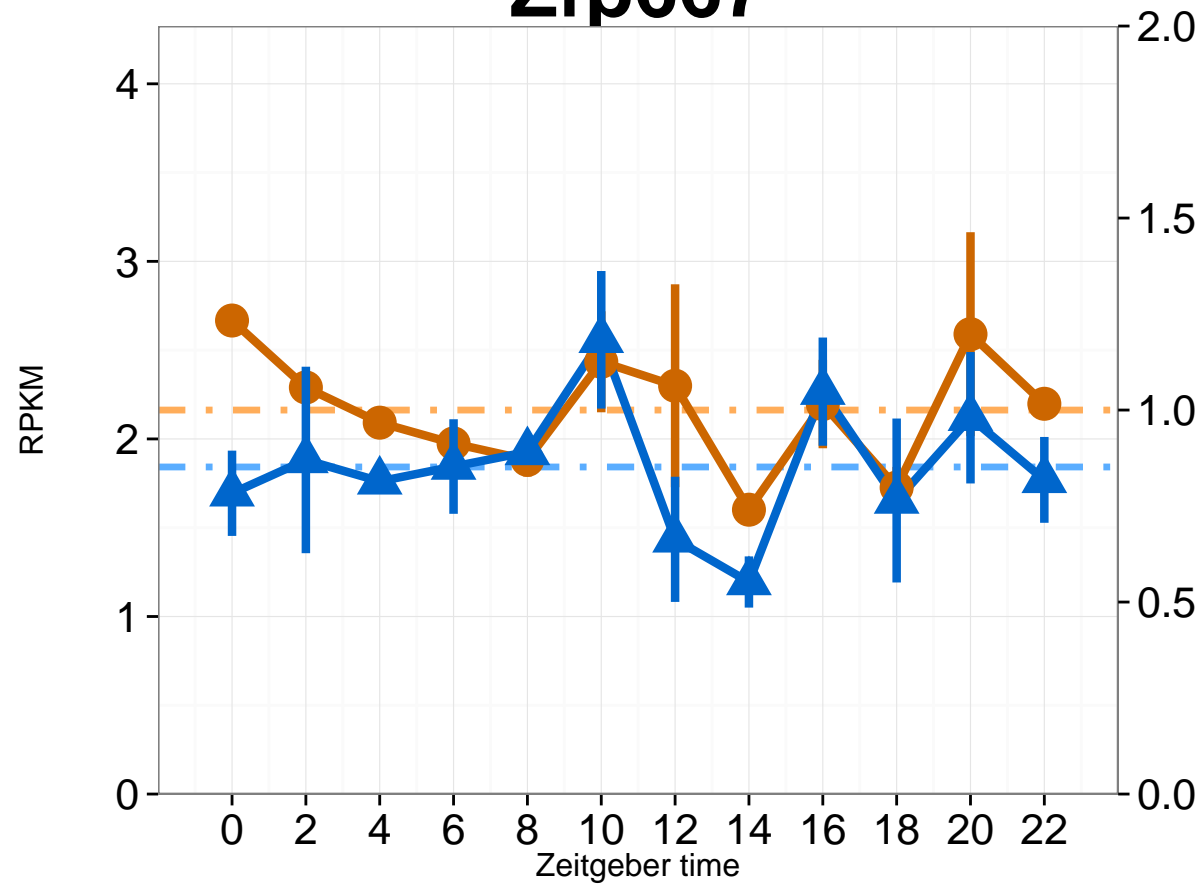

# Zfp667

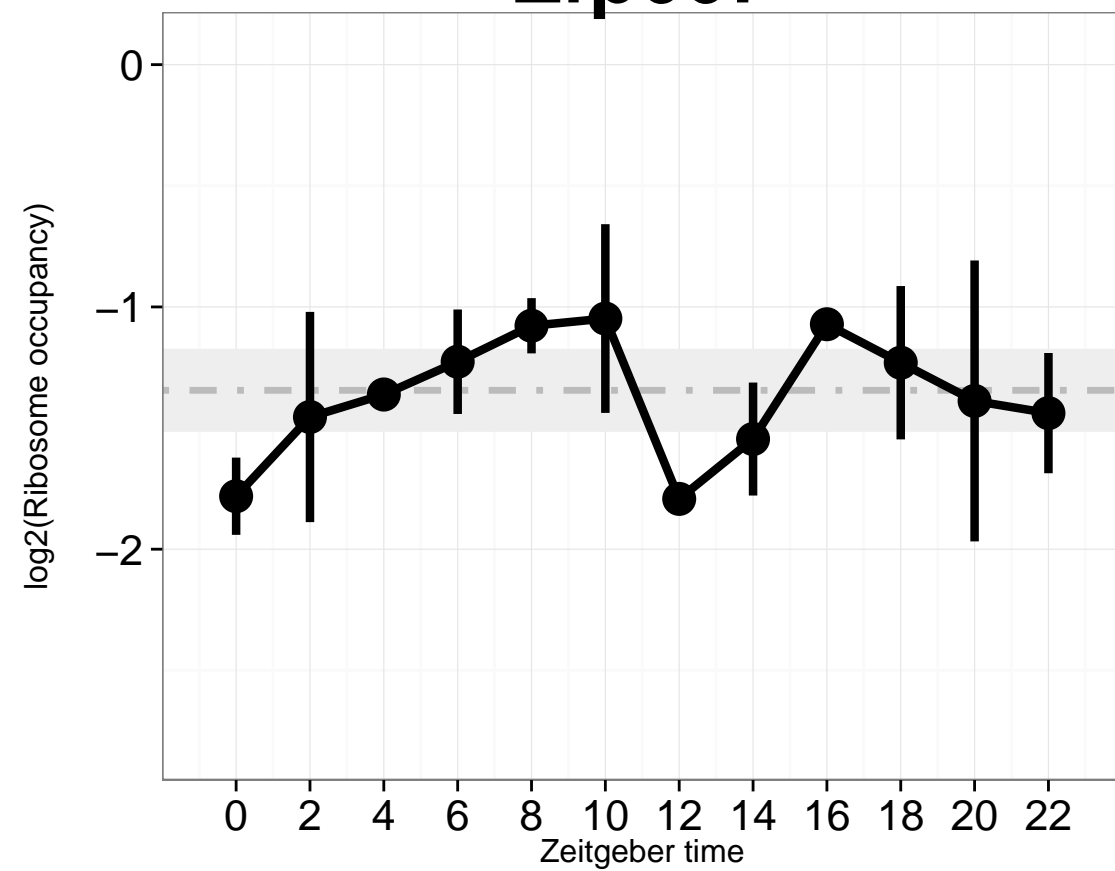

Supplement: Supplementary file 884 [file 1]

## Plin5

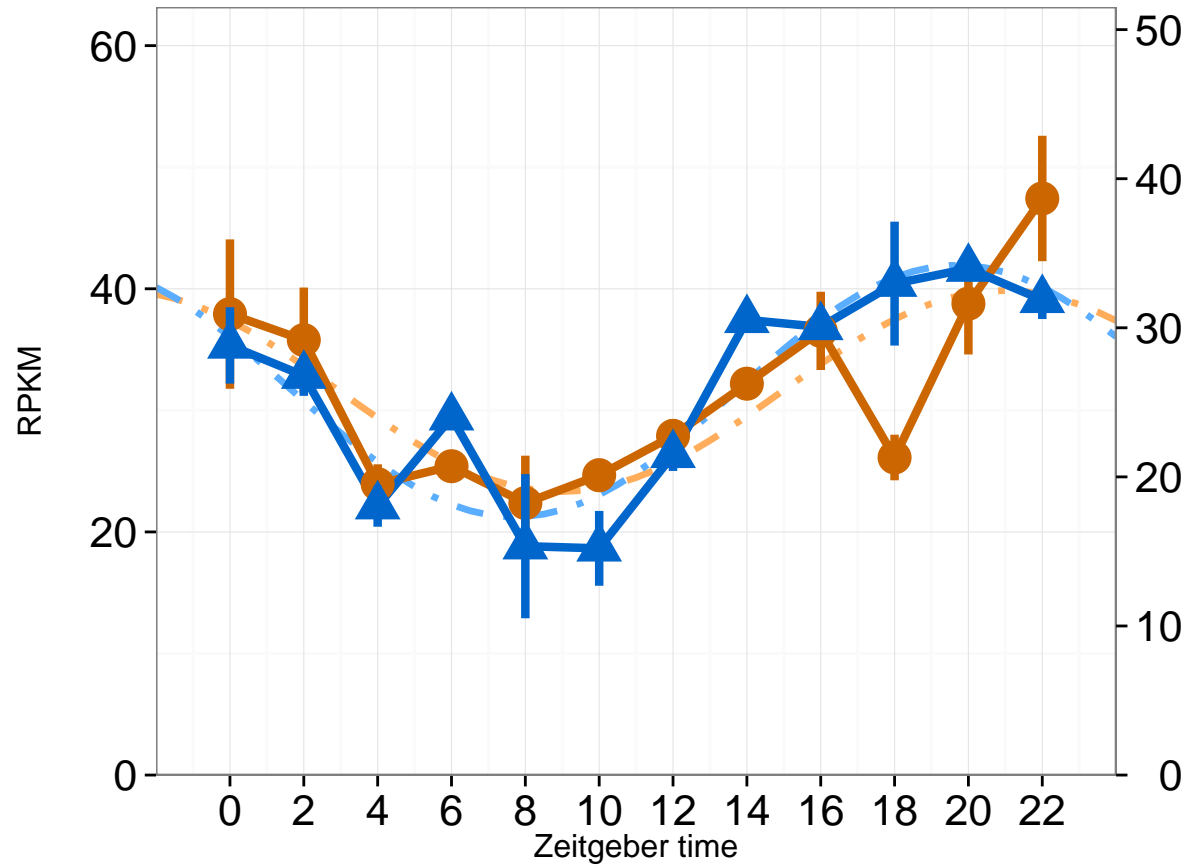

## Plin5

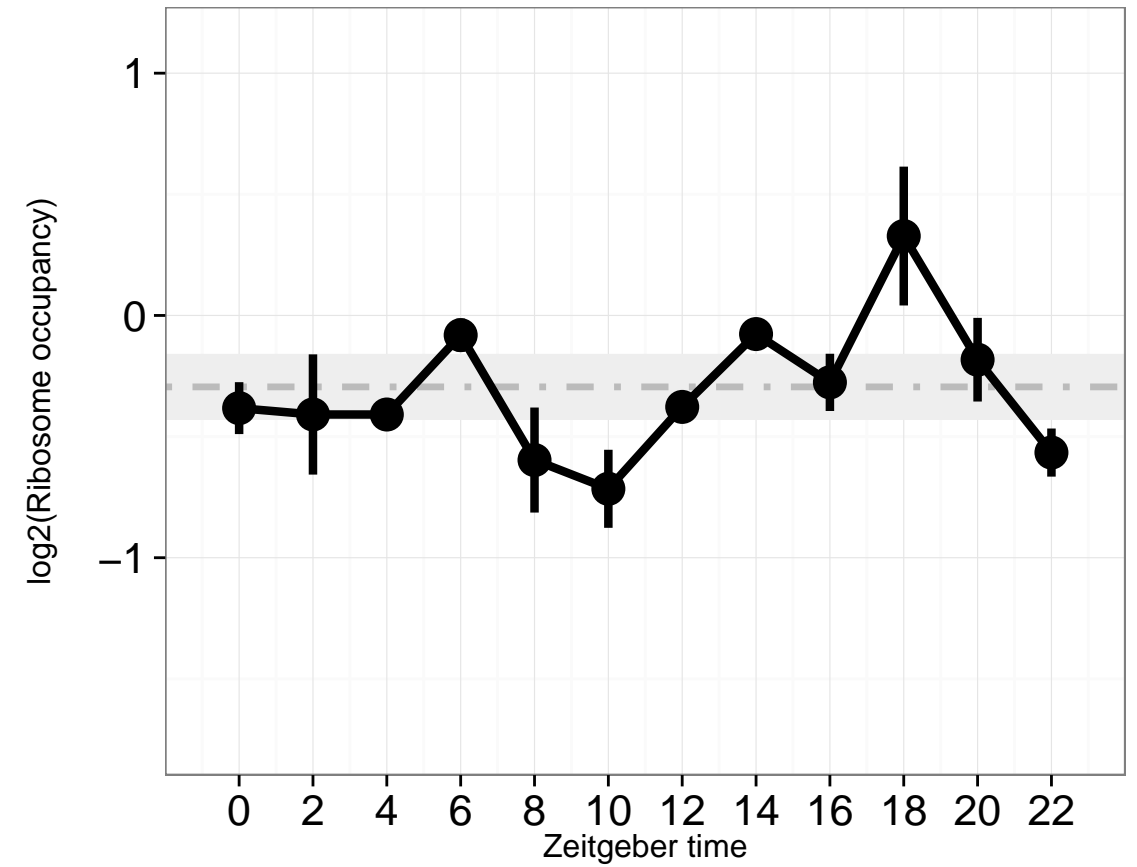

Supplement: Supplementary file 885 [file 1]

## Plekhh3

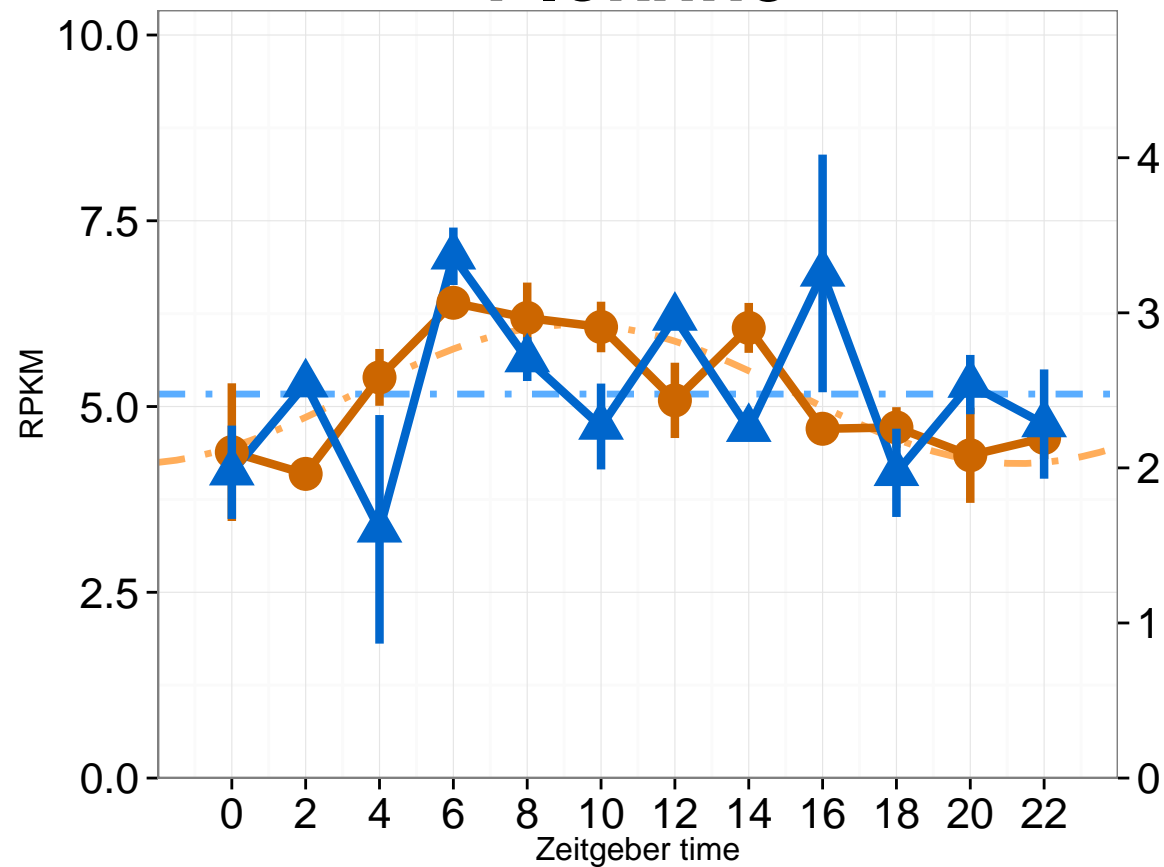

## Plekhh3

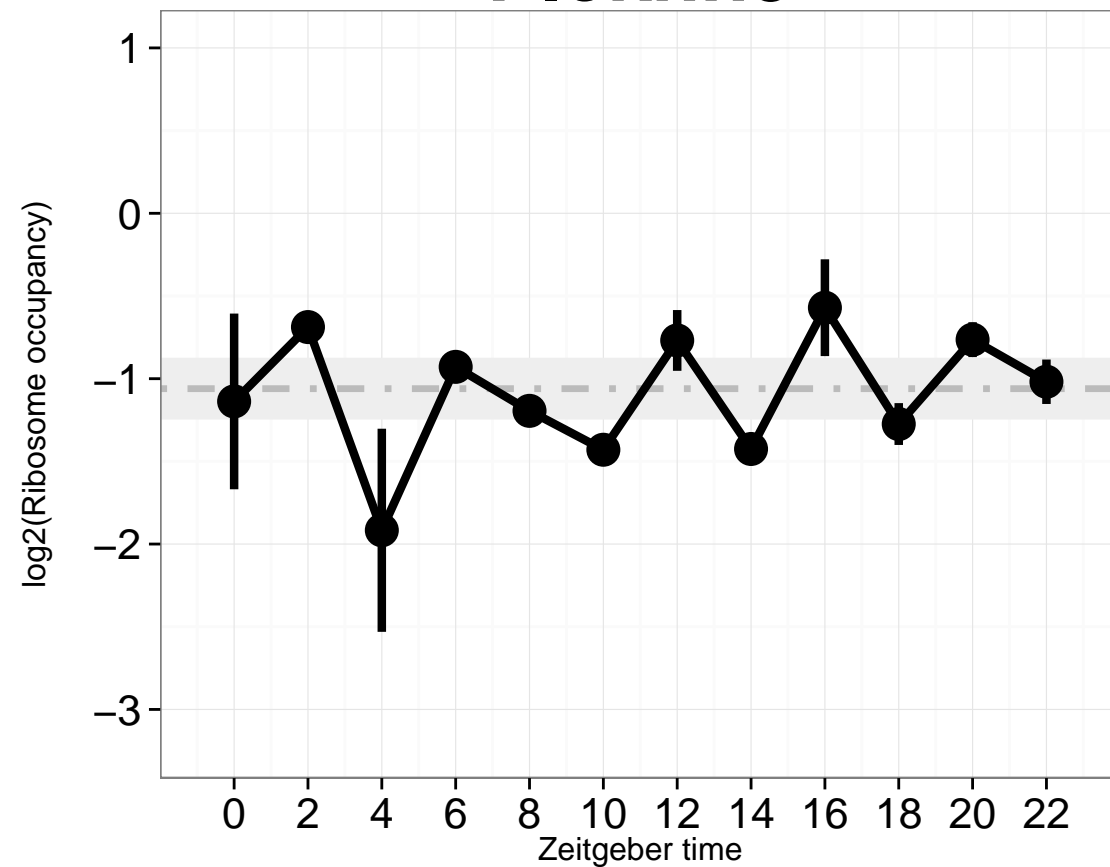

Supplement: Supplementary file 886 [file 1]

# Zfp820

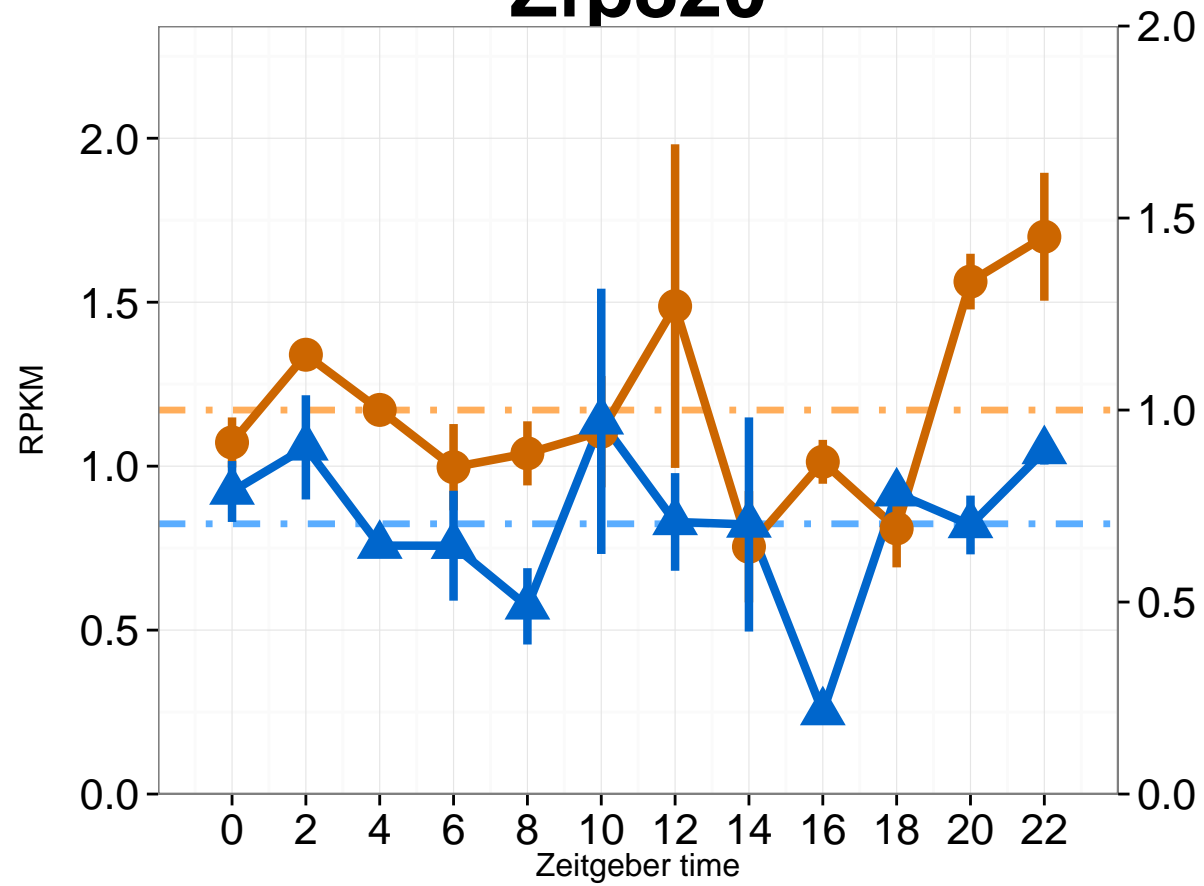

# Zfp820

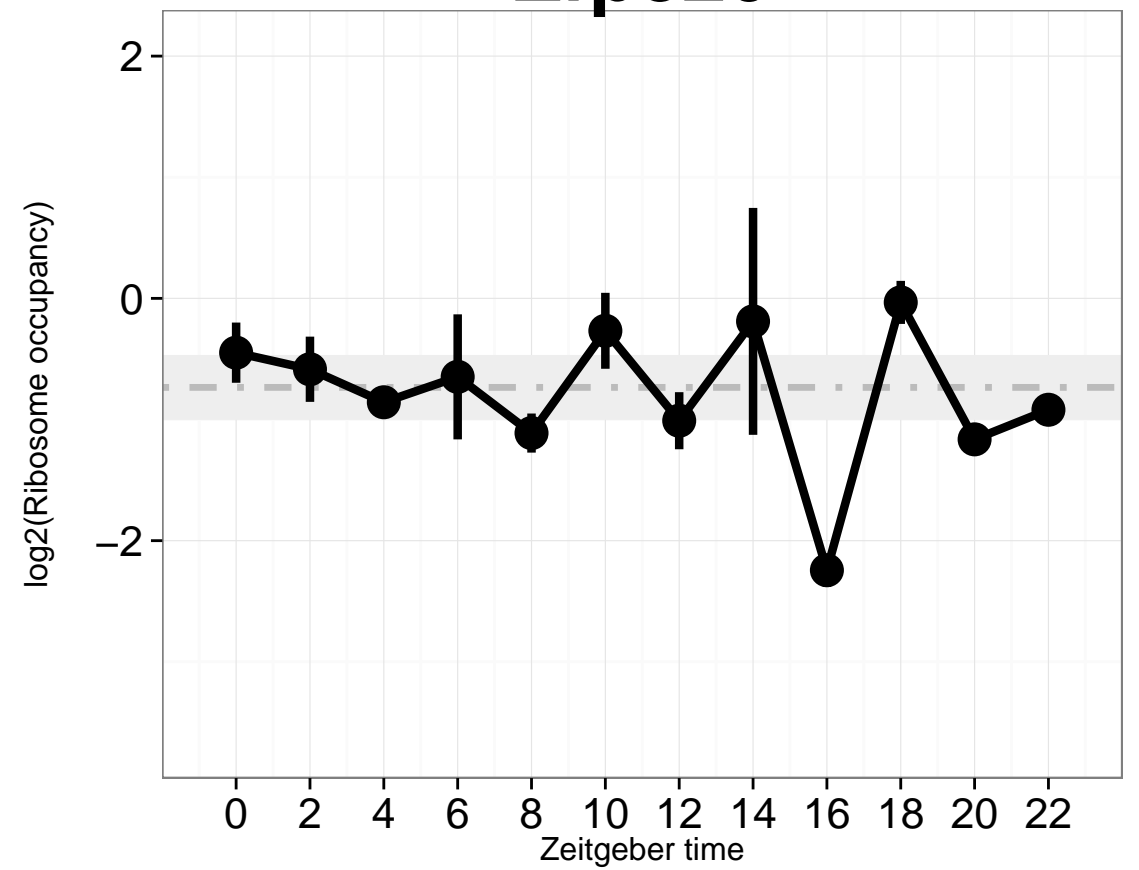

Supplement: Supplementary file 887 [file 1]

# Dmap1

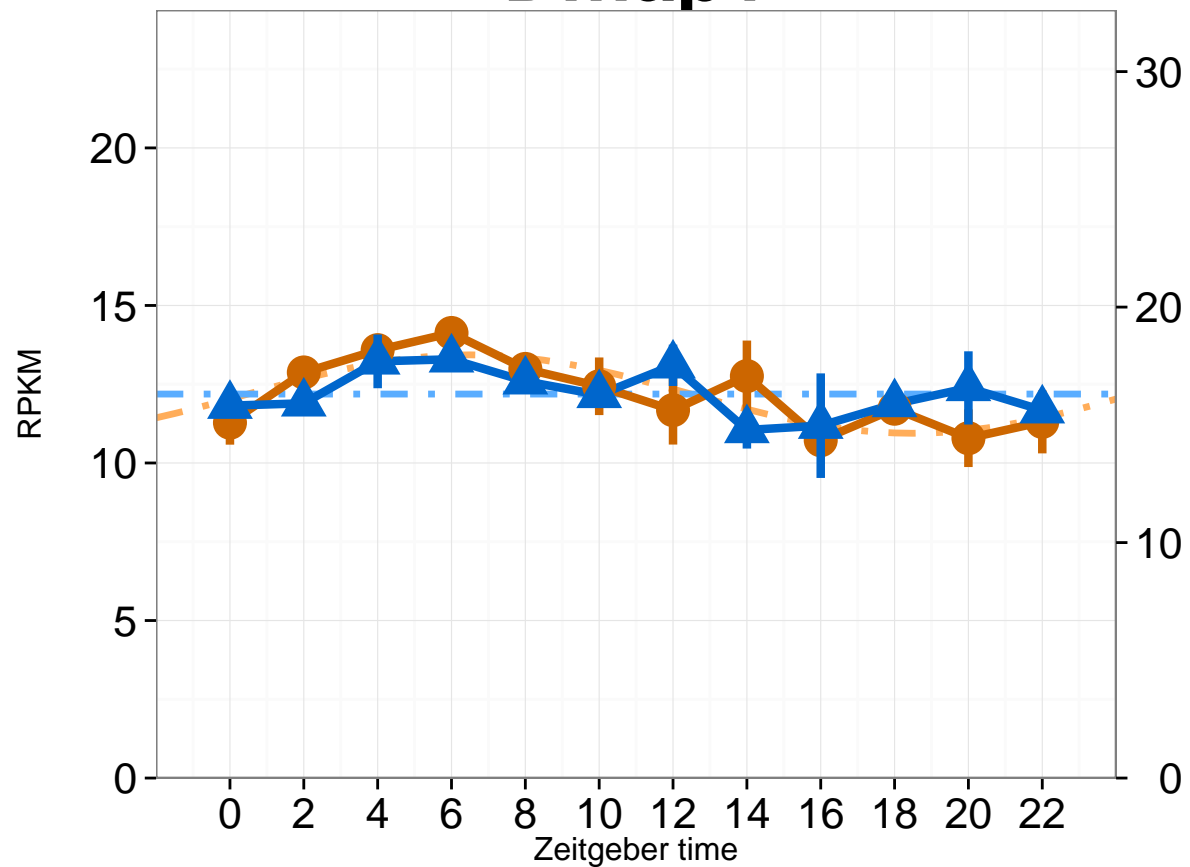

# Dmap1

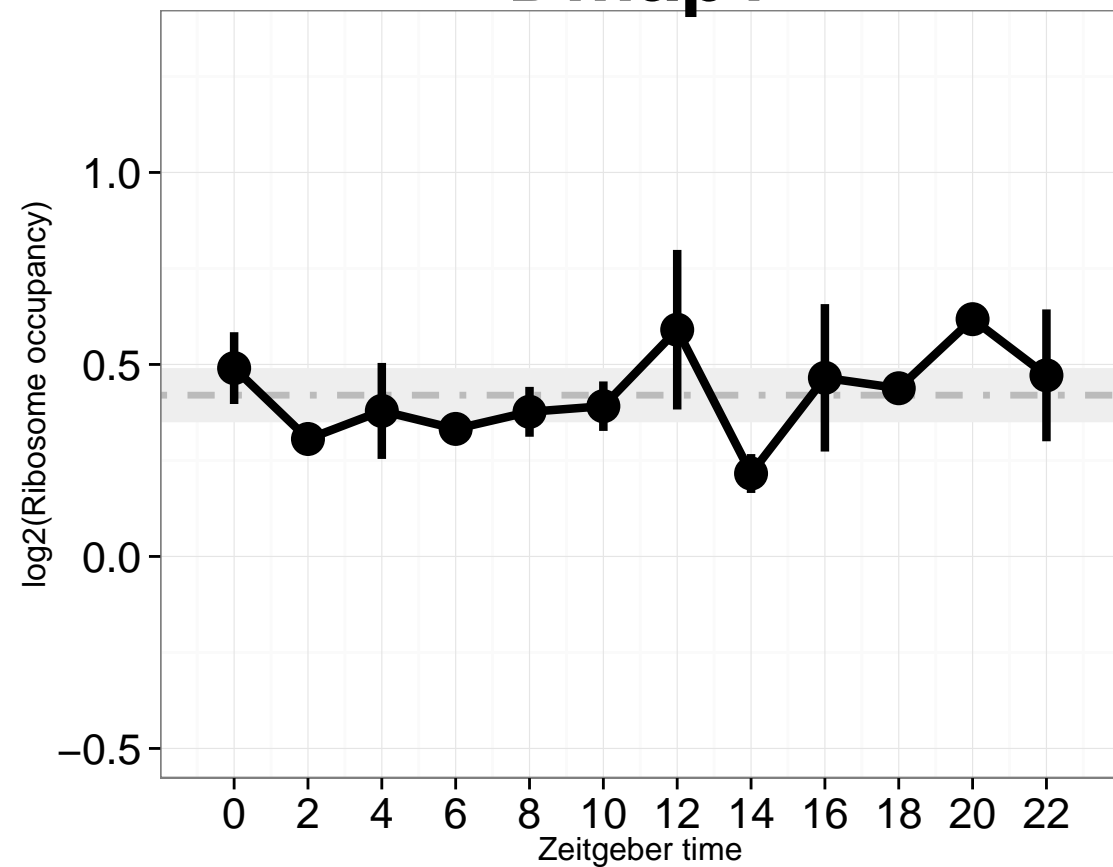

Supplement: Supplementary file 888 [file 1]

# Anapc15

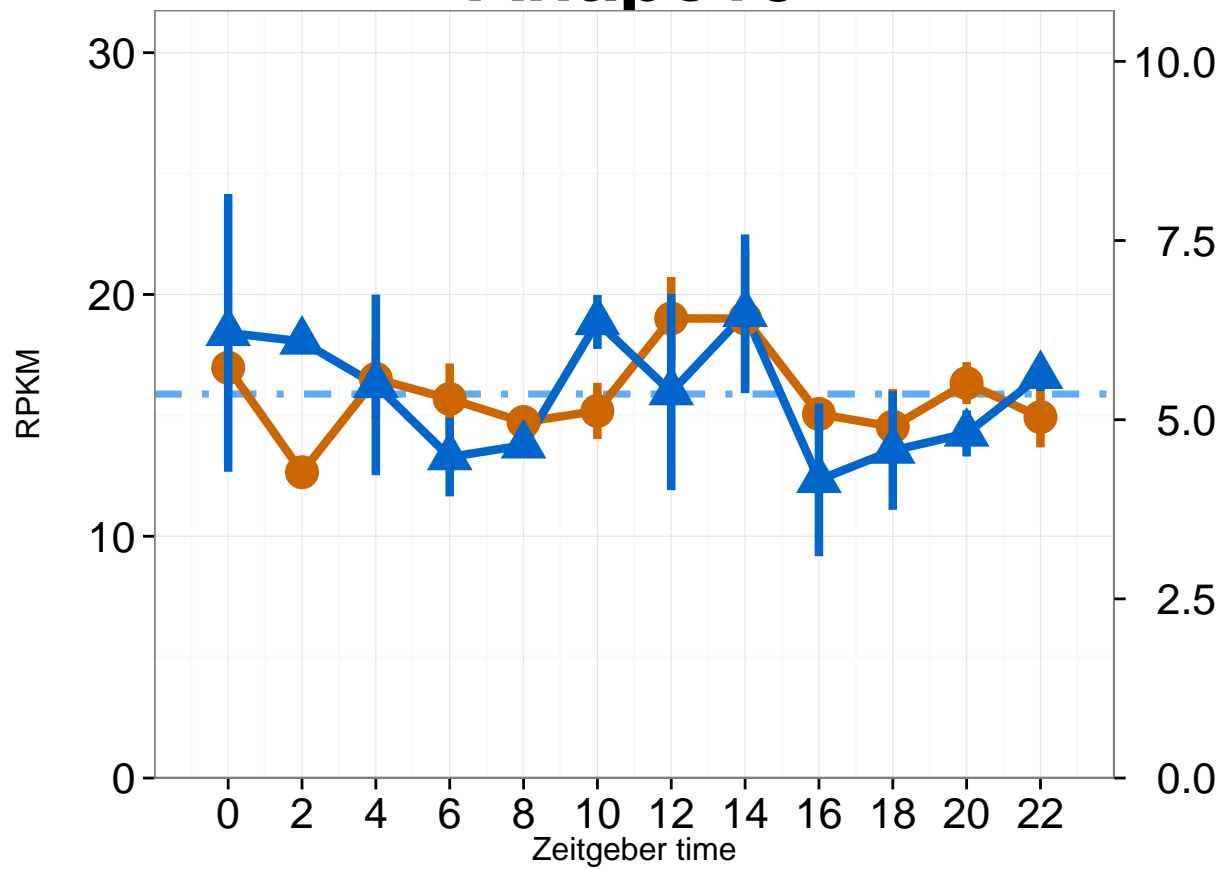

# Anapc15

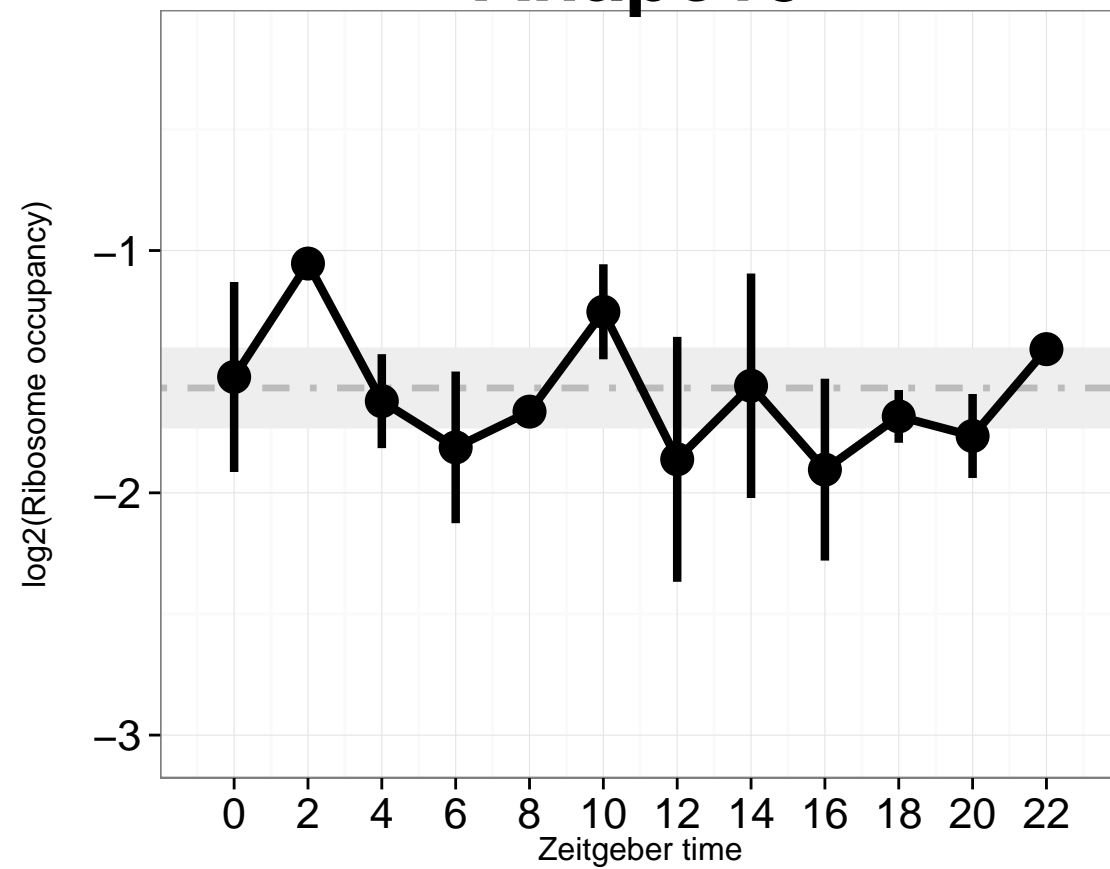

Supplement: Supplementary file 889 [file 1]

# Atp5c1

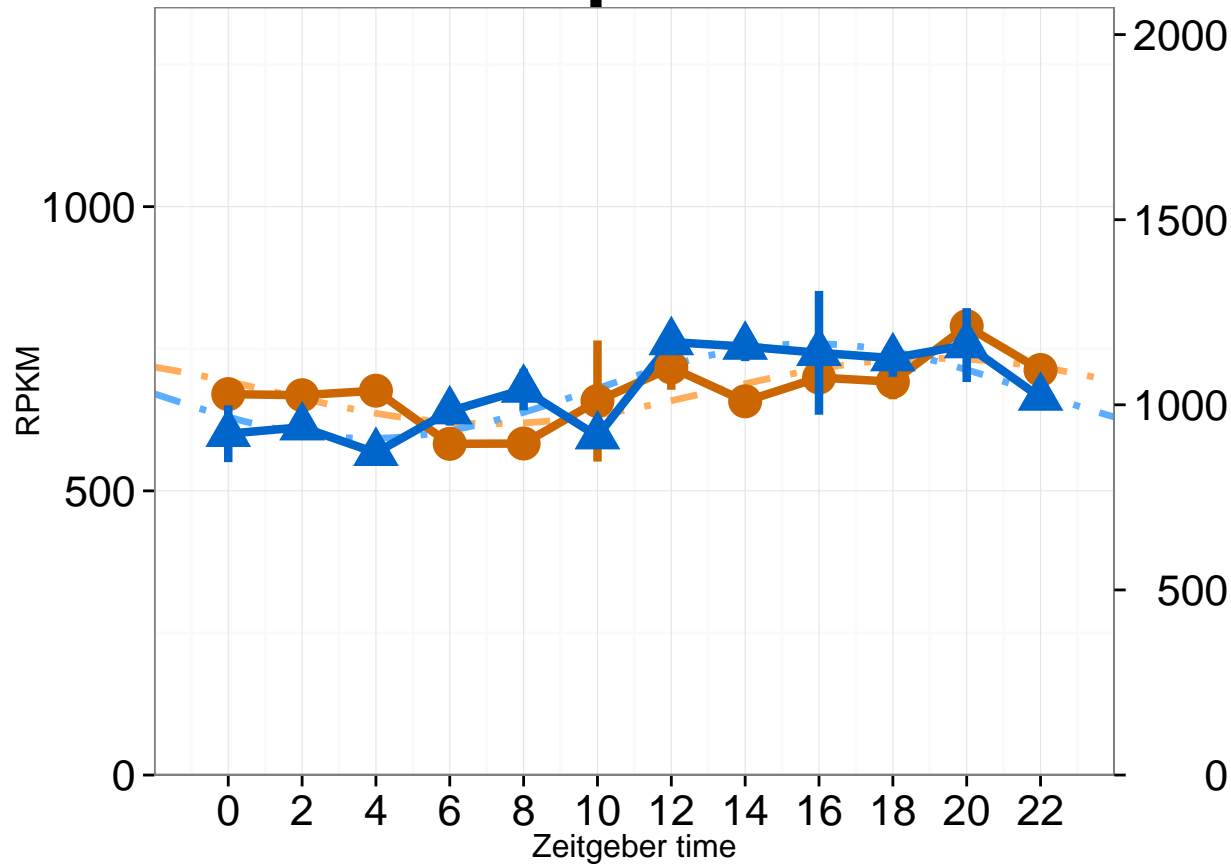

# Atp5c1

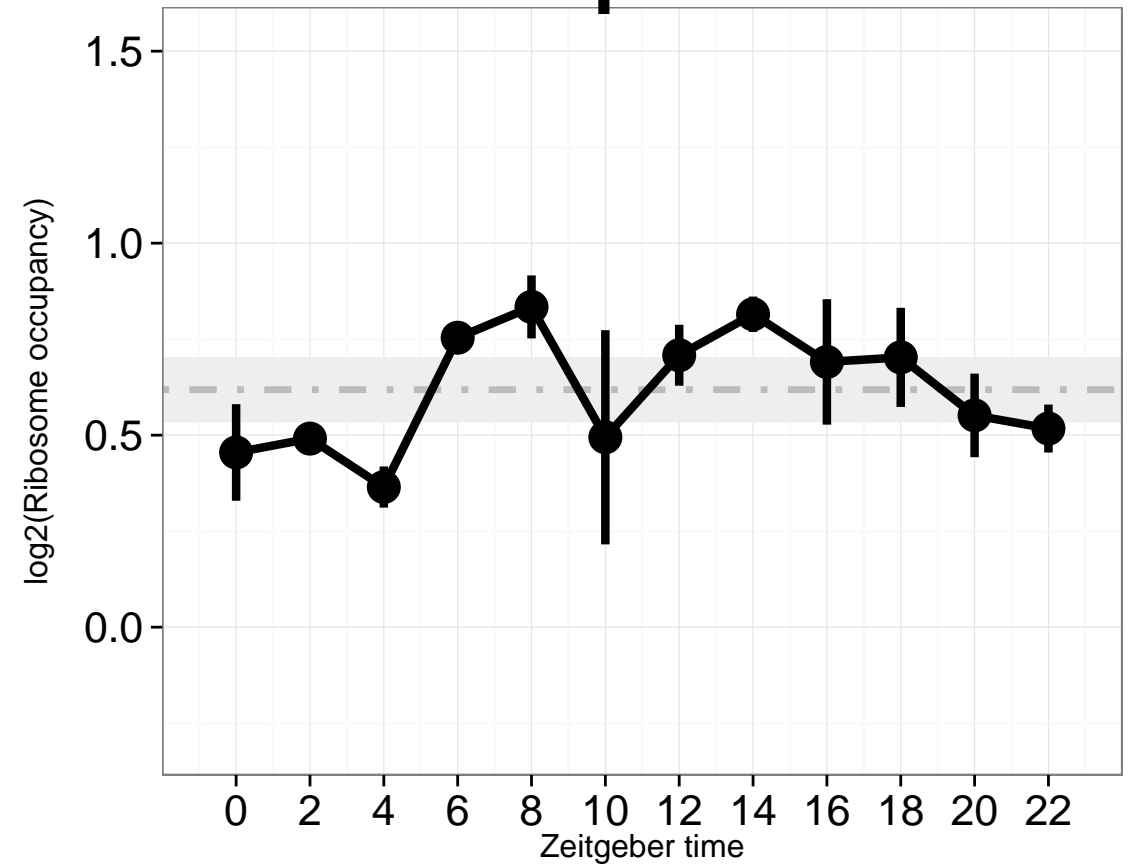

Supplement: Supplementary file 890 [file 1]

# Polr2m

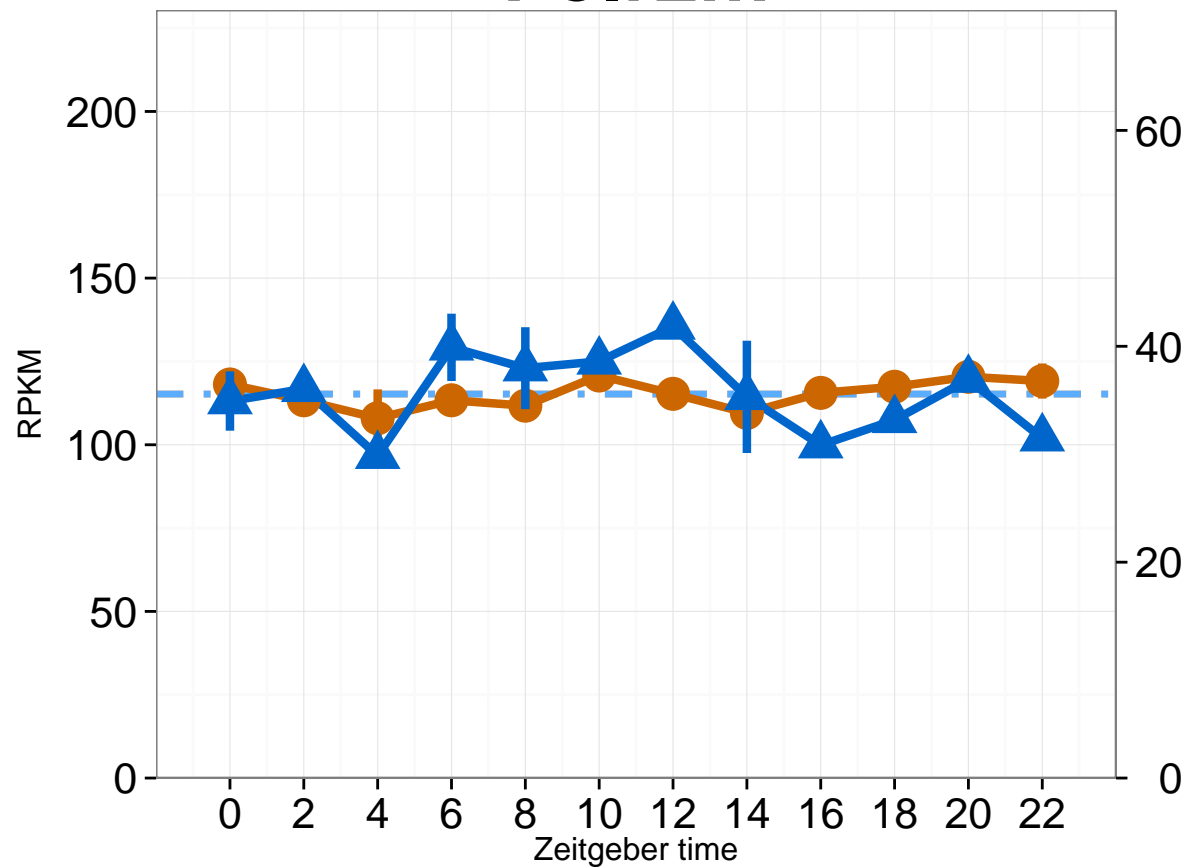

# Polr2m

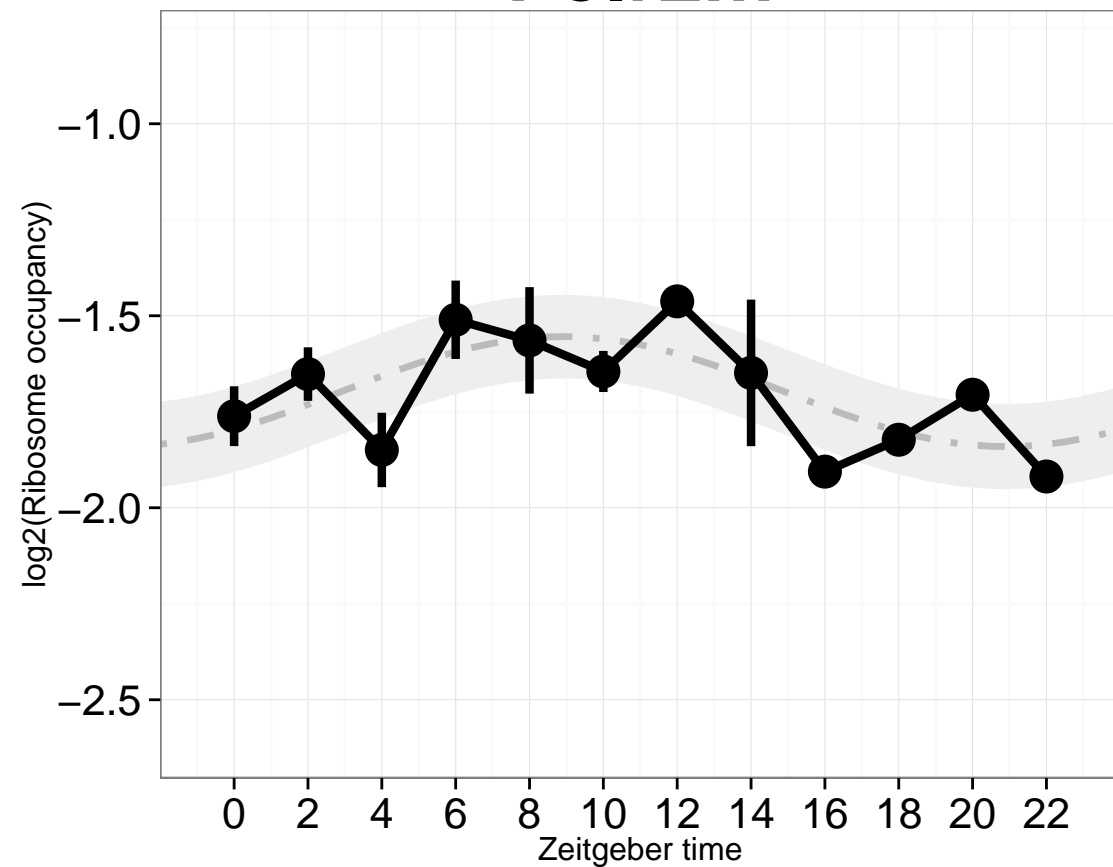

Supplement: Supplementary file 891 [file 1]

## Tgif2

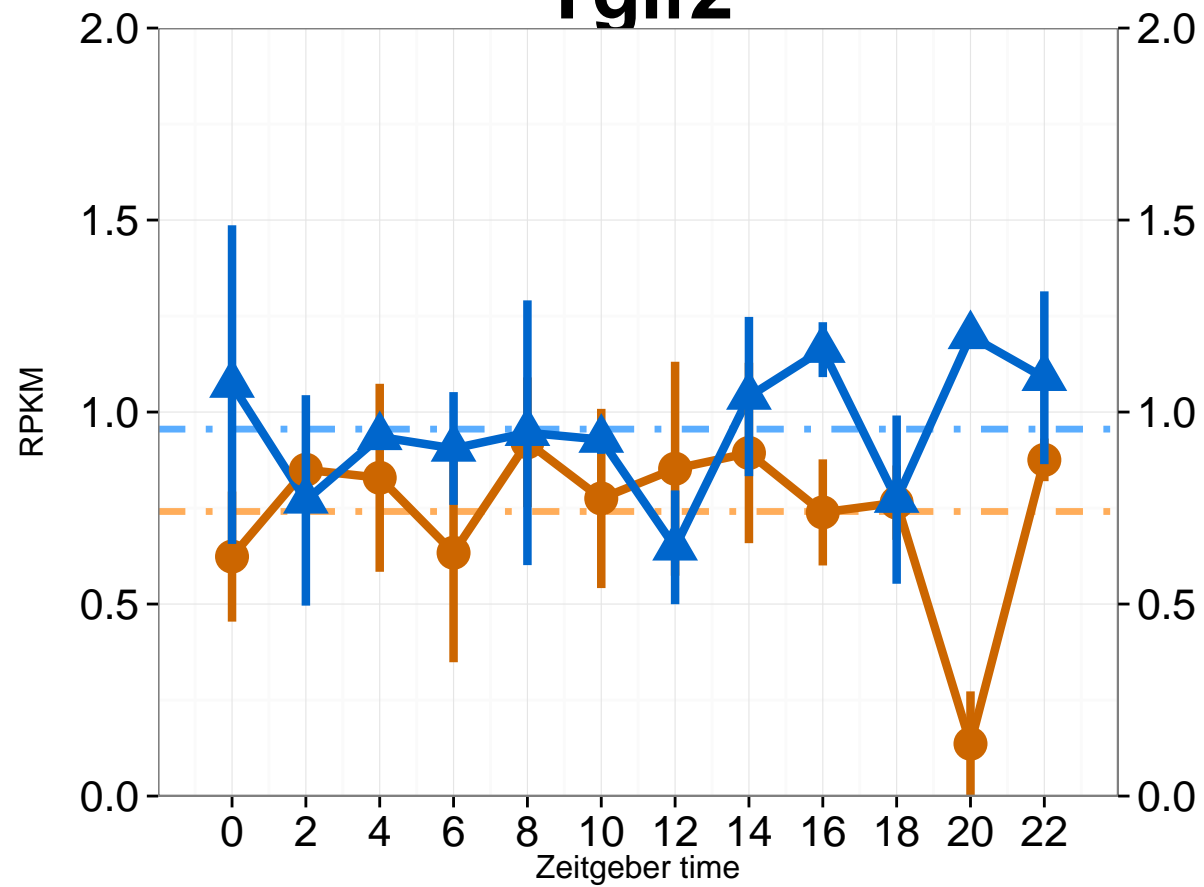

## Tgif2

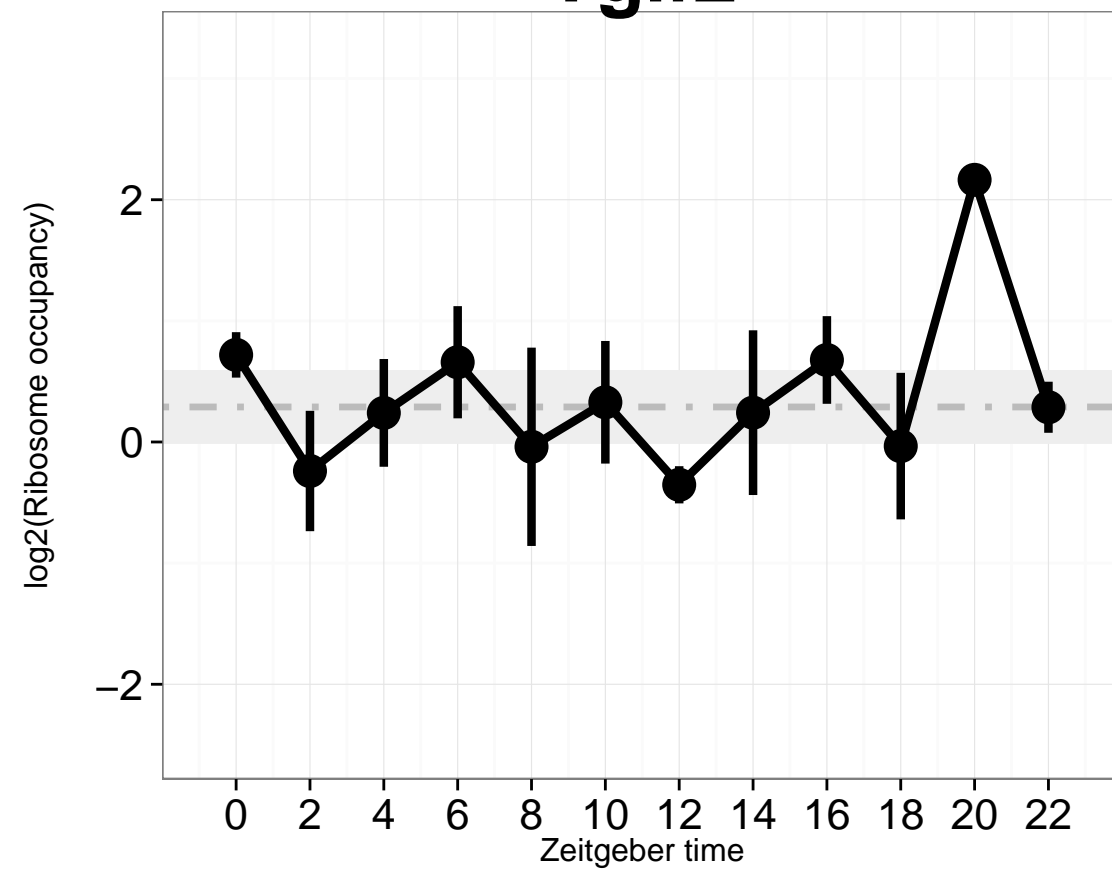

Supplement: Supplementary file 892 [file 1]

# Kifc5b

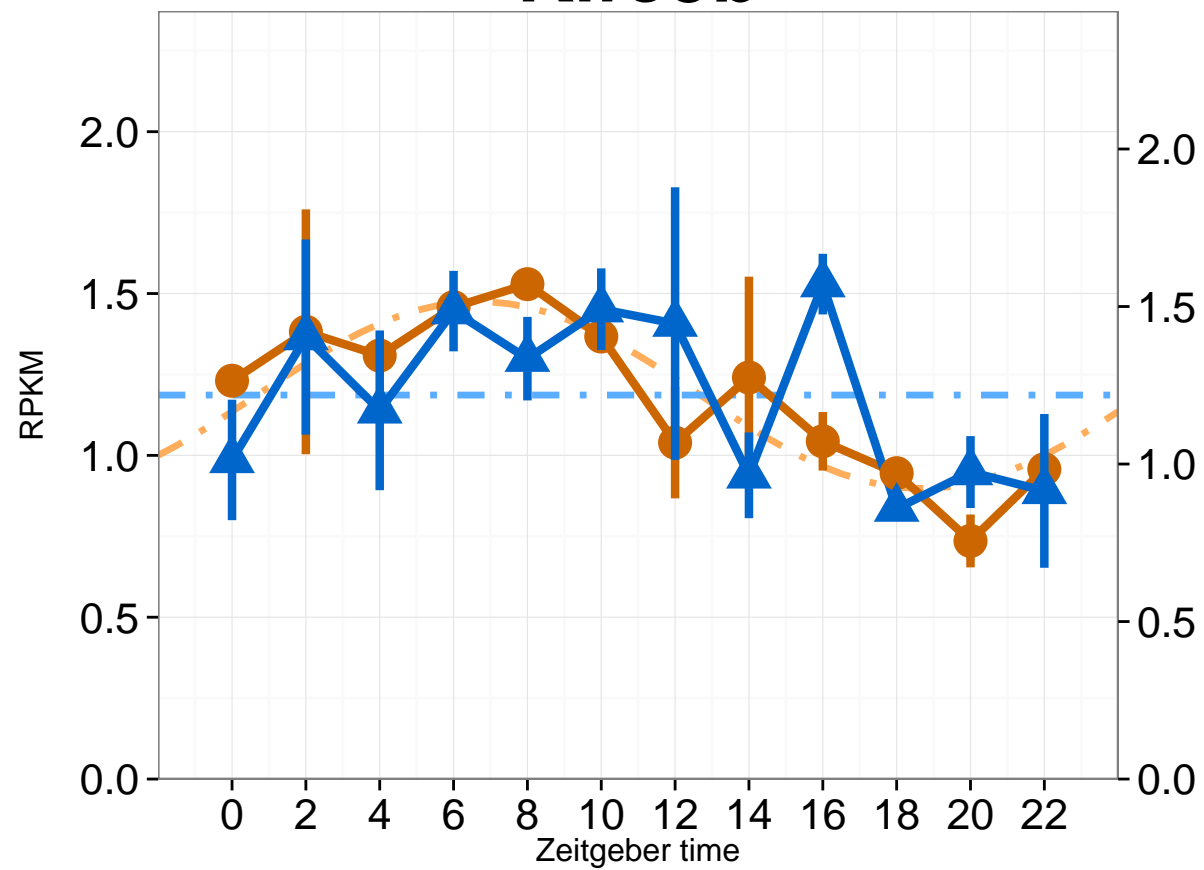

# Kifc5b

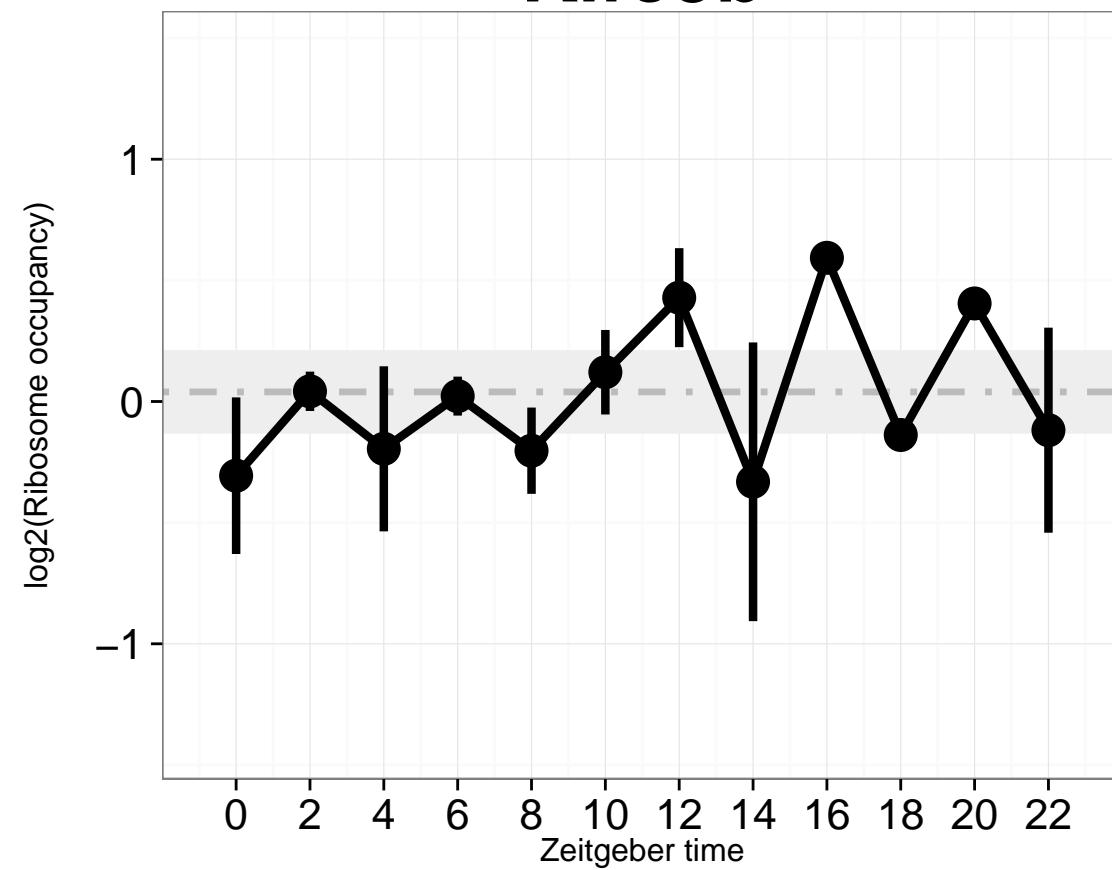

Supplement: Supplementary file 893 [file 1]

# Tenc1

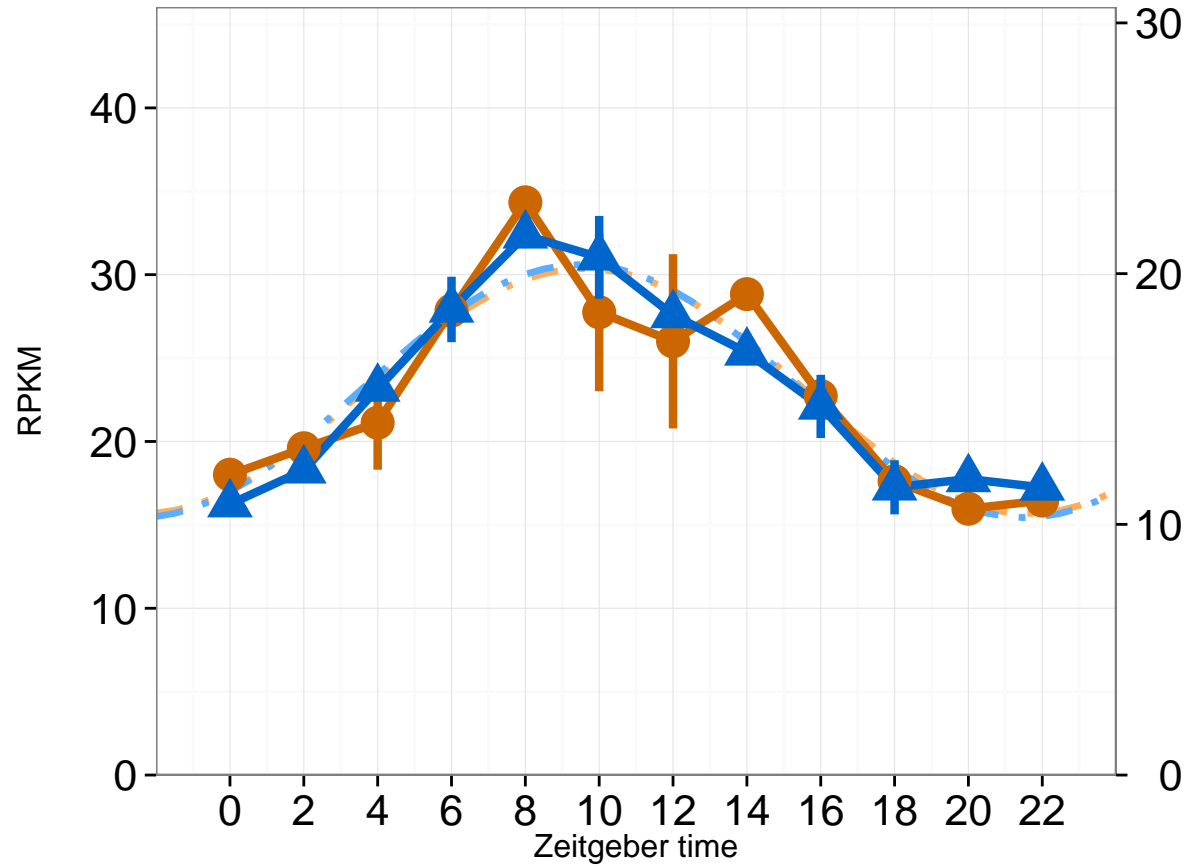

# Tenc1

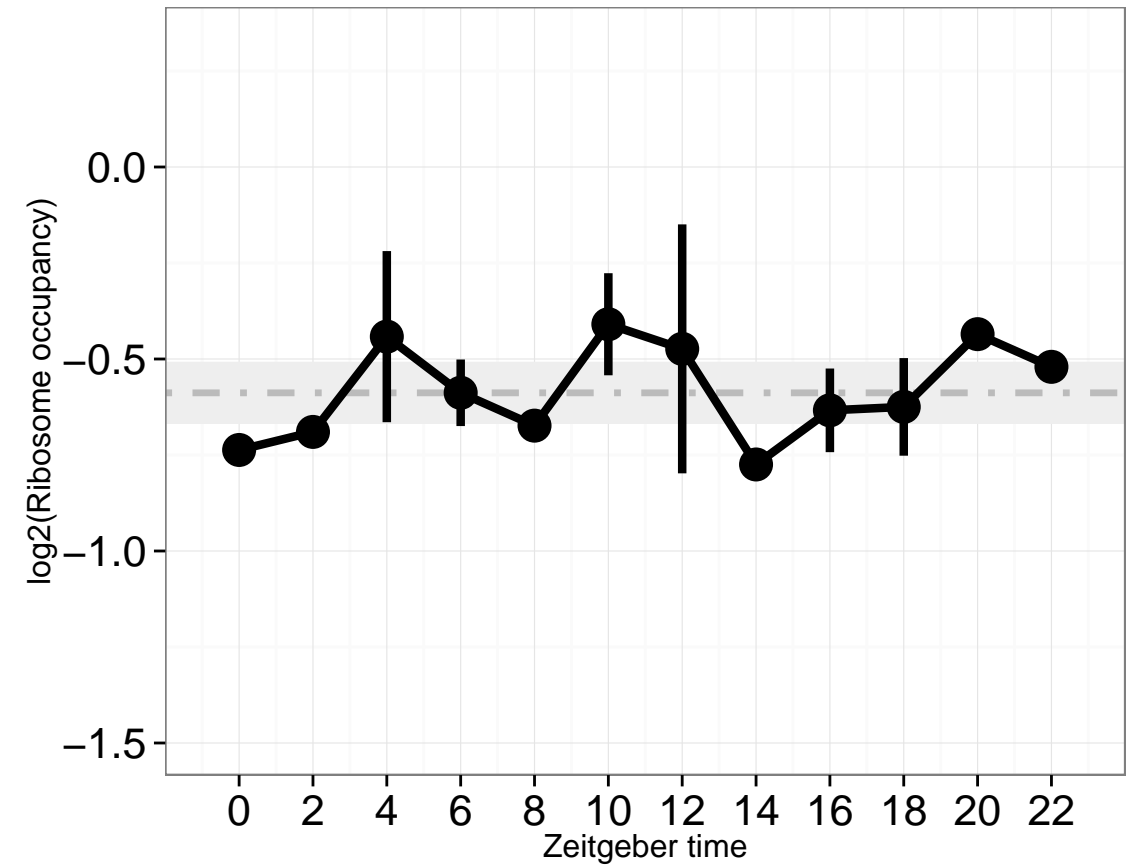

Supplement: Supplementary file 894 [file 1]

## Npdc1

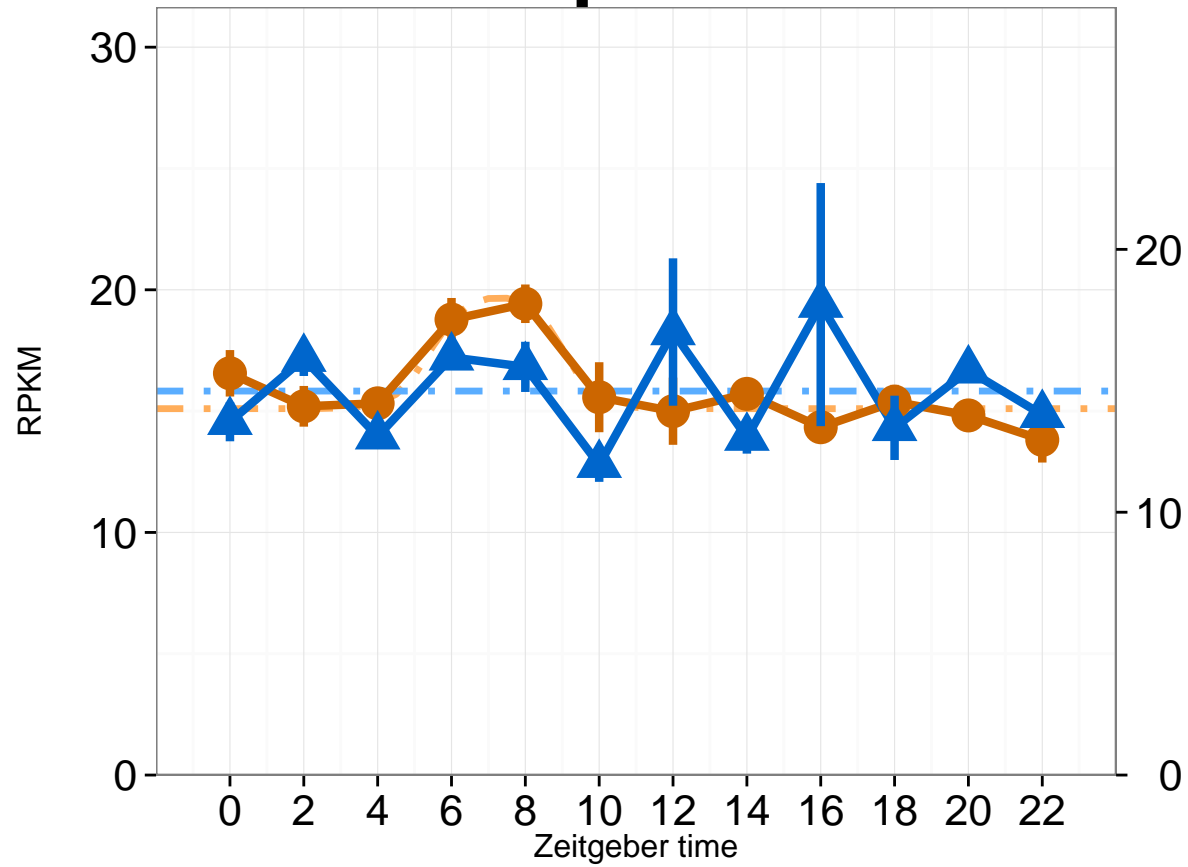

## Npdc1

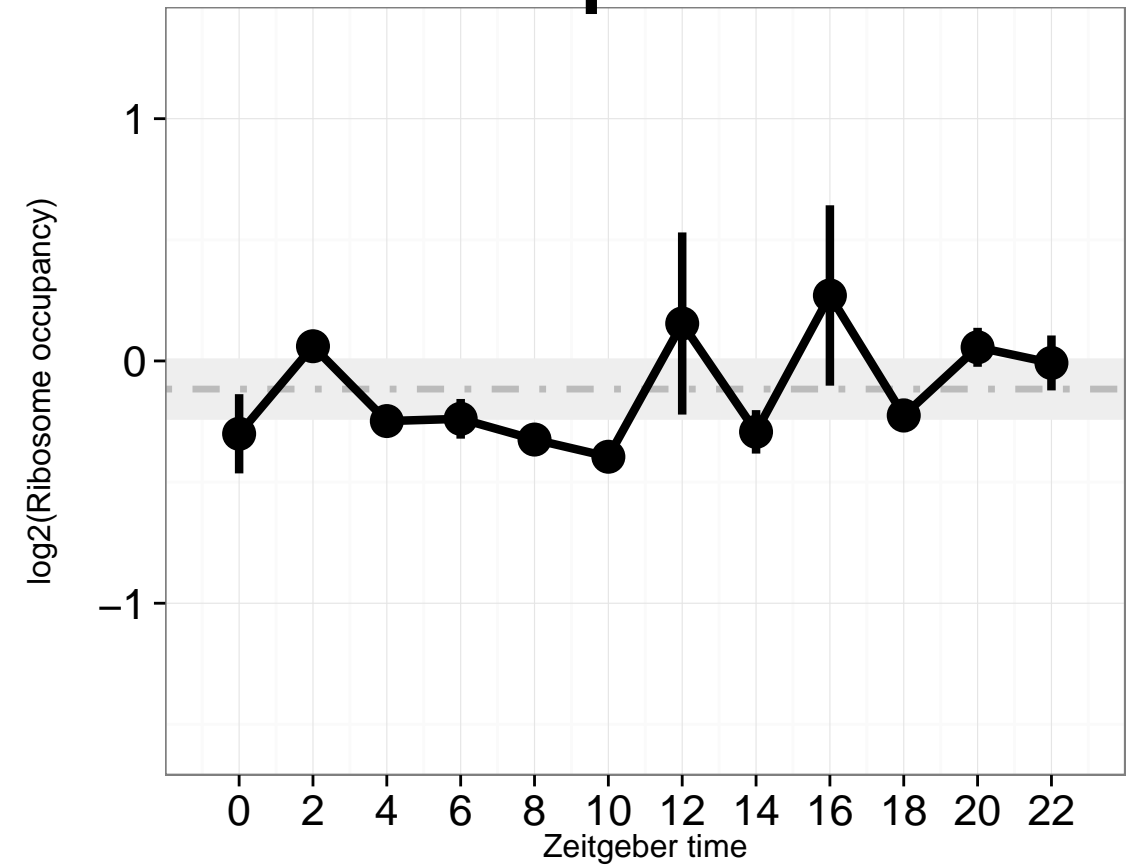

Supplement: Supplementary file 895 [file 1]

# Rac3

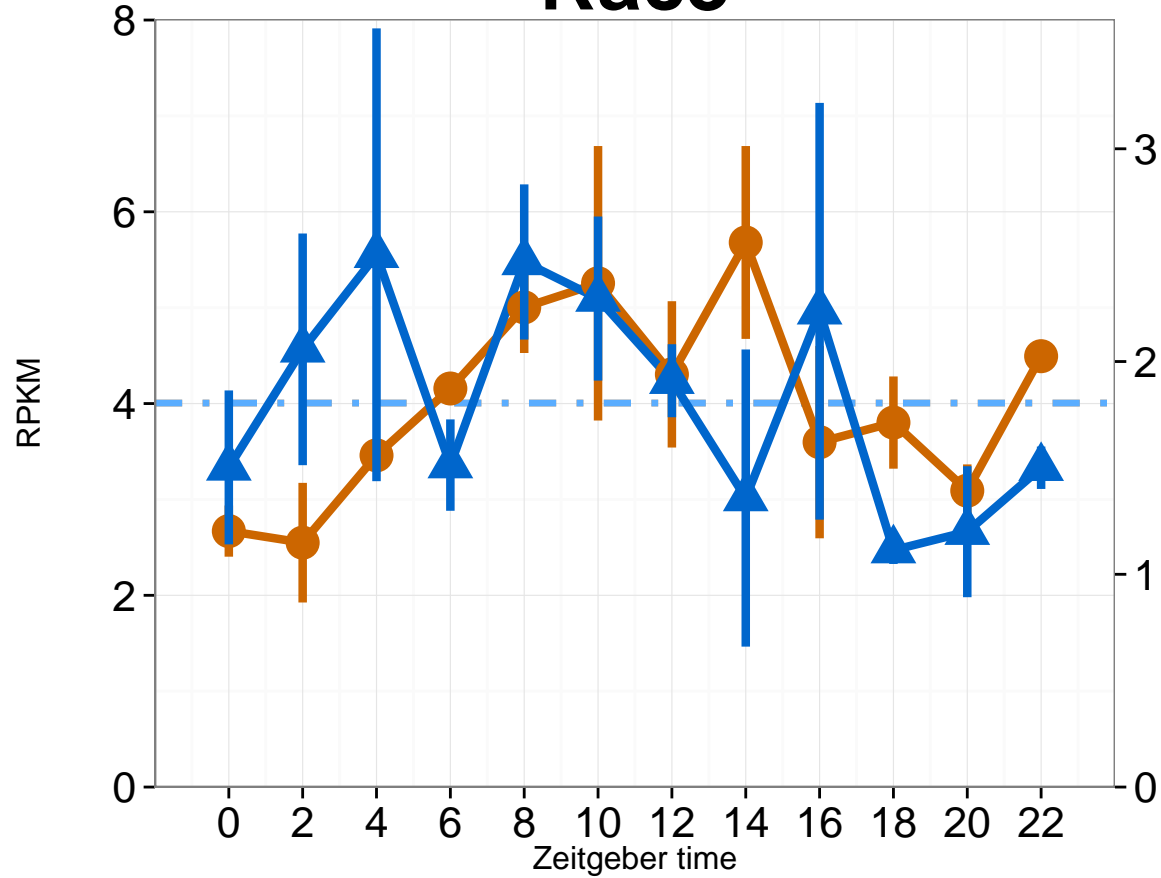

# Rac3

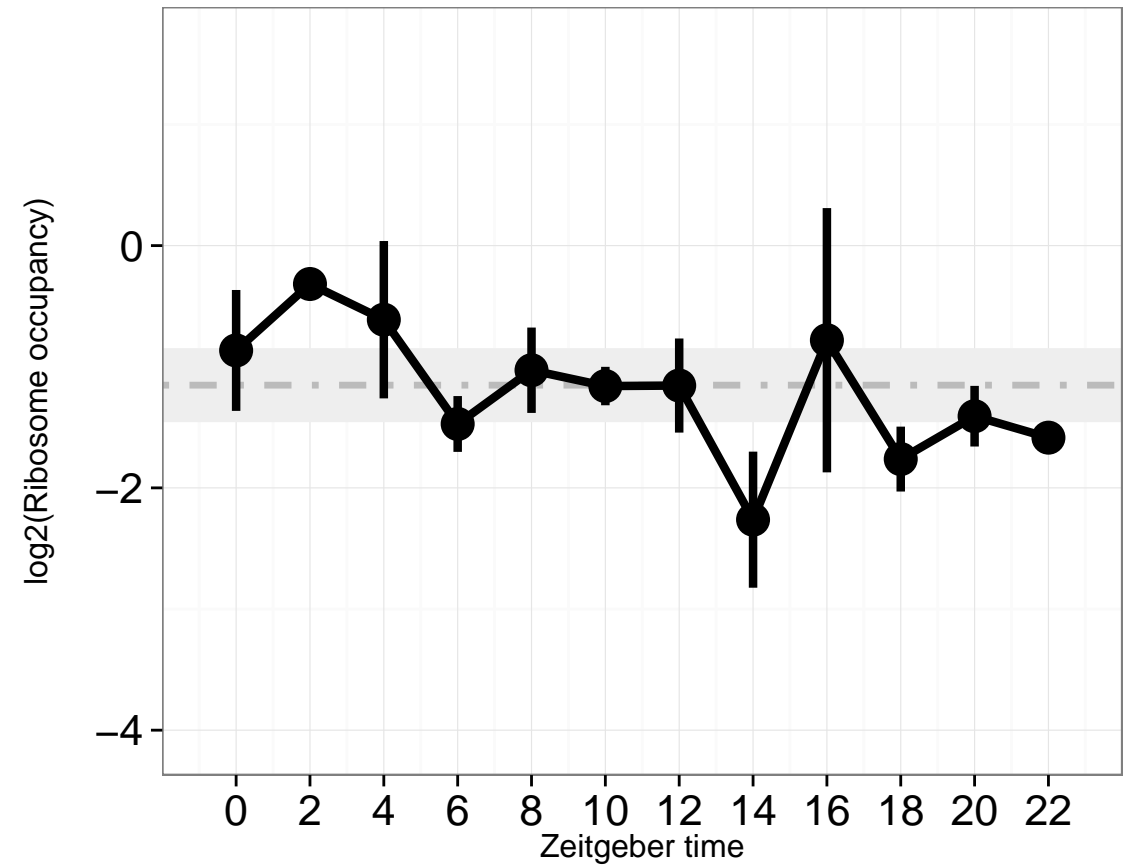

Supplement: Supplementary file 896 [file 1]

## Prune

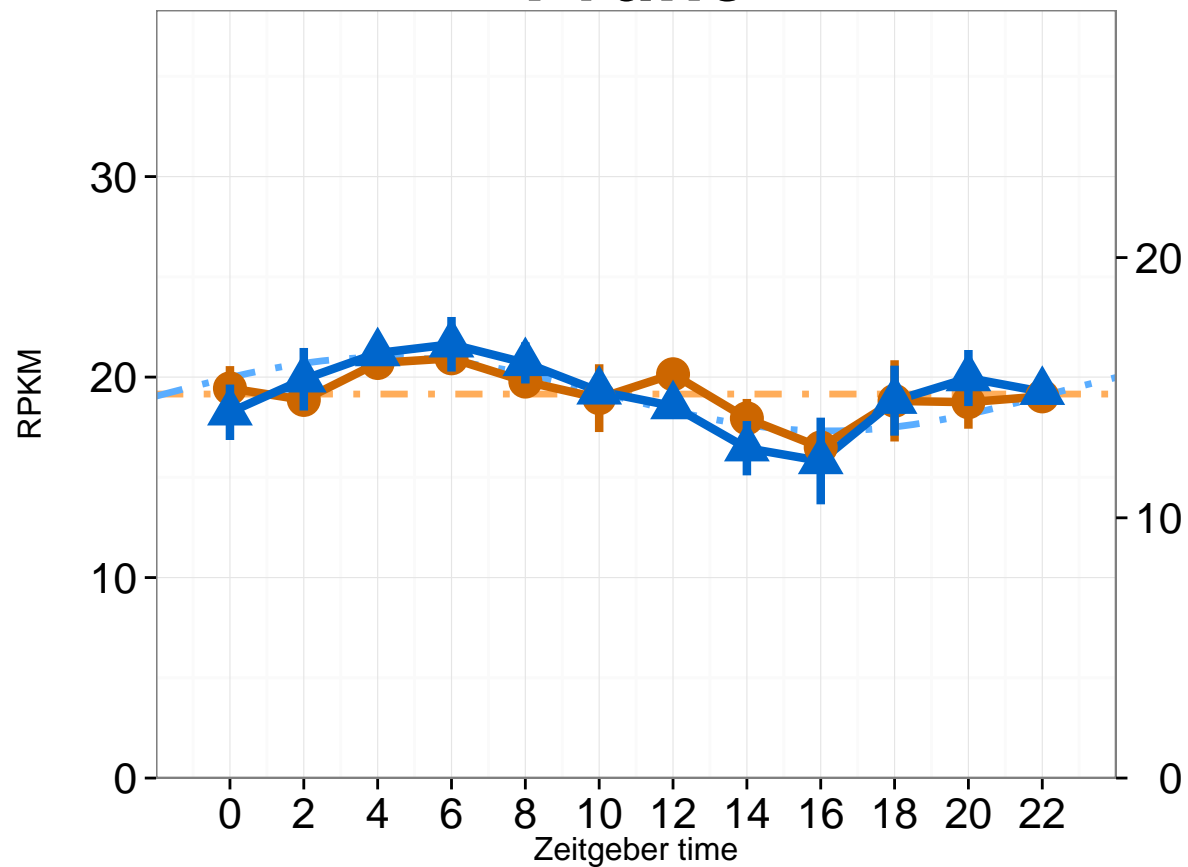

## Prune

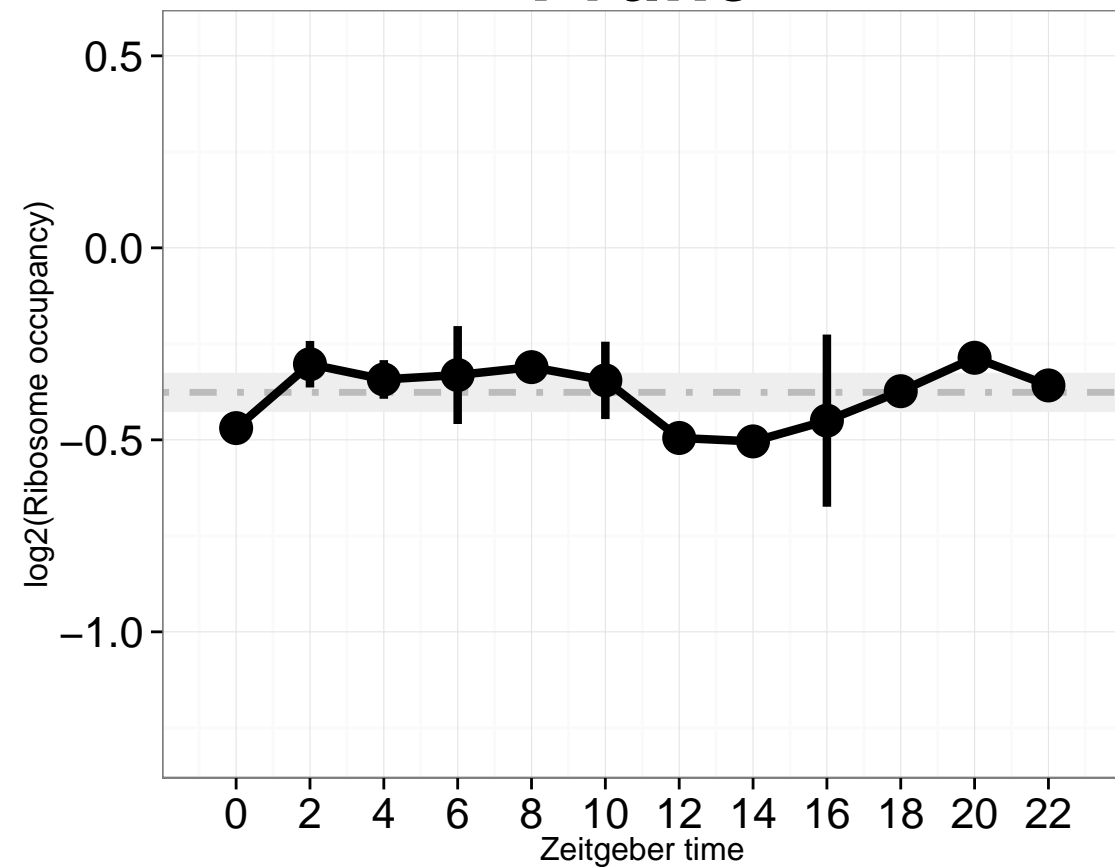

Supplement: Supplementary file 897 [file 1]

# Tspan3

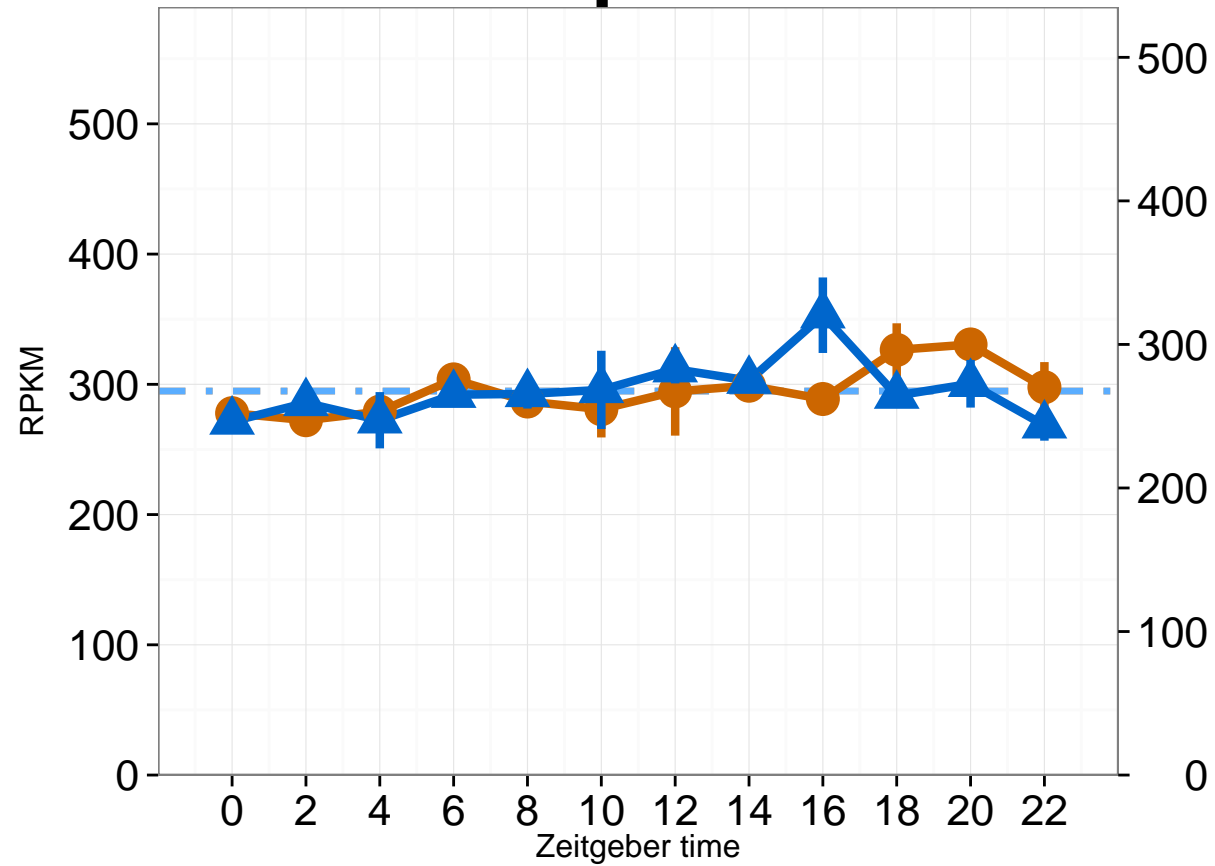

# Tspan3

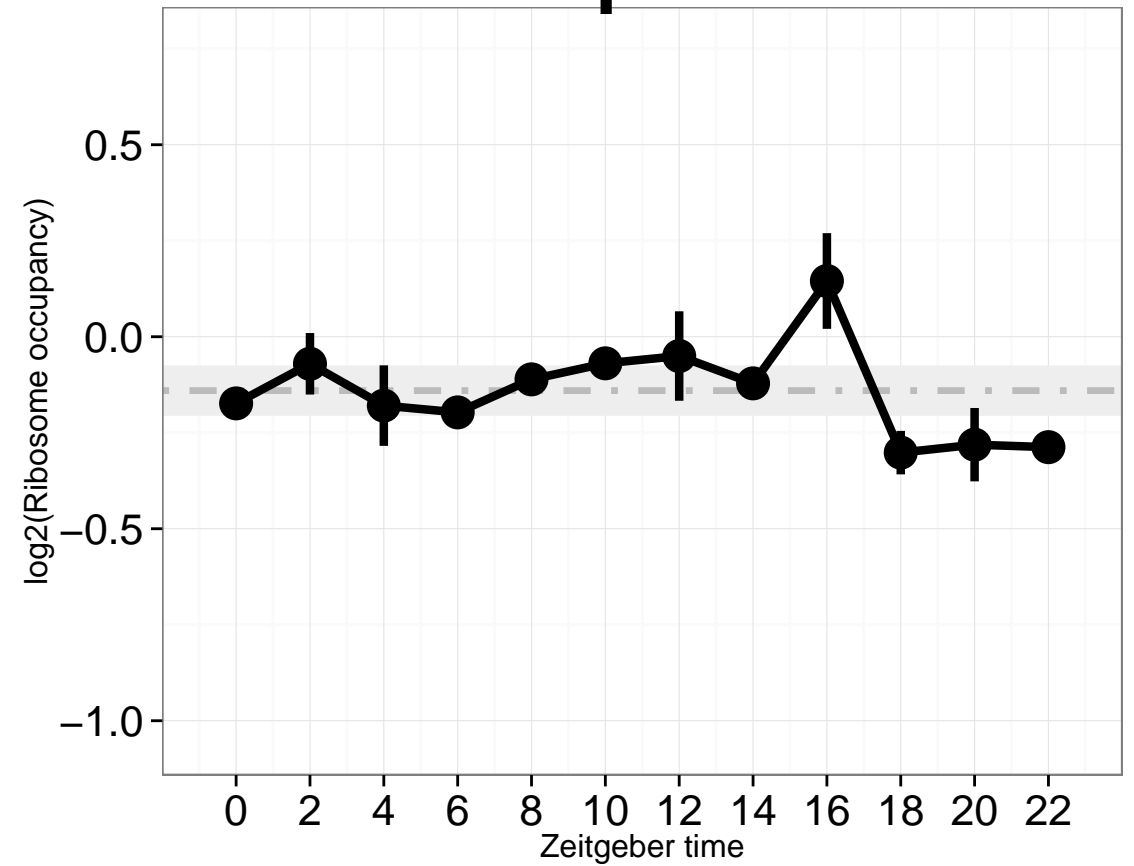

Supplement: Supplementary file 898 [file 1]

## Chd3

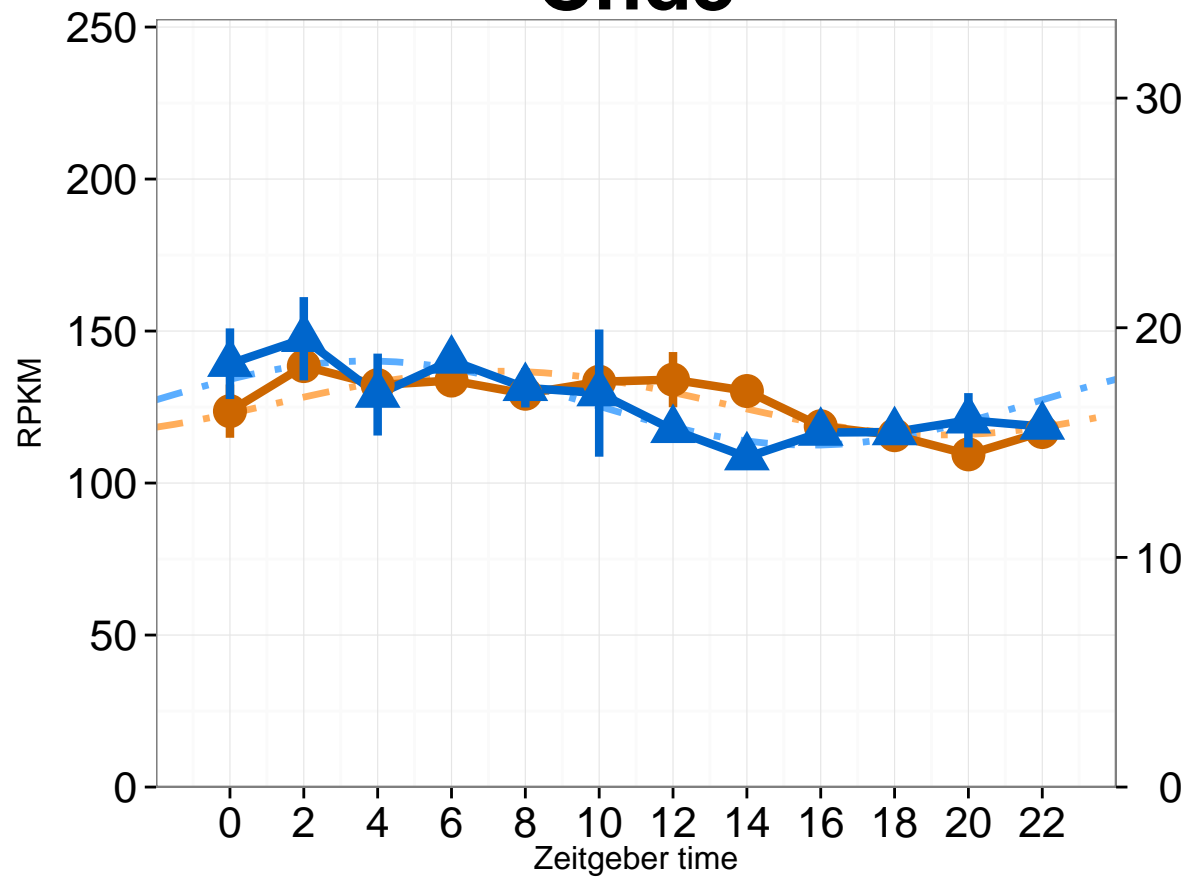

## Chd3

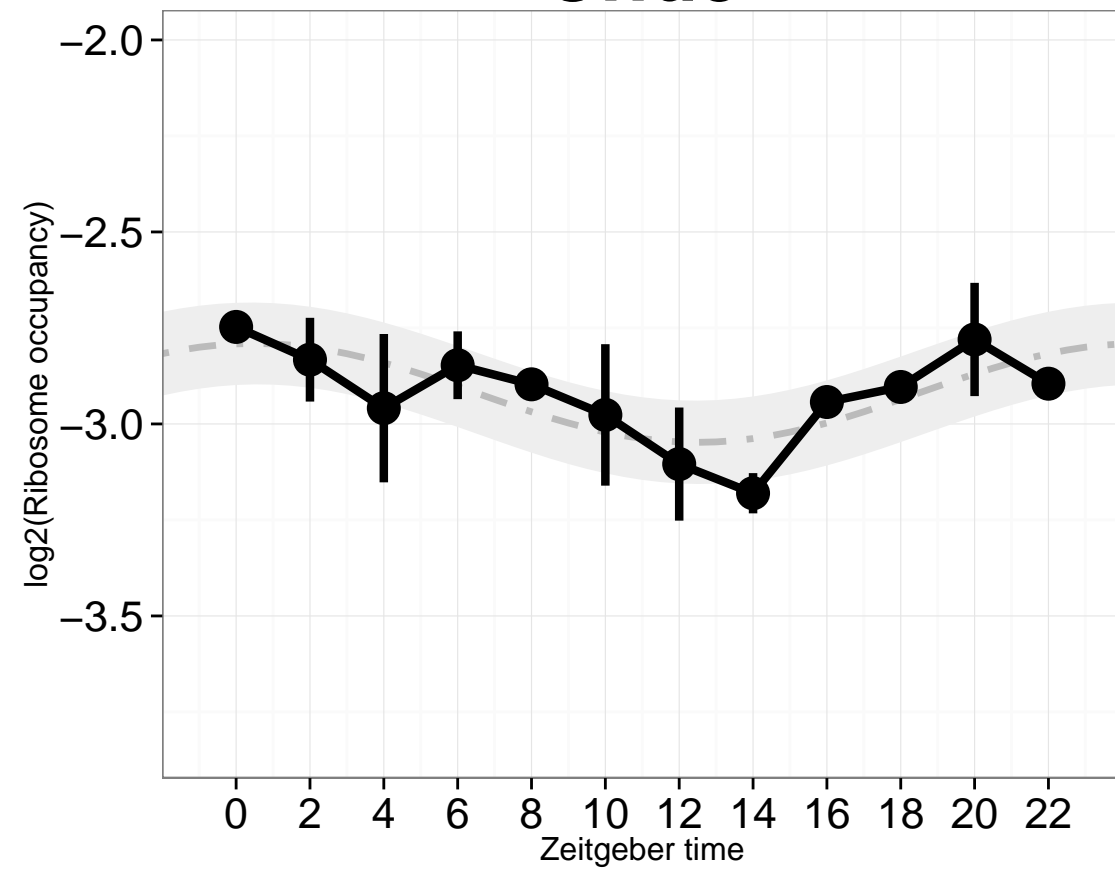

Supplement: Supplementary file 899 [file 1]

# Mrpl13

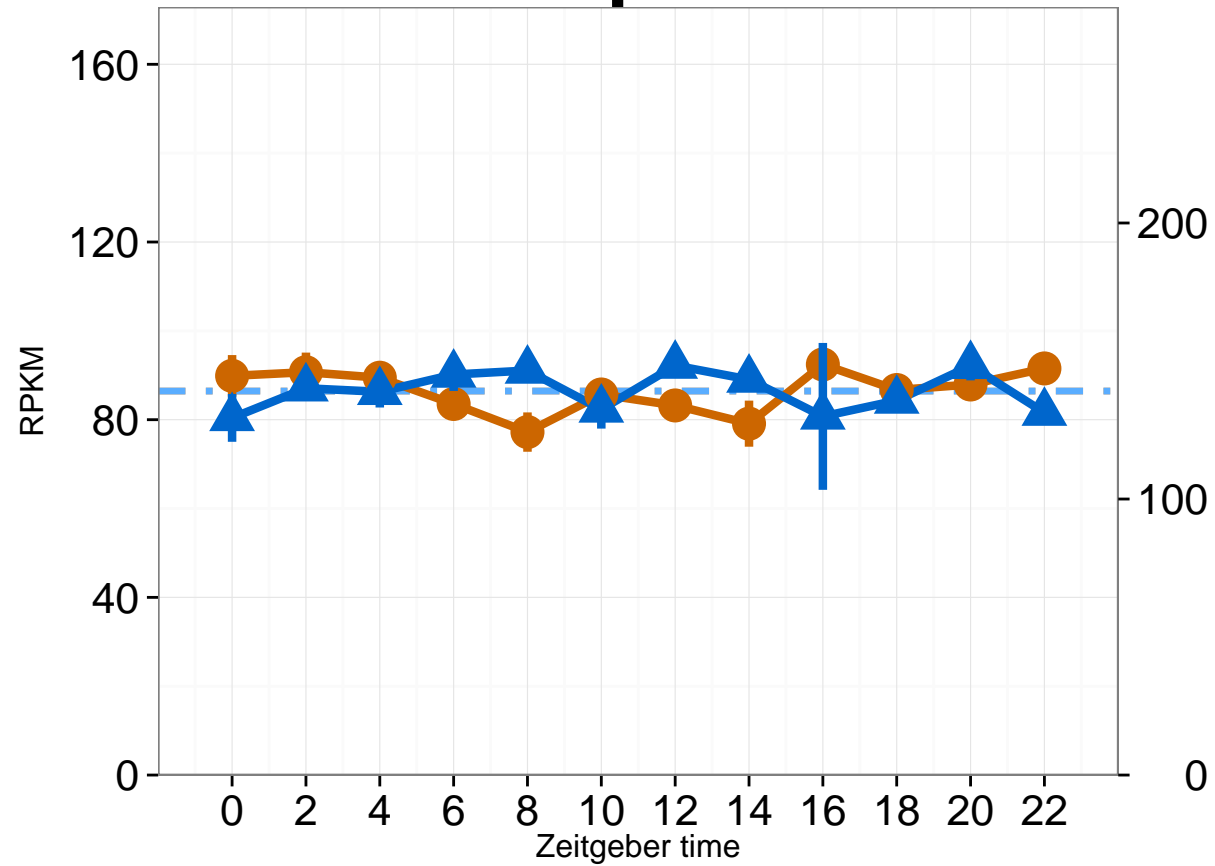

# Mrpl13

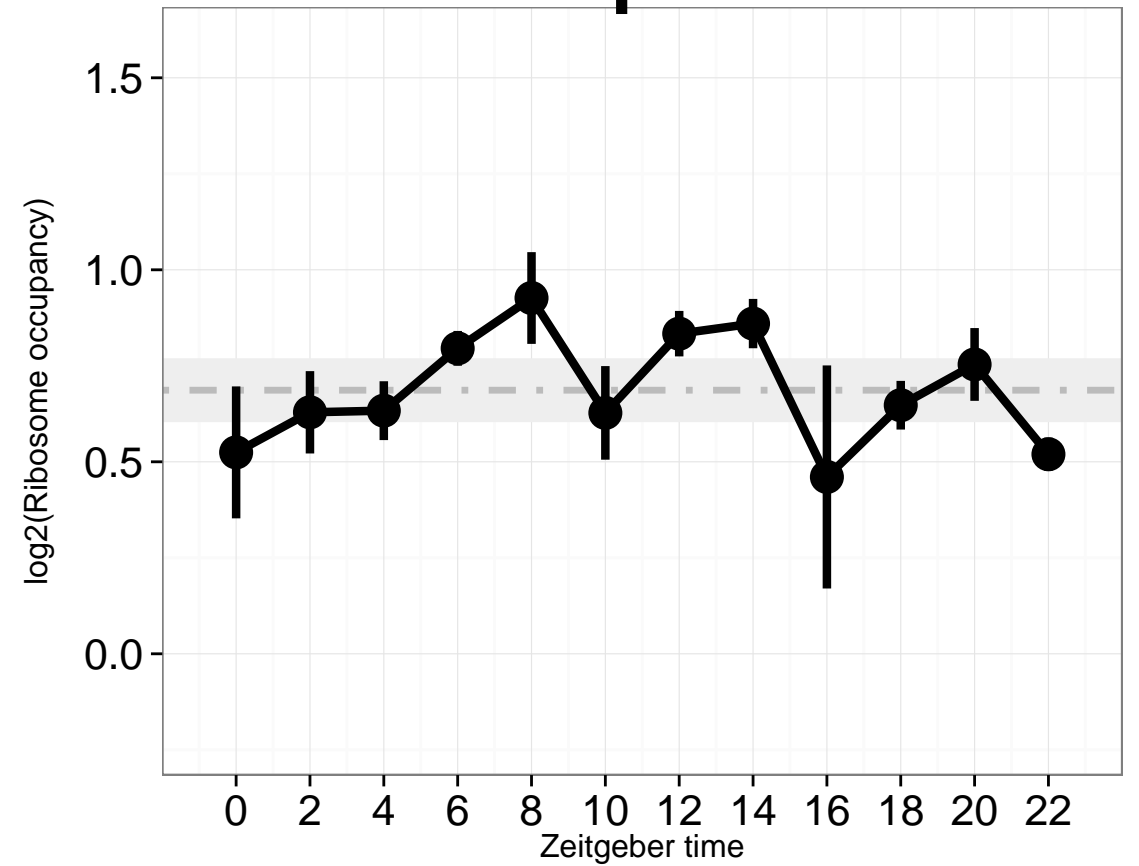

Supplement: Supplementary file 900 [file 1]

## Pik3cd

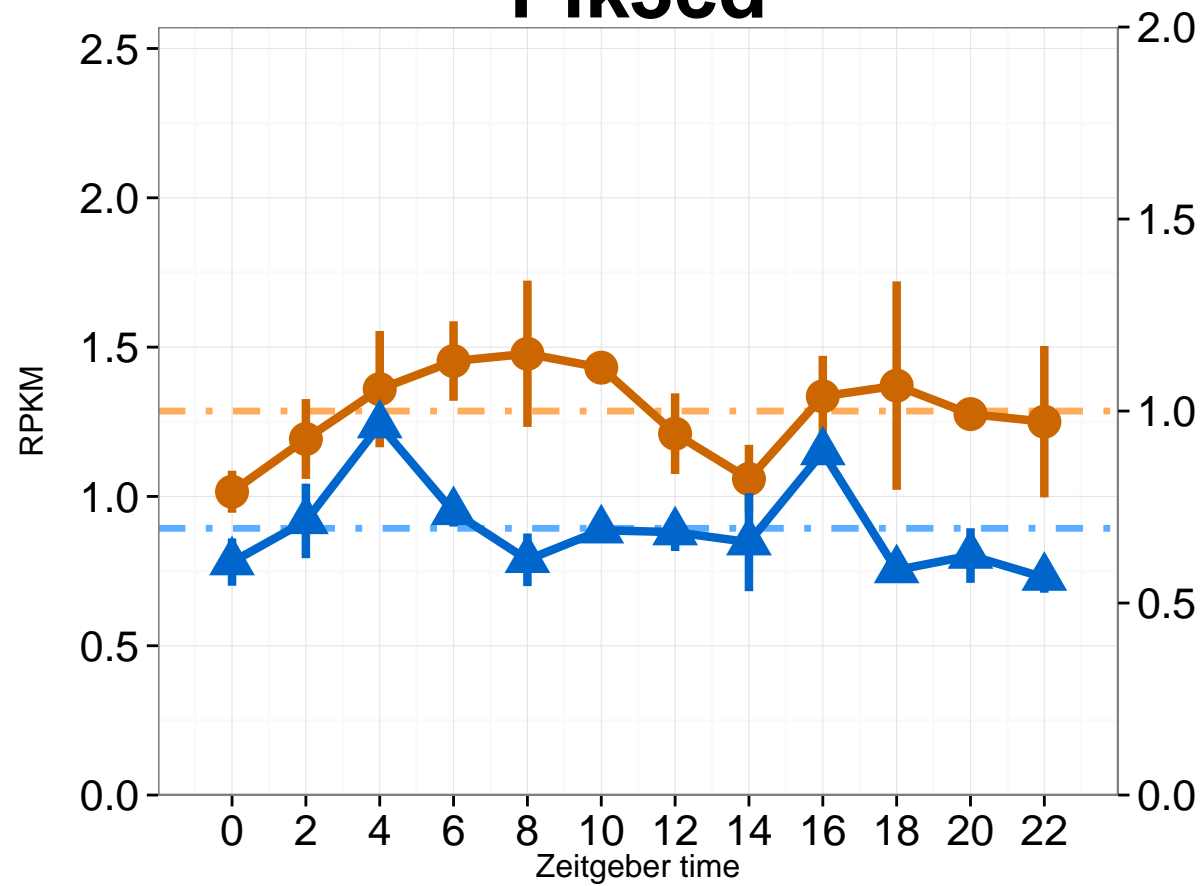

## Pik3cd

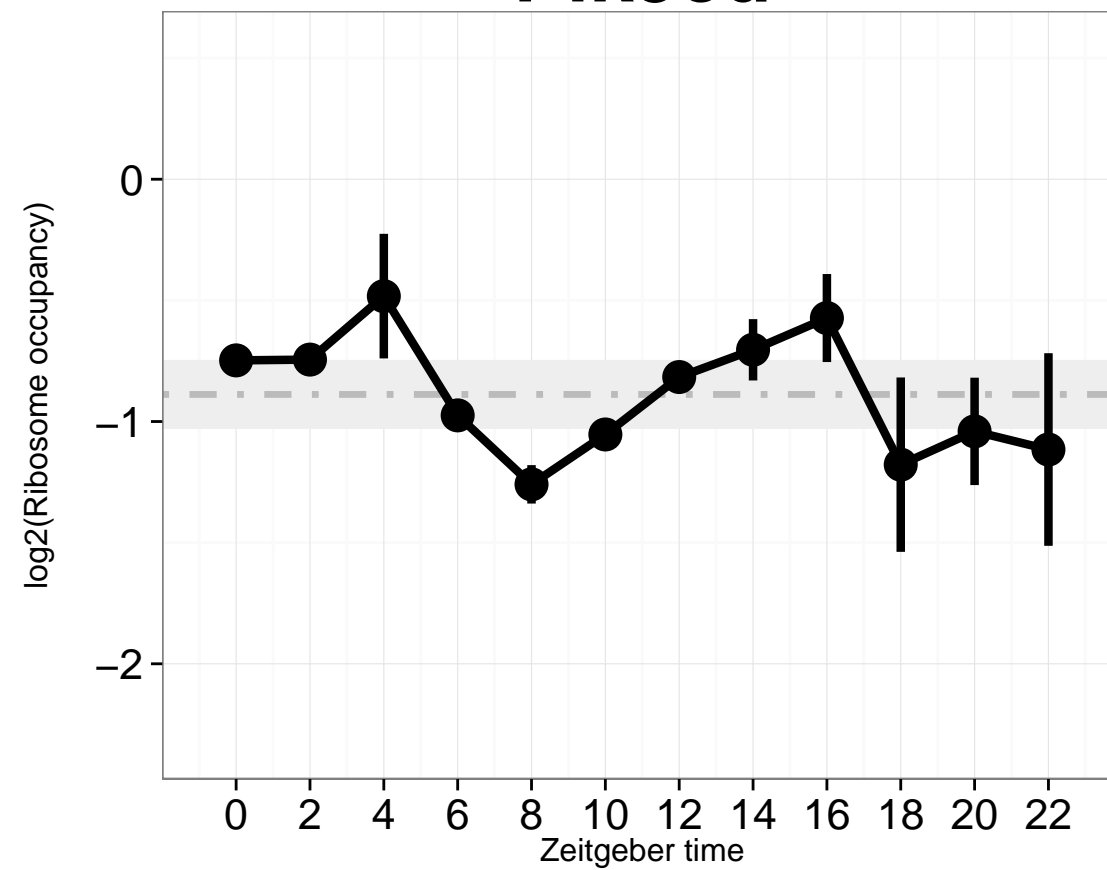

Supplement: Supplementary file 901 [file 1]

## Ing2

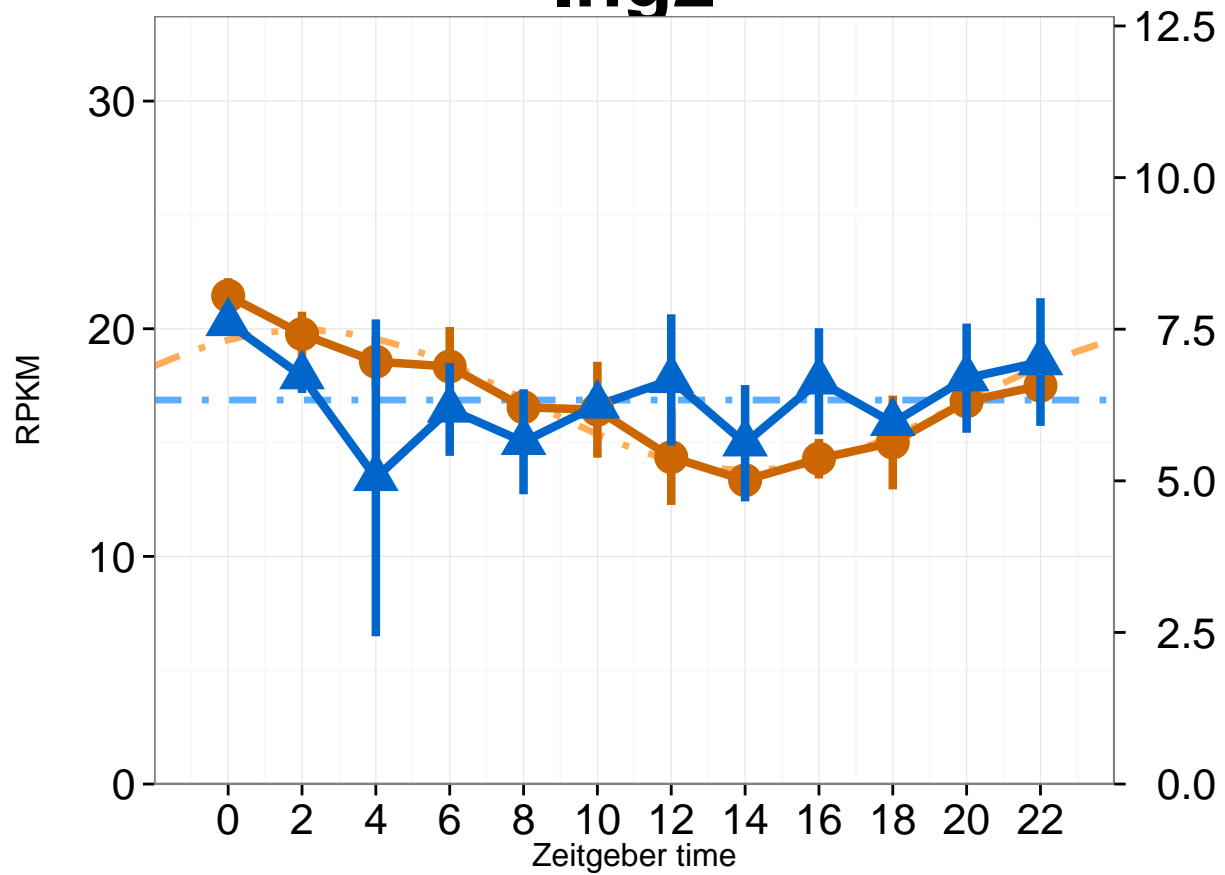

## Ing2

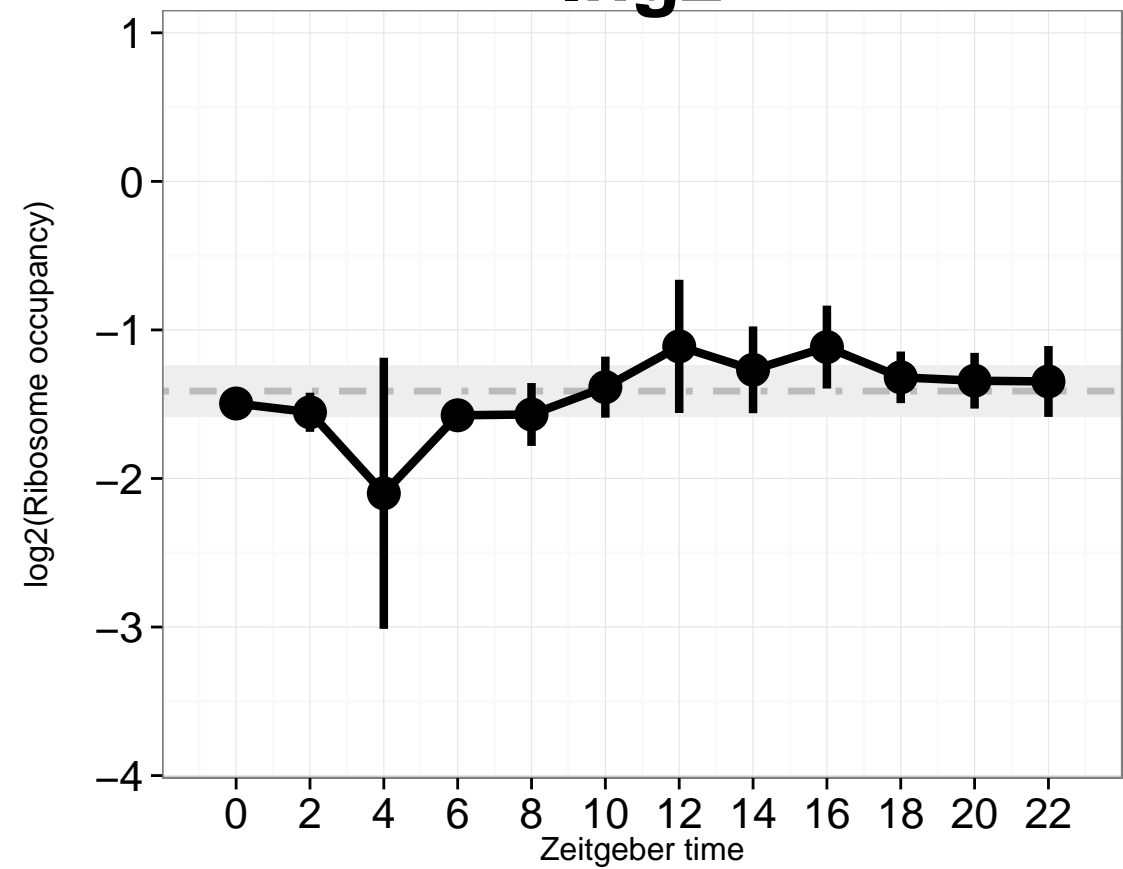

Supplement: Supplementary file 902 [file 1]

# Zfp961

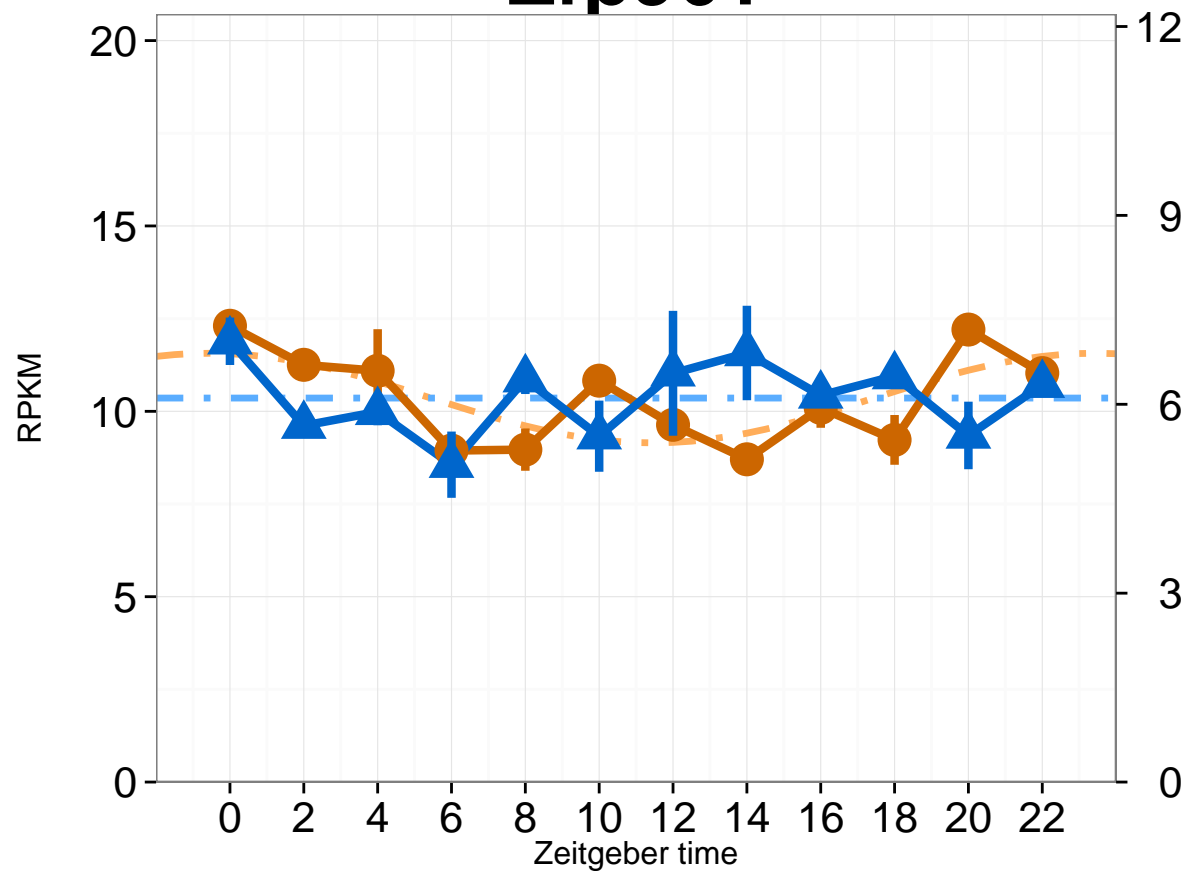

# Zfp961

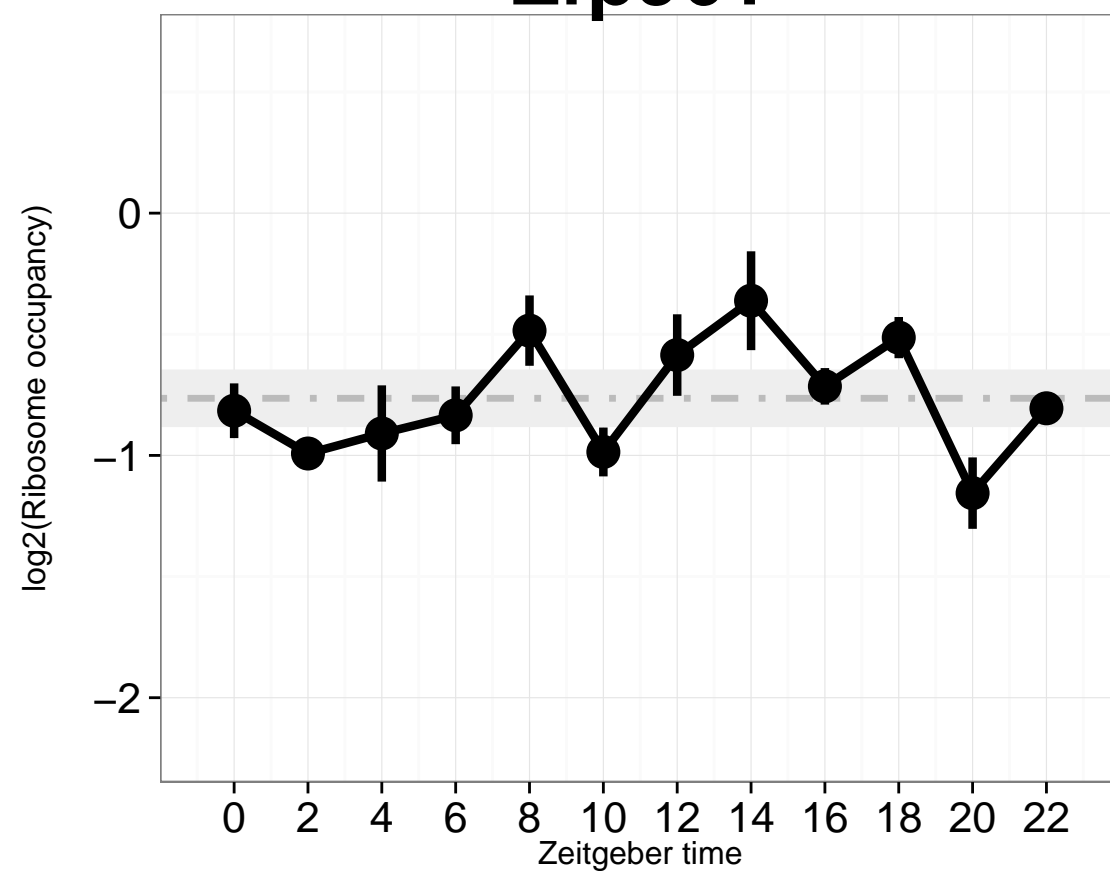

Supplement: Supplementary file 903 [file 1]
