# Supplementary material (part 10 of 133)
Source: publisher figshare collection journal article supplement (https://springernature.figshare.com/articles/dataset/_/4903193)

# Upk1b

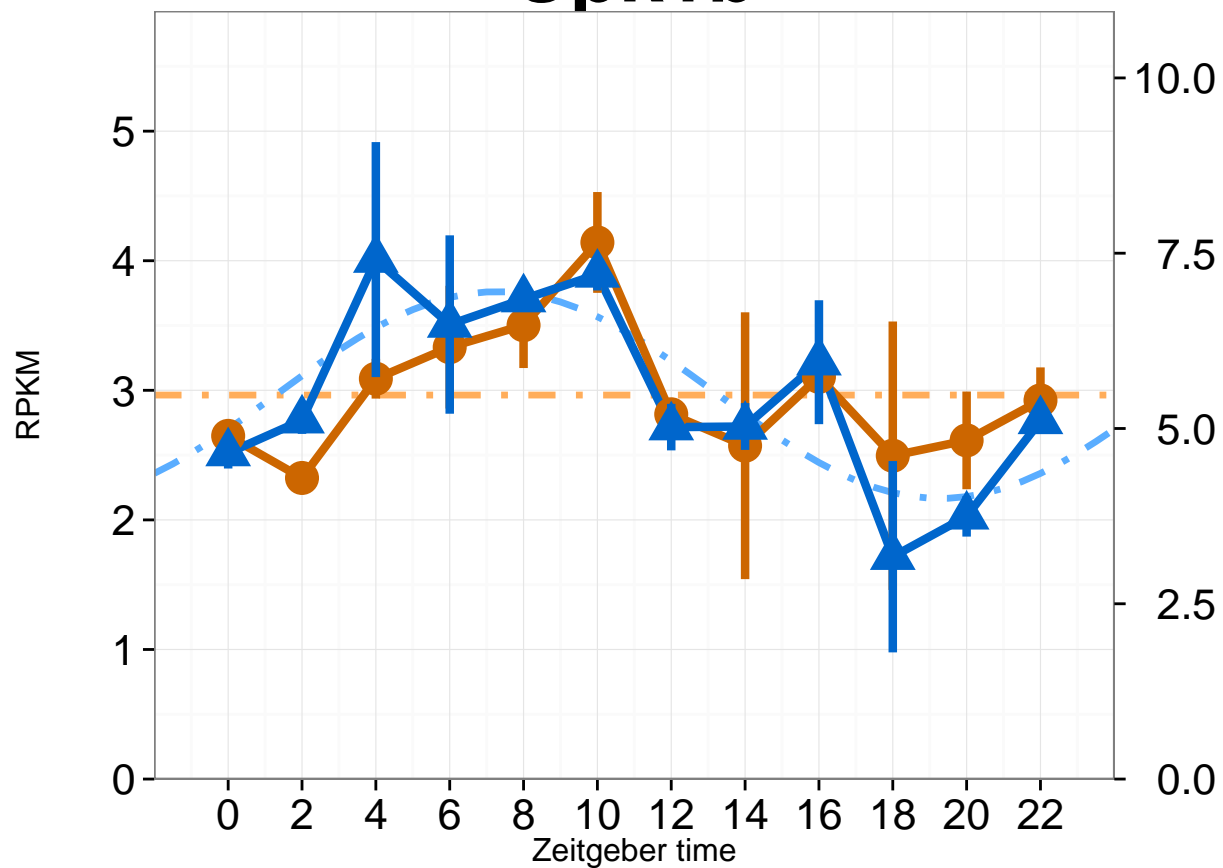

# Upk1b

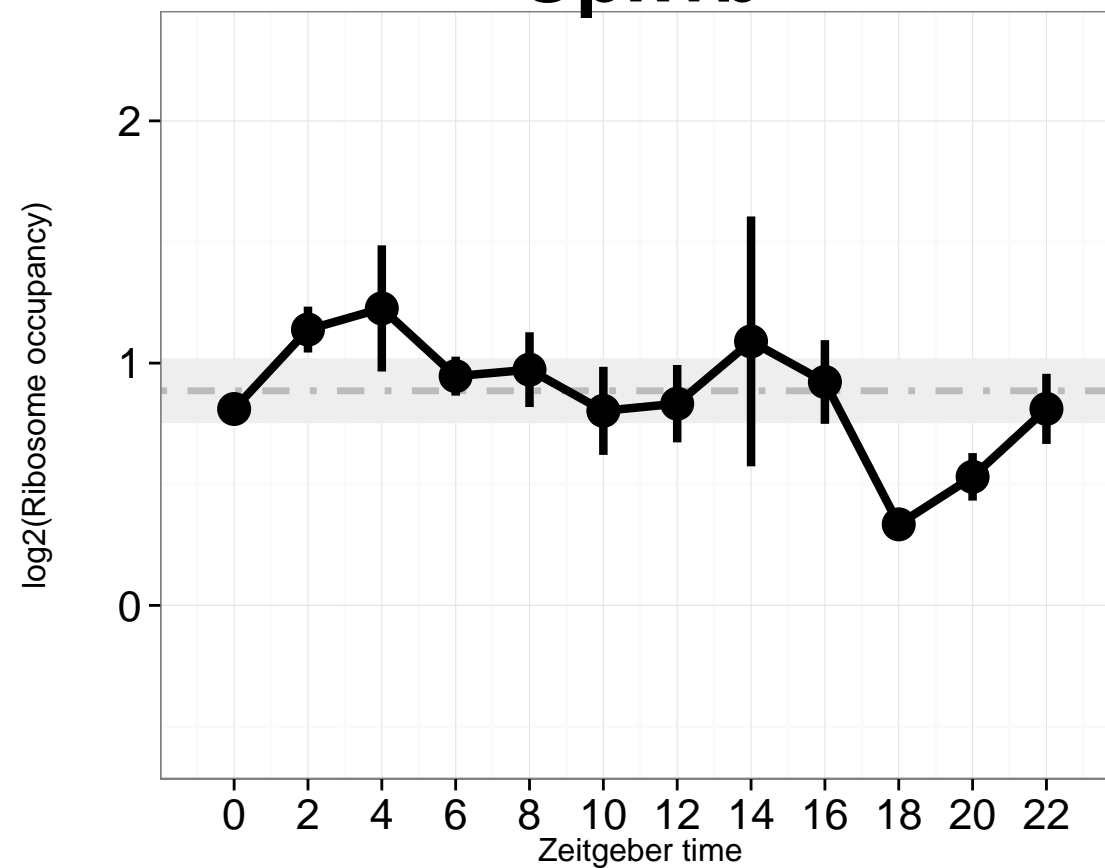

Supplement: Supplementary file 904 [file 1]

## Srpk3

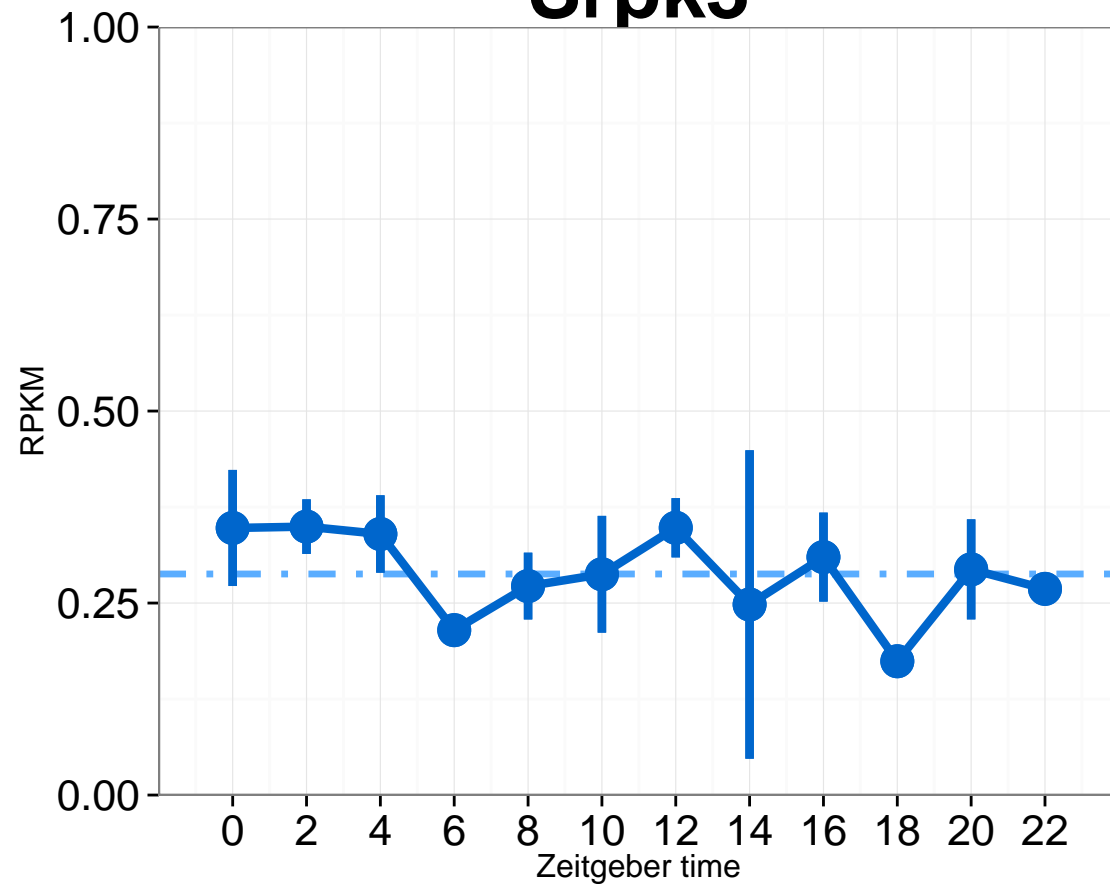

## Srpk3 log2(Ribosome occupancy

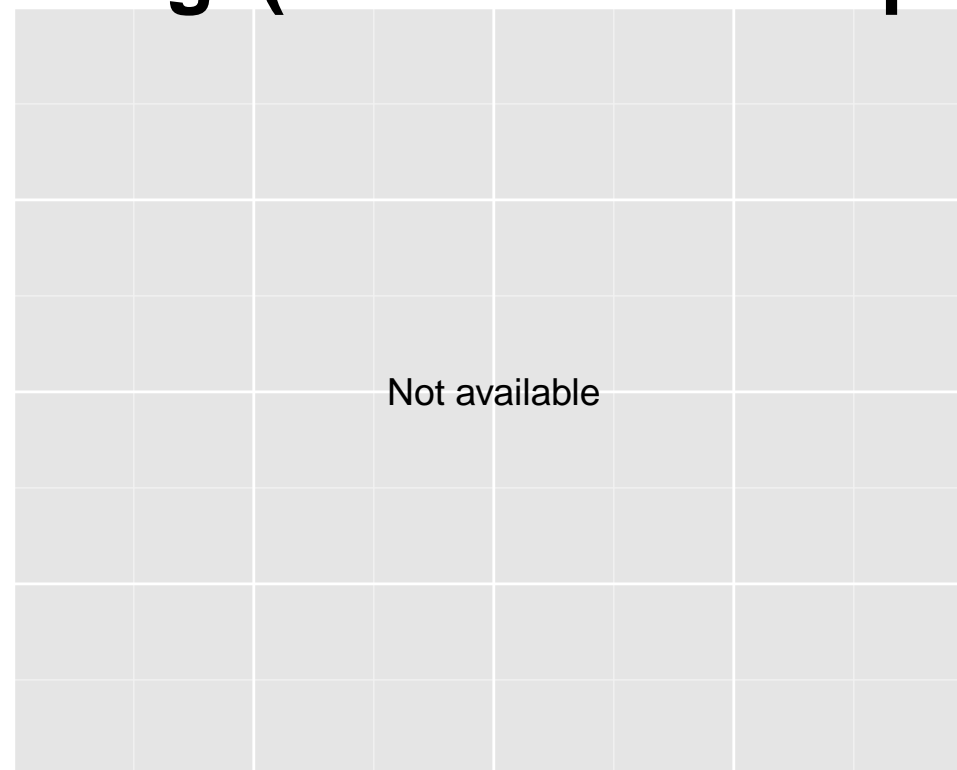

Supplement: Supplementary file 905 [file 1]

# Dqx1

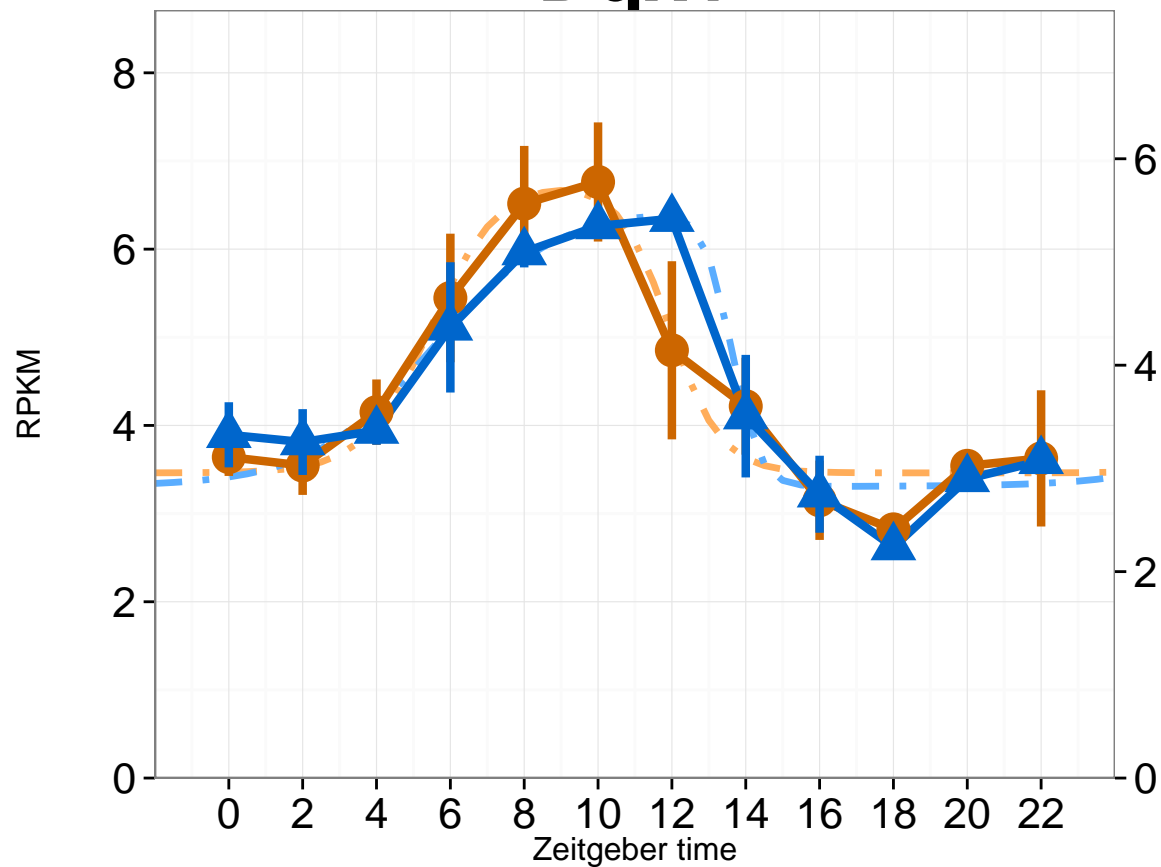

# Dqx1

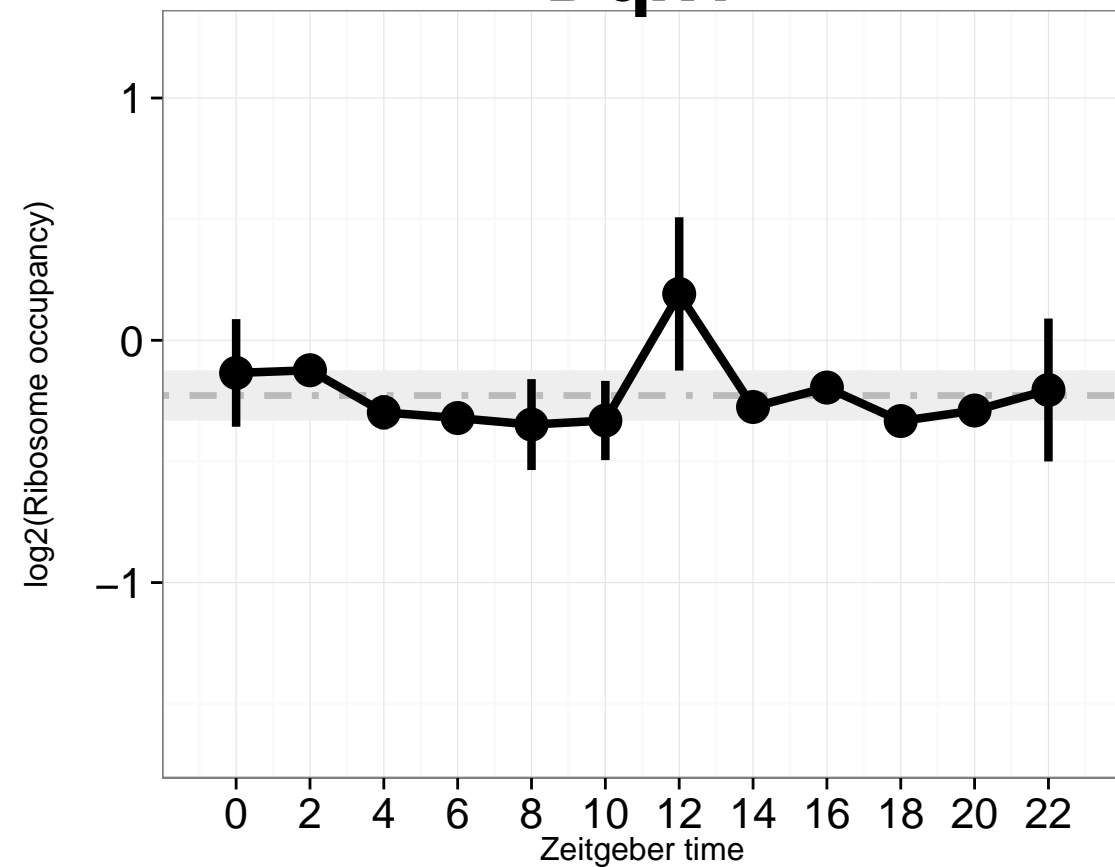

Supplement: Supplementary file 906 [file 1]

# Akap2

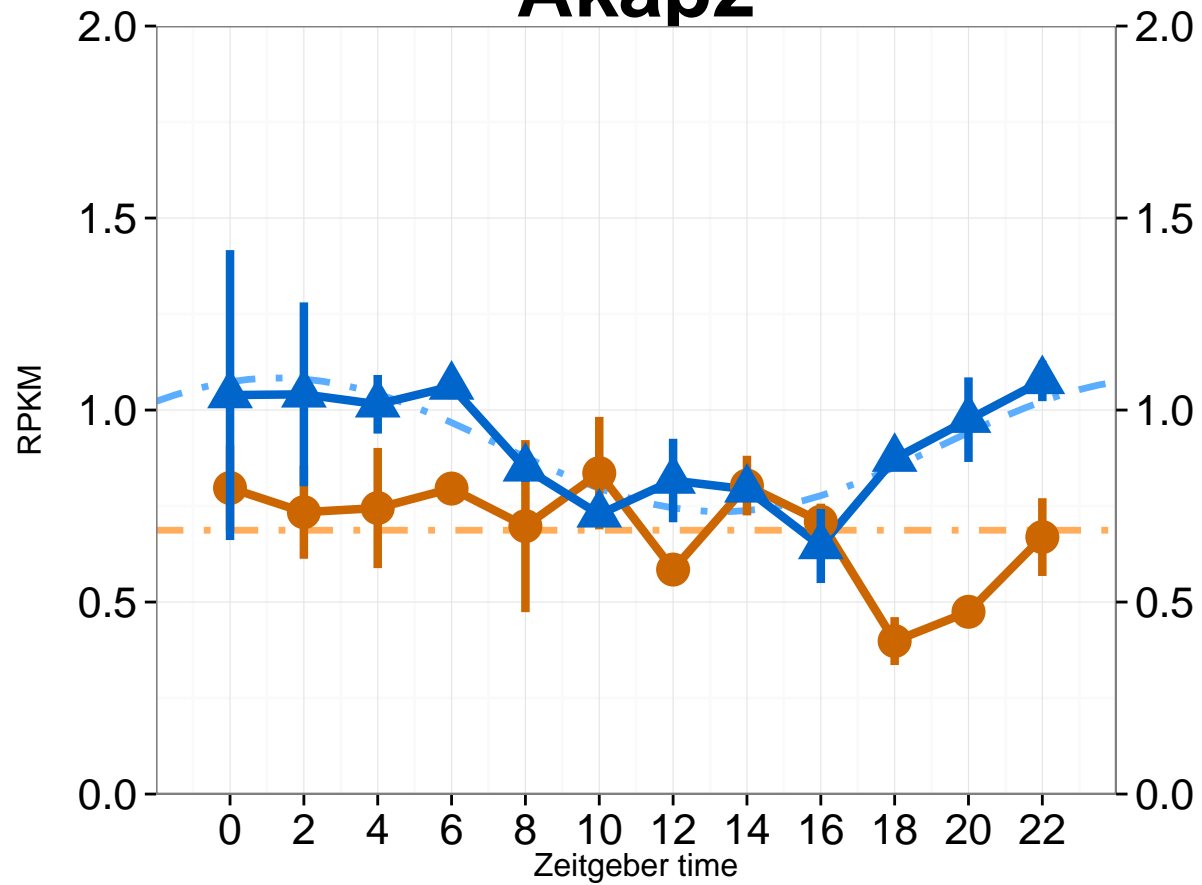

# Akap2

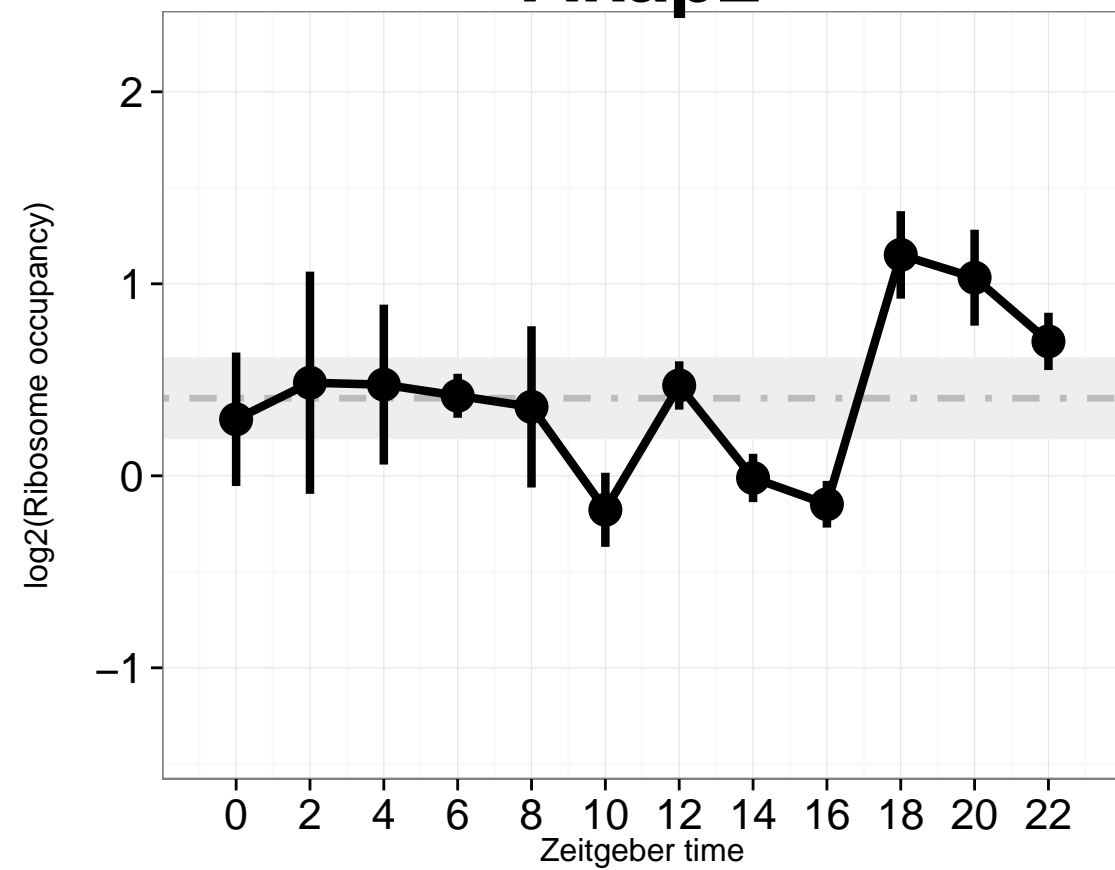

Supplement: Supplementary file 907 [file 1]

# Zfp319

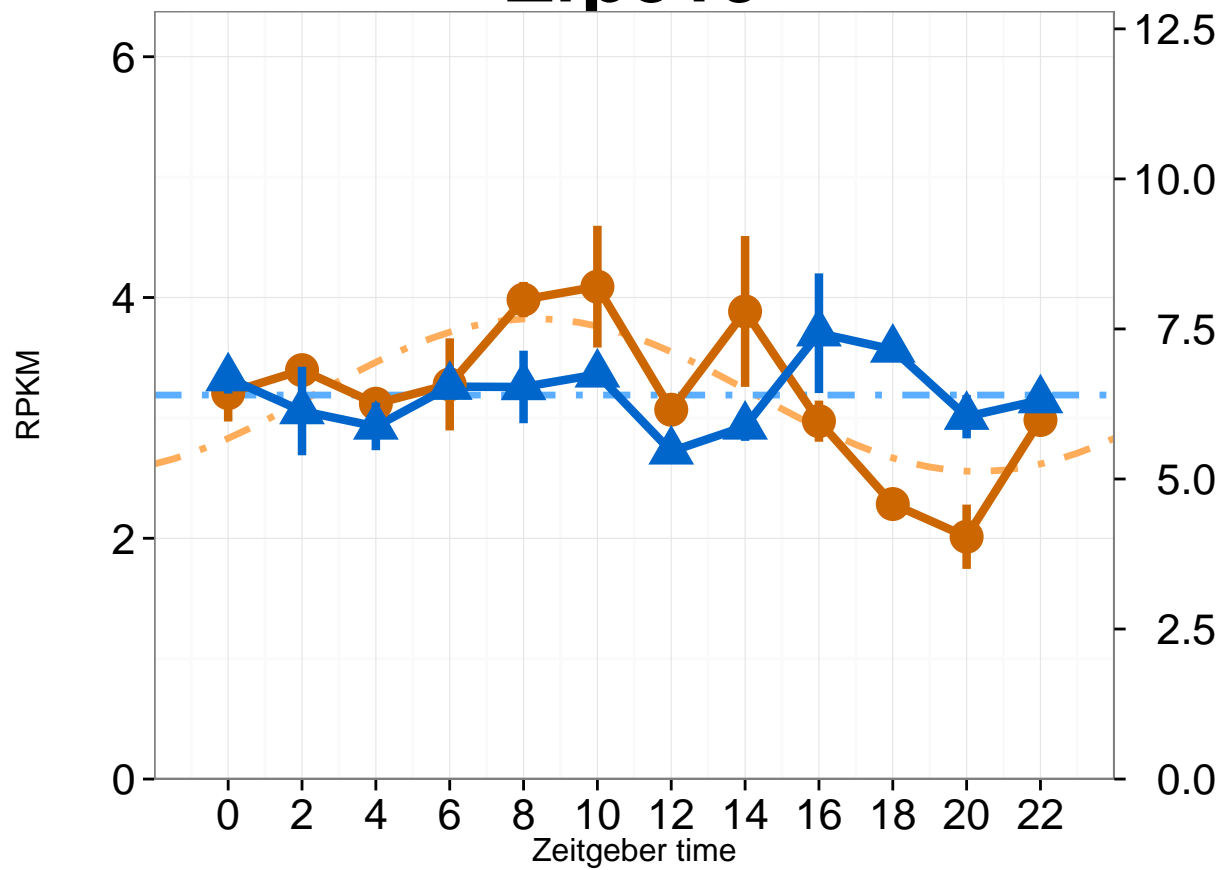

# Zfp319

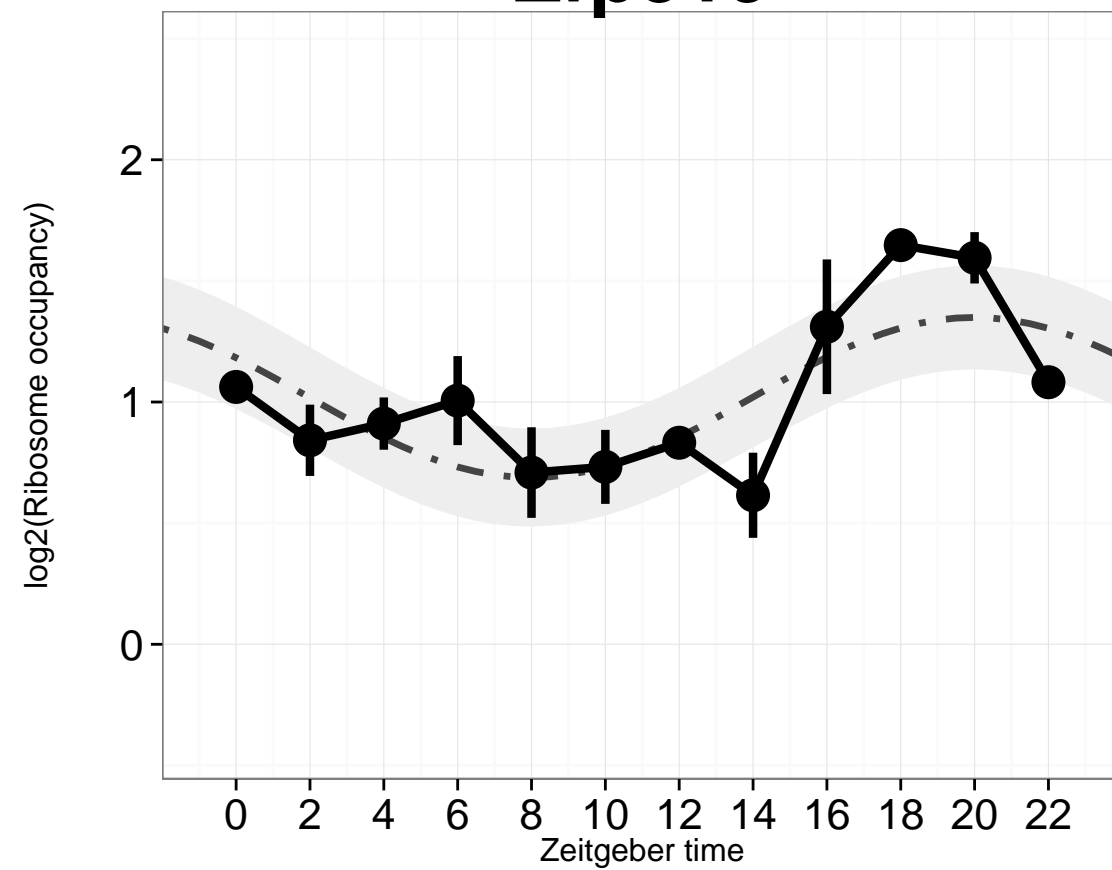

Supplement: Supplementary file 908 [file 1]

## Chkb

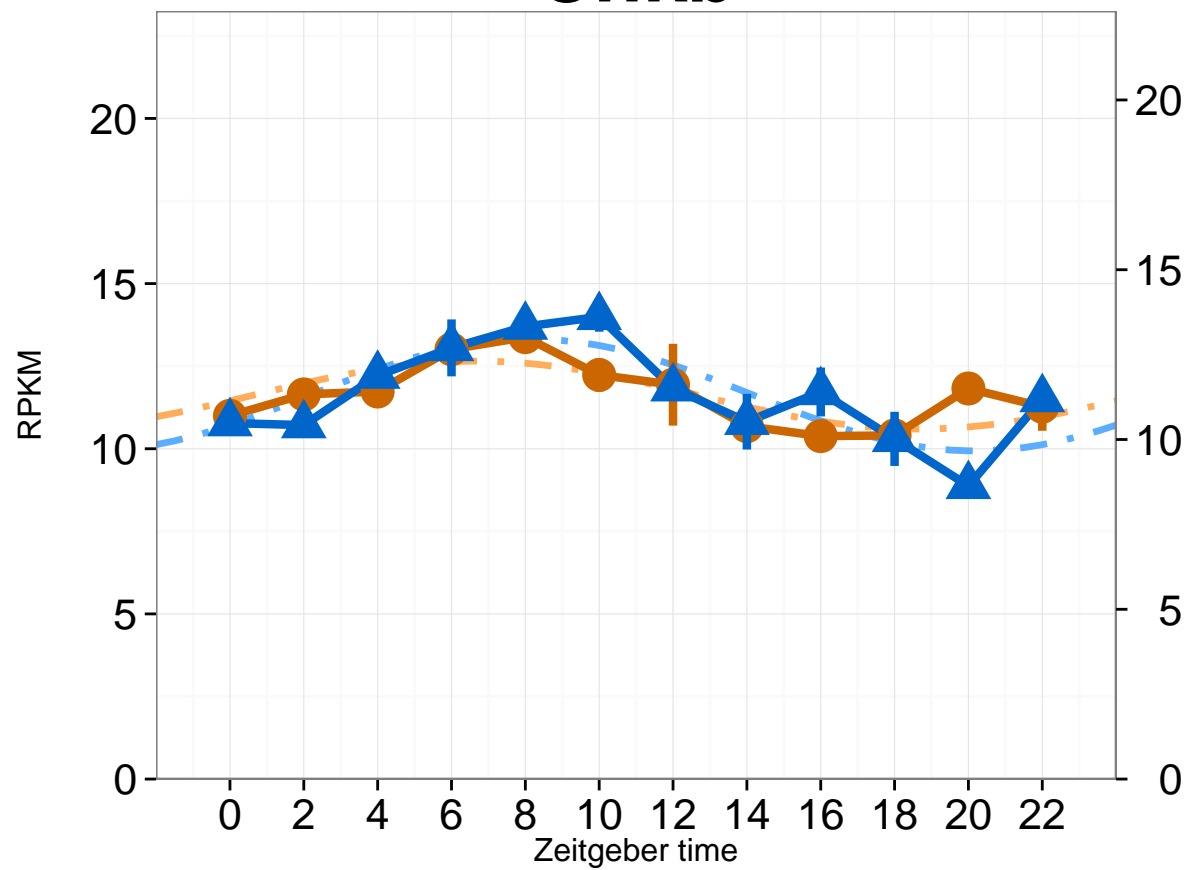

## Chkb

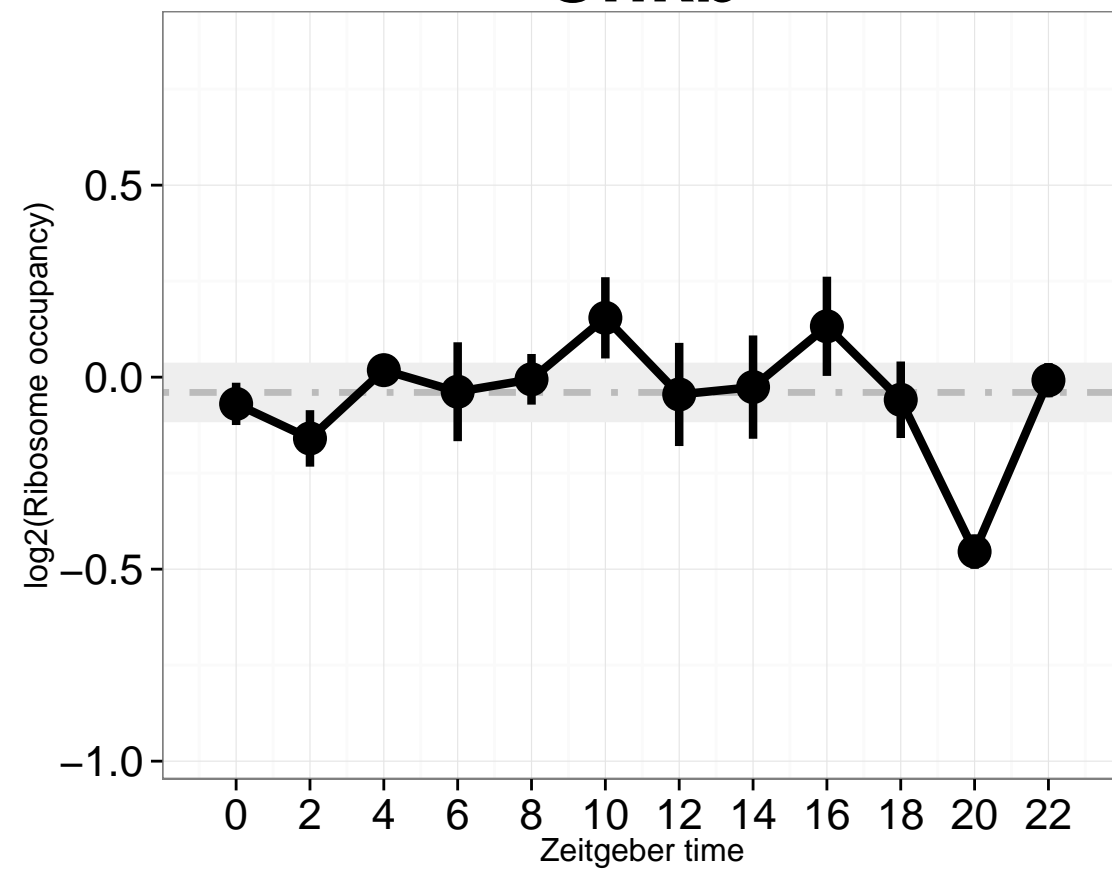

Supplement: Supplementary file 909 [file 1]

## Arfgef2

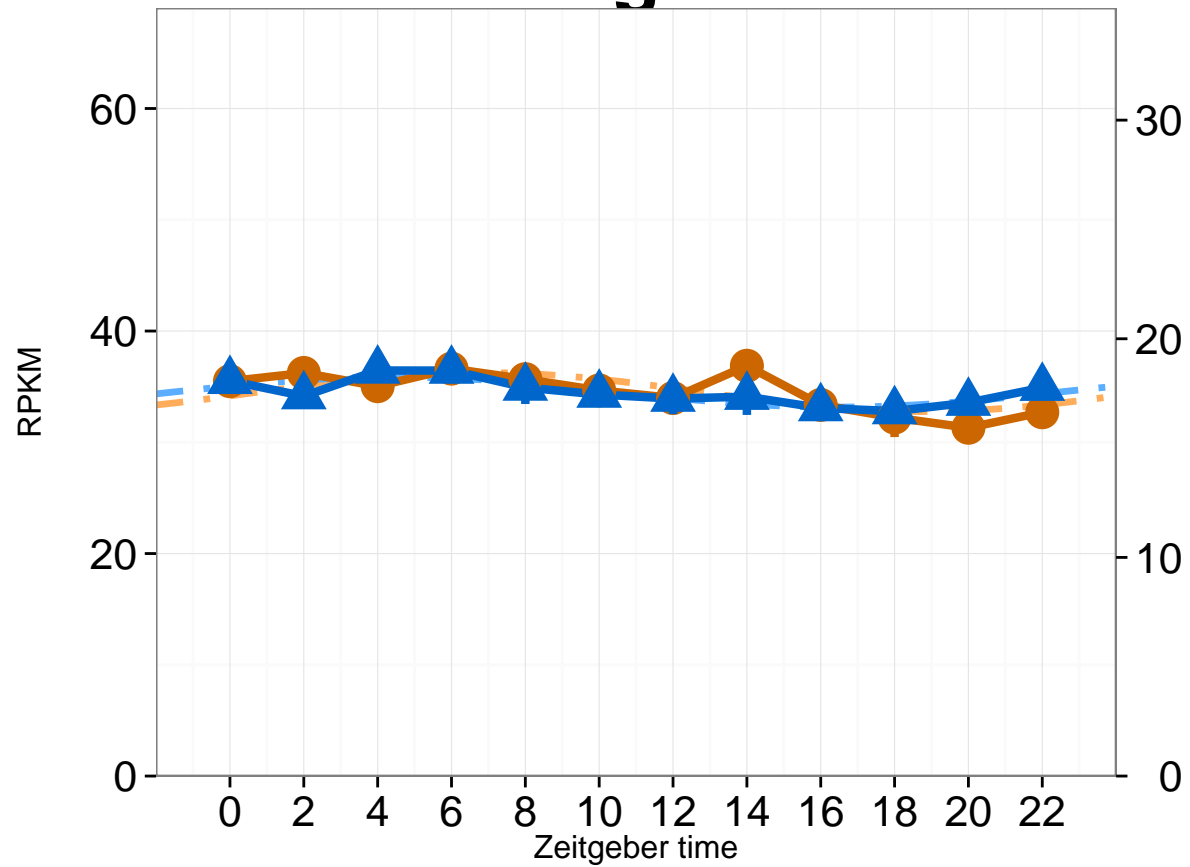

## Arfgef2

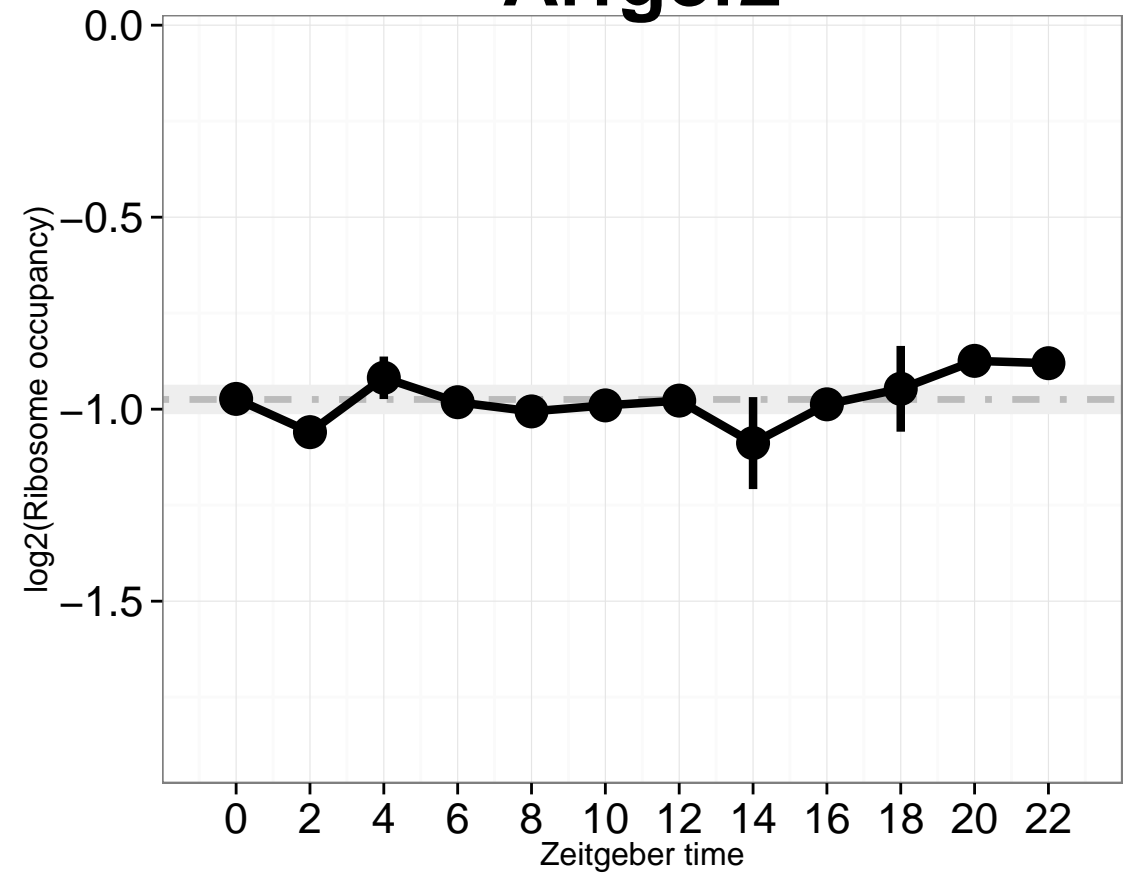

Supplement: Supplementary file 910 [file 1]

# Nme4

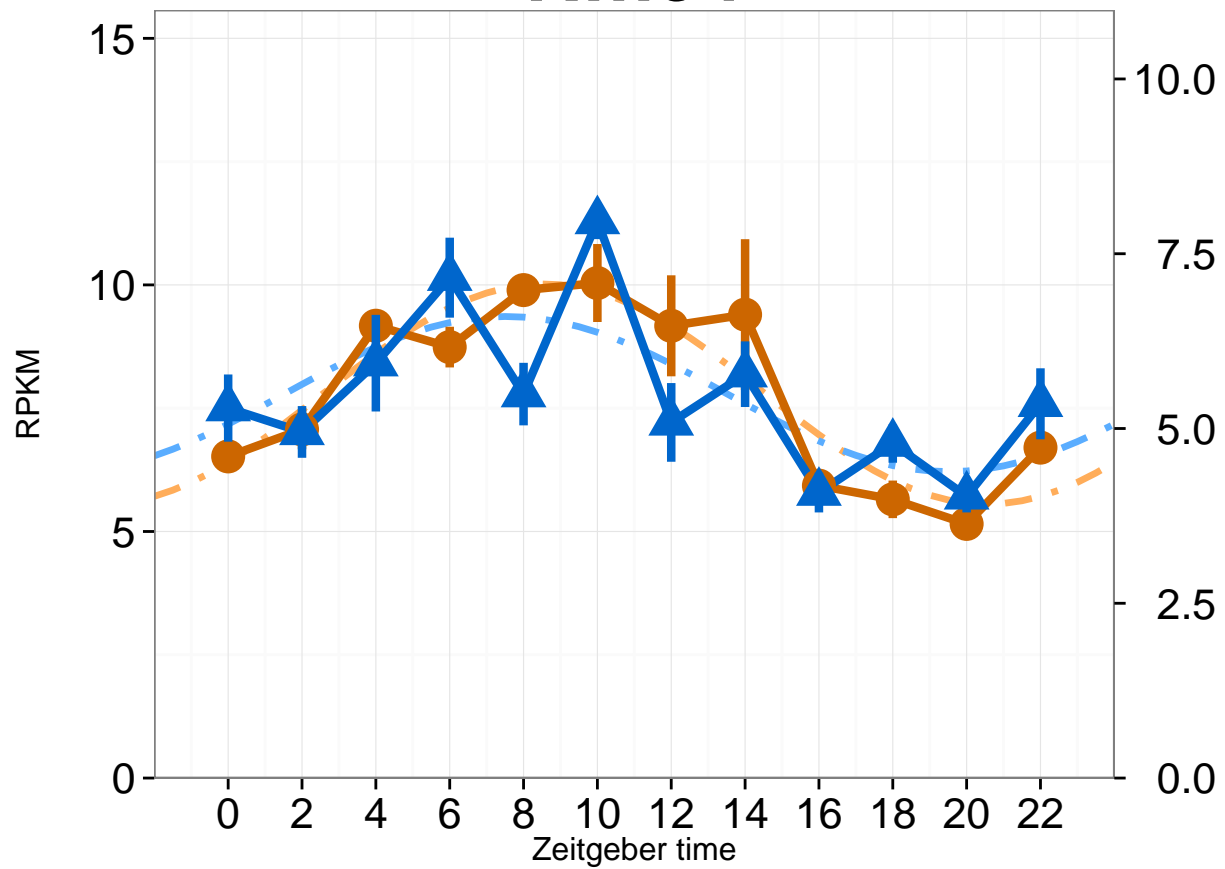

# Nme4

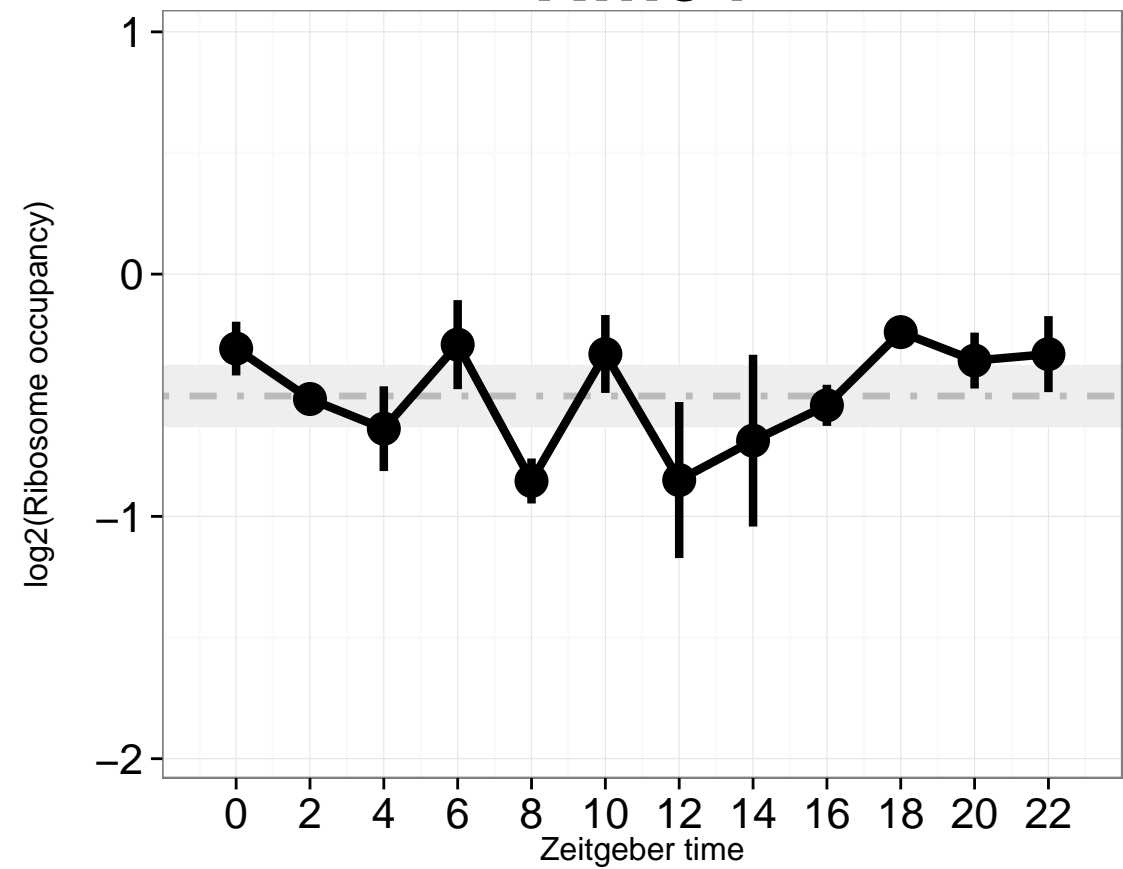

Supplement: Supplementary file 911 [file 1]

## Golga4

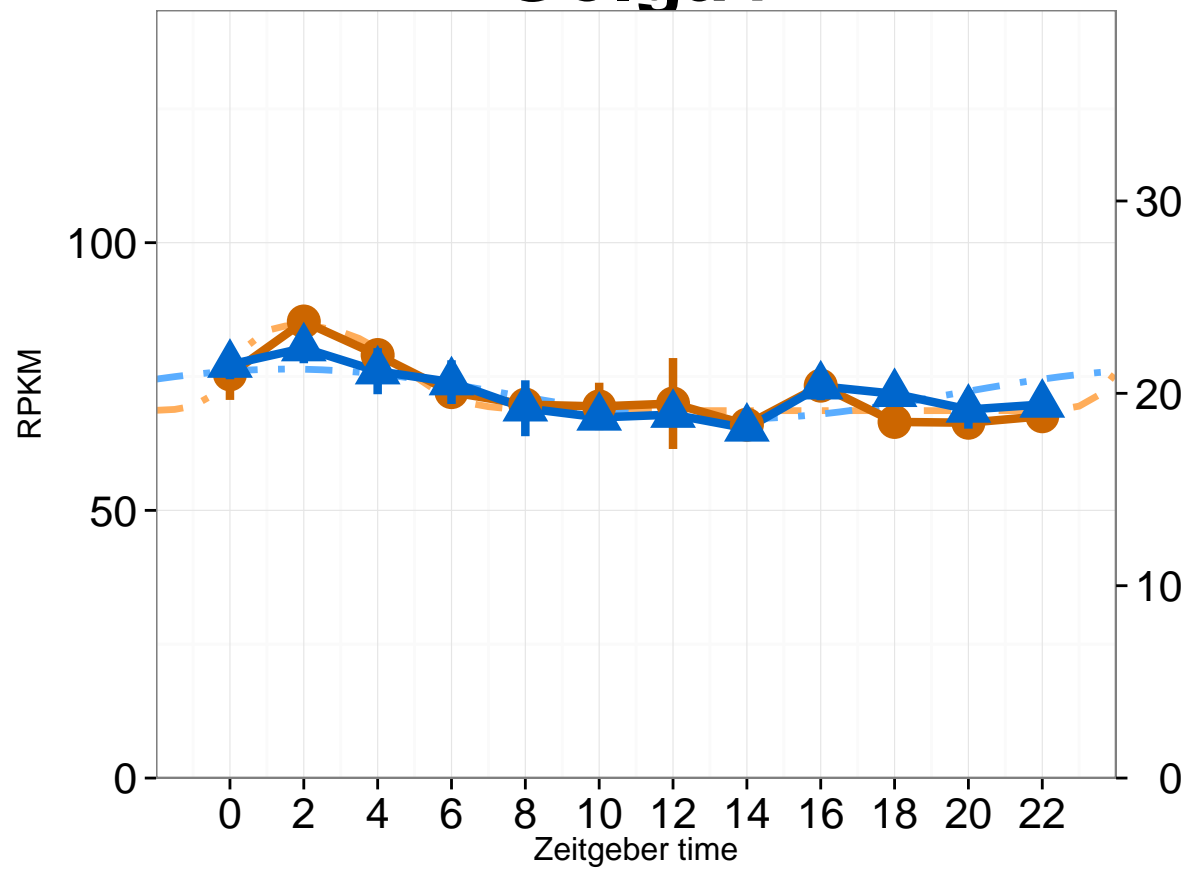

## Golga4

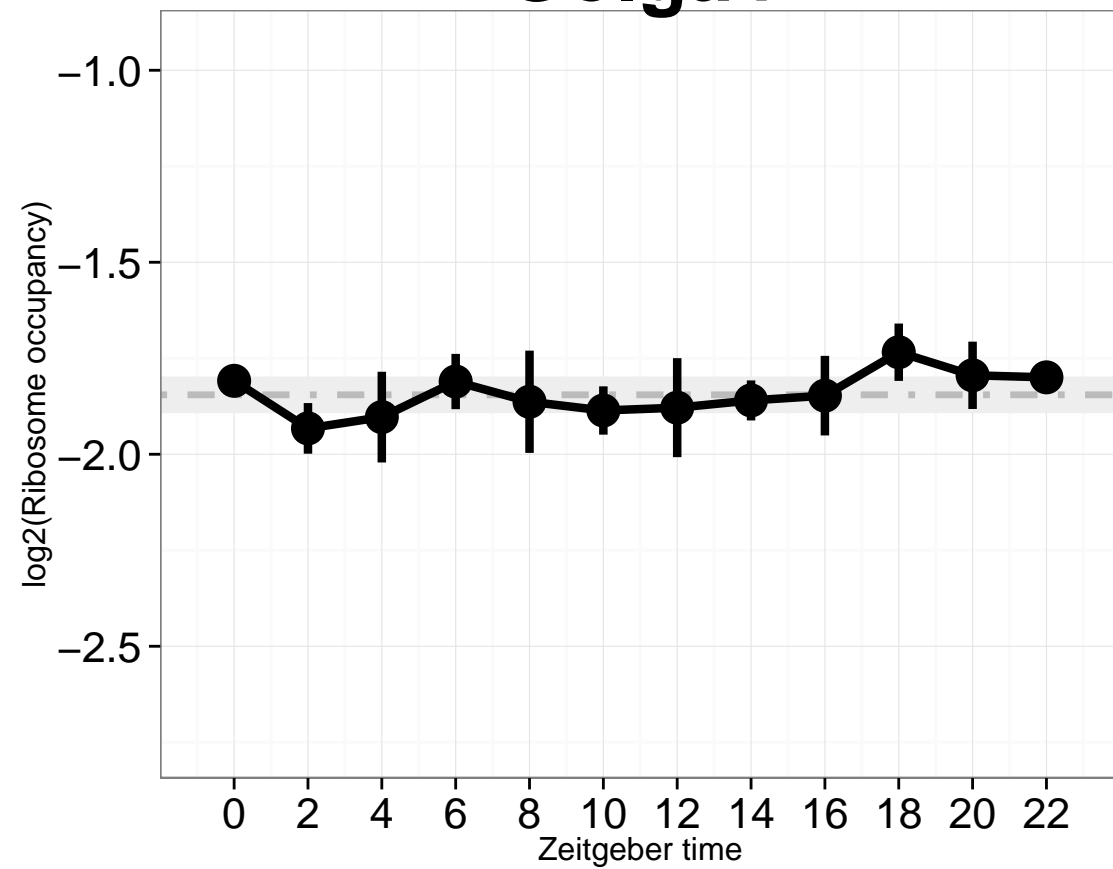

Supplement: Supplementary file 912 [file 1]

# 1700019G17Rik

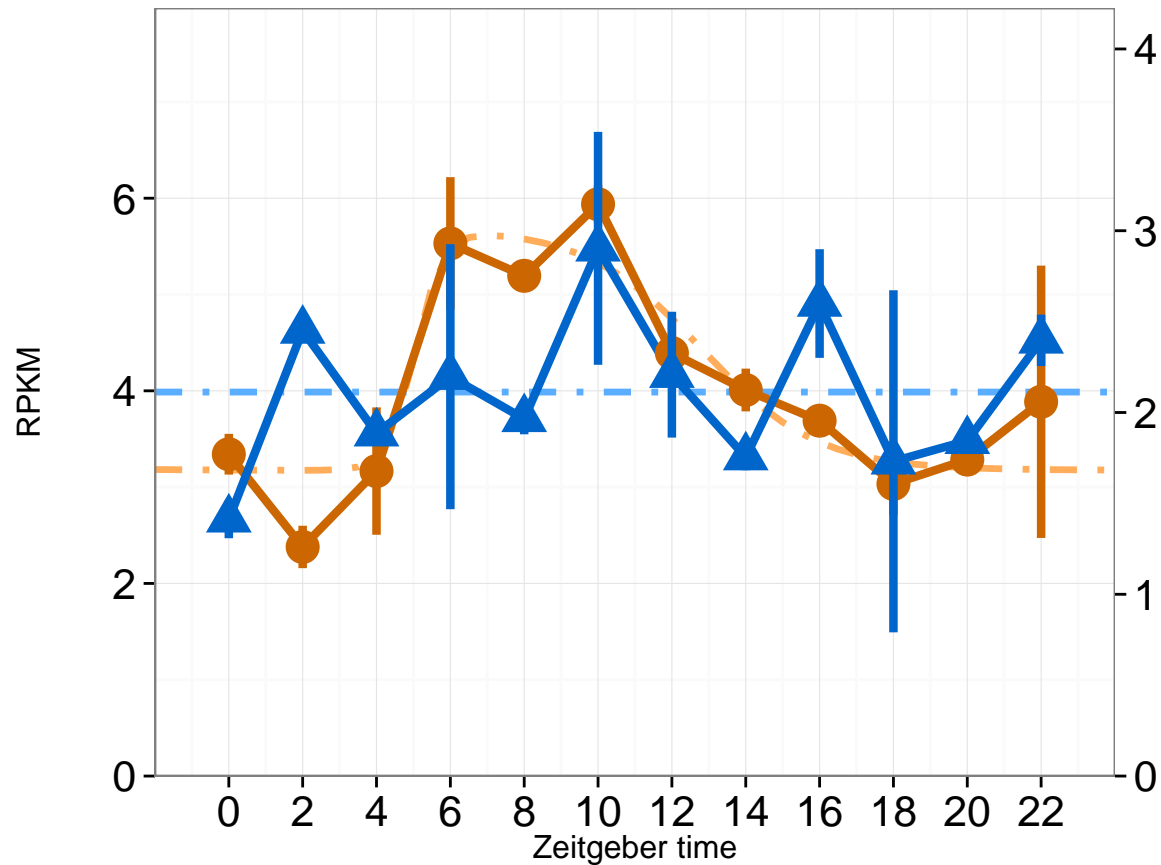

# 1700019G17Rik

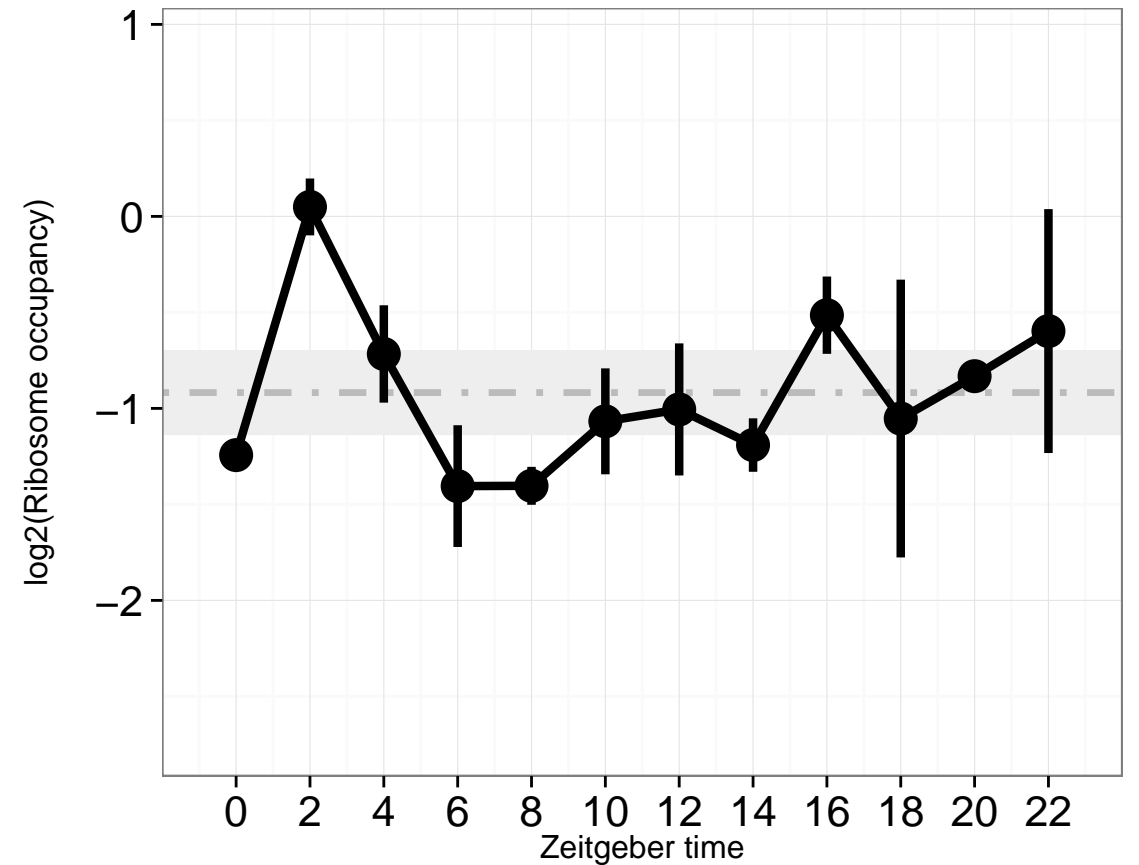

Supplement: Supplementary file 913 [file 1]

## Ulk1

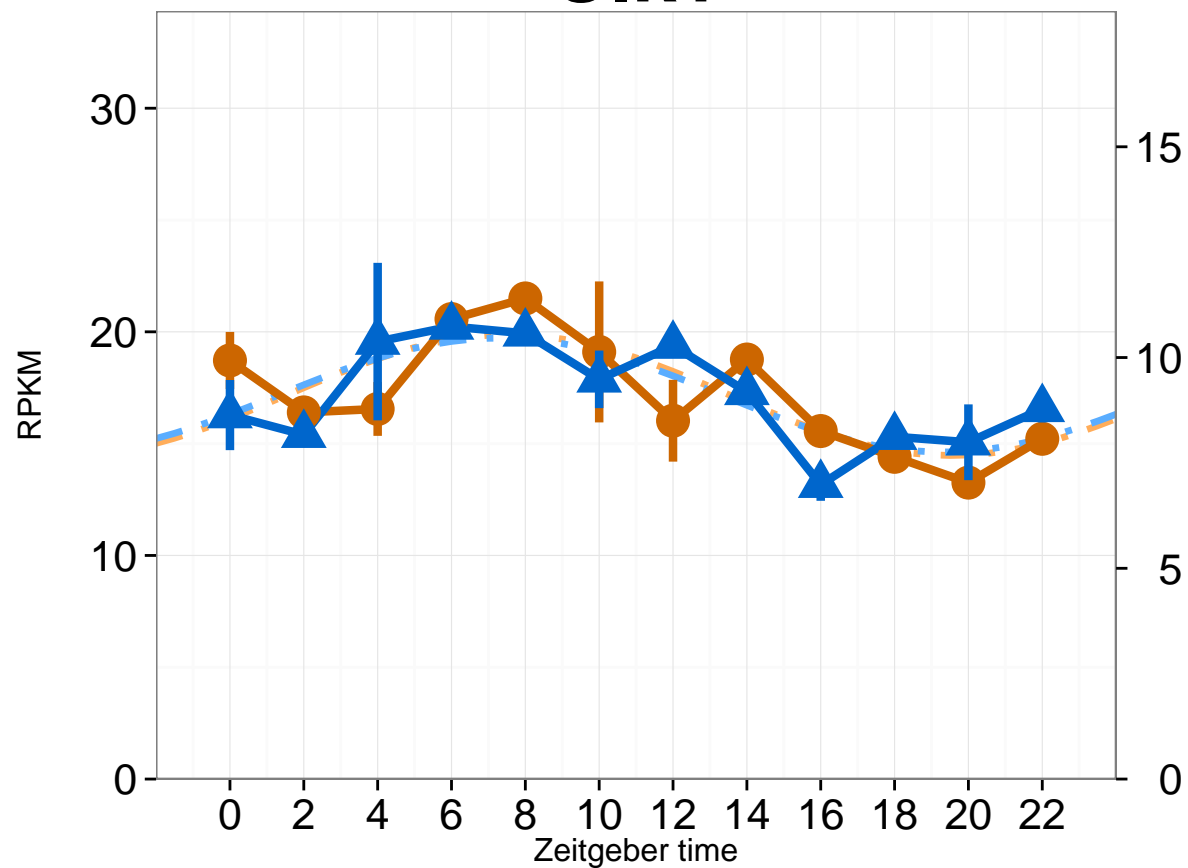

## Ulk1

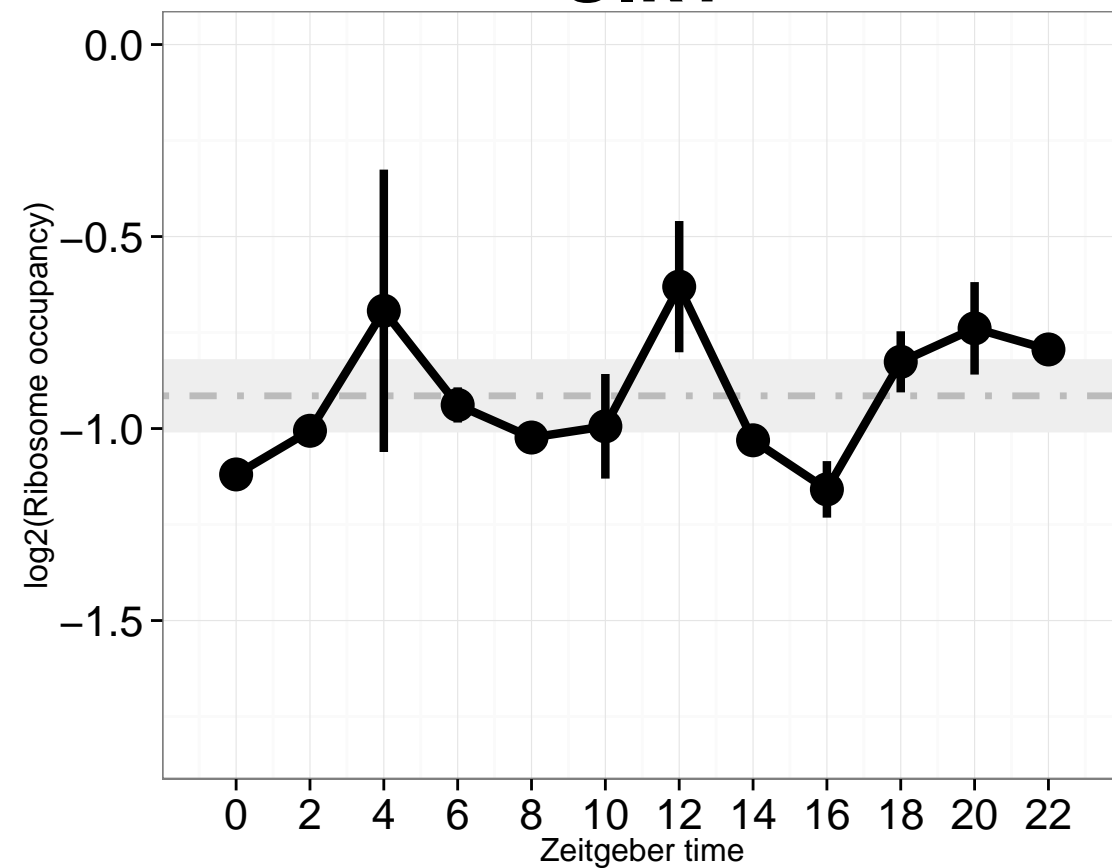

Supplement: Supplementary file 914 [file 1]

## Prcp

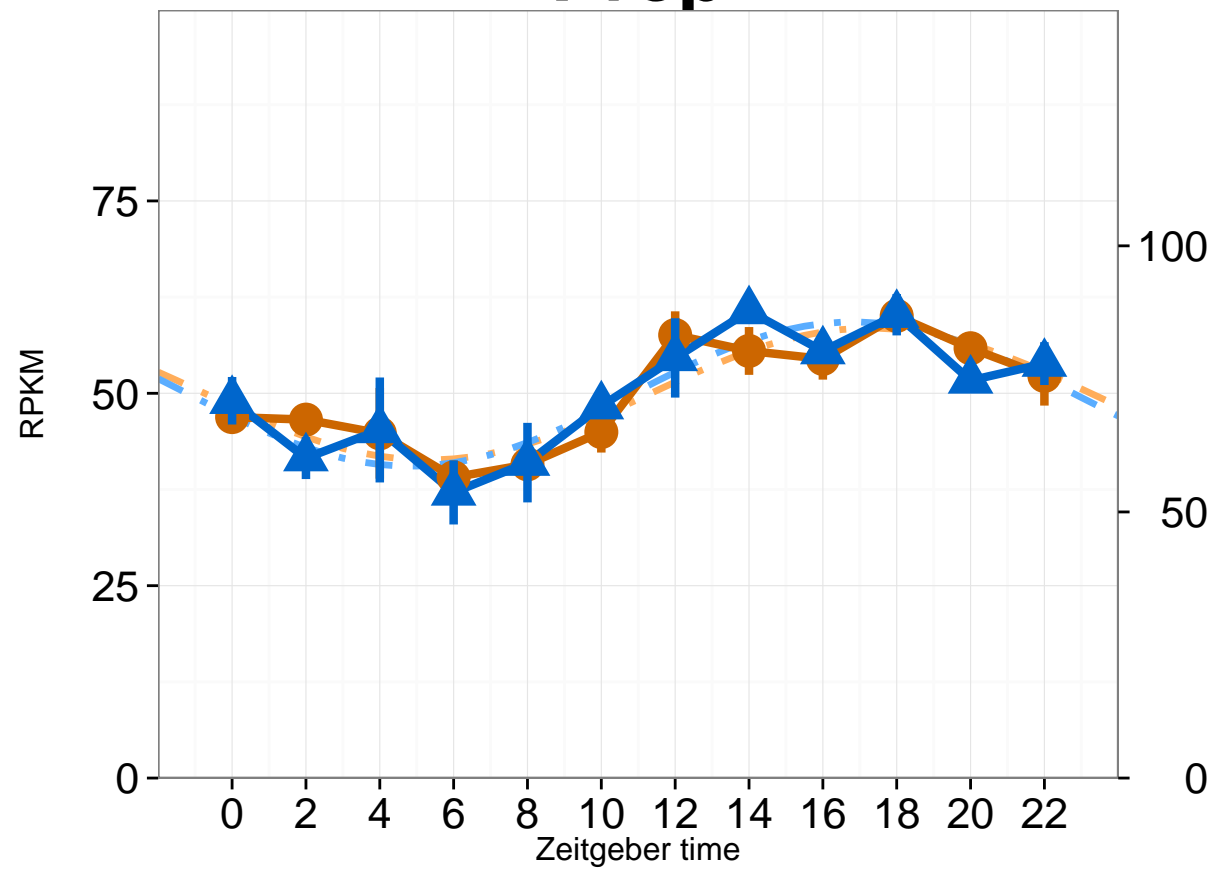

## Prcp

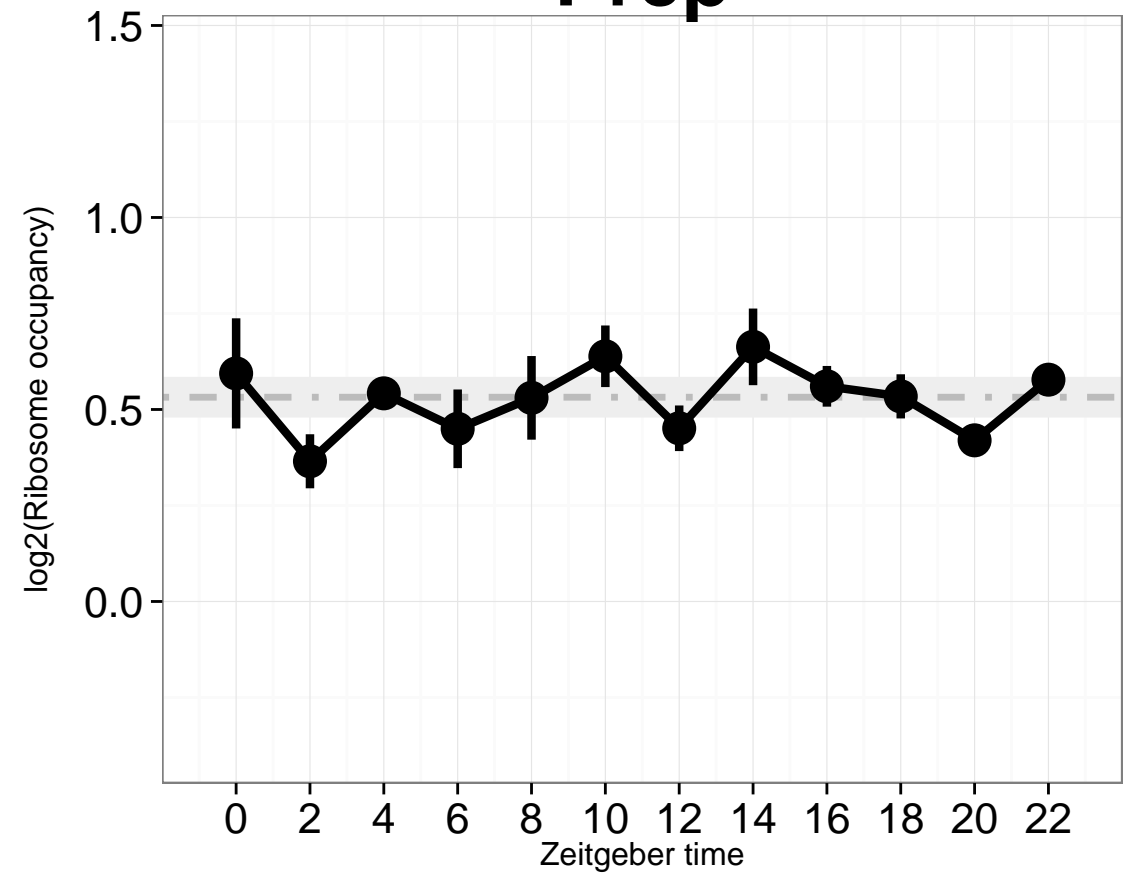

Supplement: Supplementary file 915 [file 1]

## Tap2

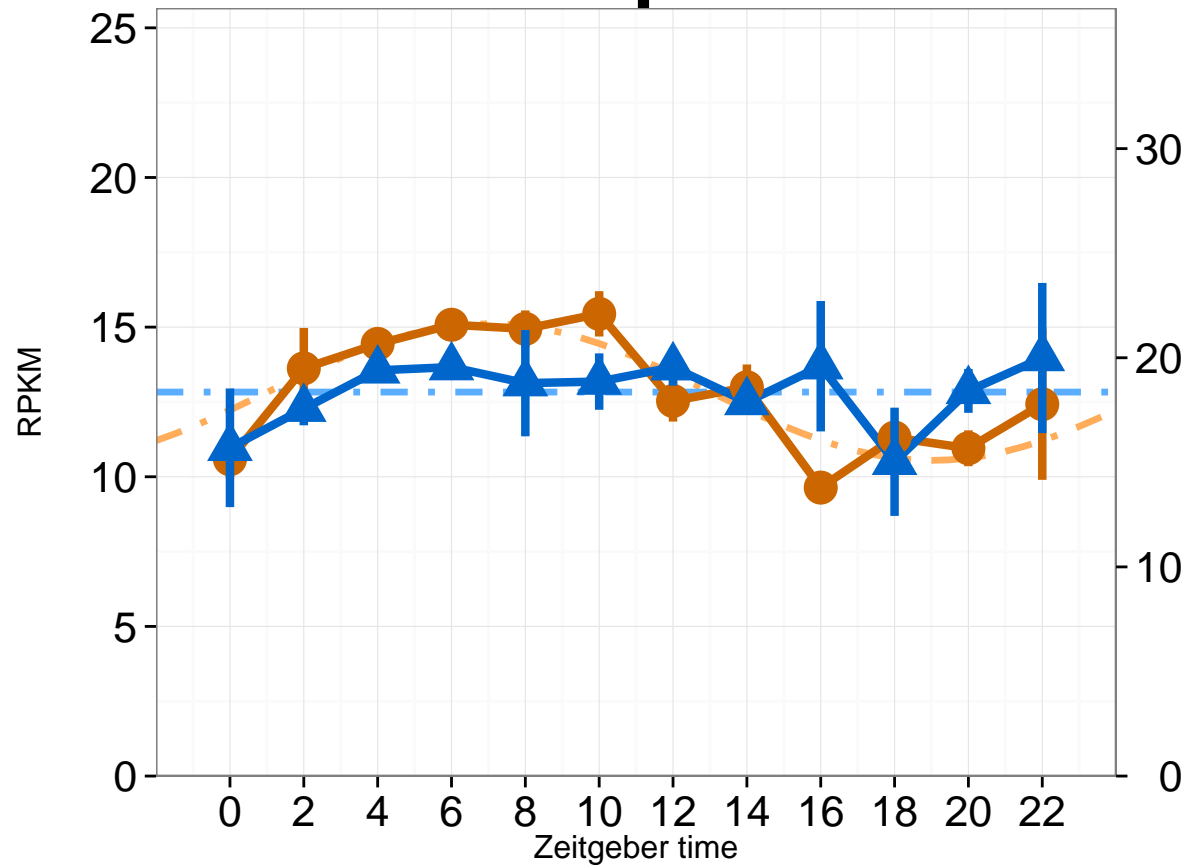

## Tap2

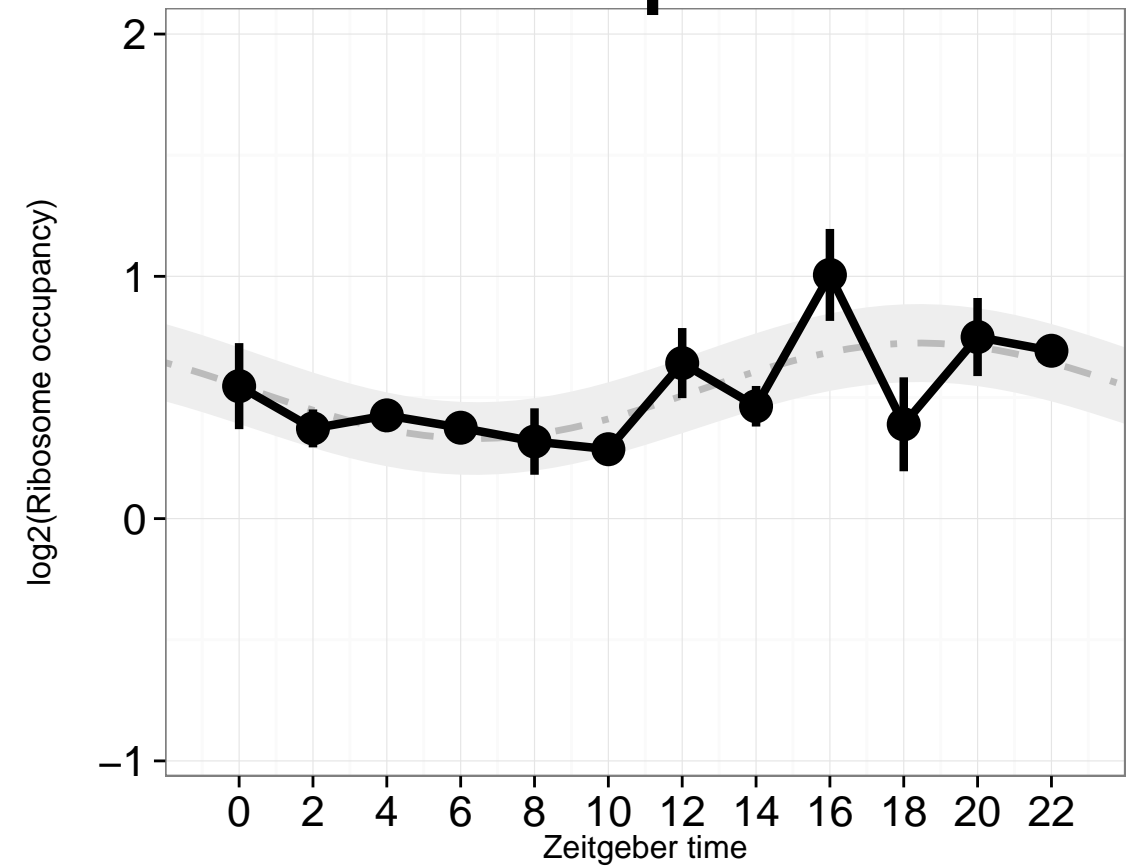

Supplement: Supplementary file 916 [file 1]

## Tbcc

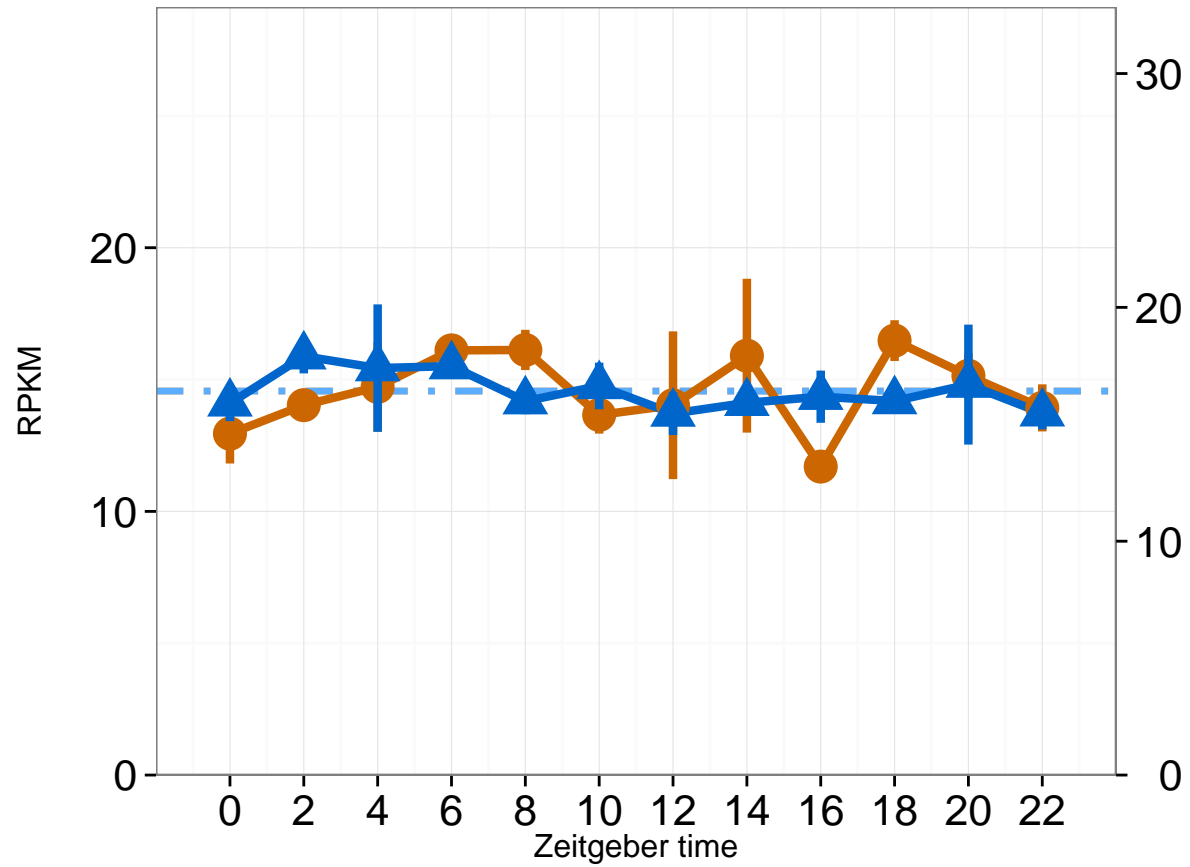

## Tbcc

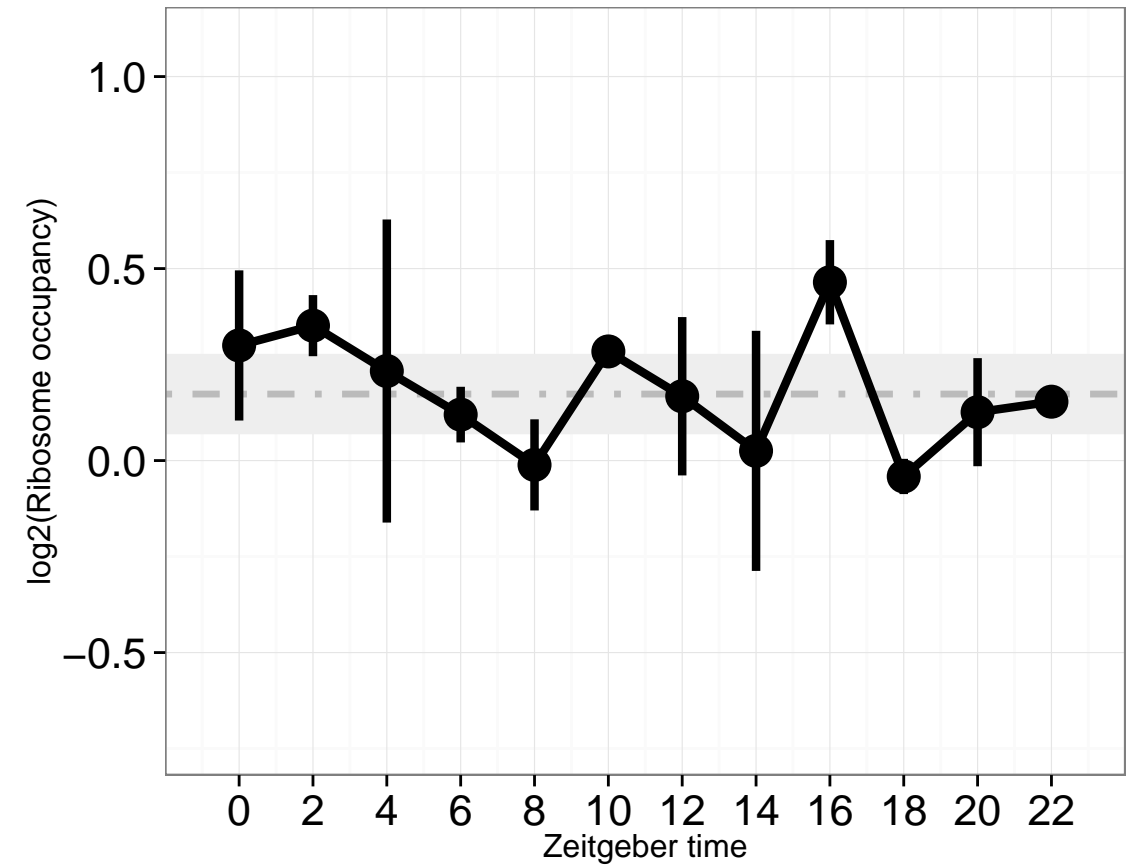

Supplement: Supplementary file 917 [file 1]

## Tert

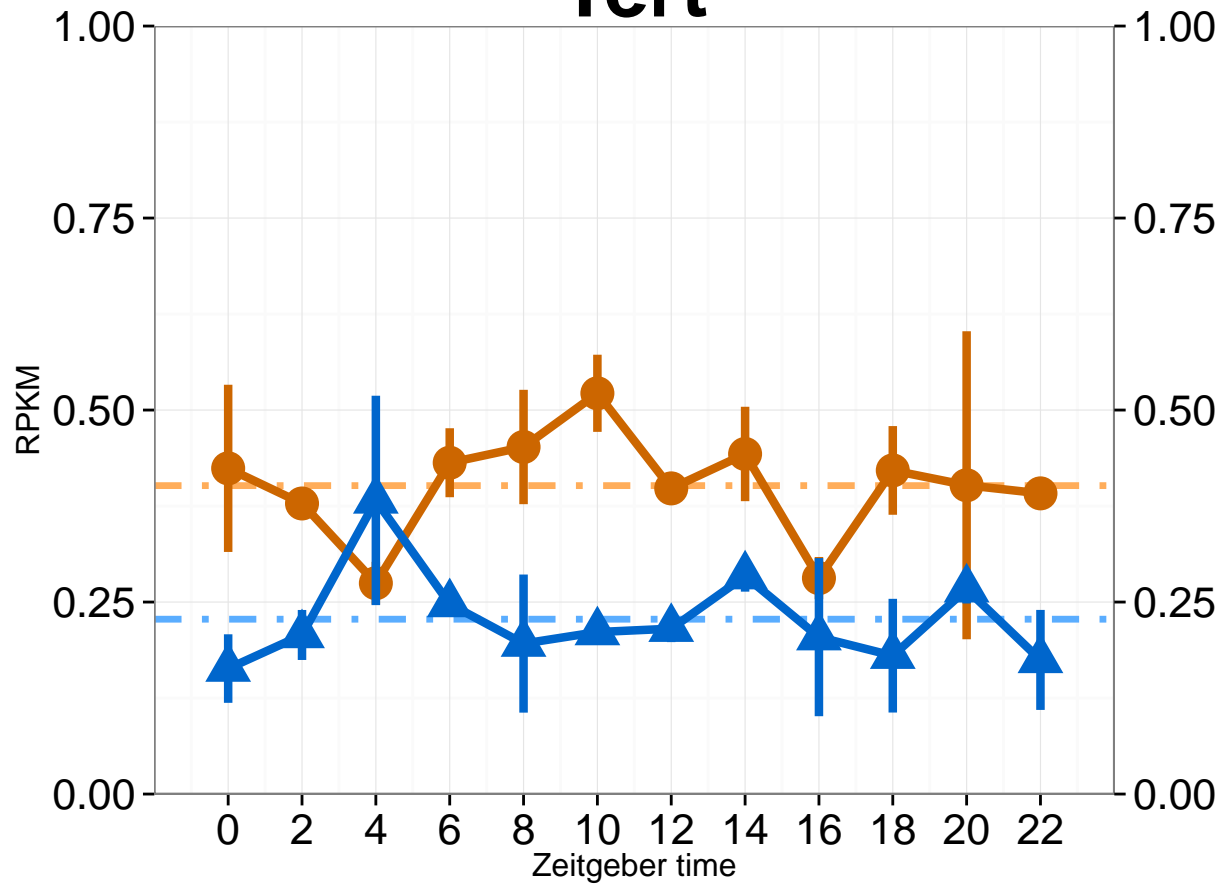

## Tert

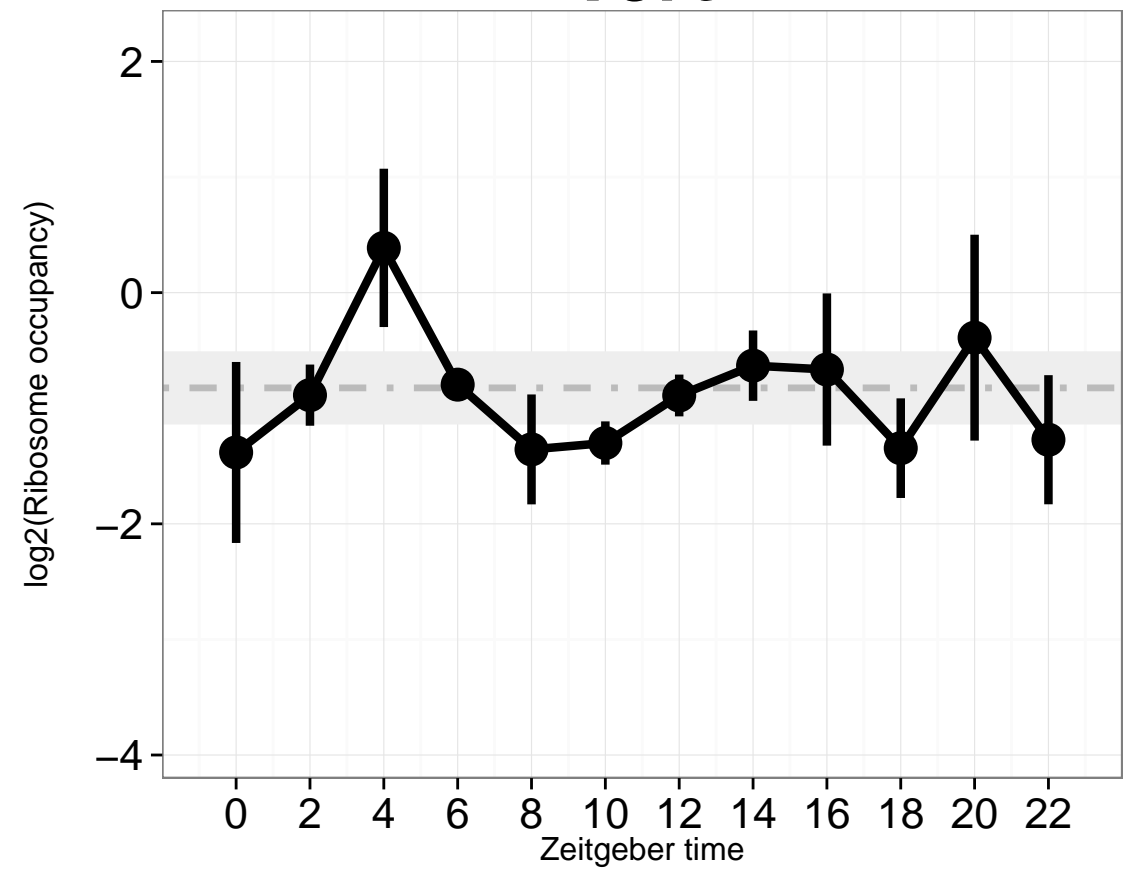

Supplement: Supplementary file 918 [file 1]

# Itgb6

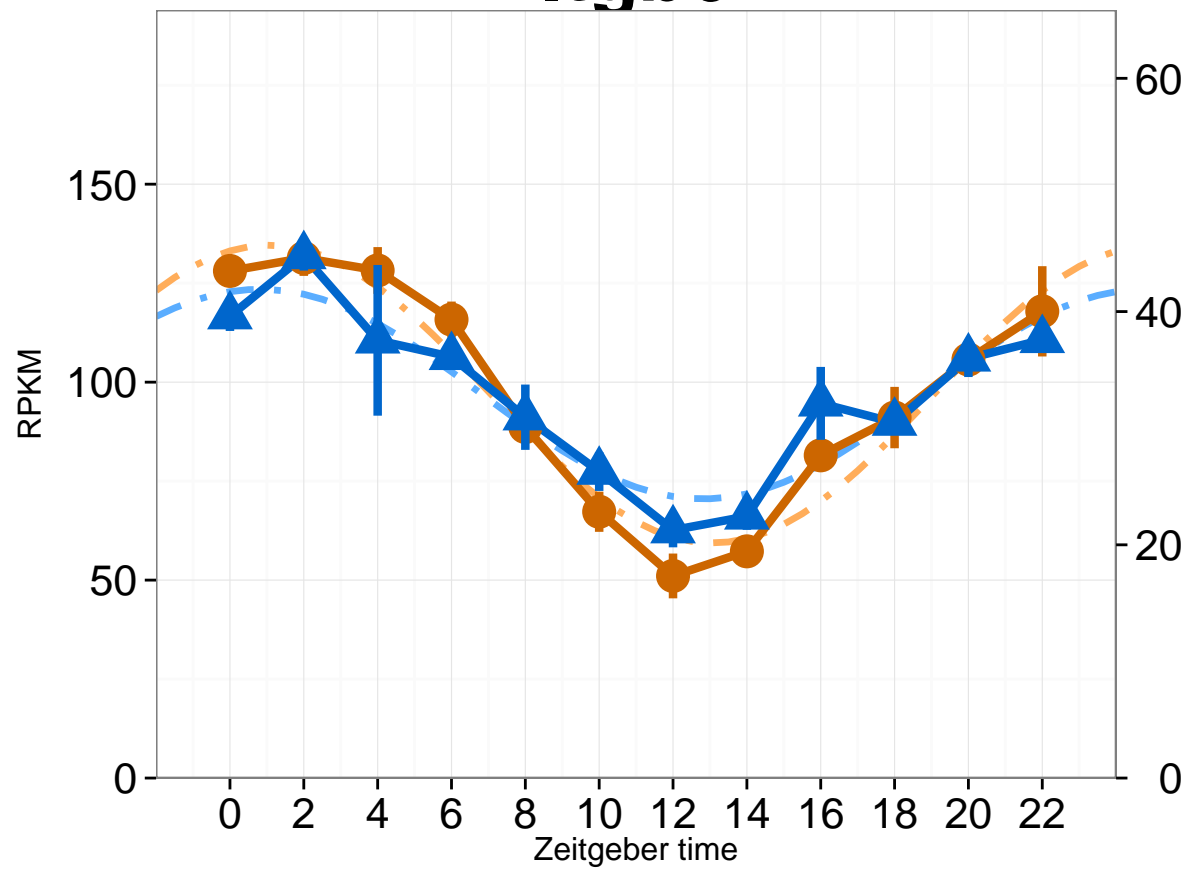

# Itgb6

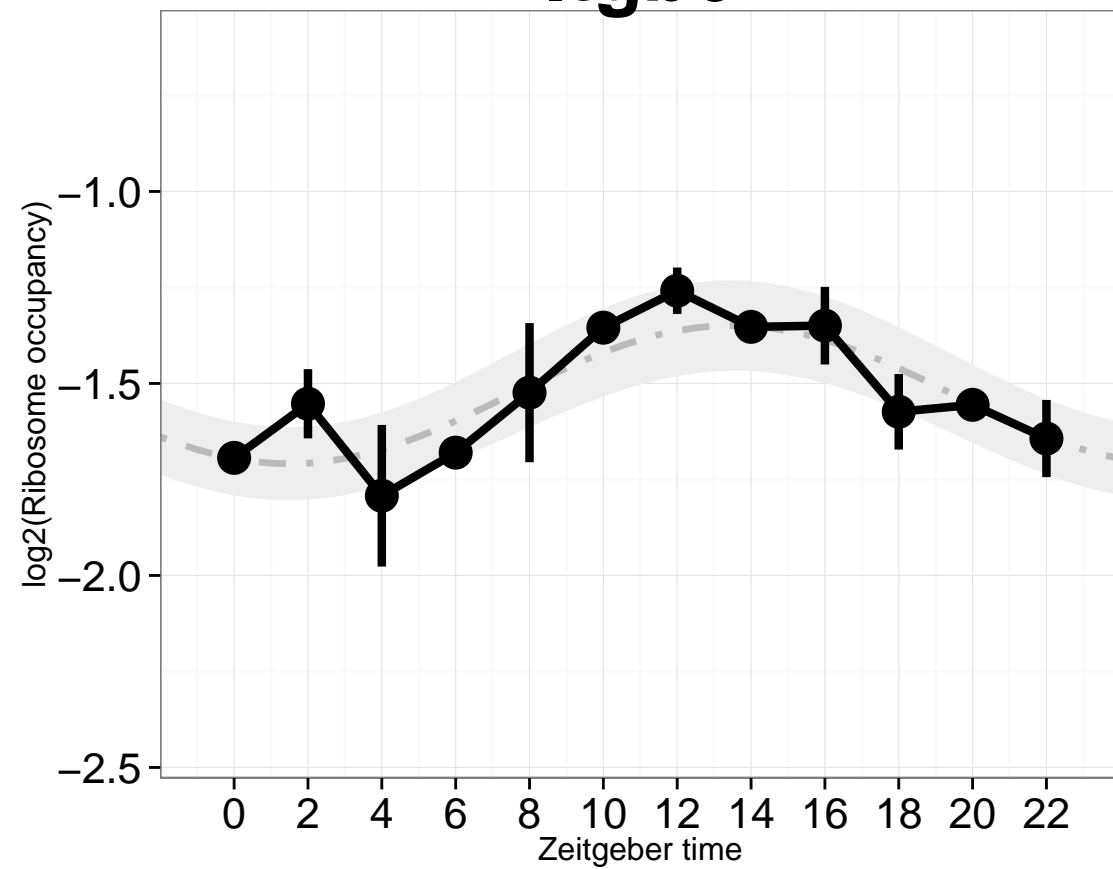

Supplement: Supplementary file 919 [file 1]

# Acsm1

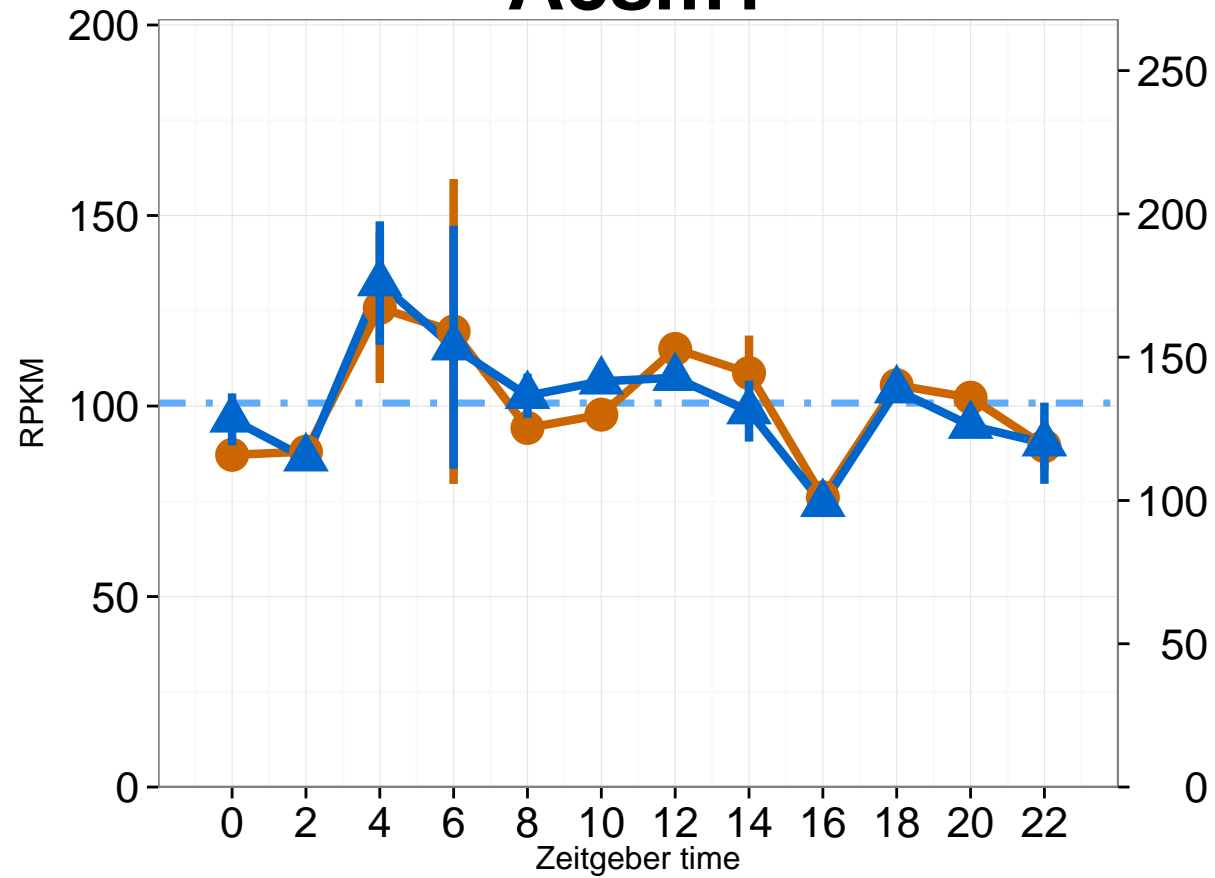

# Acsm1

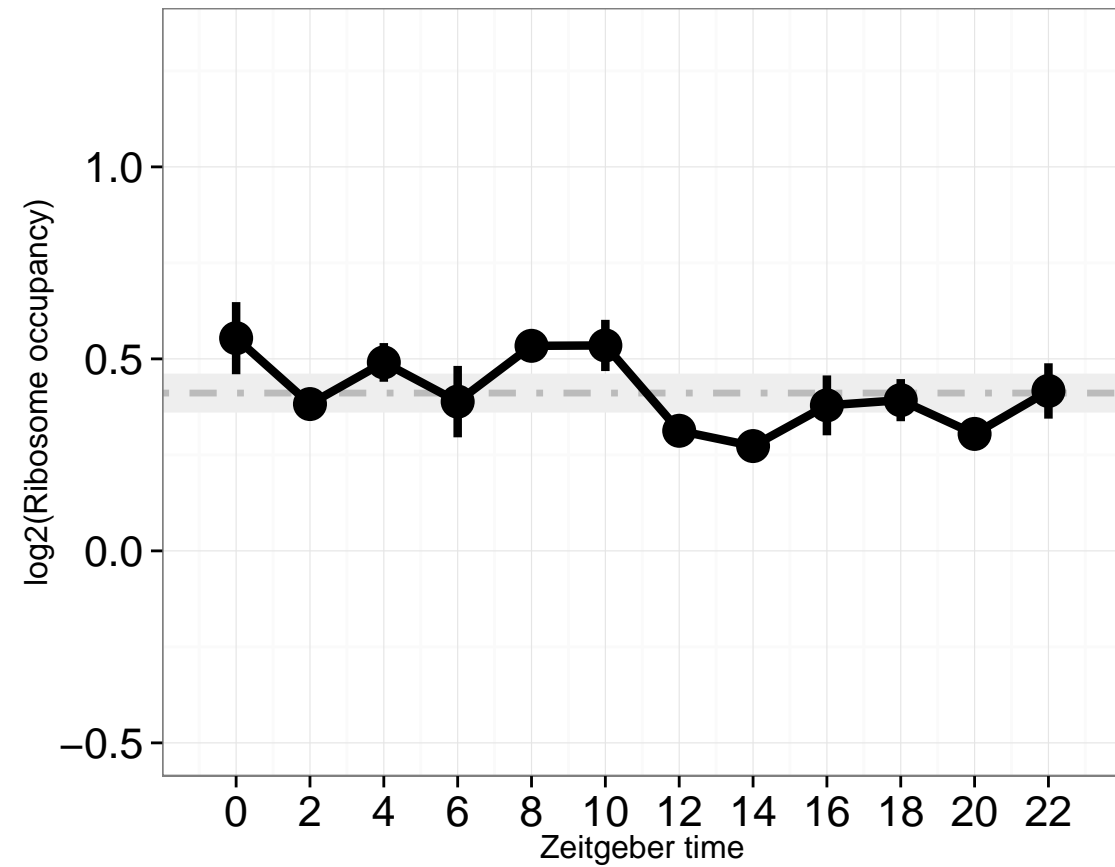

Supplement: Supplementary file 920 [file 1]

## Slc35d2

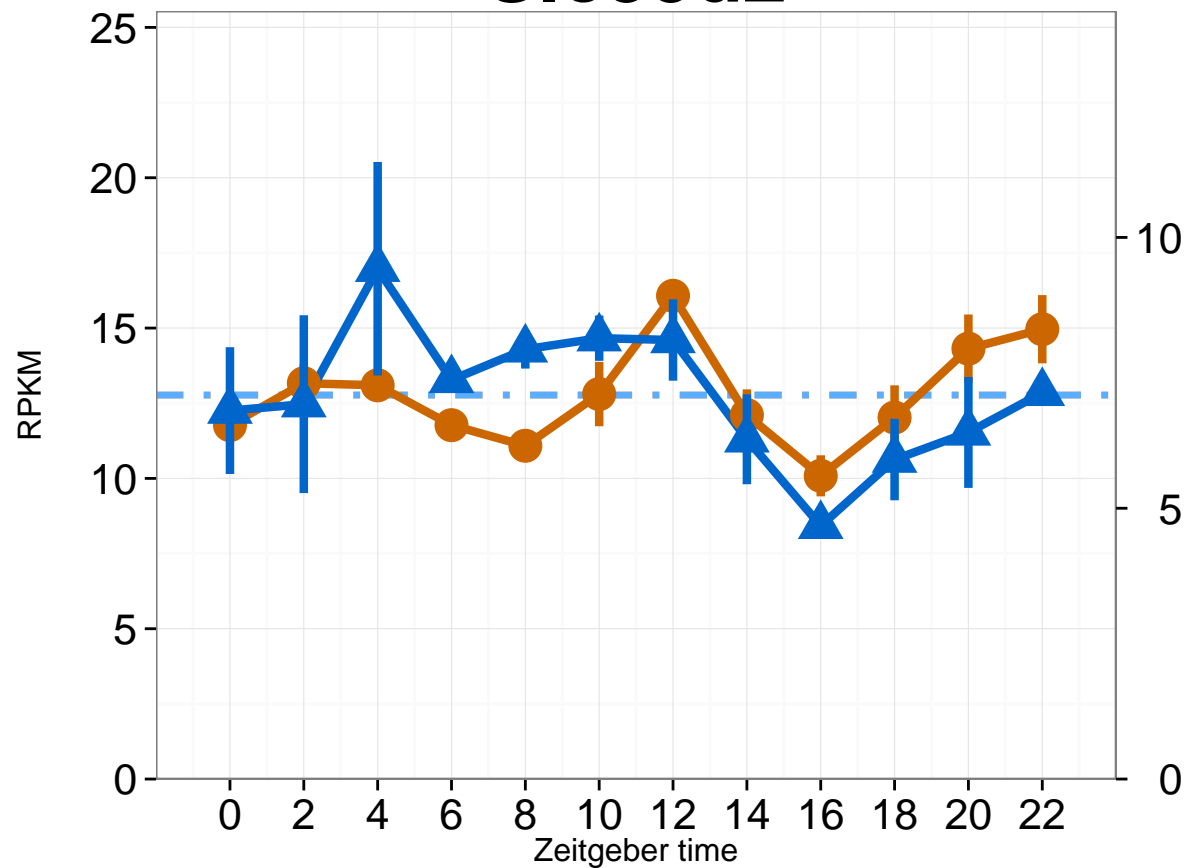

## Slc35d2

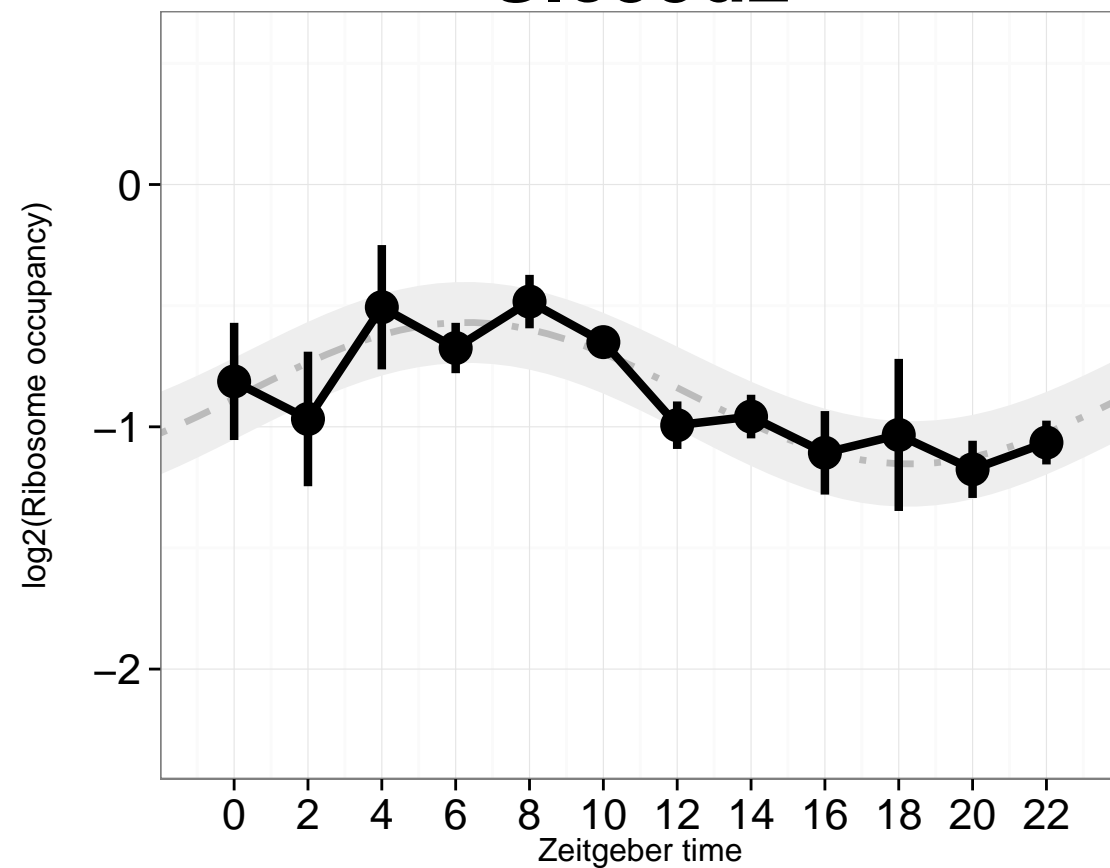

Supplement: Supplementary file 921 [file 1]

## Sh3bgr TR

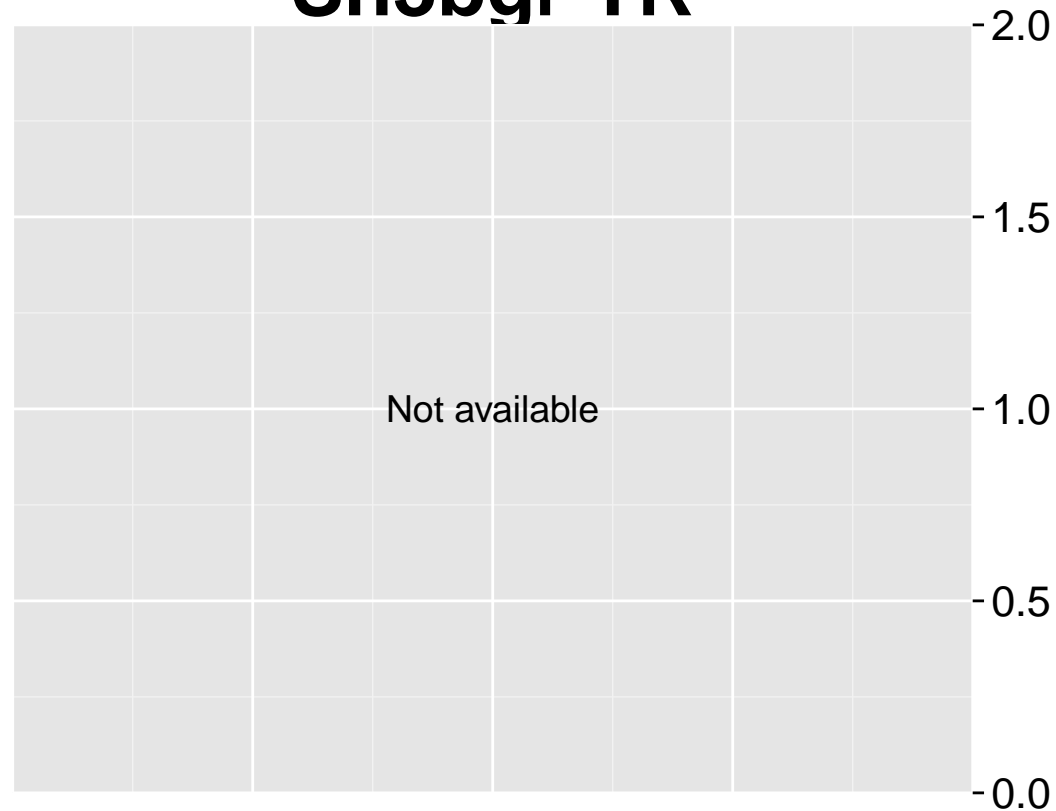

## Sh3bgr log2(Ribosome occupancy

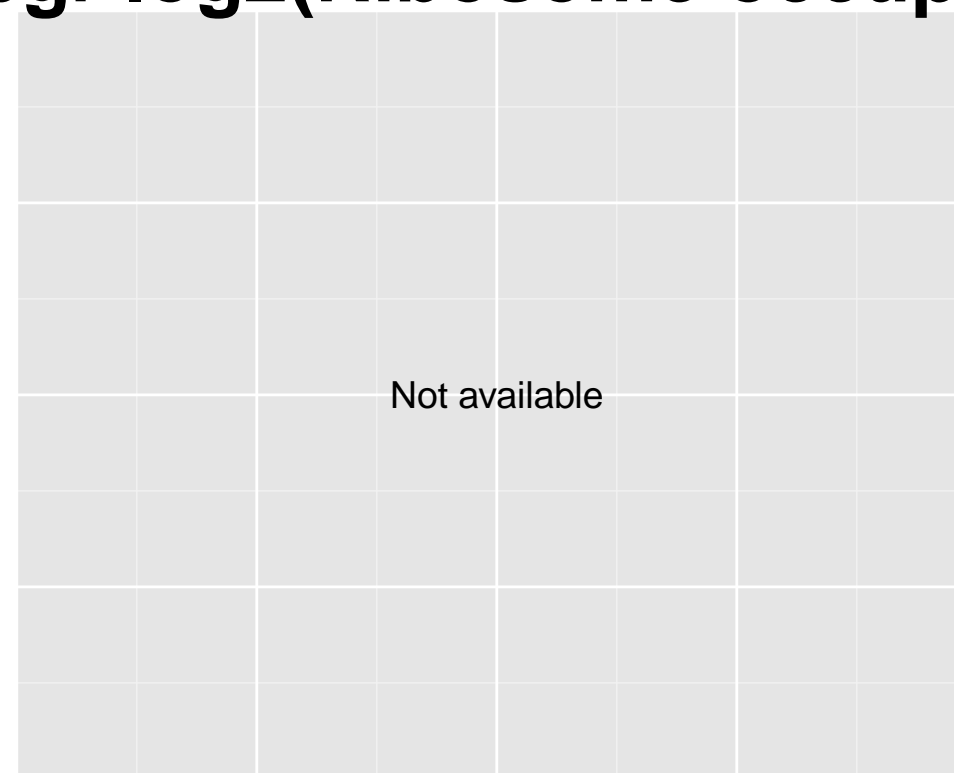

Supplement: Supplementary file 922 [file 1]

## Nufip1

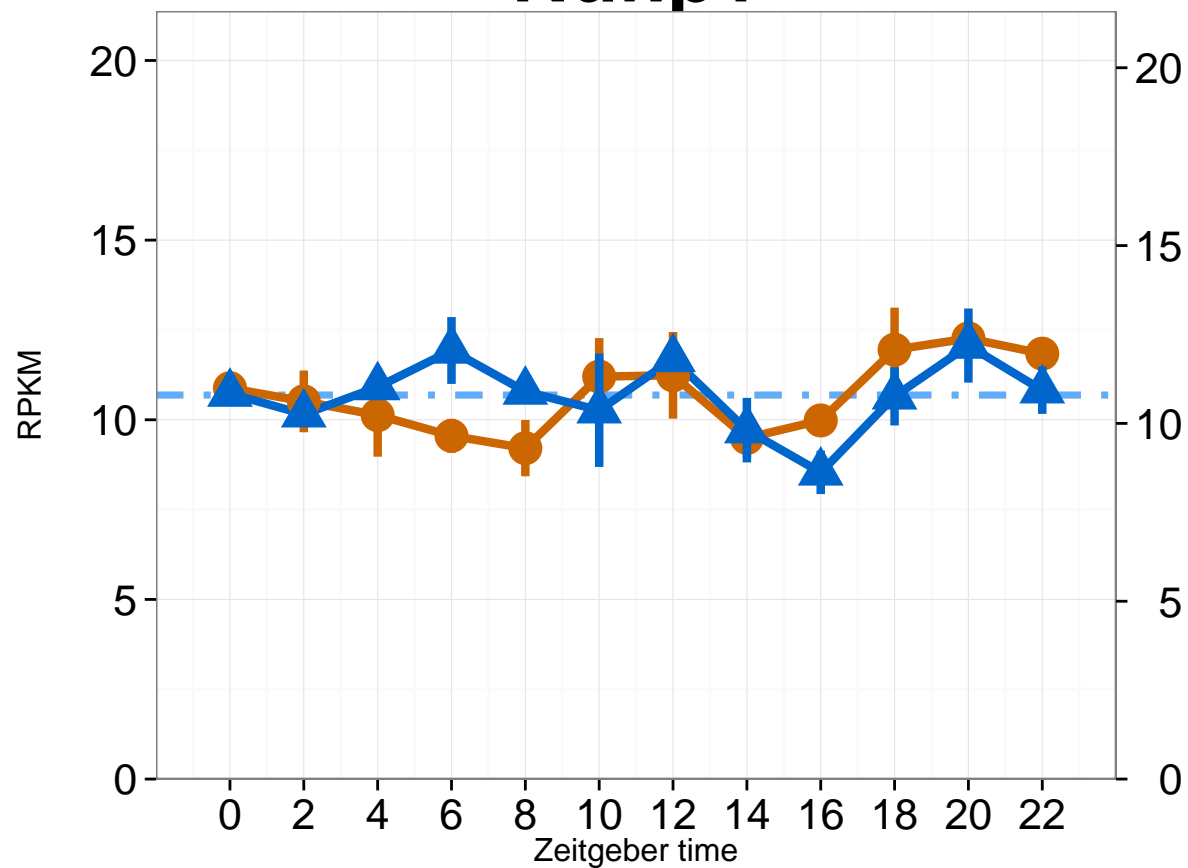

## Nufip1

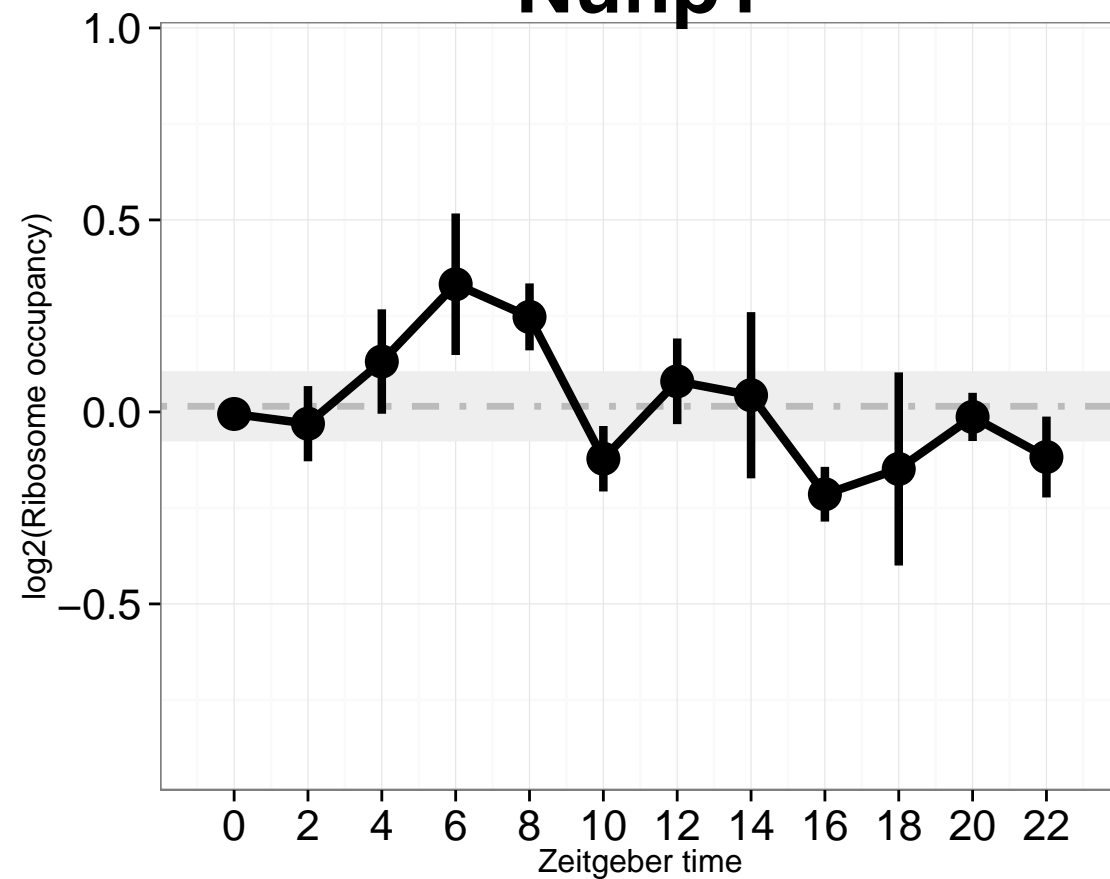

Supplement: Supplementary file 923 [file 1]

## Emp2

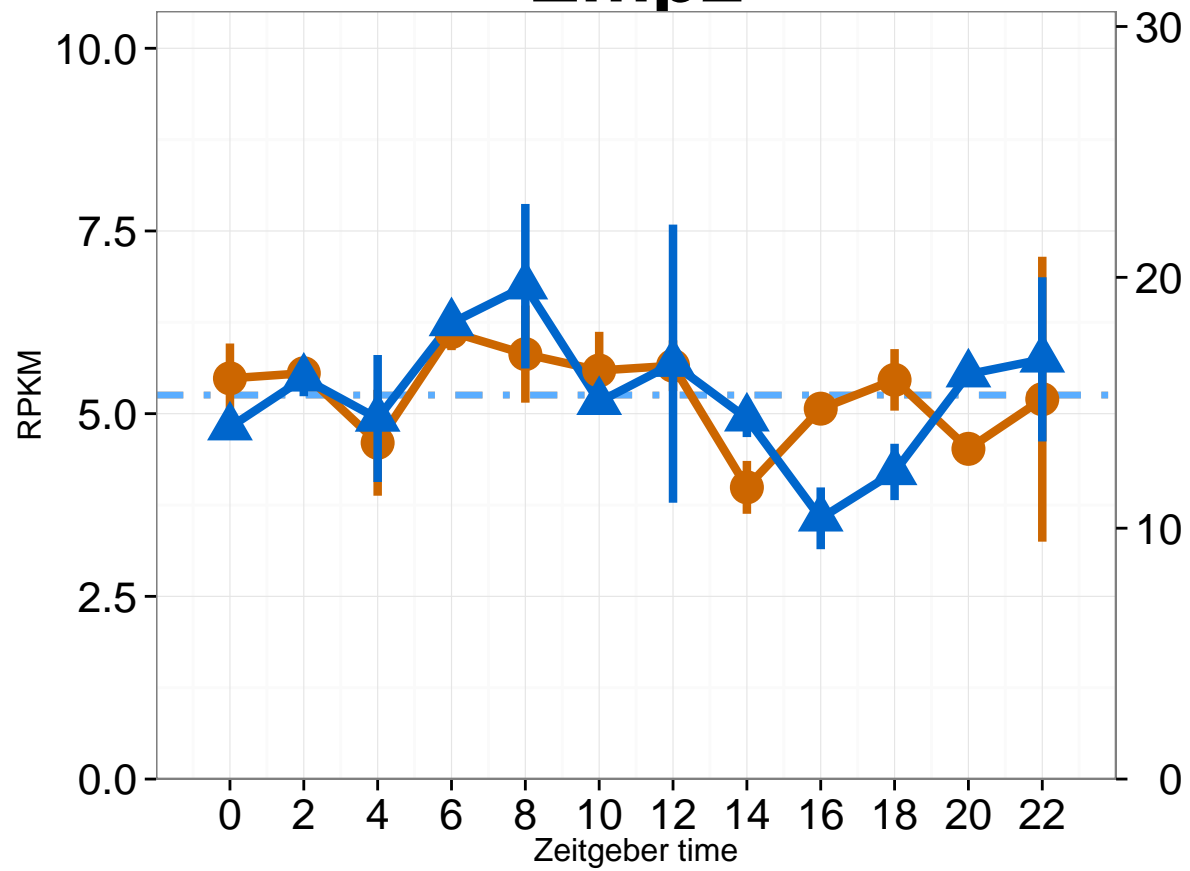

## Emp2

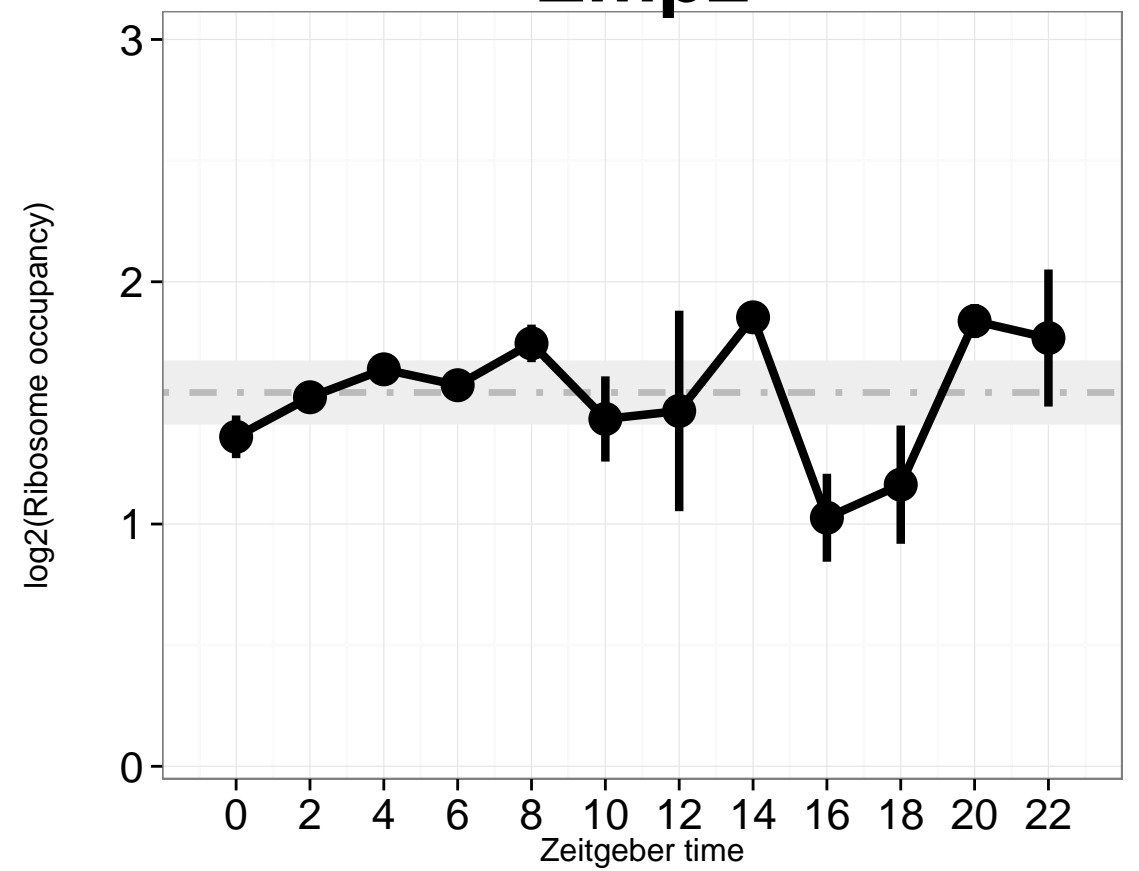

Supplement: Supplementary file 924 [file 1]

## Aes

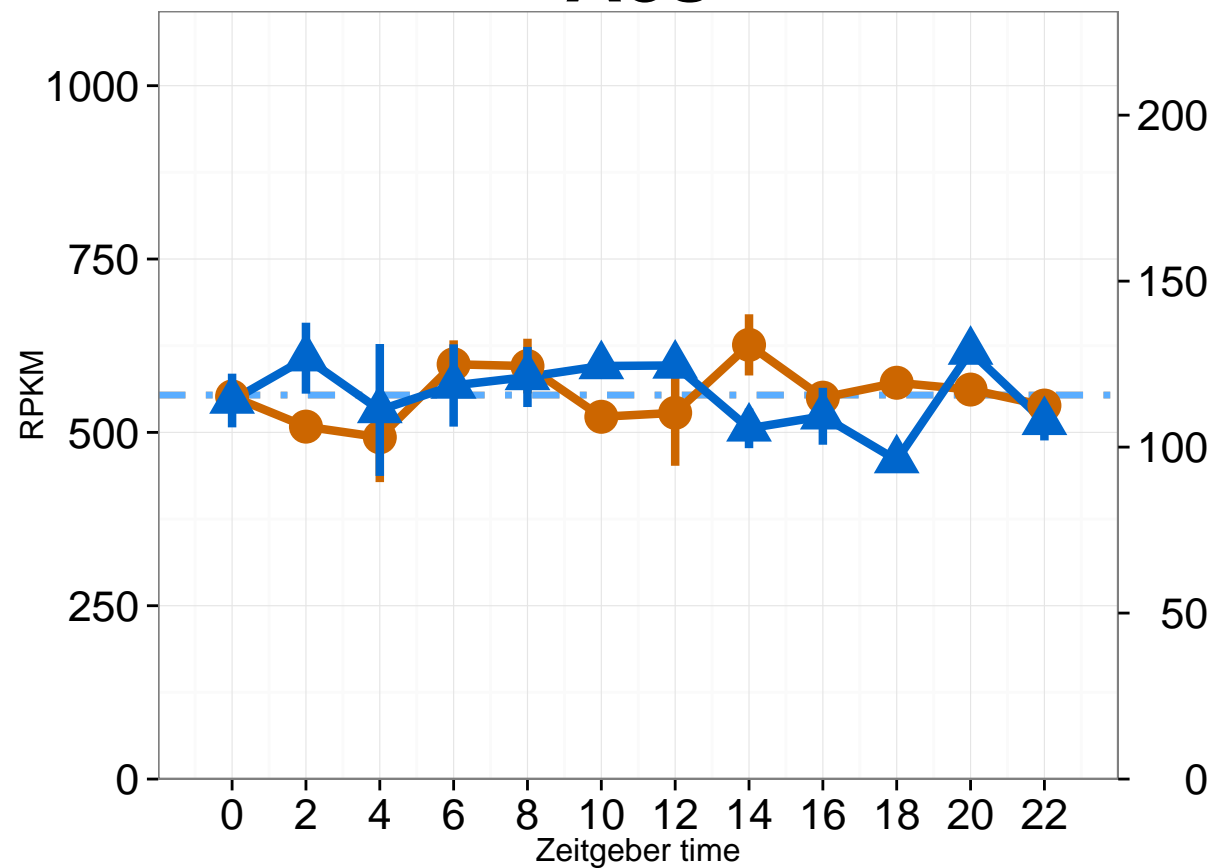

## Aes

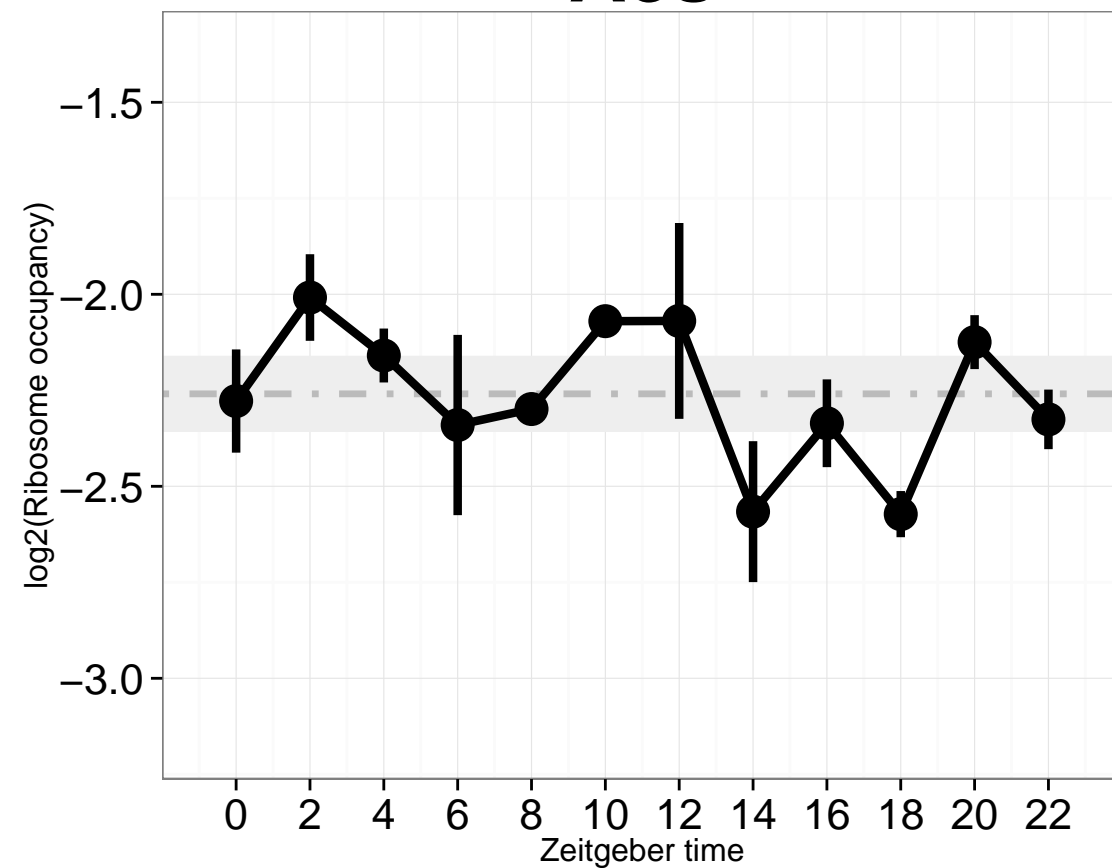

Supplement: Supplementary file 925 [file 1]

## Hoxb2

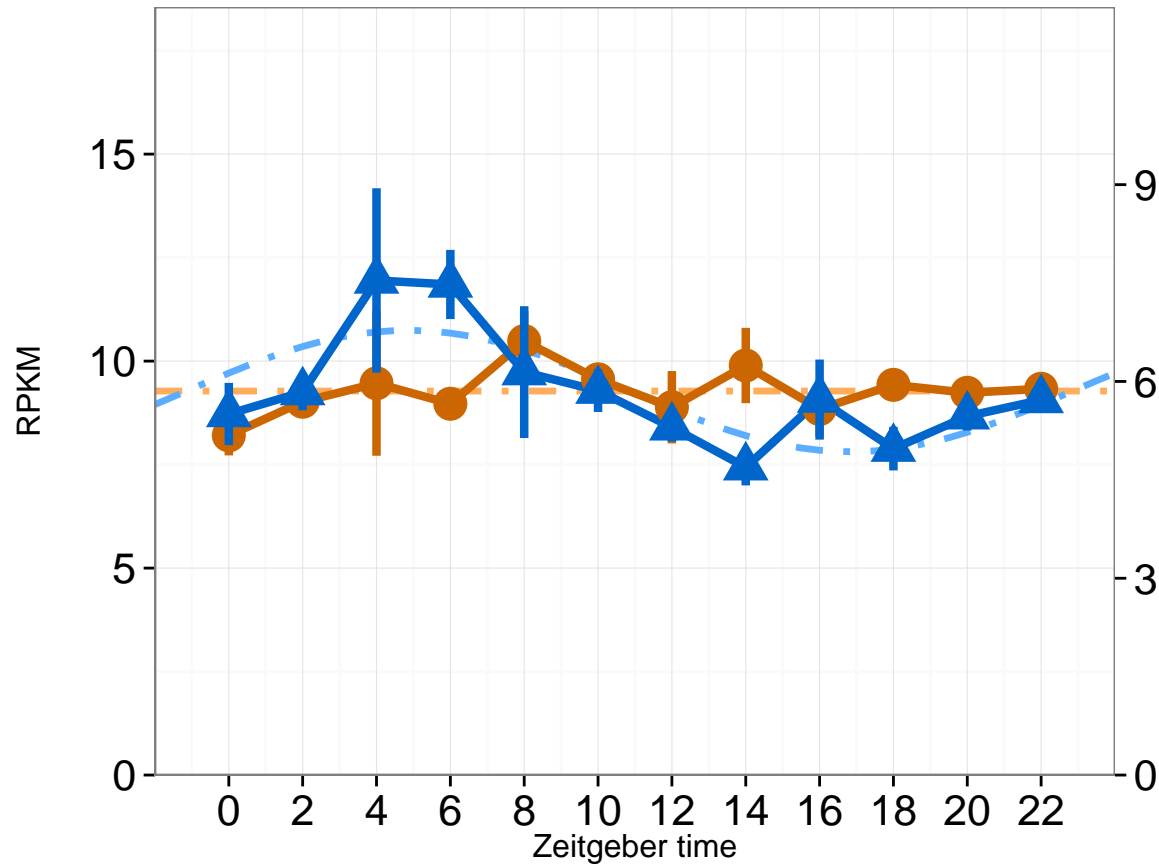

## Hoxb2

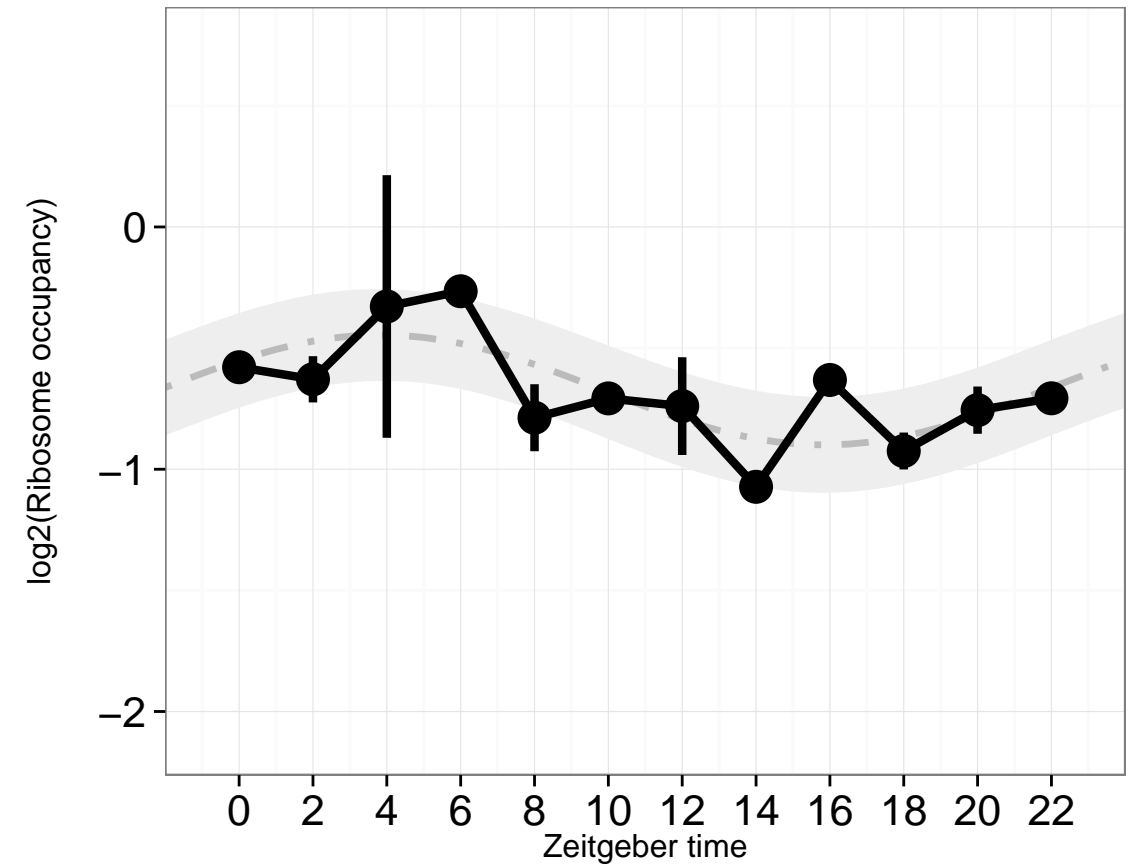

Supplement: Supplementary file 926 [file 1]

# Tmie

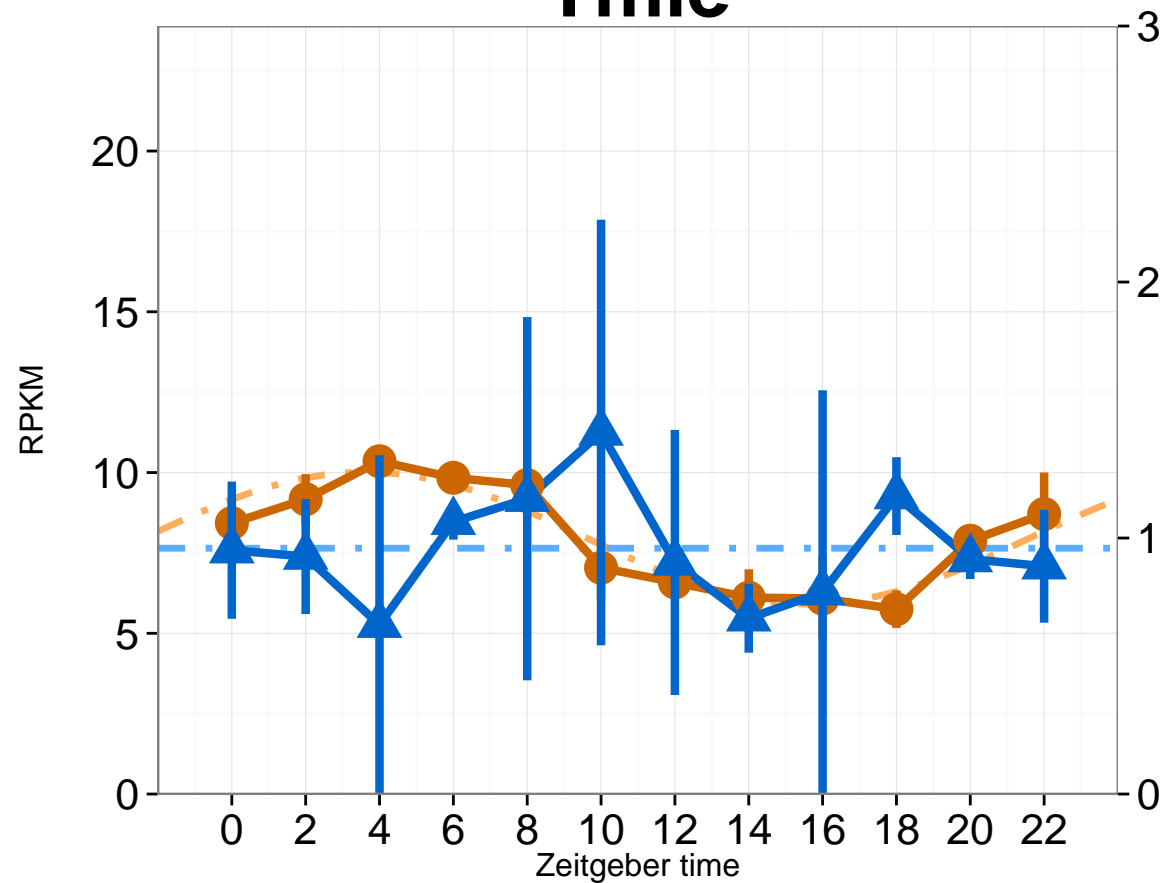

# Tmie

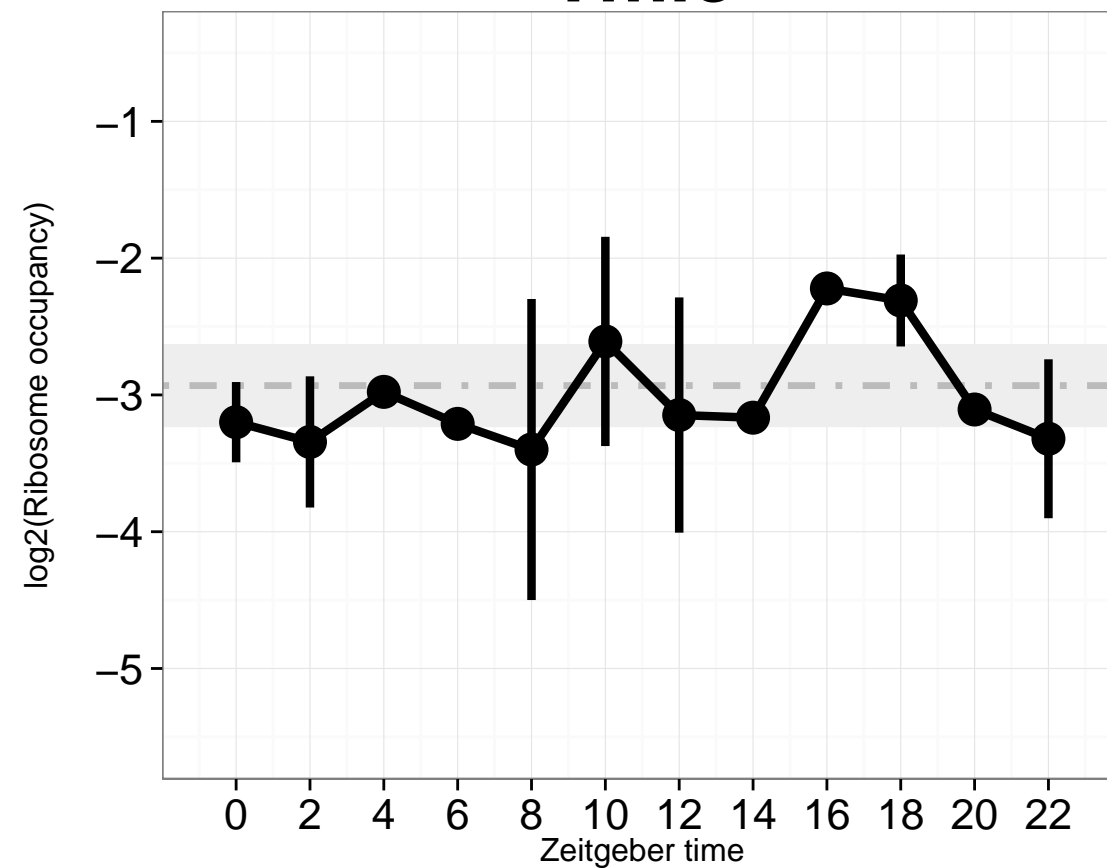

Supplement: Supplementary file 928 [file 1]

## Usp3

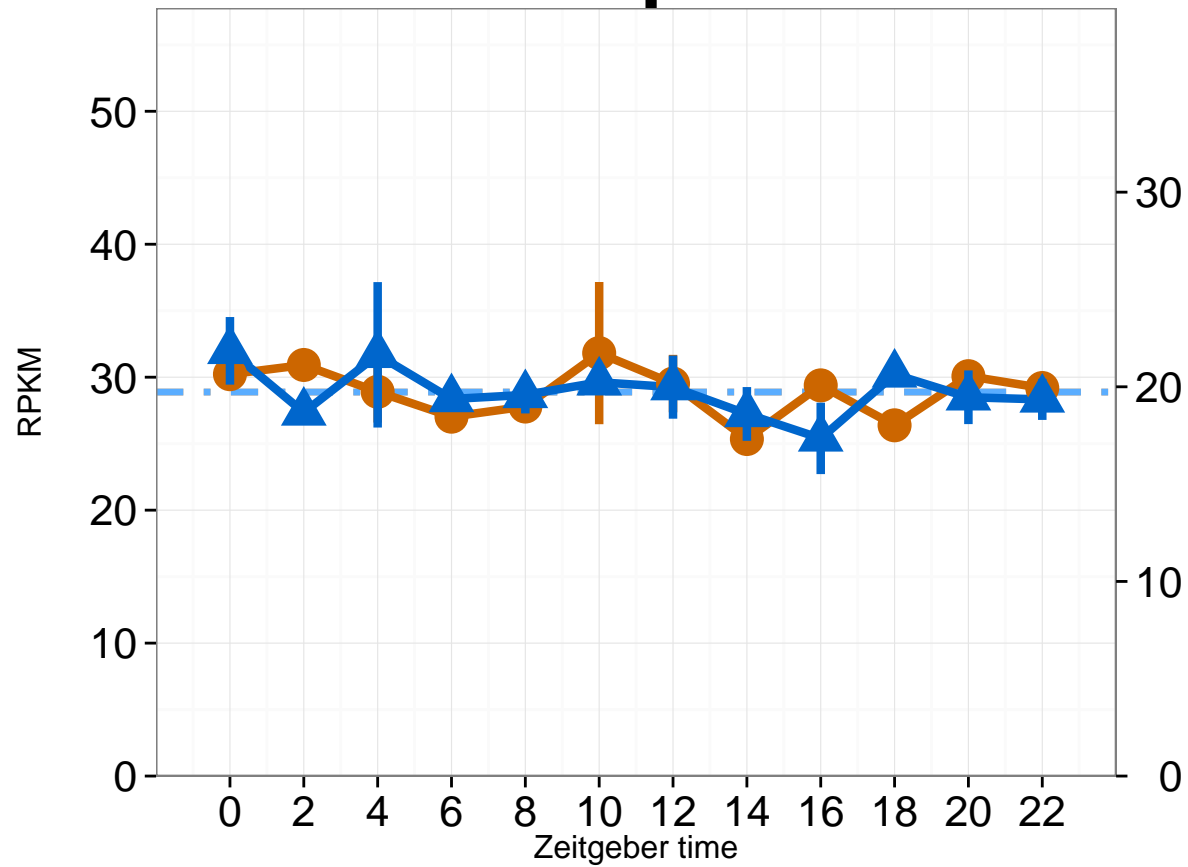

## Usp3

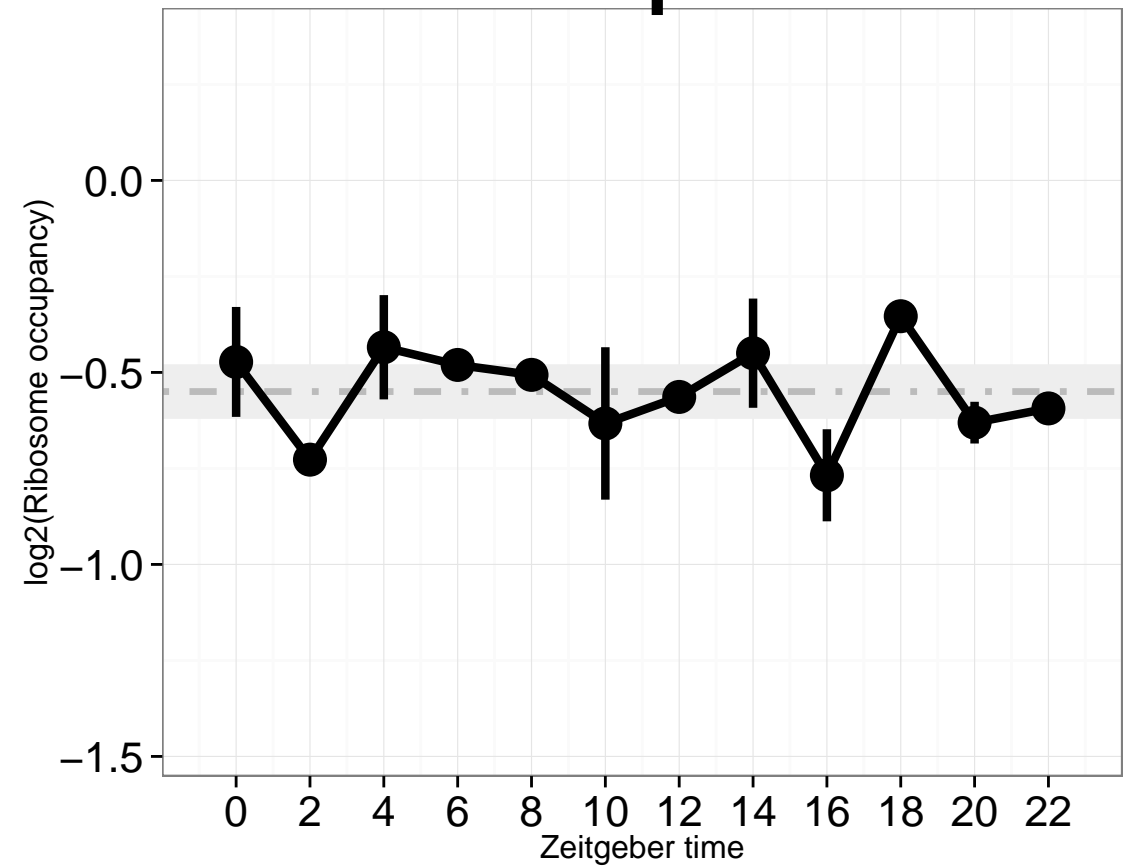

Supplement: Supplementary file 929 [file 1]

## Fgf9

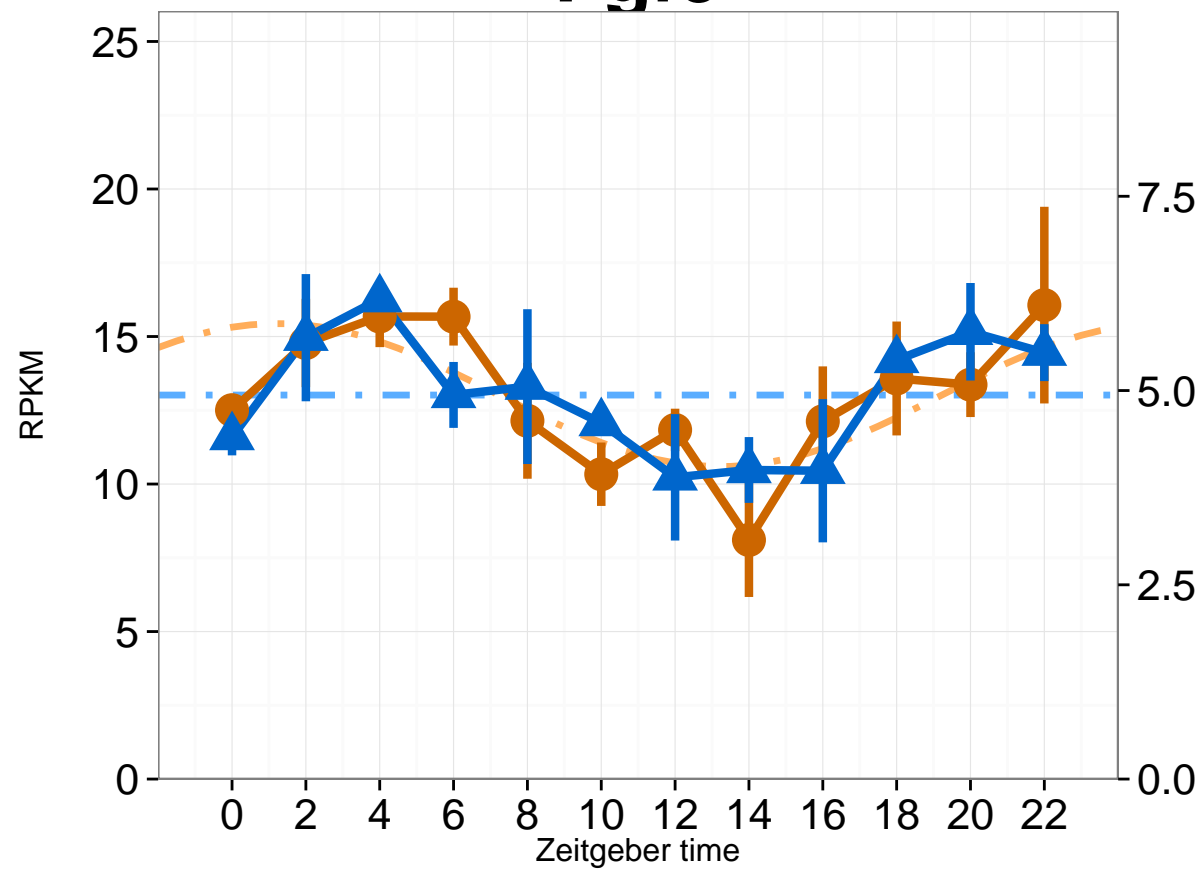

## Fgf9

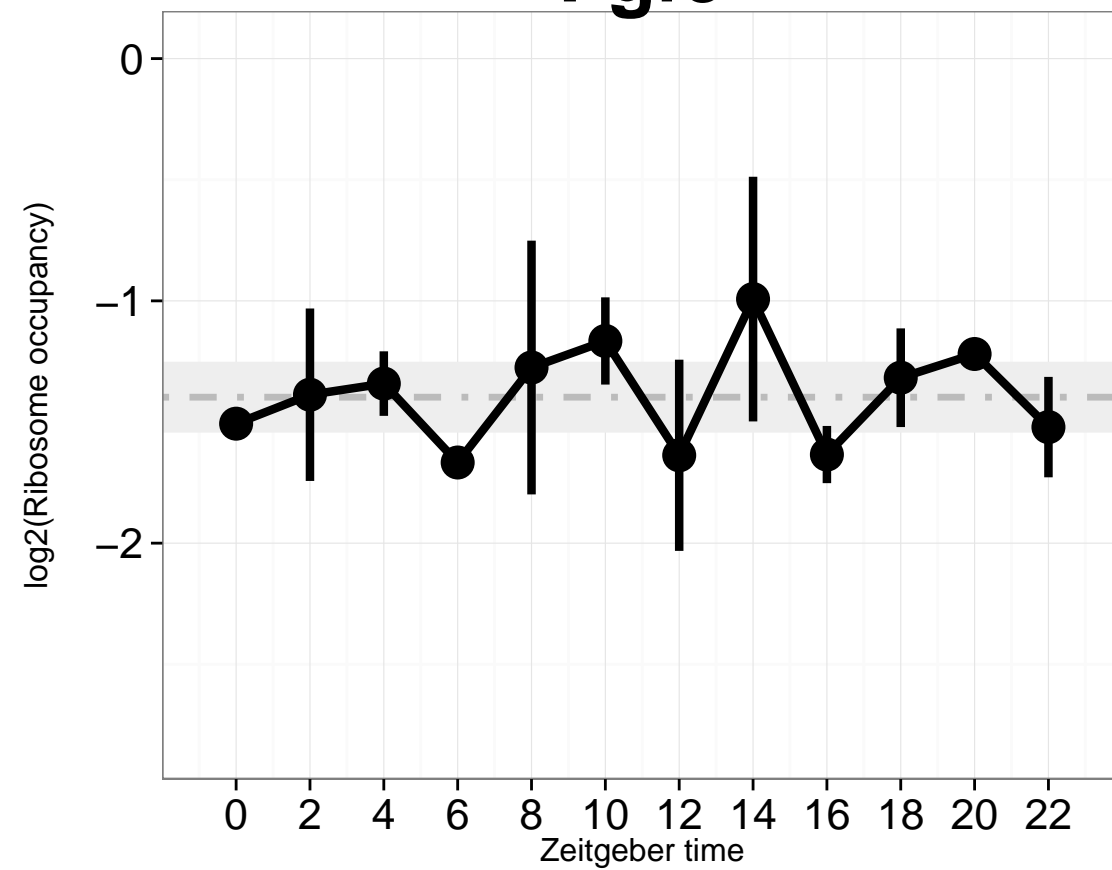

Supplement: Supplementary file 930 [file 1]

# Tmem2

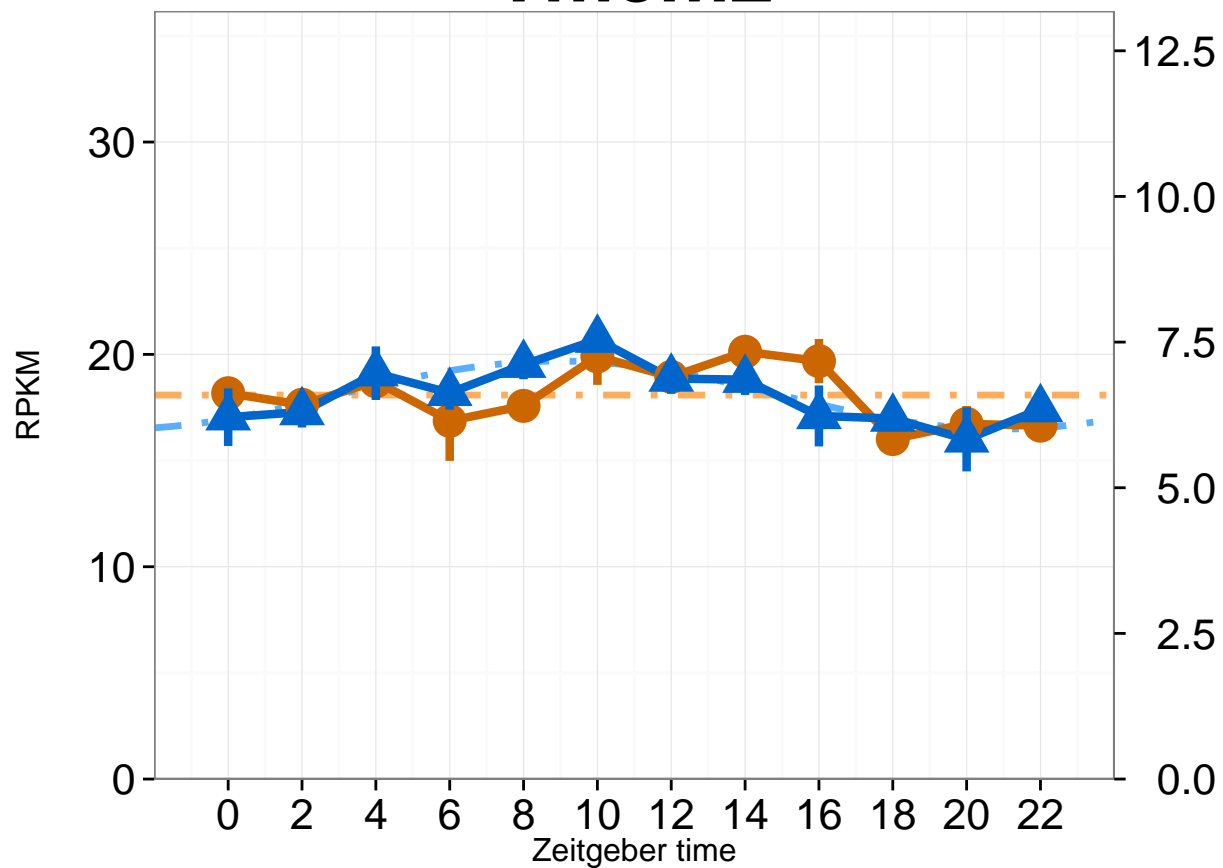

# Tmem2

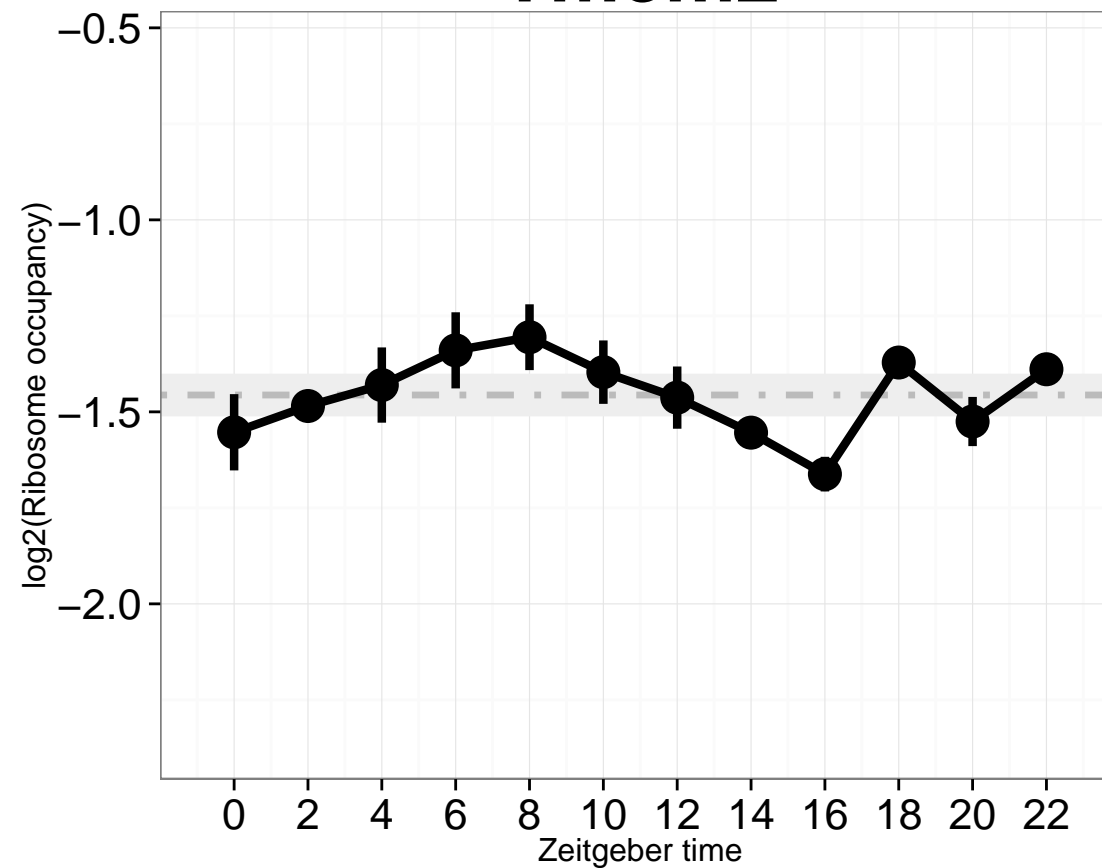

Supplement: Supplementary file 931 [file 1]

## Pdlim2

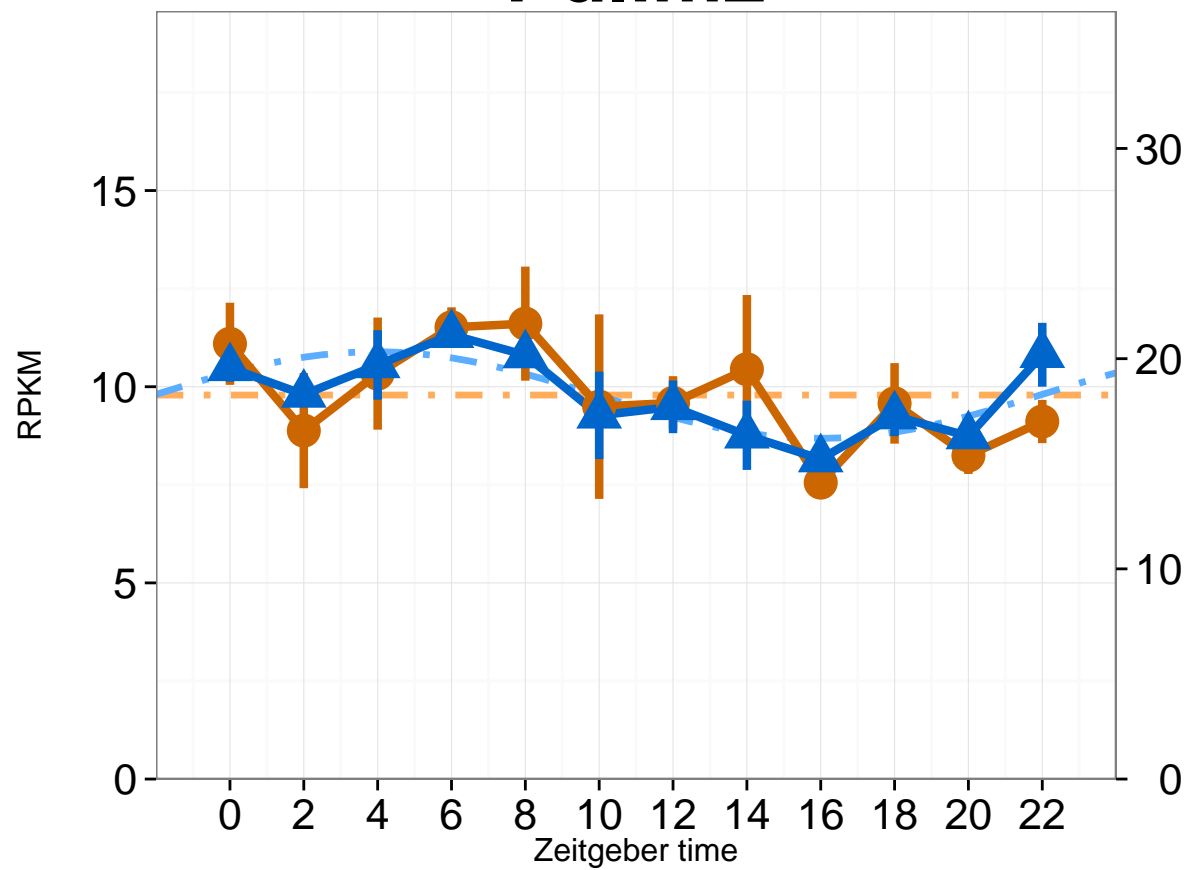

## Pdlim2

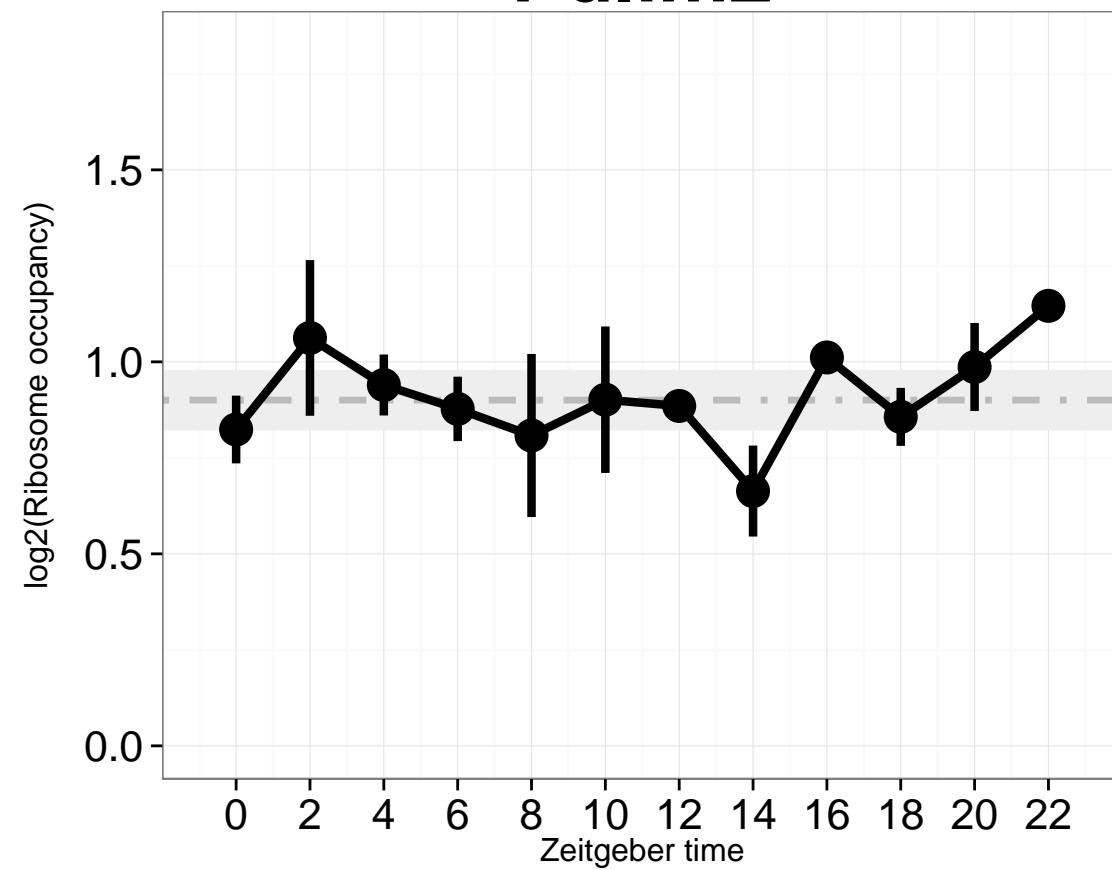

Supplement: Supplementary file 932 [file 1]

## Prosc

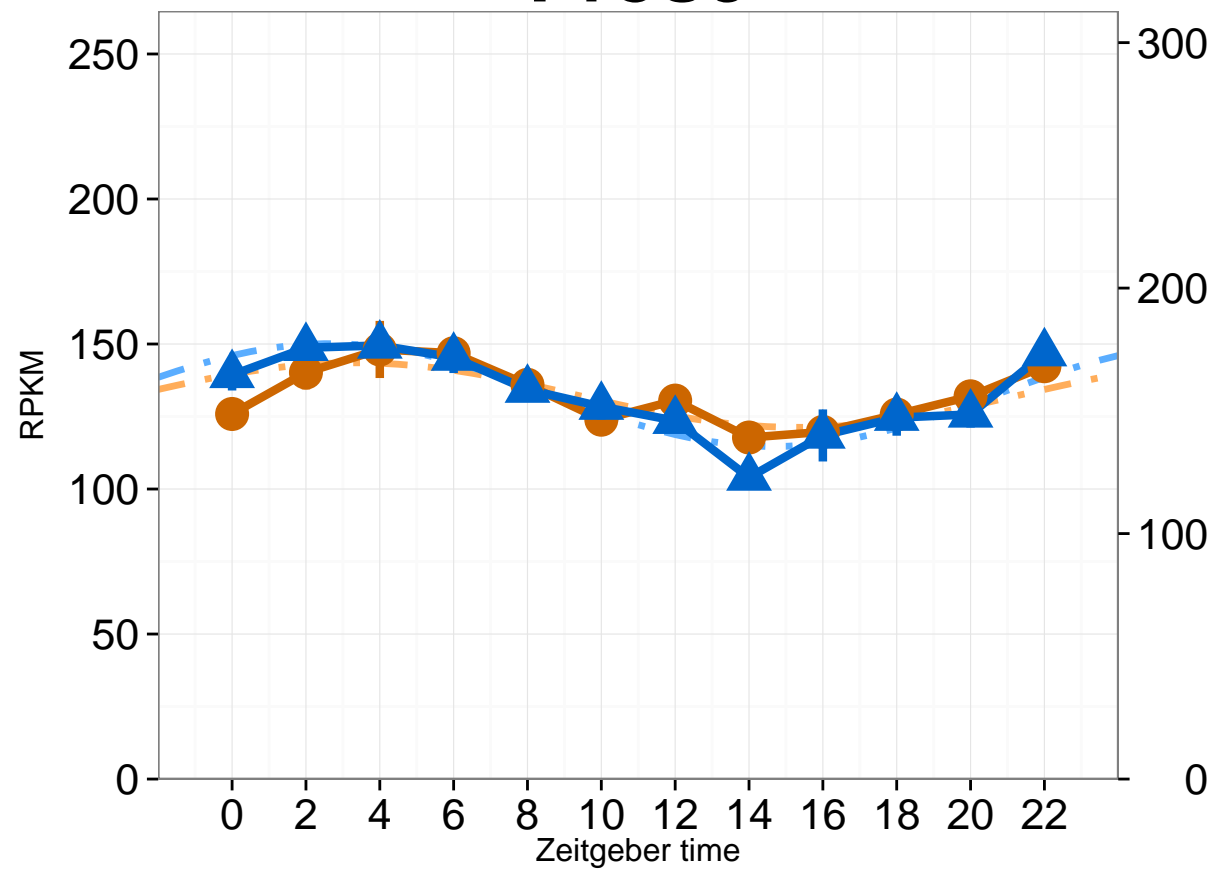

## Prosc

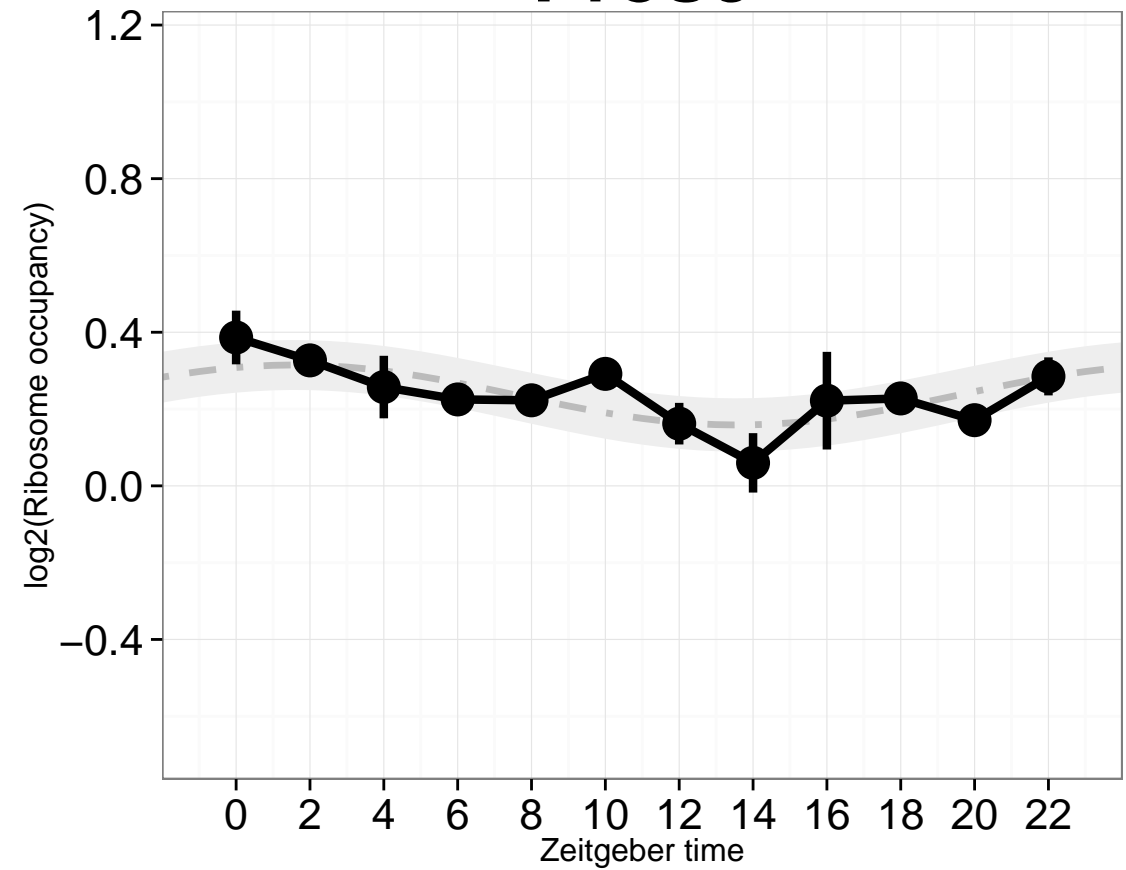

Supplement: Supplementary file 933 [file 1]

# Mrm1

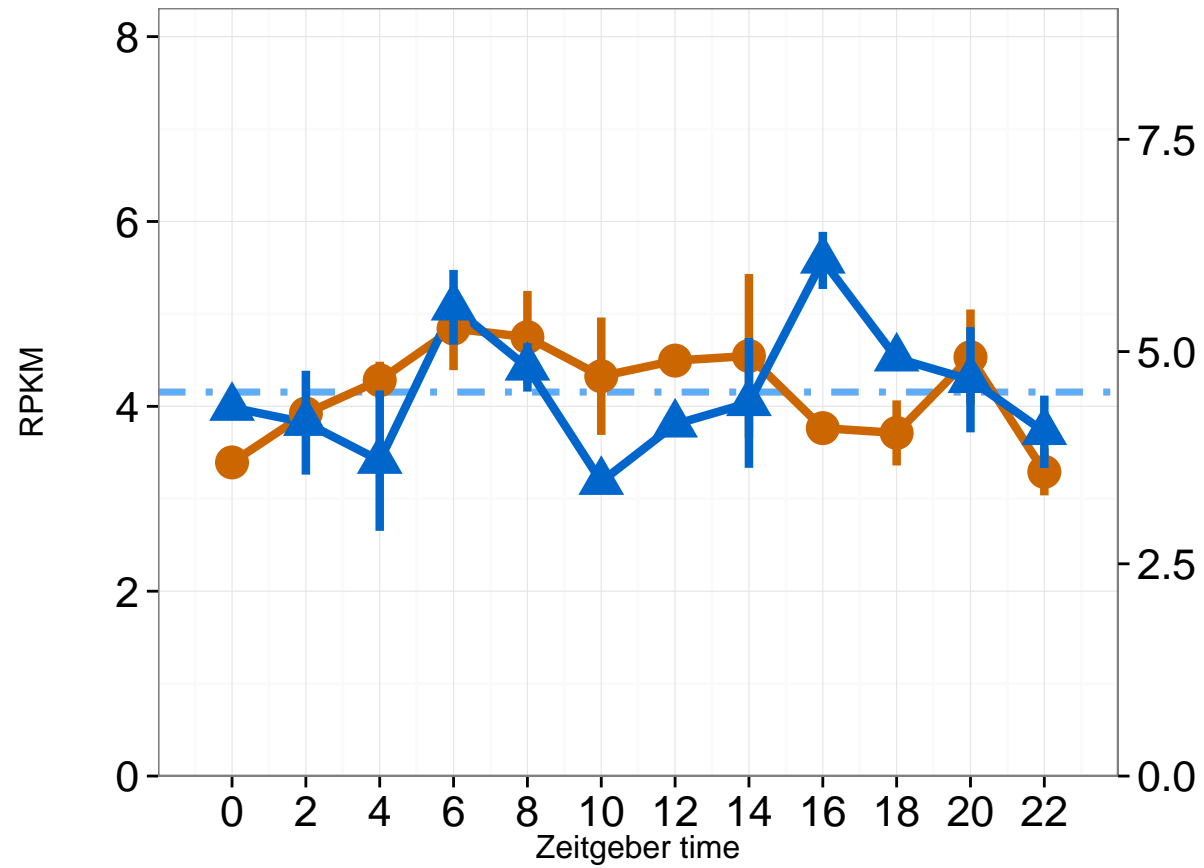

# Mrm1

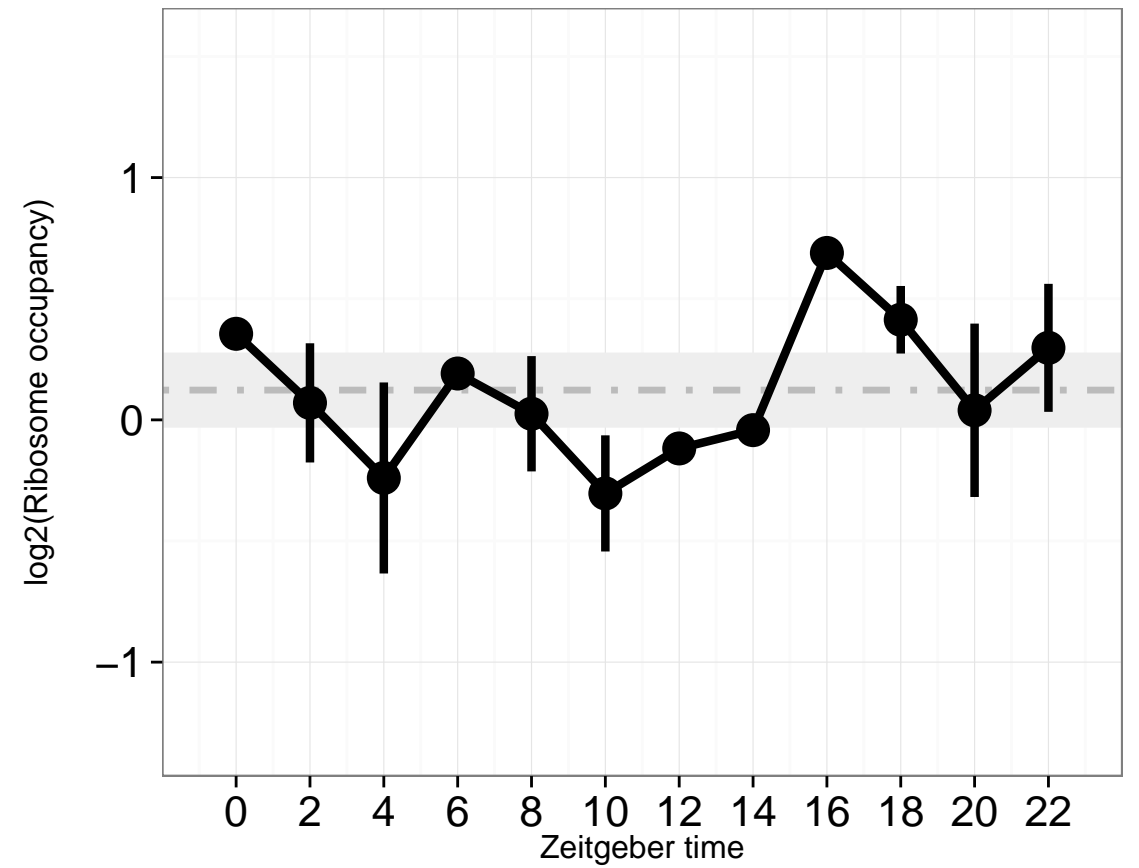

Supplement: Supplementary file 934 [file 1]

# Acin1

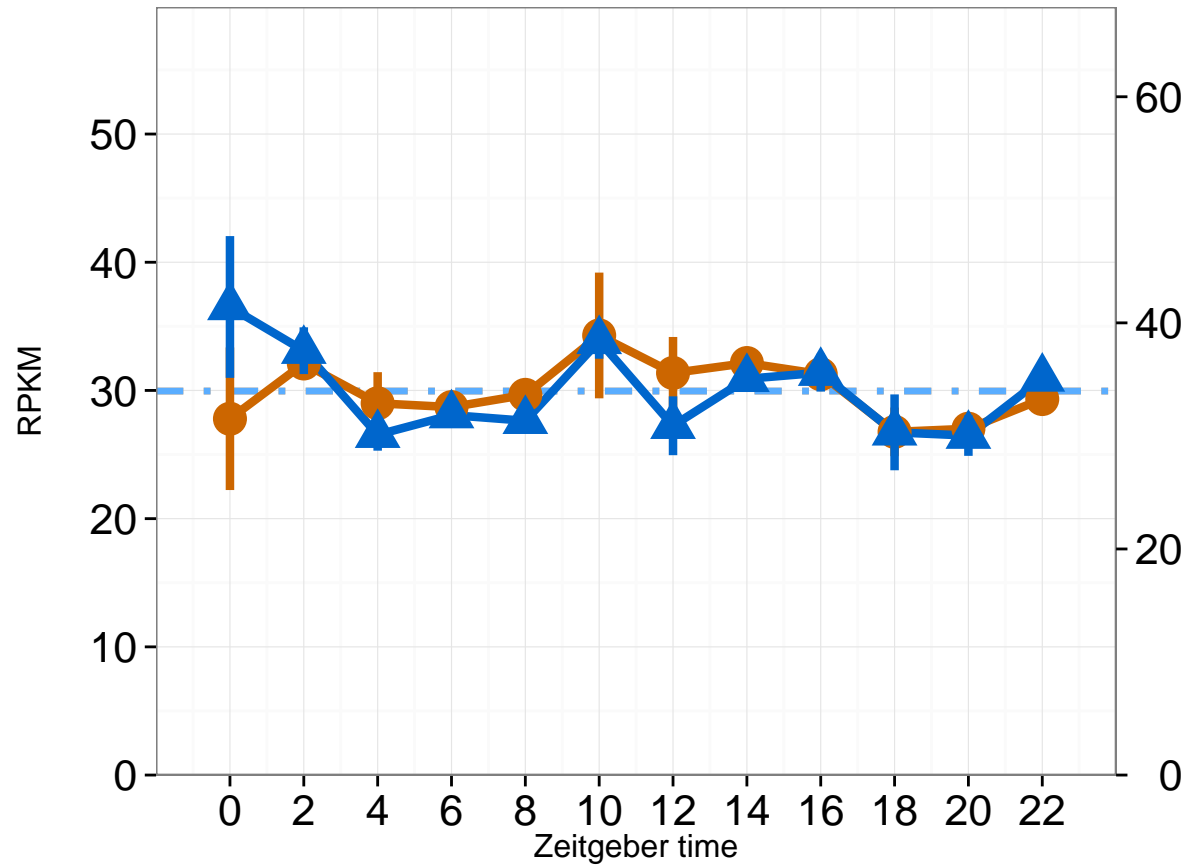

# Acin1

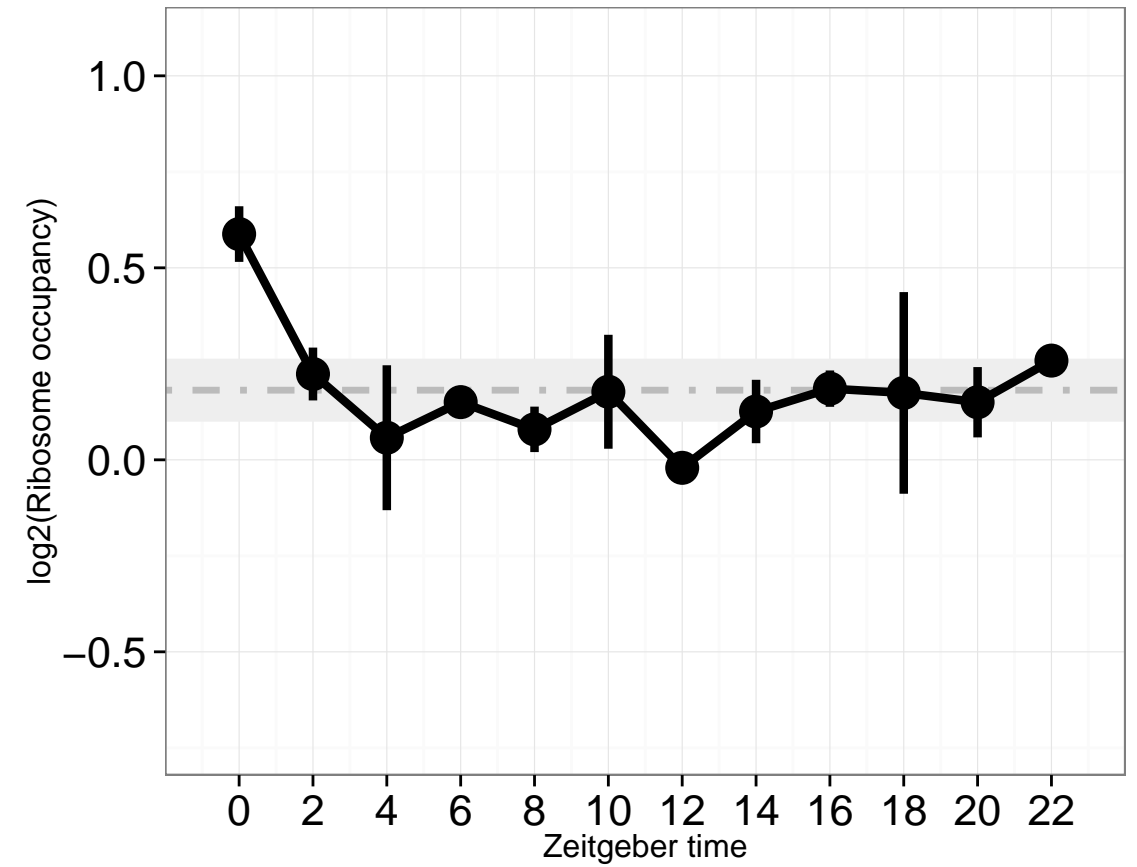

Supplement: Supplementary file 935 [file 1]

**Mnda TR**

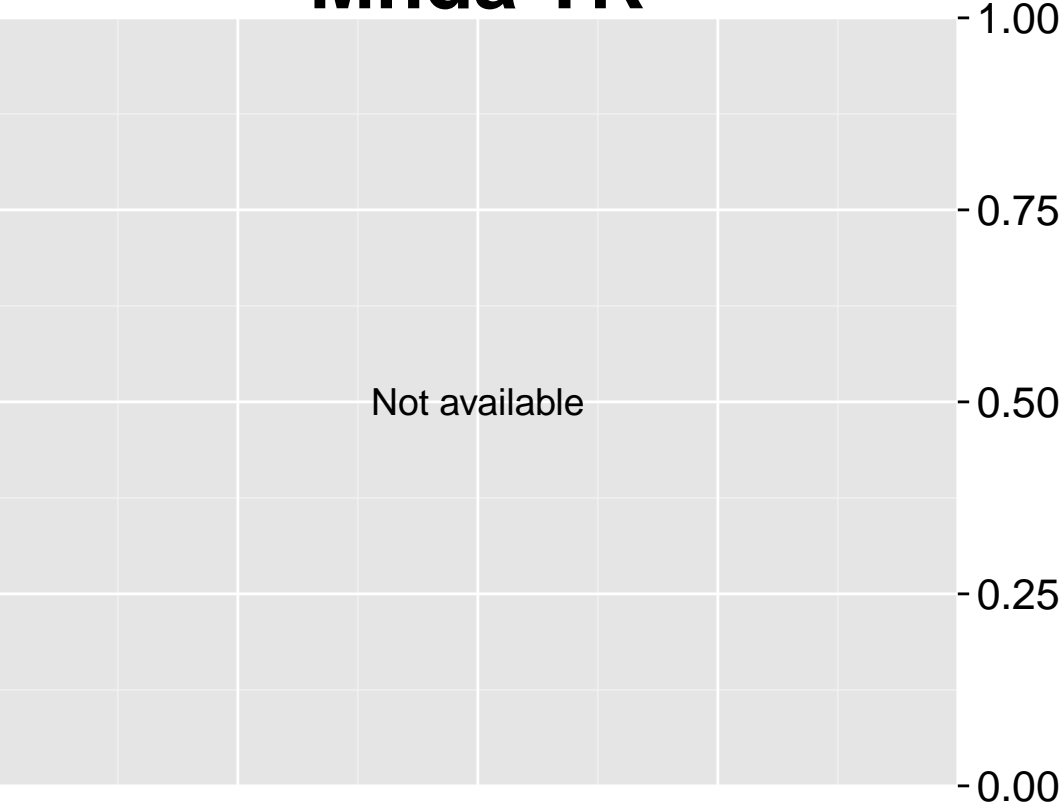

**Mnda log2(Ribosome occupancy)**

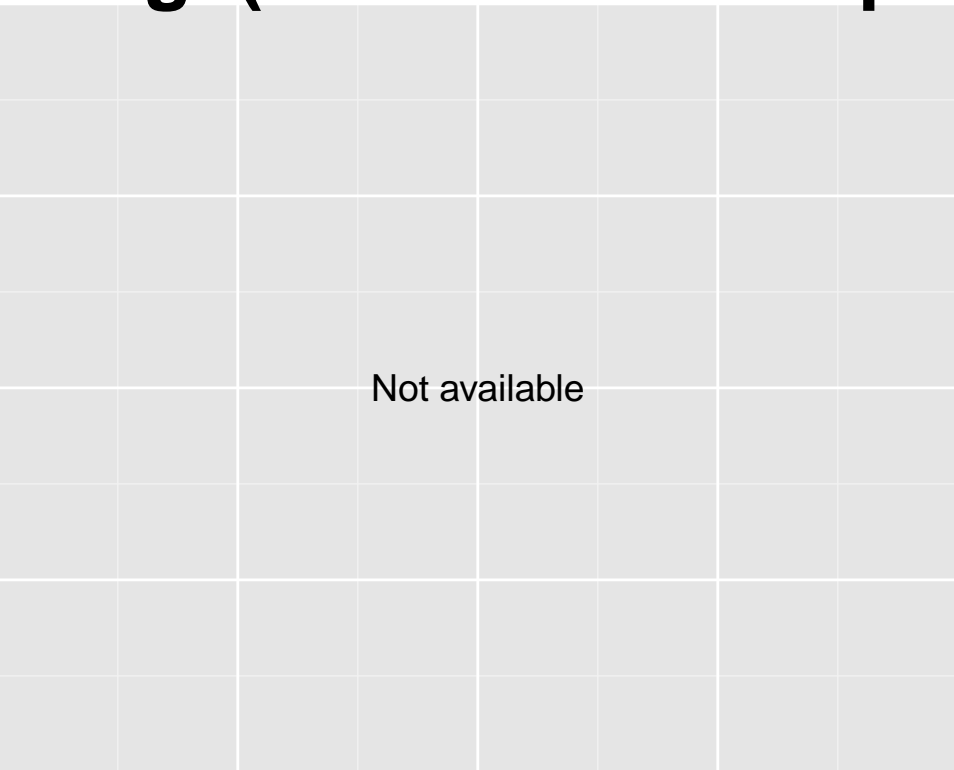

Supplement: Supplementary file 936 [file 1]

# Gnb5

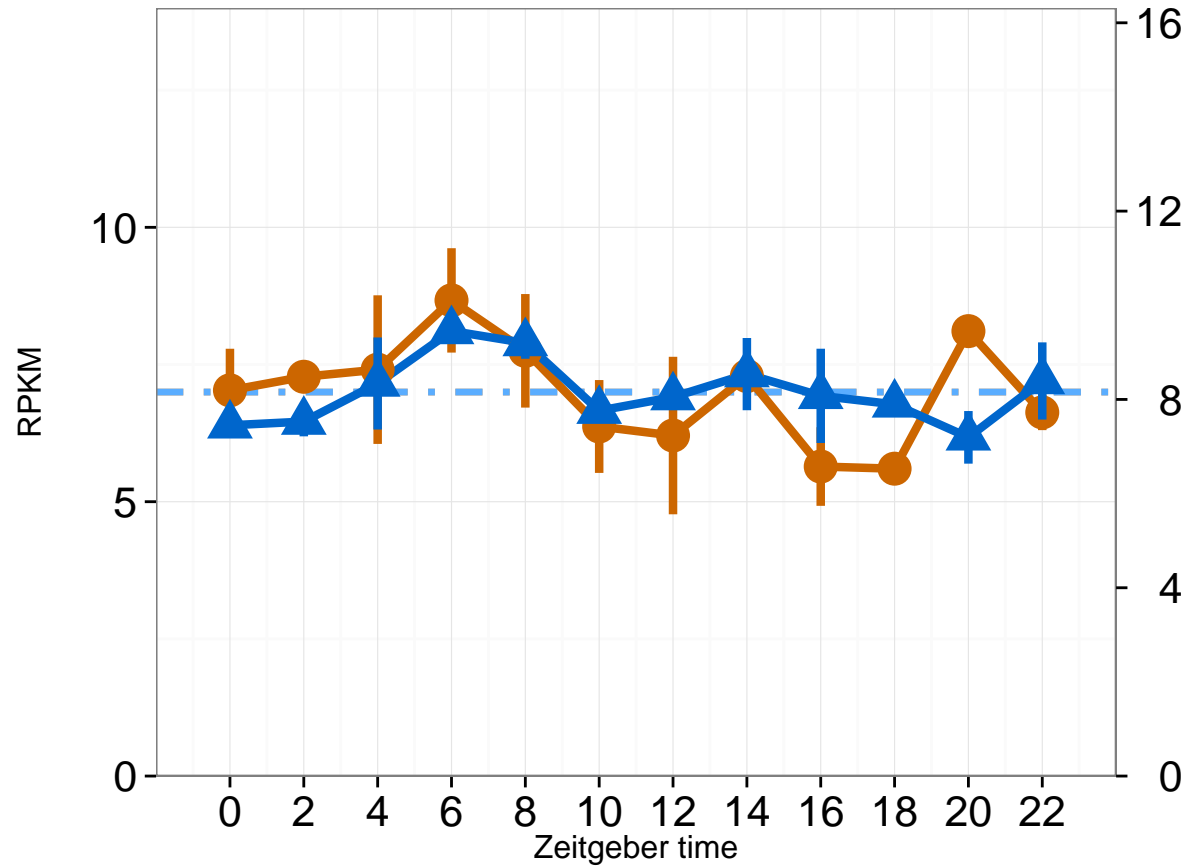

# Gnb5

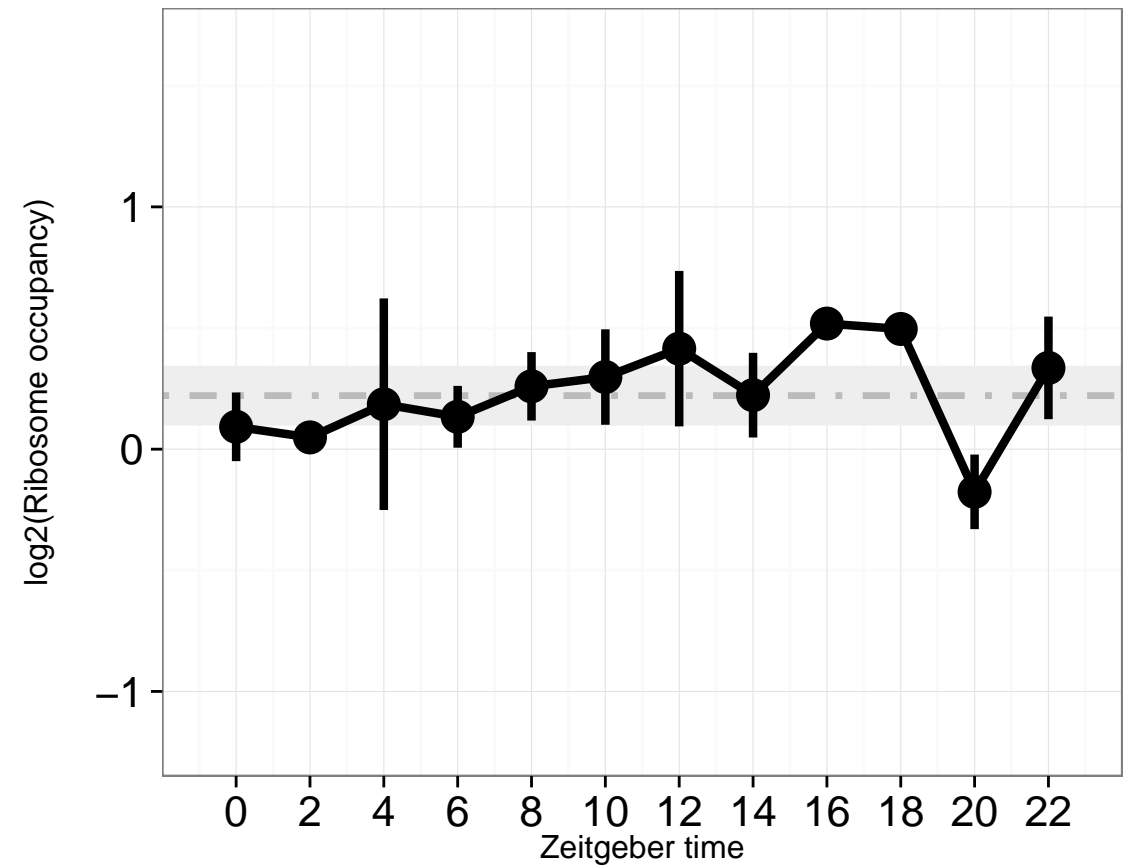

Supplement: Supplementary file 937 [file 1]

# Lztr1

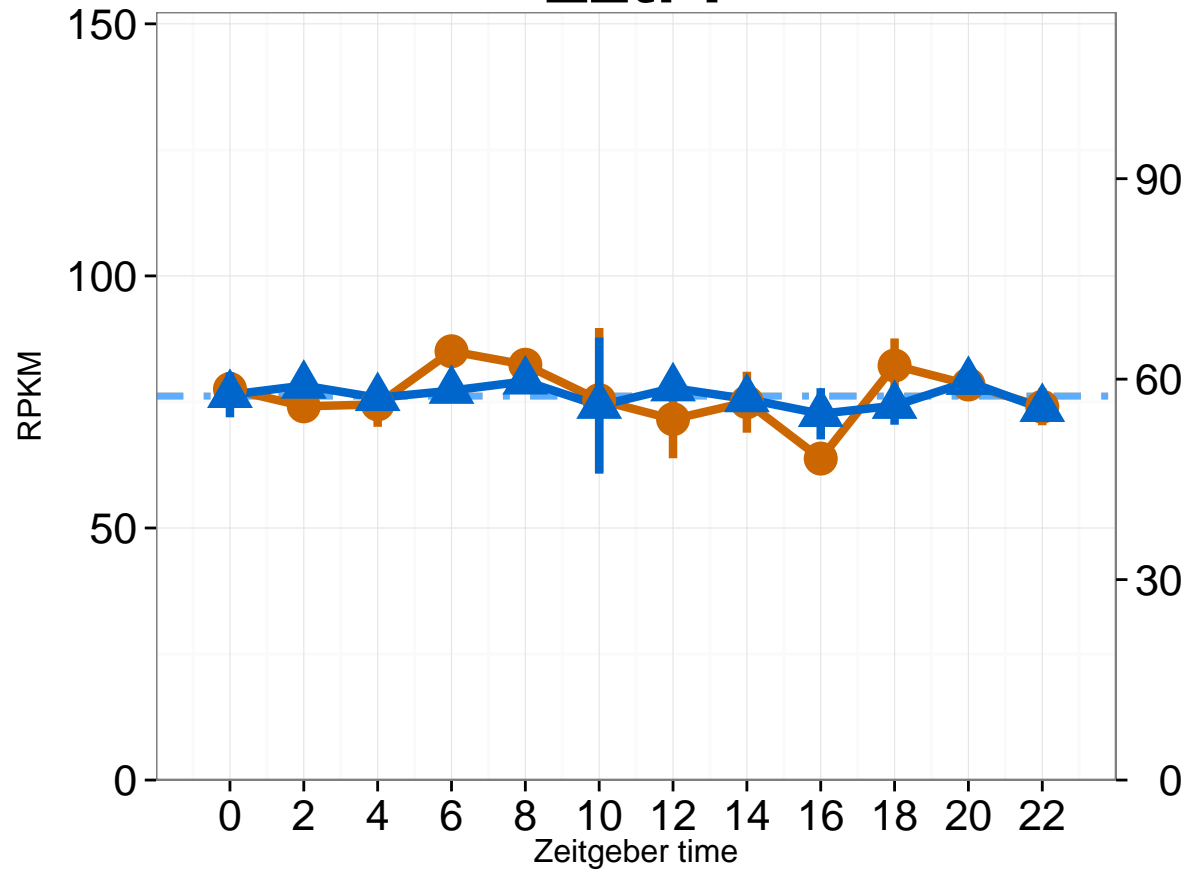

# Lztr1

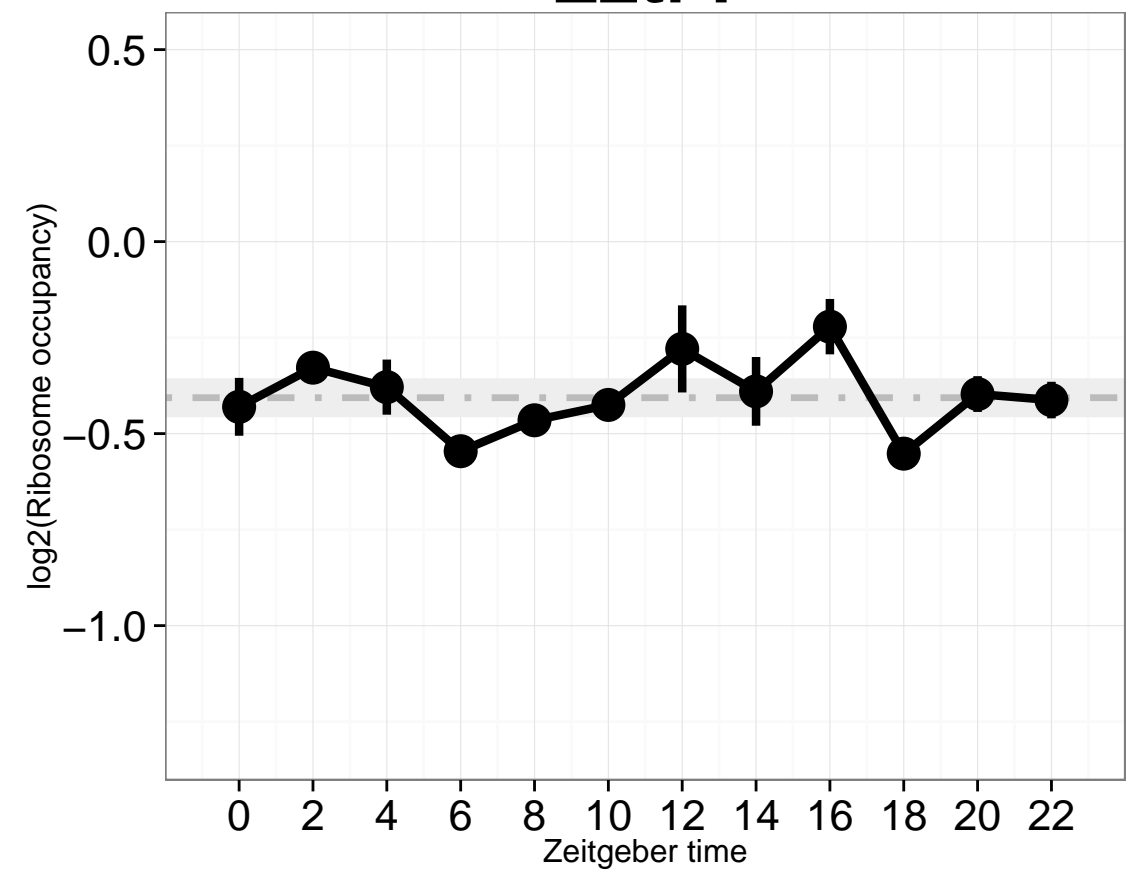

Supplement: Supplementary file 938 [file 1]

## Nfe2l3

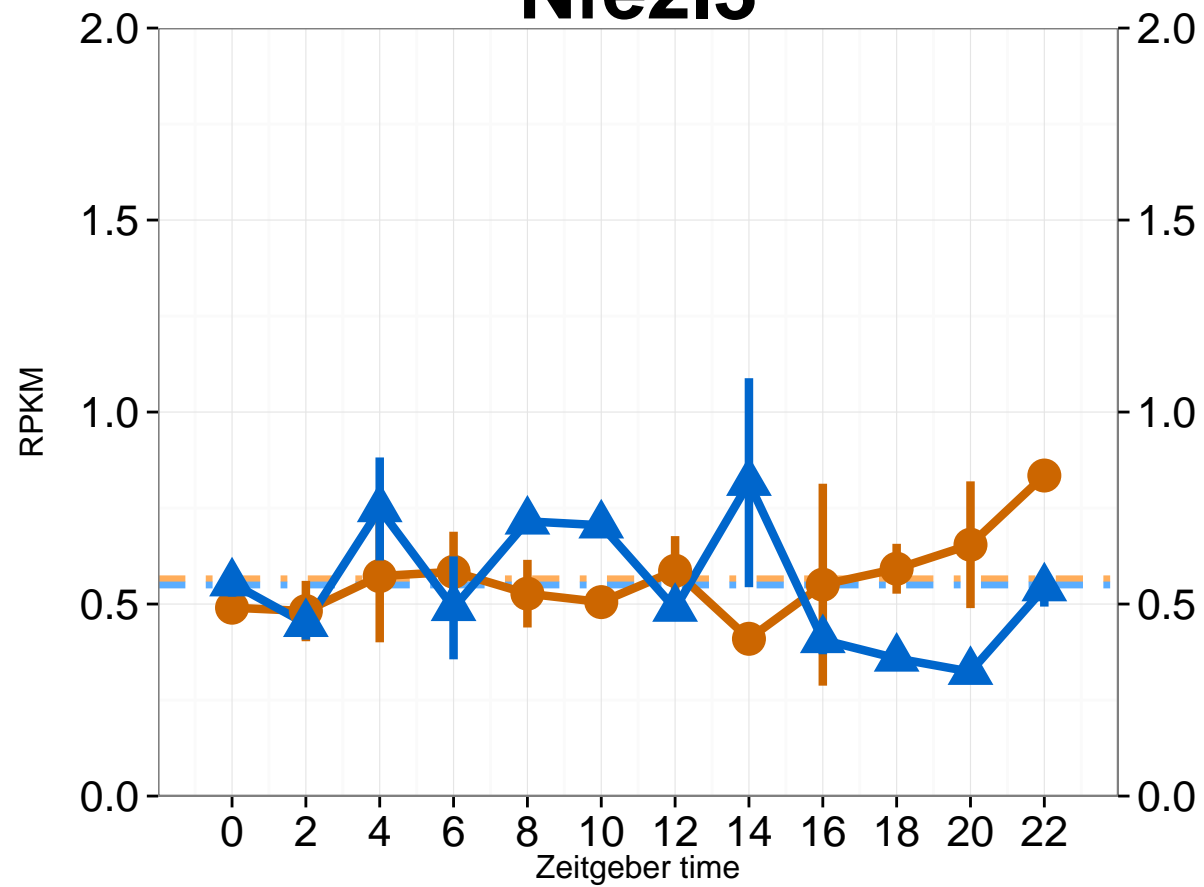

## Nfe2l3

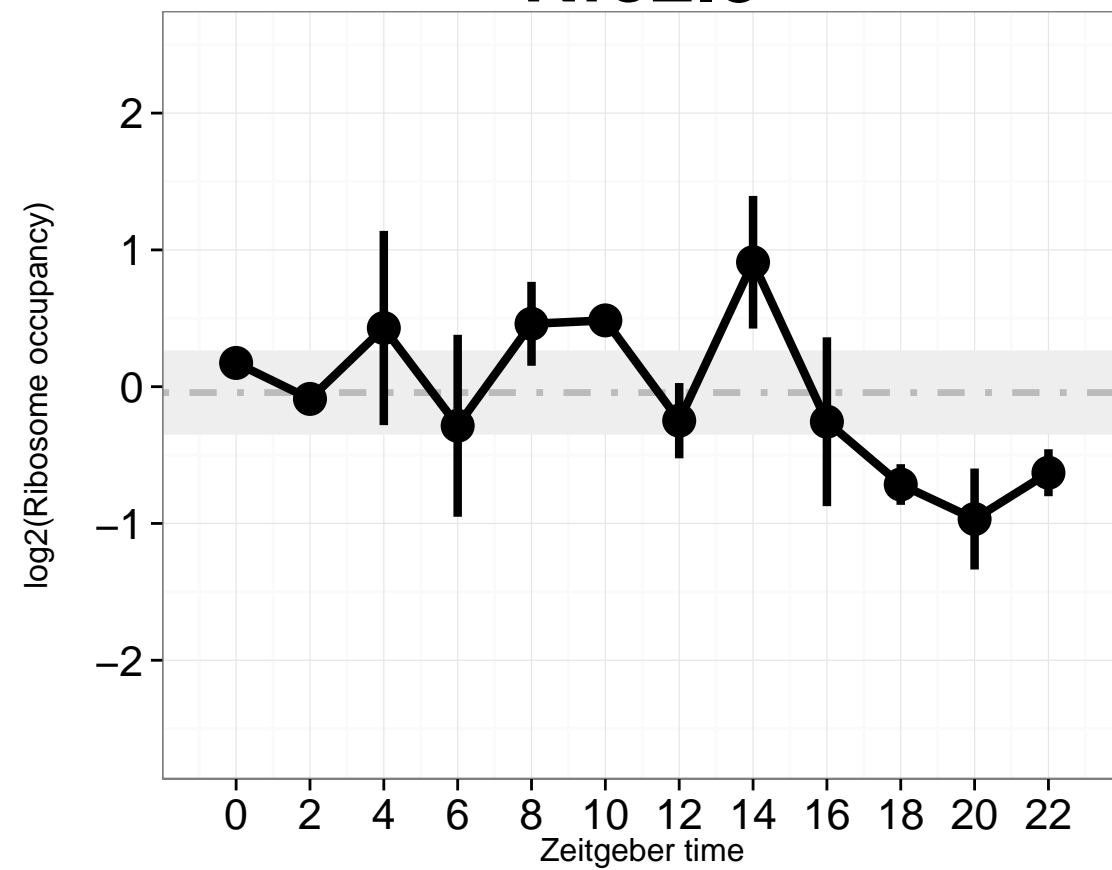

Supplement: Supplementary file 939 [file 1]

# Prkar2a

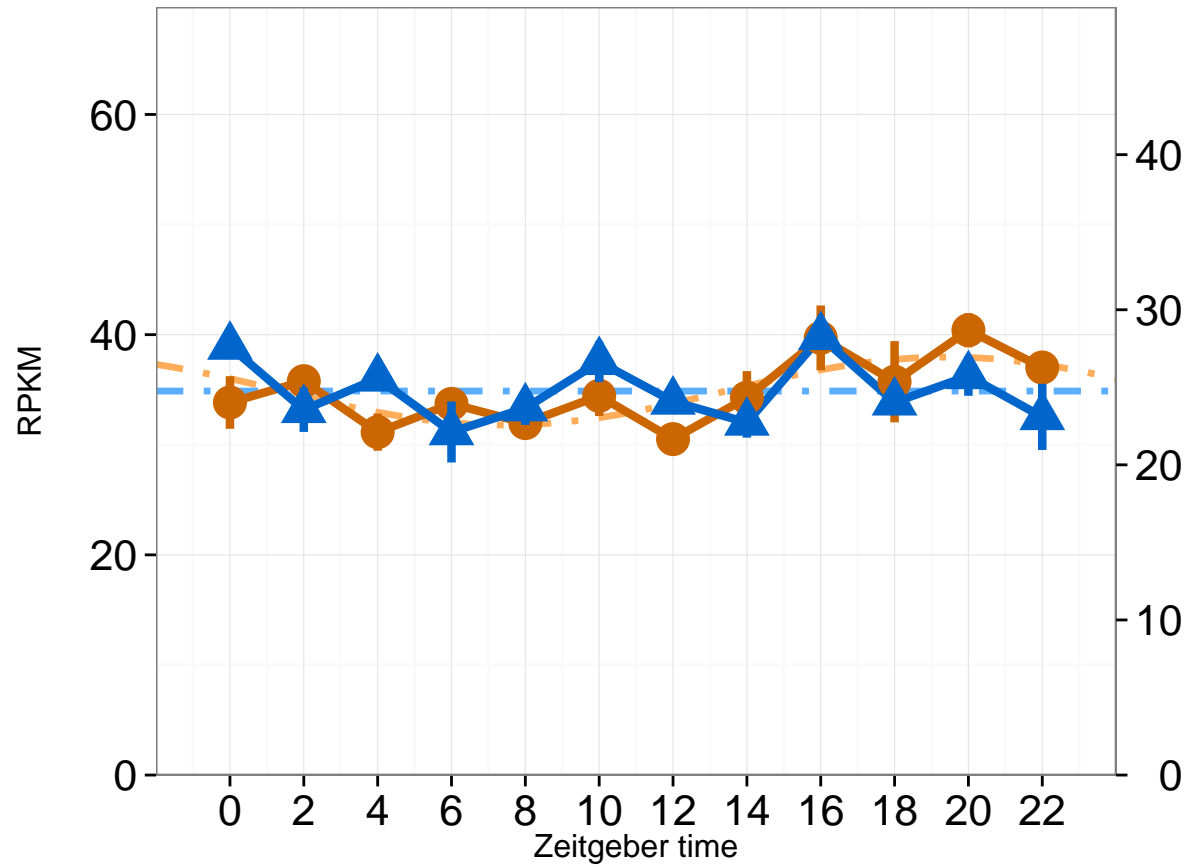

# Prkar2a

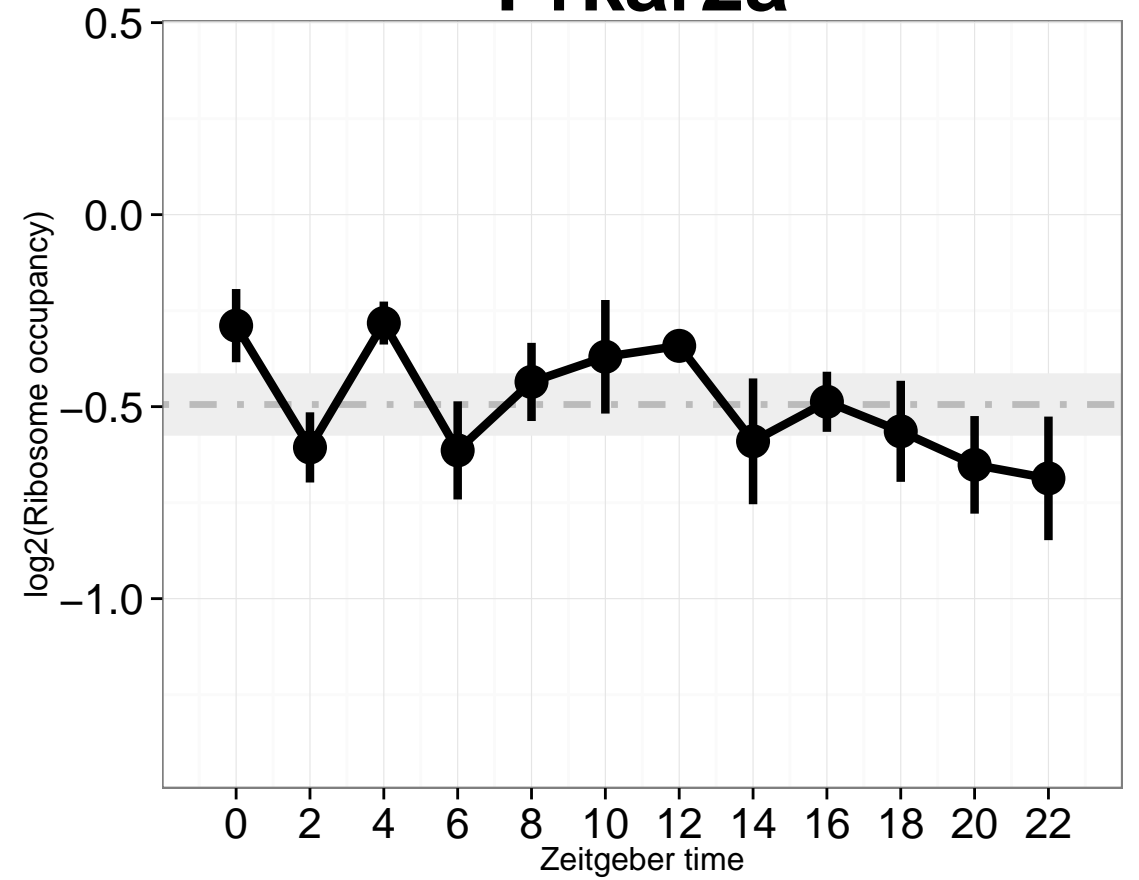

Supplement: Supplementary file 940 [file 1]

# Spint1

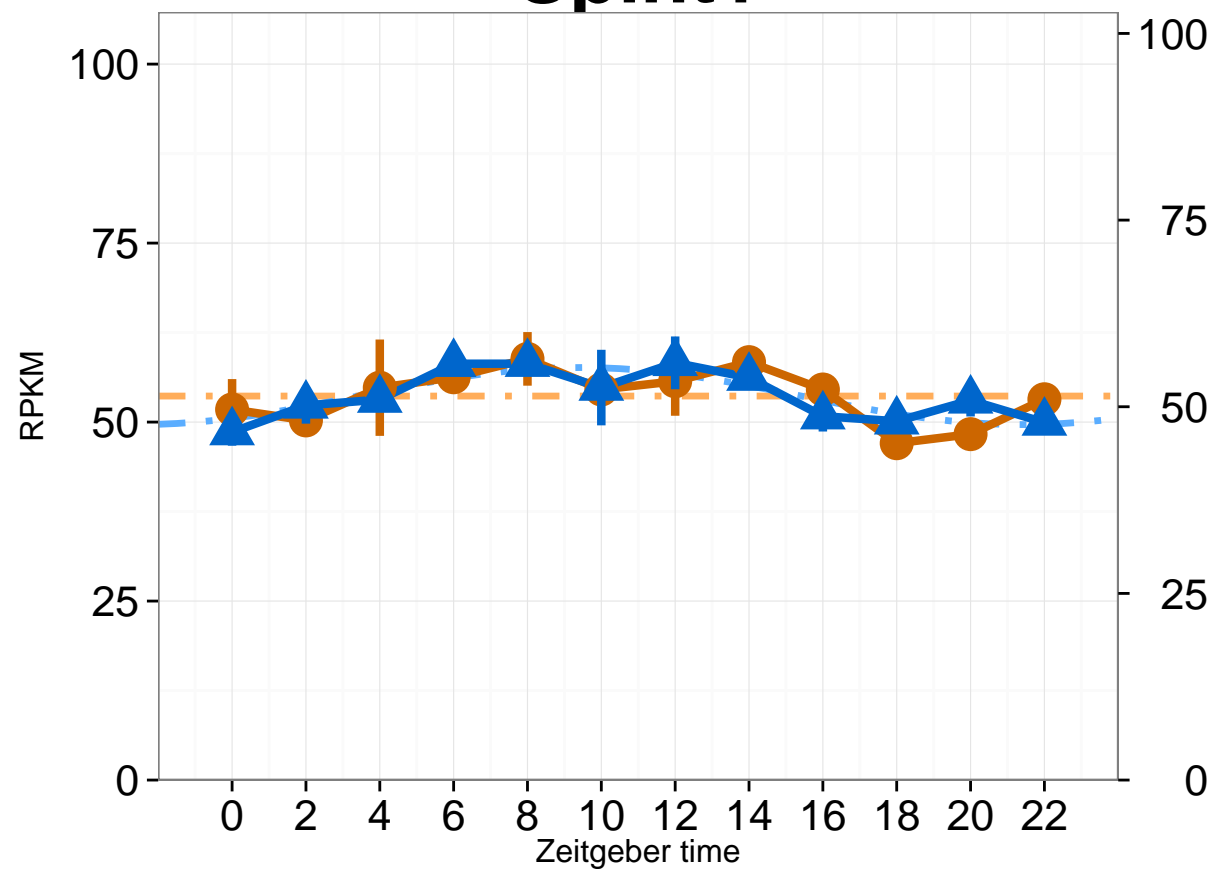

# Spint1

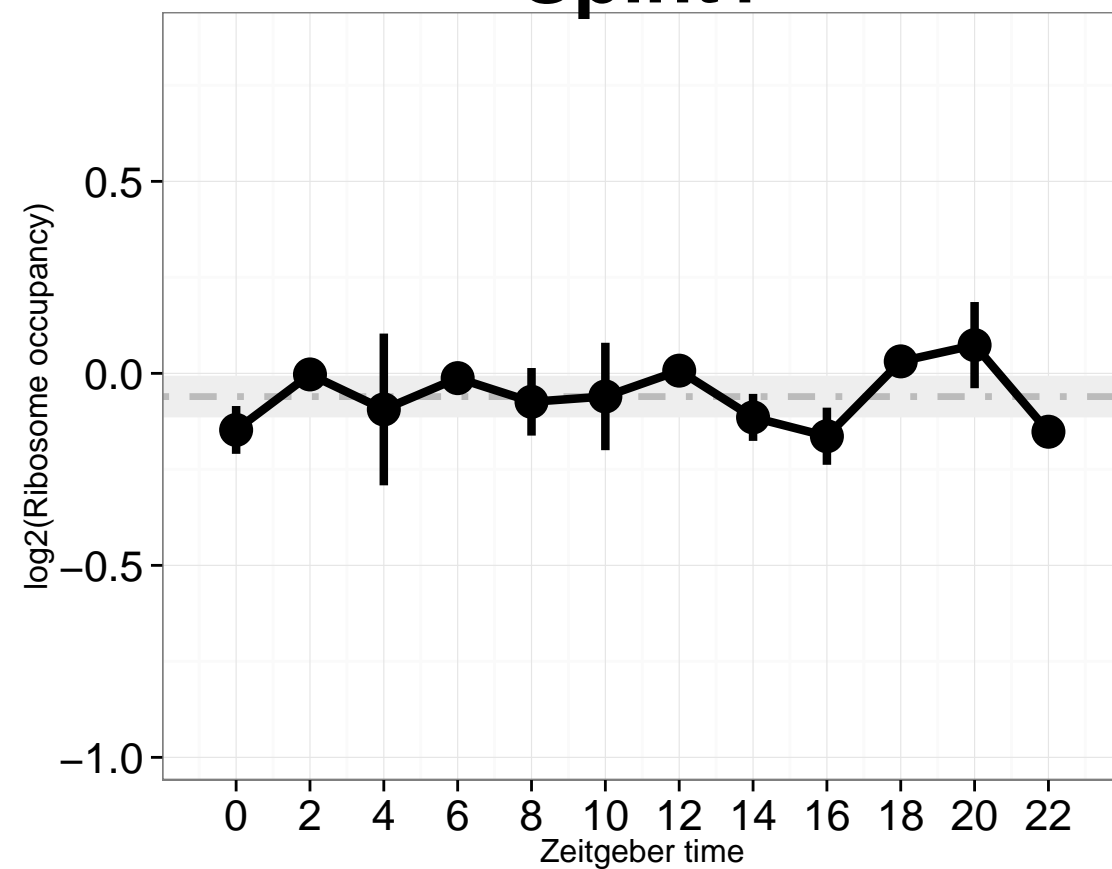

Supplement: Supplementary file 941 [file 1]

# Gabarapl1

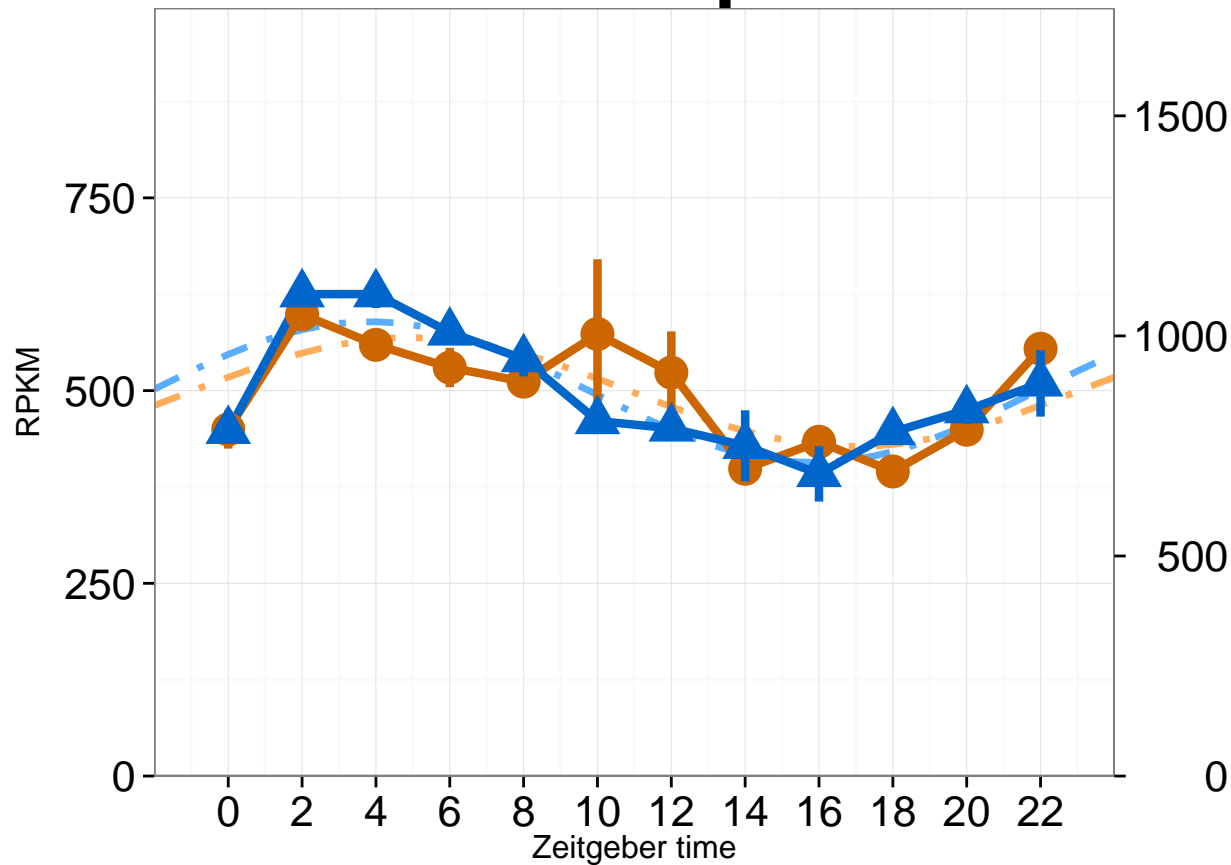

# Gabarapl1

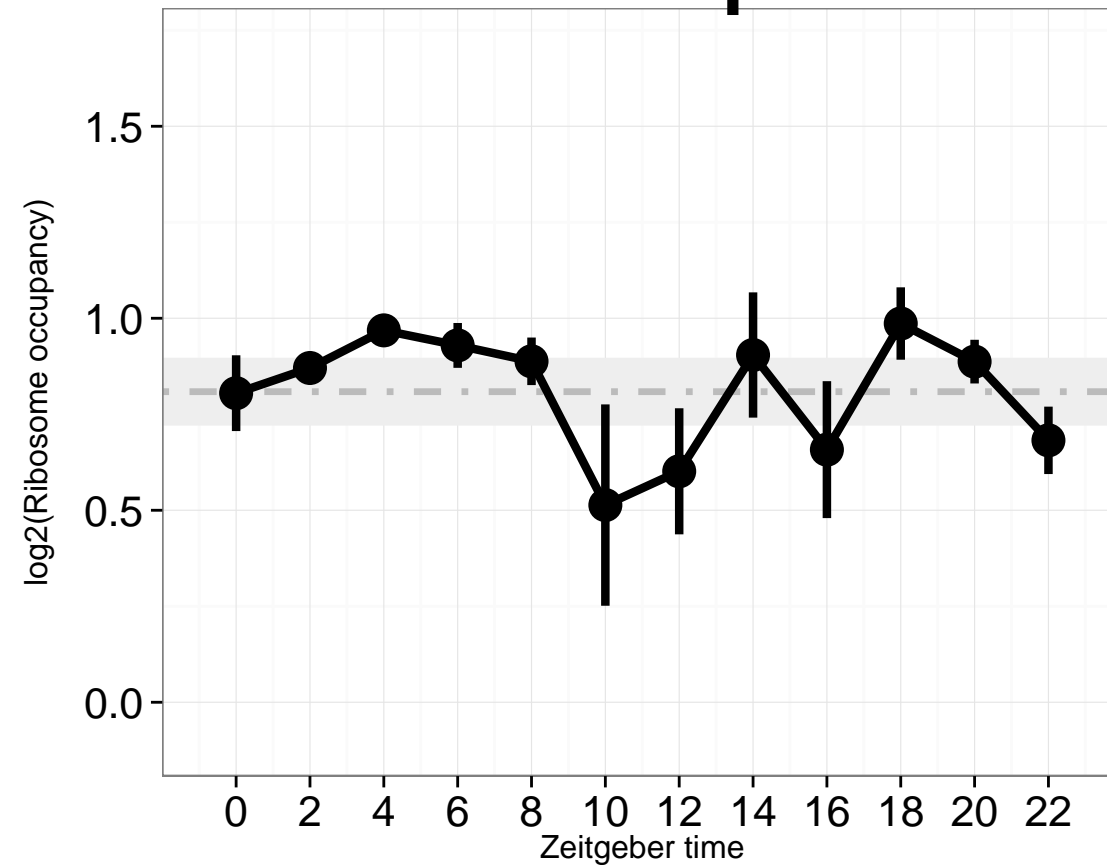

Supplement: Supplementary file 942 [file 1]

# Itprip

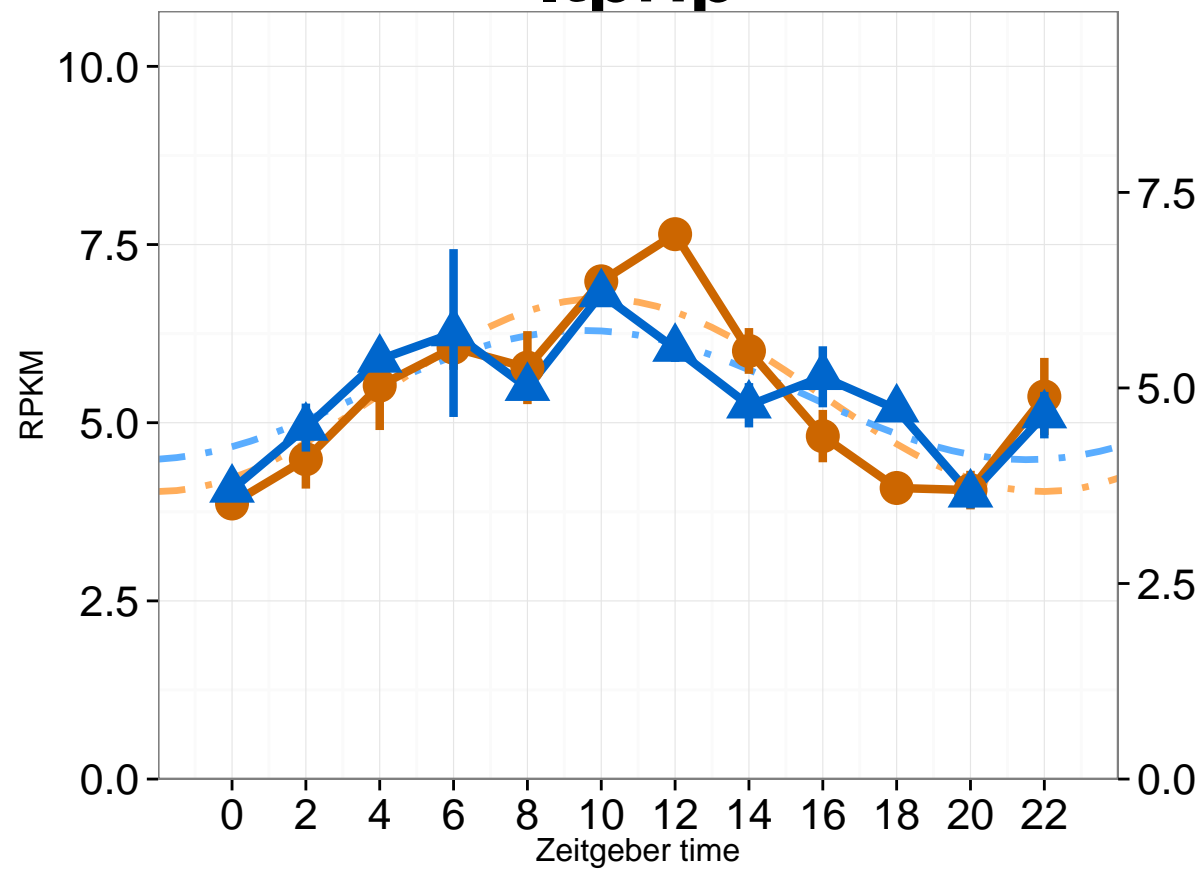

# Itprip

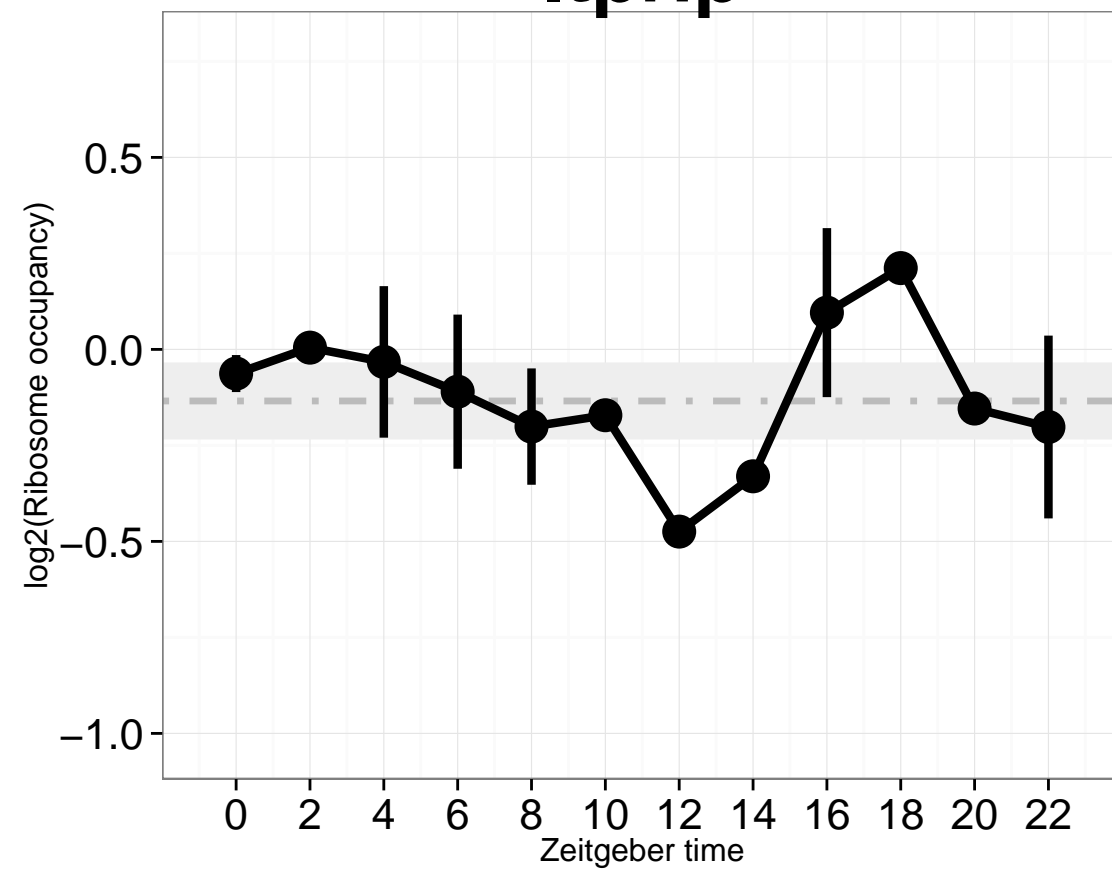

Supplement: Supplementary file 943 [file 1]

# Pip4k2b

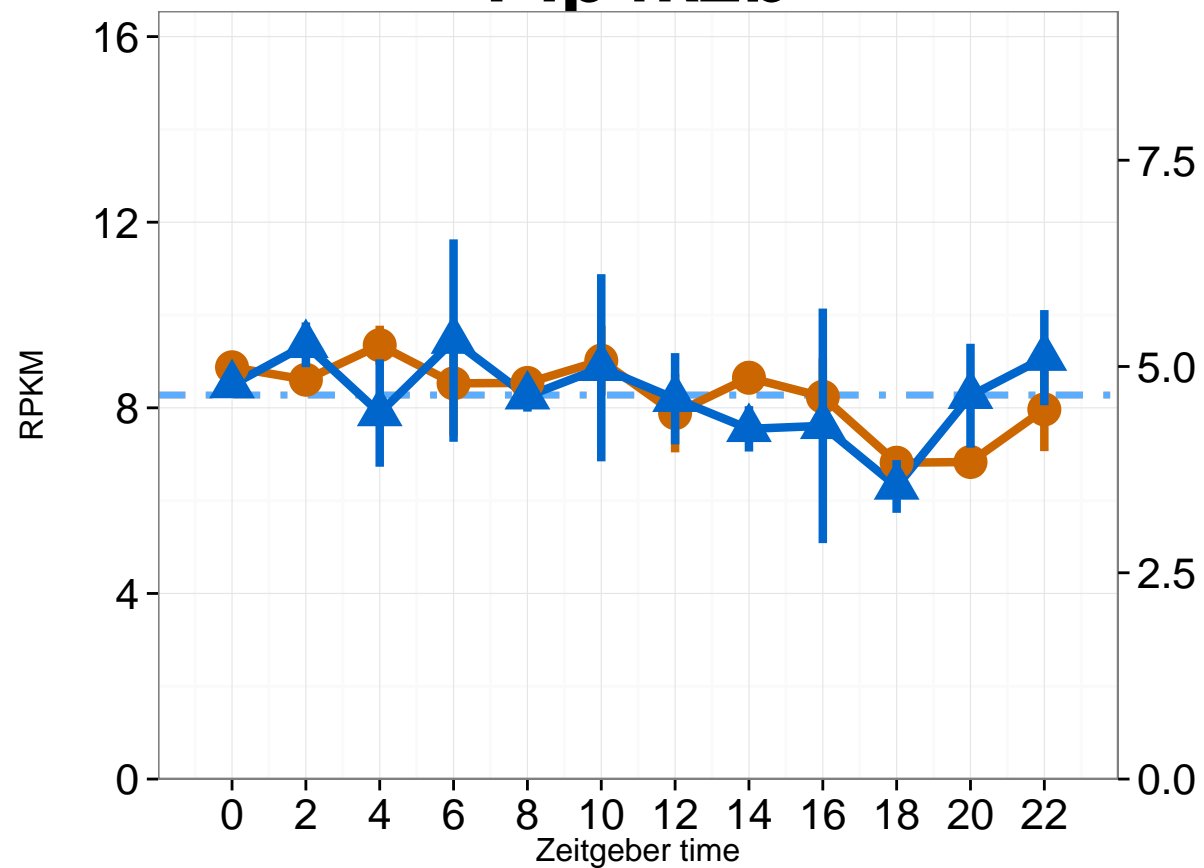

# Pip4k2b

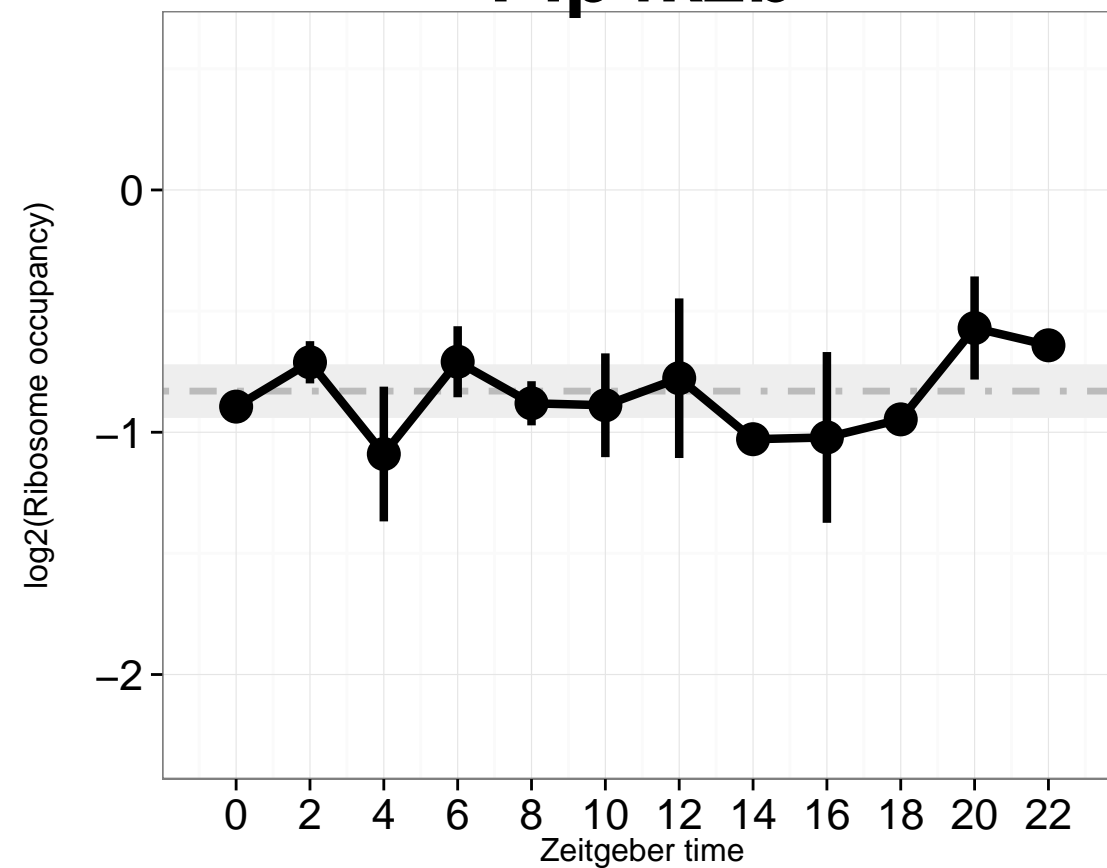

Supplement: Supplementary file 944 [file 1]

## Cym

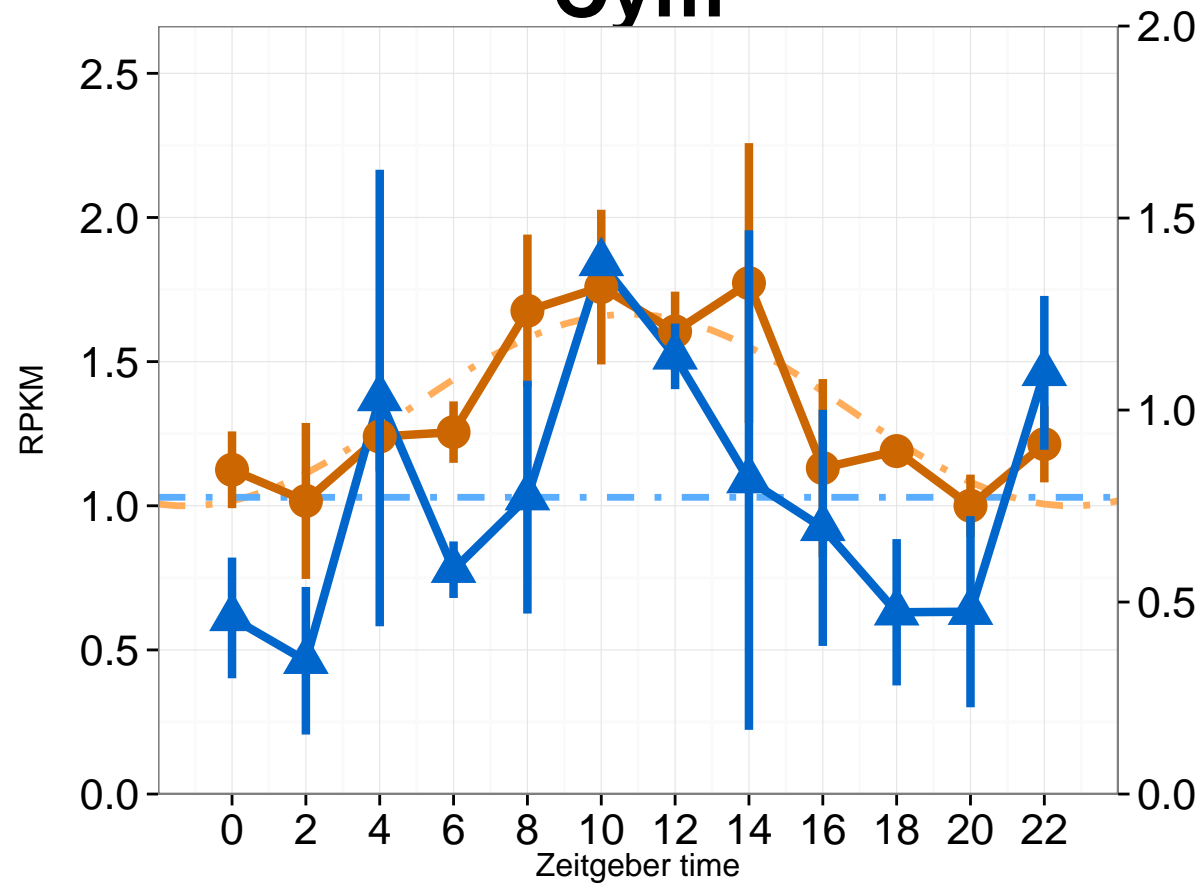

## Cym

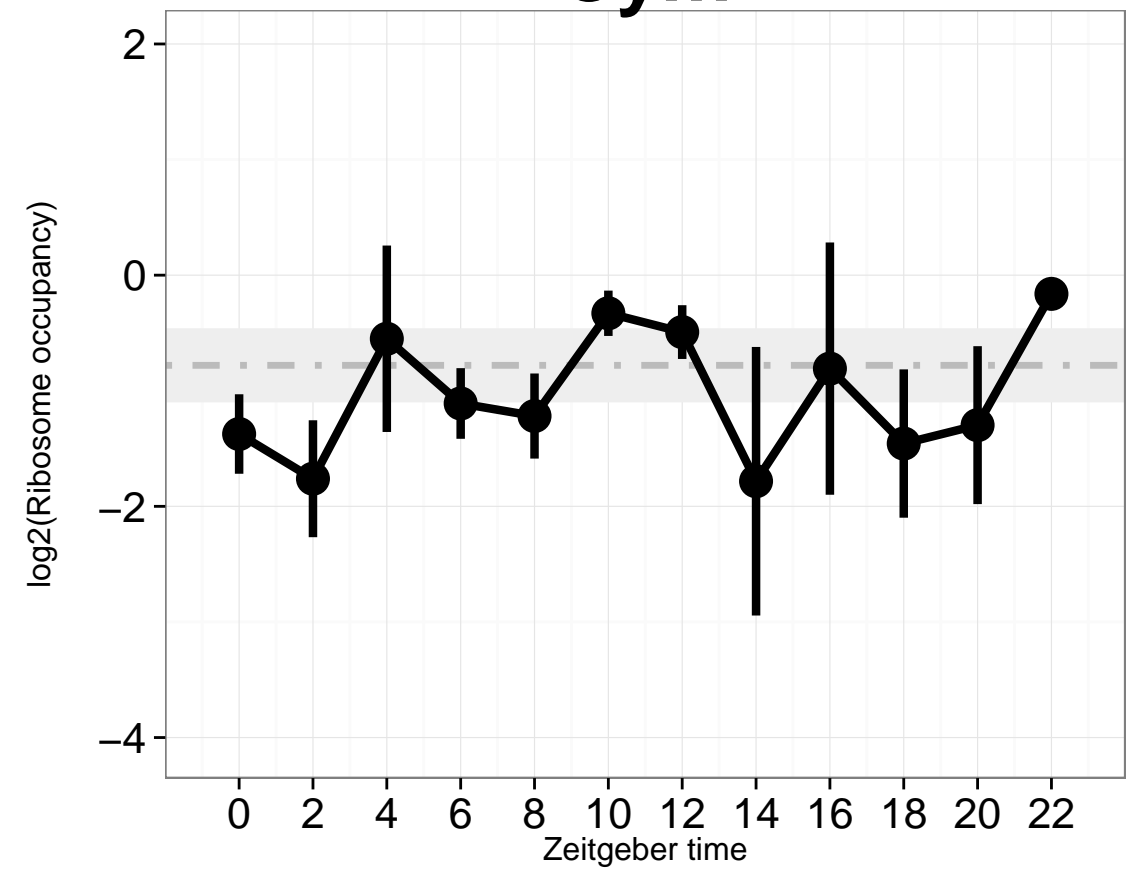

Supplement: Supplementary file 945 [file 1]

## Srms

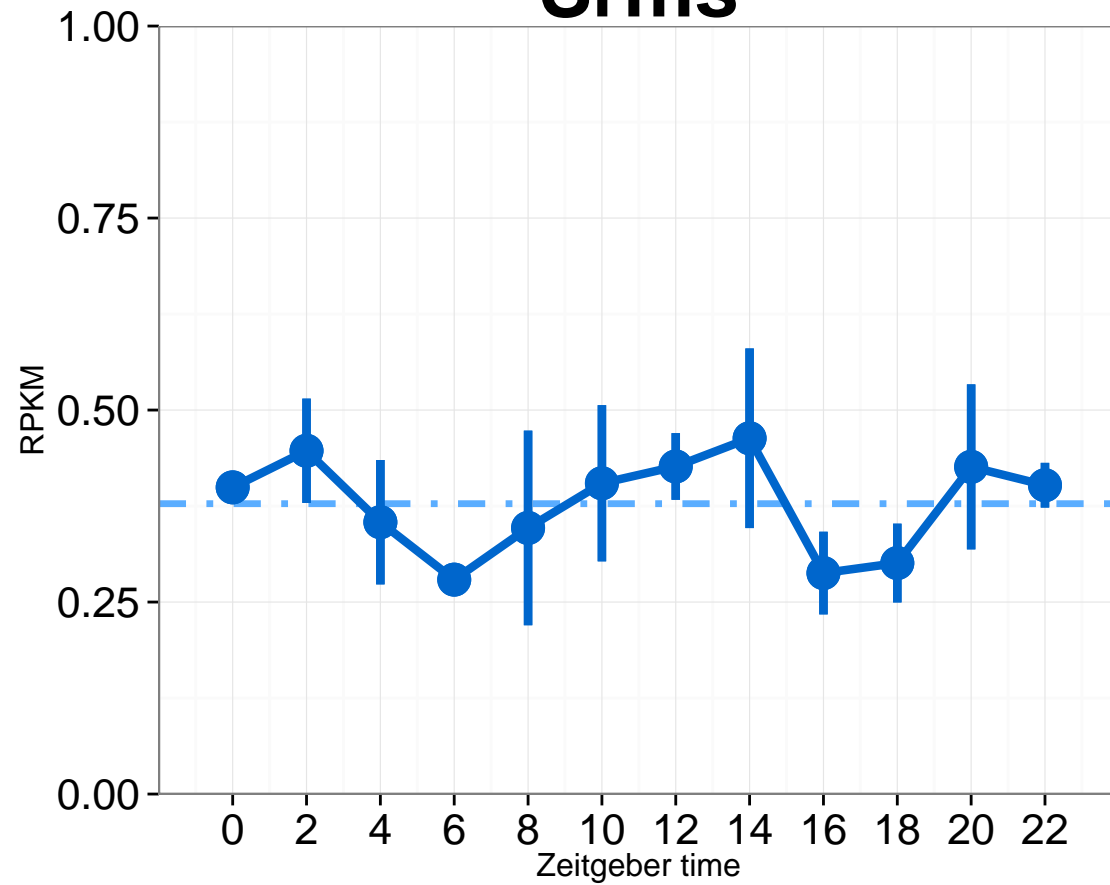

## Srms log2(Ribosome occupancy)

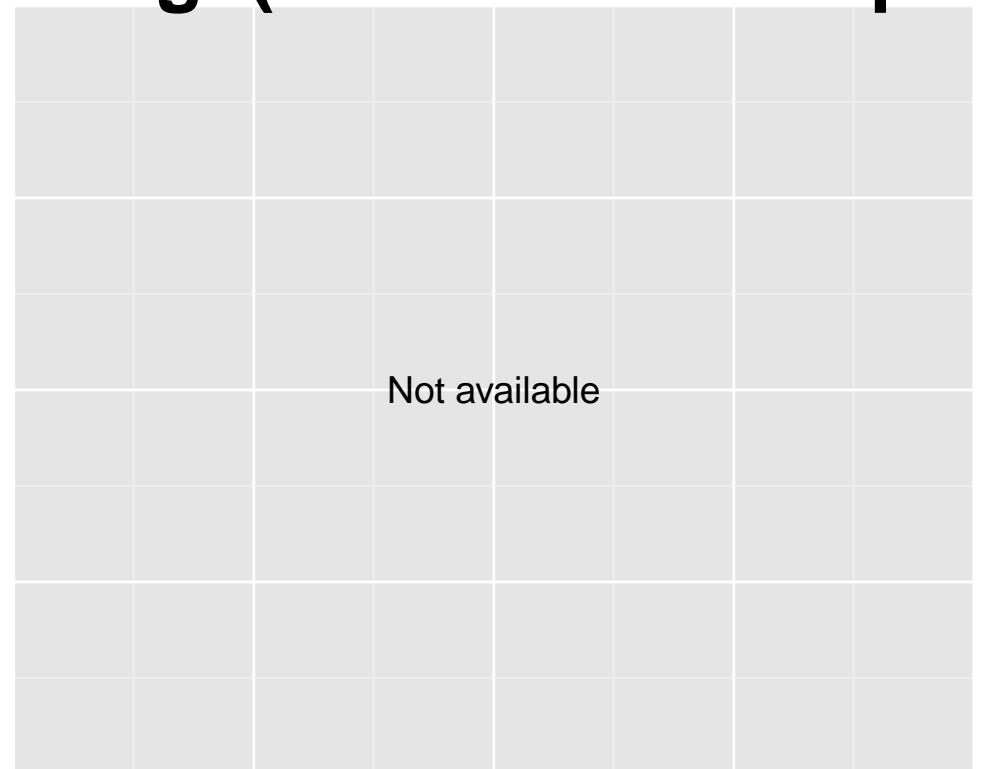

Supplement: Supplementary file 946 [file 1]

## Gadd45a

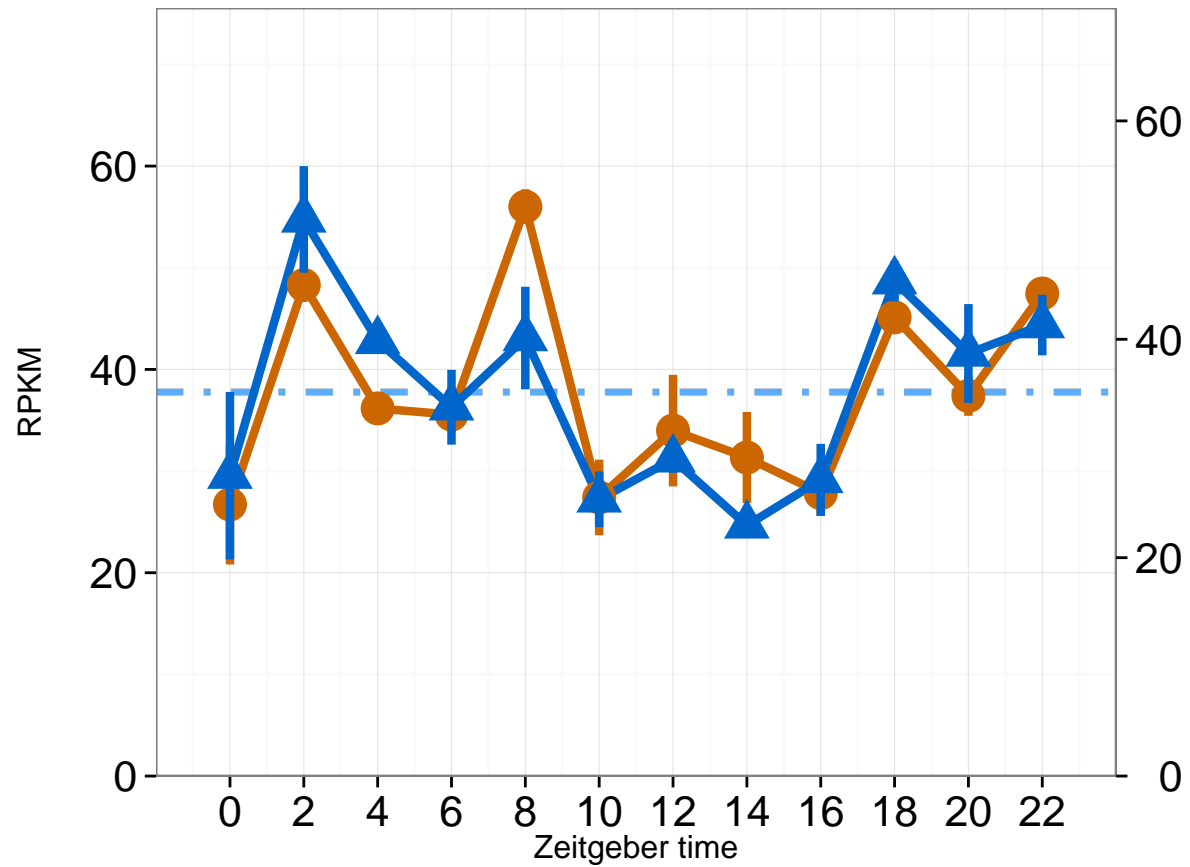

## Gadd45a

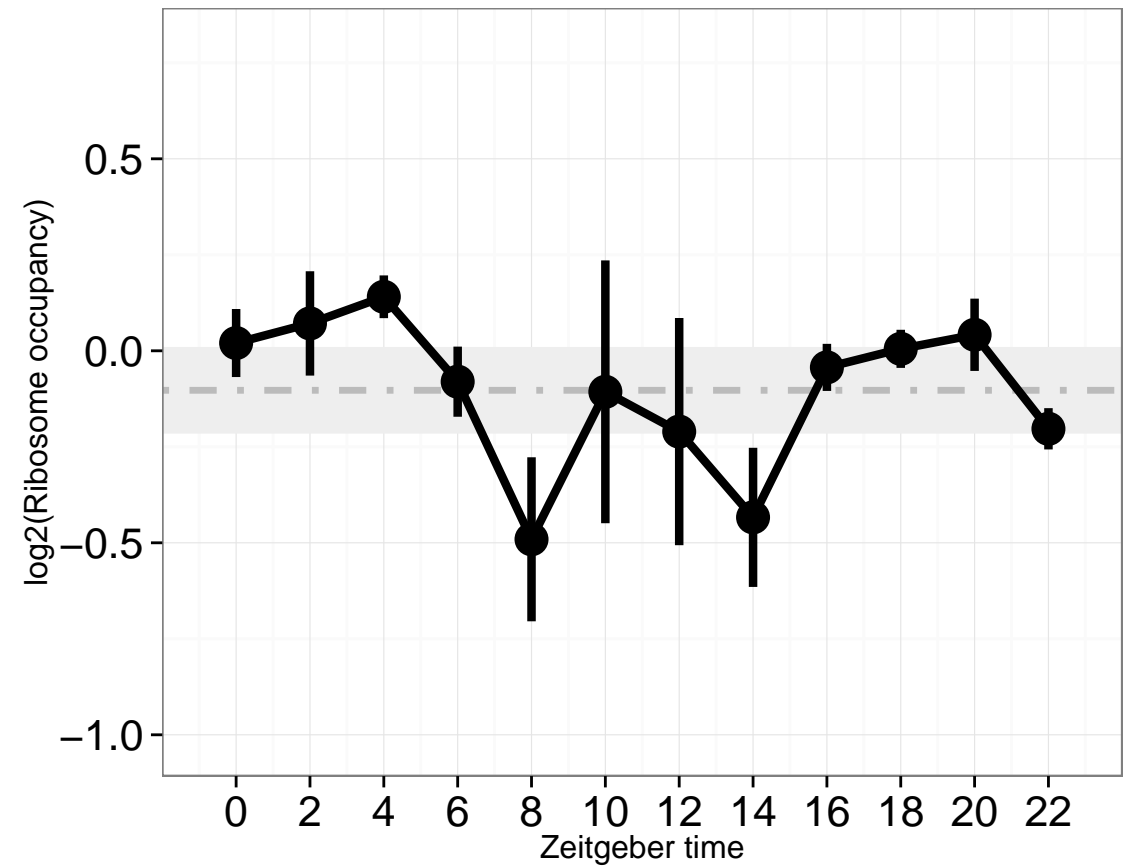

Supplement: Supplementary file 947 [file 1]

## Cacnb4

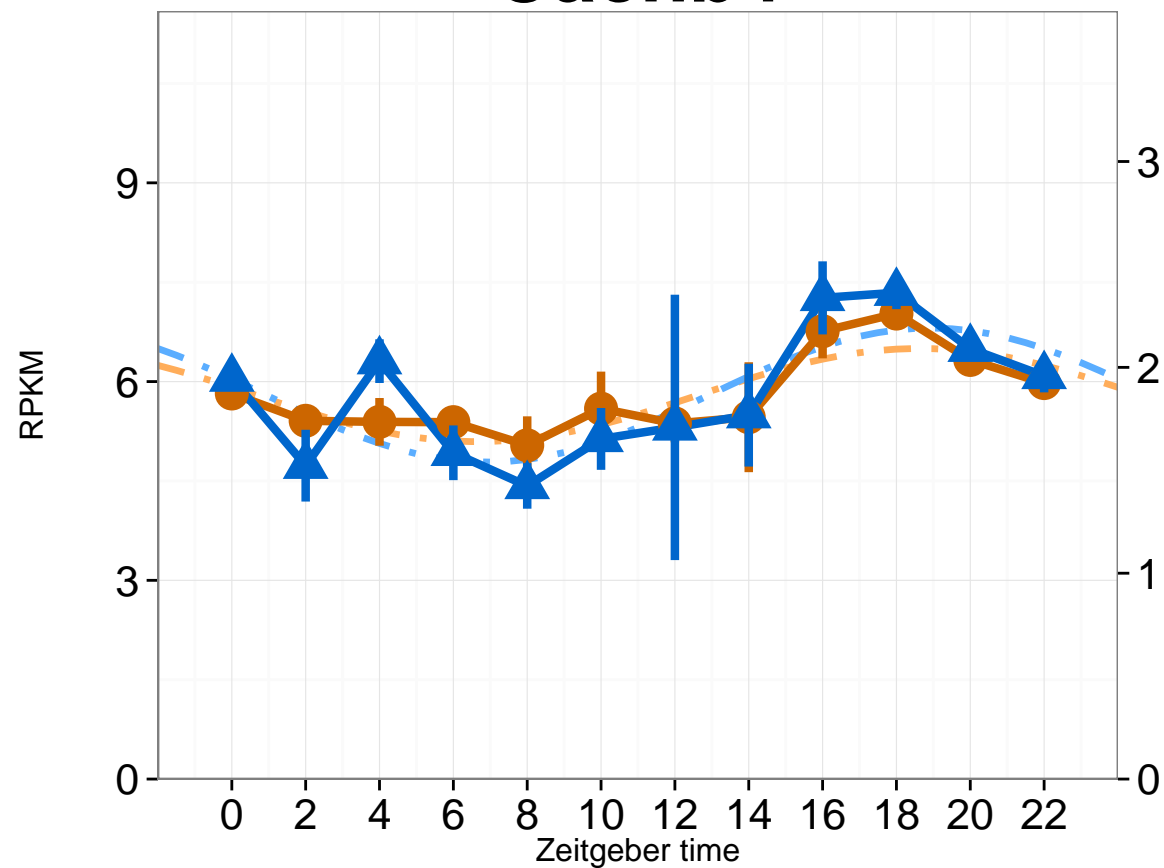

## Cacnb4

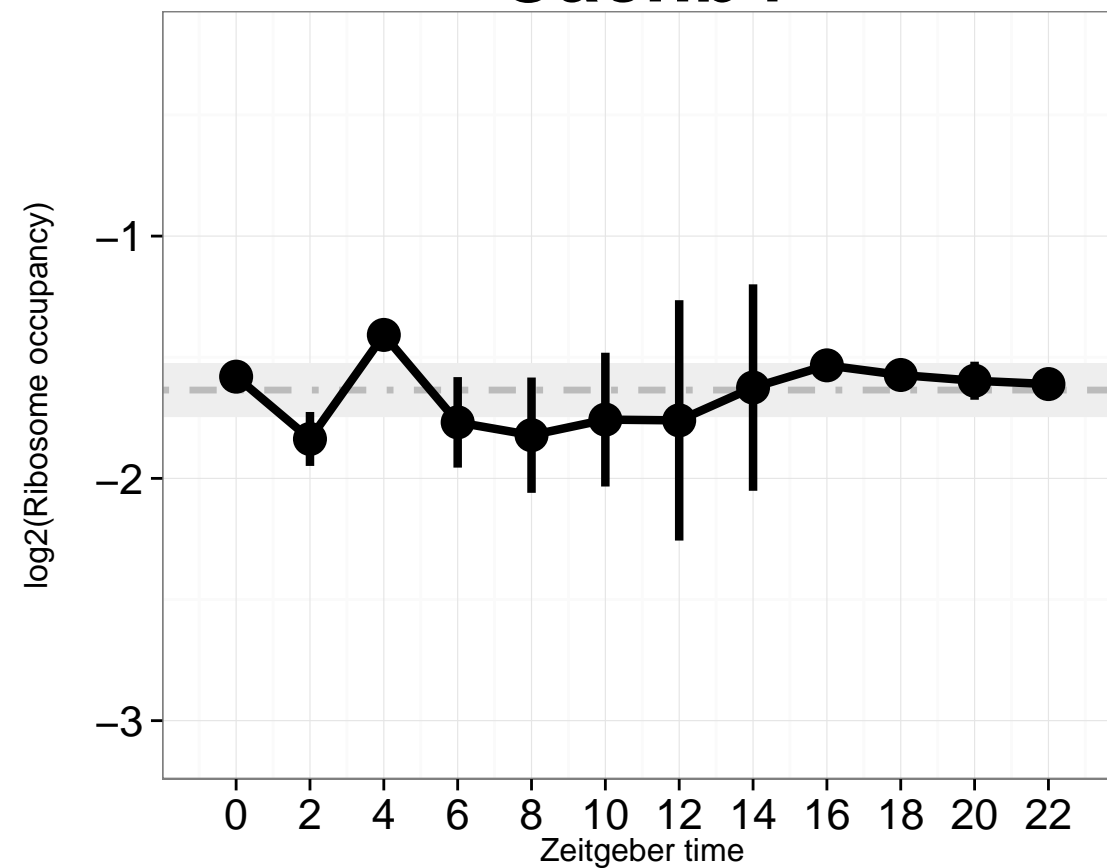

Supplement: Supplementary file 948 [file 1]

## Gm10762

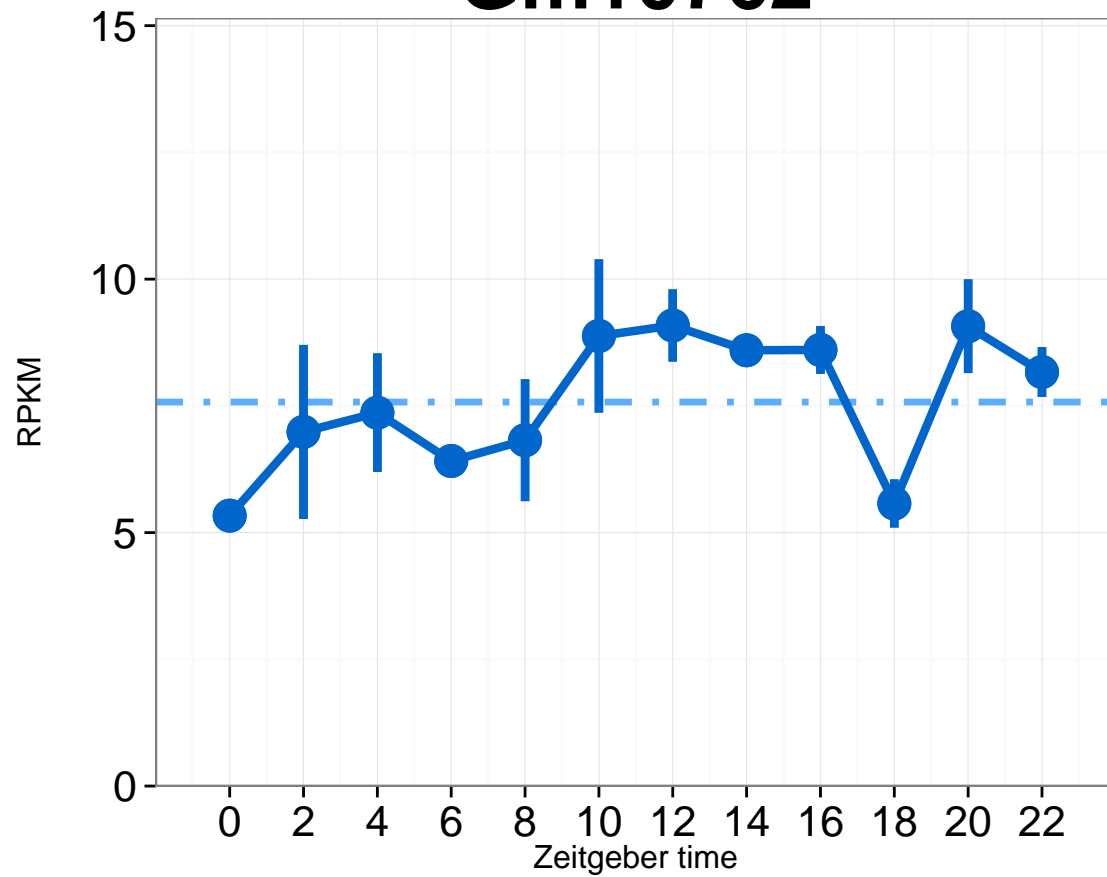

## Gm10762 log2(Ribosome occupanc

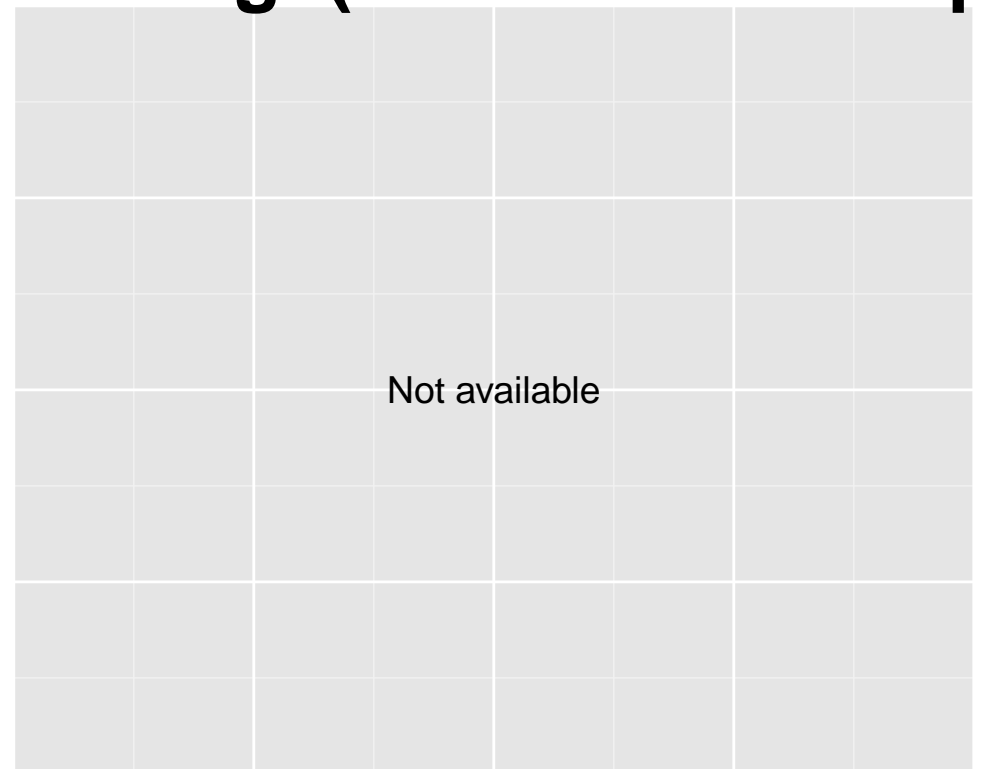

Supplement: Supplementary file 949 [file 1]

## Gmppa

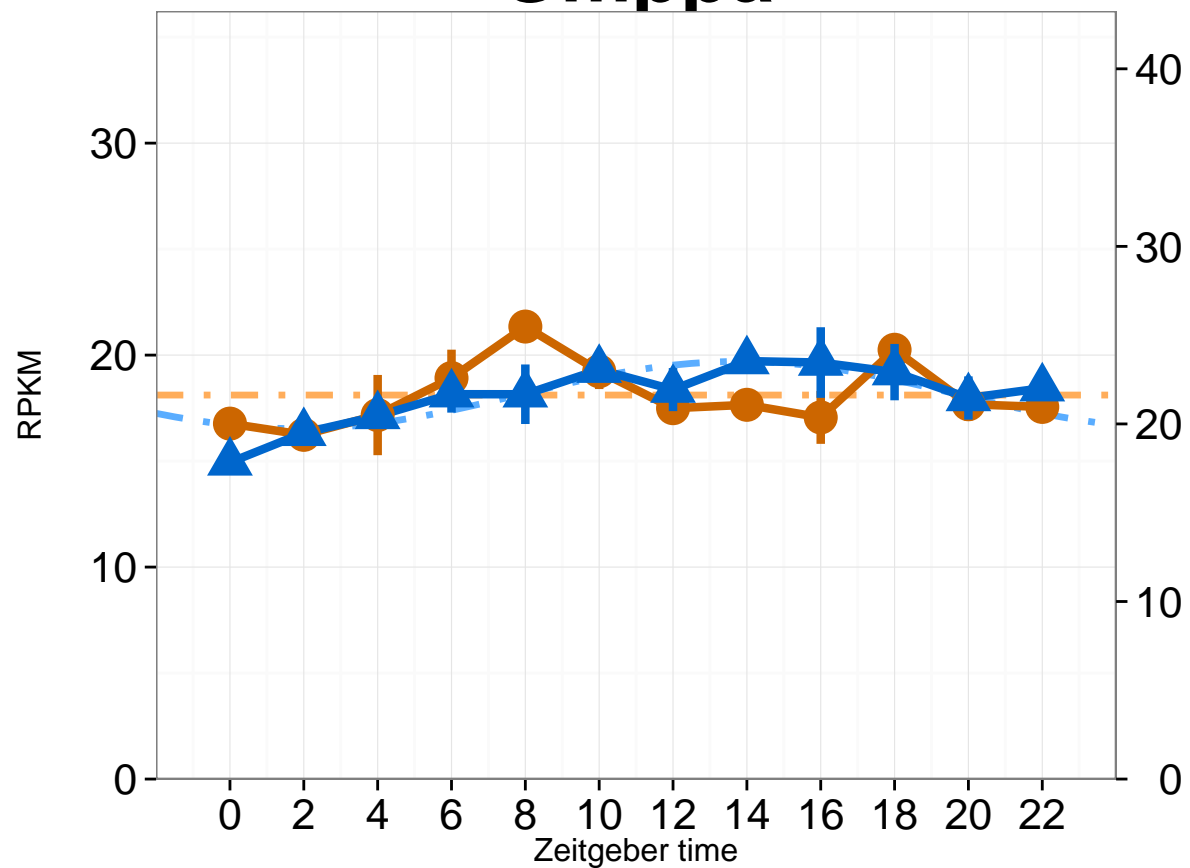

## Gmppa

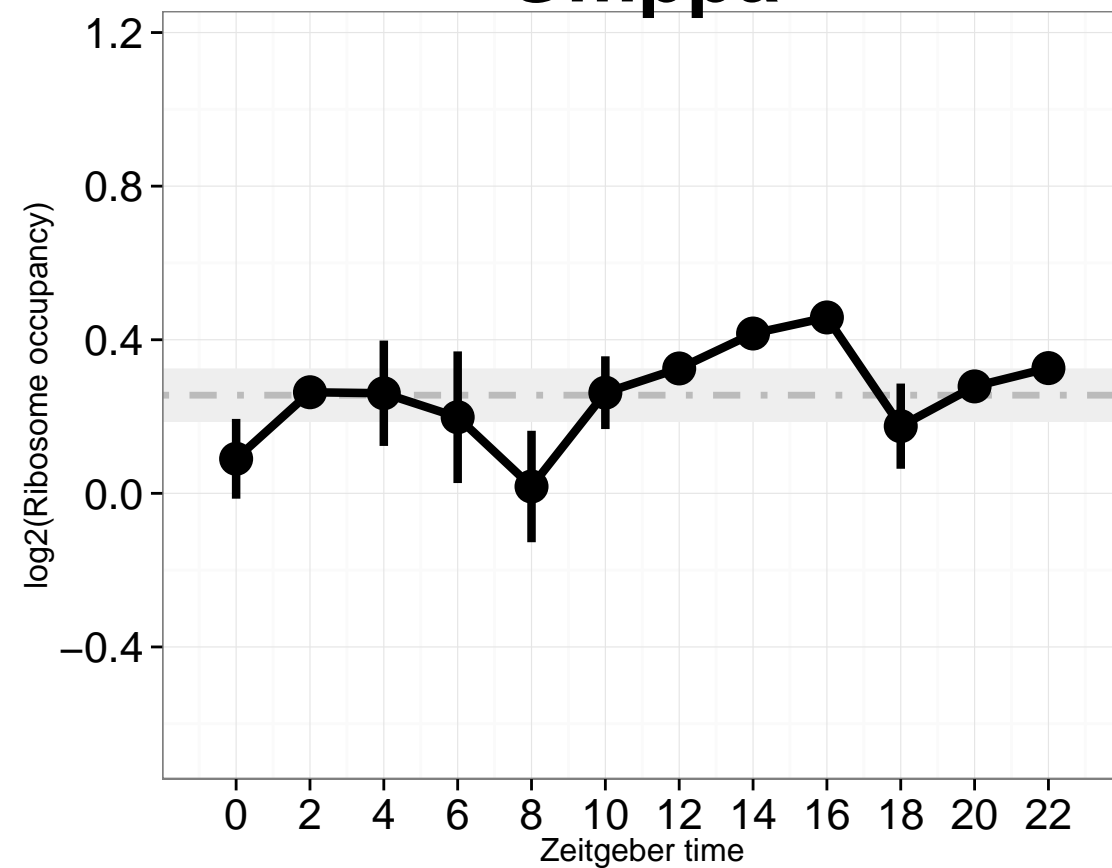

Supplement: Supplementary file 950 [file 1]

## Sv2a

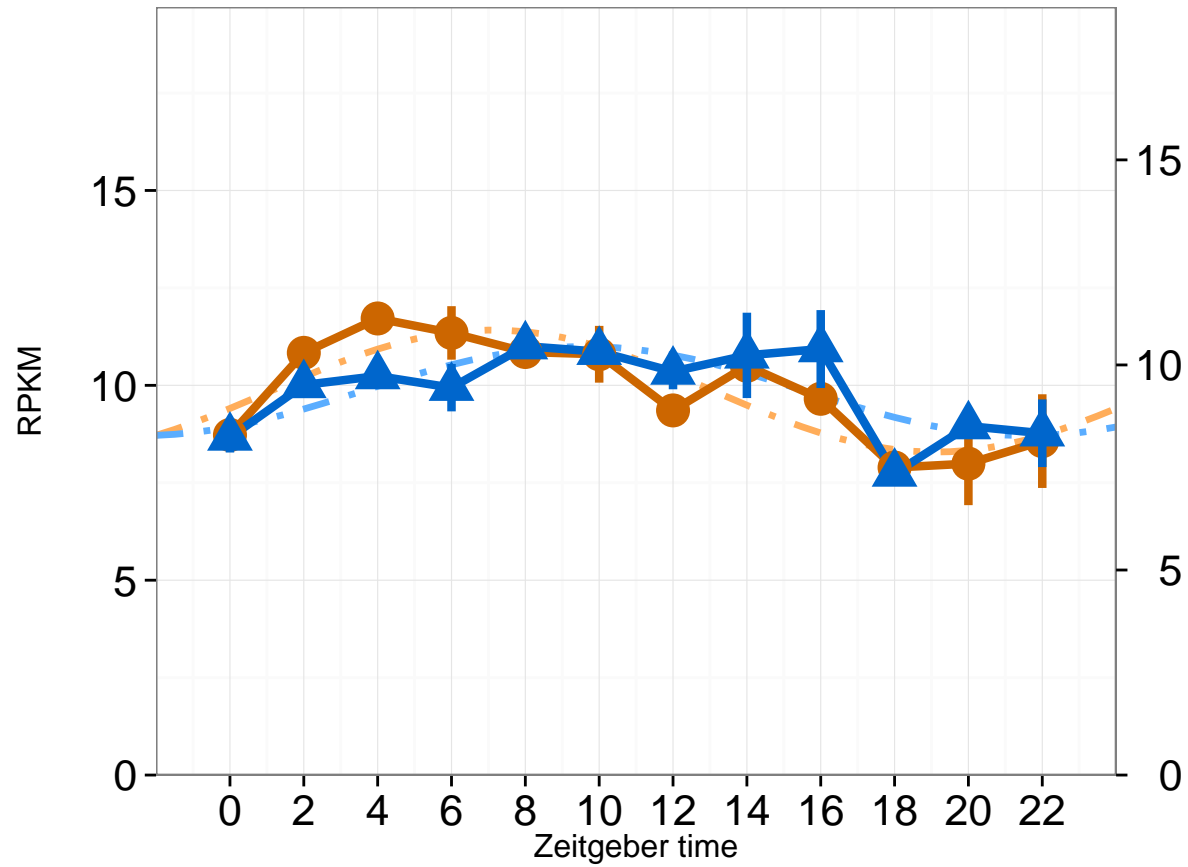

## Sv2a

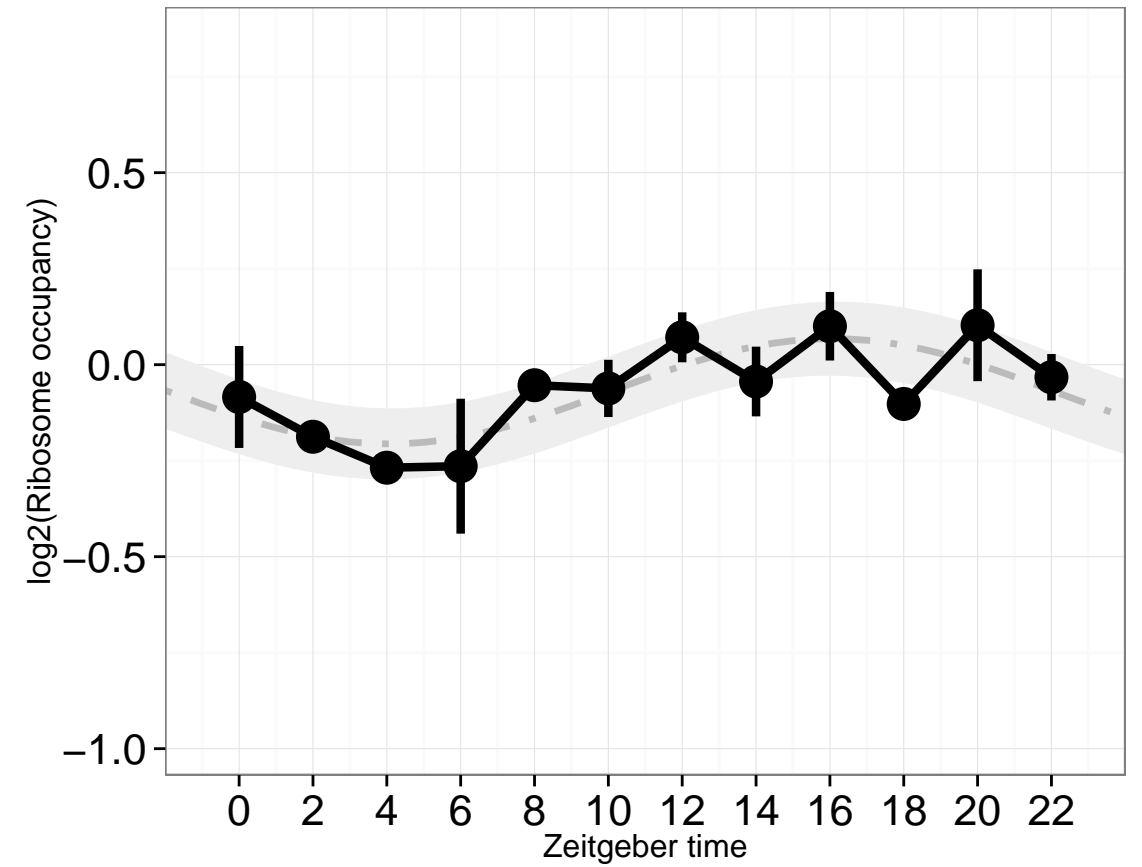

Supplement: Supplementary file 951 [file 1]

# Ndufv1

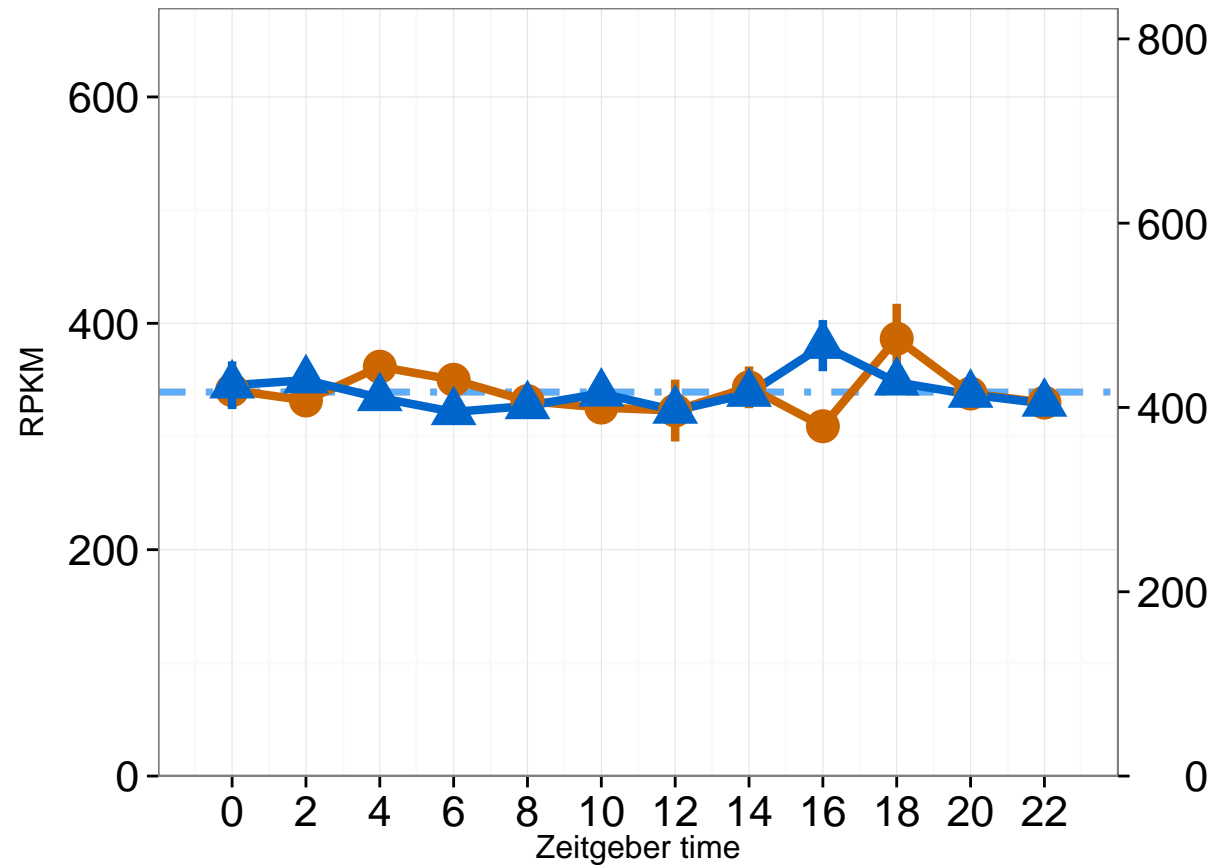

# Ndufv1

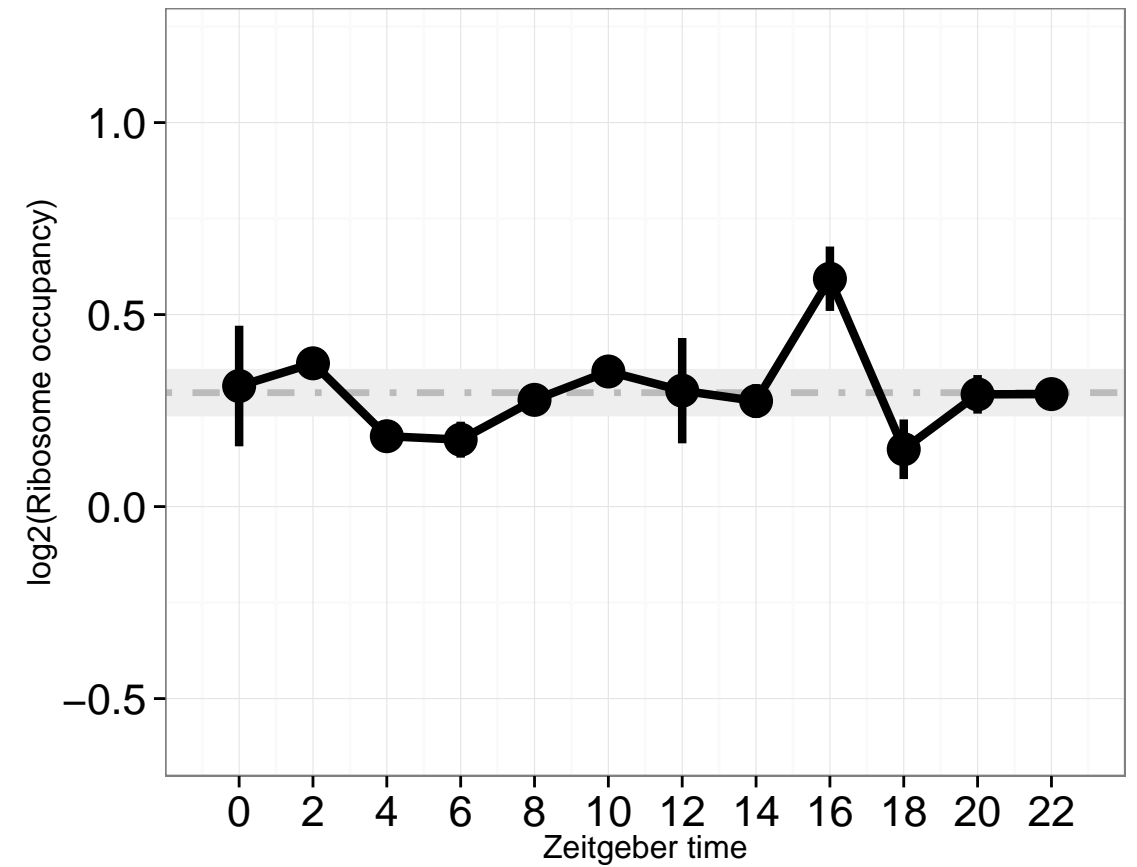

Supplement: Supplementary file 952 [file 1]

# Lrdd

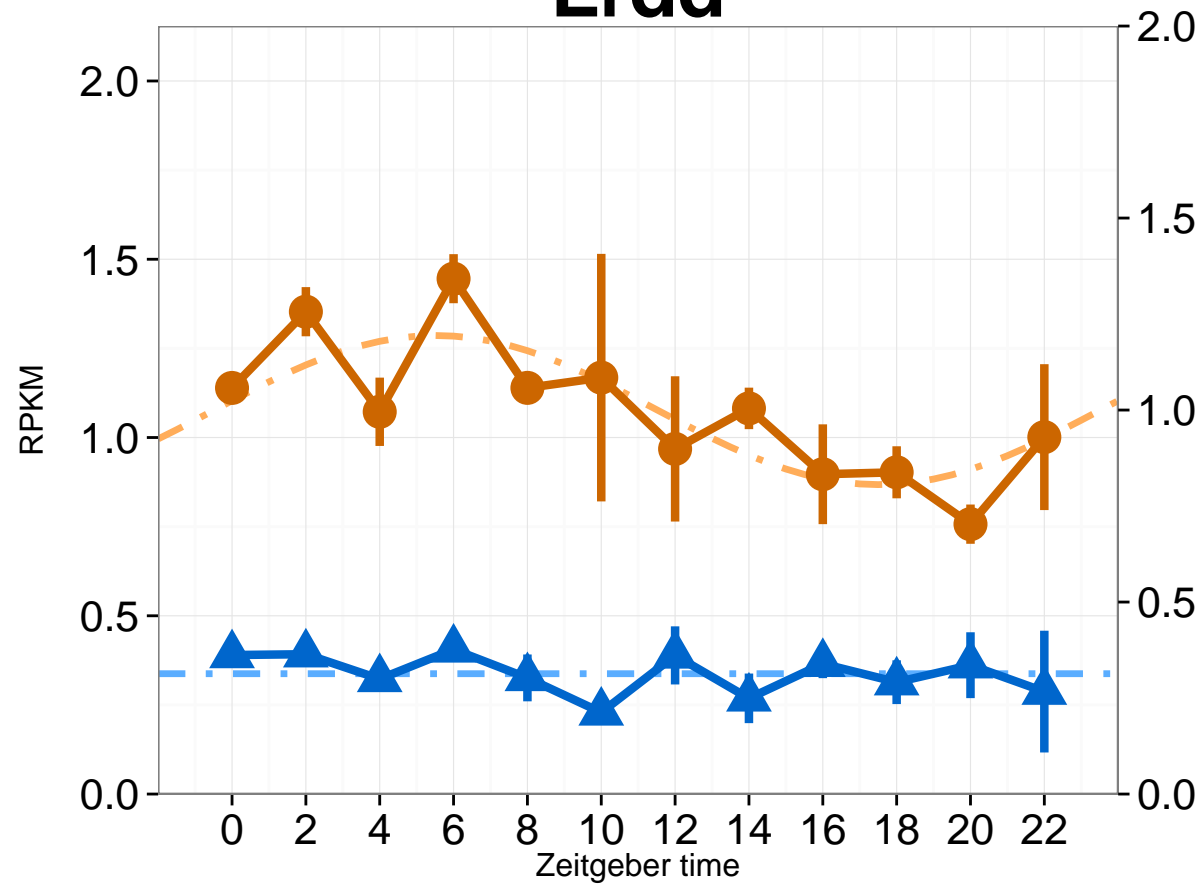

# Lrdd

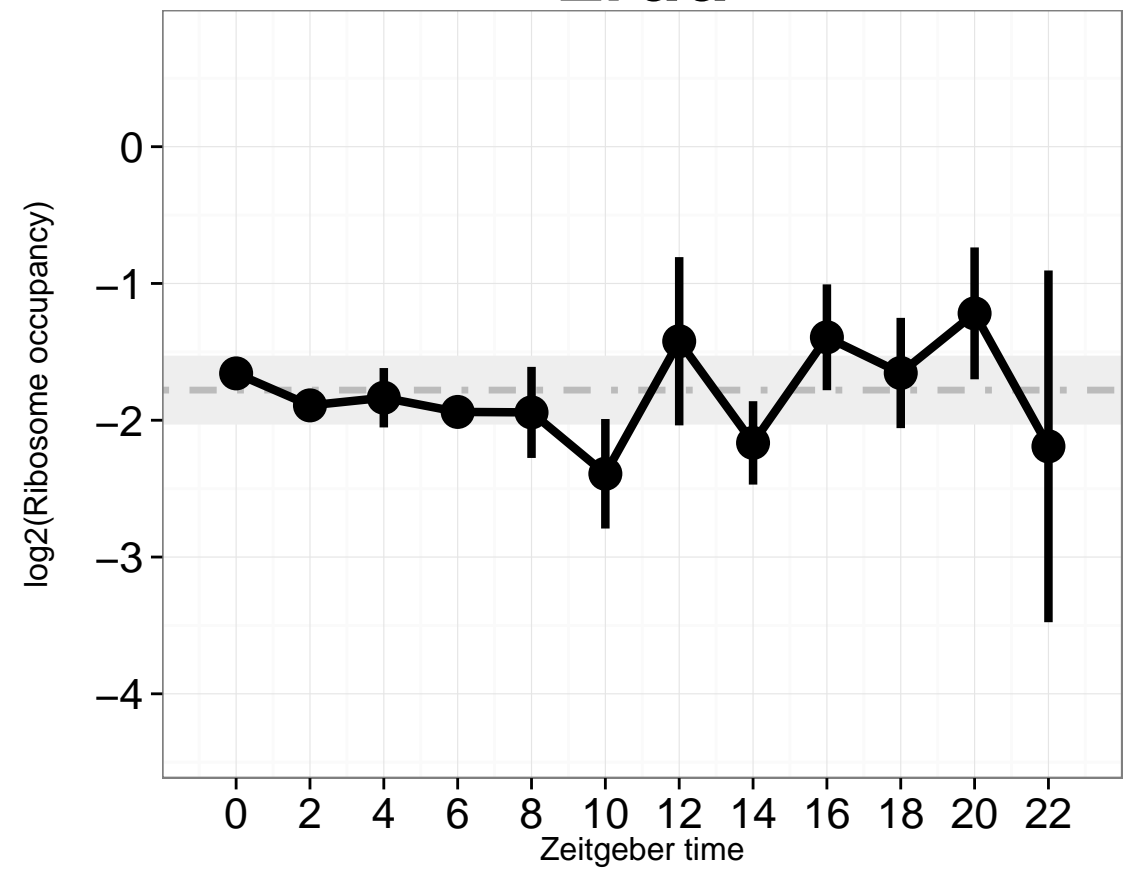

Supplement: Supplementary file 953 [file 1]

## Mboat7

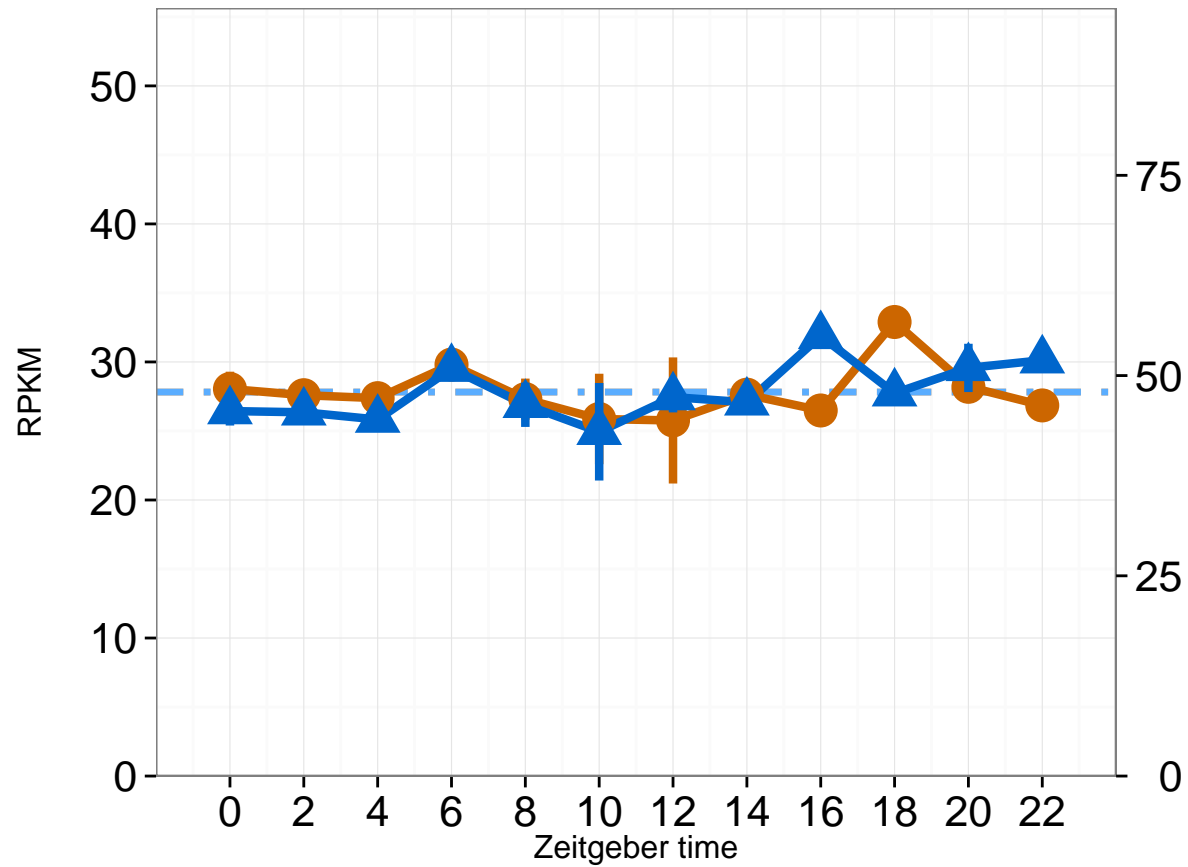

## Mboat7

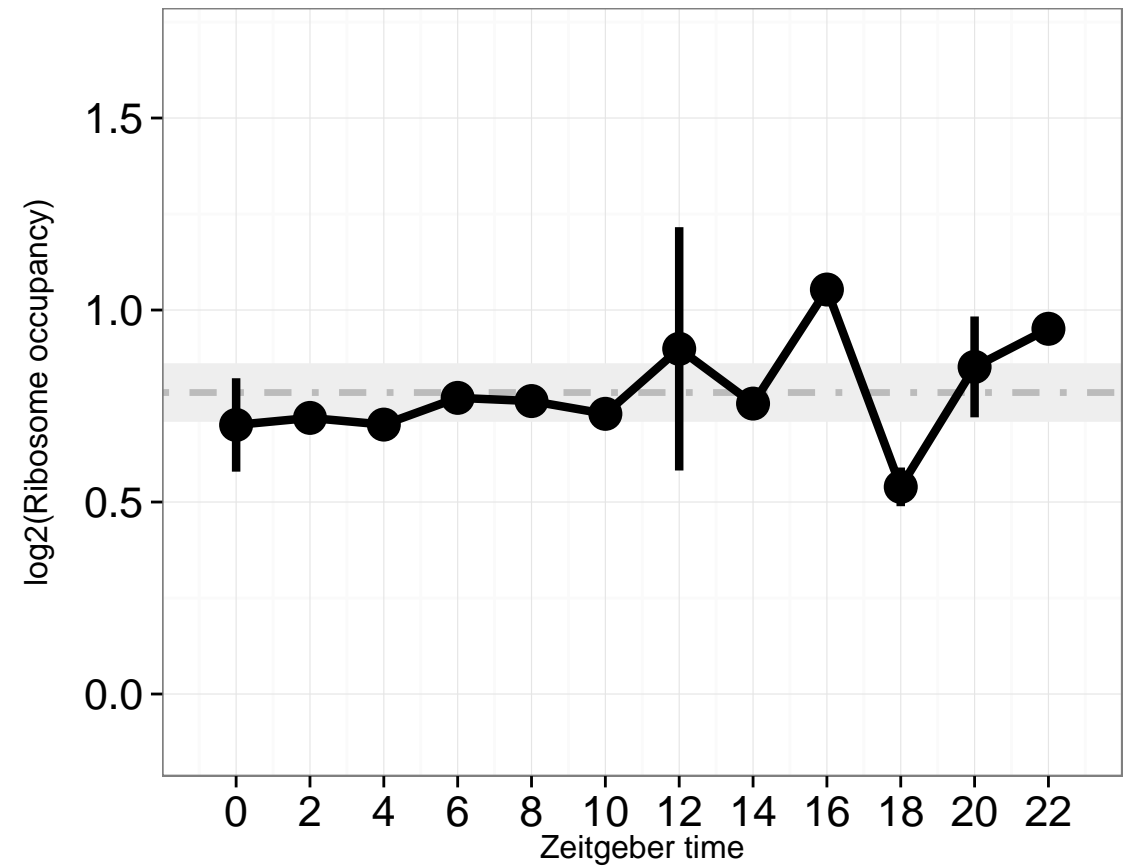

Supplement: Supplementary file 954 [file 1]

# Impa1

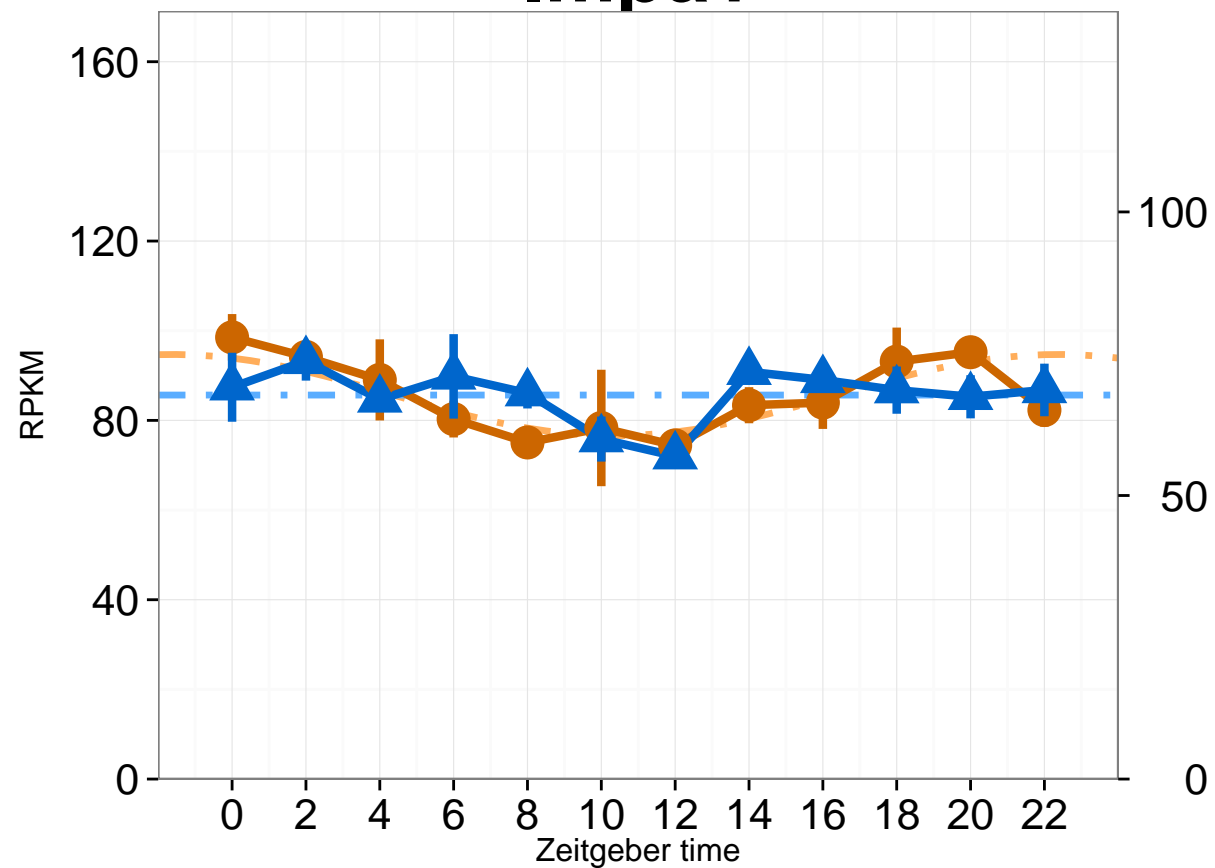

# Impa1

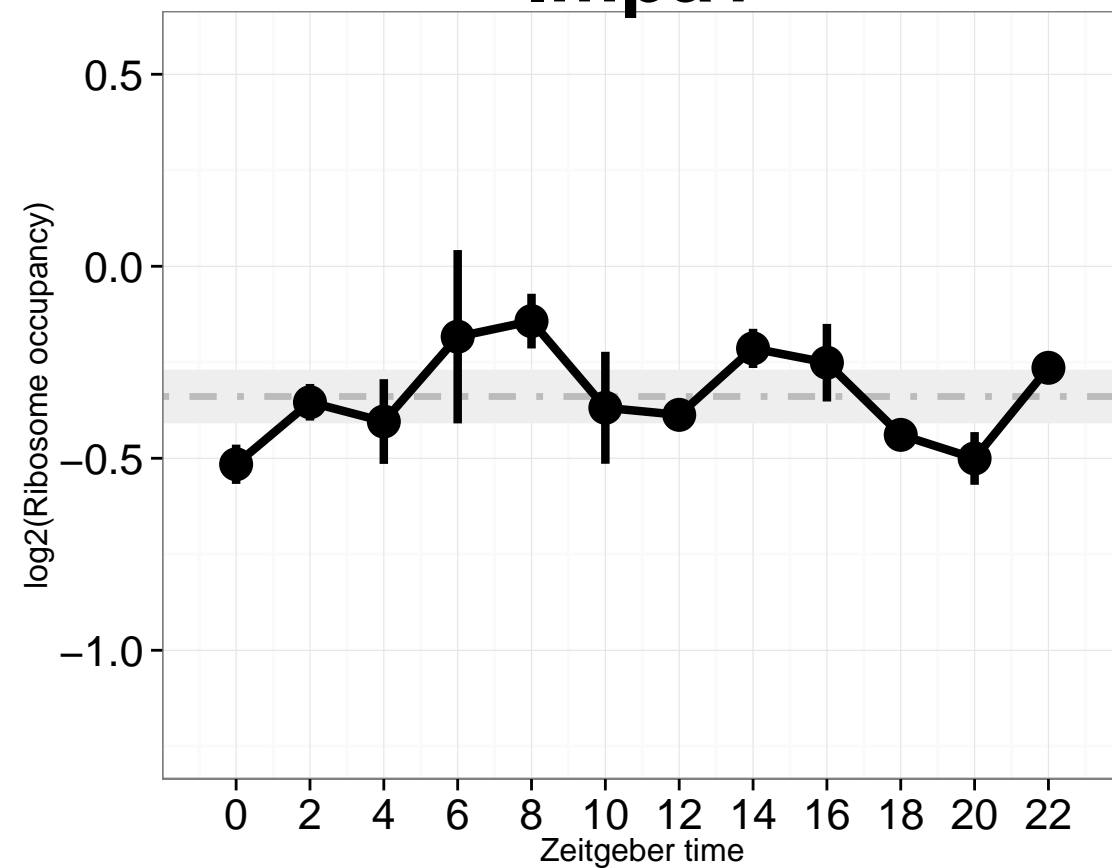

Supplement: Supplementary file 955 [file 1]

## Ripk4

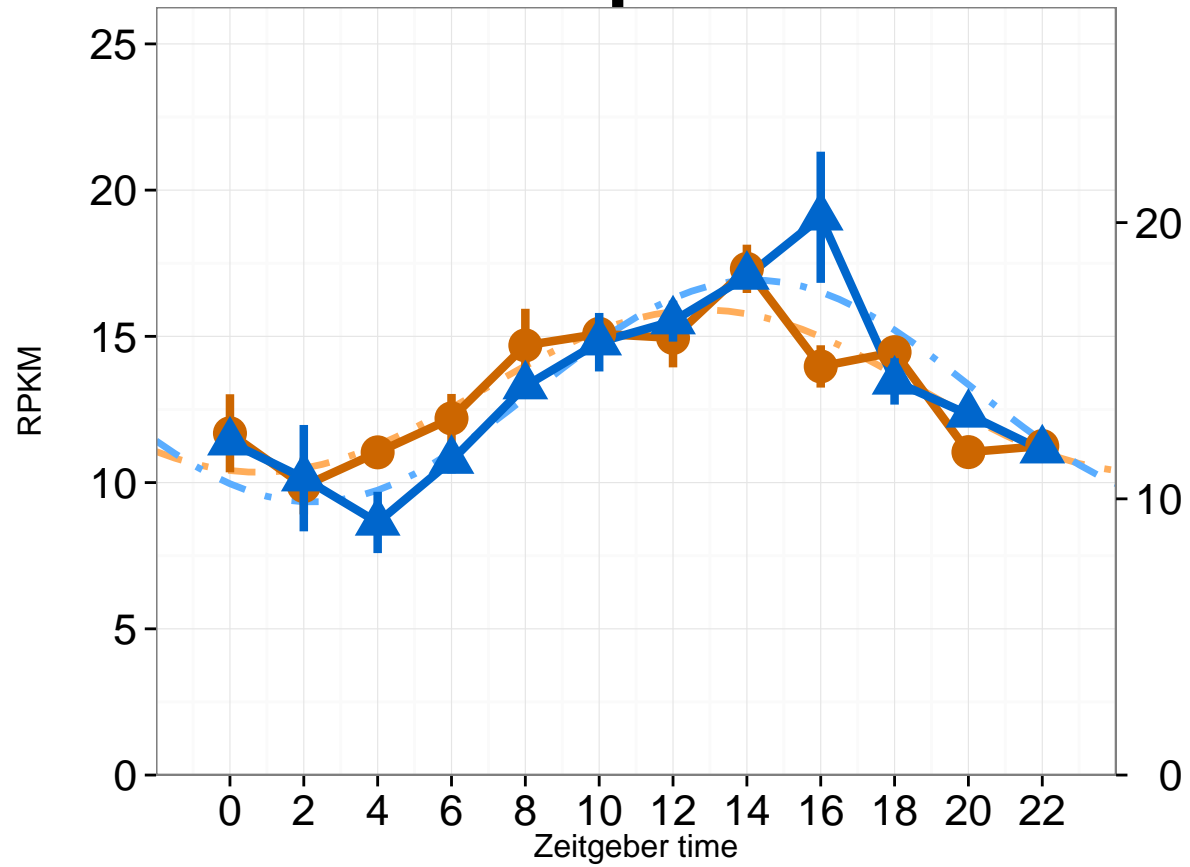

## Ripk4

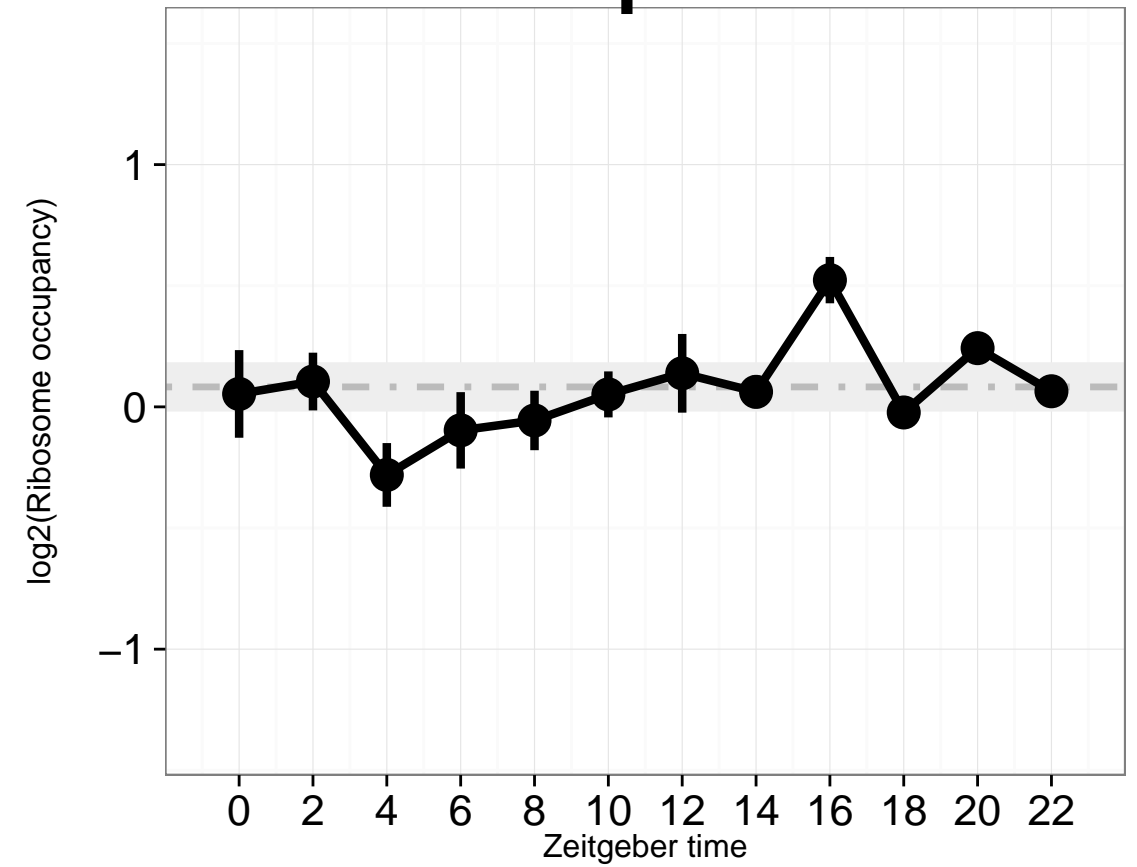

Supplement: Supplementary file 956 [file 1]

## Hint1

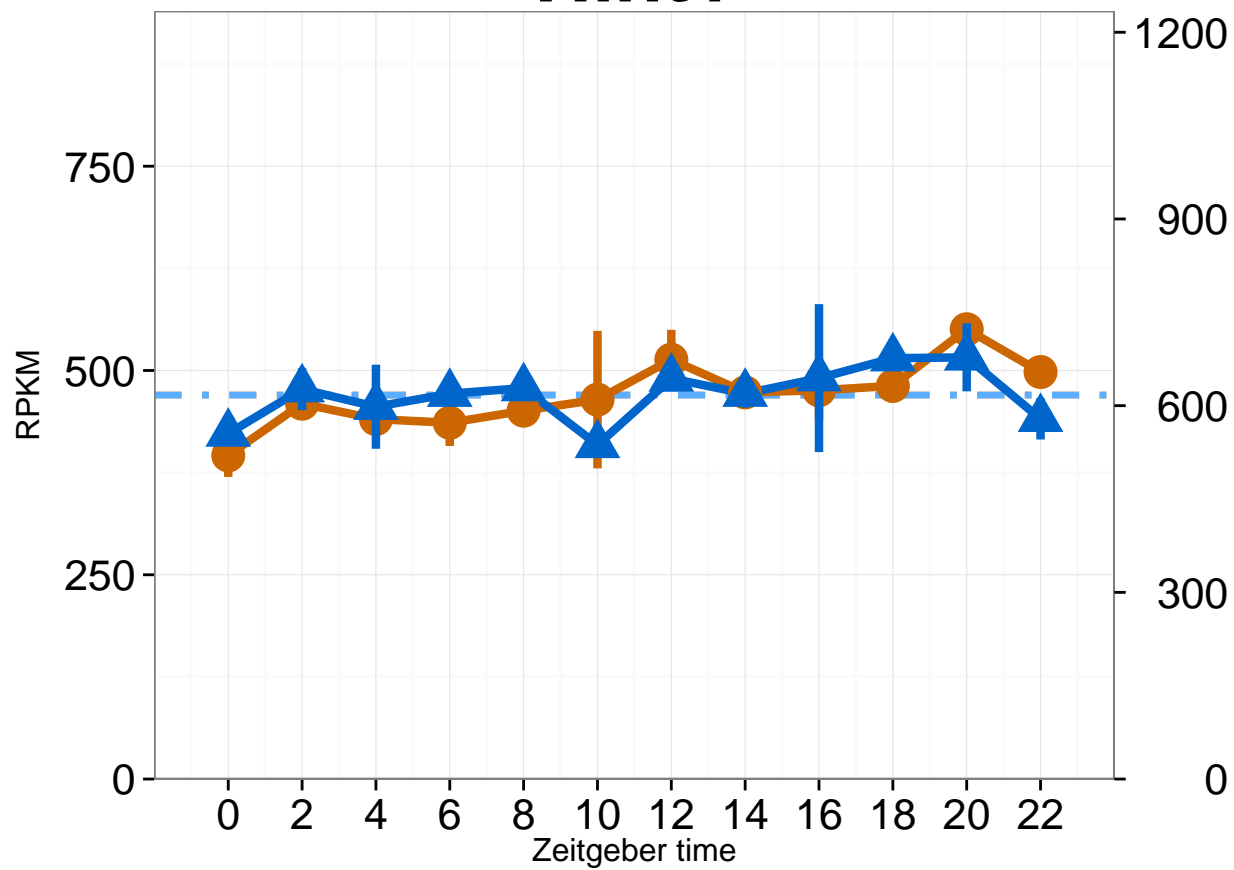

## Hint1

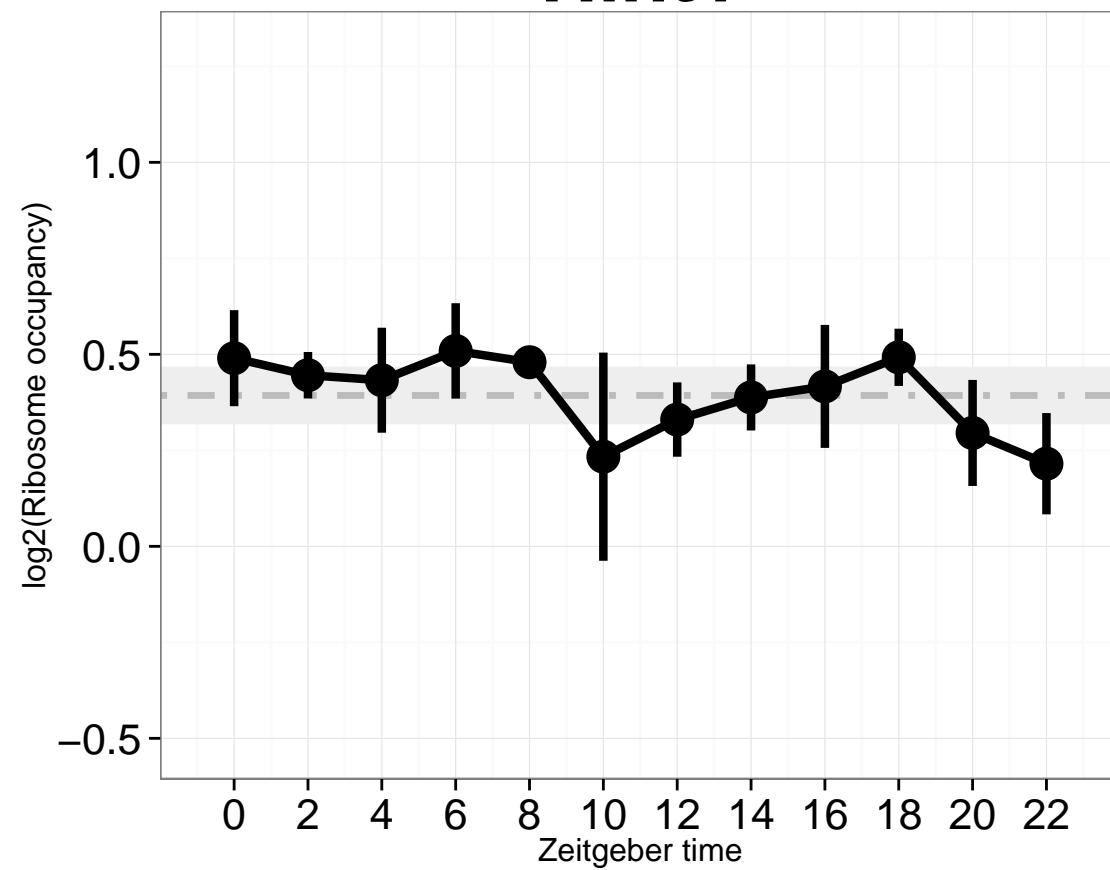

Supplement: Supplementary file 957 [file 1]

## Mcl1

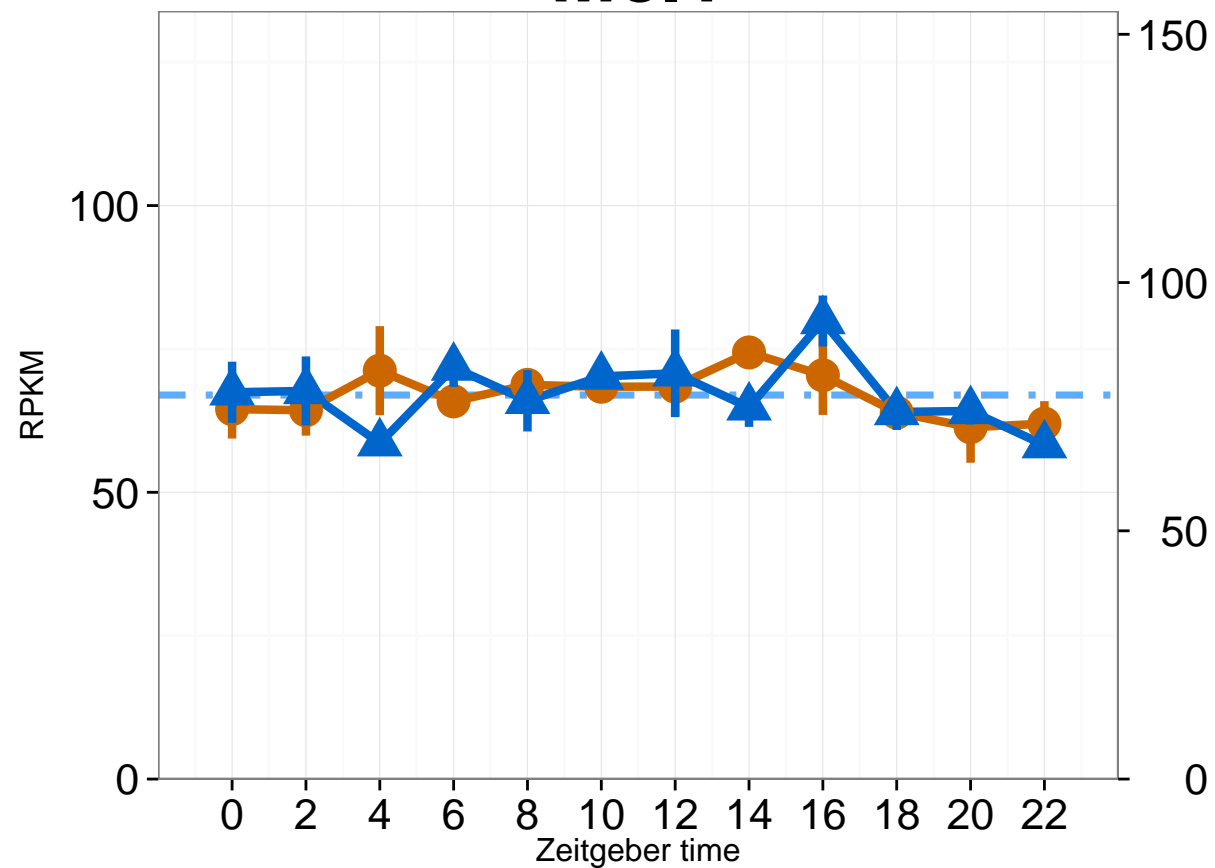

## Mcl1

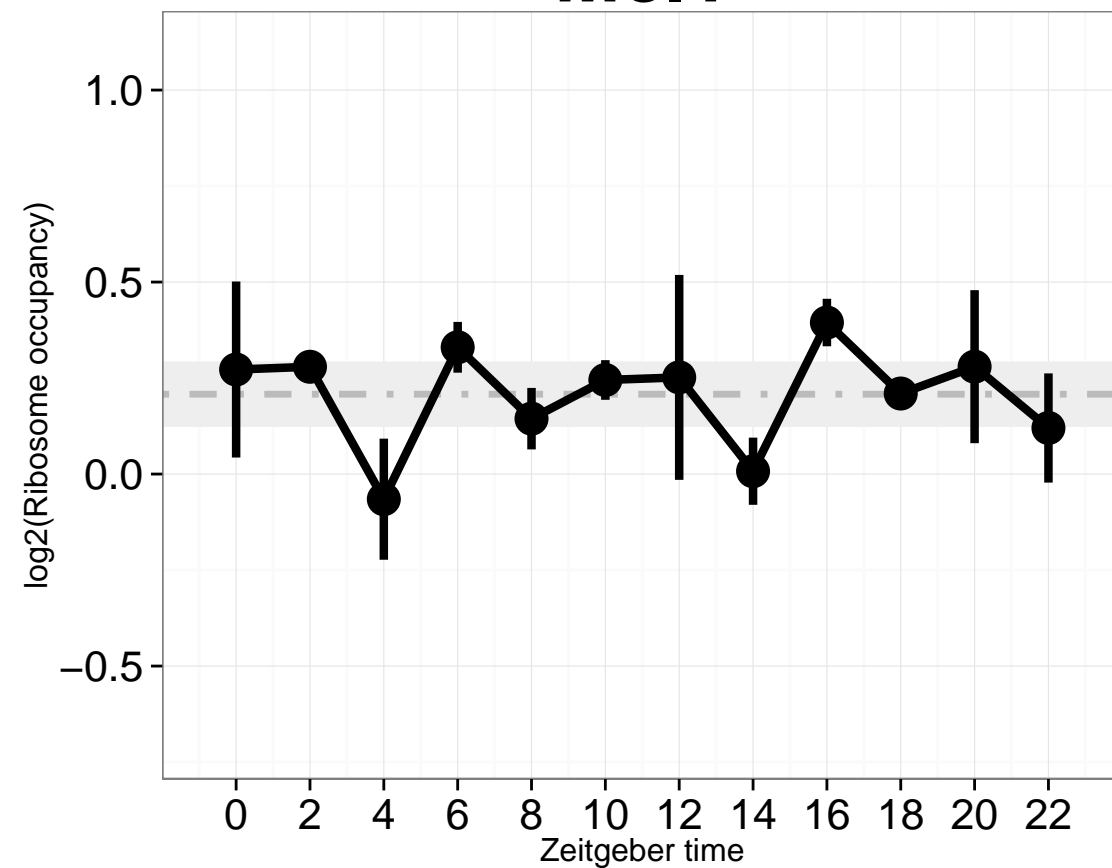

Supplement: Supplementary file 958 [file 1]

# Rem1

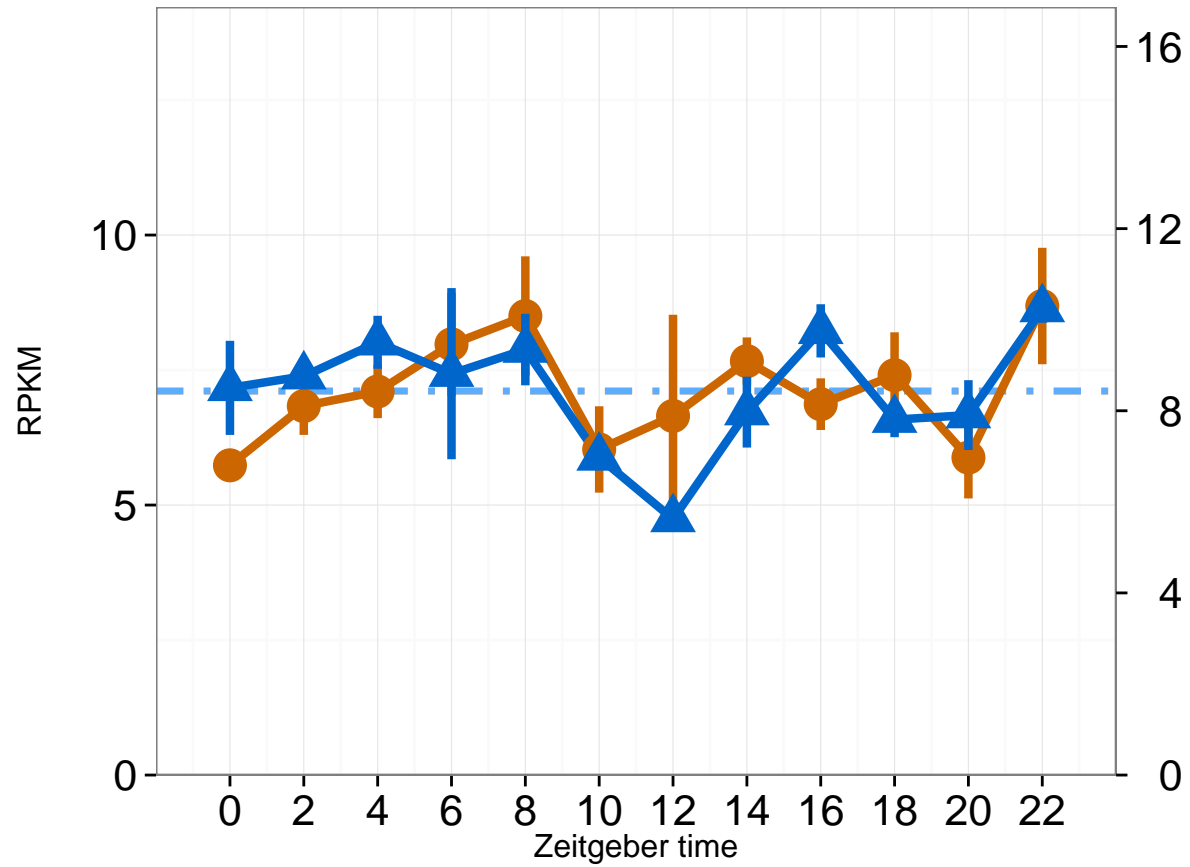

# Rem1

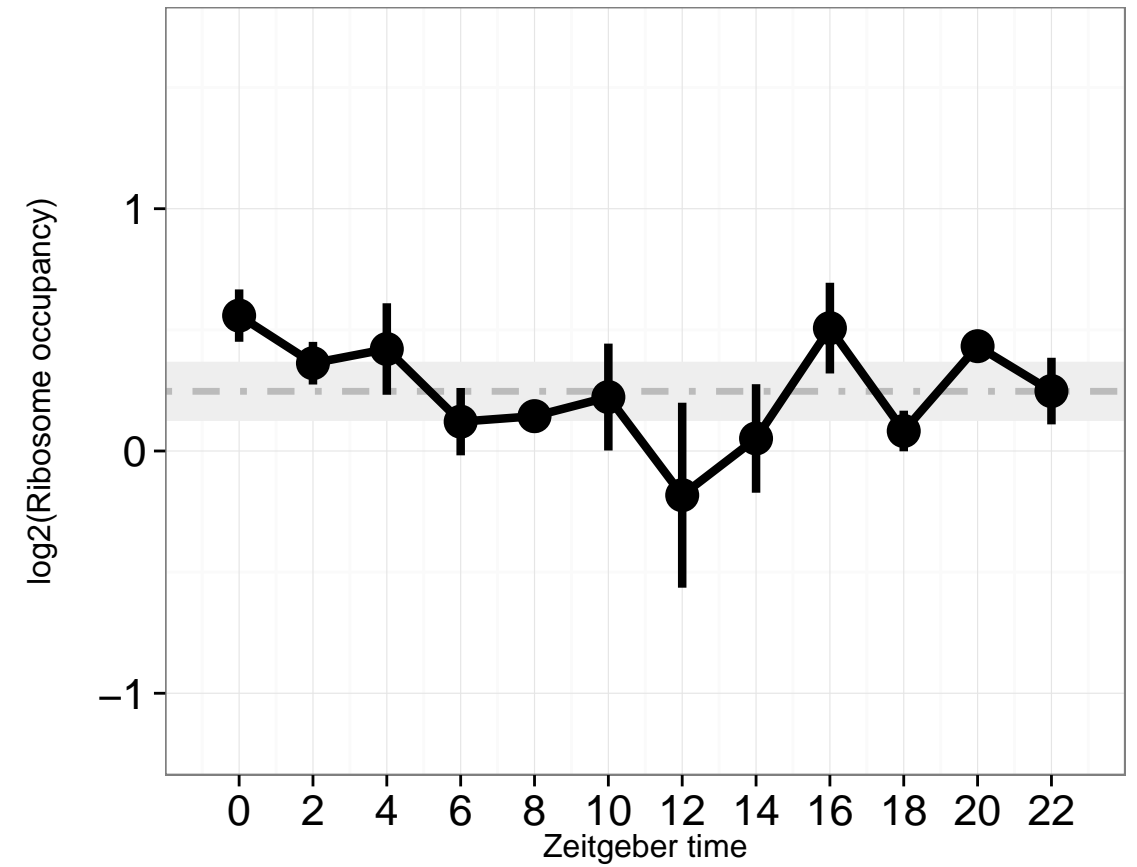

Supplement: Supplementary file 959 [file 1]

# Il18r1

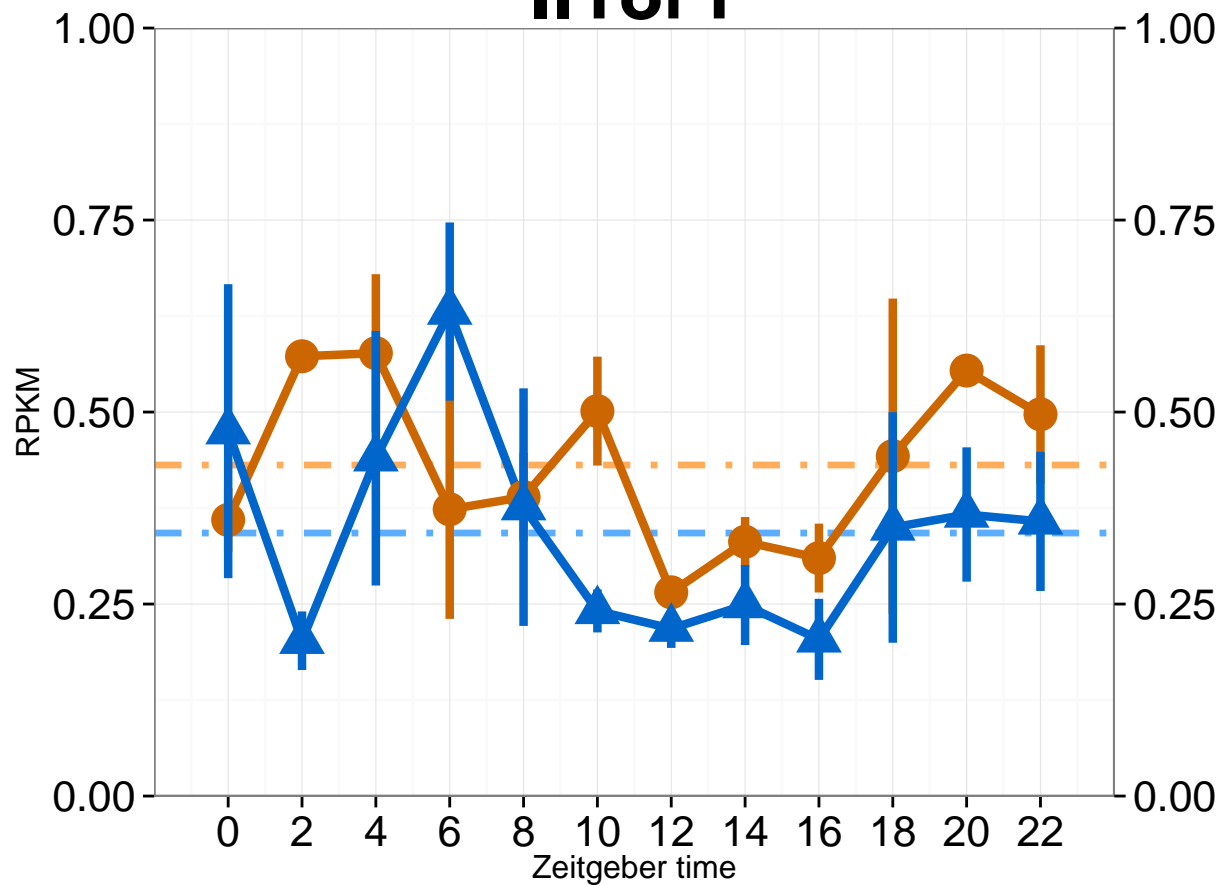

# Il18r1

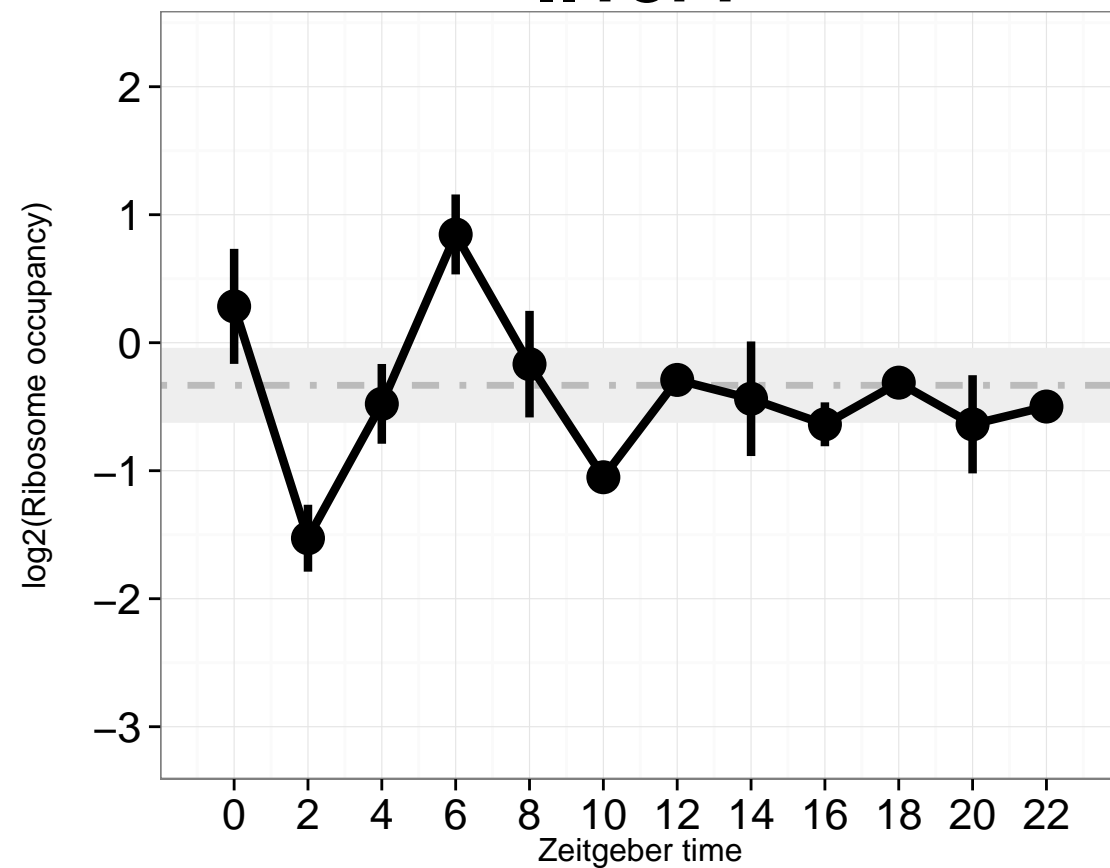

Supplement: Supplementary file 960 [file 1]

# Apob

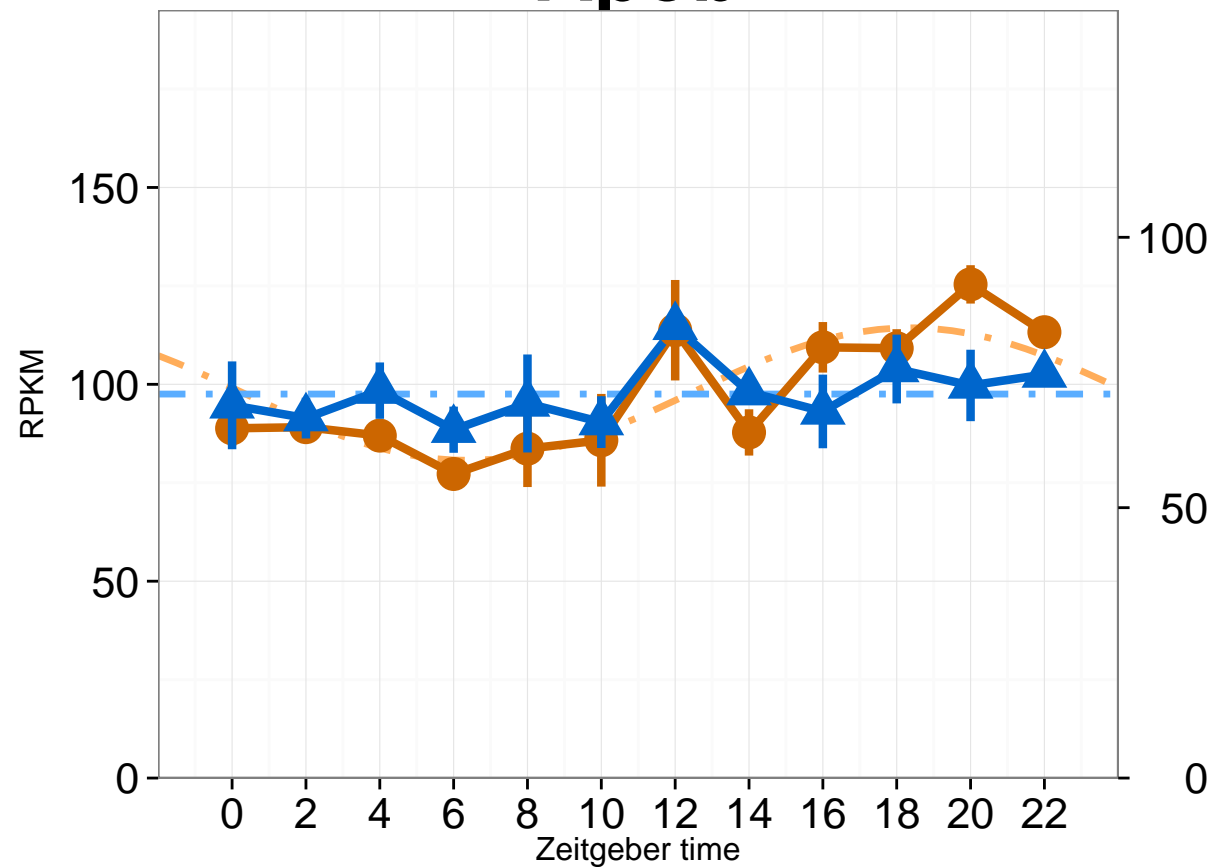

# Apob

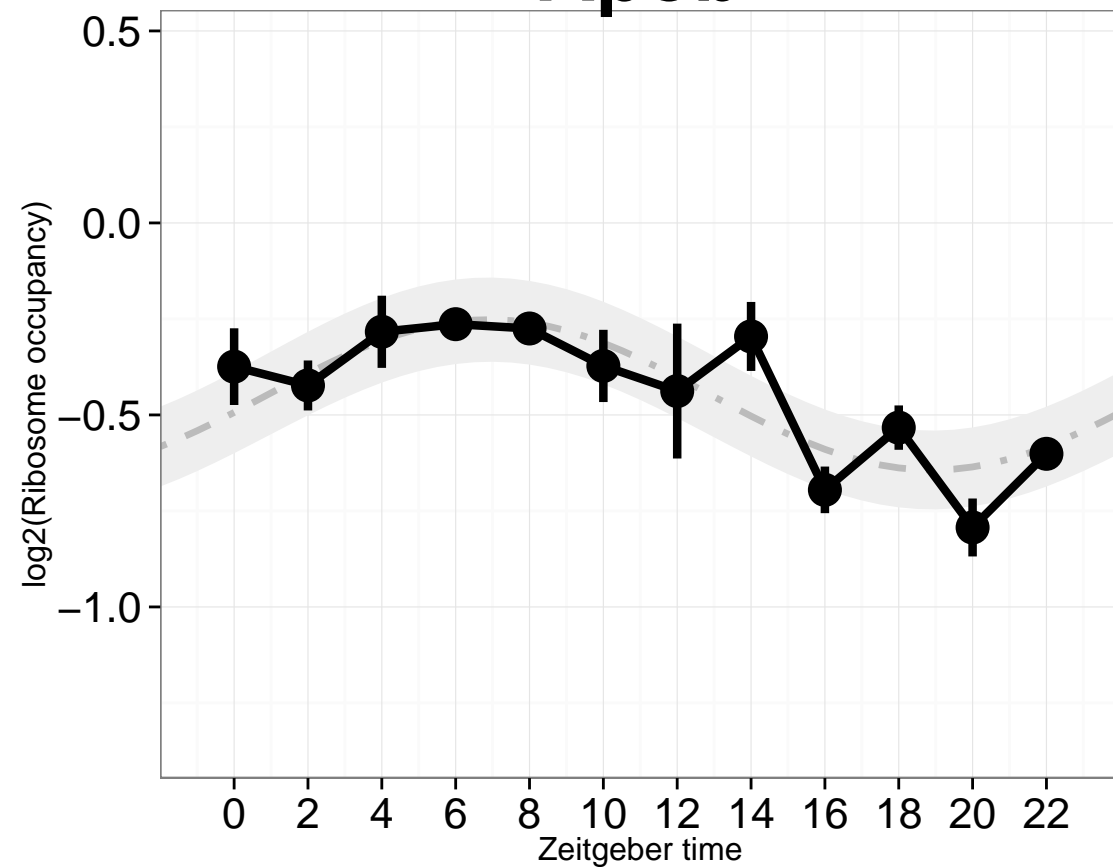

Supplement: Supplementary file 961 [file 1]

## Midn

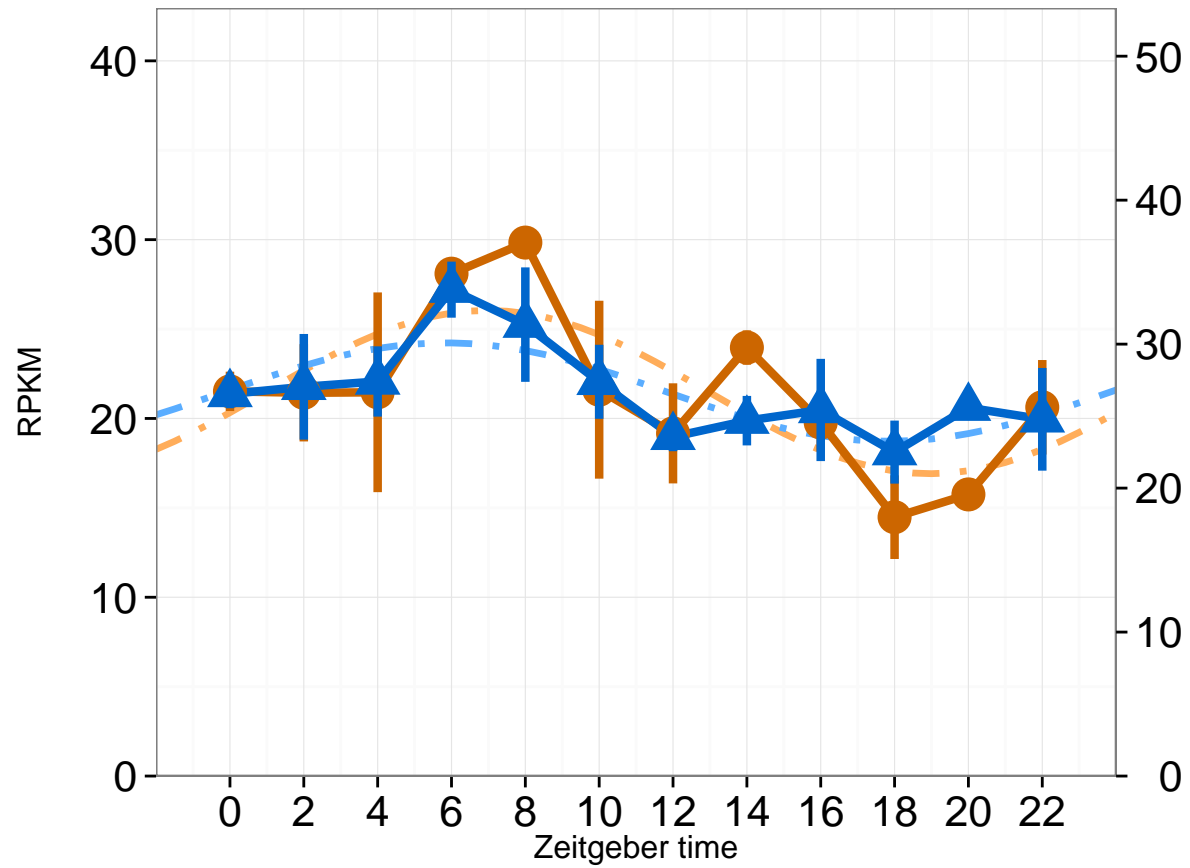

## Midn

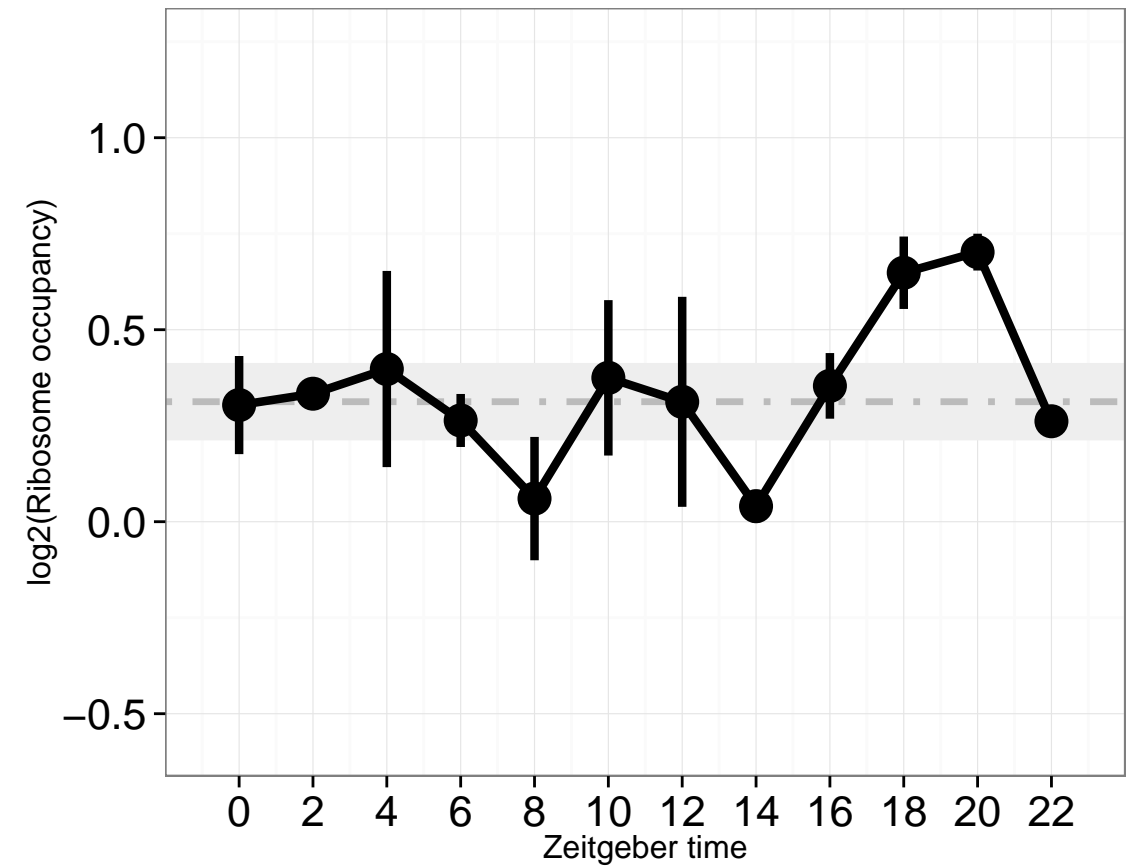

Supplement: Supplementary file 962 [file 1]

## Tle4

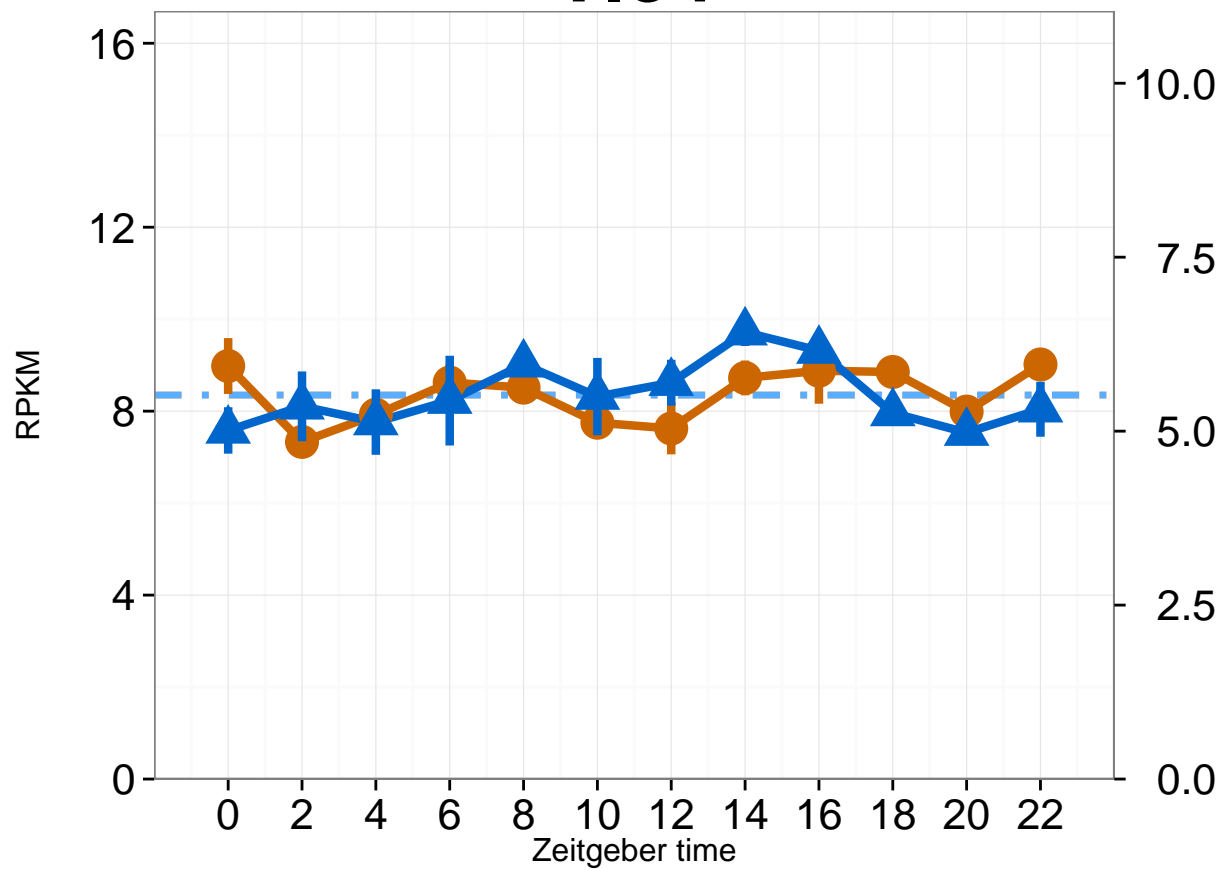

## Tle4

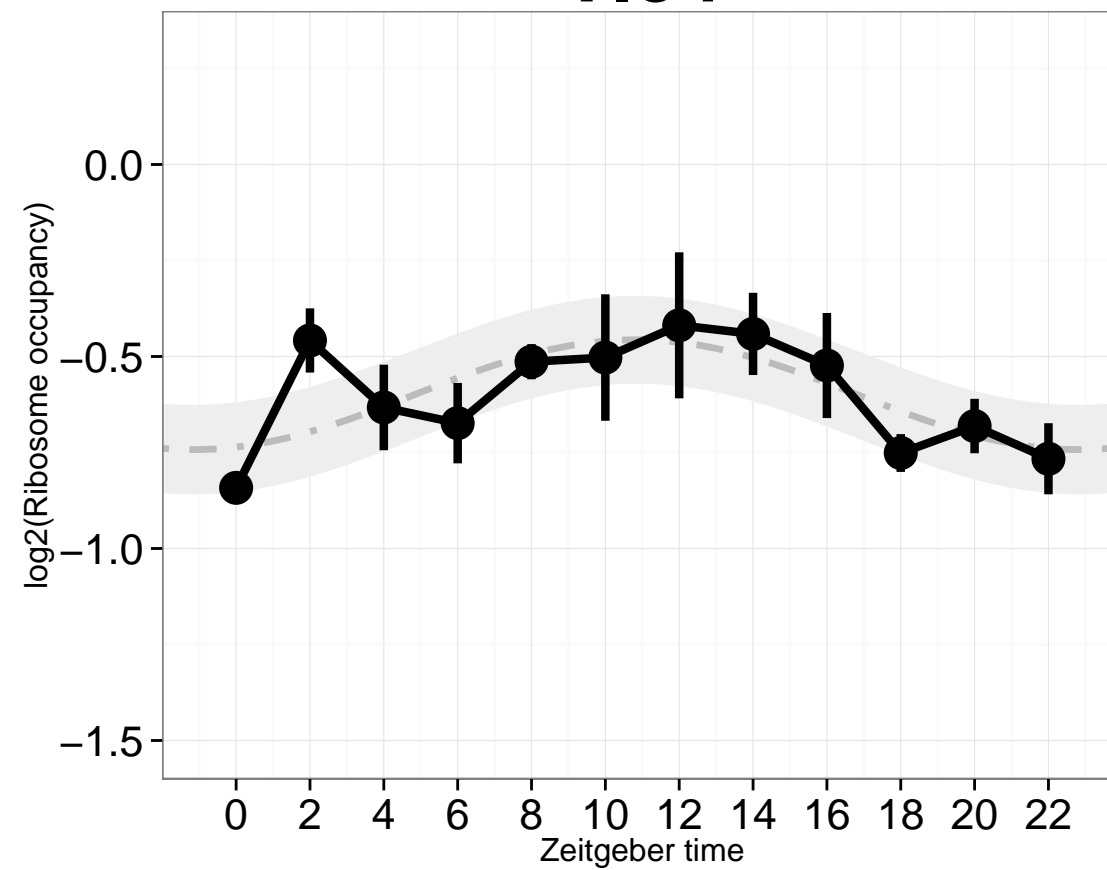

Supplement: Supplementary file 963 [file 1]

# Dab1

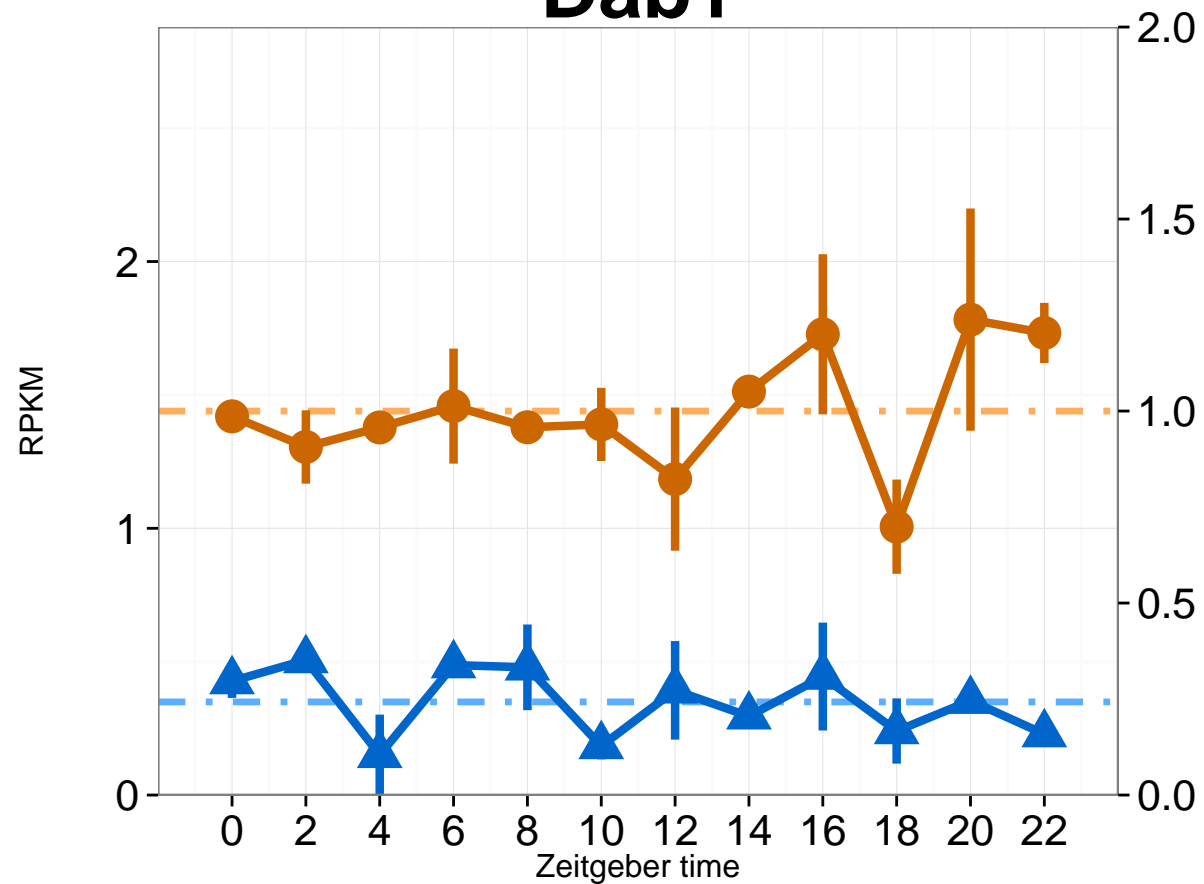

# Dab1

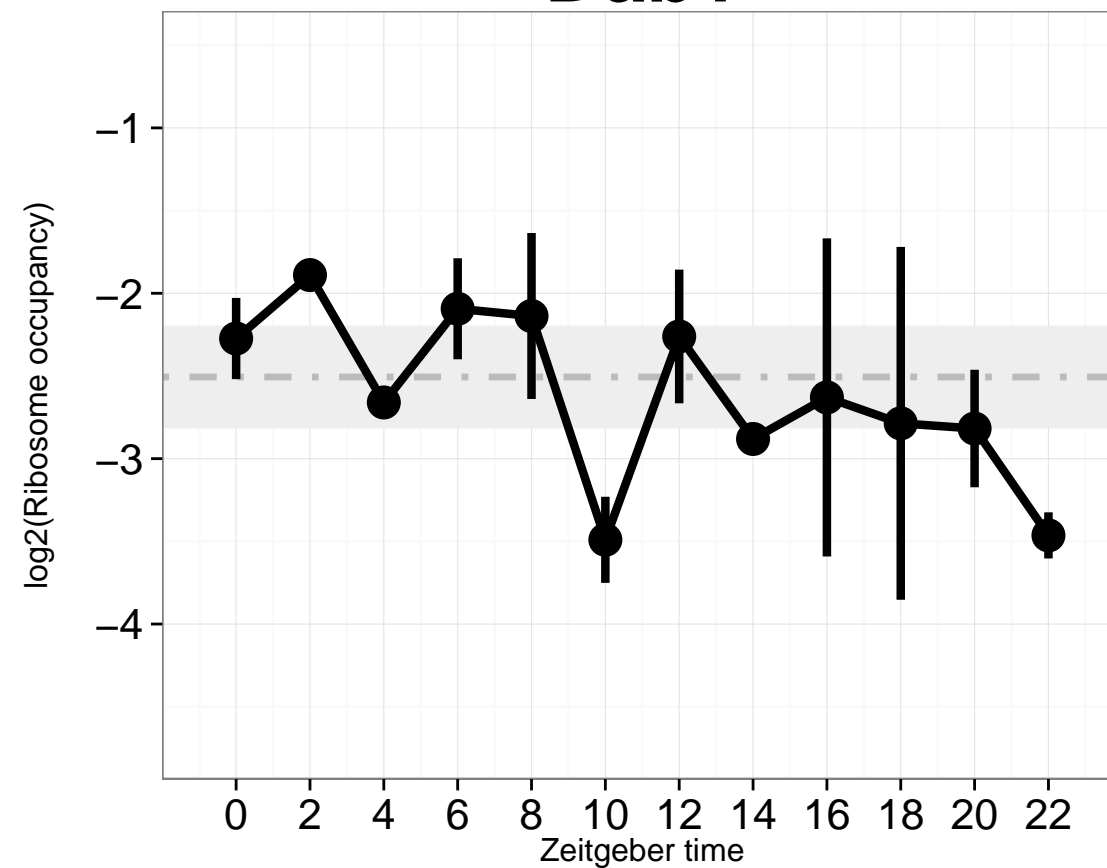

Supplement: Supplementary file 964 [file 1]

# Ap2a1

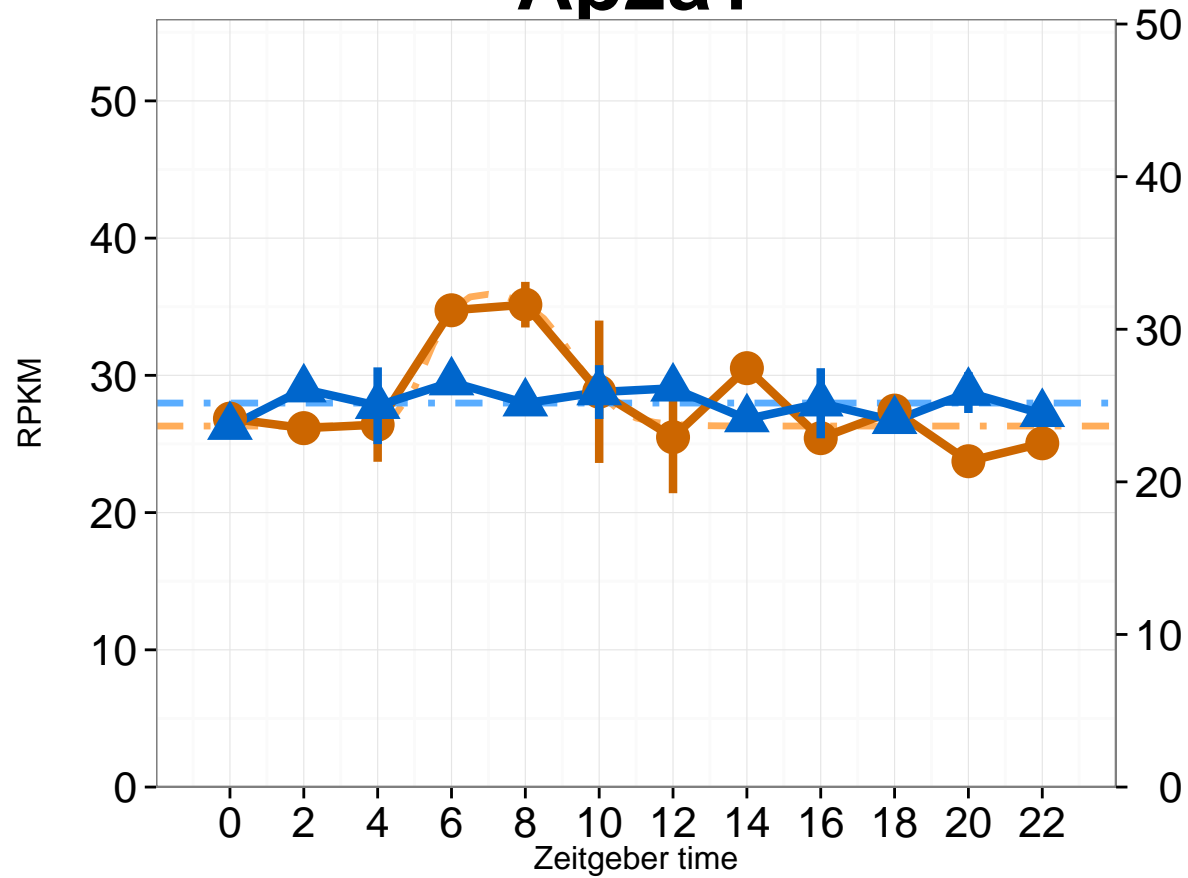

# Ap2a1

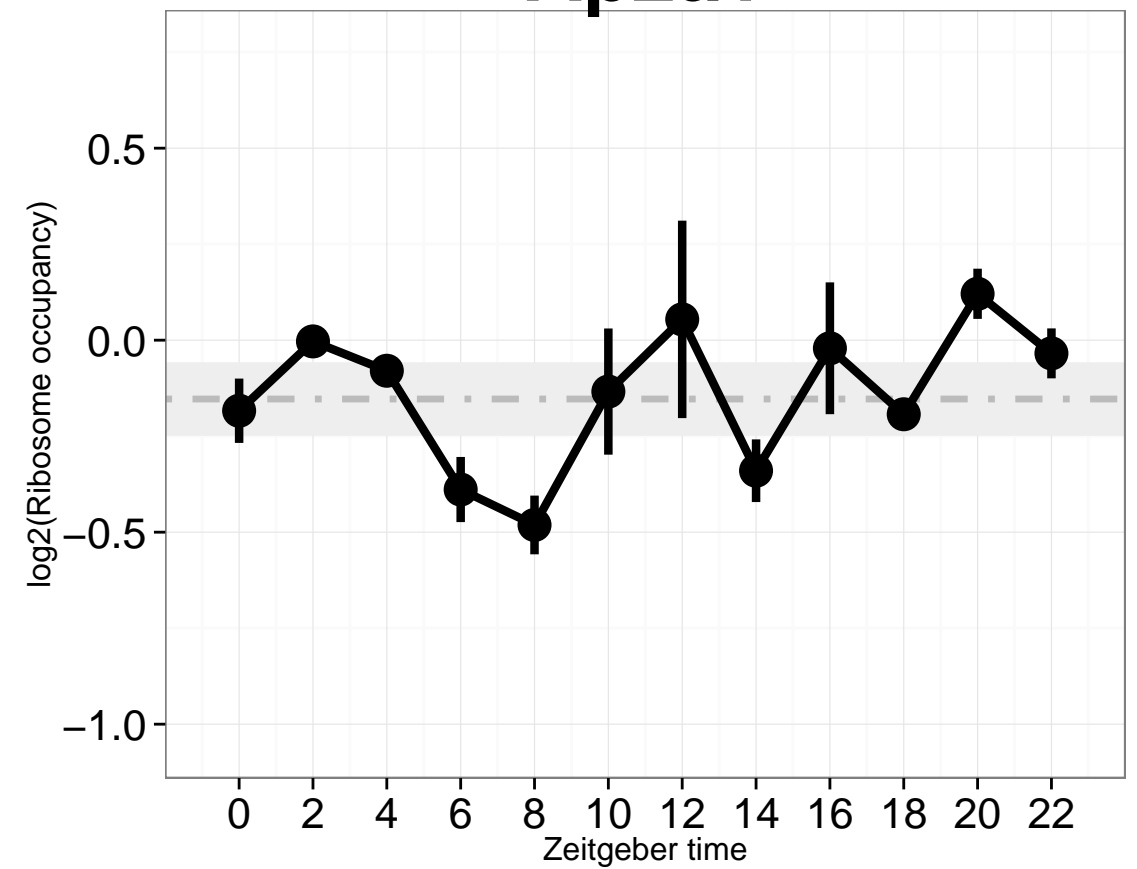

Supplement: Supplementary file 965 [file 1]

## Slc17a1

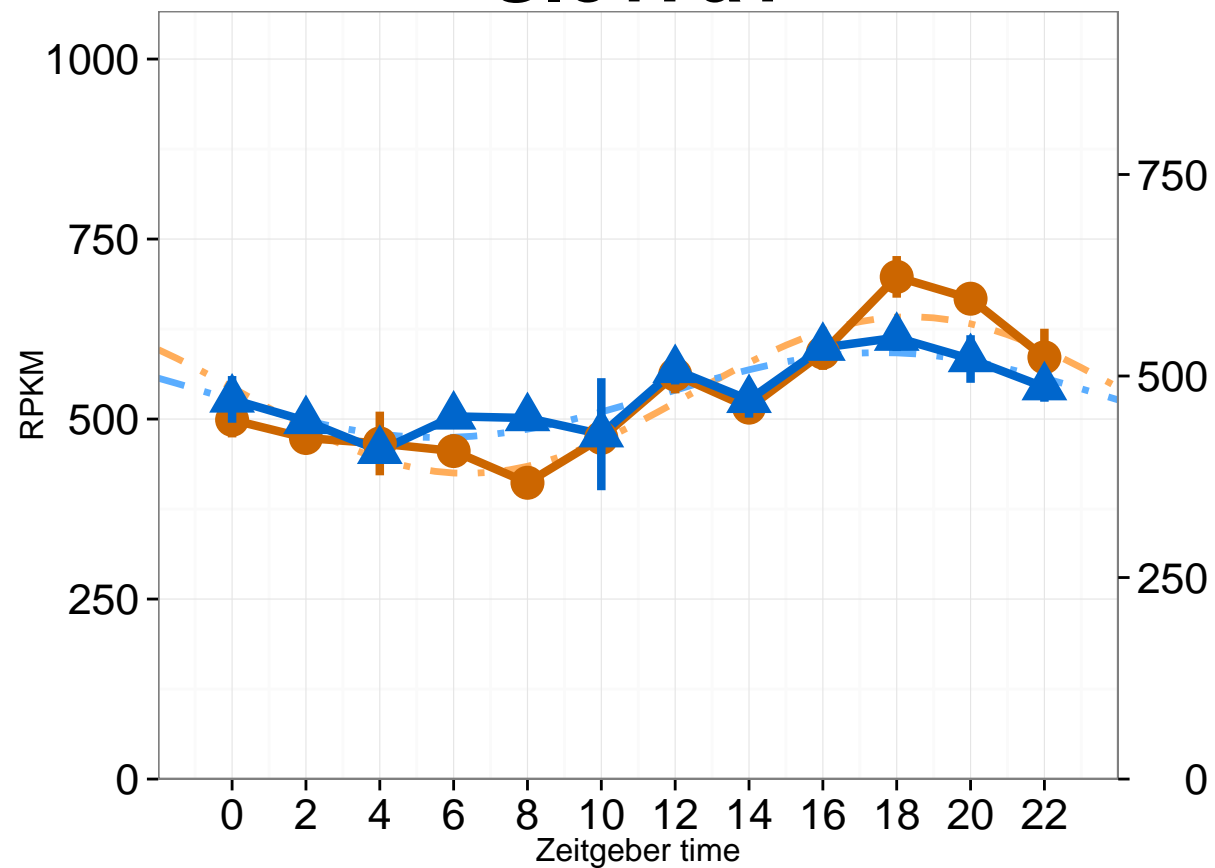

## Slc17a1

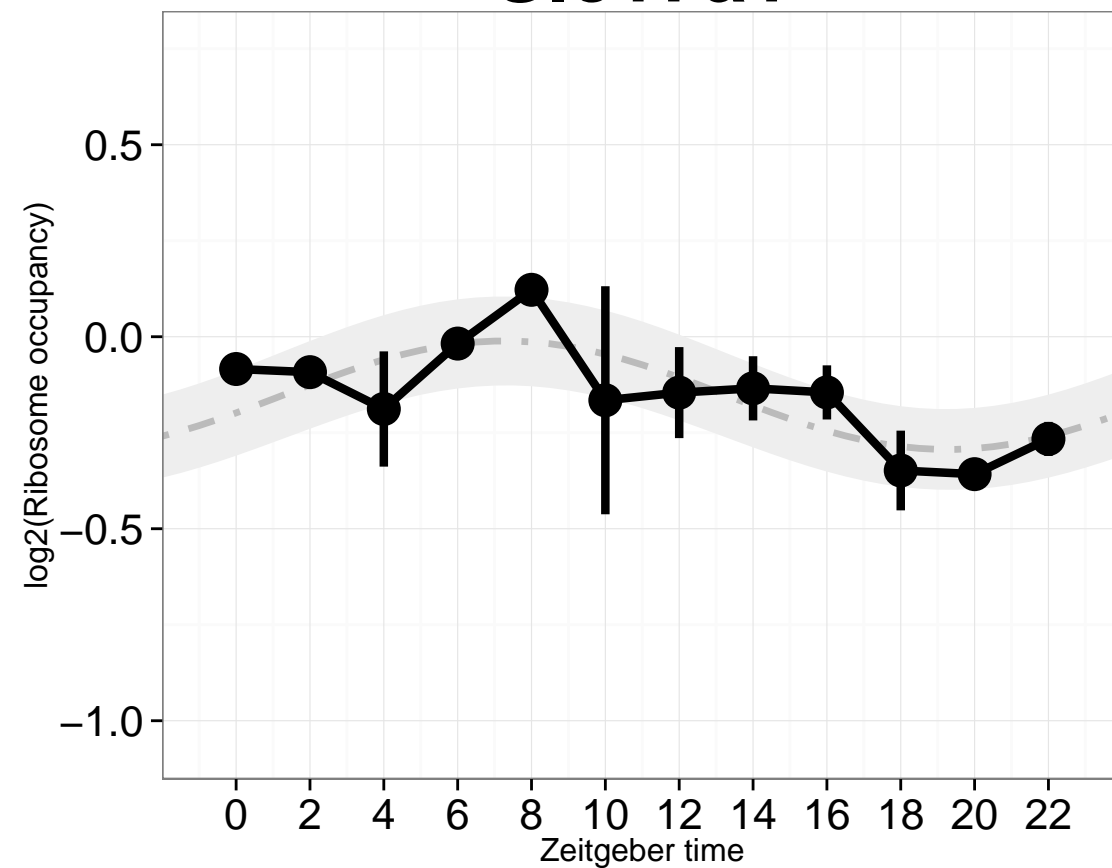

Supplement: Supplementary file 966 [file 1]

# Atp10b

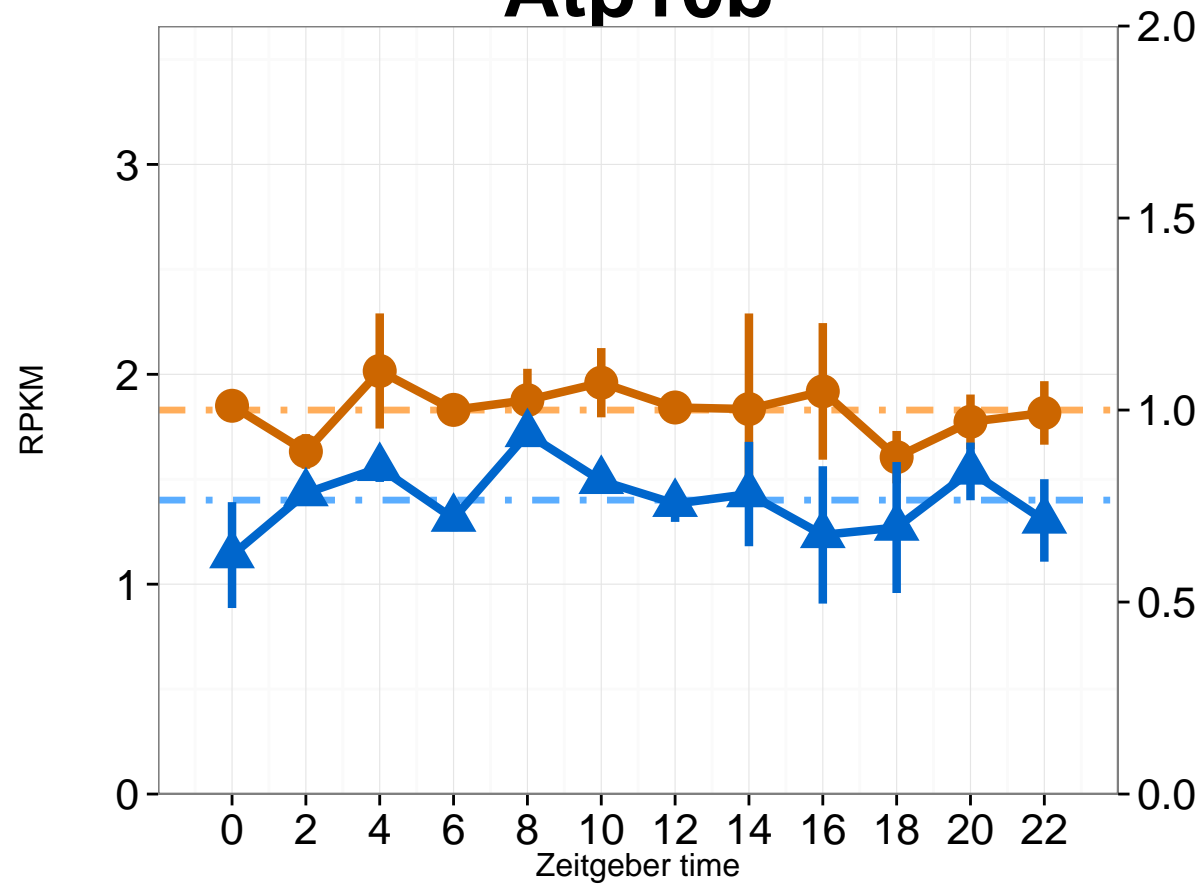

# Atp10b

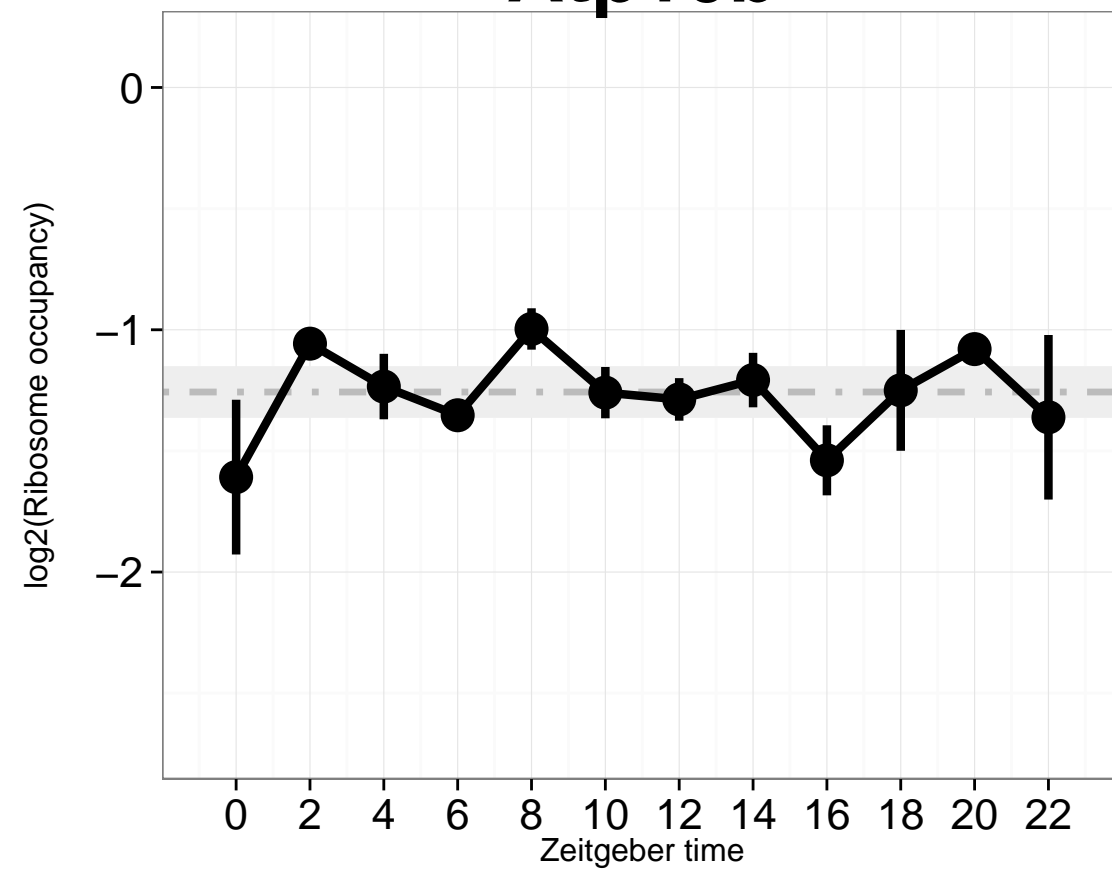

Supplement: Supplementary file 967 [file 1]

**2610524H06Rik**

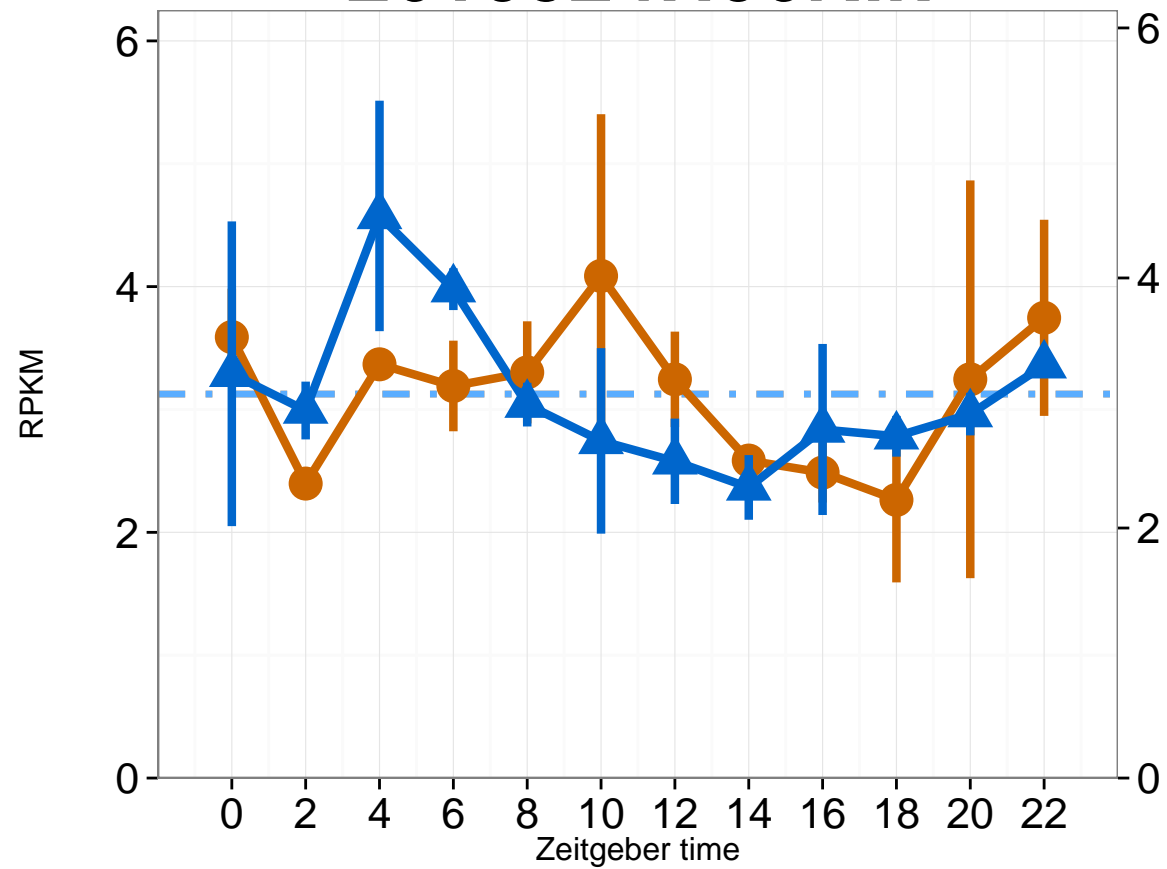

**2610524H06Rik**

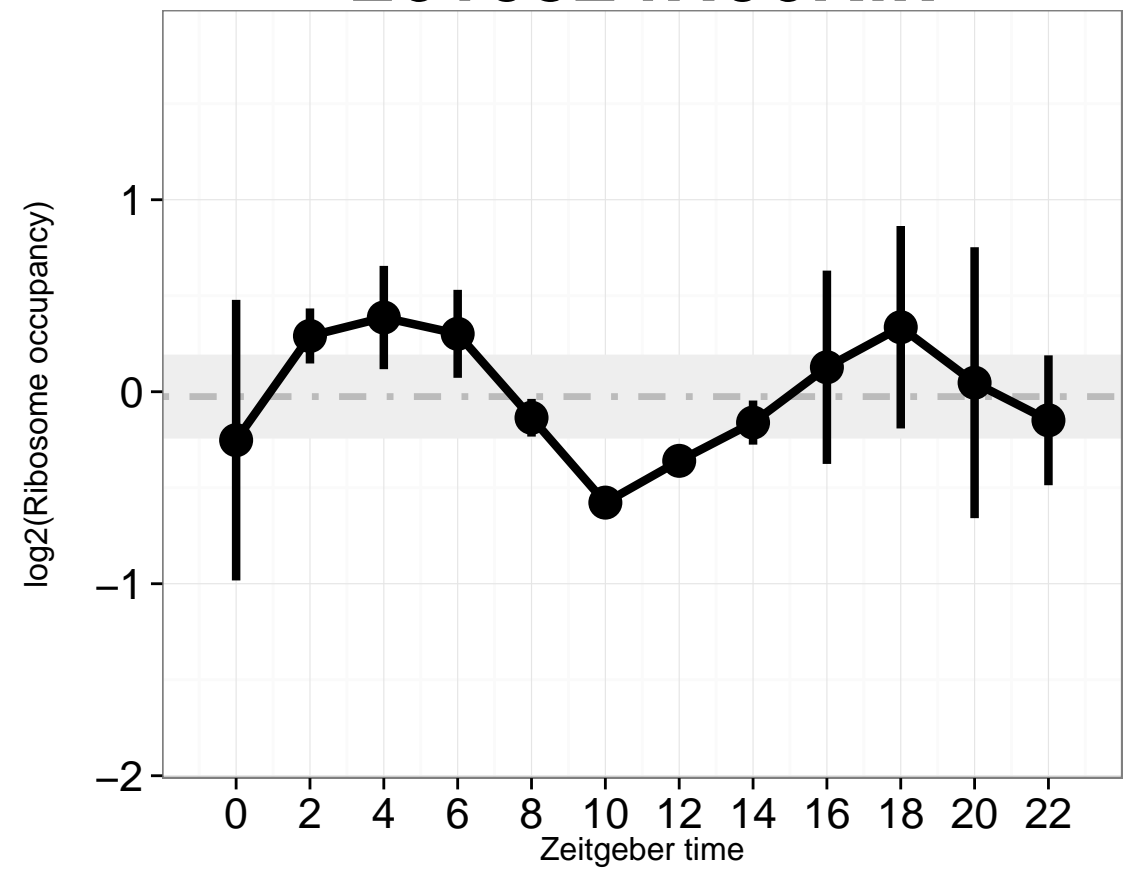

Supplement: Supplementary file 968 [file 1]

# Msm

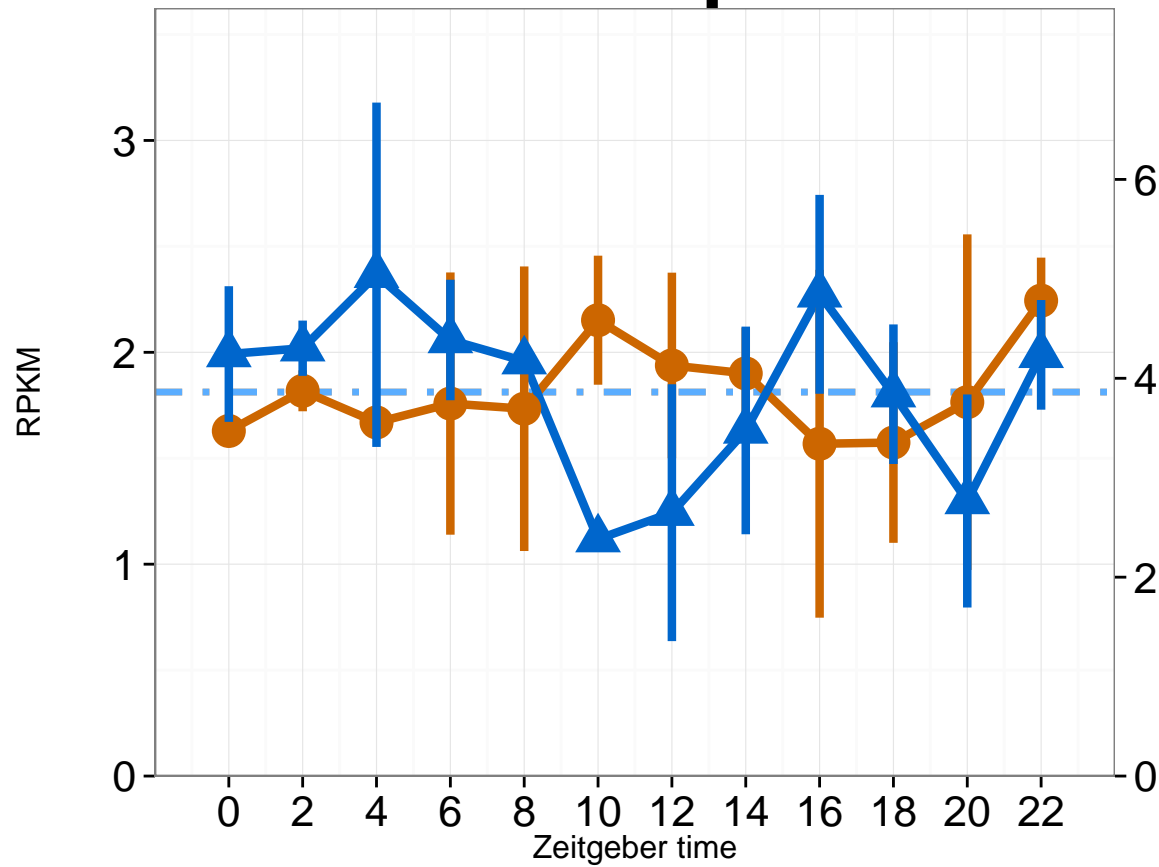

# Msm

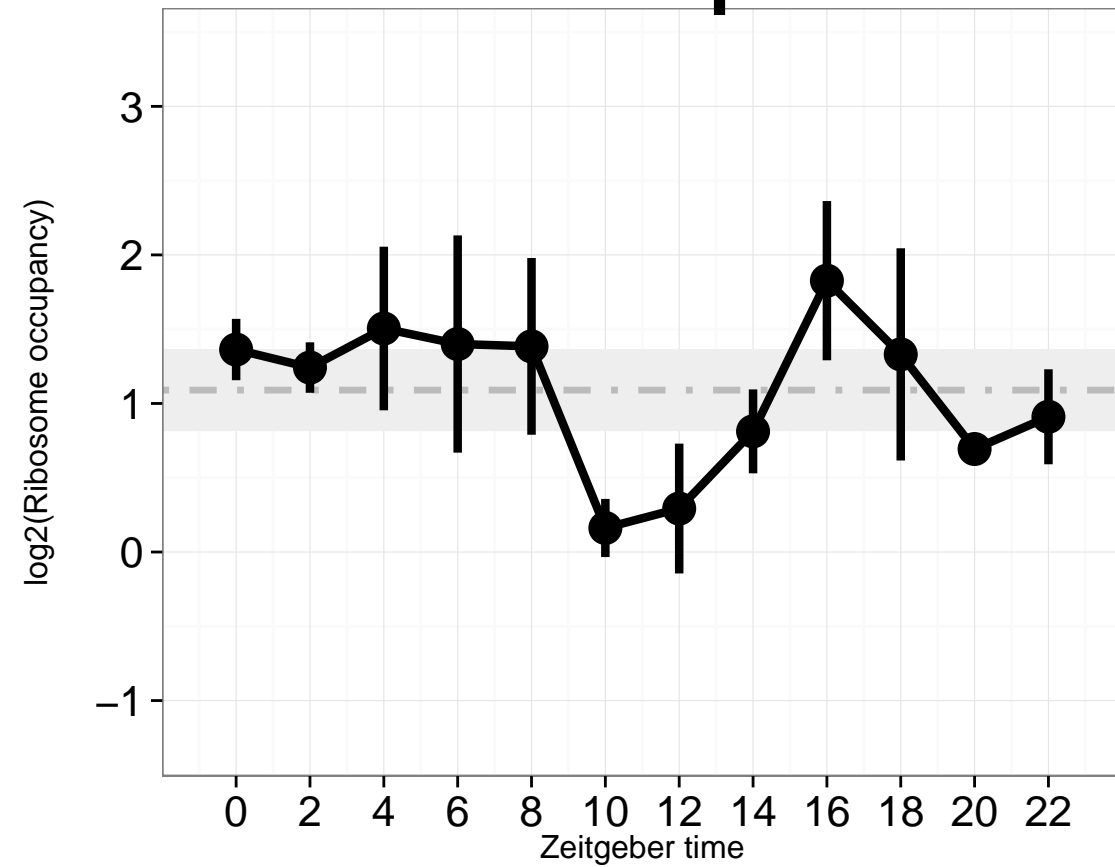

Supplement: Supplementary file 969 [file 1]

# Pcdhb20

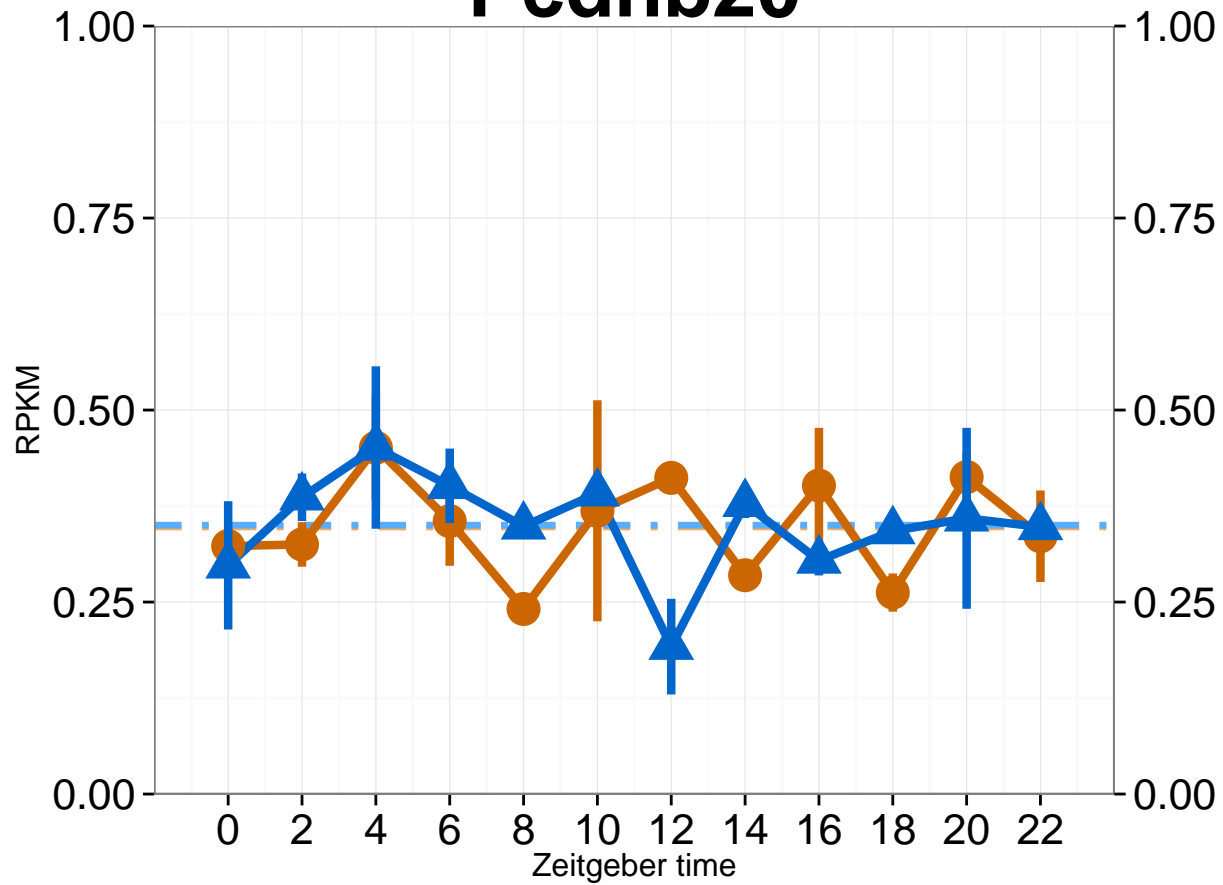

# Pcdhb20

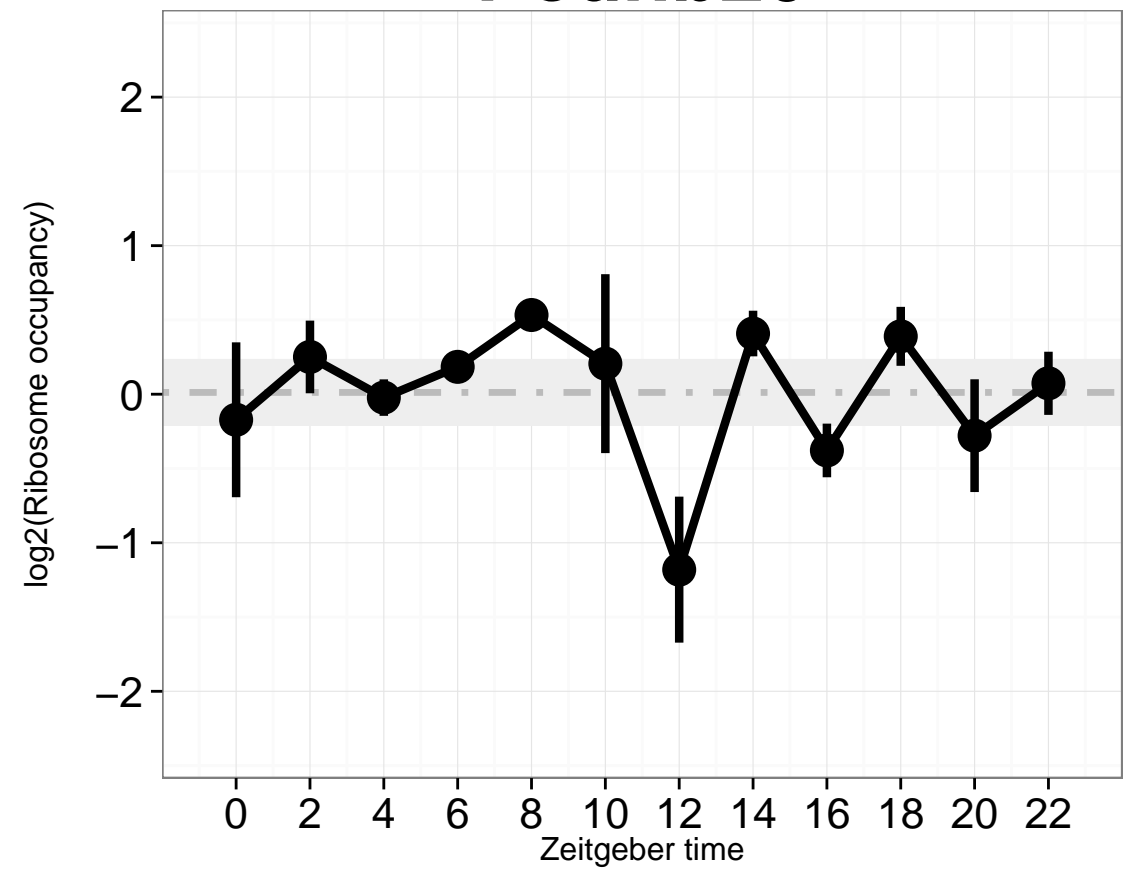

Supplement: Supplementary file 970 [file 1]

## Apaf1

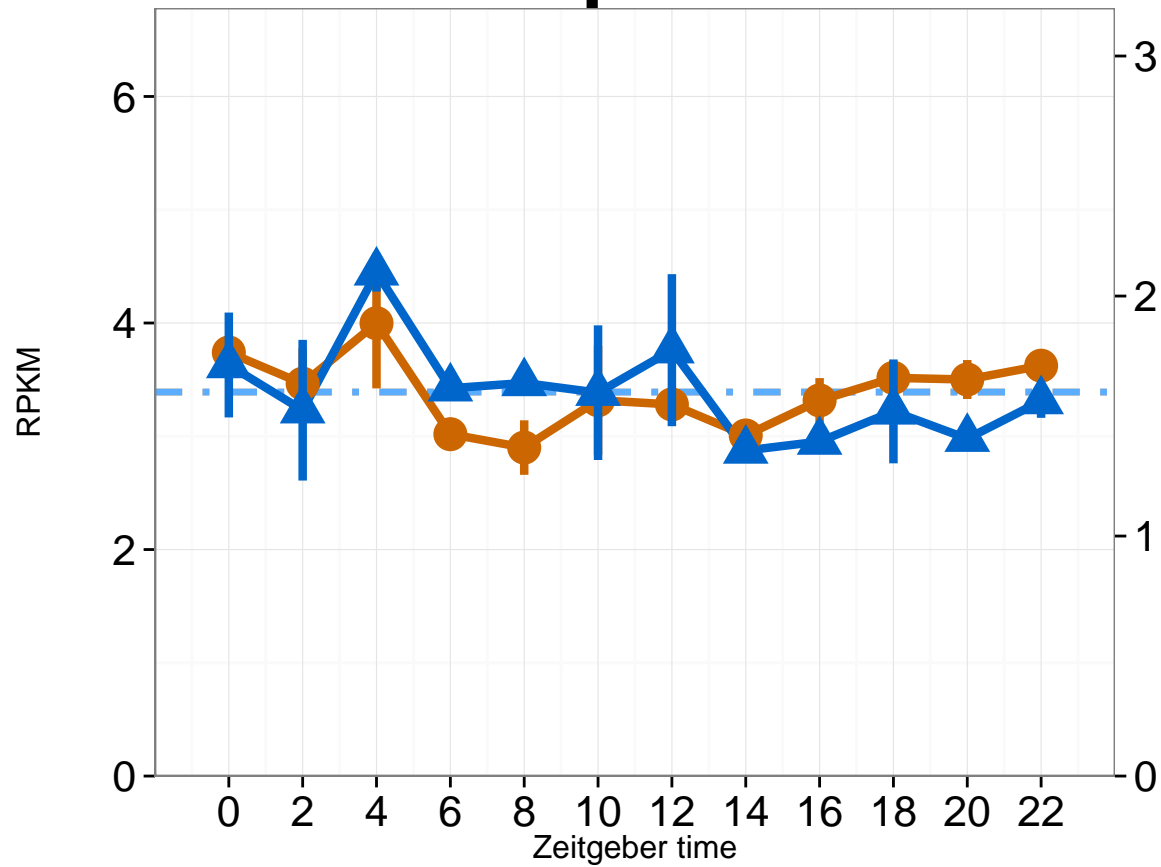

## Apaf1

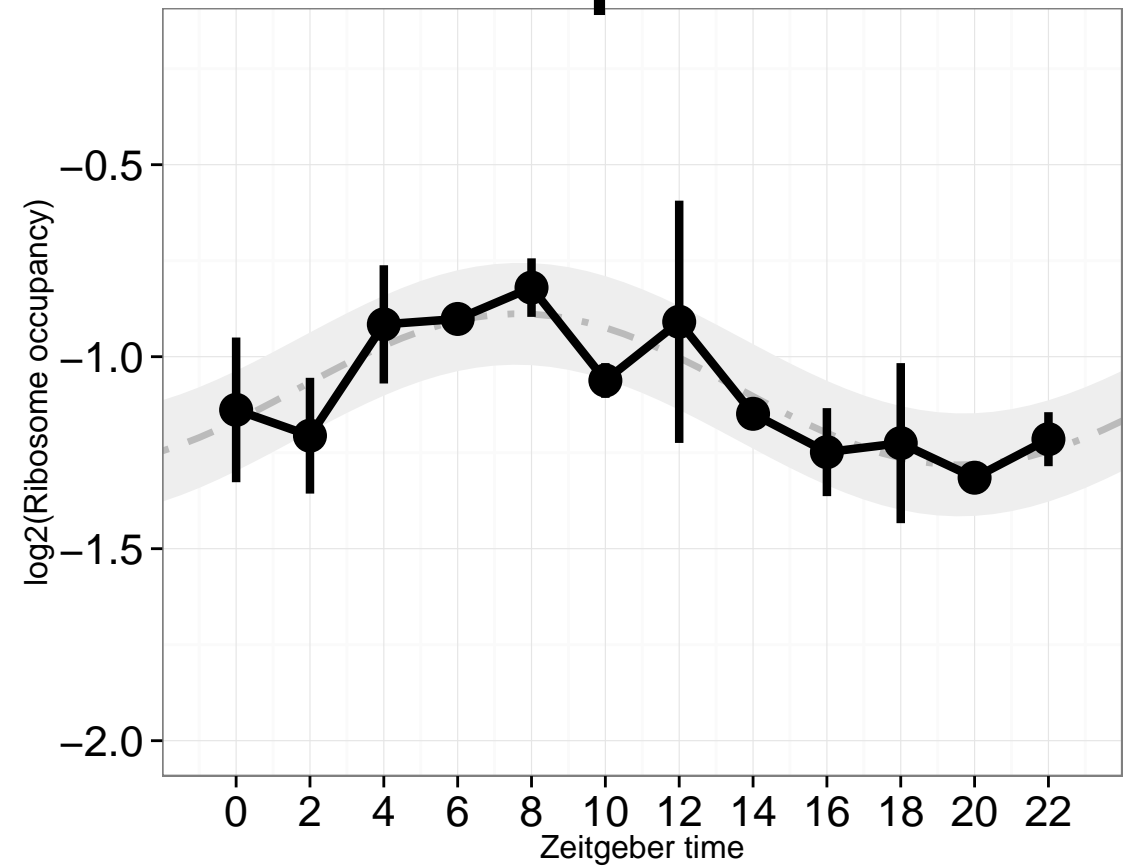

Supplement: Supplementary file 971 [file 1]

# Clec4a1

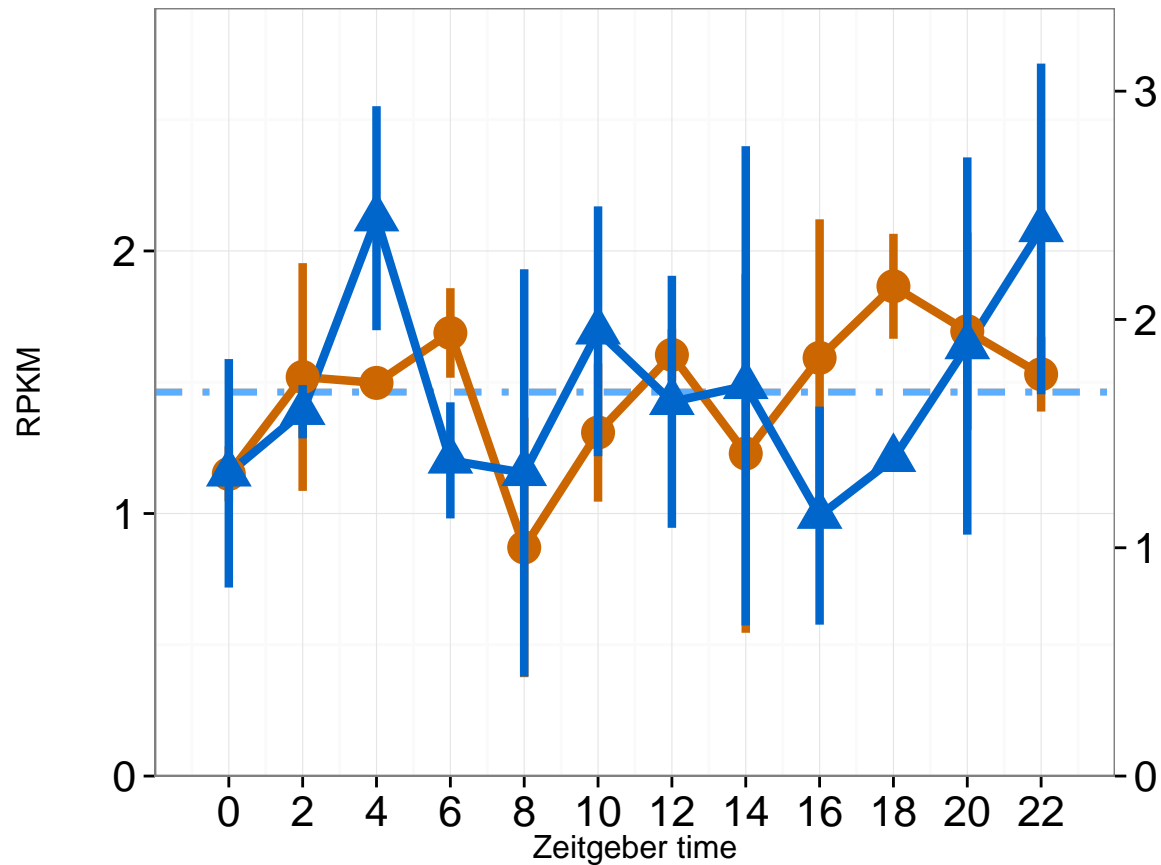

# Clec4a1

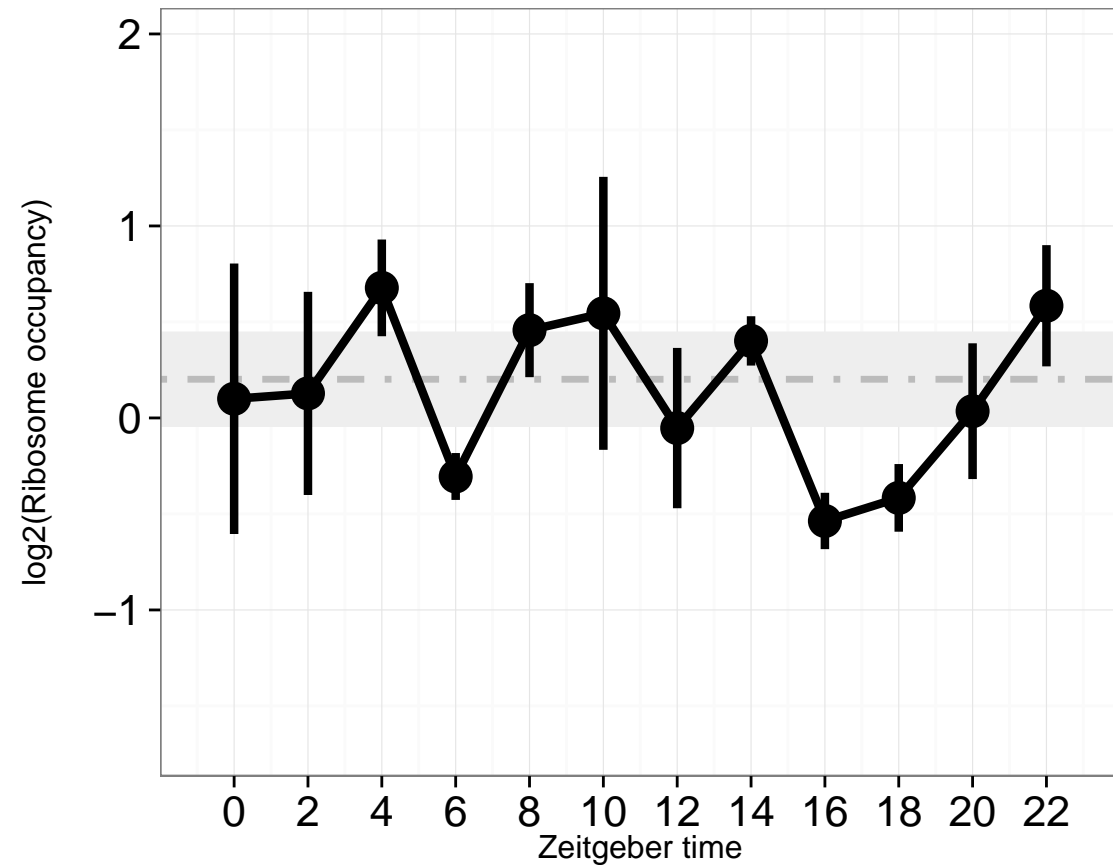

Supplement: Supplementary file 972 [file 1]

## Nmral1

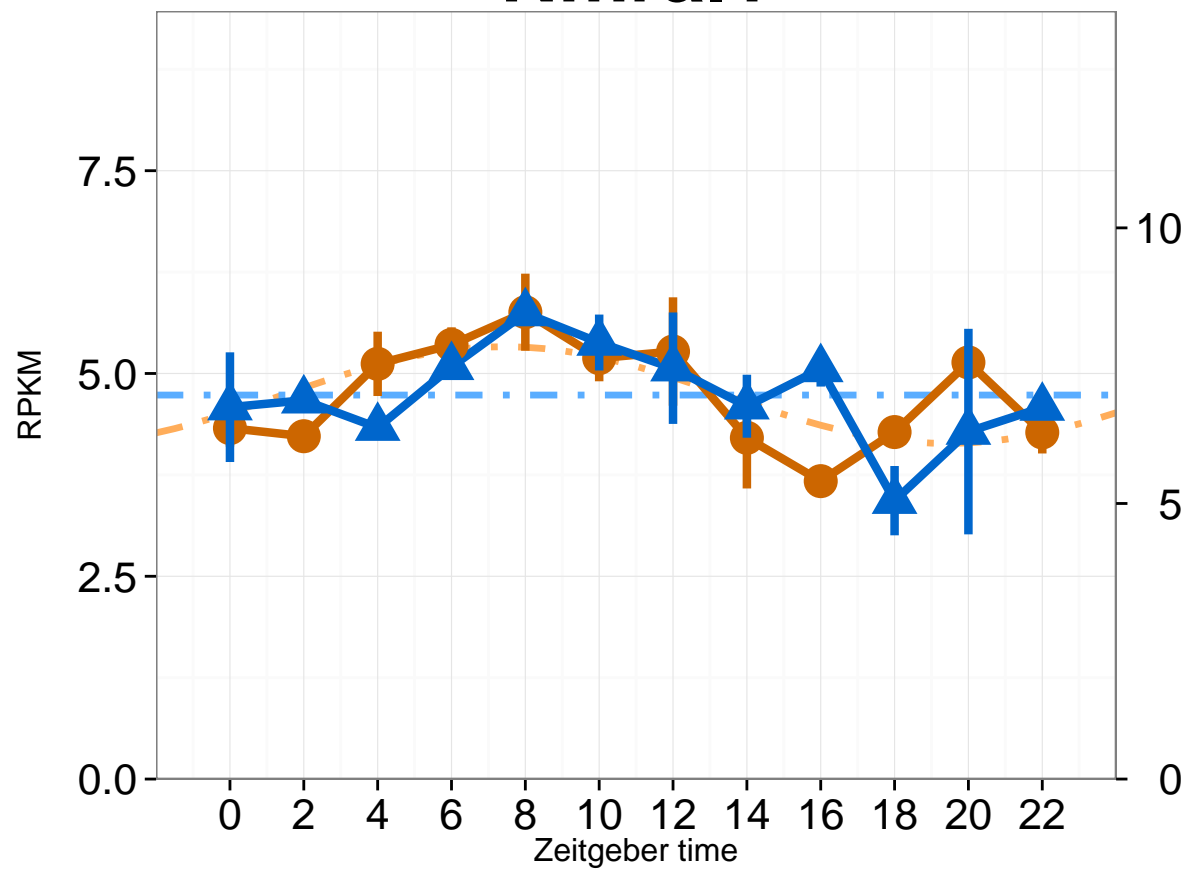

## Nmral1

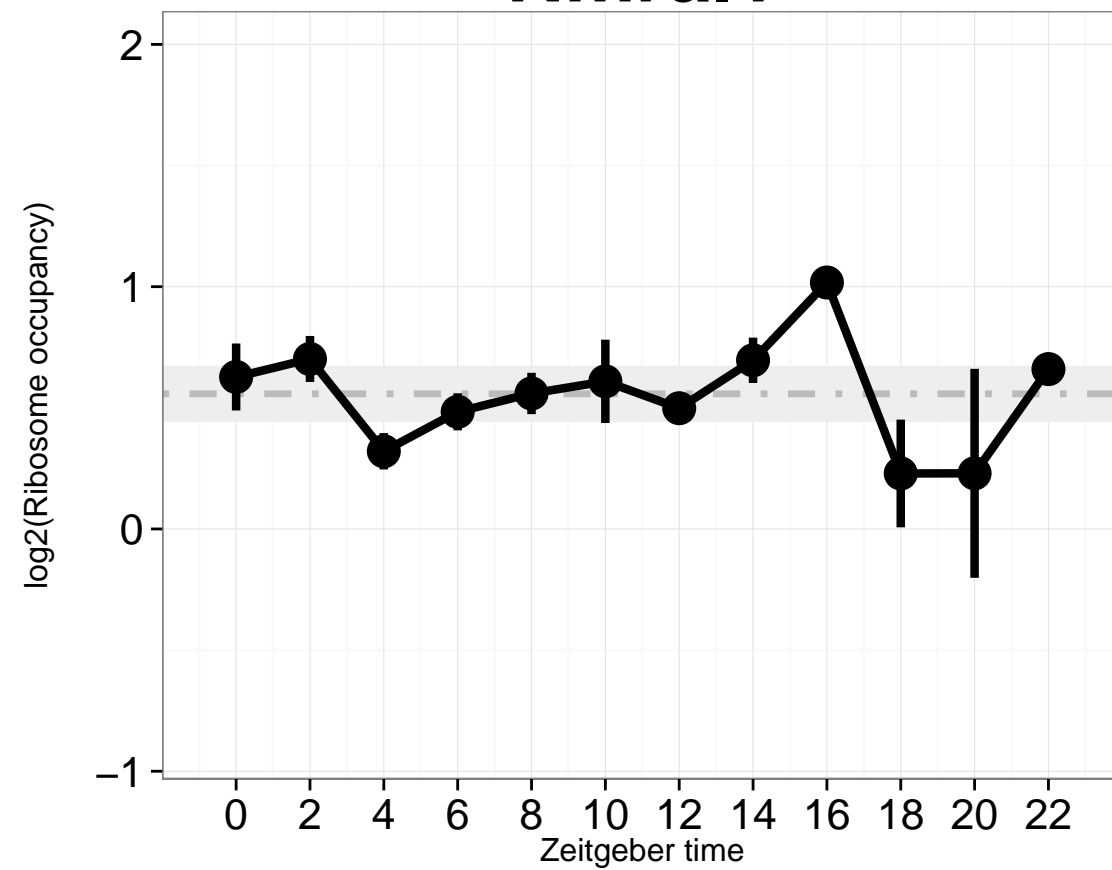

Supplement: Supplementary file 973 [file 1]

# Prmt6

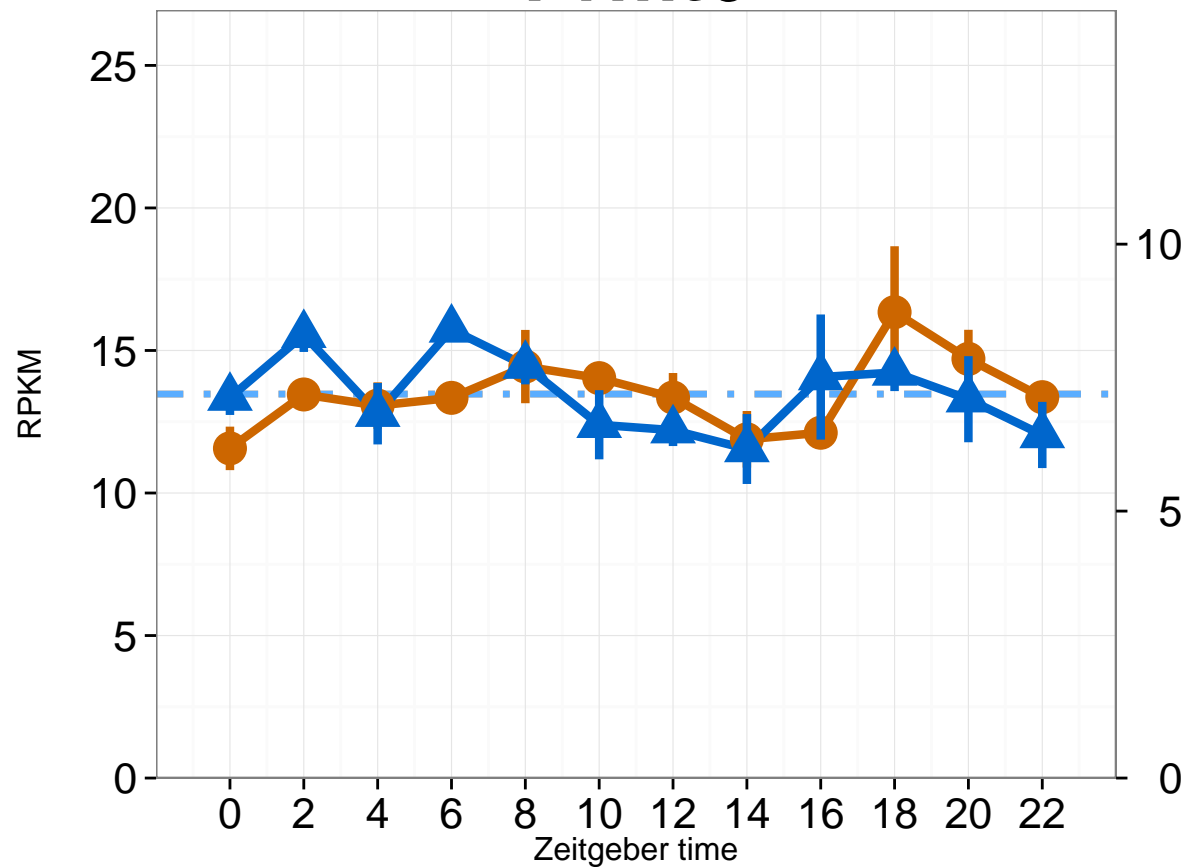

# Prmt6

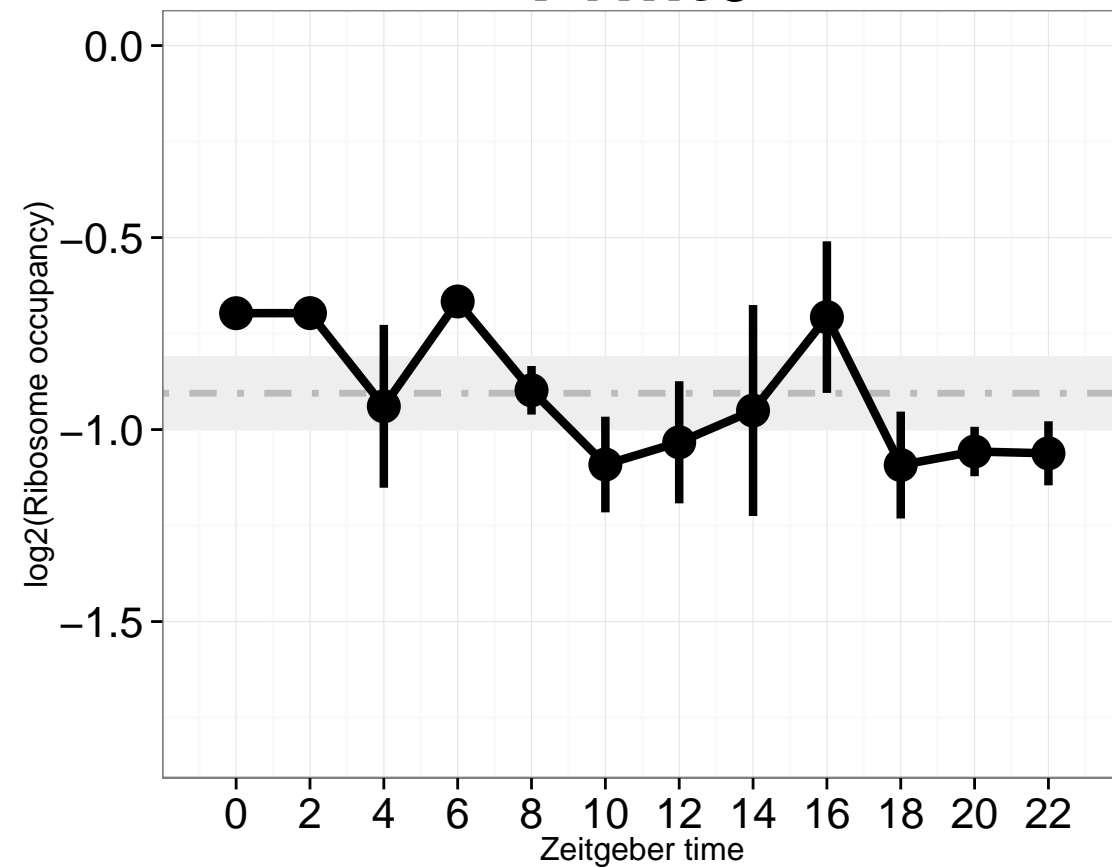

Supplement: Supplementary file 974 [file 1]

# Pabpc4

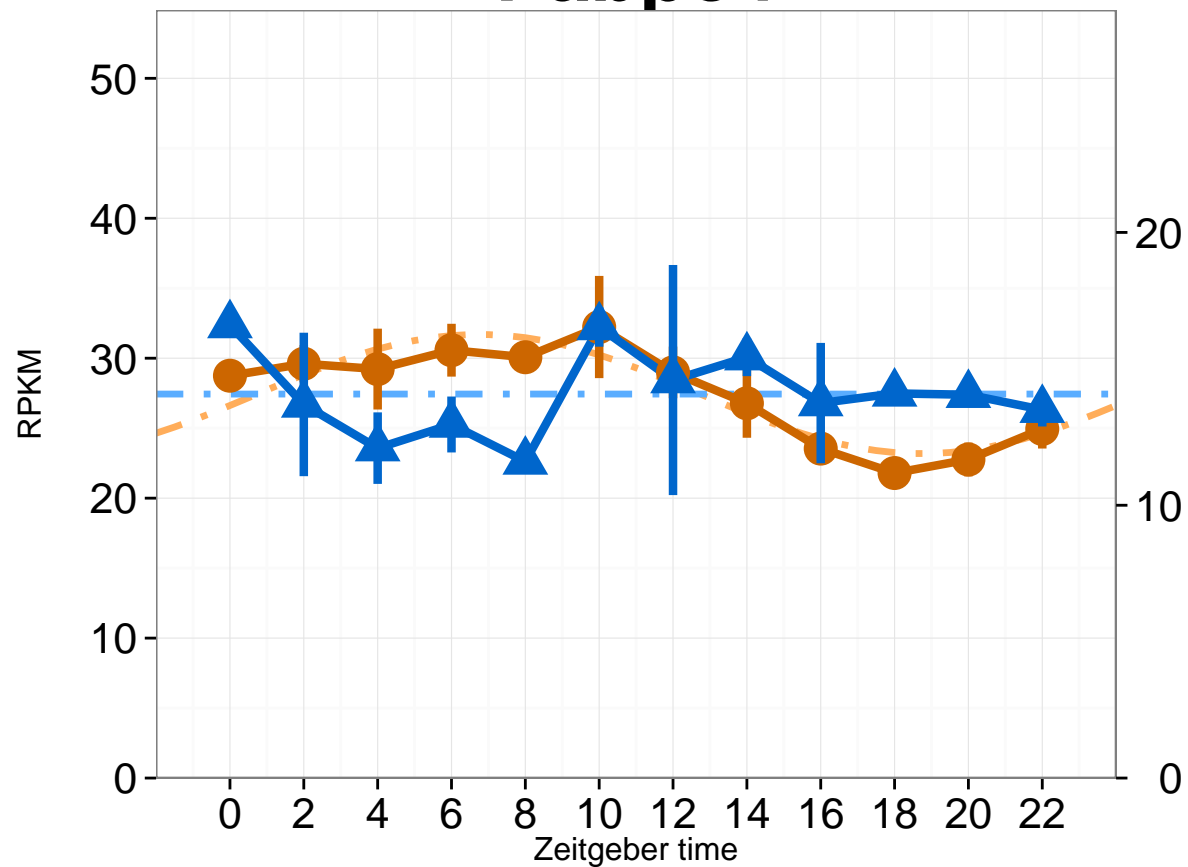

# Pabpc4

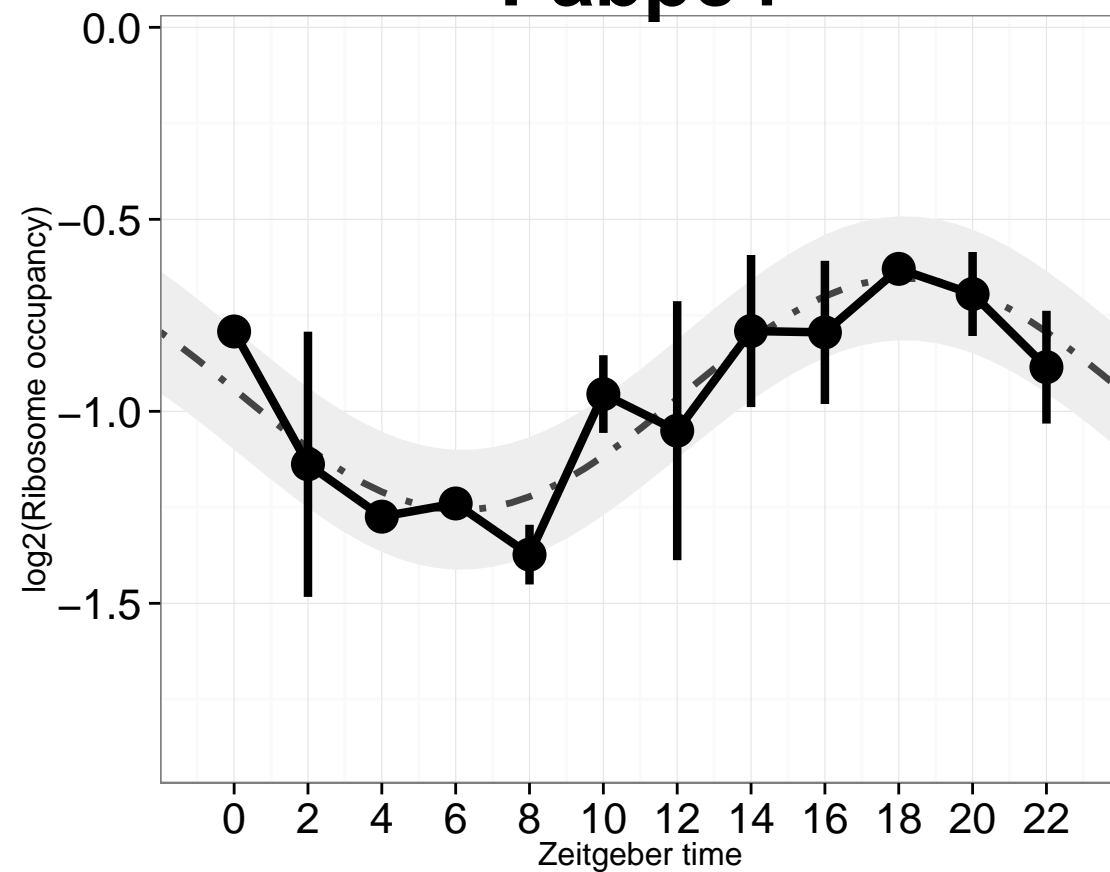

Supplement: Supplementary file 975 [file 1]

## EII2

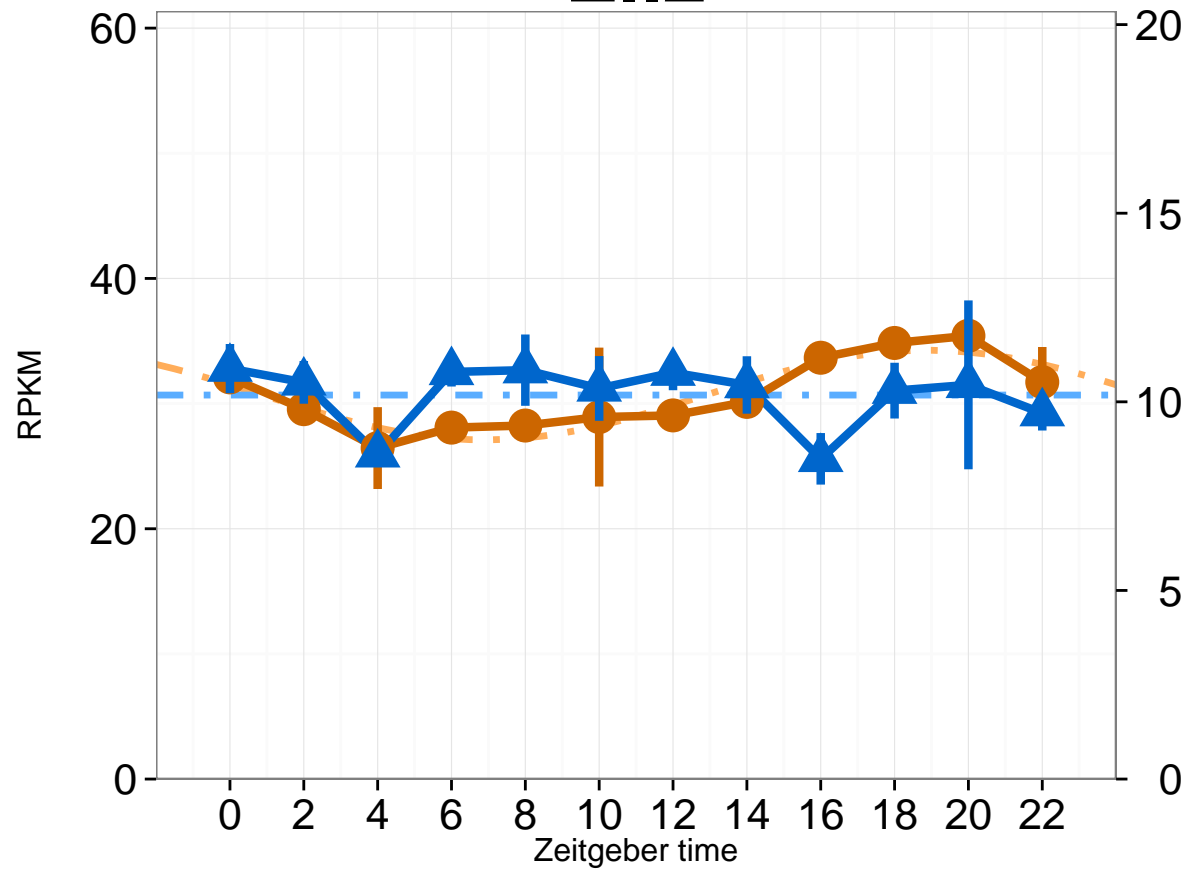

## EII2

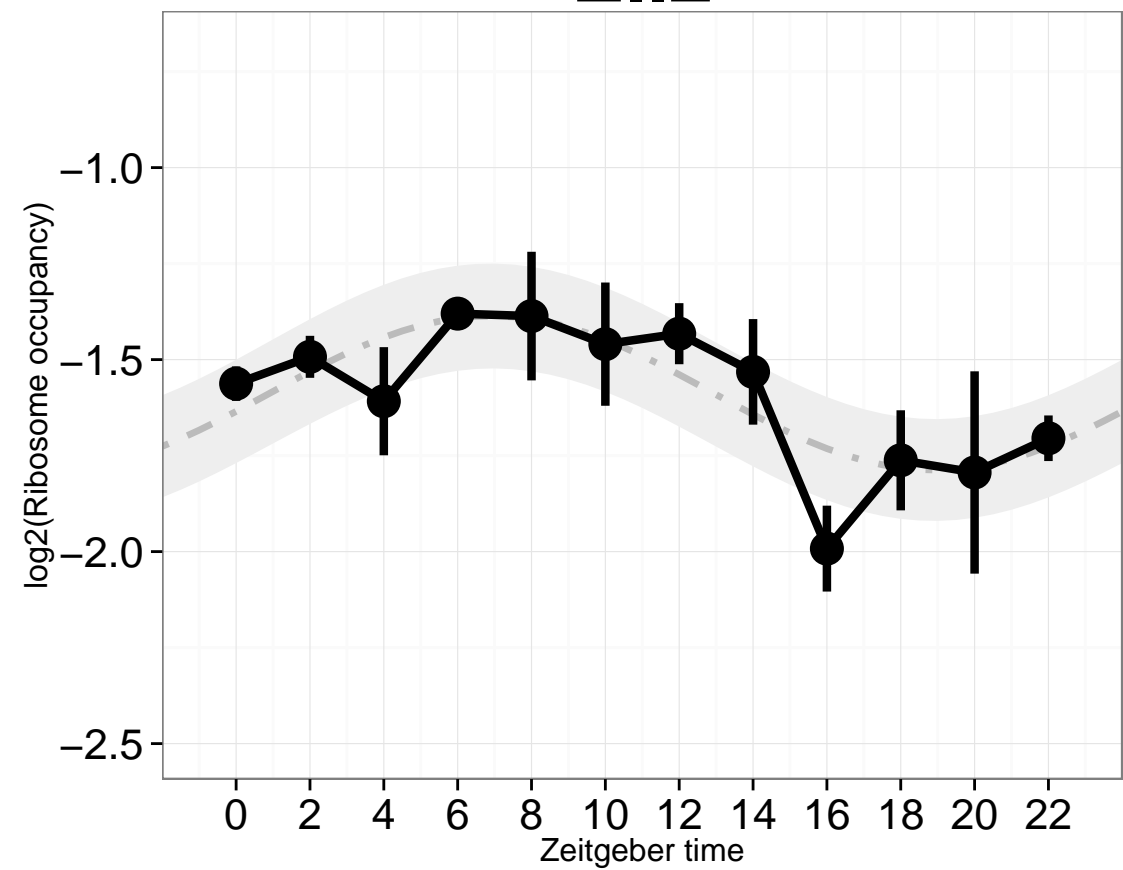

Supplement: Supplementary file 976 [file 1]

## Scd1

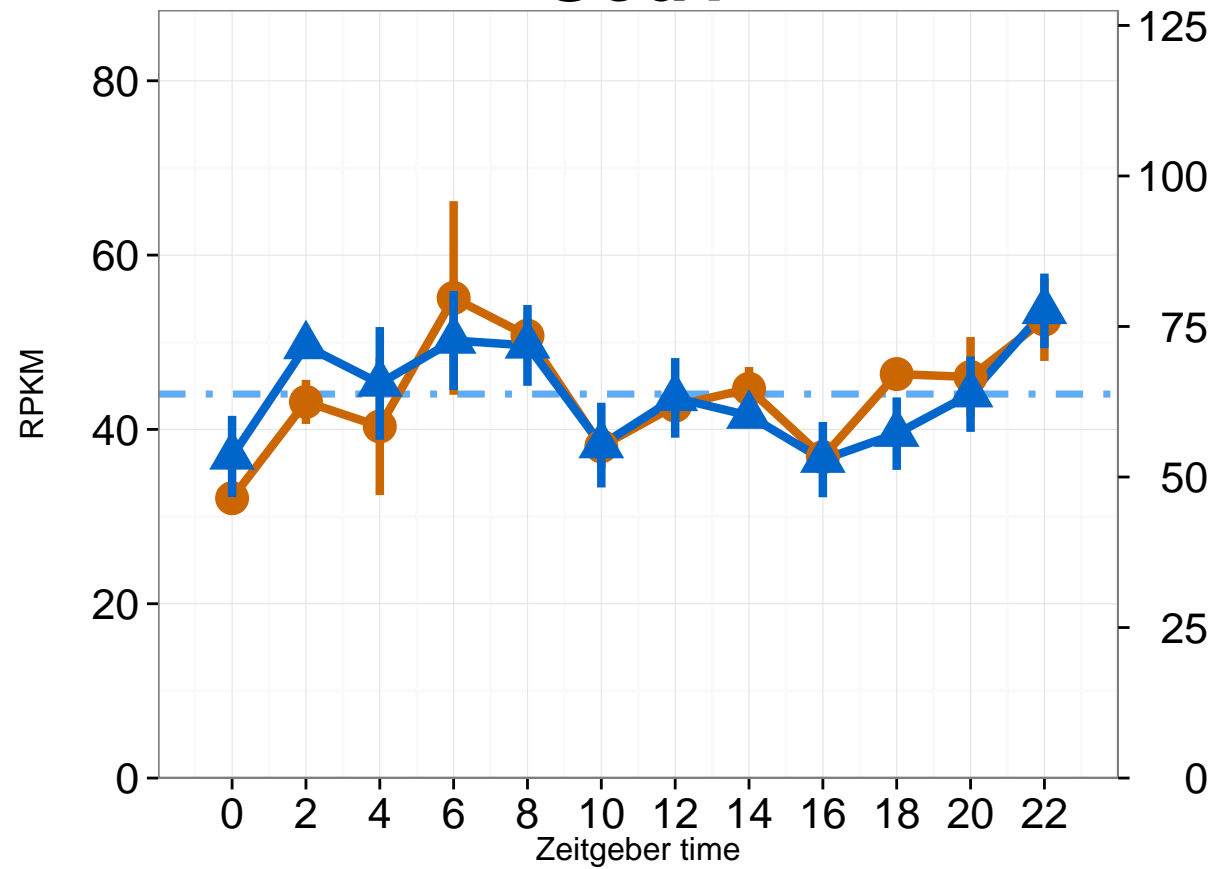

## Scd1

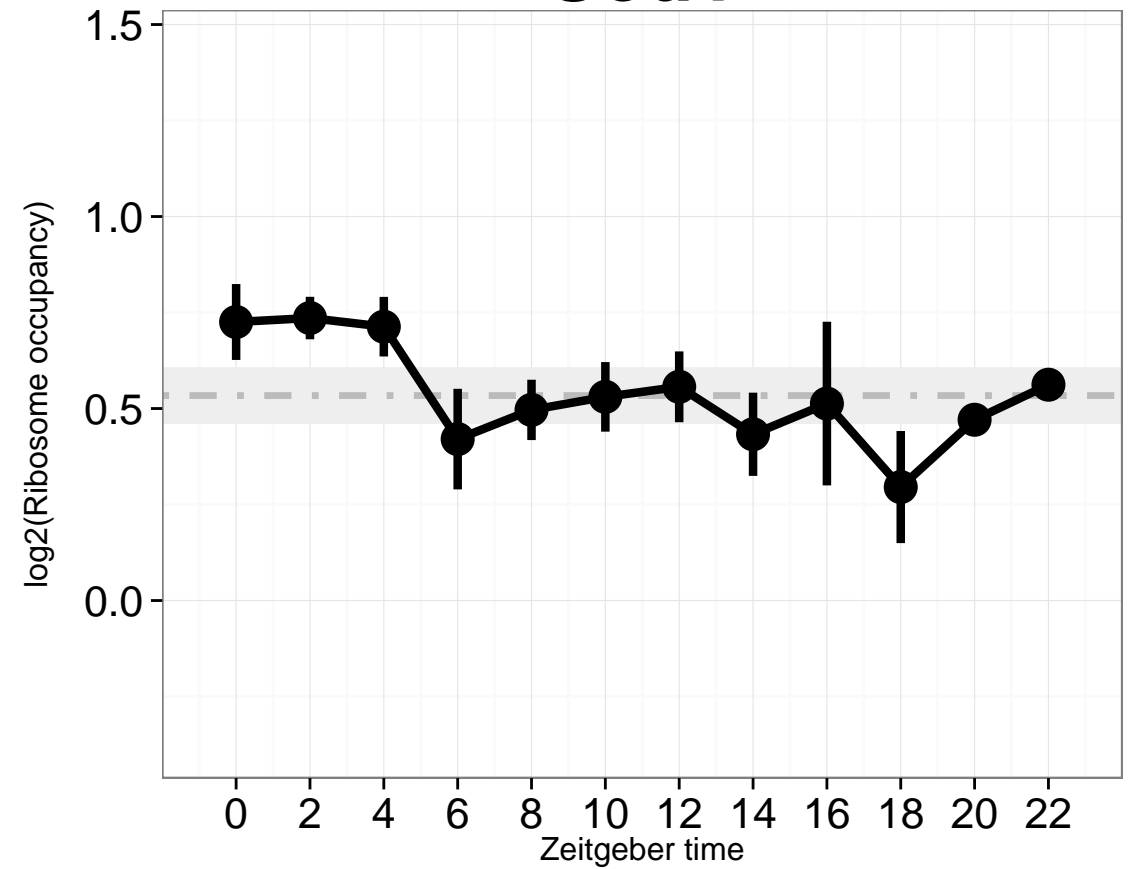

Supplement: Supplementary file 977 [file 1]

# Zfp64

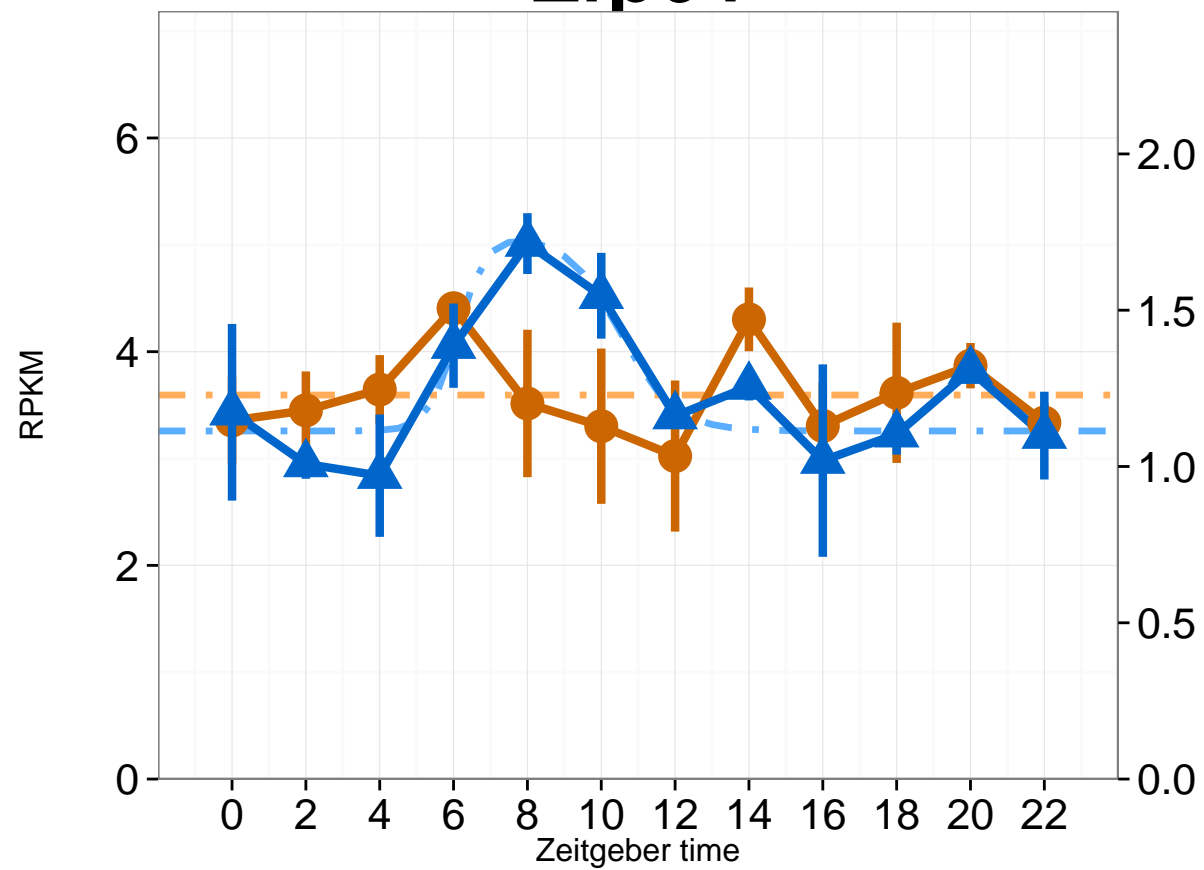

# Zfp64

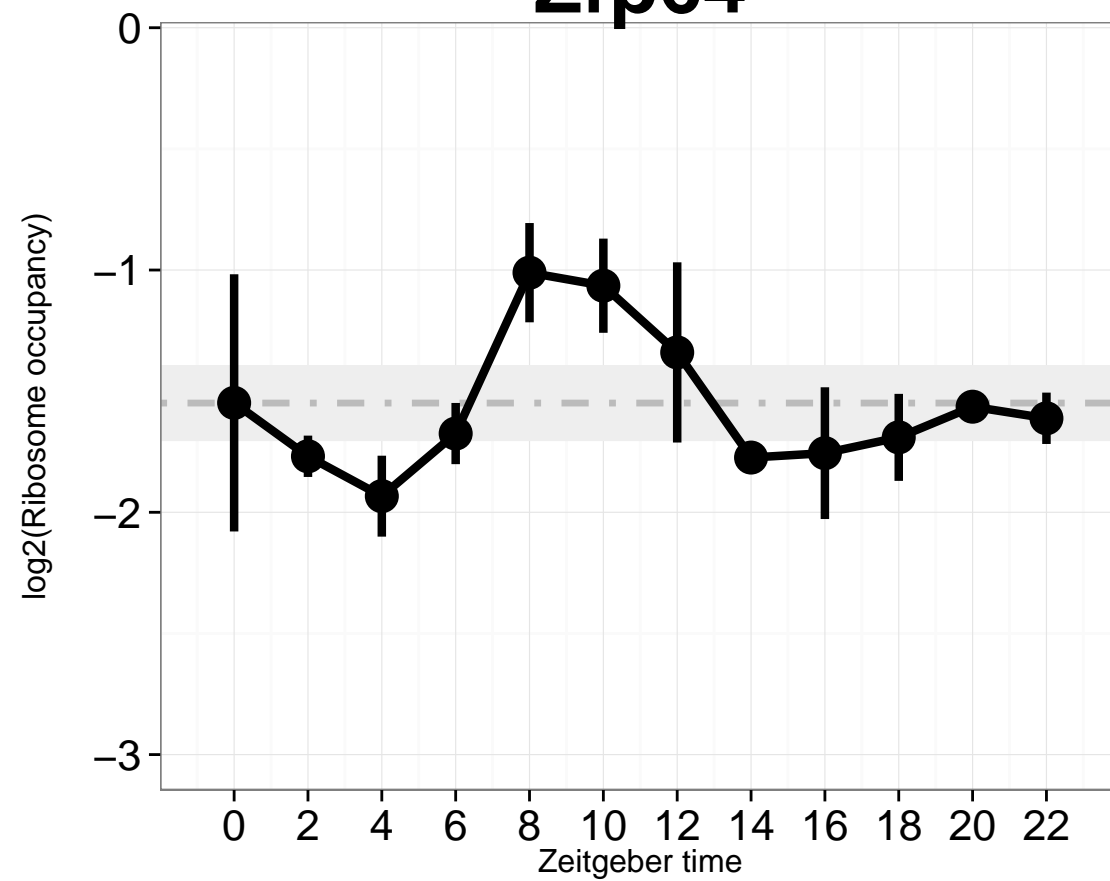

Supplement: Supplementary file 978 [file 1]

# Cluap1

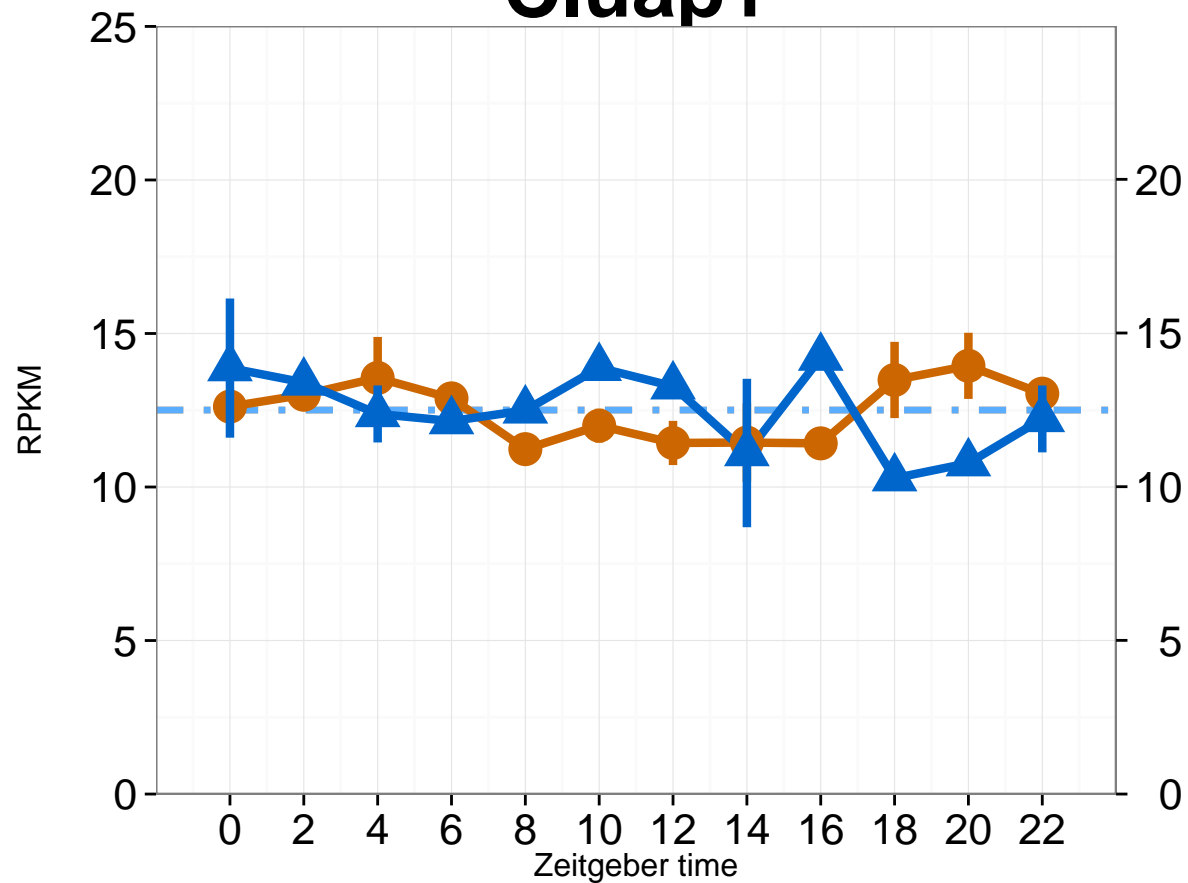

# Cluap1

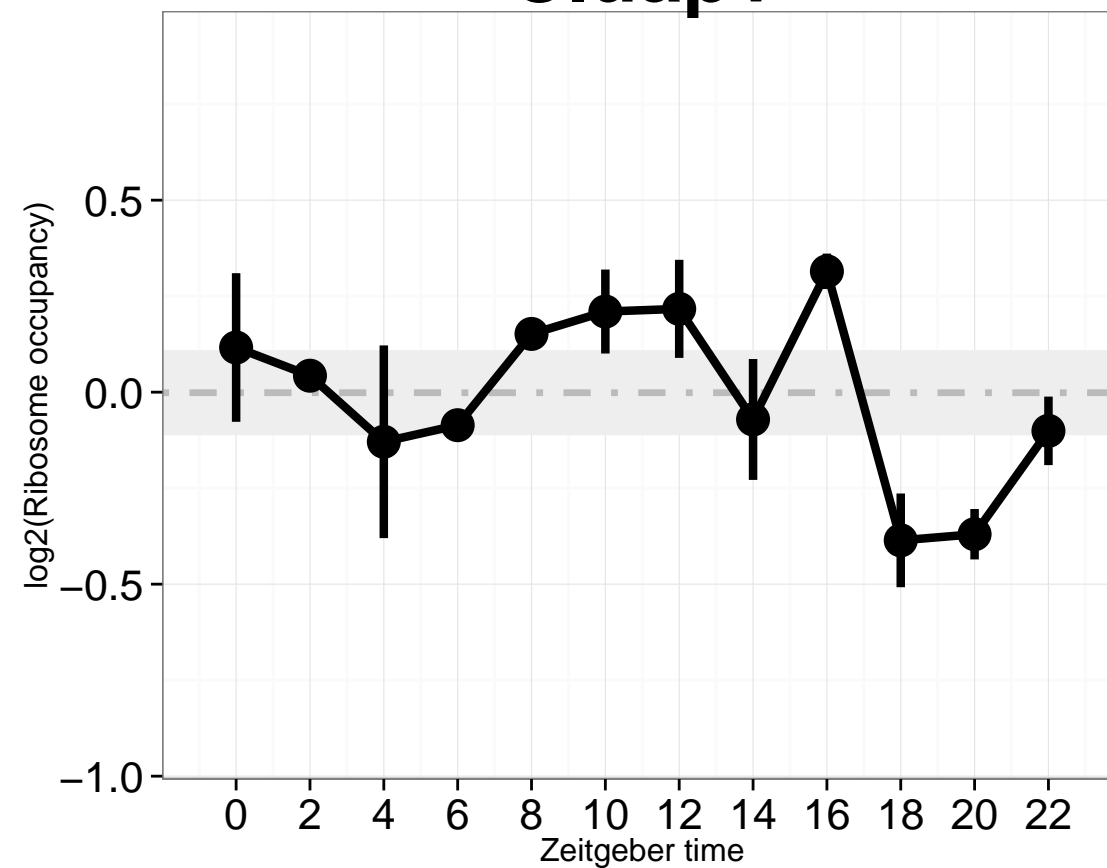

Supplement: Supplementary file 979 [file 1]

# Gdpd1

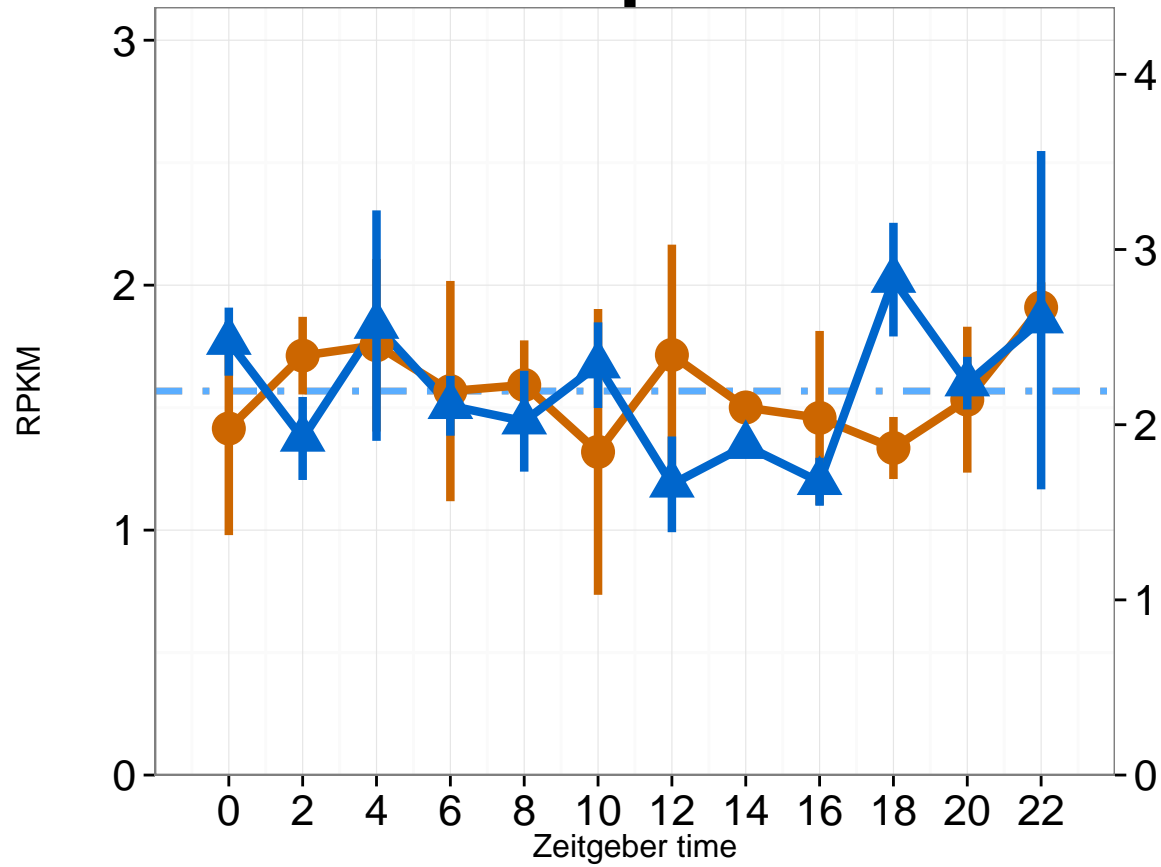

# Gdpd1

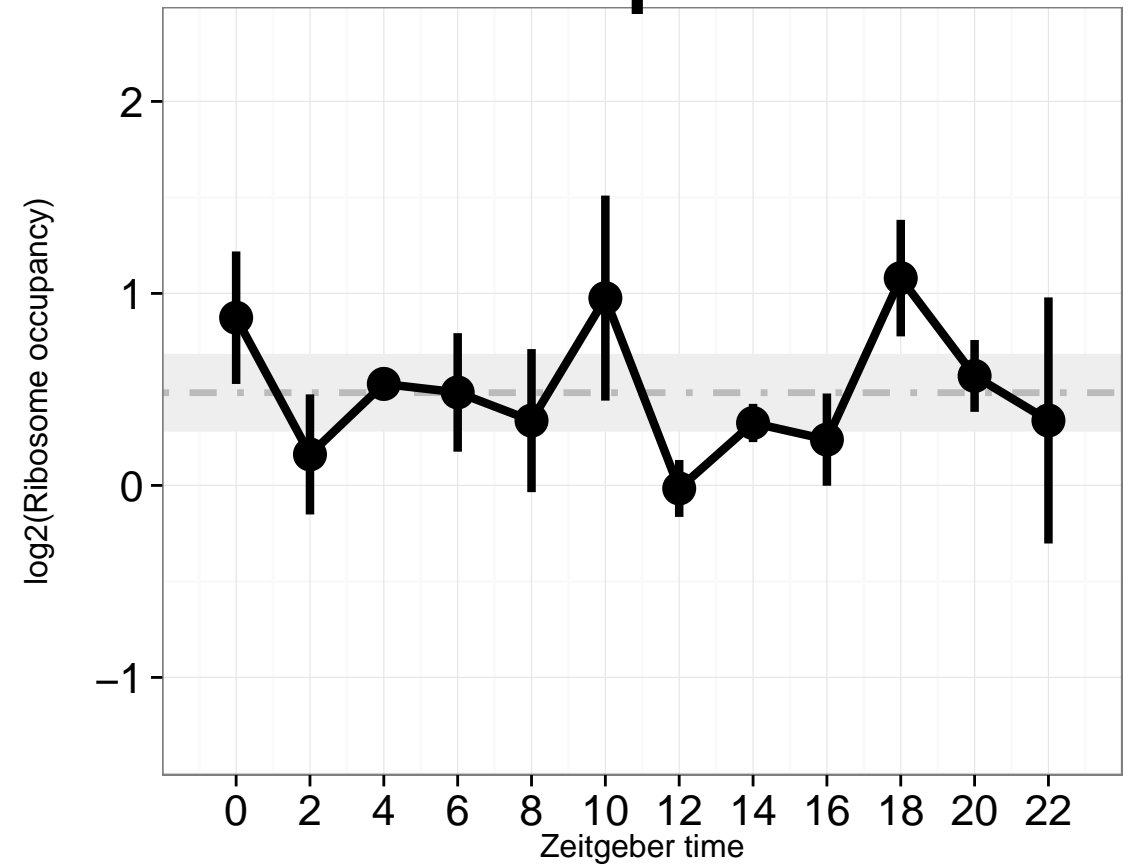

Supplement: Supplementary file 980 [file 1]

## Abi1

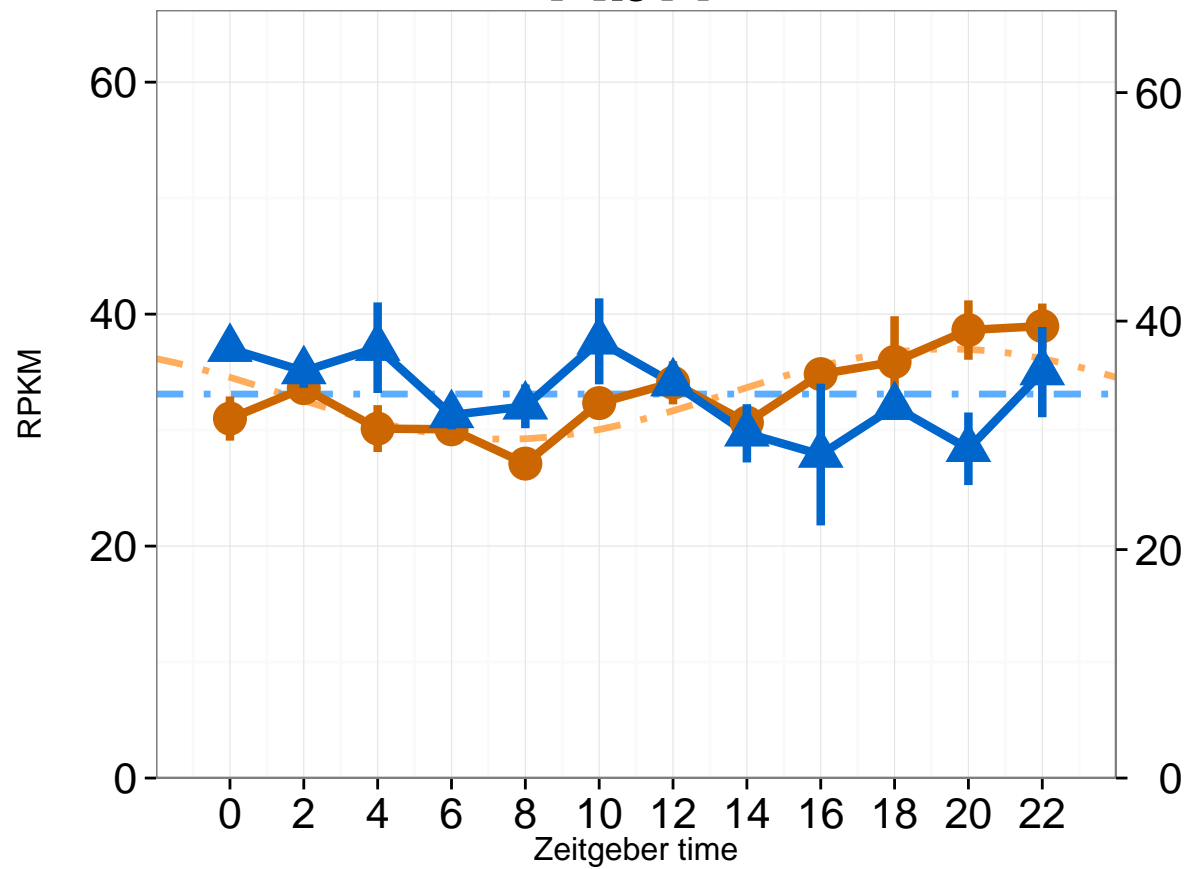

## Abi1

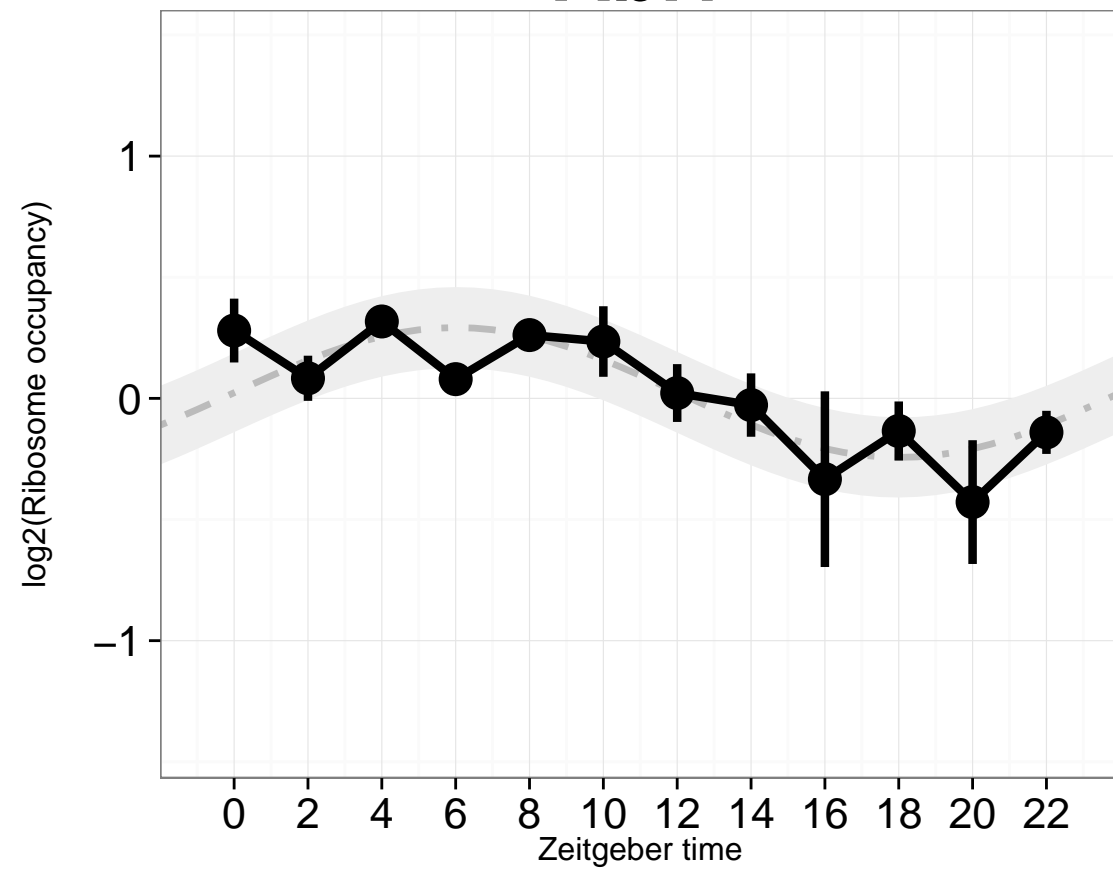

Supplement: Supplementary file 981 [file 1]

## Dynlrb1

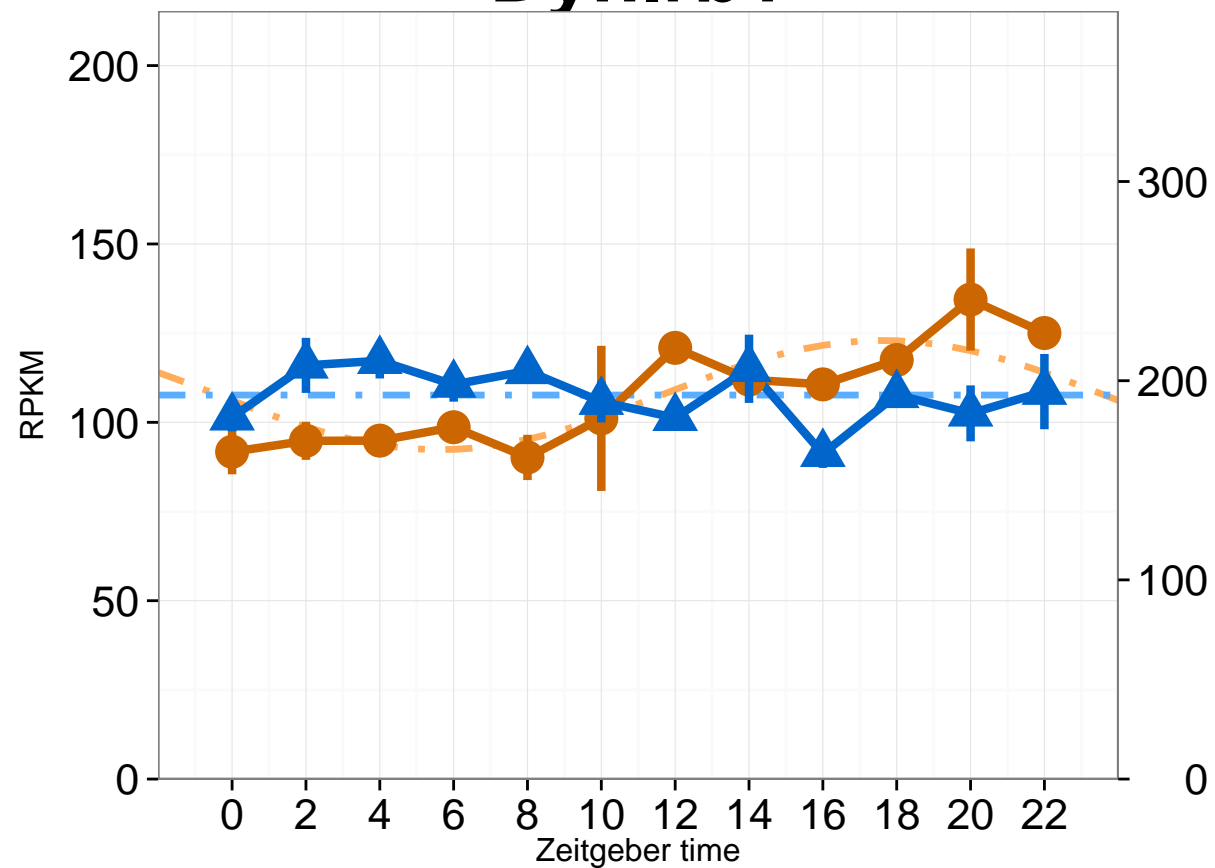

## Dynlrb1

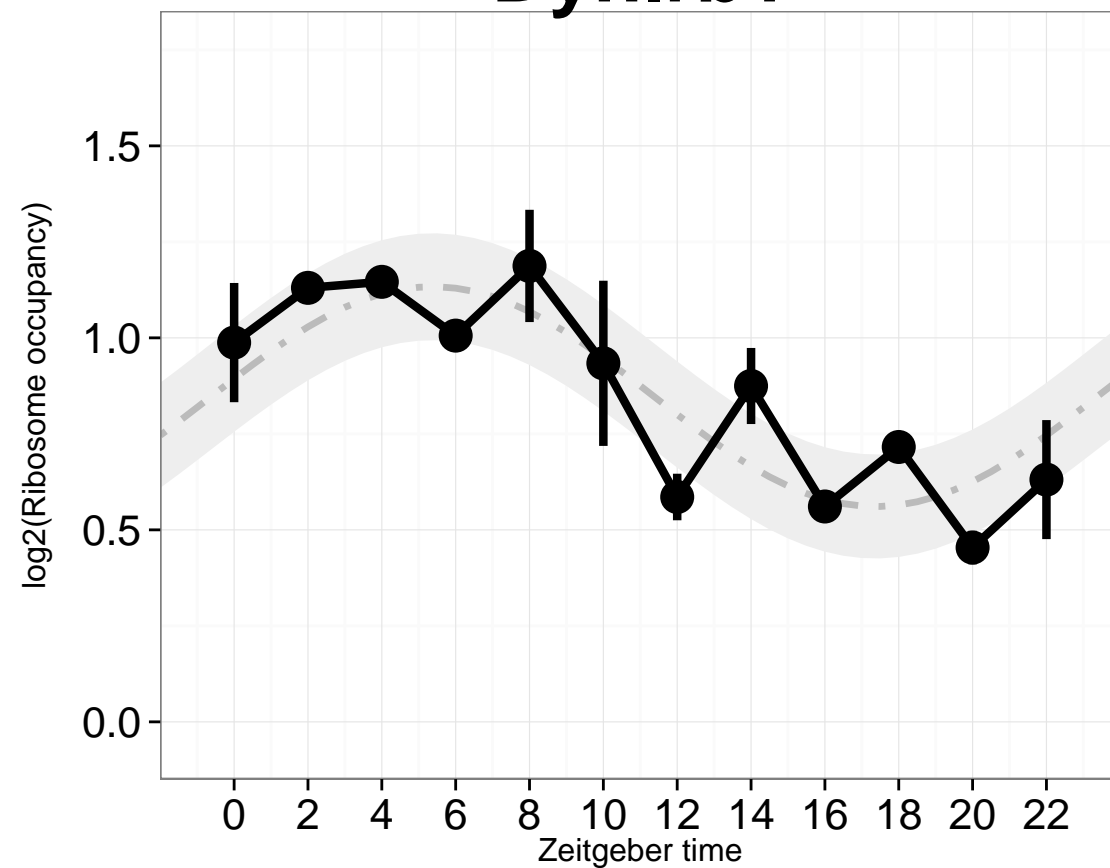

Supplement: Supplementary file 983 [file 1]

## Obfc1

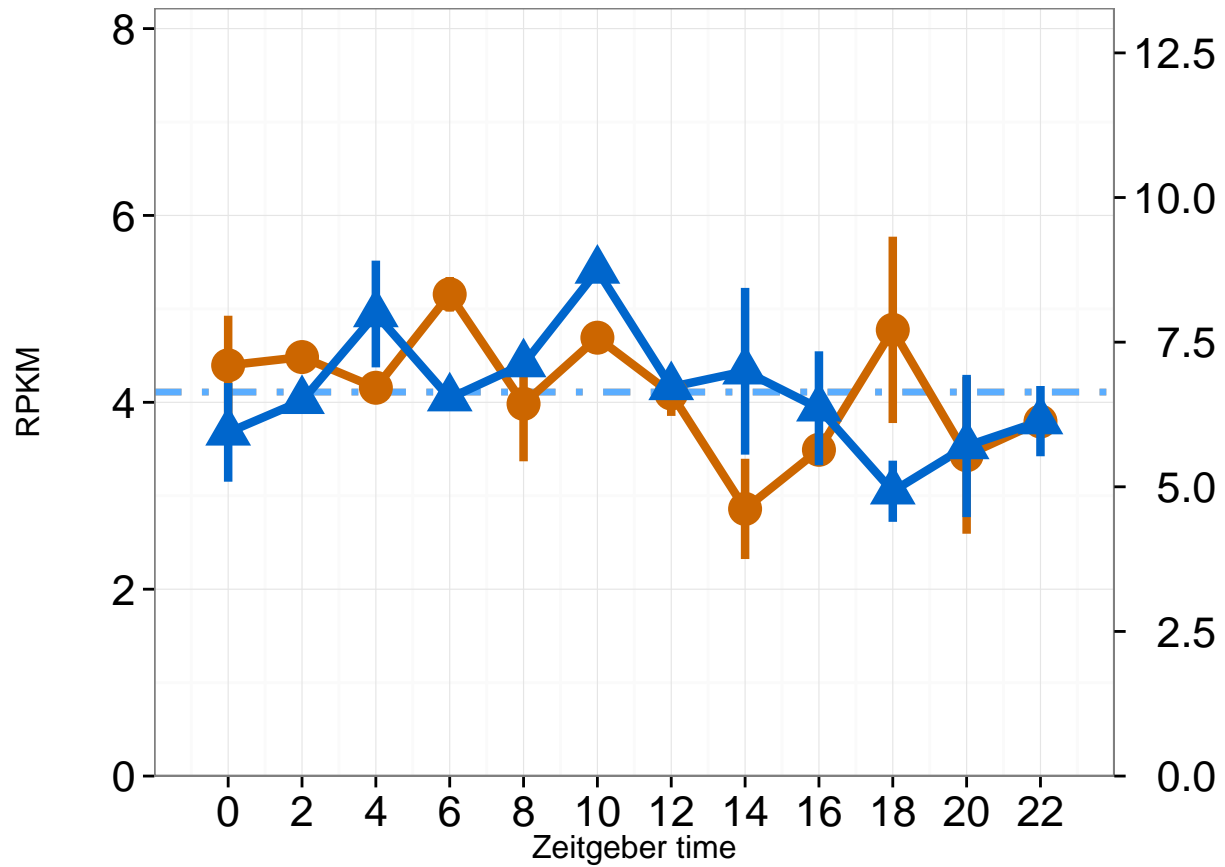

## Obfc1

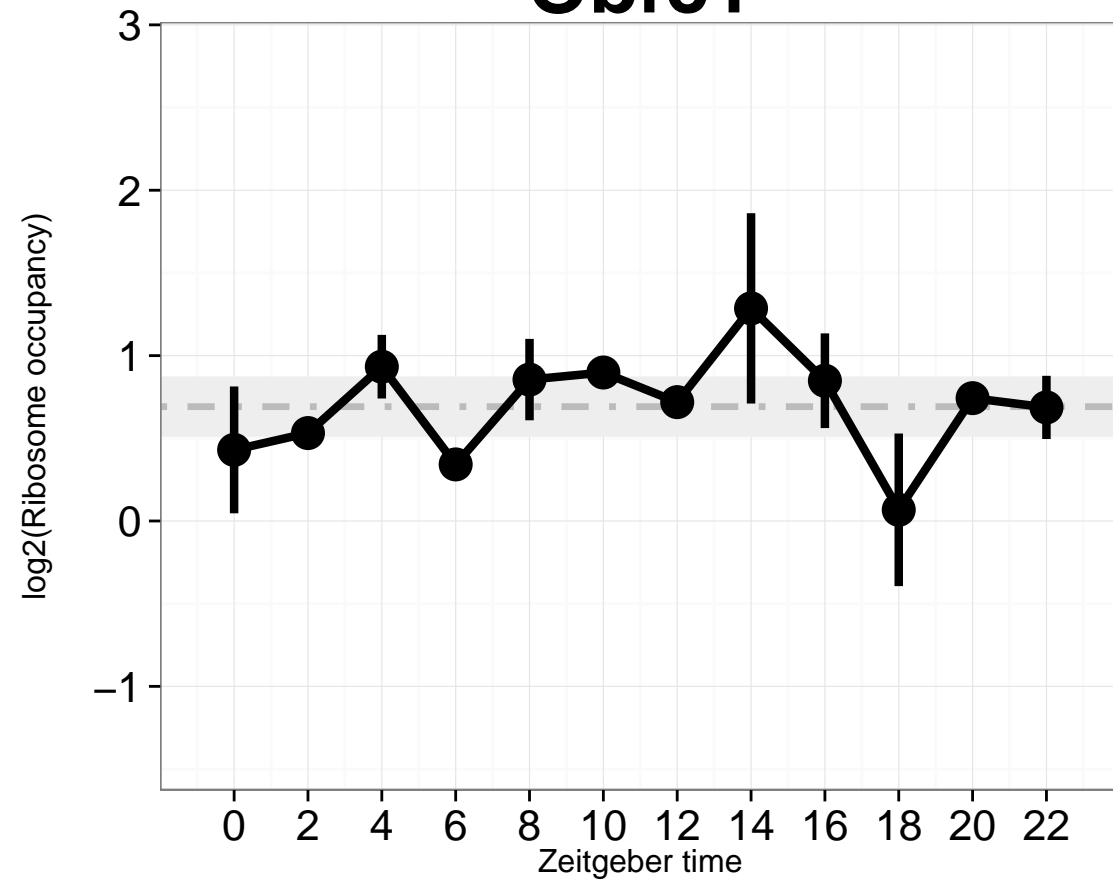

Supplement: Supplementary file 984 [file 1]

# Tecpr2

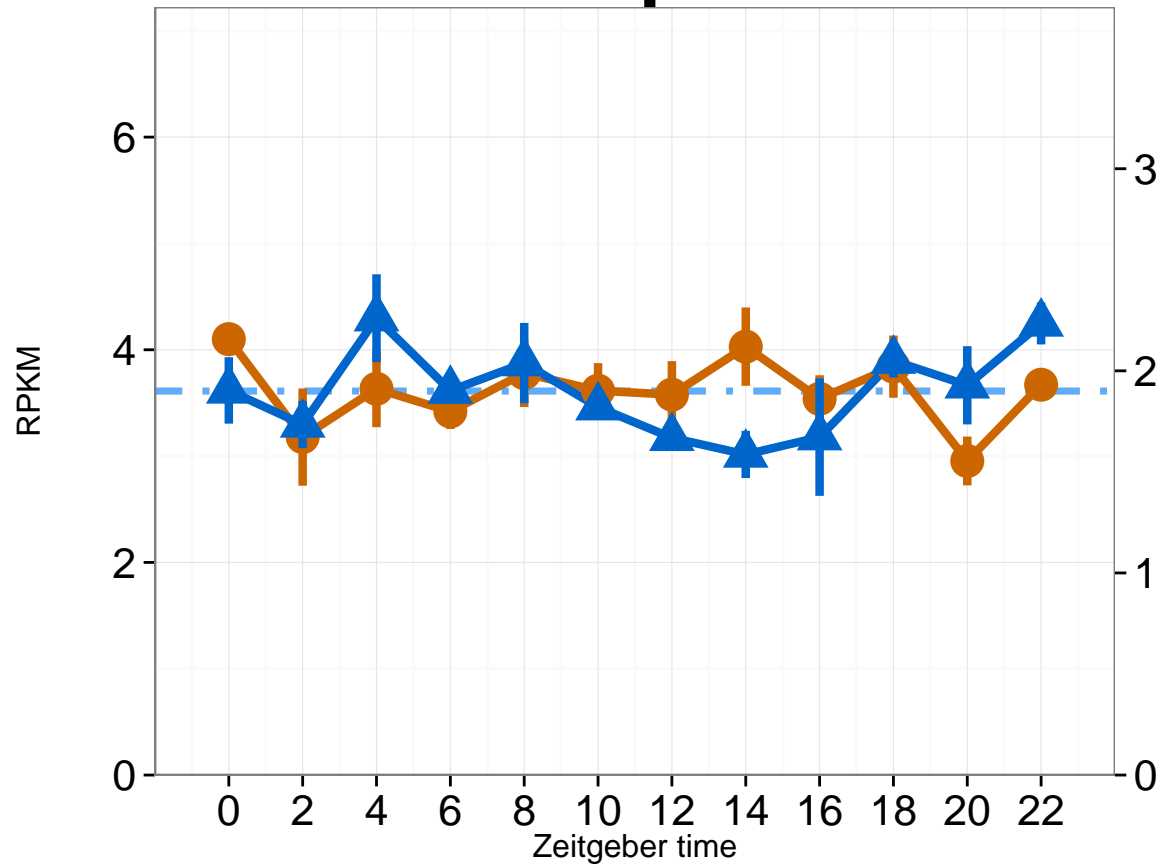

# Tecpr2

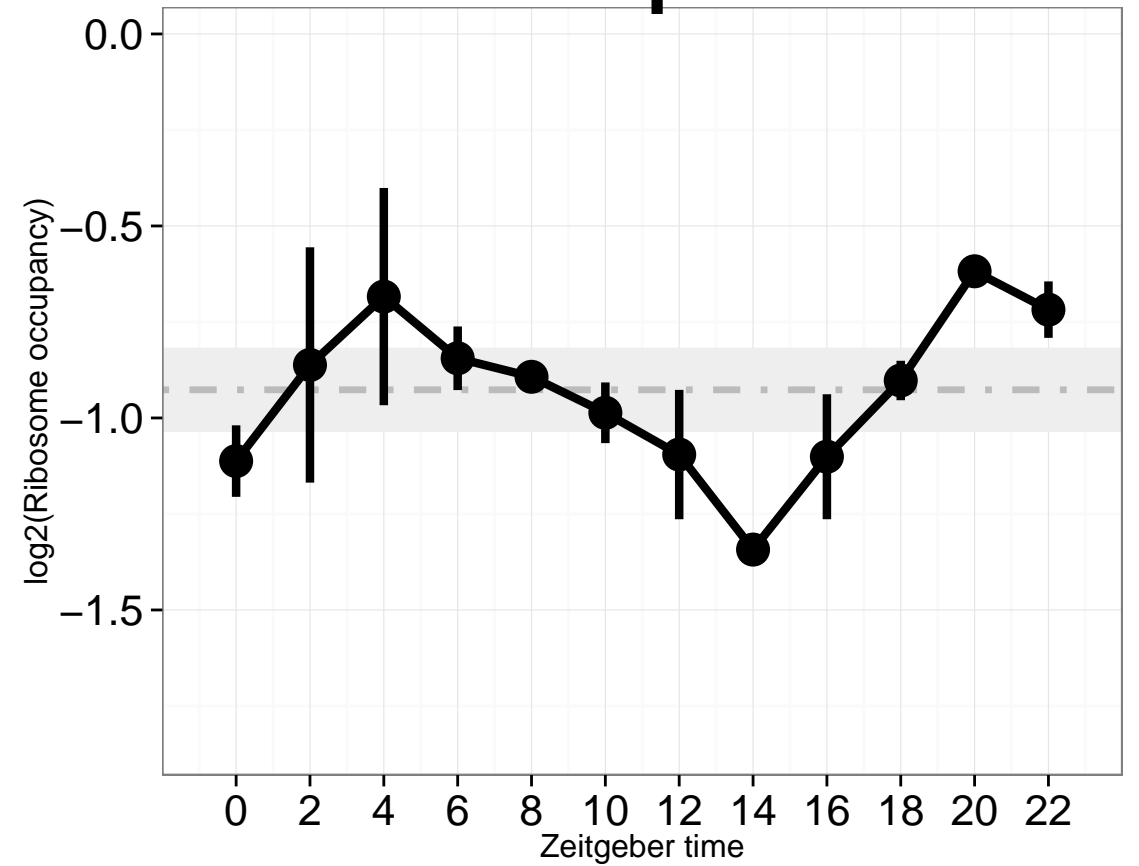

Supplement: Supplementary file 985 [file 1]

## Dlg1

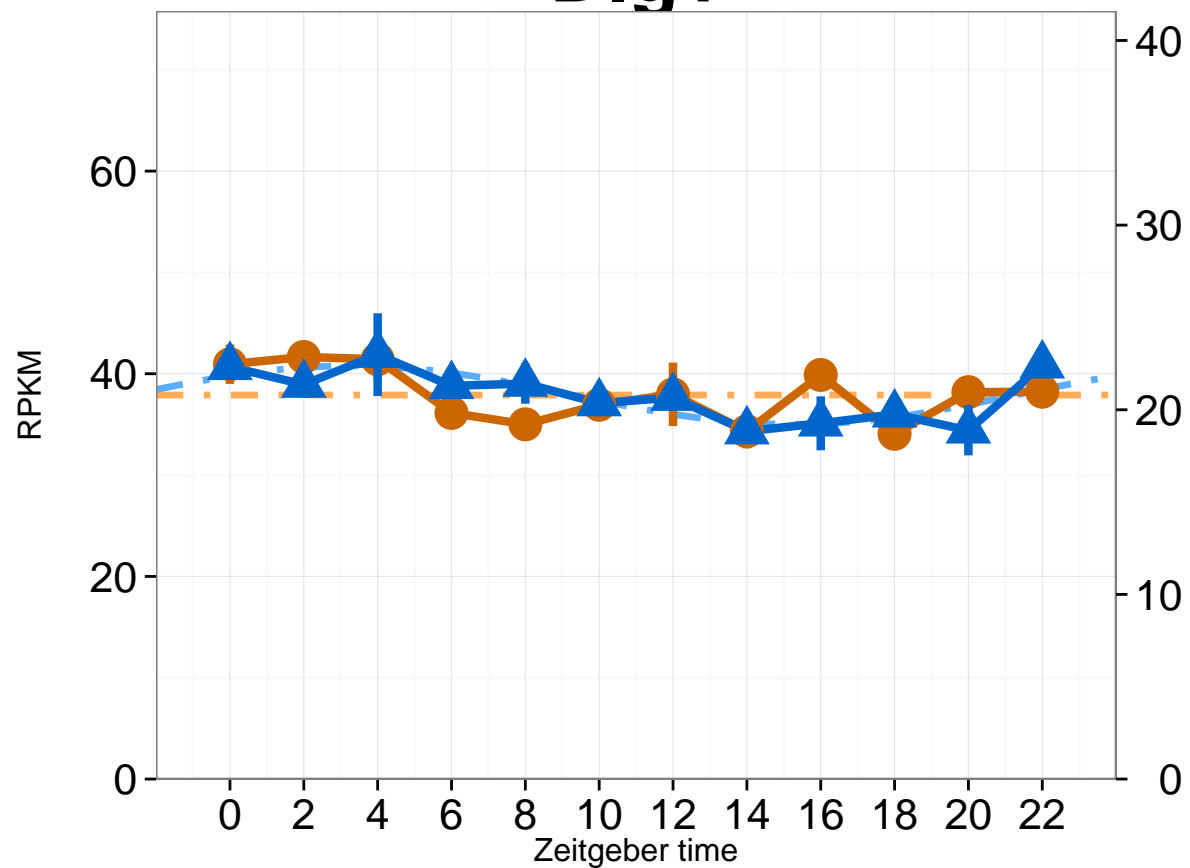

## Dlg1

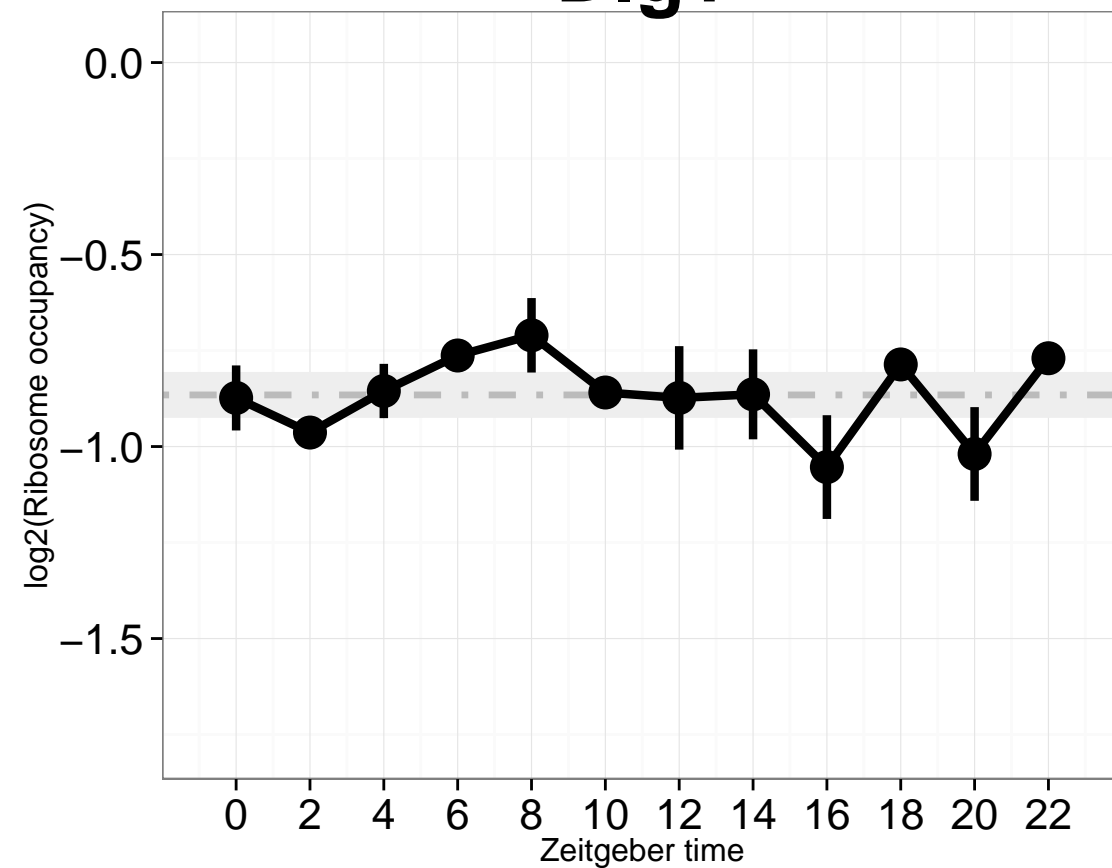

Supplement: Supplementary file 986 [file 1]

# Stxbp1

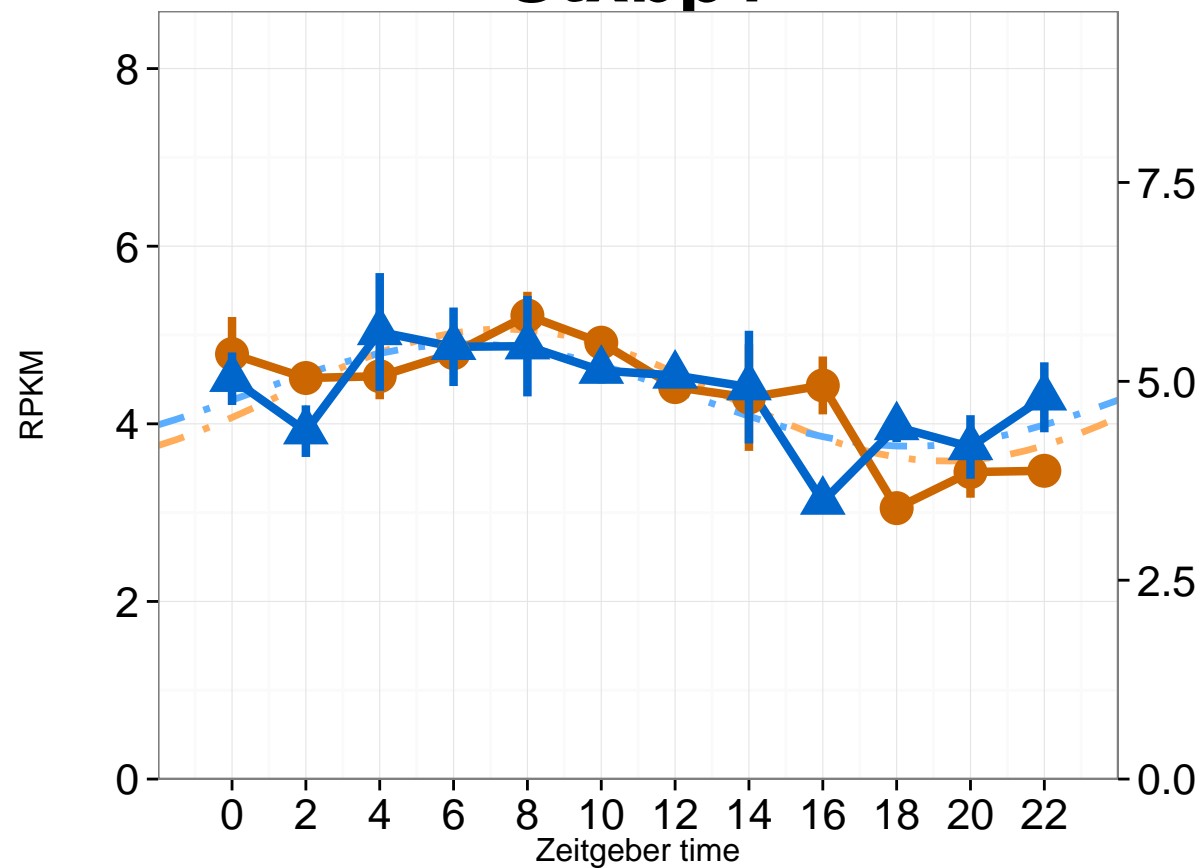

# Stxbp1

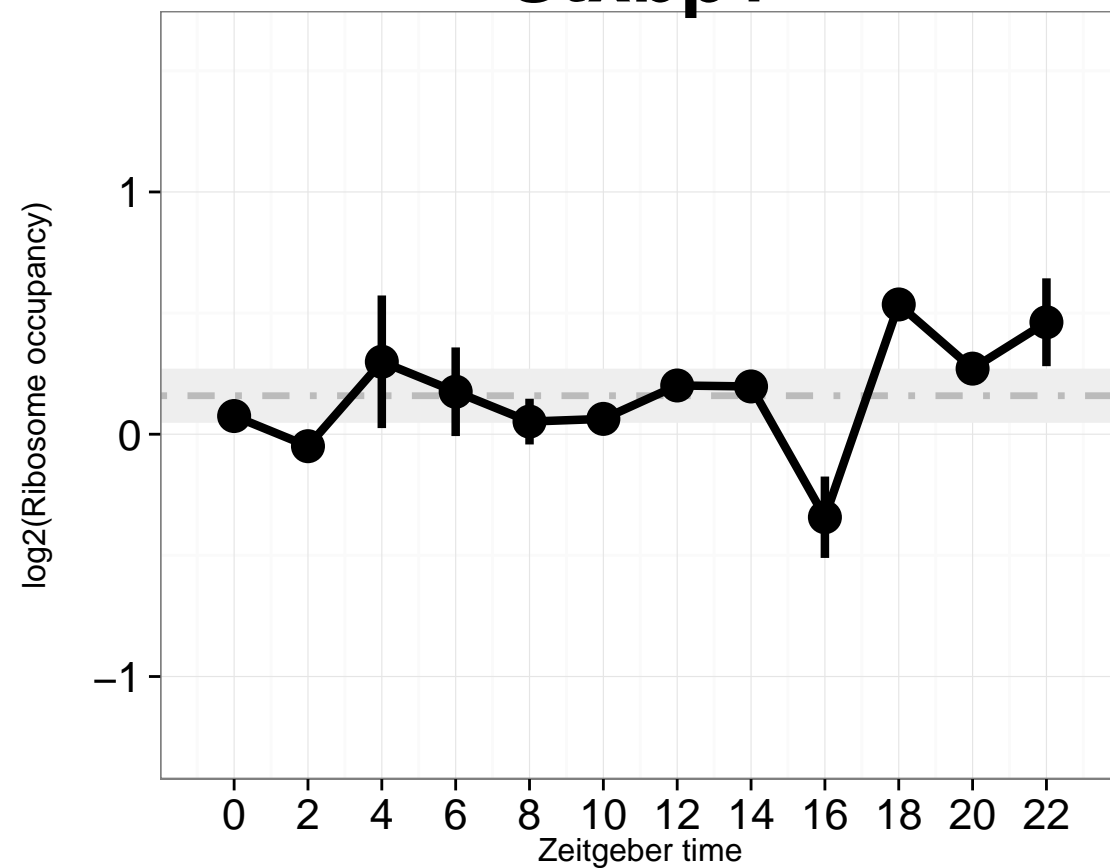

Supplement: Supplementary file 987 [file 1]

# Zfp706

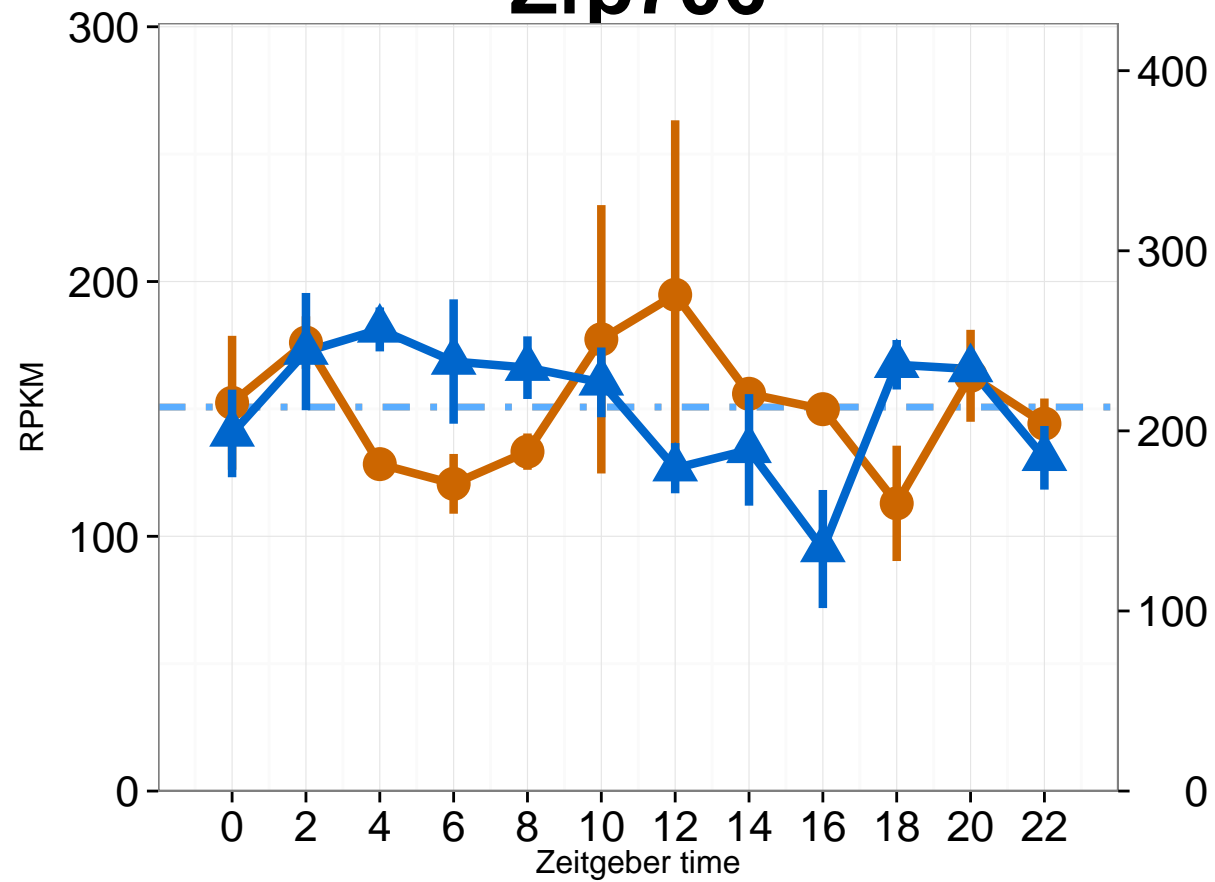

# Zfp706

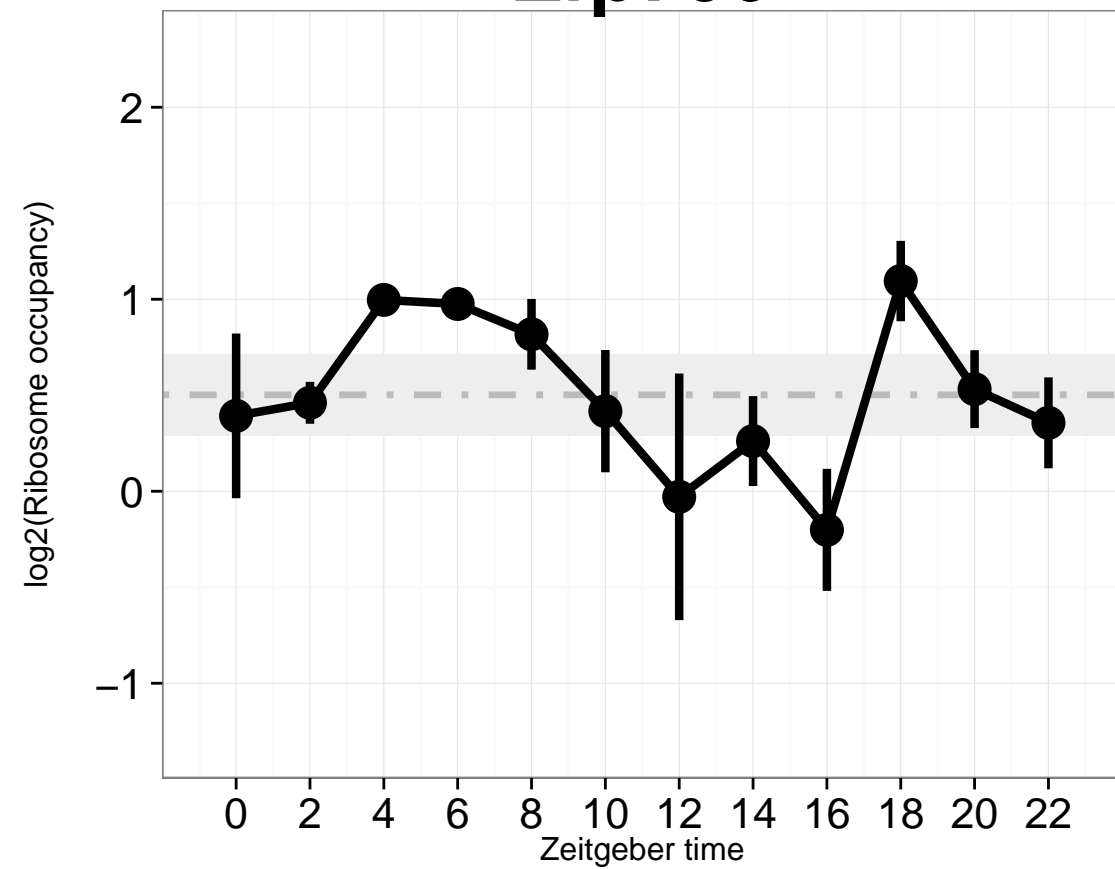

Supplement: Supplementary file 988 [file 1]

## Fermt3

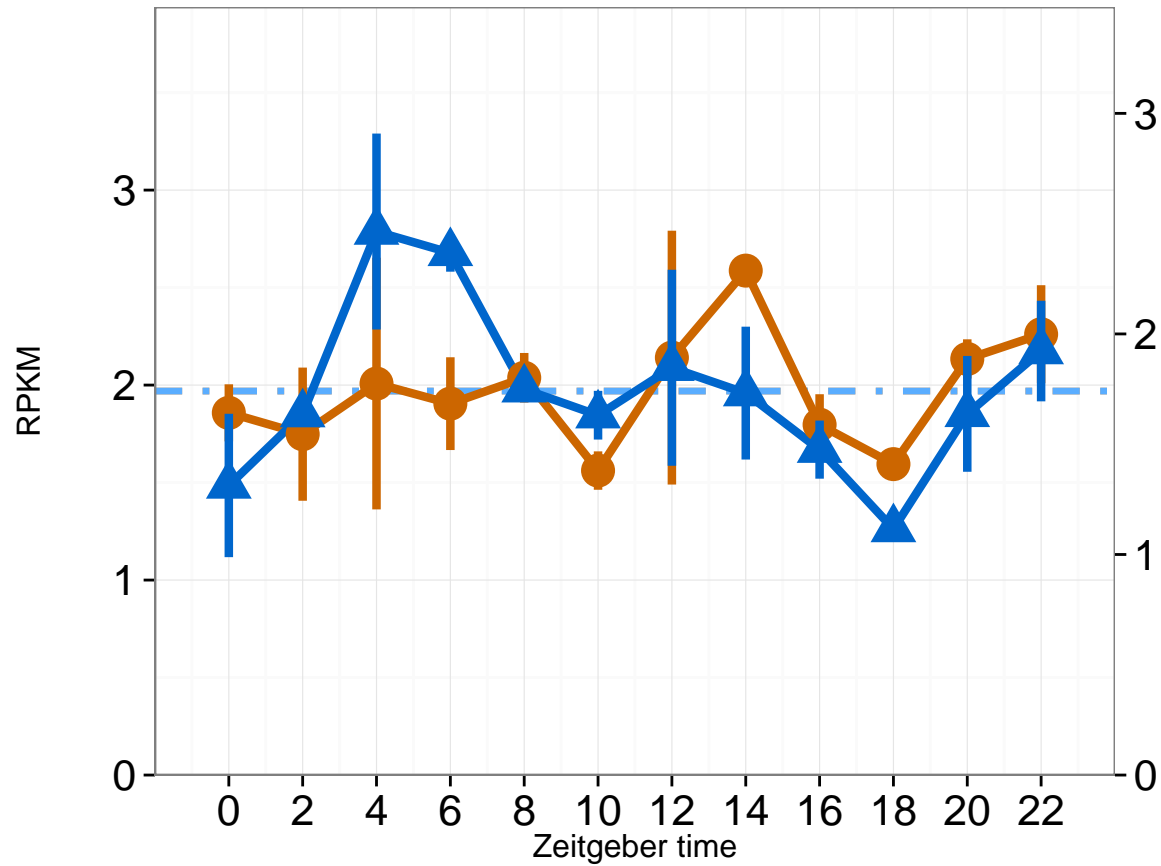

## Fermt3

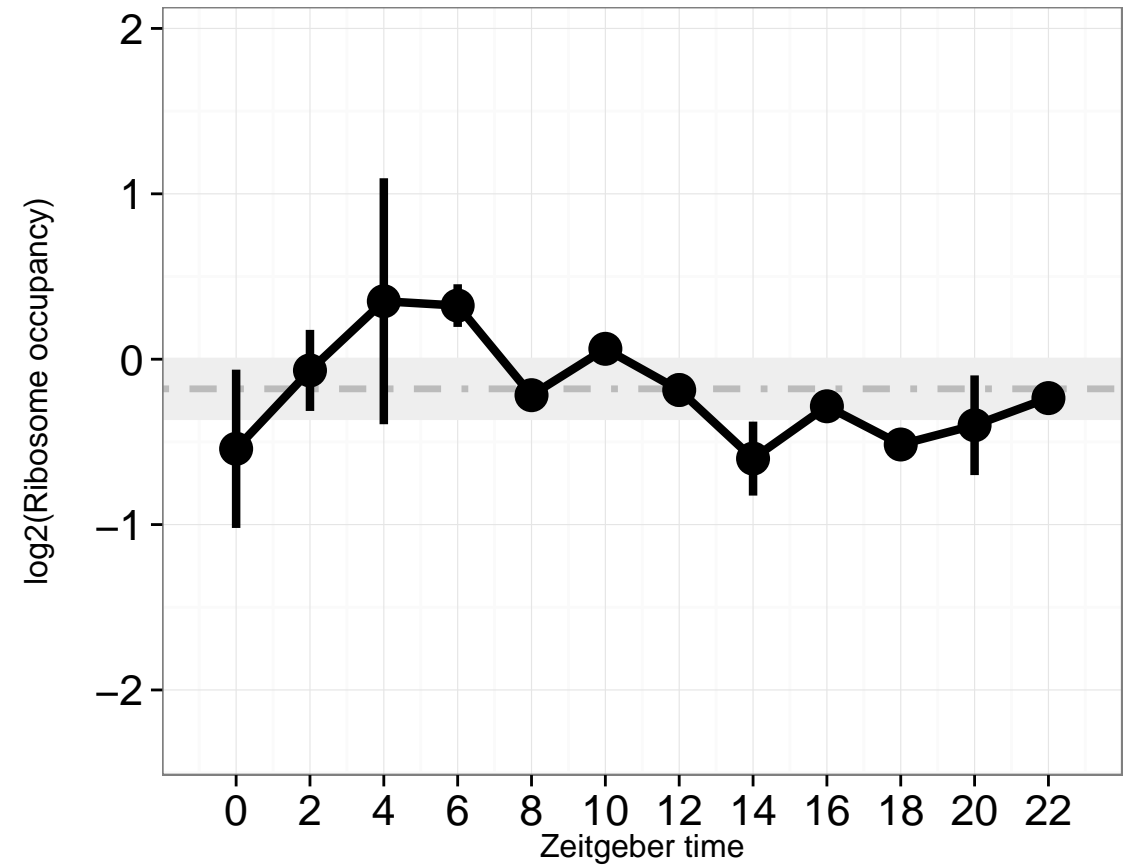

Supplement: Supplementary file 989 [file 1]

# Rap1gap2

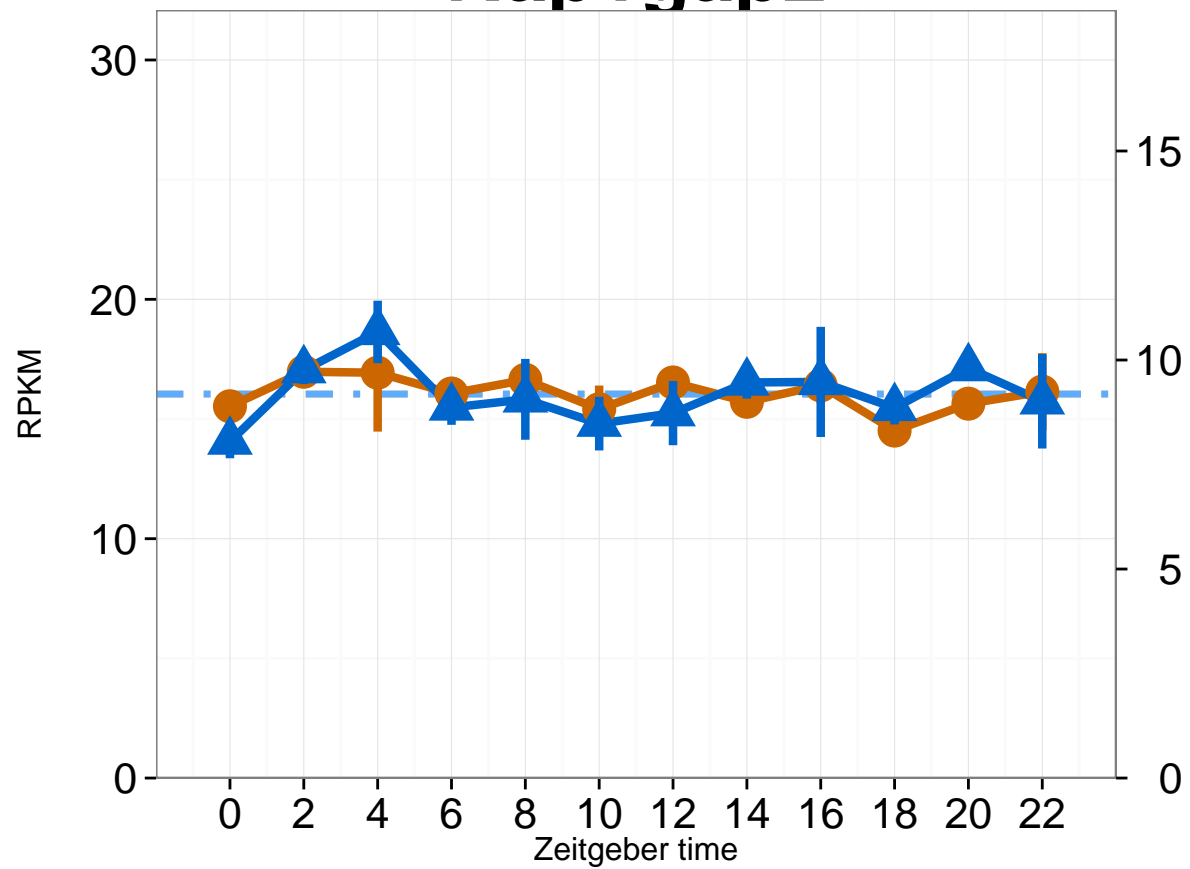

# Rap1gap2

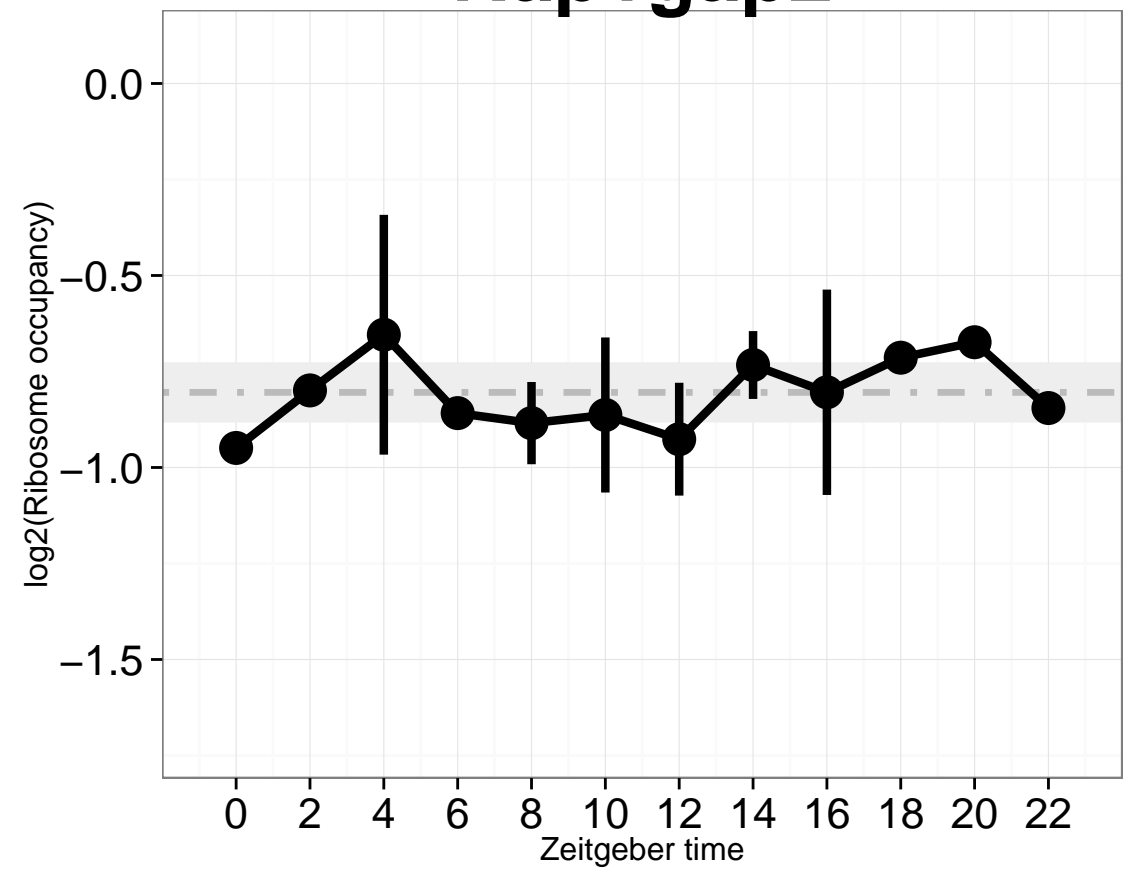

Supplement: Supplementary file 990 [file 1]

## Zmym4

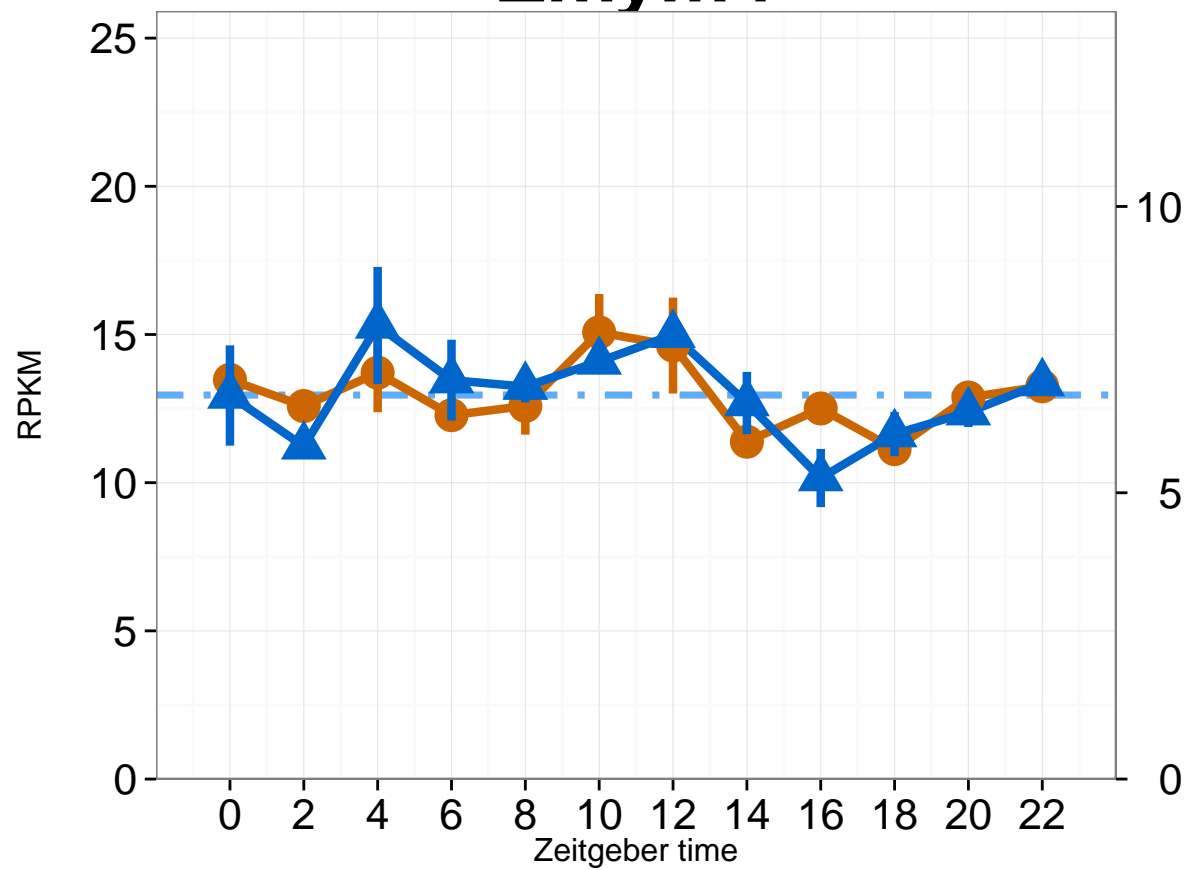

## Zmym4

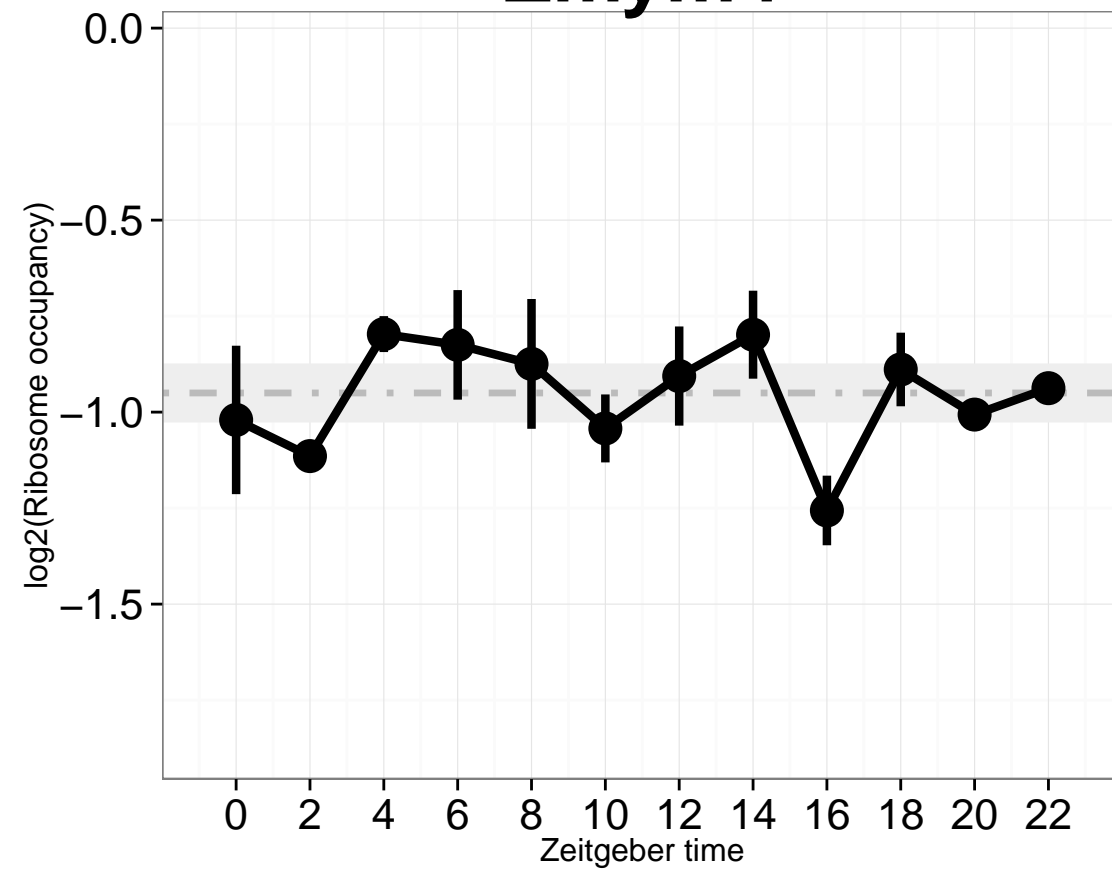

Supplement: Supplementary file 991 [file 1]

# Ren1

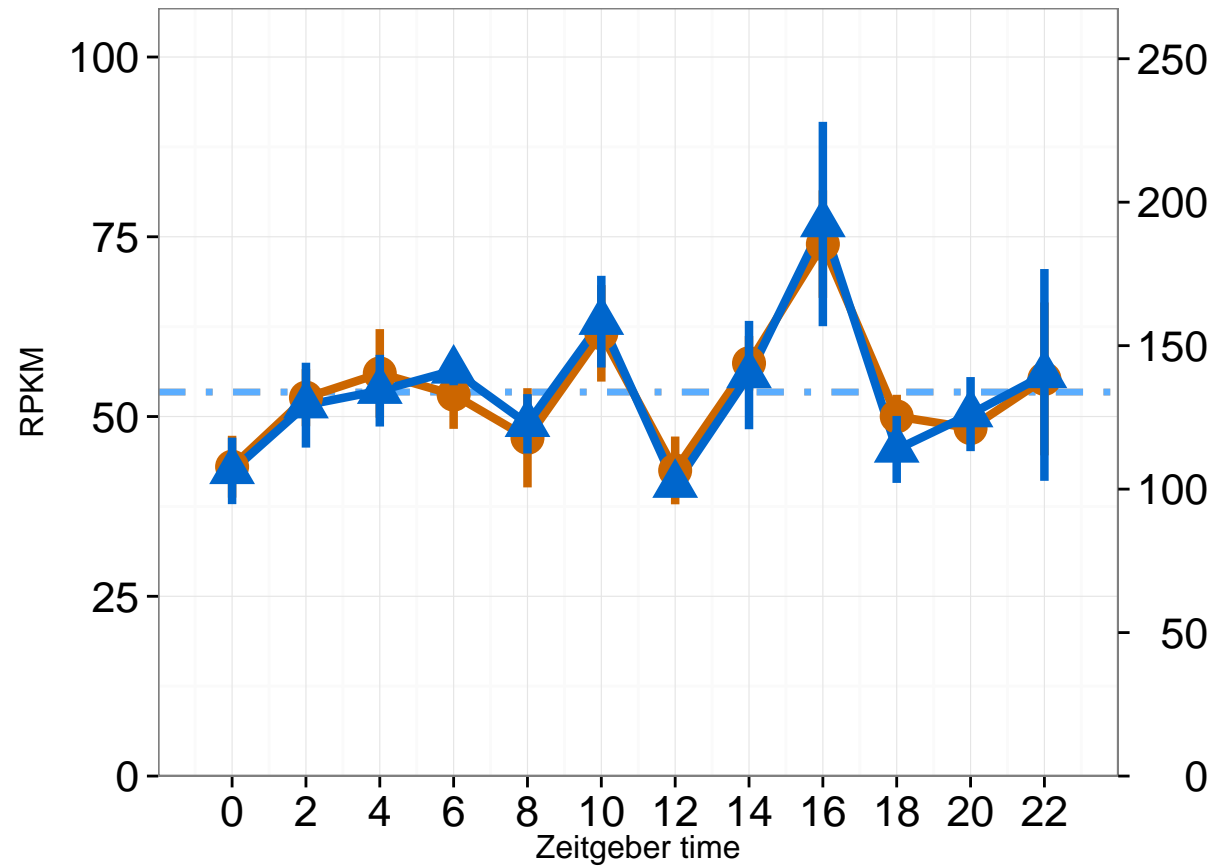

# Ren1

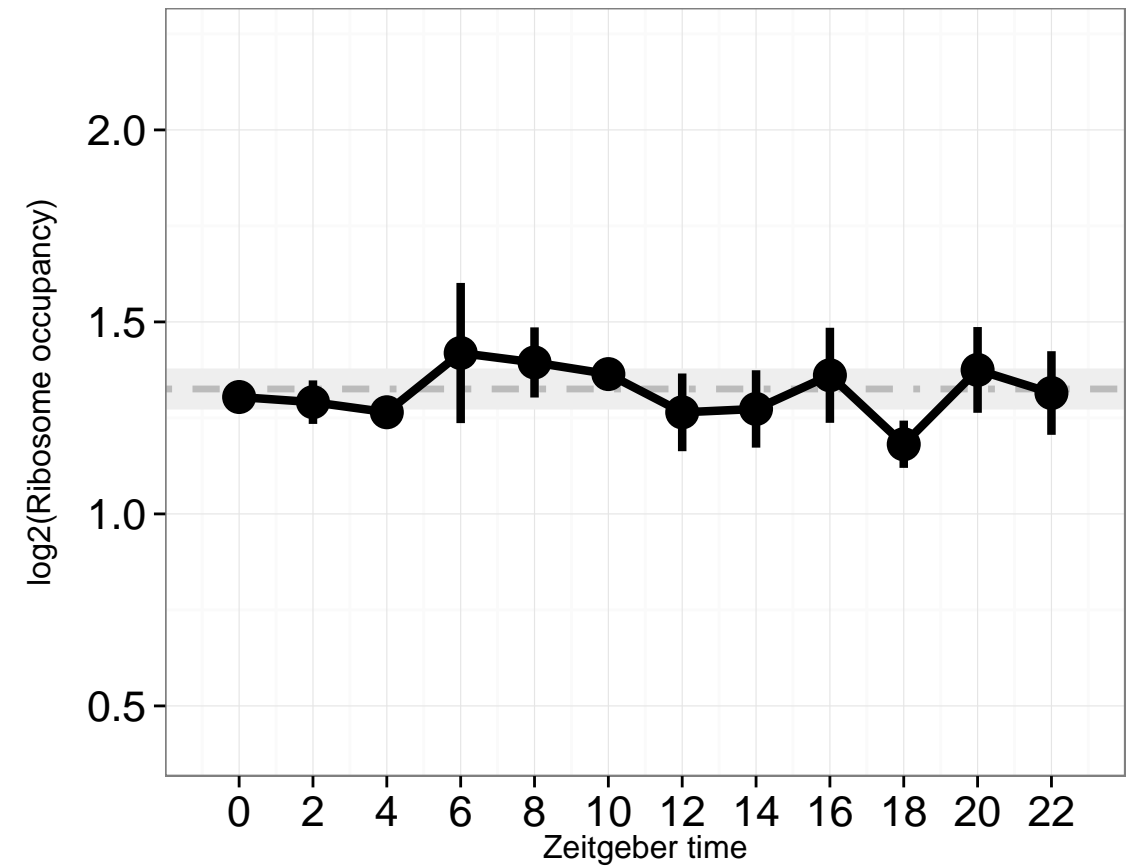

Supplement: Supplementary file 992 [file 1]

# Rbbp8

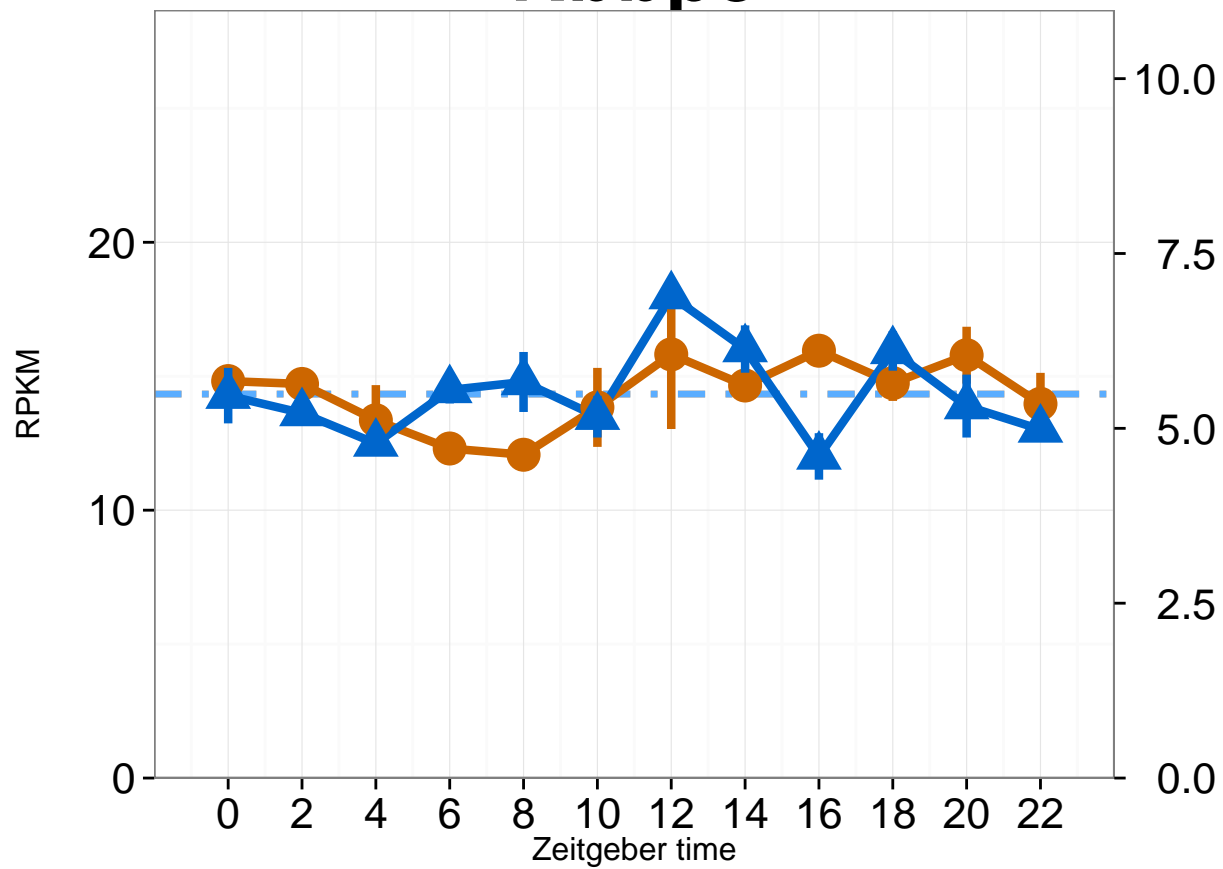

# Rbbp8

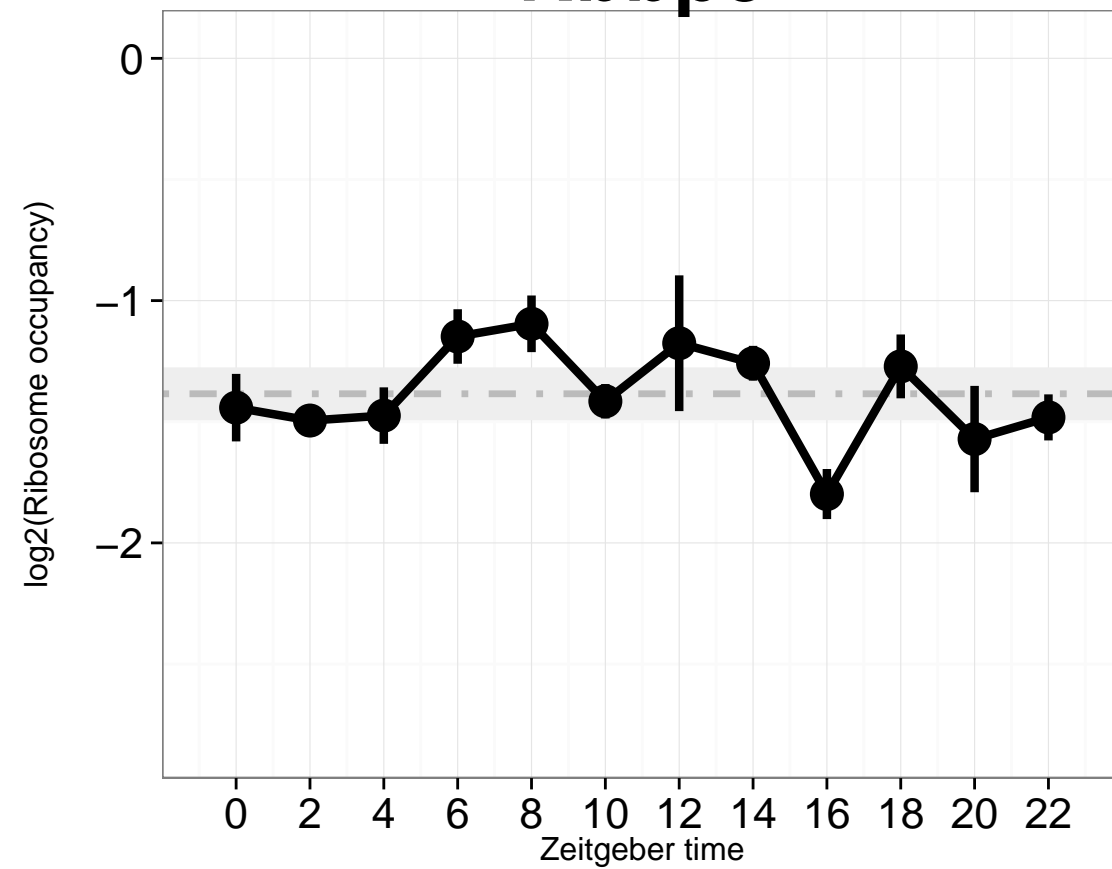

Supplement: Supplementary file 993 [file 1]

## Gpn3

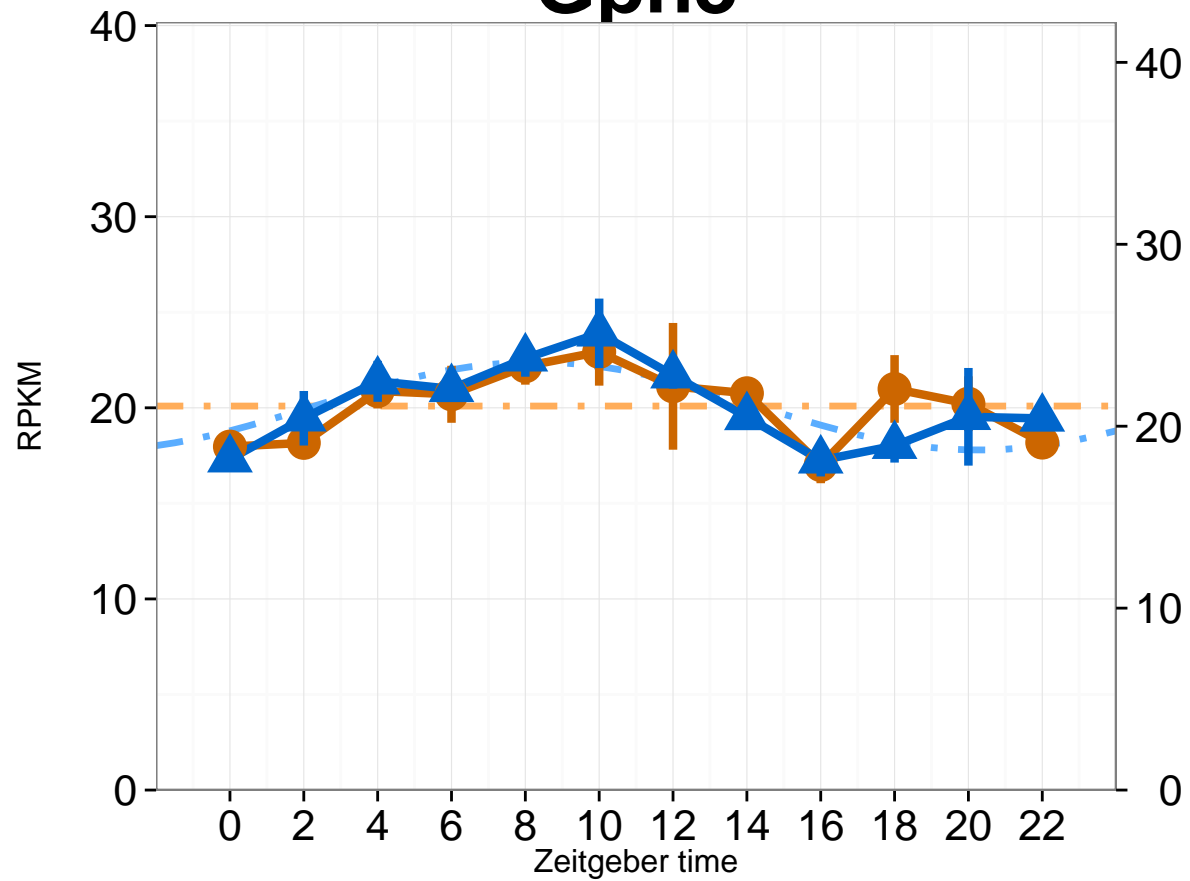

## Gpn3

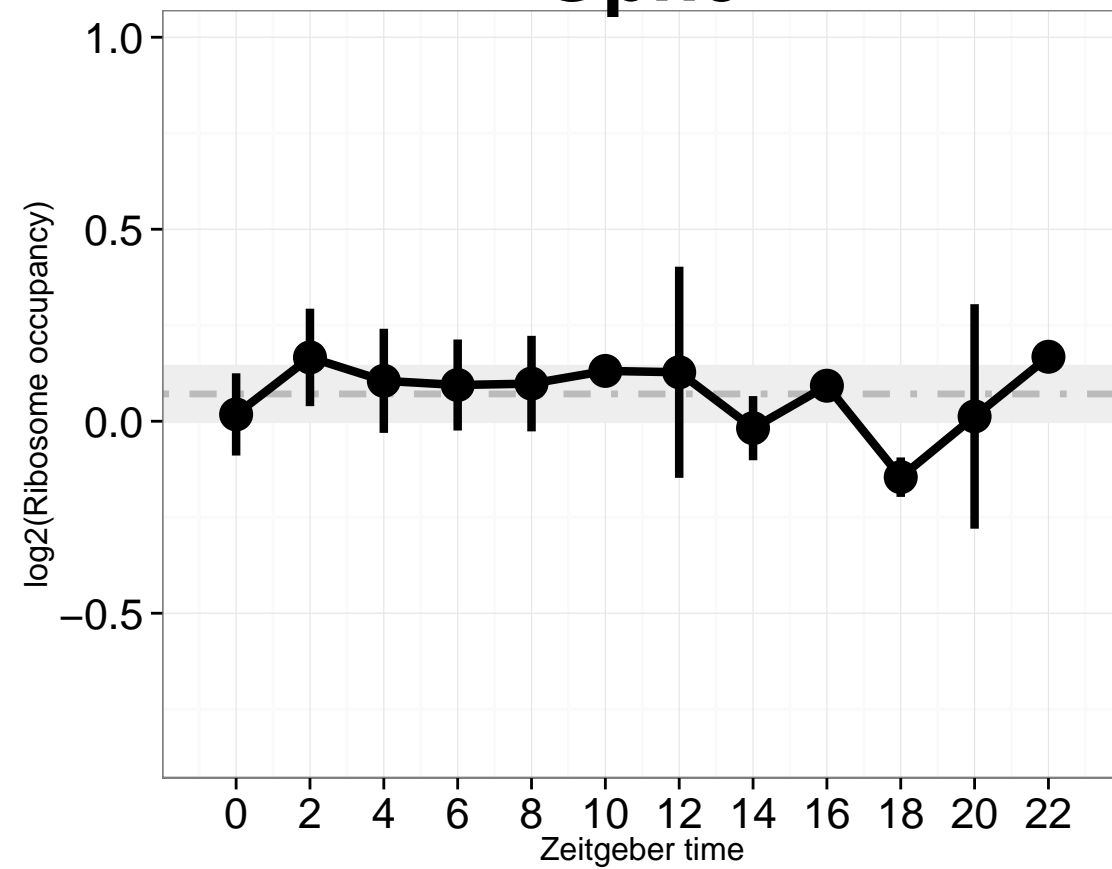

Supplement: Supplementary file 994 [file 1]

# Tfap4

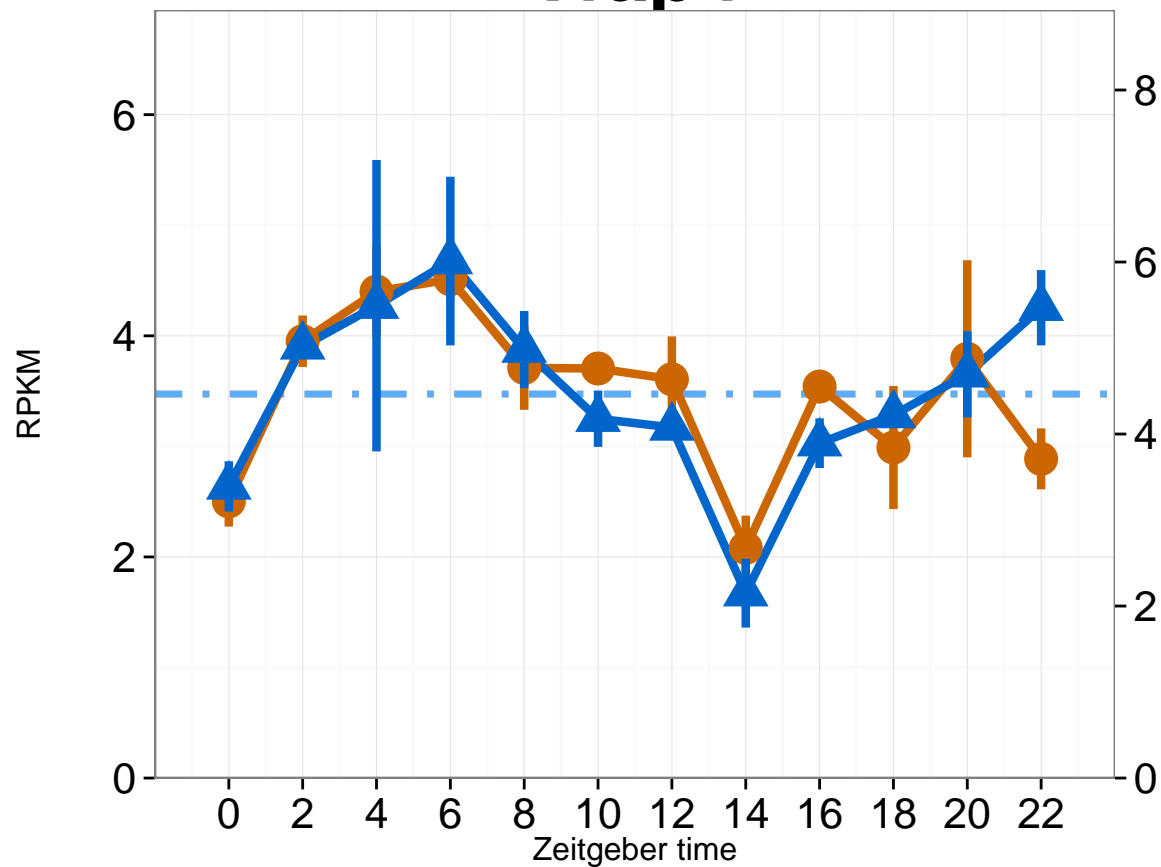

# Tfap4

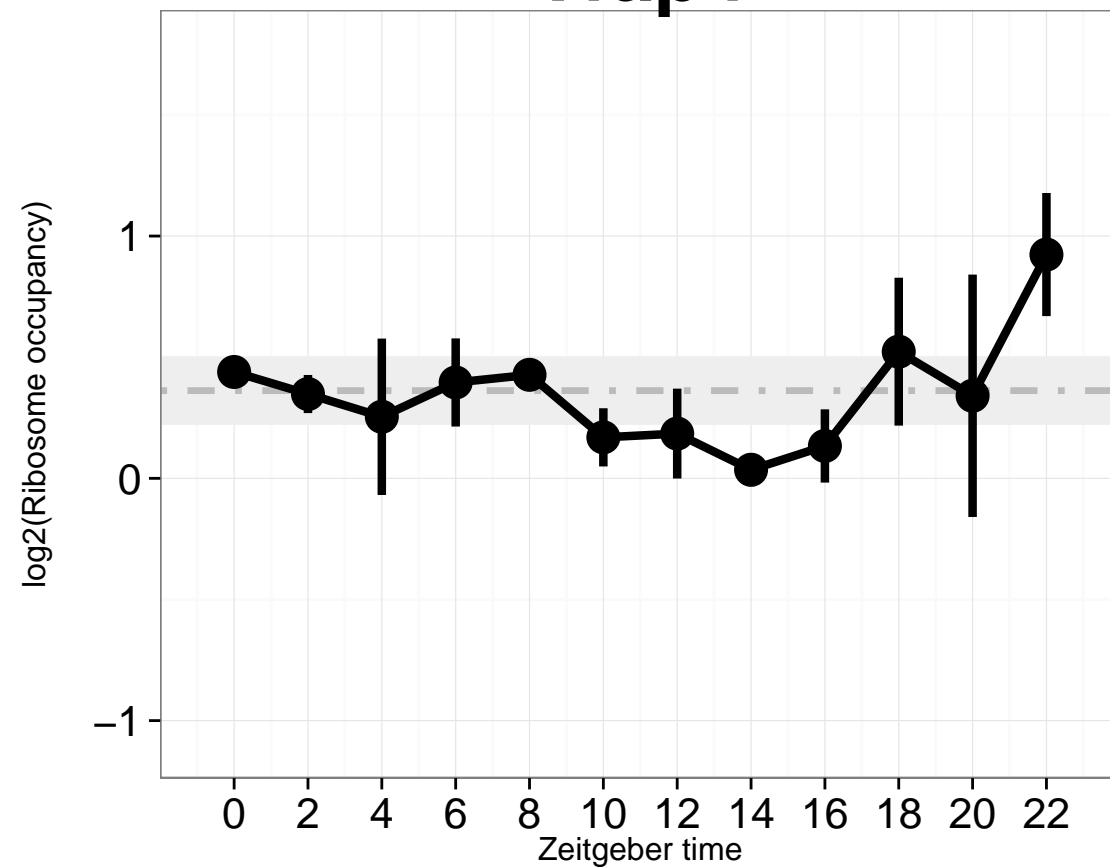

Supplement: Supplementary file 995 [file 1]

## Skap2

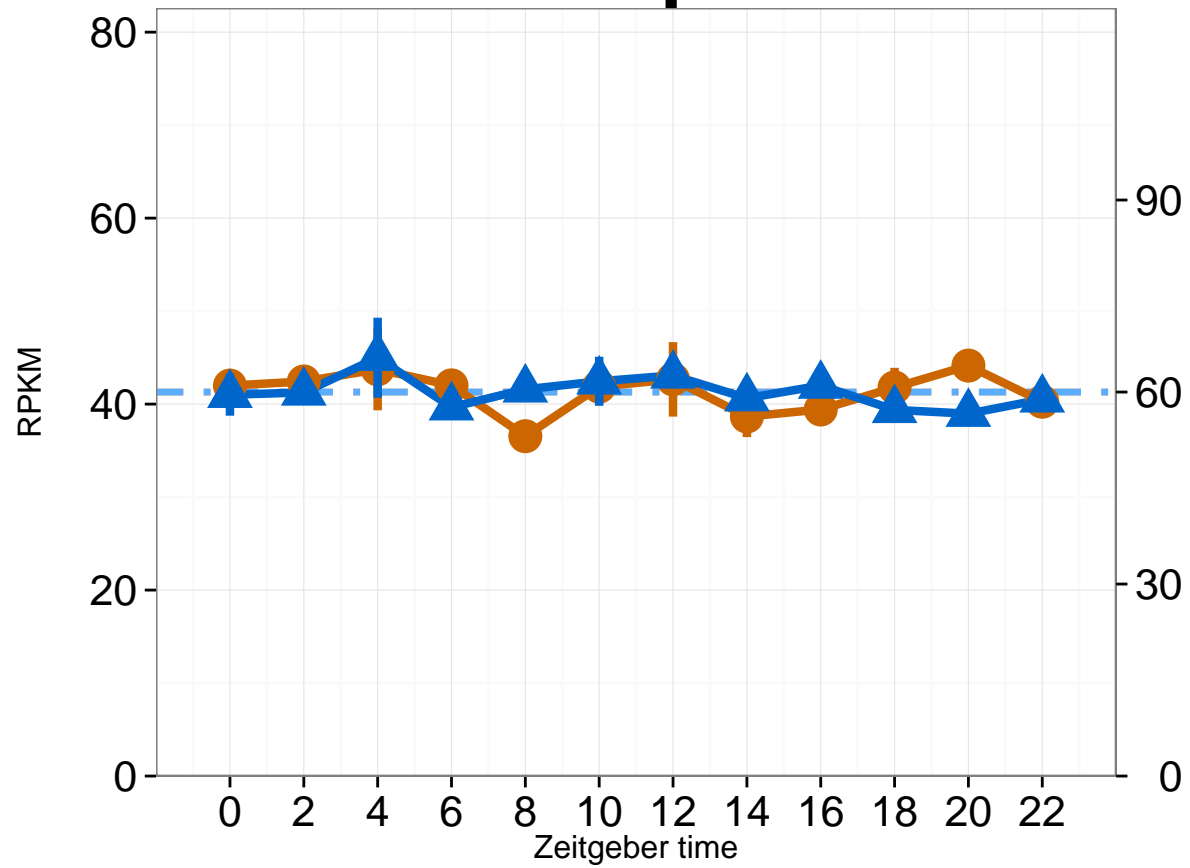

## Skap2

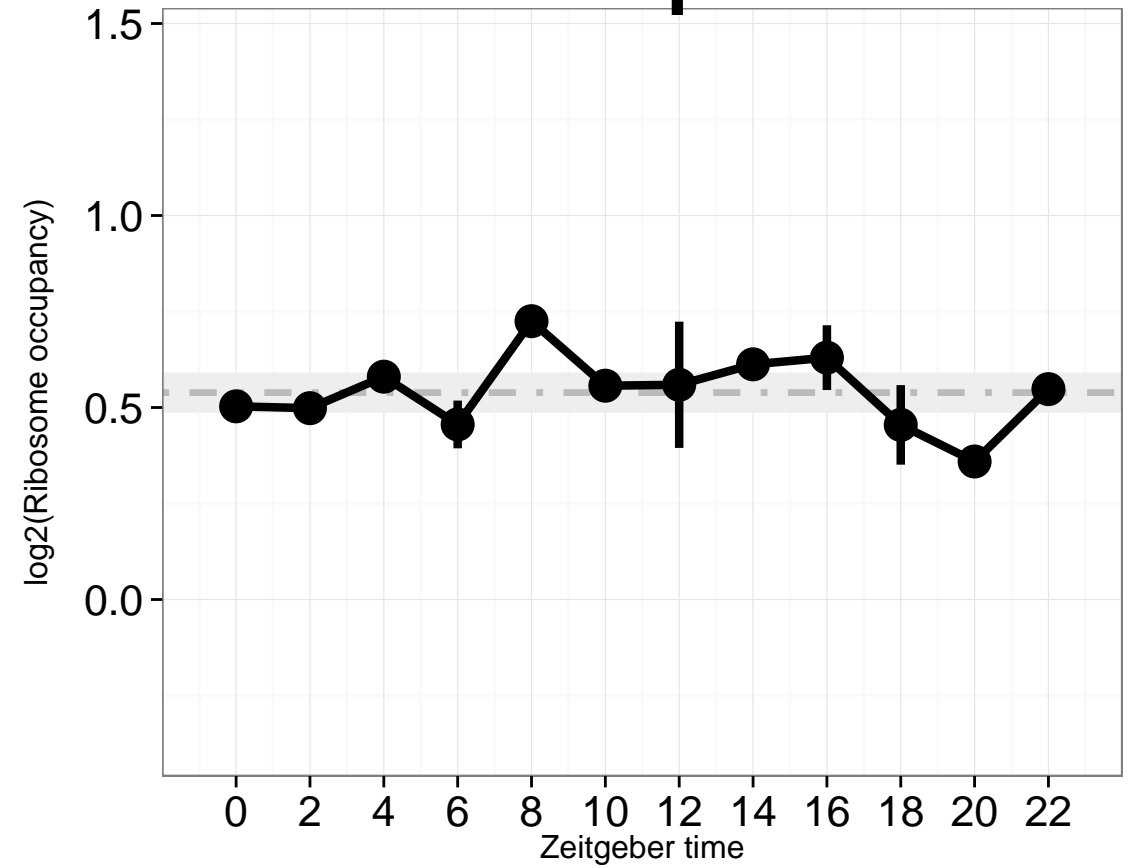

Supplement: Supplementary file 996 [file 1]

## Ryr2

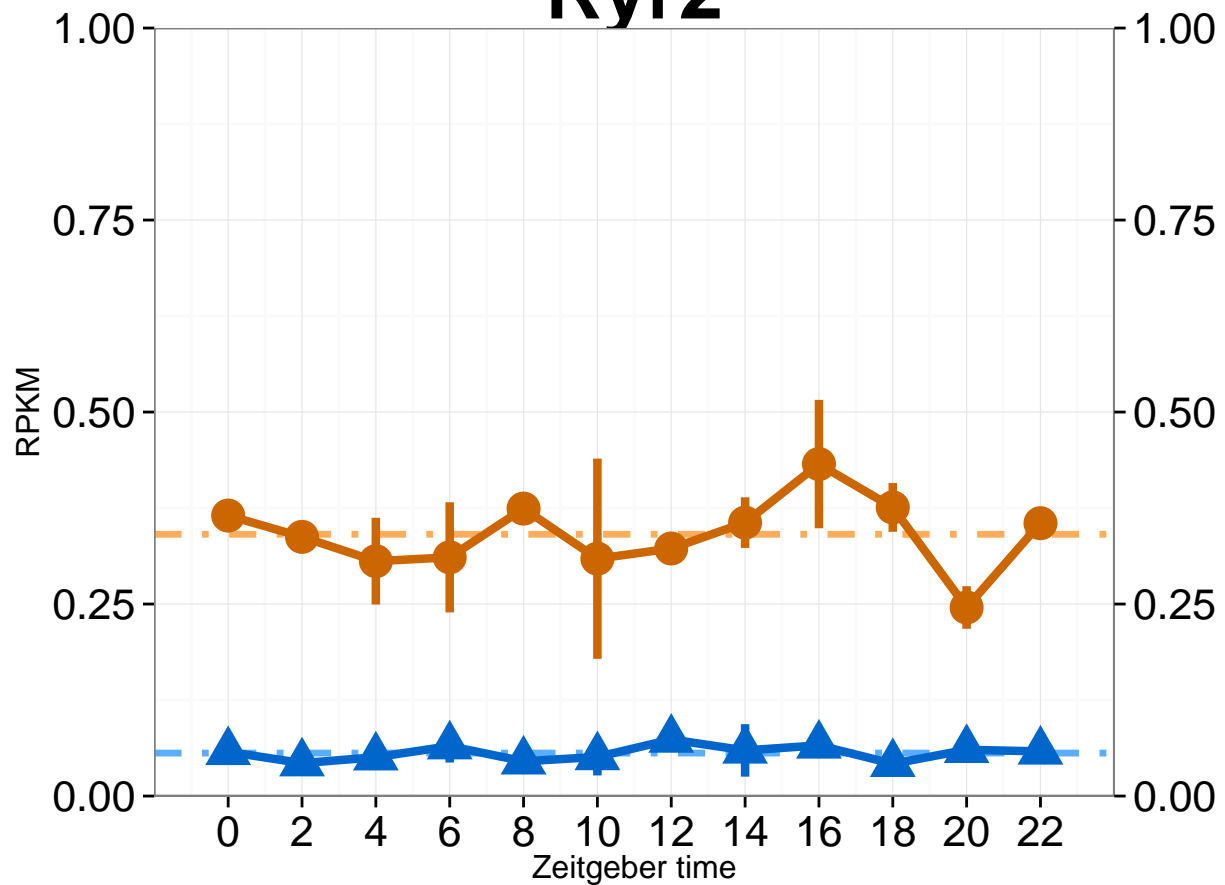

## Ryr2

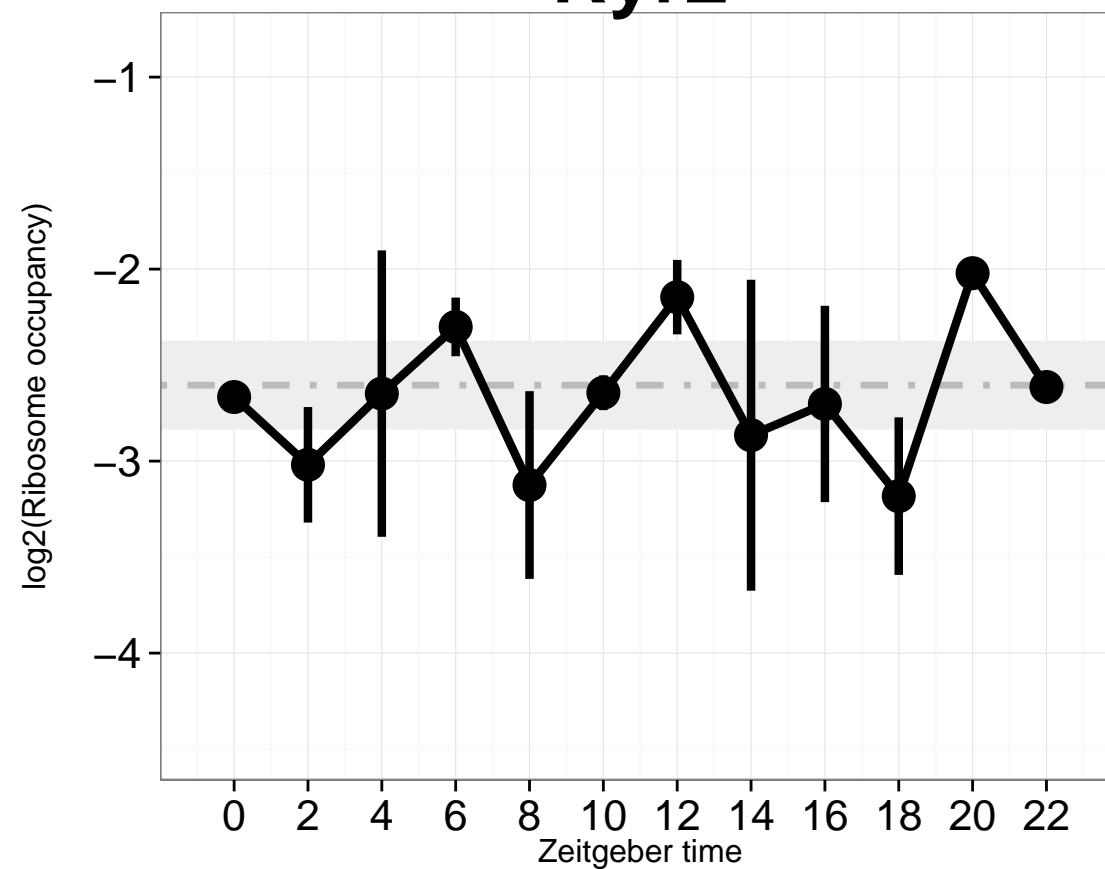

Supplement: Supplementary file 997 [file 1]

# Gm10639

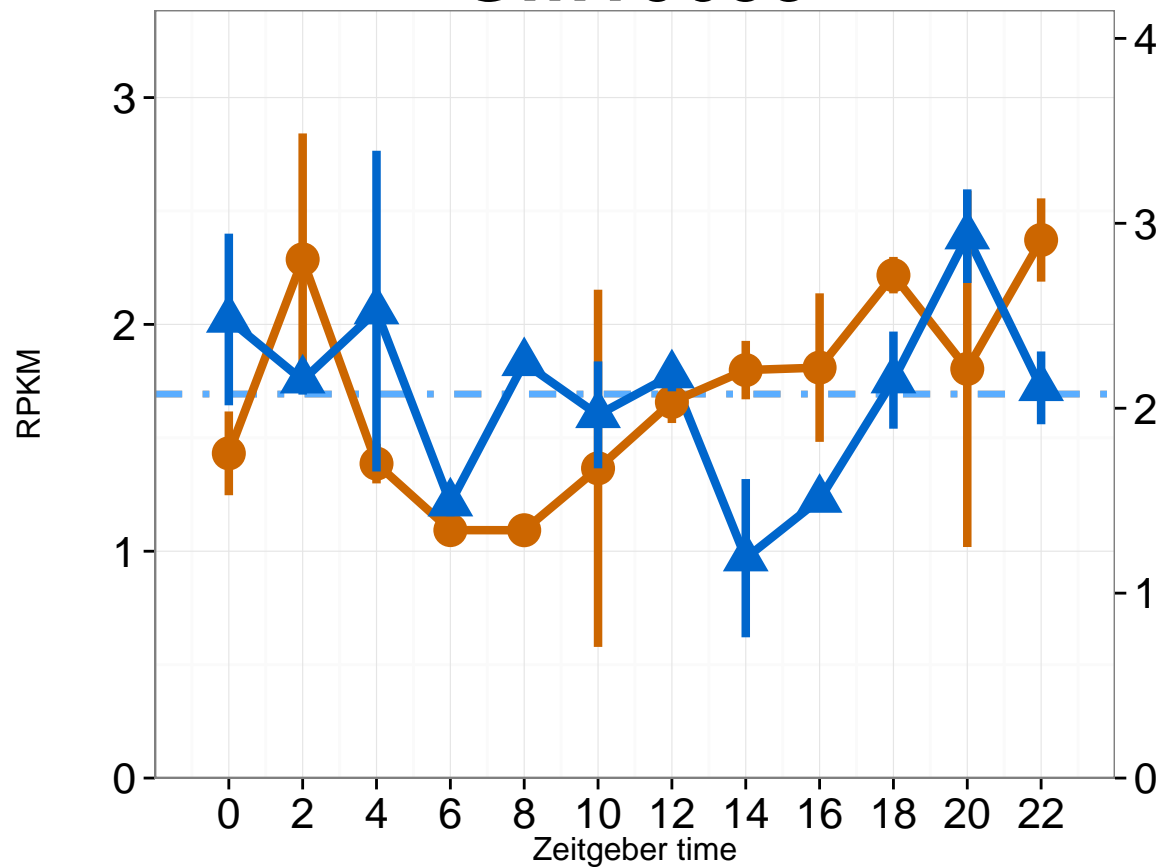

# Gm10639

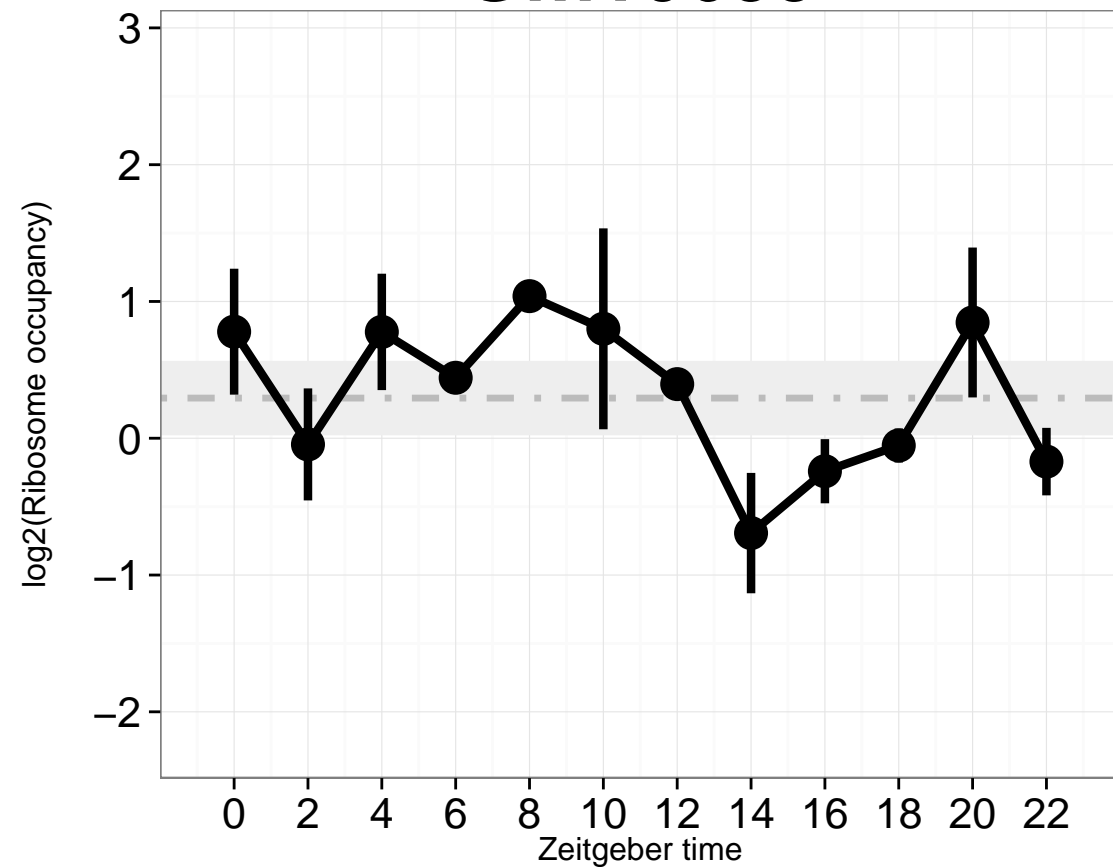

Supplement: Supplementary file 998 [file 1]

## Pigb

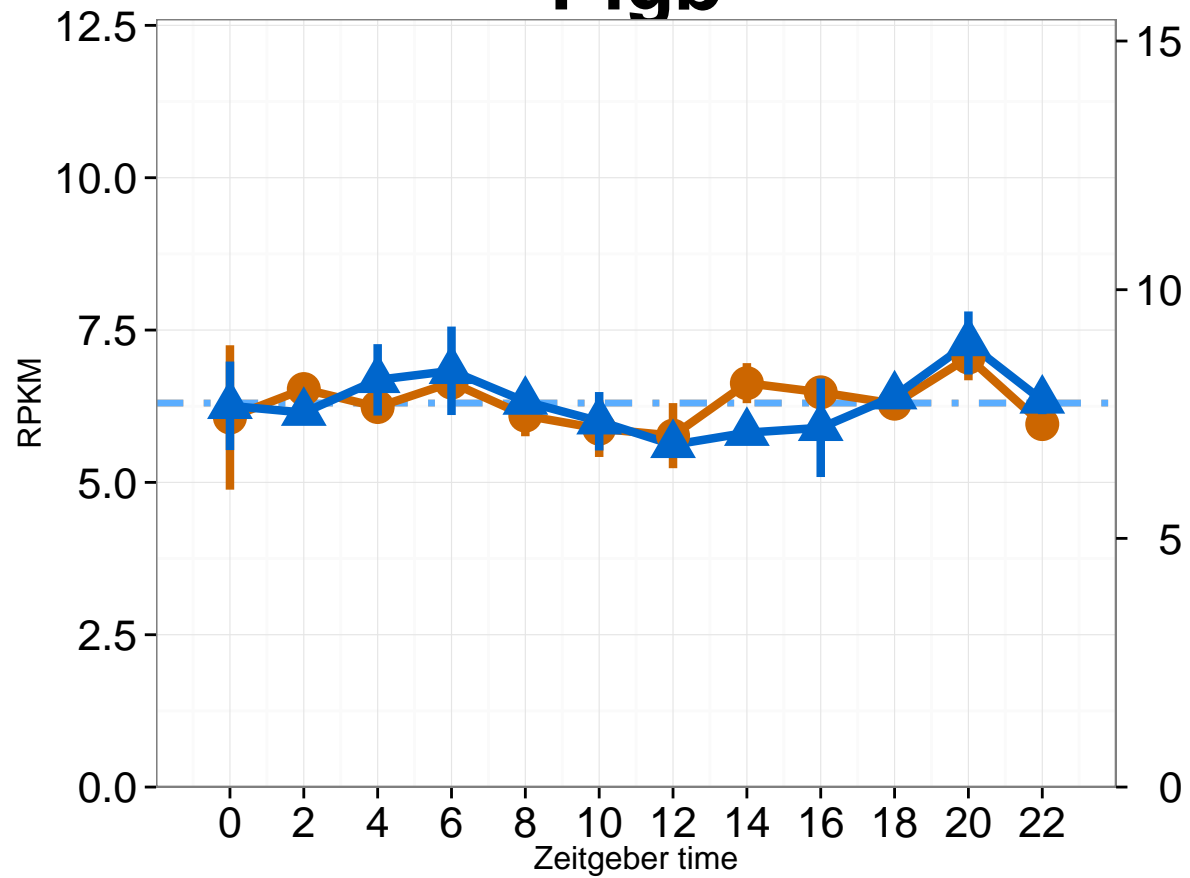

## Pigb

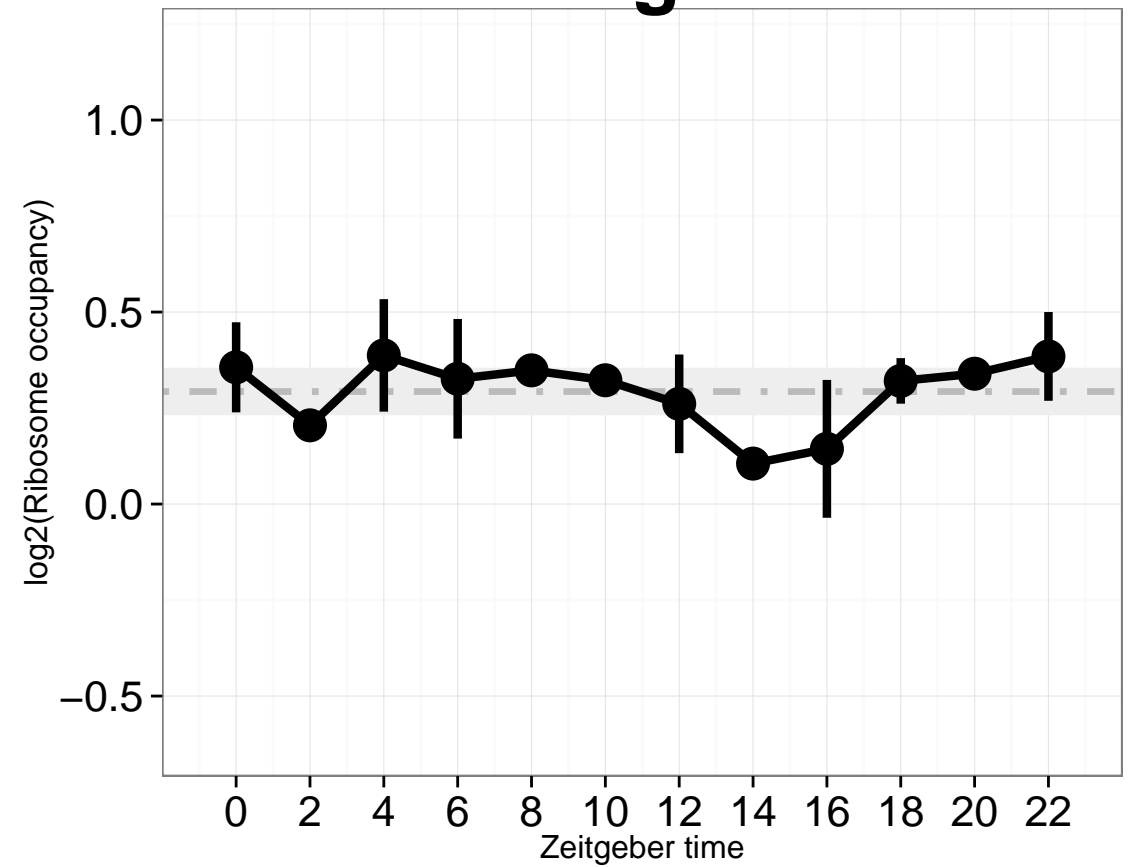

Supplement: Supplementary file 999 [file 1]

# Mrps6

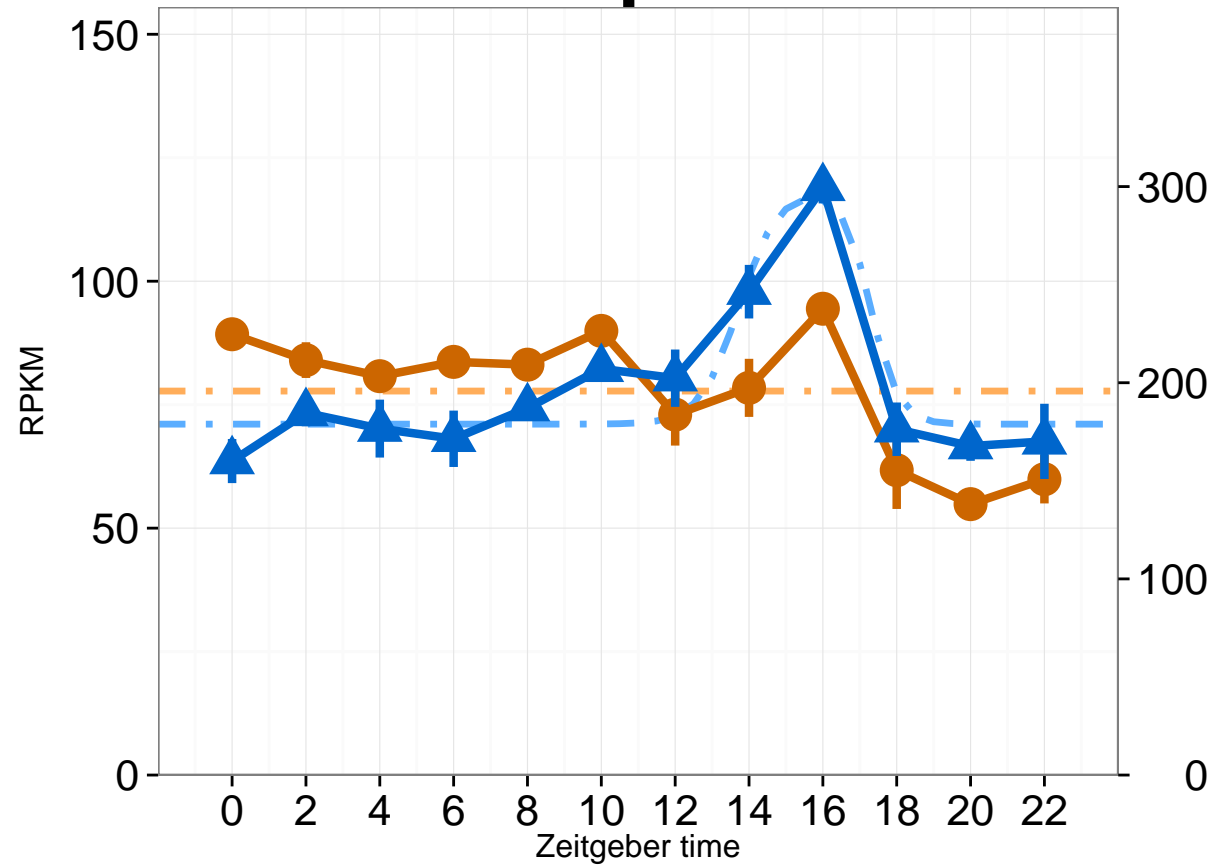

# Mrps6

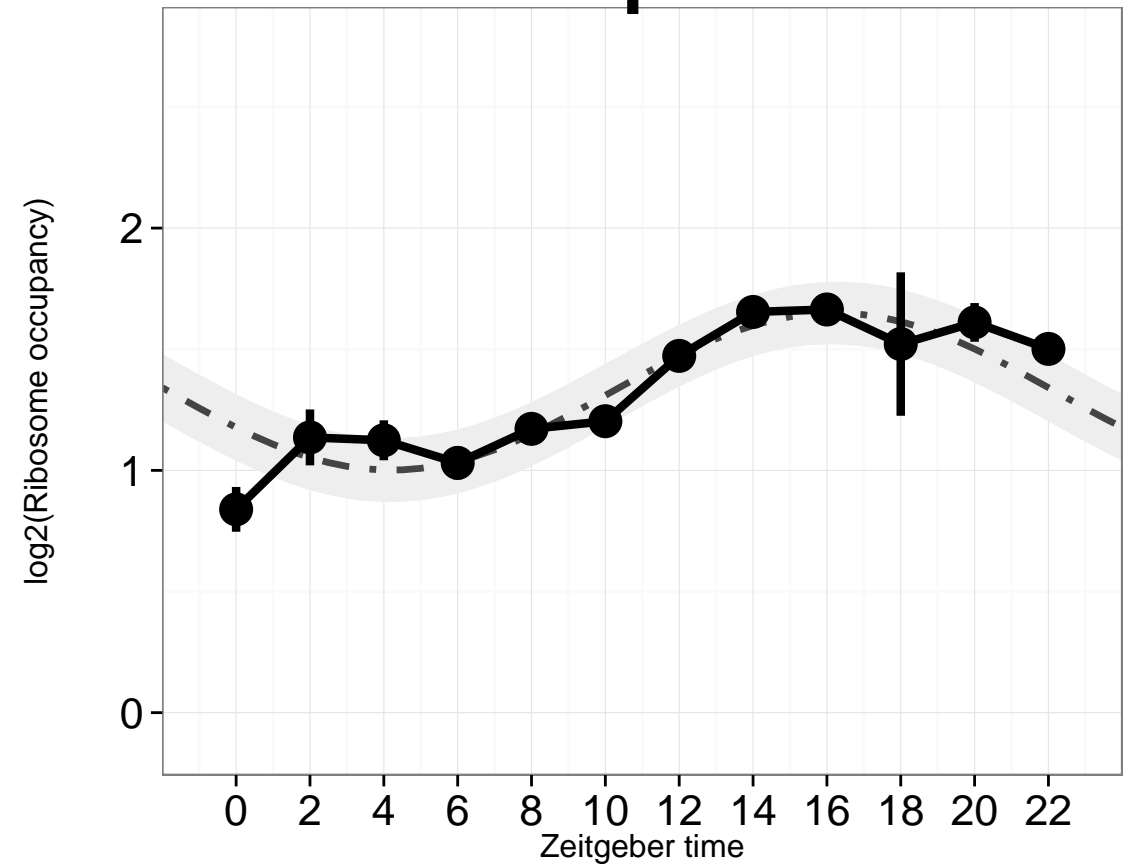

Supplement: Supplementary file 1000 [file 1]

# Kcnn4

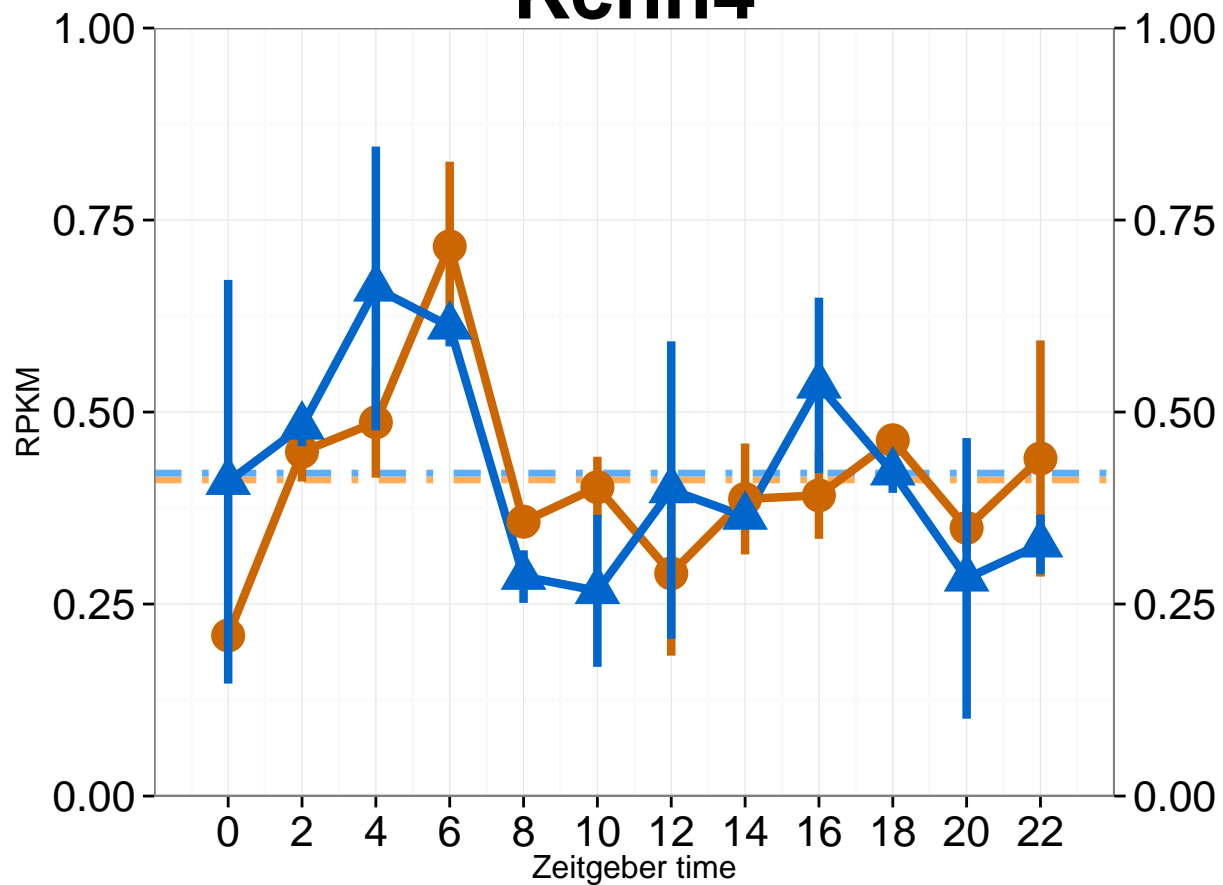

# Kcnn4

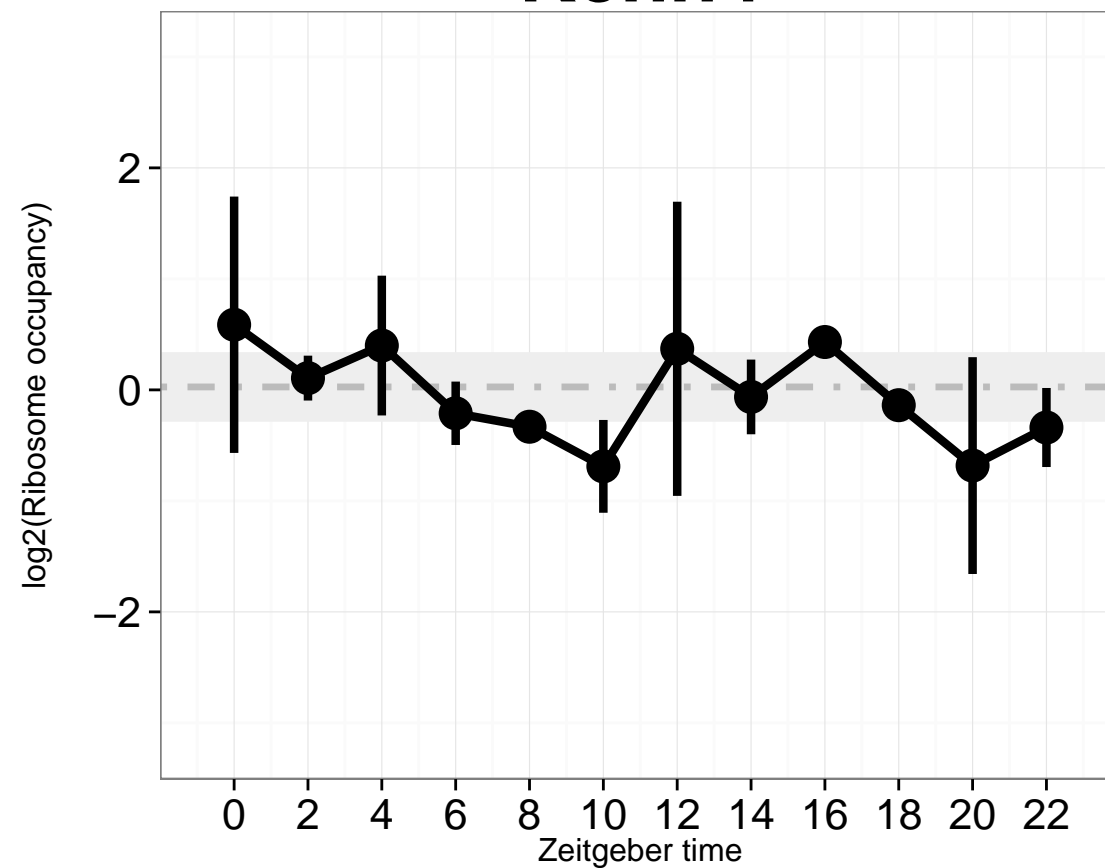

Supplement: Supplementary file 1001 [file 1]

## Ap1g1

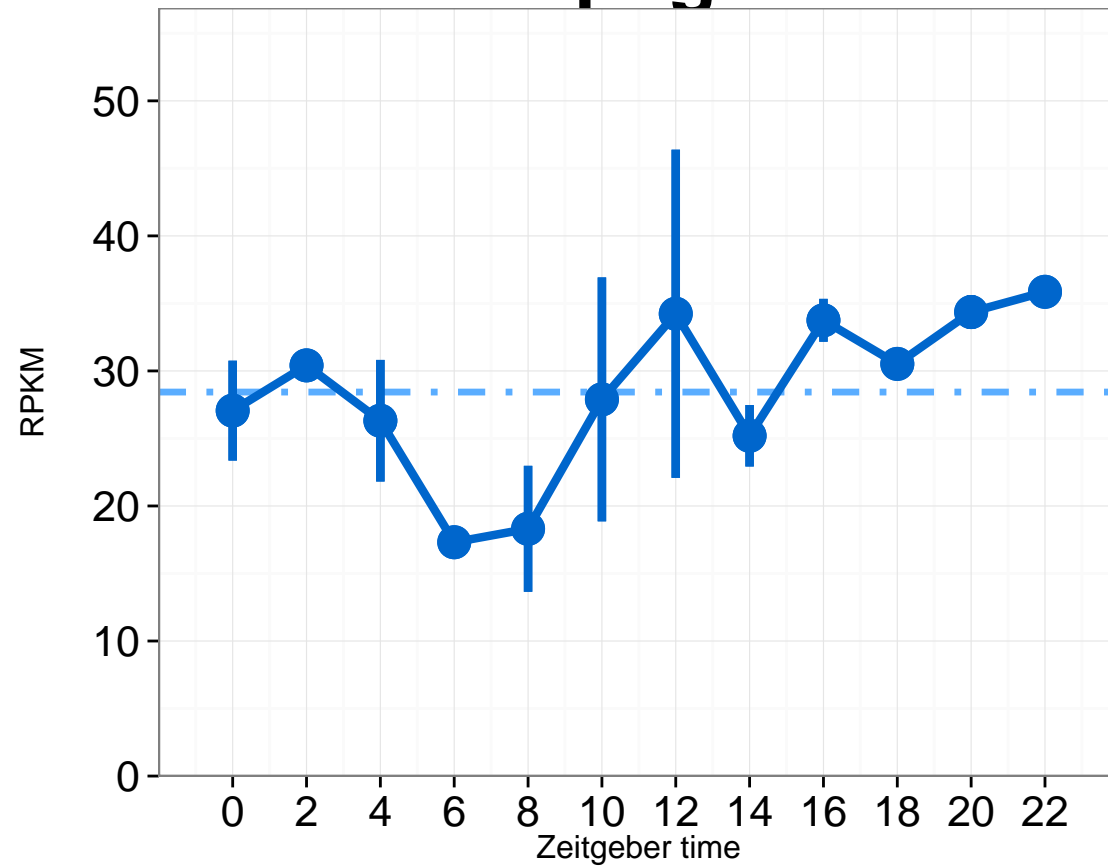

## Ap1g1 log2(Ribosome occupancy

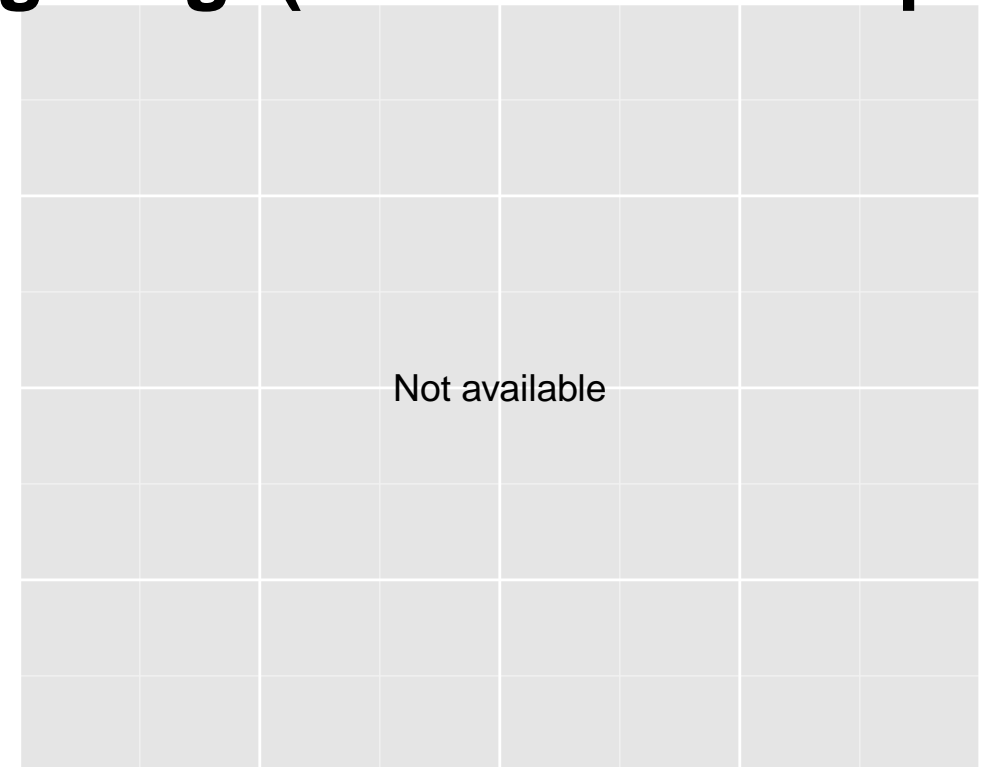

Supplement: Supplementary file 1002 [file 1]

# N4bp2l1

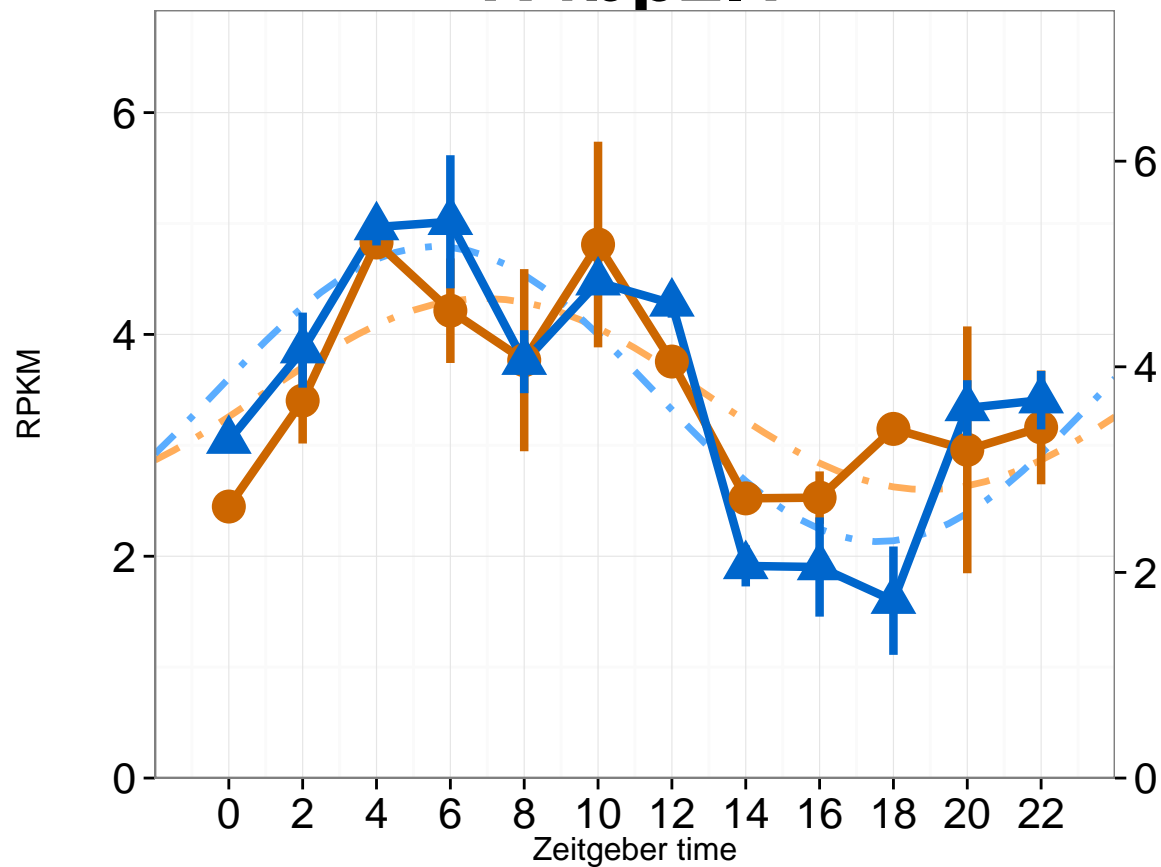

# N4bp2l1

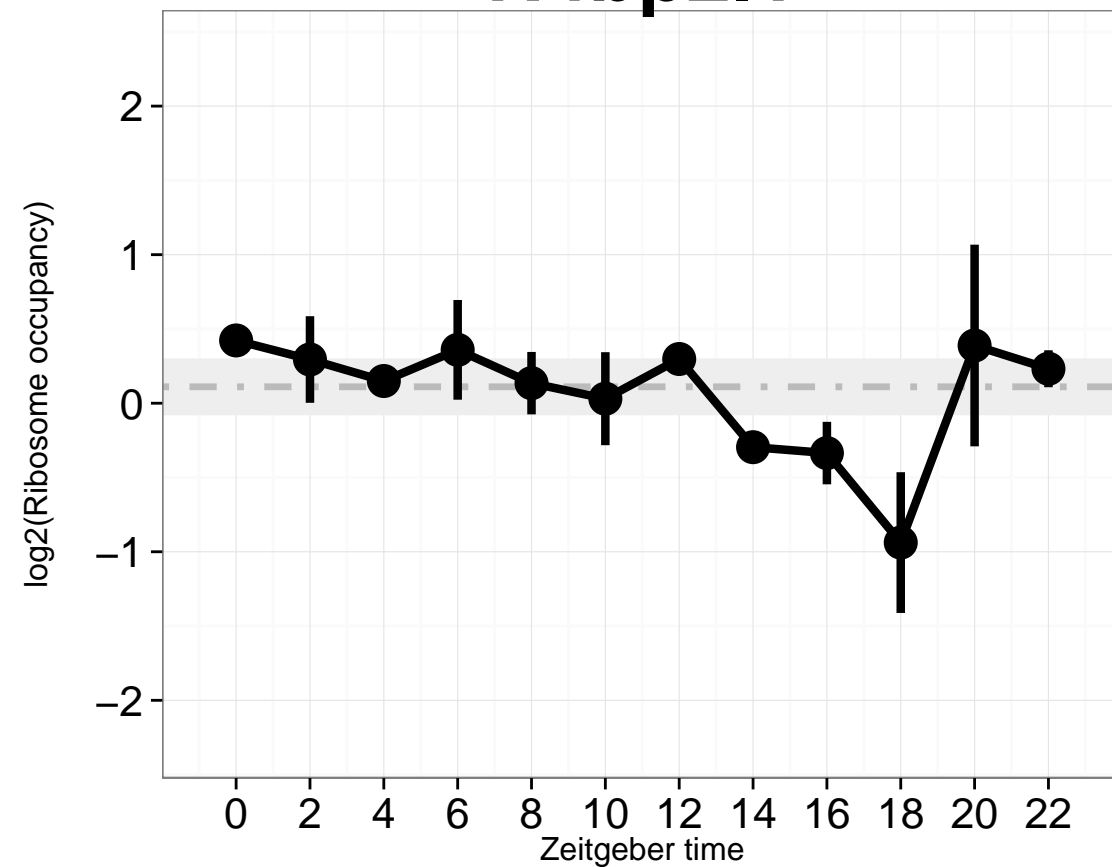

Supplement: Supplementary file 1003 [file 1]

## Zfml

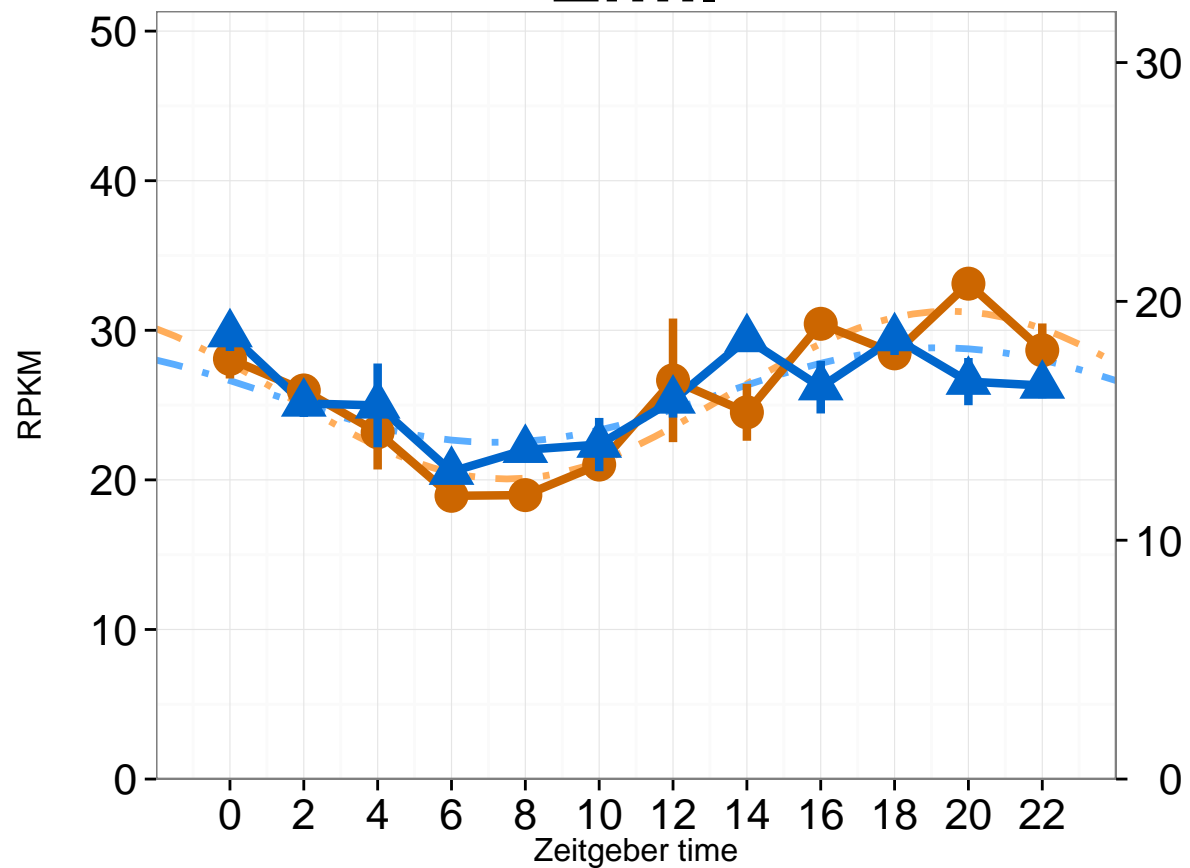

## Zfml

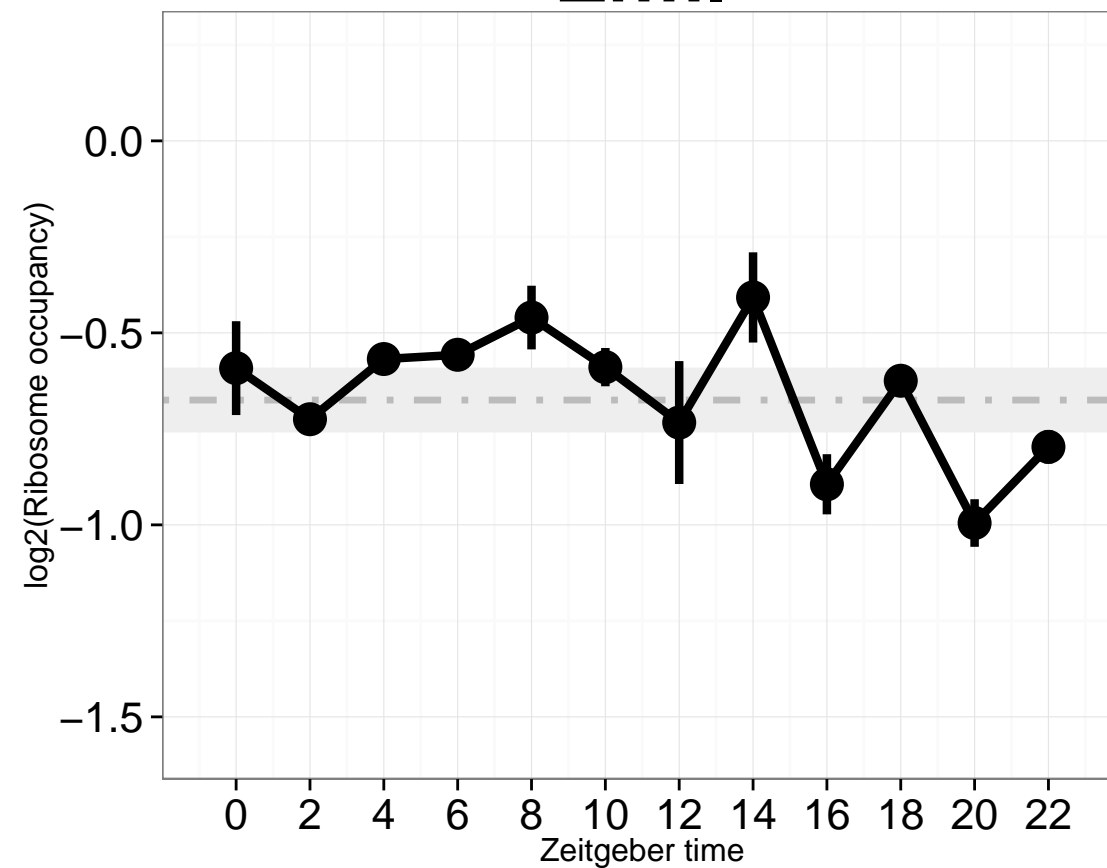

Supplement: Supplementary file 1004 [file 1]

# Ifit3

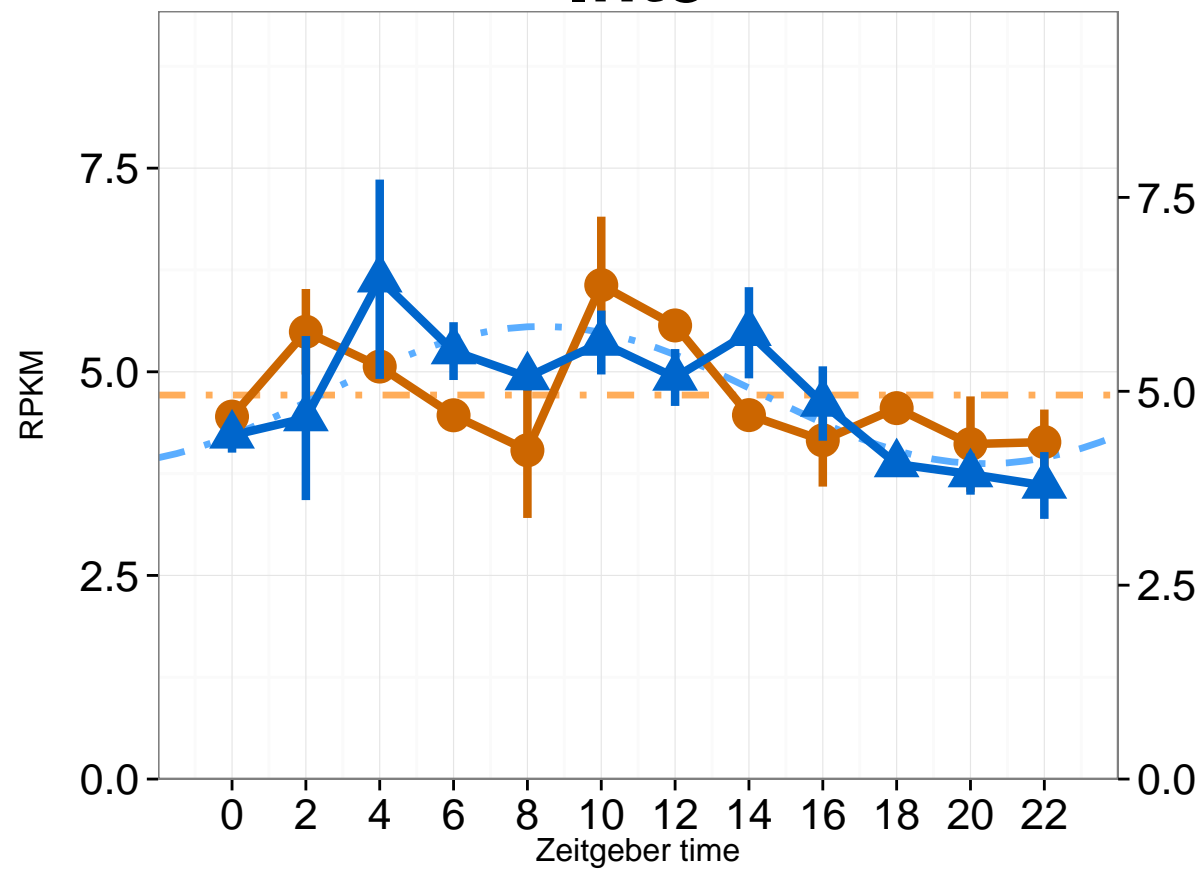

# Ifit3

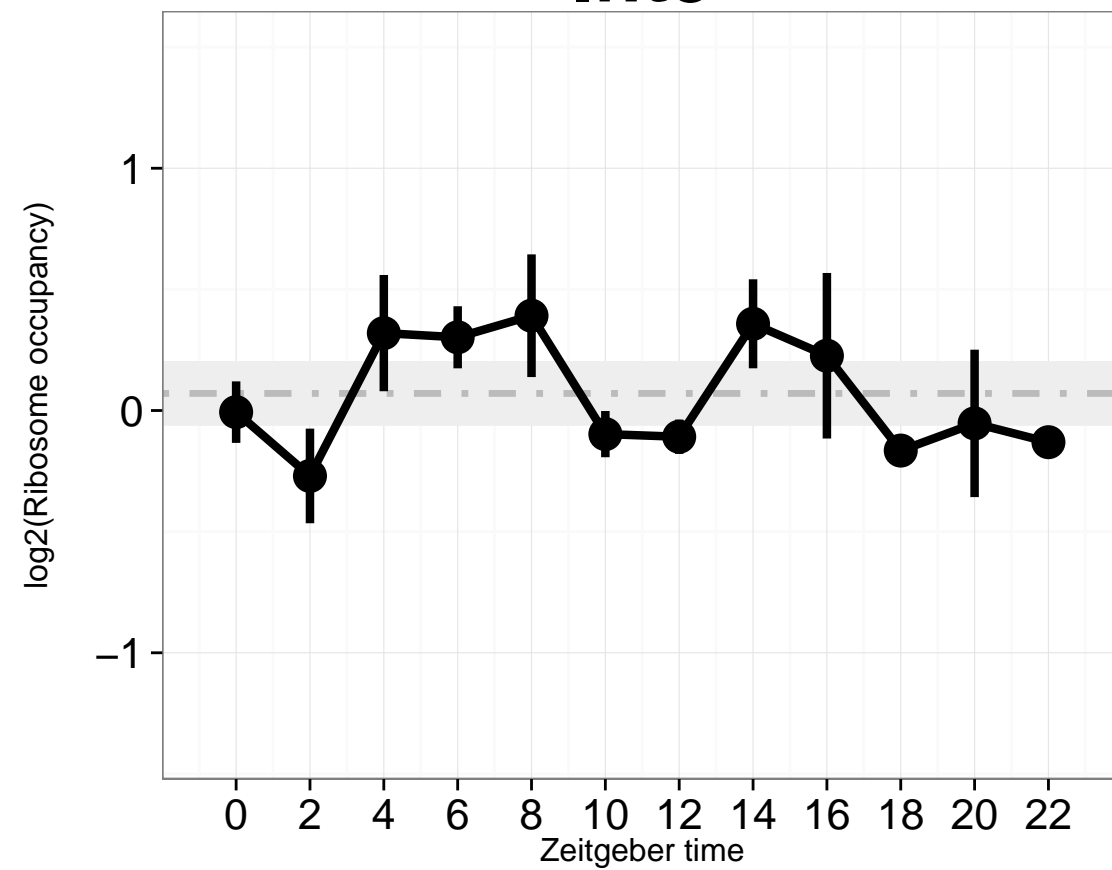

Supplement: Supplementary file 1005 [file 1]
