# Supplementary material (part 11 of 133)
Source: publisher figshare collection journal article supplement (https://springernature.figshare.com/articles/dataset/_/4903193)

## Ceacam2

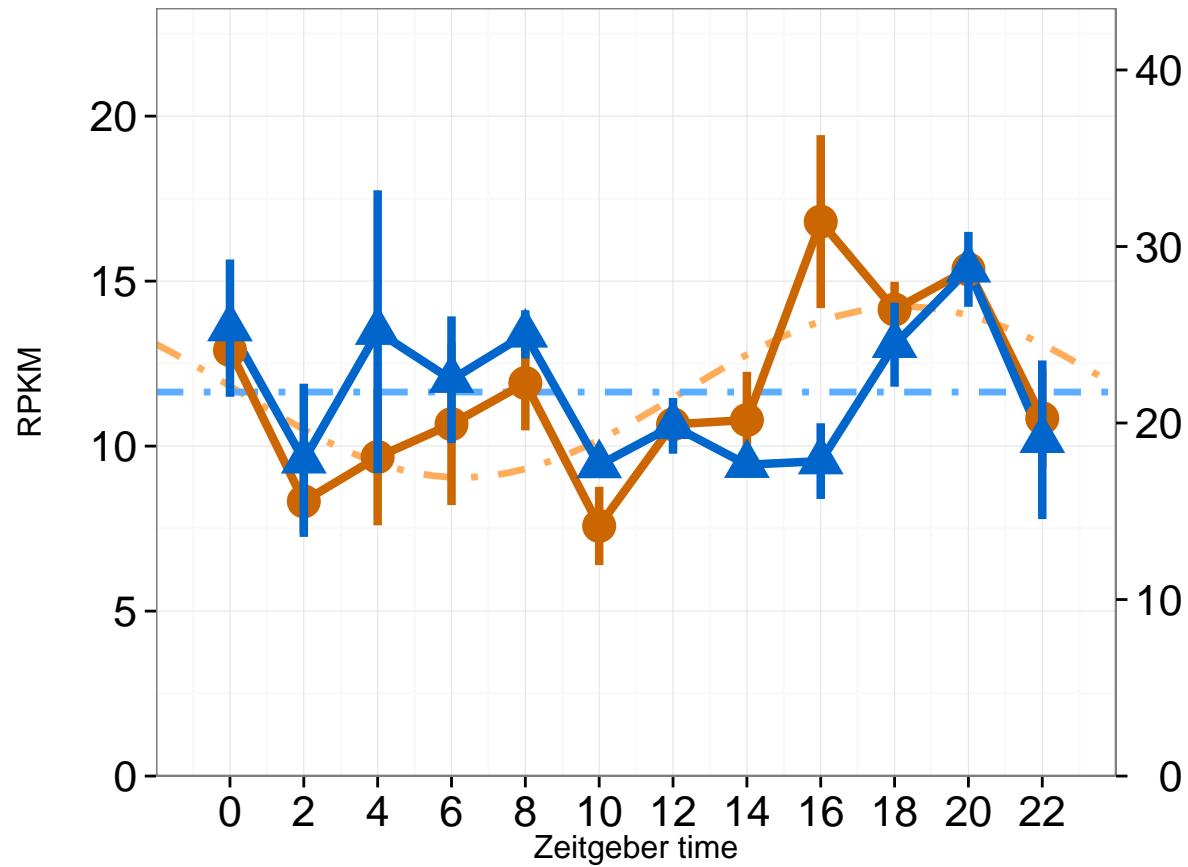

## Ceacam2

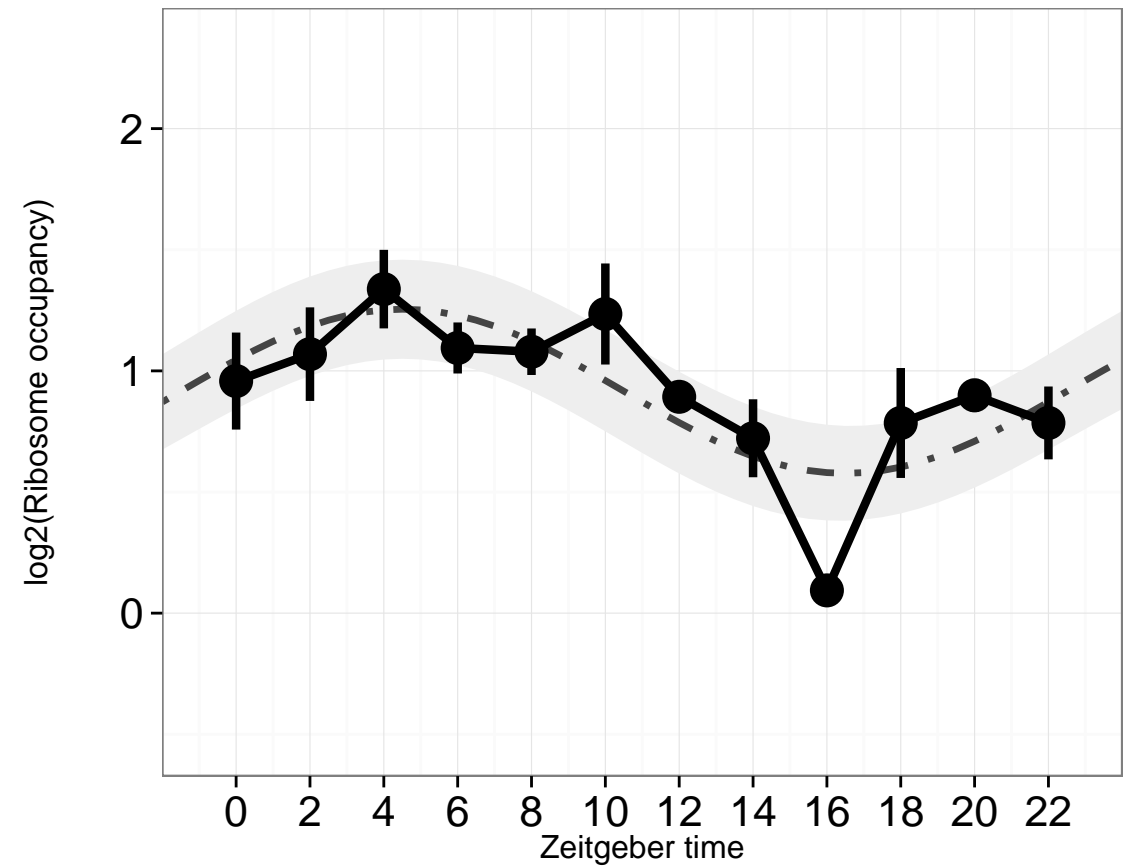

Supplement: Supplementary file 1006 [file 1]

## Eps15

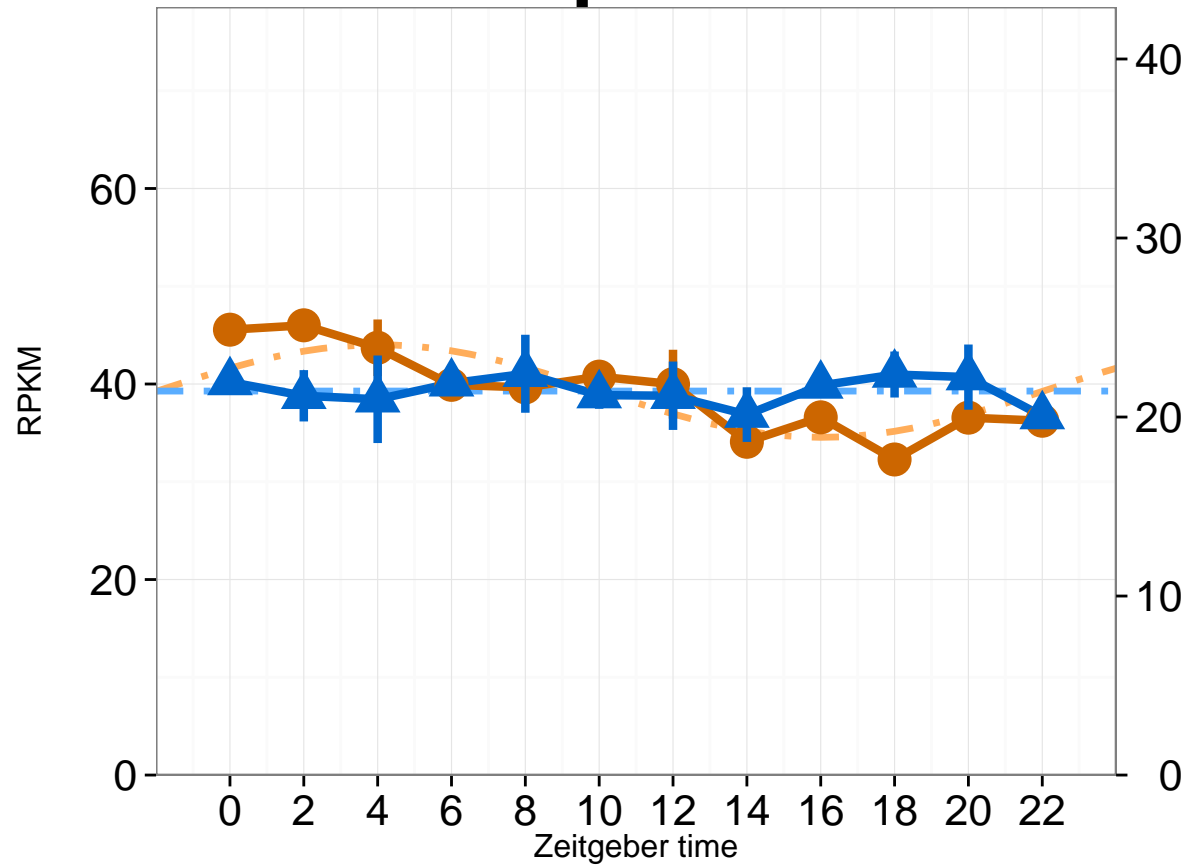

## Eps15

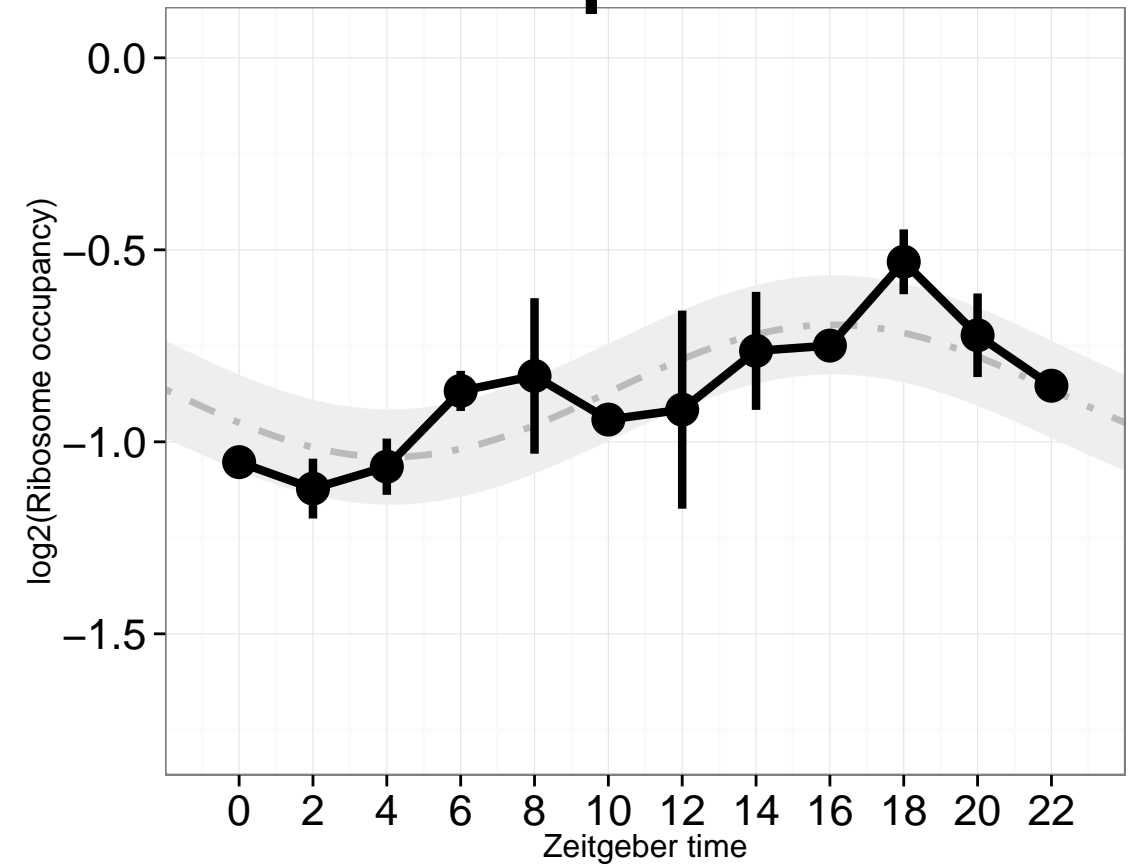

Supplement: Supplementary file 1007 [file 1]

# Lyn

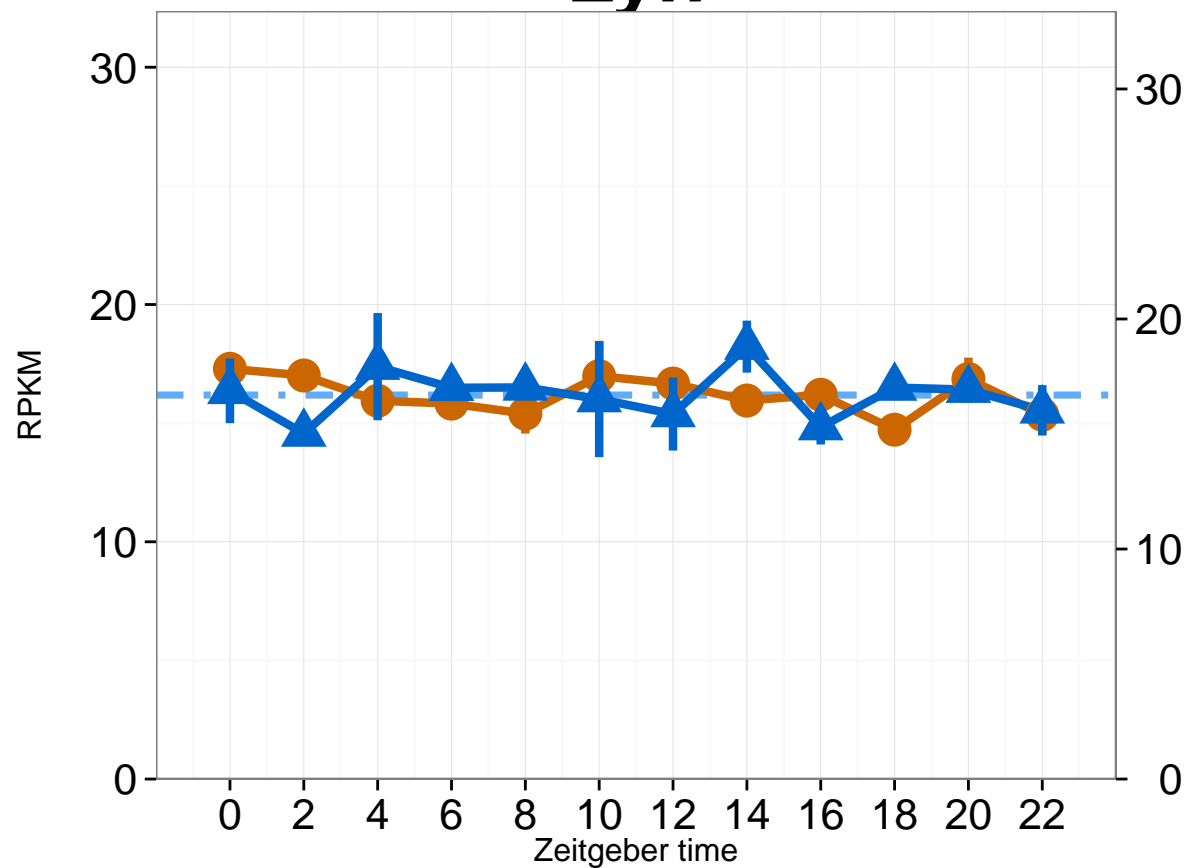

# Lyn

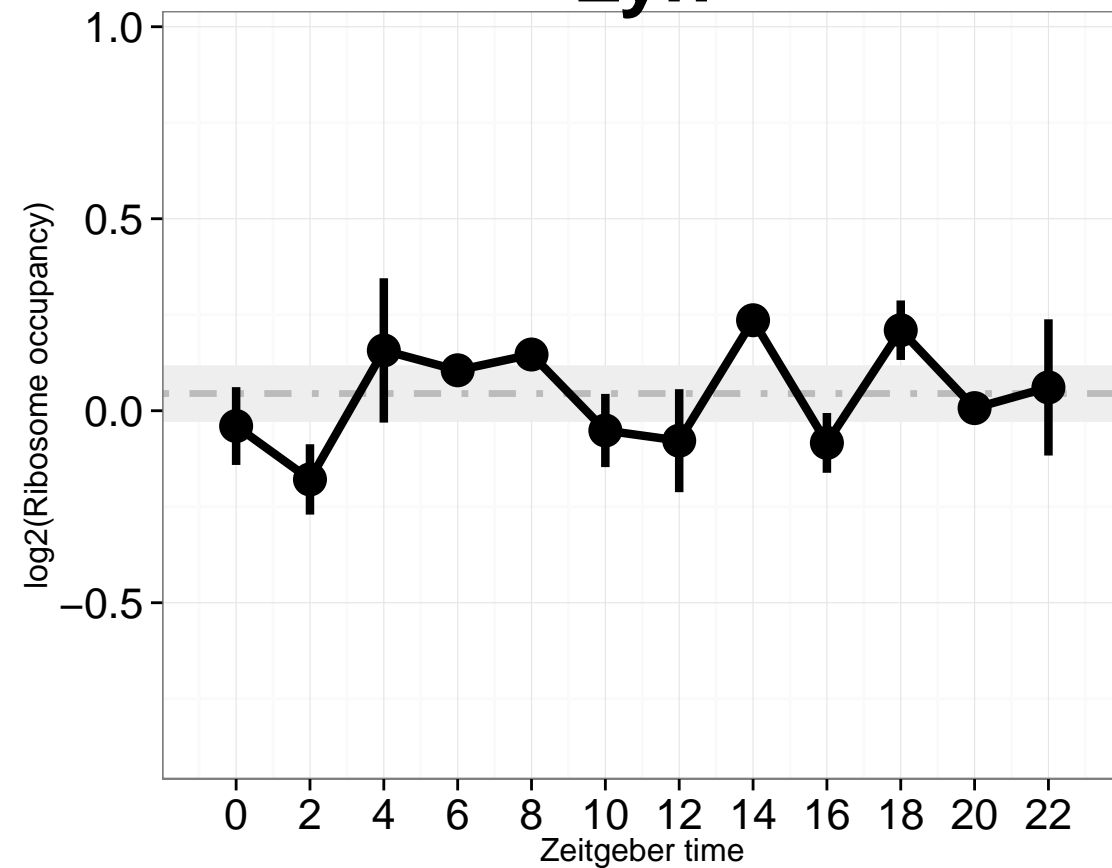

Supplement: Supplementary file 1008 [file 1]

## Fam195b

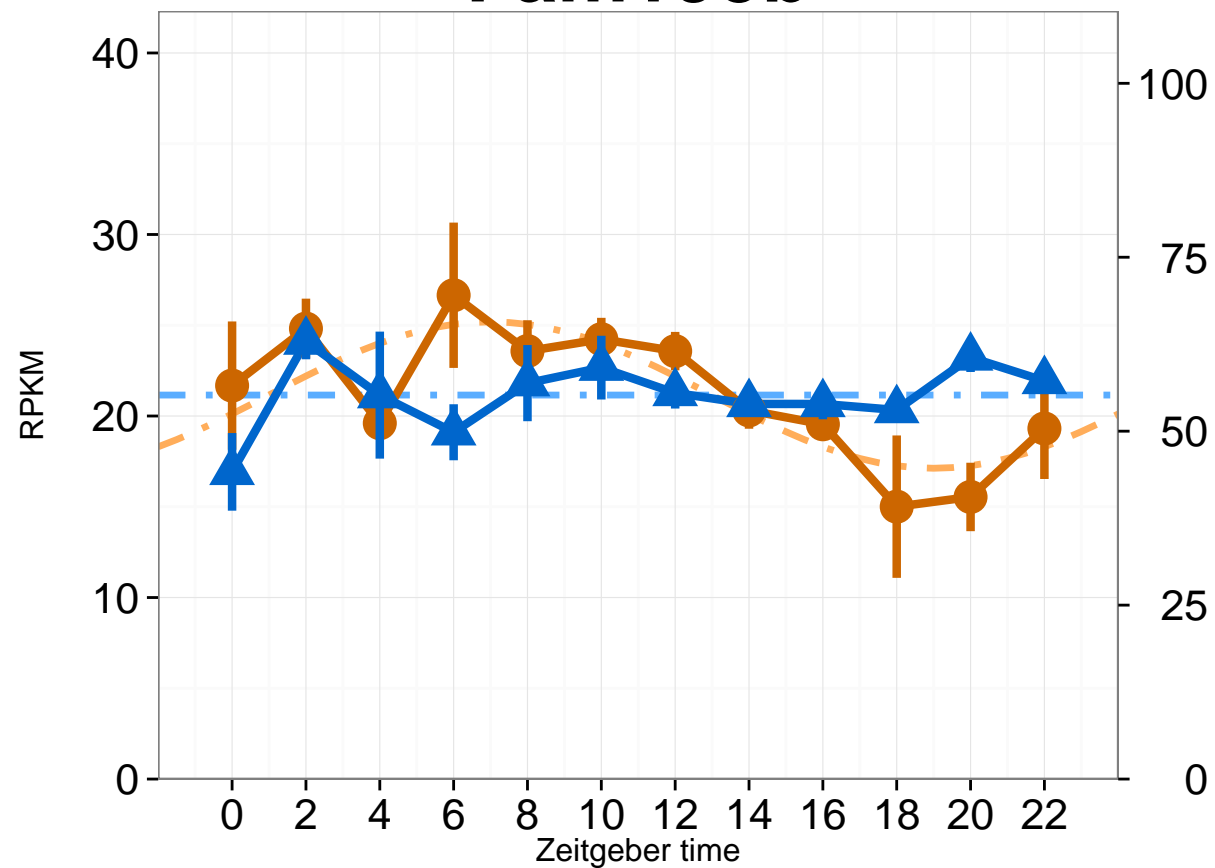

## Fam195b

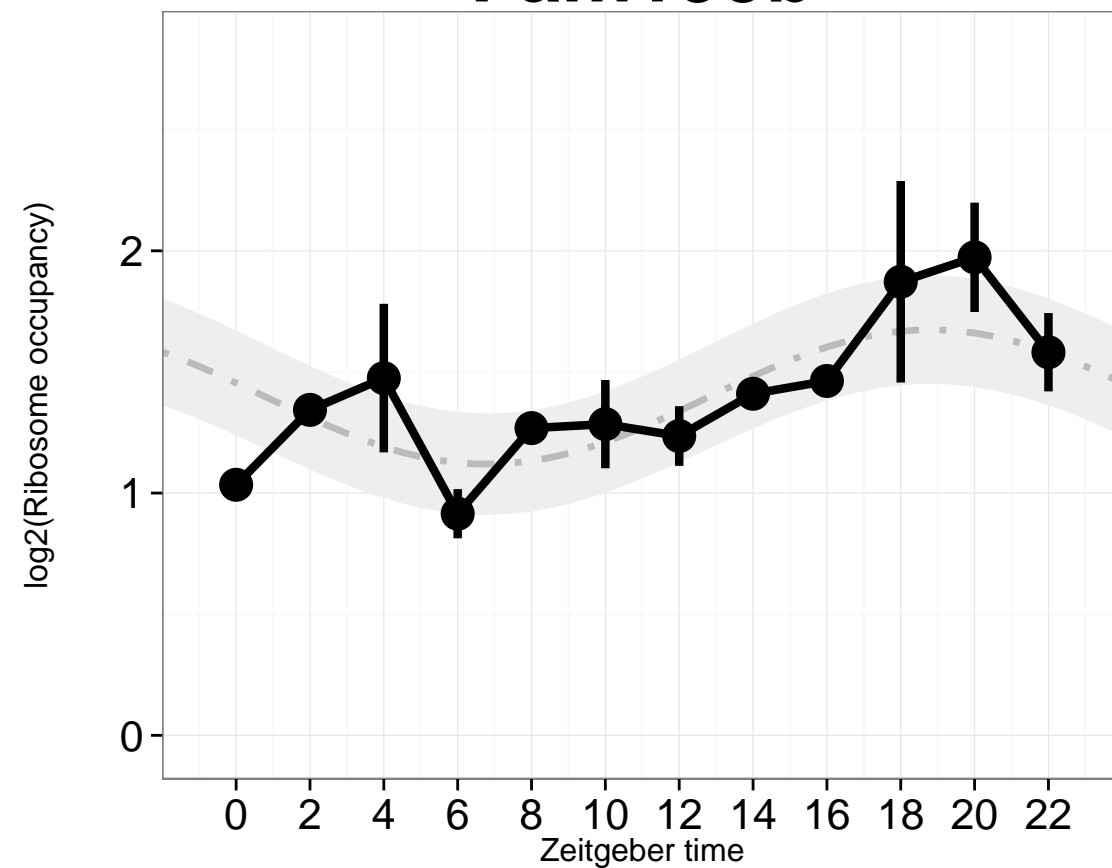

Supplement: Supplementary file 1009 [file 1]

## Idua

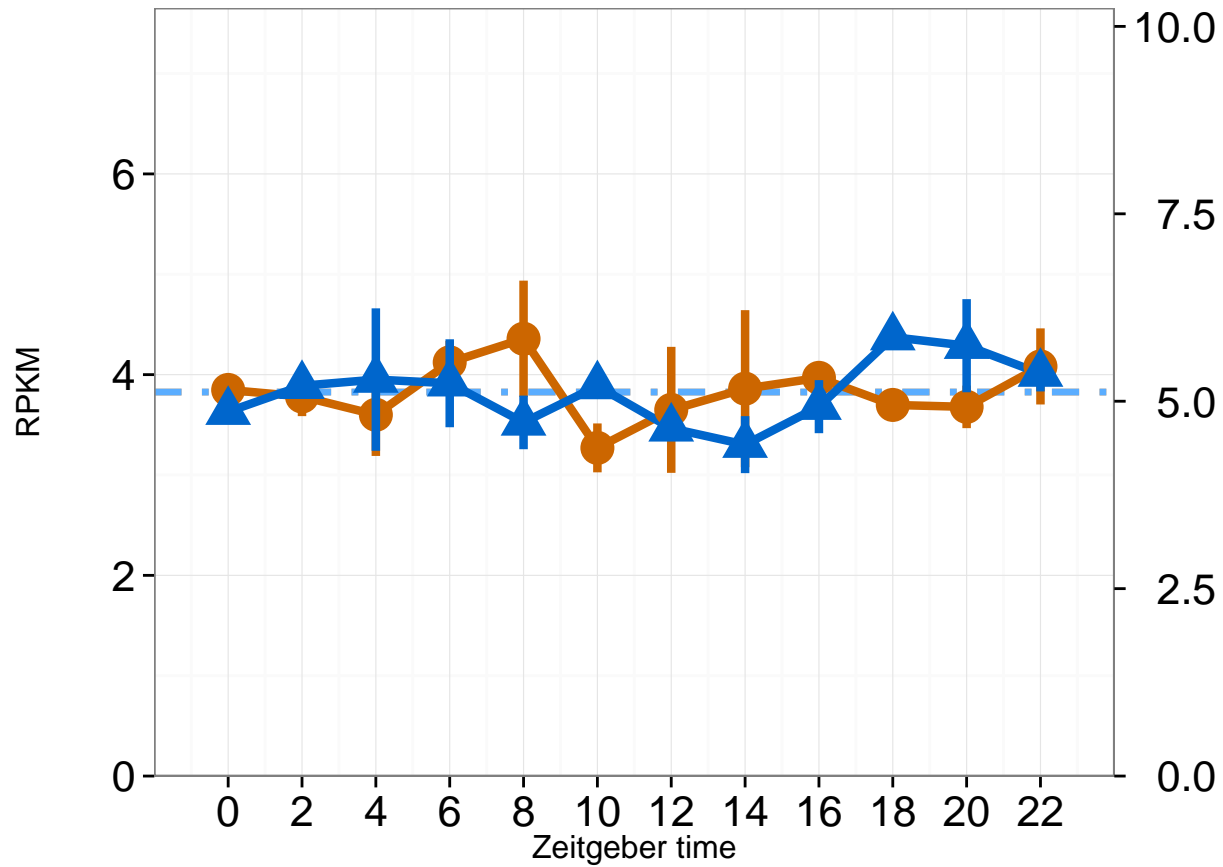

## Idua

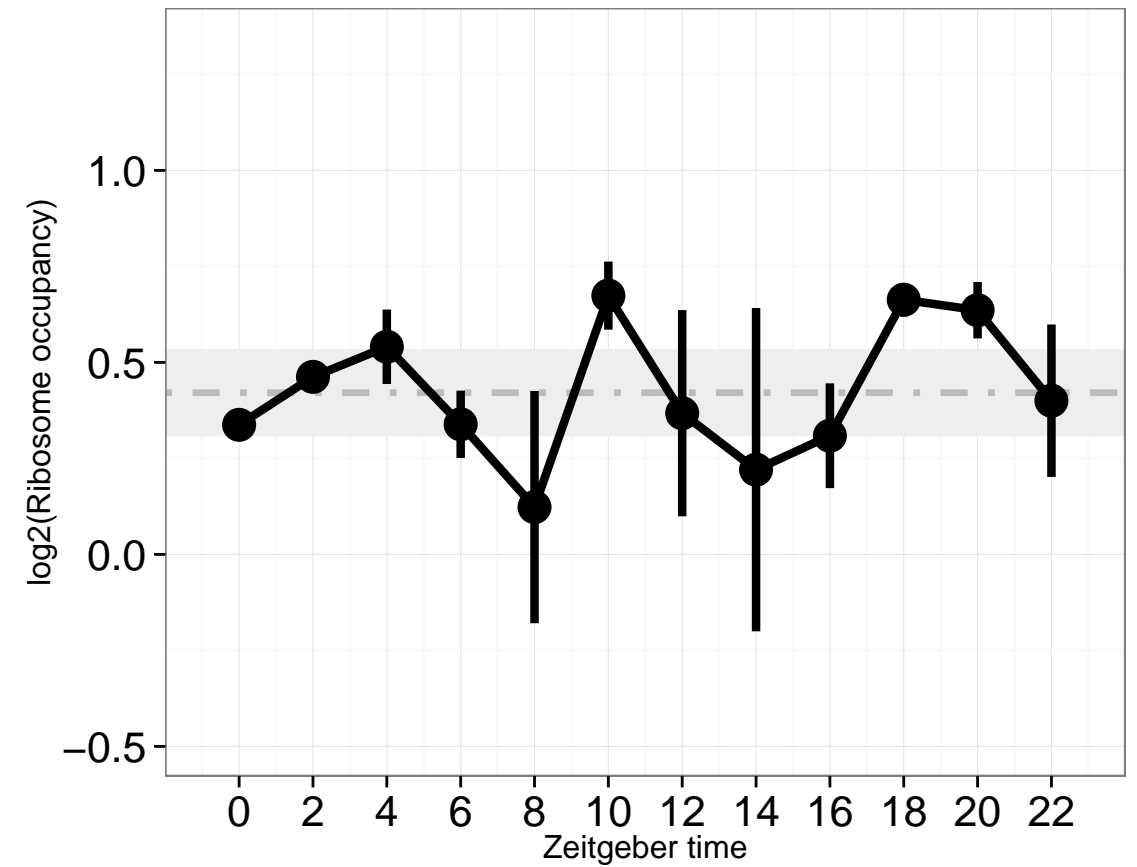

Supplement: Supplementary file 1010 [file 1]

## Naglu

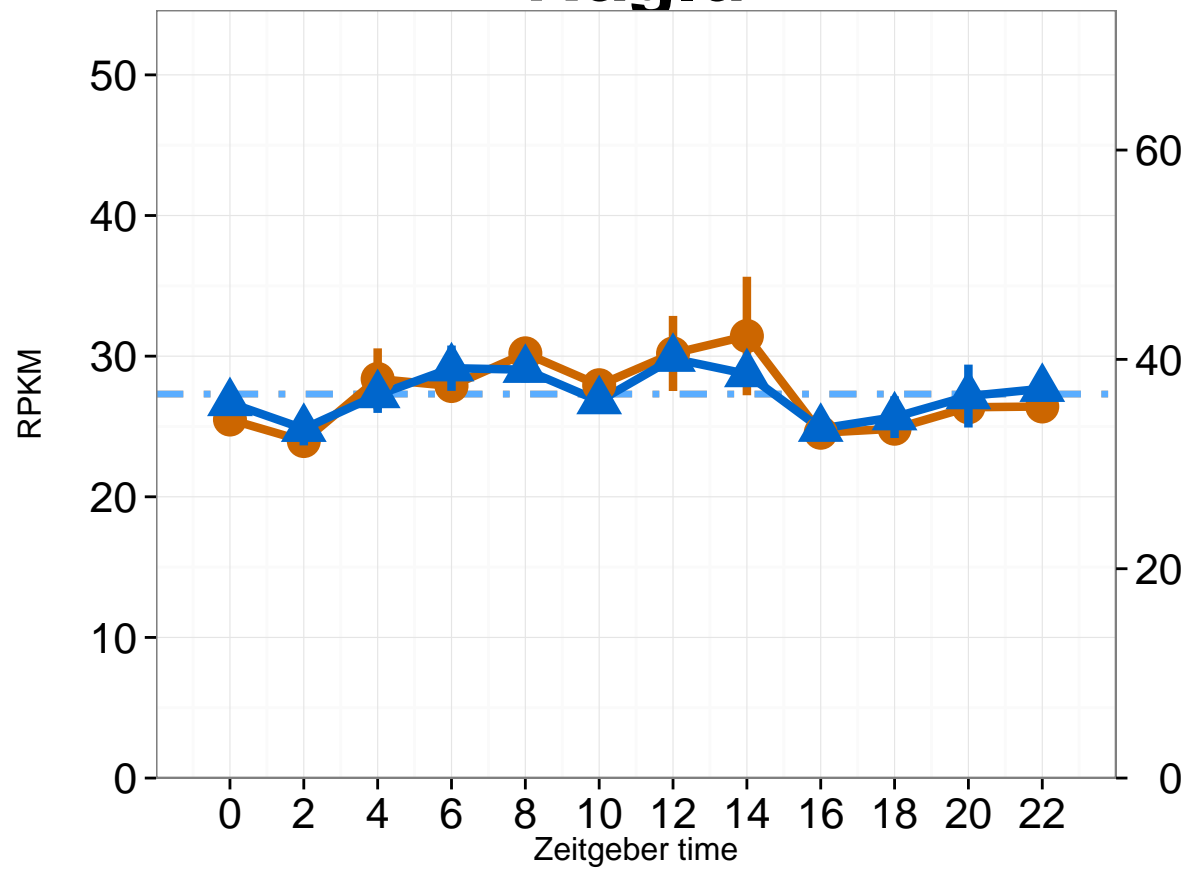

## Naglu

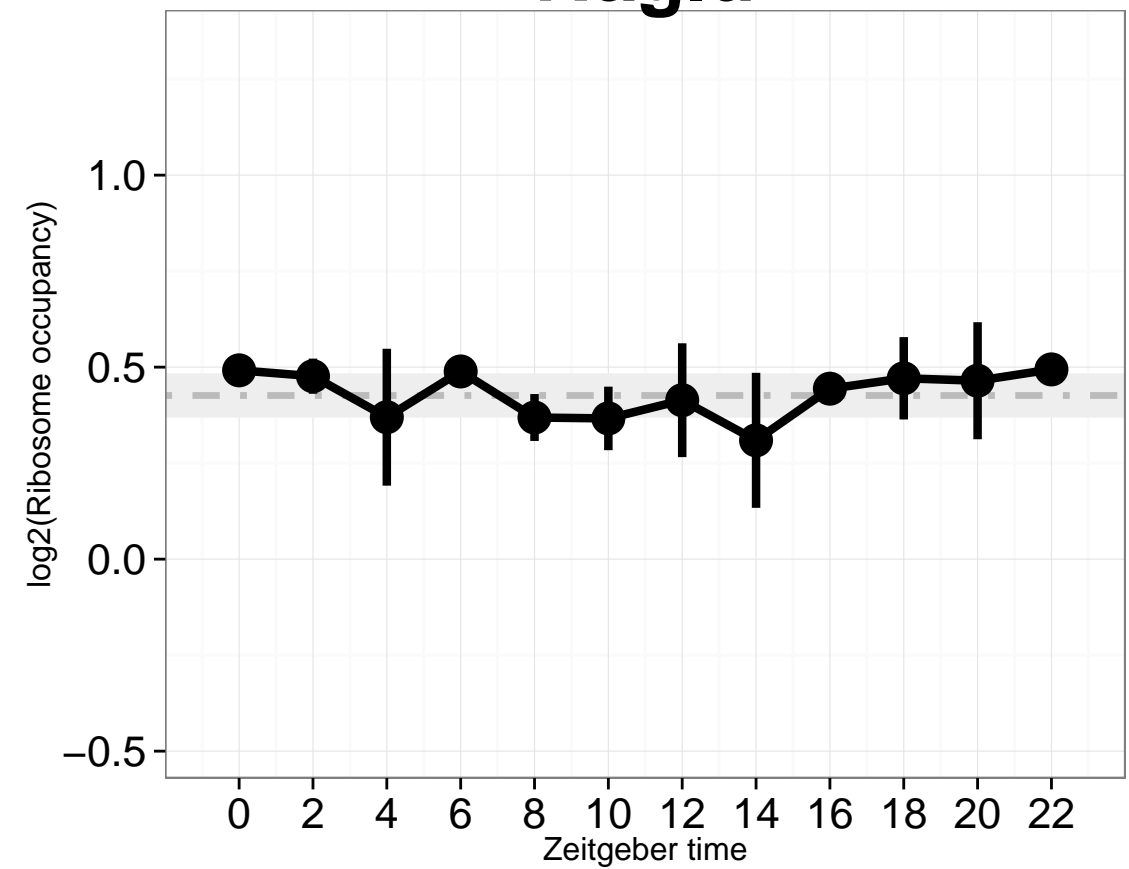

Supplement: Supplementary file 1011 [file 1]

## Setd7

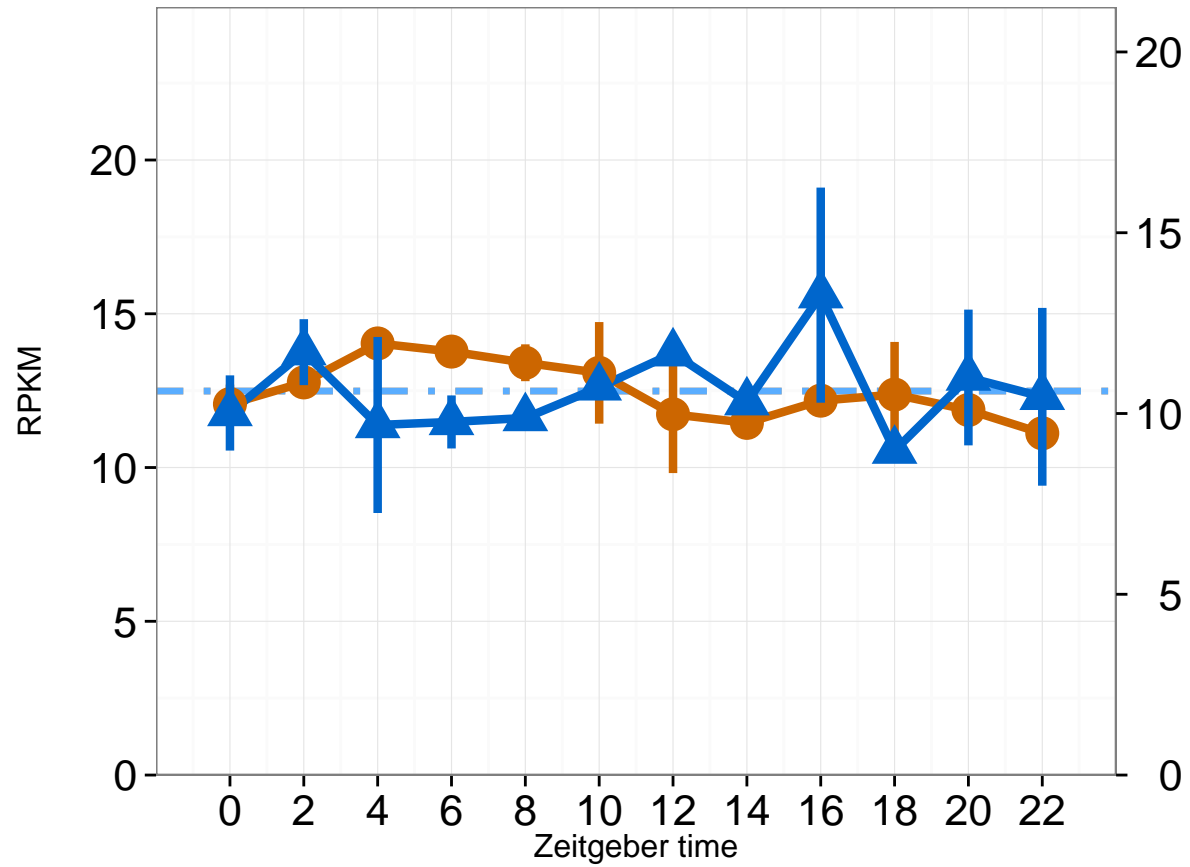

## Setd7

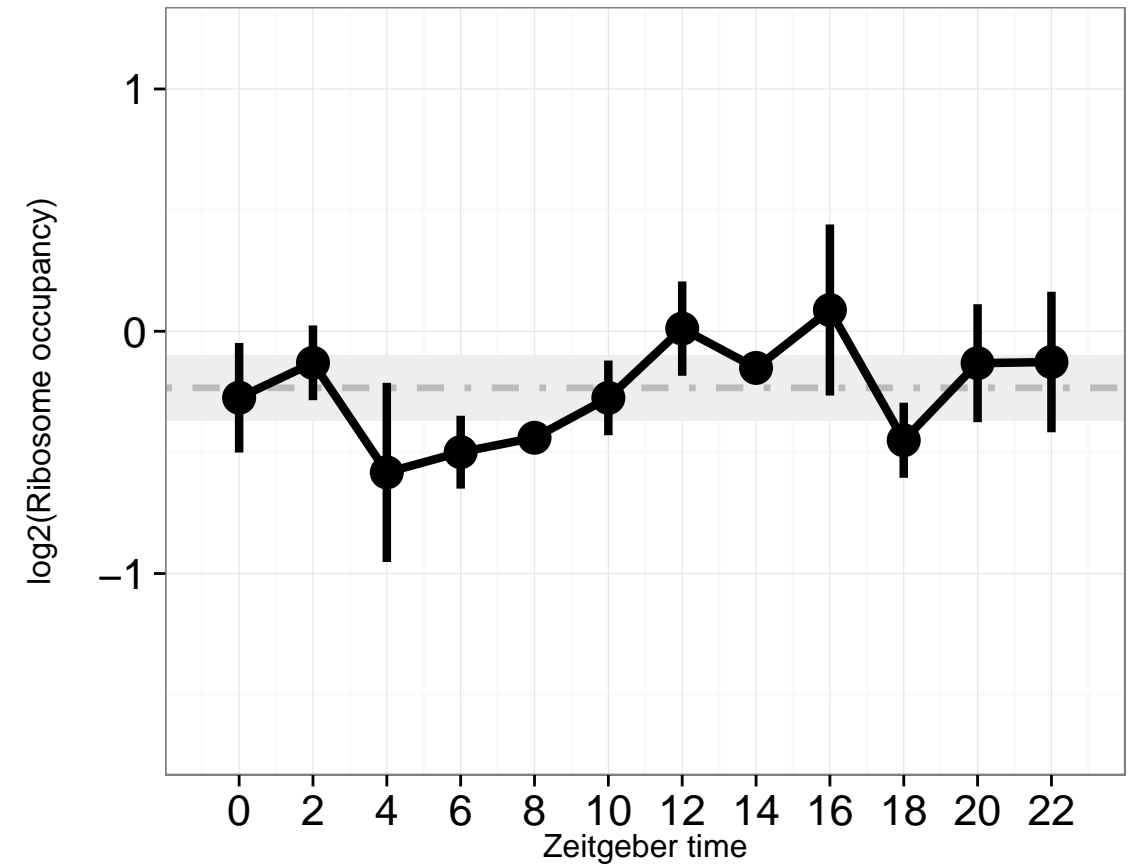

Supplement: Supplementary file 1012 [file 1]

## Fbxo32

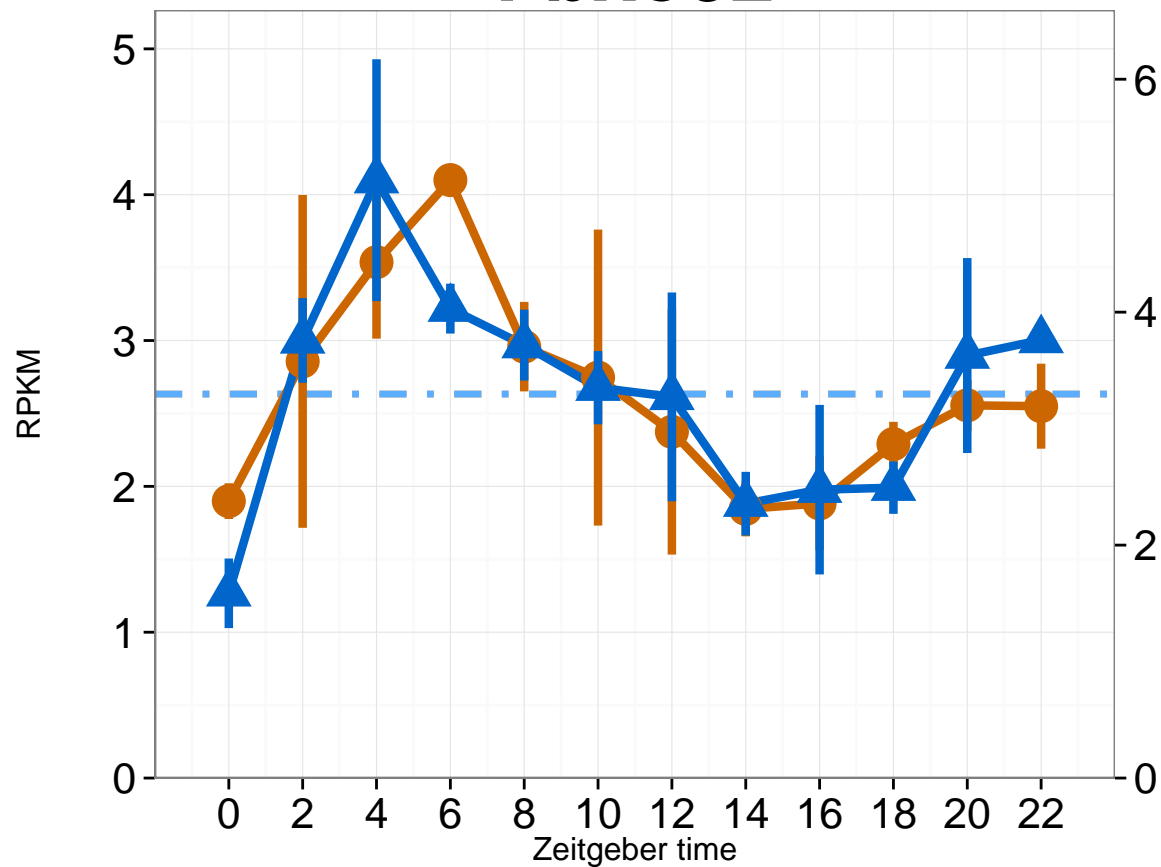

## Fbxo32

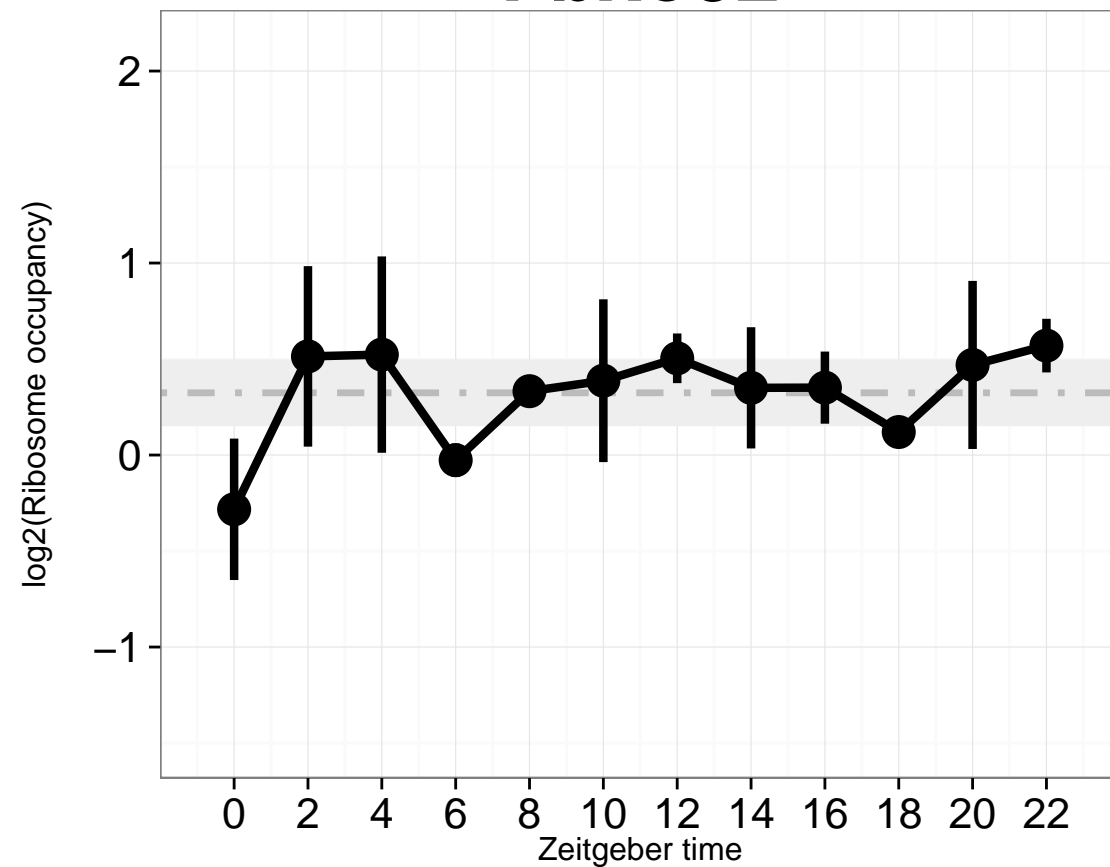

Supplement: Supplementary file 1013 [file 1]

## Thoc6

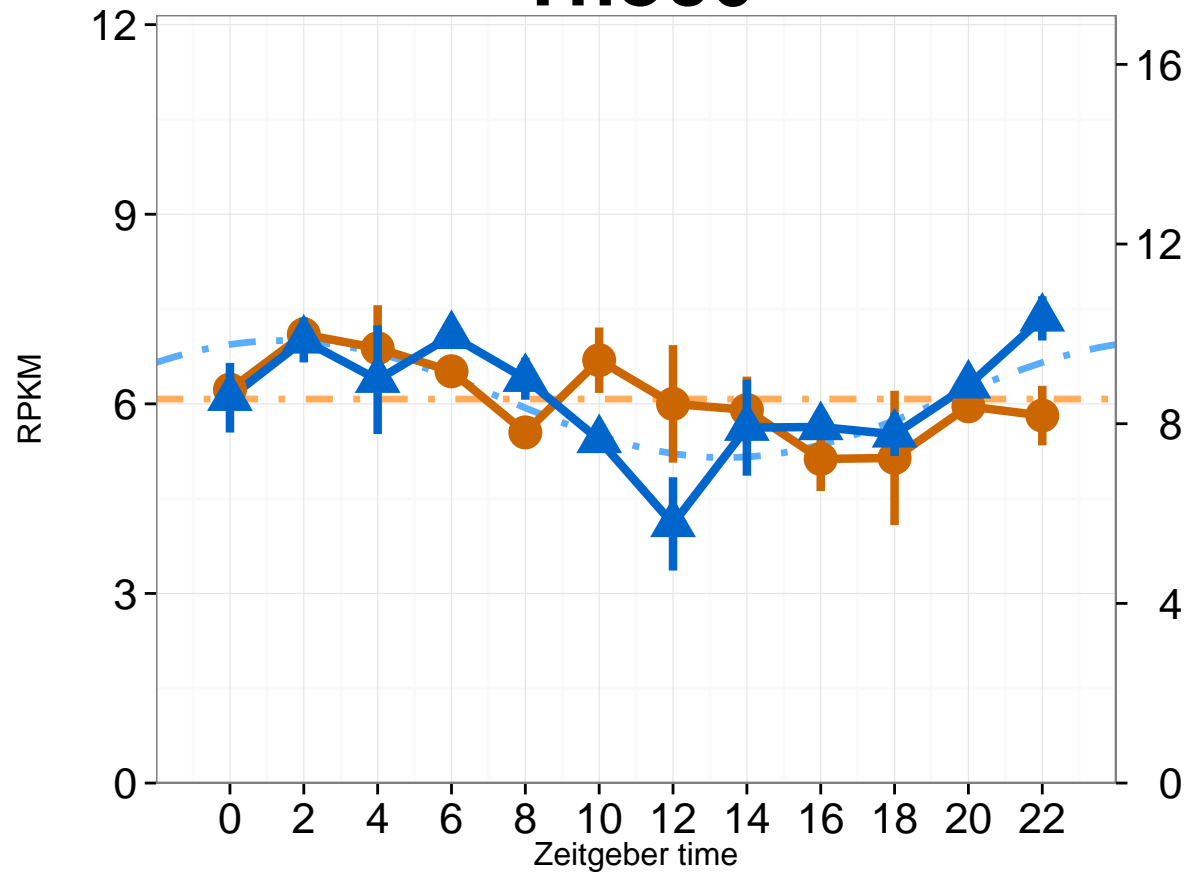

## Thoc6

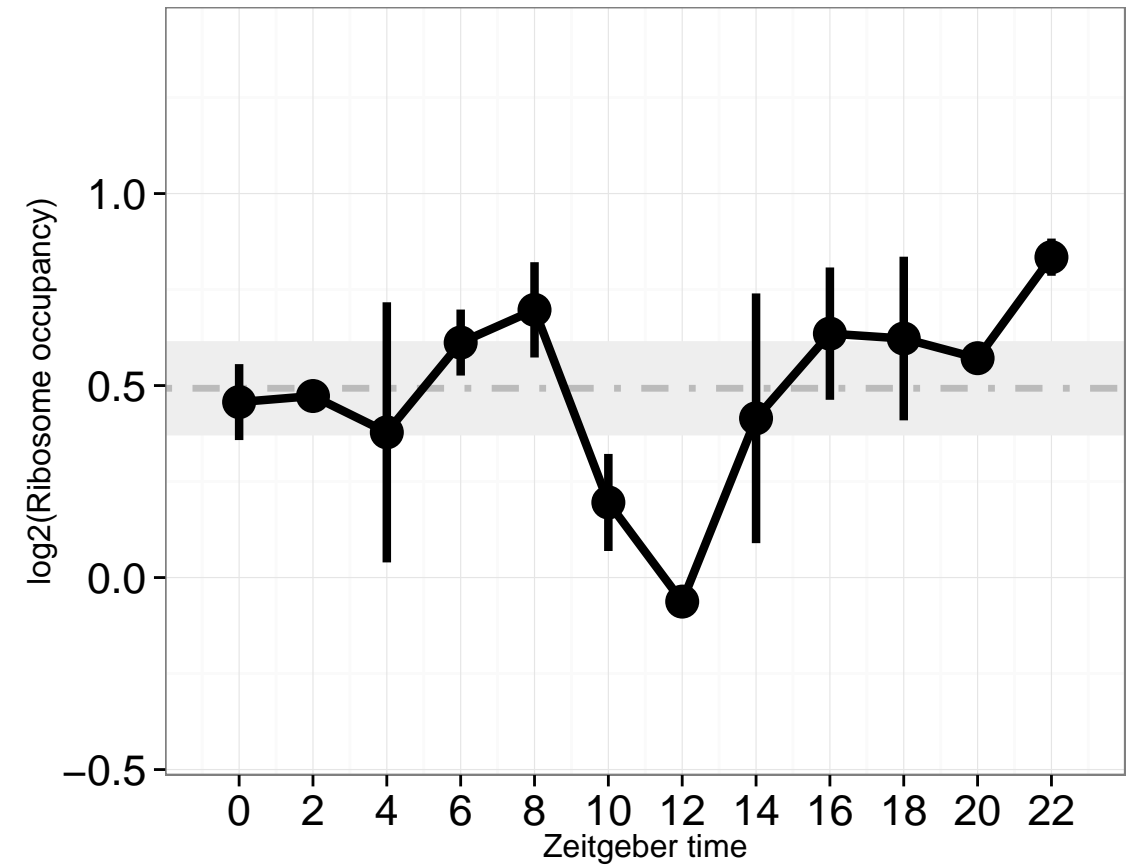

Supplement: Supplementary file 1014 [file 1]

# Zfp273

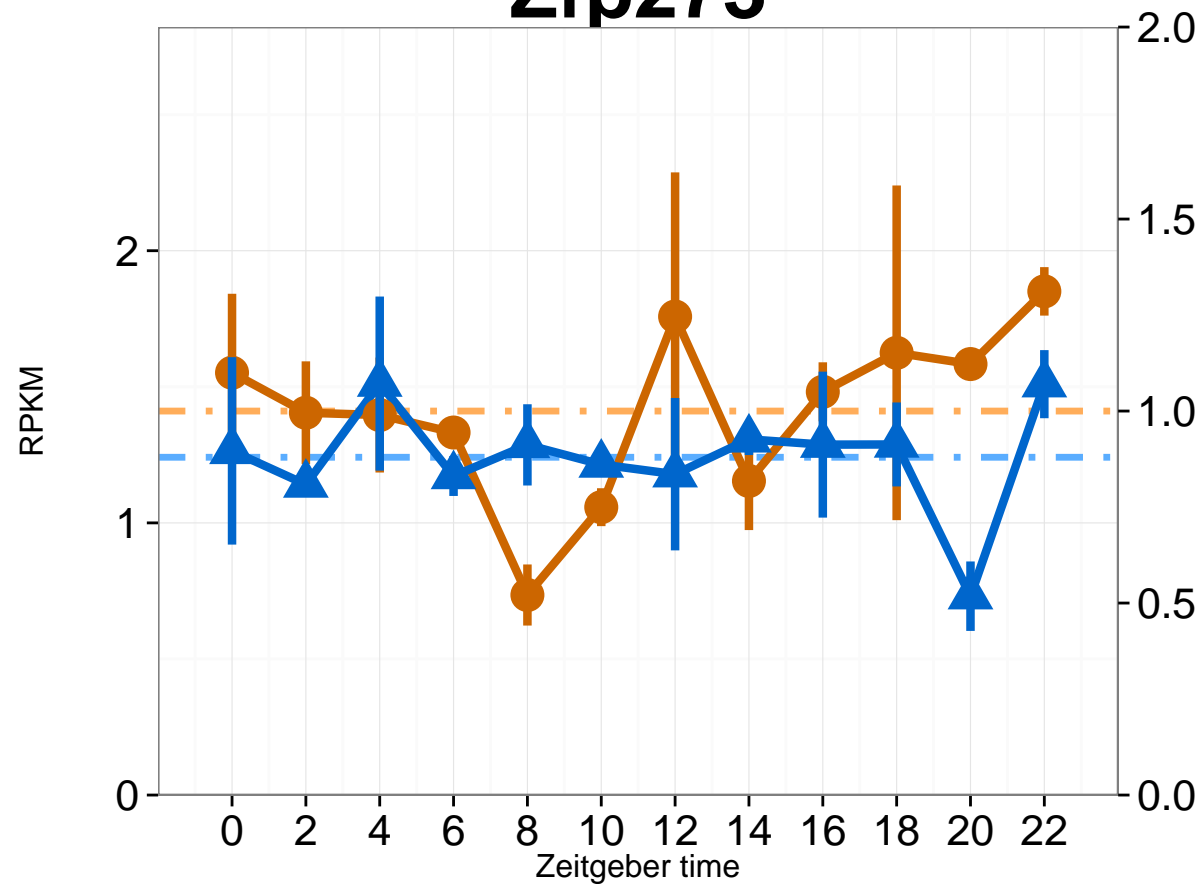

# Zfp273

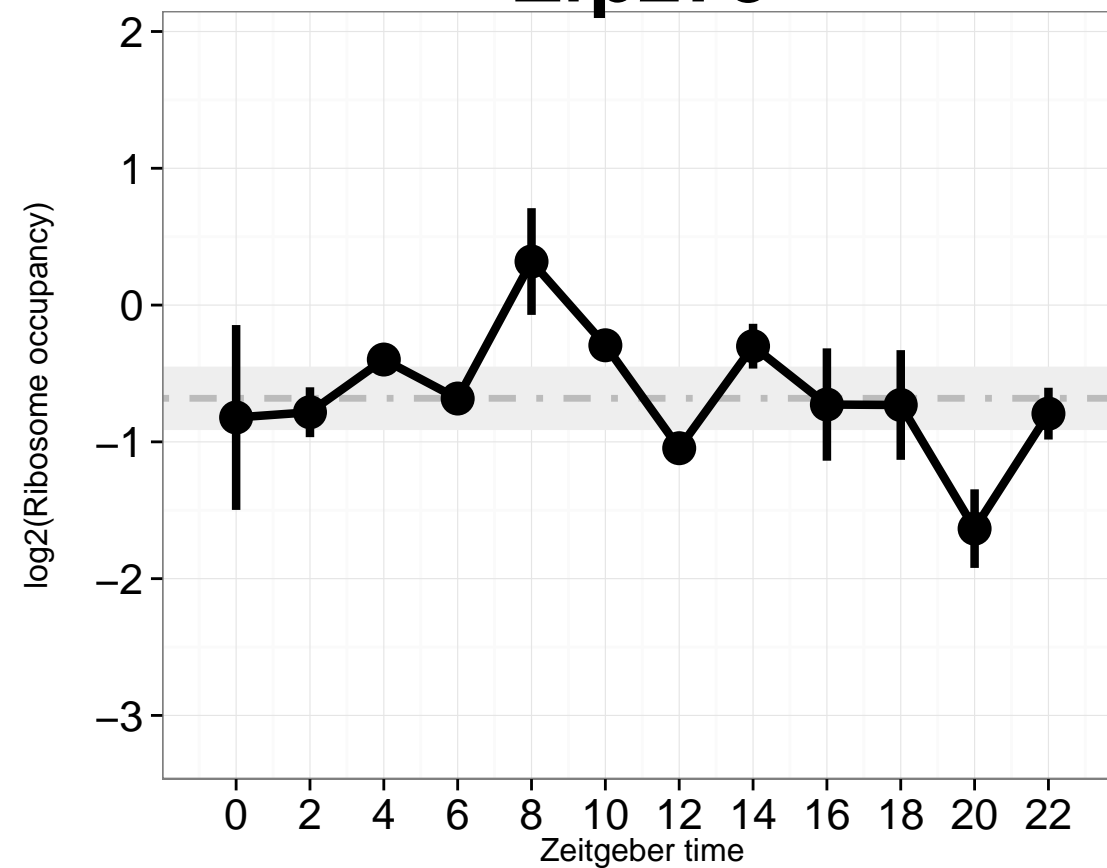

Supplement: Supplementary file 1015 [file 1]

# Slc23a1

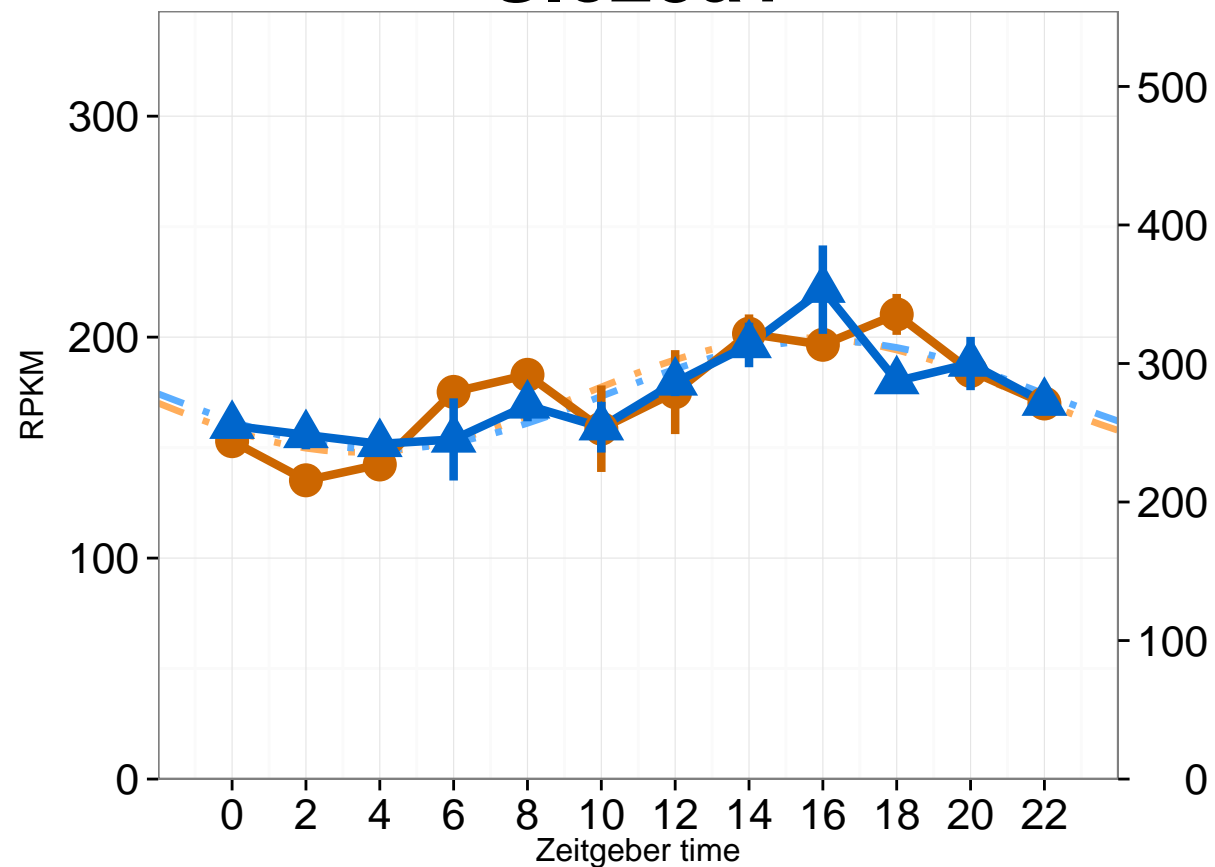

# Slc23a1

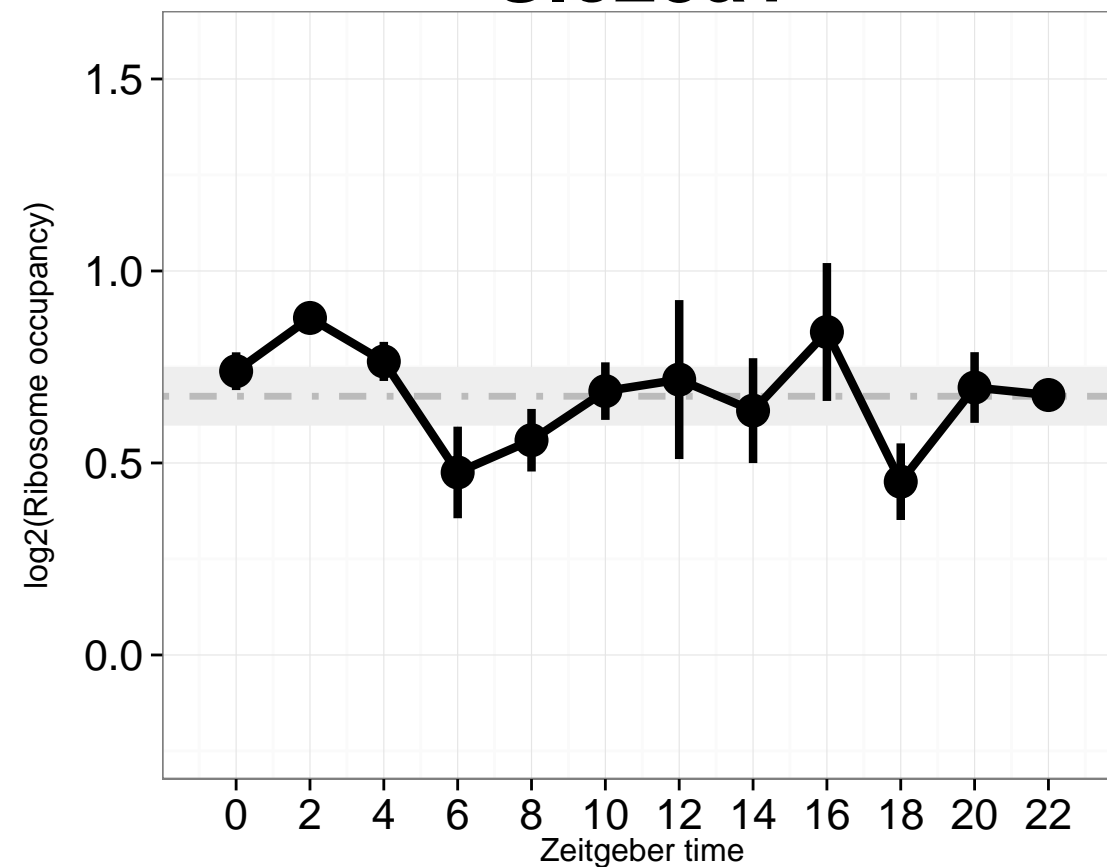

Supplement: Supplementary file 1016 [file 1]

## Tsfm

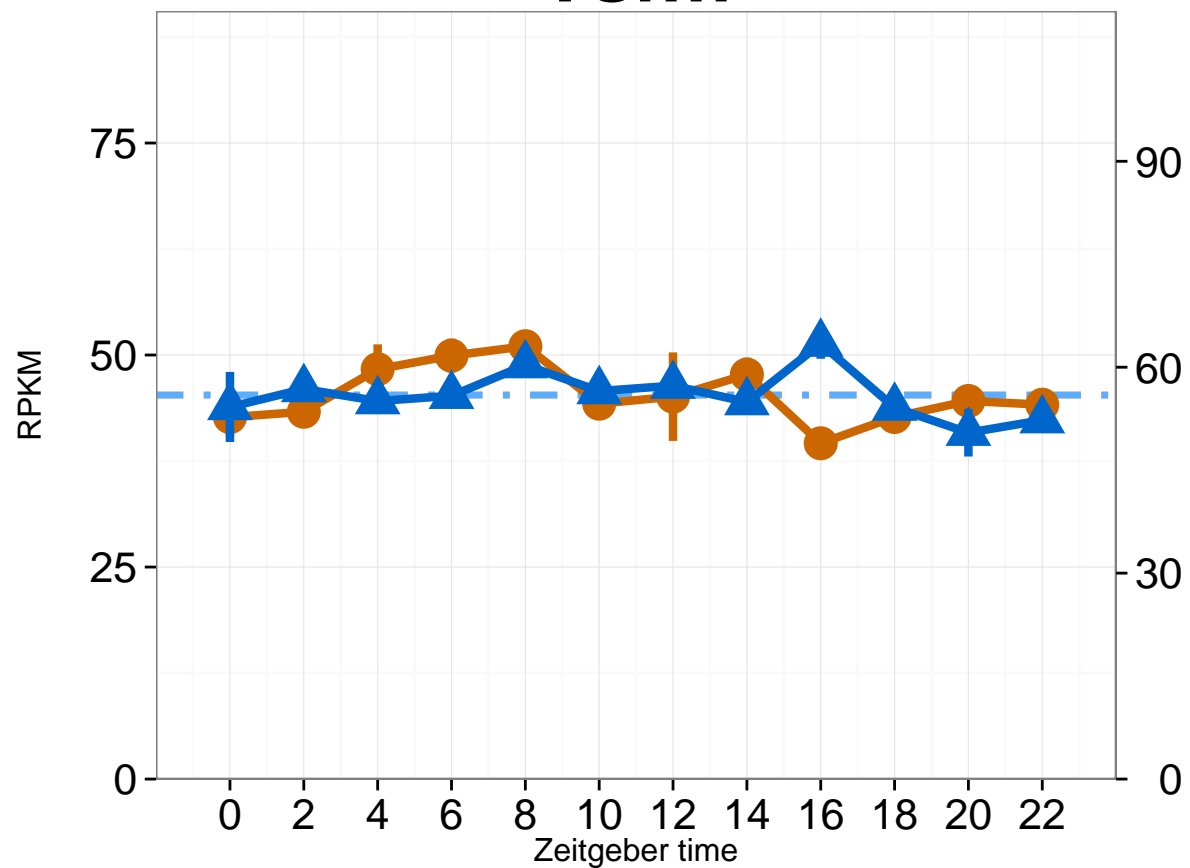

## Tsfm

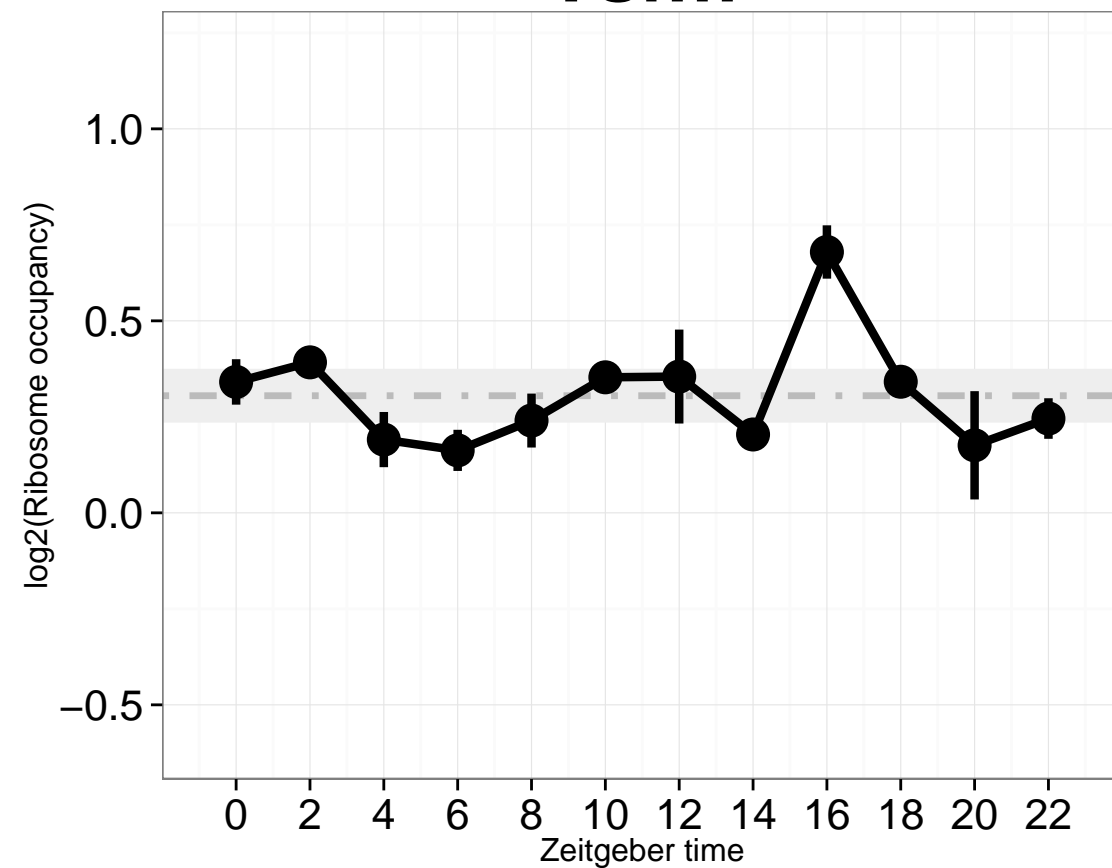

Supplement: Supplementary file 1017 [file 1]

# Arhgap9

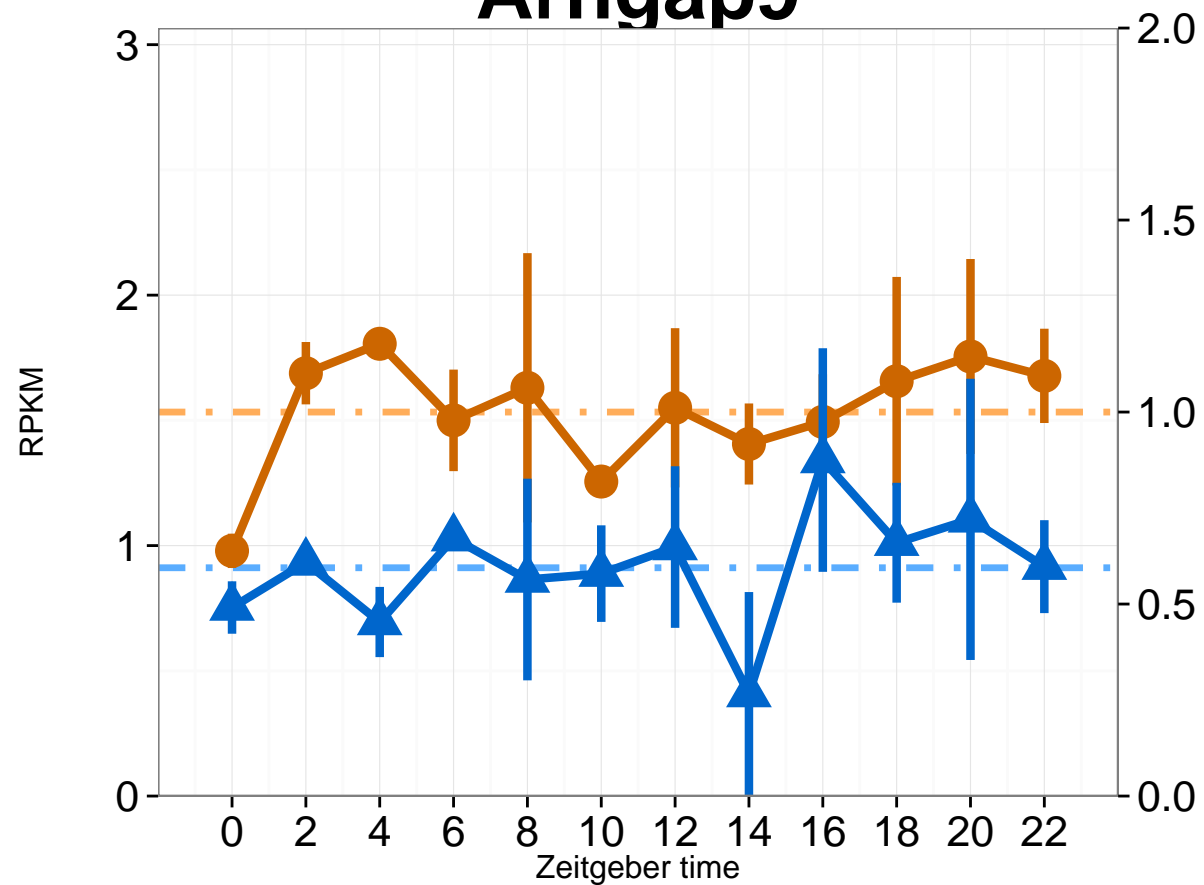

# Arhgap9

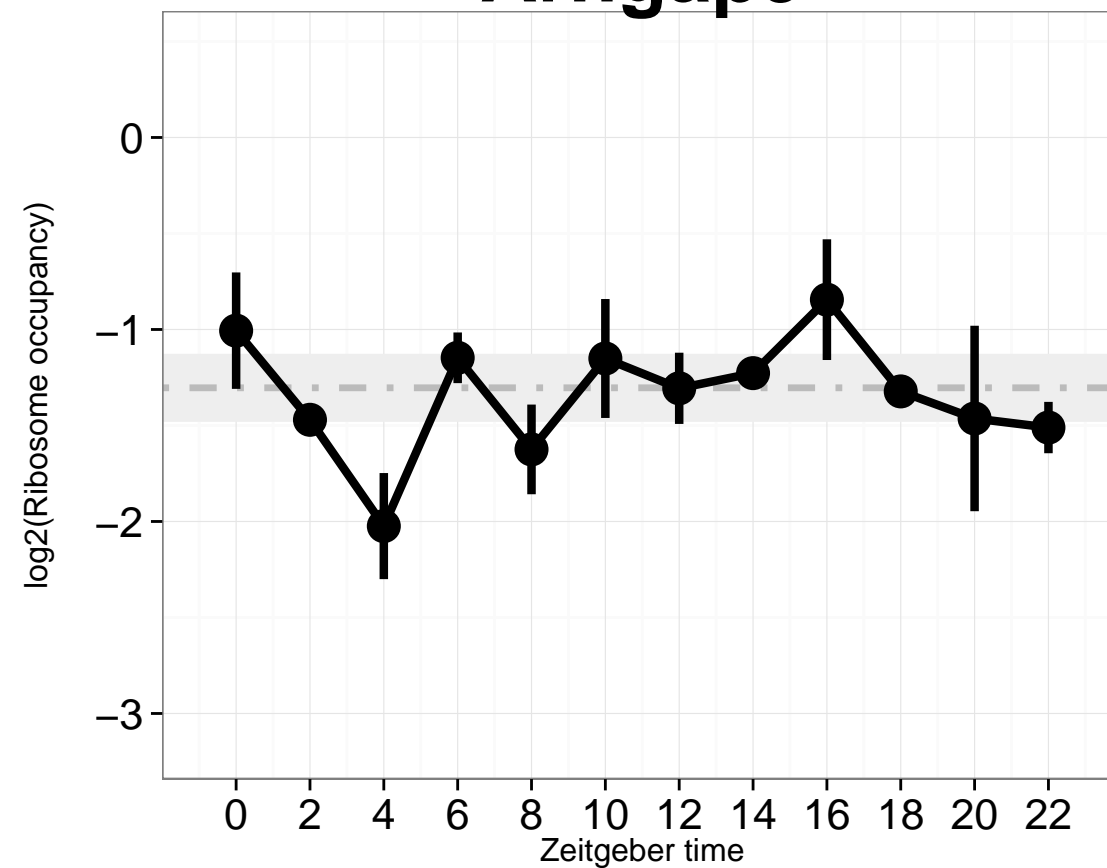

Supplement: Supplementary file 1018 [file 1]

# Cttnbp2nl

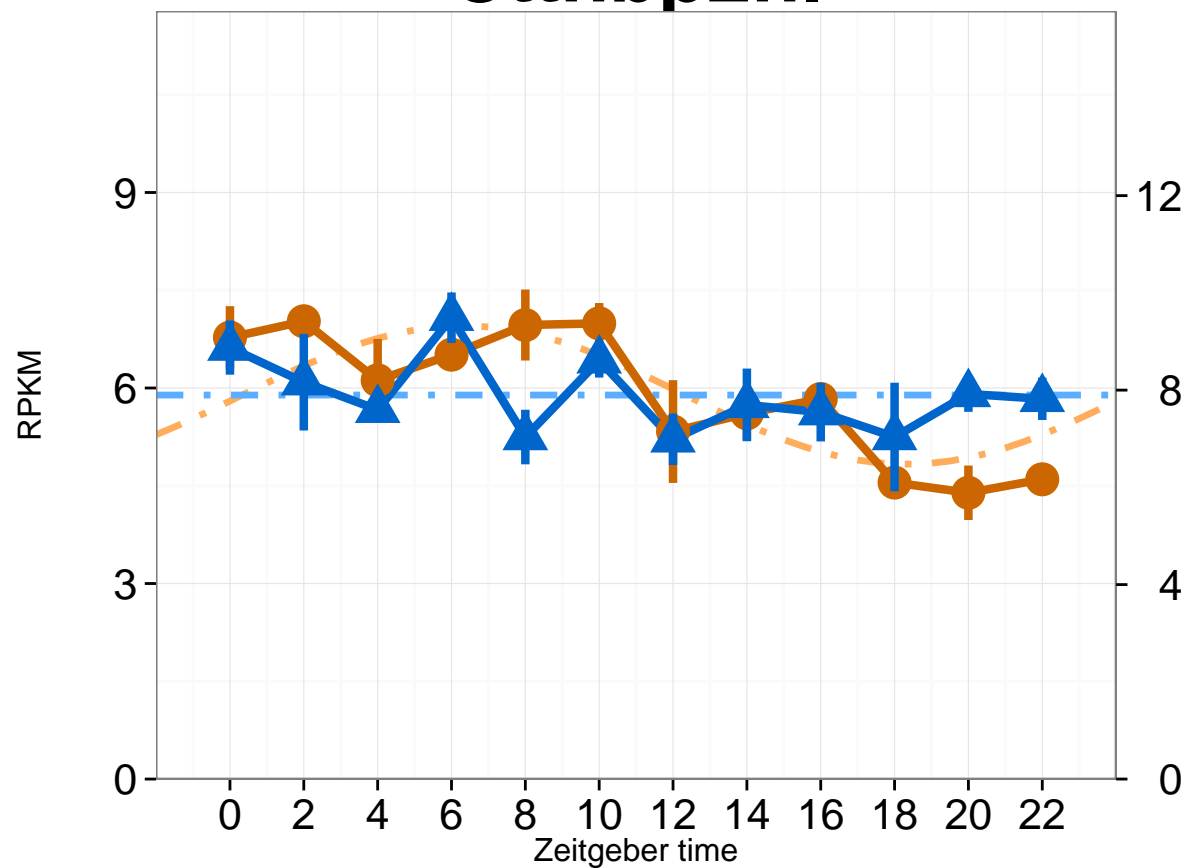

# Cttnbp2nl

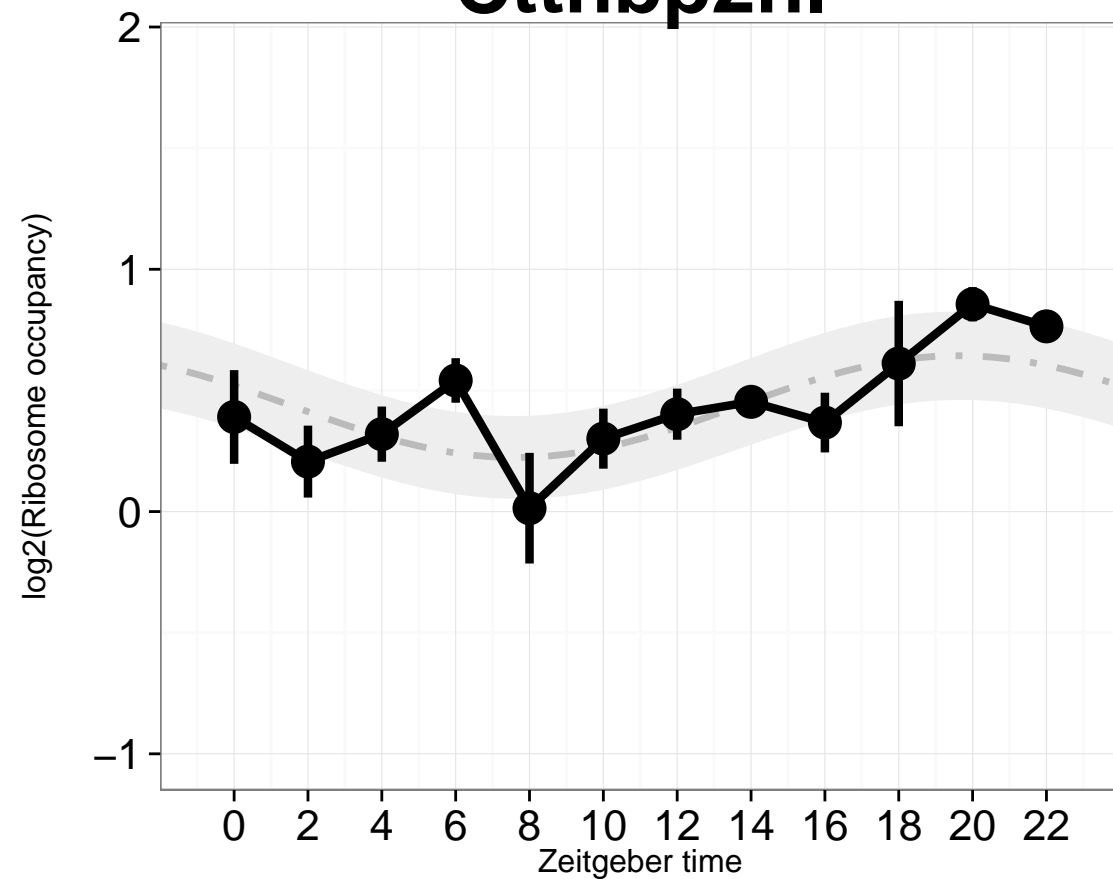

Supplement: Supplementary file 1019 [file 1]

# Casp8ap2

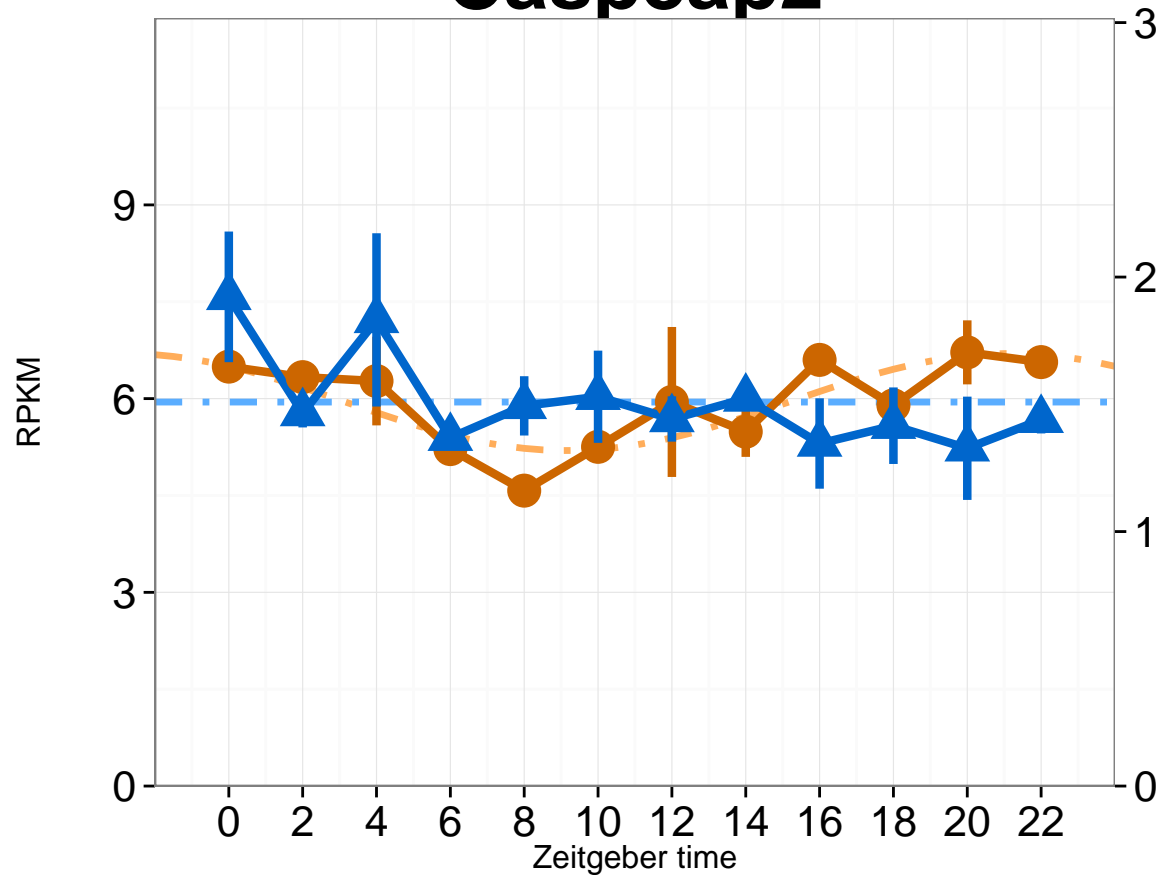

# Casp8ap2

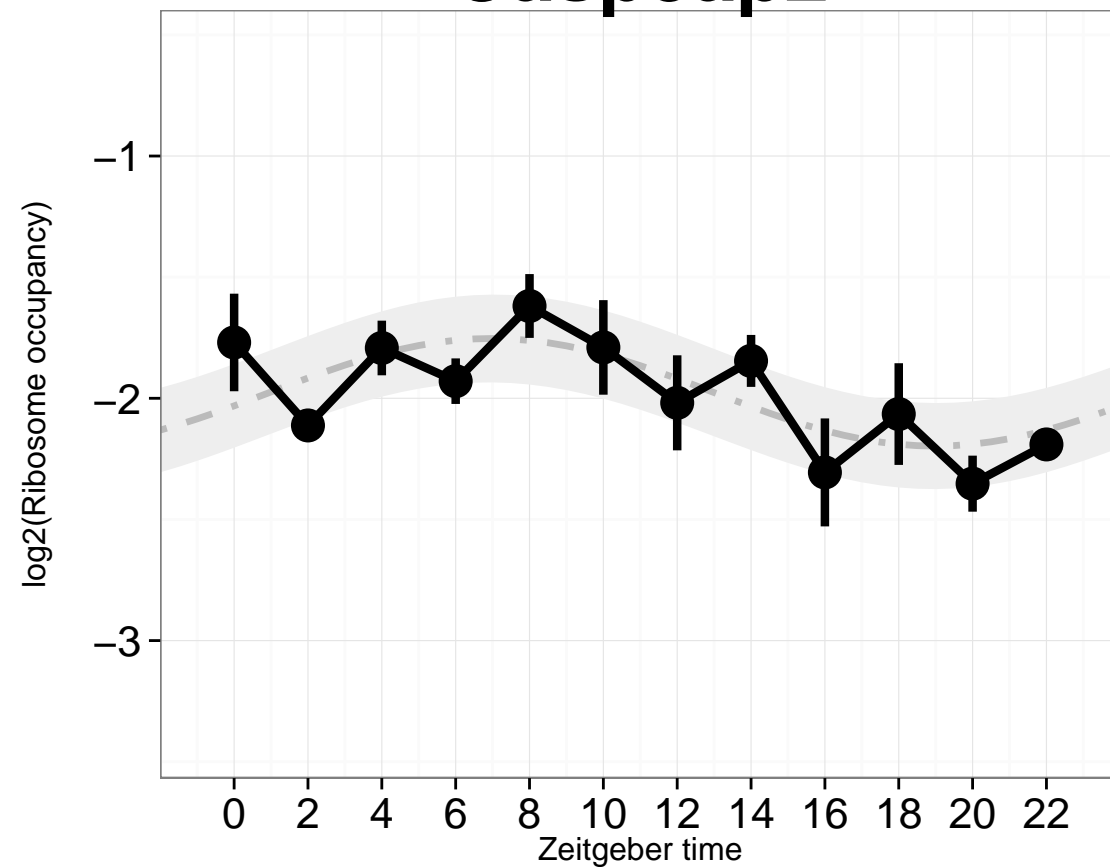

Supplement: Supplementary file 1020 [file 1]

## Commd8

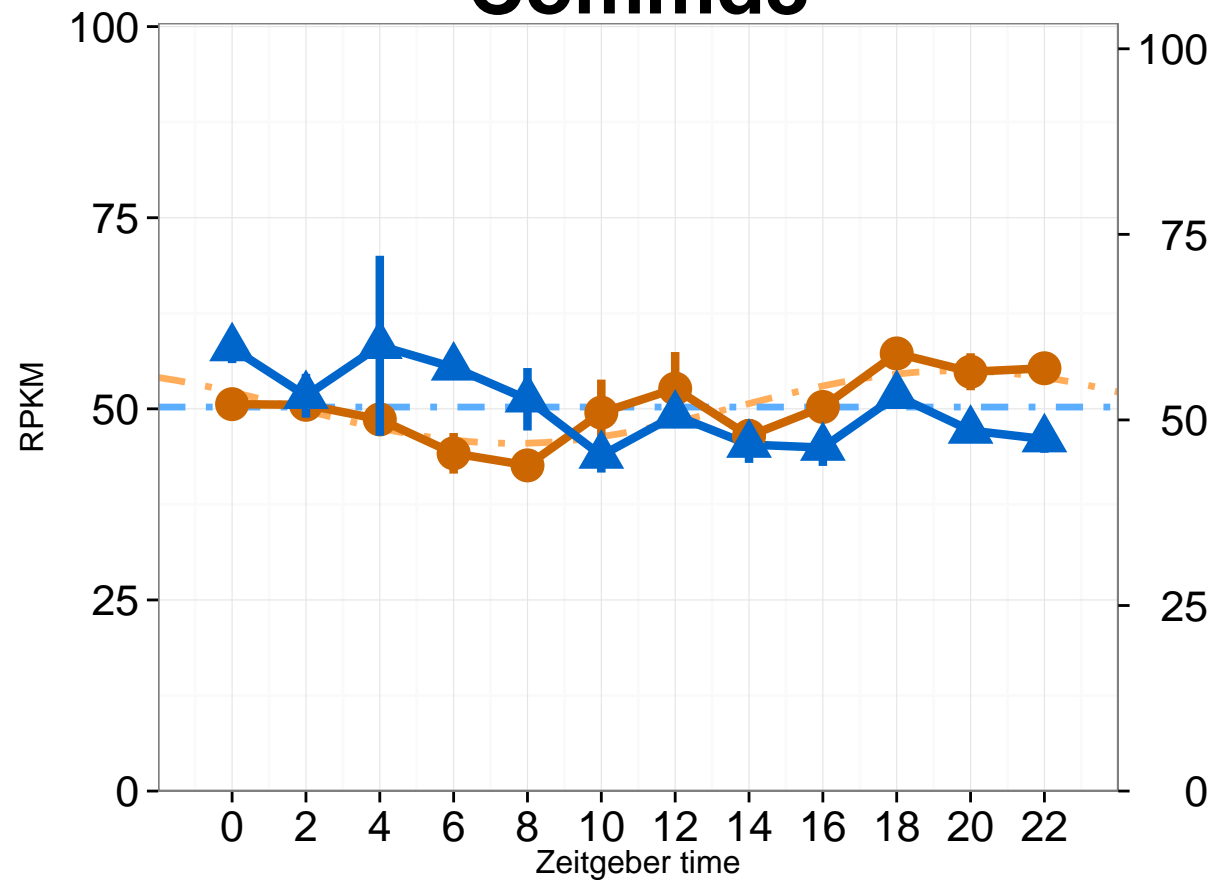

## Commd8

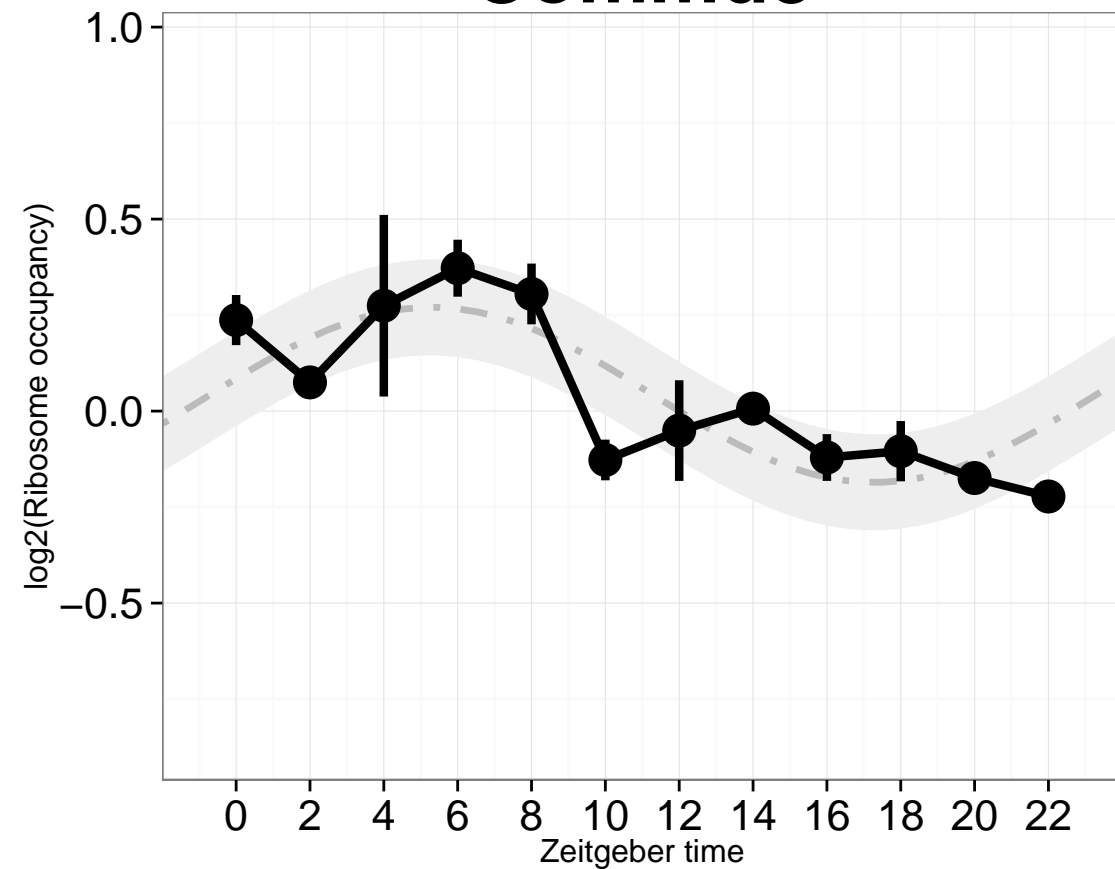

Supplement: Supplementary file 1021 [file 1]

## H2-Eb1

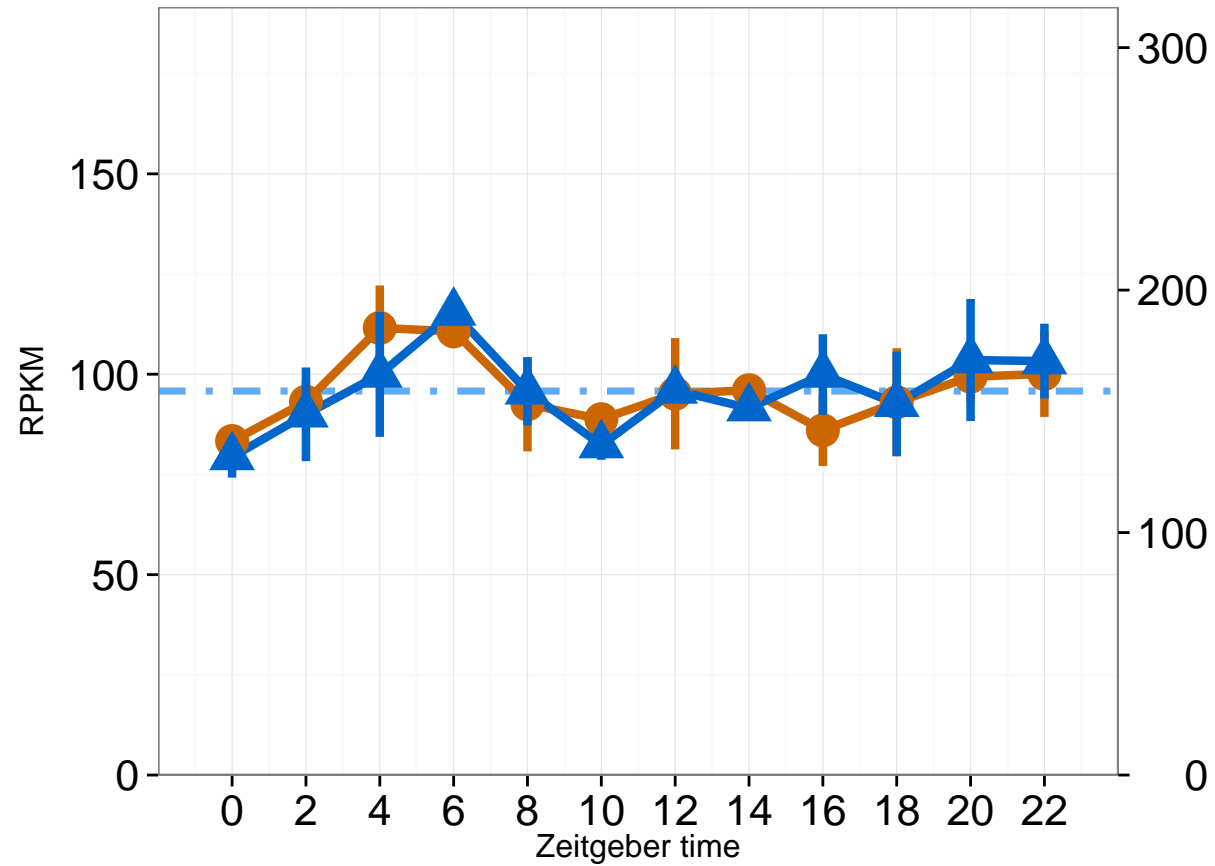

## H2-Eb1

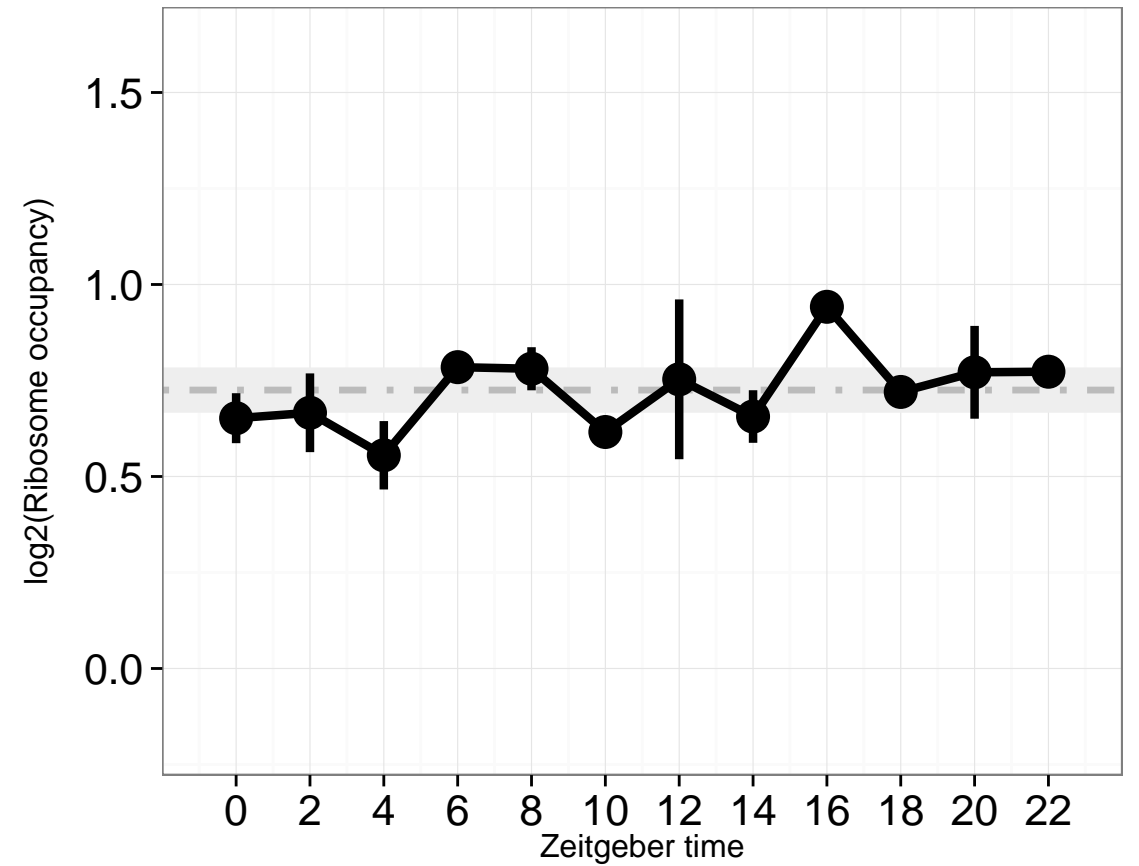

Supplement: Supplementary file 1022 [file 1]

## Aoc2

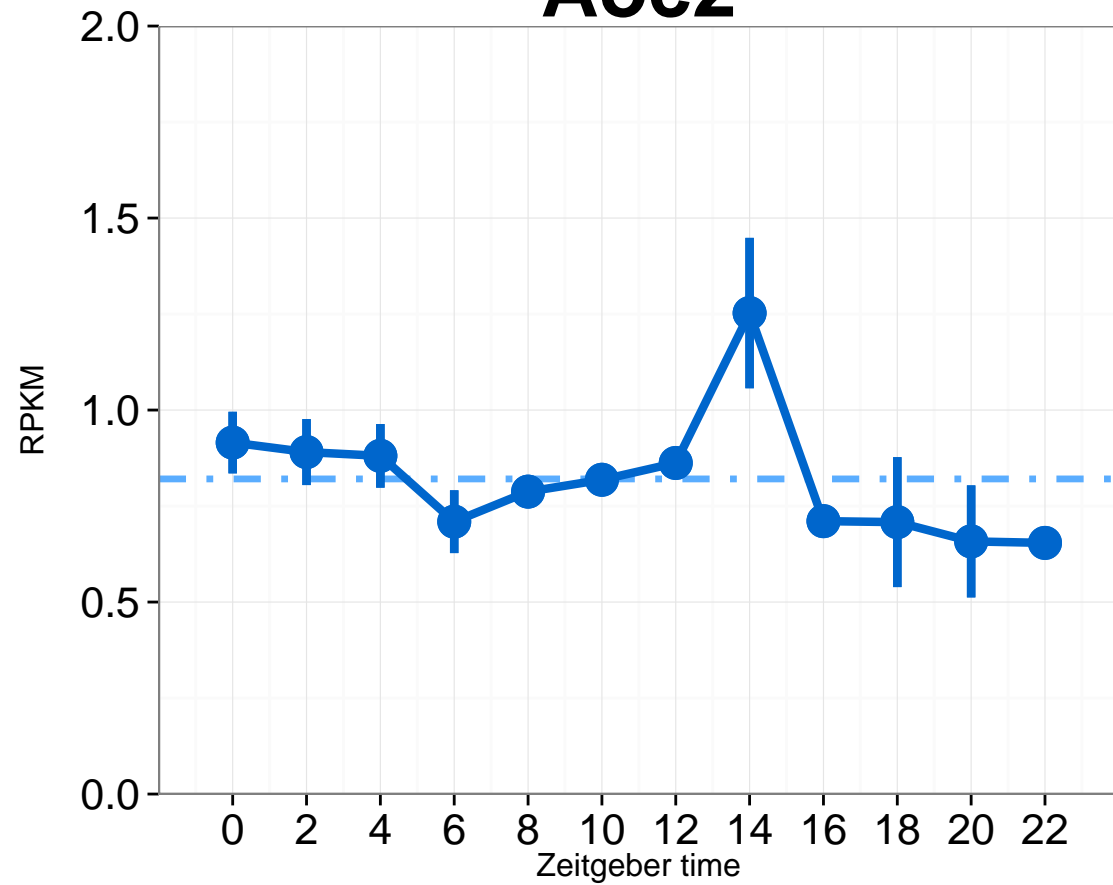

## Aoc2 log2(Ribosome occupancy)

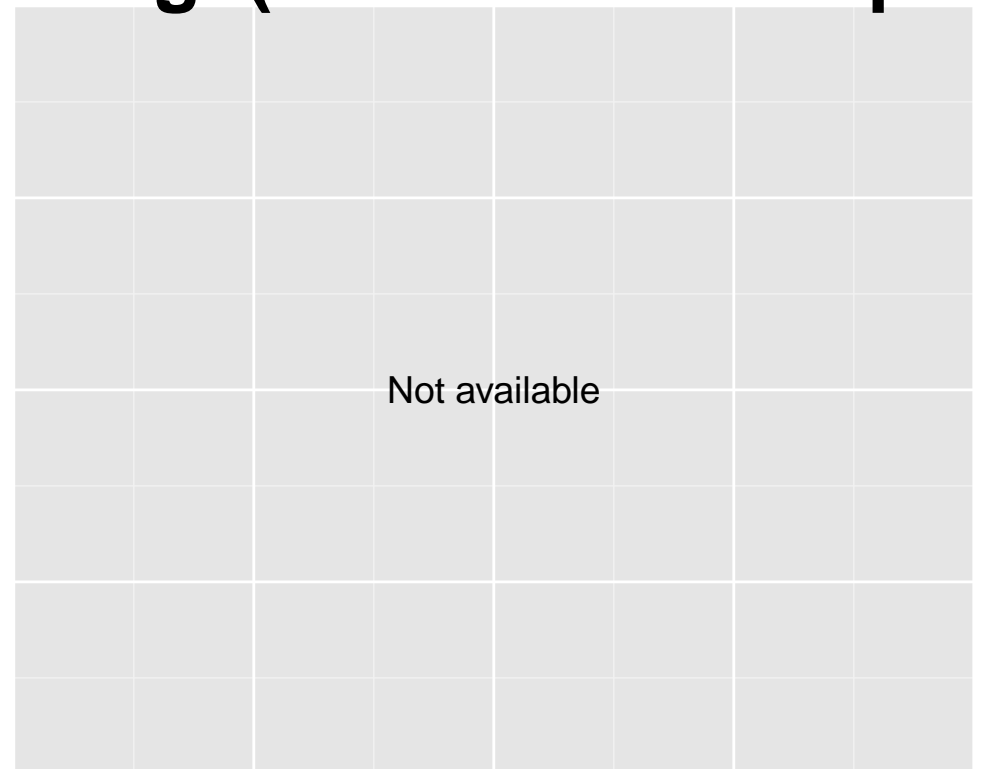

Supplement: Supplementary file 1023 [file 1]

## Tfpi2

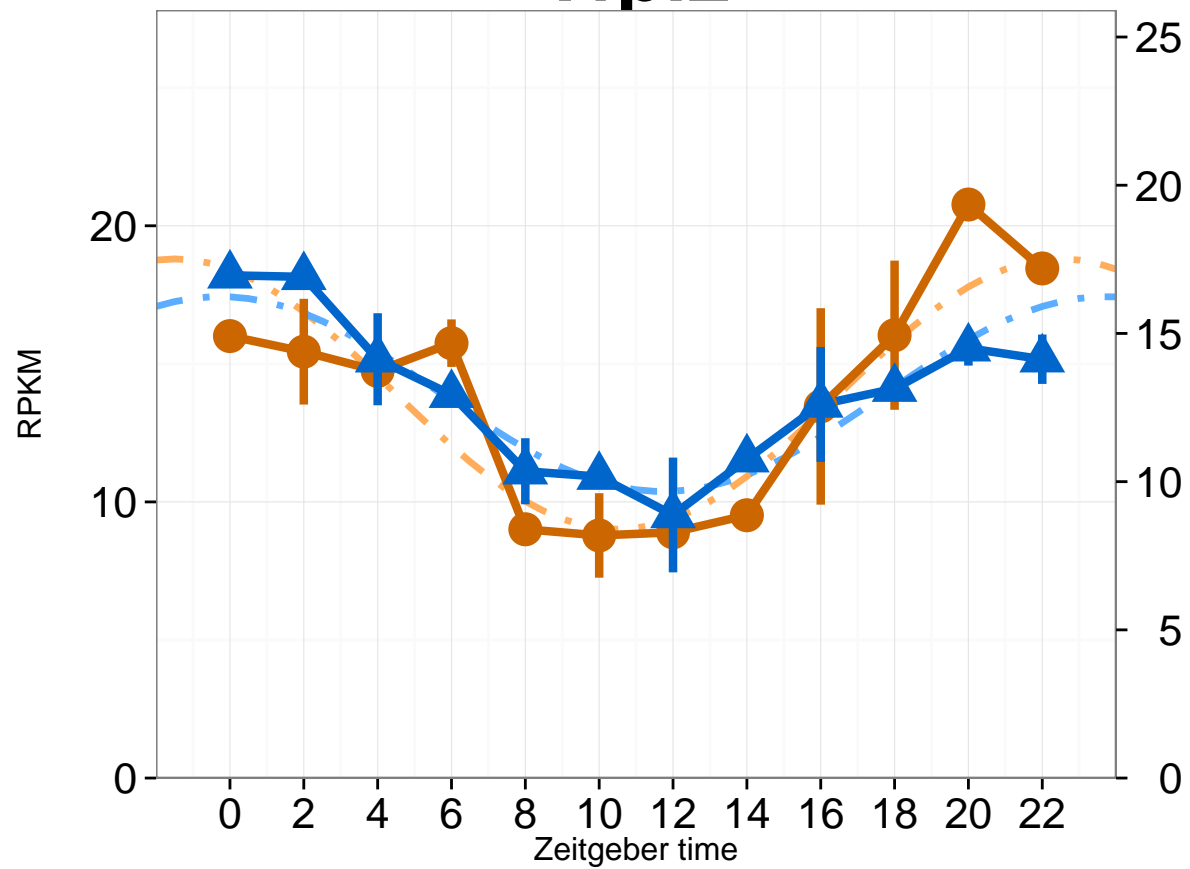

## Tfpi2

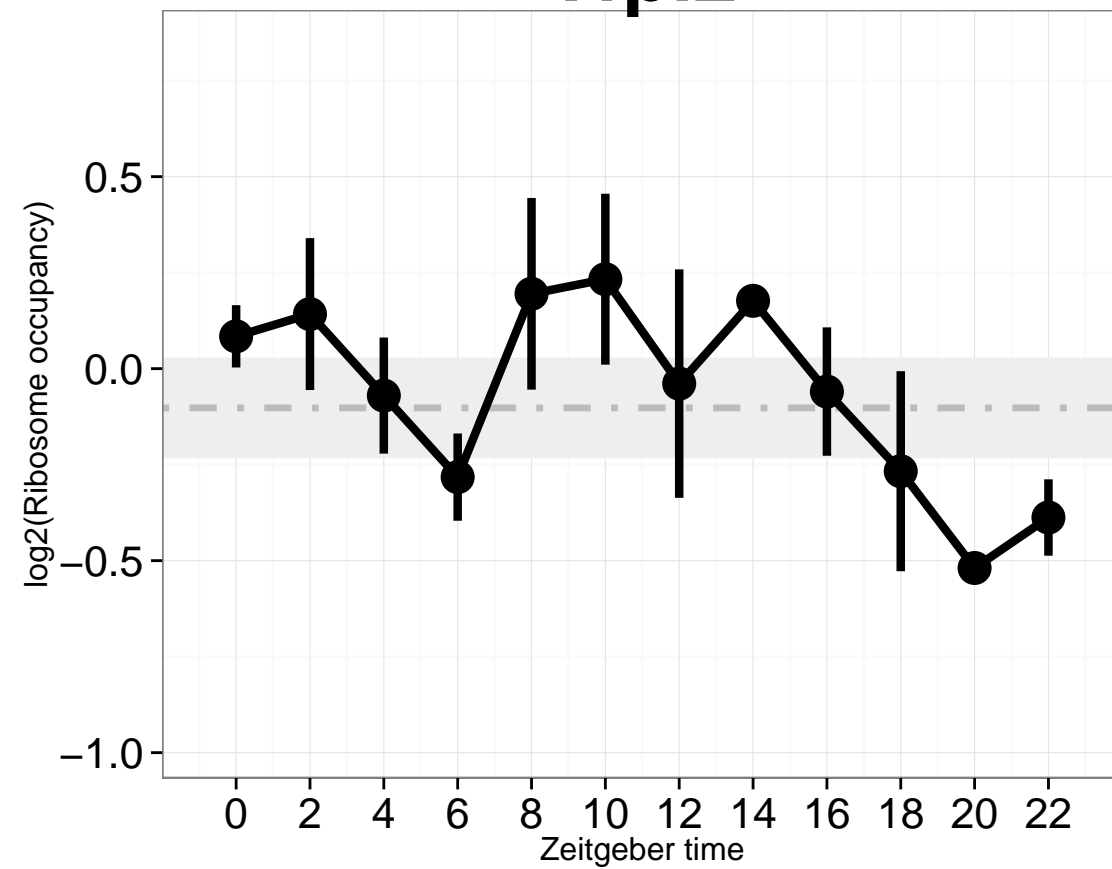

Supplement: Supplementary file 1024 [file 1]

## Efnb1

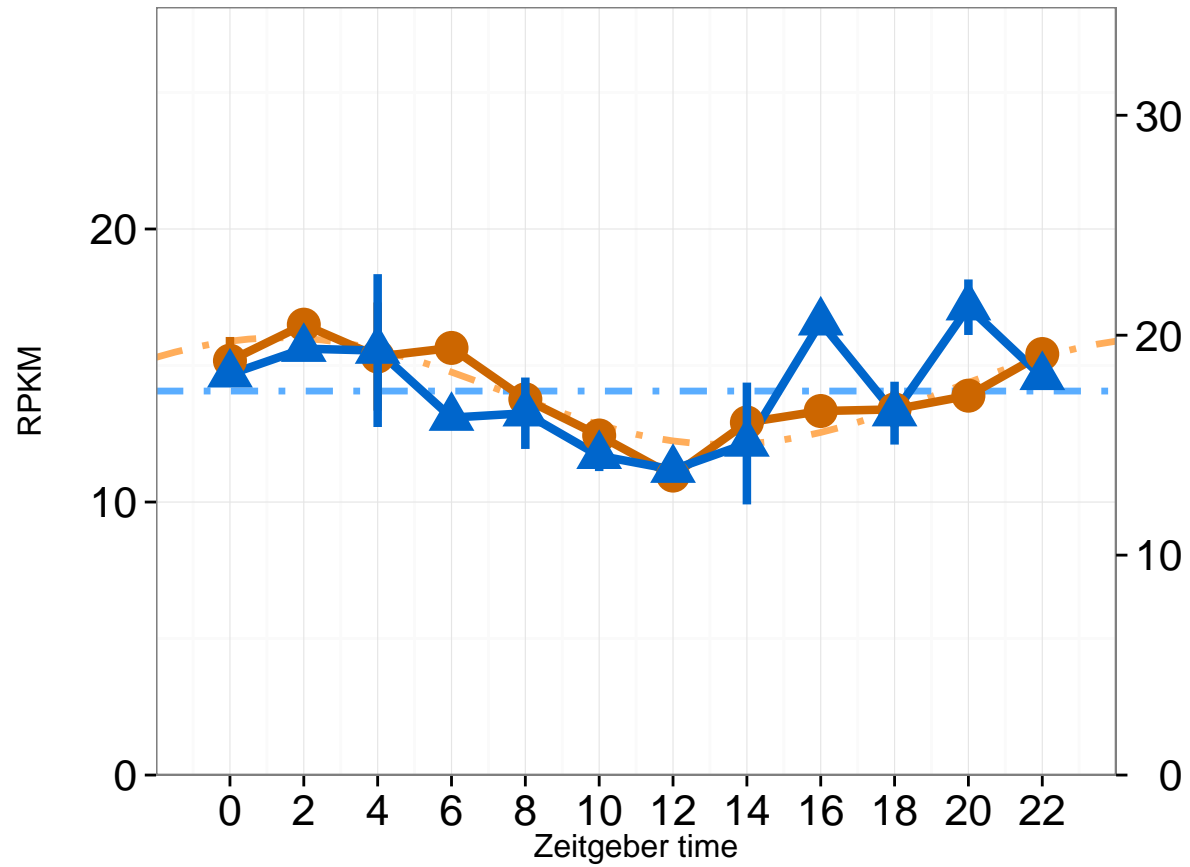

## Efnb1

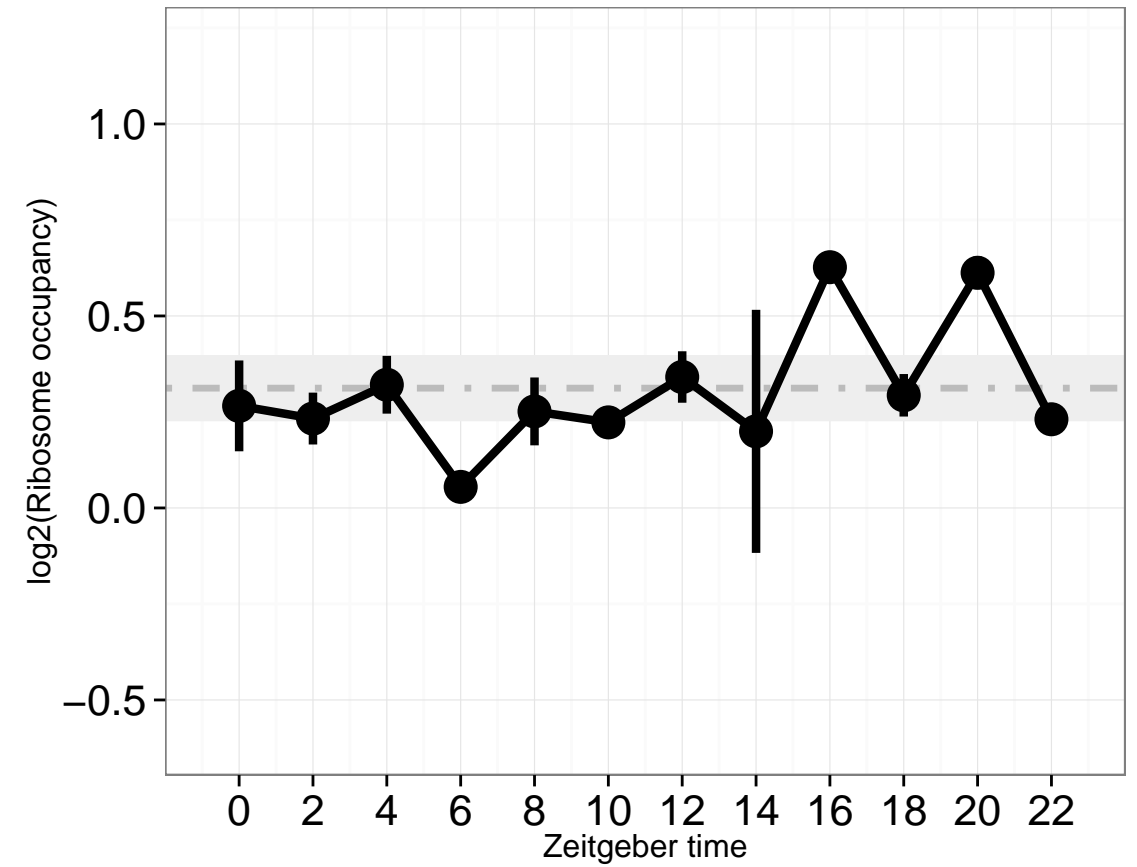

Supplement: Supplementary file 1025 [file 1]

# Lonrf1

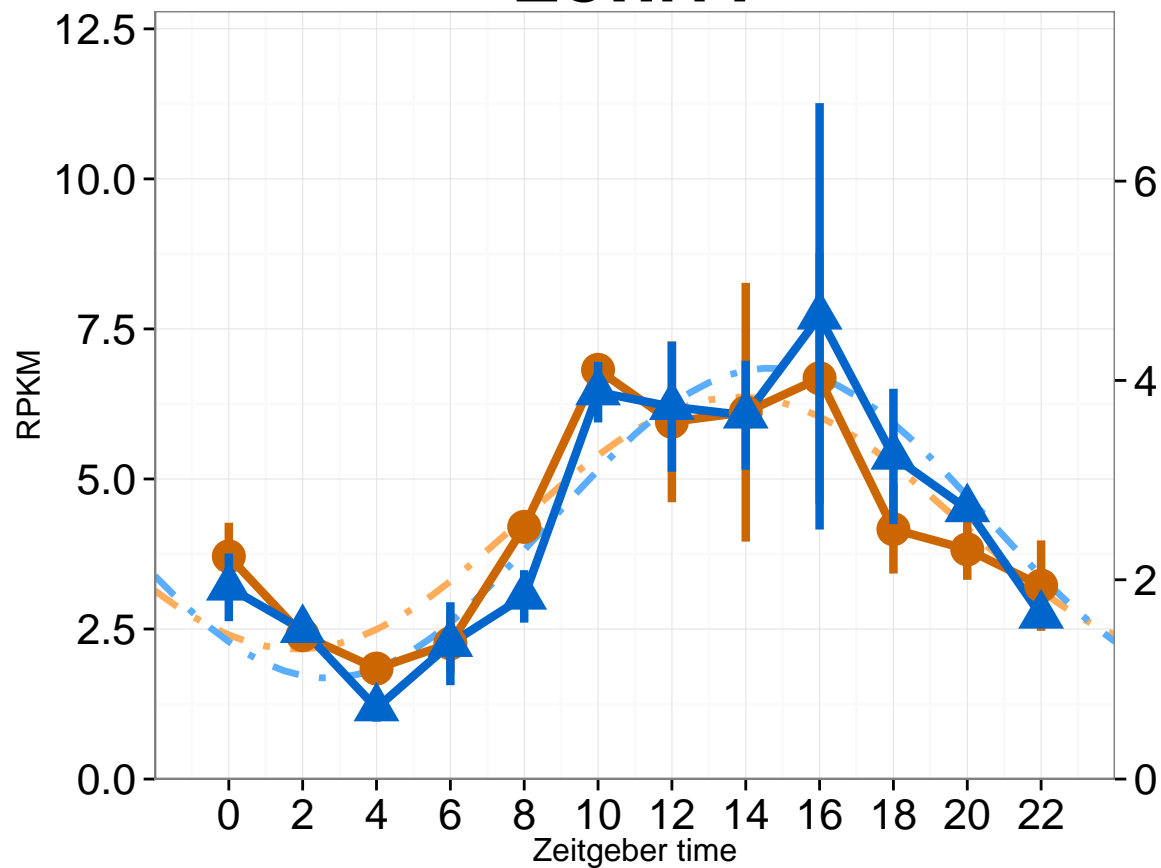

# Lonrf1

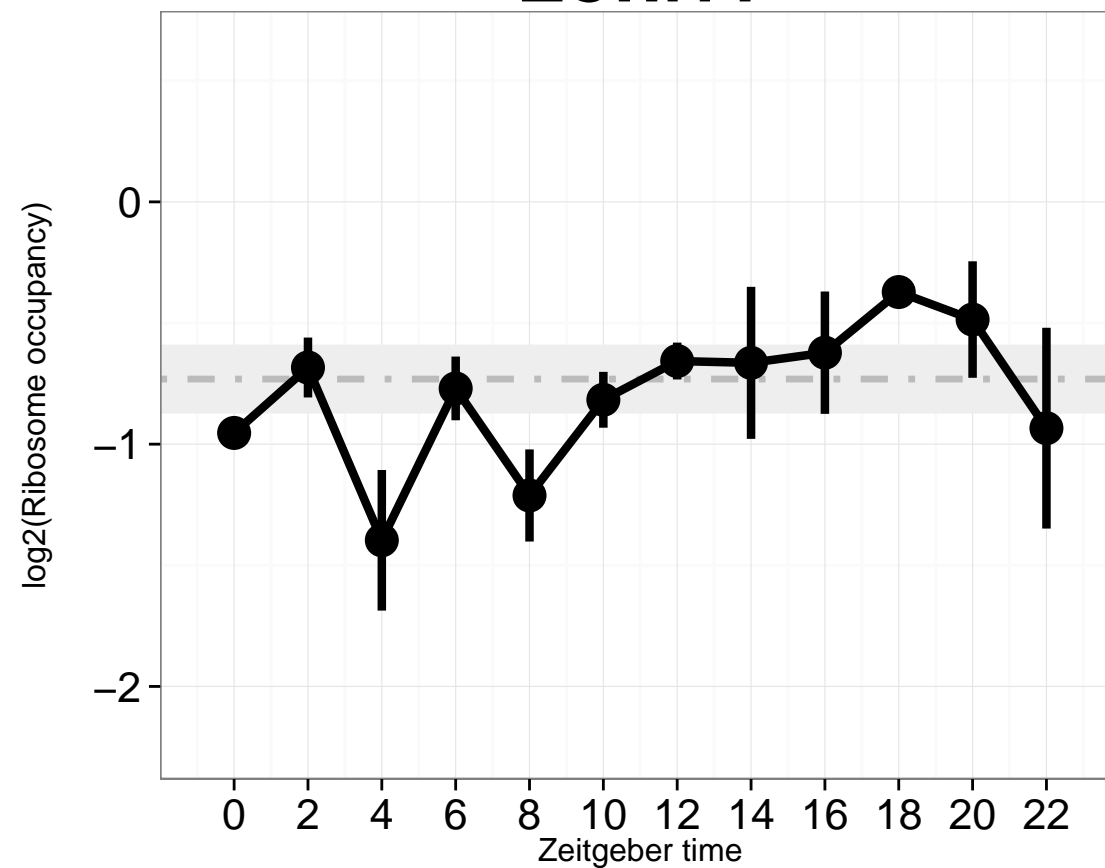

Supplement: Supplementary file 1026 [file 1]

## Imp4

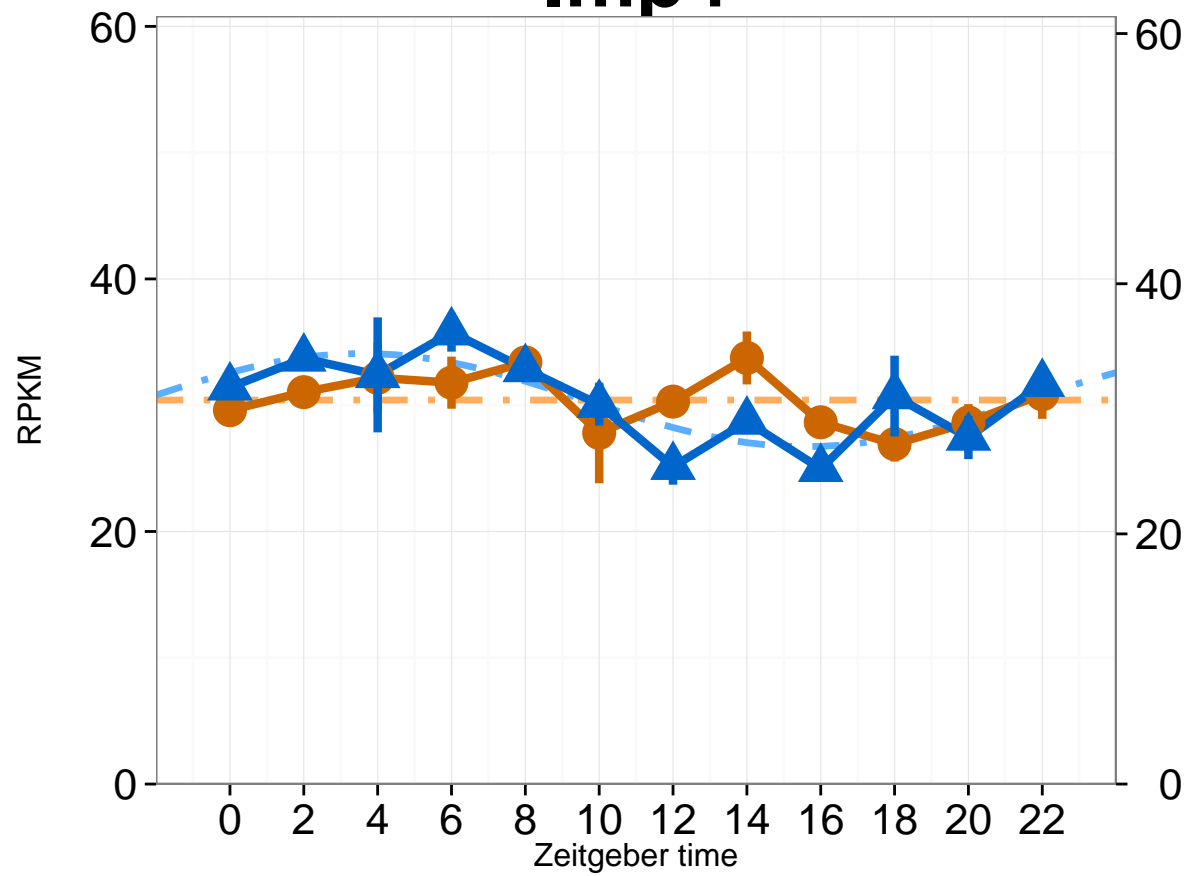

## Imp4

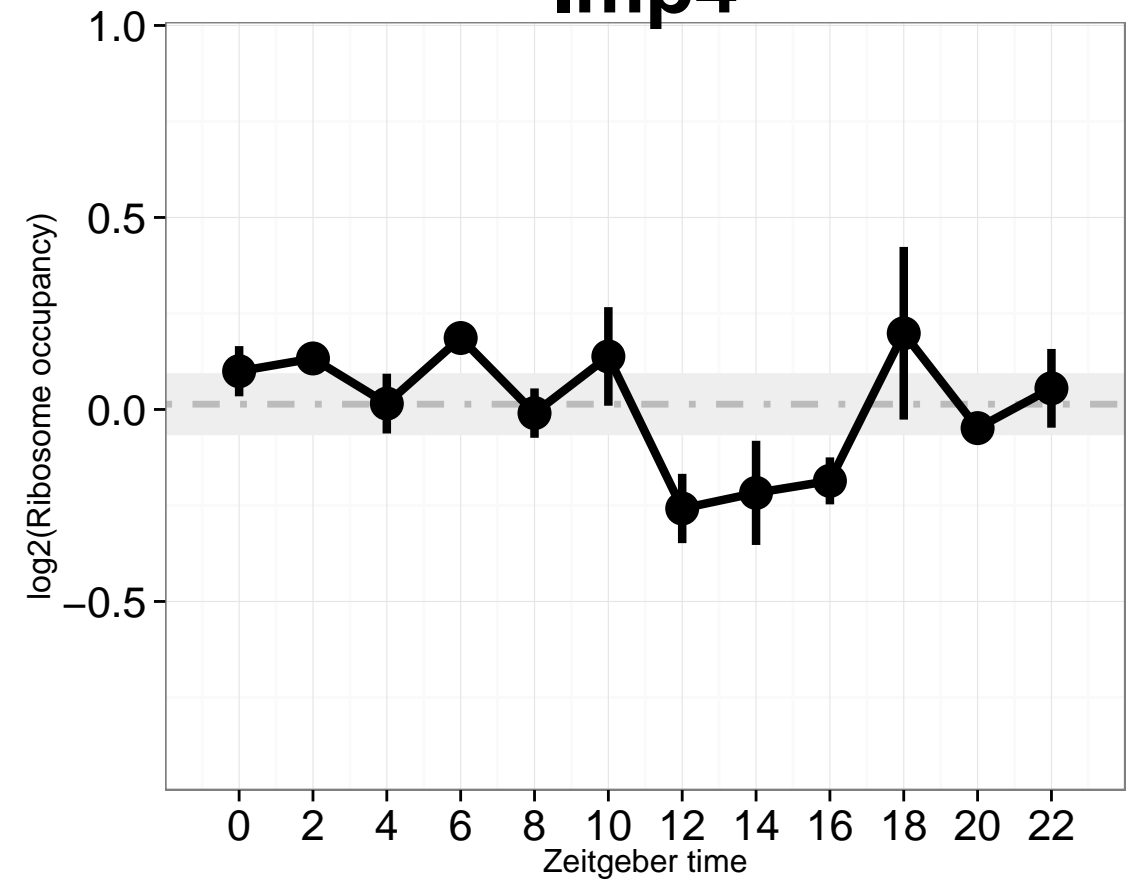

Supplement: Supplementary file 1027 [file 1]

## Ctnnbl1

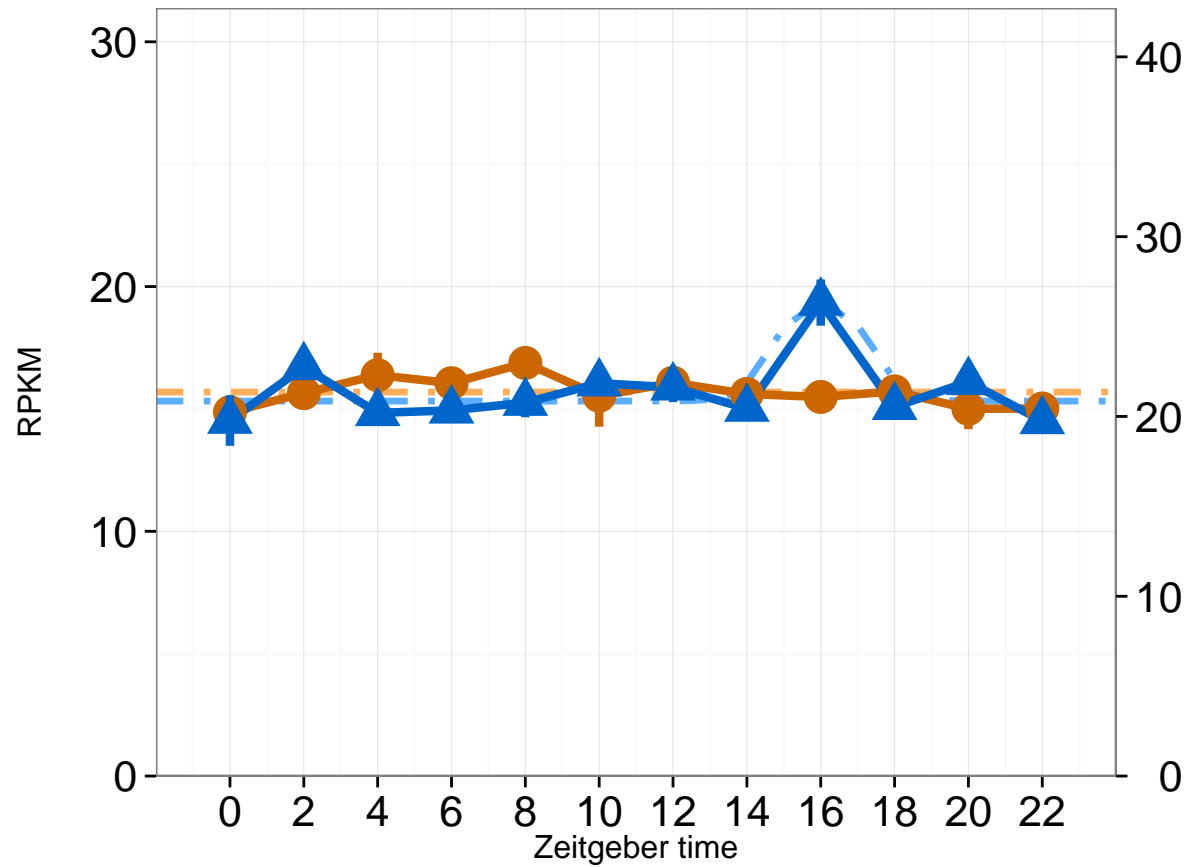

## Ctnnbl1

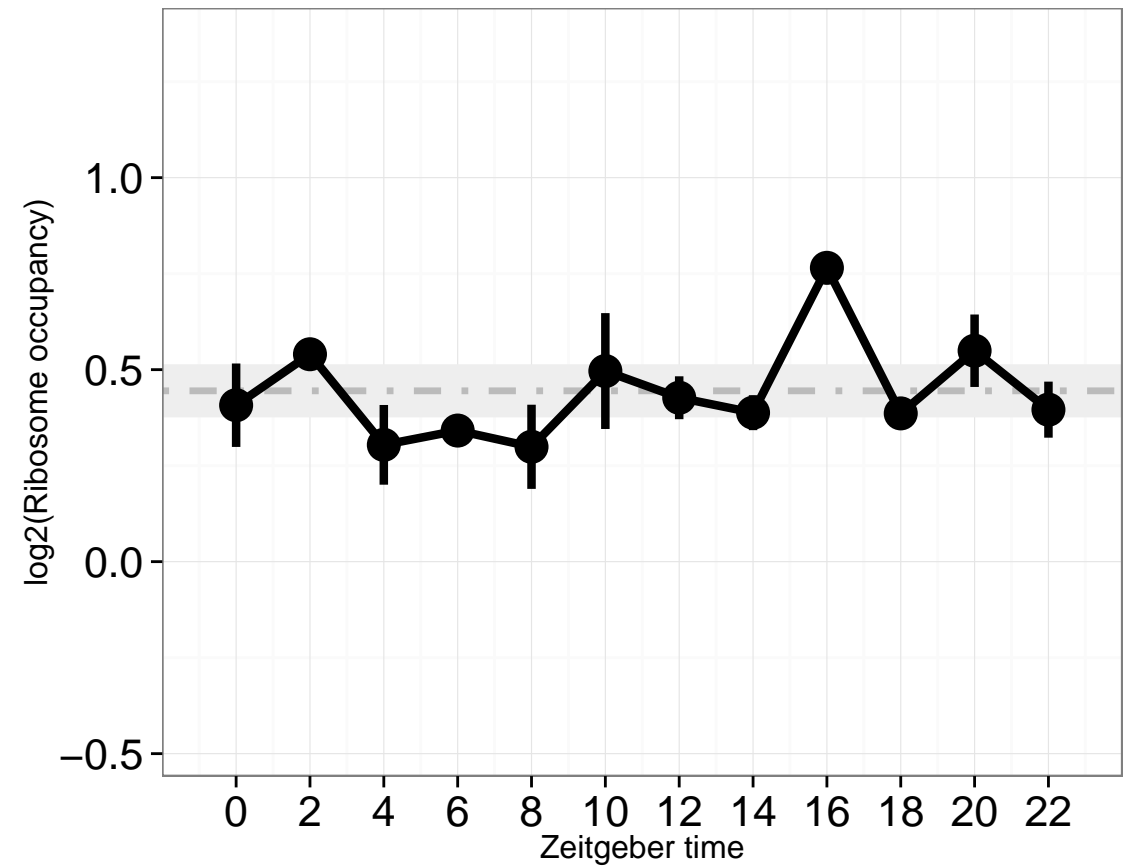

Supplement: Supplementary file 1028 [file 1]

## Zmym2

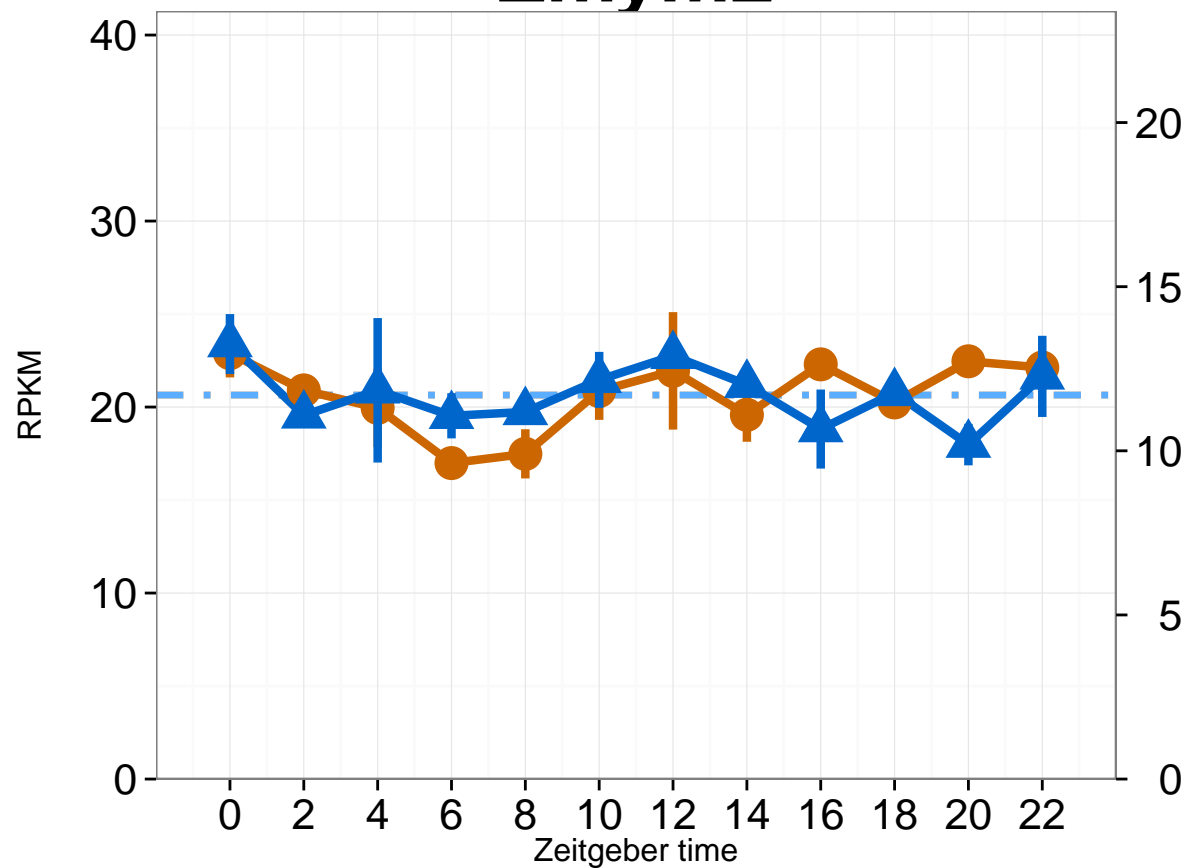

## Zmym2

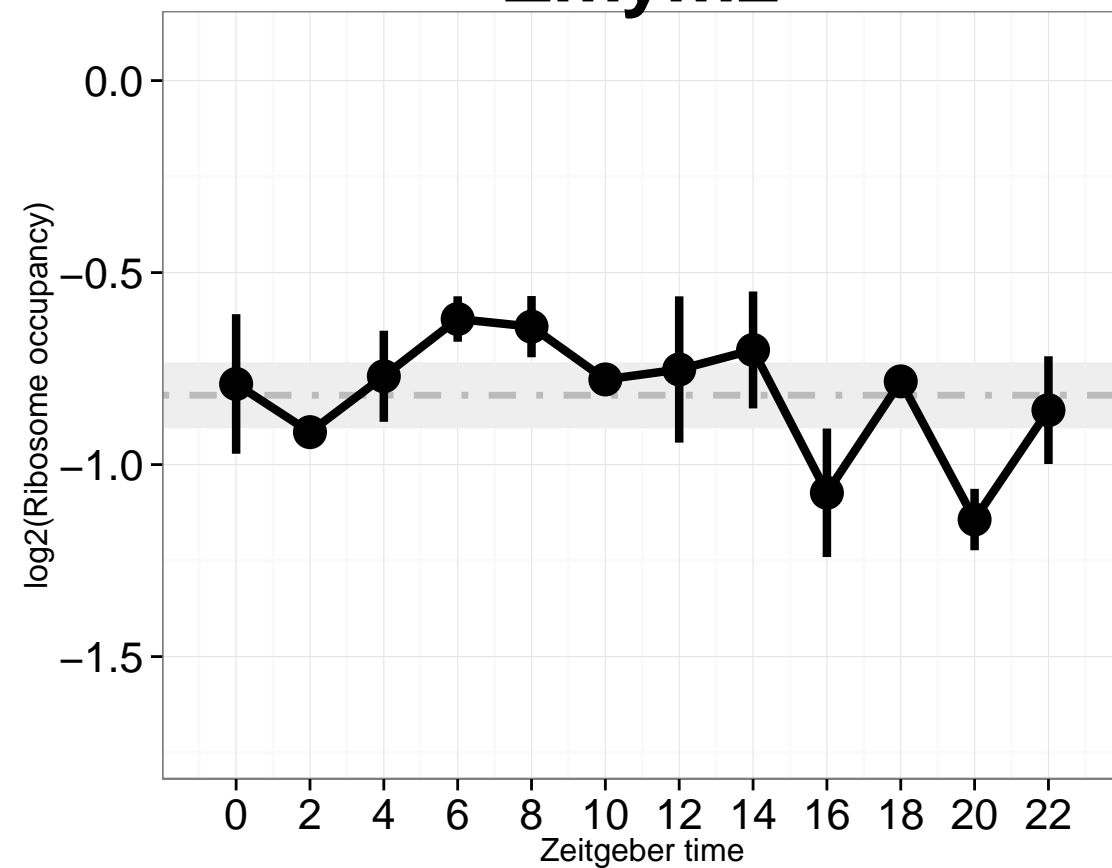

Supplement: Supplementary file 1029 [file 1]

# Dennd2c

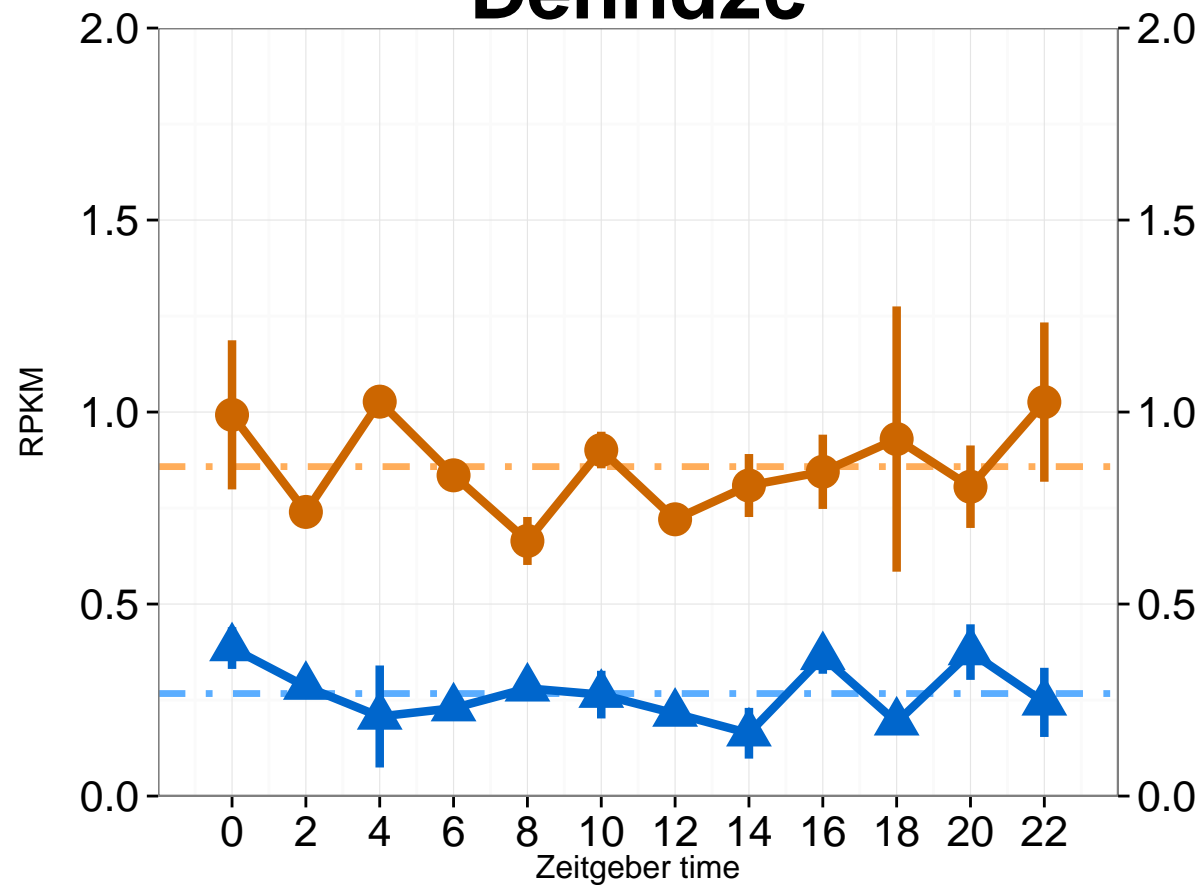

# Dennd2c

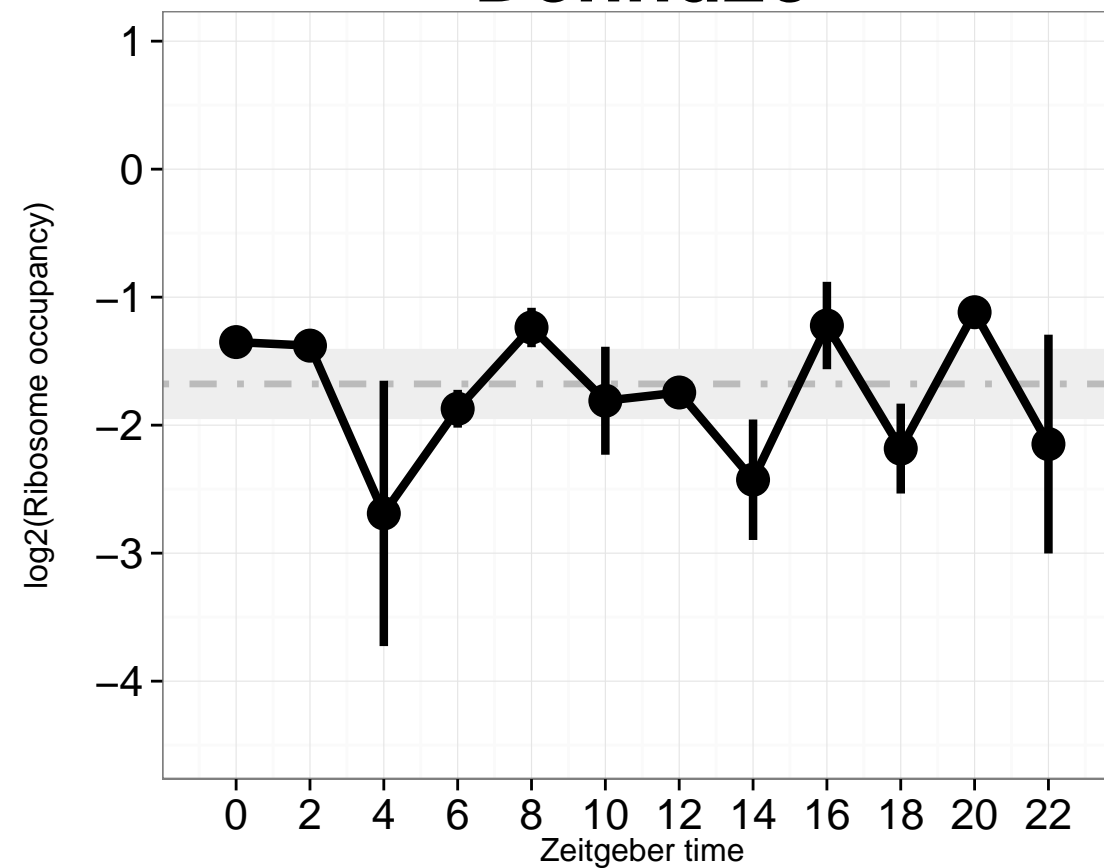

Supplement: Supplementary file 1030 [file 1]

## Cisd3

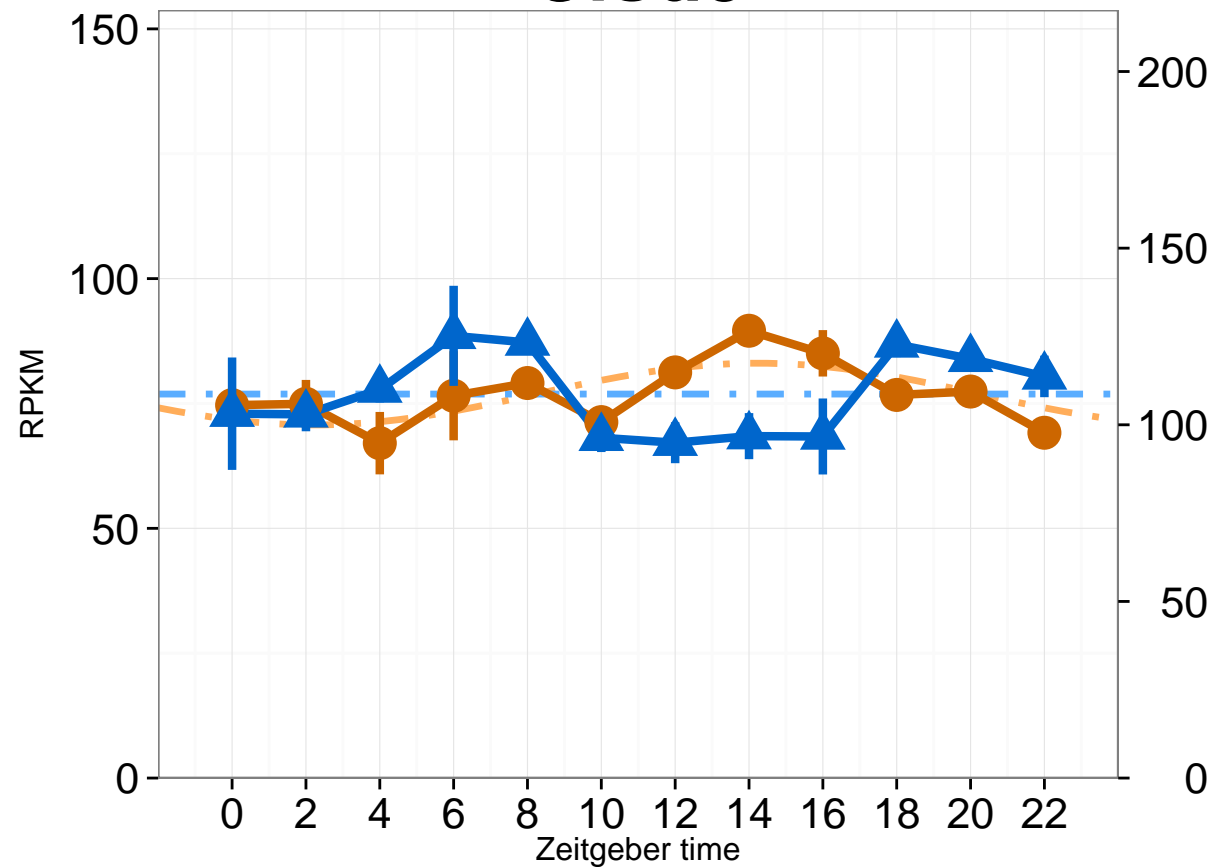

## Cisd3

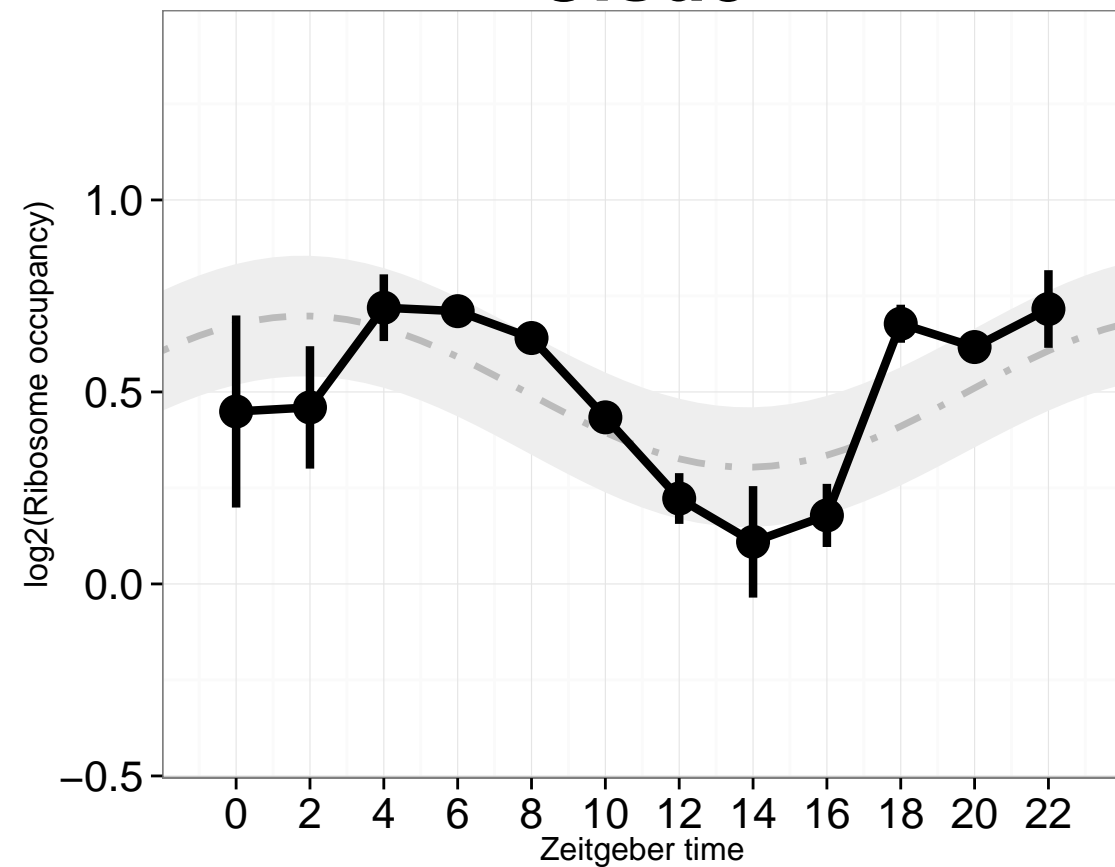

Supplement: Supplementary file 1031 [file 1]

## Pus1

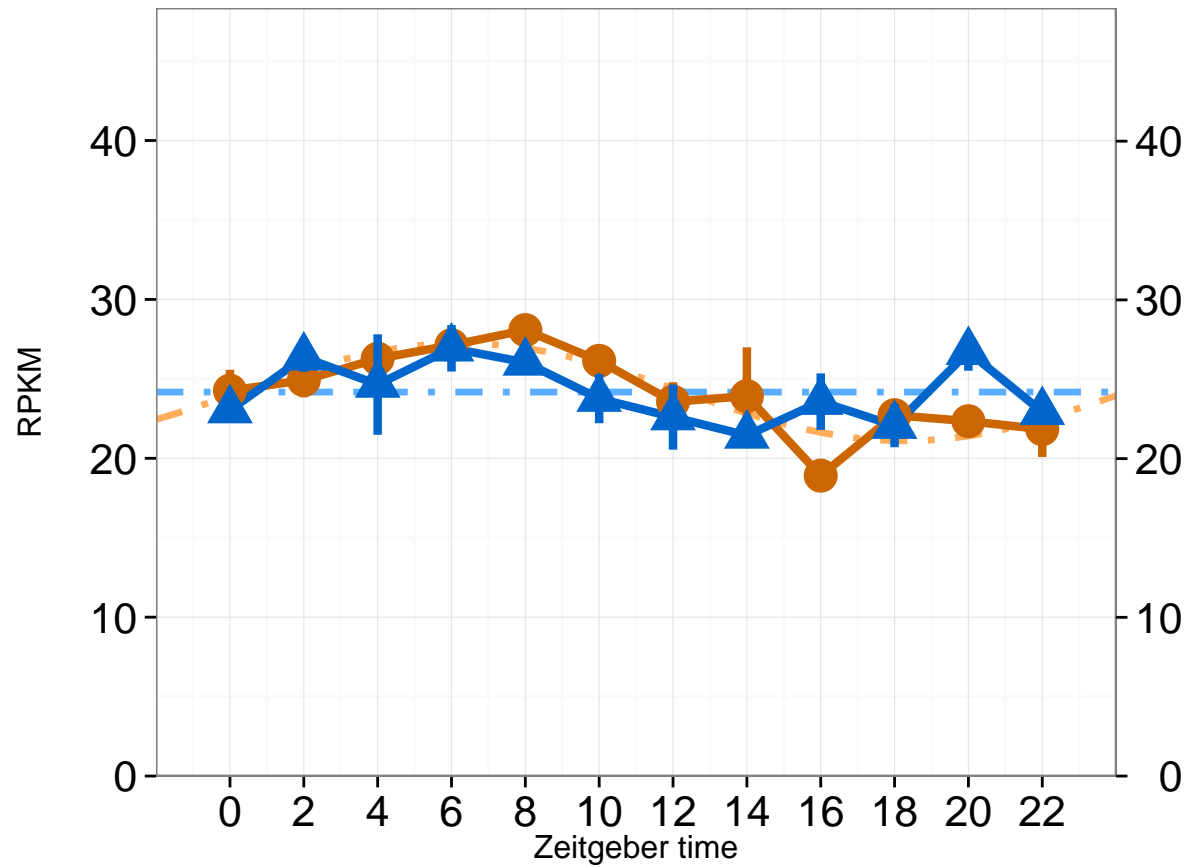

## Pus1

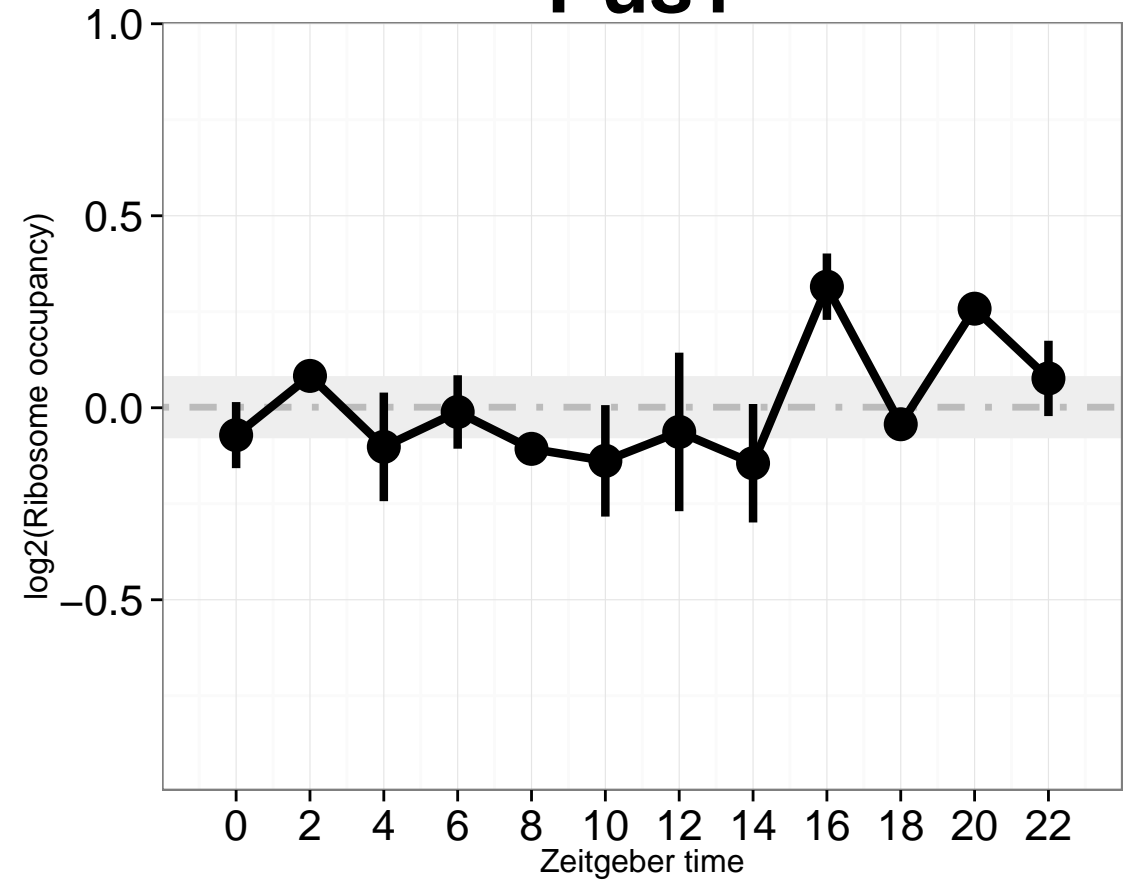

Supplement: Supplementary file 1032 [file 1]

## Upp2

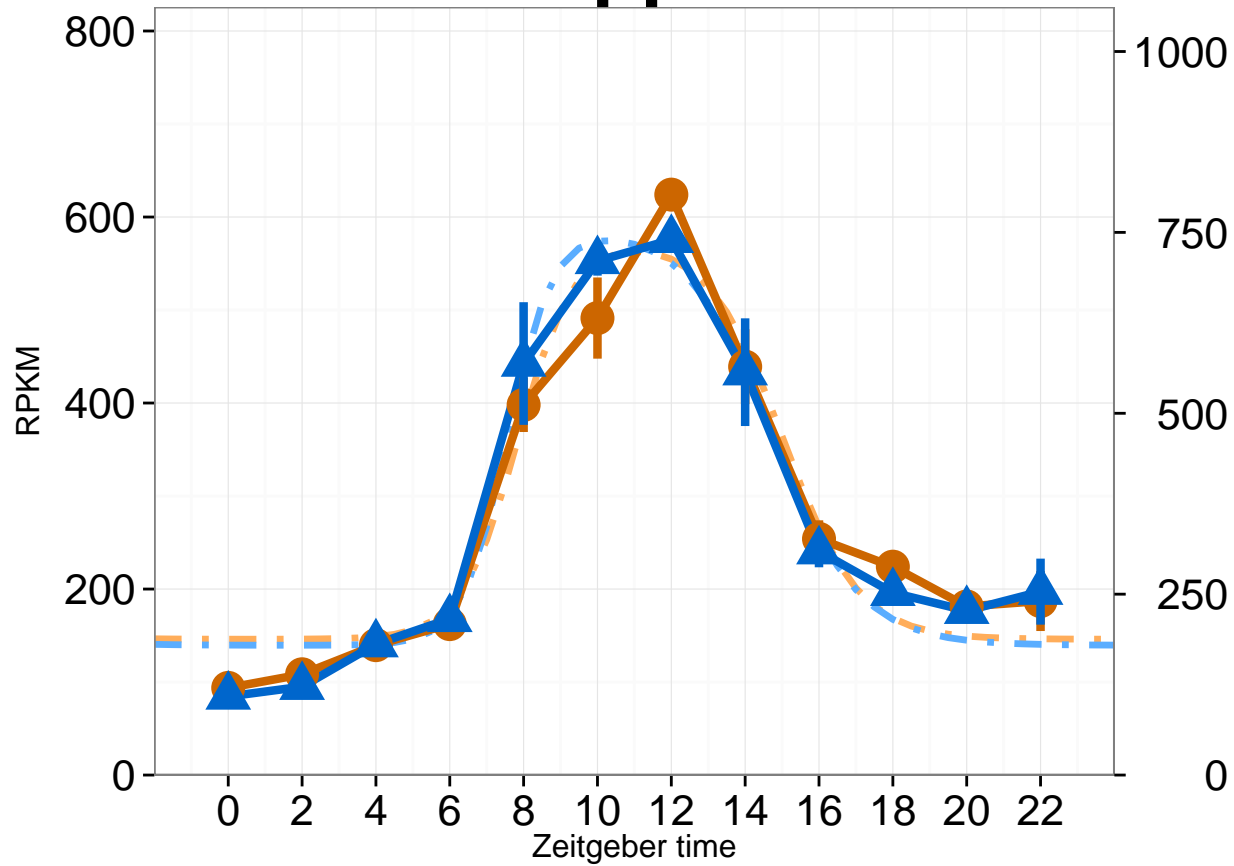

## Upp2

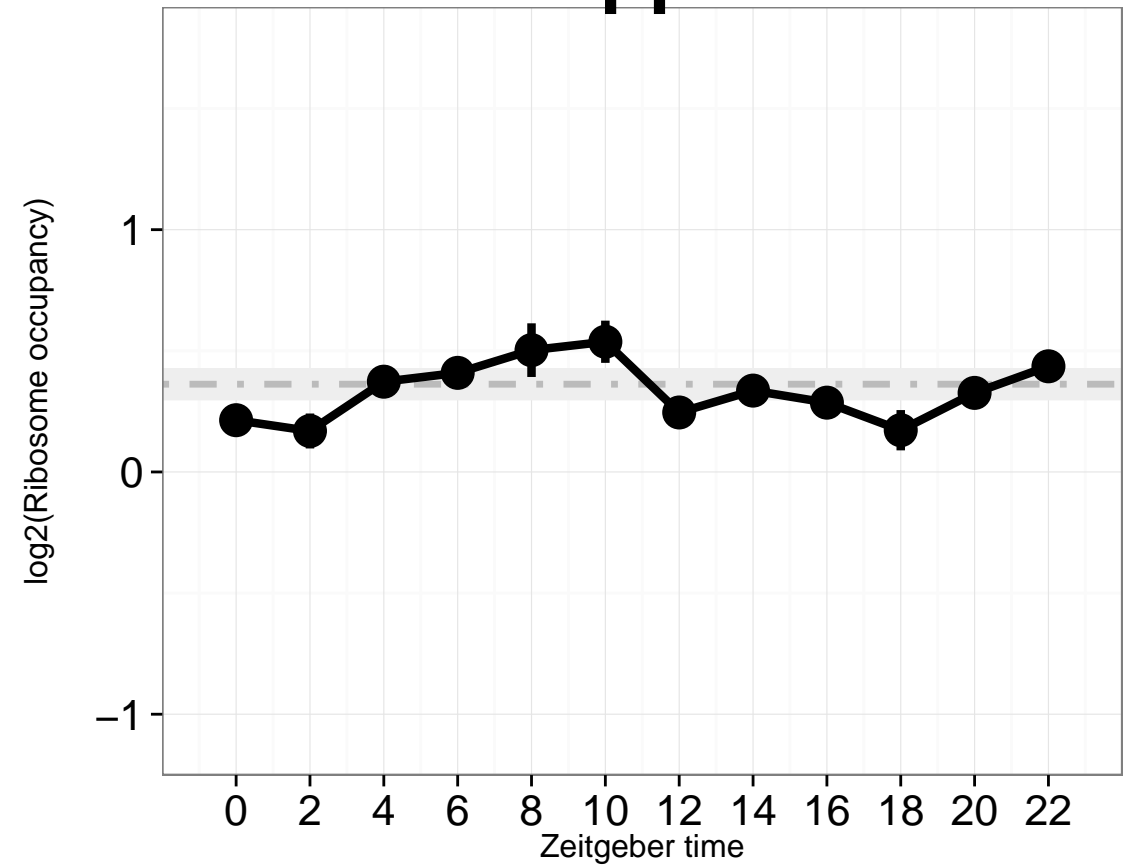

Supplement: Supplementary file 1033 [file 1]

# Eif4g2

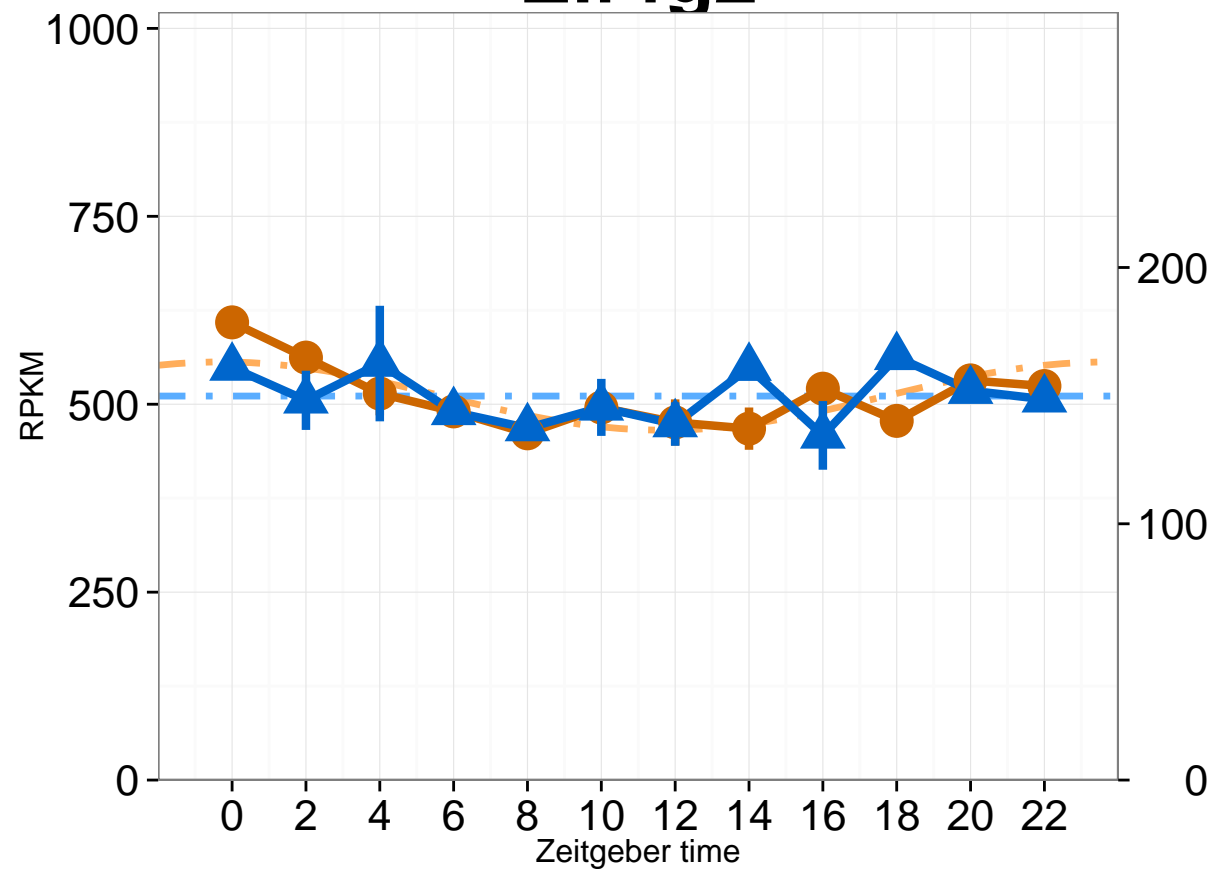

# Eif4g2

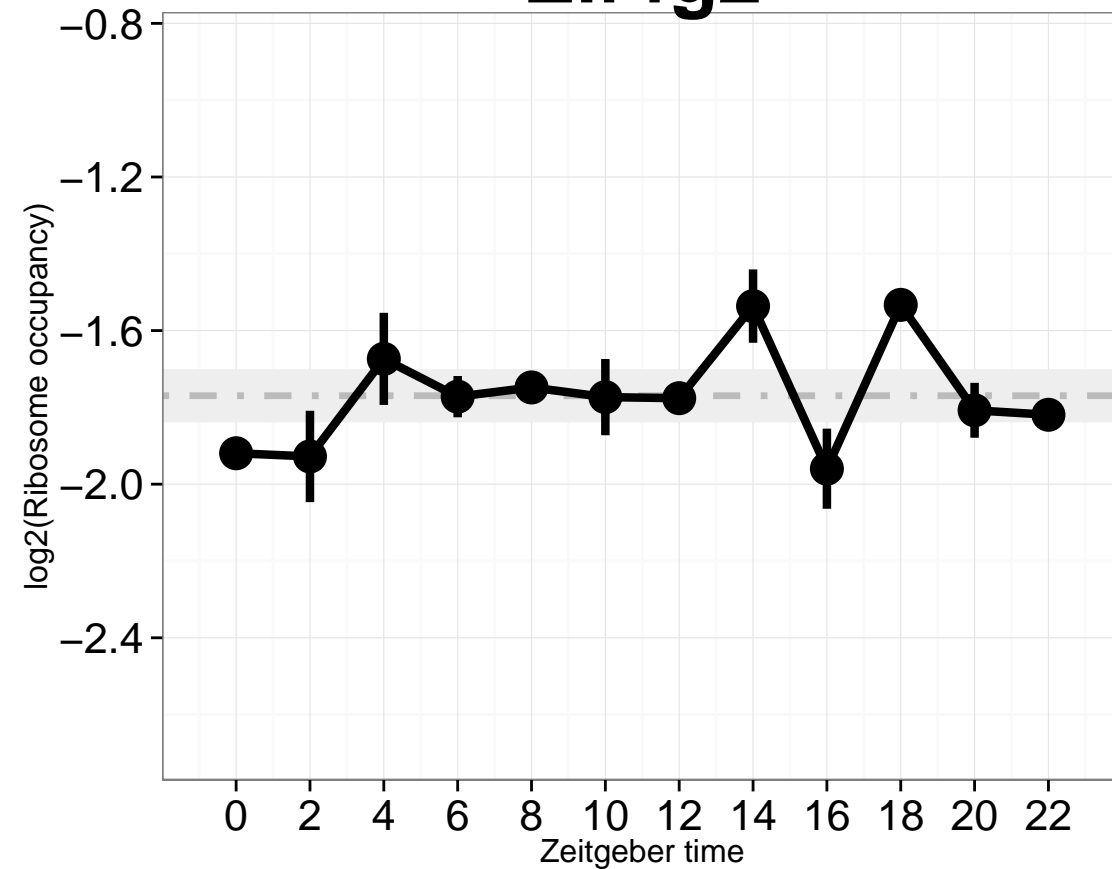

Supplement: Supplementary file 1034 [file 1]

# Pik3ip1

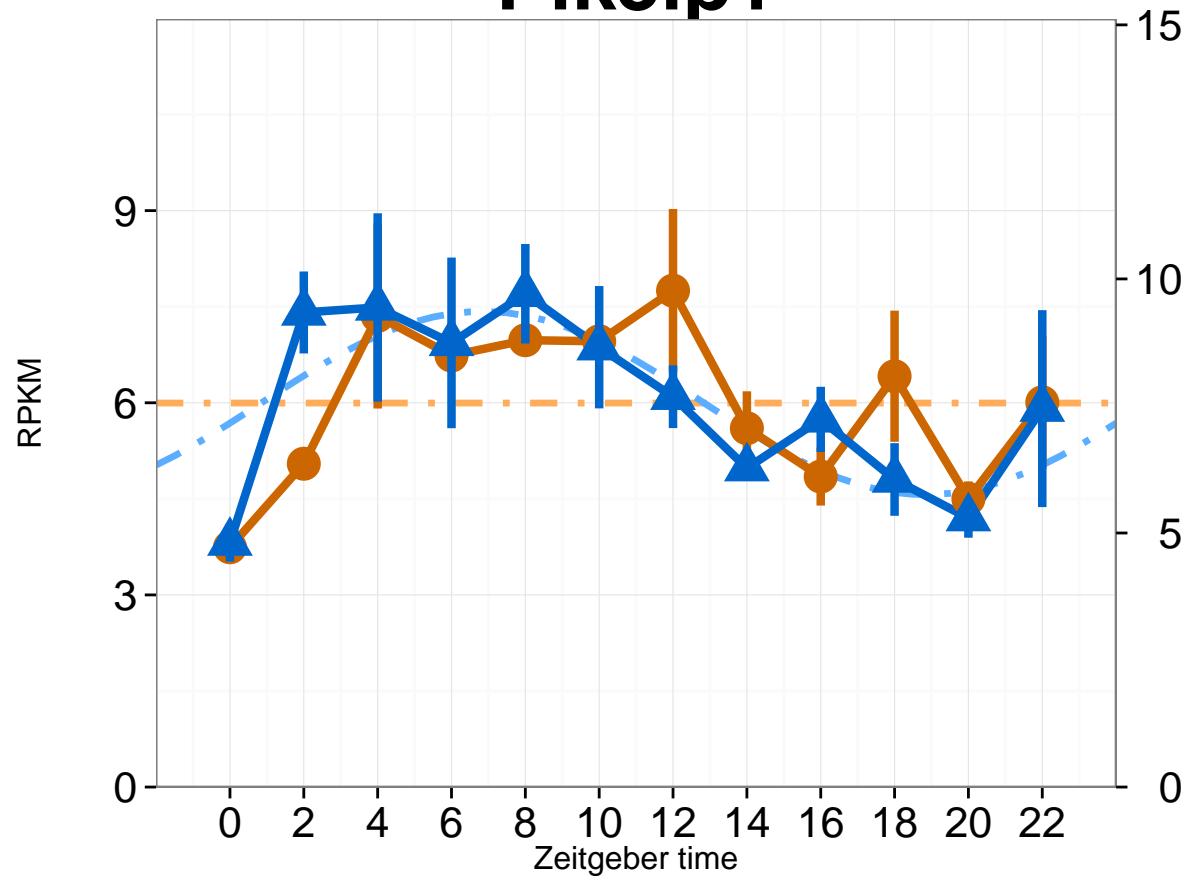

# Pik3ip1

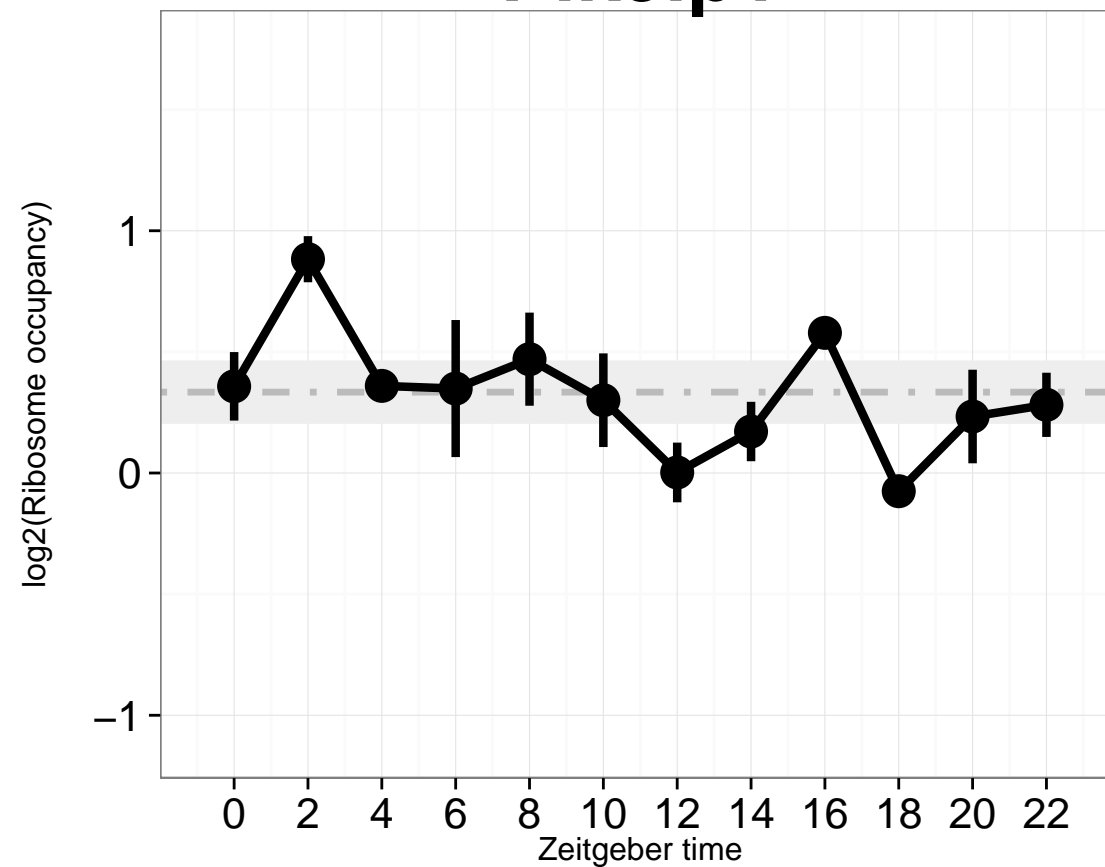

Supplement: Supplementary file 1035 [file 1]

# Akr1c19

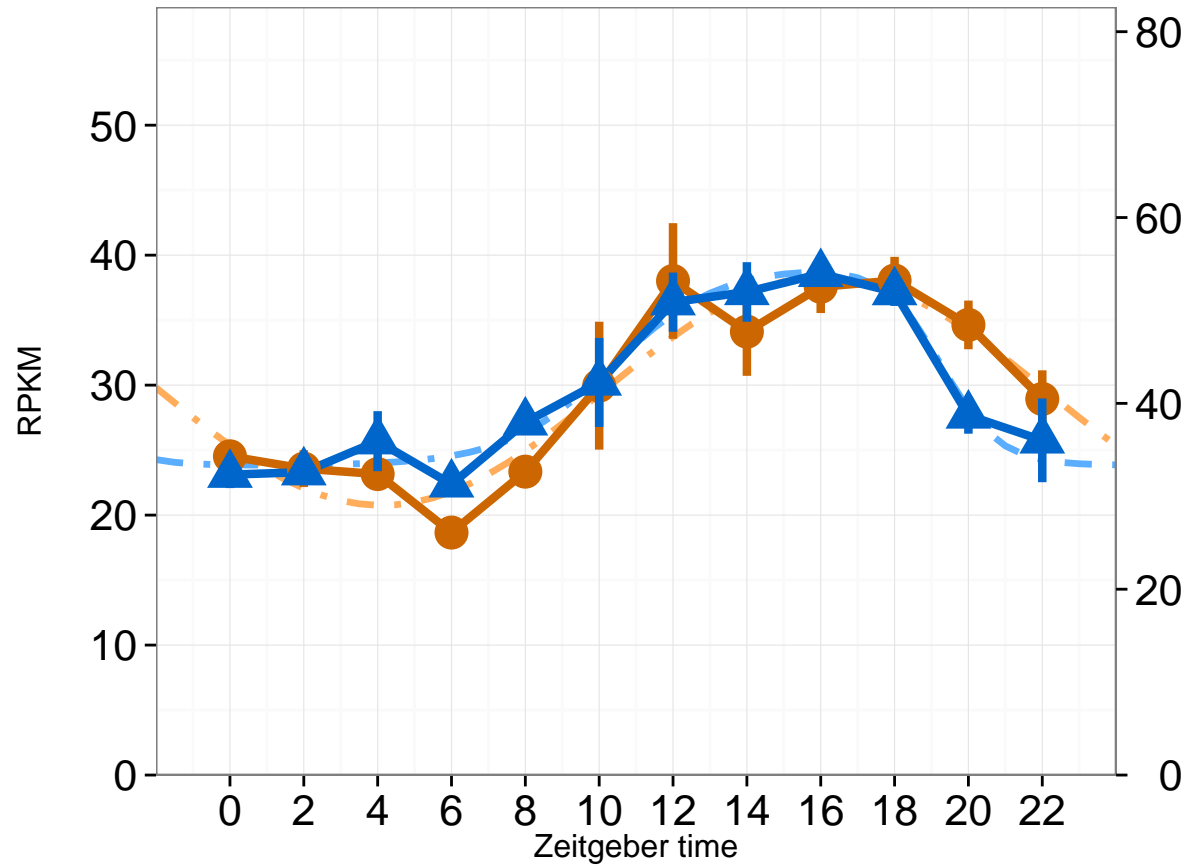

# Akr1c19

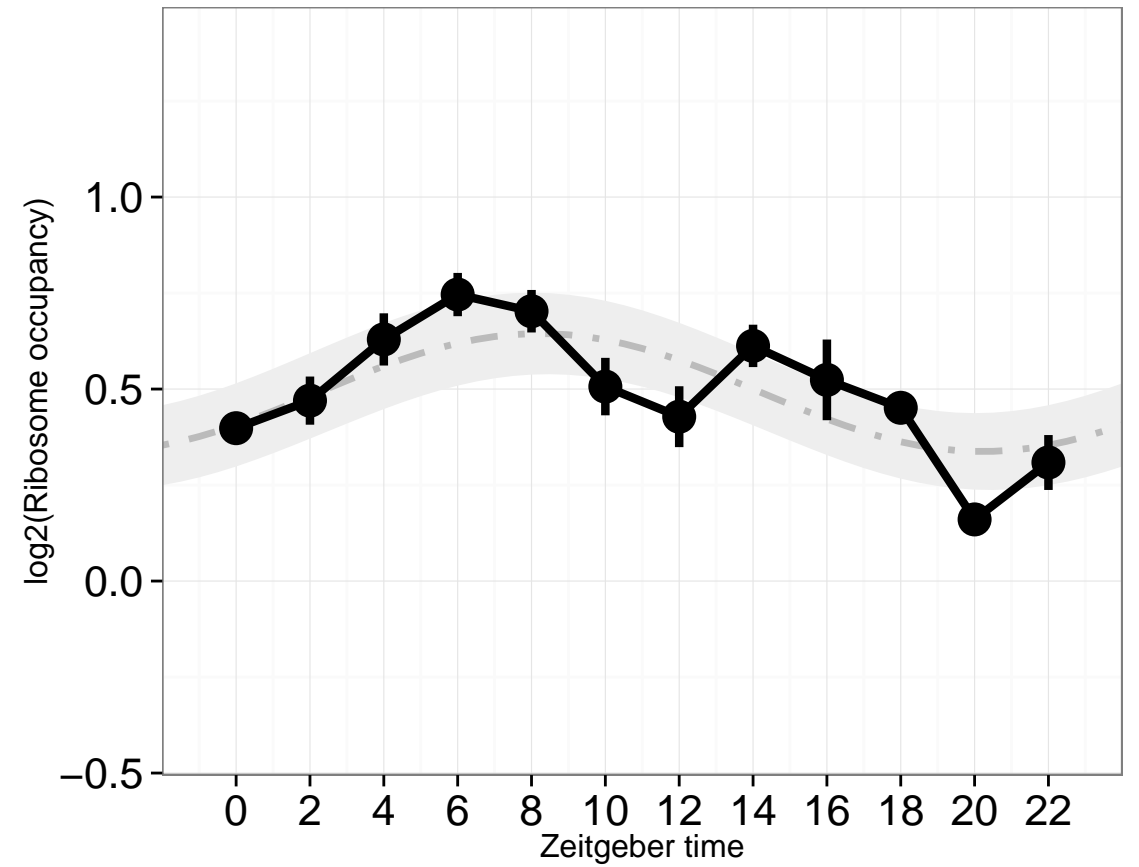

Supplement: Supplementary file 1036 [file 1]

# Mast3

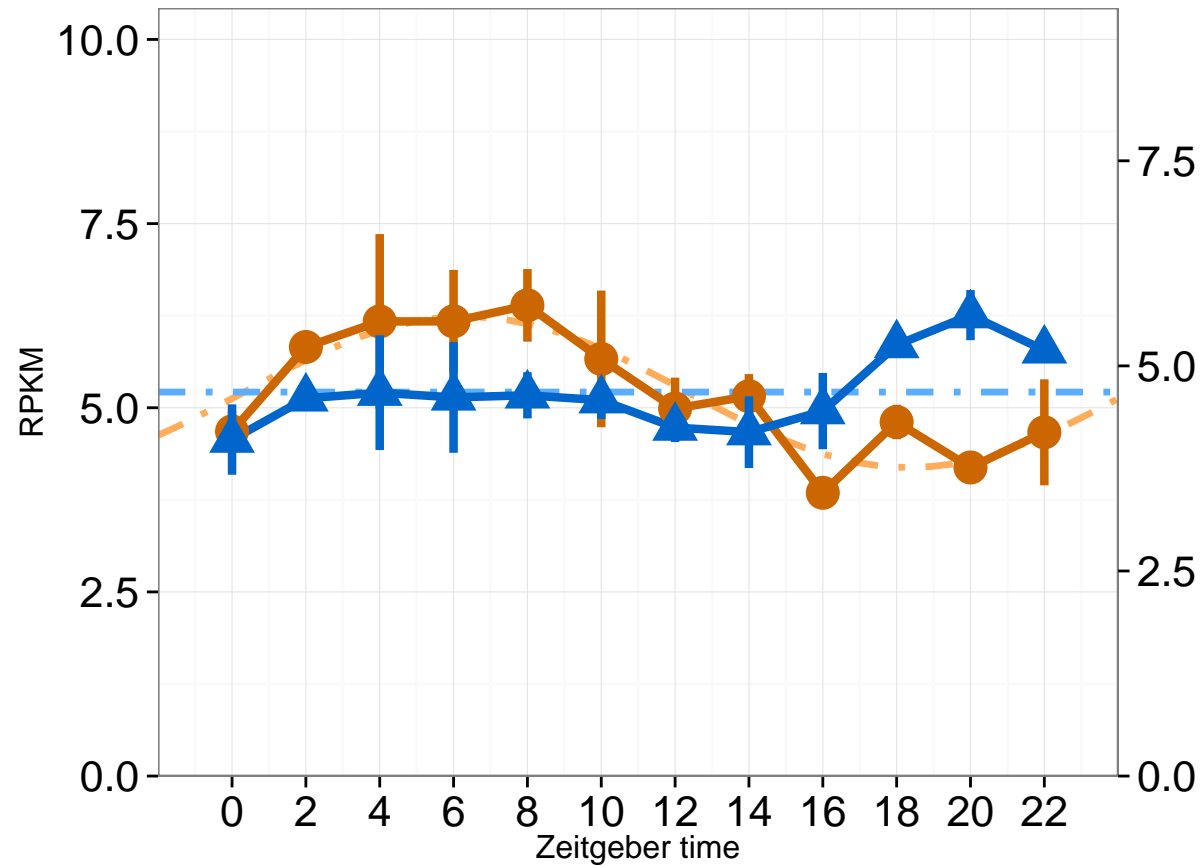

# Mast3

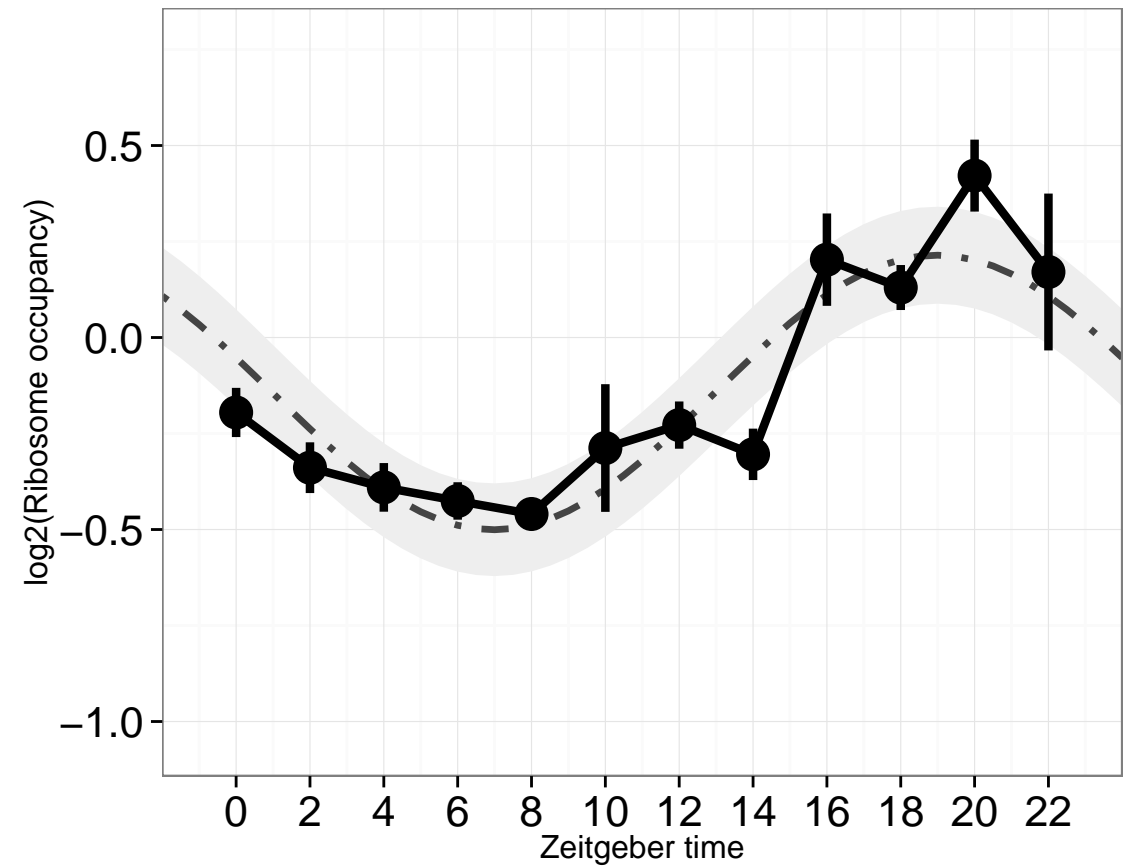

Supplement: Supplementary file 1037 [file 1]

## Ckap4

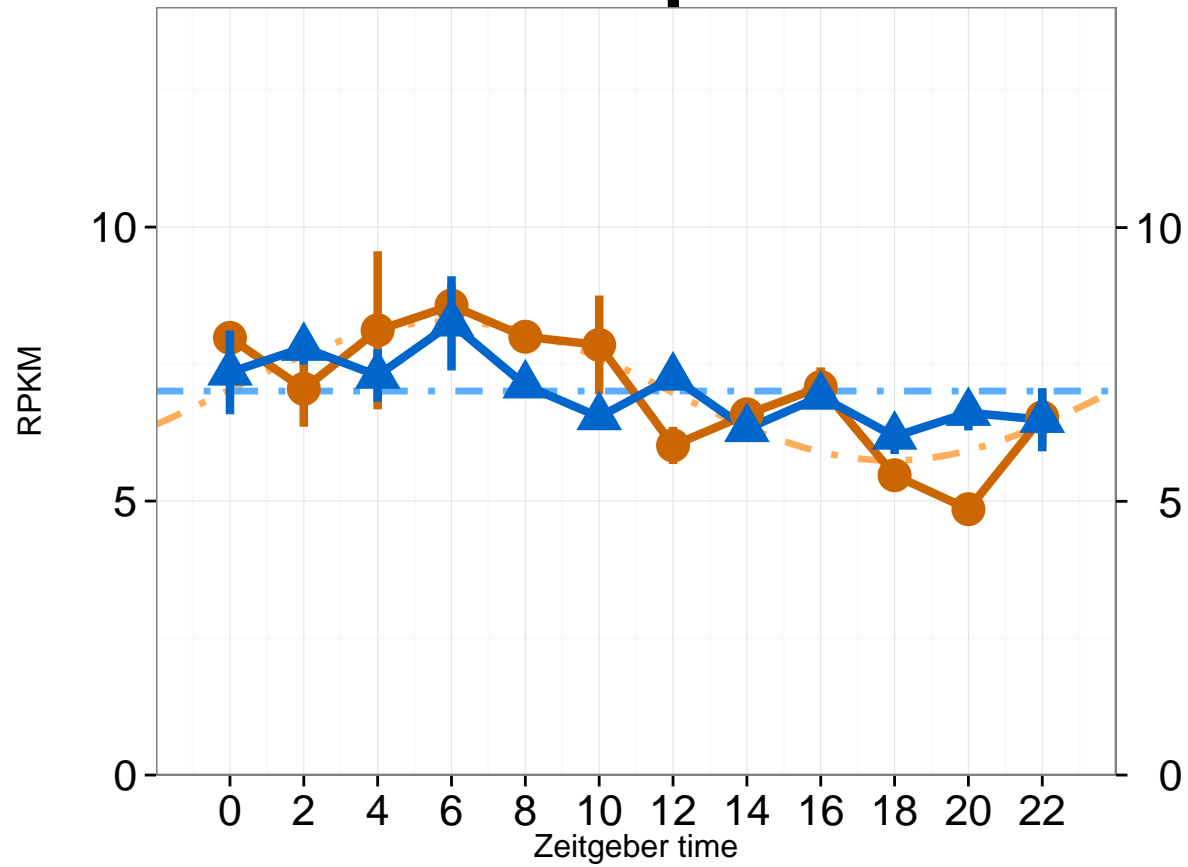

## Ckap4

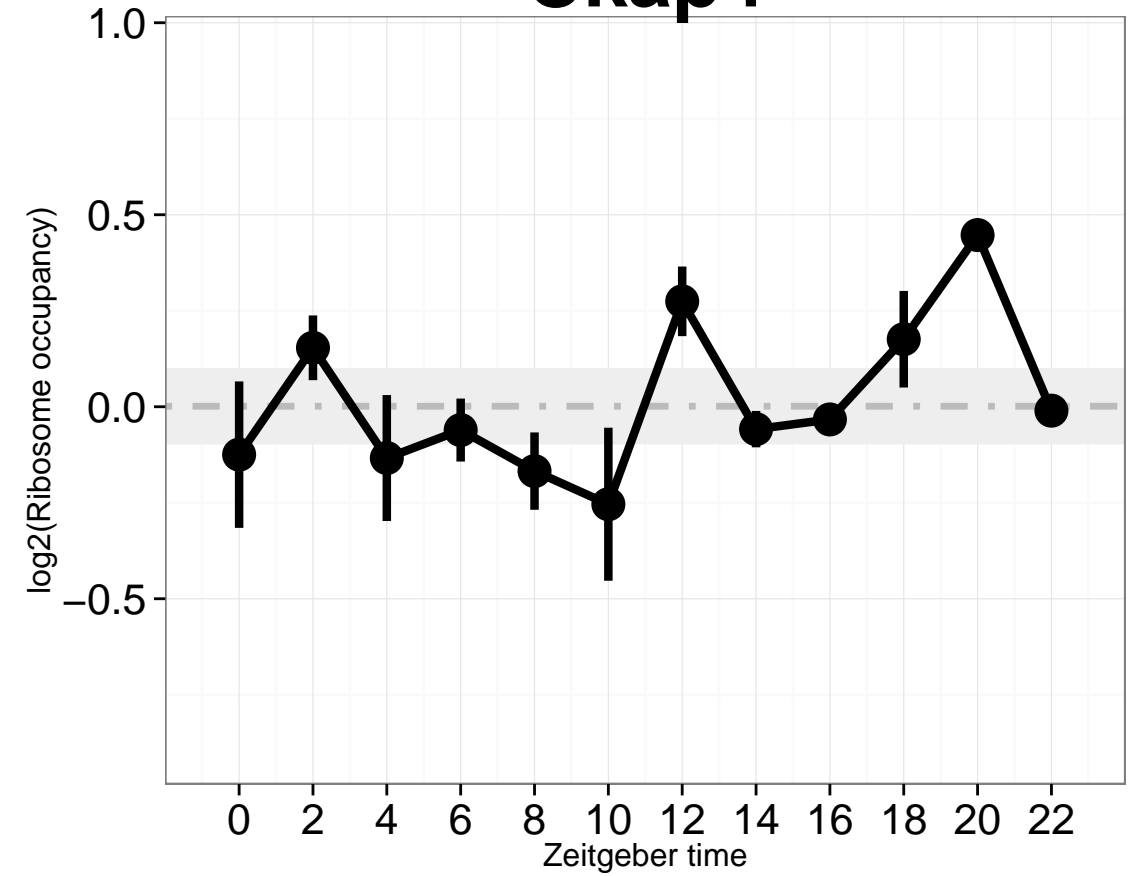

Supplement: Supplementary file 1038 [file 1]

# Gsta2

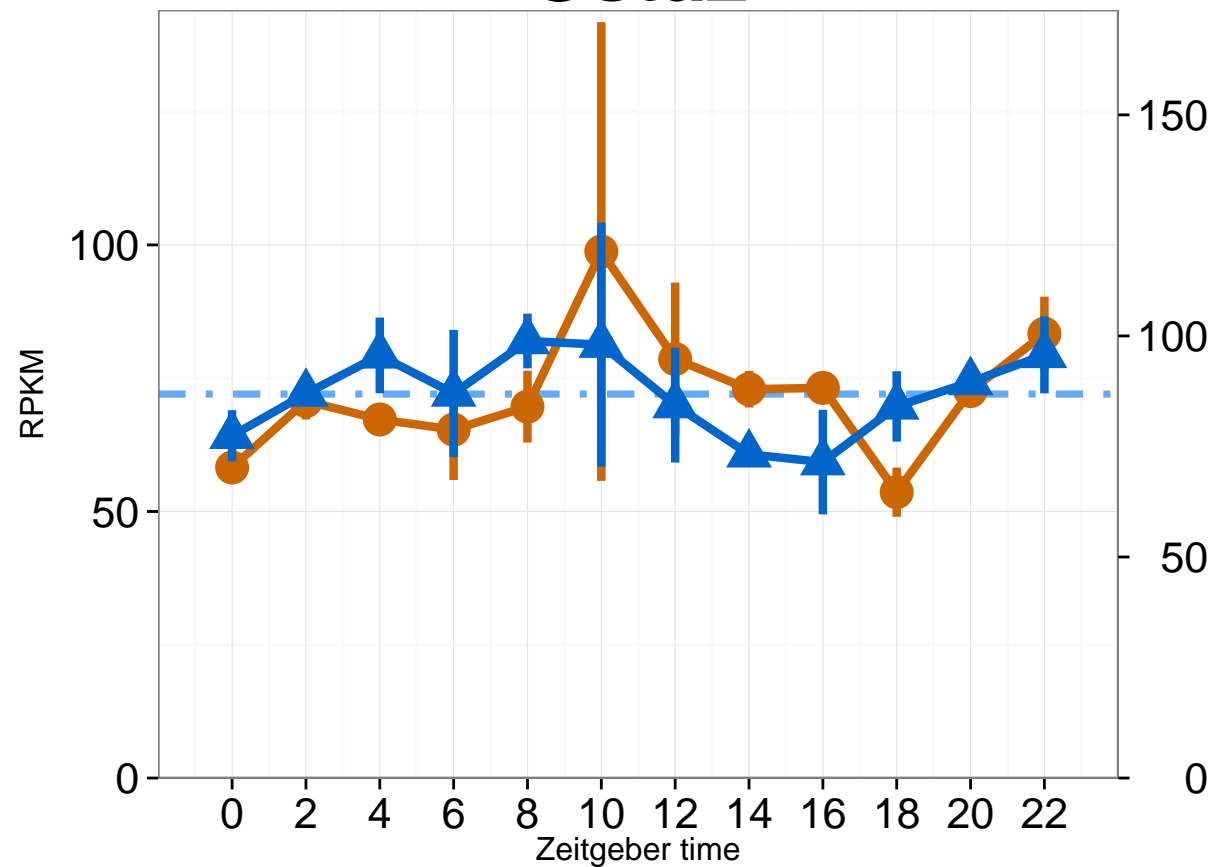

# Gsta2

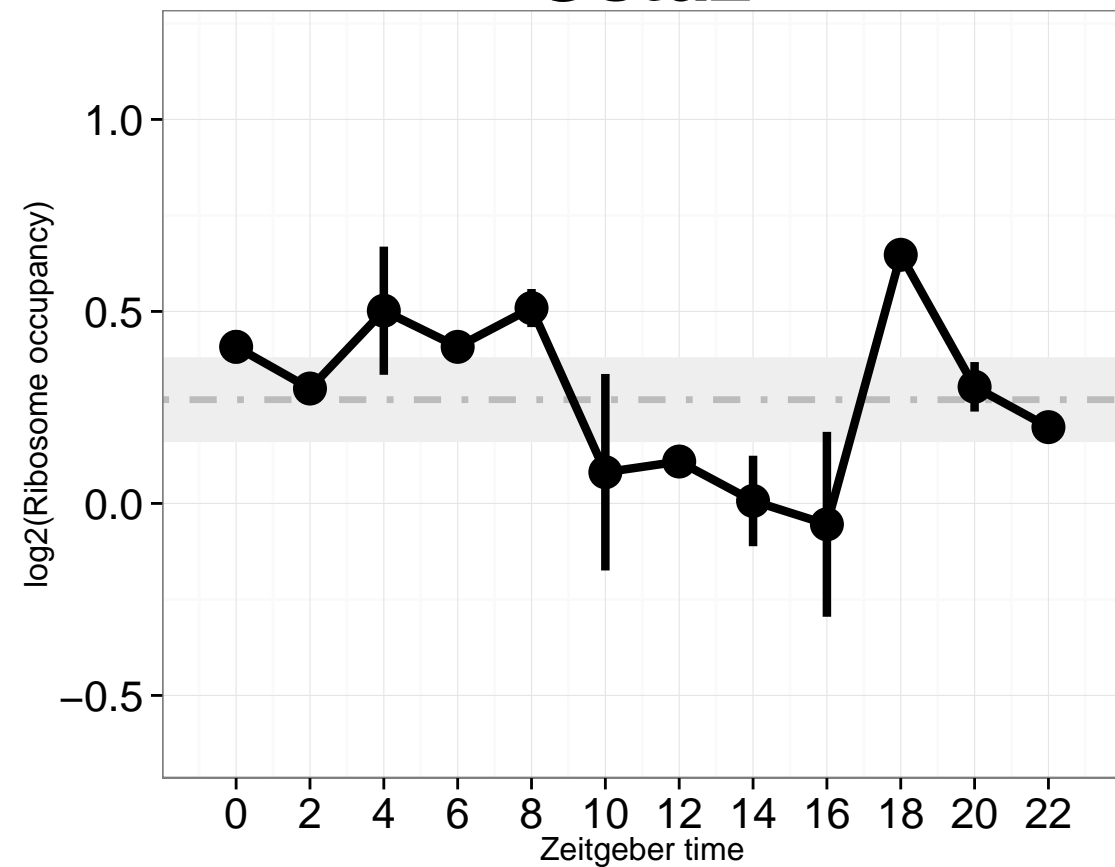

Supplement: Supplementary file 1039 [file 1]

## Stard9

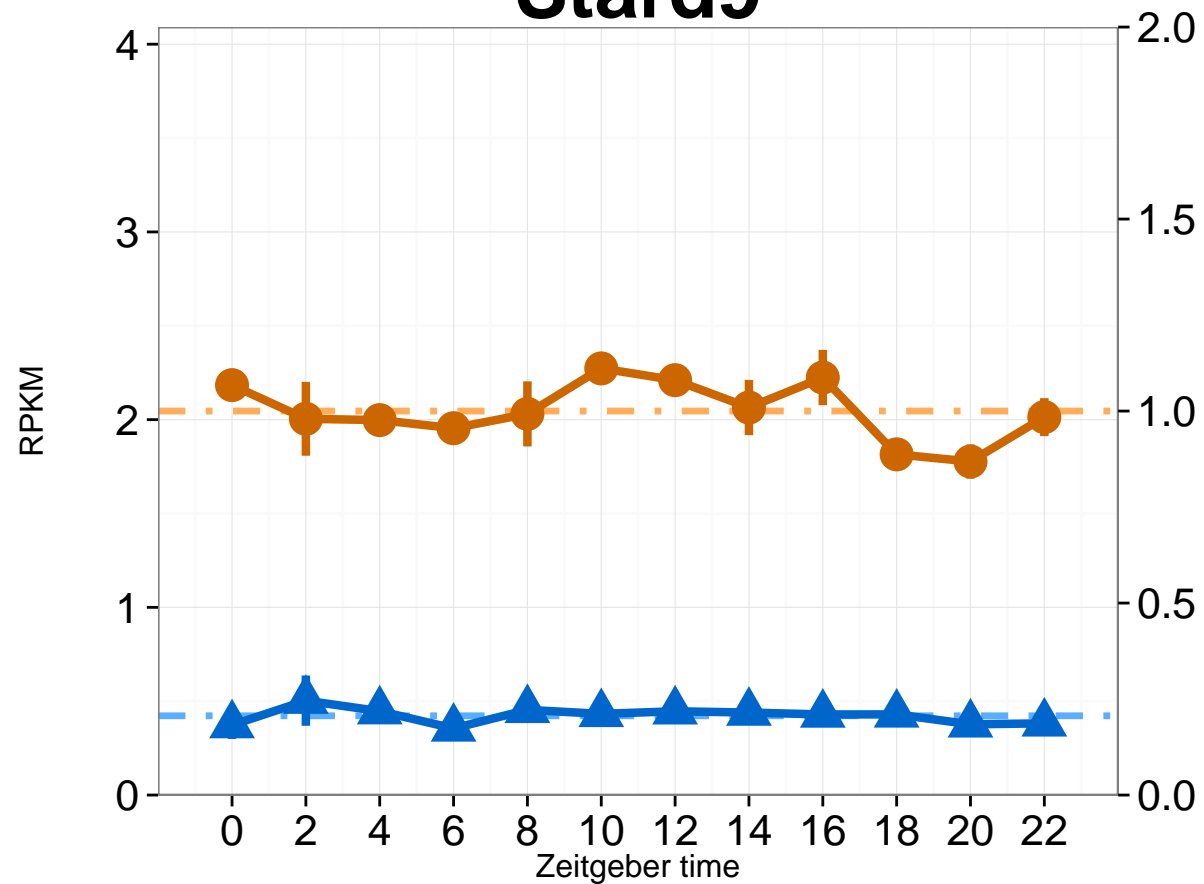

## Stard9

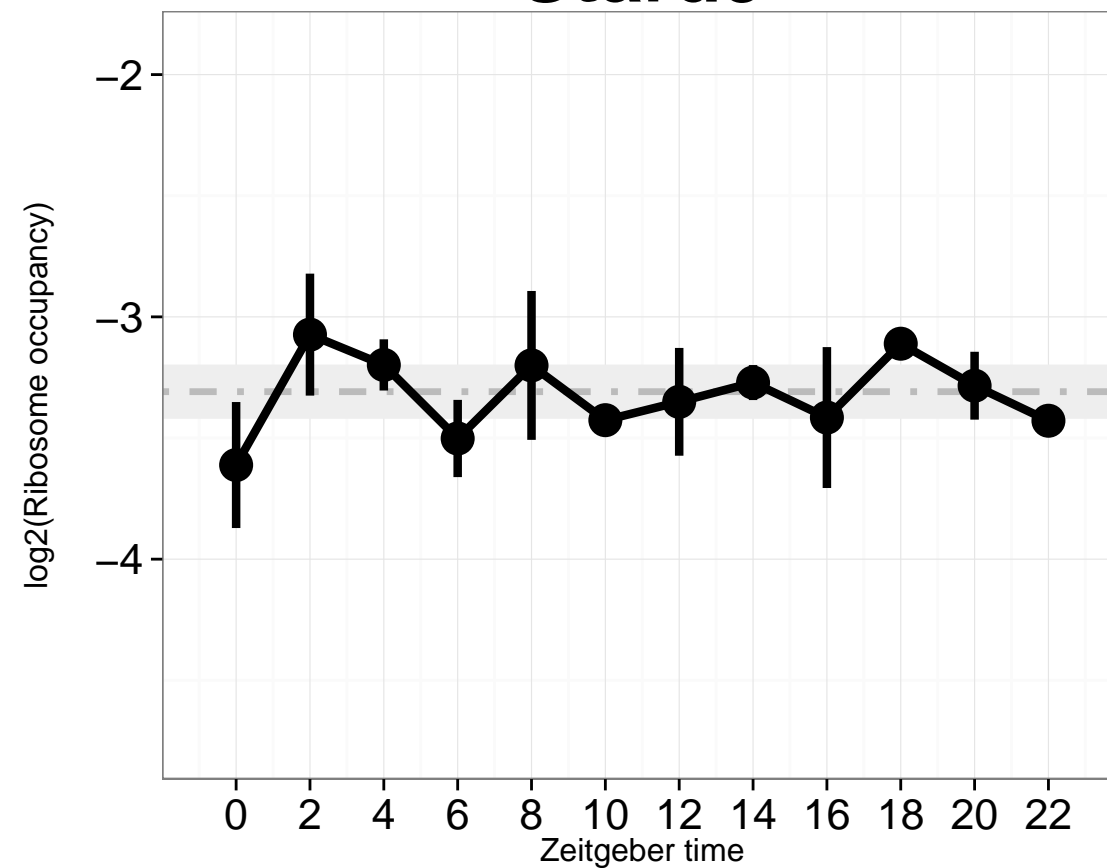

Supplement: Supplementary file 1040 [file 1]

# Gpatch11

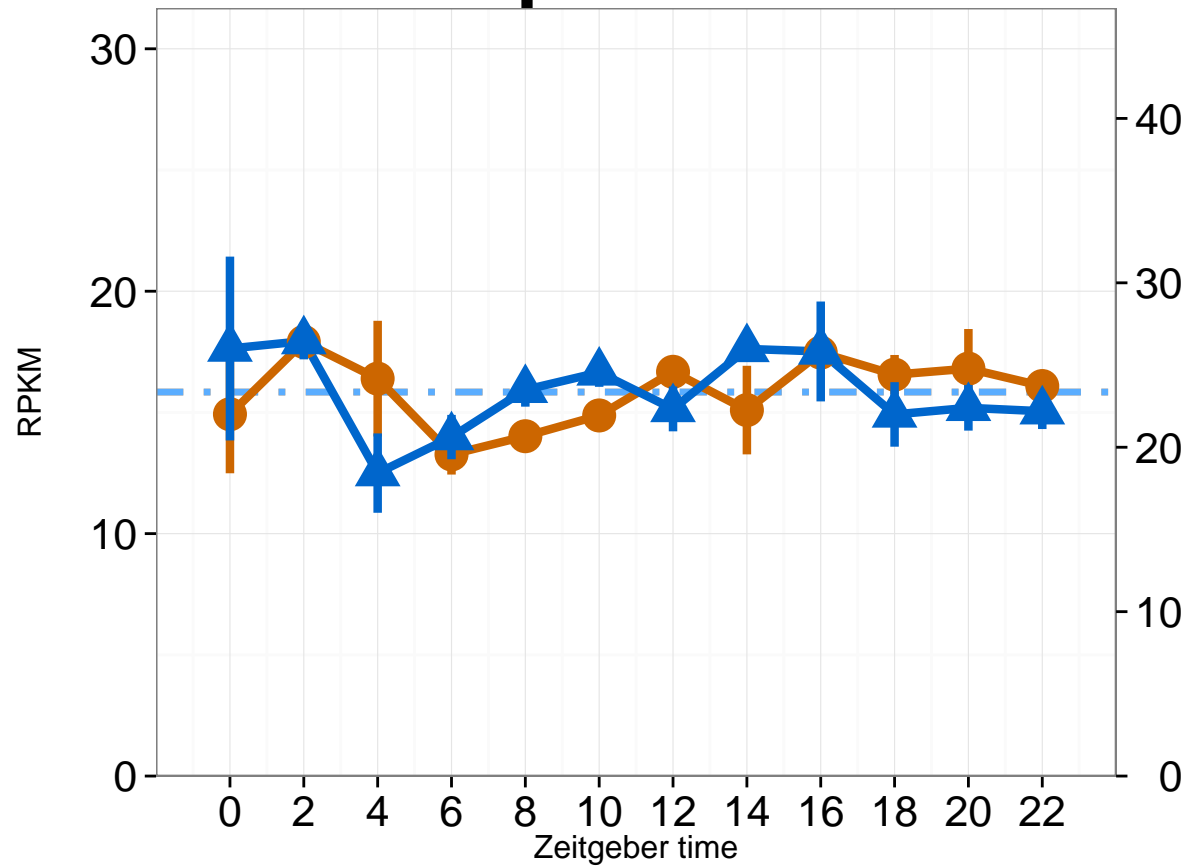

# Gpatch11

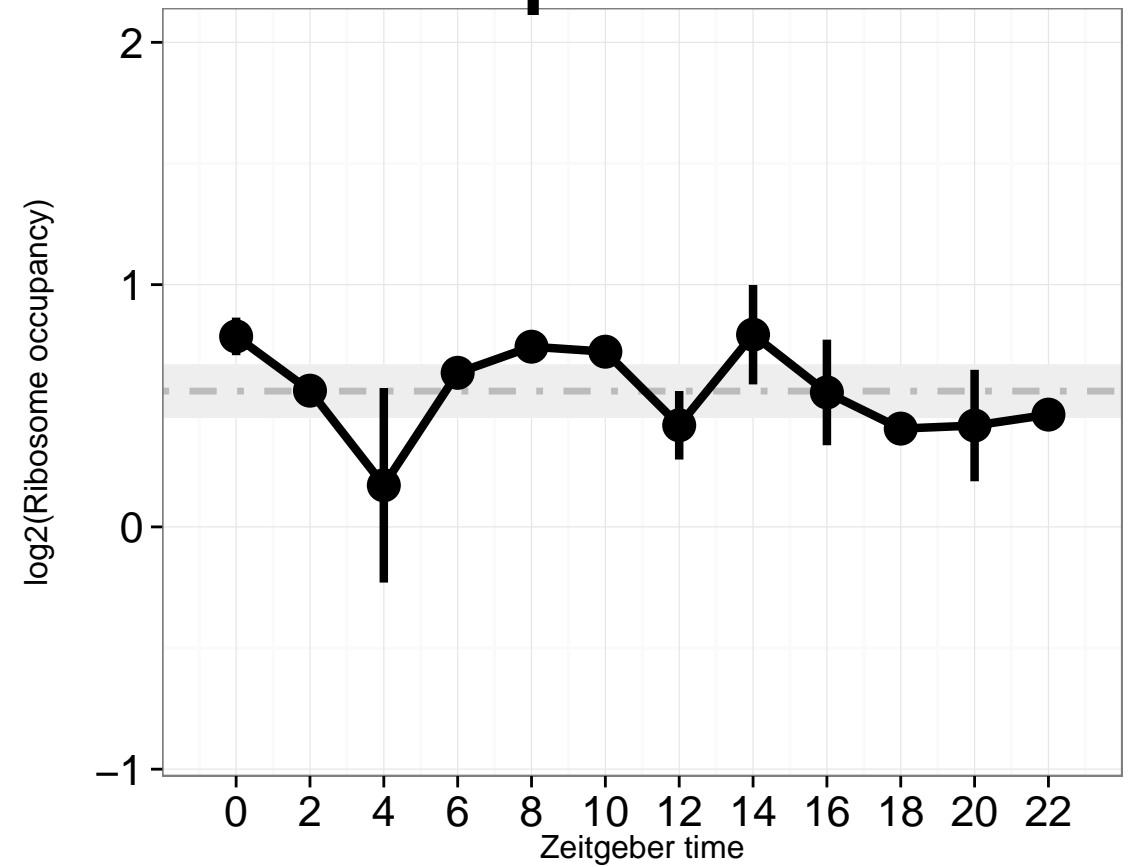

Supplement: Supplementary file 1041 [file 1]

# 1110038F14Rik

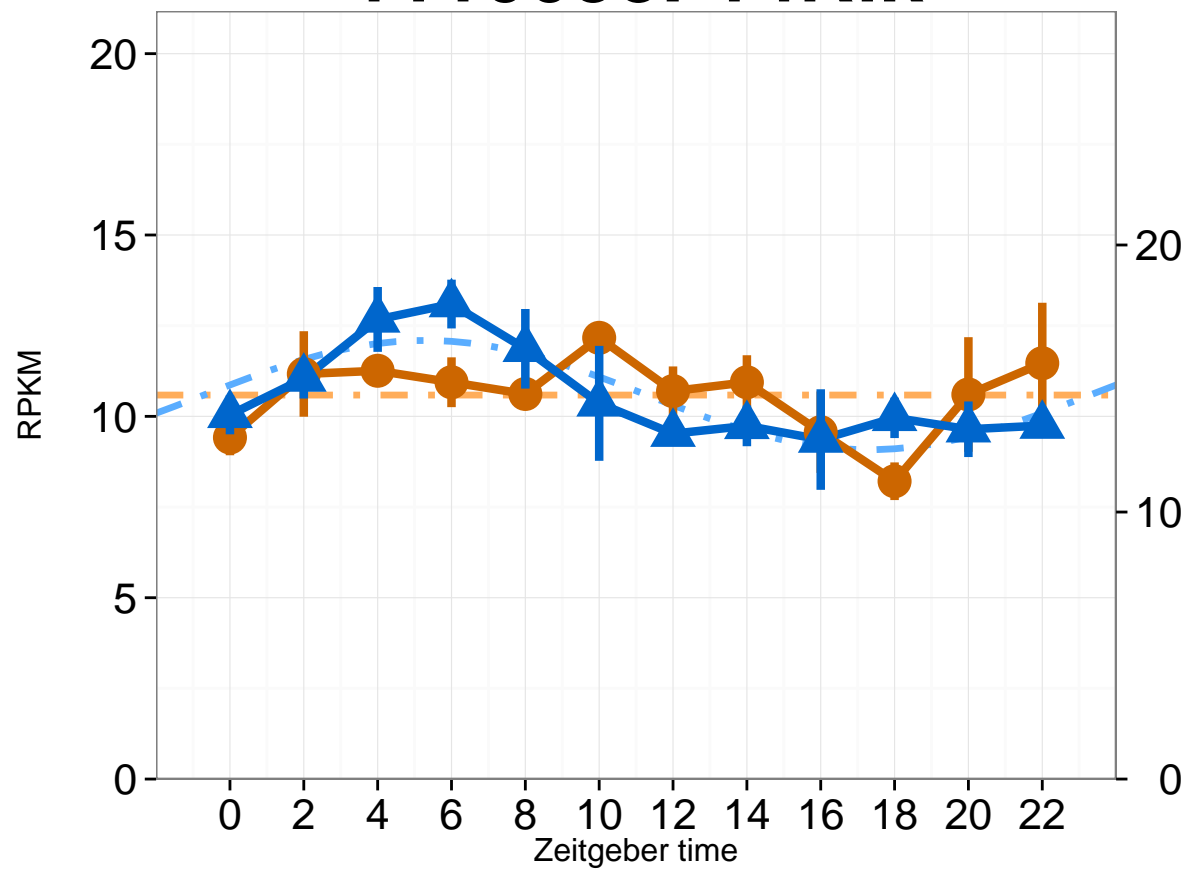

# 1110038F14Rik

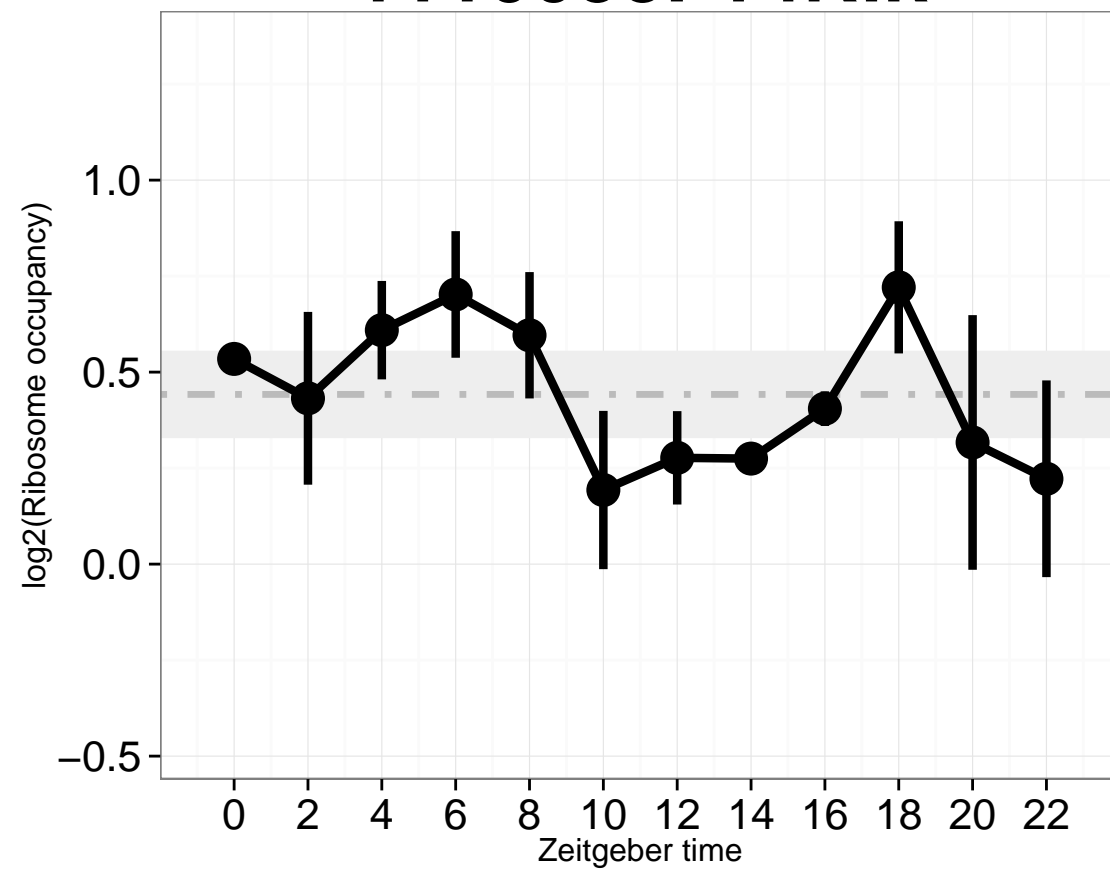

Supplement: Supplementary file 1042 [file 1]

## Clock

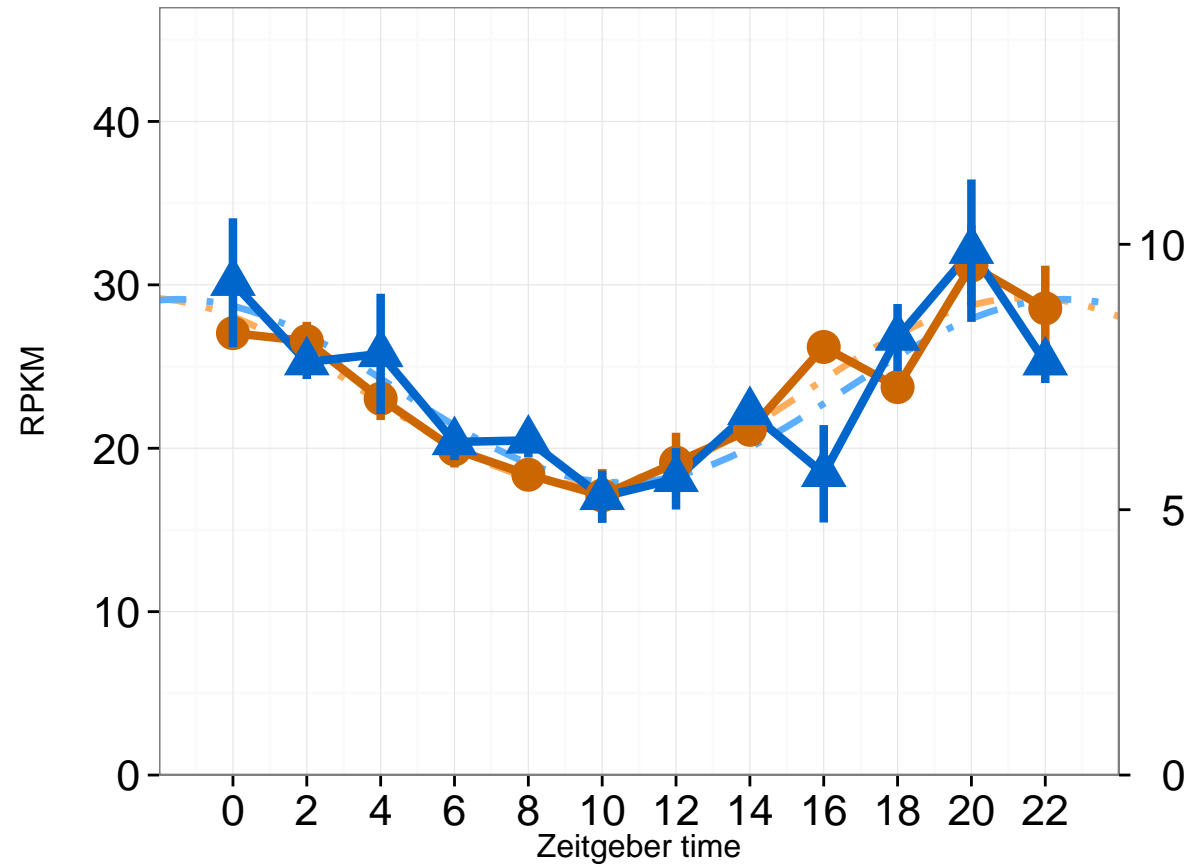

## Clock

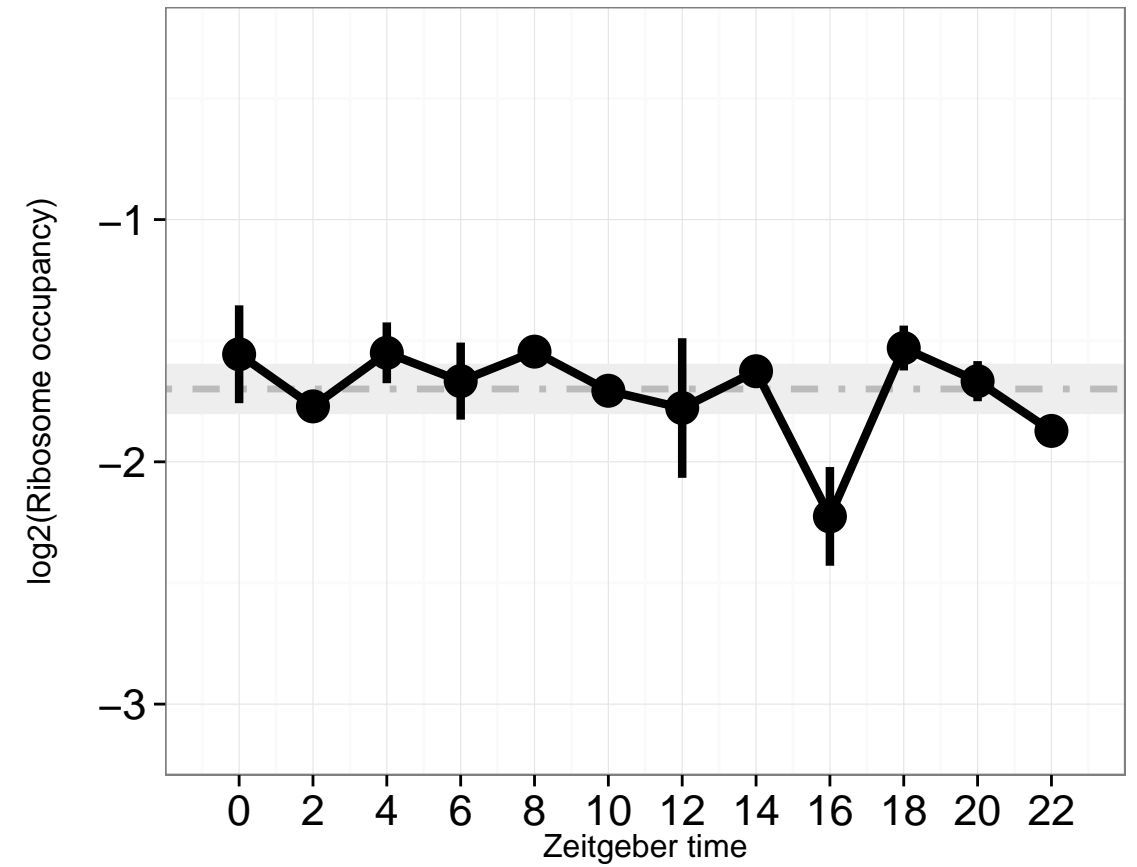

Supplement: Supplementary file 1043 [file 1]

## Pzp

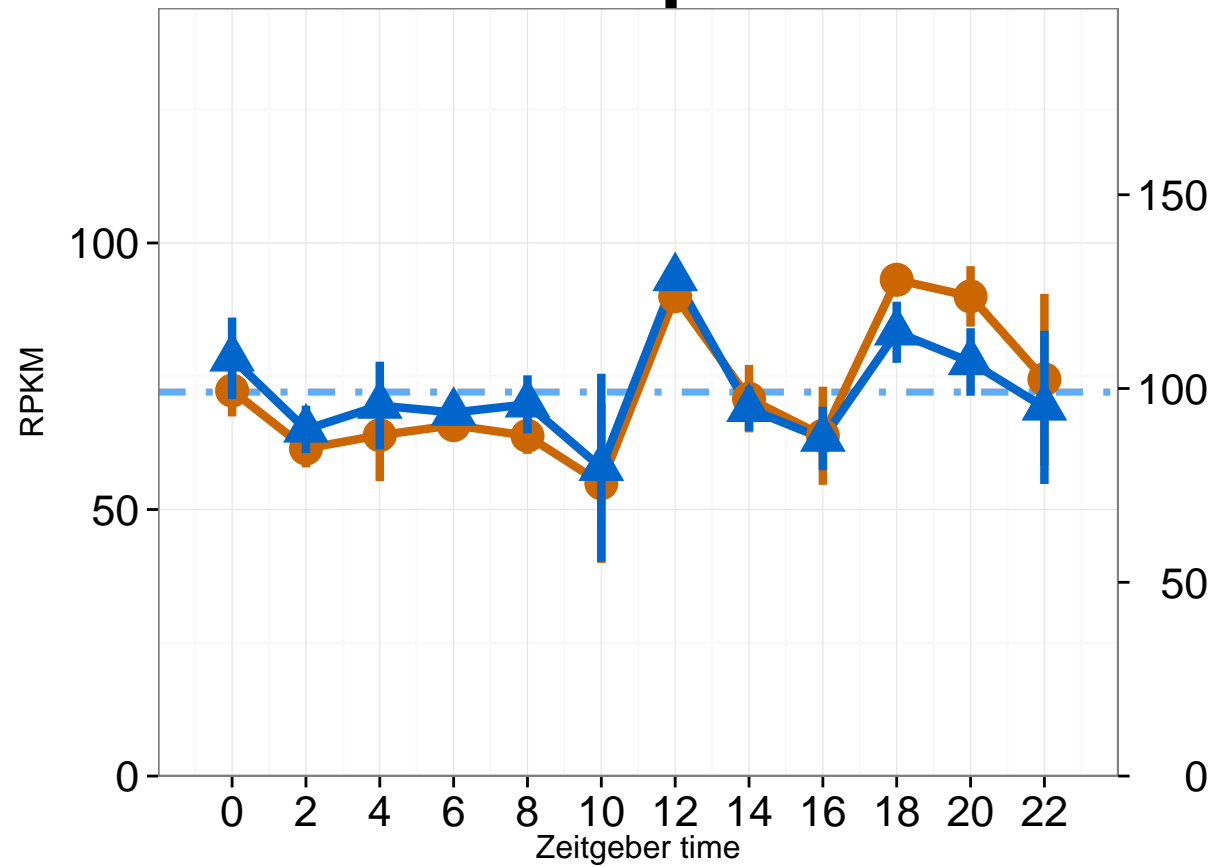

## Pzp

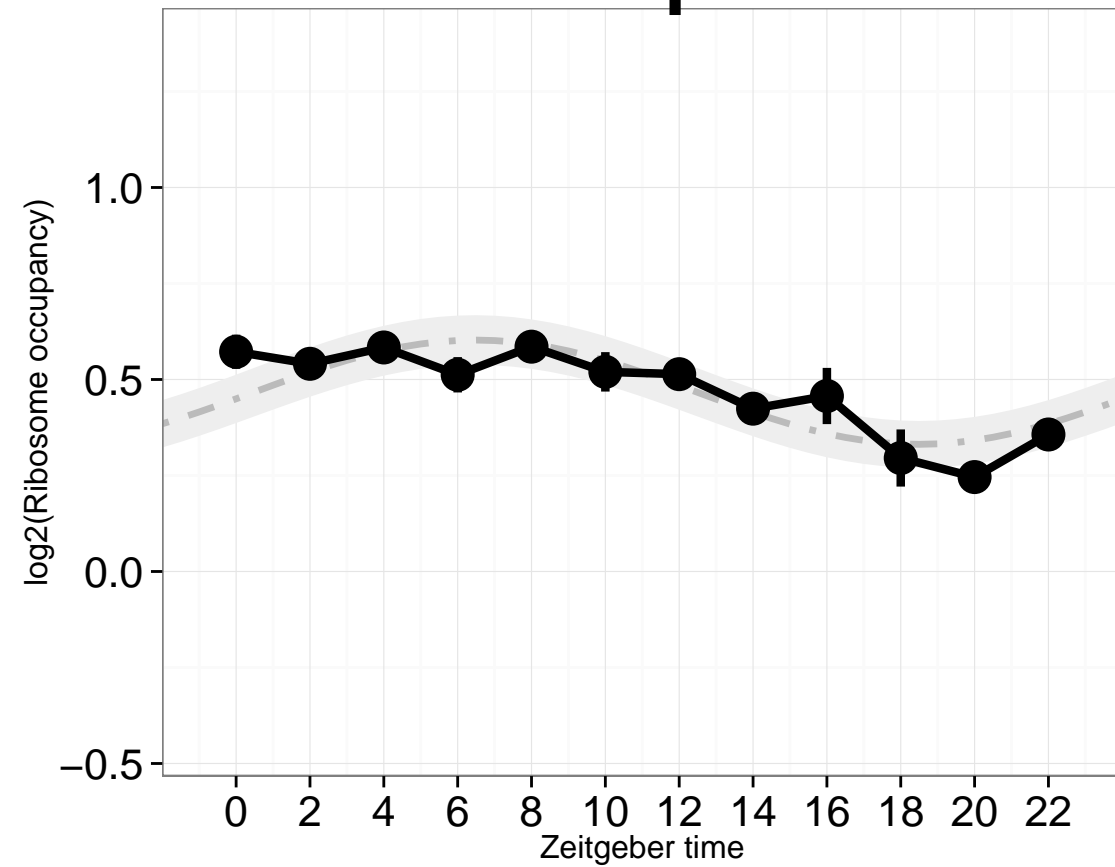

Supplement: Supplementary file 1044 [file 1]

## Tonsl

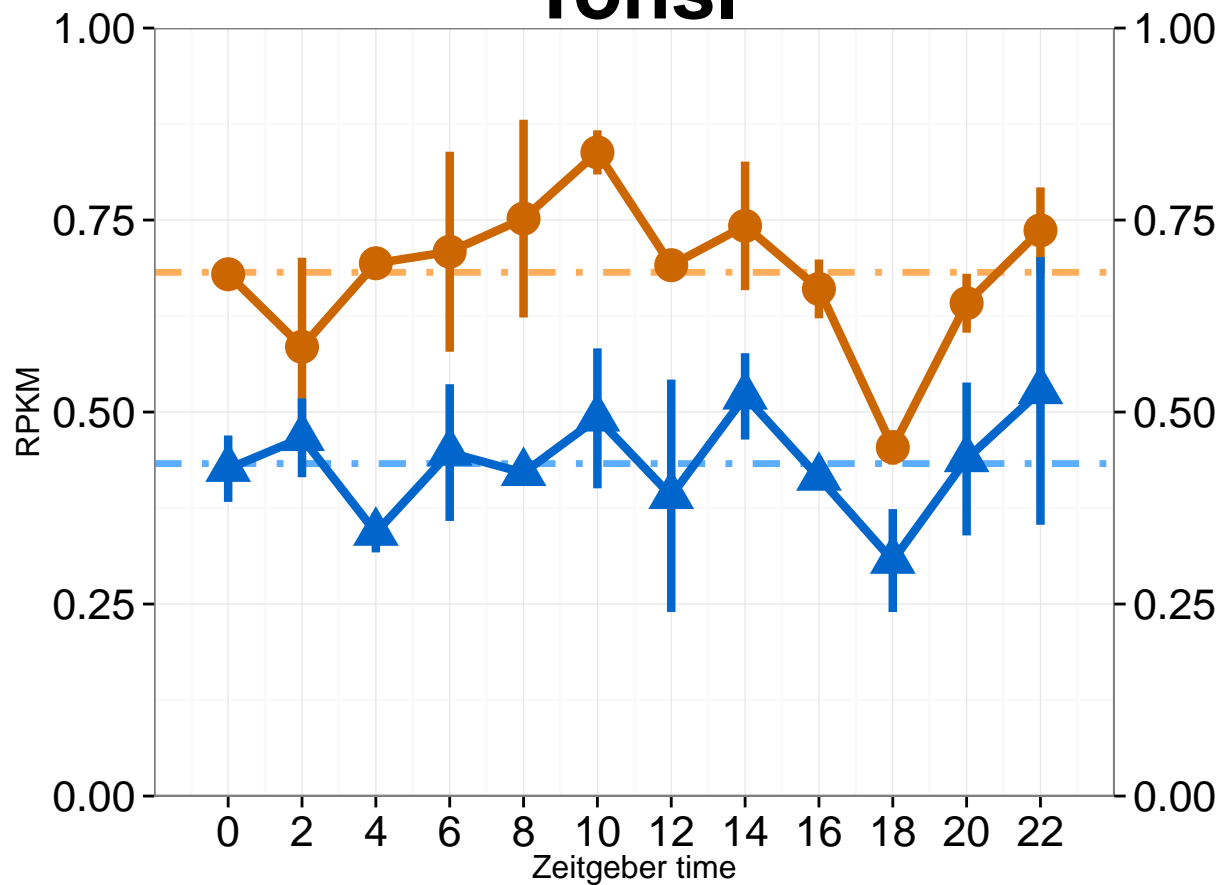

## Tonsl

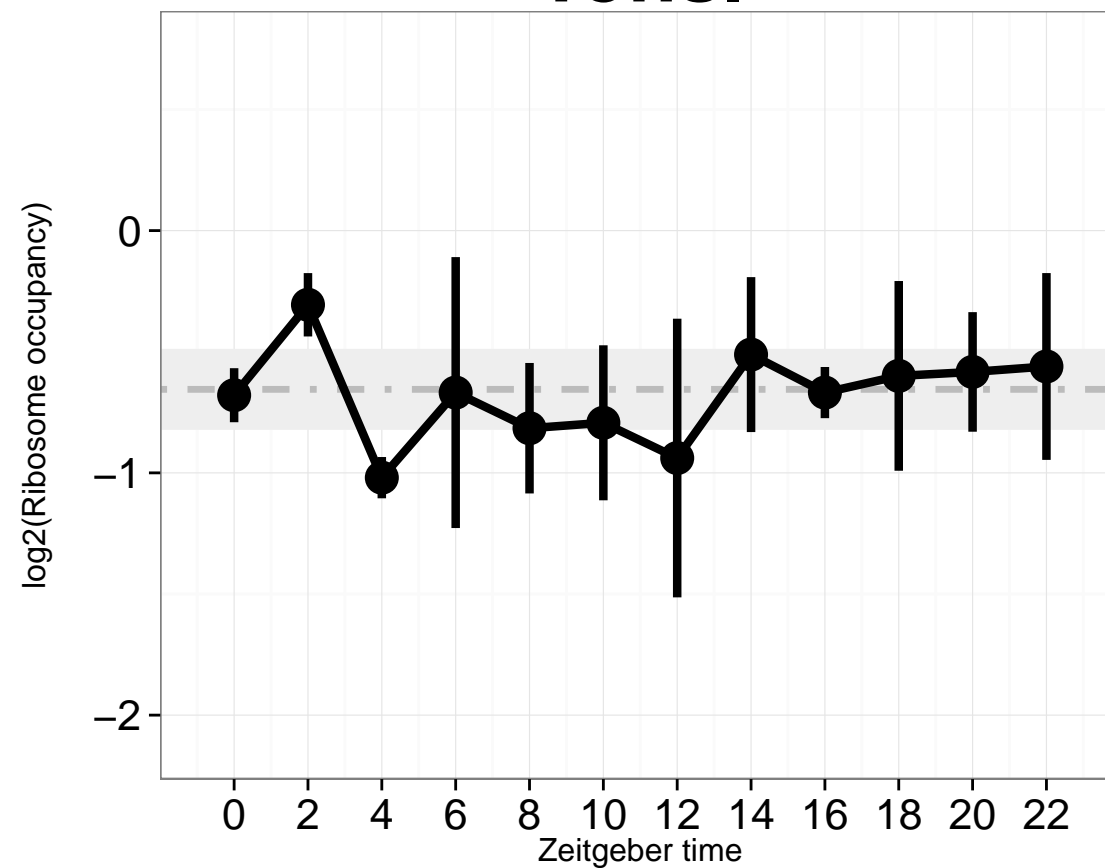

Supplement: Supplementary file 1045 [file 1]

## Cry1

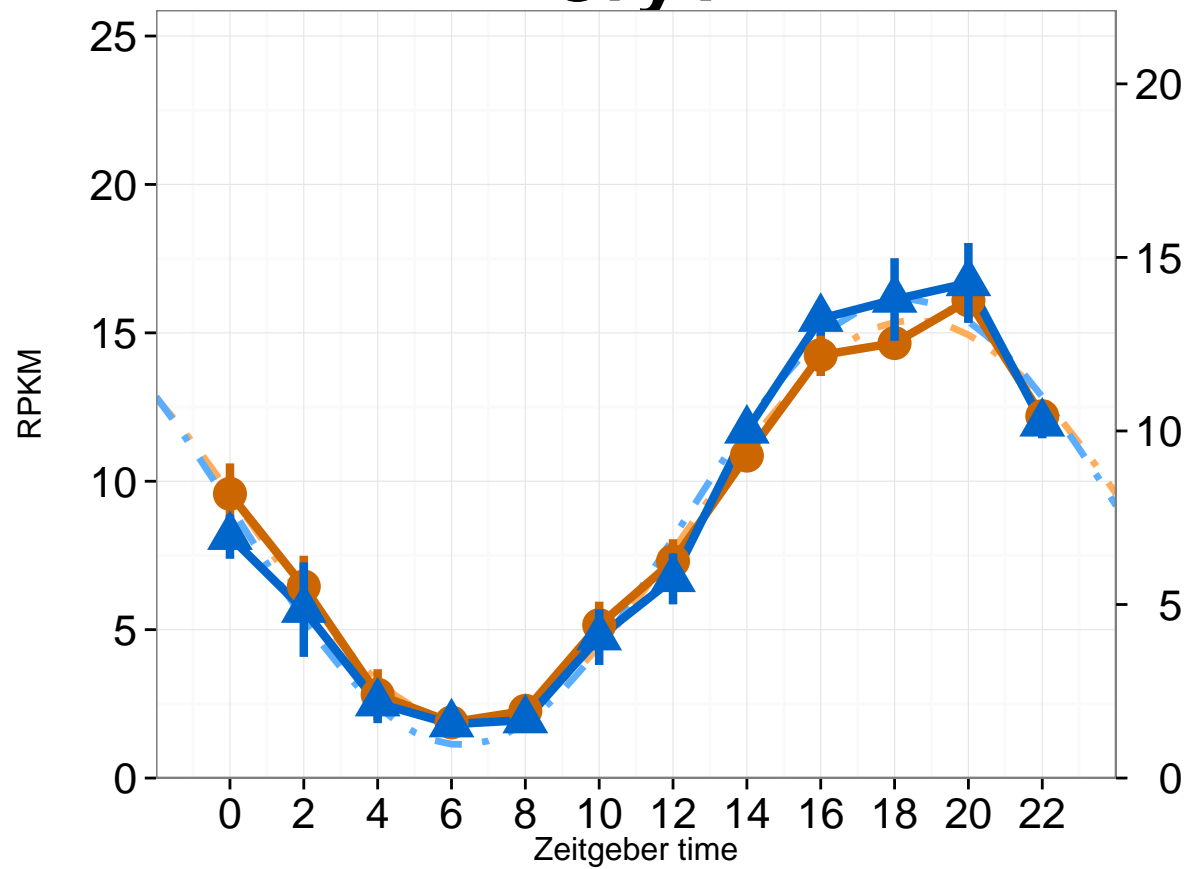

## Cry1

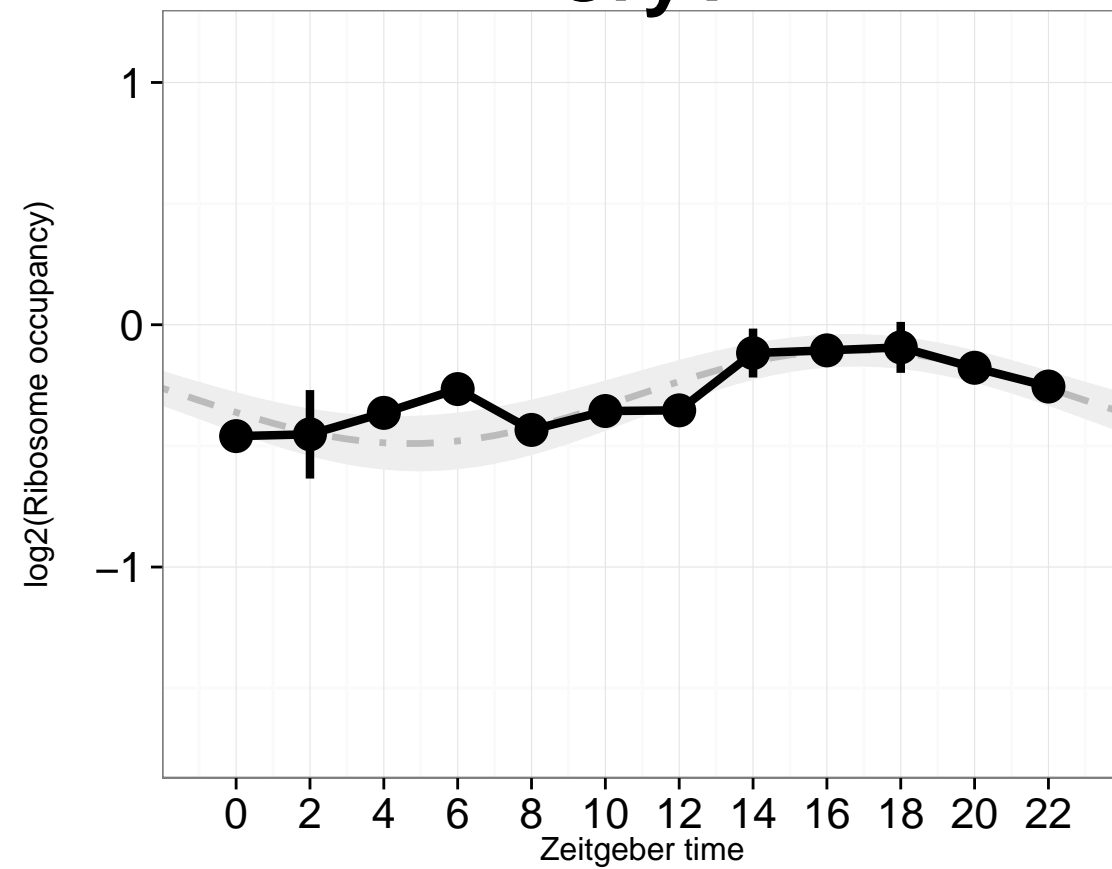

Supplement: Supplementary file 1046 [file 1]

# Tmem45a

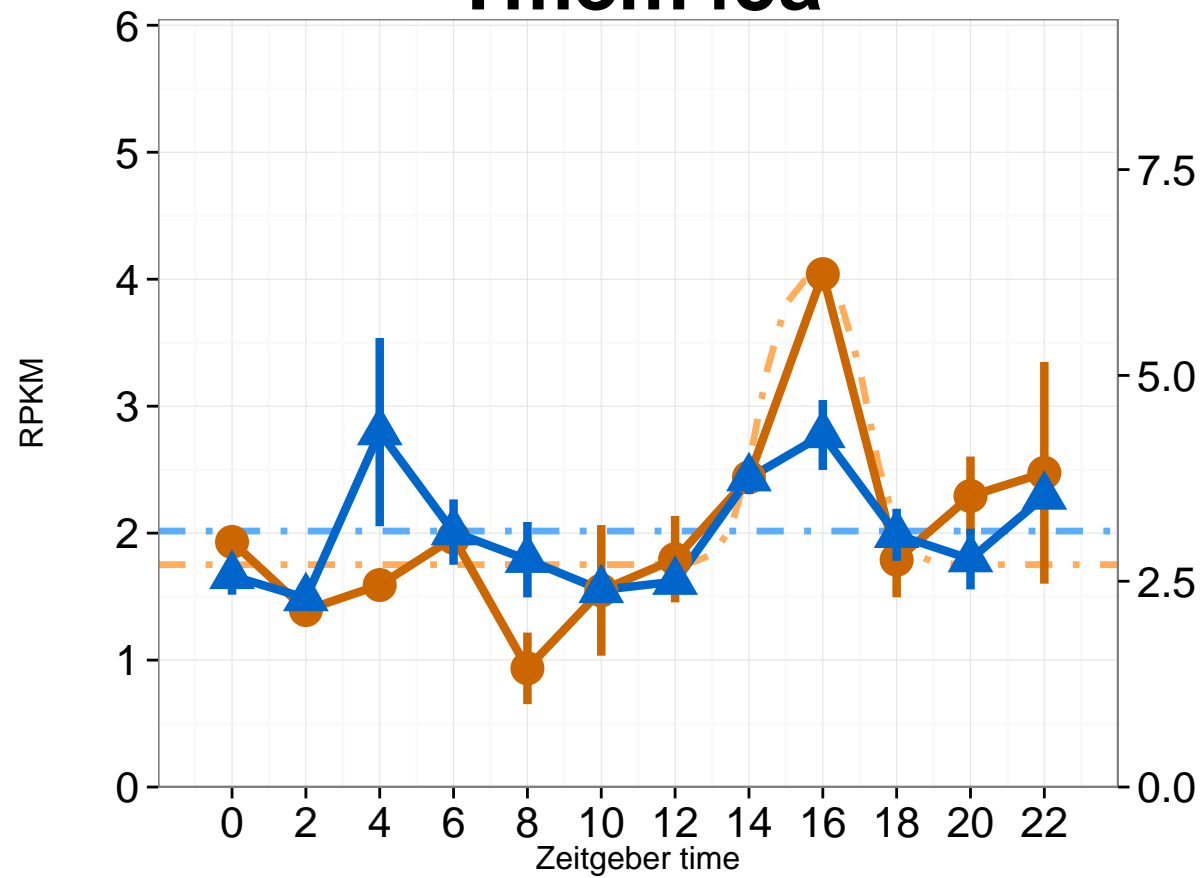

# Tmem45a

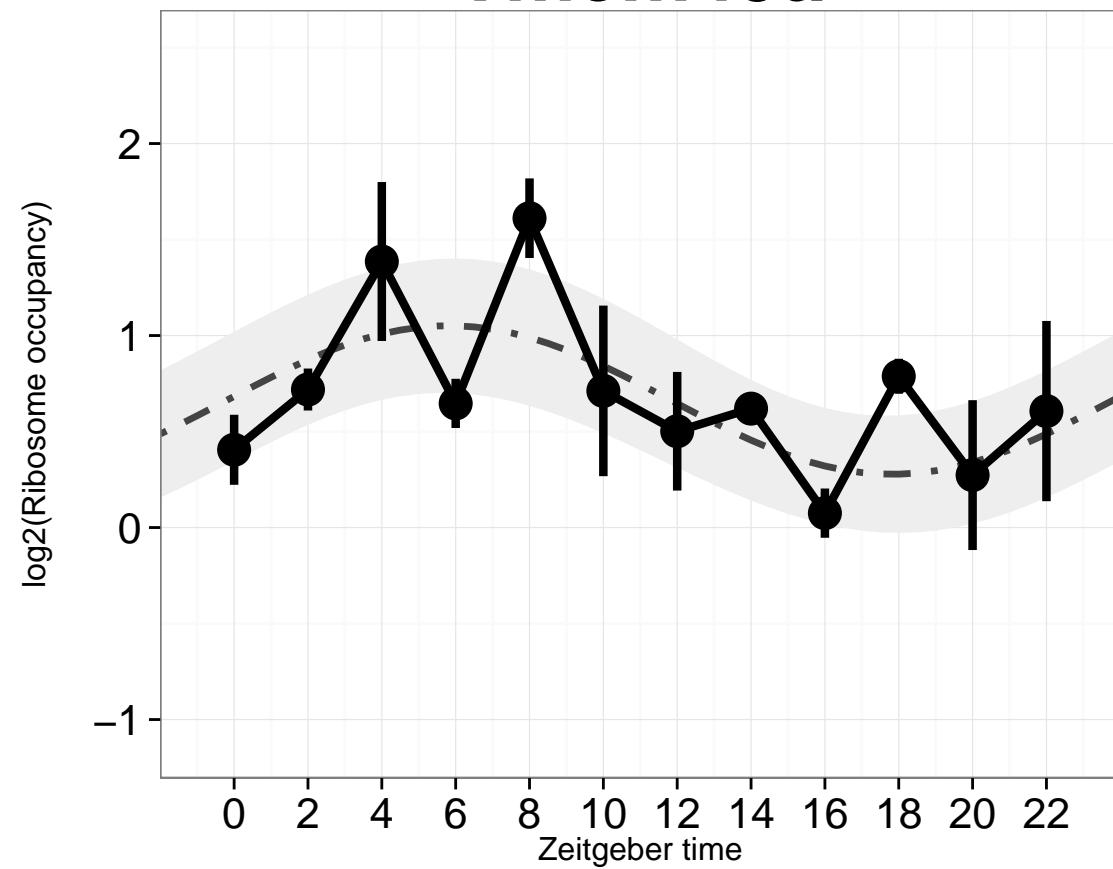

Supplement: Supplementary file 1047 [file 1]

## Abcd4

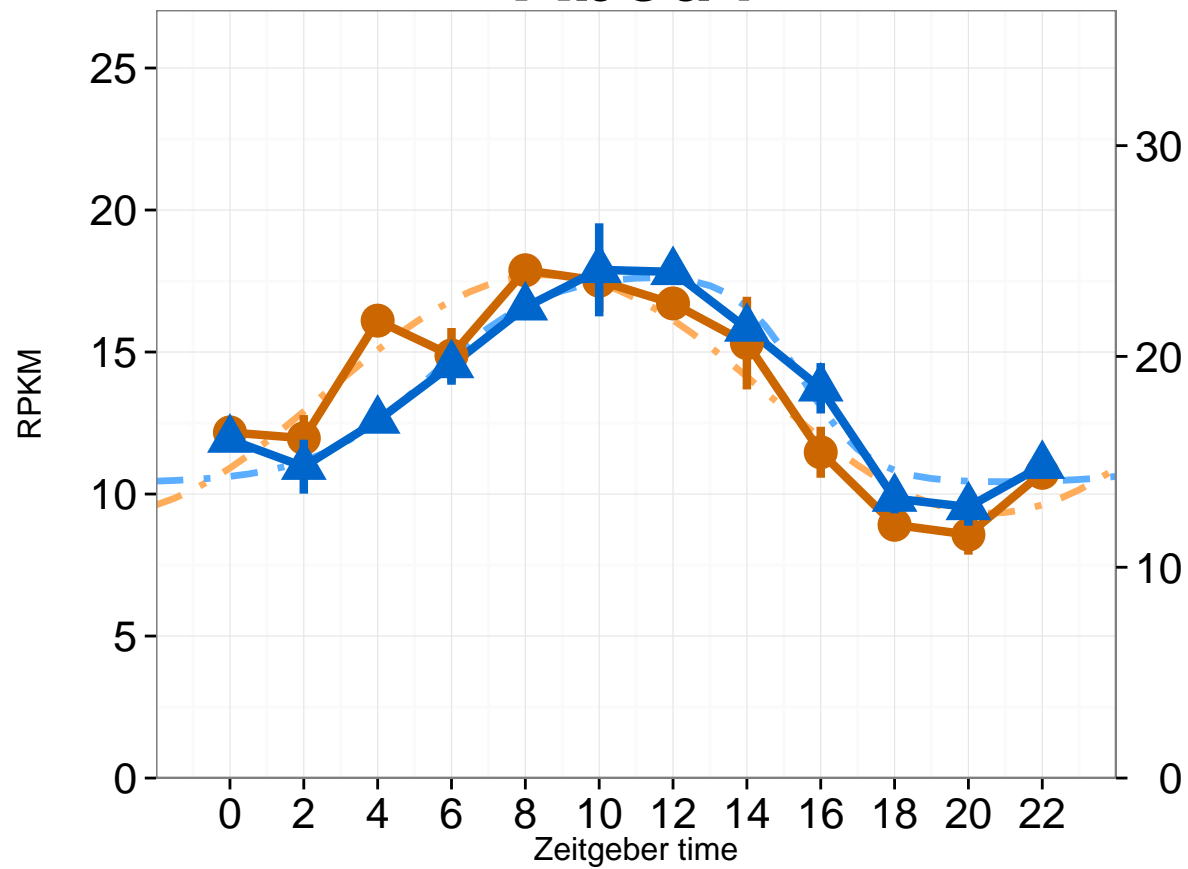

## Abcd4

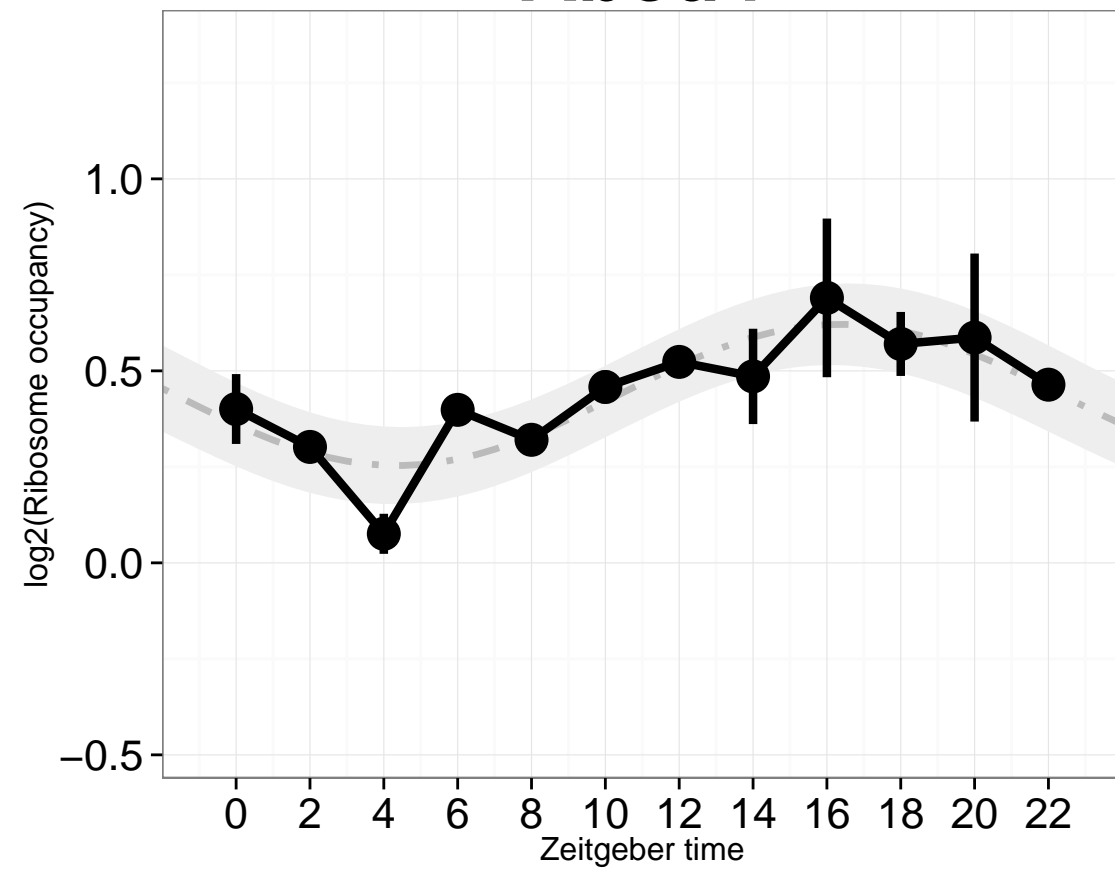

Supplement: Supplementary file 1048 [file 1]

## Dusp8

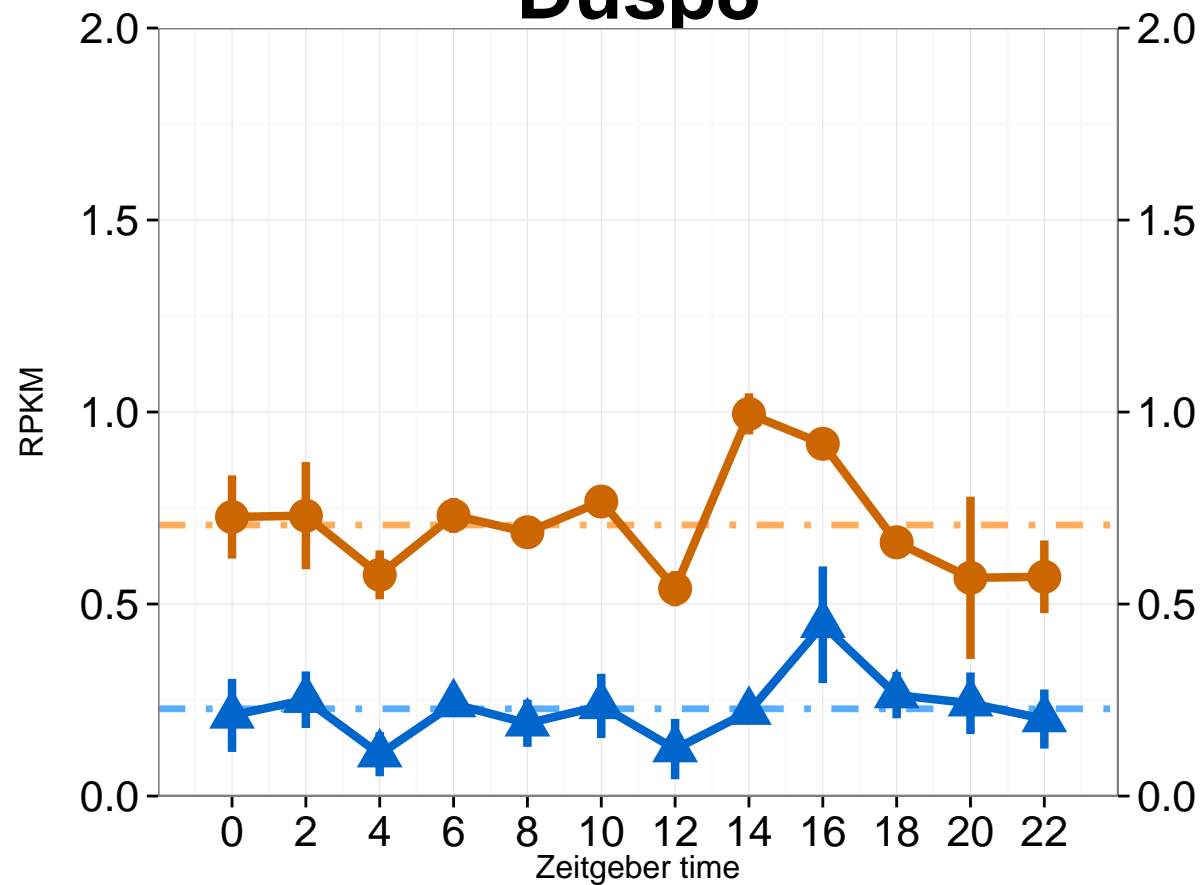

## Dusp8

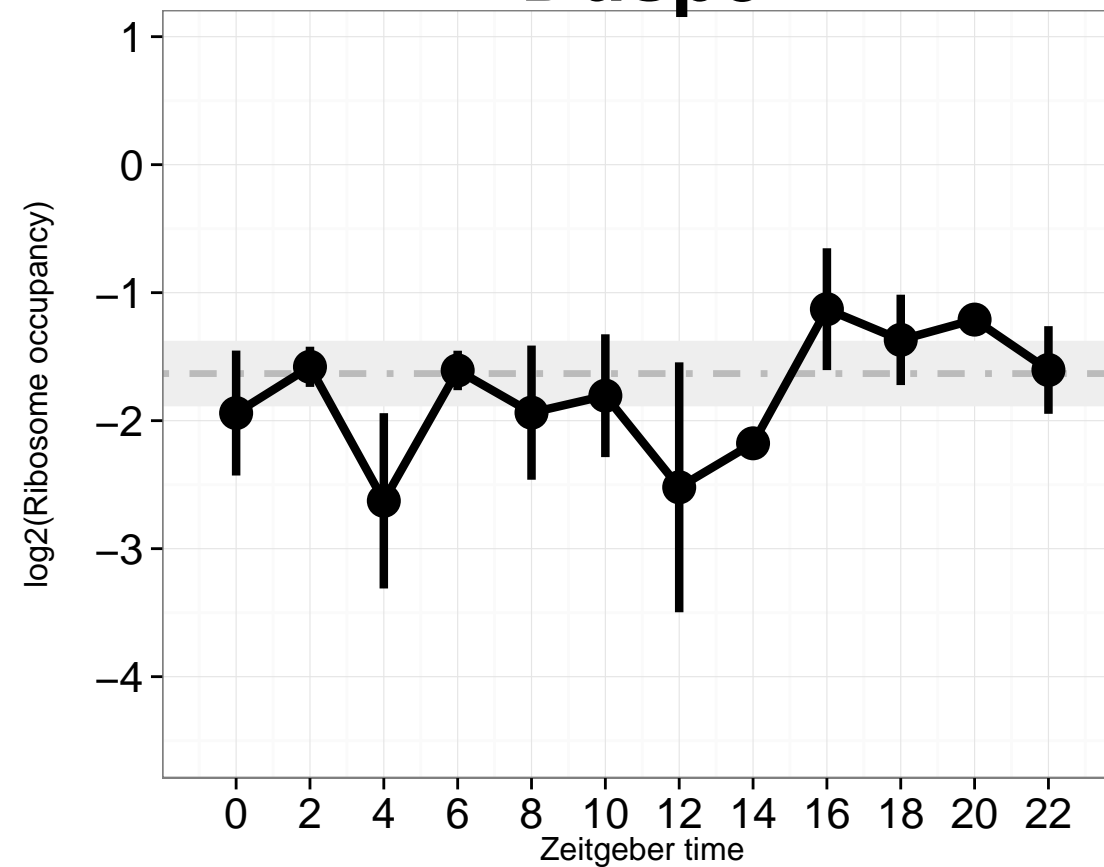

Supplement: Supplementary file 1049 [file 1]

## Prr14

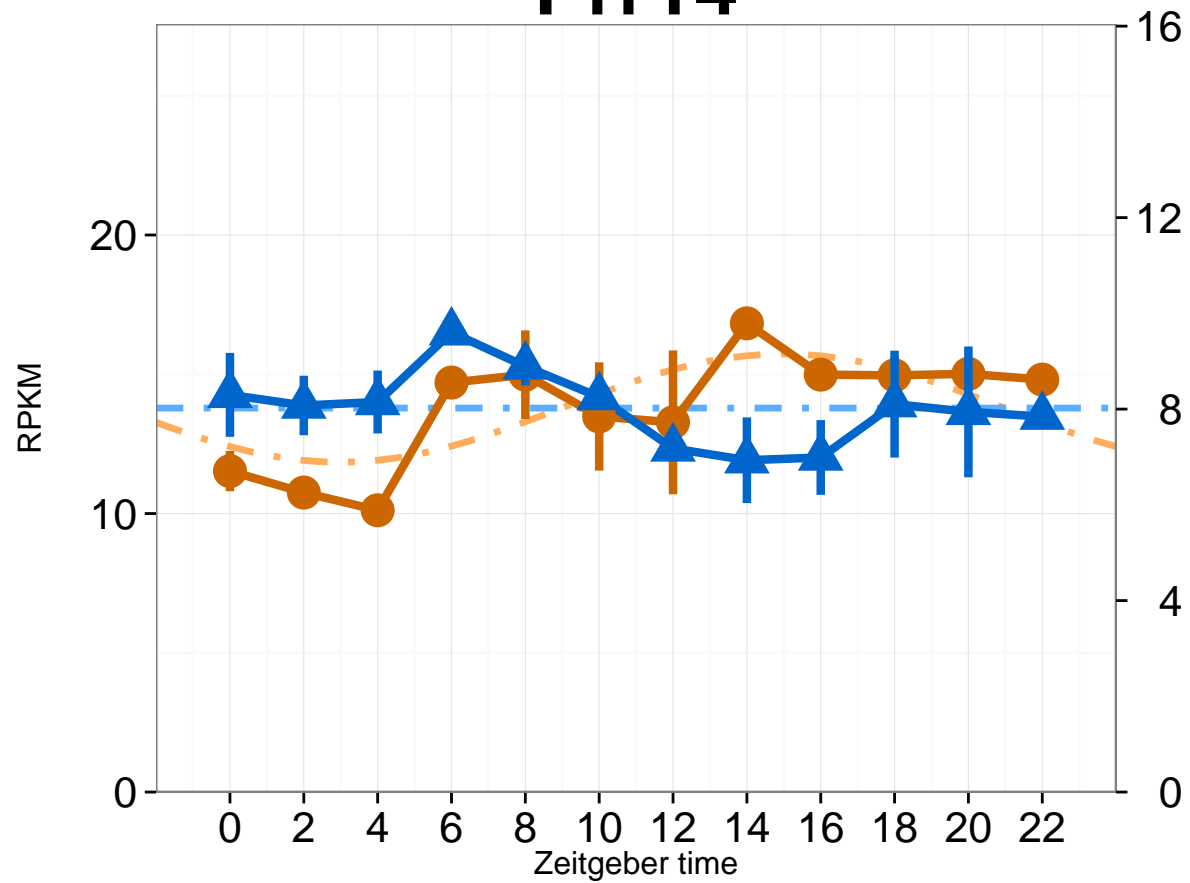

## Prr14

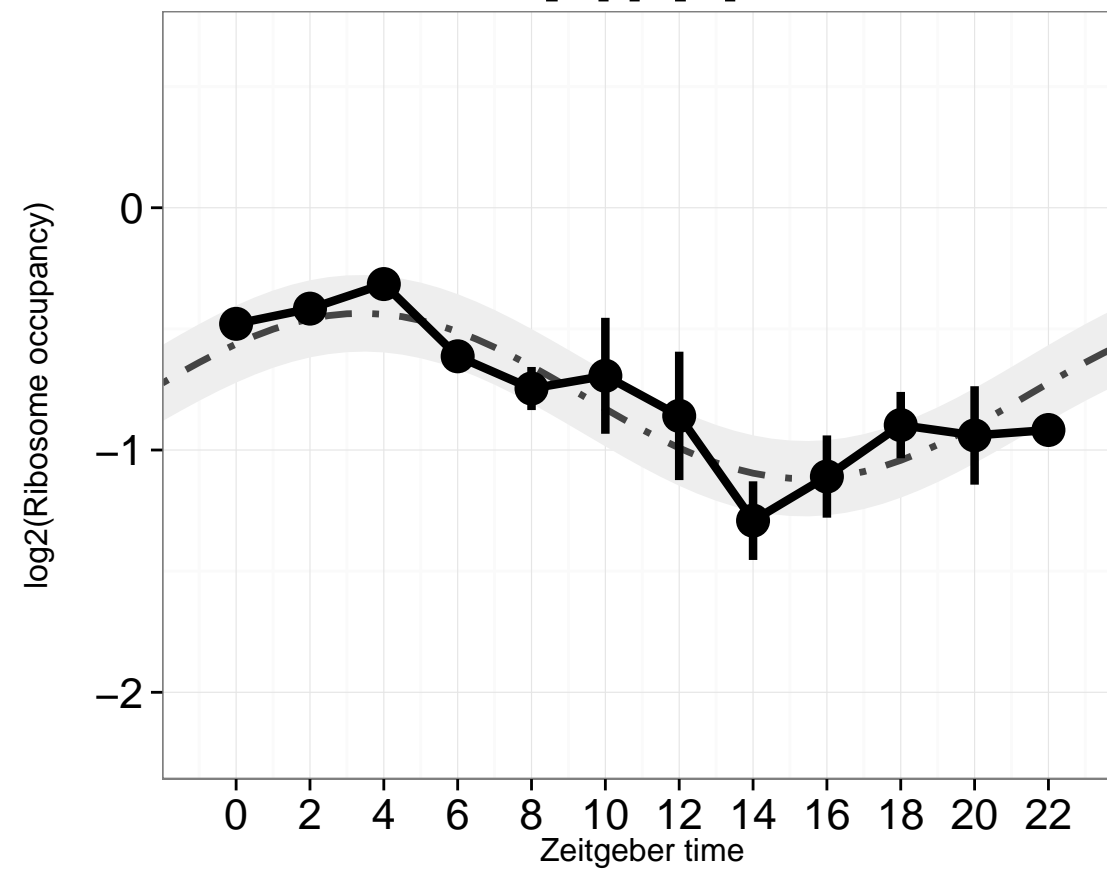

Supplement: Supplementary file 1050 [file 1]

## Pnmal2

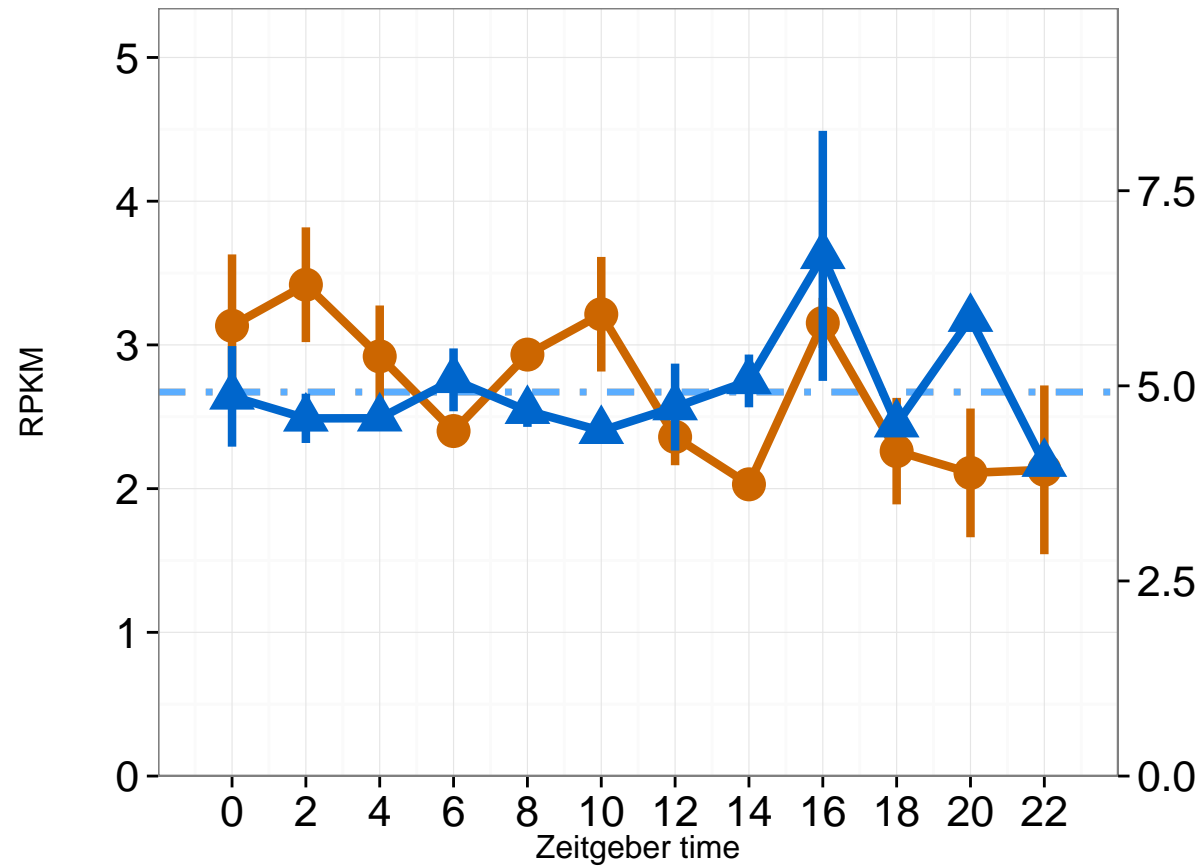

## Pnmal2

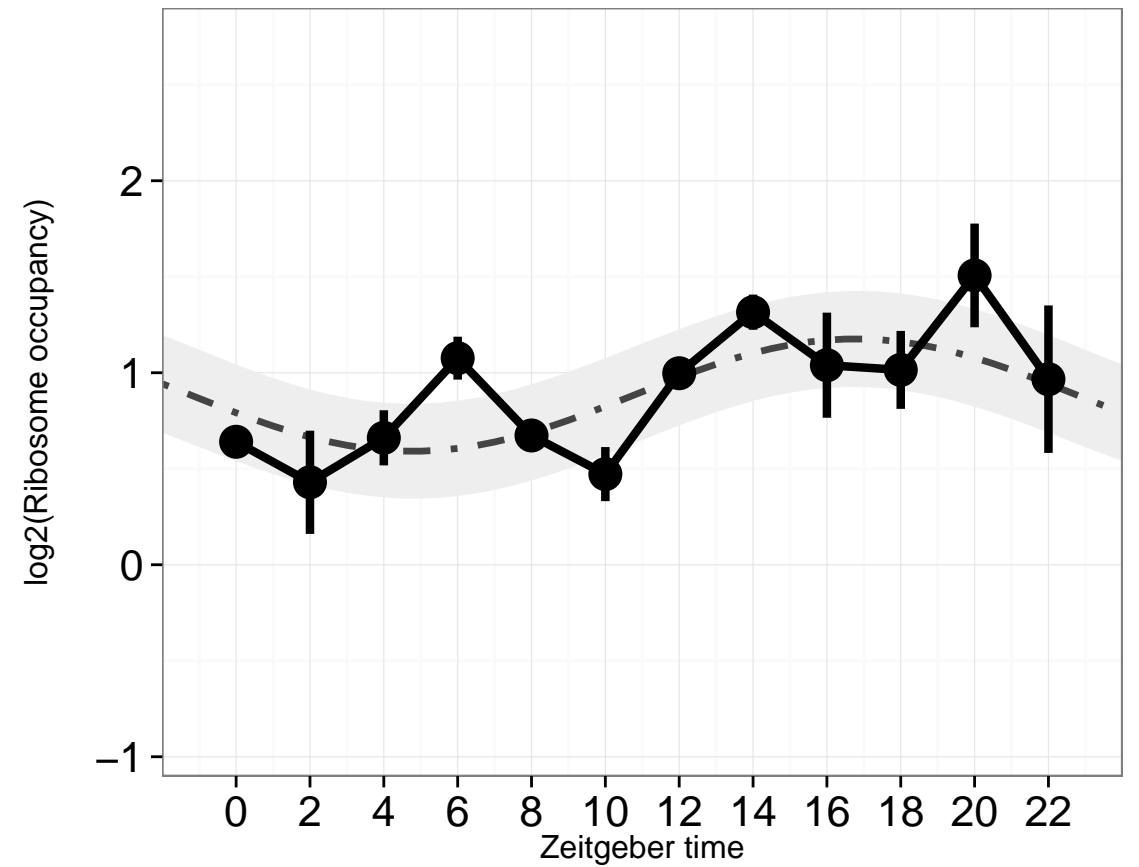

Supplement: Supplementary file 1051 [file 1]

# Sigirr

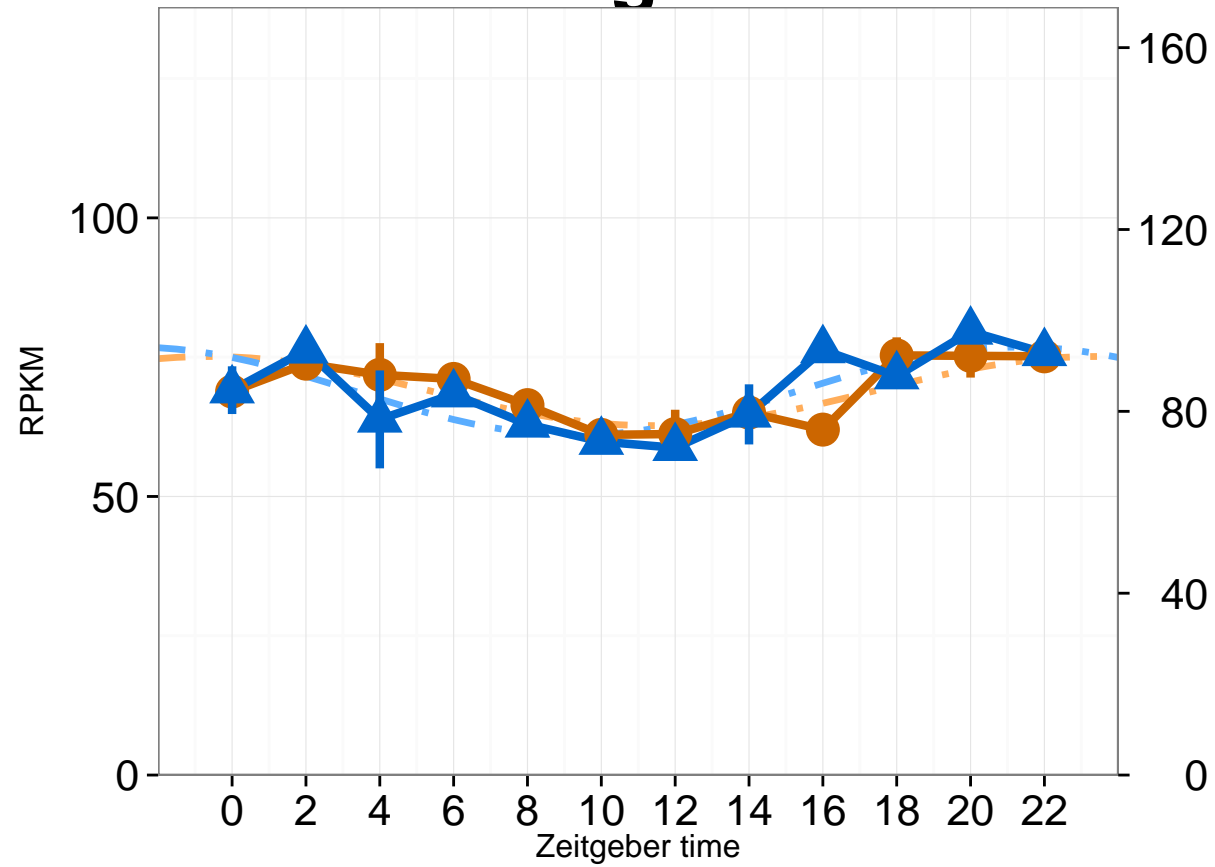

# Sigirr

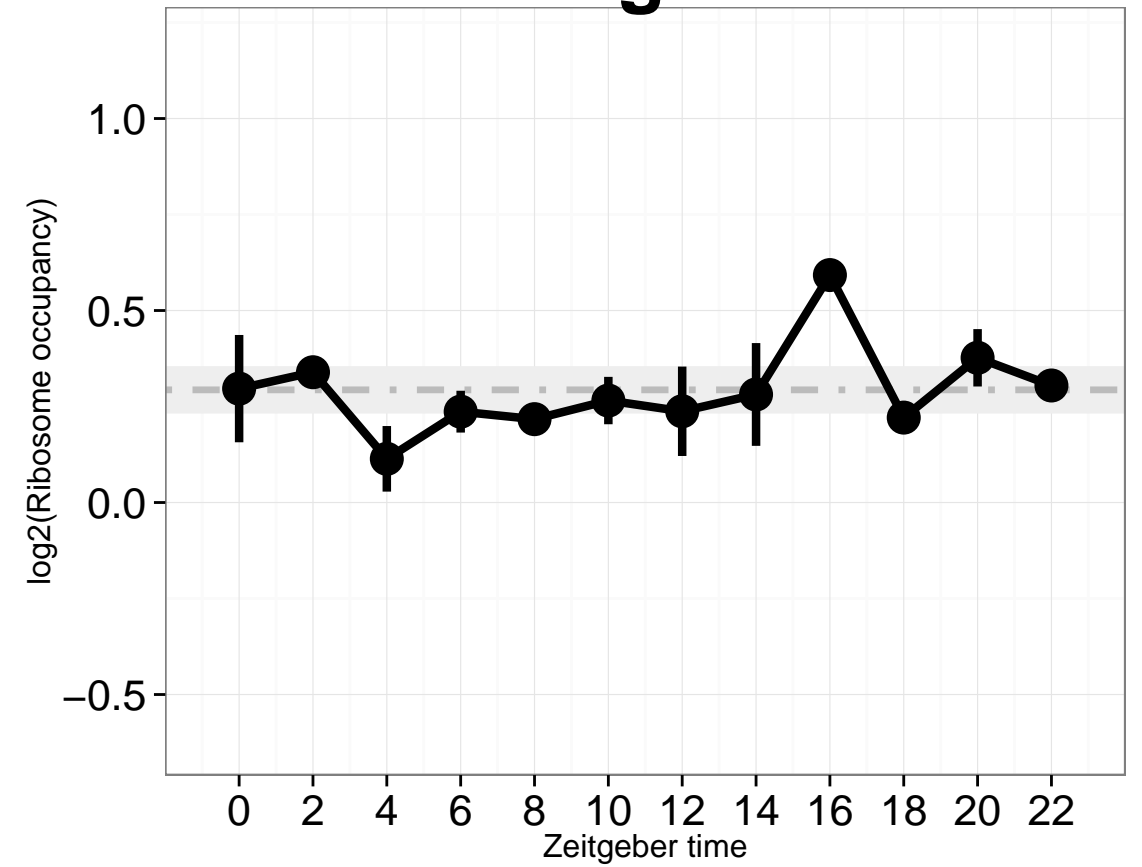

Supplement: Supplementary file 1052 [file 1]

## Snx30

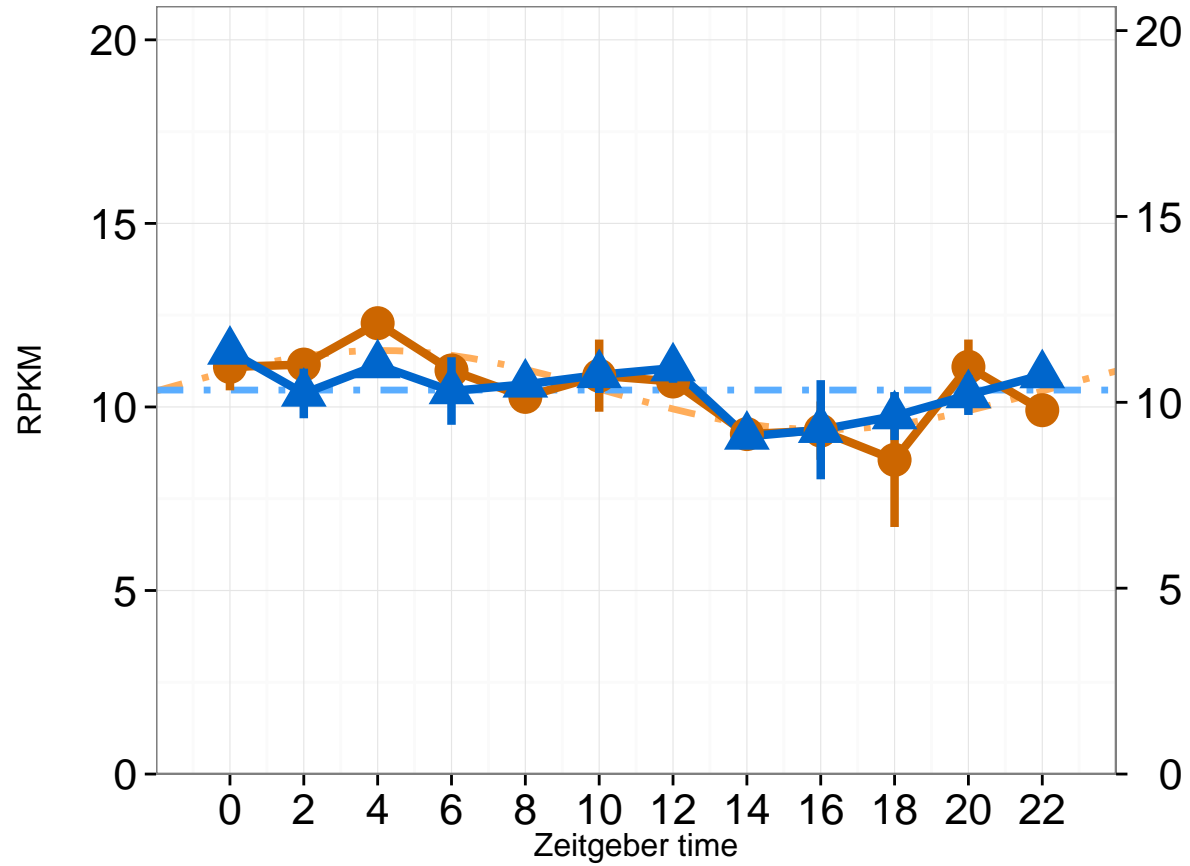

## Snx30

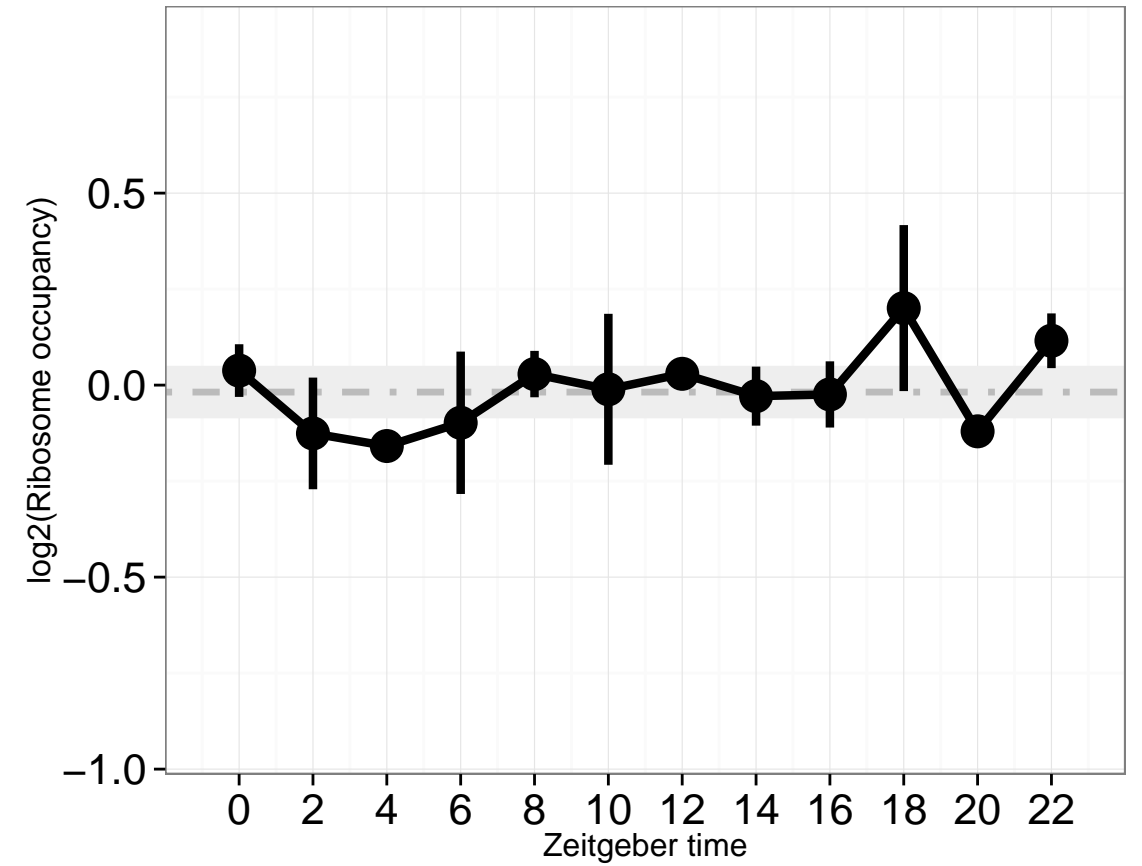

Supplement: Supplementary file 1053 [file 1]

# Hlcs

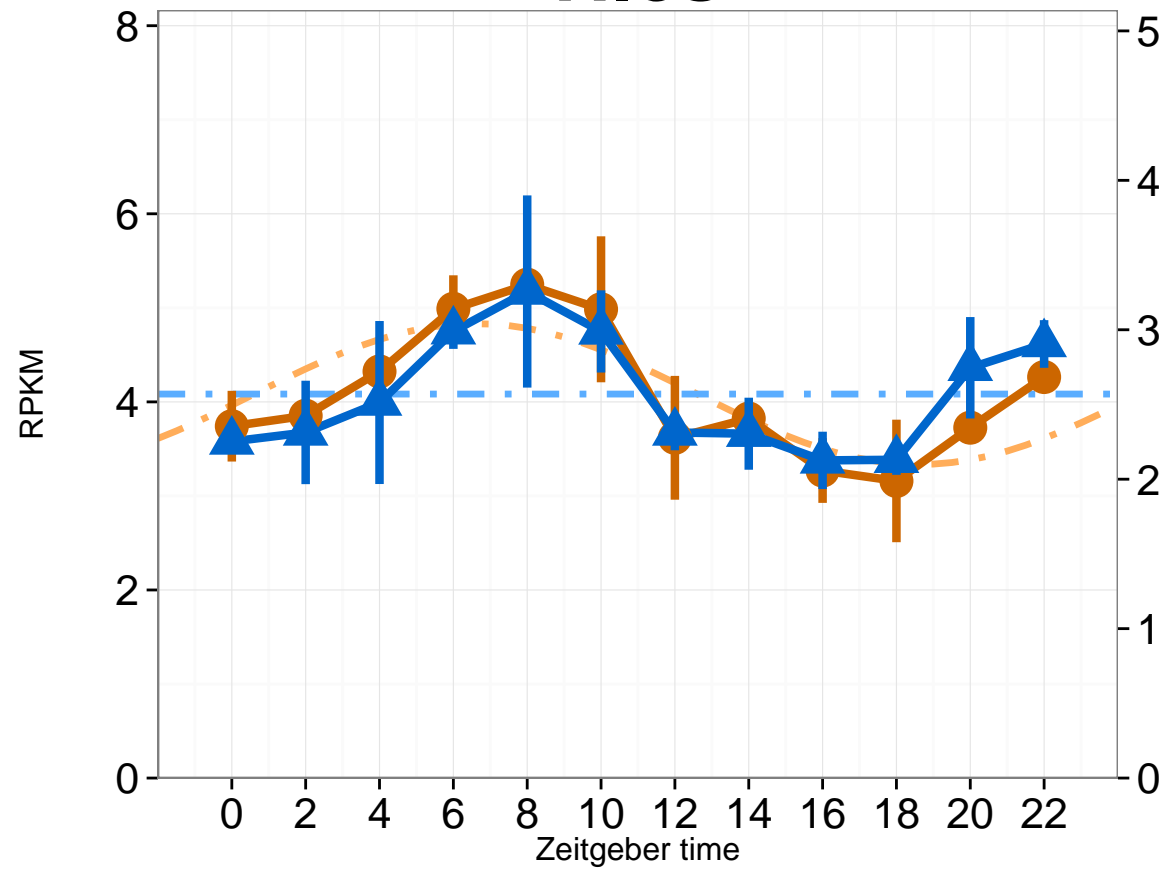

# Hlcs

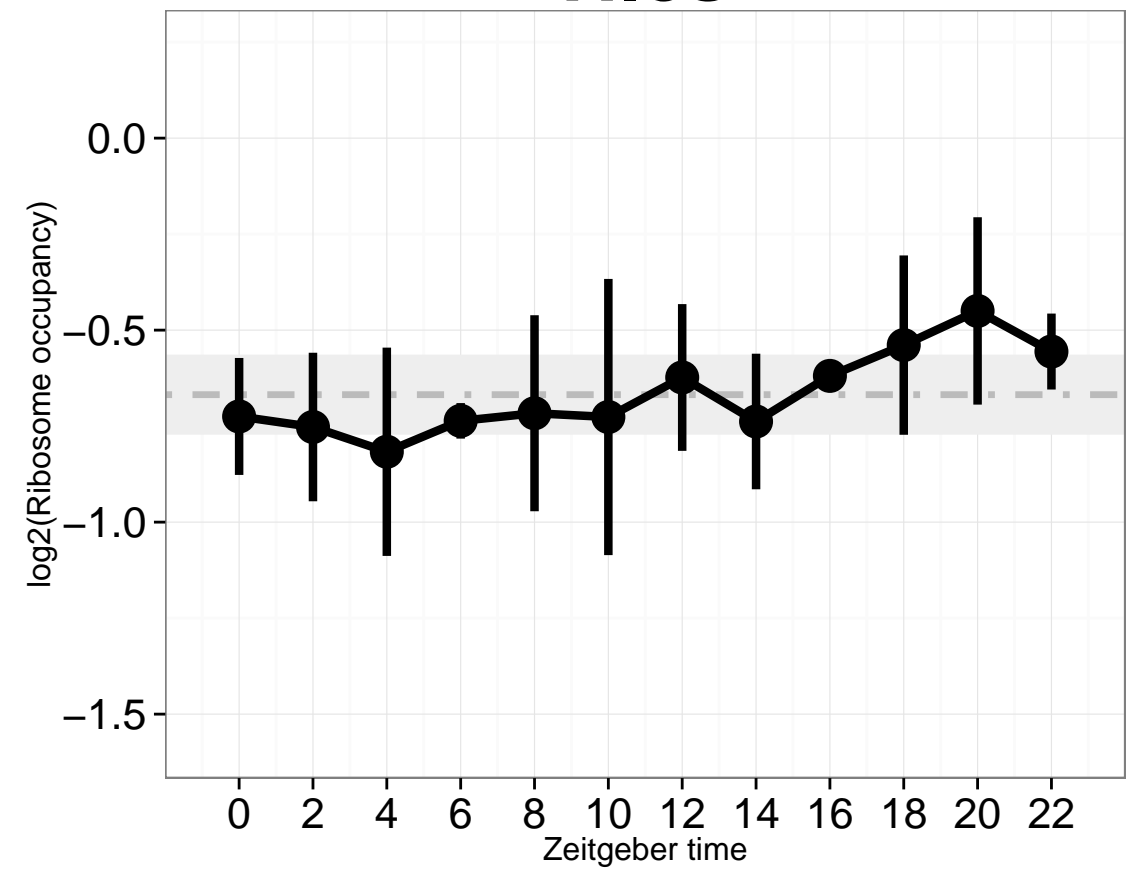

Supplement: Supplementary file 1054 [file 1]

## Rgs2

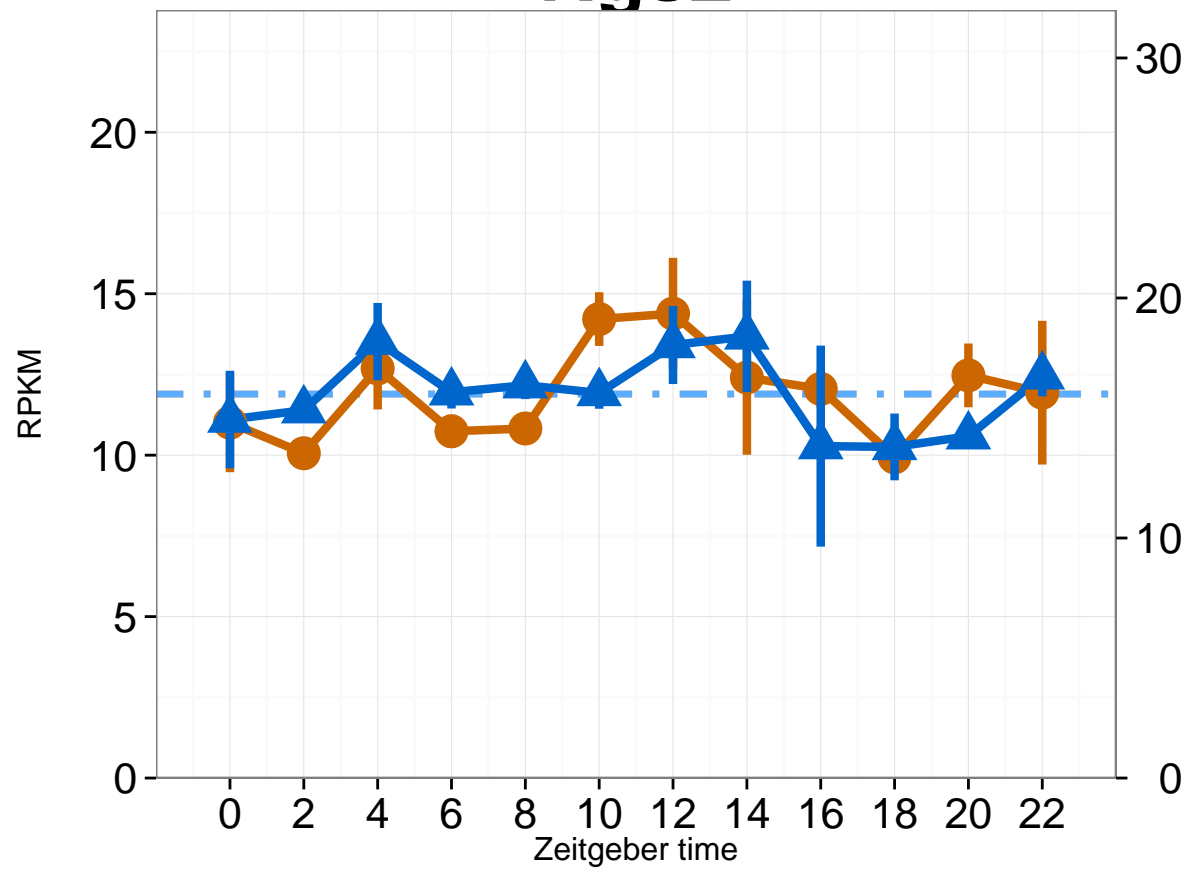

## Rgs2

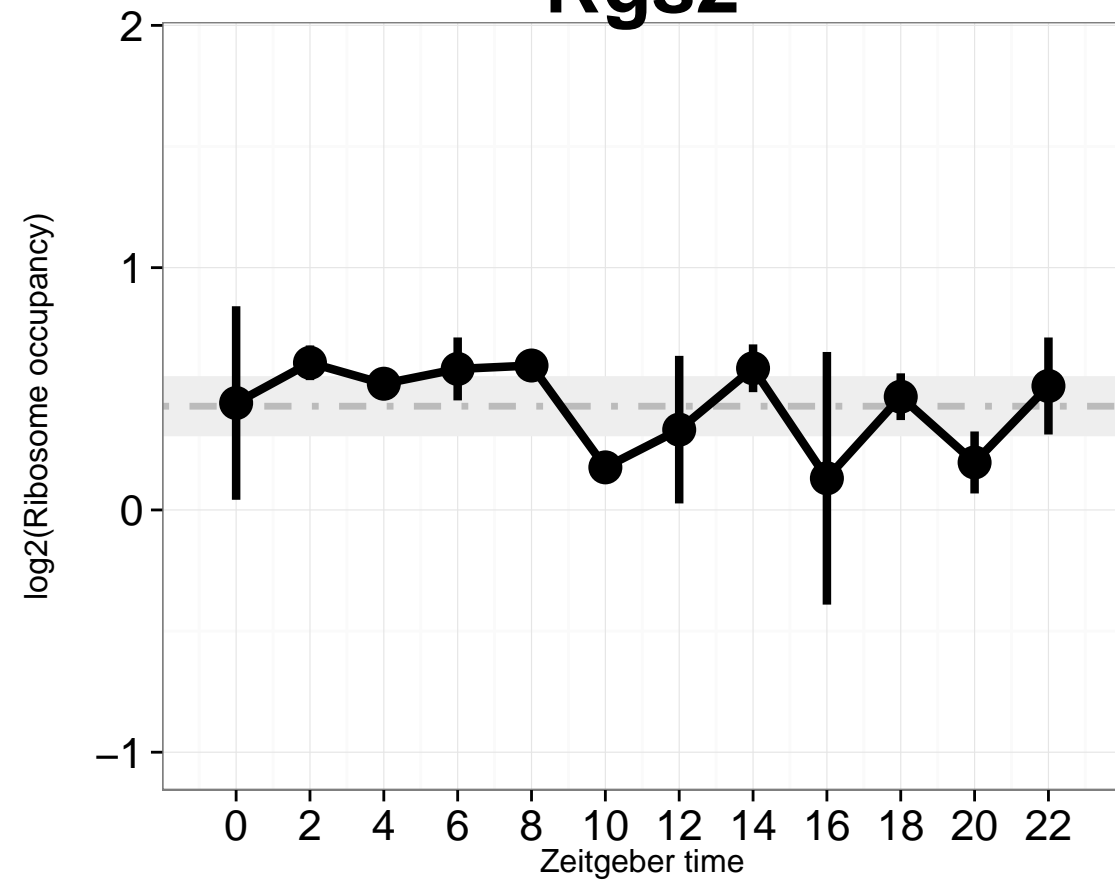

Supplement: Supplementary file 1055 [file 1]

## Nit1

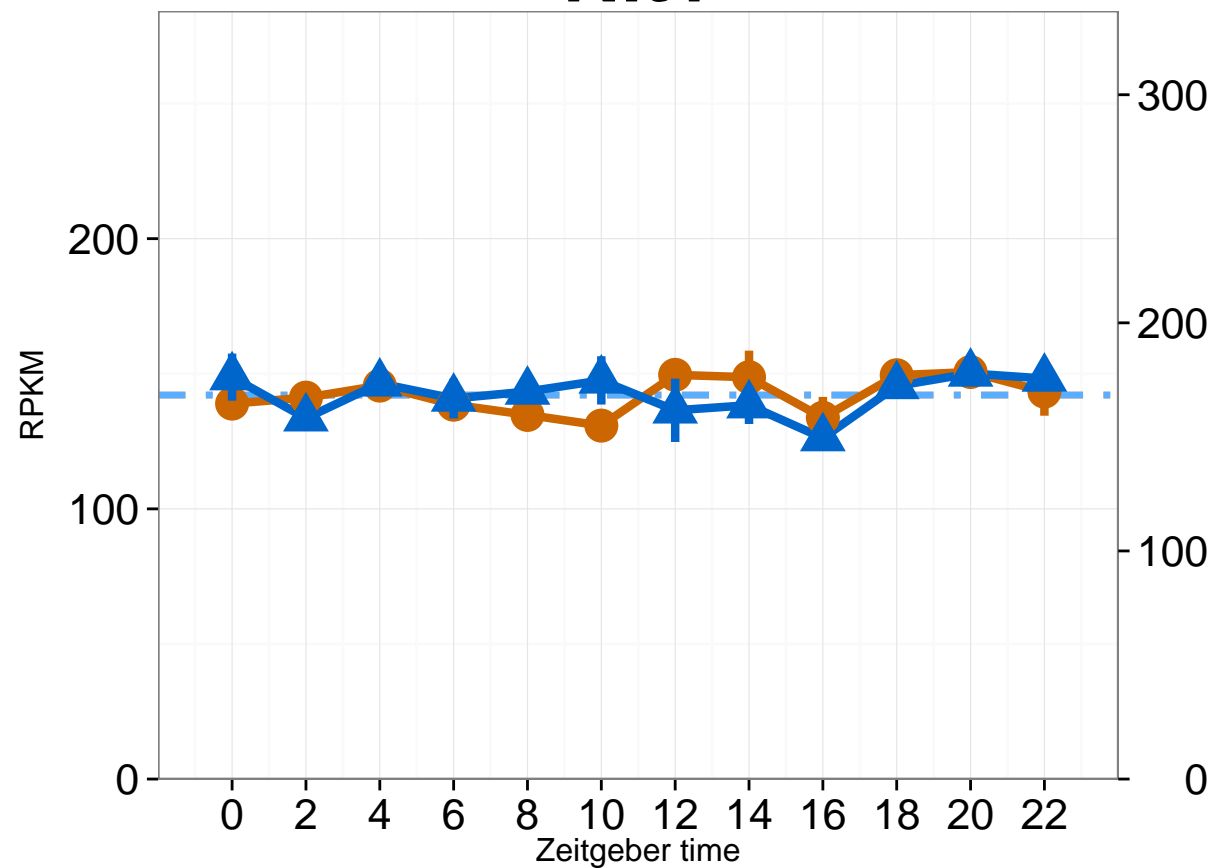

## Nit1

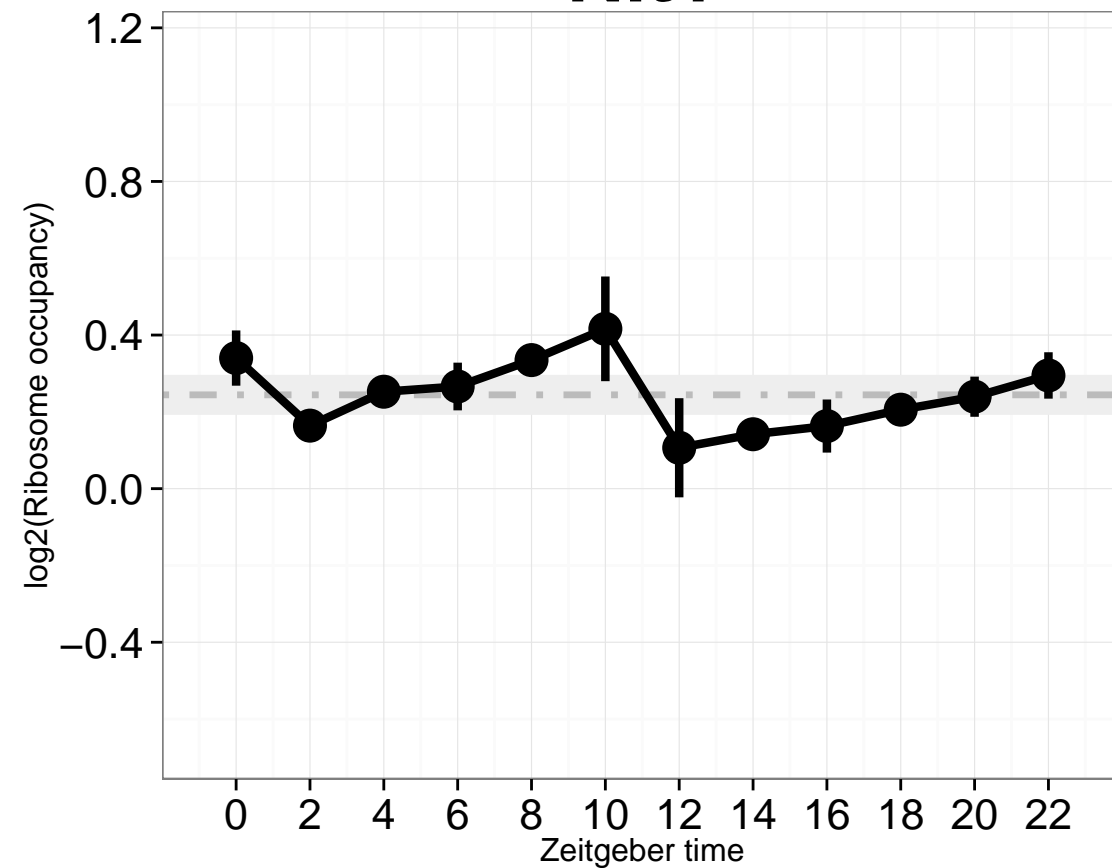

Supplement: Supplementary file 1056 [file 1]

# Bub1

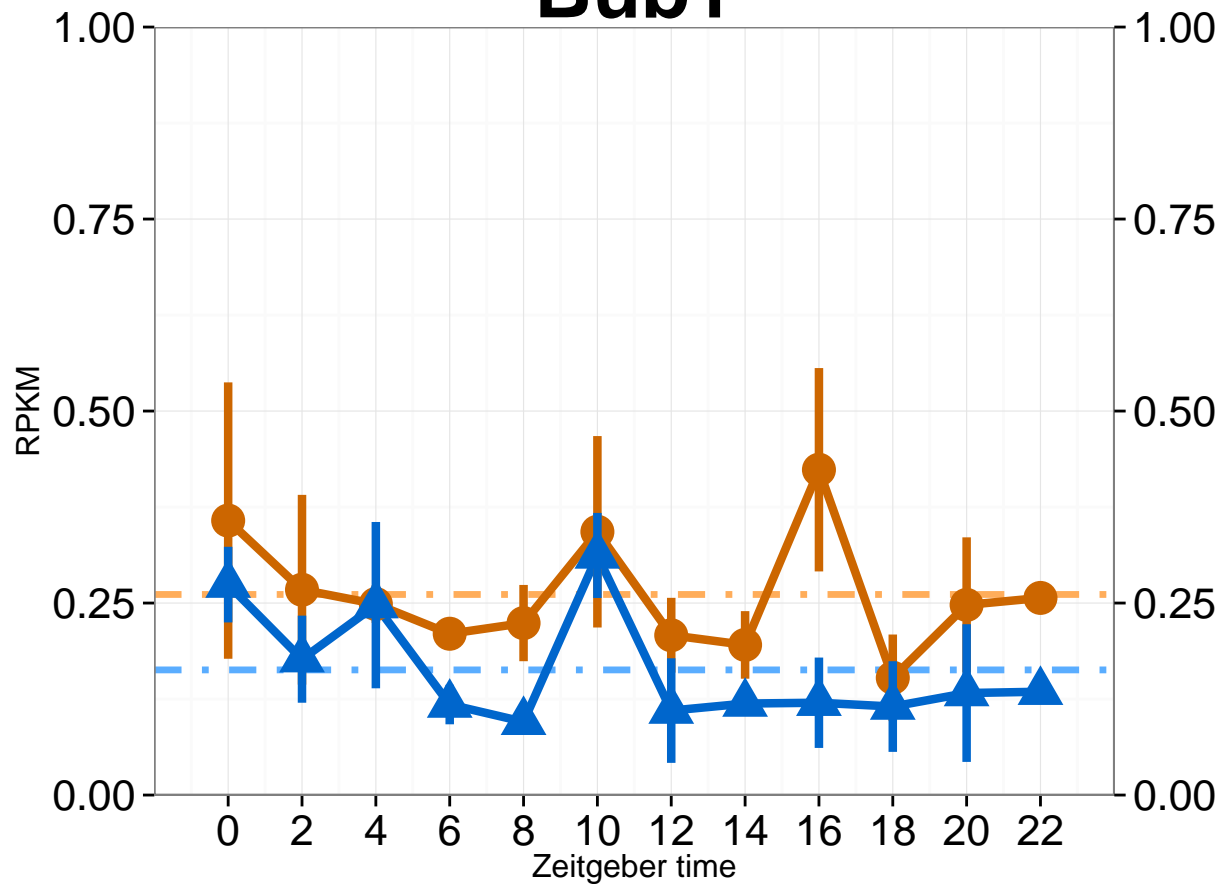

# Bub1

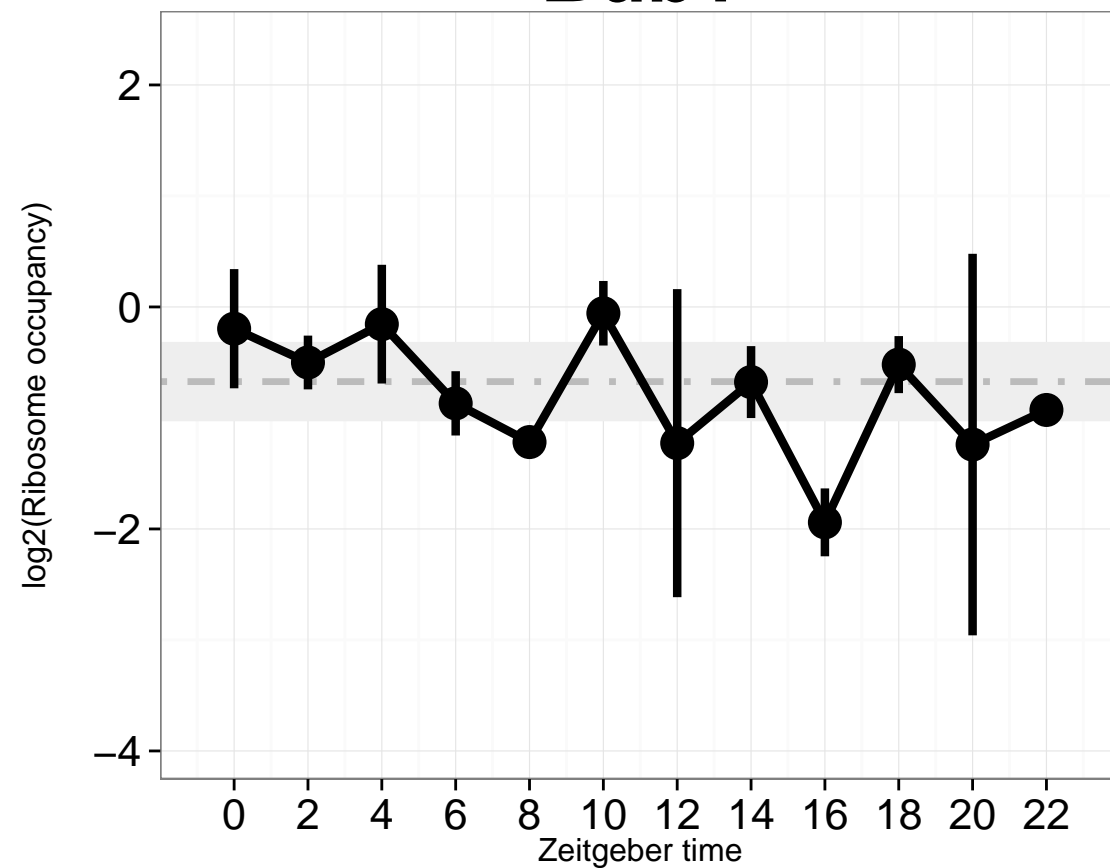

Supplement: Supplementary file 1057 [file 1]

# Fam122b

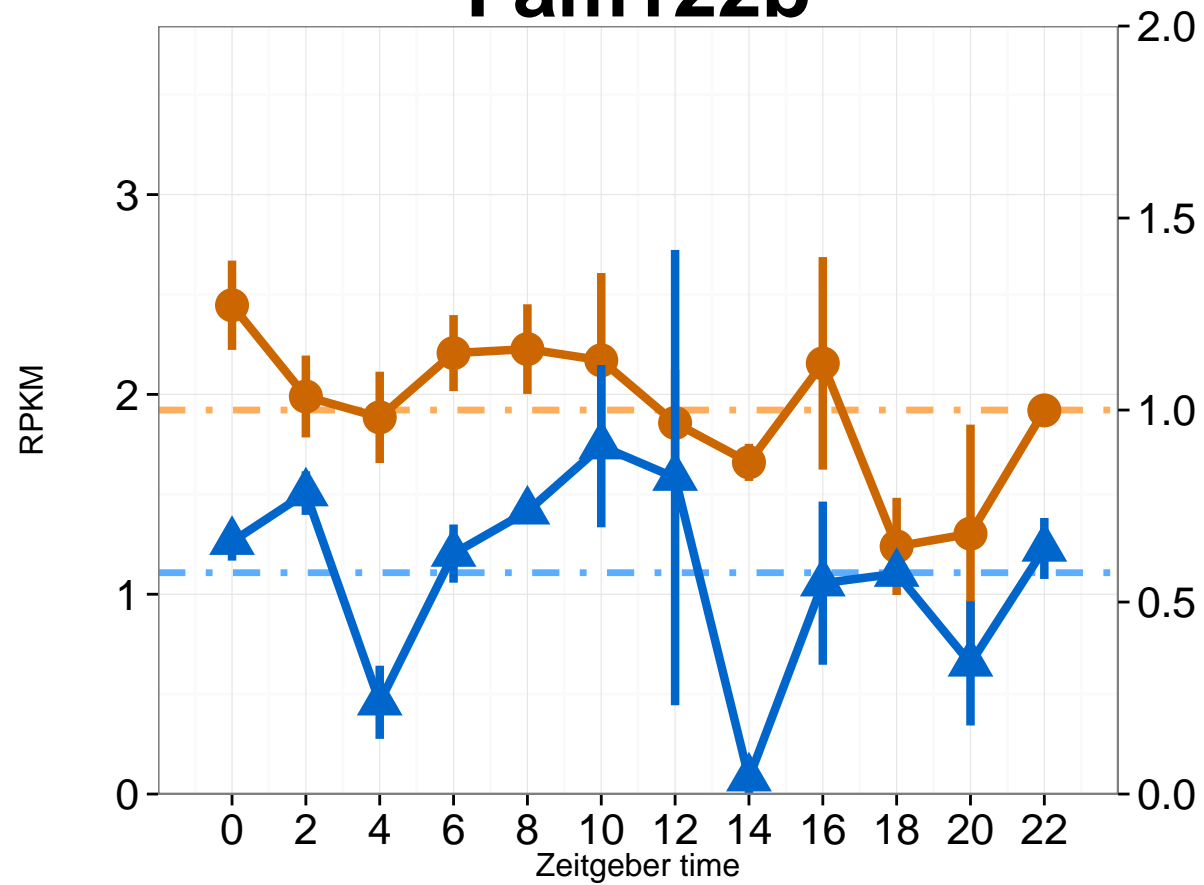

# Fam122b

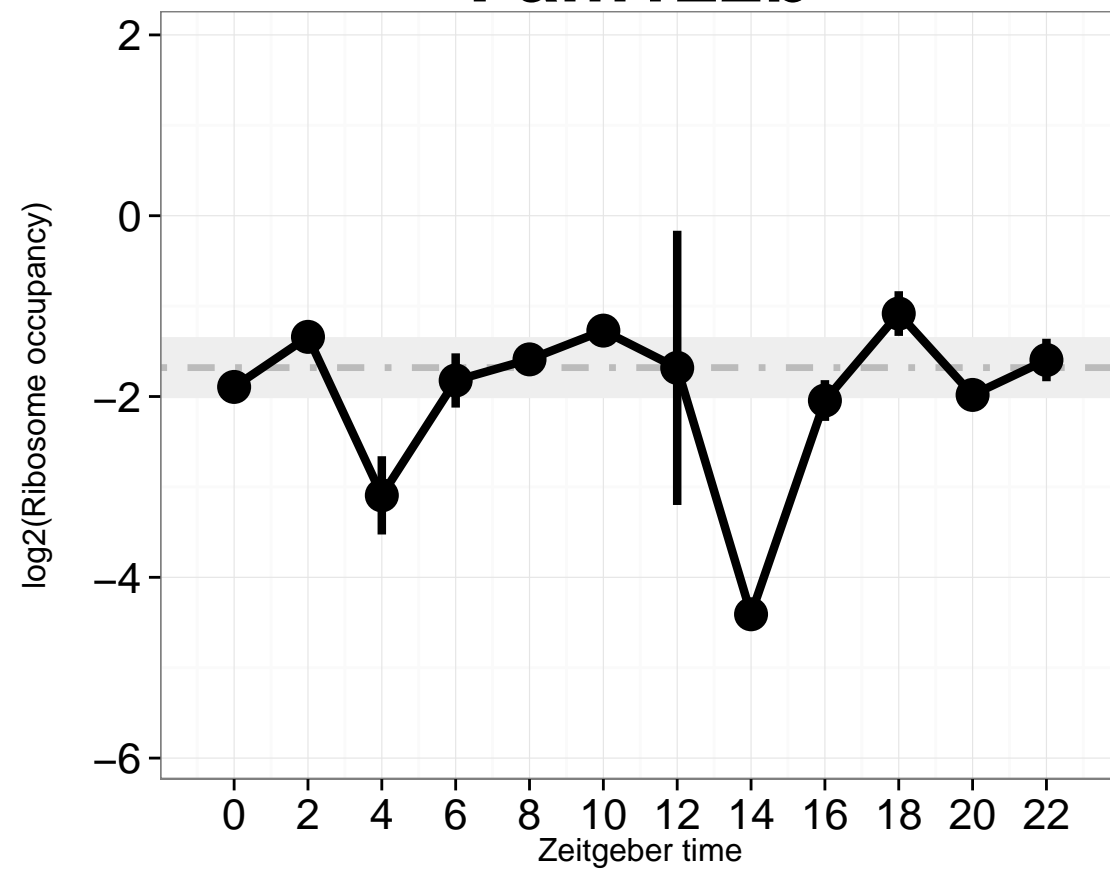

Supplement: Supplementary file 1058 [file 1]

## Cdk5

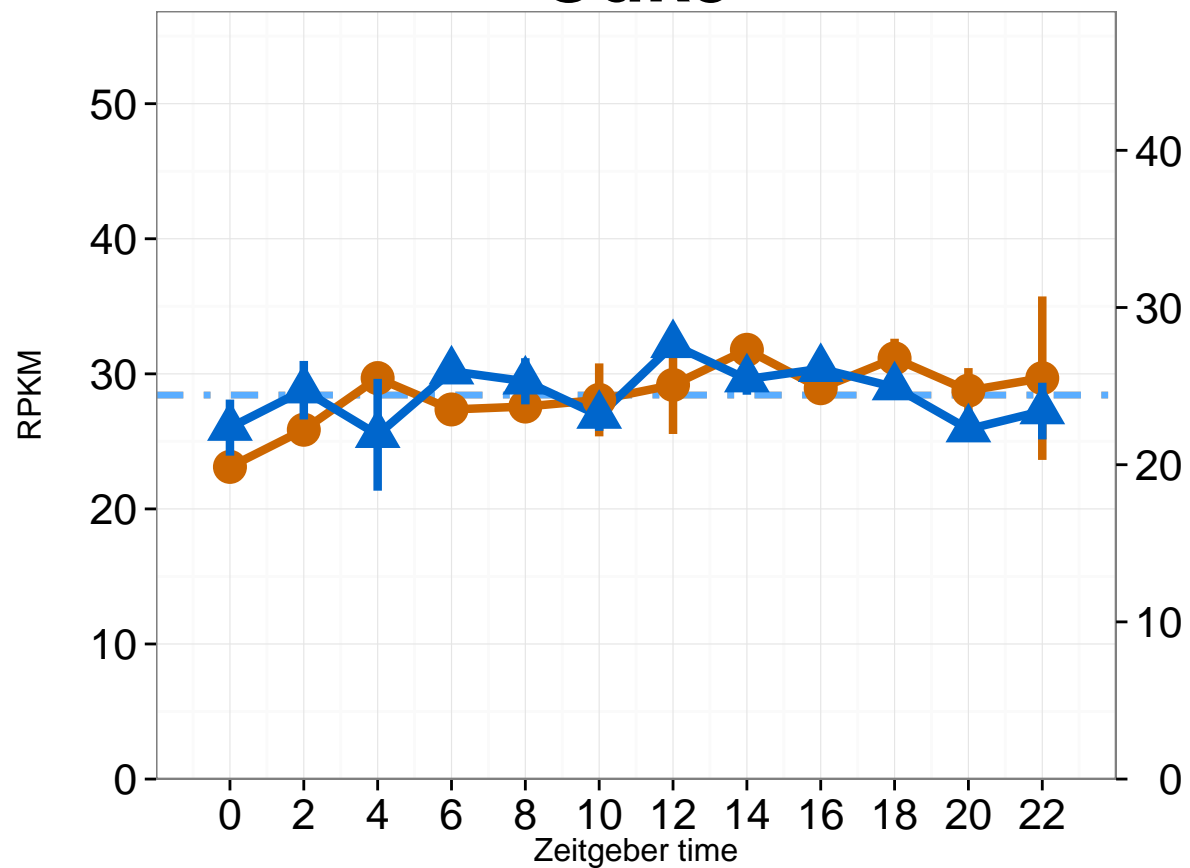

## Cdk5

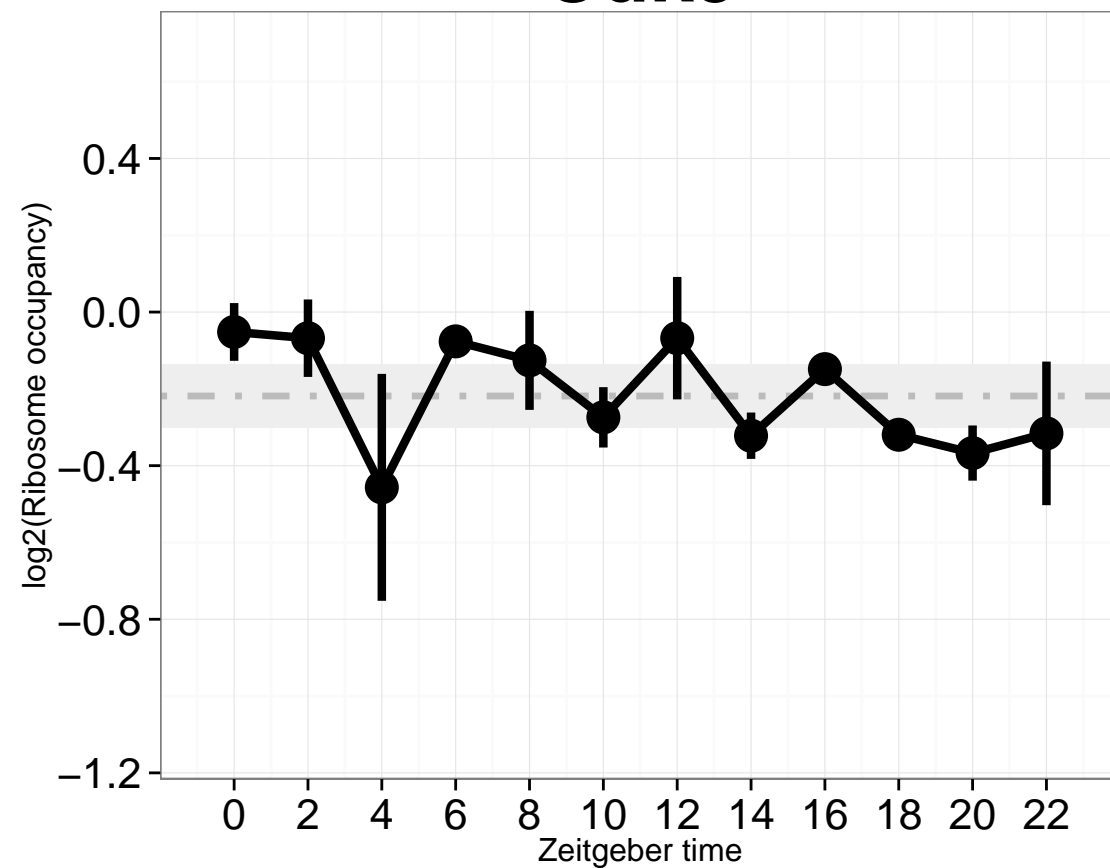

Supplement: Supplementary file 1059 [file 1]

**Bdkrb2 TR**

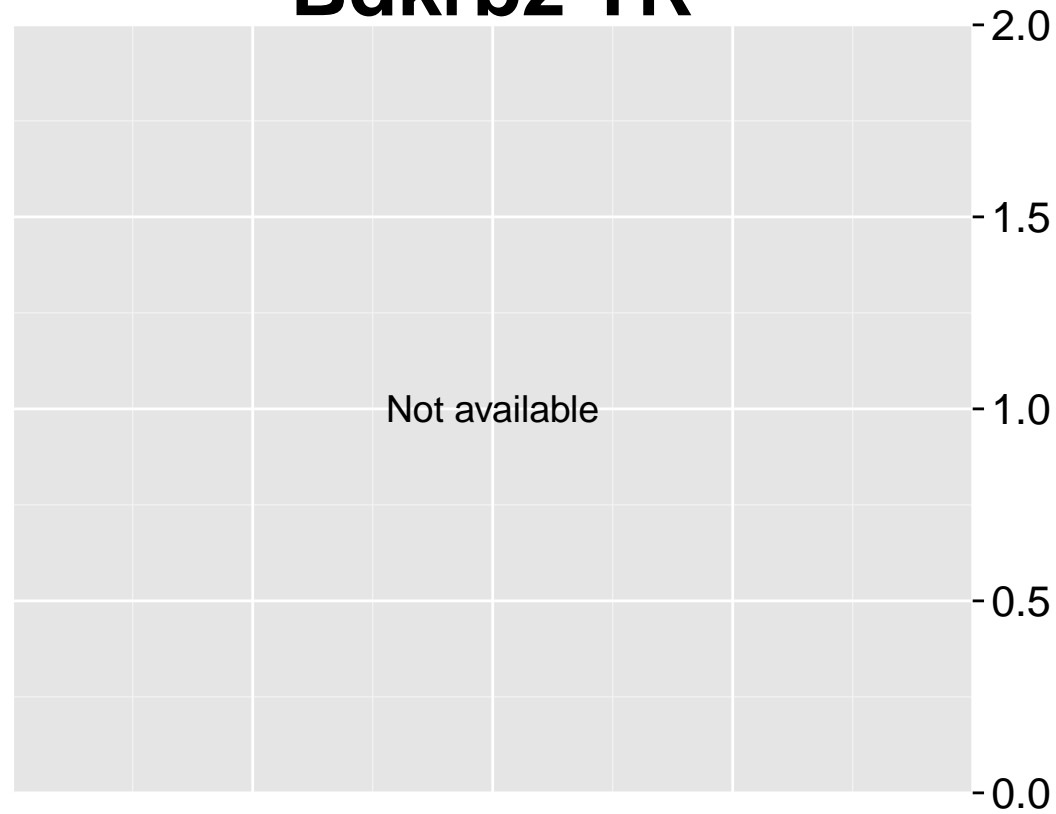

**Bdkrb2 log2(Ribosome occupancy**

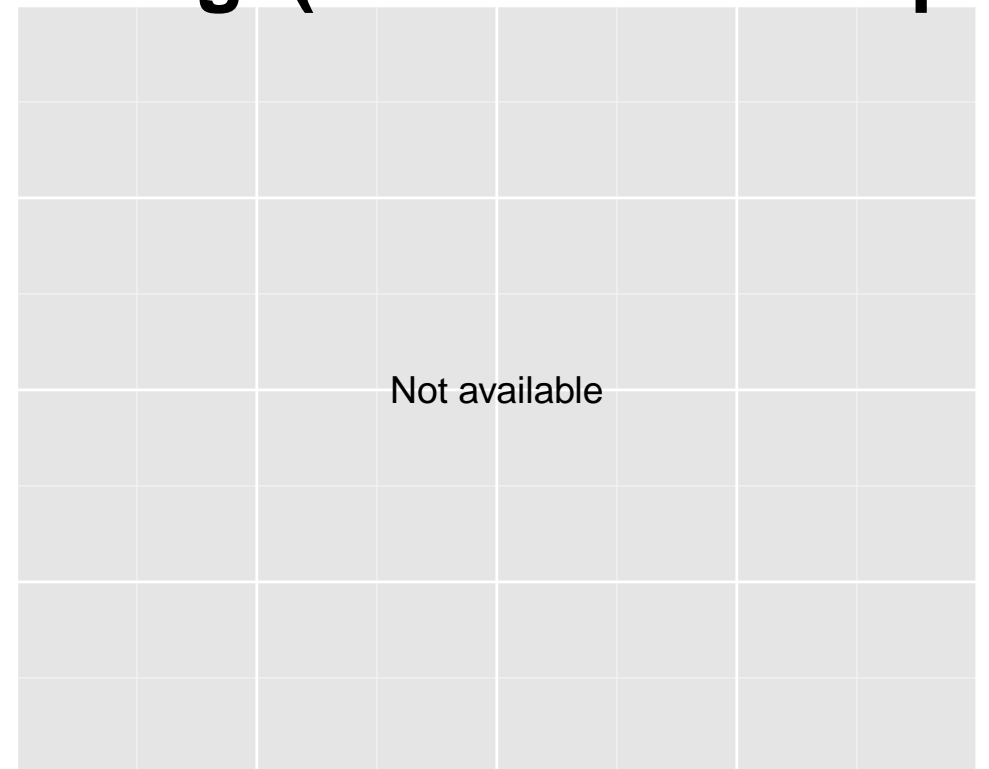

Supplement: Supplementary file 1060 [file 1]

## Rnf20

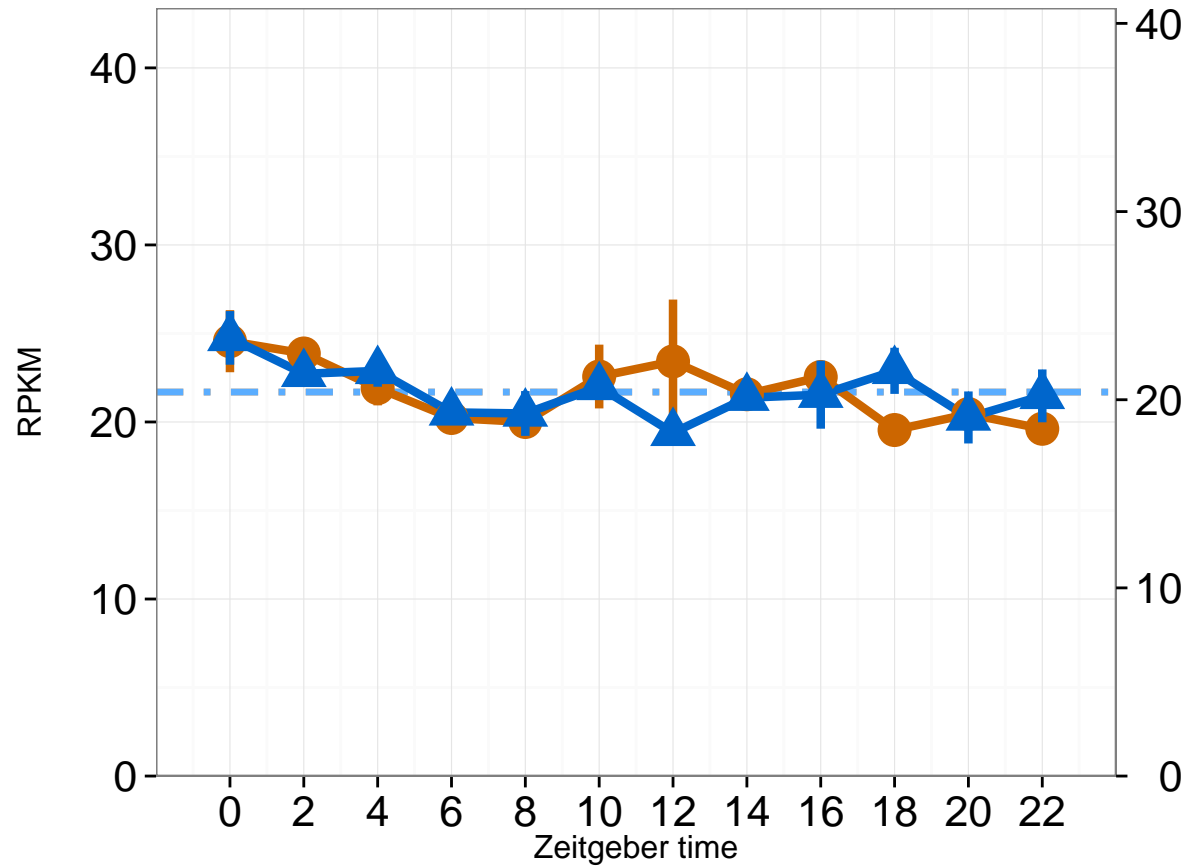

## Rnf20

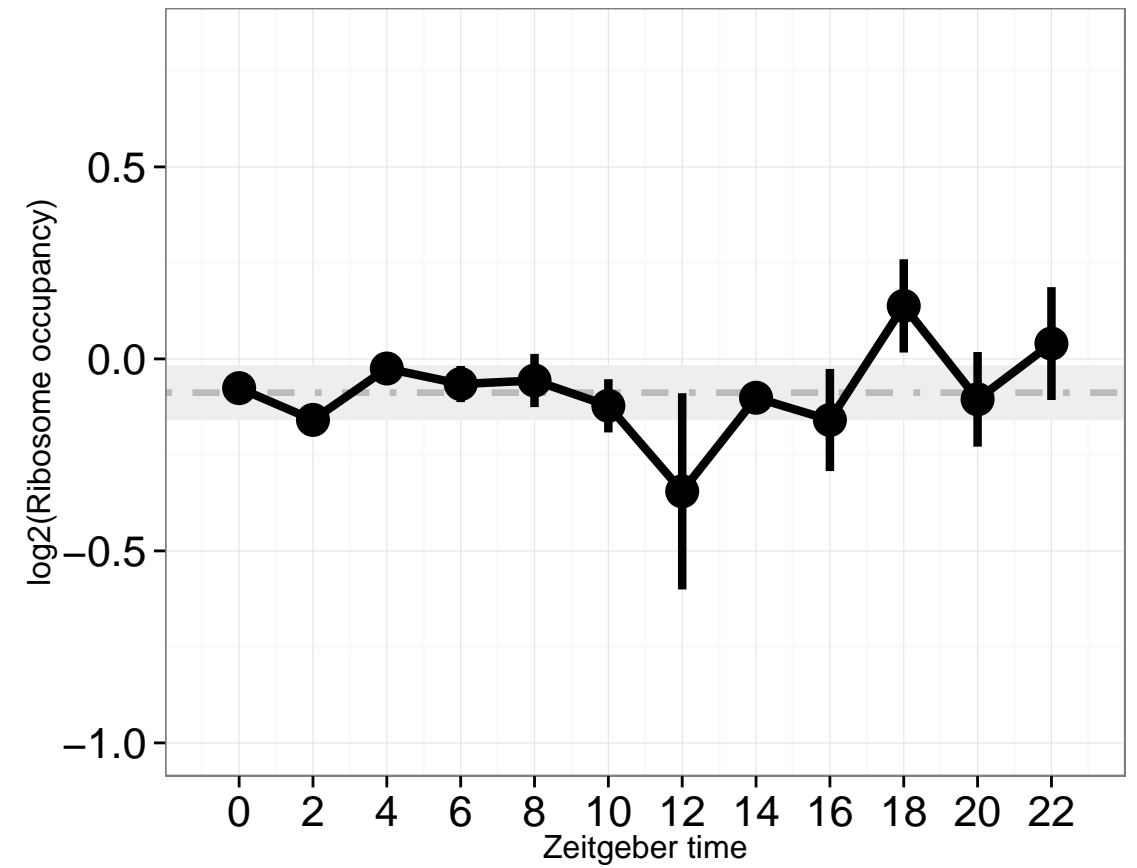

Supplement: Supplementary file 1061 [file 1]

# F8a

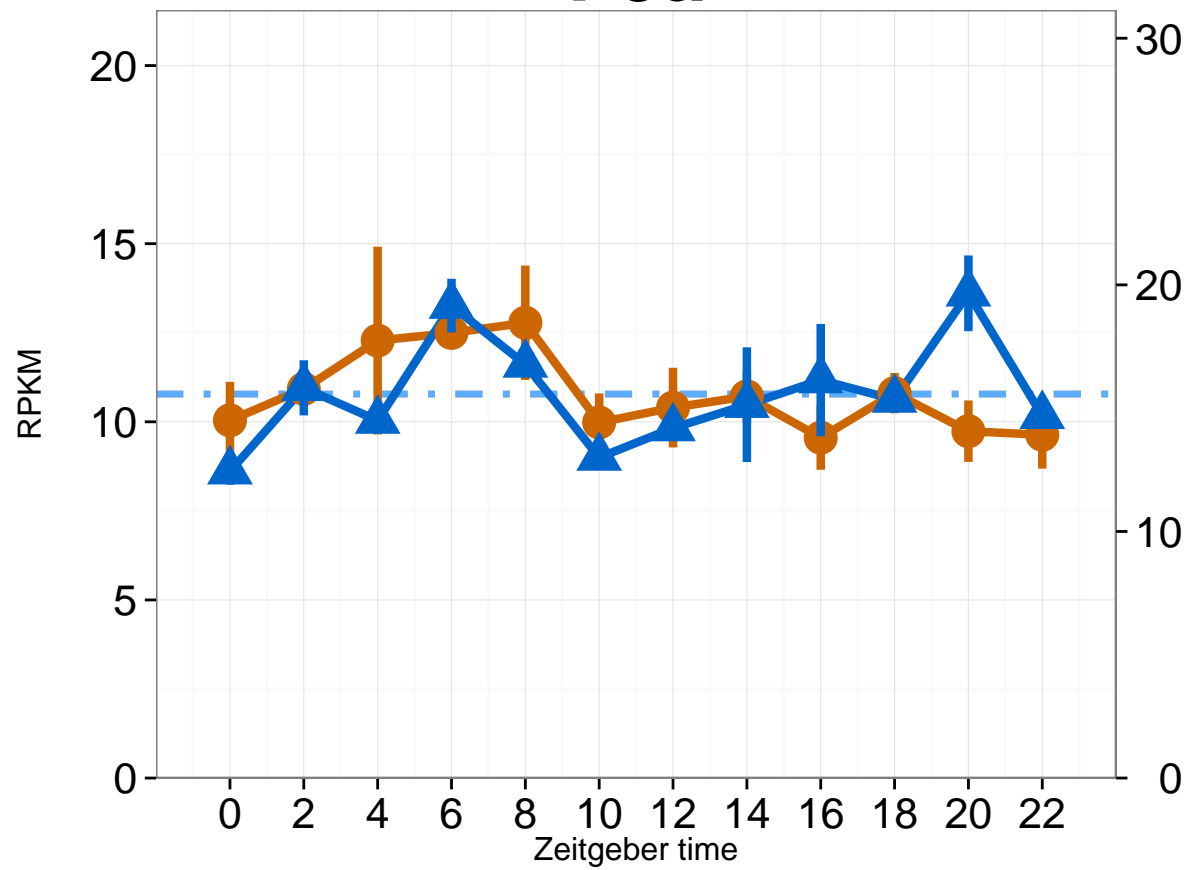

# F8a

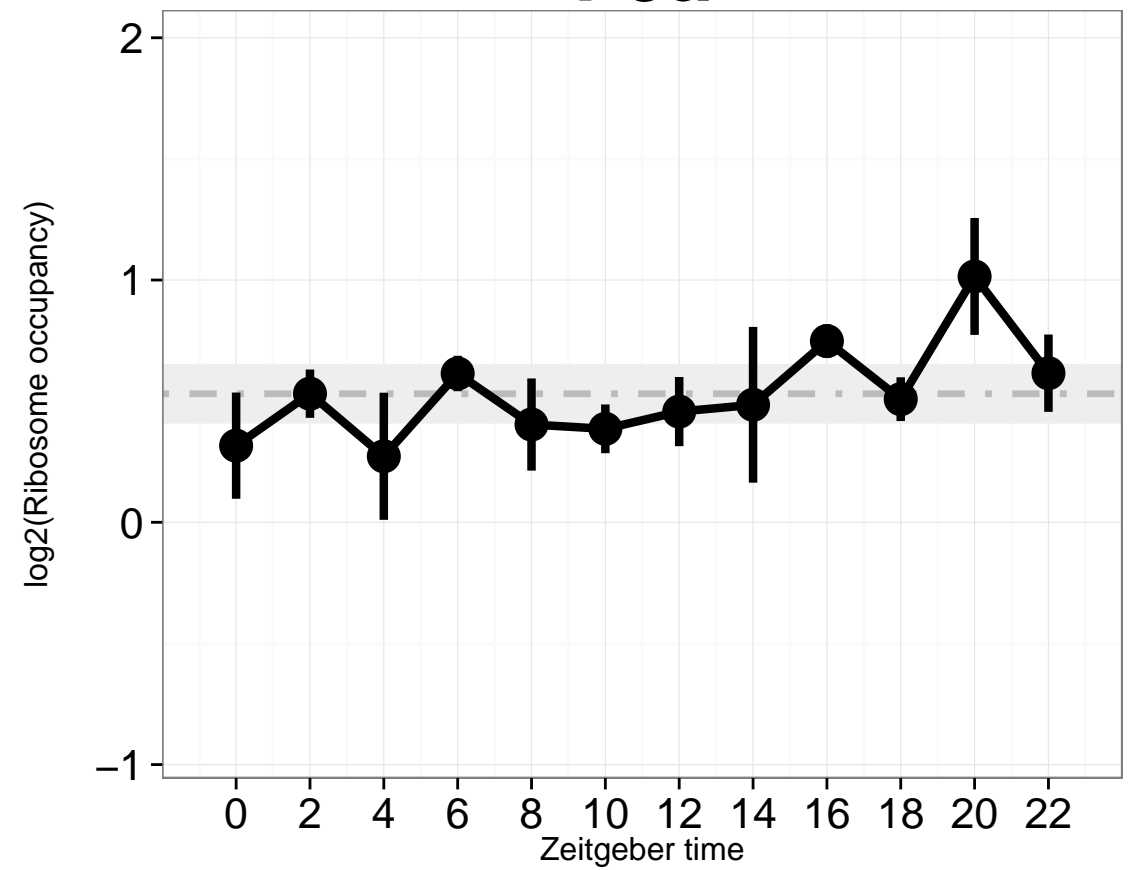

Supplement: Supplementary file 1062 [file 1]

# Pxmp4

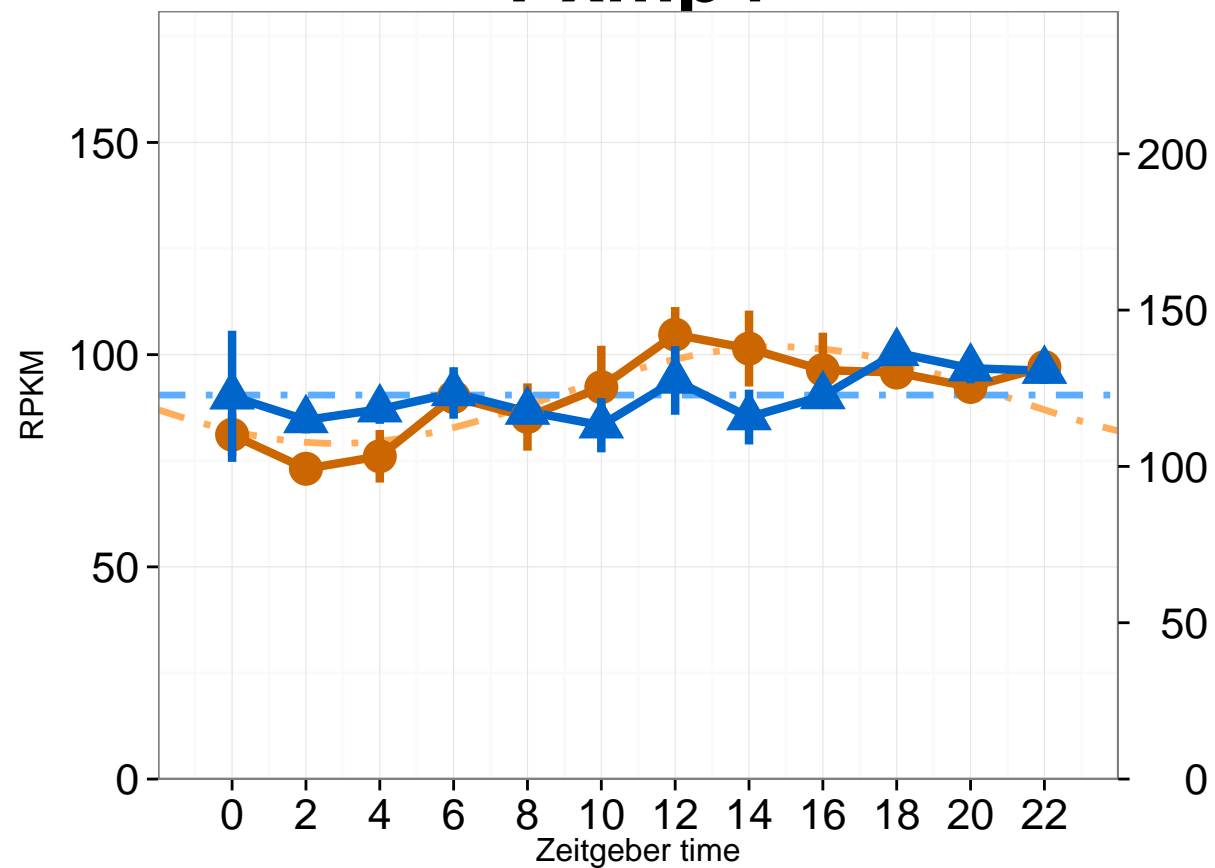

# Pxmp4

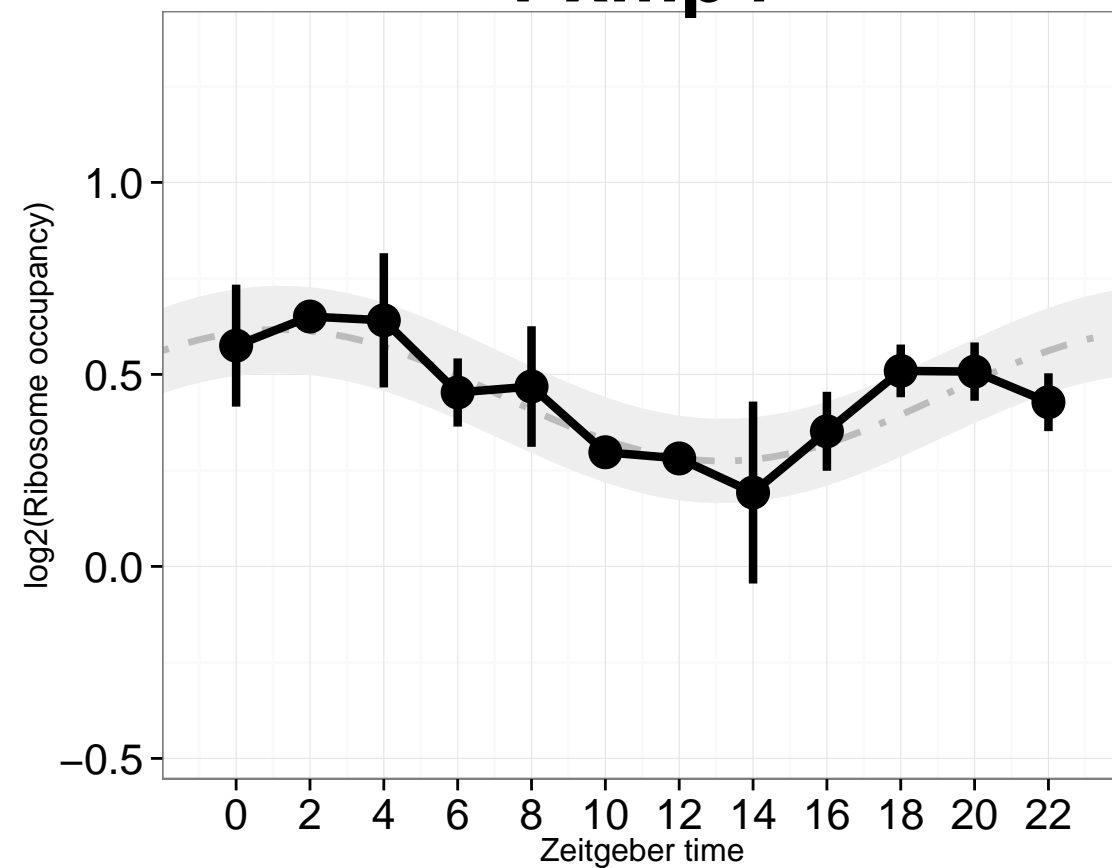

Supplement: Supplementary file 1063 [file 1]

# 2310045N01Rik

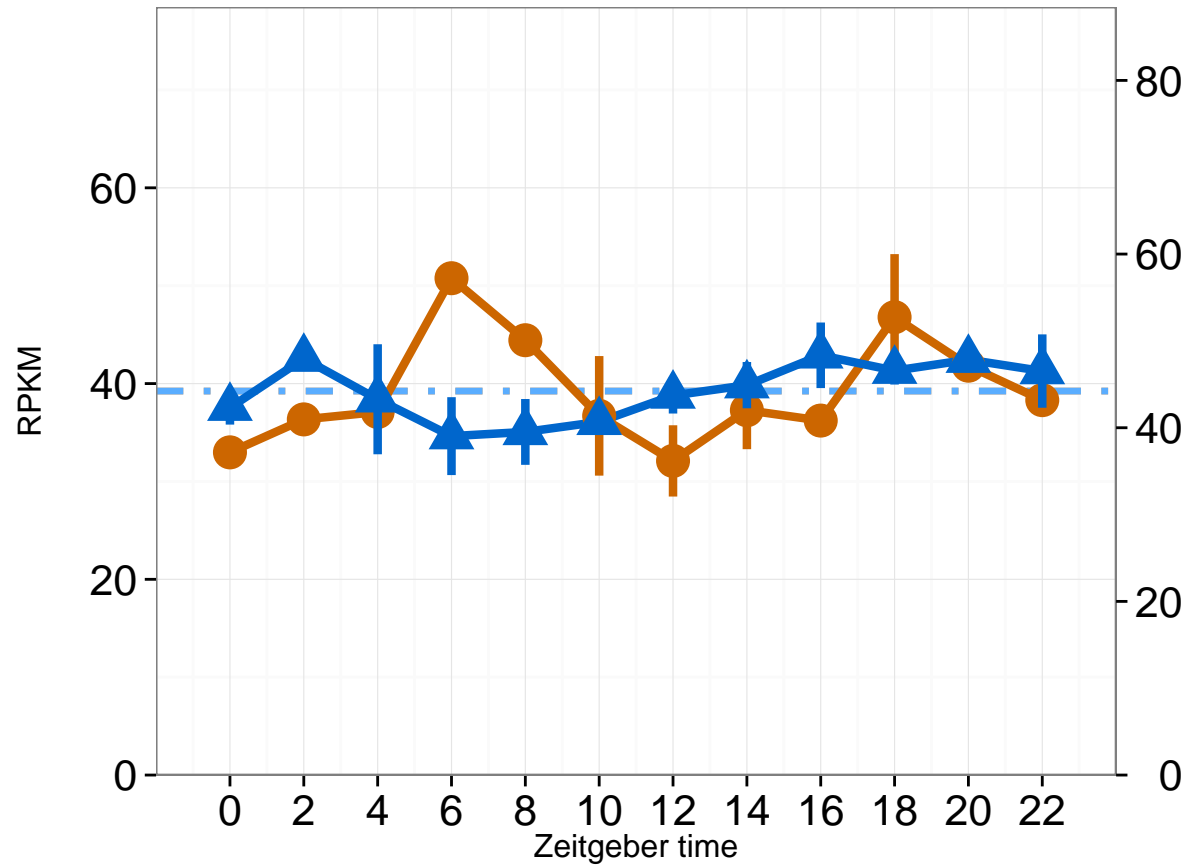

# 2310045N01Rik

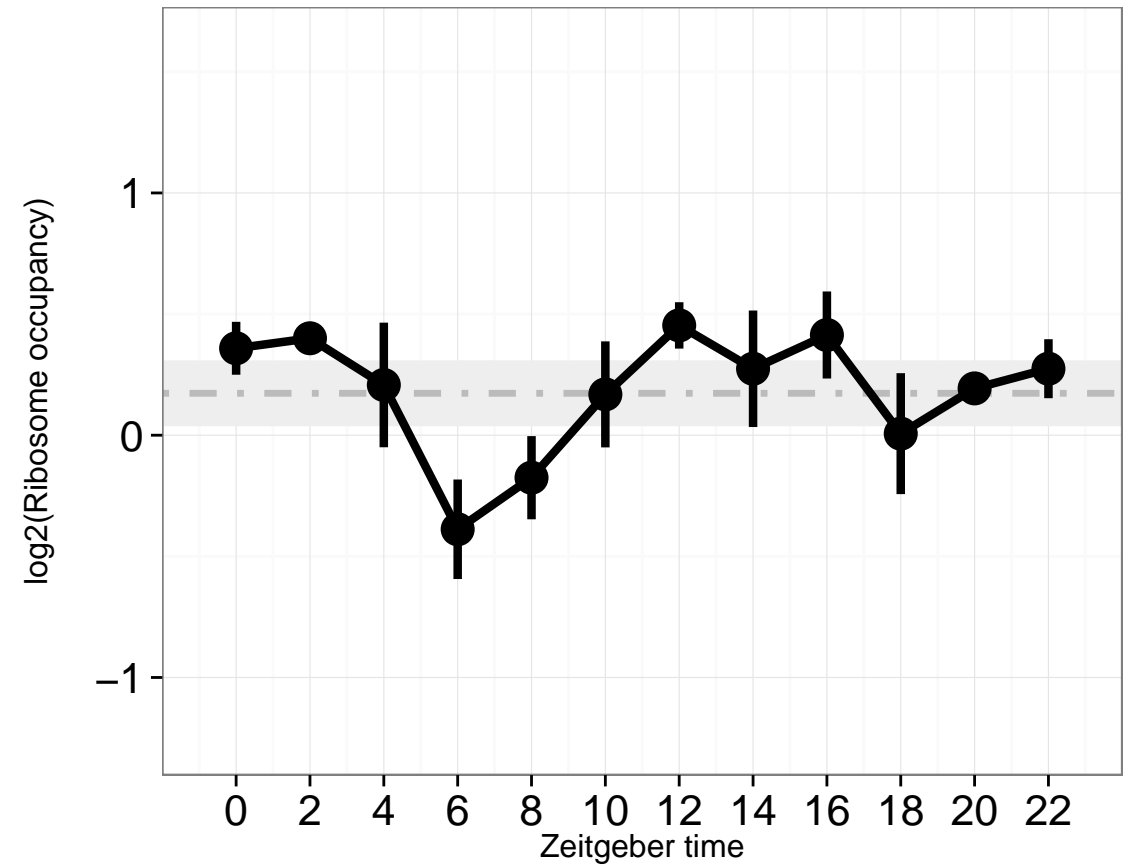

Supplement: Supplementary file 1064 [file 1]

# Ap3m2

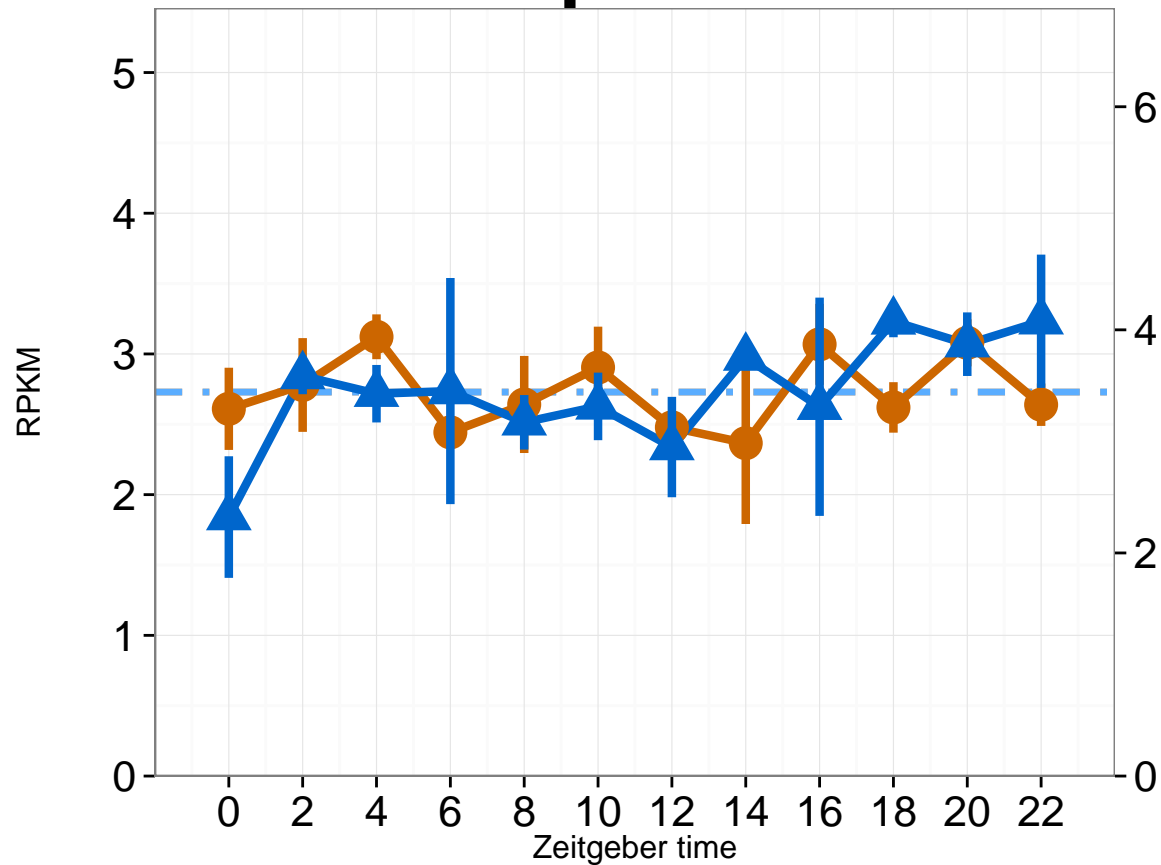

# Ap3m2

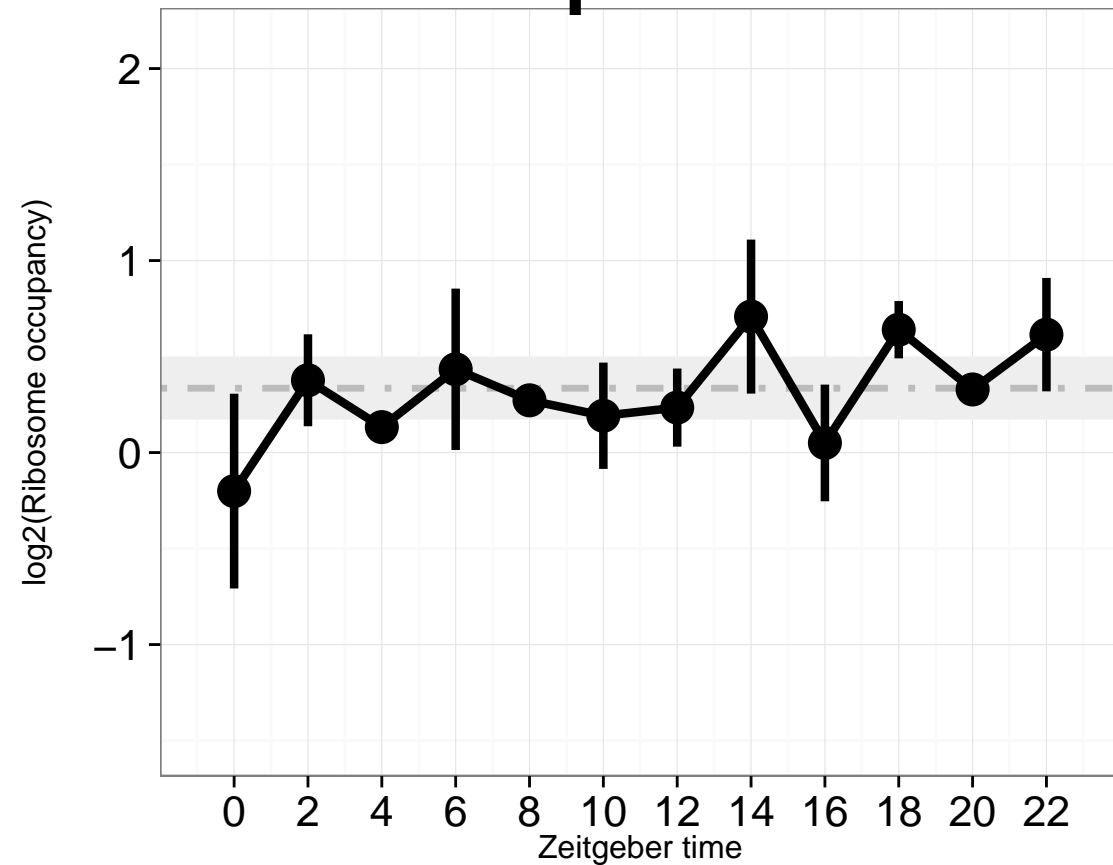

Supplement: Supplementary file 1065 [file 1]

# N4bp3

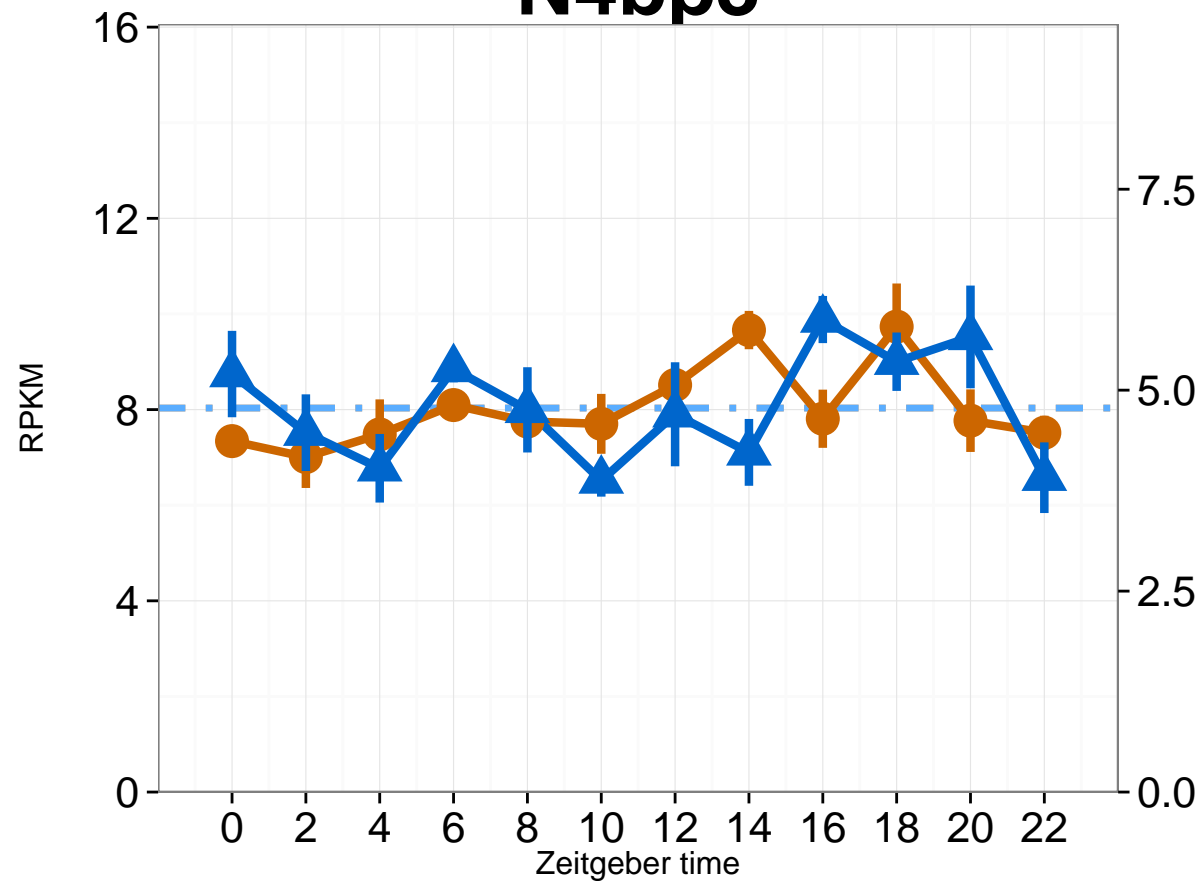

# N4bp3

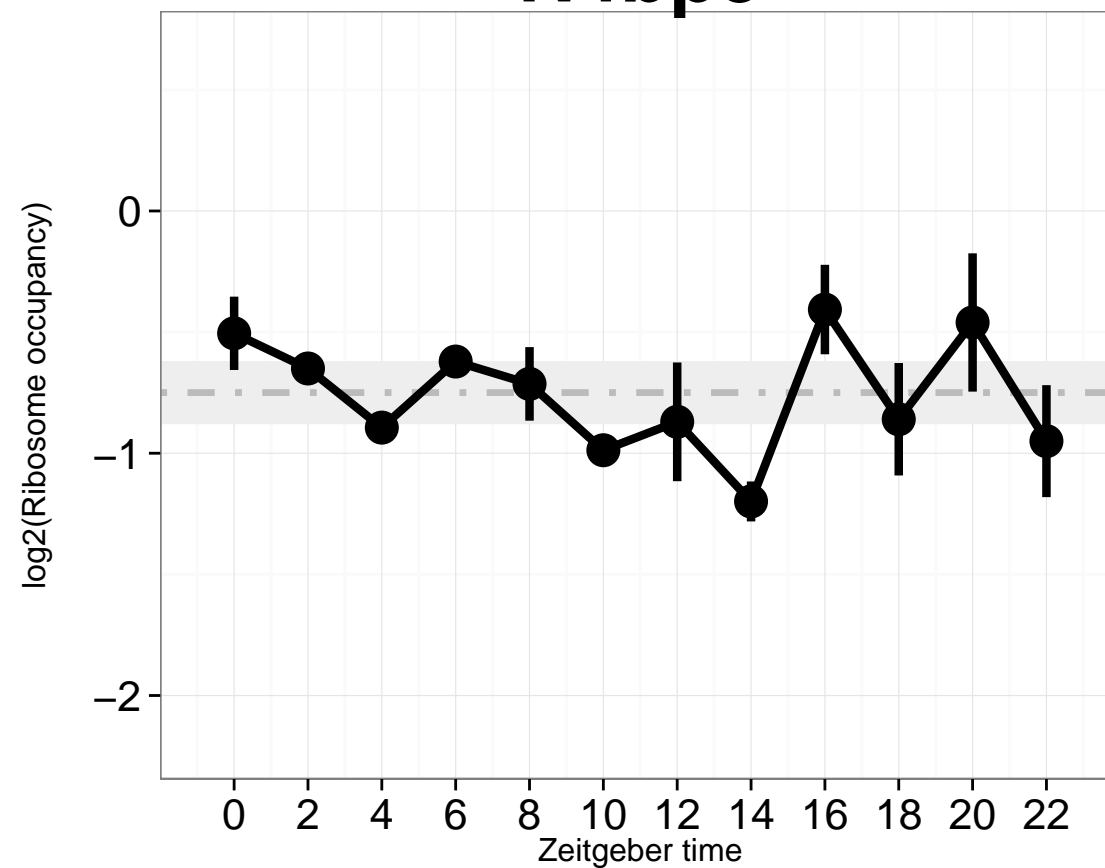

Supplement: Supplementary file 1066 [file 1]

## H2afy

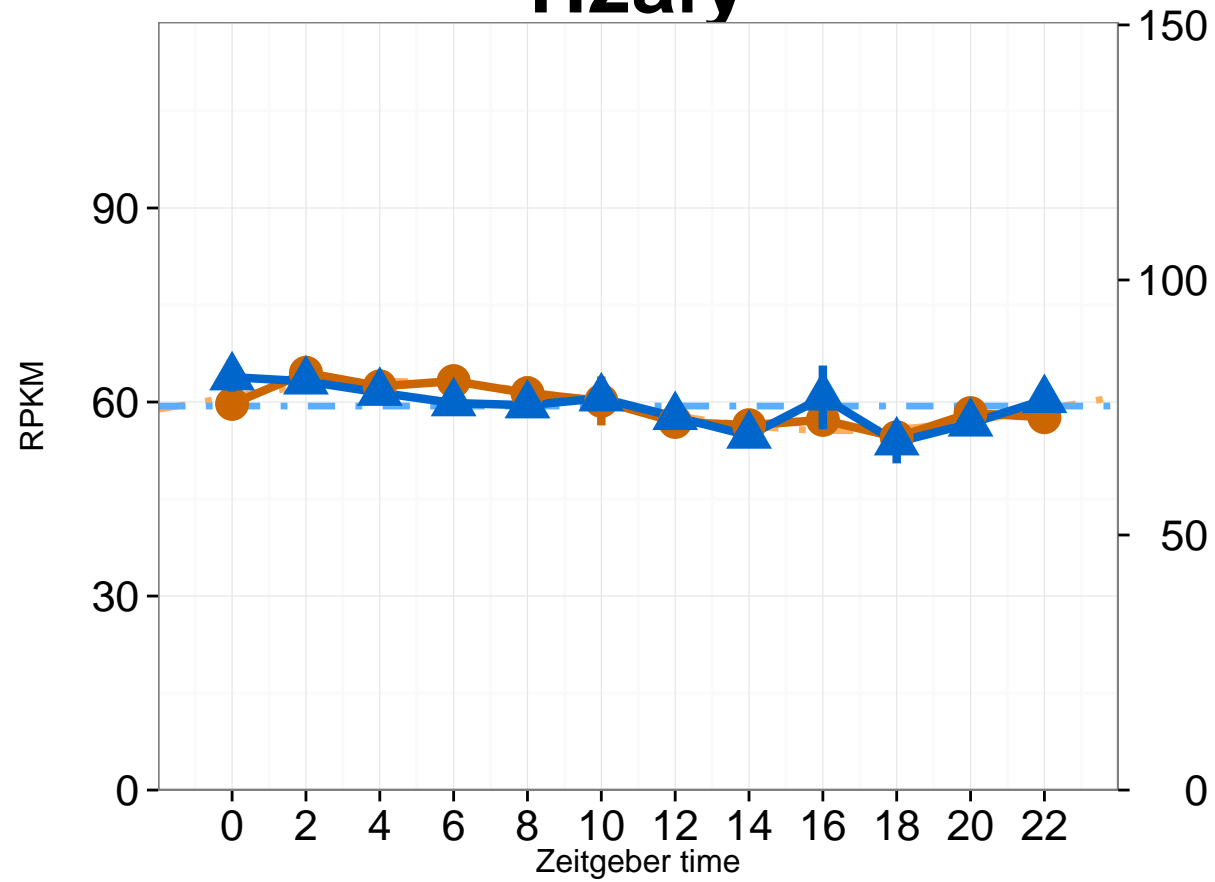

## H2afy

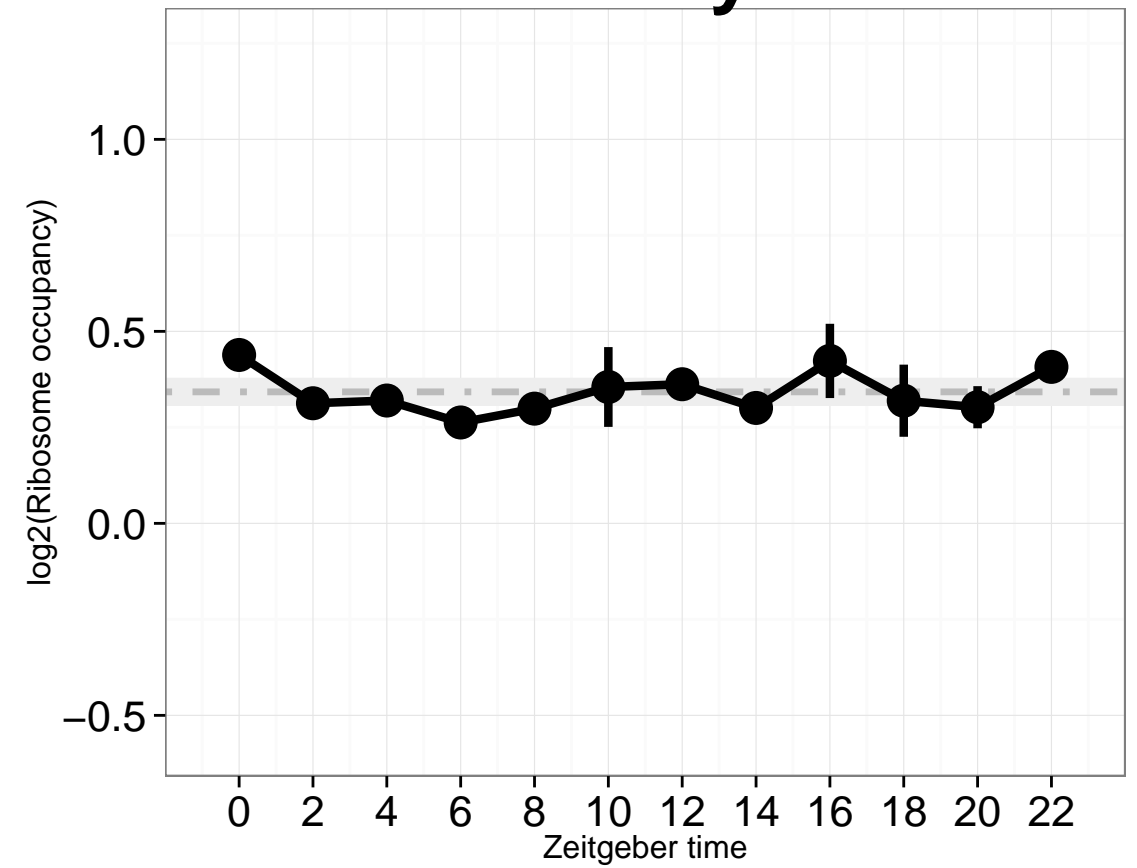

Supplement: Supplementary file 1067 [file 1]

## Jak3

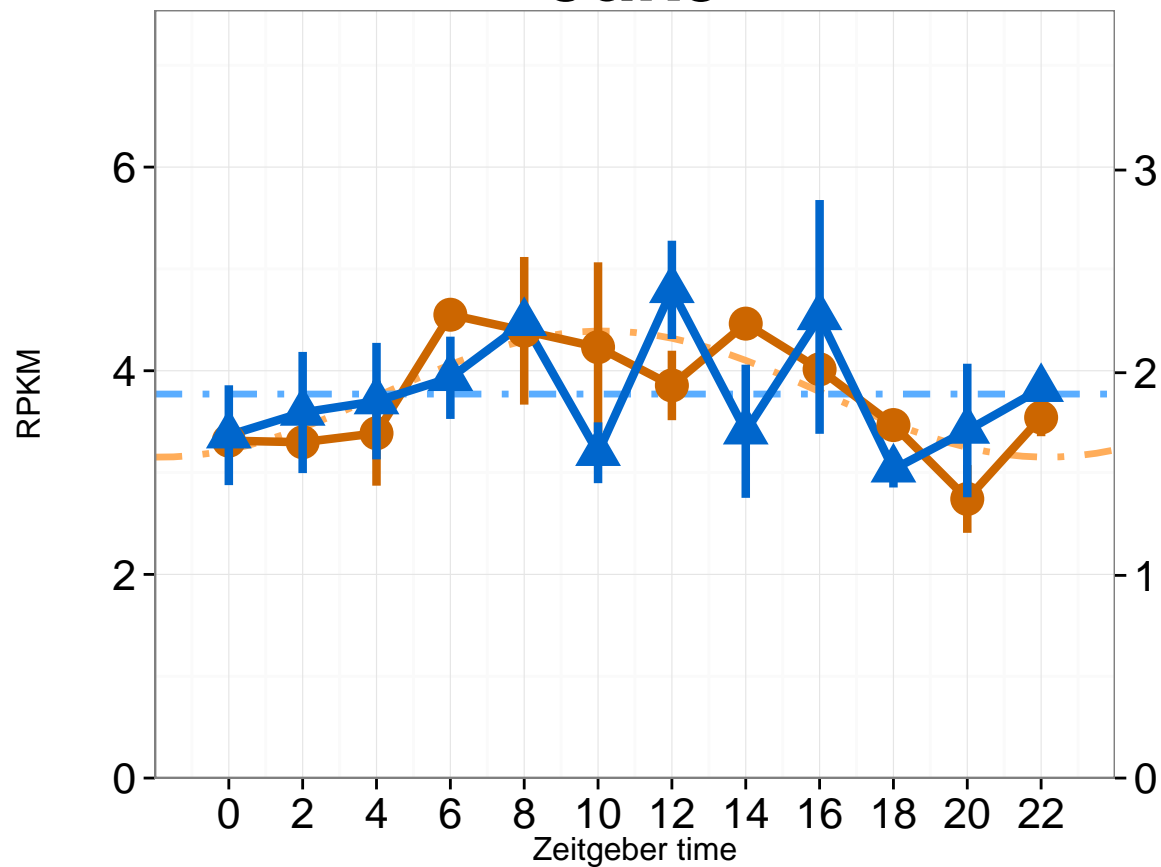

## Jak3

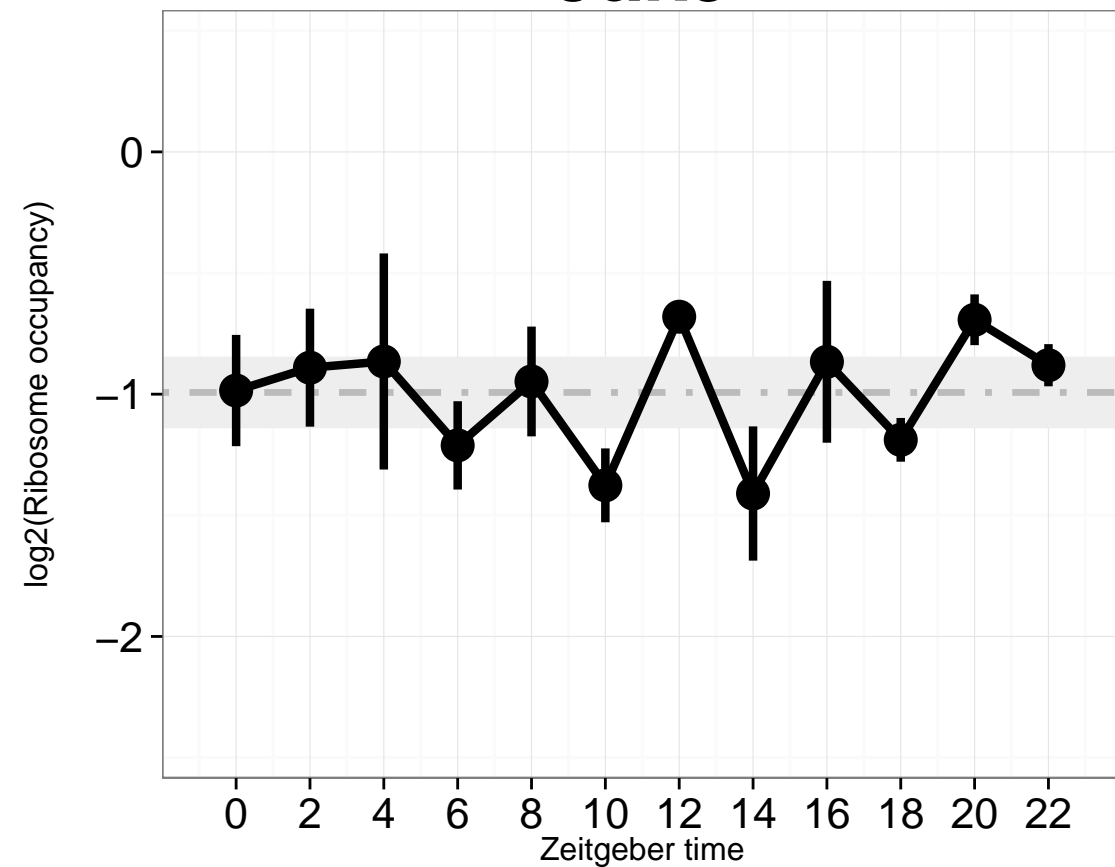

Supplement: Supplementary file 1068 [file 1]

## Aldh16a1

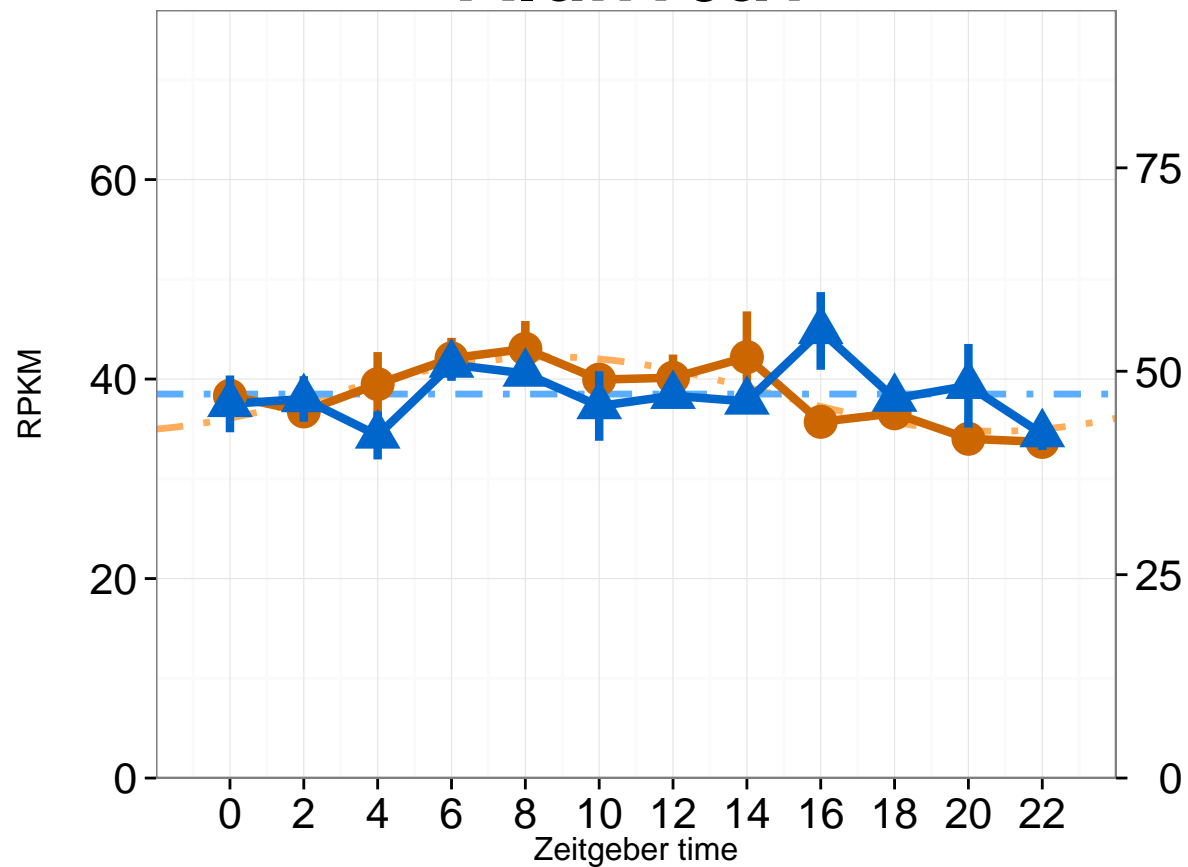

## Aldh16a1

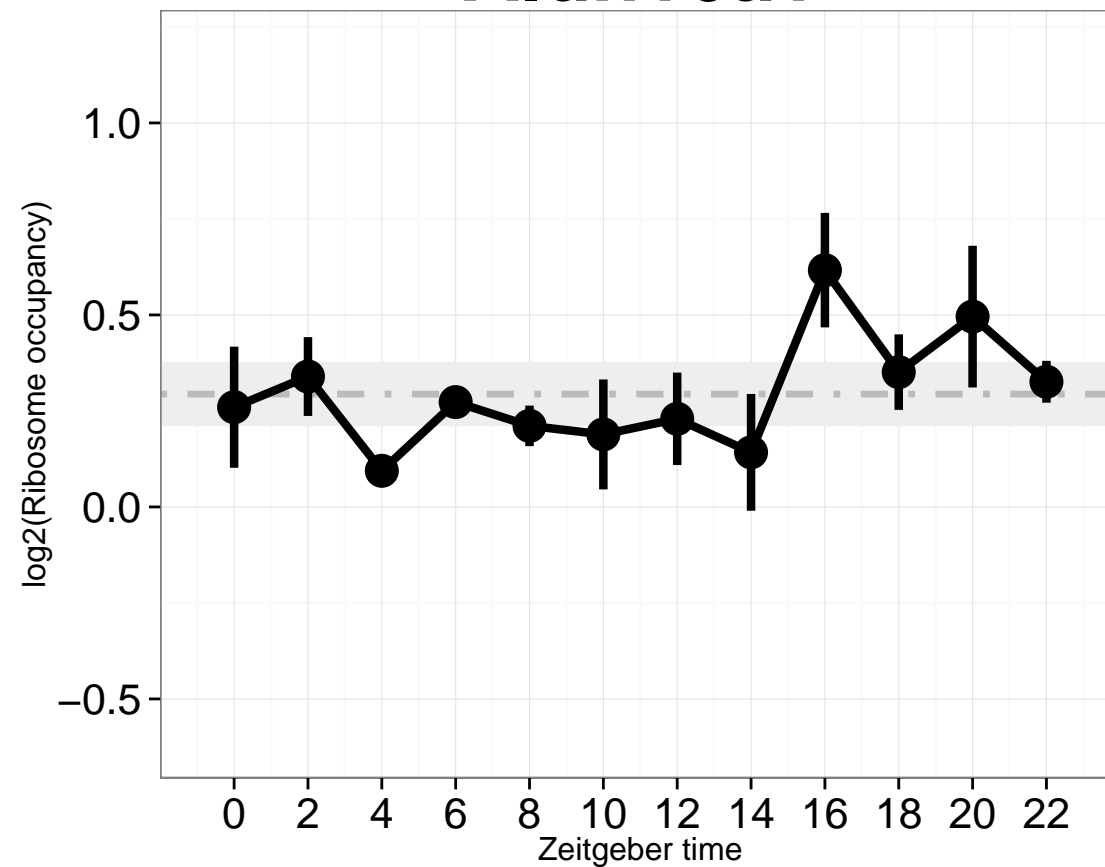

Supplement: Supplementary file 1069 [file 1]

## Zhx3

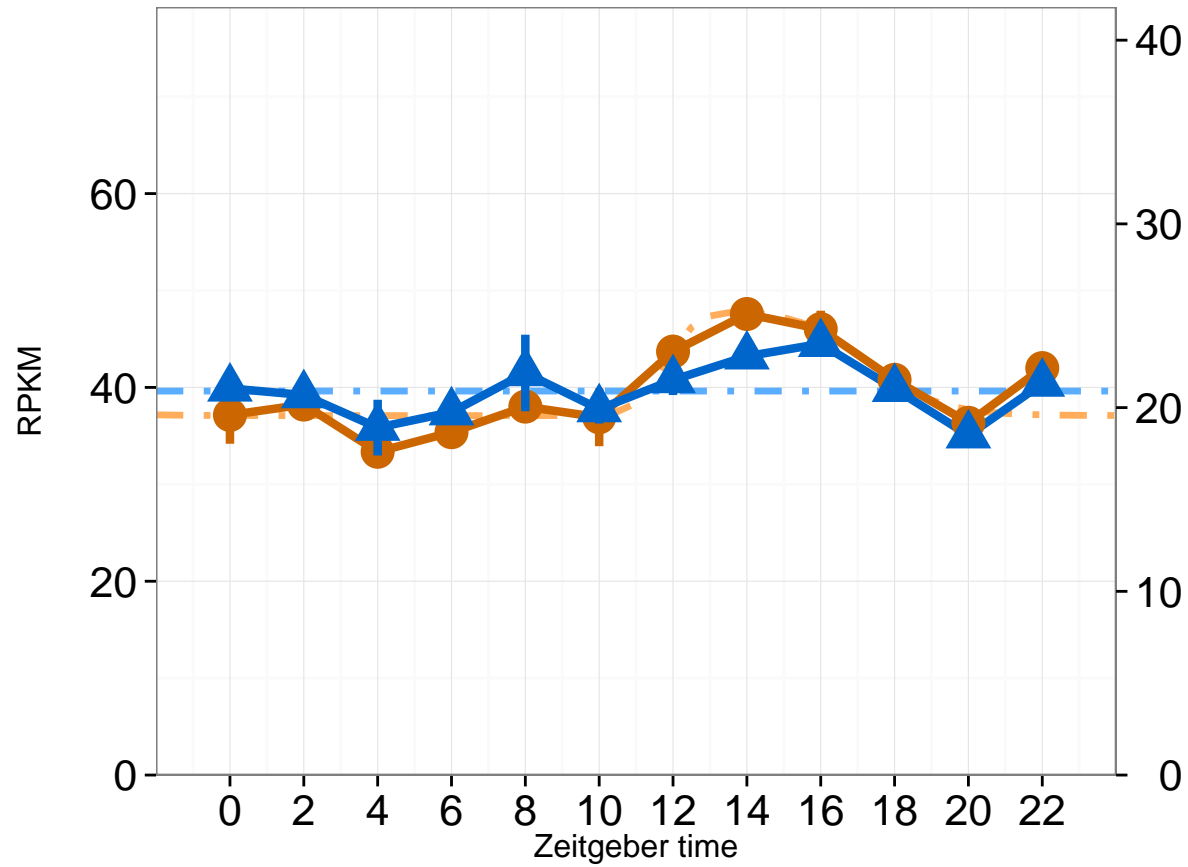

## Zhx3

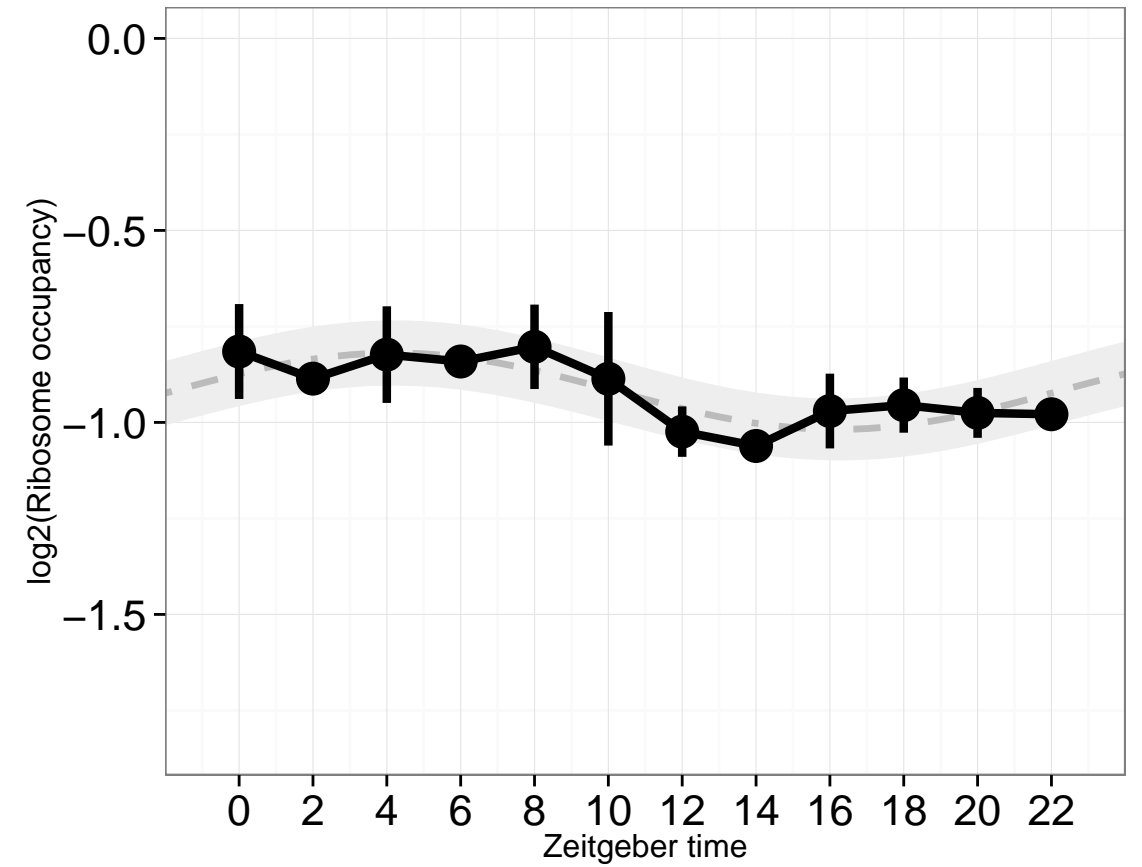

Supplement: Supplementary file 1070 [file 1]

# Mrpl20

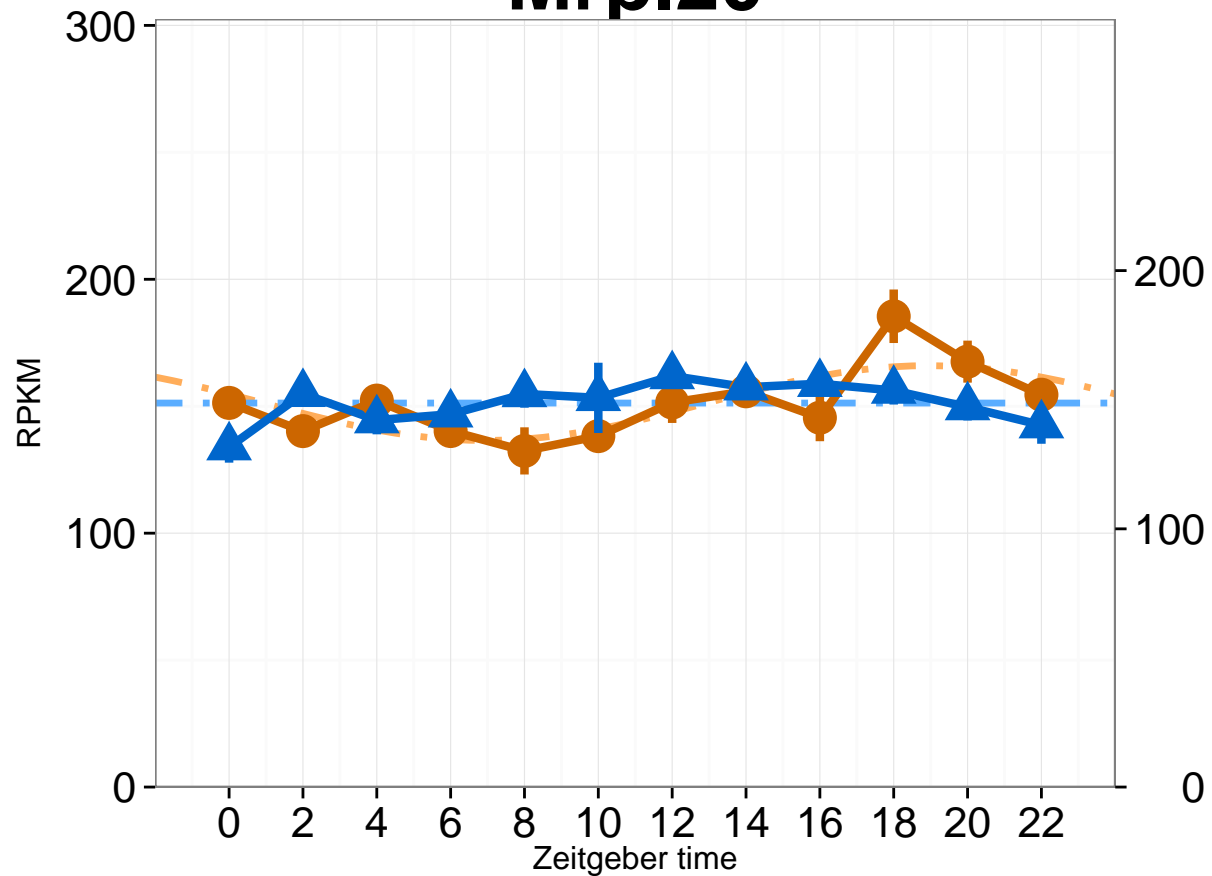

# Mrpl20

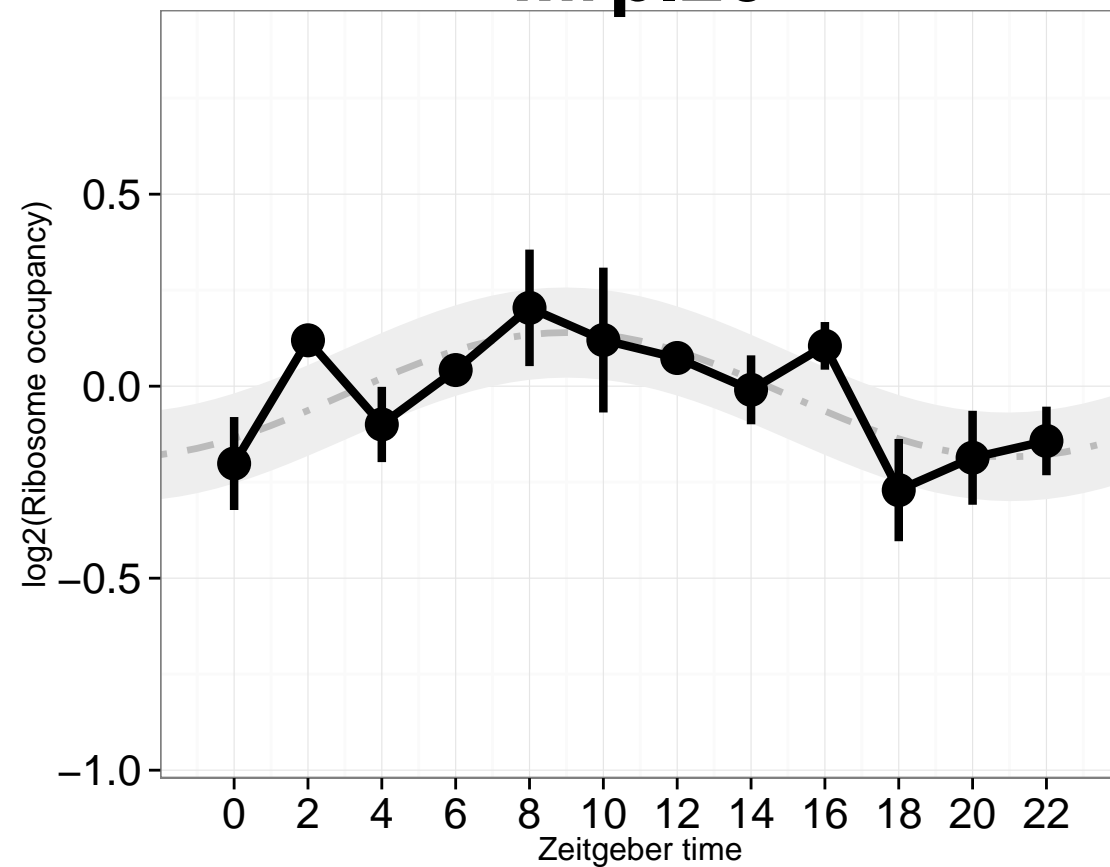

Supplement: Supplementary file 1071 [file 1]

## Bhlhe40

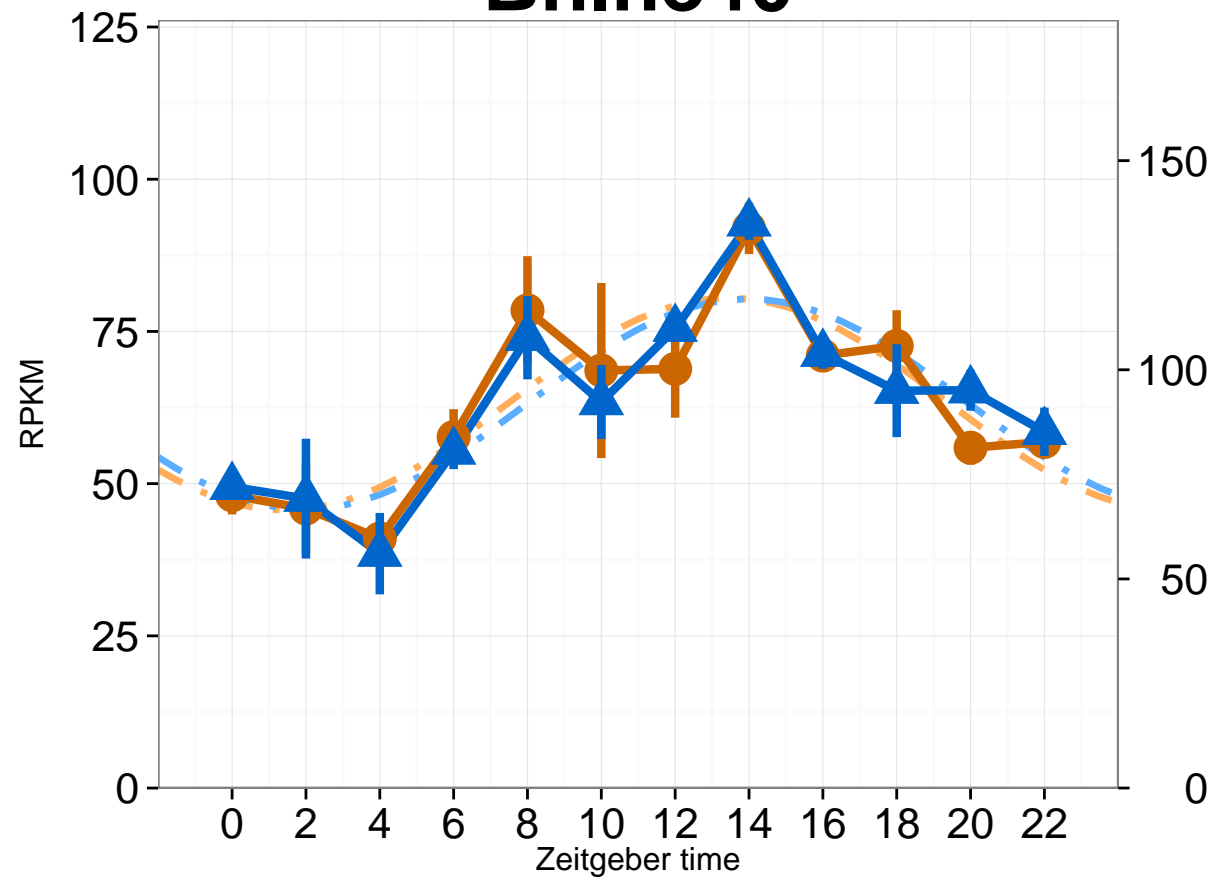

## Bhlhe40

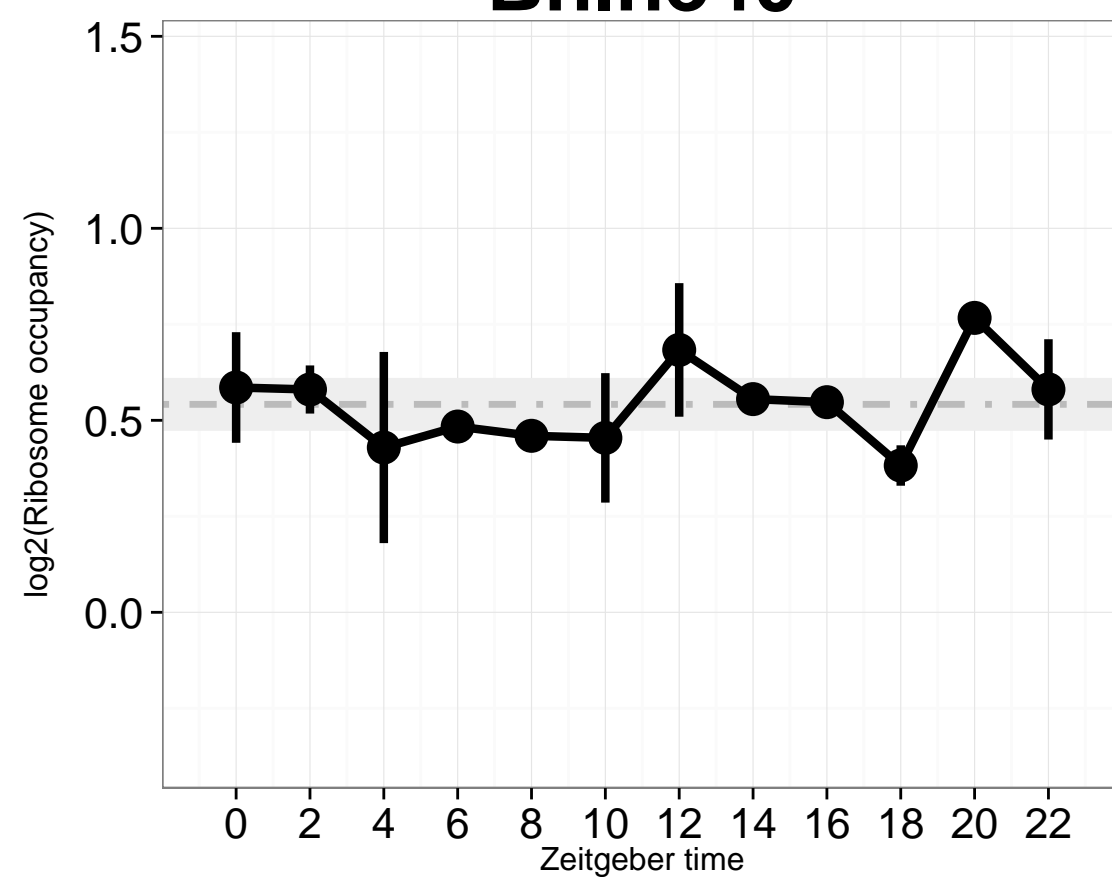

Supplement: Supplementary file 1072 [file 1]

## Nrep

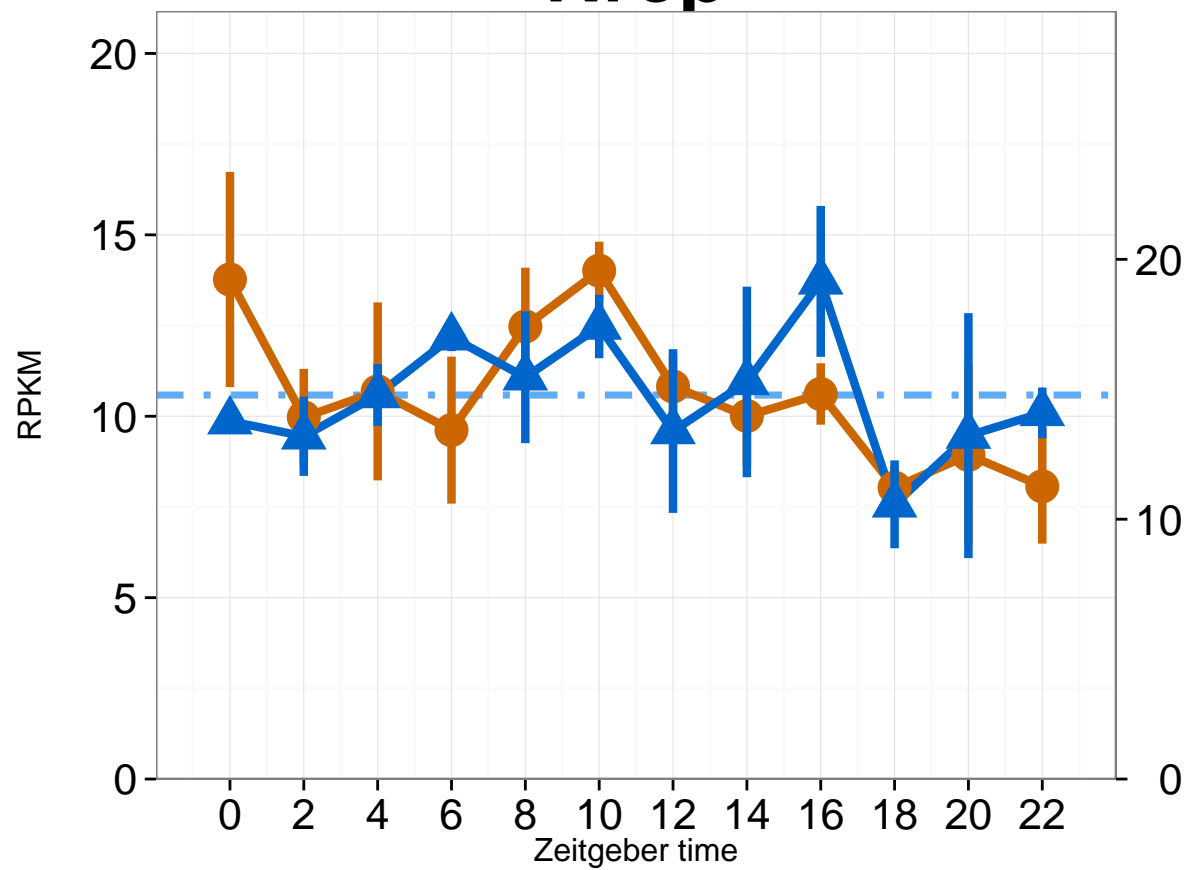

## Nrep

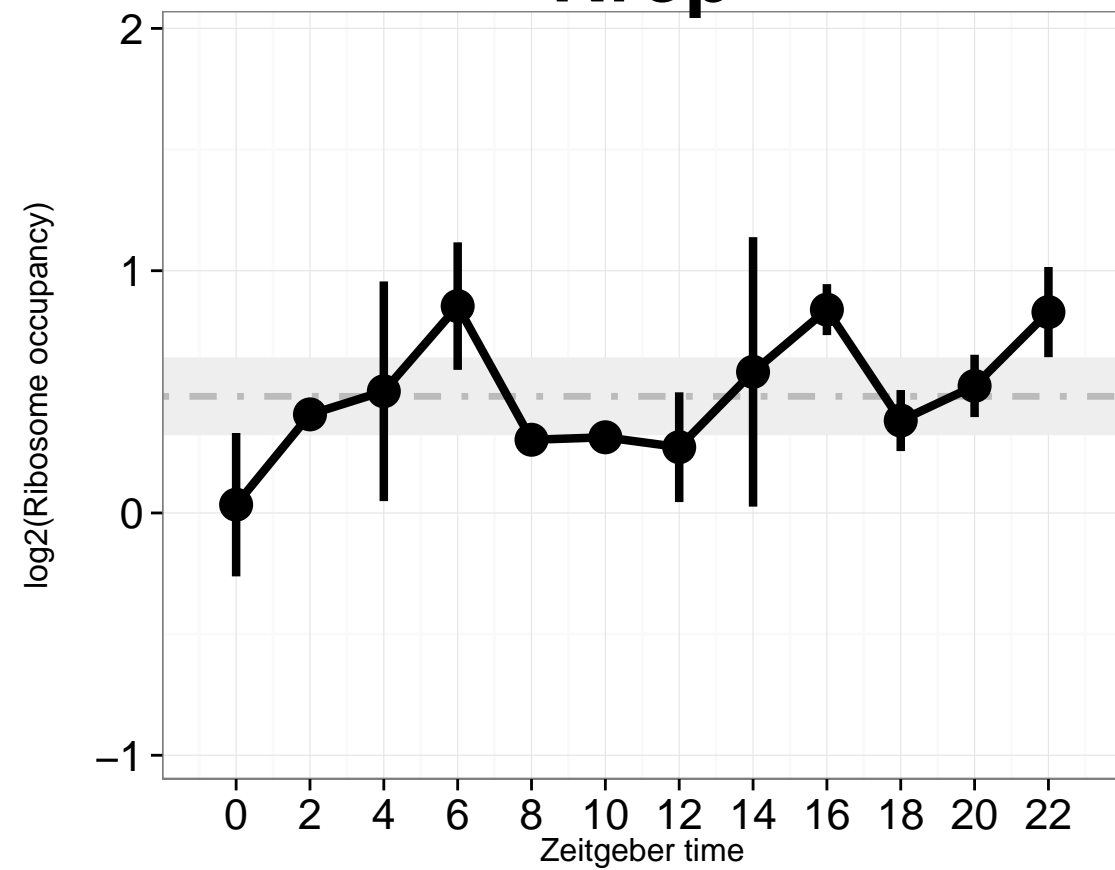

Supplement: Supplementary file 1073 [file 1]

# Nr1d1

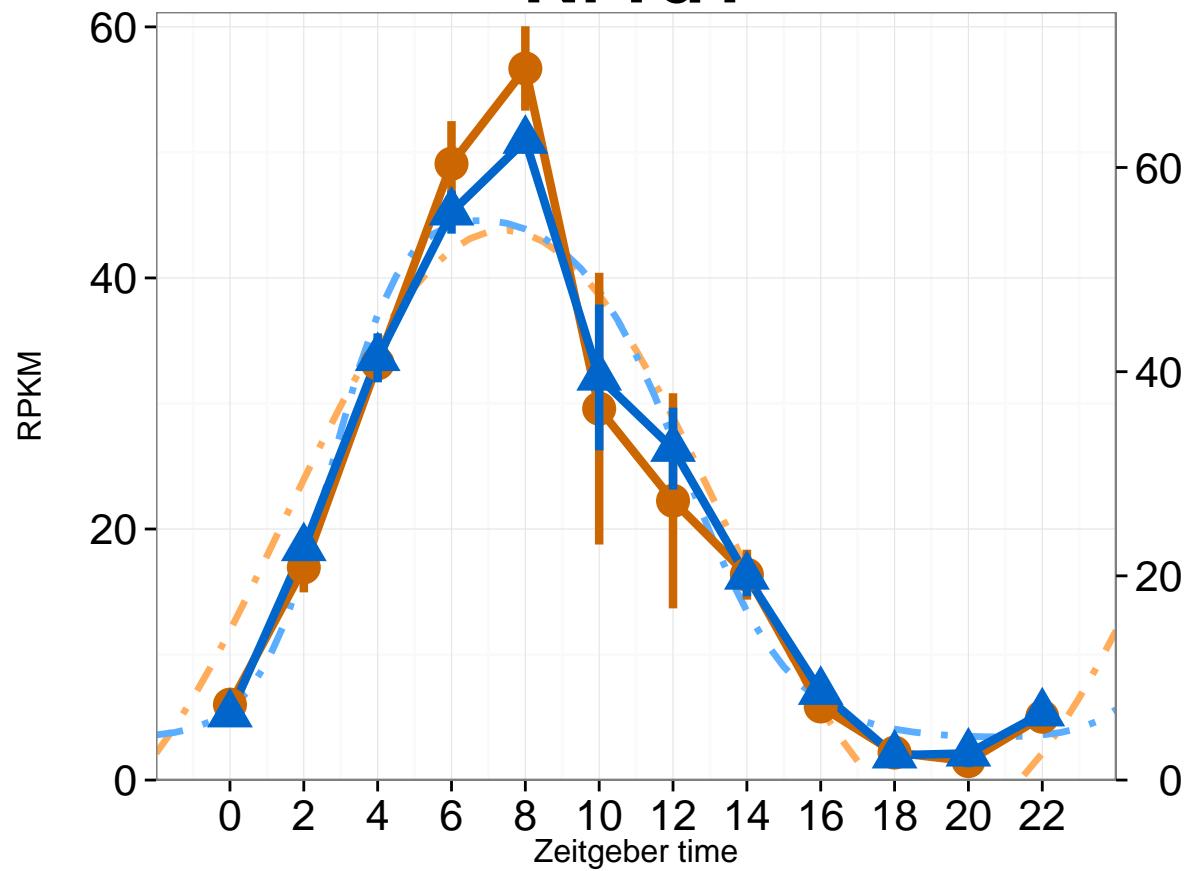

# Nr1d1

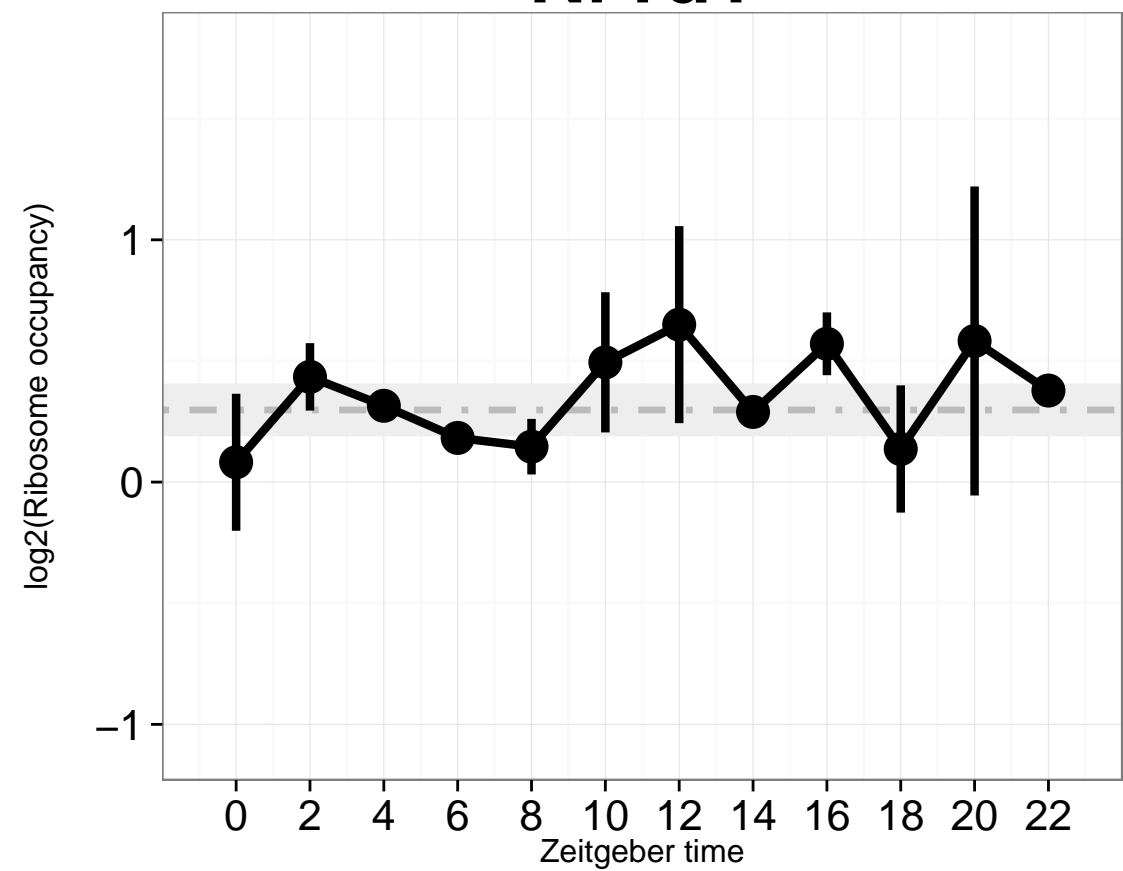

Supplement: Supplementary file 1074 [file 1]

# Ythdf1

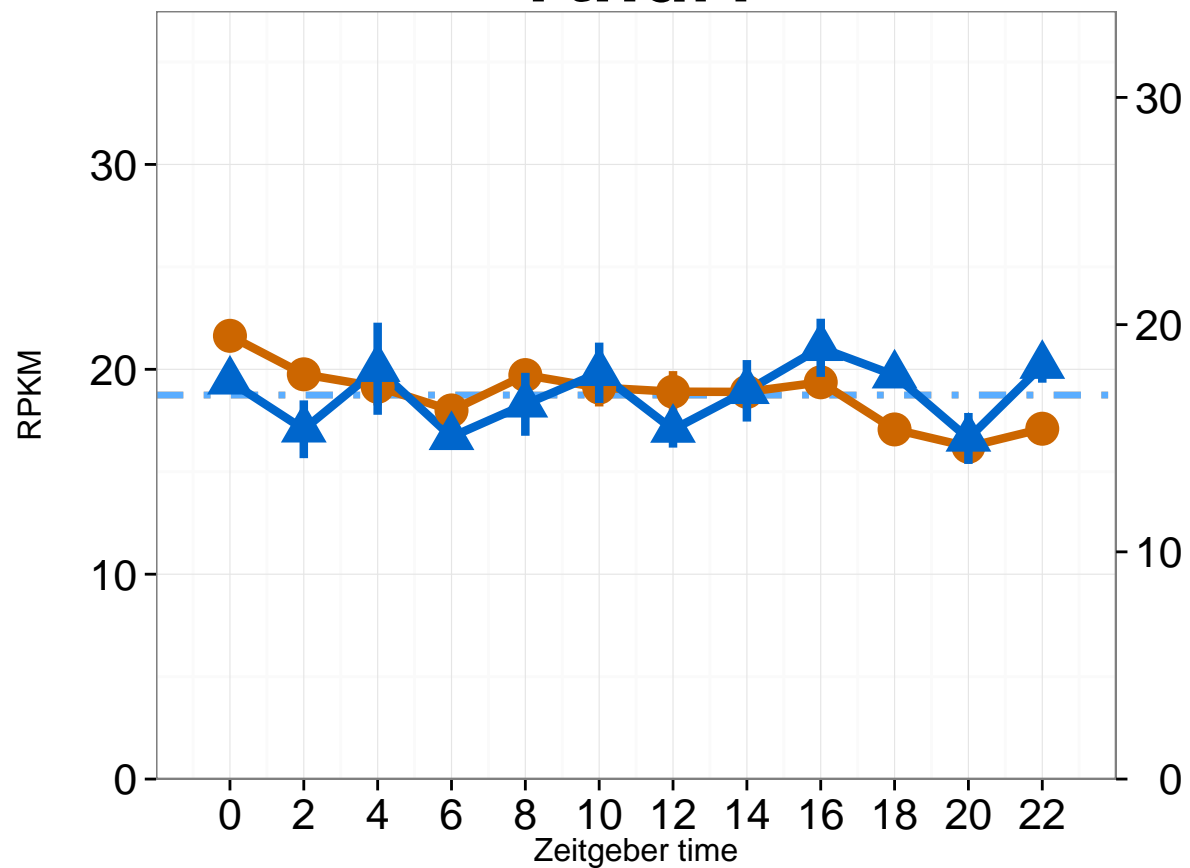

# Ythdf1

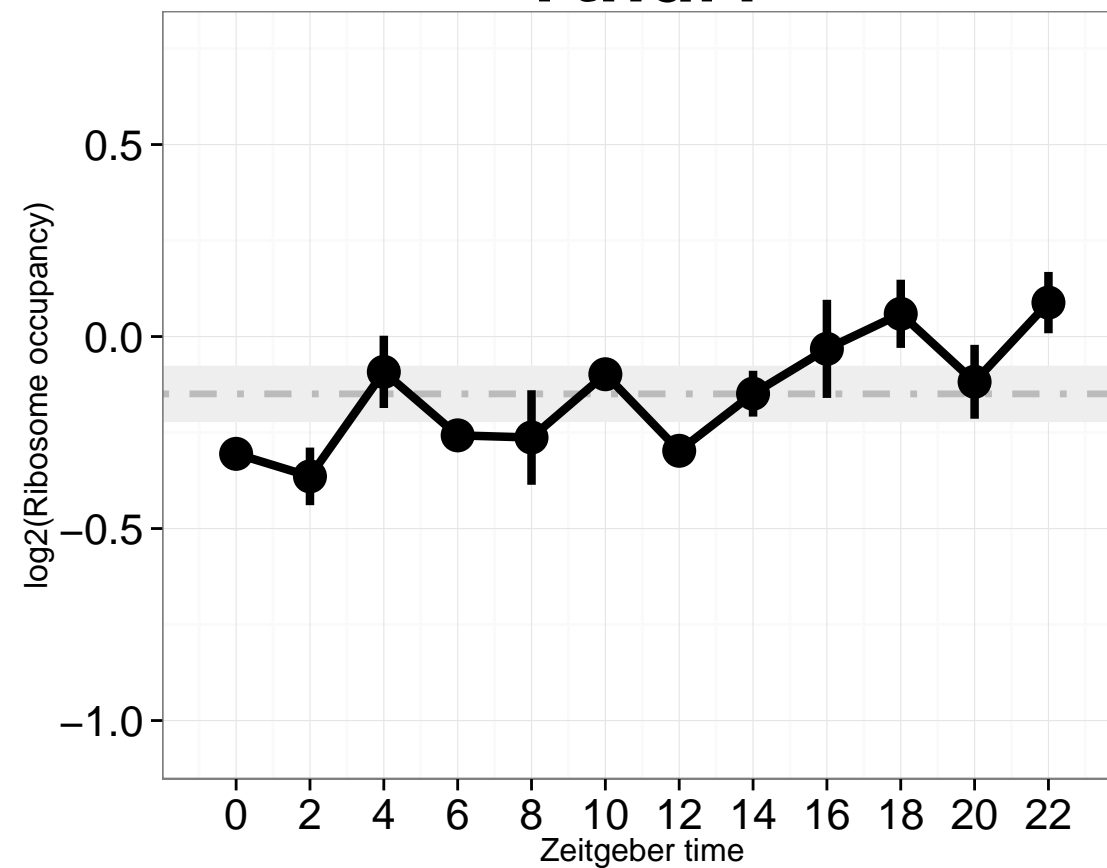

Supplement: Supplementary file 1075 [file 1]

## Suox

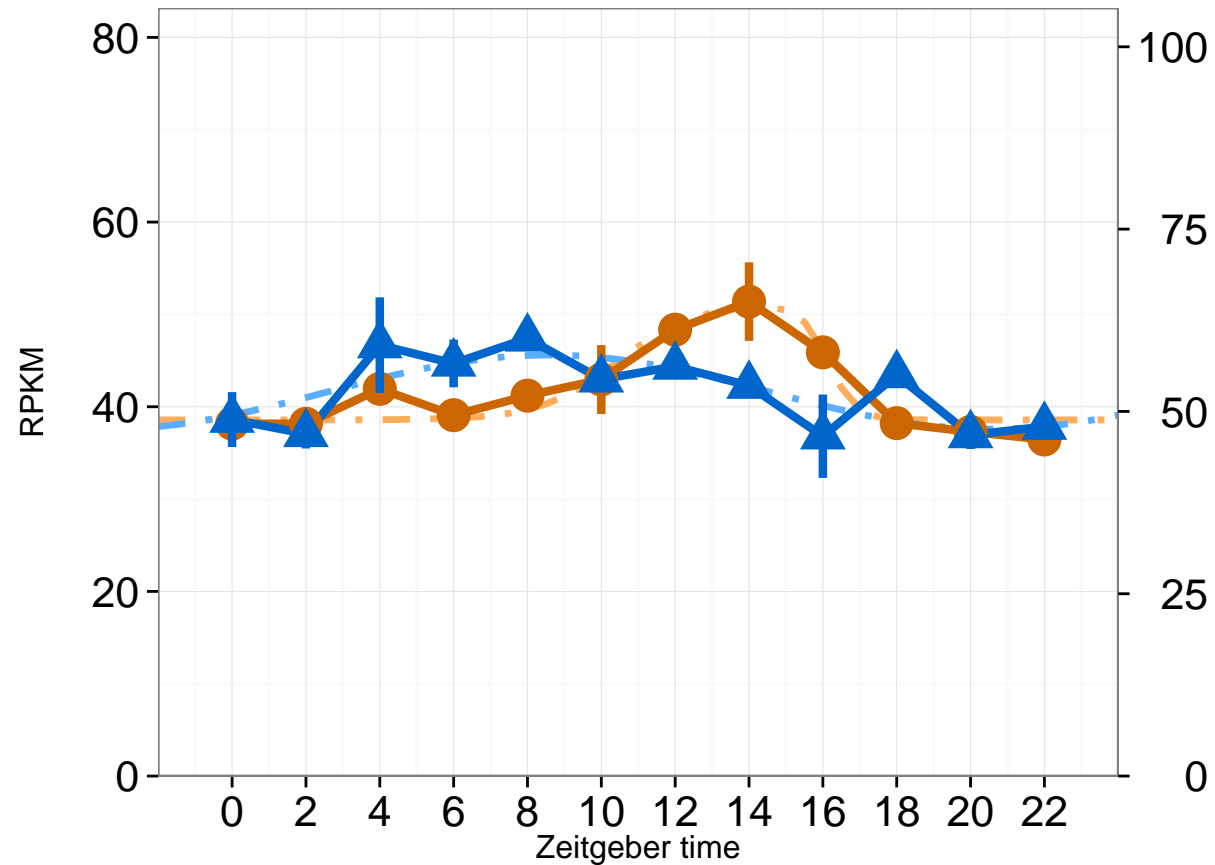

## Suox

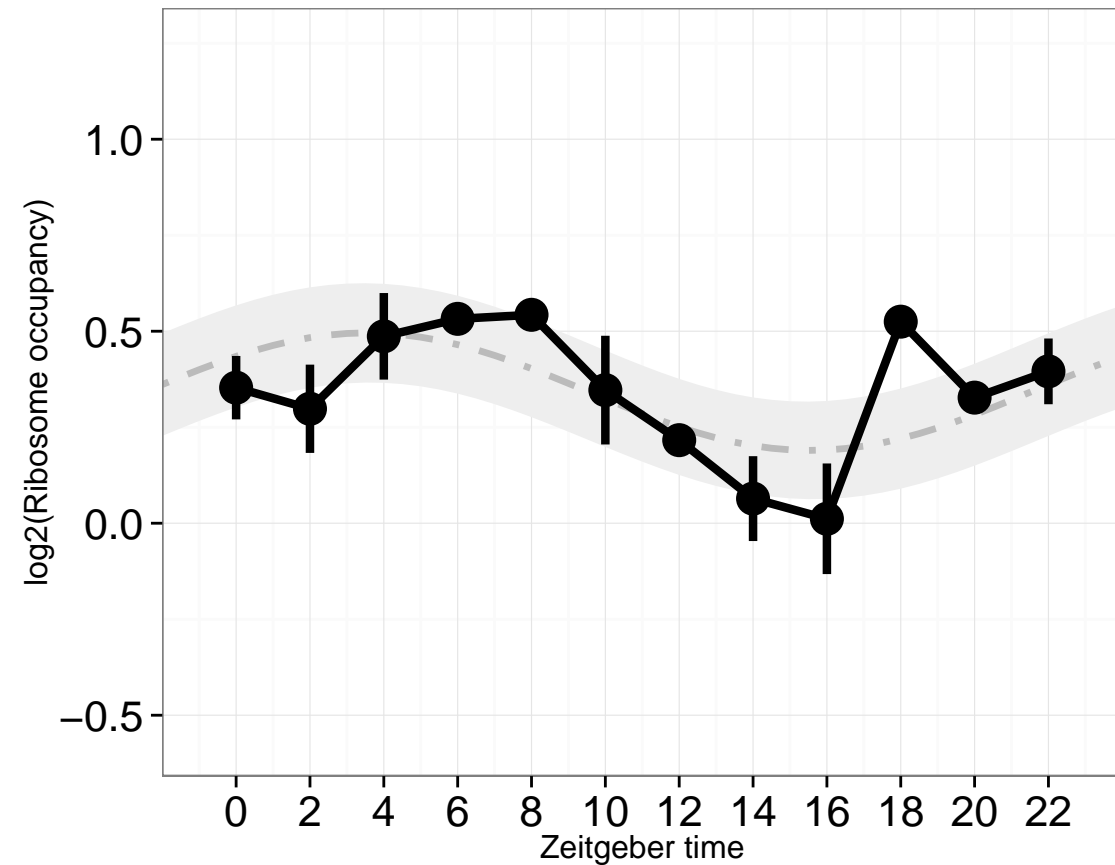

Supplement: Supplementary file 1076 [file 1]

## Smpd4

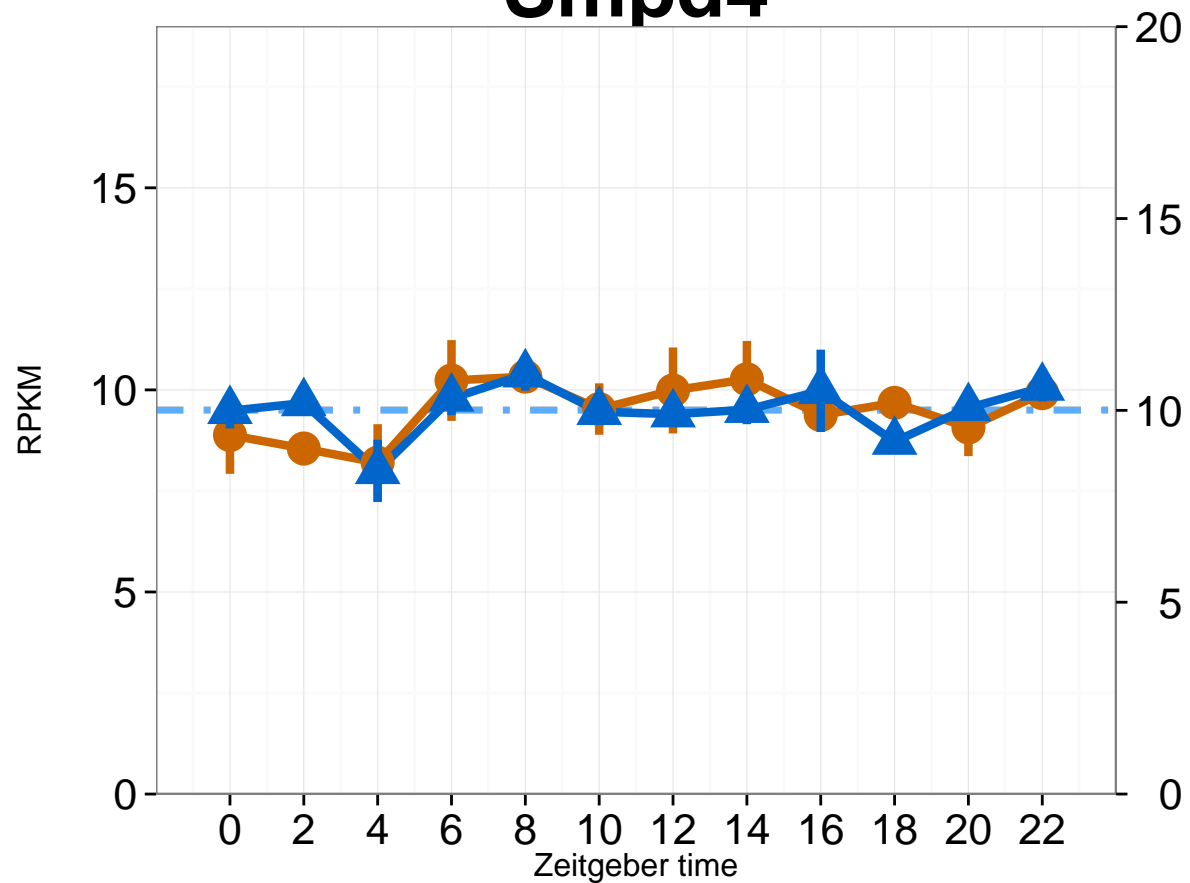

## Smpd4

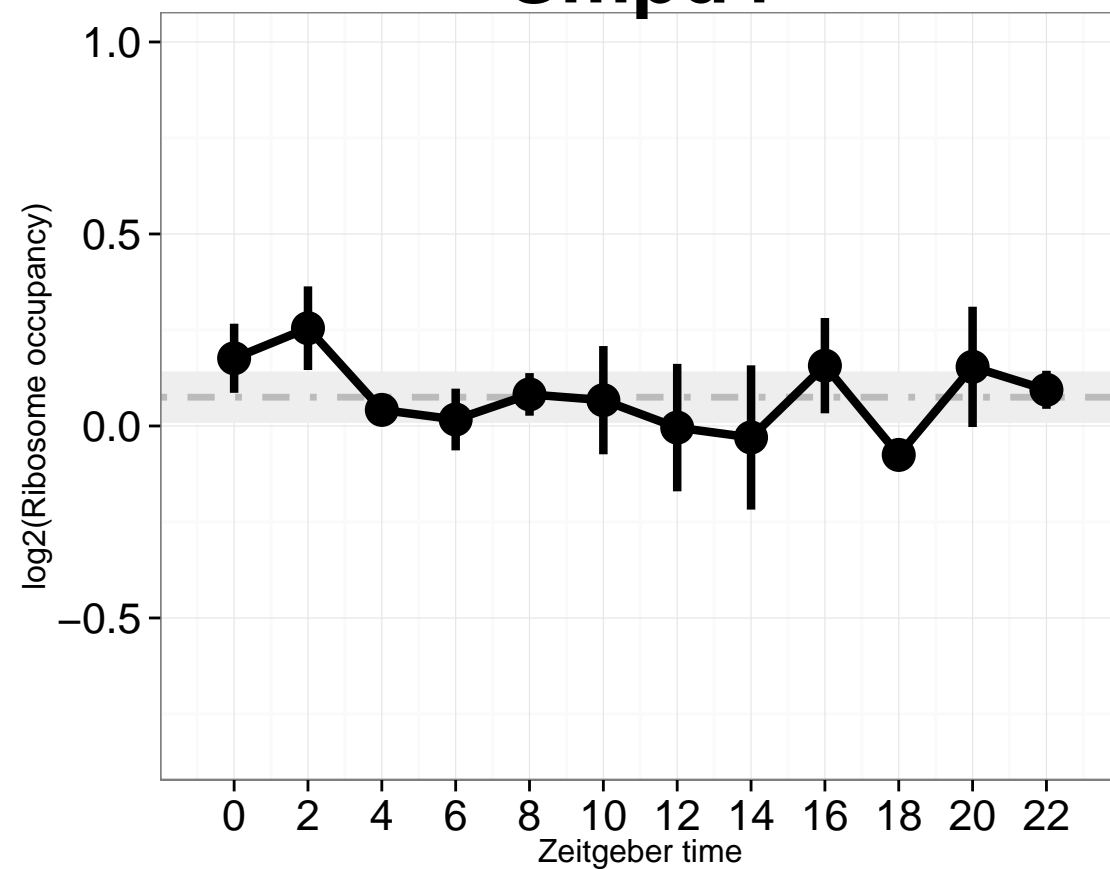

Supplement: Supplementary file 1077 [file 1]

## Bola2

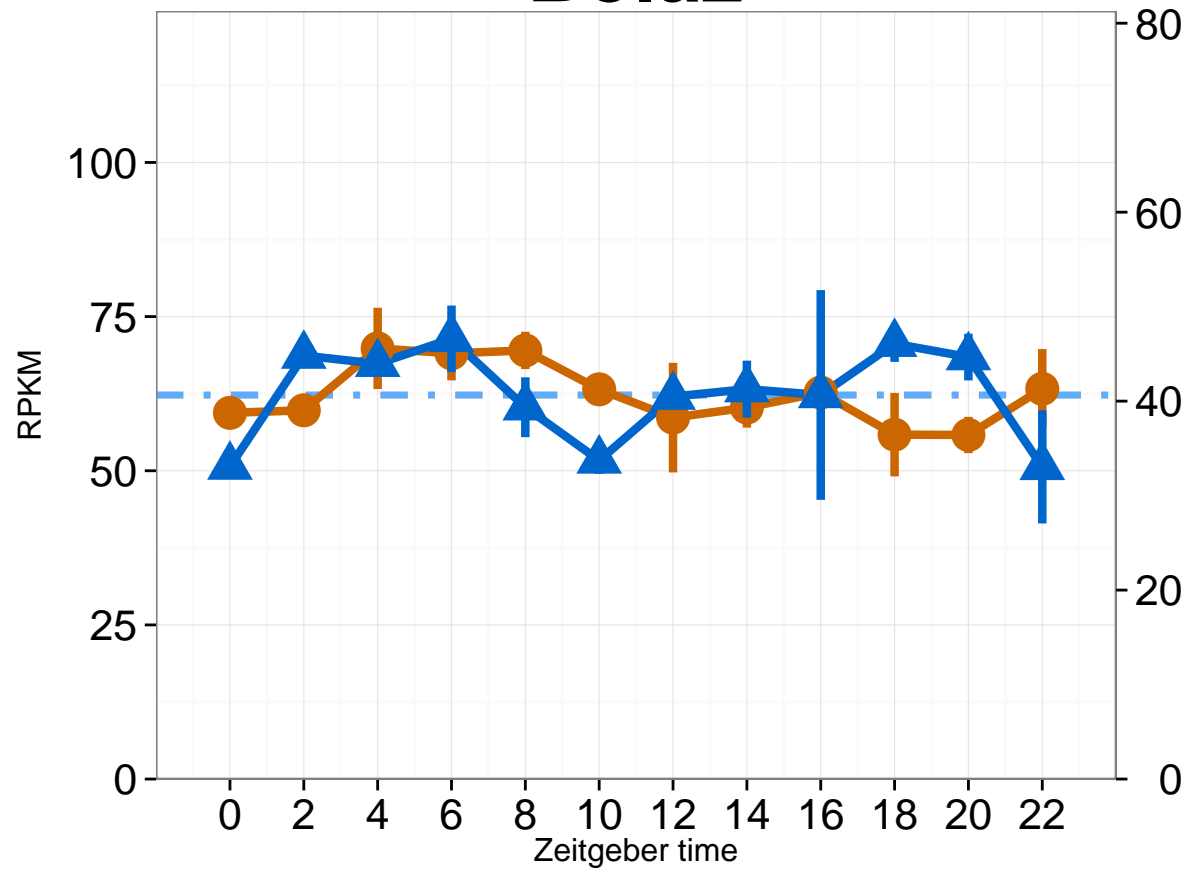

## Bola2

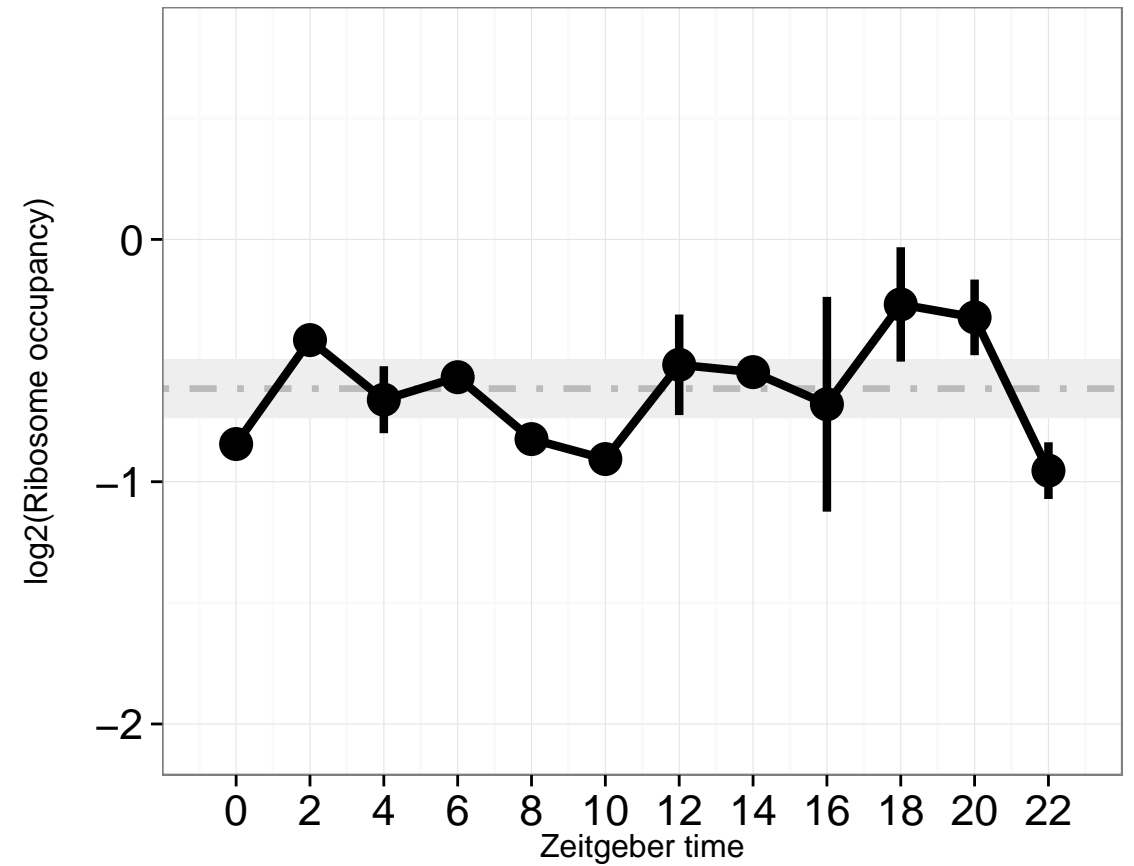

Supplement: Supplementary file 1078 [file 1]

# Kit

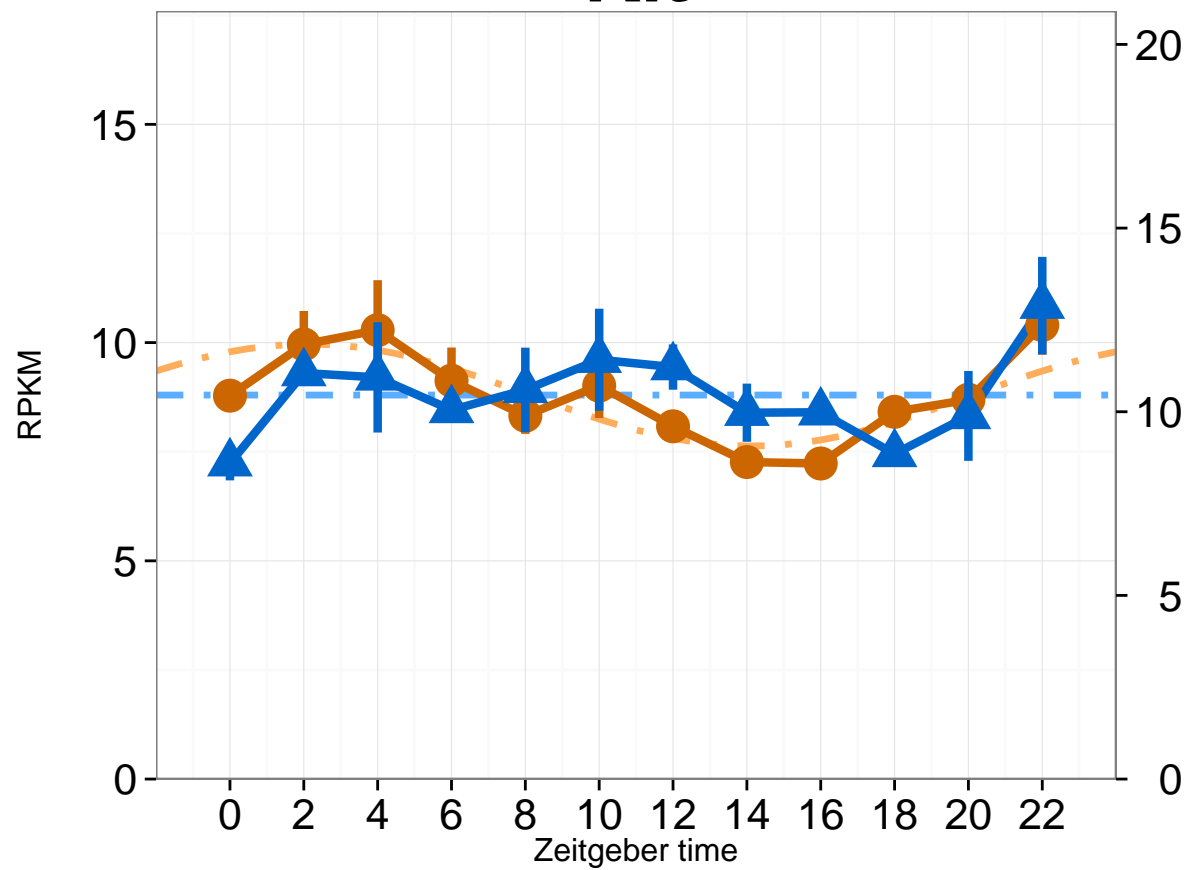

# Kit

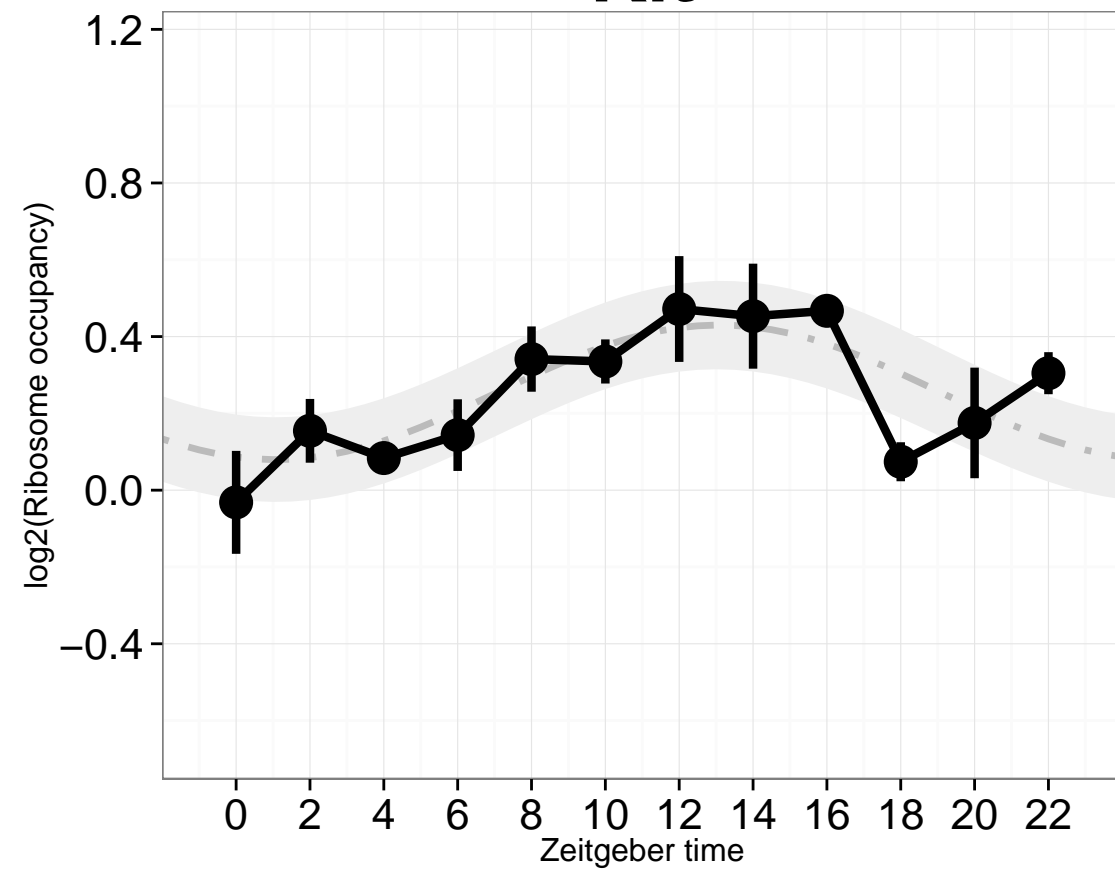

Supplement: Supplementary file 1079 [file 1]

# Alyref2

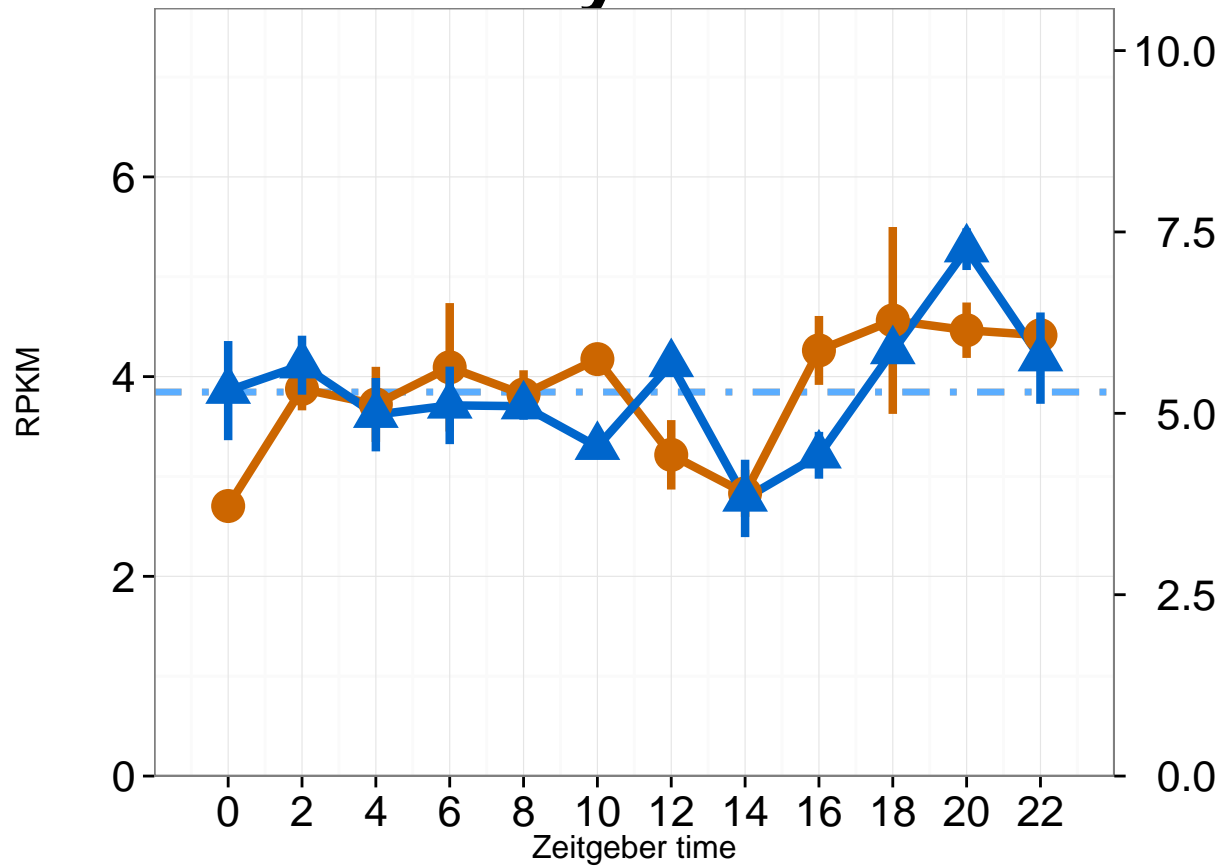

# Alyref2

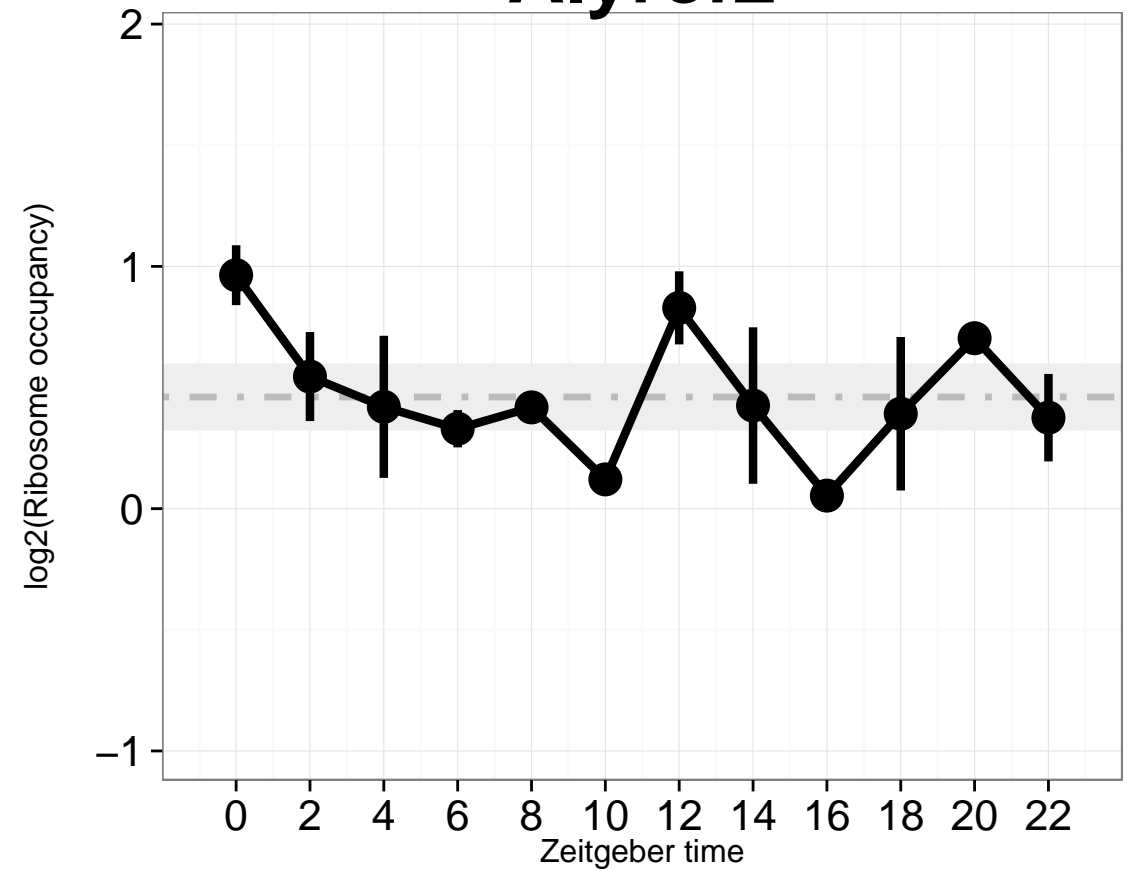

Supplement: Supplementary file 1080 [file 1]

## Dhrs11

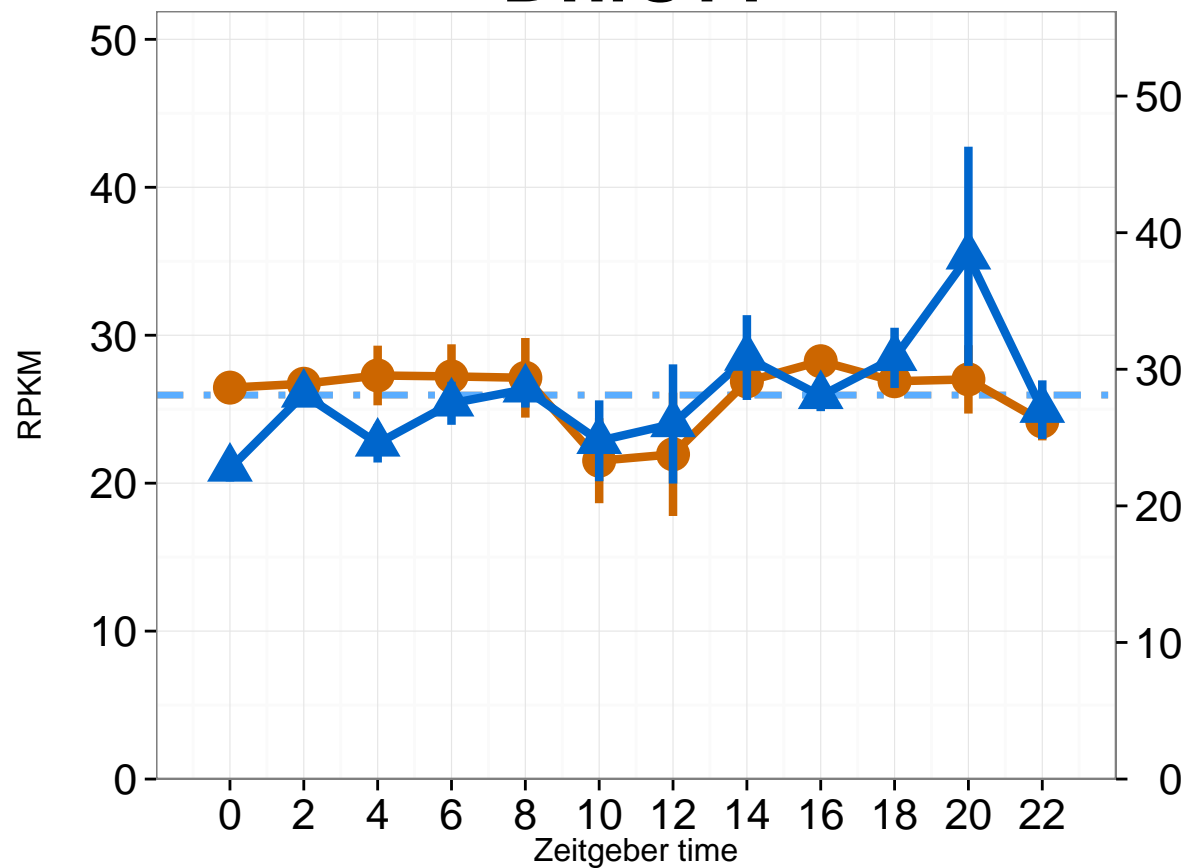

## Dhrs11

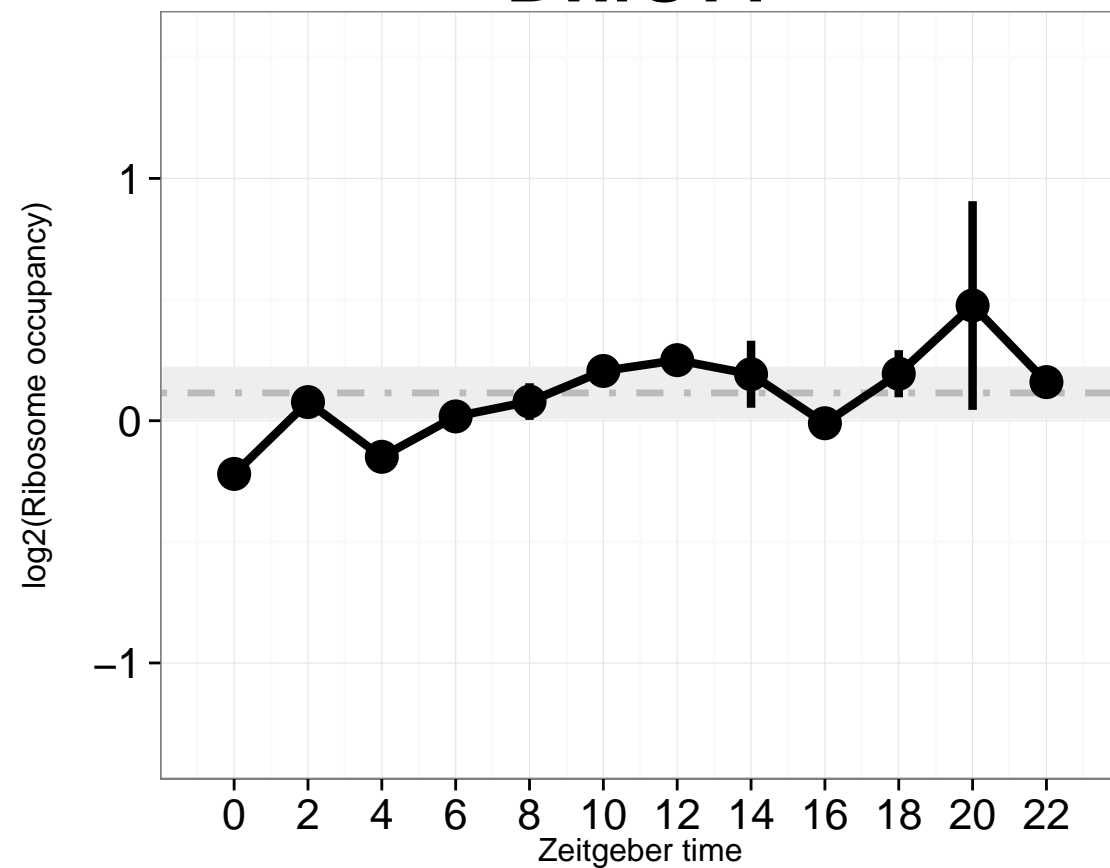

Supplement: Supplementary file 1081 [file 1]

## Acbd6

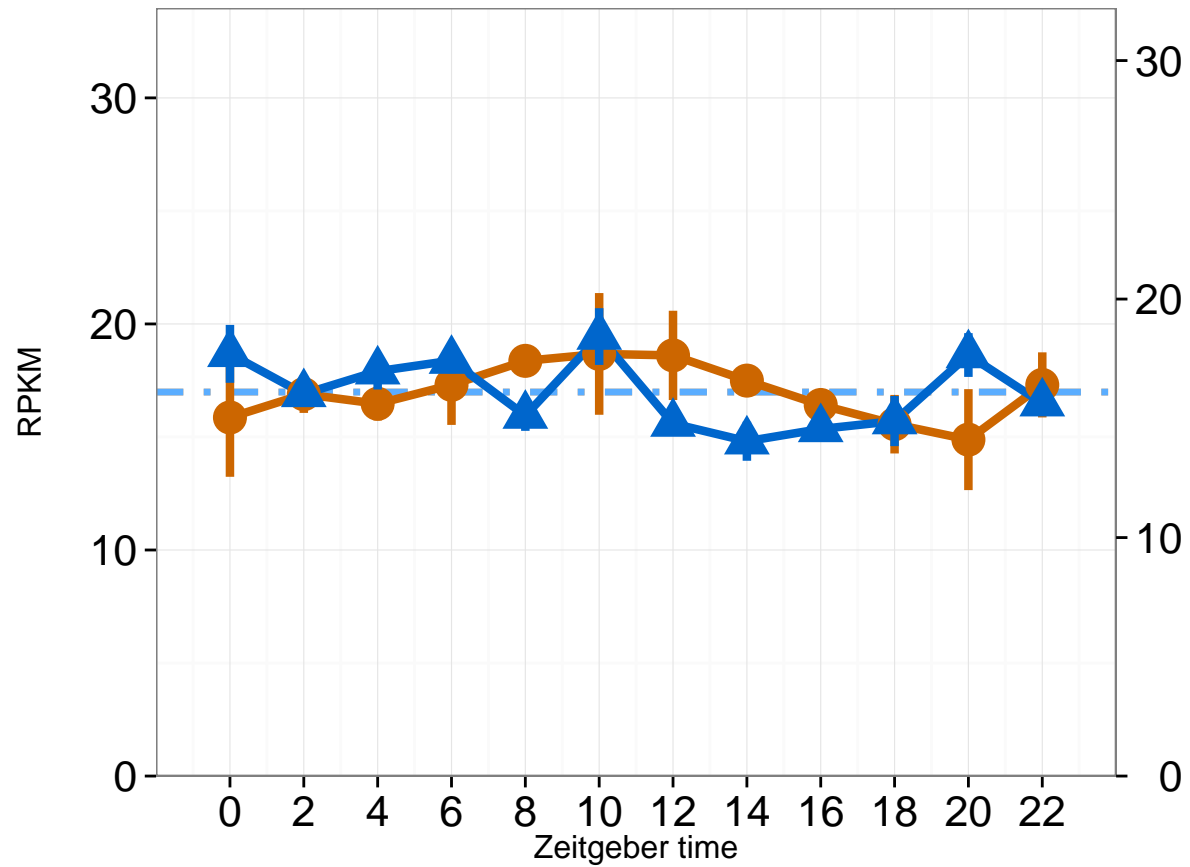

## Acbd6

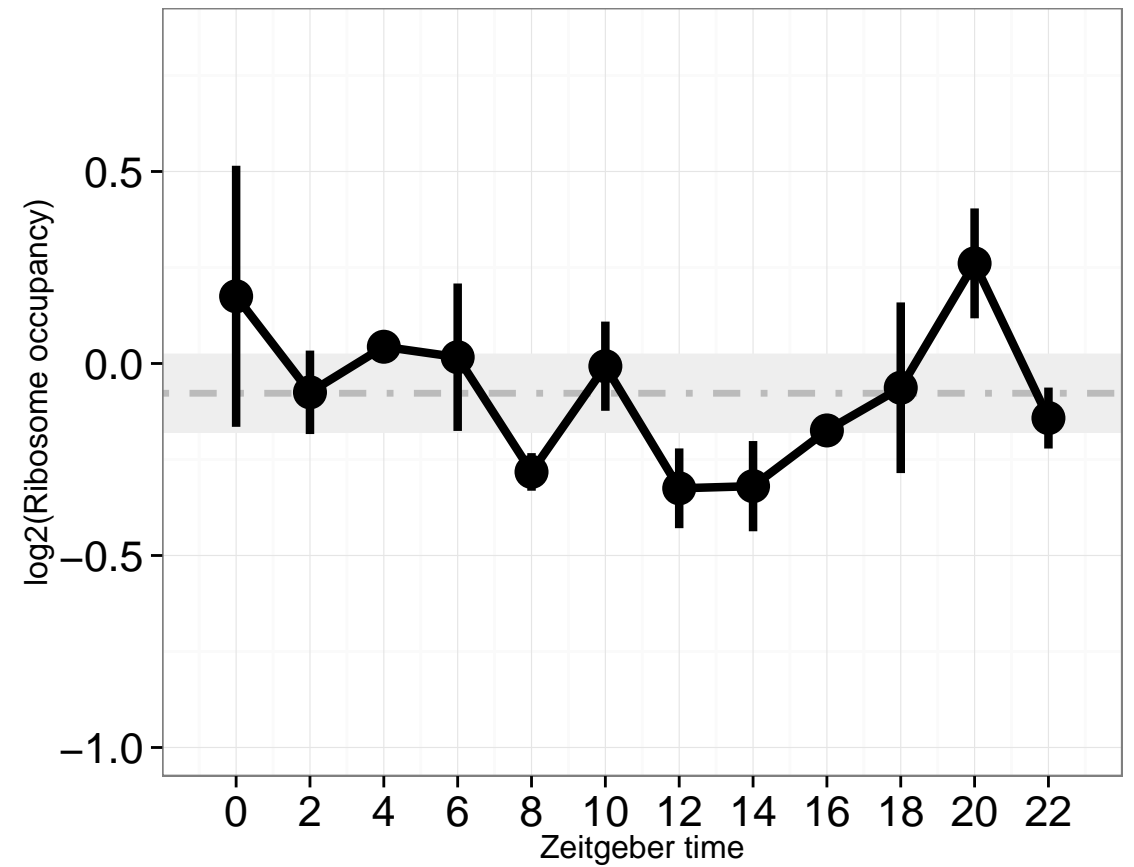

Supplement: Supplementary file 1082 [file 1]

# Zfp456

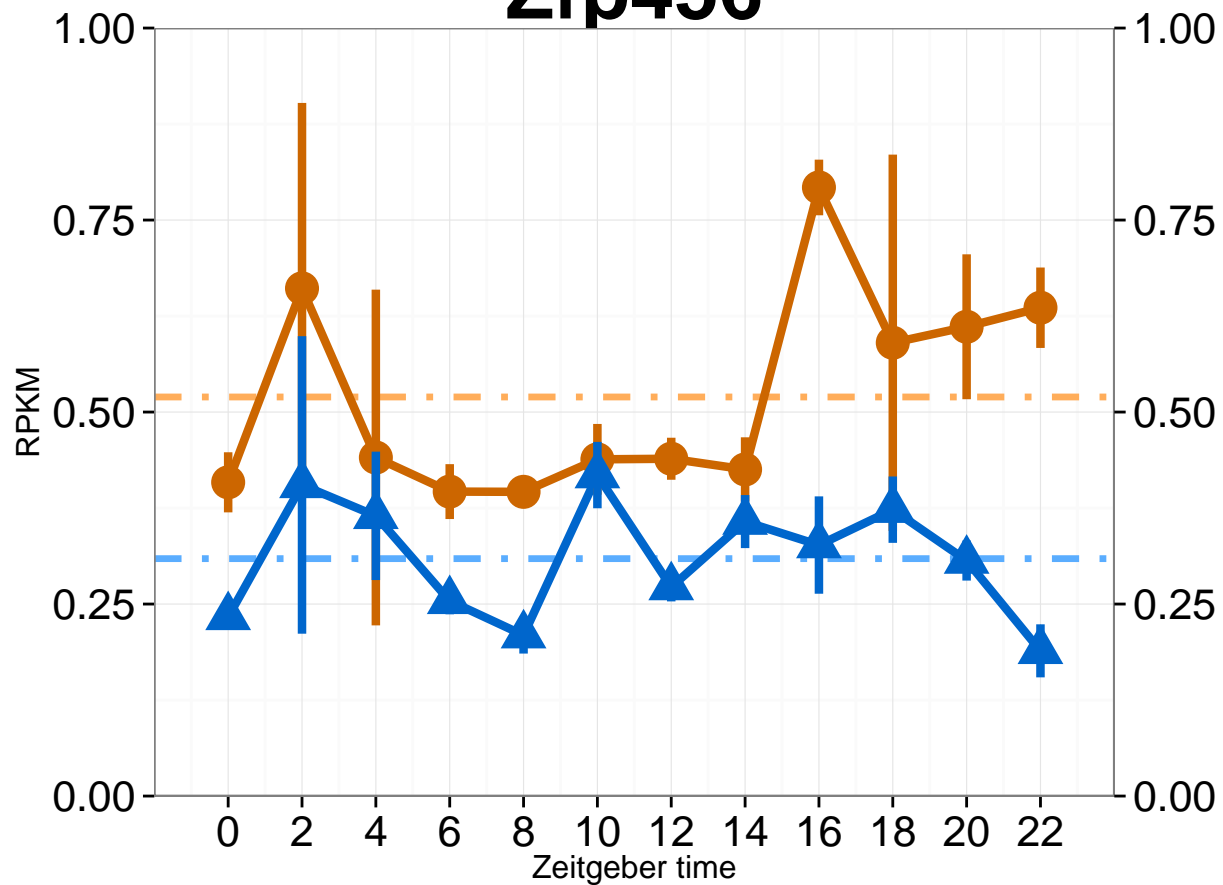

# Zfp456

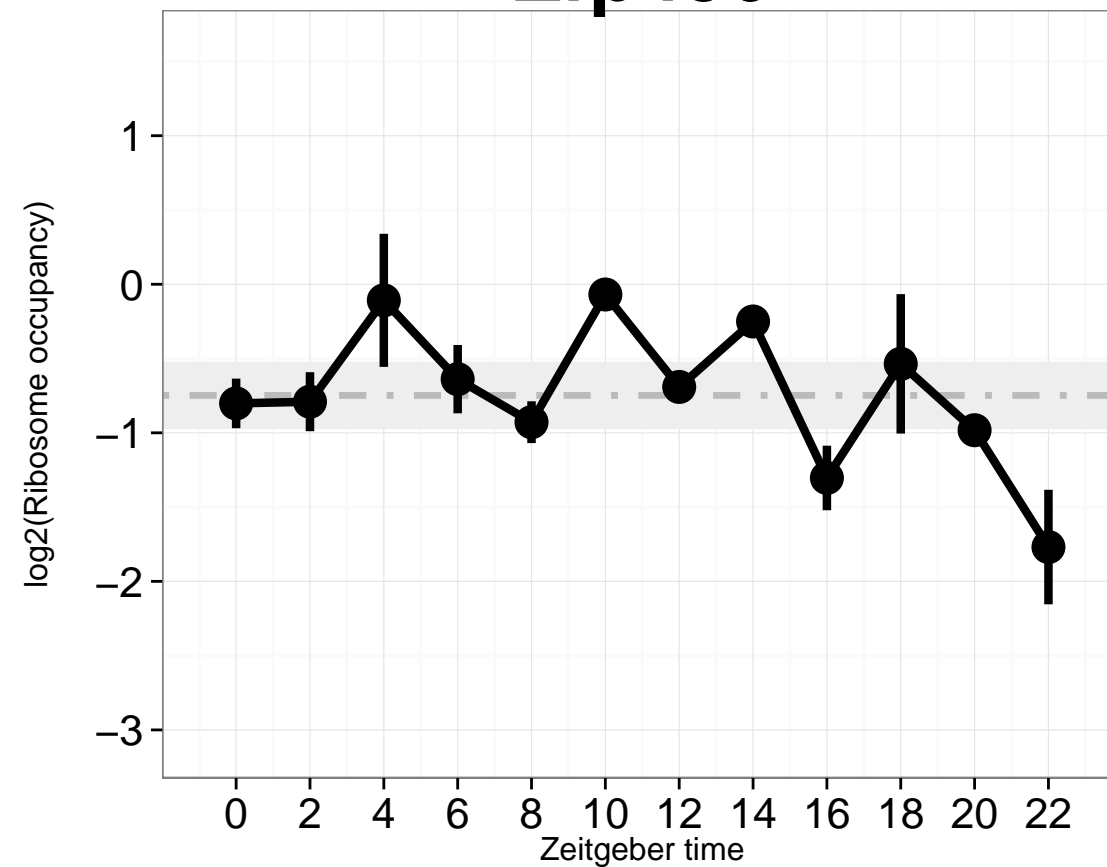

Supplement: Supplementary file 1083 [file 1]

## Cd97

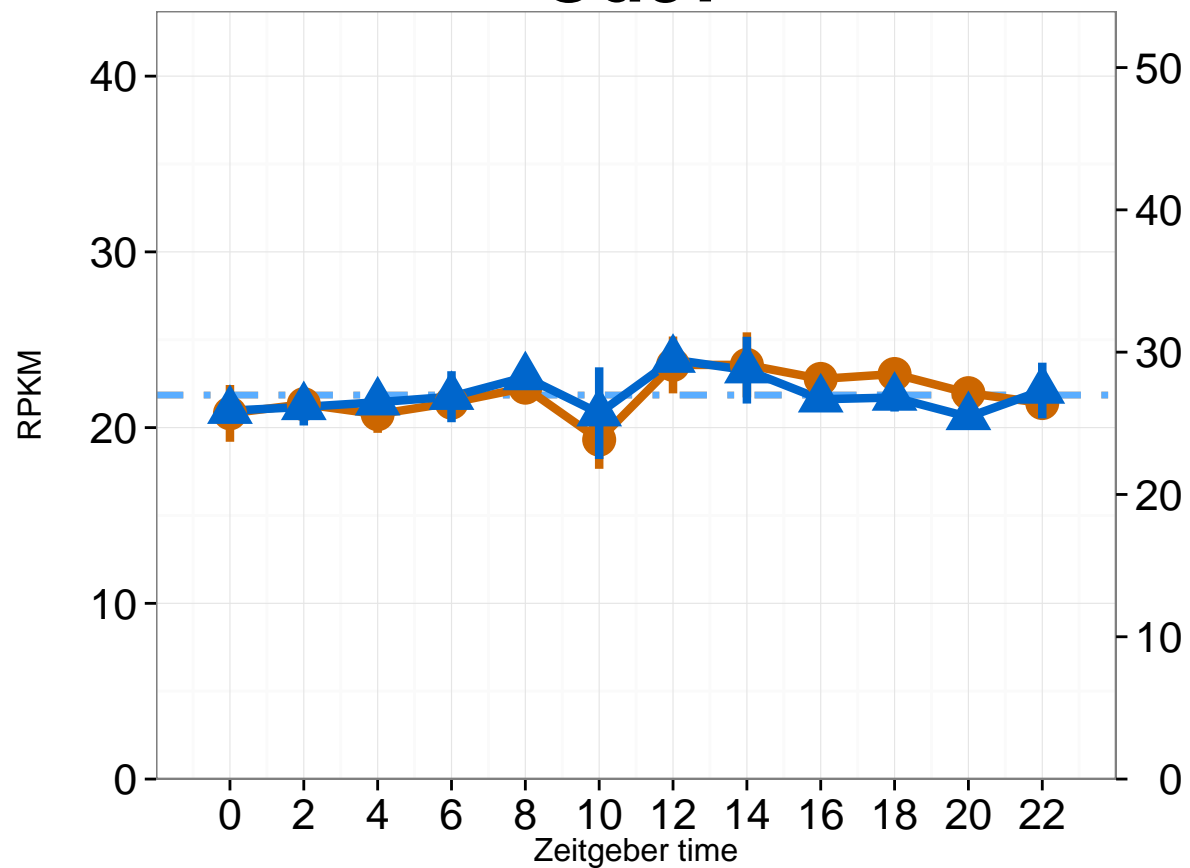

## Cd97

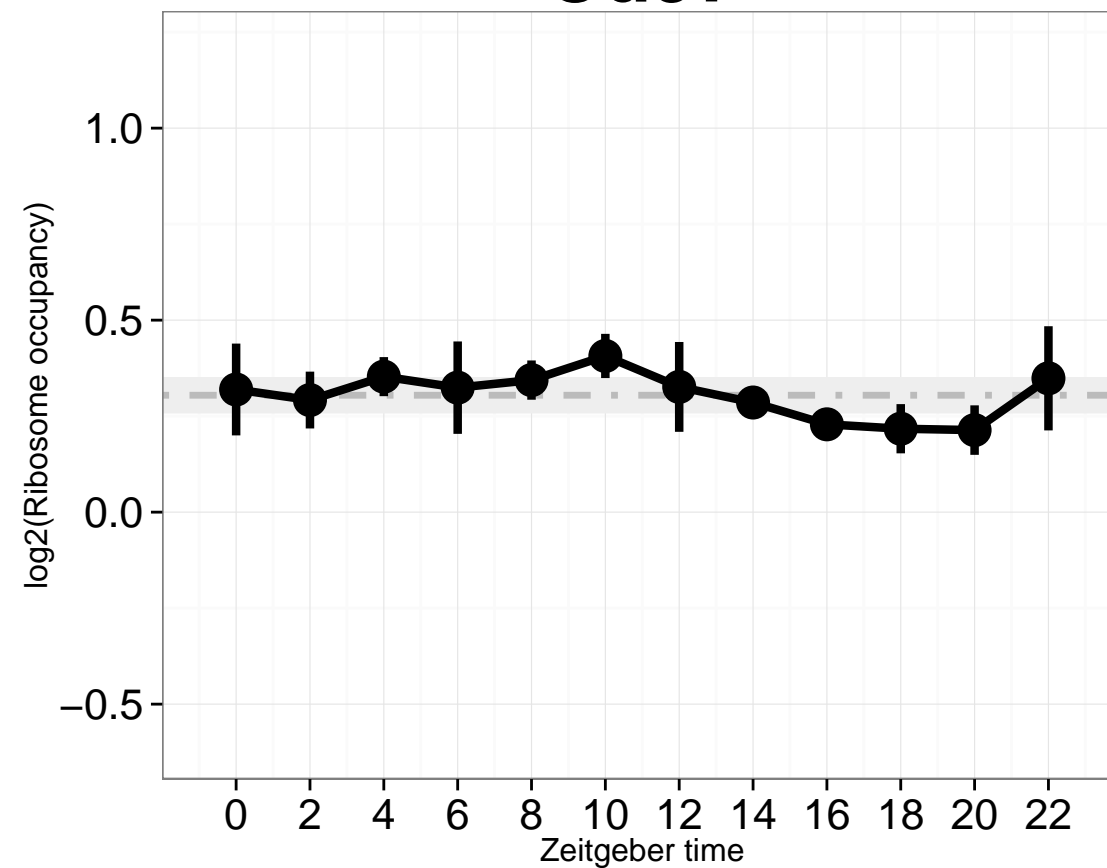

Supplement: Supplementary file 1084 [file 1]

## Zcchc8

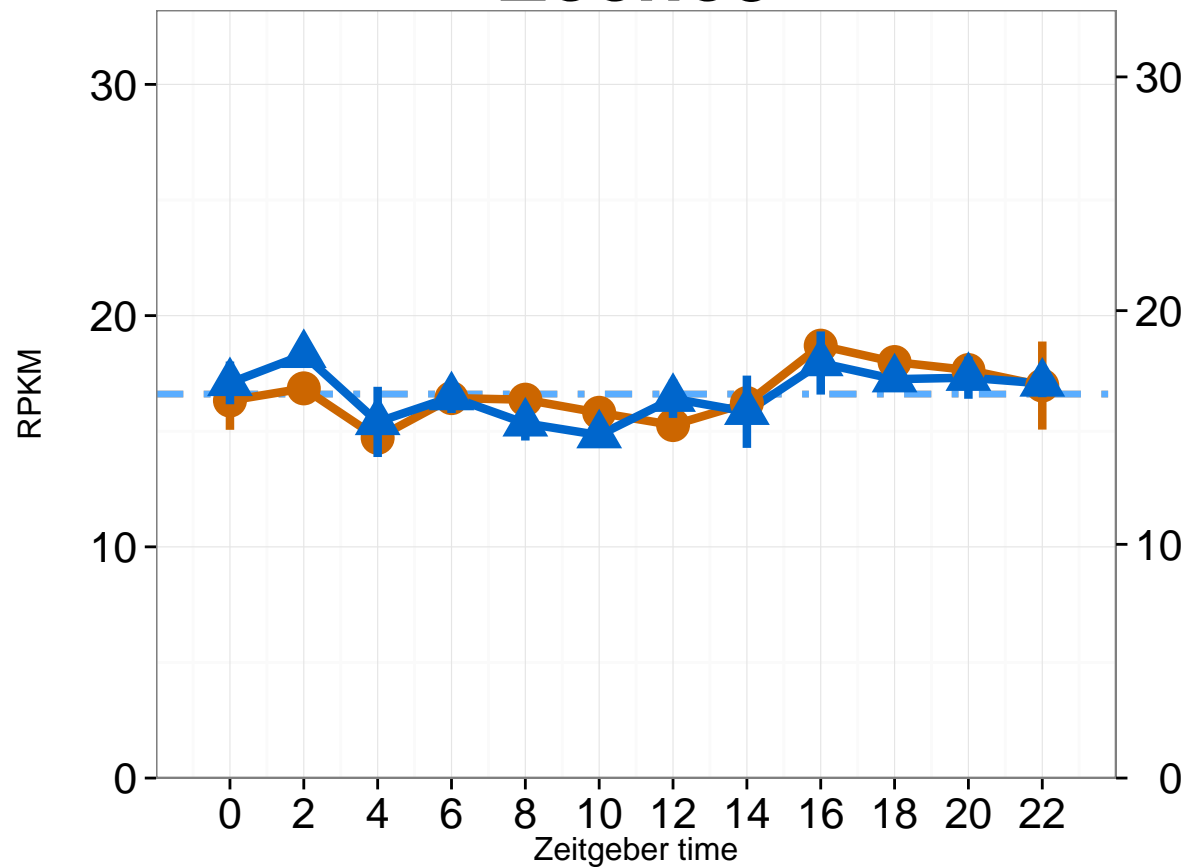

## Zcchc8

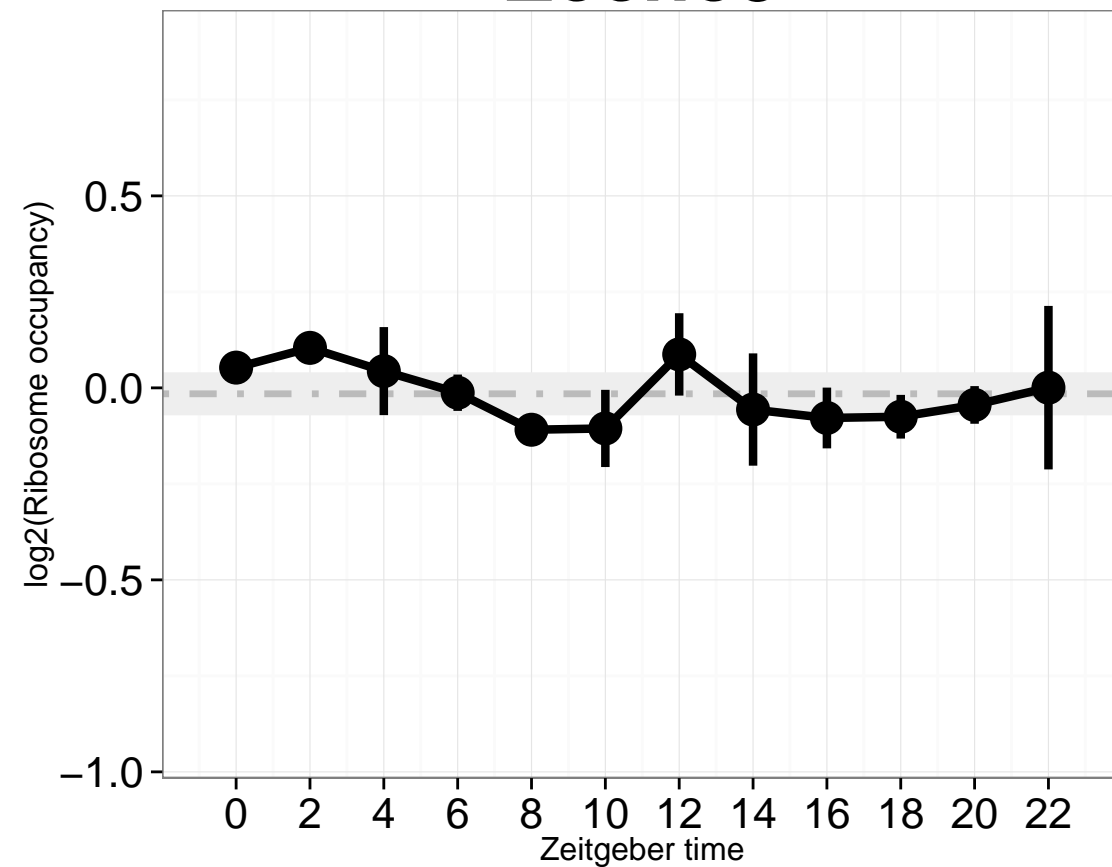

Supplement: Supplementary file 1085 [file 1]

## Gstt2

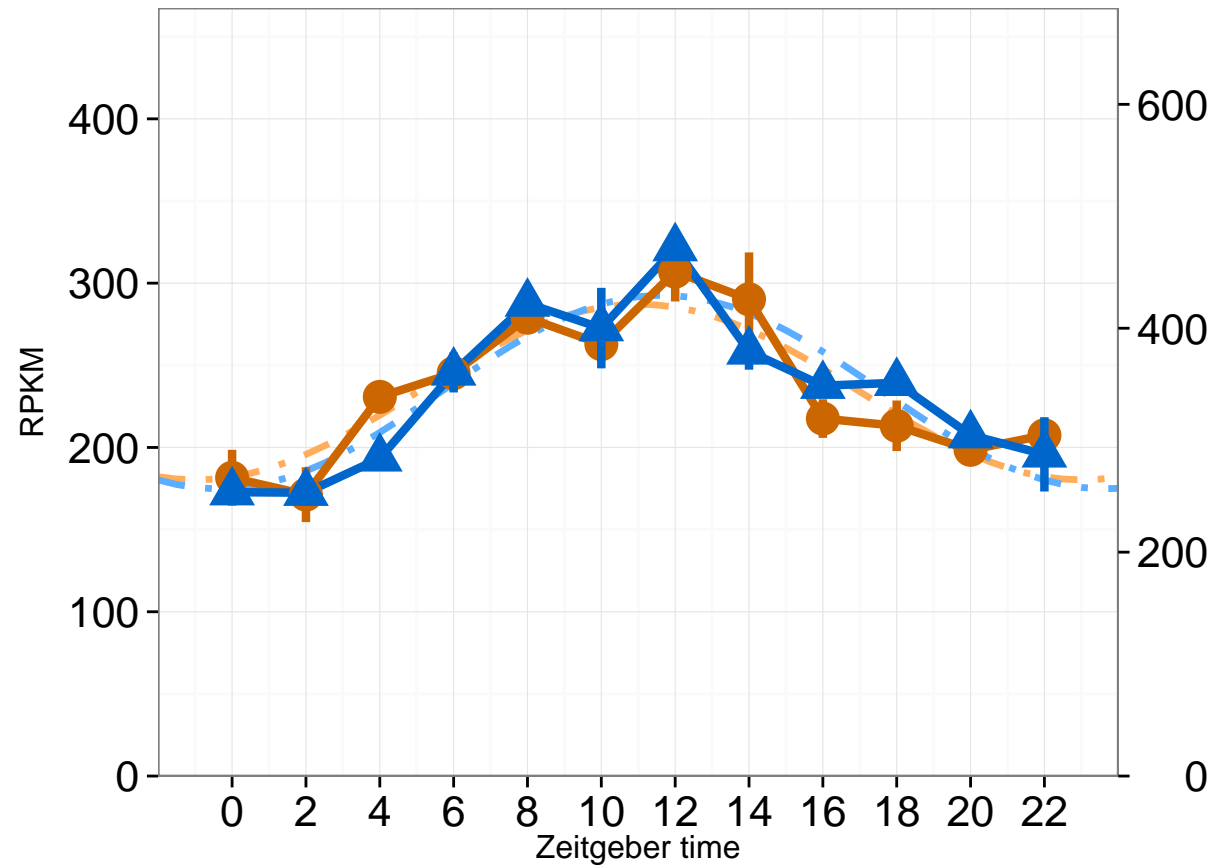

## Gstt2

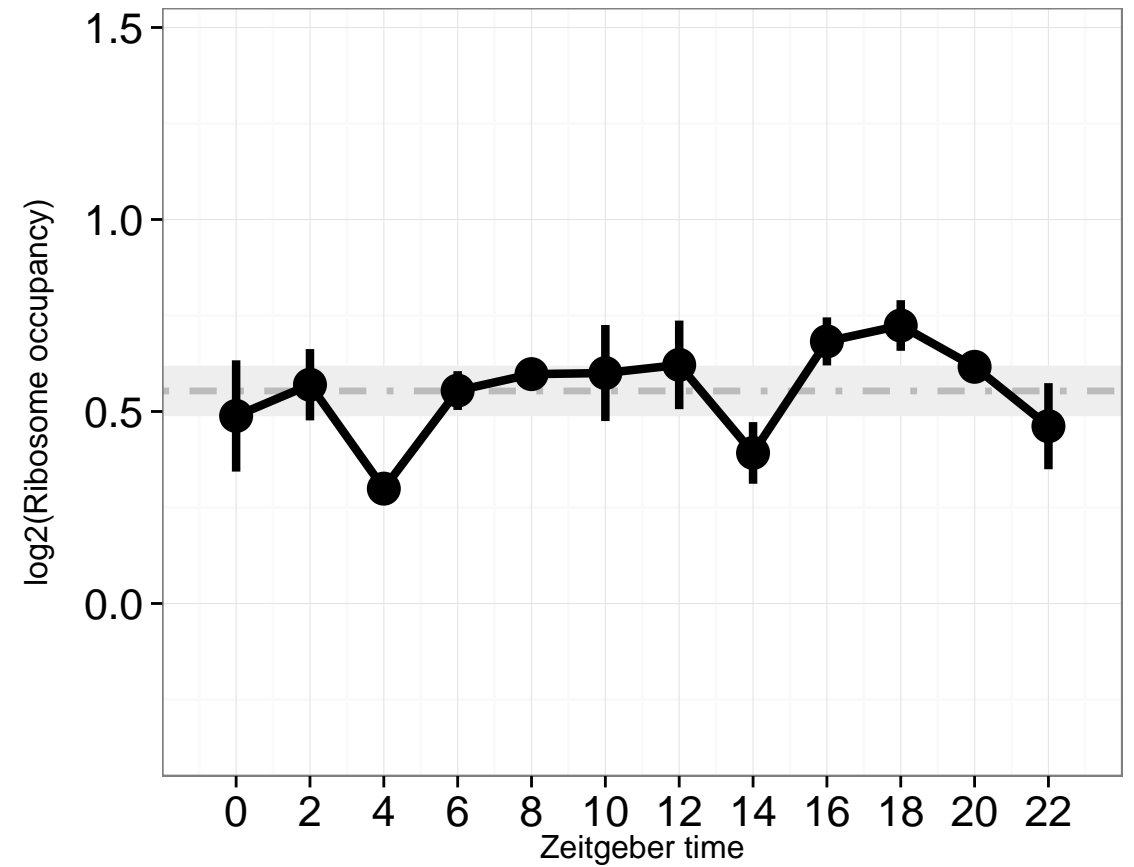

Supplement: Supplementary file 1086 [file 1]

## Erc2

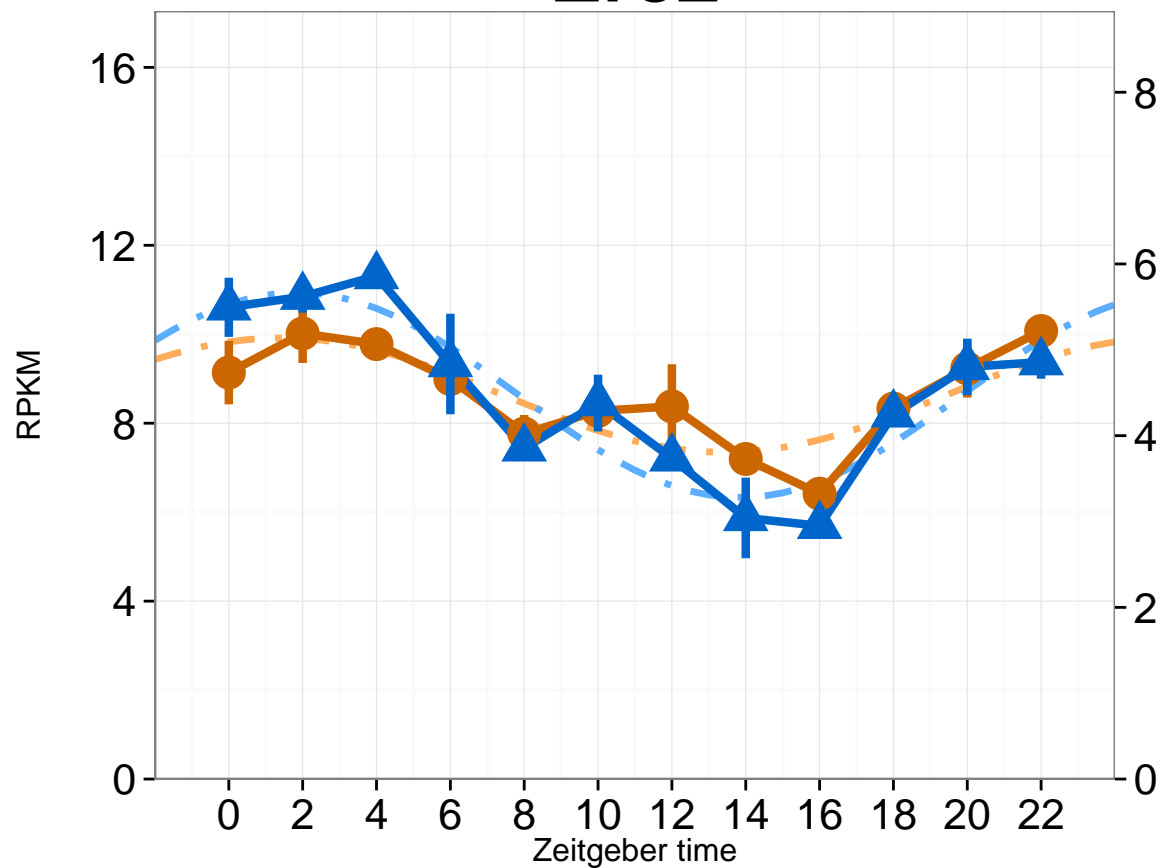

## Erc2

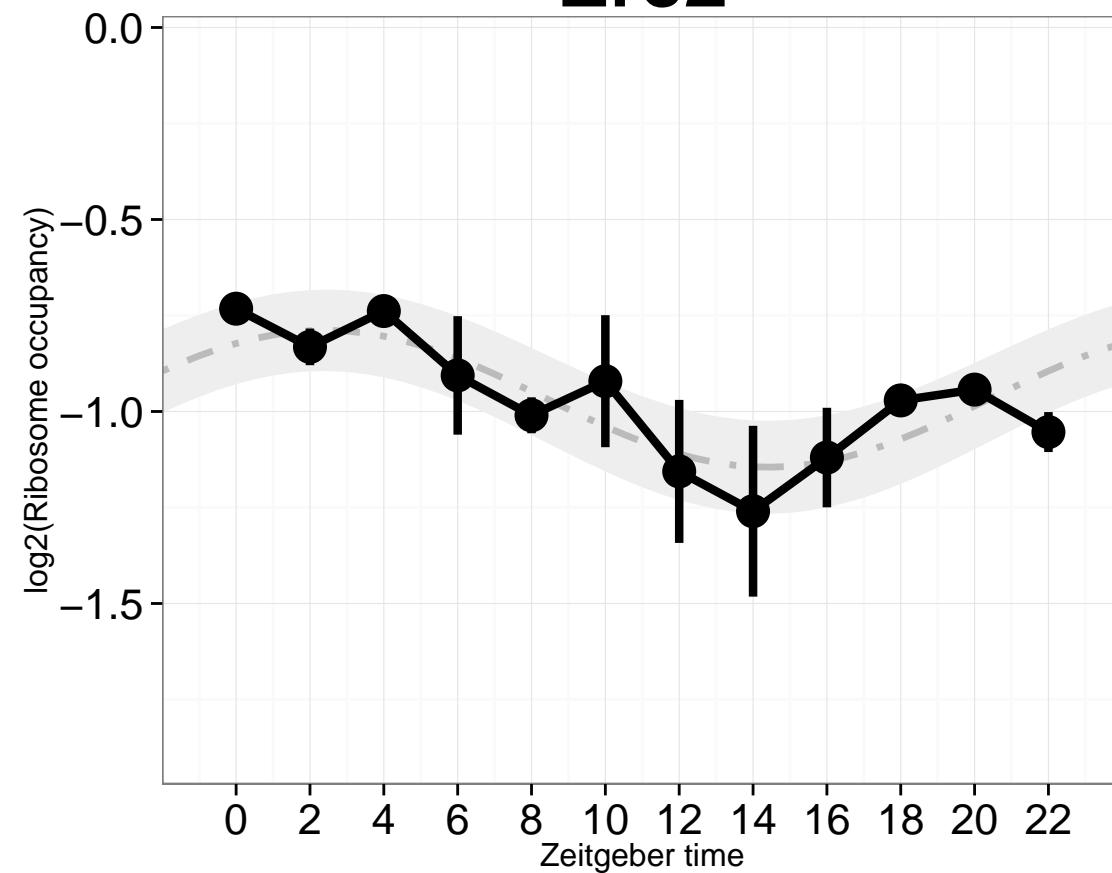

Supplement: Supplementary file 1087 [file 1]

## Adck5

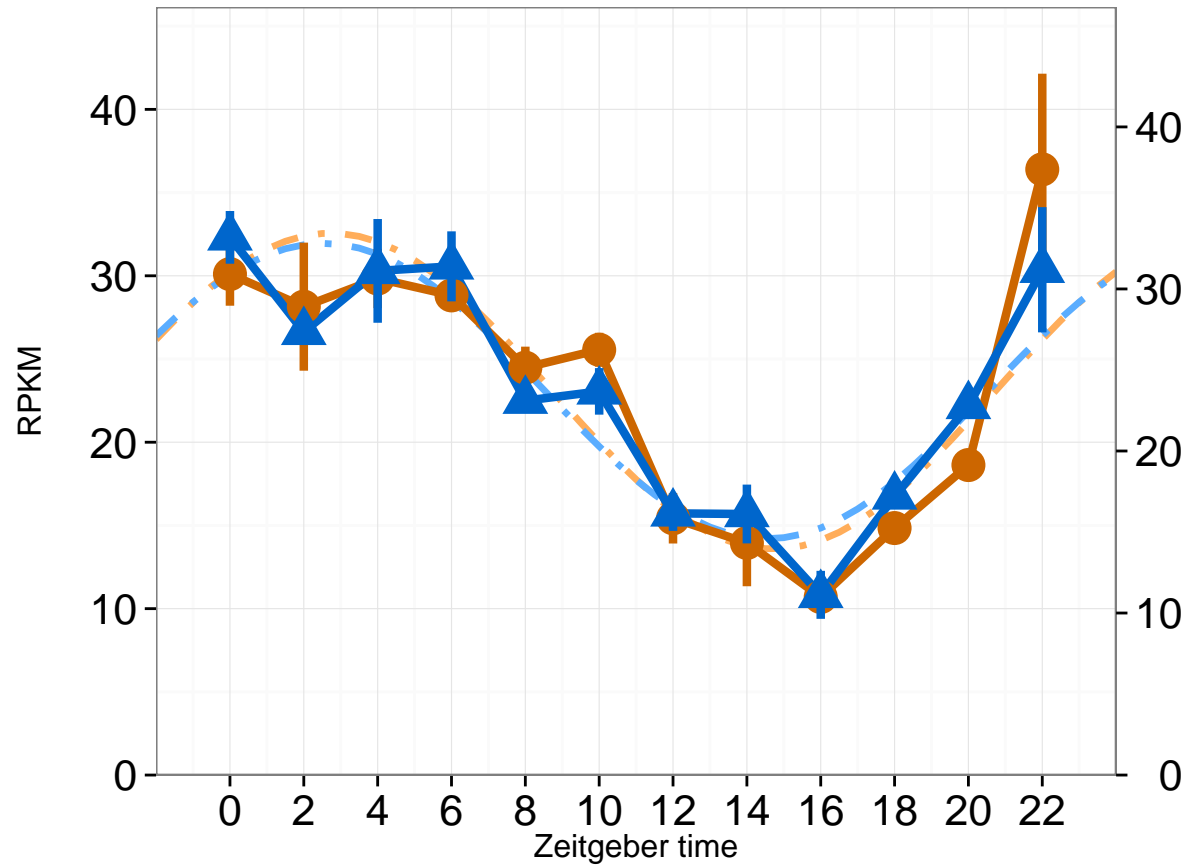

## Adck5

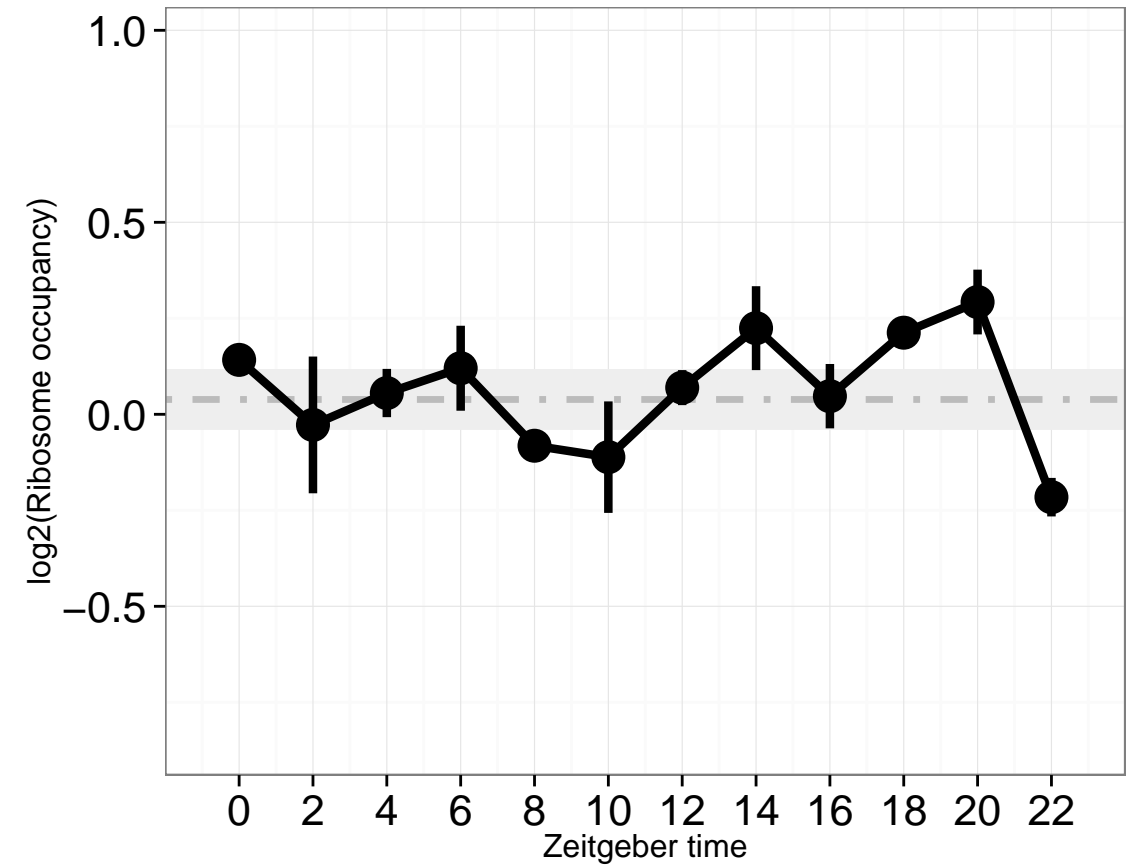

Supplement: Supplementary file 1088 [file 1]

## Ubqln2

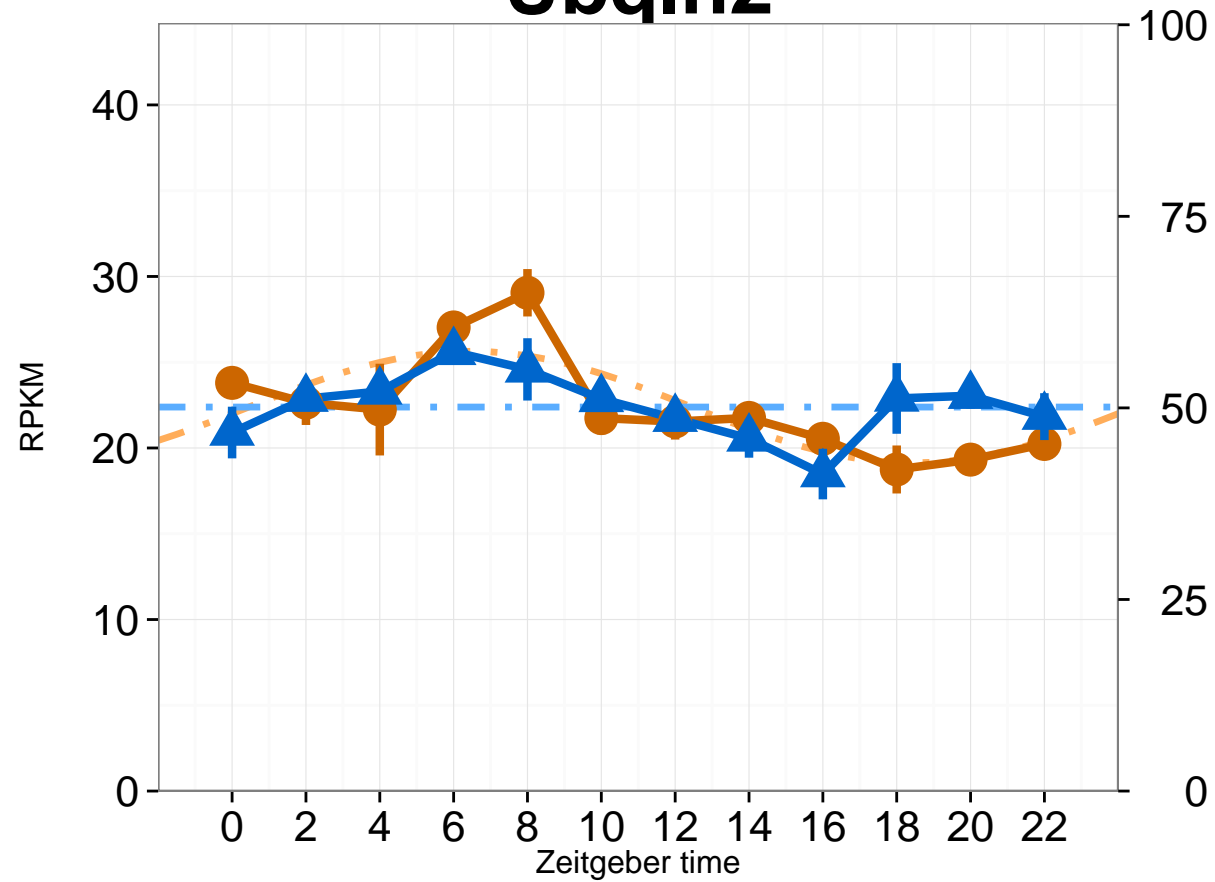

## Ubqln2

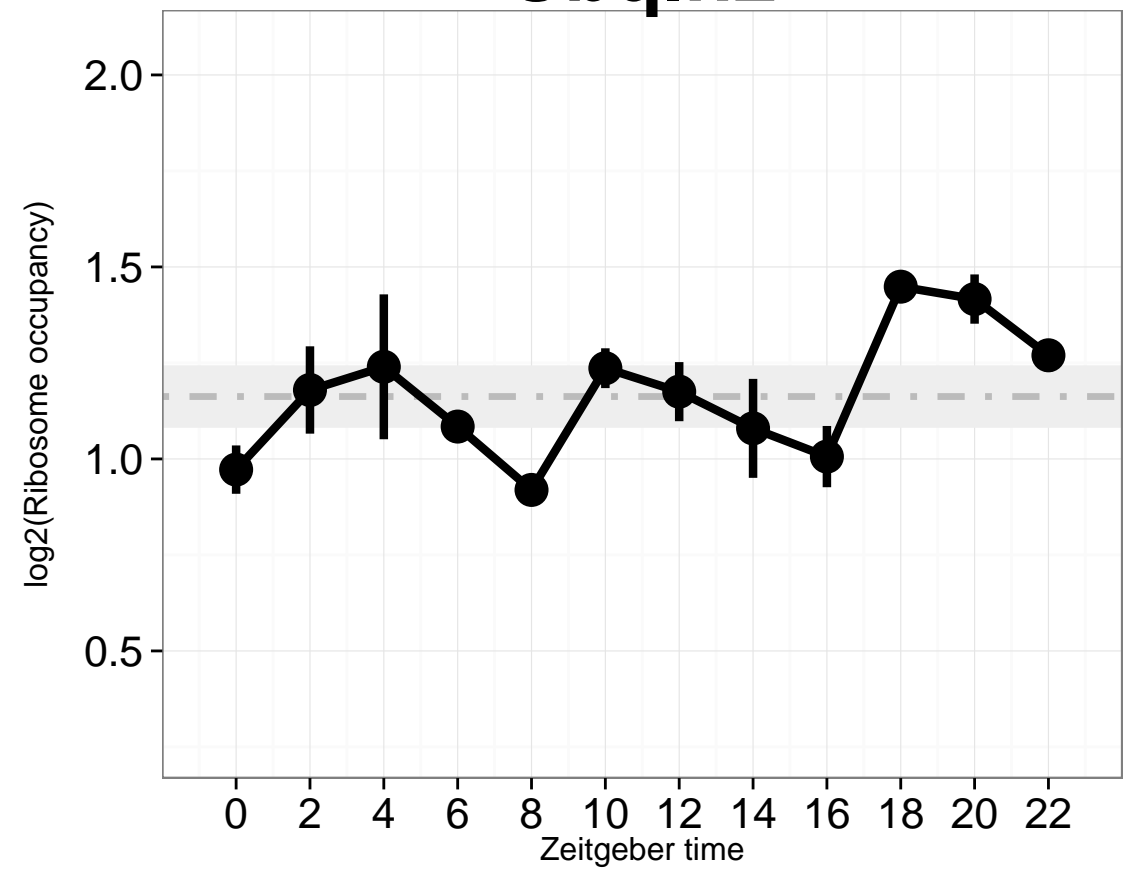

Supplement: Supplementary file 1089 [file 1]

# Fcgr1

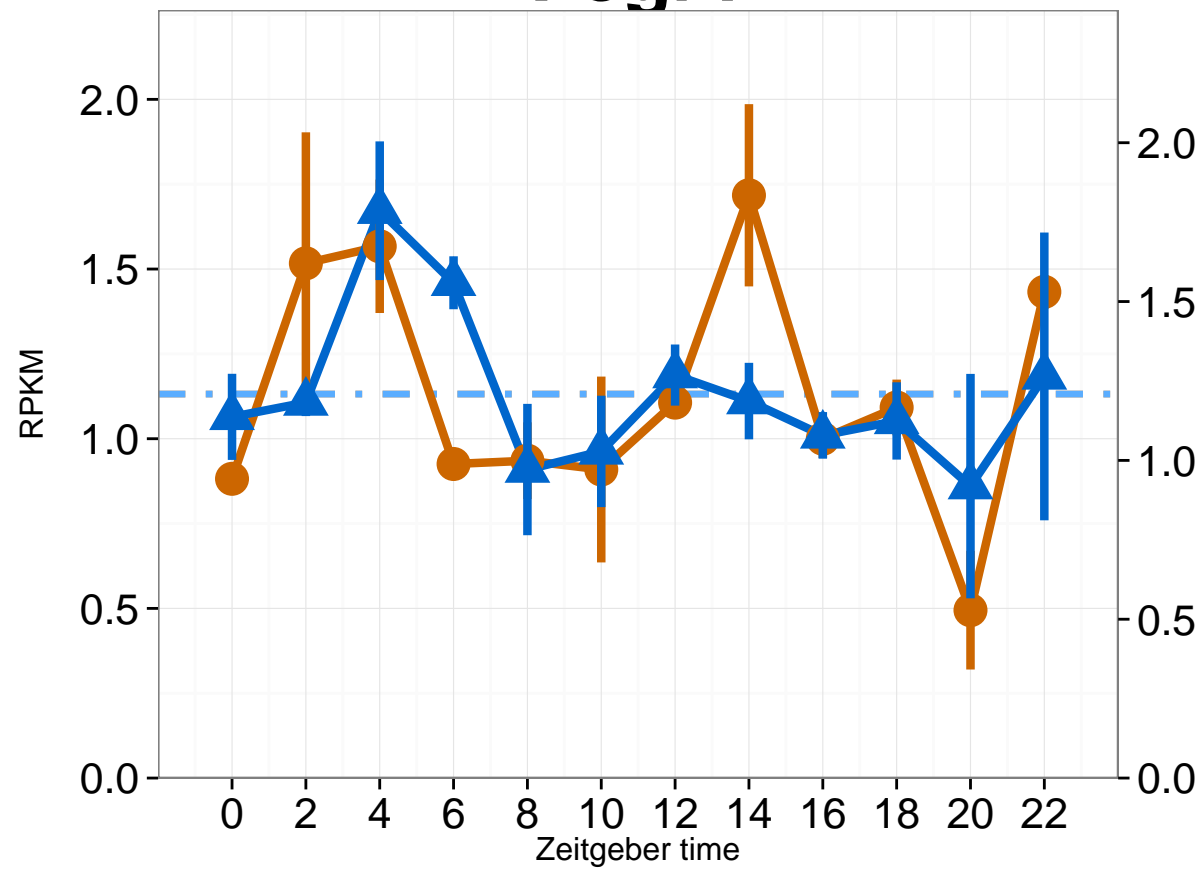

# Fcgr1

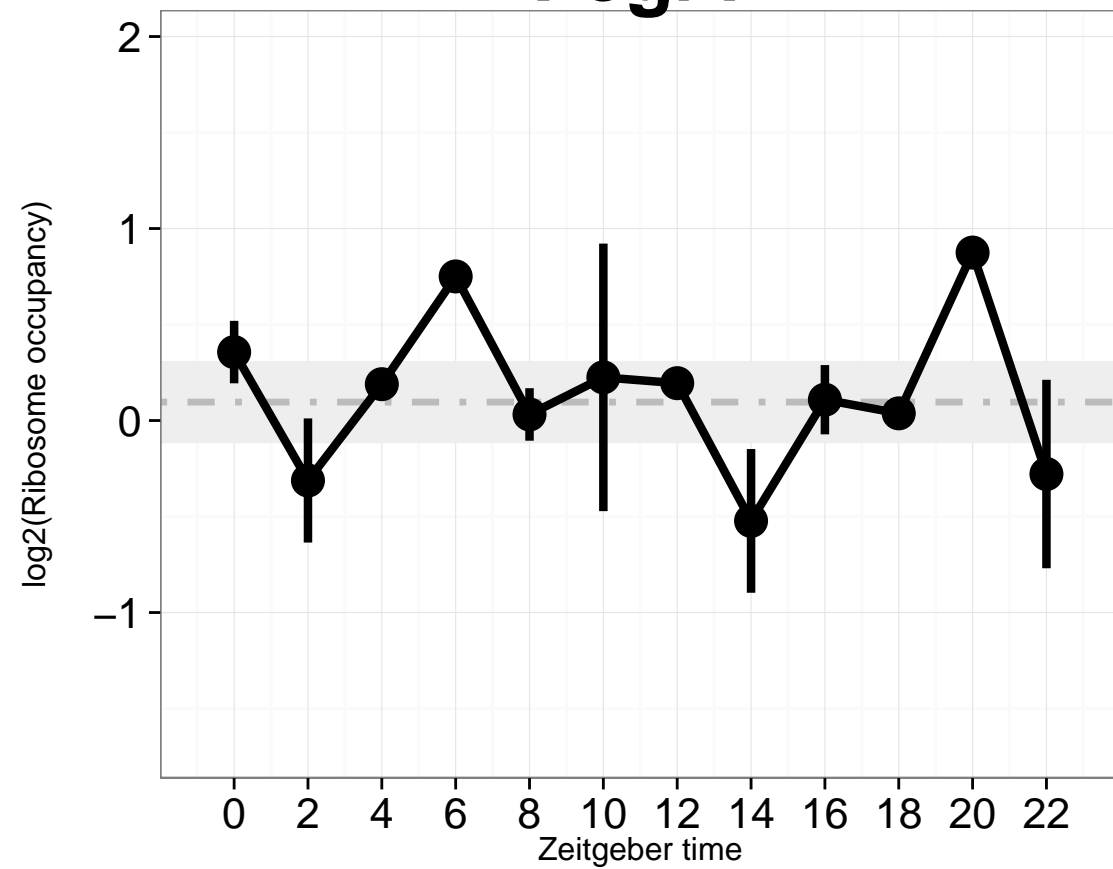

Supplement: Supplementary file 1090 [file 1]

## Commd3

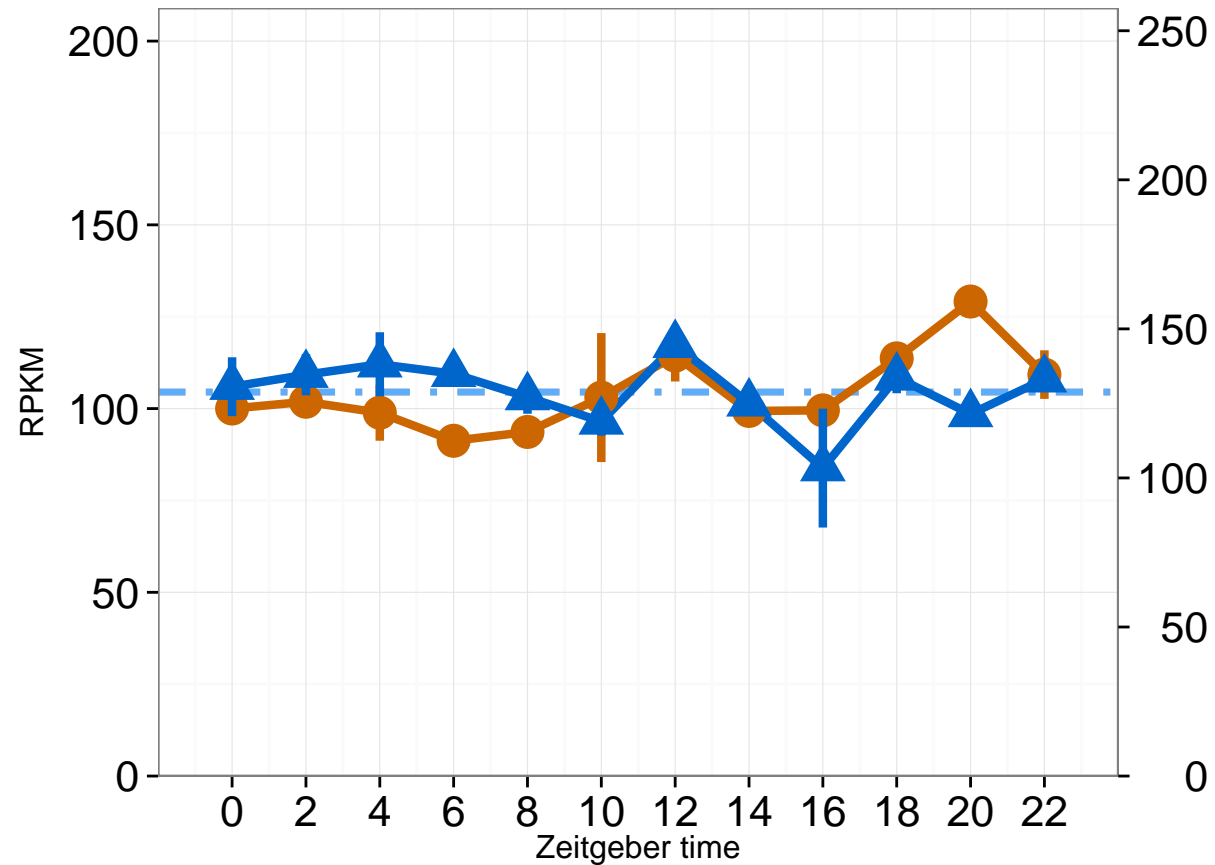

## Commd3

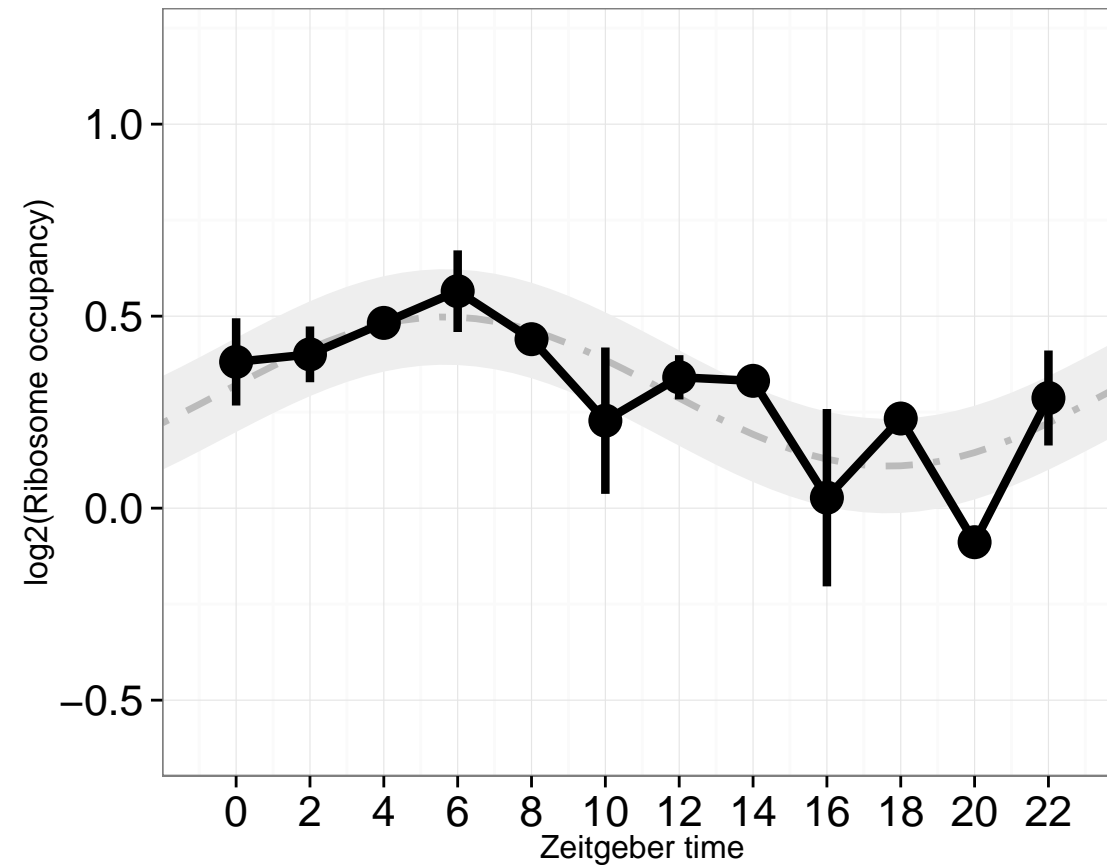

Supplement: Supplementary file 1091 [file 1]

## Txnip

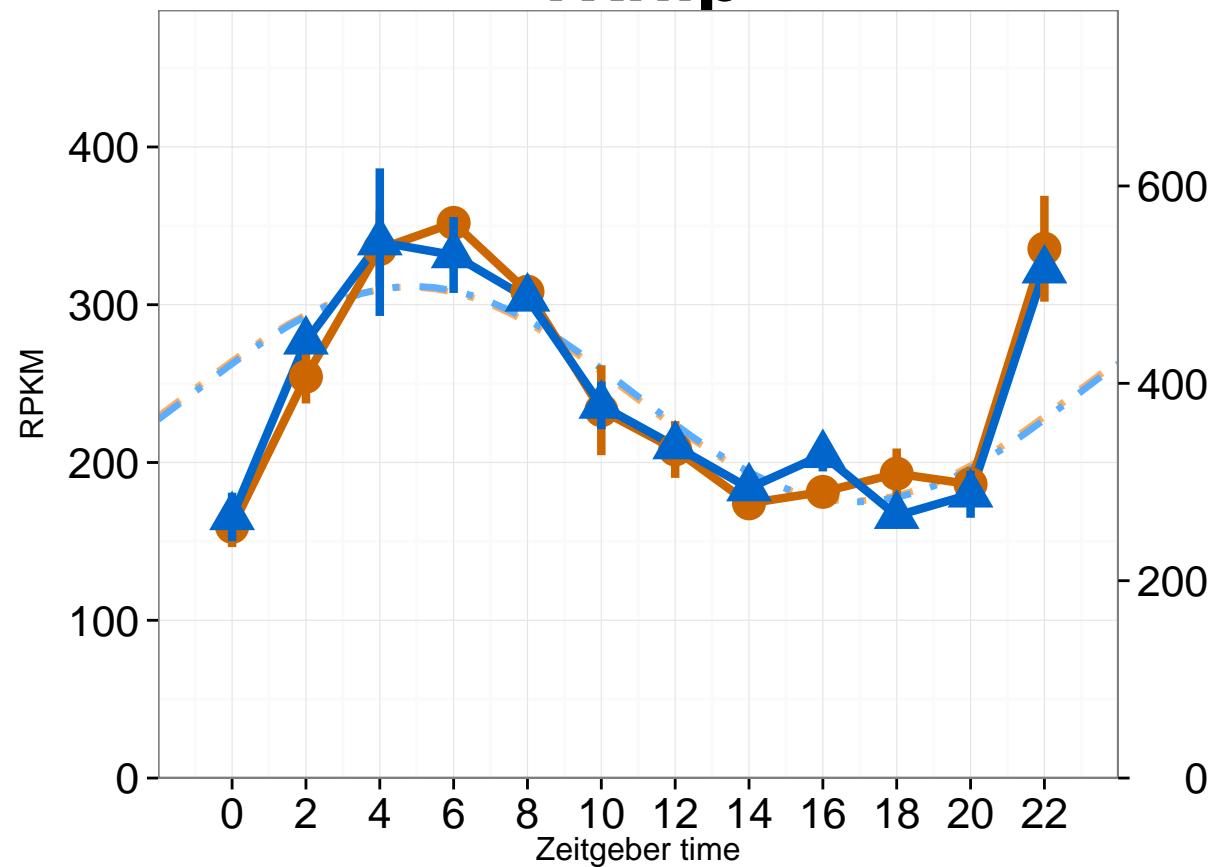

## Txnip

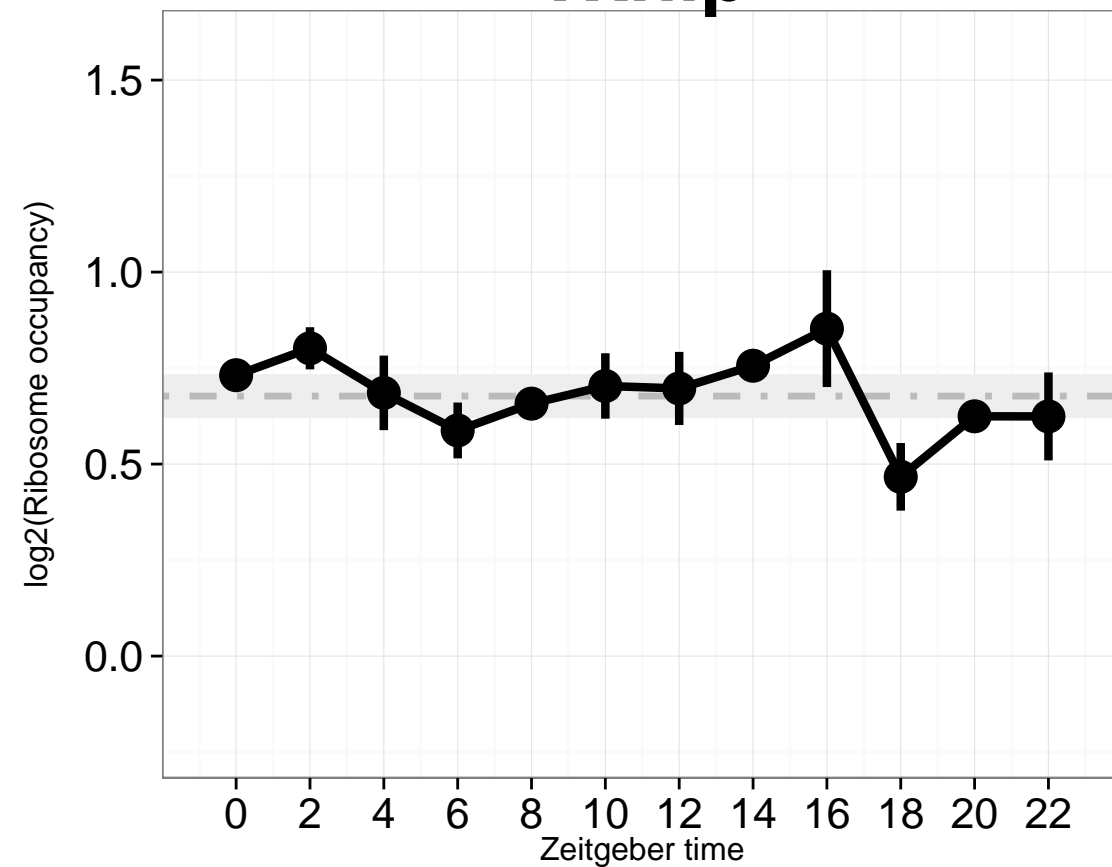

Supplement: Supplementary file 1092 [file 1]

## Pank2

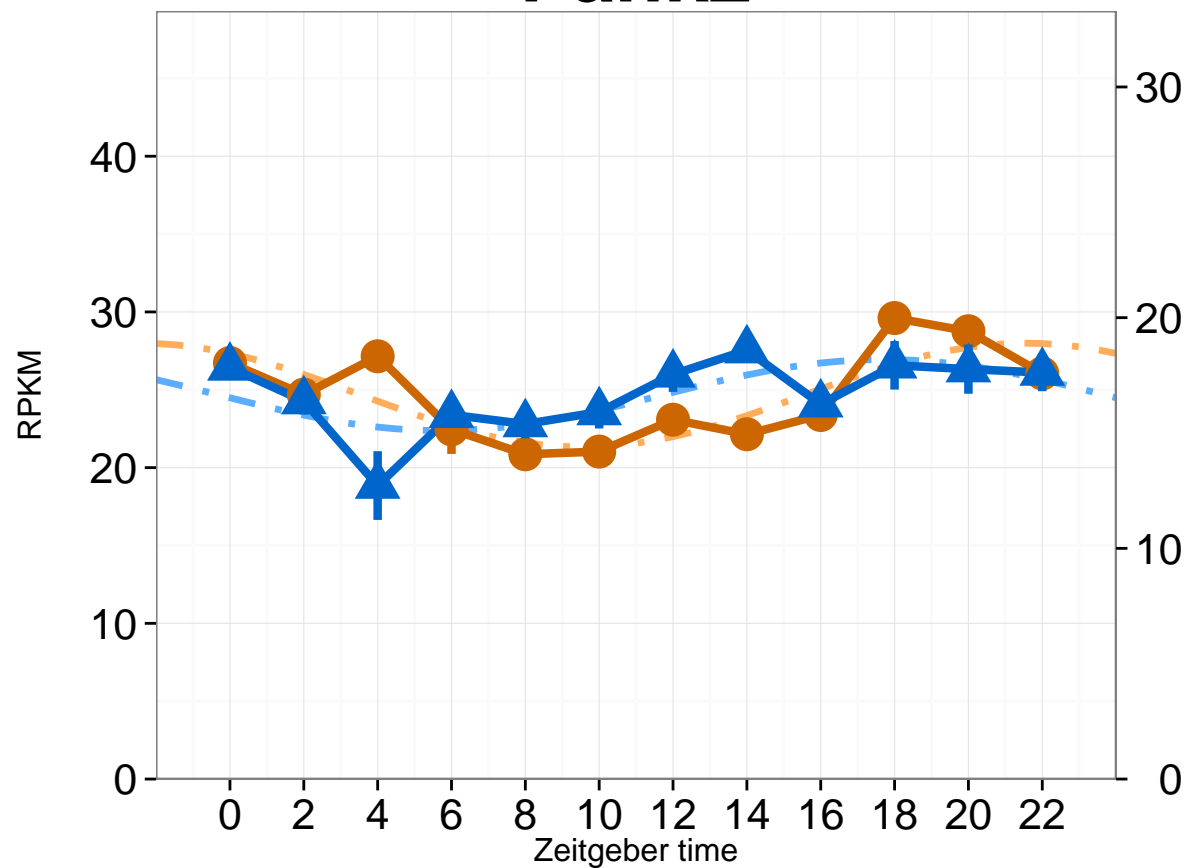

## Pank2

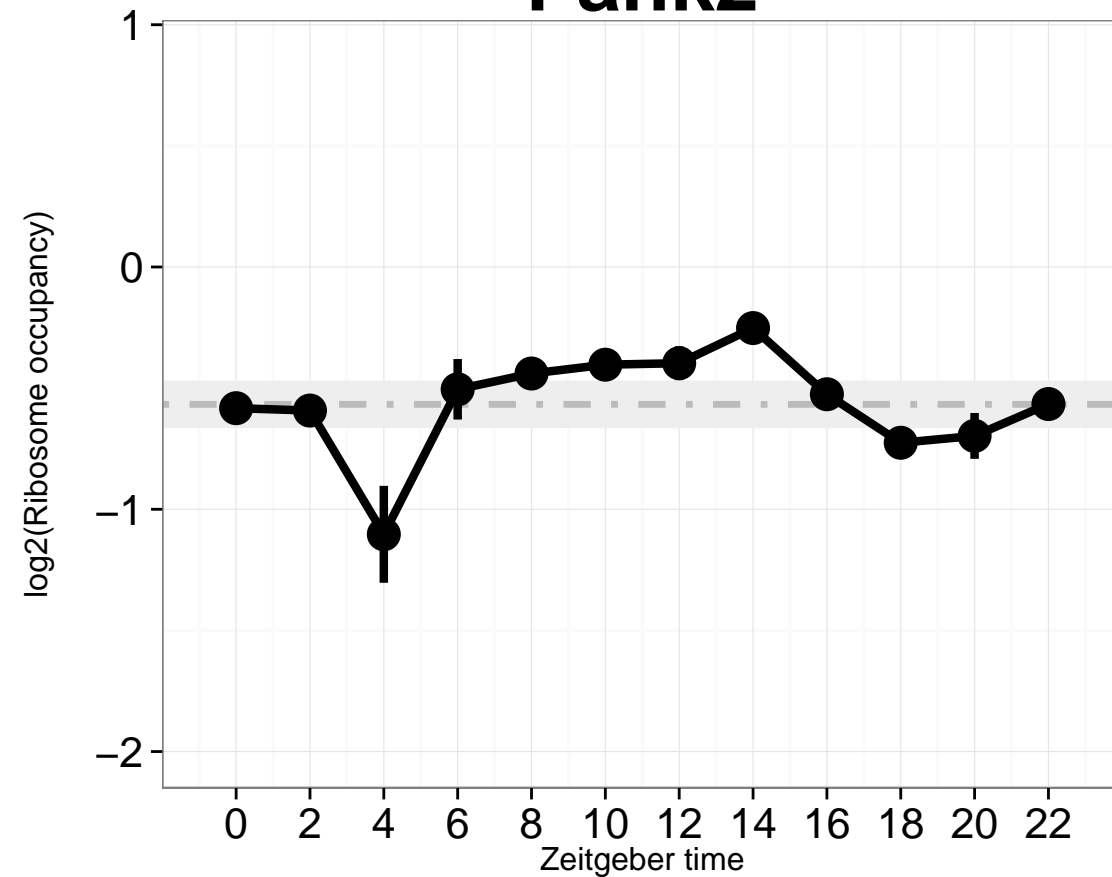

Supplement: Supplementary file 1093 [file 1]

## Cyth4

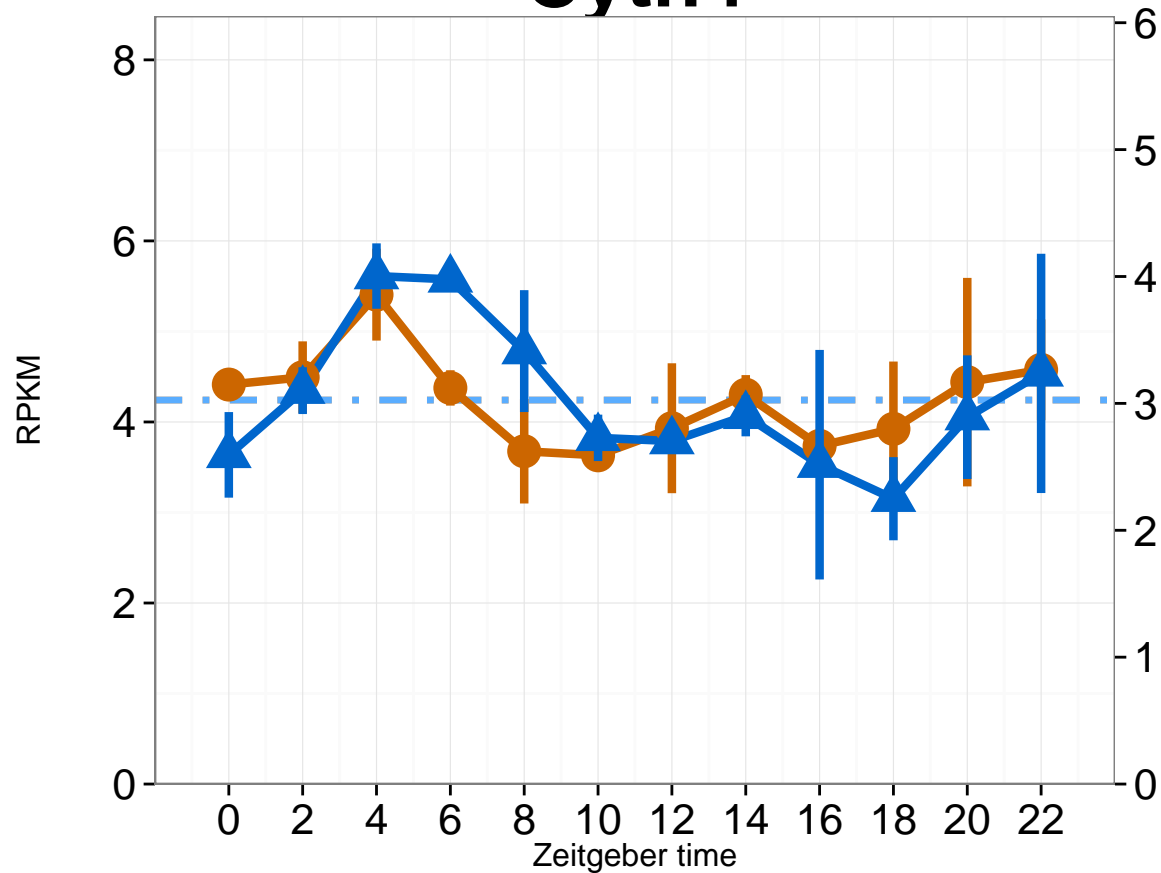

## Cyth4

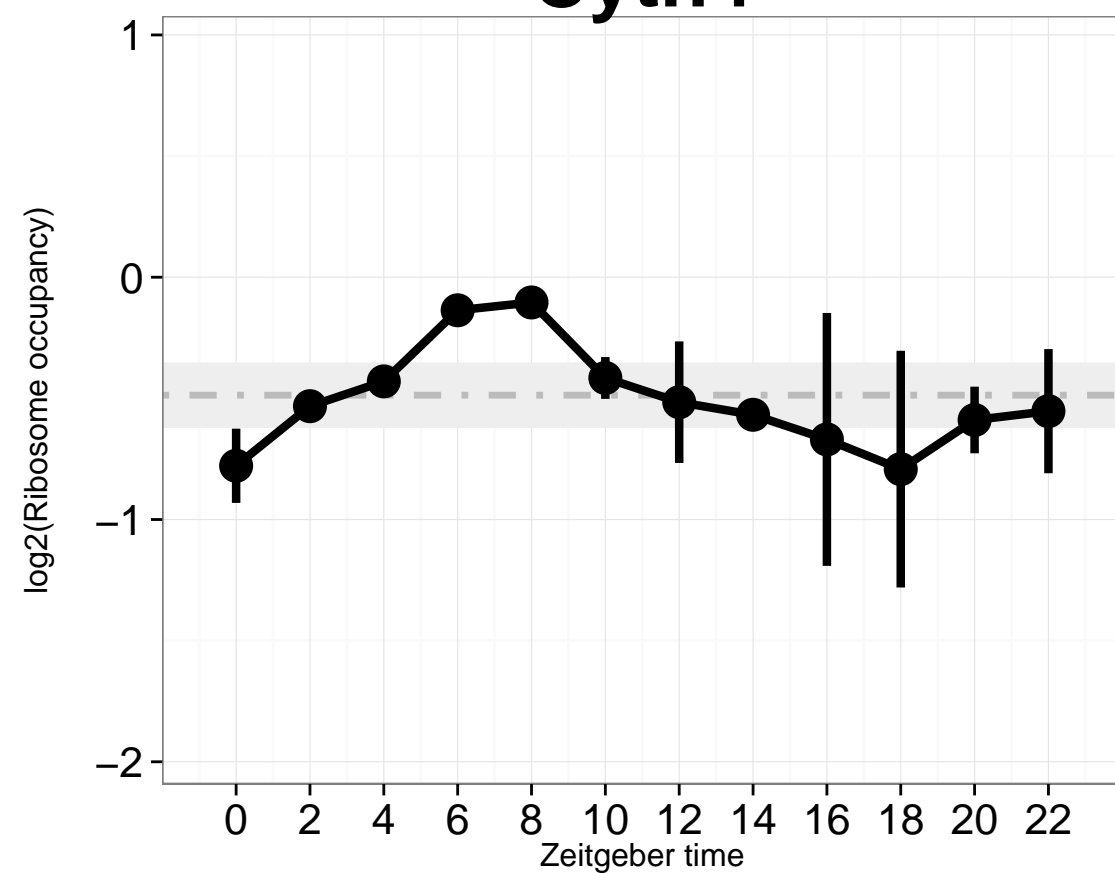

Supplement: Supplementary file 1094 [file 1]

# Slc35a5

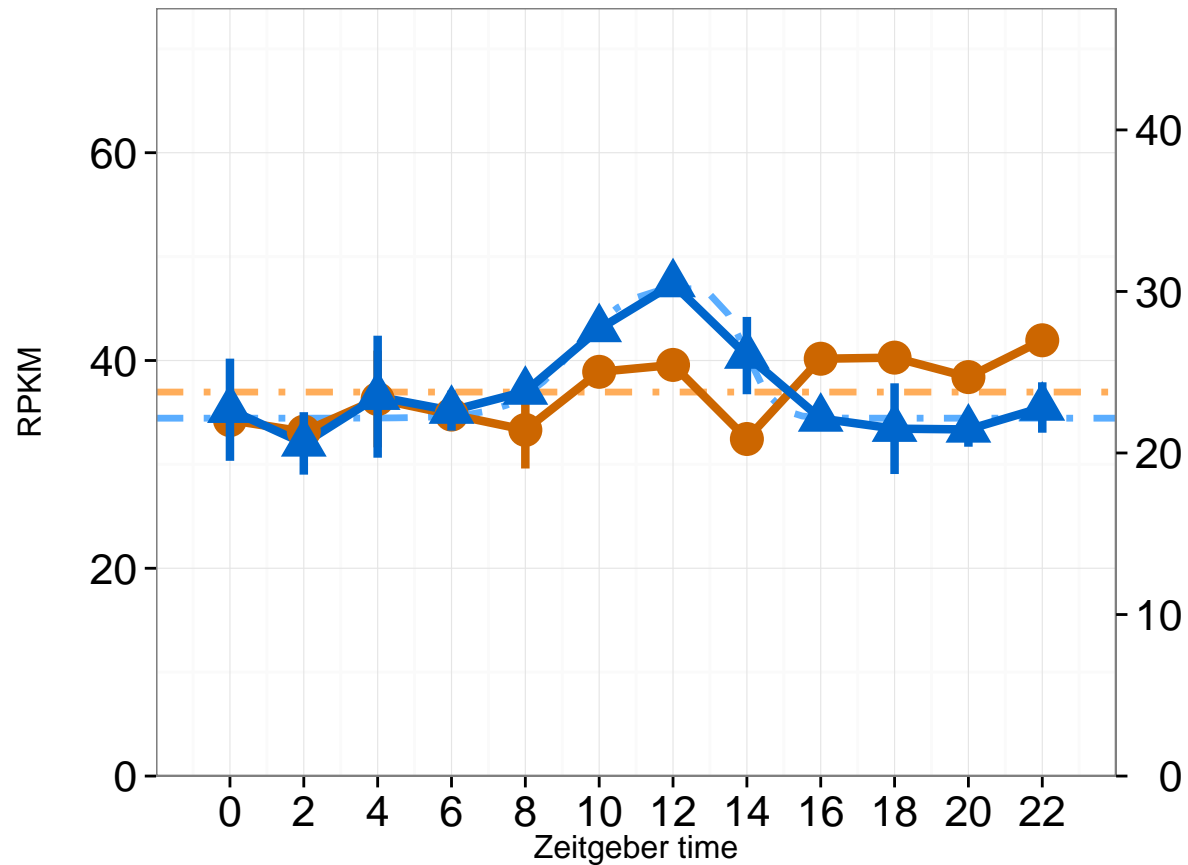

# Slc35a5

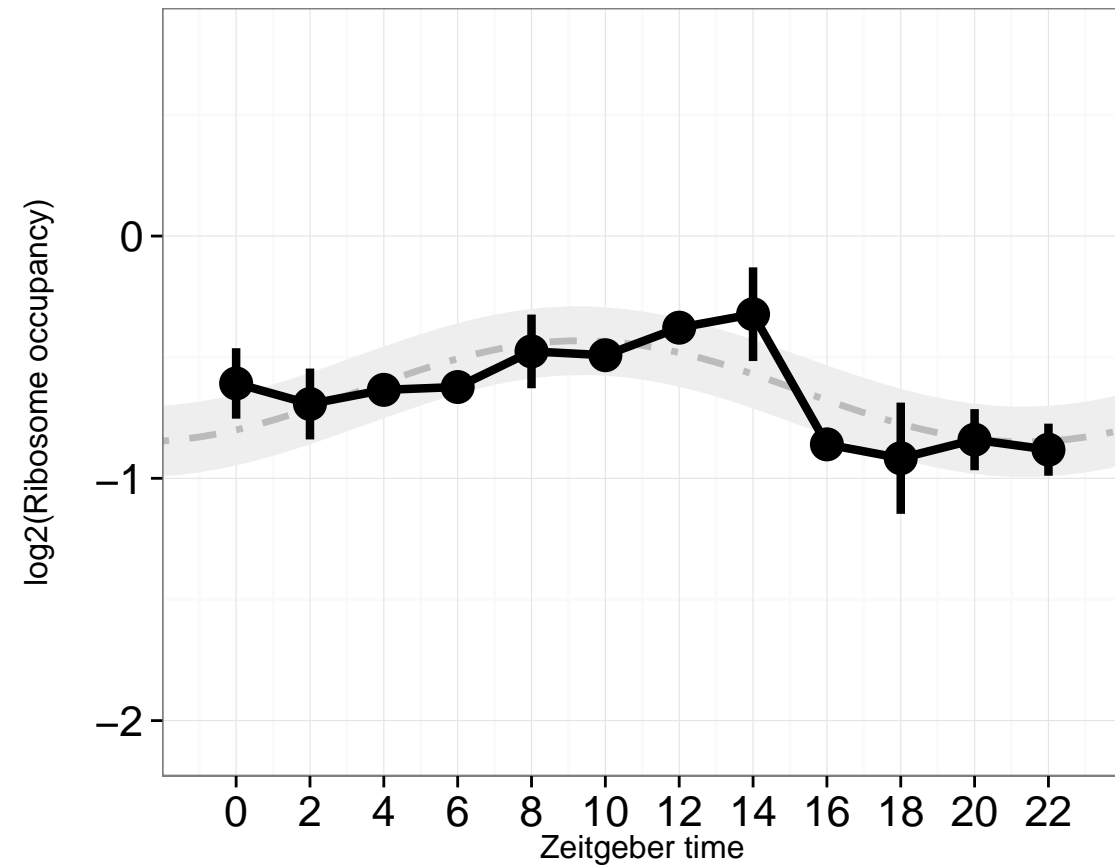

Supplement: Supplementary file 1095 [file 1]

# Grid1

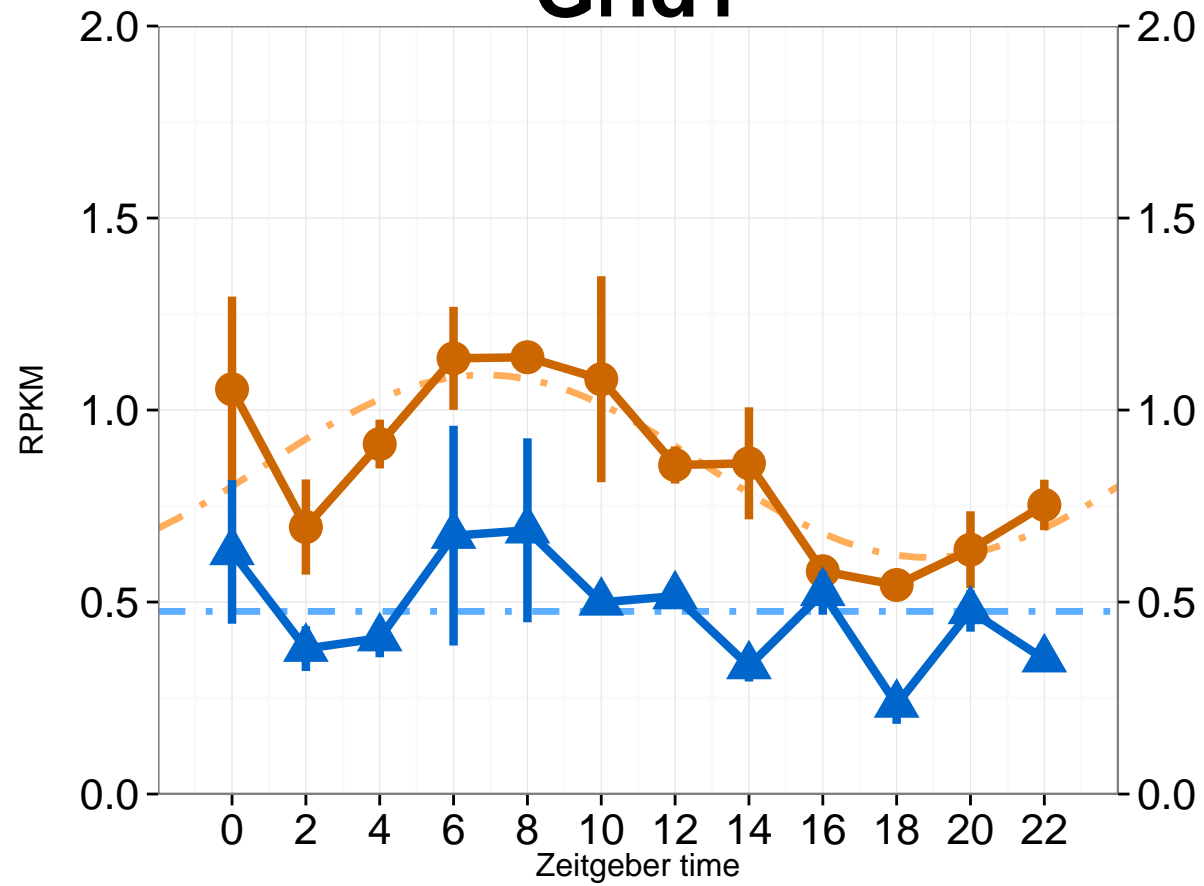

# Grid1

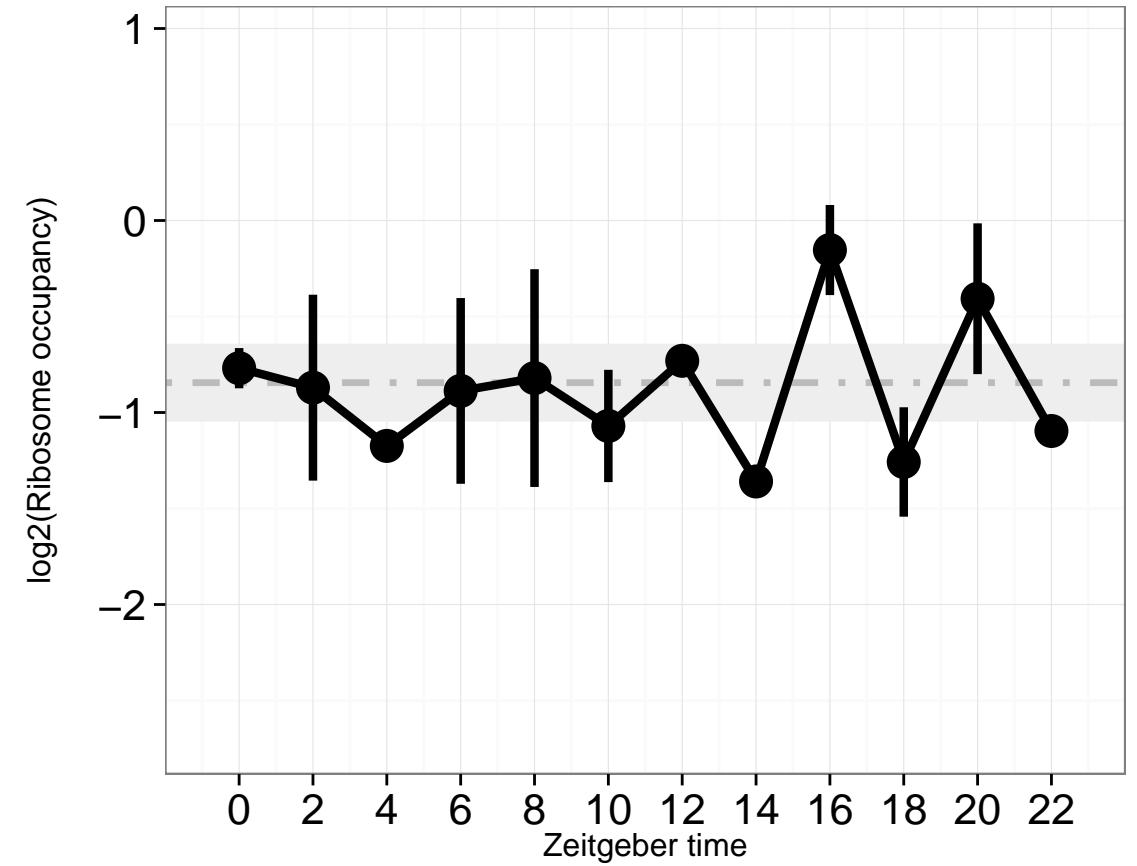

Supplement: Supplementary file 1096 [file 1]

## Uba6

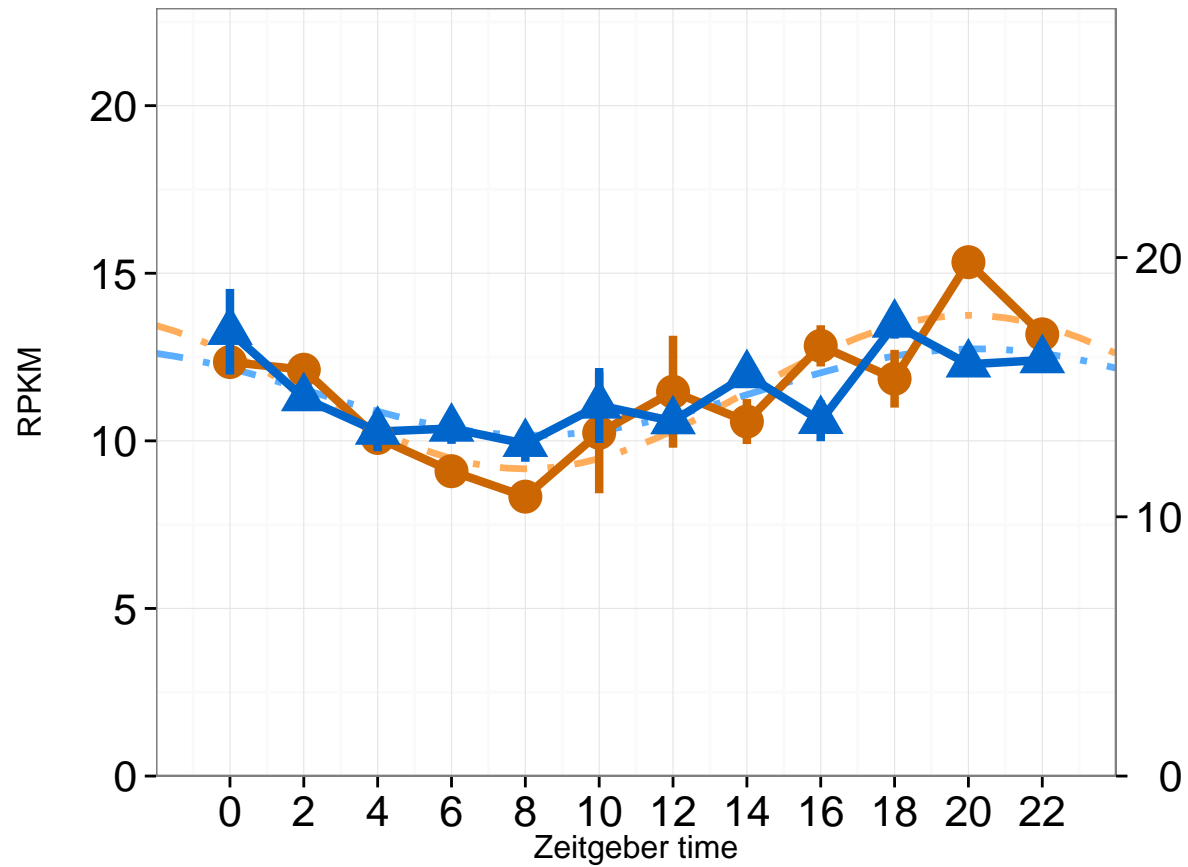

## Uba6

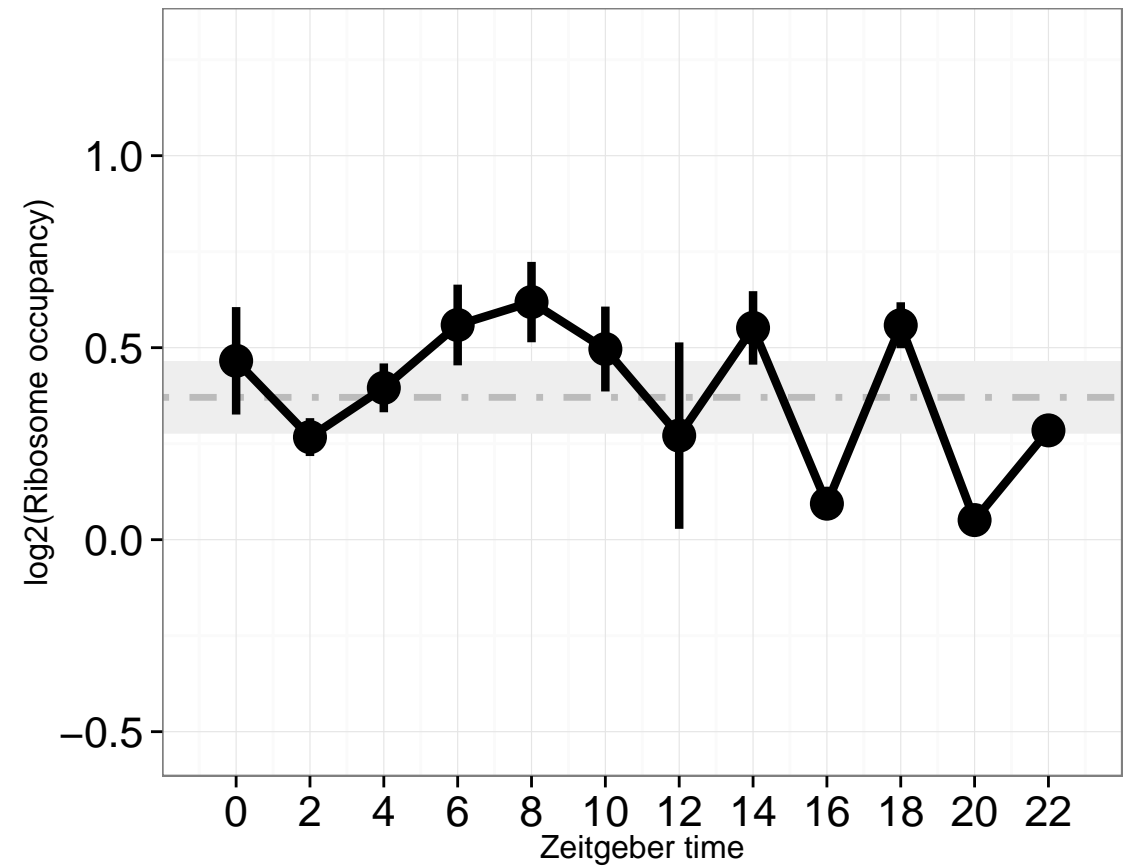

Supplement: Supplementary file 1097 [file 1]

## Mbd2

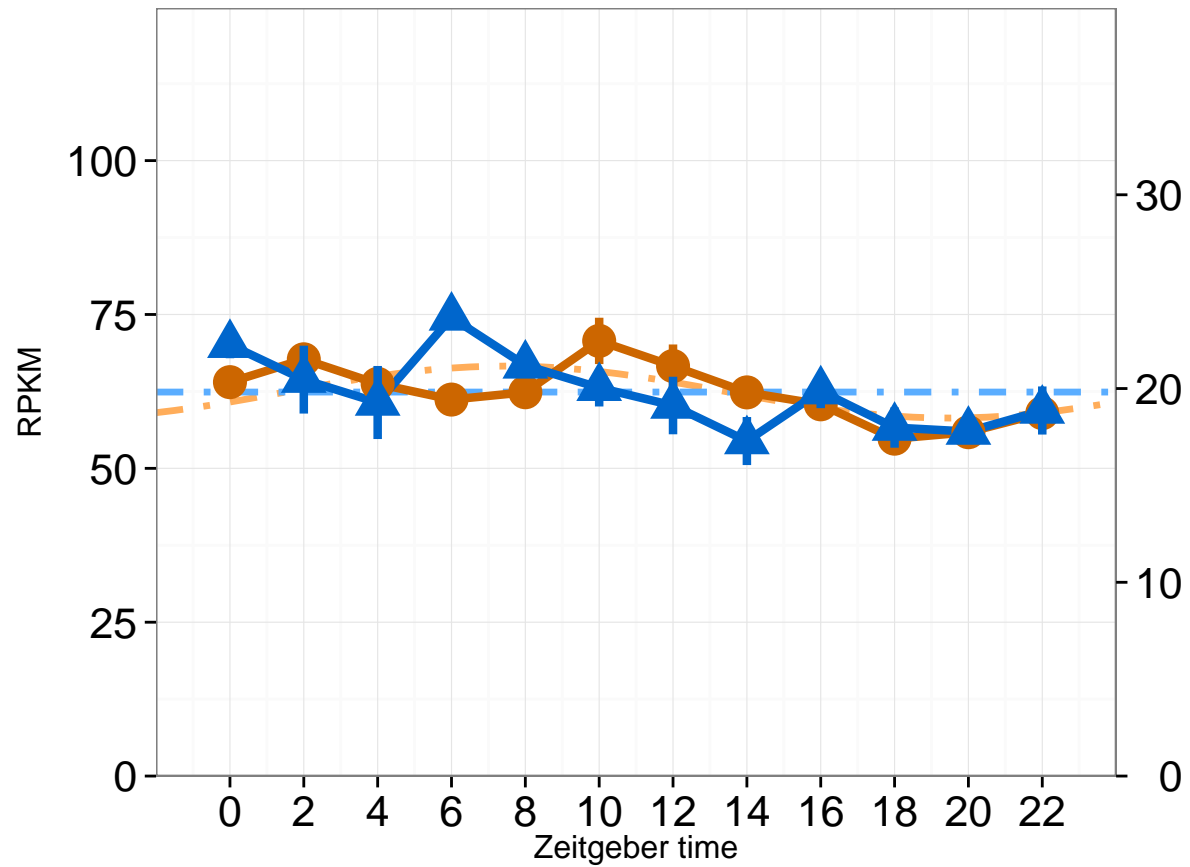

## Mbd2

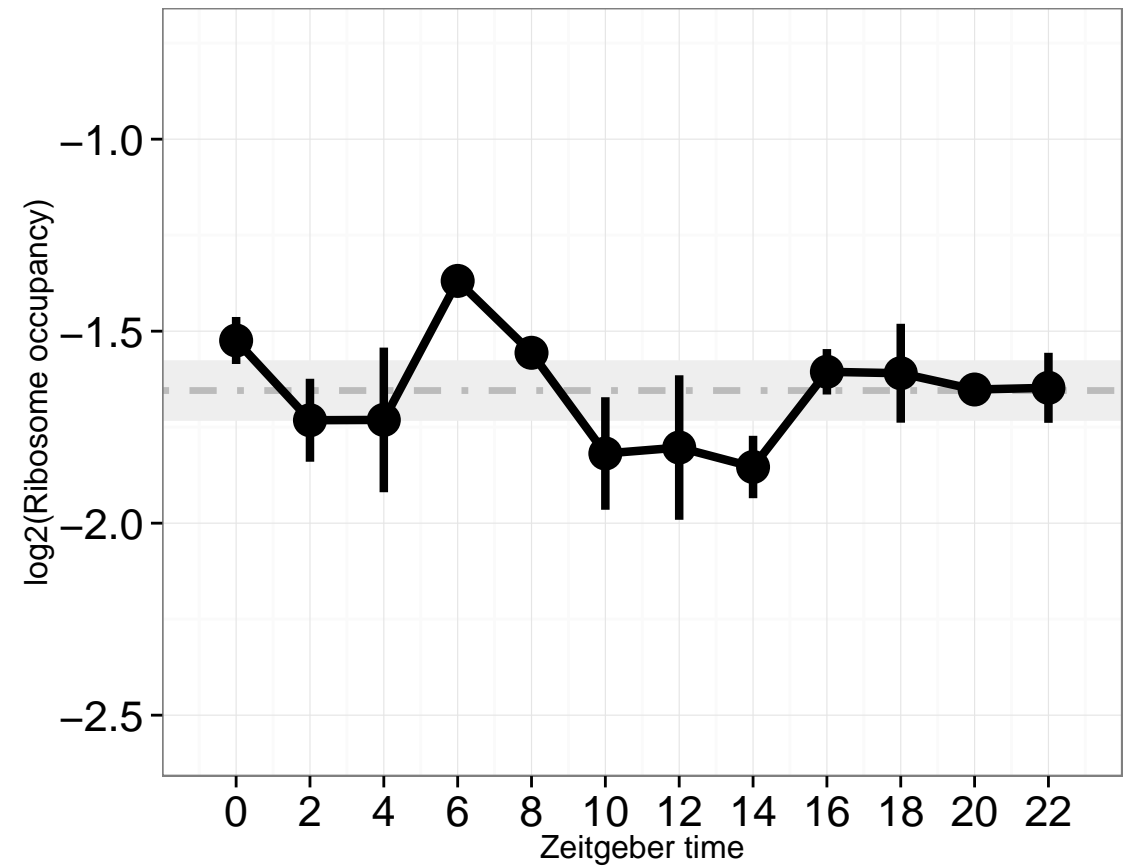

Supplement: Supplementary file 1098 [file 1]

# Ppp1r10

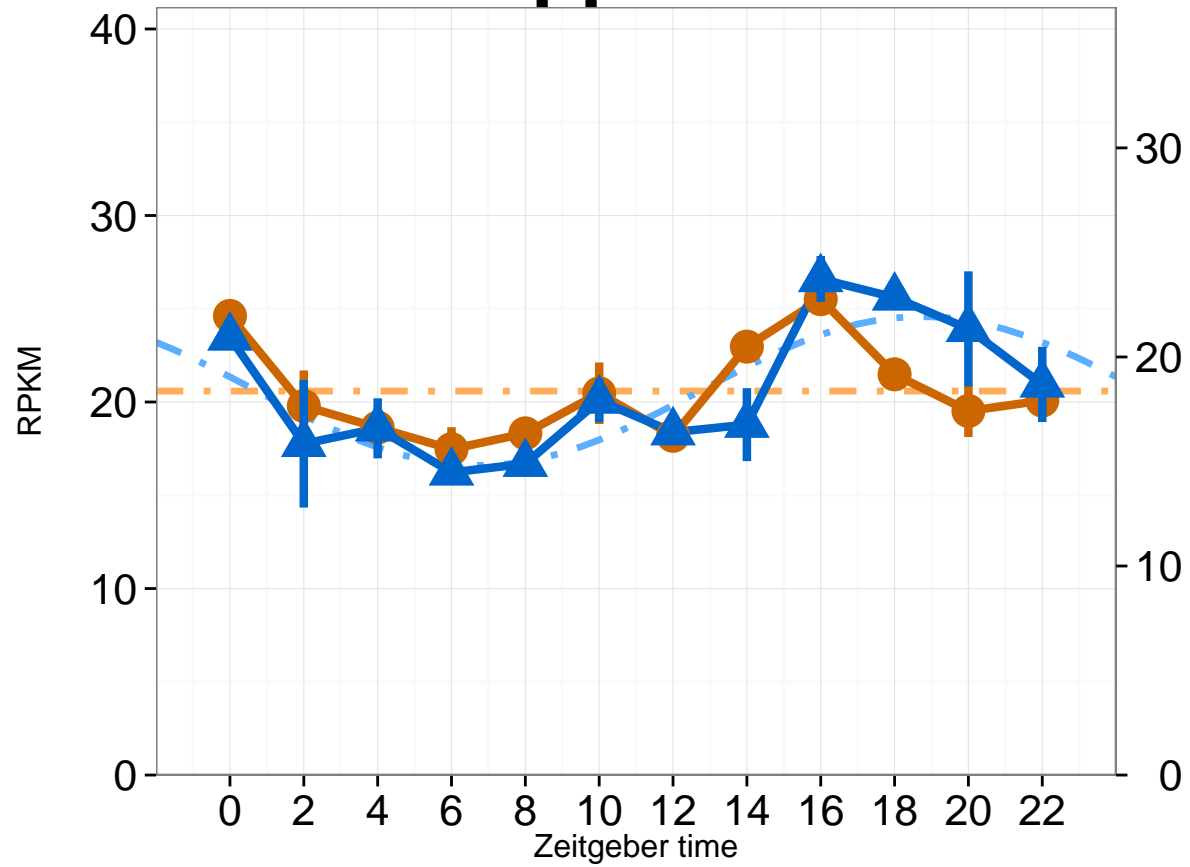

# Ppp1r10

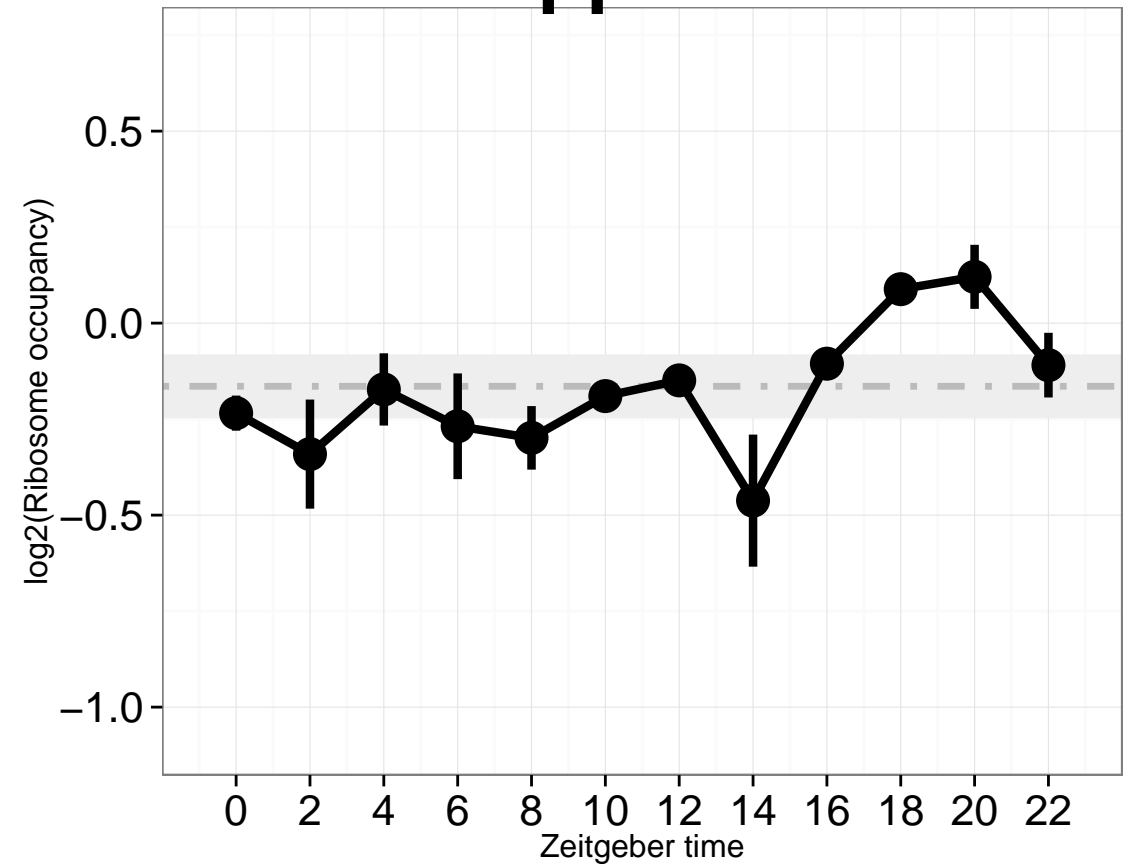

Supplement: Supplementary file 1099 [file 1]

# Hist1h2ab

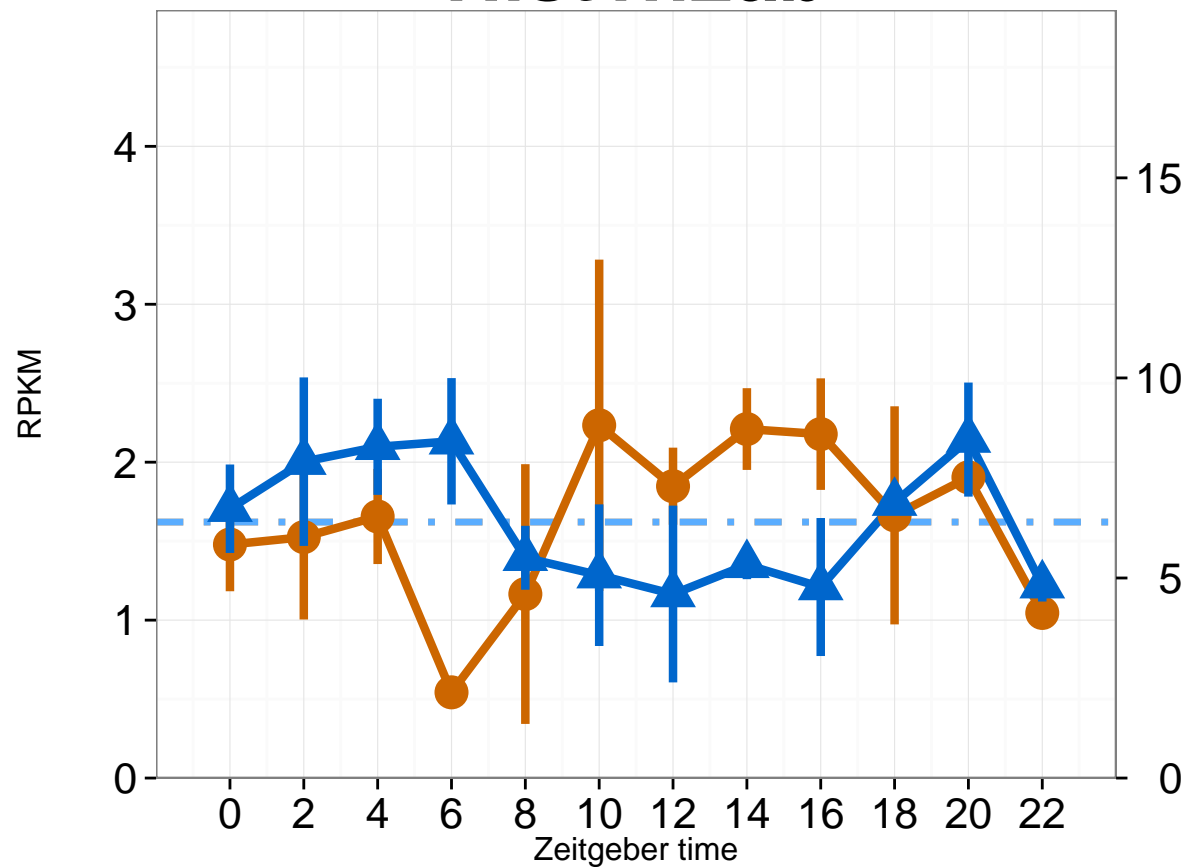

# Hist1h2ab

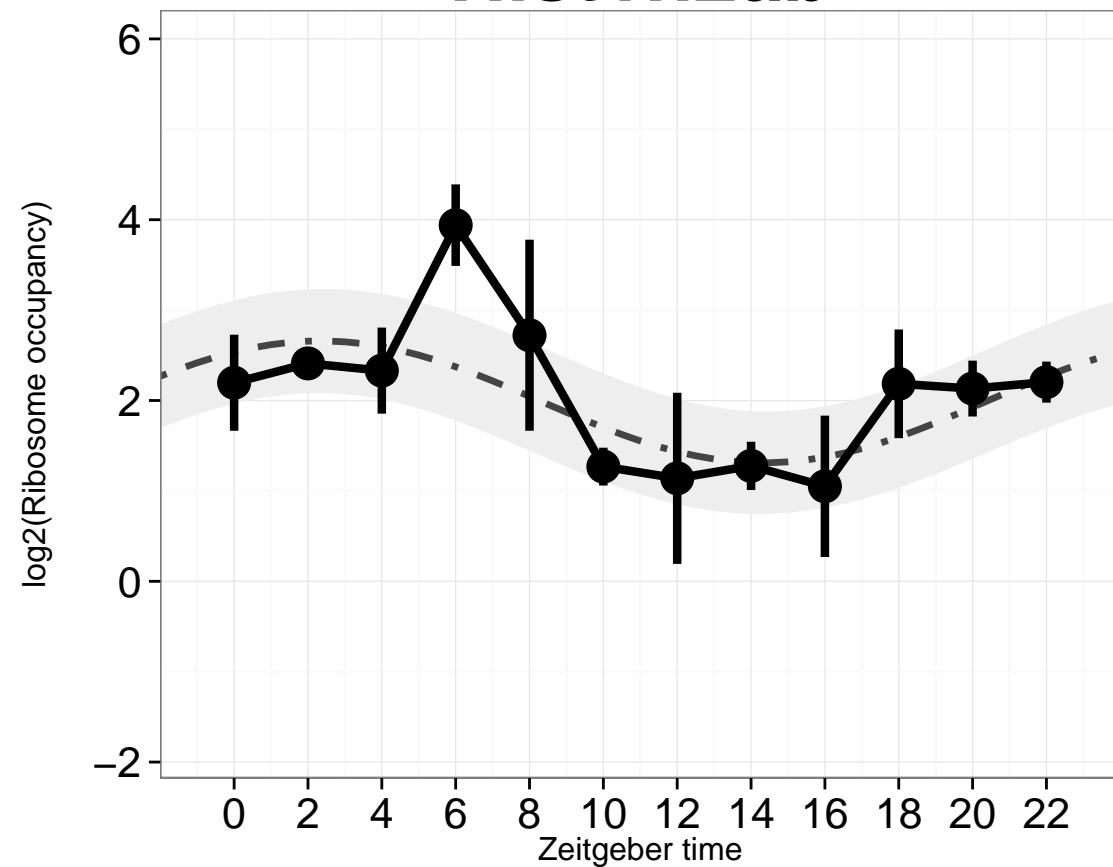

Supplement: Supplementary file 1100 [file 1]

**Fam83d TR**

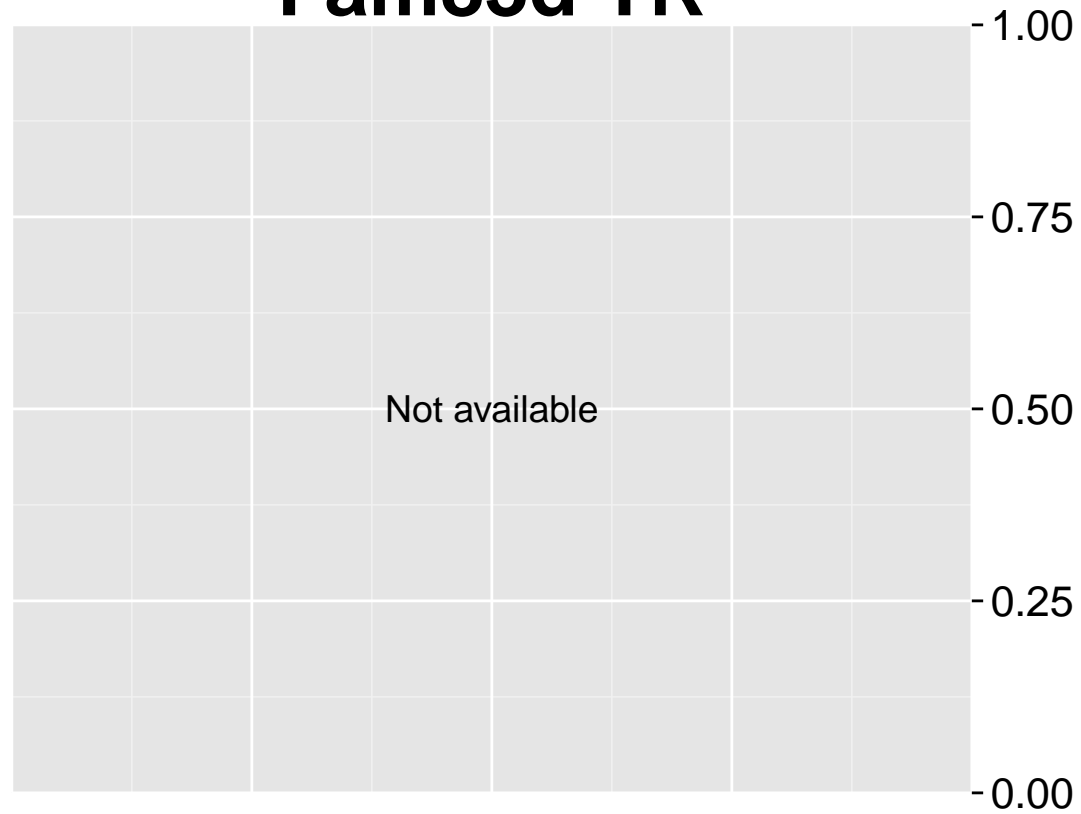

**Fam83d log2(Ribosome occupancy**

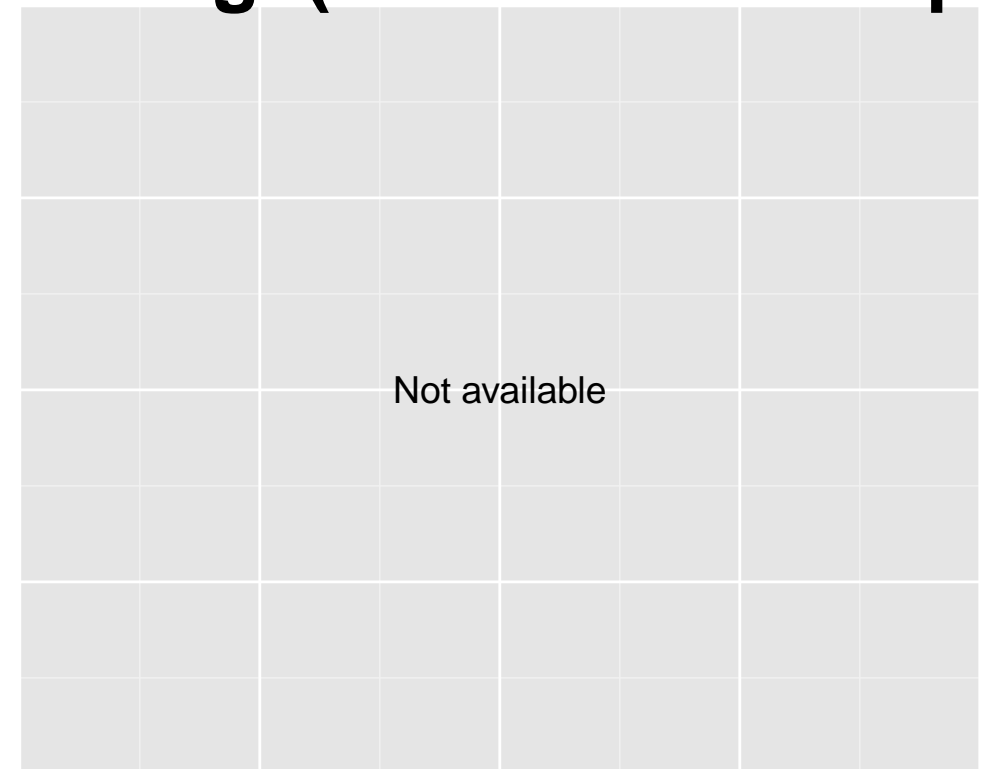

Supplement: Supplementary file 1101 [file 1]

## Rabgap1l

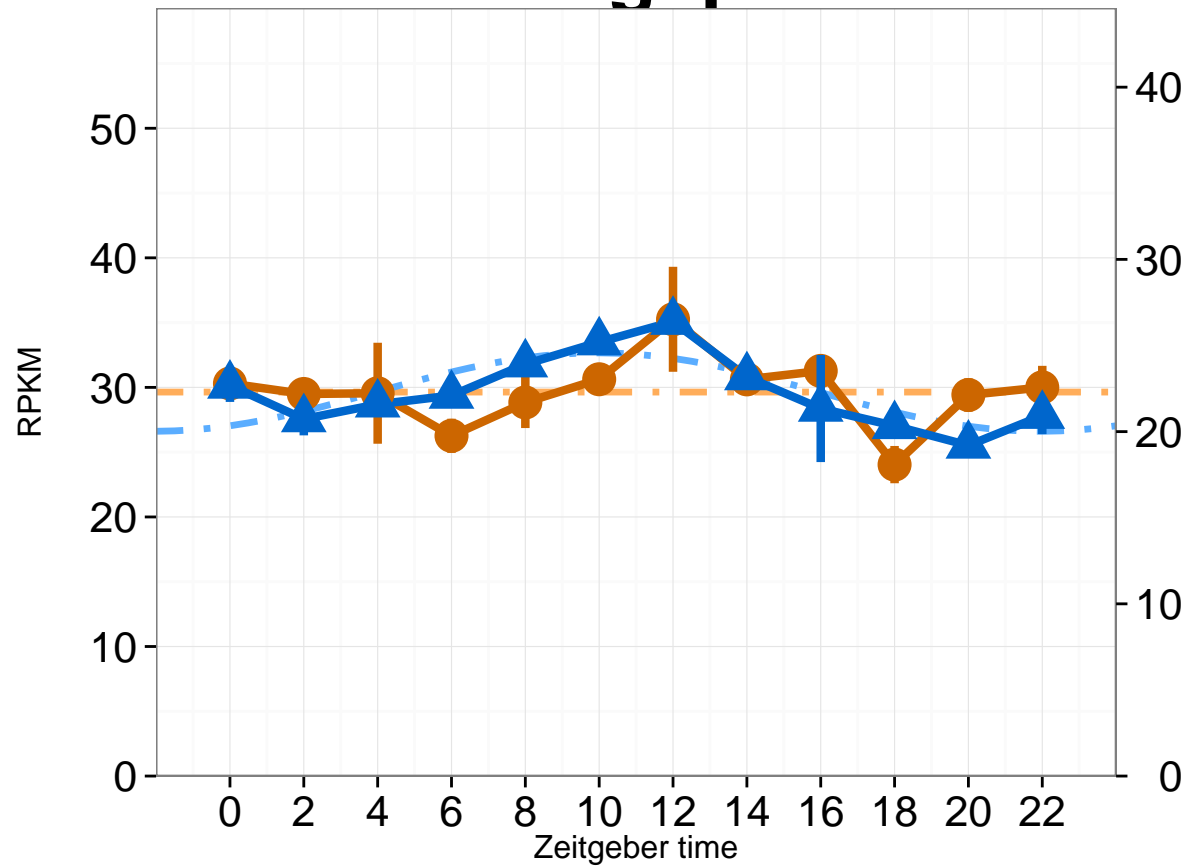

## Rabgap1l

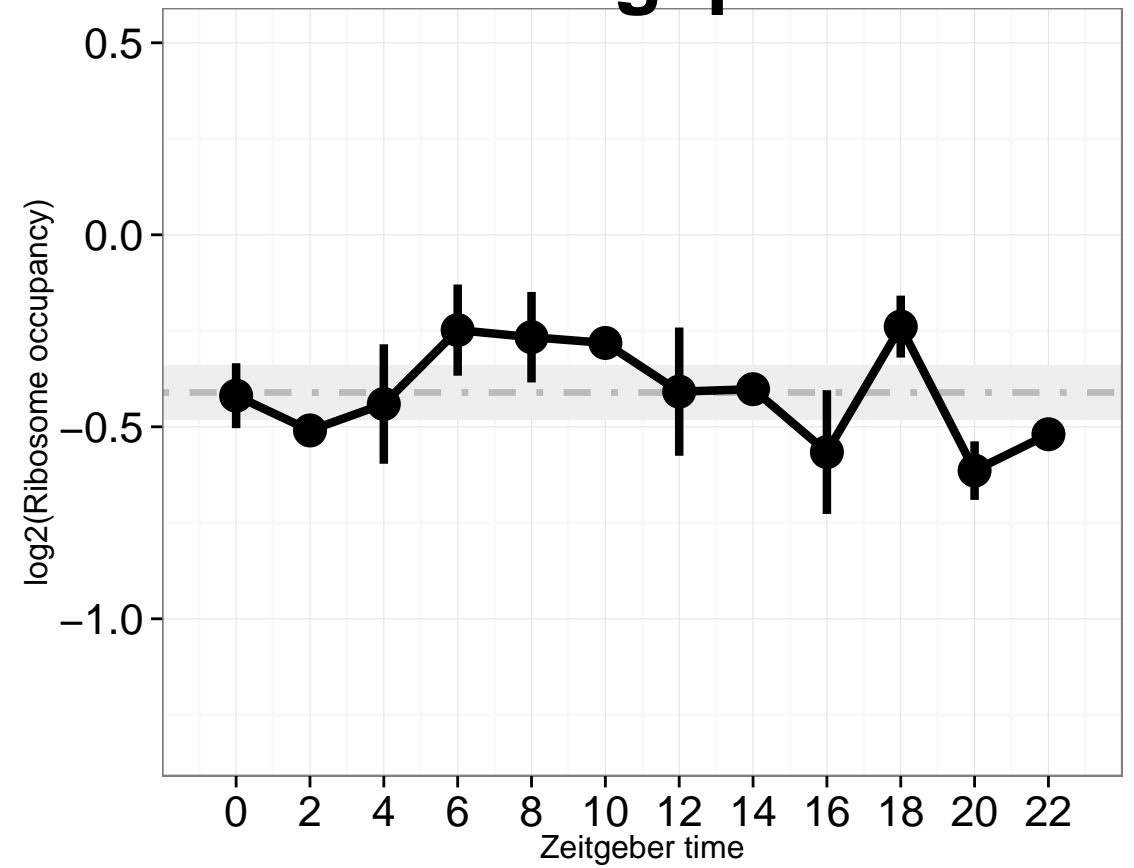

Supplement: Supplementary file 1102 [file 1]

## Vwa2

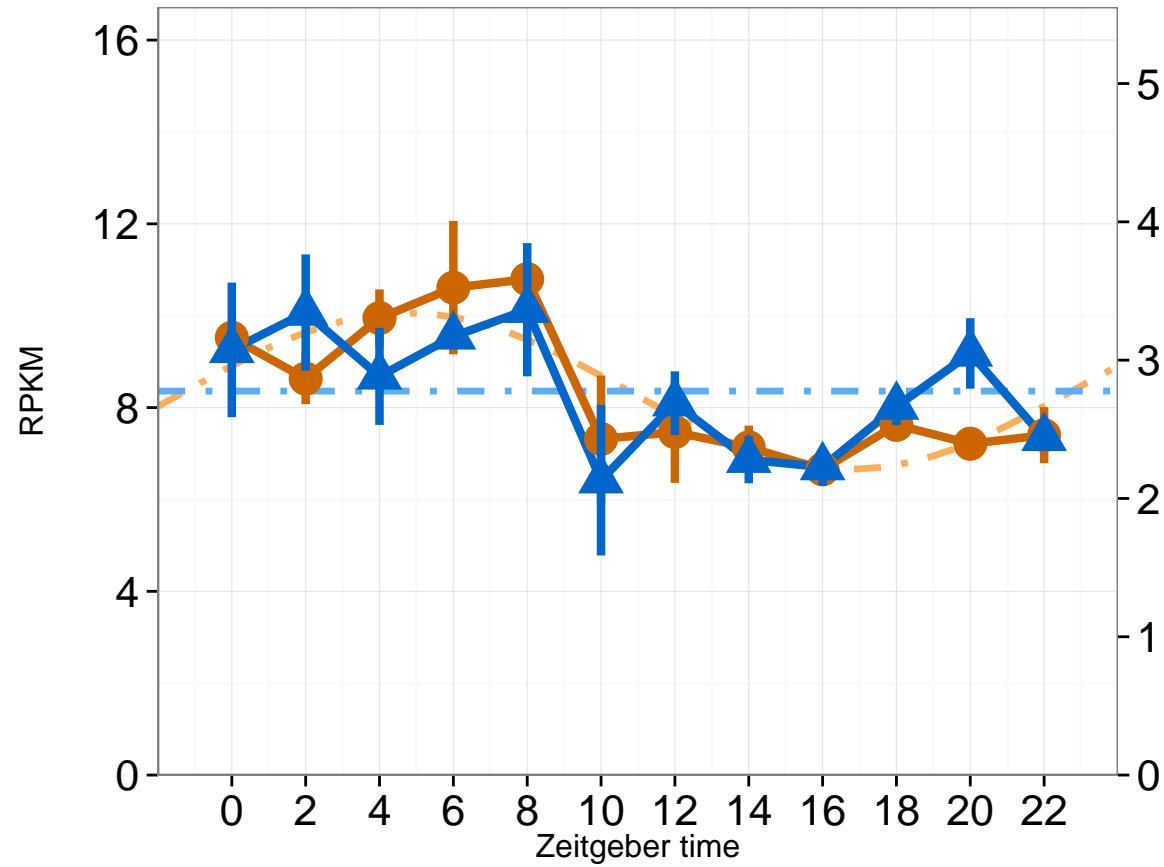

## Vwa2

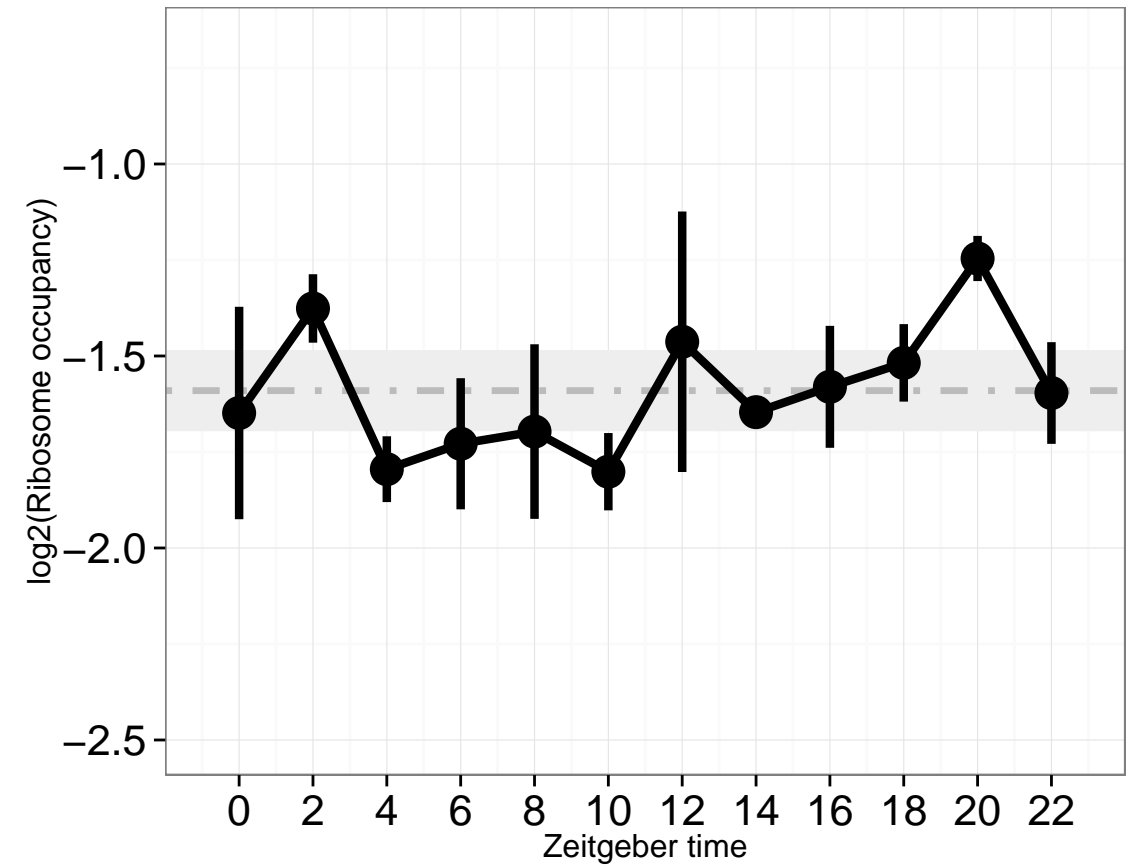

Supplement: Supplementary file 1103 [file 1]

# Il15ra

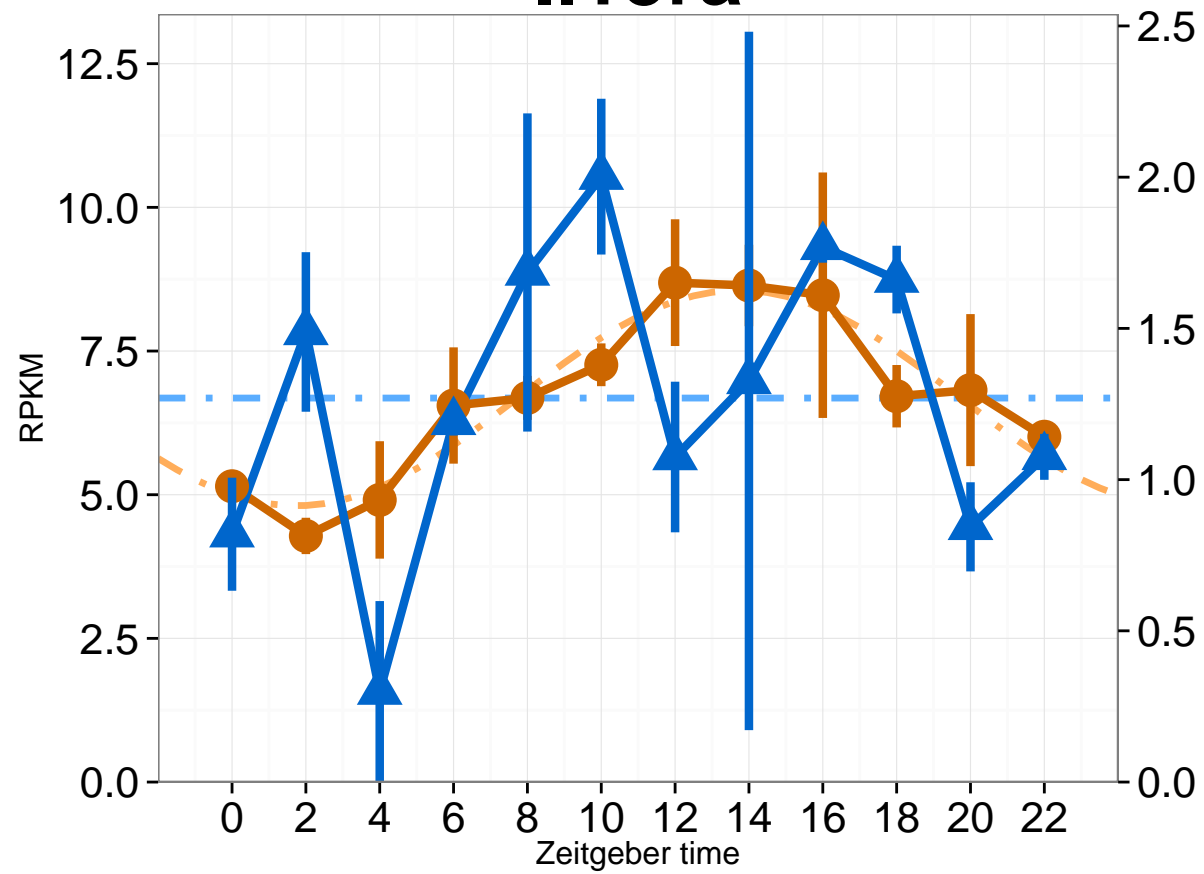

# Il15ra

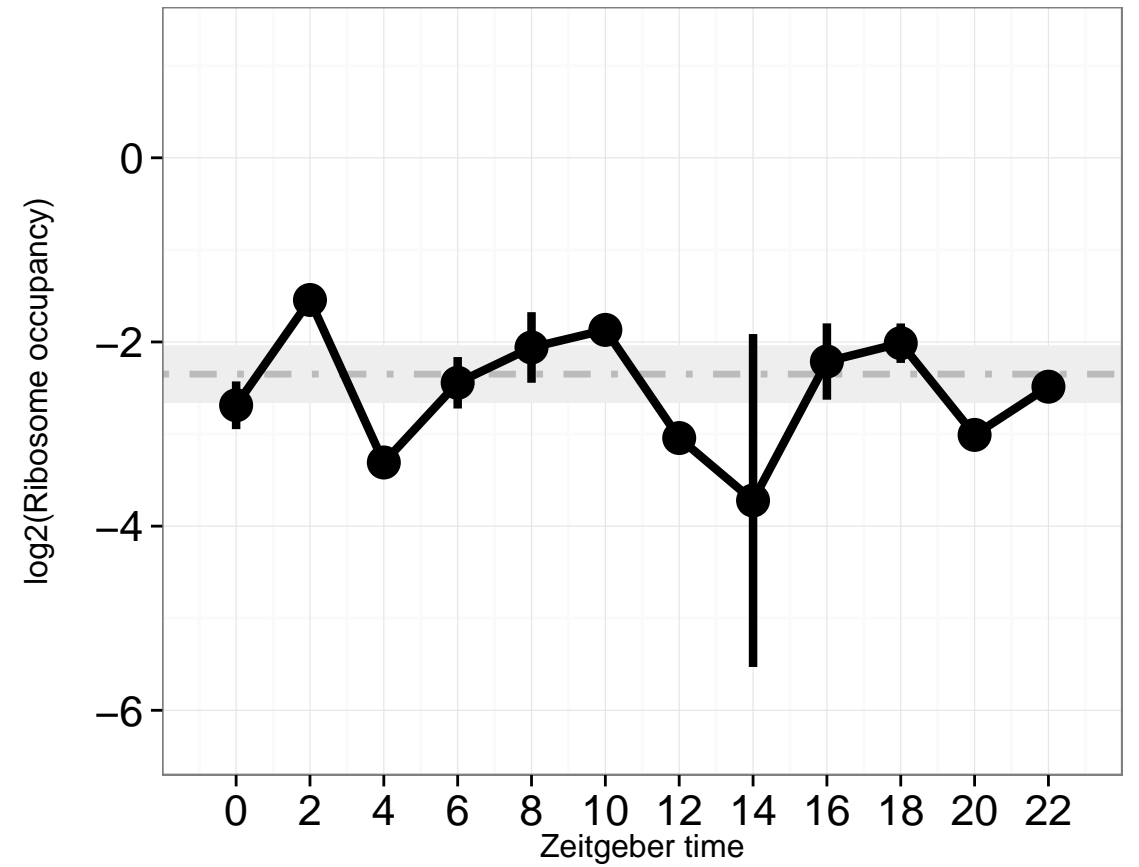

Supplement: Supplementary file 1104 [file 1]

# Zkscan8

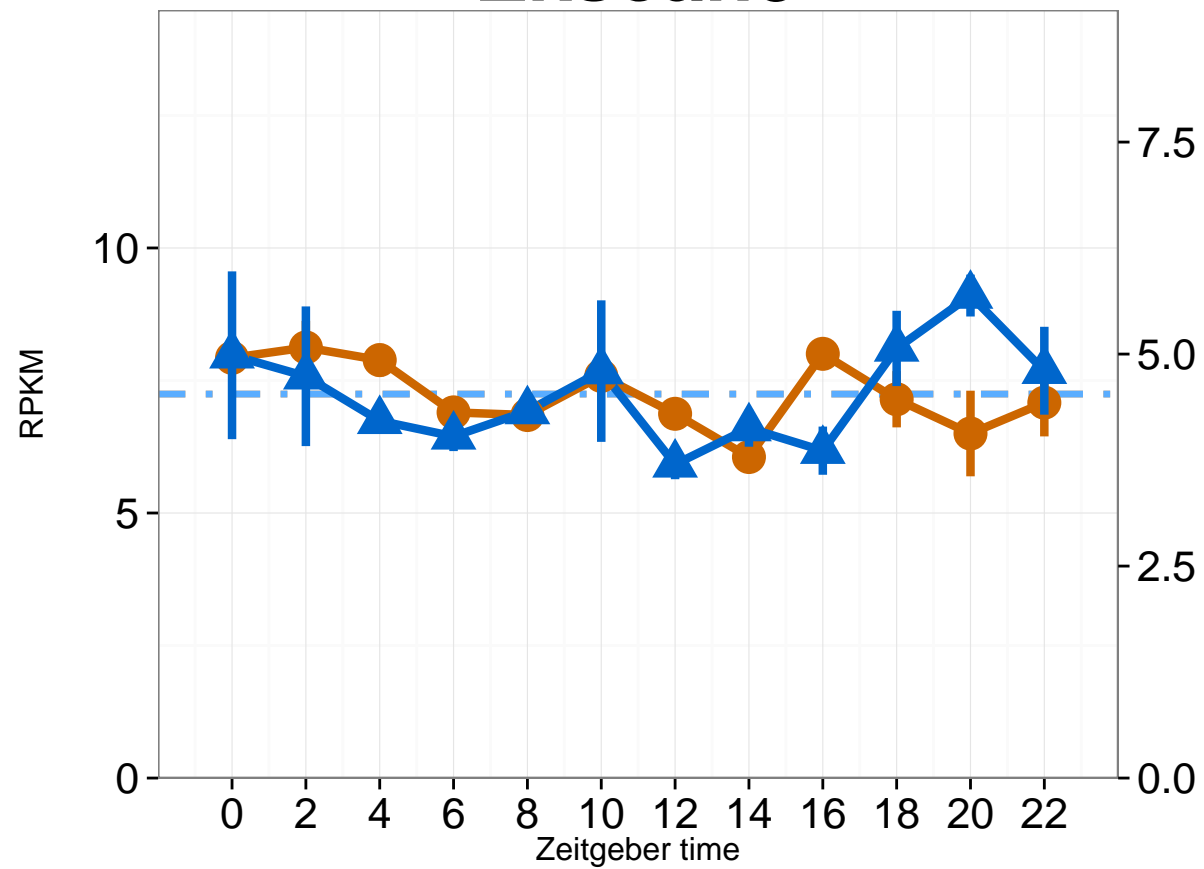

# Zkscan8

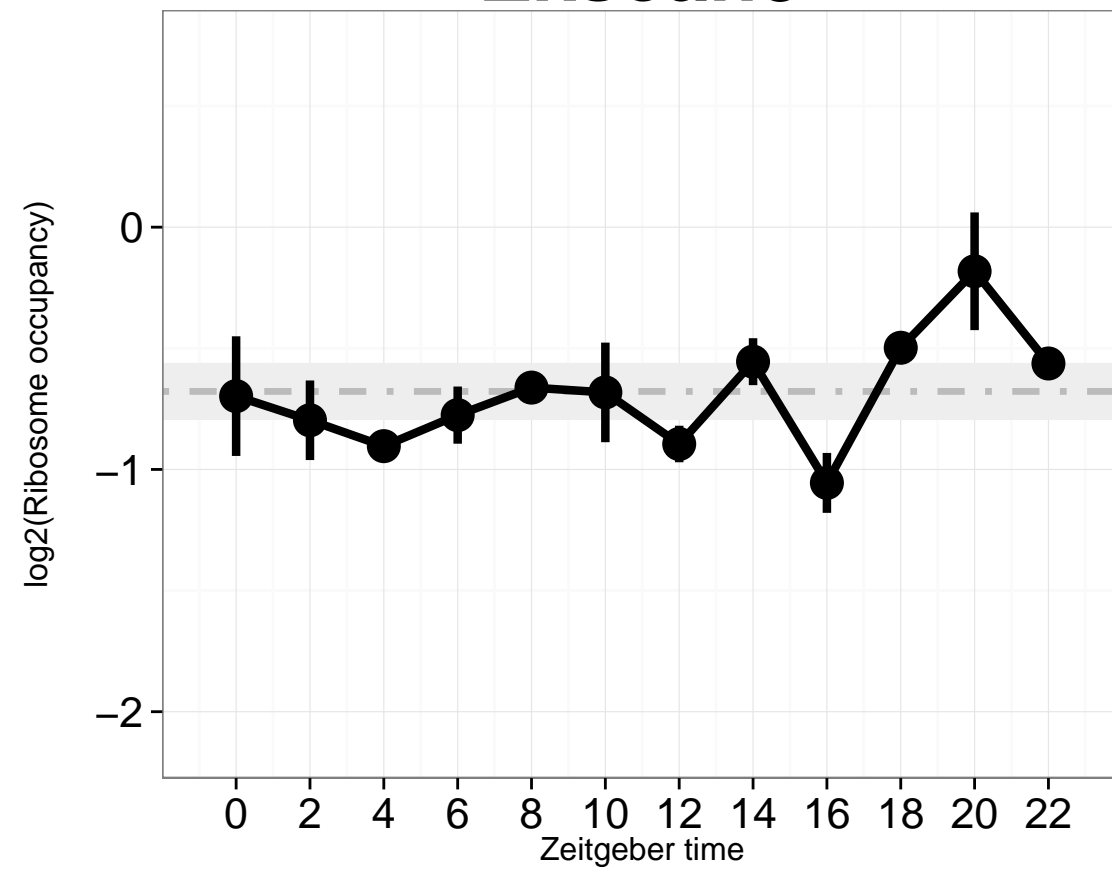

Supplement: Supplementary file 1105 [file 1]
