# Supplementary material (part 12 of 133)
Source: publisher figshare collection journal article supplement (https://springernature.figshare.com/articles/dataset/_/4903193)

# Ints5

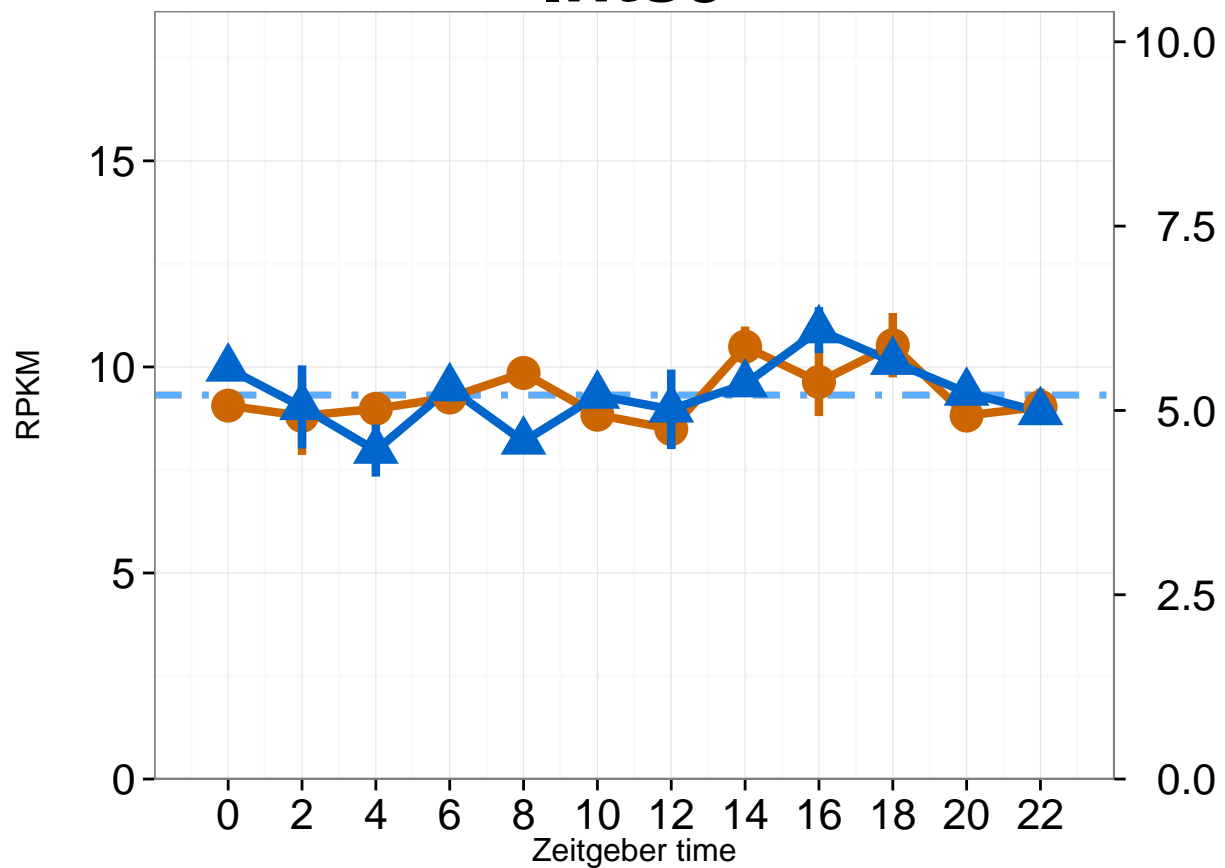

# Ints5

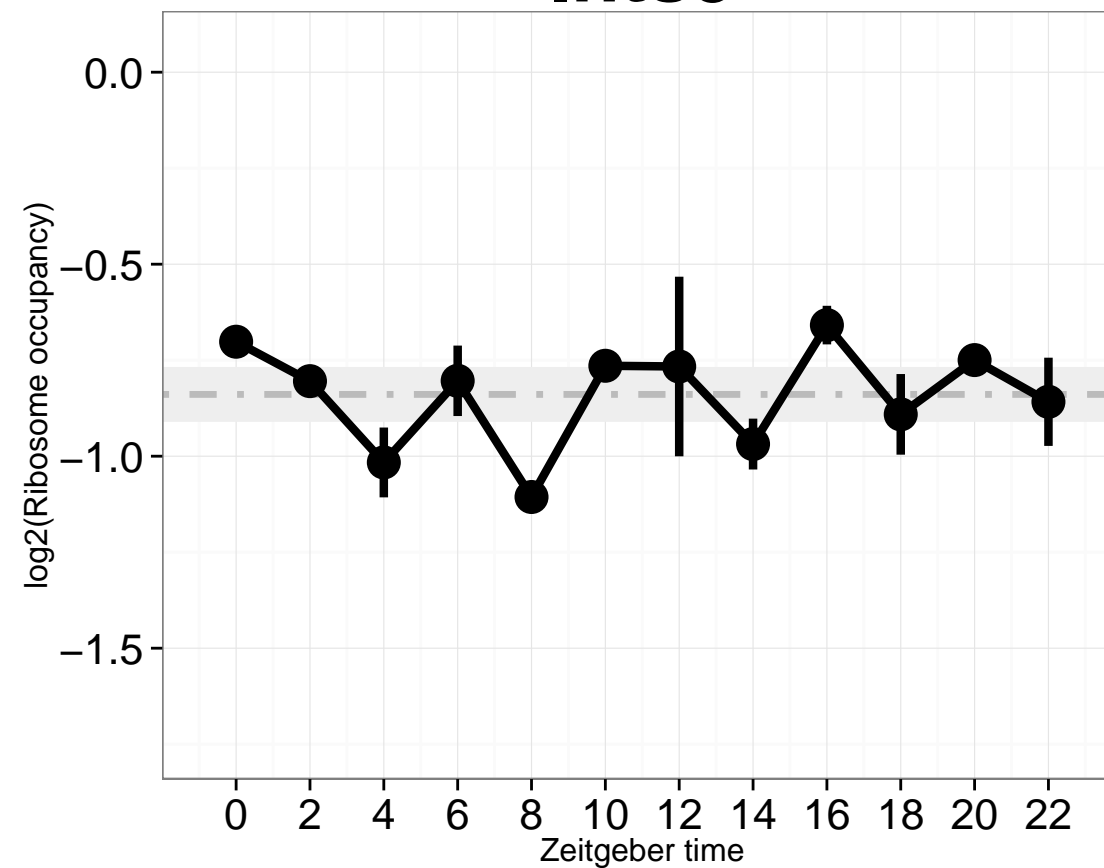

Supplement: Supplementary file 1106 [file 1]

# Slc39a1

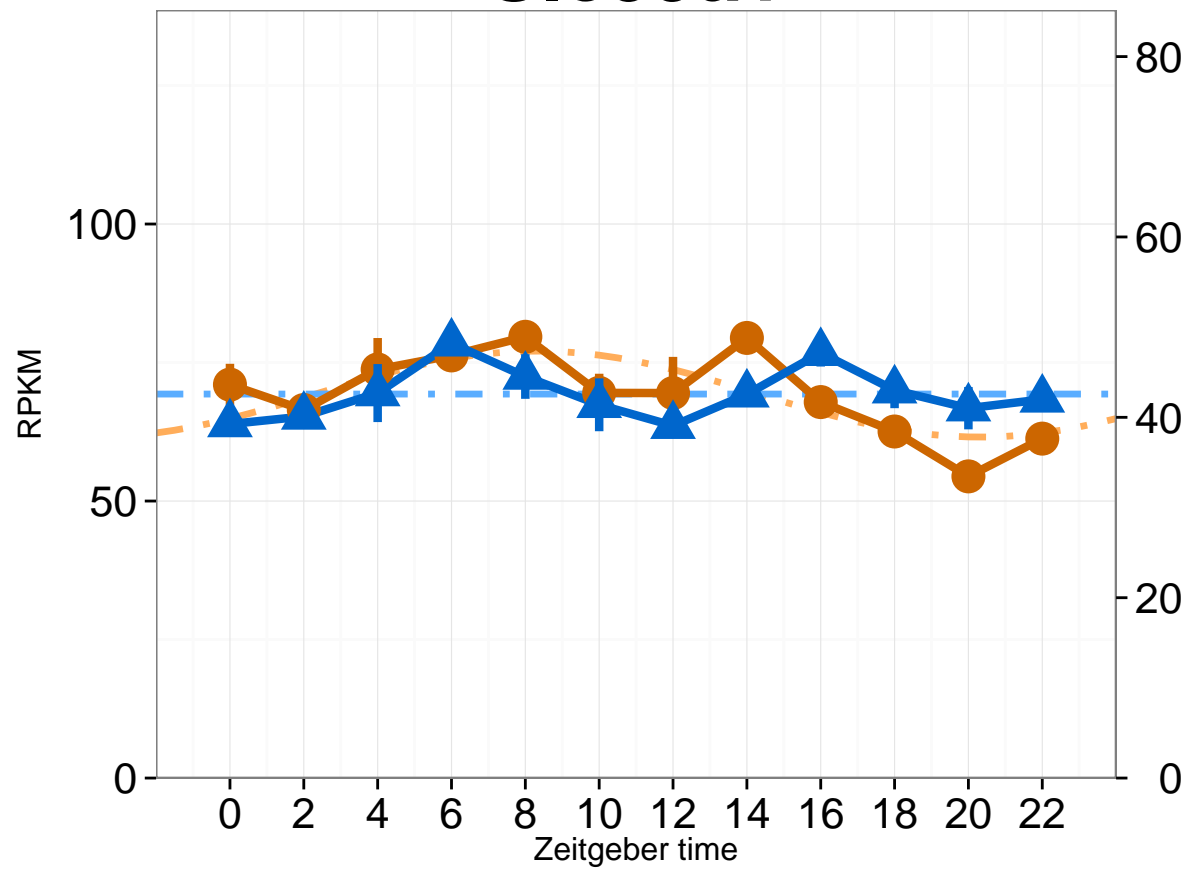

# Slc39a1

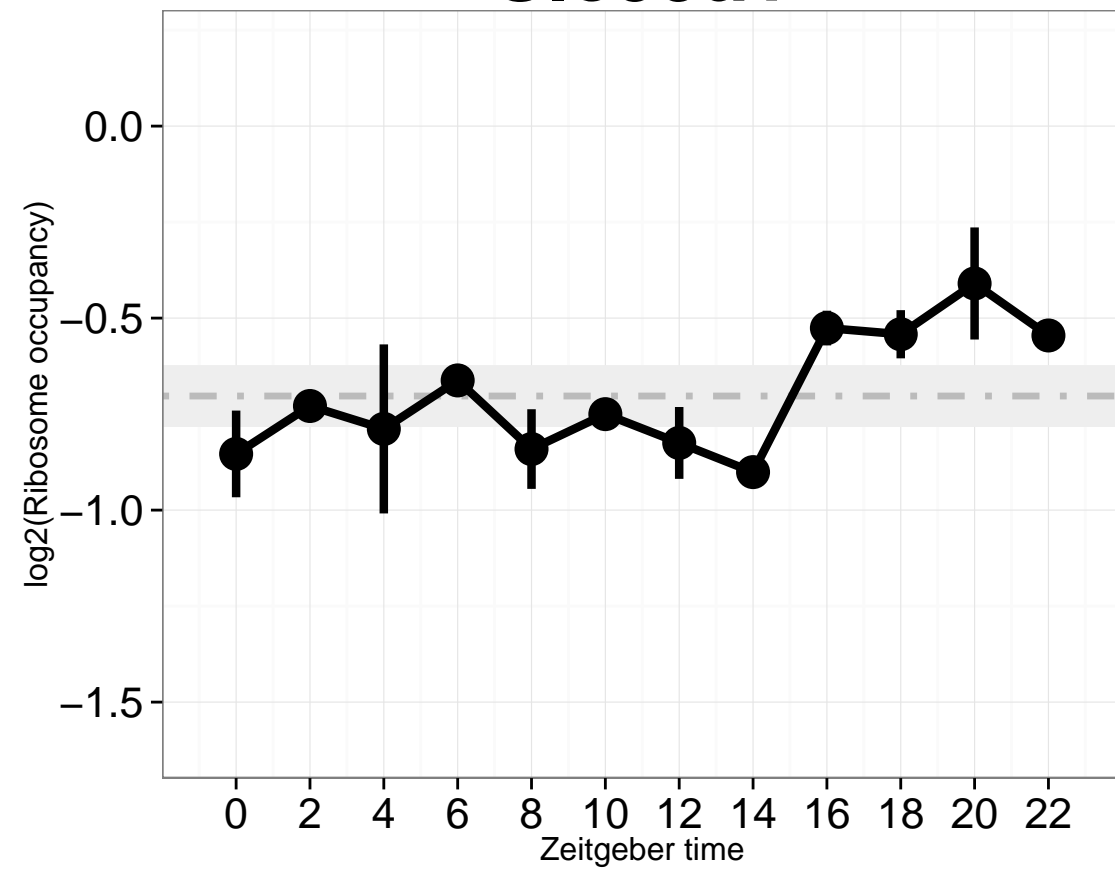

Supplement: Supplementary file 1107 [file 1]

## Tmc4

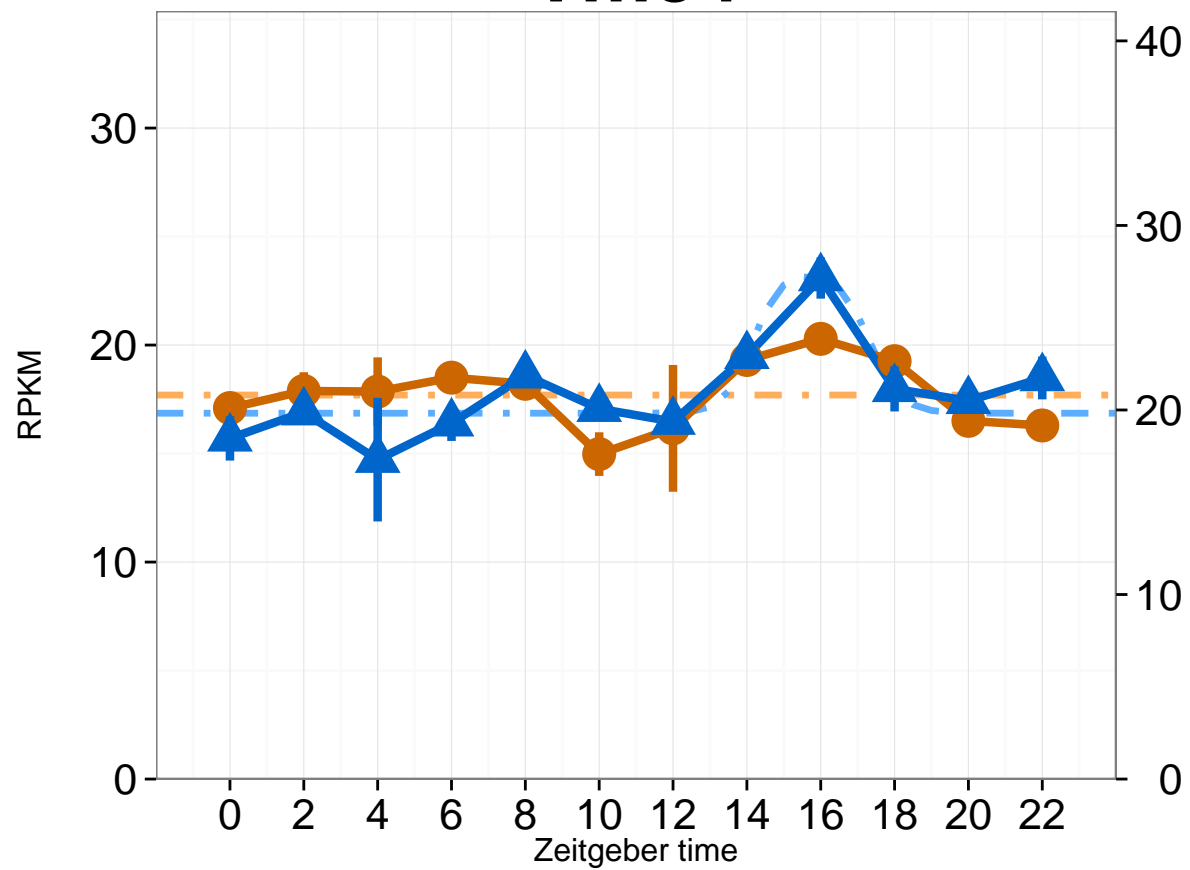

## Tmc4

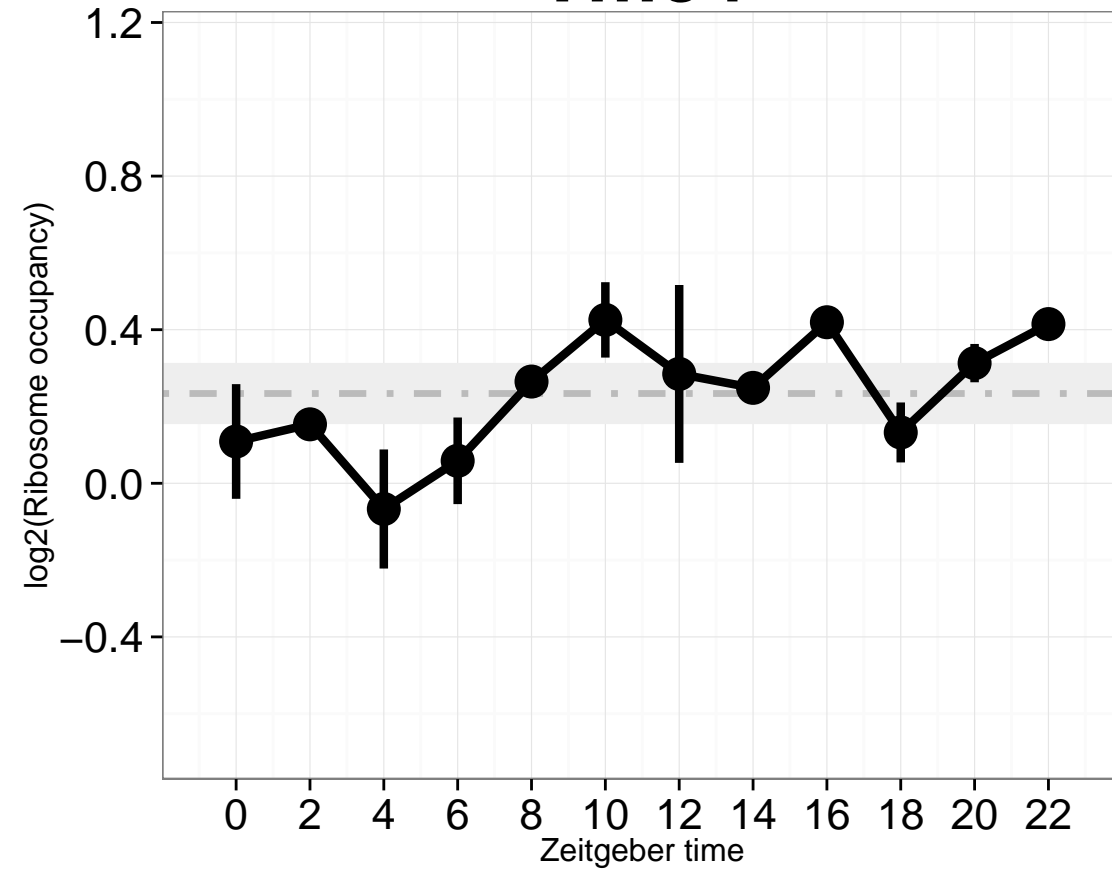

Supplement: Supplementary file 1108 [file 1]

## Ly96

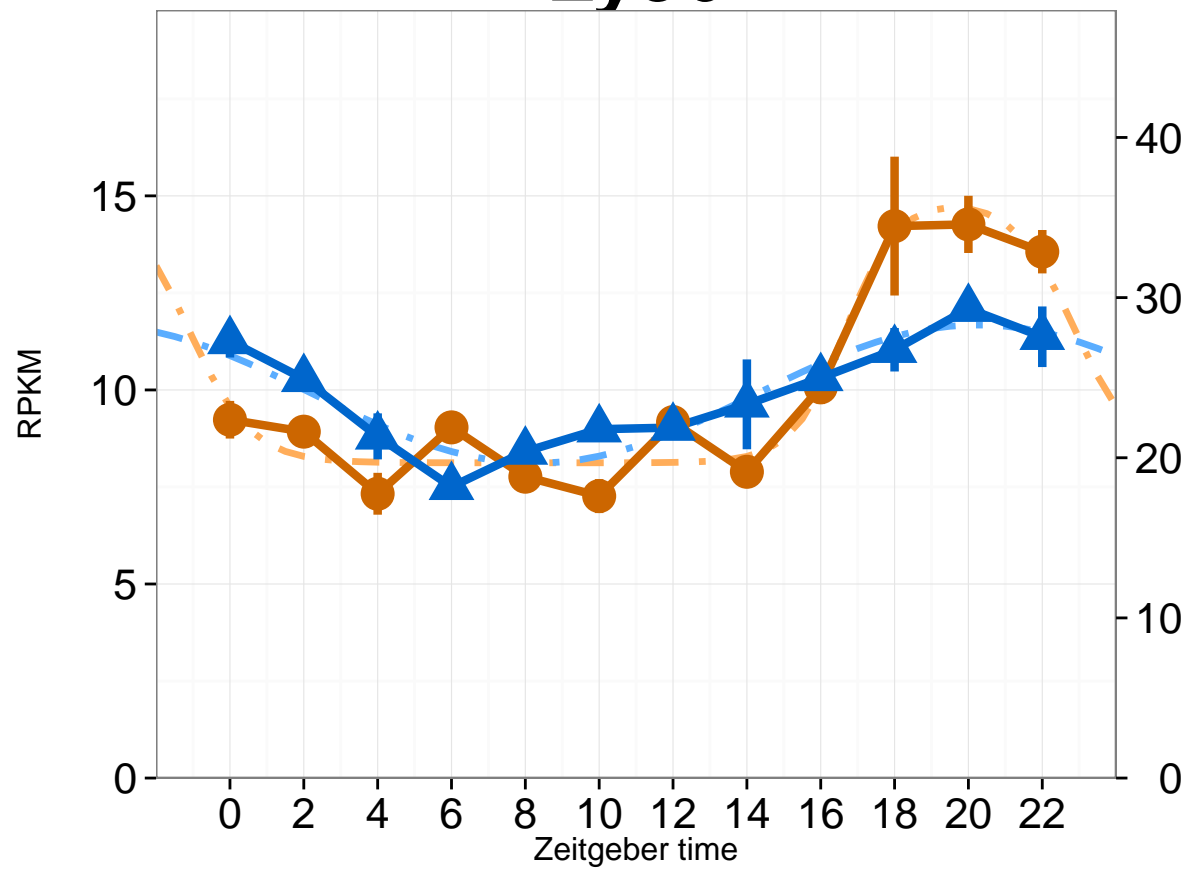

## Ly96

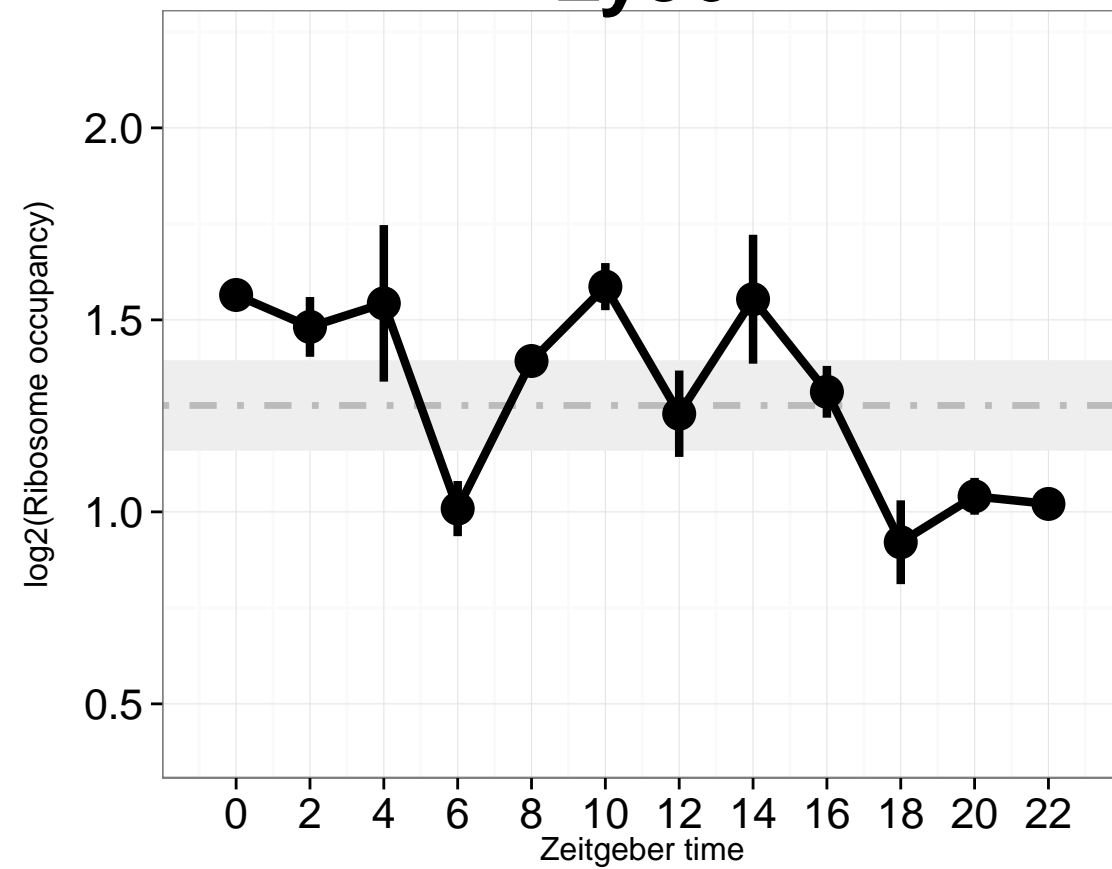

Supplement: Supplementary file 1109 [file 1]

## Mettl21a

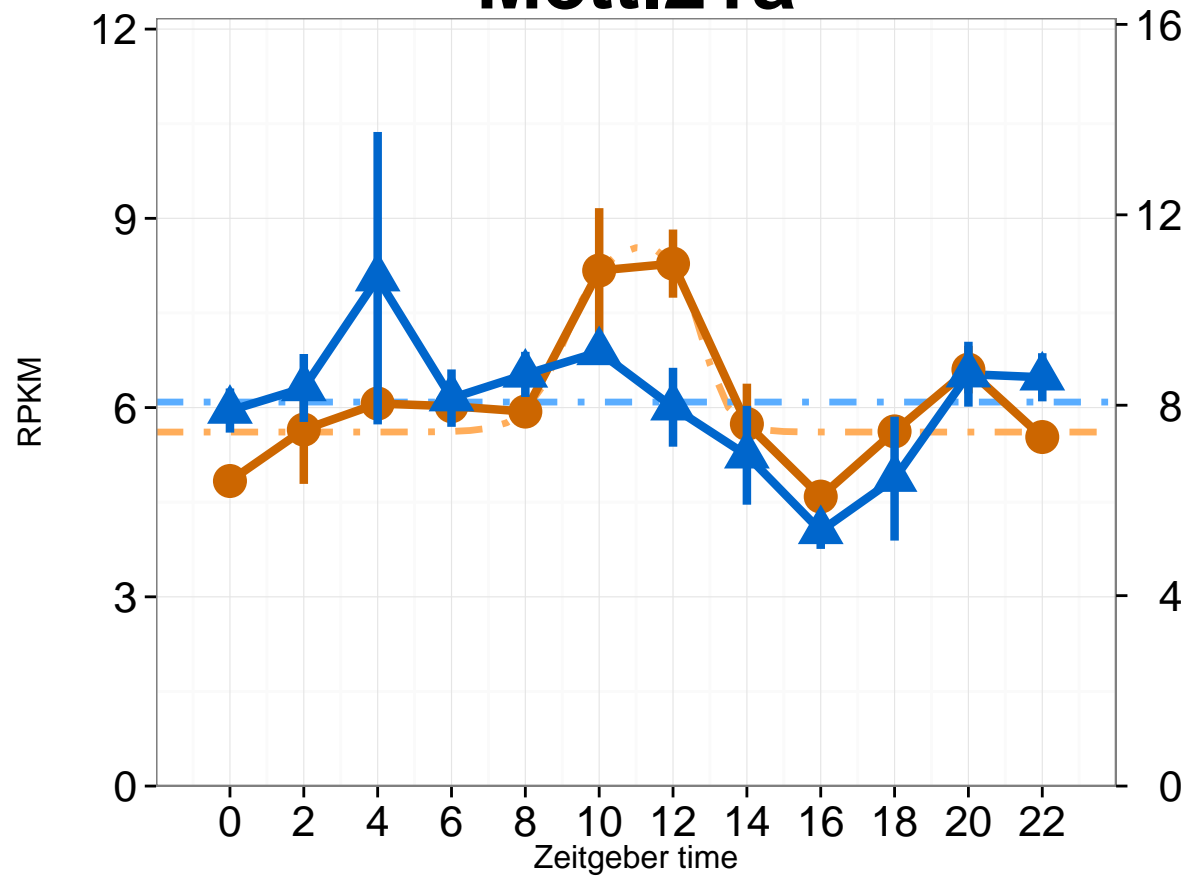

## Mettl21a

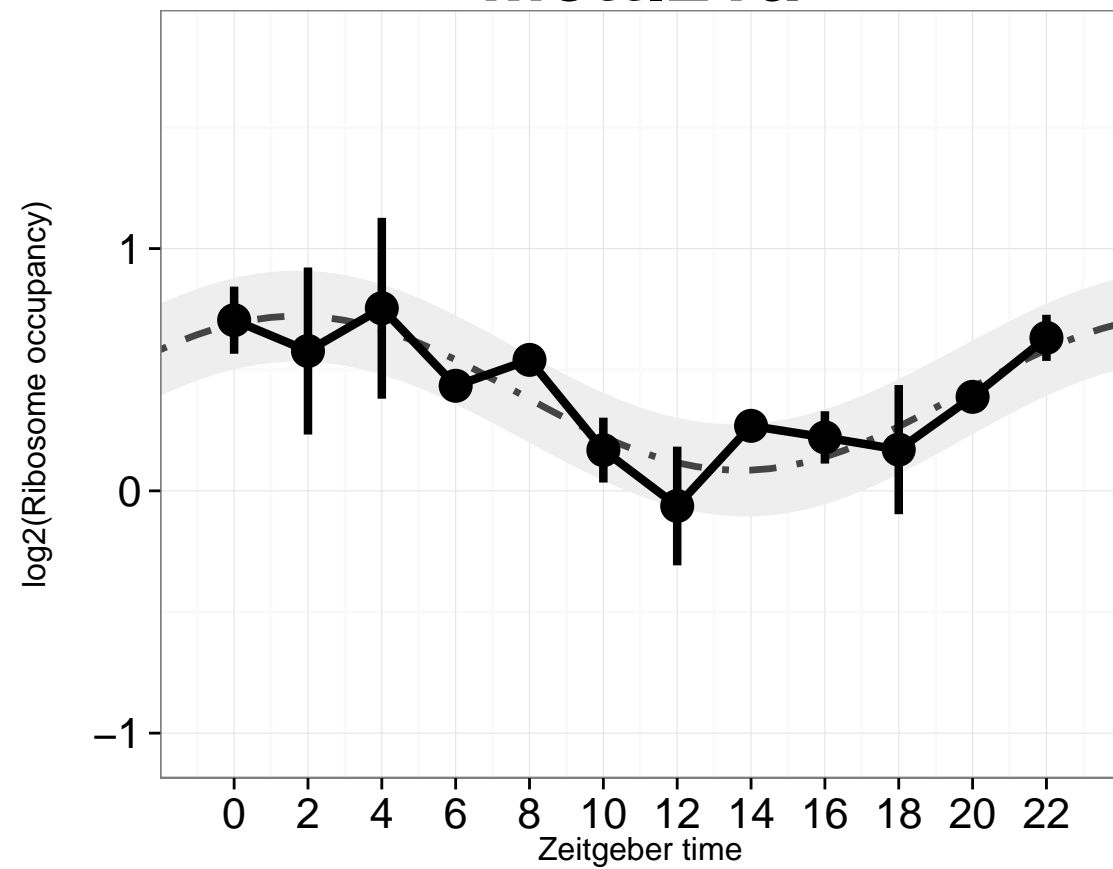

Supplement: Supplementary file 1110 [file 1]

mt-Nd3

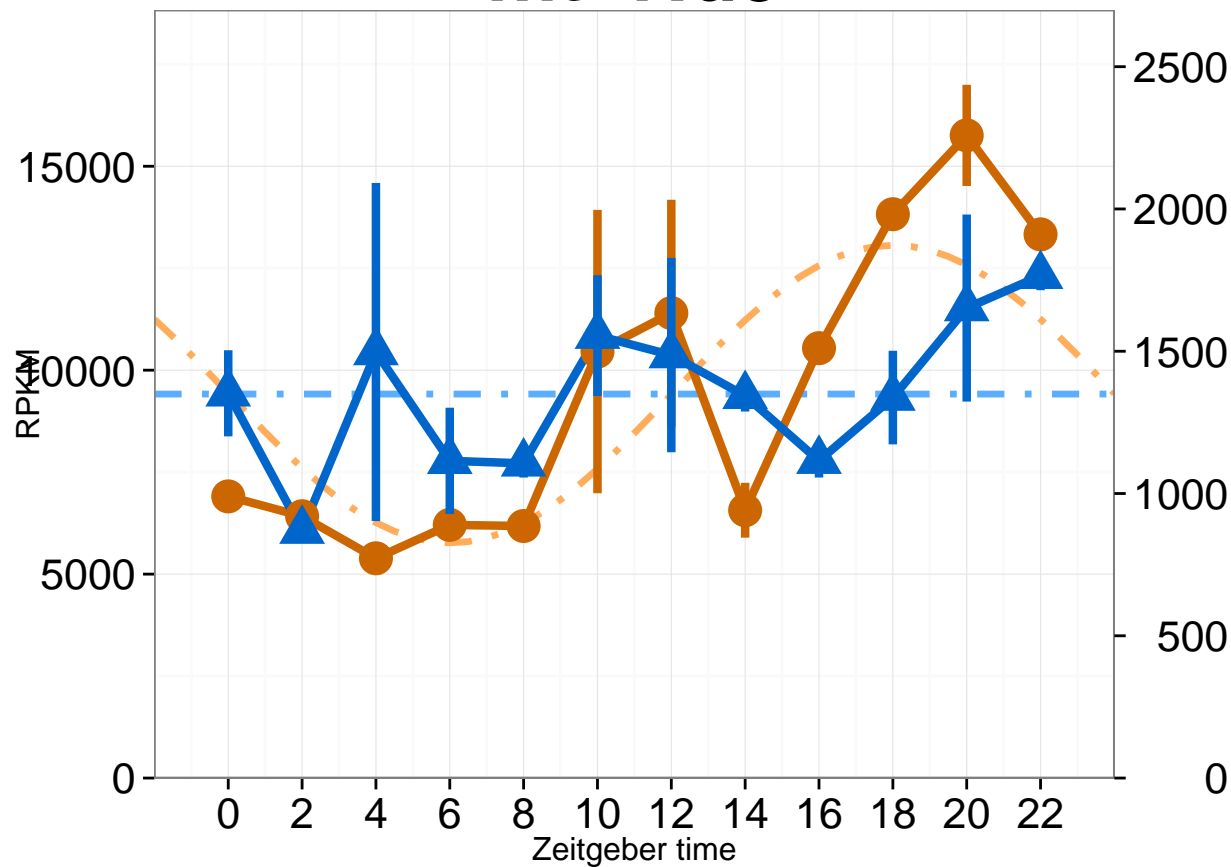

mt-Nd3

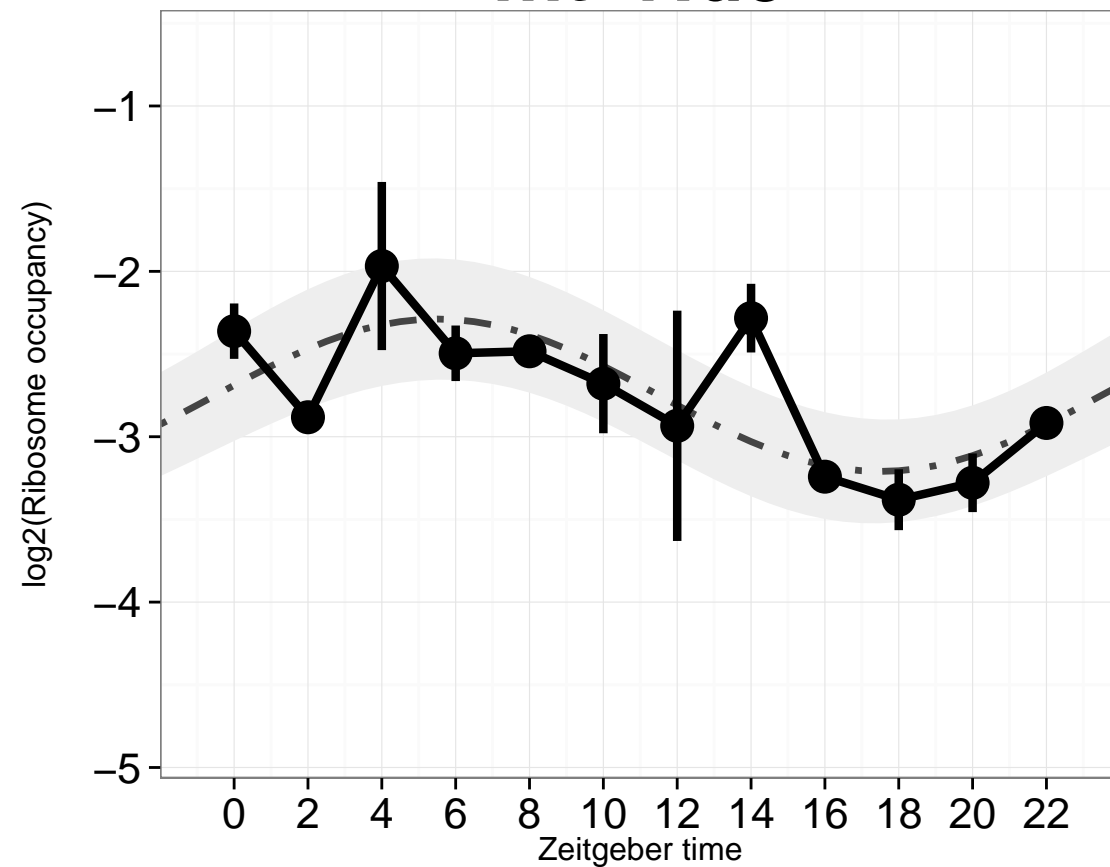

Supplement: Supplementary file 1111 [file 1]

## Aldh3b1

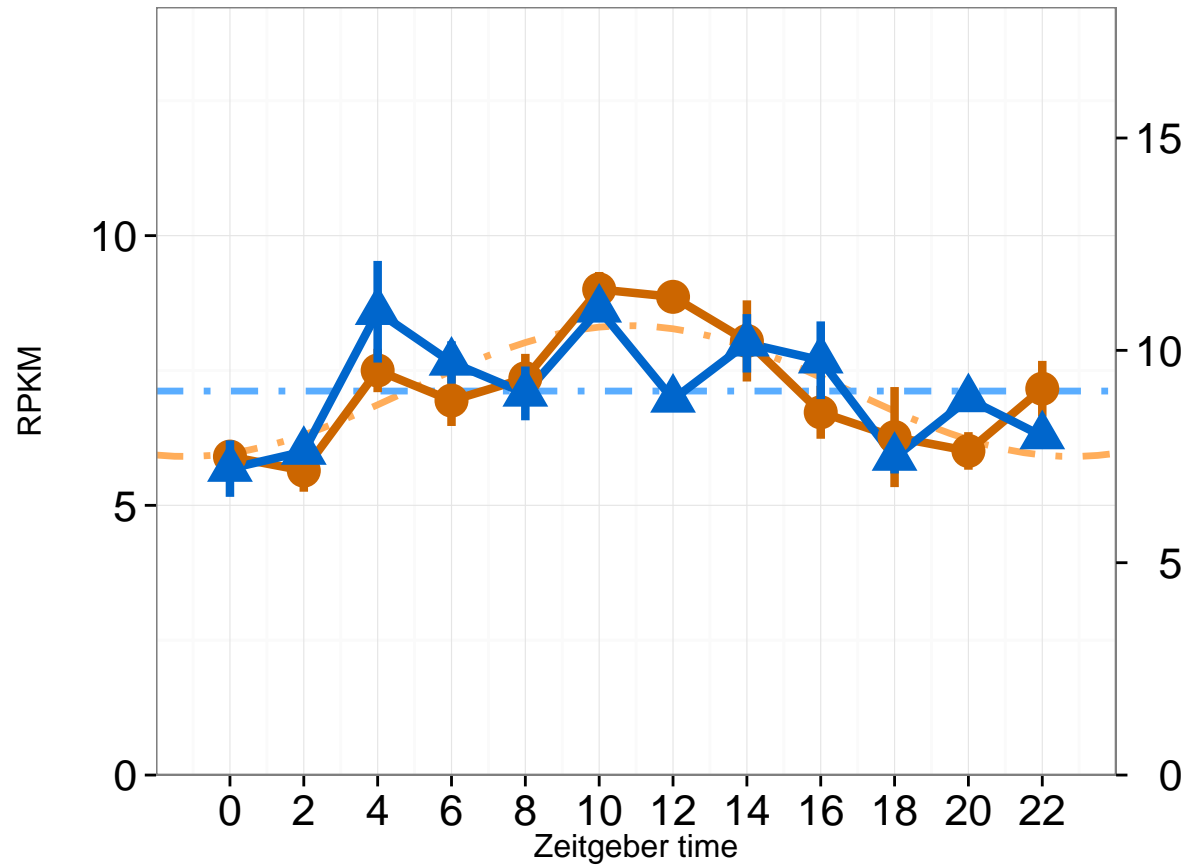

## Aldh3b1

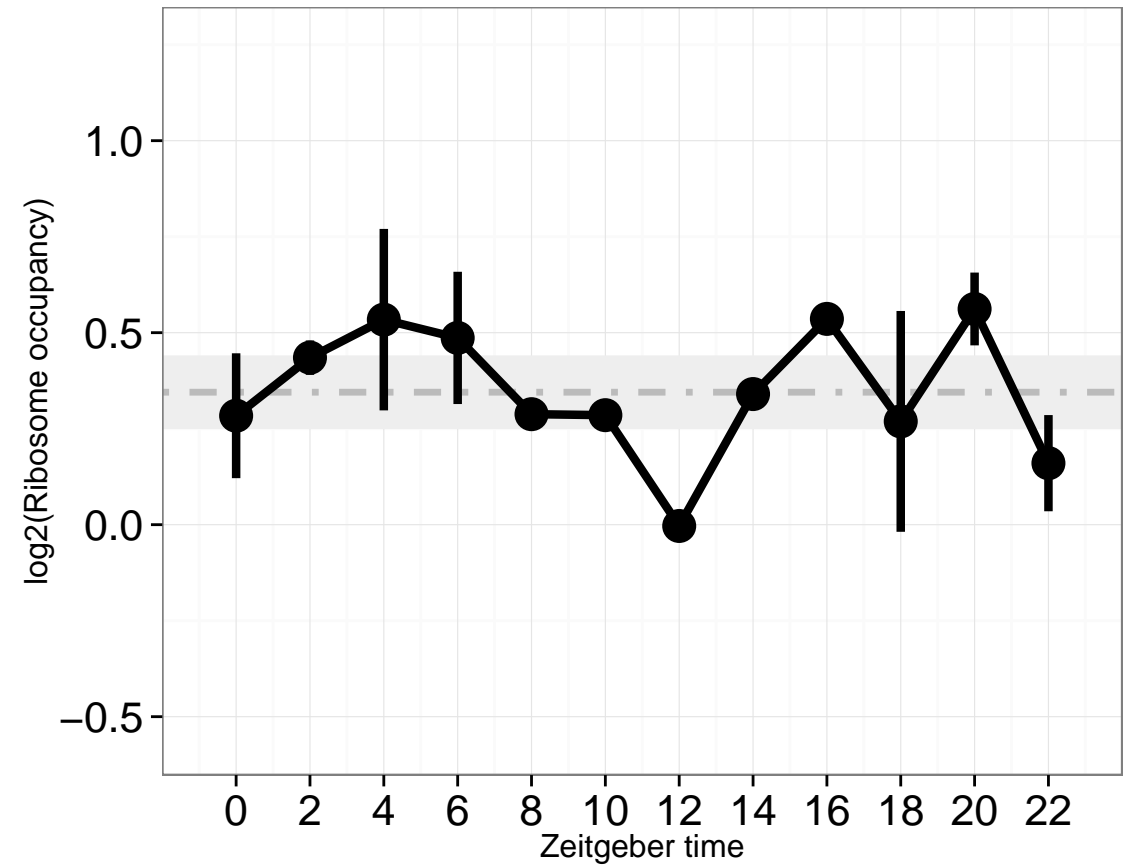

Supplement: Supplementary file 1112 [file 1]

# Med16

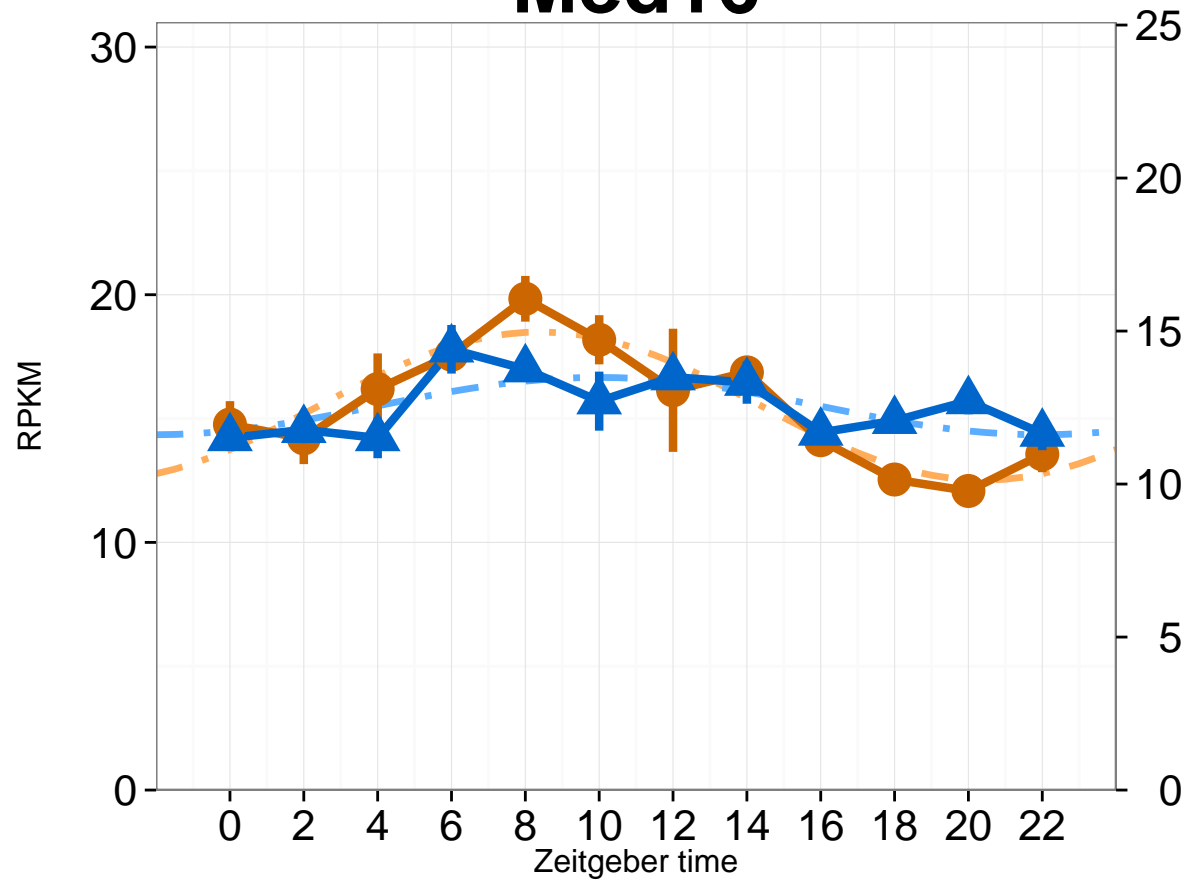

# Med16

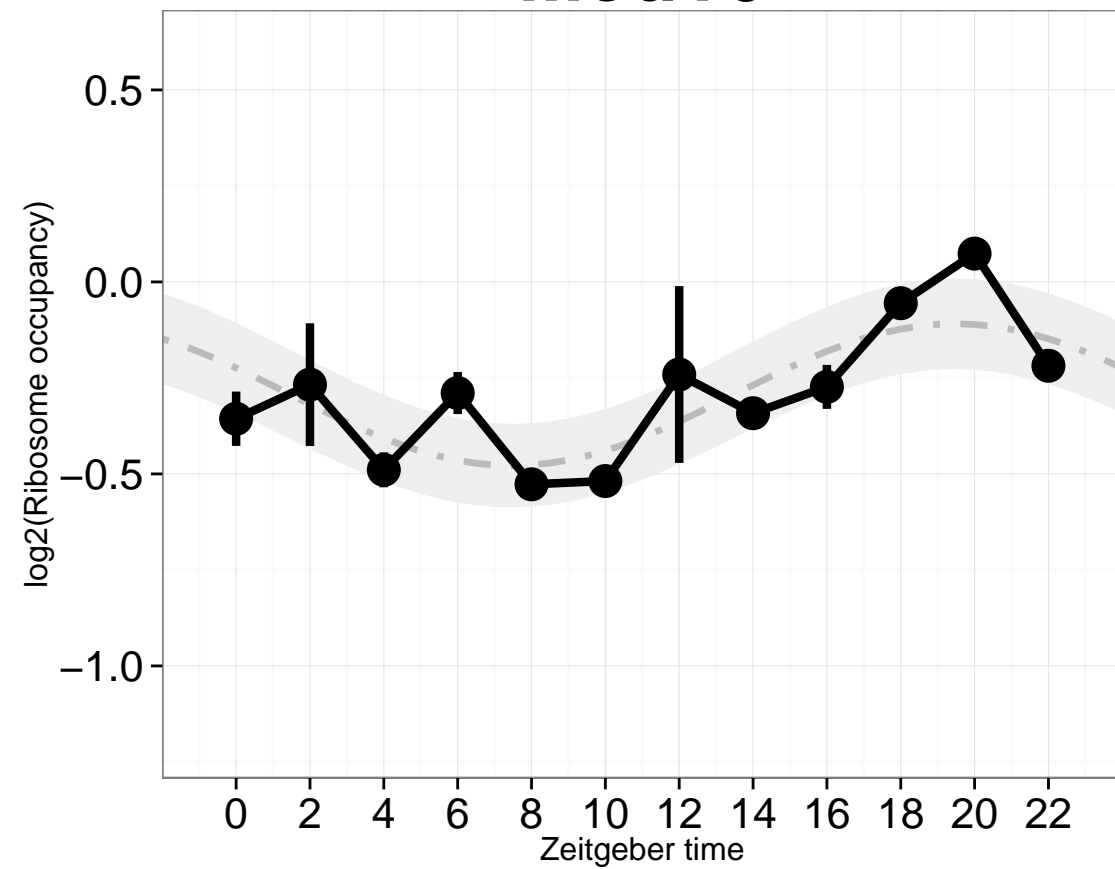

Supplement: Supplementary file 1113 [file 1]

**Lysmd2 TR**

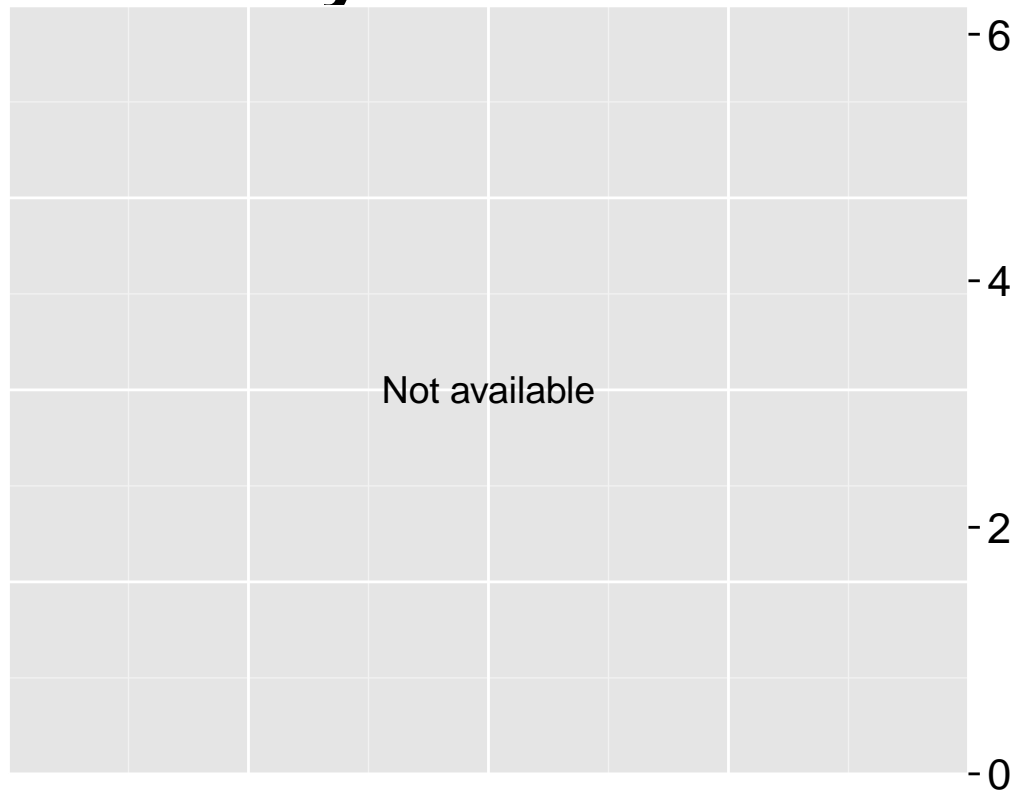

**Lysmd2 log2(Ribosome occupancy**

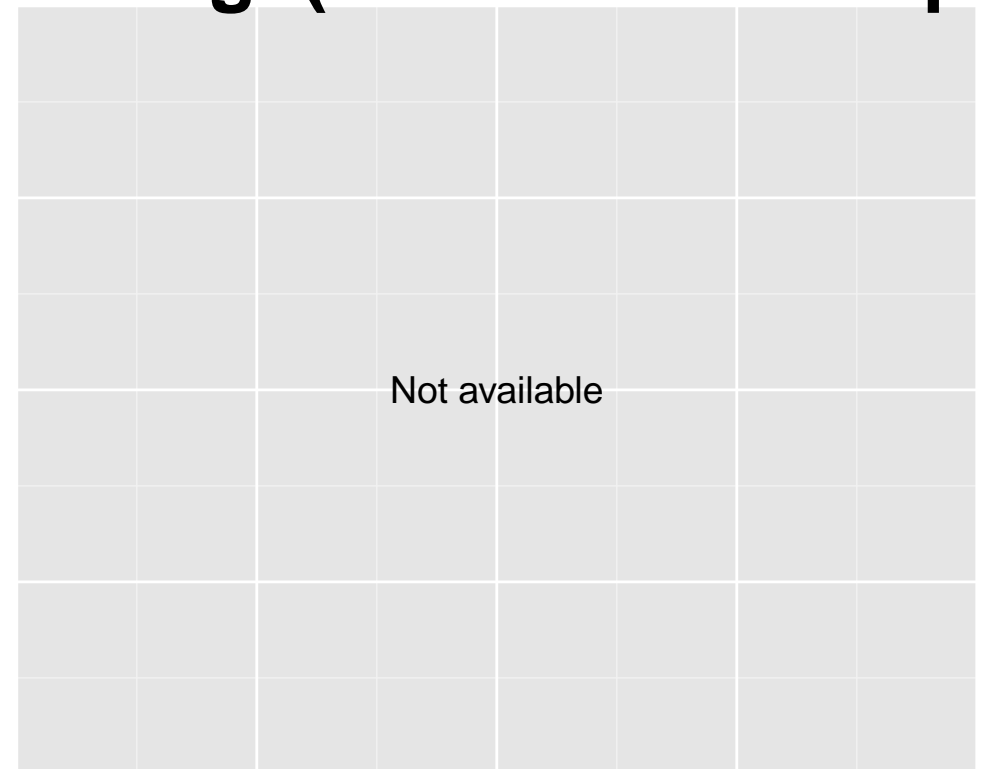

Supplement: Supplementary file 1114 [file 1]

# 3110009E18Rik

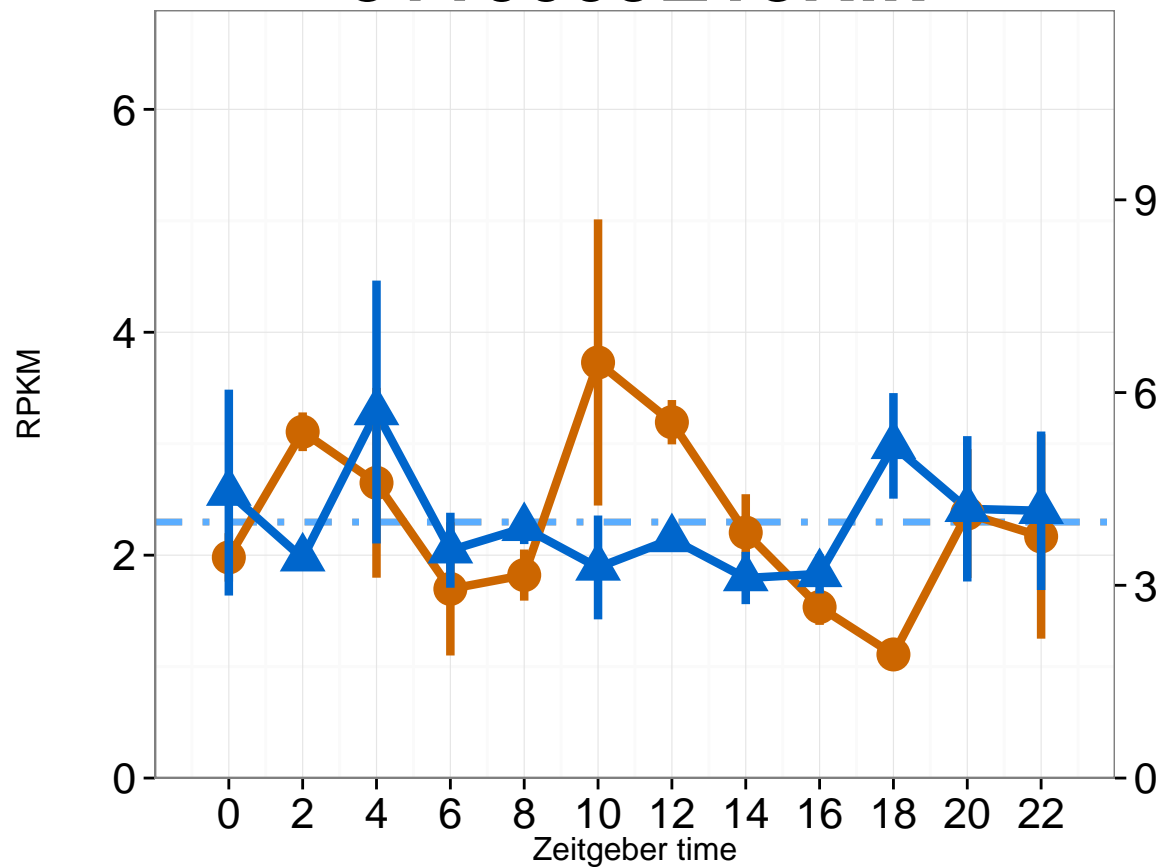

# 3110009E18Rik

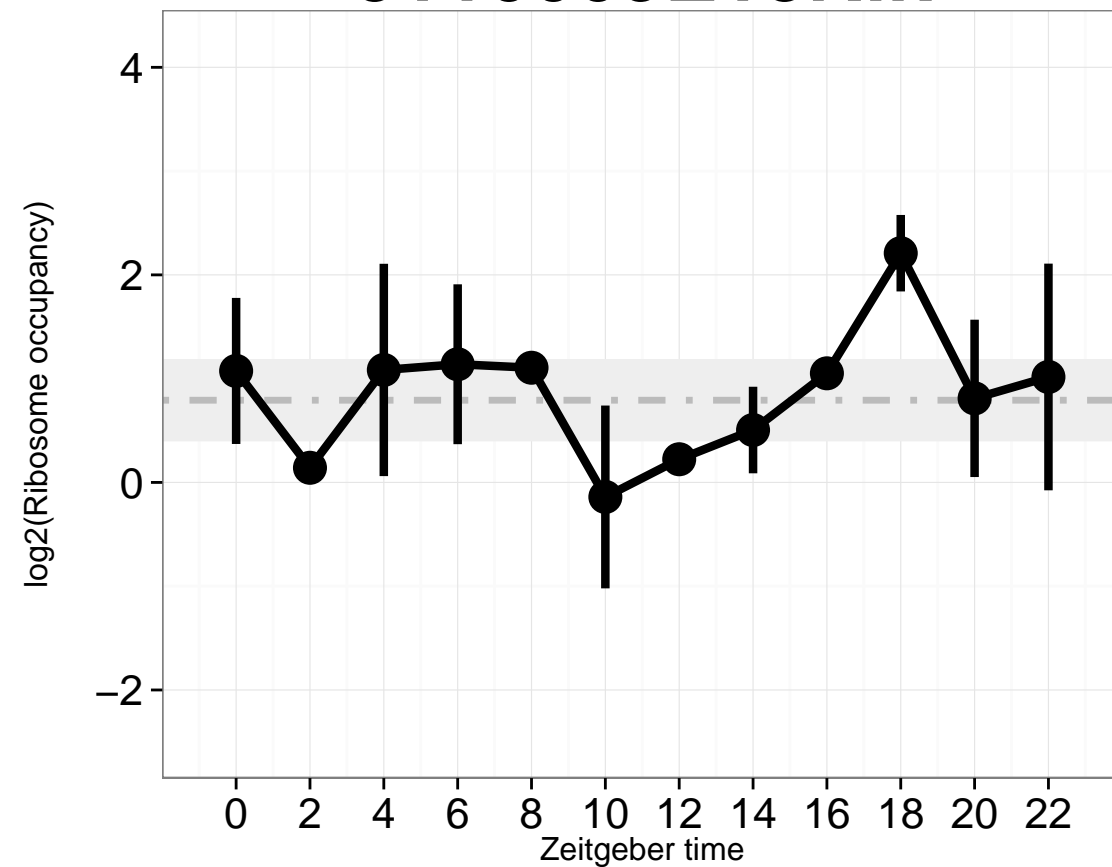

Supplement: Supplementary file 1115 [file 1]

## Tmub2

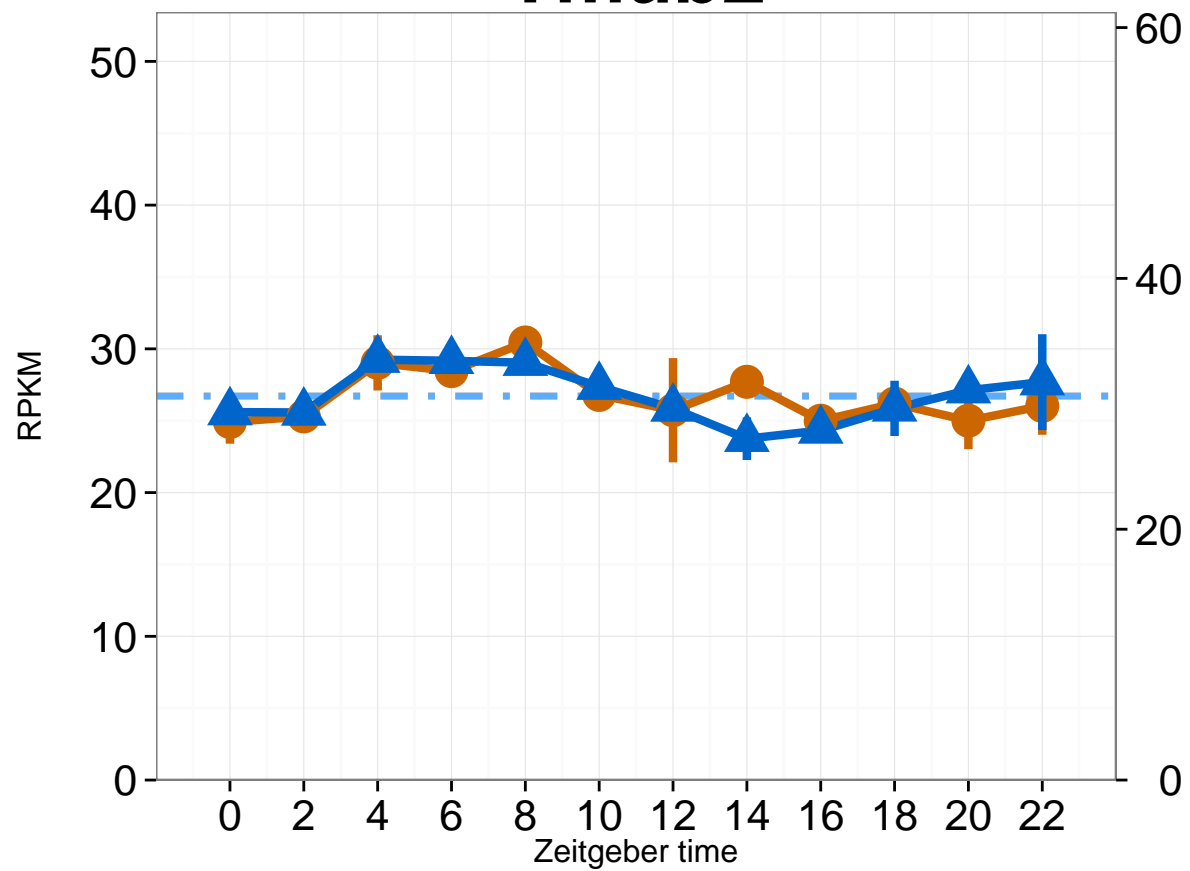

## Tmub2

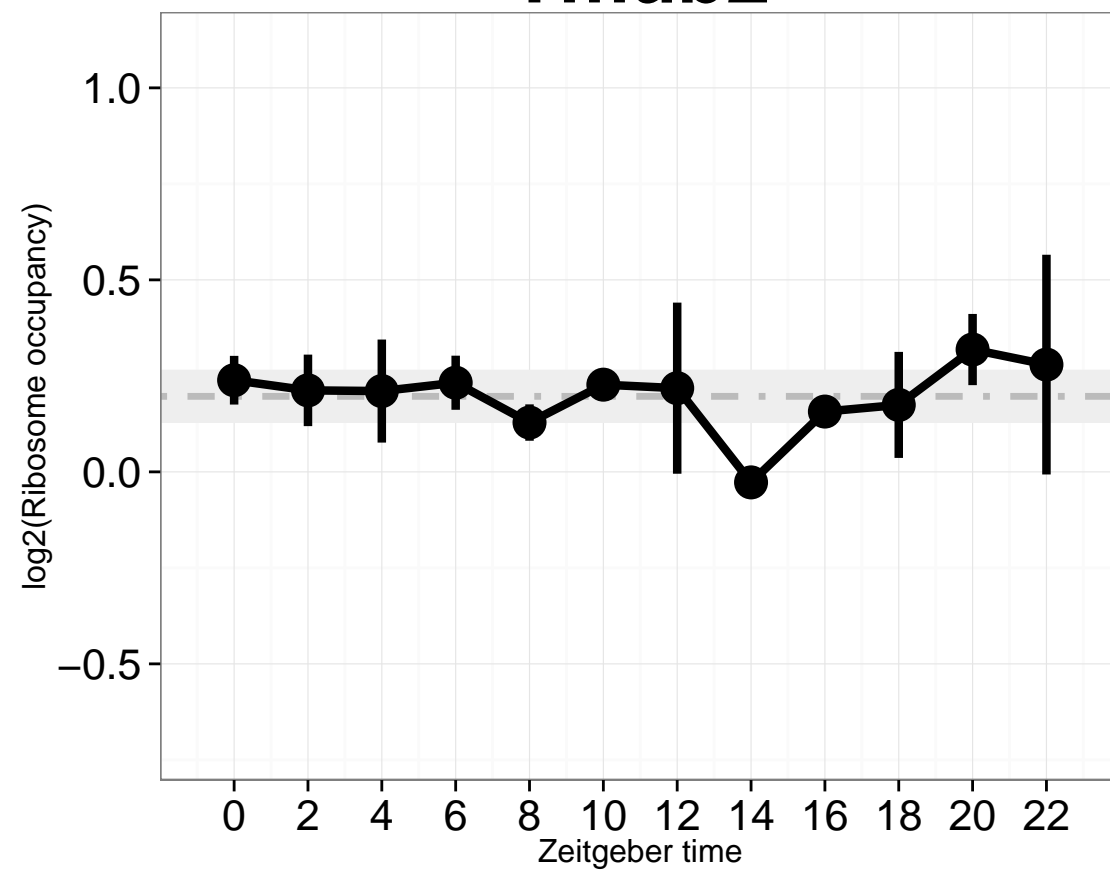

Supplement: Supplementary file 1116 [file 1]

# Ap2s1

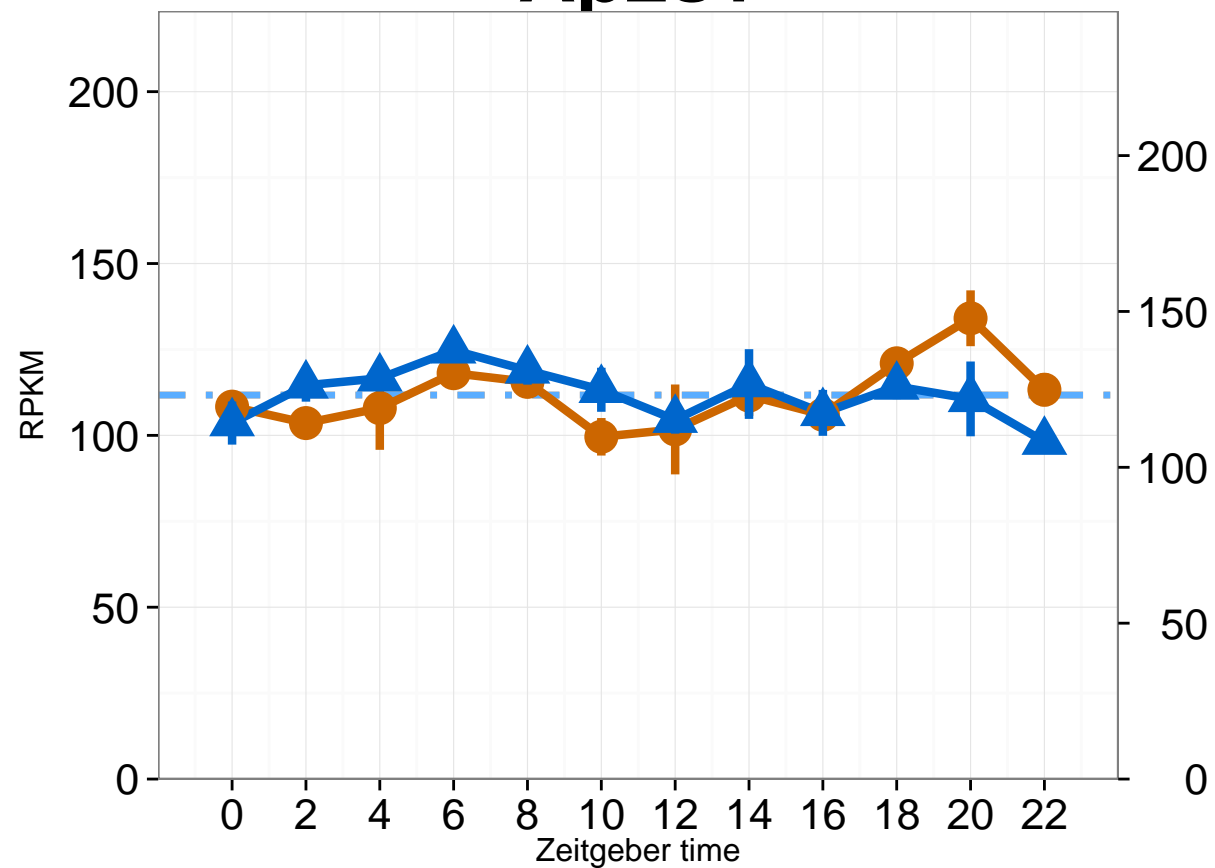

# Ap2s1

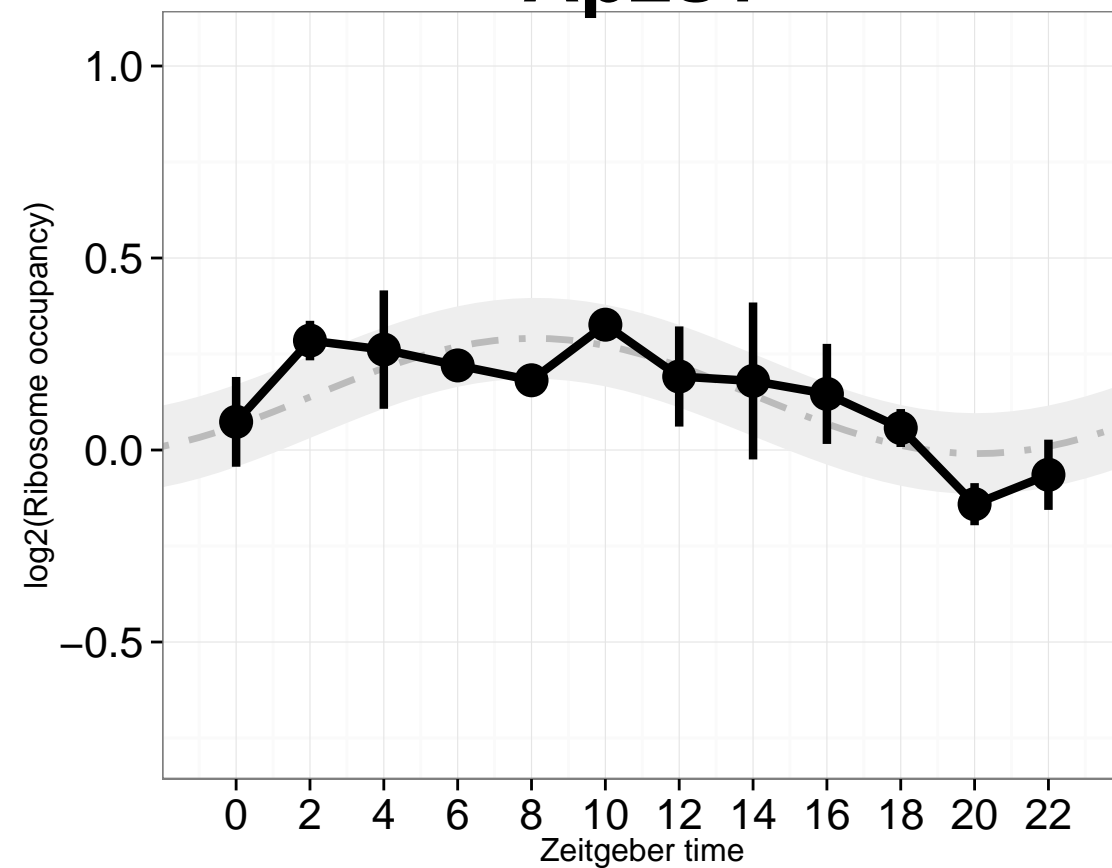

Supplement: Supplementary file 1117 [file 1]

## Tfpi

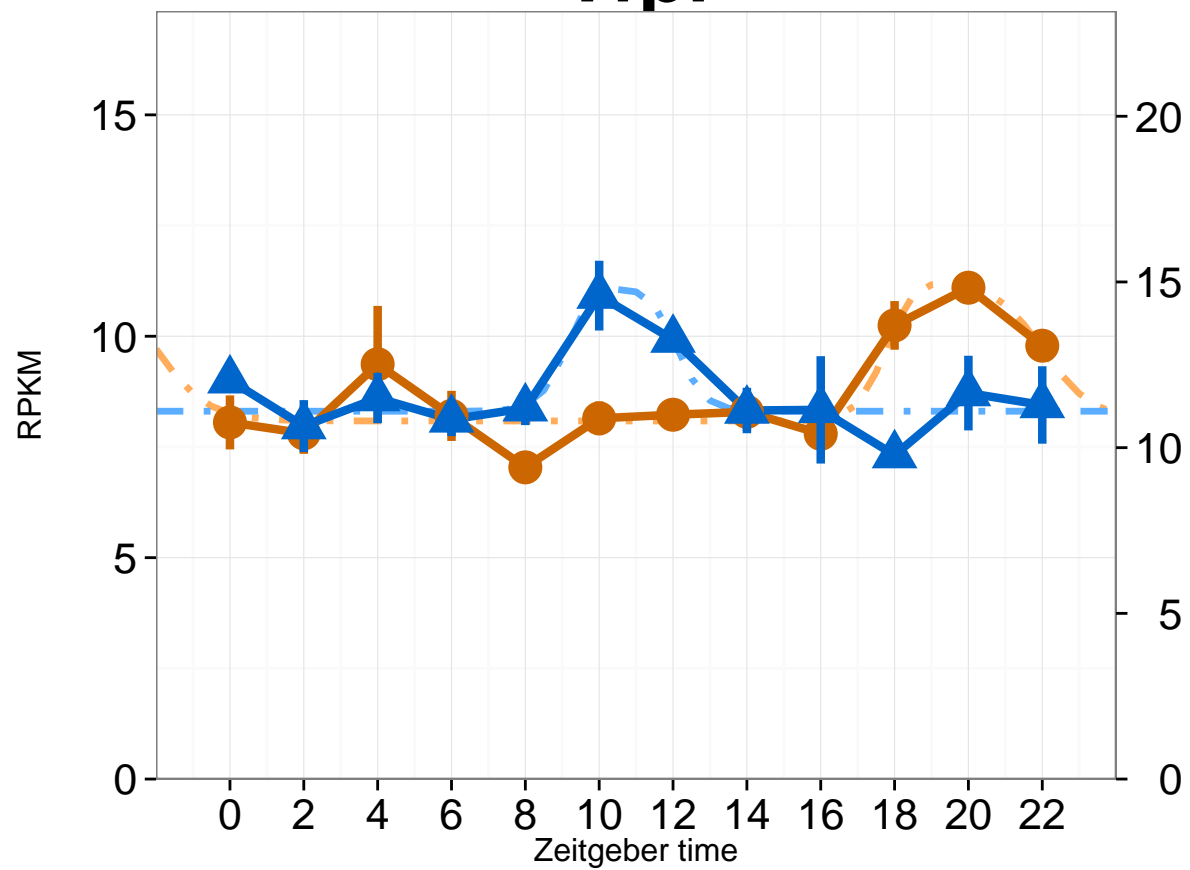

## Tfpi

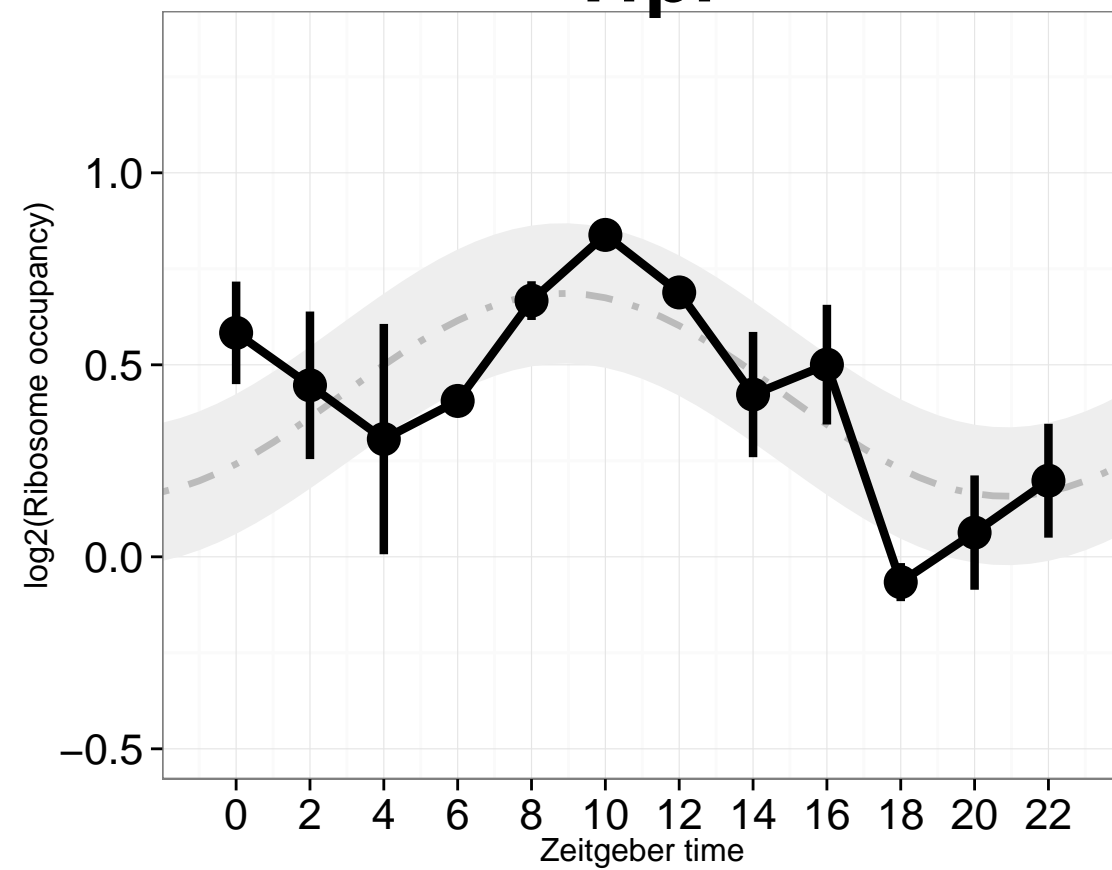

Supplement: Supplementary file 1118 [file 1]

## Gstk1

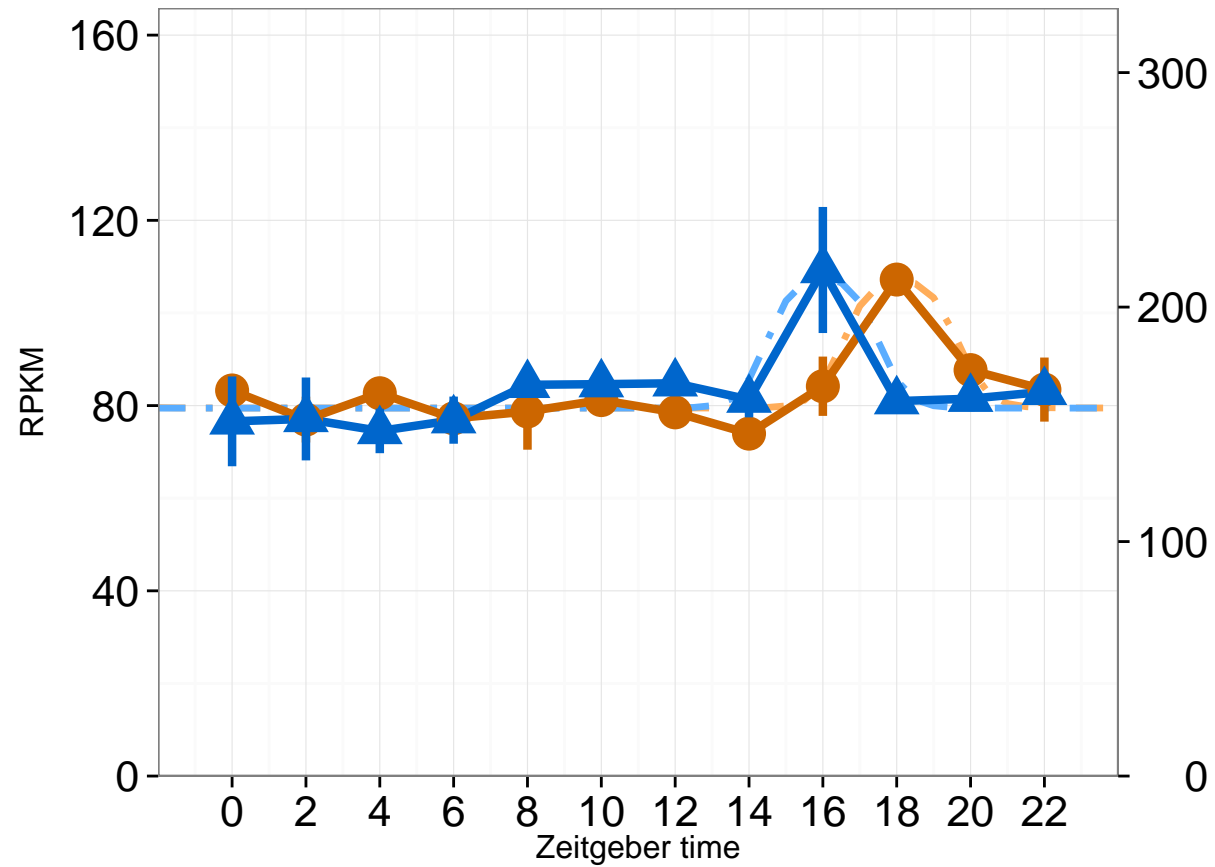

## Gstk1

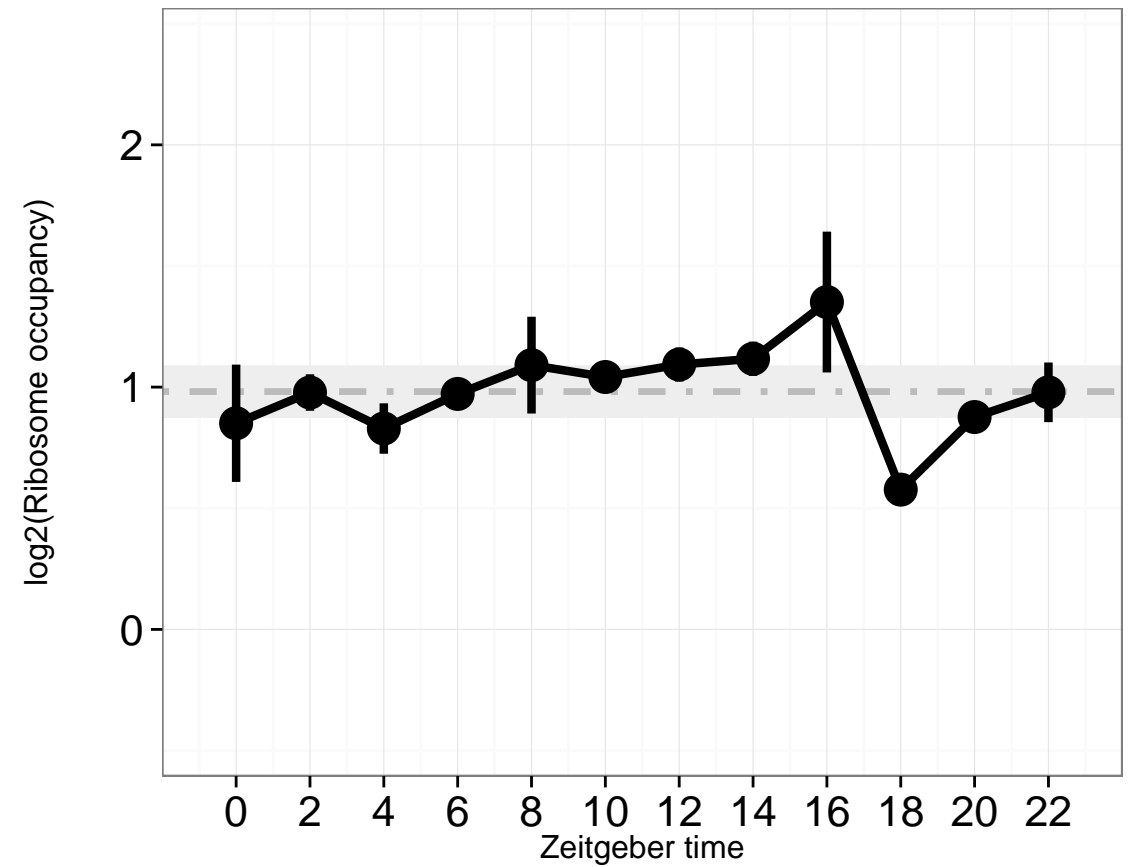

Supplement: Supplementary file 1119 [file 1]

# Steap2

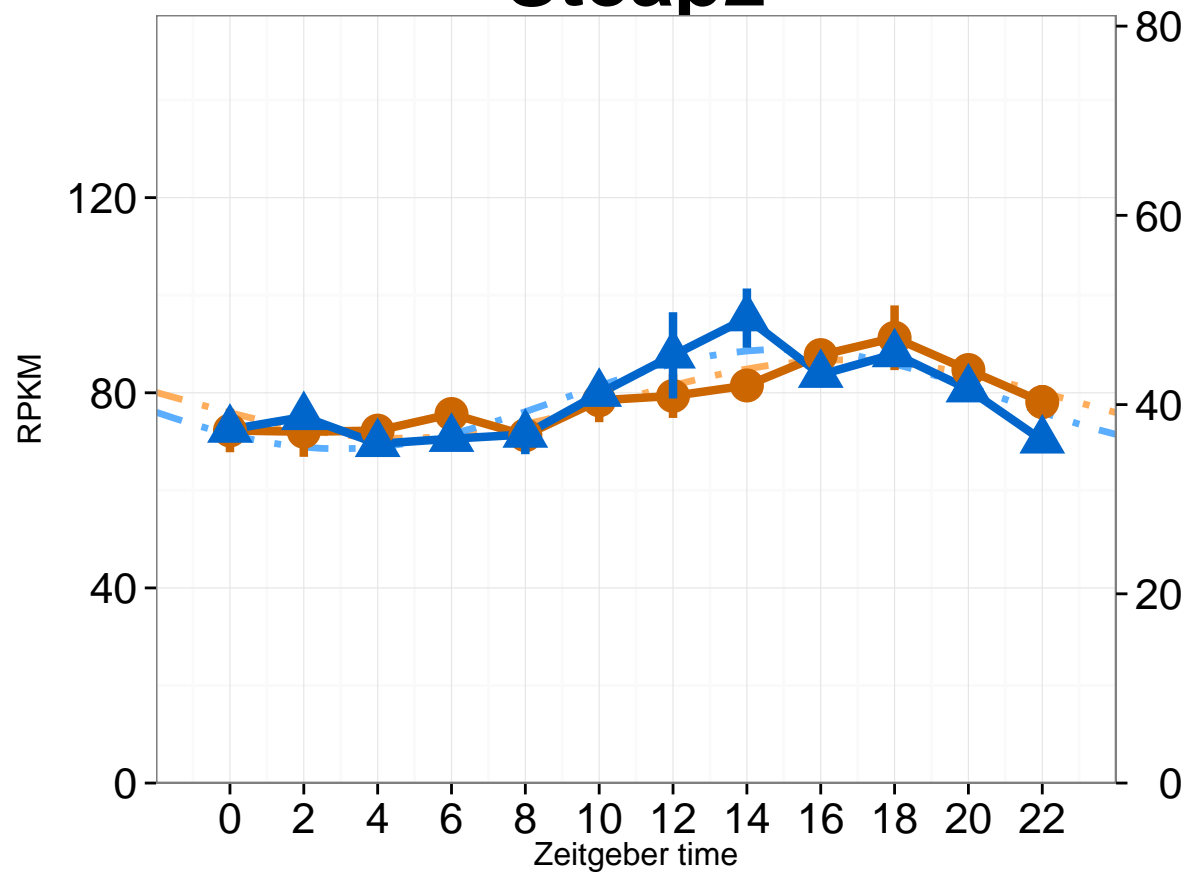

# Steap2

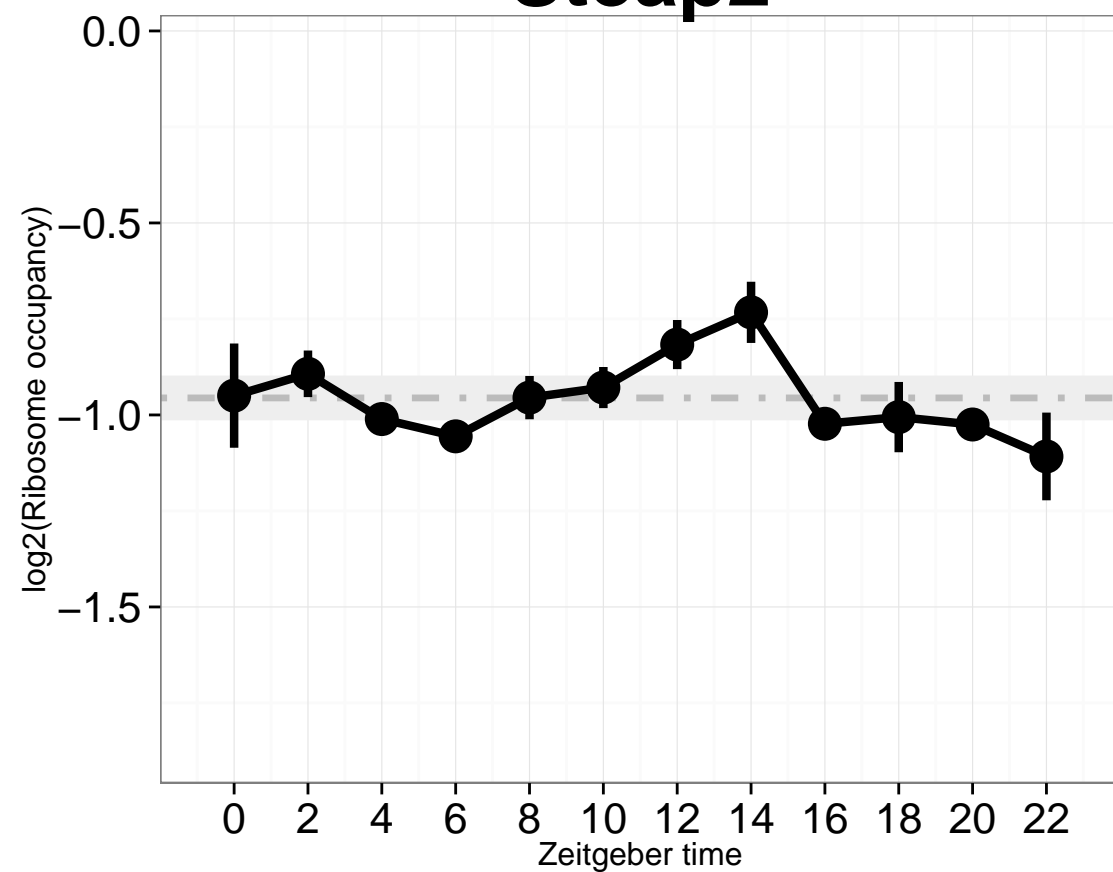

Supplement: Supplementary file 1120 [file 1]

## Ddx50

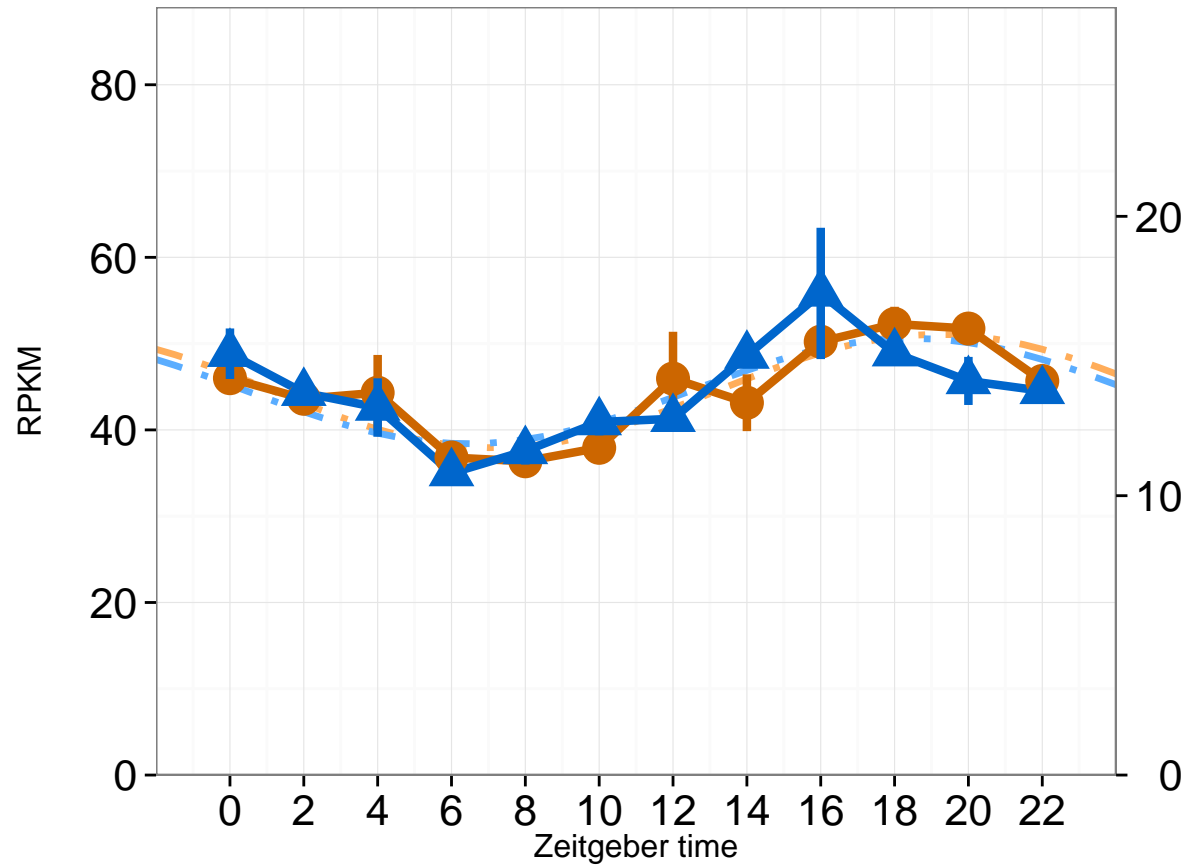

## Ddx50

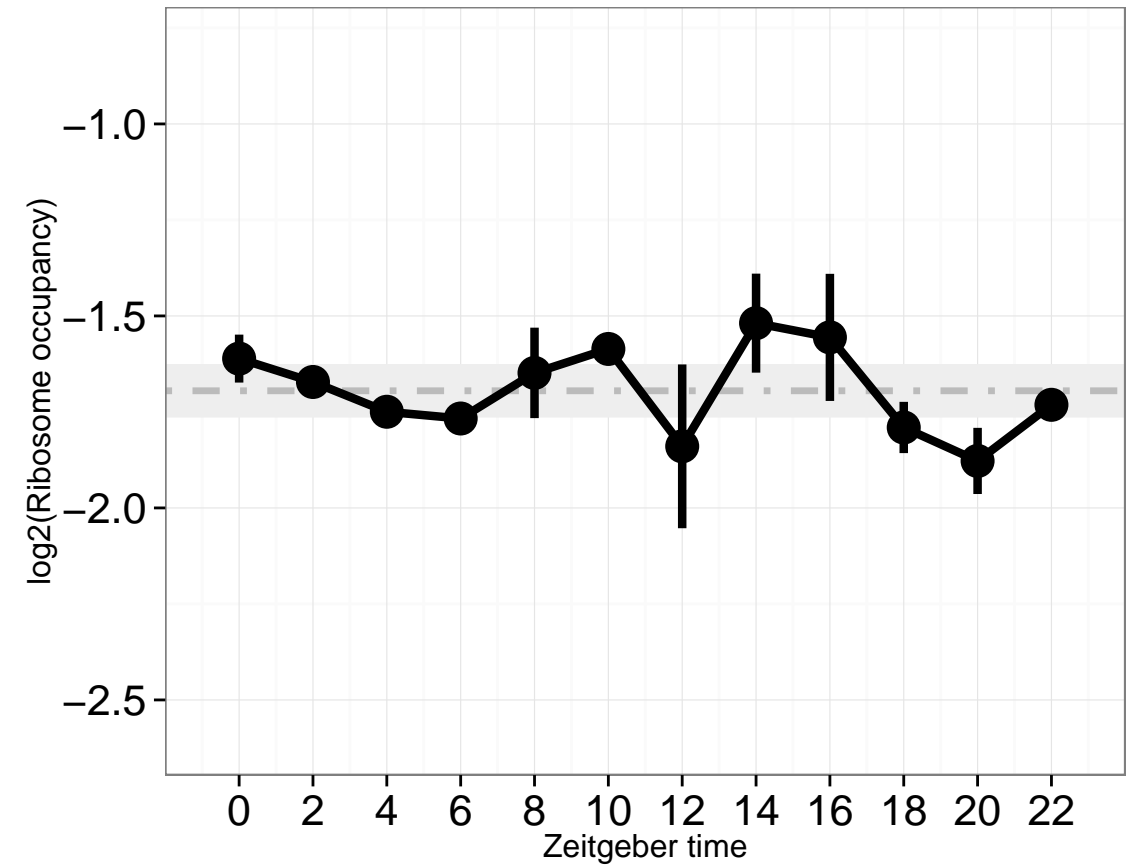

Supplement: Supplementary file 1121 [file 1]

# Col8a2

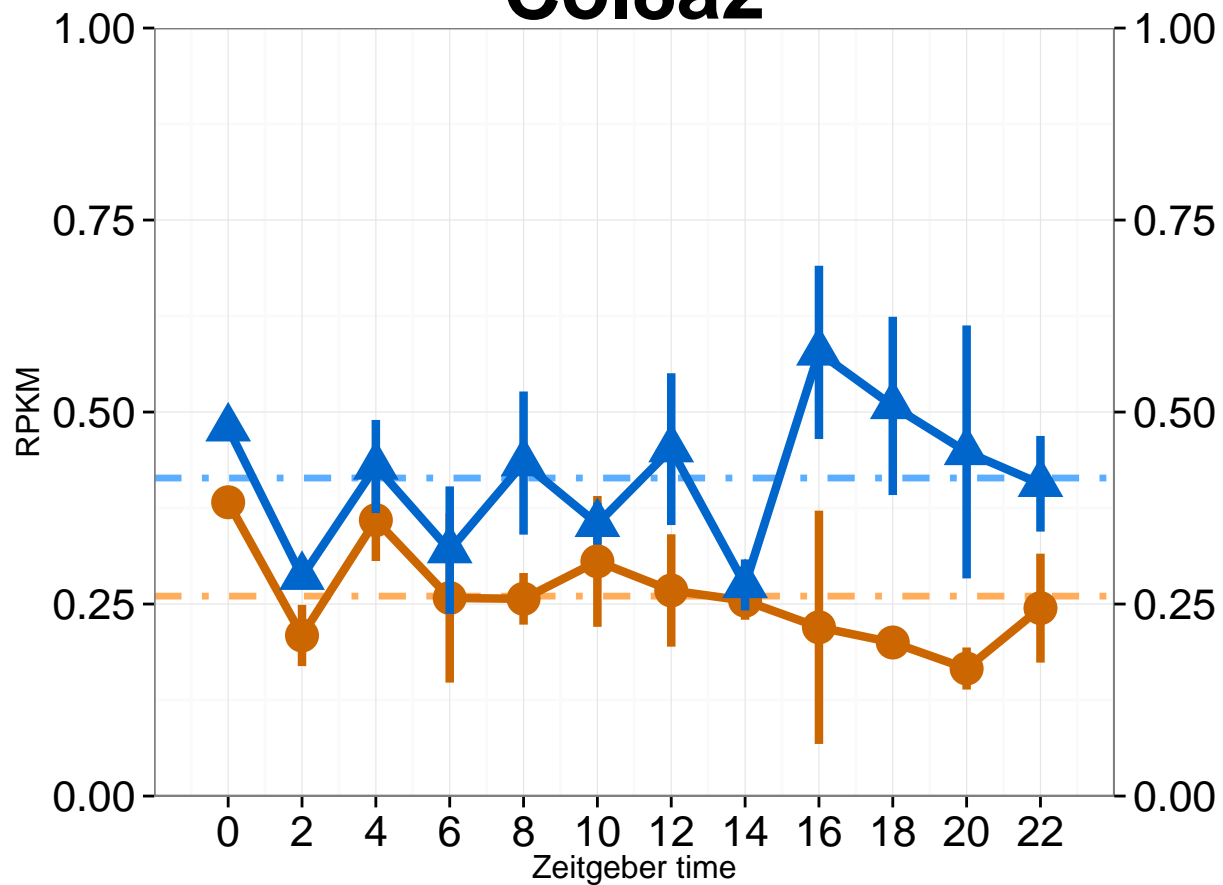

# Col8a2

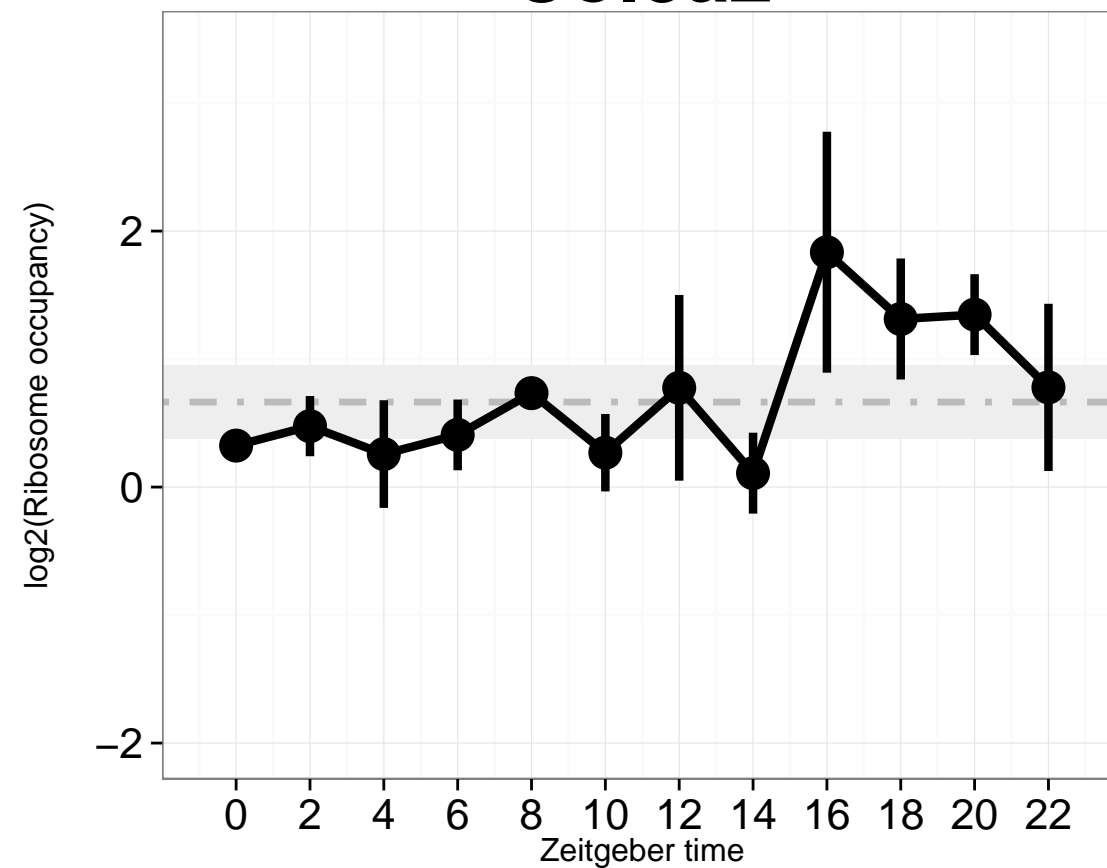

Supplement: Supplementary file 1122 [file 1]

# Pigh

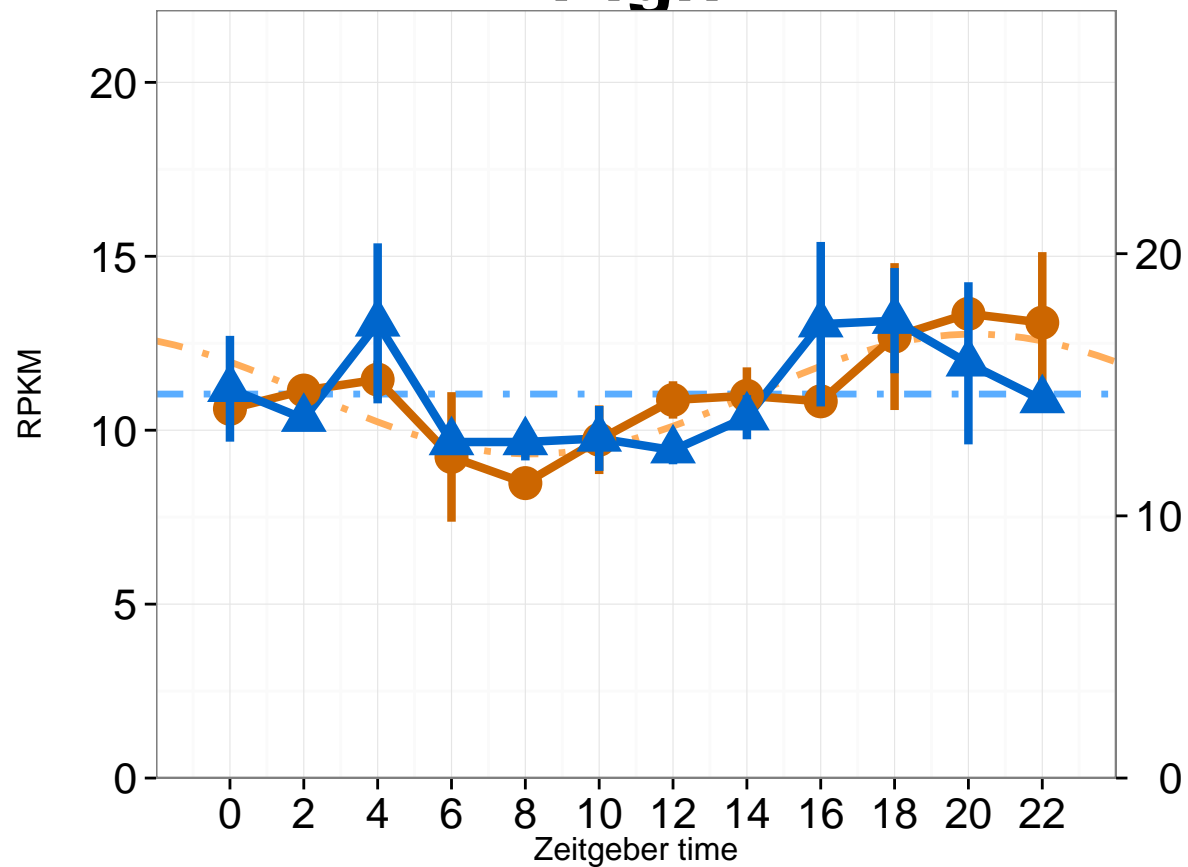

# Pigh

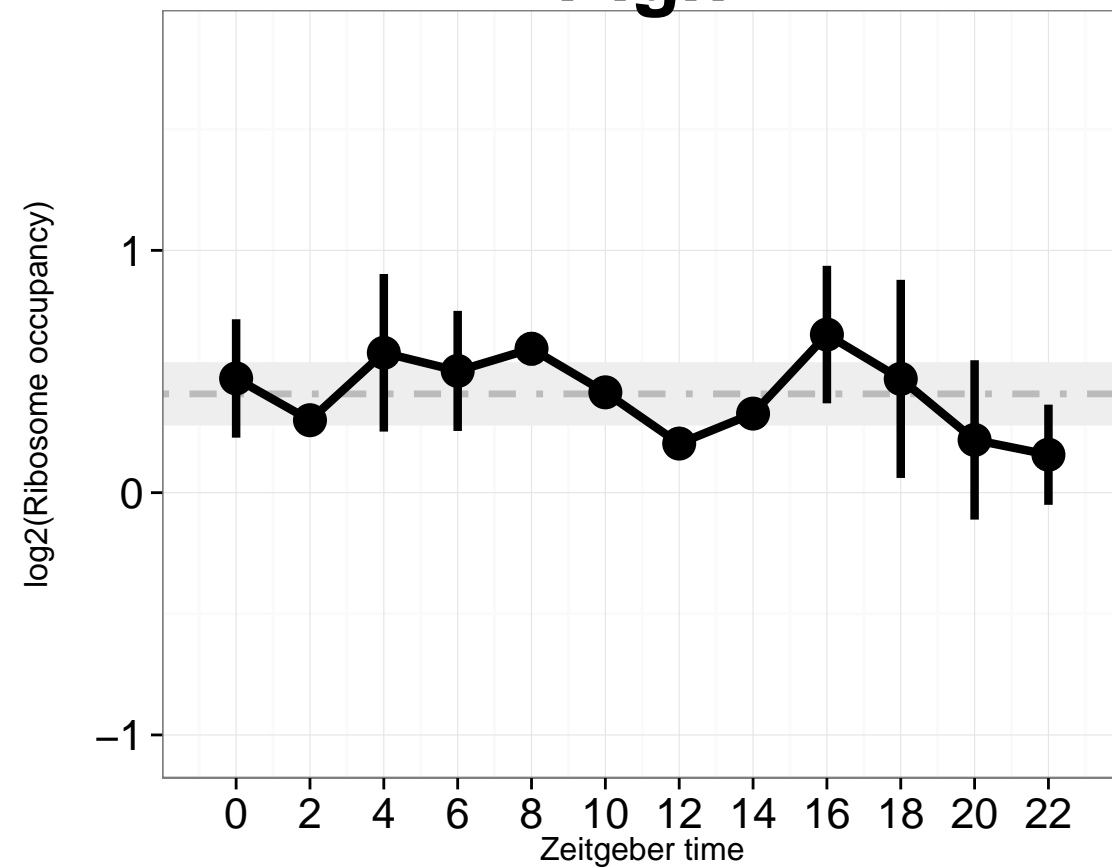

Supplement: Supplementary file 1123 [file 1]

# Fam213a

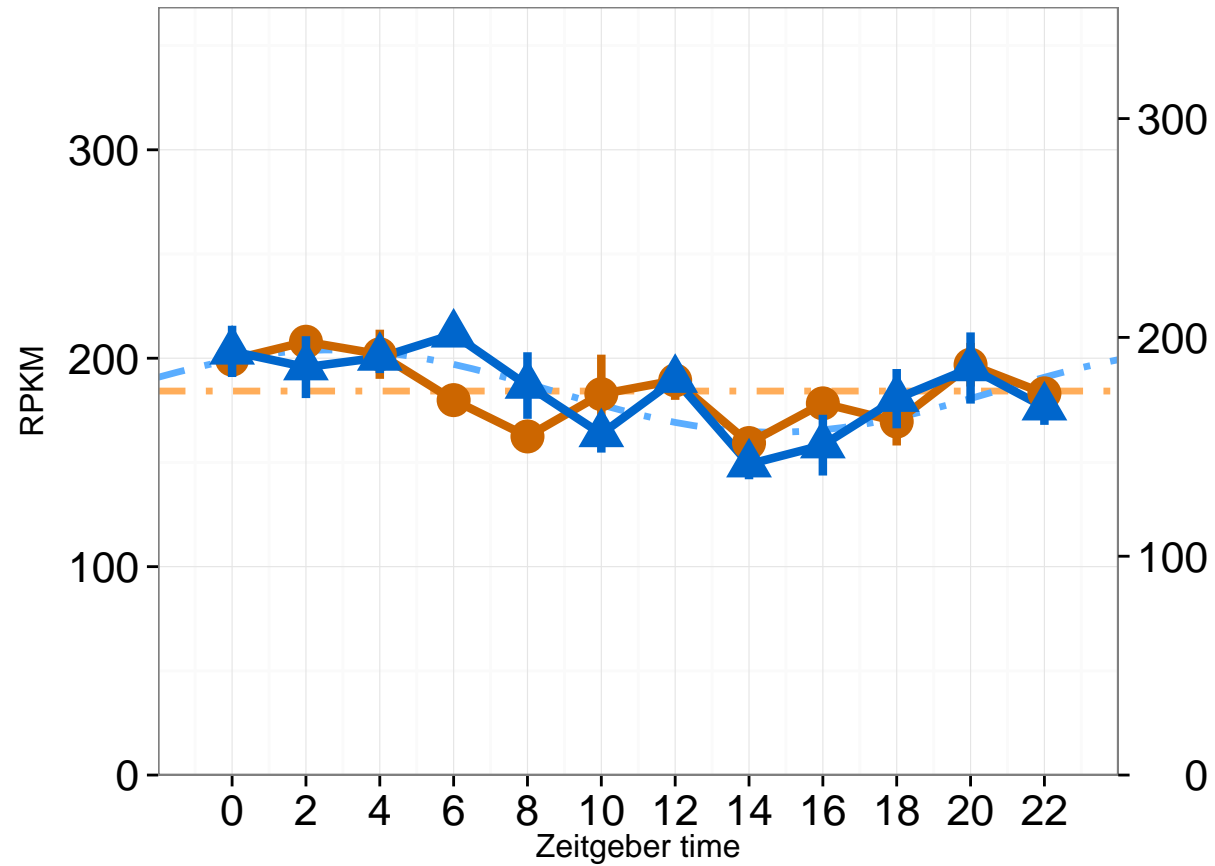

# Fam213a

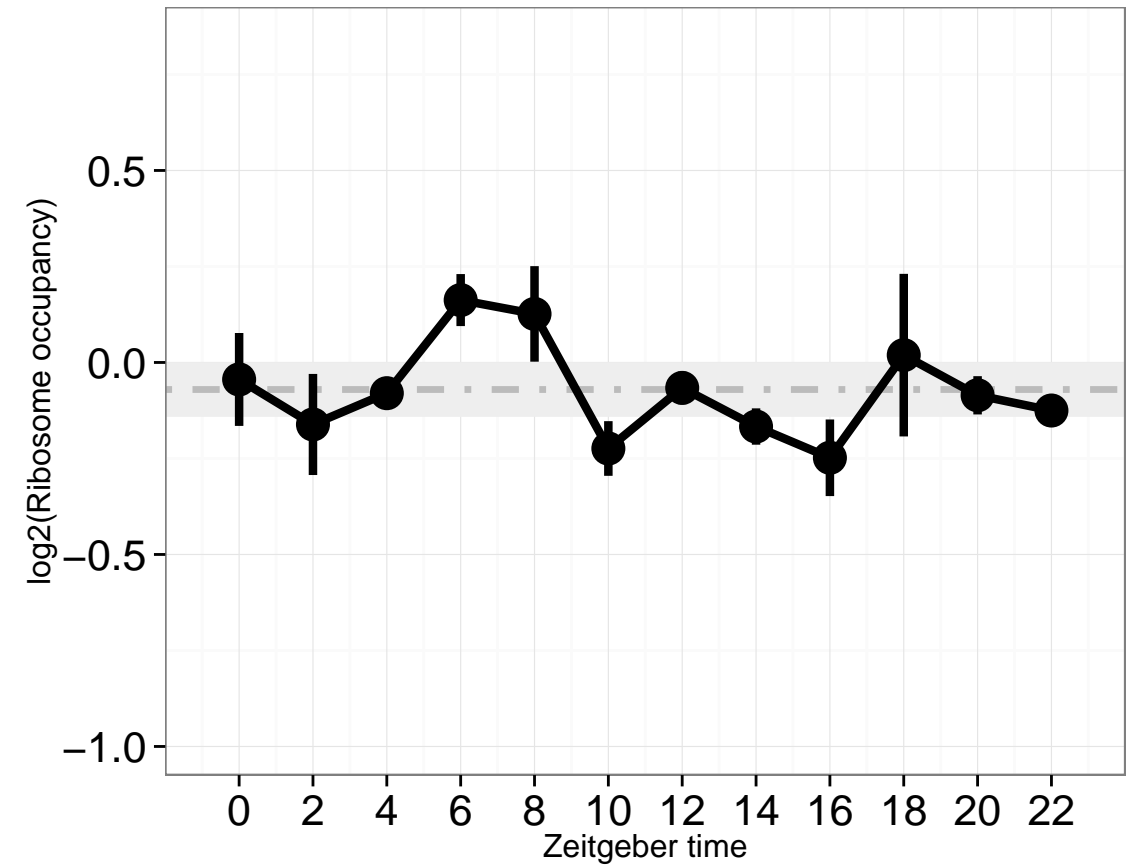

Supplement: Supplementary file 1124 [file 1]

# Uqcrh

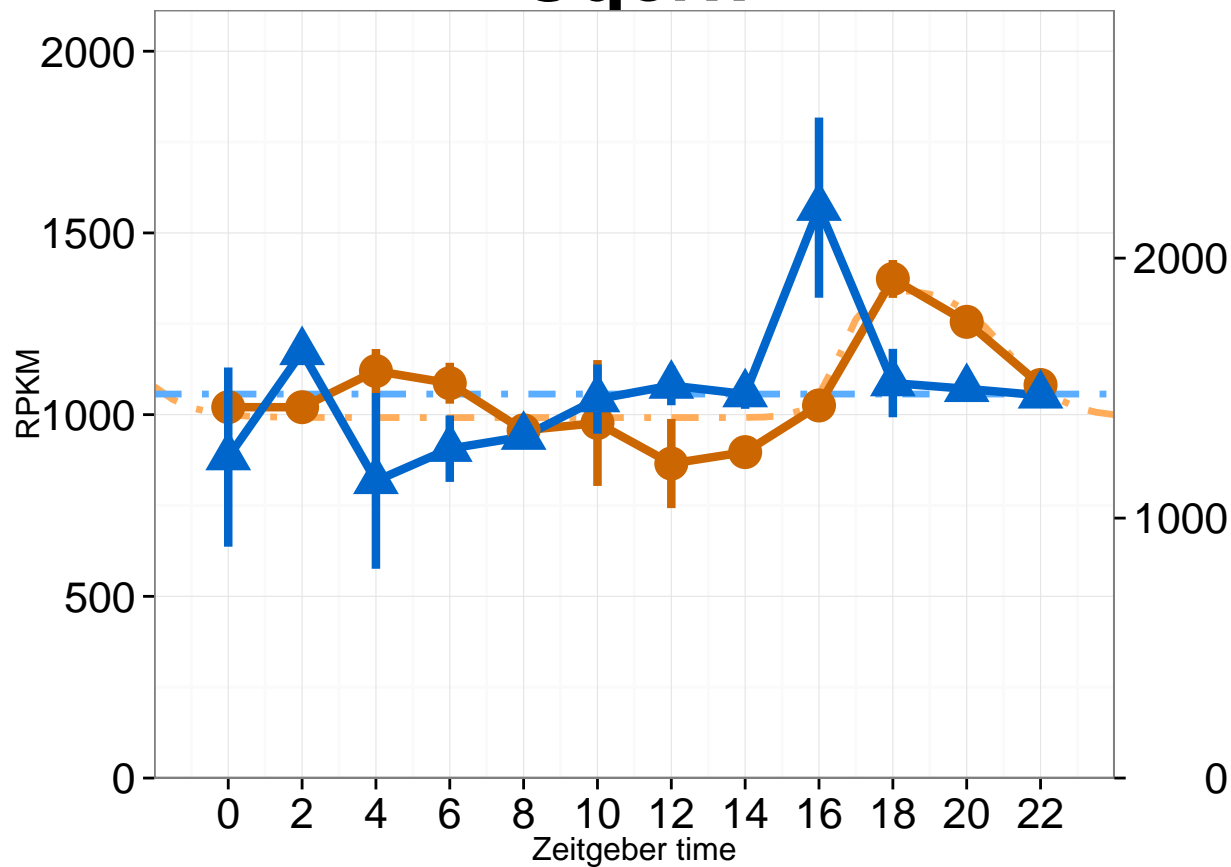

# Uqcrh

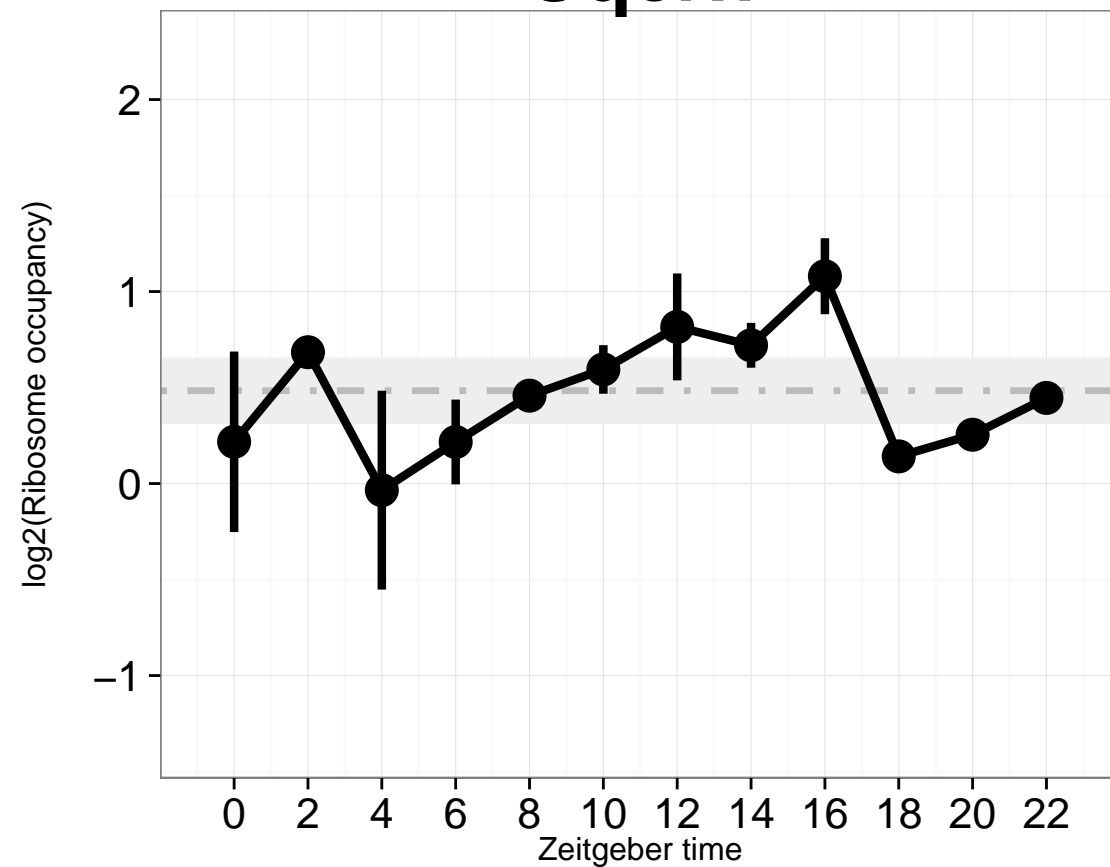

Supplement: Supplementary file 1125 [file 1]

# Ankrd34b

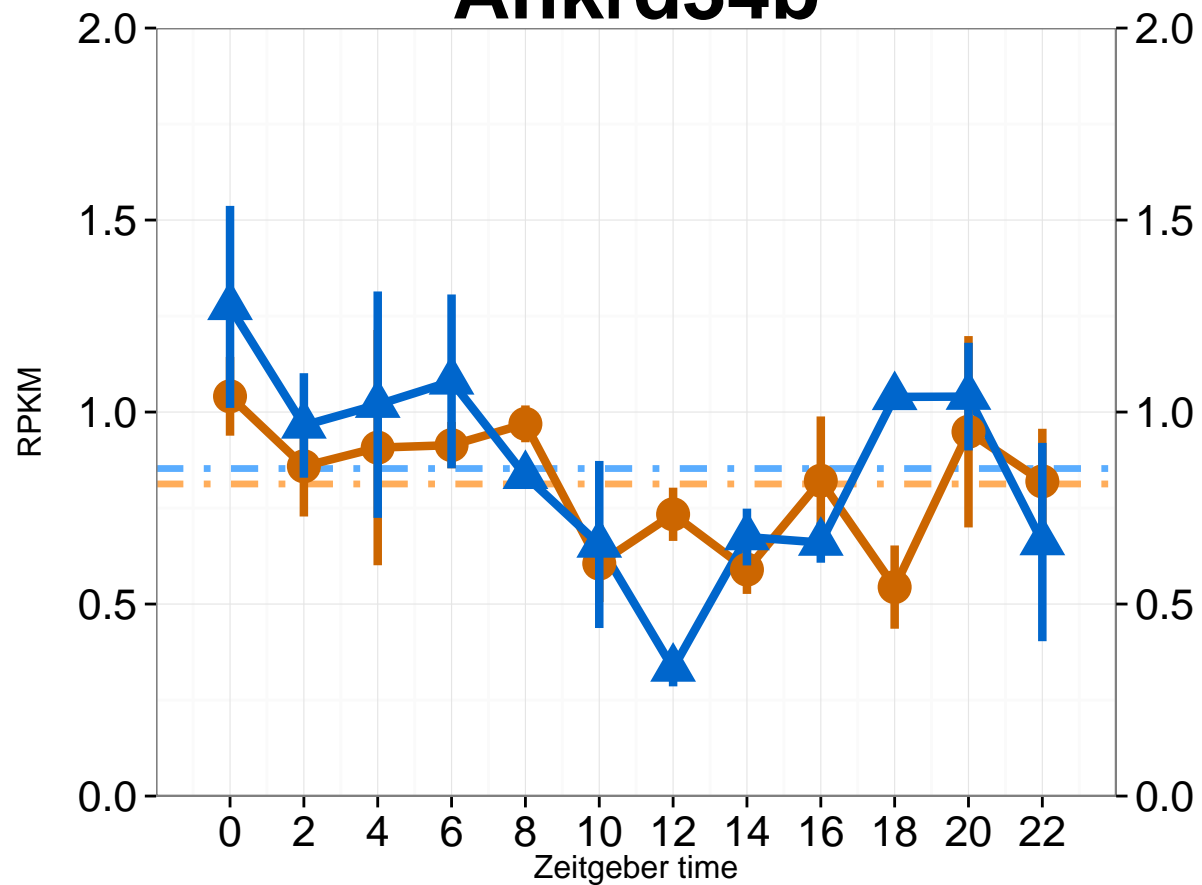

# Ankrd34b

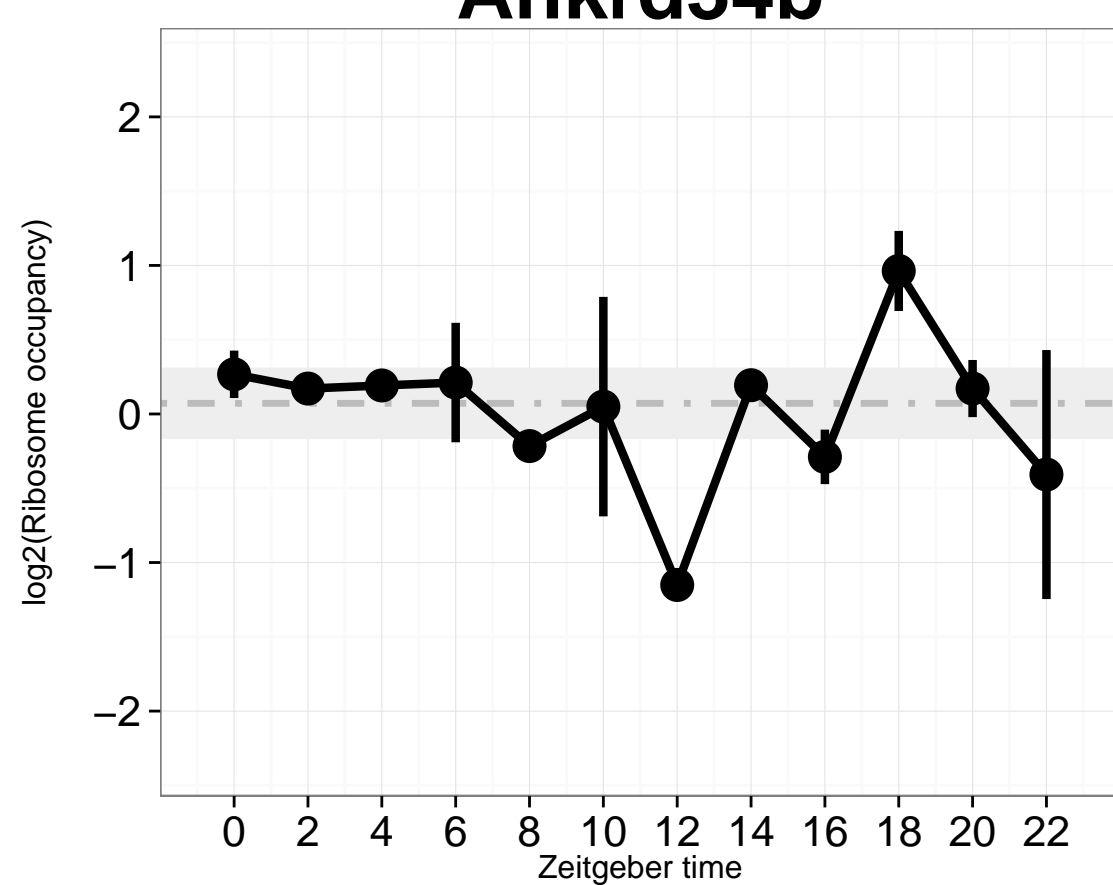

Supplement: Supplementary file 1126 [file 1]

# Chp1

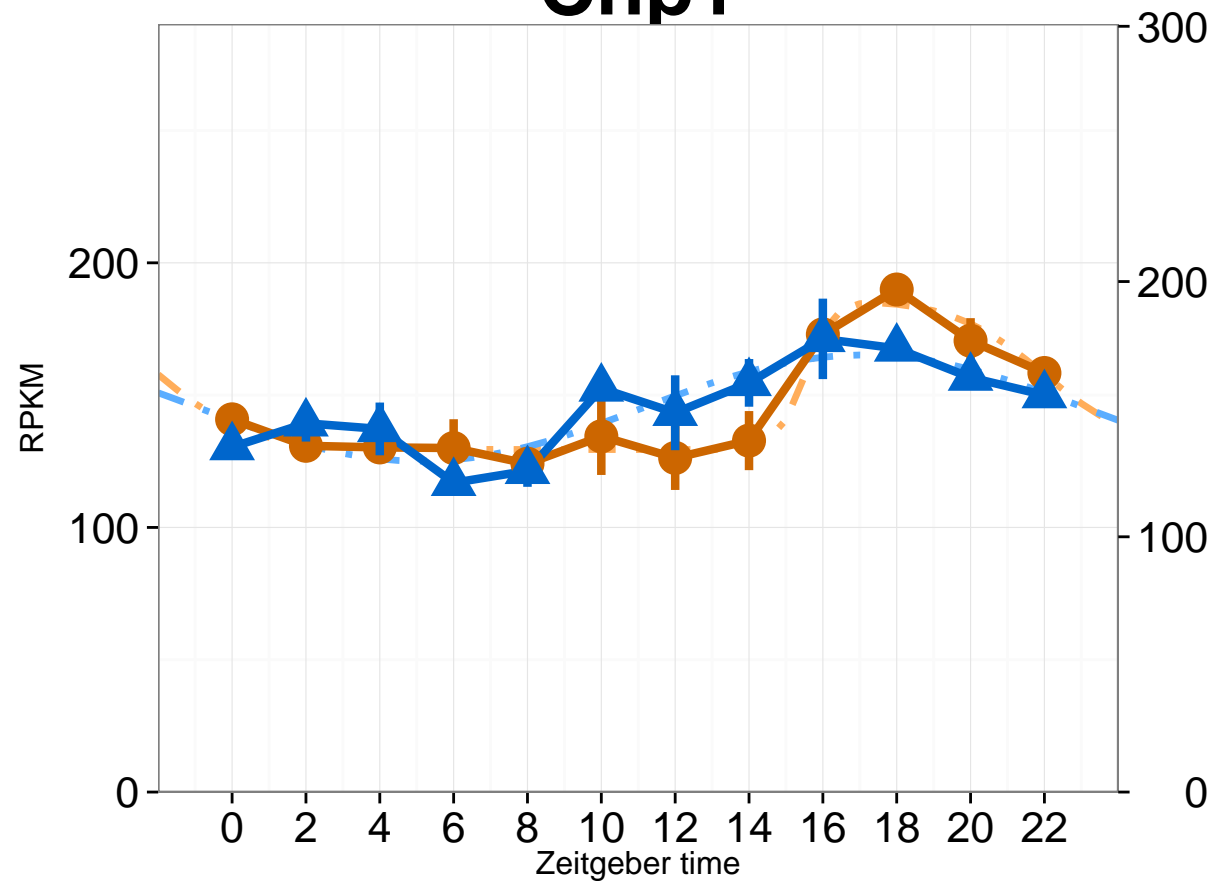

# Chp1

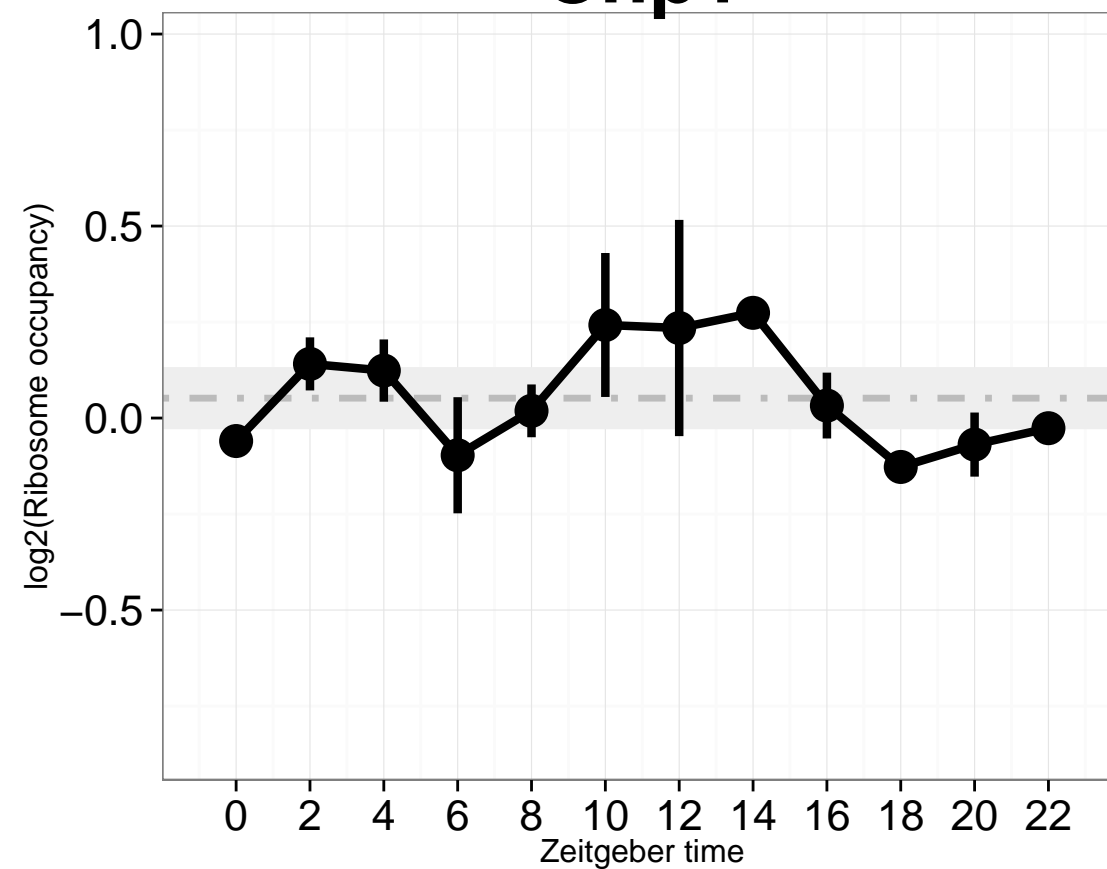

Supplement: Supplementary file 1127 [file 1]

## Plekhh2

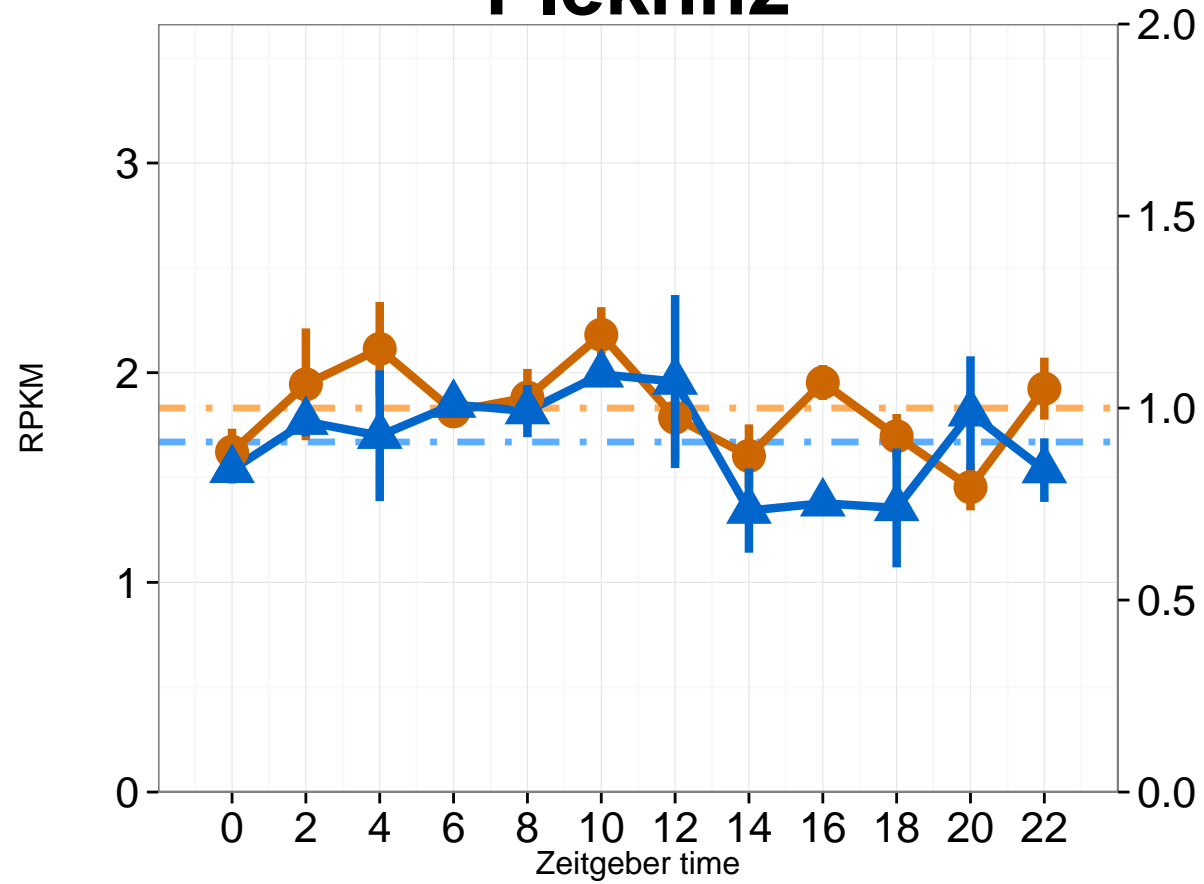

## Plekhh2

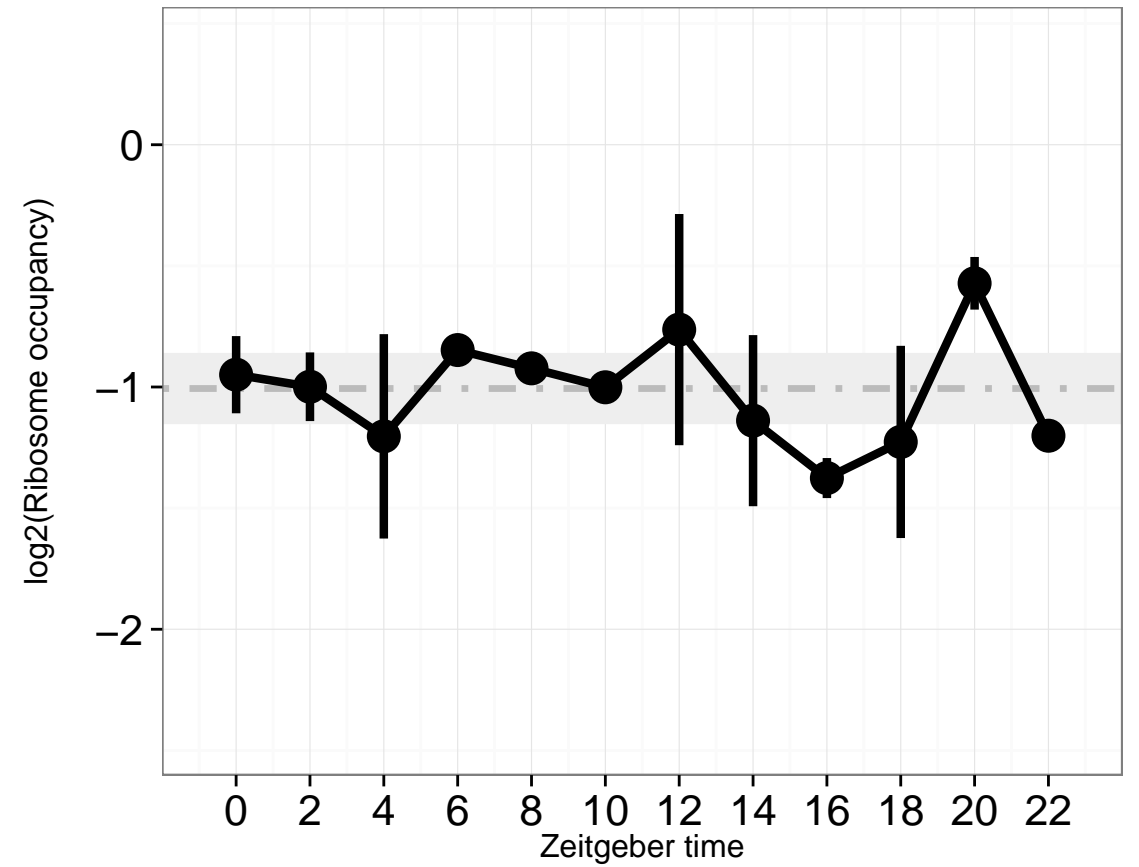

Supplement: Supplementary file 1128 [file 1]

# Mrps18b

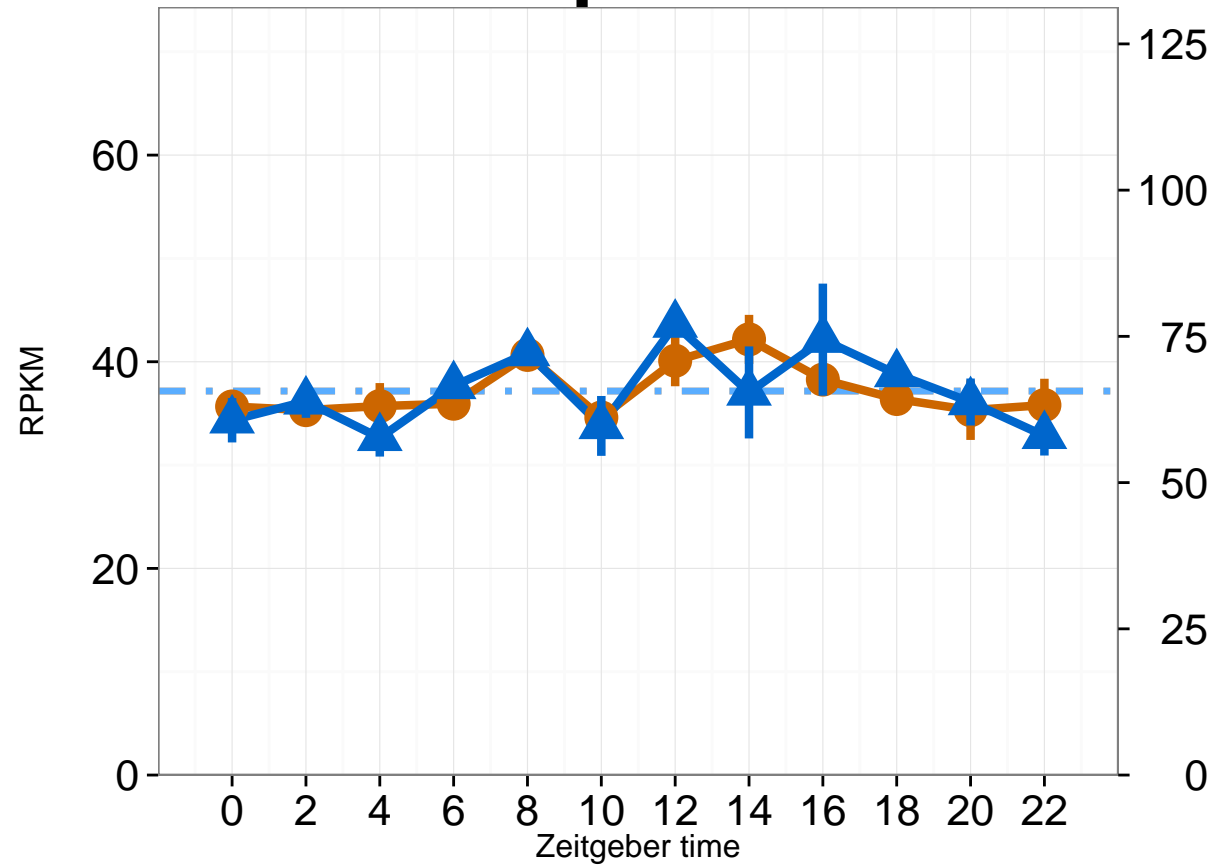

# Mrps18b

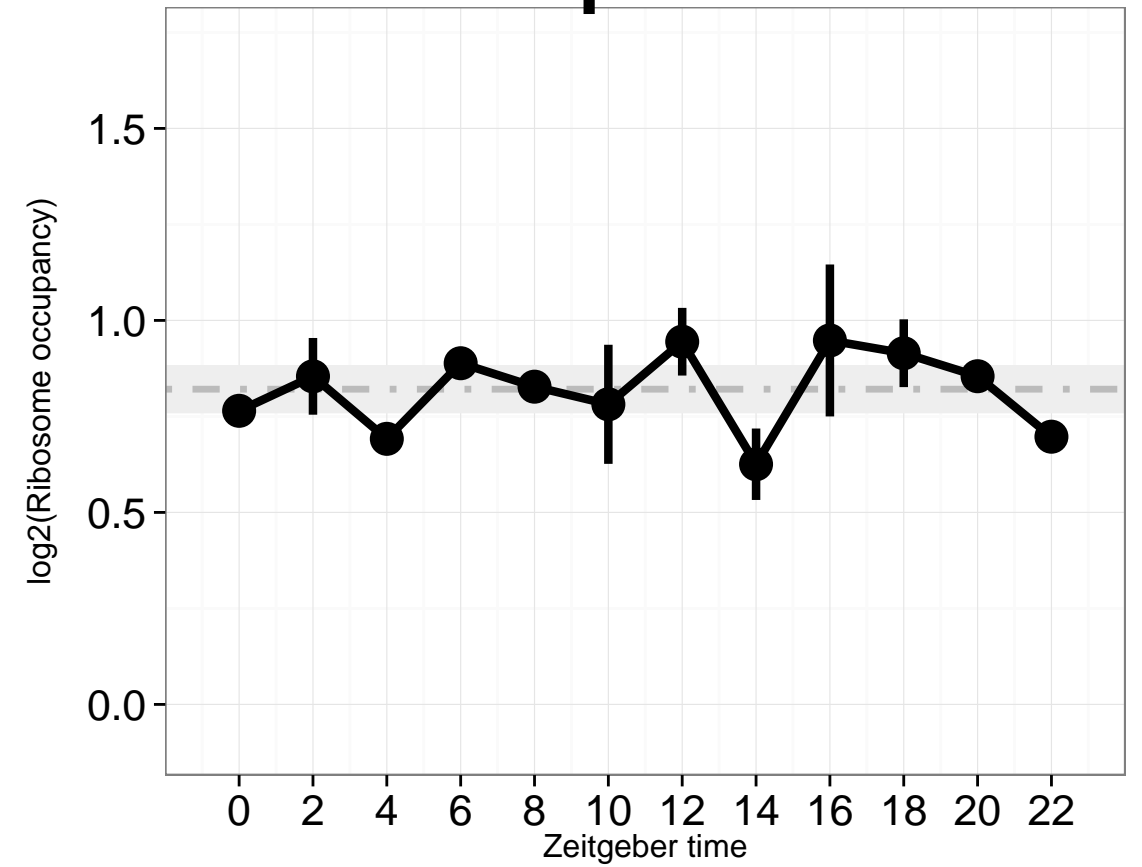

Supplement: Supplementary file 1129 [file 1]

# Slc10a2

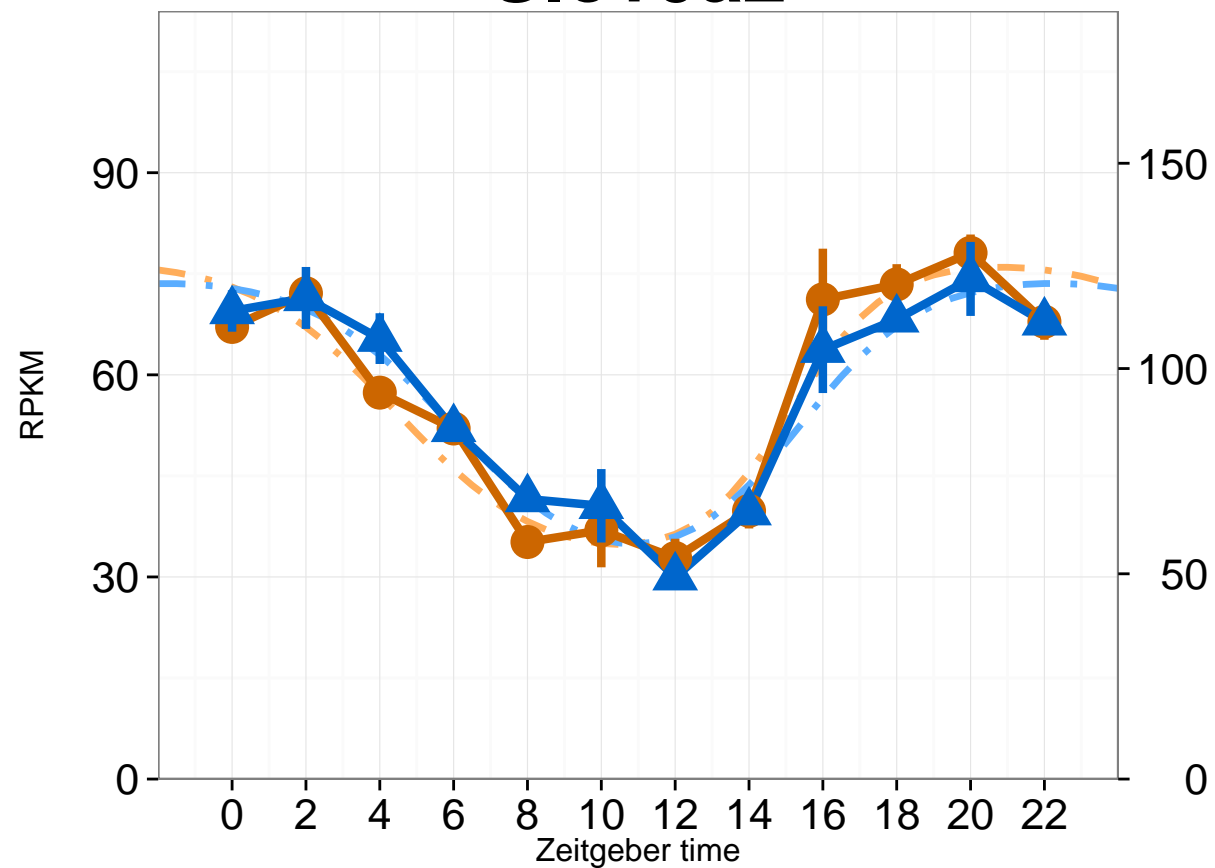

# Slc10a2

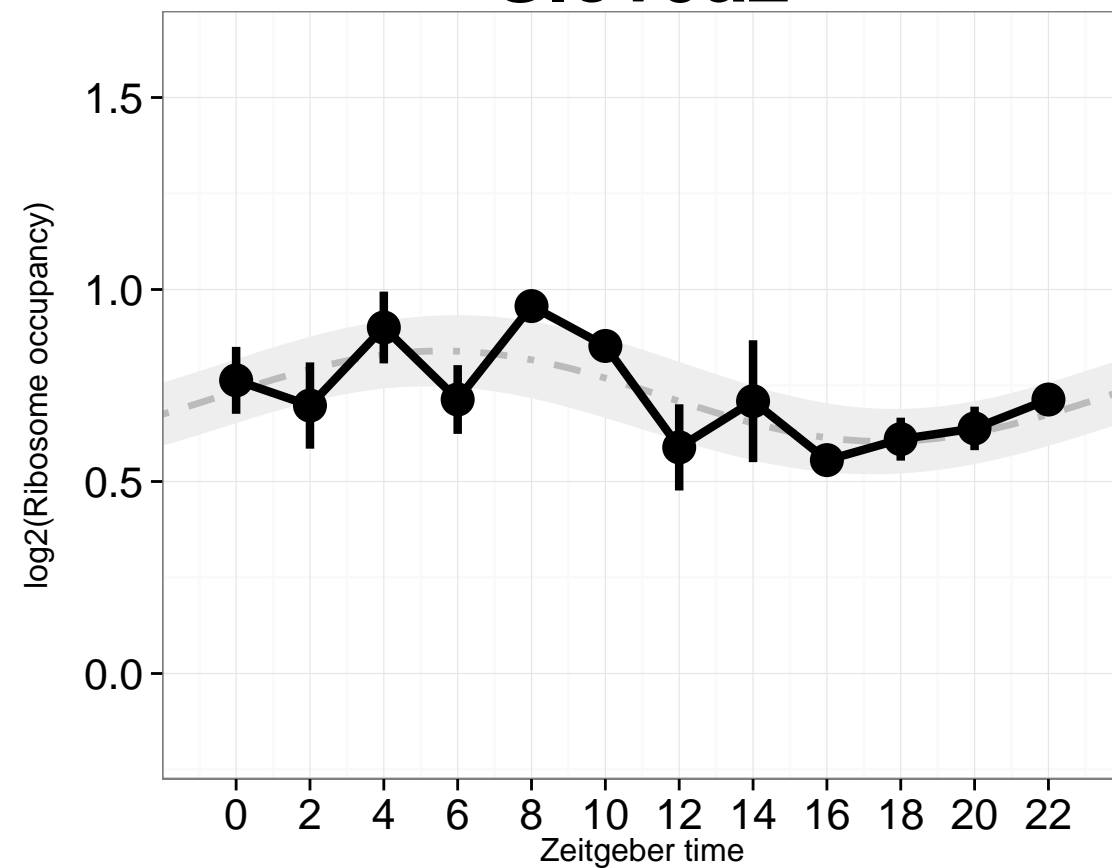

Supplement: Supplementary file 1130 [file 1]

## Ube3b

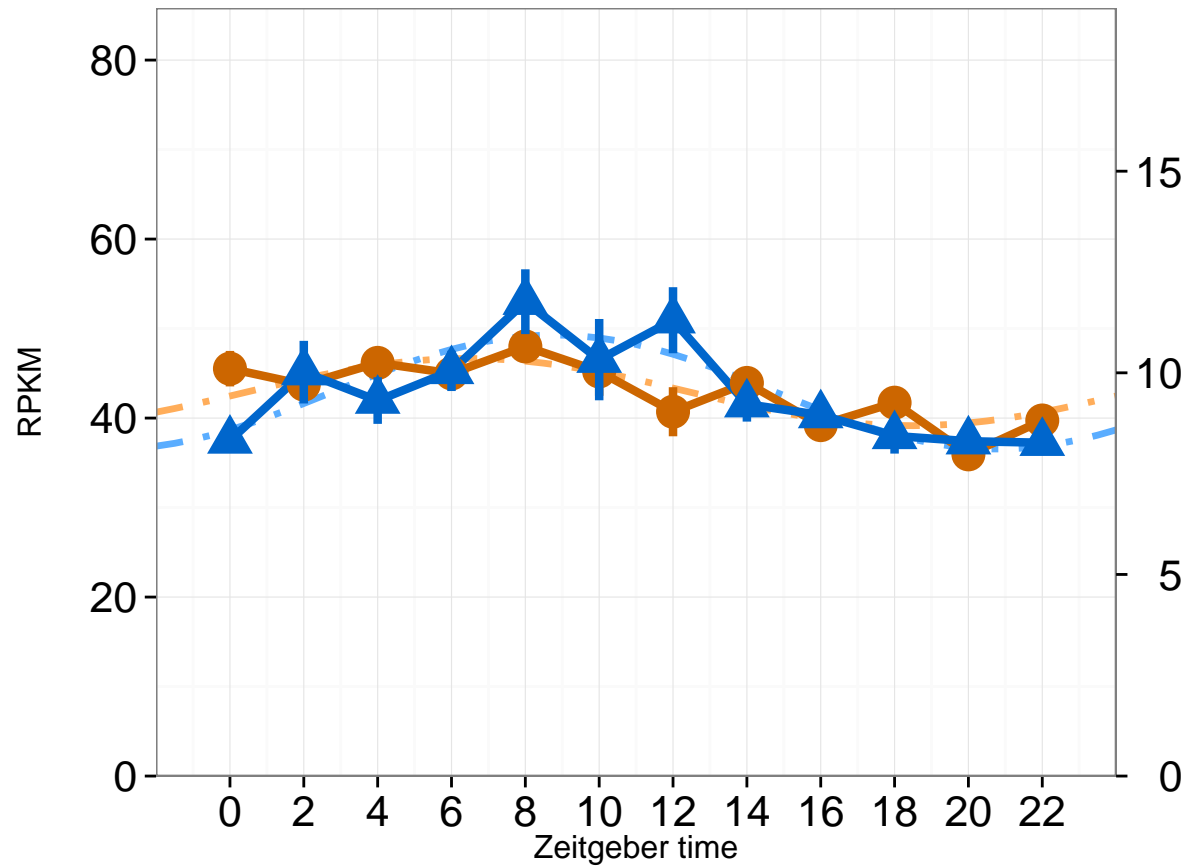

## Ube3b

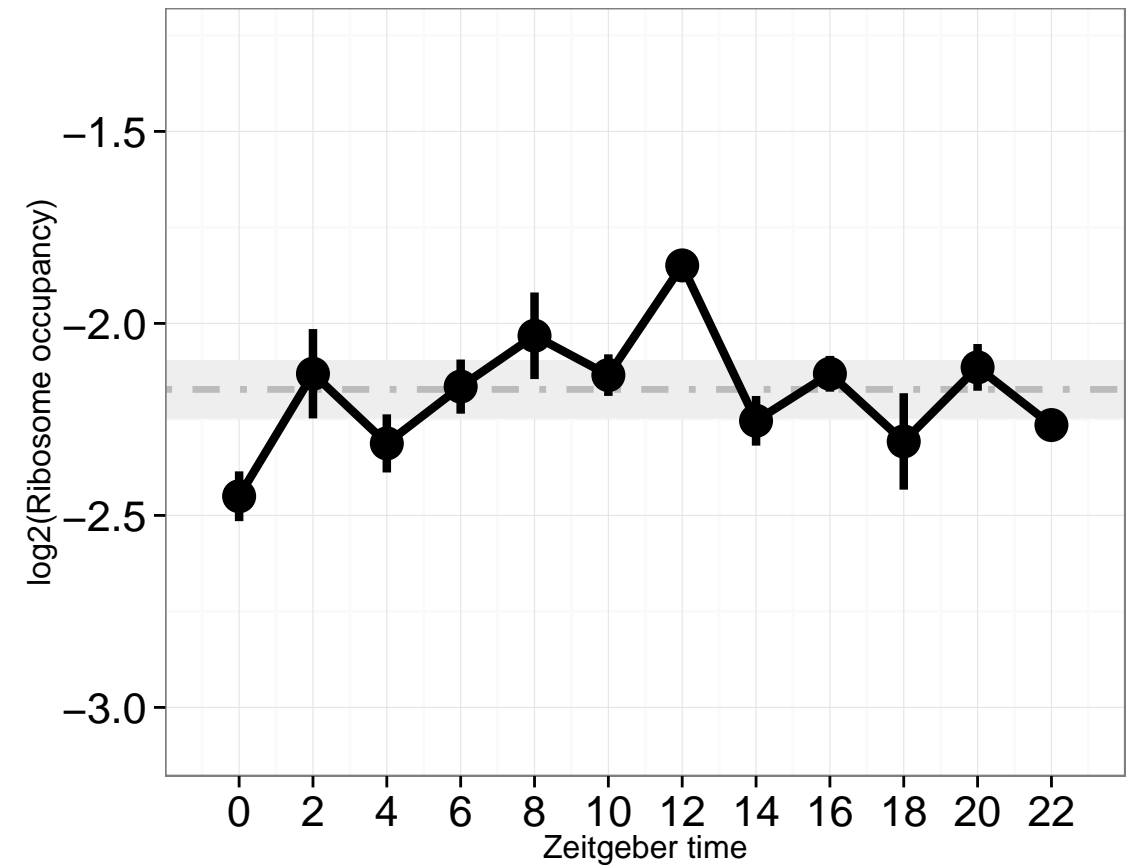

Supplement: Supplementary file 1131 [file 1]

## Ppap2c

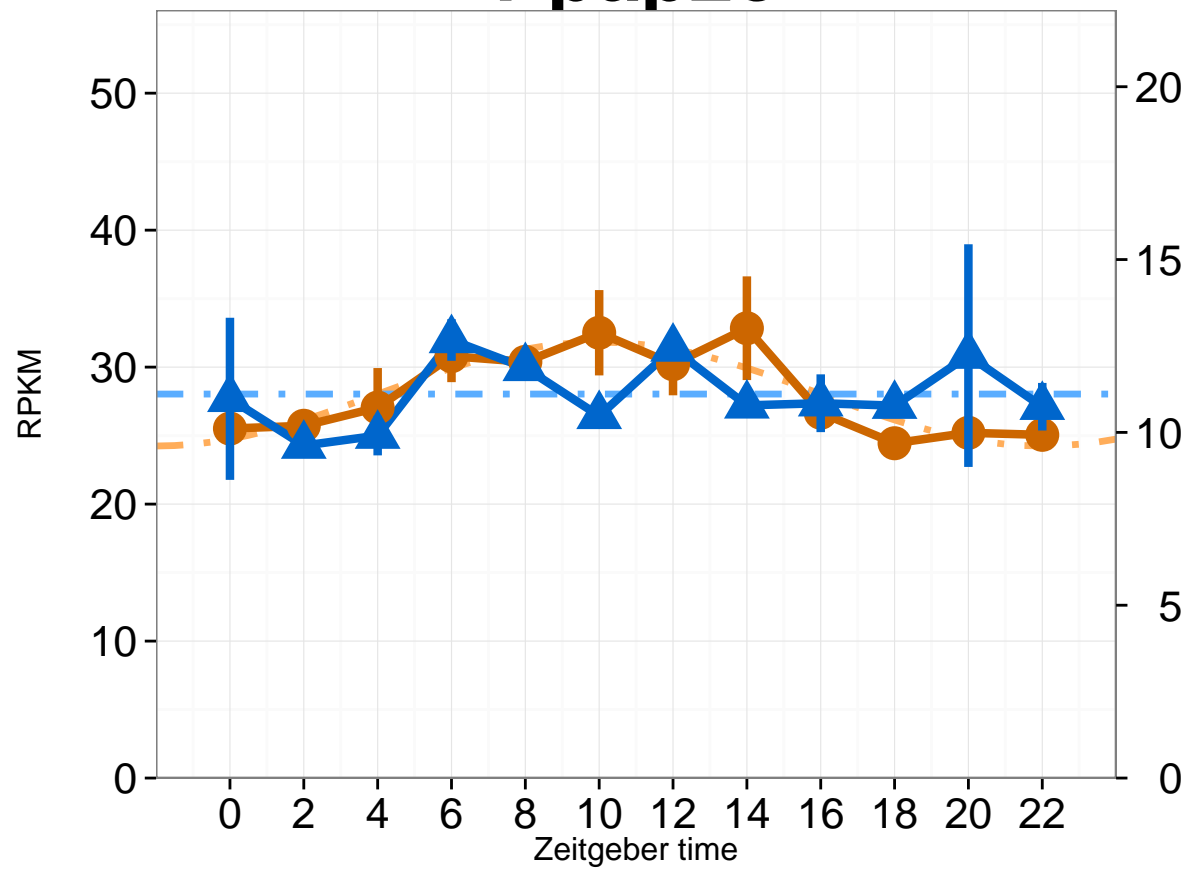

## Ppap2c

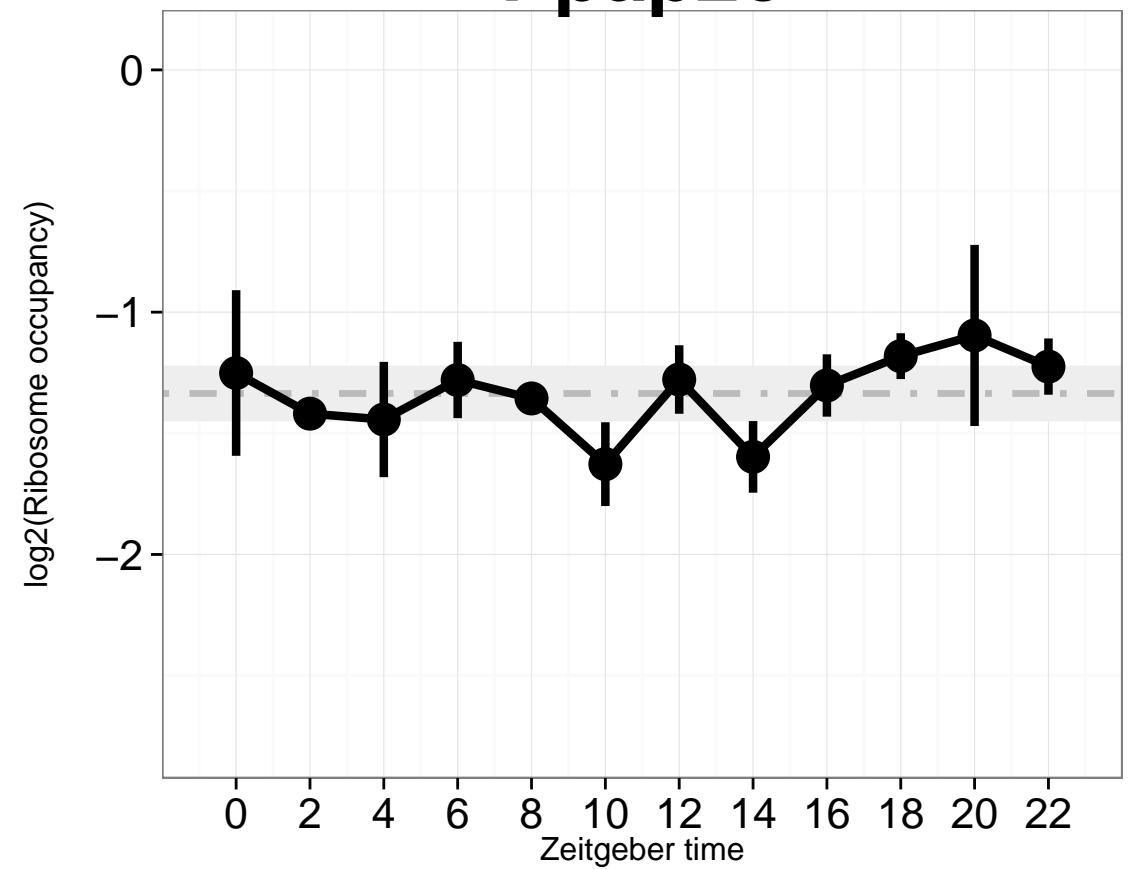

Supplement: Supplementary file 1132 [file 1]

## Gm9776

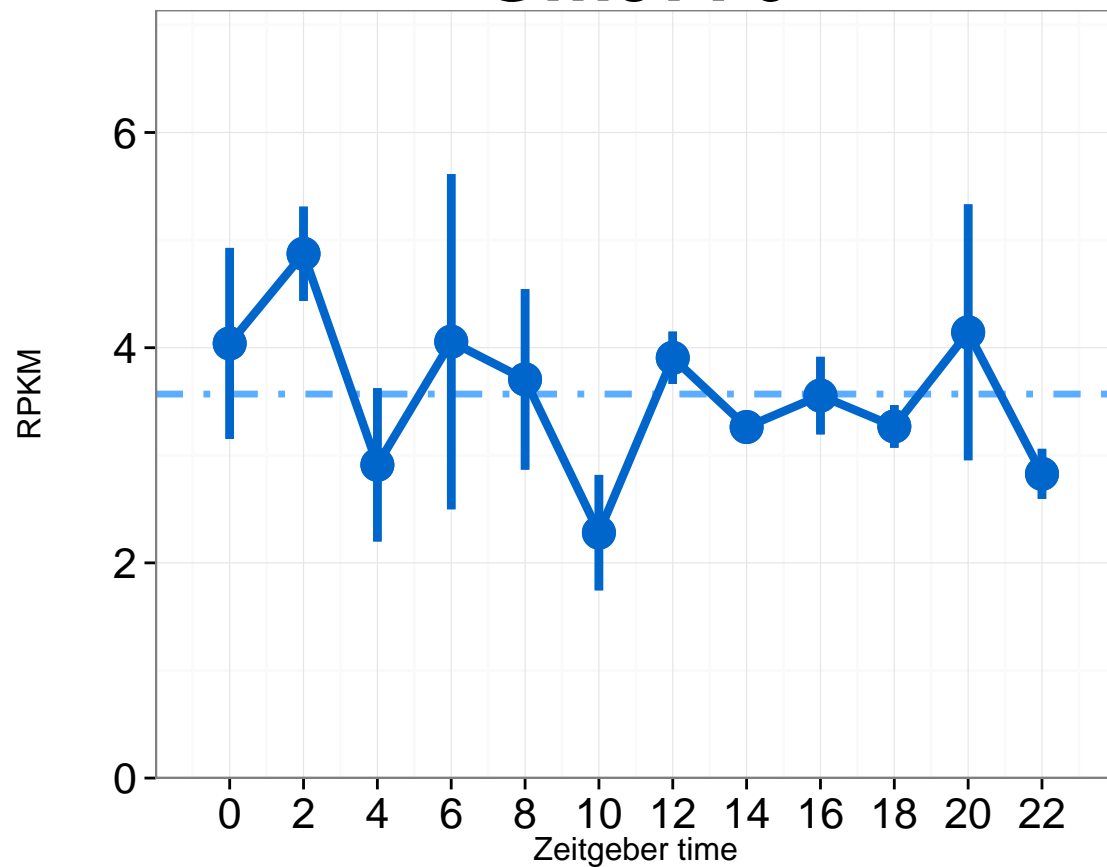

## Gm9776 log2(Ribosome occupanc

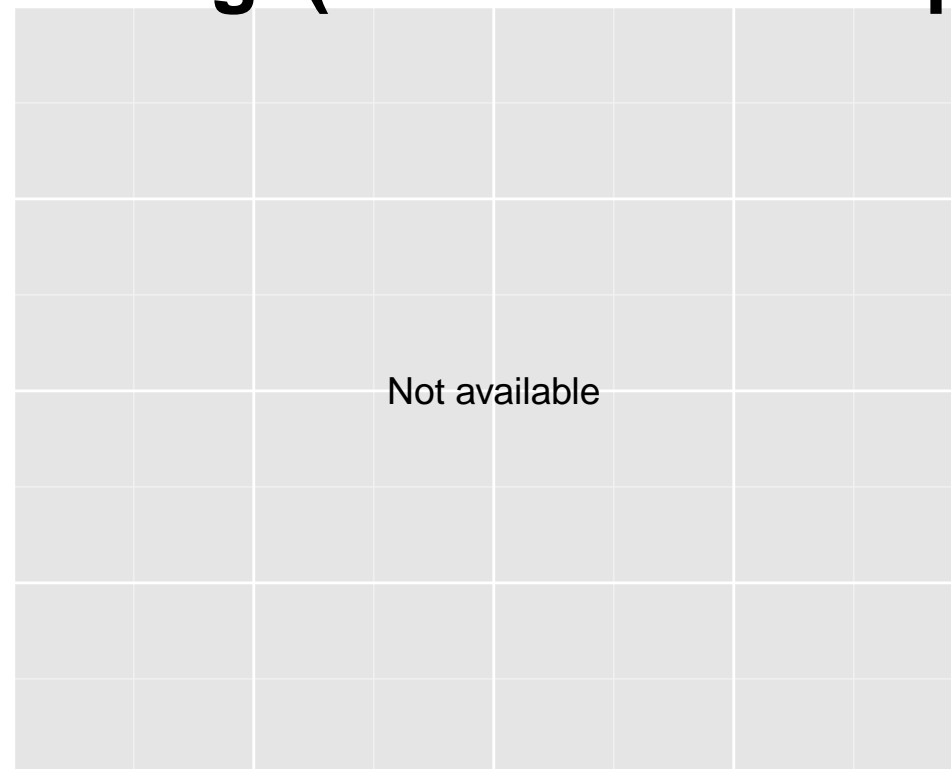

Supplement: Supplementary file 1133 [file 1]

## Upf2

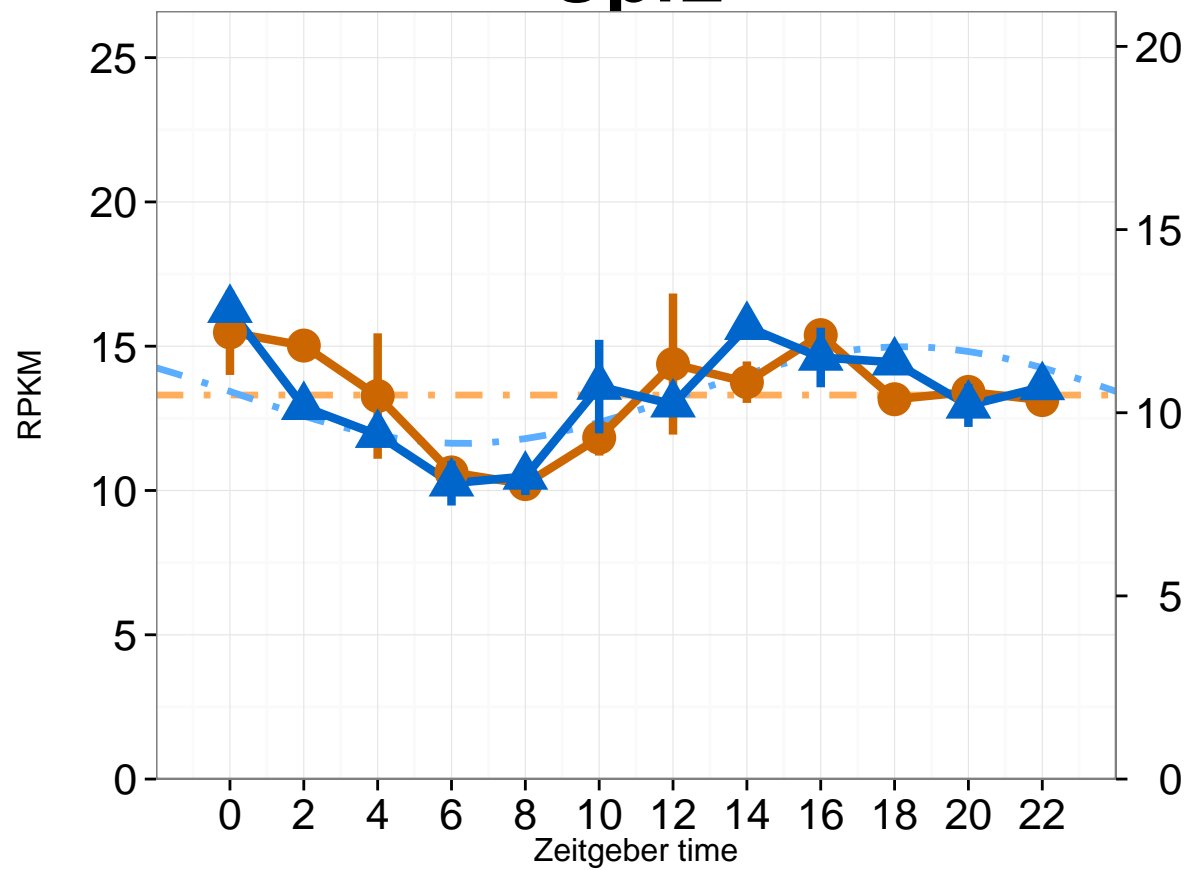

## Upf2

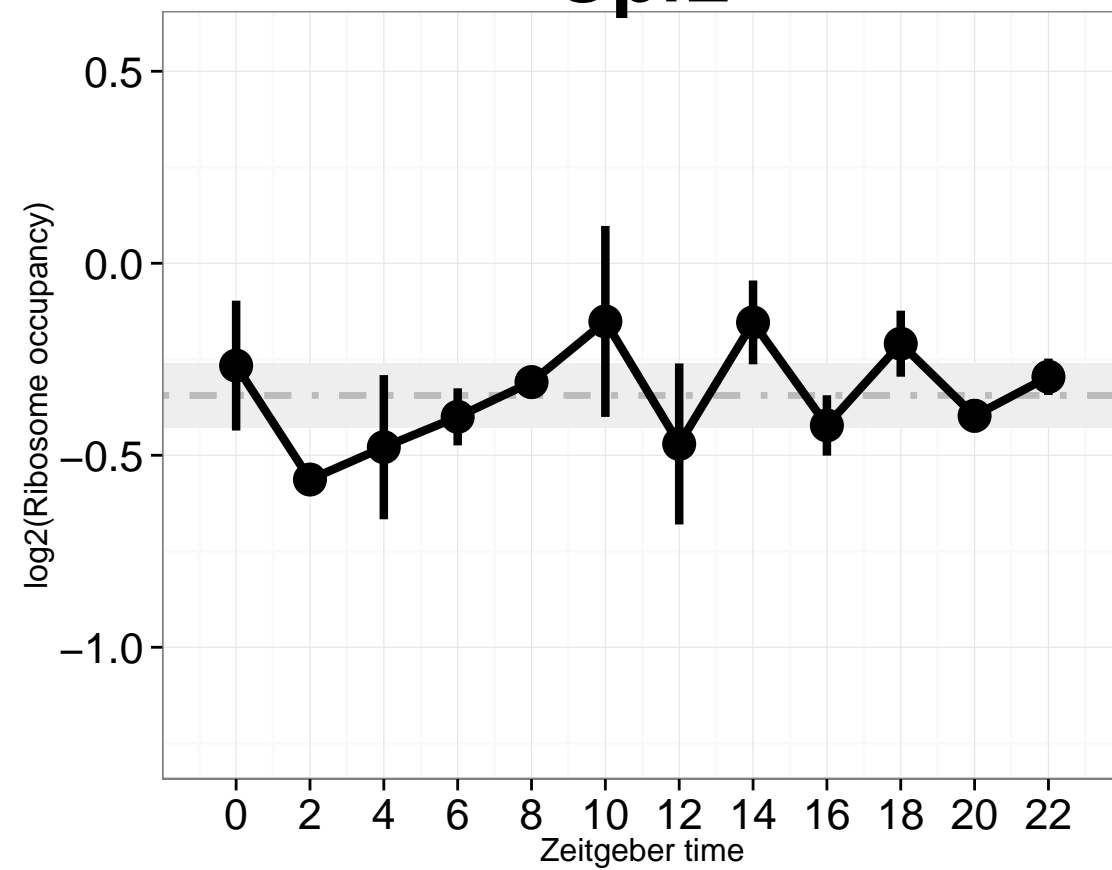

Supplement: Supplementary file 1134 [file 1]

# Arfgap2

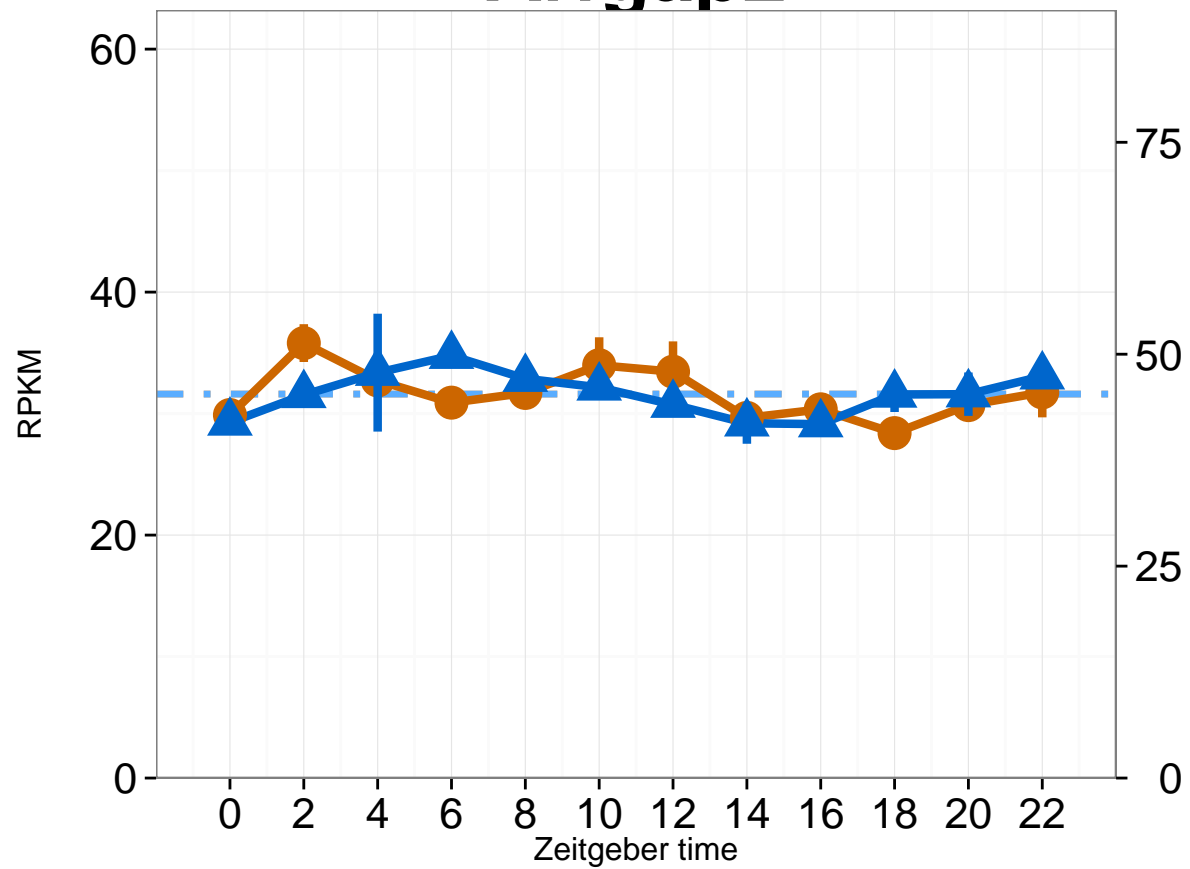

# Arfgap2

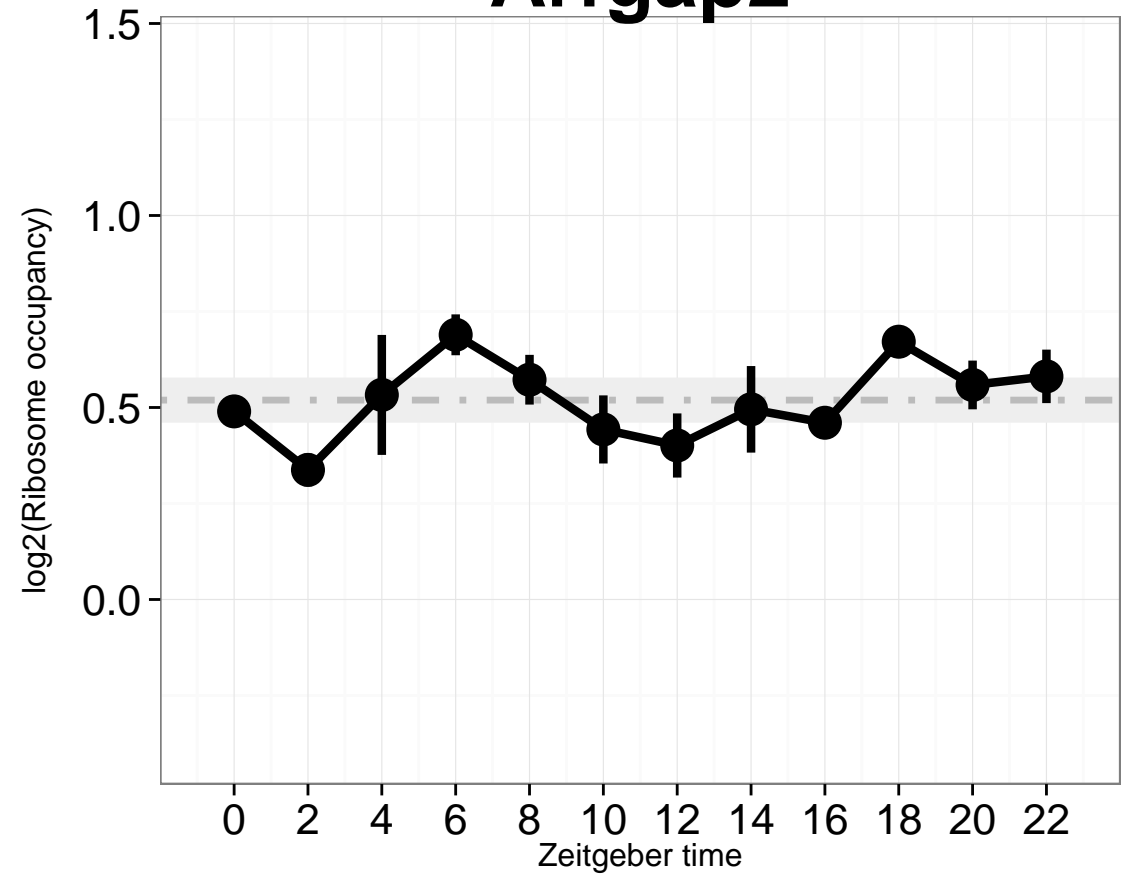

Supplement: Supplementary file 1135 [file 1]

## Gdap2

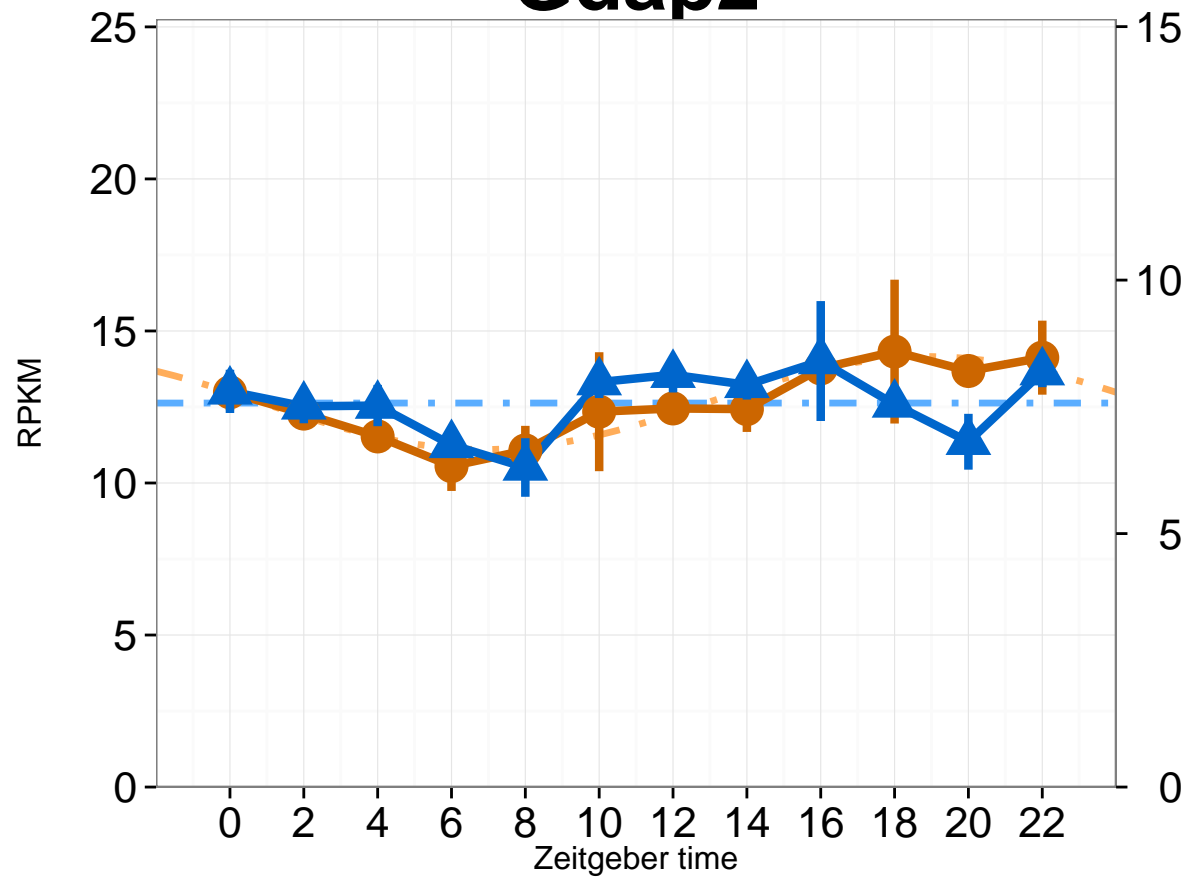

## Gdap2

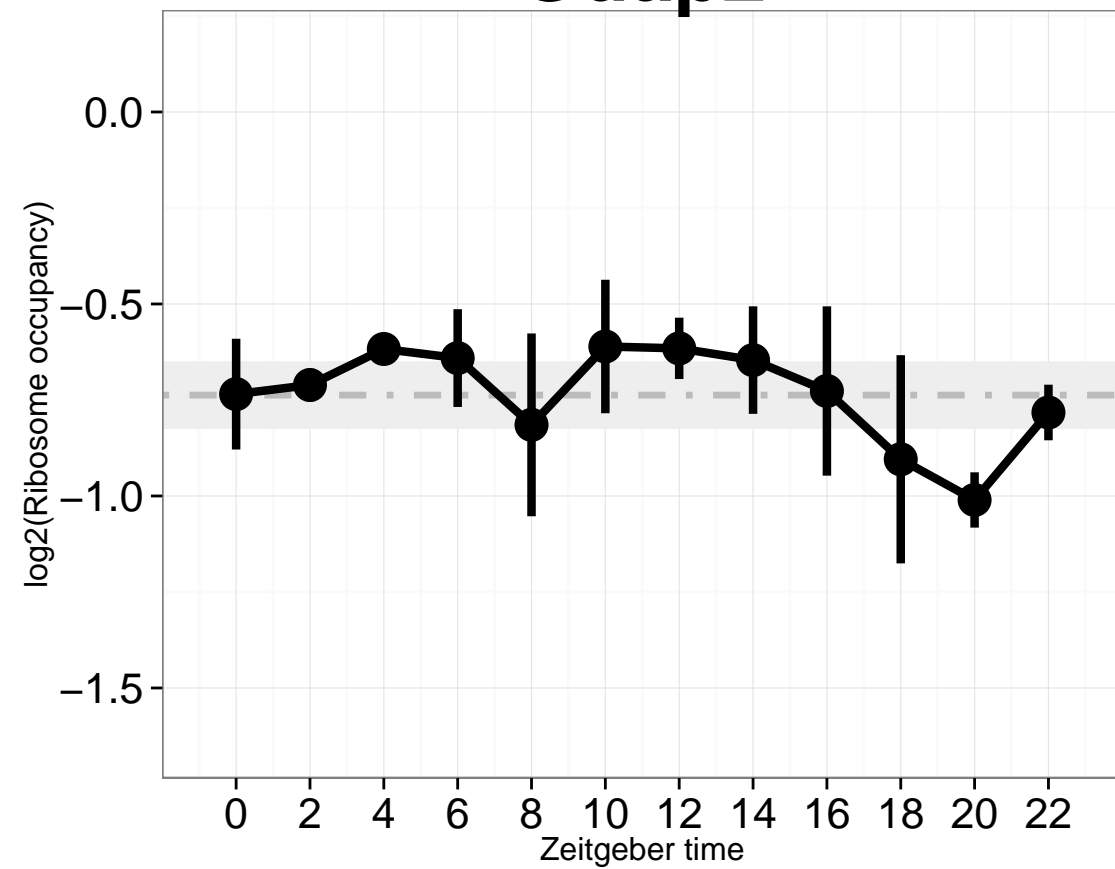

Supplement: Supplementary file 1136 [file 1]

# Tacc1

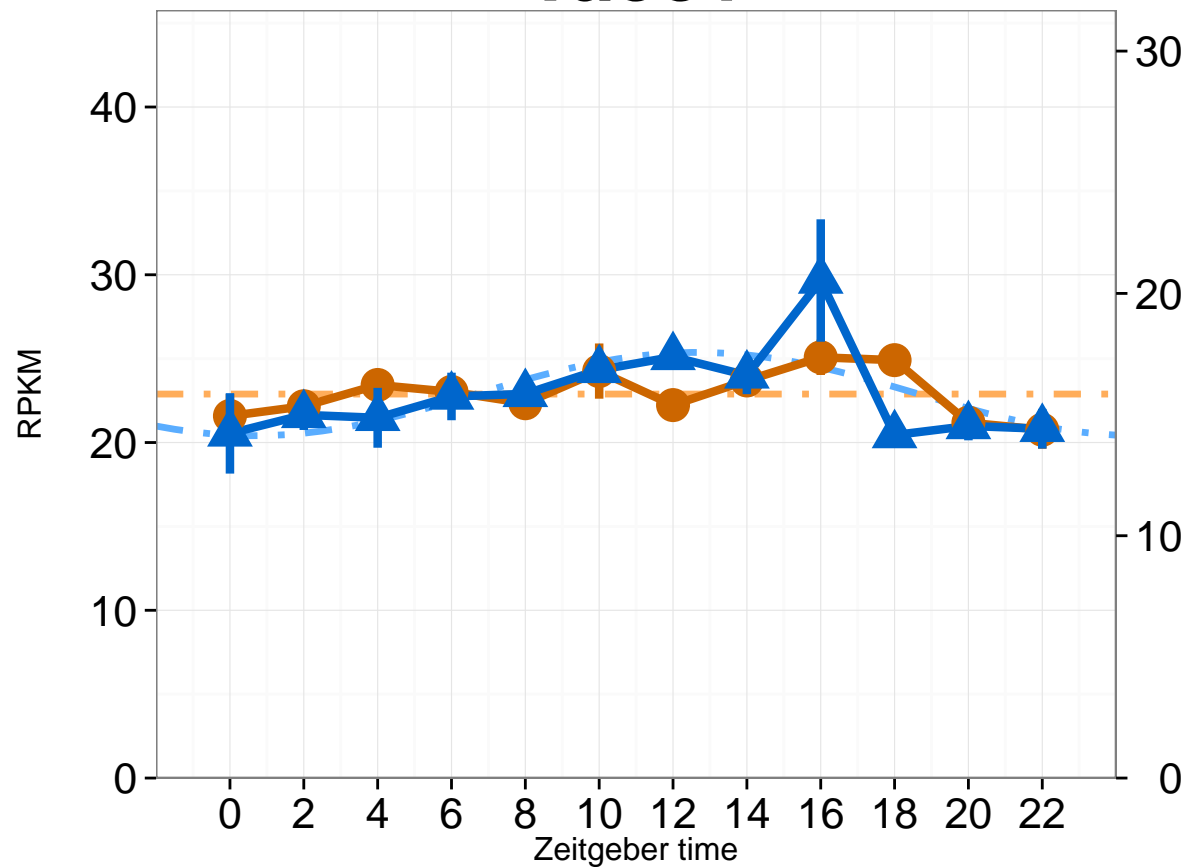

# Tacc1

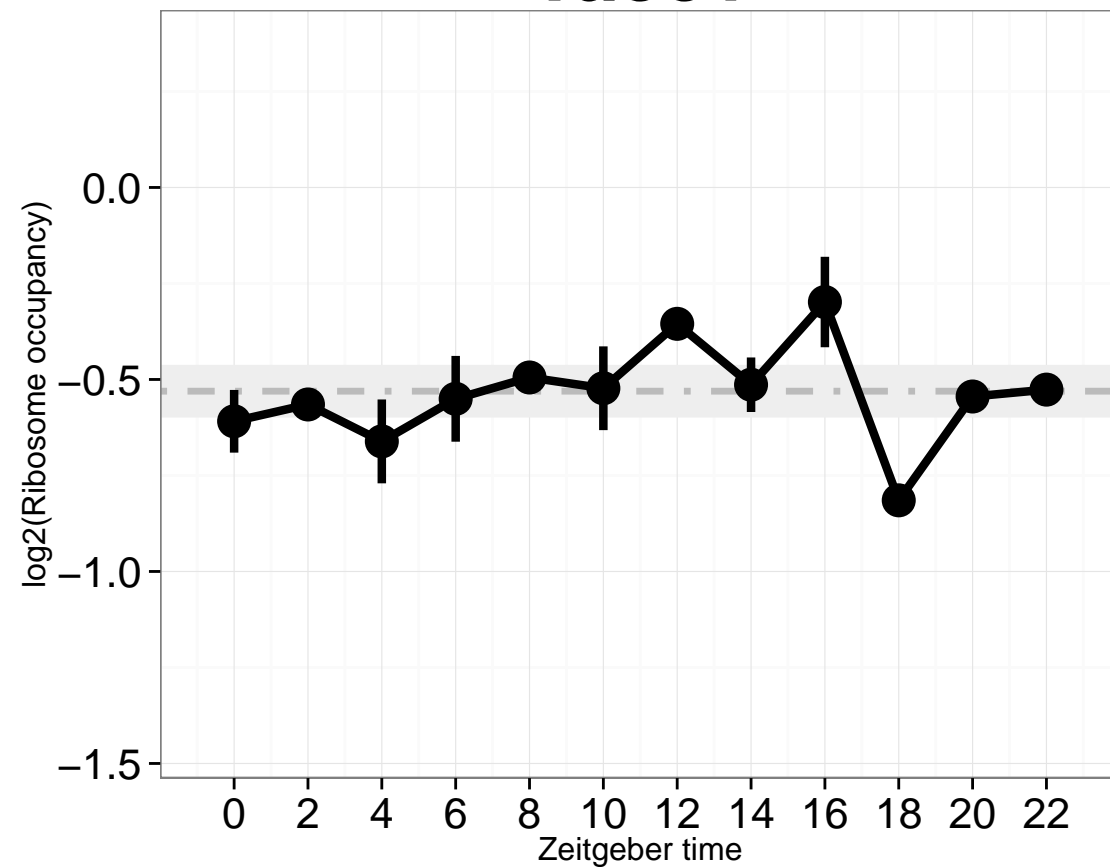

Supplement: Supplementary file 1137 [file 1]

# lws1

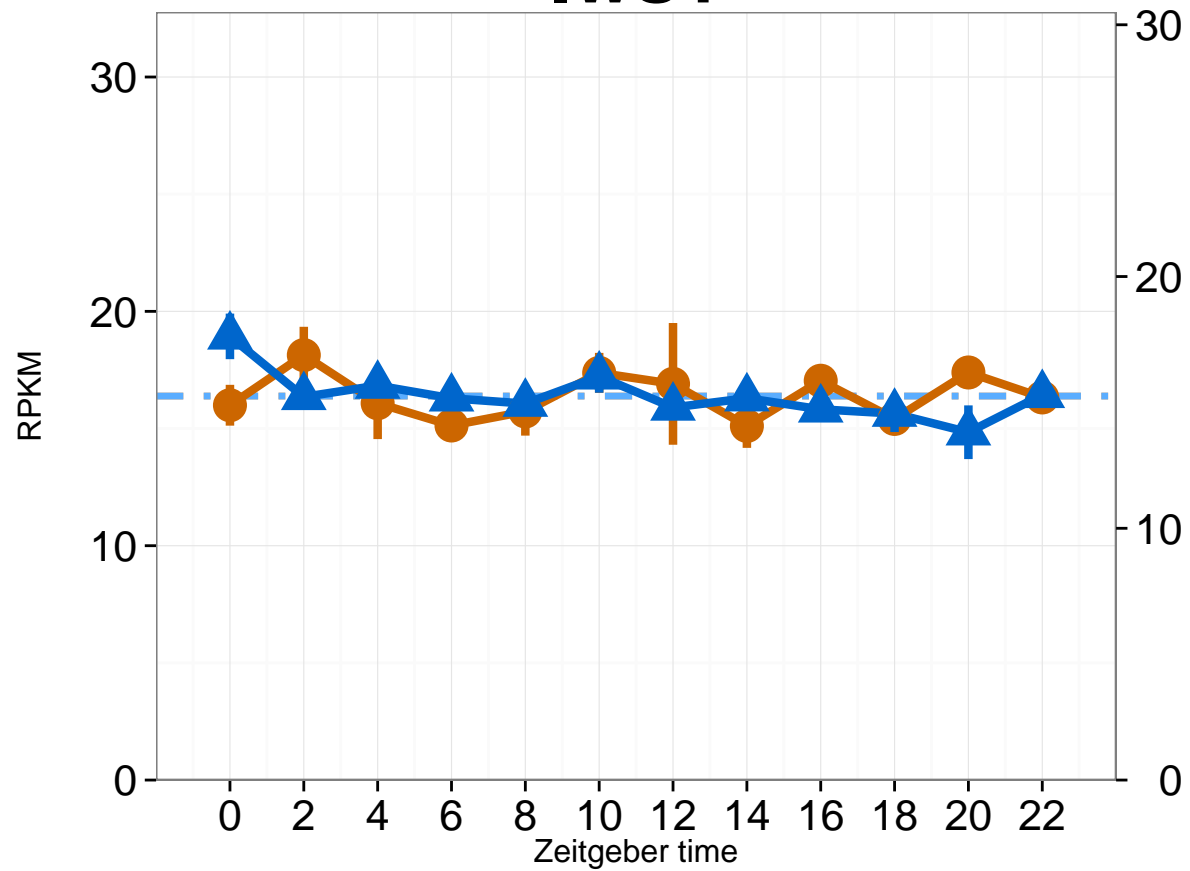

# lws1

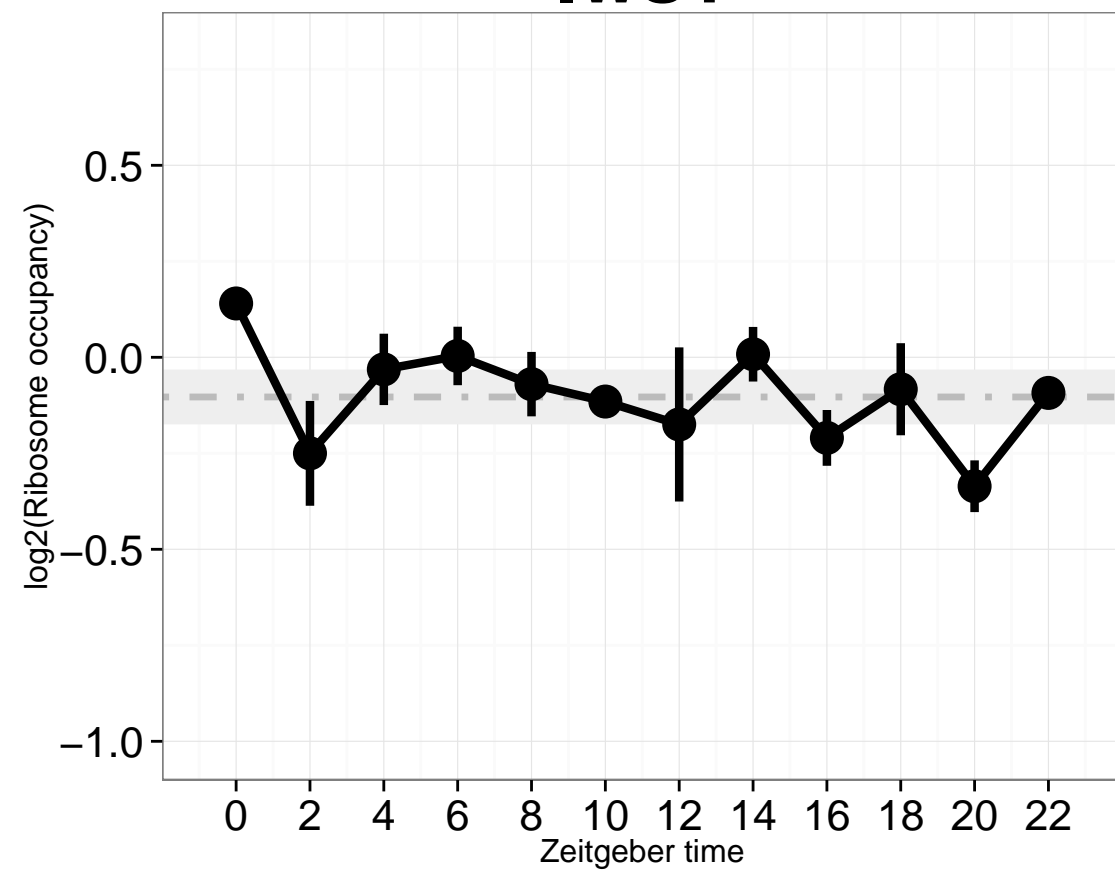

Supplement: Supplementary file 1138 [file 1]

## Ccdc171

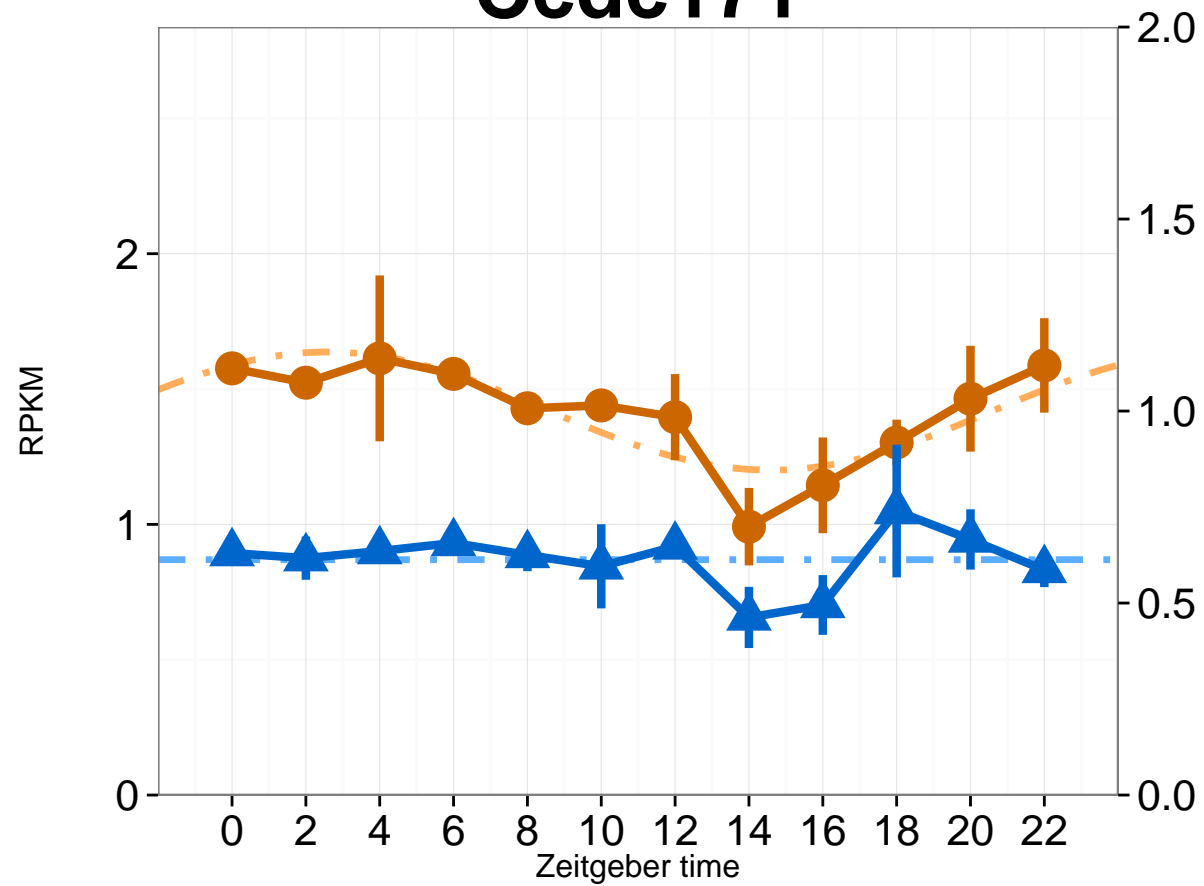

## Ccdc171

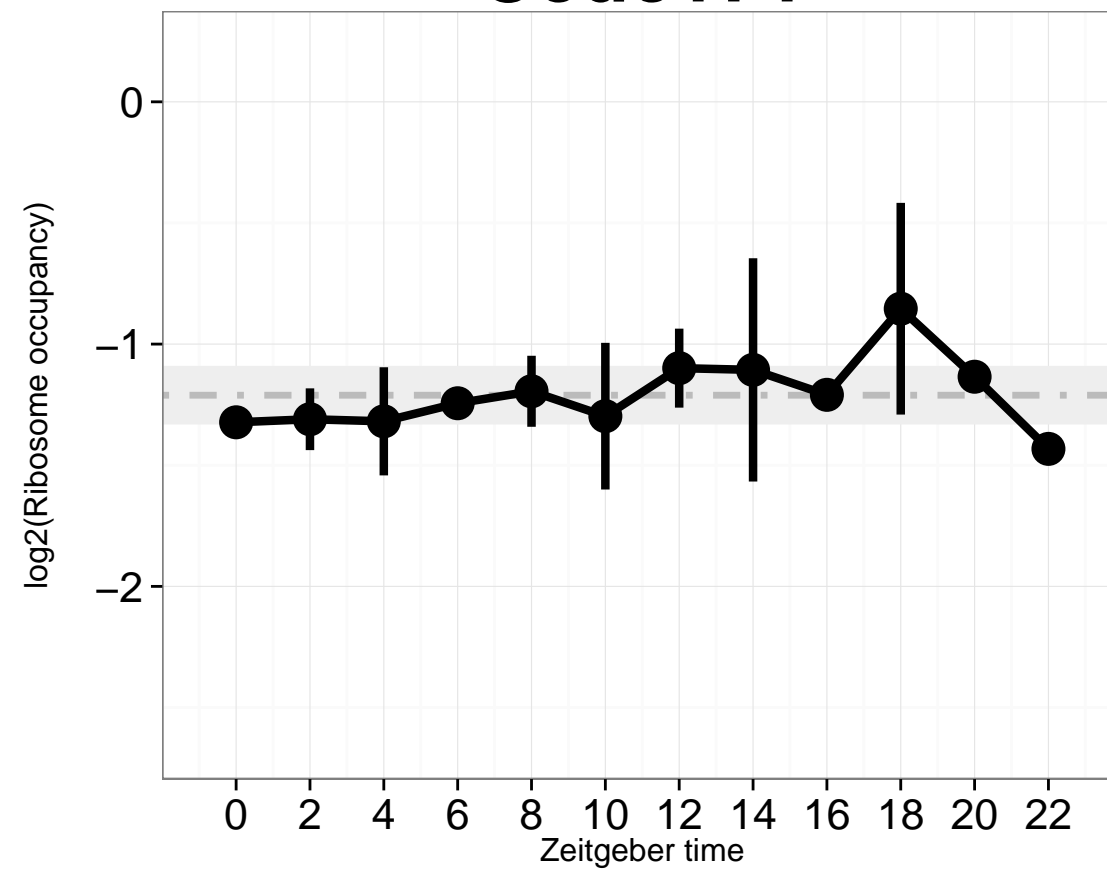

Supplement: Supplementary file 1139 [file 1]

## Ecm1

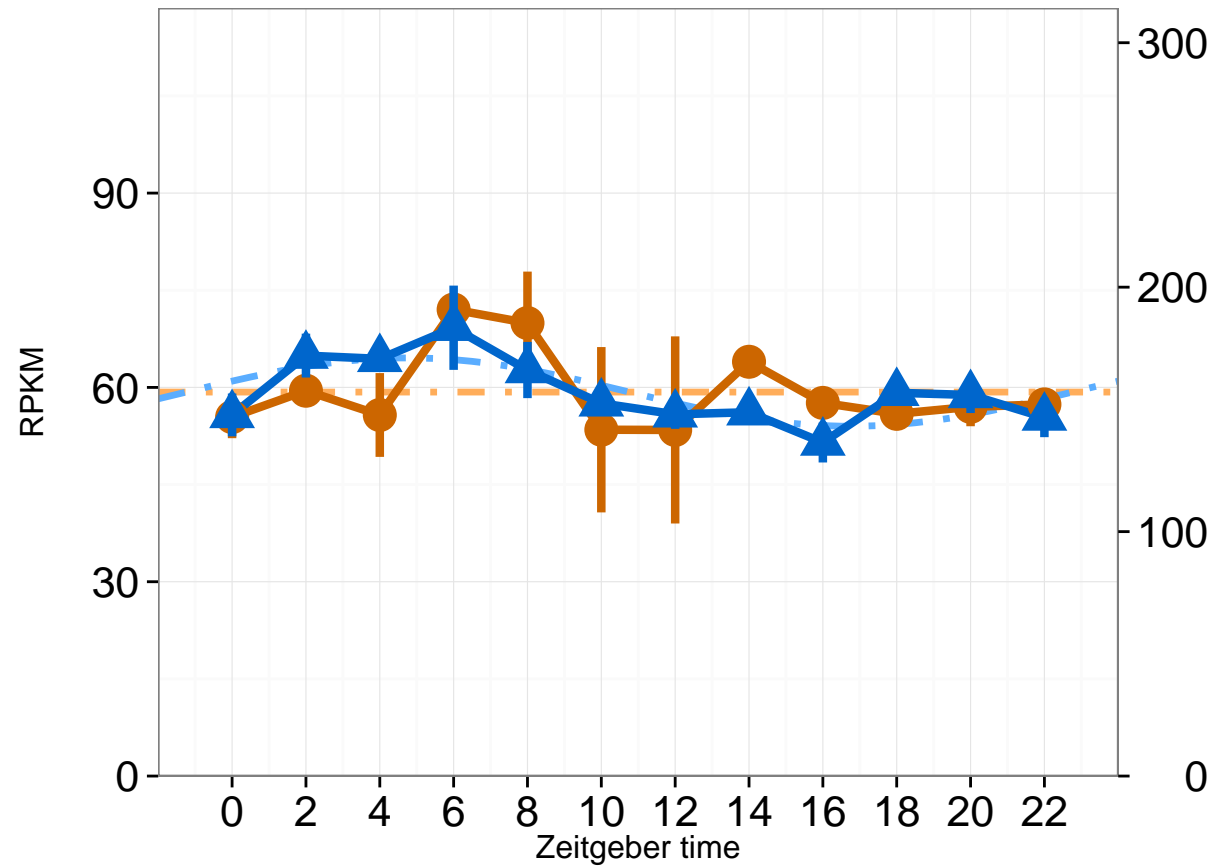

## Ecm1

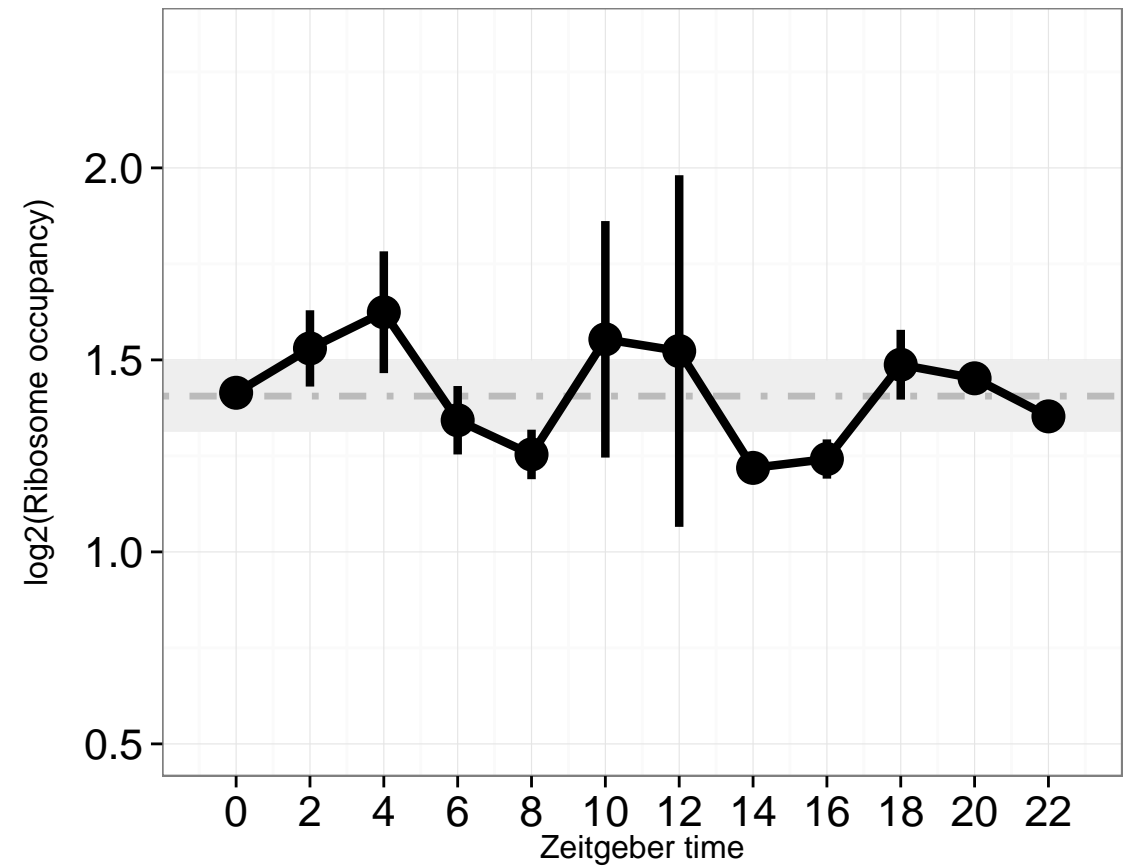

Supplement: Supplementary file 1140 [file 1]

# Asb15

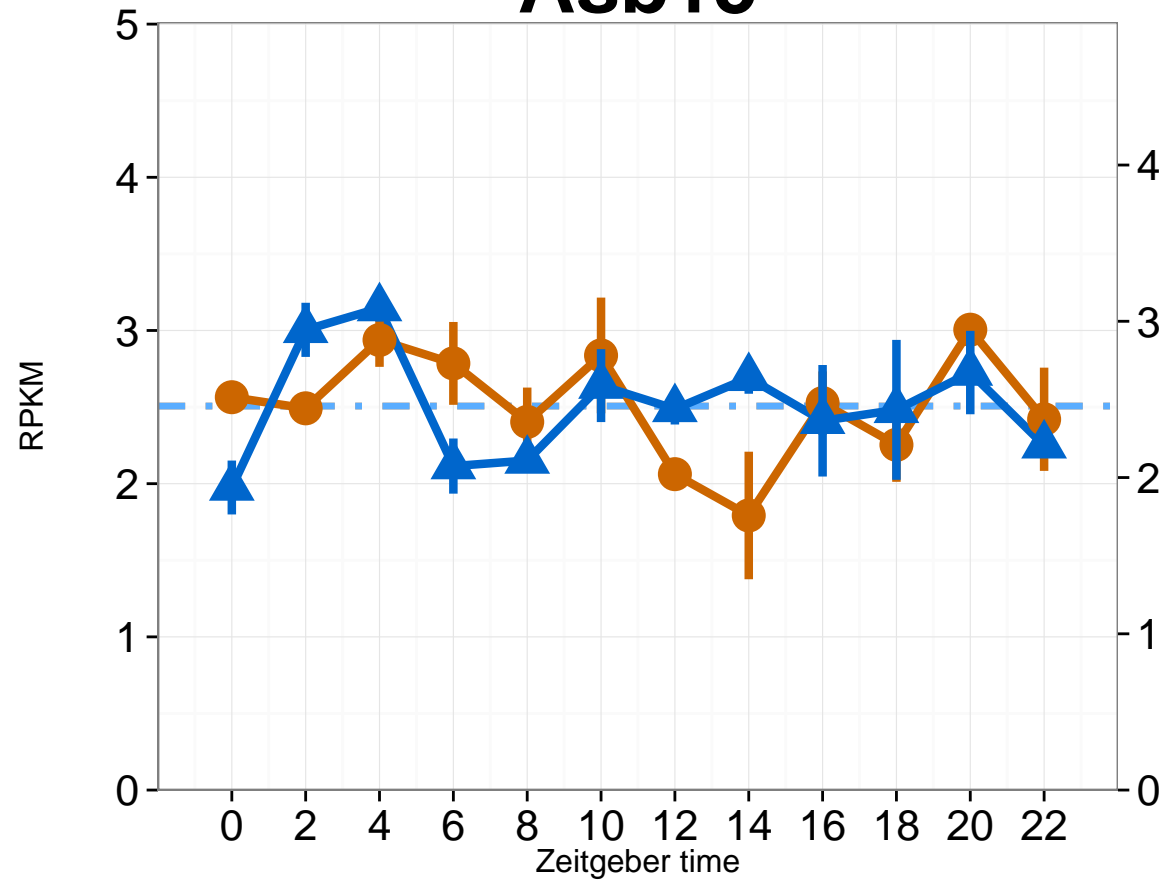

# Asb15

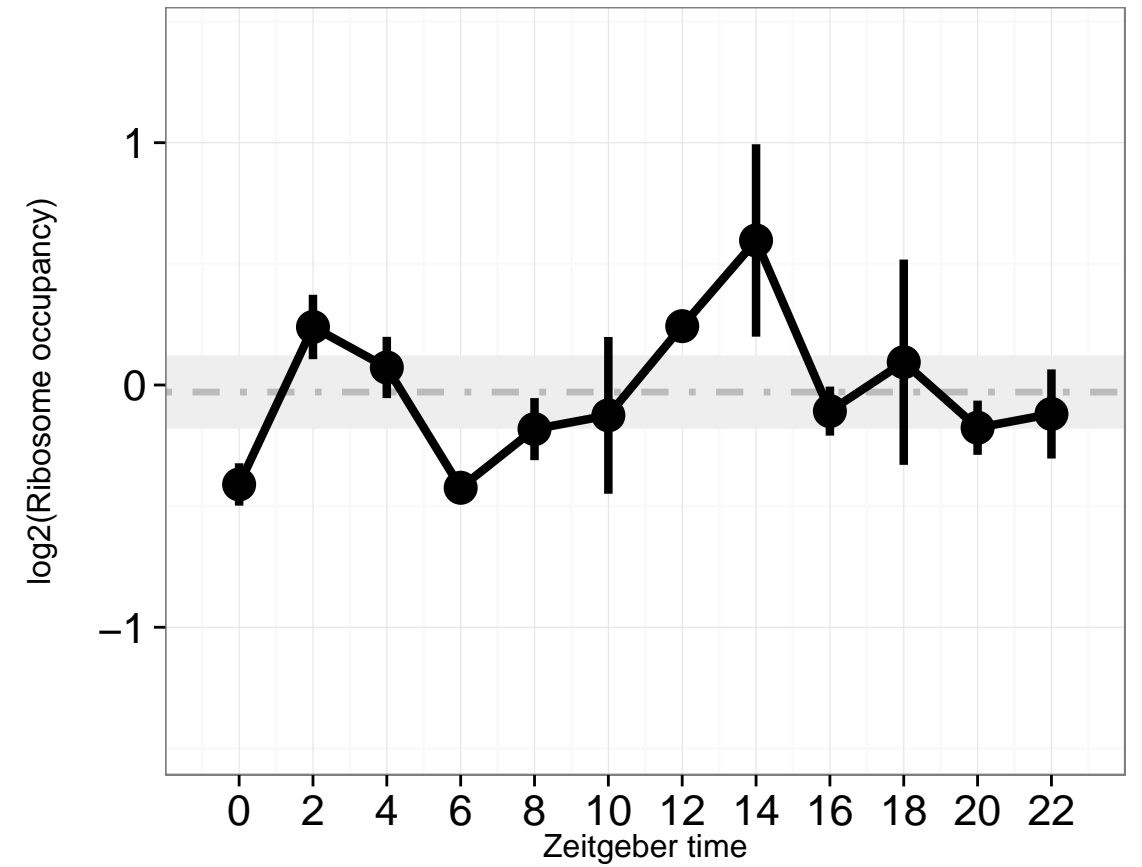

Supplement: Supplementary file 1141 [file 1]

# Ift80

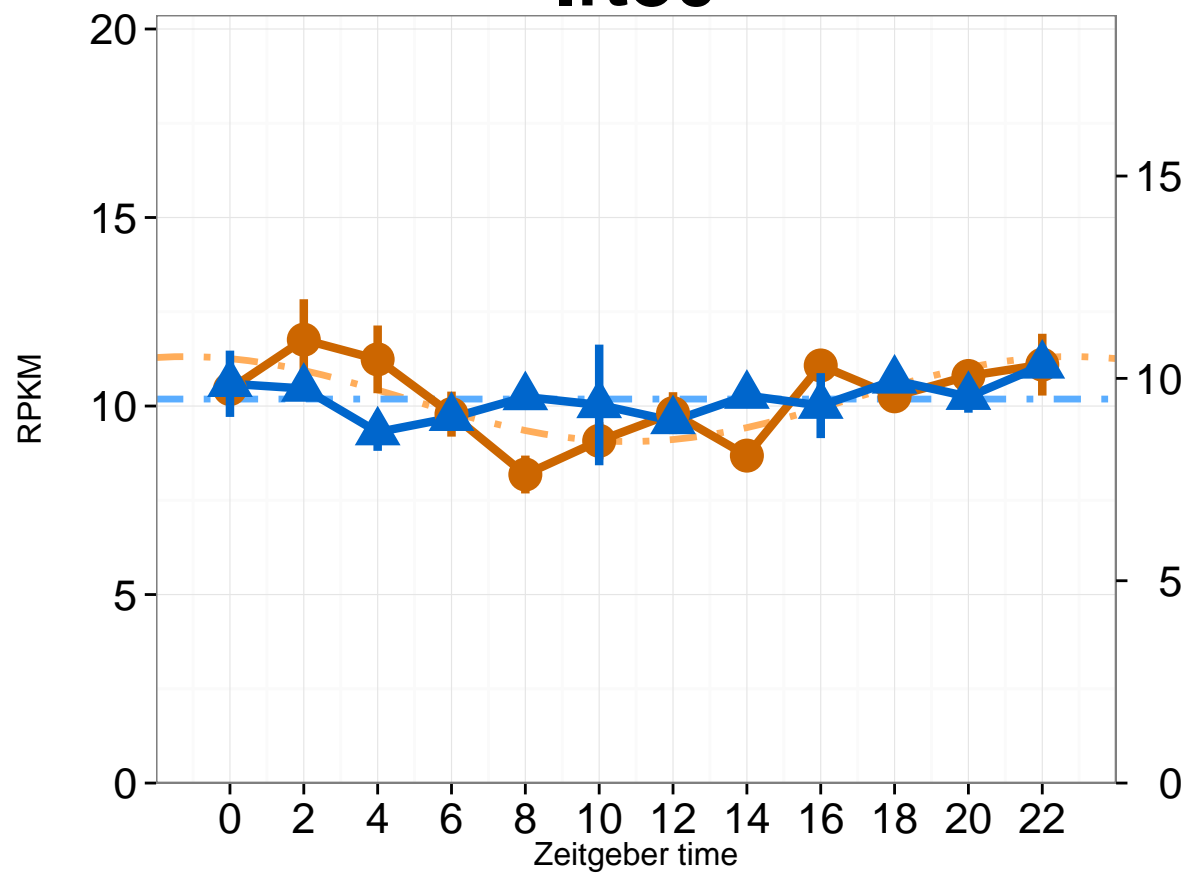

# Ift80

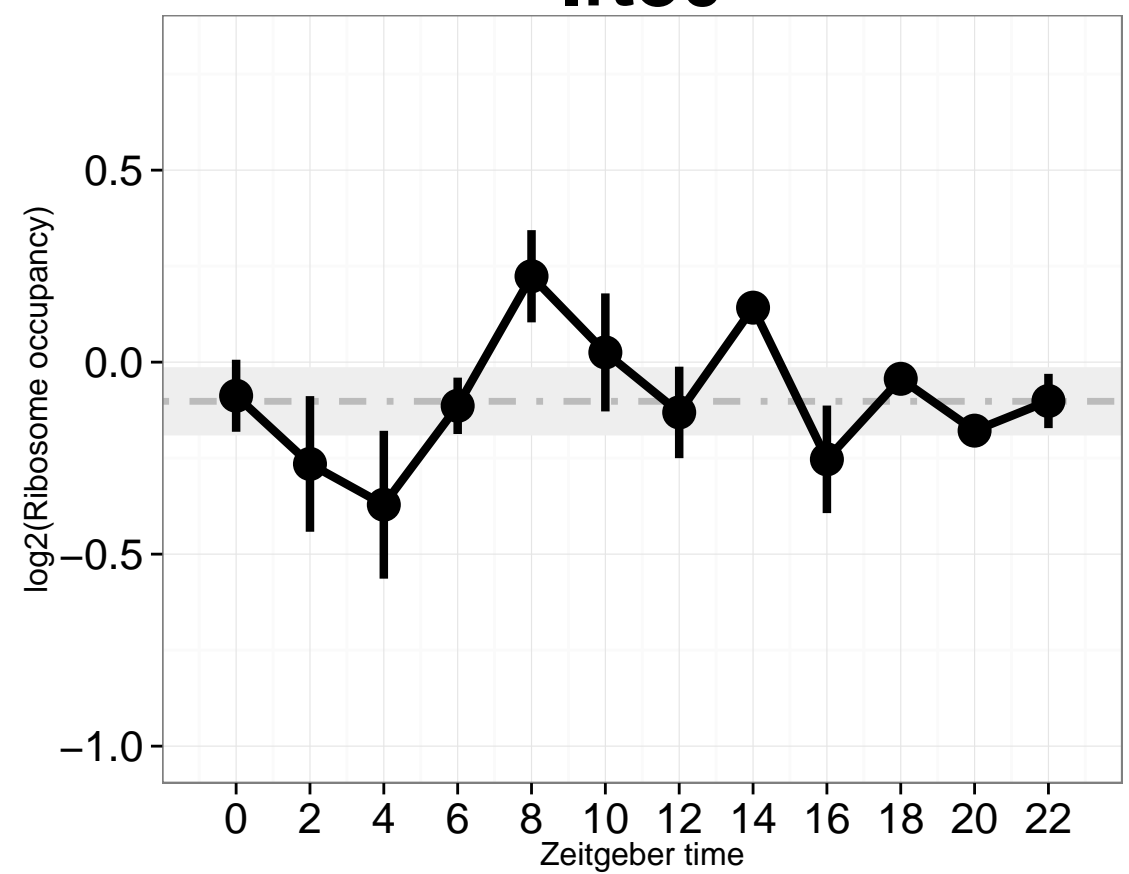

Supplement: Supplementary file 1142 [file 1]

## Alg5

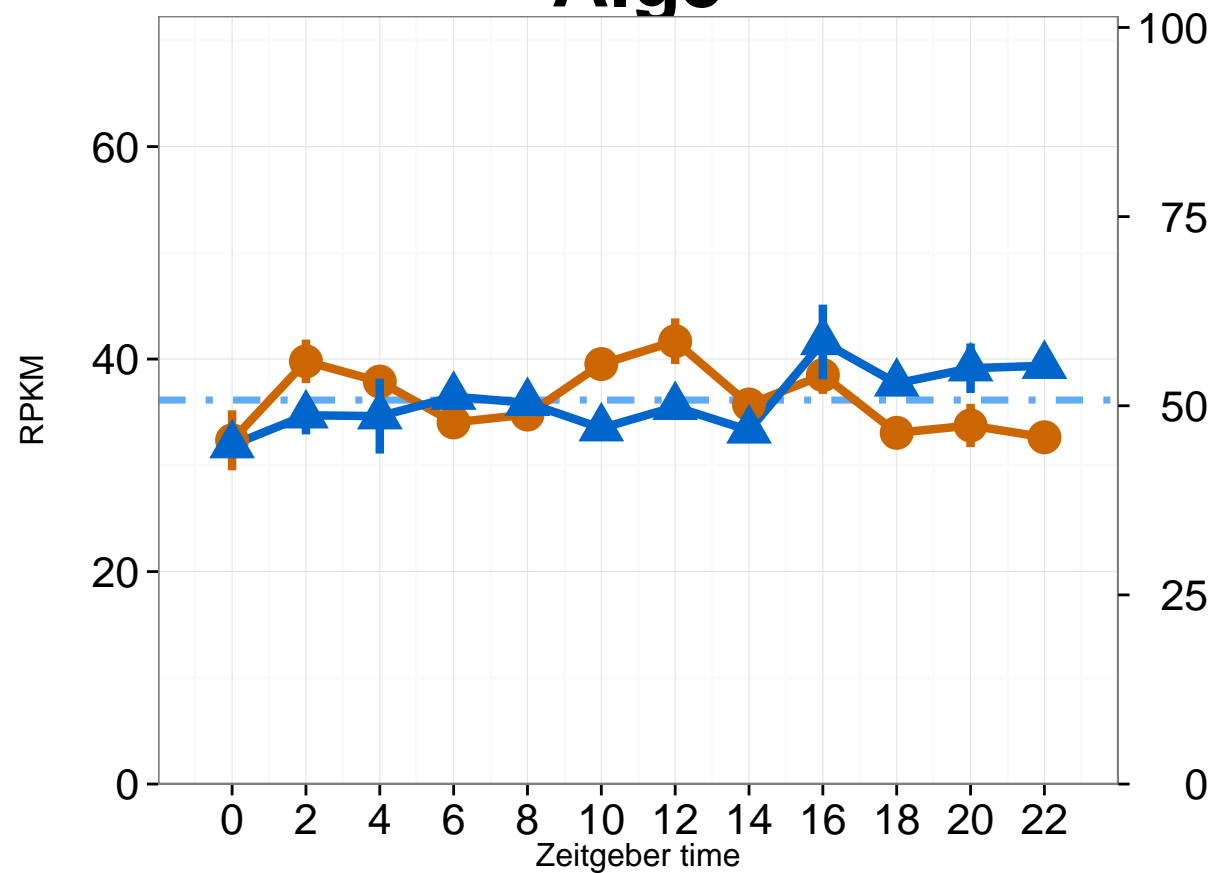

## Alg5

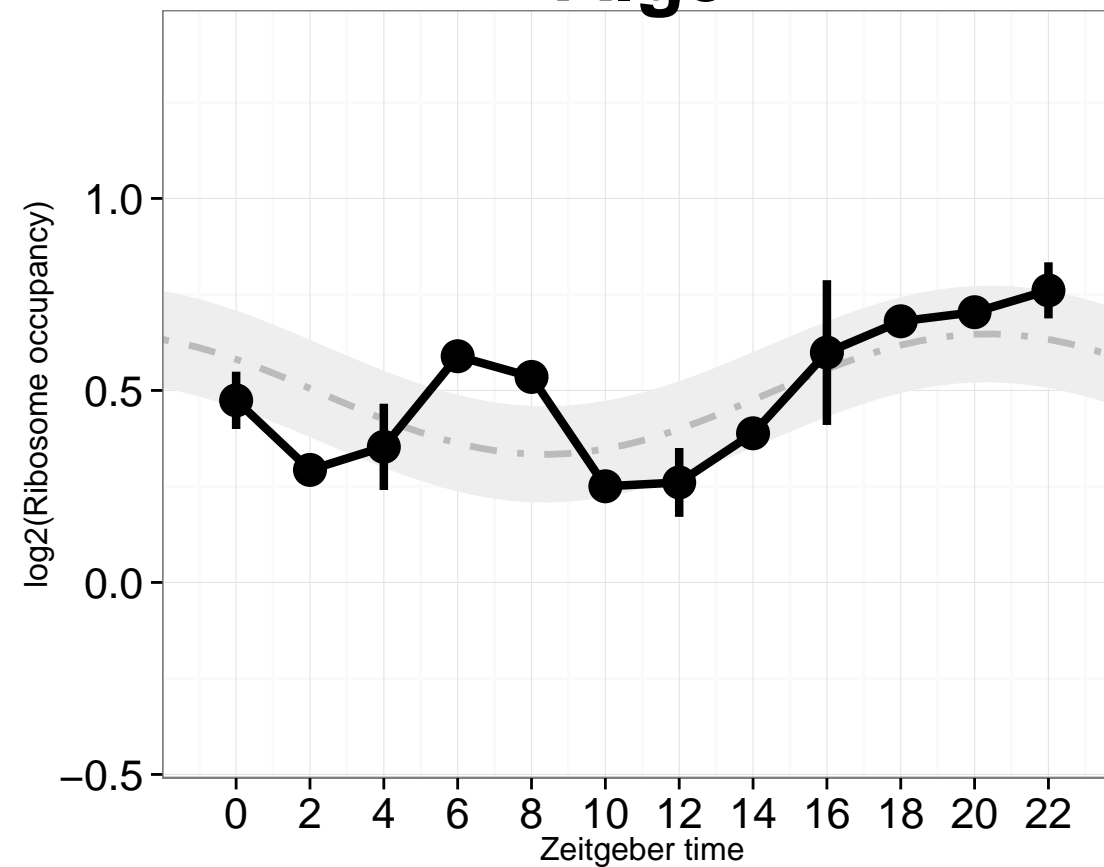

Supplement: Supplementary file 1143 [file 1]

## Vps29

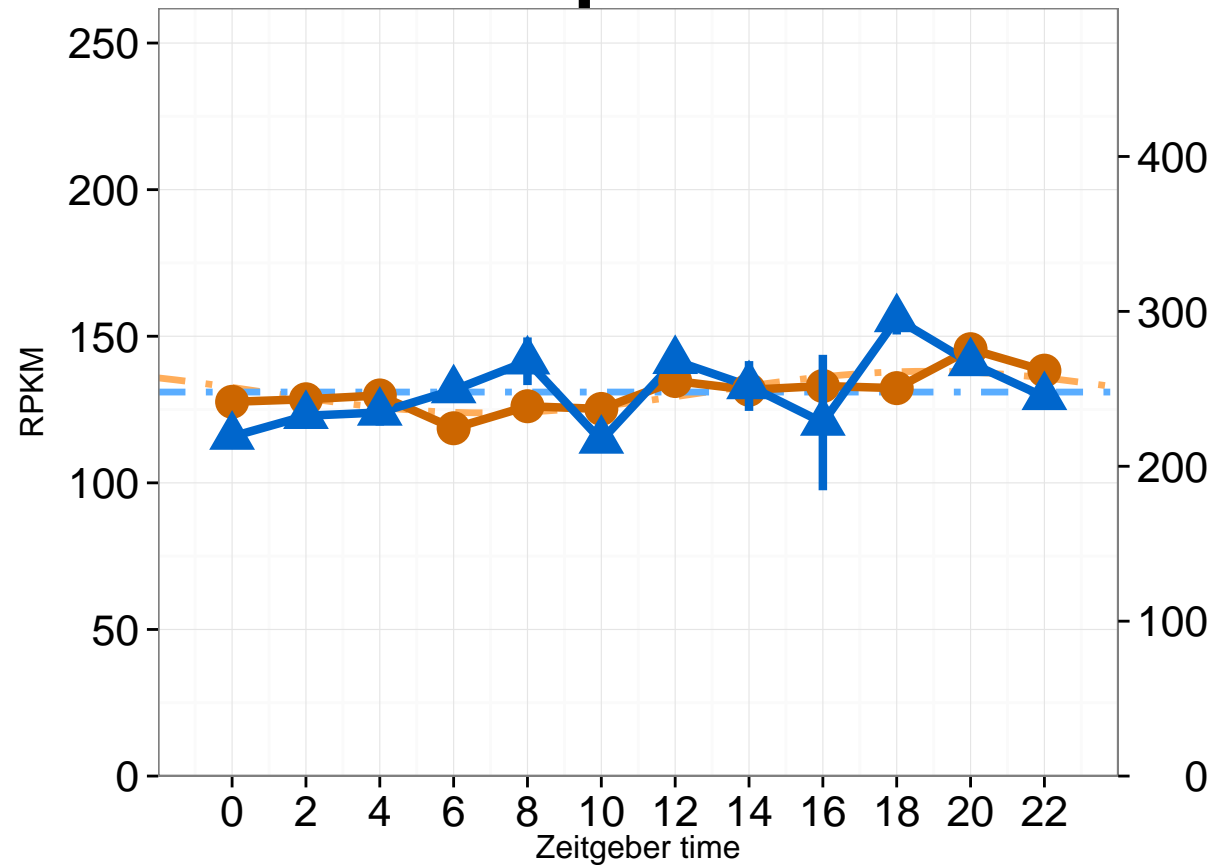

## Vps29

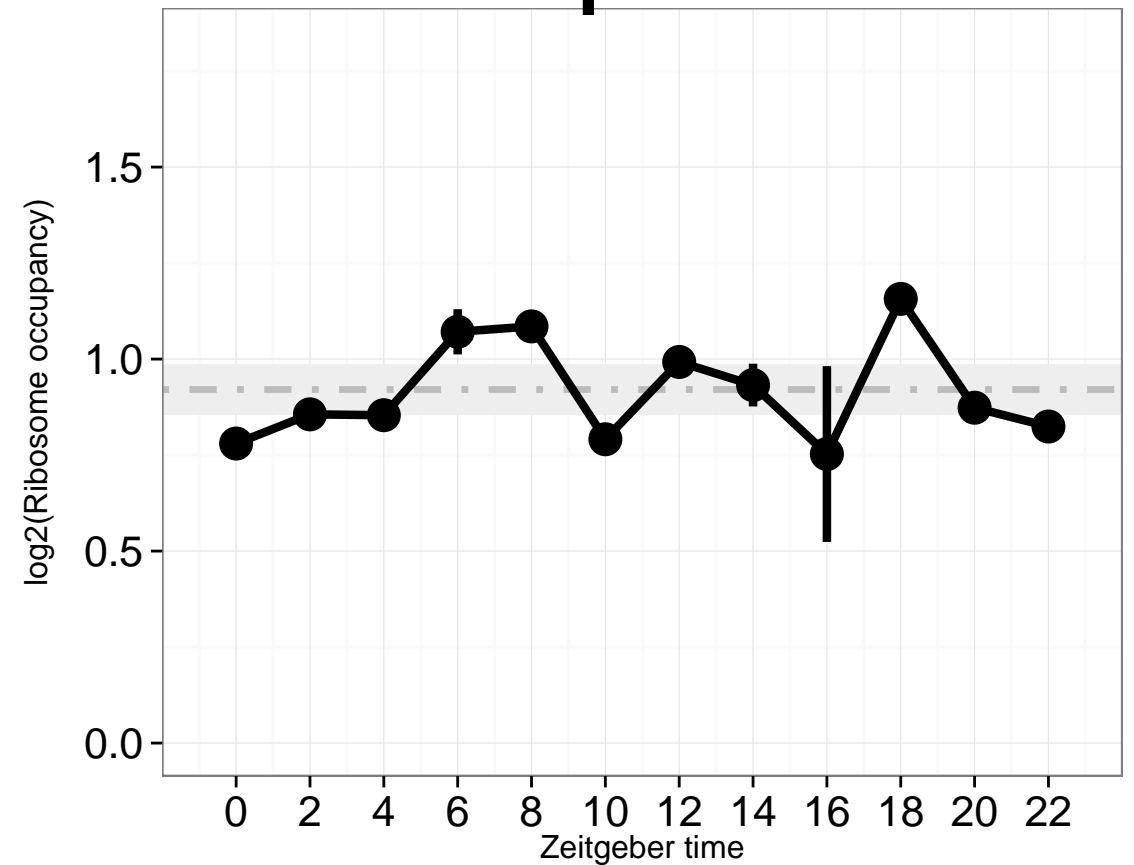

Supplement: Supplementary file 1144 [file 1]

## Smarcc1

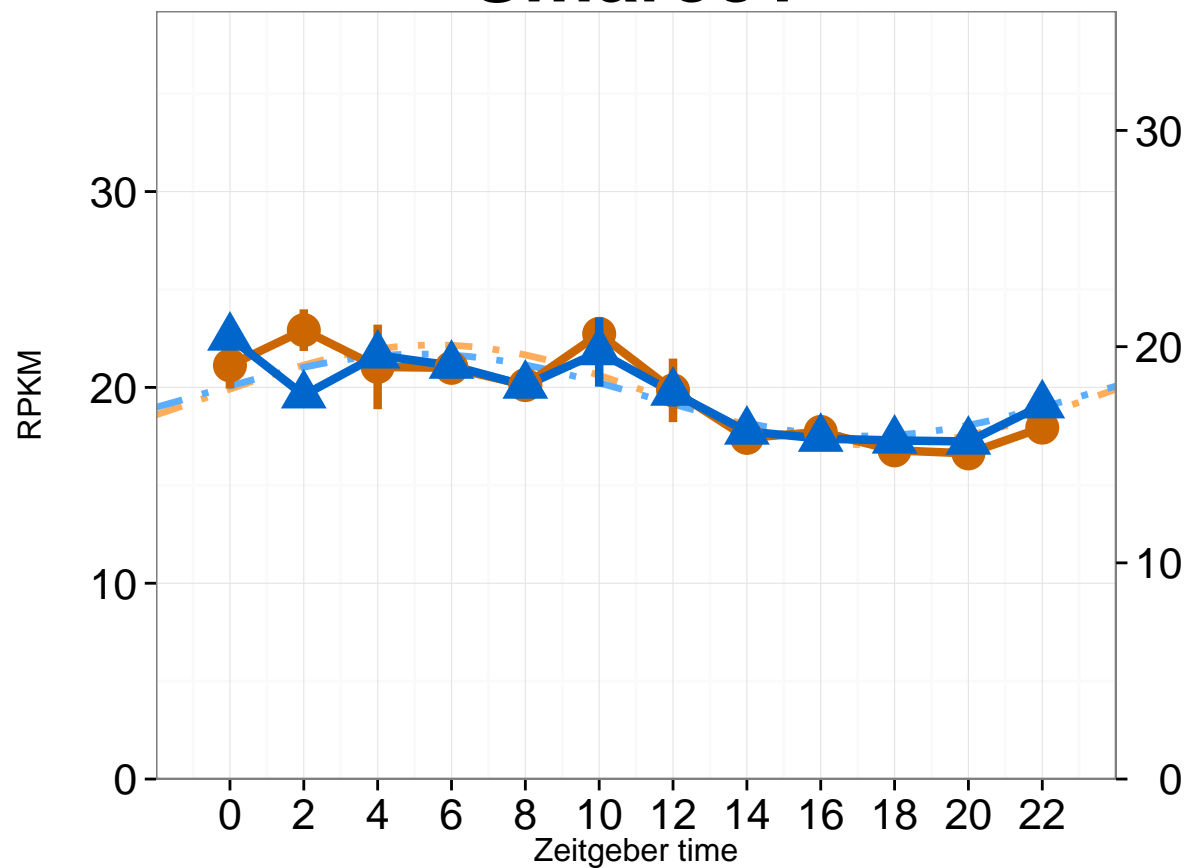

## Smarcc1

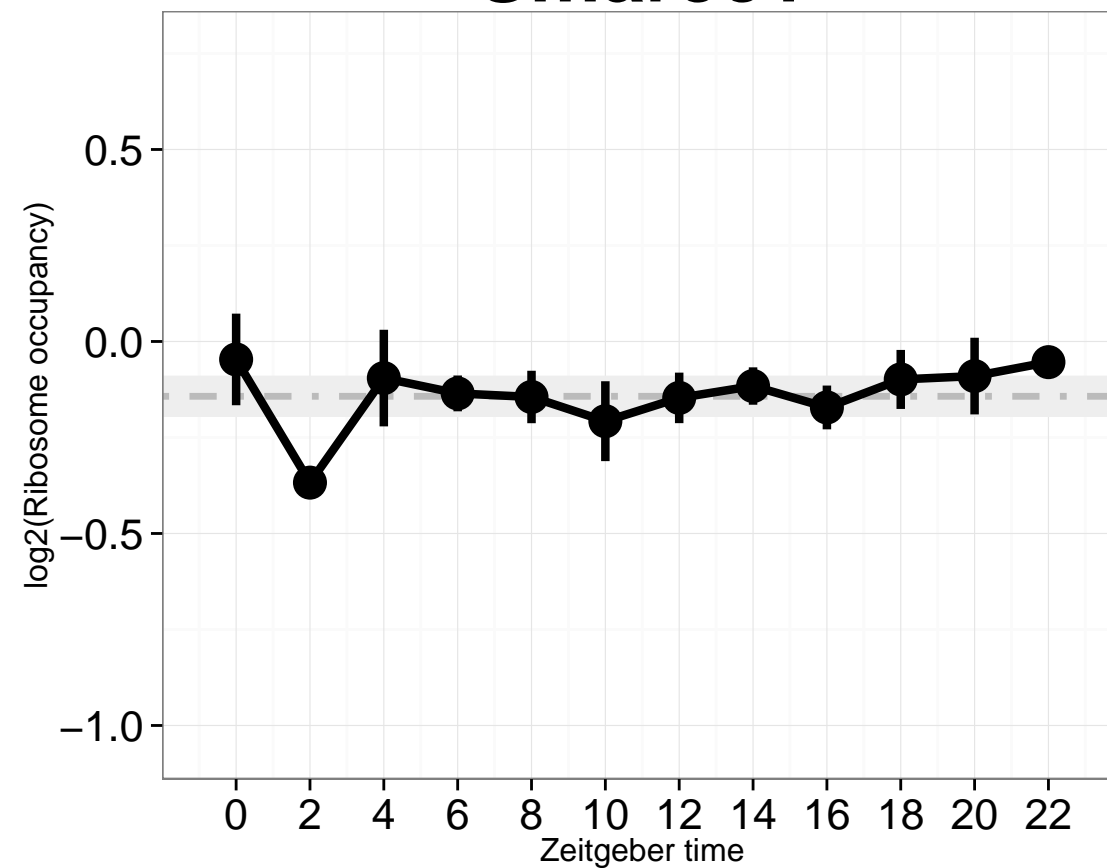

Supplement: Supplementary file 1145 [file 1]

# Agap2

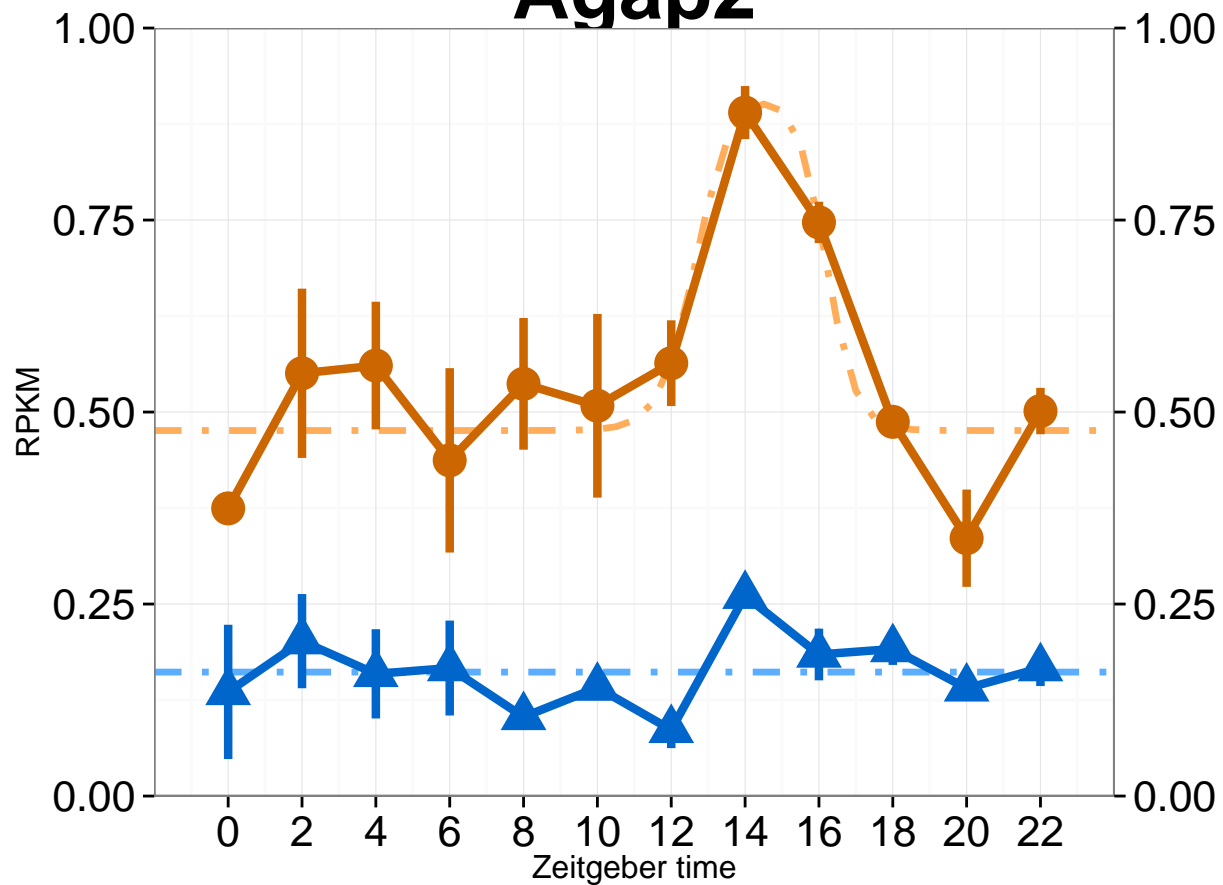

# Agap2

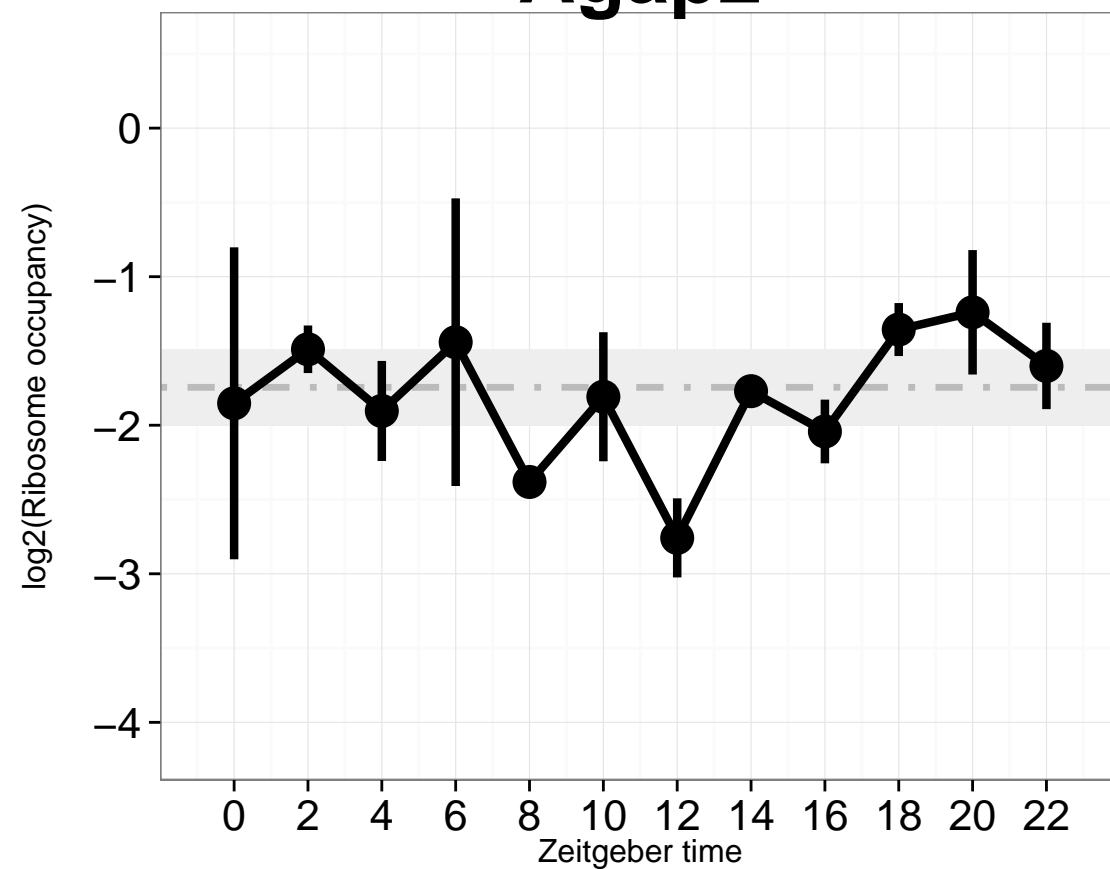

Supplement: Supplementary file 1146 [file 1]

## Chd2

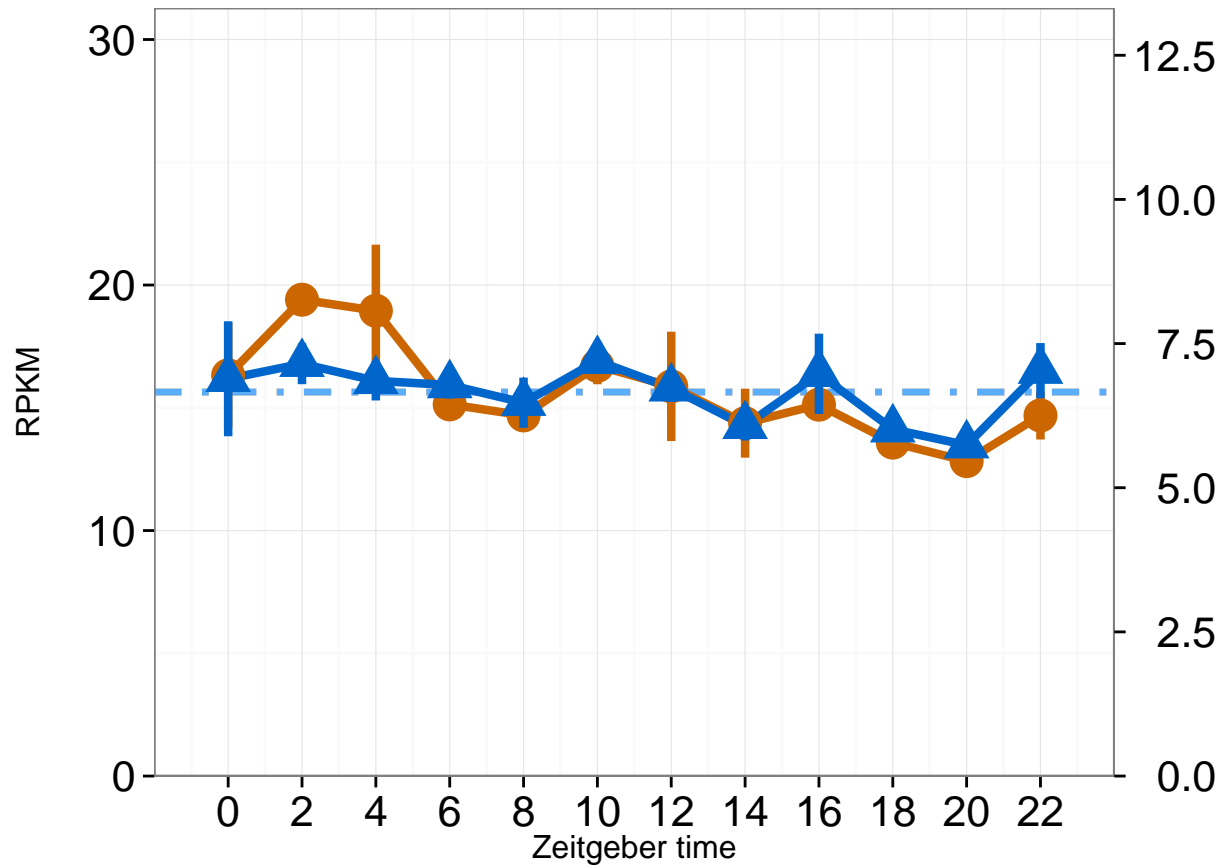

## Chd2

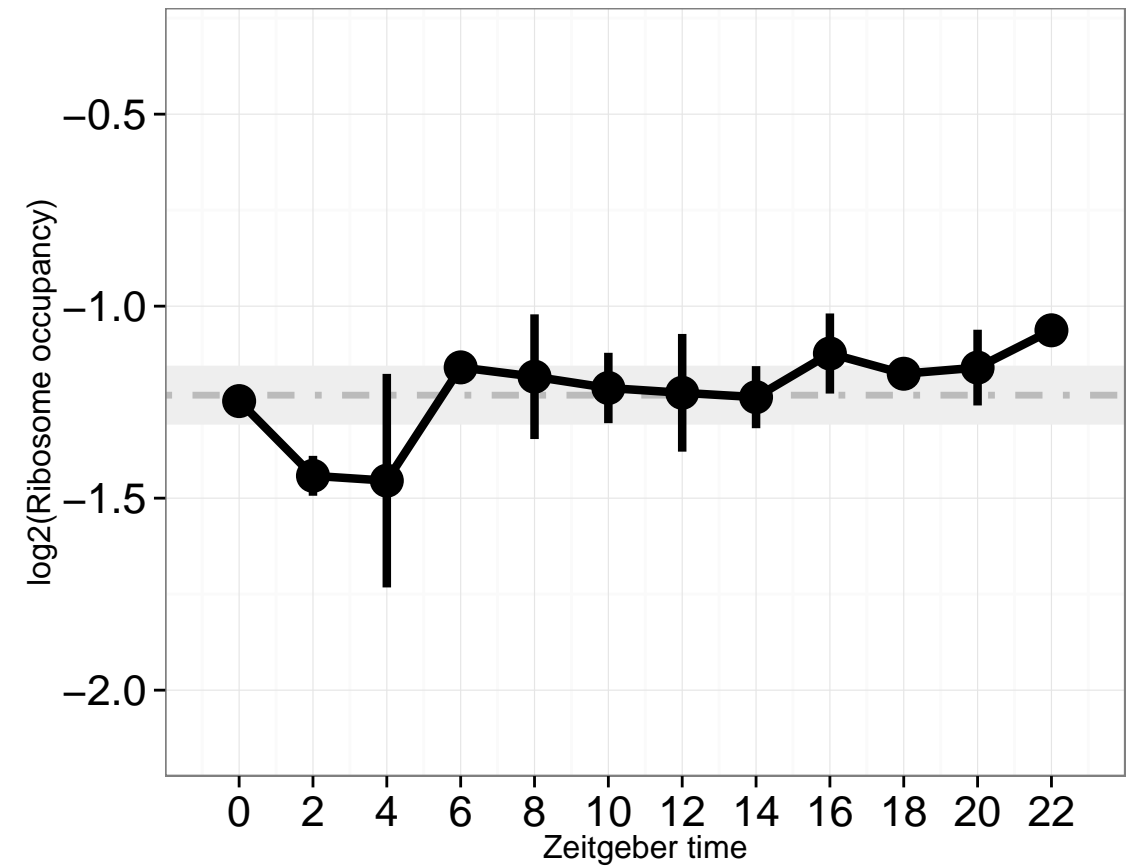

Supplement: Supplementary file 1147 [file 1]

## Grik5

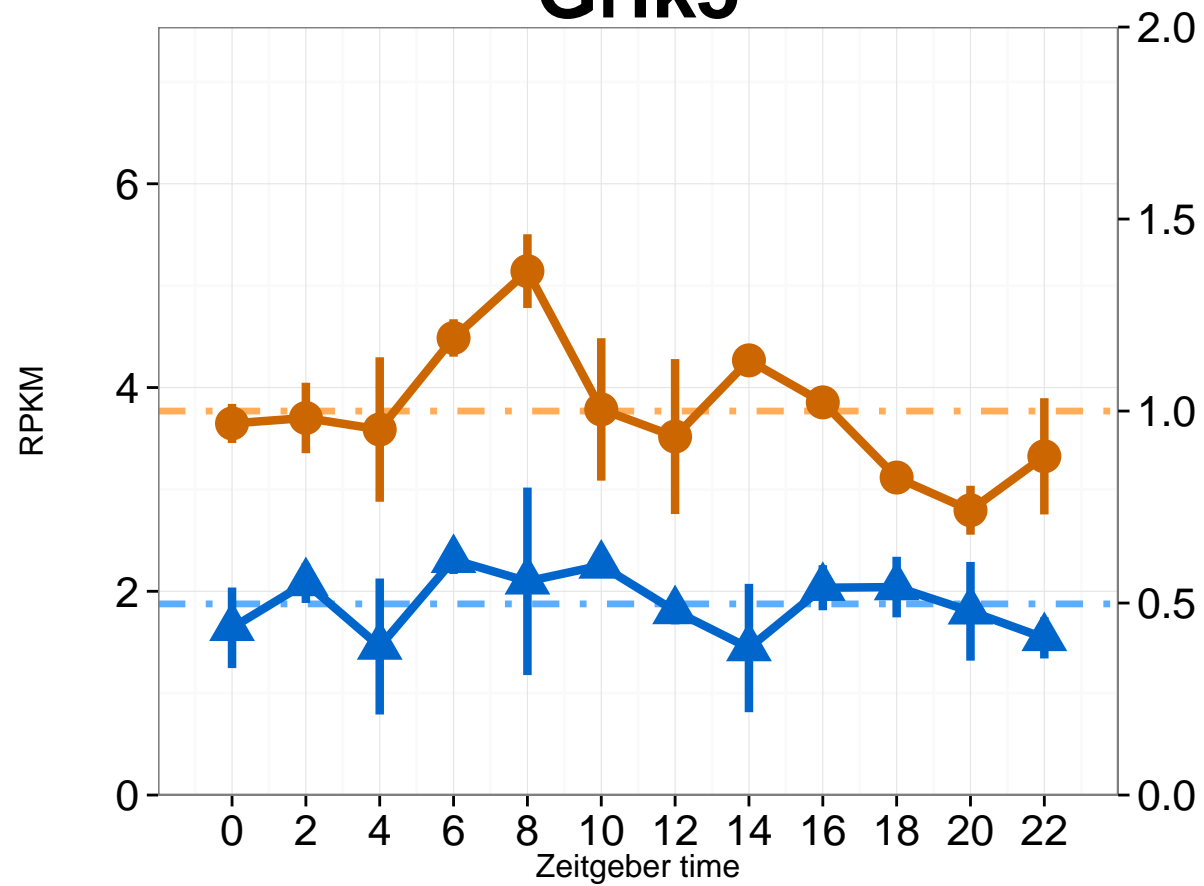

## Grik5

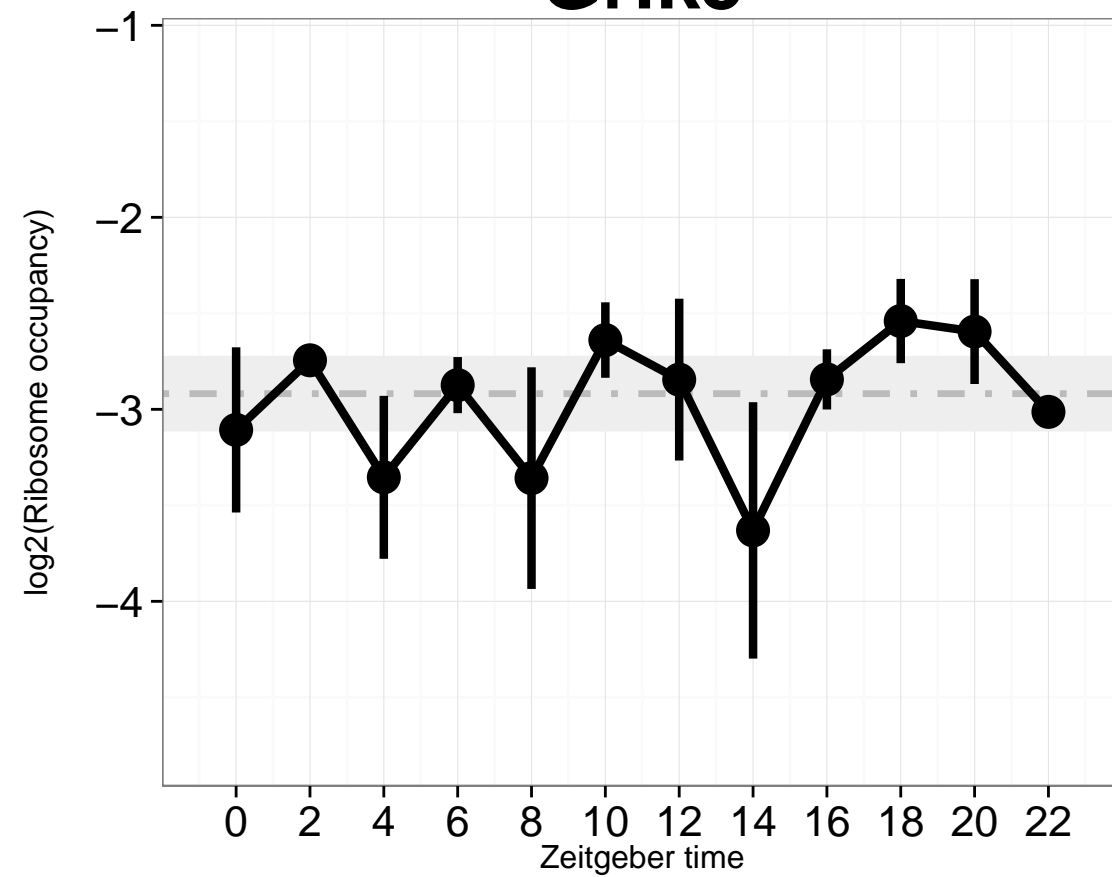

Supplement: Supplementary file 1148 [file 1]

## Mepce

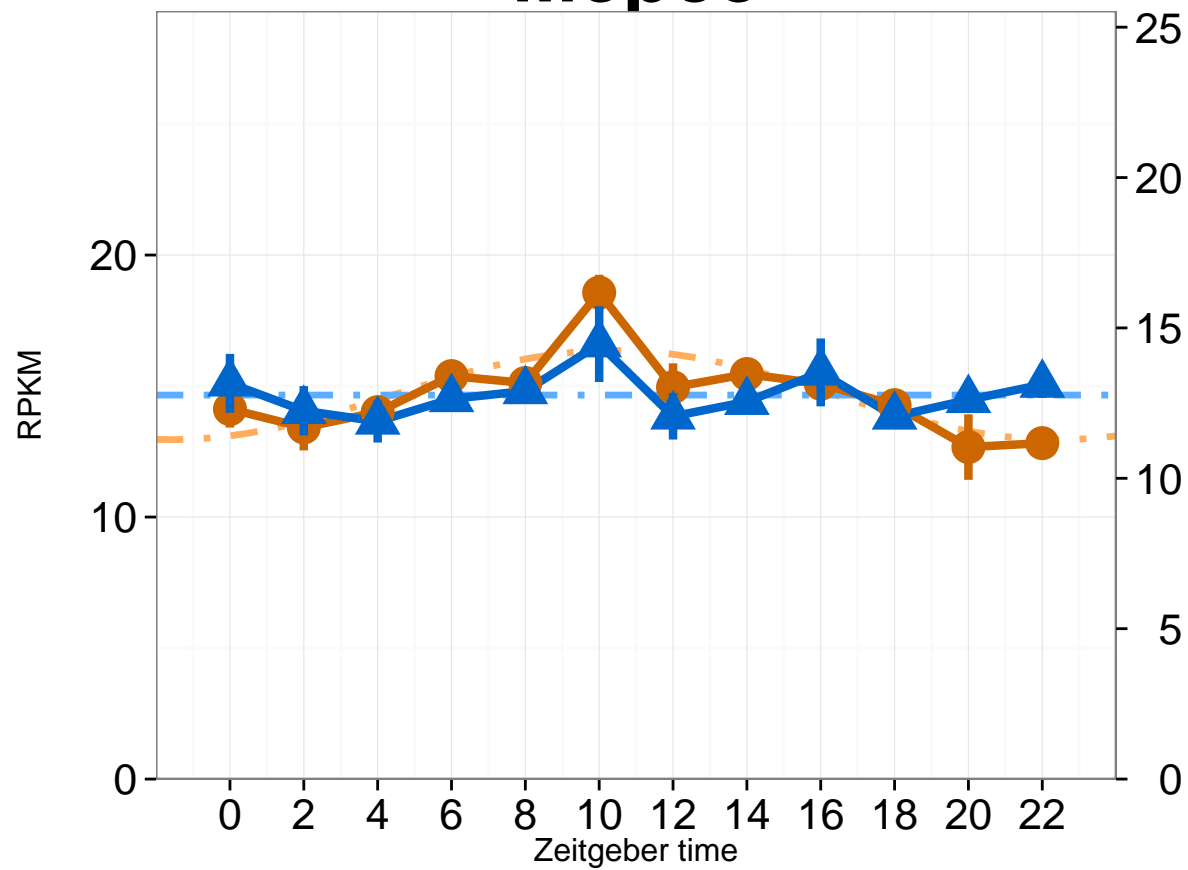

## Mepce

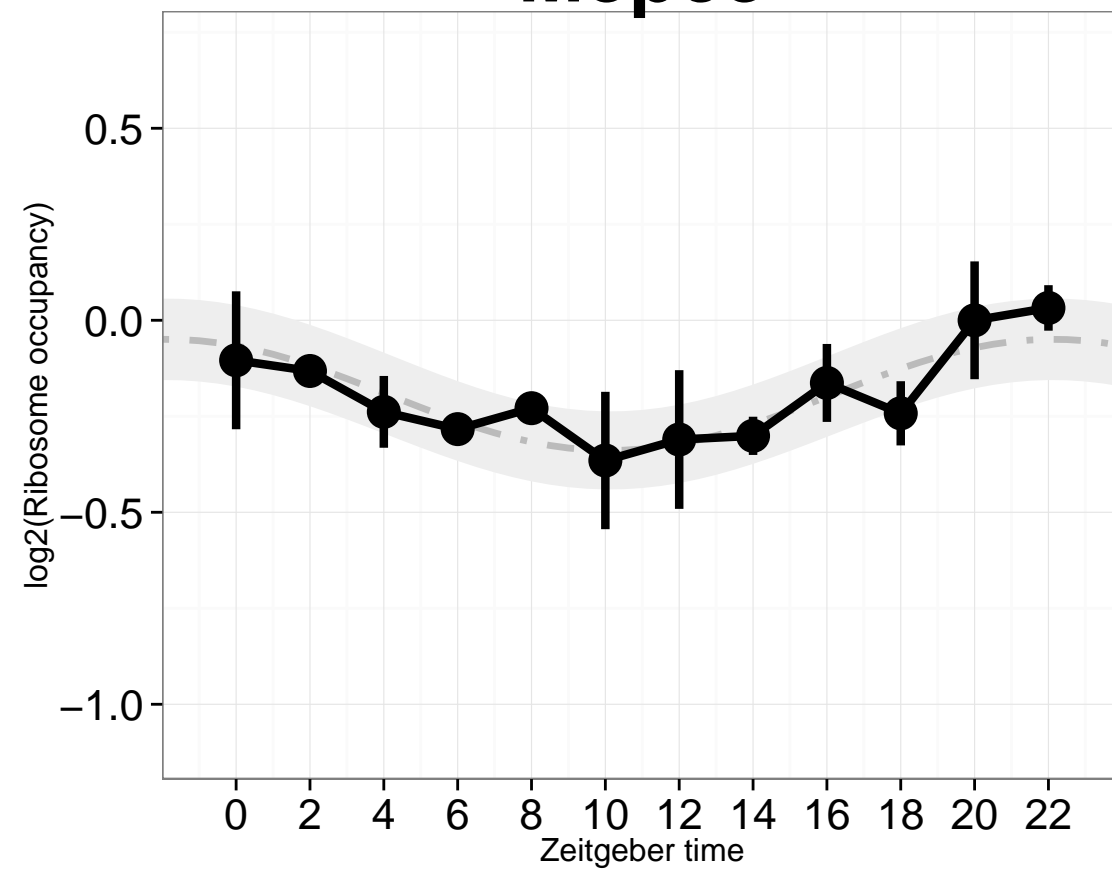

Supplement: Supplementary file 1149 [file 1]

# 2010002M12Rik

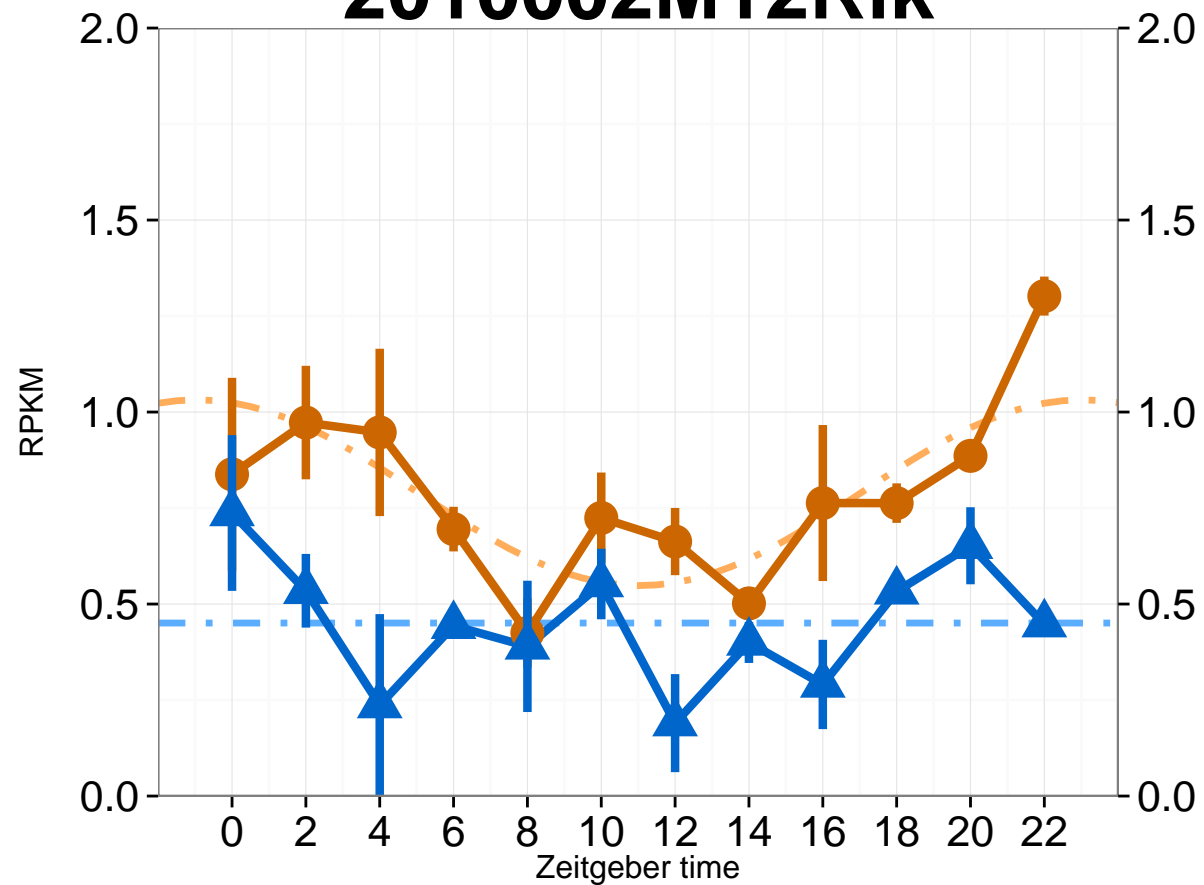

# 2010002M12Rik

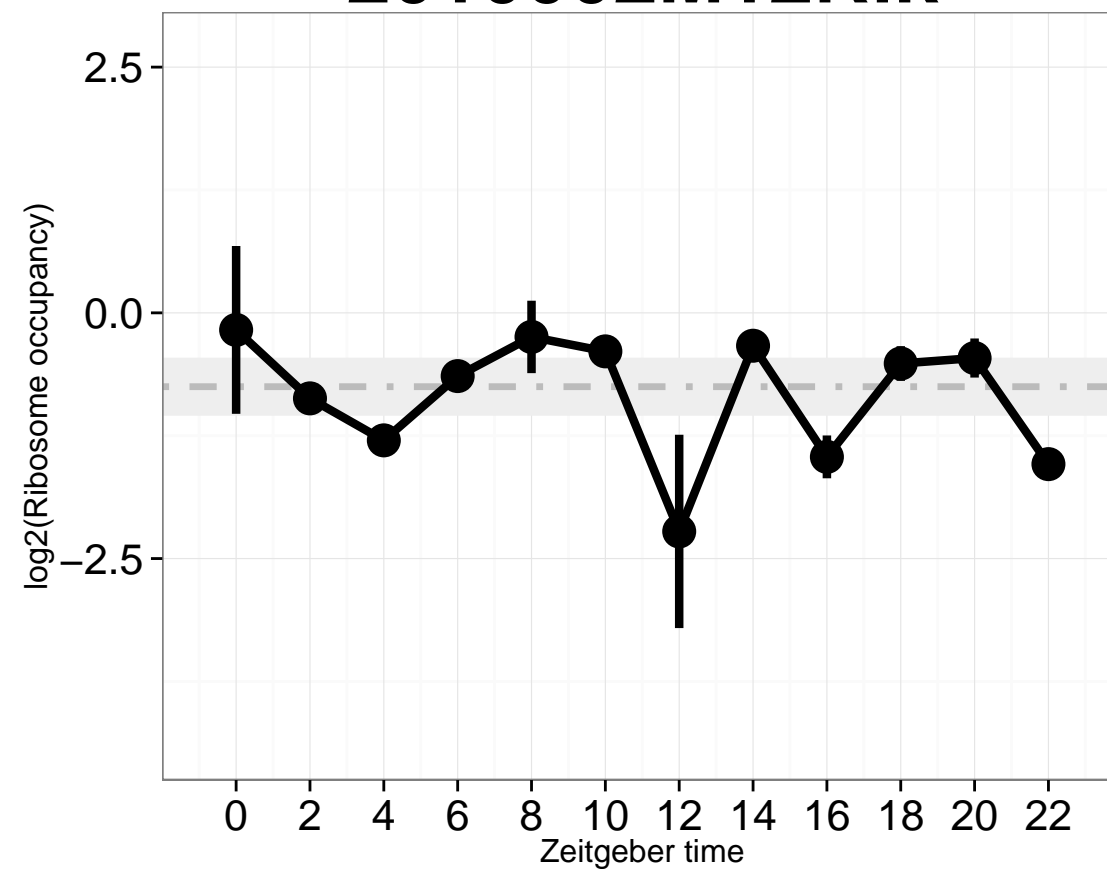

Supplement: Supplementary file 1150 [file 1]

## Gldc

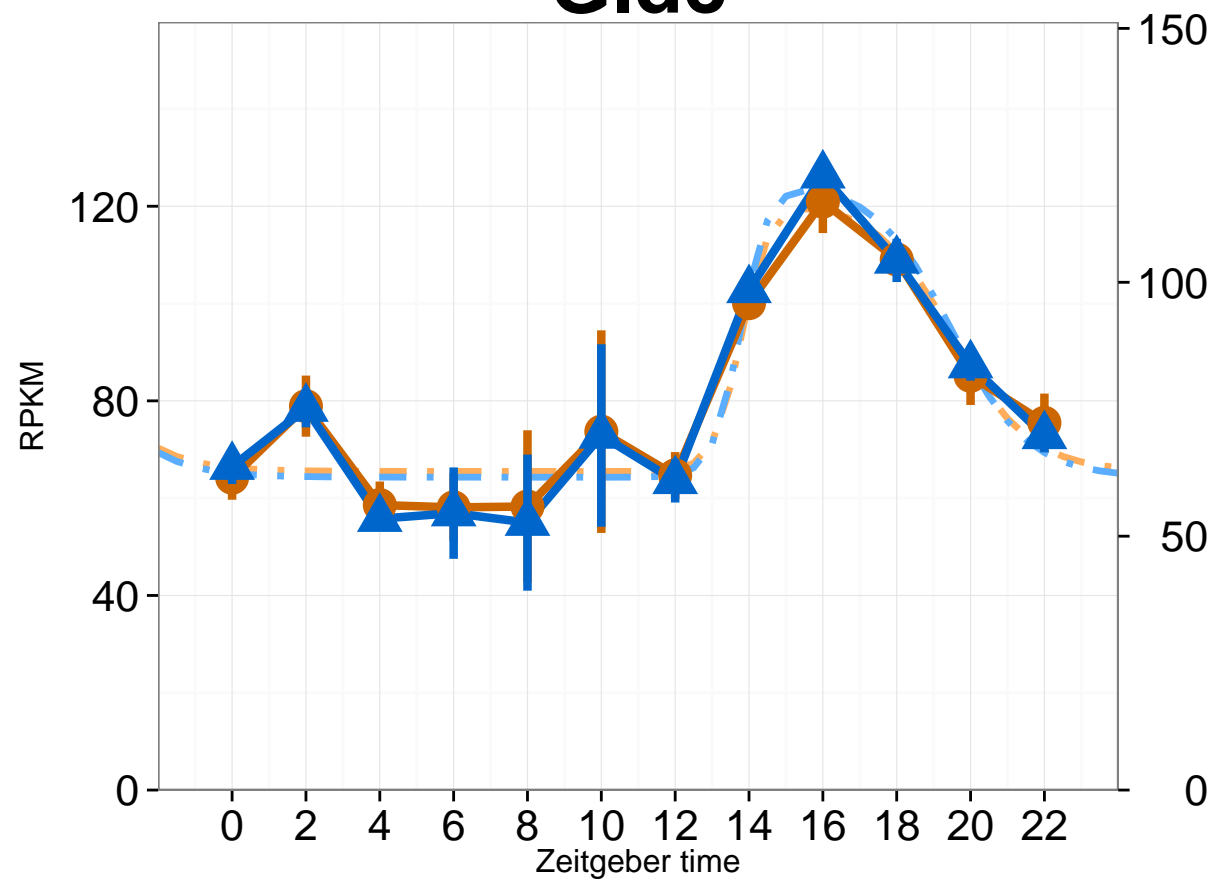

## Gldc

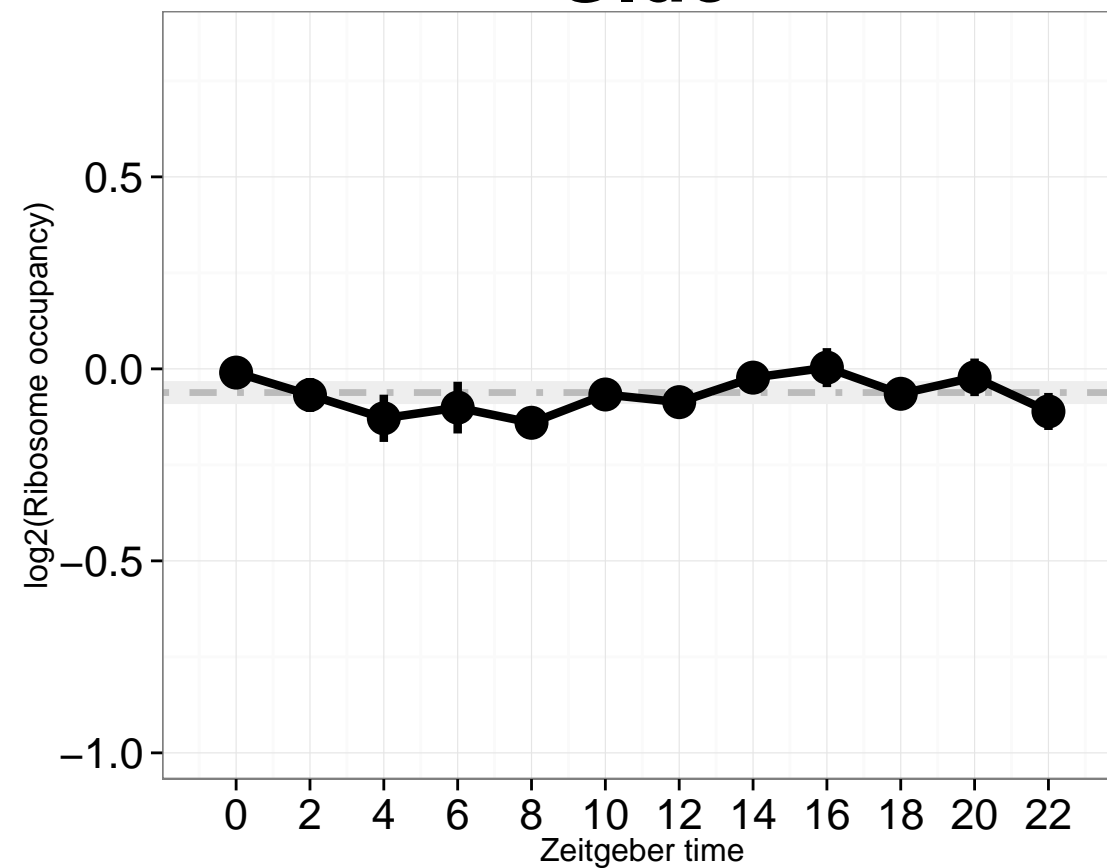

Supplement: Supplementary file 1151 [file 1]

# Prps1l3

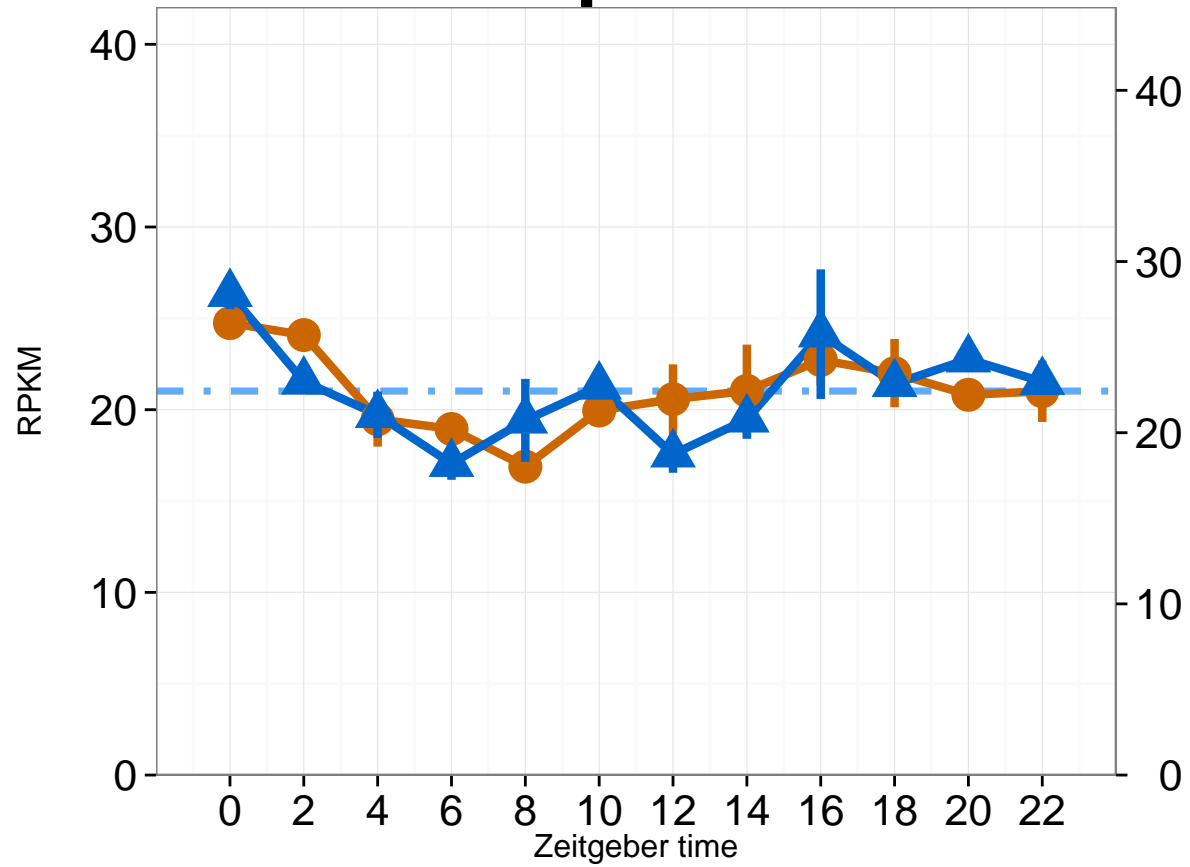

# Prps1l3

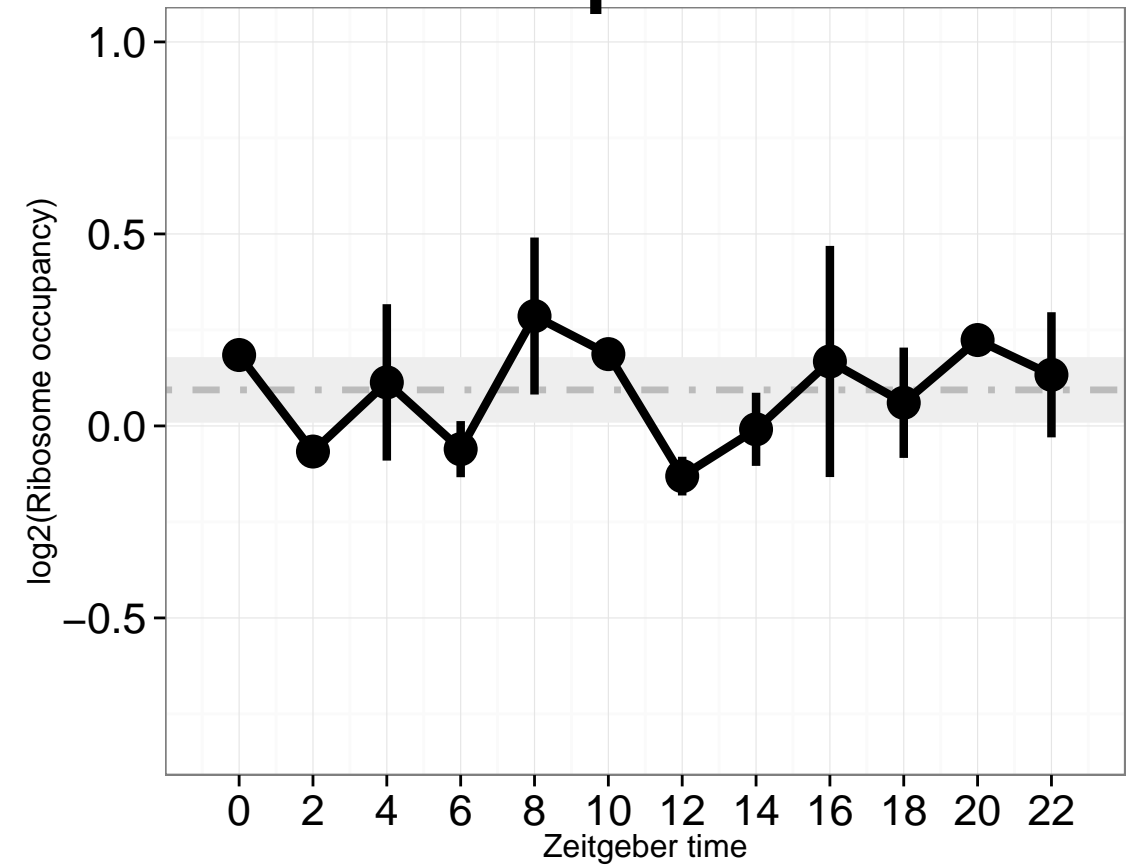

Supplement: Supplementary file 1152 [file 1]

**Ik**

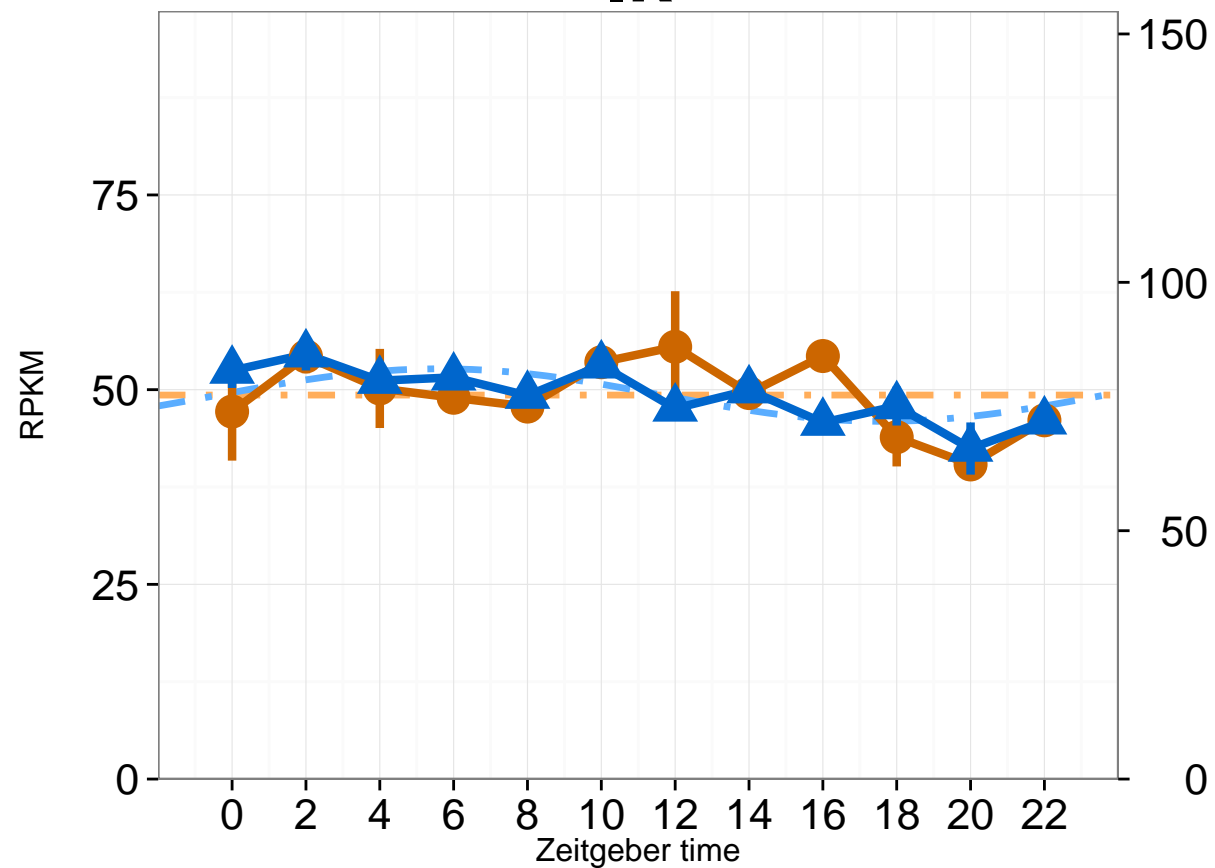

**Ik**

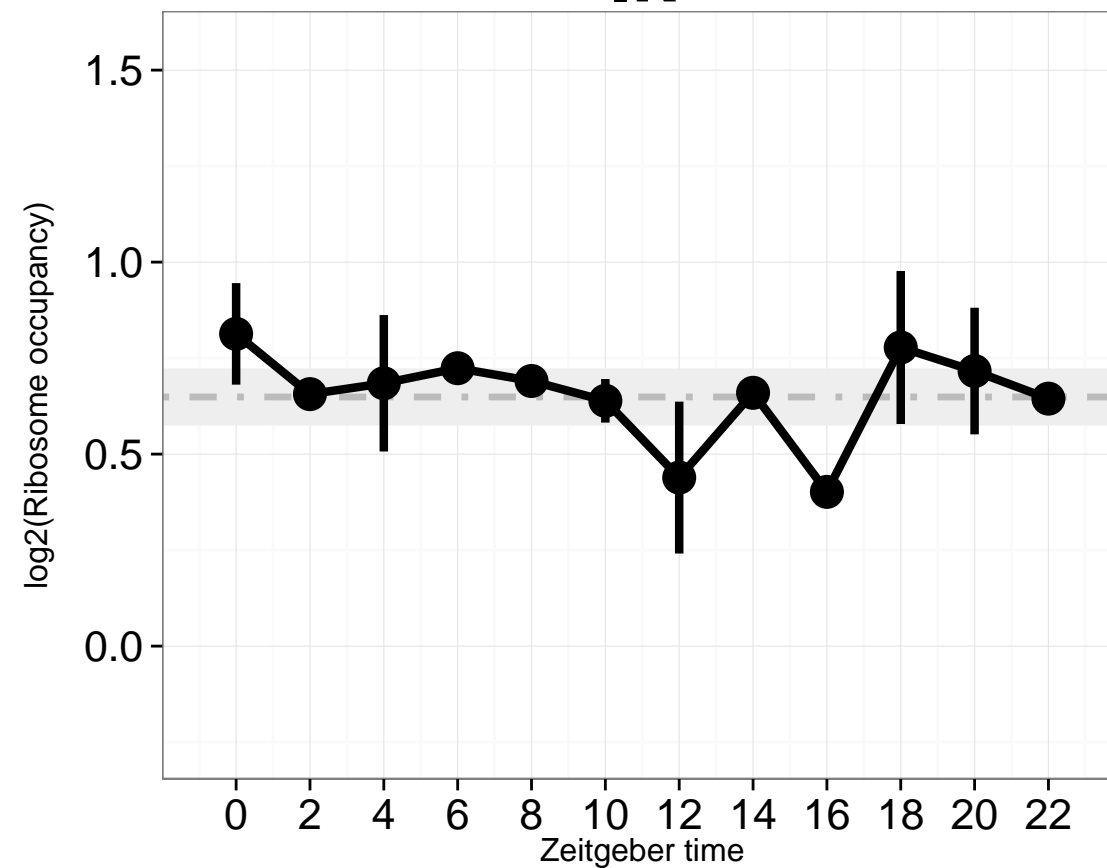

Supplement: Supplementary file 1153 [file 1]

# Psmb2

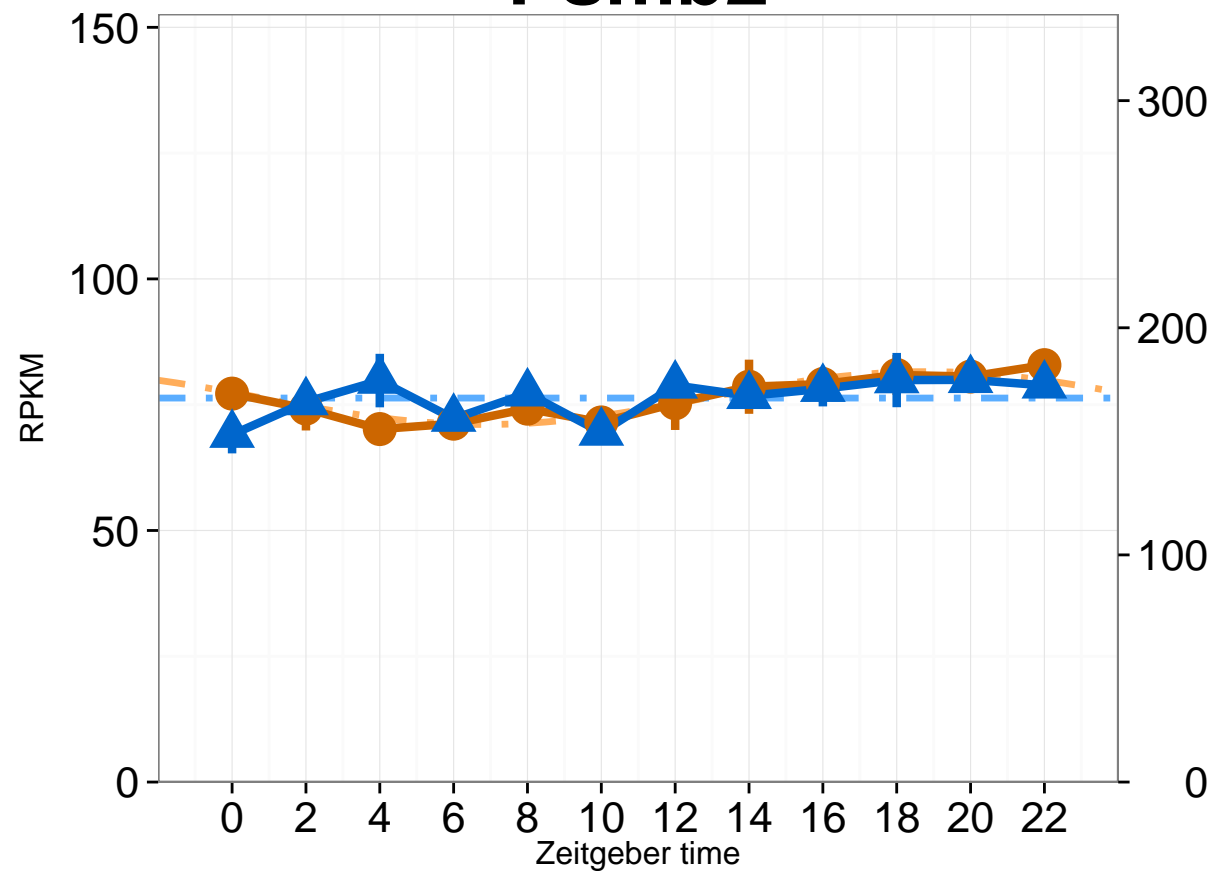

# Psmb2

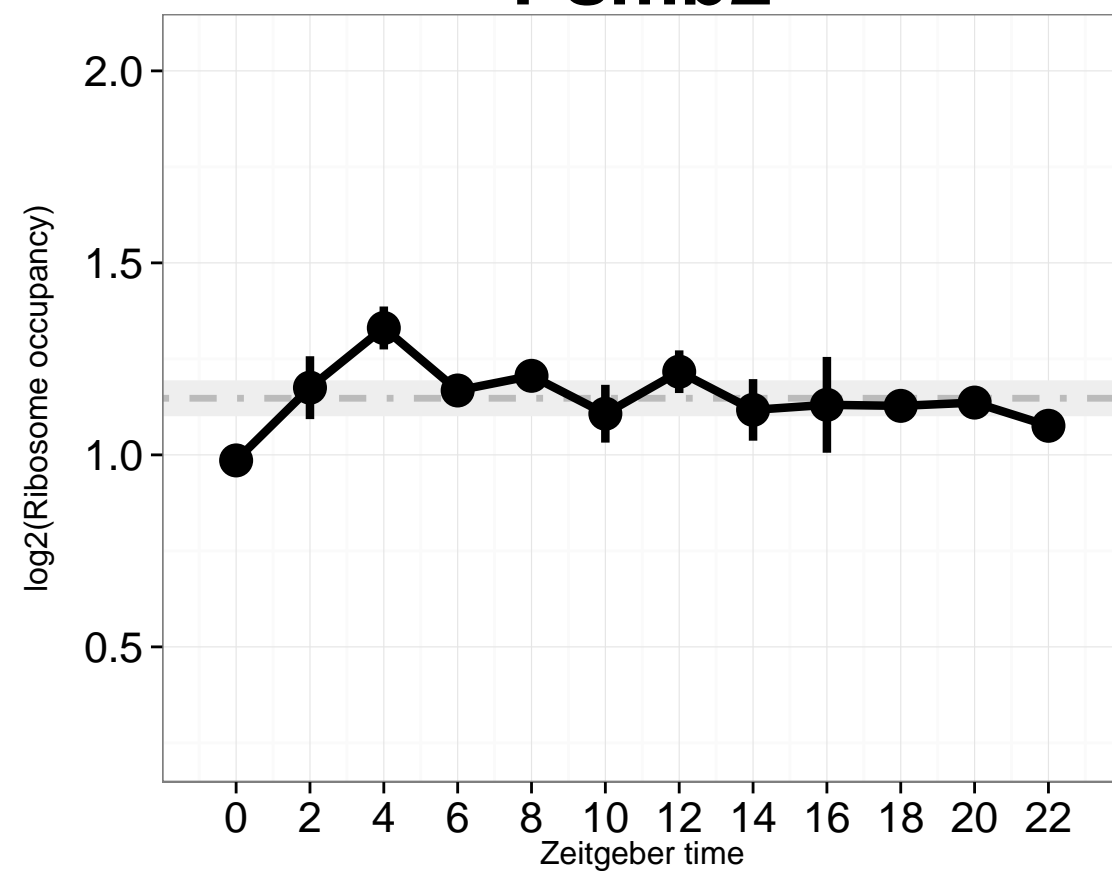

Supplement: Supplementary file 1154 [file 1]

## Uxt

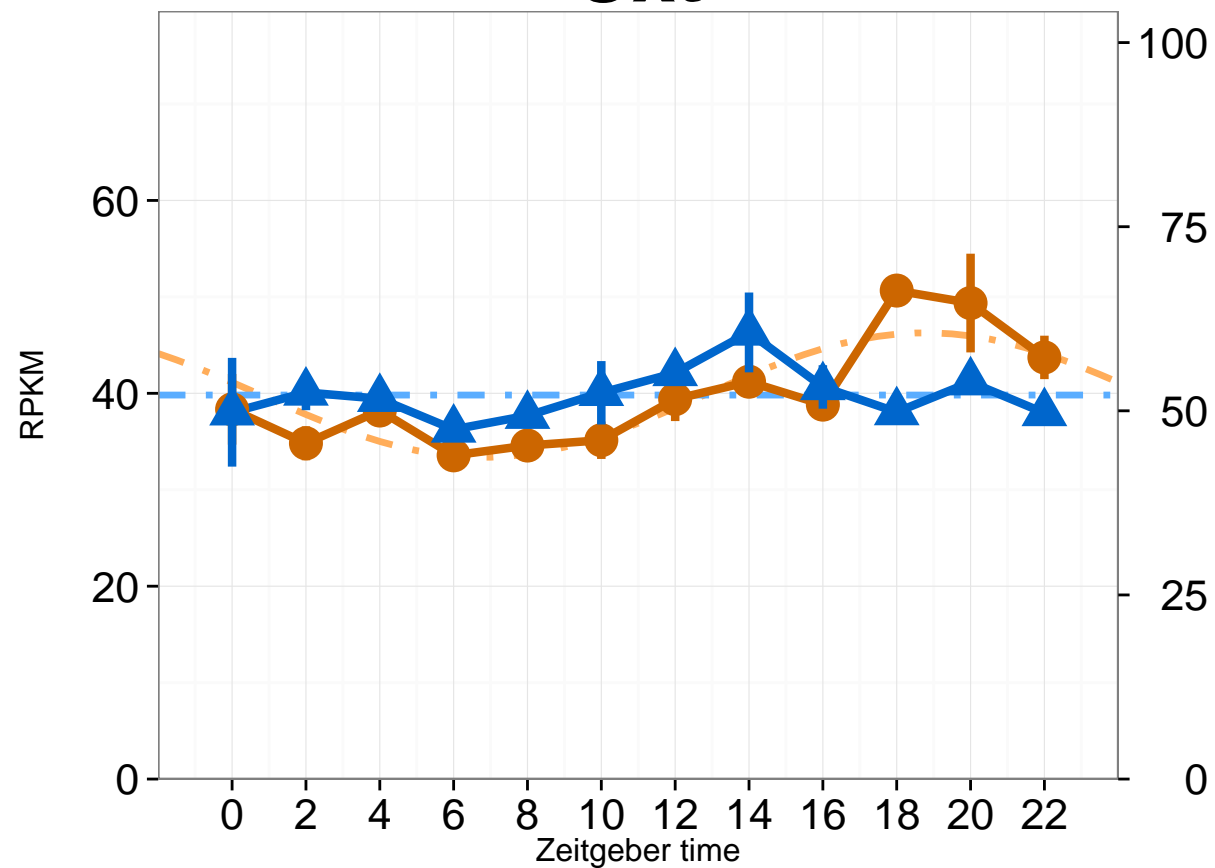

## Uxt

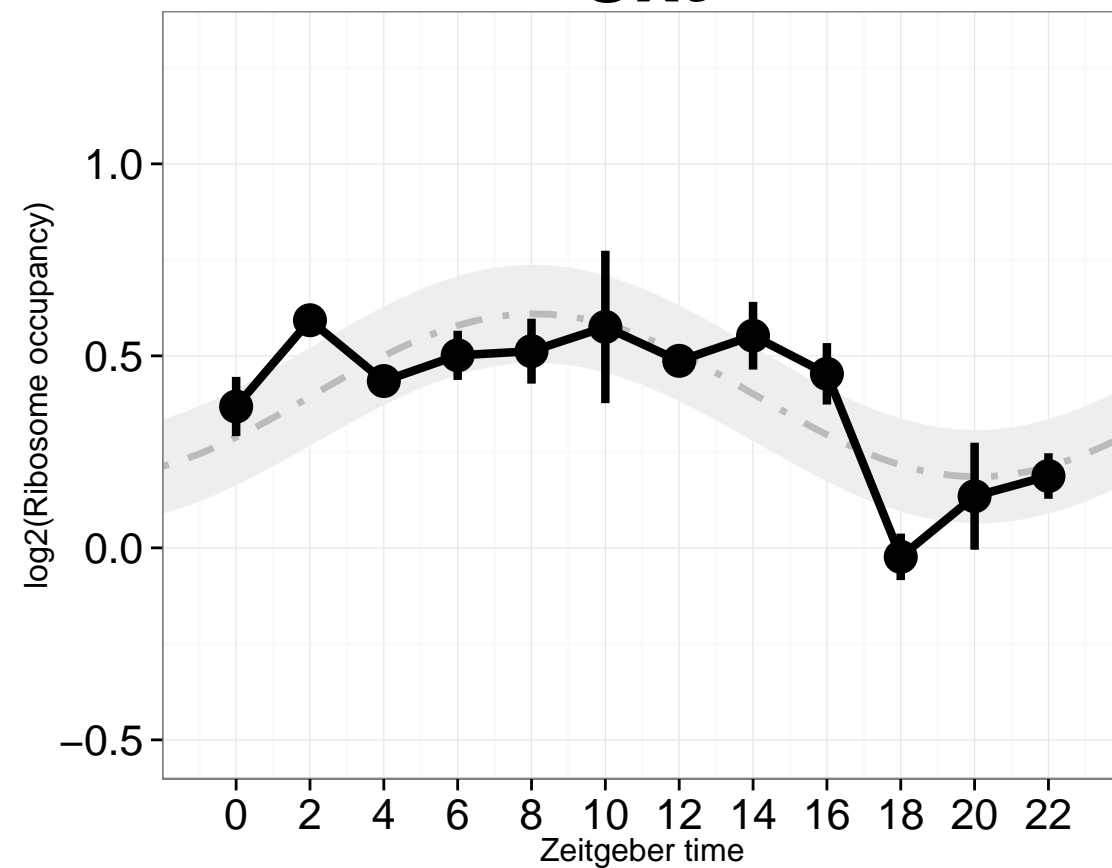

Supplement: Supplementary file 1155 [file 1]

## 1810043H04Rik

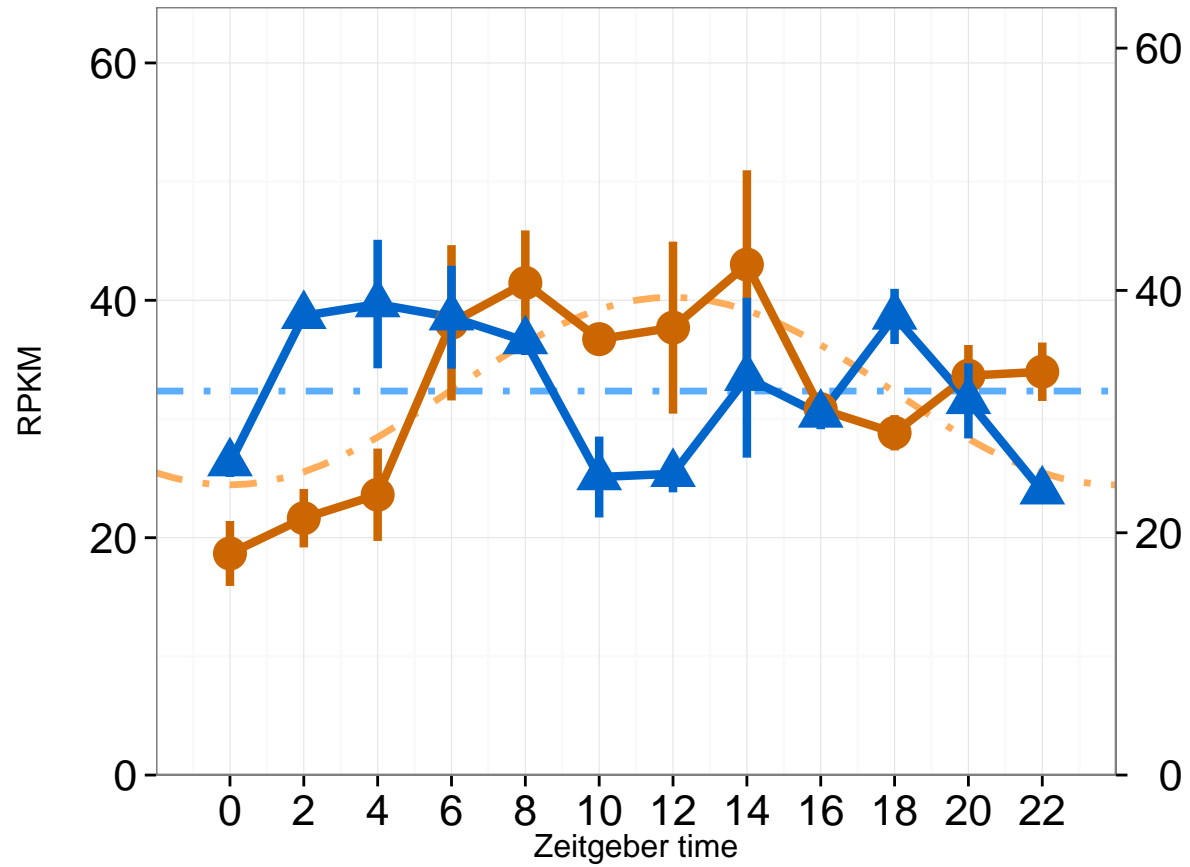

## 1810043H04Rik

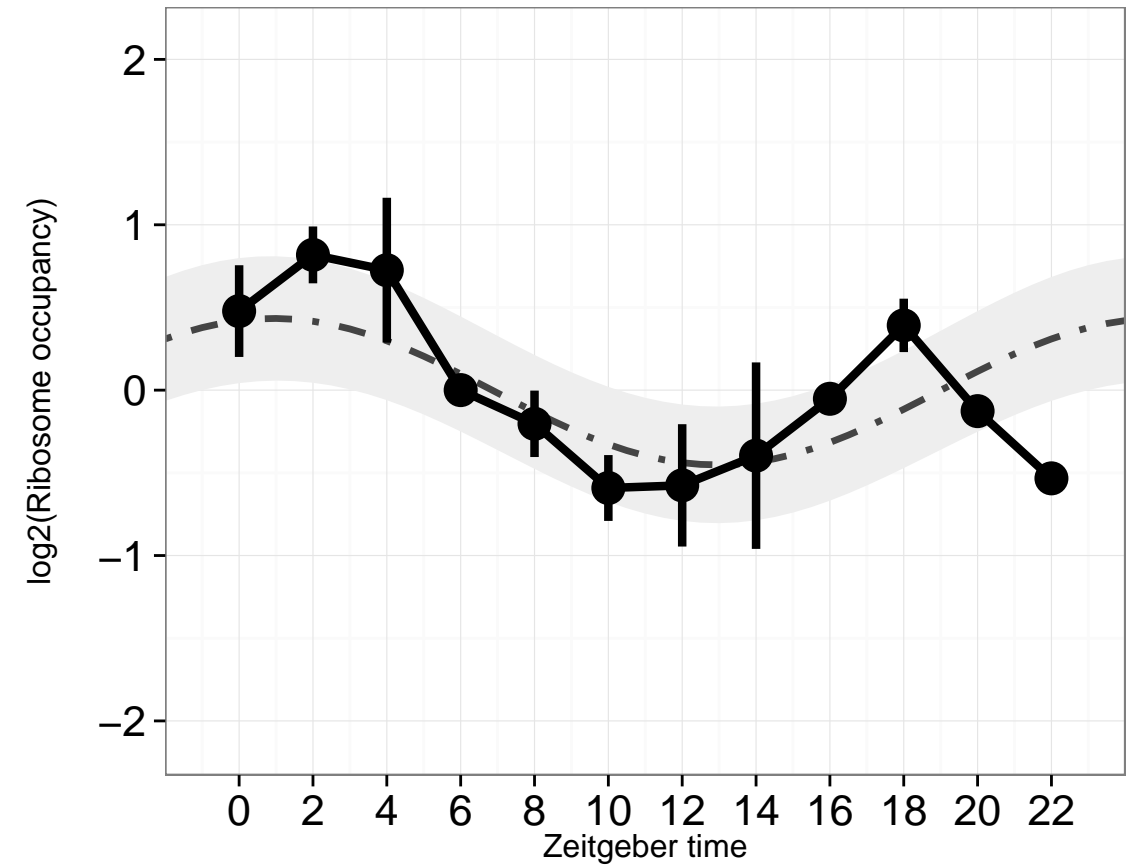

Supplement: Supplementary file 1156 [file 1]

# Bmp1

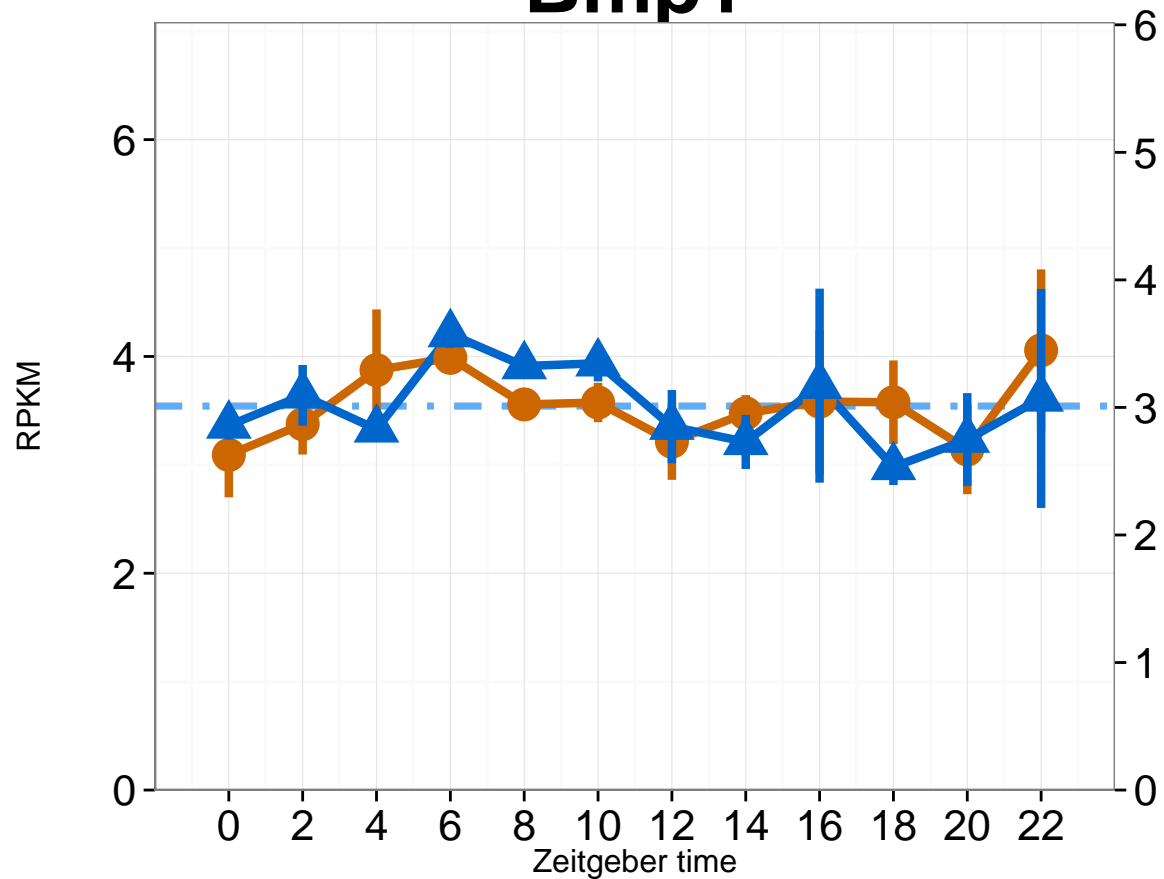

# Bmp1

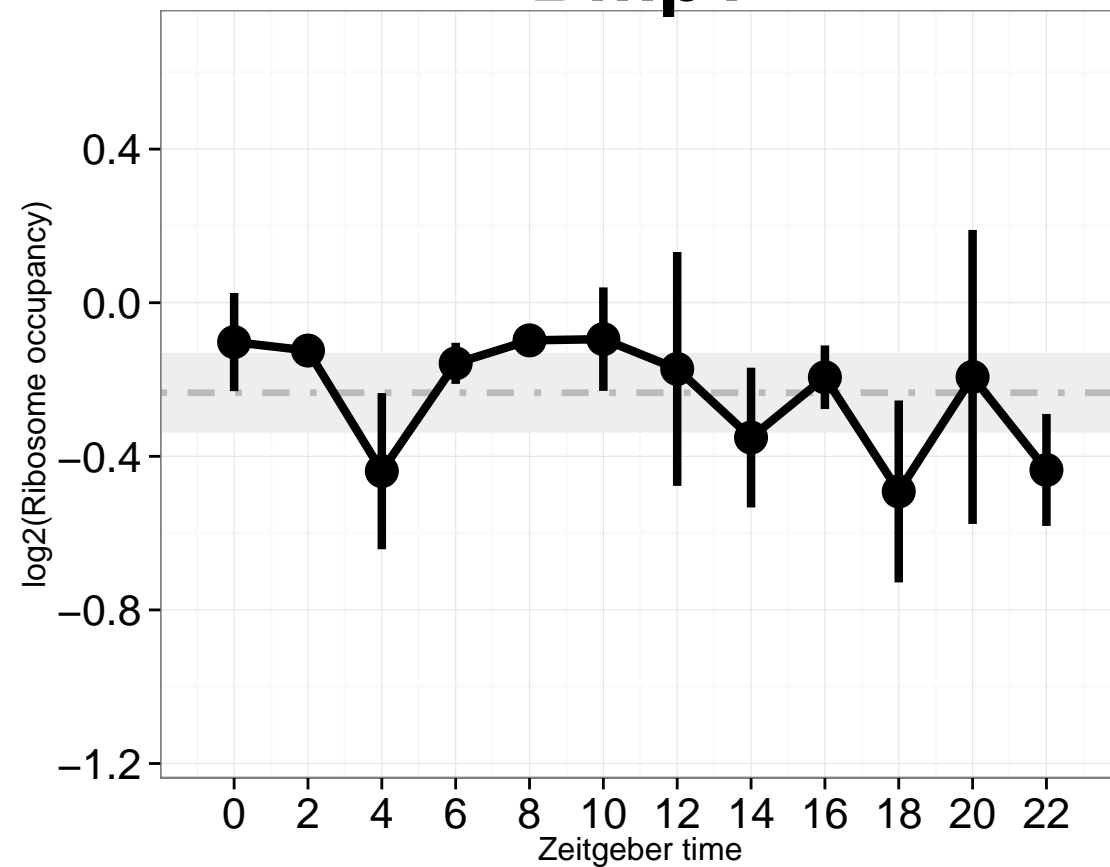

Supplement: Supplementary file 1157 [file 1]

## Uhrf1

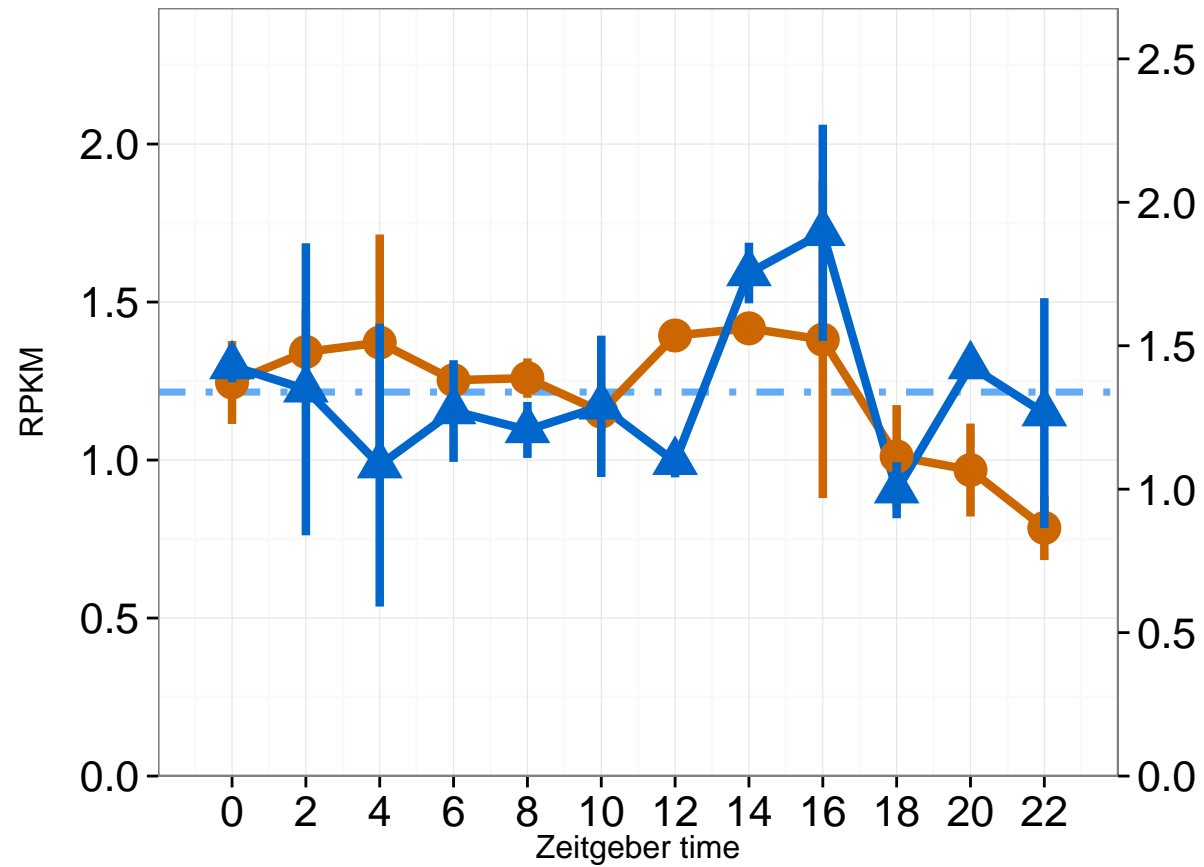

## Uhrf1

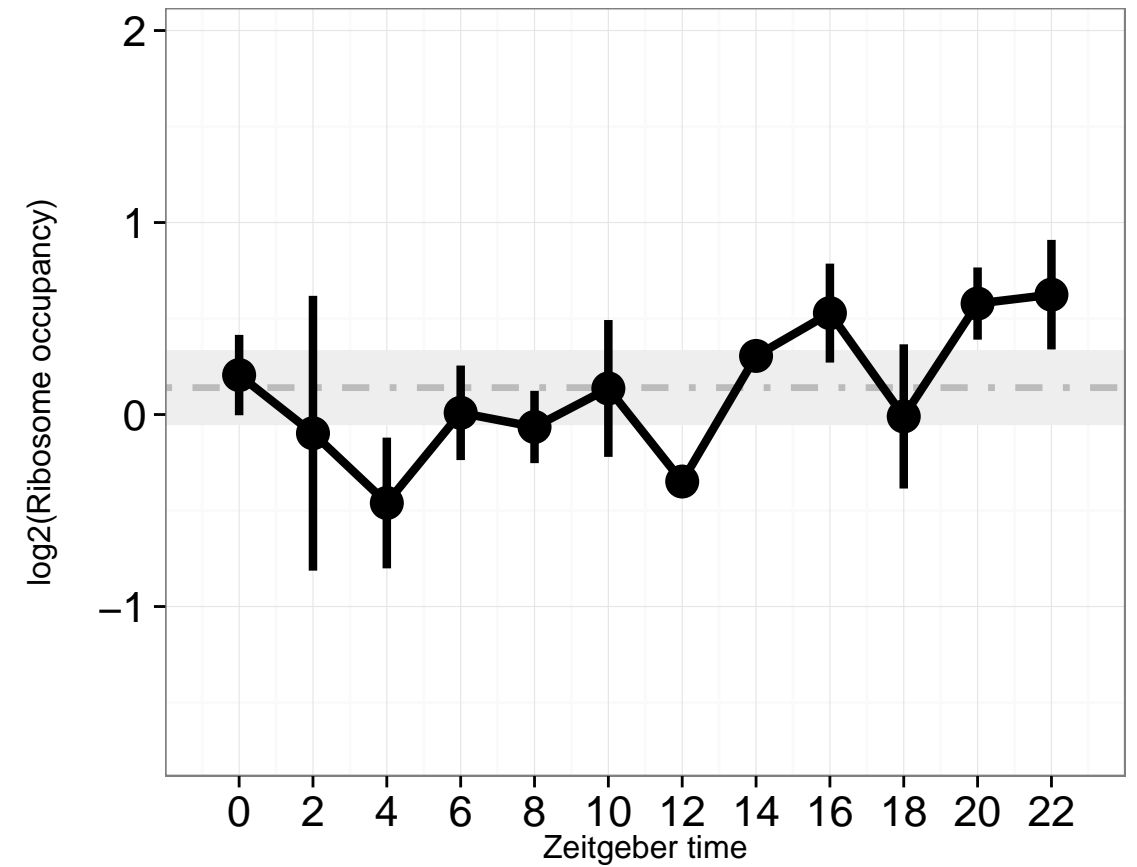

Supplement: Supplementary file 1158 [file 1]

## Ggt5

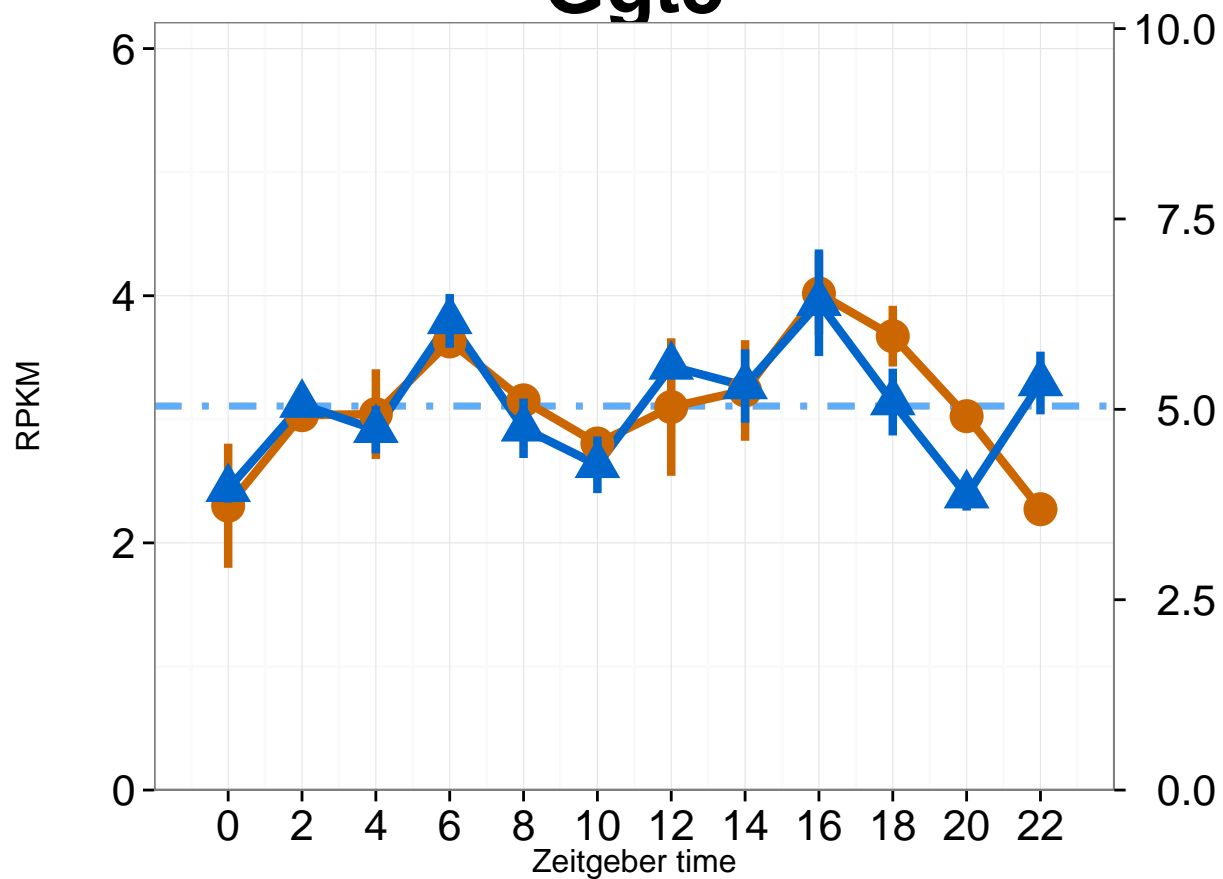

## Ggt5

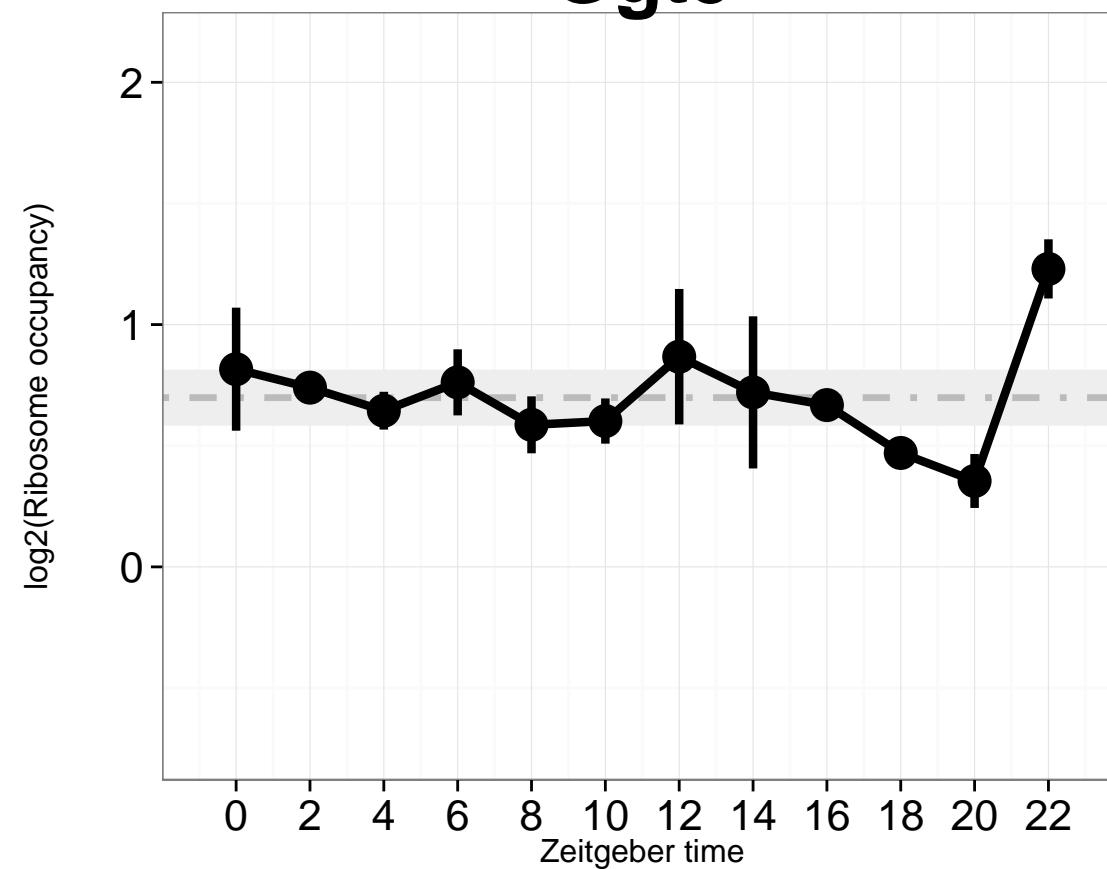

Supplement: Supplementary file 1159 [file 1]

# Btbd7

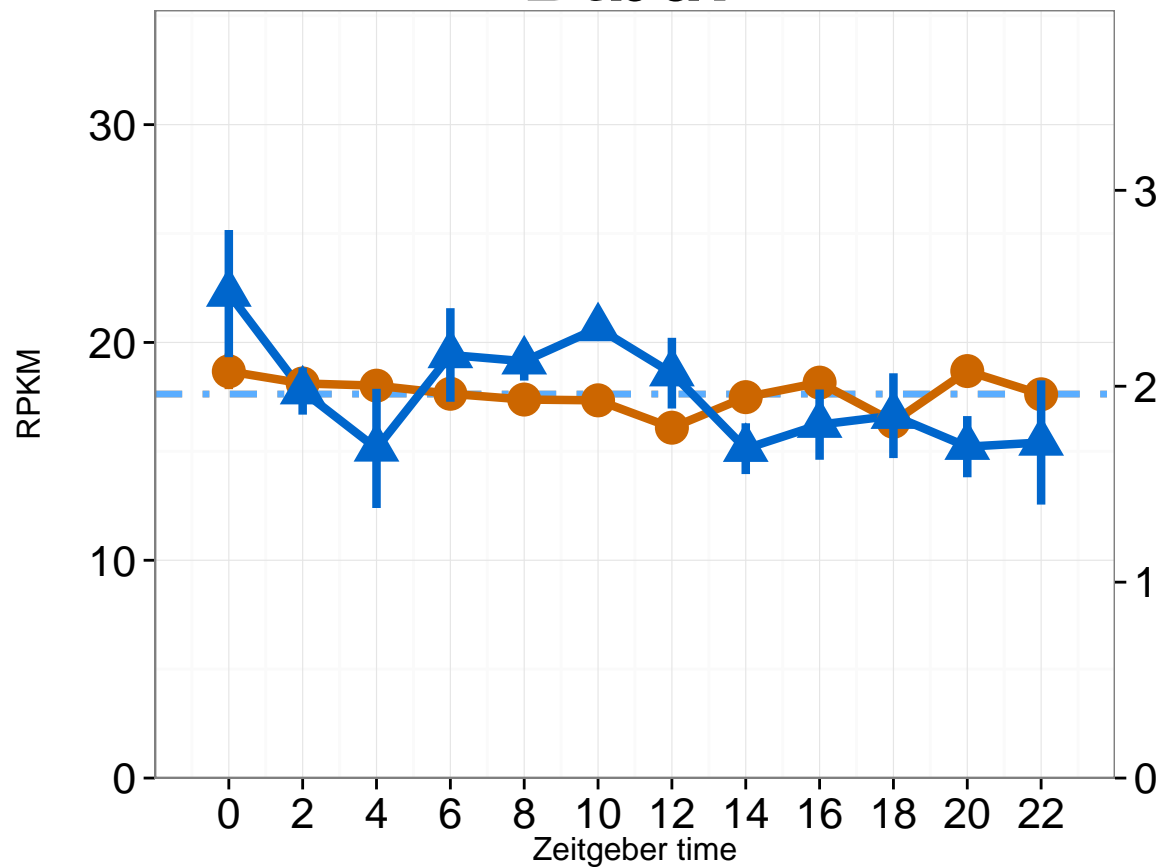

# Btbd7

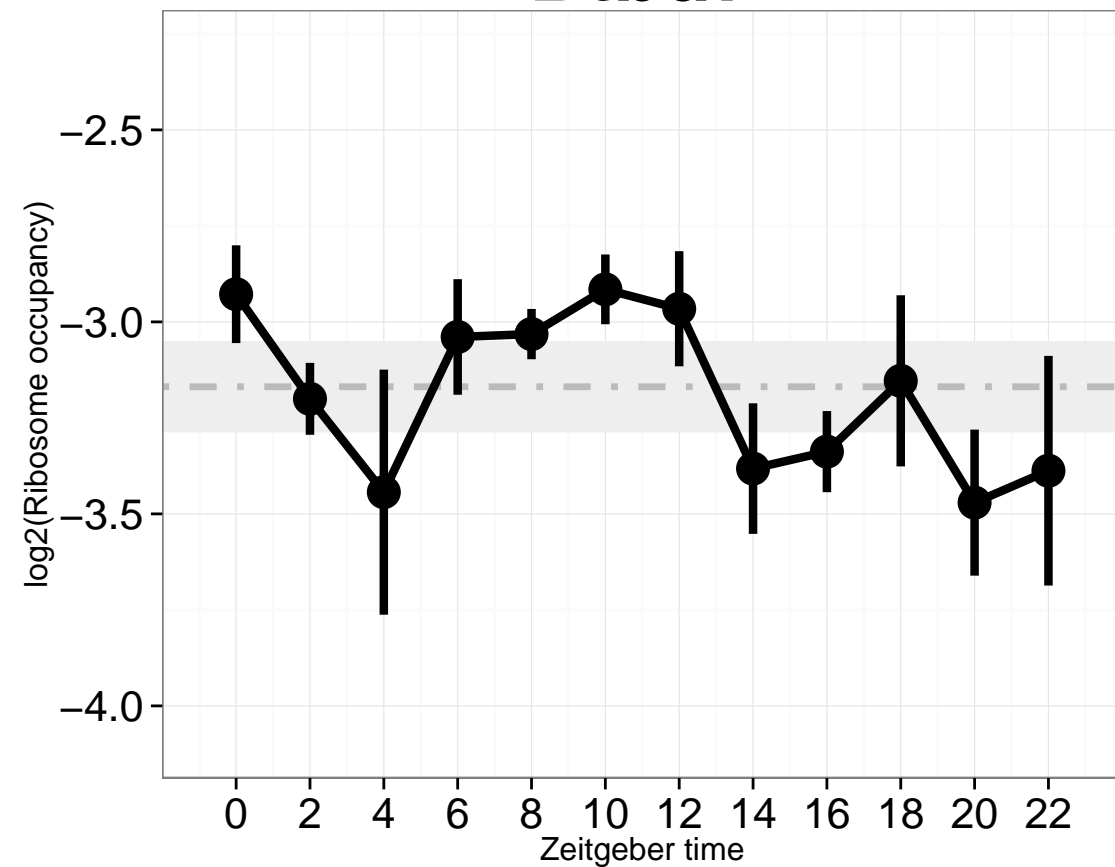

Supplement: Supplementary file 1160 [file 1]

# Phlda1

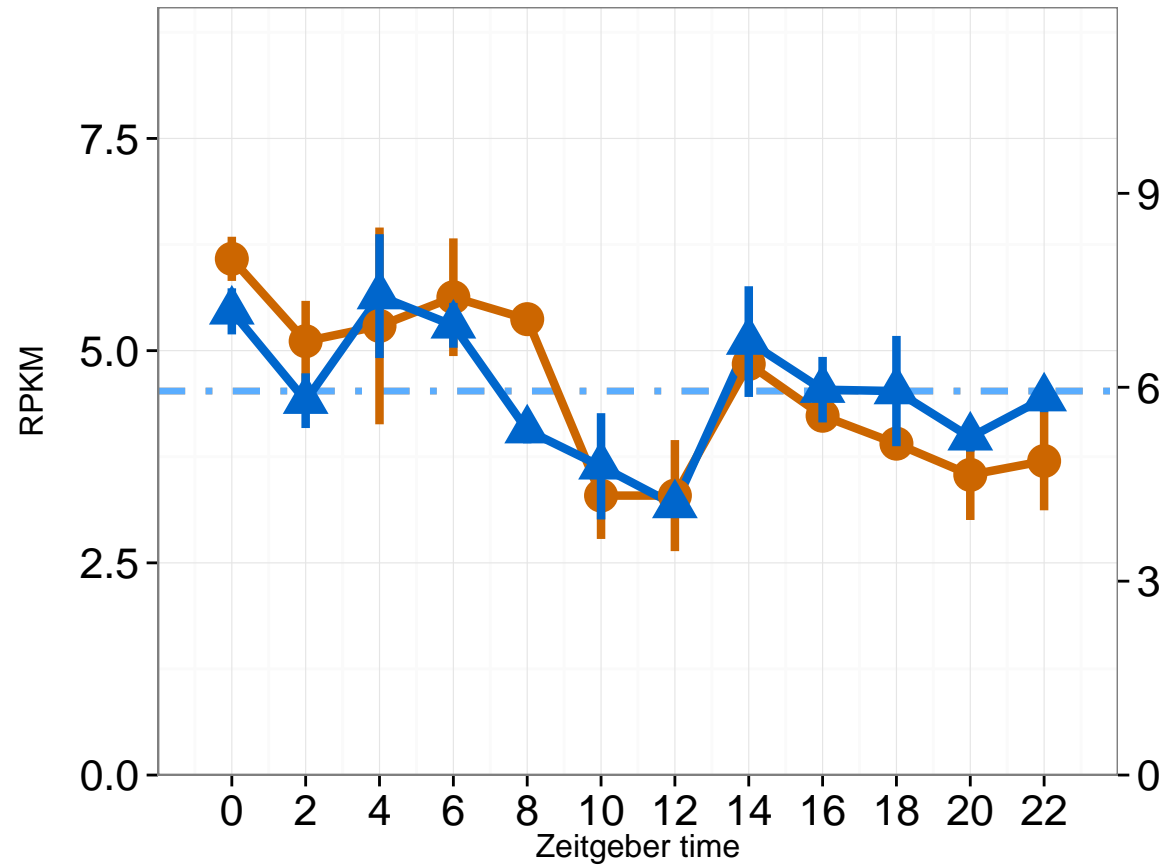

# Phlda1

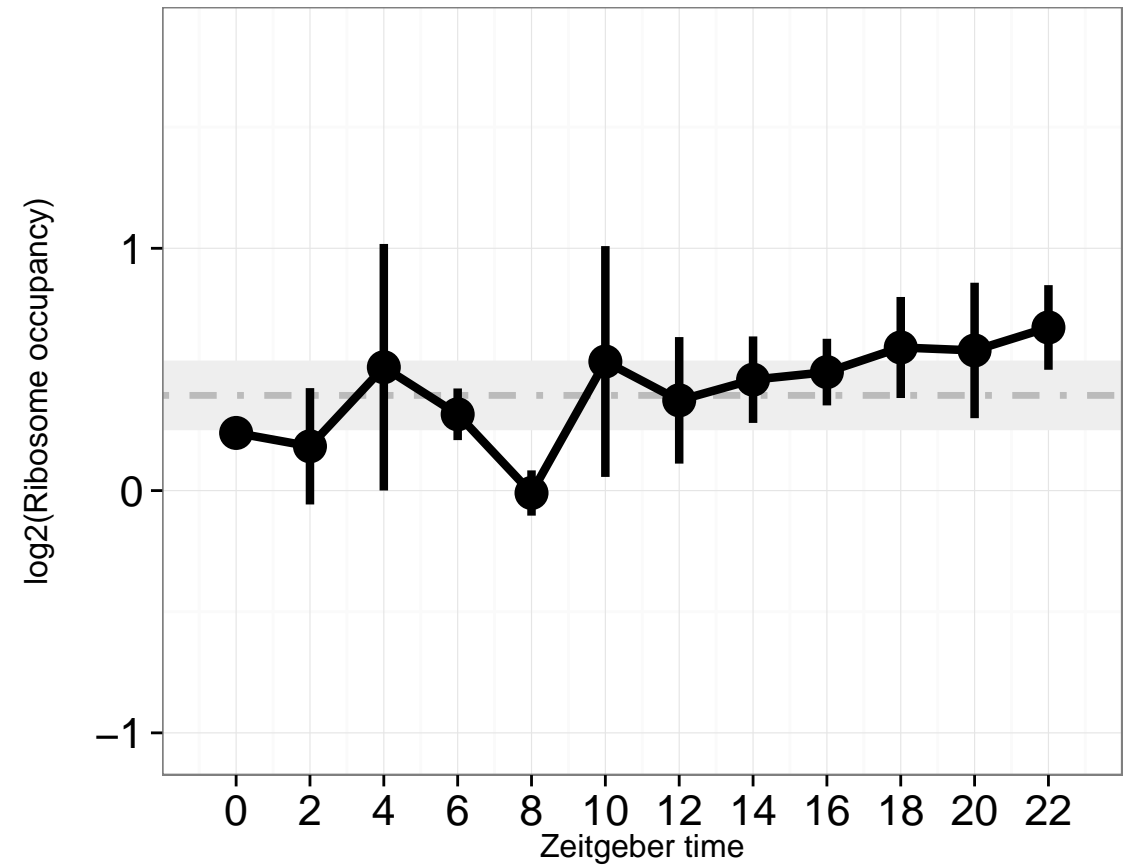

Supplement: Supplementary file 1161 [file 1]

# Tmem181a

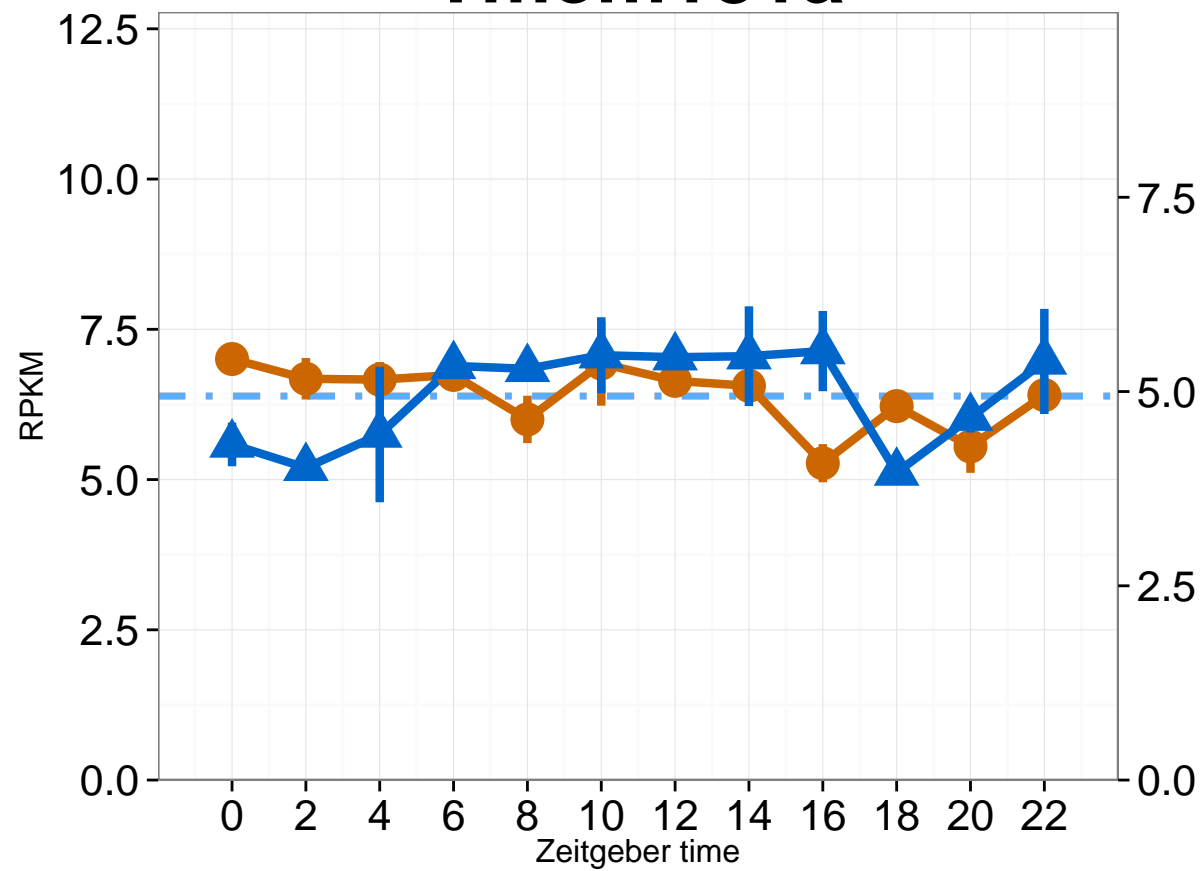

# Tmem181a

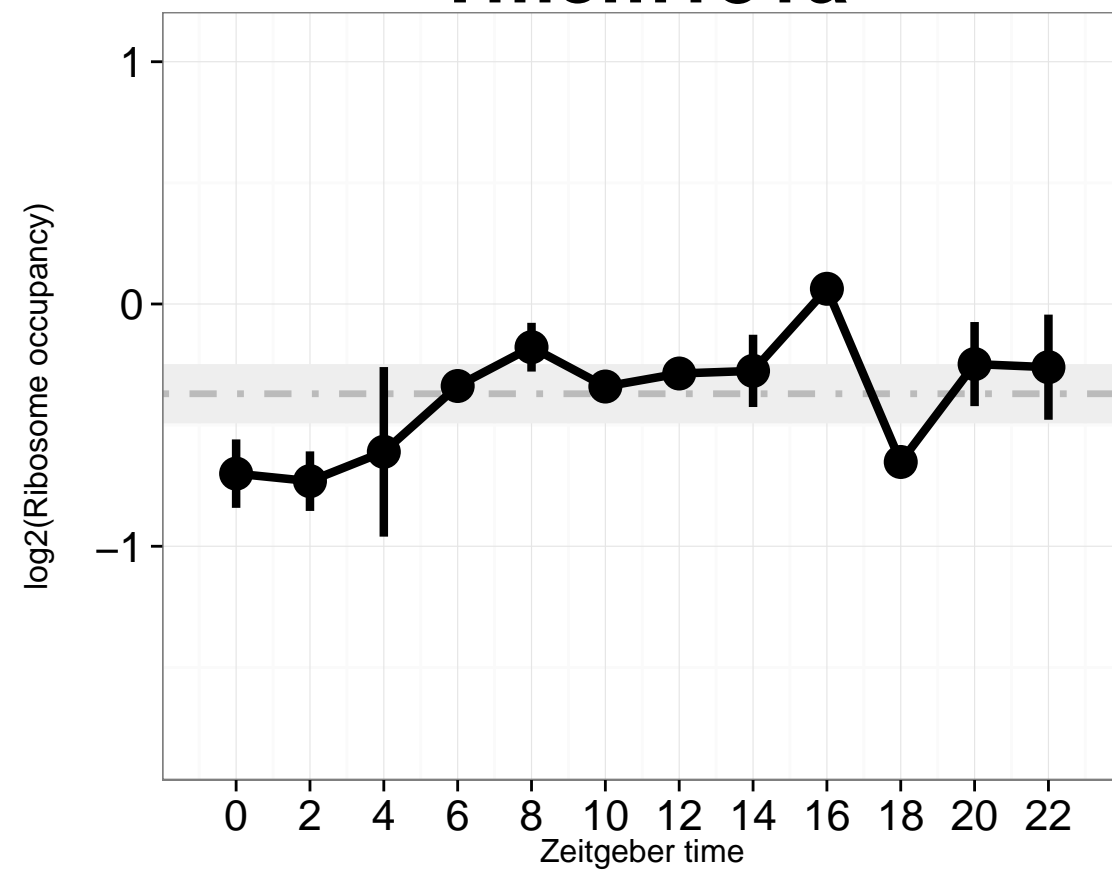

Supplement: Supplementary file 1162 [file 1]

## Pdcd6

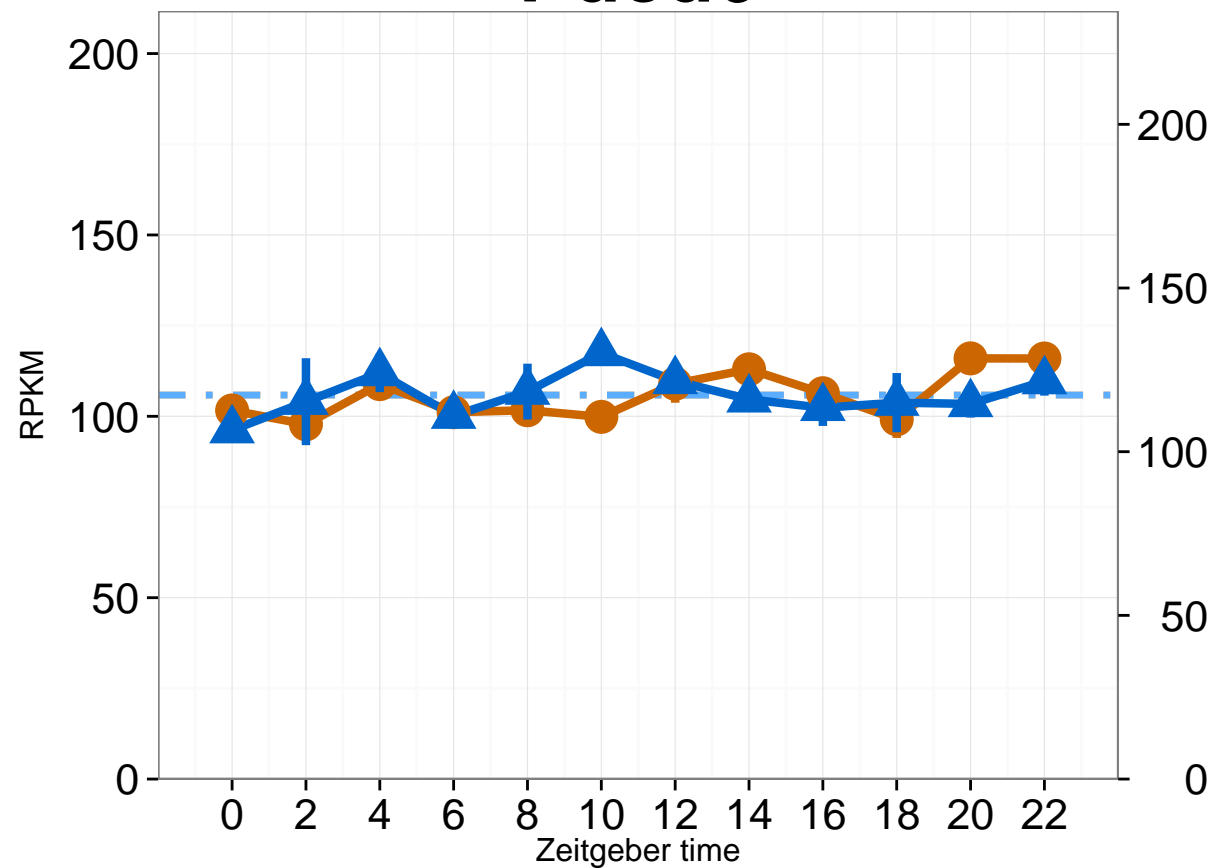

## Pdcd6

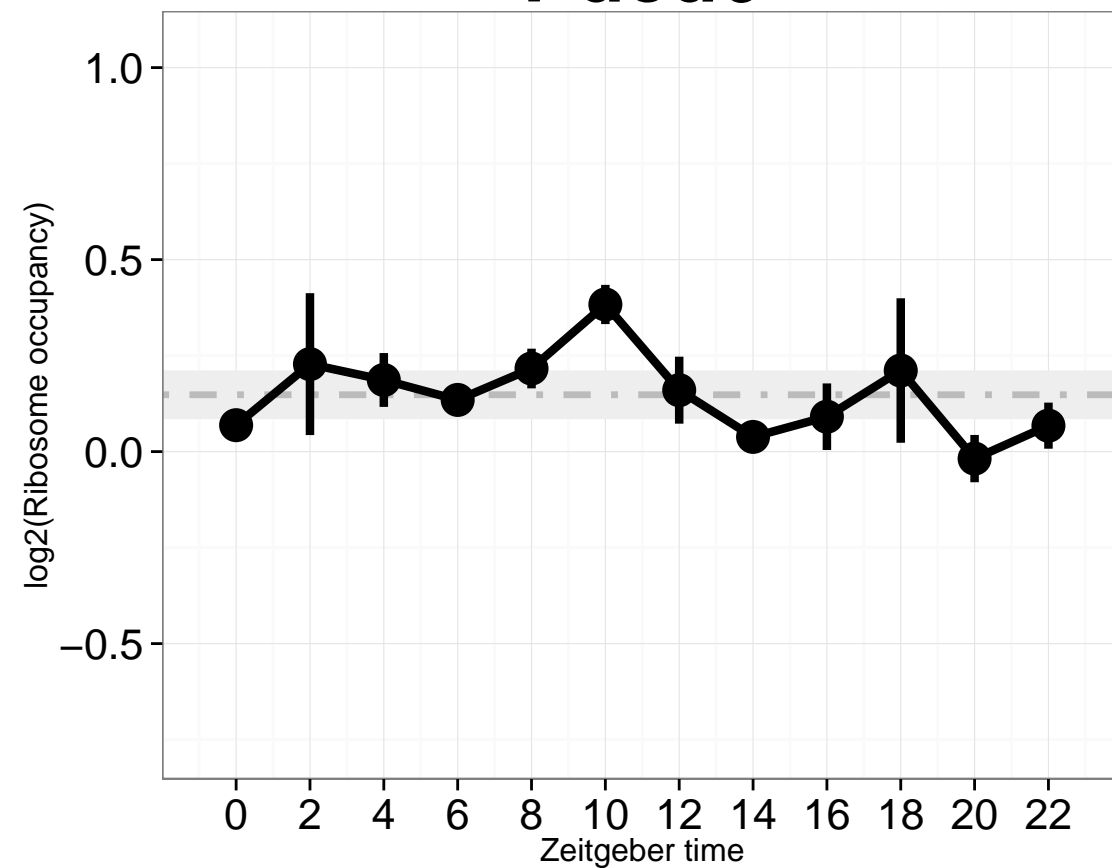

Supplement: Supplementary file 1163 [file 1]

## Hnrnpf

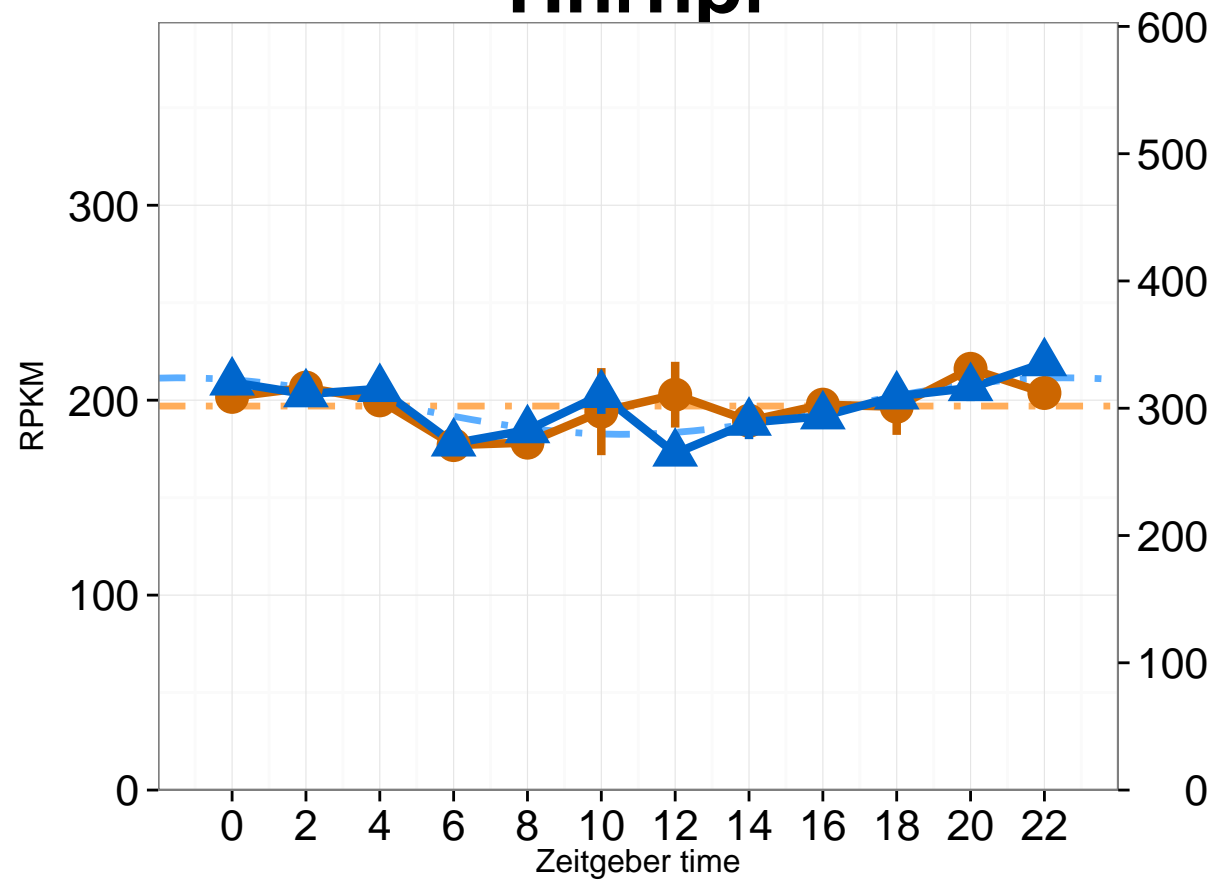

## Hnrnpf

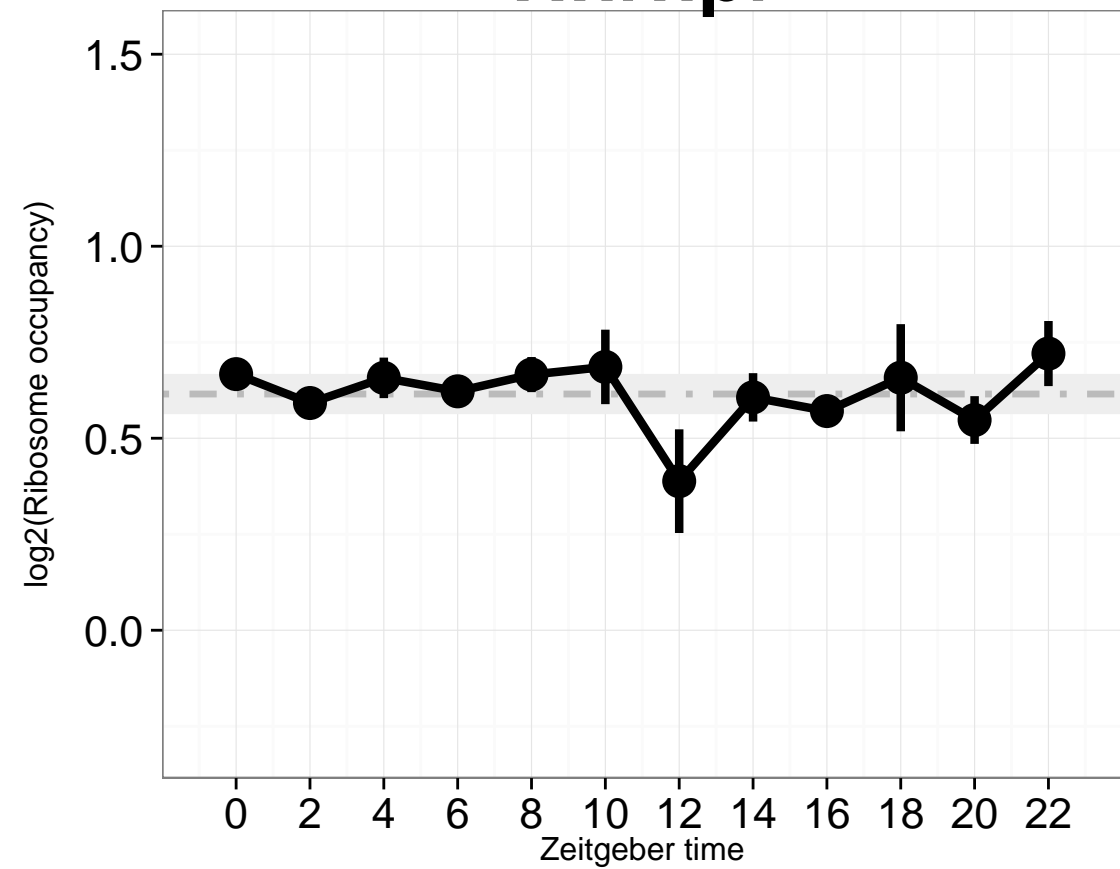

Supplement: Supplementary file 1164 [file 1]

## Zak

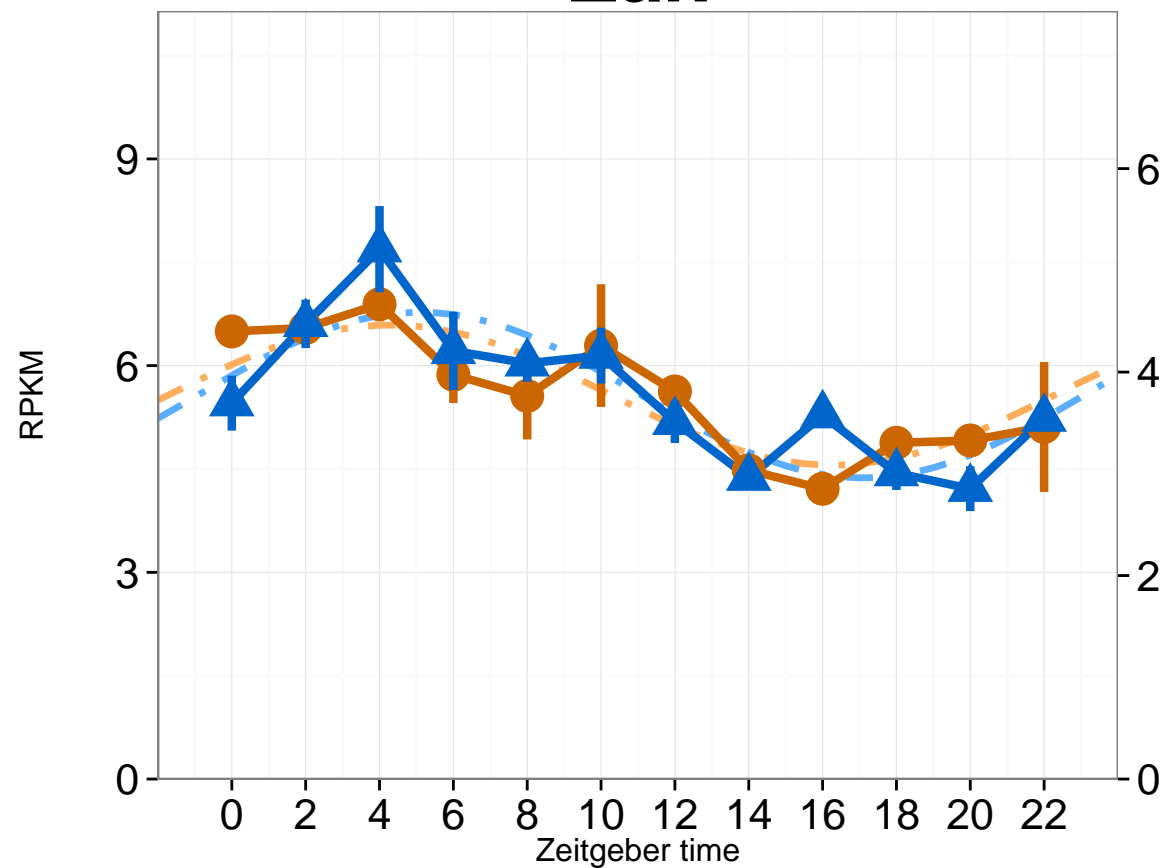

## Zak

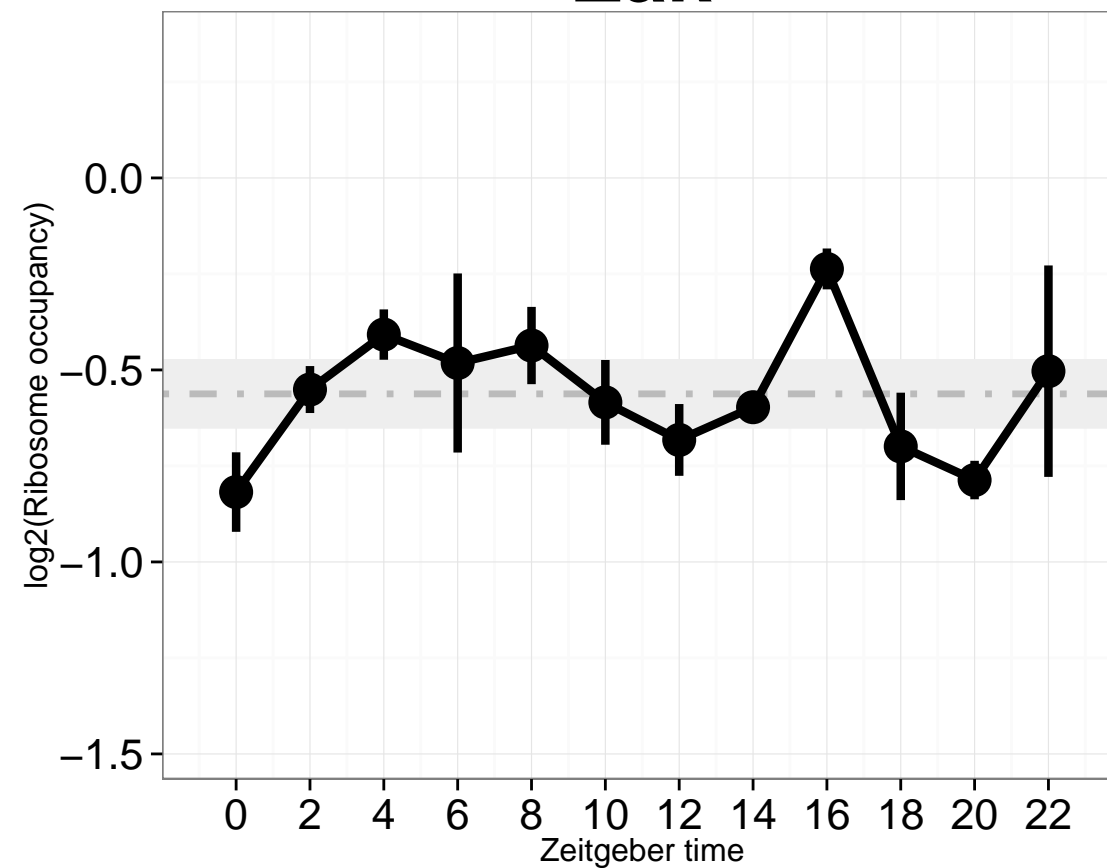

Supplement: Supplementary file 1165 [file 1]

# Asb7

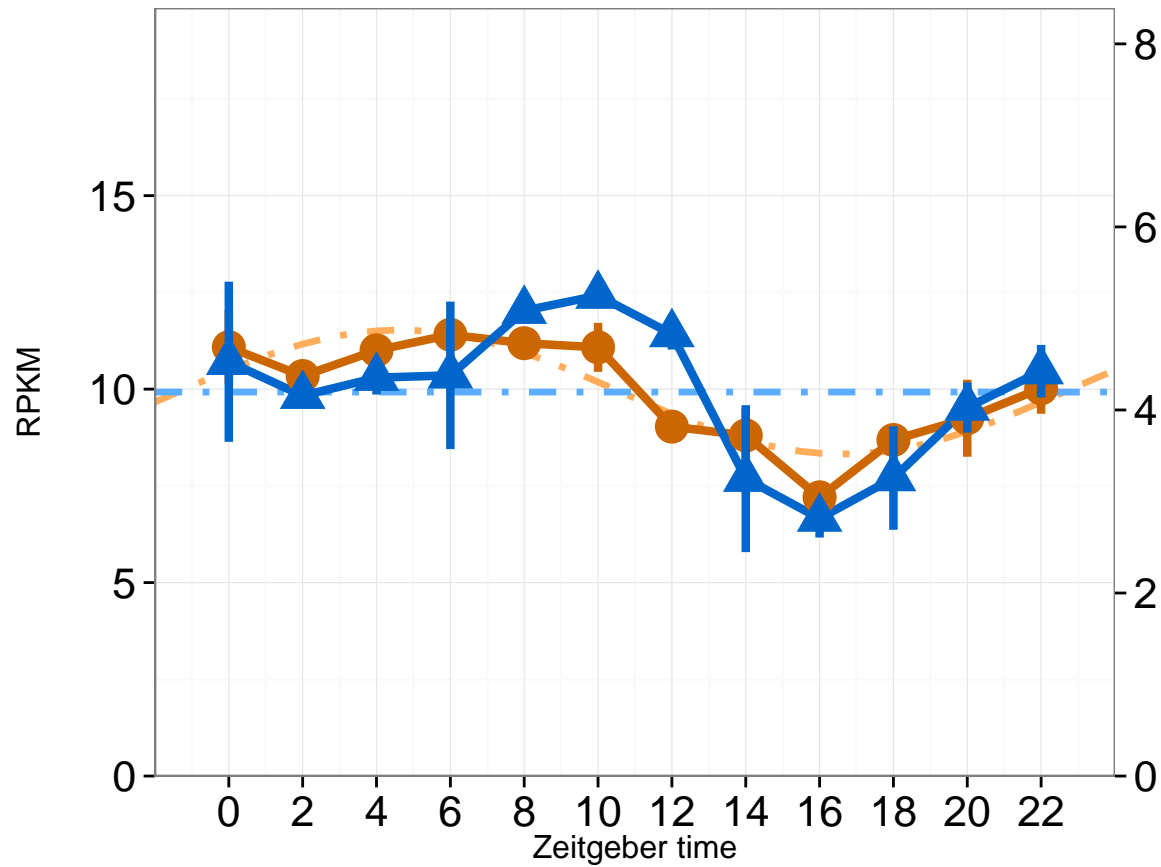

# Asb7

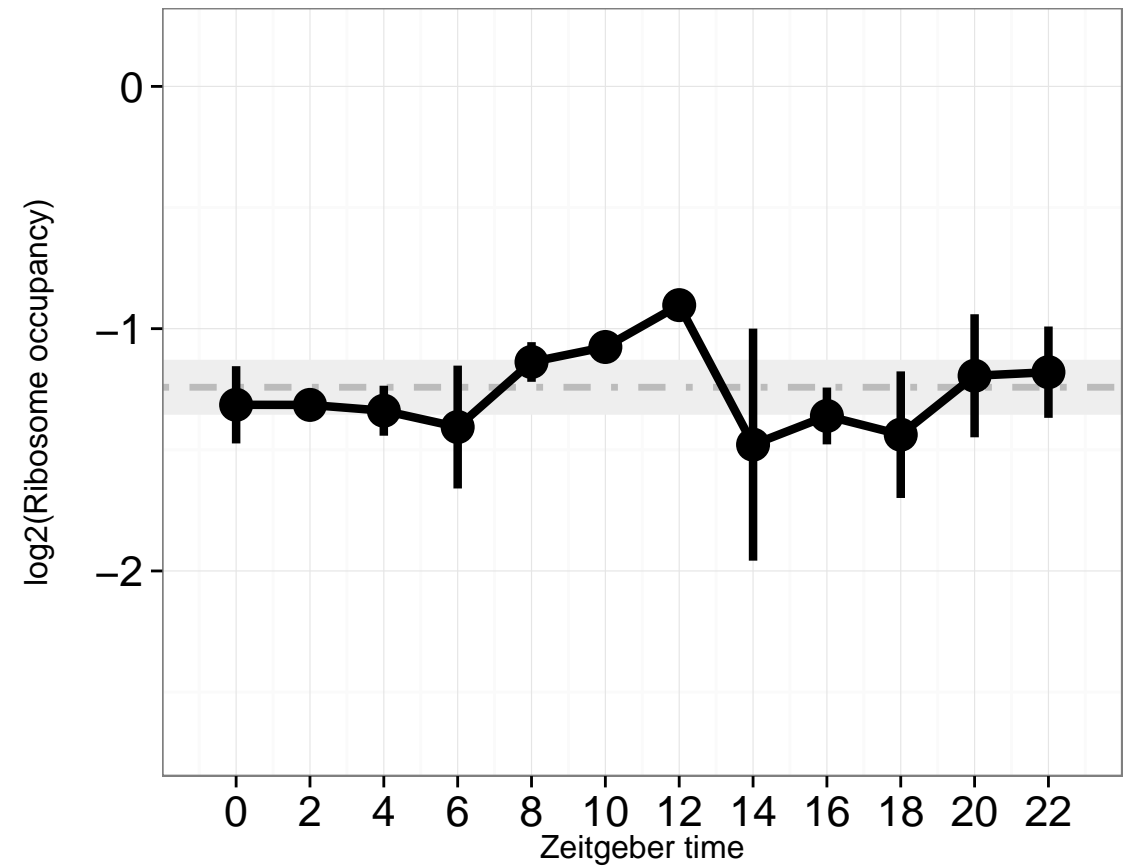

Supplement: Supplementary file 1166 [file 1]

## Cerk

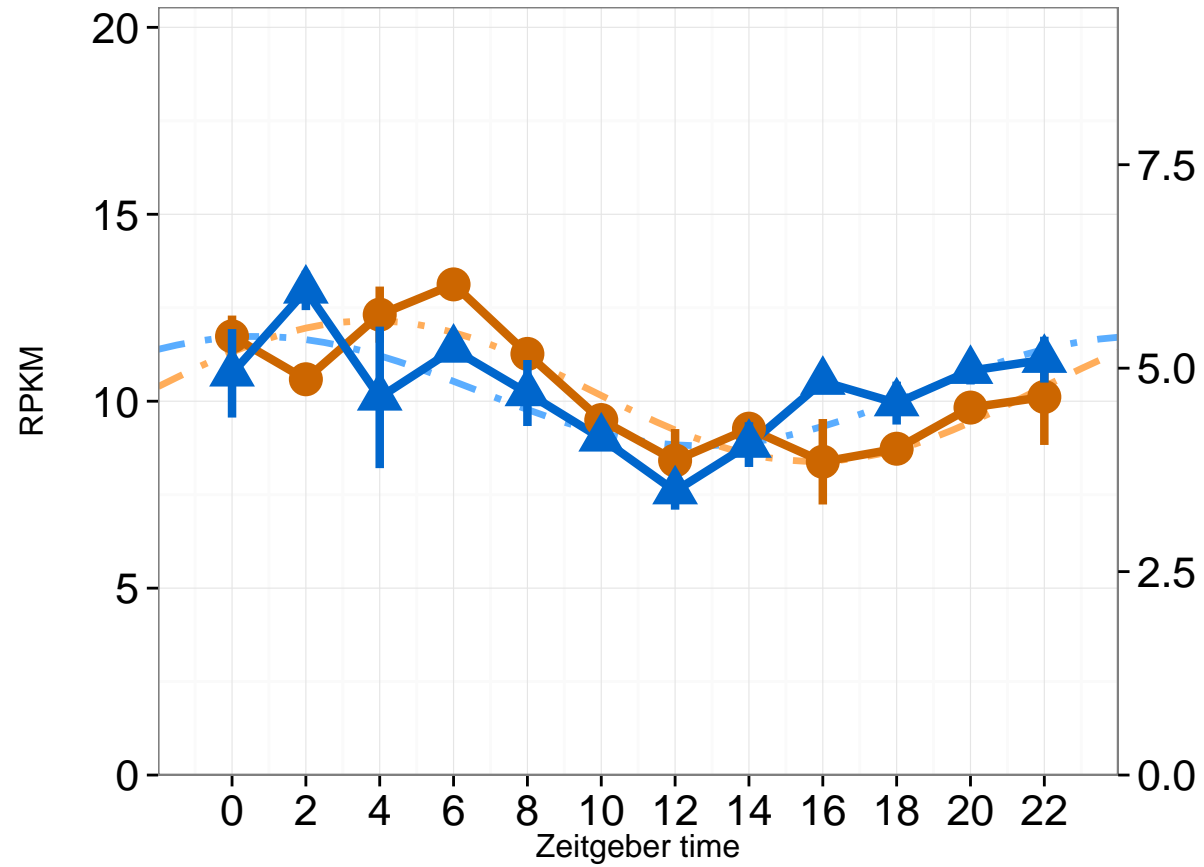

## Cerk

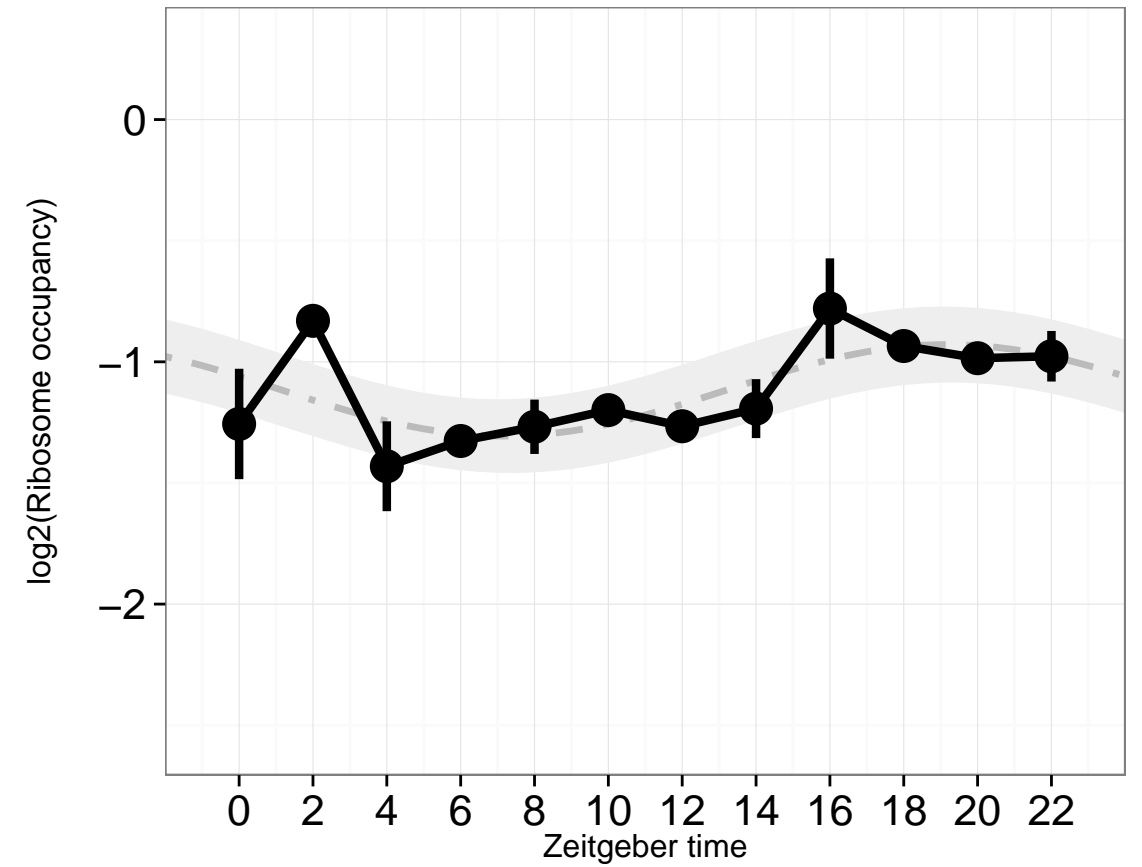

Supplement: Supplementary file 1167 [file 1]

# Supt20

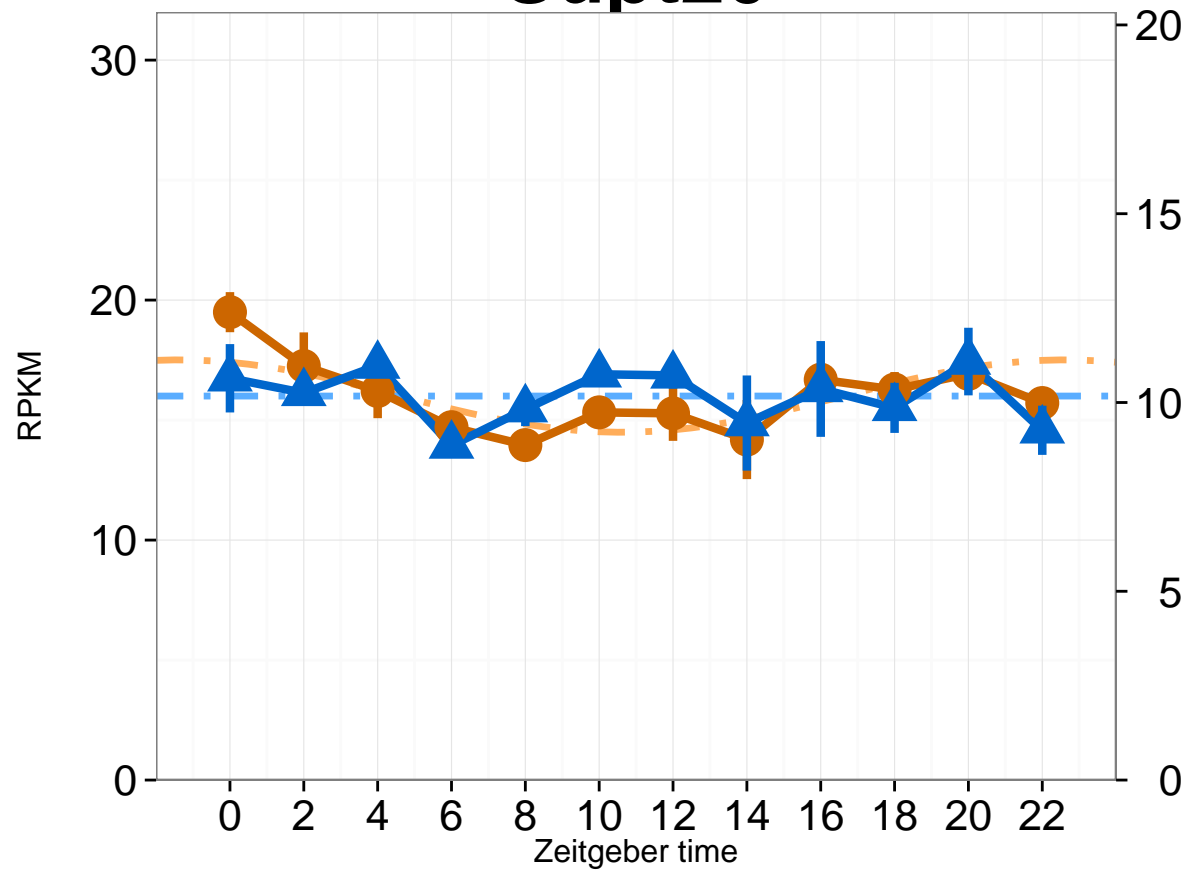

# Supt20

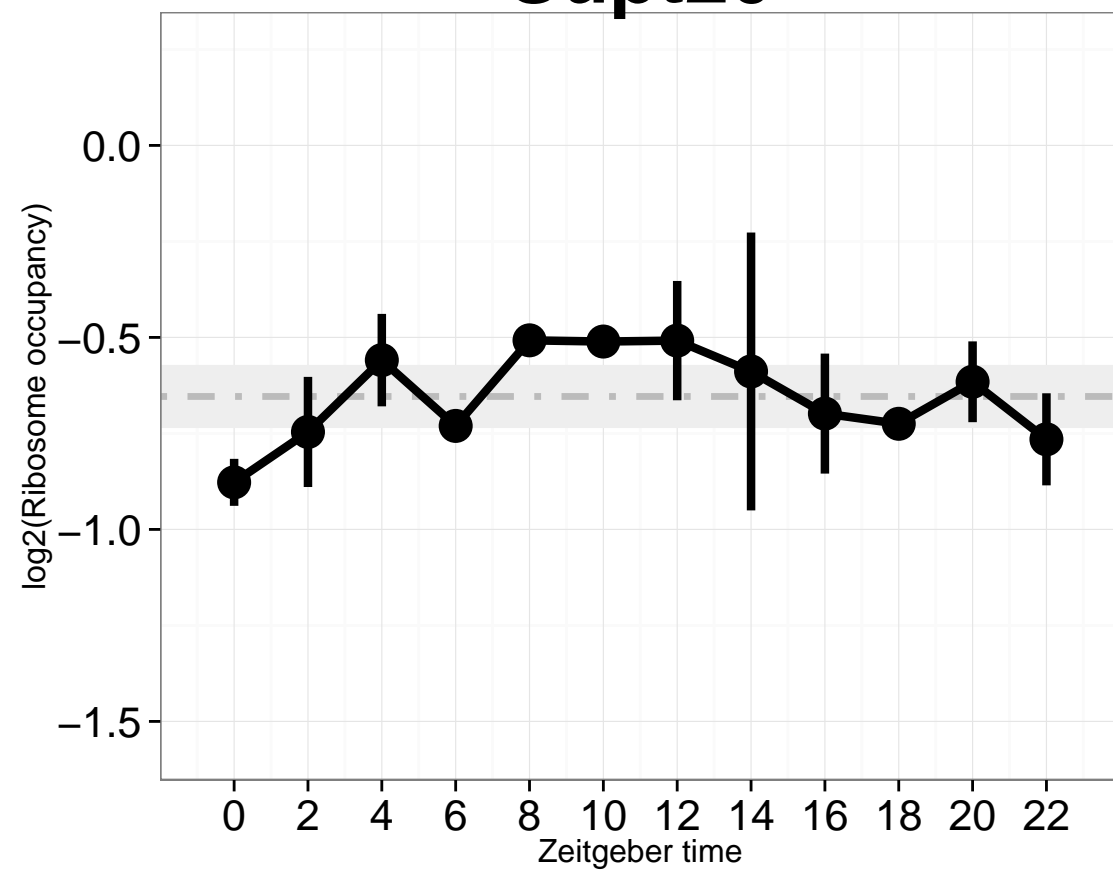

Supplement: Supplementary file 1168 [file 1]

## Arhgef2

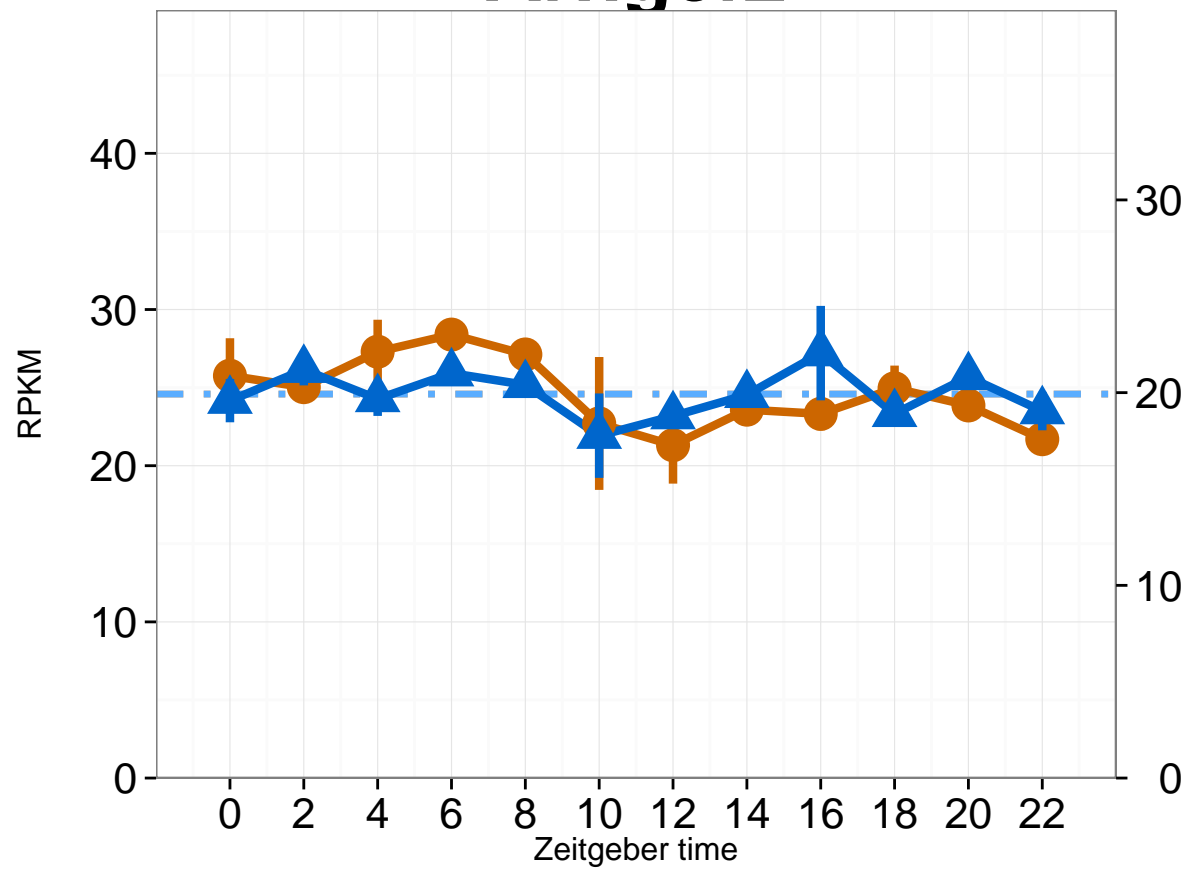

## Arhgef2

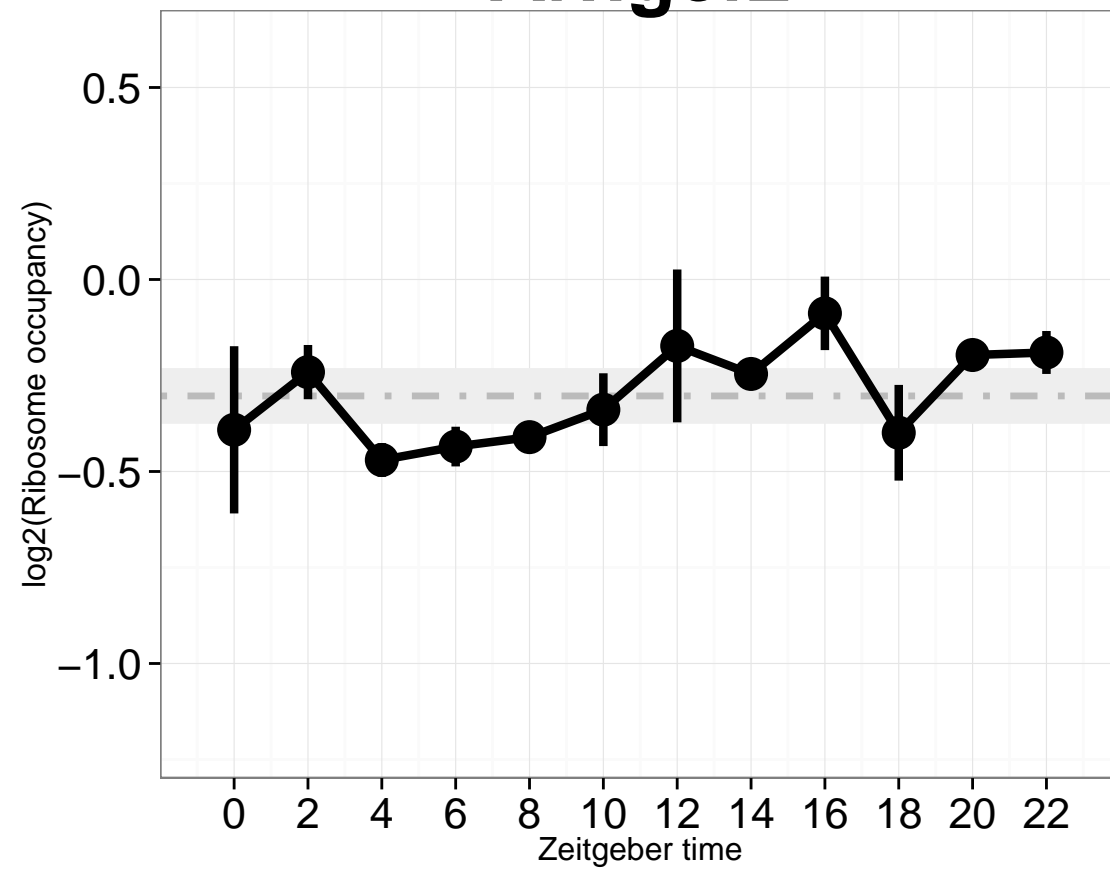

Supplement: Supplementary file 1169 [file 1]

## Ccdc50

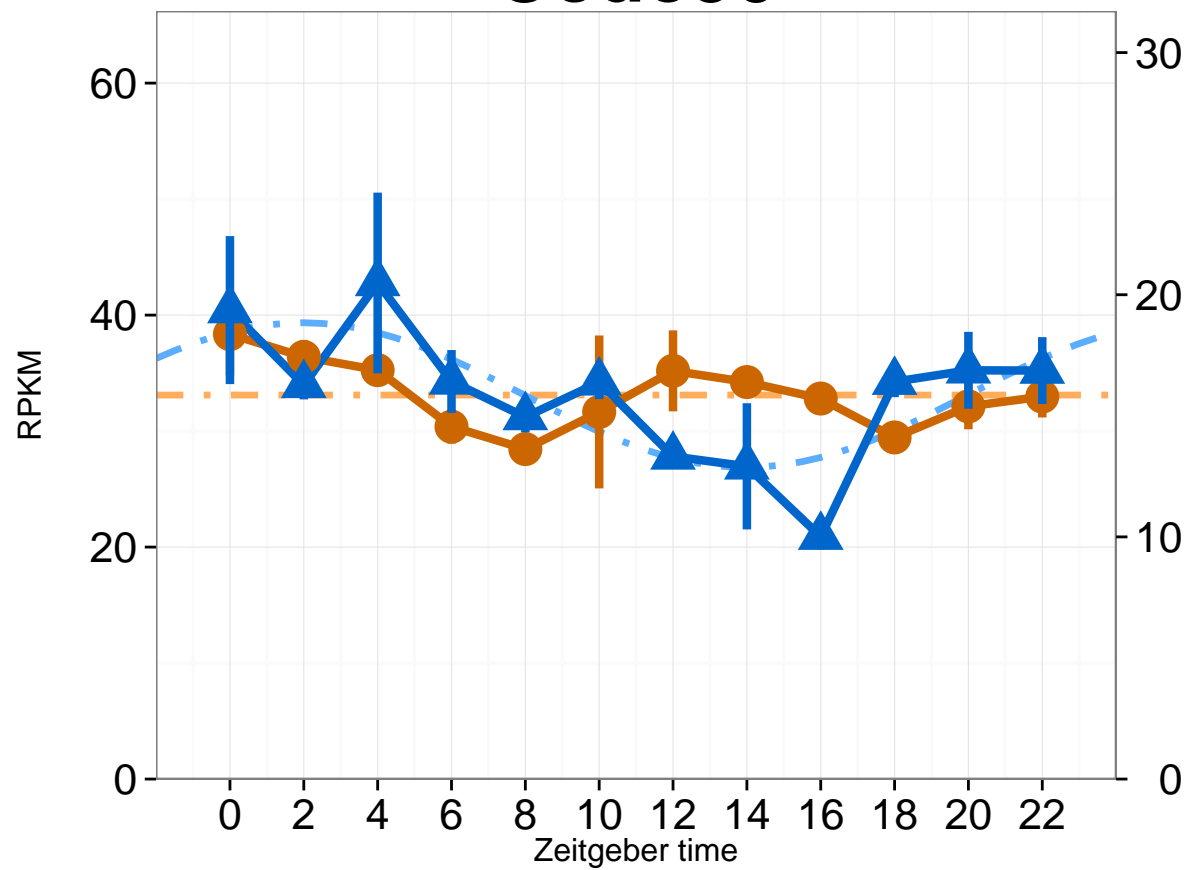

## Ccdc50

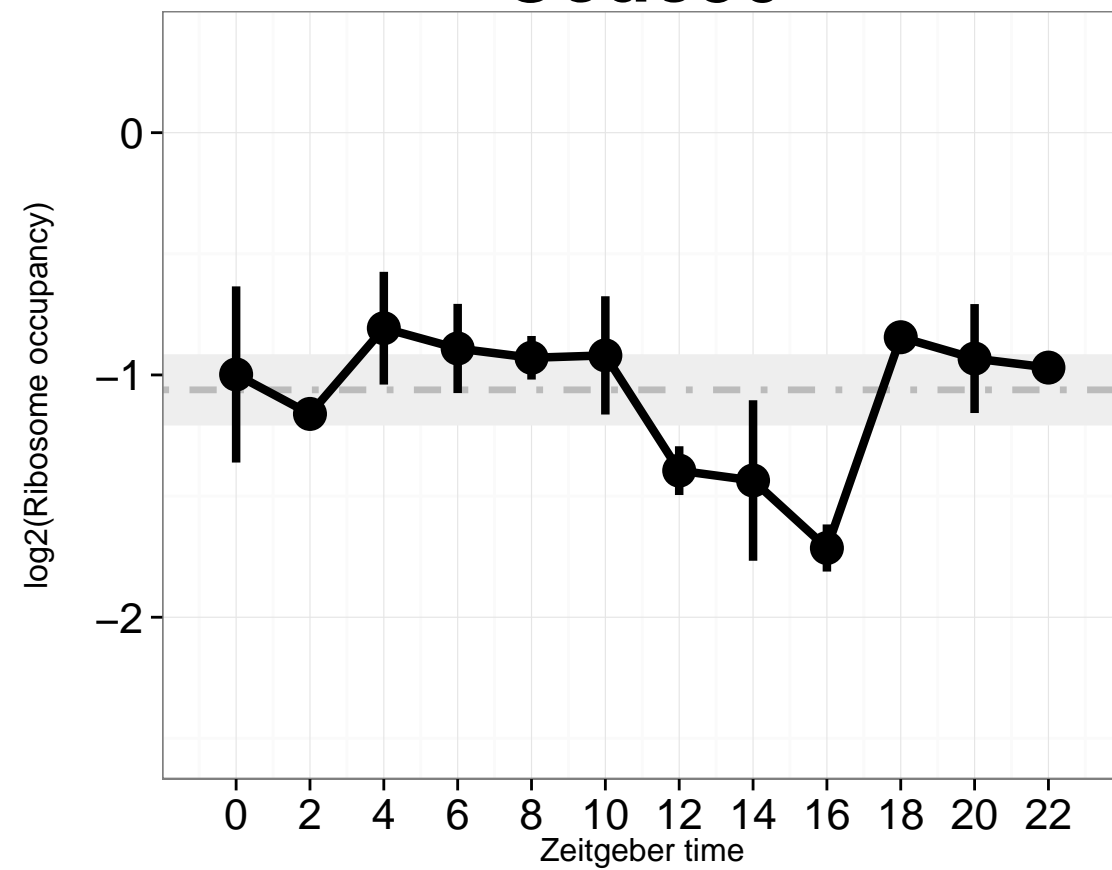

Supplement: Supplementary file 1170 [file 1]

## Snx27

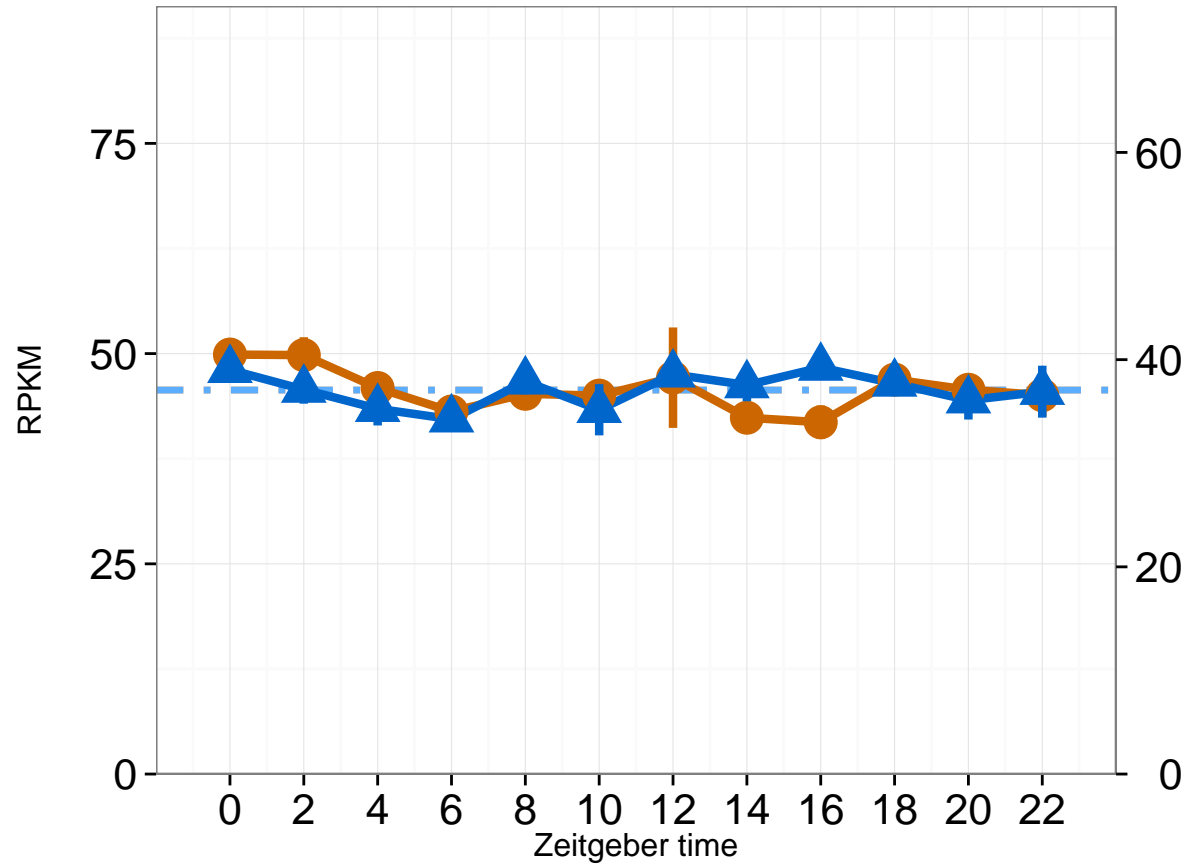

## Snx27

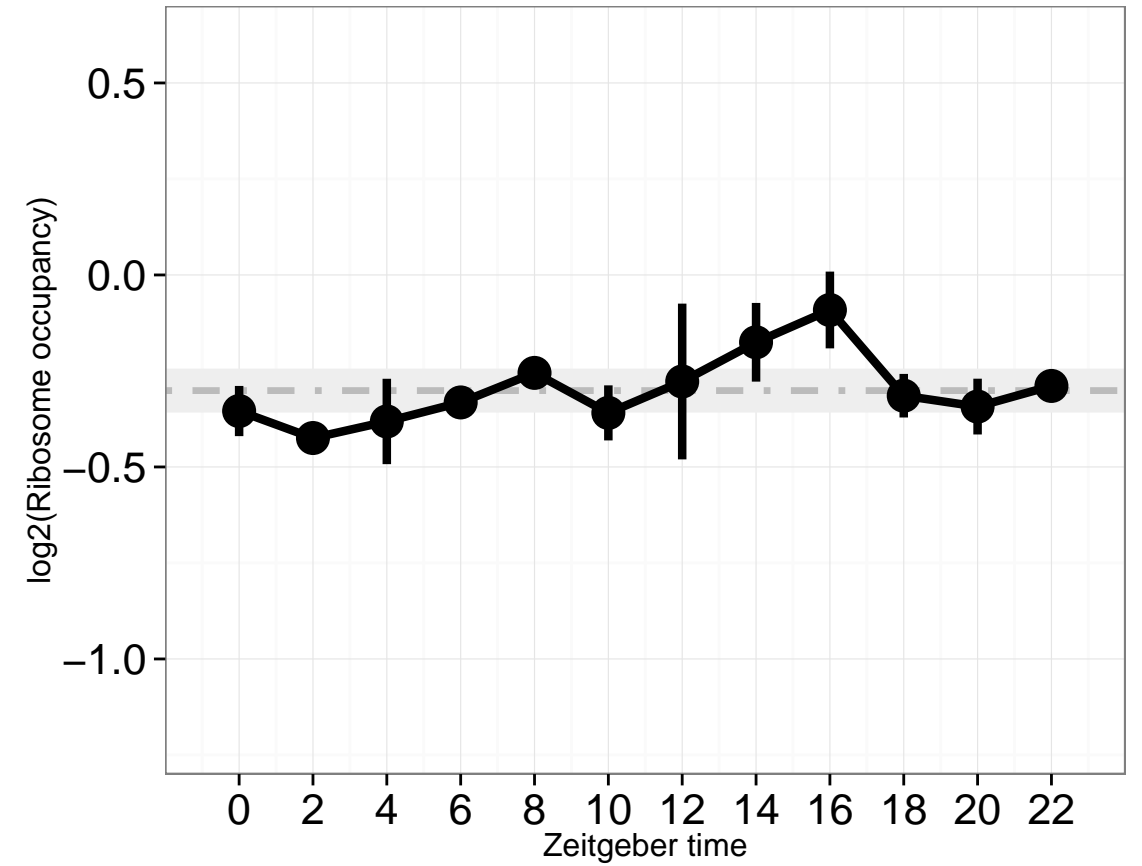

Supplement: Supplementary file 1171 [file 1]

## Slc1a4

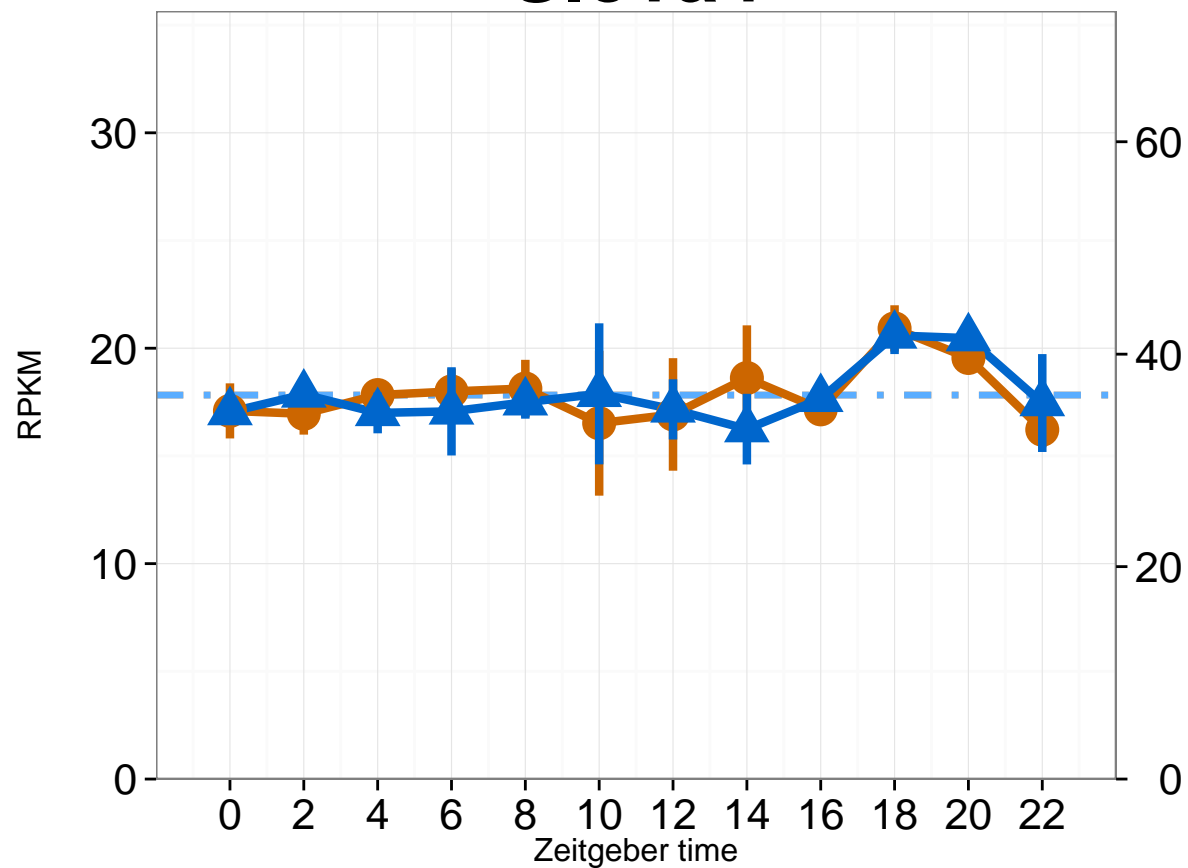

## Slc1a4

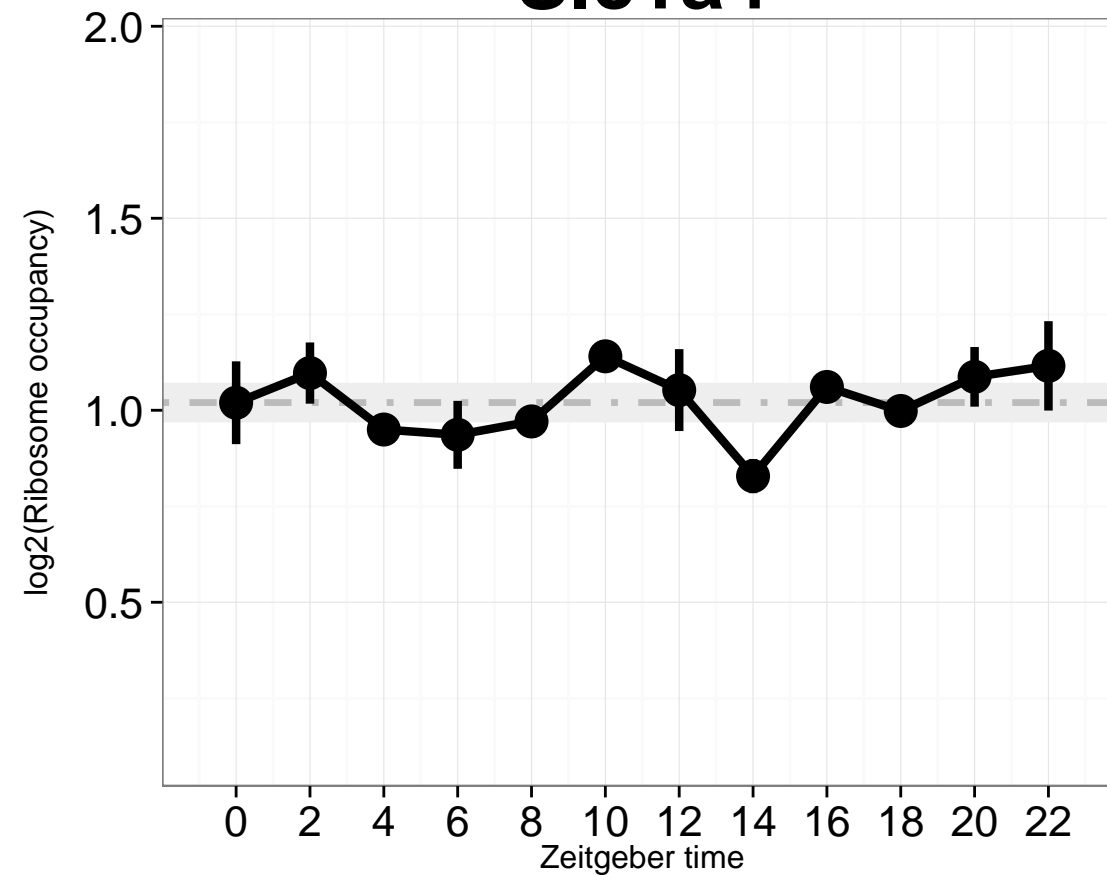

Supplement: Supplementary file 1172 [file 1]

**Tnfrsf11b TR**

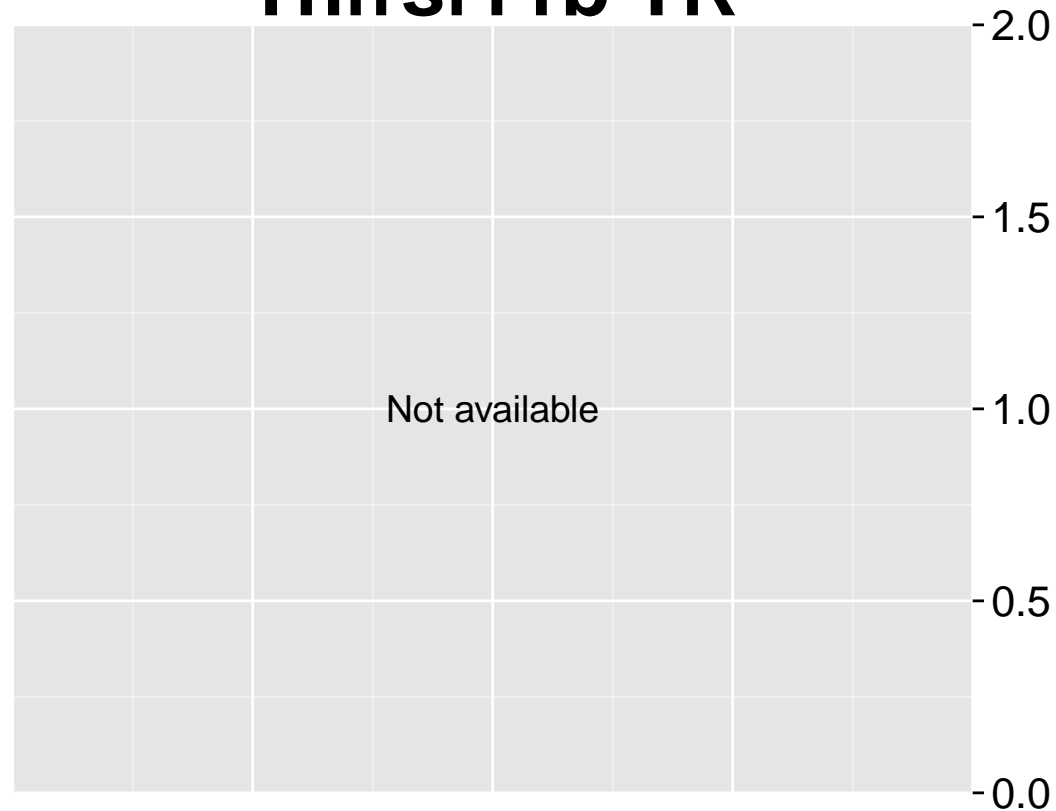

**Tnfrsf11b log2(Ribosome occupancy)**

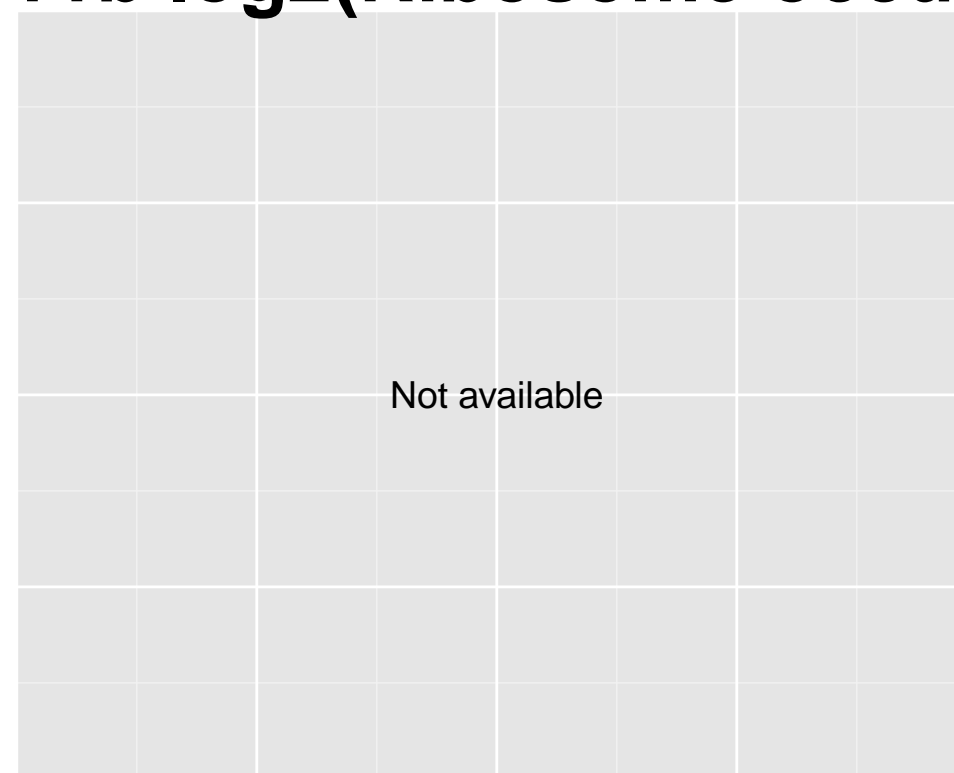

Supplement: Supplementary file 1173 [file 1]

# Rexo1

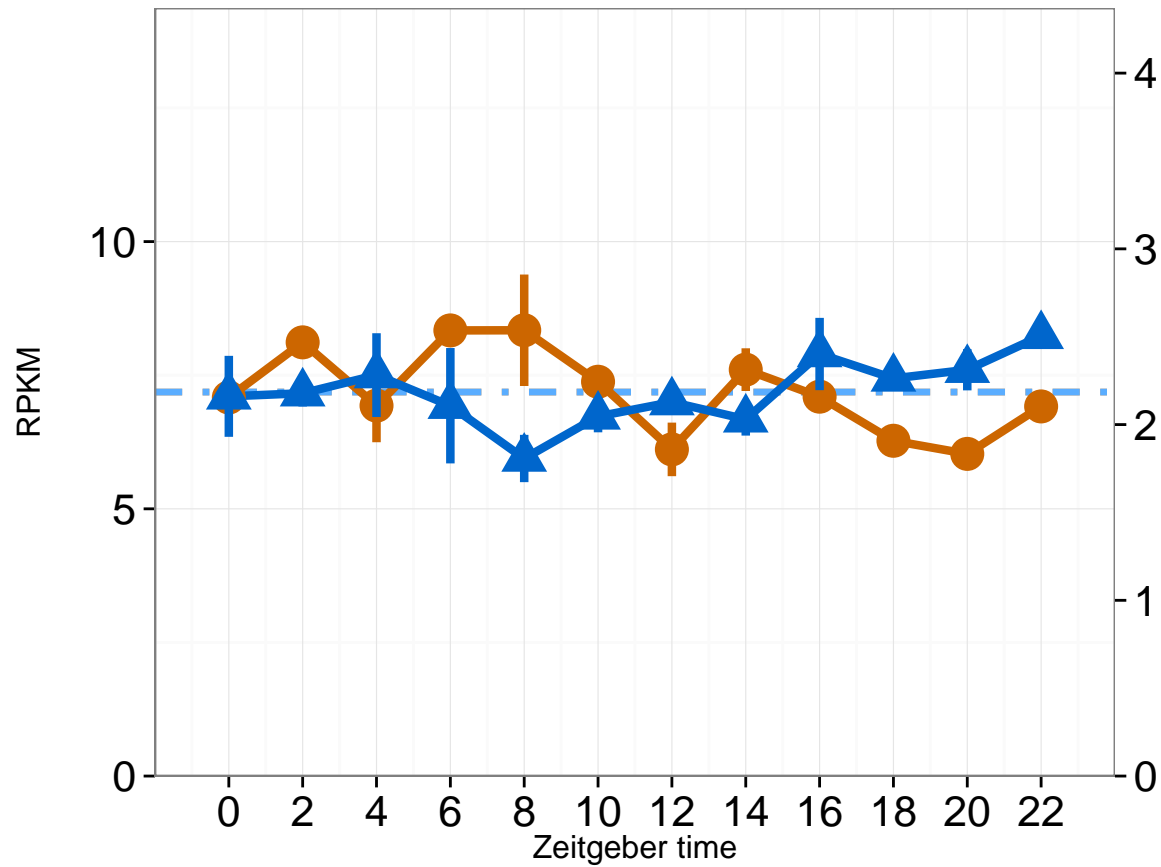

# Rexo1

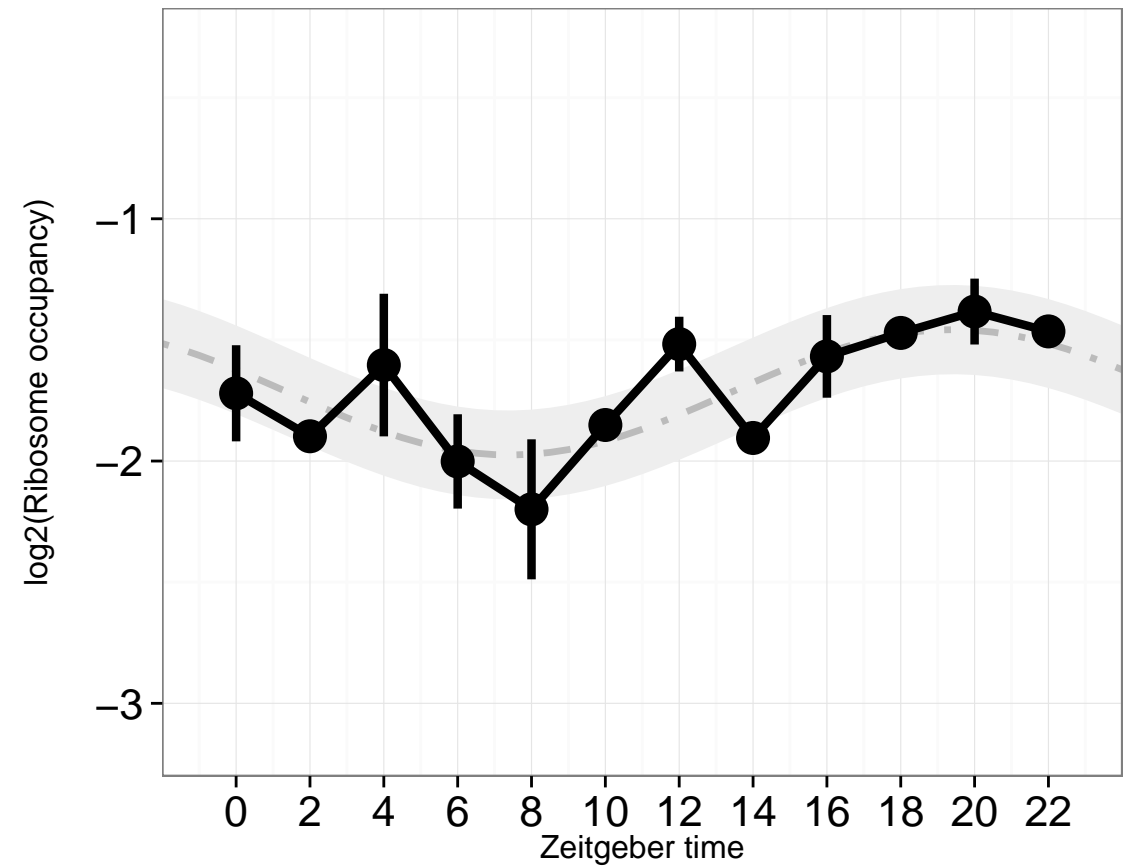

Supplement: Supplementary file 1174 [file 1]

## Msln

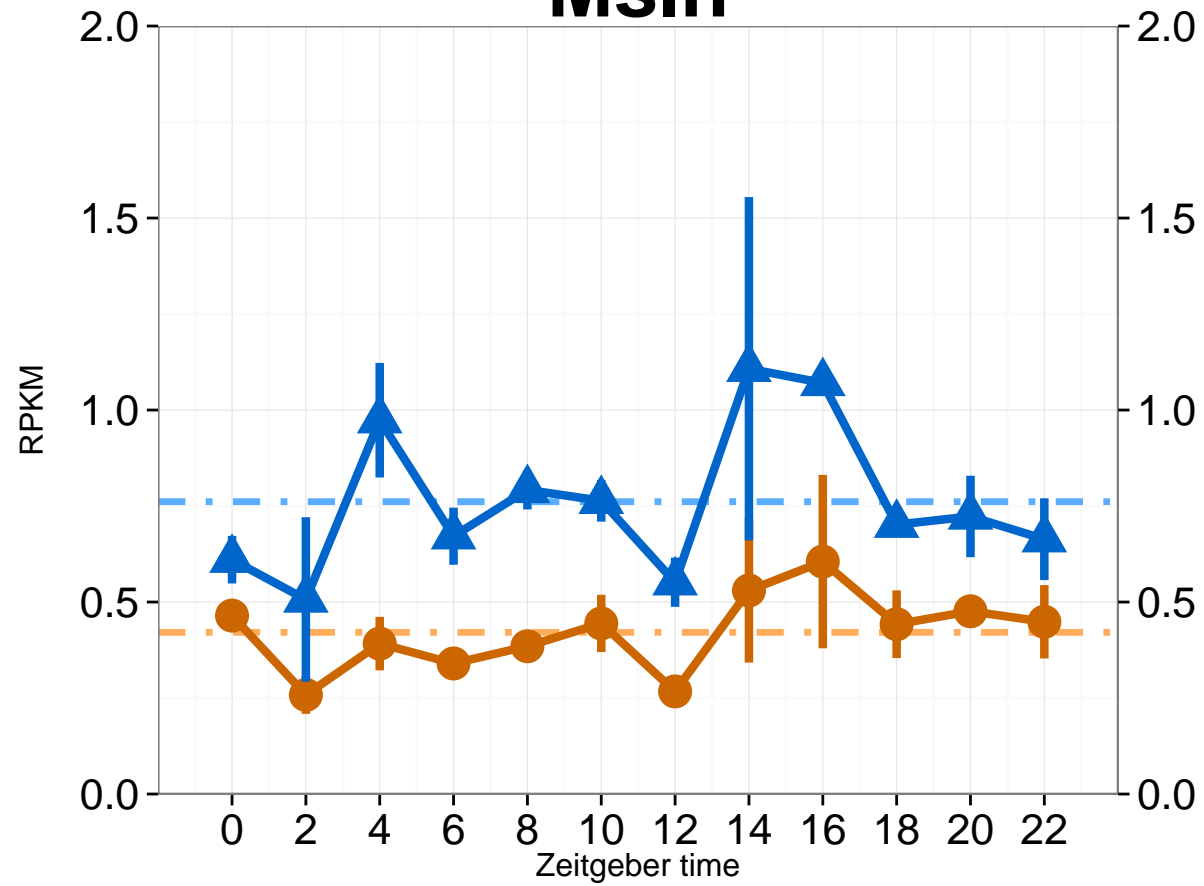

## Msln

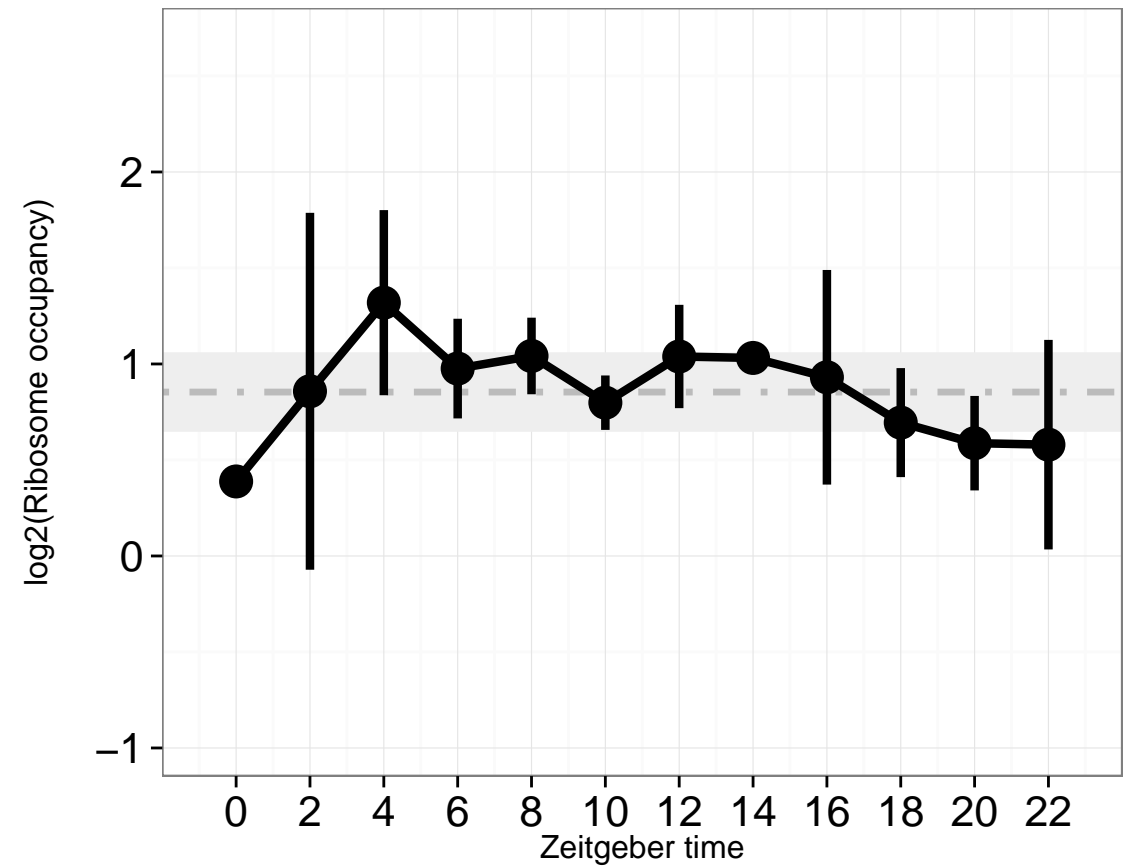

Supplement: Supplementary file 1175 [file 1]

## Lbr

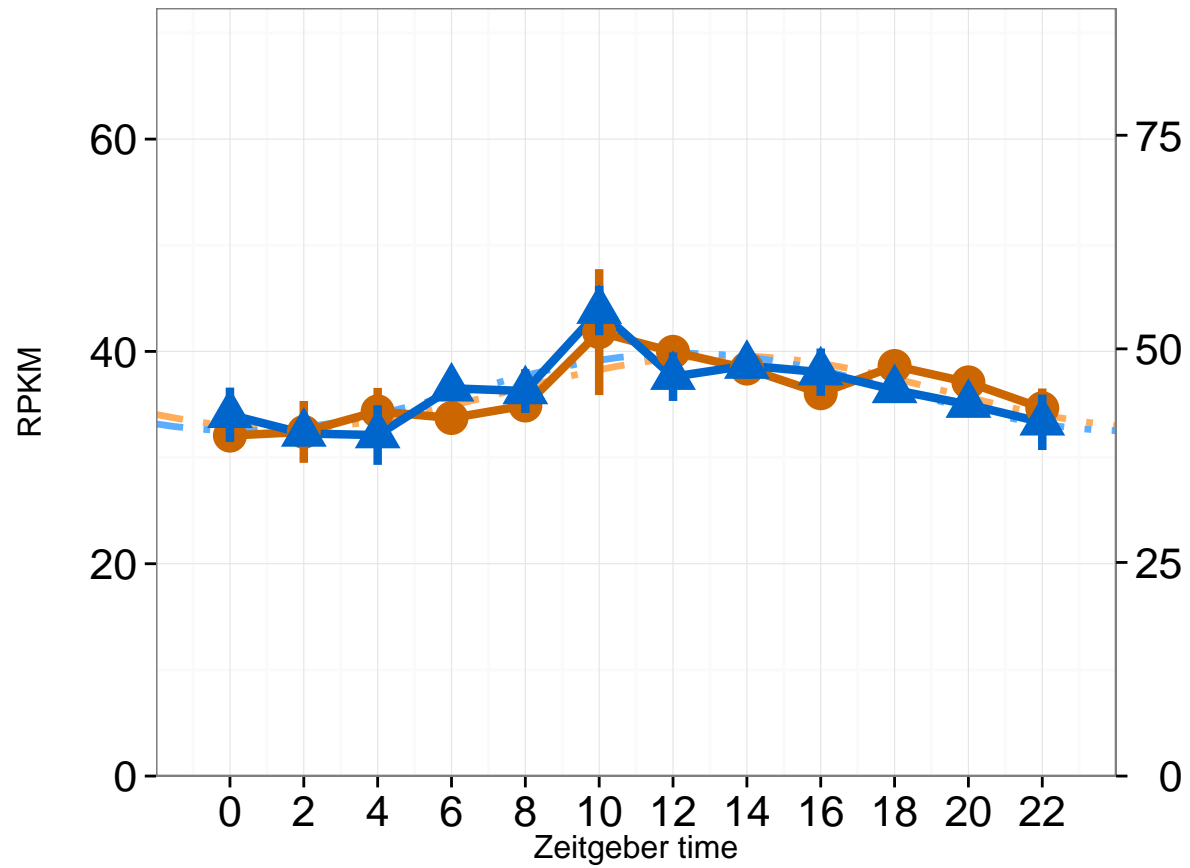

## Lbr

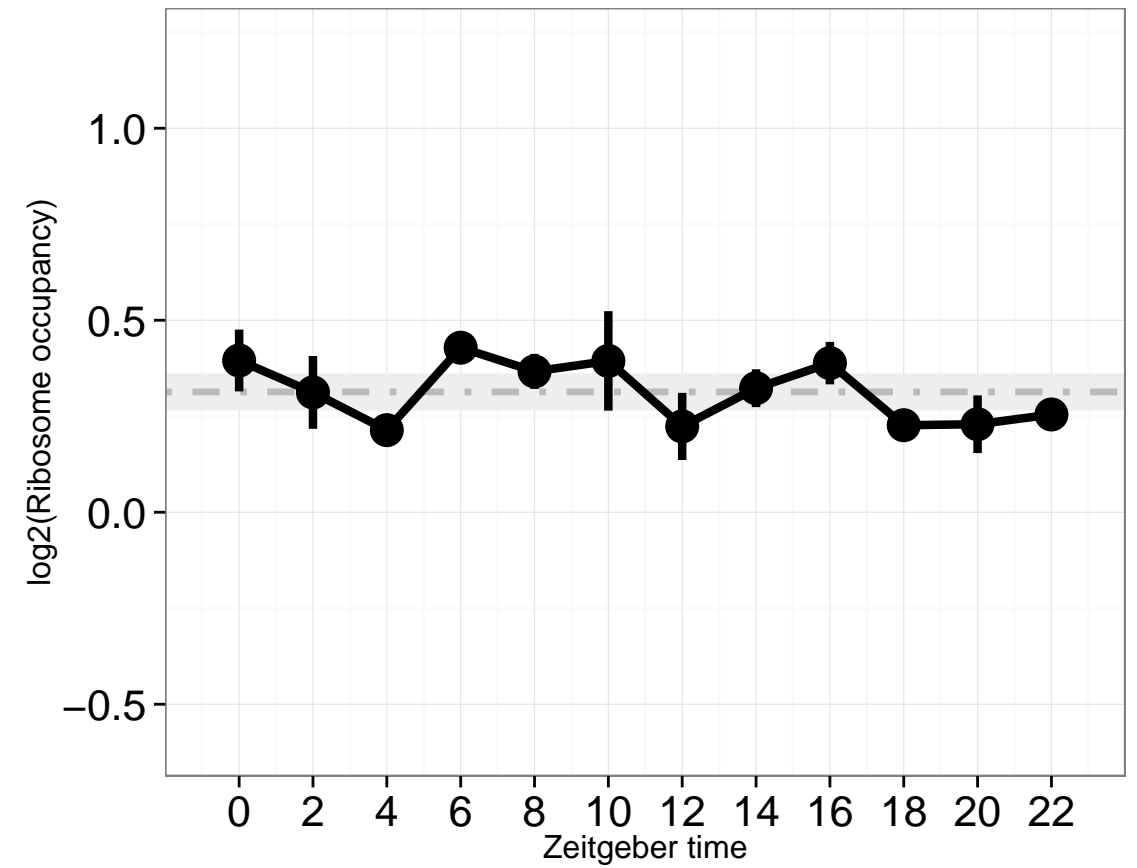

Supplement: Supplementary file 1176 [file 1]

# Snrnp25

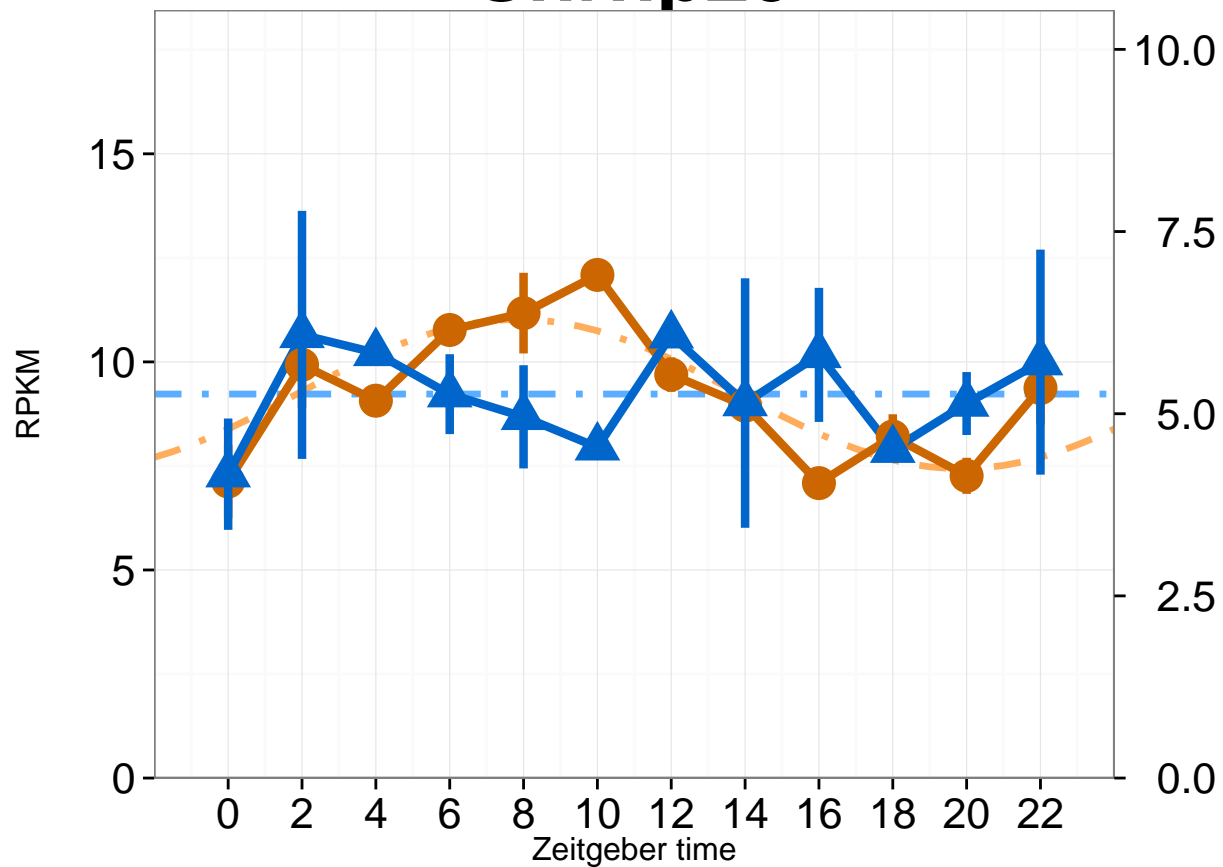

# Snrnp25

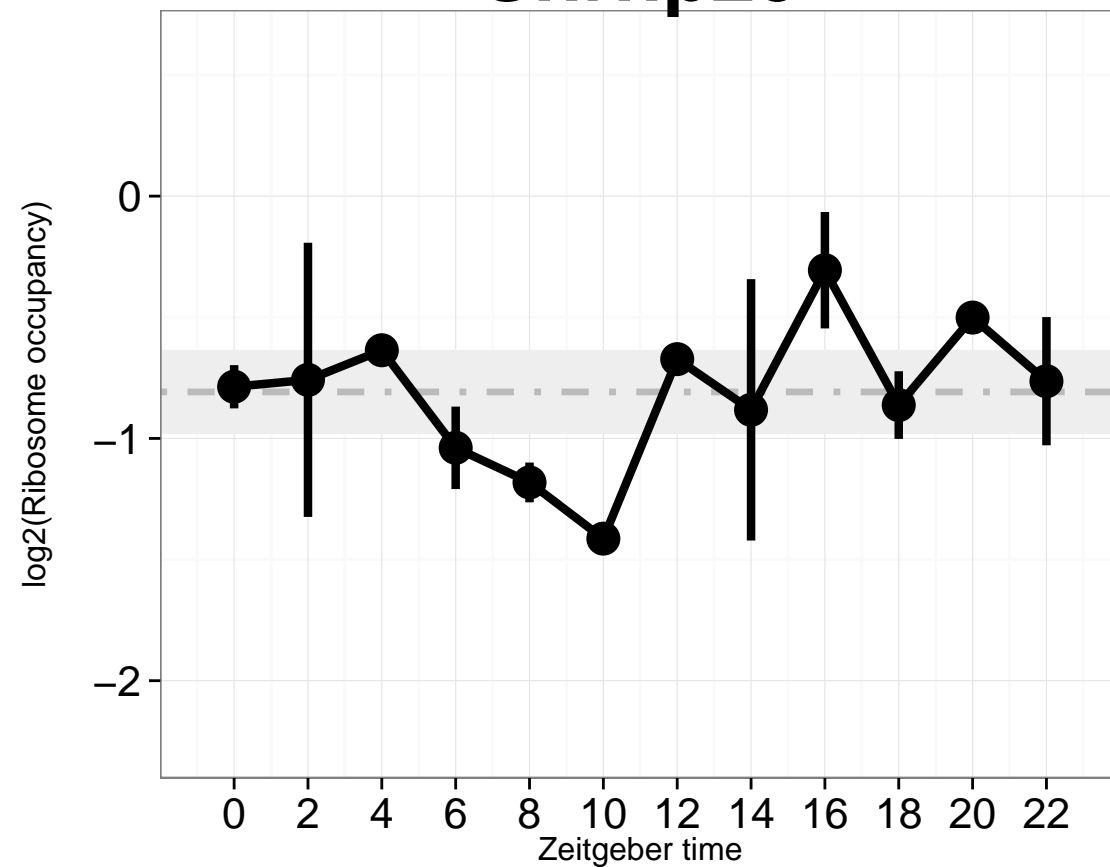

Supplement: Supplementary file 1177 [file 1]

# Arhgap12

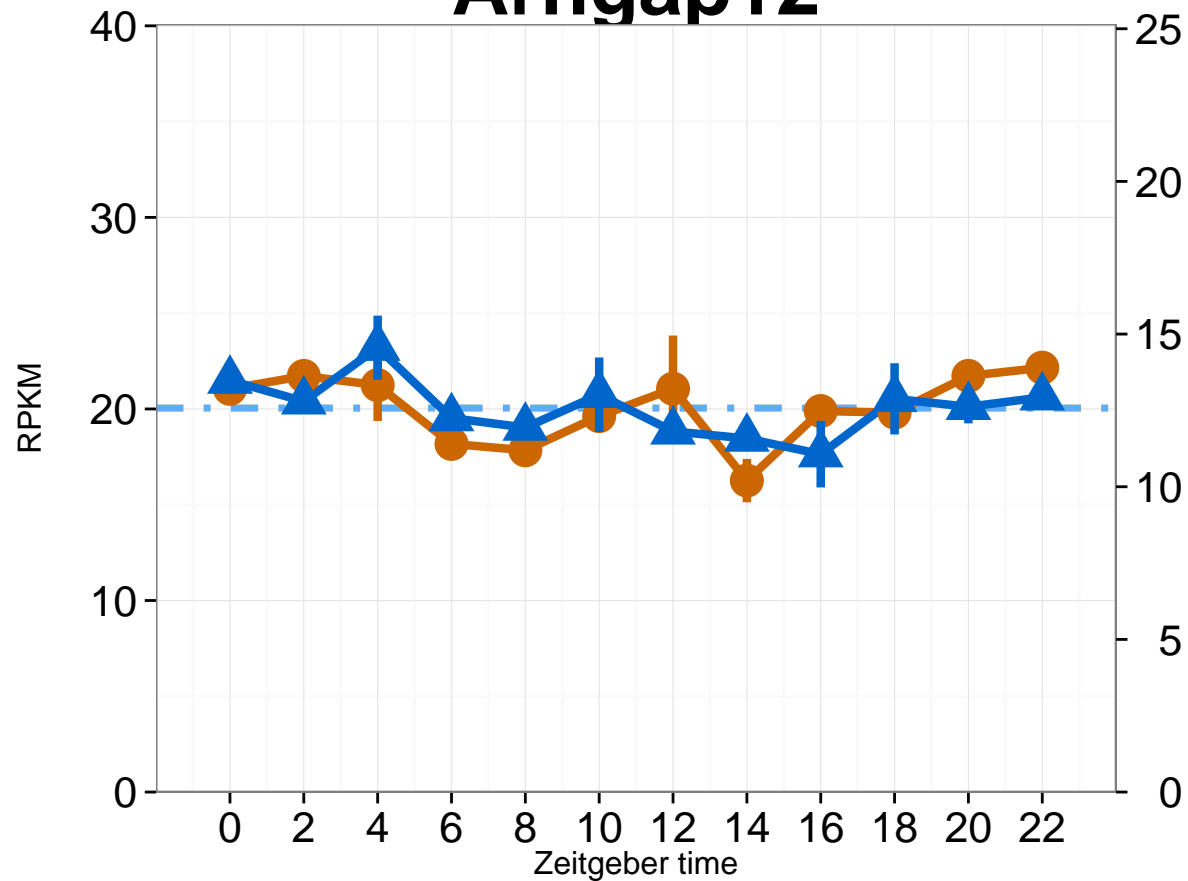

# Arhgap12

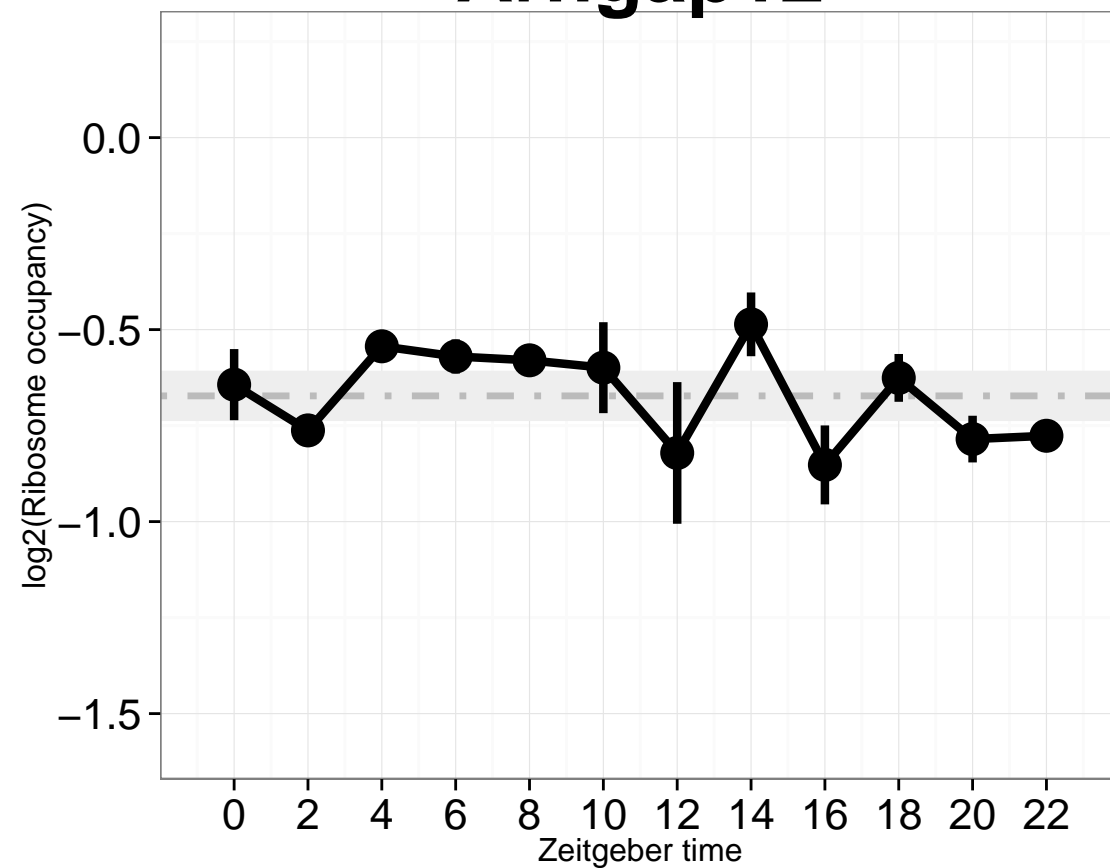

Supplement: Supplementary file 1178 [file 1]

## Pcx

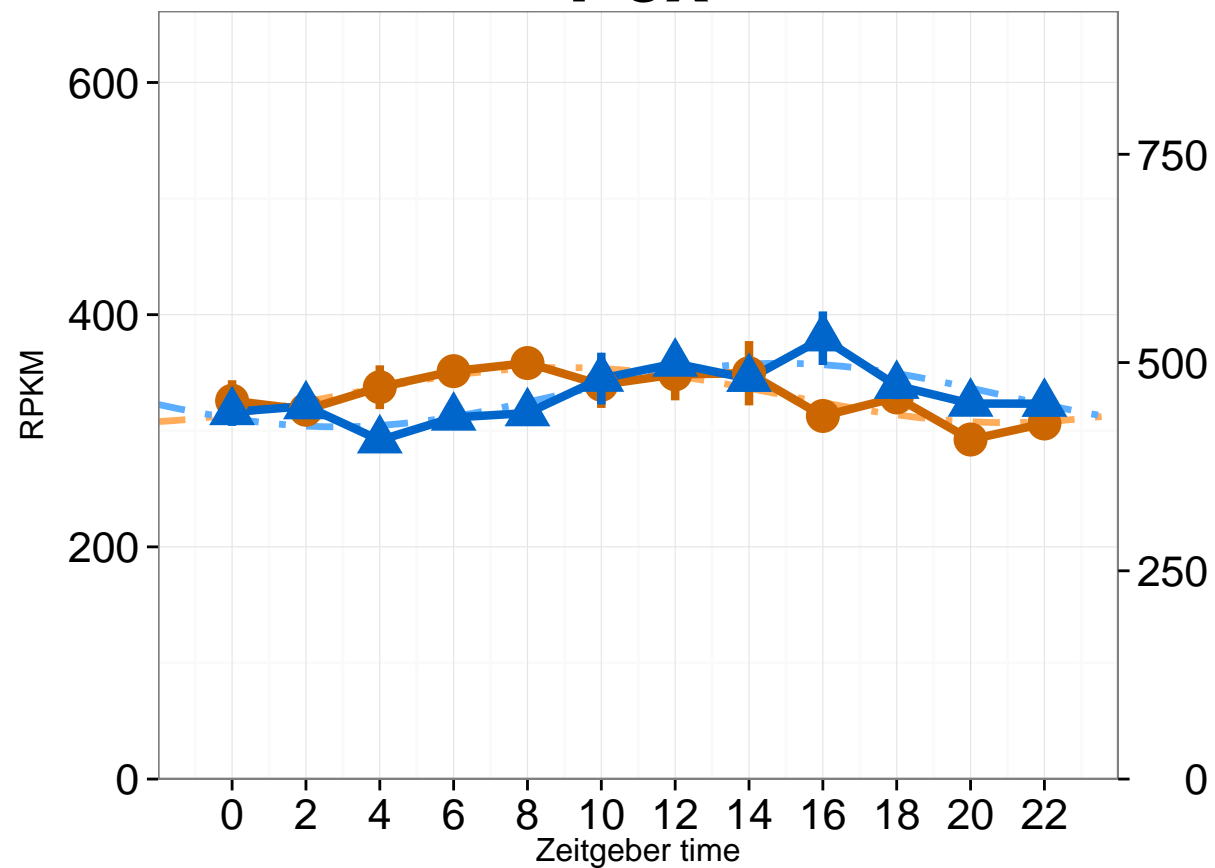

## Pcx

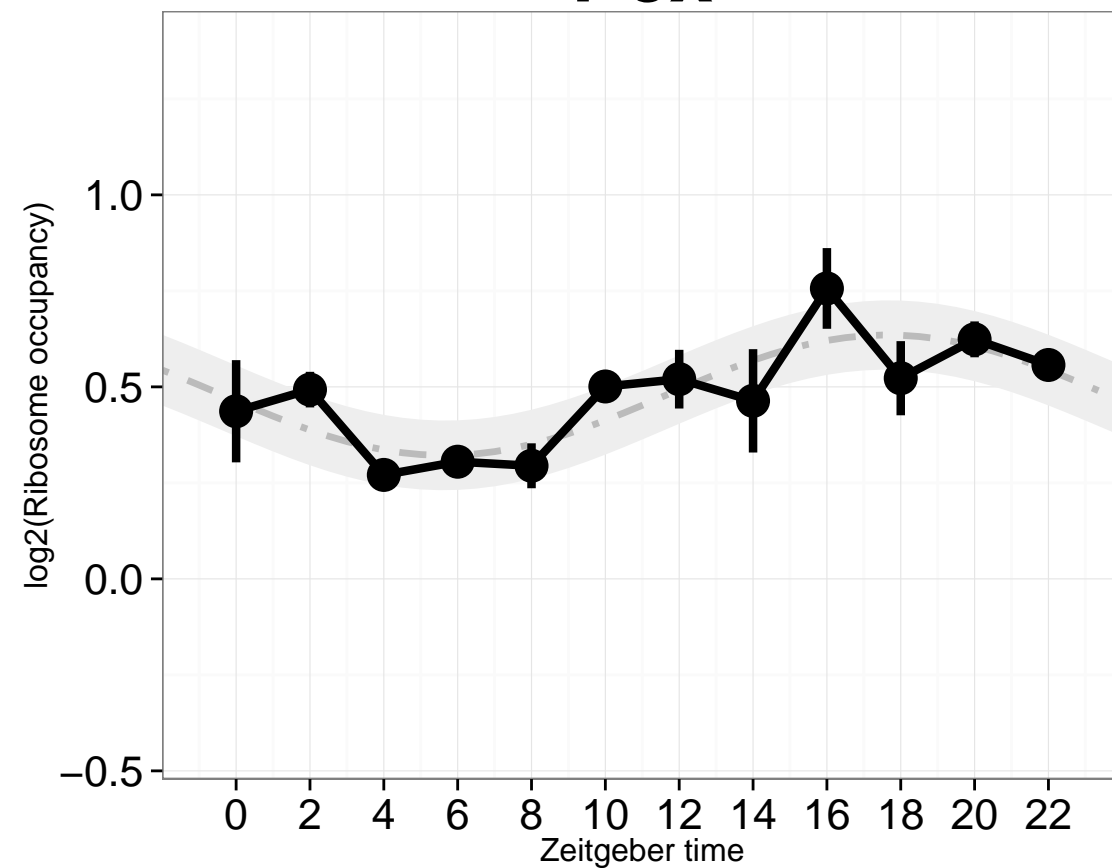

Supplement: Supplementary file 1179 [file 1]

## Ublcp1

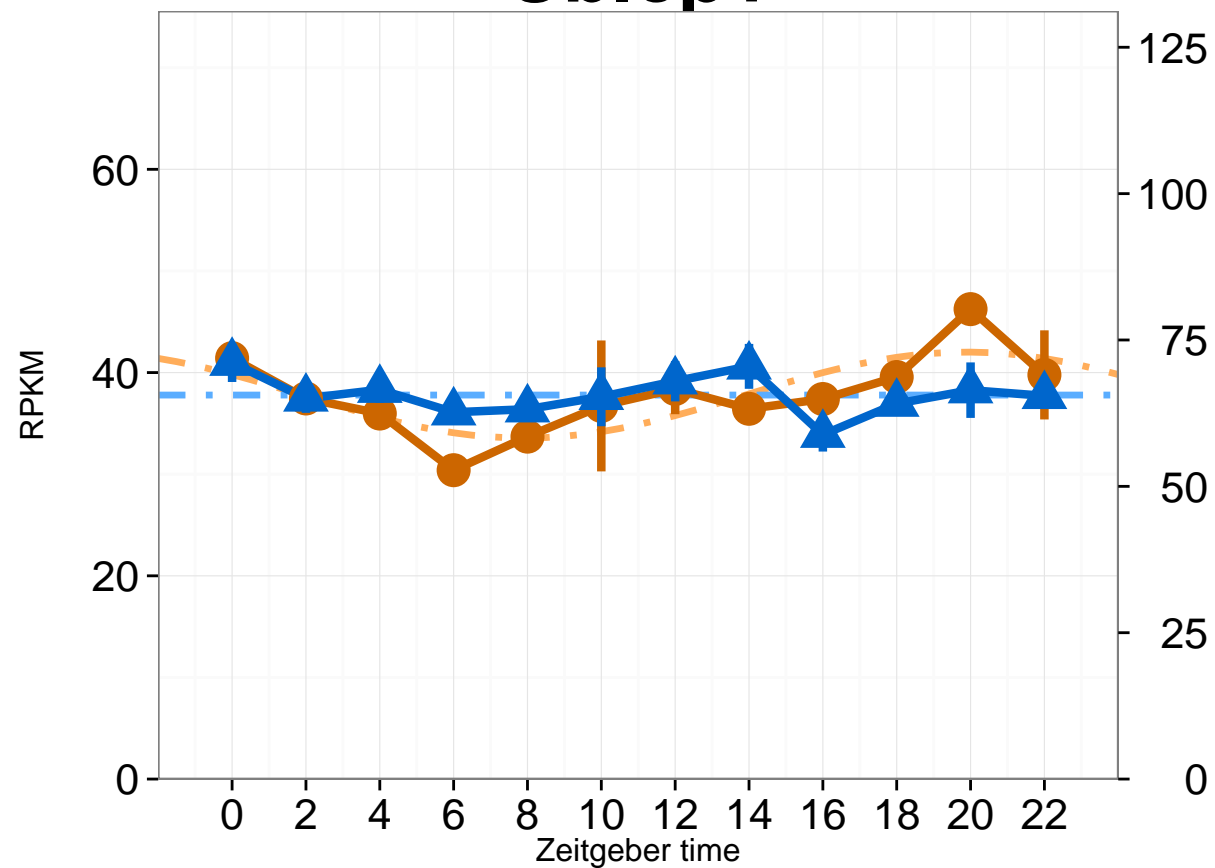

## Ublcp1

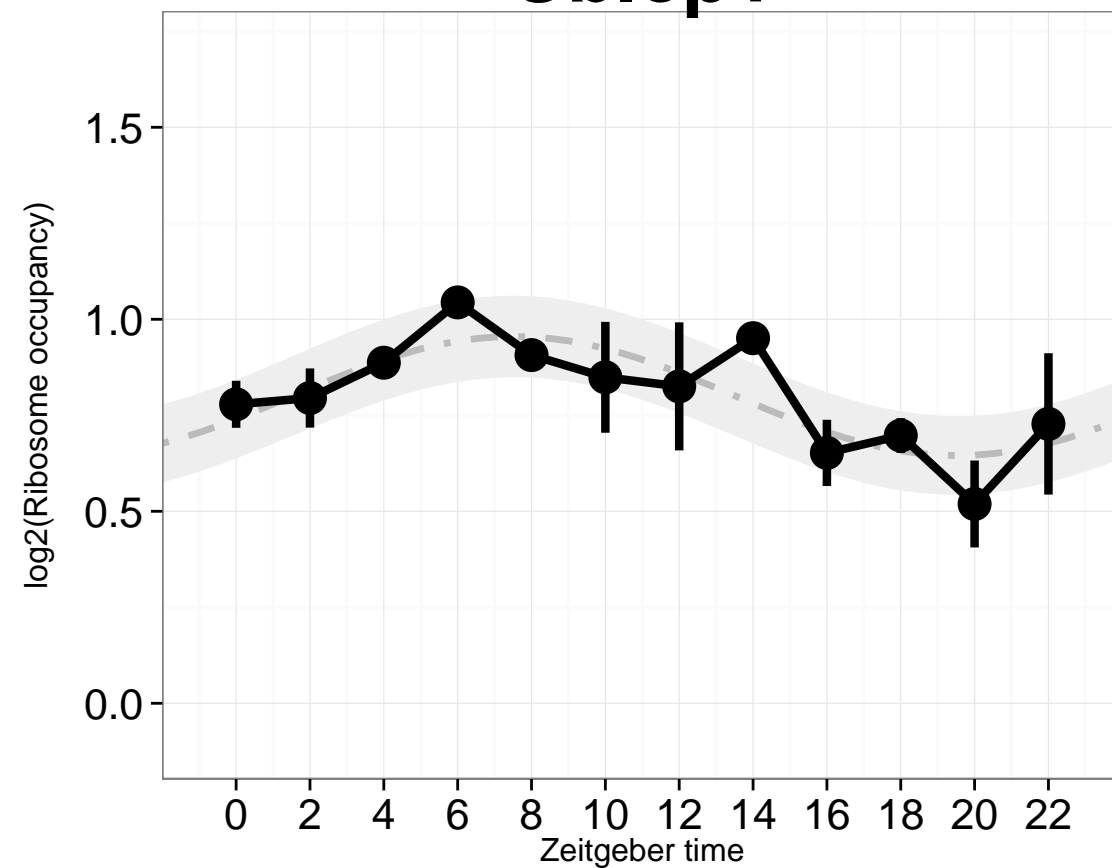

Supplement: Supplementary file 1180 [file 1]

## Tmem53

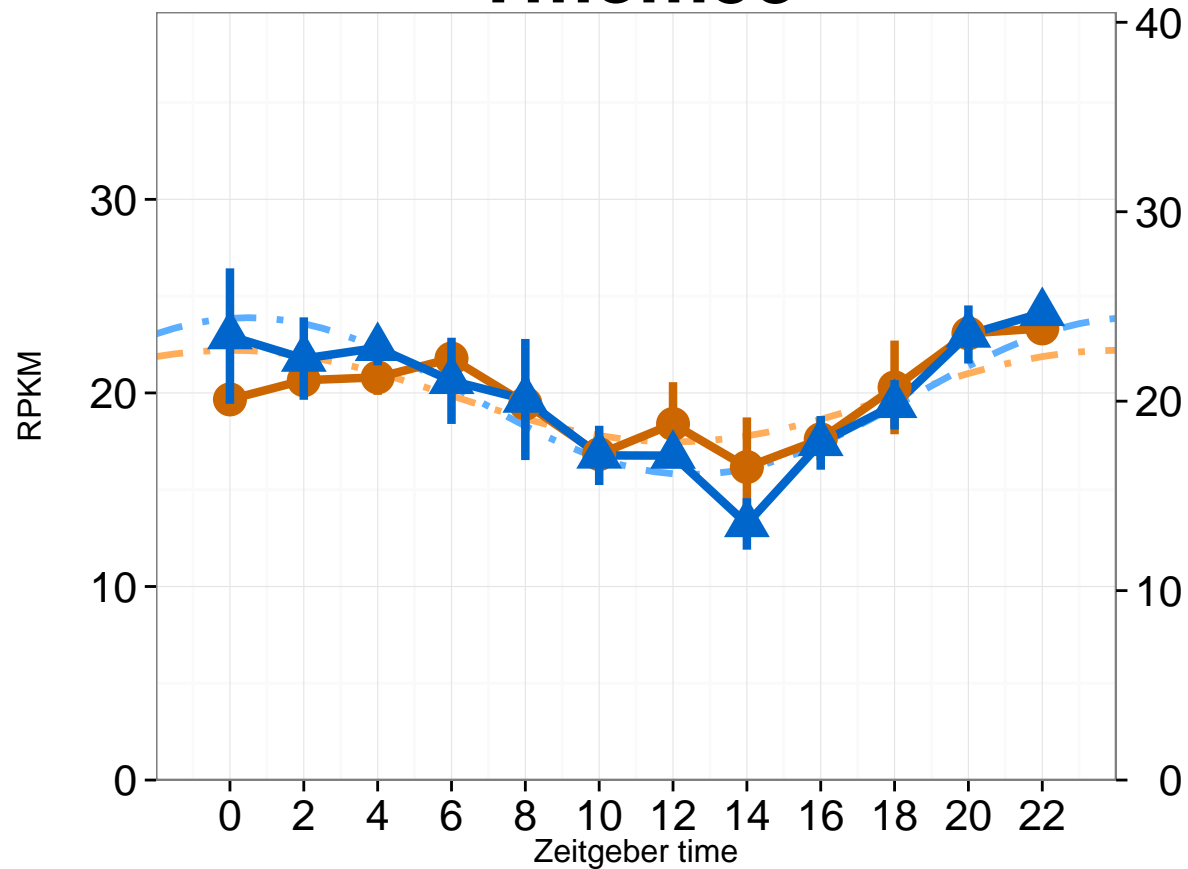

## Tmem53

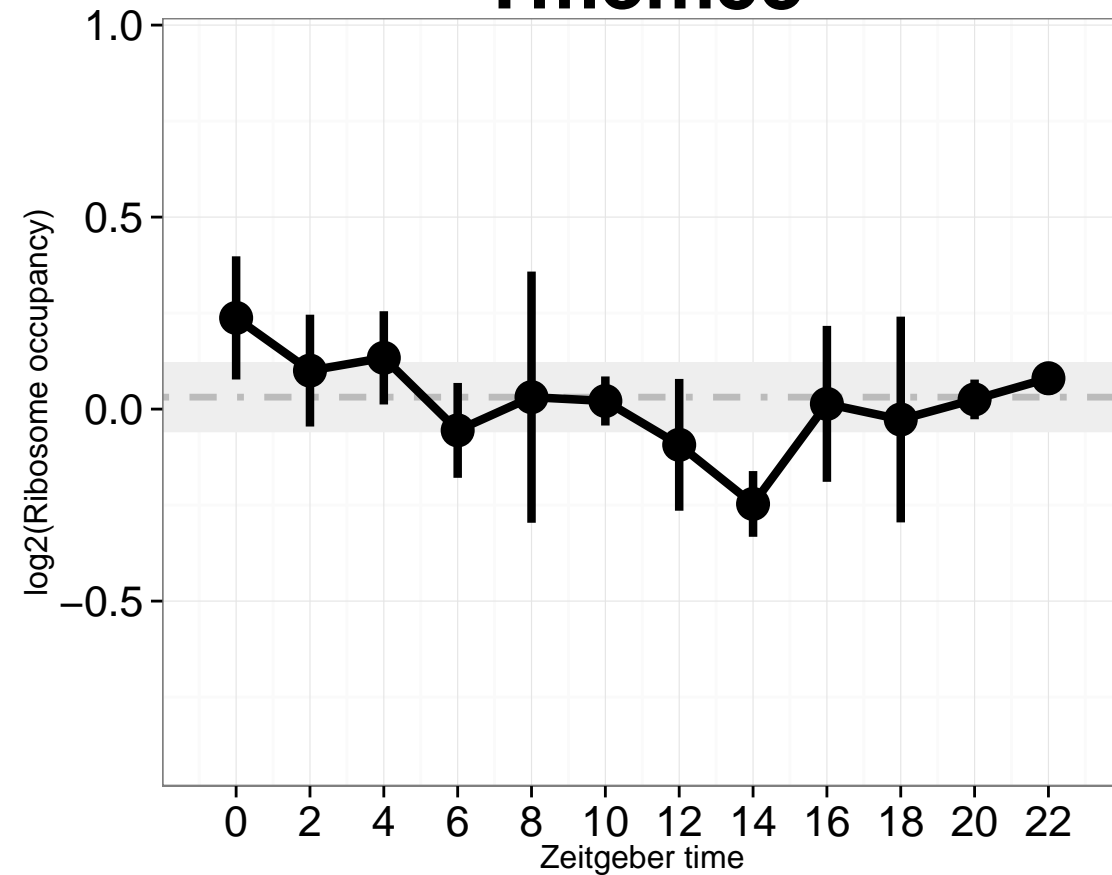

Supplement: Supplementary file 1181 [file 1]

# Sfrs18

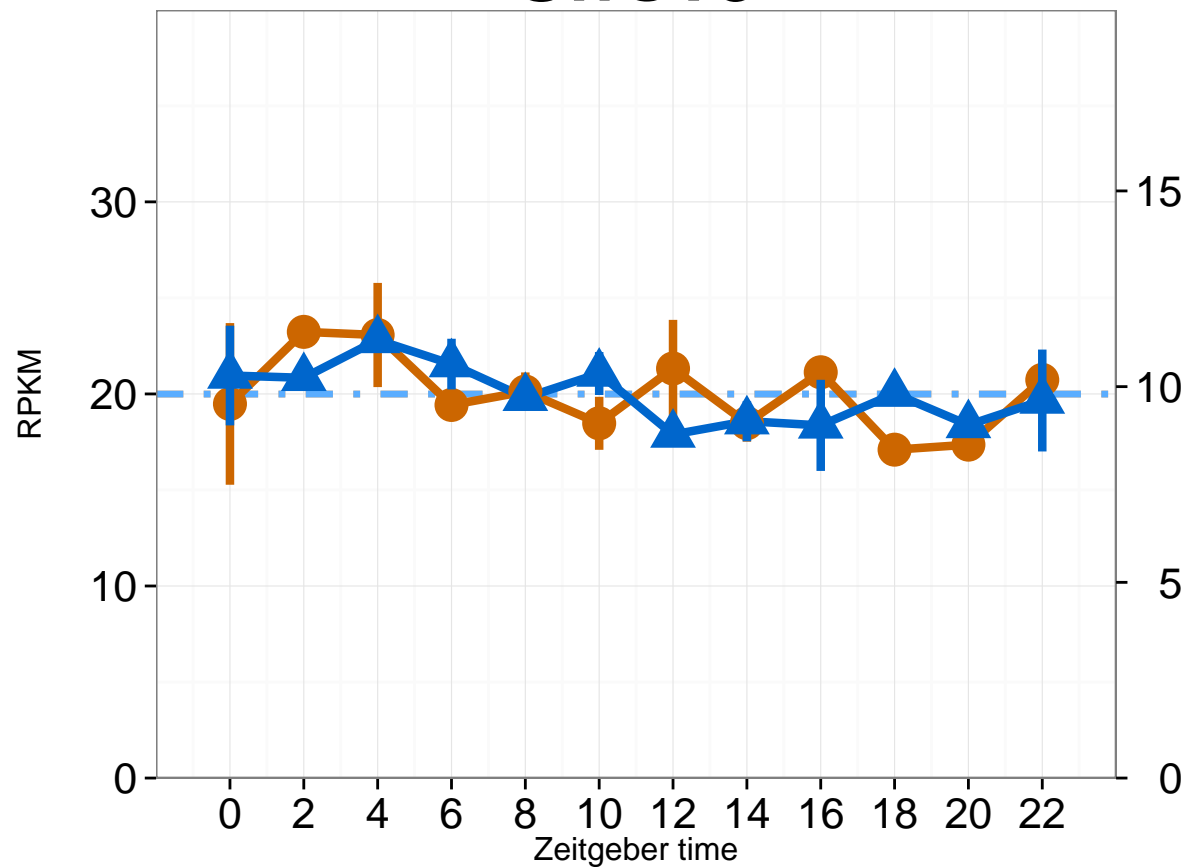

# Sfrs18

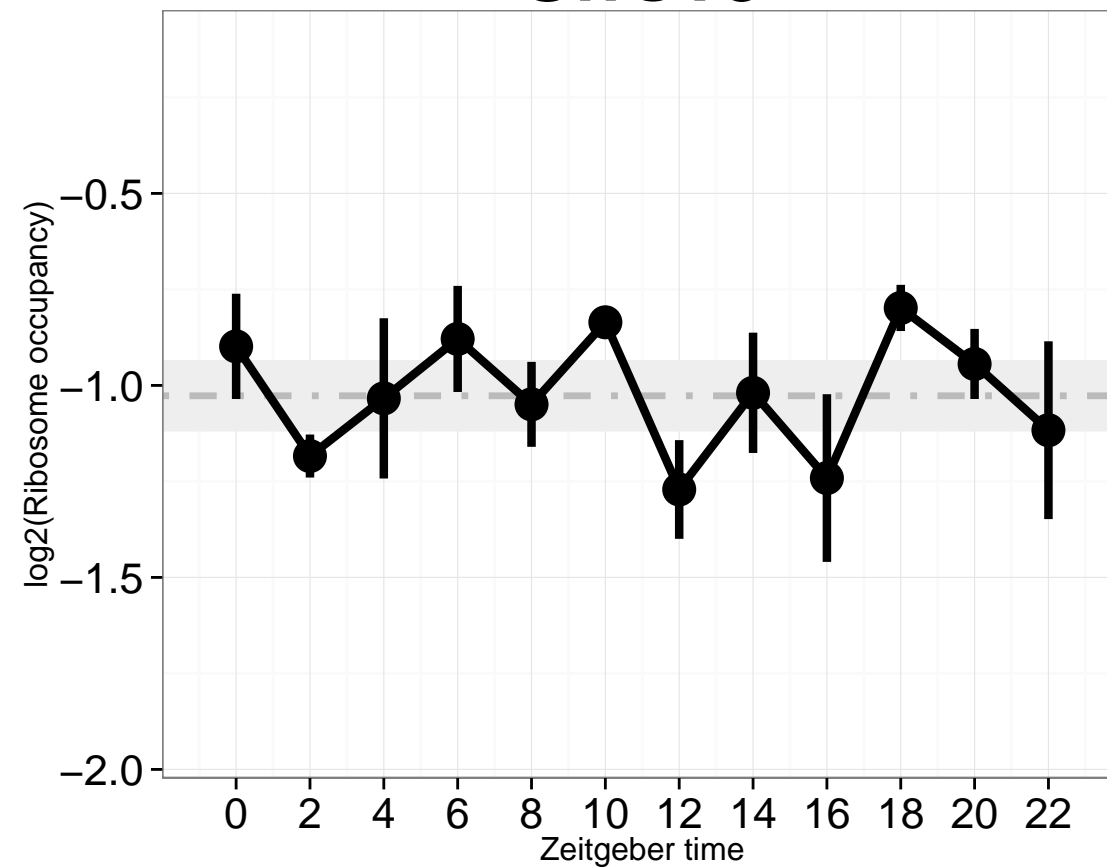

Supplement: Supplementary file 1182 [file 1]

# Tbc1d2b

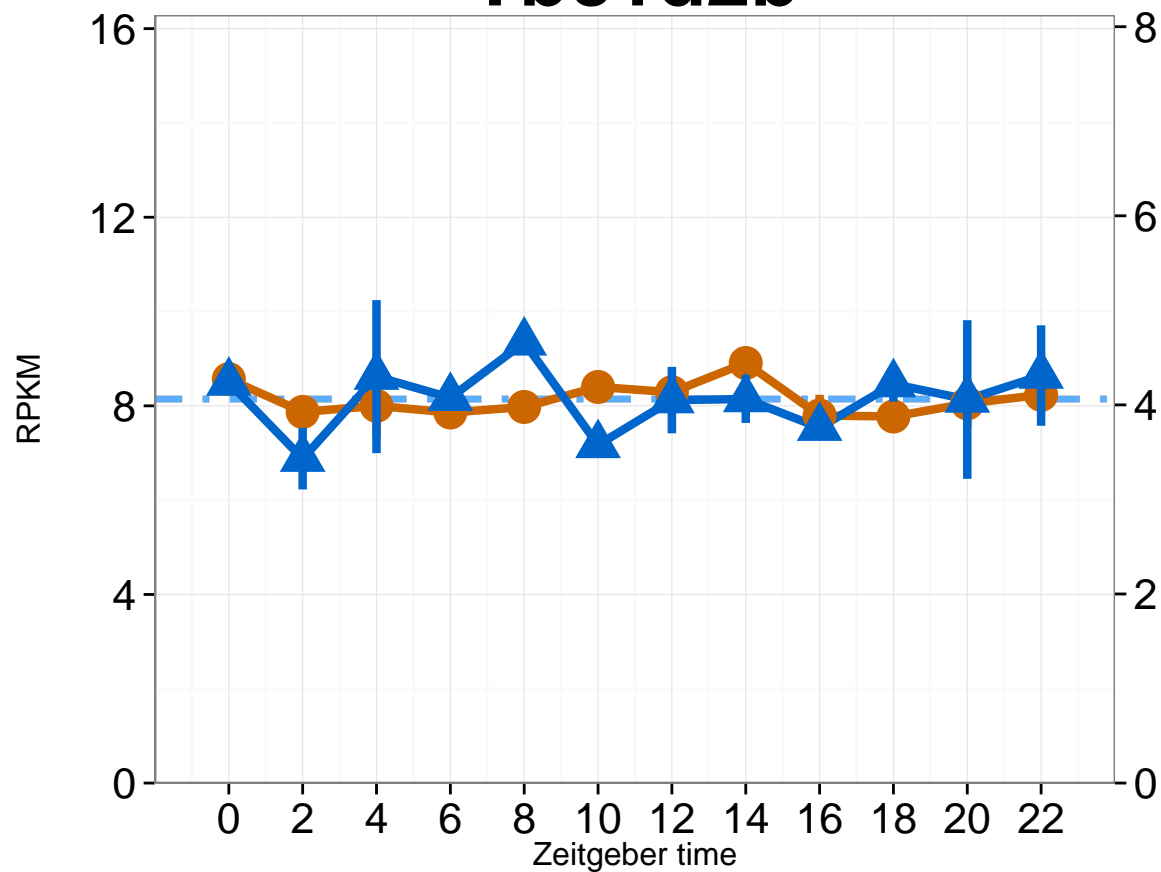

# Tbc1d2b

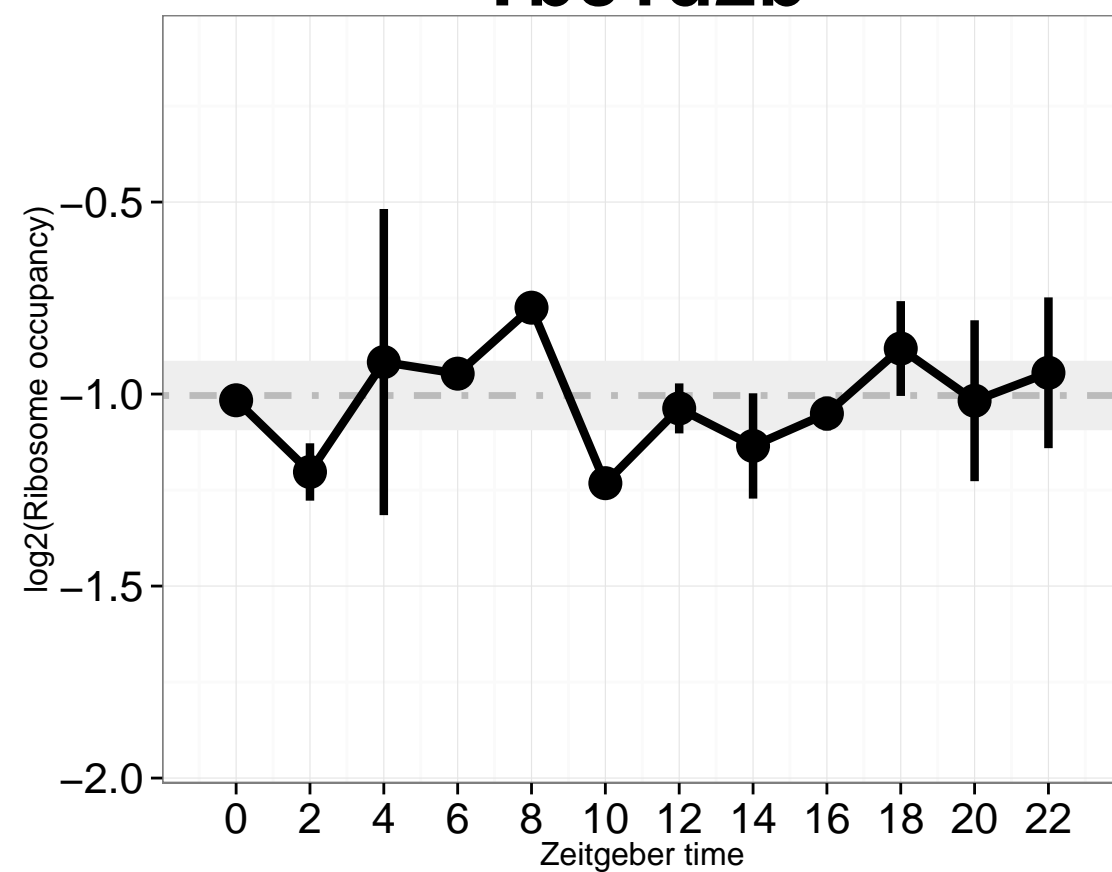

Supplement: Supplementary file 1183 [file 1]

## Sdhd

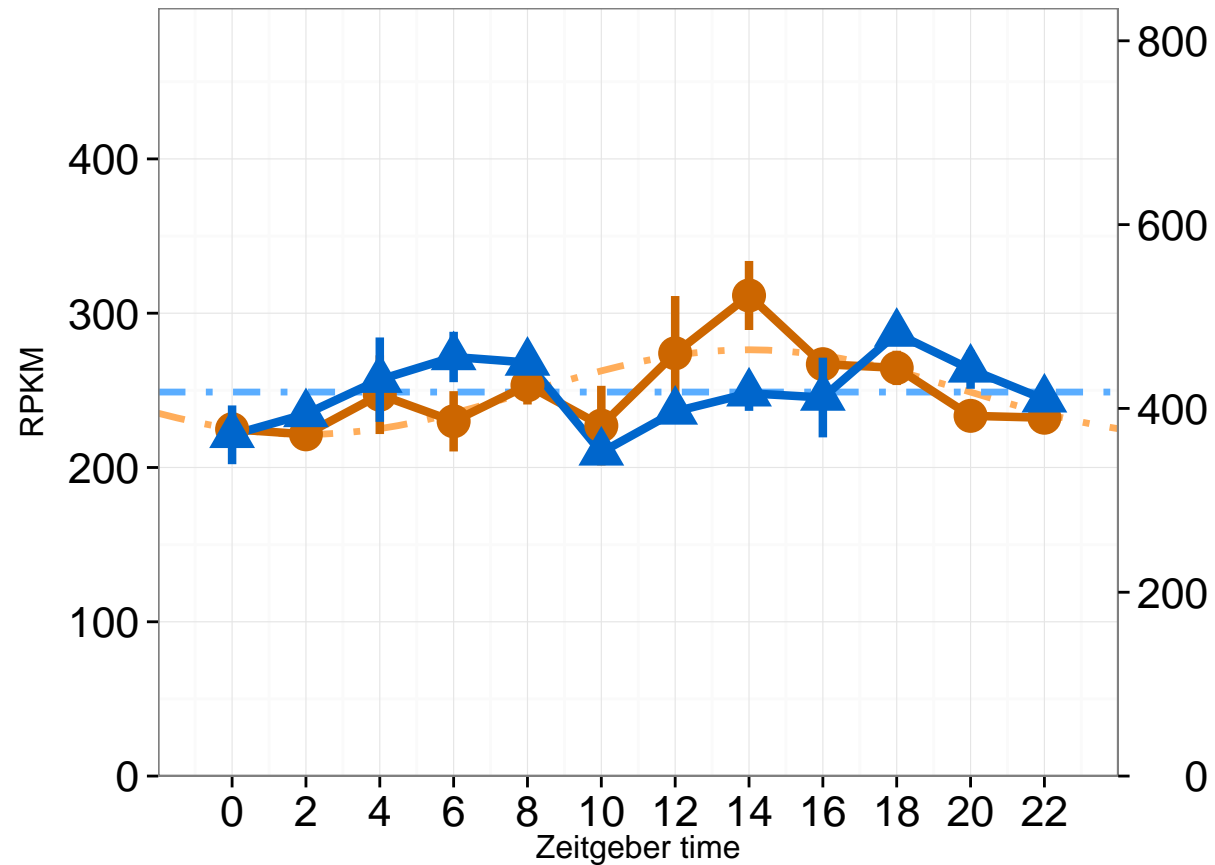

## Sdhd

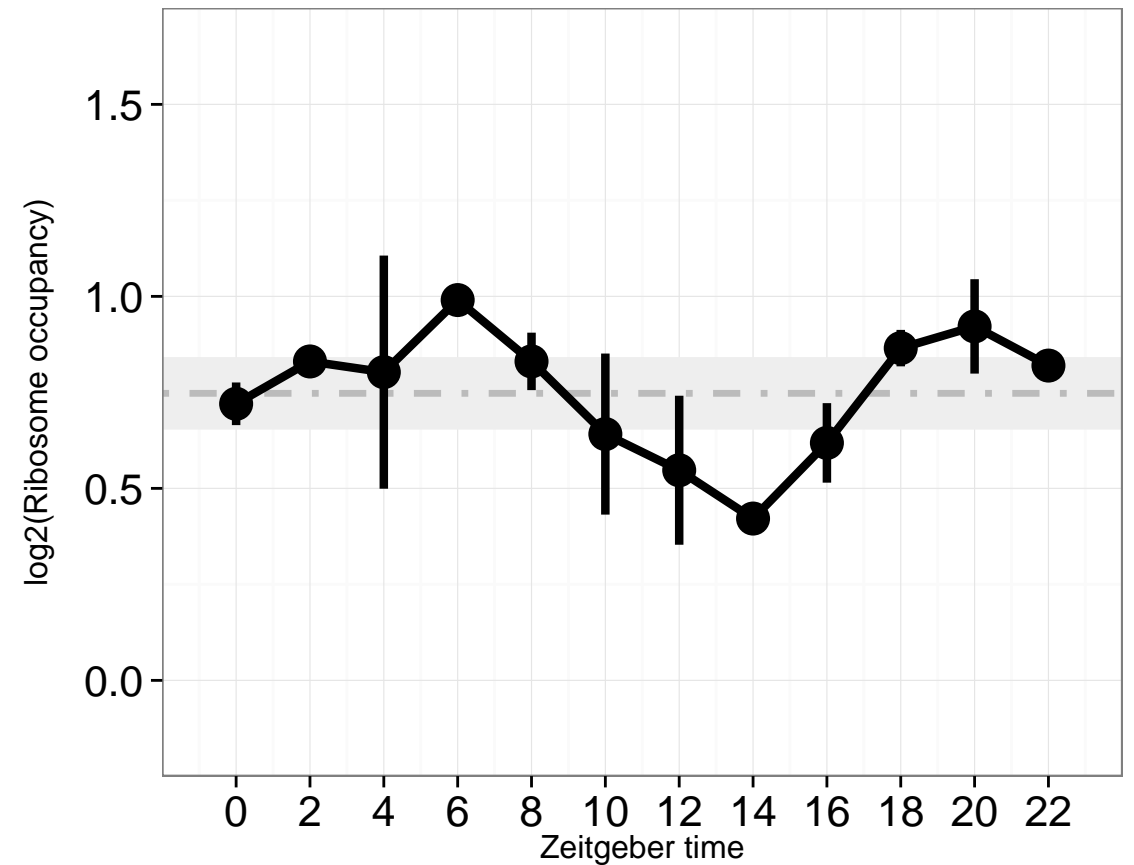

Supplement: Supplementary file 1184 [file 1]

## Caps2

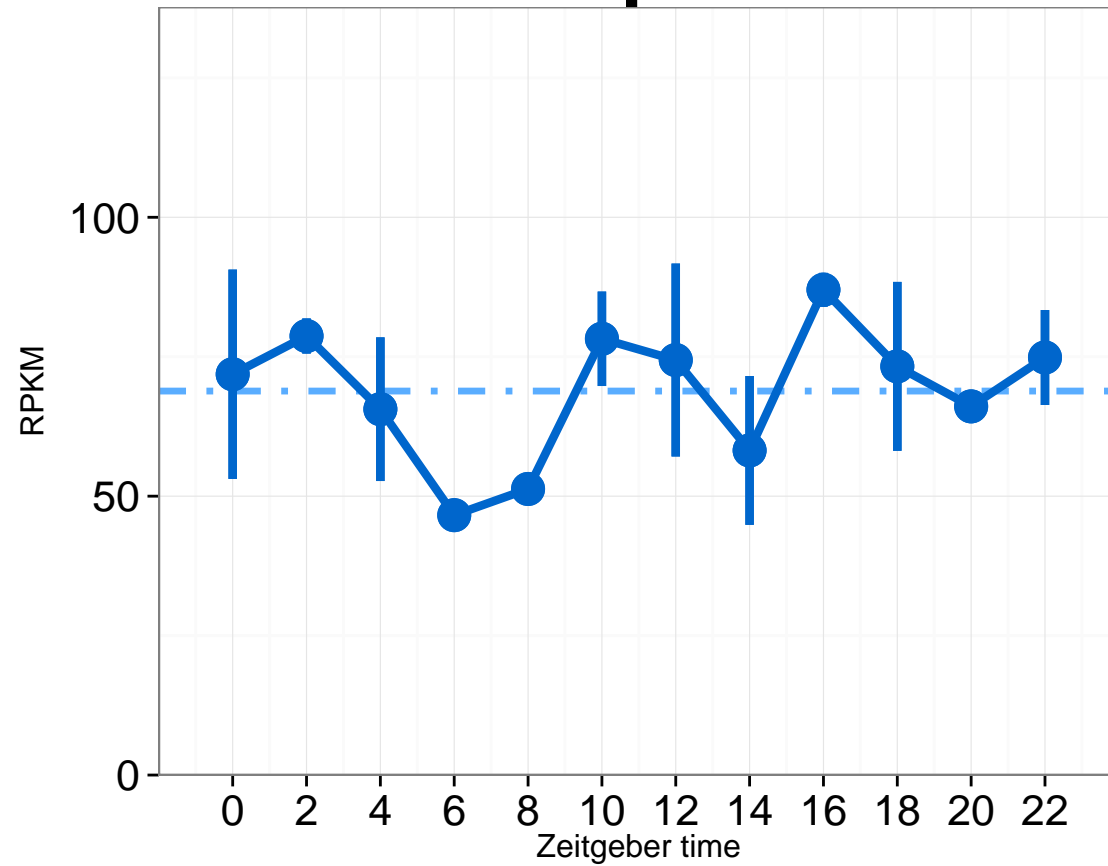

## Caps2 log2(Ribosome occupancy

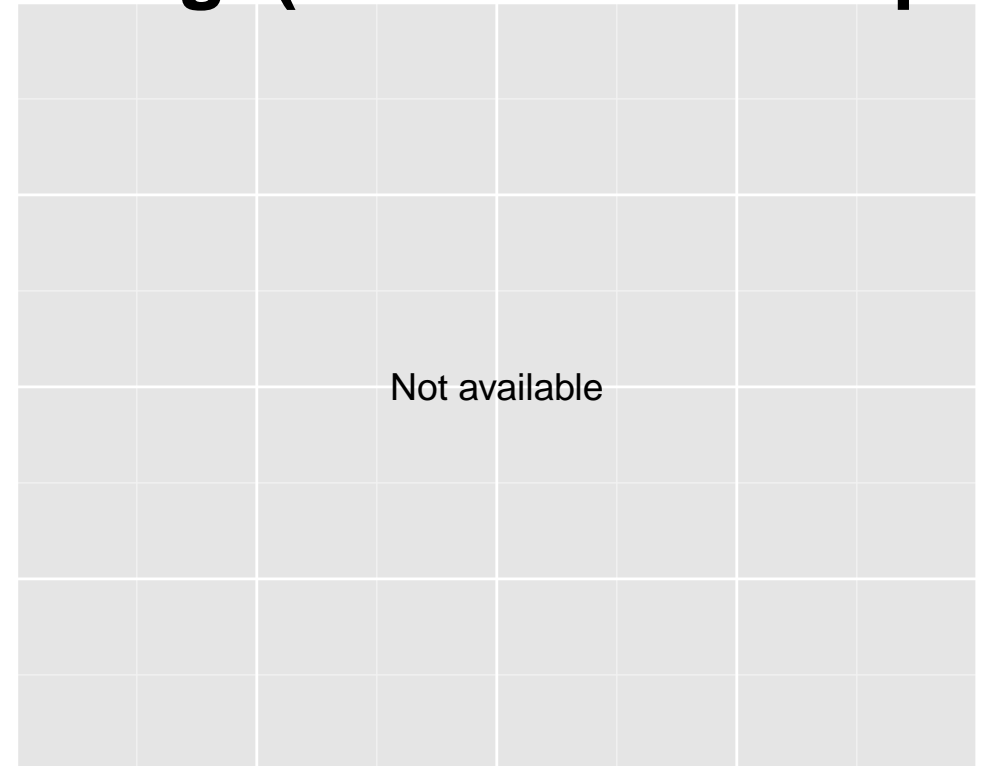

Supplement: Supplementary file 1185 [file 1]

## Ppm1l

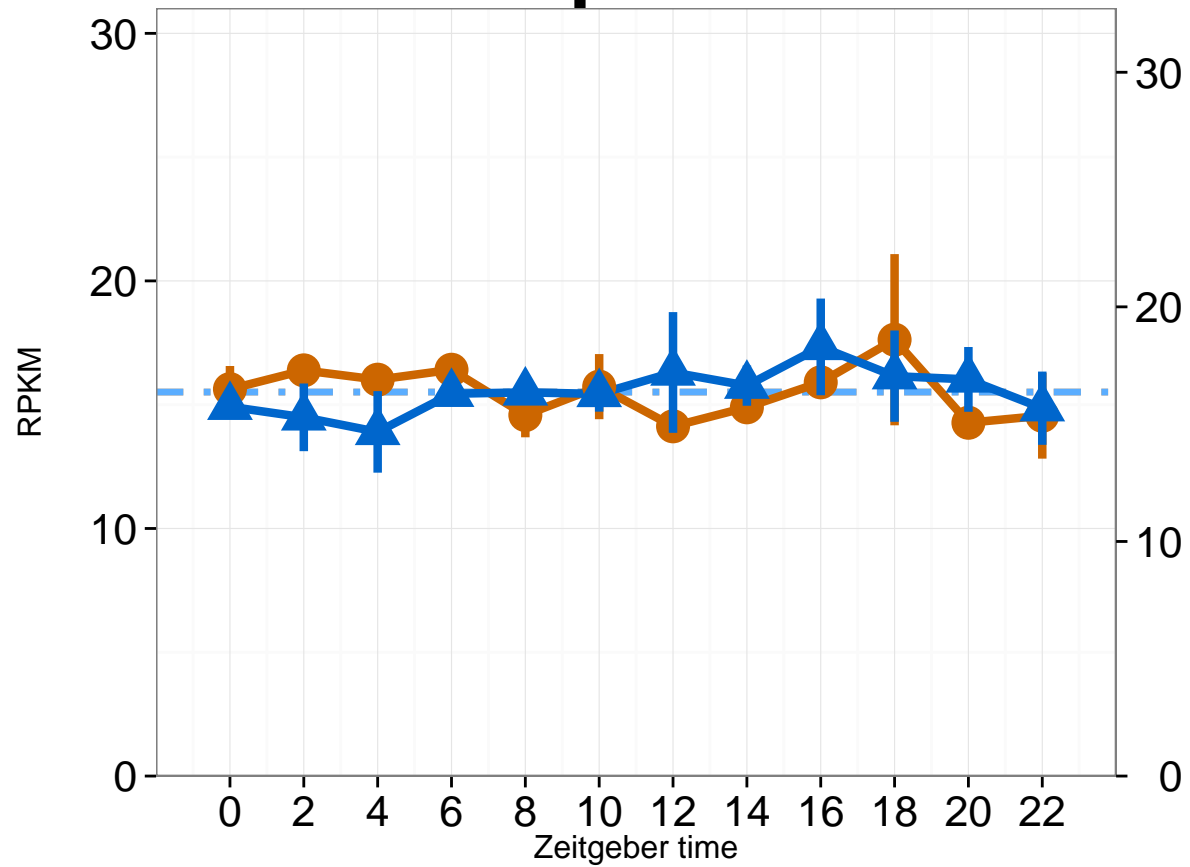

## Ppm1l

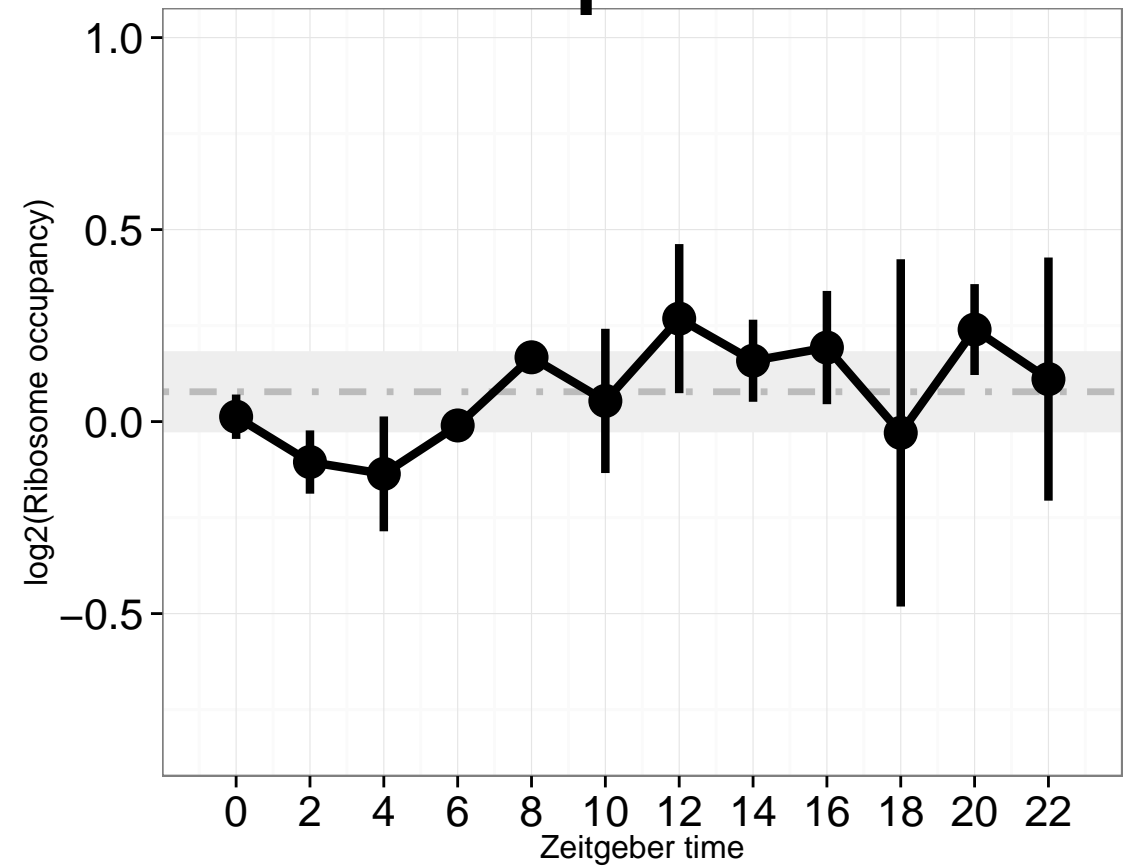

Supplement: Supplementary file 1186 [file 1]

# Mpc1

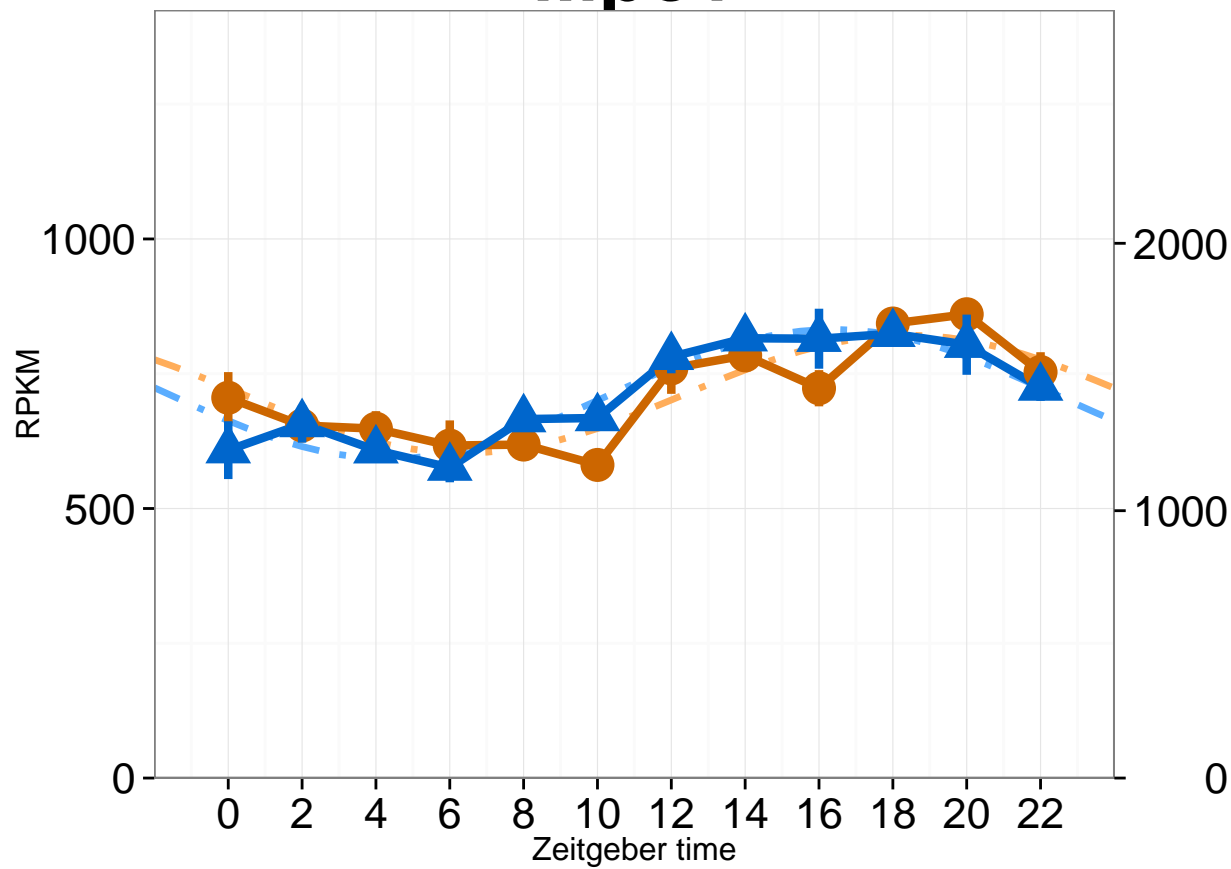

# Mpc1

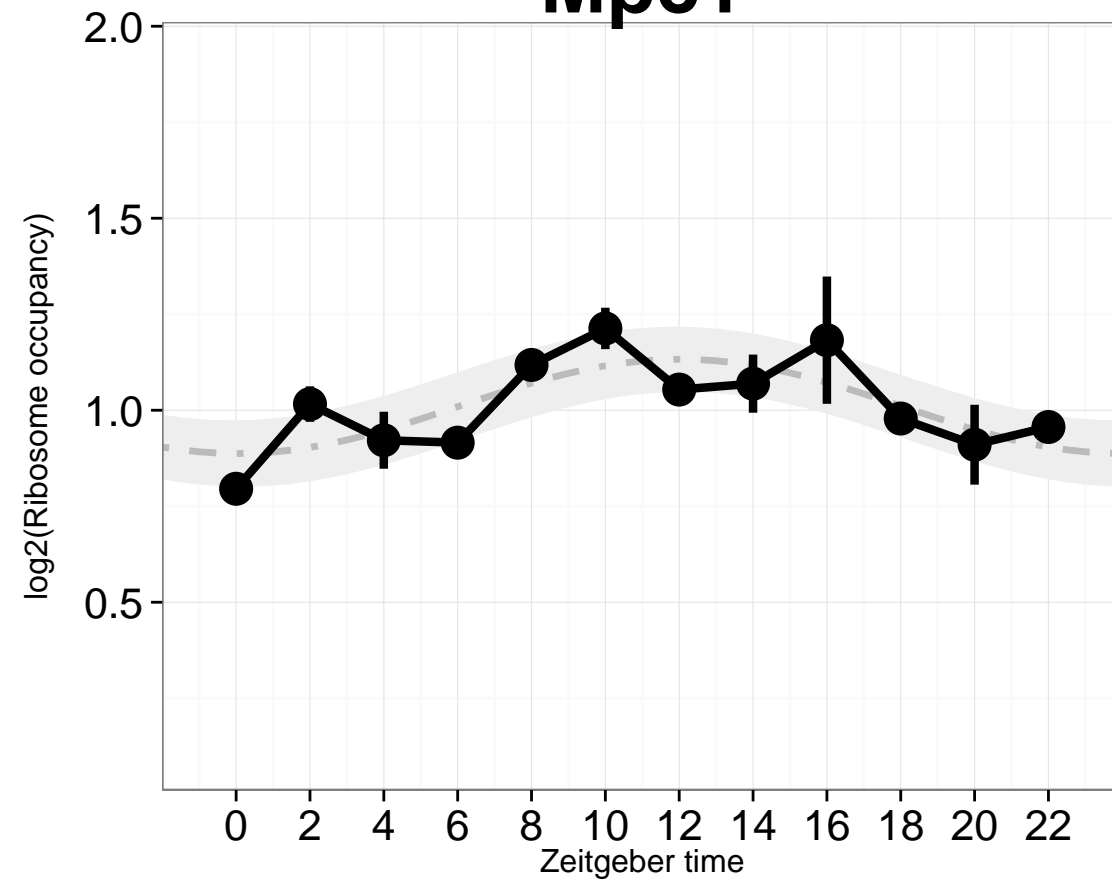

Supplement: Supplementary file 1187 [file 1]

**Sema3g**

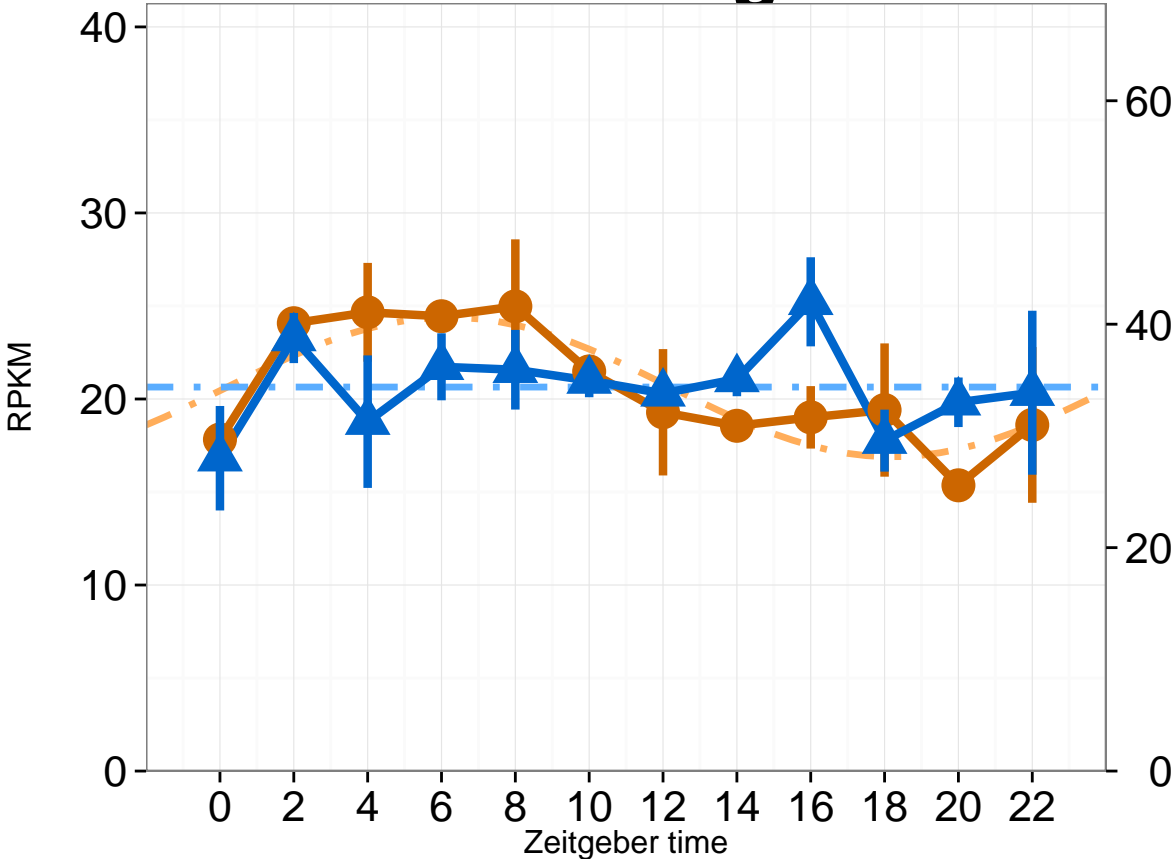

**Sema3g**

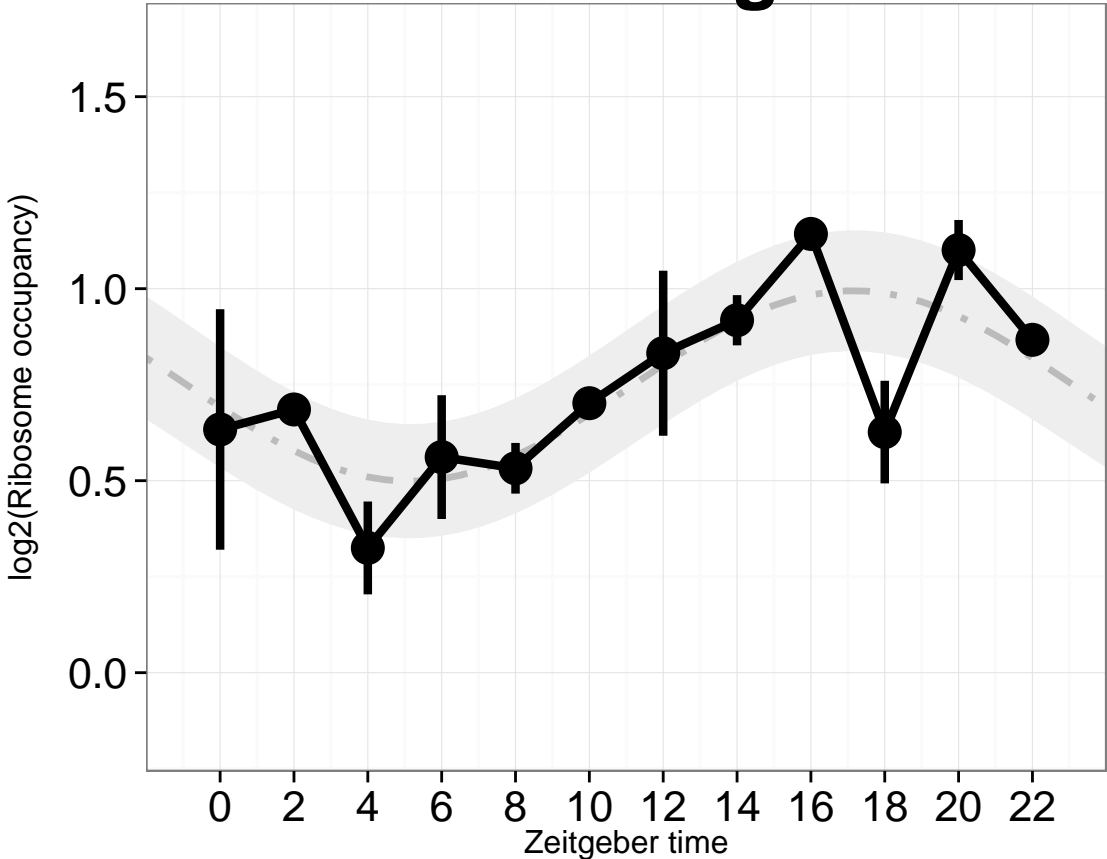

Supplement: Supplementary file 1188 [file 1]

# Mtrf1l

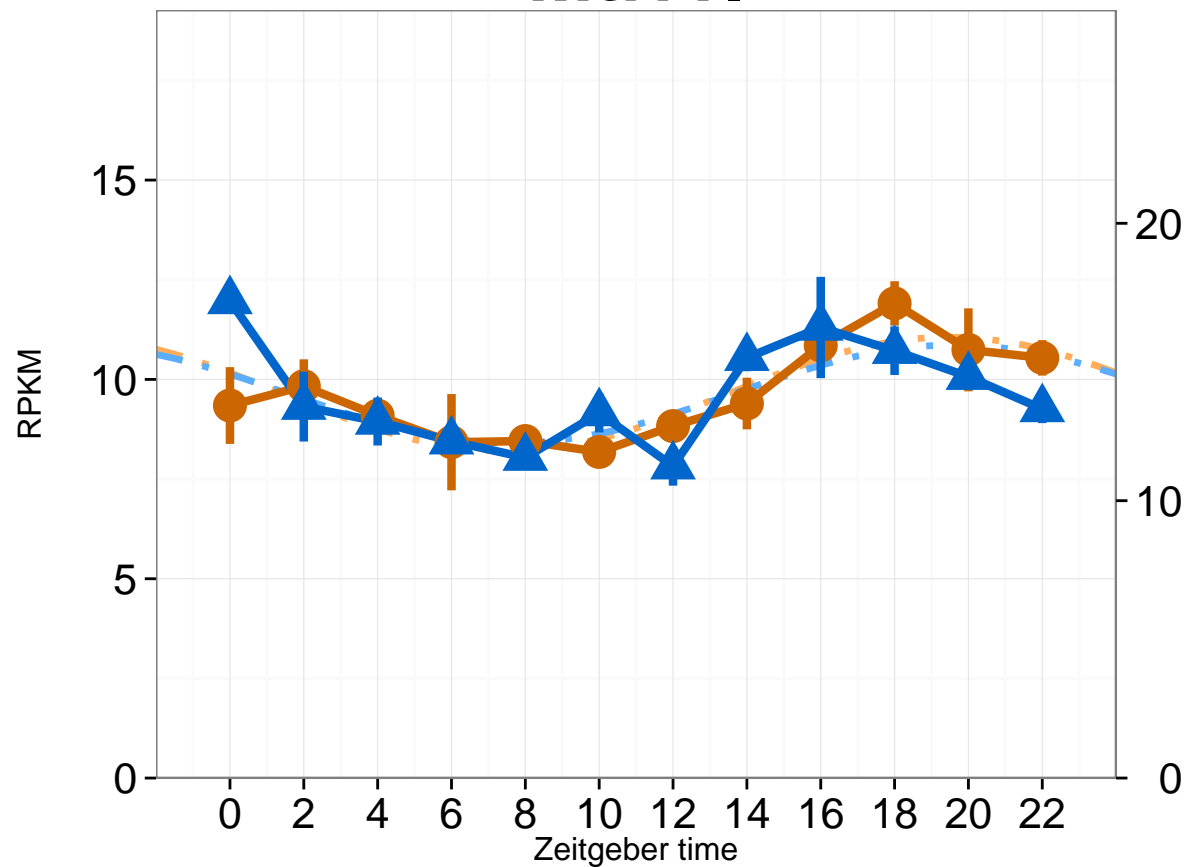

# Mtrf1l

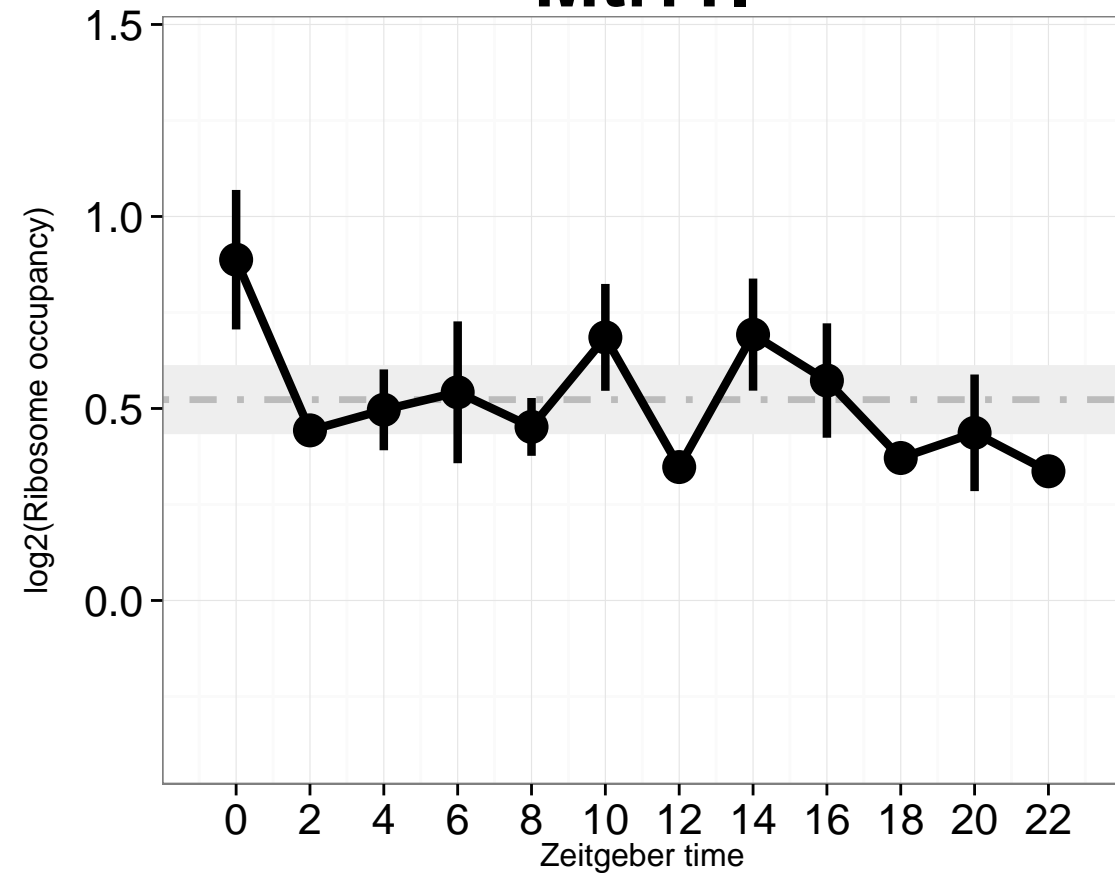

Supplement: Supplementary file 1189 [file 1]

# Stip1

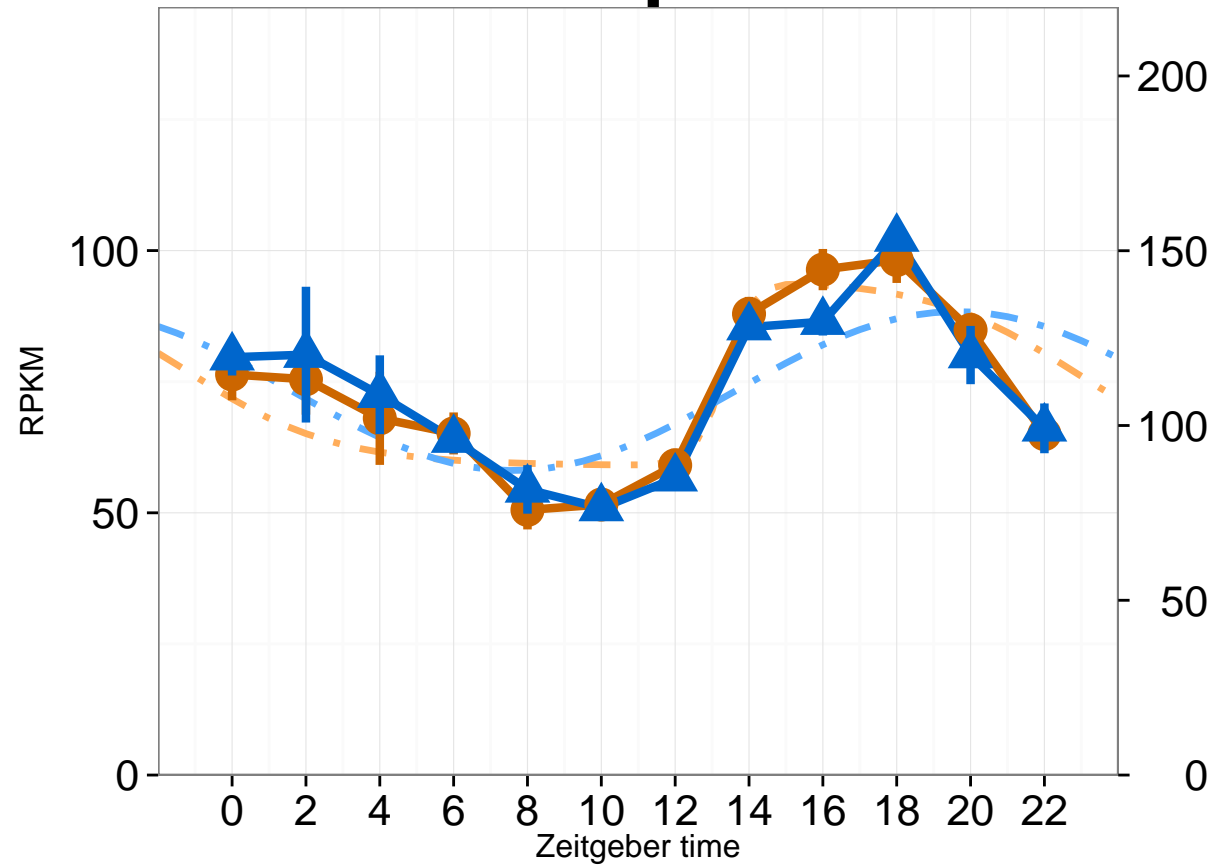

# Stip1

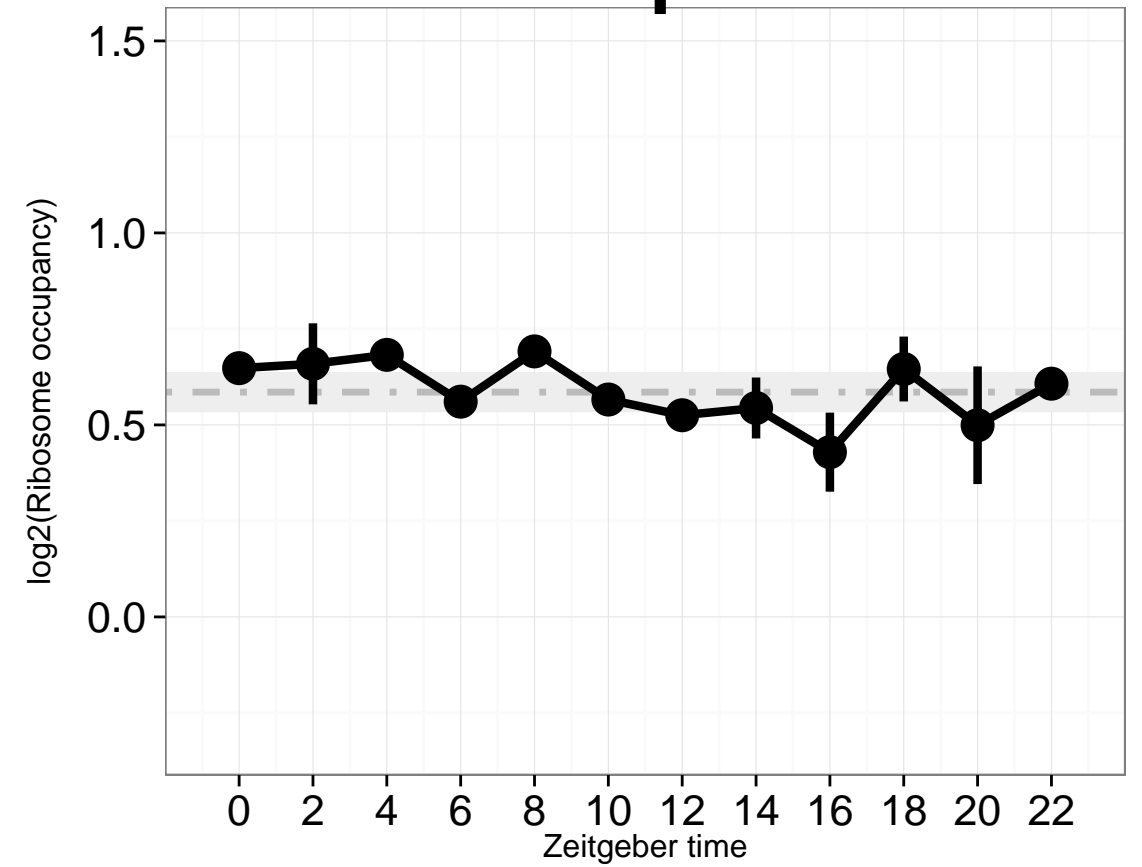

Supplement: Supplementary file 1190 [file 1]

## Slc35b1

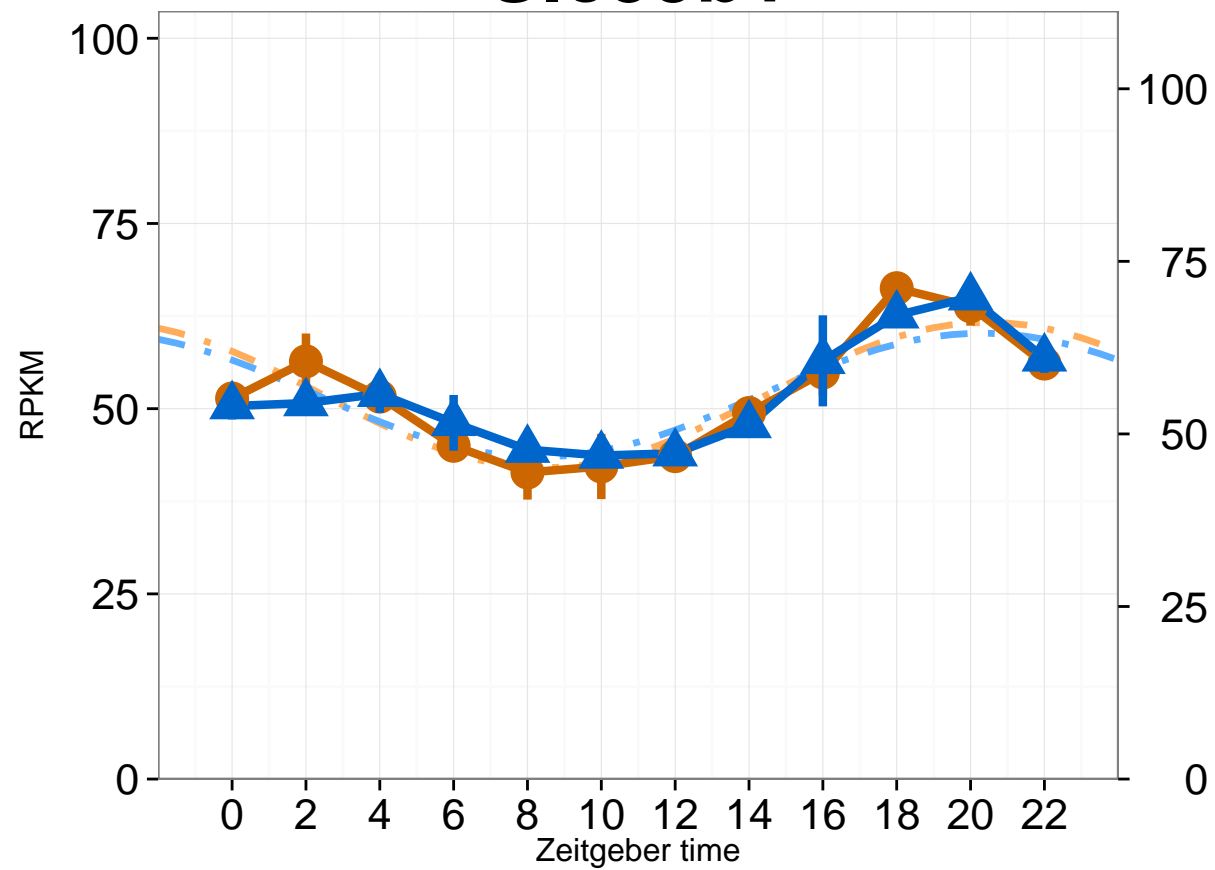

## Slc35b1

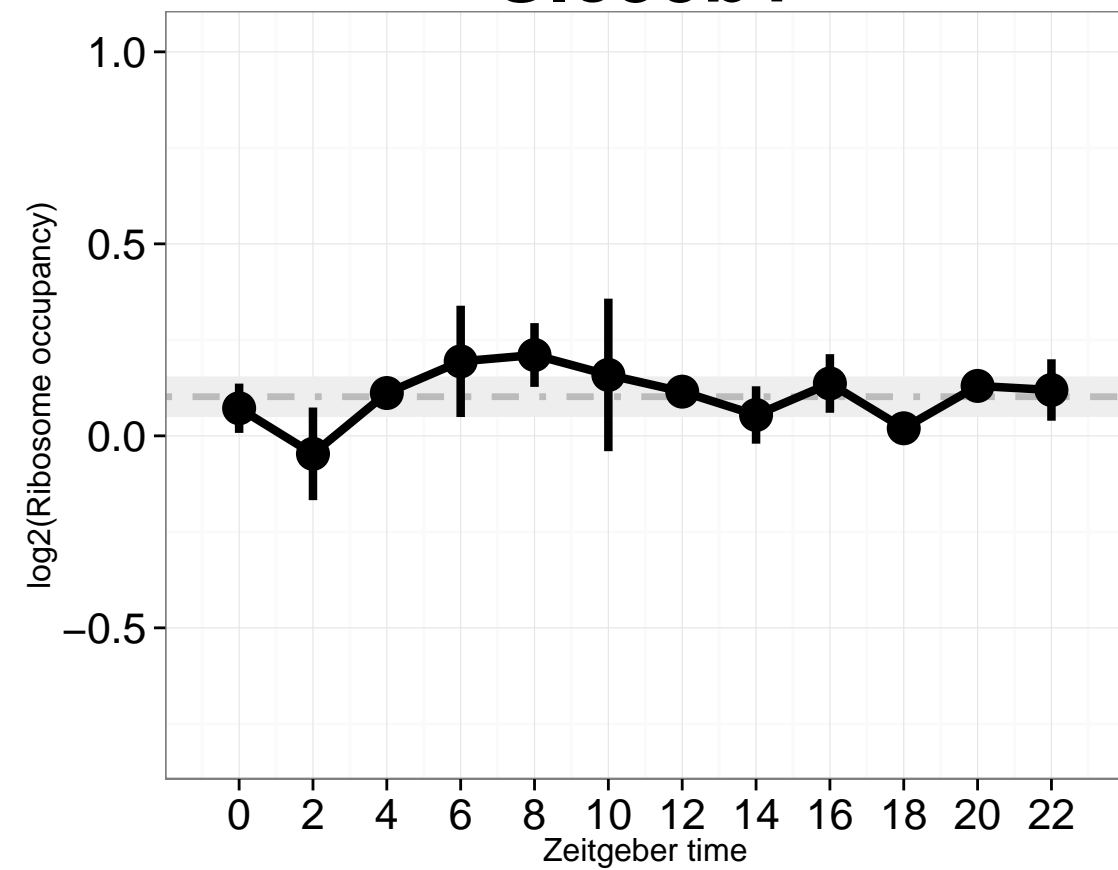

Supplement: Supplementary file 1191 [file 1]

## Eral1

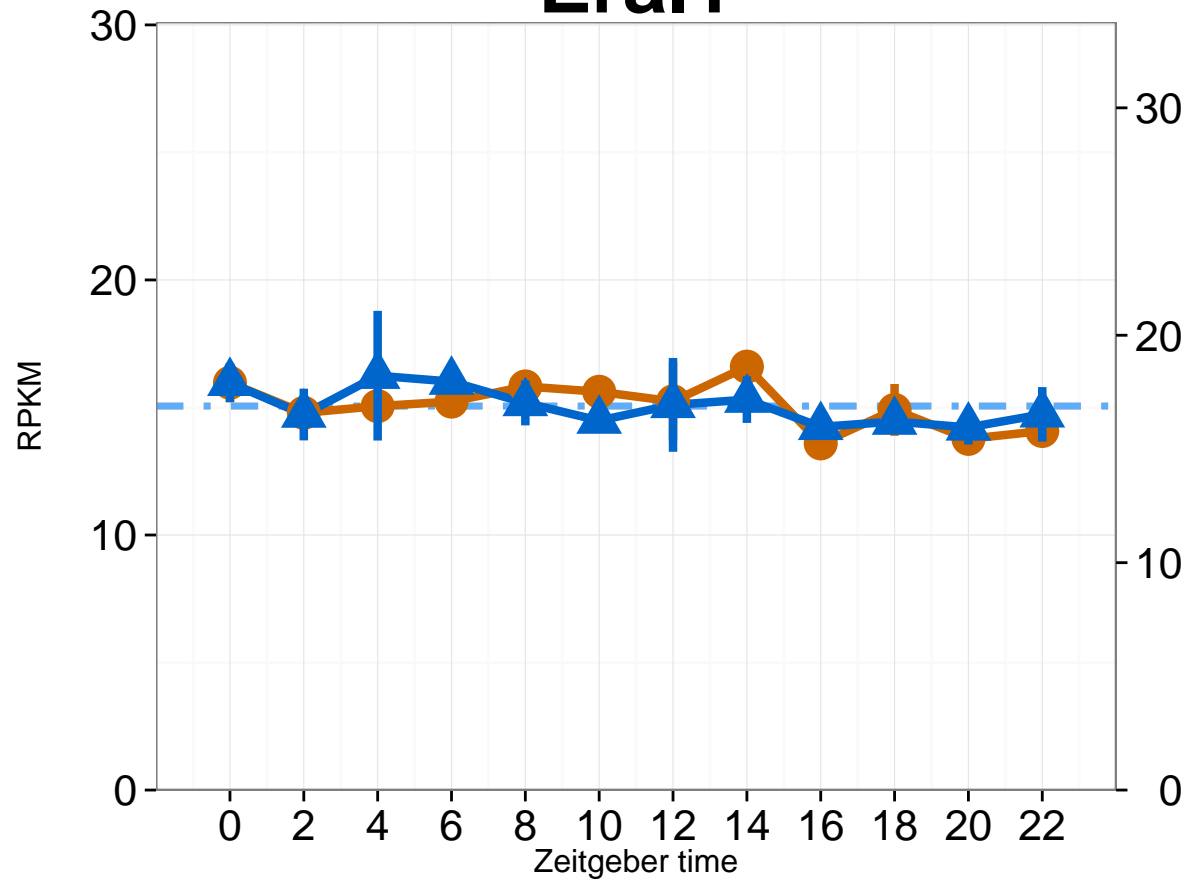

## Eral1

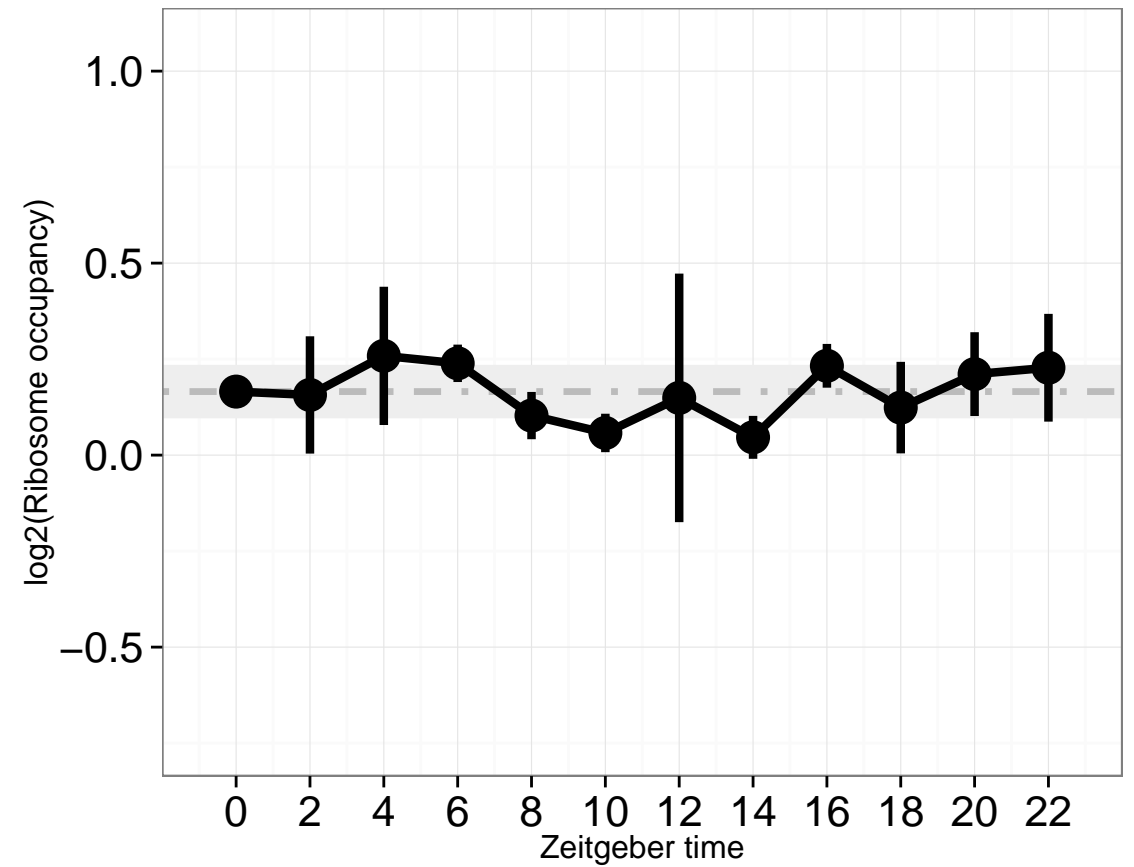

Supplement: Supplementary file 1192 [file 1]

# Mrps18a

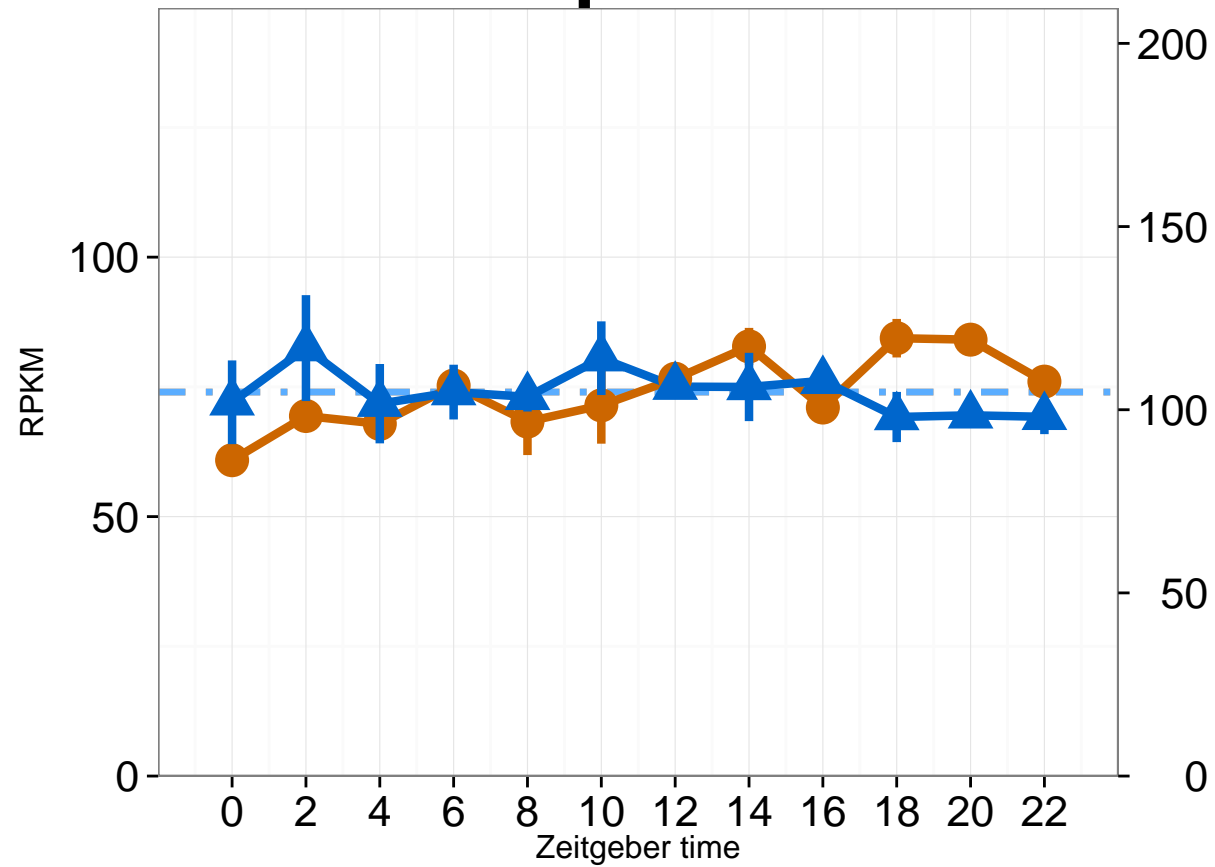

# Mrps18a

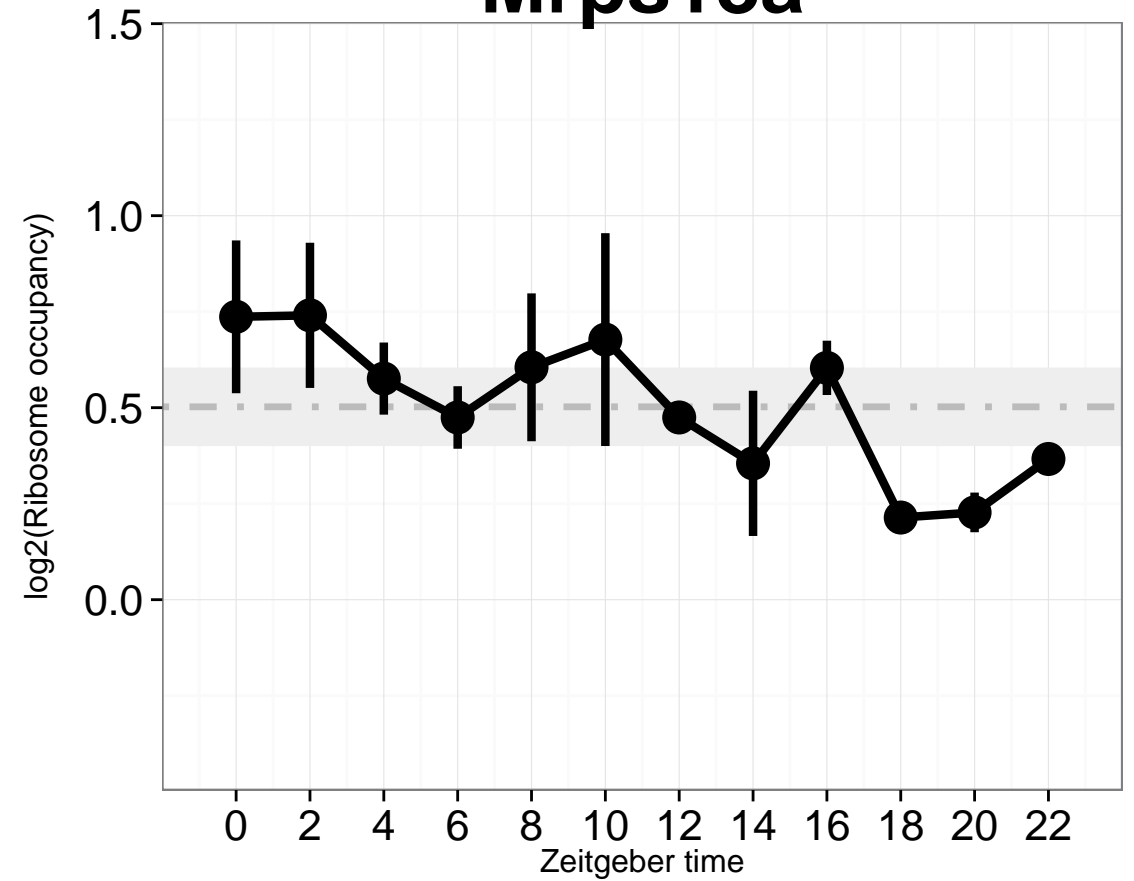

Supplement: Supplementary file 1193 [file 1]

# Tmem14a

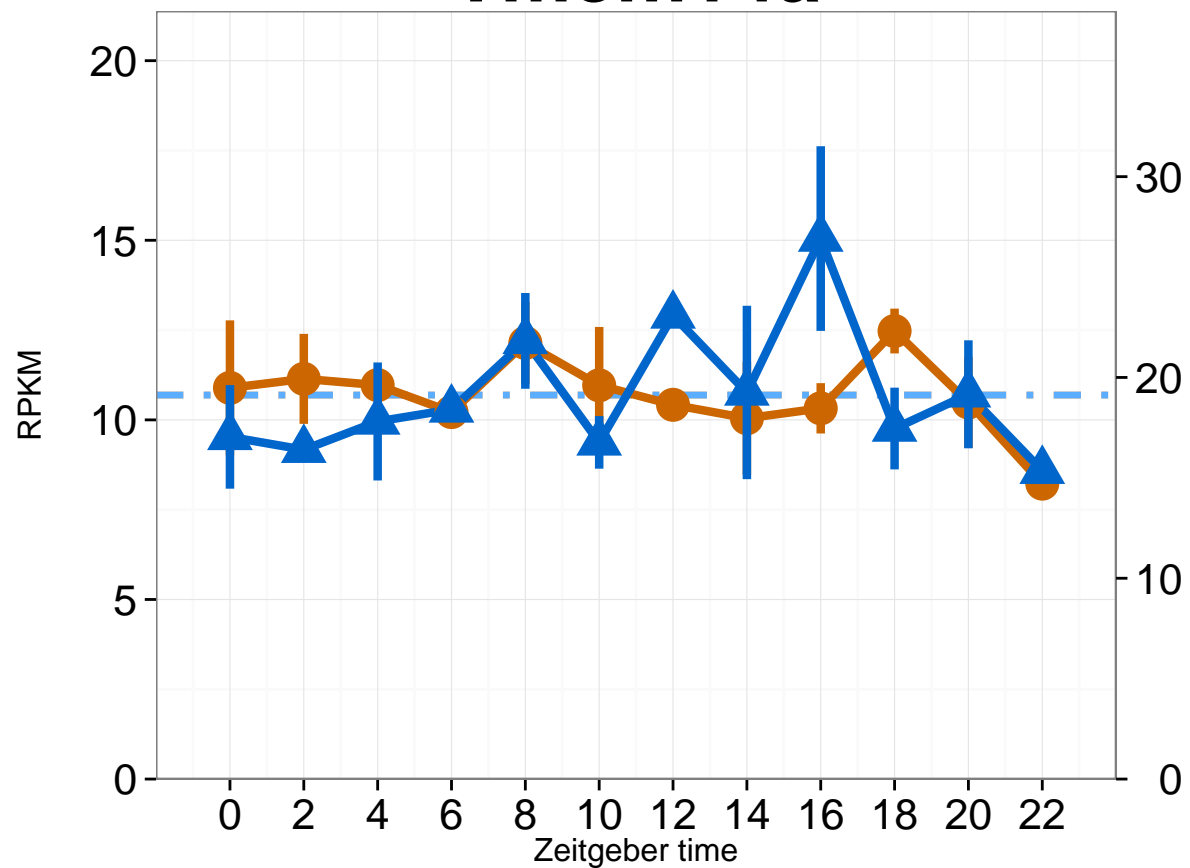

# Tmem14a

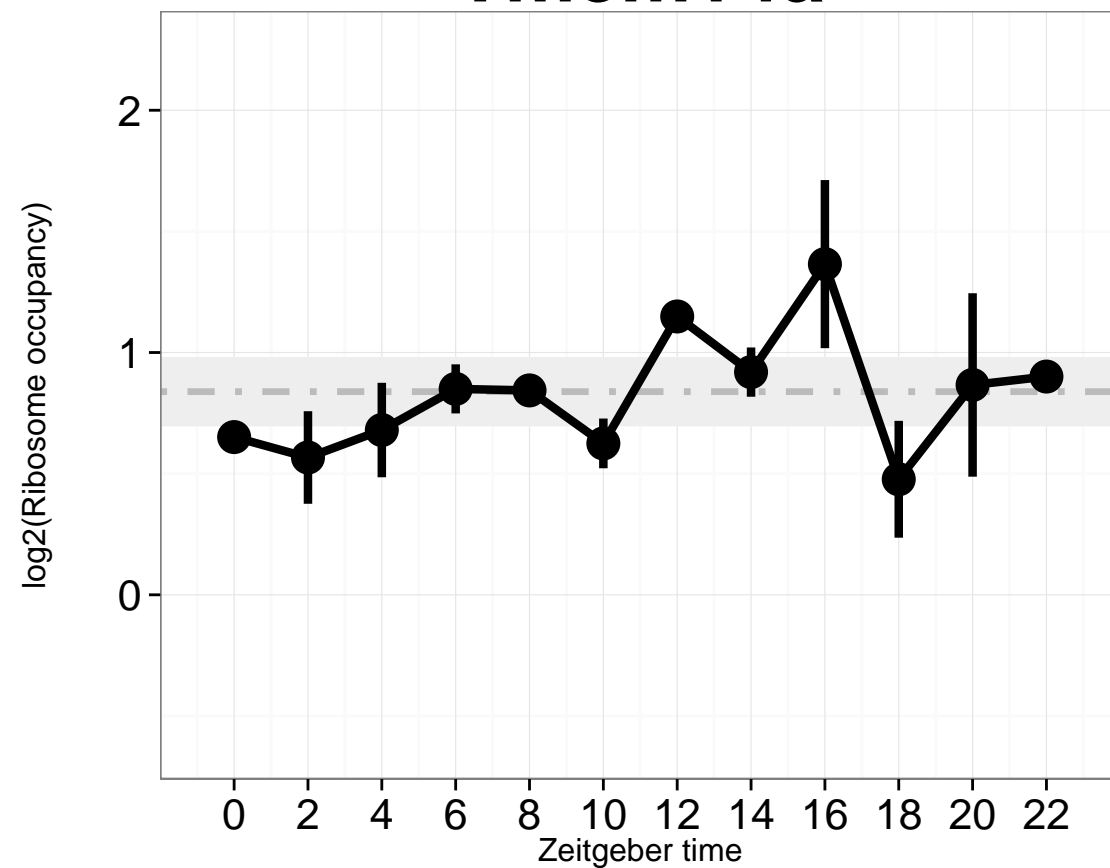

Supplement: Supplementary file 1194 [file 1]

# Trim41

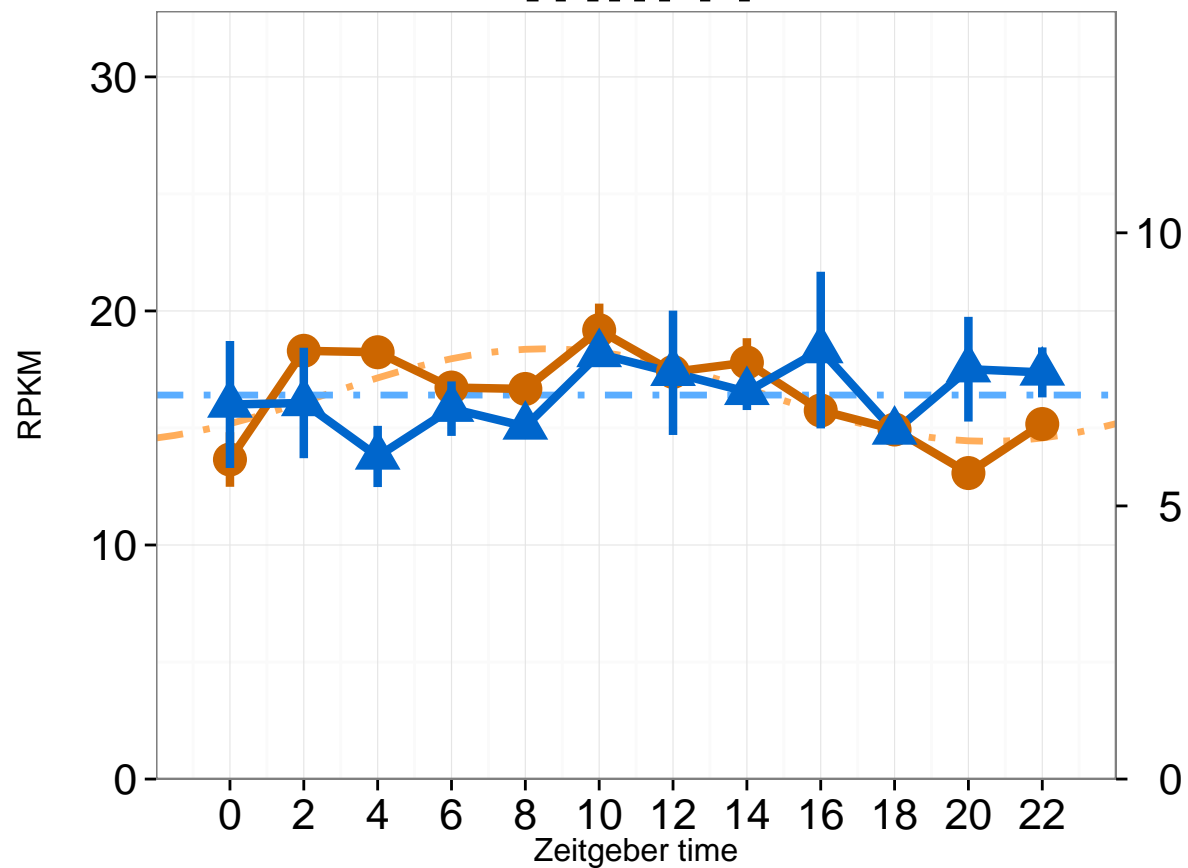

# Trim41

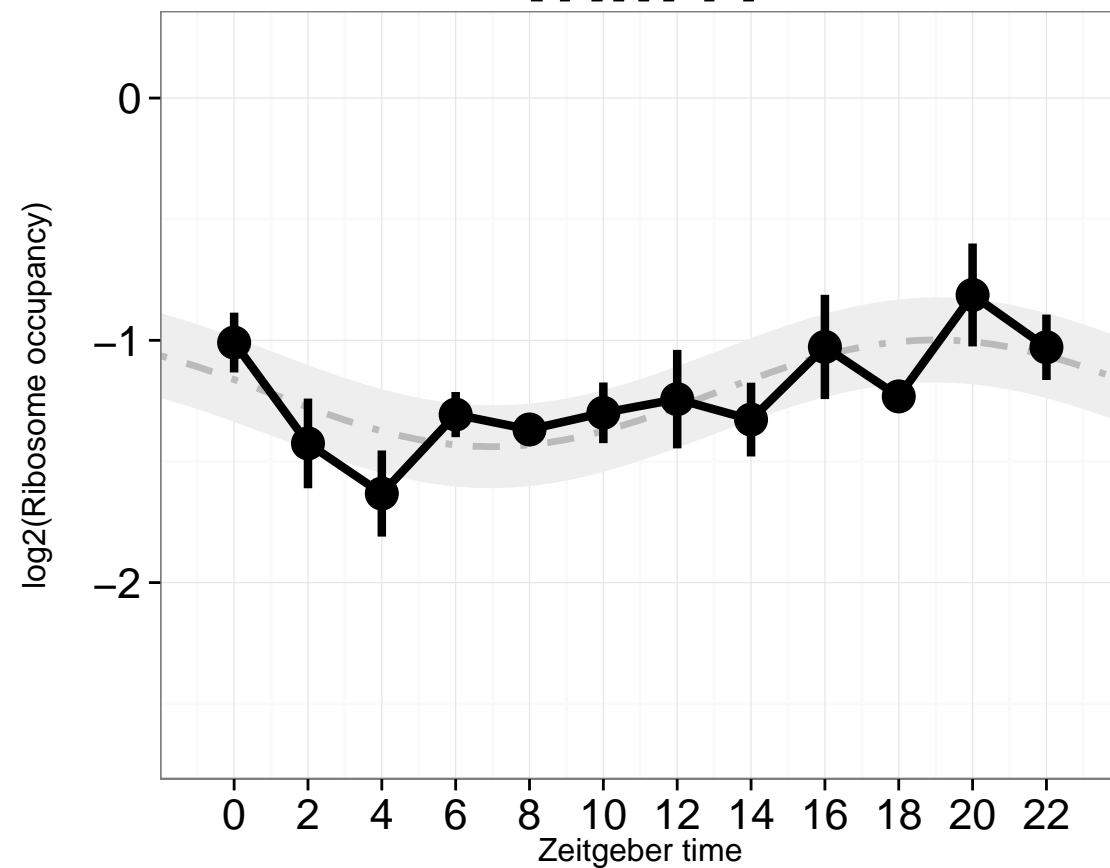

Supplement: Supplementary file 1195 [file 1]

## Parp10

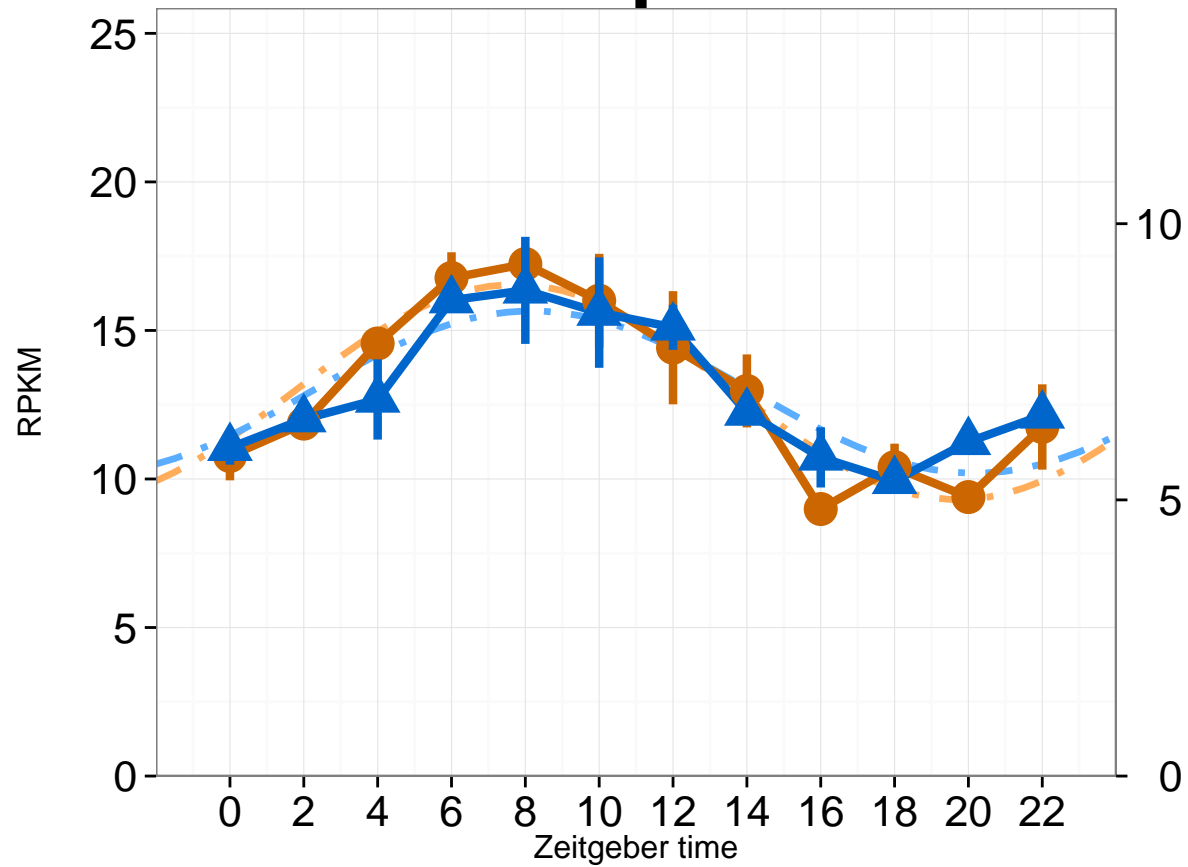

## Parp10

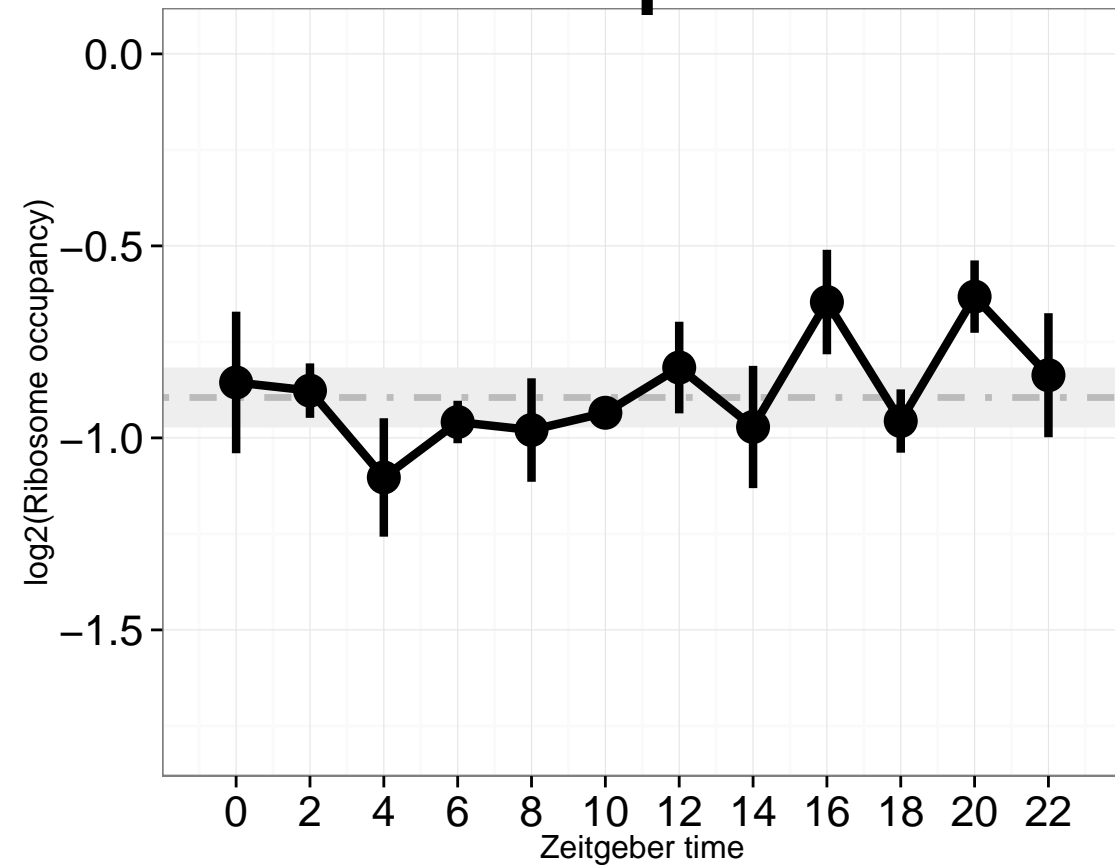

Supplement: Supplementary file 1196 [file 1]

# Igfbp2

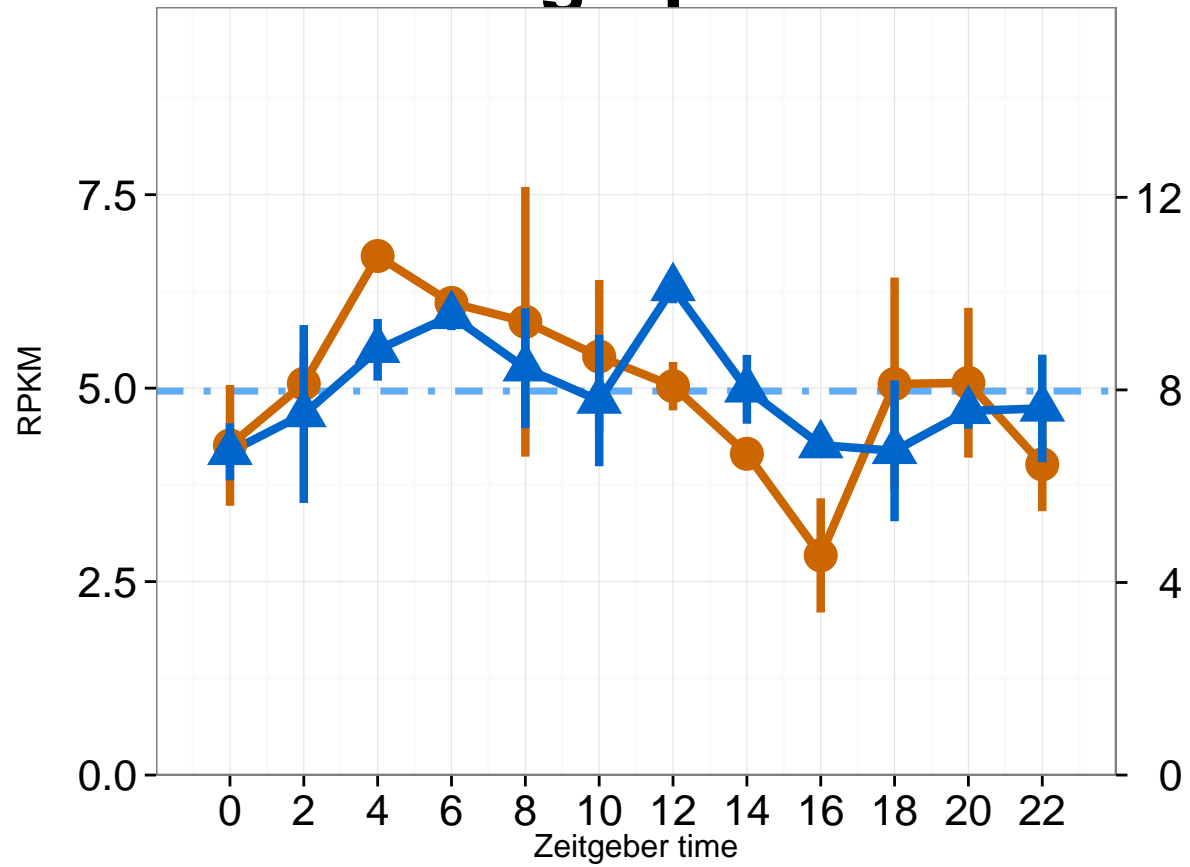

# Igfbp2

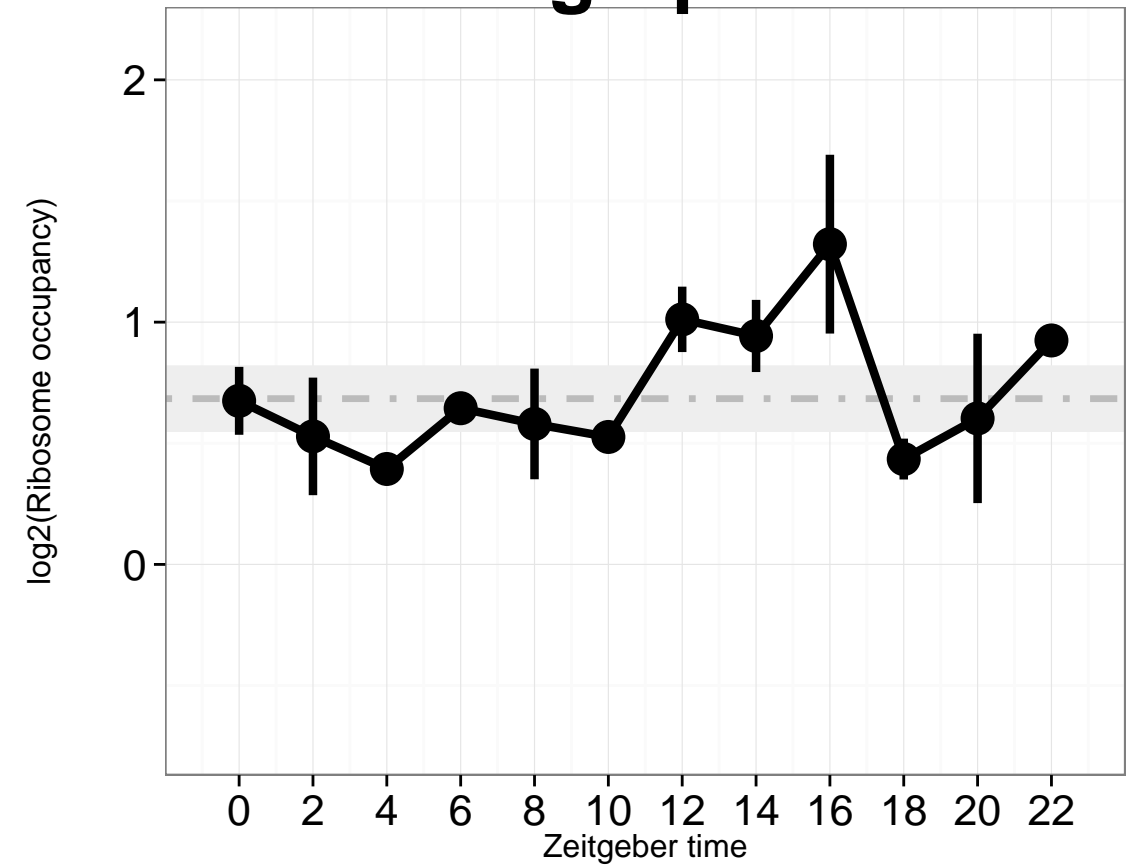

Supplement: Supplementary file 1197 [file 1]

## Srsf11

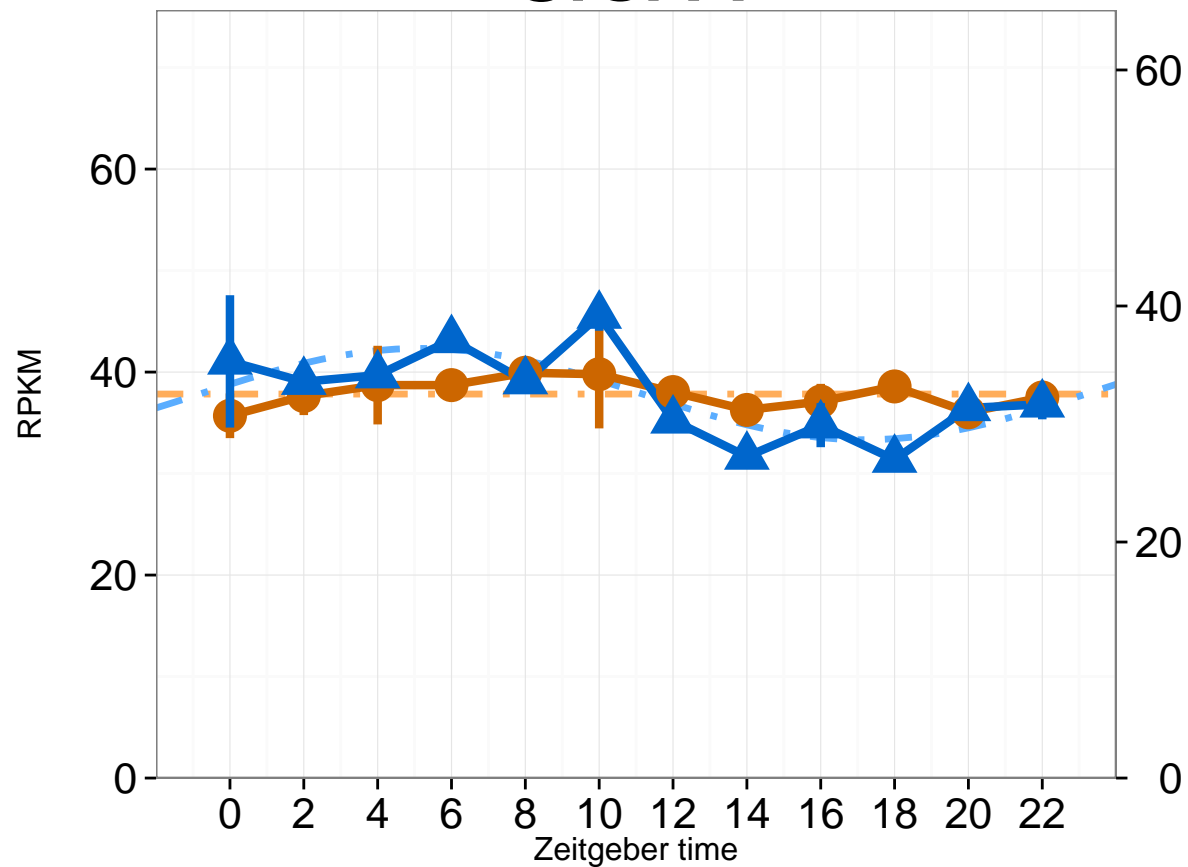

## Srsf11

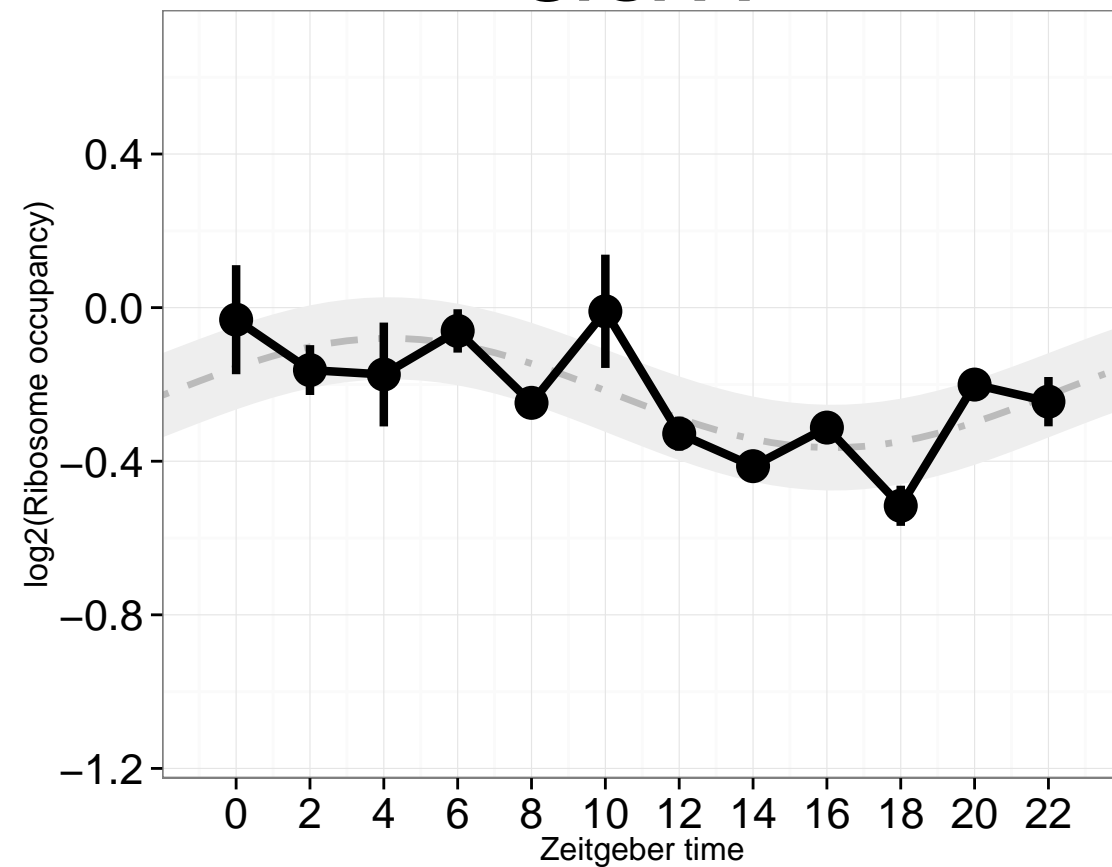

Supplement: Supplementary file 1198 [file 1]

## Celf1

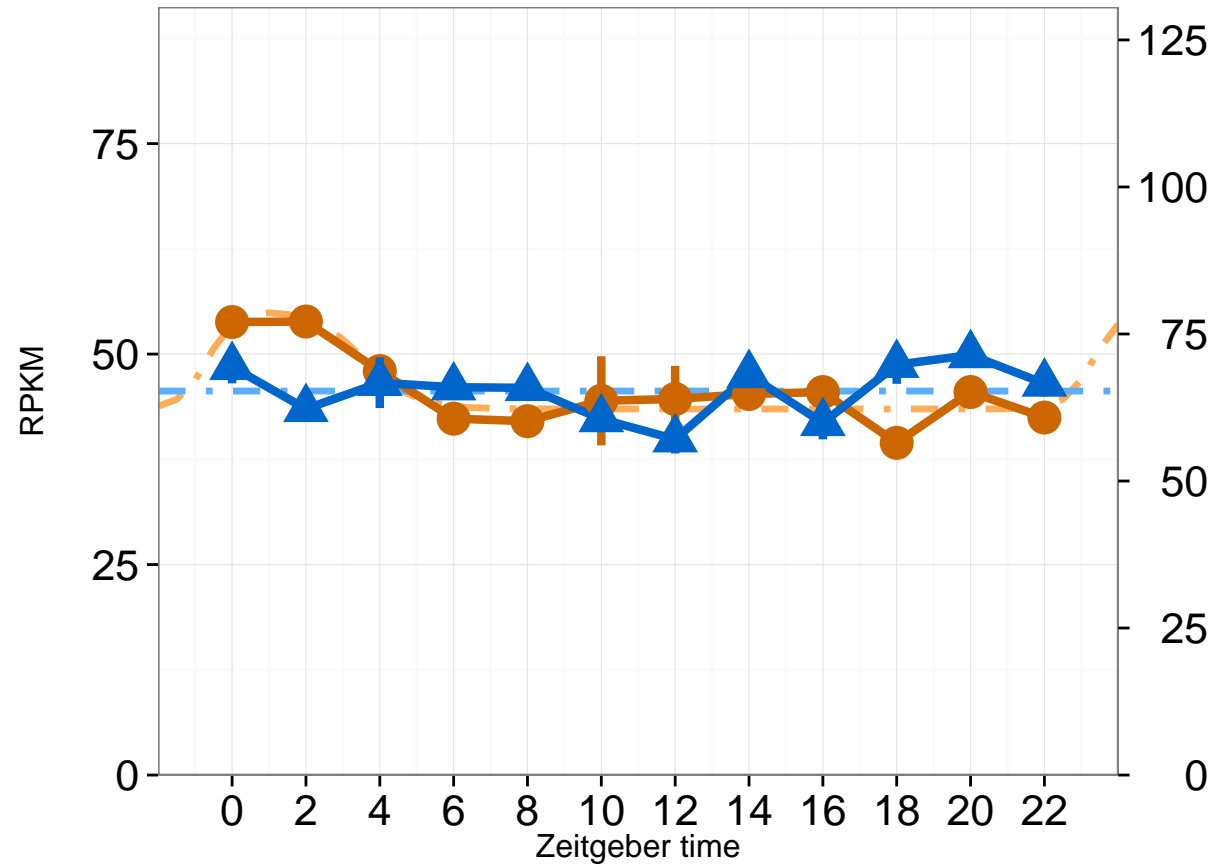

## Celf1

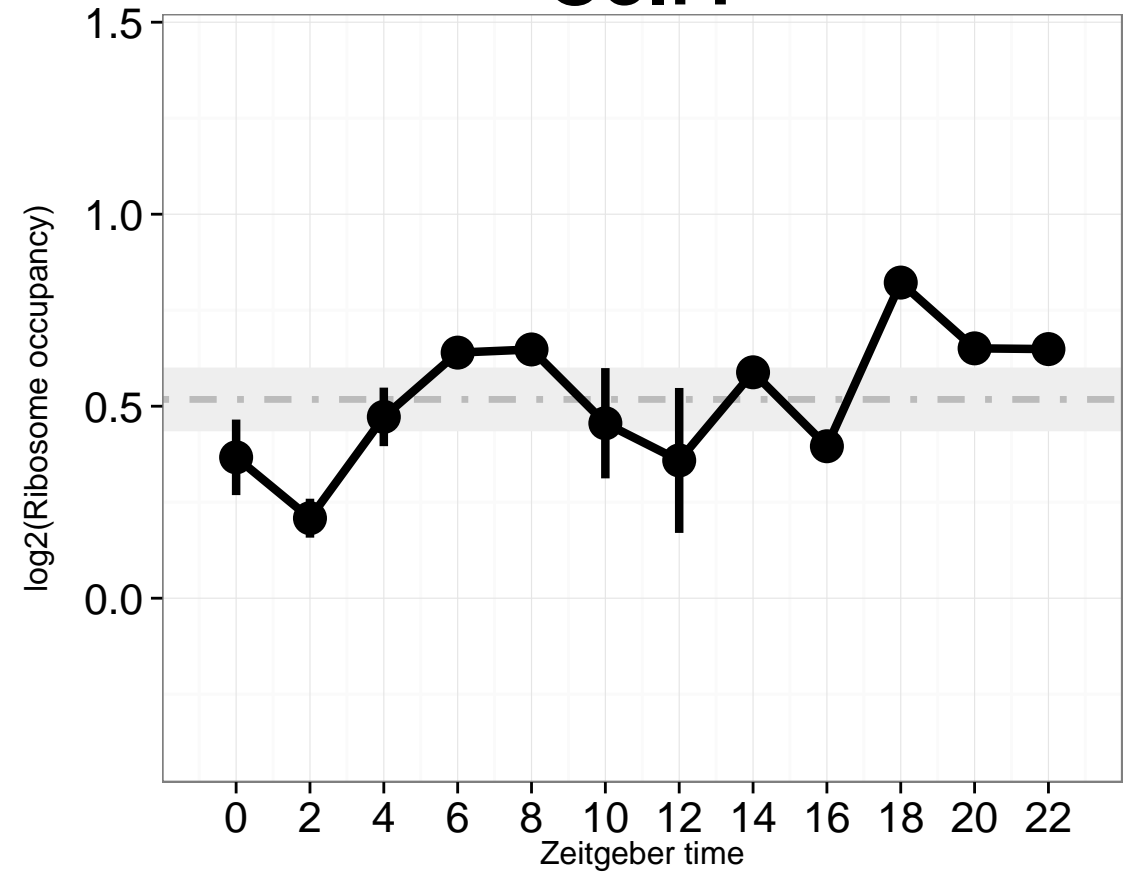

Supplement: Supplementary file 1199 [file 1]

## Cryz

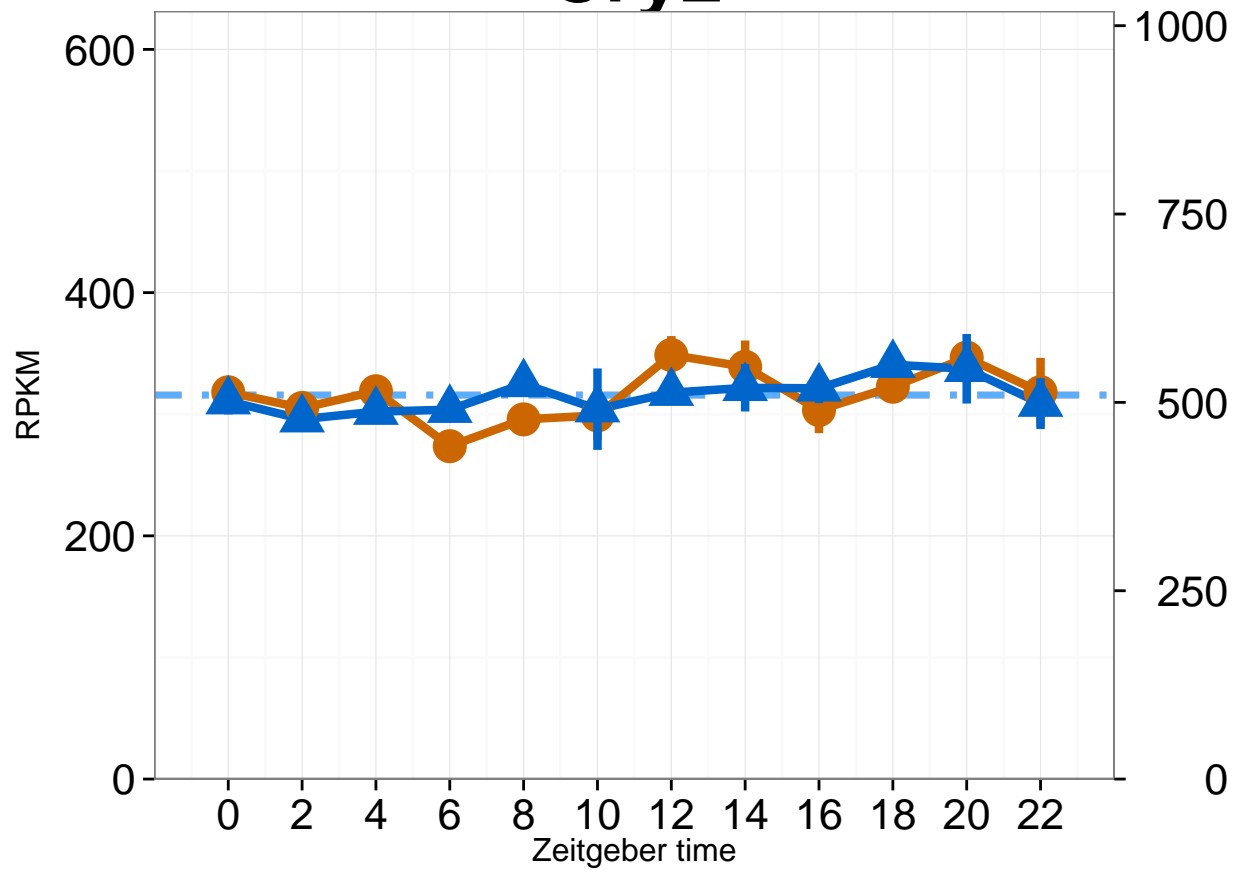

## Cryz

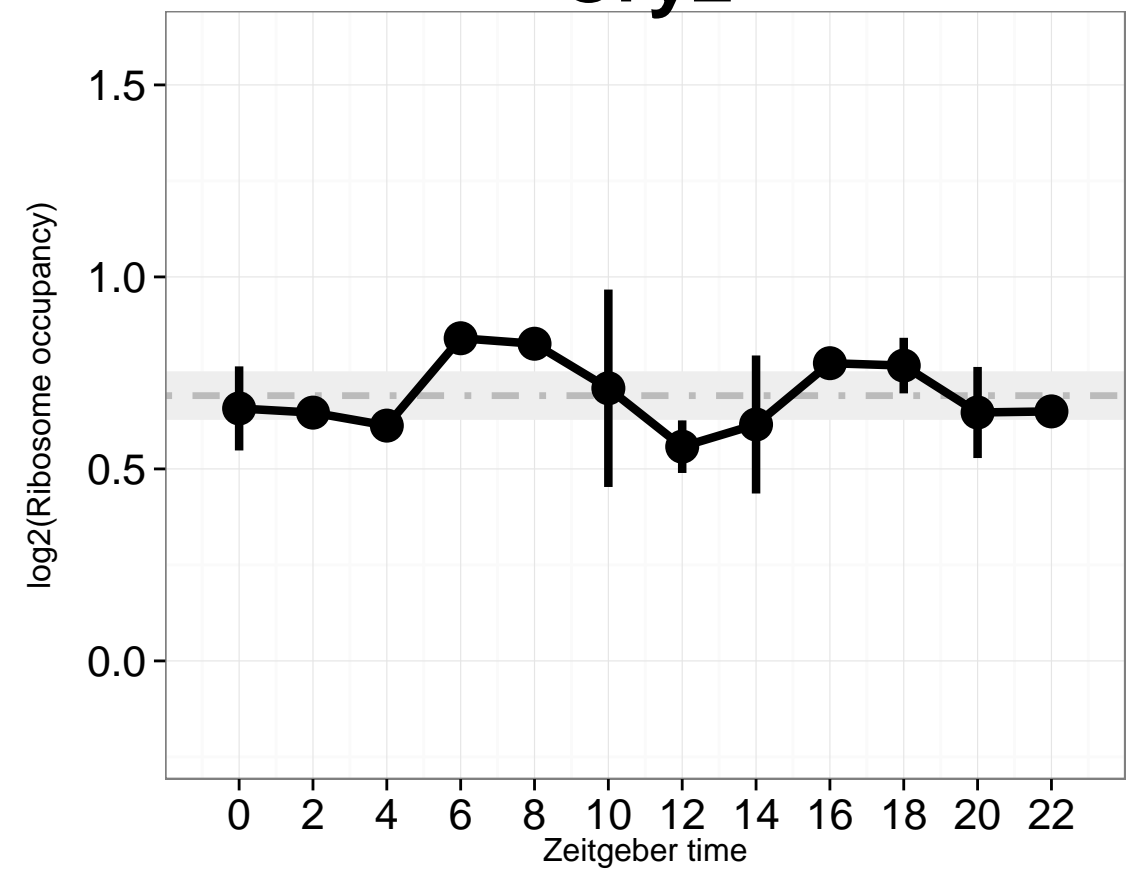

Supplement: Supplementary file 1200 [file 1]

# Sbf1

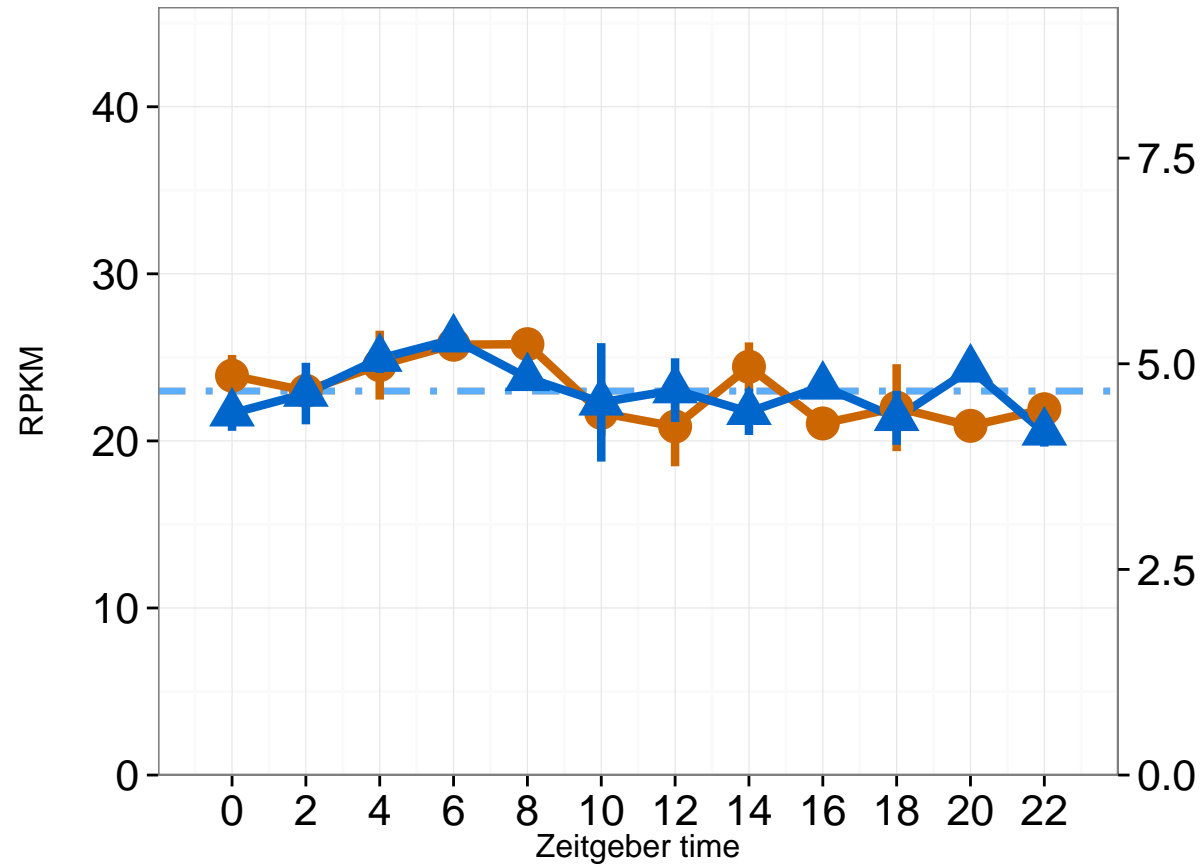

# Sbf1

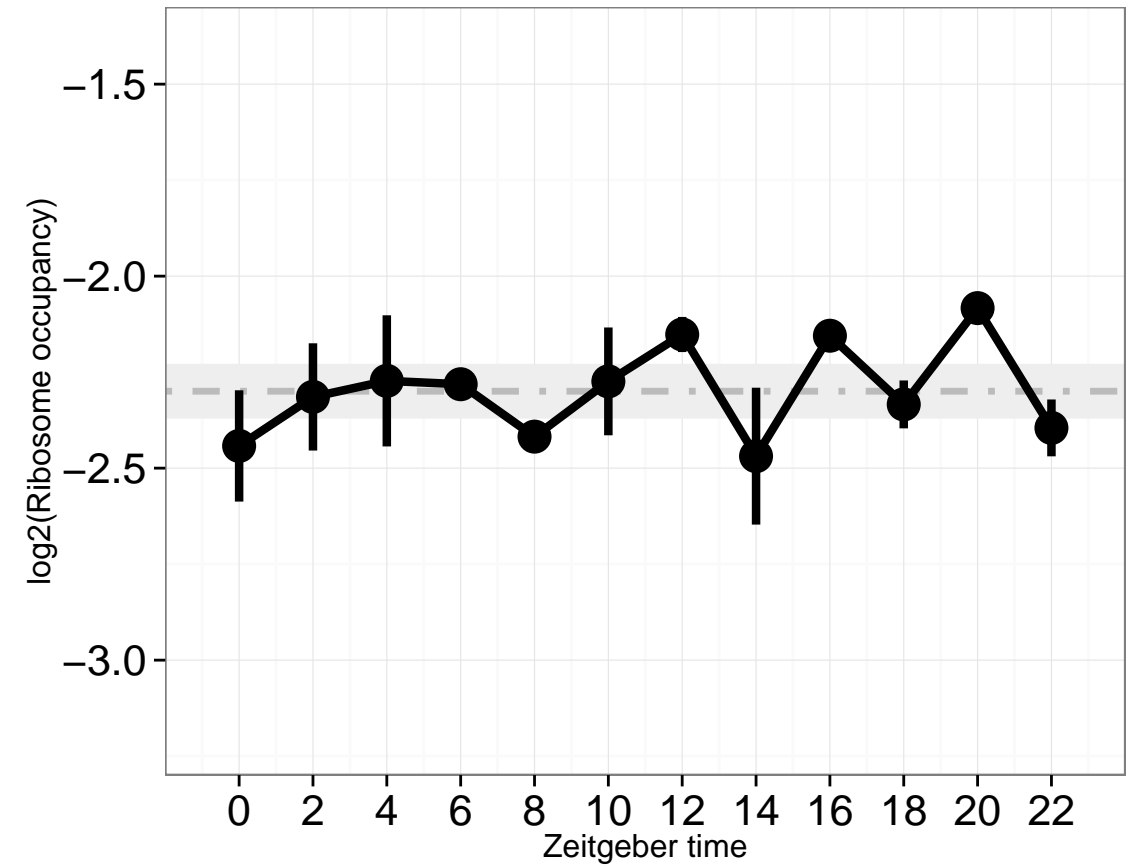

Supplement: Supplementary file 1201 [file 1]

# Igfbp3

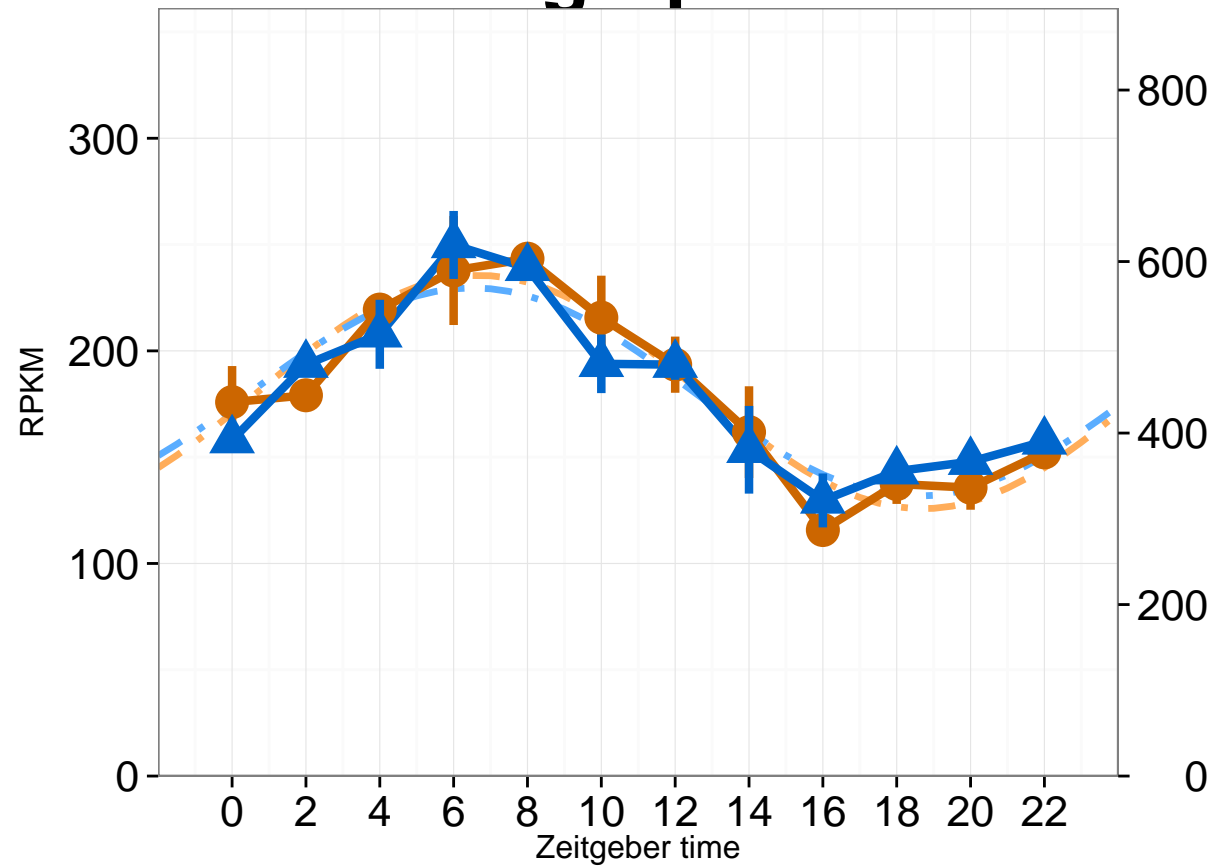

# Igfbp3

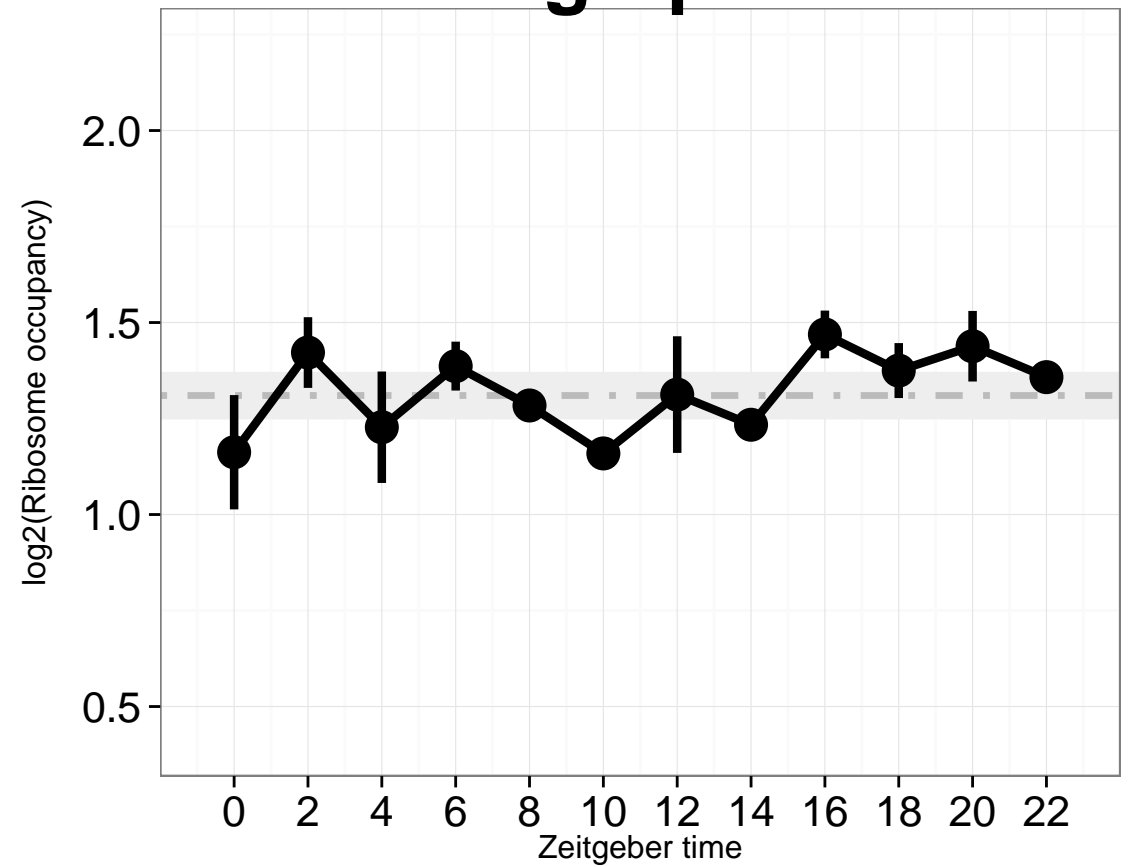

Supplement: Supplementary file 1202 [file 1]

# Gpr176

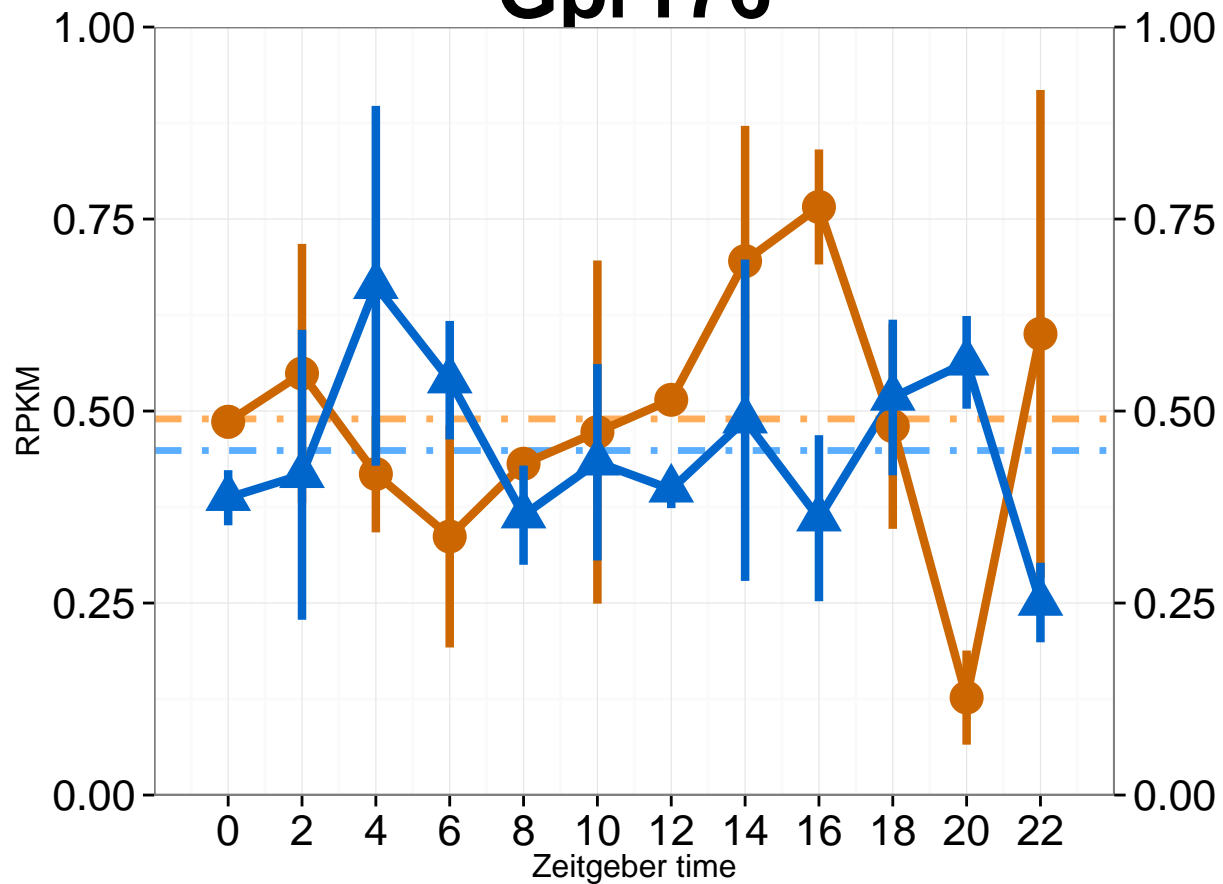

# Gpr176

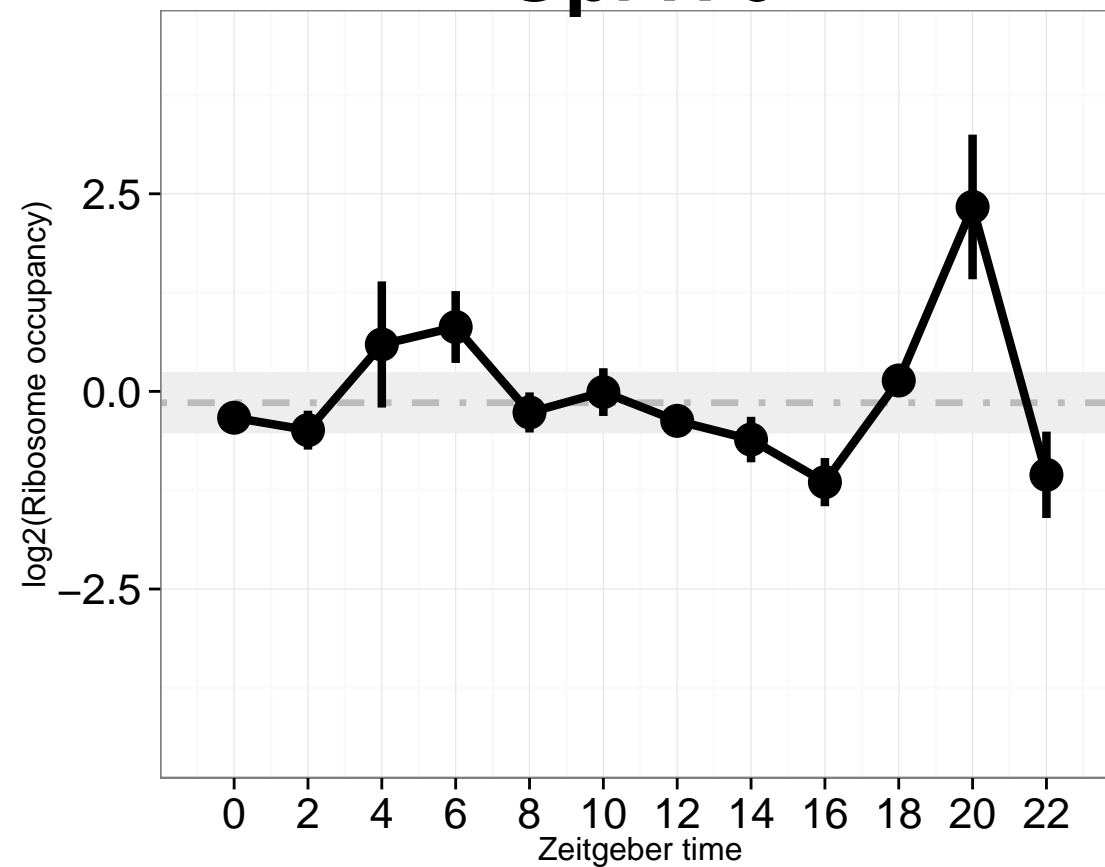

Supplement: Supplementary file 1203 [file 1]

## Nek9

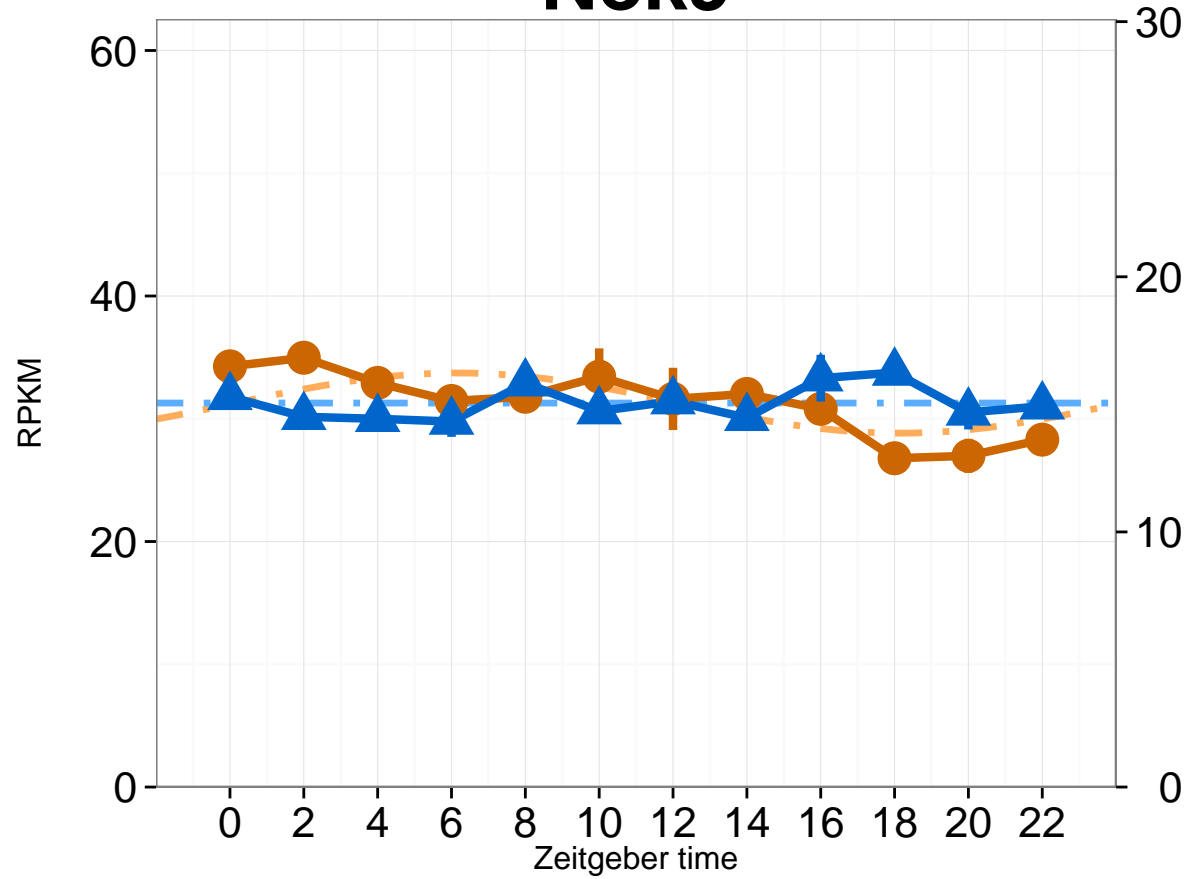

## Nek9

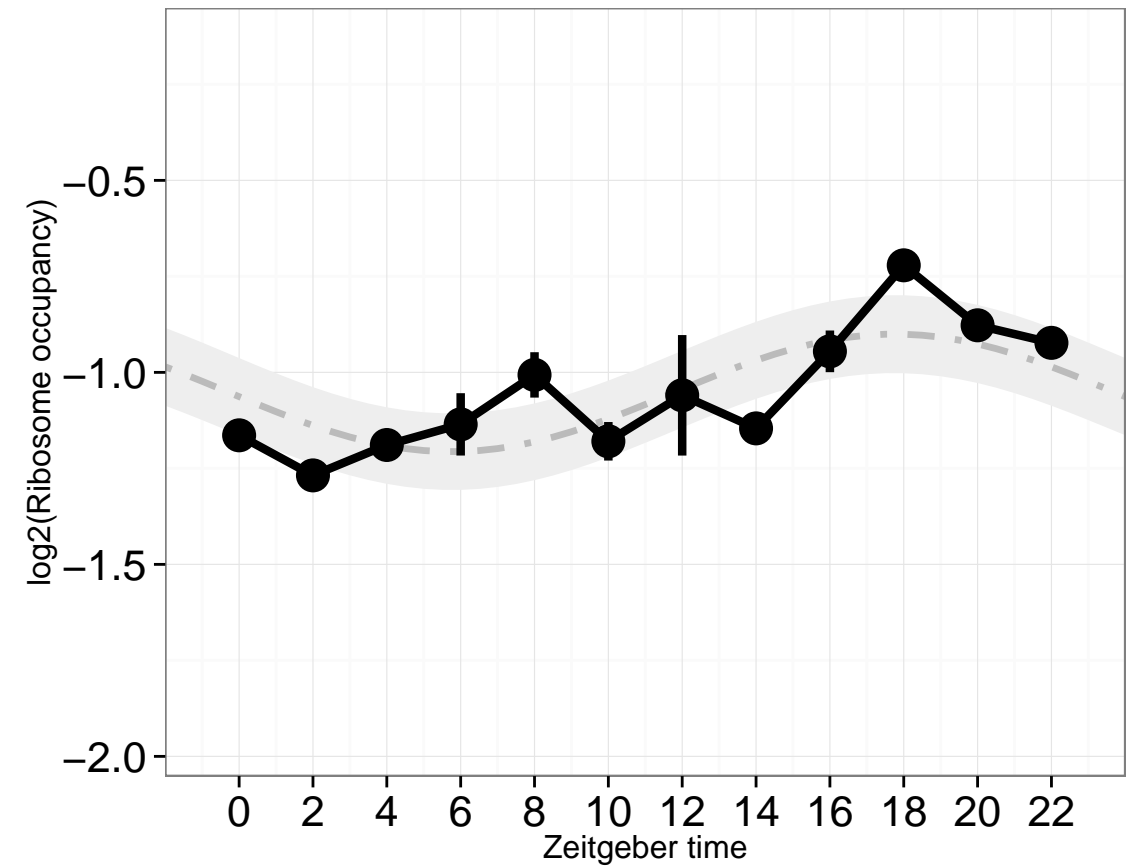

Supplement: Supplementary file 1204 [file 1]

## Amfr

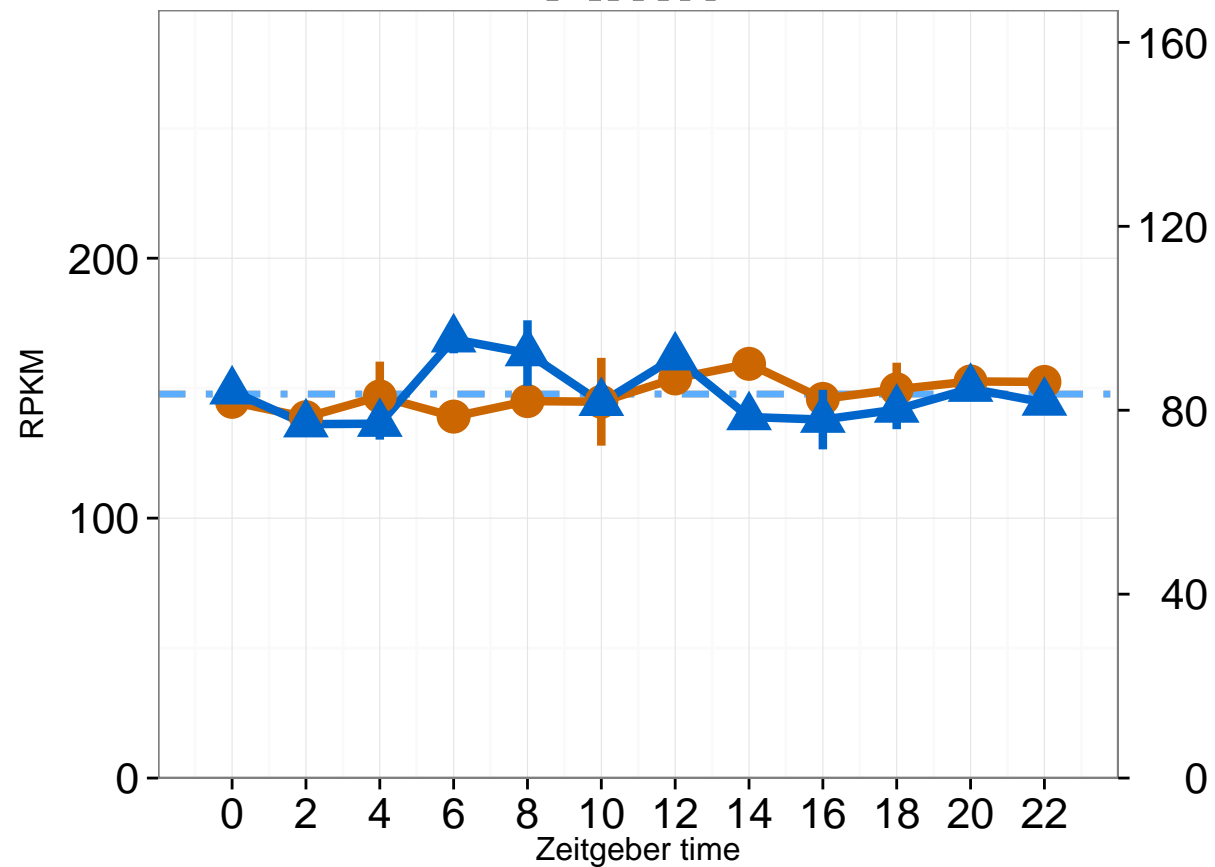

## Amfr

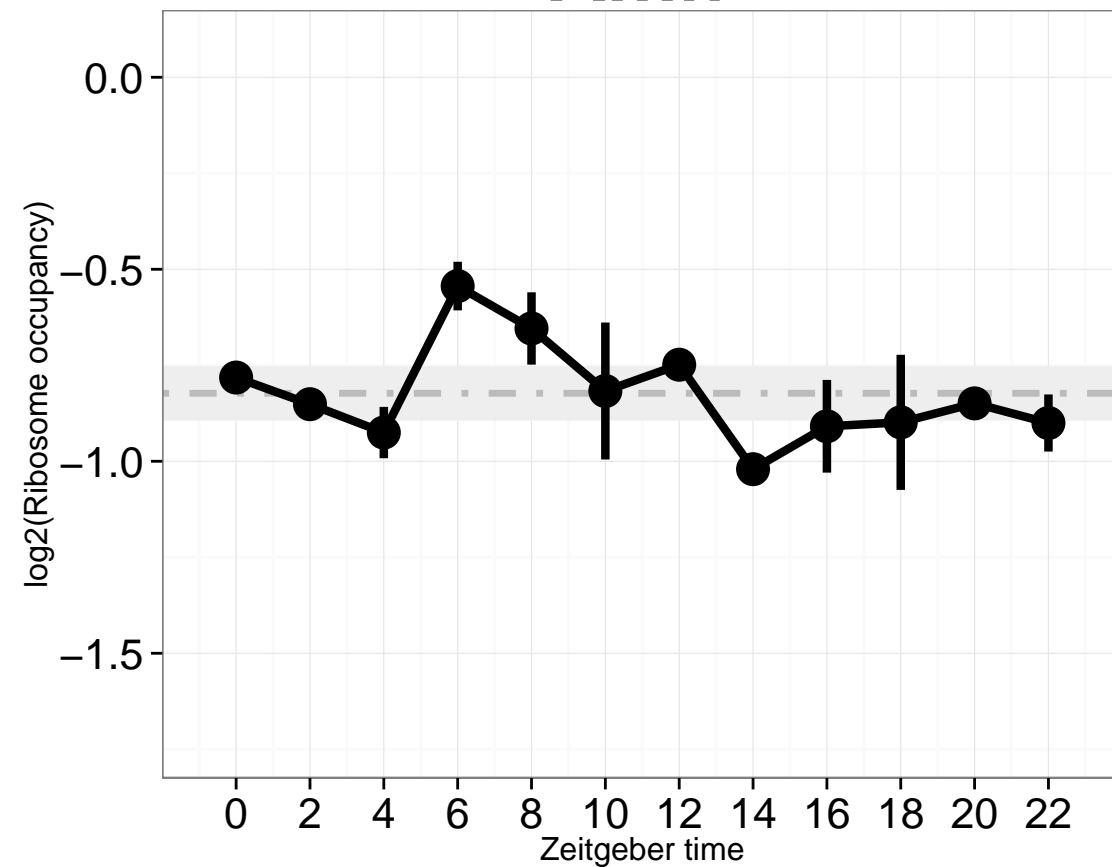

Supplement: Supplementary file 1205 [file 1]
