# Supplementary material (part 13 of 133)
Source: publisher figshare collection journal article supplement (https://springernature.figshare.com/articles/dataset/_/4903193)

## Snx20

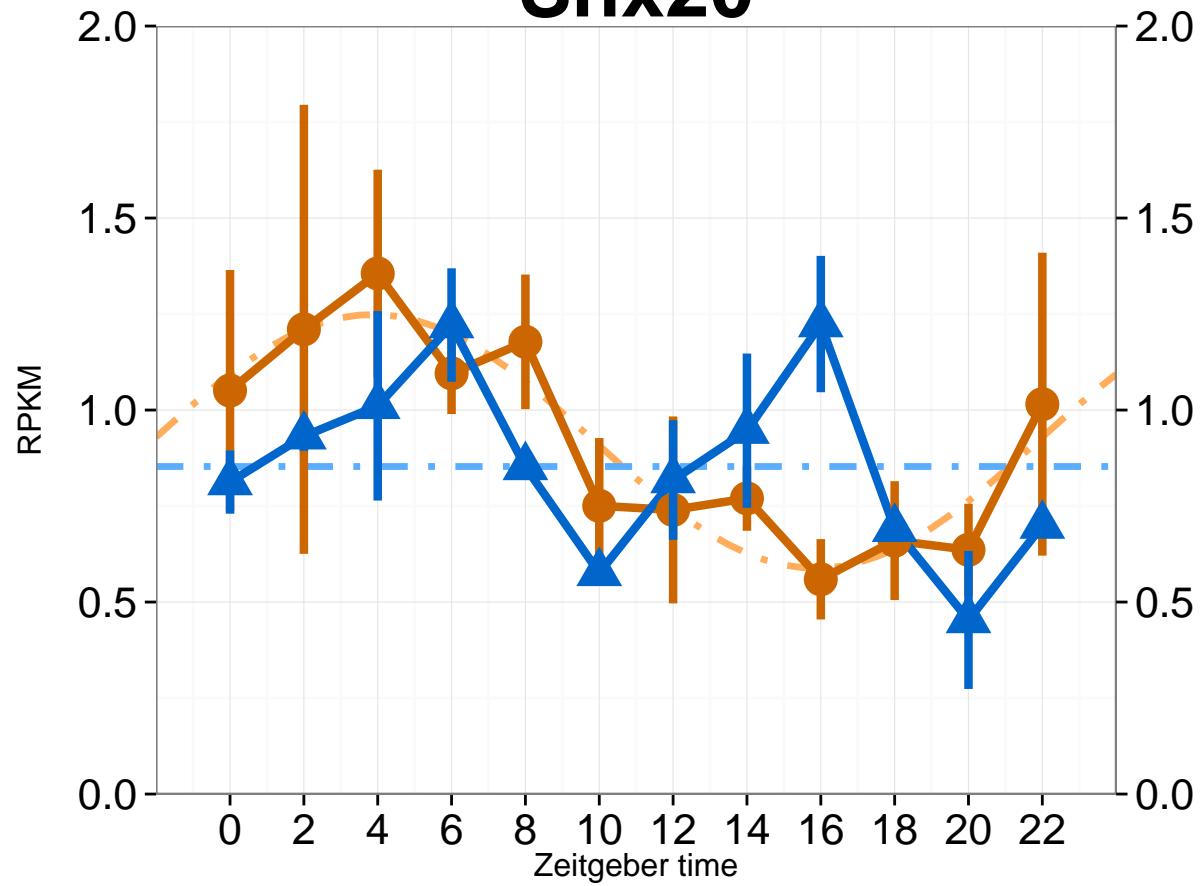

## Snx20

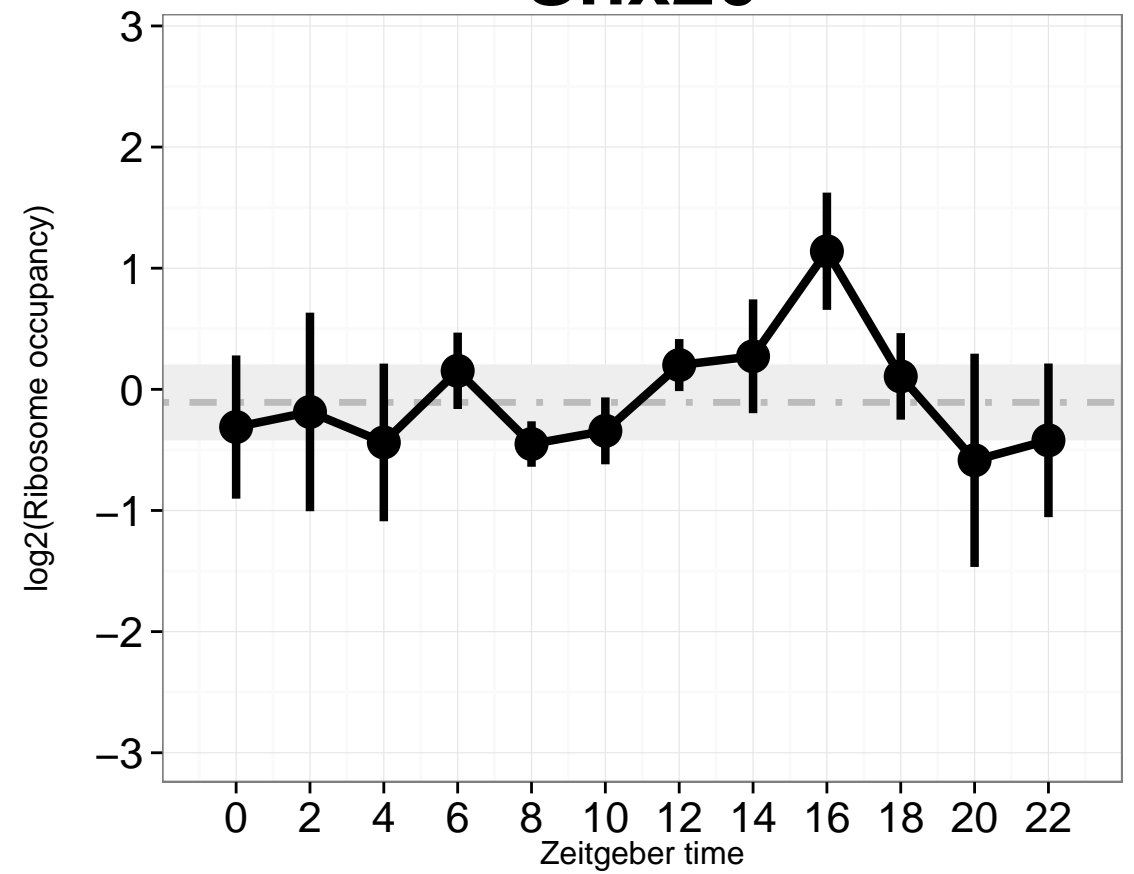

Supplement: Supplementary file 1206 [file 1]

## Pdcd2l

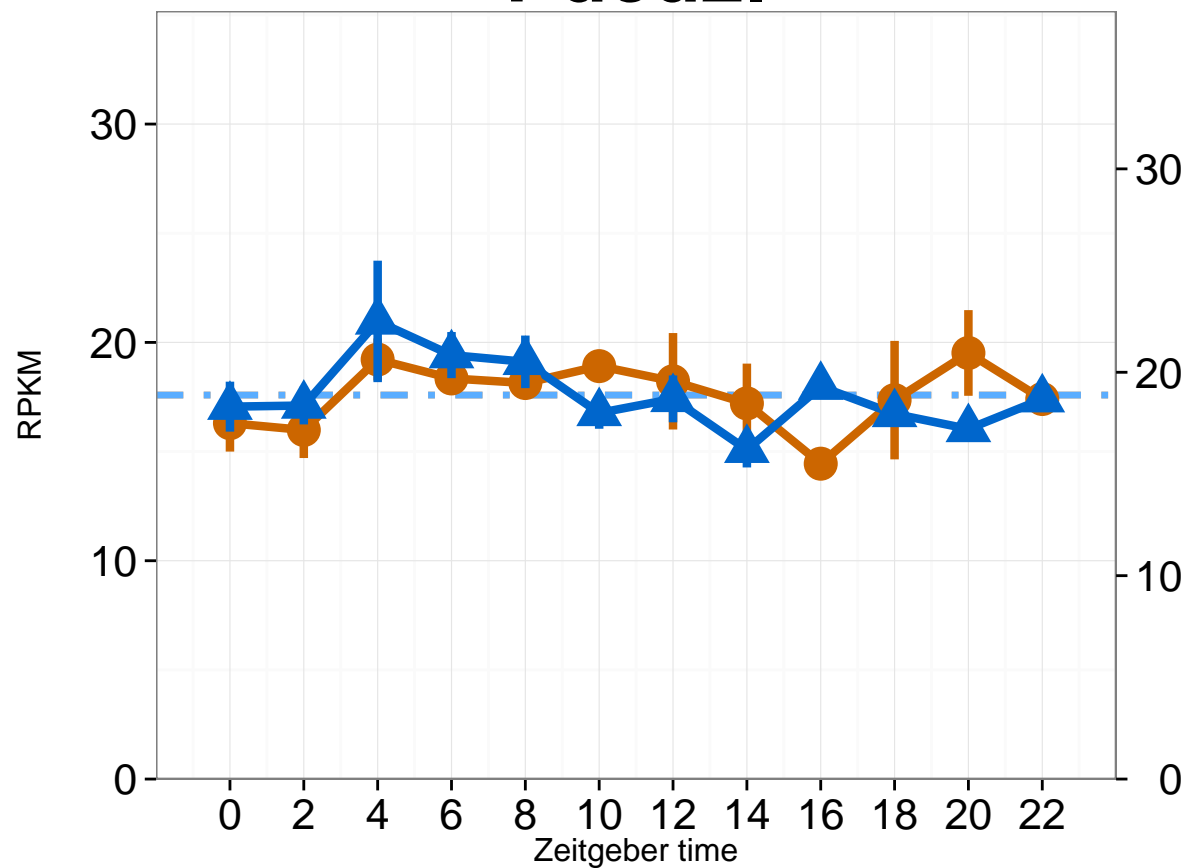

## Pdcd2l

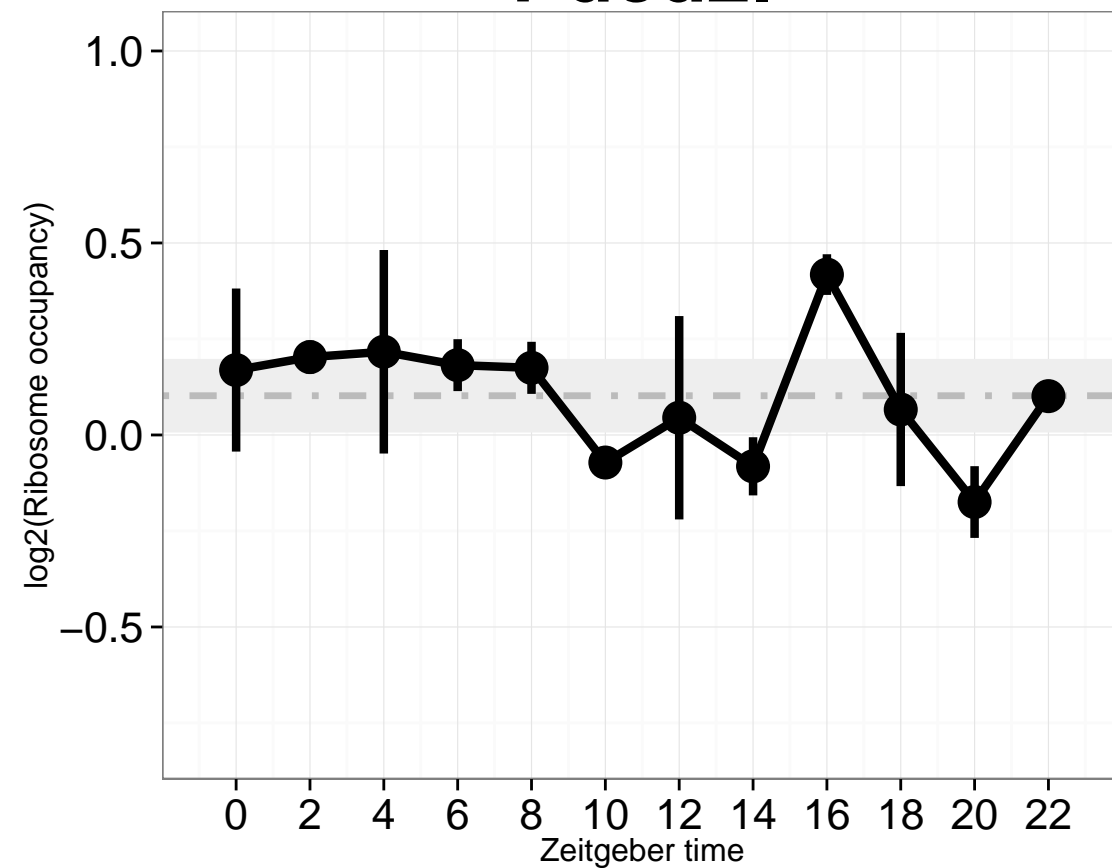

Supplement: Supplementary file 1207 [file 1]

# Ehbp1

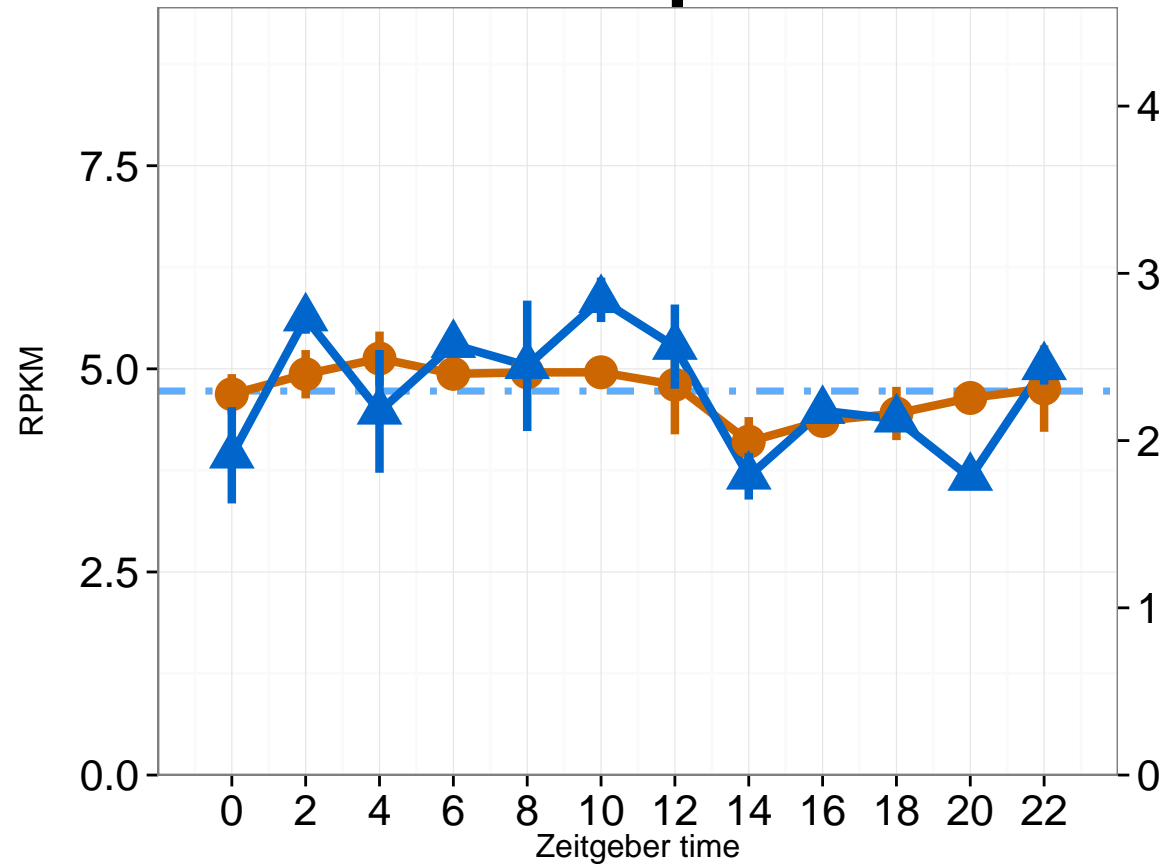

# Ehbp1

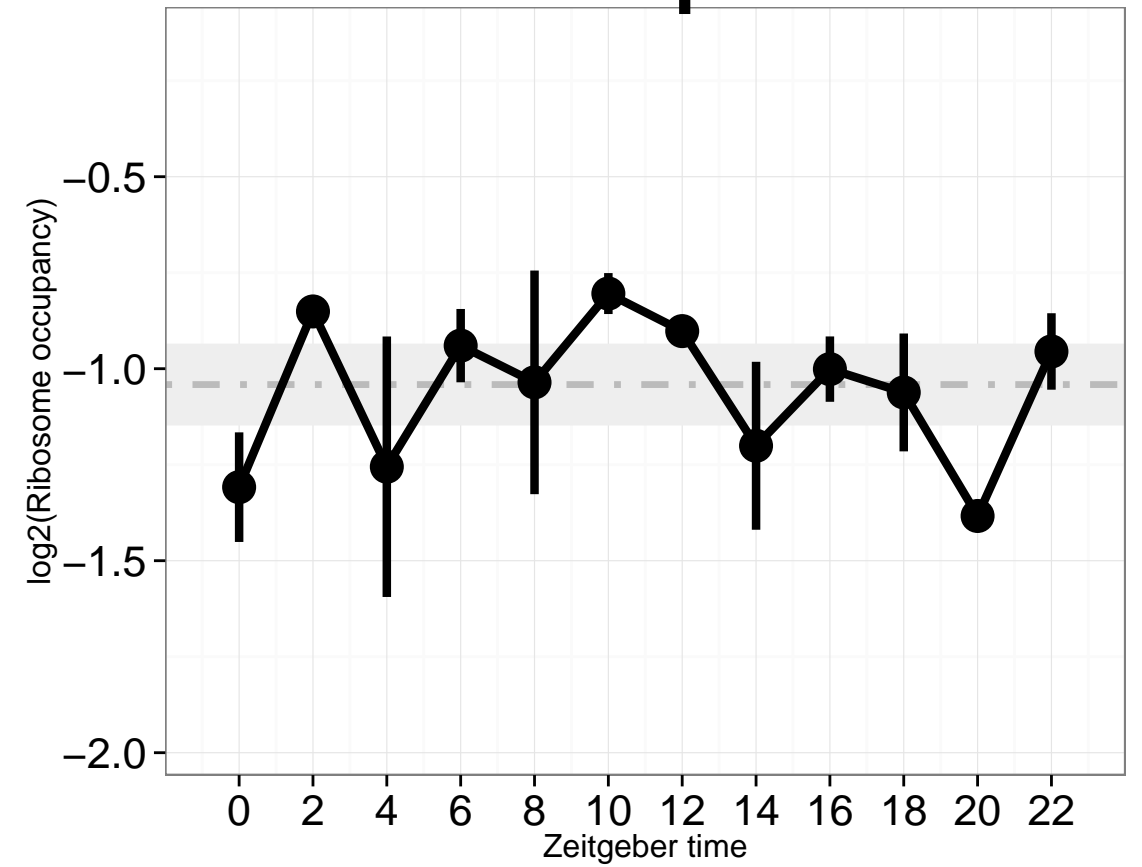

Supplement: Supplementary file 1208 [file 1]

# Ccdc103

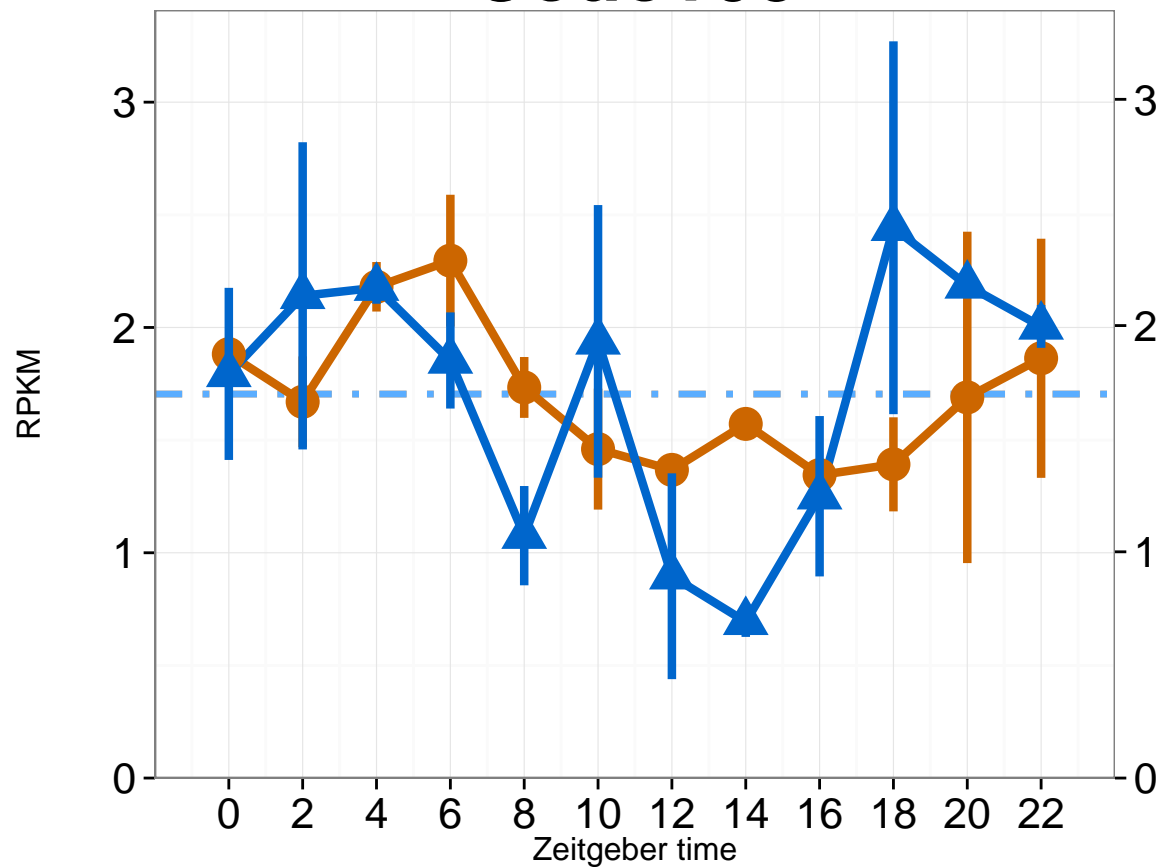

# Ccdc103

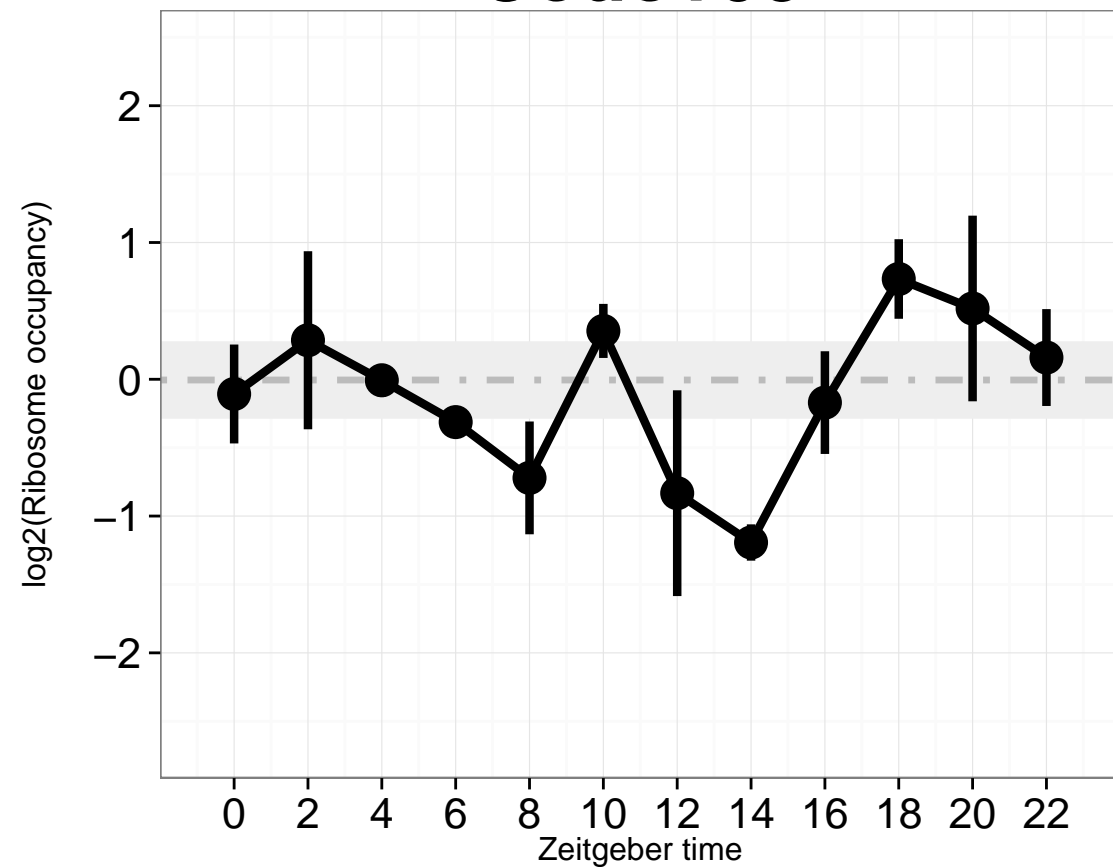

Supplement: Supplementary file 1209 [file 1]

**Cenpw TR**

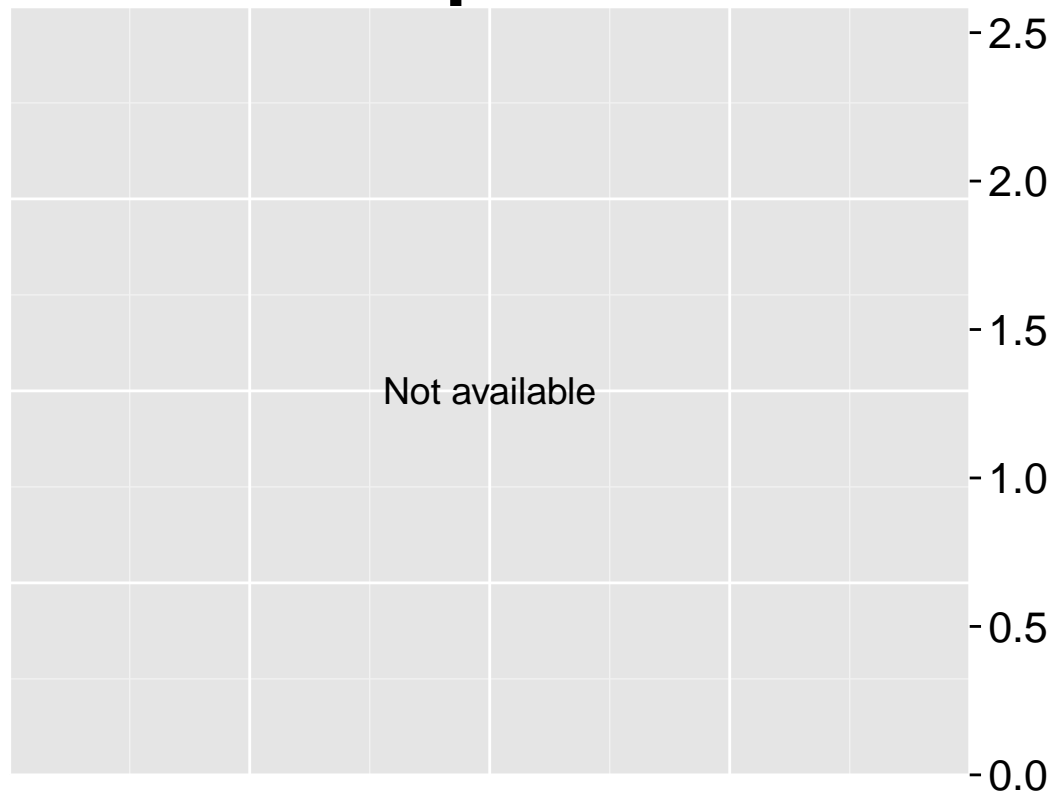

**Cenpw log2(Ribosome occupancy**

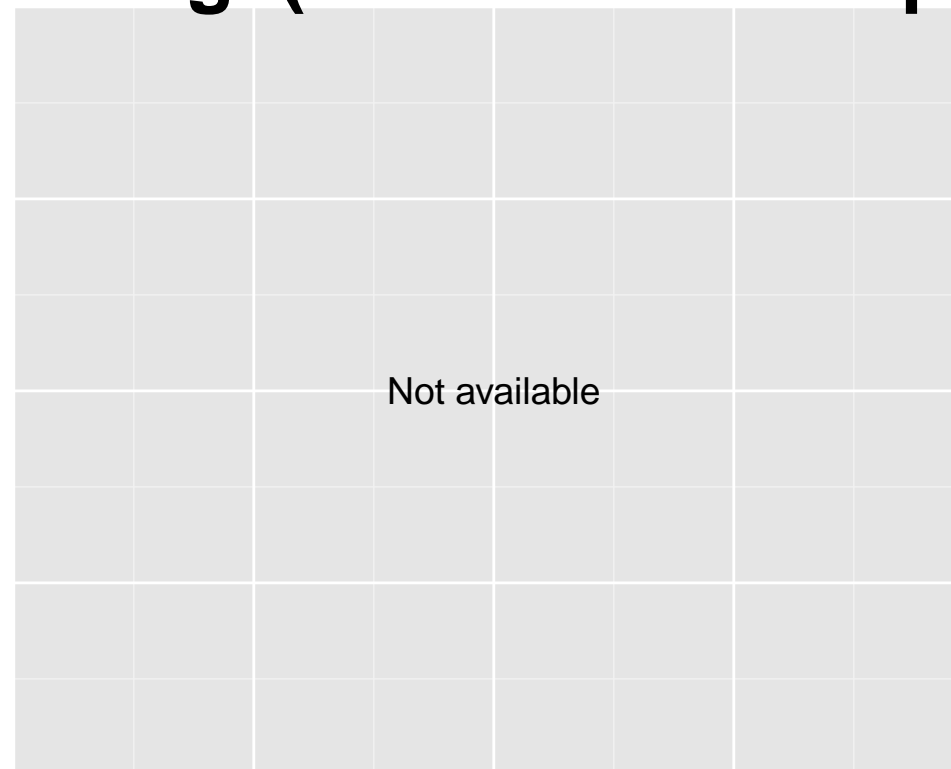

Supplement: Supplementary file 1210 [file 1]

# Pygl

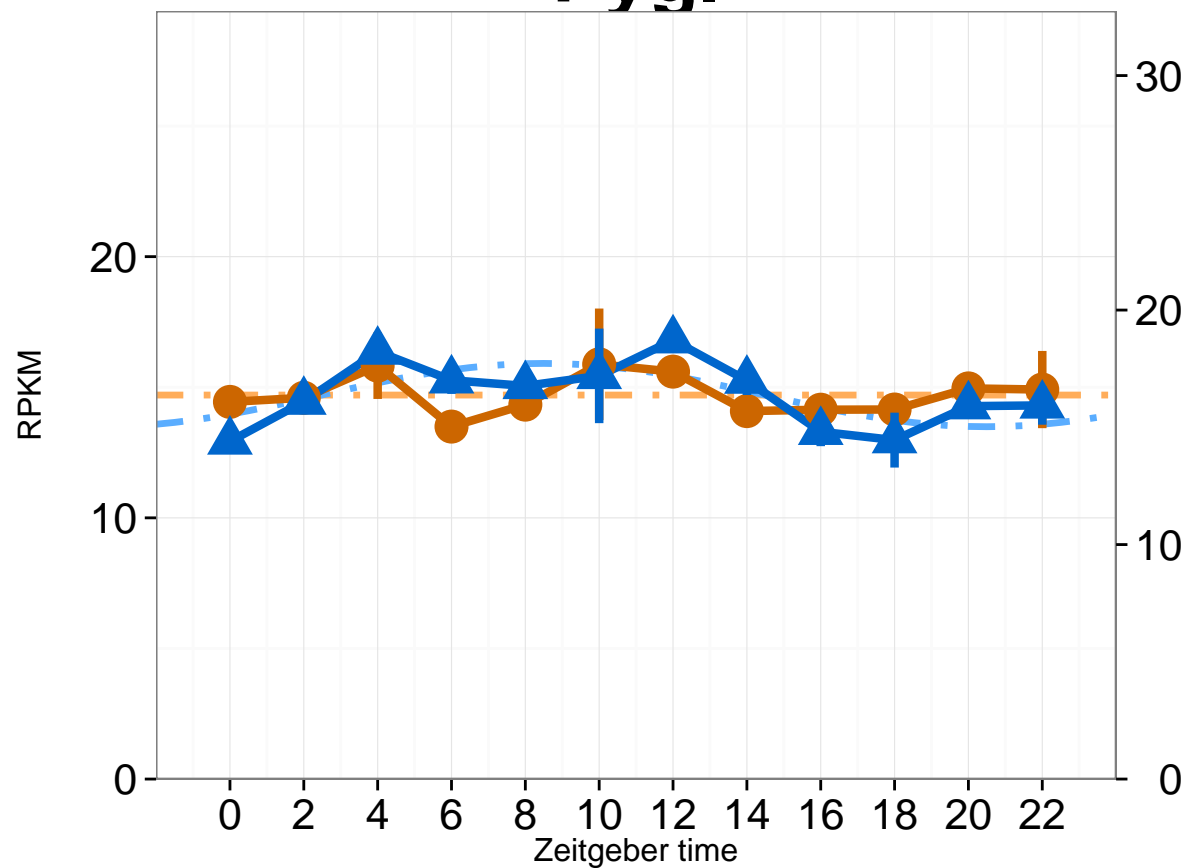

# Pygl

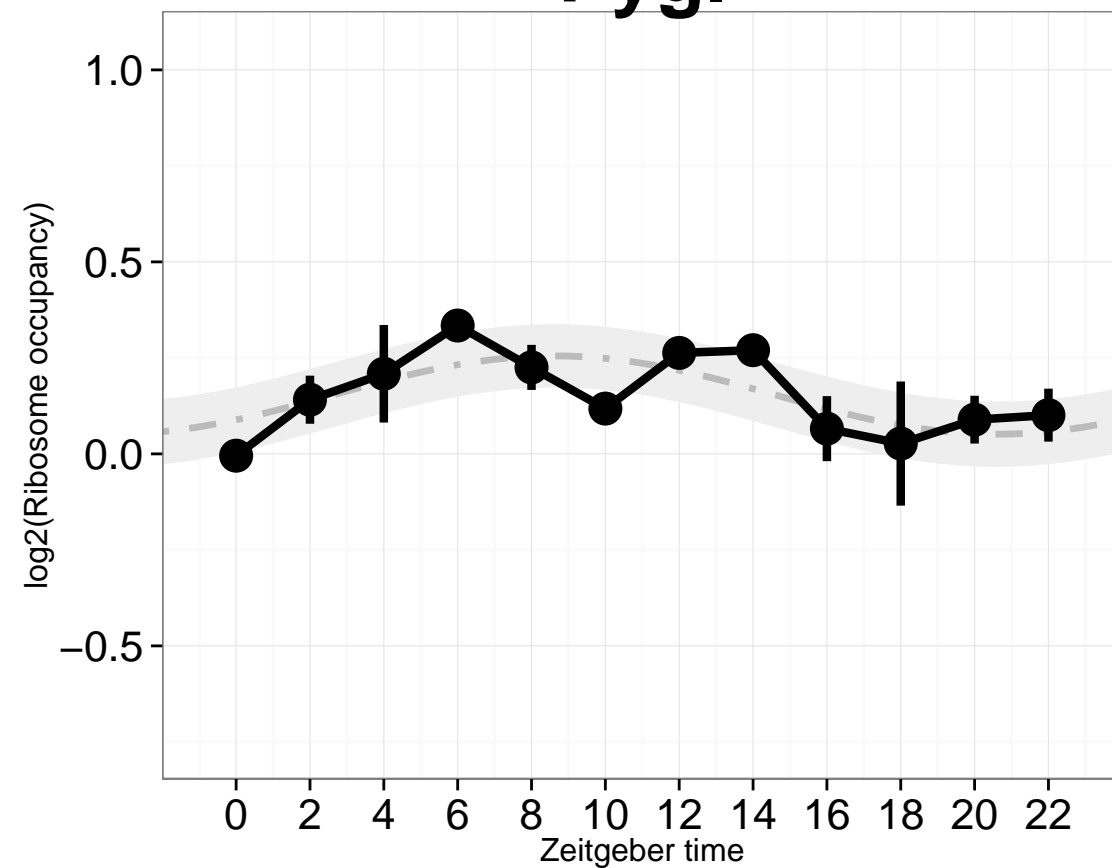

Supplement: Supplementary file 1211 [file 1]

# Strn4

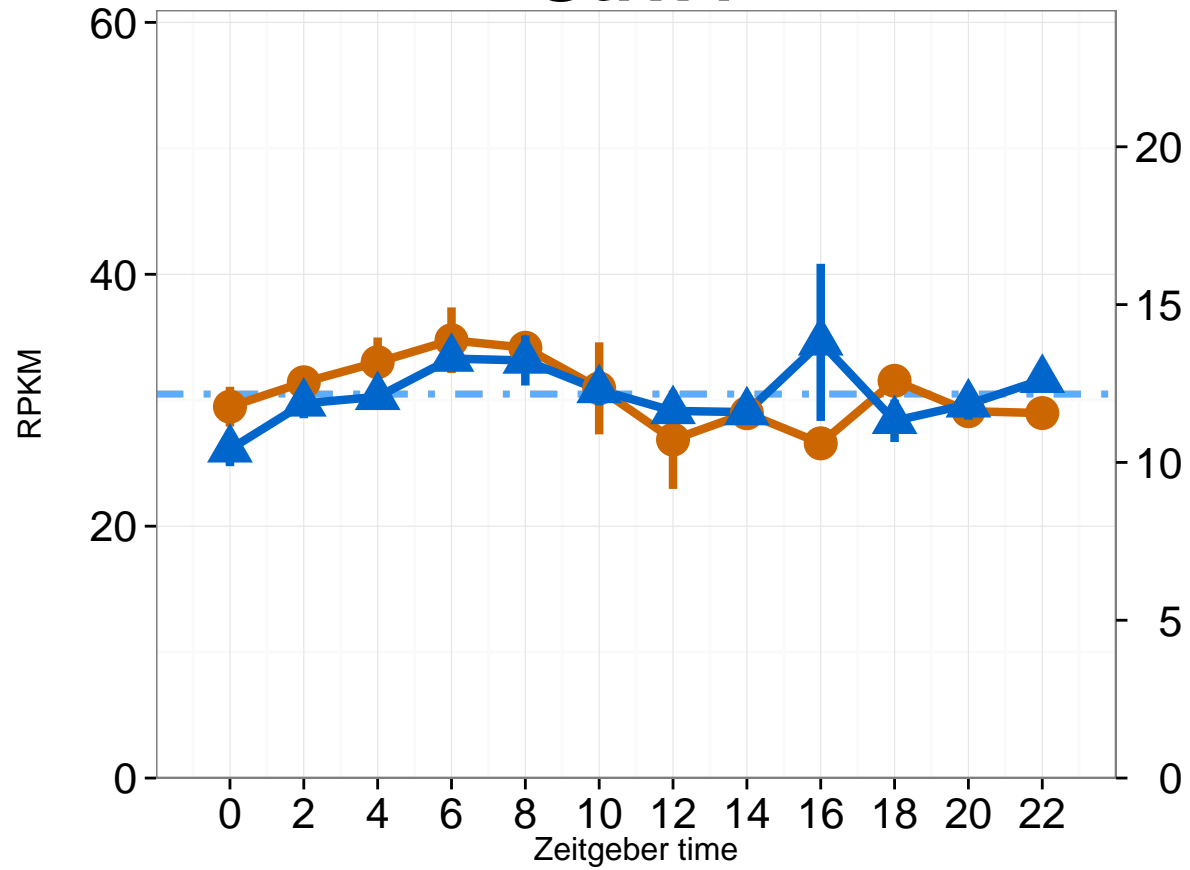

# Strn4

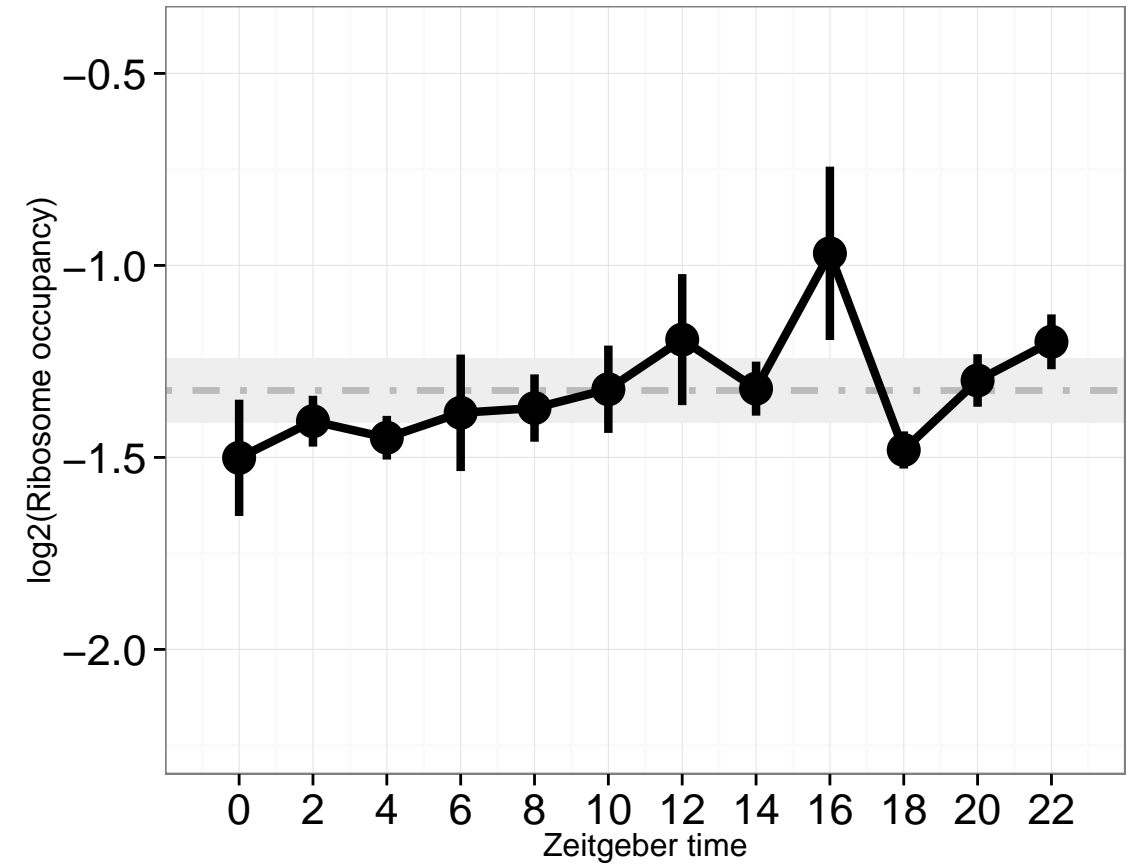

Supplement: Supplementary file 1212 [file 1]

# Zfp462

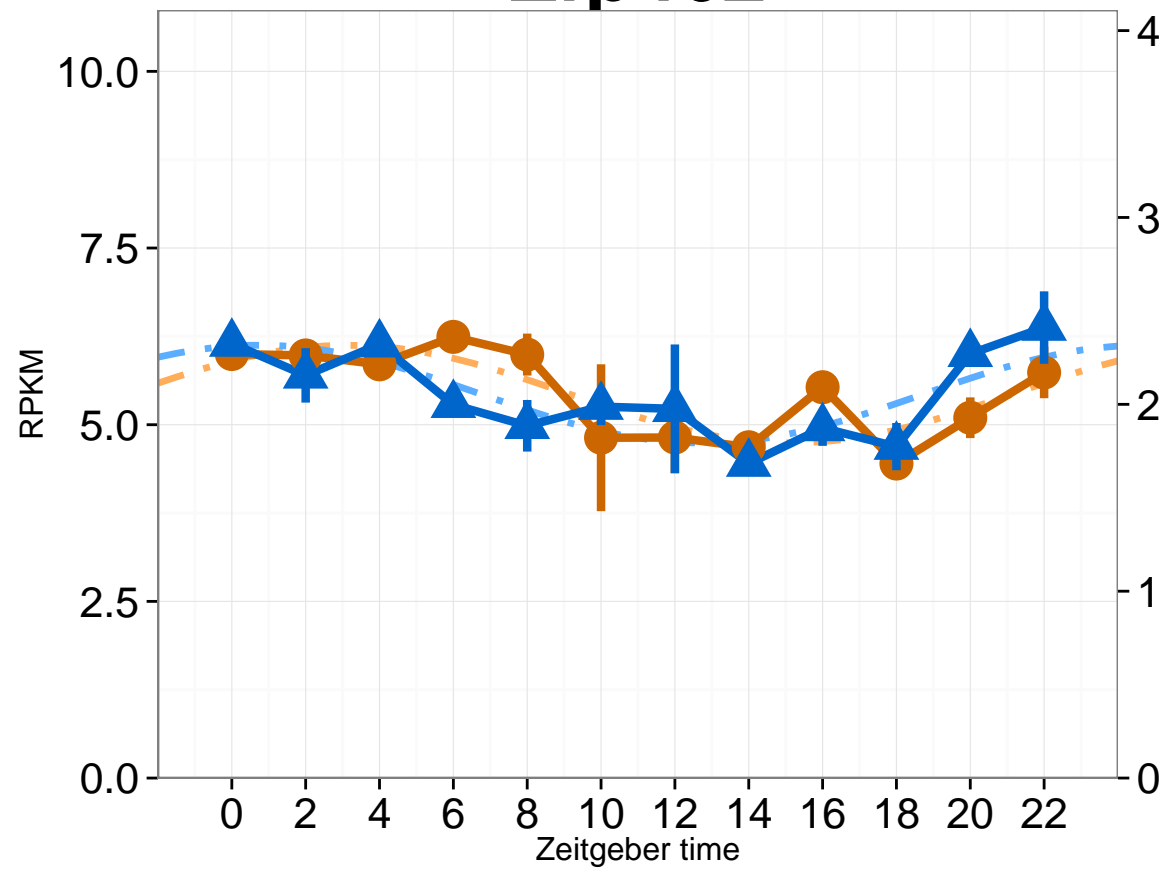

# Zfp462

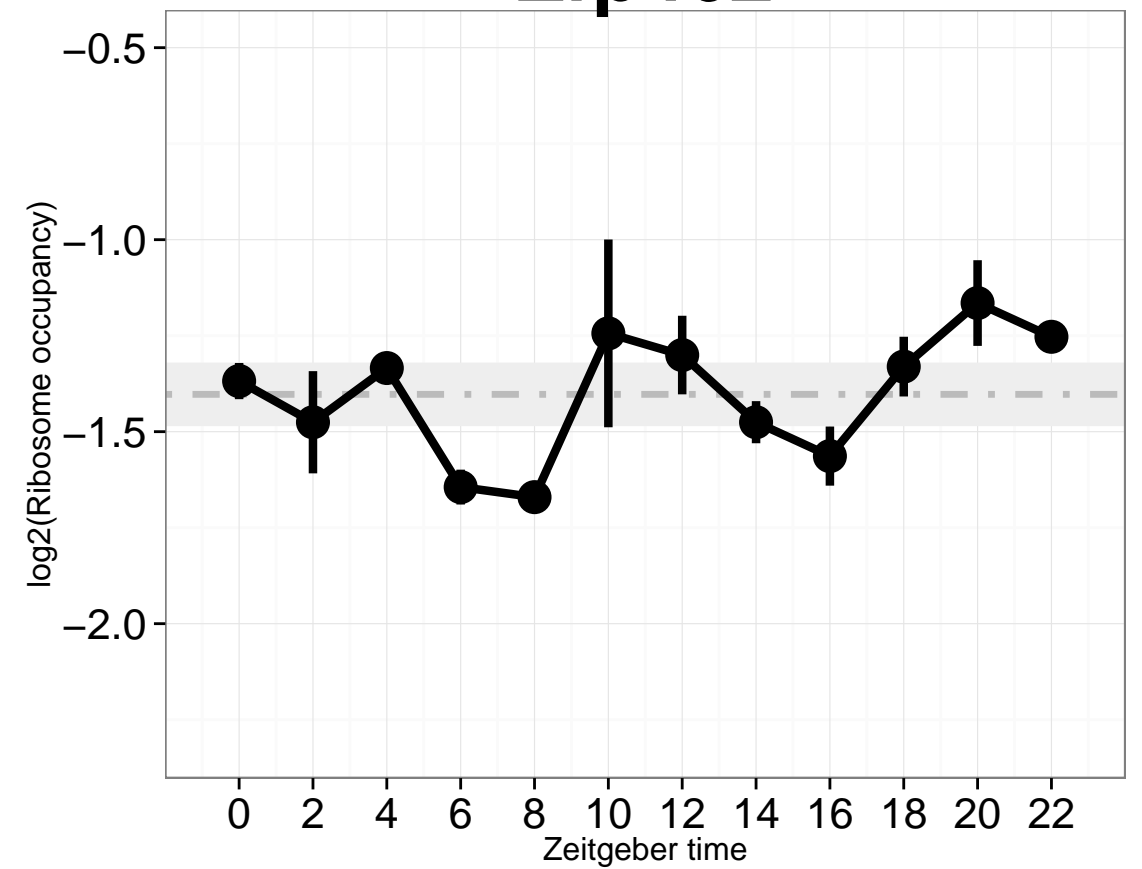

Supplement: Supplementary file 1213 [file 1]

## Xylb

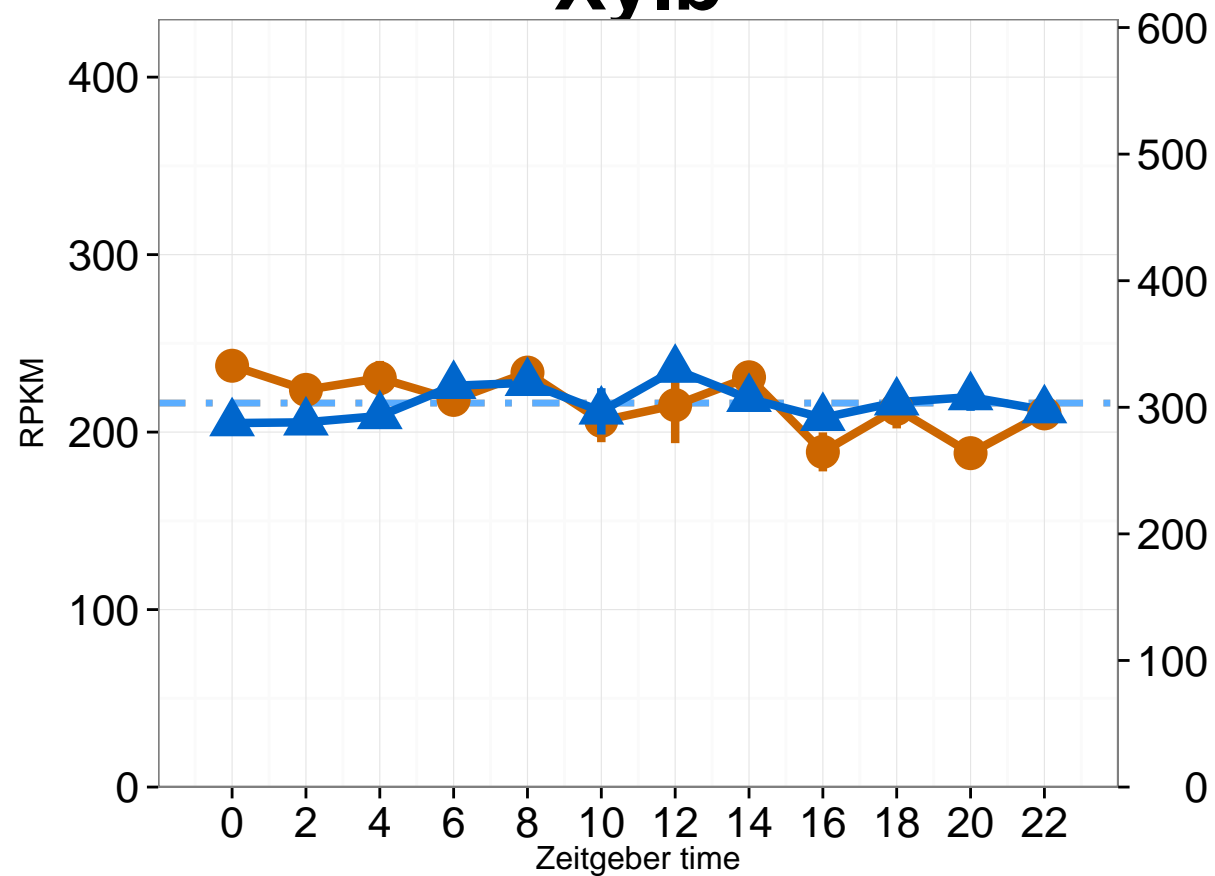

## Xylb

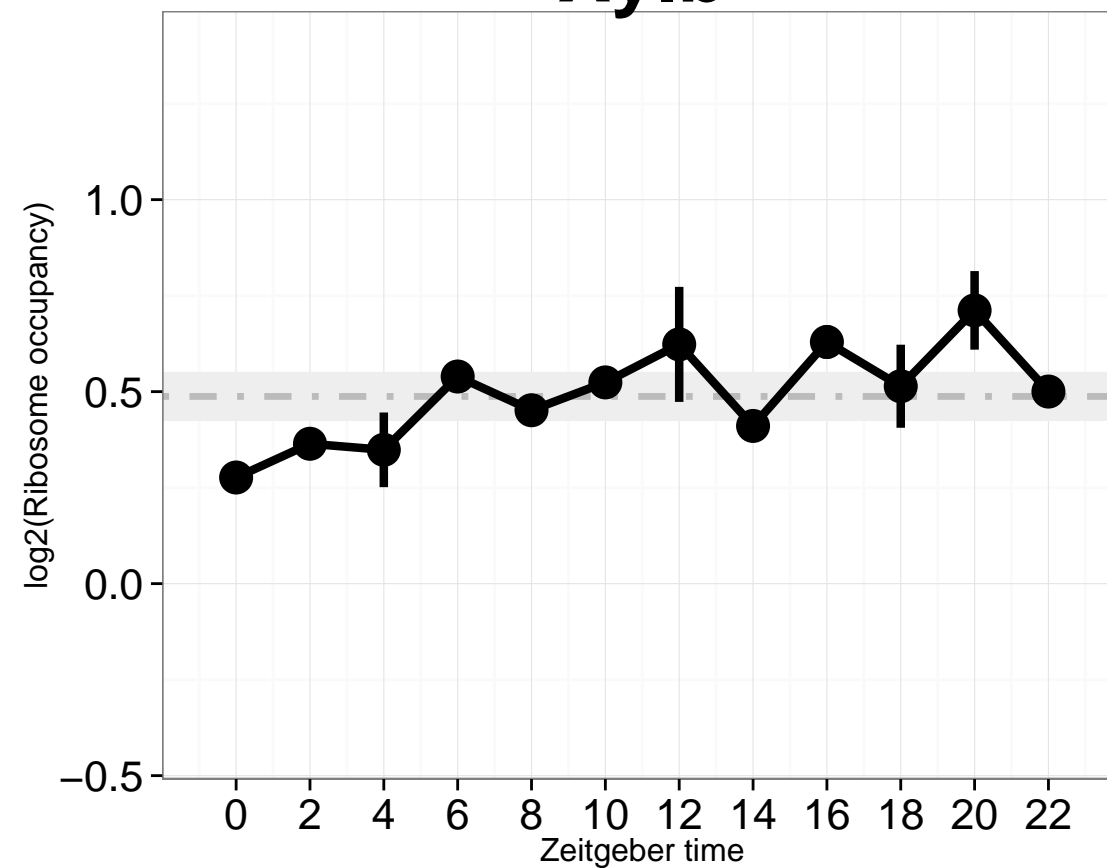

Supplement: Supplementary file 1214 [file 1]

# Mctp2

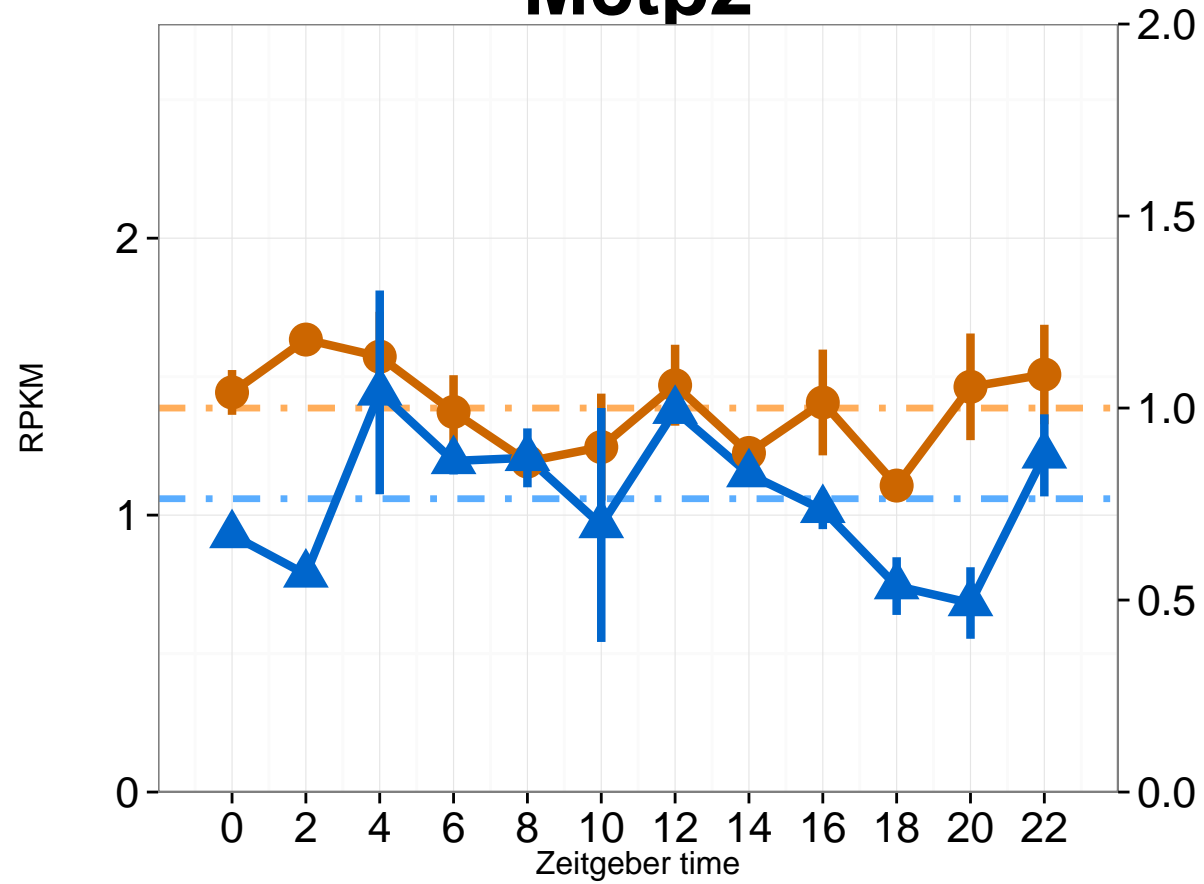

# Mctp2

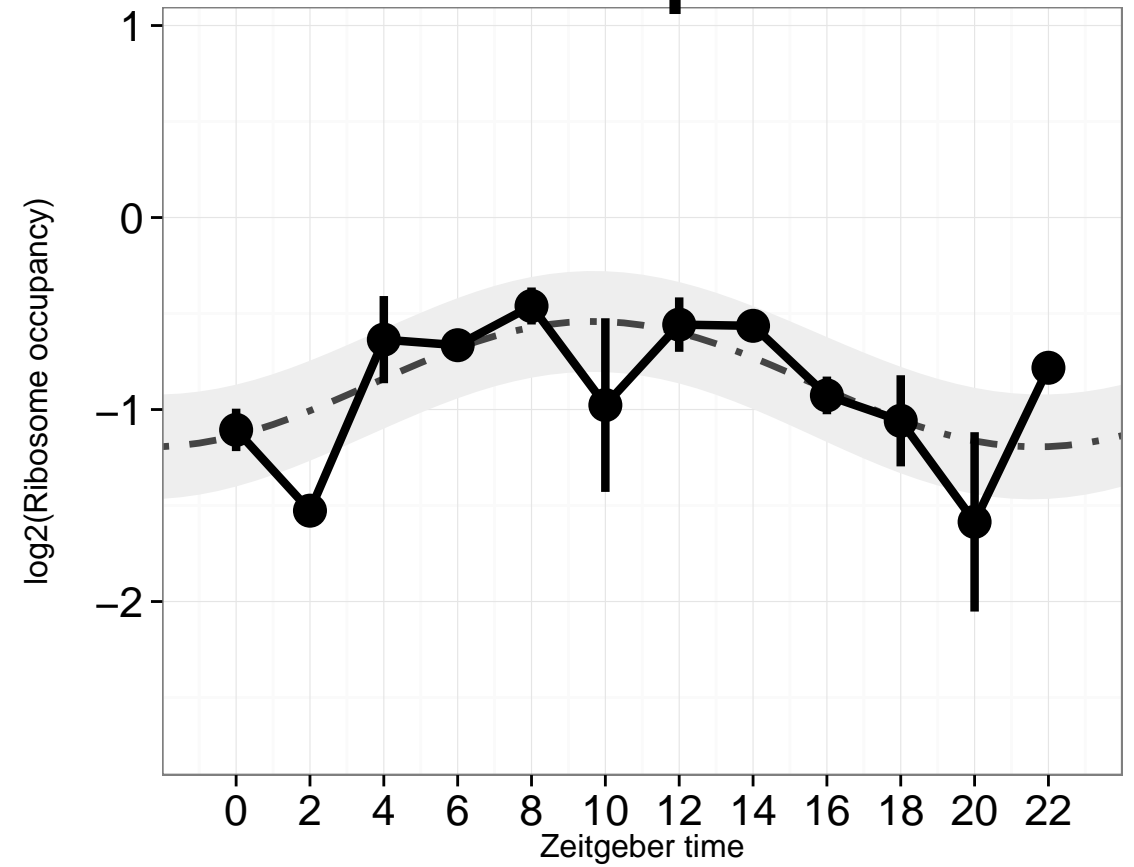

Supplement: Supplementary file 1215 [file 1]

# Rab3gap1

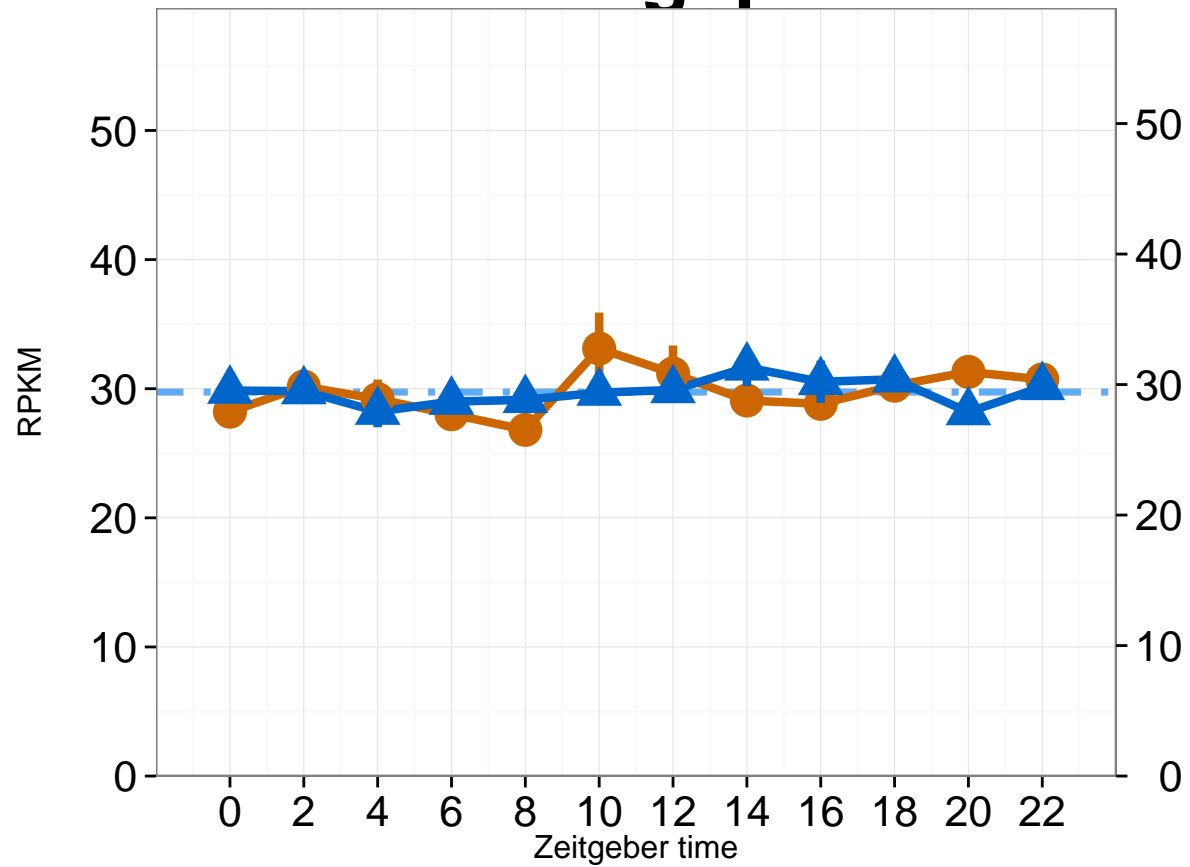

# Rab3gap1

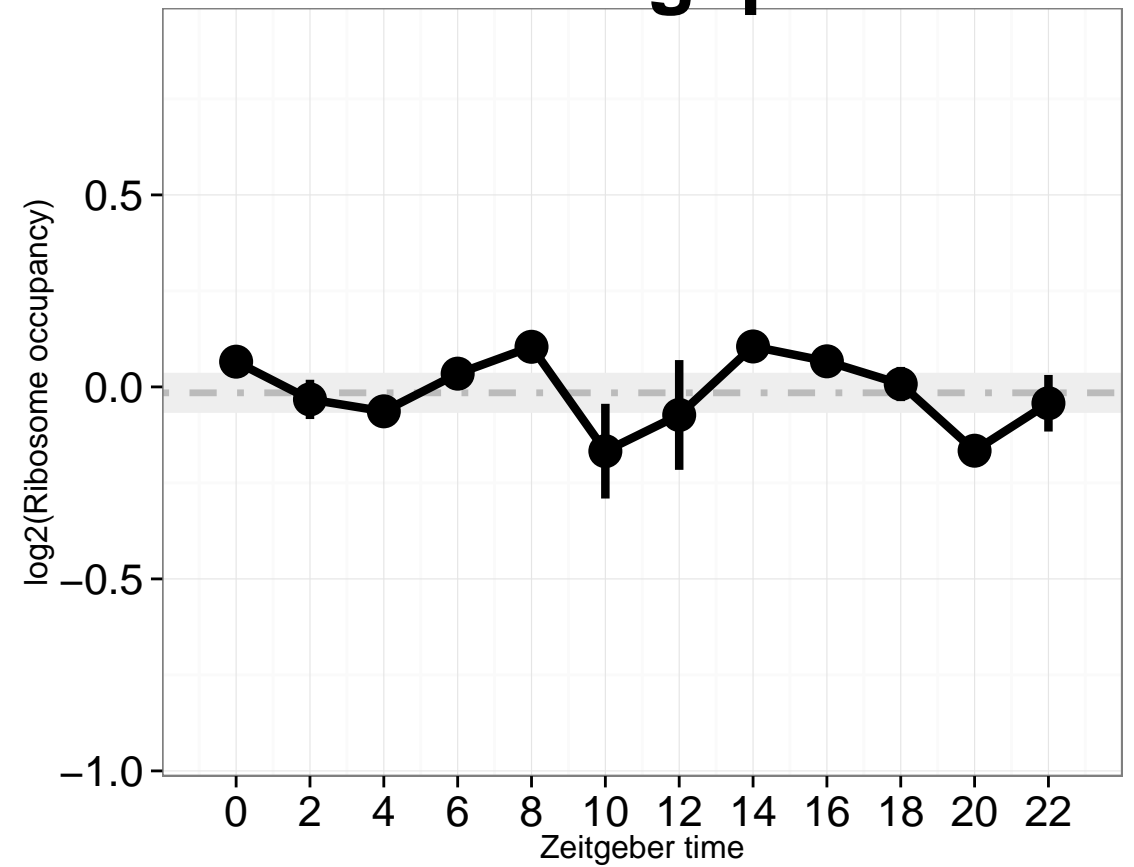

Supplement: Supplementary file 1216 [file 1]

# Ppargc1a

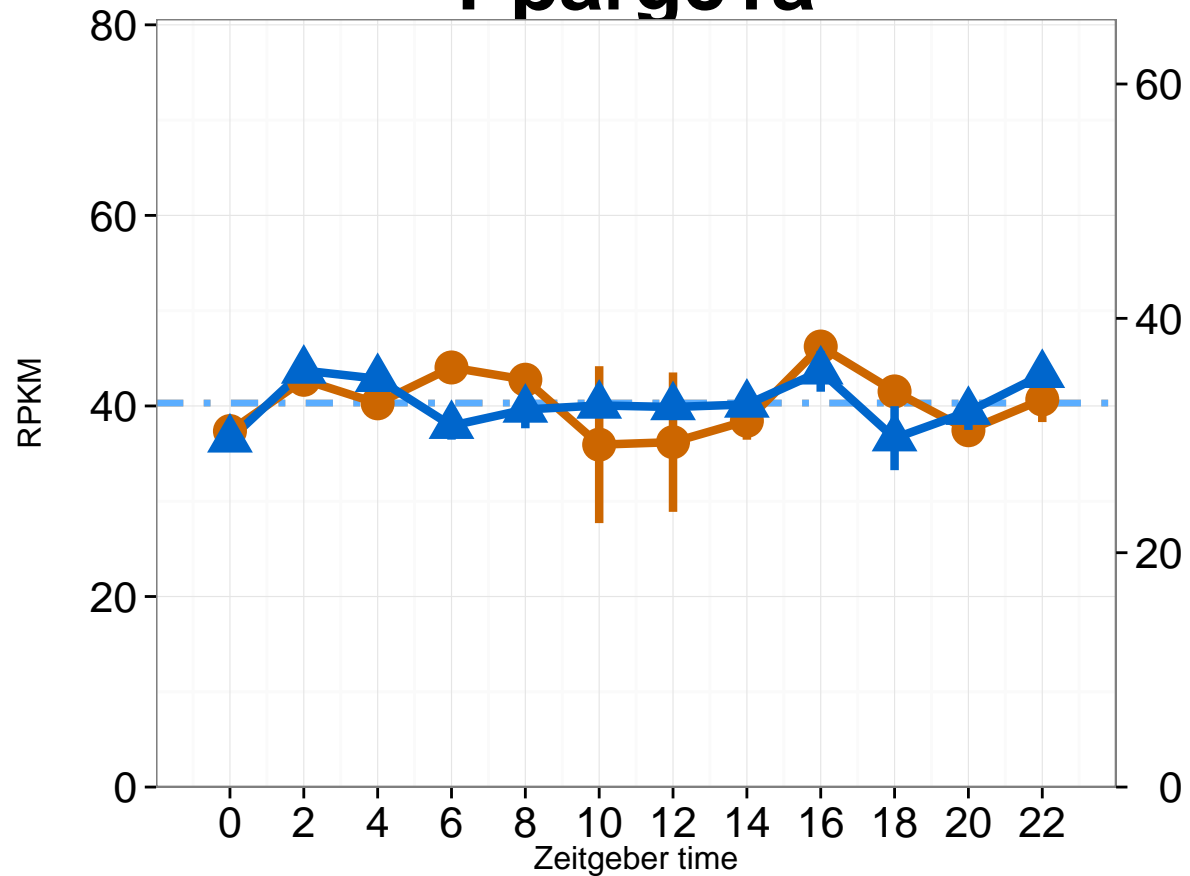

# Ppargc1a

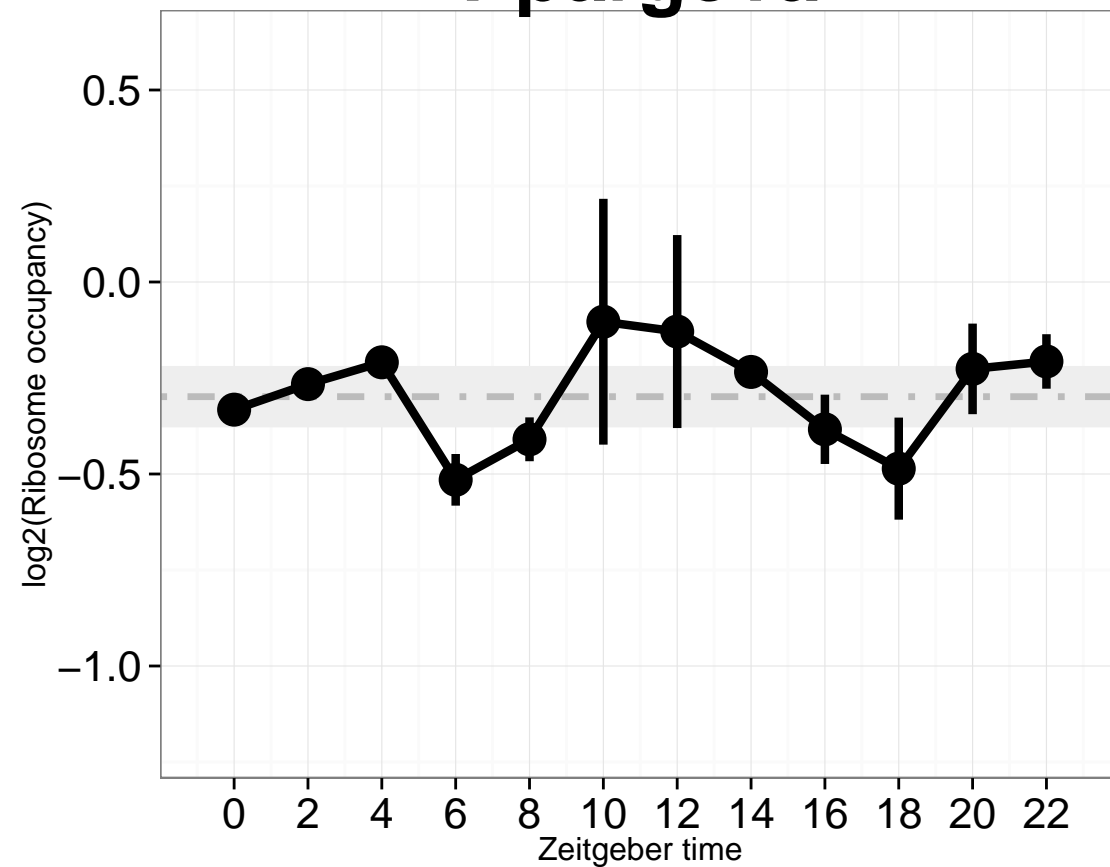

Supplement: Supplementary file 1217 [file 1]

# Abca3

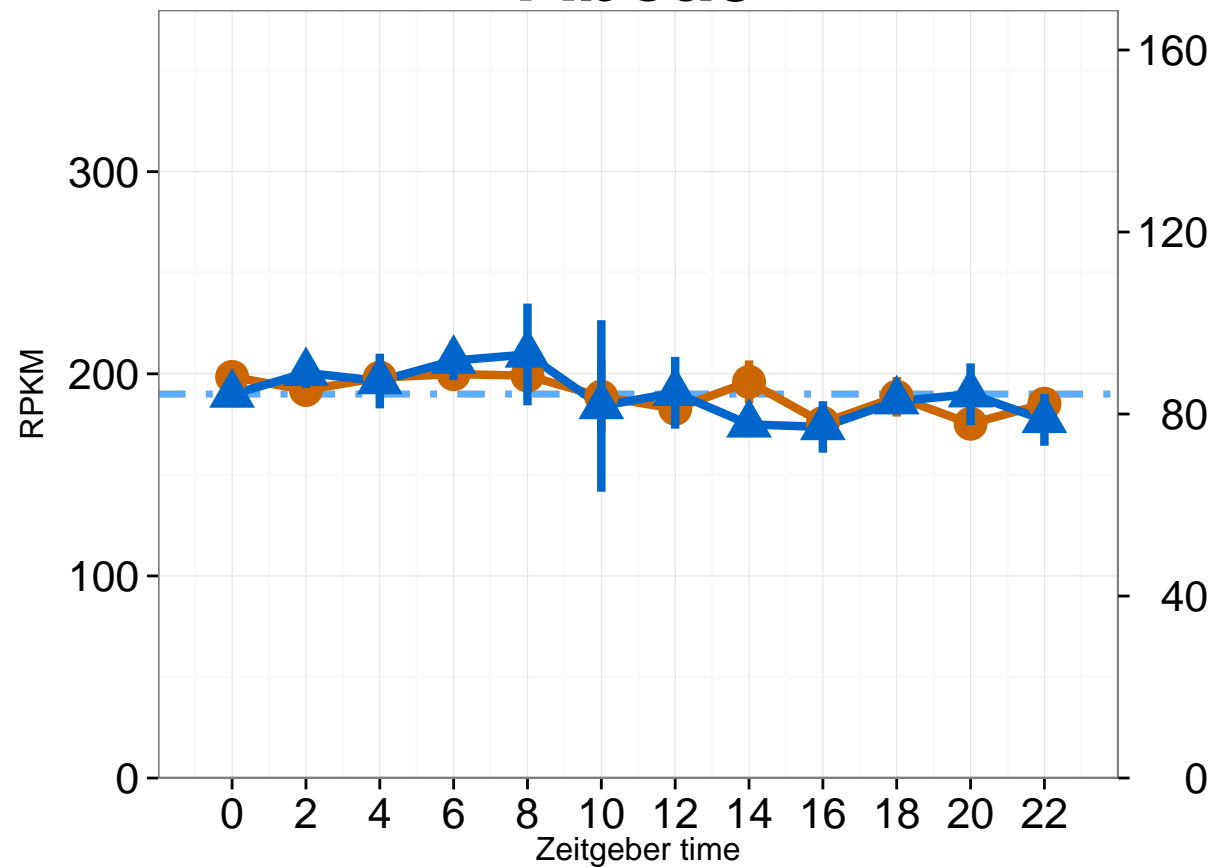

# Abca3

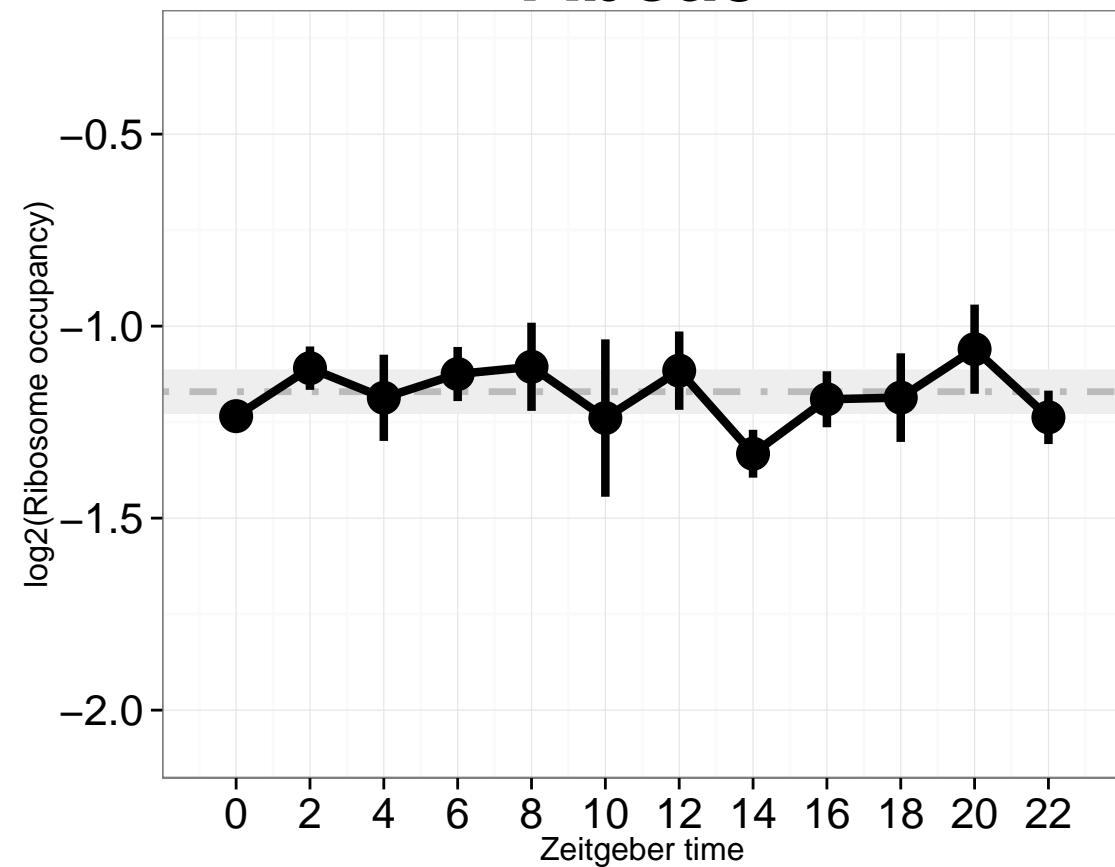

Supplement: Supplementary file 1218 [file 1]

## Tmem220

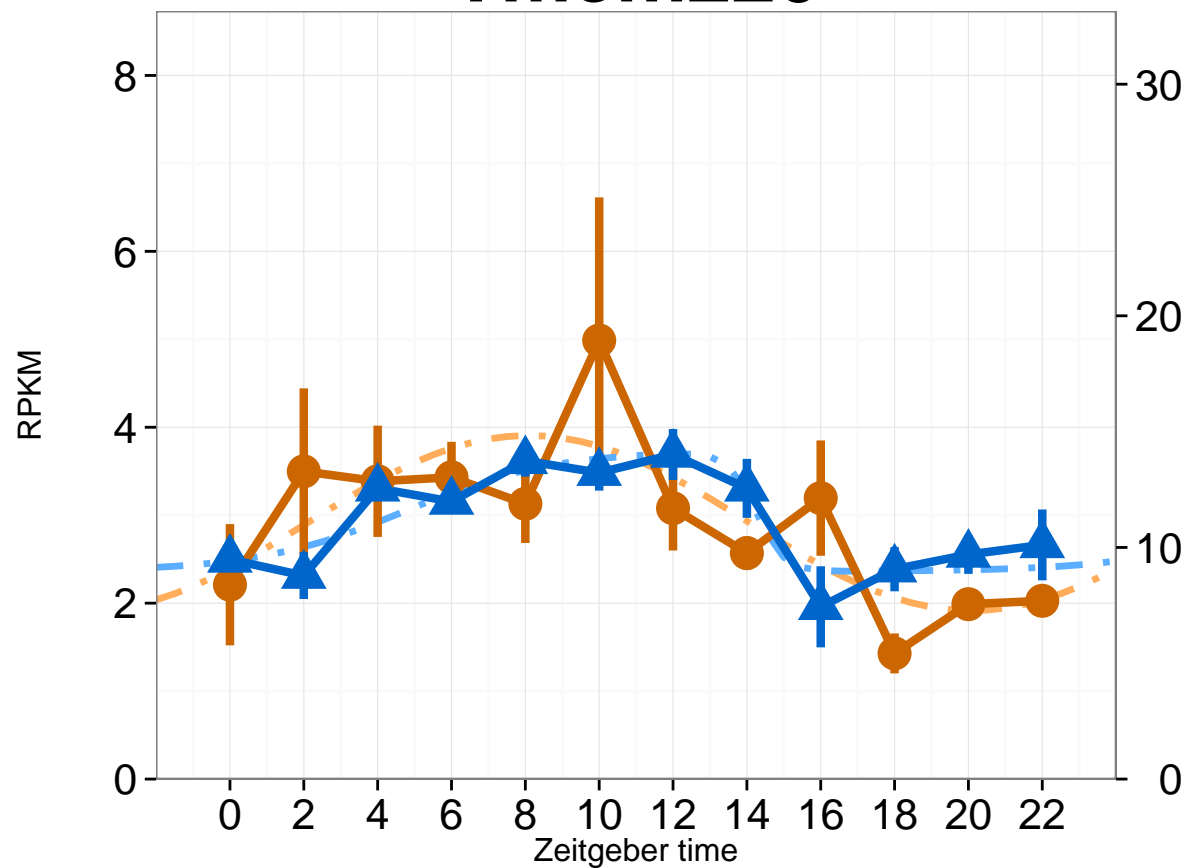

## Tmem220

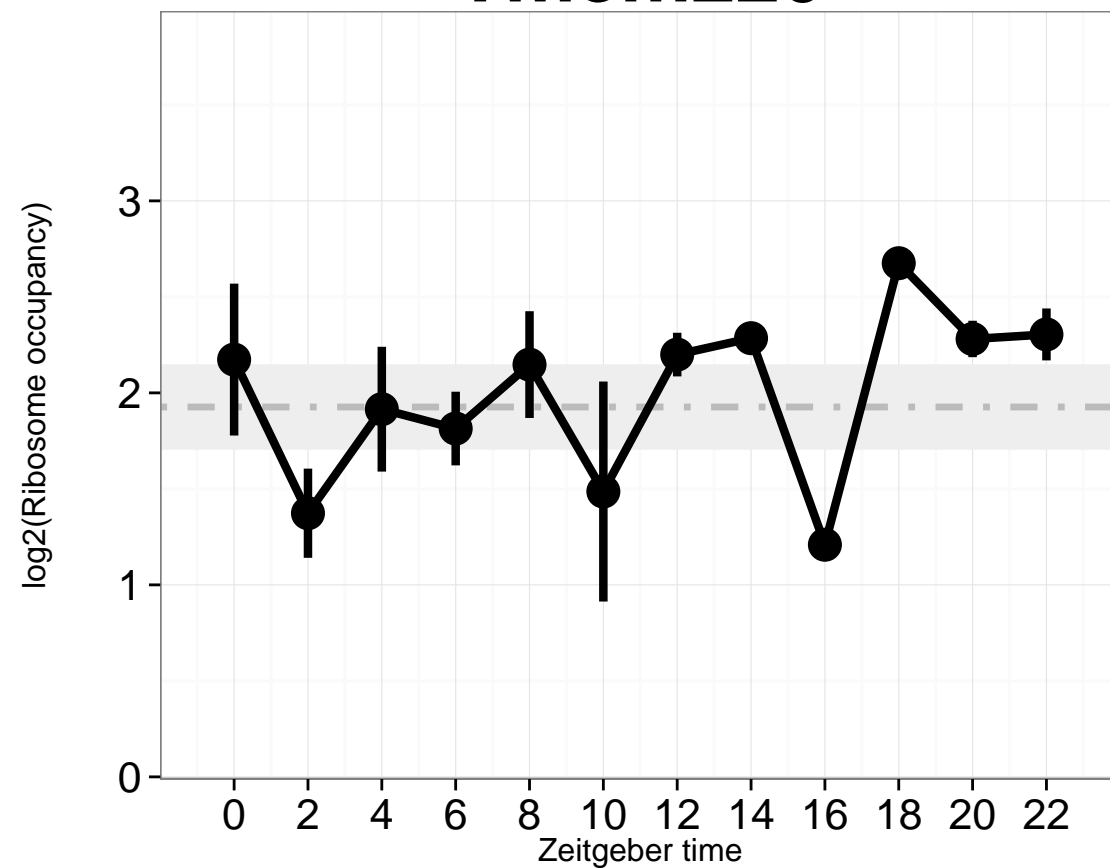

Supplement: Supplementary file 1219 [file 1]

# Lrrc8d

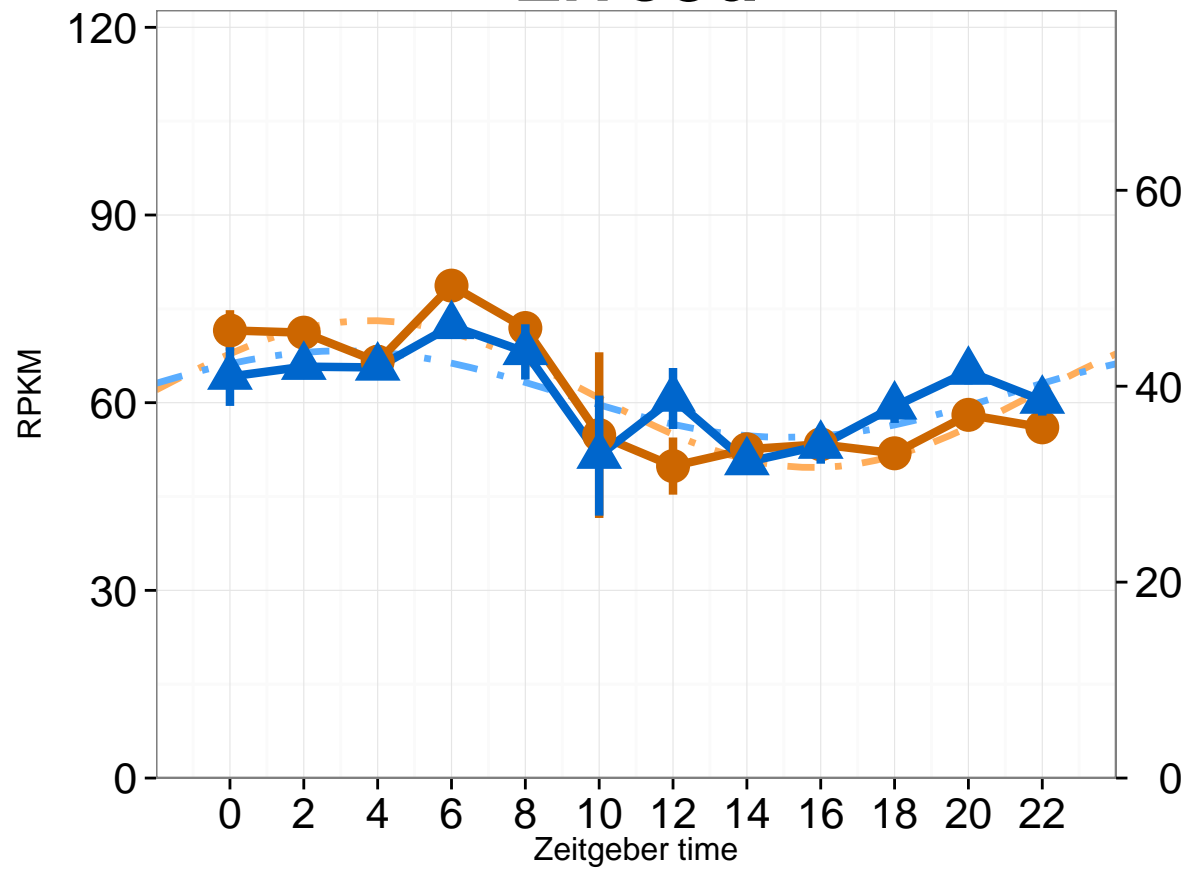

# Lrrc8d

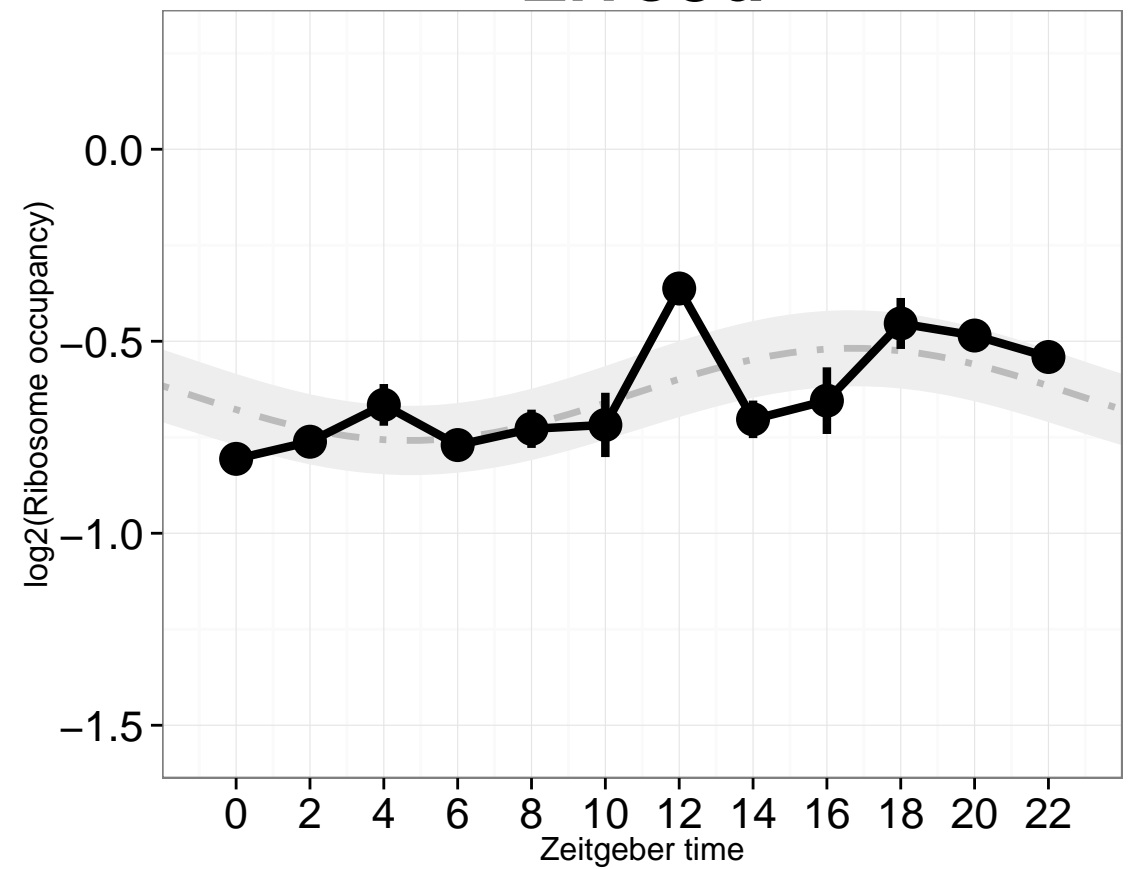

Supplement: Supplementary file 1220 [file 1]

## Tmem135

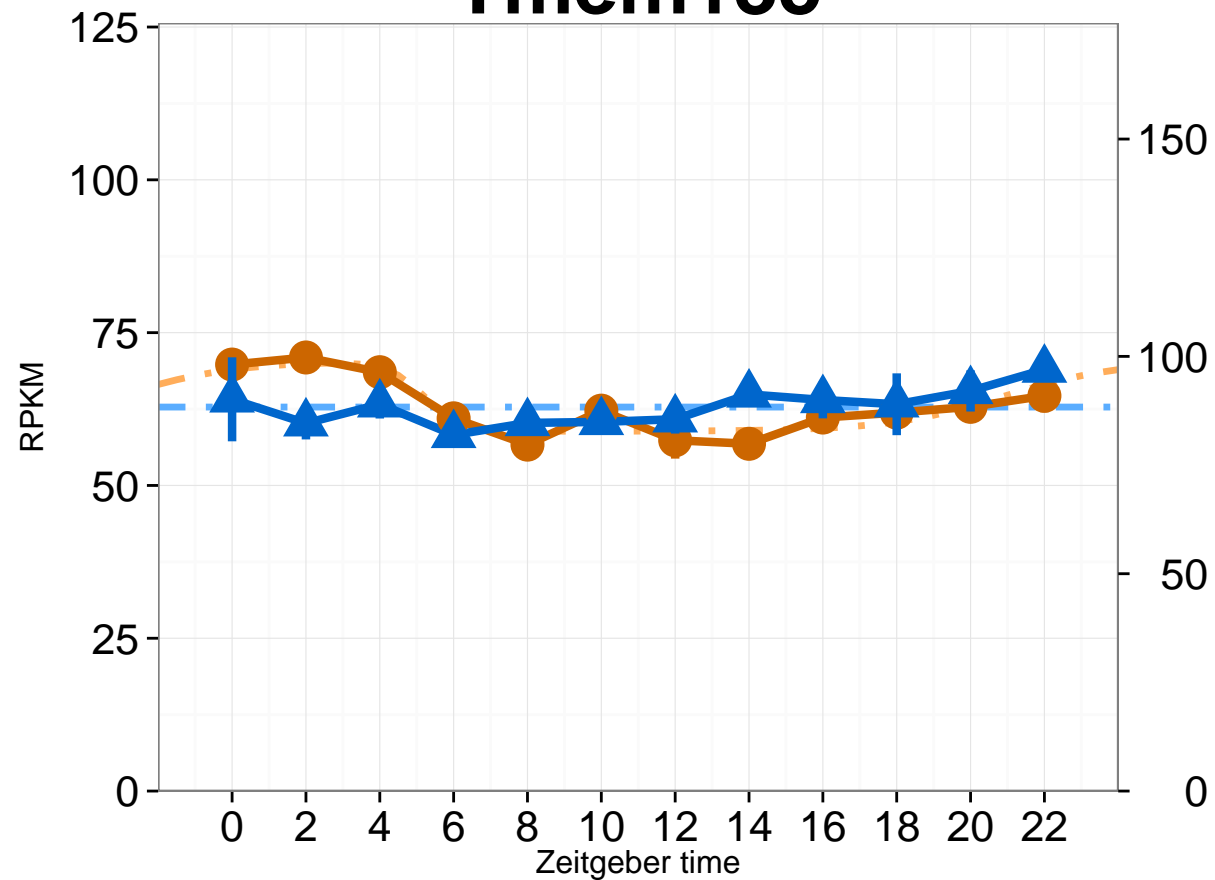

## Tmem135

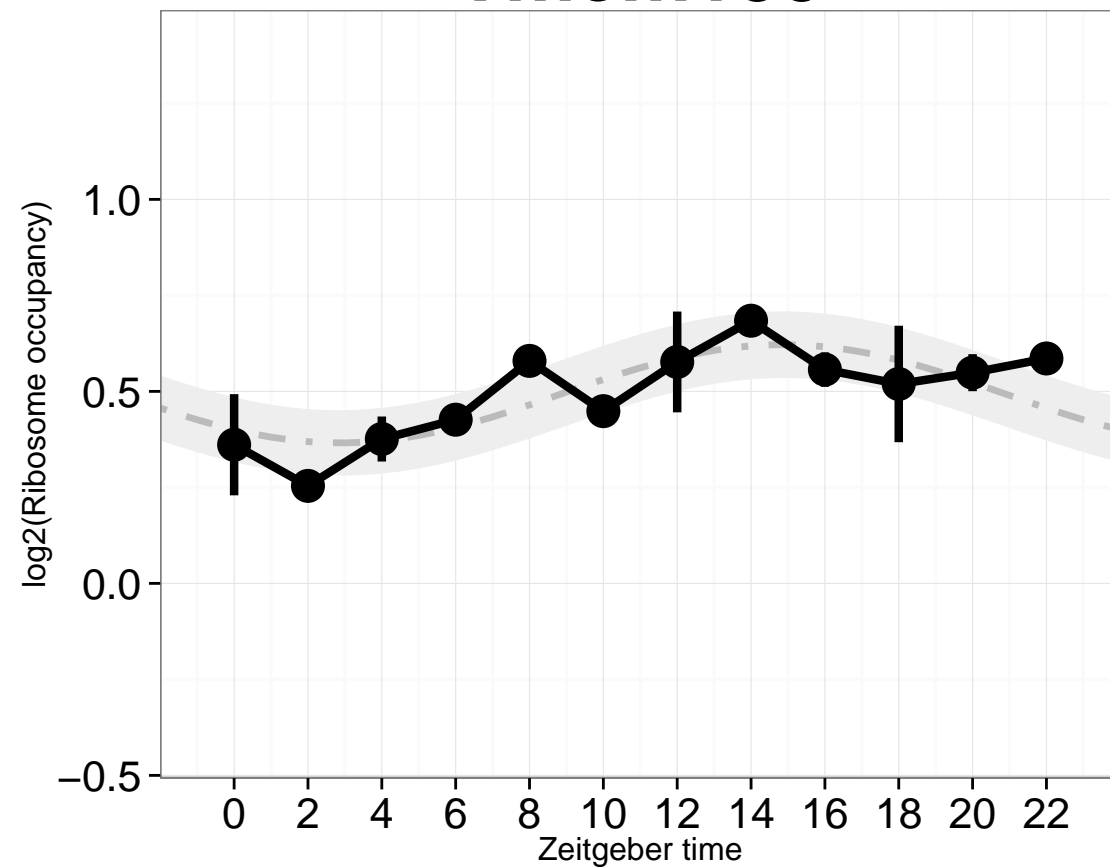

Supplement: Supplementary file 1221 [file 1]

## Ly86

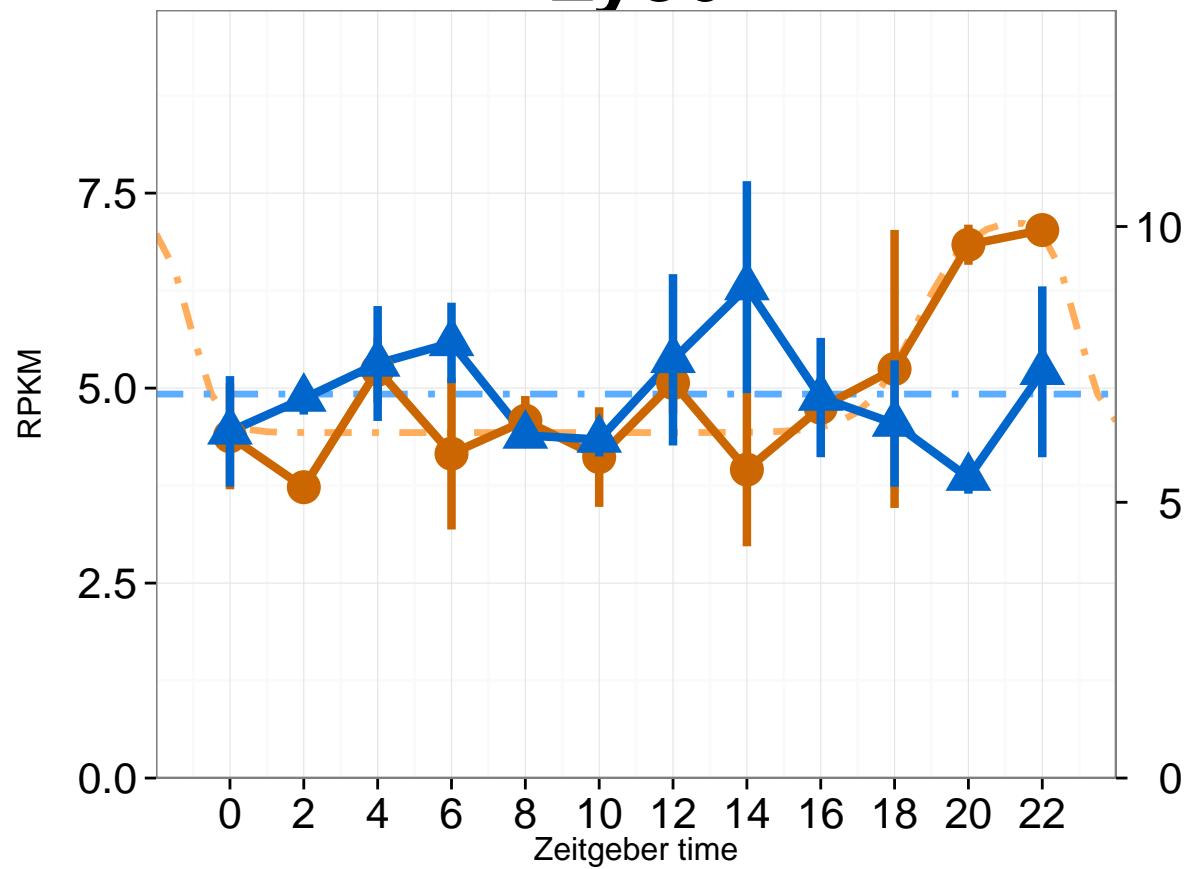

## Ly86

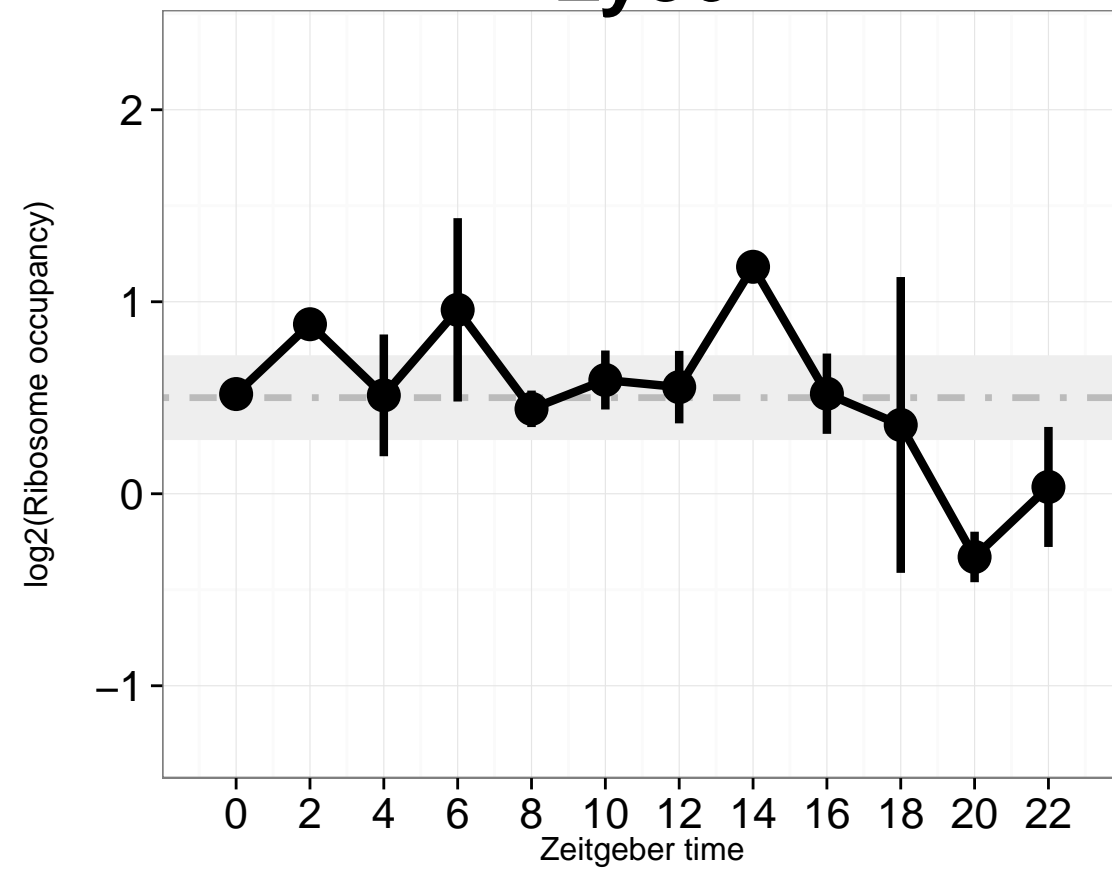

Supplement: Supplementary file 1222 [file 1]

## Rnf111

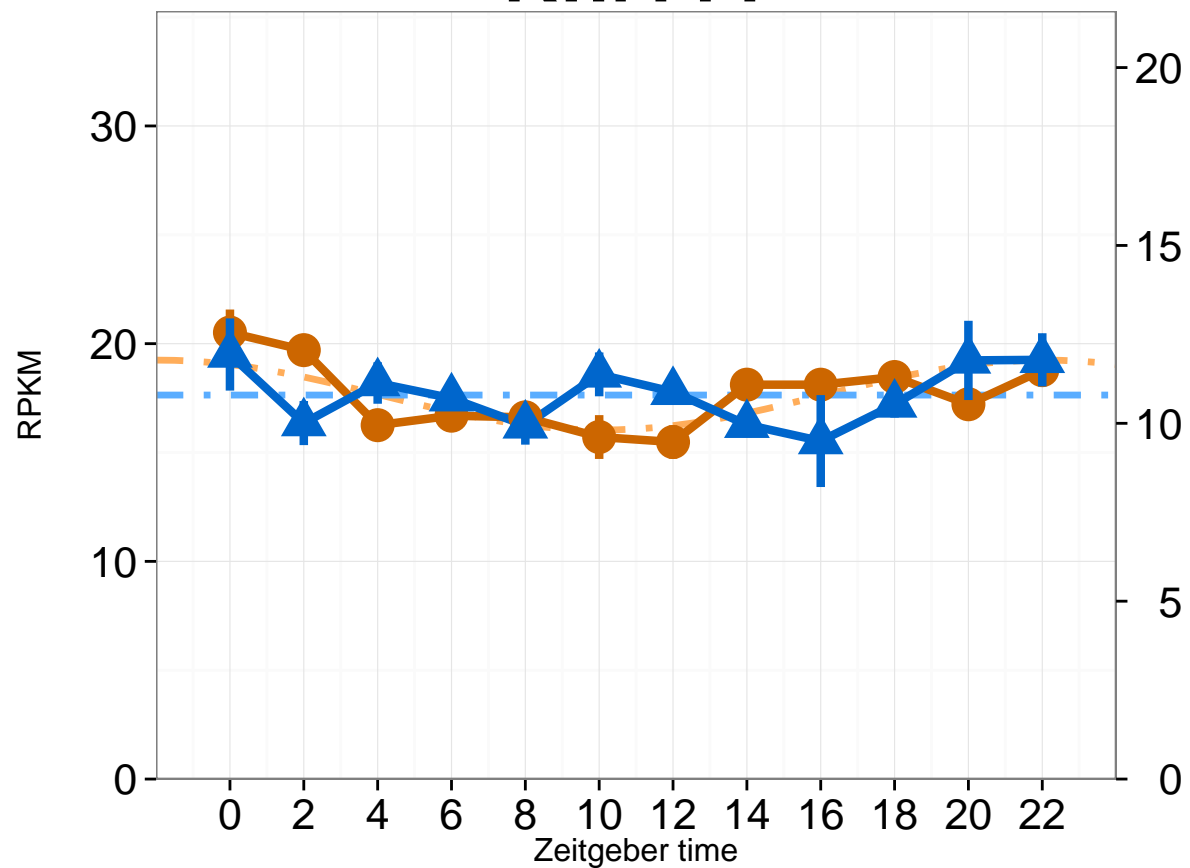

## Rnf111

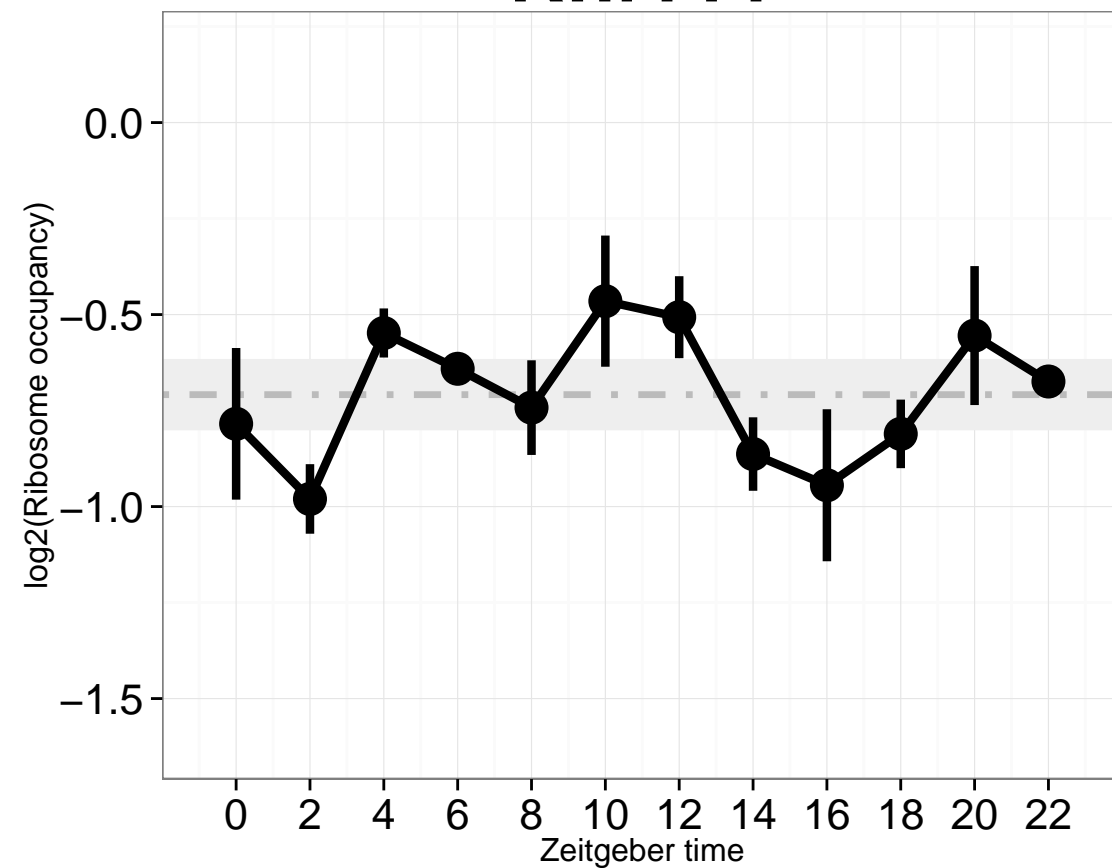

Supplement: Supplementary file 1223 [file 1]

## Lamc1

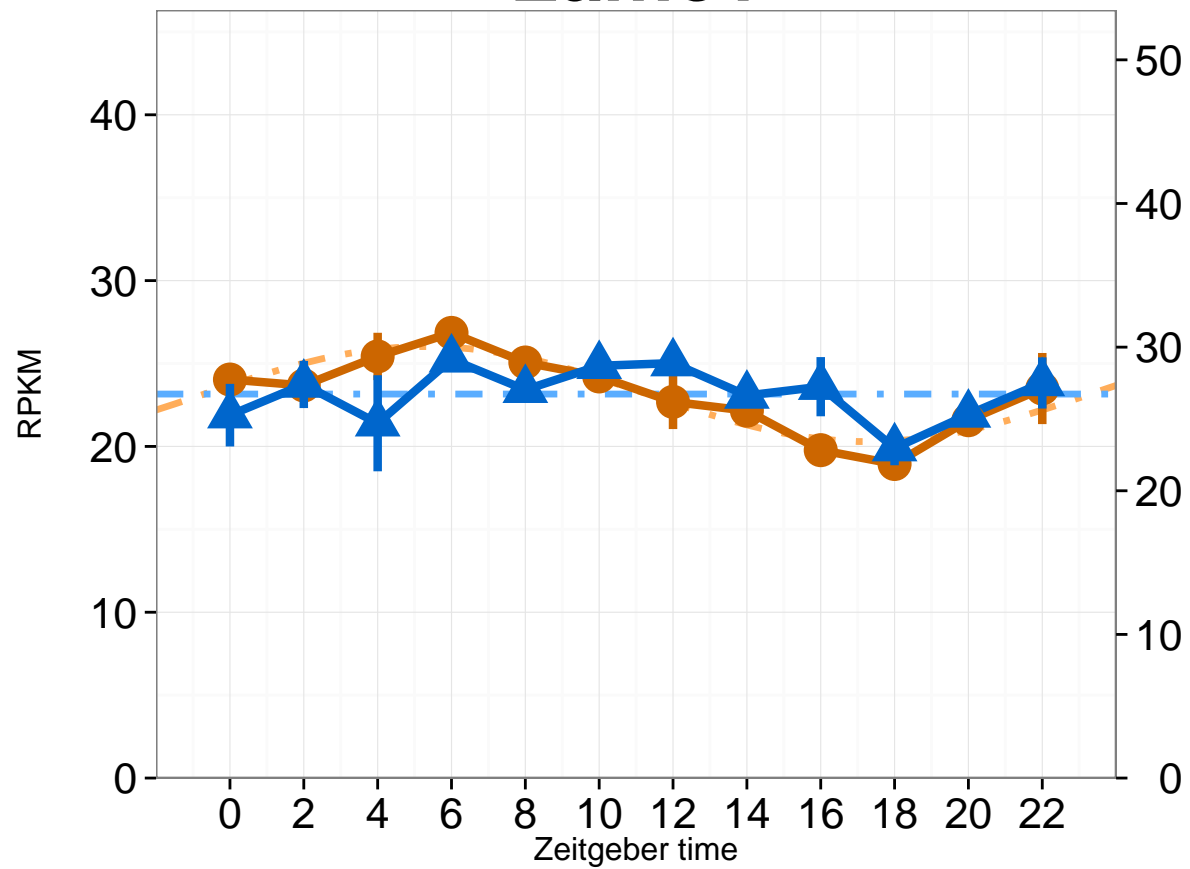

## Lamc1

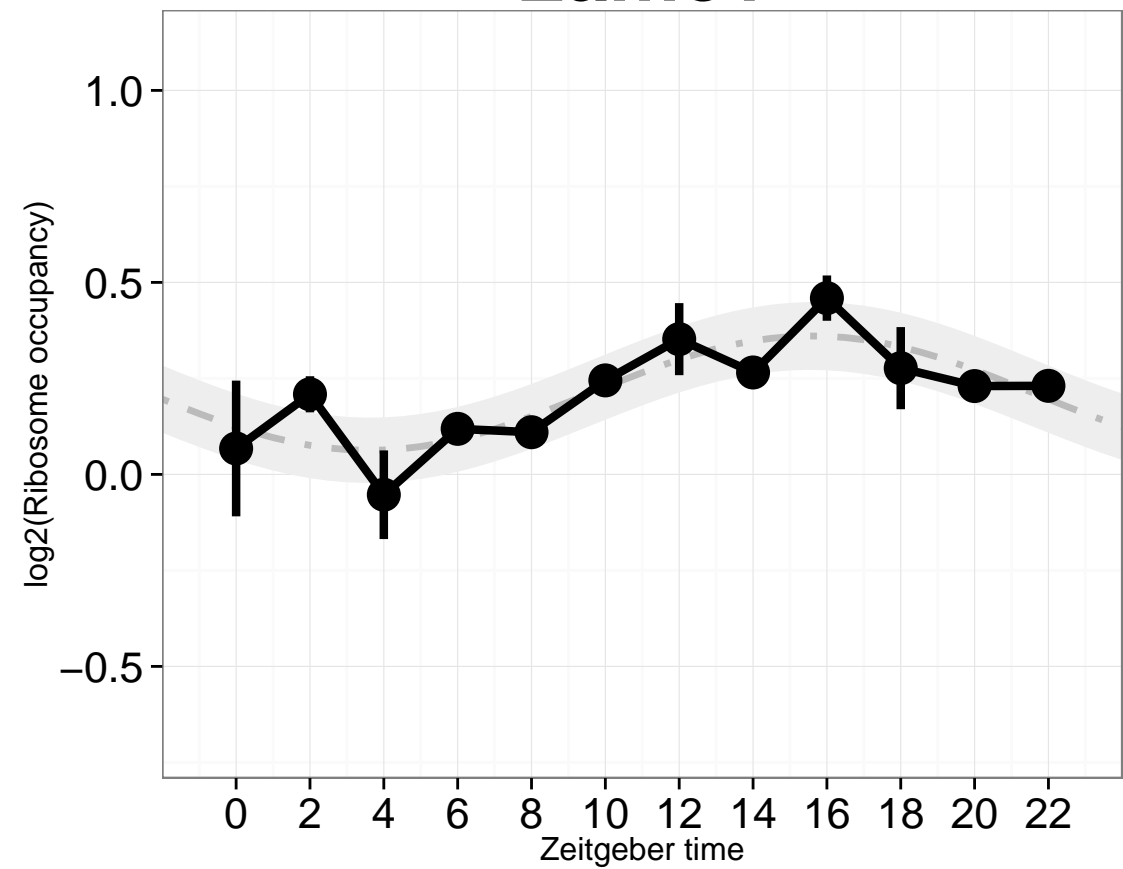

Supplement: Supplementary file 1224 [file 1]

## Kat7

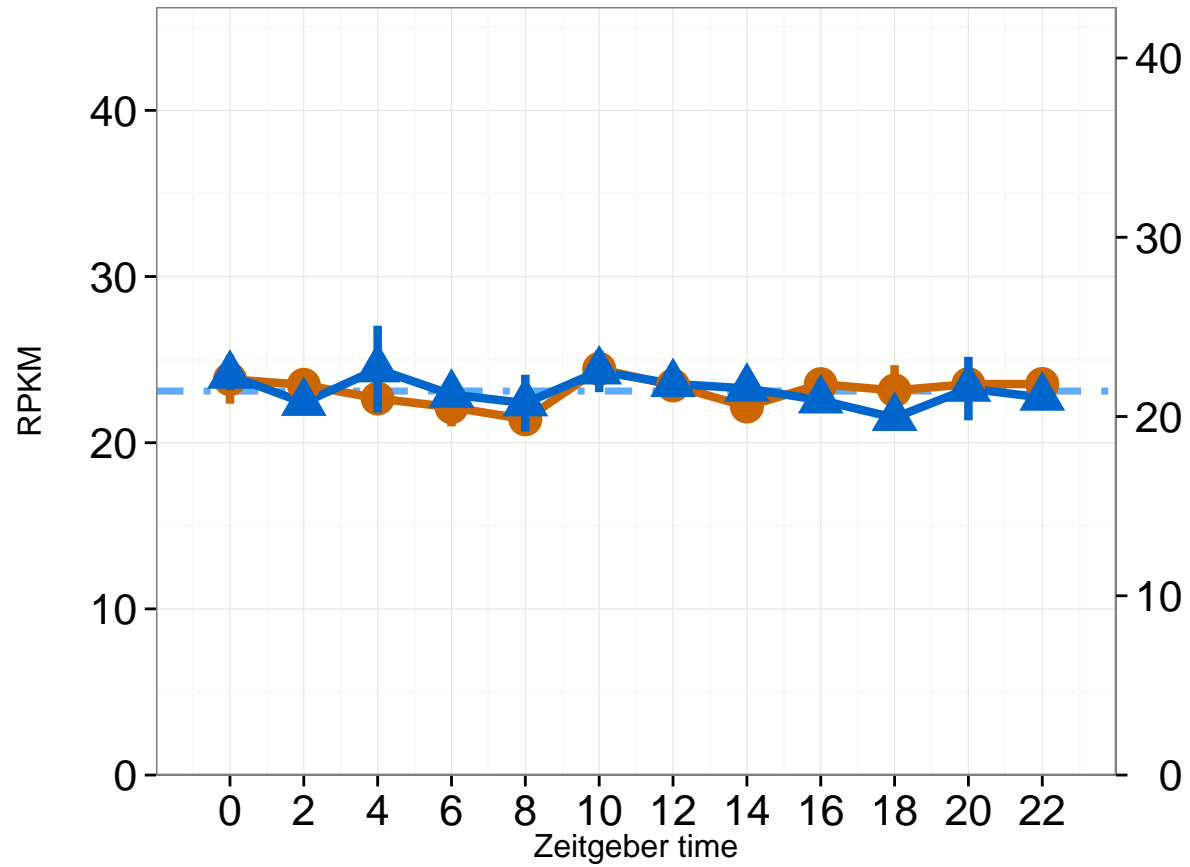

## Kat7

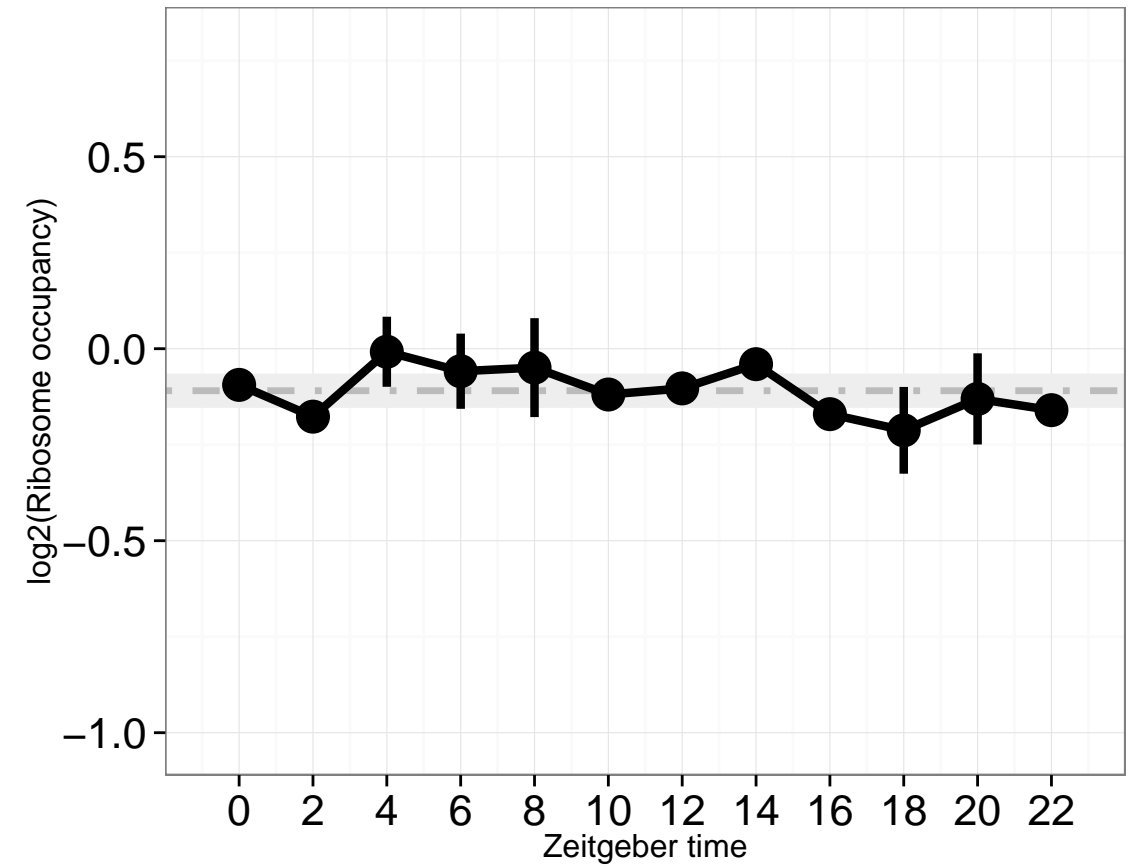

Supplement: Supplementary file 1225 [file 1]

# Fam131a

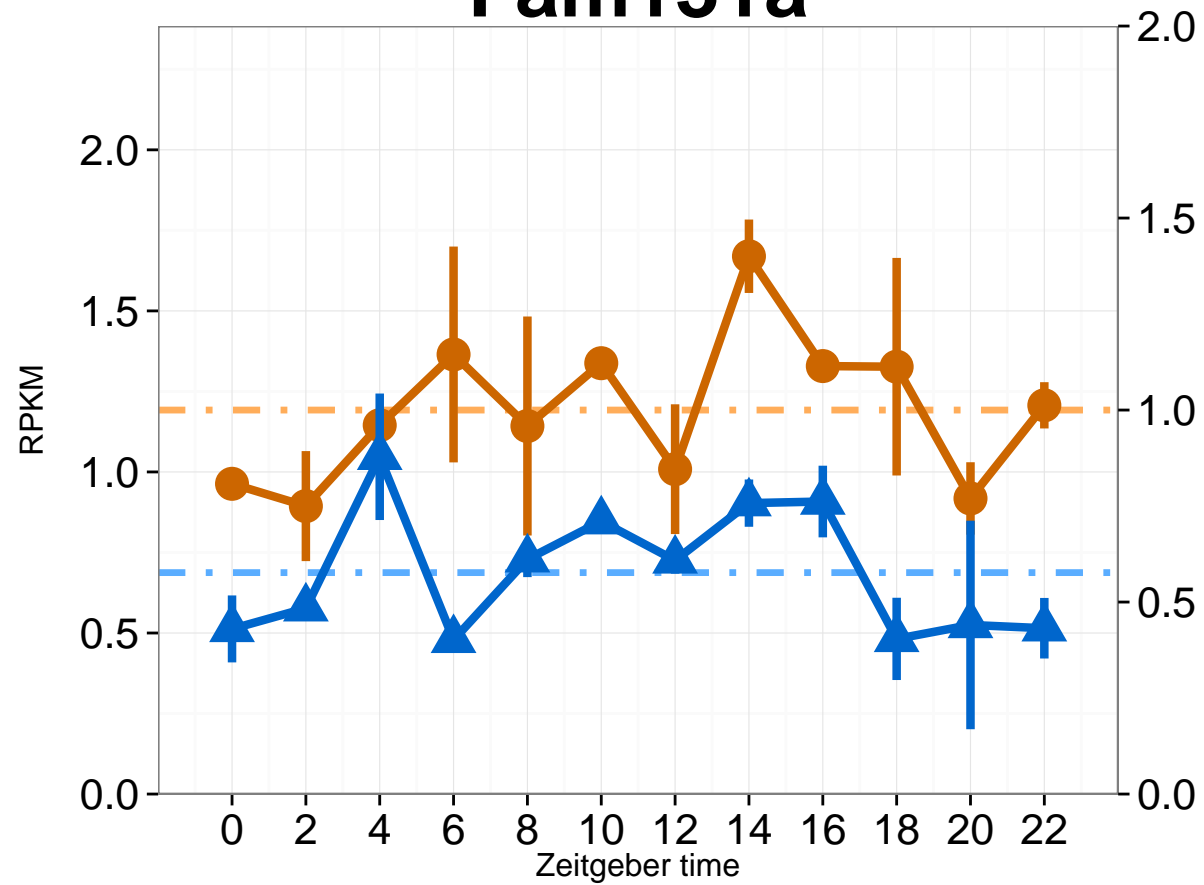

# Fam131a

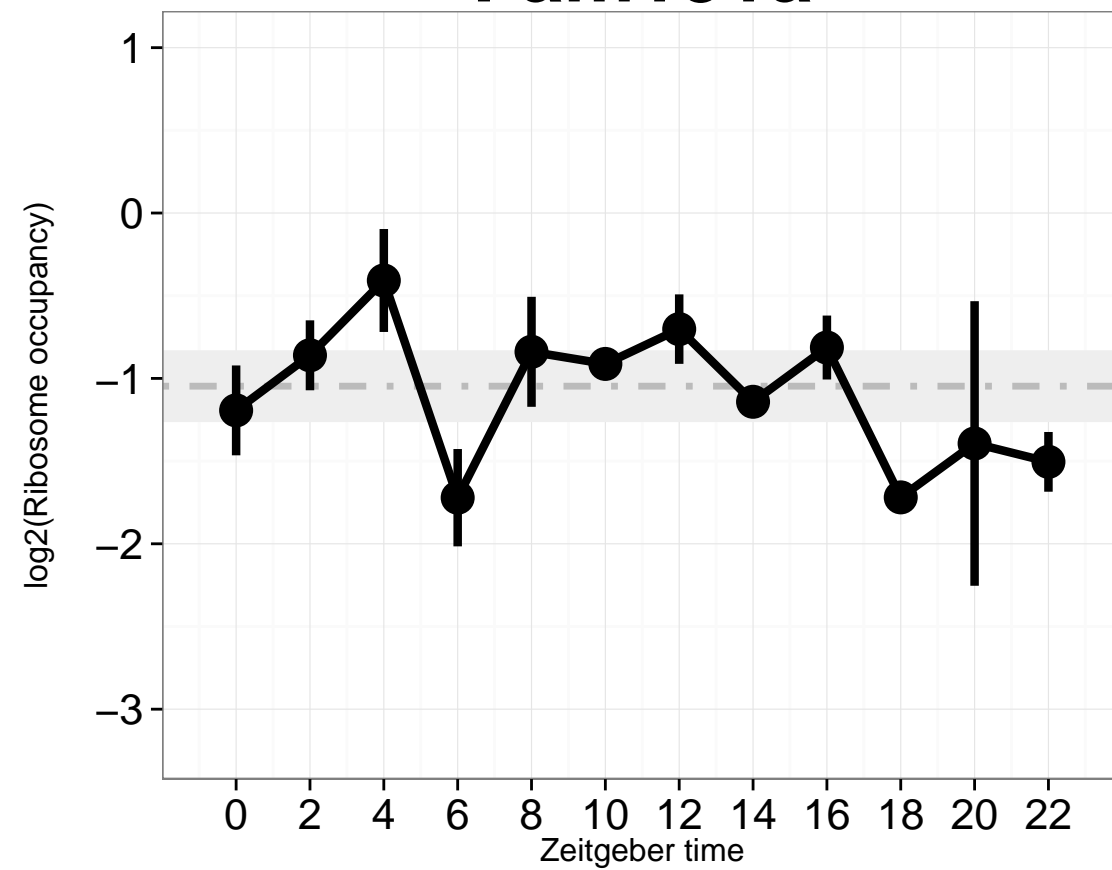

Supplement: Supplementary file 1226 [file 1]

# Tmem165

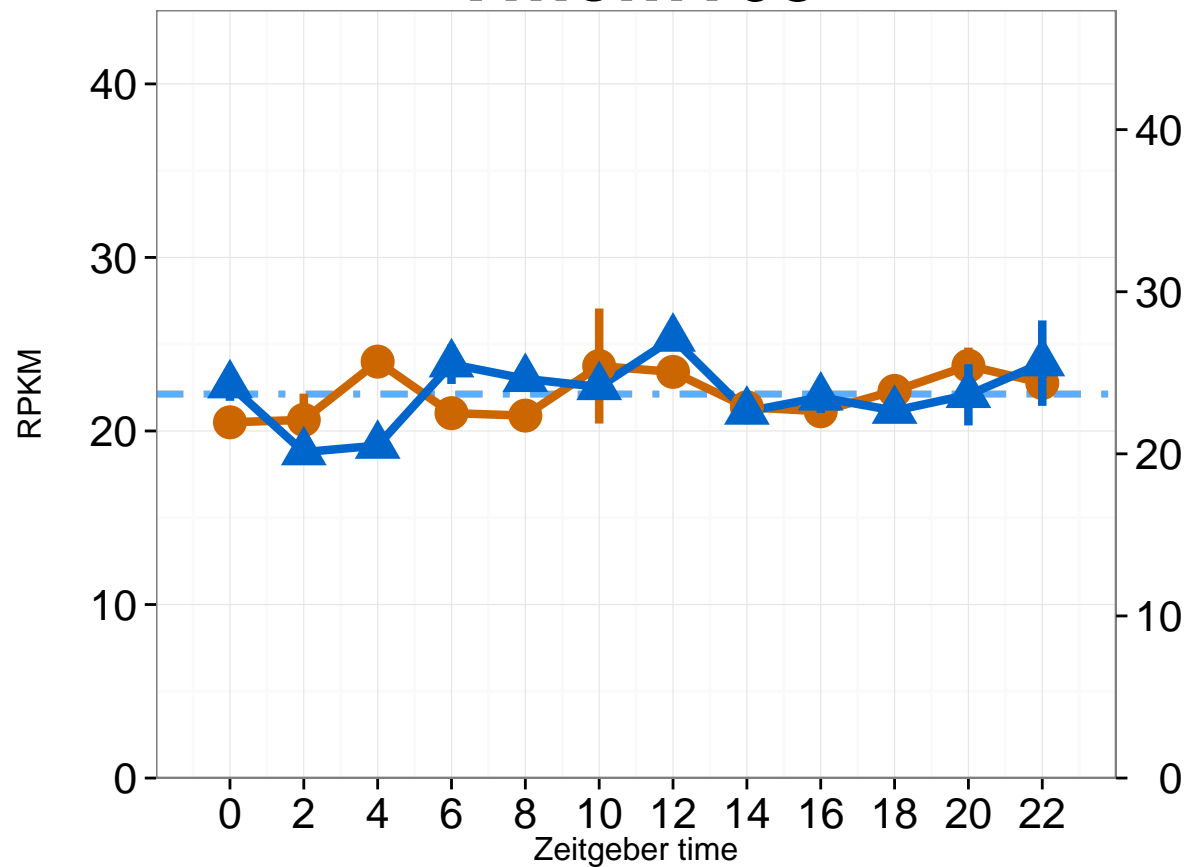

# Tmem165

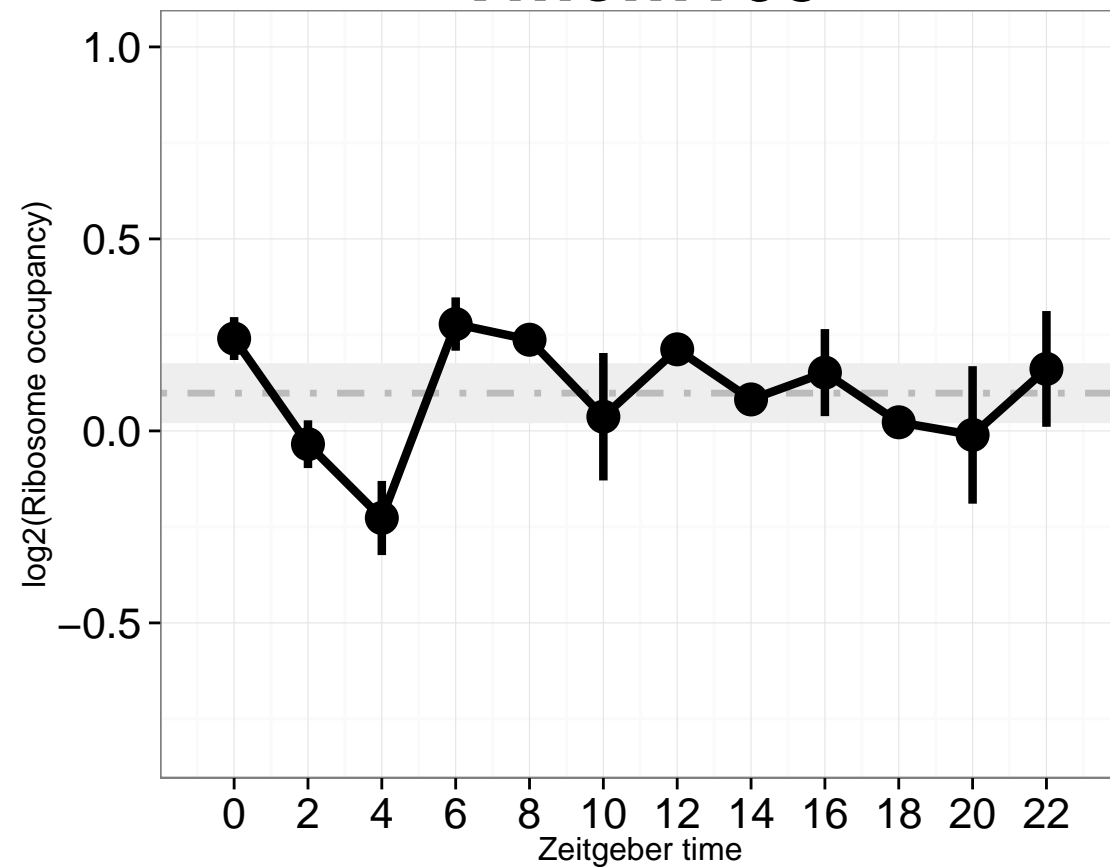

Supplement: Supplementary file 1227 [file 1]

## Rhob

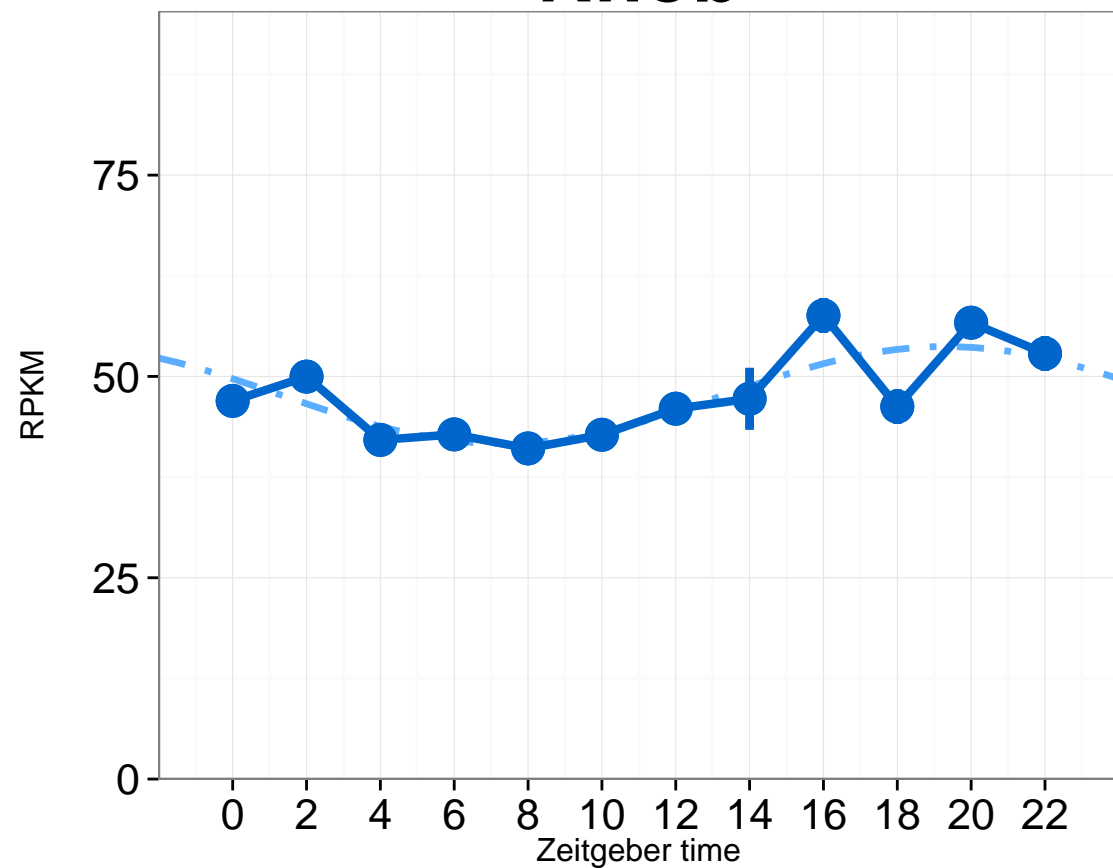

## Rhob log2(Ribosome occupancy)

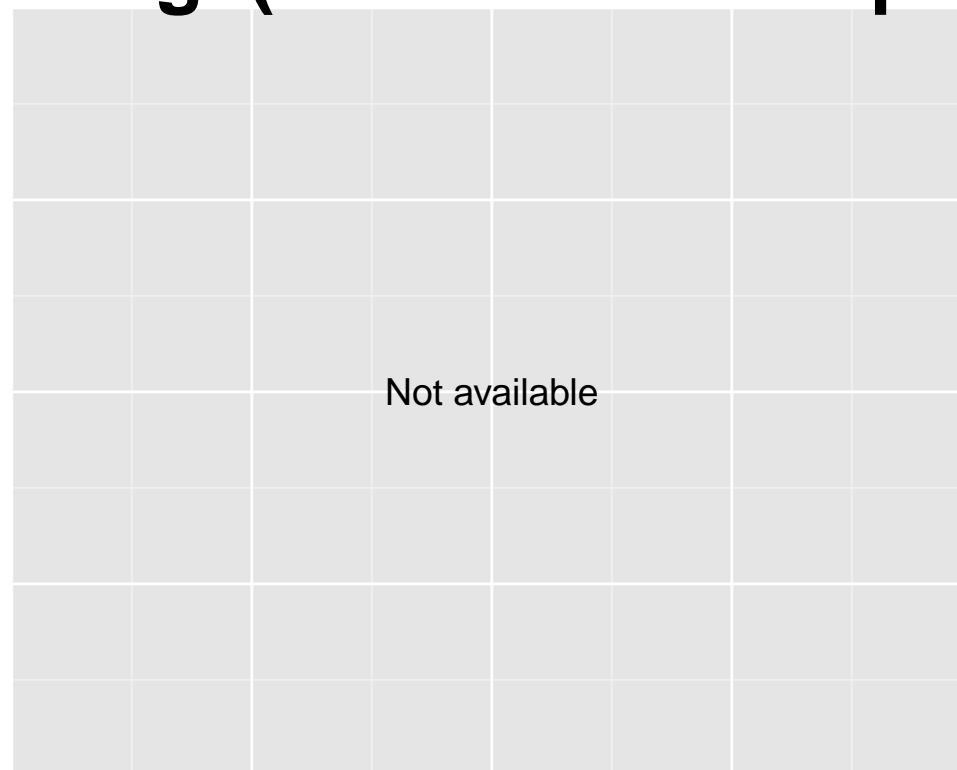

Supplement: Supplementary file 1228 [file 1]

# Fam210a

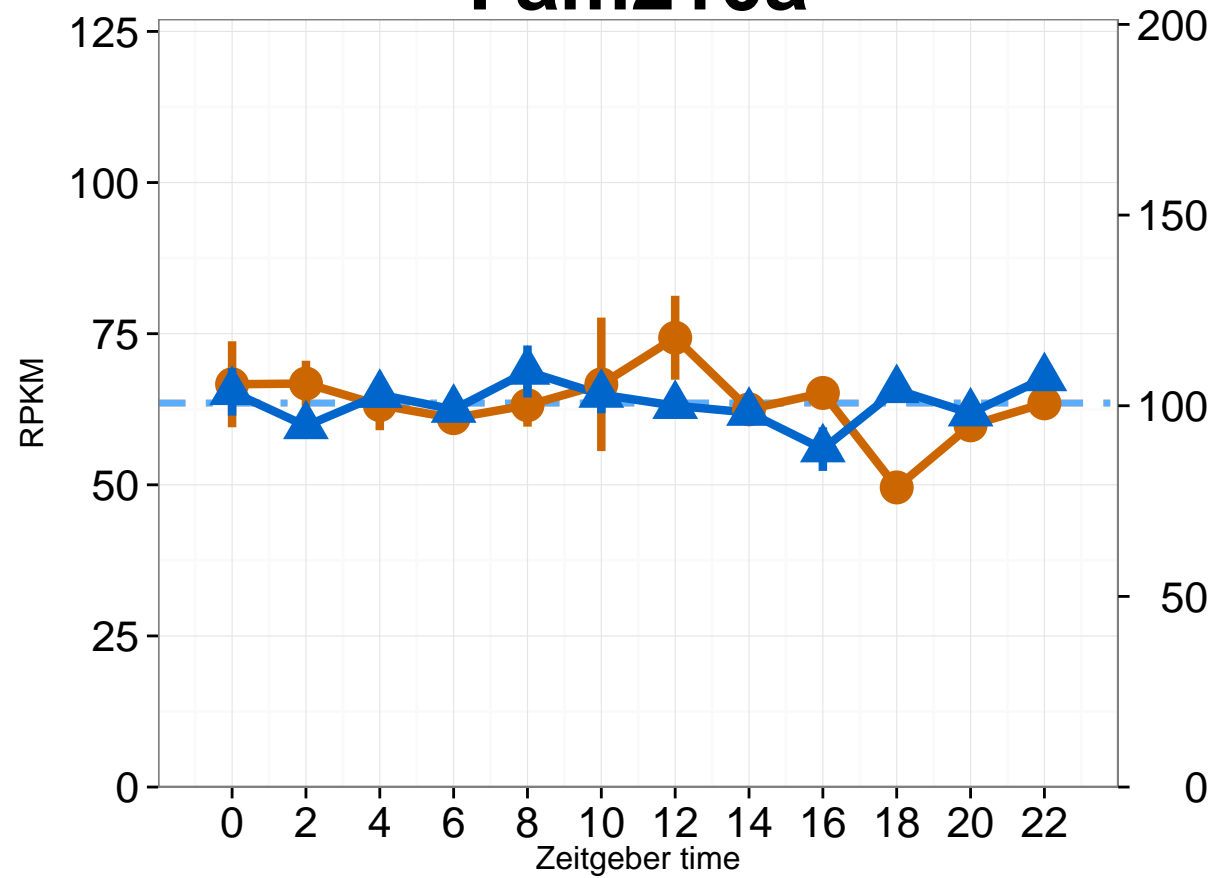

# Fam210a

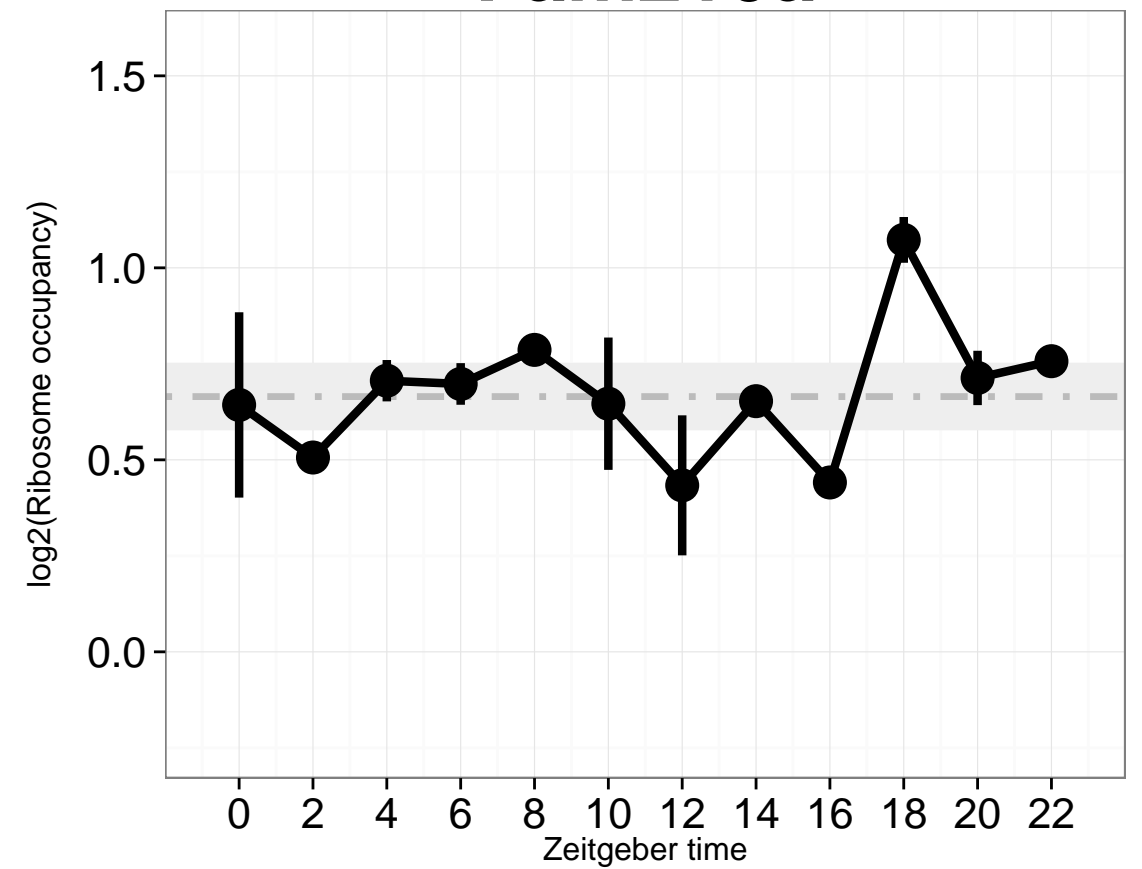

Supplement: Supplementary file 1229 [file 1]

## Tmbim6

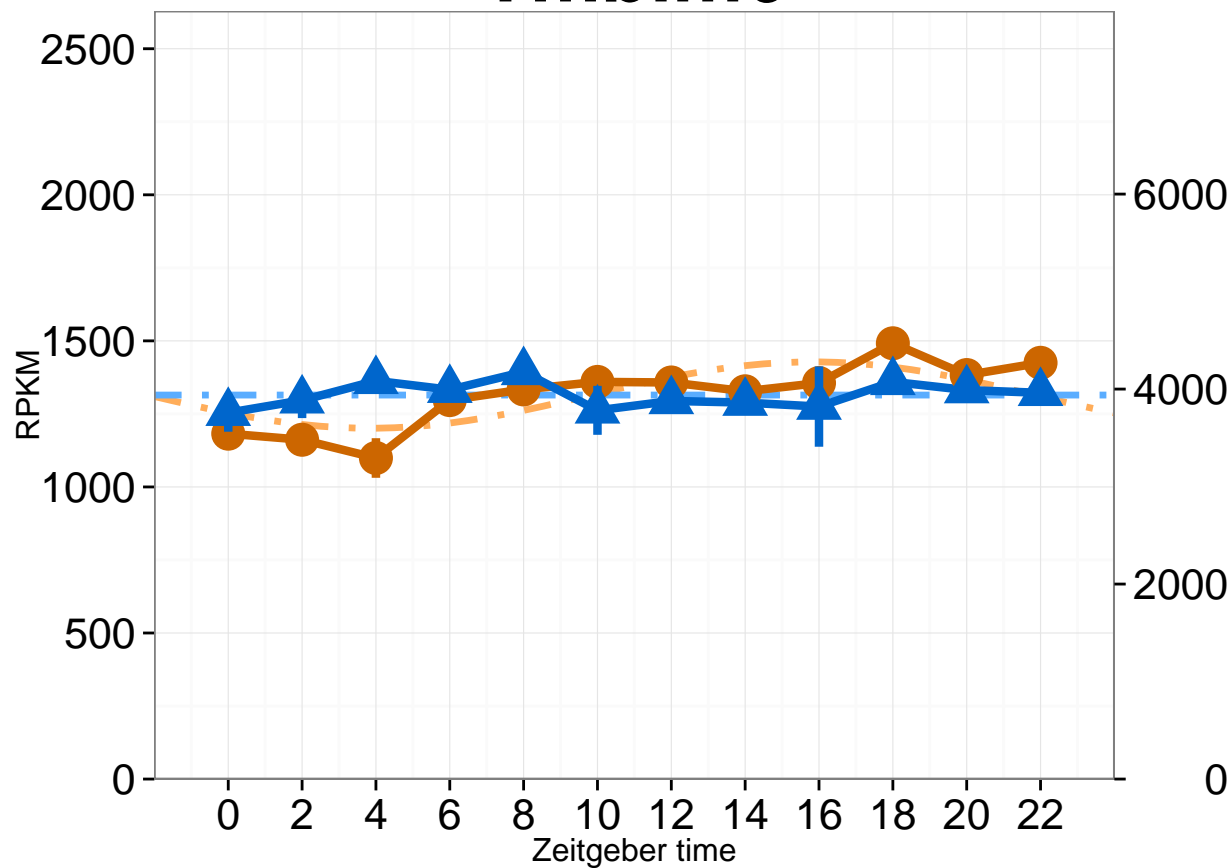

## Tmbim6

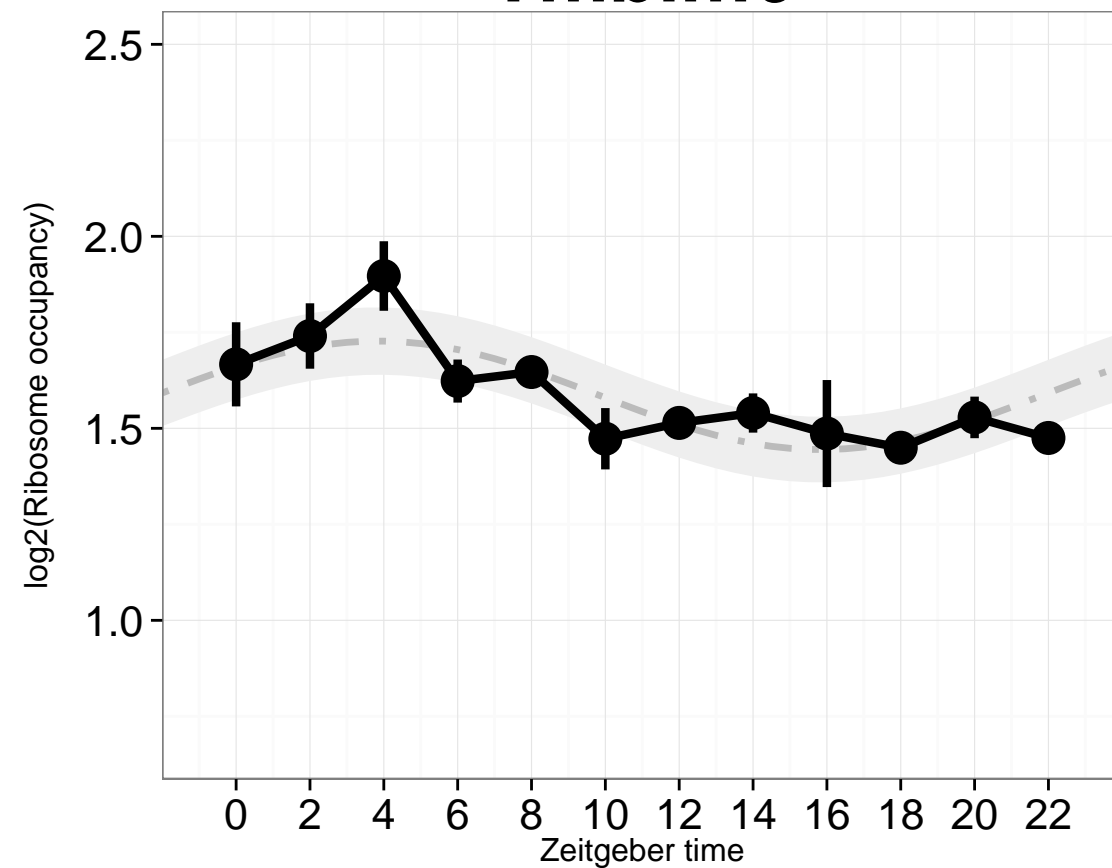

Supplement: Supplementary file 1230 [file 1]

## Cul4b

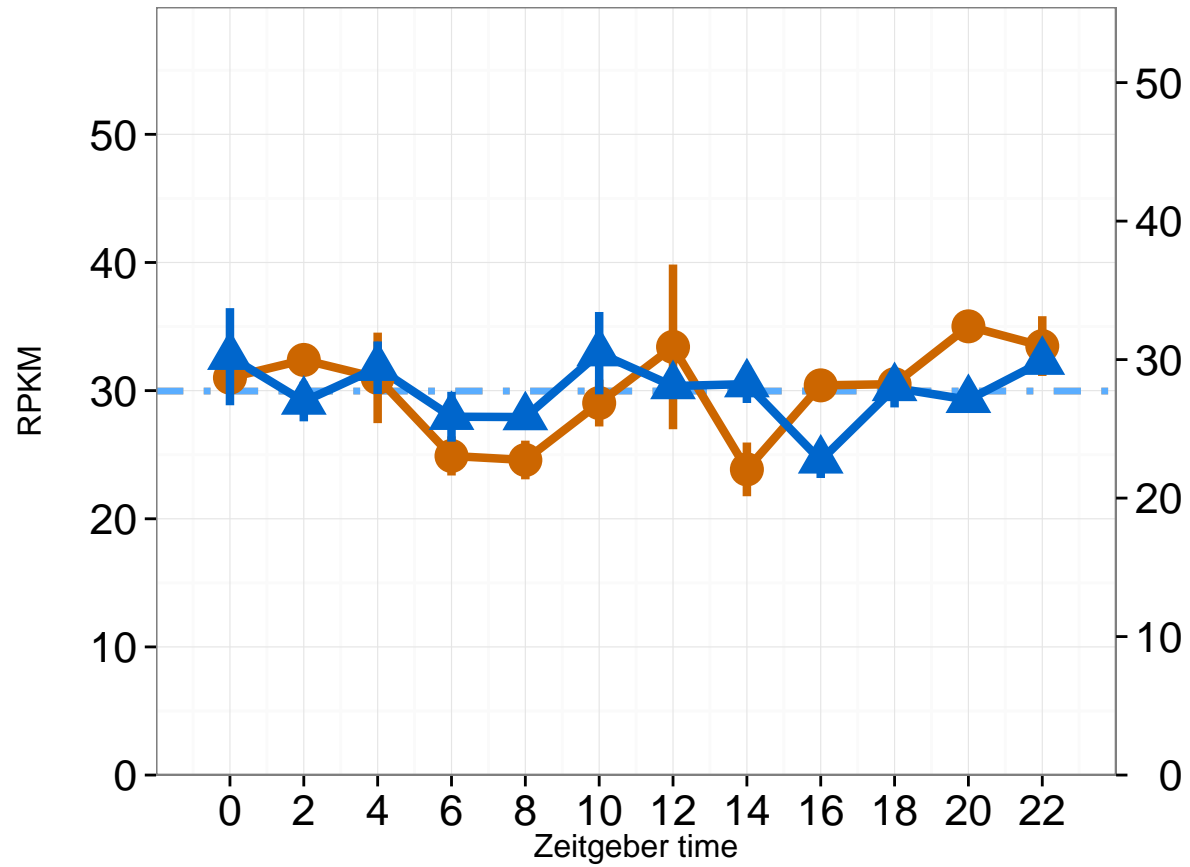

## Cul4b

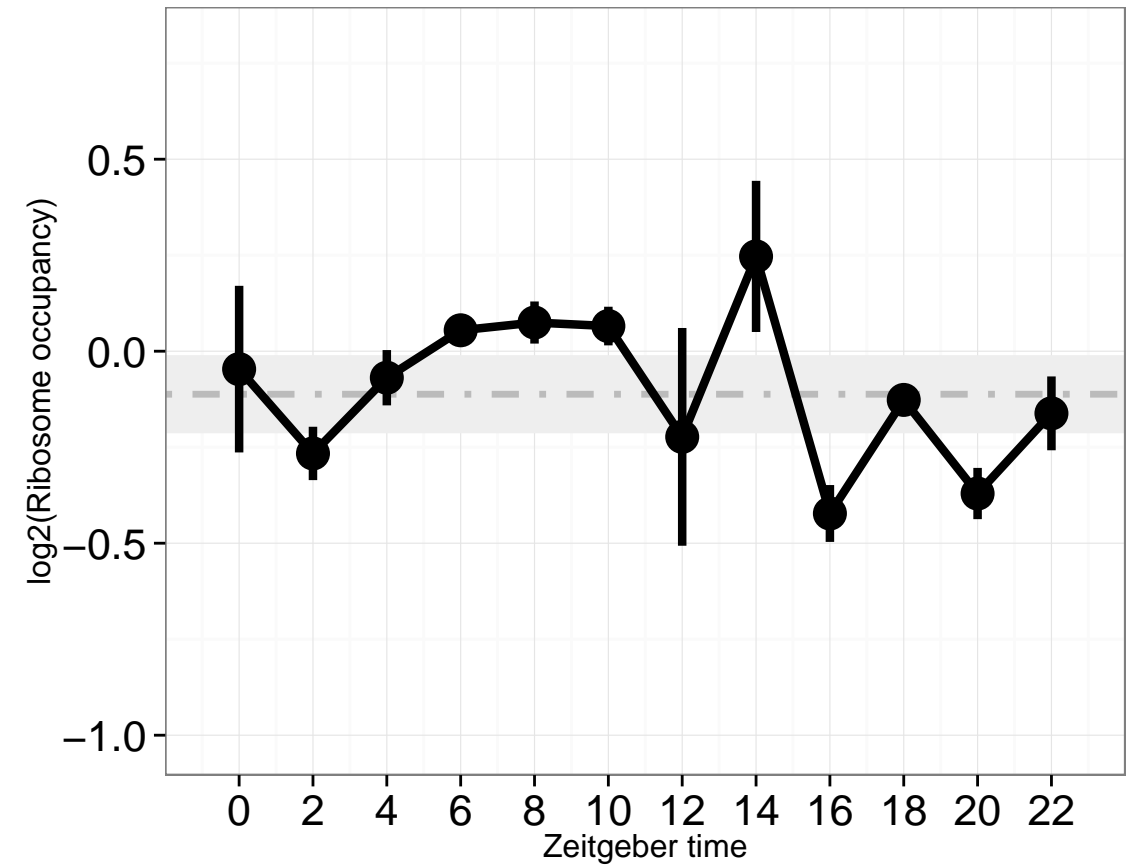

Supplement: Supplementary file 1231 [file 1]

# Psmb1

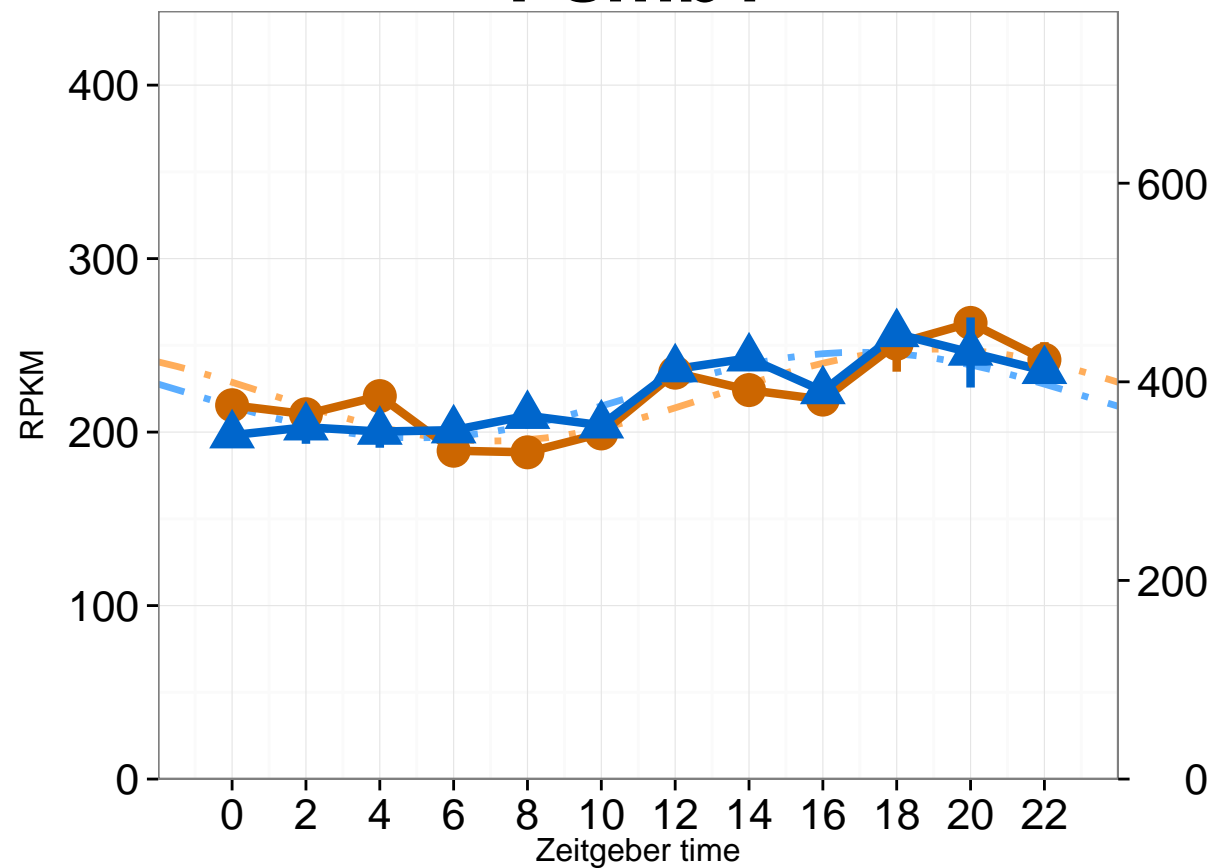

# Psmb1

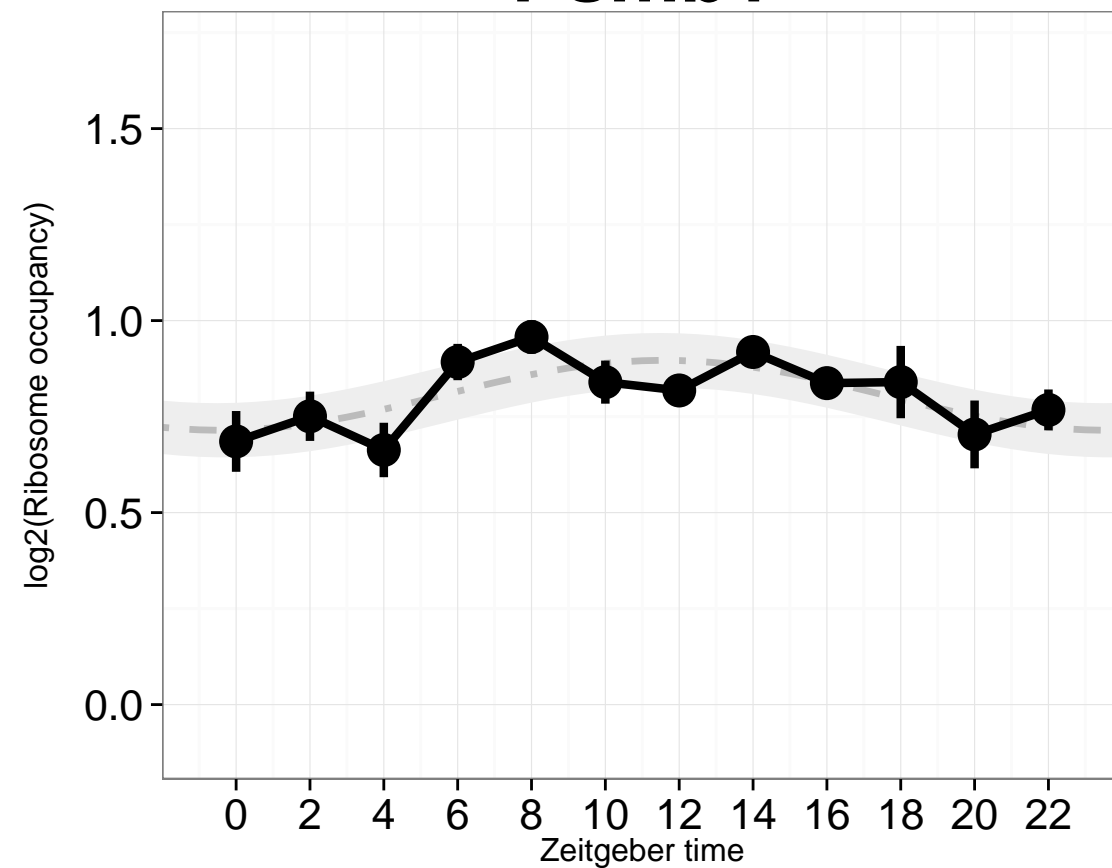

Supplement: Supplementary file 1232 [file 1]

## Nmnat1

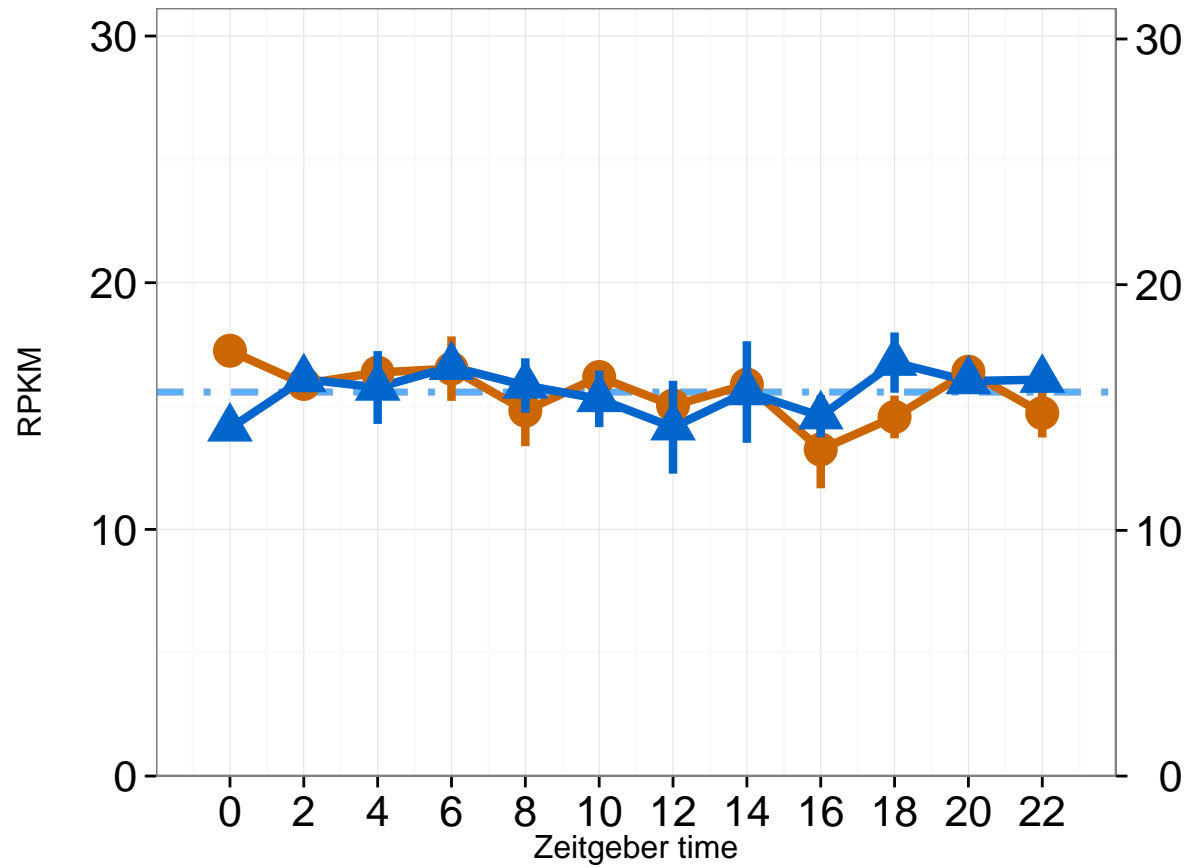

## Nmnat1

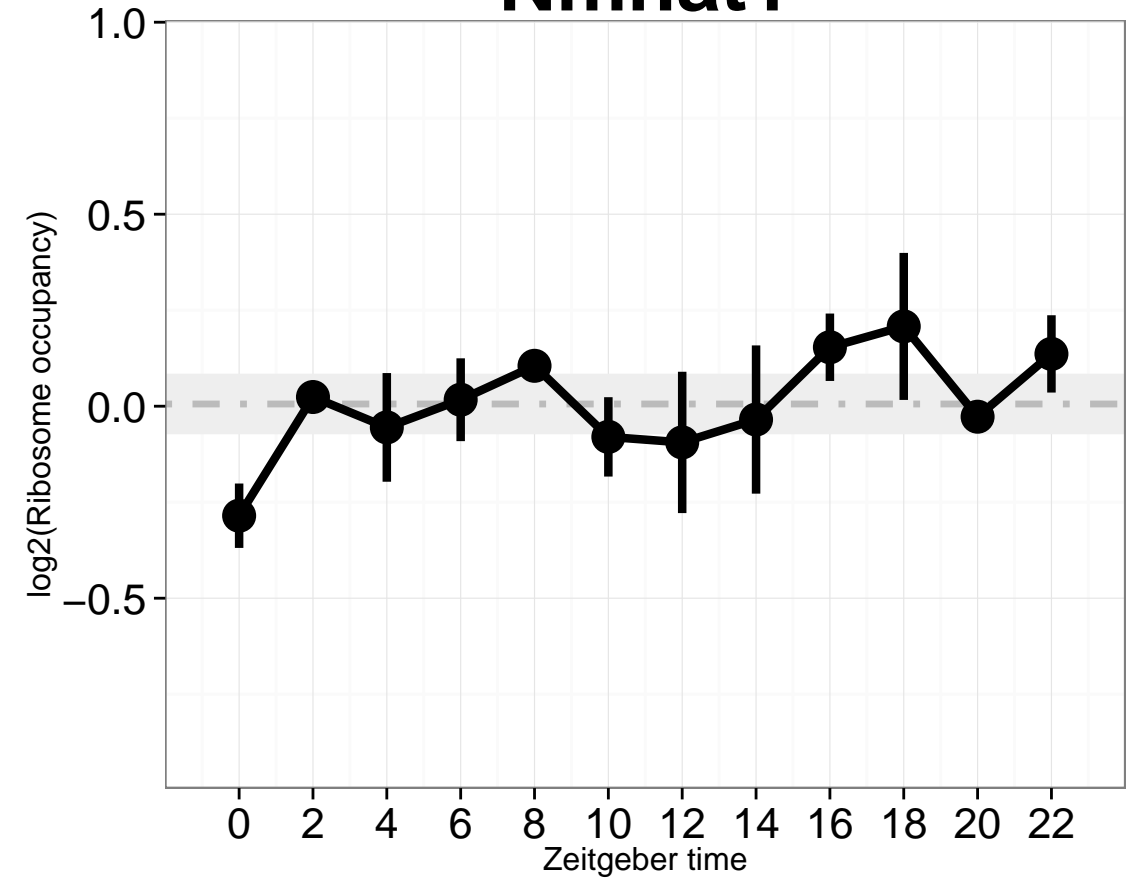

Supplement: Supplementary file 1233 [file 1]

## Asns

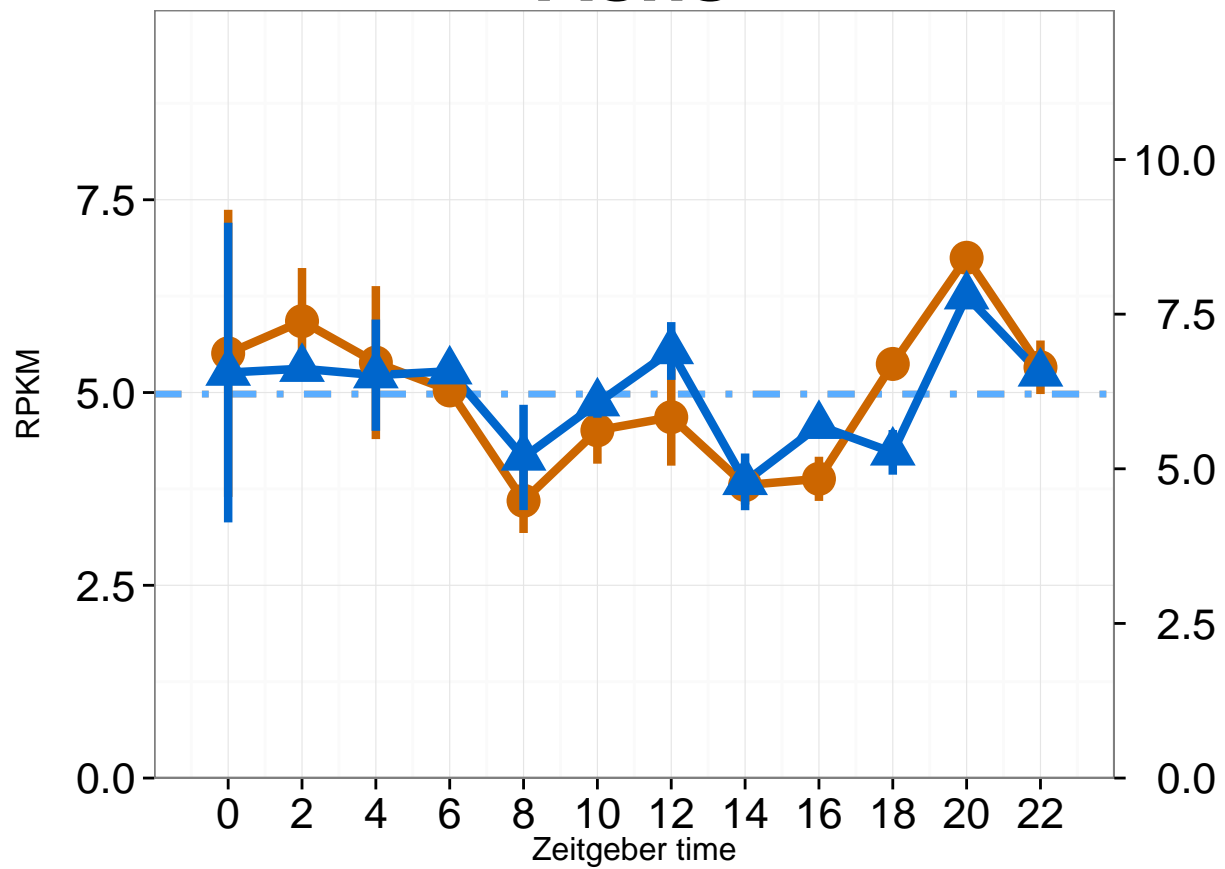

## Asns

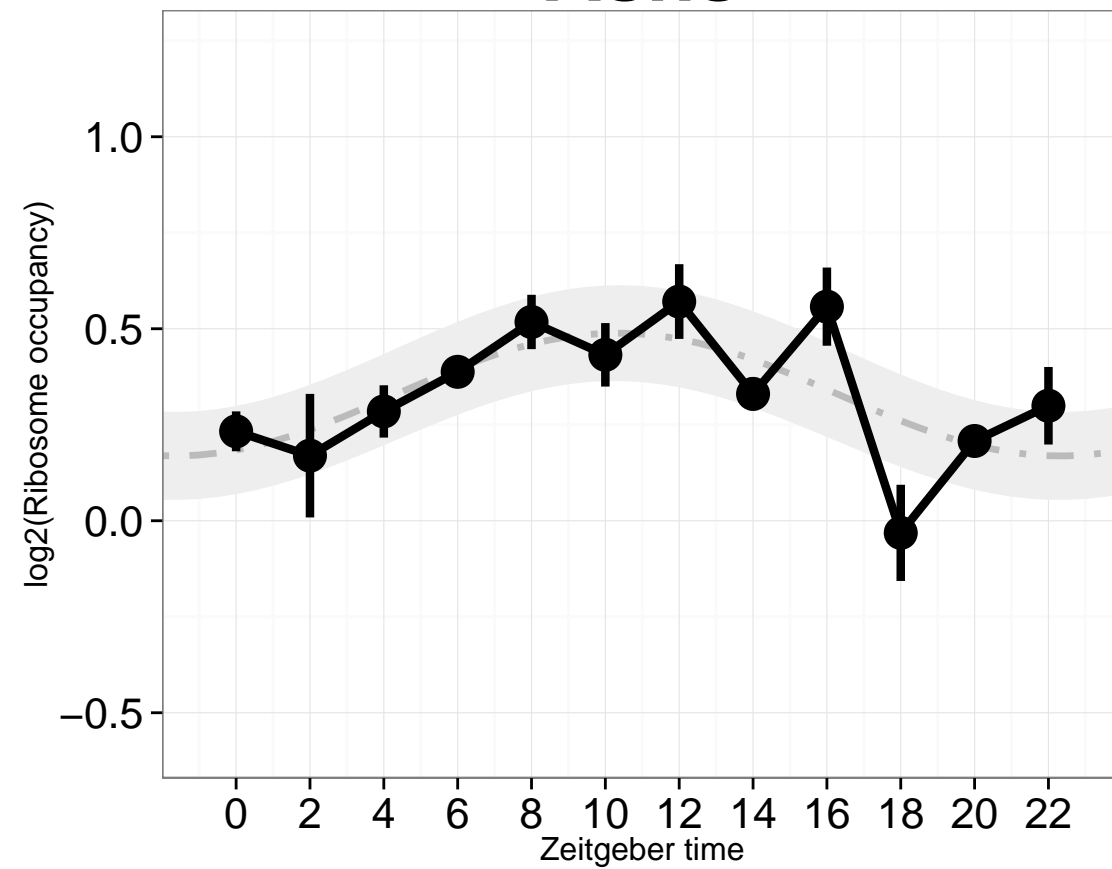

Supplement: Supplementary file 1234 [file 1]

# Marf1

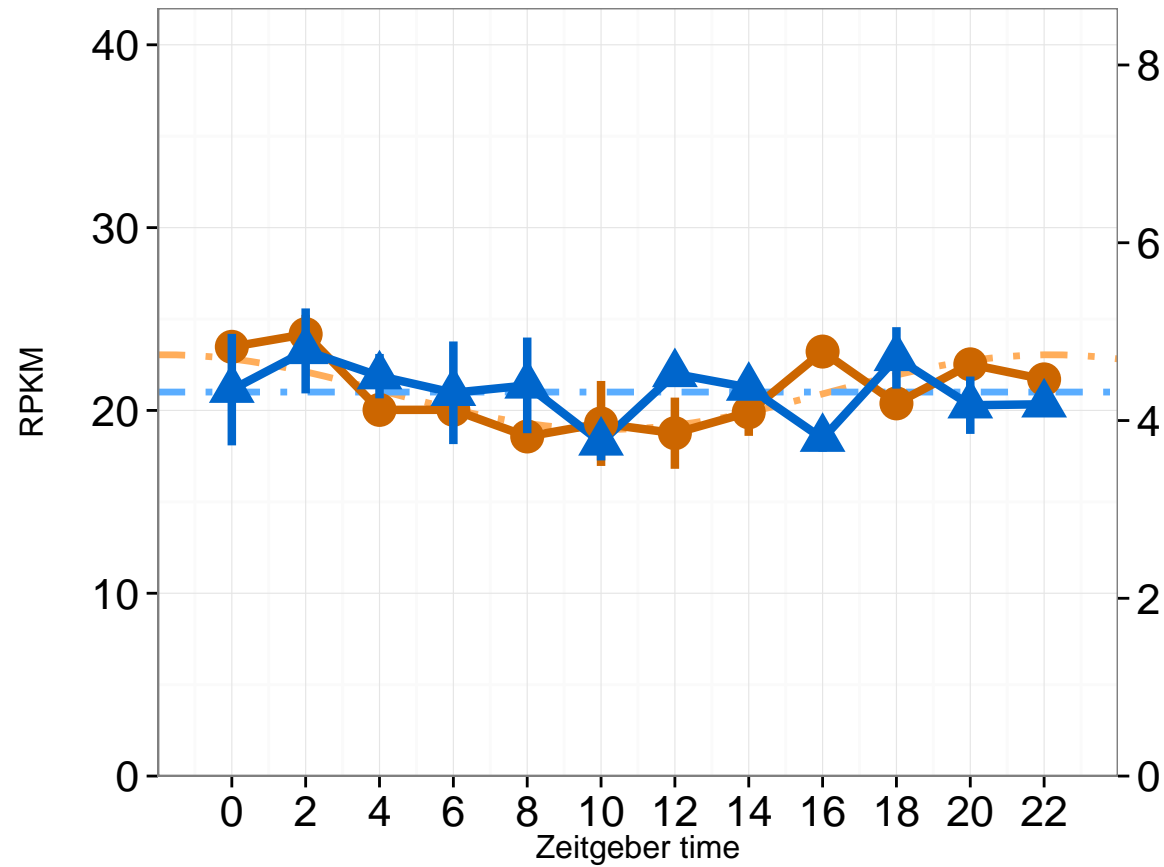

# Marf1

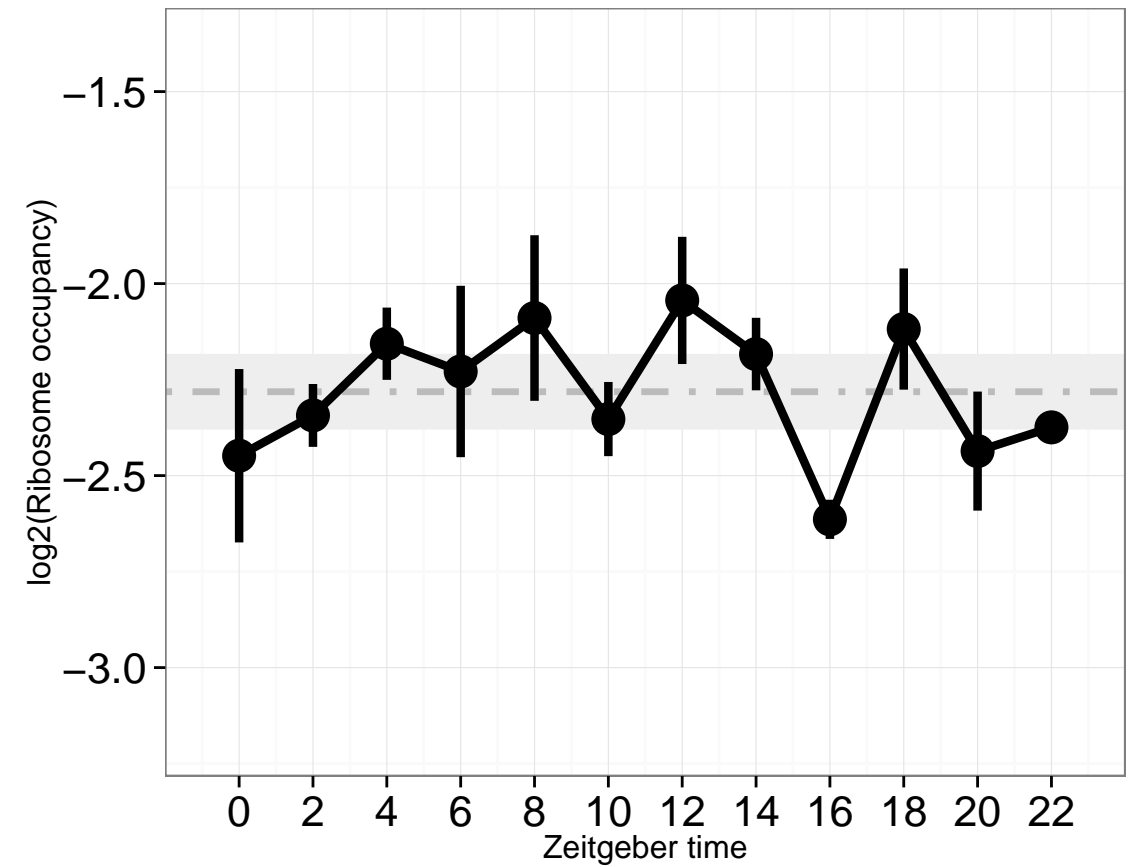

Supplement: Supplementary file 1235 [file 1]

## 9430020K01Rik

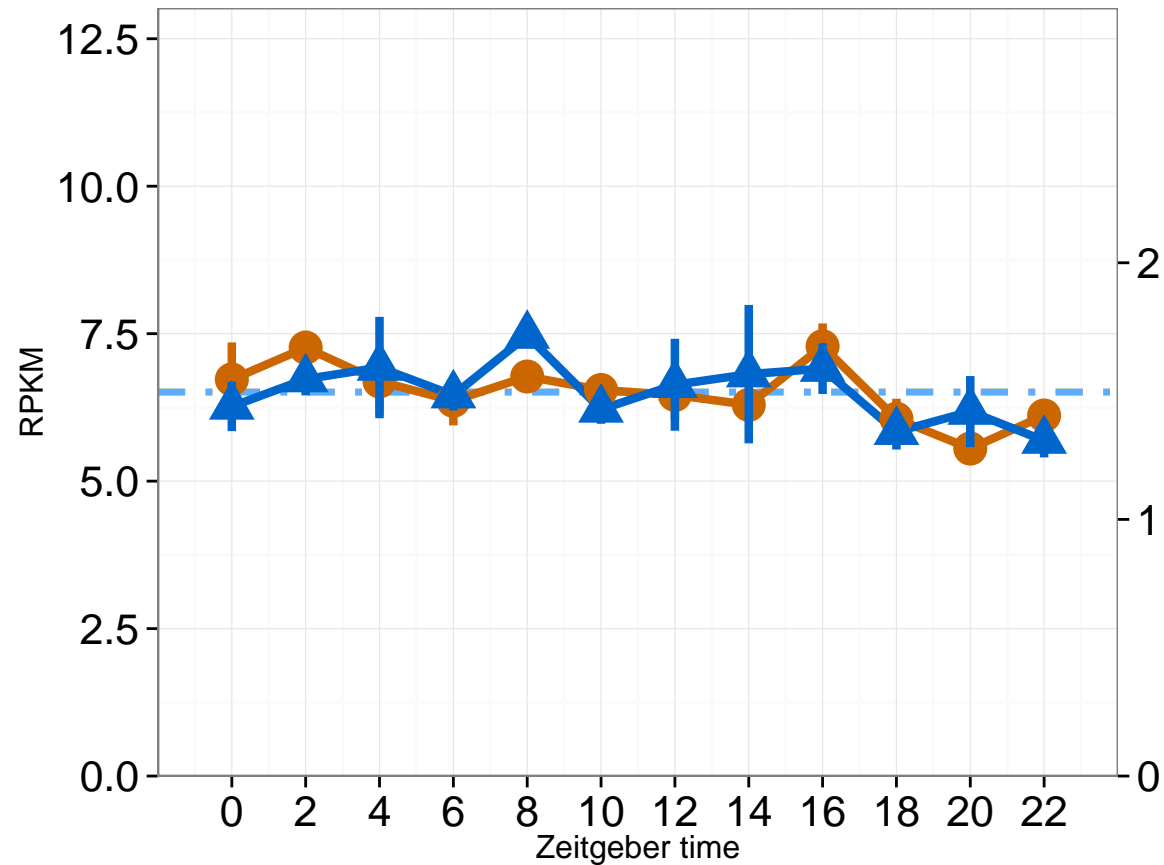

## 9430020K01Rik

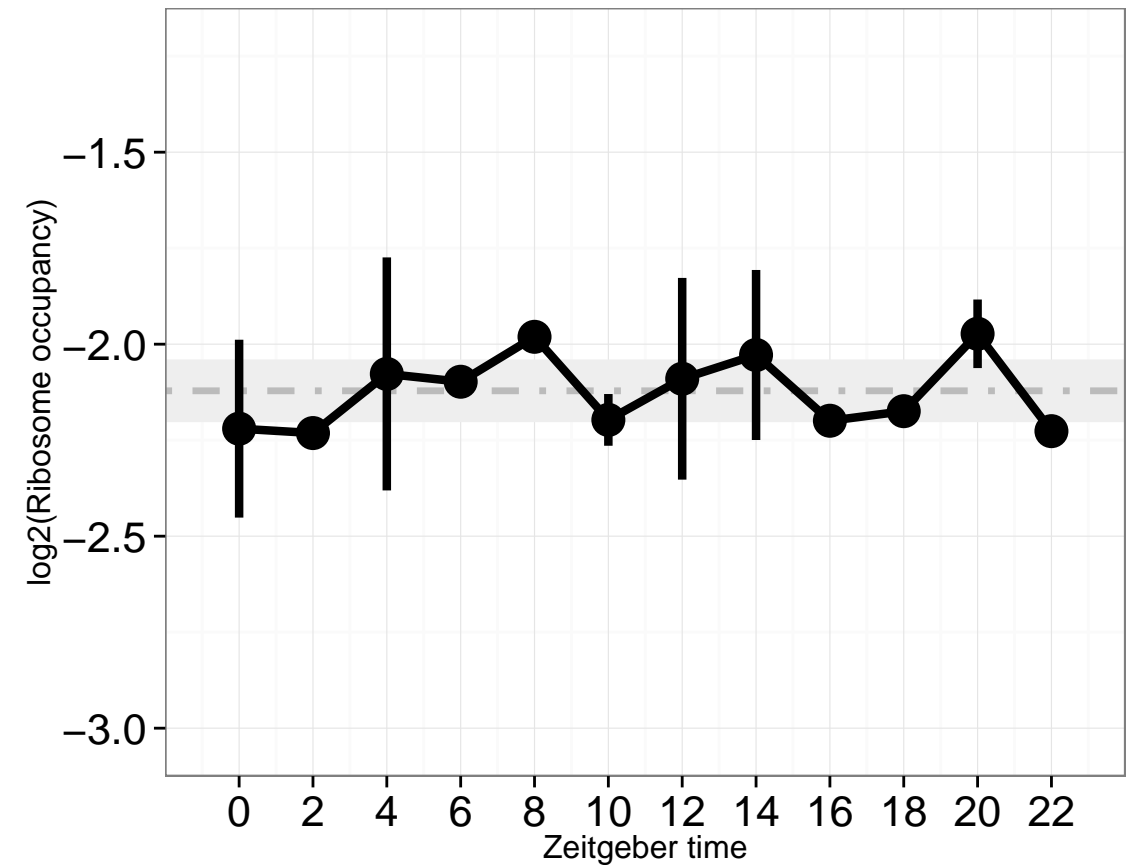

Supplement: Supplementary file 1236 [file 1]

# Jagn1

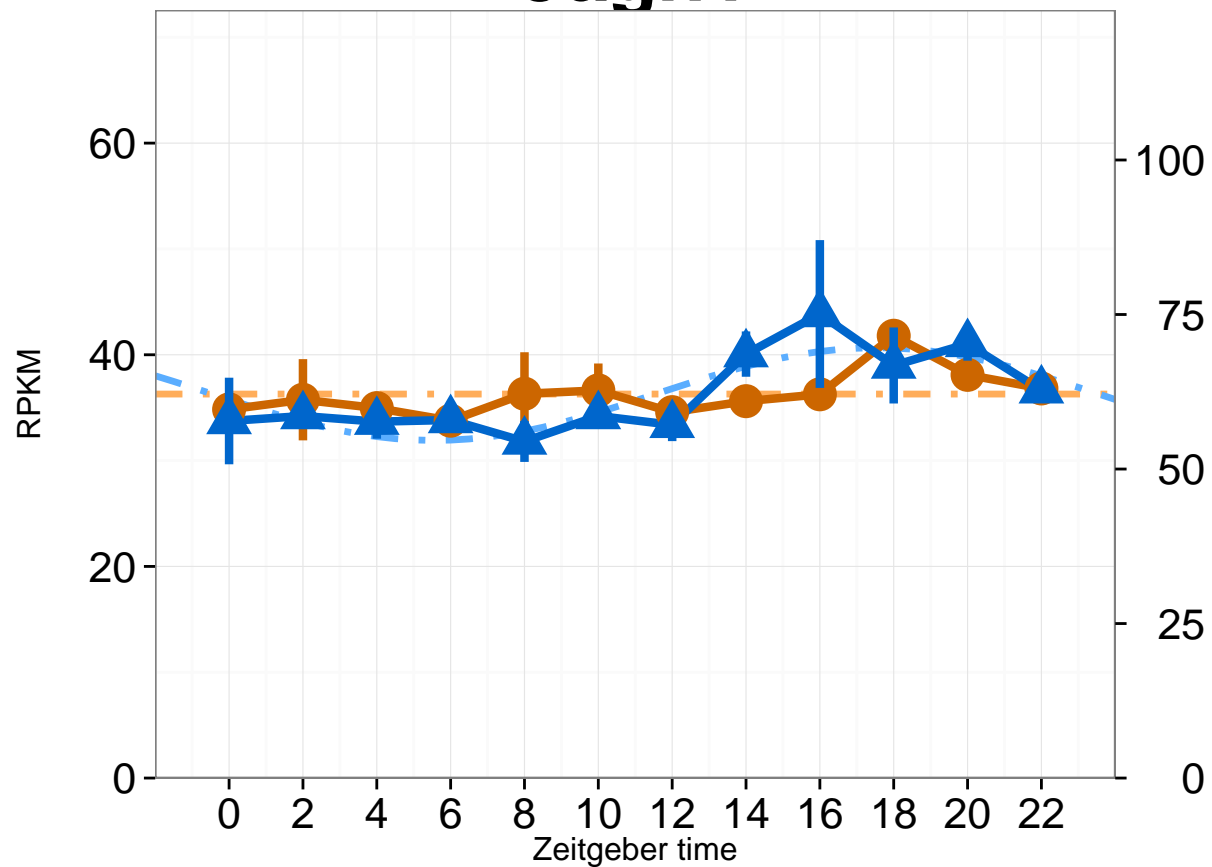

# Jagn1

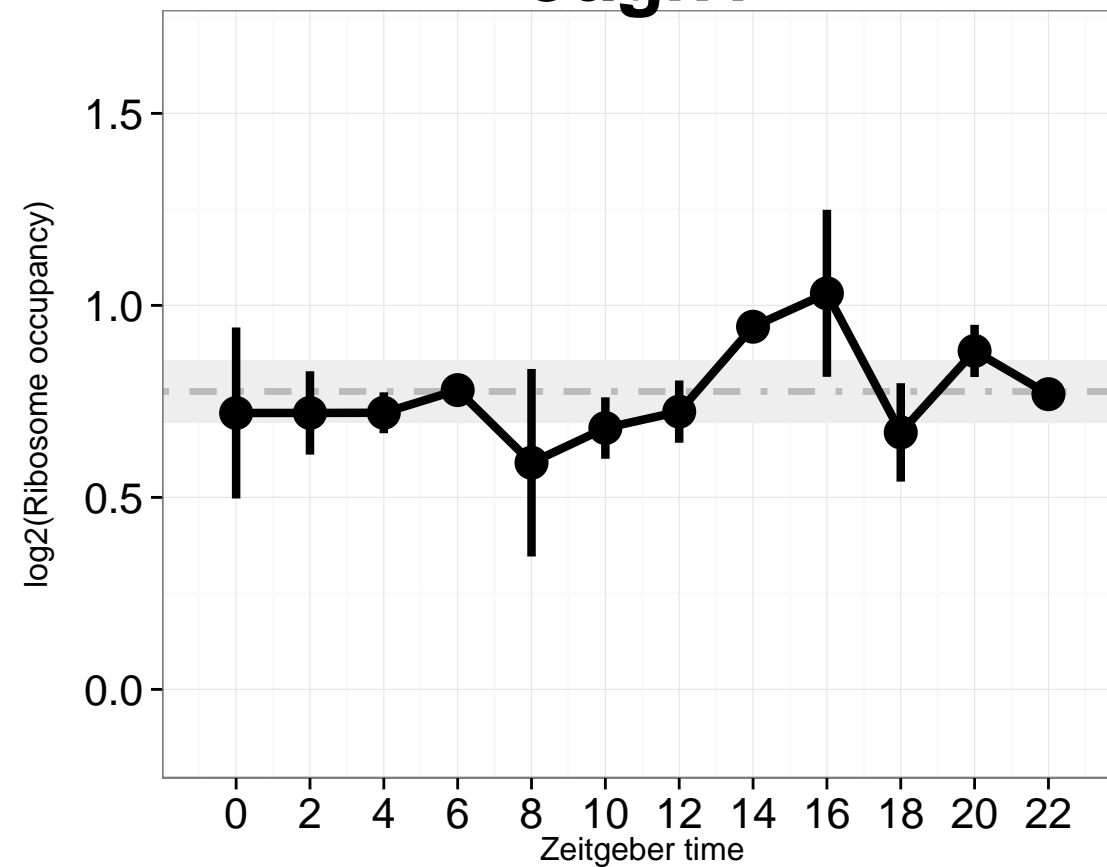

Supplement: Supplementary file 1237 [file 1]

## Scyl1

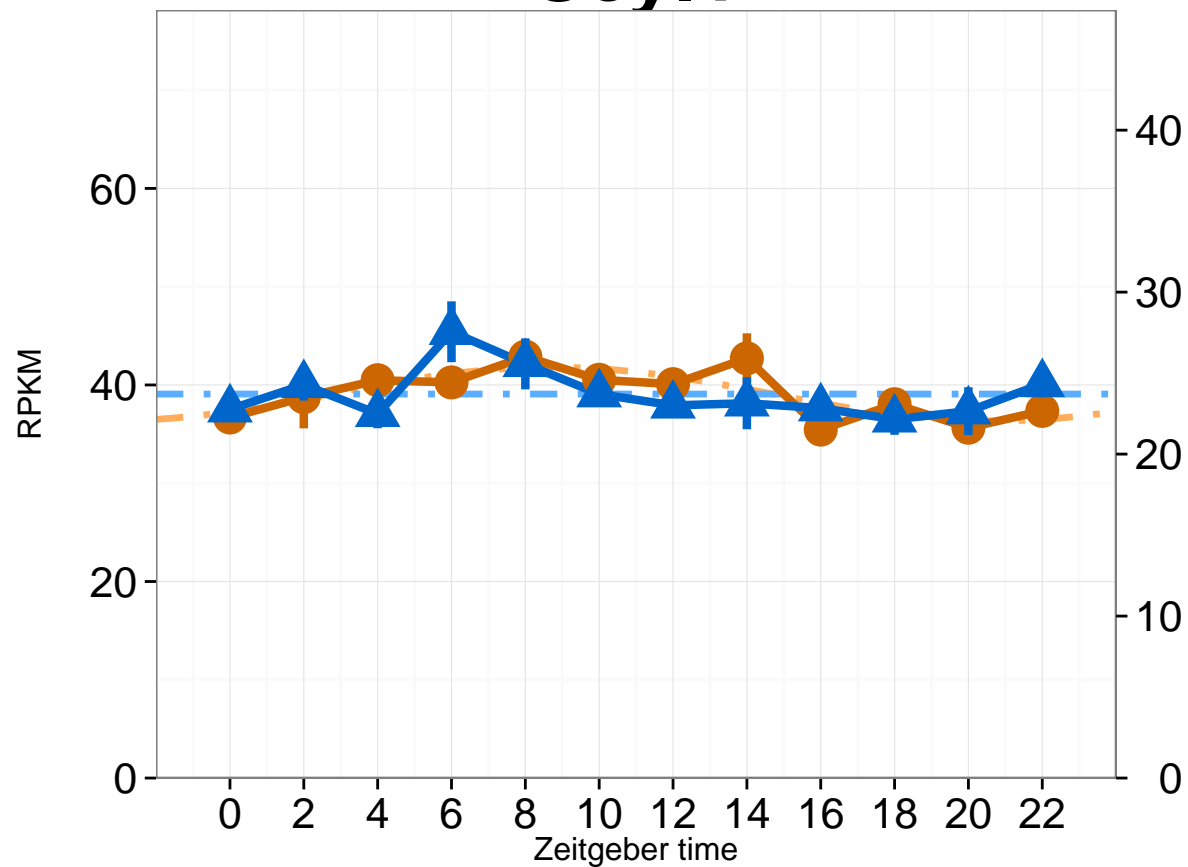

## Scyl1

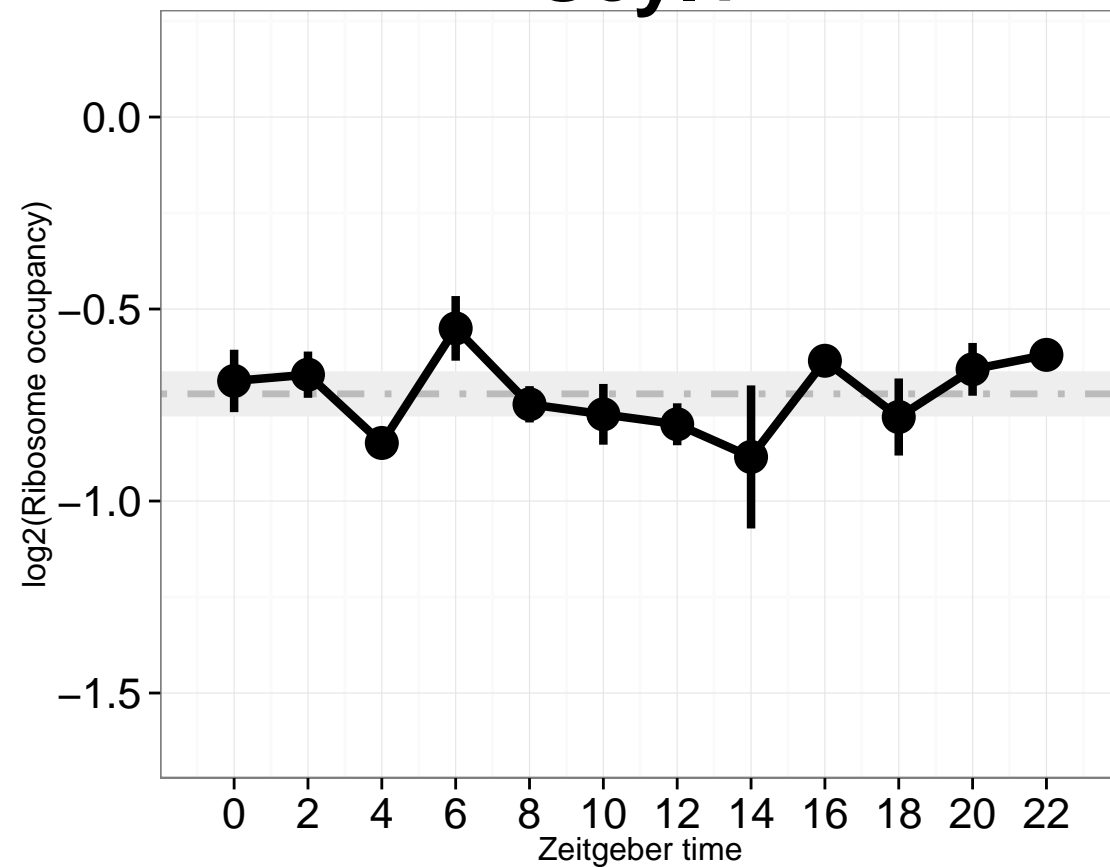

Supplement: Supplementary file 1238 [file 1]

# FtI1

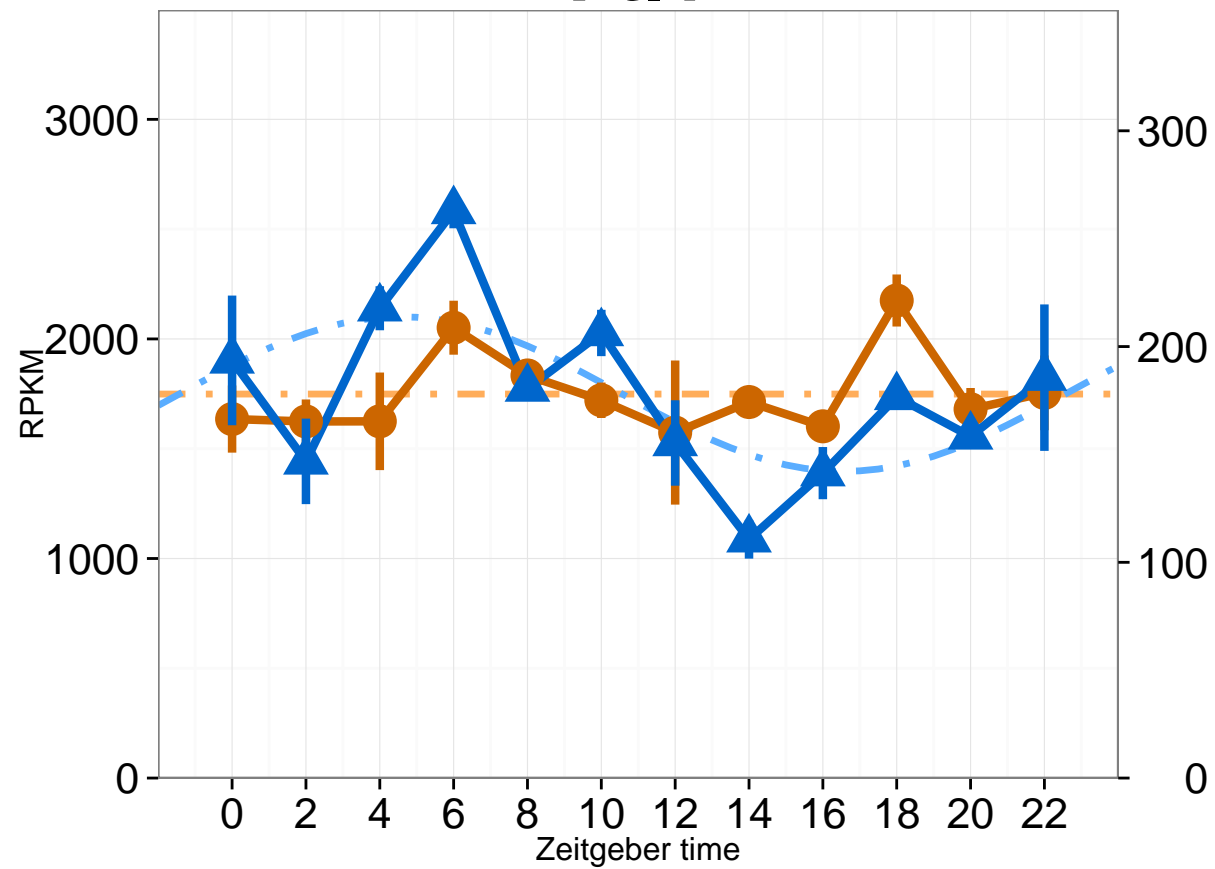

# FtI1

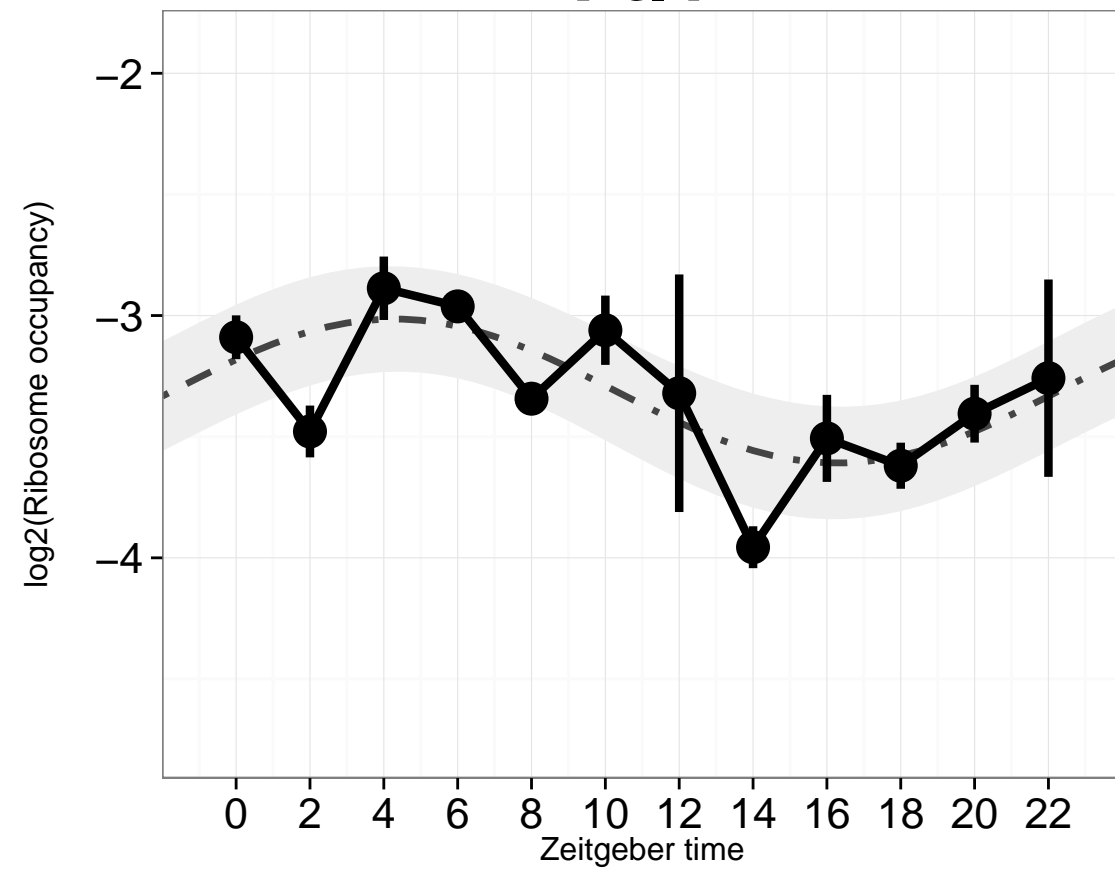

Supplement: Supplementary file 1239 [file 1]

# Zbtb7a

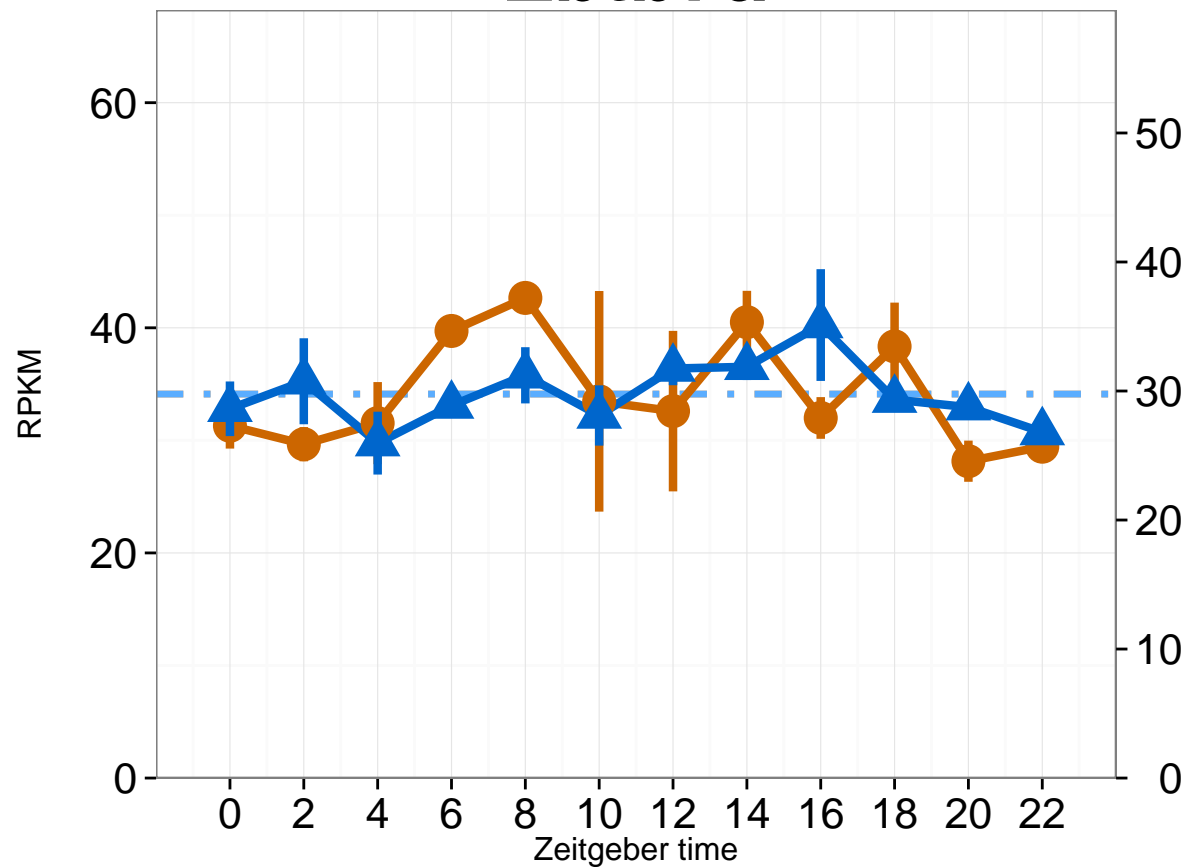

# Zbtb7a

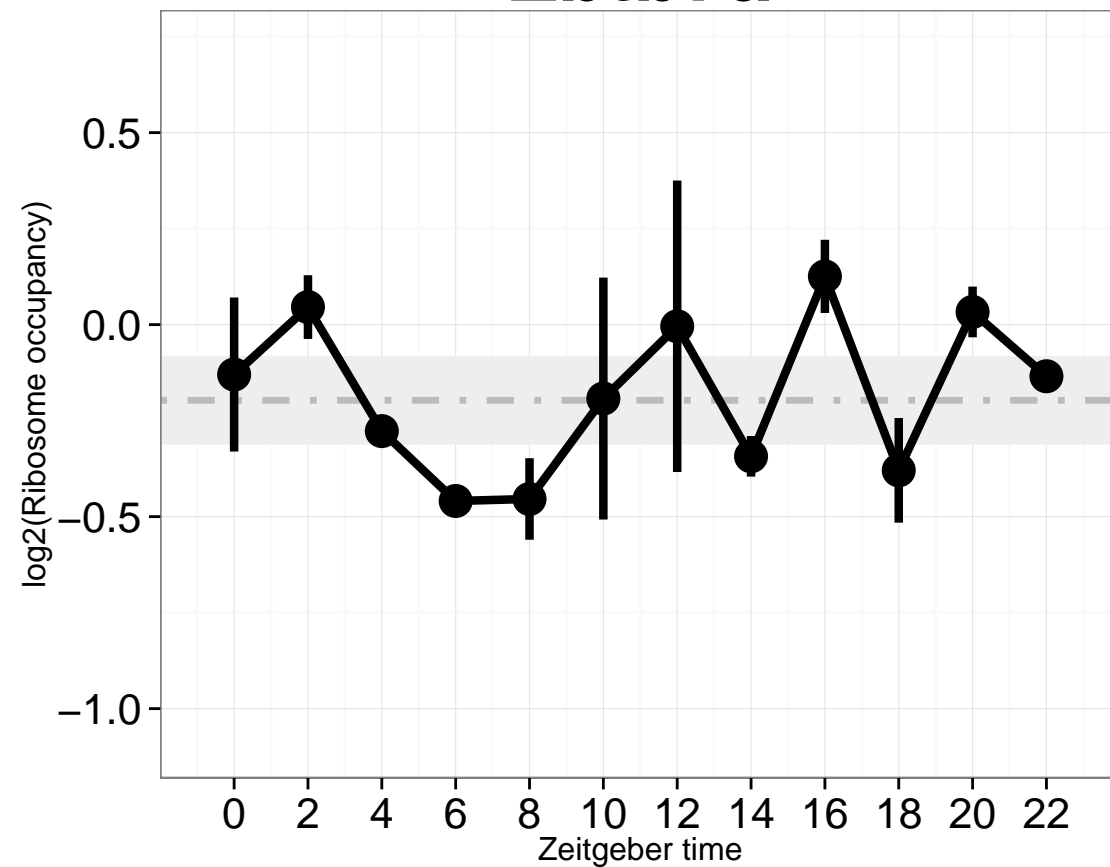

Supplement: Supplementary file 1240 [file 1]

# Tigd2

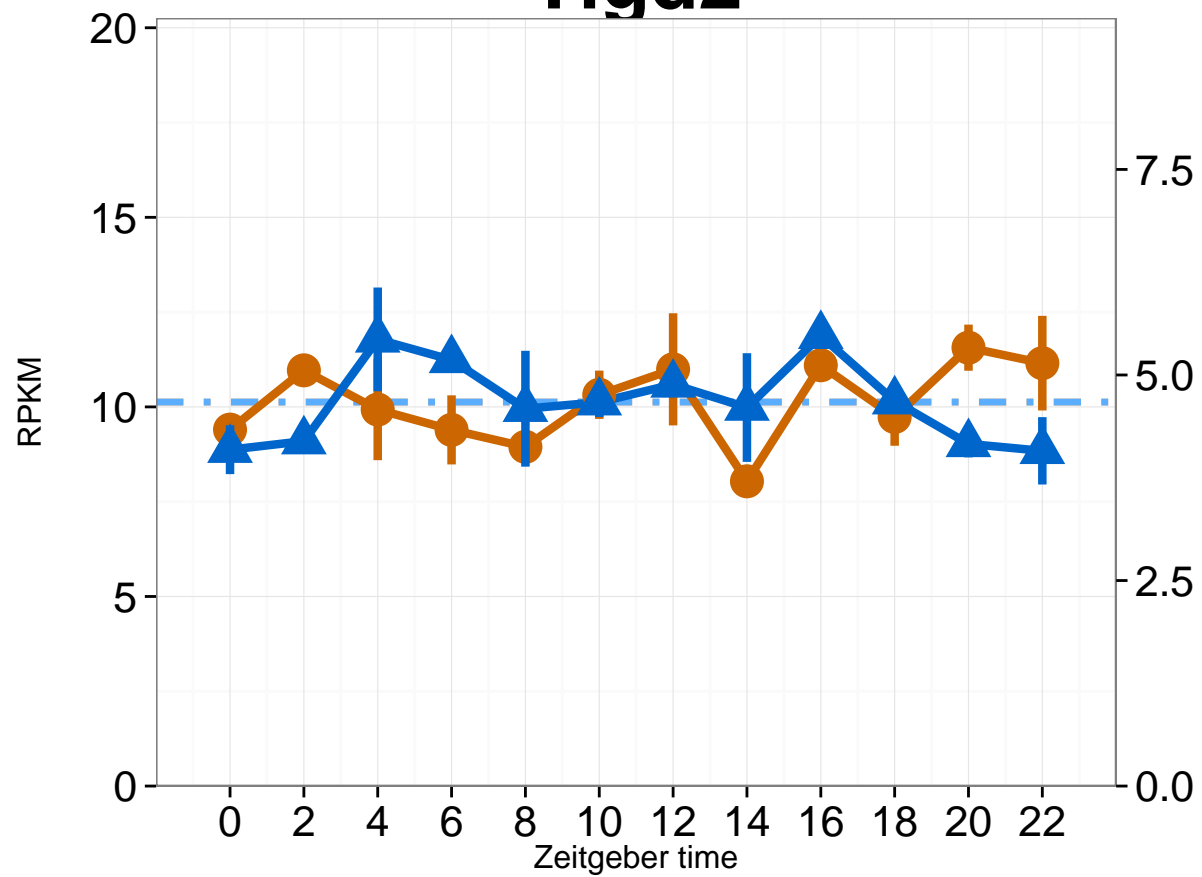

# Tigd2

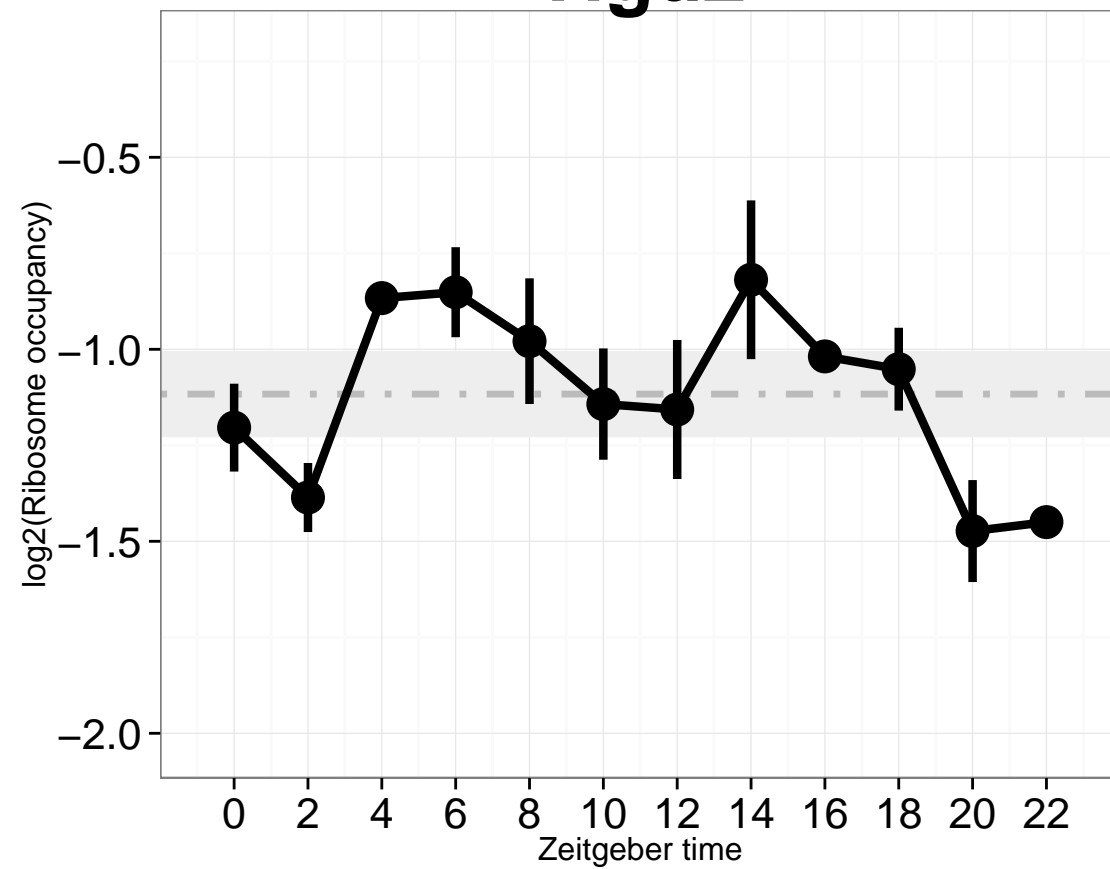

Supplement: Supplementary file 1241 [file 1]

## Polr2b

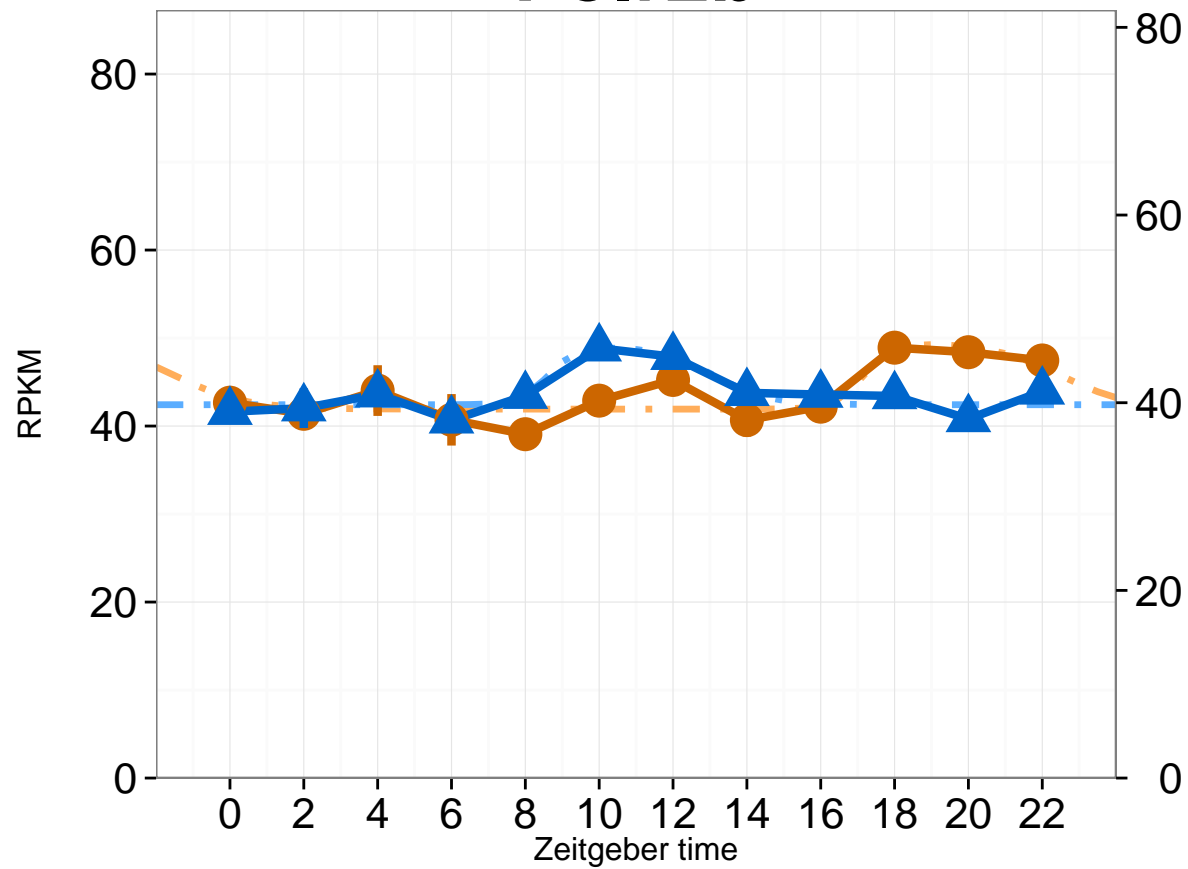

## Polr2b

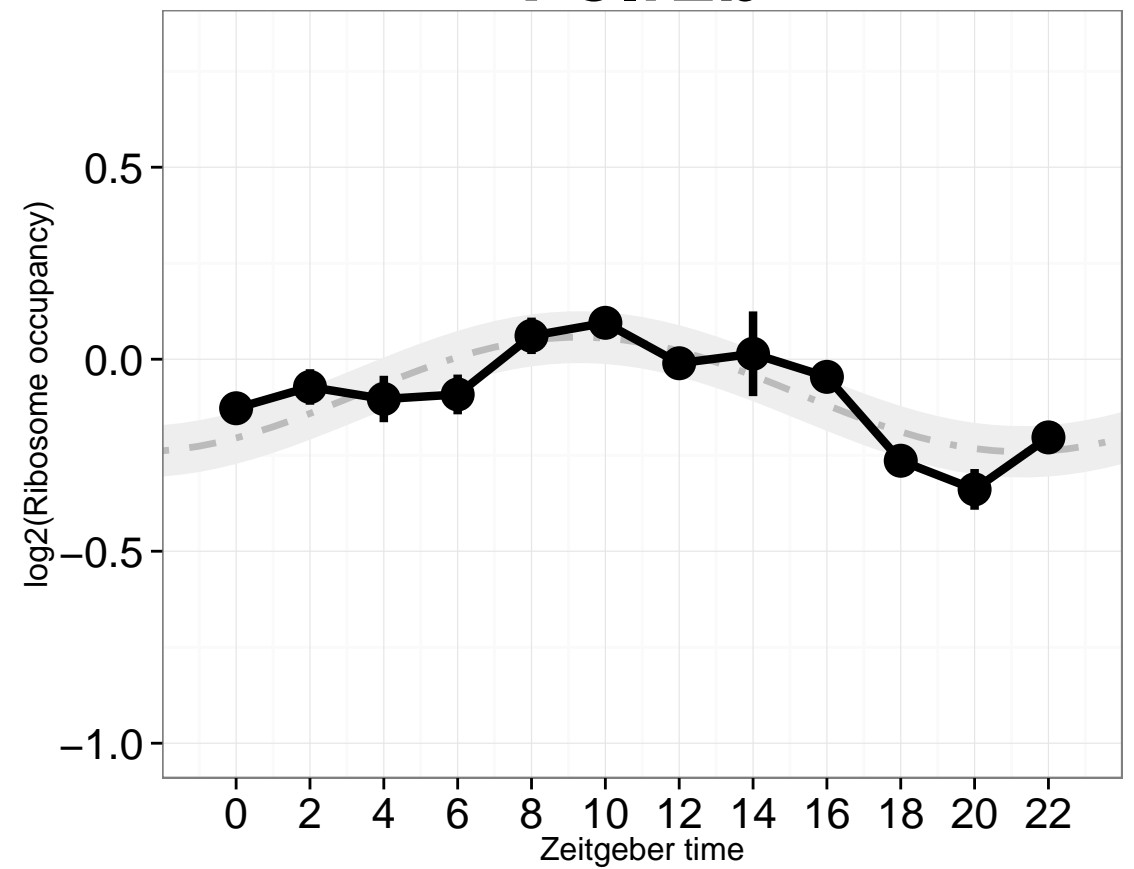

Supplement: Supplementary file 1242 [file 1]

# Zfp106

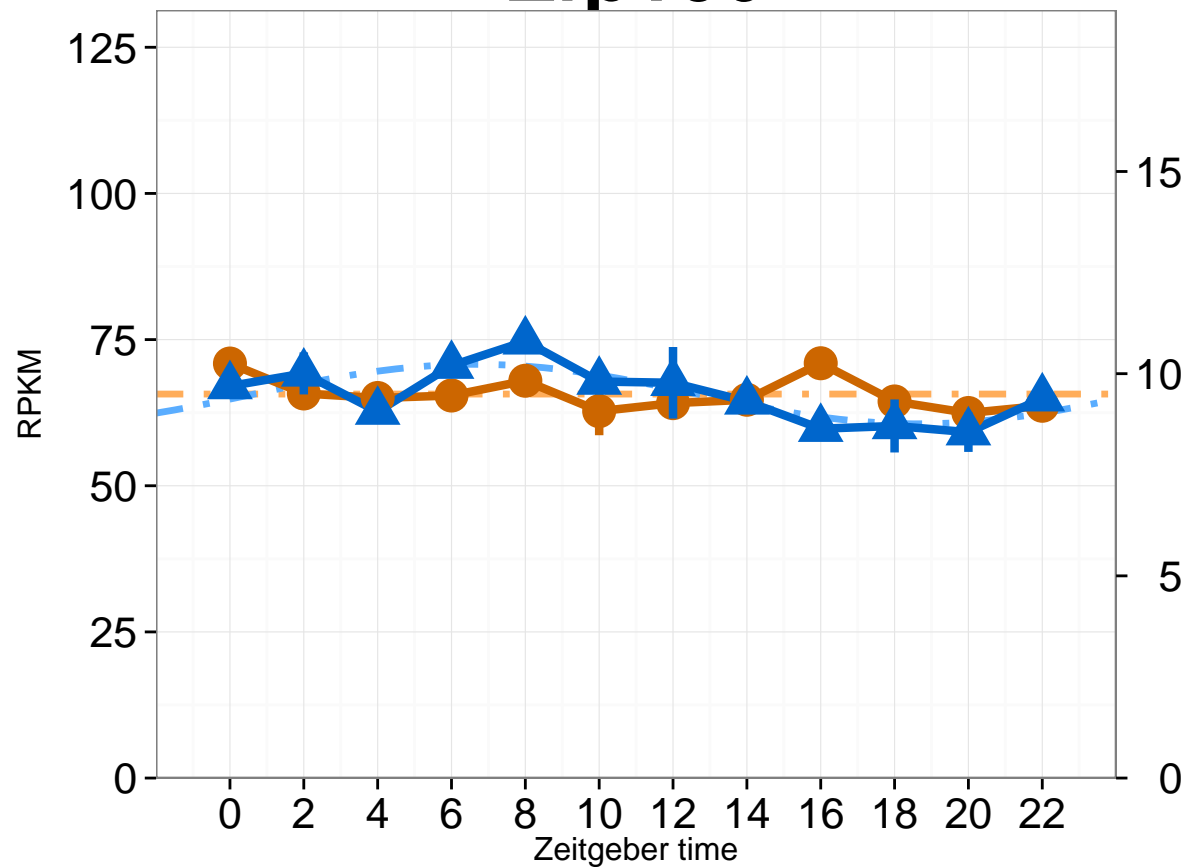

# Zfp106

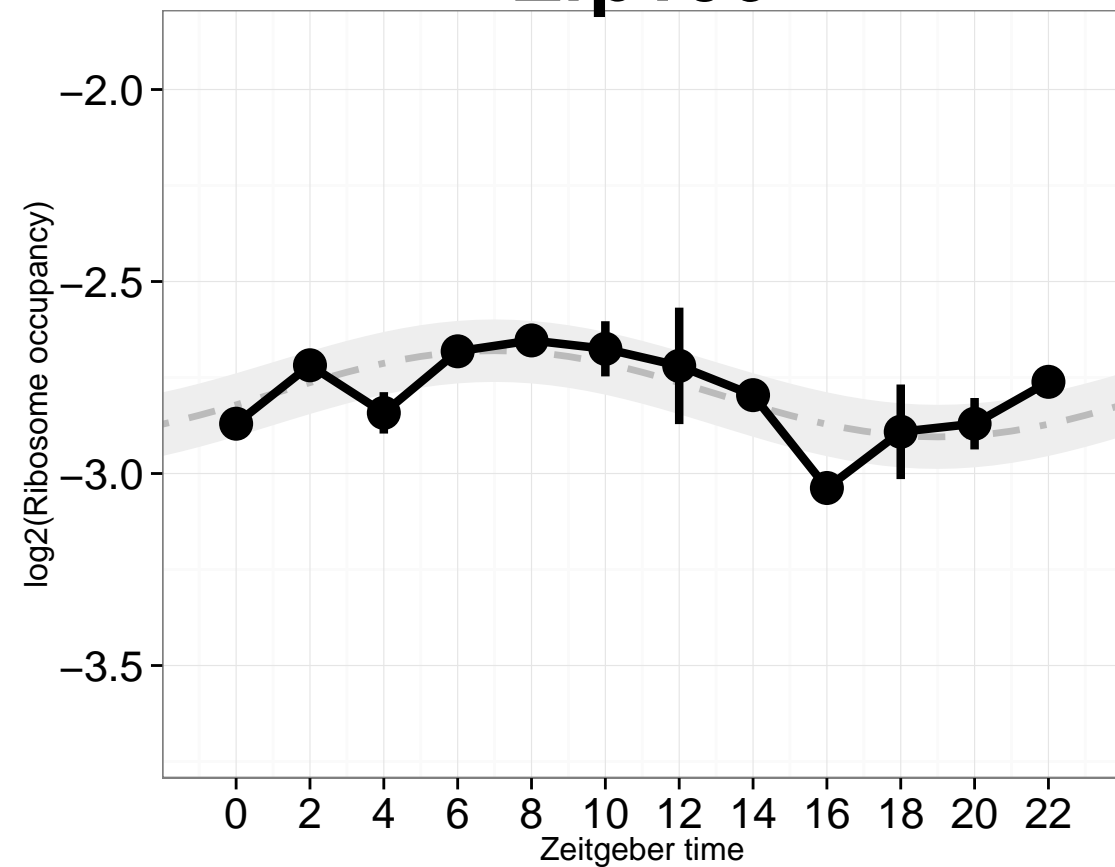

Supplement: Supplementary file 1243 [file 1]

# Tra2a

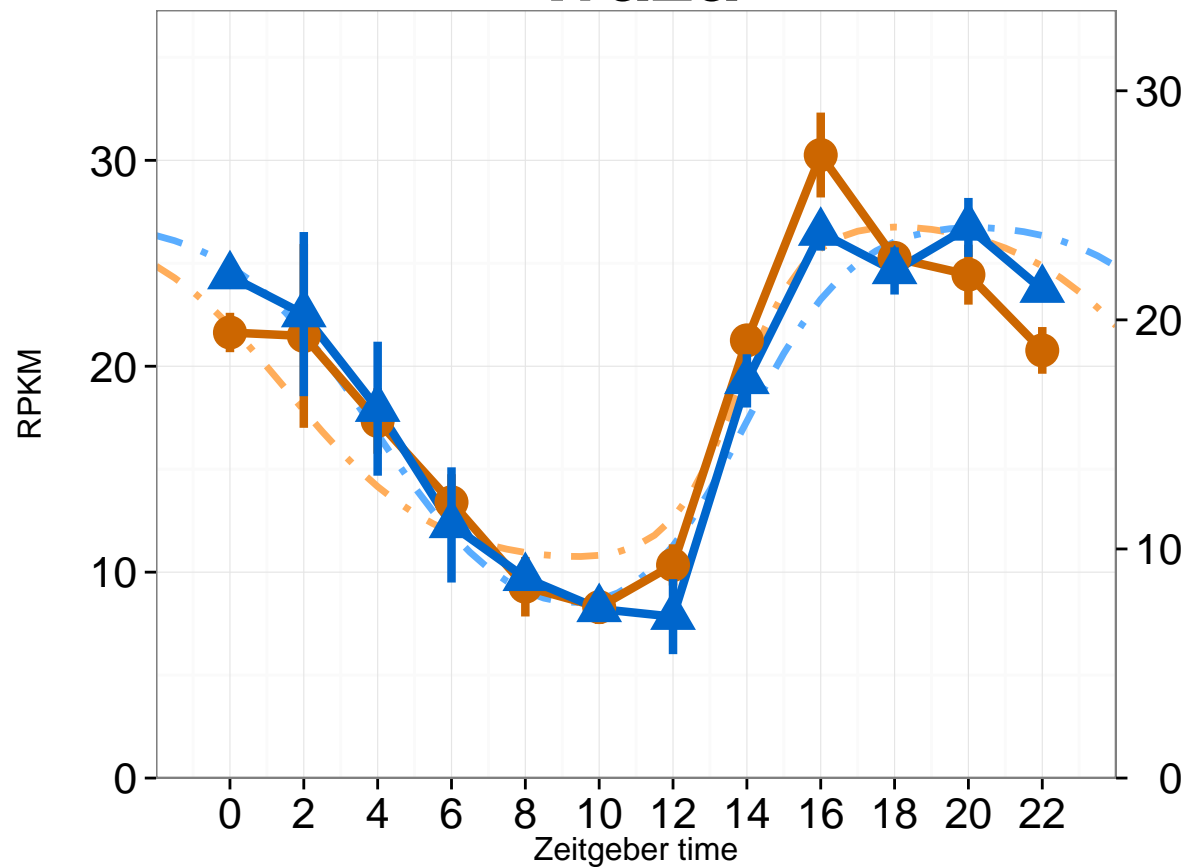

# Tra2a

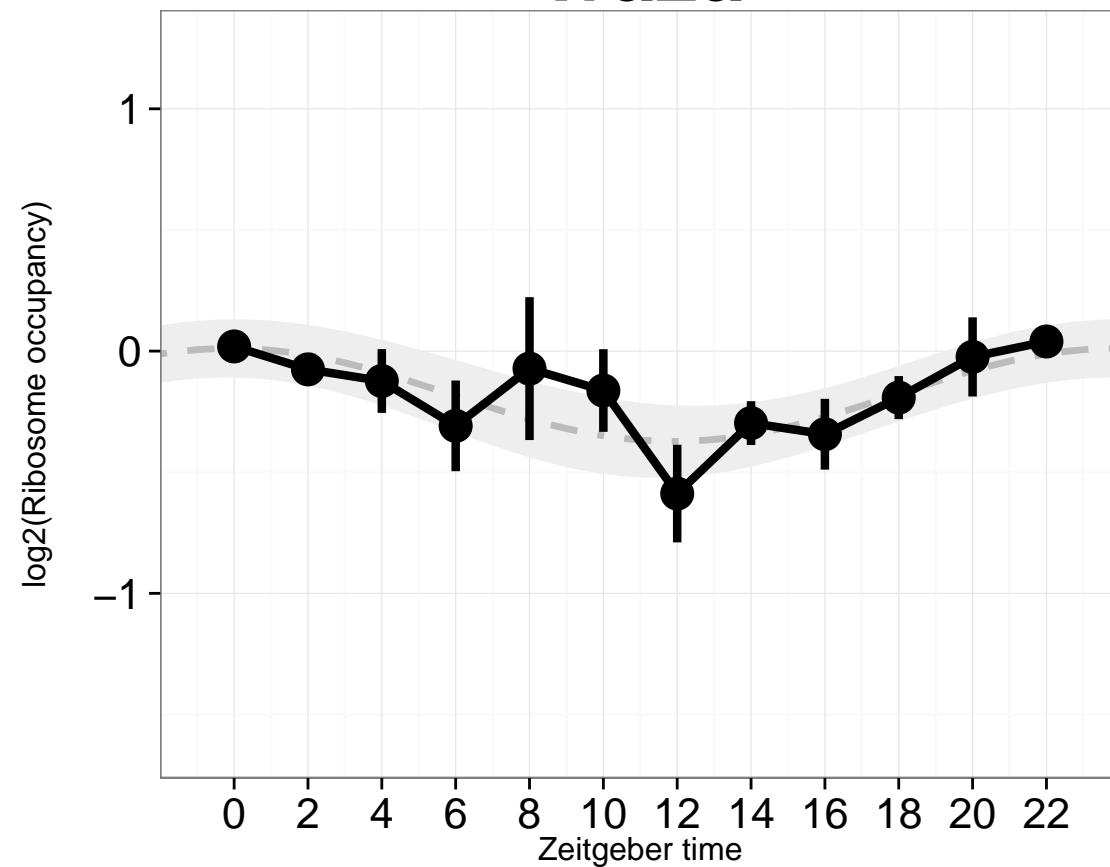

Supplement: Supplementary file 1244 [file 1]

## Dalrd3

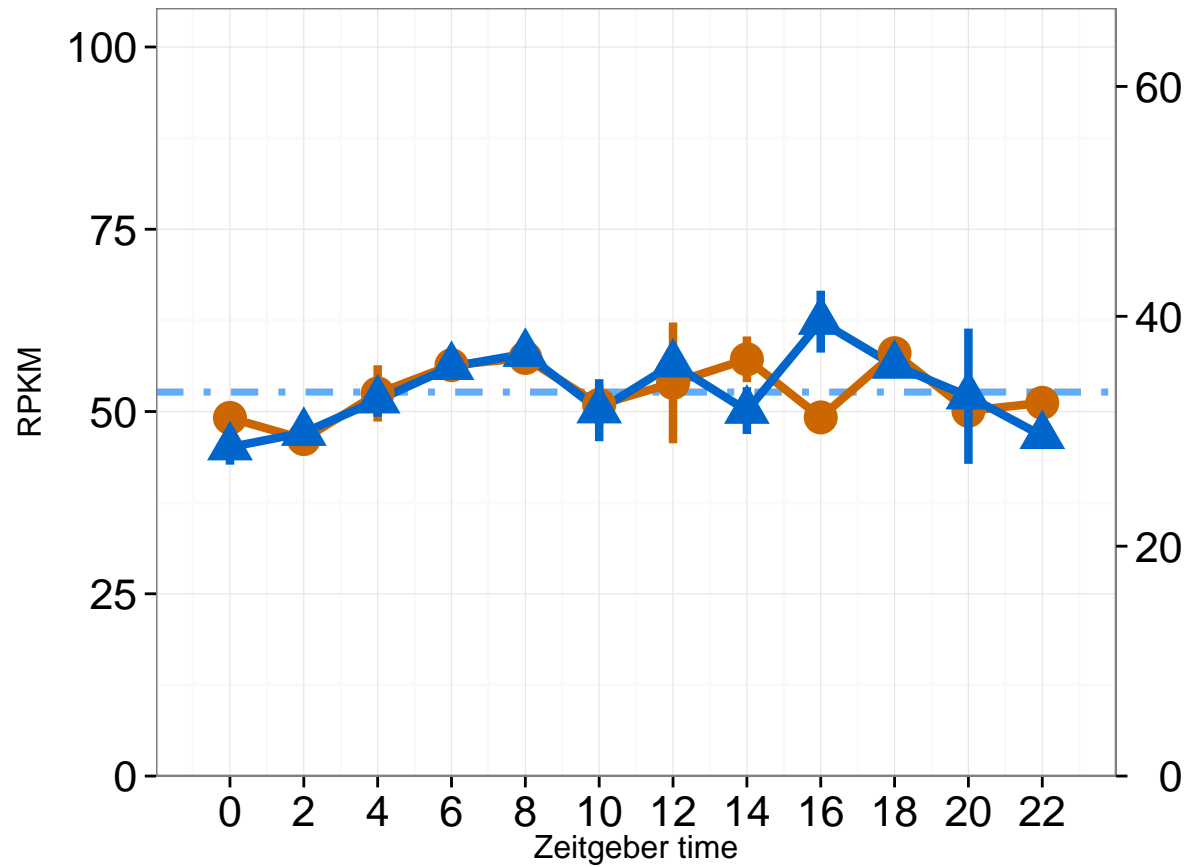

## Dalrd3

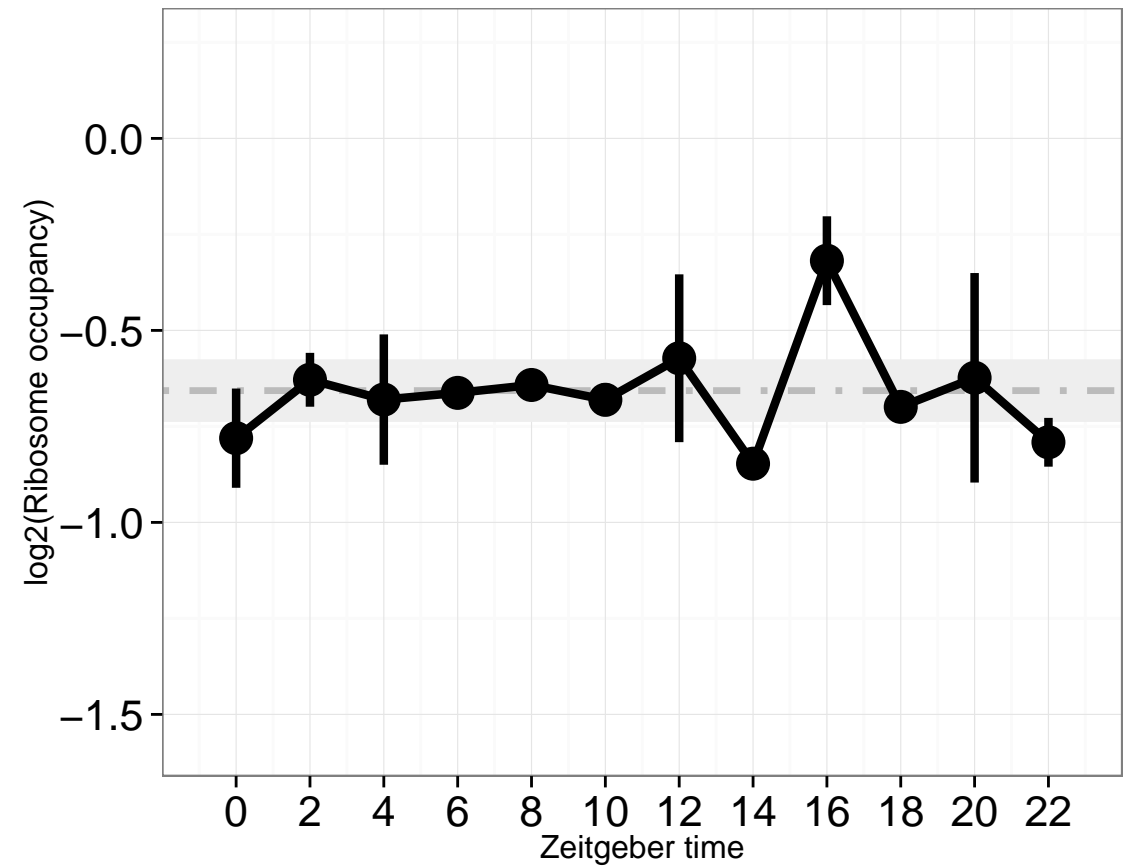

Supplement: Supplementary file 1245 [file 1]

# H2-D1

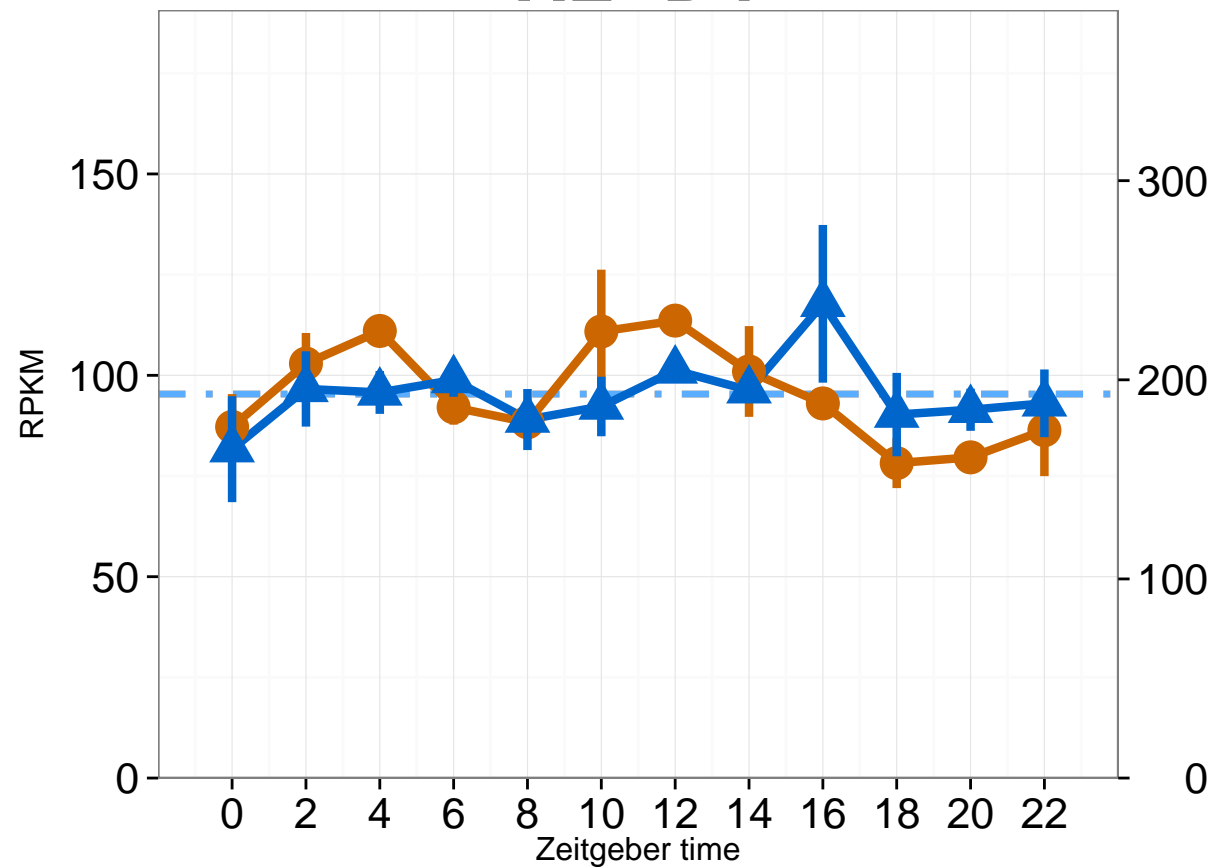

# H2-D1

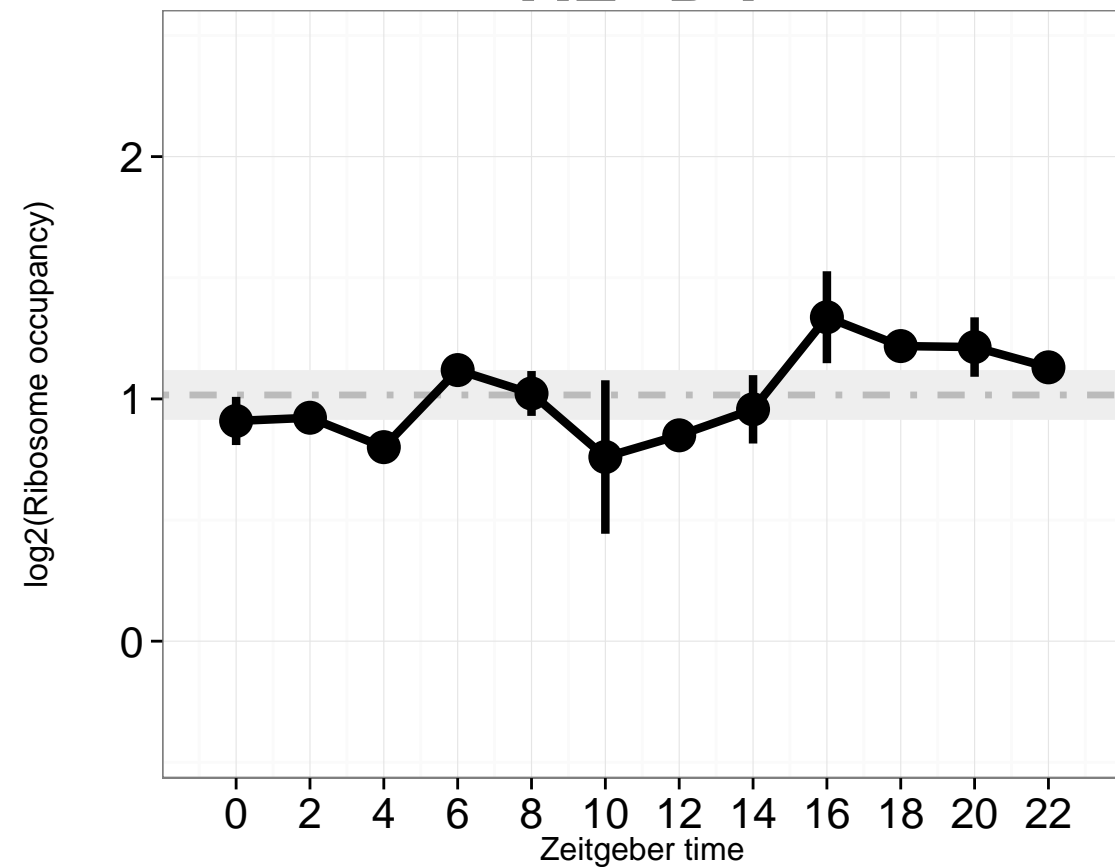

Supplement: Supplementary file 1246 [file 1]

# Ndrg2

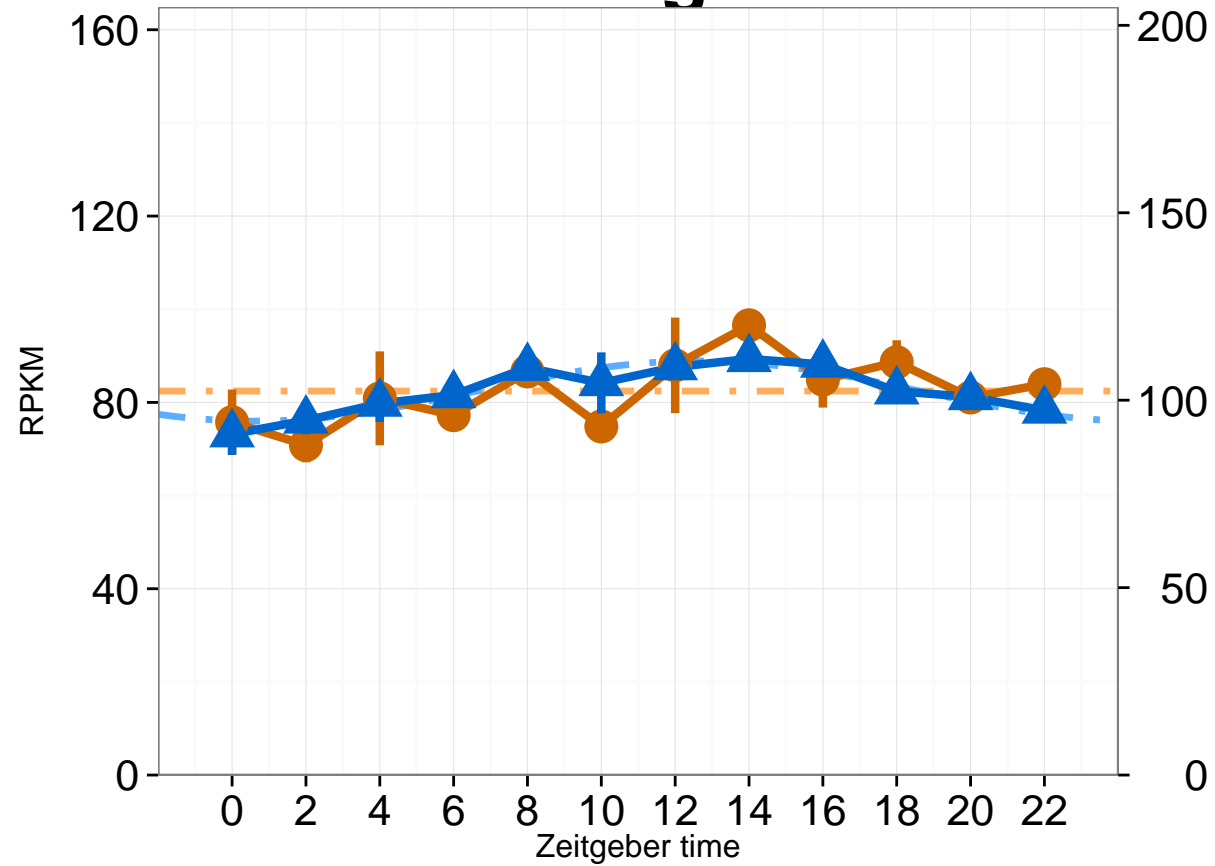

# Ndrg2

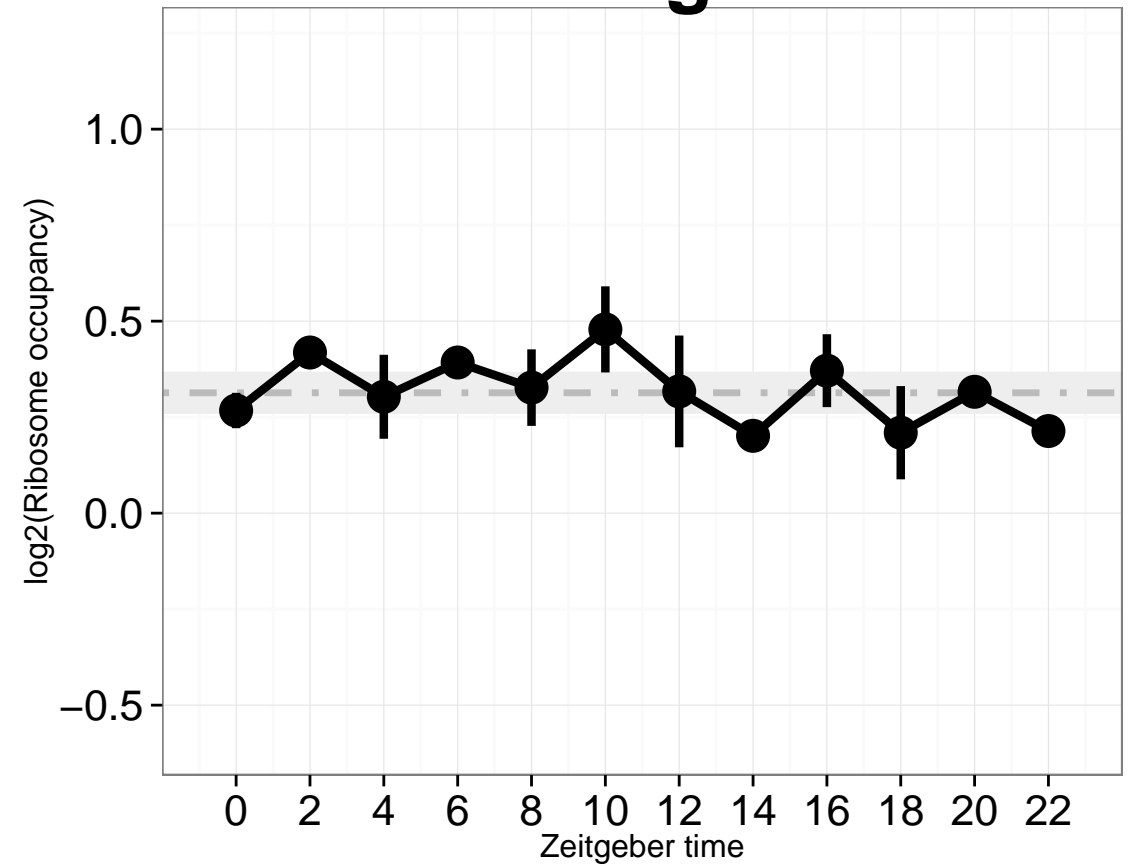

Supplement: Supplementary file 1247 [file 1]

# Wipf3

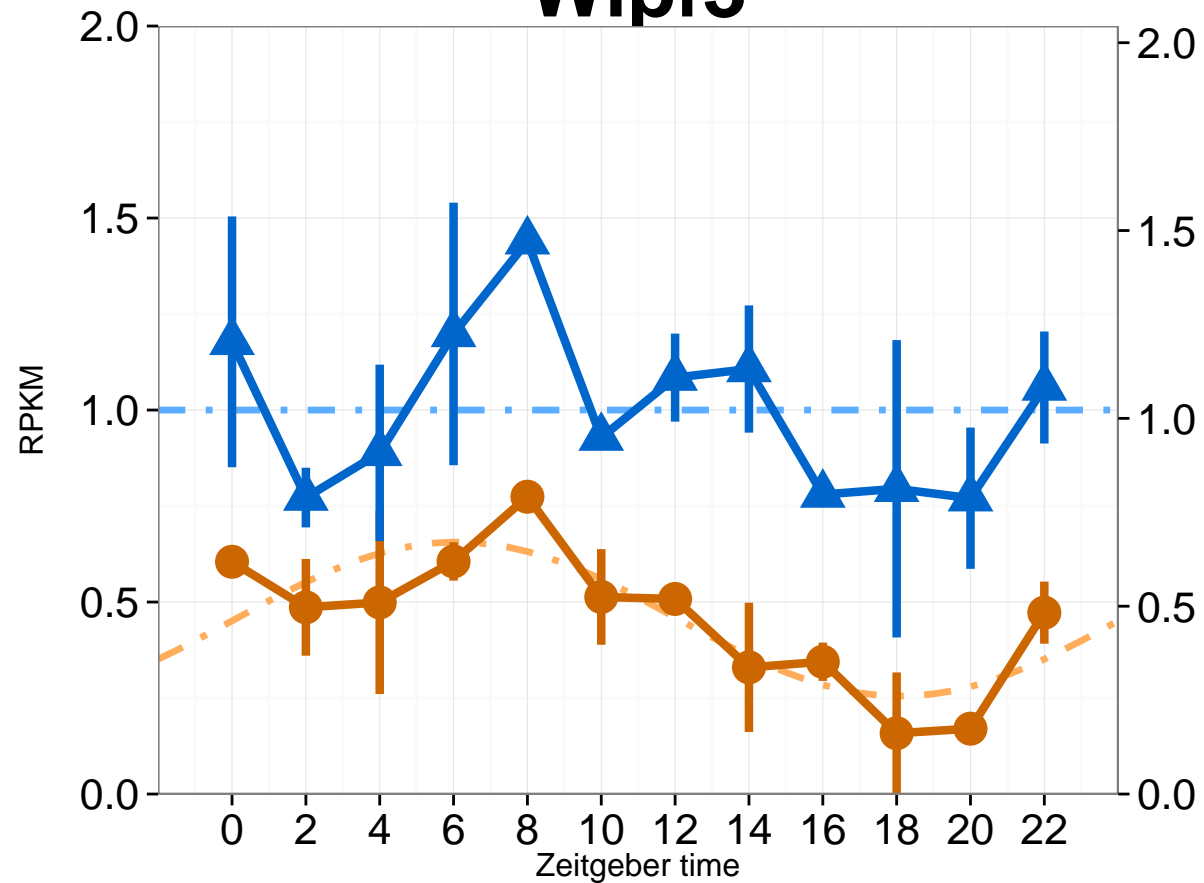

# Wipf3

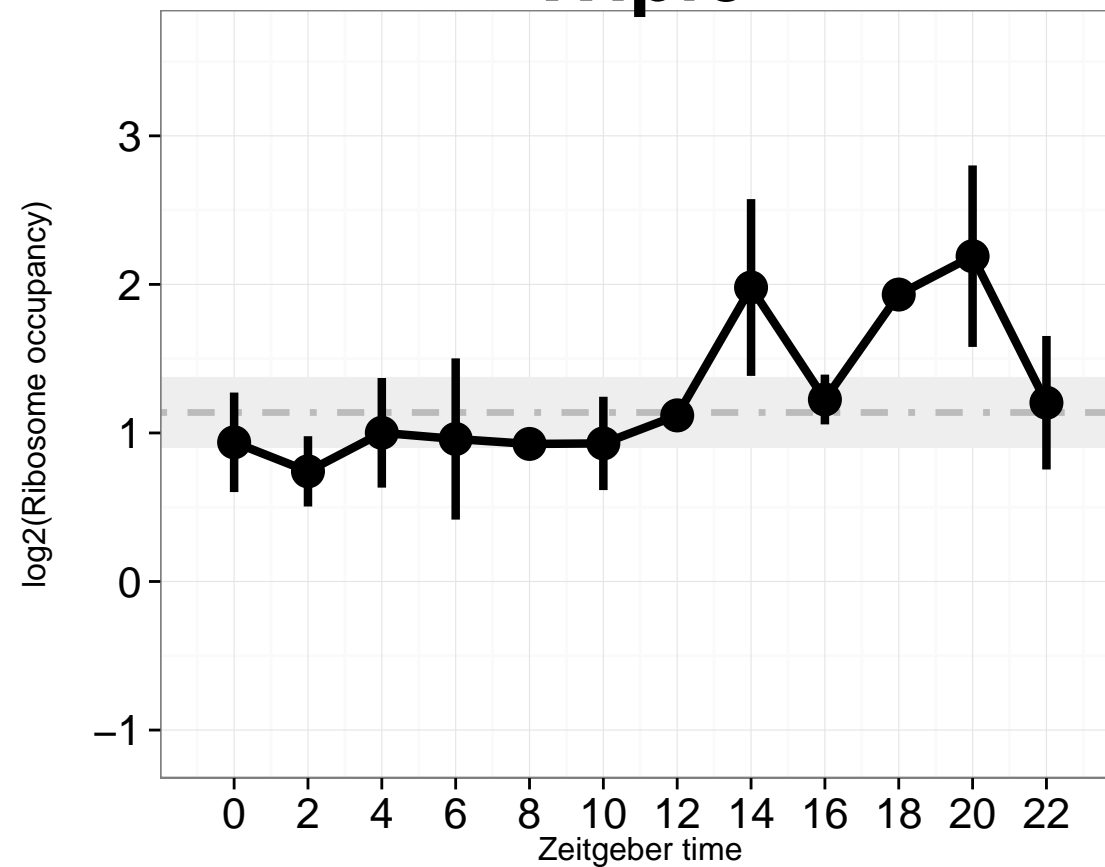

Supplement: Supplementary file 1248 [file 1]

# Rap1a

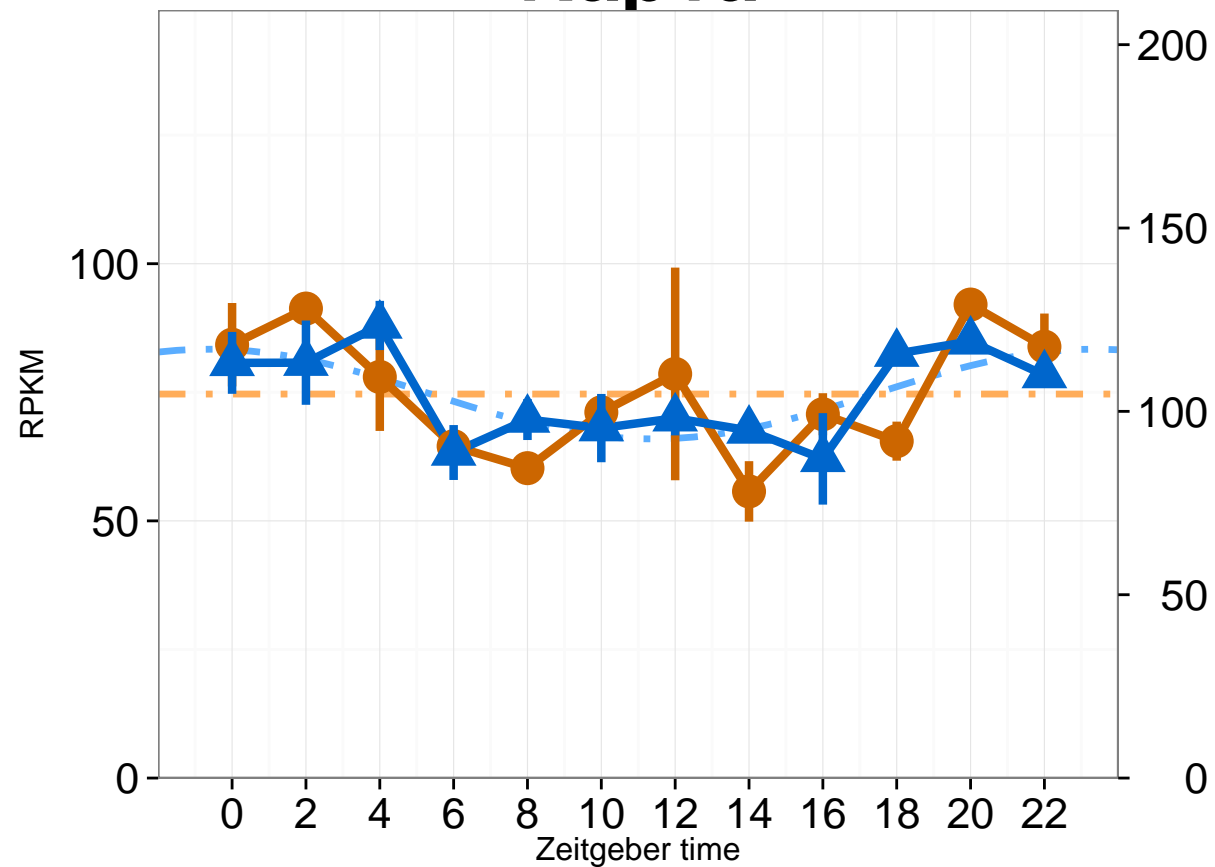

# Rap1a

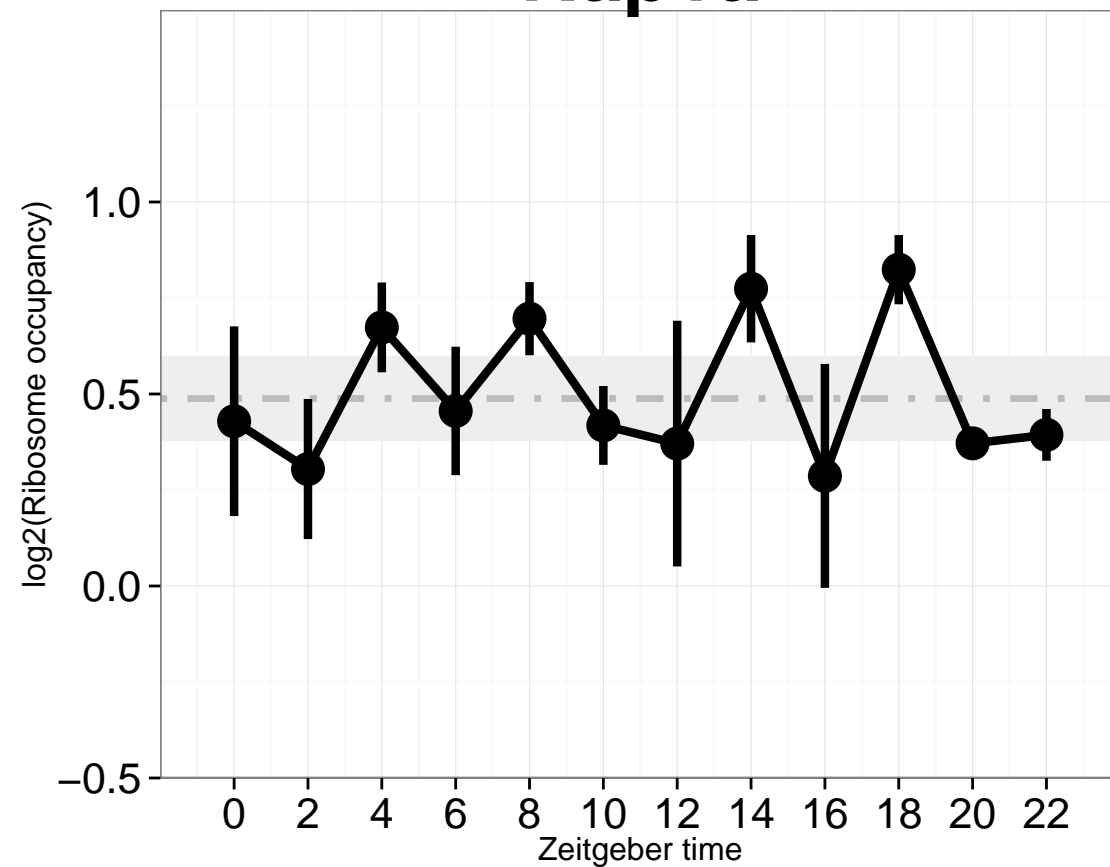

Supplement: Supplementary file 1249 [file 1]

## 2310067B10Rik

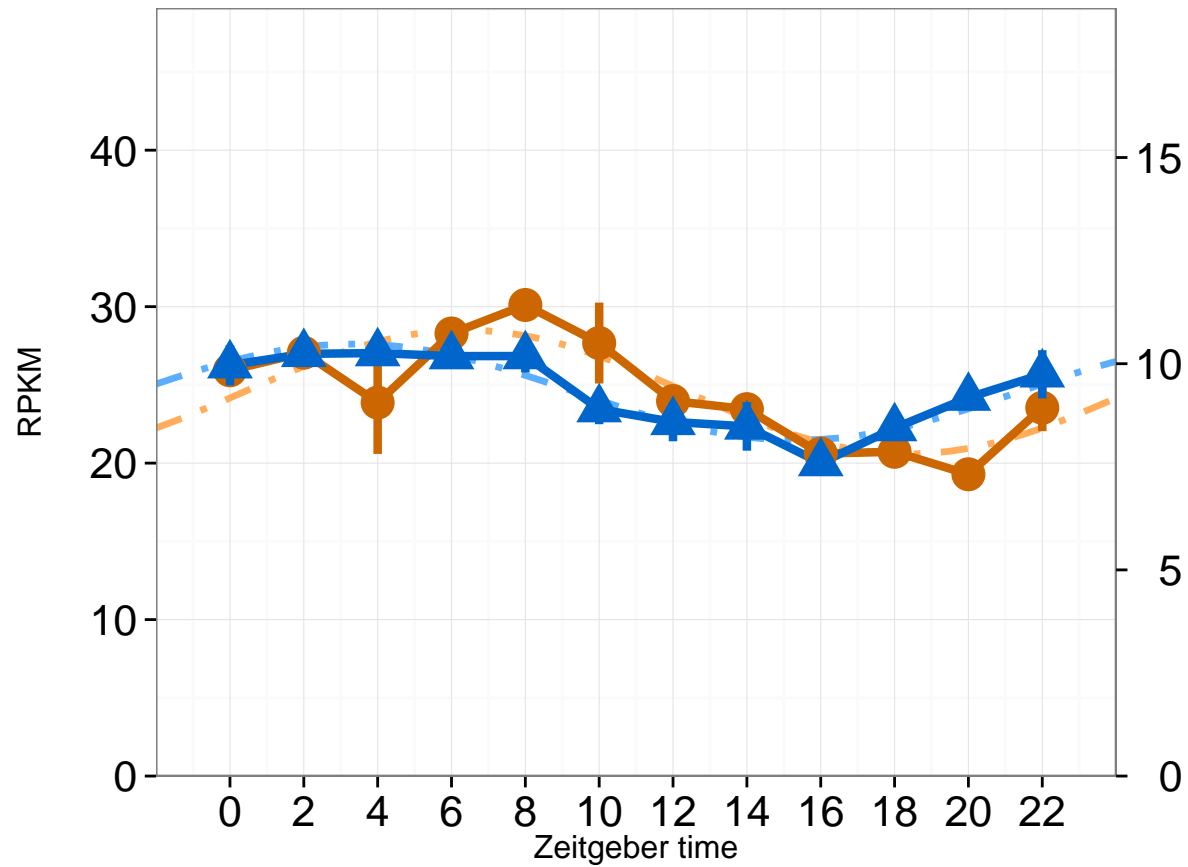

## 2310067B10Rik

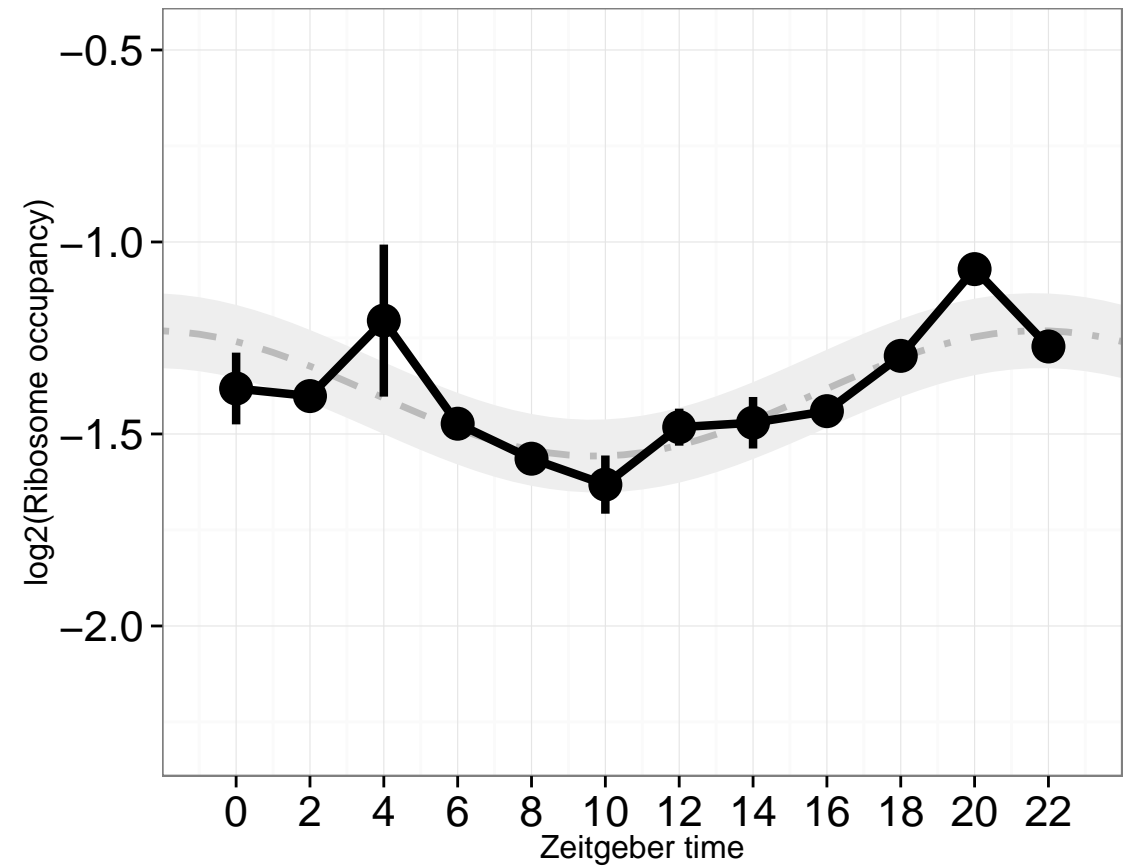

Supplement: Supplementary file 1250 [file 1]

## Sptlc1

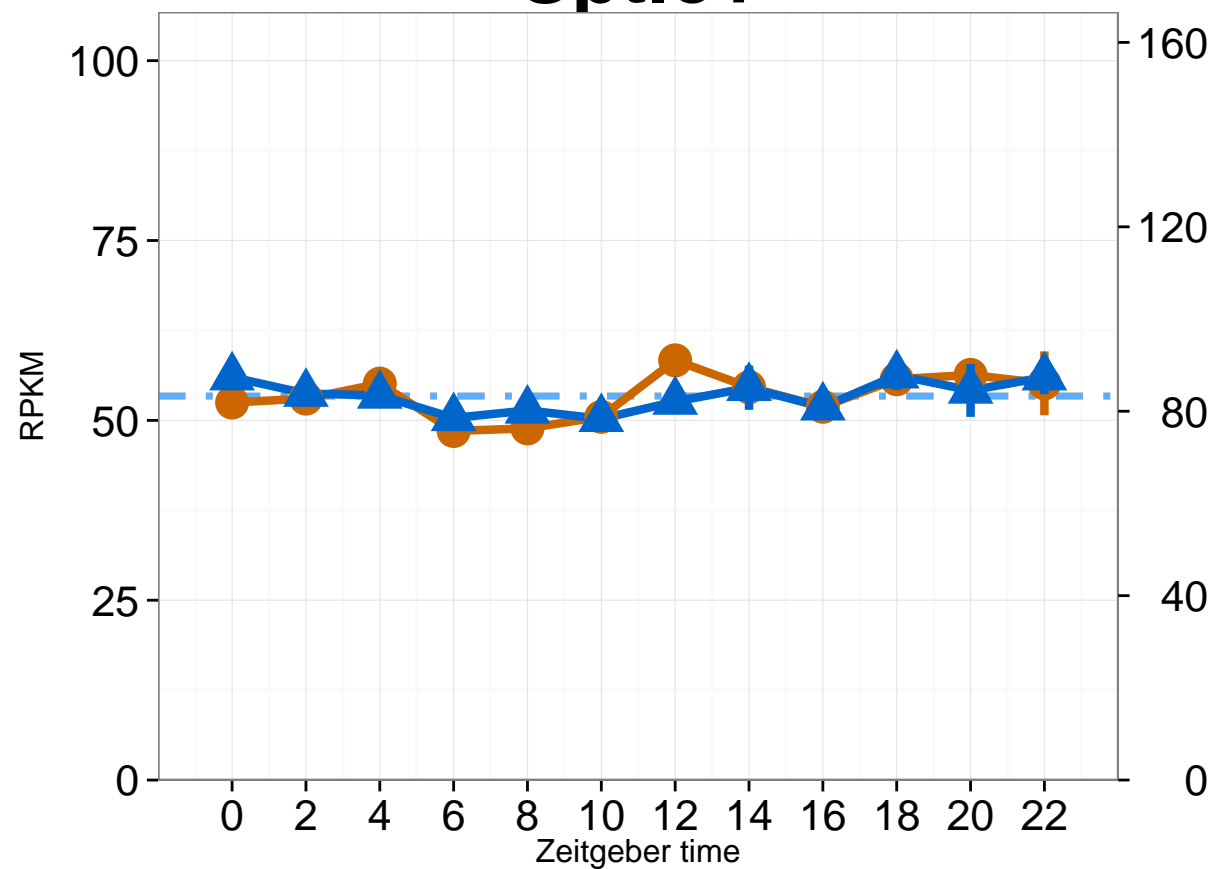

## Sptlc1

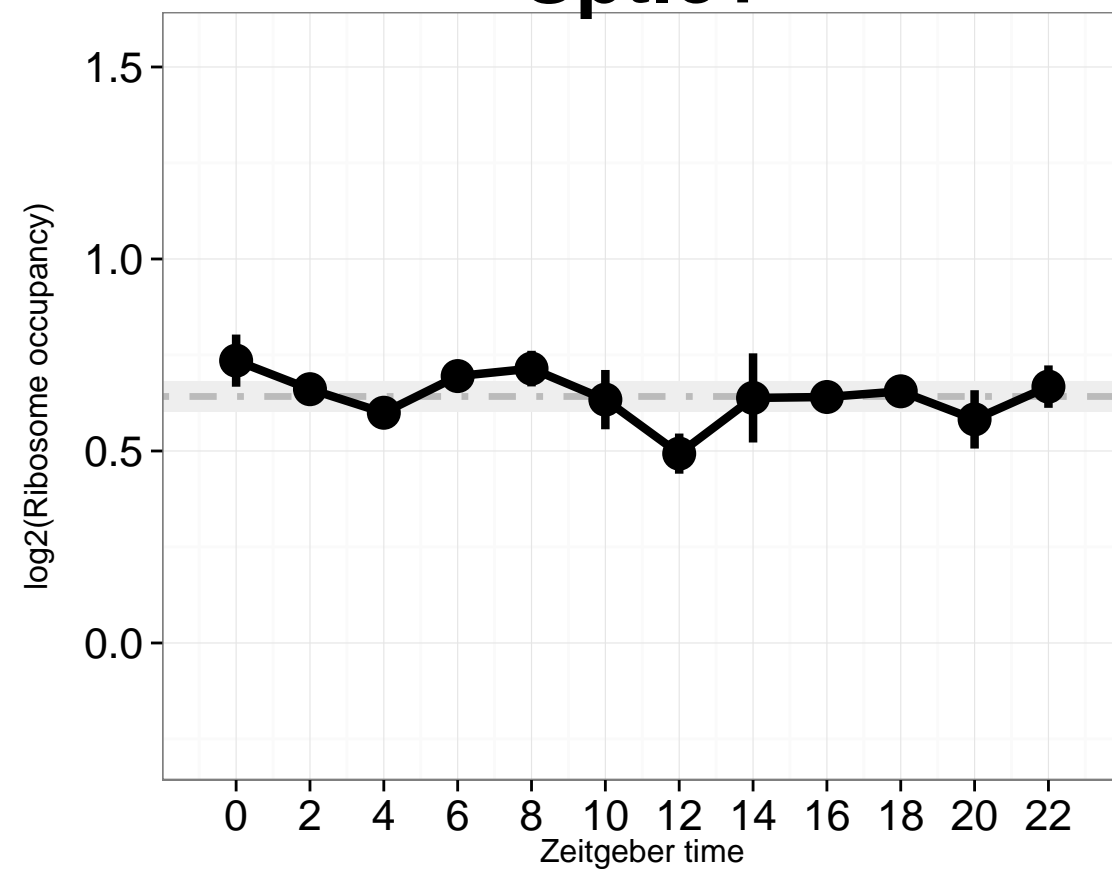

Supplement: Supplementary file 1251 [file 1]

## Pknox2

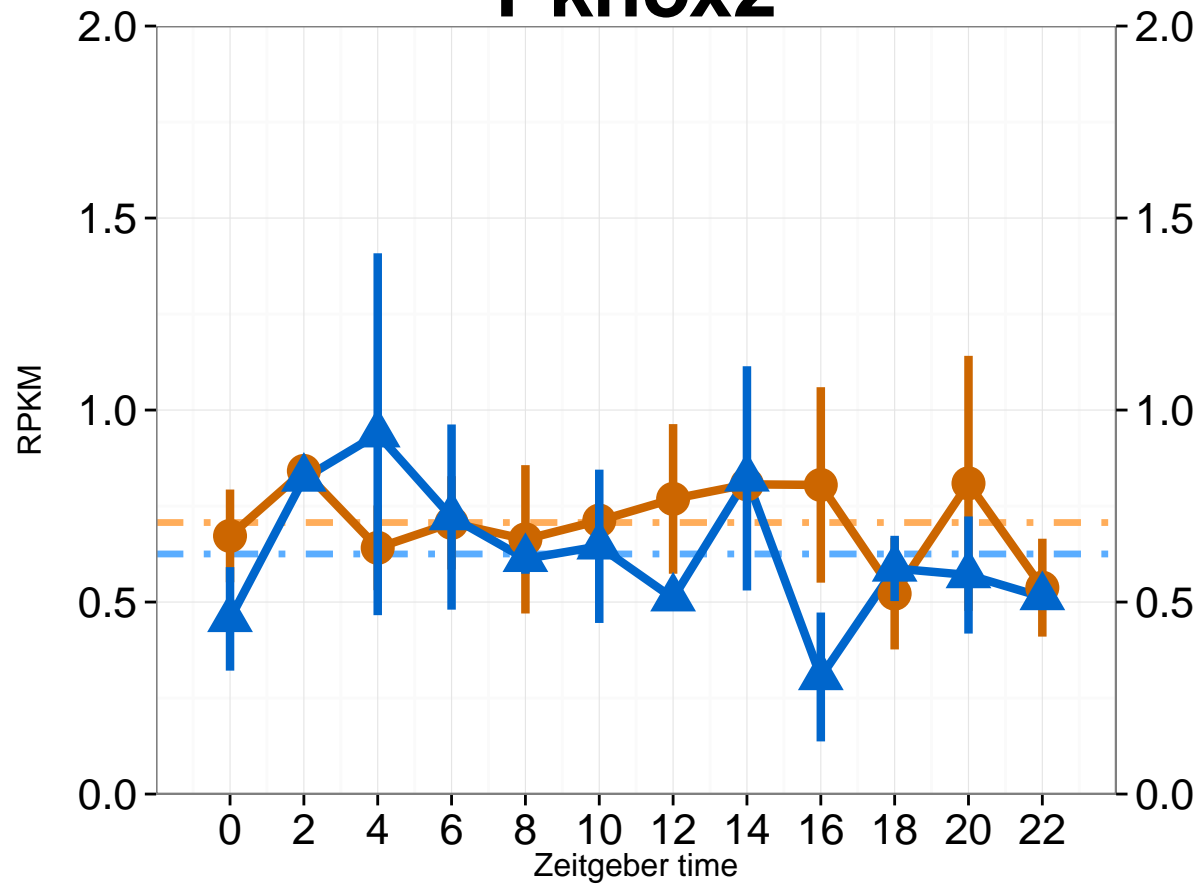

## Pknox2

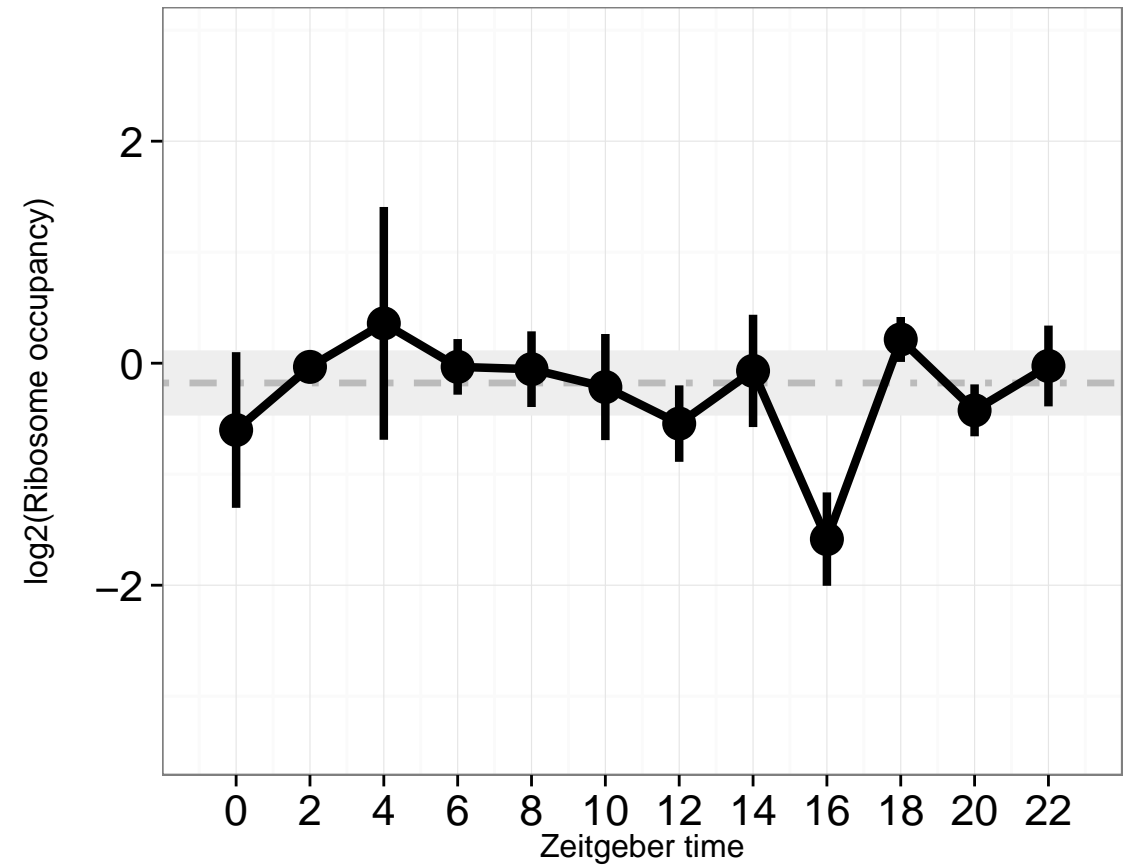

Supplement: Supplementary file 1252 [file 1]

## Exoc2

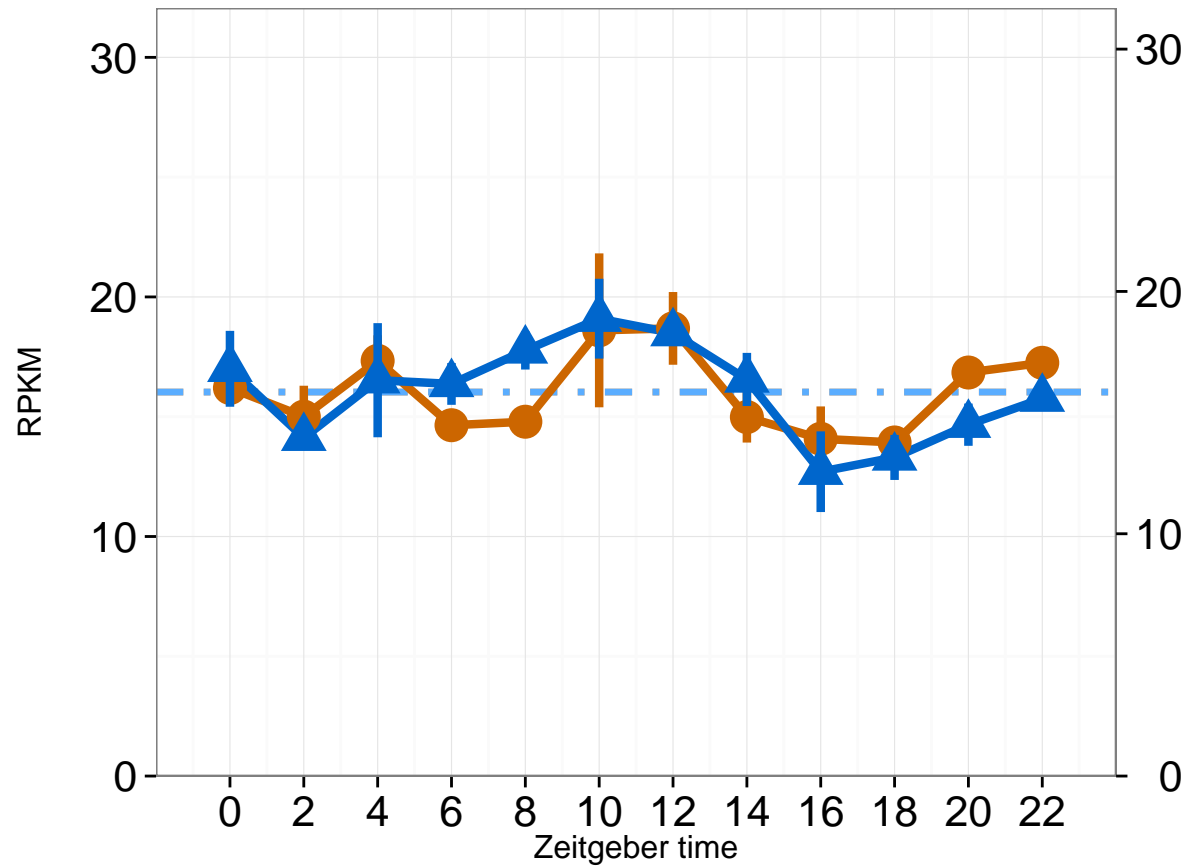

## Exoc2

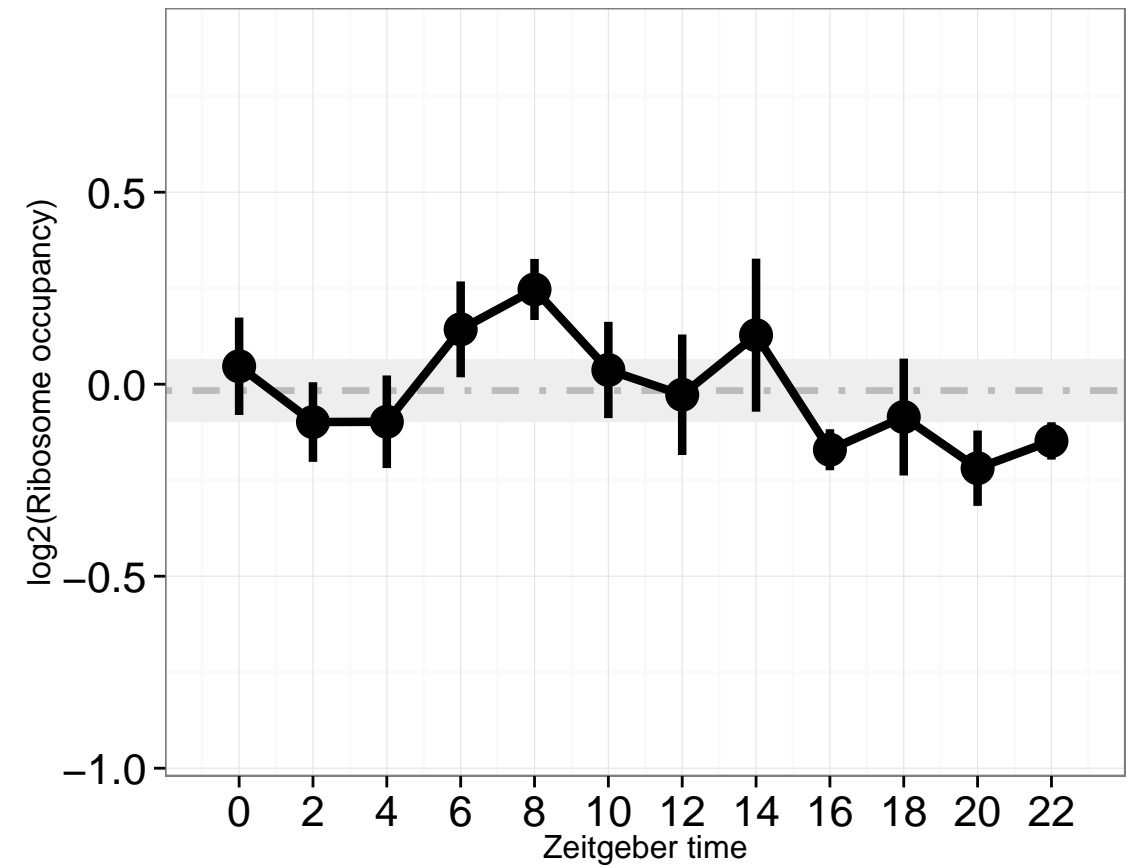

Supplement: Supplementary file 1253 [file 1]

# Usp2

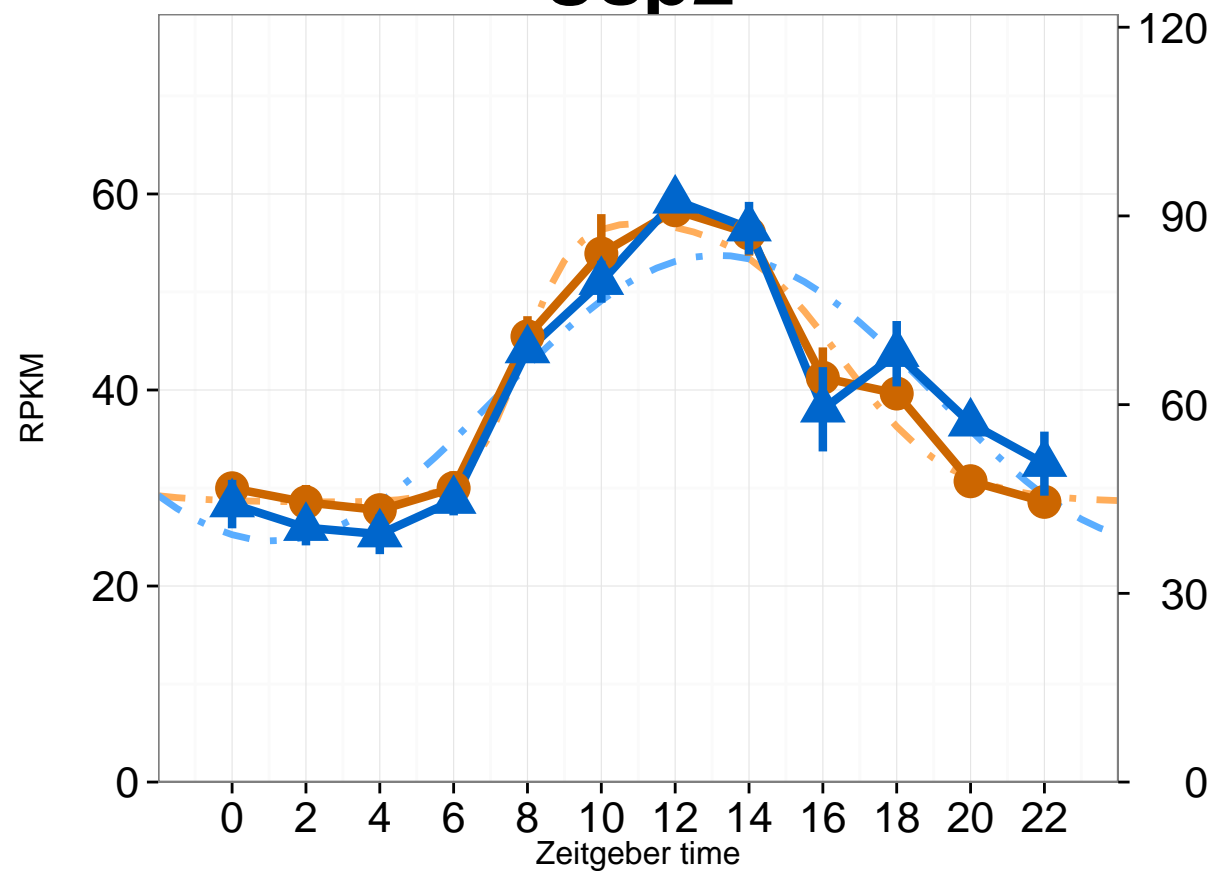

# Usp2

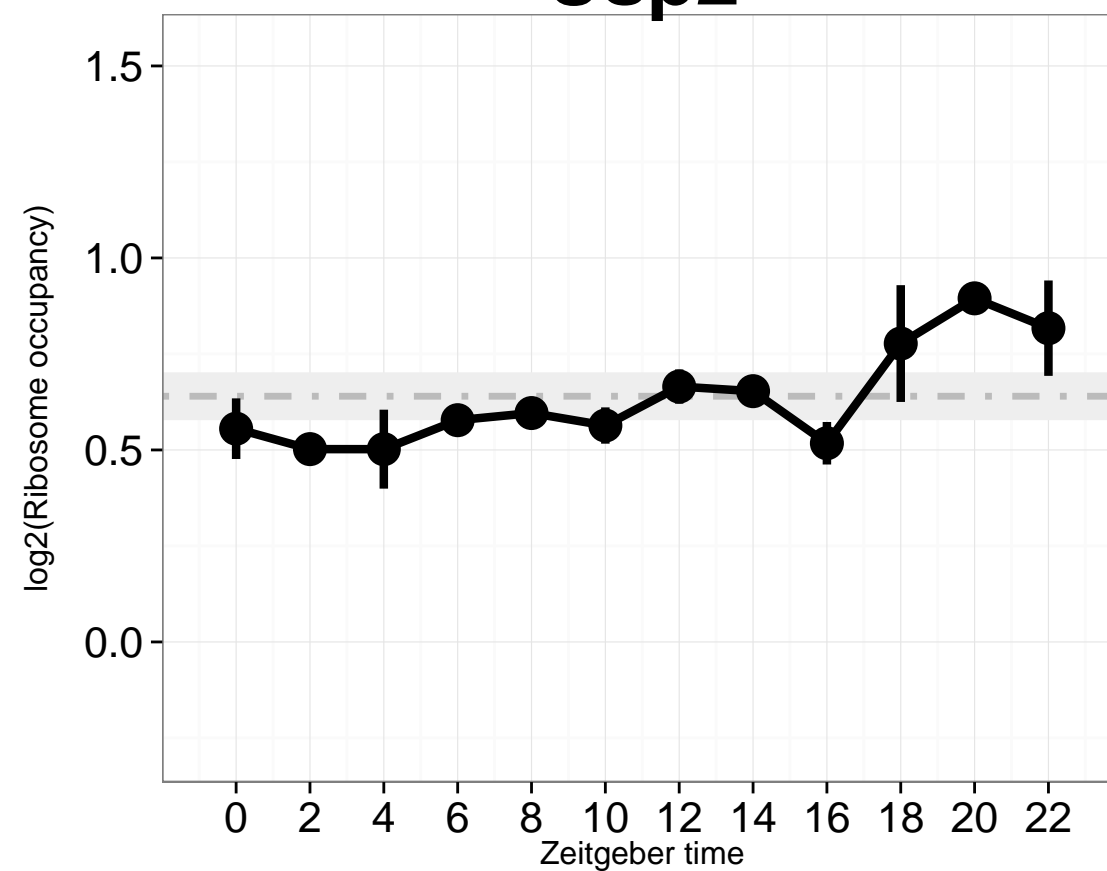

Supplement: Supplementary file 1254 [file 1]

# Tmem151a

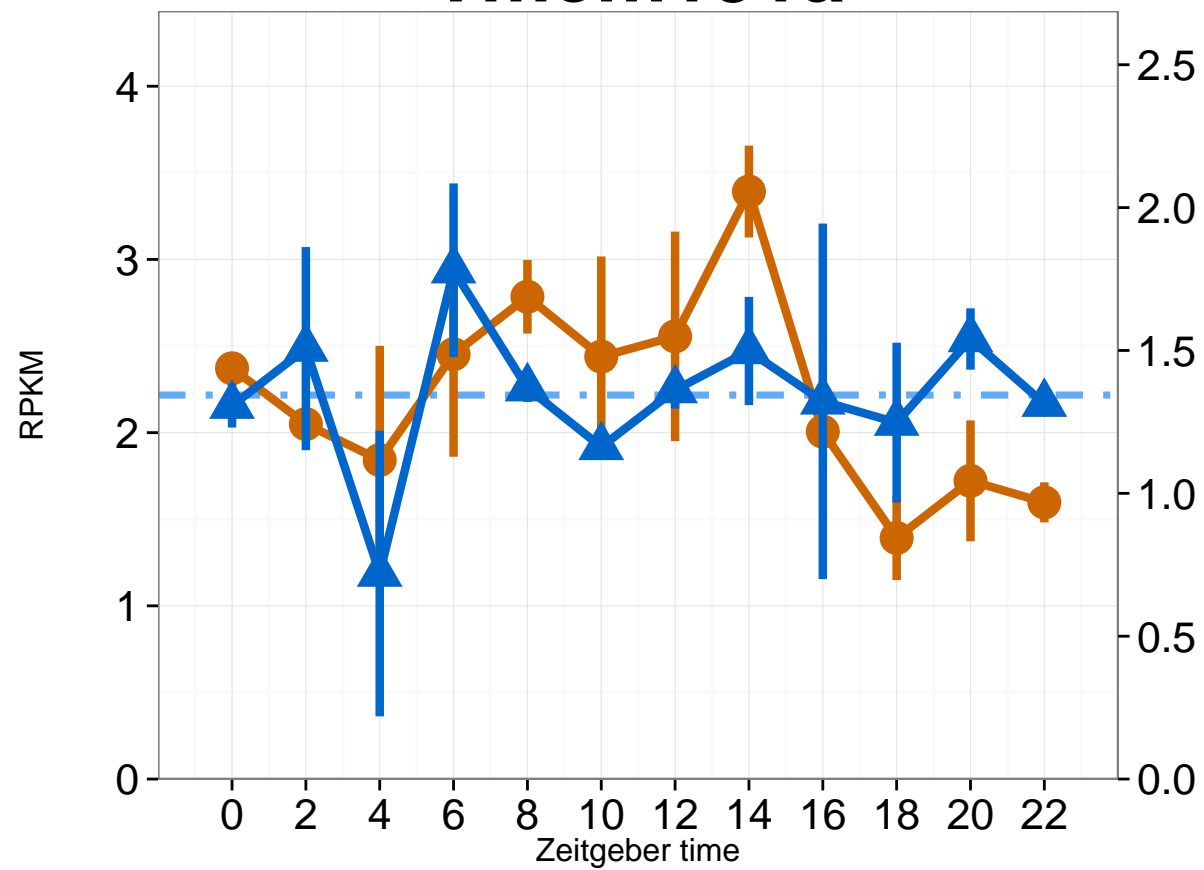

# Tmem151a

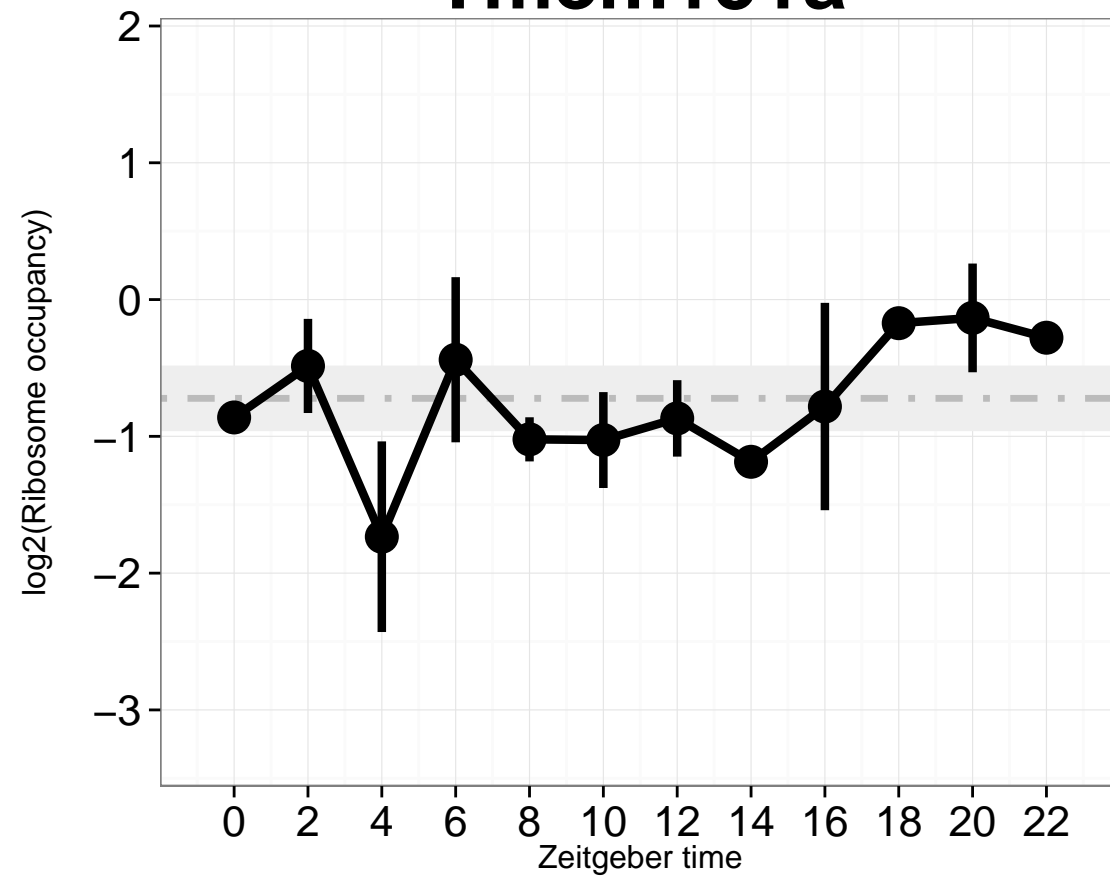

Supplement: Supplementary file 1255 [file 1]

# S100a9

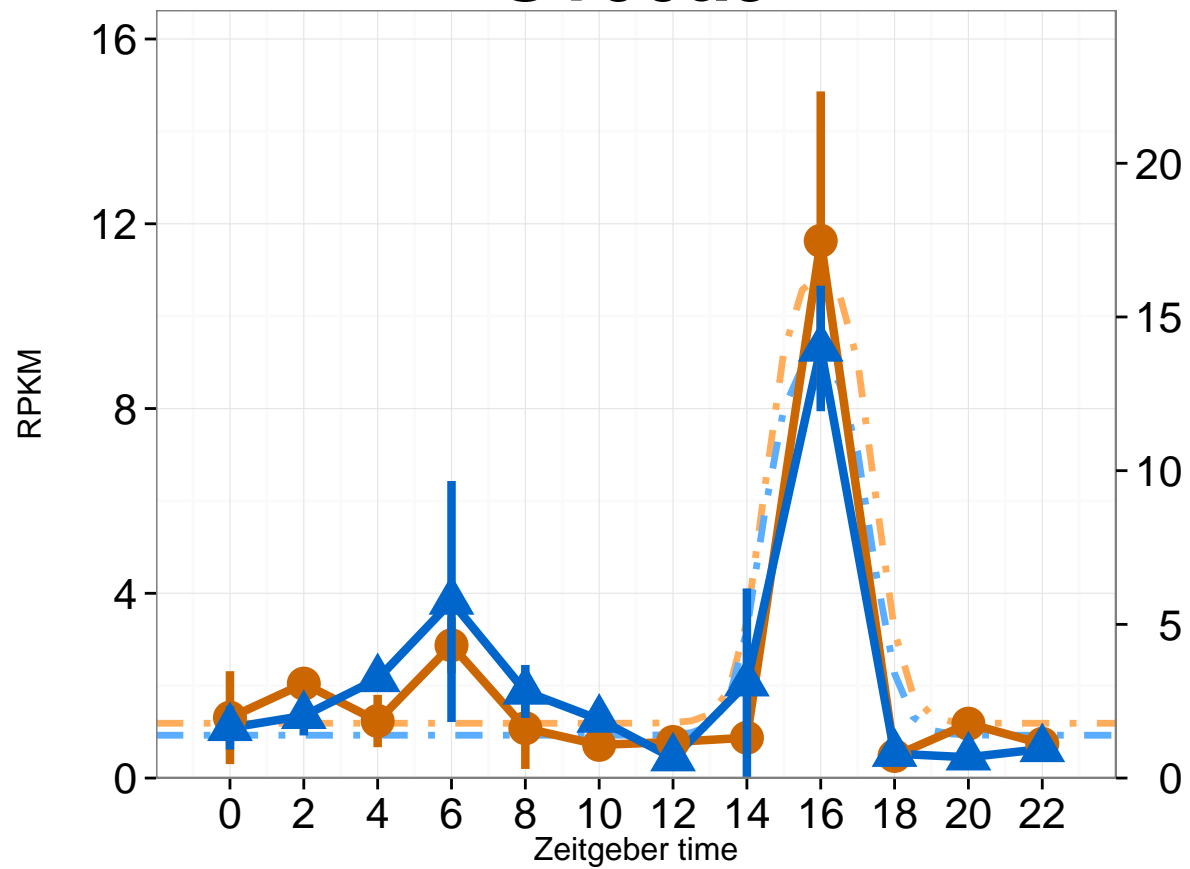

# S100a9

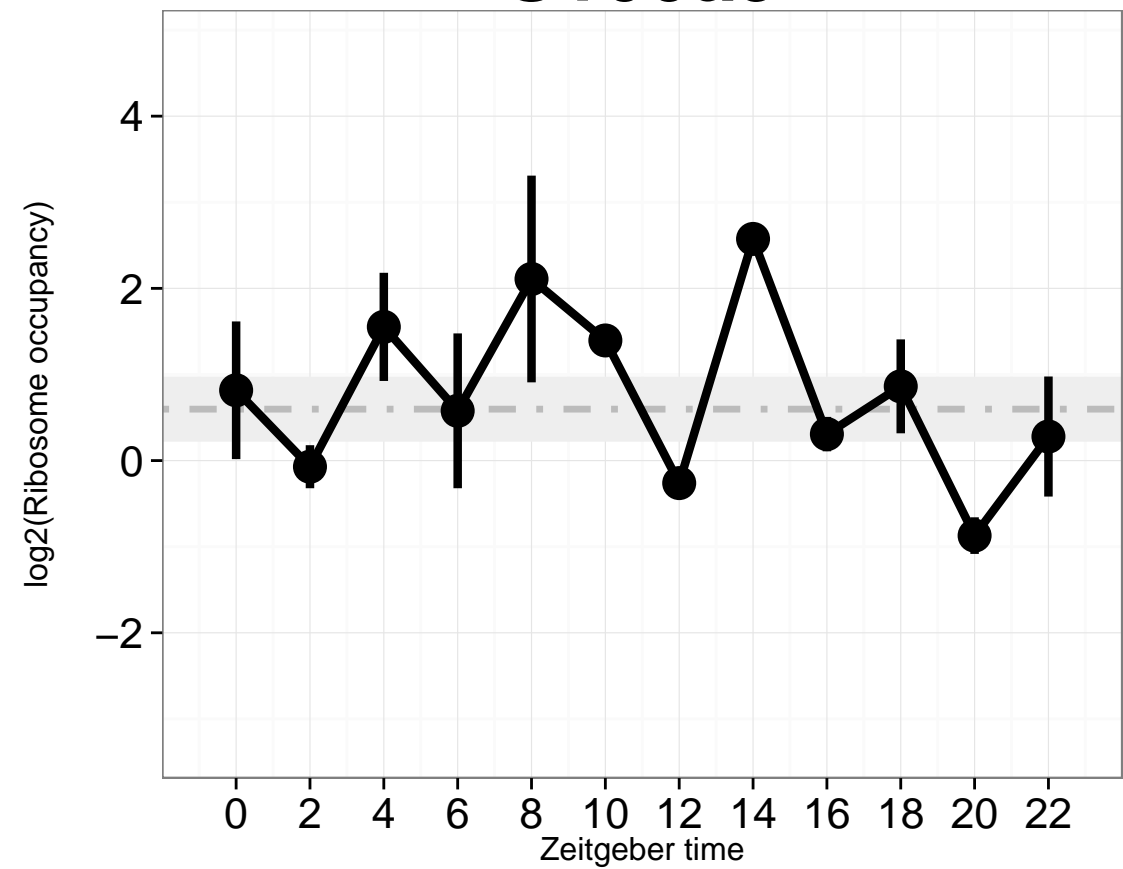

Supplement: Supplementary file 1256 [file 1]

## Smo

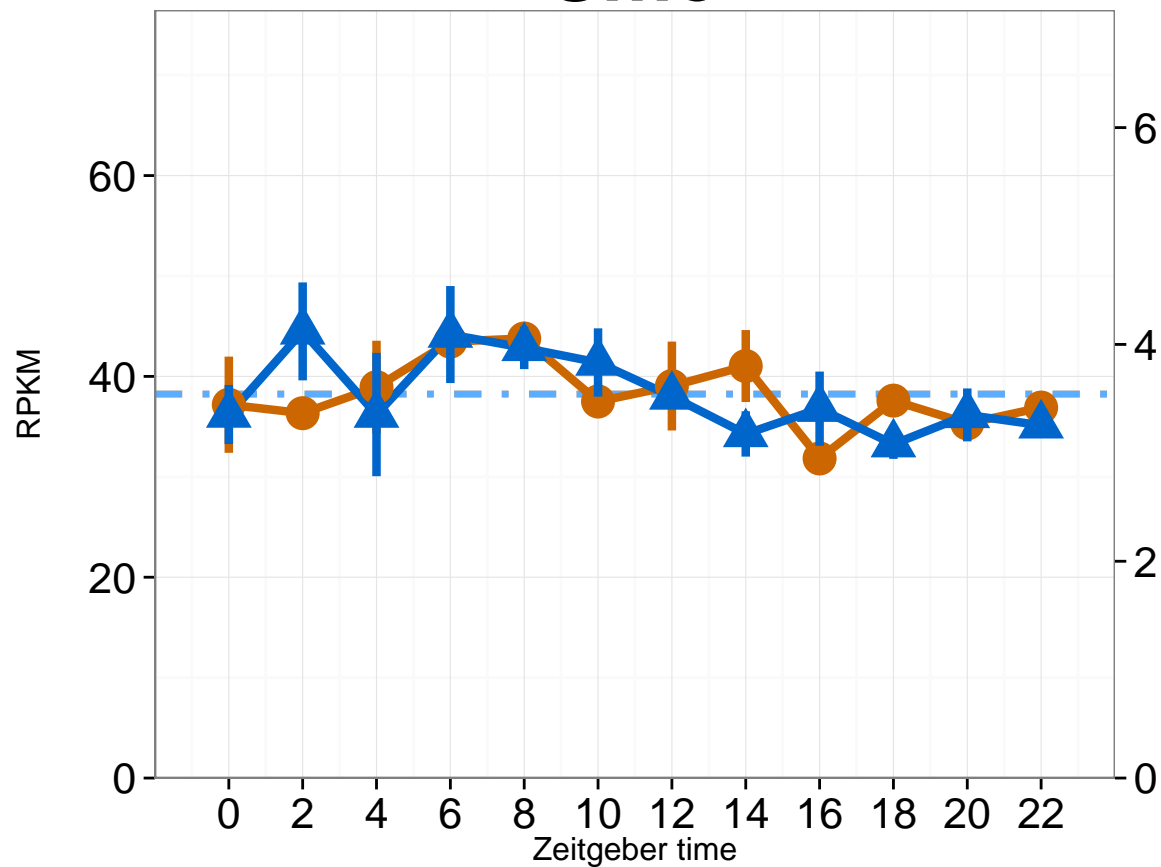

## Smo

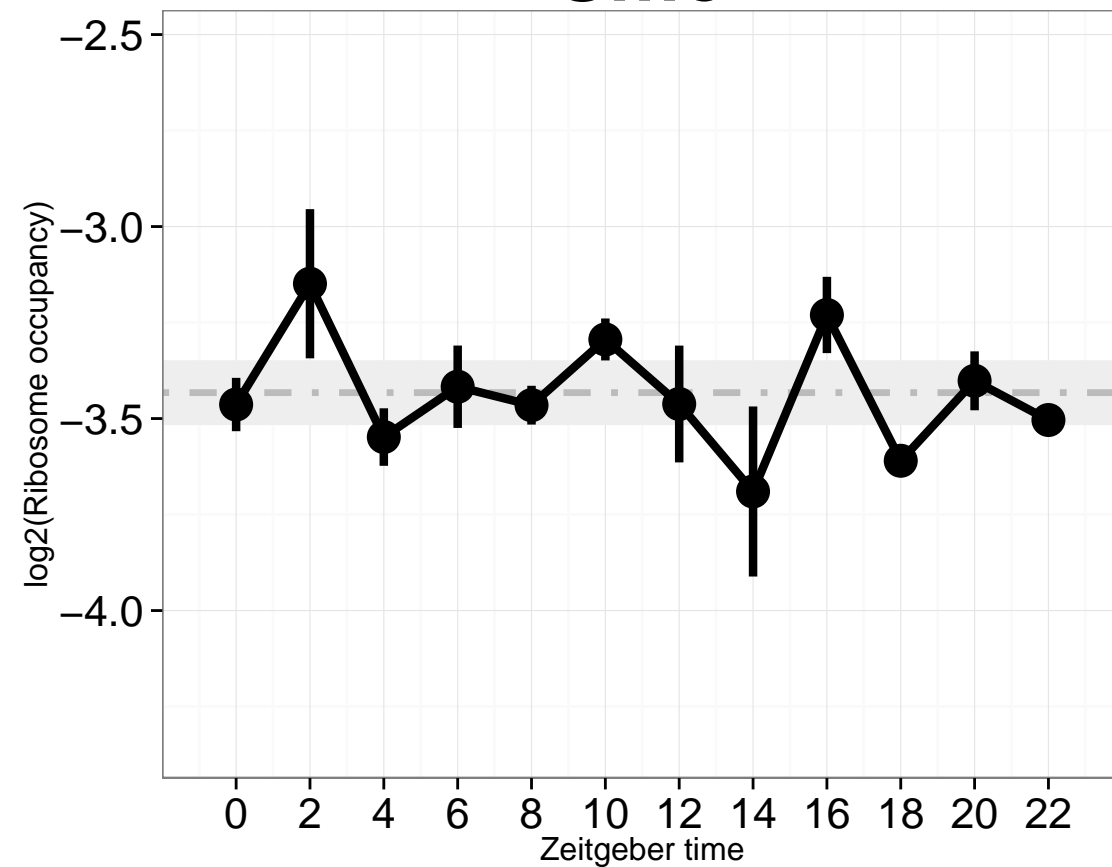

Supplement: Supplementary file 1257 [file 1]

## Ccbl1

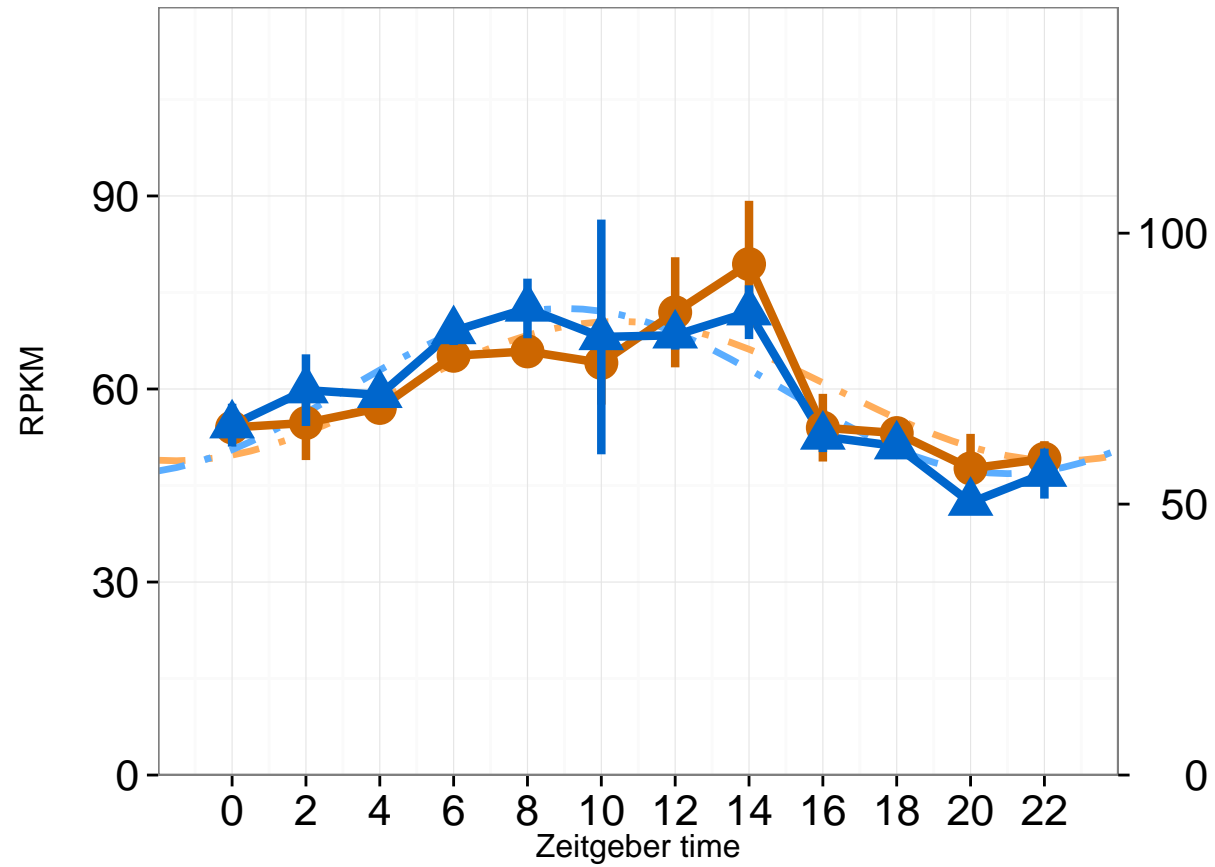

## Ccbl1

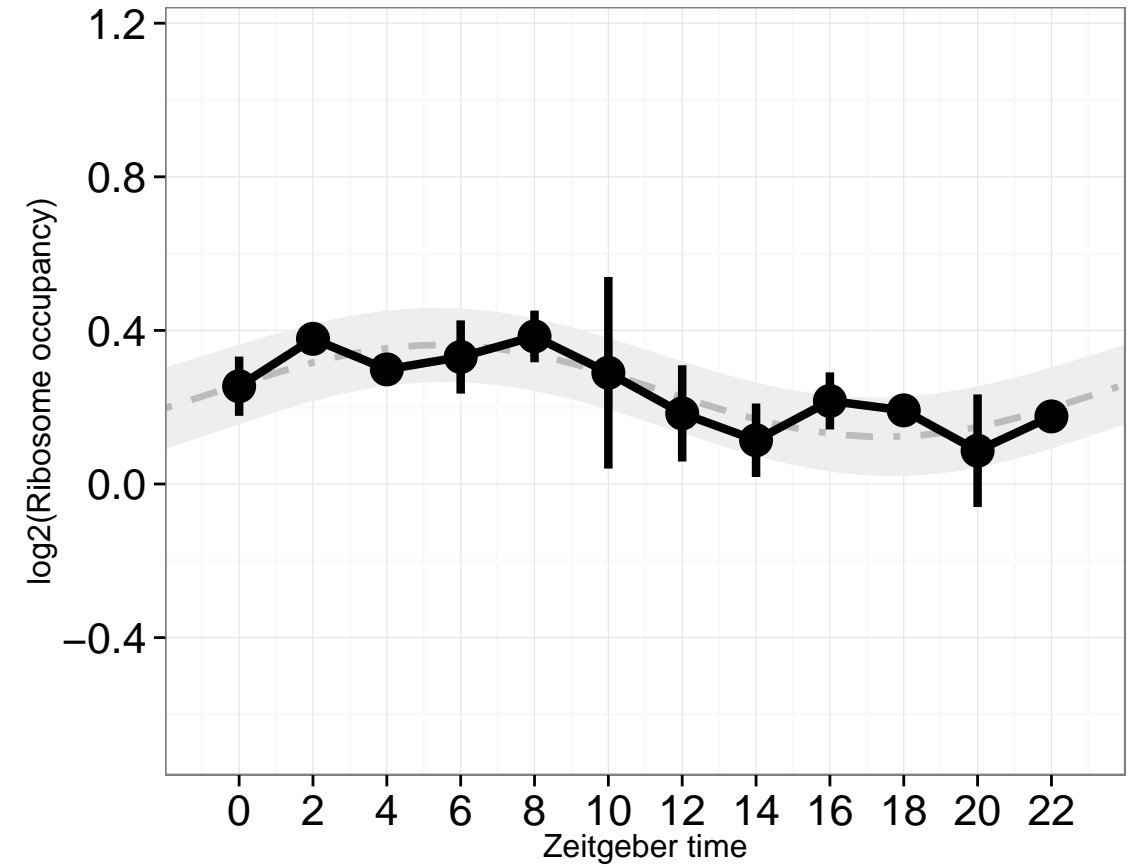

Supplement: Supplementary file 1258 [file 1]

## Gas1

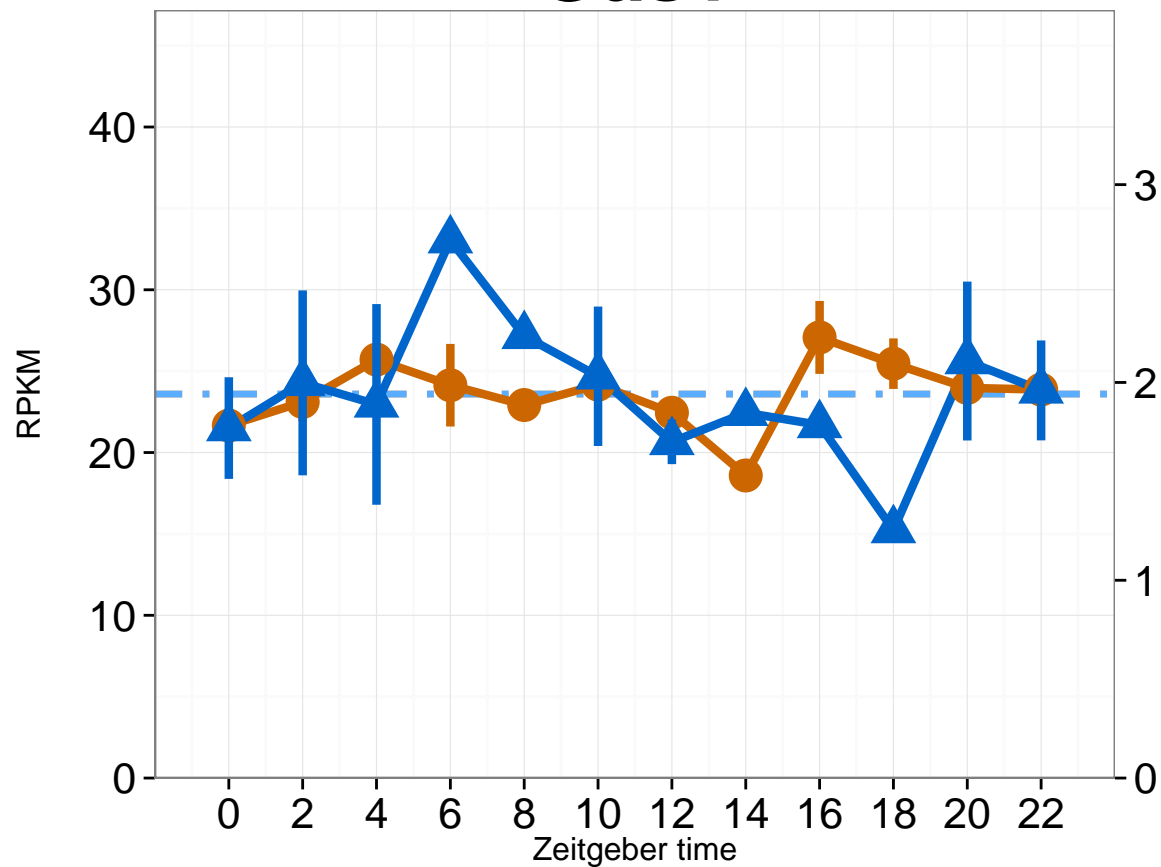

## Gas1

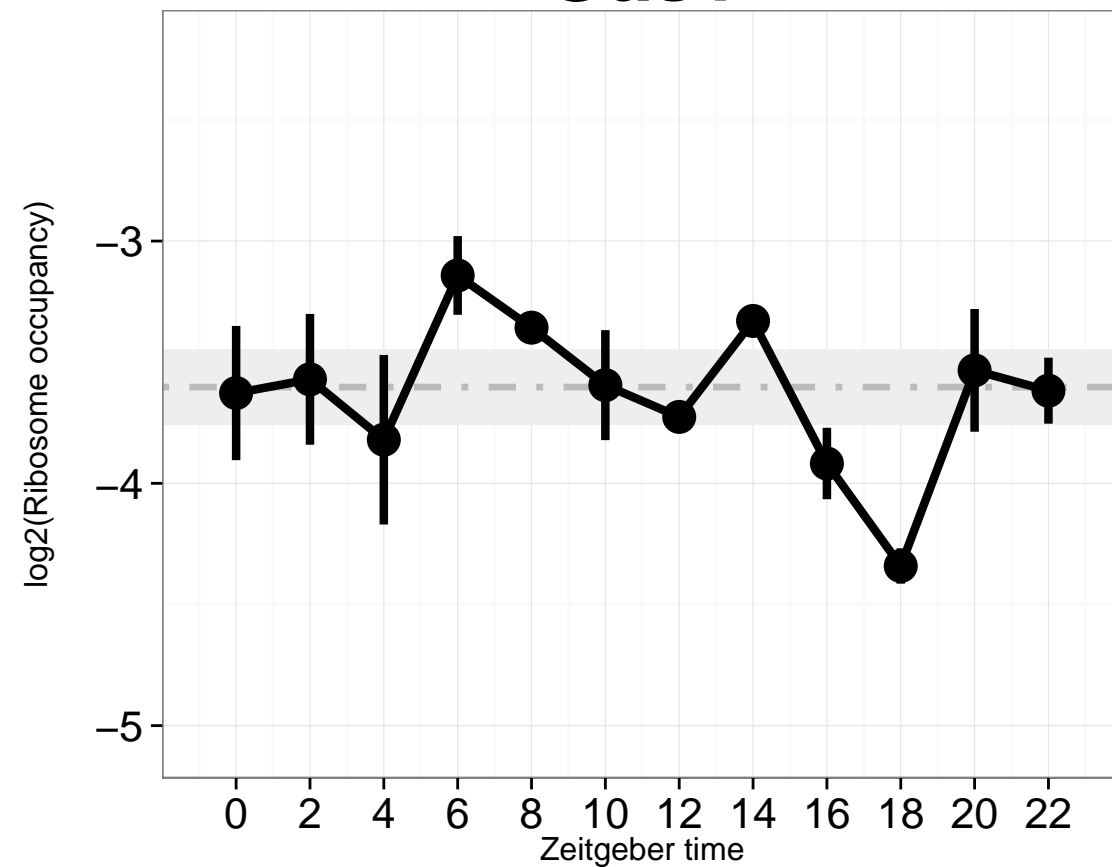

Supplement: Supplementary file 1259 [file 1]

## Wasf2

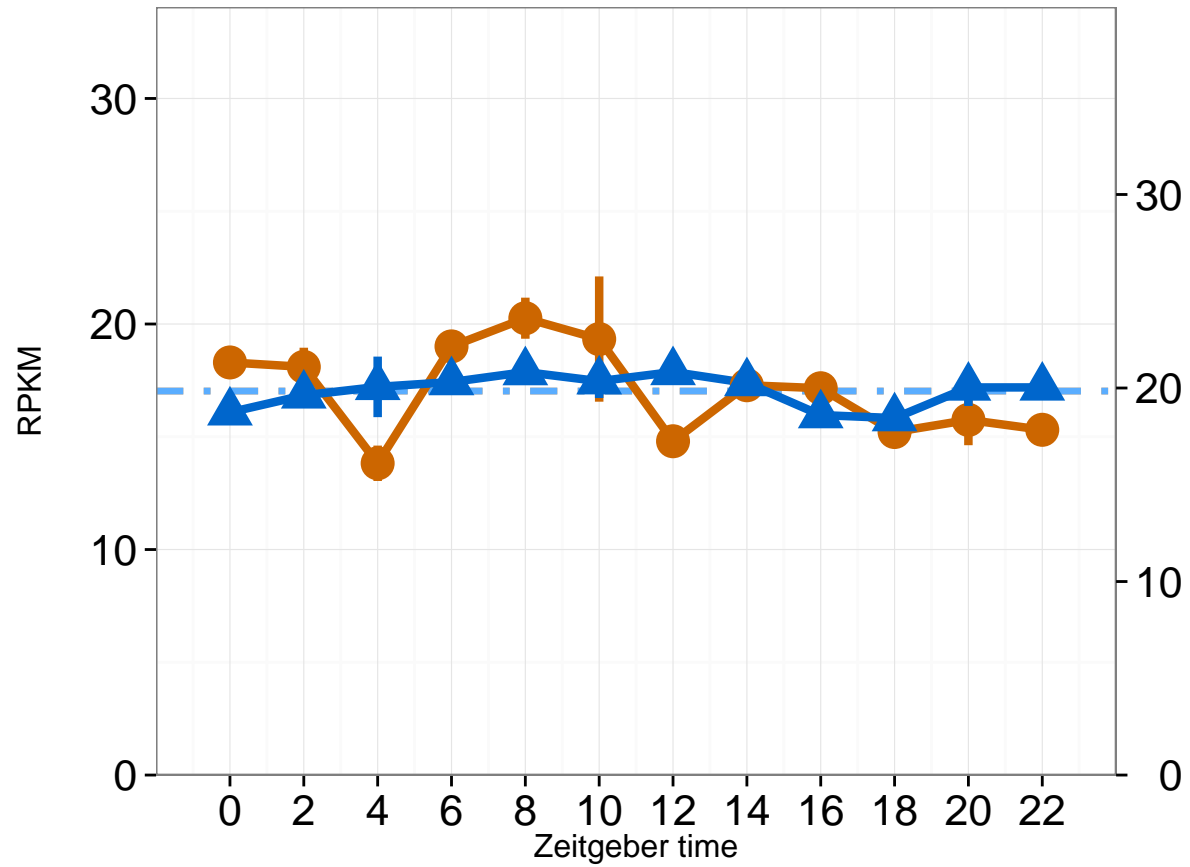

## Wasf2

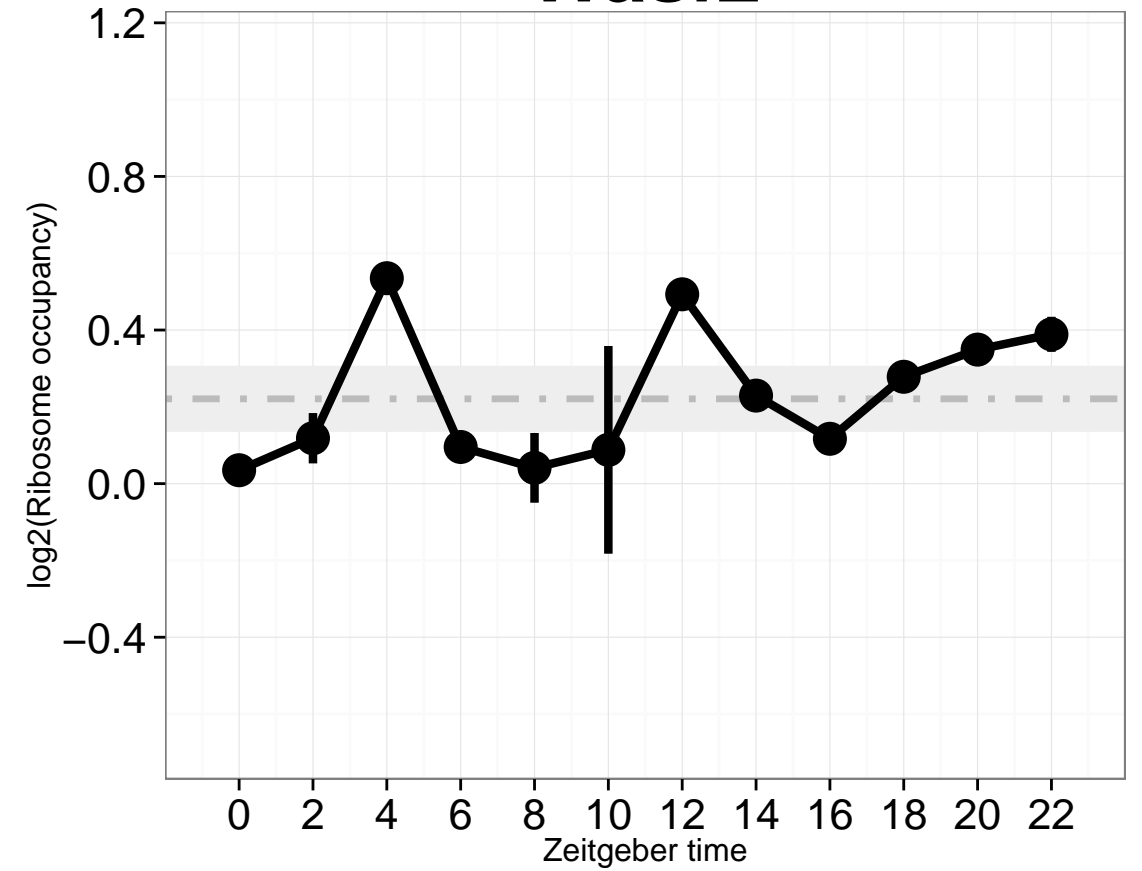

Supplement: Supplementary file 1260 [file 1]

## Eea1

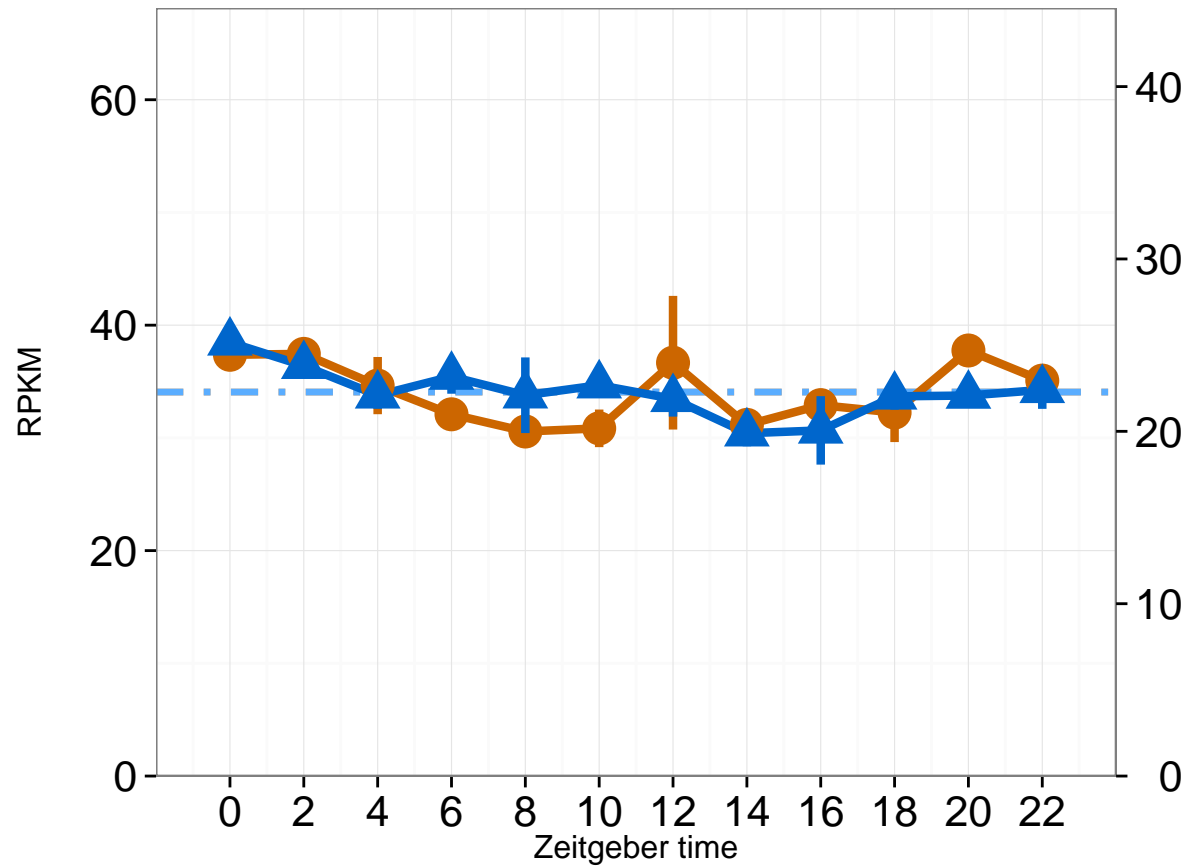

## Eea1

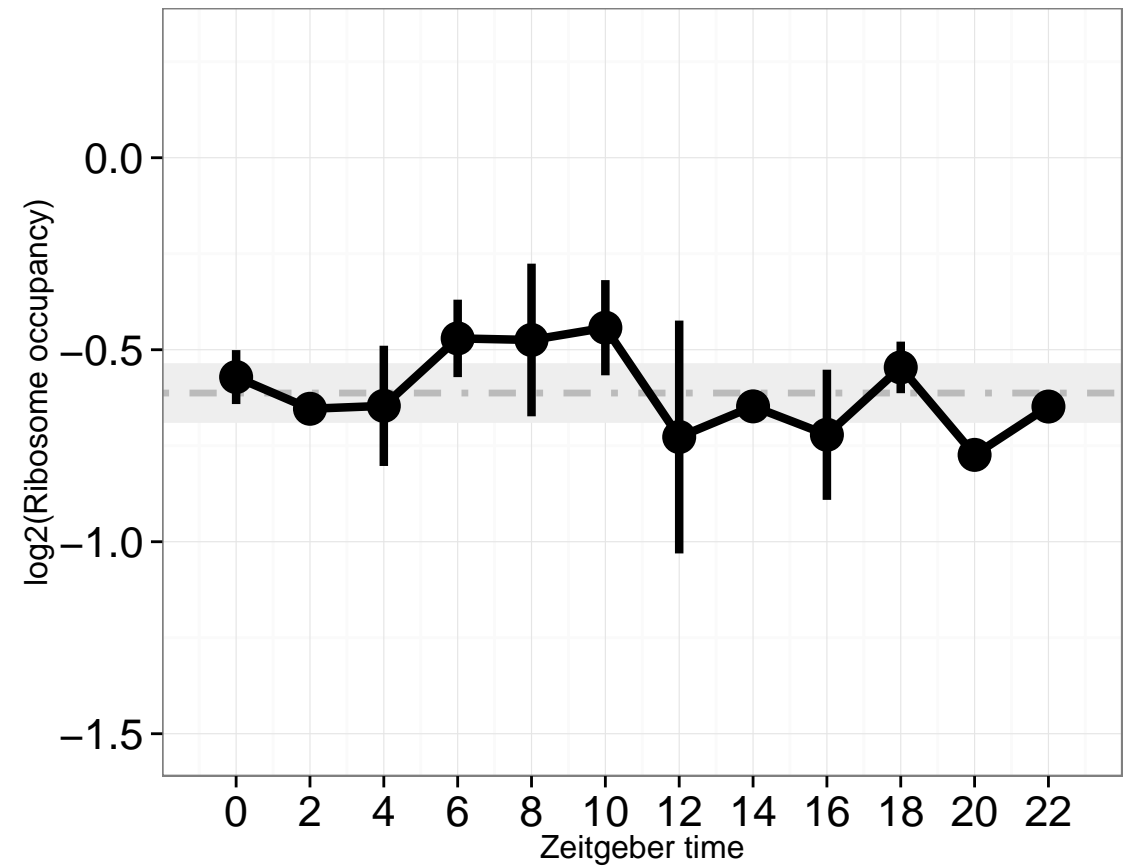

Supplement: Supplementary file 1261 [file 1]

## Cul3

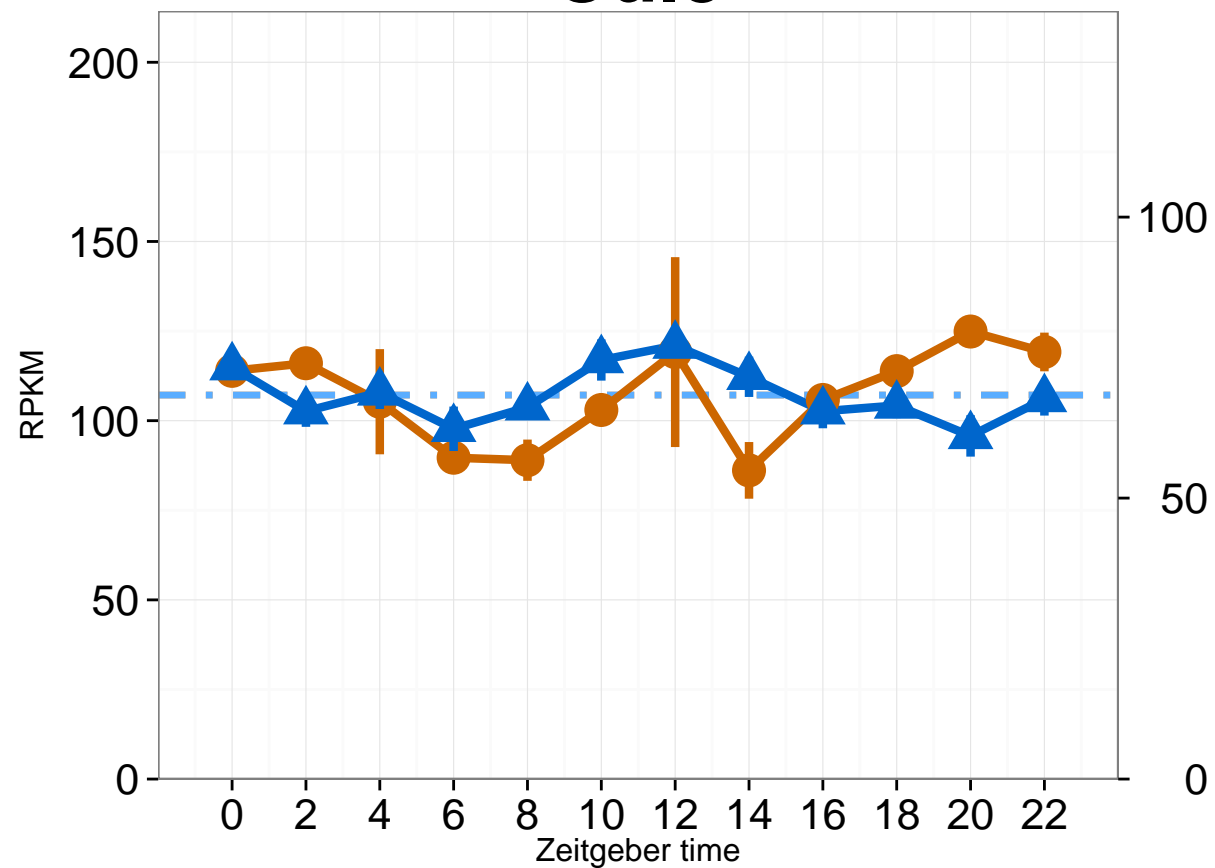

## Cul3

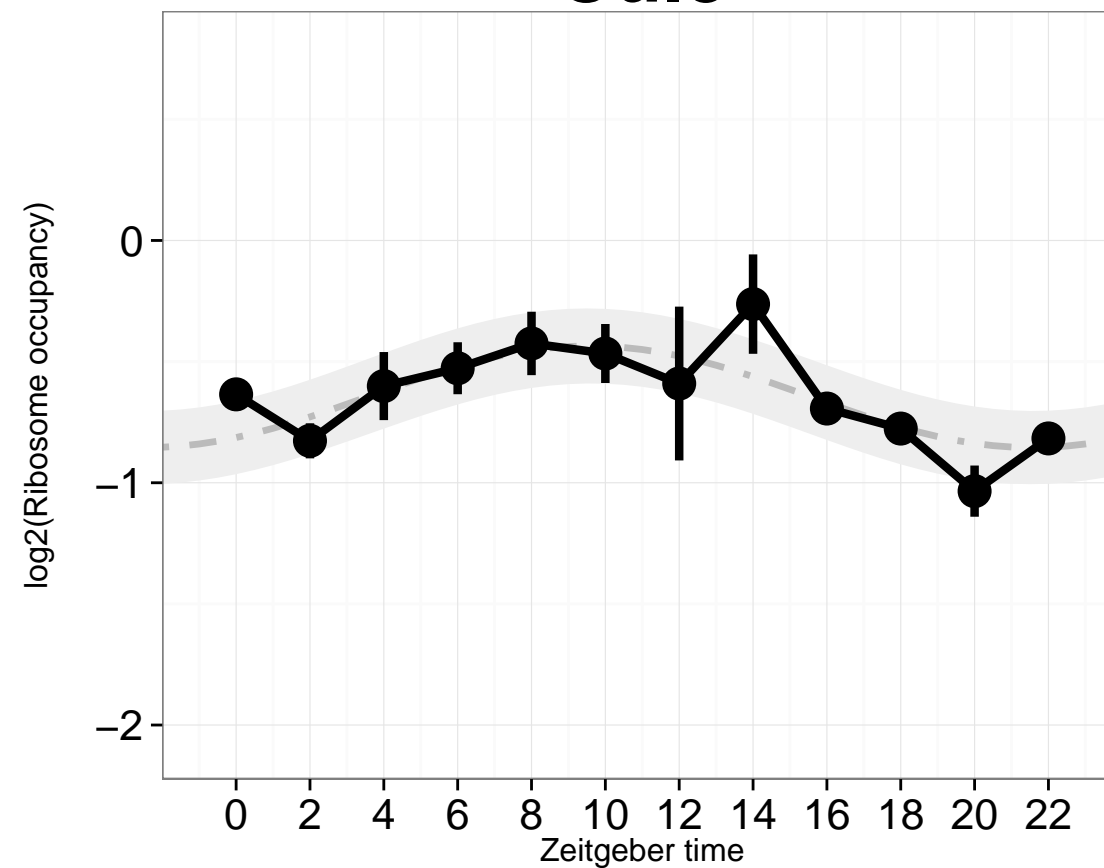

Supplement: Supplementary file 1262 [file 1]

## Cry2

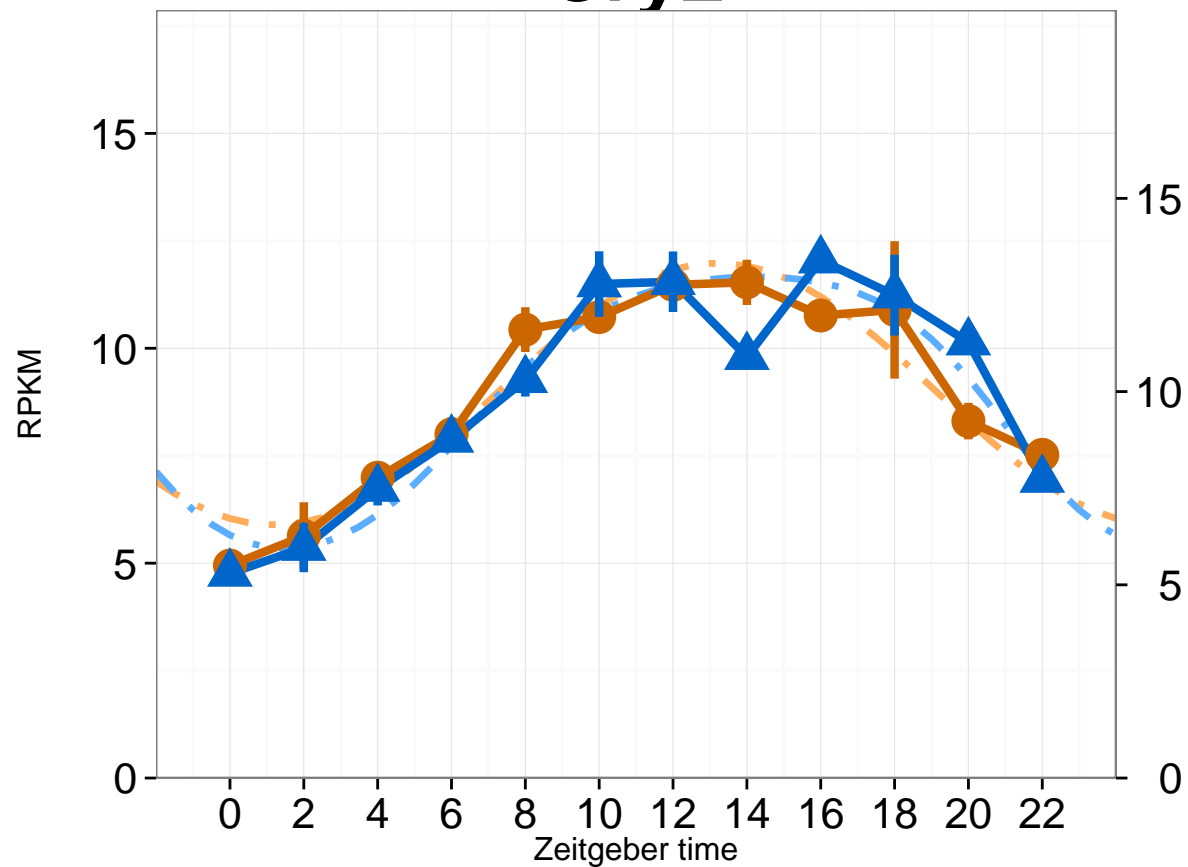

## Cry2

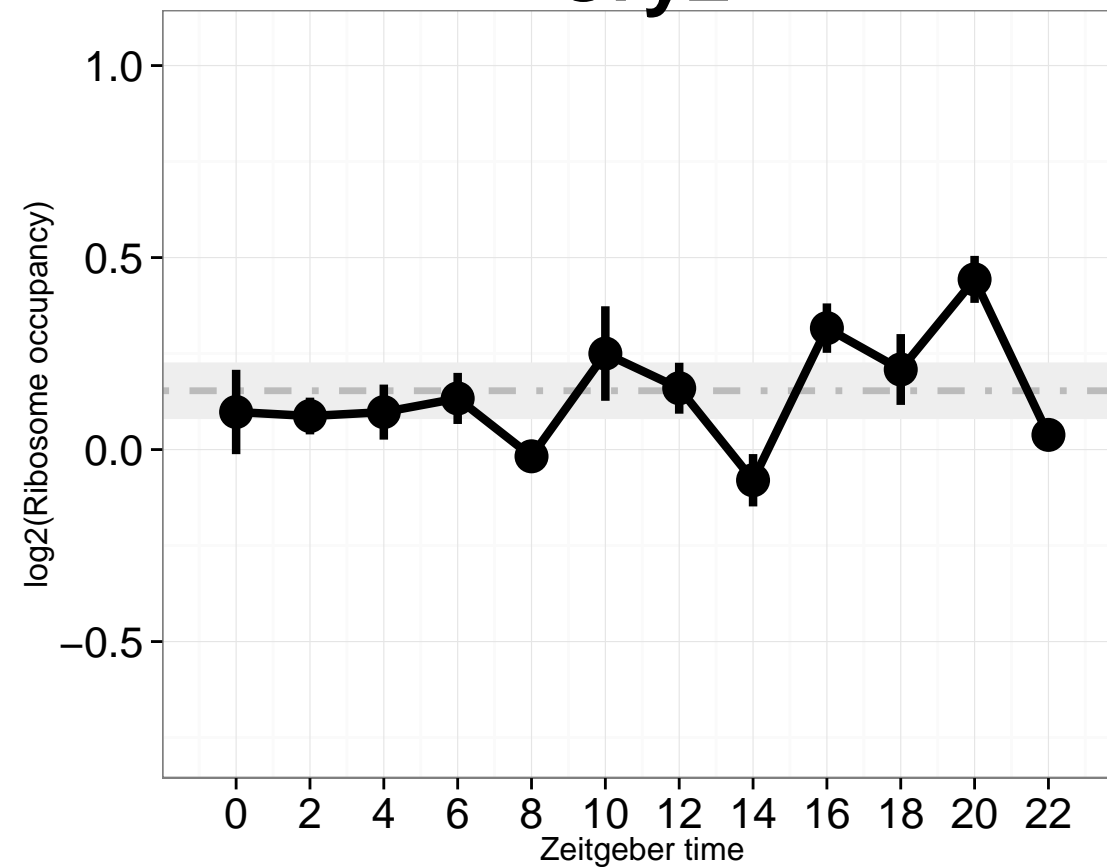

Supplement: Supplementary file 1263 [file 1]

## Galnt3

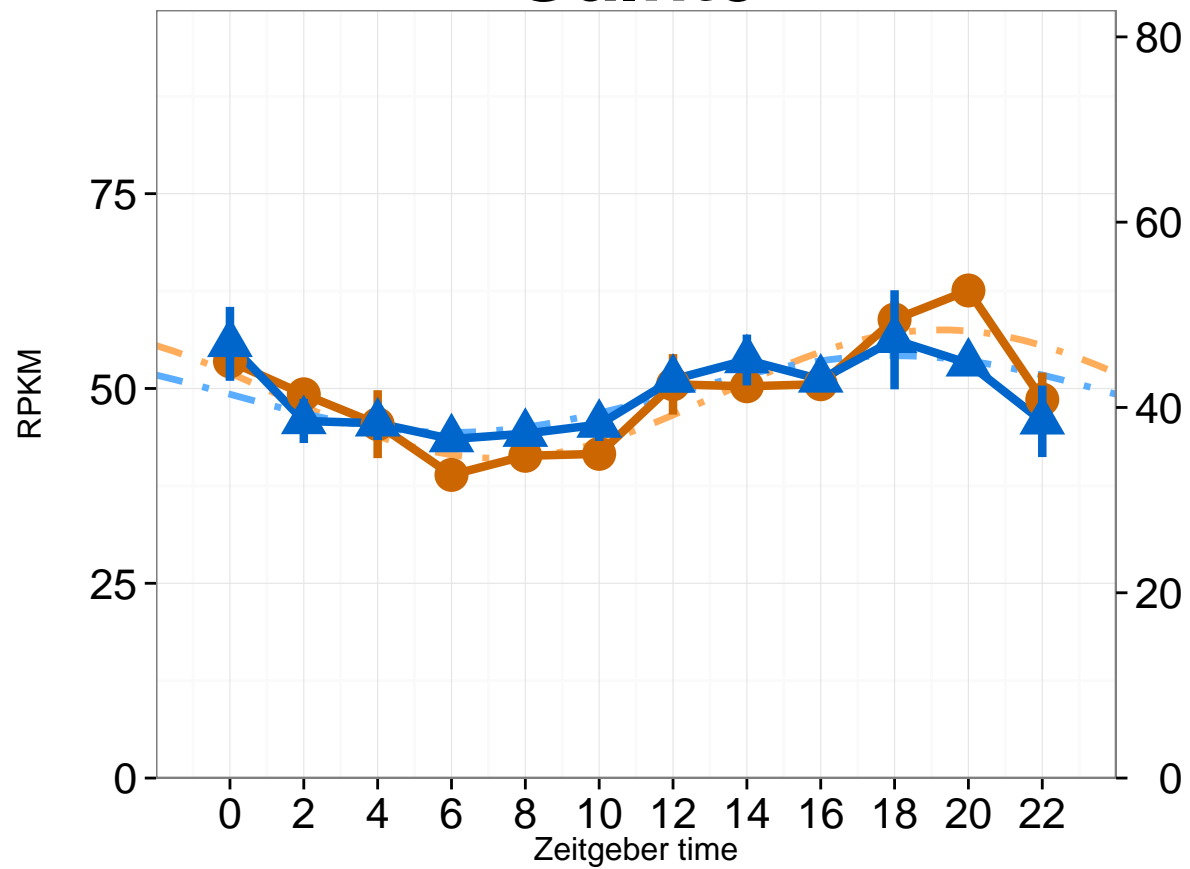

## Galnt3

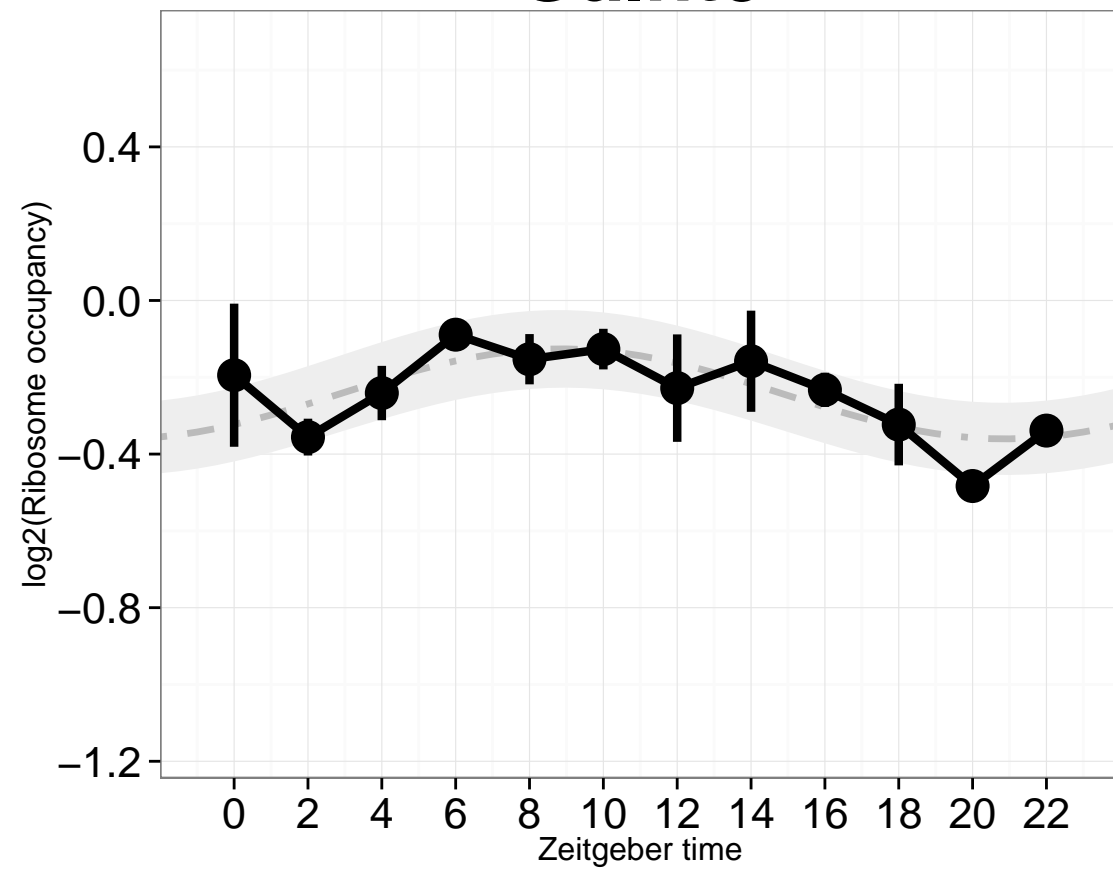

Supplement: Supplementary file 1264 [file 1]

# Mesdc1

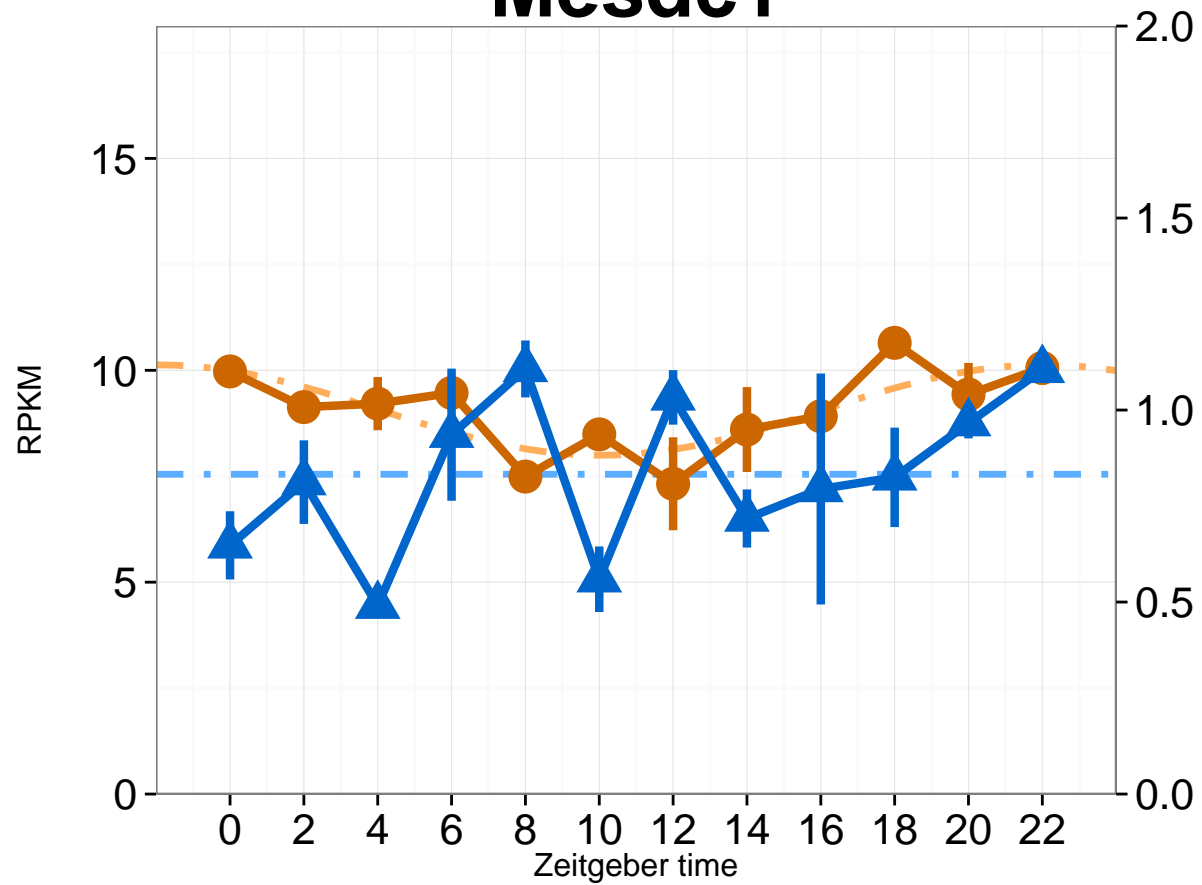

# Mesdc1

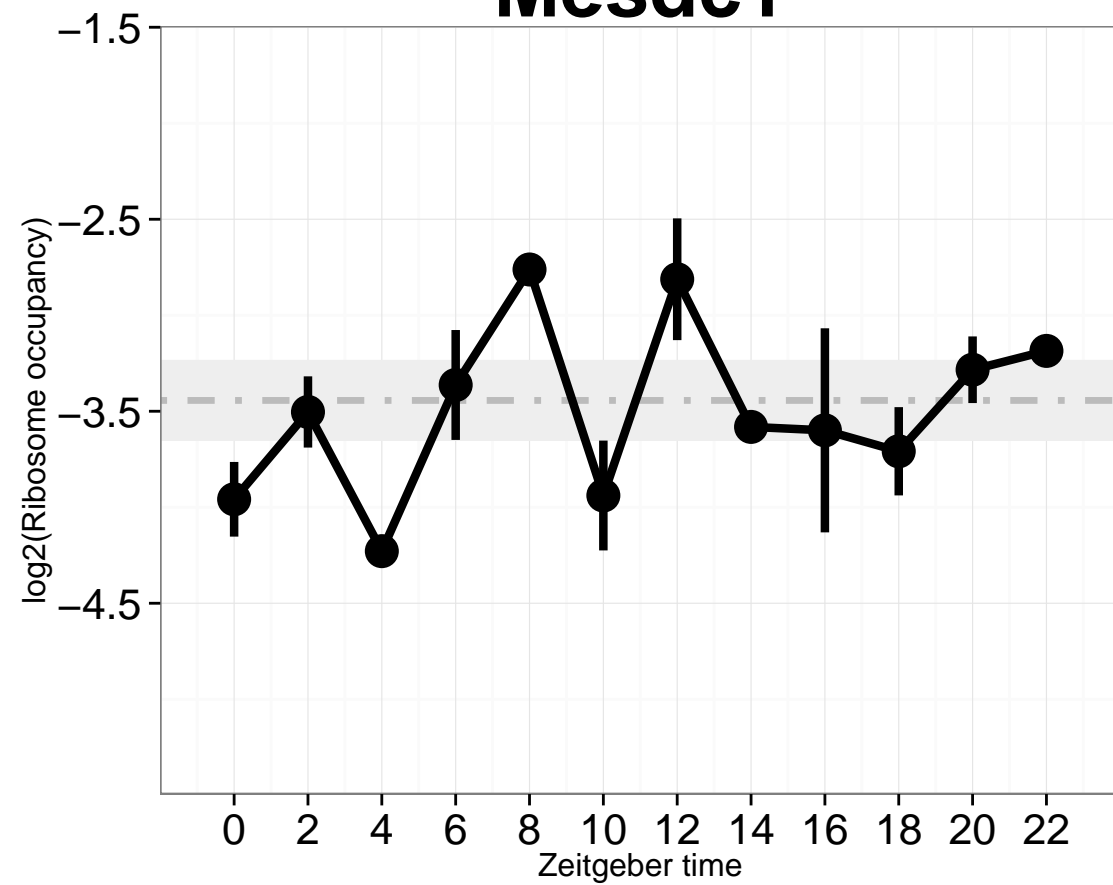

Supplement: Supplementary file 1265 [file 1]

## Nfrkb

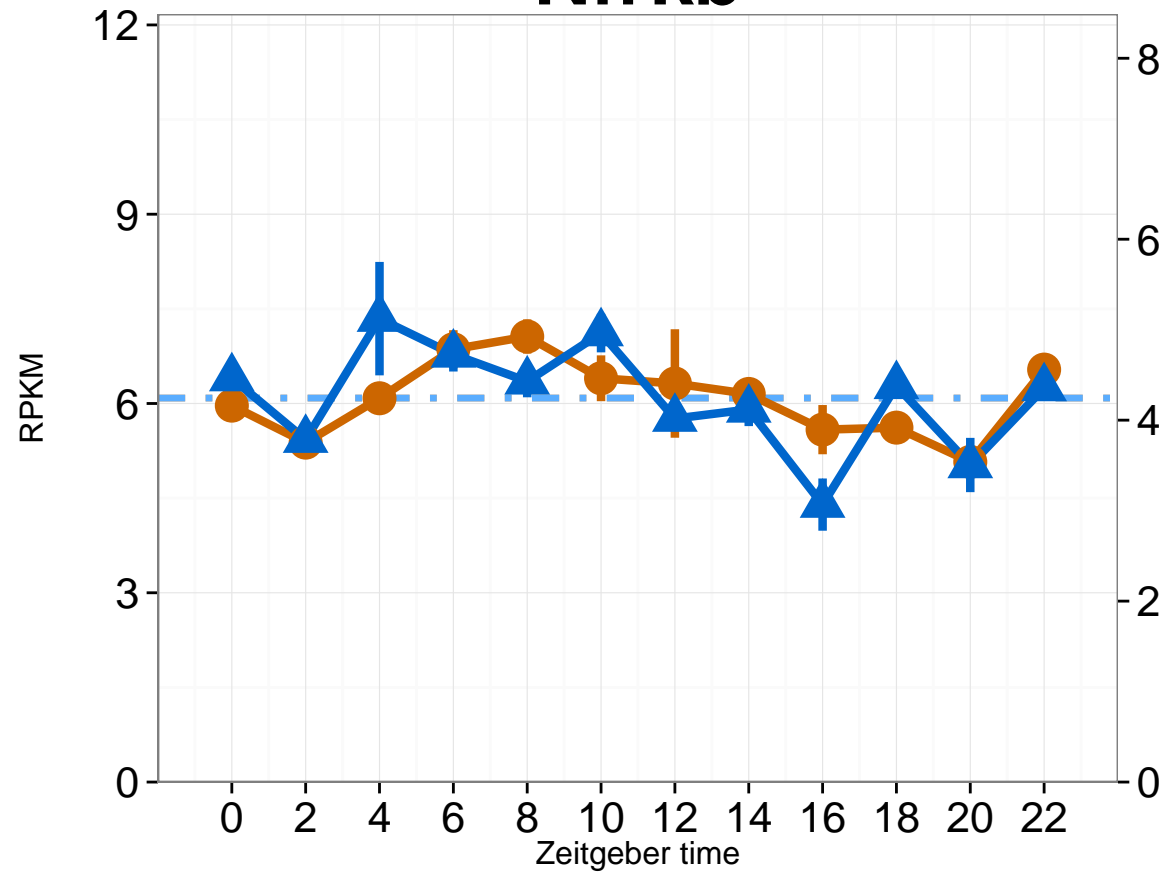

## Nfrkb

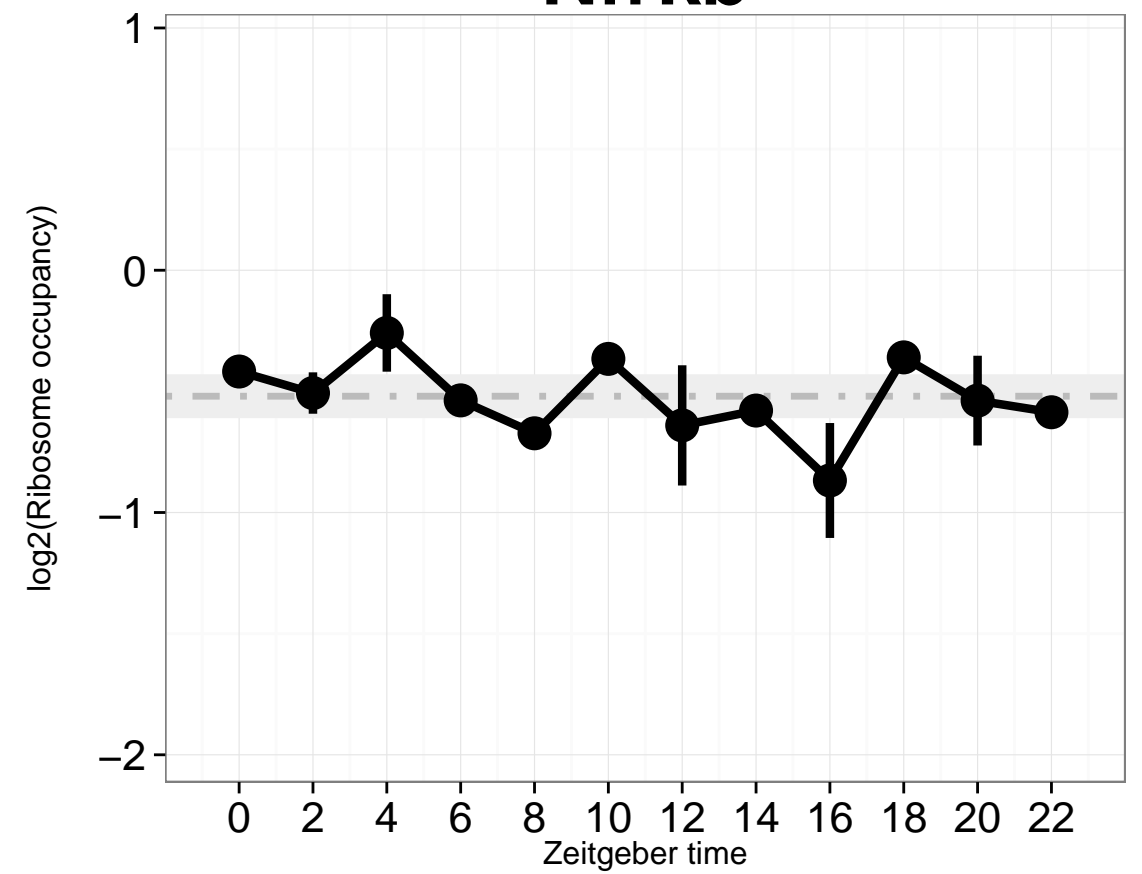

Supplement: Supplementary file 1266 [file 1]

## Stradb

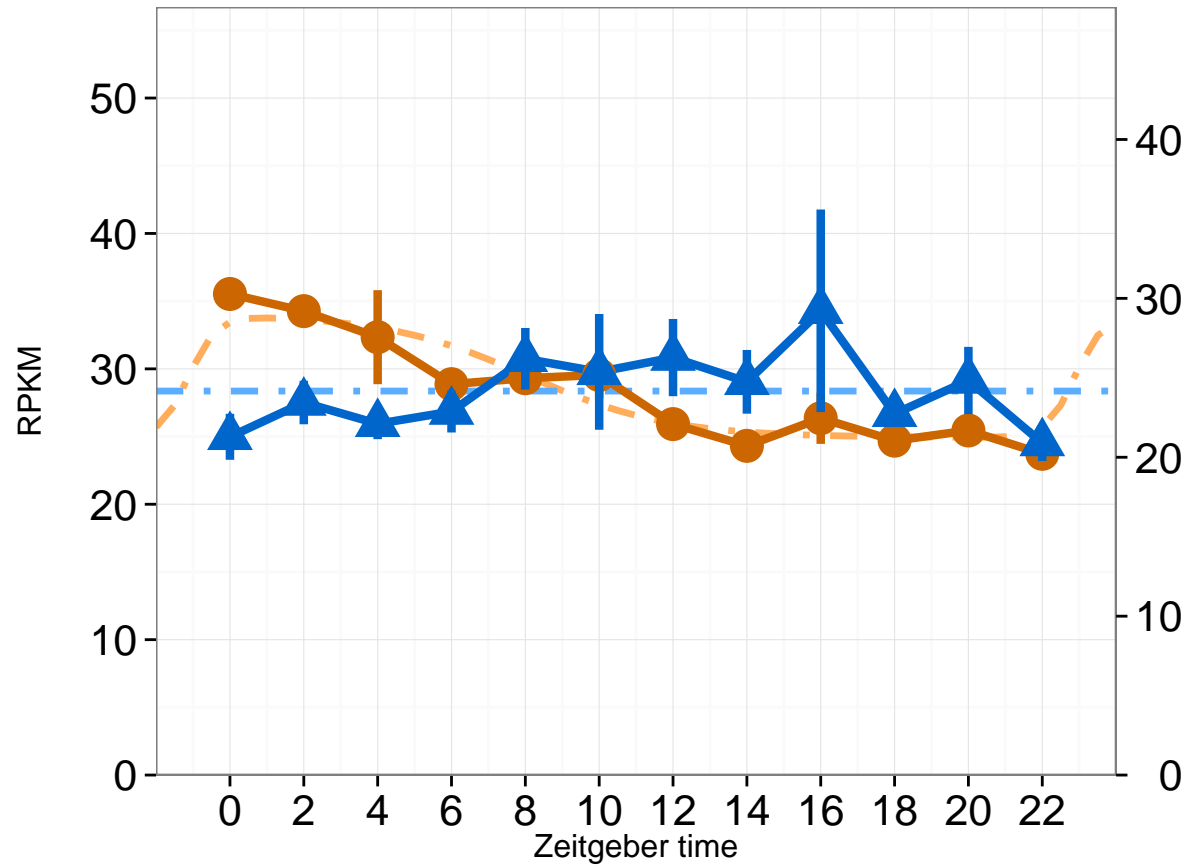

## Stradb

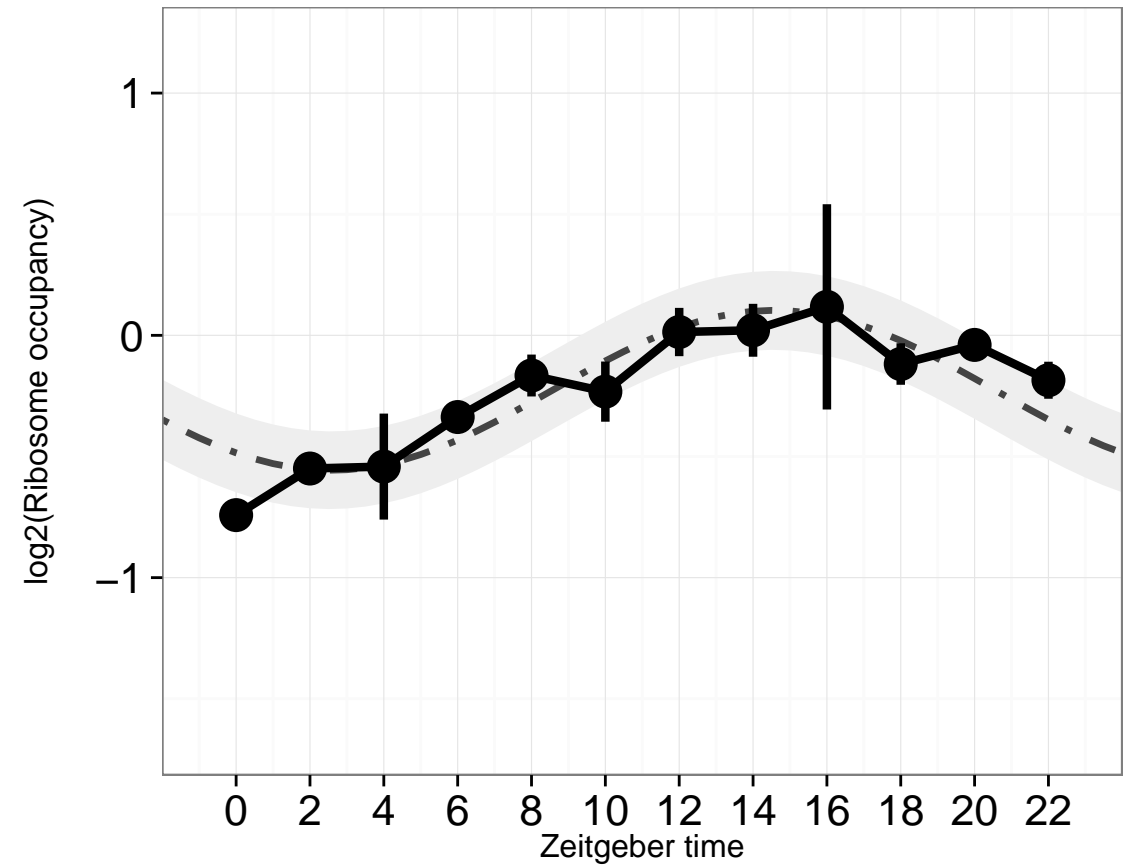

Supplement: Supplementary file 1267 [file 1]

## Dstn

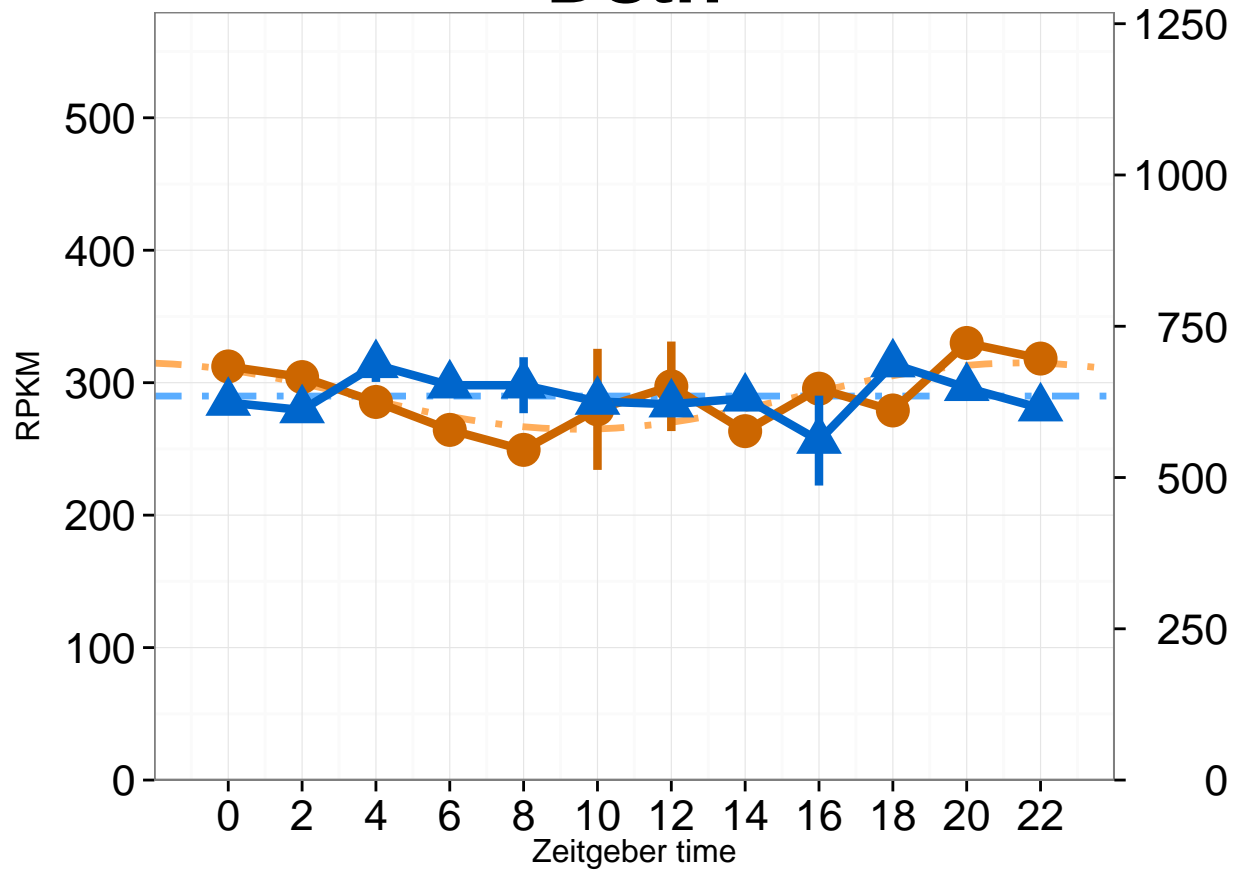

## Dstn

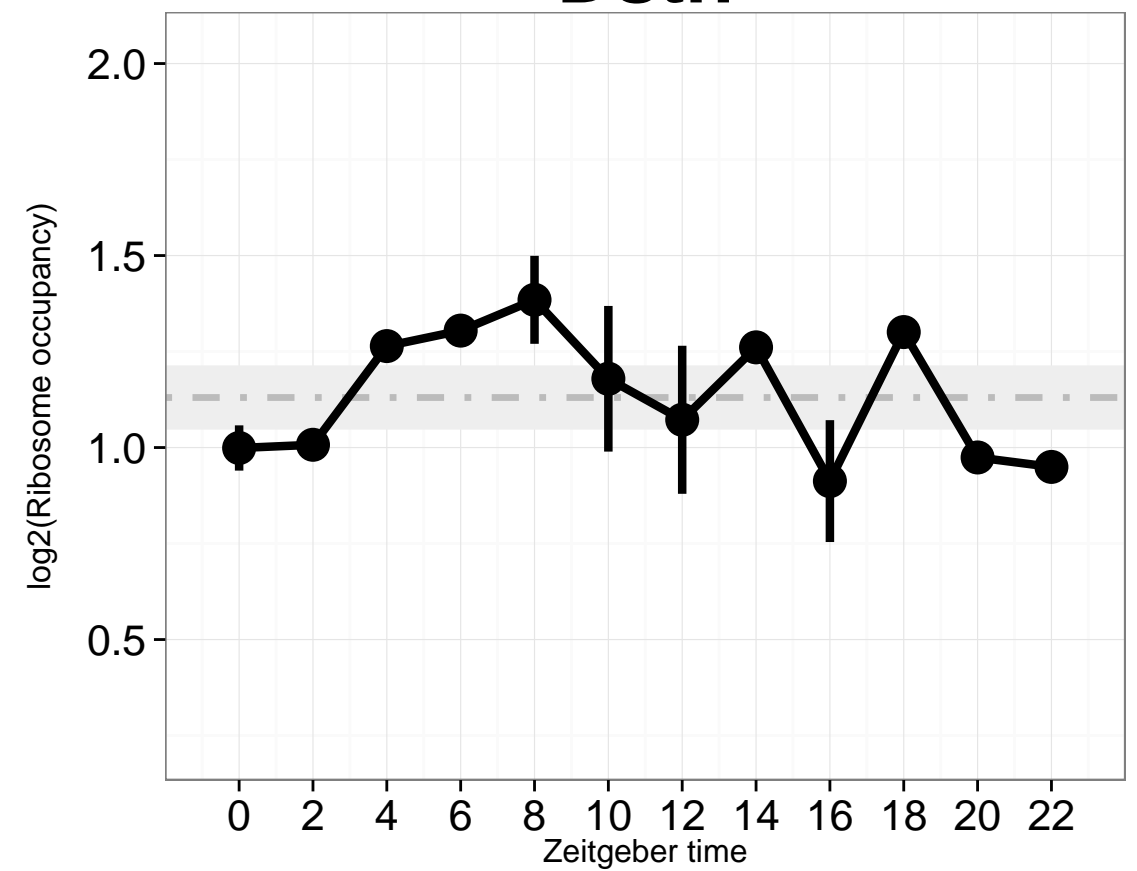

Supplement: Supplementary file 1268 [file 1]

## Ccdc59

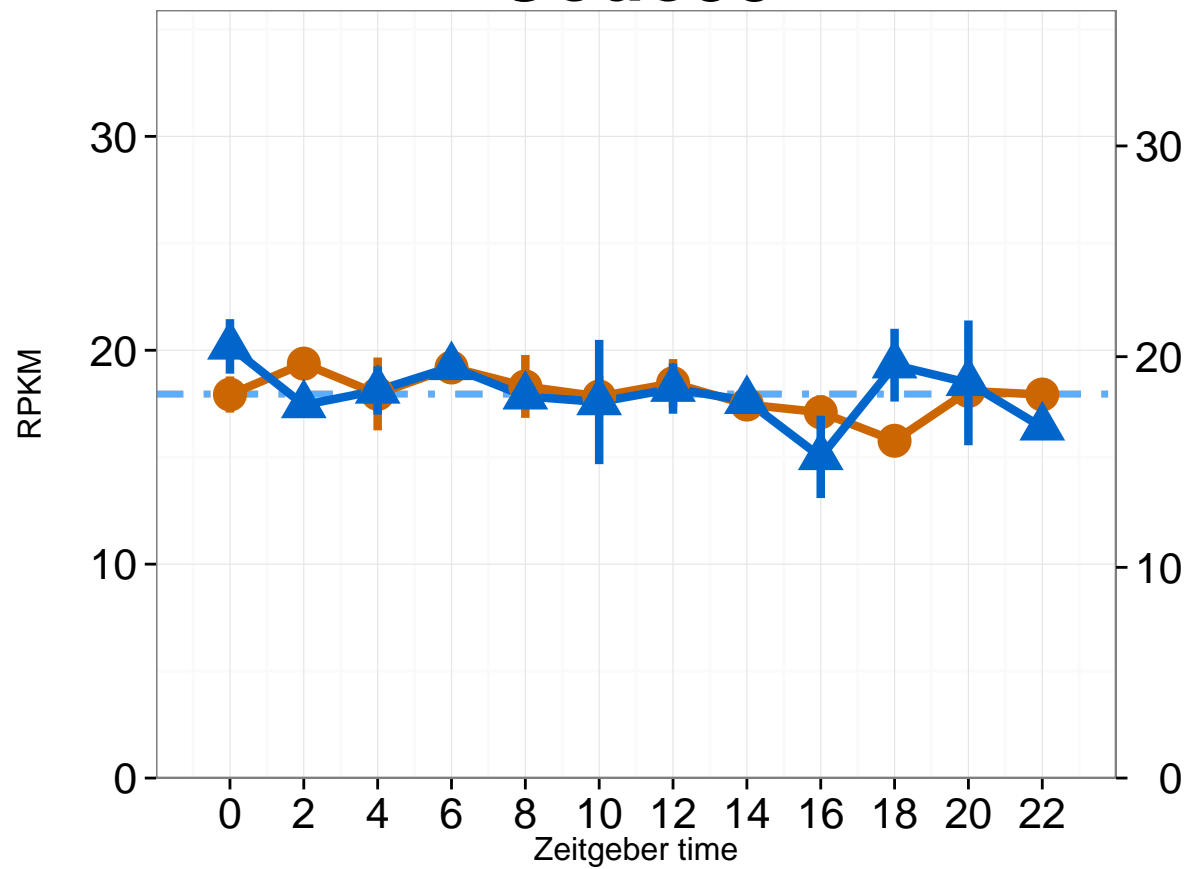

## Ccdc59

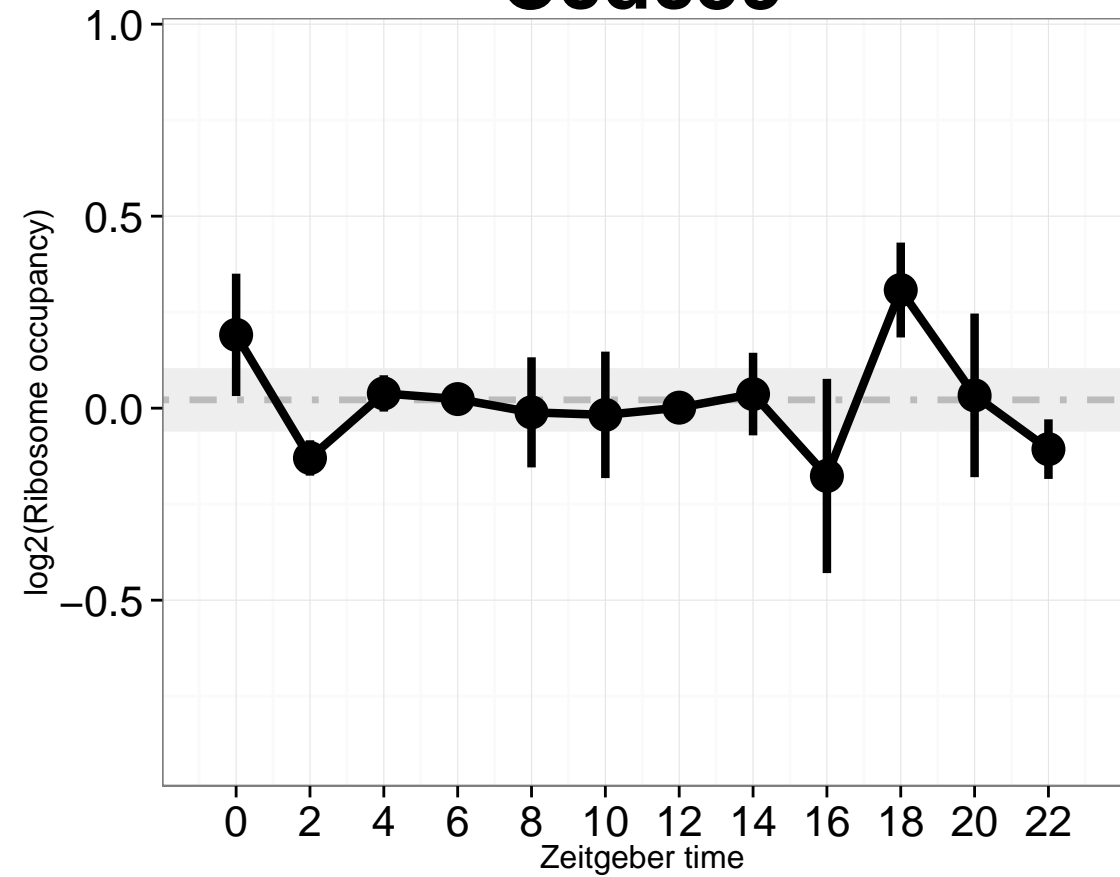

Supplement: Supplementary file 1269 [file 1]

## Nemf

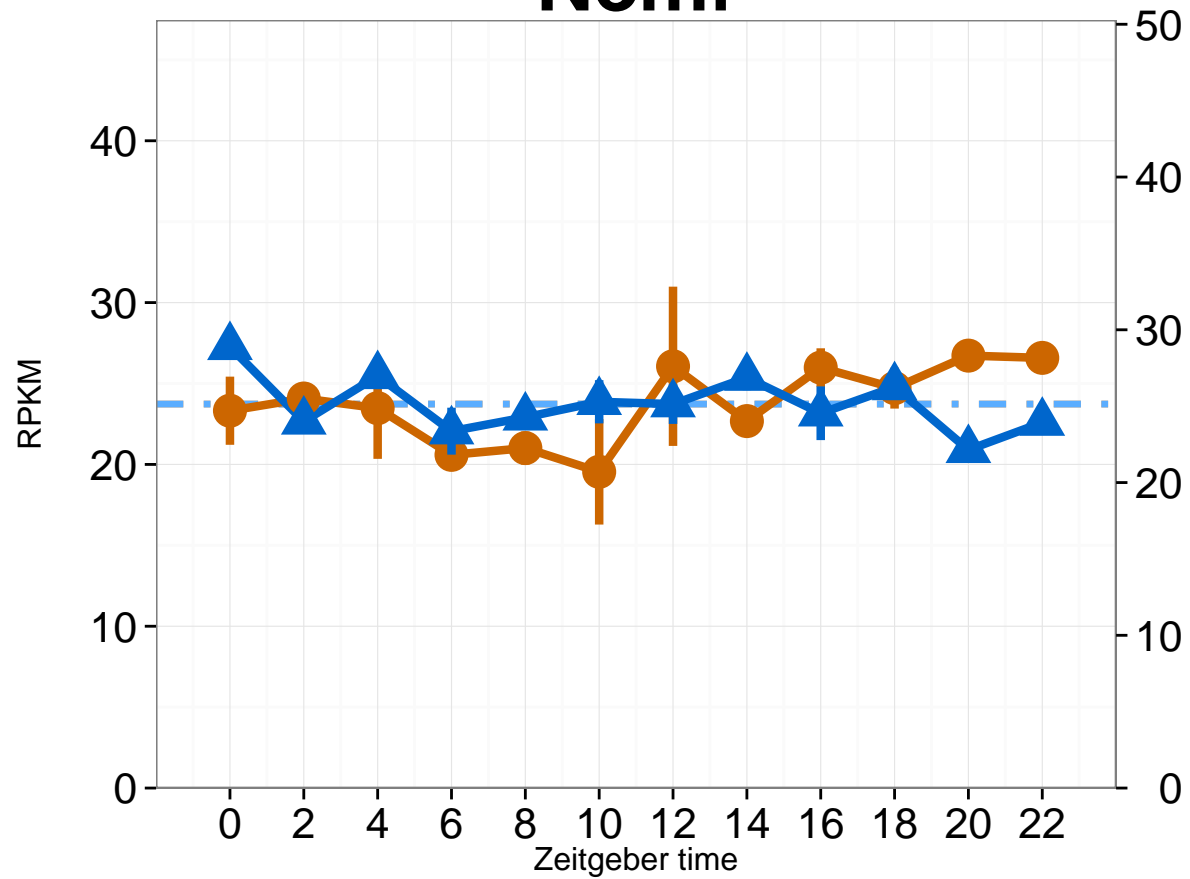

## Nemf

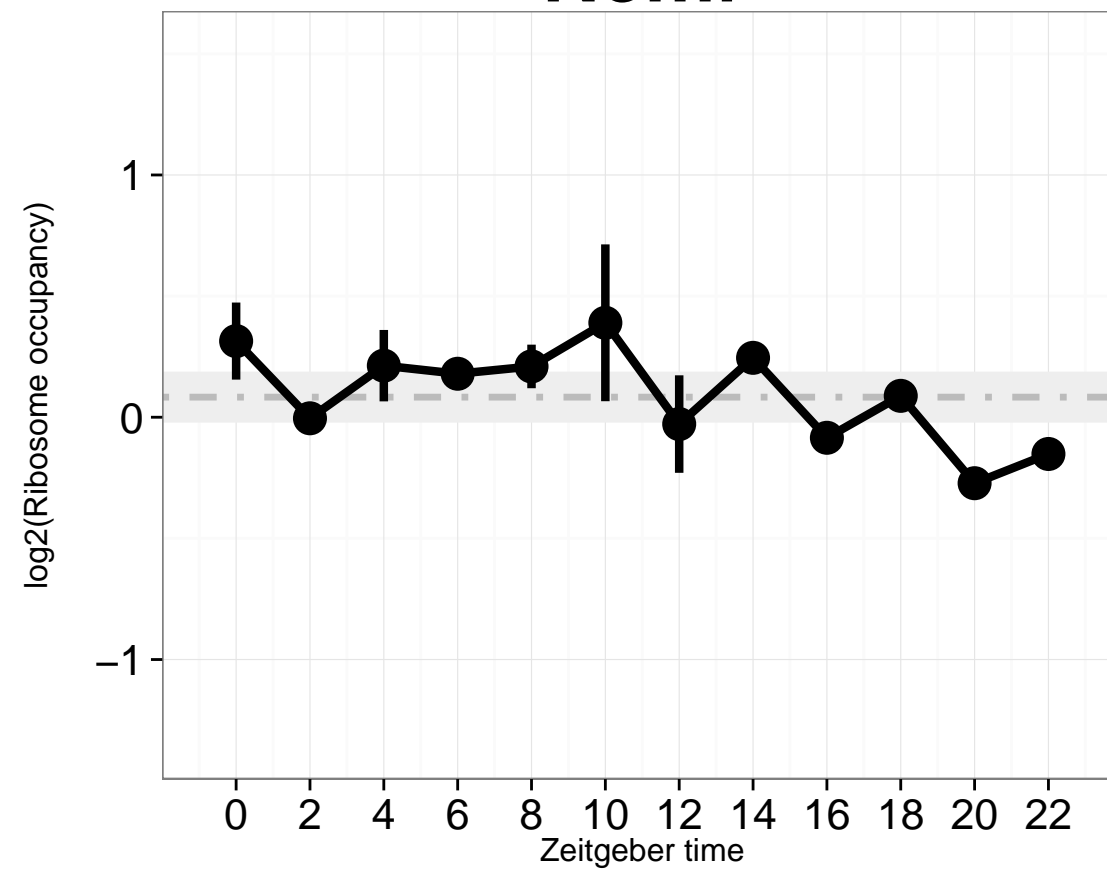

Supplement: Supplementary file 1270 [file 1]

# Tnpo3

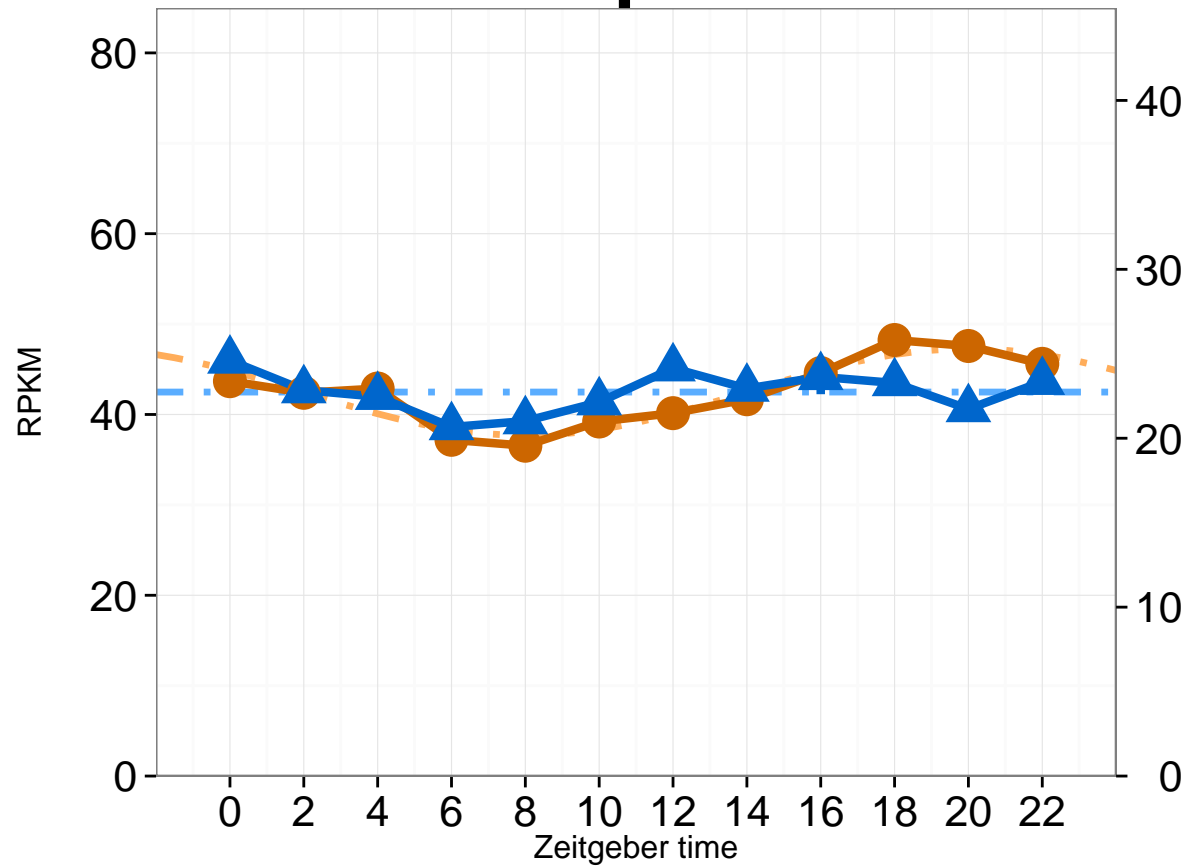

# Tnpo3

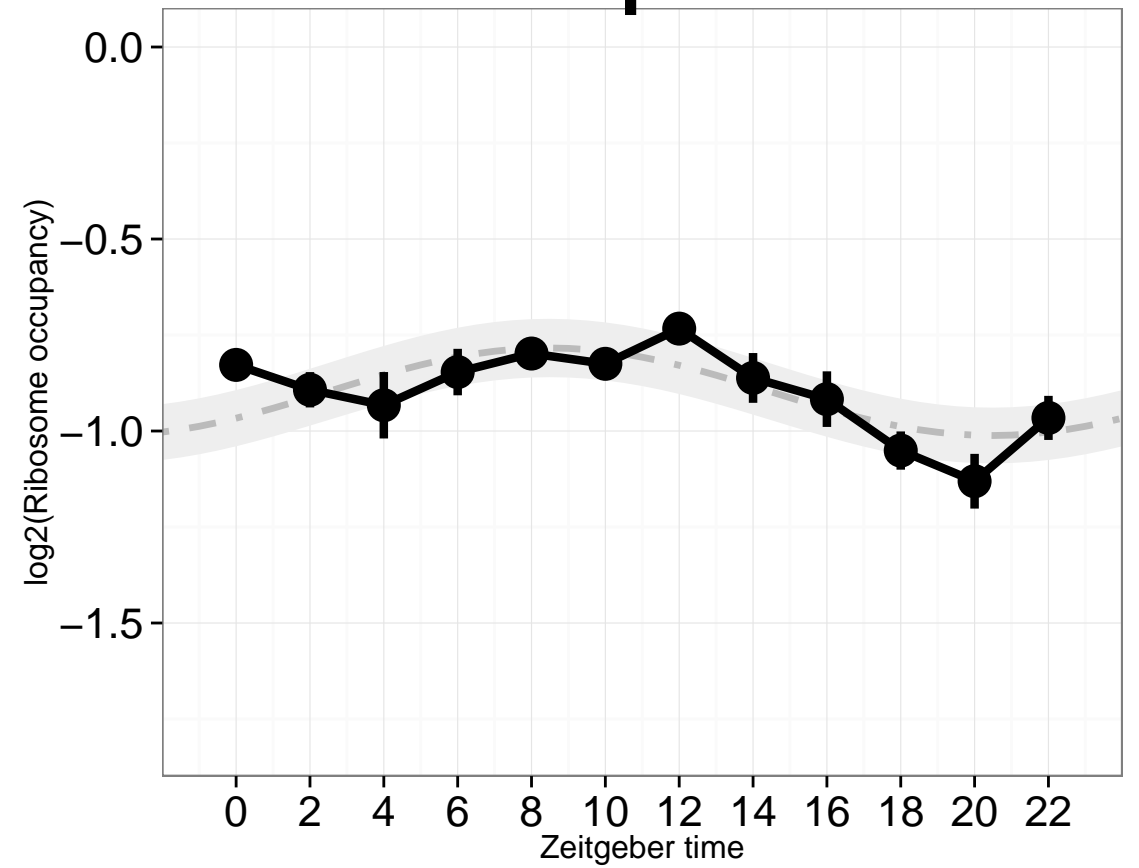

Supplement: Supplementary file 1271 [file 1]

## Ctxn3

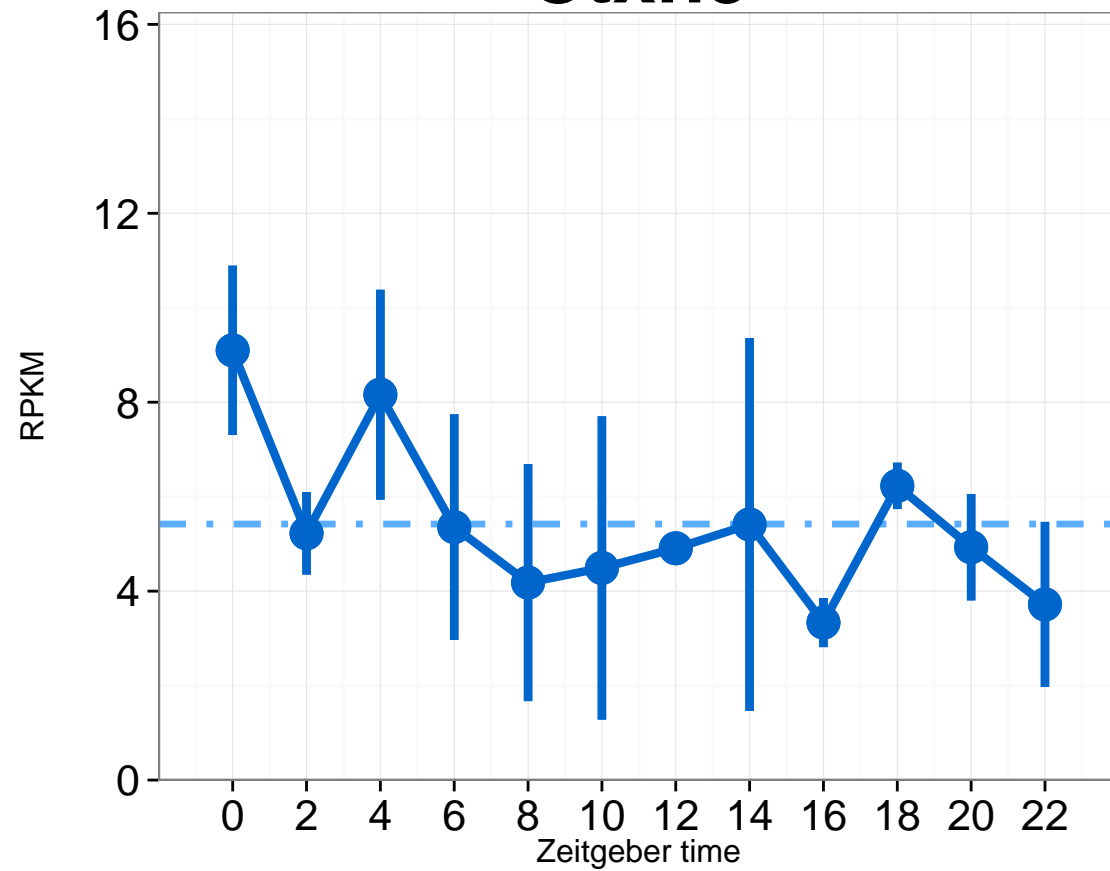

## Ctxn3 log2(Ribosome occupancy

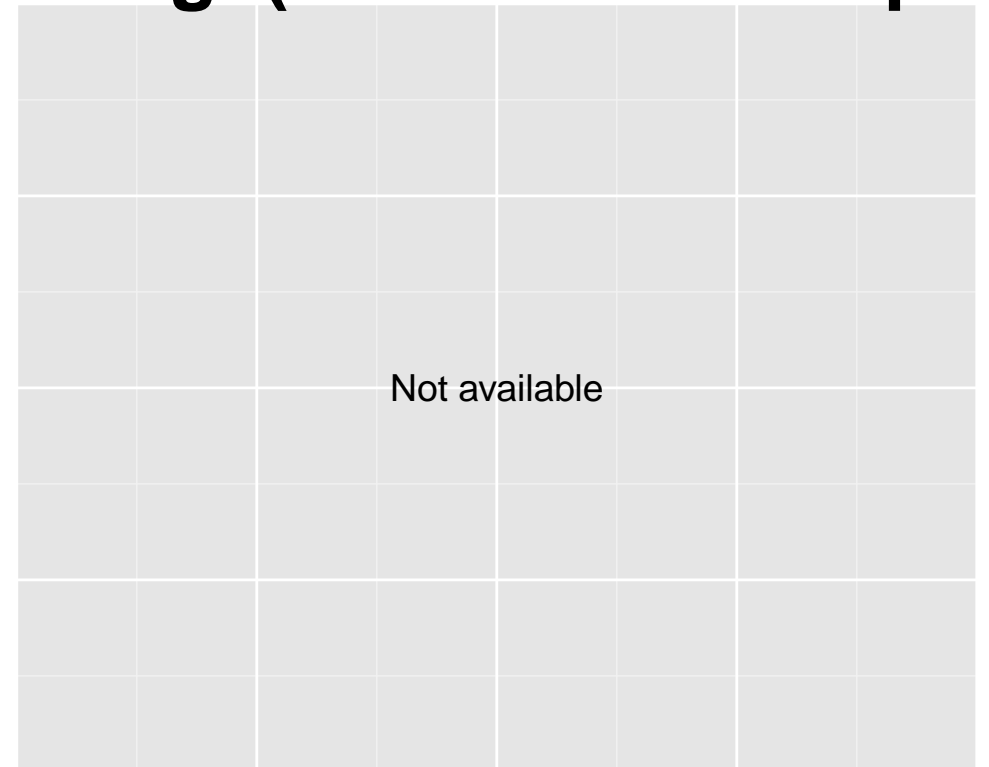

Supplement: Supplementary file 1272 [file 1]

## Lsm1

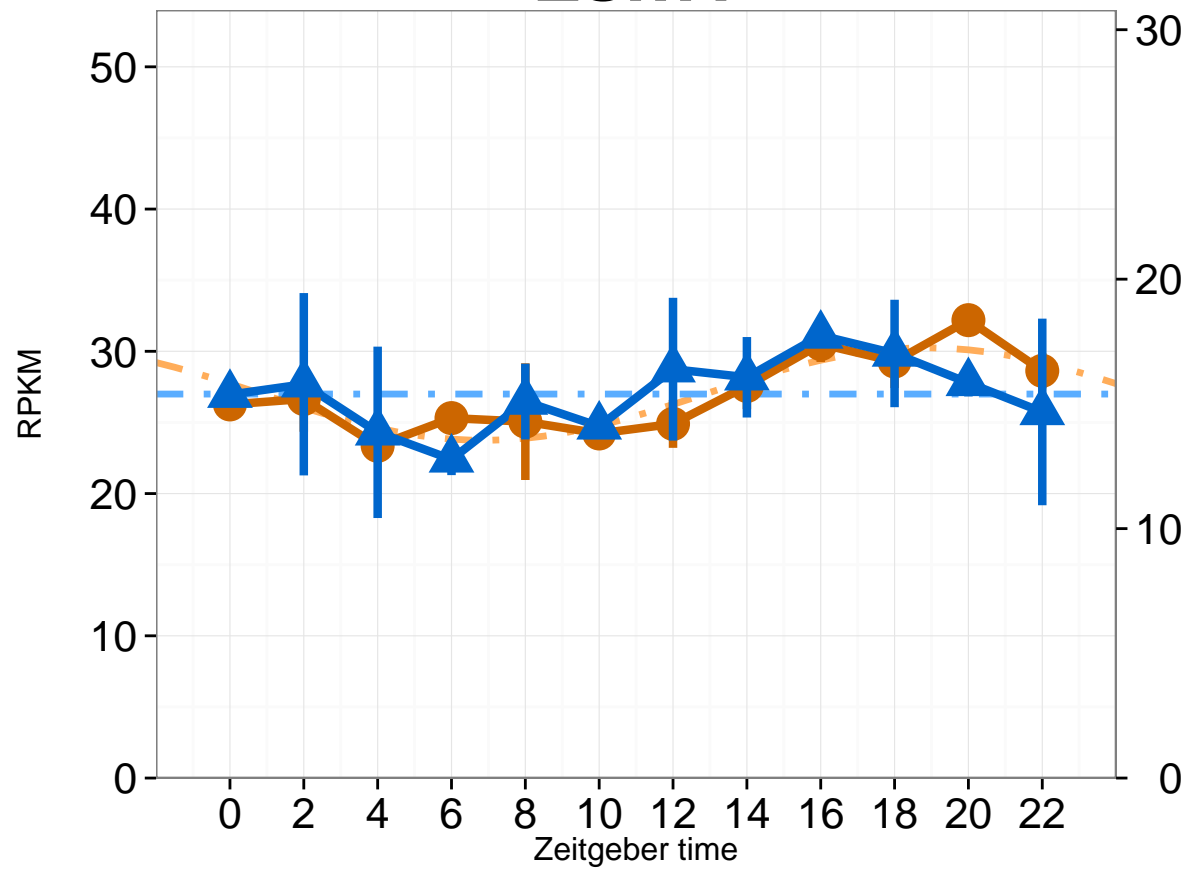

## Lsm1

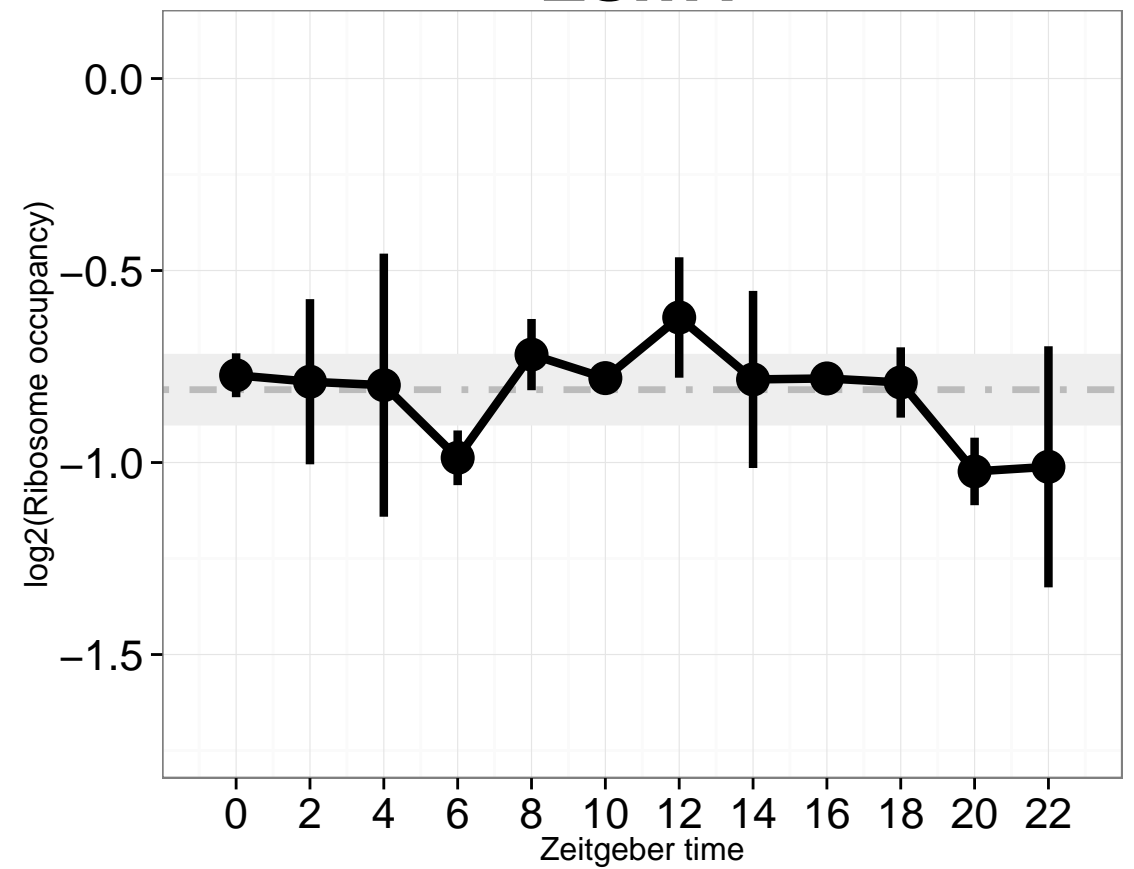

Supplement: Supplementary file 1273 [file 1]

## Kbtbd2

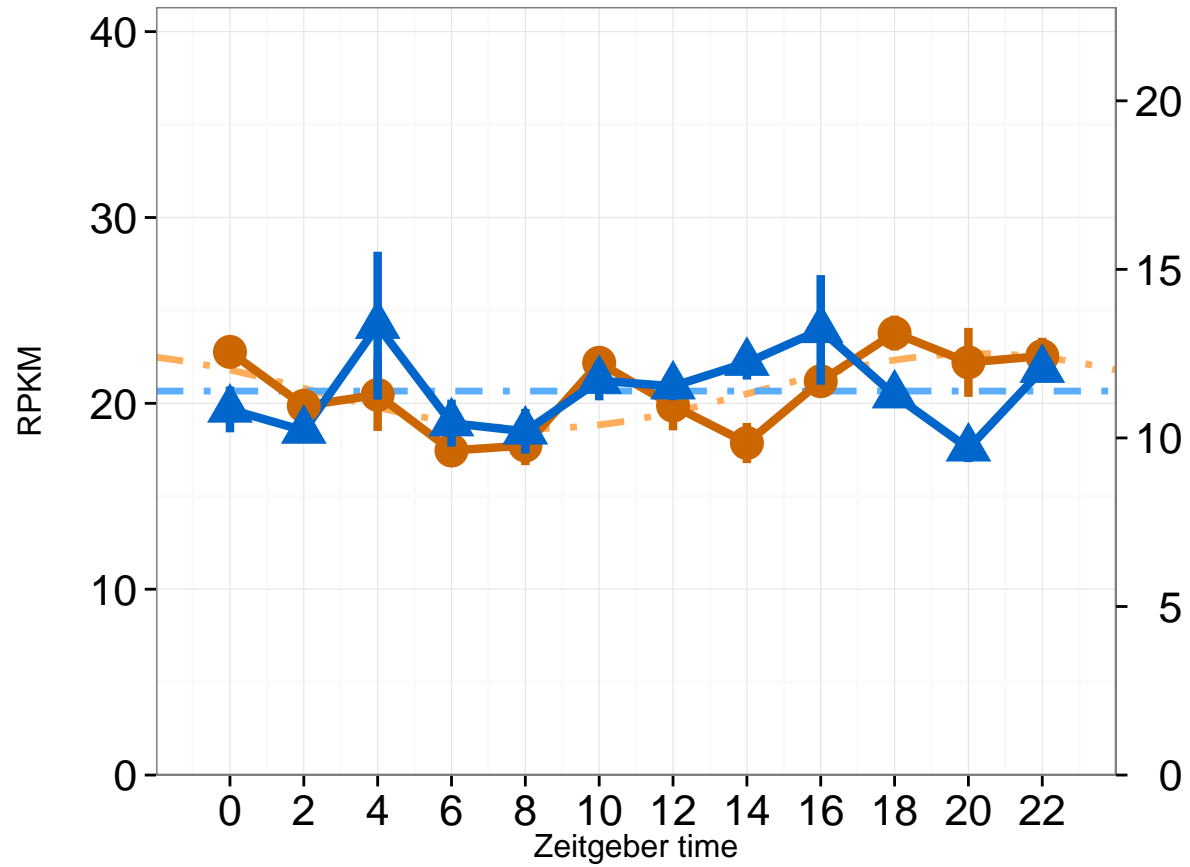

## Kbtbd2

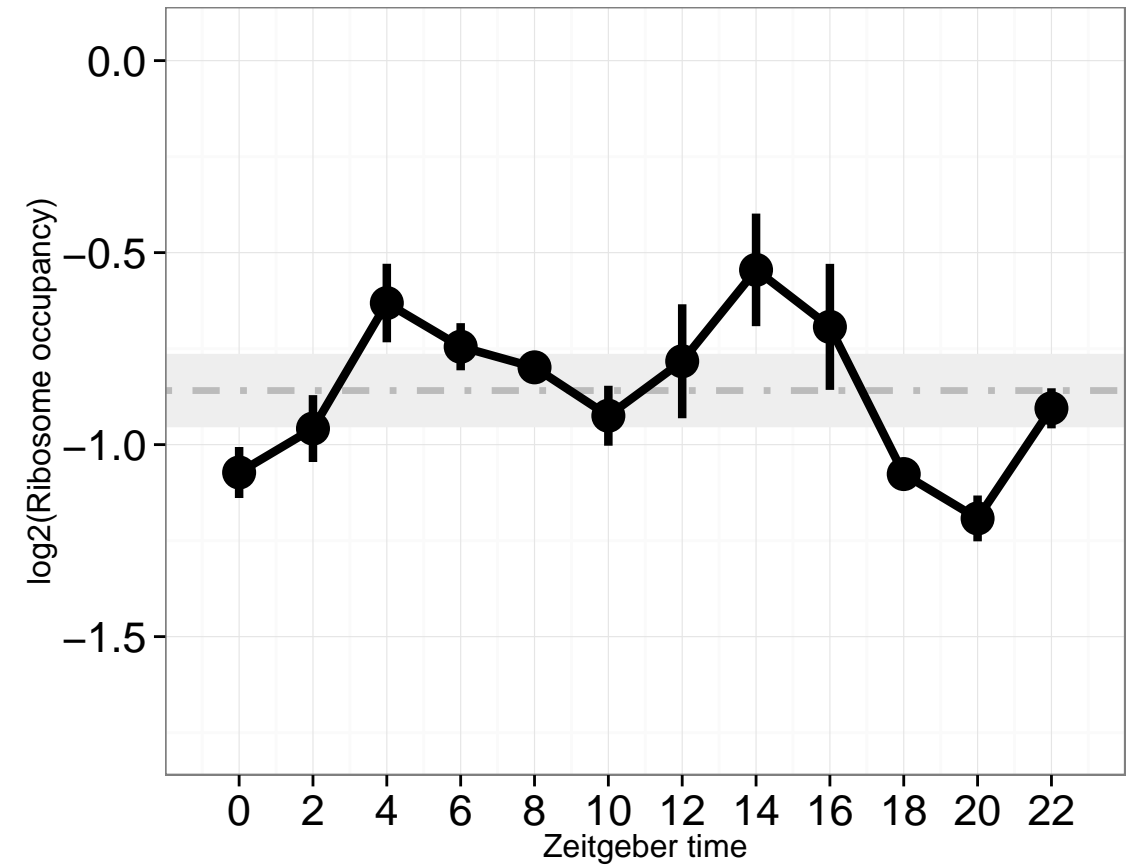

Supplement: Supplementary file 1274 [file 1]

# Dgkg

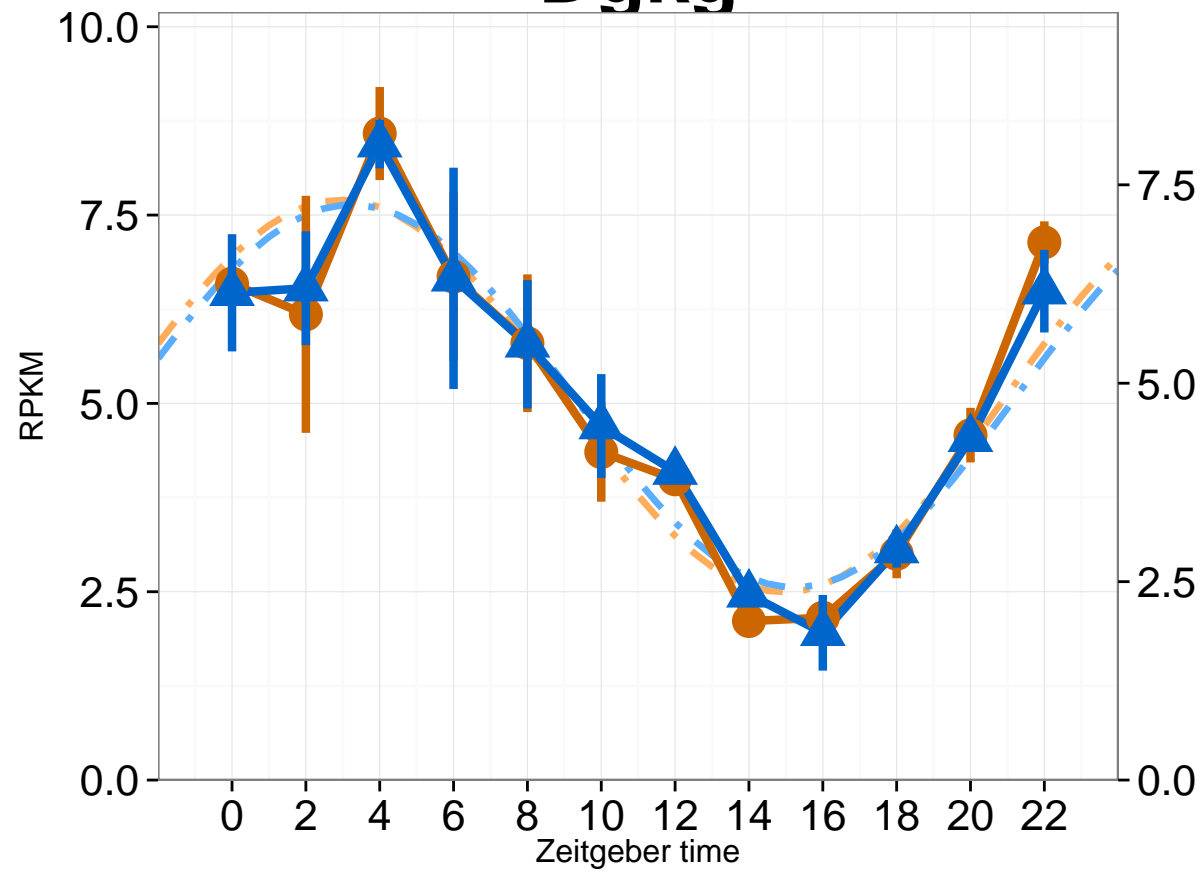

# Dgkg

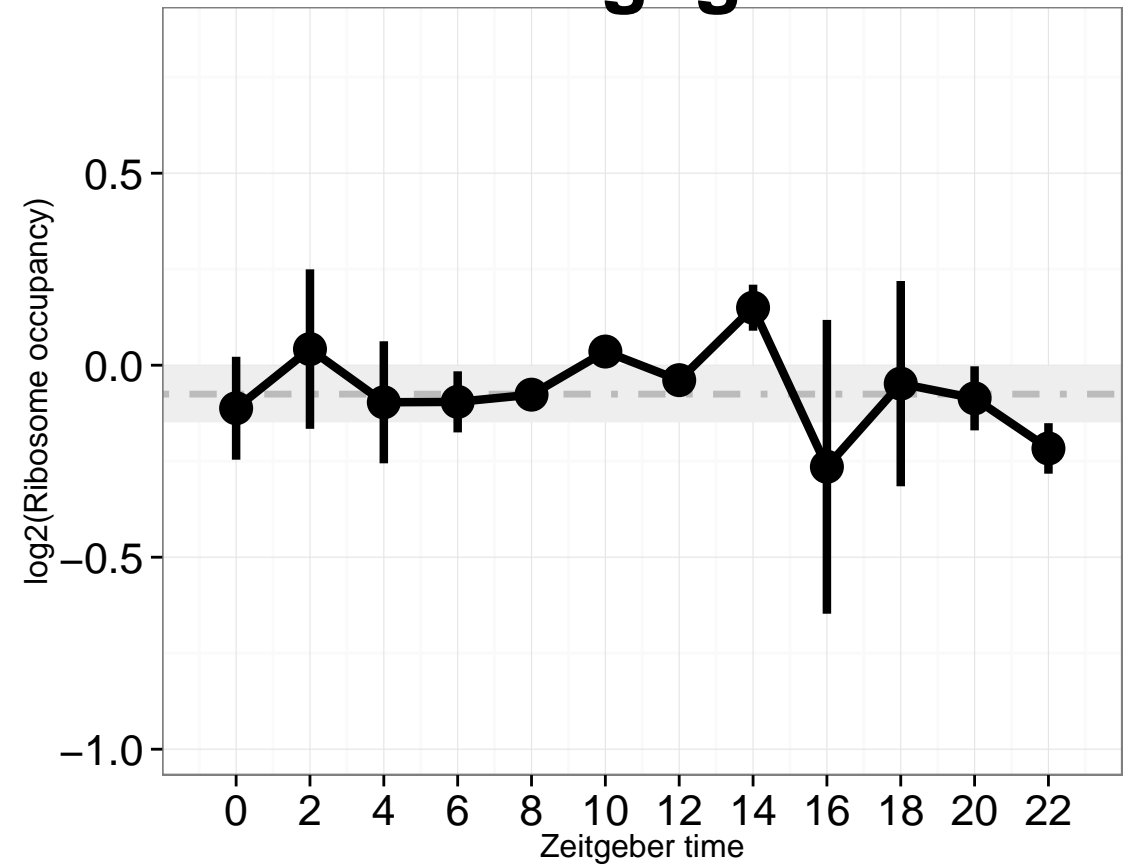

Supplement: Supplementary file 1275 [file 1]

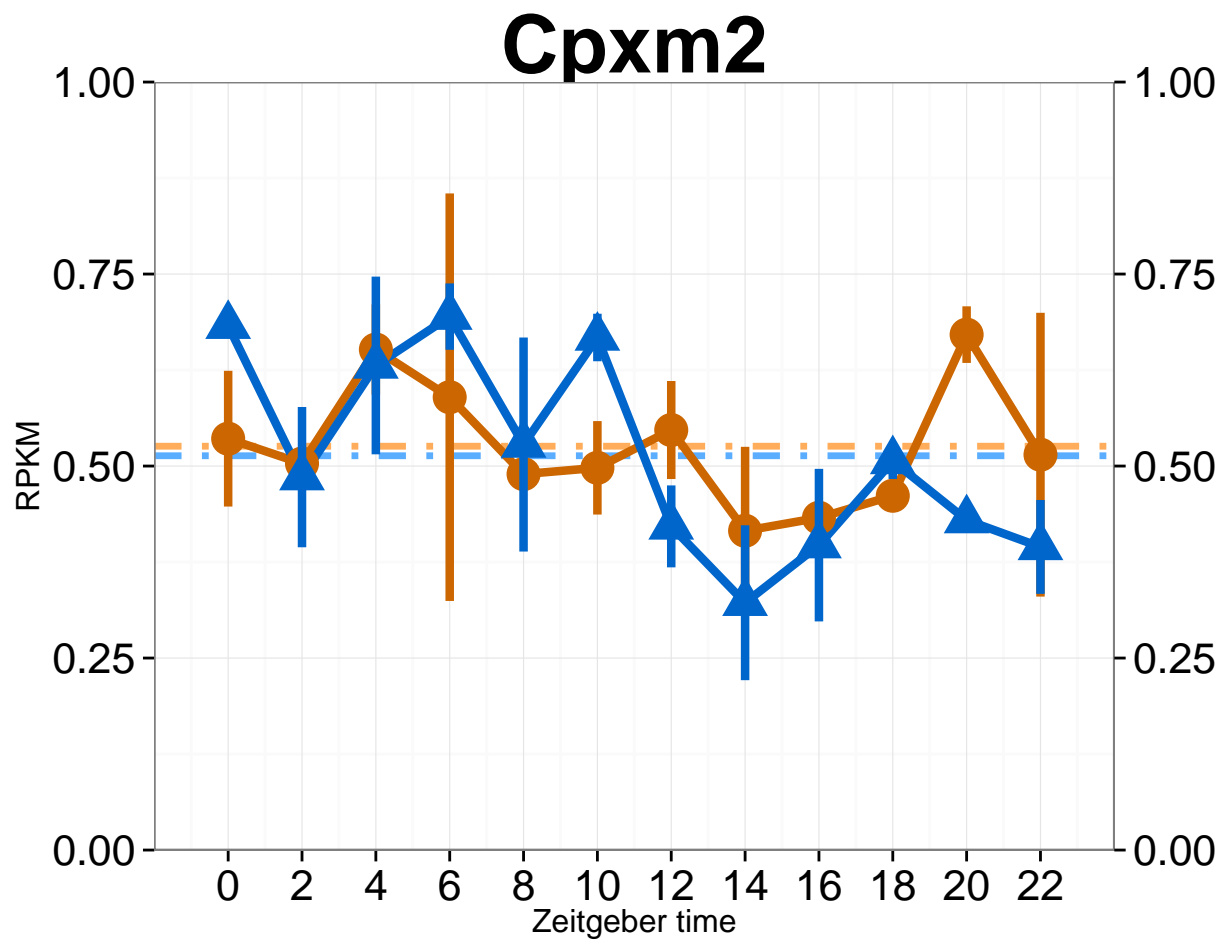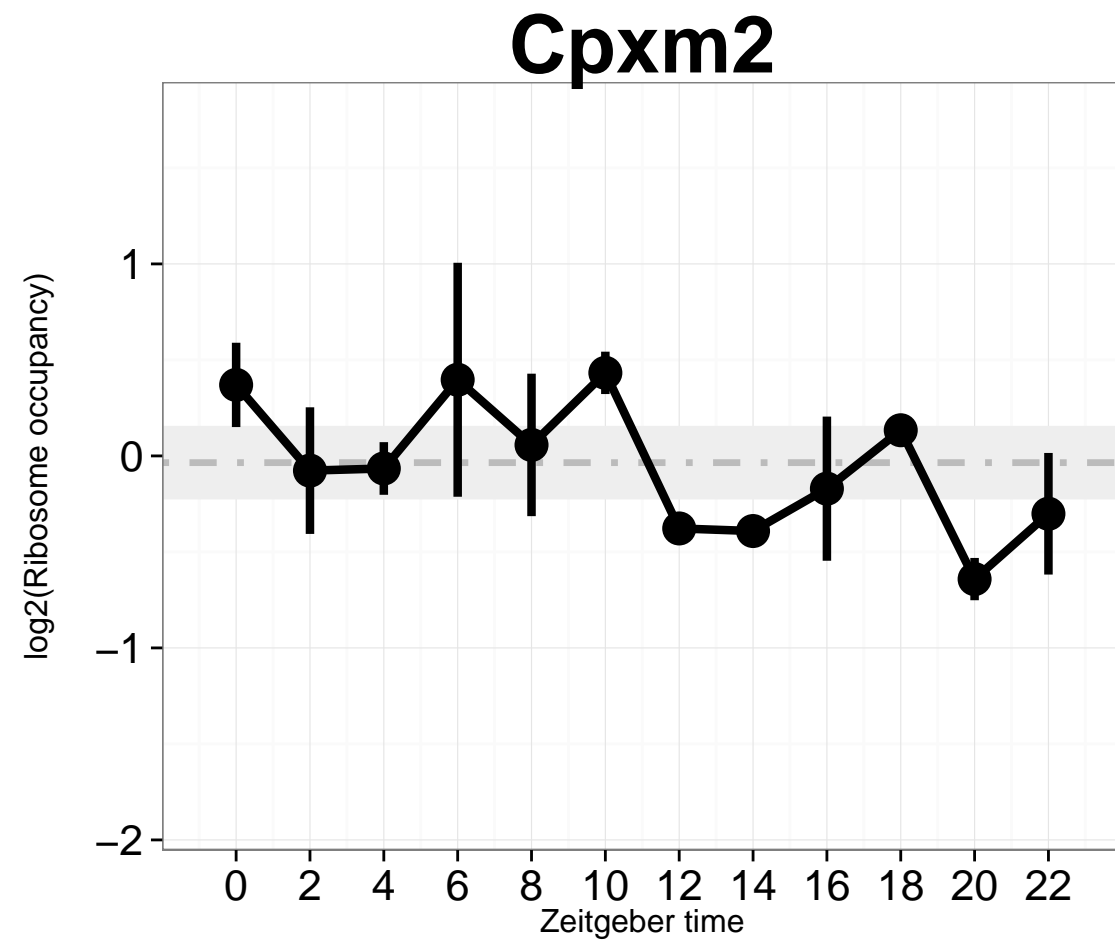

Supplement: Supplementary file 1276 [file 1]

# Arhgef10l

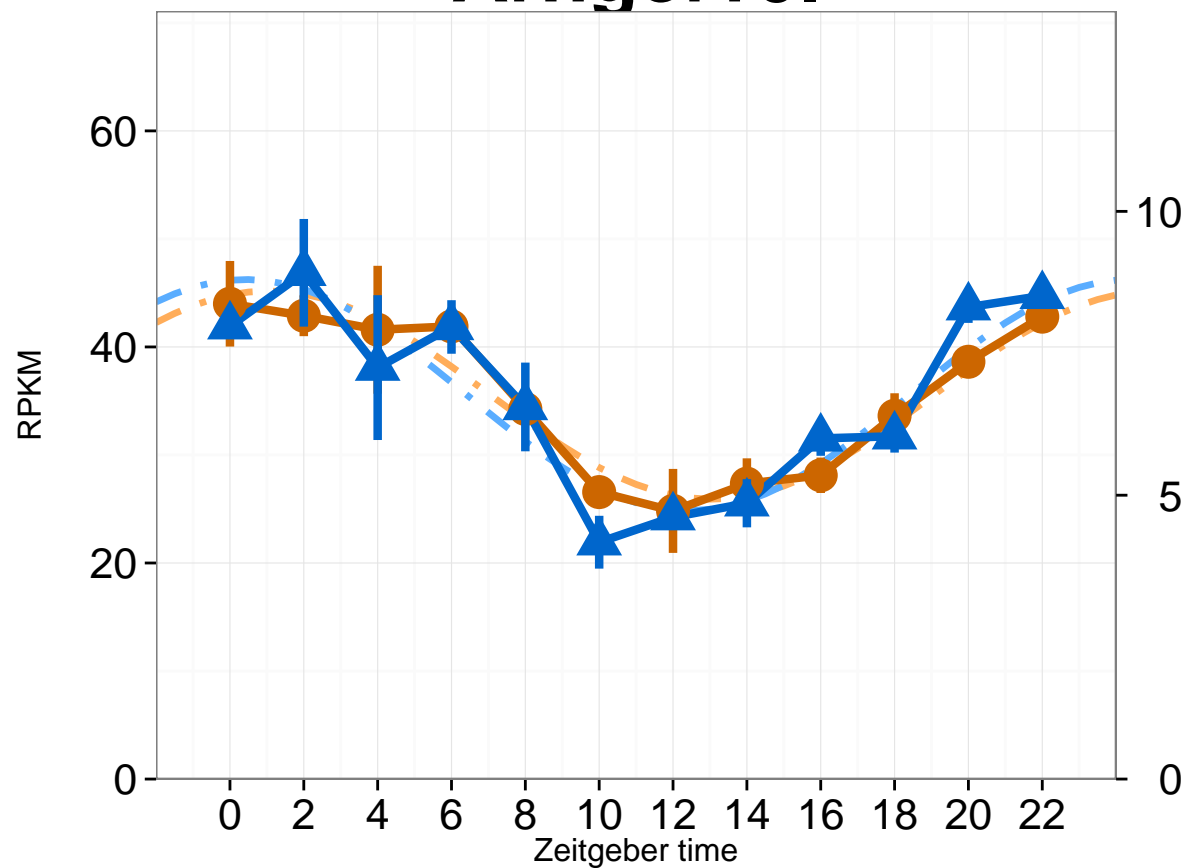

# Arhgef10l

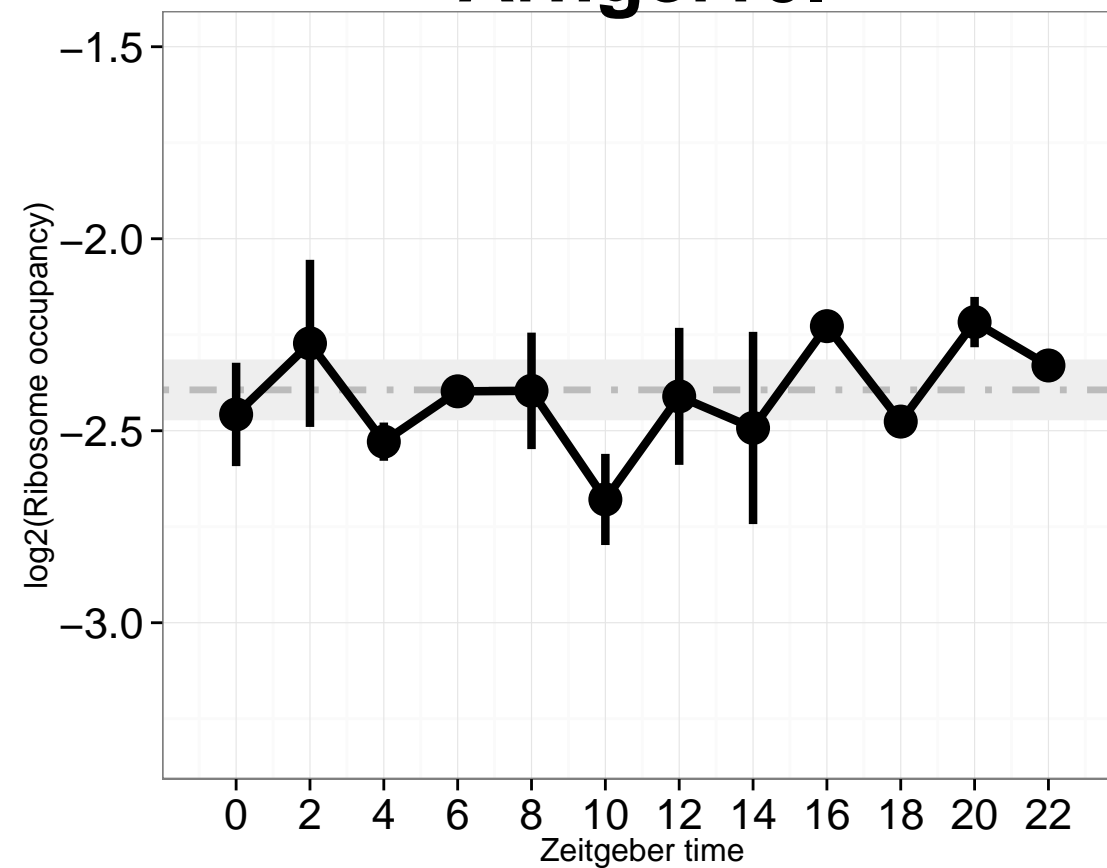

Supplement: Supplementary file 1277 [file 1]

## Carf

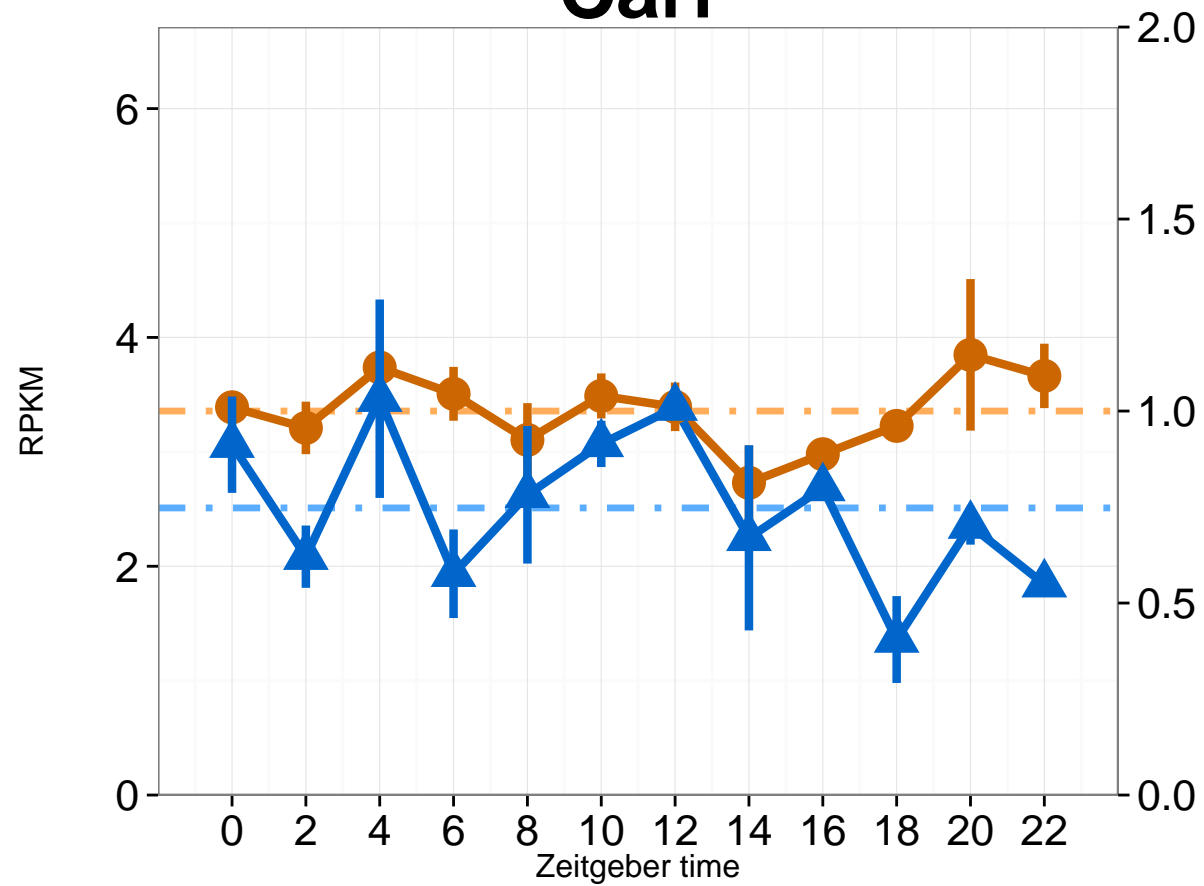

## Carf

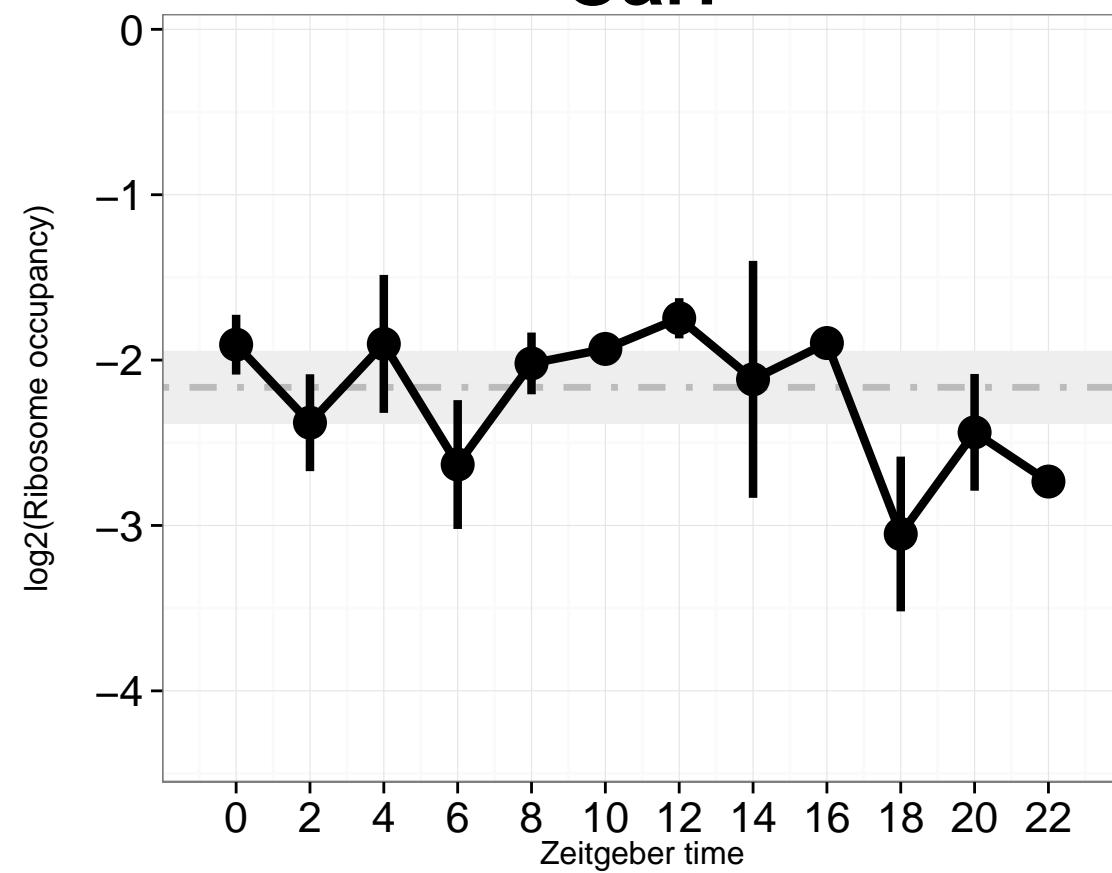

Supplement: Supplementary file 1278 [file 1]

## Parp8

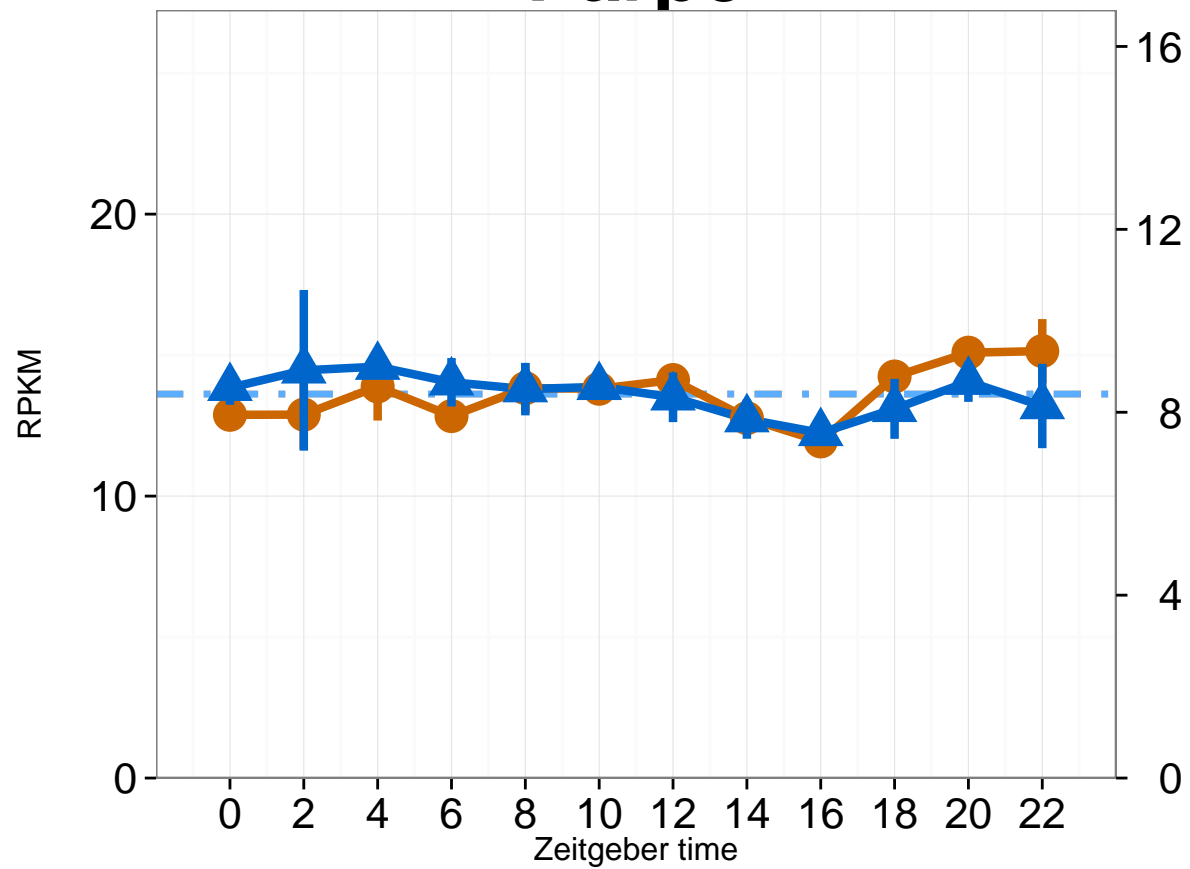

## Parp8

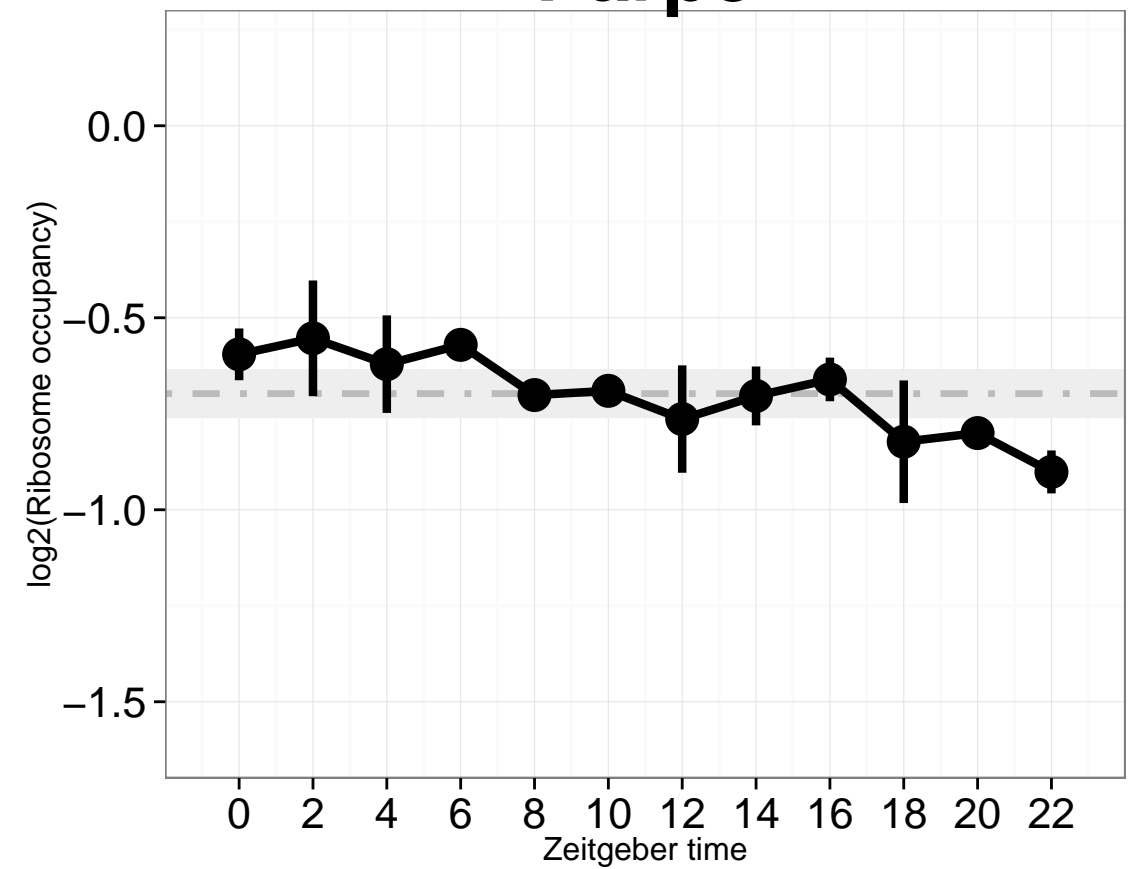

Supplement: Supplementary file 1279 [file 1]

# Mmp28

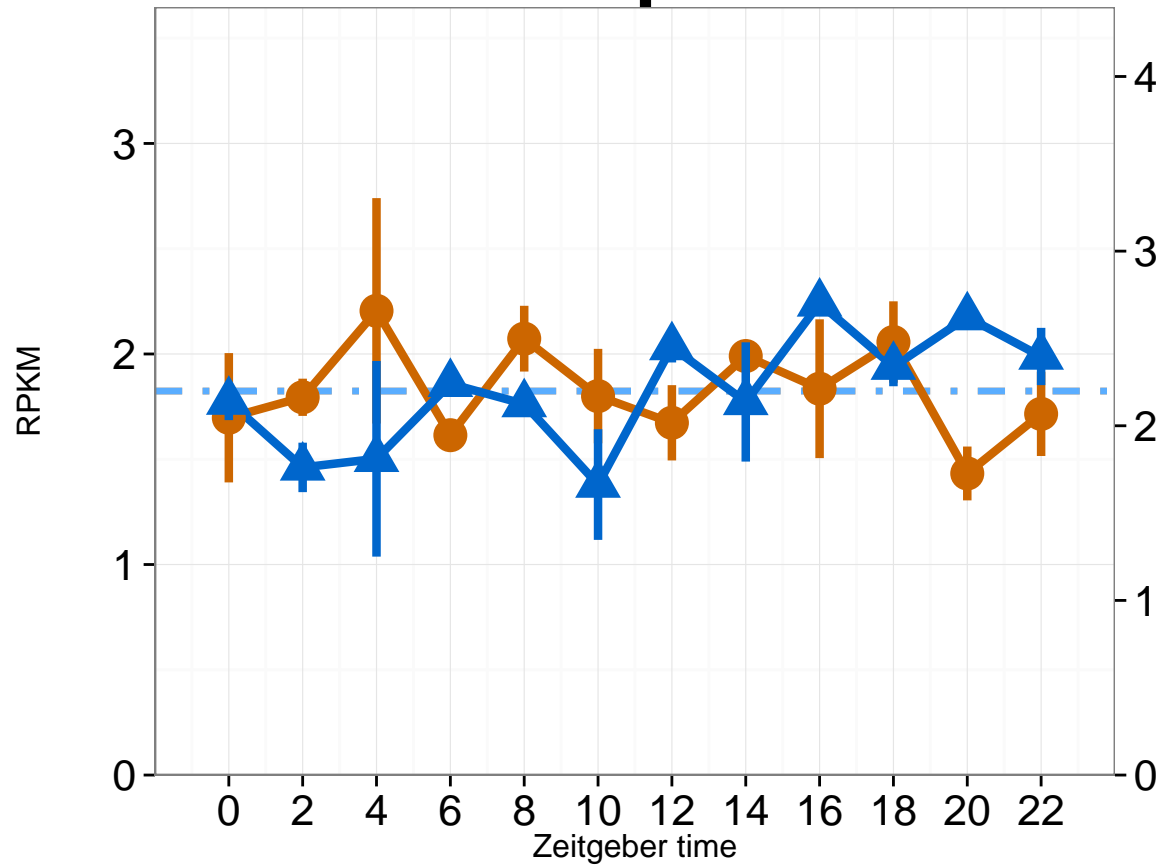

# Mmp28

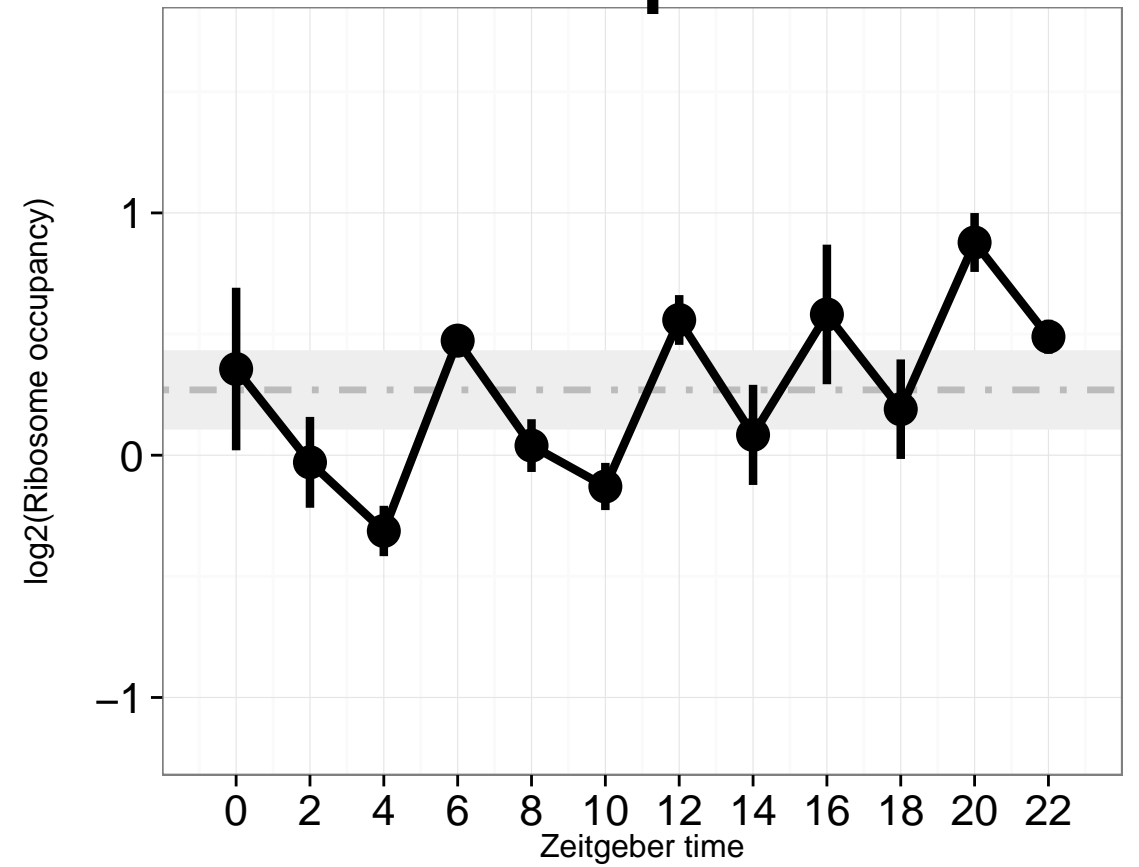

Supplement: Supplementary file 1280 [file 1]

## Spred2

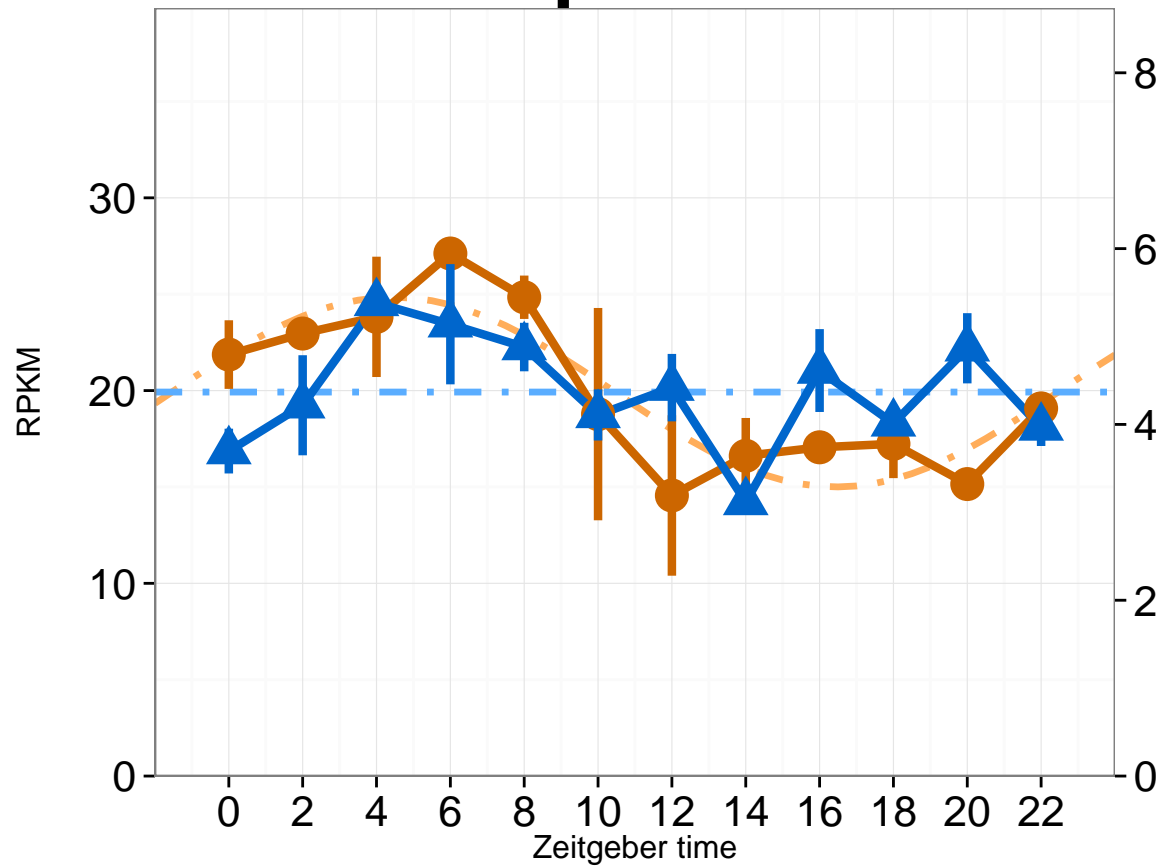

## Spred2

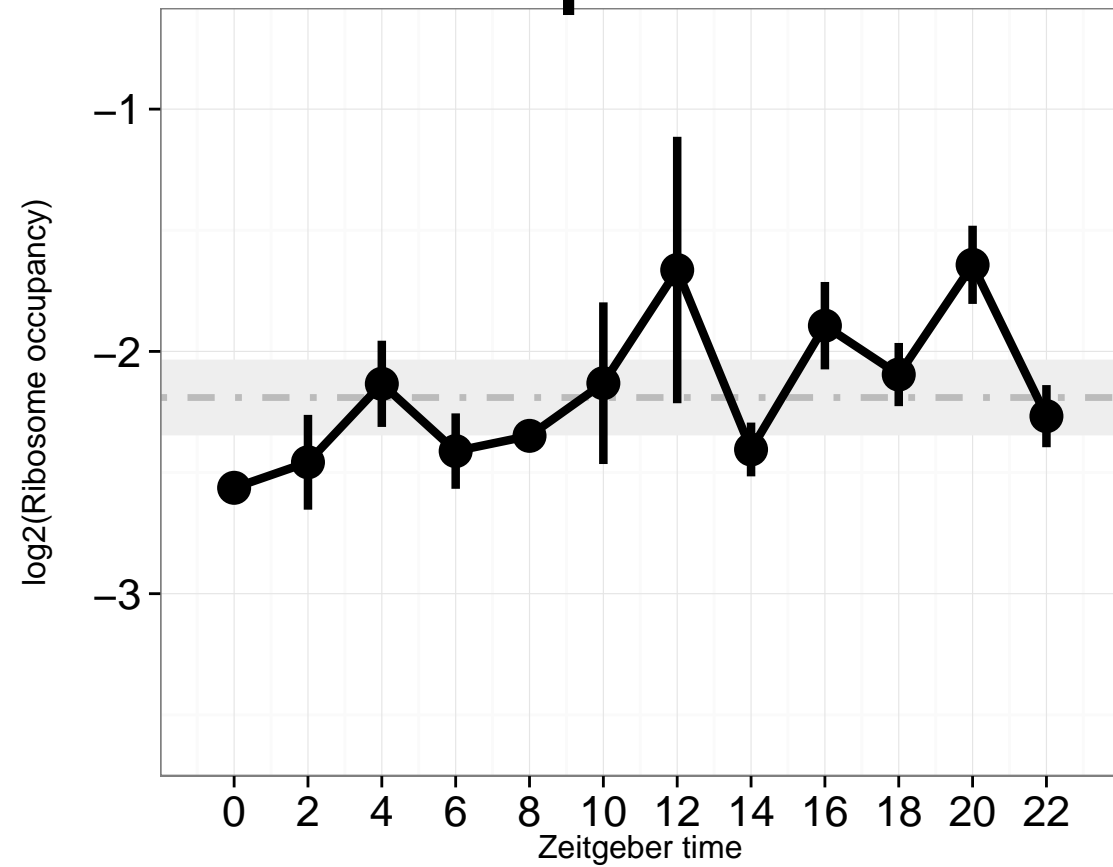

Supplement: Supplementary file 1281 [file 1]

## Fmo5

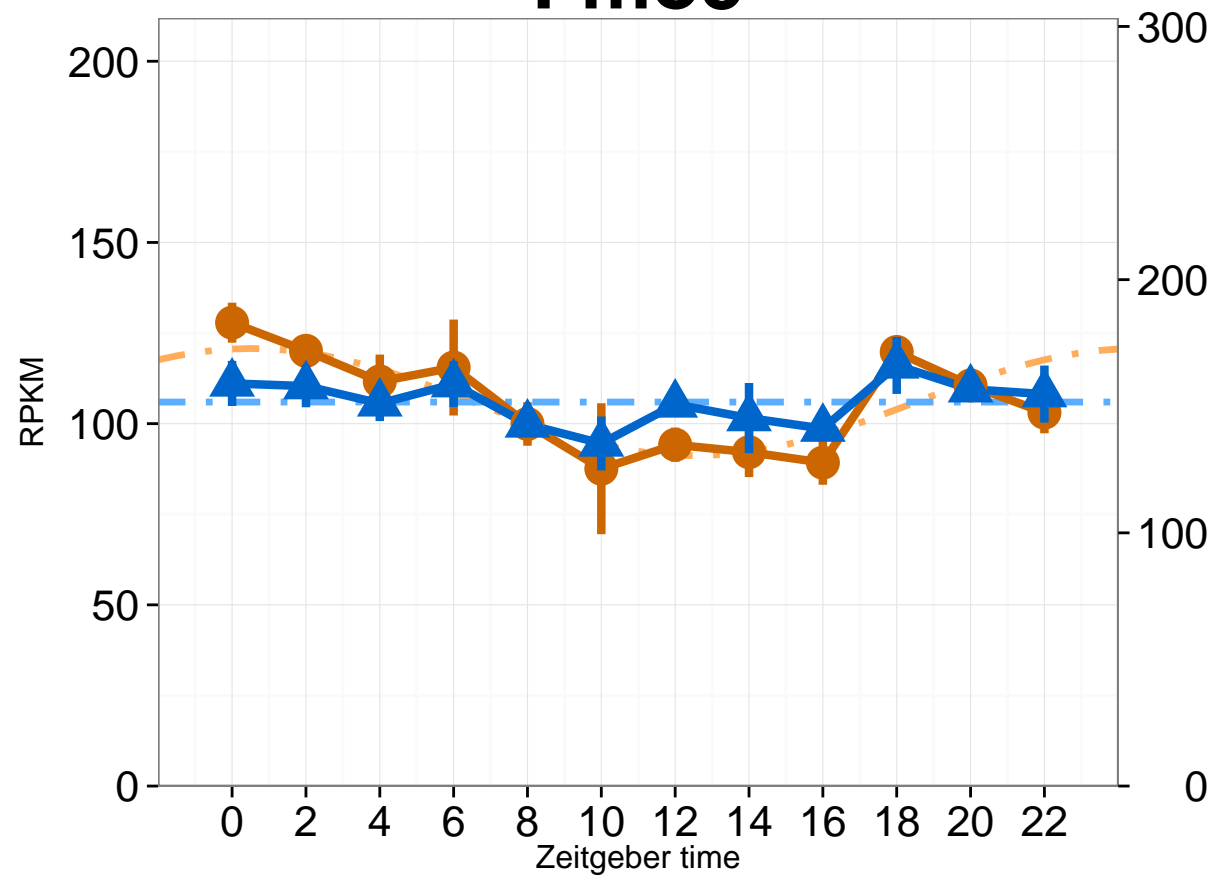

## Fmo5

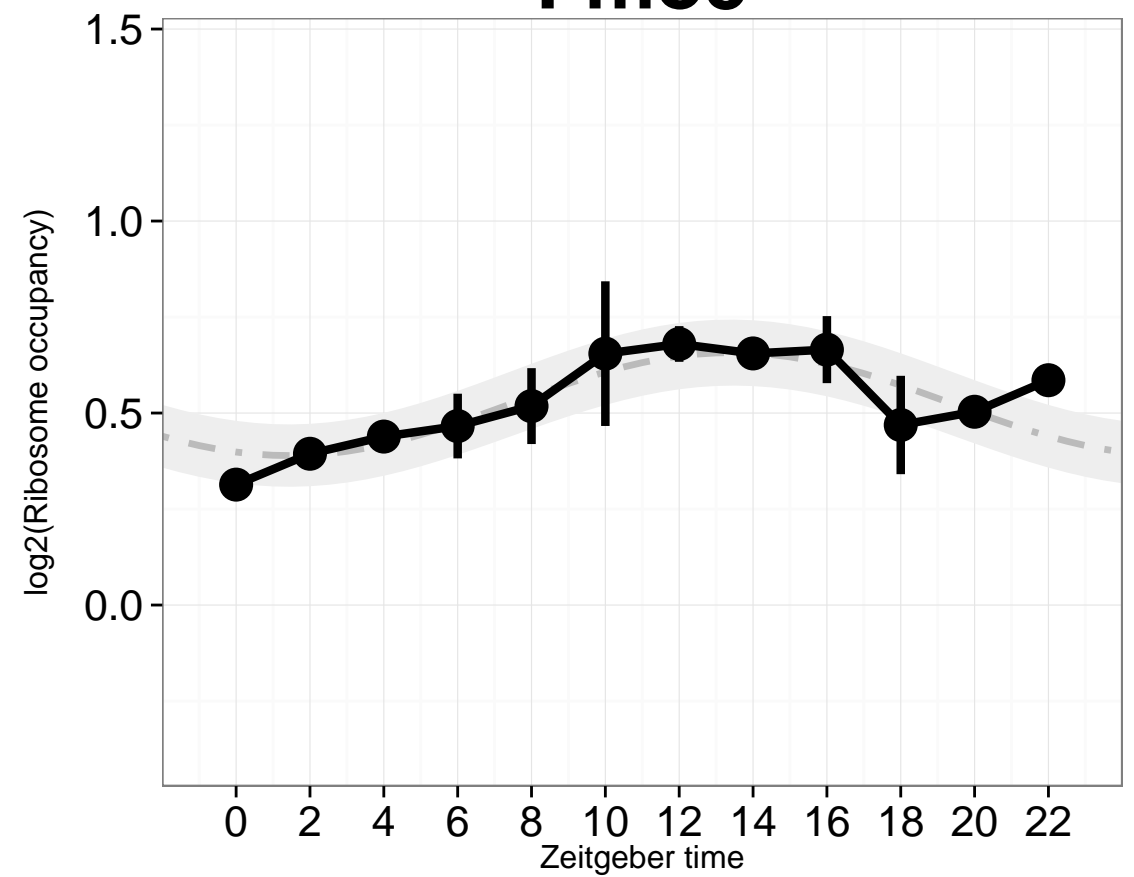

Supplement: Supplementary file 1282 [file 1]

# Brca1

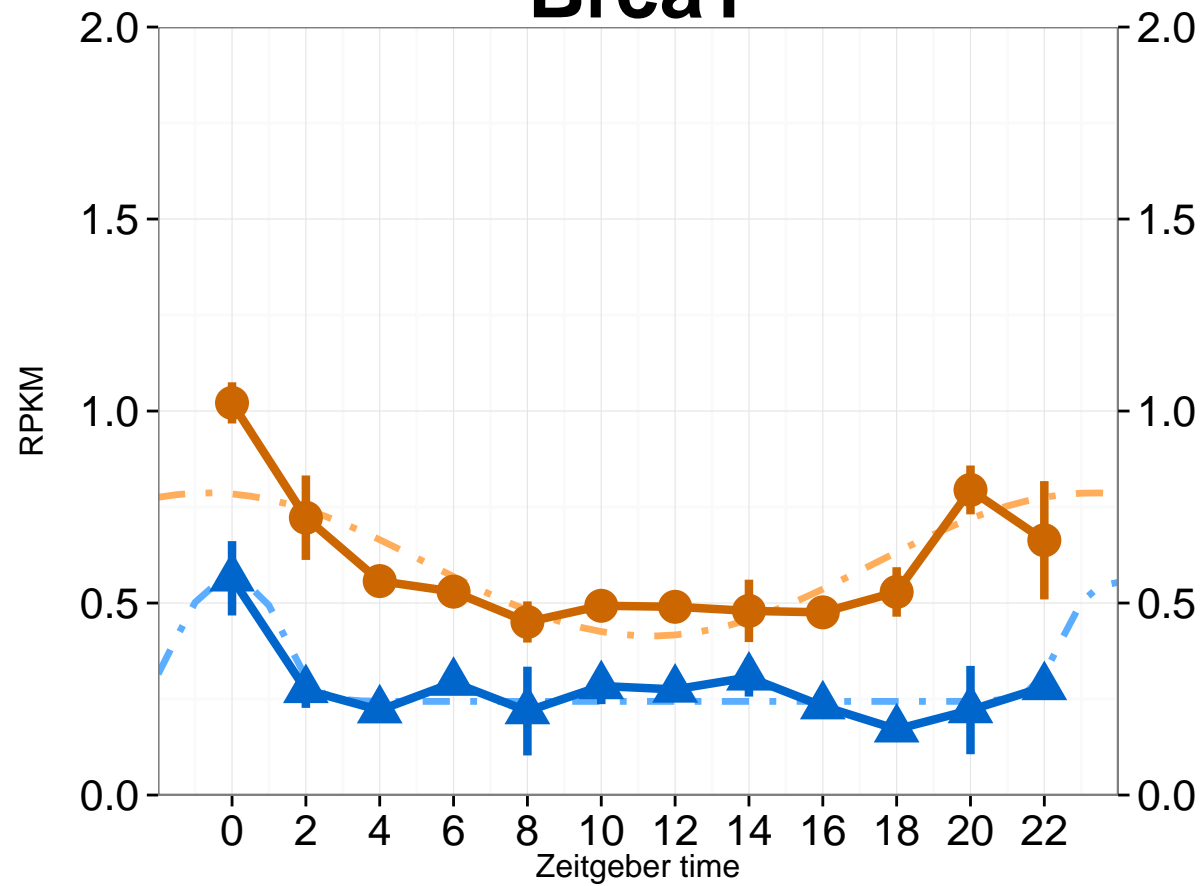

# Brca1

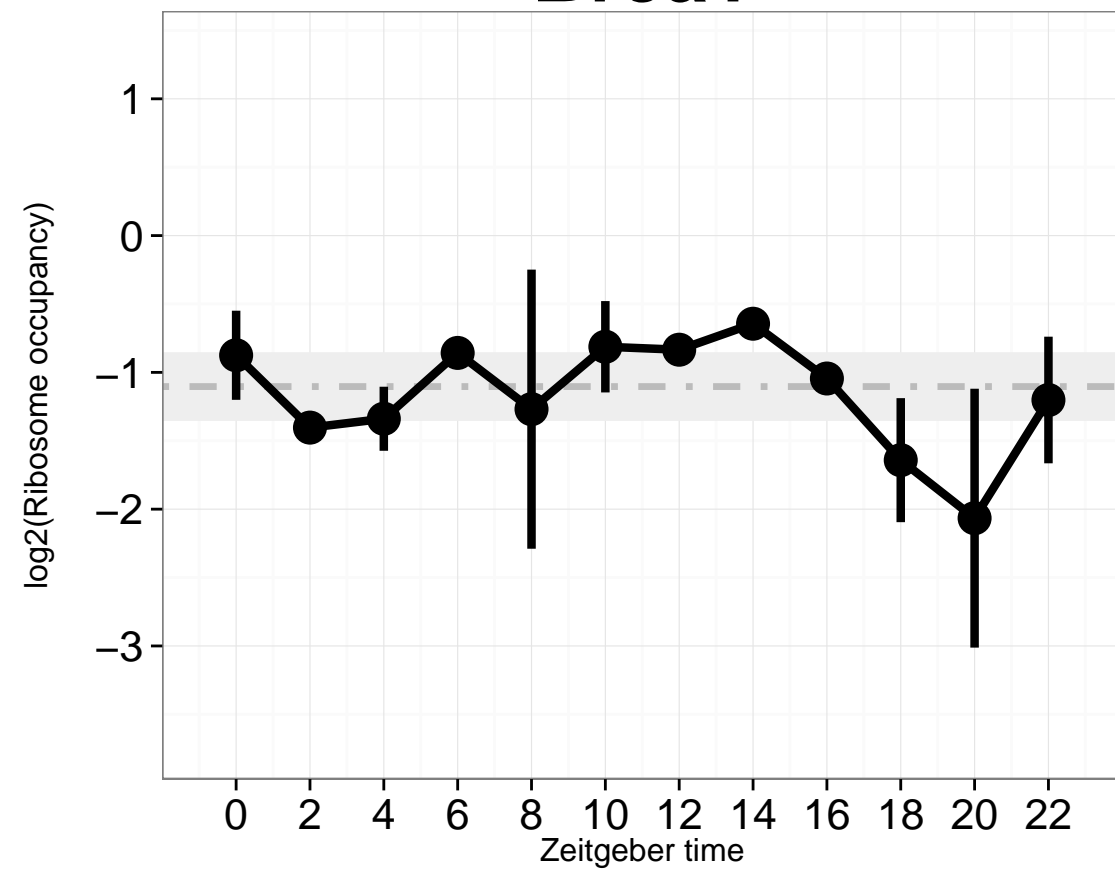

Supplement: Supplementary file 1283 [file 1]

## Nqo2

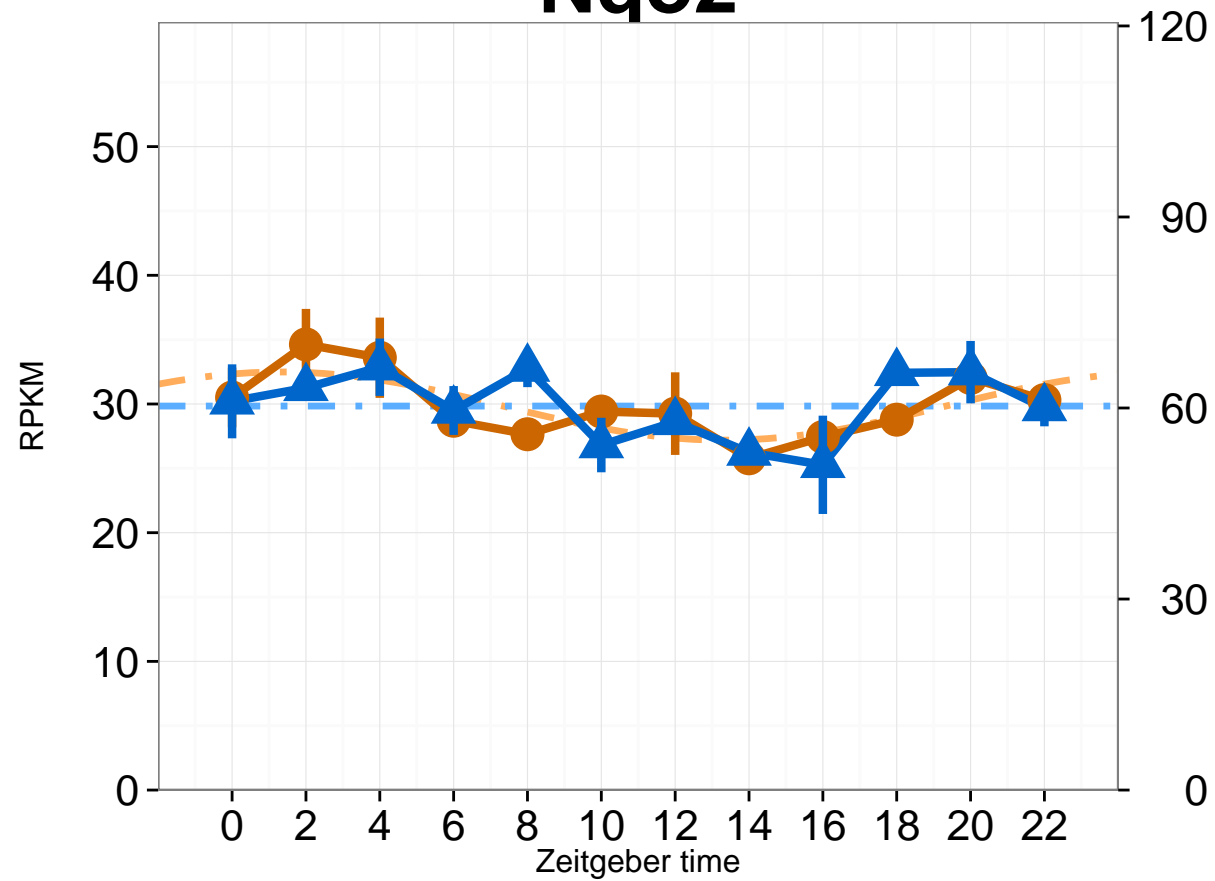

## Nqo2

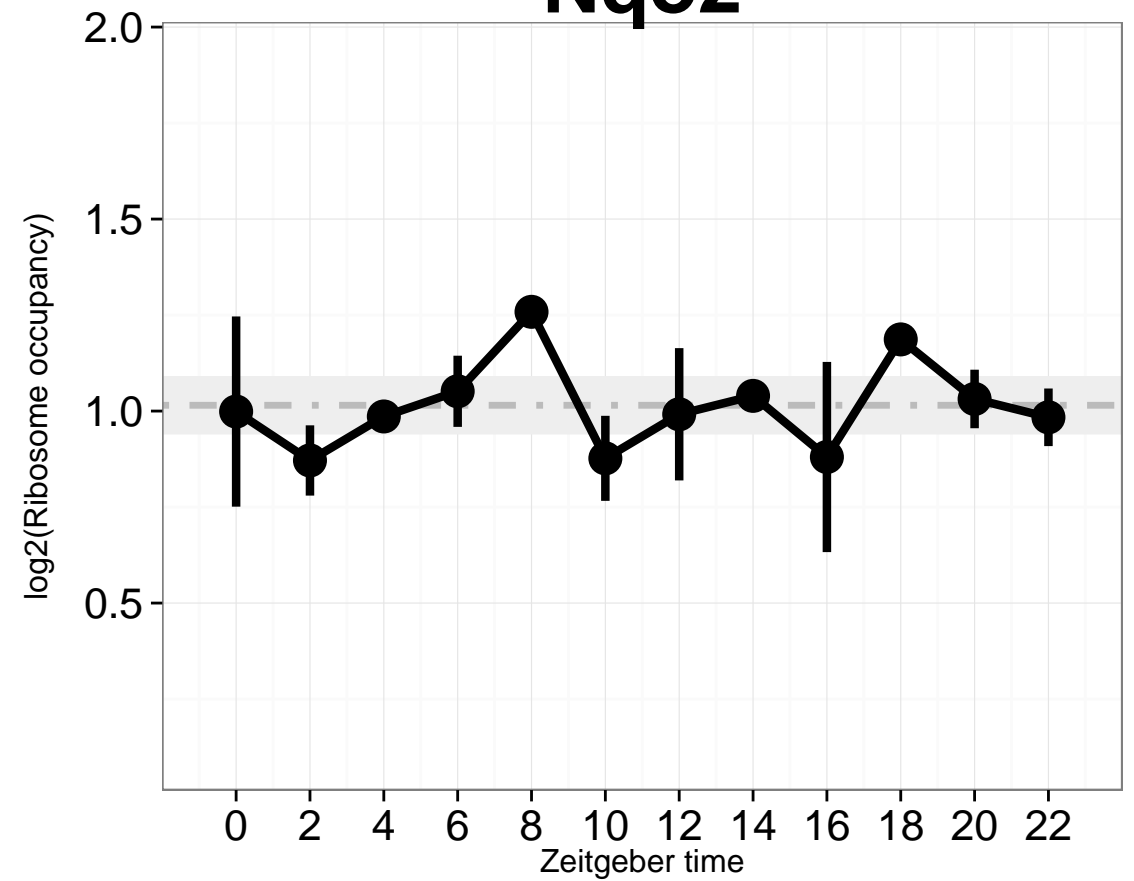

Supplement: Supplementary file 1284 [file 1]

# Zfp93

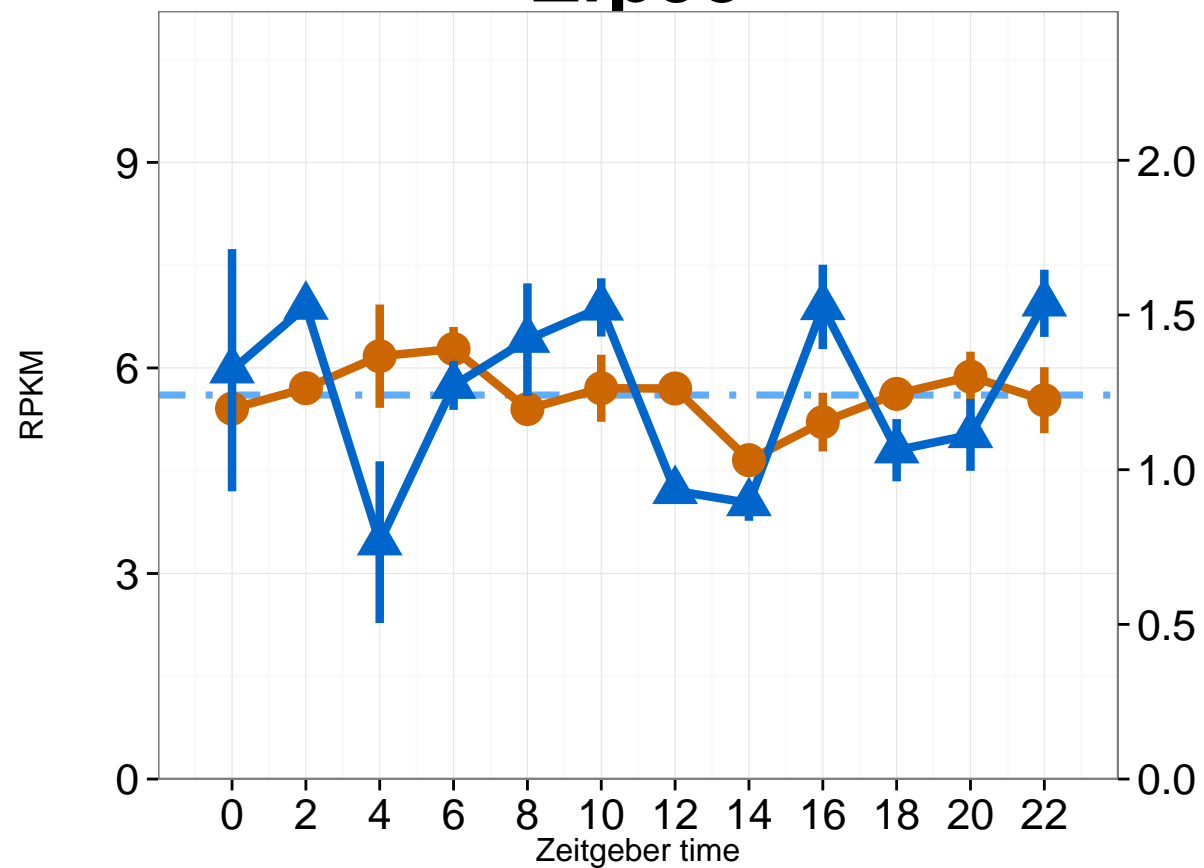

# Zfp93

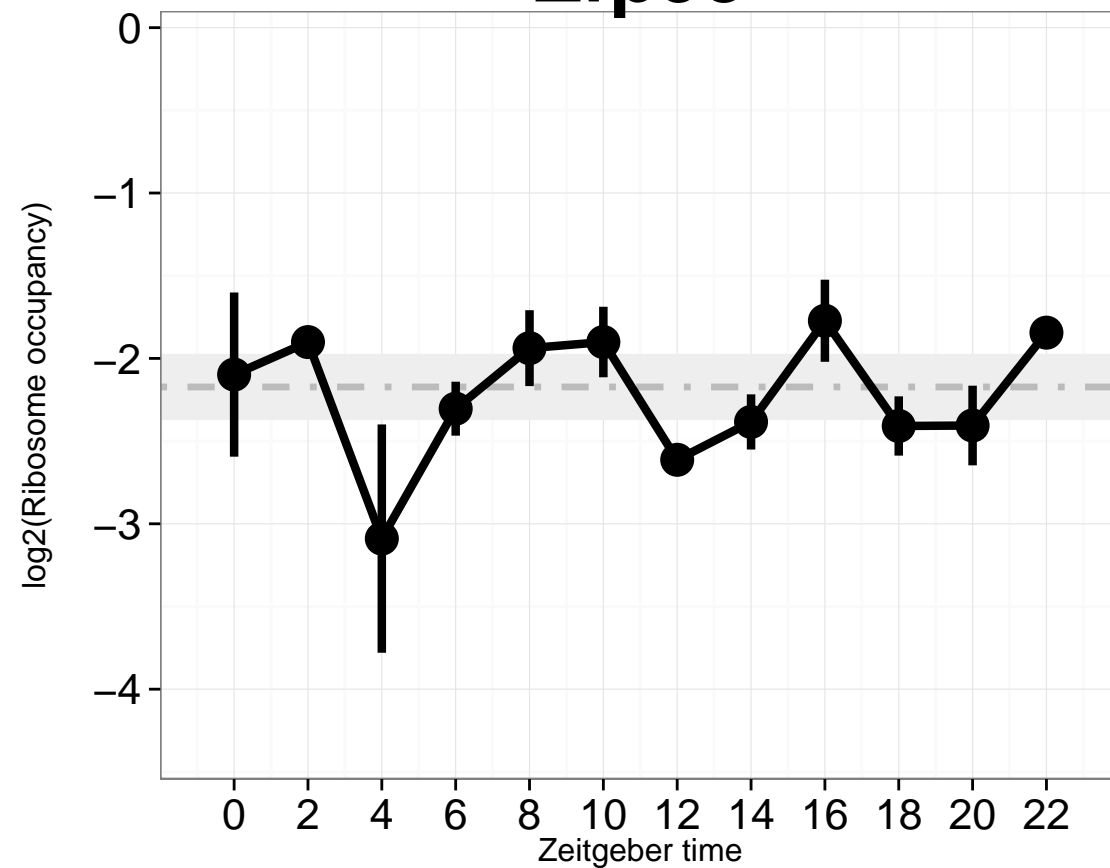

Supplement: Supplementary file 1285 [file 1]

mt-Cytb

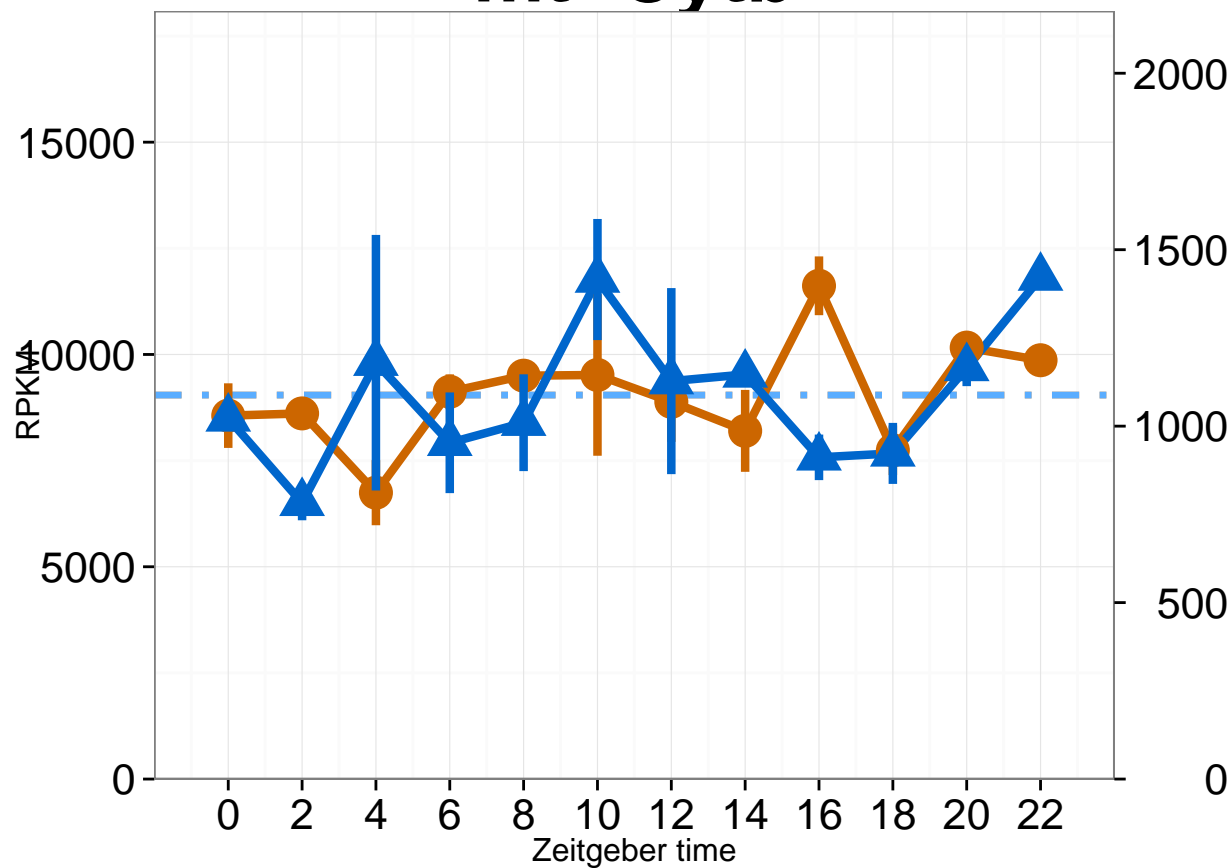

mt-Cytb

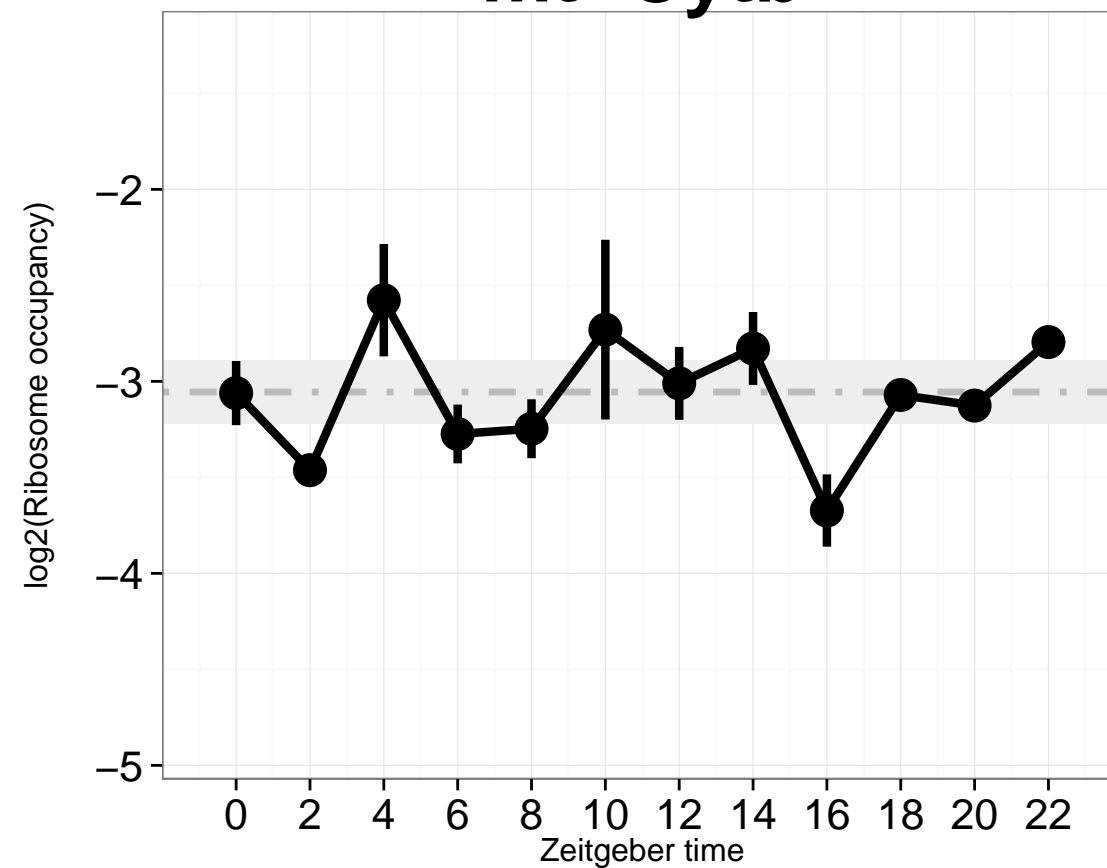

Supplement: Supplementary file 1286 [file 1]

## Nucb2

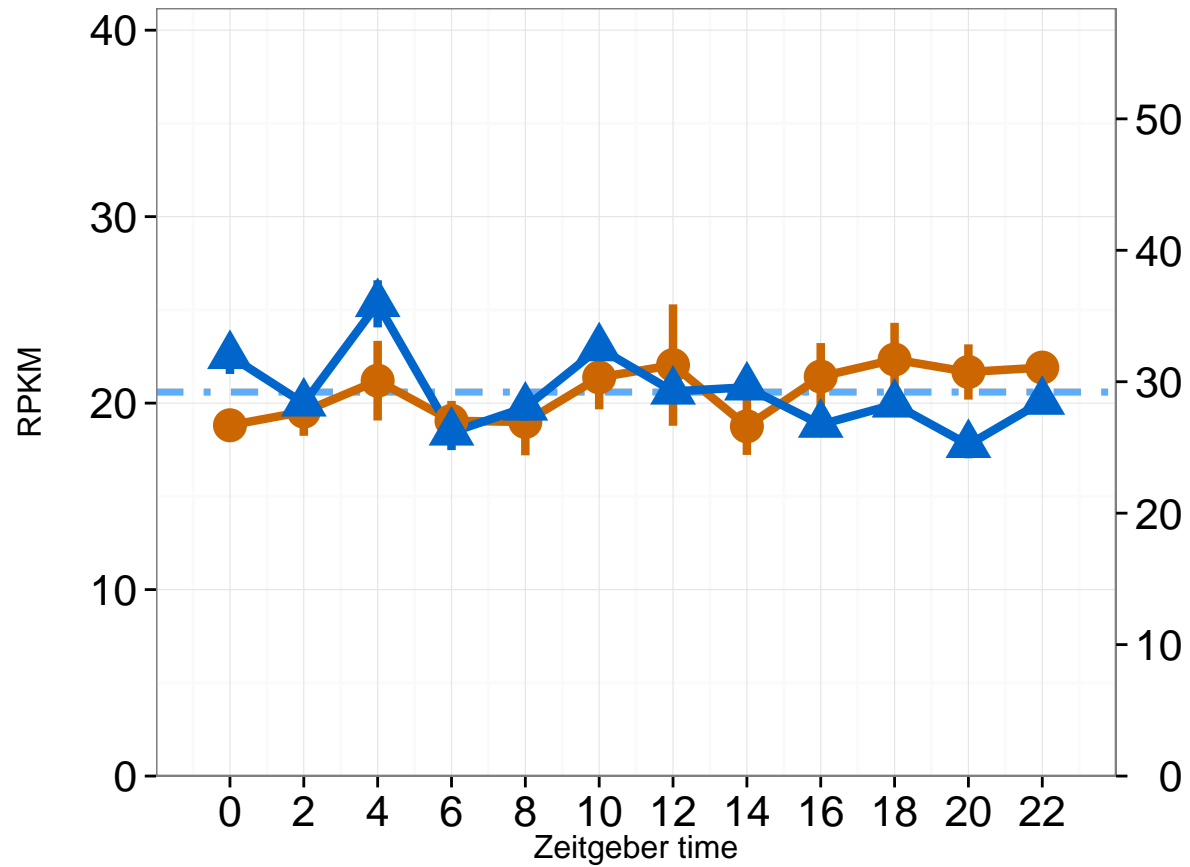

## Nucb2

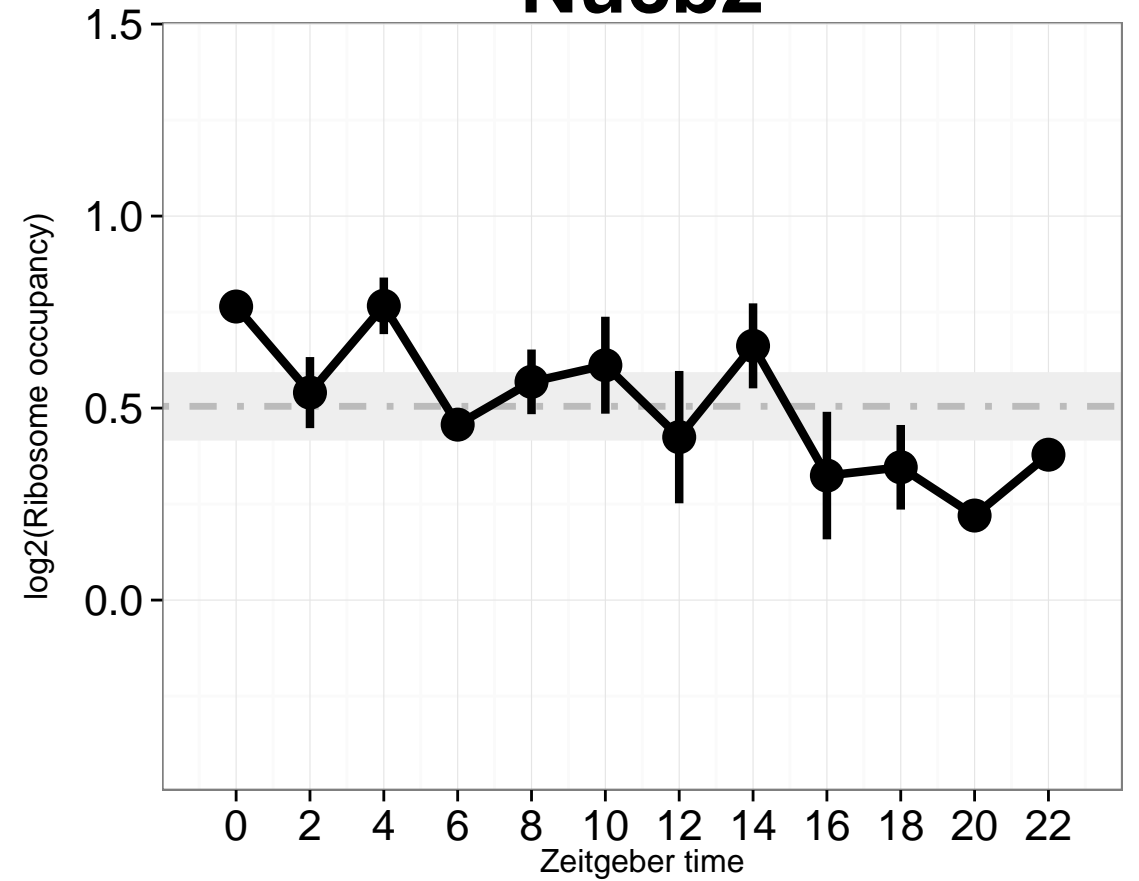

Supplement: Supplementary file 1287 [file 1]

# Timm17a

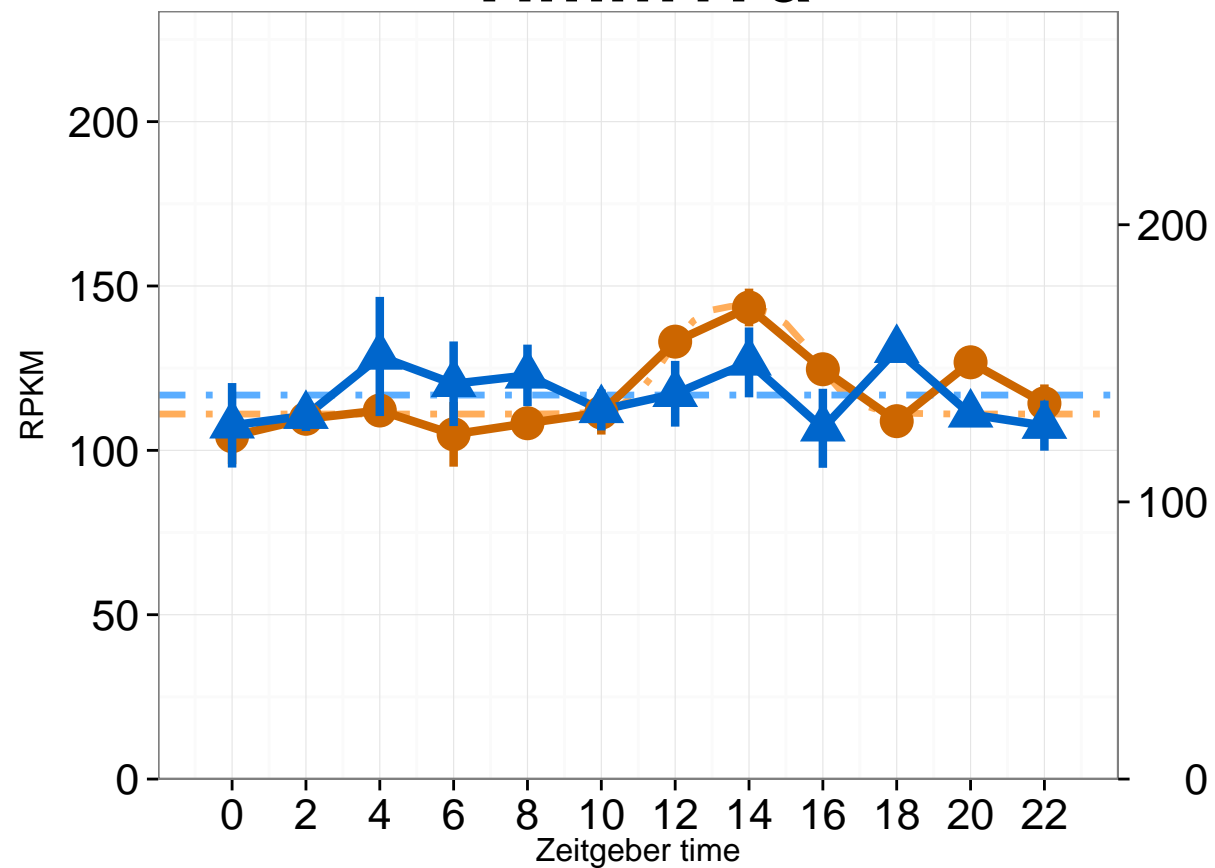

# Timm17a

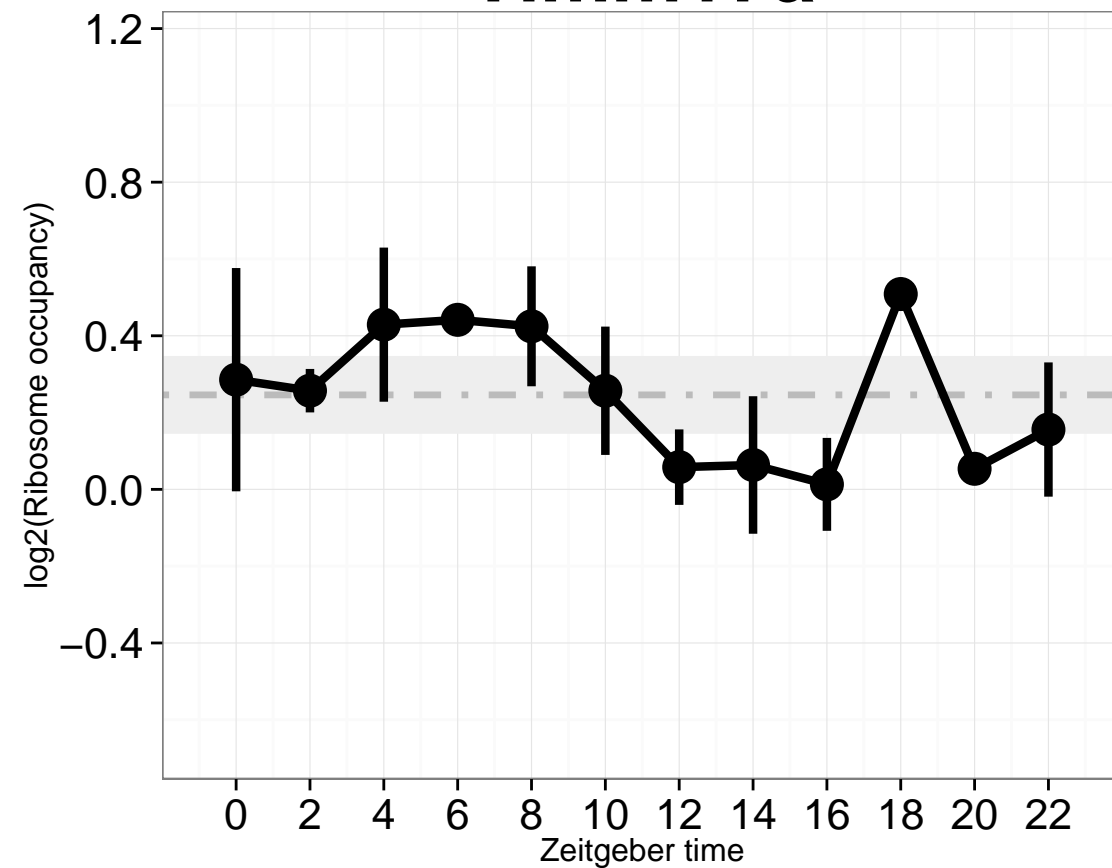

Supplement: Supplementary file 1288 [file 1]

# Ube2d1

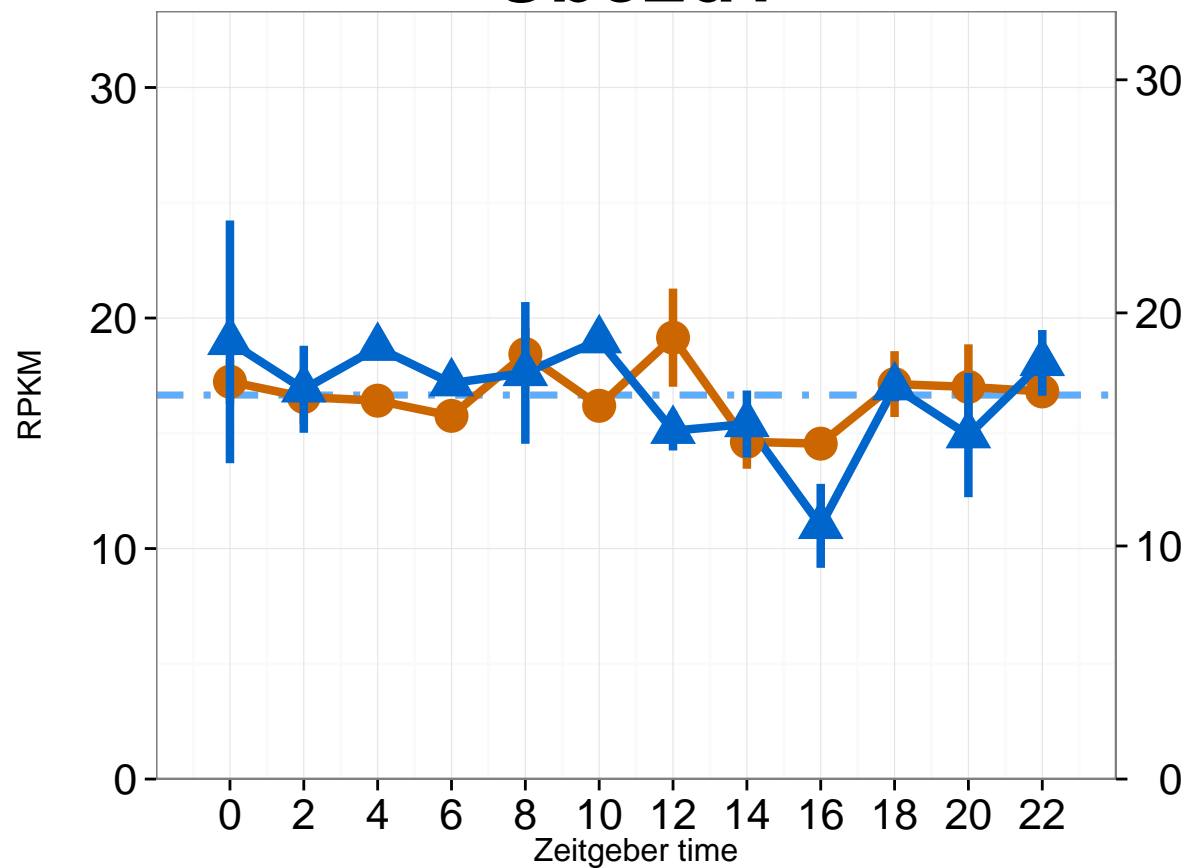

# Ube2d1

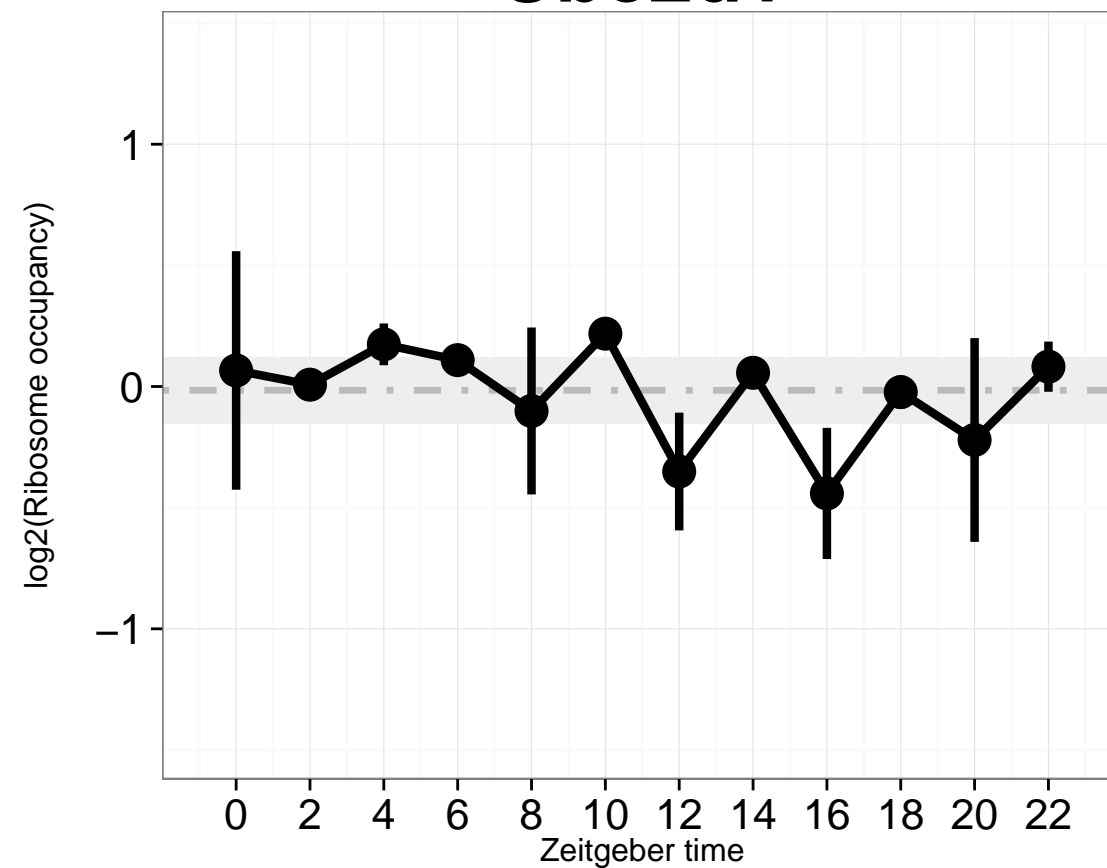

Supplement: Supplementary file 1289 [file 1]

## Cab39

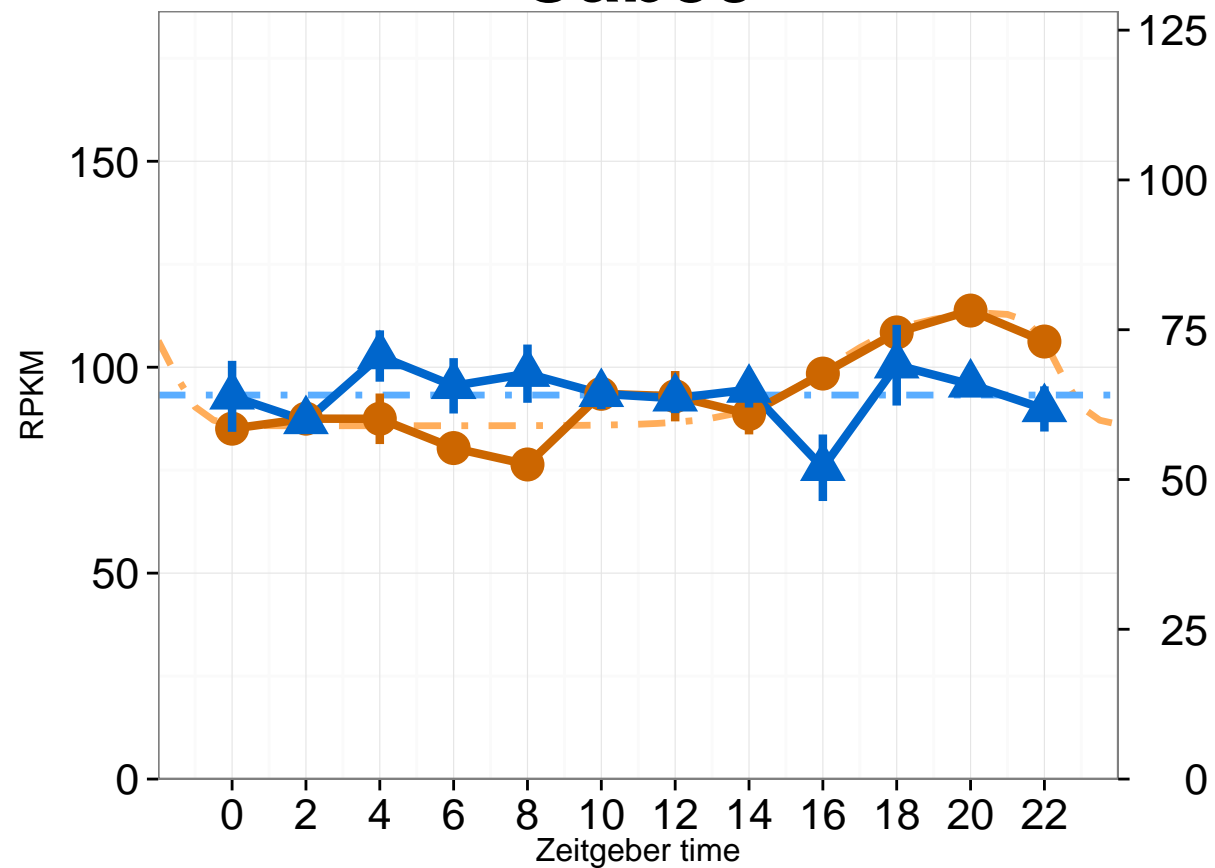

## Cab39

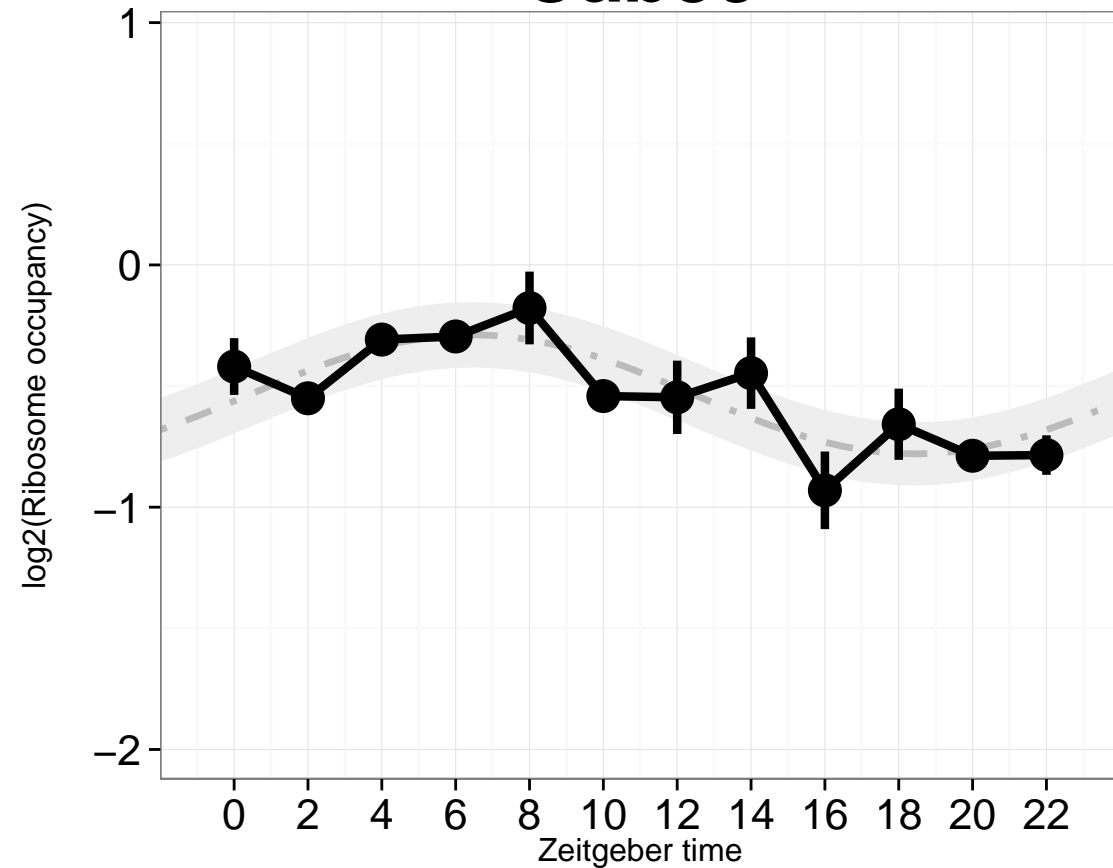

Supplement: Supplementary file 1290 [file 1]

# Car11

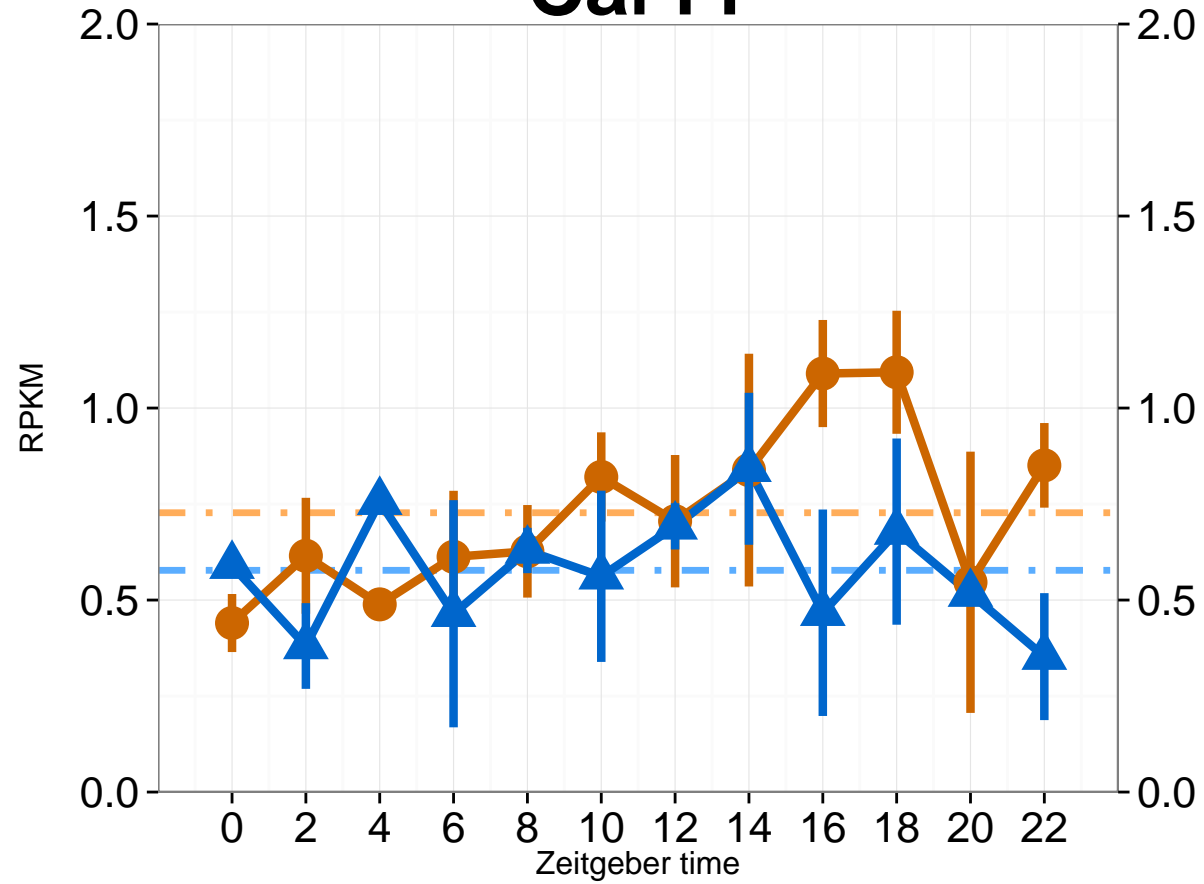

# Car11

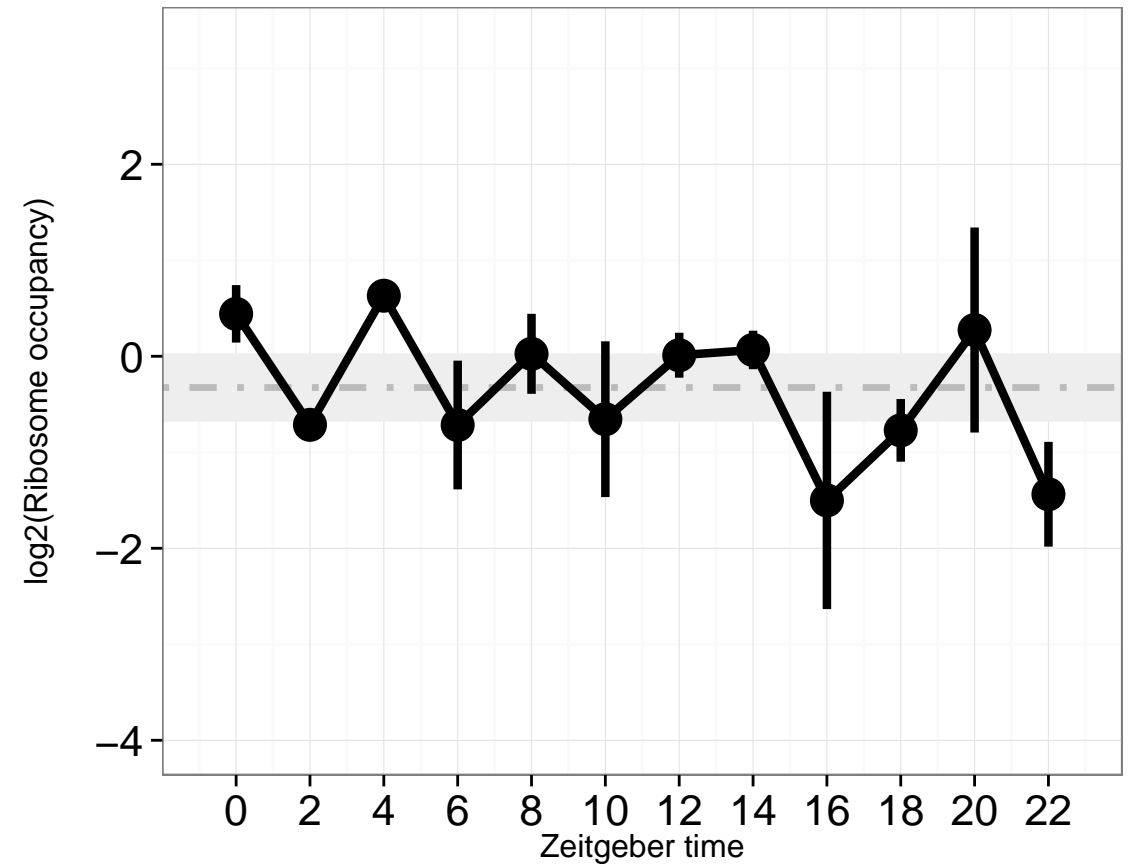

Supplement: Supplementary file 1291 [file 1]

# Prkar2b

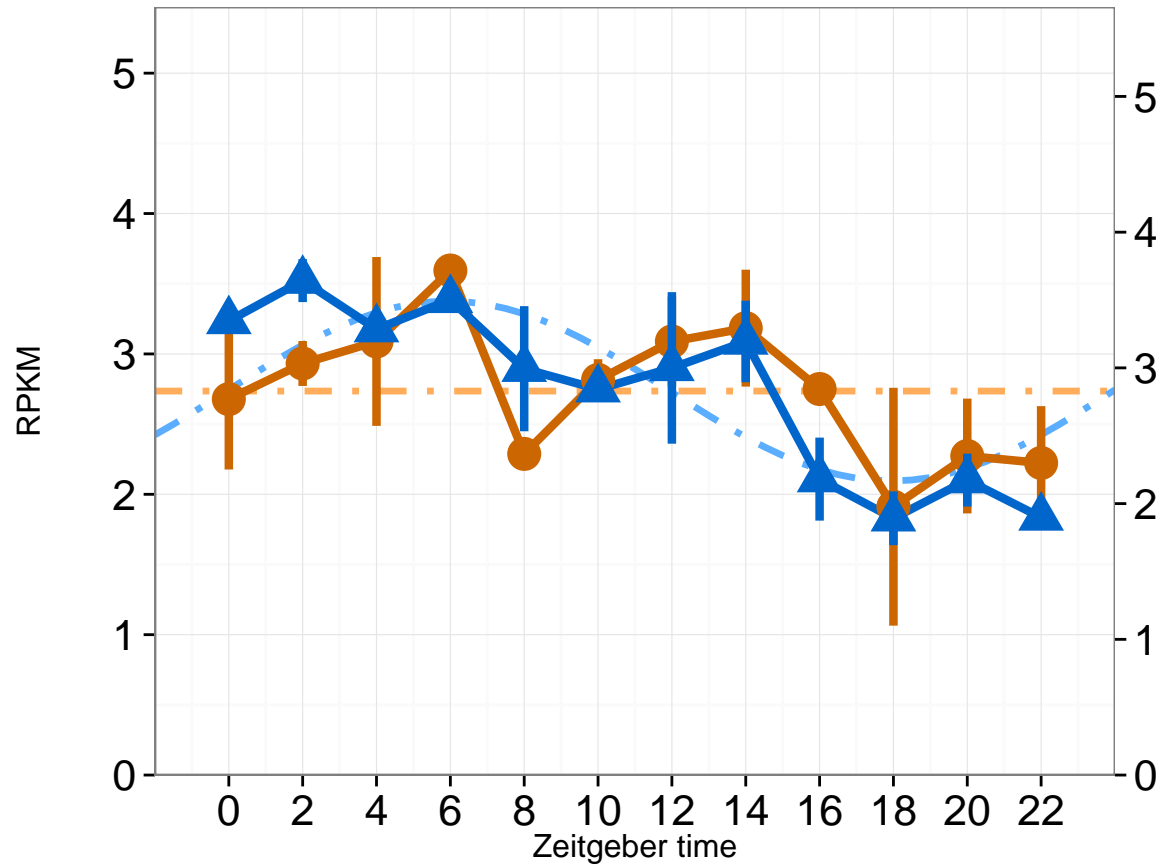

# Prkar2b

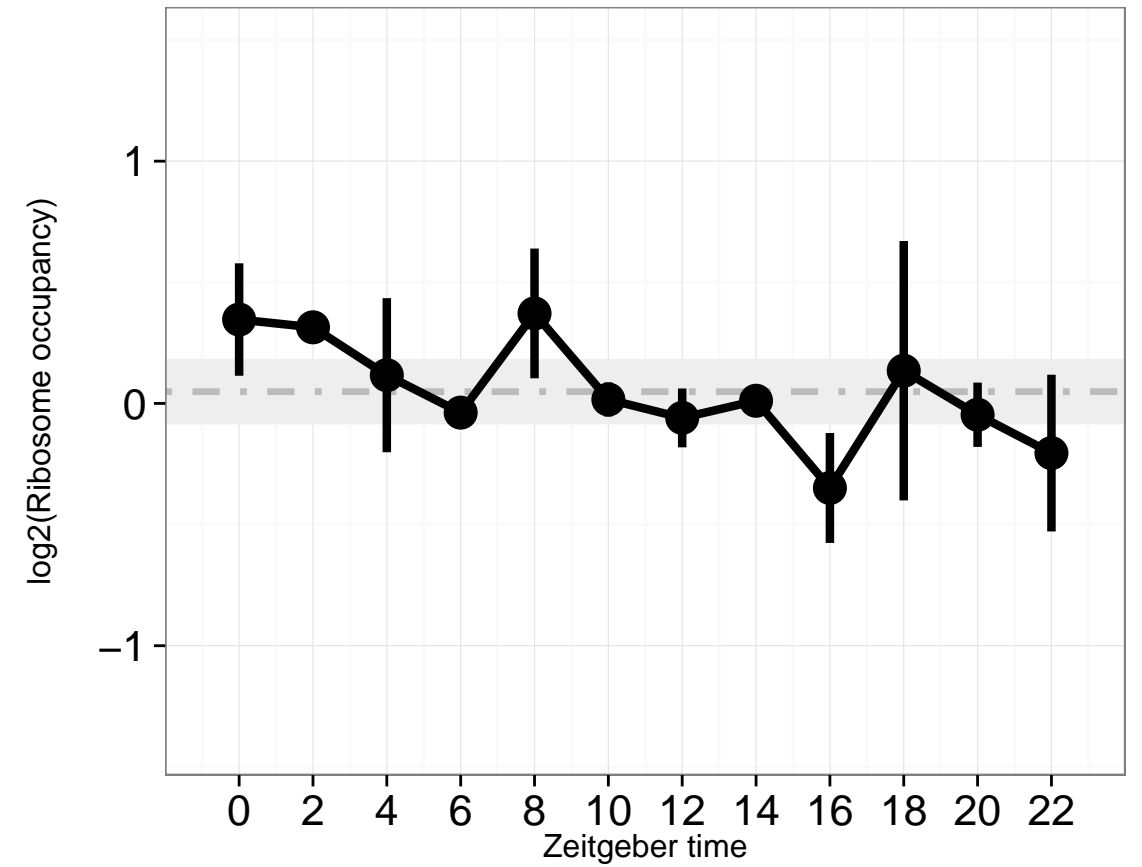

Supplement: Supplementary file 1292 [file 1]

## Kctd8

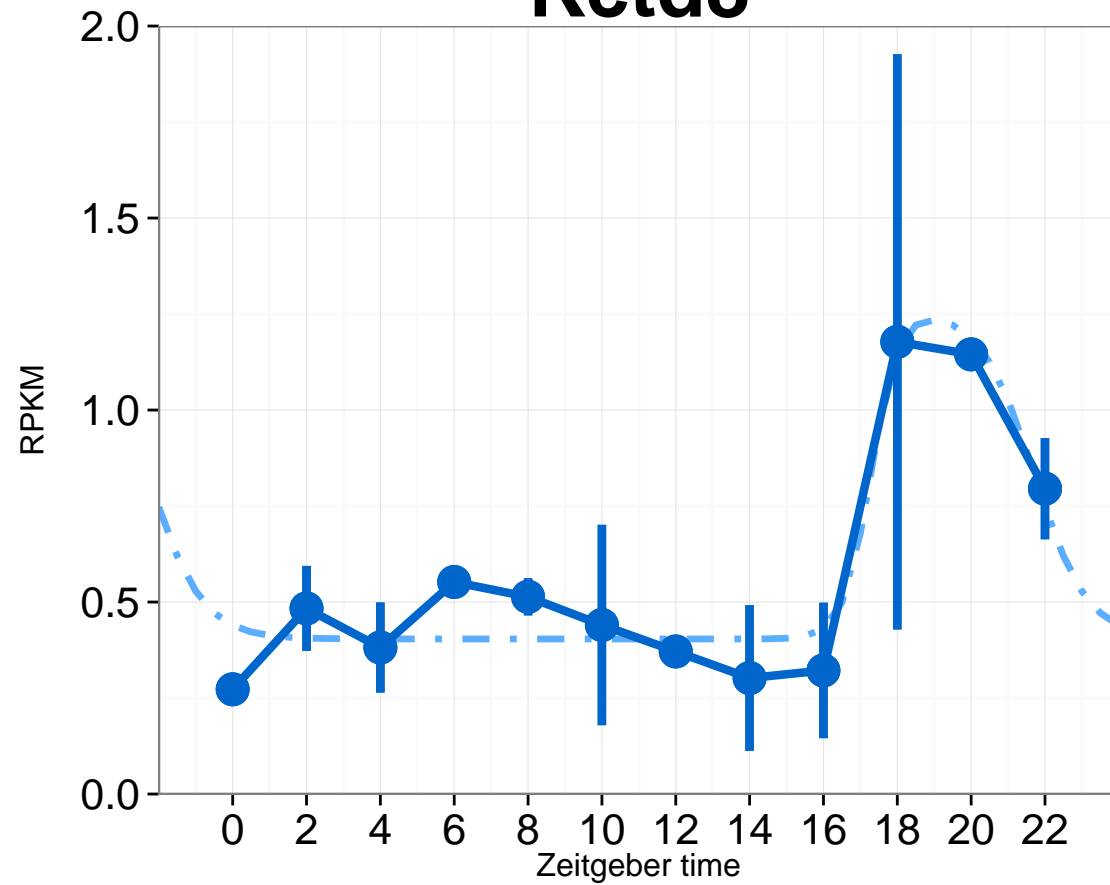

## Kctd8 log2(Ribosome occupancy

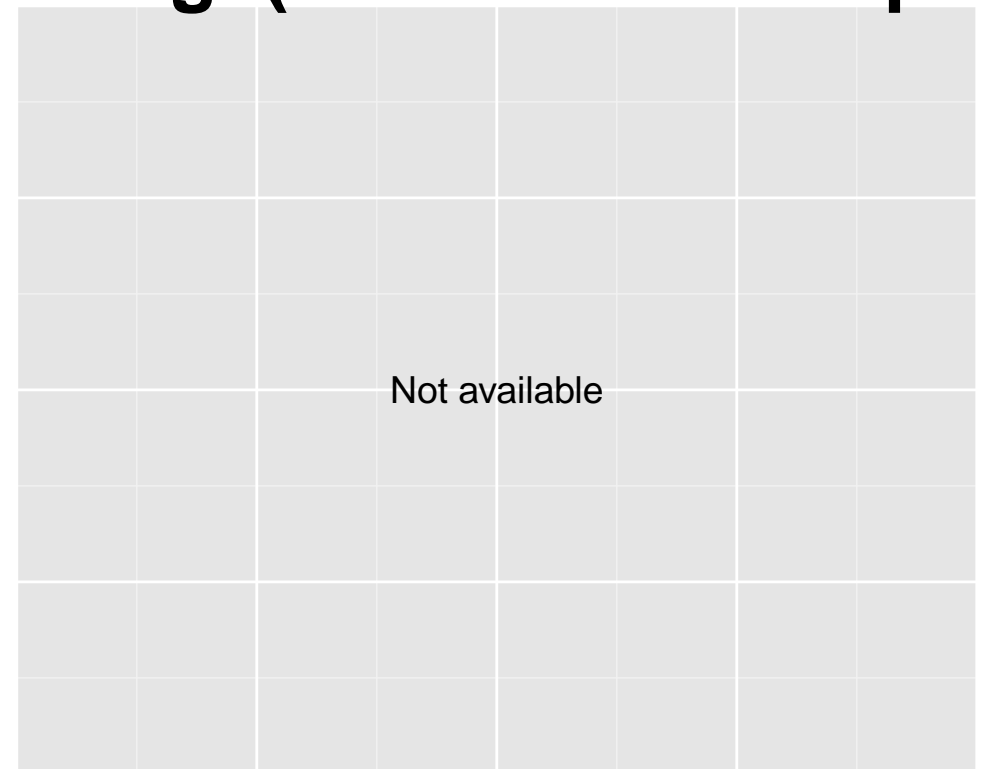

Supplement: Supplementary file 1293 [file 1]

## Ulk2

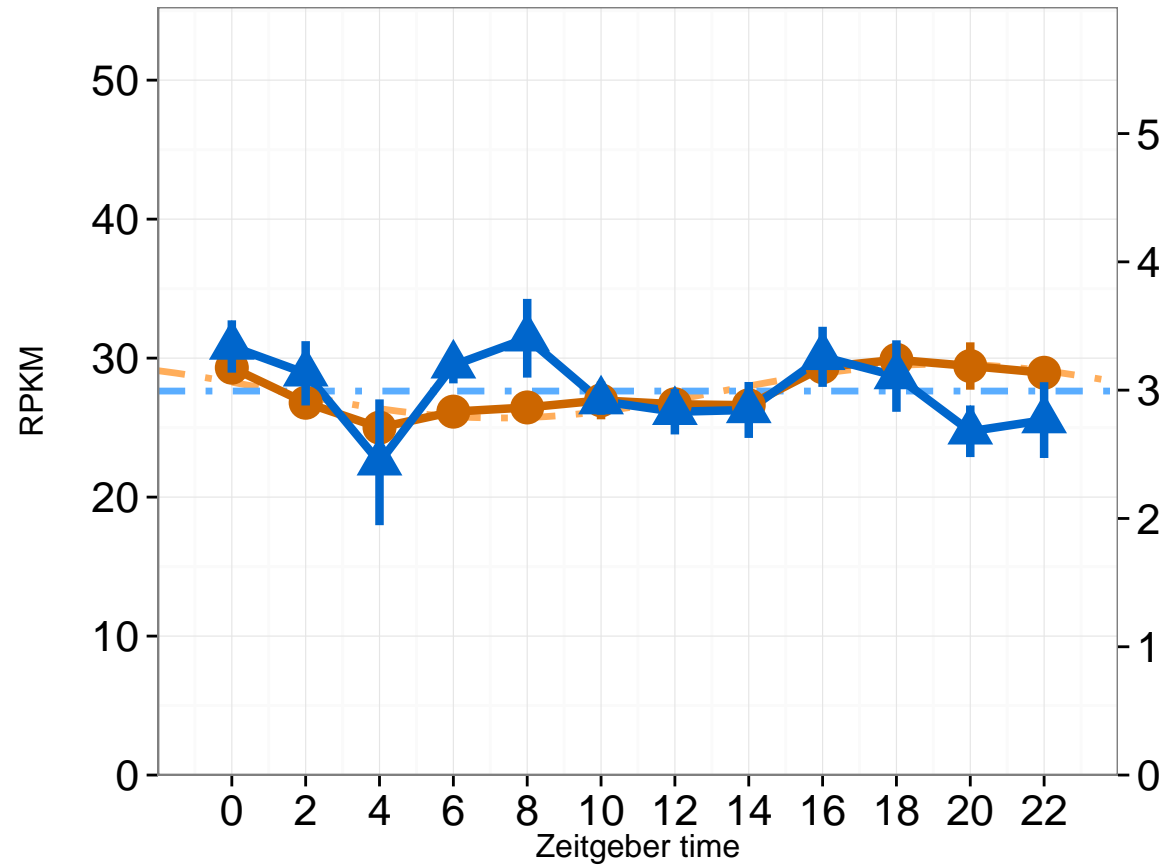

## Ulk2

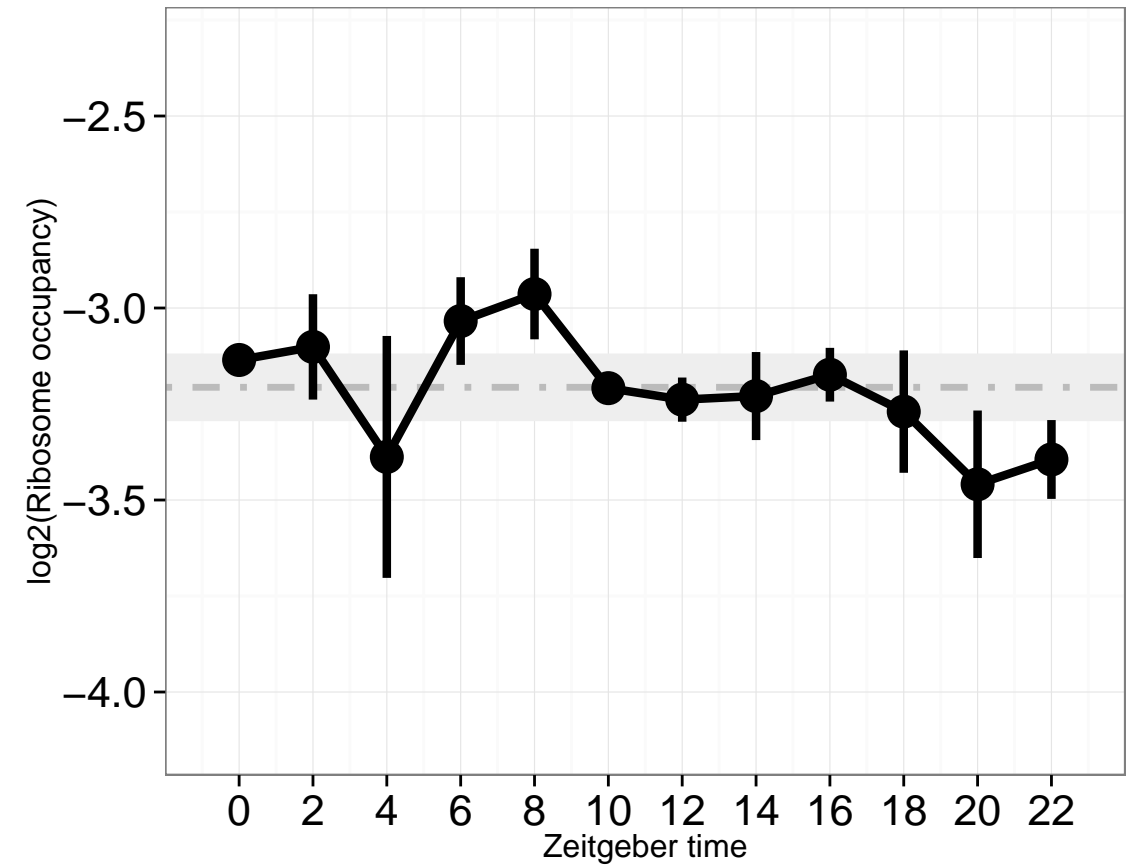

Supplement: Supplementary file 1294 [file 1]

# Psmb7

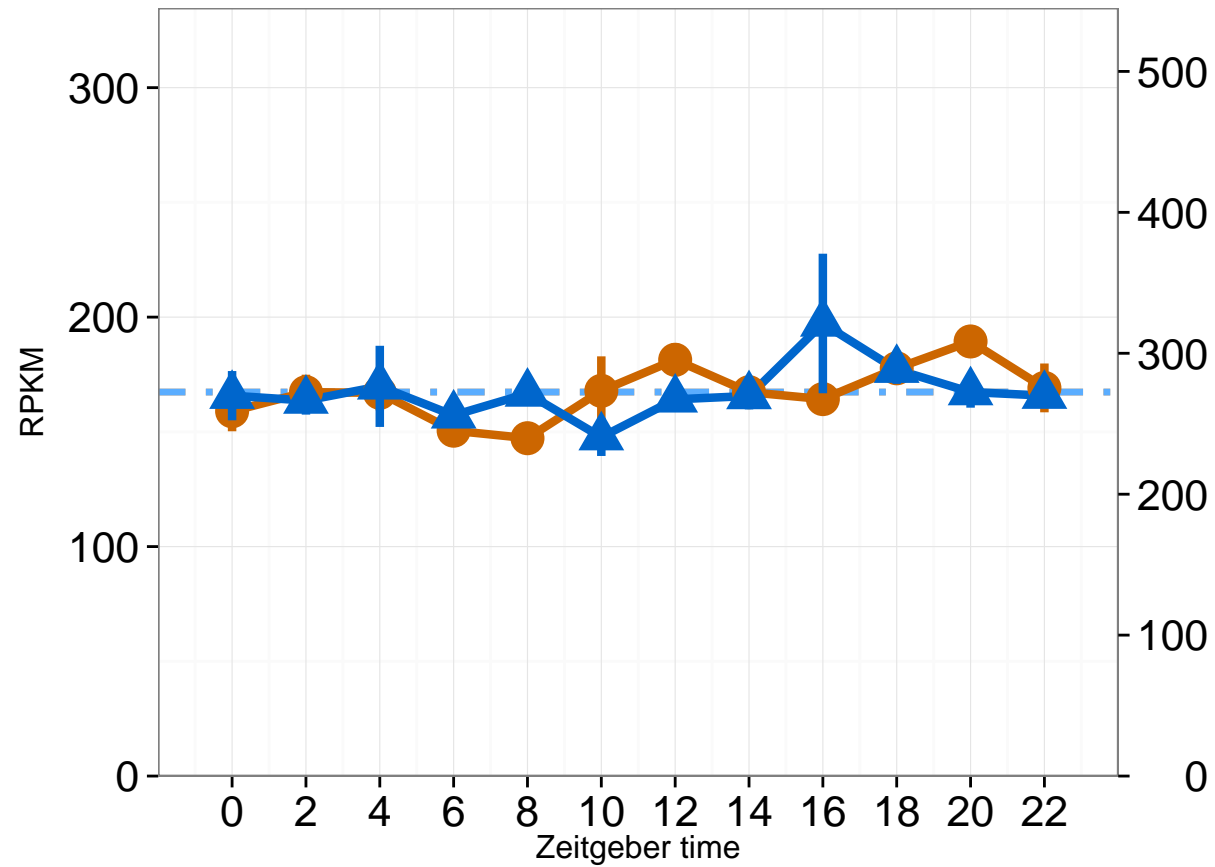

# Psmb7

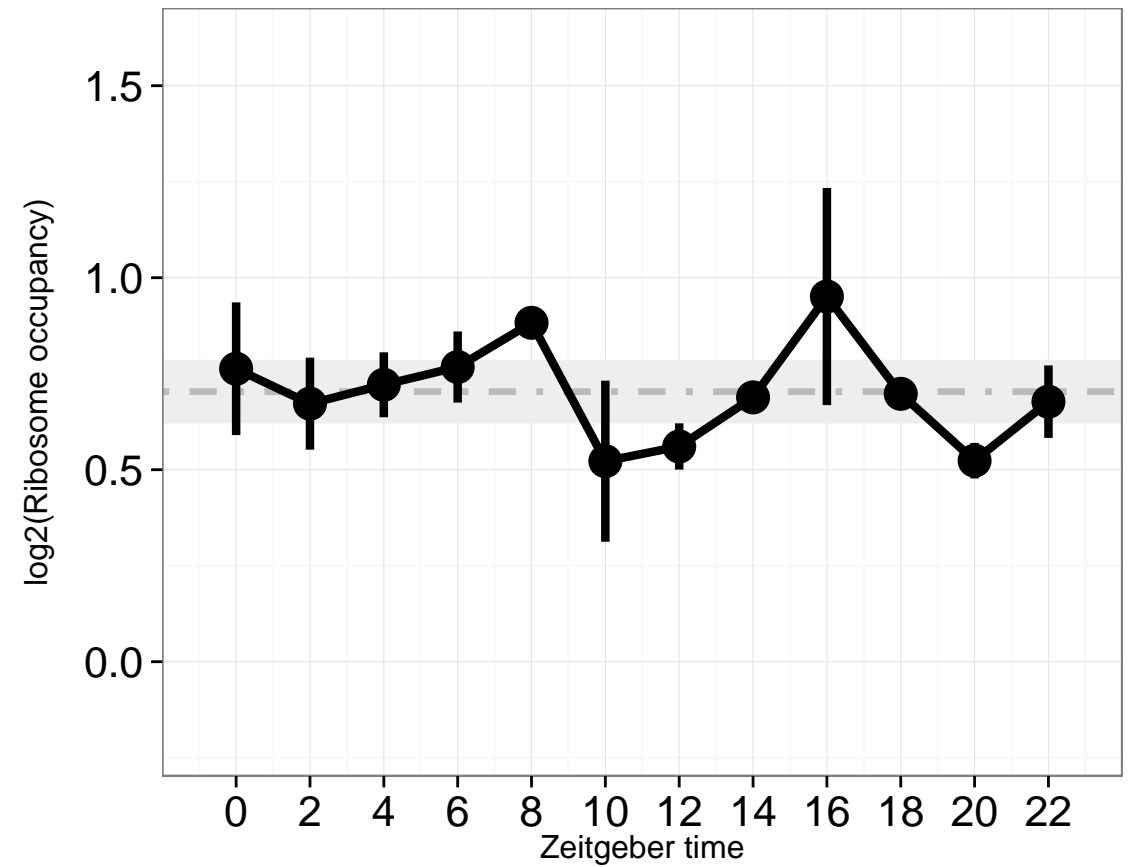

Supplement: Supplementary file 1295 [file 1]

# BC022687

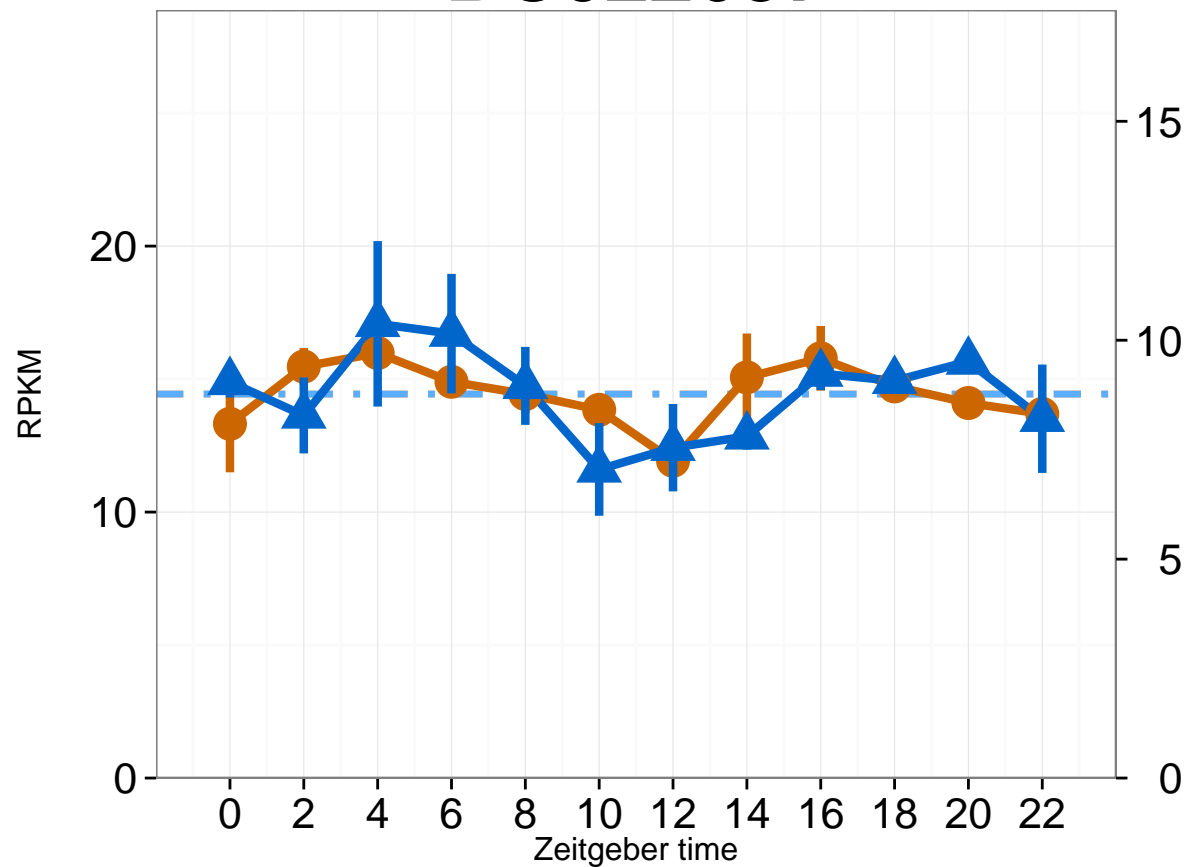

# BC022687

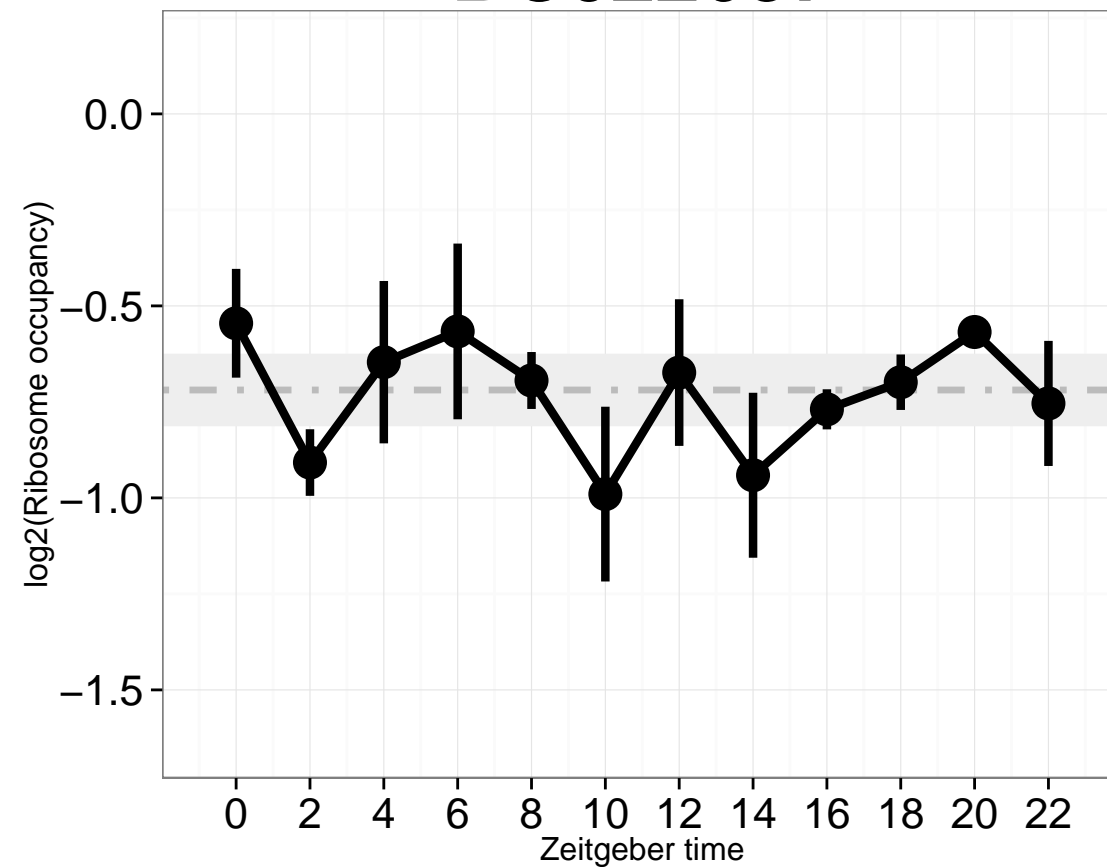

Supplement: Supplementary file 1296 [file 1]

# L2hgdh

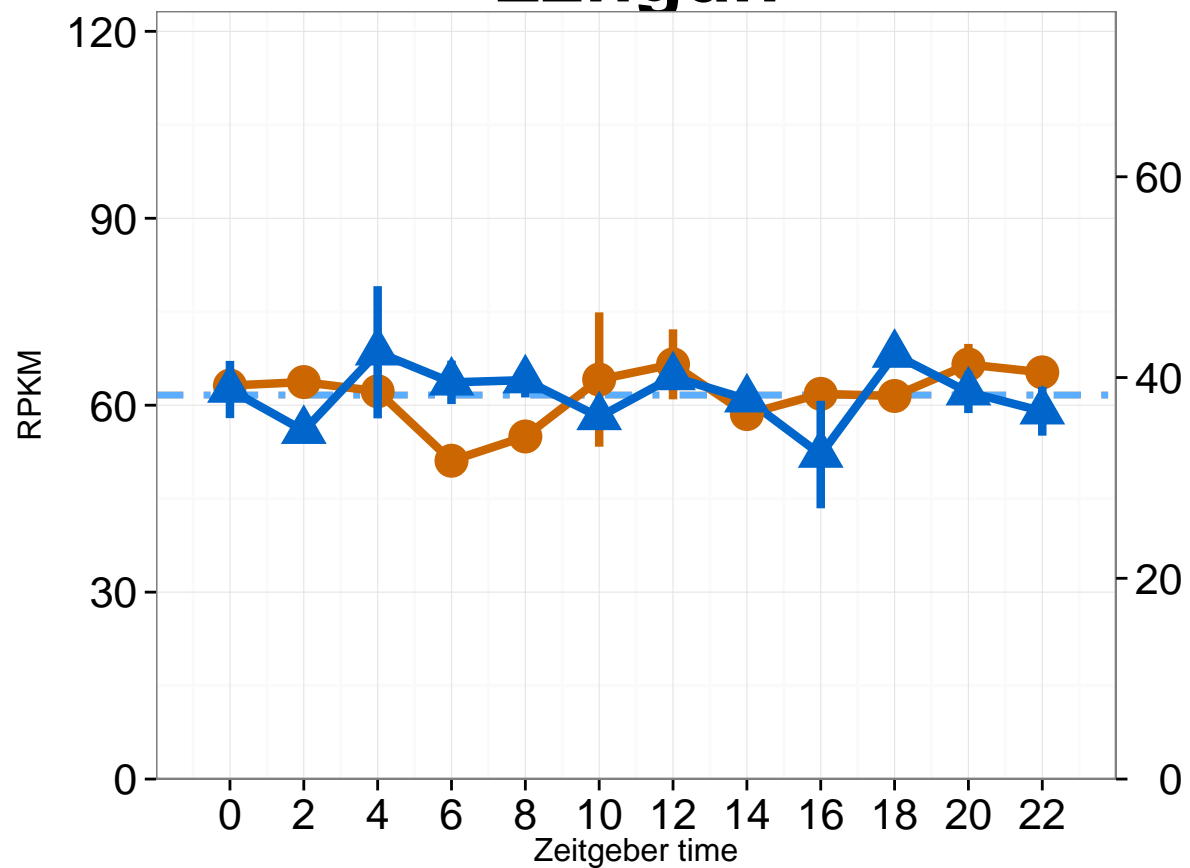

# L2hgdh

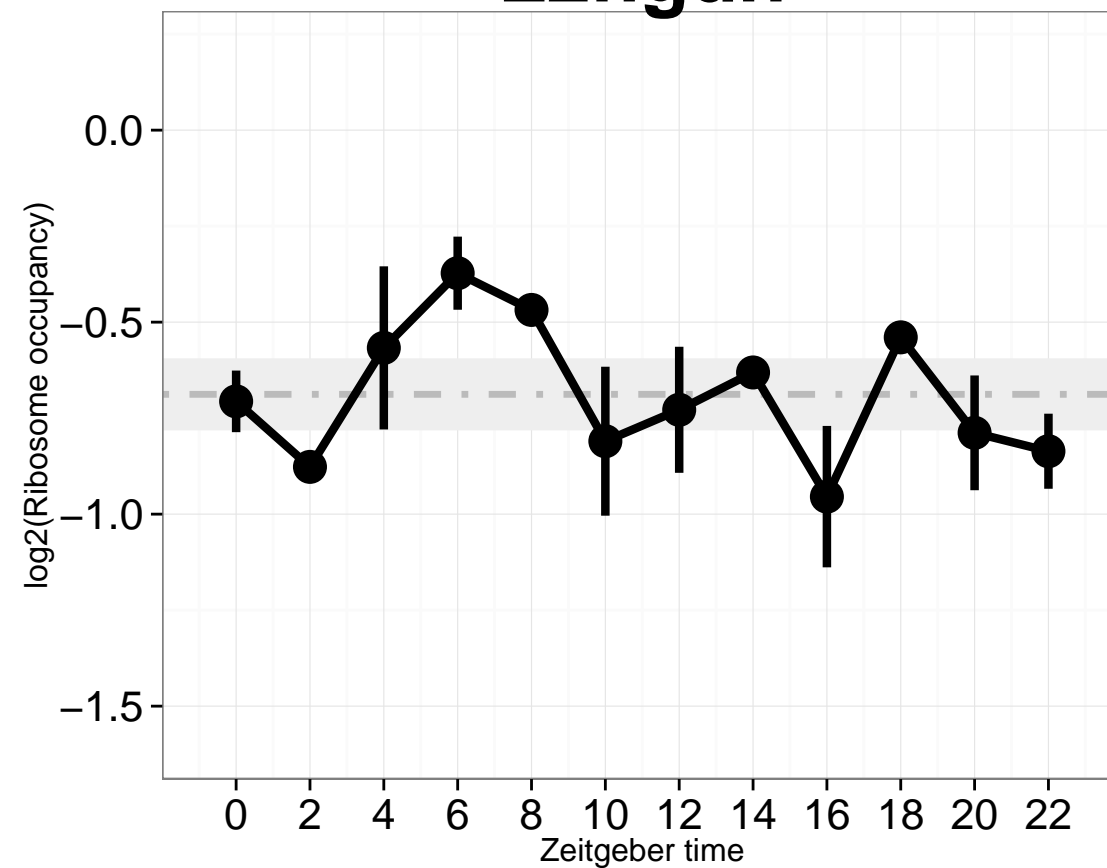

Supplement: Supplementary file 1297 [file 1]

# Mcrs1

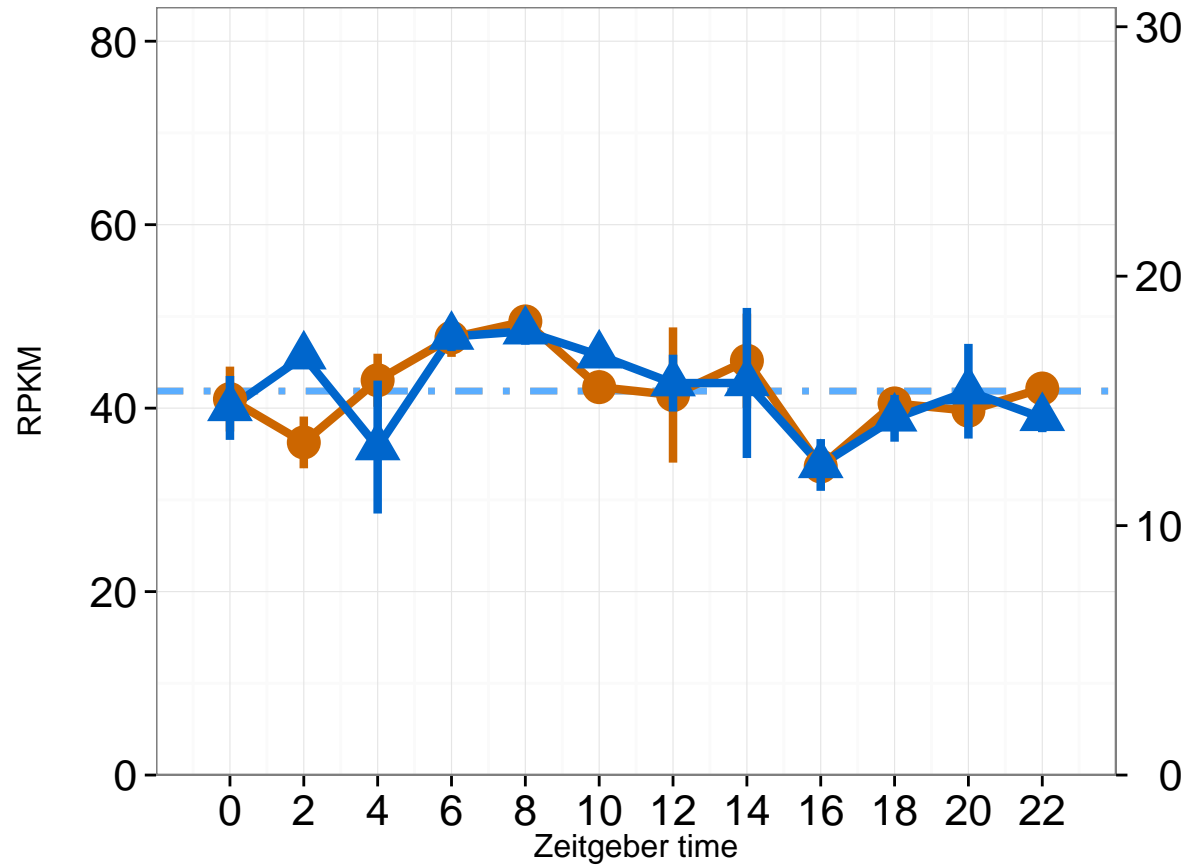

# Mcrs1

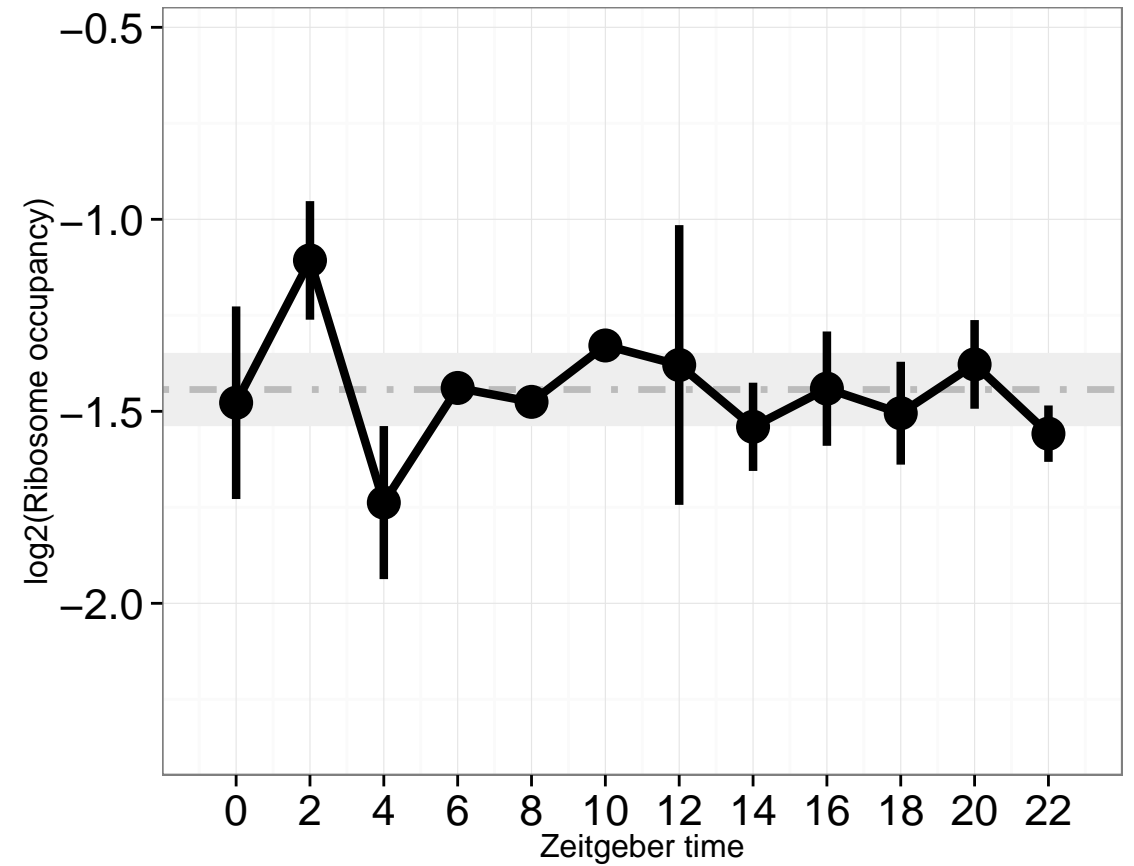

Supplement: Supplementary file 1298 [file 1]

## Arid1a

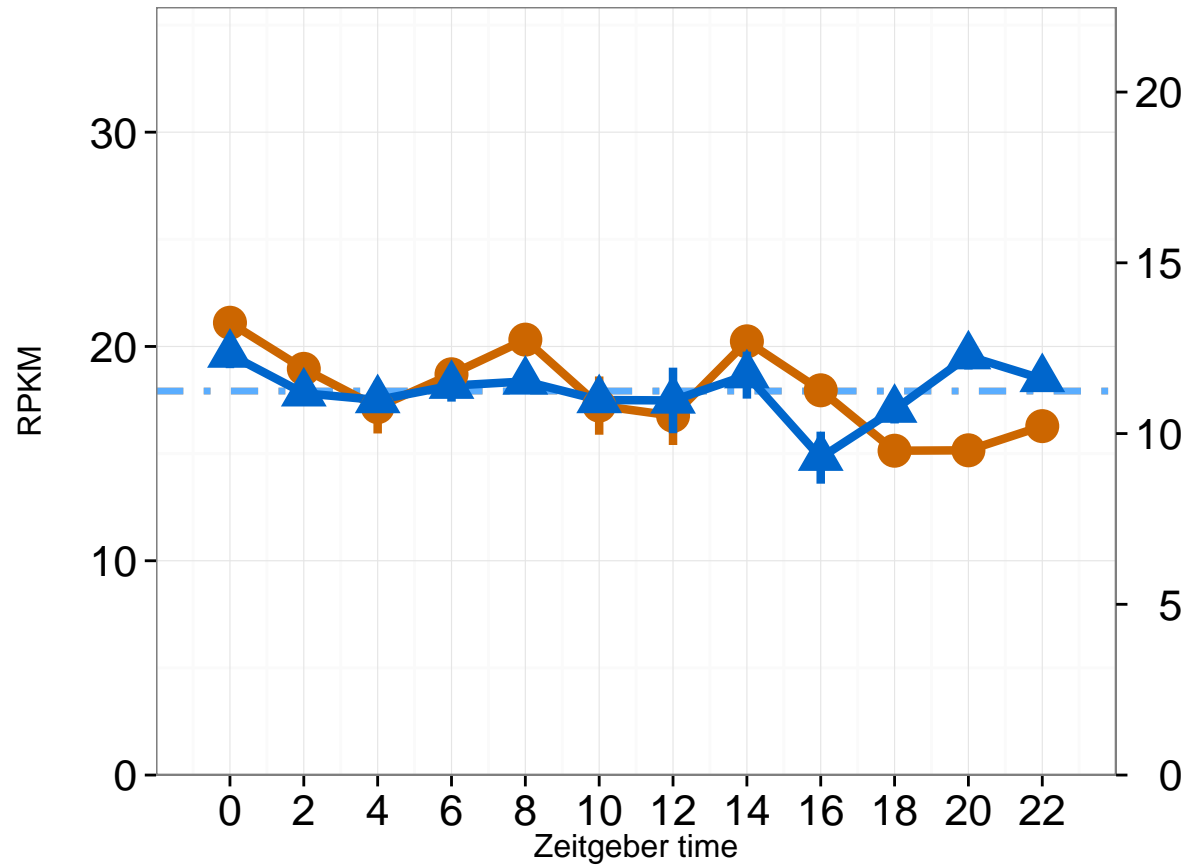

## Arid1a

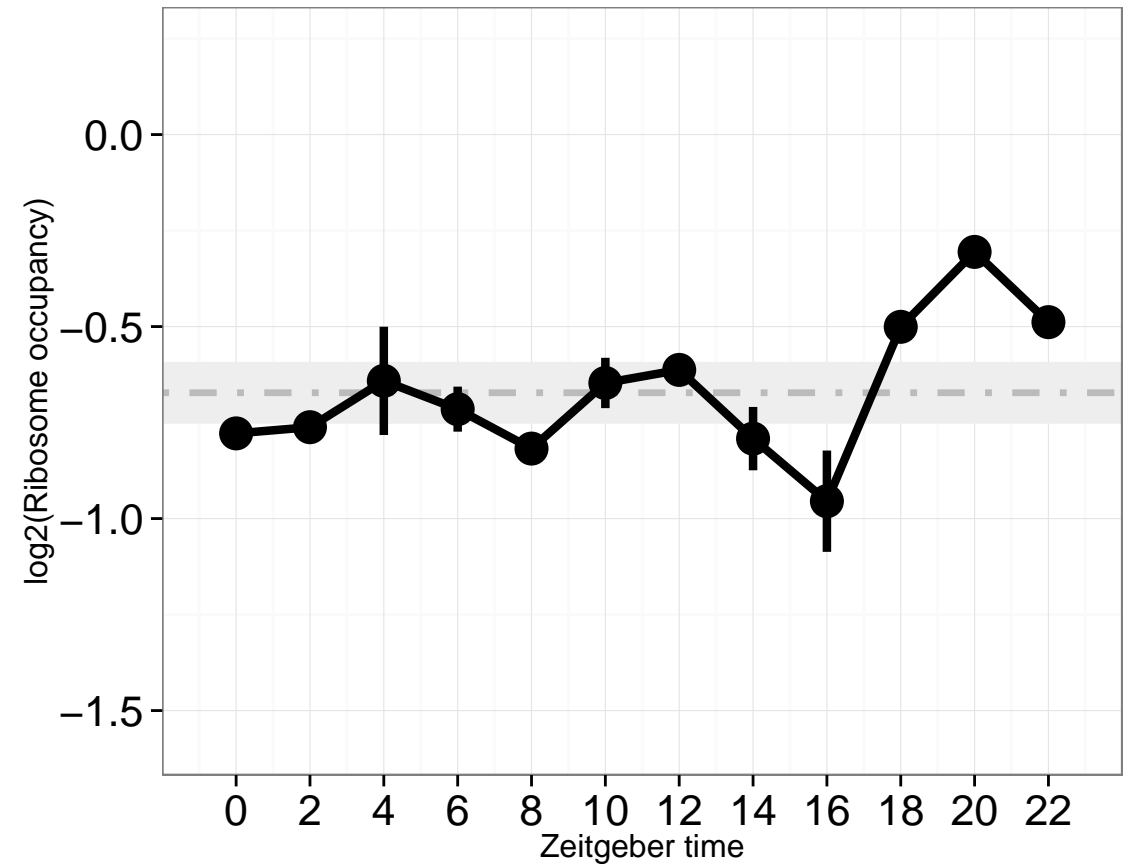

Supplement: Supplementary file 1299 [file 1]

# Itga2b

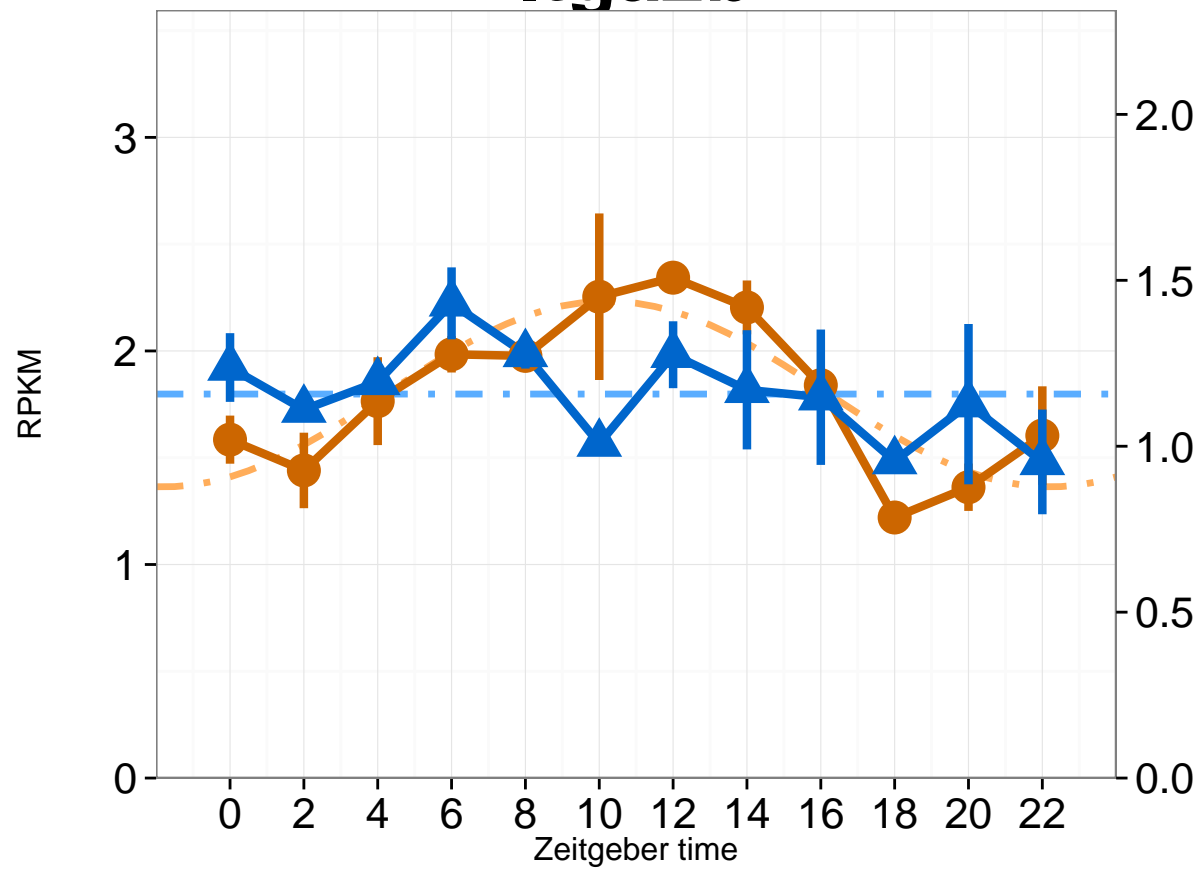

# Itga2b

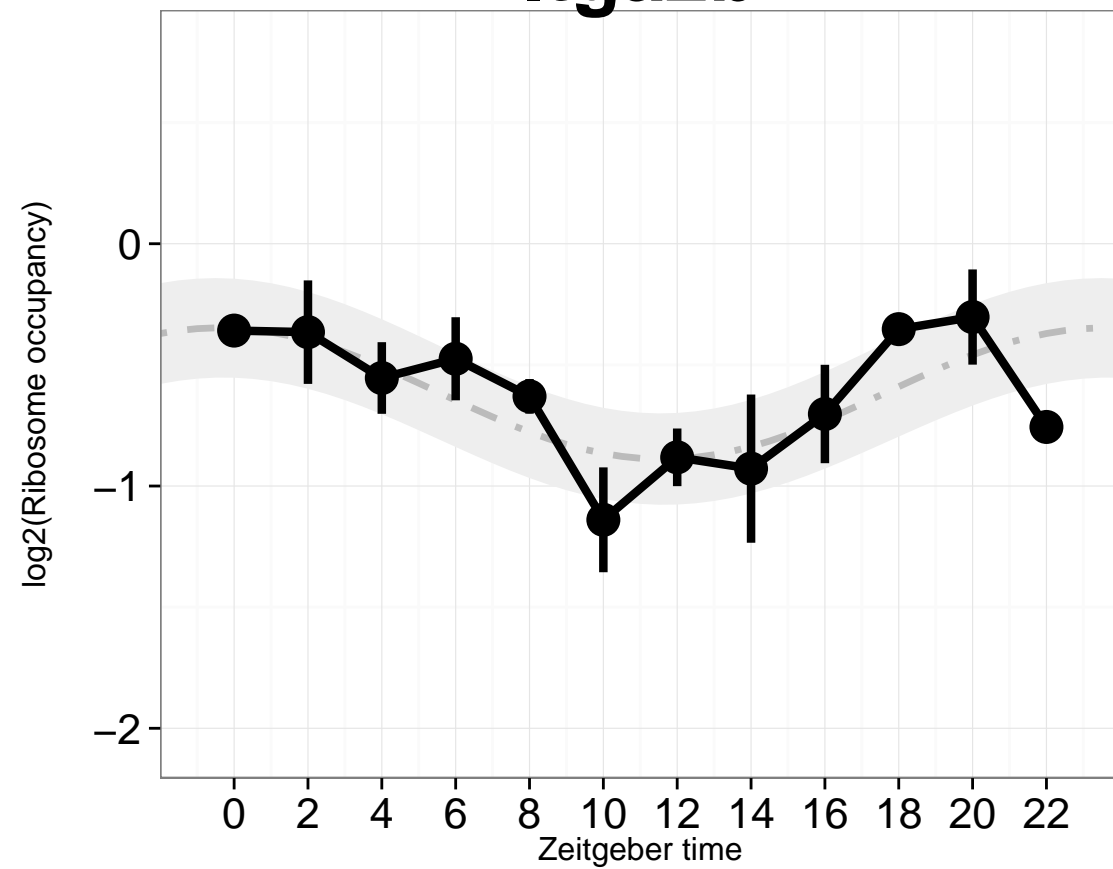

Supplement: Supplementary file 1300 [file 1]

## Hadh

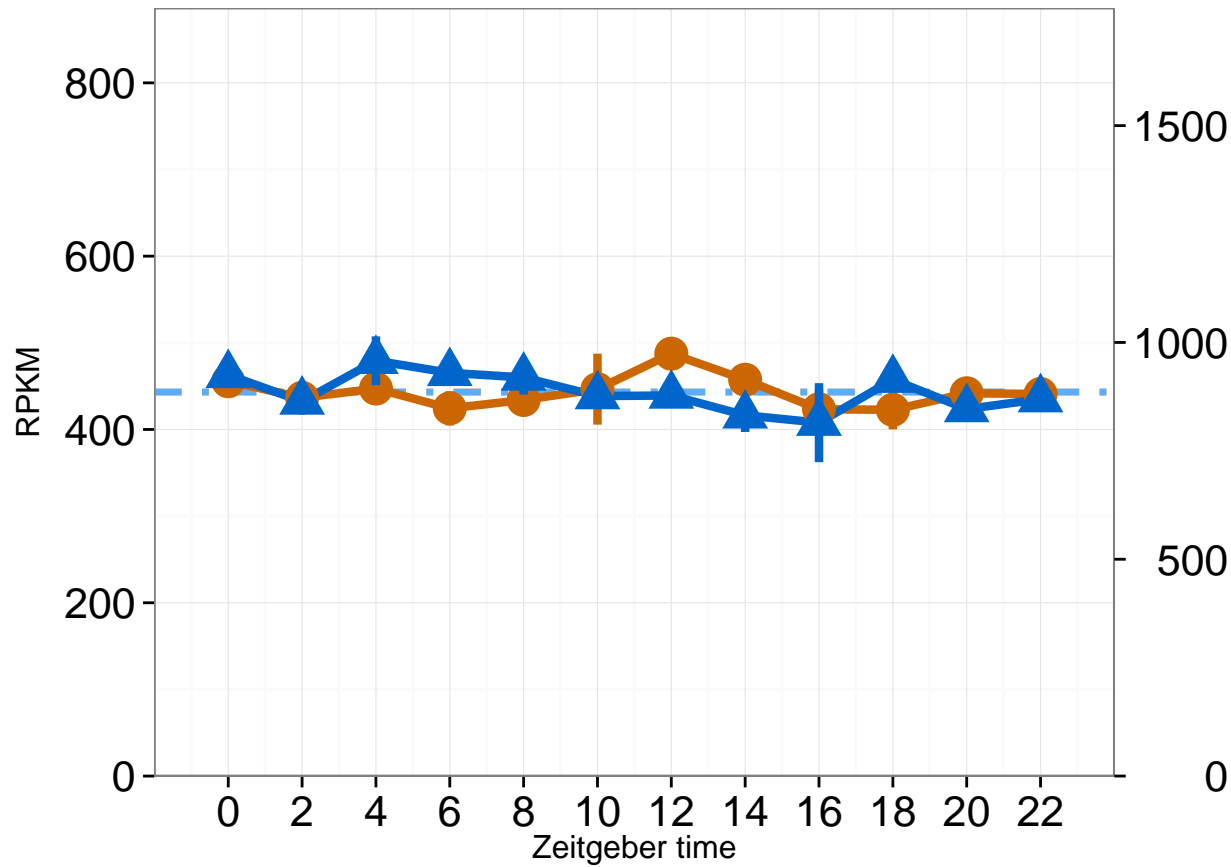

## Hadh

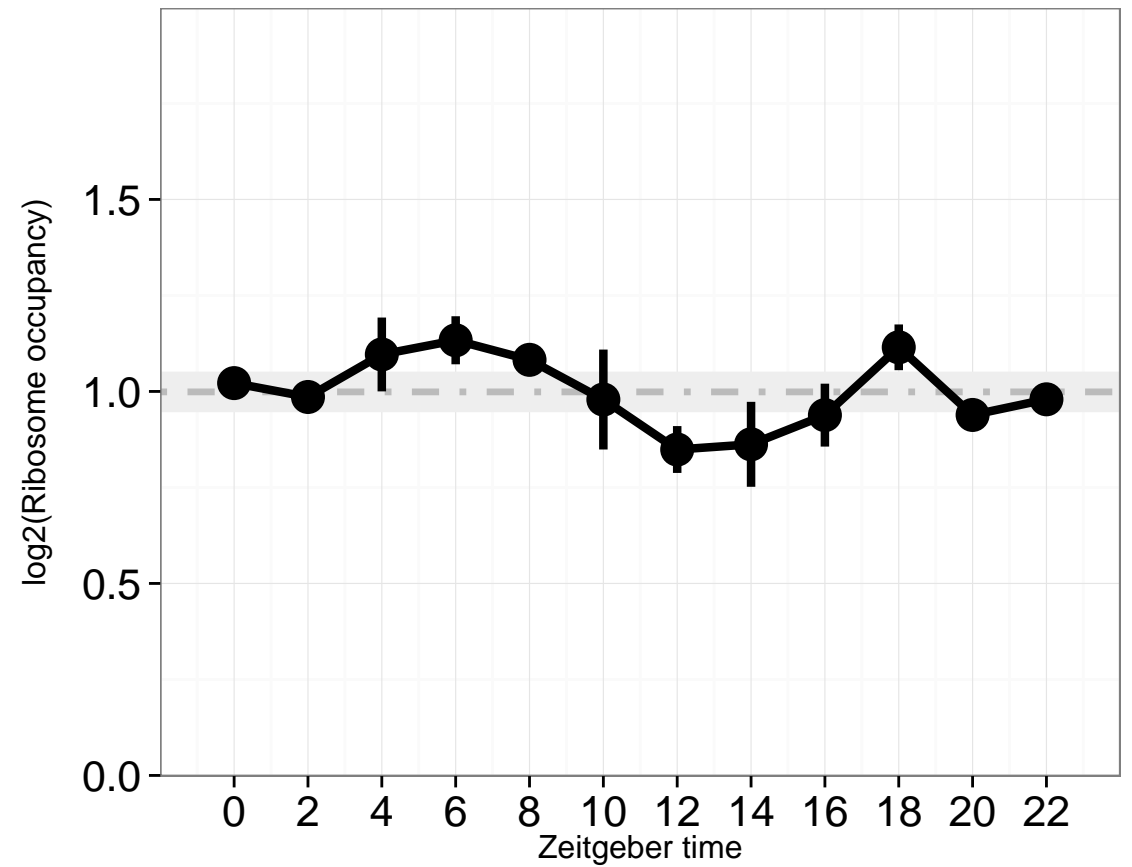

Supplement: Supplementary file 1301 [file 1]

# Tep1

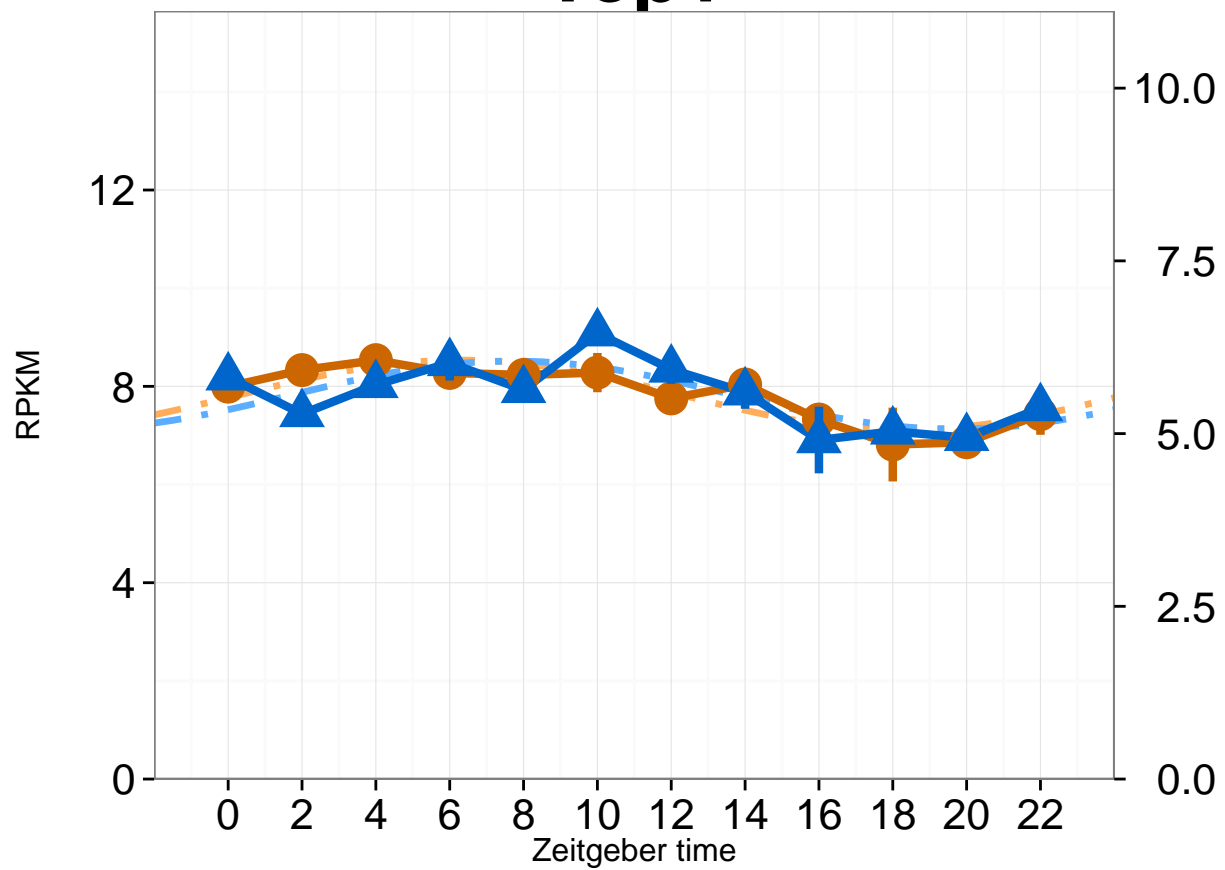

# Tep1

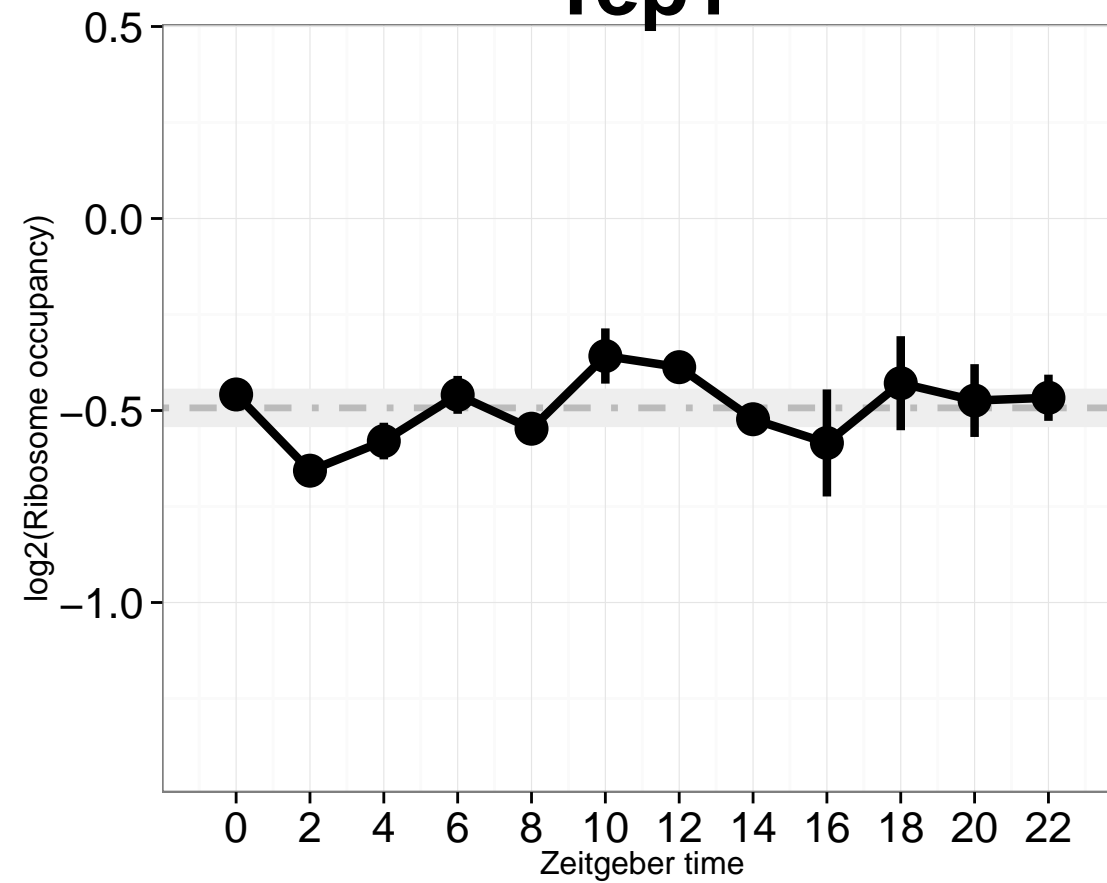

Supplement: Supplementary file 1302 [file 1]

## Eefsec

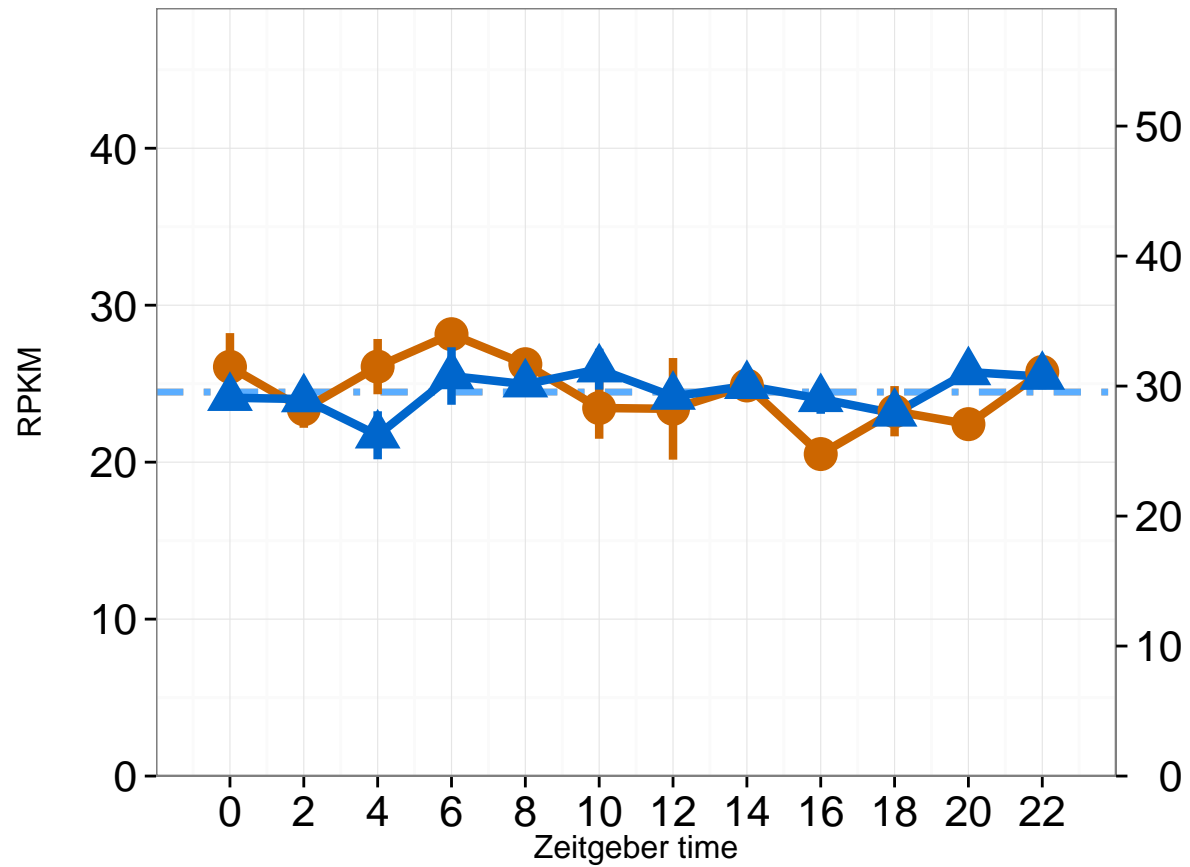

## Eefsec

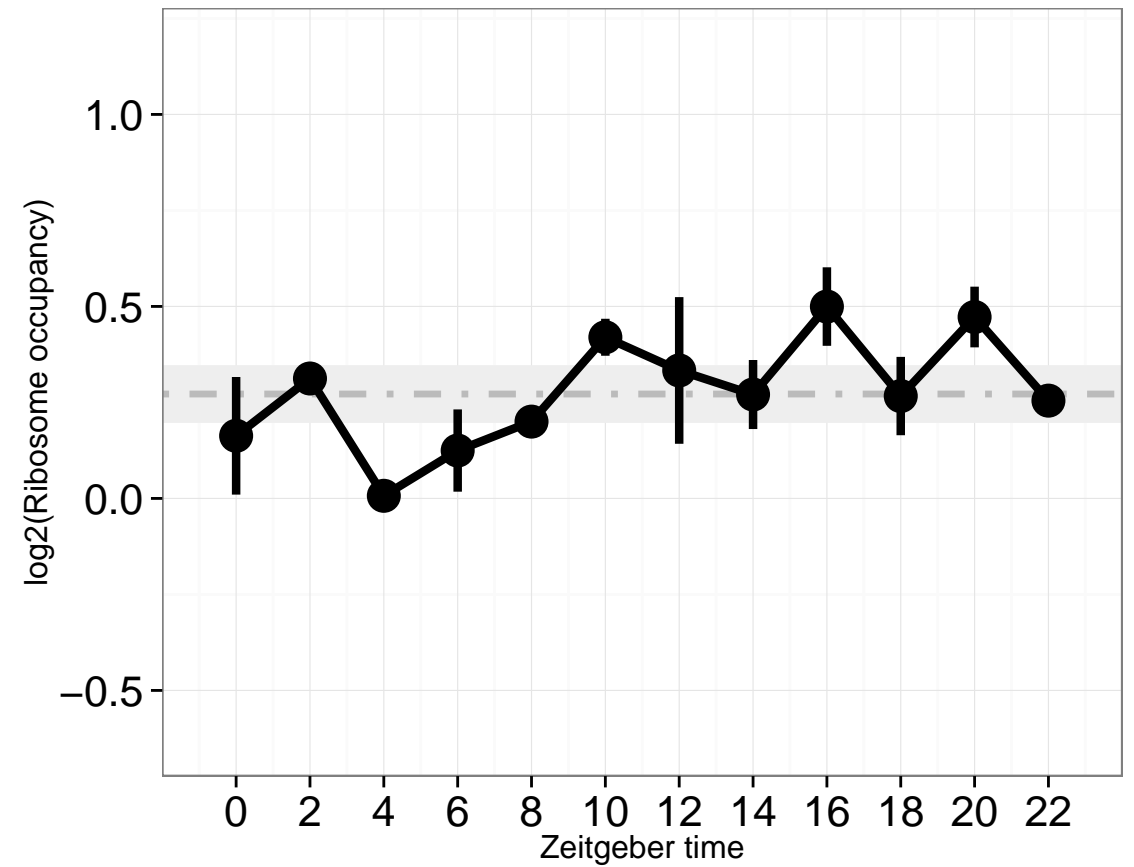

Supplement: Supplementary file 1303 [file 1]

## Cbr1

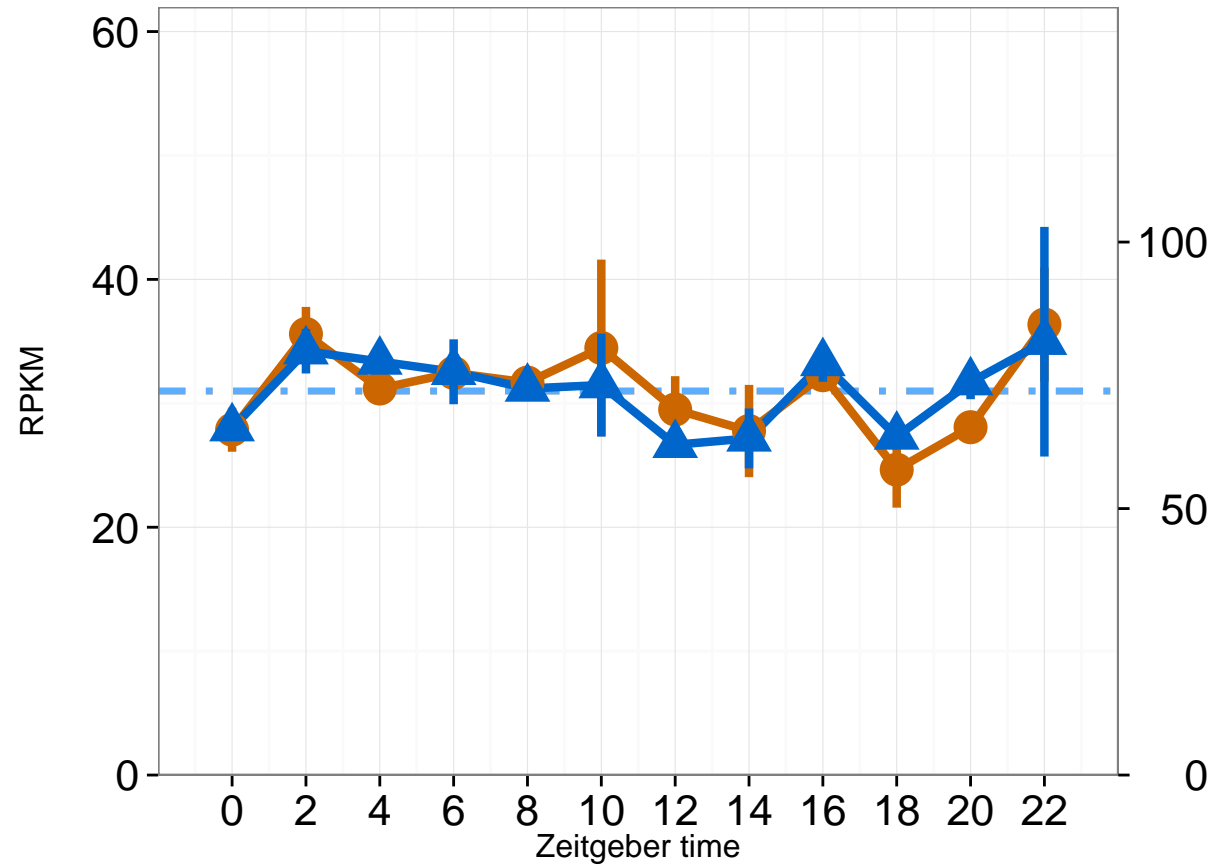

## Cbr1

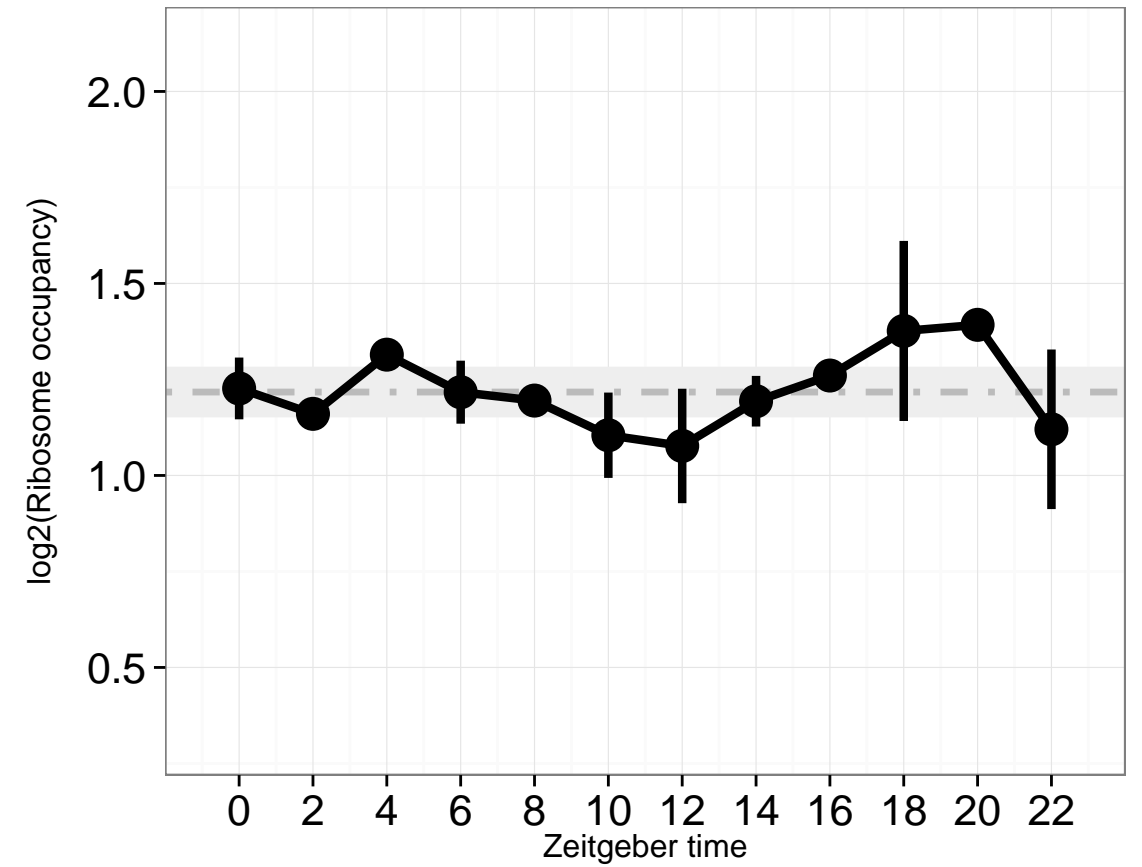

Supplement: Supplementary file 1304 [file 1]

## Smap2

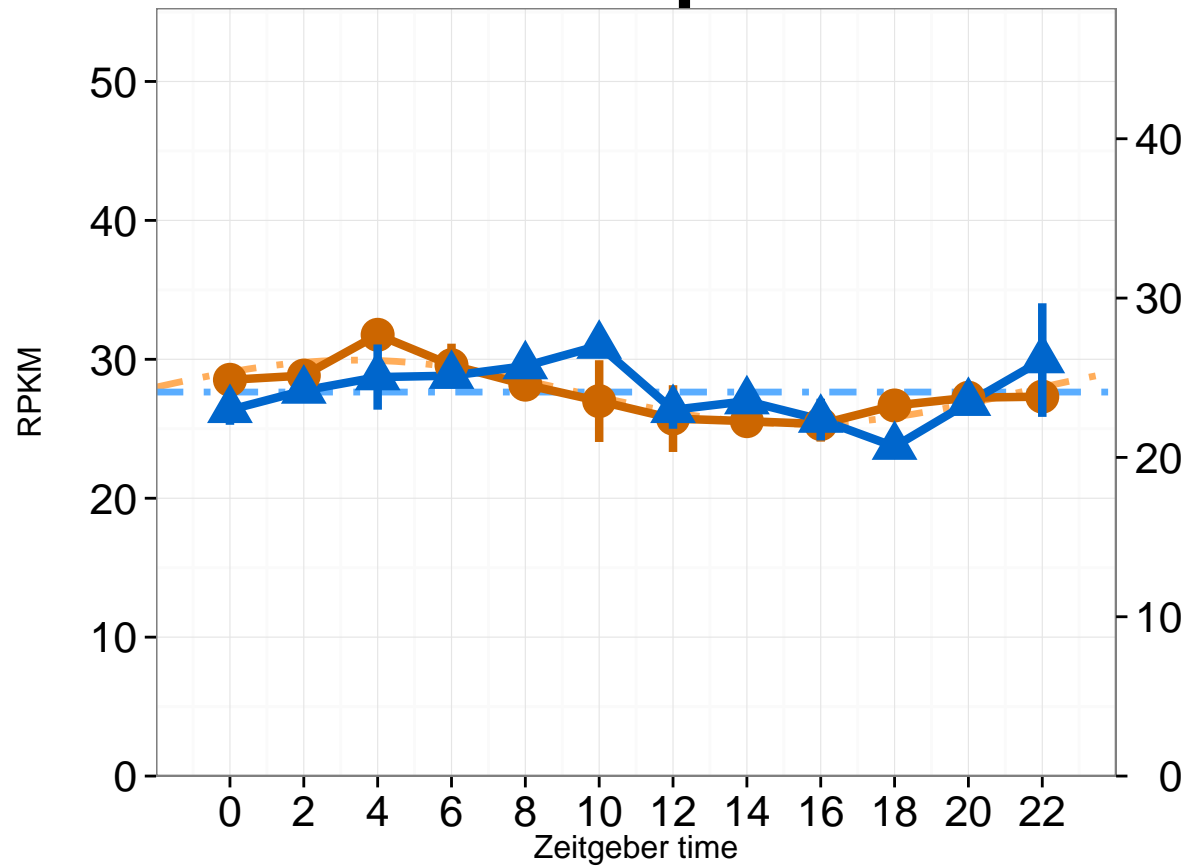

## Smap2

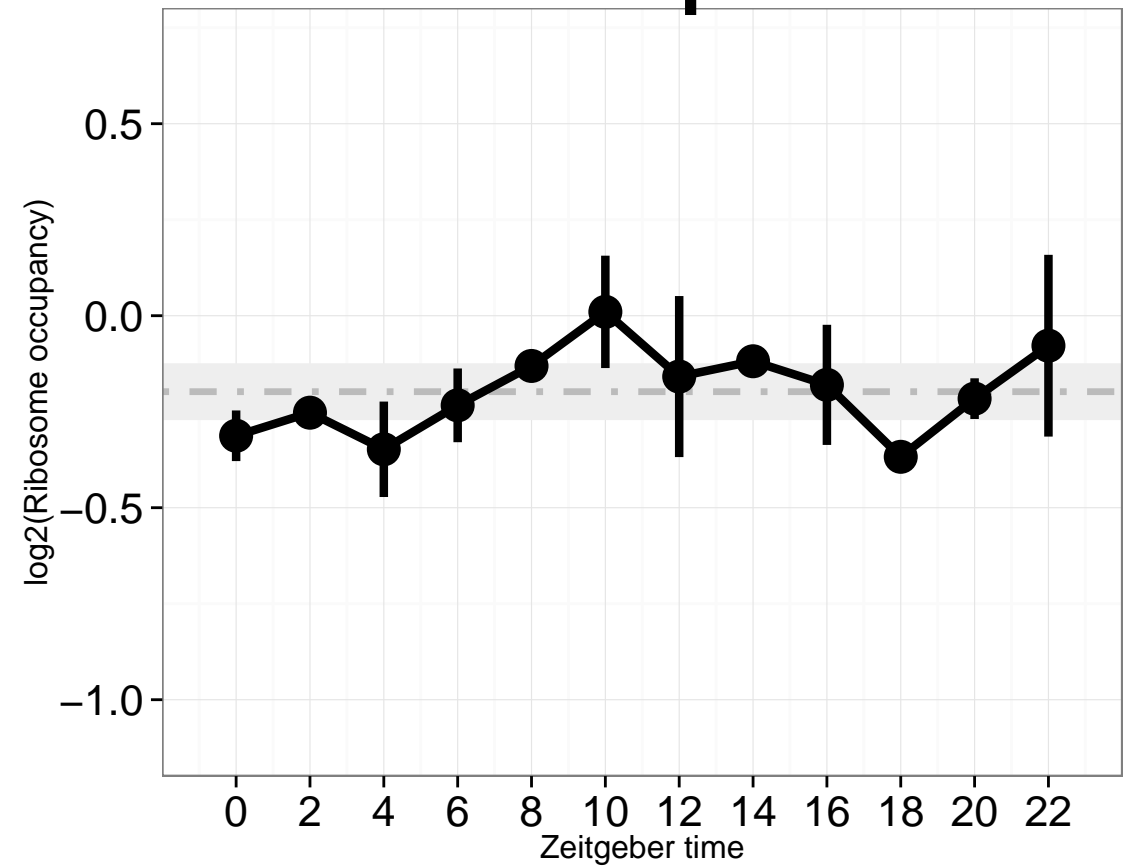

Supplement: Supplementary file 1305 [file 1]
