# Supplementary material (part 14 of 133)
Source: publisher figshare collection journal article supplement (https://springernature.figshare.com/articles/dataset/_/4903193)

# Tm2d3

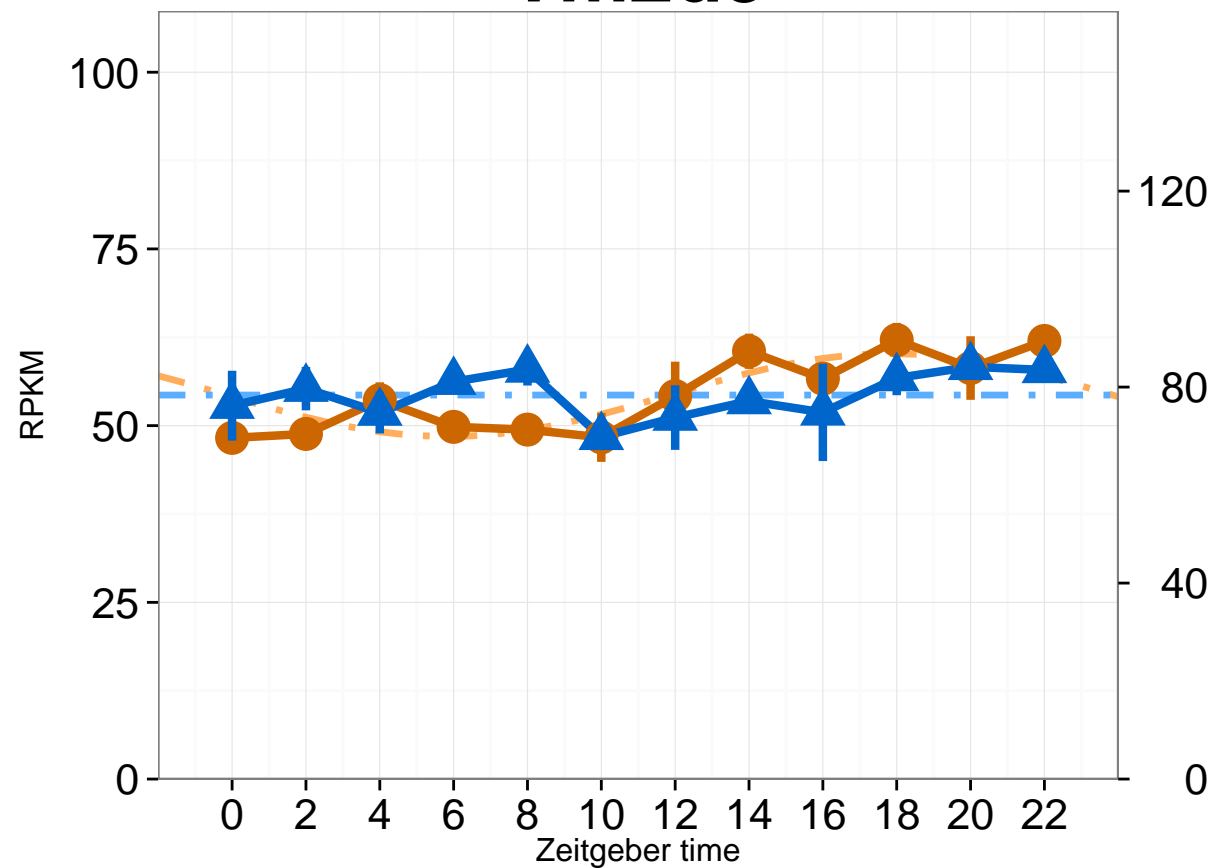

# Tm2d3

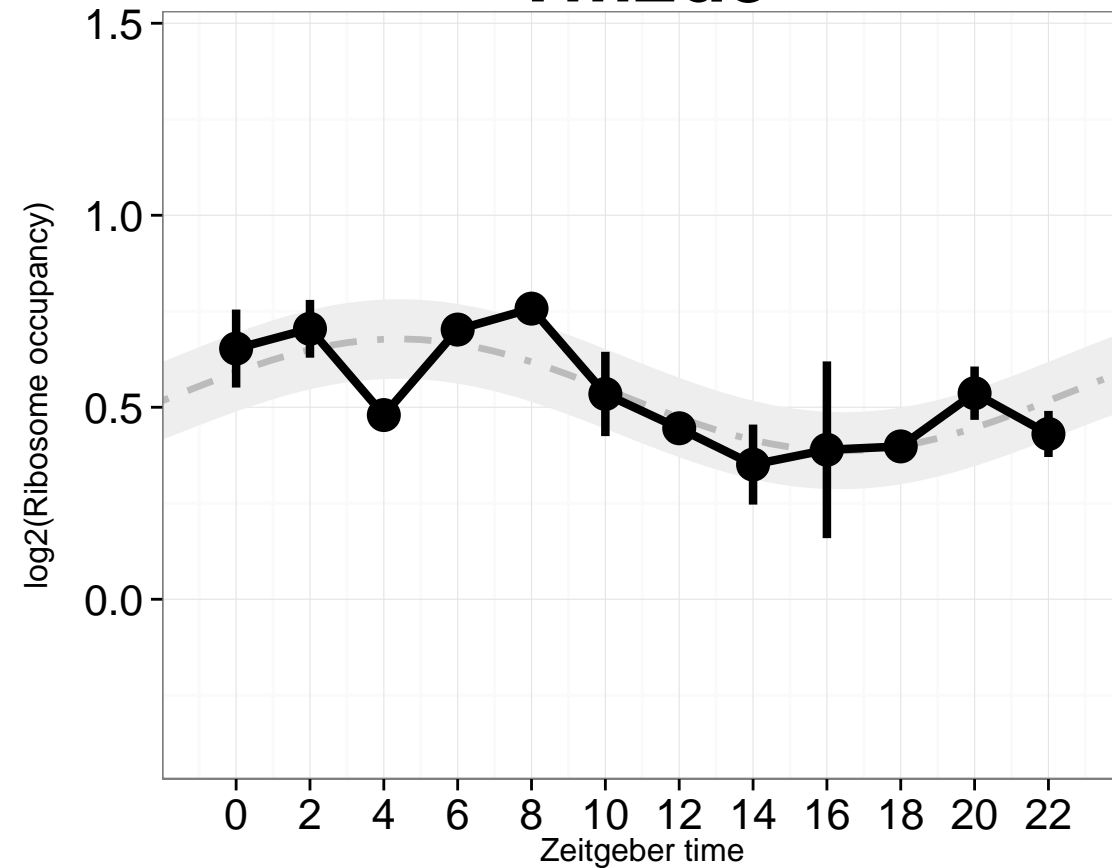

Supplement: Supplementary file 1306 [file 1]

## Mknk2

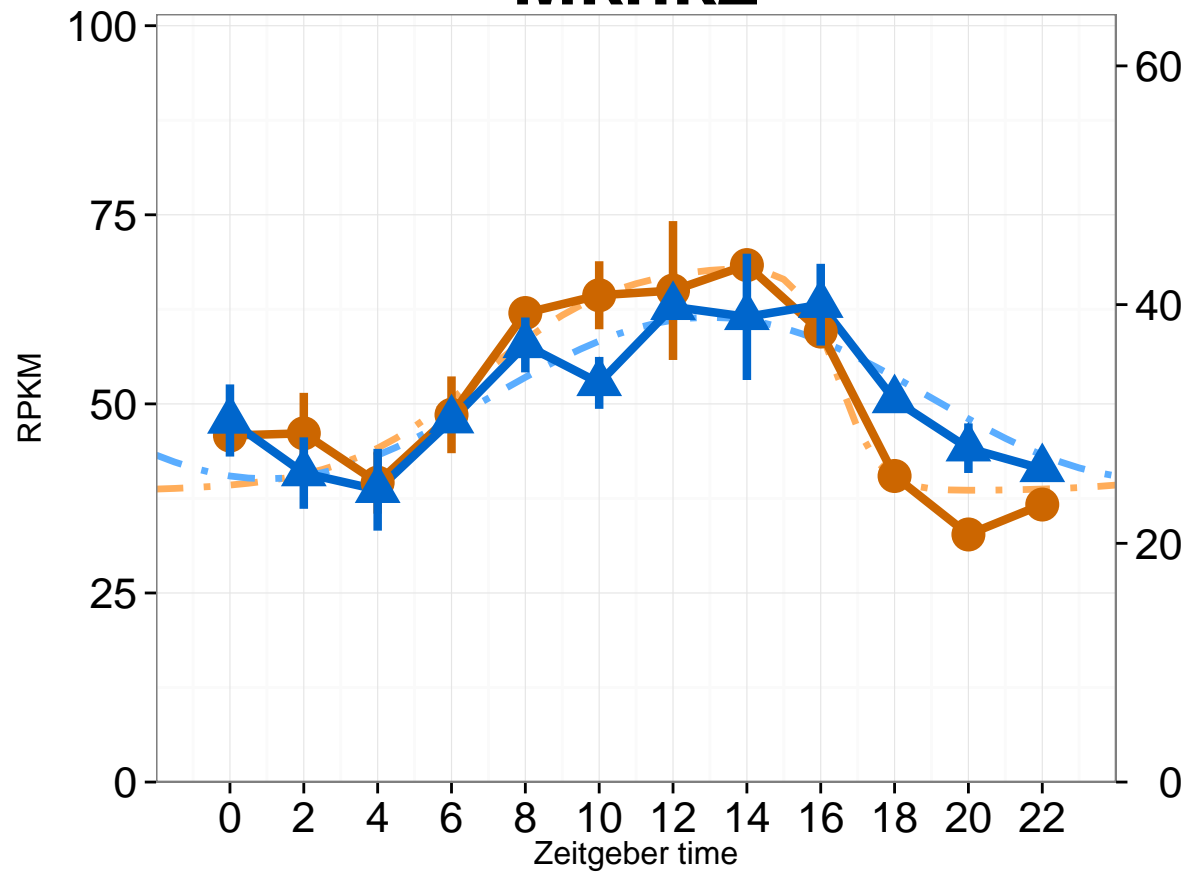

## Mknk2

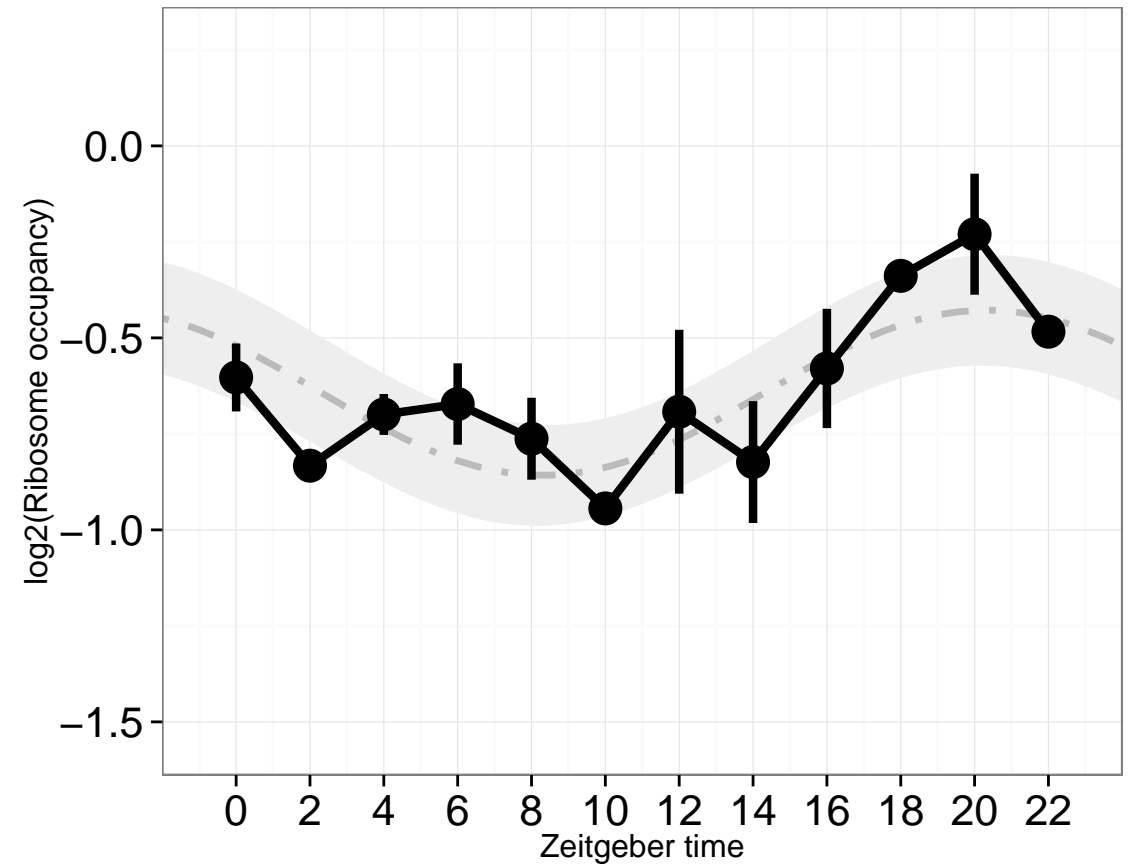

Supplement: Supplementary file 1307 [file 1]

## Psmc2

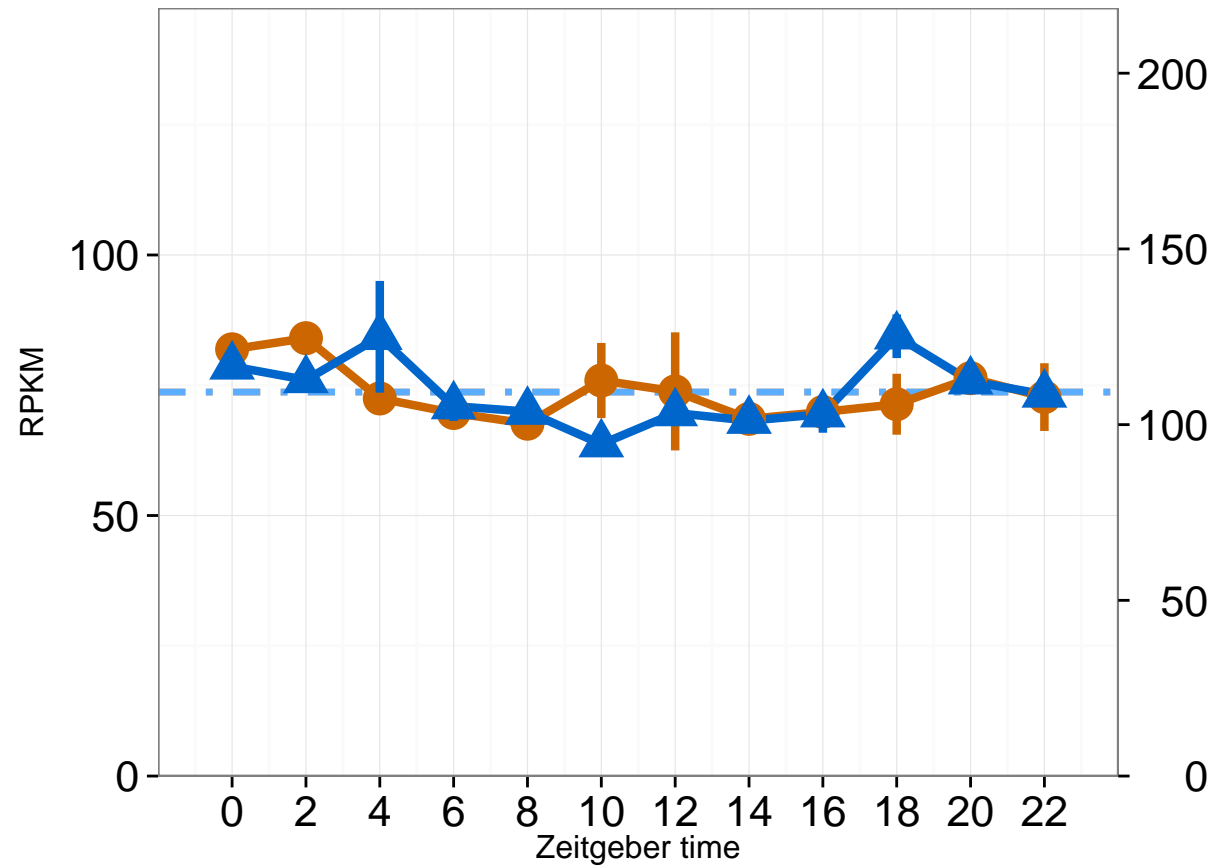

## Psmc2

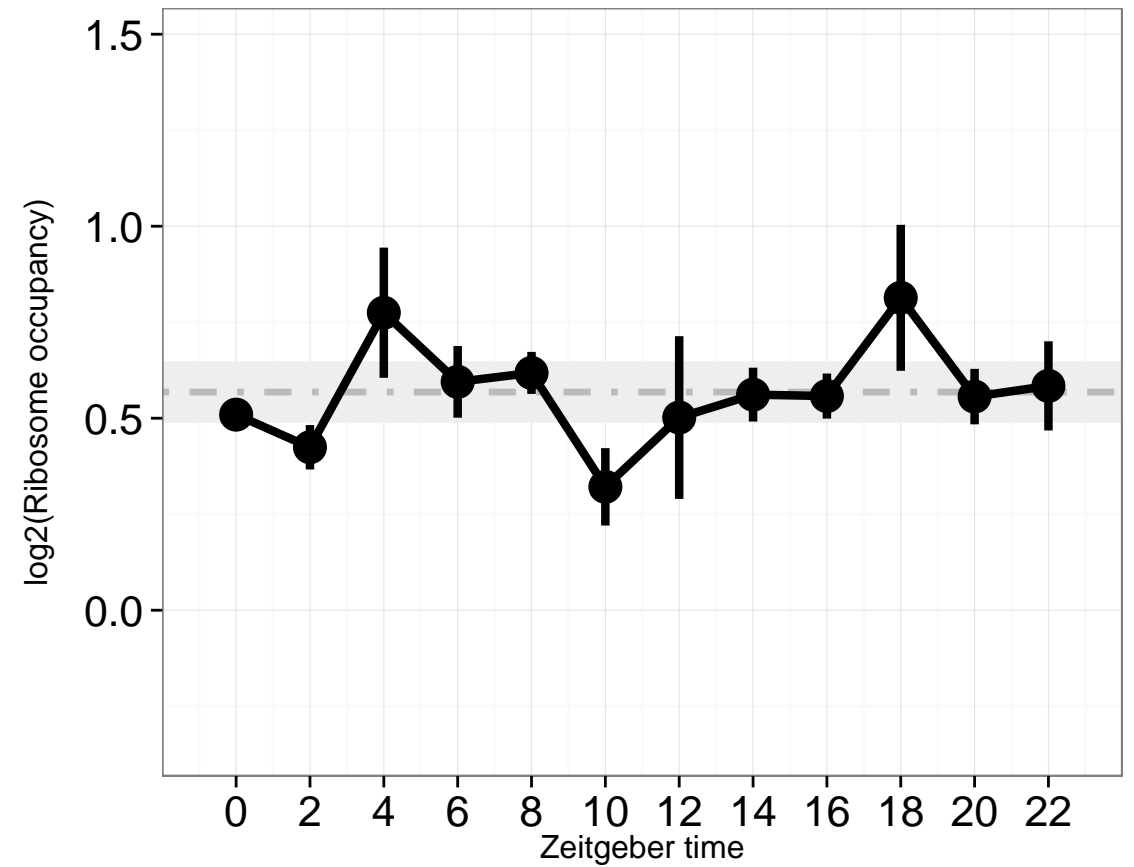

Supplement: Supplementary file 1308 [file 1]

## Hrg

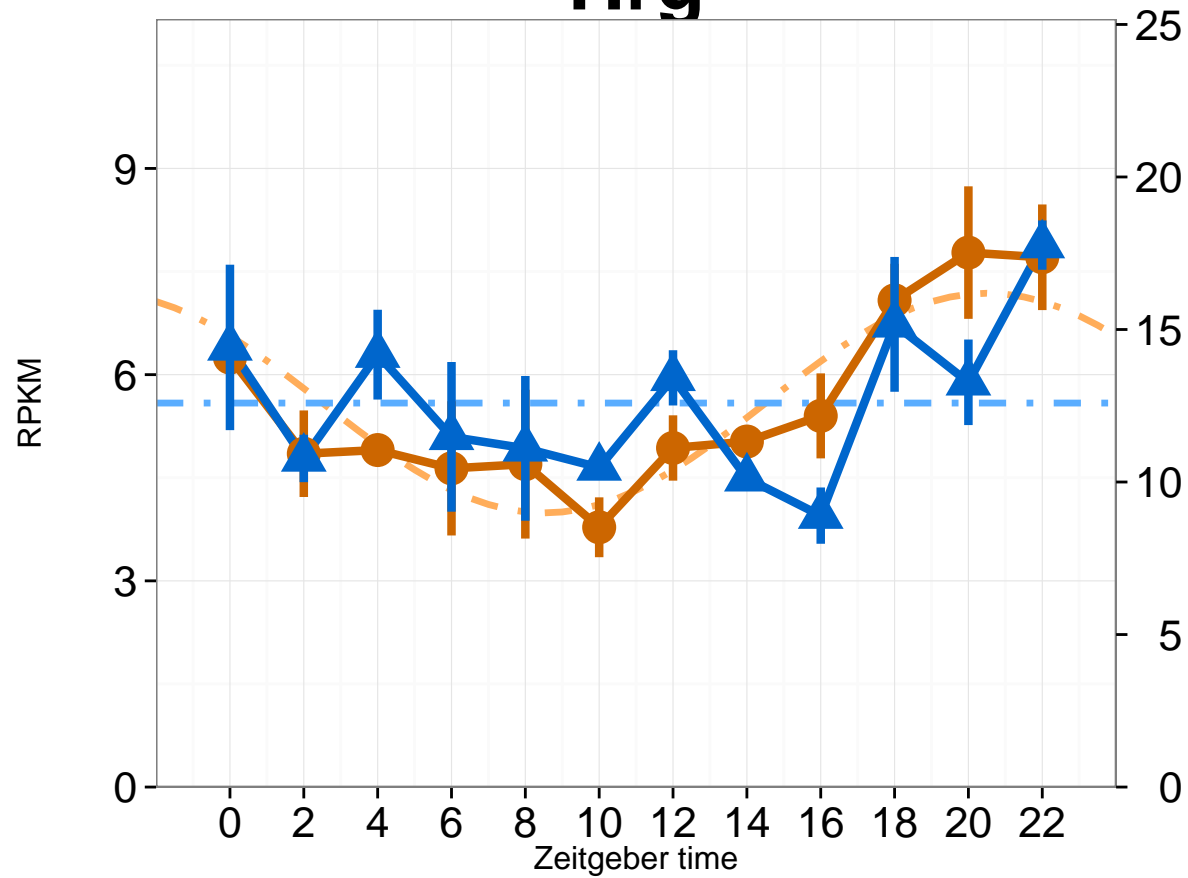

## Hrg

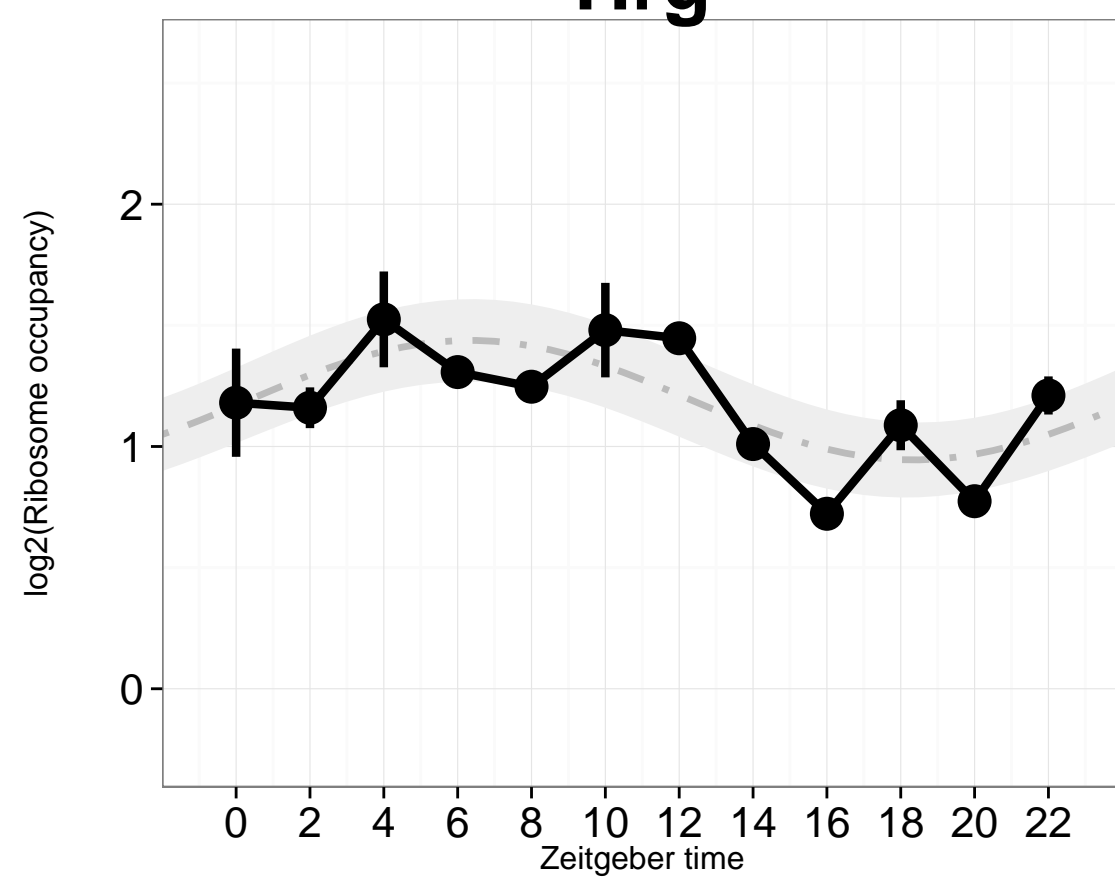

Supplement: Supplementary file 1309 [file 1]

## Btbd3

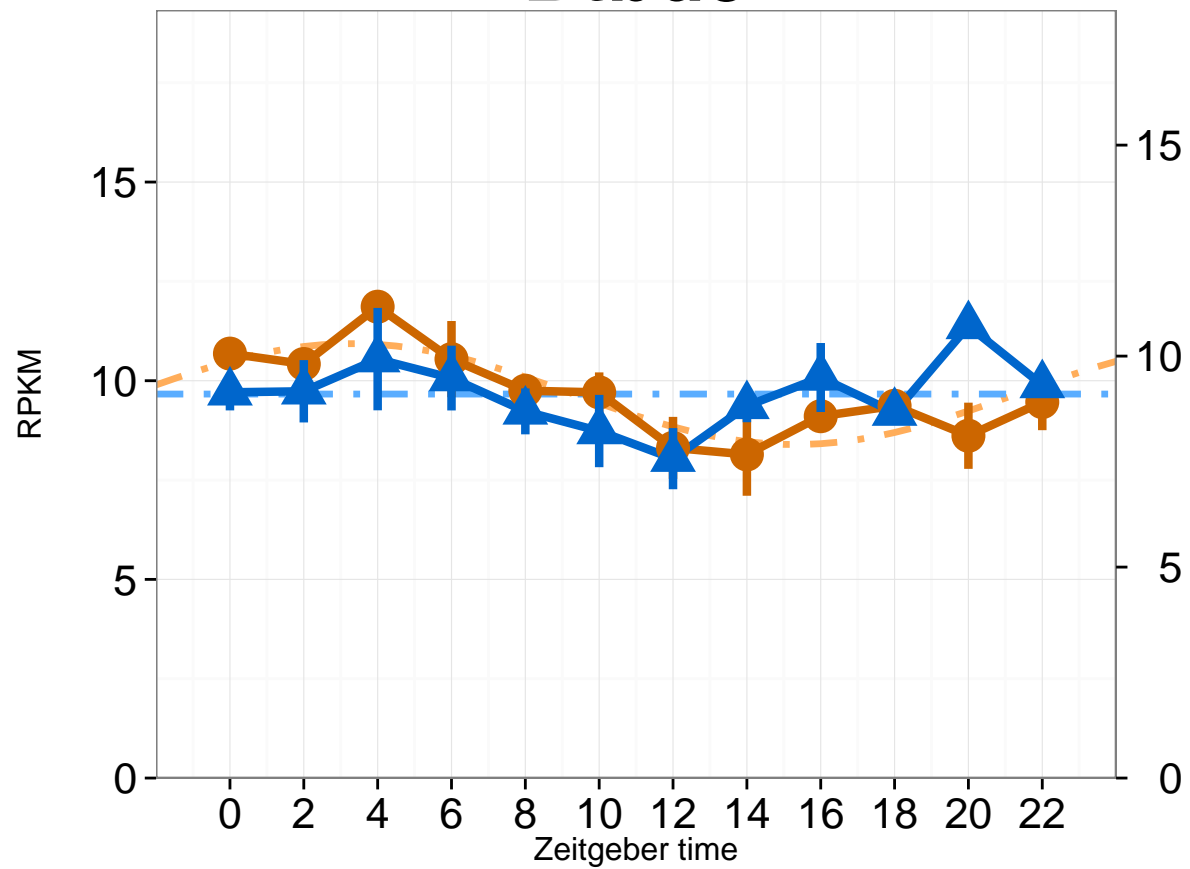

## Btbd3

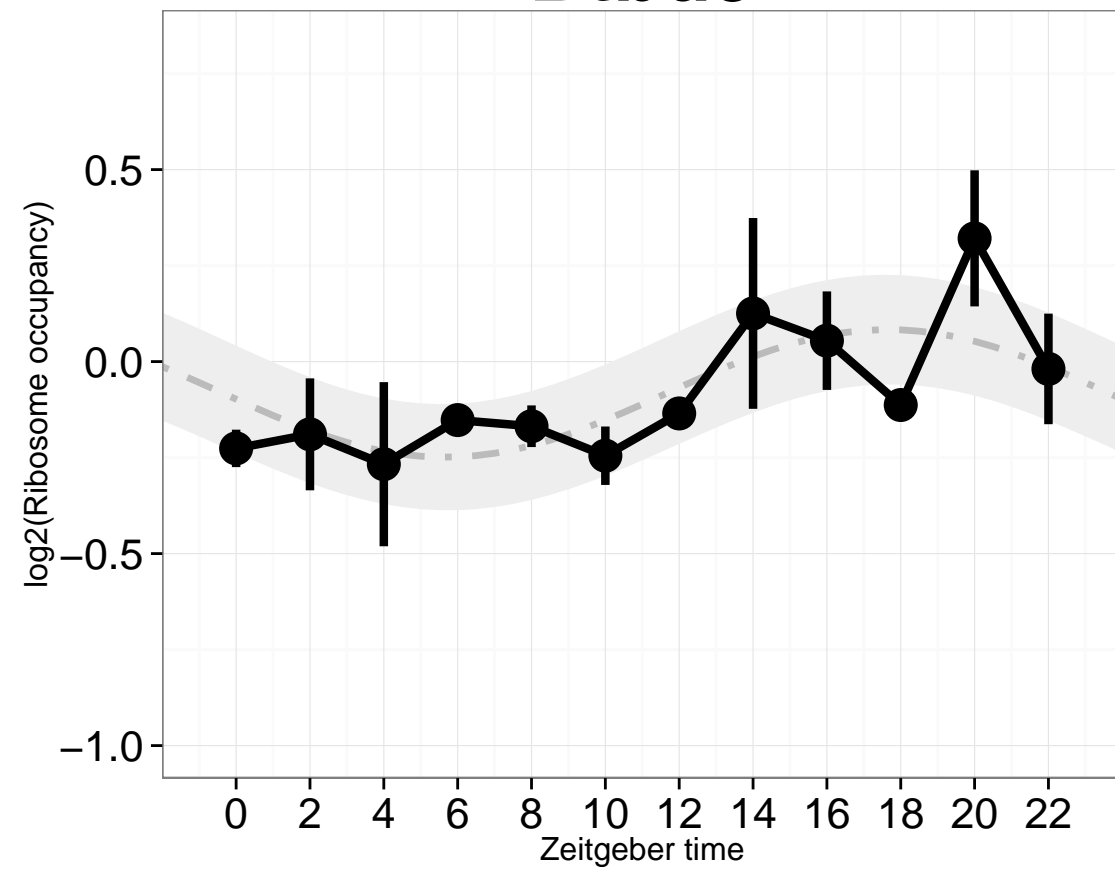

Supplement: Supplementary file 1310 [file 1]

## Uqcrb

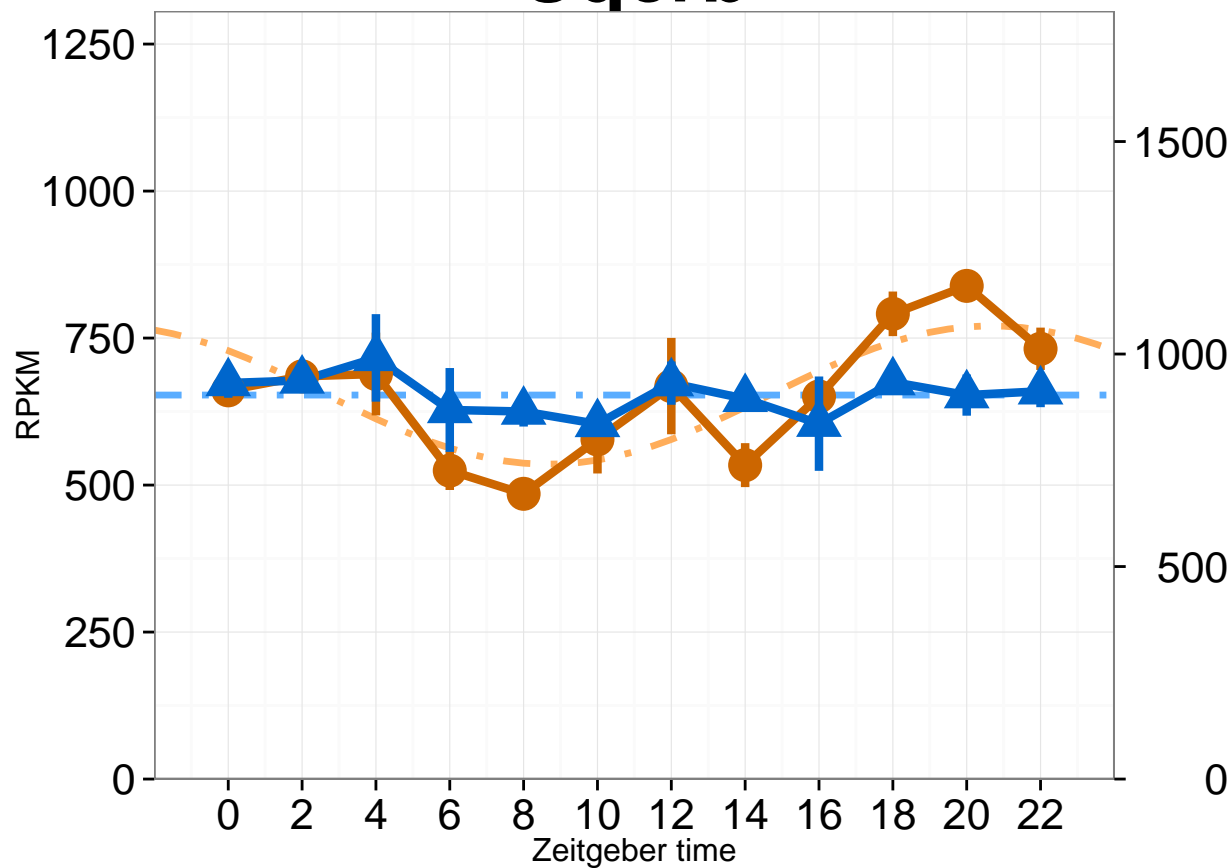

## Uqcrb

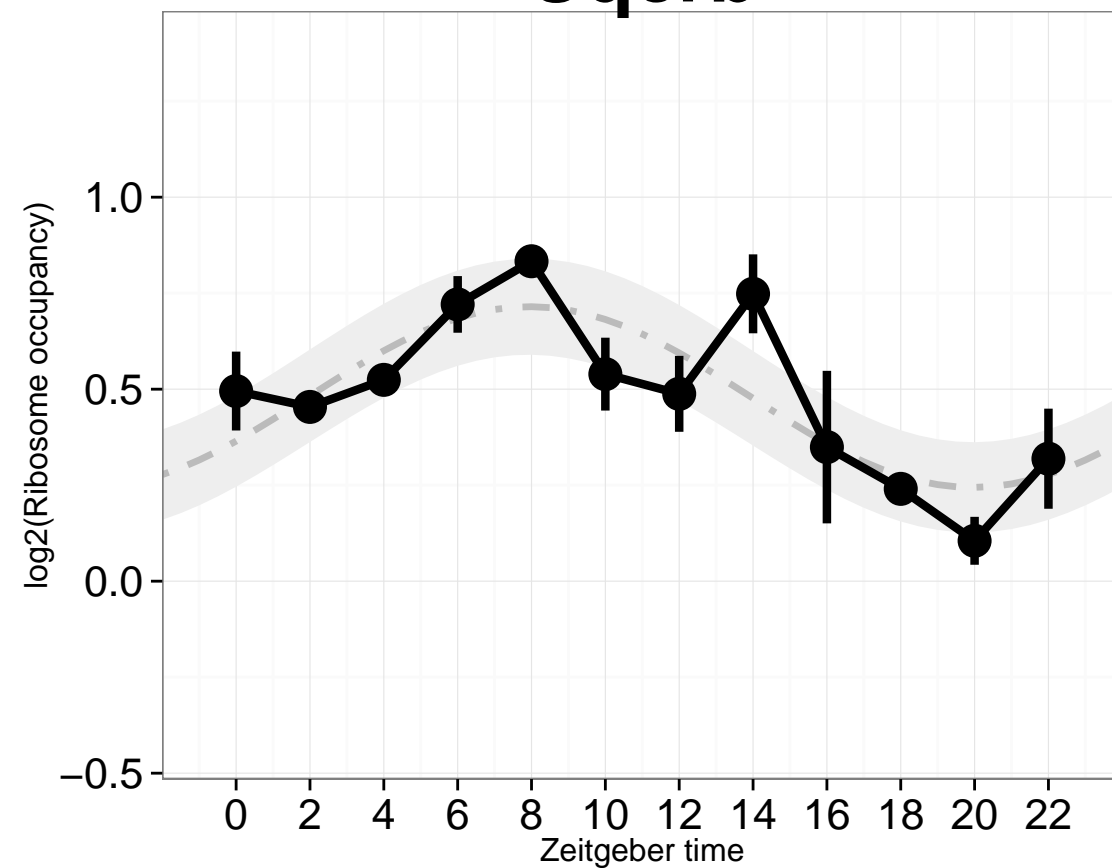

Supplement: Supplementary file 1311 [file 1]

## PvrI2

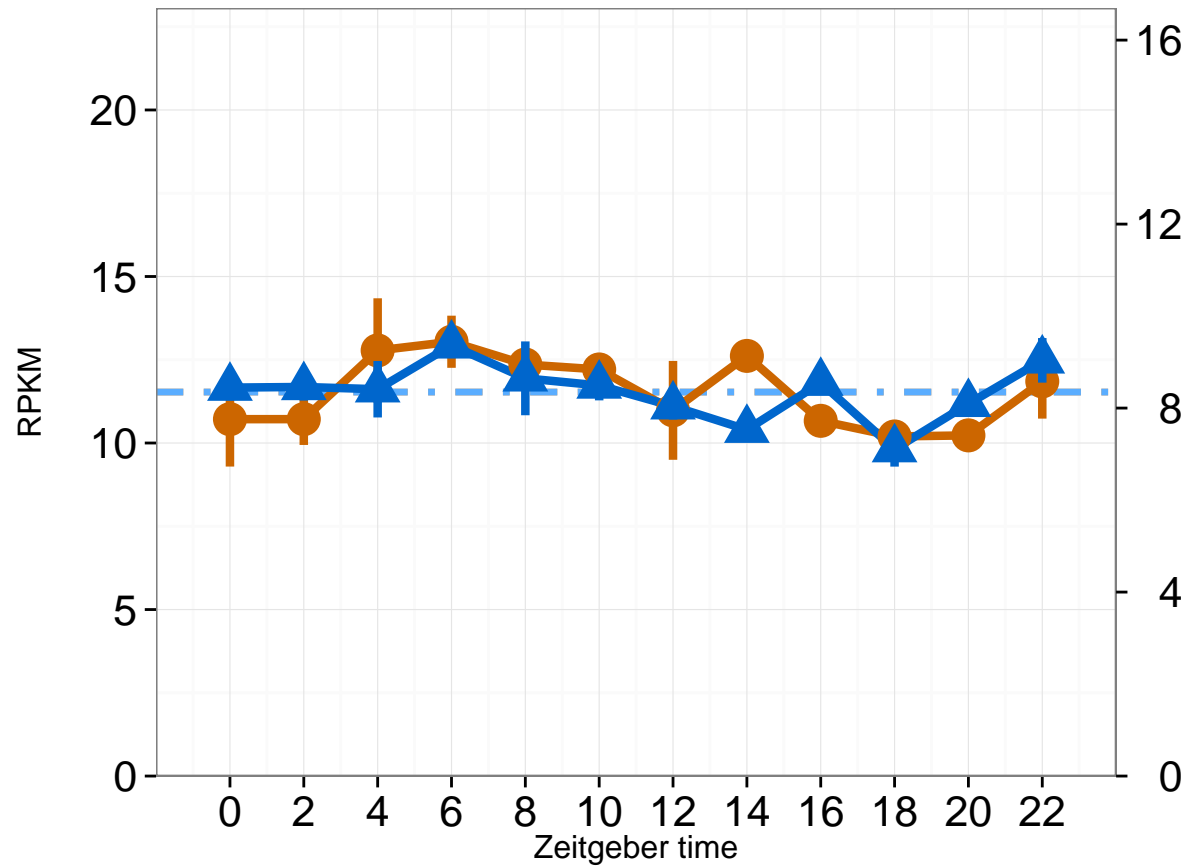

## PvrI2

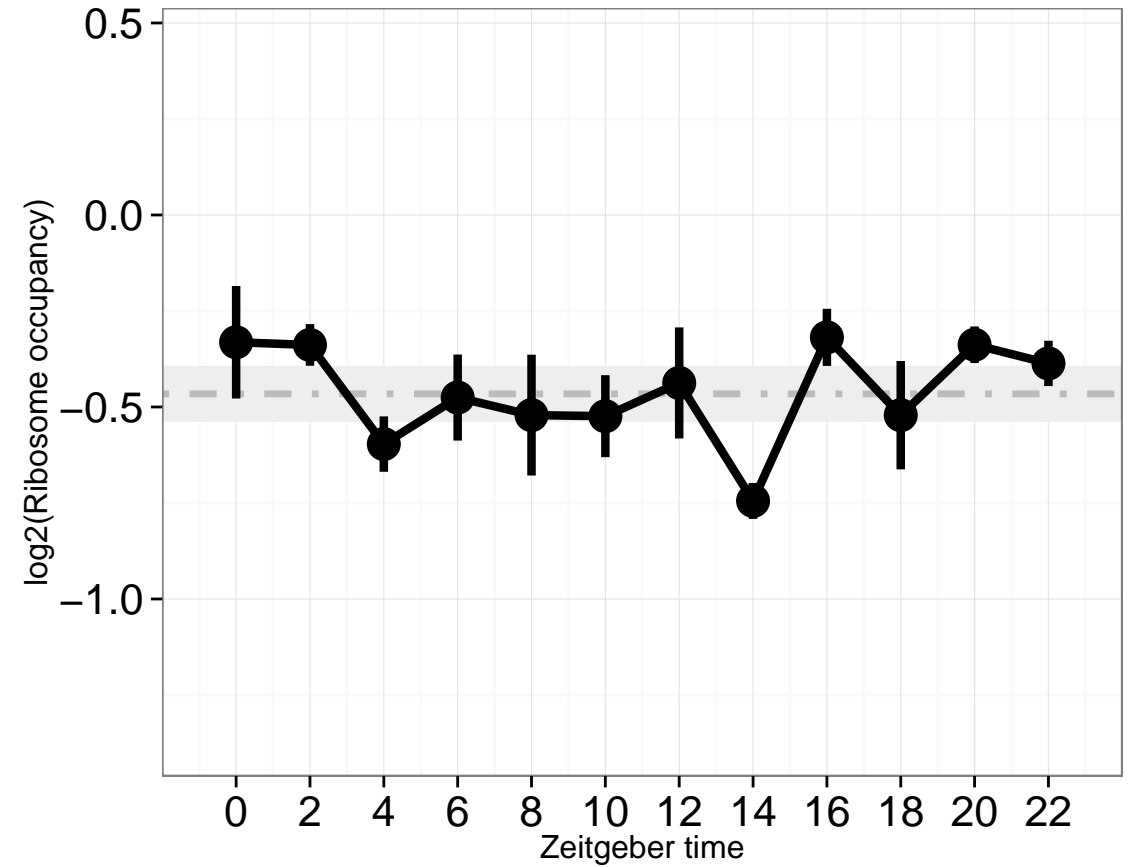

Supplement: Supplementary file 1312 [file 1]

## Ubxn6

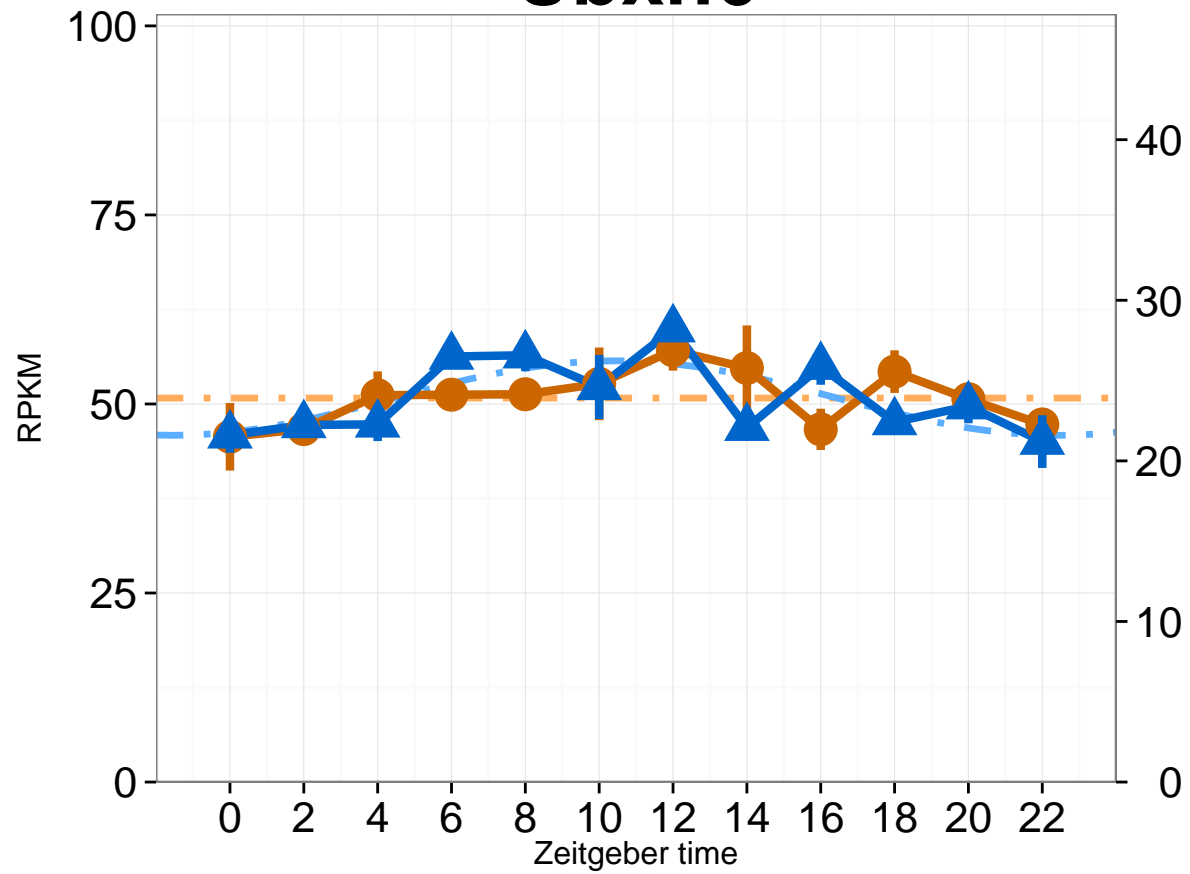

## Ubxn6

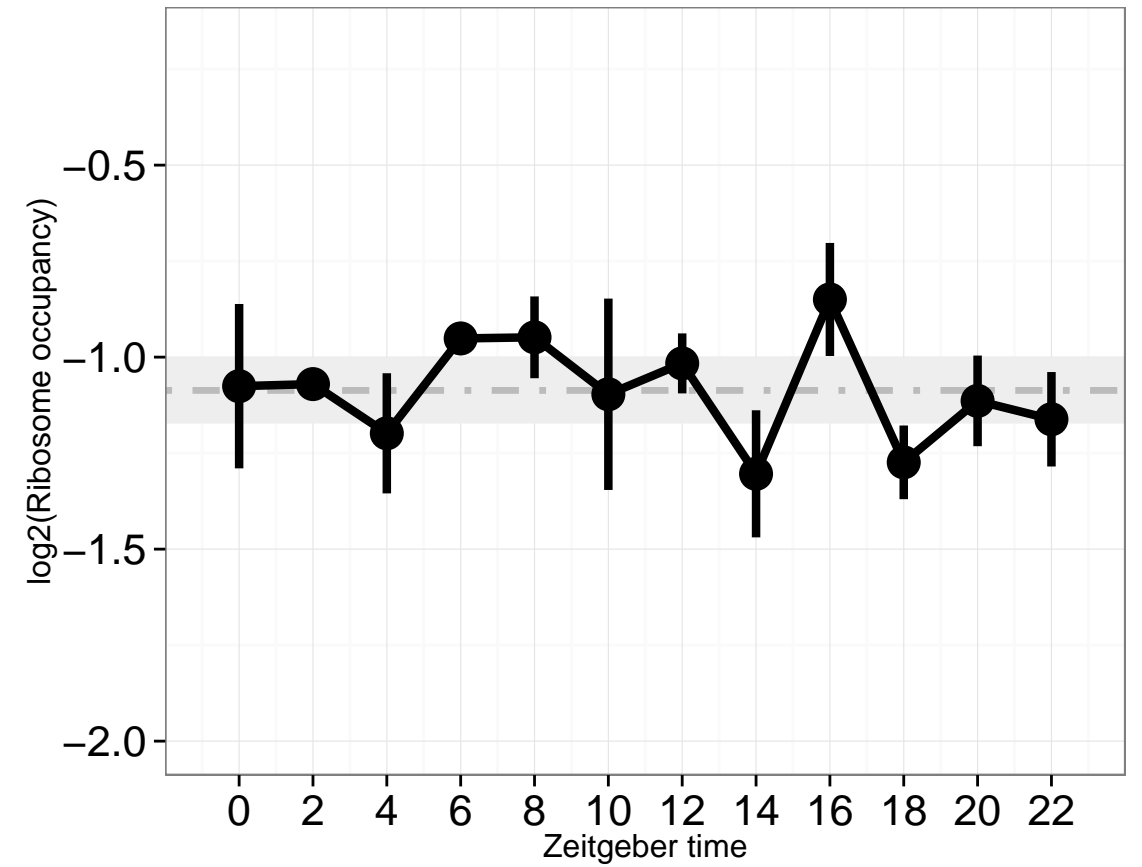

Supplement: Supplementary file 1313 [file 1]

## Umod

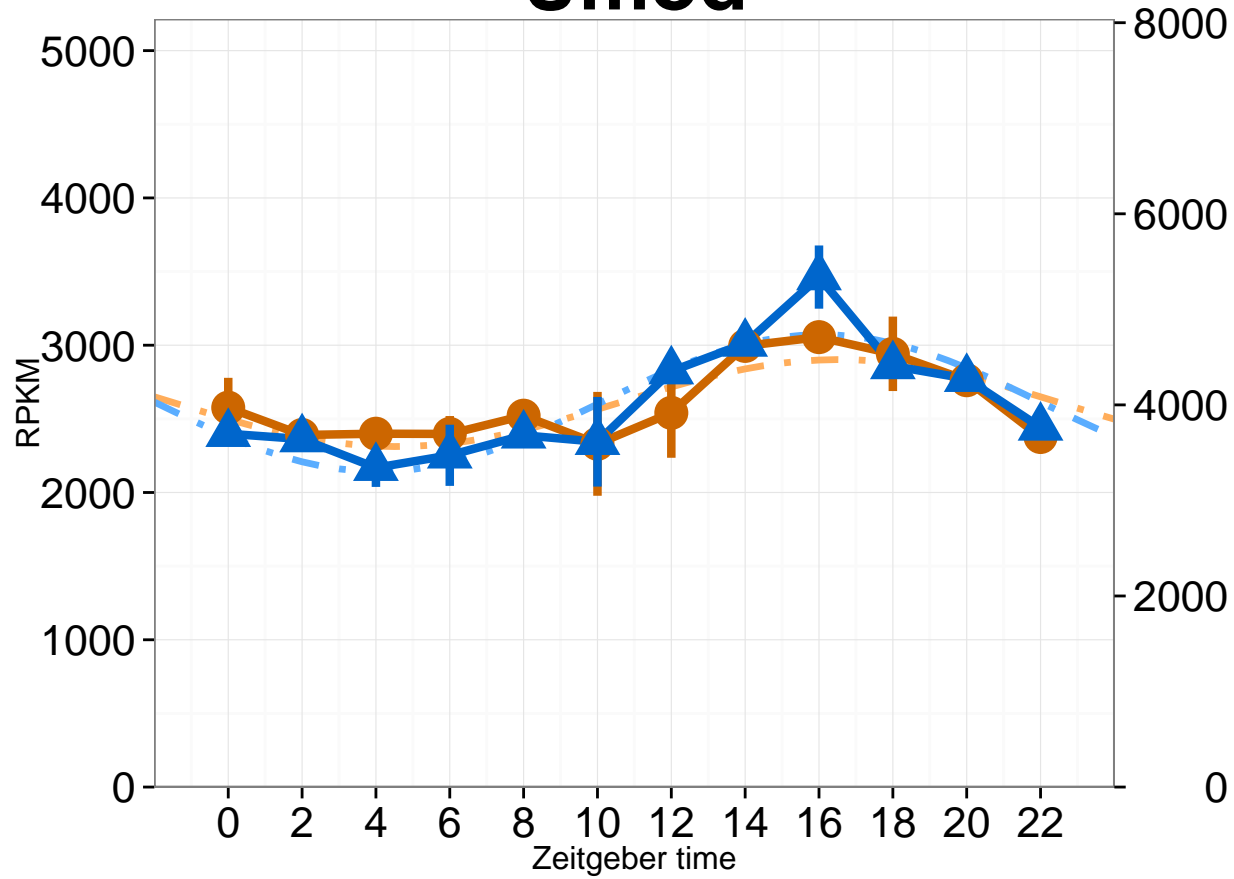

## Umod

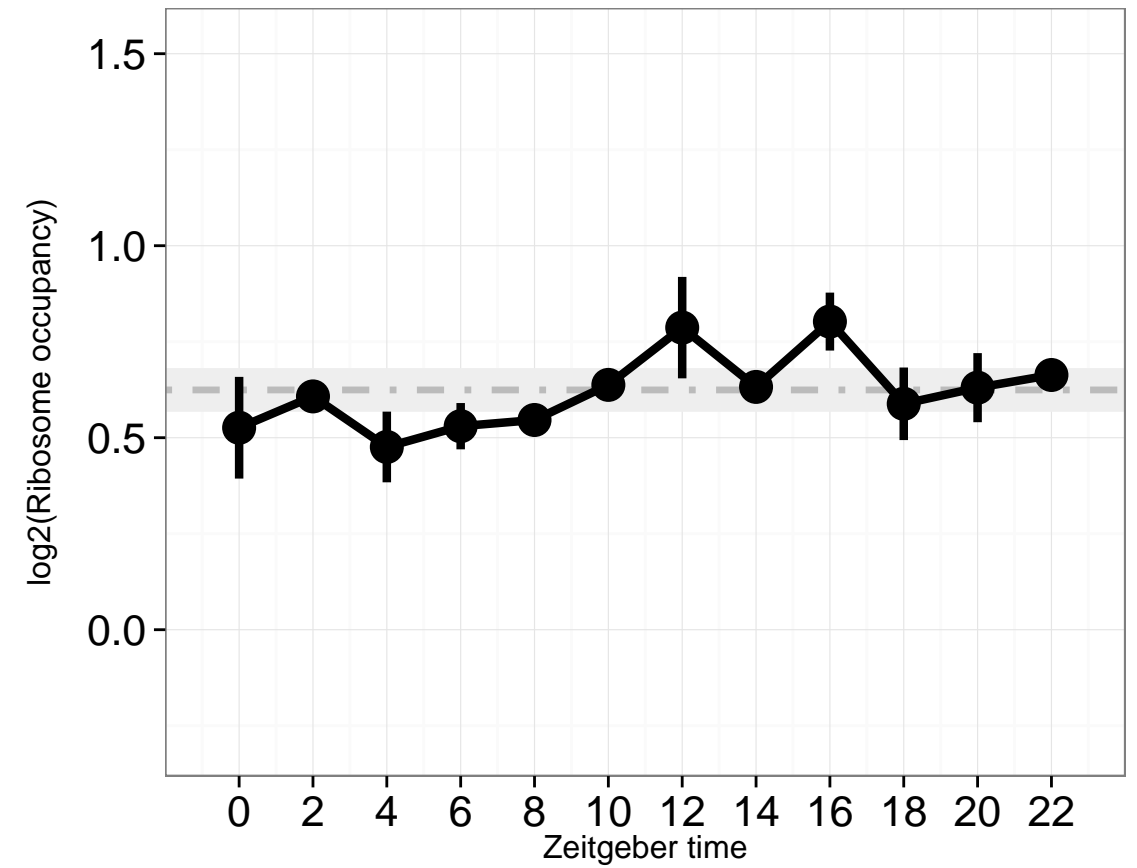

Supplement: Supplementary file 1314 [file 1]

## Psma5

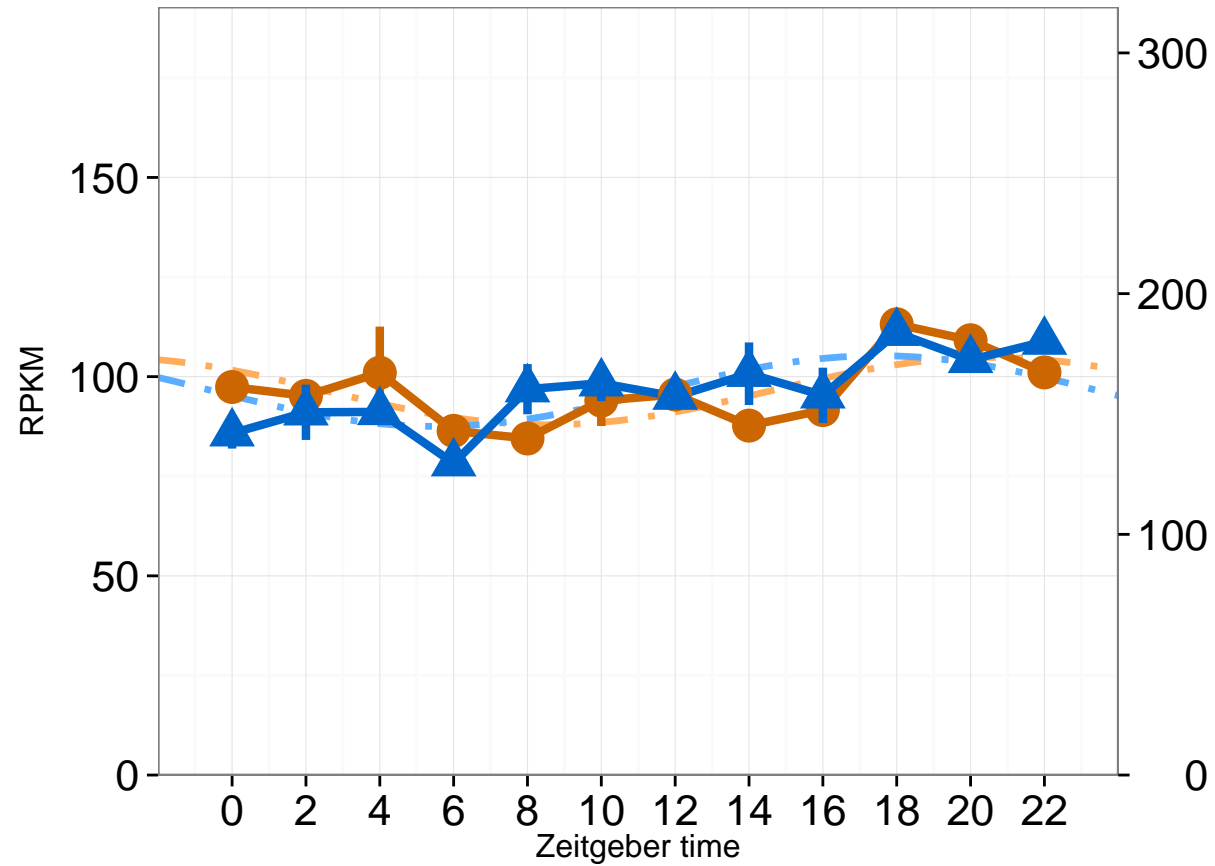

## Psma5

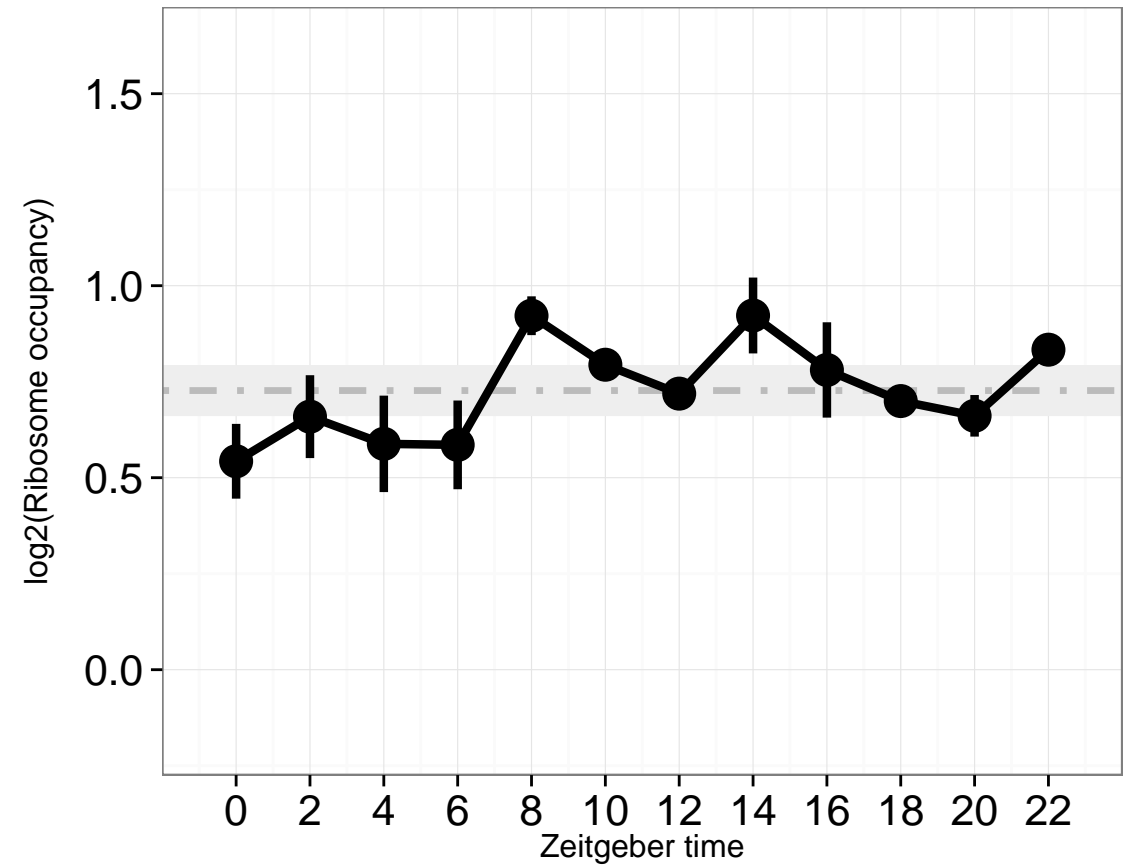

Supplement: Supplementary file 1315 [file 1]

**FcrIs TR**

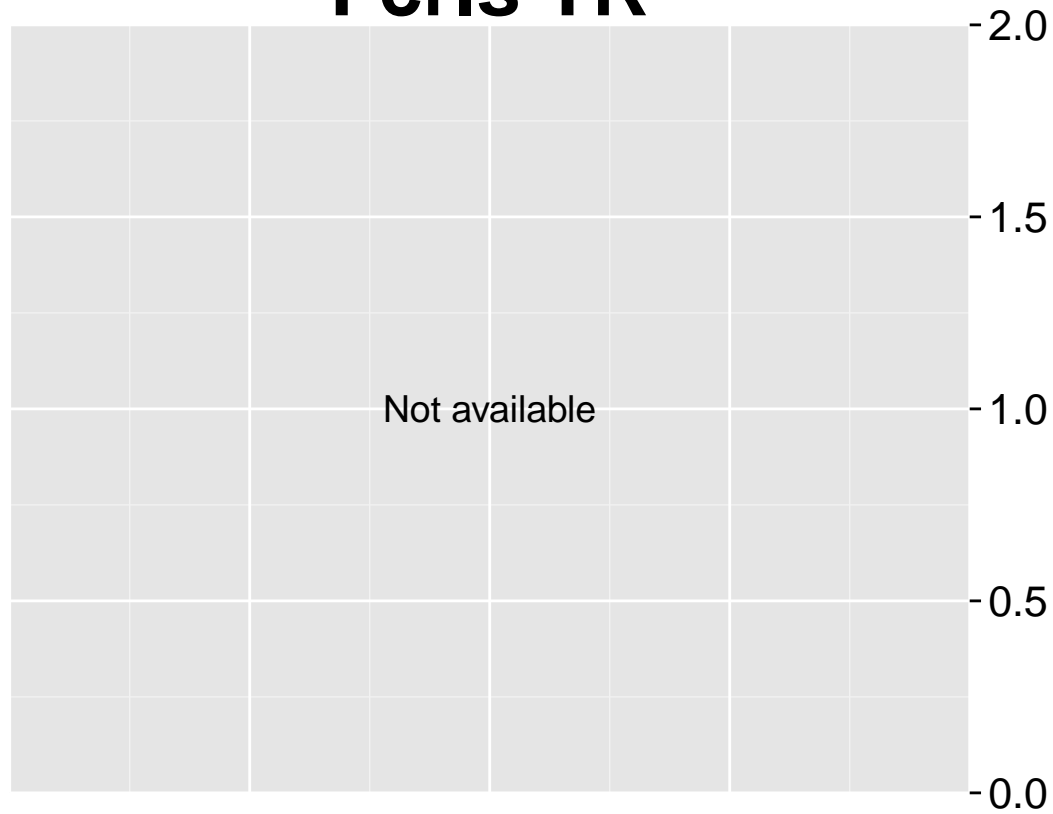

**FcrIs log2(Ribosome occupancy)**

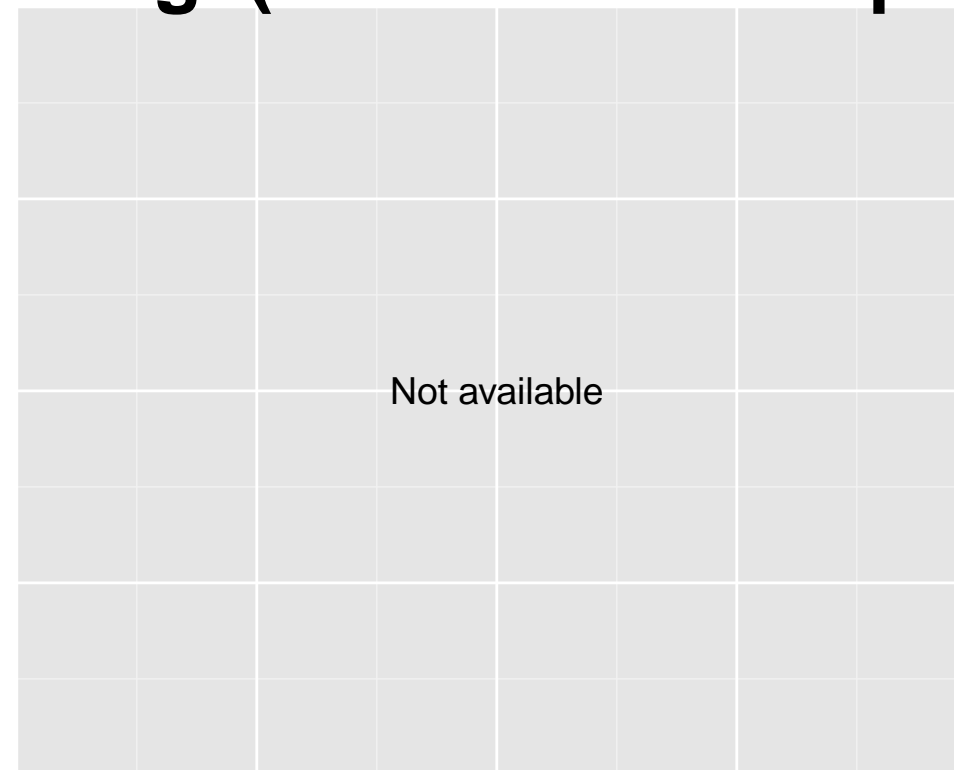

Supplement: Supplementary file 1316 [file 1]

# Tmem37

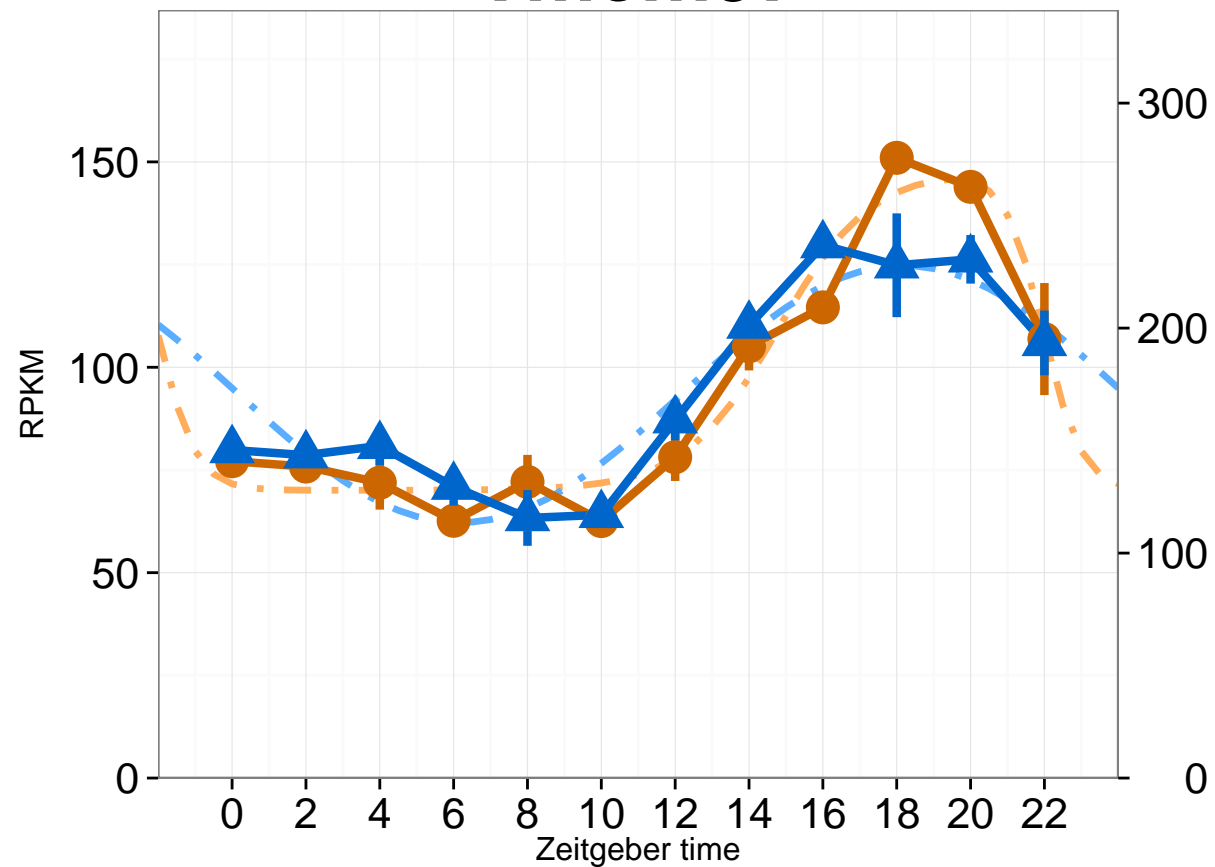

# Tmem37

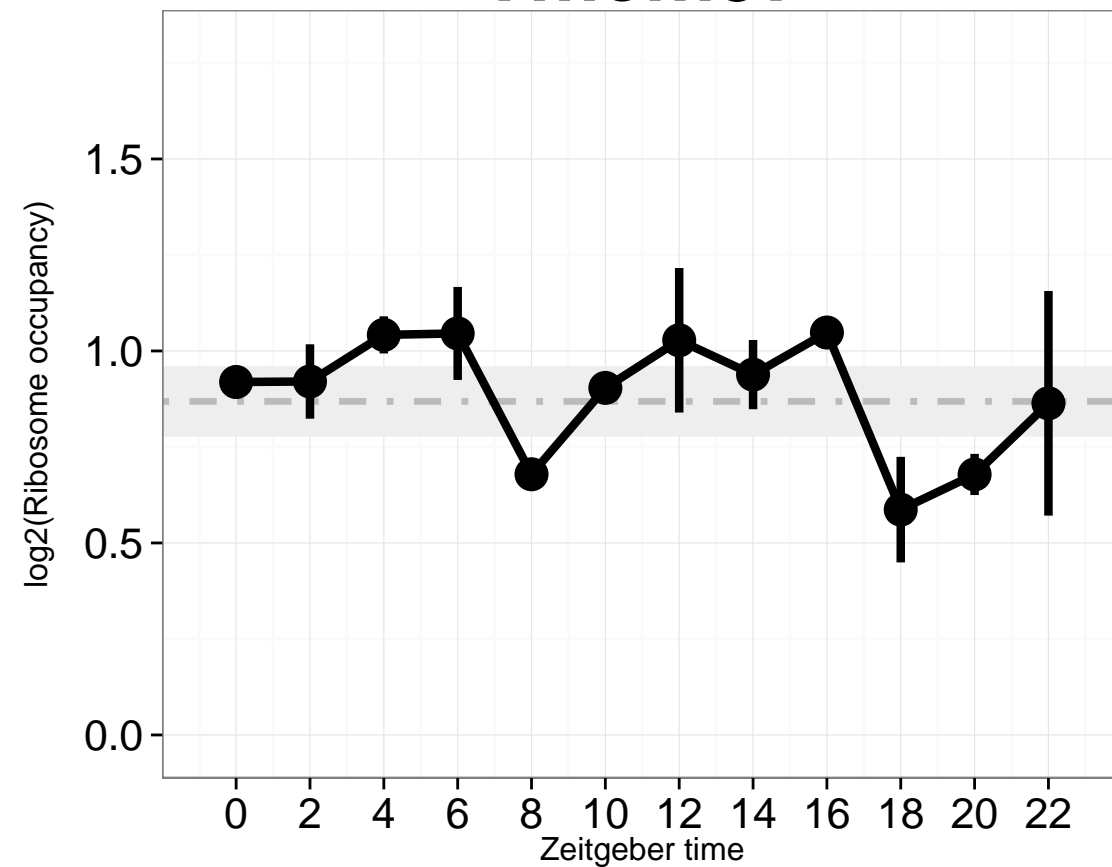

Supplement: Supplementary file 1317 [file 1]

**1110008P14Rik**

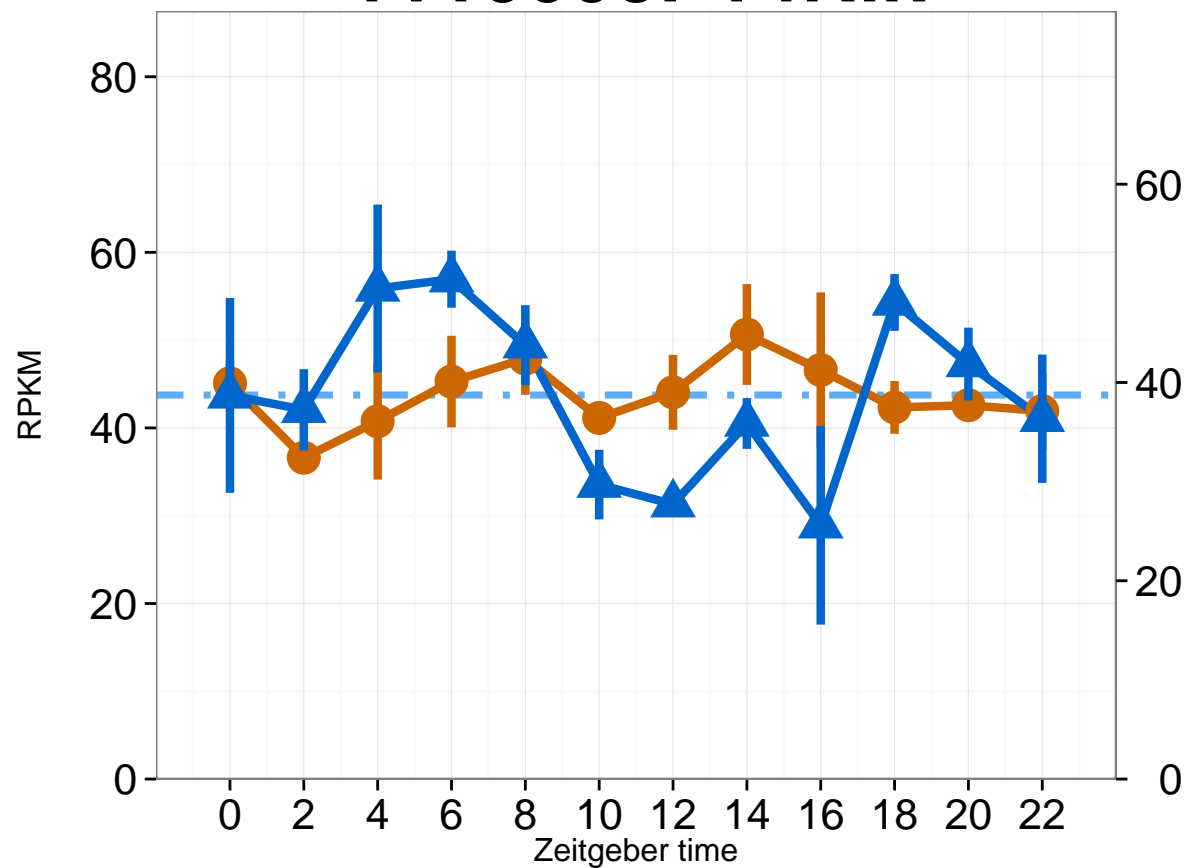

**1110008P14Rik**

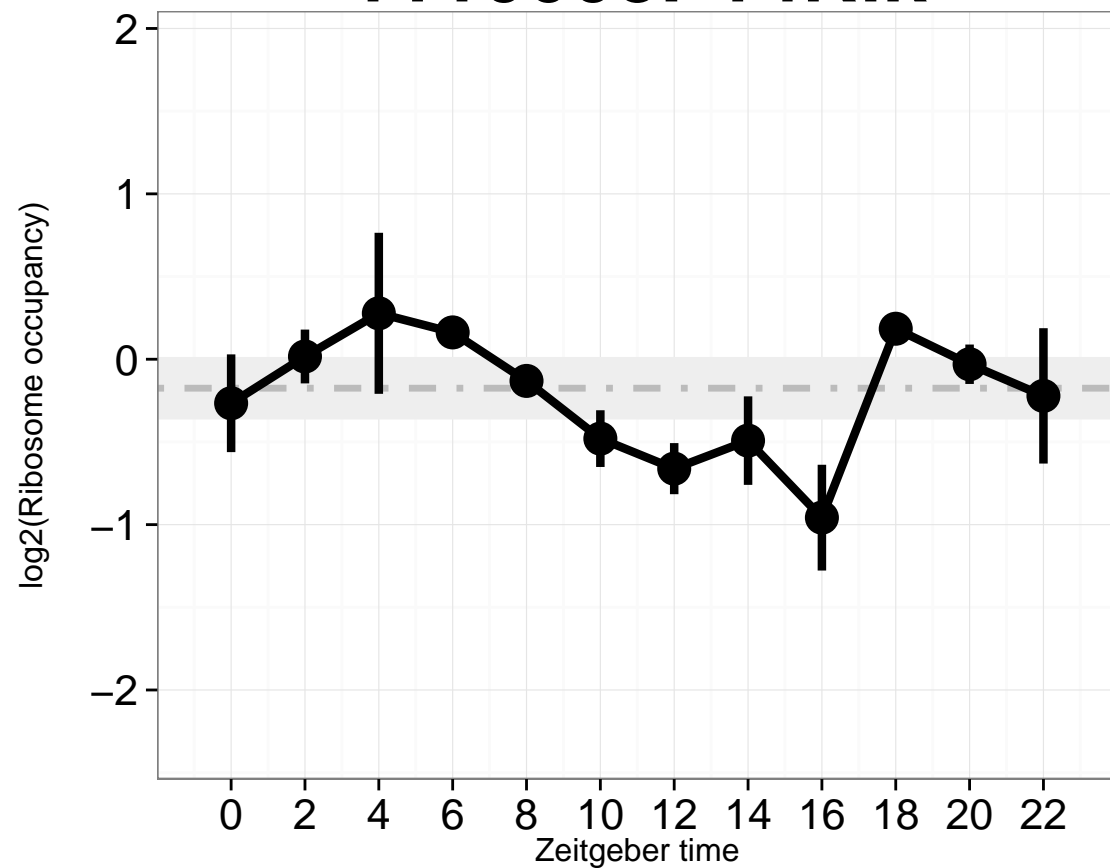

Supplement: Supplementary file 1318 [file 1]

# Ppp1r9a

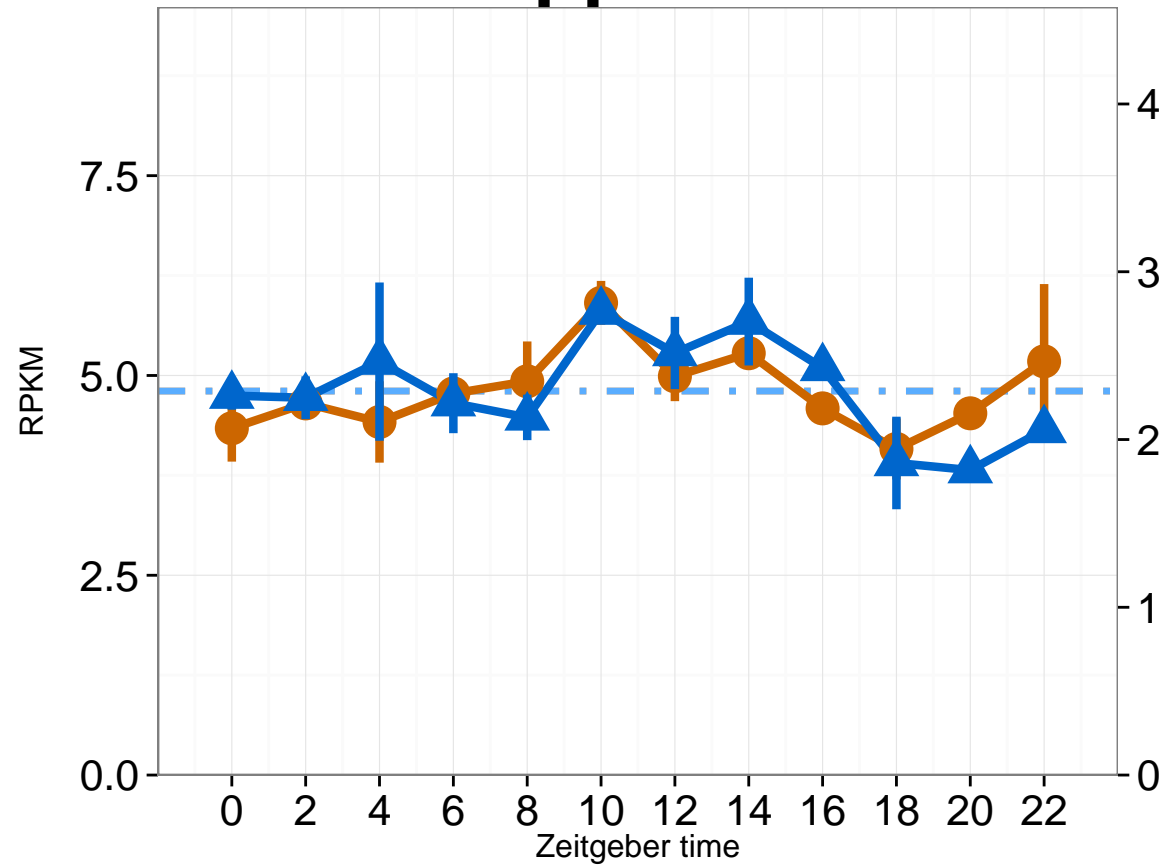

# Ppp1r9a

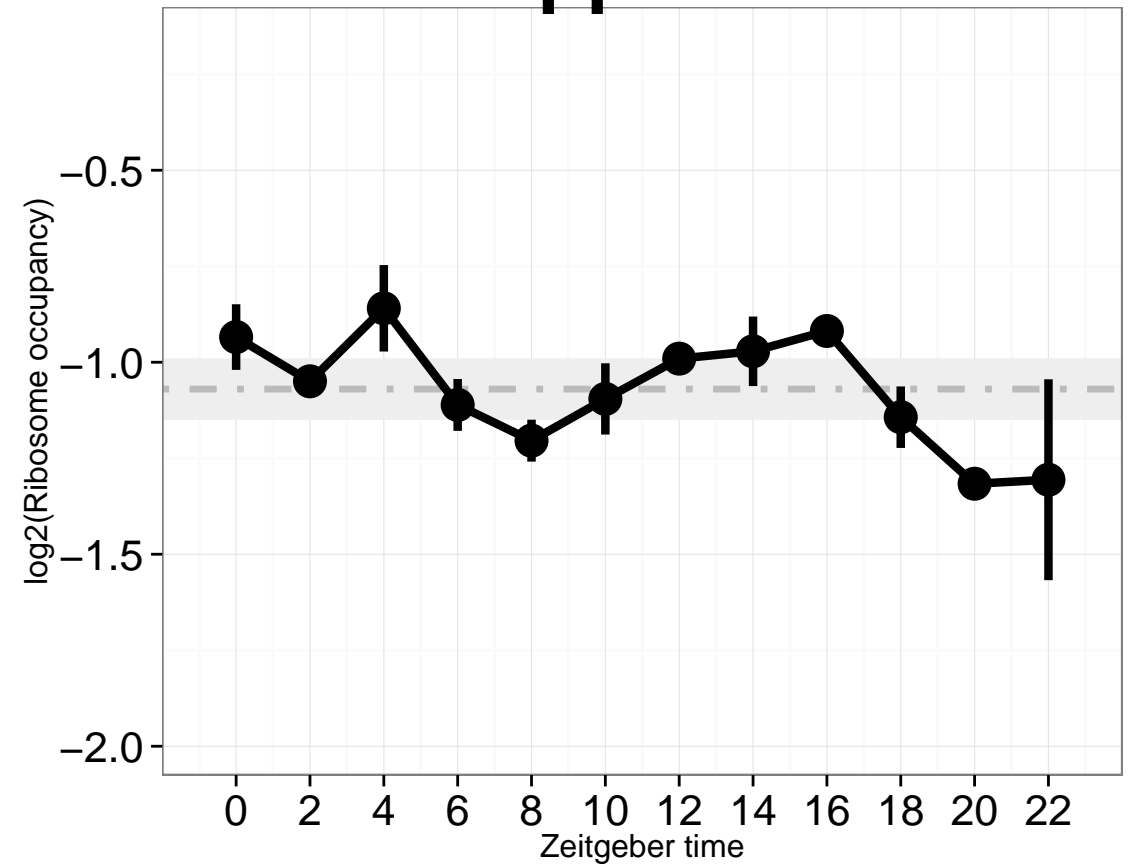

Supplement: Supplementary file 1319 [file 1]

# Epb4.1l4b

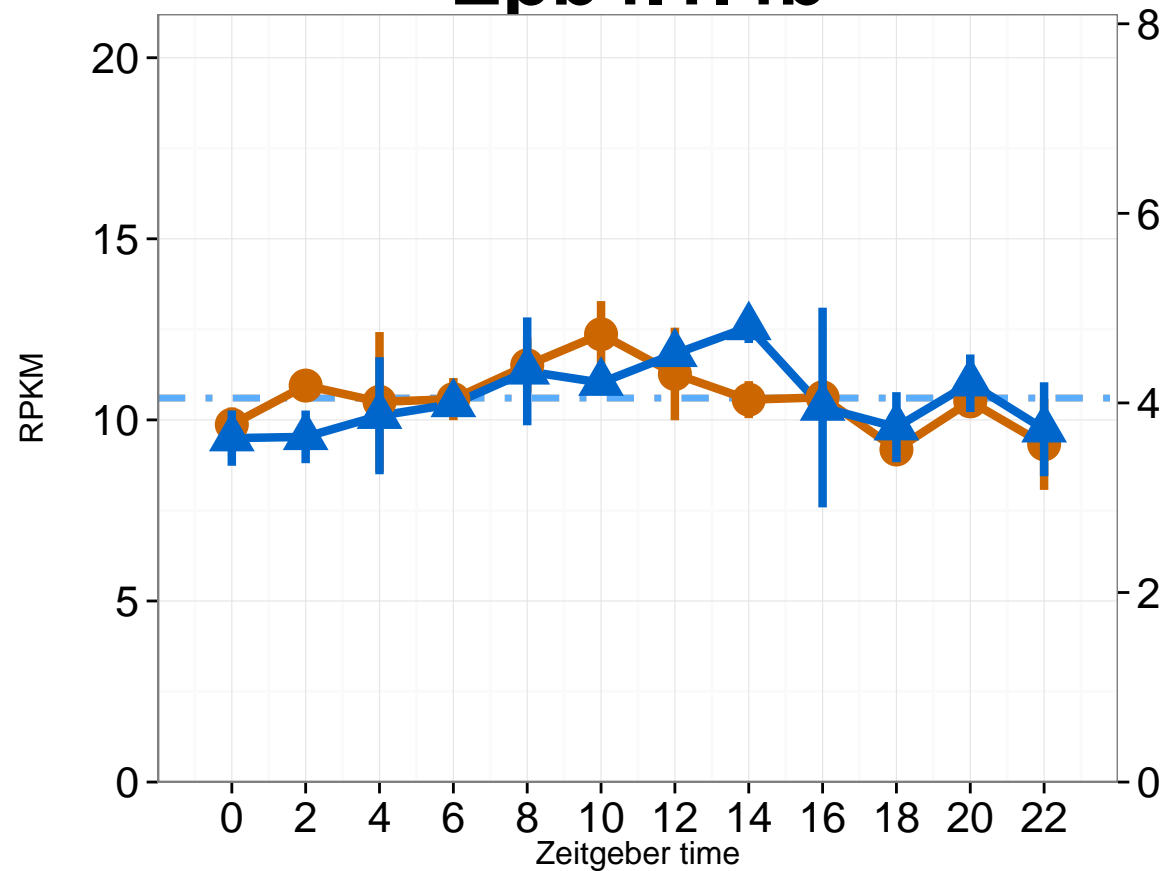

# Epb4.1l4b

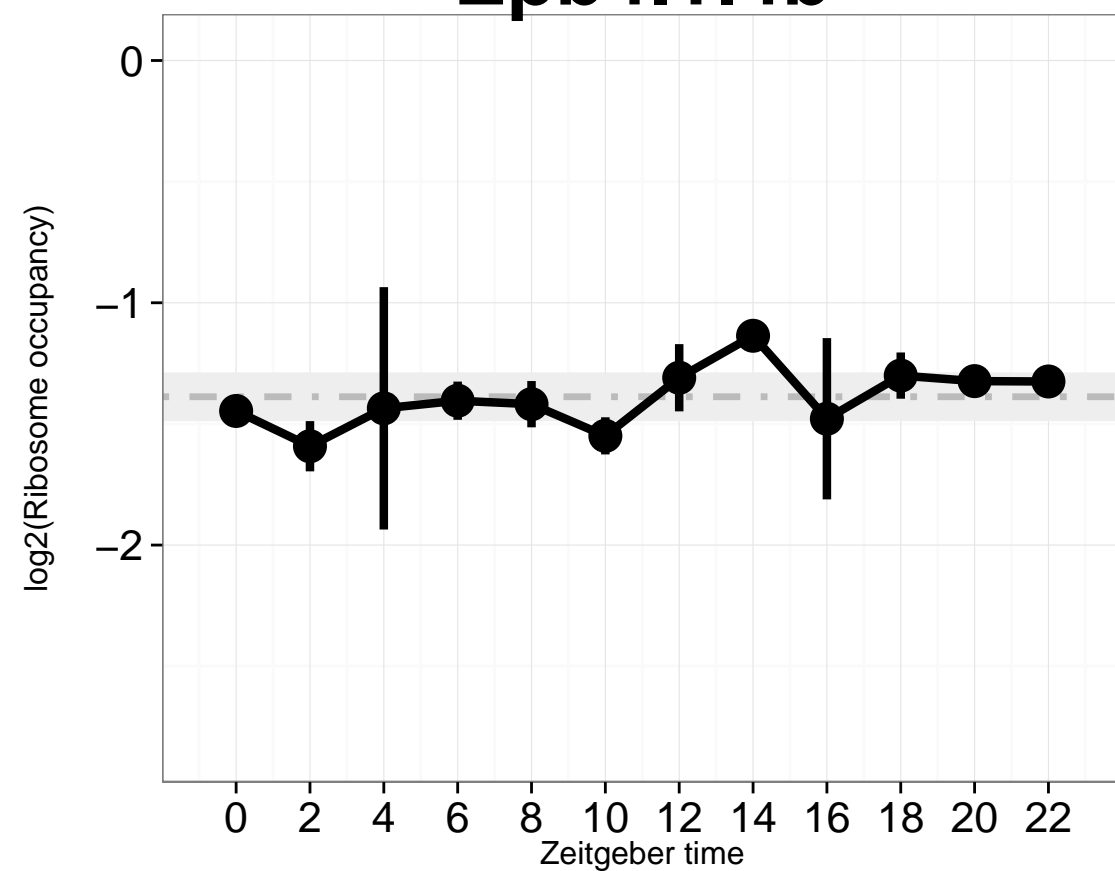

Supplement: Supplementary file 1320 [file 1]

## Fbxo21

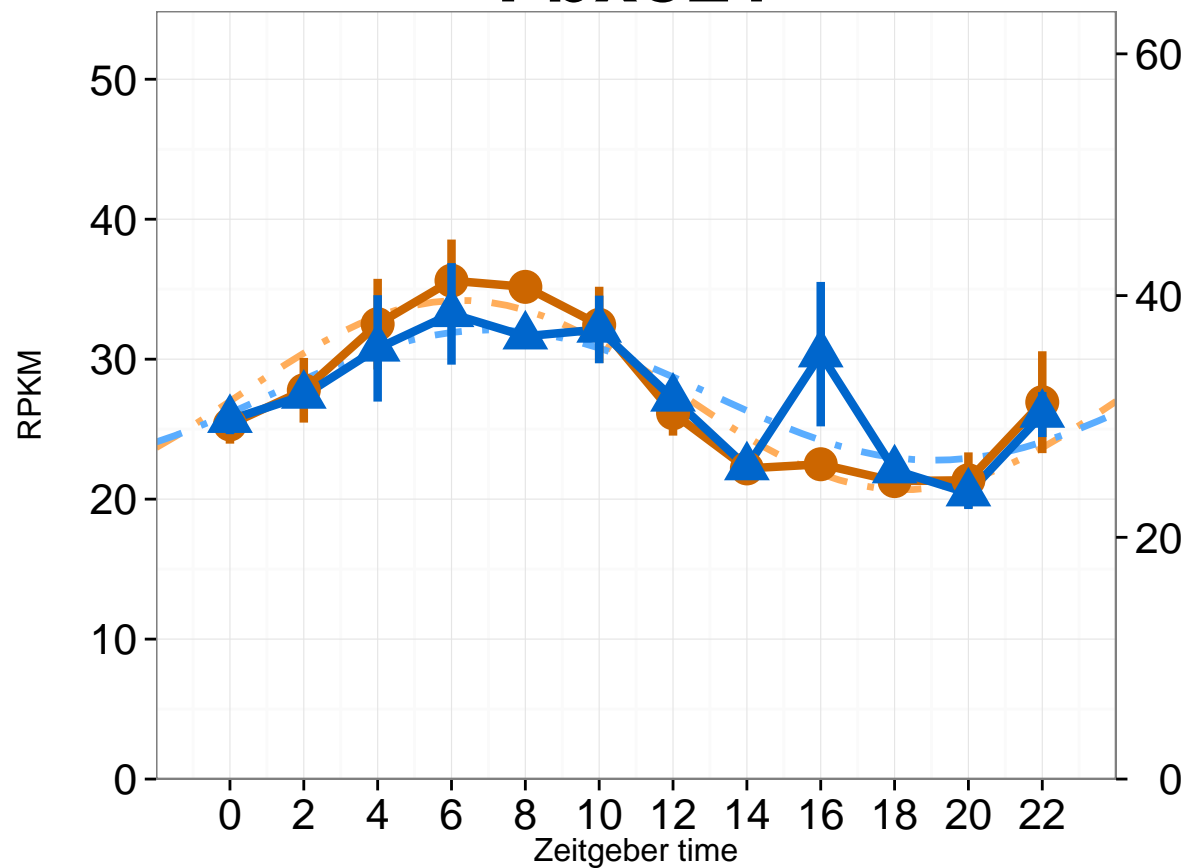

## Fbxo21

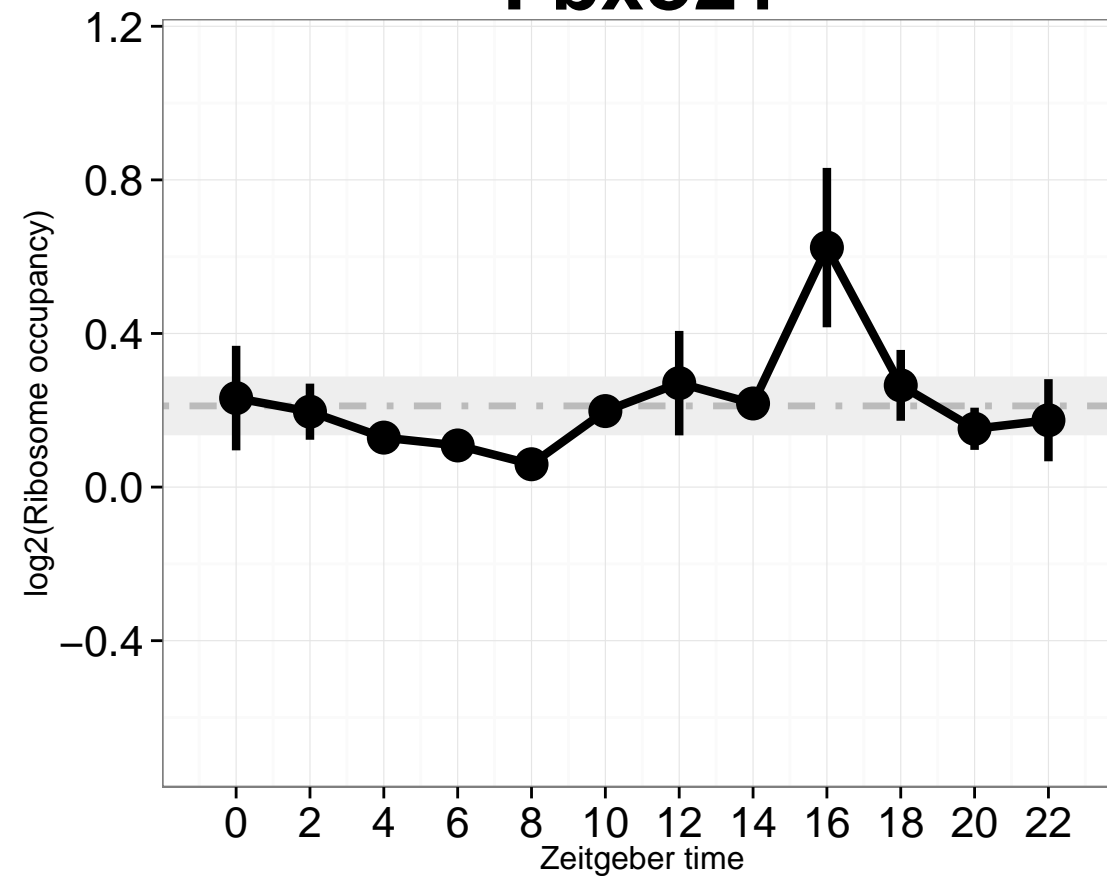

Supplement: Supplementary file 1321 [file 1]

## Rab33b

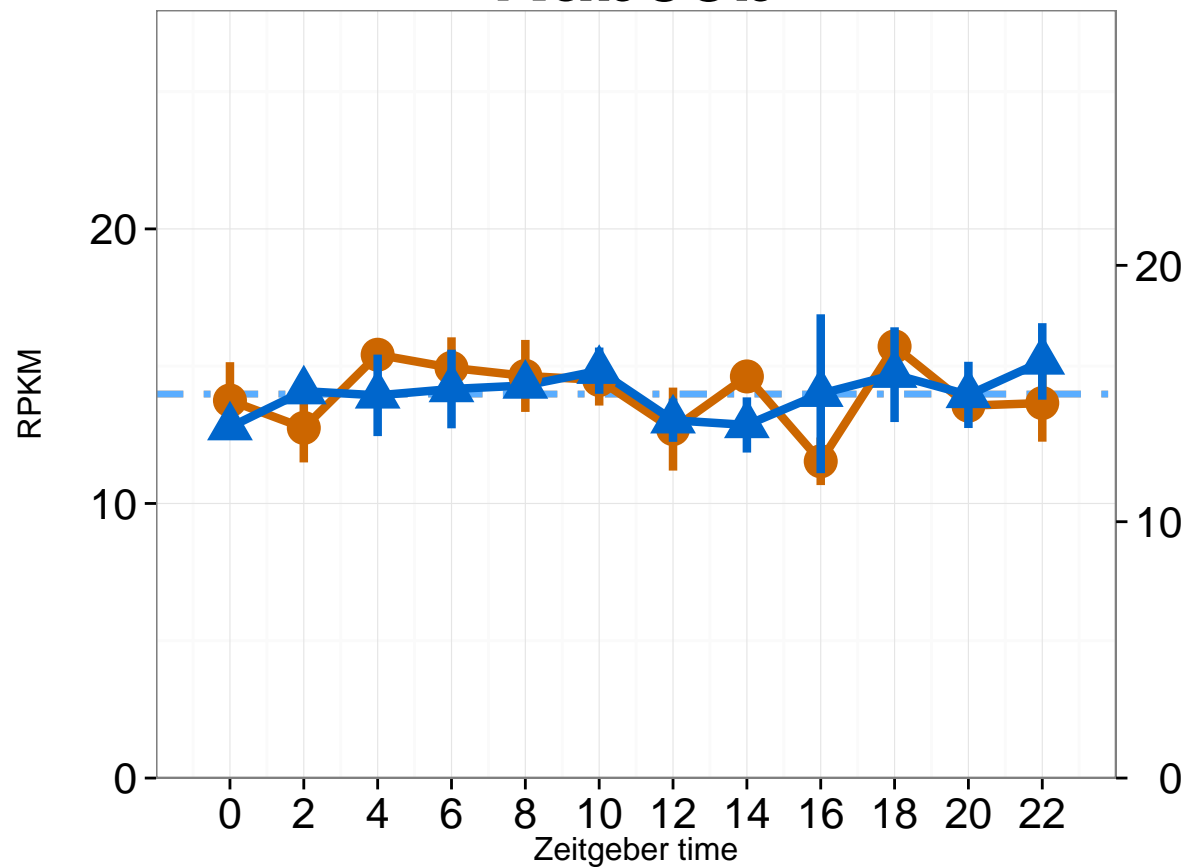

## Rab33b

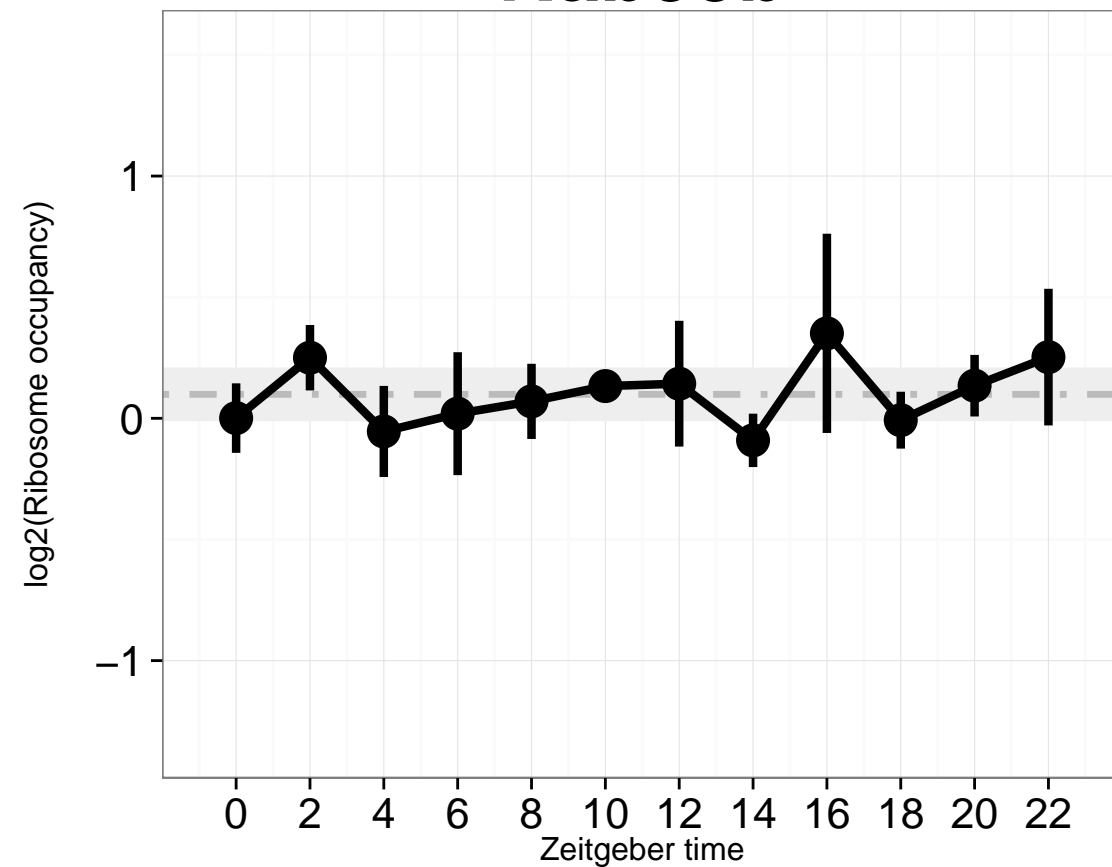

Supplement: Supplementary file 1322 [file 1]

# Mrpl40

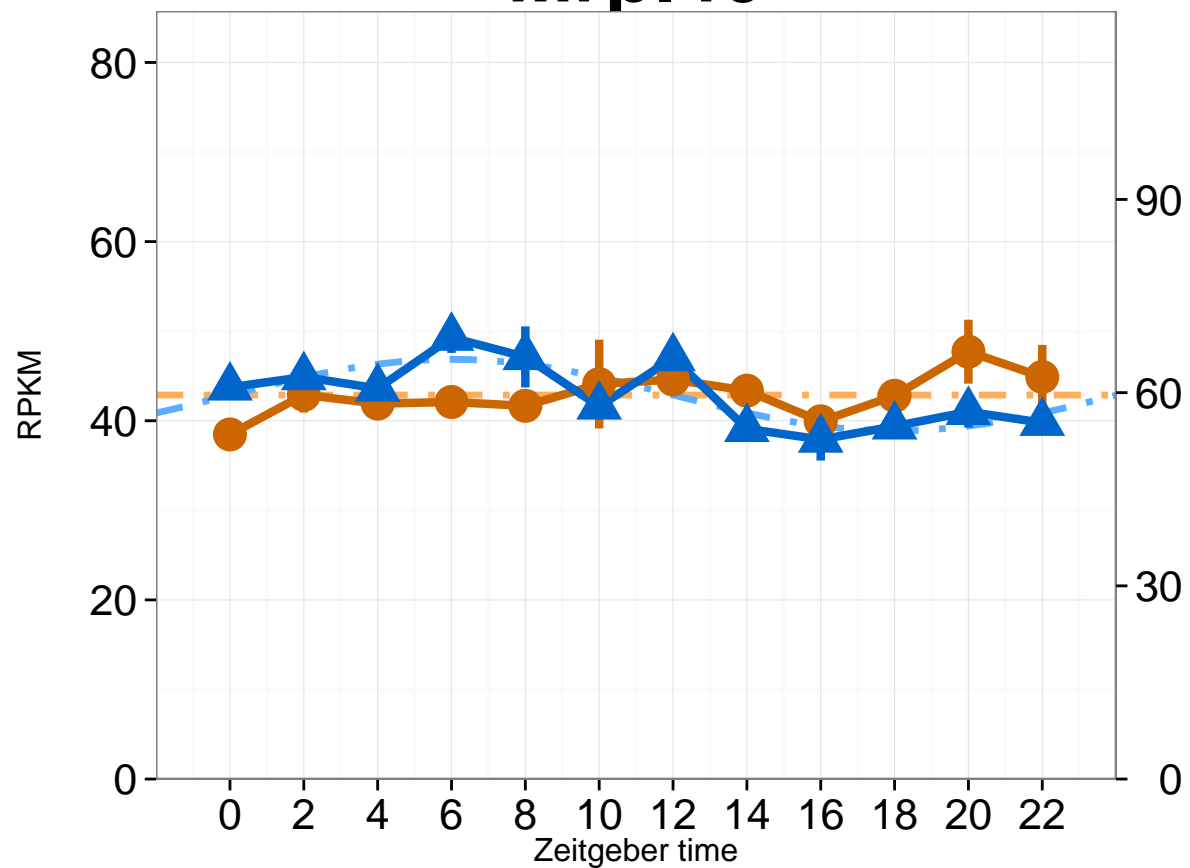

# Mrpl40

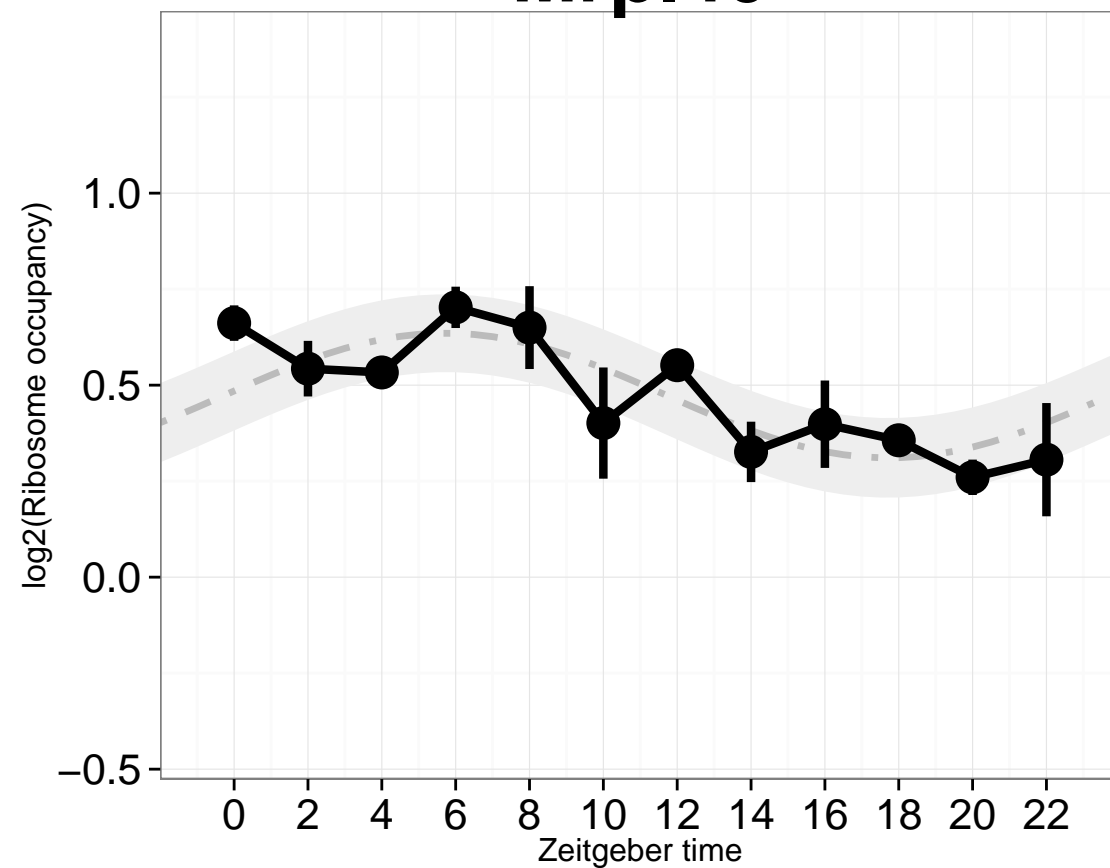

Supplement: Supplementary file 1323 [file 1]

## Jund

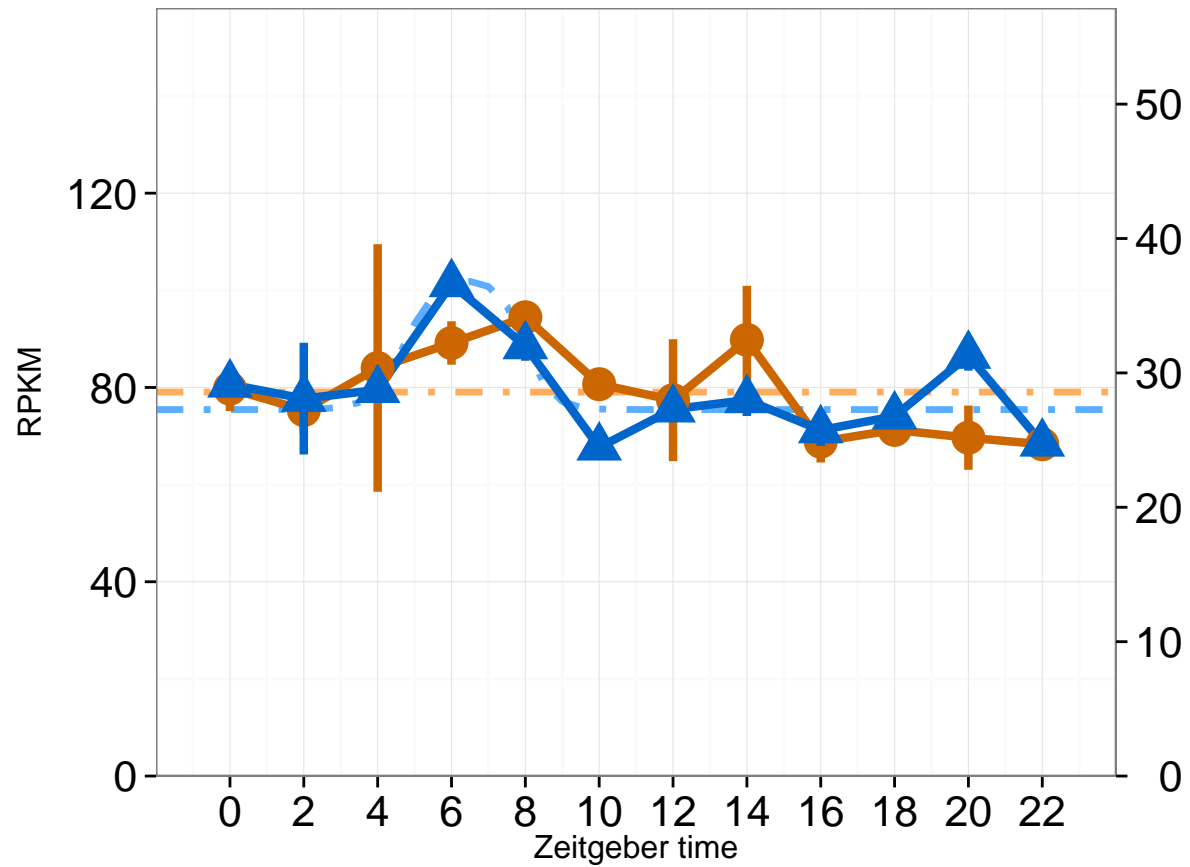

## Jund

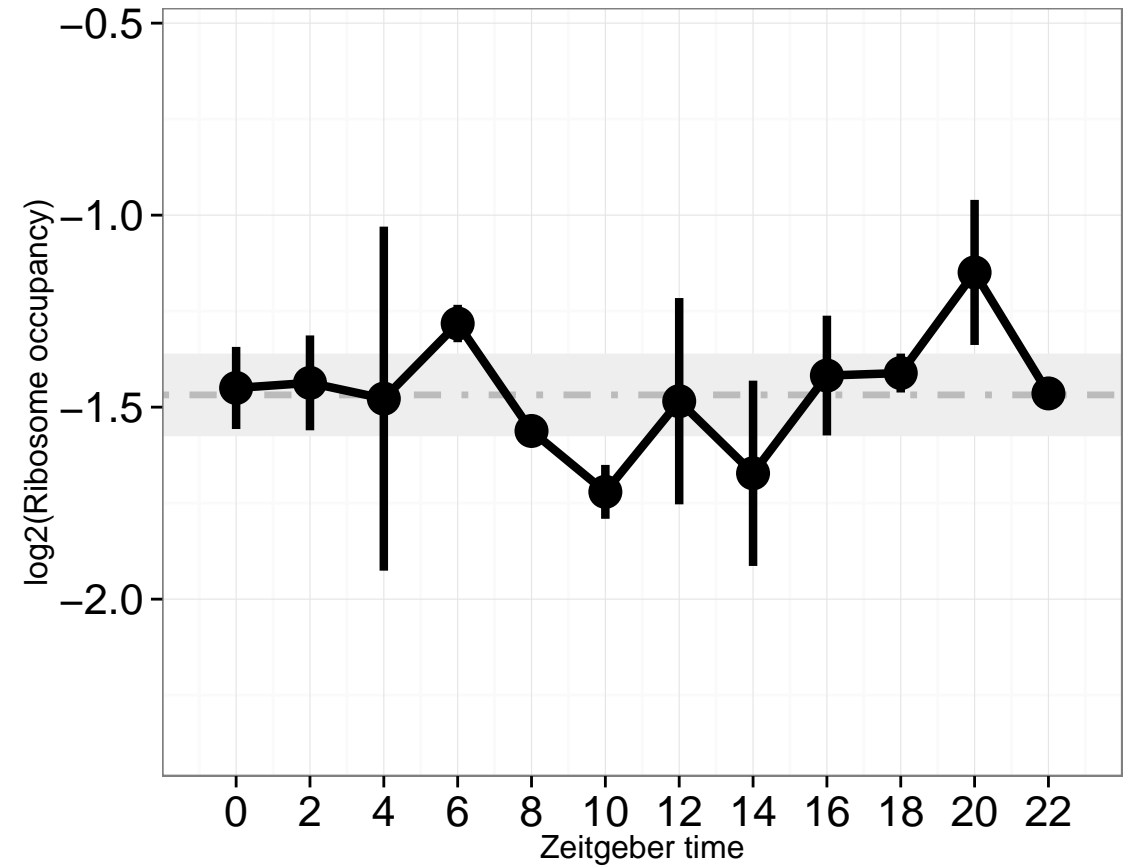

Supplement: Supplementary file 1324 [file 1]

## Chl1

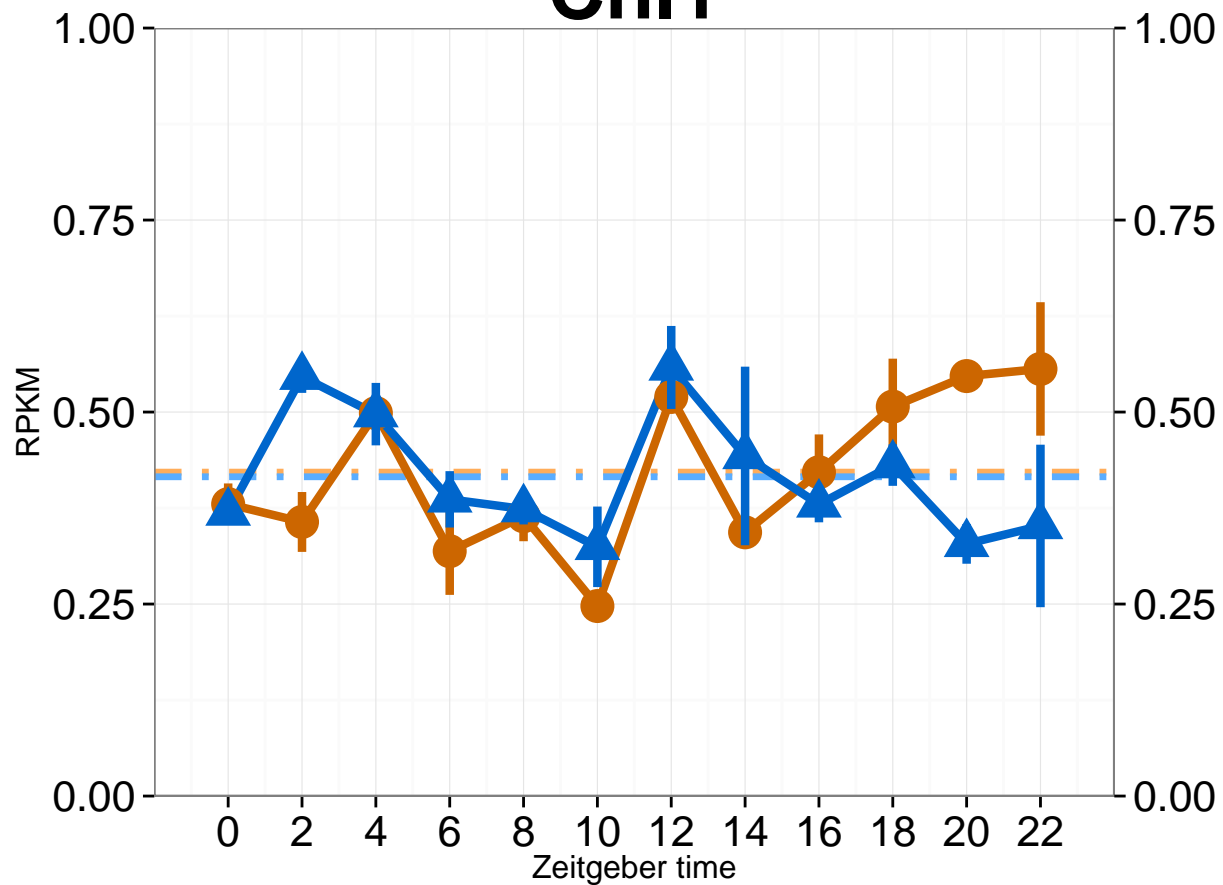

## Chl1

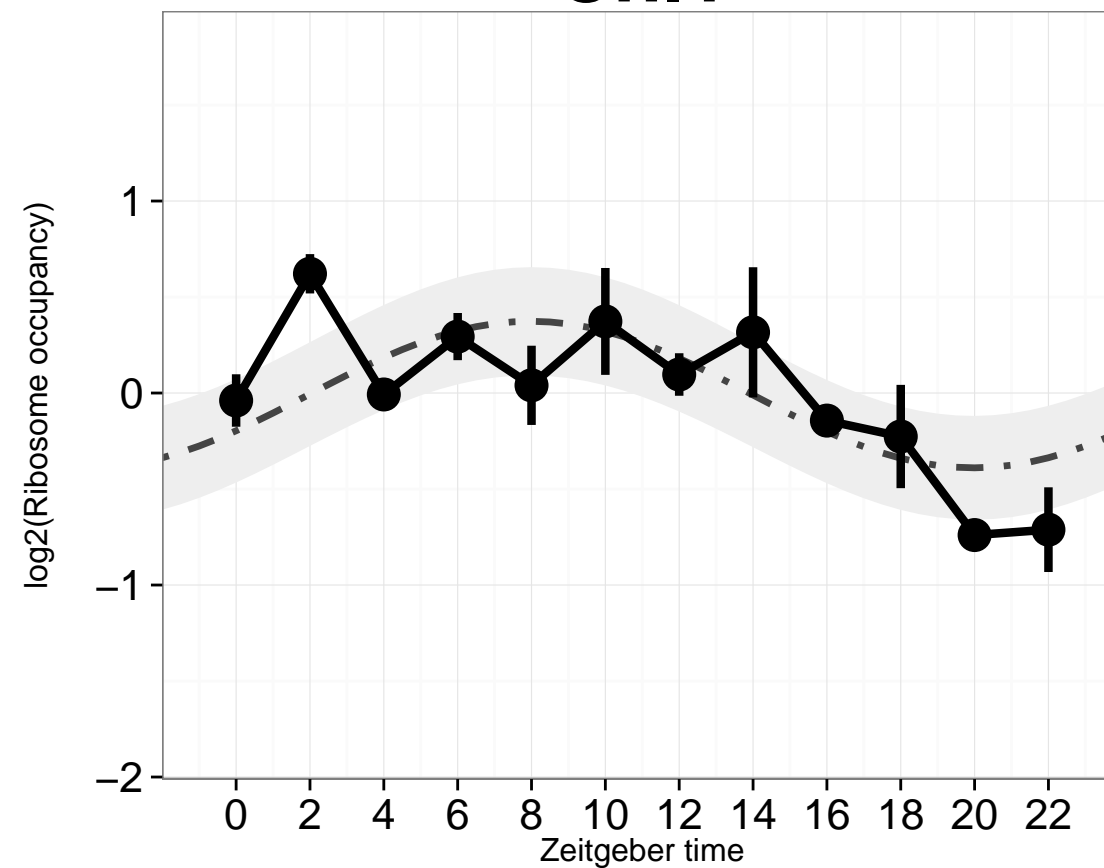

Supplement: Supplementary file 1325 [file 1]

## Aspdh

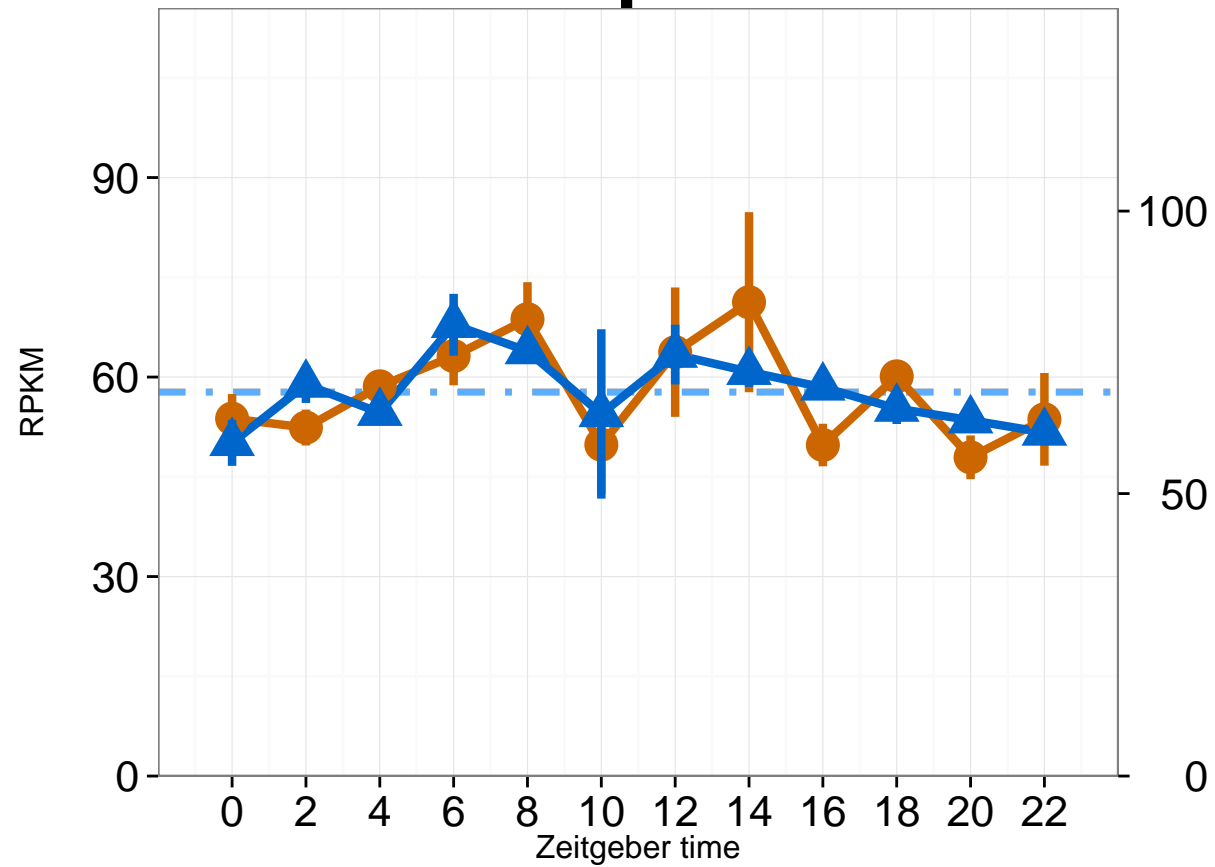

## Aspdh

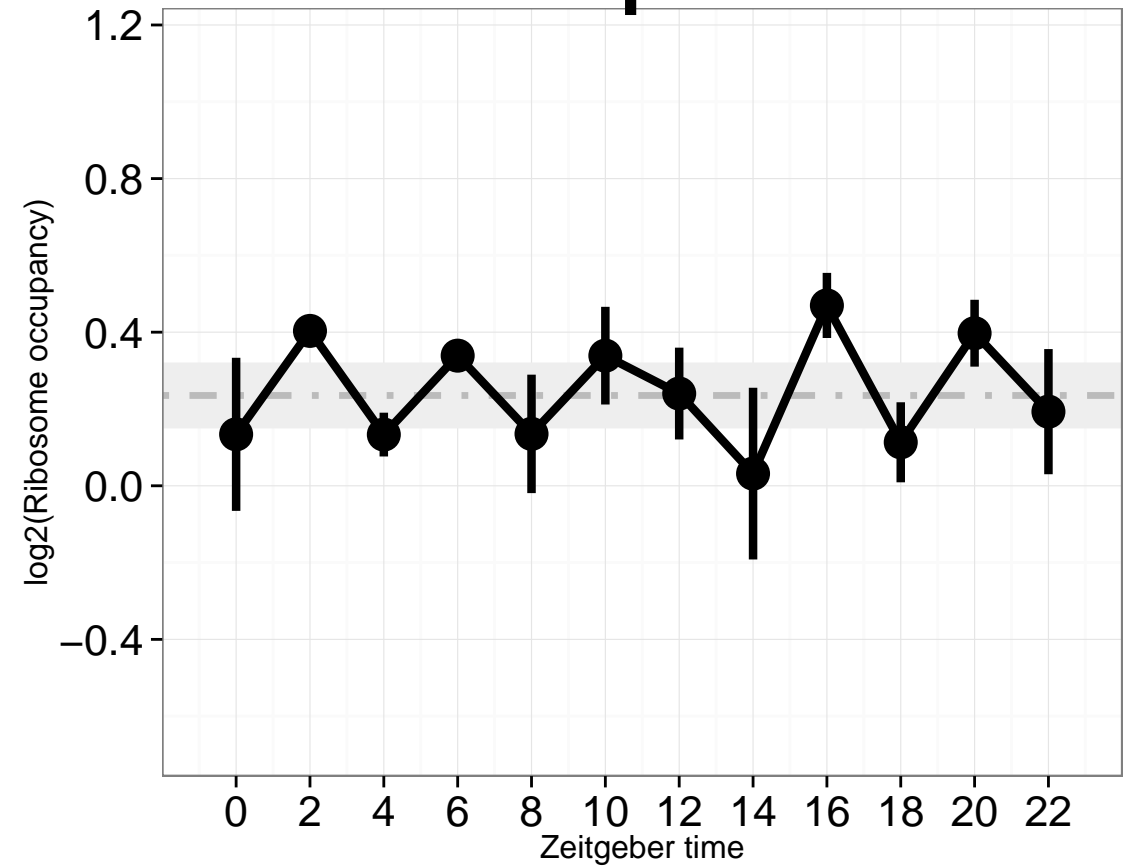

Supplement: Supplementary file 1326 [file 1]

## Psenen

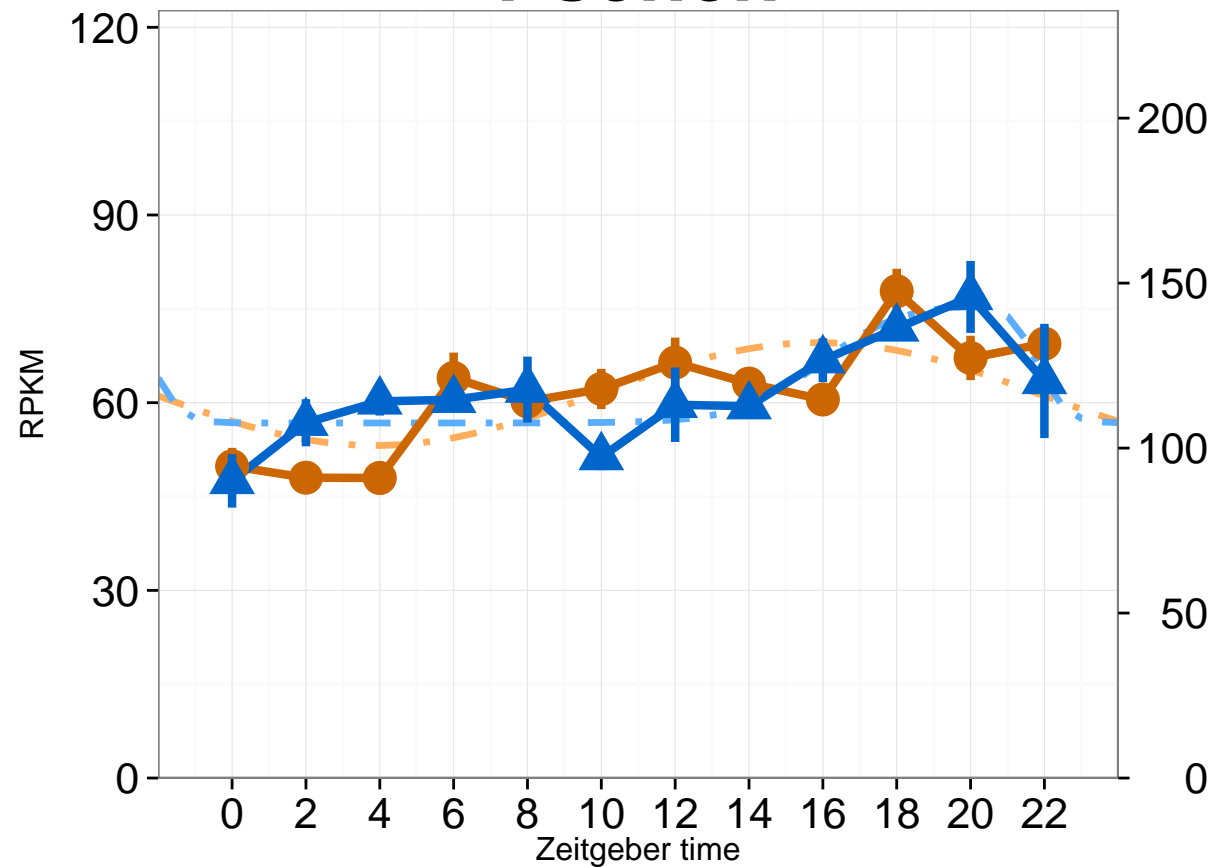

## Psenen

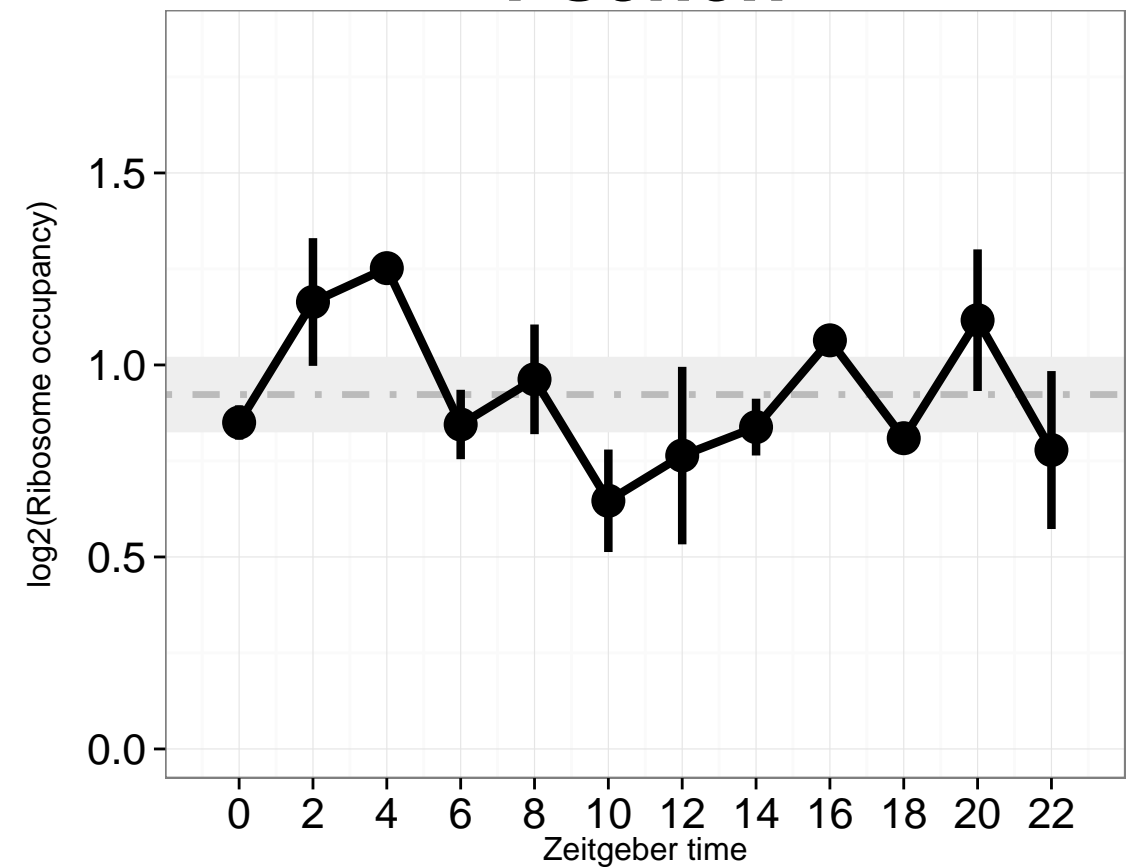

Supplement: Supplementary file 1327 [file 1]

# Hspb8

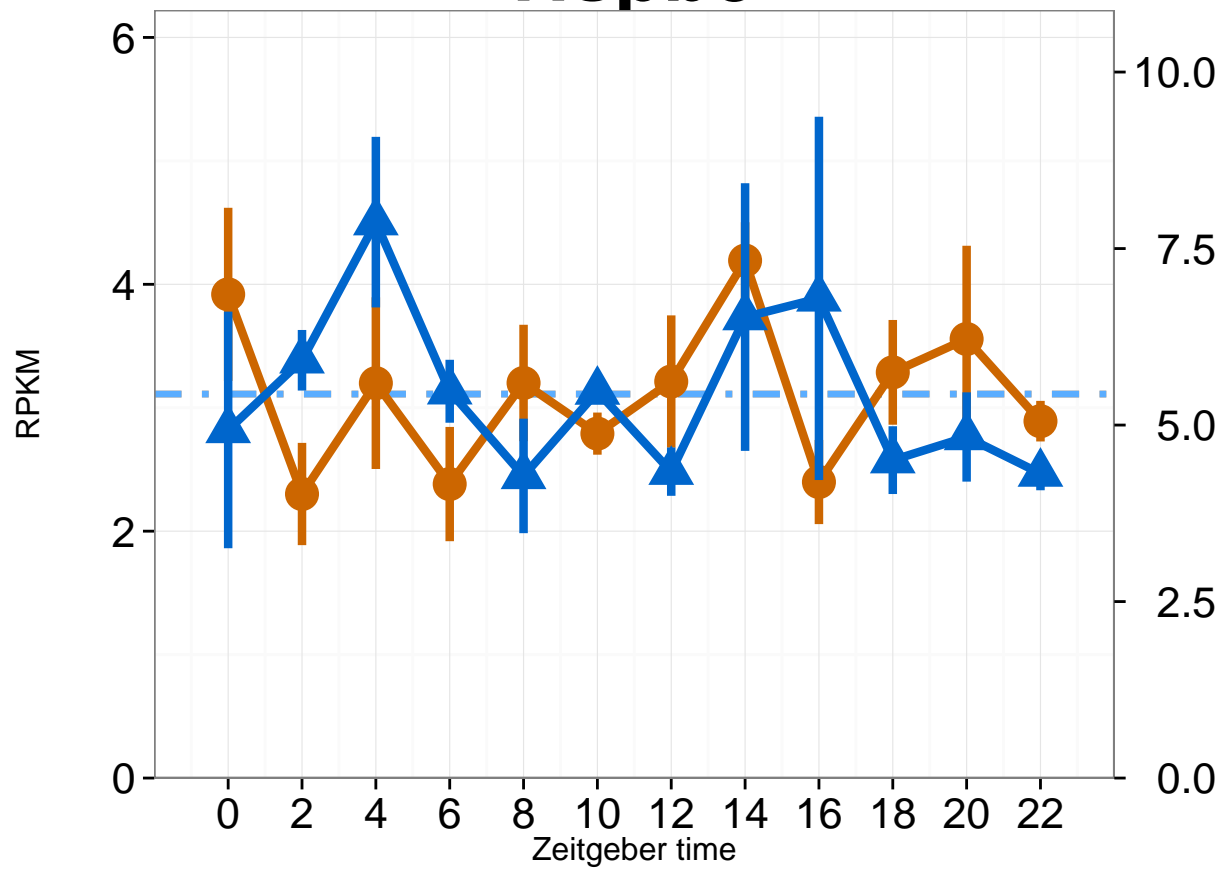

# Hspb8

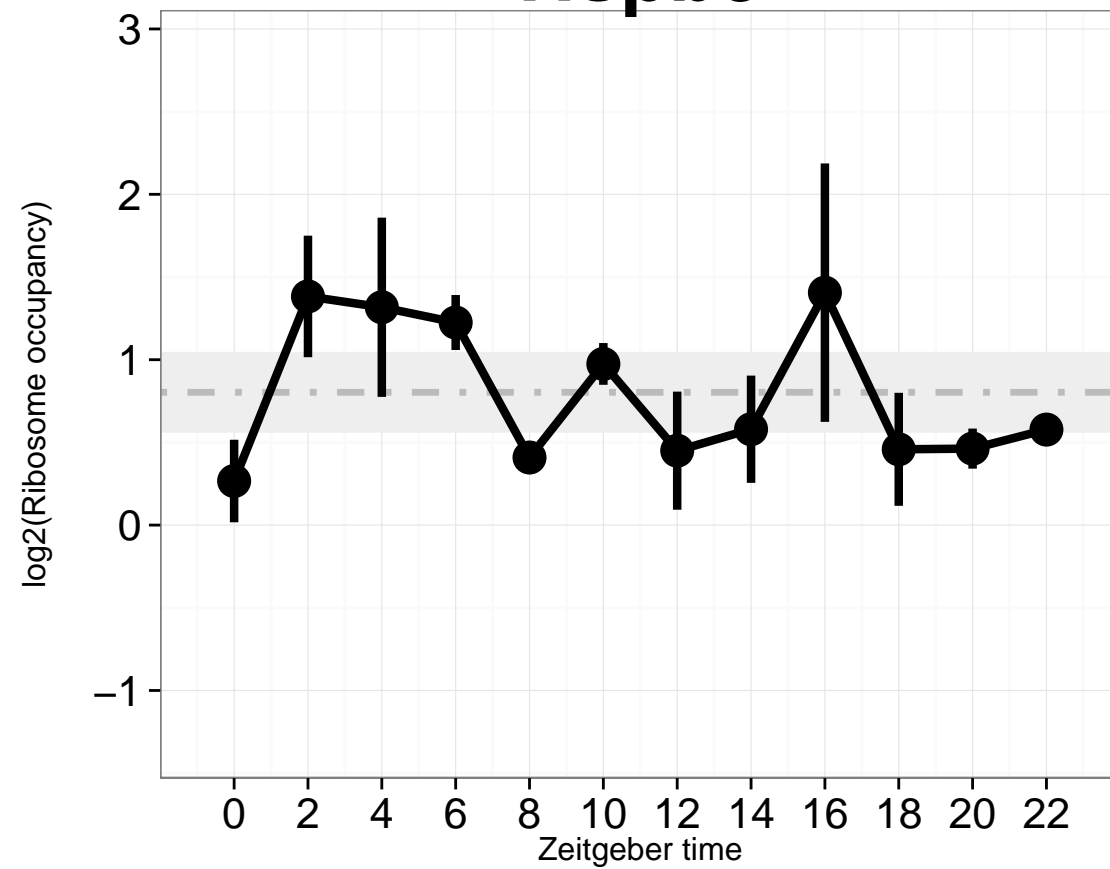

Supplement: Supplementary file 1328 [file 1]

# Col6a4

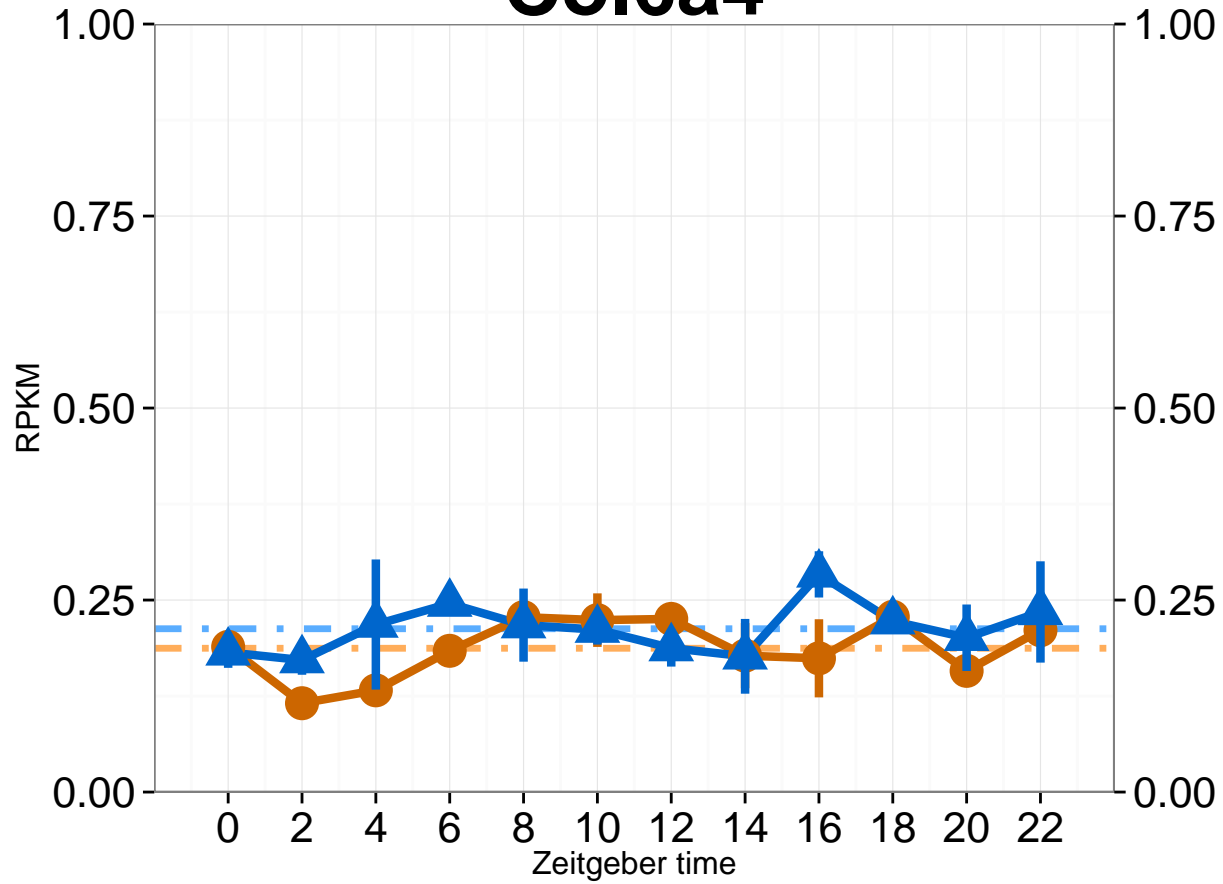

# Col6a4

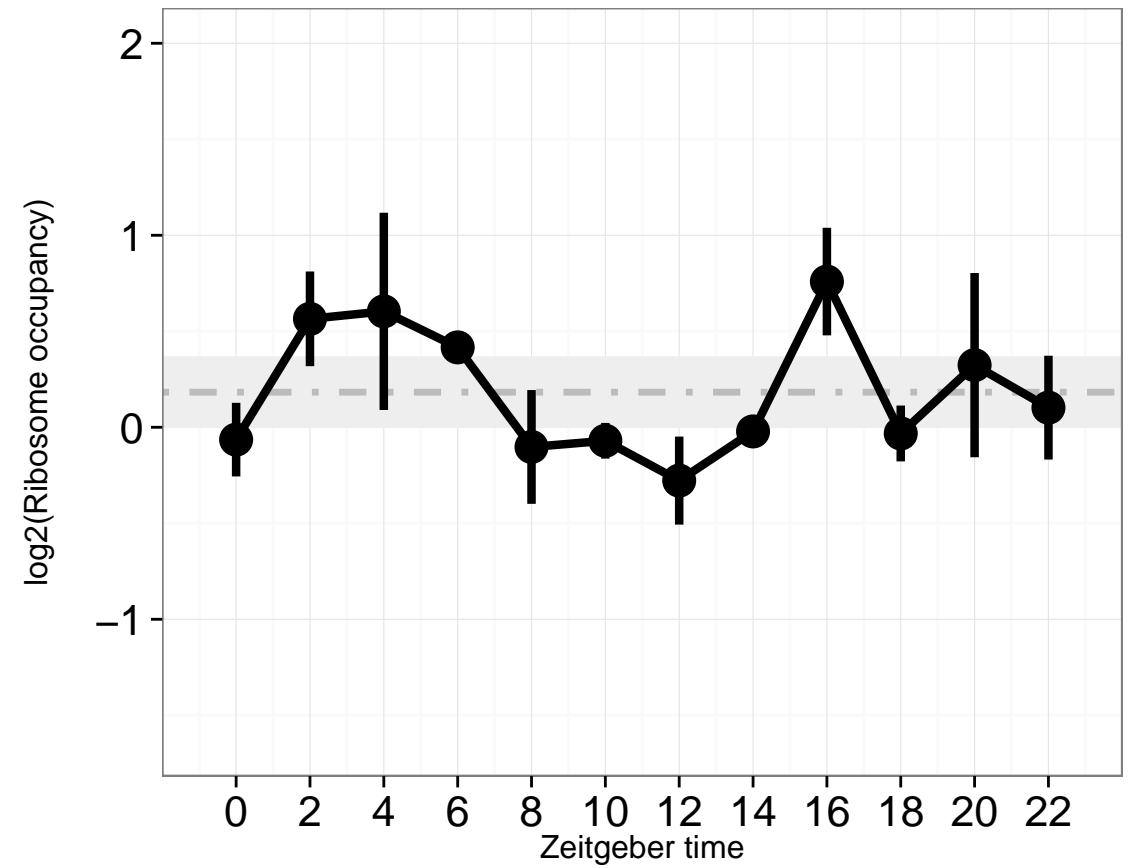

Supplement: Supplementary file 1329 [file 1]

## Abi3bp

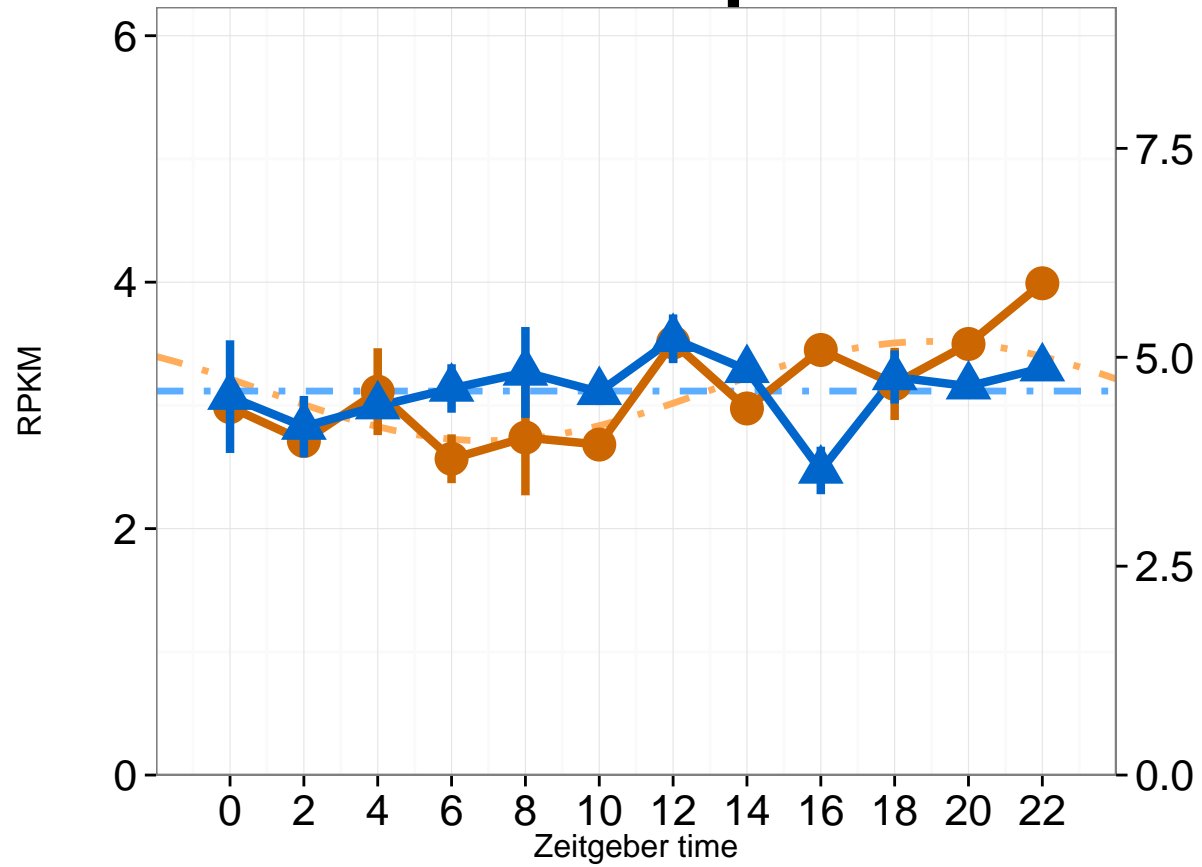

## Abi3bp

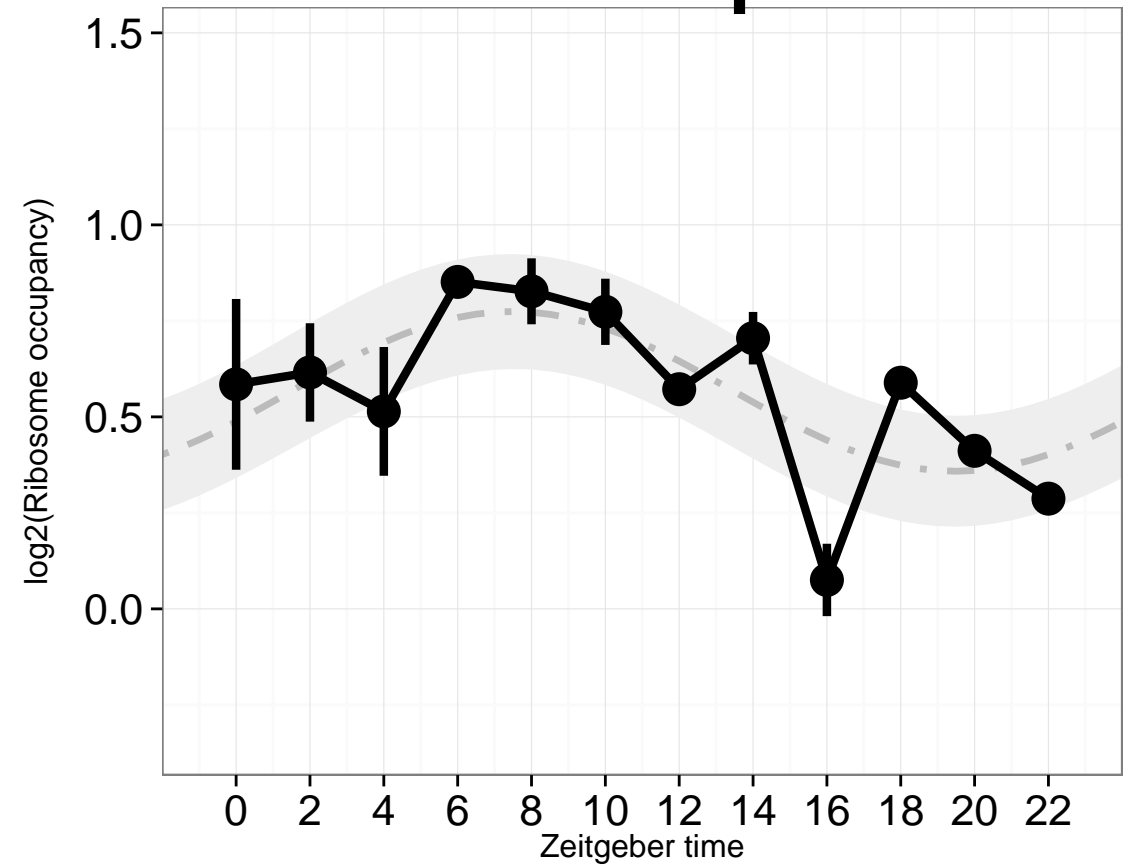

Supplement: Supplementary file 1330 [file 1]

## Prex2

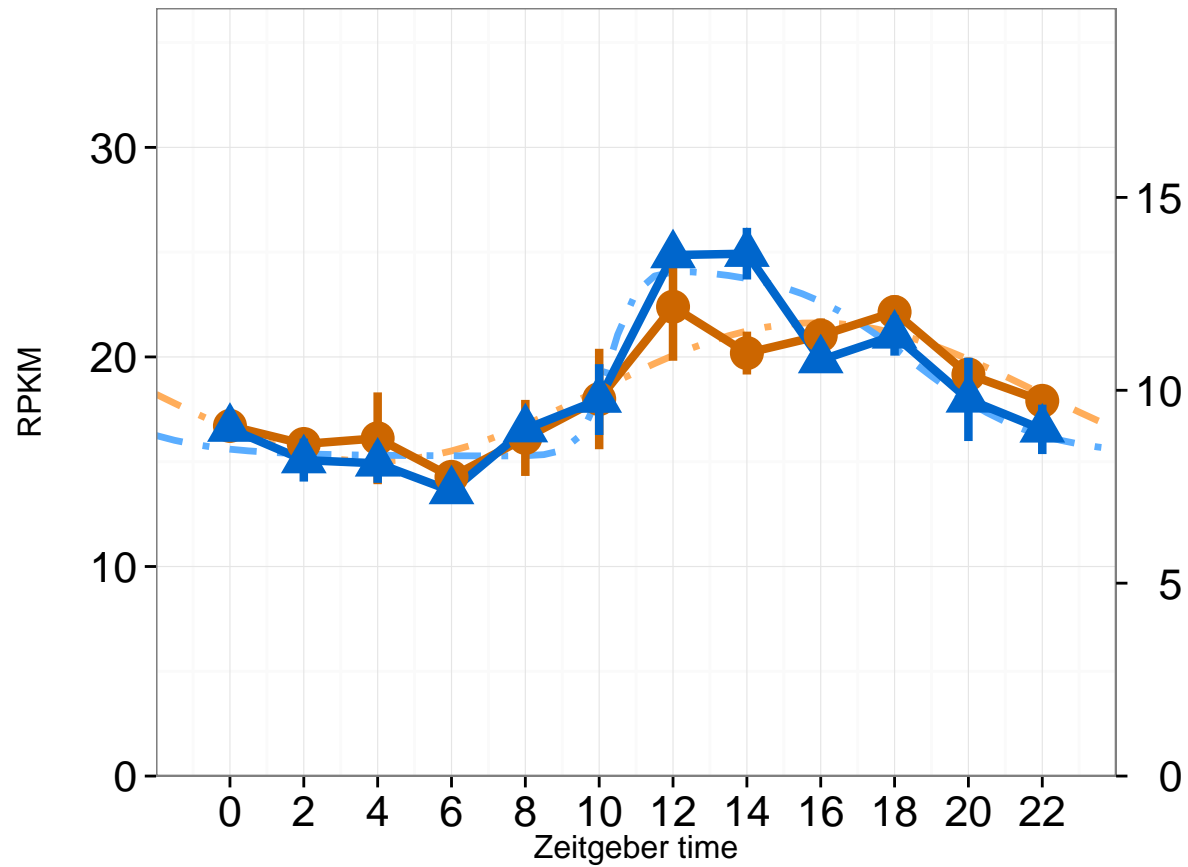

## Prex2

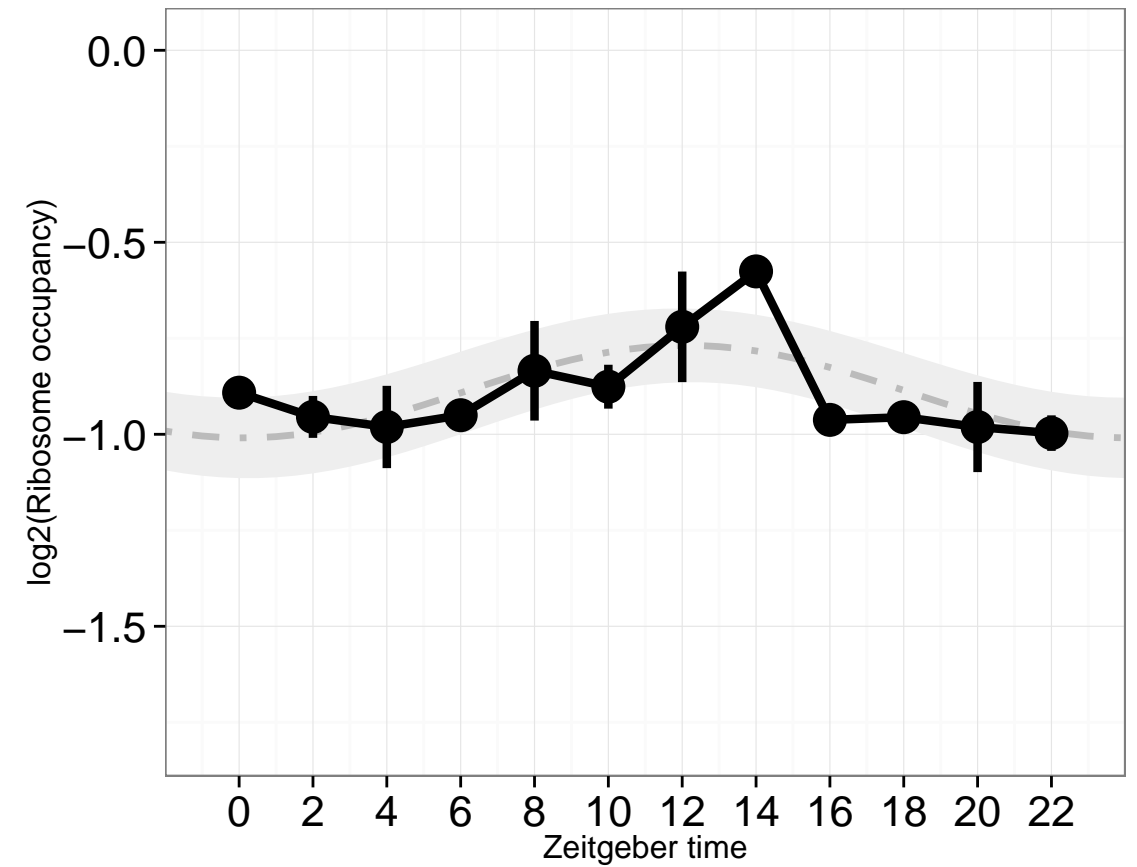

Supplement: Supplementary file 1331 [file 1]

# Hspa12a

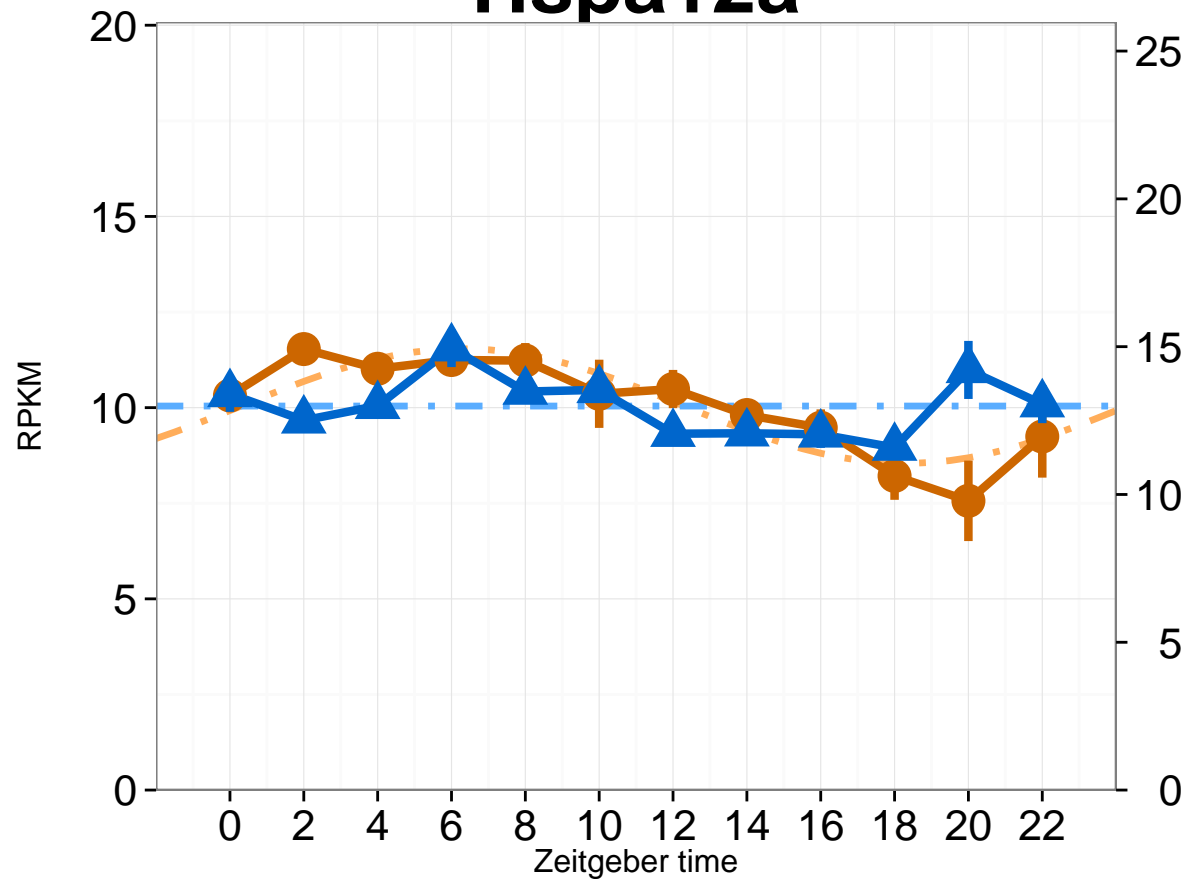

# Hspa12a

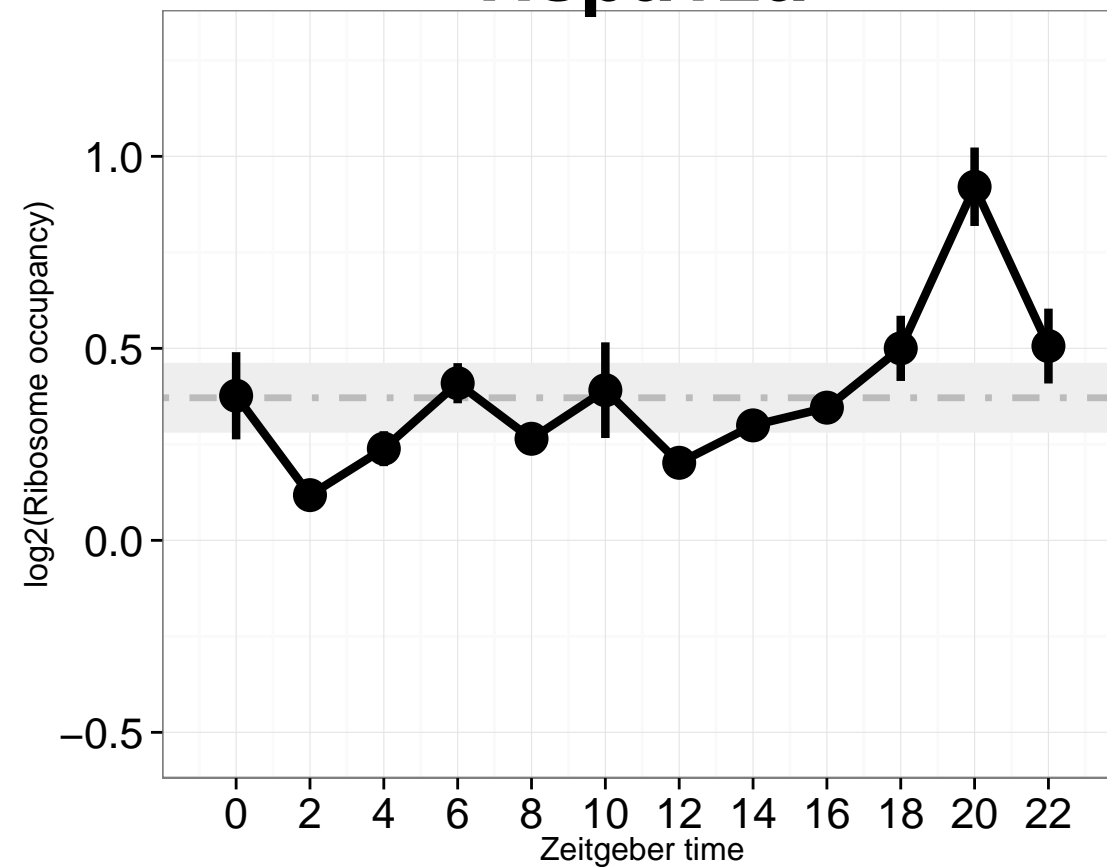

Supplement: Supplementary file 1332 [file 1]

## Ttc33

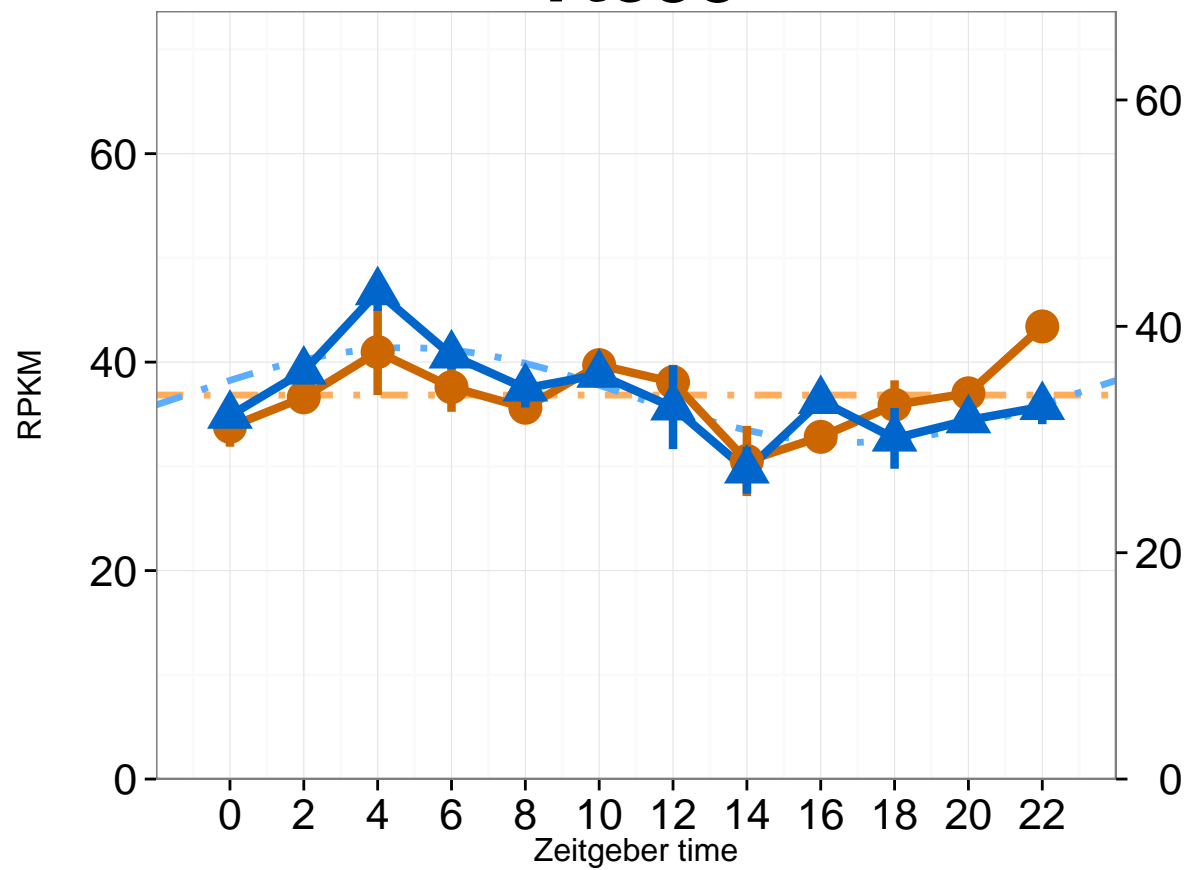

## Ttc33

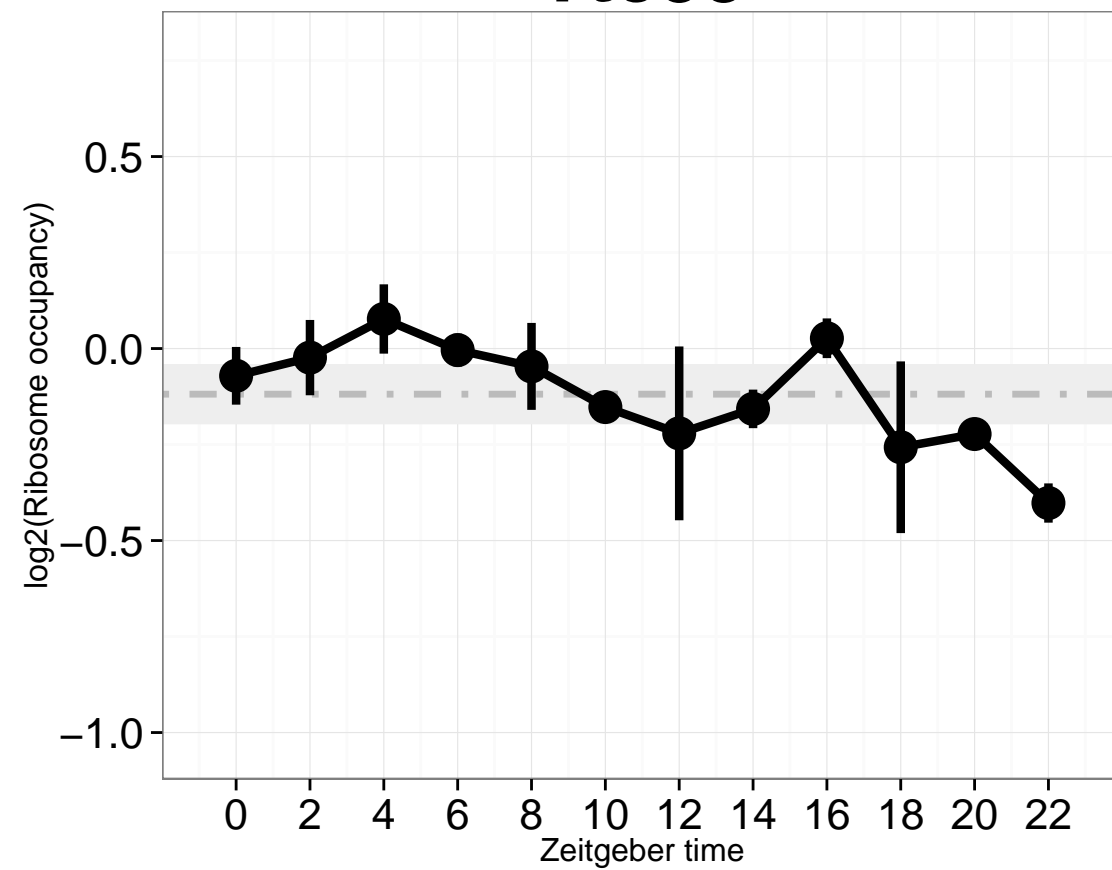

Supplement: Supplementary file 1333 [file 1]

# Pcdh7

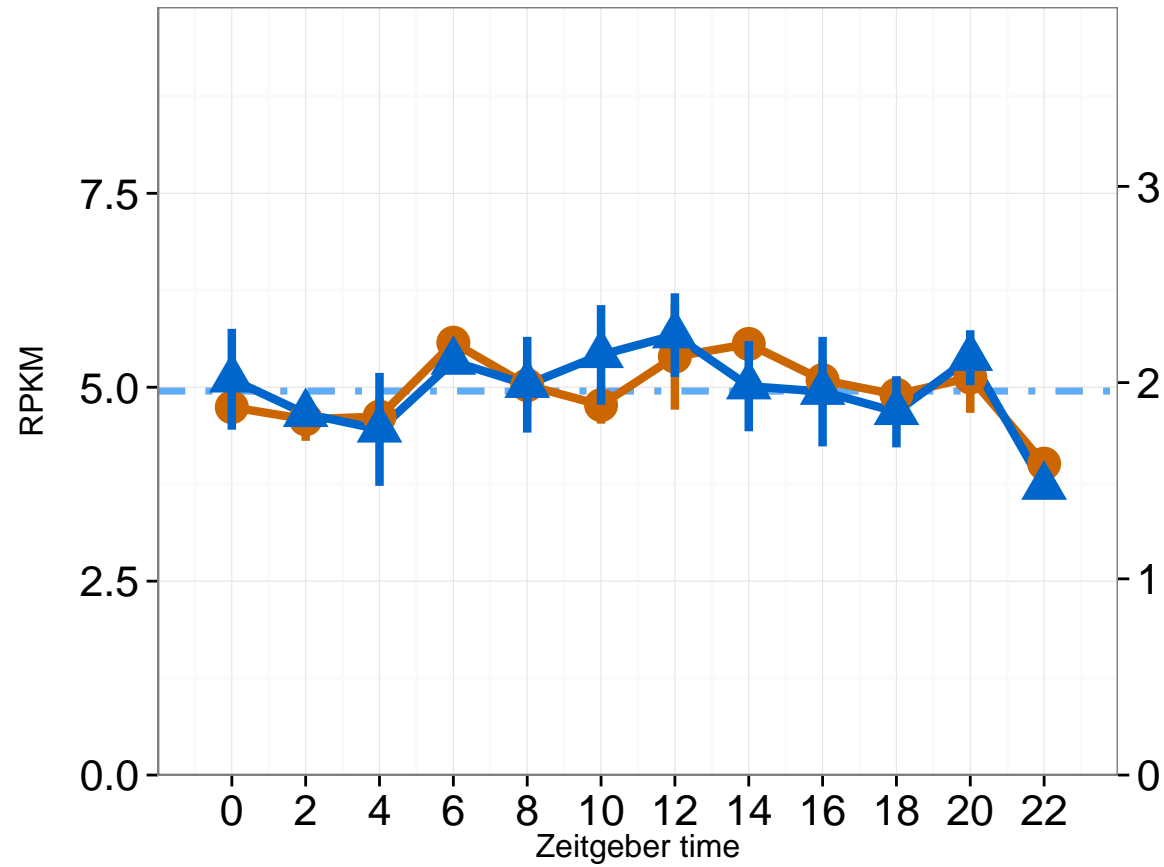

# Pcdh7

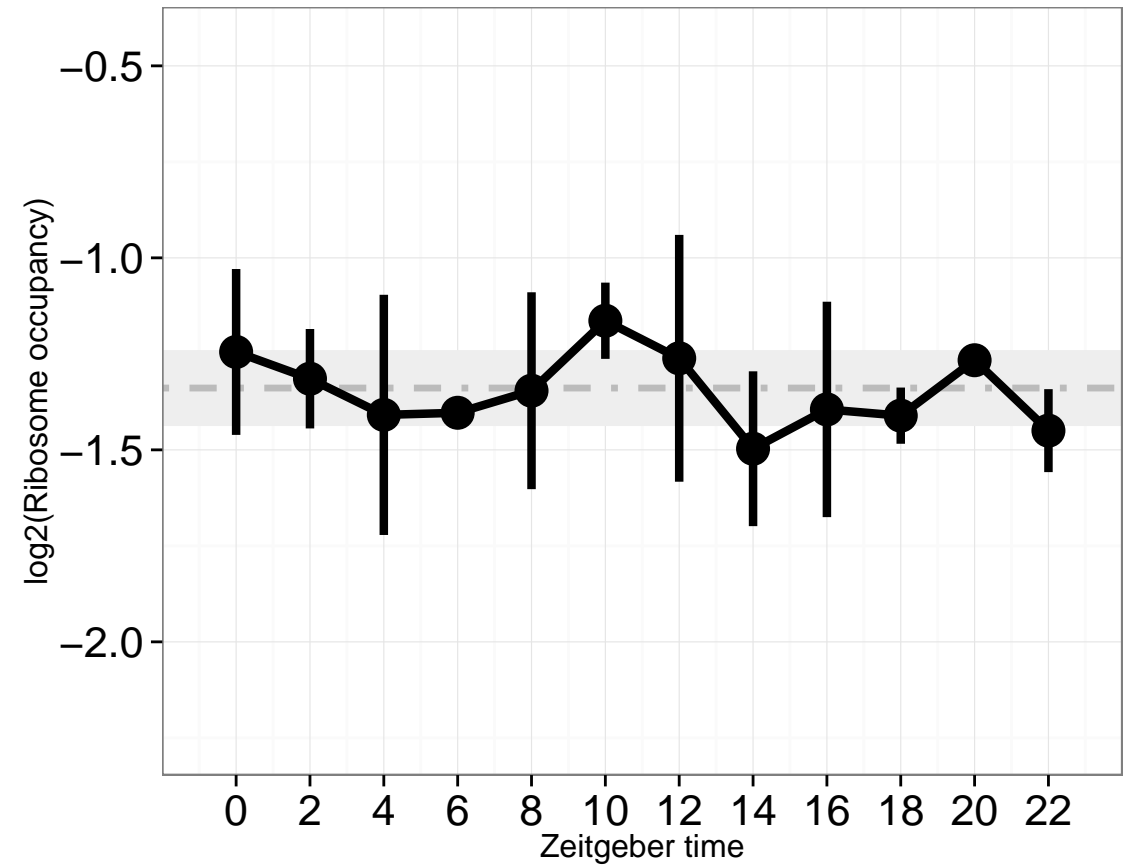

Supplement: Supplementary file 1334 [file 1]

## Ntrk3

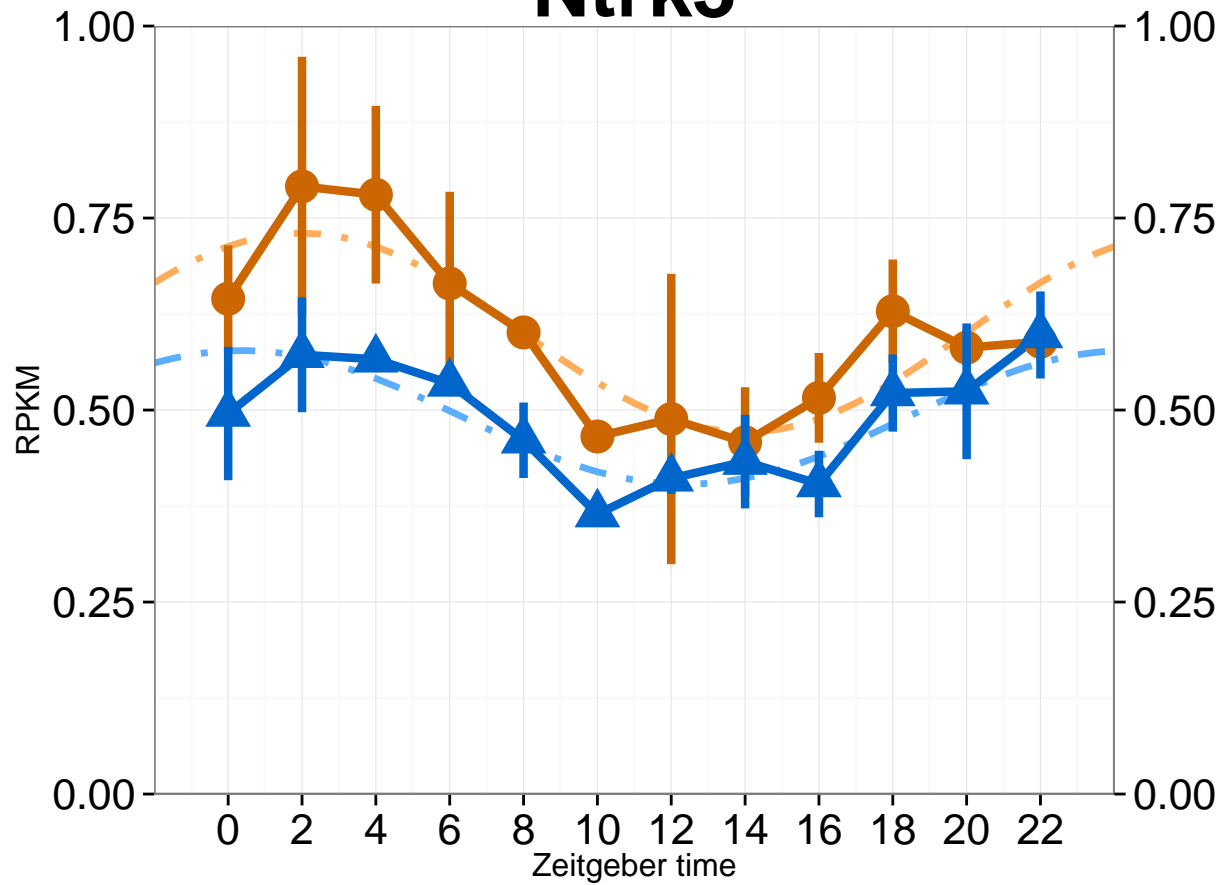

## Ntrk3

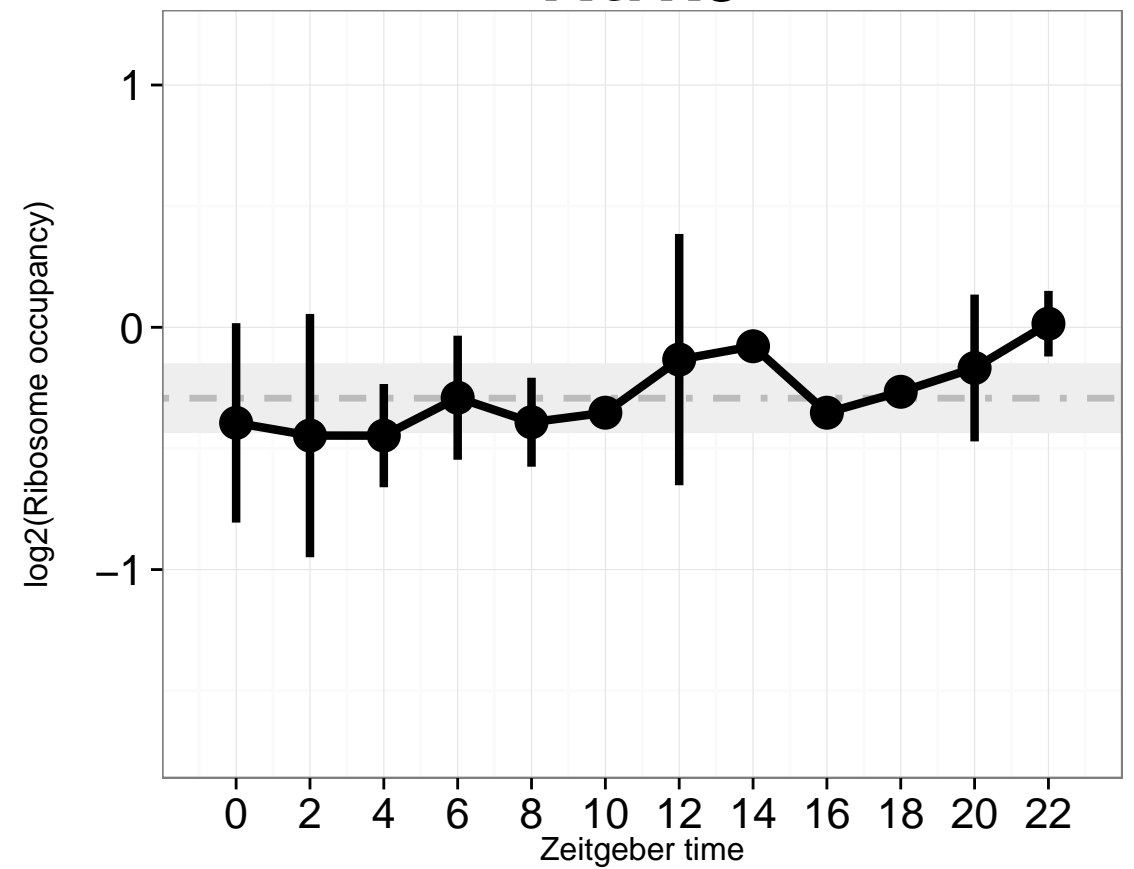

Supplement: Supplementary file 1335 [file 1]

## Tshz2

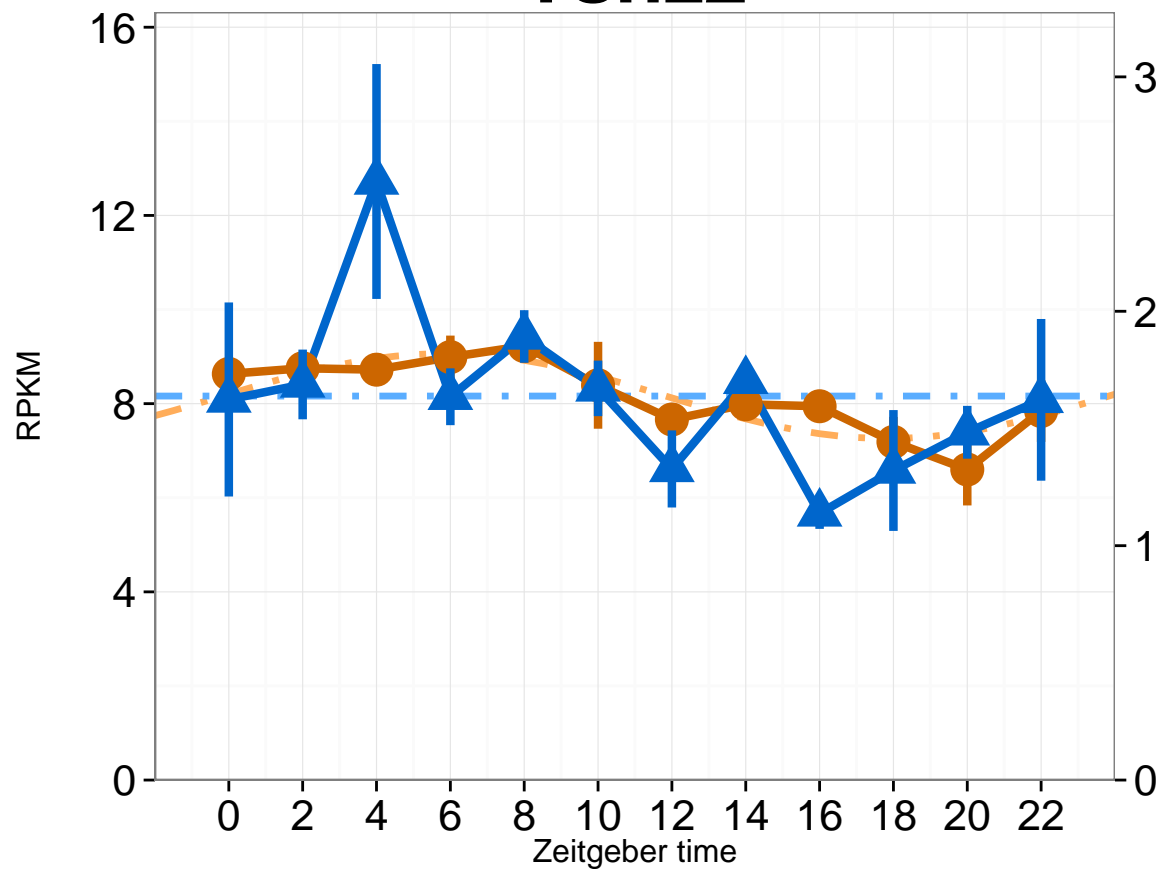

## Tshz2

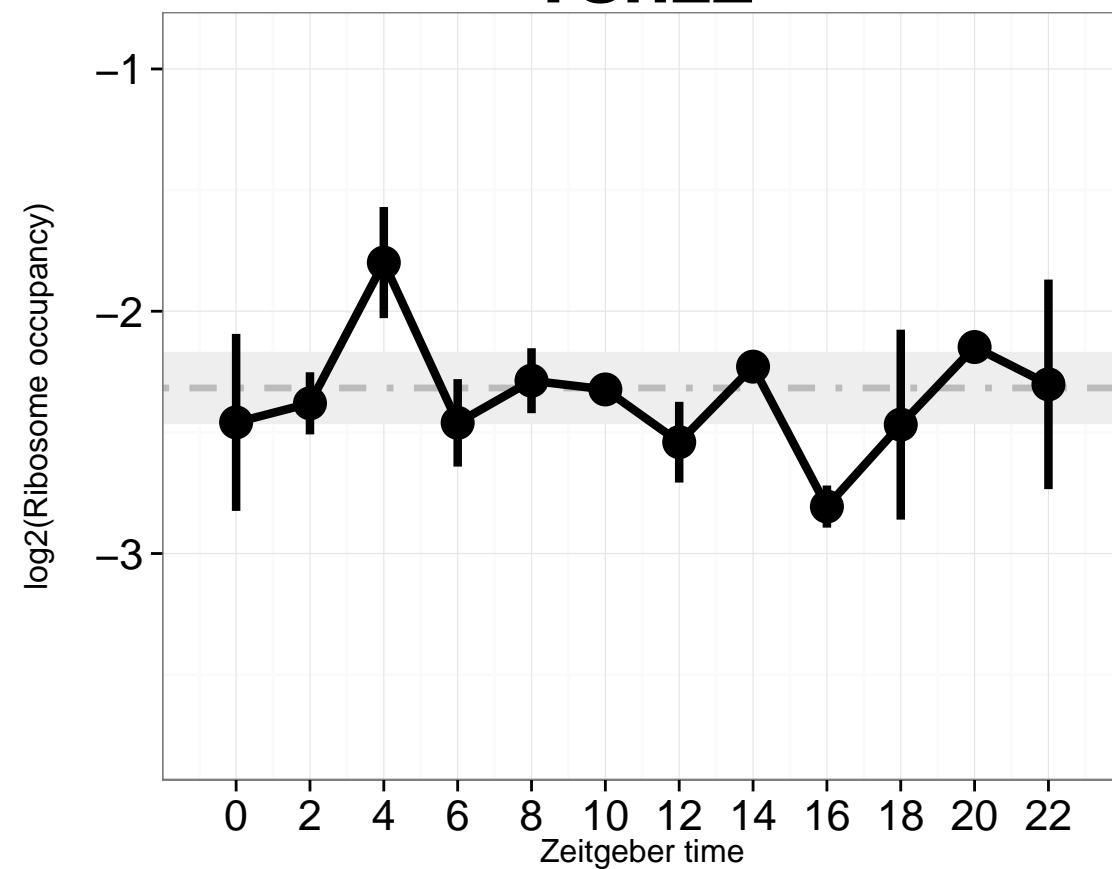

Supplement: Supplementary file 1336 [file 1]

## Ahrr

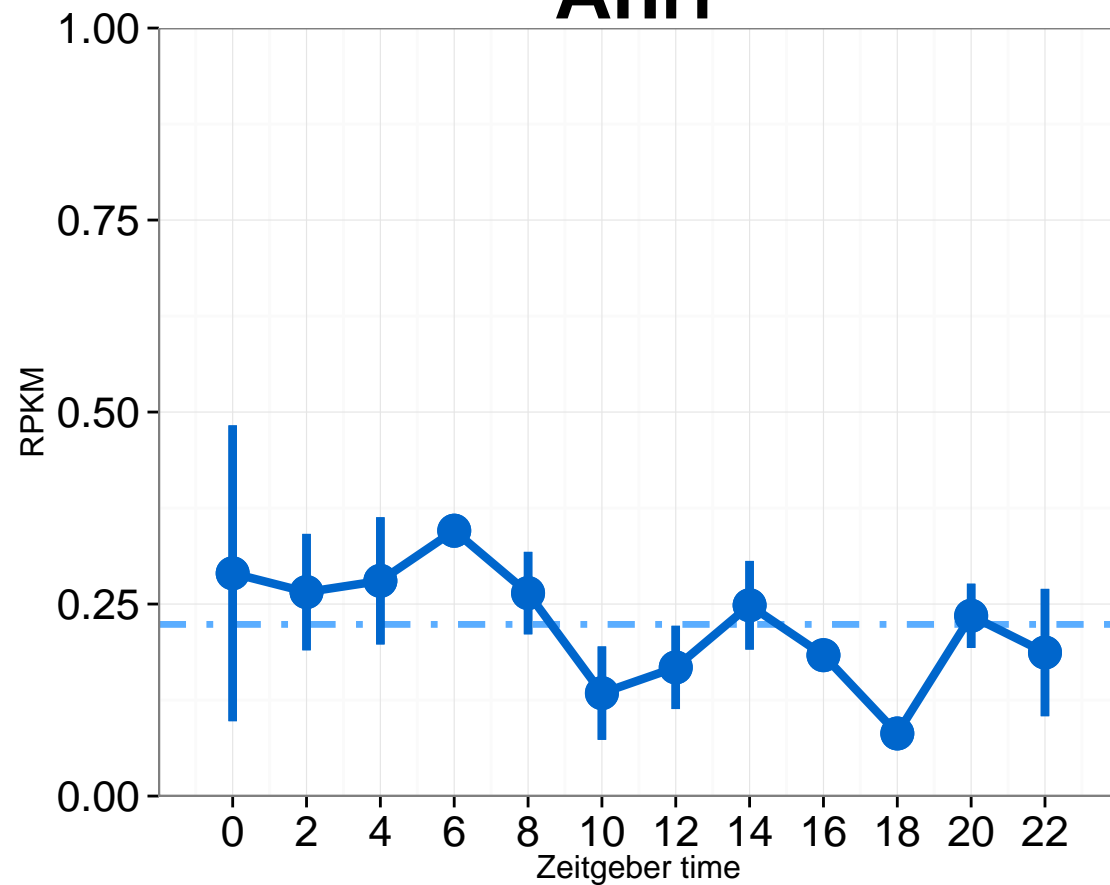

## Ahrr log2(Ribosome occupancy)

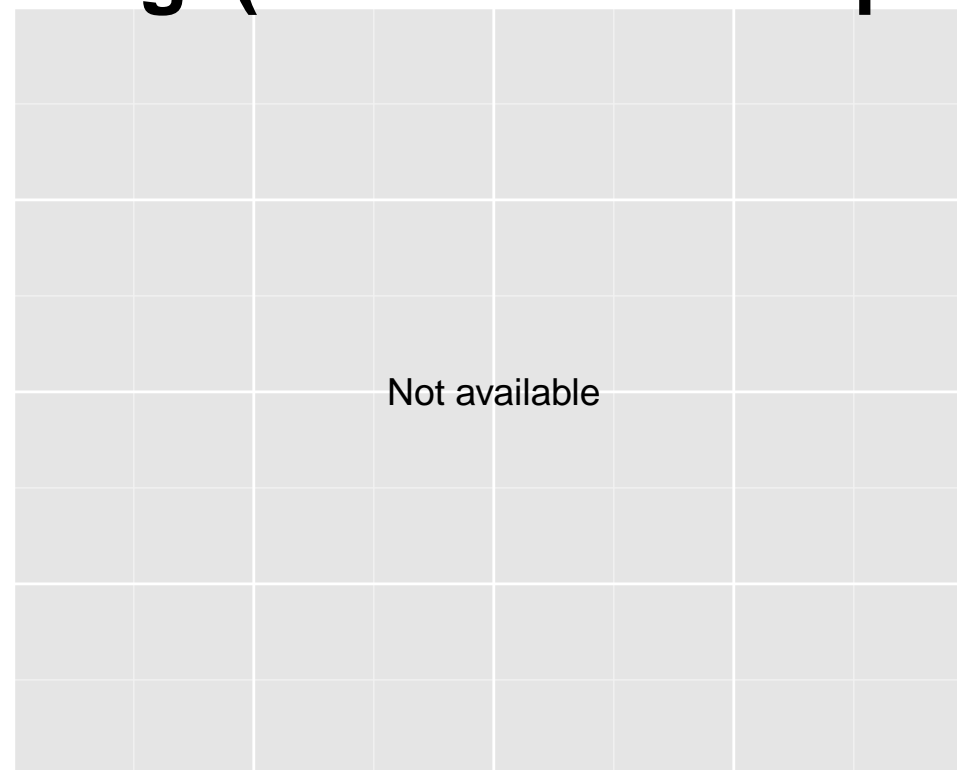

Supplement: Supplementary file 1337 [file 1]

# Ppp3cb

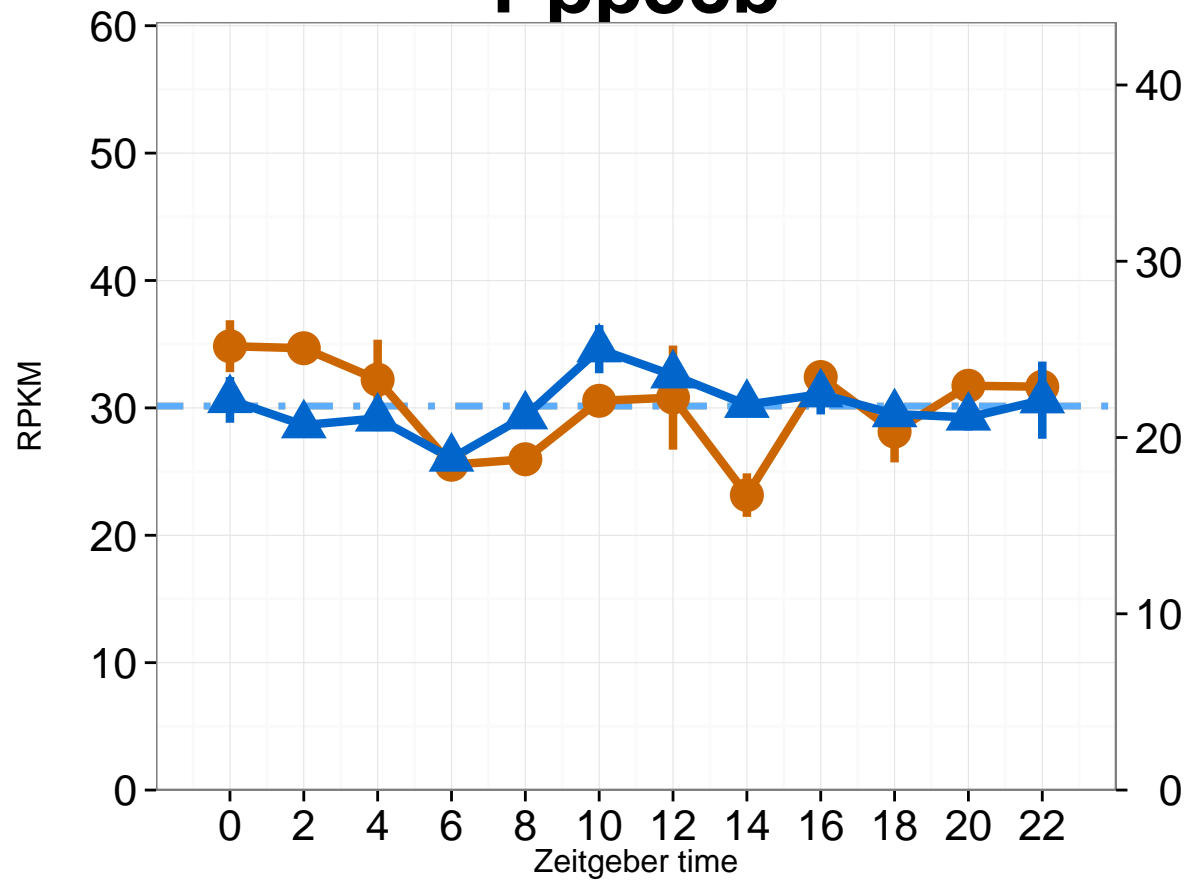

# Ppp3cb

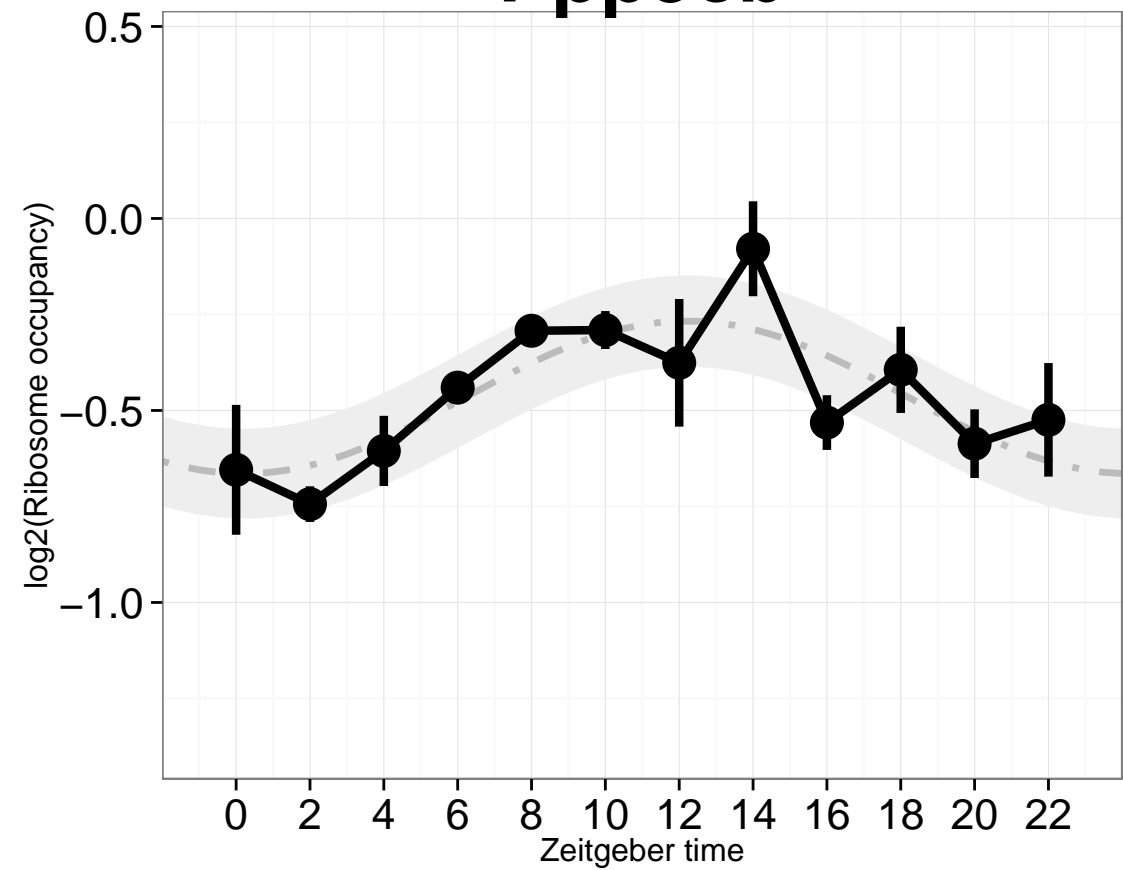

Supplement: Supplementary file 1338 [file 1]

# Usp27x

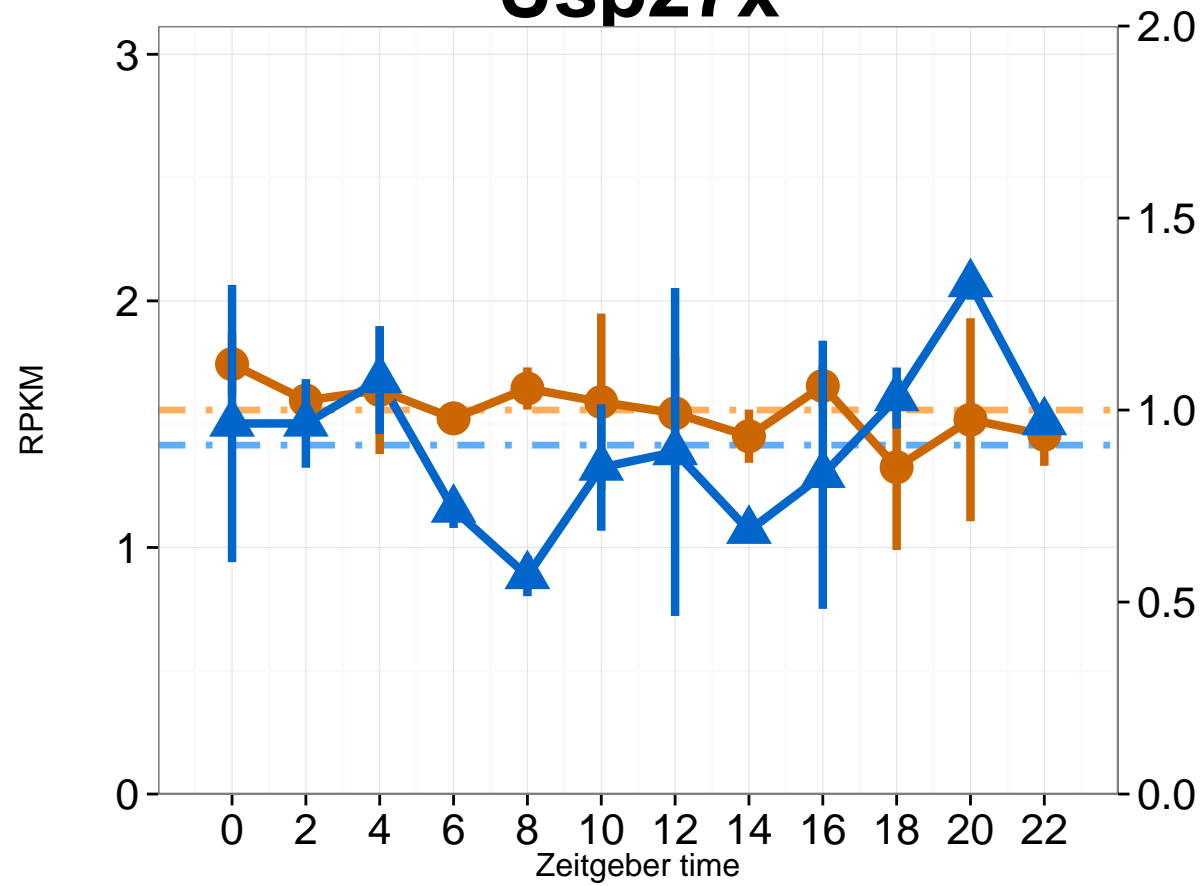

# Usp27x

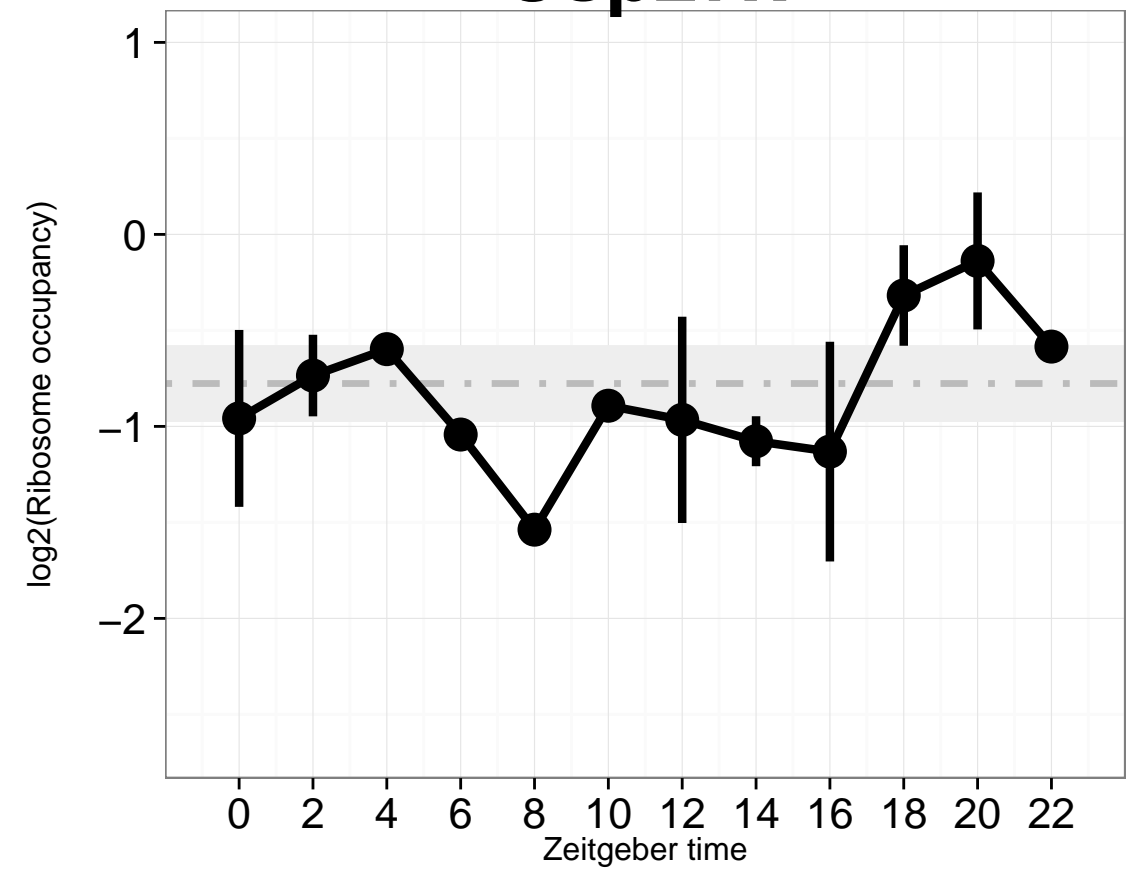

Supplement: Supplementary file 1339 [file 1]

# Cd40

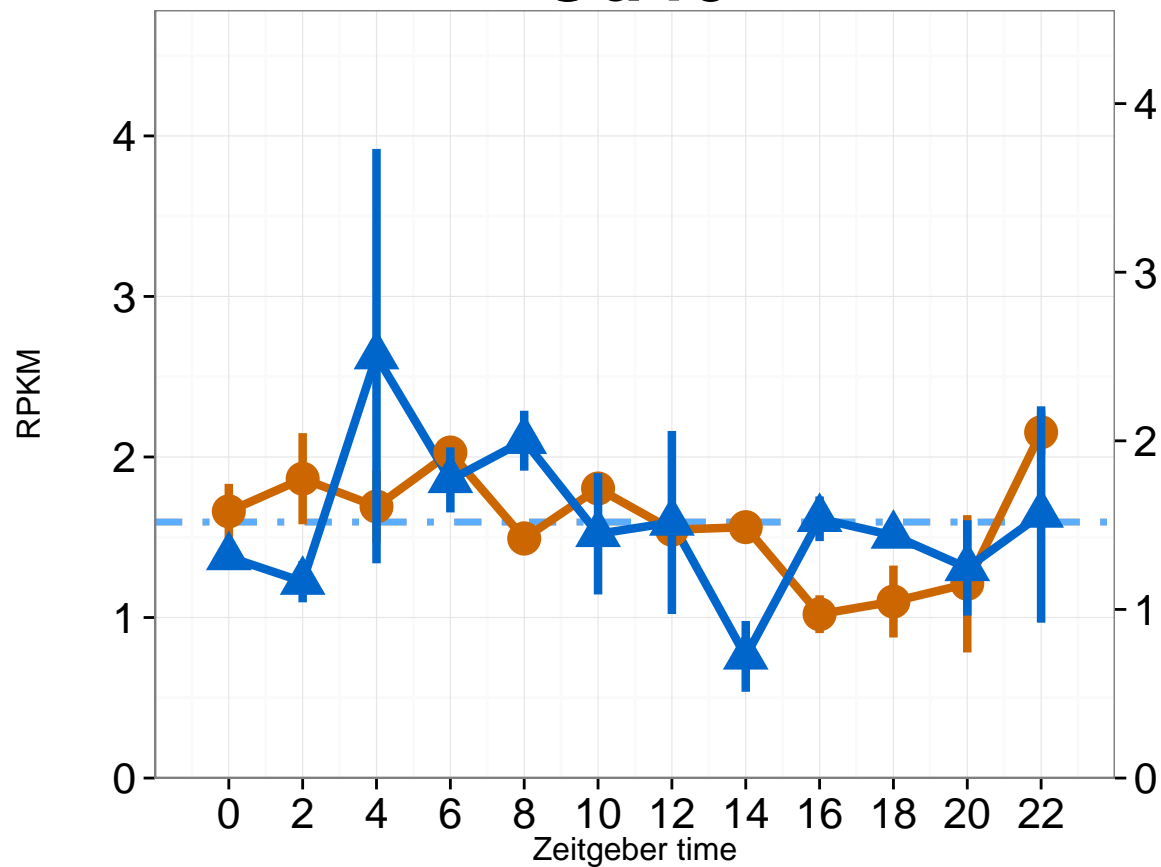

# Cd40

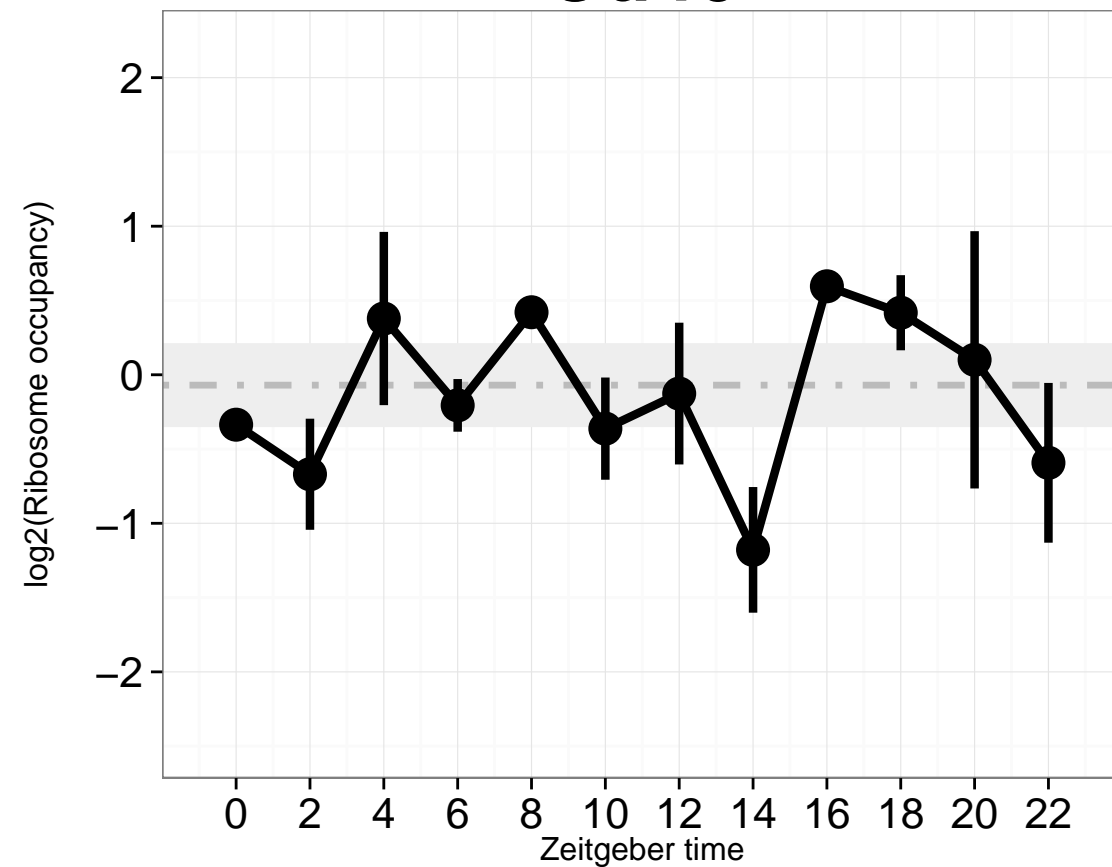

Supplement: Supplementary file 1340 [file 1]

## Mrpl44

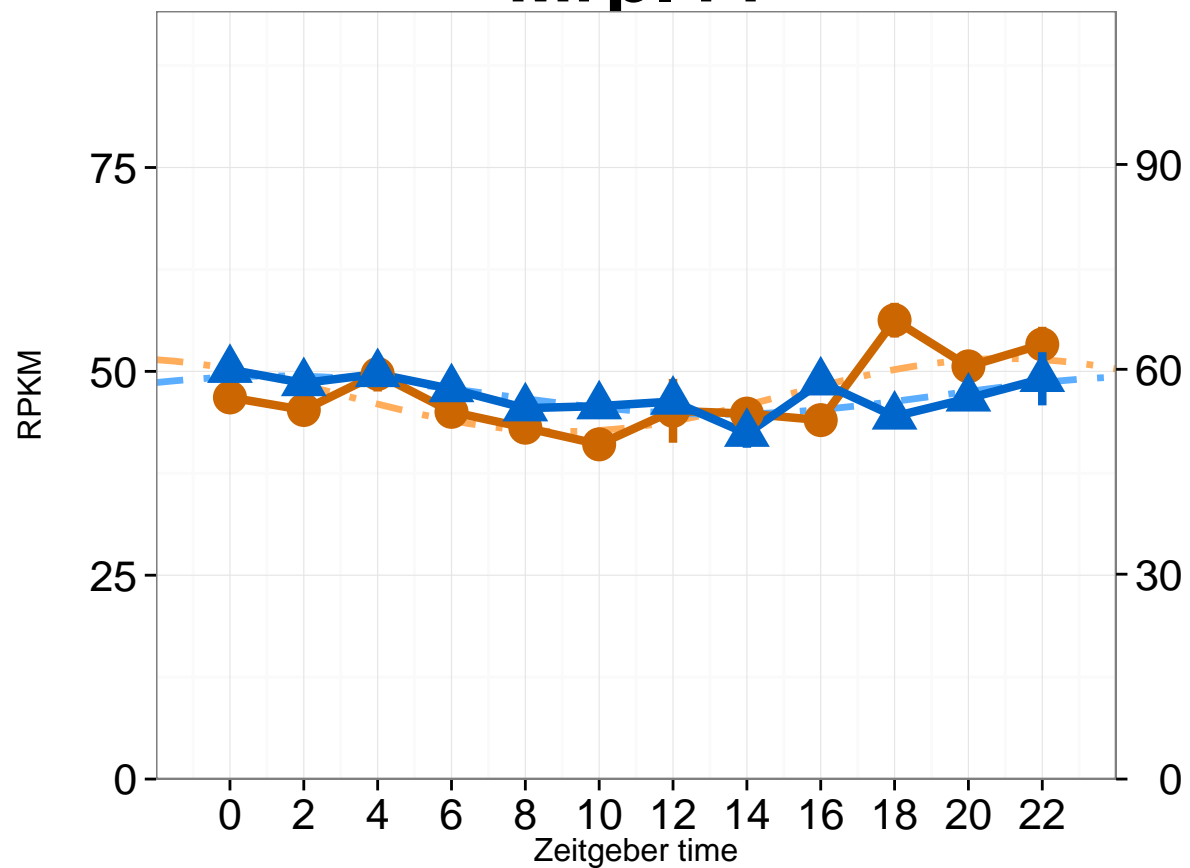

## Mrpl44

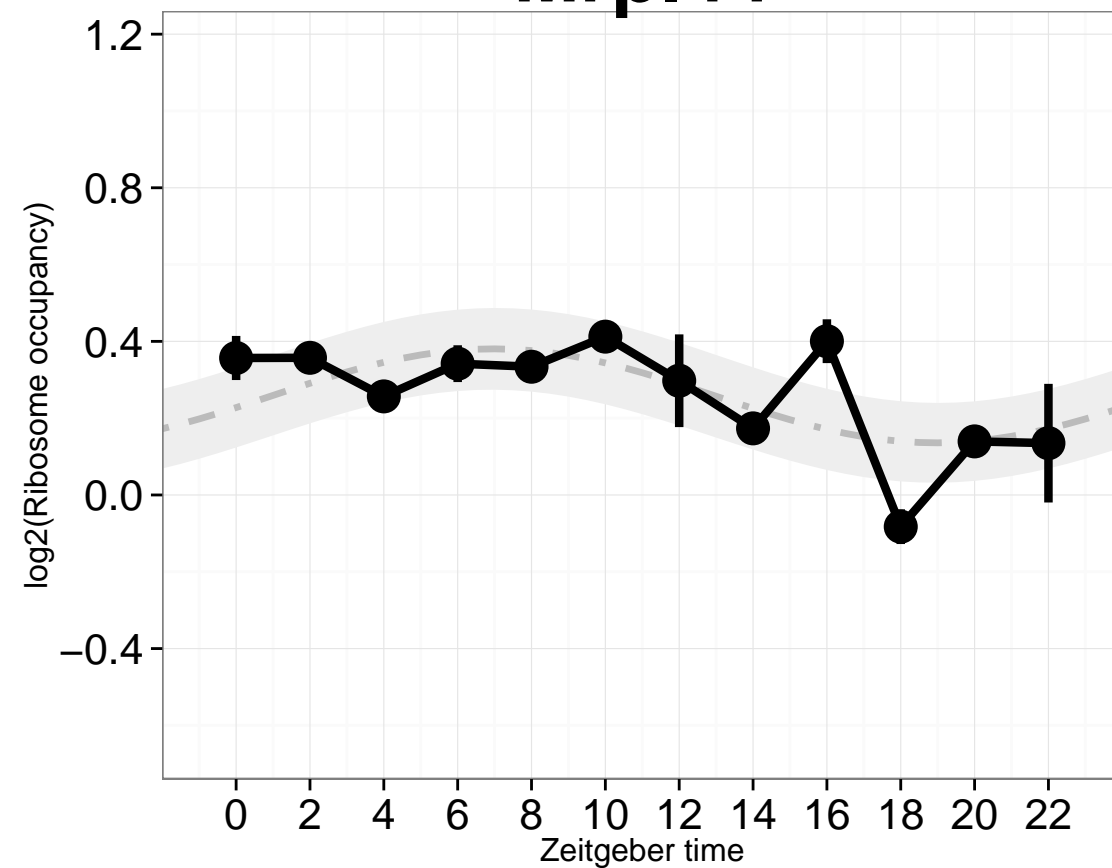

Supplement: Supplementary file 1341 [file 1]

## Cdk7

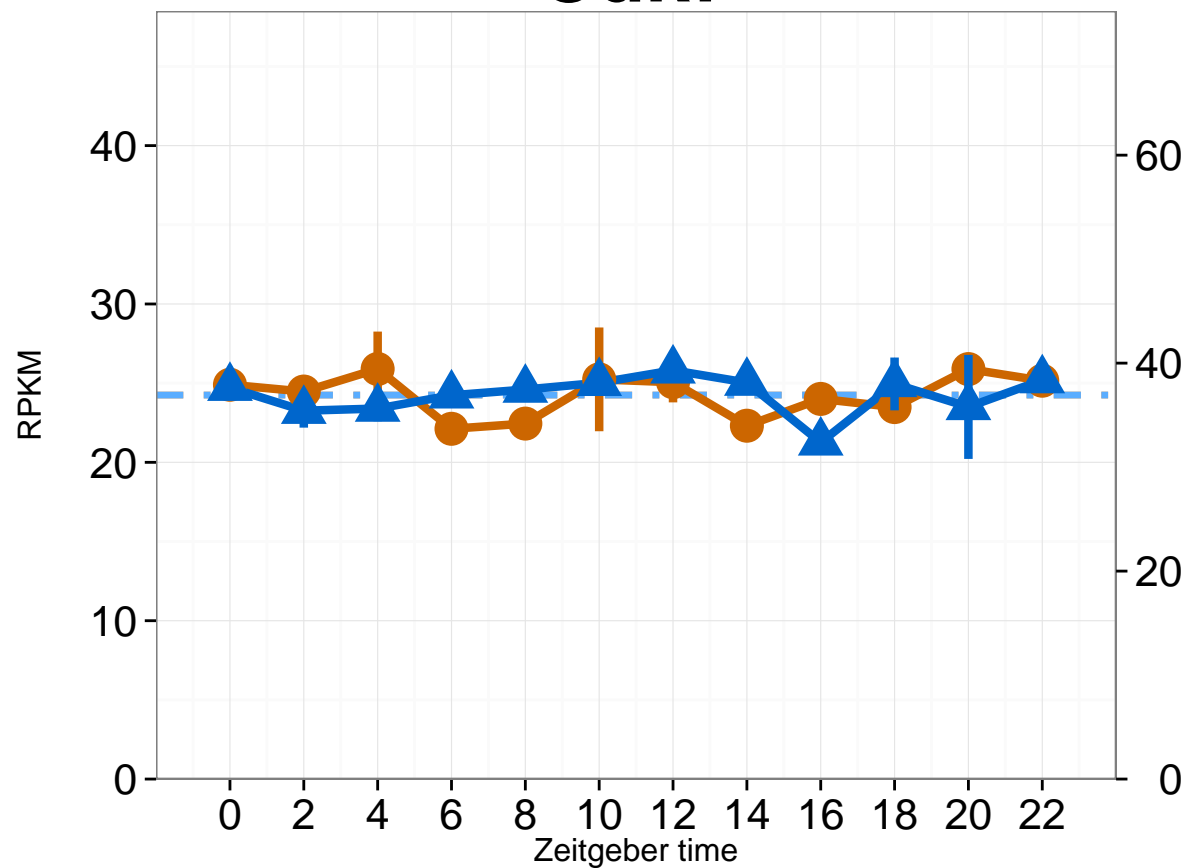

## Cdk7

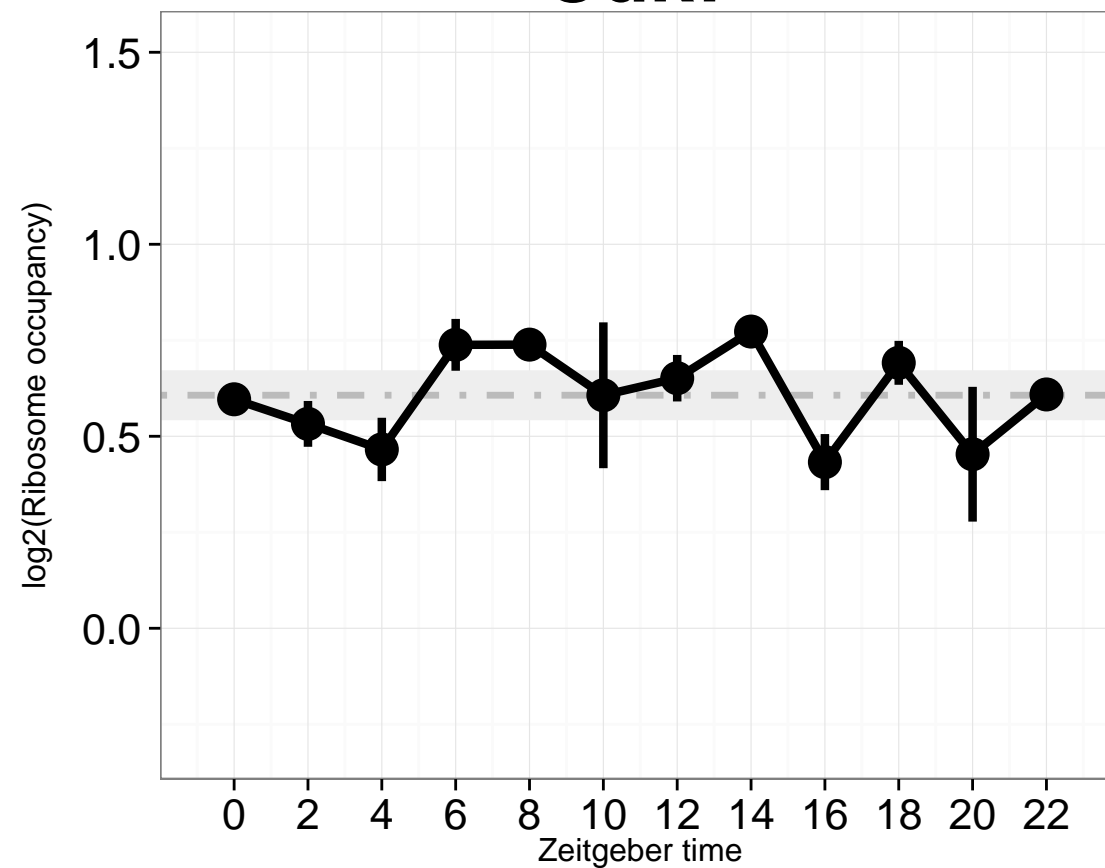

Supplement: Supplementary file 1342 [file 1]

# Tnfrsf11a

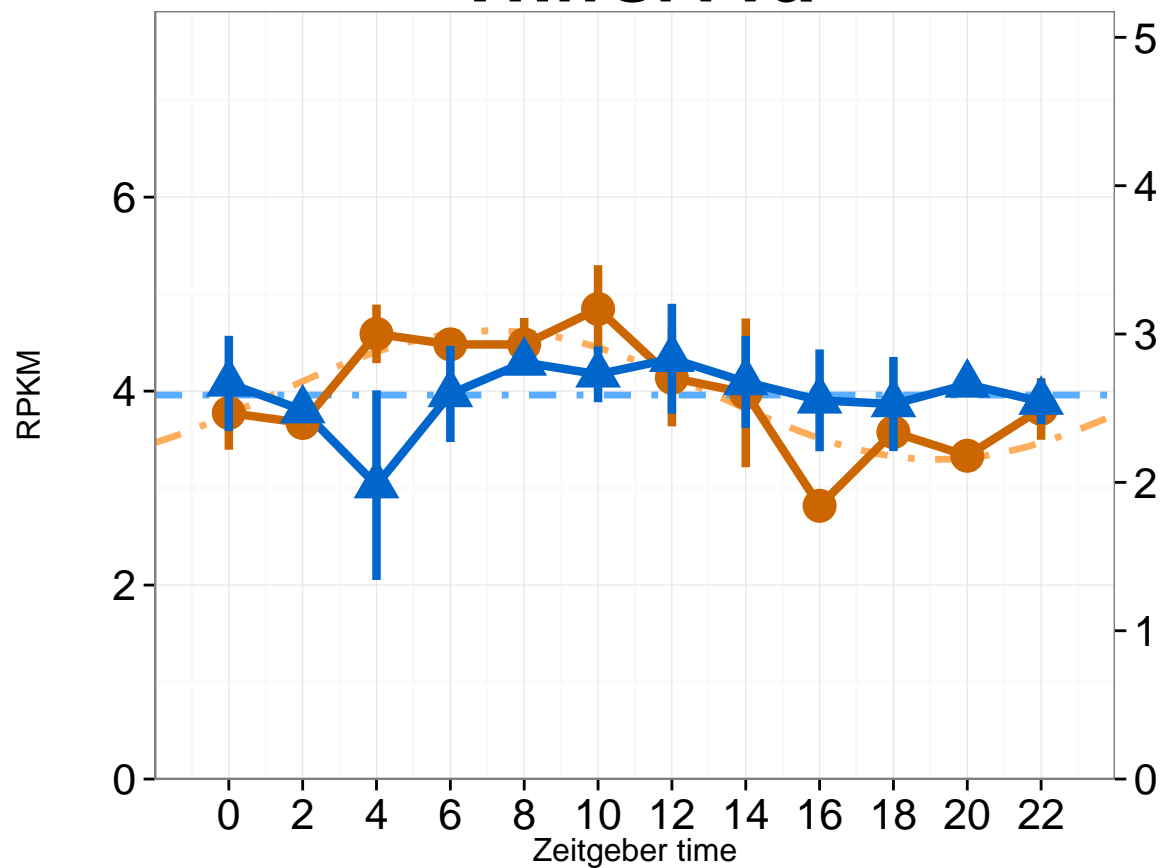

# Tnfrsf11a

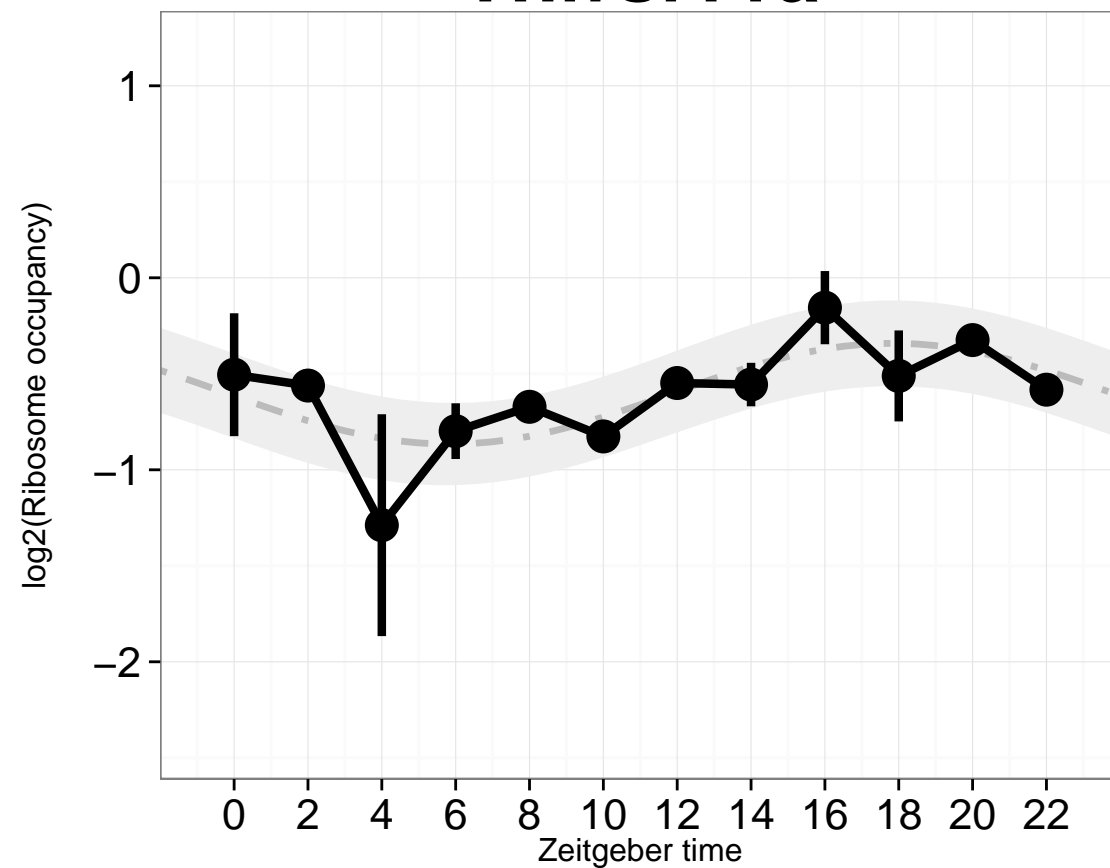

Supplement: Supplementary file 1343 [file 1]

## Psen2

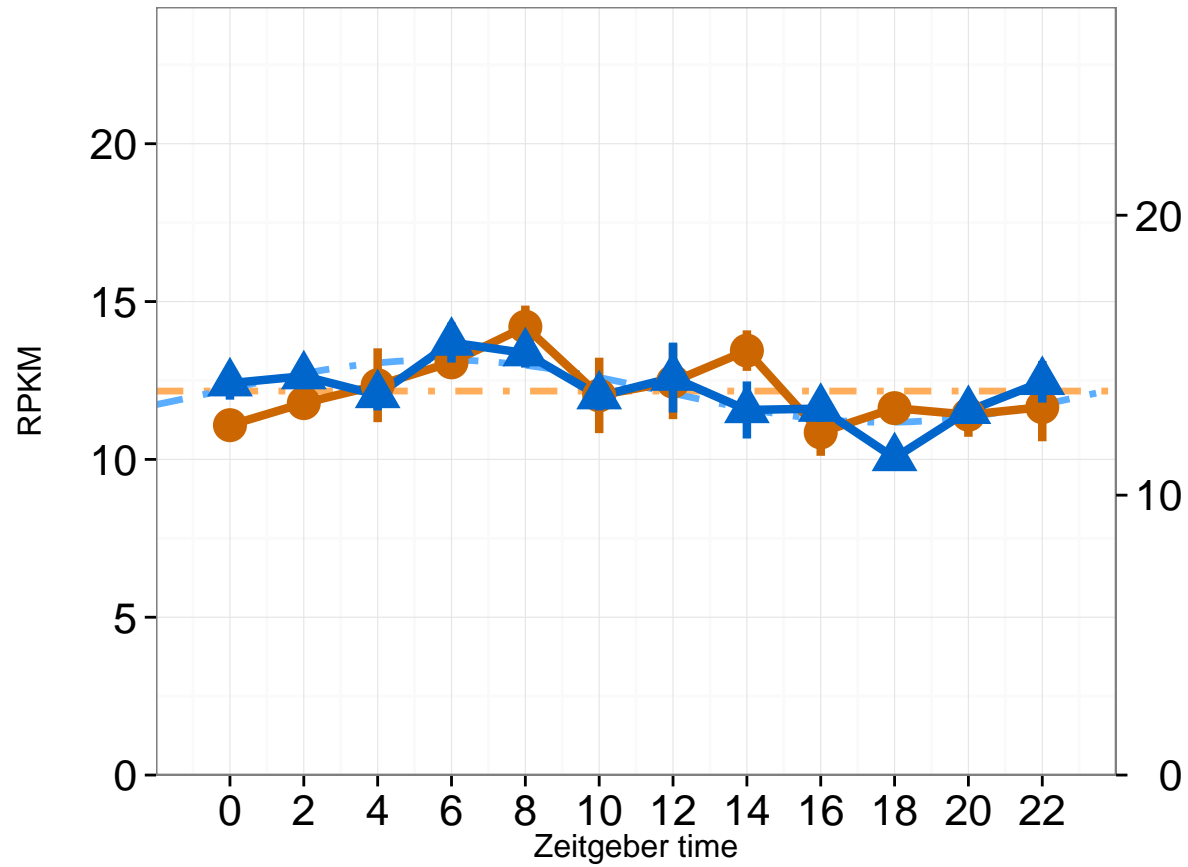

## Psen2

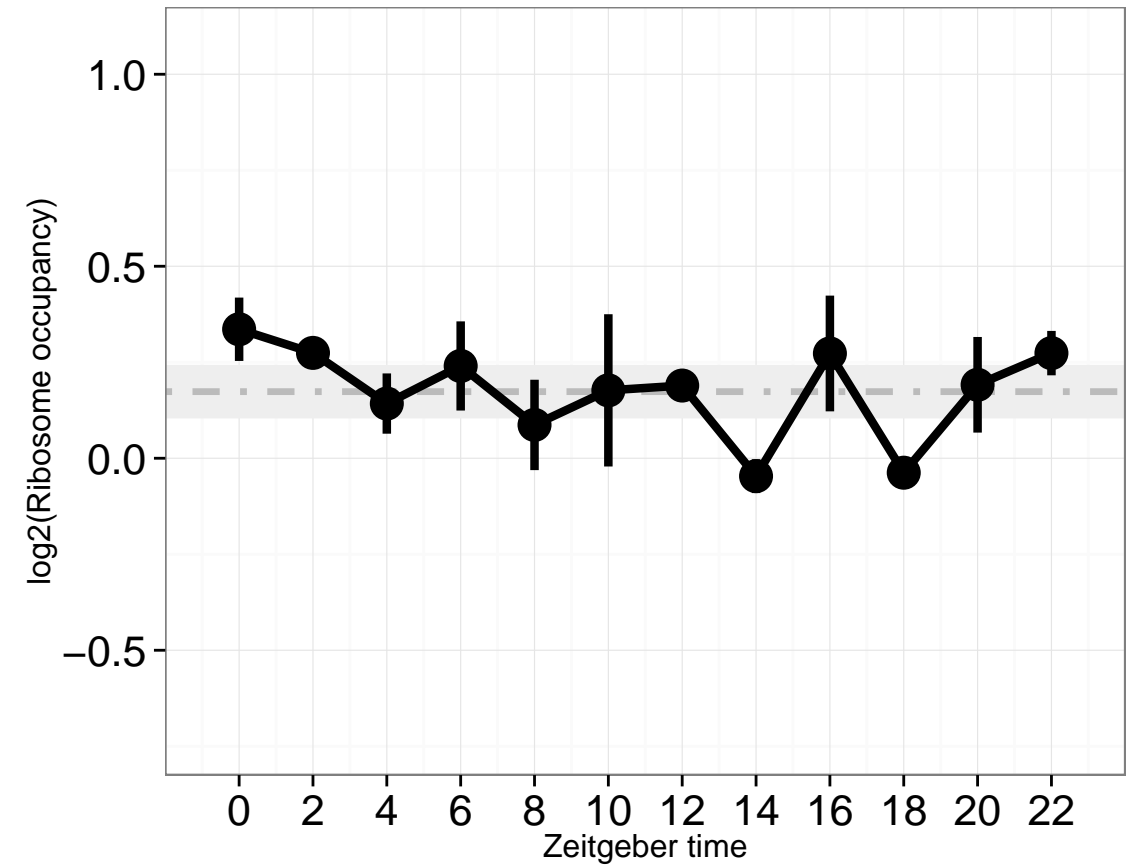

Supplement: Supplementary file 1344 [file 1]

## Preb

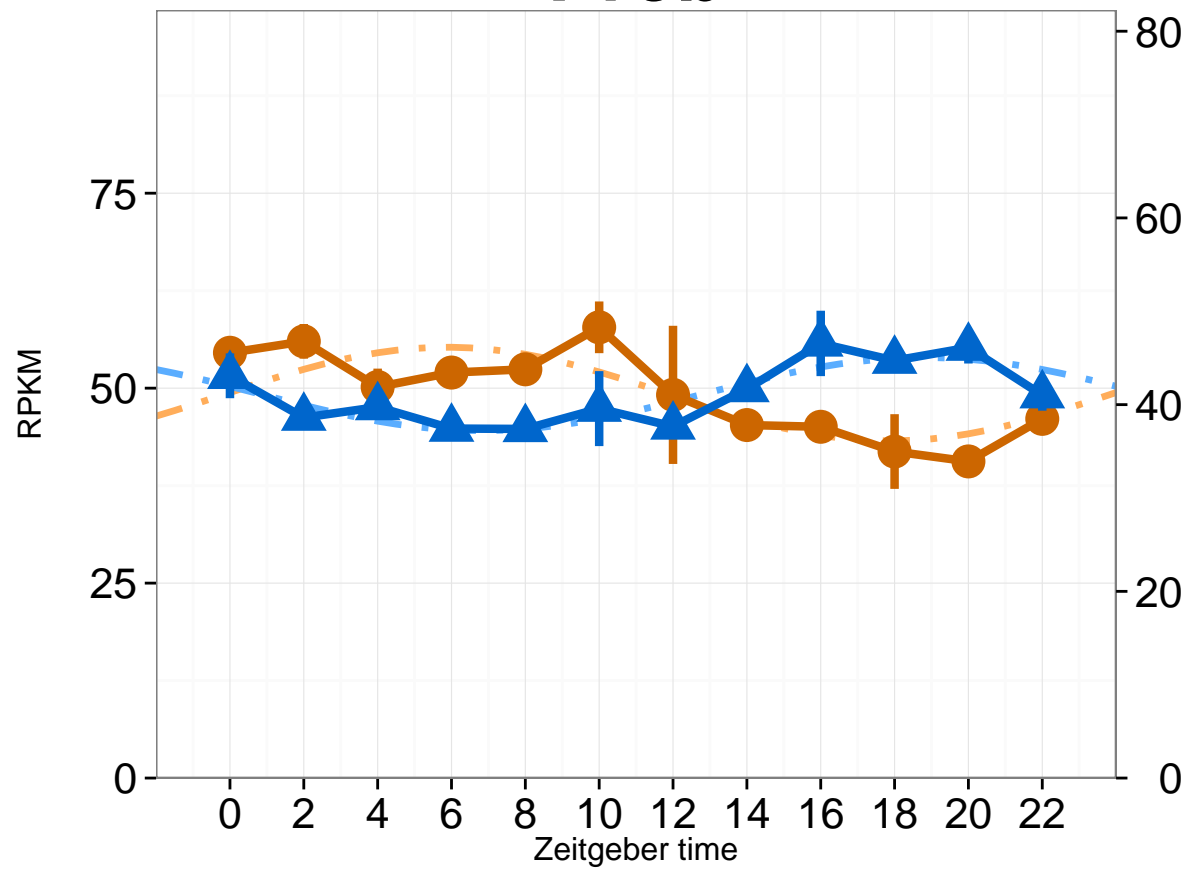

## Preb

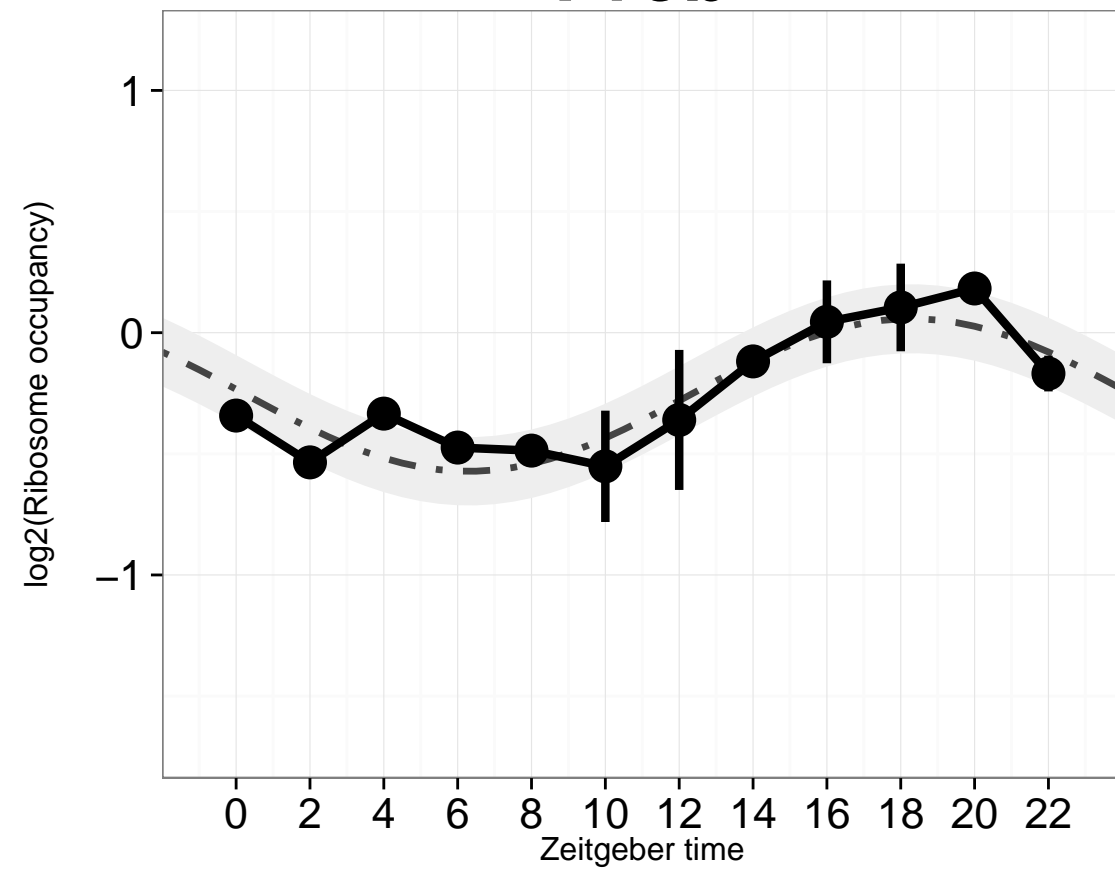

Supplement: Supplementary file 1345 [file 1]

## B4galt2

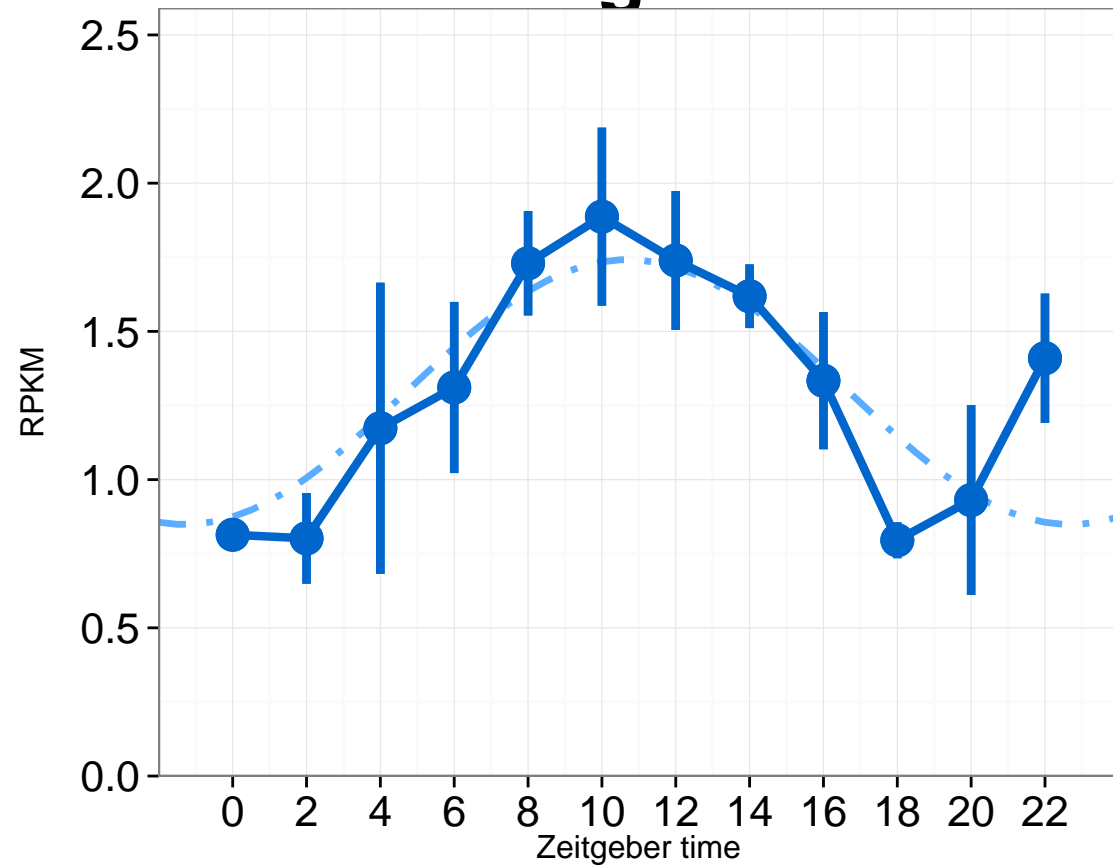

## B4galt2 log2(Ribosome occupancy)

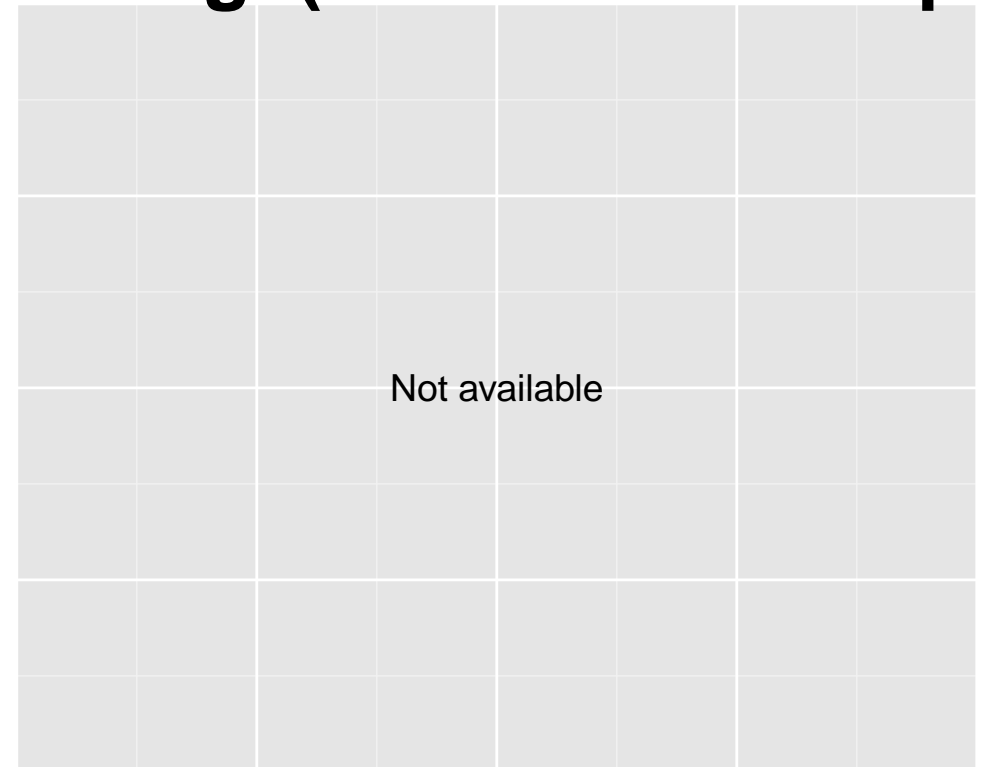

Supplement: Supplementary file 1346 [file 1]

## Hscb

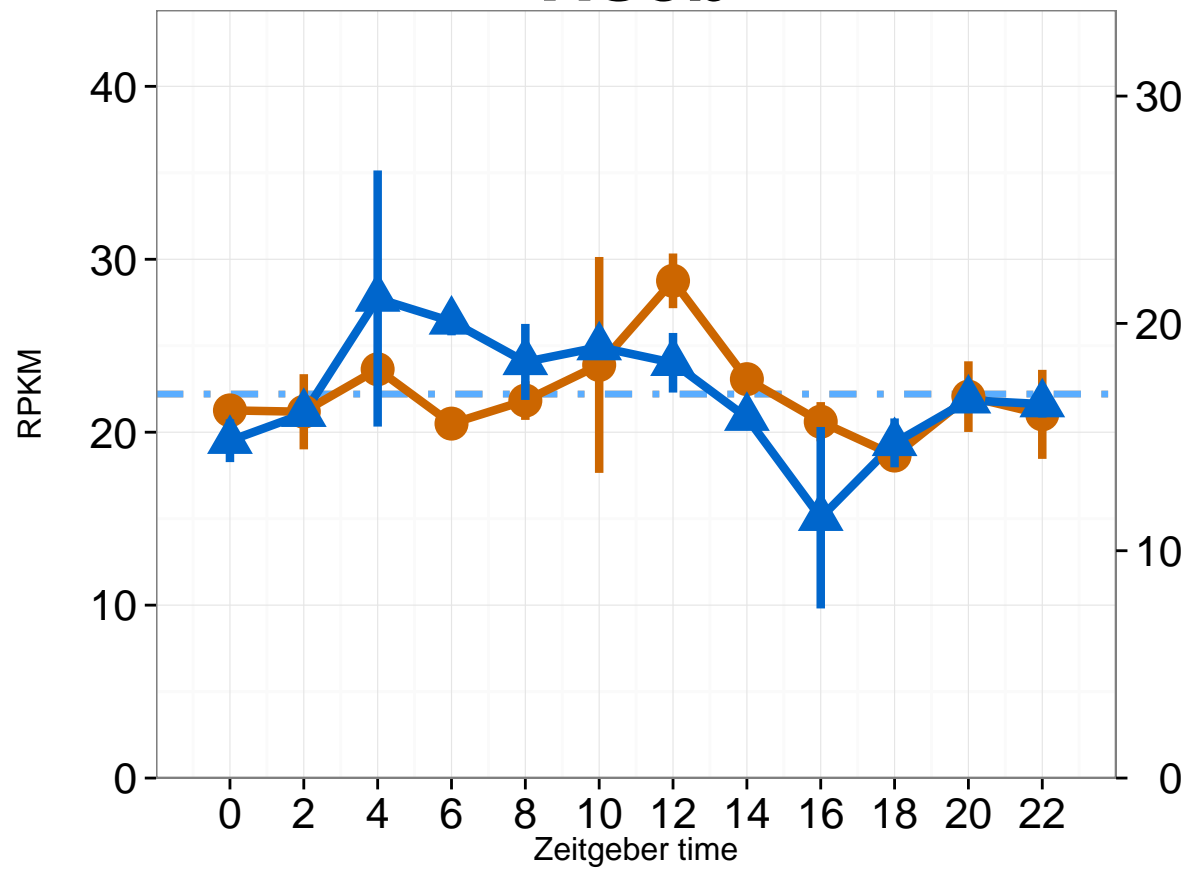

## Hscb

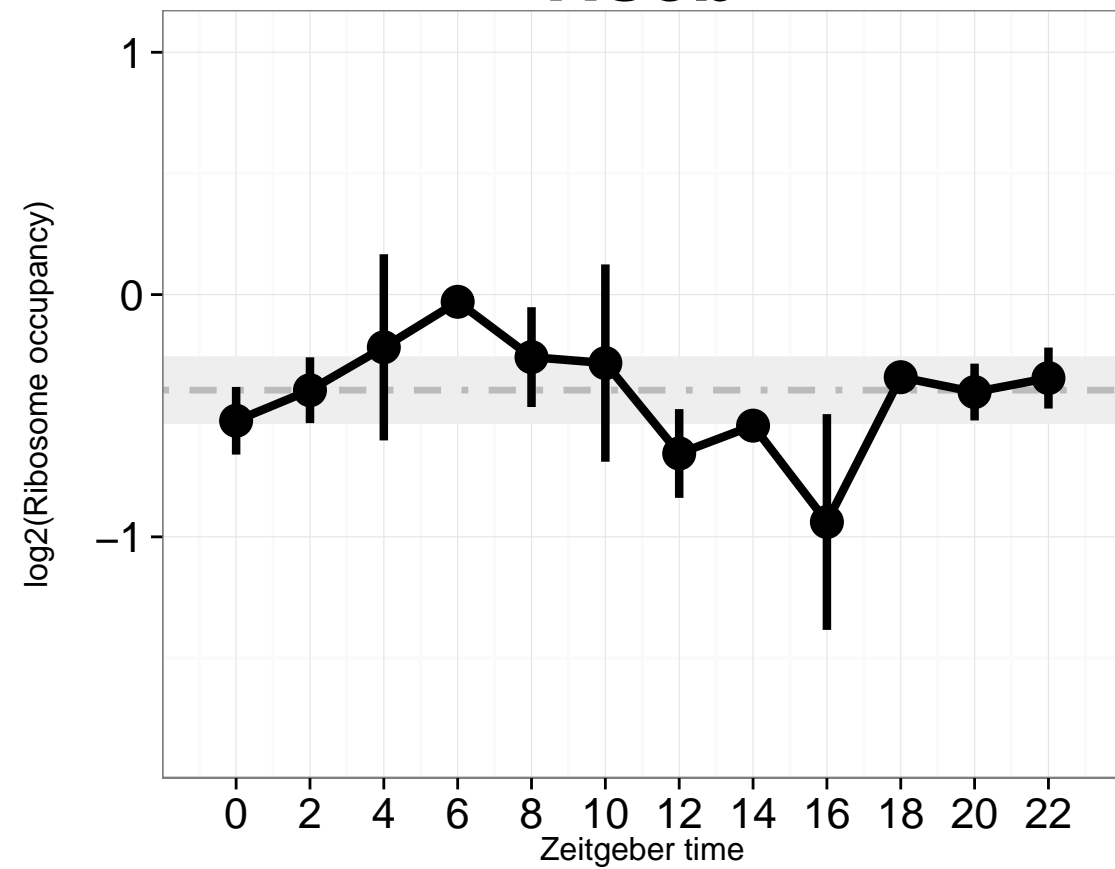

Supplement: Supplementary file 1347 [file 1]

## Dzip1

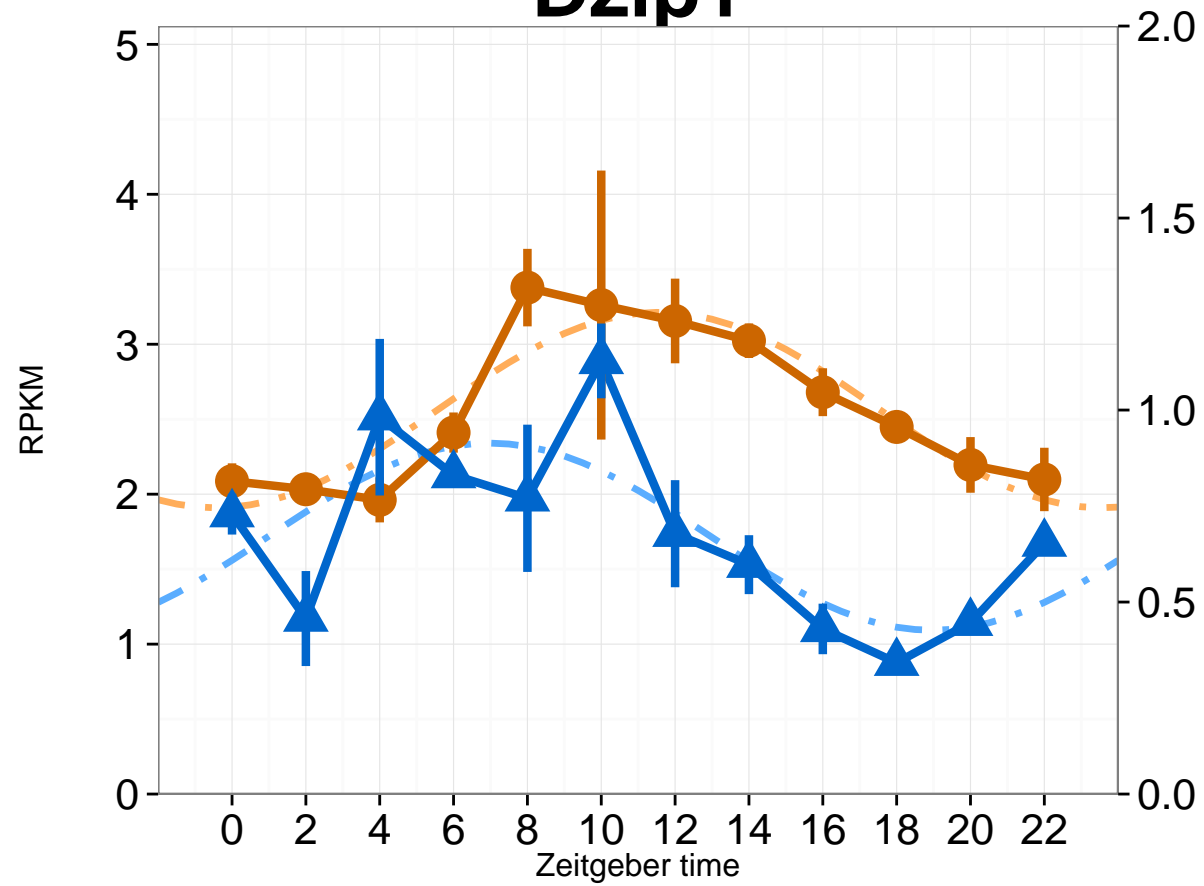

## Dzip1

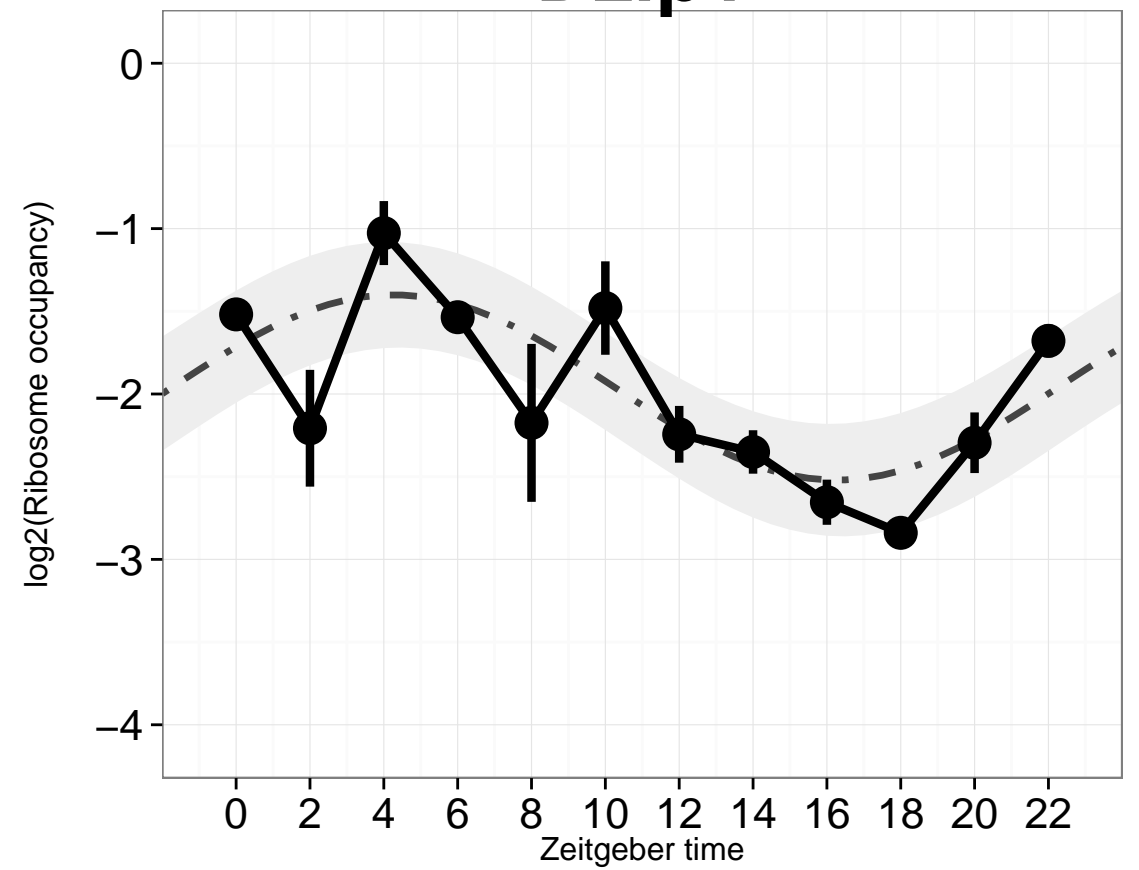

Supplement: Supplementary file 1348 [file 1]

## Med4

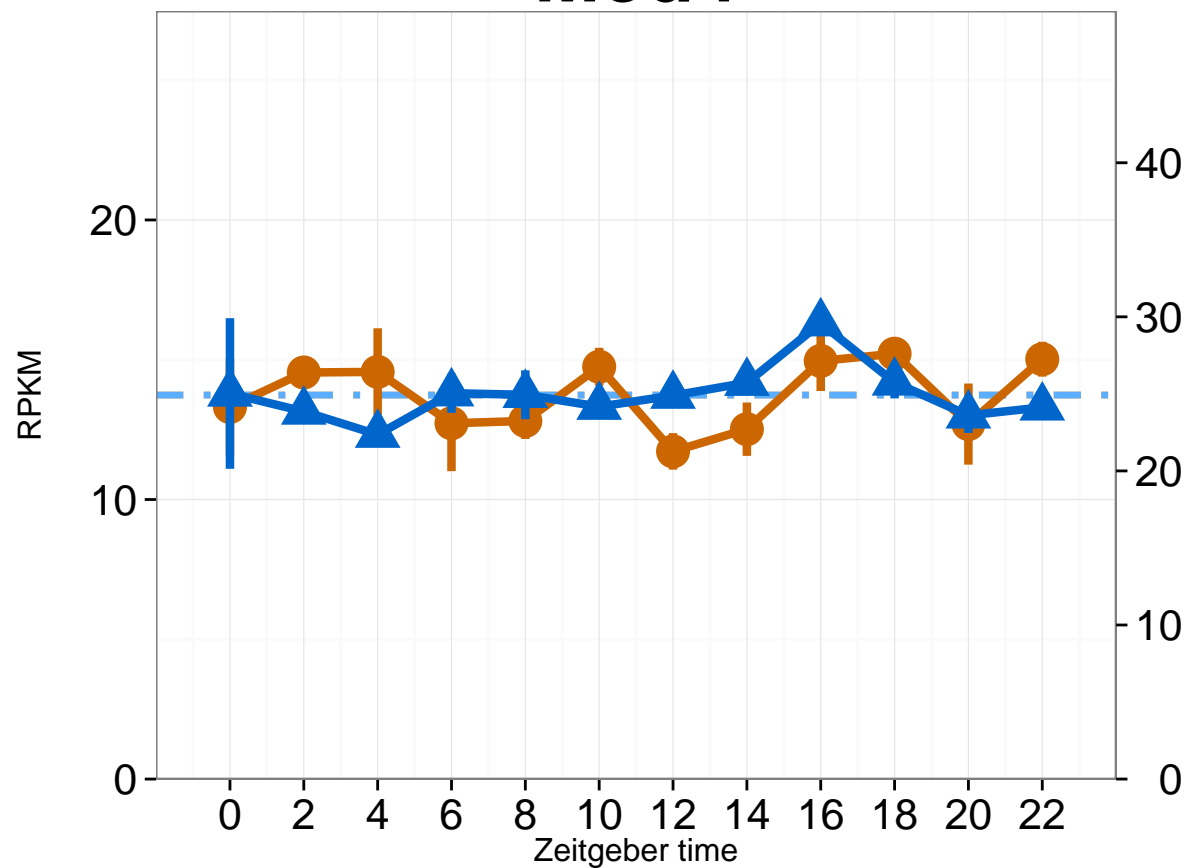

## Med4

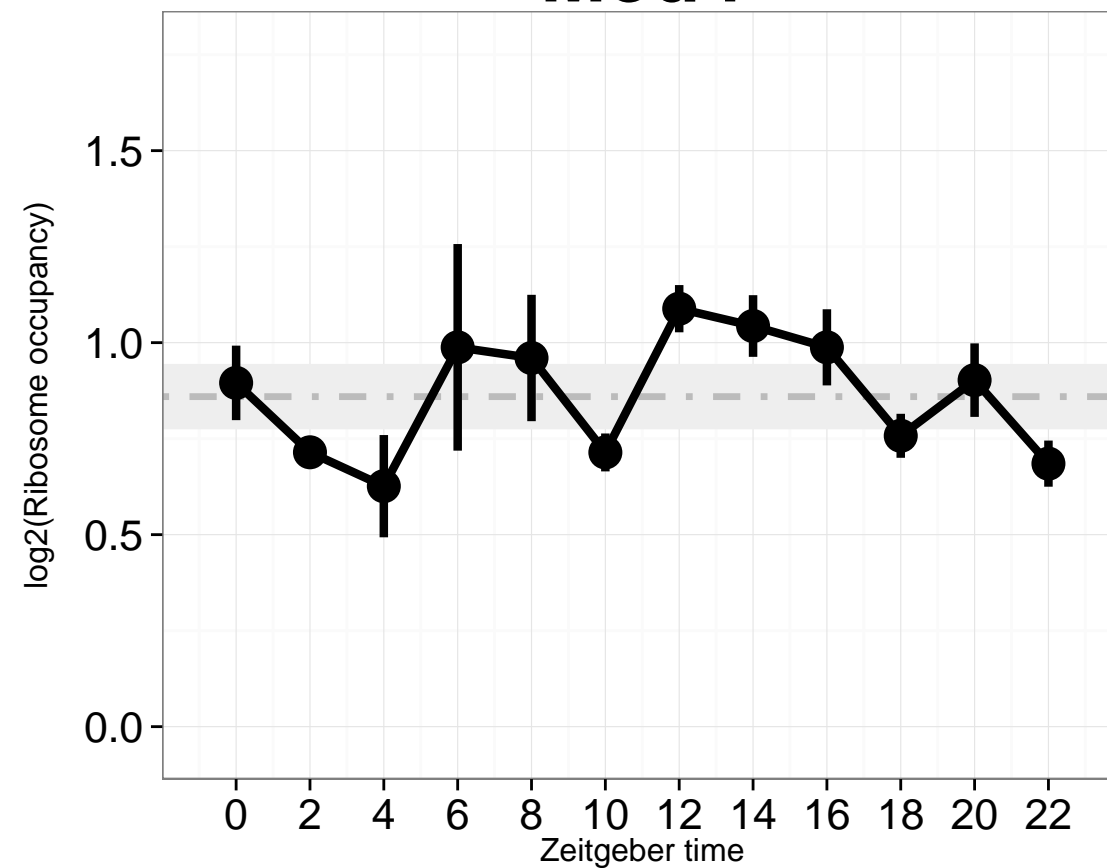

Supplement: Supplementary file 1349 [file 1]

## Slc25a40

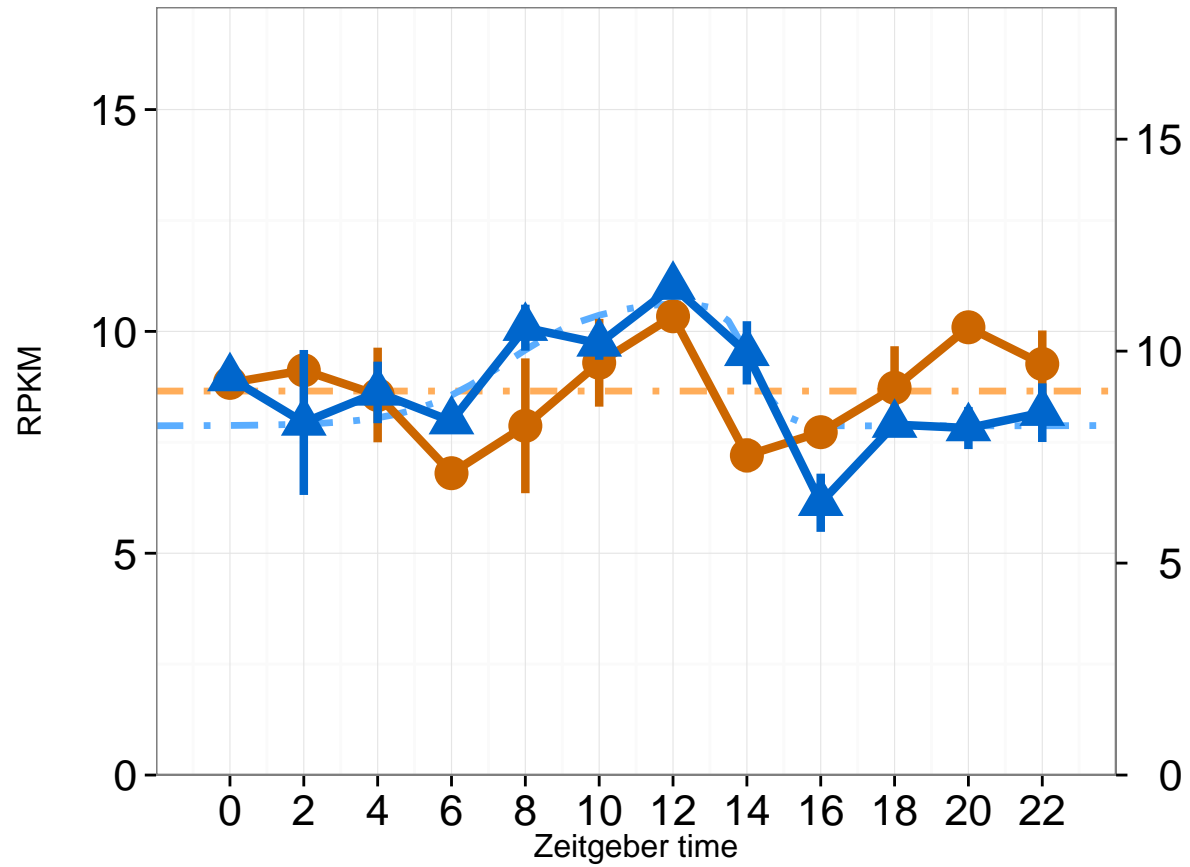

## Slc25a40

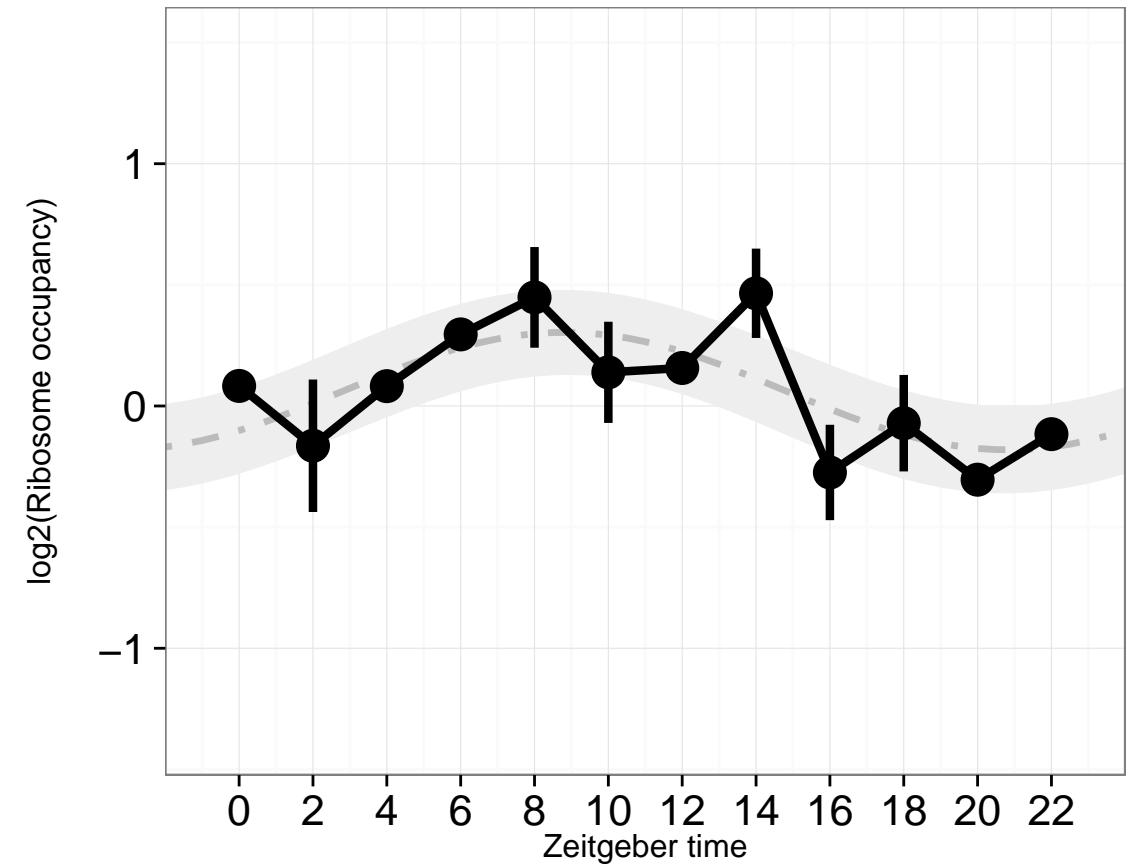

Supplement: Supplementary file 1350 [file 1]

# Zfp366

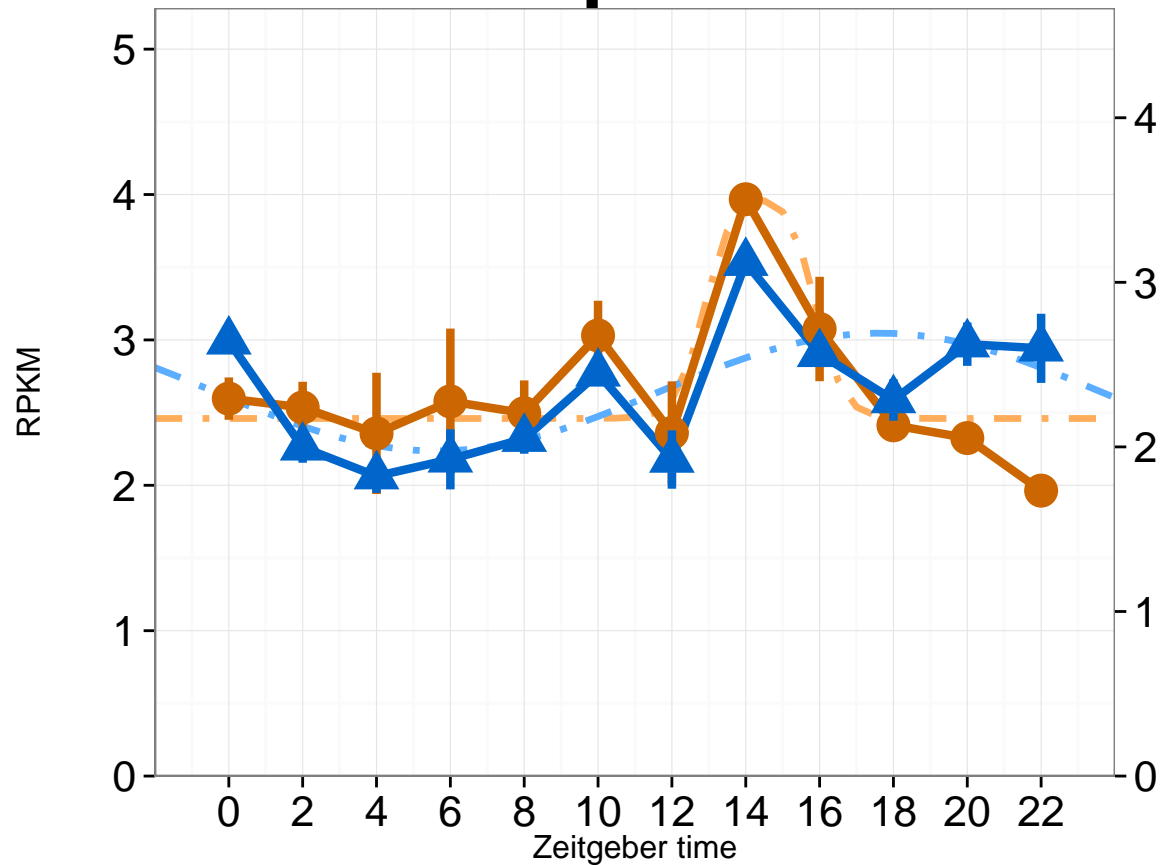

# Zfp366

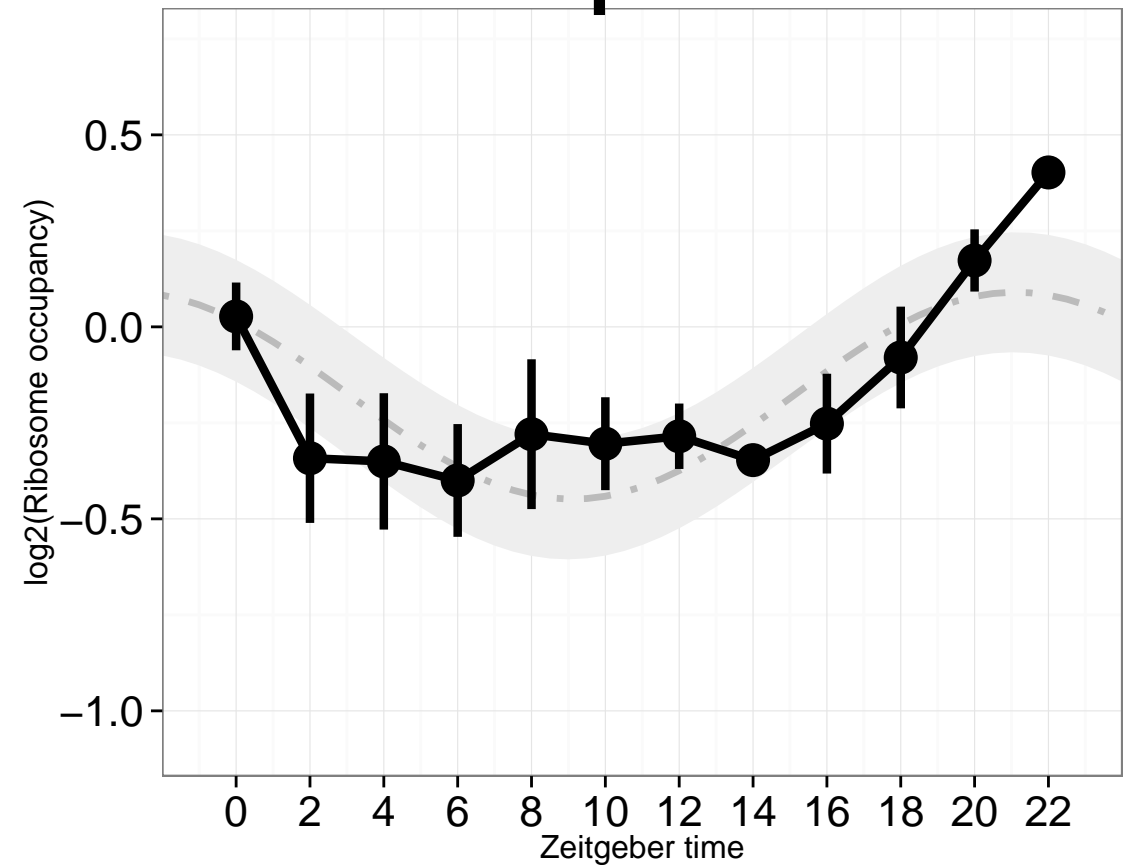

Supplement: Supplementary file 1351 [file 1]

# BC021891

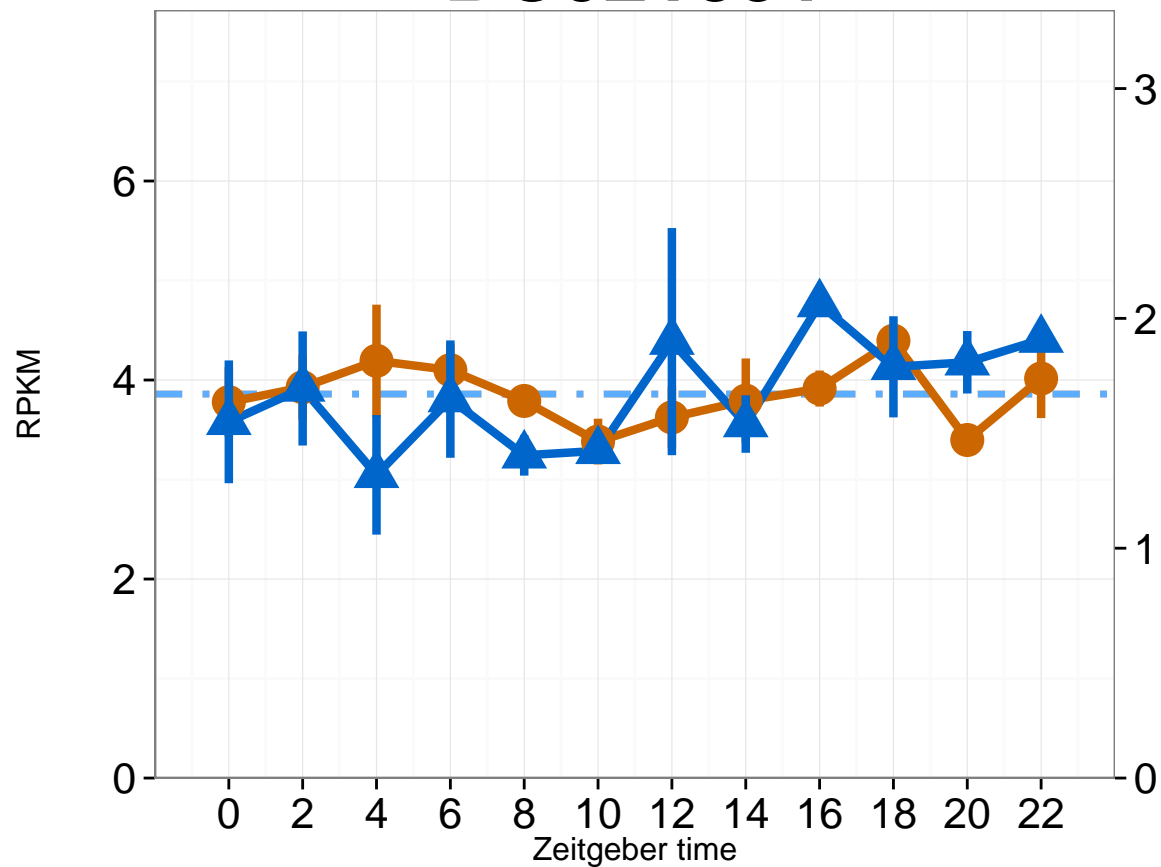

# BC021891

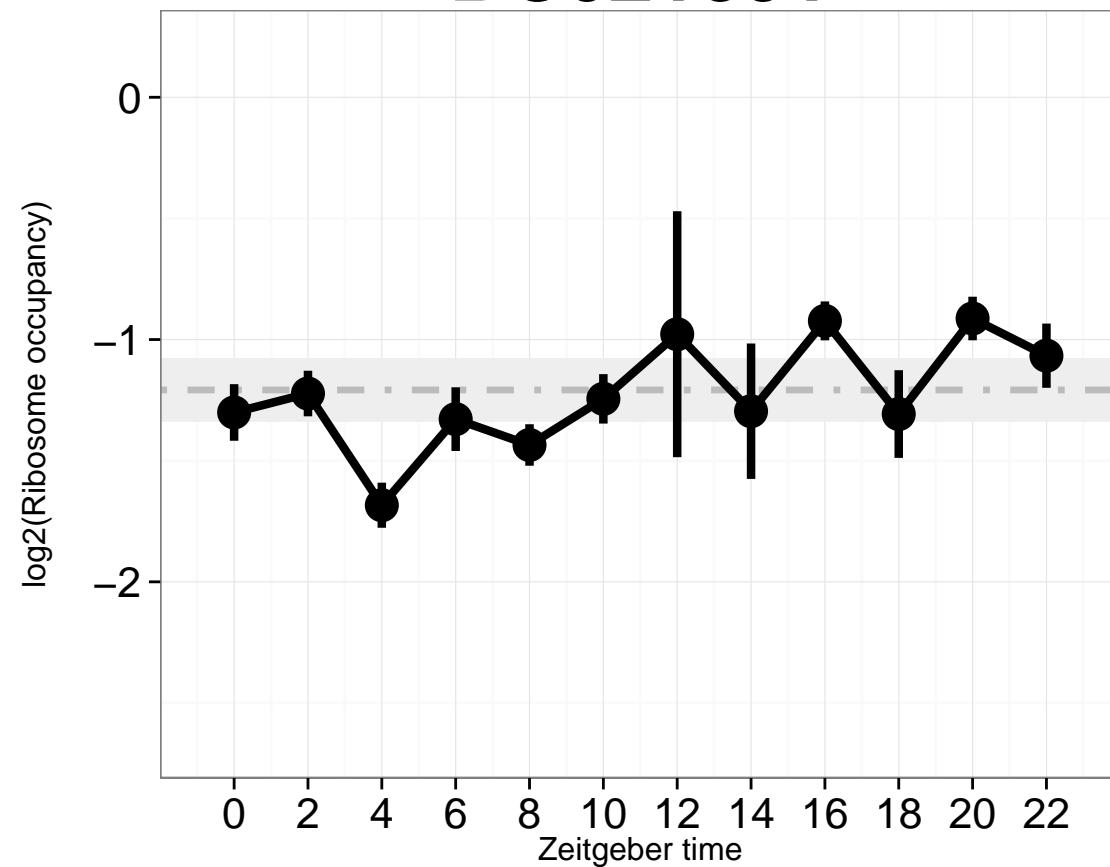

Supplement: Supplementary file 1352 [file 1]

# Ergic2

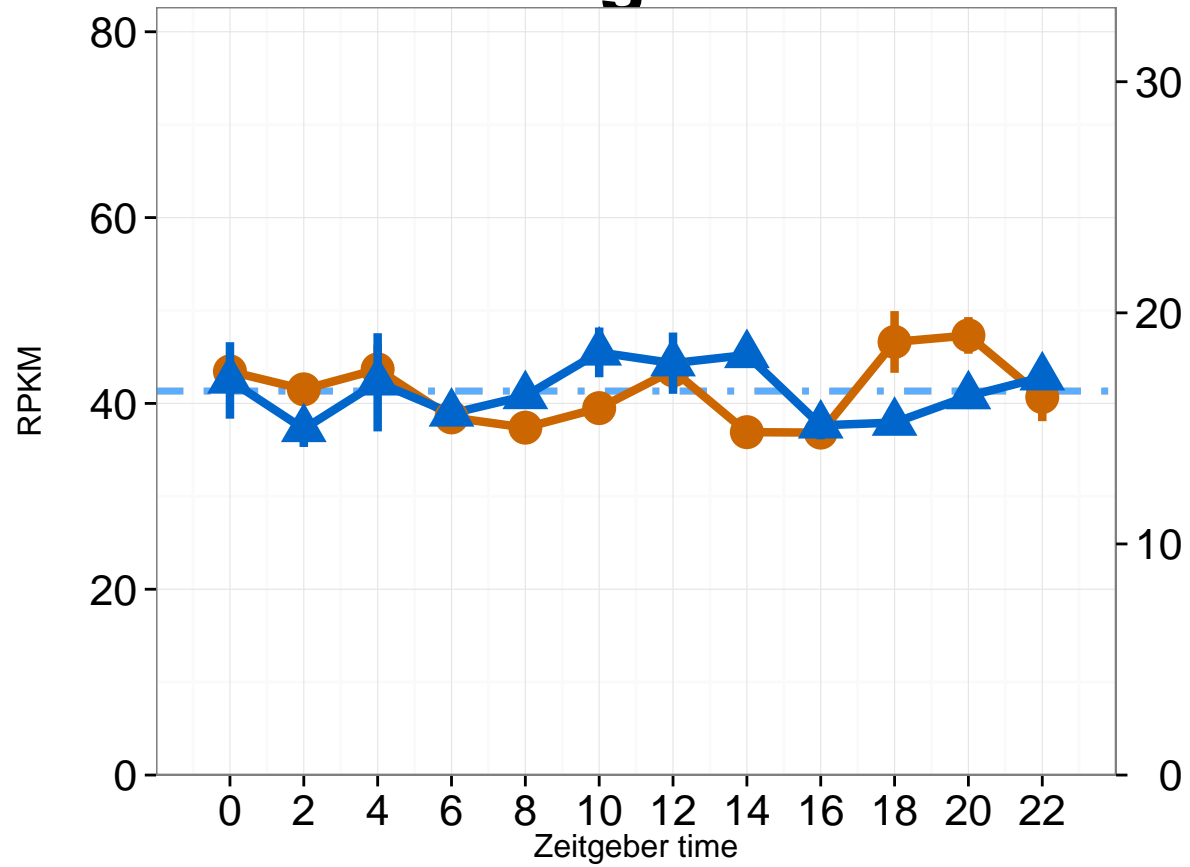

# Ergic2

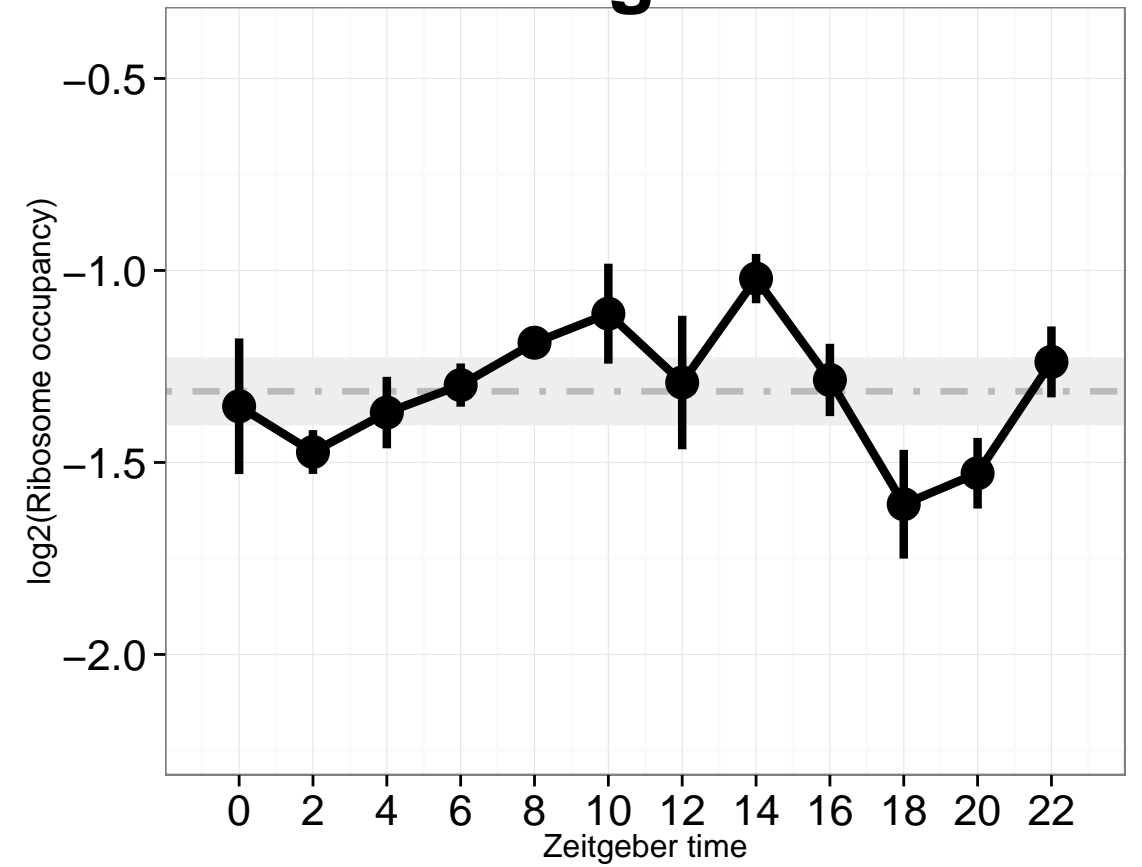

Supplement: Supplementary file 1353 [file 1]

## B130024G19Rik

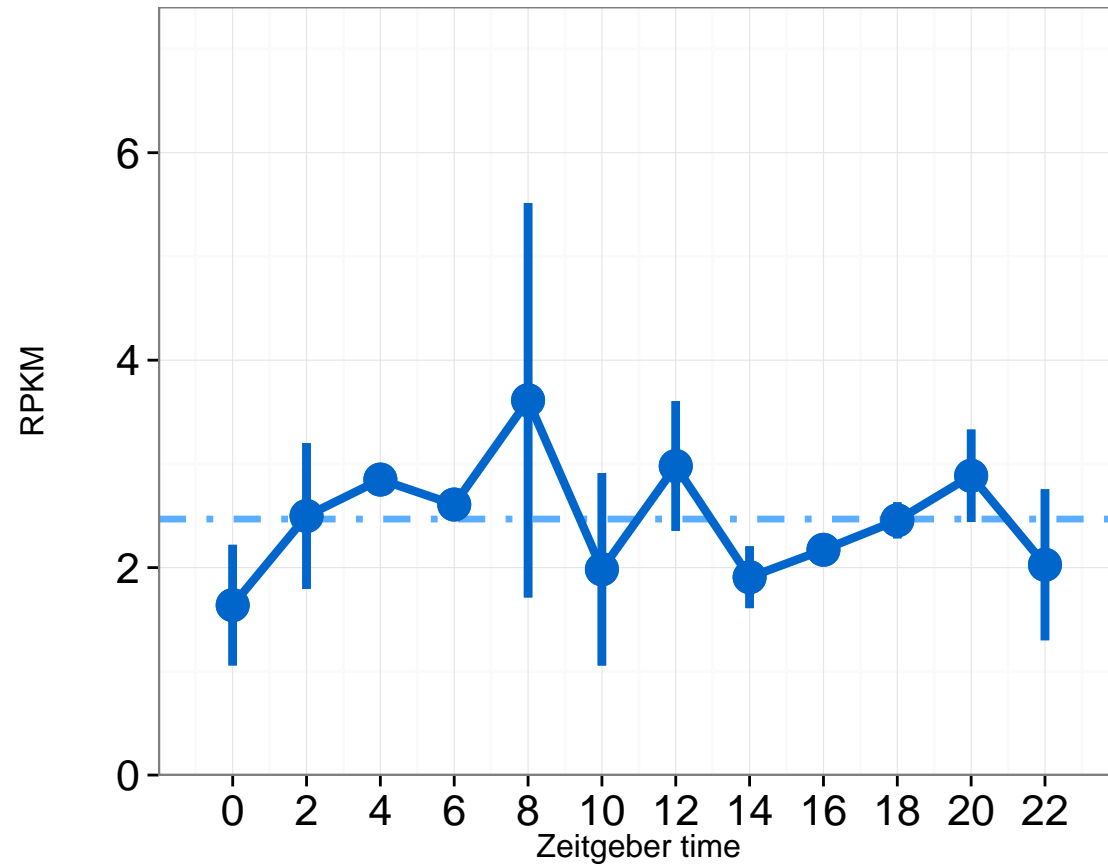

## B130024G19Rik log2(Ribosome occup

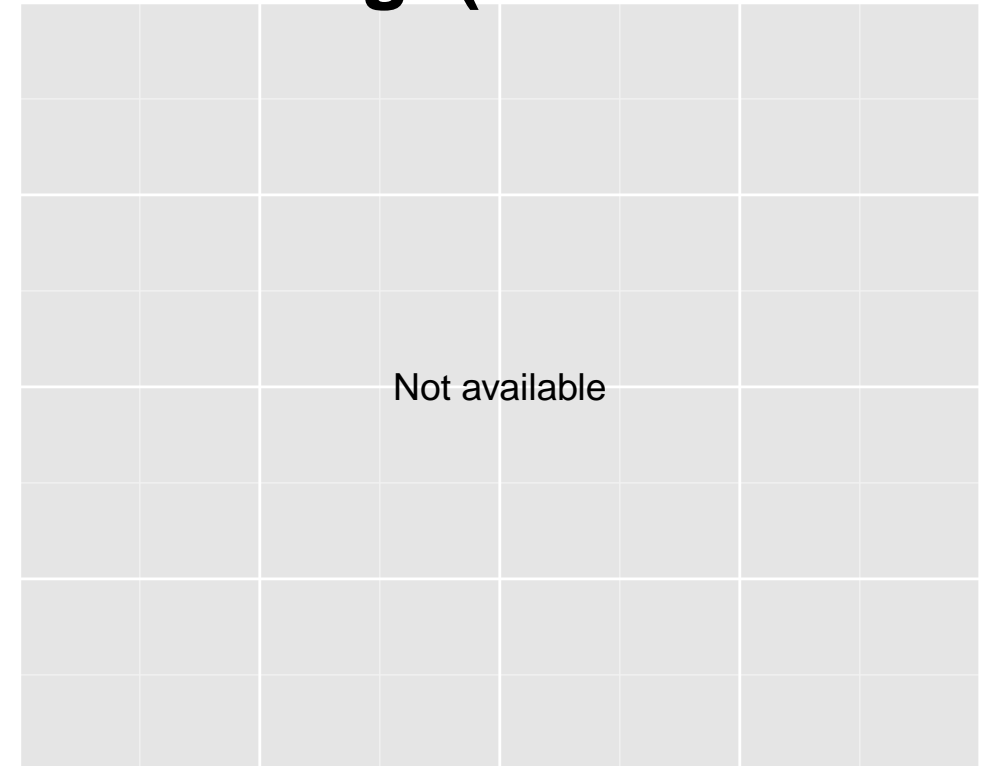

Supplement: Supplementary file 1354 [file 1]

## Smarca1

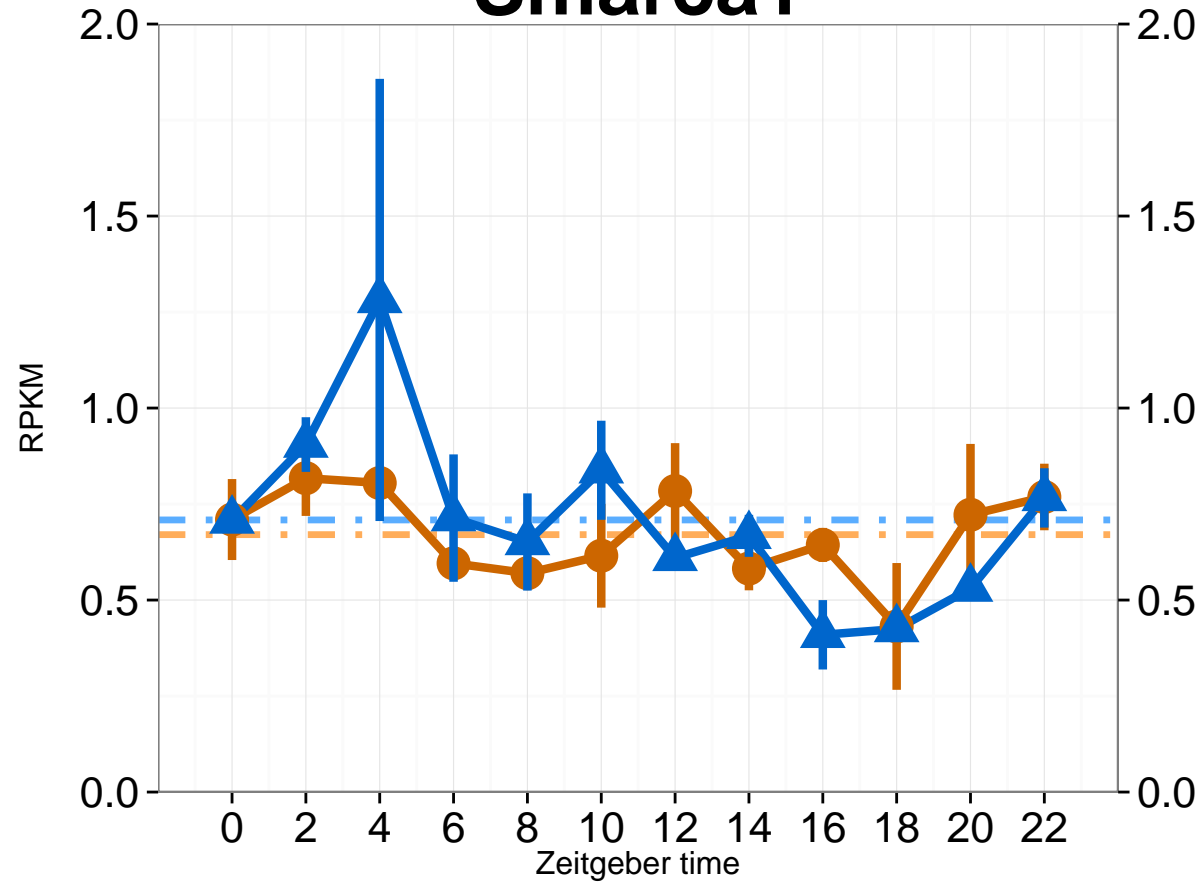

## Smarca1

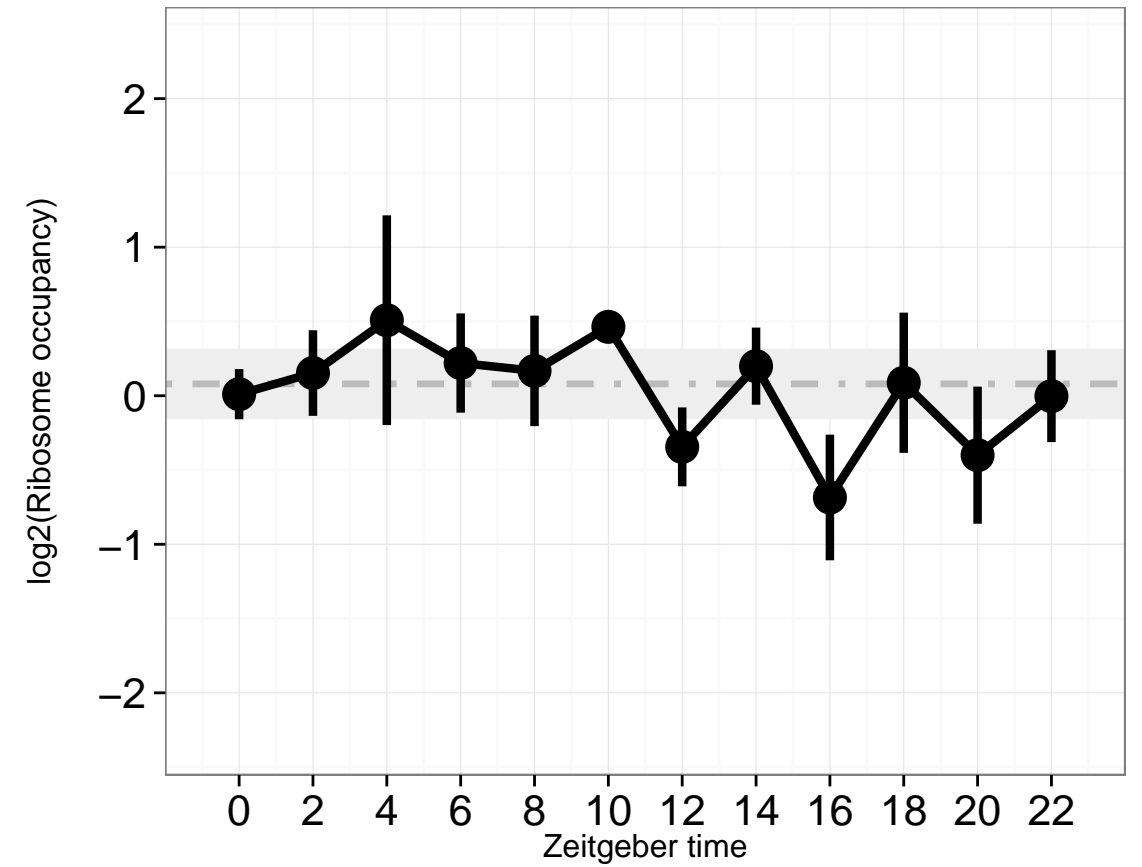

Supplement: Supplementary file 1355 [file 1]

# Mrps16

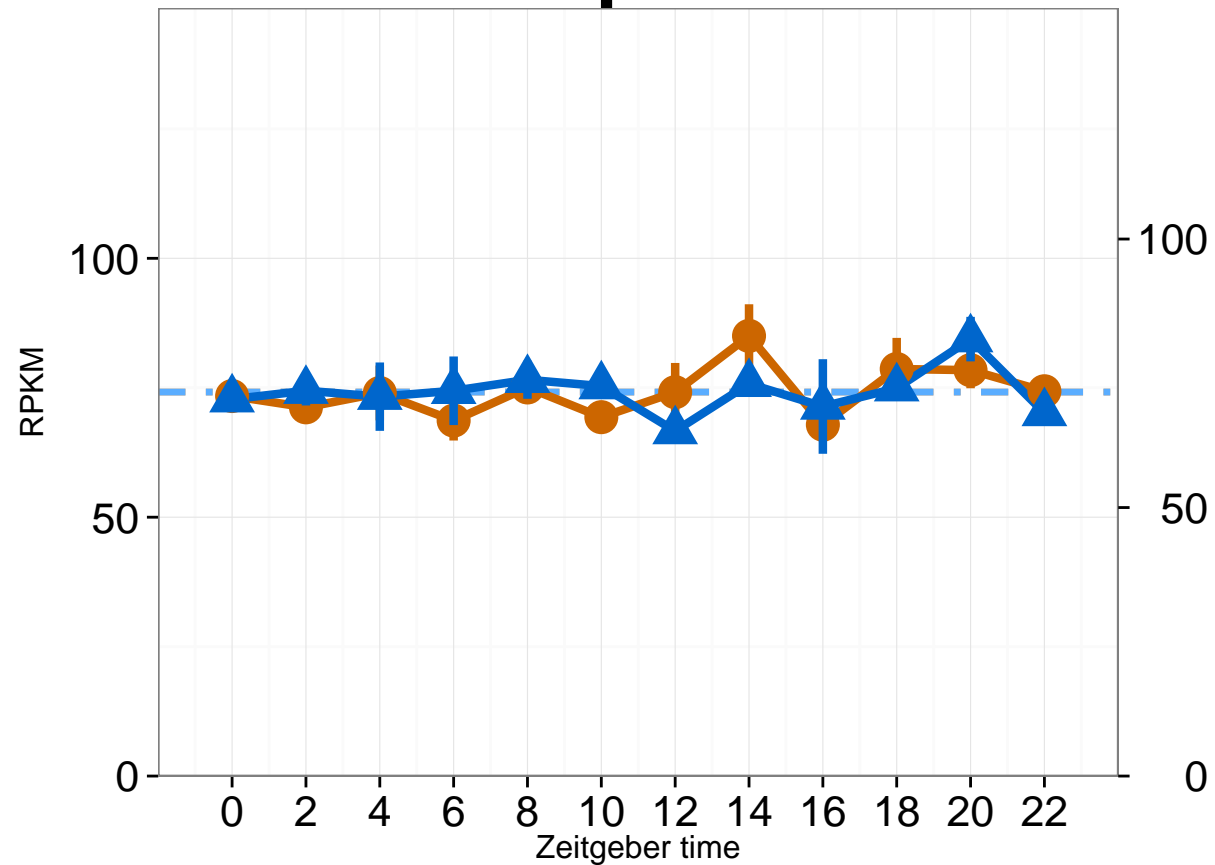

# Mrps16

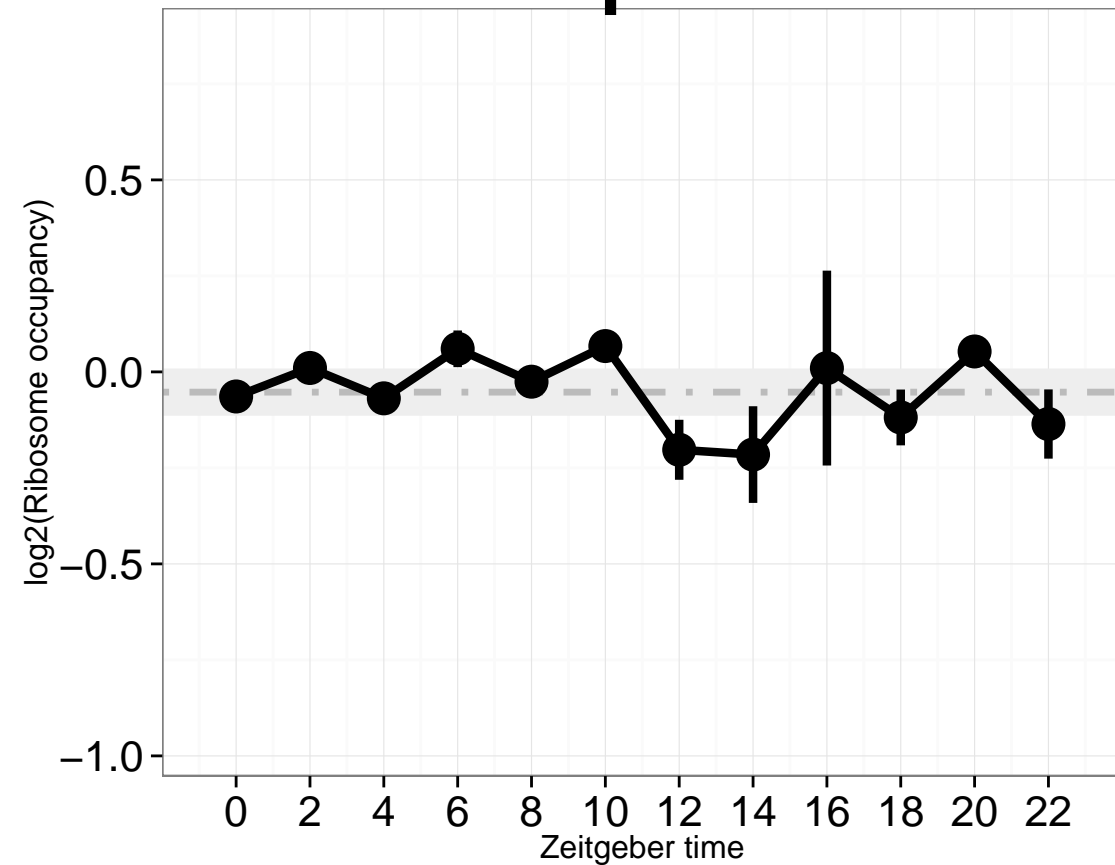

Supplement: Supplementary file 1356 [file 1]

**Reep2 TR**

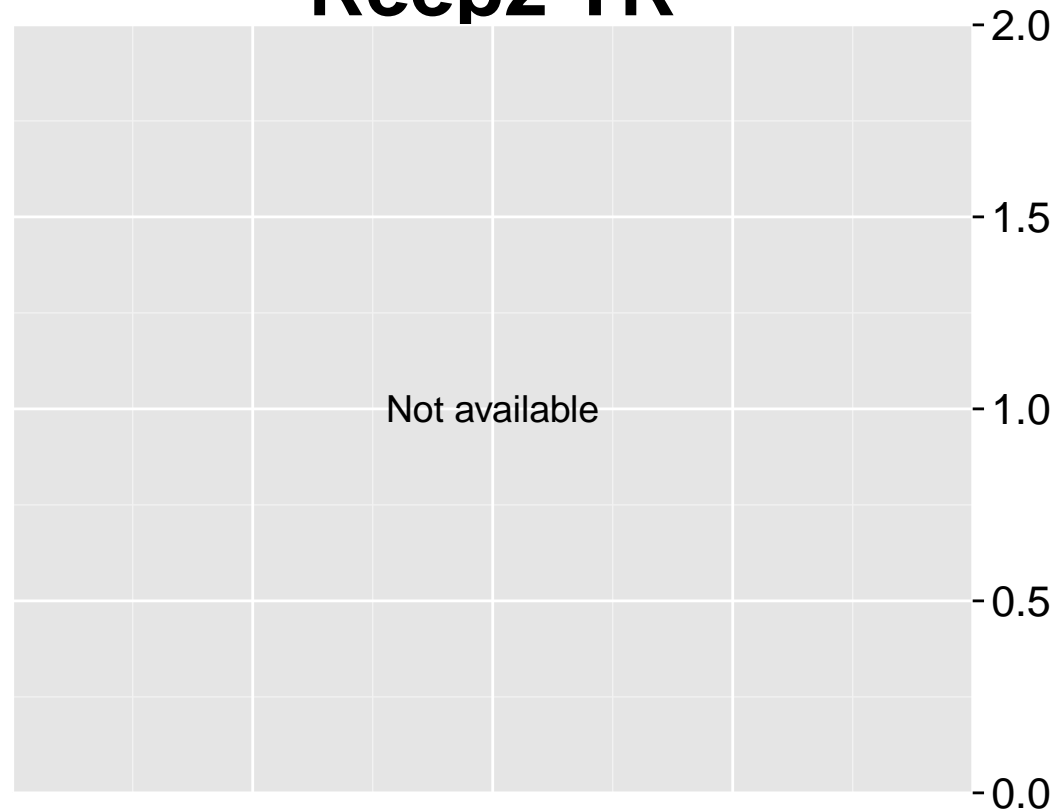

**Reep2 log2(Ribosome occupancy**

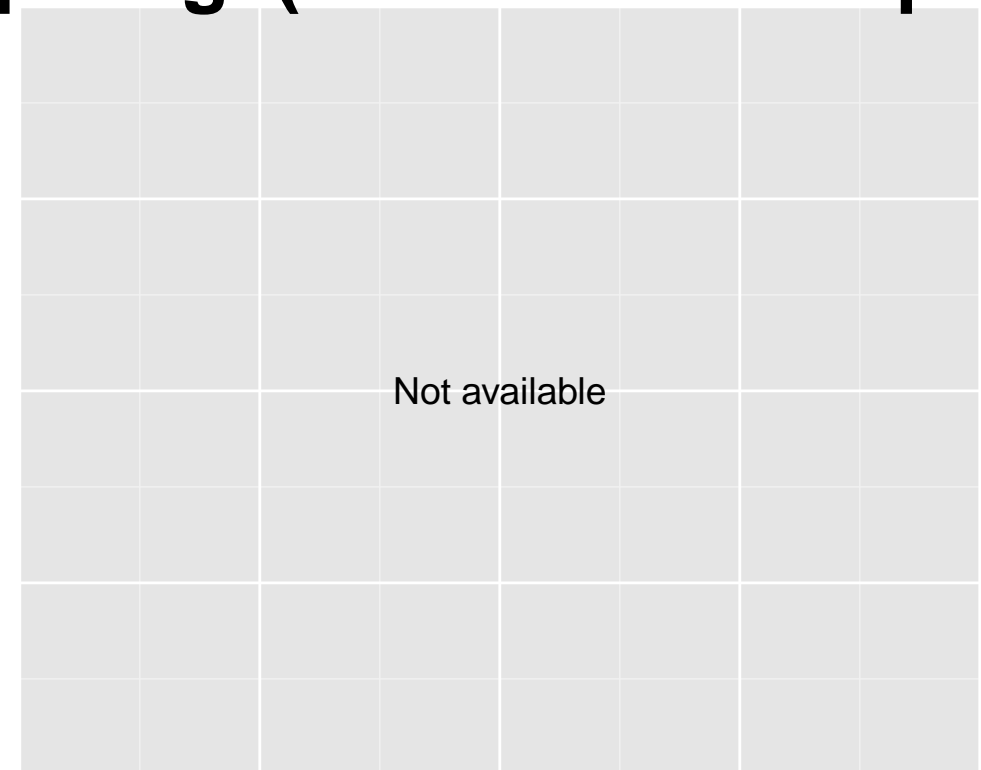

Supplement: Supplementary file 1357 [file 1]

# Cep63

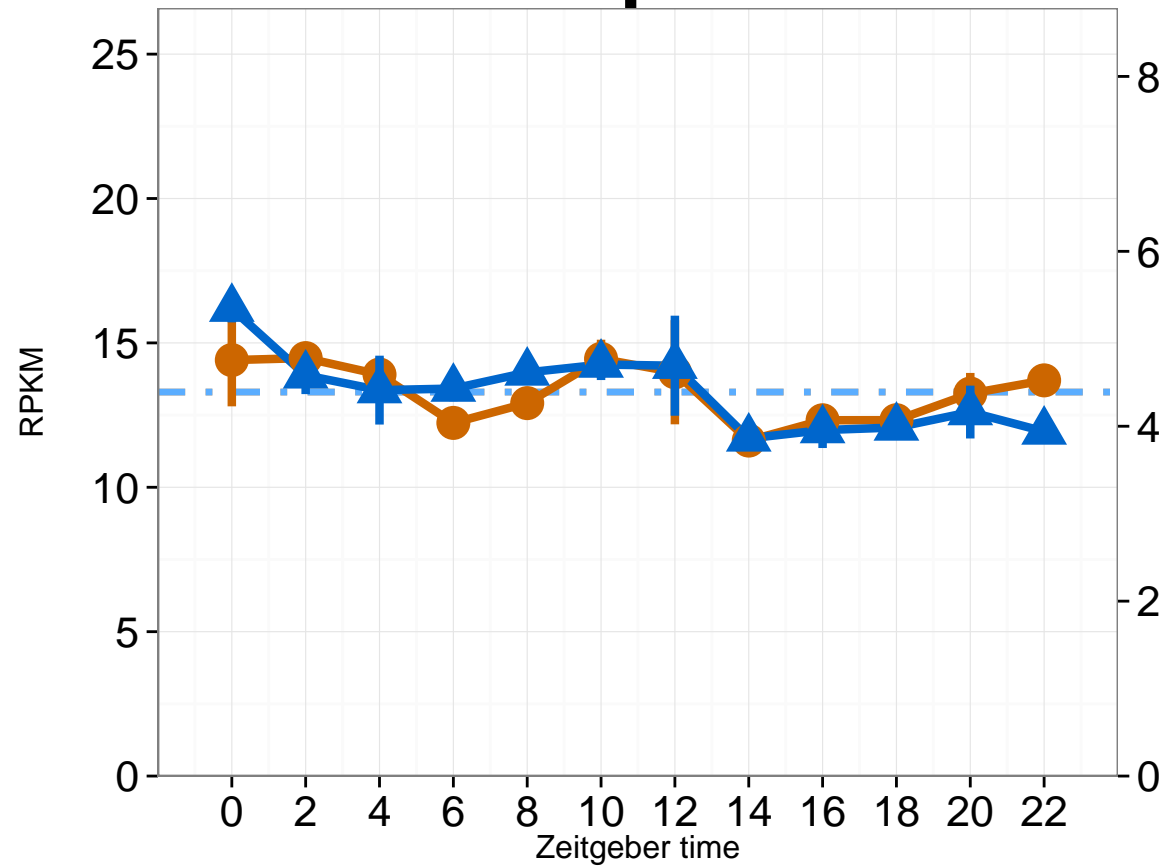

# Cep63

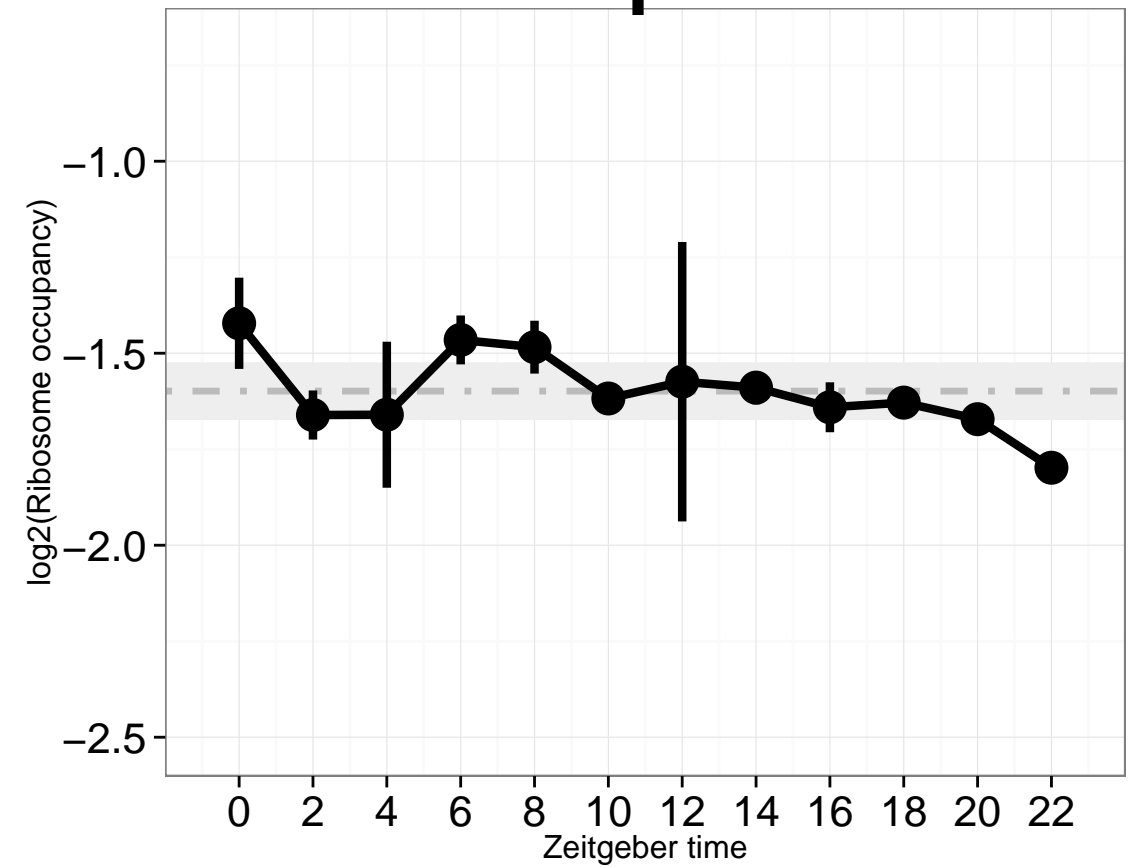

Supplement: Supplementary file 1358 [file 1]

## Il2rb

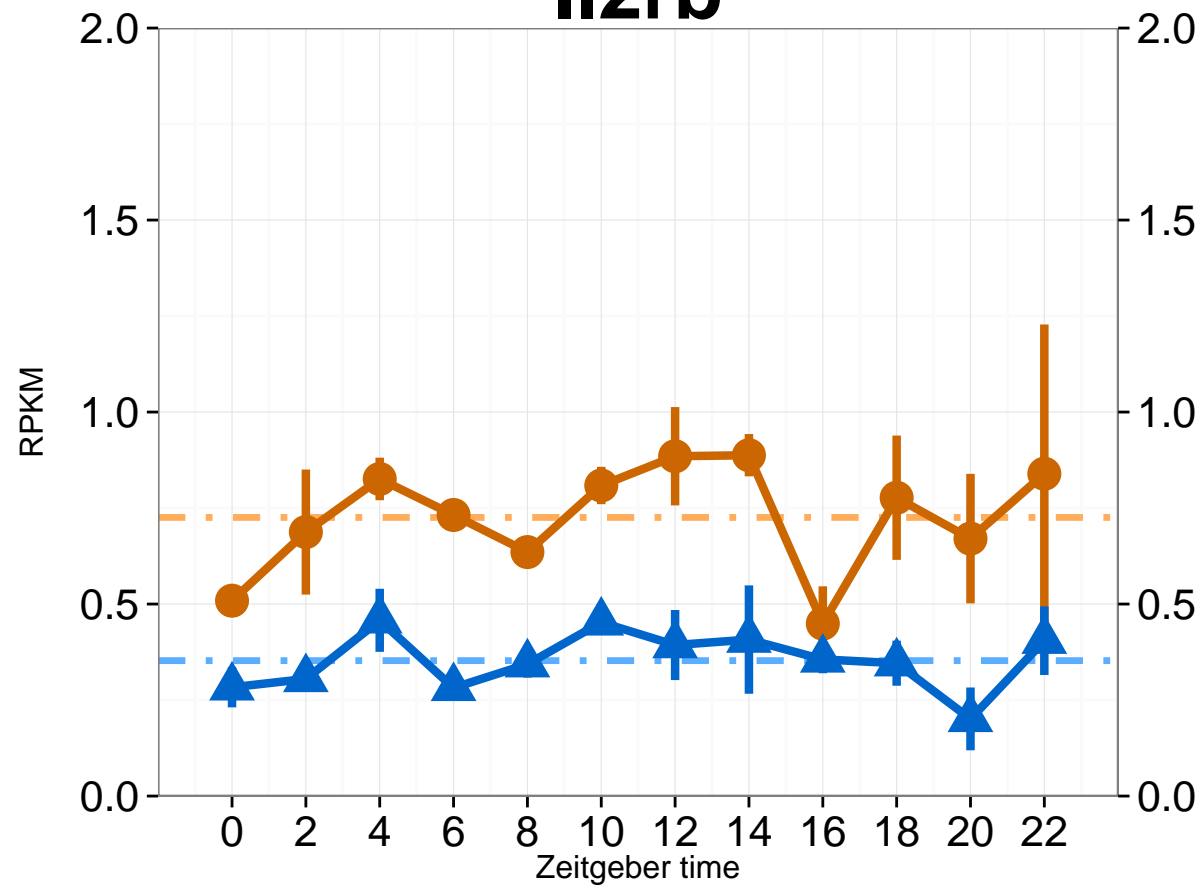

## Il2rb

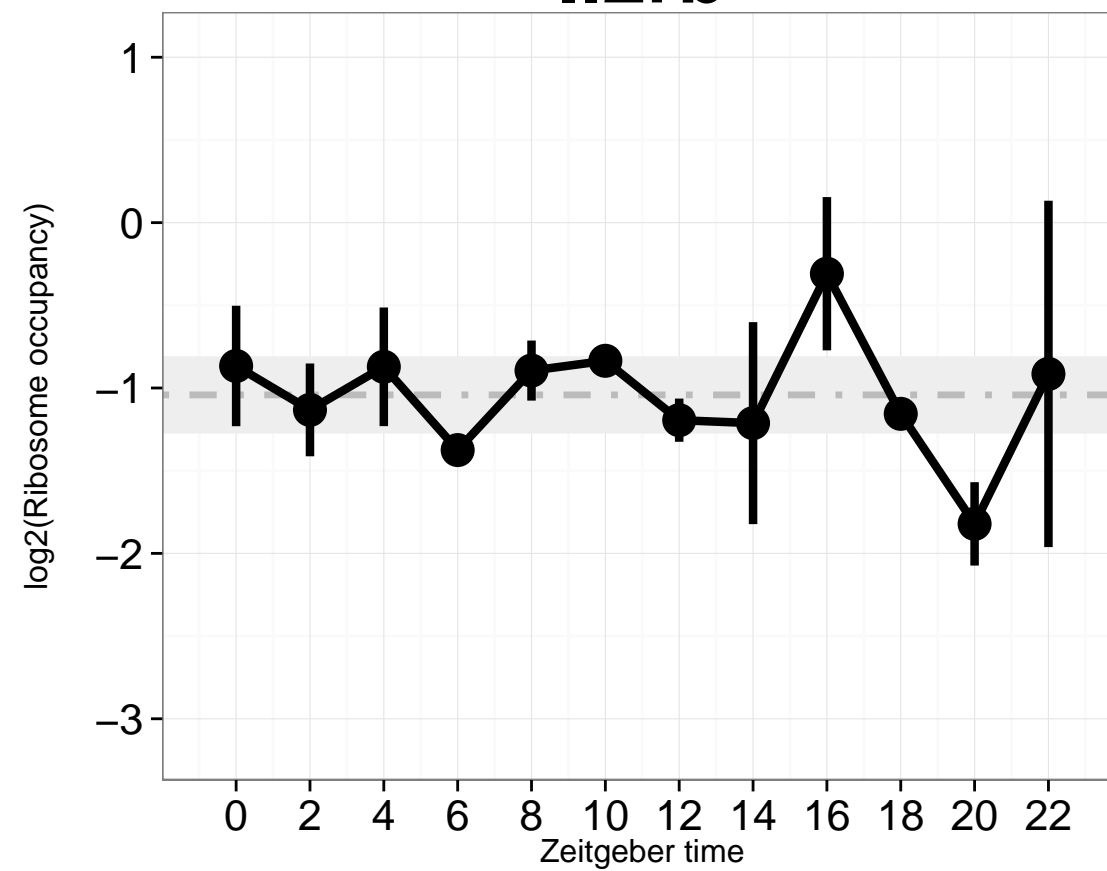

Supplement: Supplementary file 1359 [file 1]

# Tmem126b

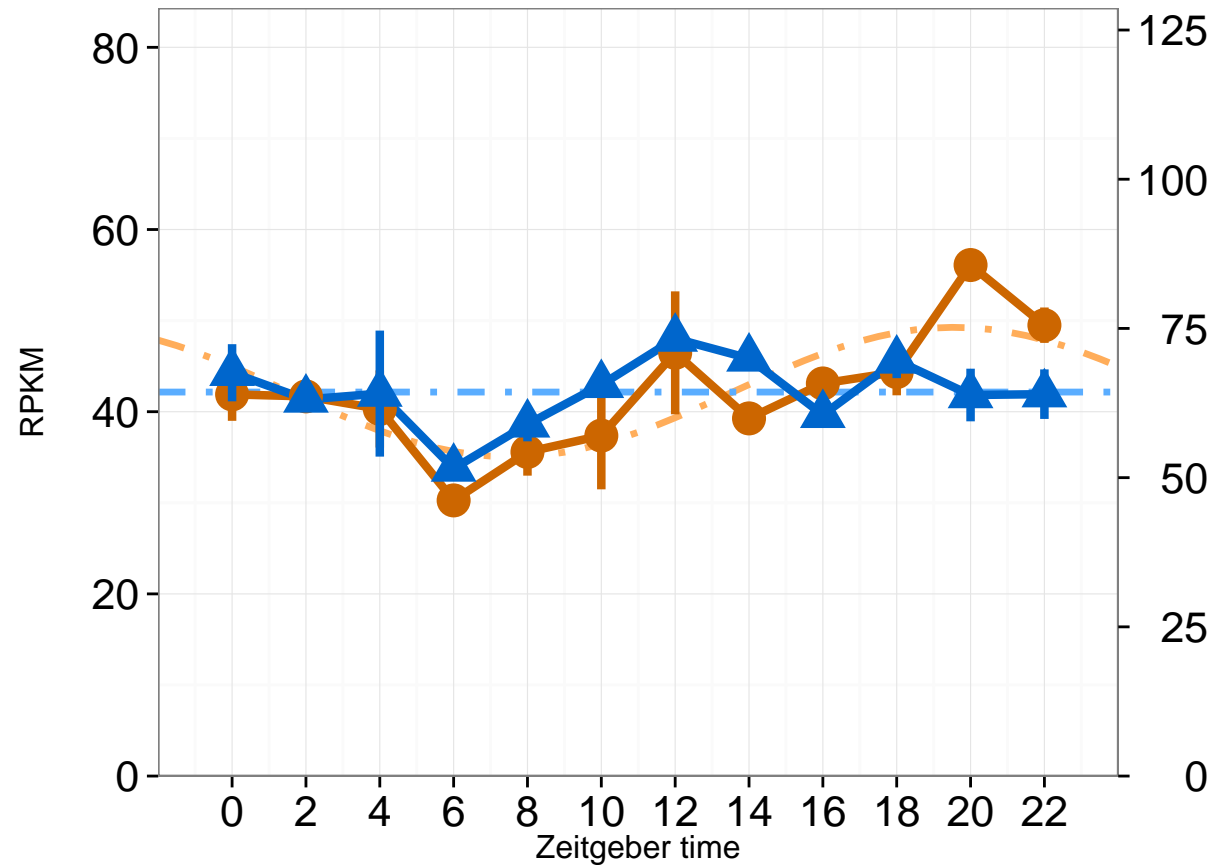

# Tmem126b

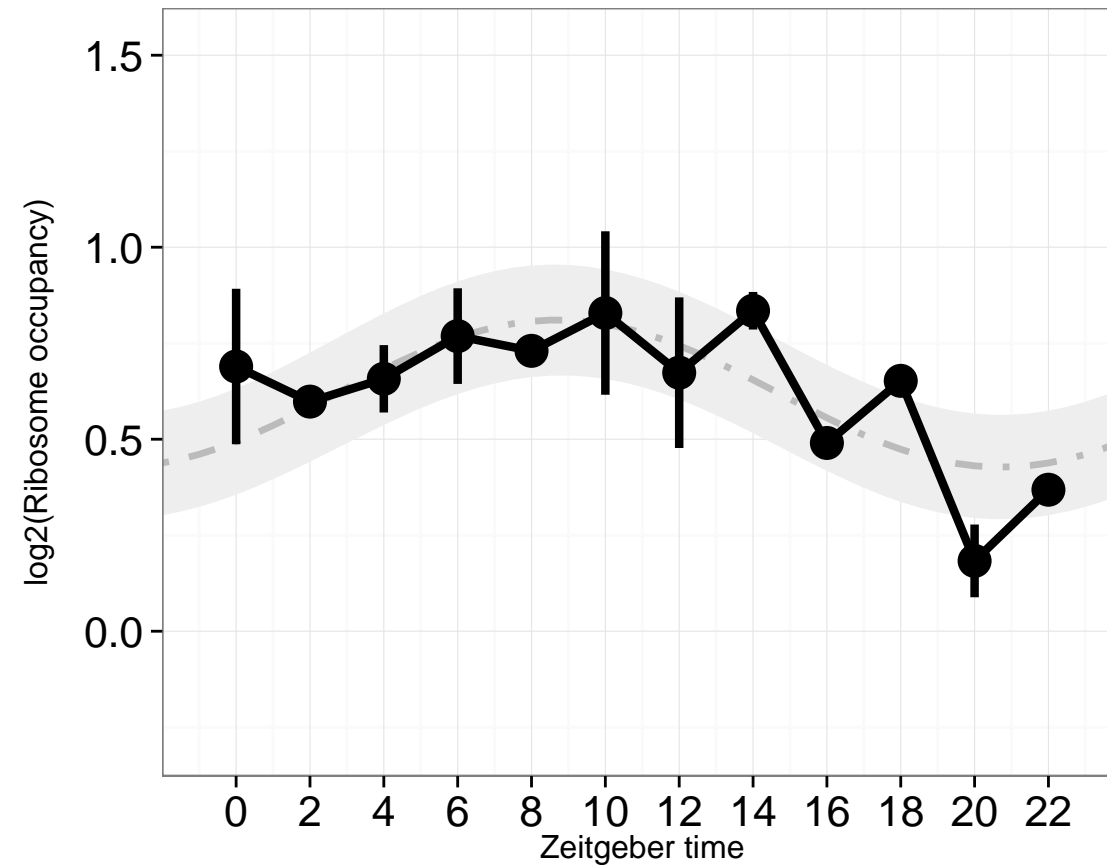

Supplement: Supplementary file 1360 [file 1]

# Strn3

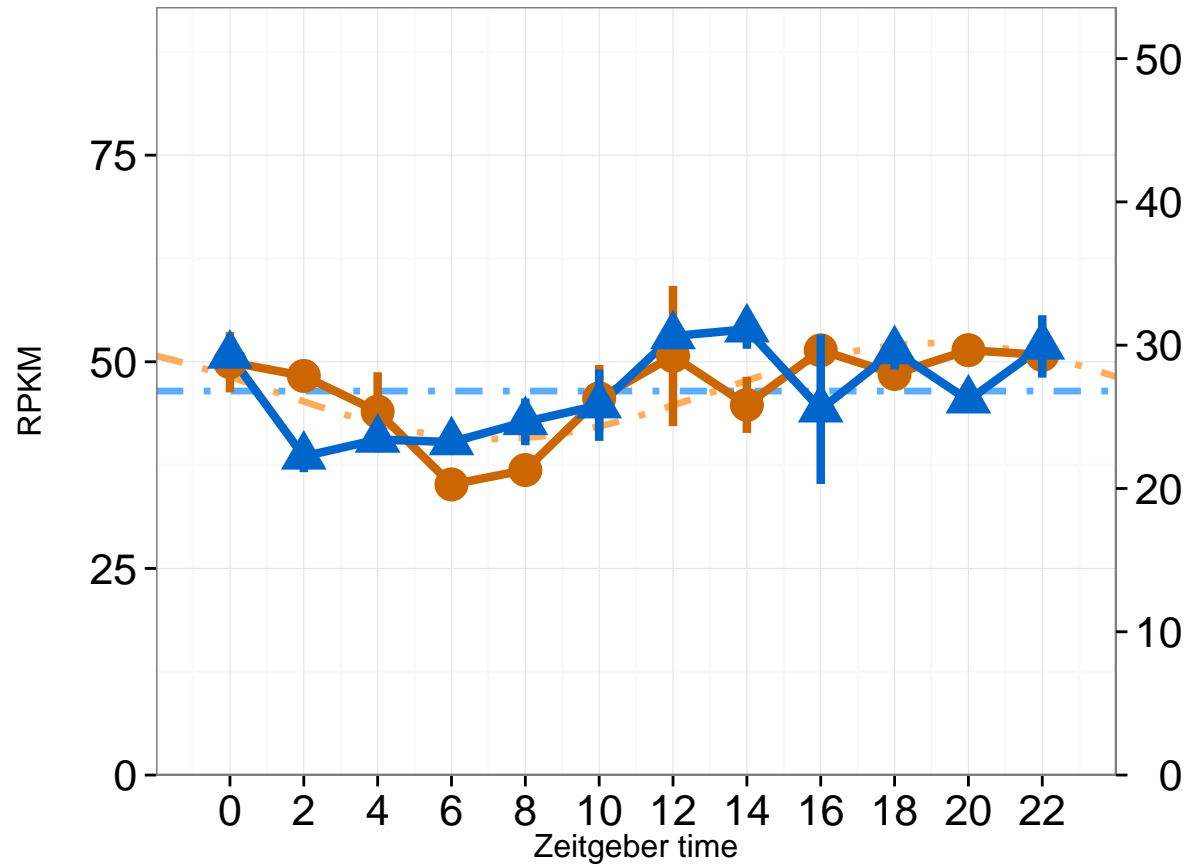

# Strn3

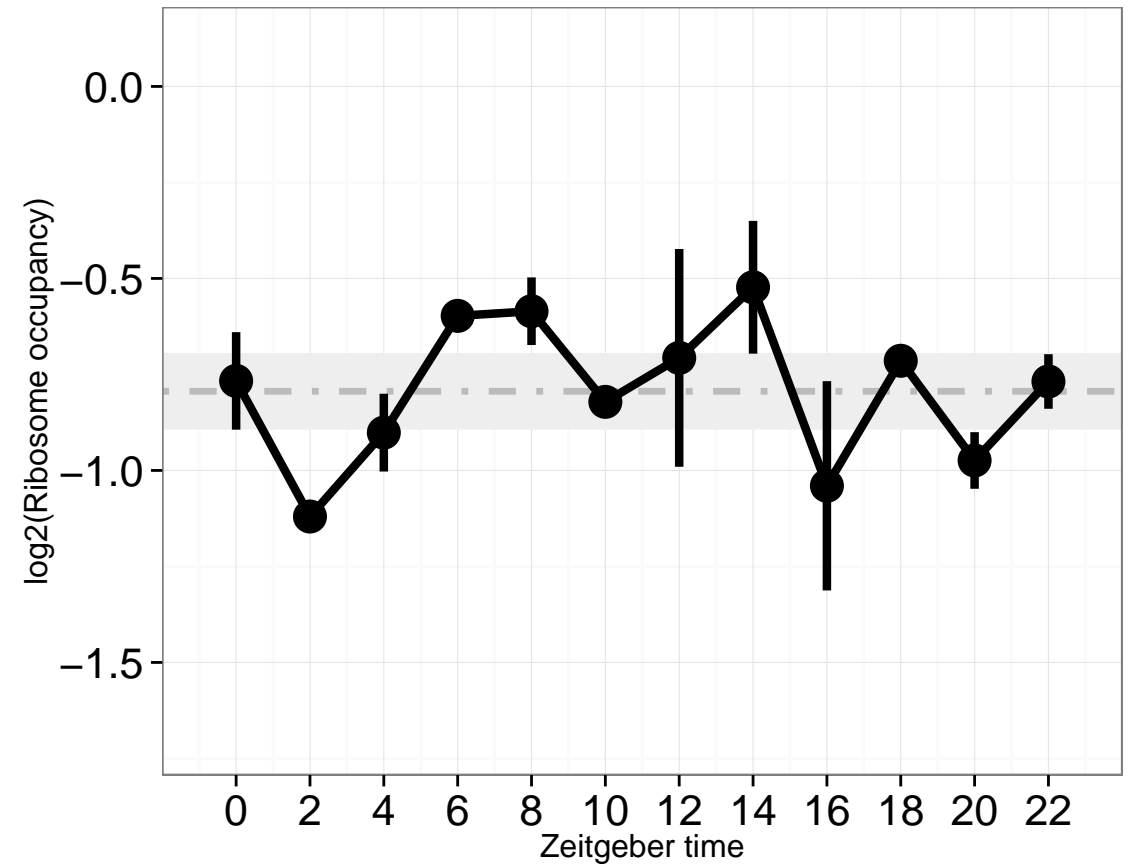

Supplement: Supplementary file 1361 [file 1]

# Tmem55b

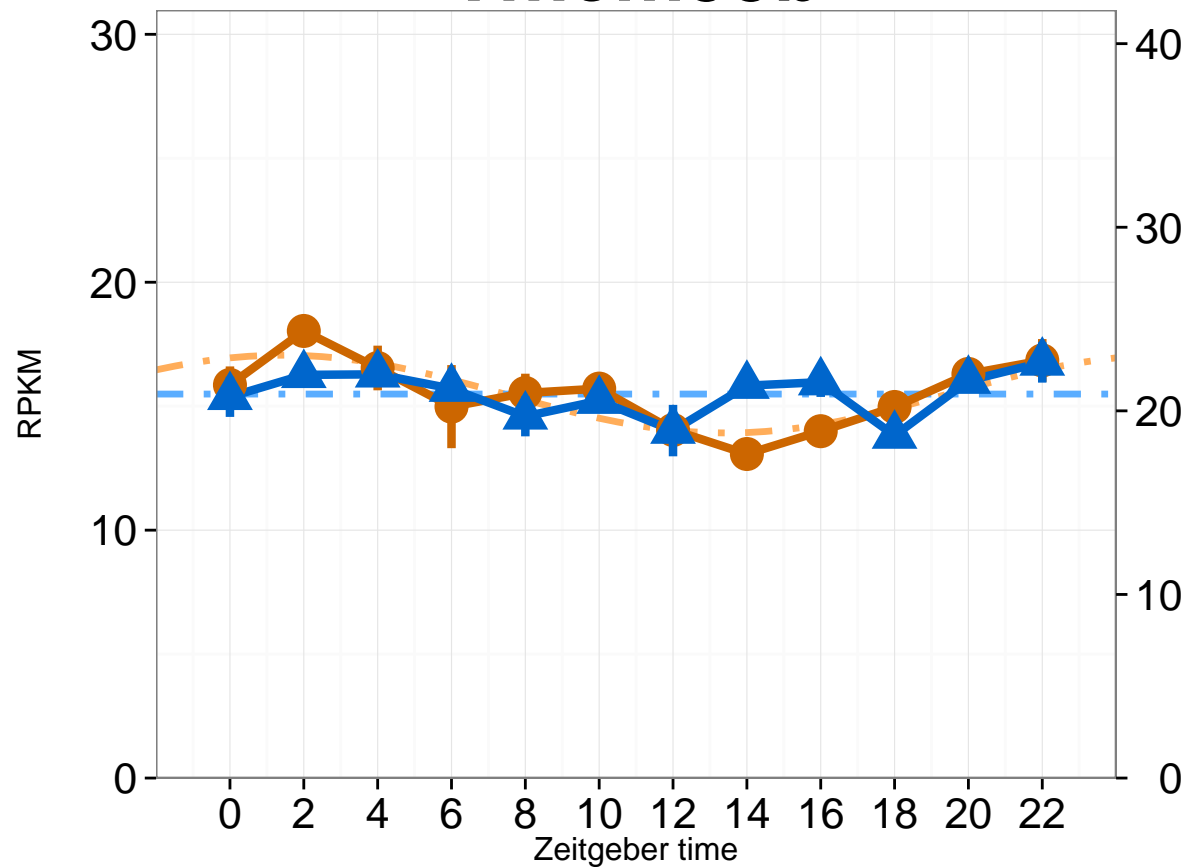

# Tmem55b

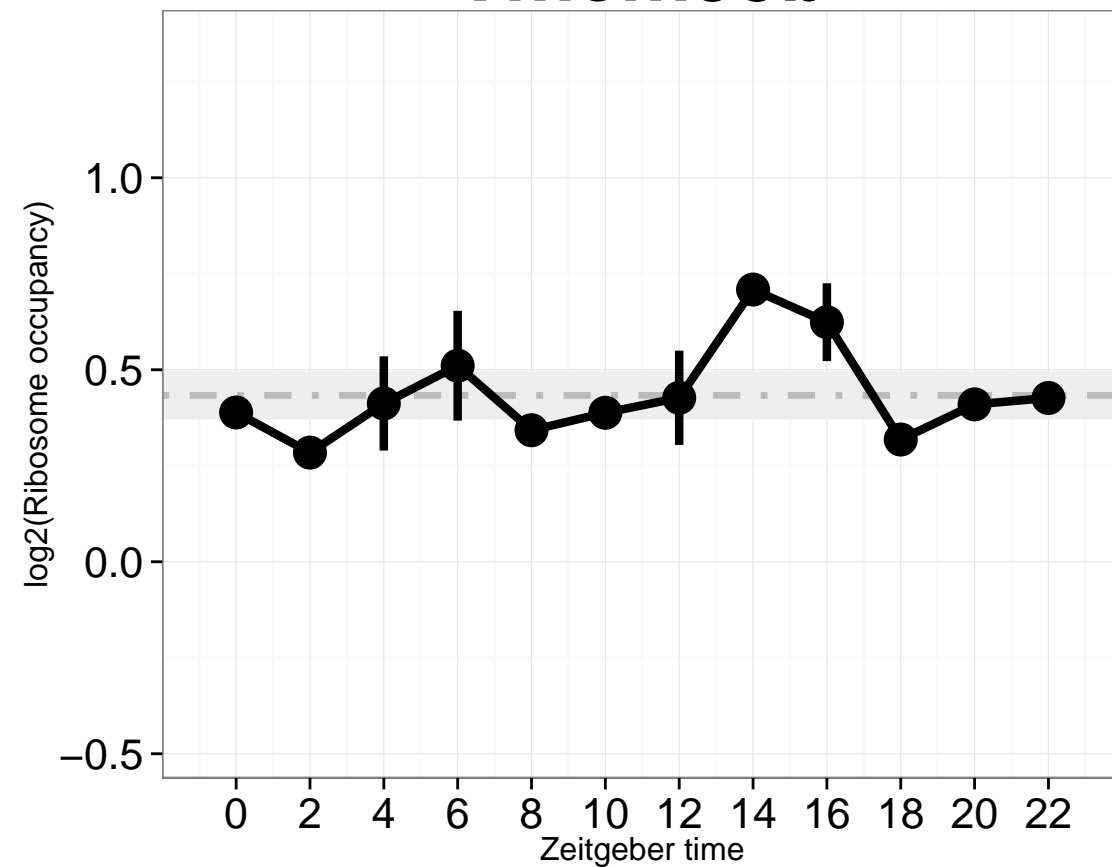

Supplement: Supplementary file 1362 [file 1]

## Polg2

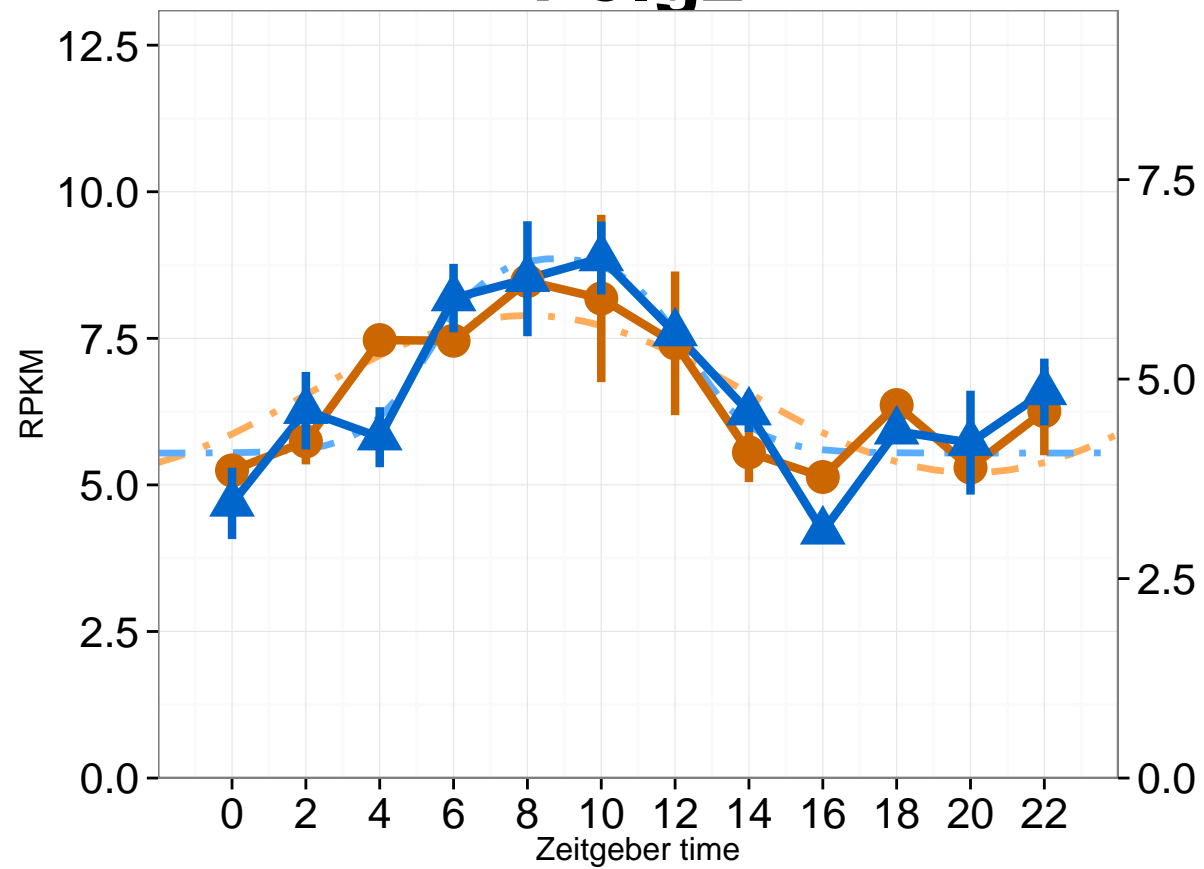

## Polg2

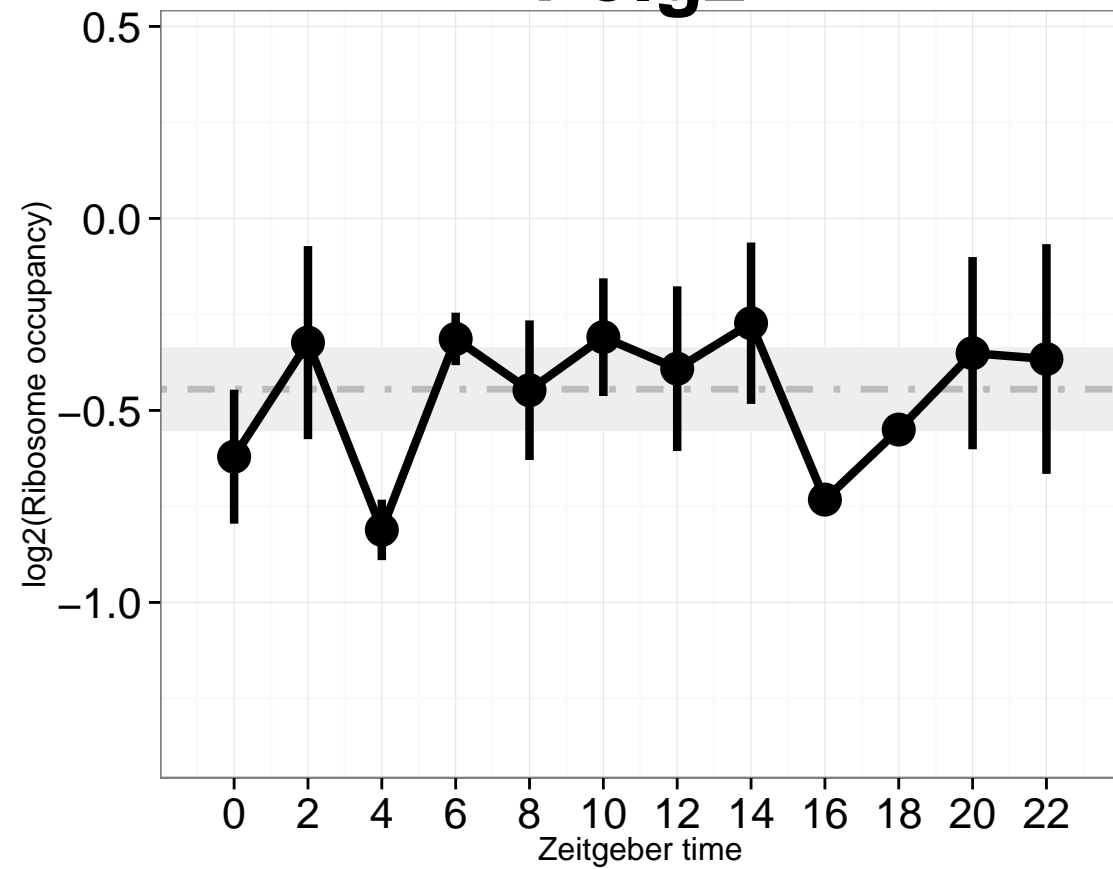

Supplement: Supplementary file 1363 [file 1]

# Tmem65

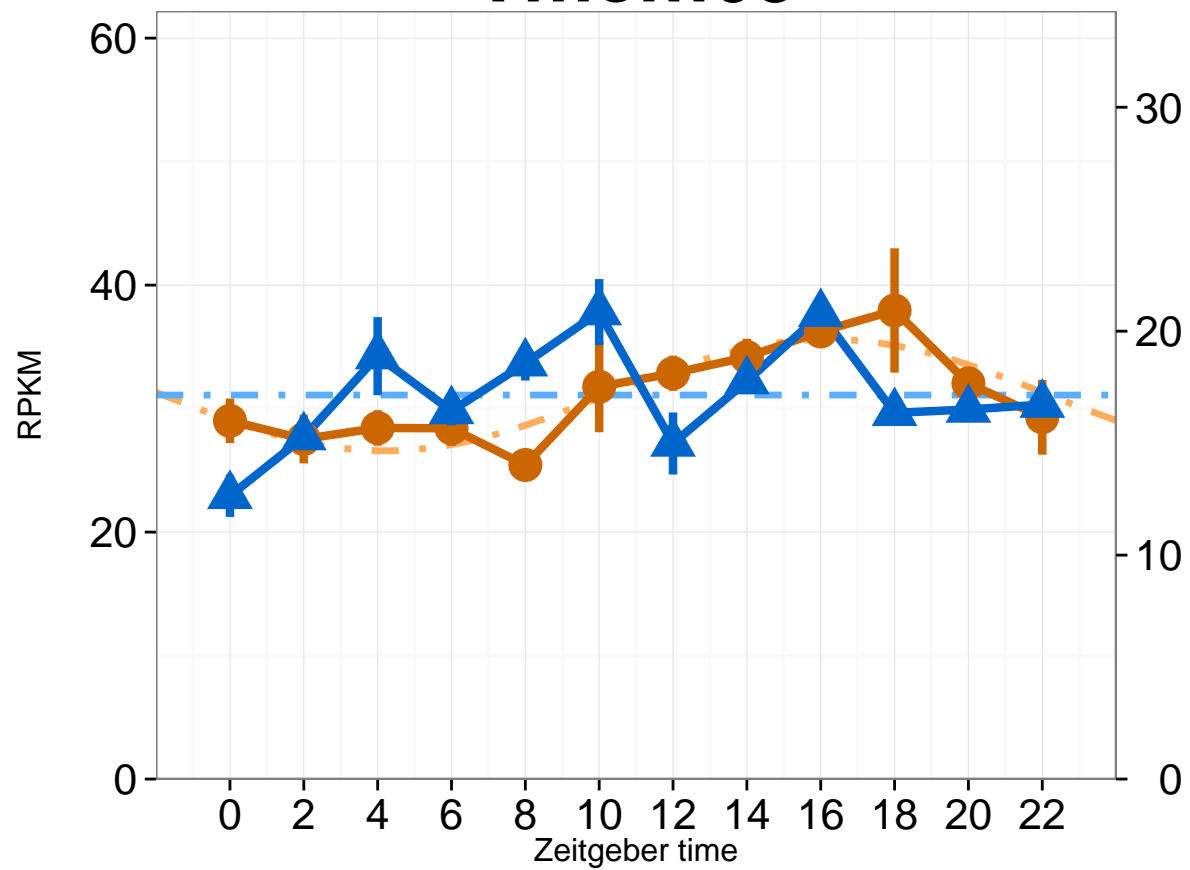

# Tmem65

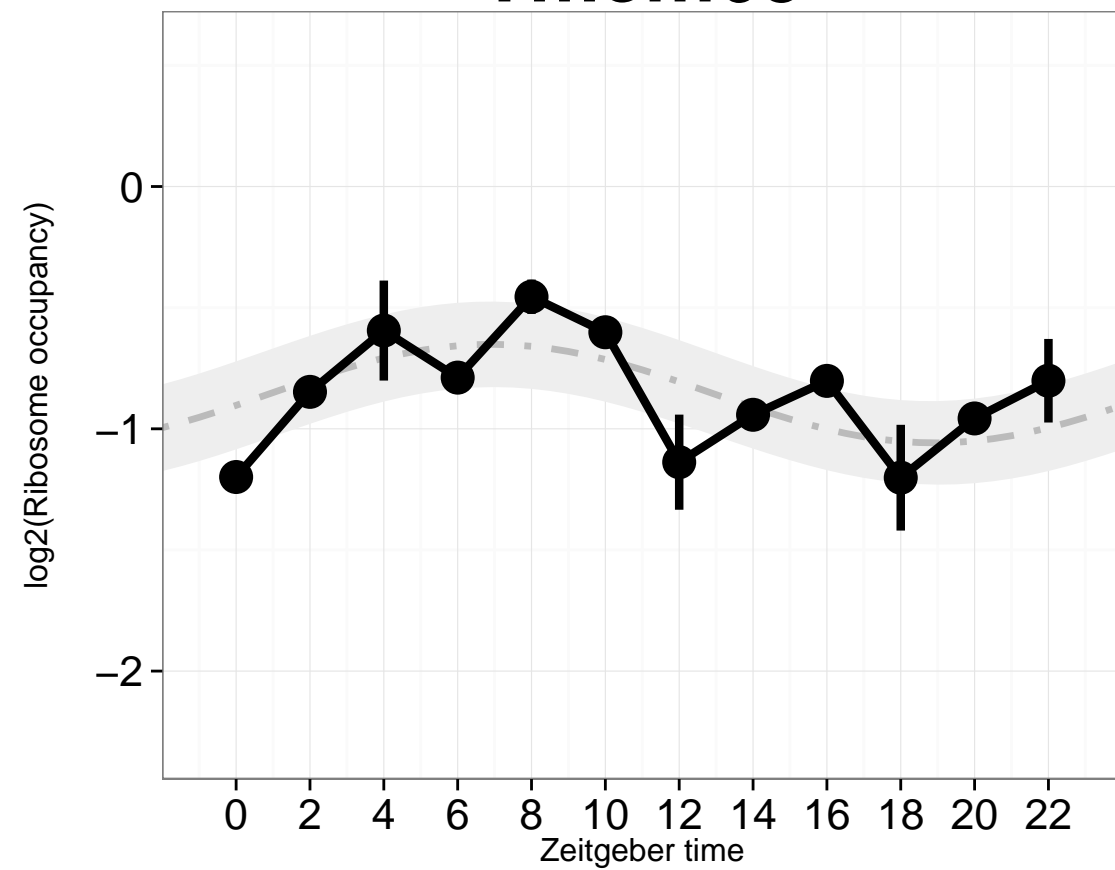

Supplement: Supplementary file 1364 [file 1]

## Siah2

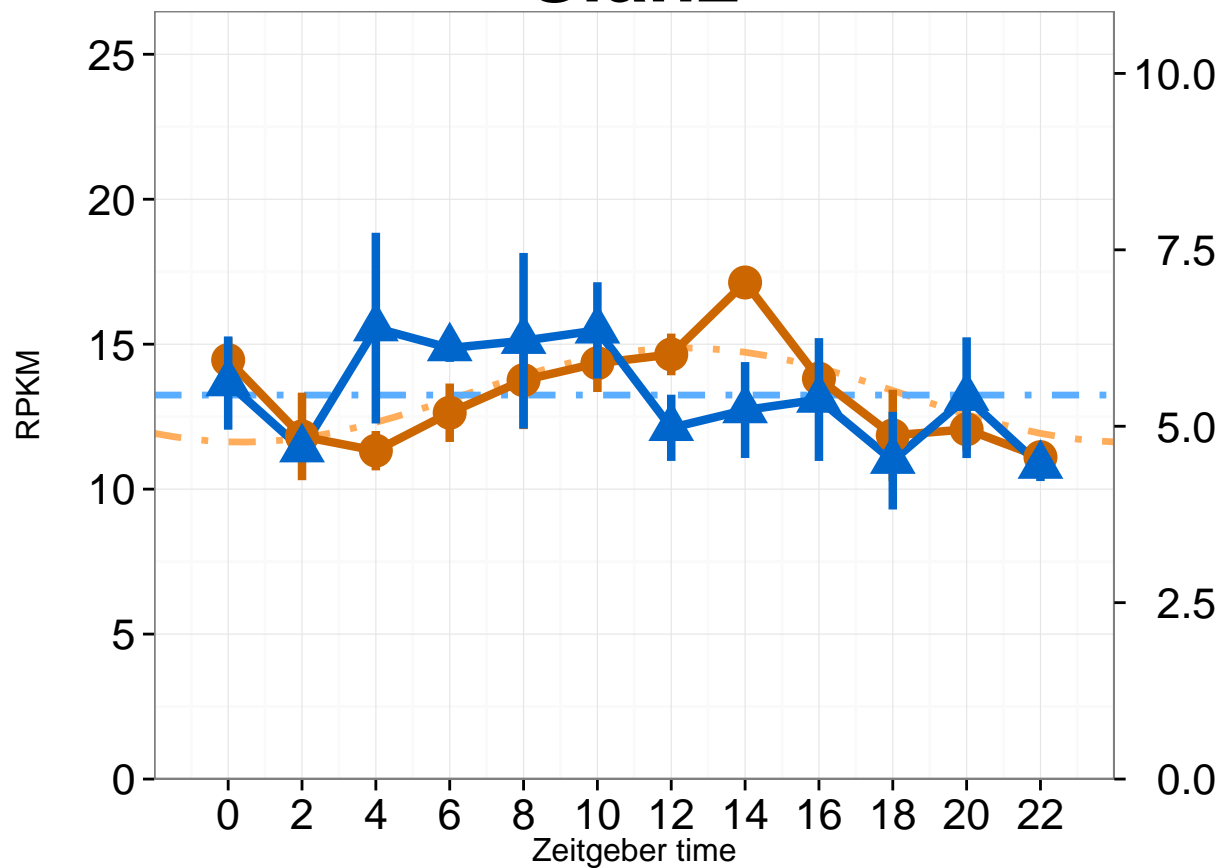

## Siah2

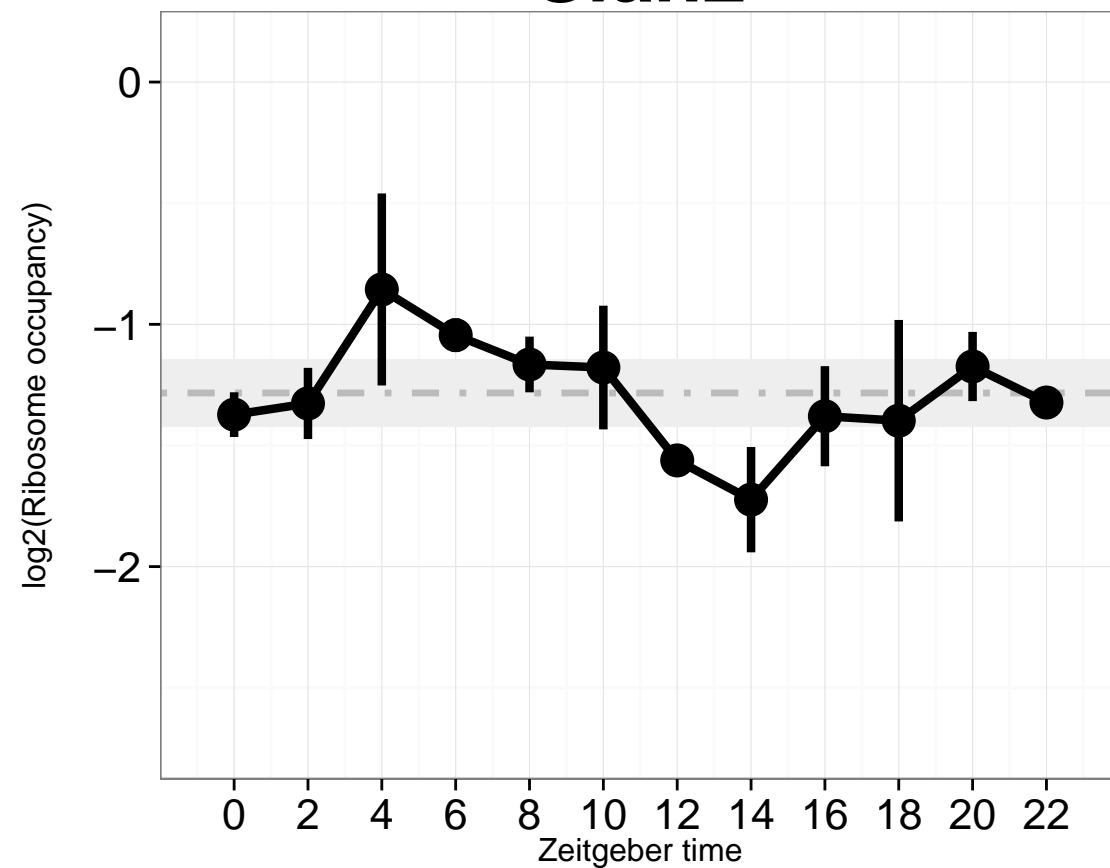

Supplement: Supplementary file 1366 [file 1]

## Slc26a6

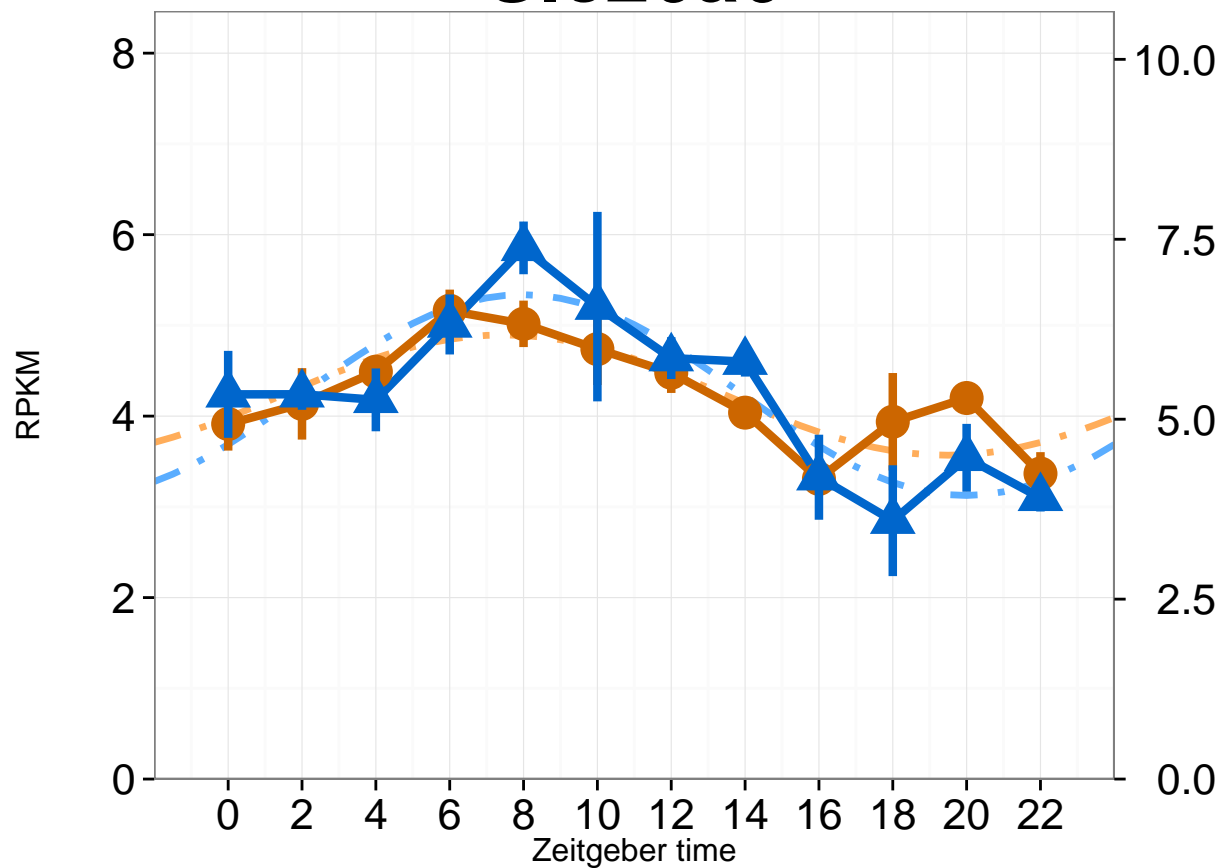

## Slc26a6

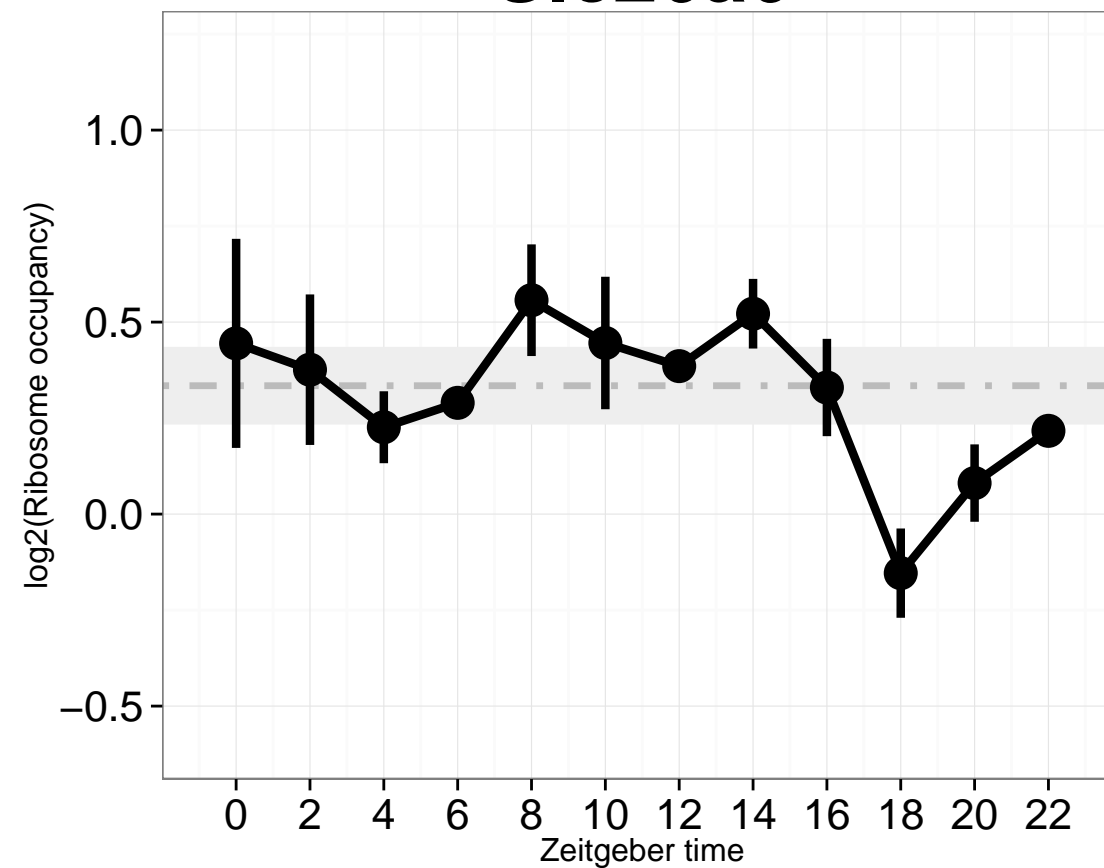

Supplement: Supplementary file 1367 [file 1]

## Eed

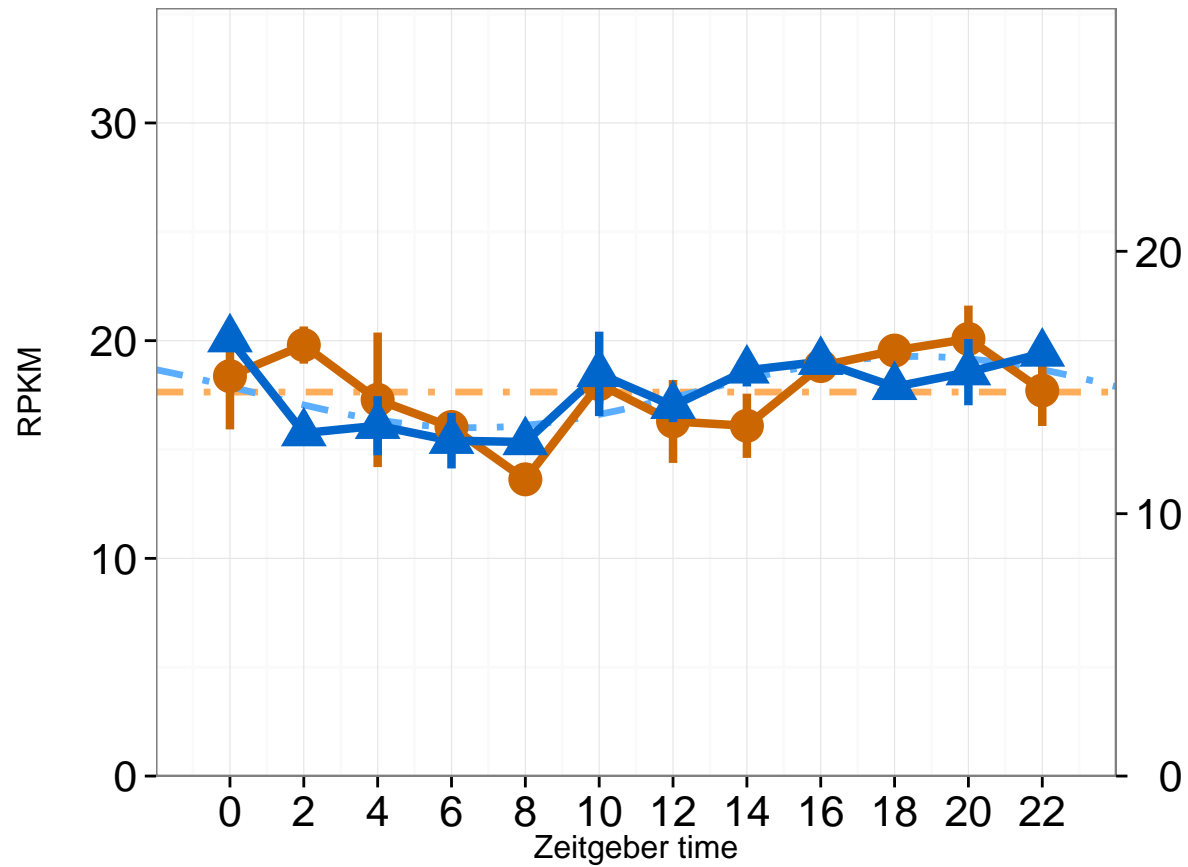

## Eed

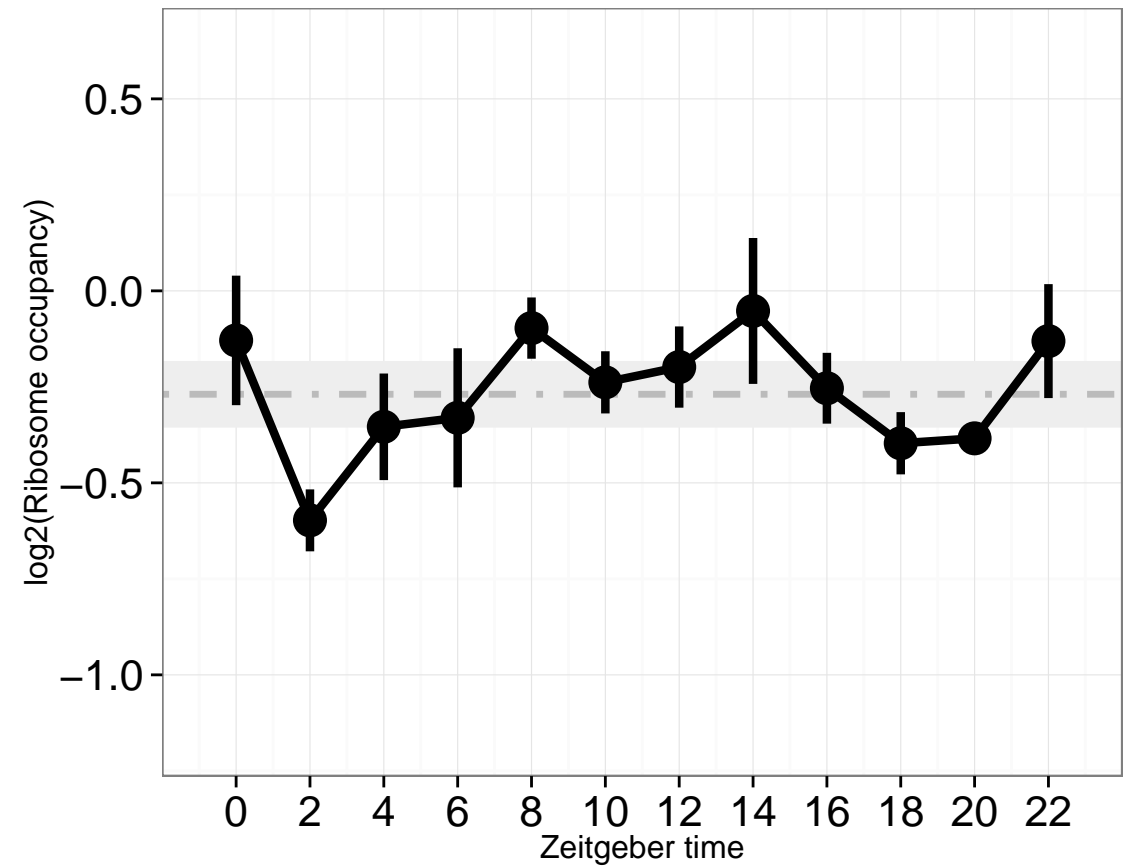

Supplement: Supplementary file 1368 [file 1]

## Chst8

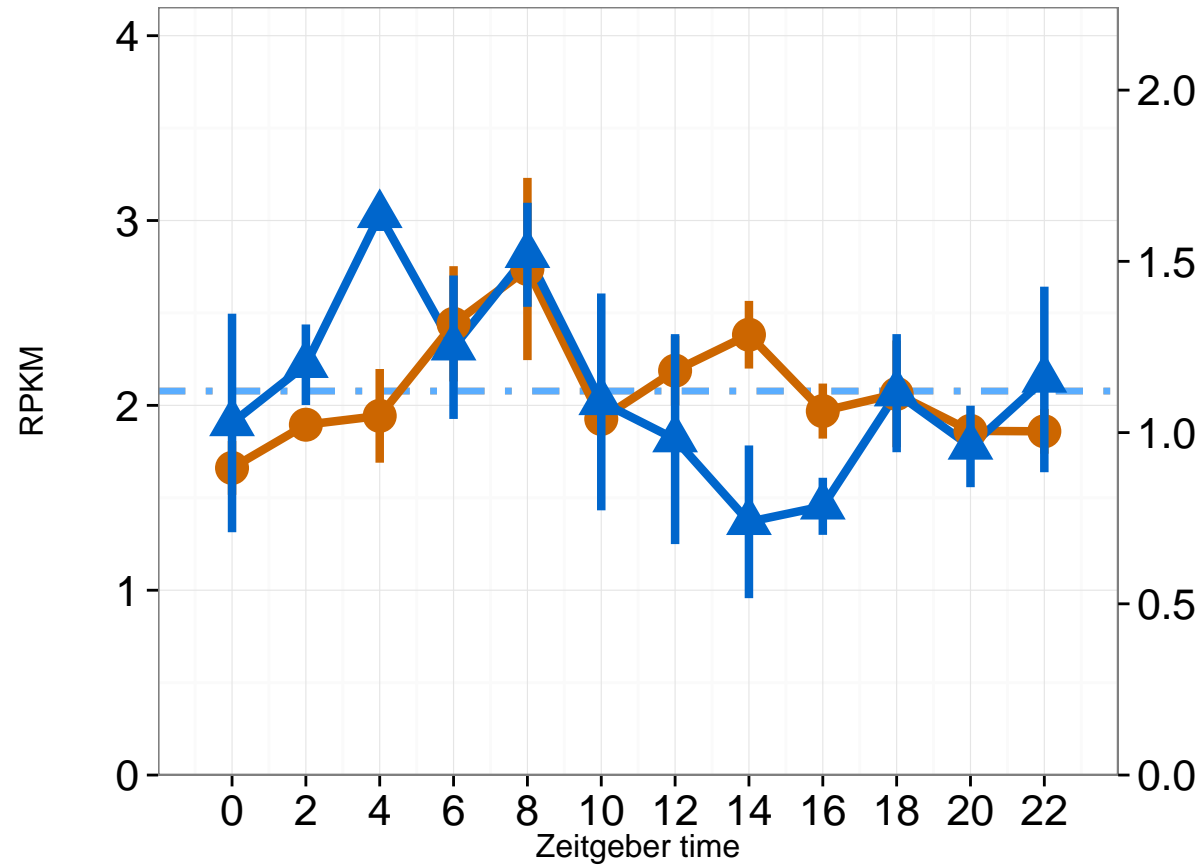

## Chst8

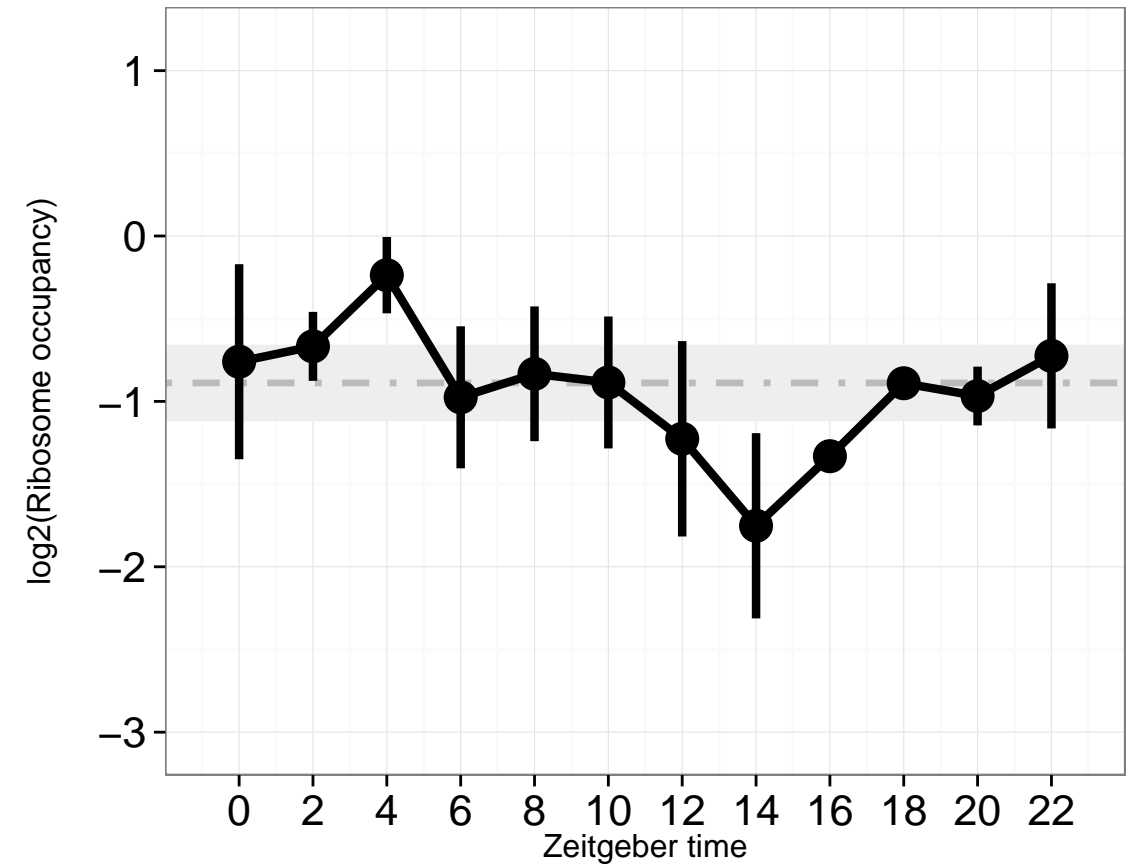

Supplement: Supplementary file 1369 [file 1]

## Arsq

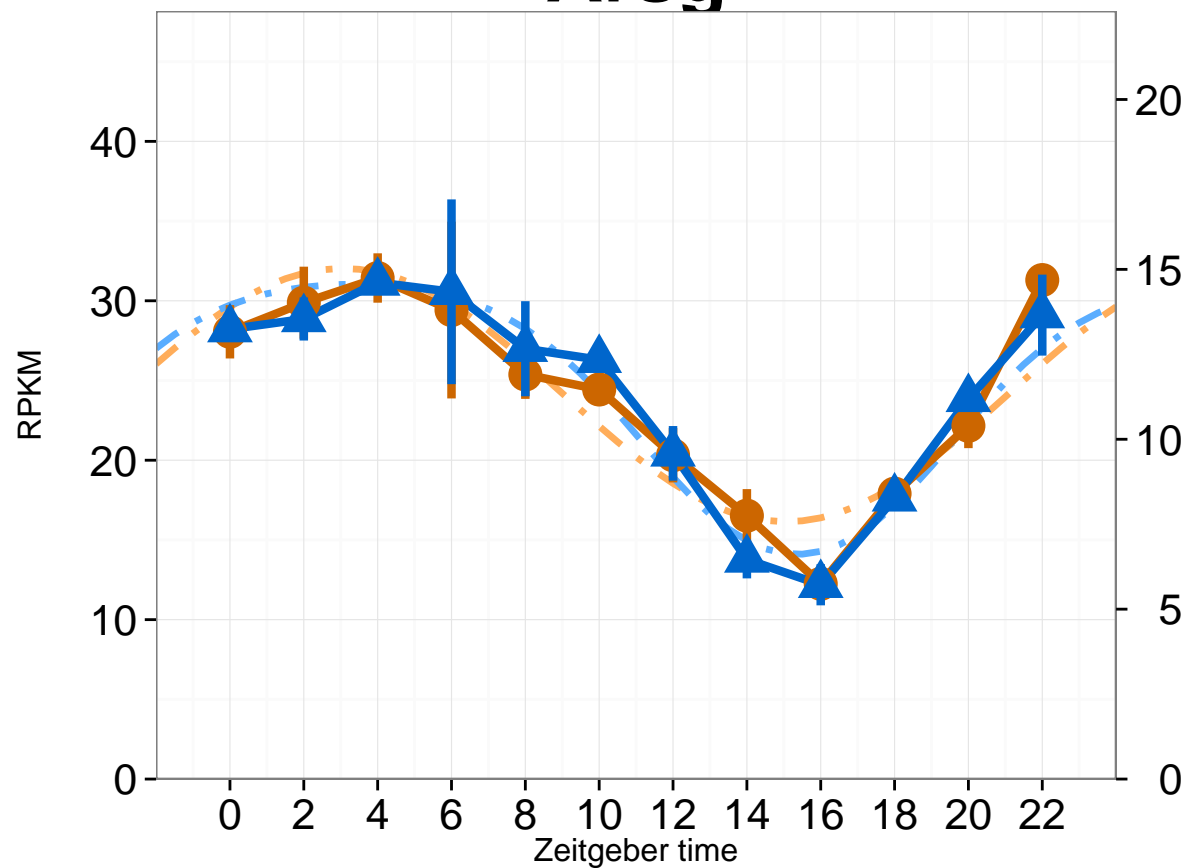

## Arsq

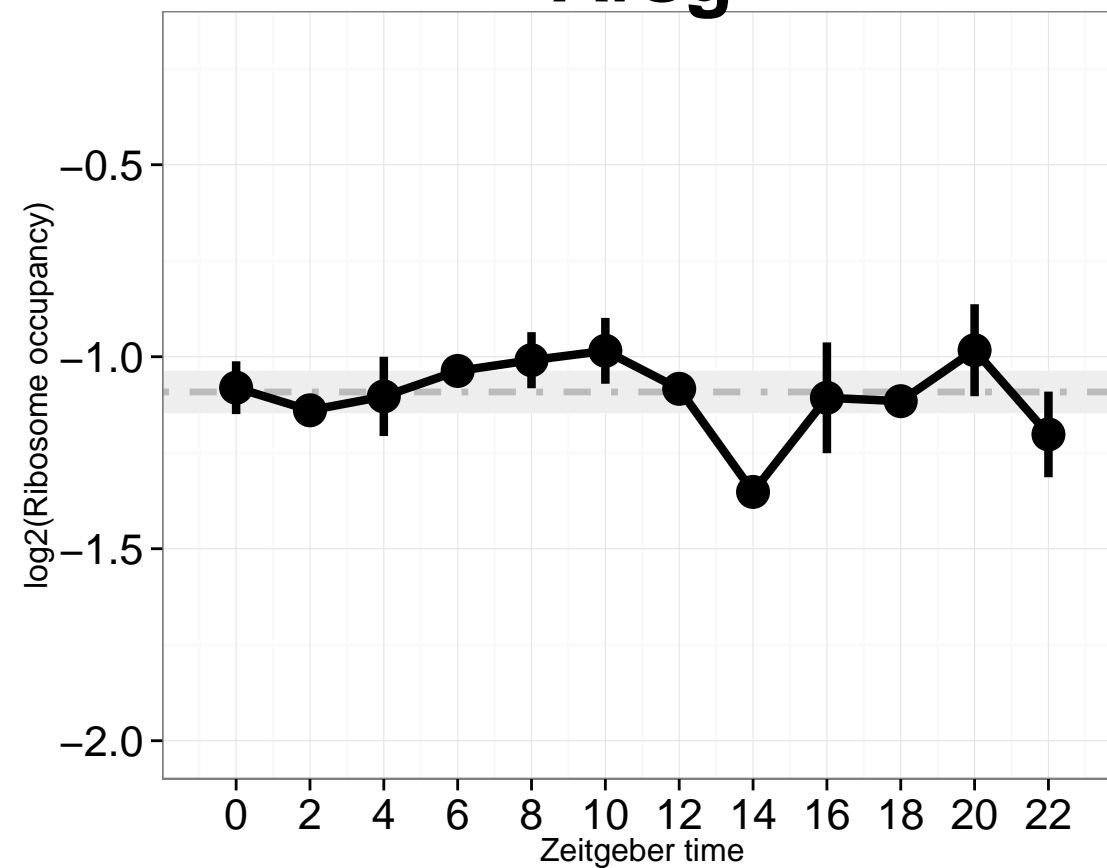

Supplement: Supplementary file 1370 [file 1]

## Hipk2

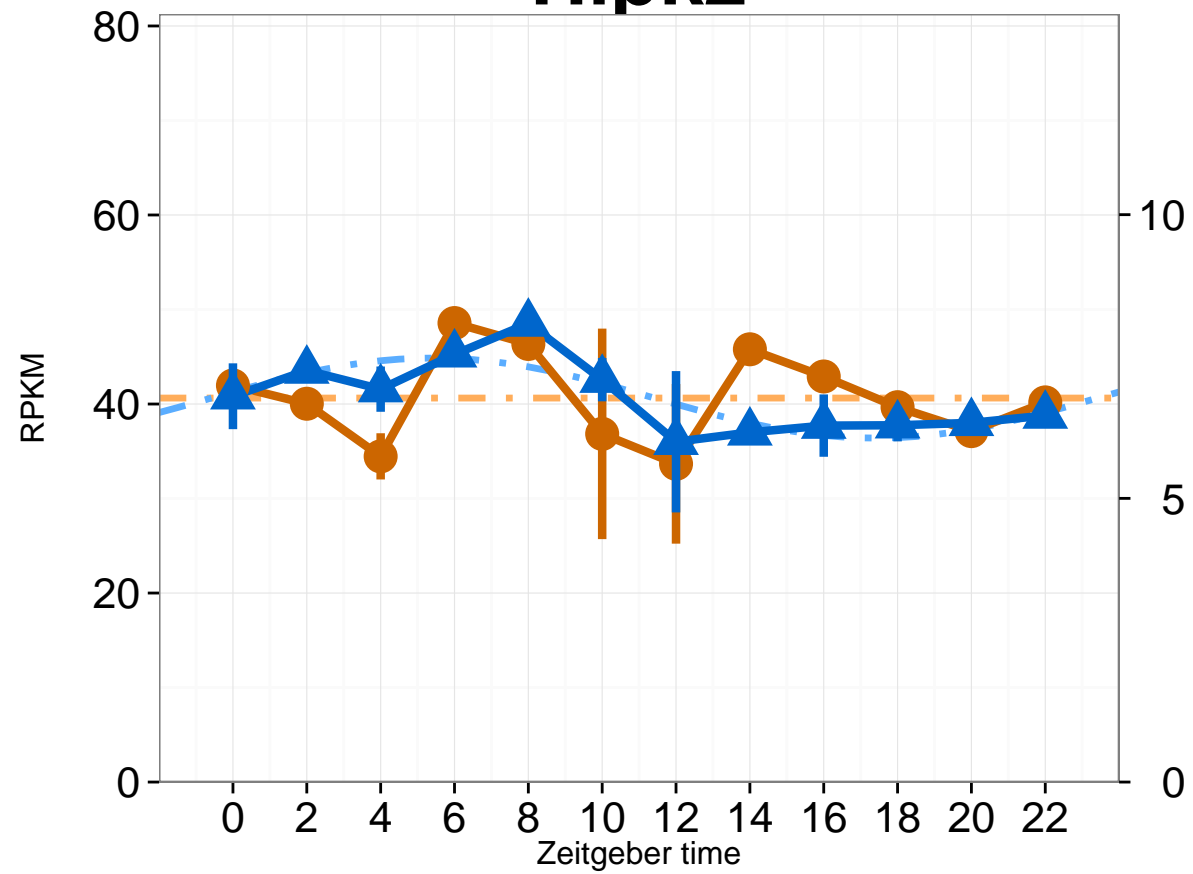

## Hipk2

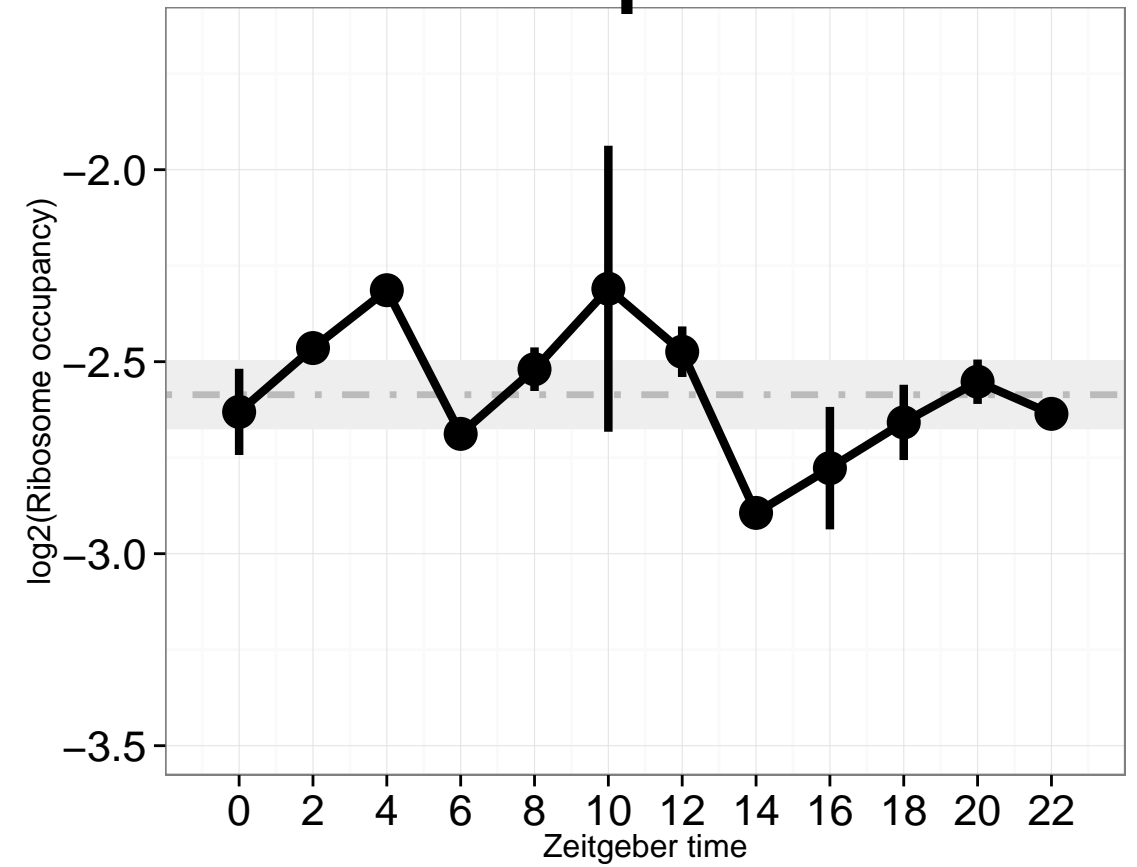

Supplement: Supplementary file 1371 [file 1]

**lbt**

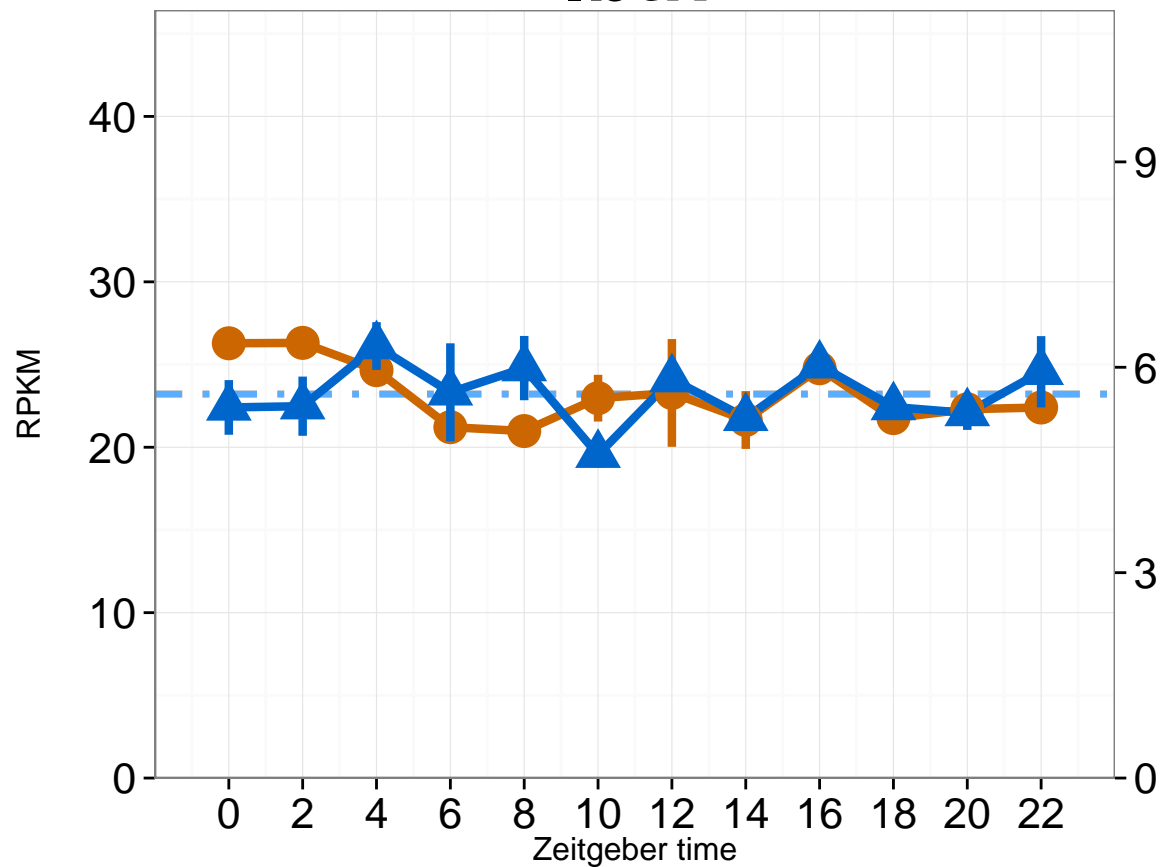

**lbt**

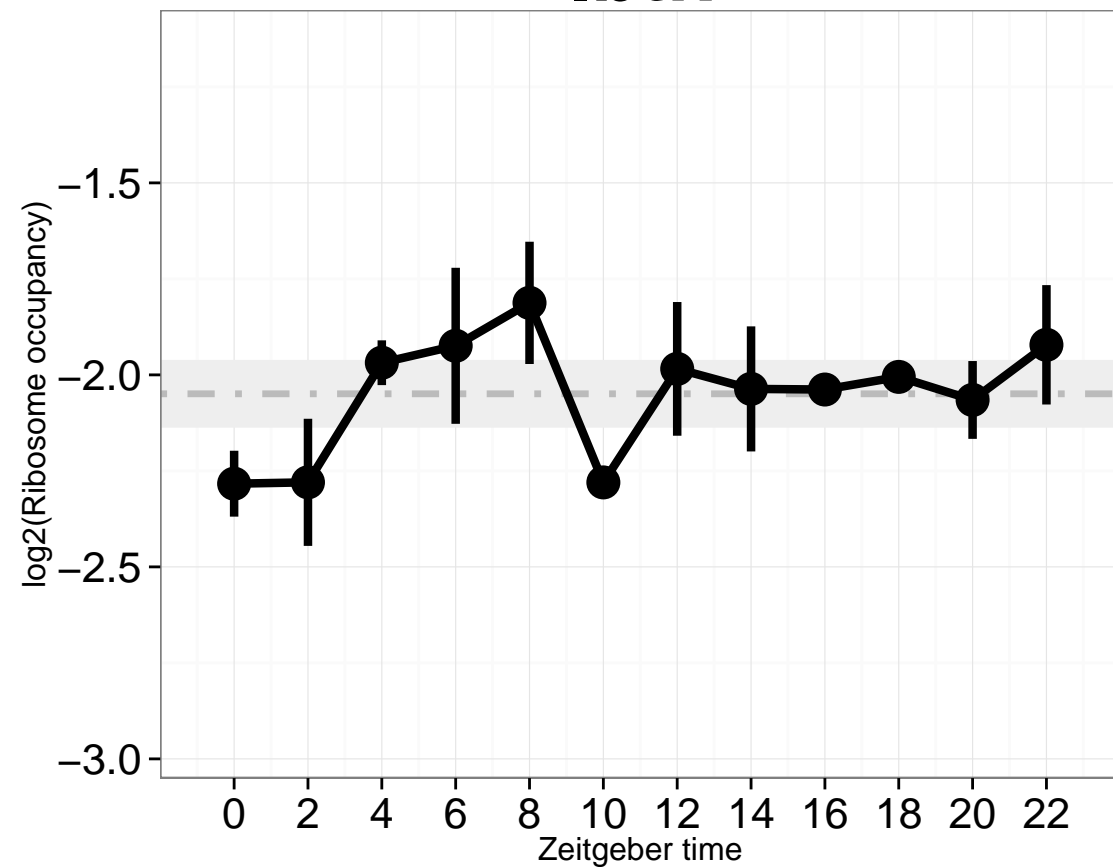

Supplement: Supplementary file 1372 [file 1]

## Pdgfd

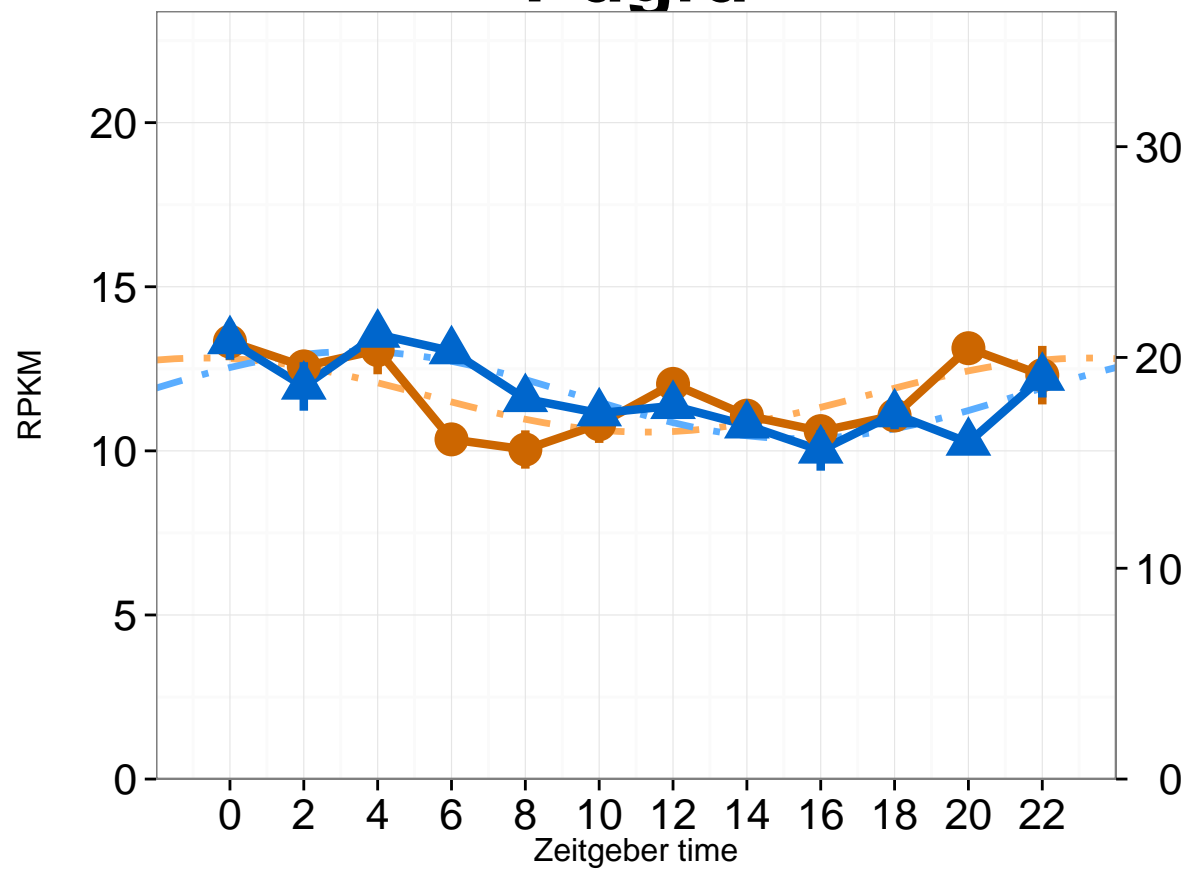

## Pdgfd

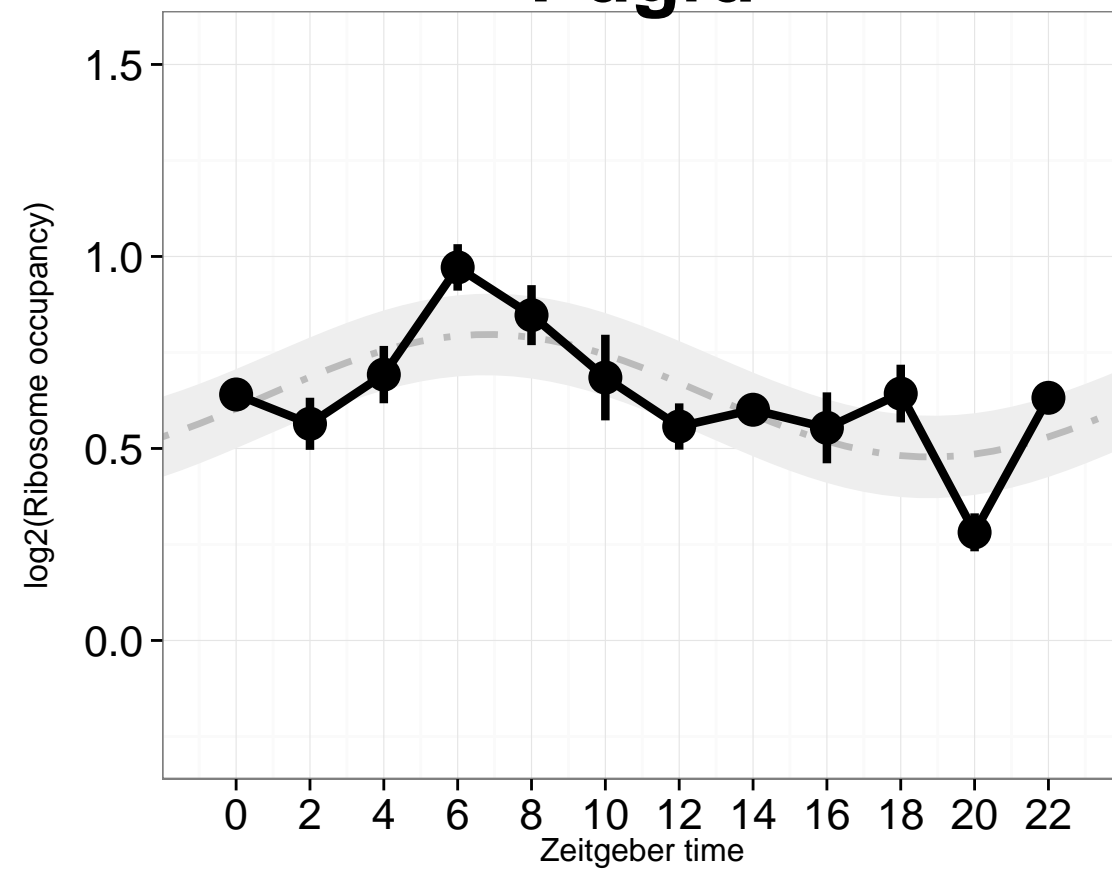

Supplement: Supplementary file 1373 [file 1]

## Dgat2

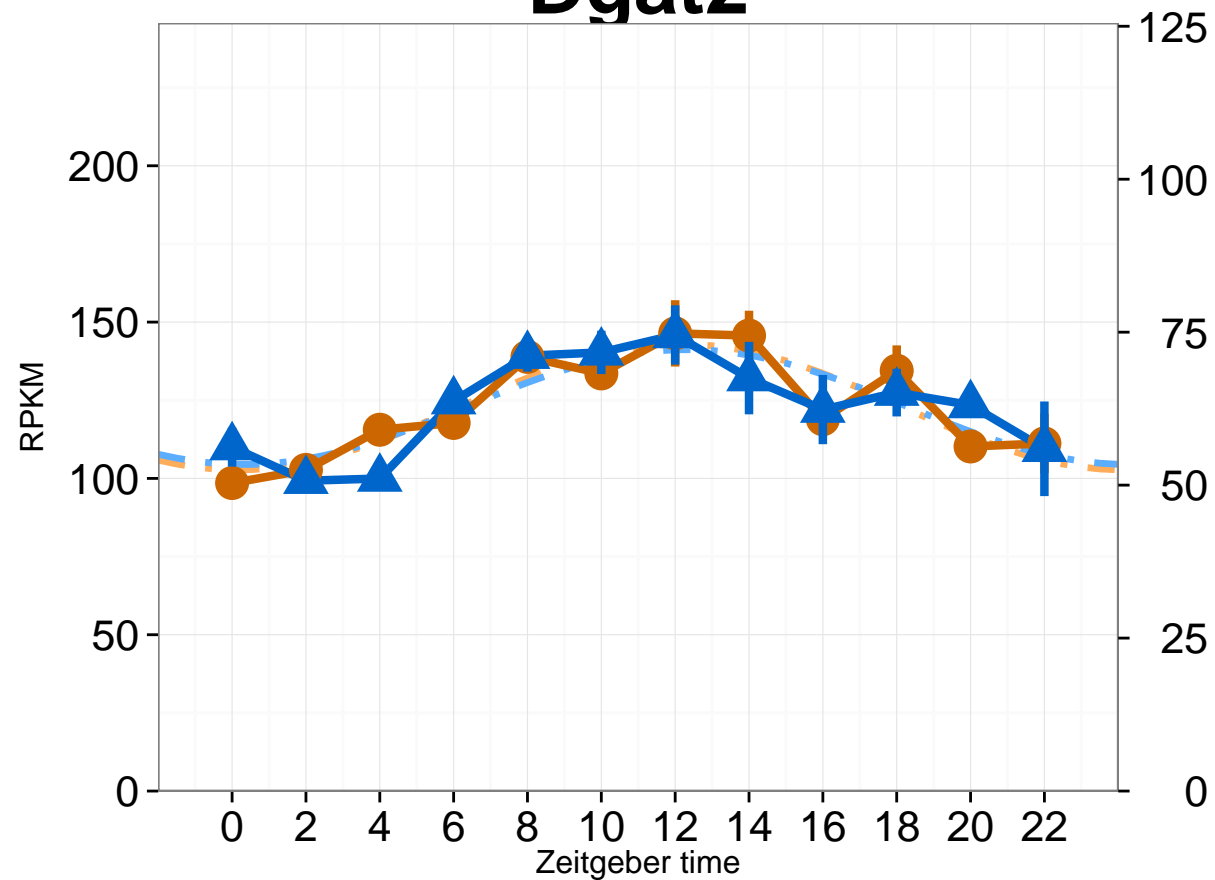

## Dgat2

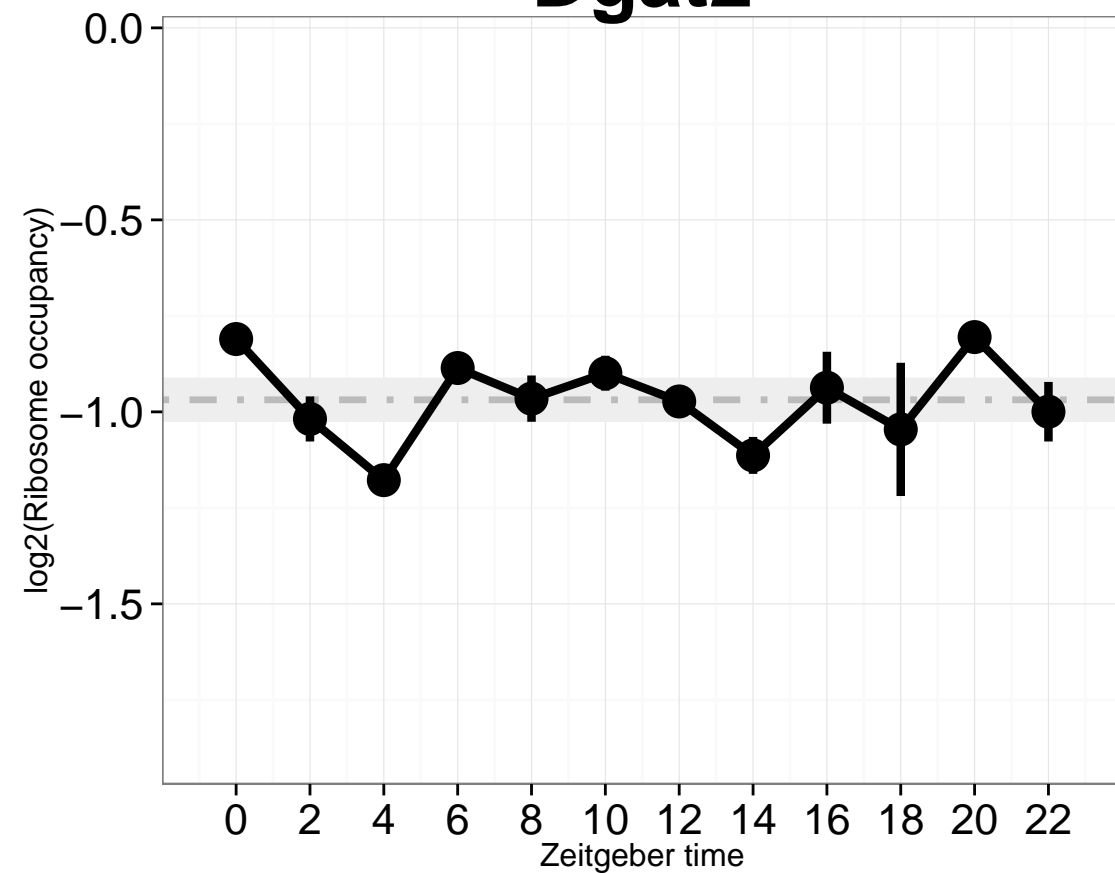

Supplement: Supplementary file 1374 [file 1]

# Nrg1

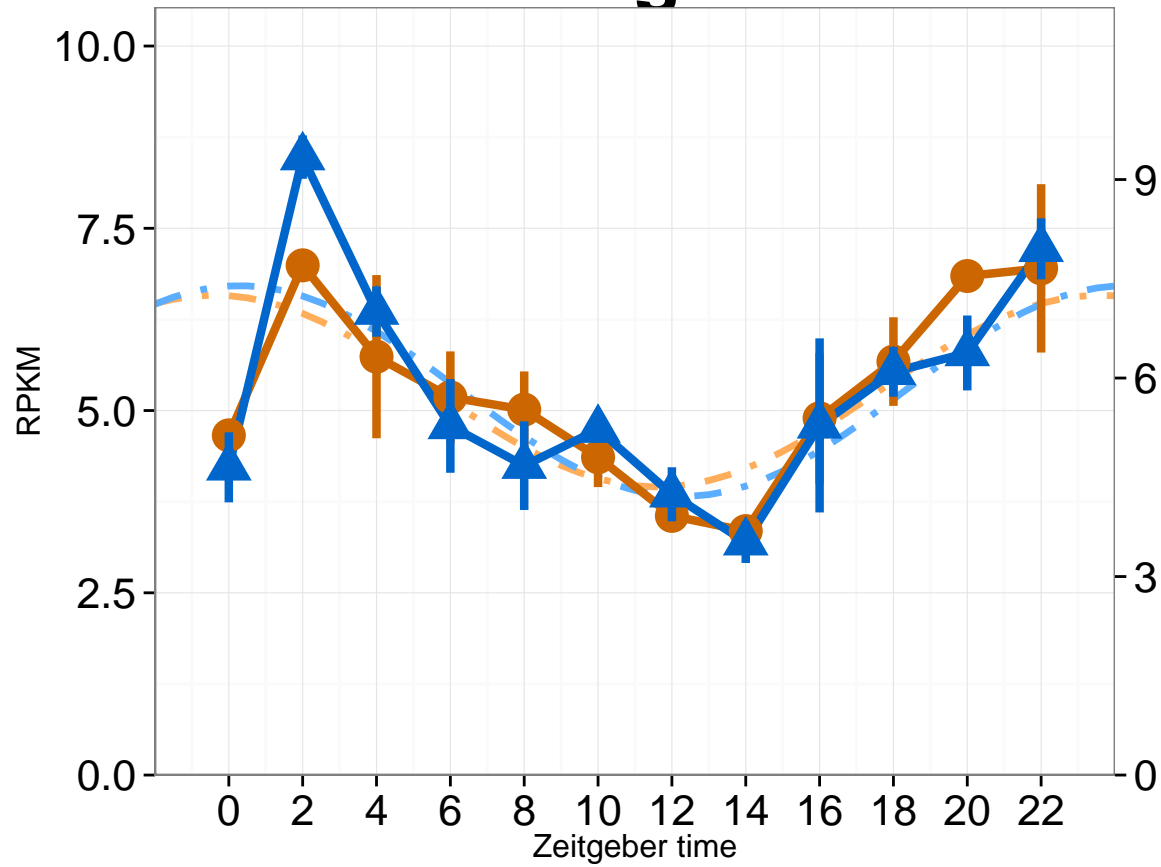

# Nrg1

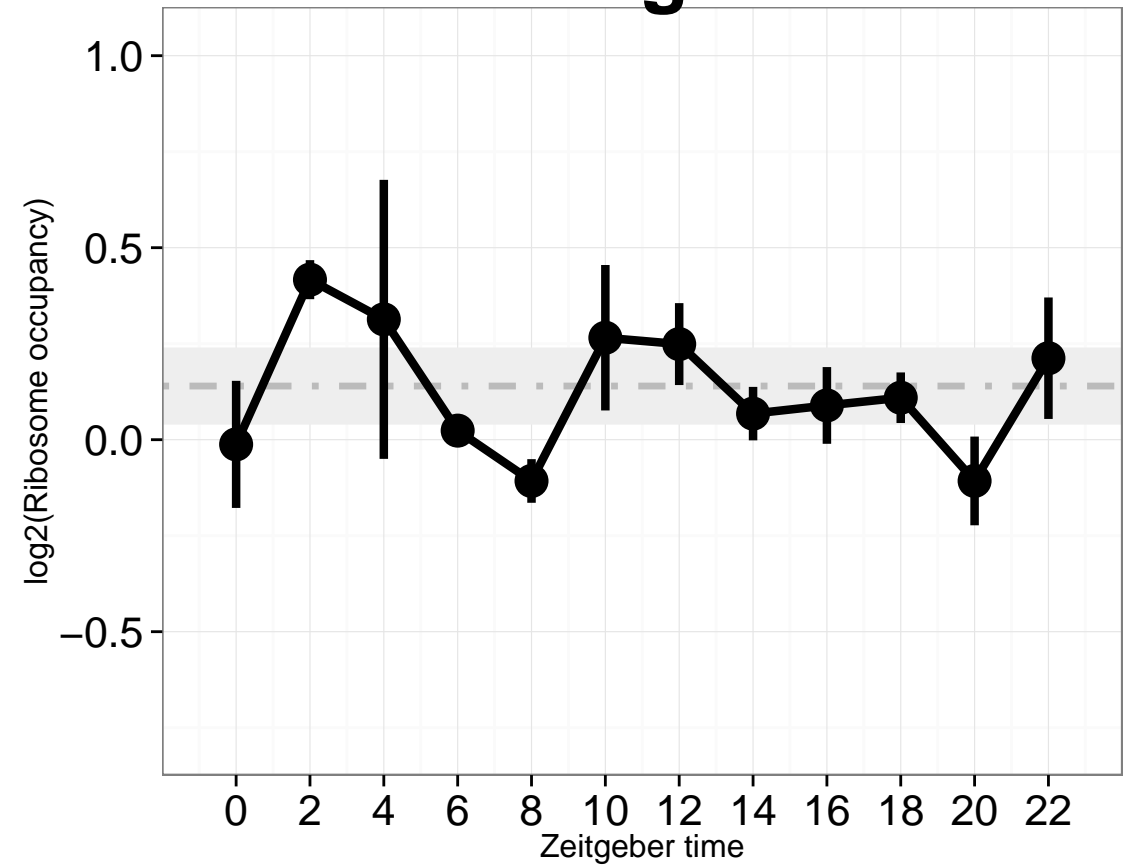

Supplement: Supplementary file 1375 [file 1]

## Dennd4c

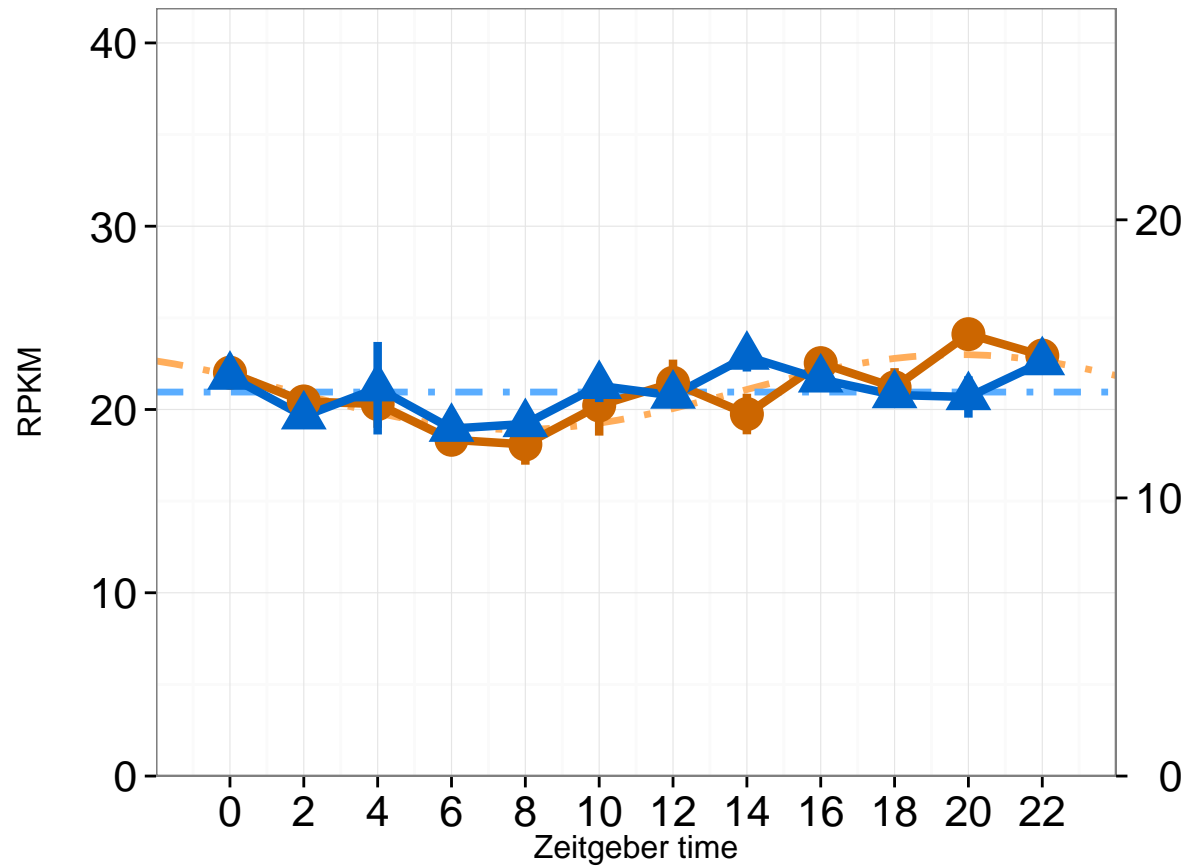

## Dennd4c

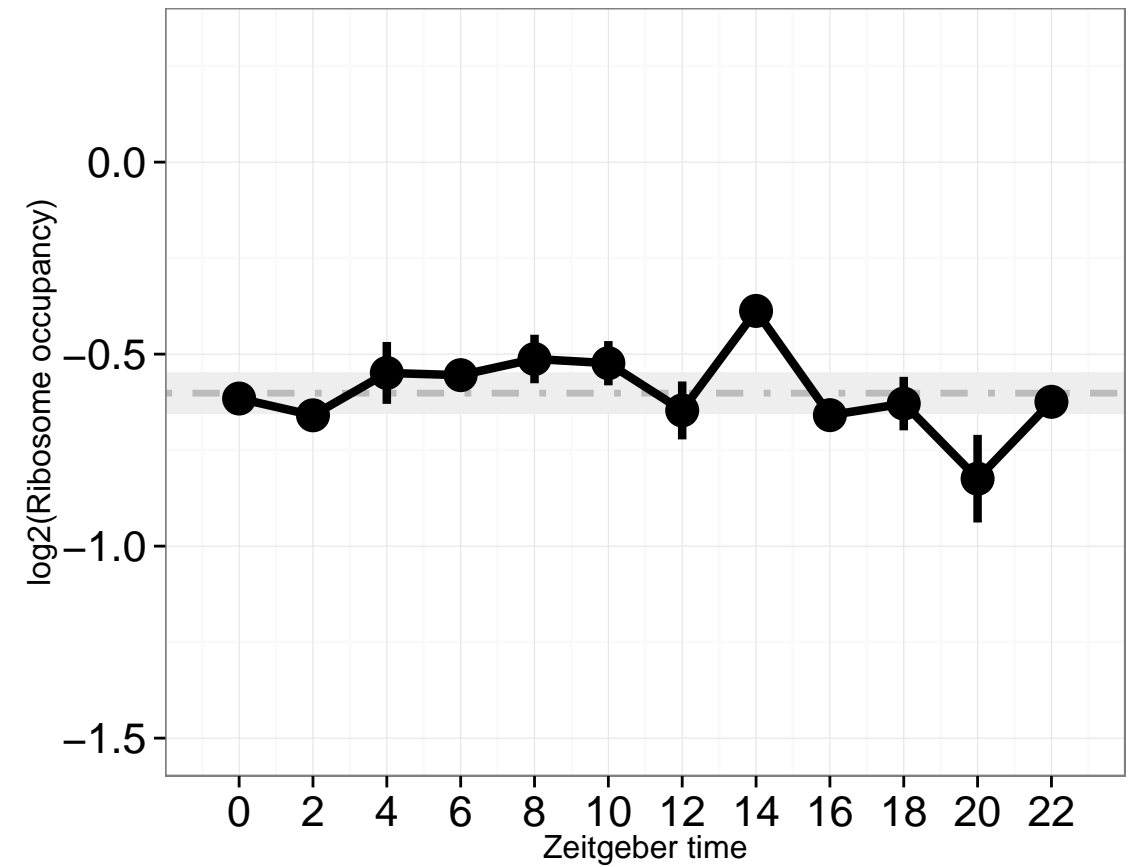

Supplement: Supplementary file 1376 [file 1]

## Glx3

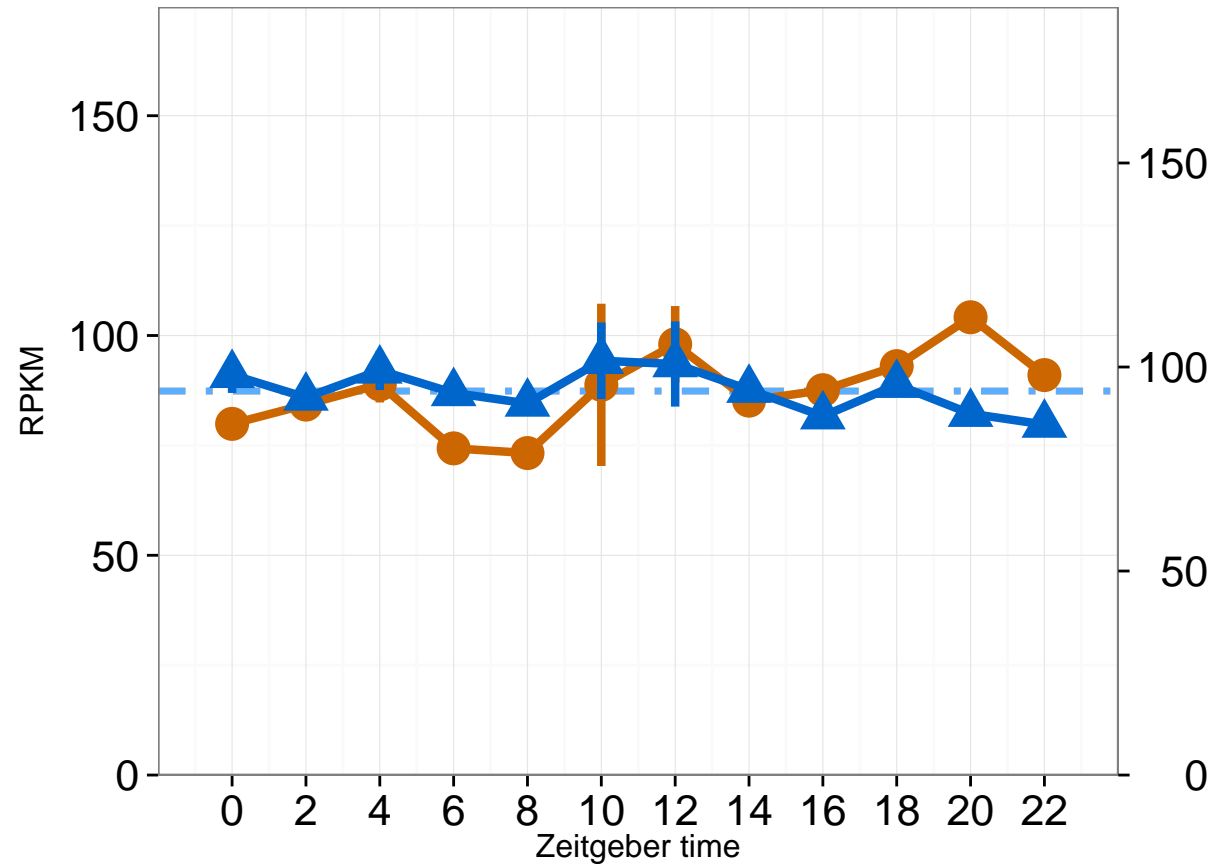

## Glx3

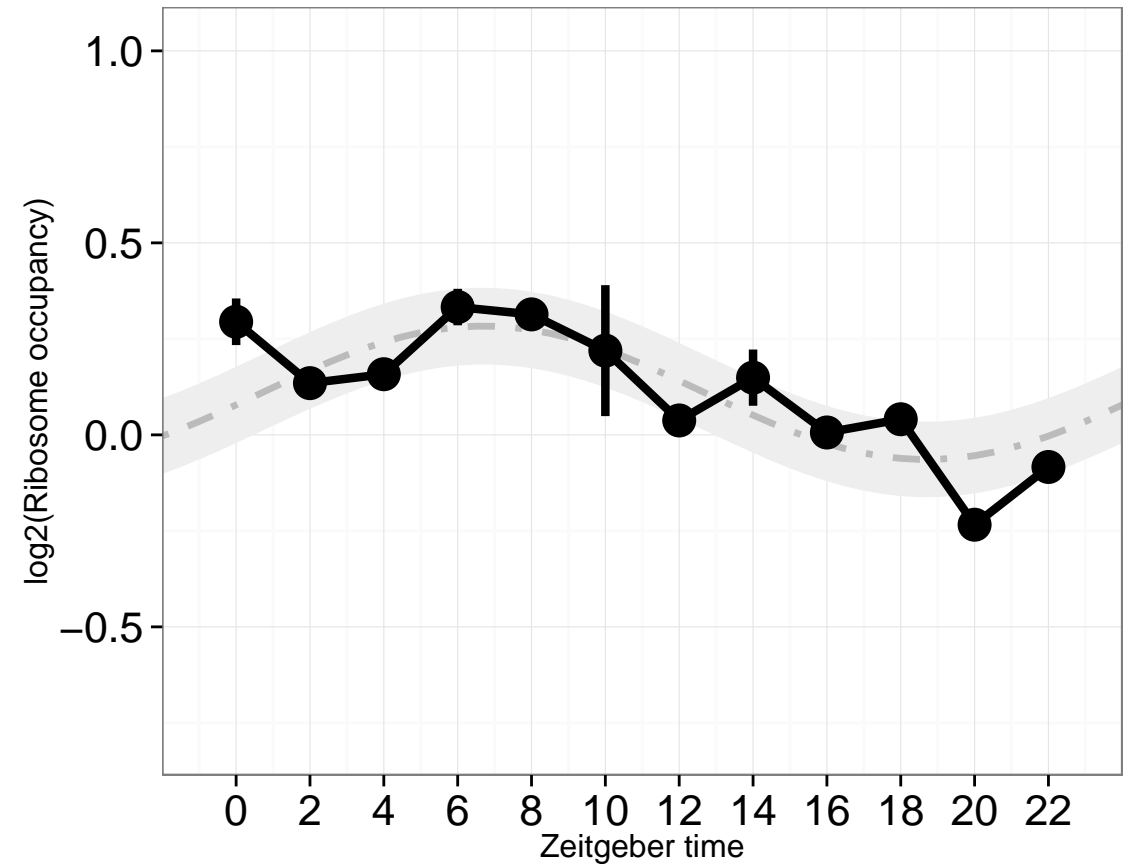

Supplement: Supplementary file 1377 [file 1]

# Slc4a3

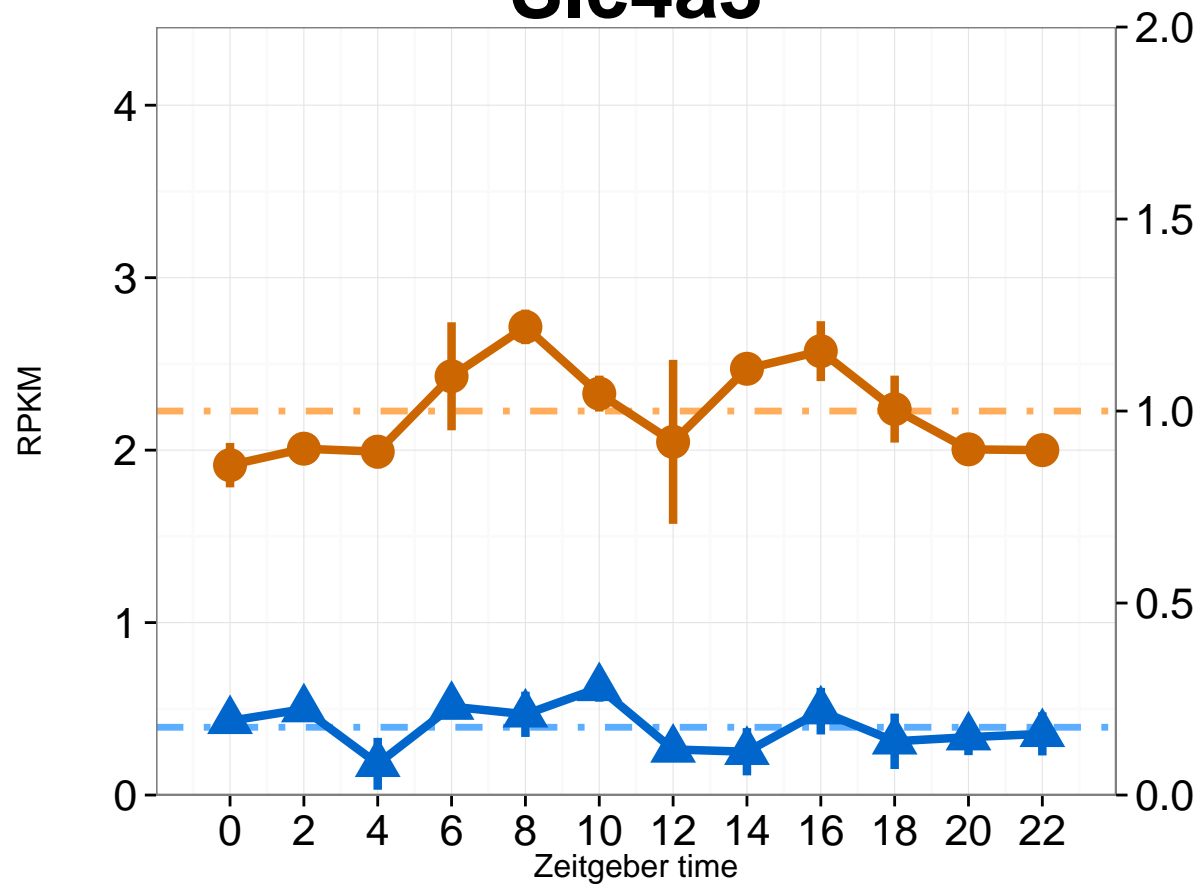

# Slc4a3

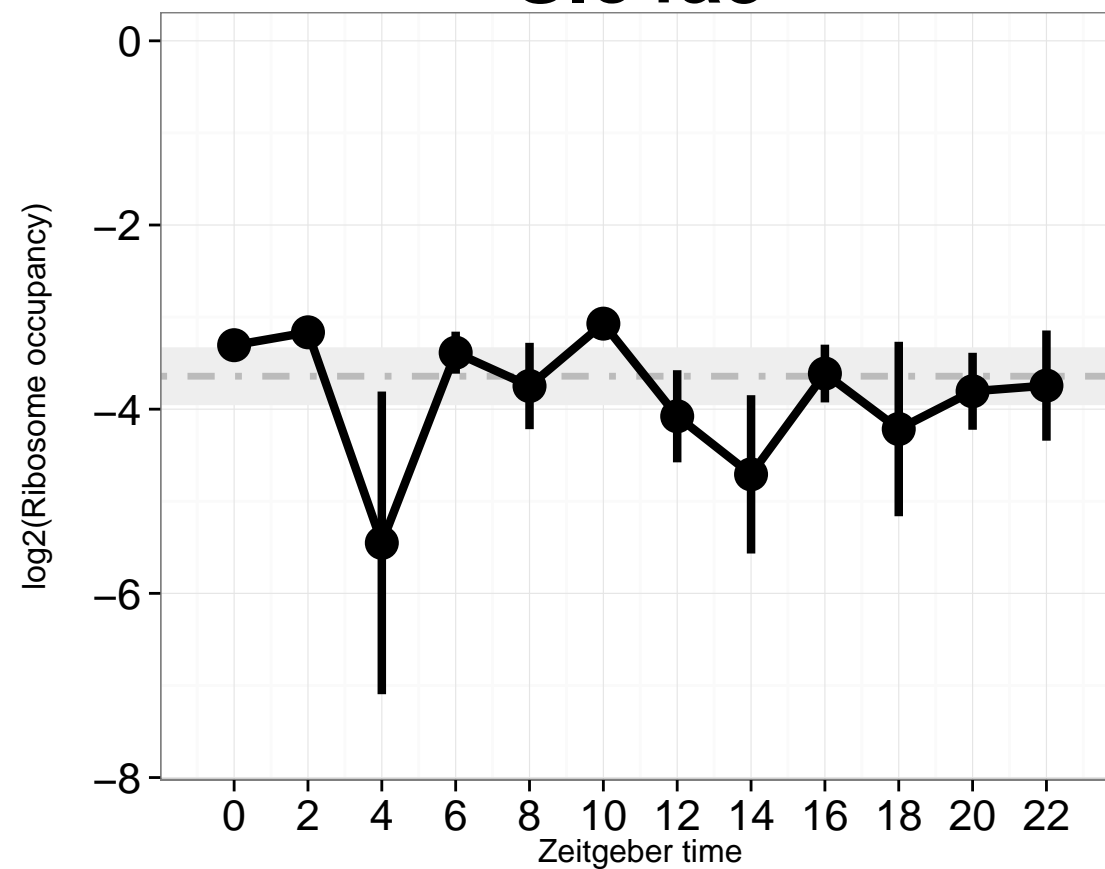

Supplement: Supplementary file 1378 [file 1]

# Depdc1b

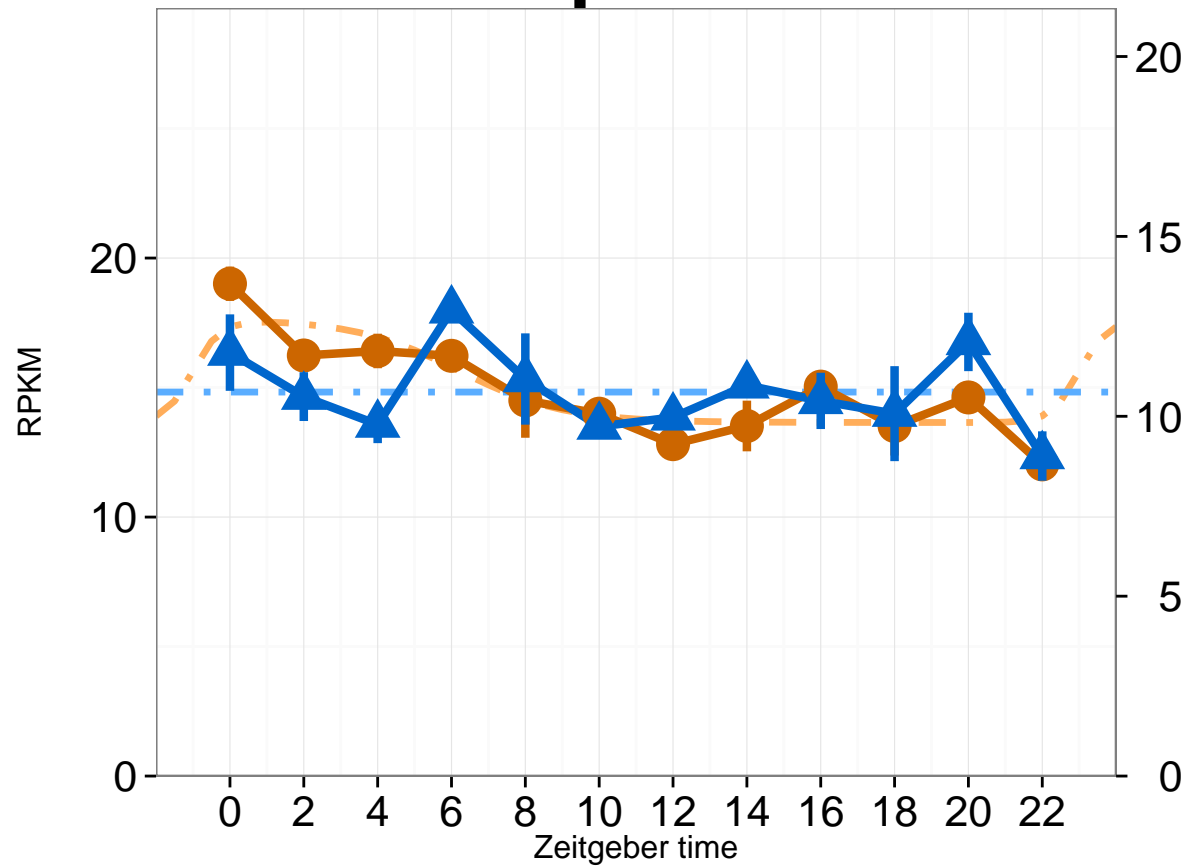

# Depdc1b

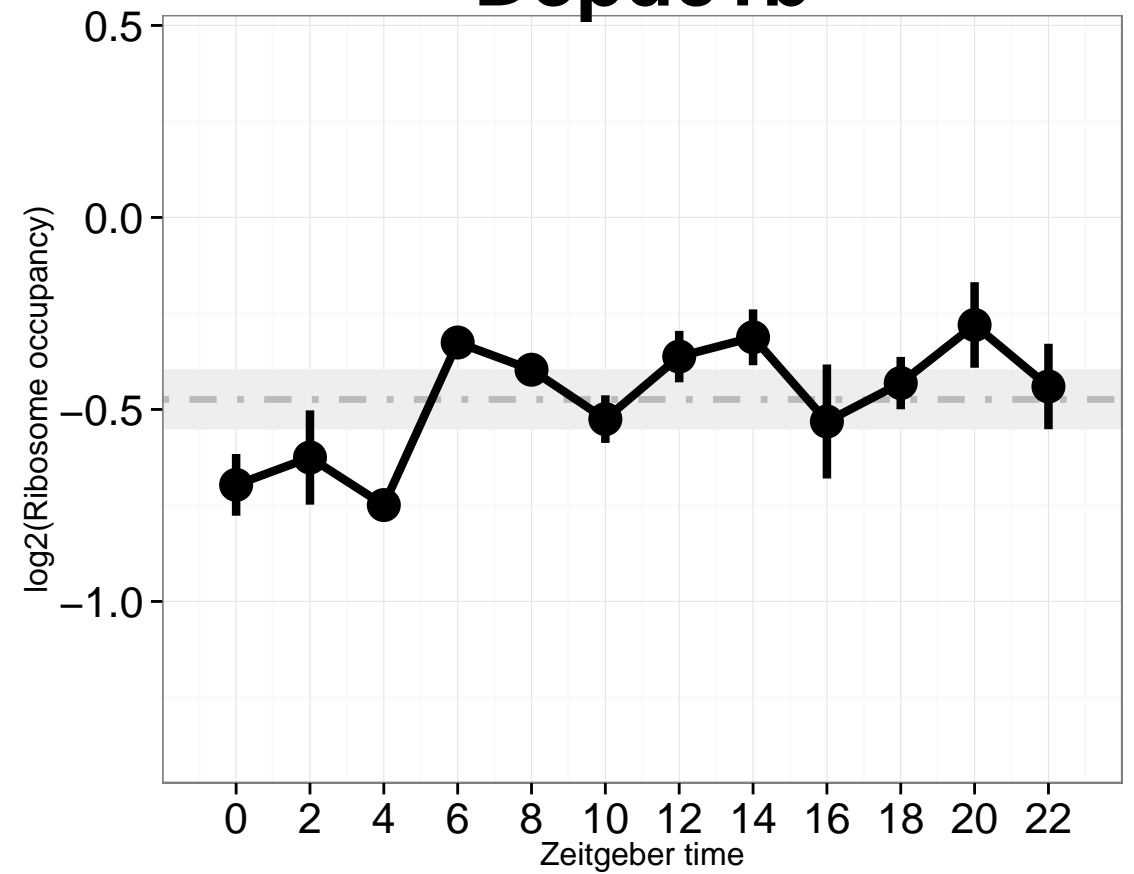

Supplement: Supplementary file 1379 [file 1]

## Ago2

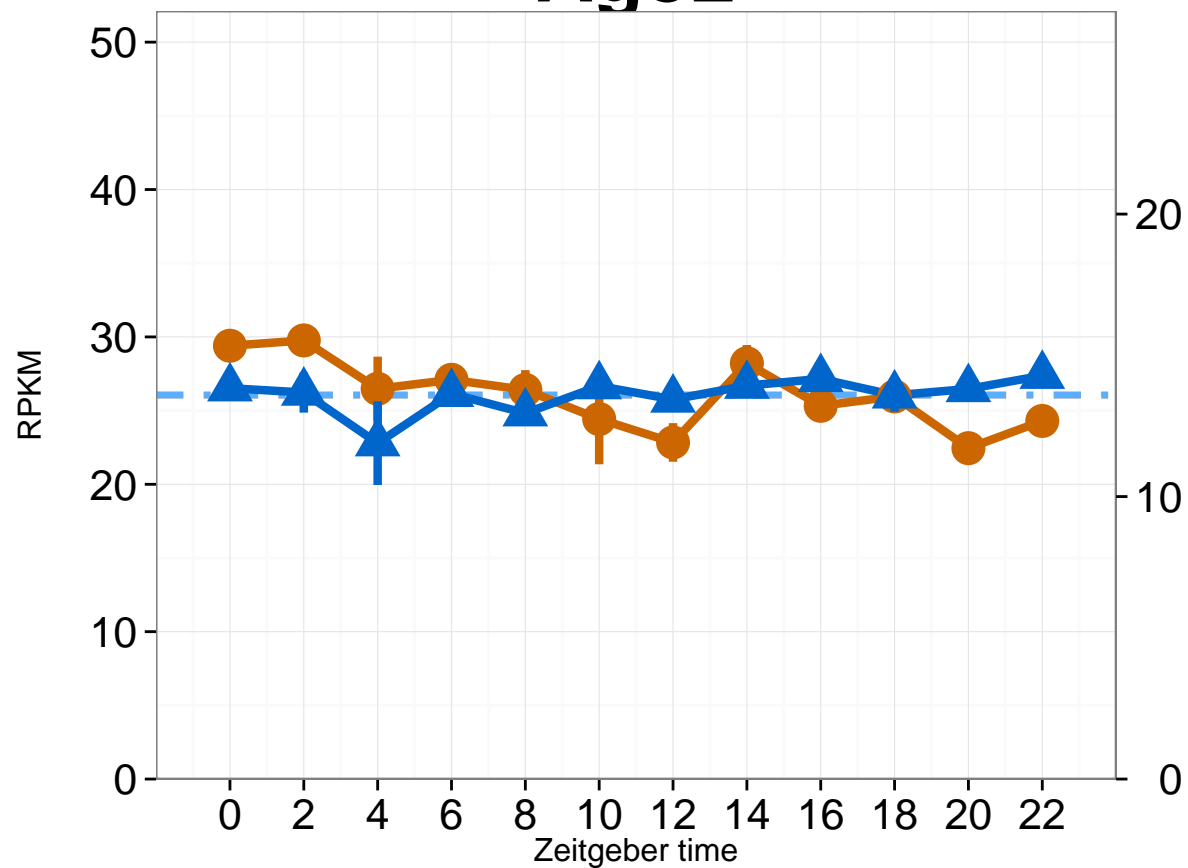

## Ago2

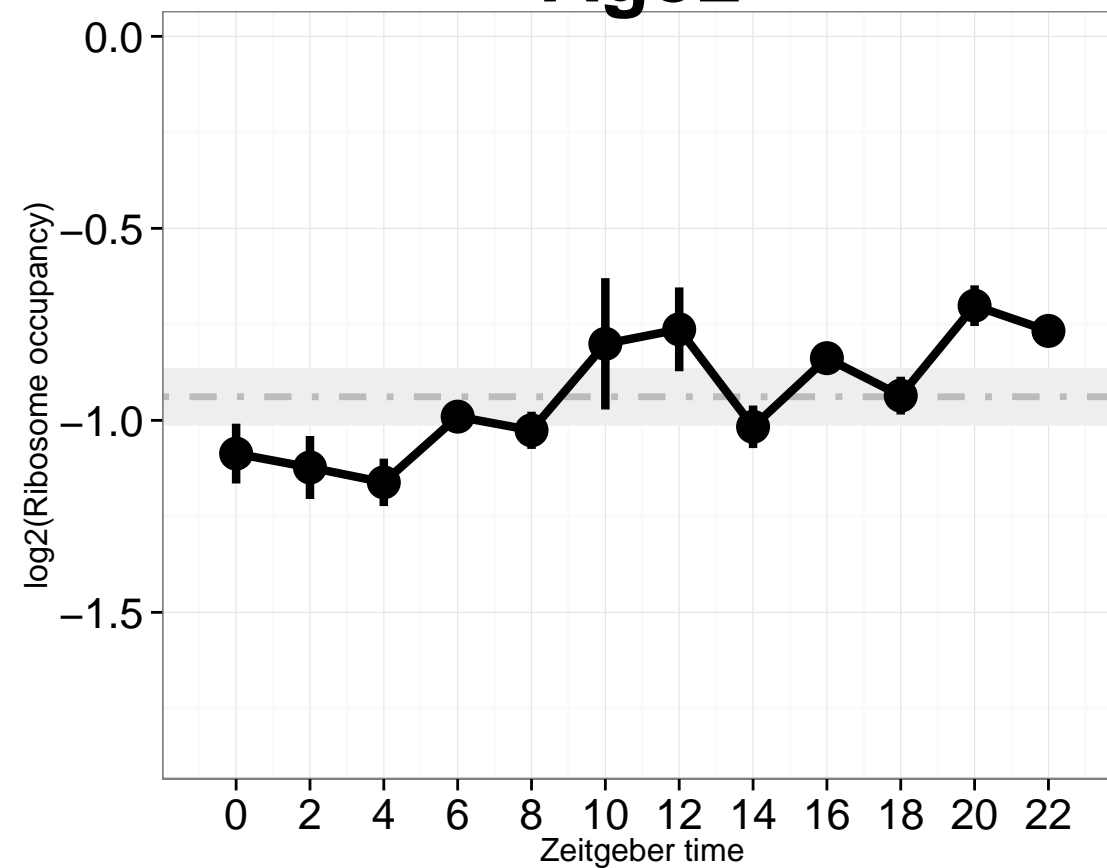

Supplement: Supplementary file 1380 [file 1]

# Keg1

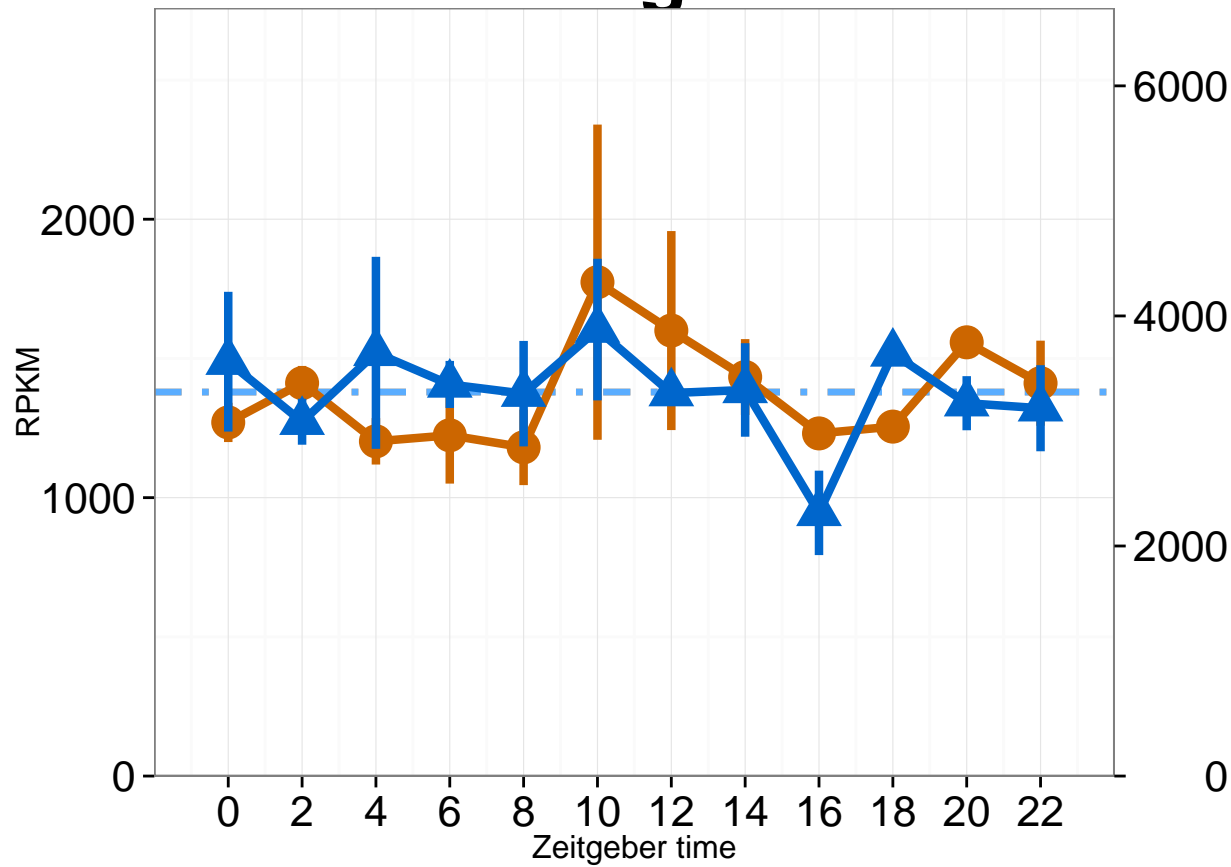

# Keg1

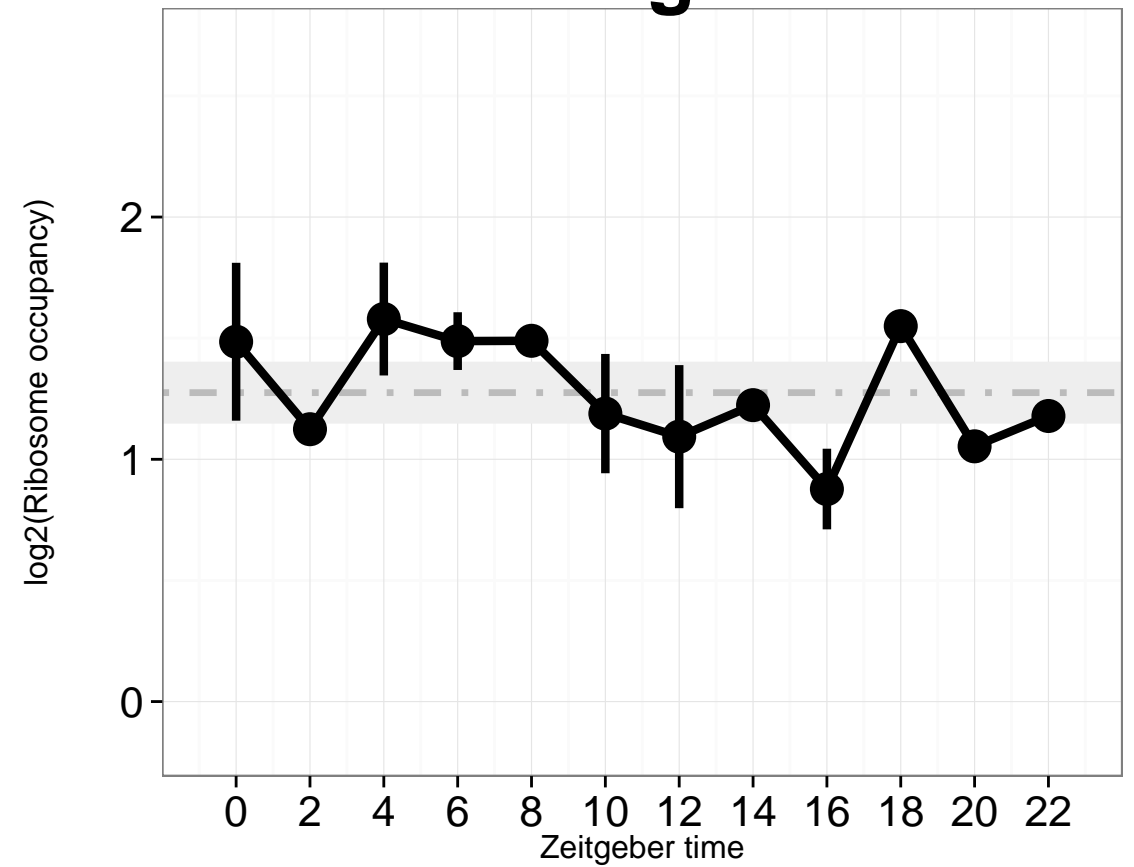

Supplement: Supplementary file 1381 [file 1]

# Tpp2

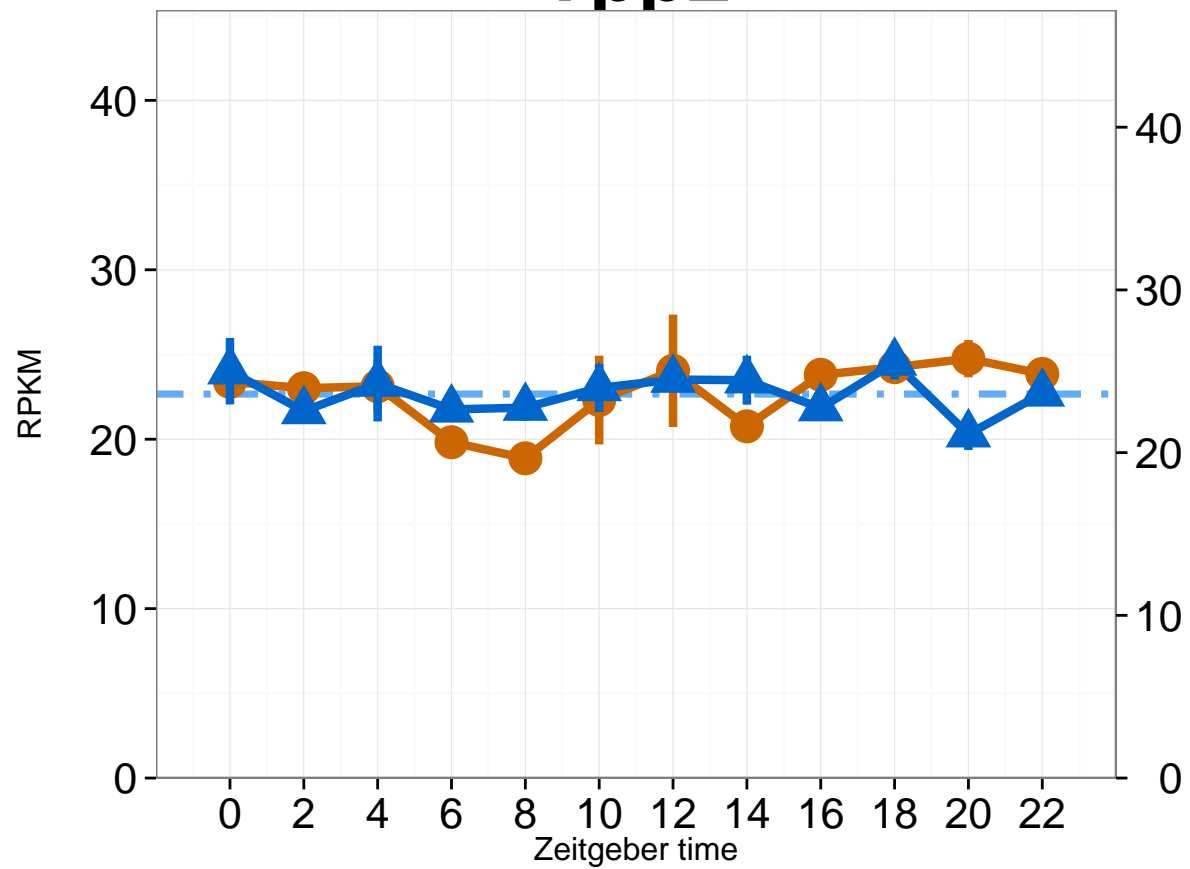

# Tpp2

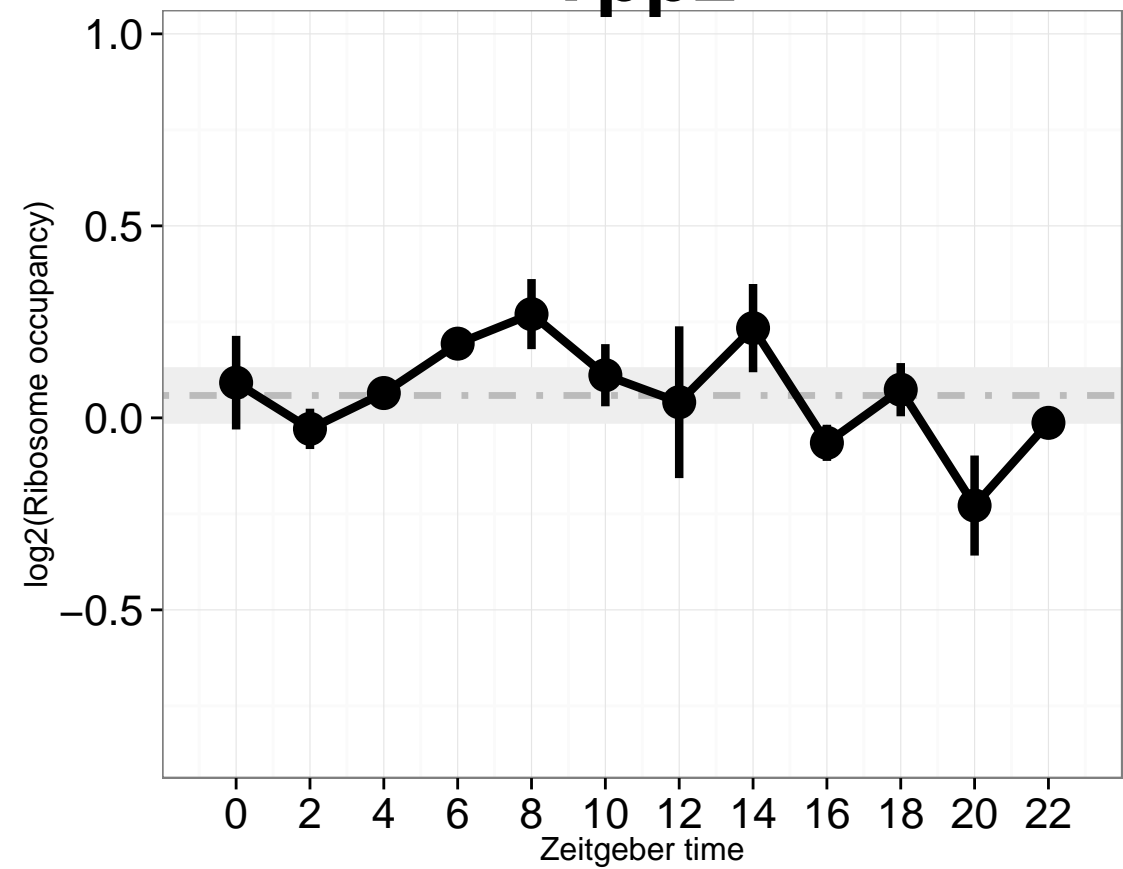

Supplement: Supplementary file 1382 [file 1]

## Sra1

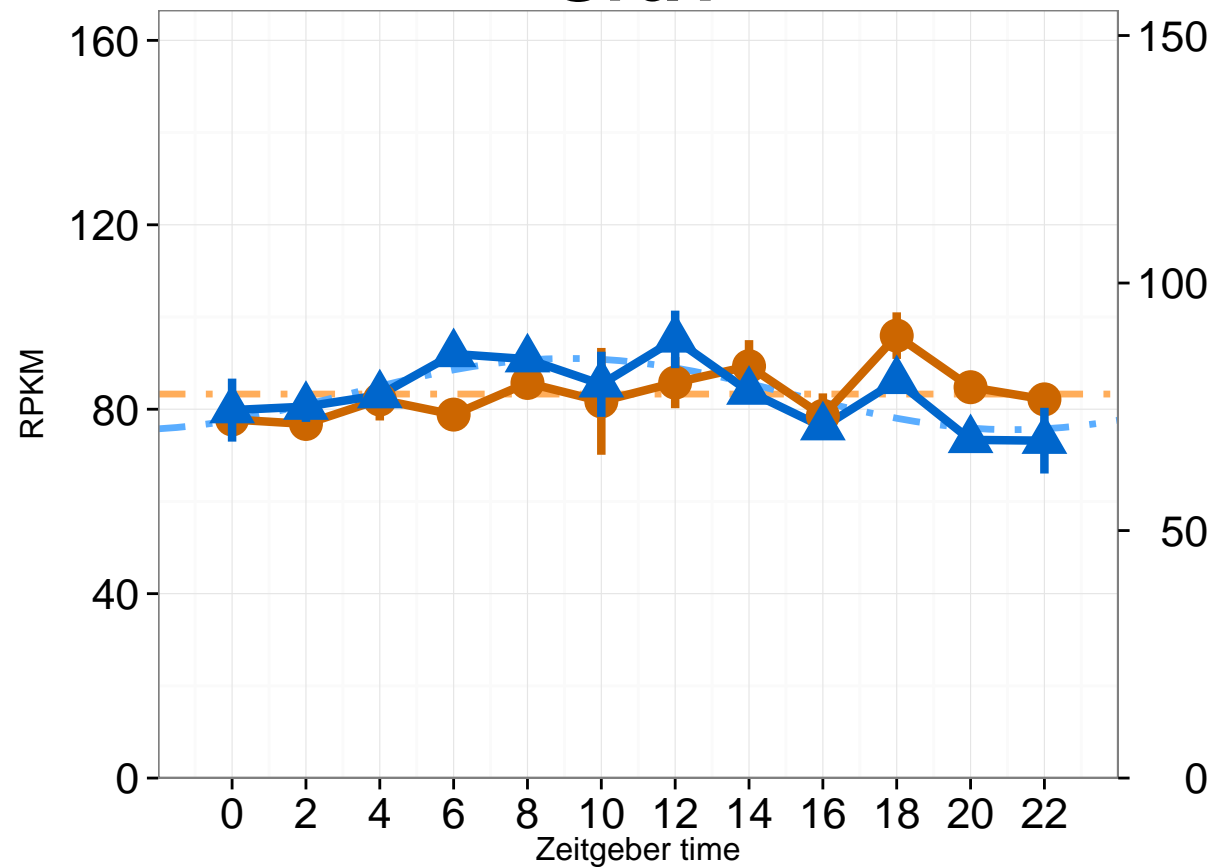

## Sra1

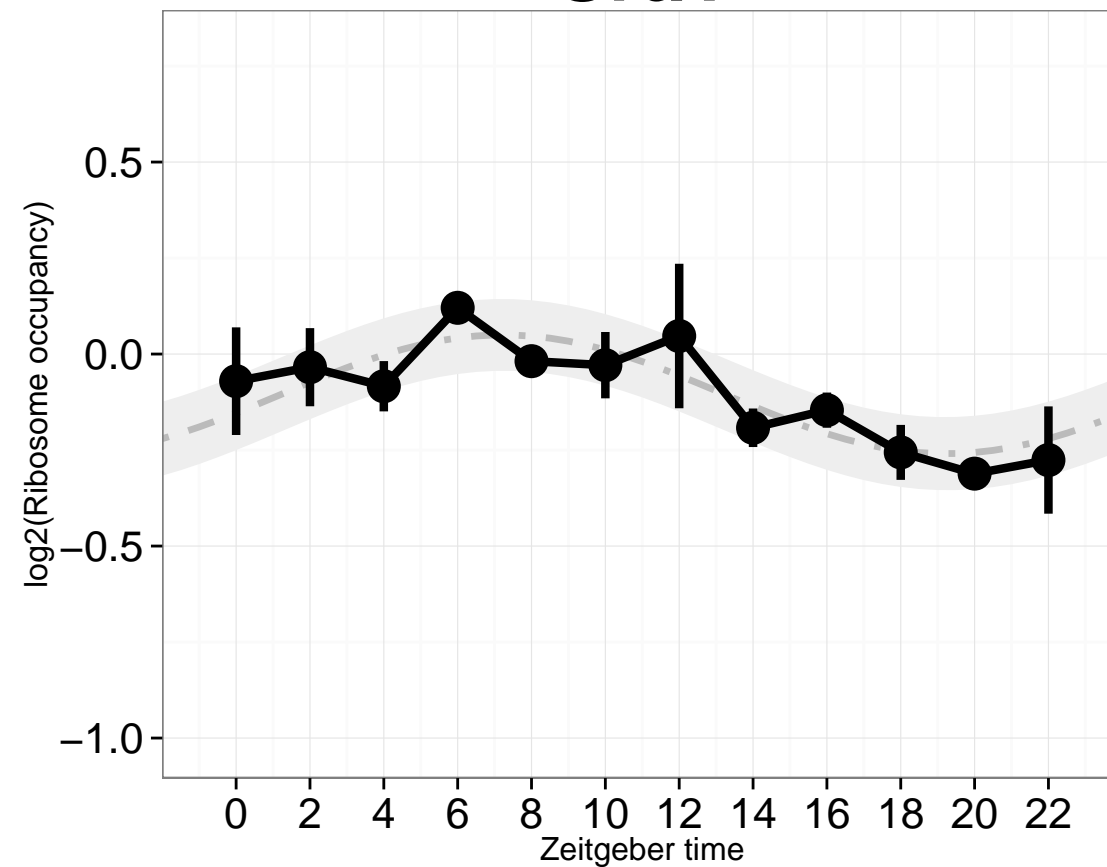

Supplement: Supplementary file 1383 [file 1]

## Adcy9

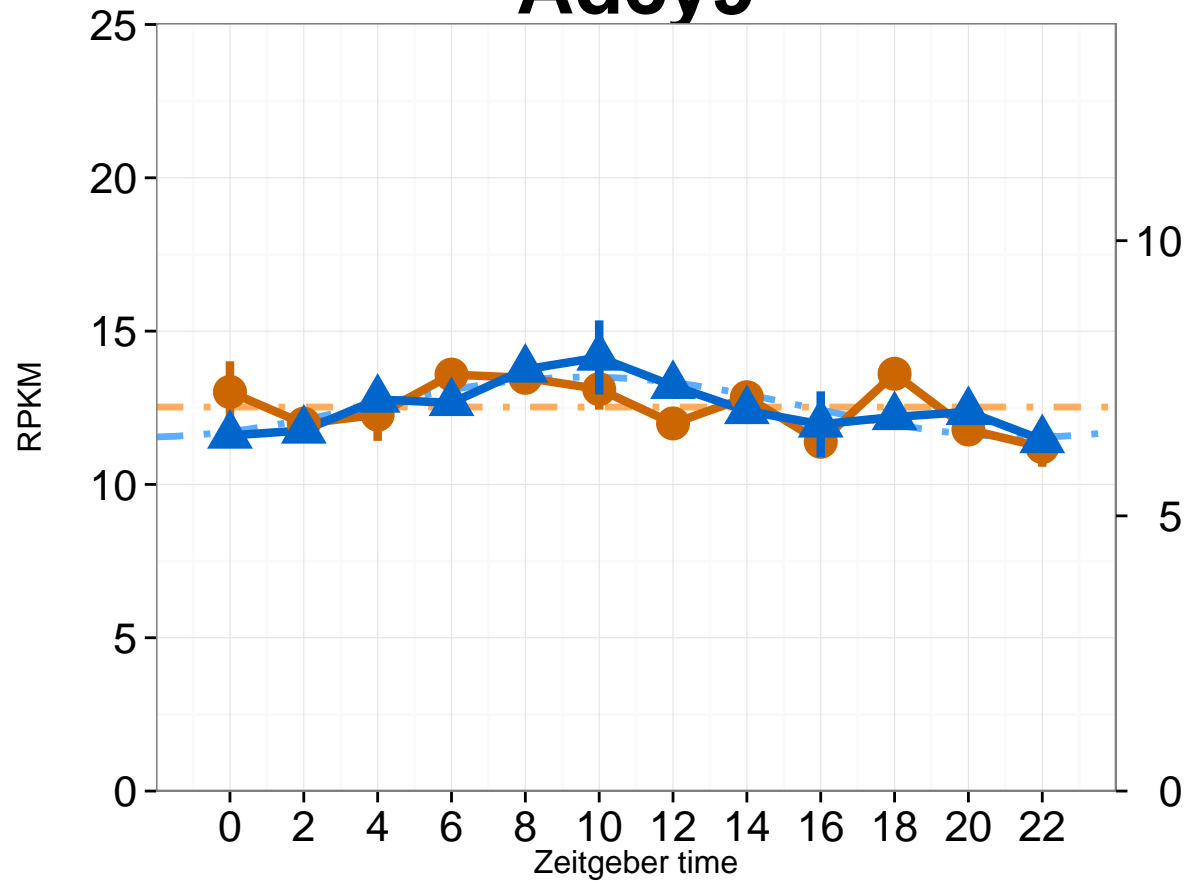

## Adcy9

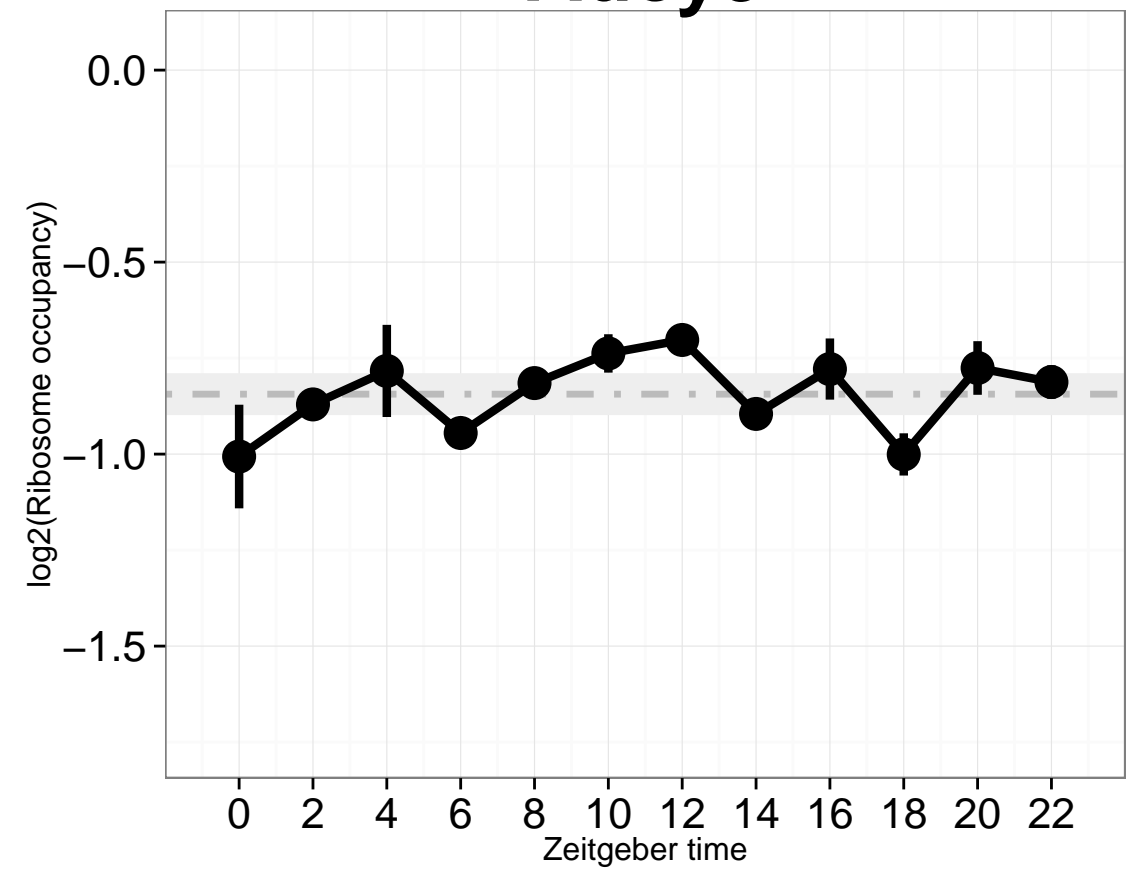

Supplement: Supplementary file 1384 [file 1]

## Enpp2

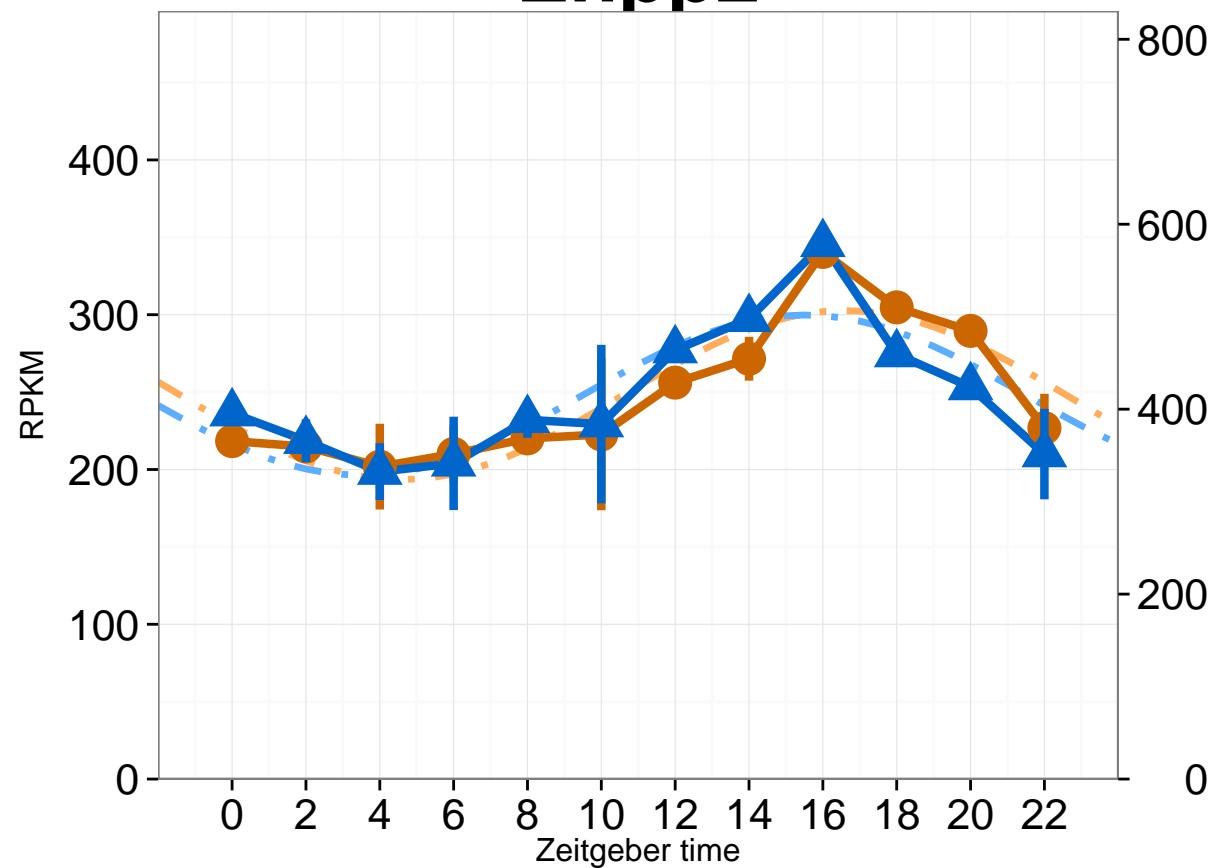

## Enpp2

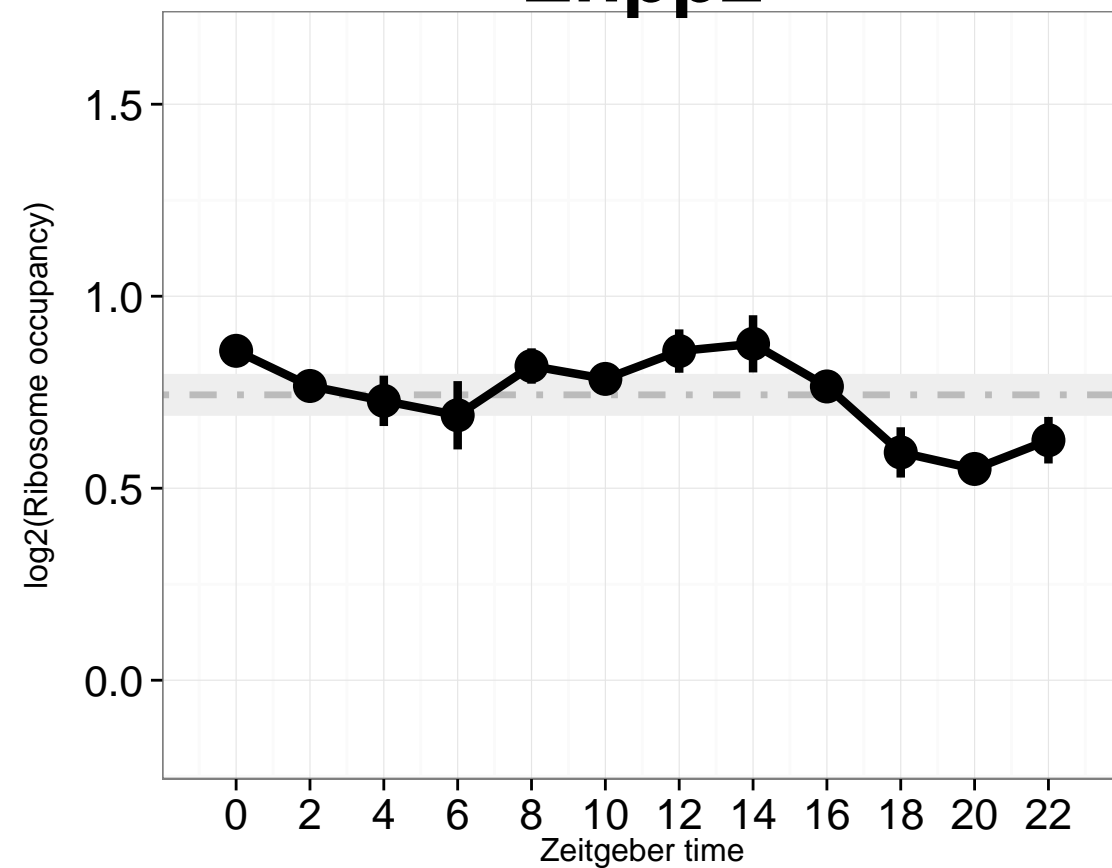

Supplement: Supplementary file 1385 [file 1]

# Clcn6

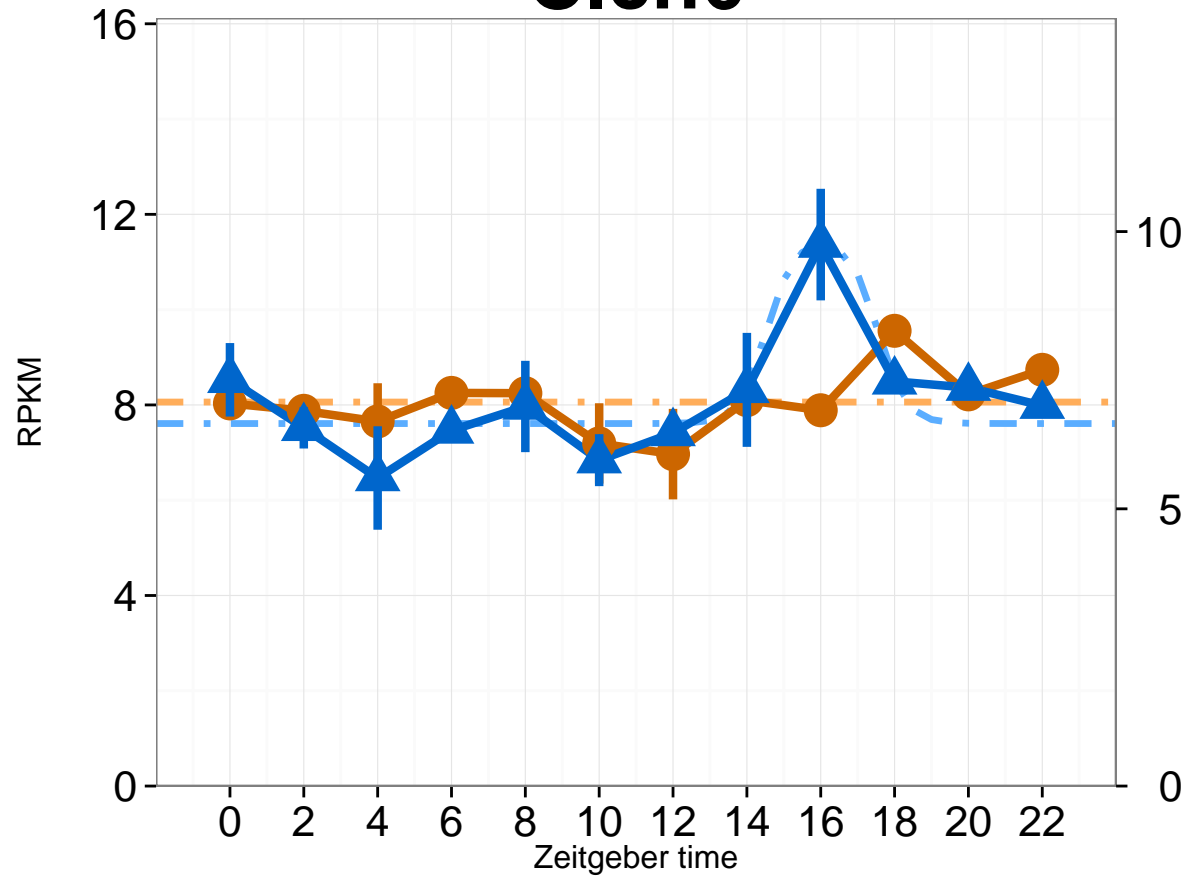

# Clcn6

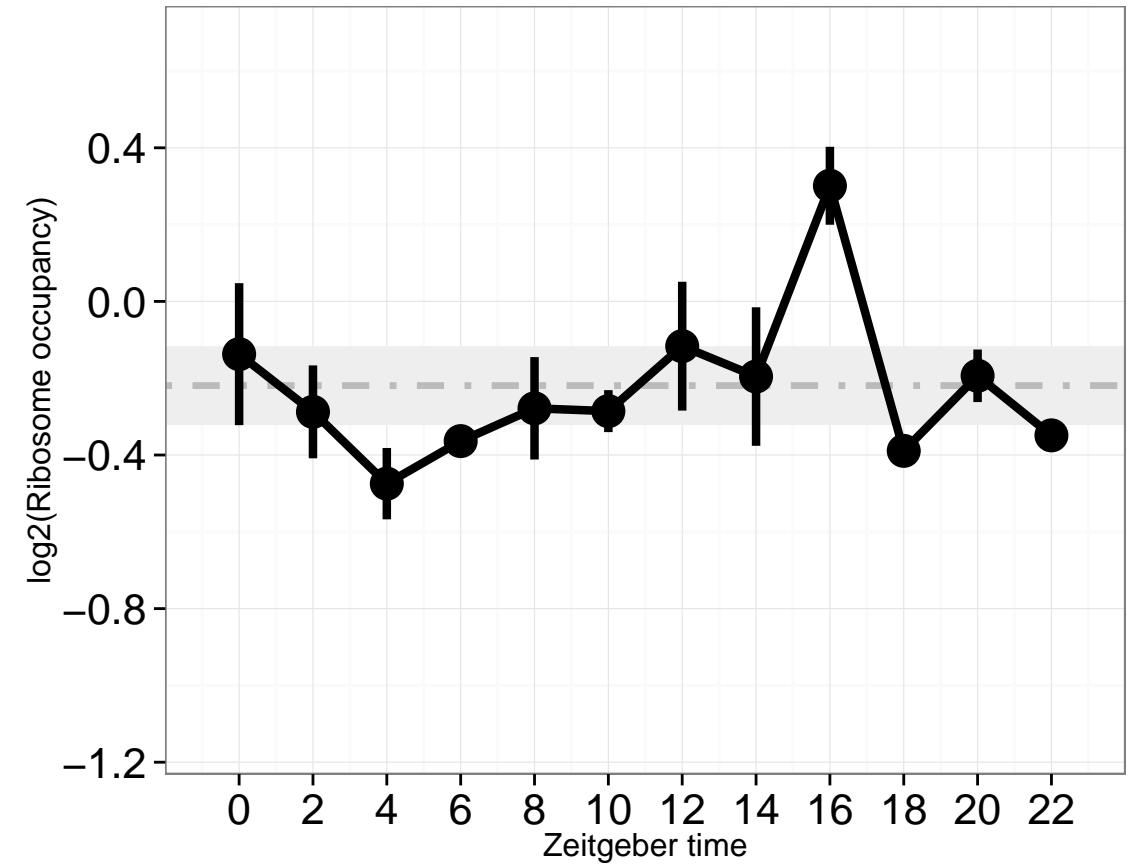

Supplement: Supplementary file 1386 [file 1]

## Gm10974

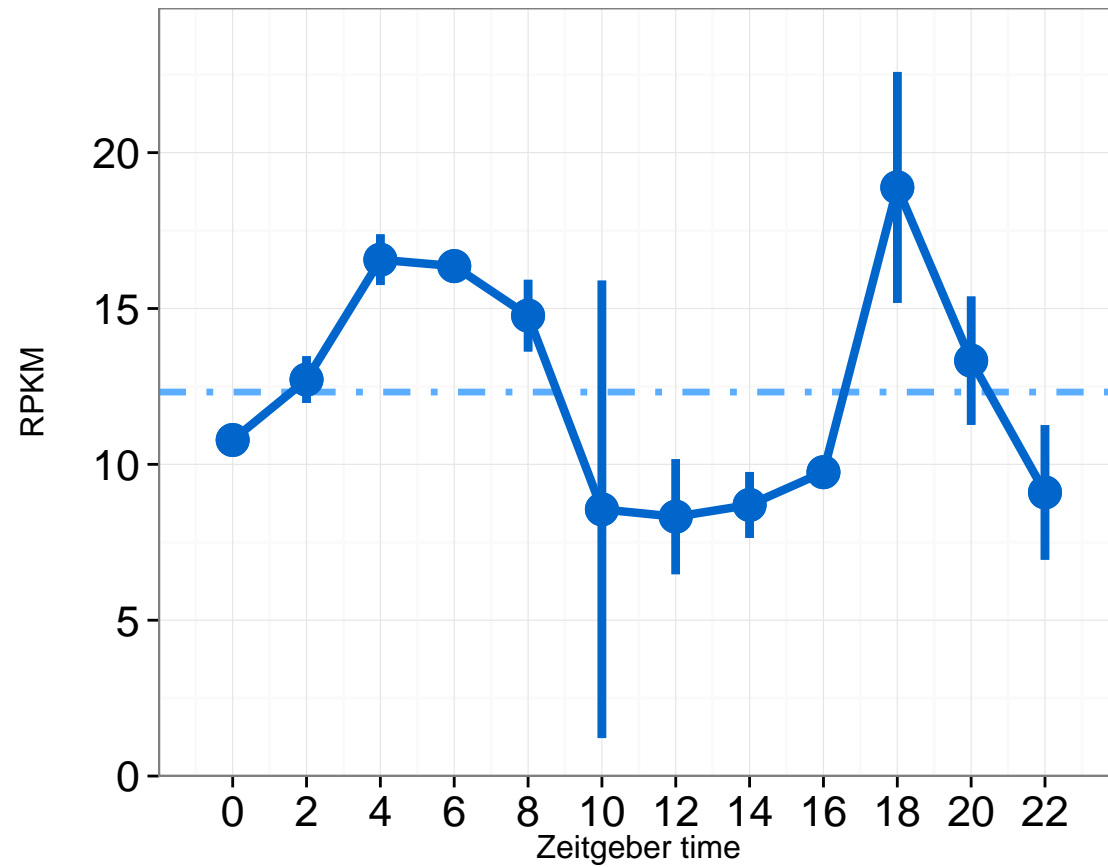

## Gm10974 log2(Ribosome occupanc

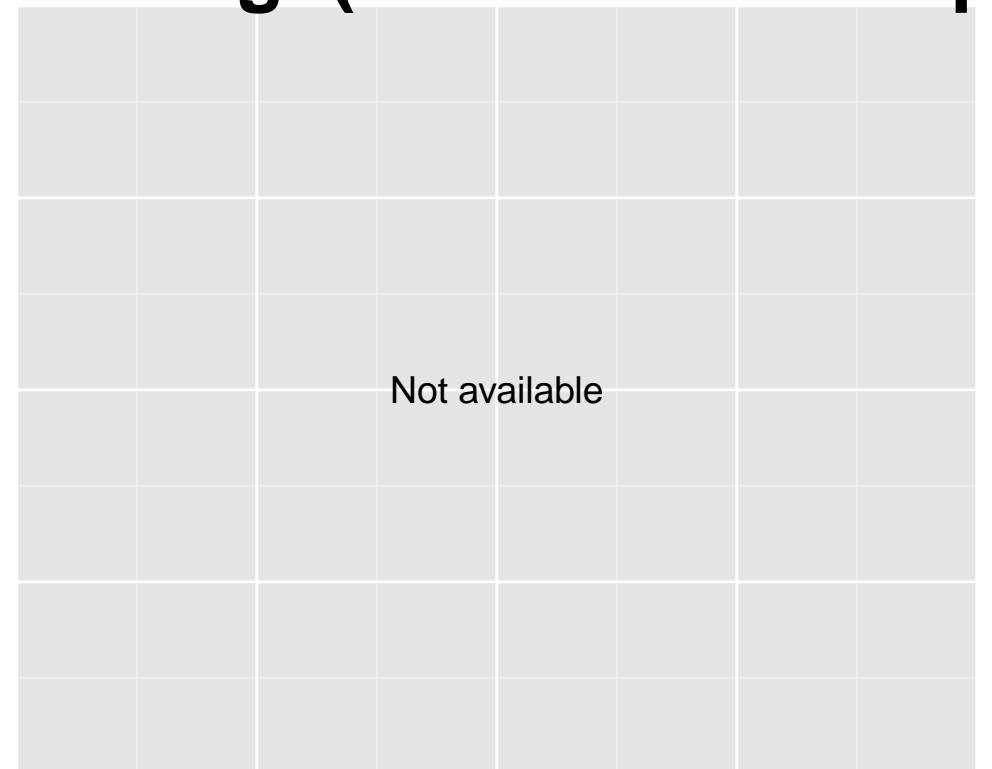

Supplement: Supplementary file 1387 [file 1]

## Thap3

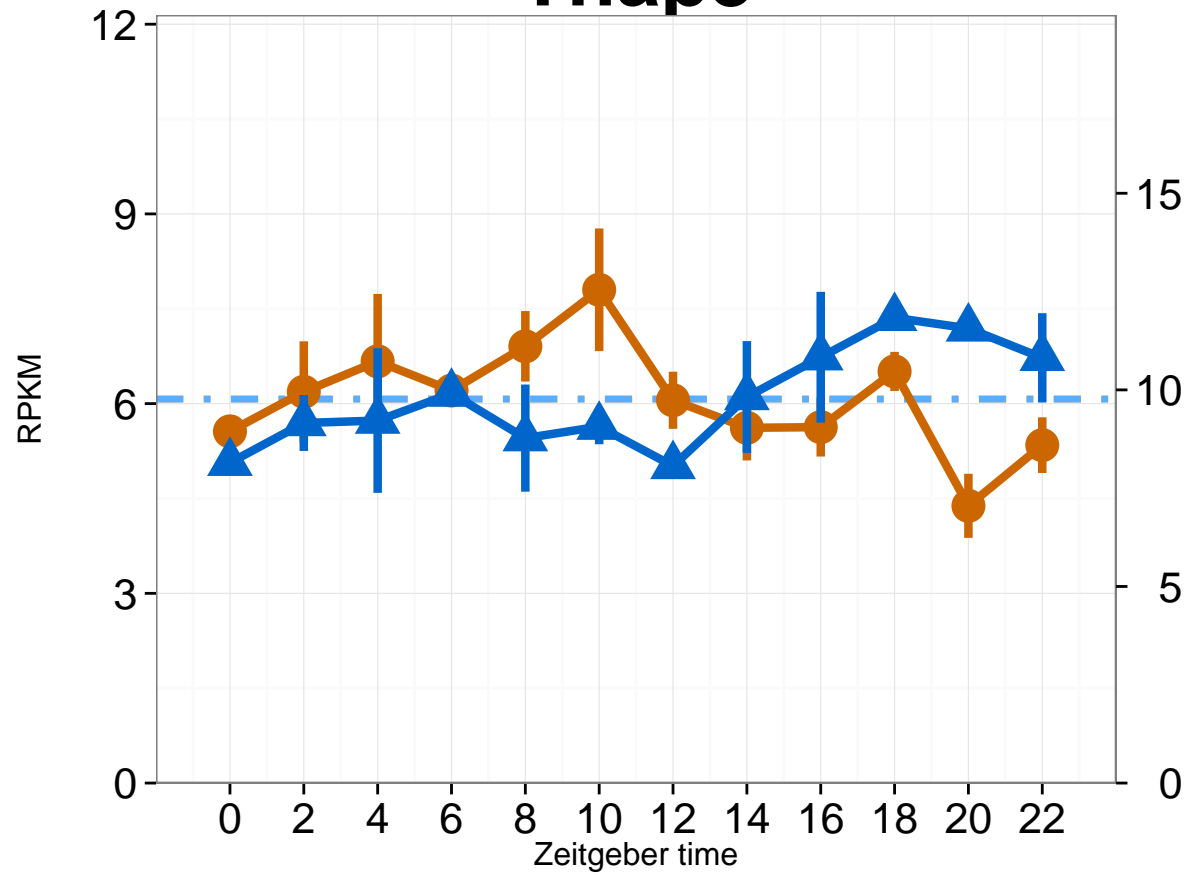

## Thap3

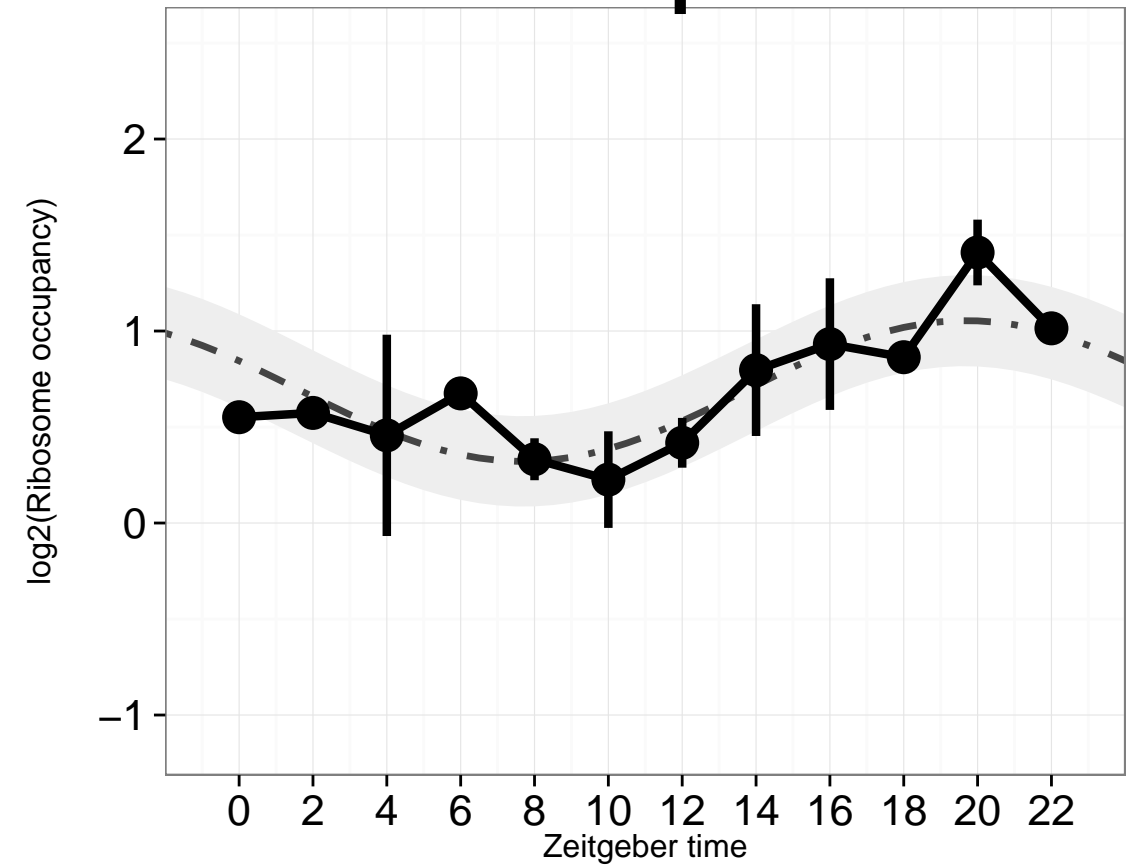

Supplement: Supplementary file 1388 [file 1]

# Arhgap24

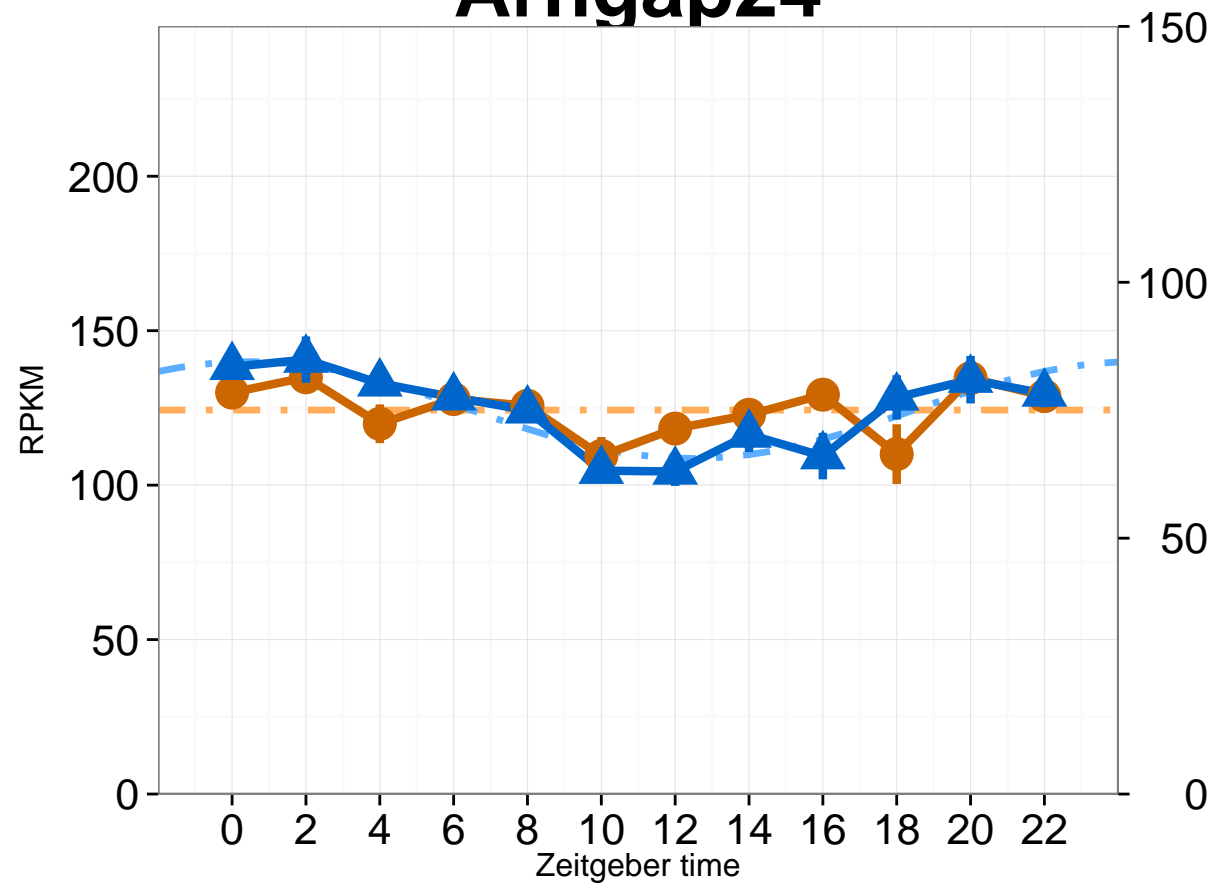

# Arhgap24

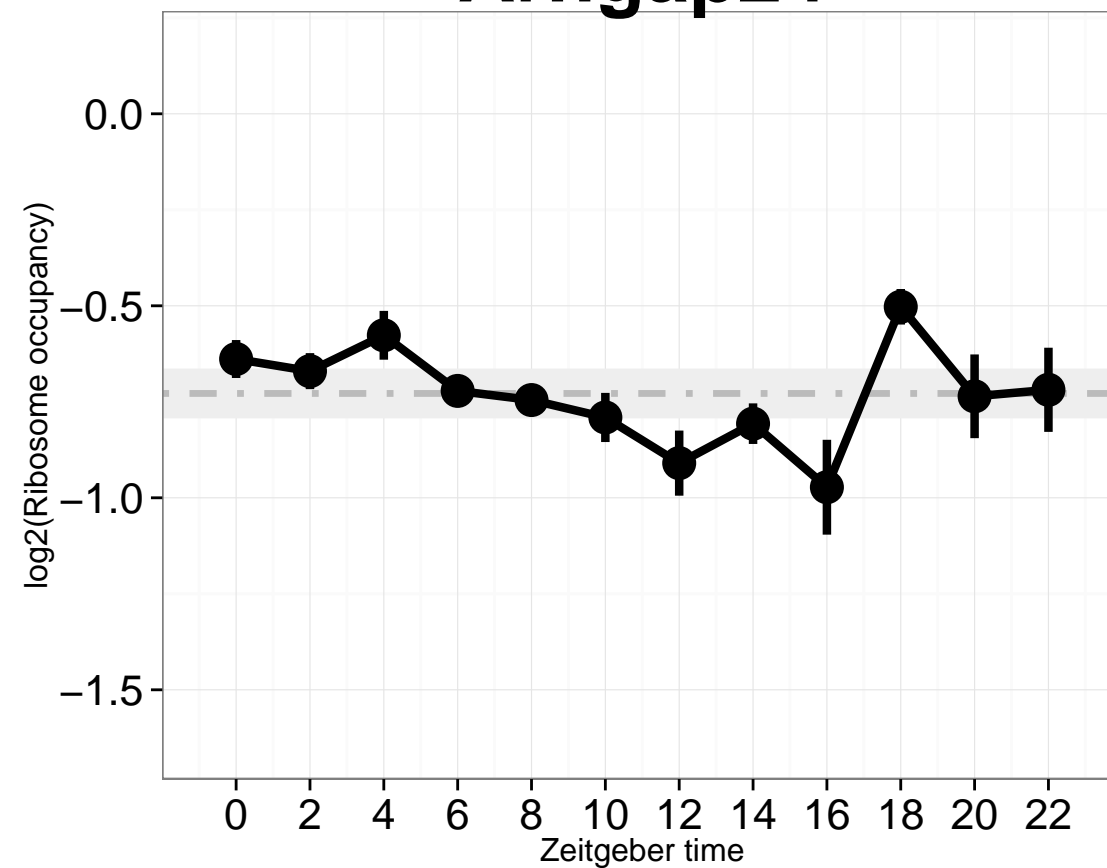

Supplement: Supplementary file 1389 [file 1]

# F2r

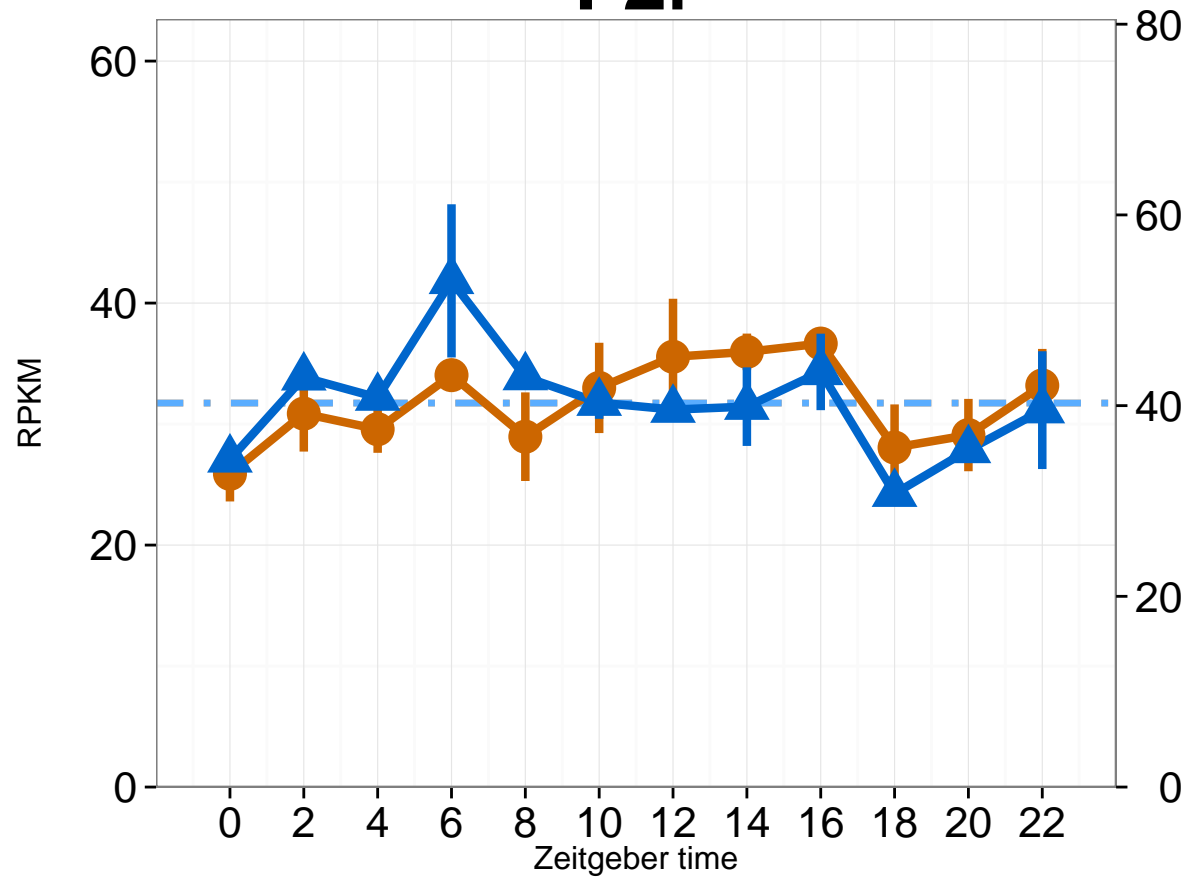

# F2r

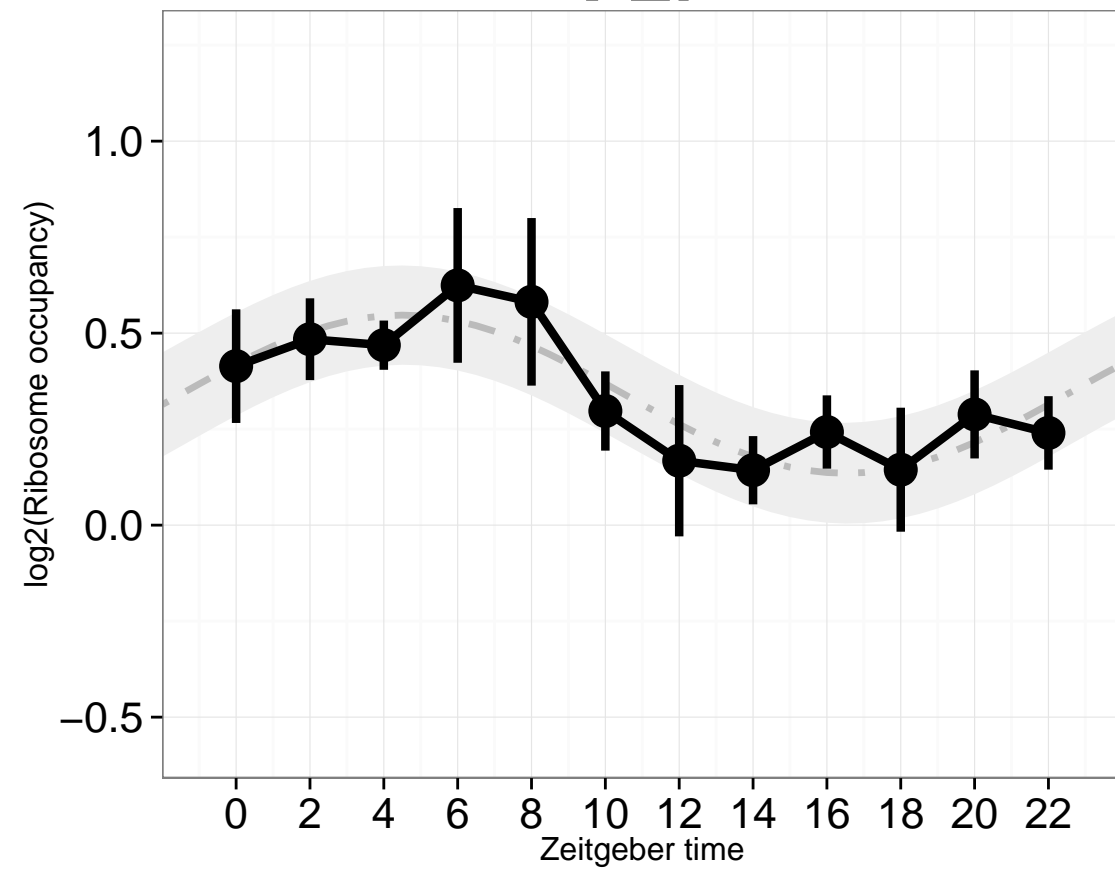

Supplement: Supplementary file 1390 [file 1]

## Rnf185

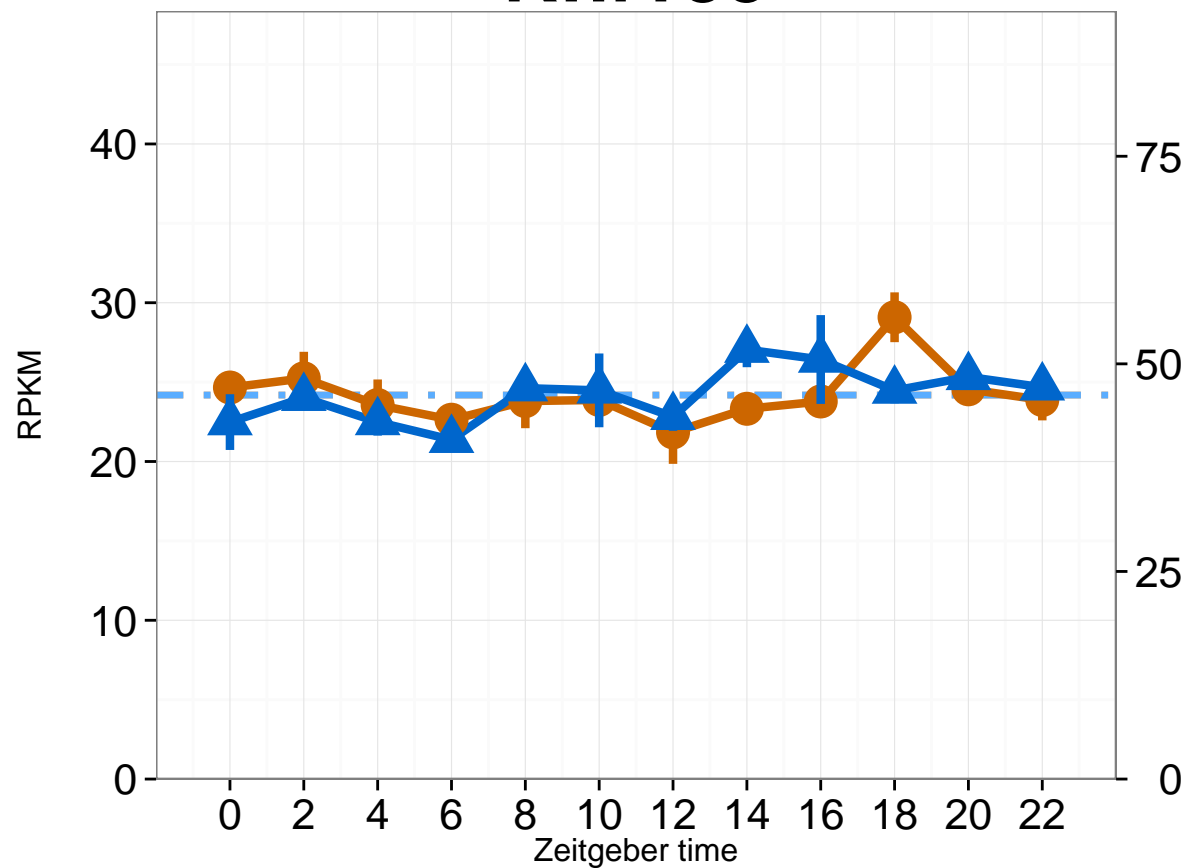

## Rnf185

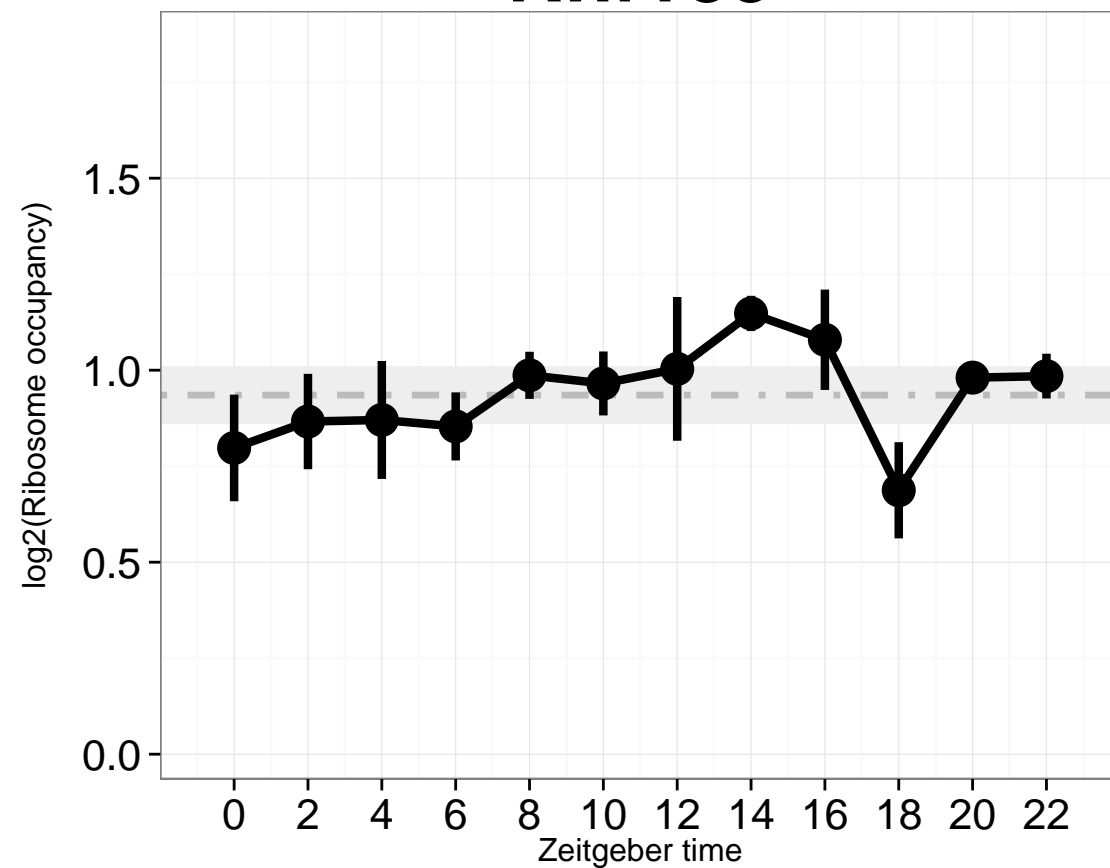

Supplement: Supplementary file 1391 [file 1]

# Rab42

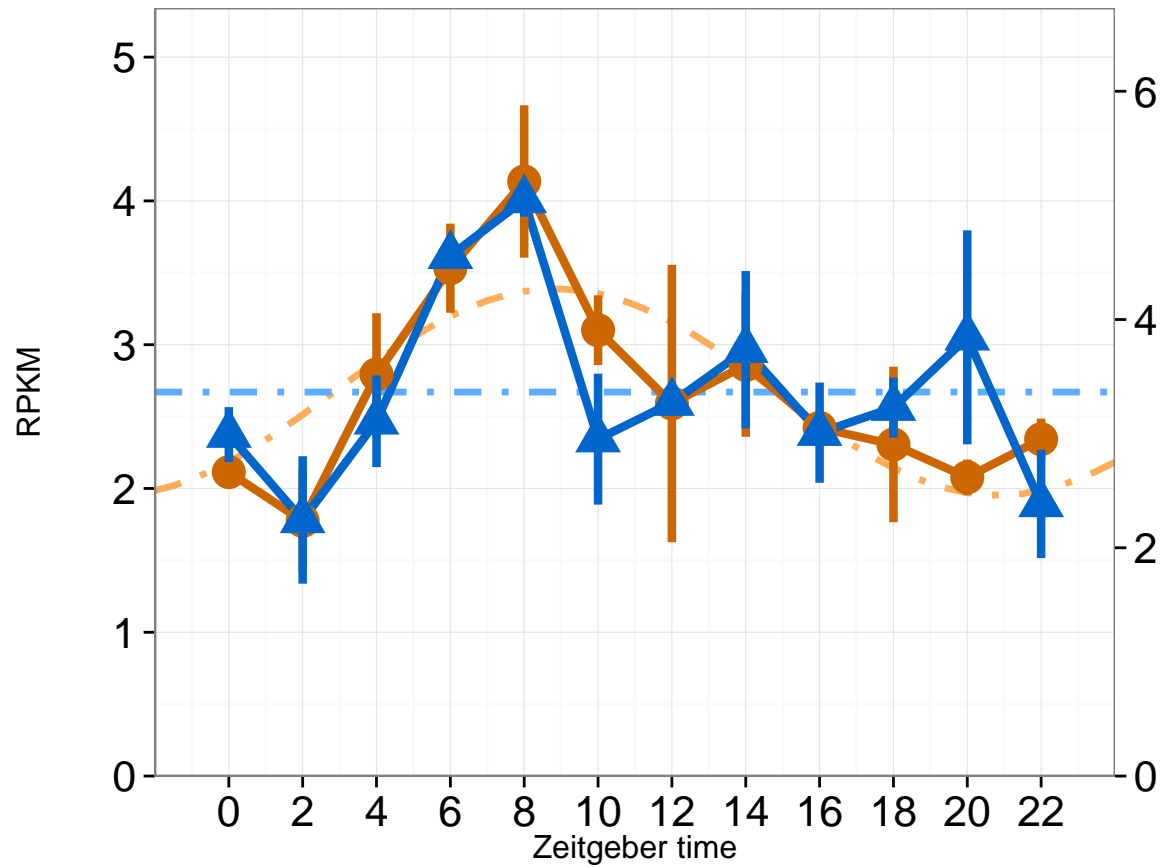

# Rab42

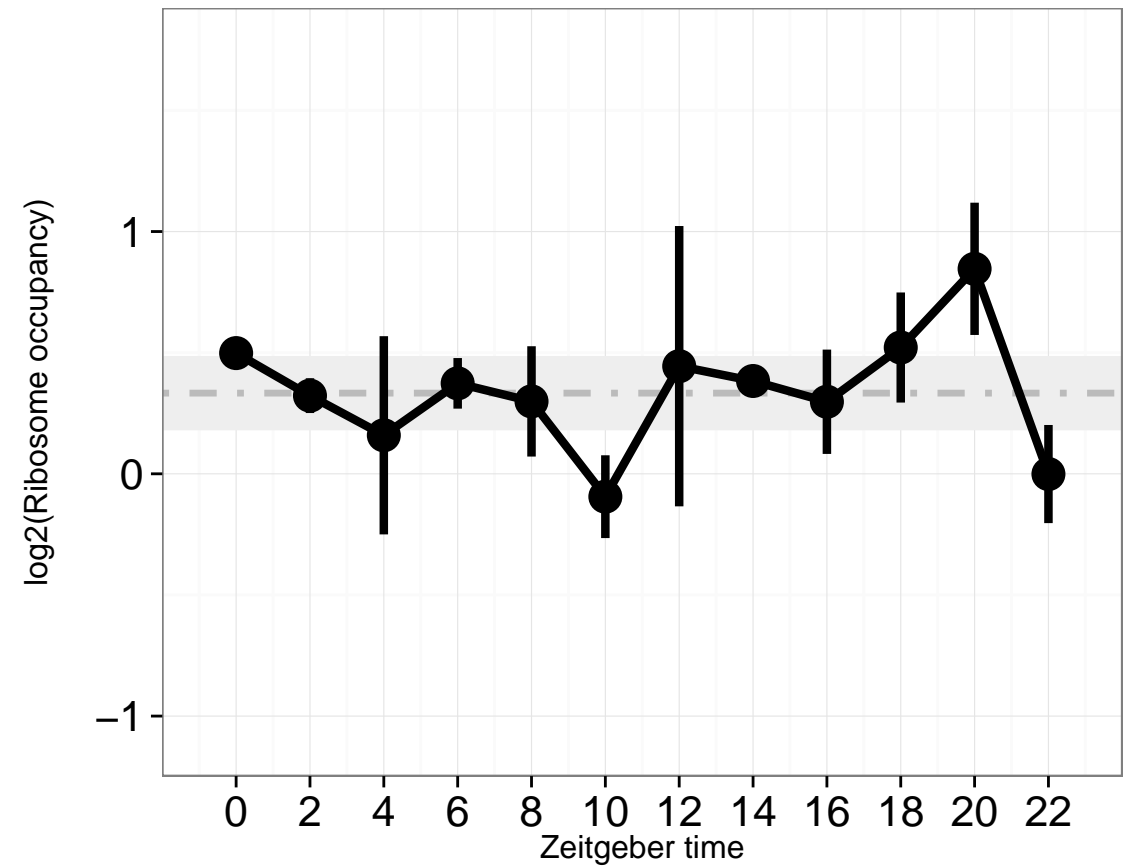

Supplement: Supplementary file 1392 [file 1]

## Foxd2

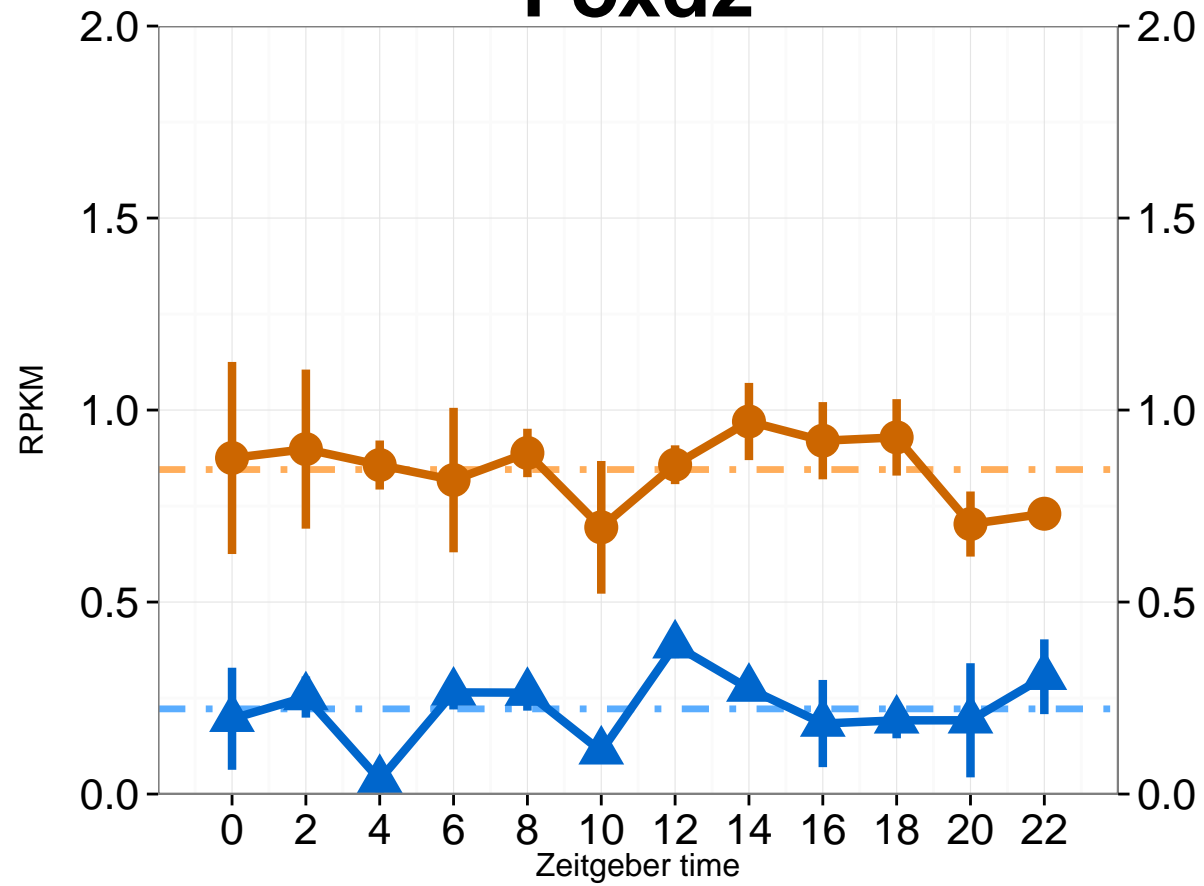

## Foxd2

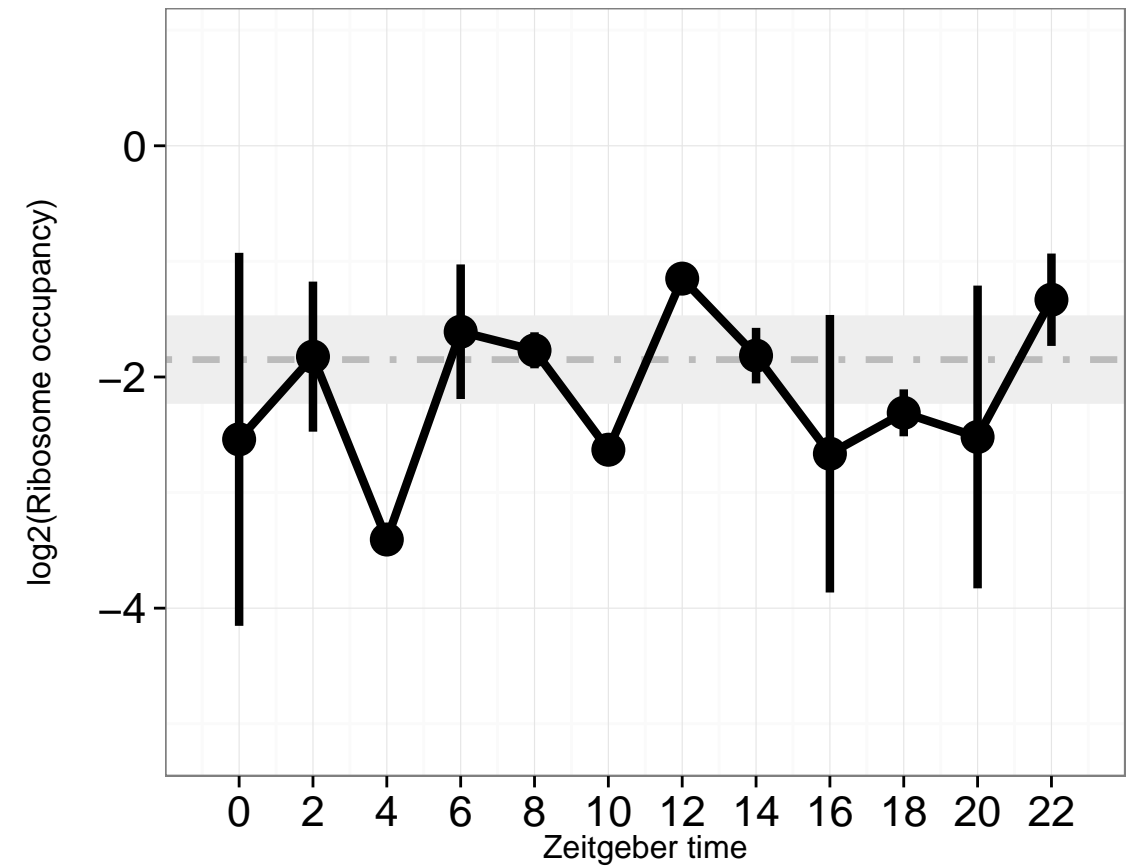

Supplement: Supplementary file 1393 [file 1]

# Tmem116

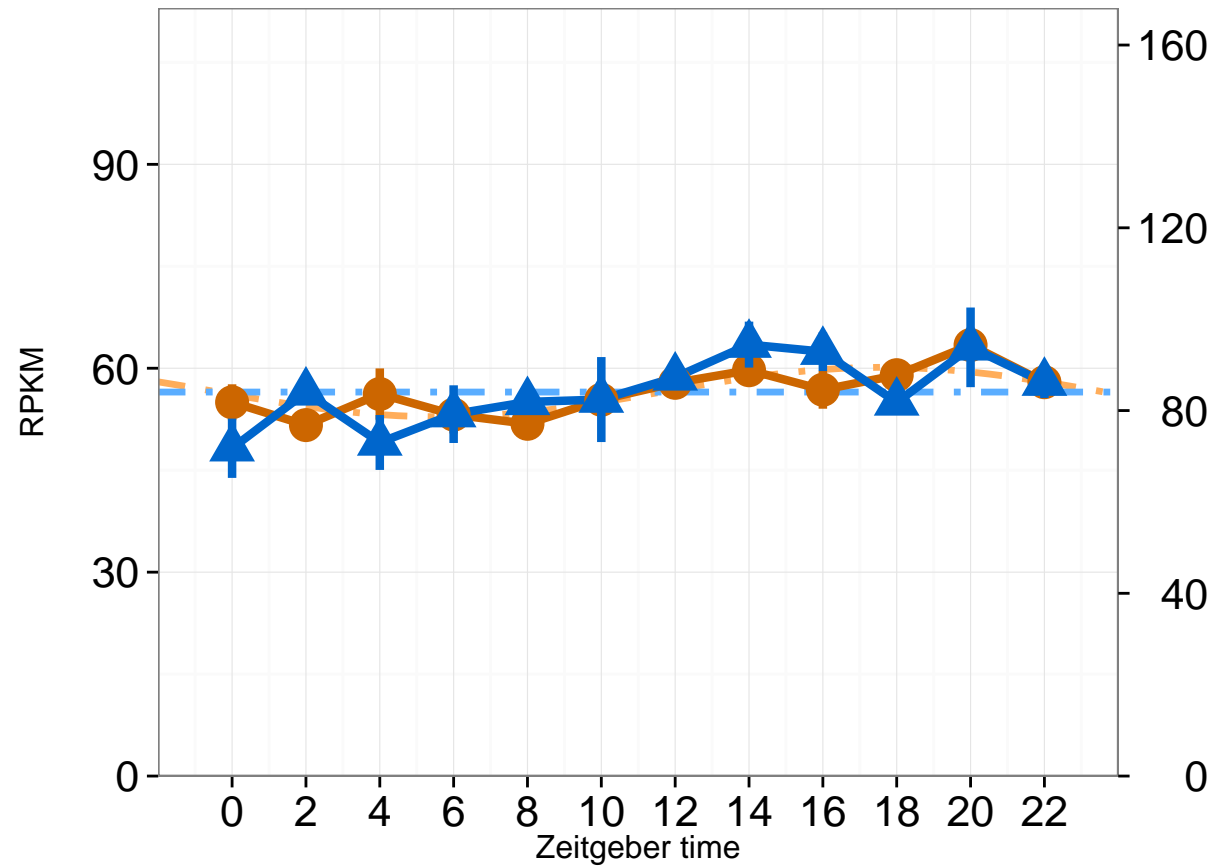

# Tmem116

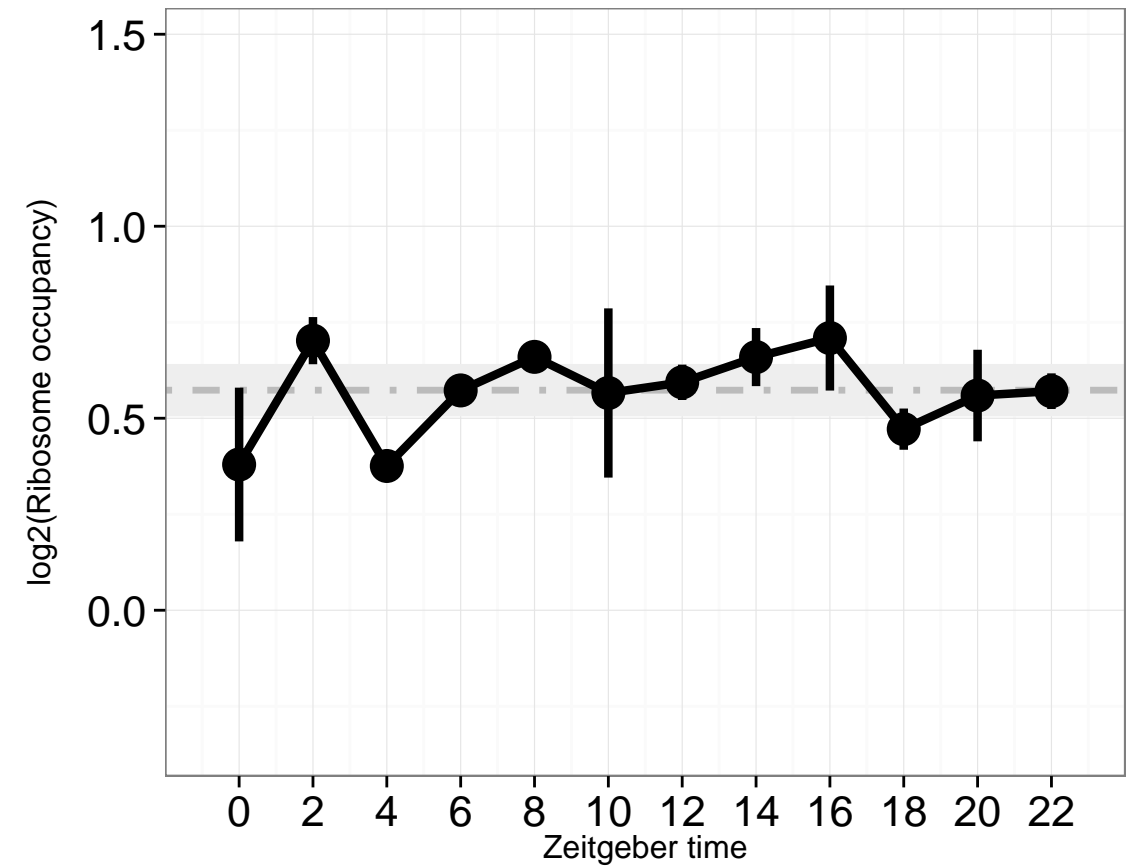

Supplement: Supplementary file 1394 [file 1]

## Rhobtb1

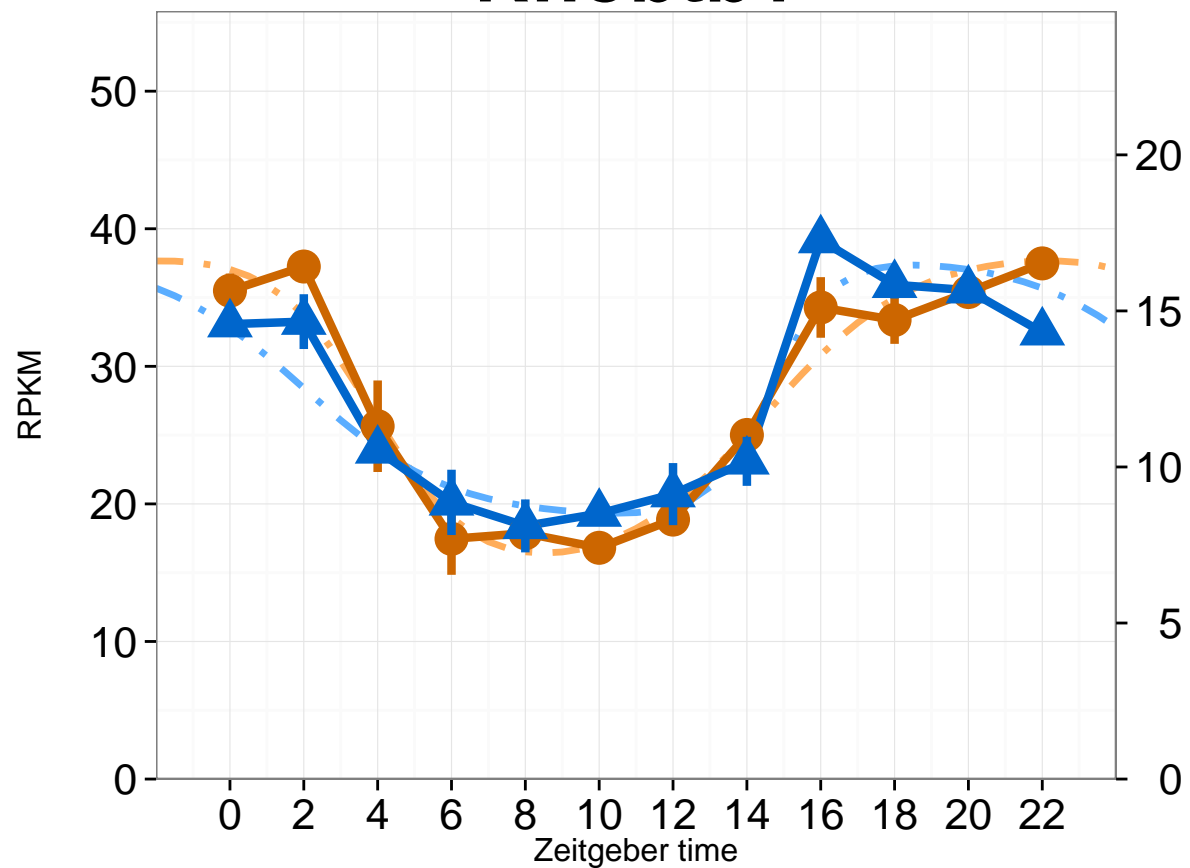

## Rhobtb1

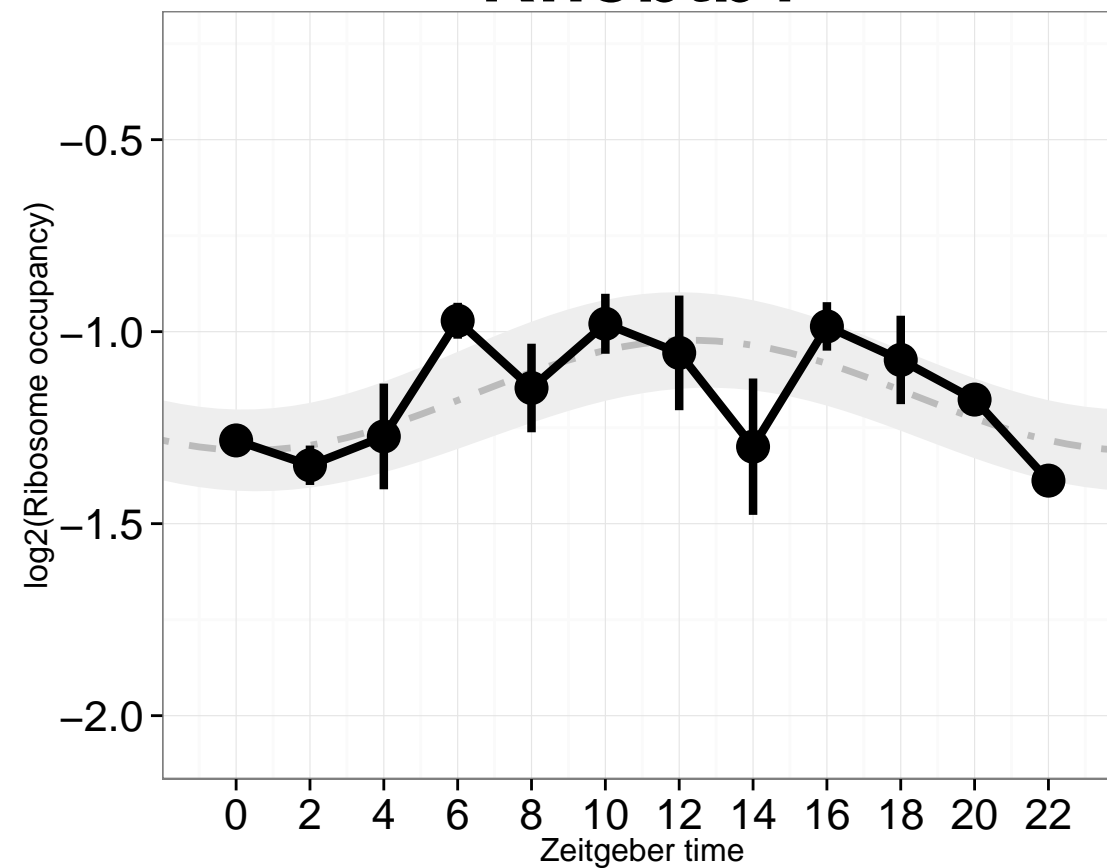

Supplement: Supplementary file 1395 [file 1]

## Lpl

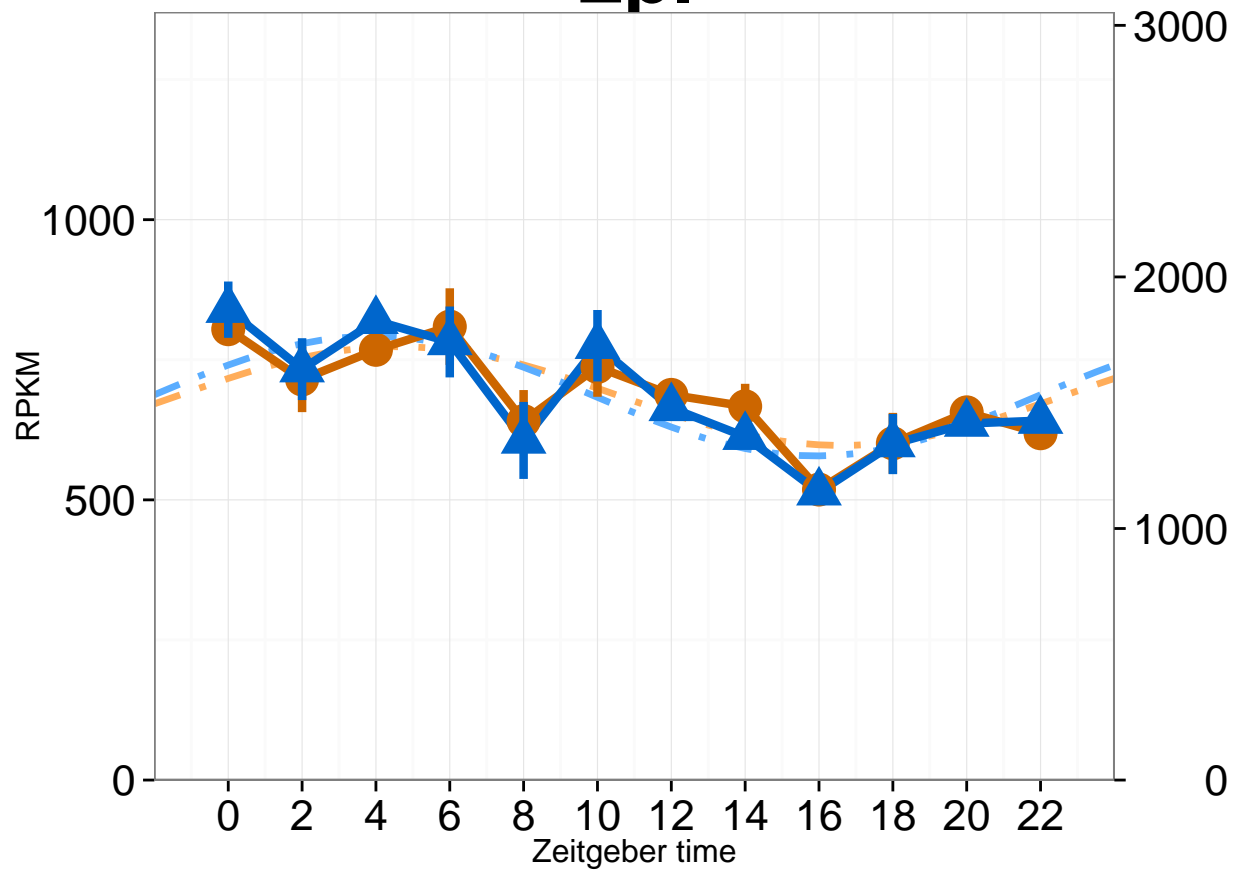

## Lpl

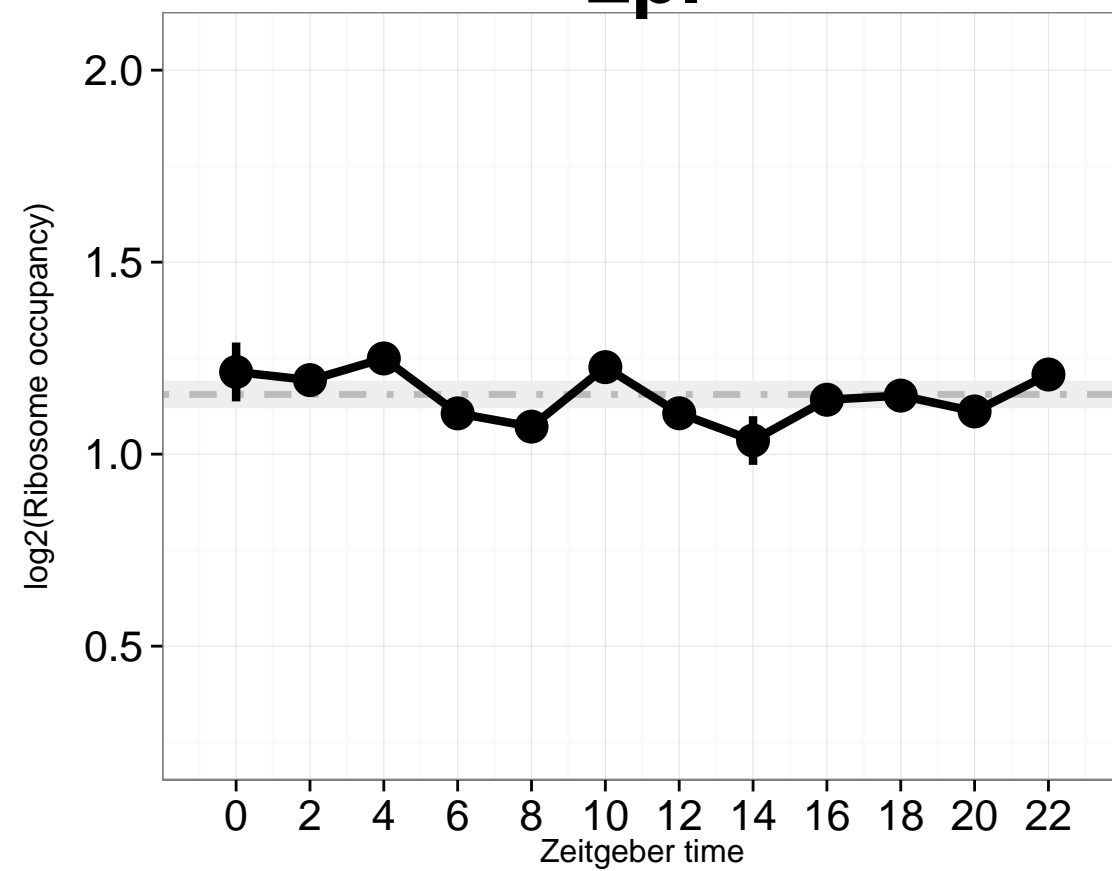

Supplement: Supplementary file 1396 [file 1]

## Nipbl

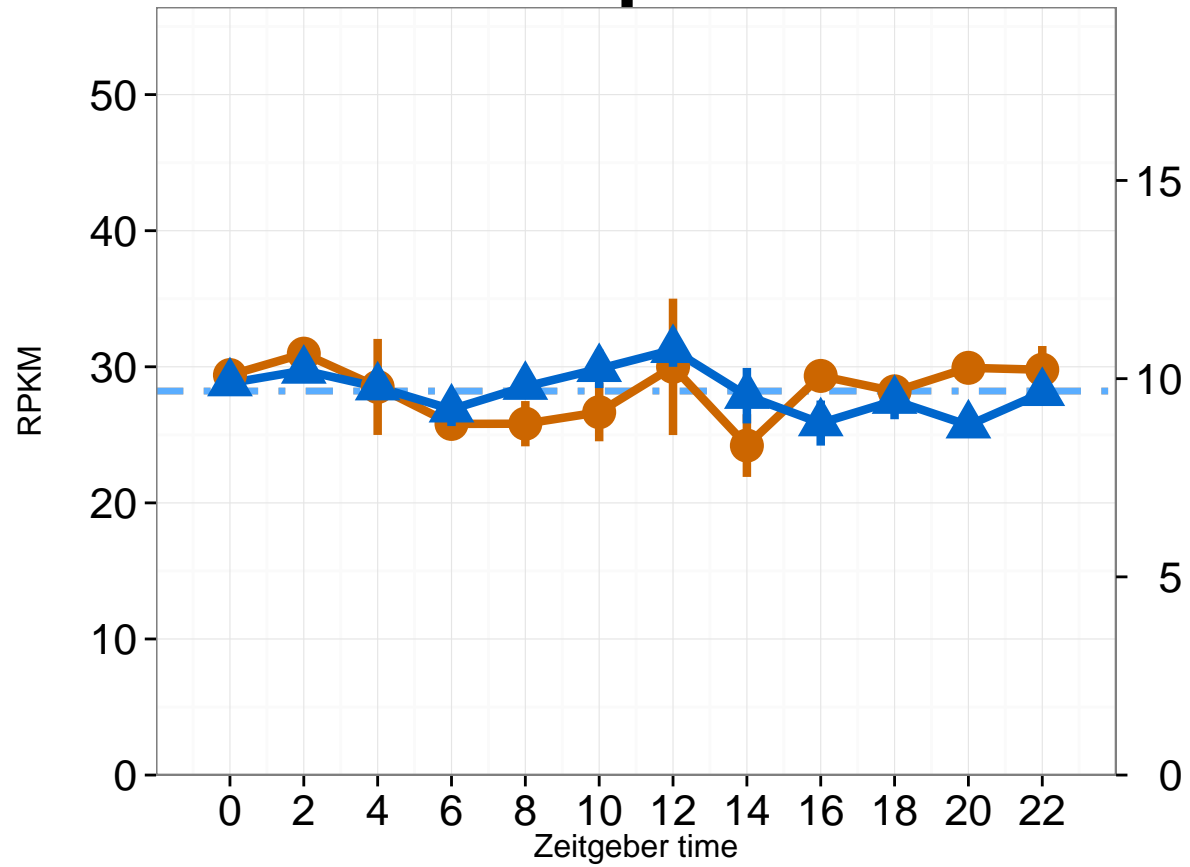

## Nipbl

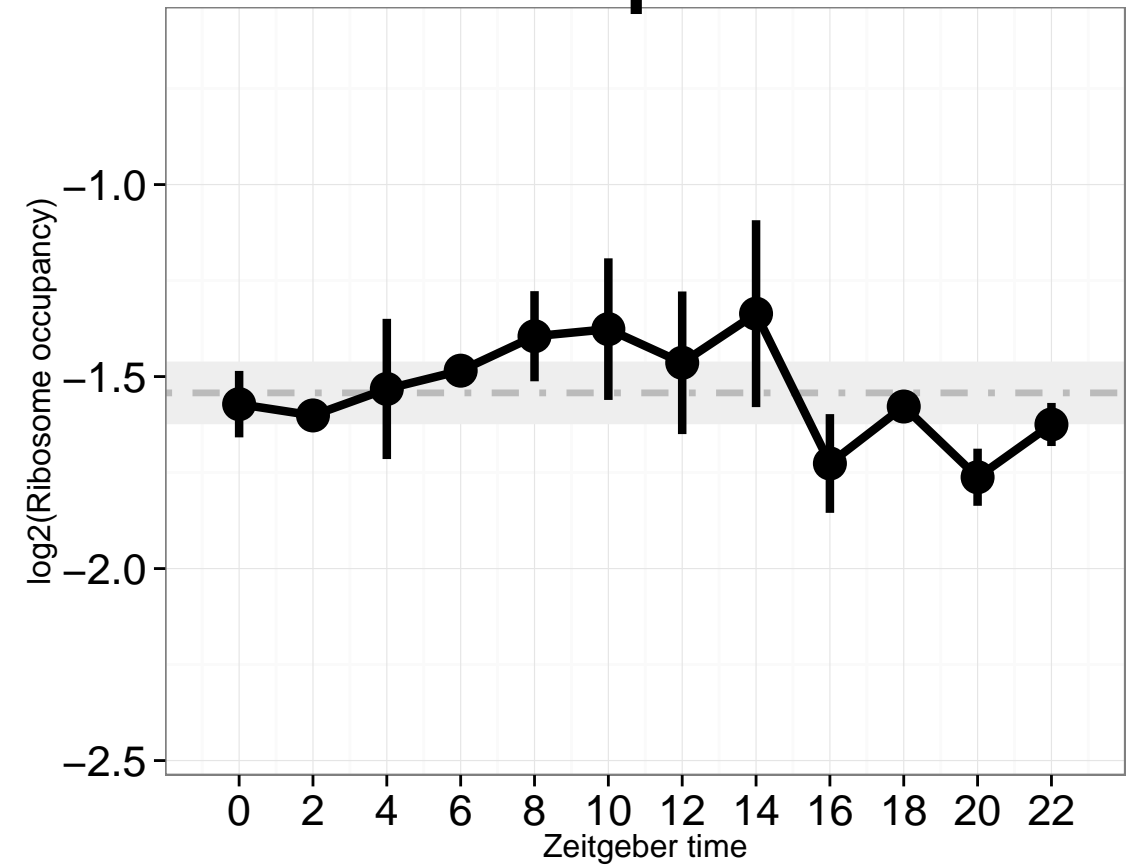

Supplement: Supplementary file 1397 [file 1]

# Nap1l4

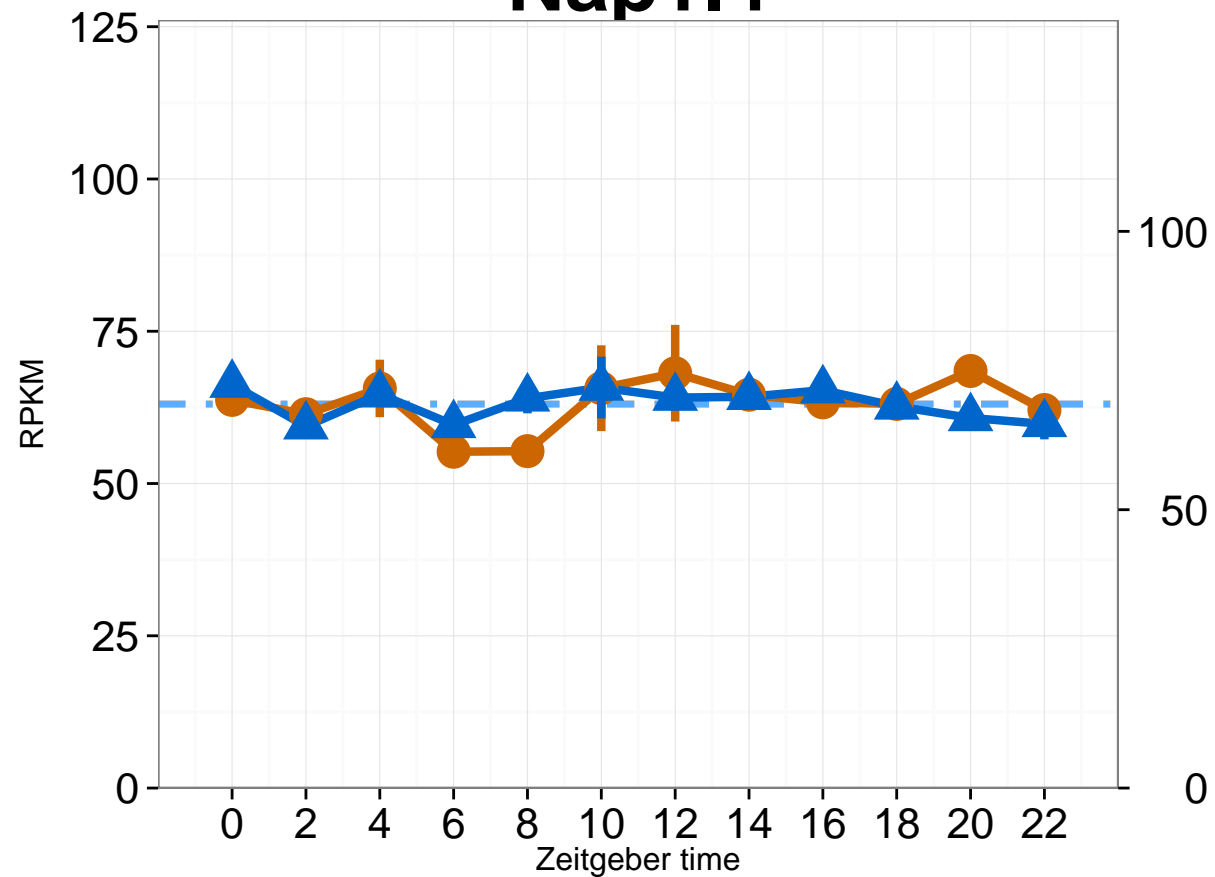

# Nap1l4

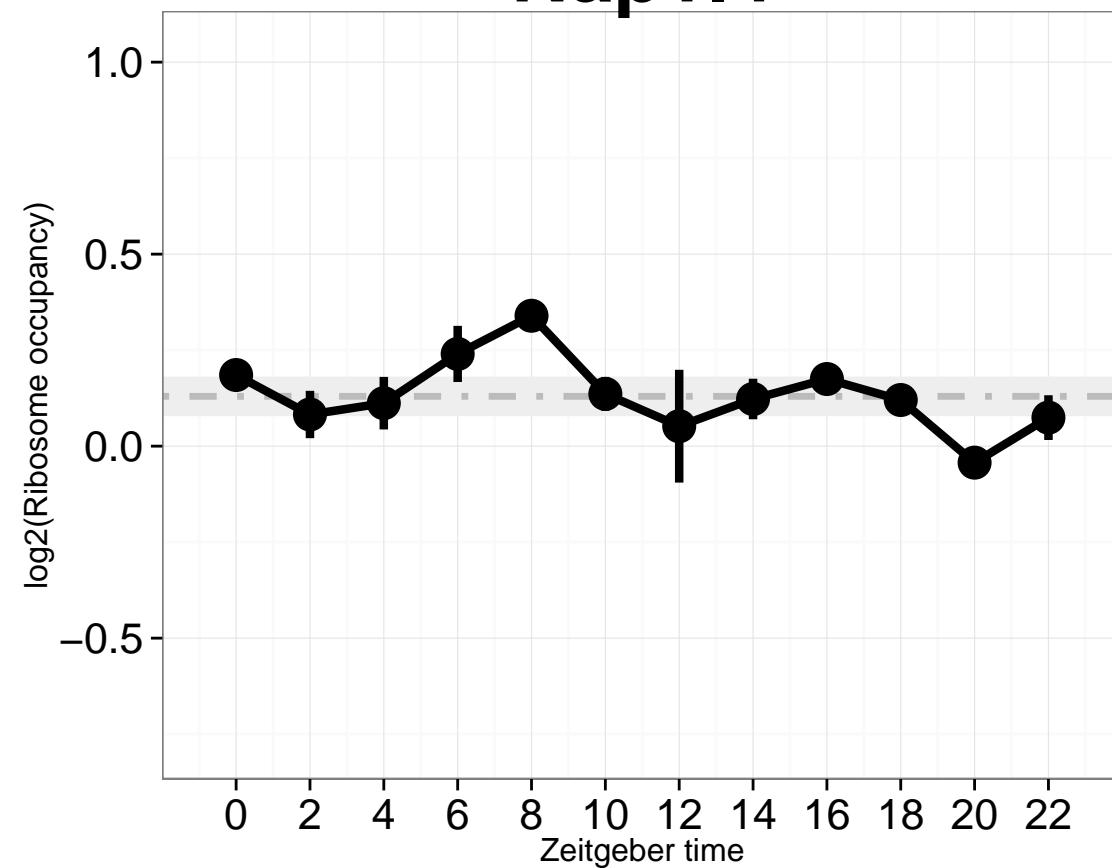

Supplement: Supplementary file 1398 [file 1]

**Actn2 TR**

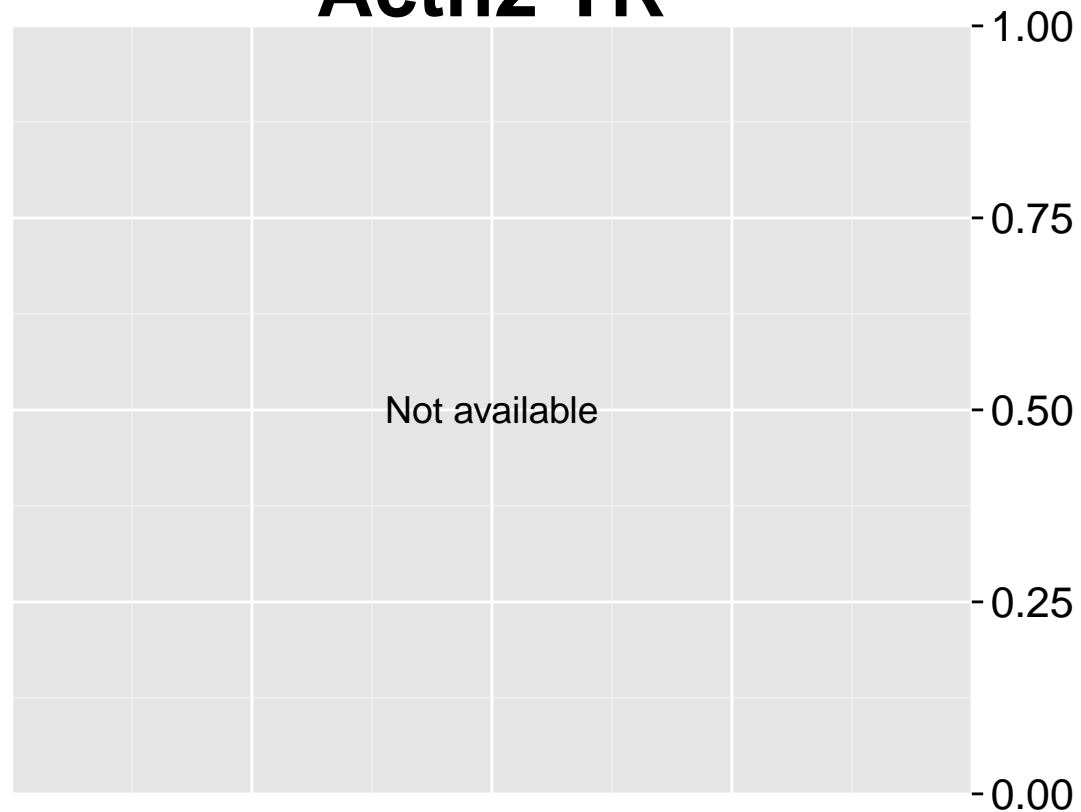

**Actn2 log2(Ribosome occupancy**

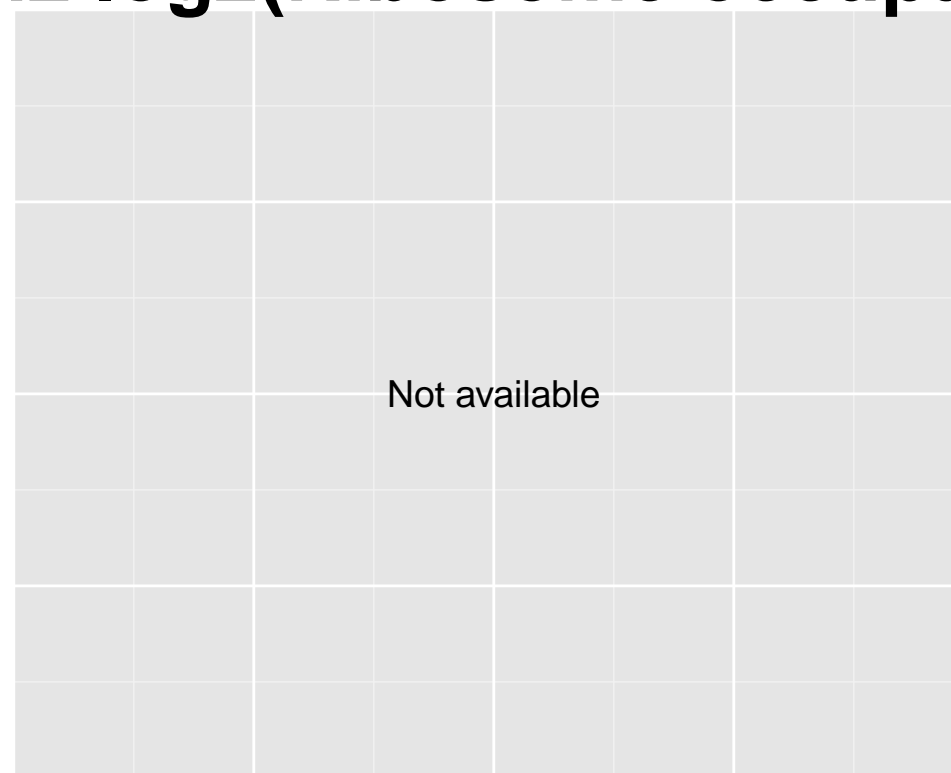

Supplement: Supplementary file 1399 [file 1]

## Pskh1

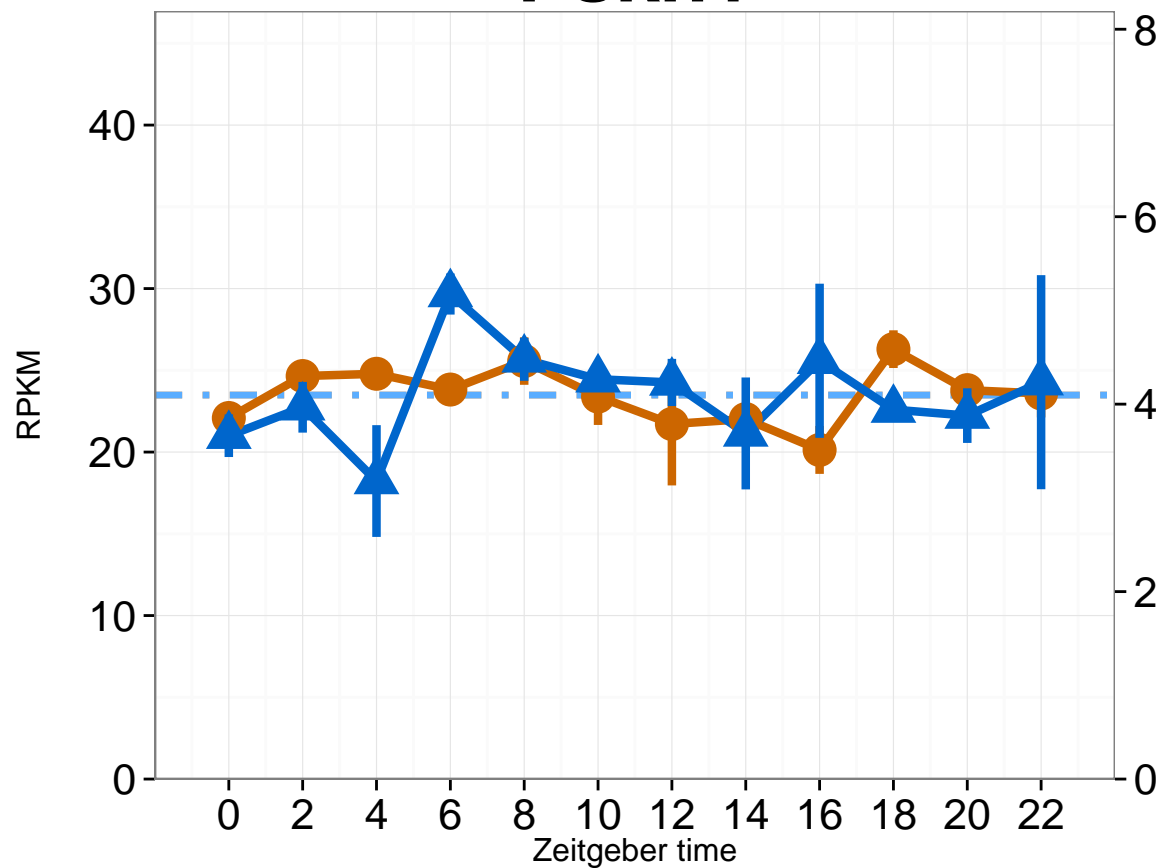

## Pskh1

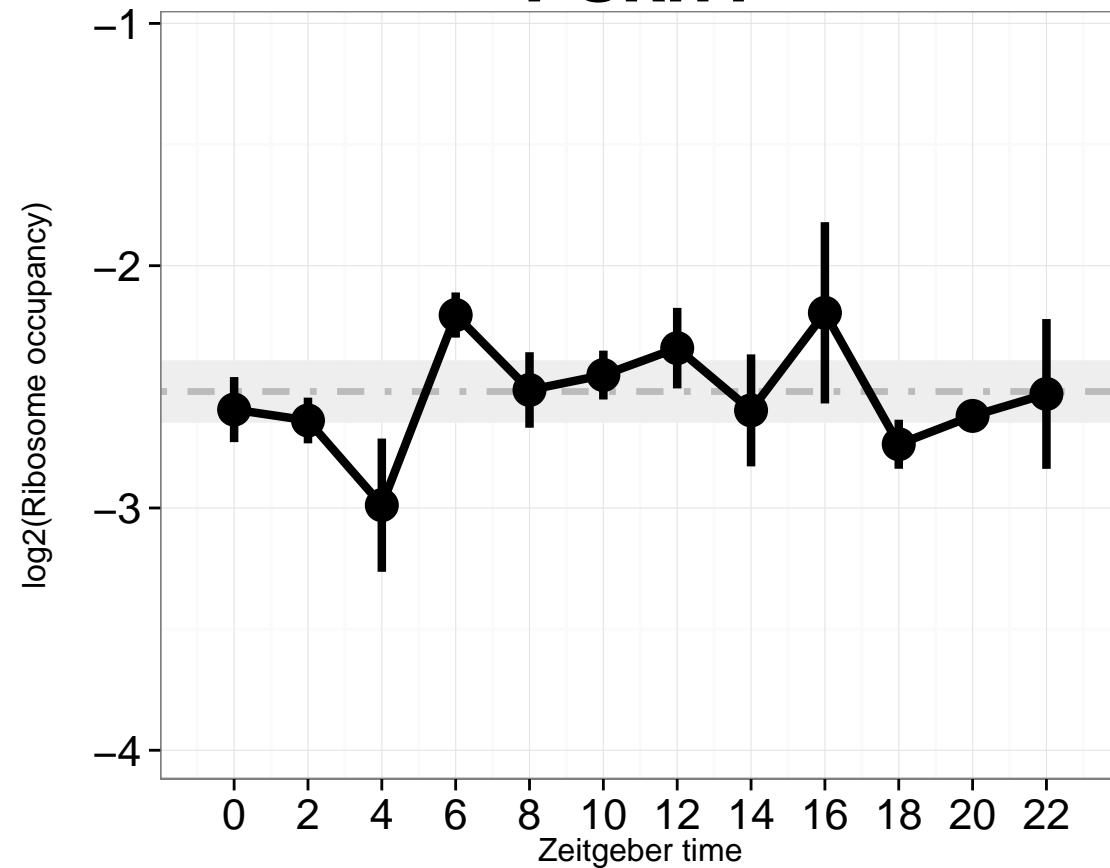

Supplement: Supplementary file 1400 [file 1]

## Nrip2

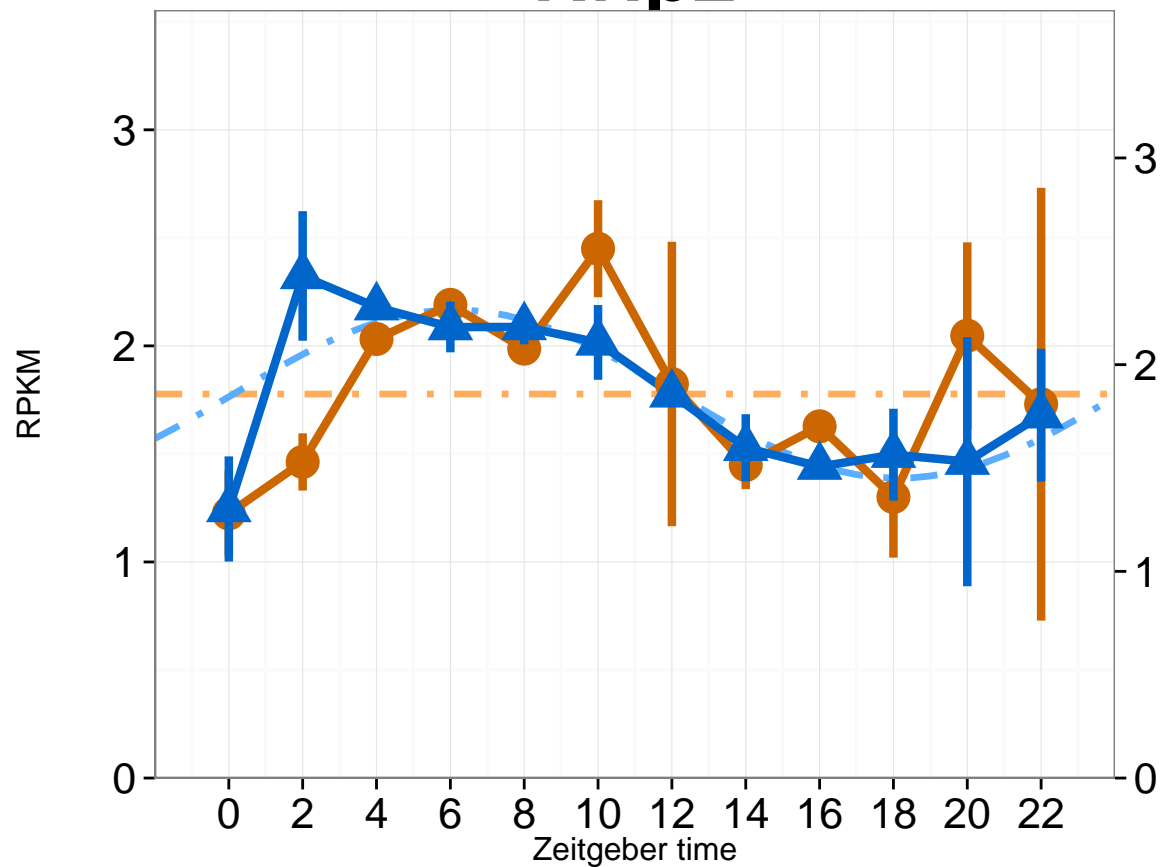

## Nrip2

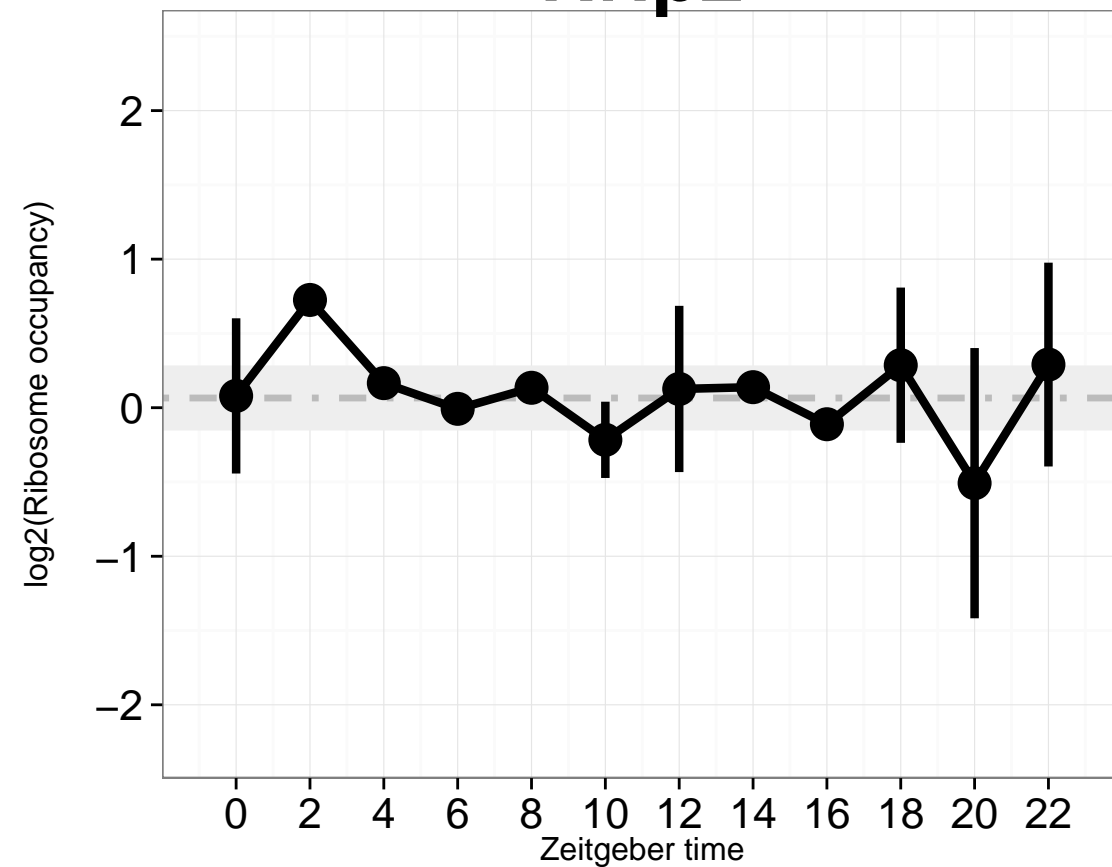

Supplement: Supplementary file 1401 [file 1]

# Ppm1h

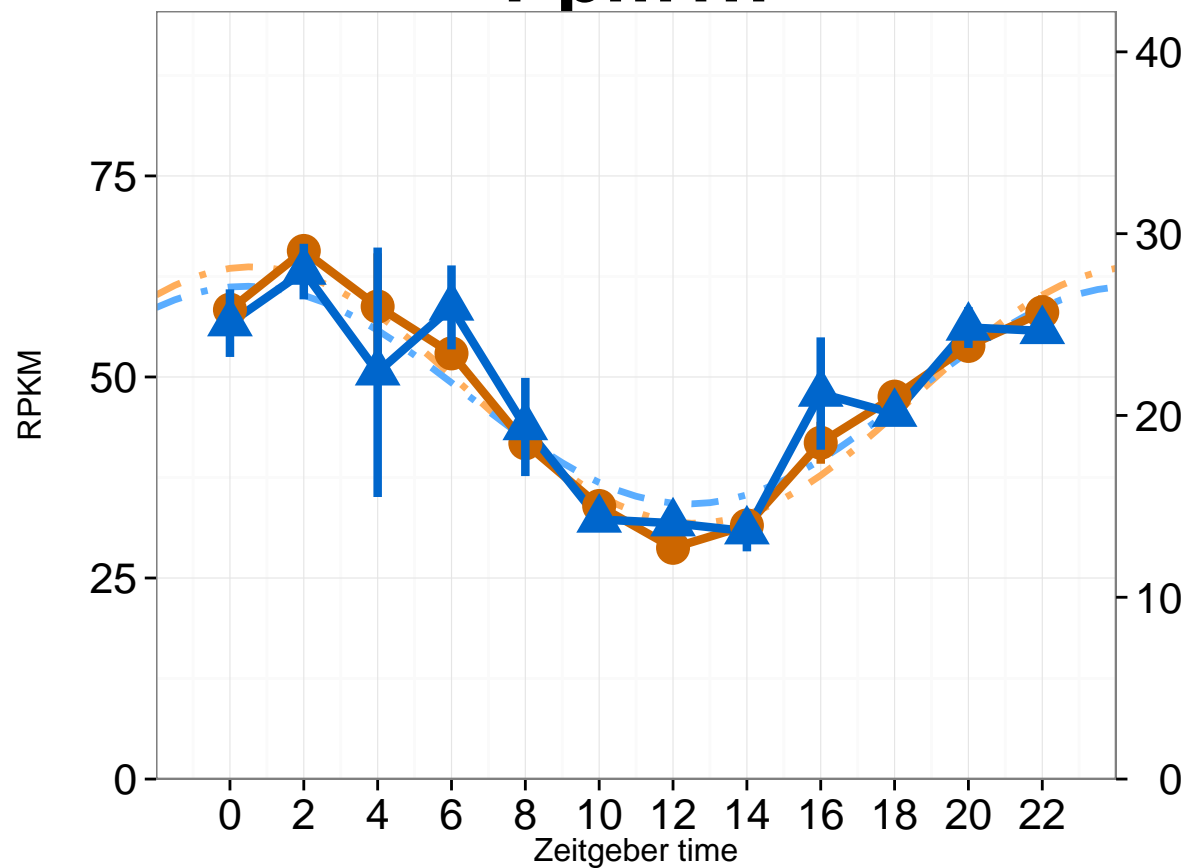

# Ppm1h

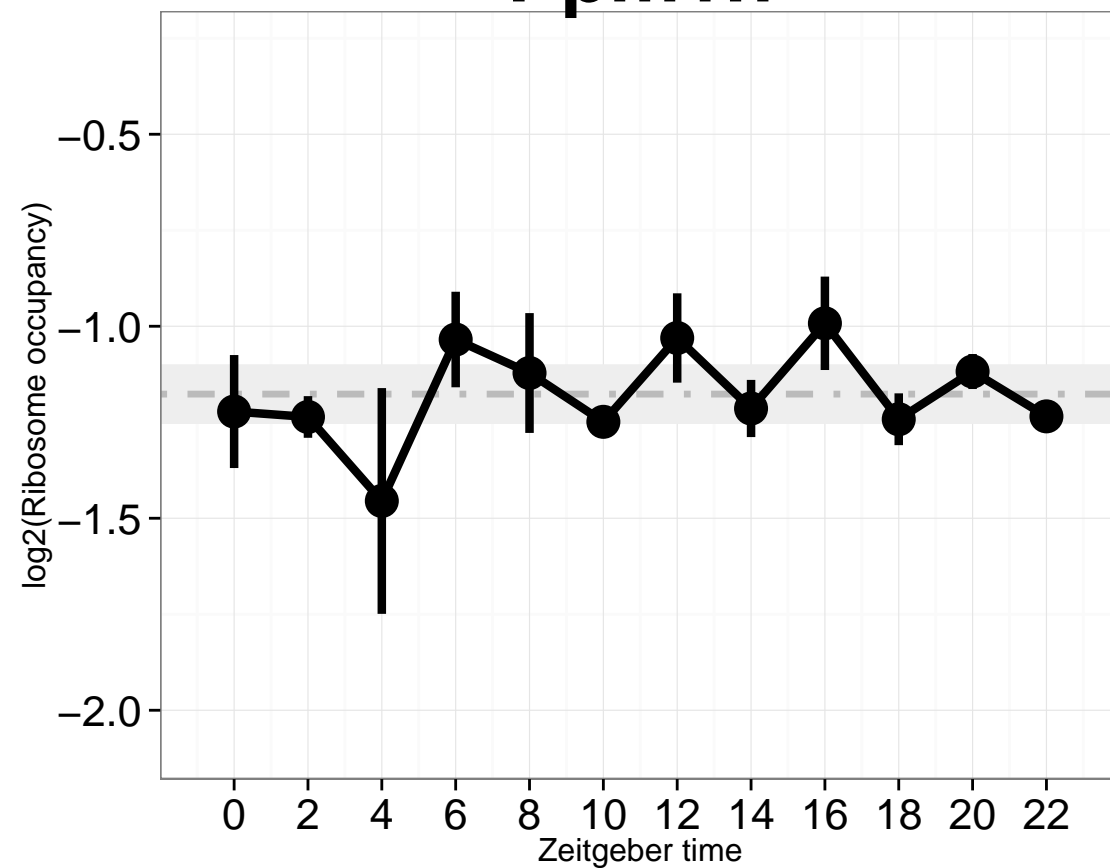

Supplement: Supplementary file 1402 [file 1]

# Syne2

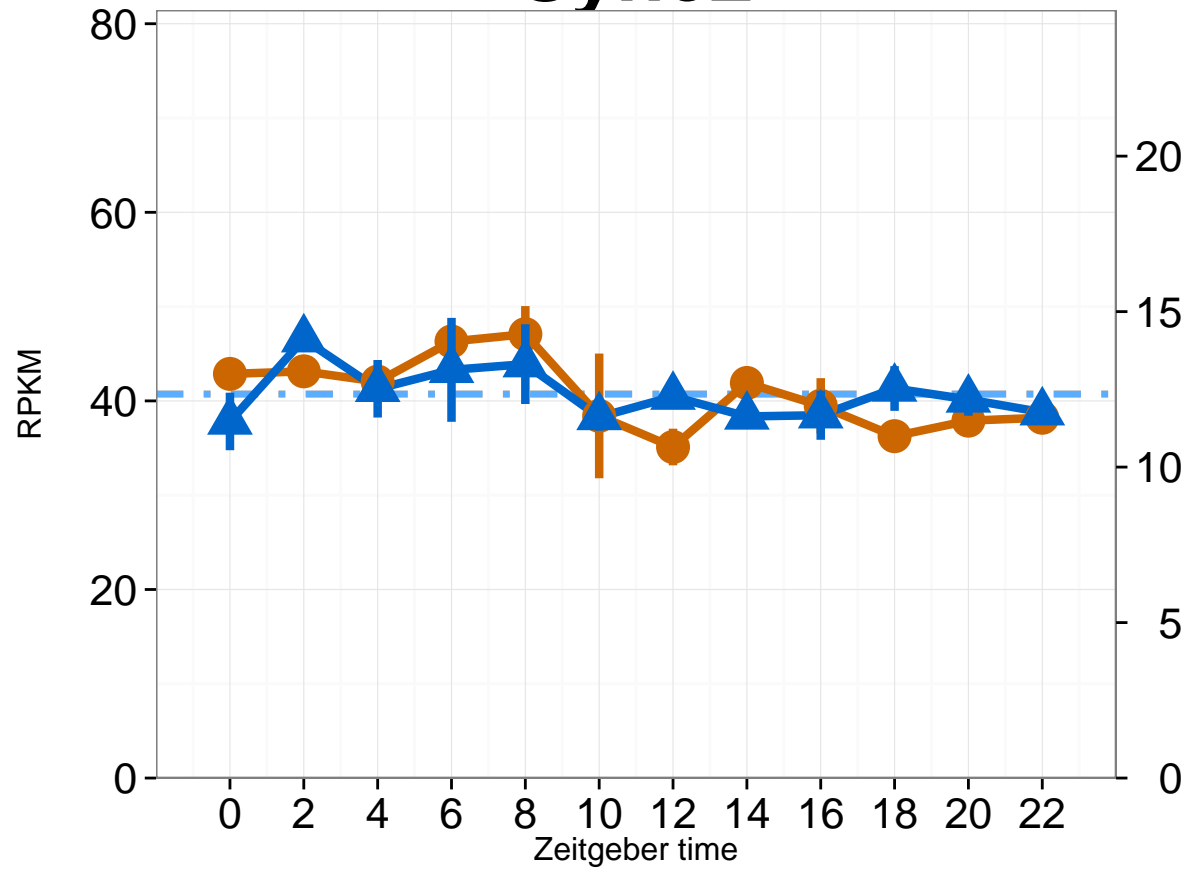

# Syne2

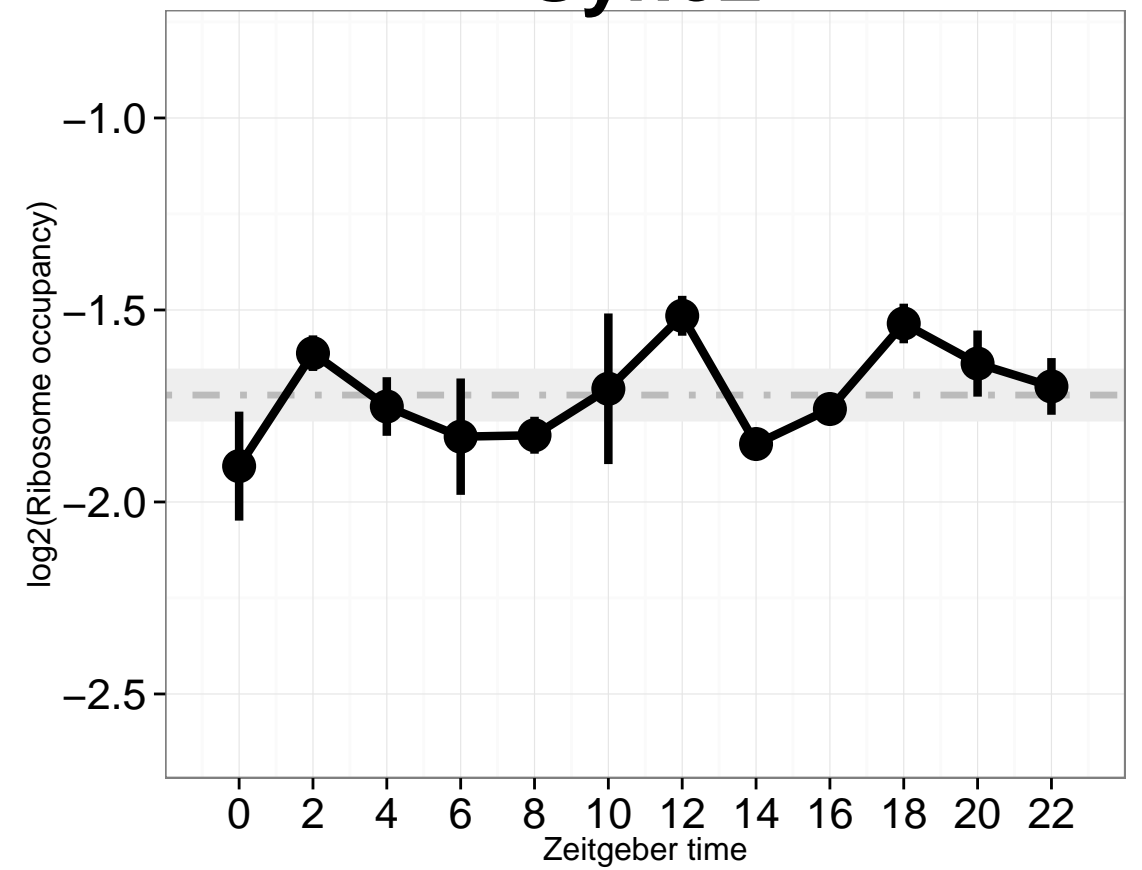

Supplement: Supplementary file 1403 [file 1]

# Ccdc90b

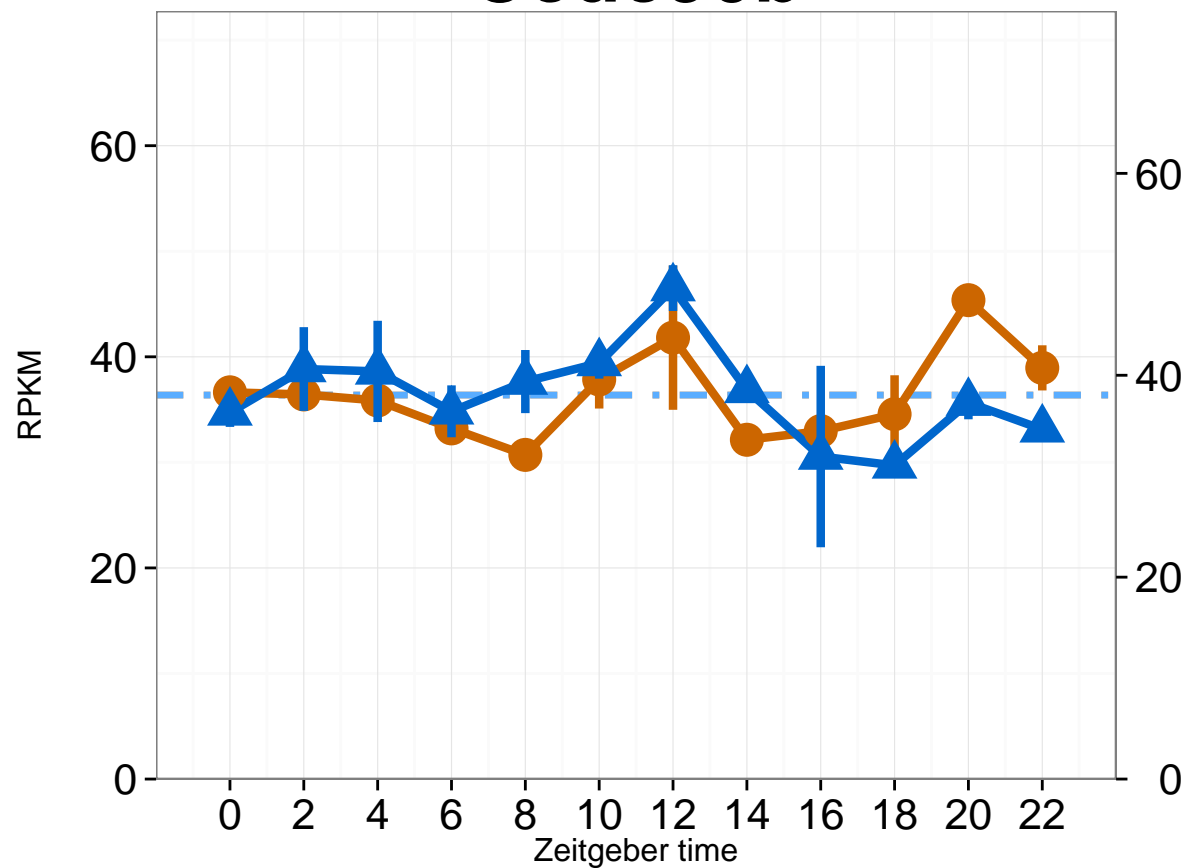

# Ccdc90b

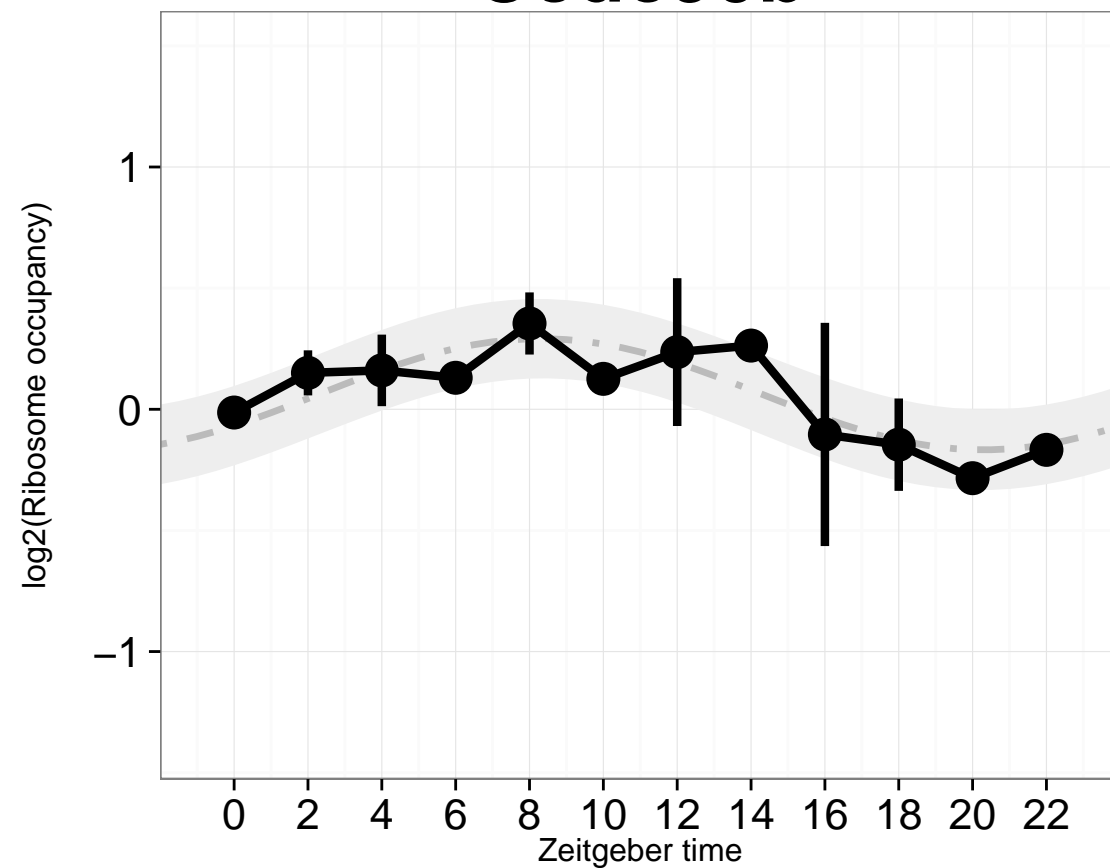

Supplement: Supplementary file 1404 [file 1]

# Zfp40

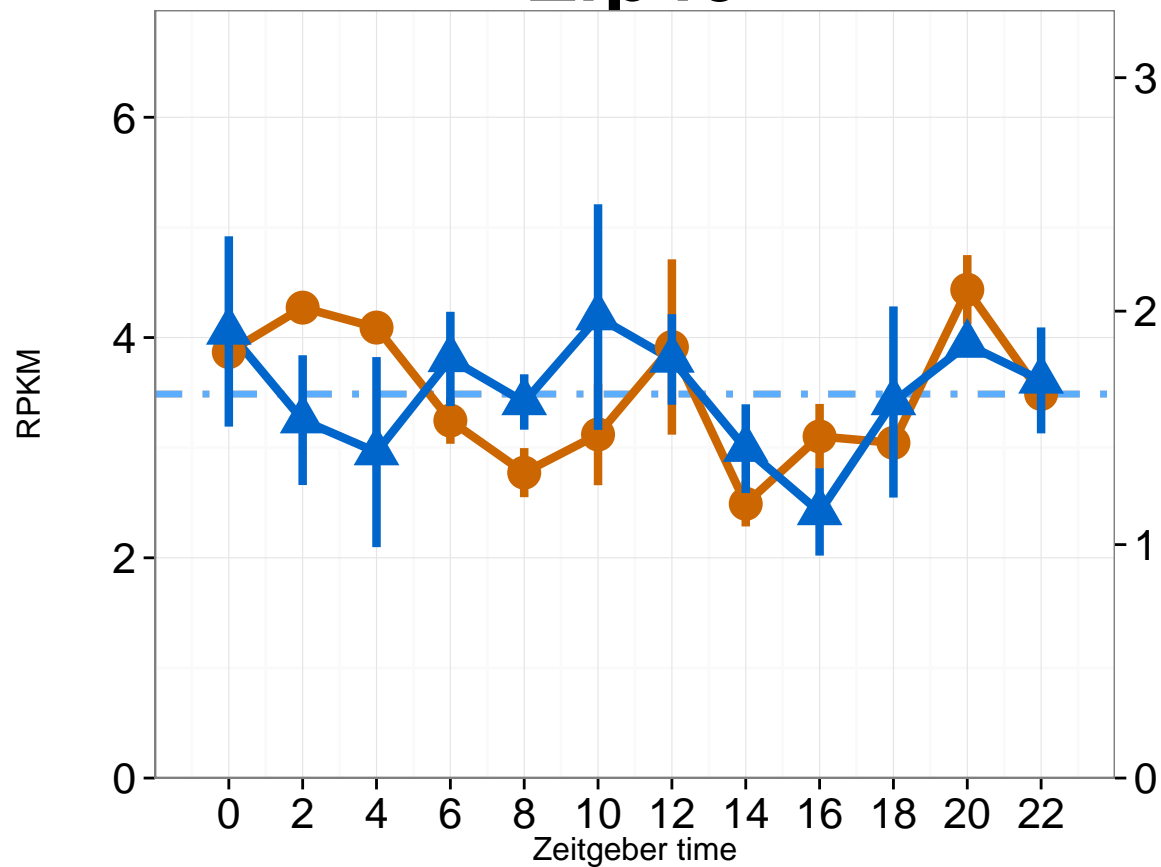

# Zfp40

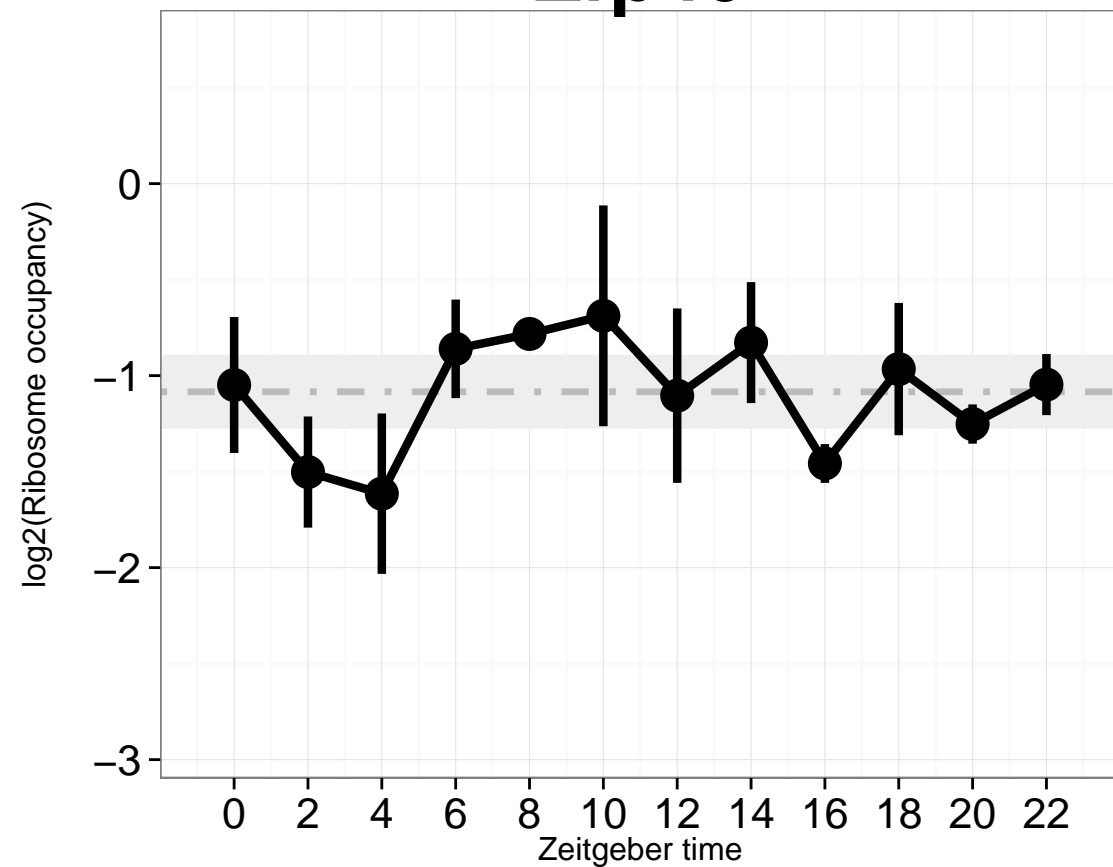

Supplement: Supplementary file 1405 [file 1]

## Osr2

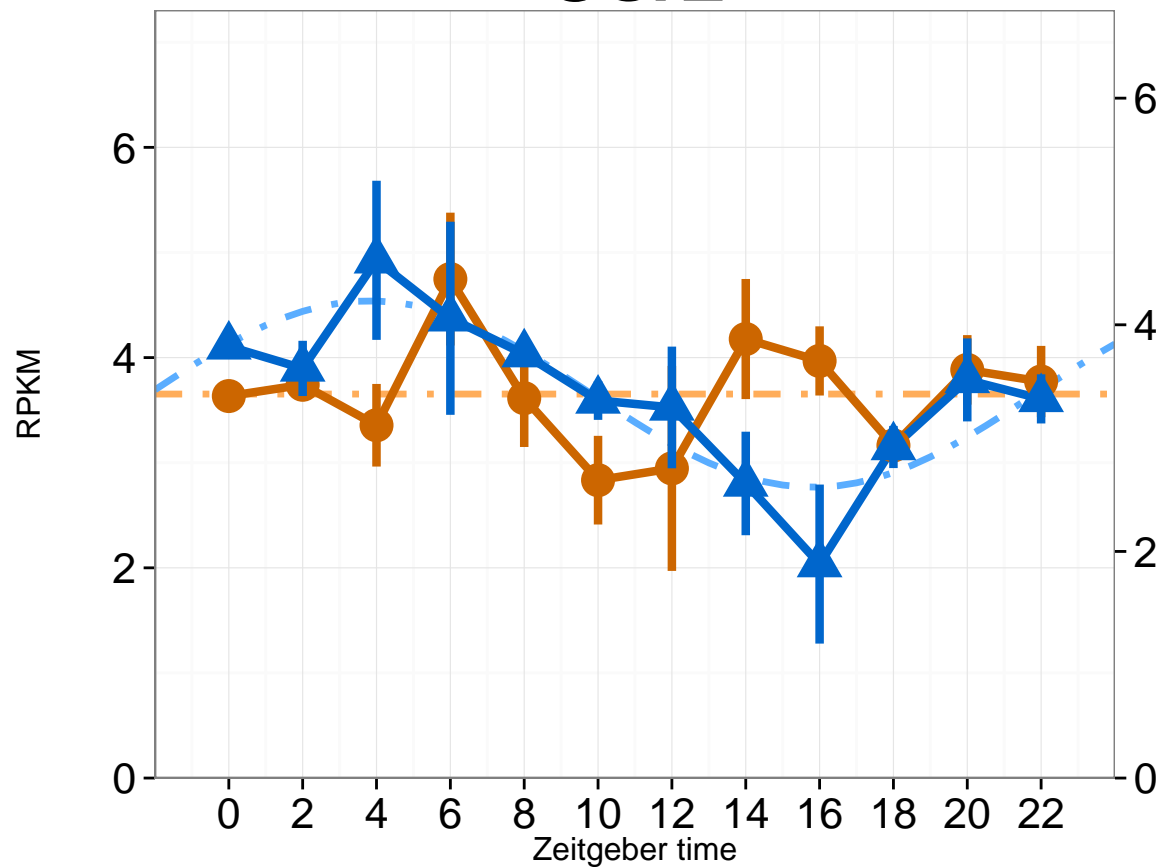

## Osr2

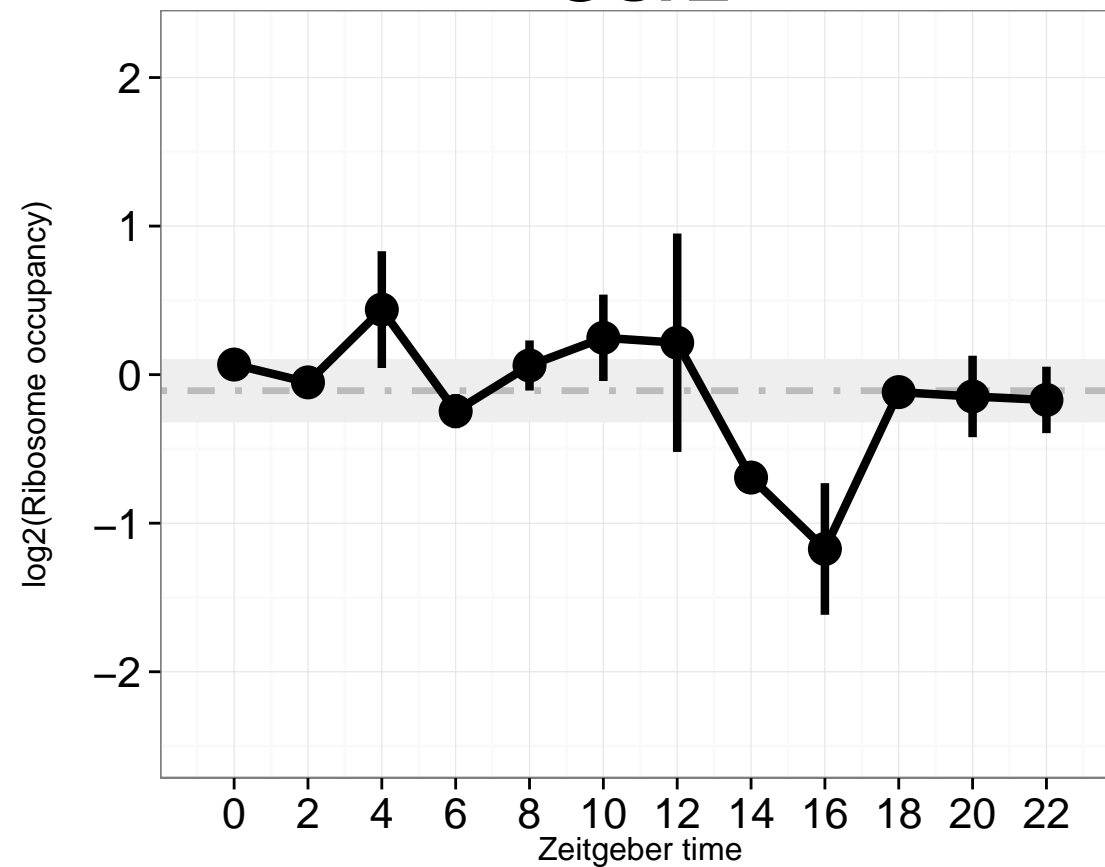

Supplement: Supplementary file 1406 [file 1]
