# Supplementary material (part 15 of 133)
Source: publisher figshare collection journal article supplement (https://springernature.figshare.com/articles/dataset/_/4903193)

## Ndc1

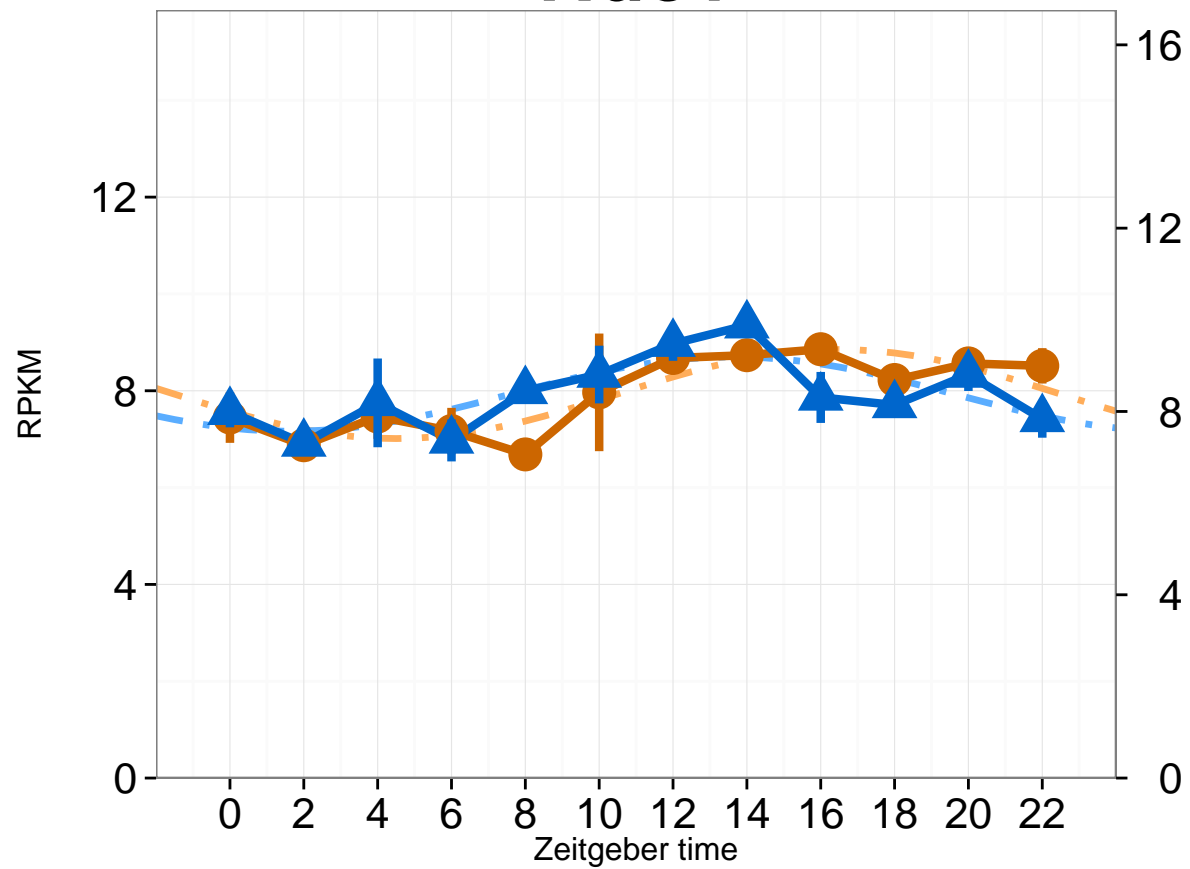

## Ndc1

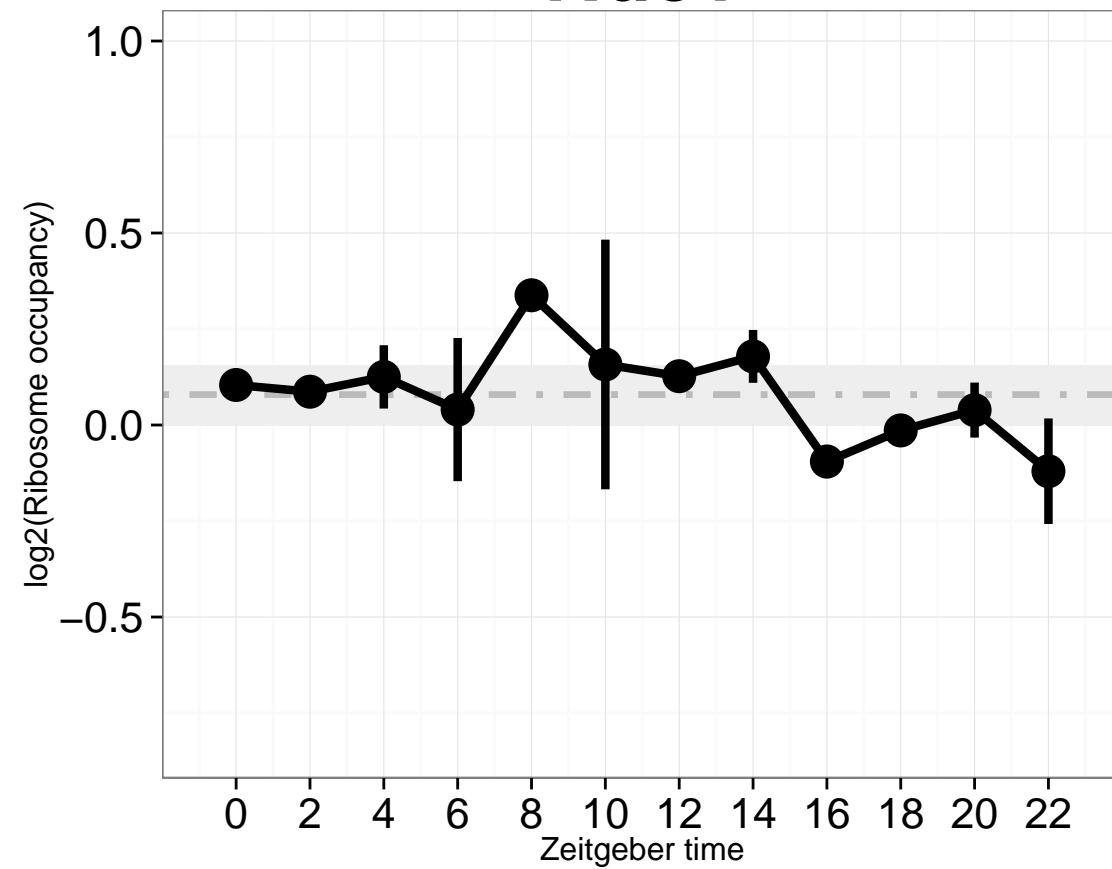

Supplement: Supplementary file 1407 [file 1]

## Mal2

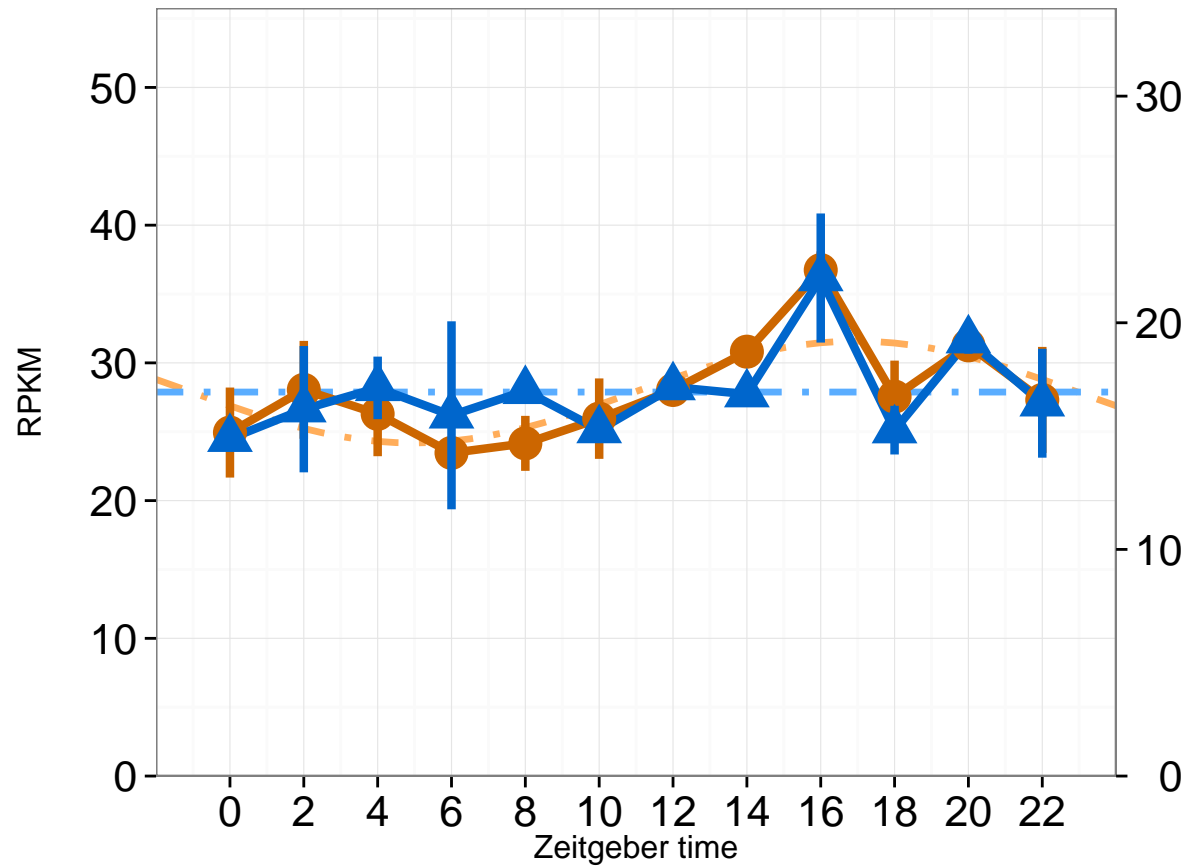

## Mal2

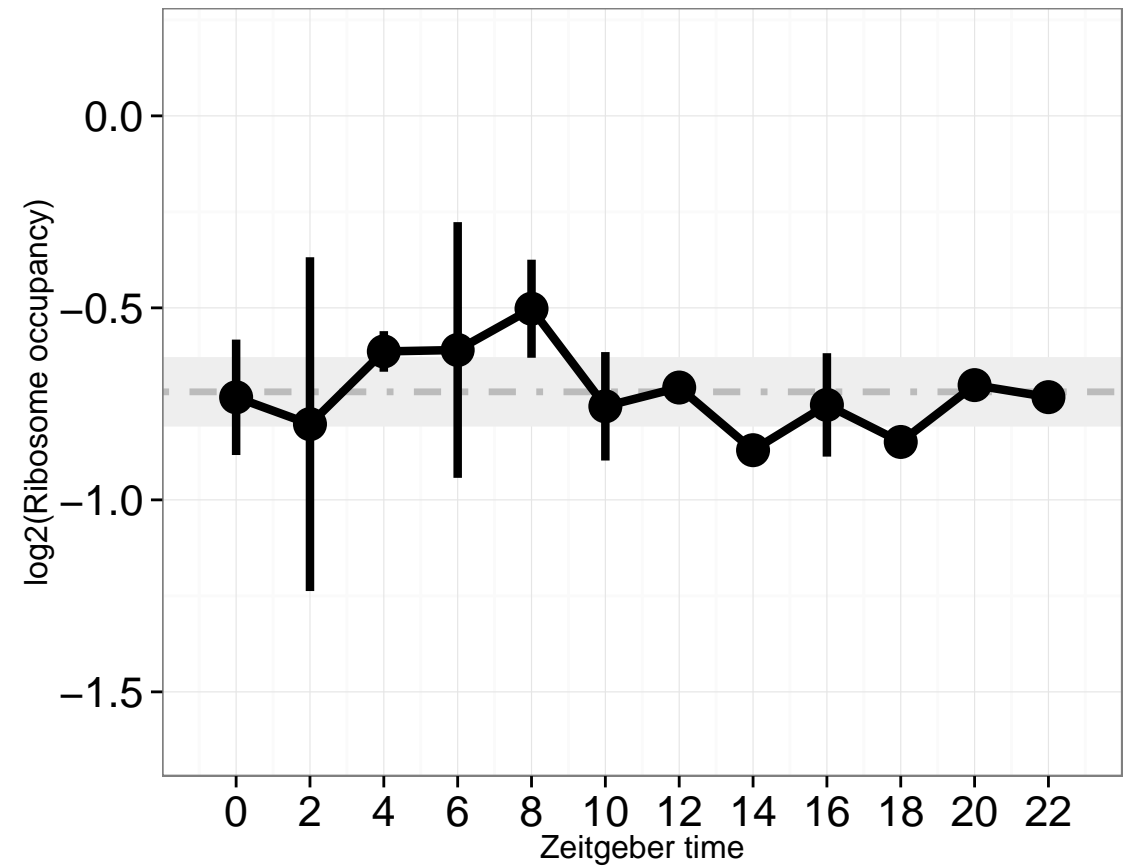

Supplement: Supplementary file 1408 [file 1]

# Ncoa6

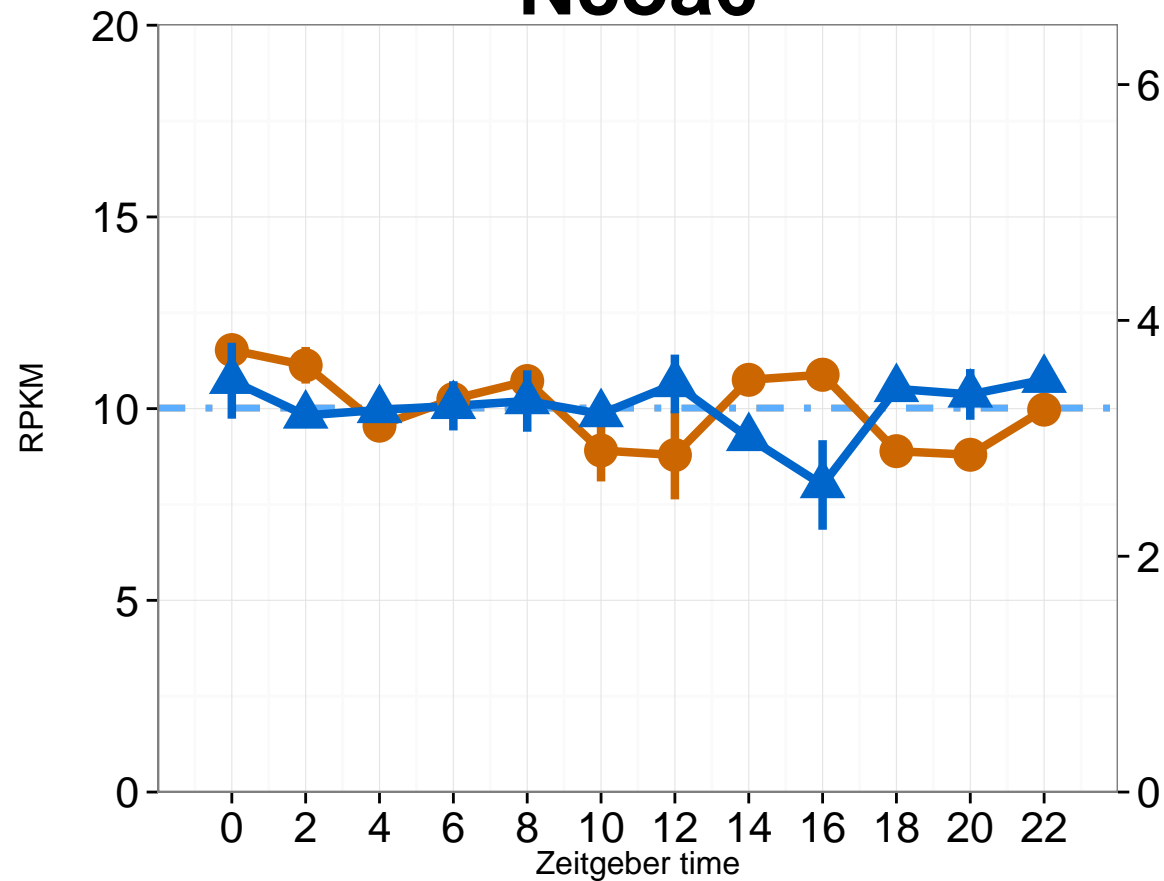

# Ncoa6

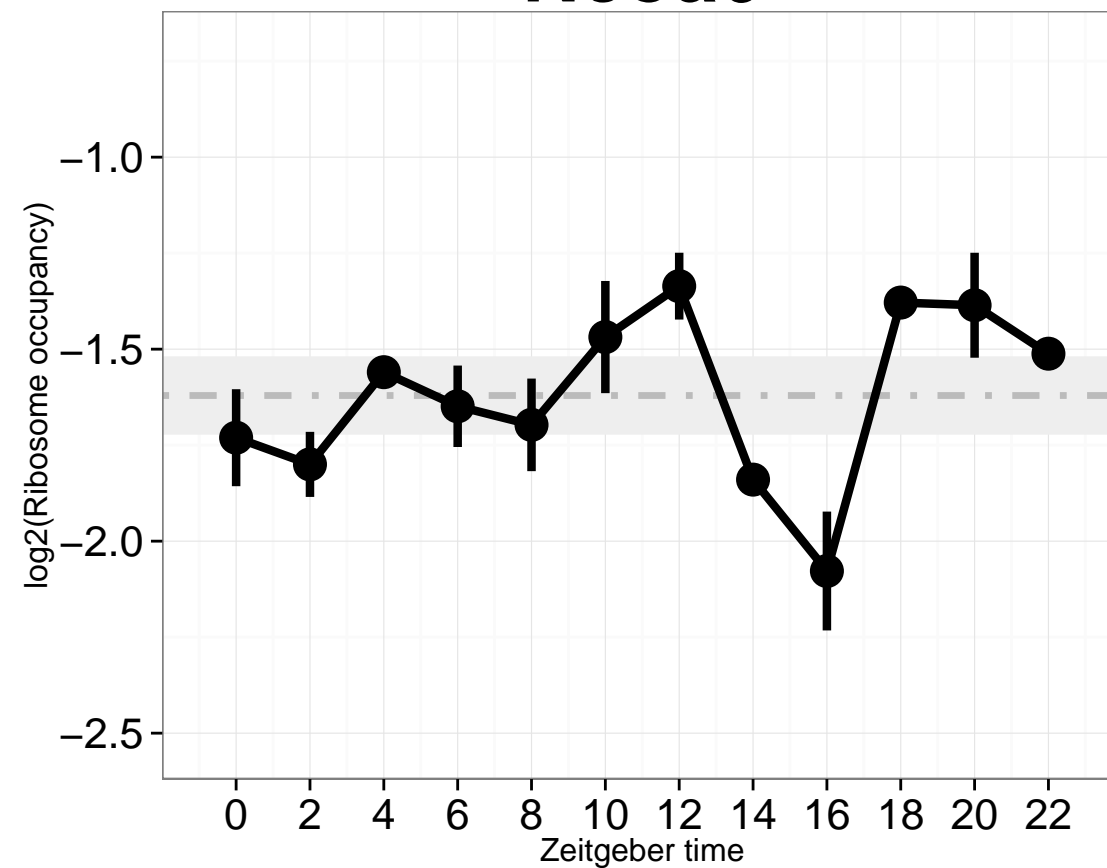

Supplement: Supplementary file 1409 [file 1]

# D630039A03Rik

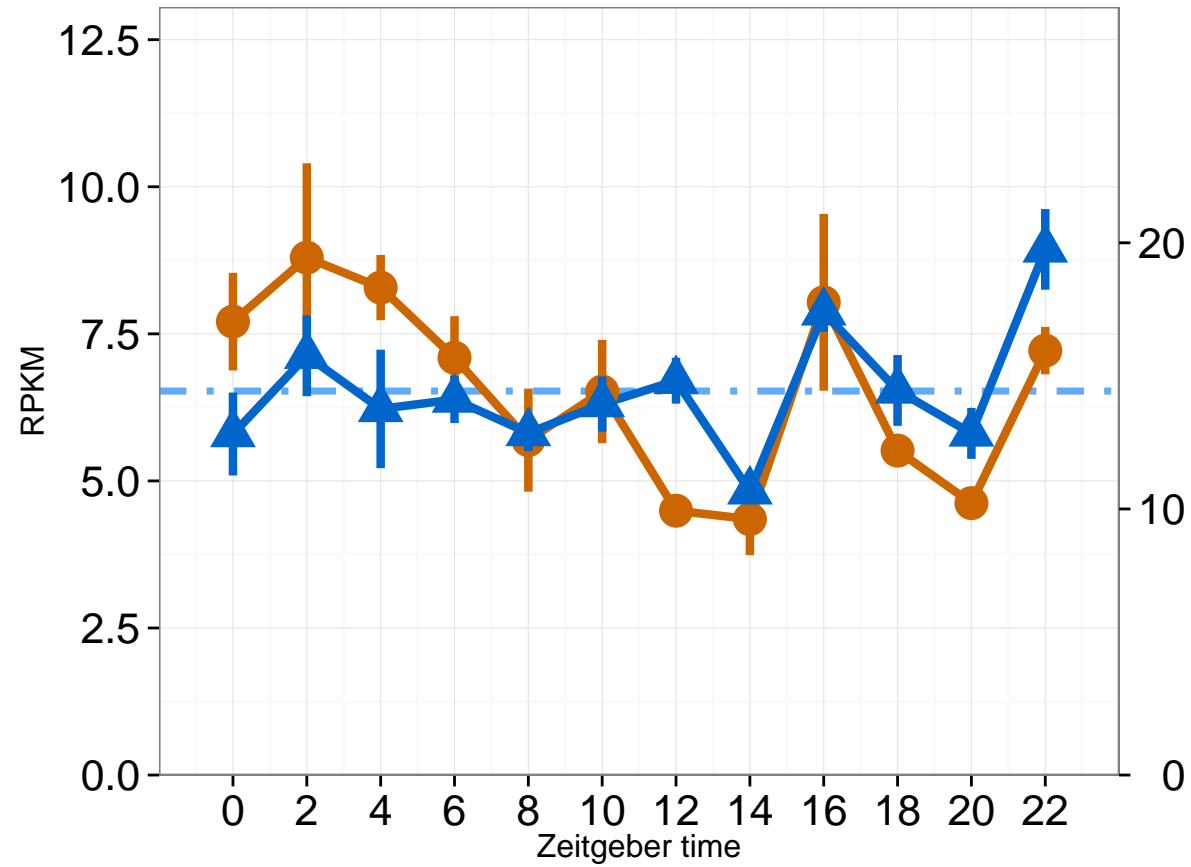

# D630039A03Rik

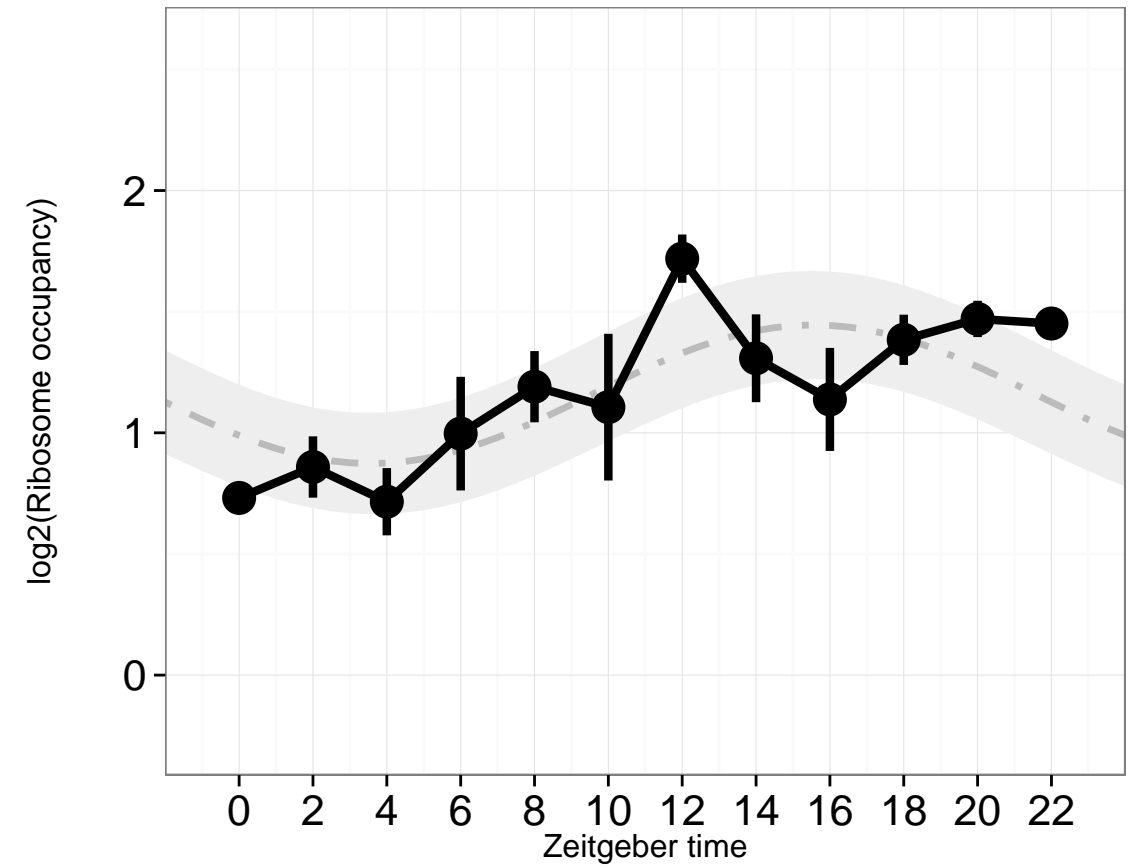

Supplement: Supplementary file 1410 [file 1]

## Cxcl12

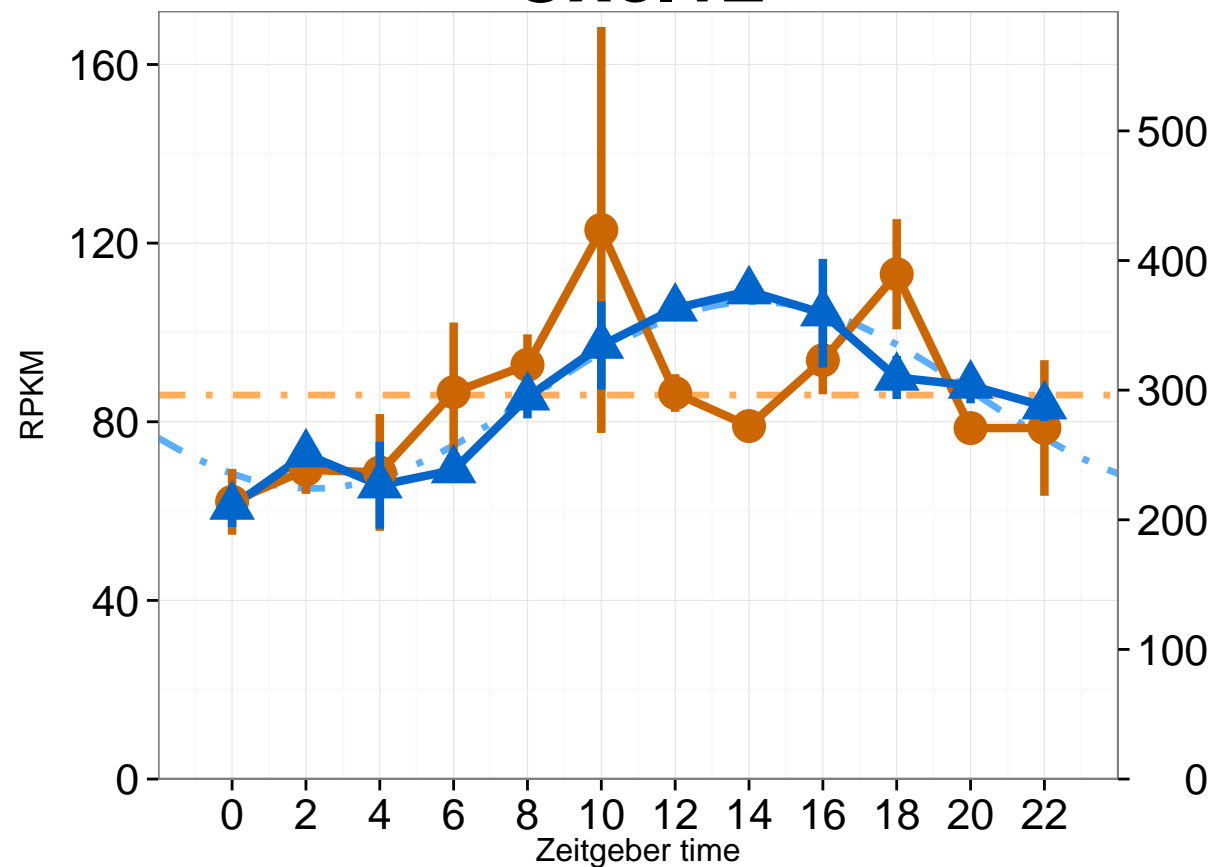

## Cxcl12

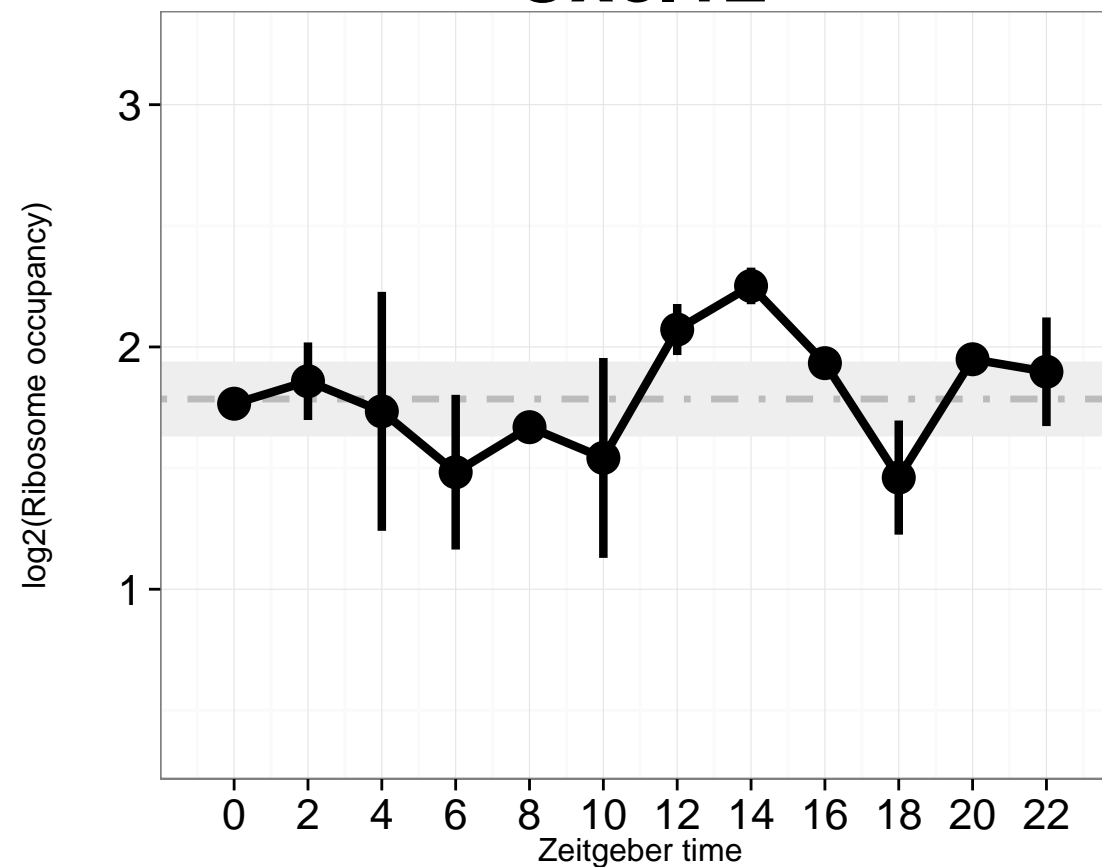

Supplement: Supplementary file 1411 [file 1]

## Fam160b1

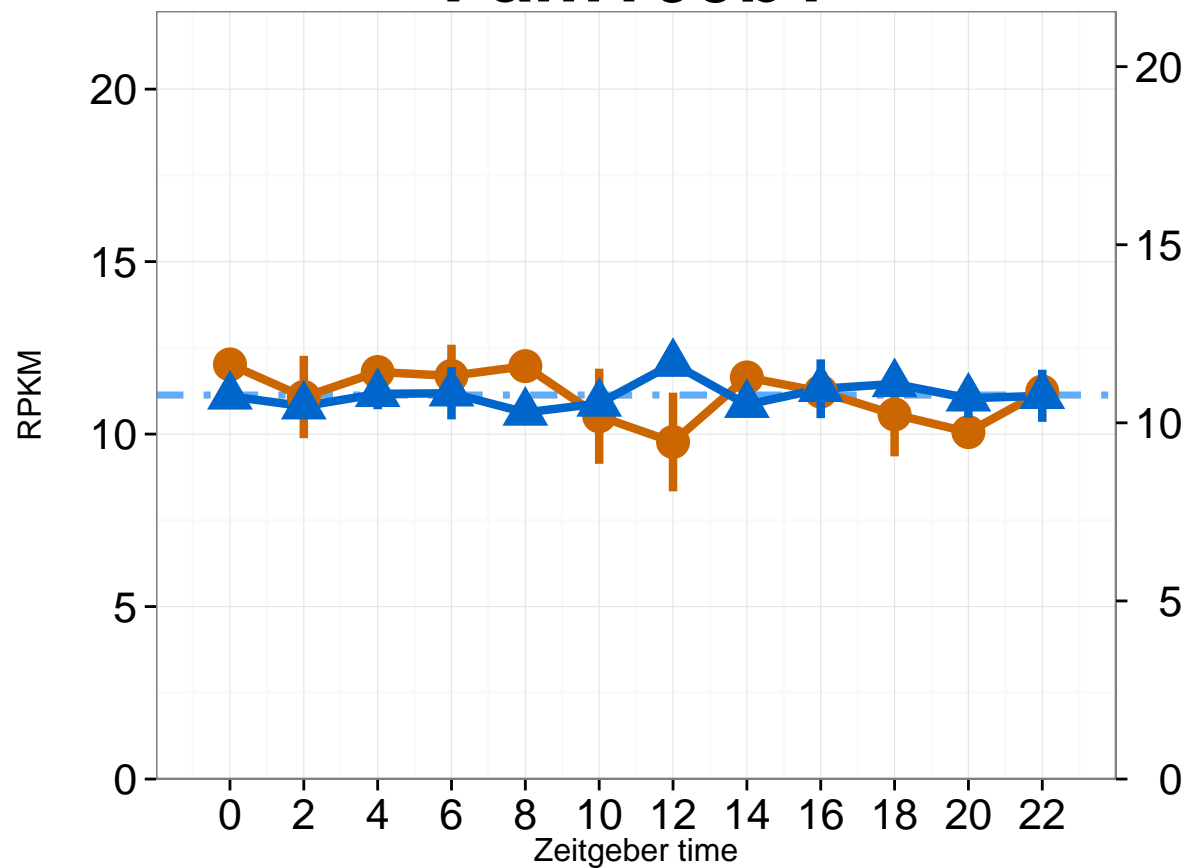

## Fam160b1

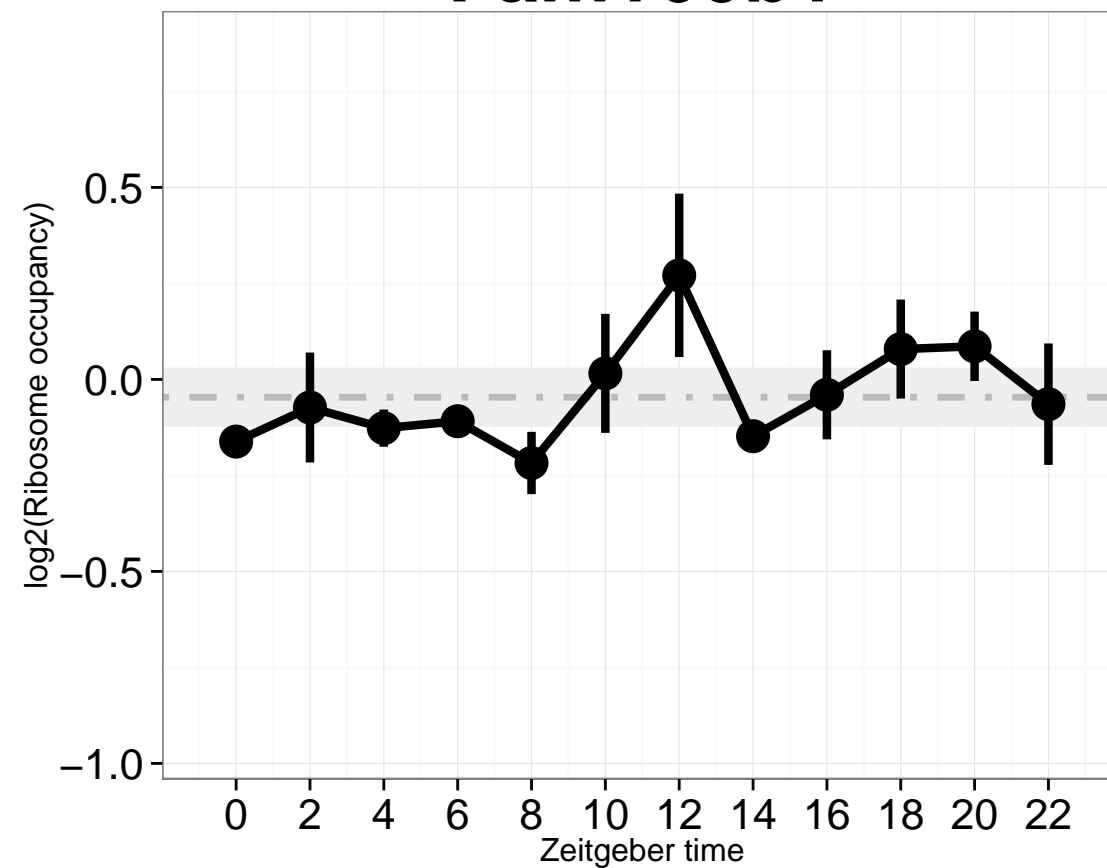

Supplement: Supplementary file 1412 [file 1]

## Sh3tc1

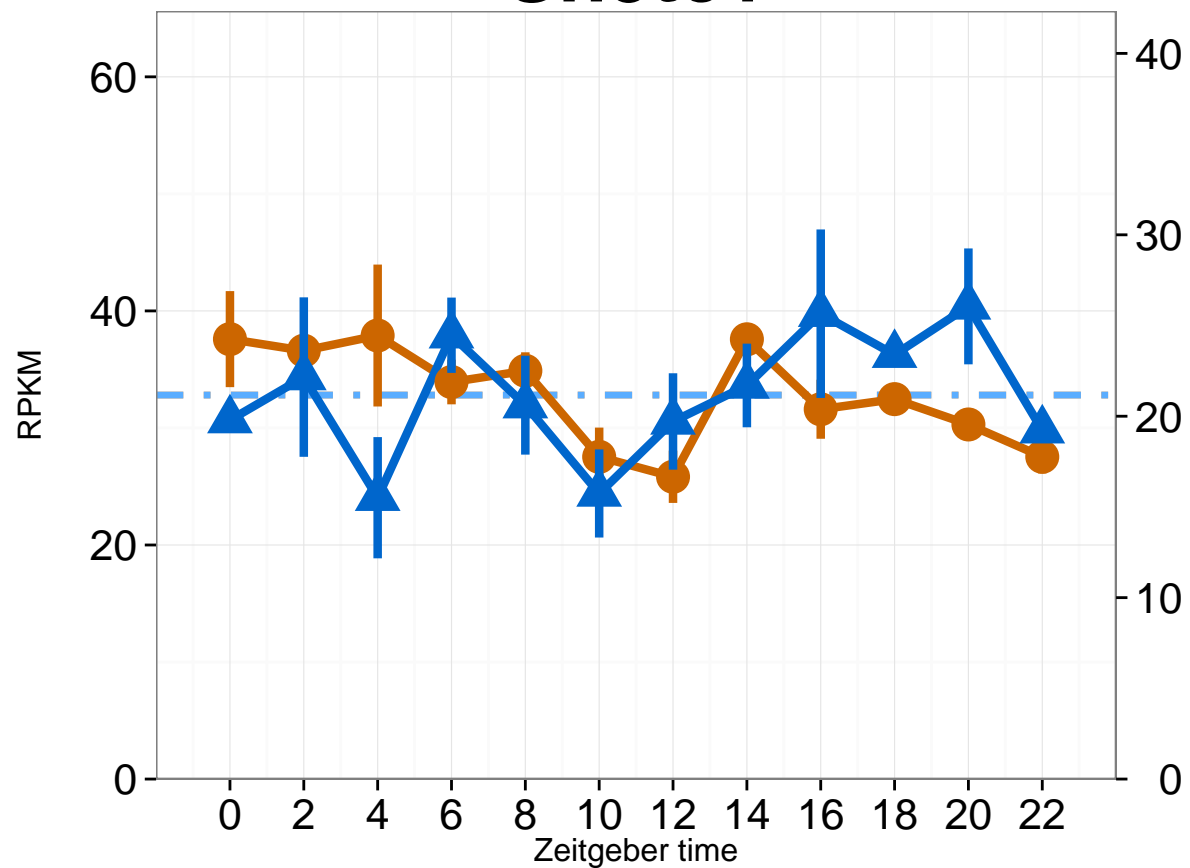

## Sh3tc1

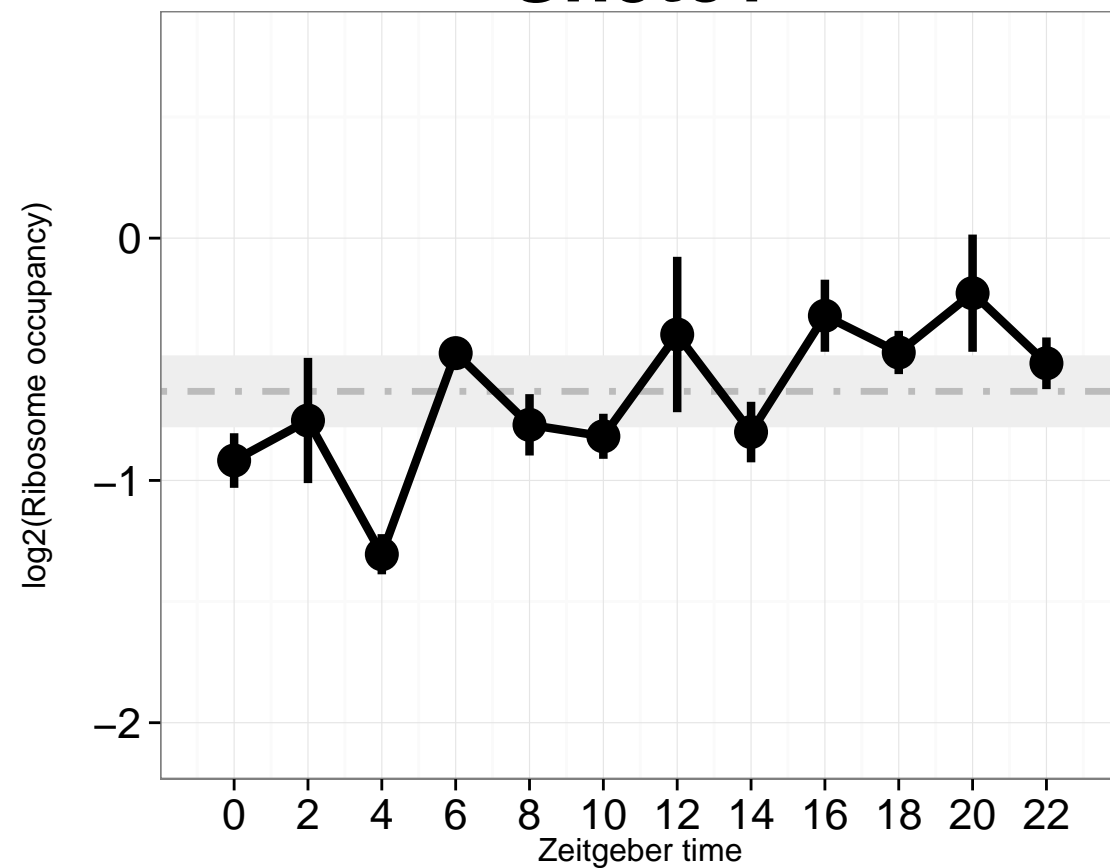

Supplement: Supplementary file 1413 [file 1]

# Trappc6a

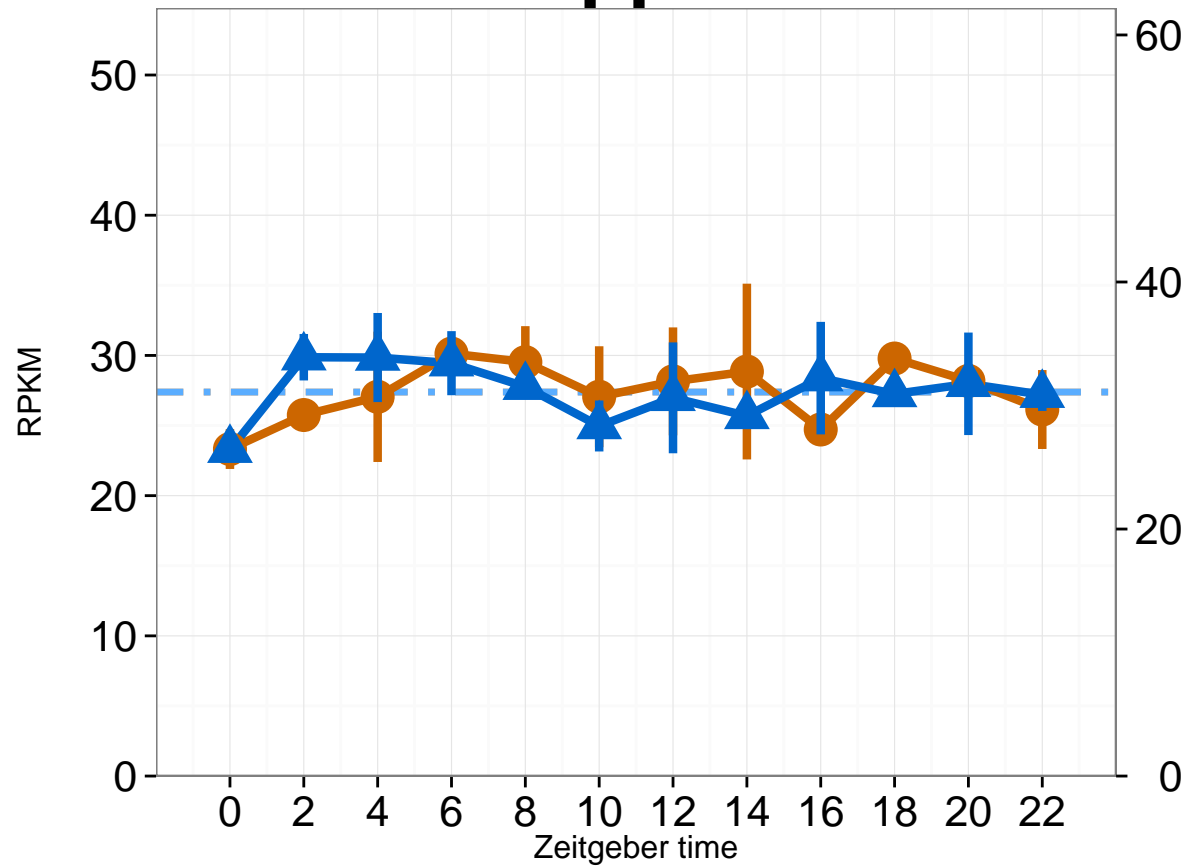

# Trappc6a

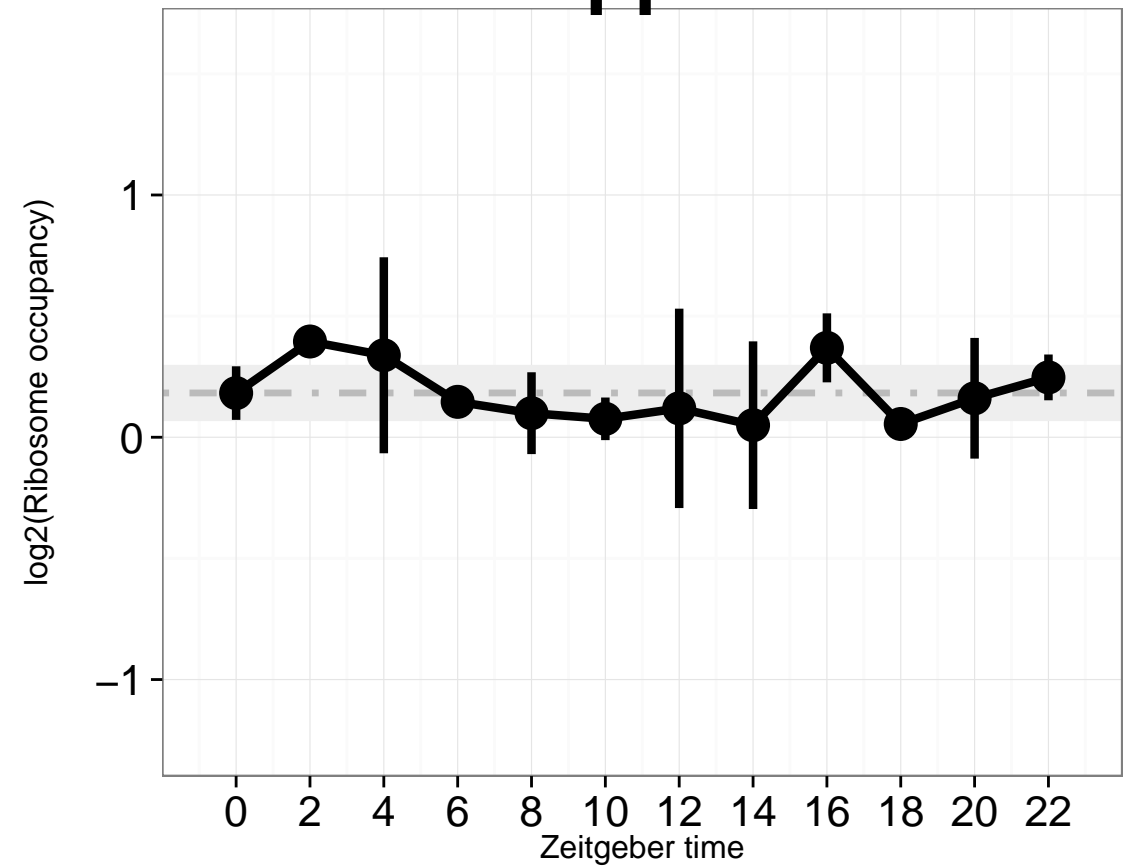

Supplement: Supplementary file 1414 [file 1]

## Itih5

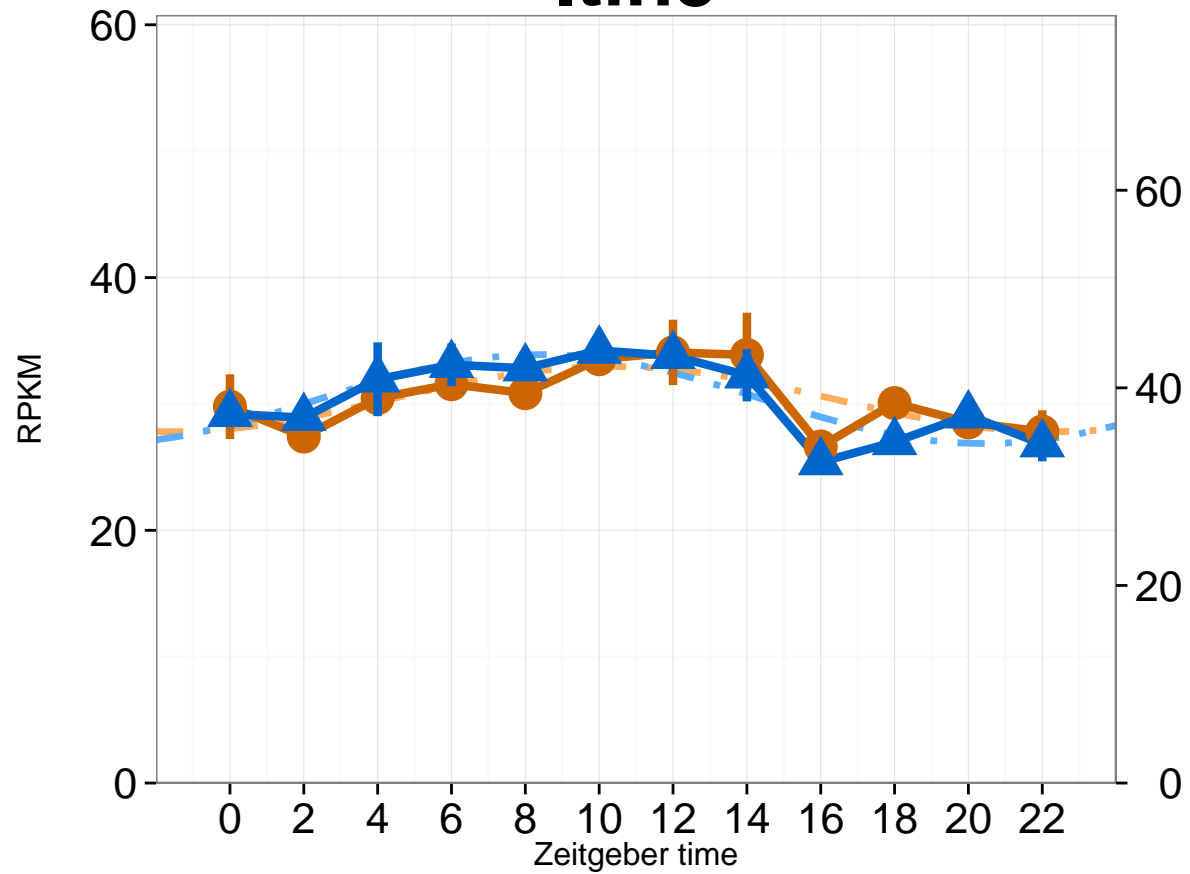

## Itih5

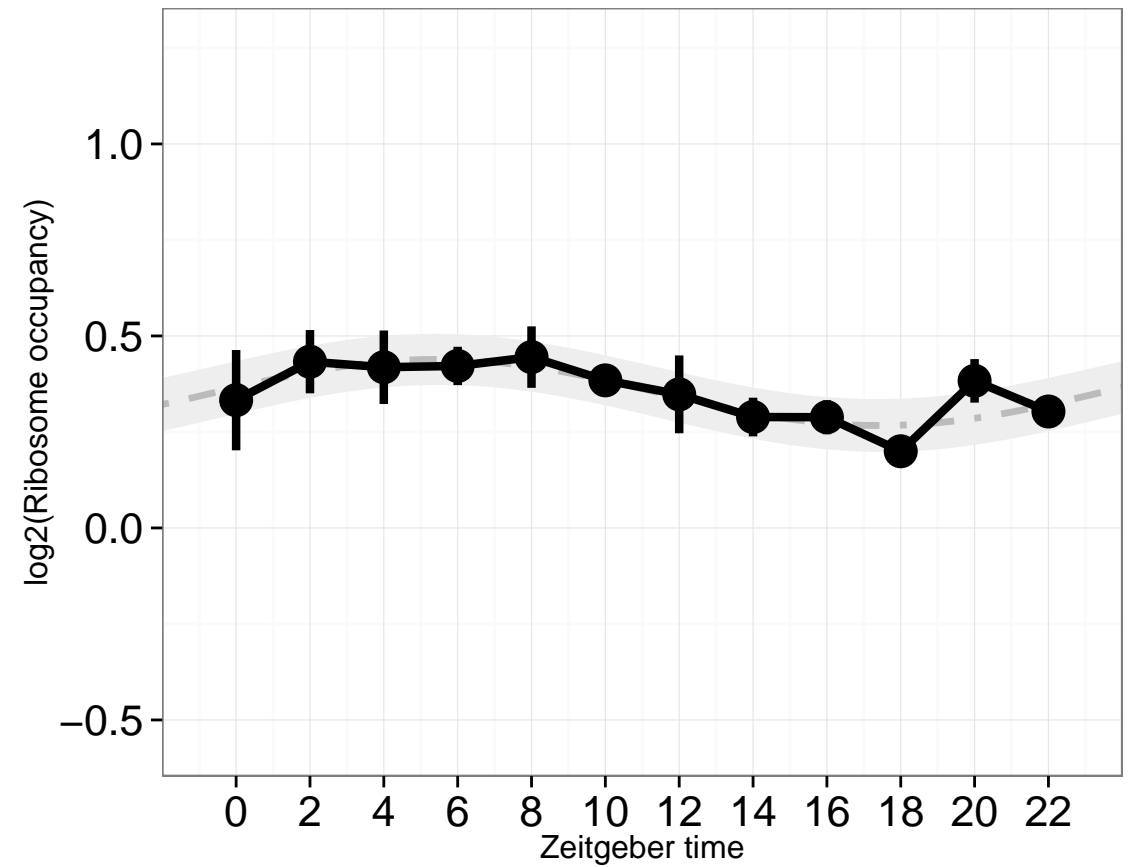

Supplement: Supplementary file 1415 [file 1]

# Prkar1b

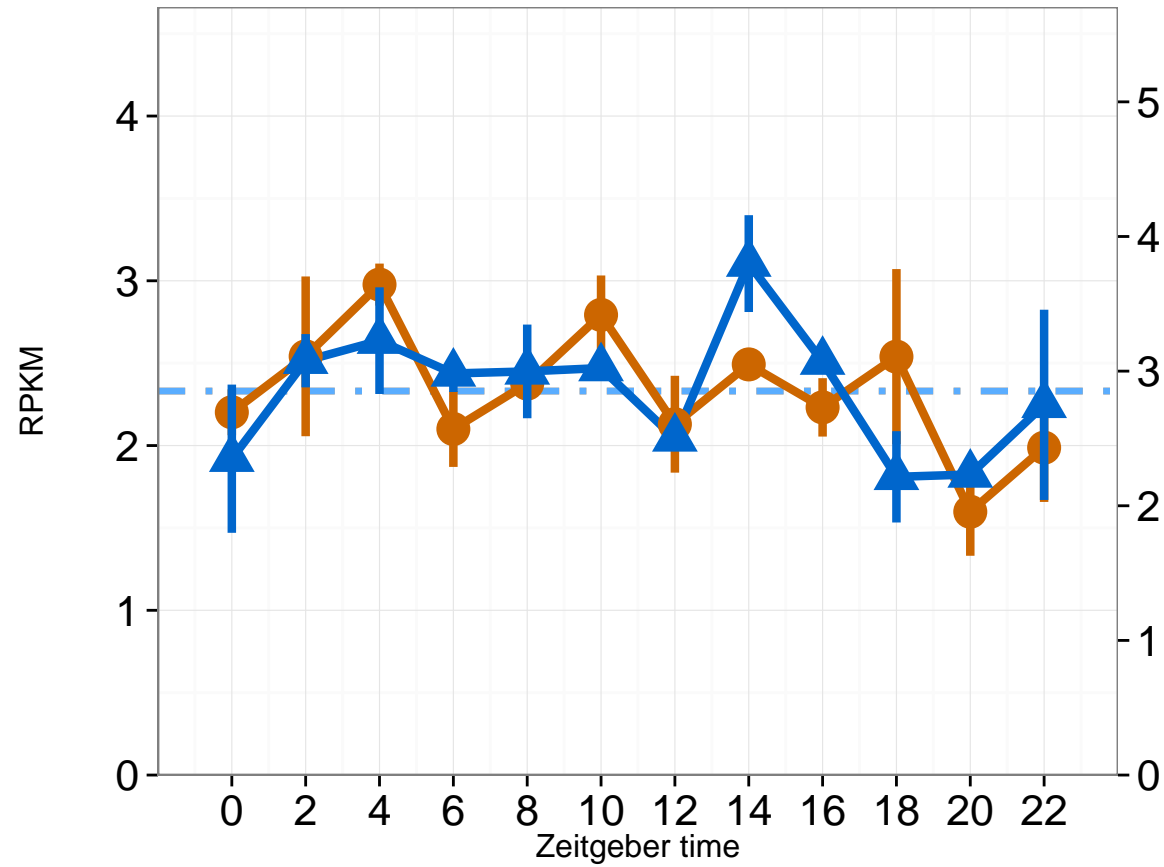

# Prkar1b

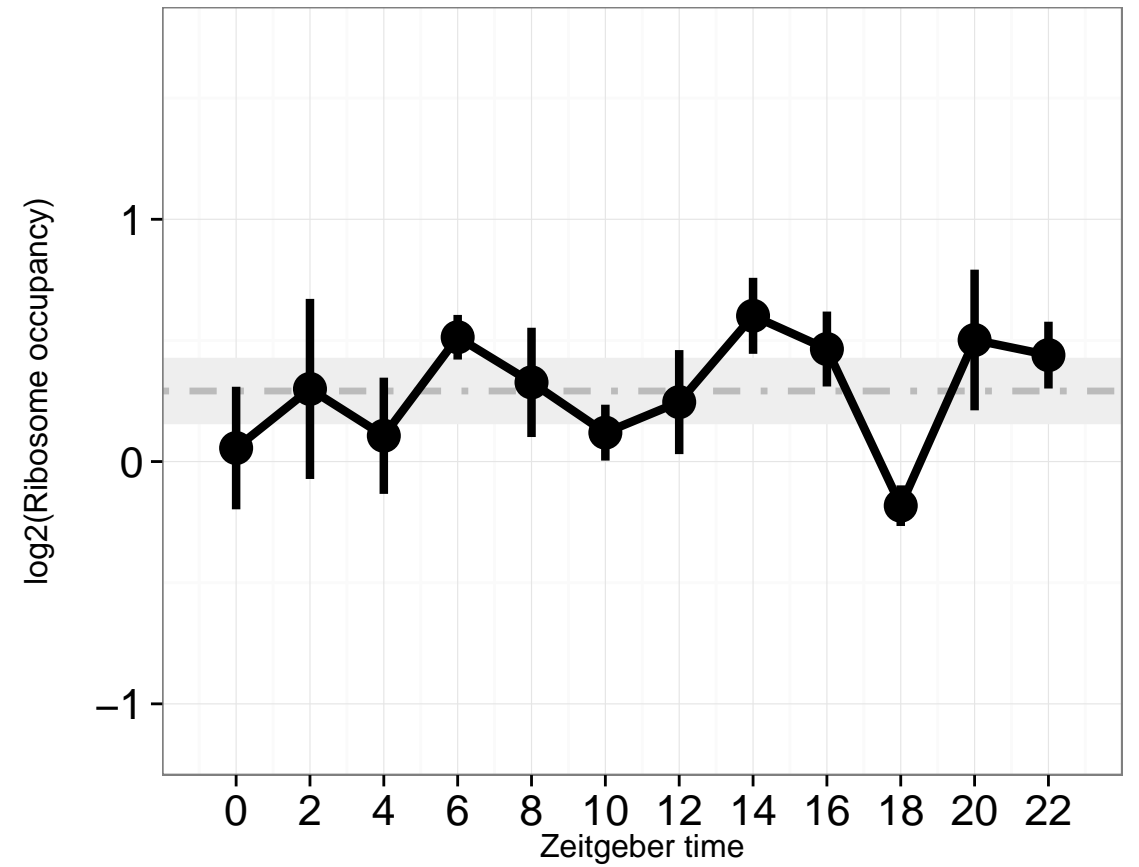

Supplement: Supplementary file 1416 [file 1]

# Atp5s

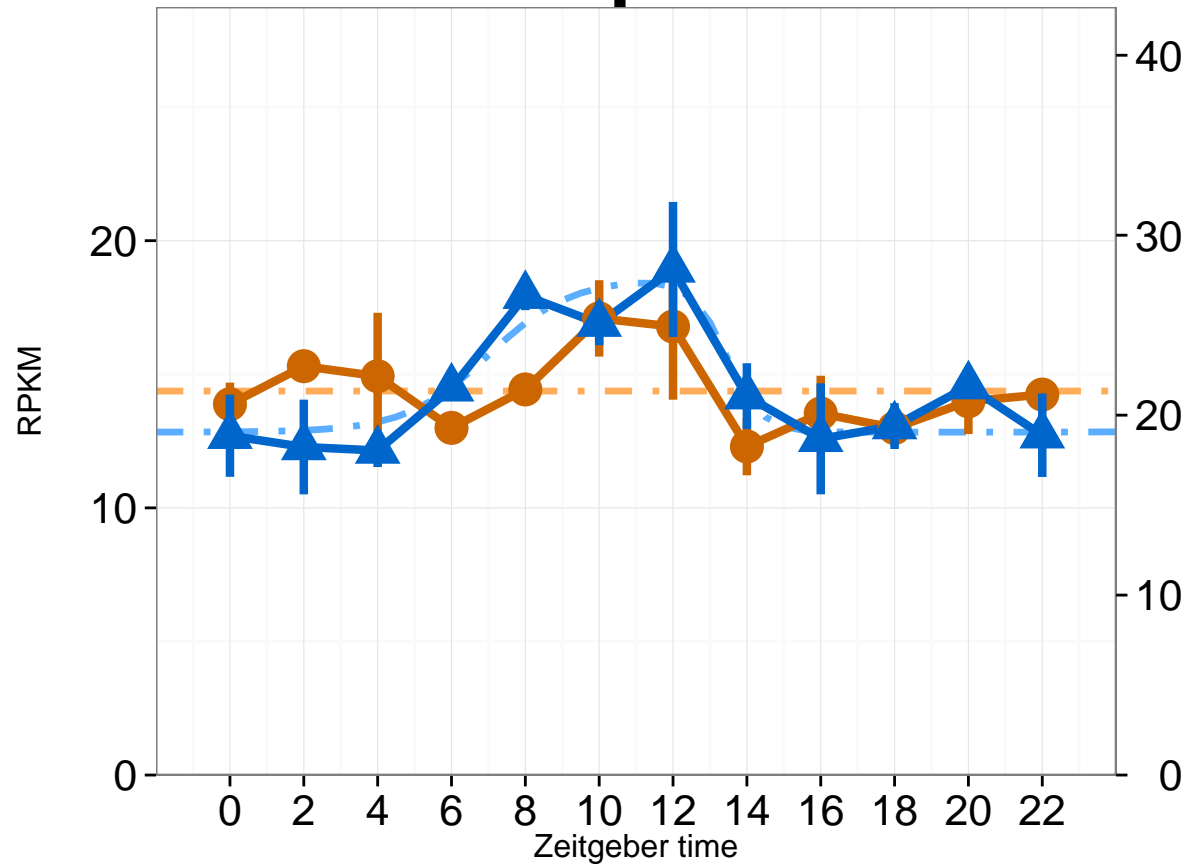

# Atp5s

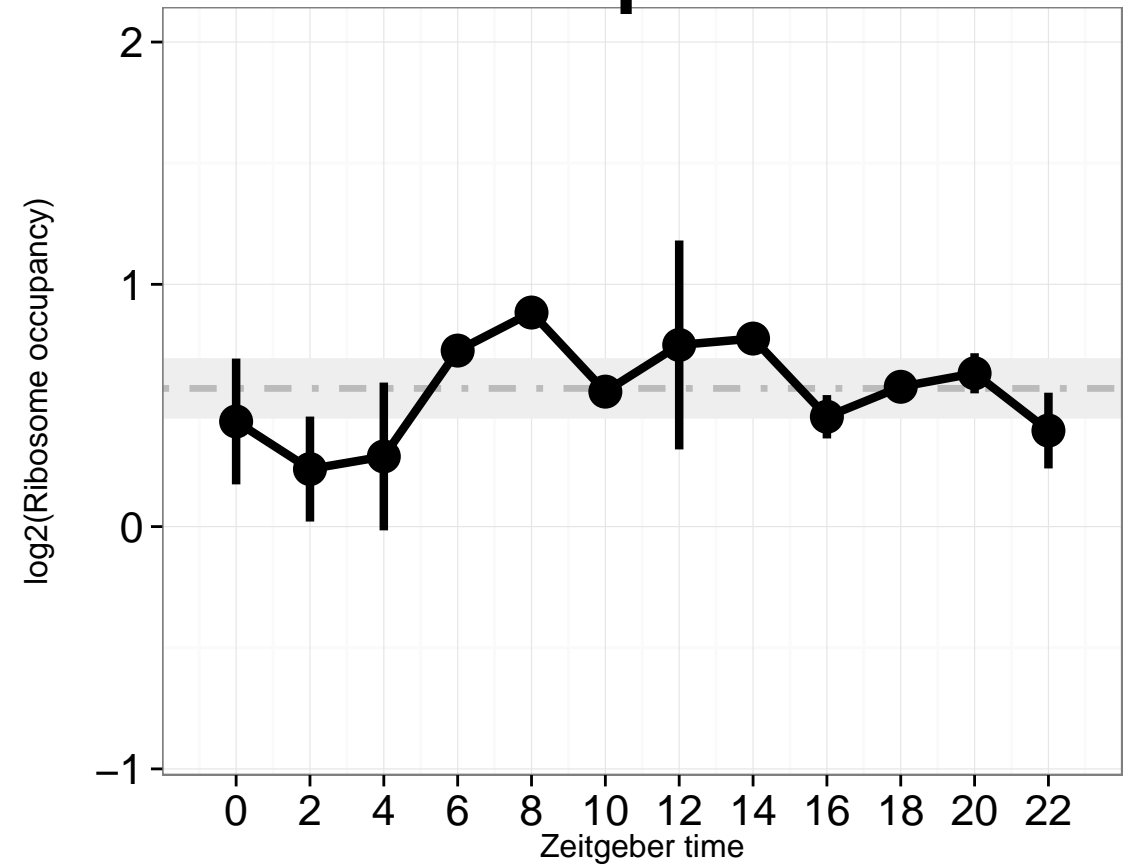

Supplement: Supplementary file 1417 [file 1]

## Sla

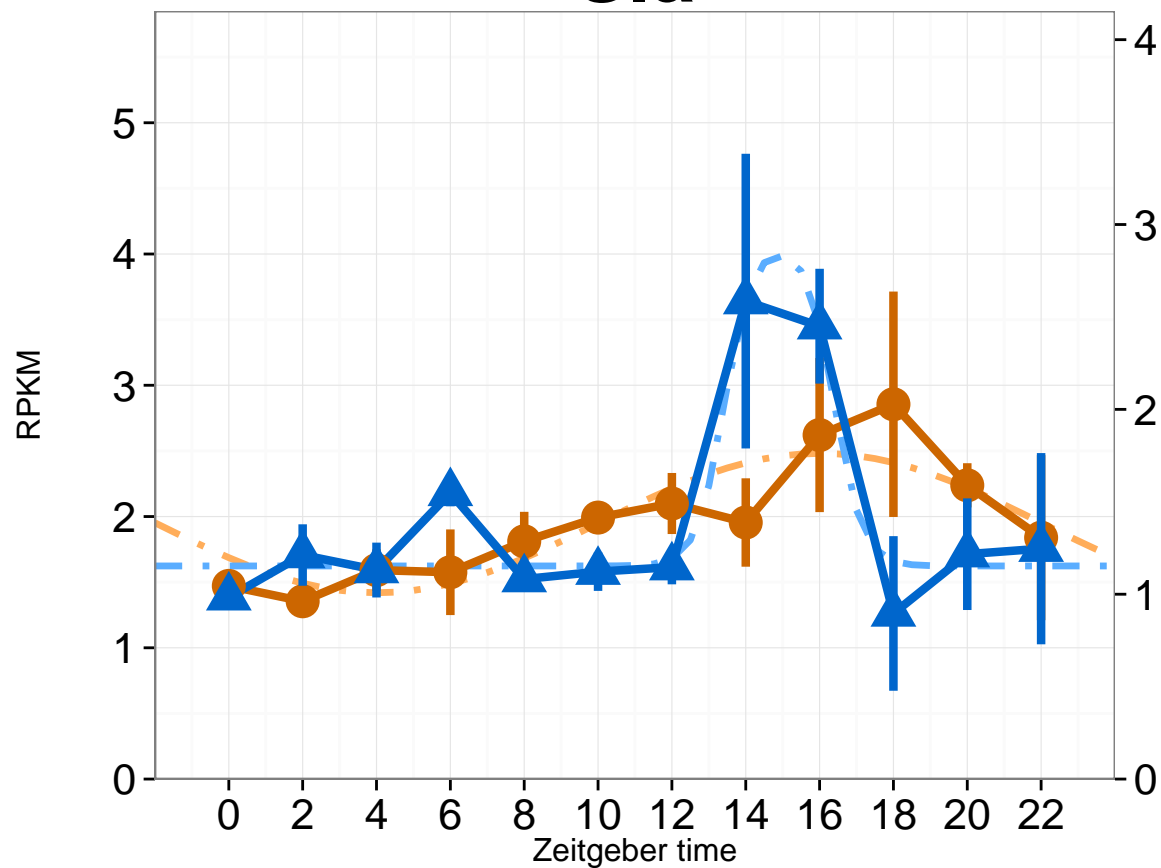

## Sla

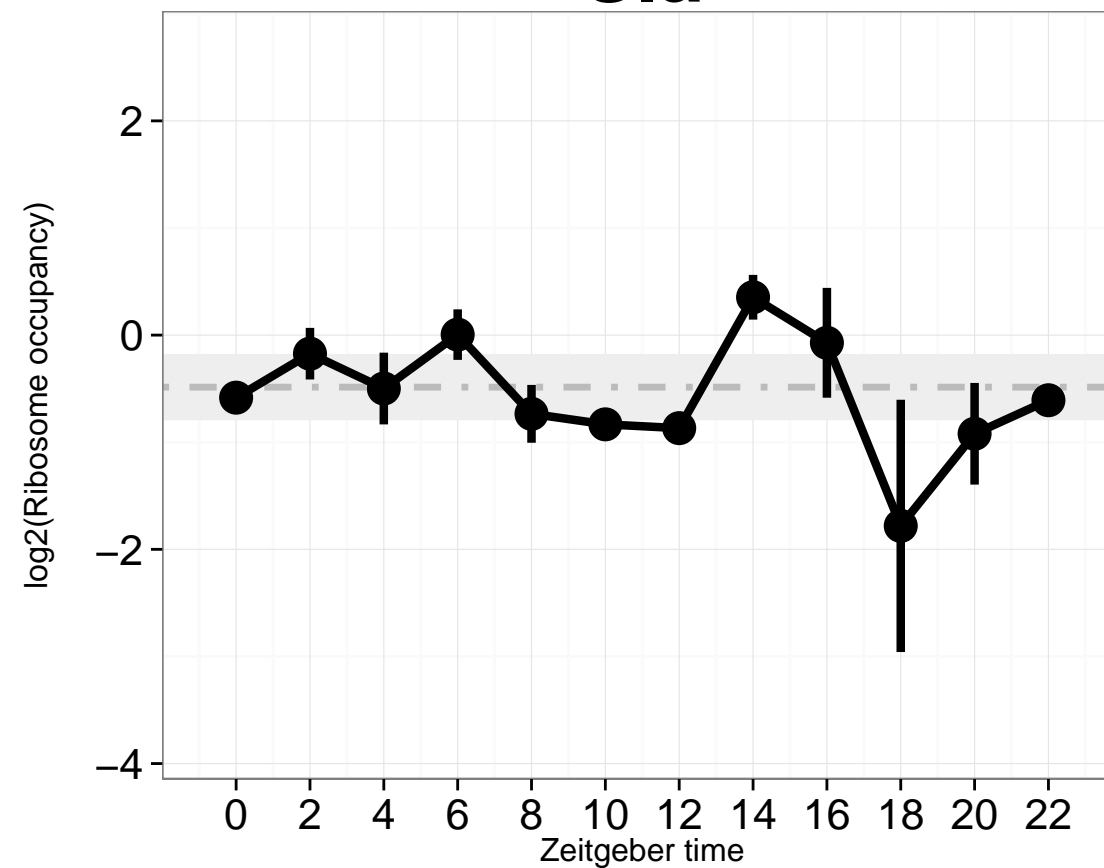

Supplement: Supplementary file 1418 [file 1]

# Ces2c

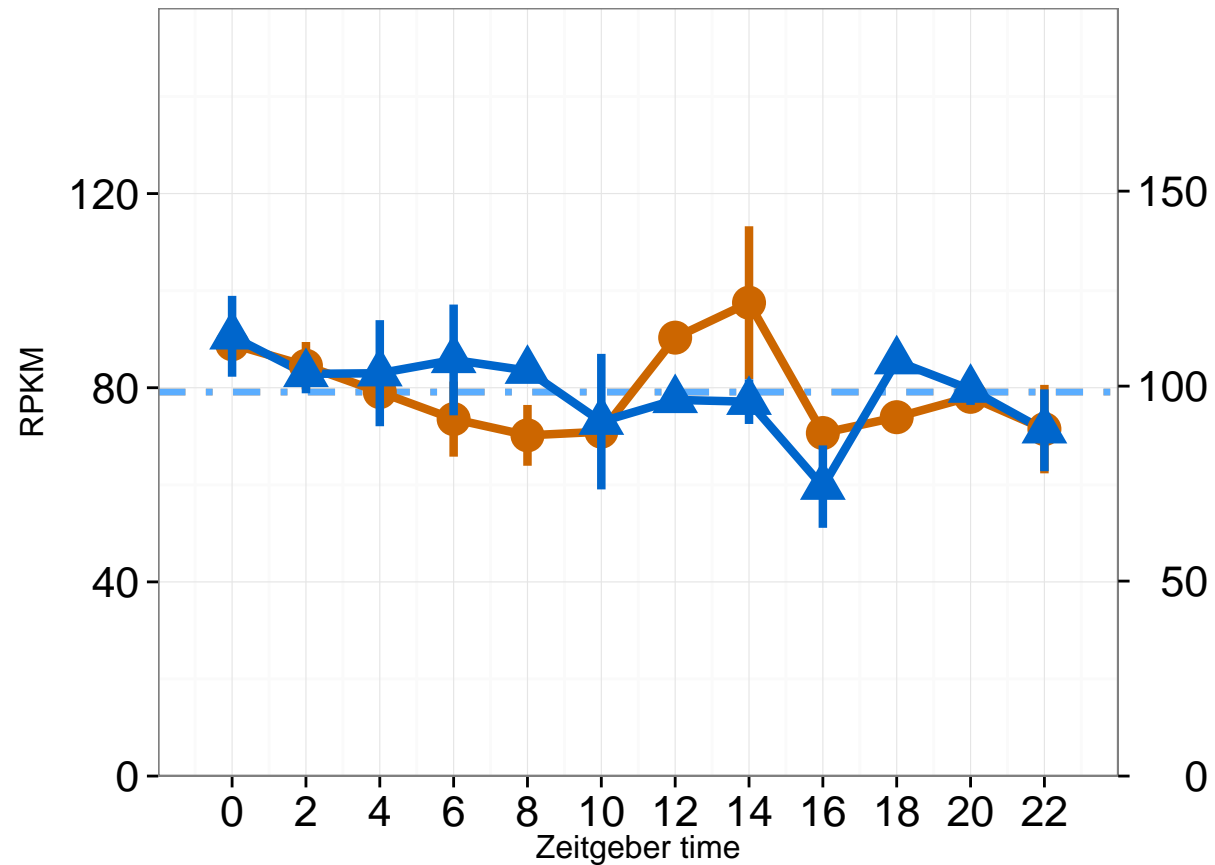

# Ces2c

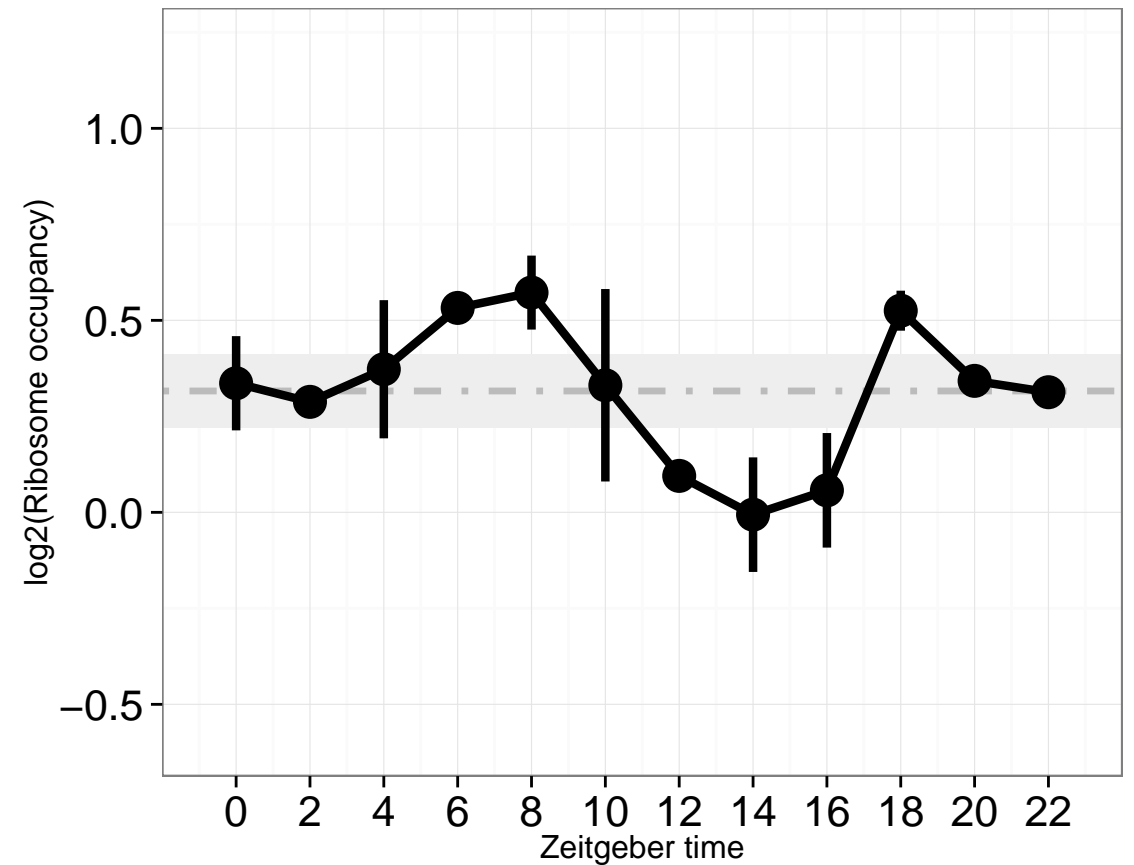

Supplement: Supplementary file 1419 [file 1]

## Snx5

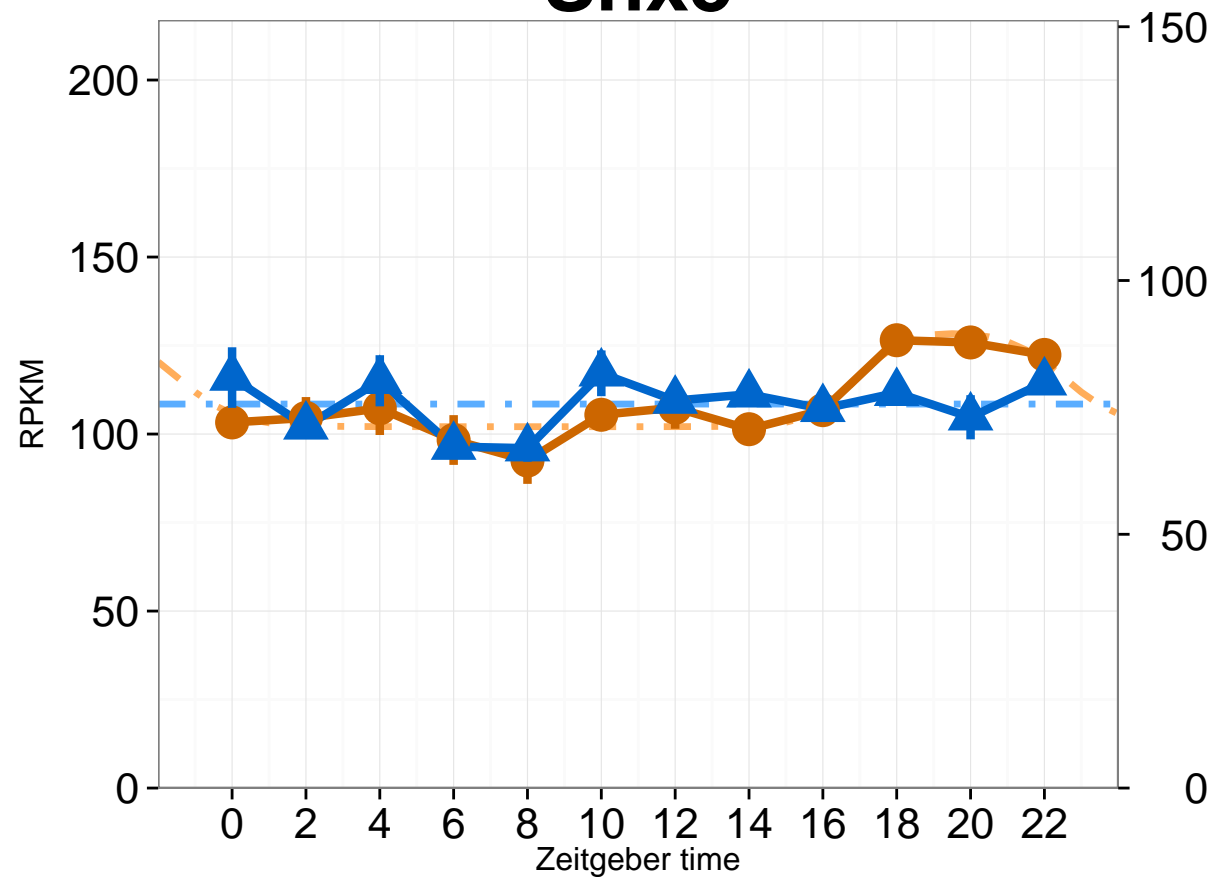

## Snx5

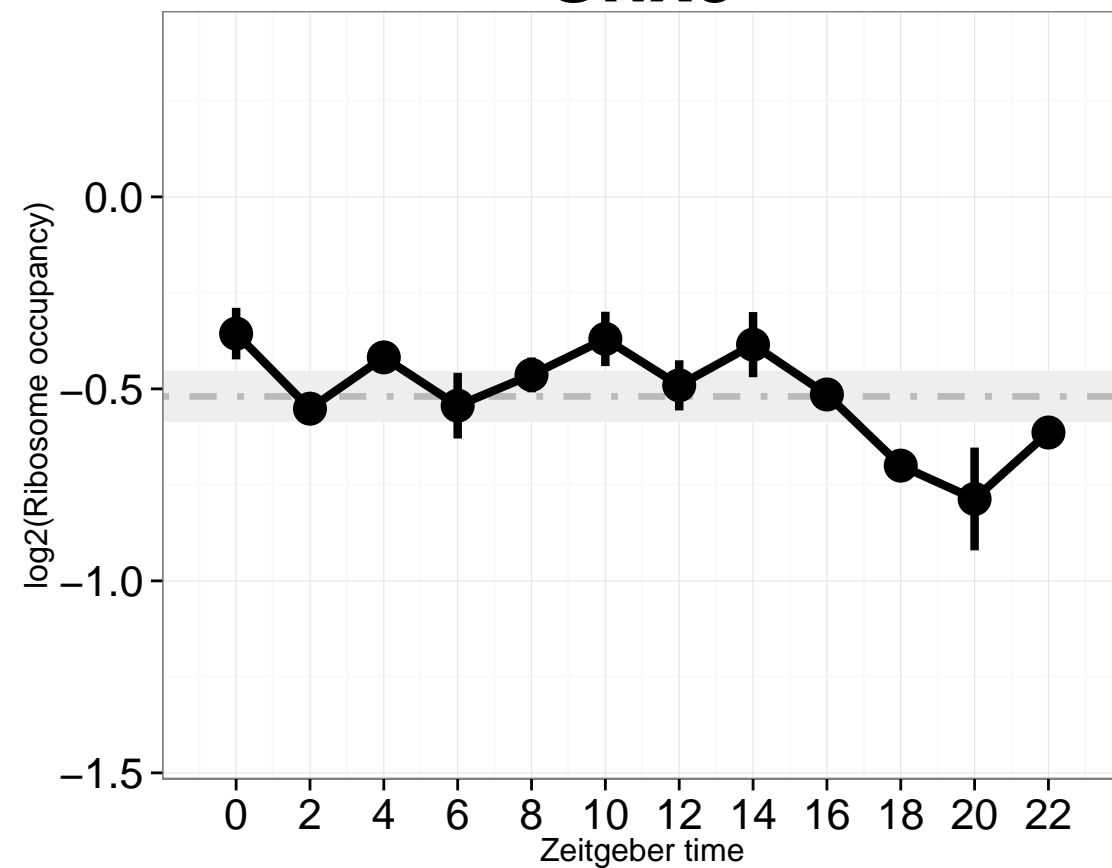

Supplement: Supplementary file 1420 [file 1]

# Zfp516

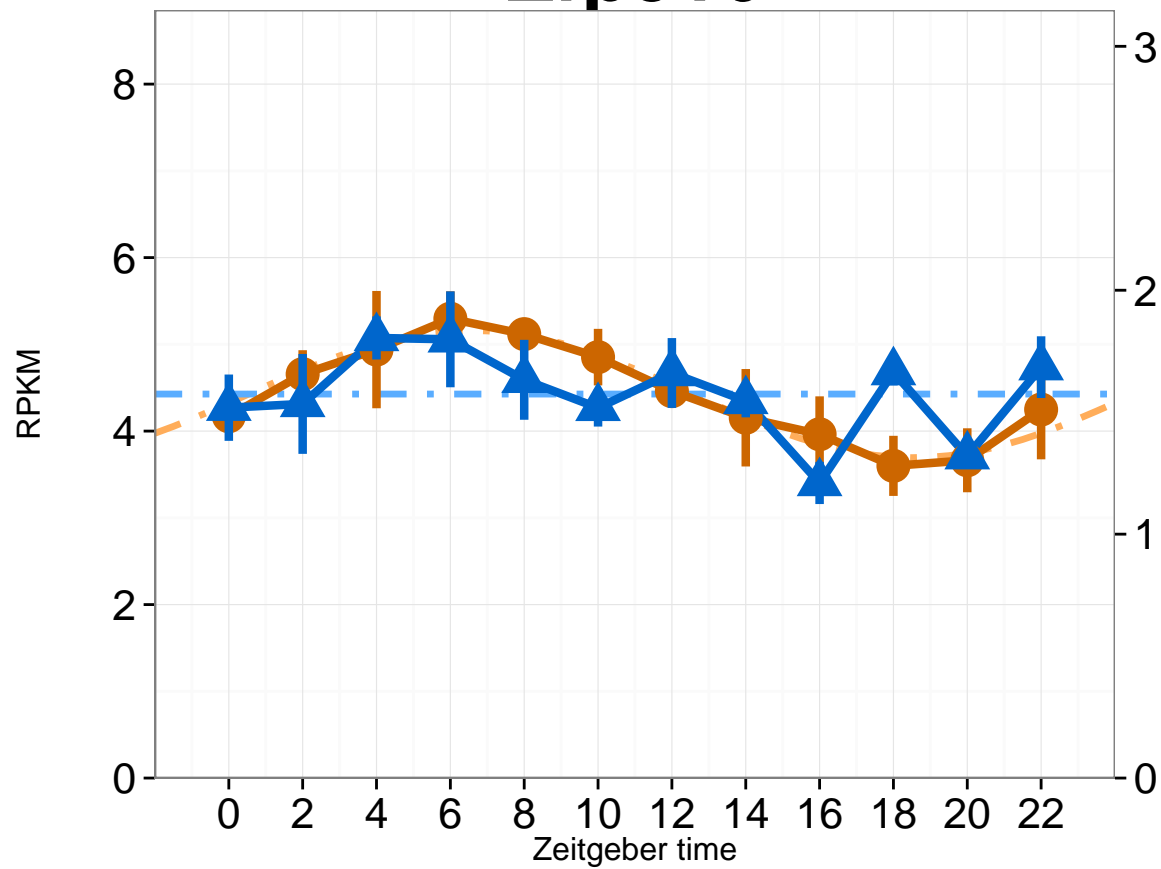

# Zfp516

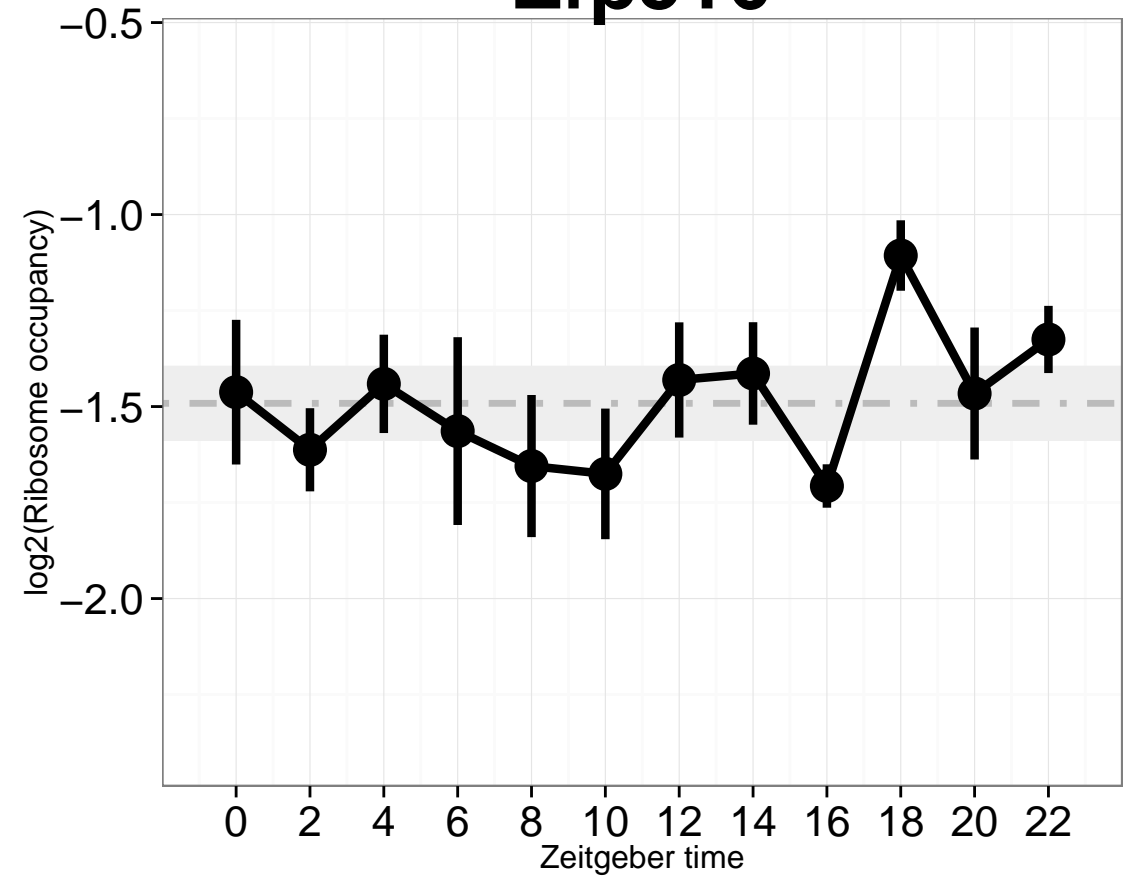

Supplement: Supplementary file 1421 [file 1]

## Dmpk

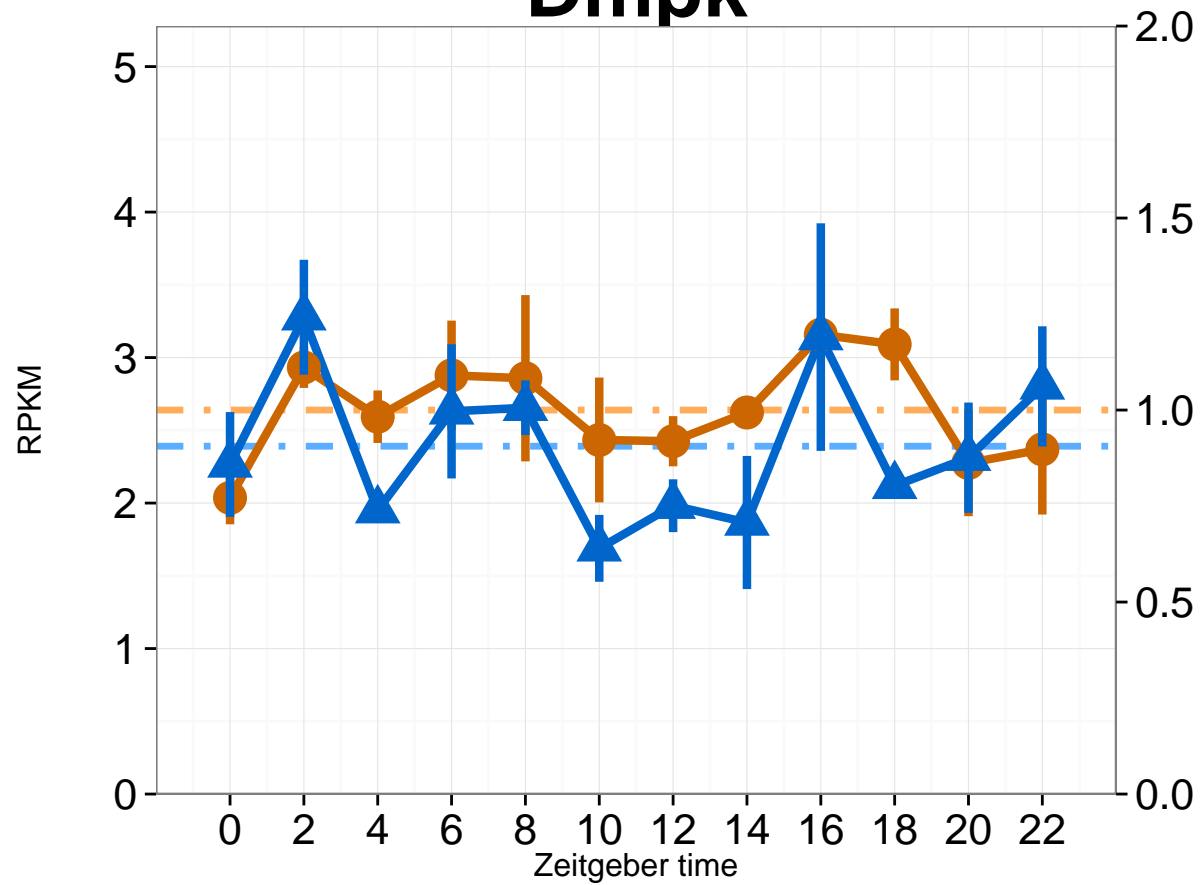

## Dmpk

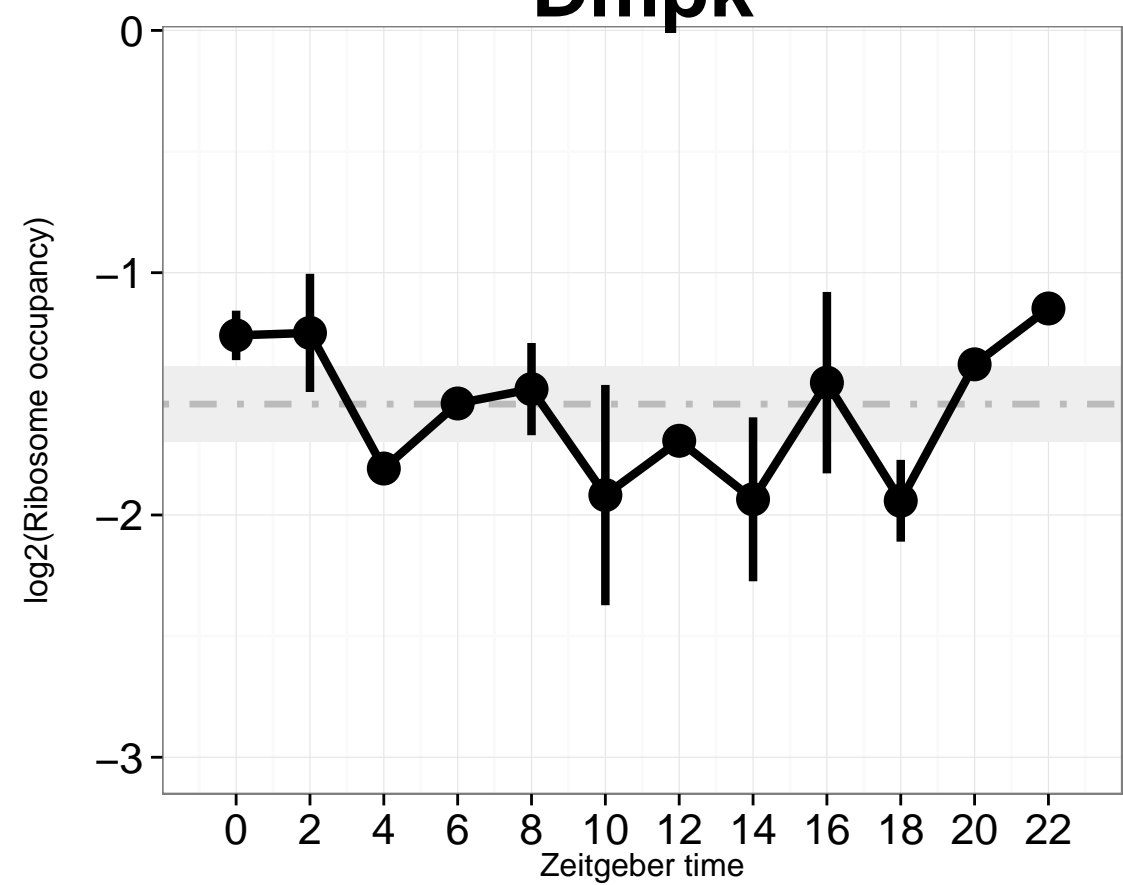

Supplement: Supplementary file 1422 [file 1]

# Dnajc22

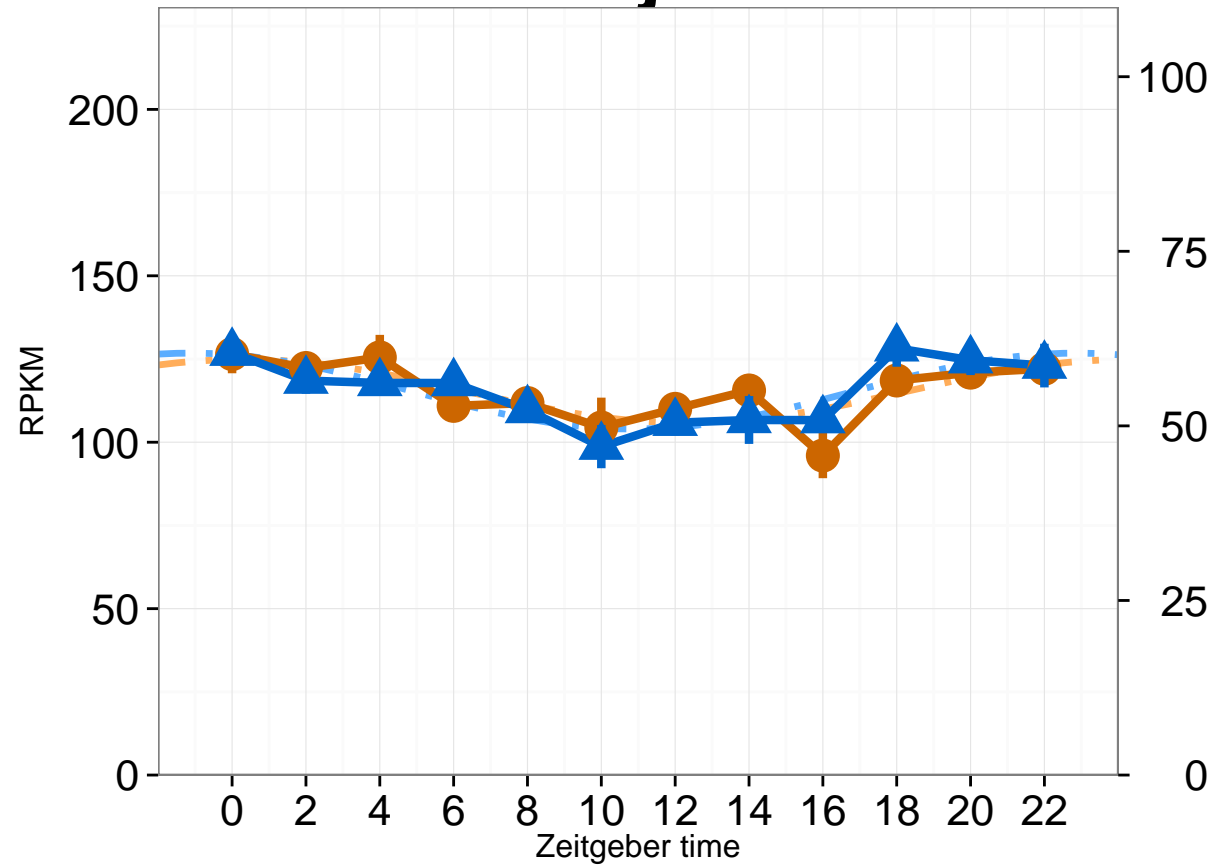

# Dnajc22

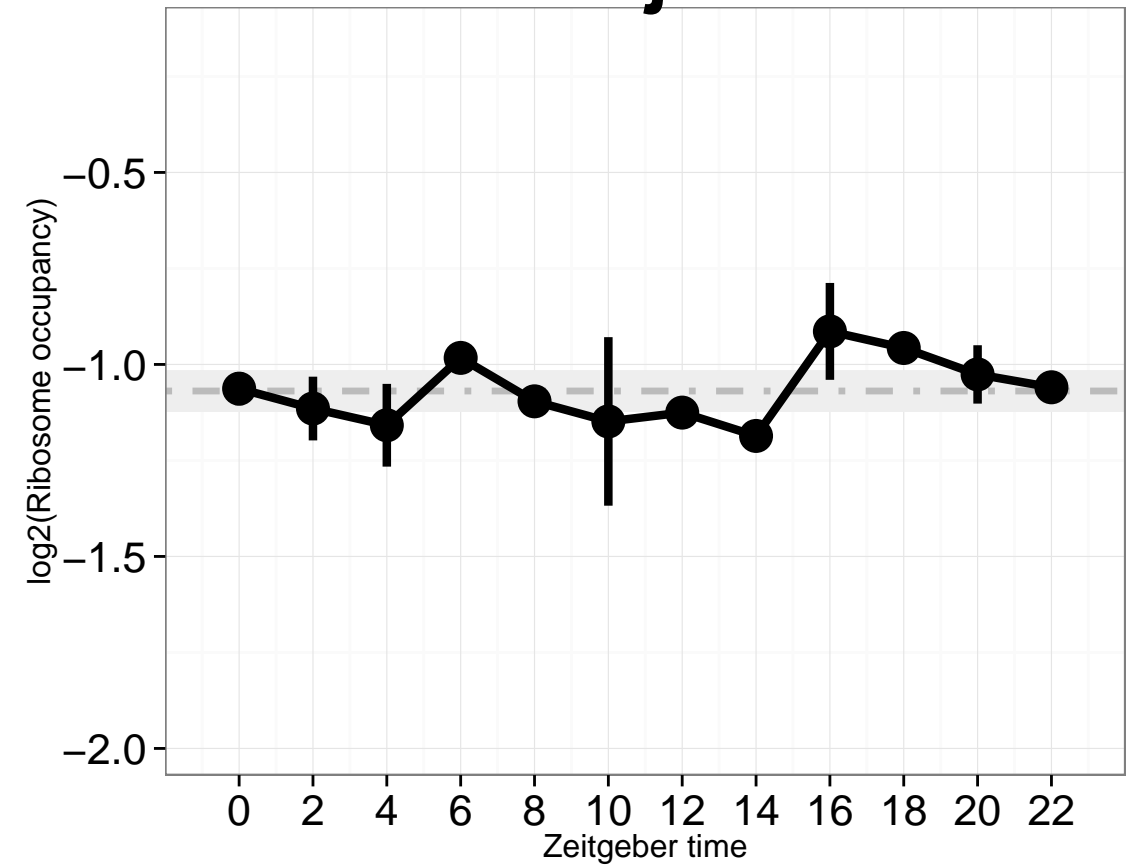

Supplement: Supplementary file 1423 [file 1]

## Bckdha

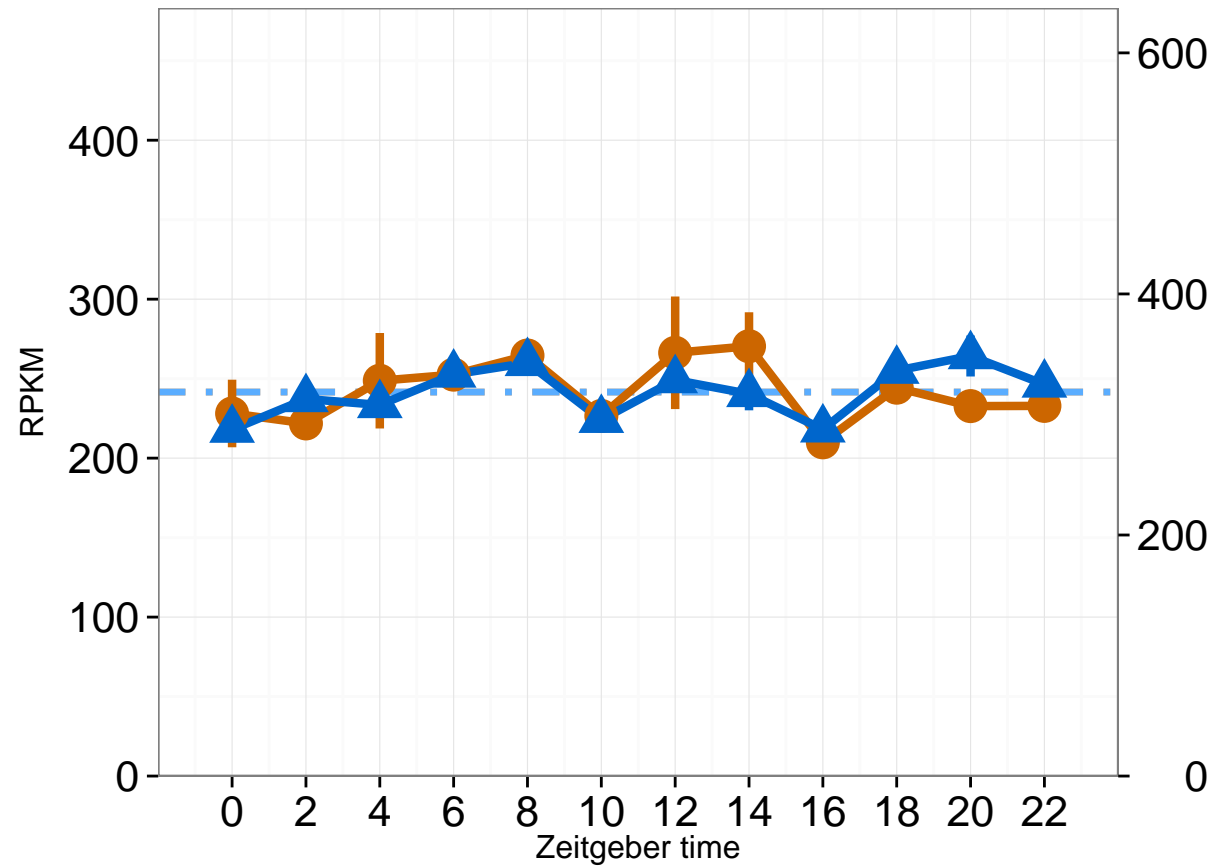

## Bckdha

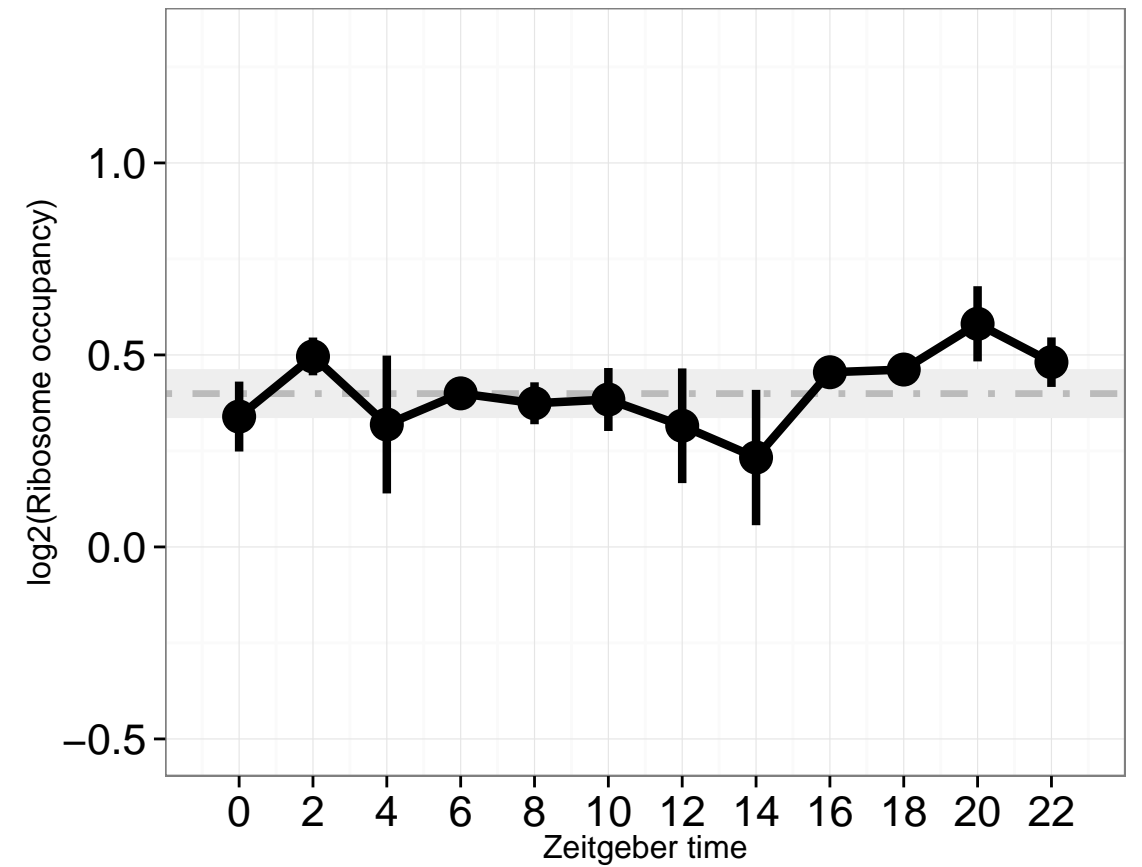

Supplement: Supplementary file 1424 [file 1]

# Tmem42

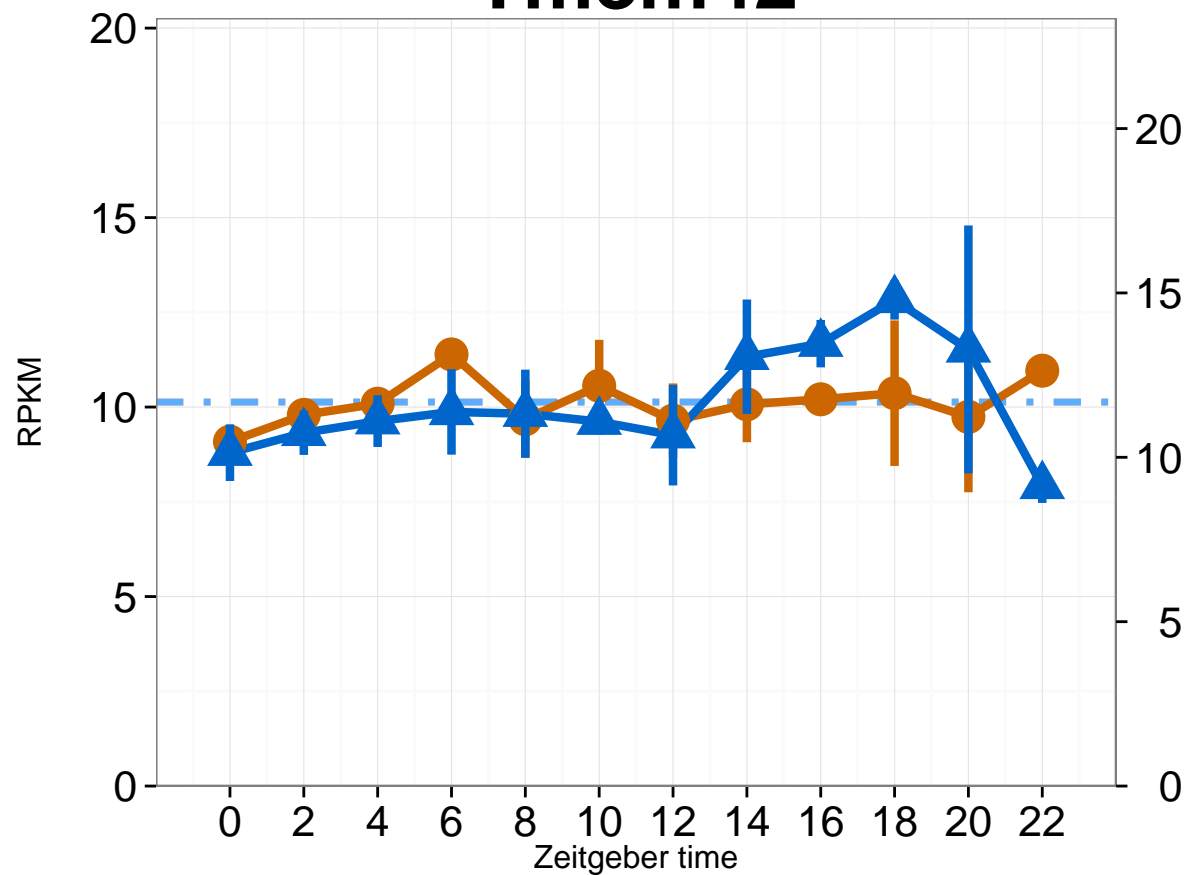

# Tmem42

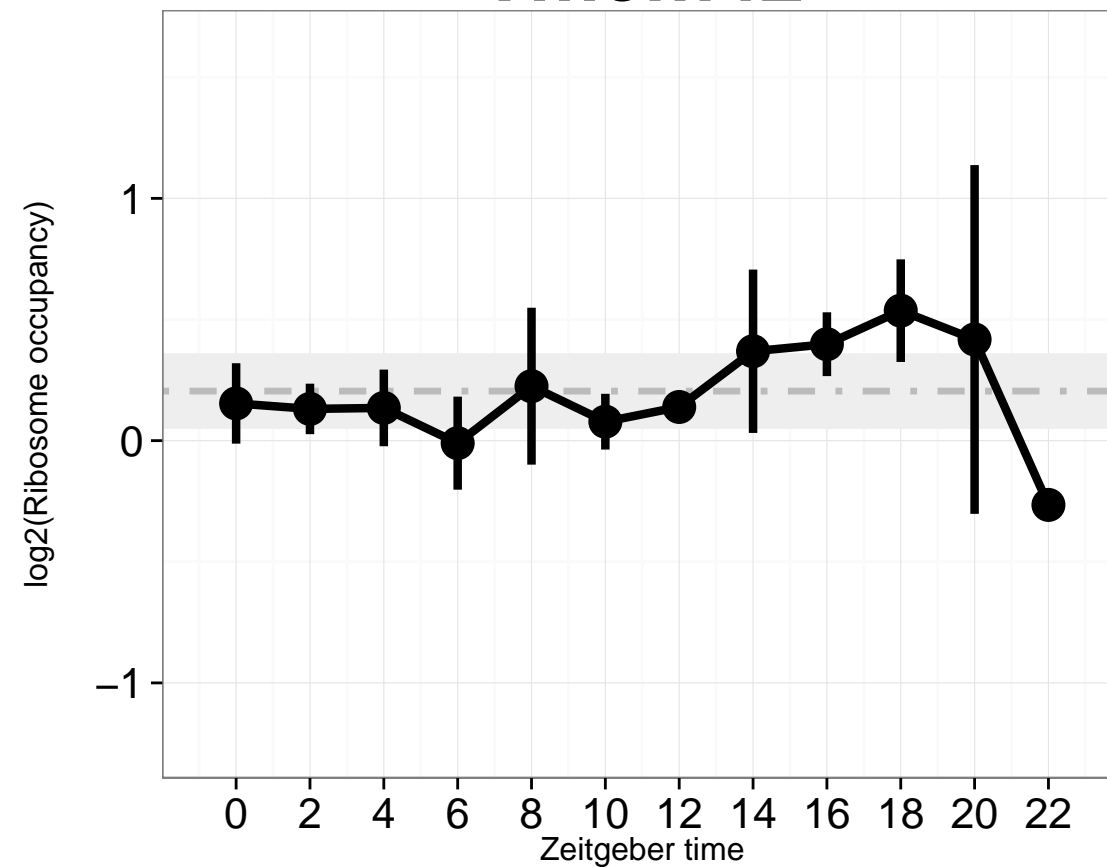

Supplement: Supplementary file 1425 [file 1]

# Zfpm2

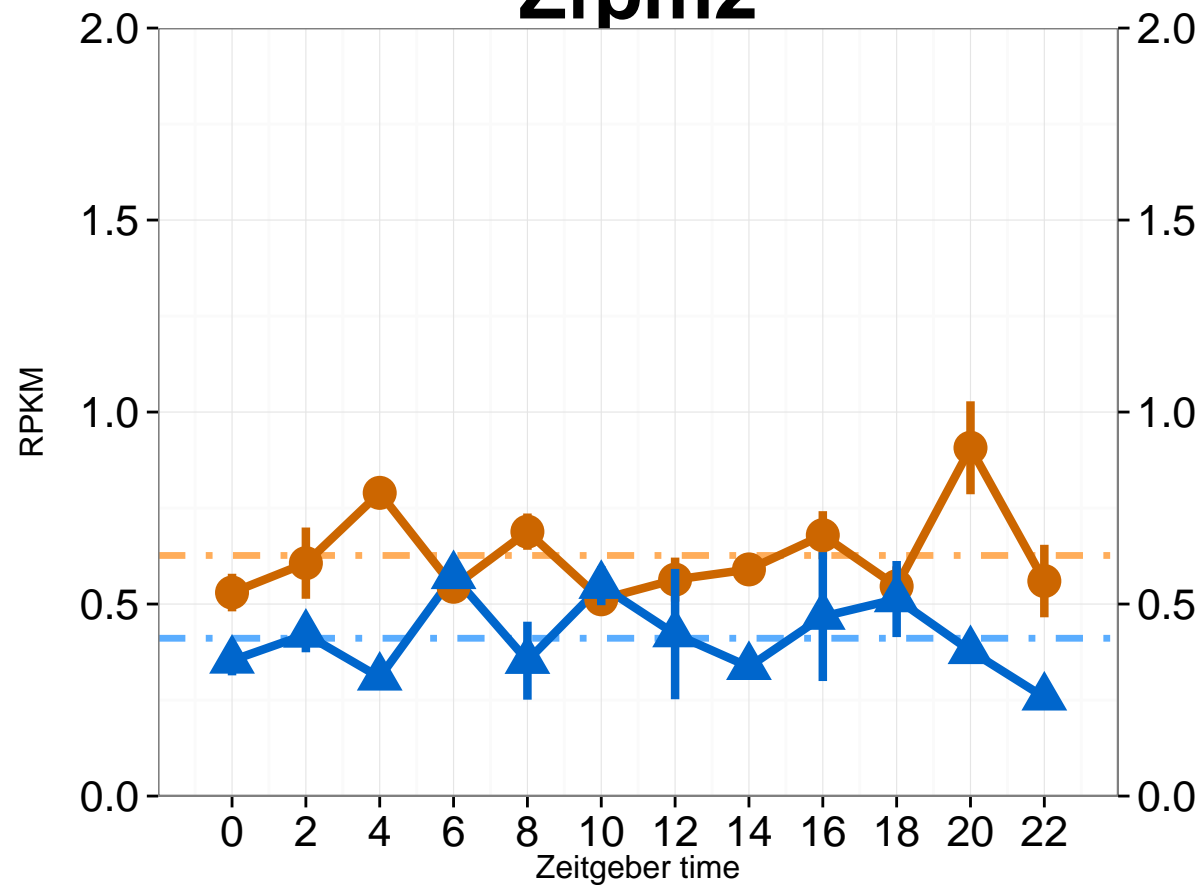

# Zfpm2

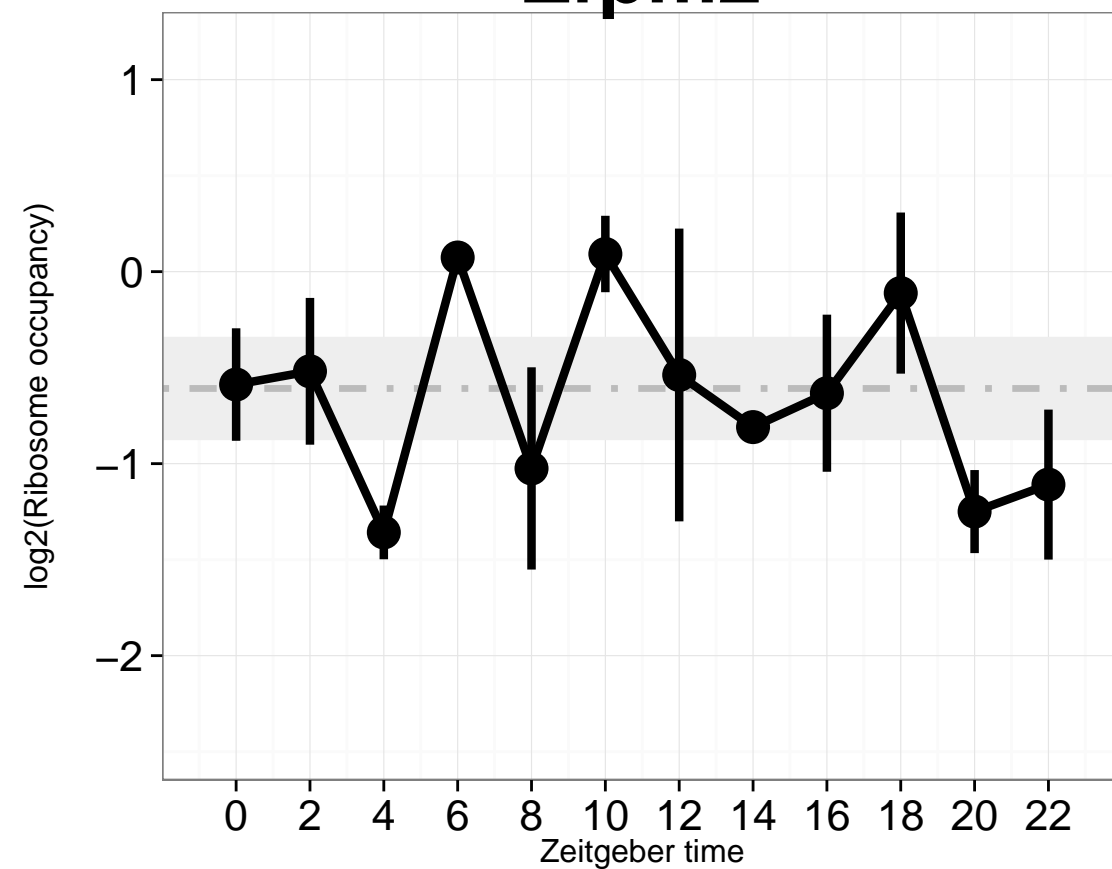

Supplement: Supplementary file 1426 [file 1]

## Tagap

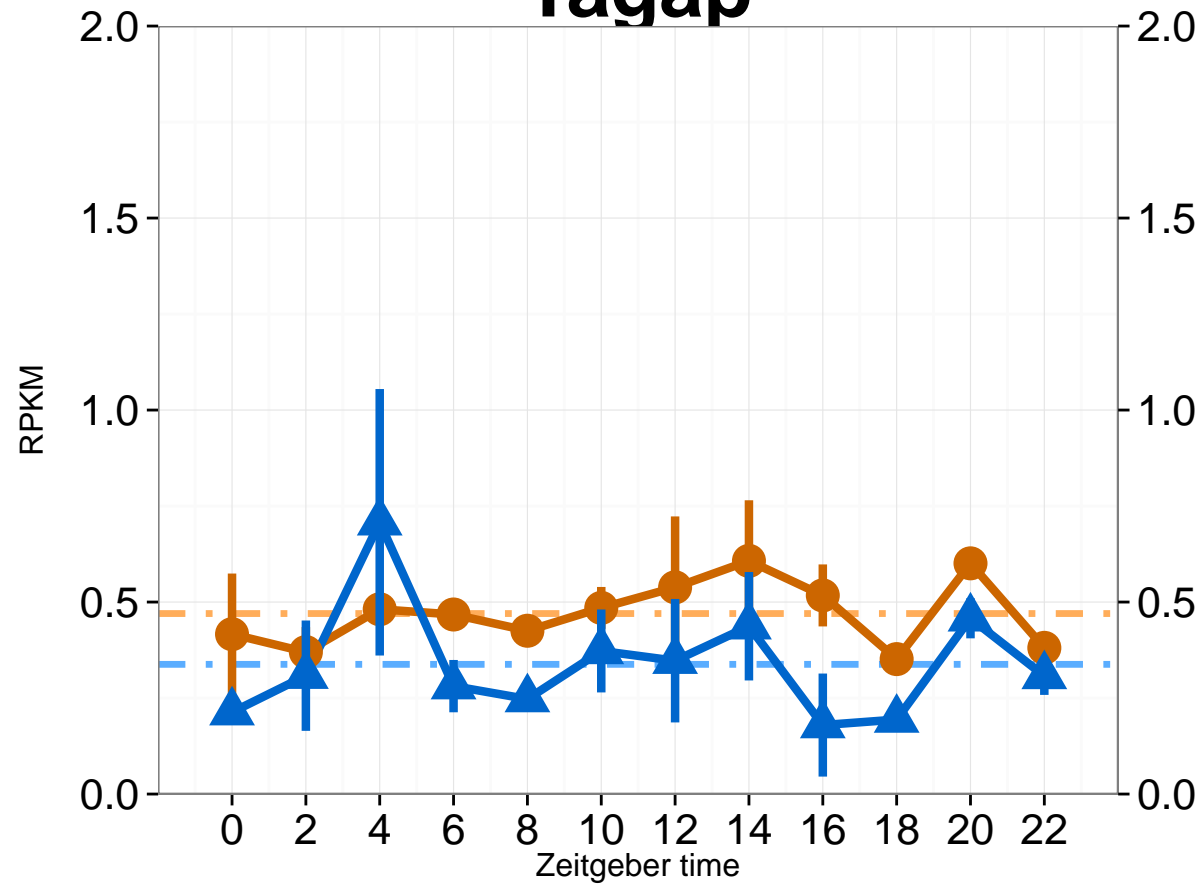

## Tagap

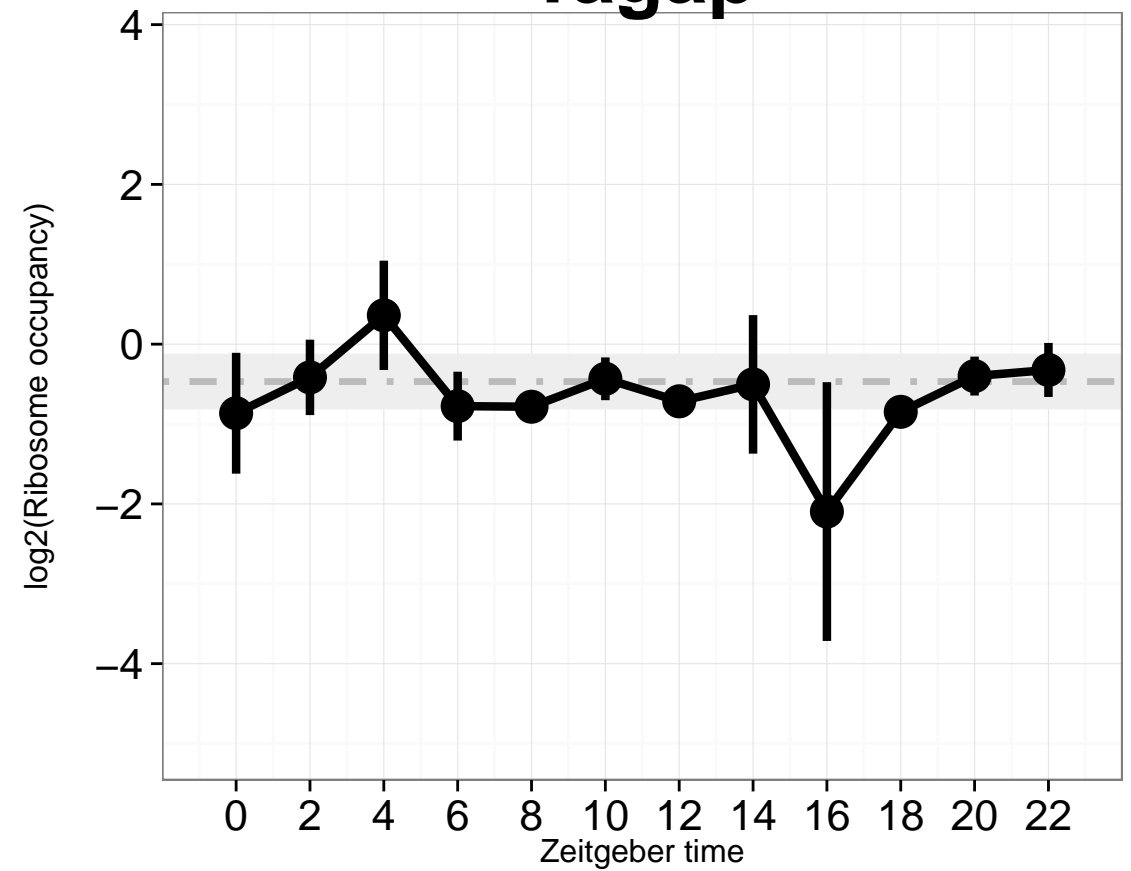

Supplement: Supplementary file 1427 [file 1]

## Dph2

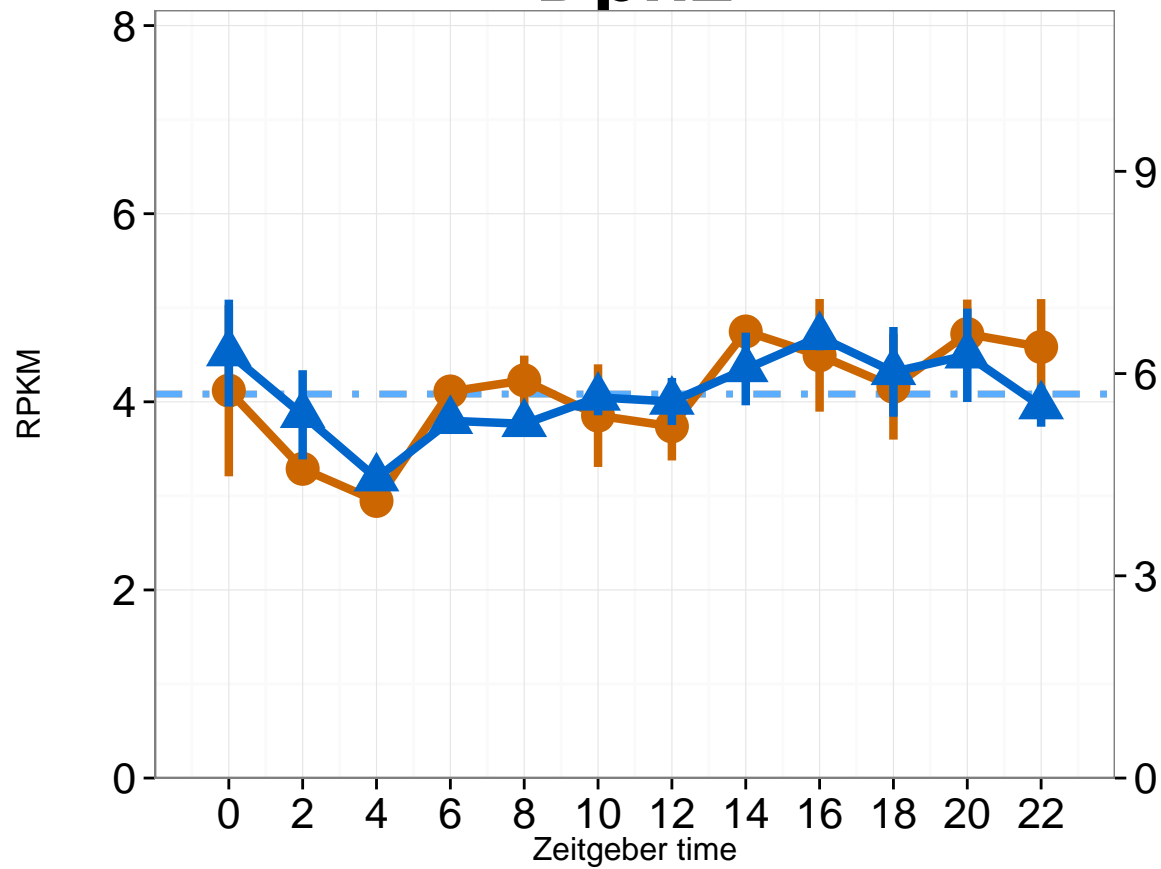

## Dph2

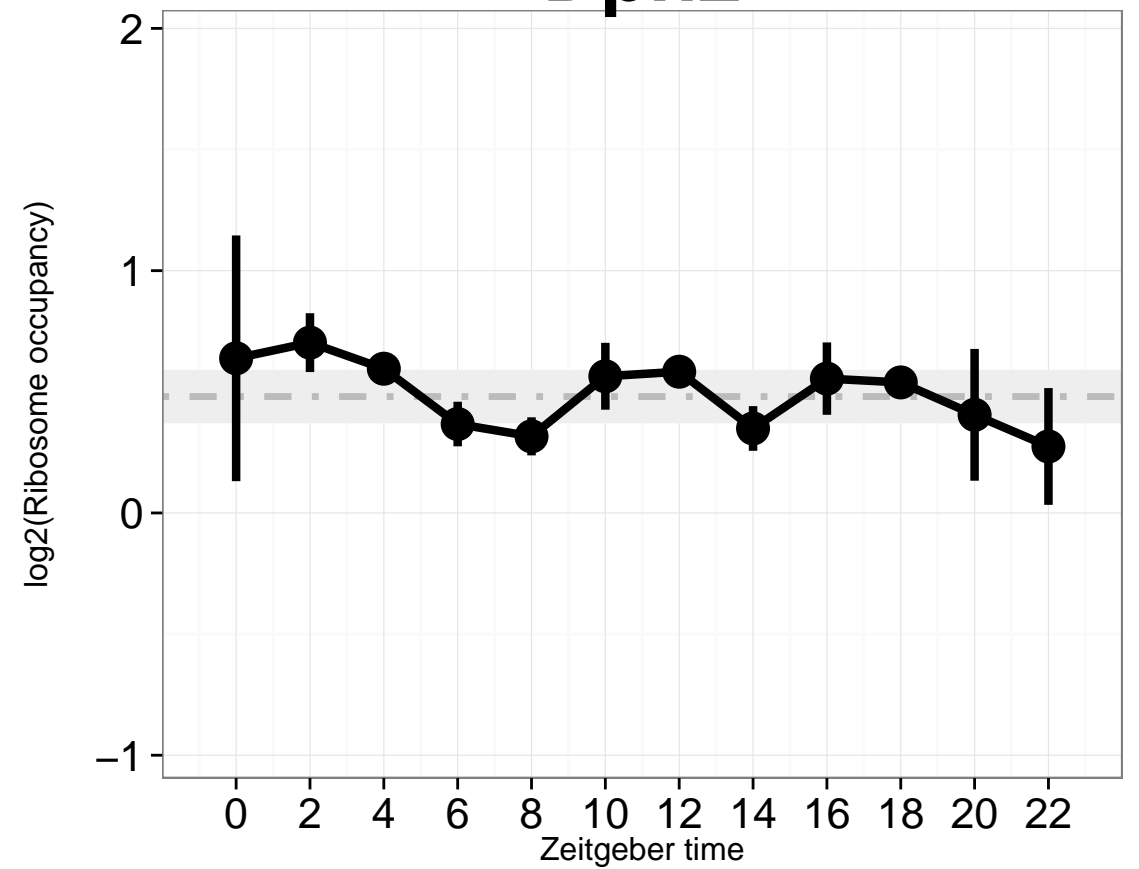

Supplement: Supplementary file 1428 [file 1]

## Fam21

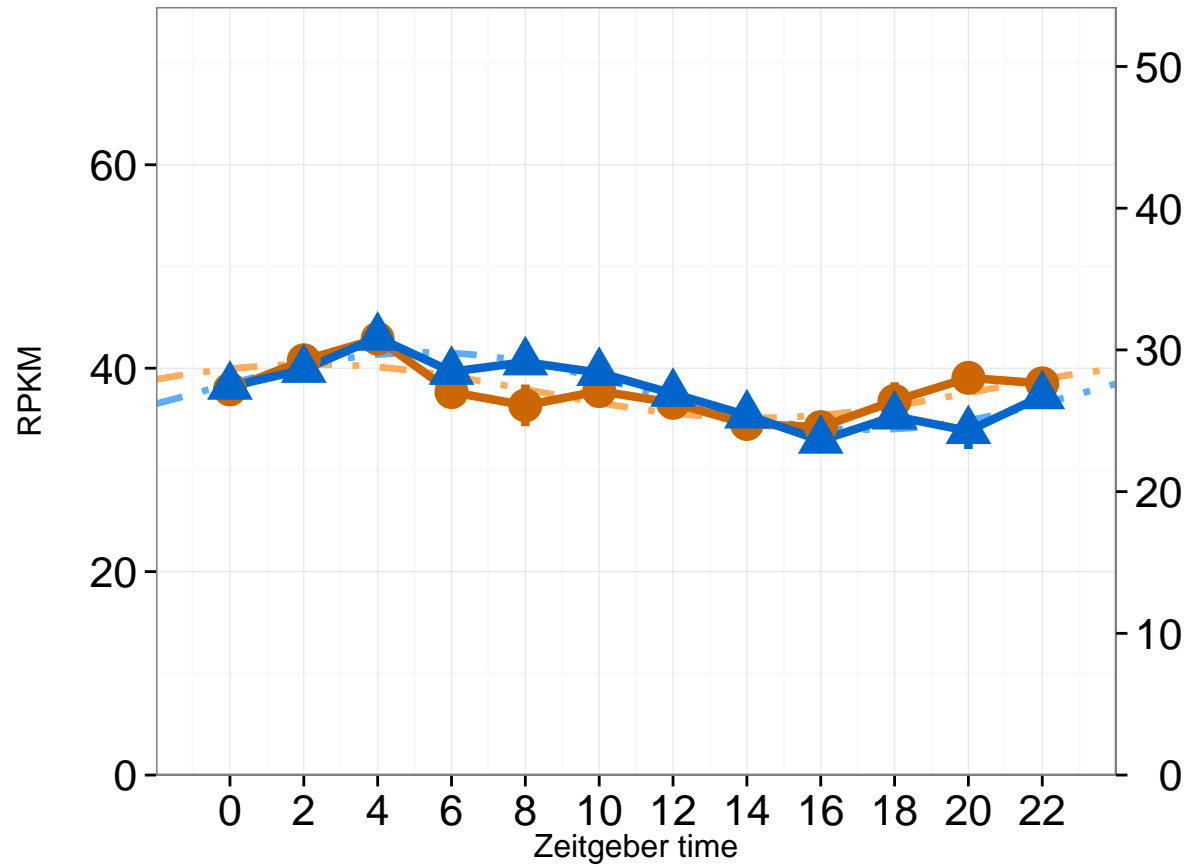

## Fam21

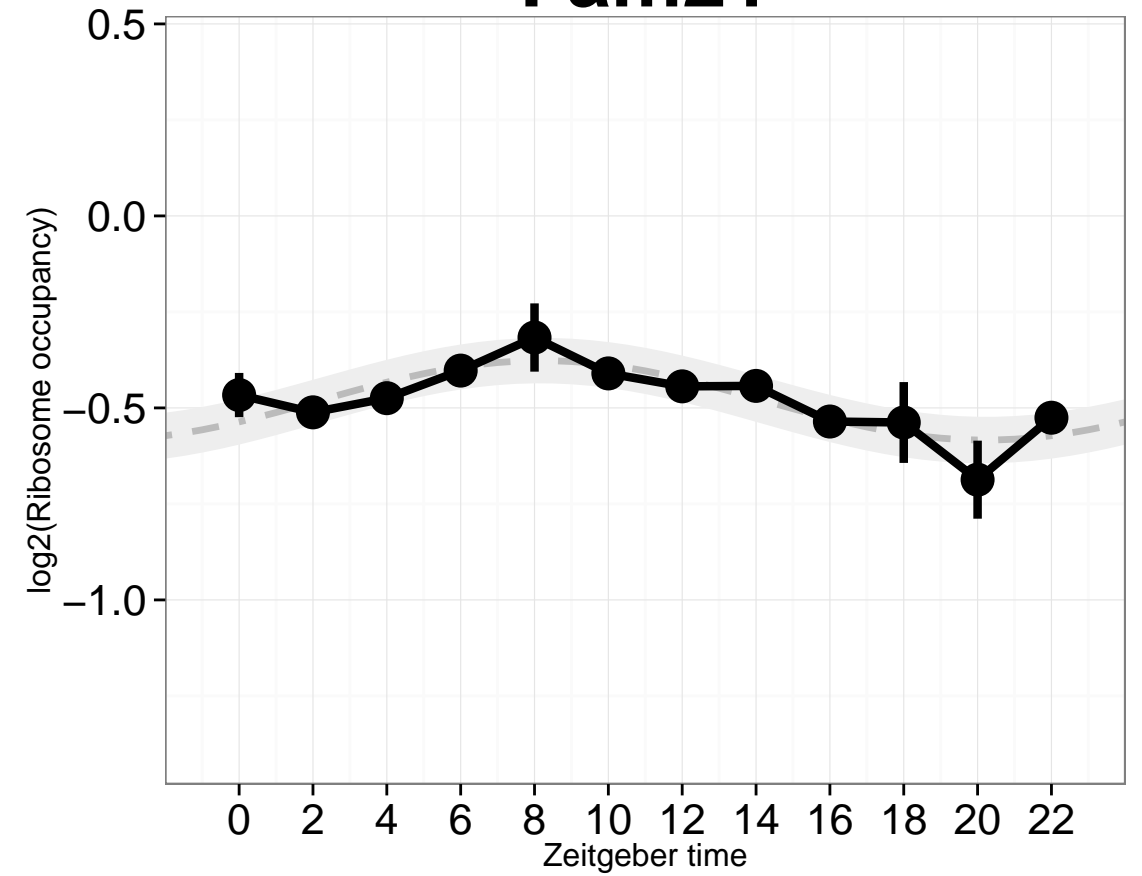

Supplement: Supplementary file 1429 [file 1]

# Megf9

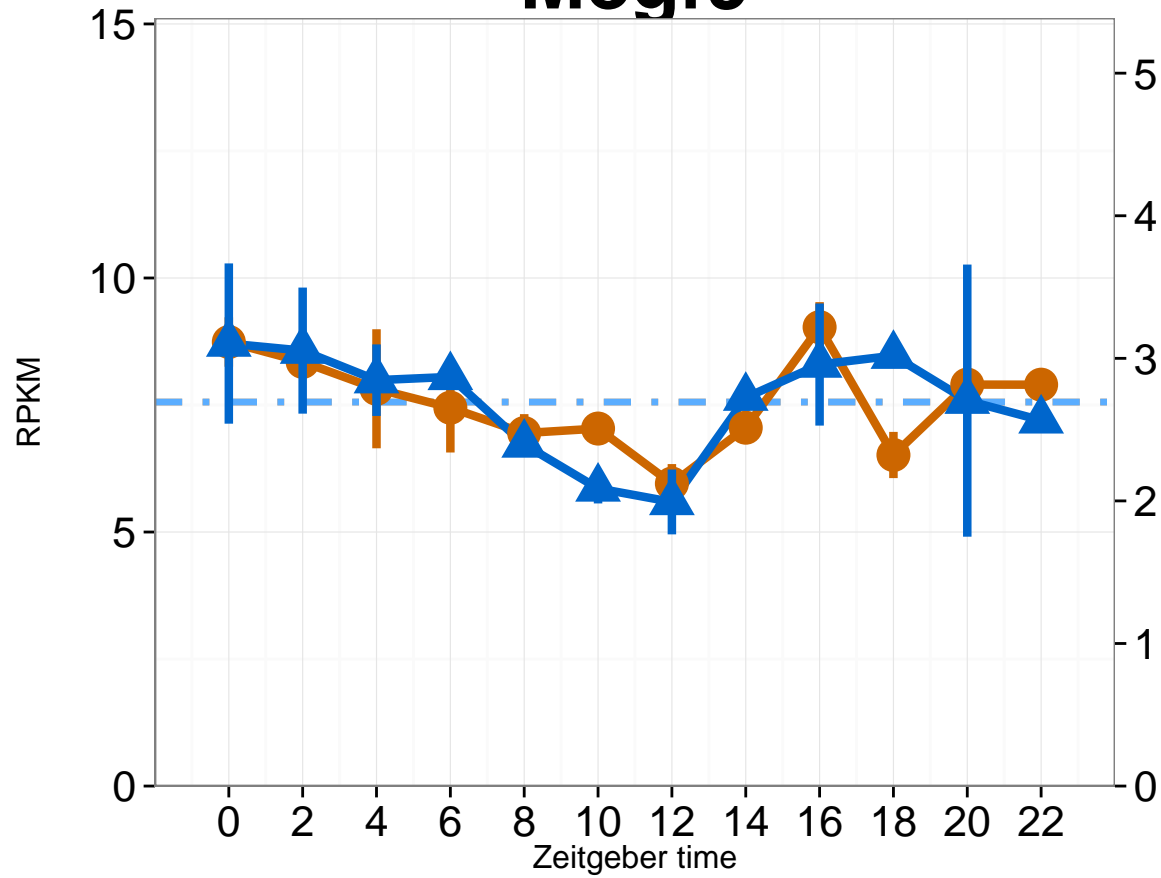

# Megf9

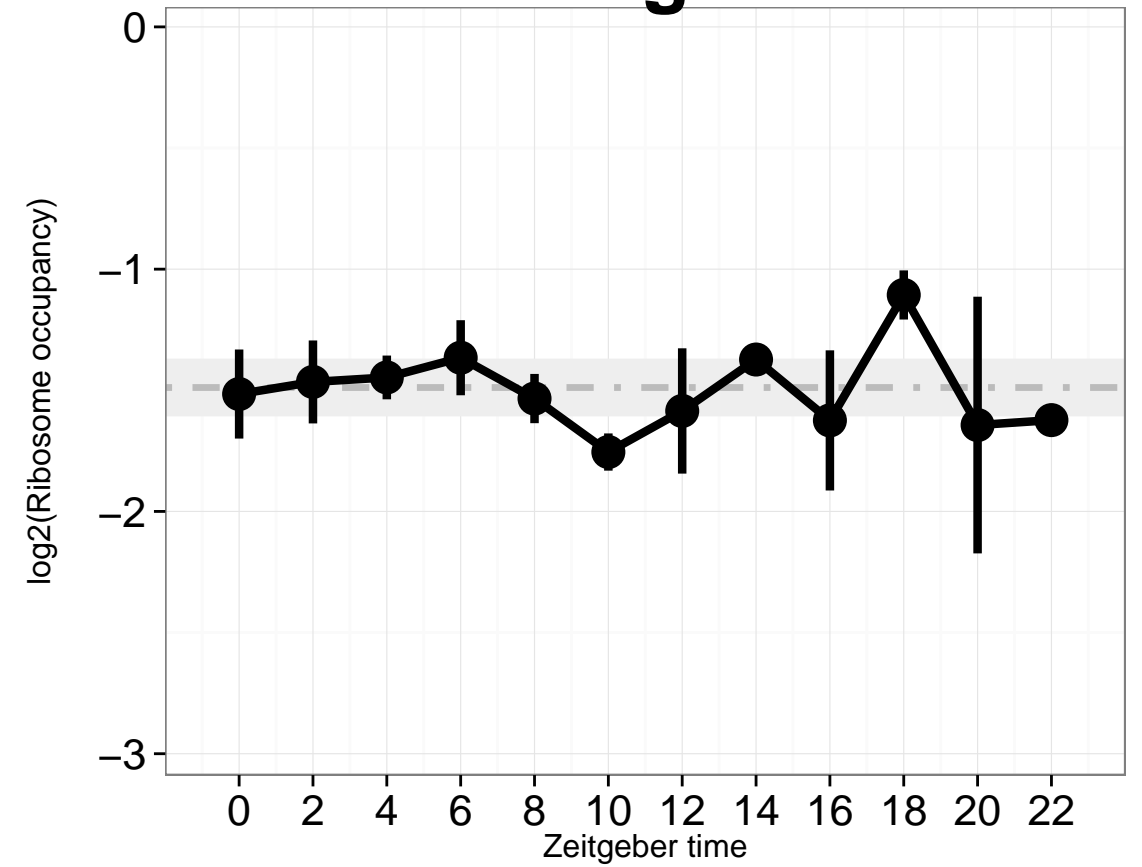

Supplement: Supplementary file 1430 [file 1]

# Gpr133 TR

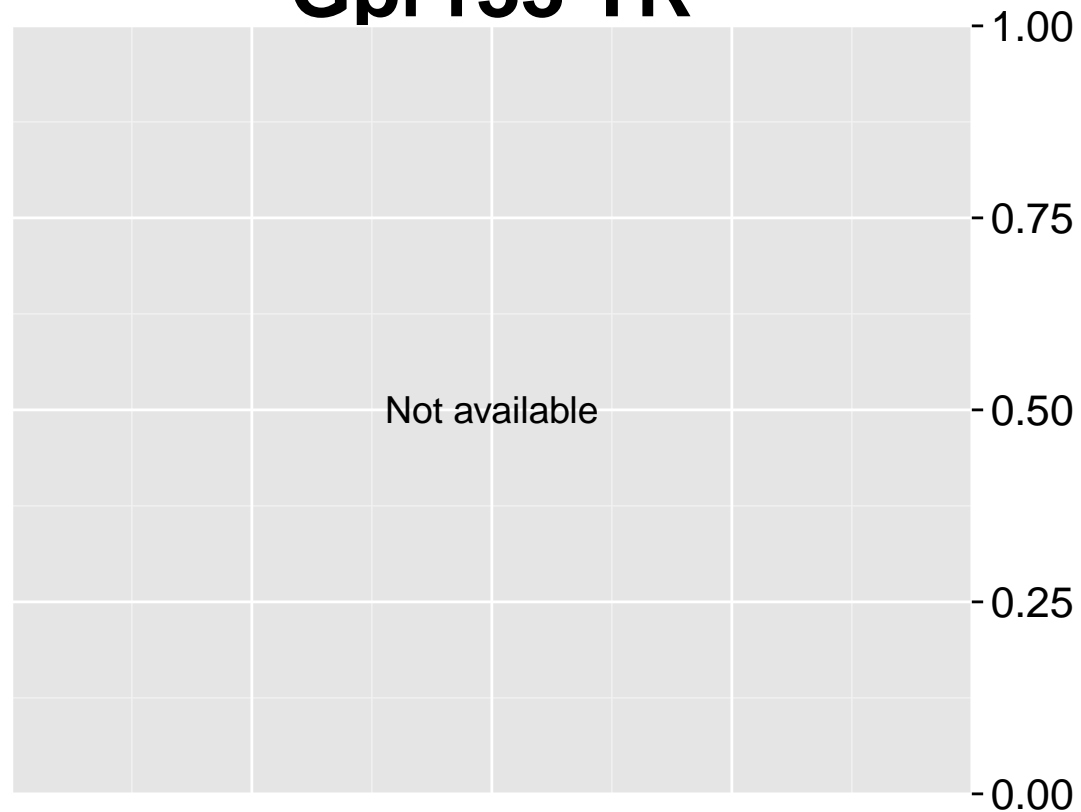

# Gpr133 log2(Ribosome occupancy)

Supplement: Supplementary file 1431 [file 1]

## Med18

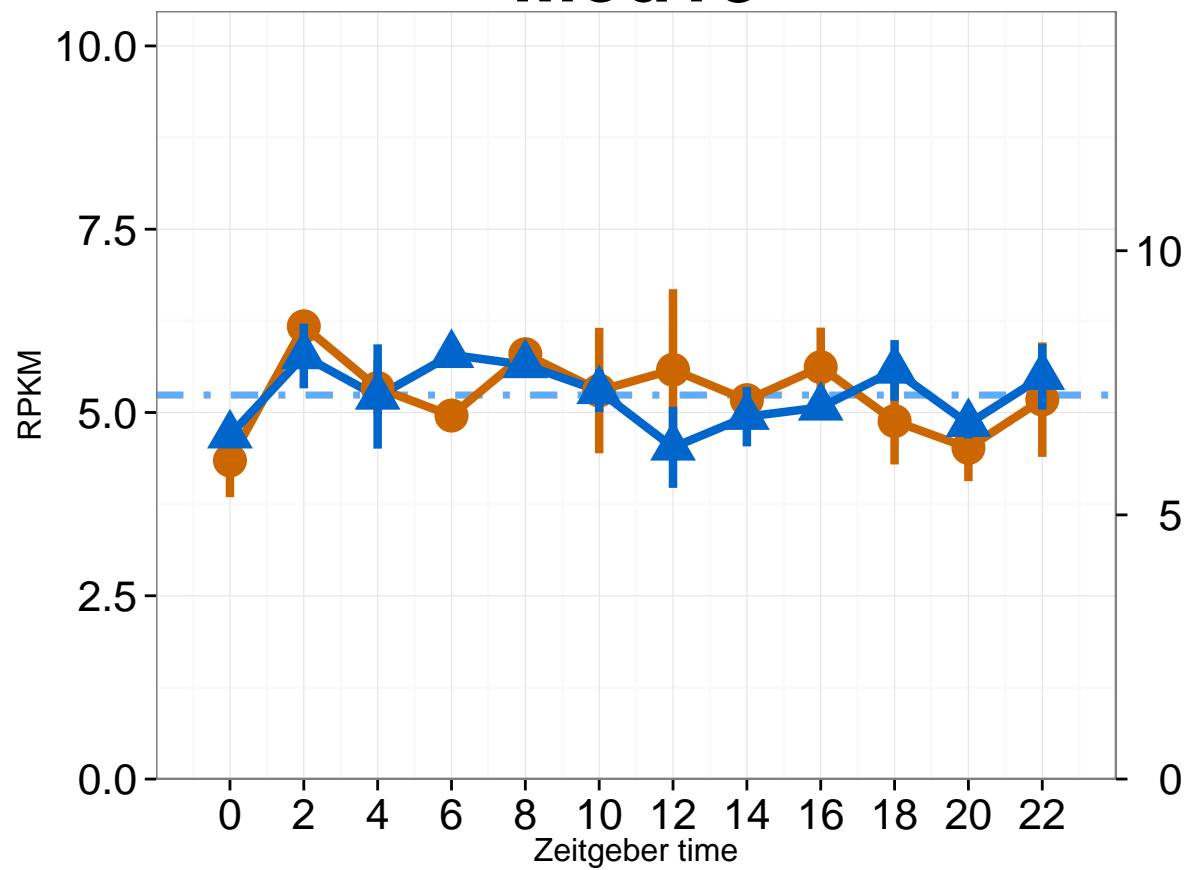

## Med18

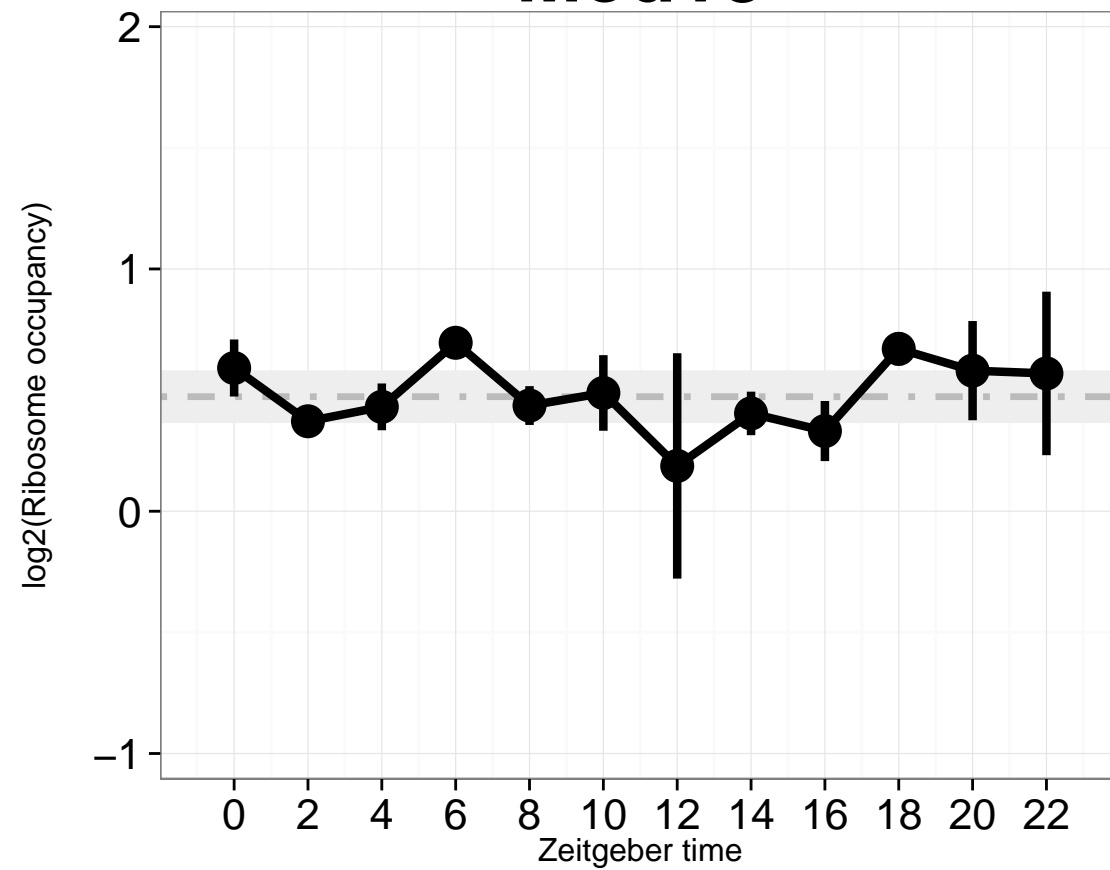

Supplement: Supplementary file 1432 [file 1]

# Pde3b

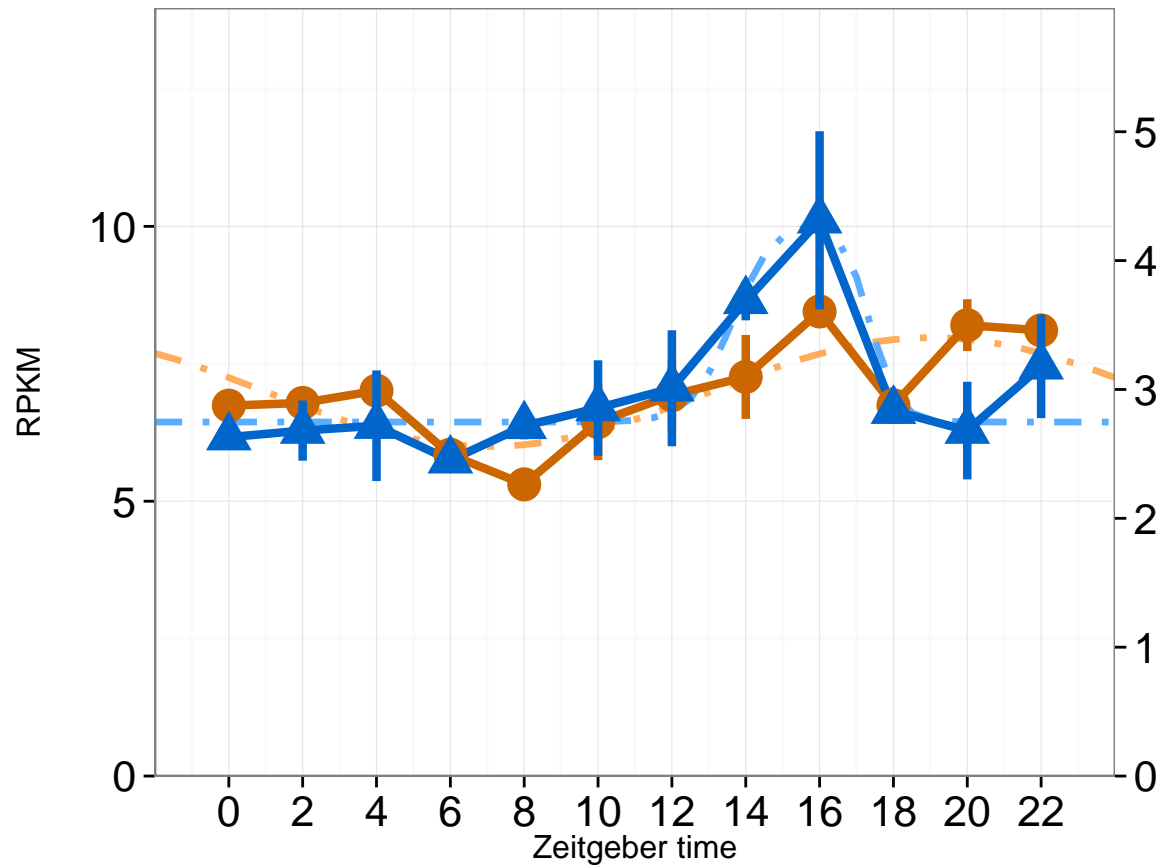

# Pde3b

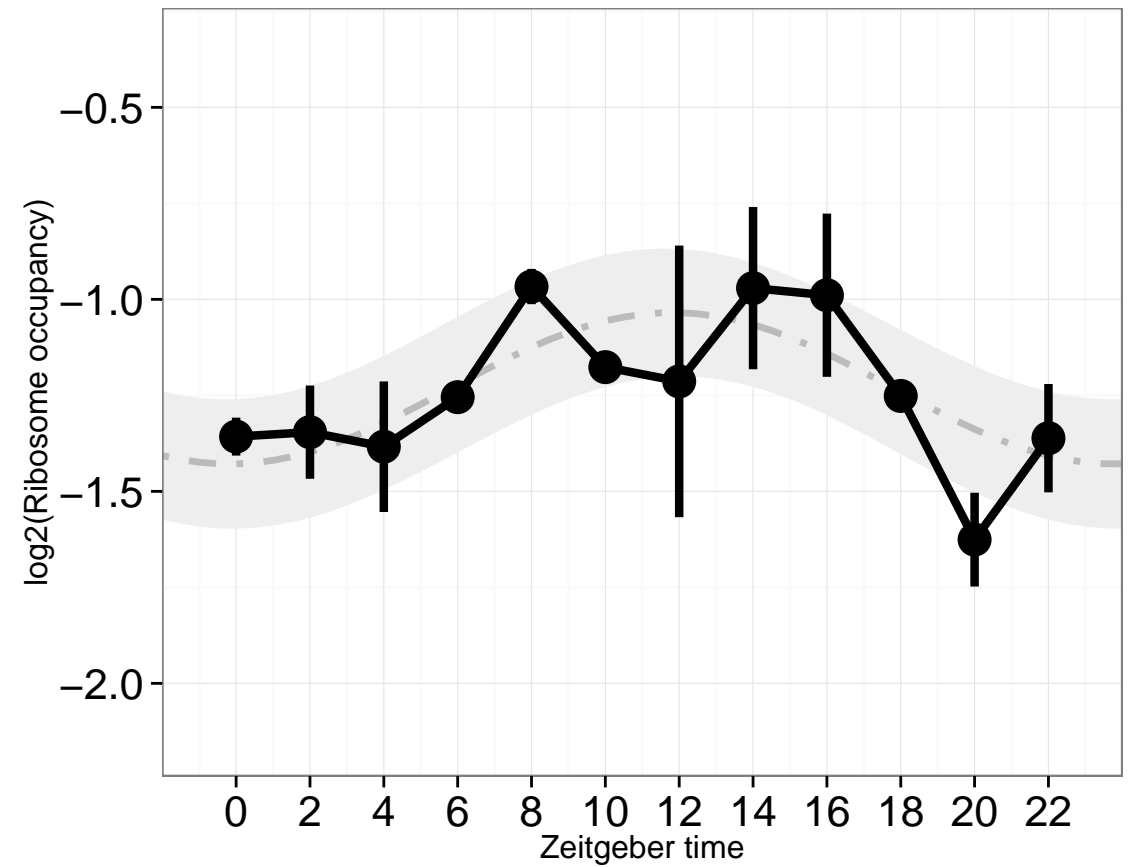

Supplement: Supplementary file 1433 [file 1]

## Tex30

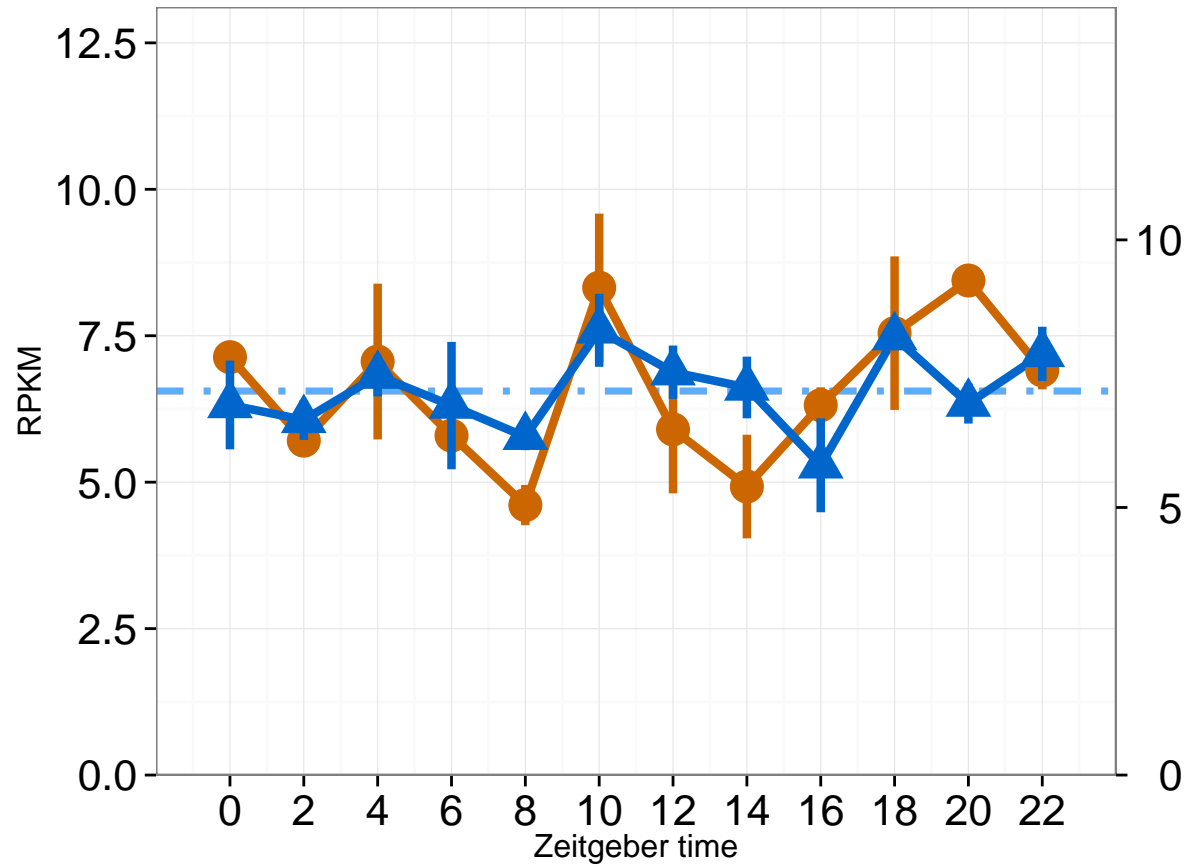

## Tex30

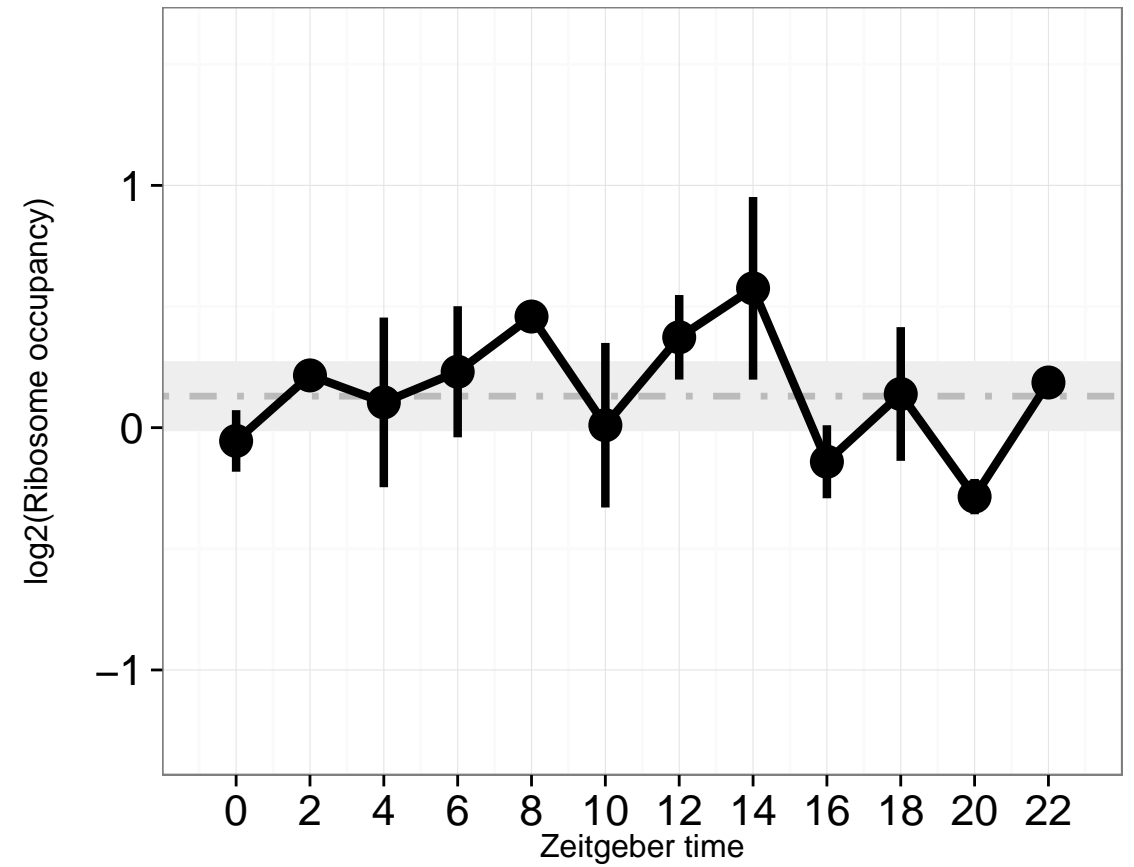

Supplement: Supplementary file 1434 [file 1]

# Zfp637

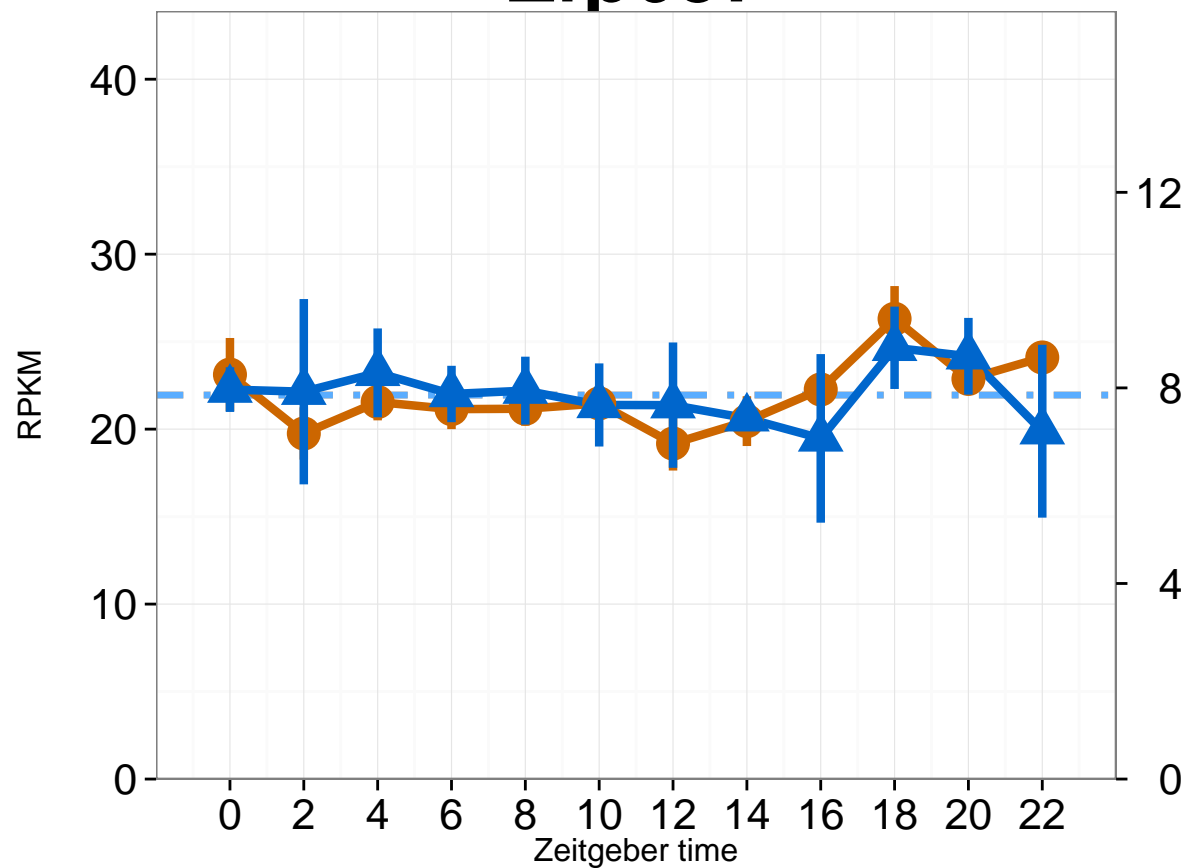

# Zfp637

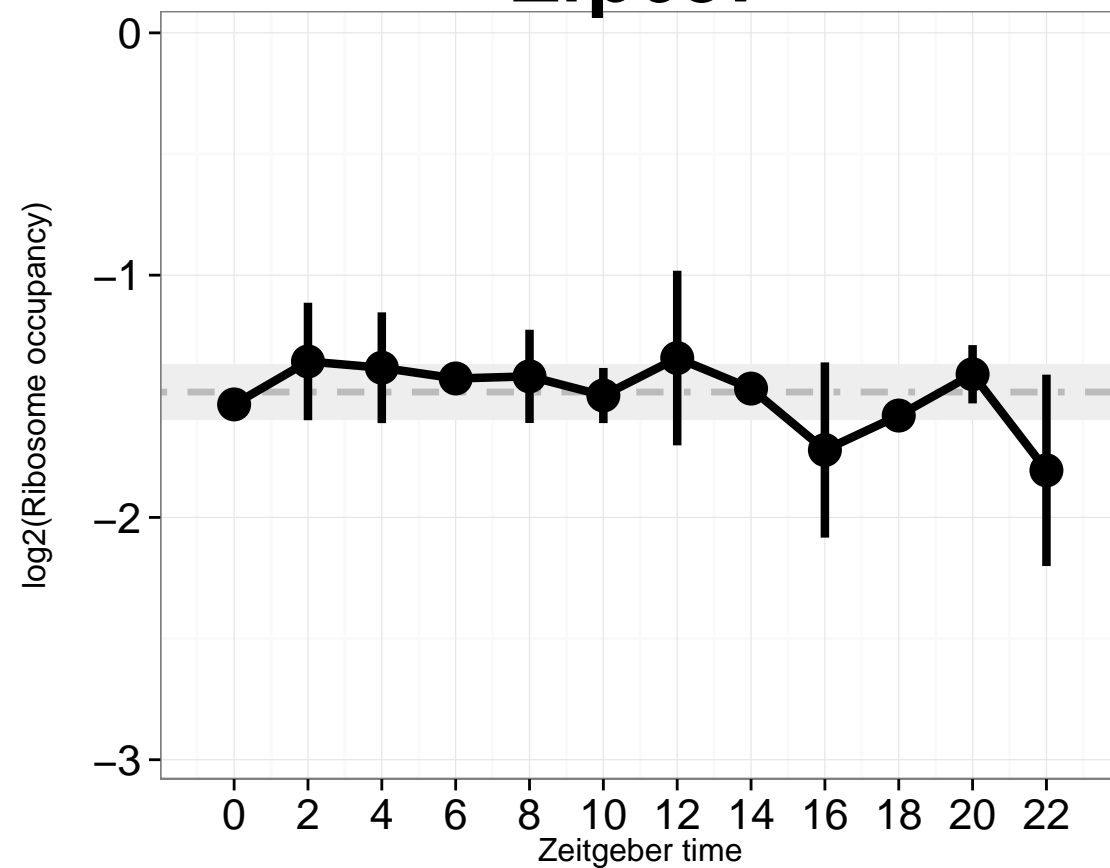

Supplement: Supplementary file 1435 [file 1]

# Zfp712

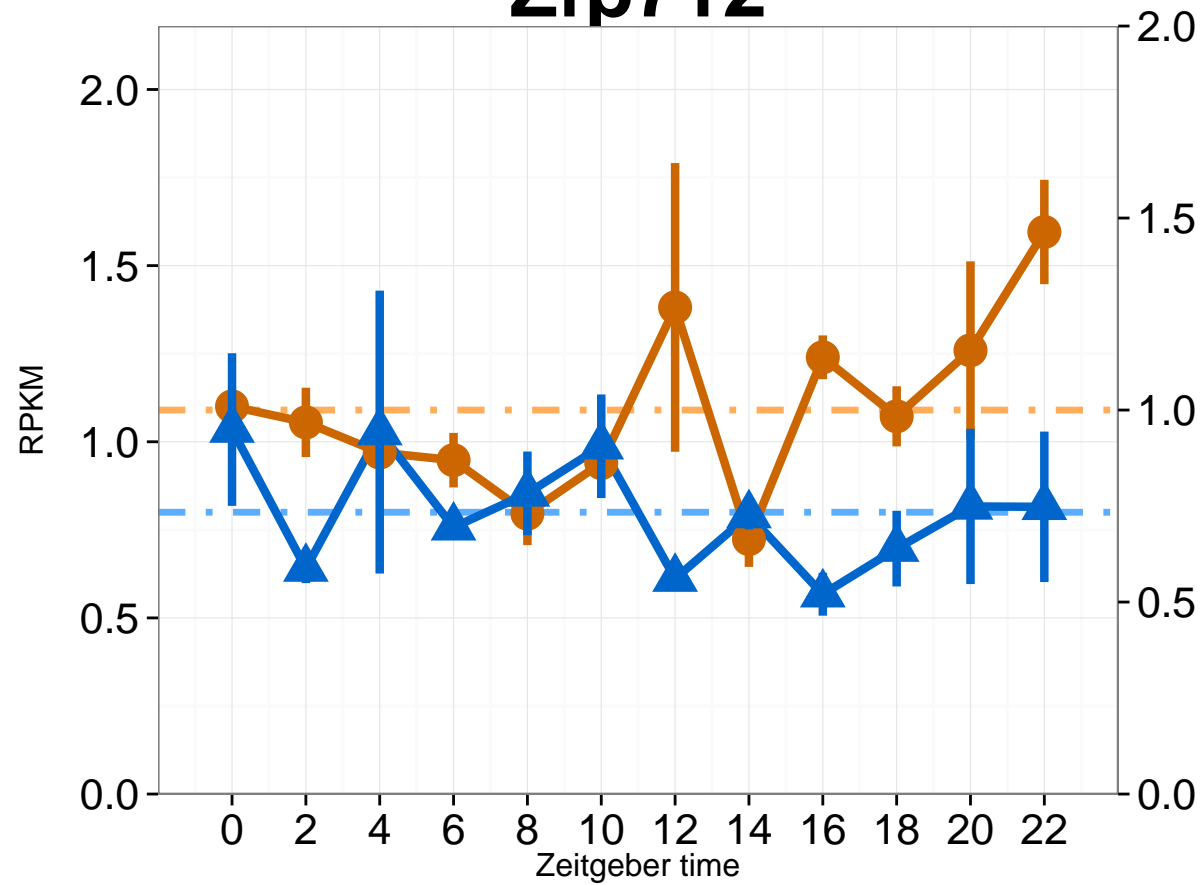

# Zfp712

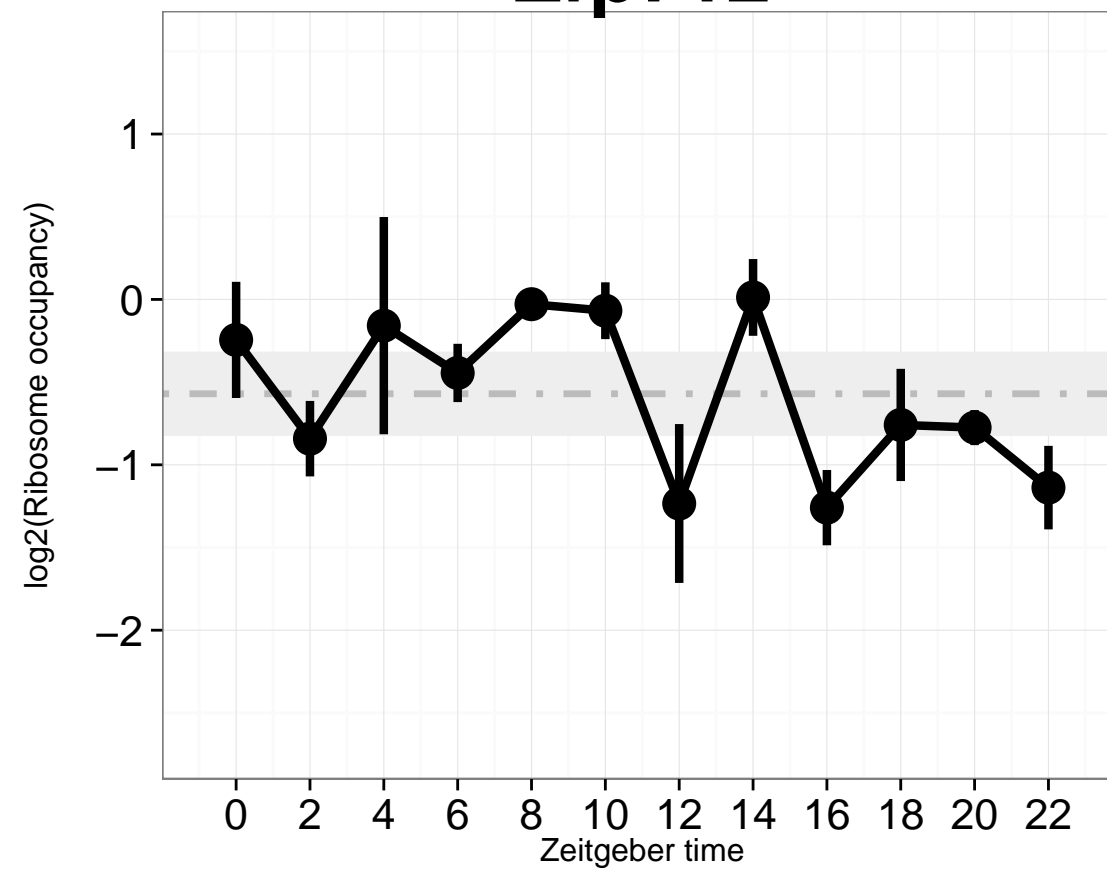

Supplement: Supplementary file 1436 [file 1]

## Fbxo10

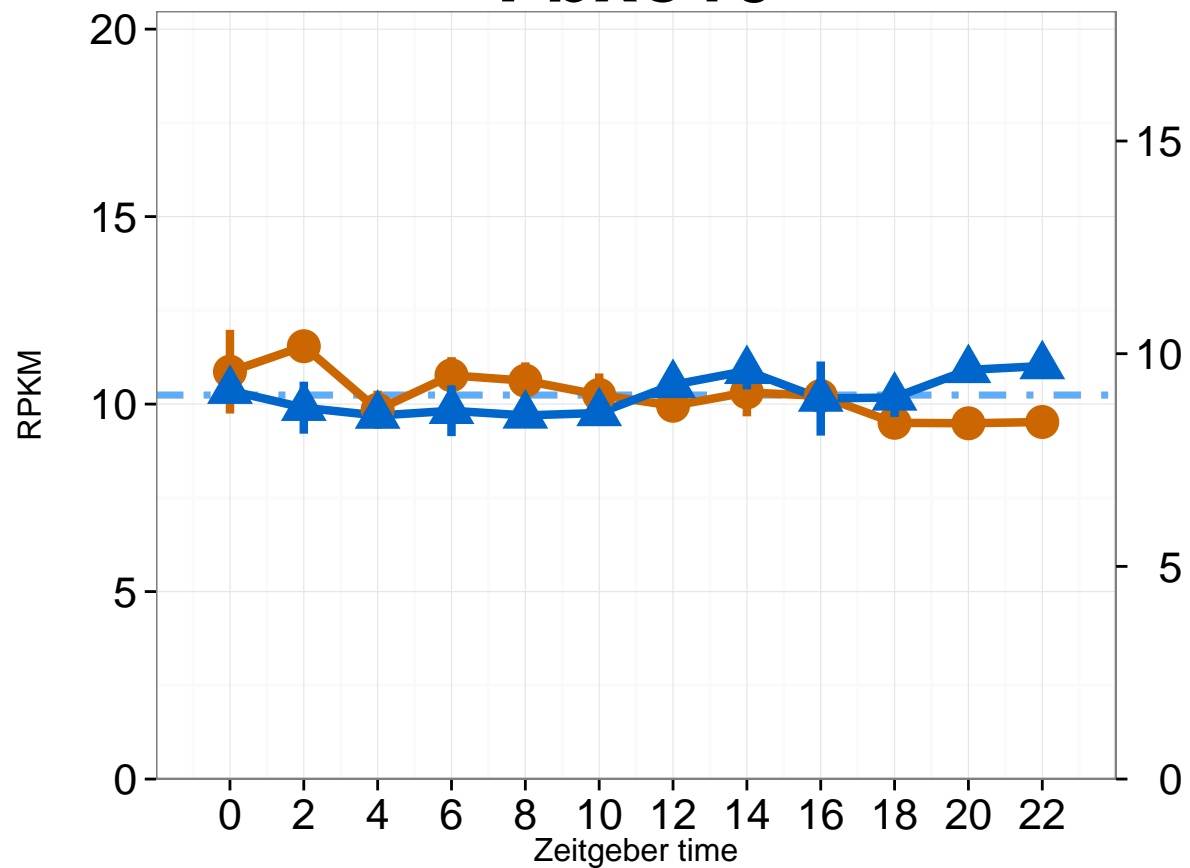

## Fbxo10

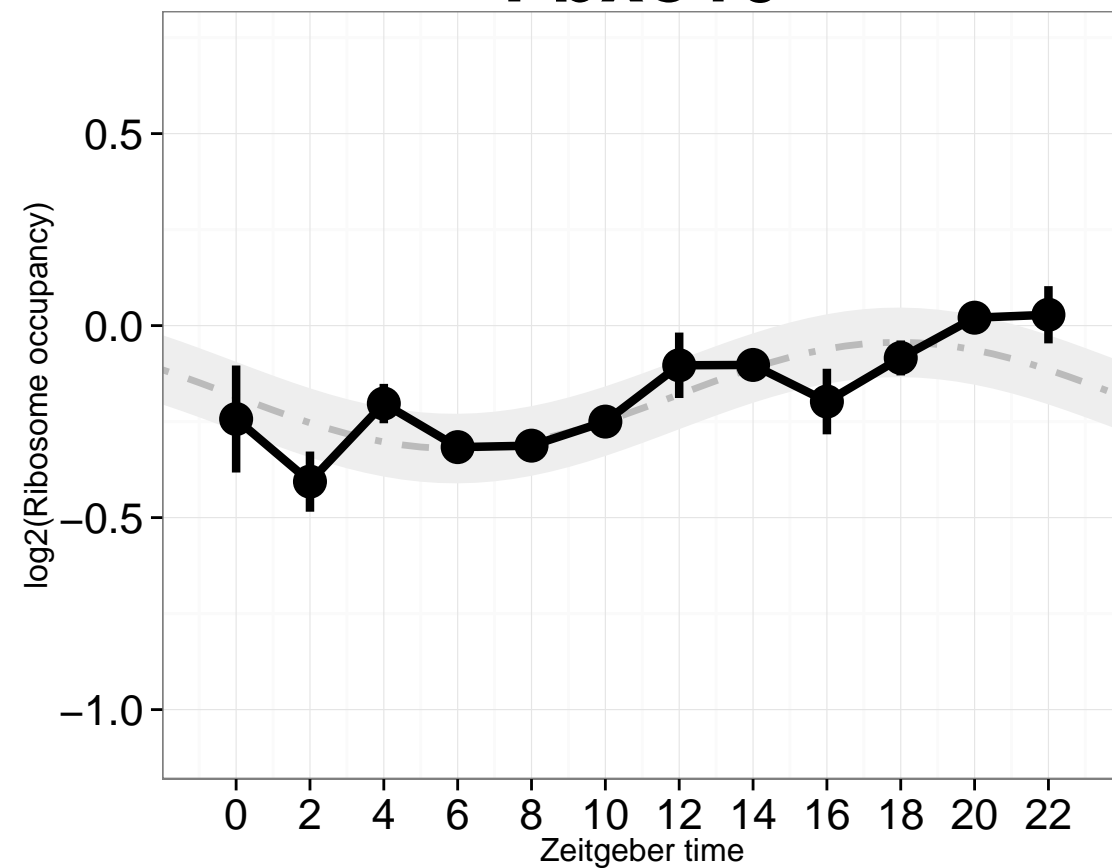

Supplement: Supplementary file 1437 [file 1]

## Ctsh

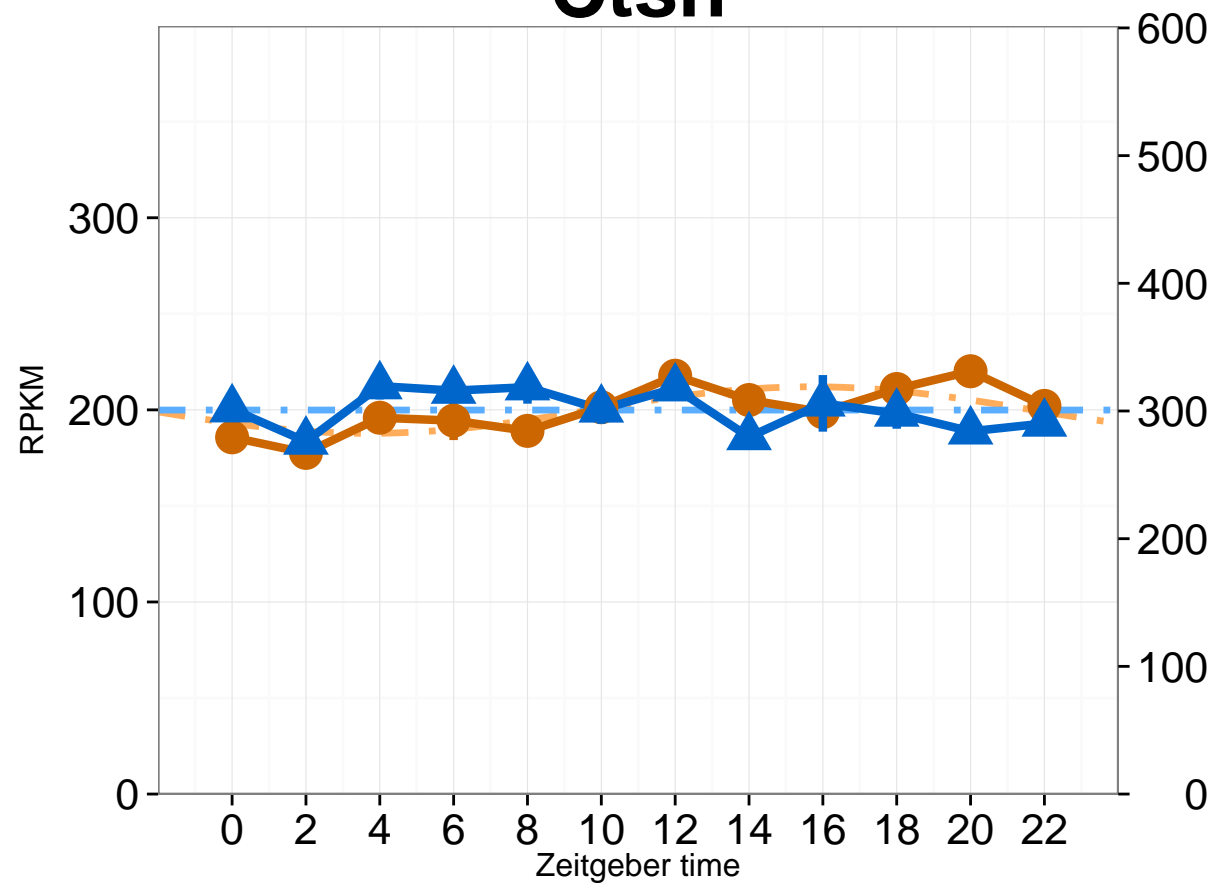

## Ctsh

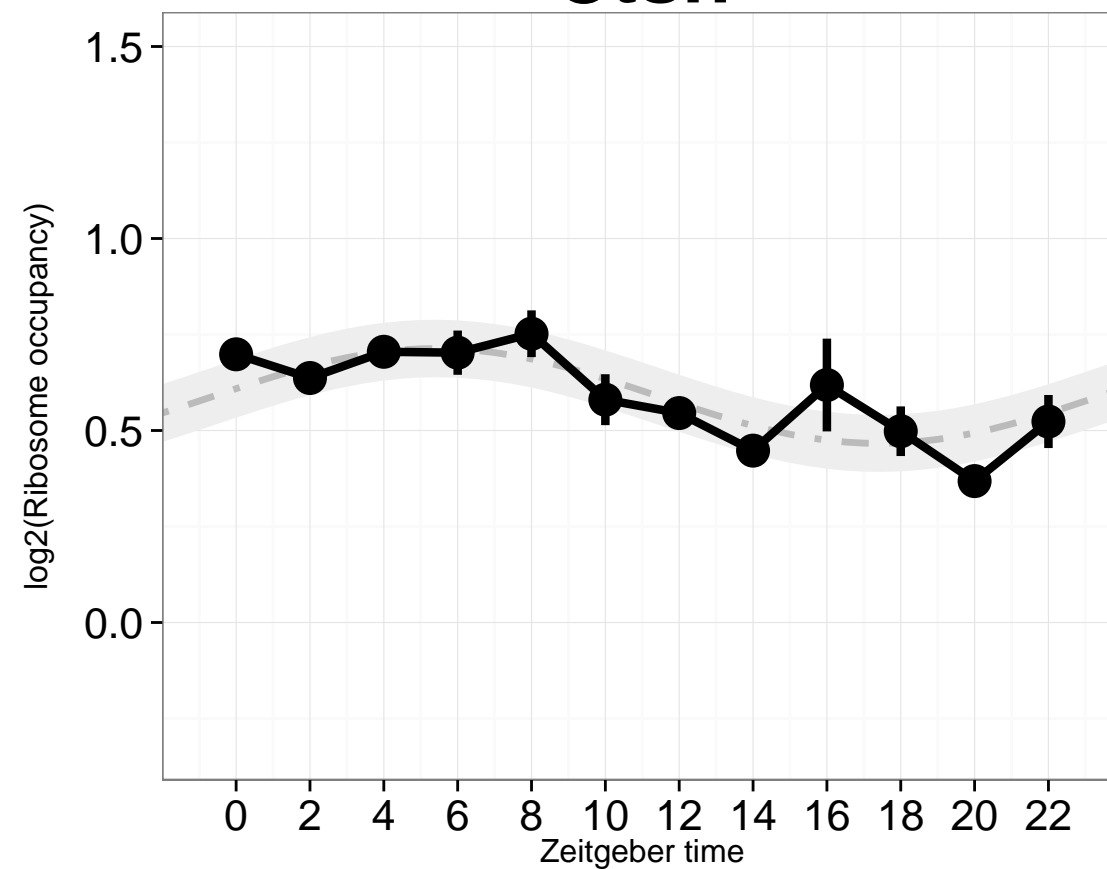

Supplement: Supplementary file 1438 [file 1]

## Plekhj1

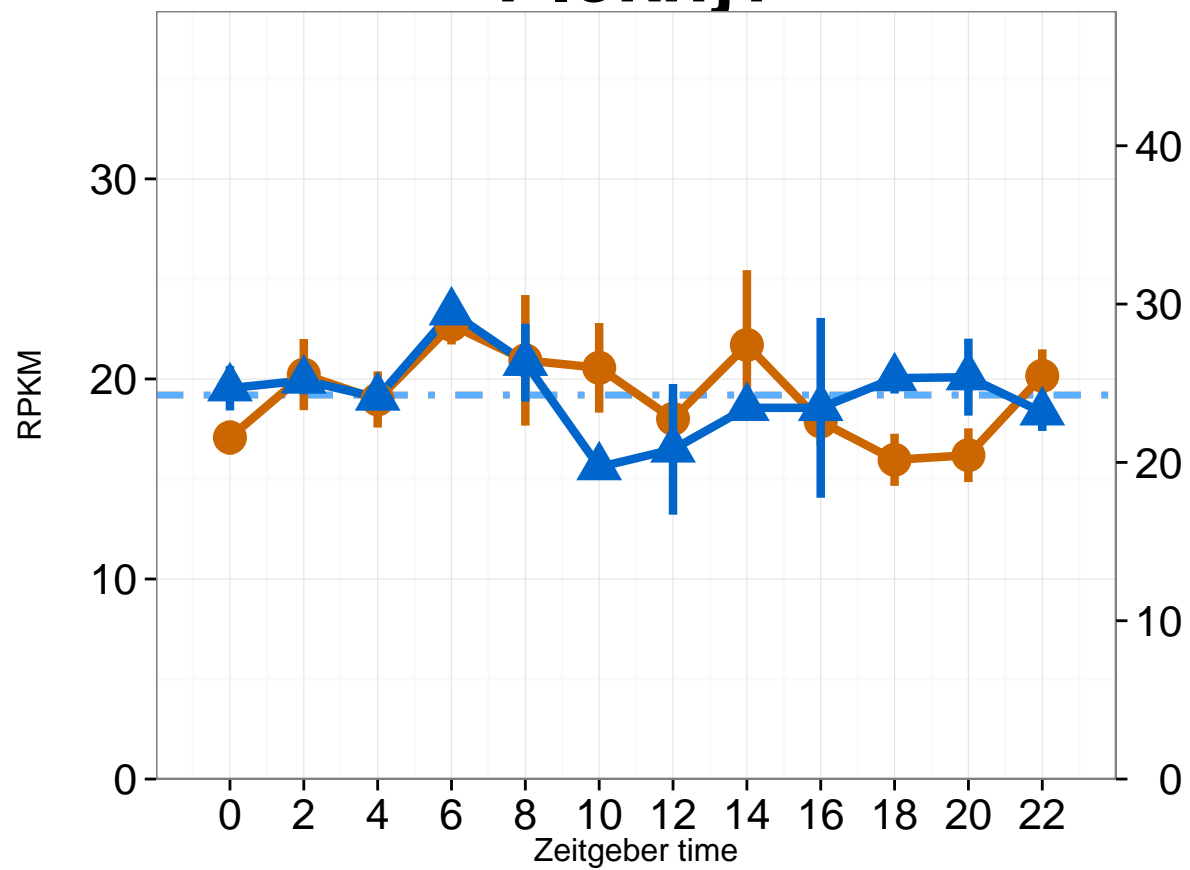

## Plekhj1

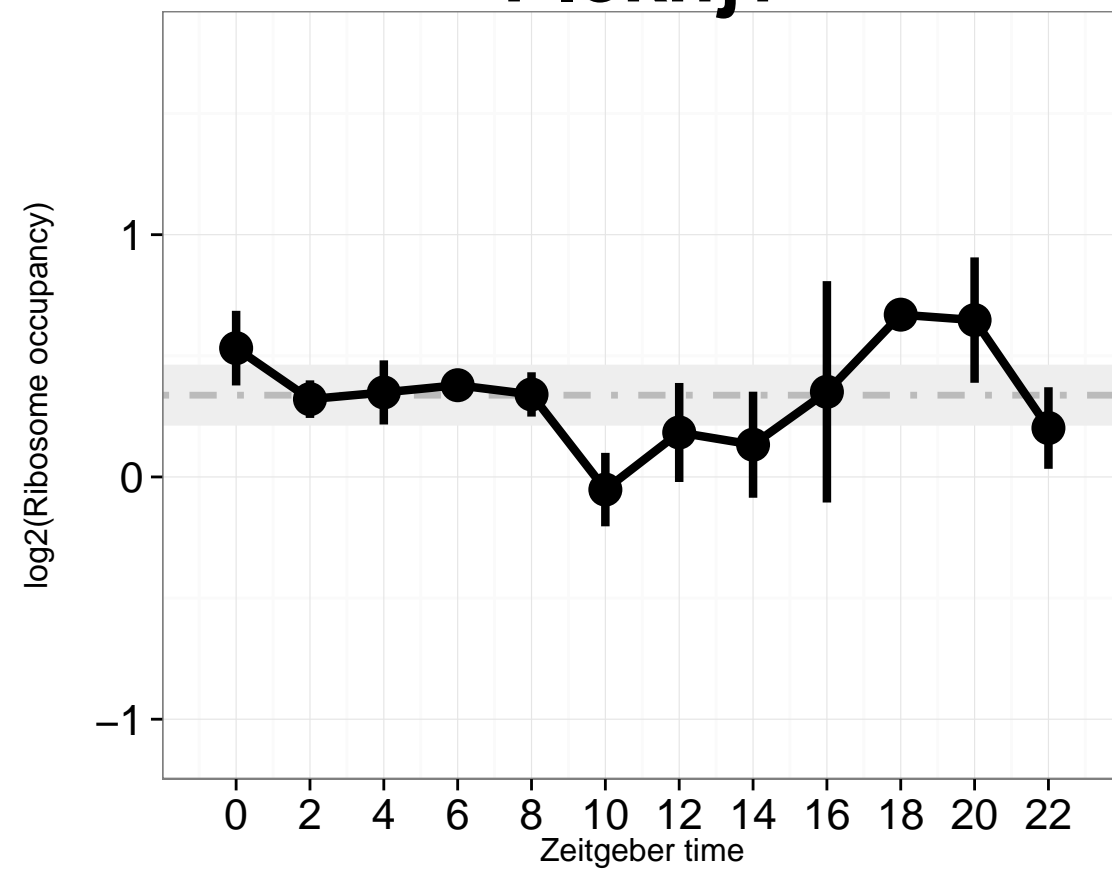

Supplement: Supplementary file 1439 [file 1]

## Sec14l1

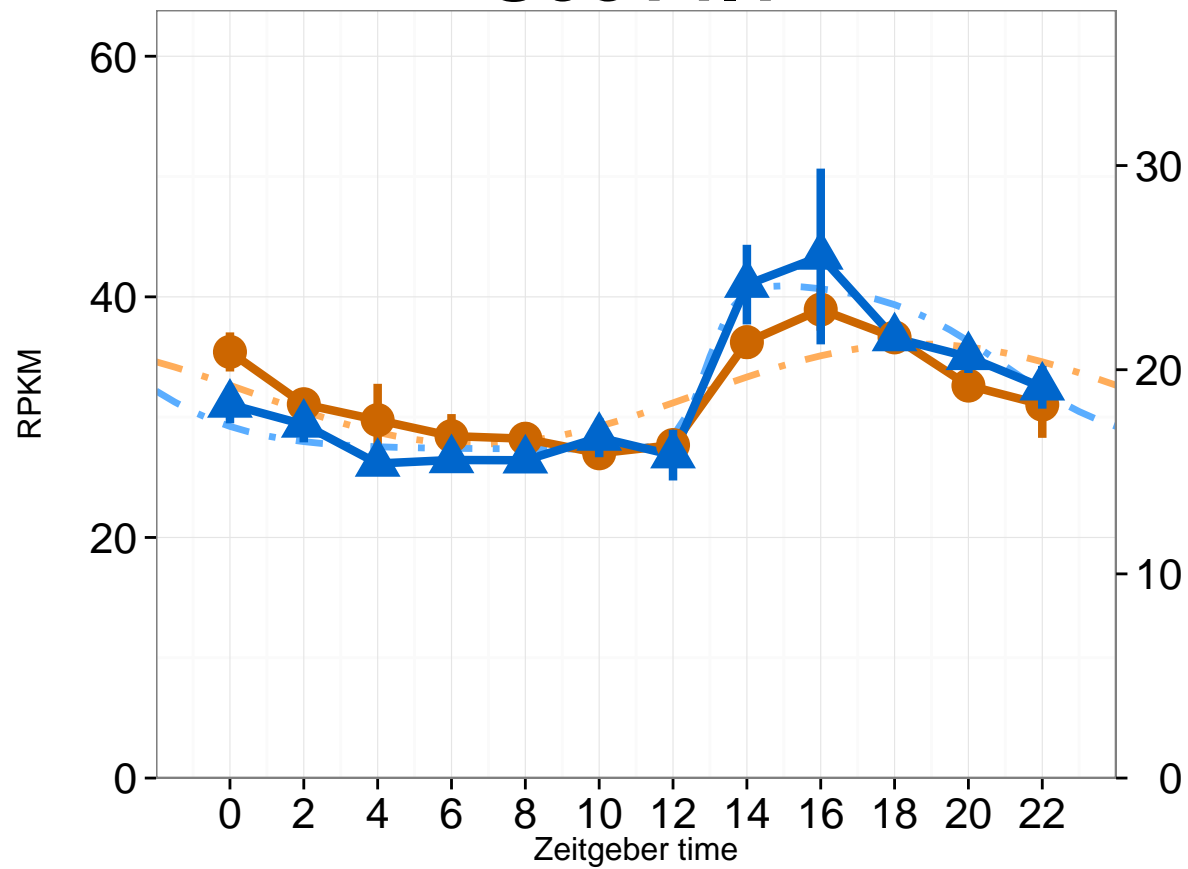

## Sec14l1

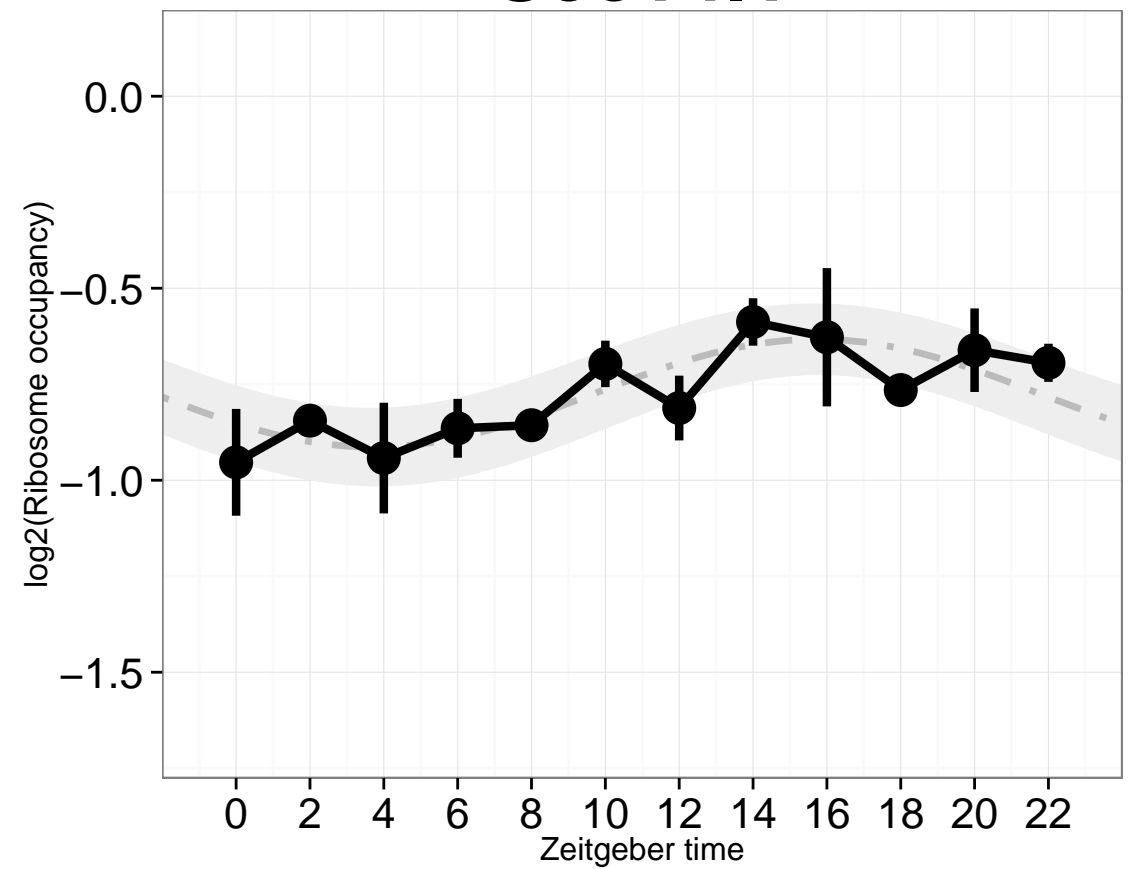

Supplement: Supplementary file 1440 [file 1]

# Tmem234

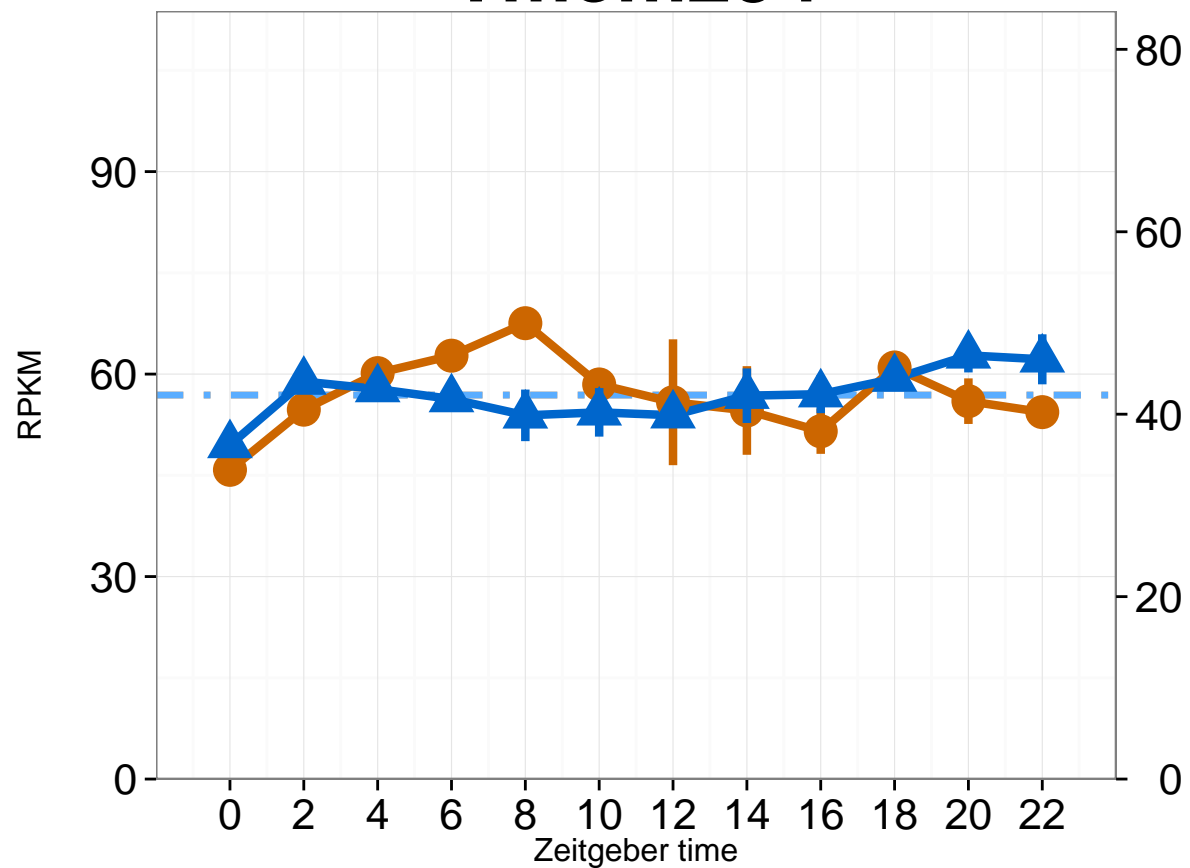

# Tmem234

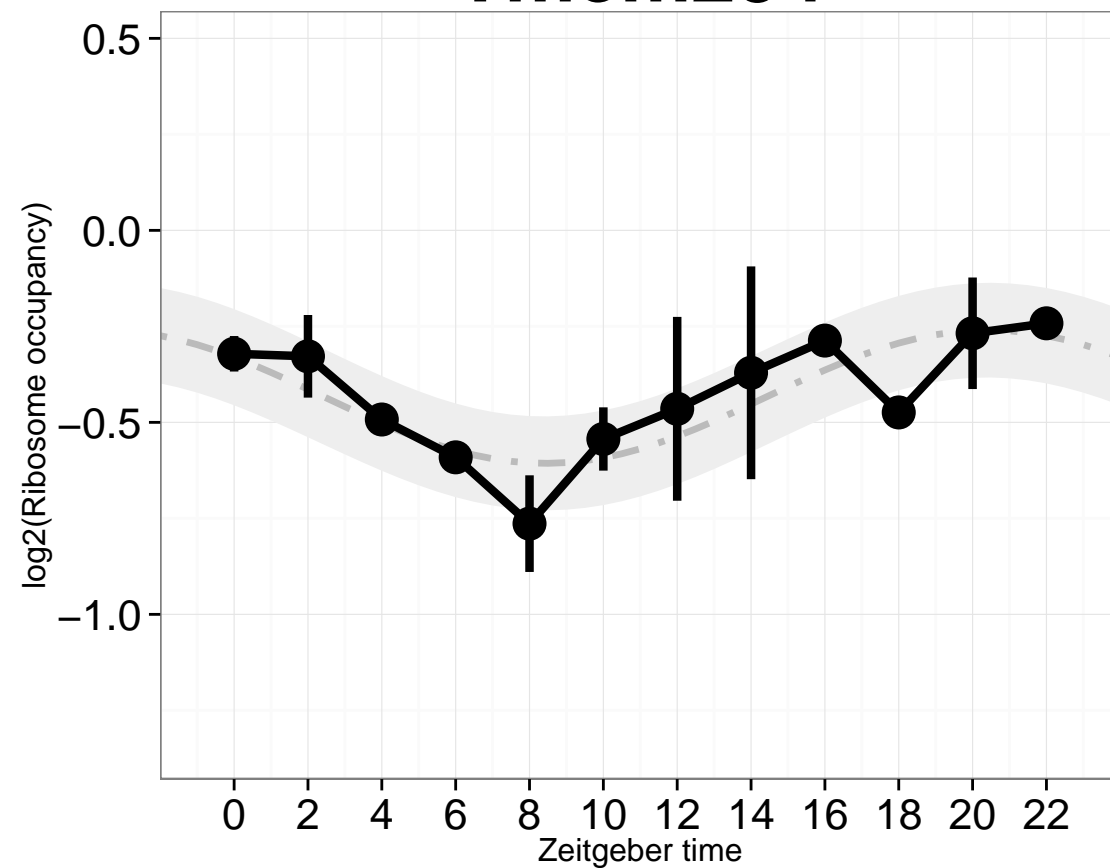

Supplement: Supplementary file 1441 [file 1]

# Eps8l3

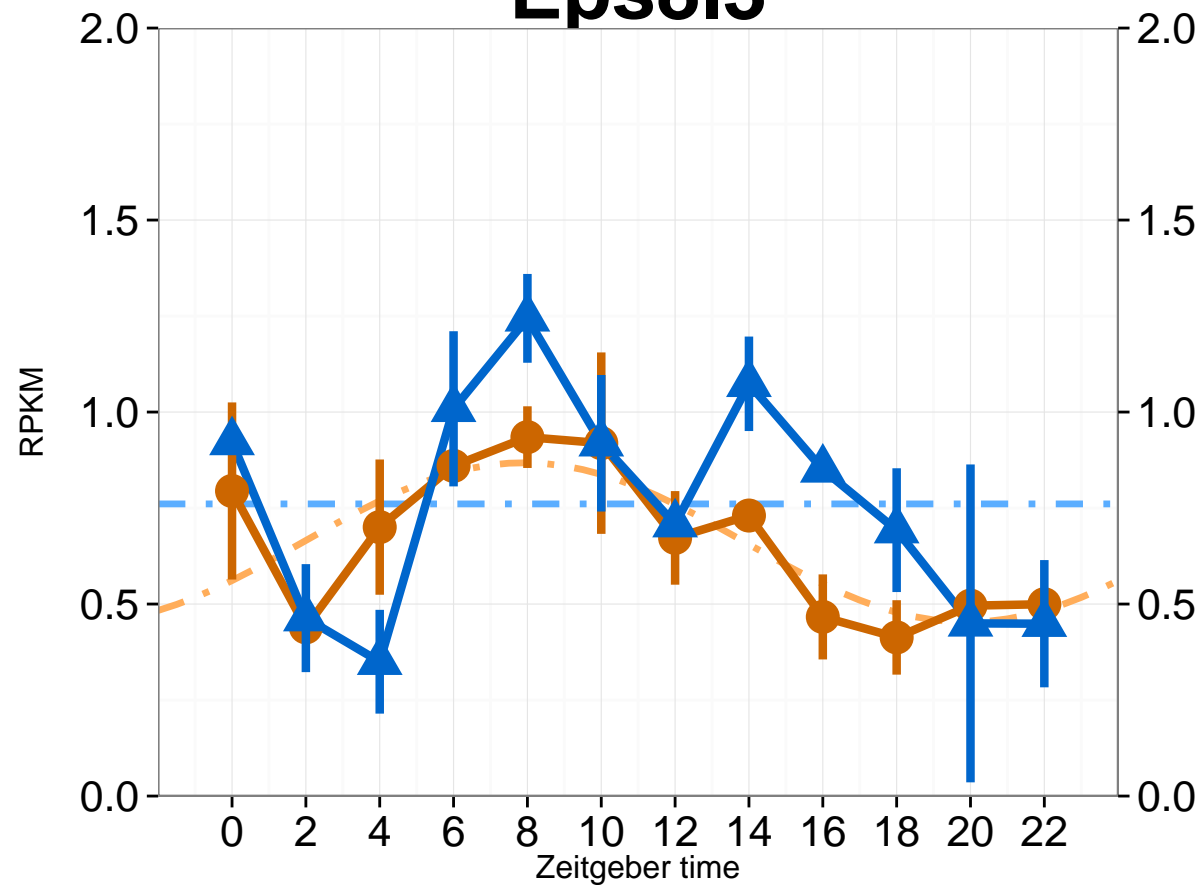

# Eps8l3

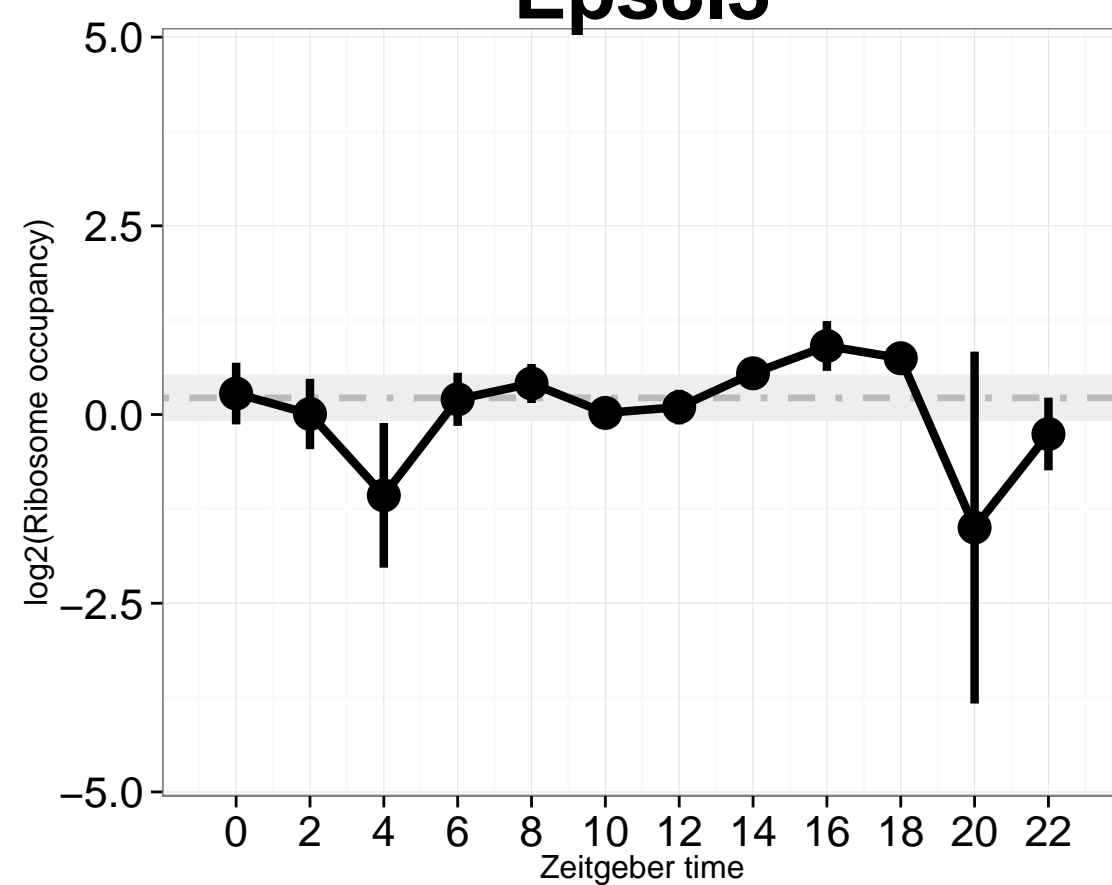

Supplement: Supplementary file 1442 [file 1]

## Ero1lb

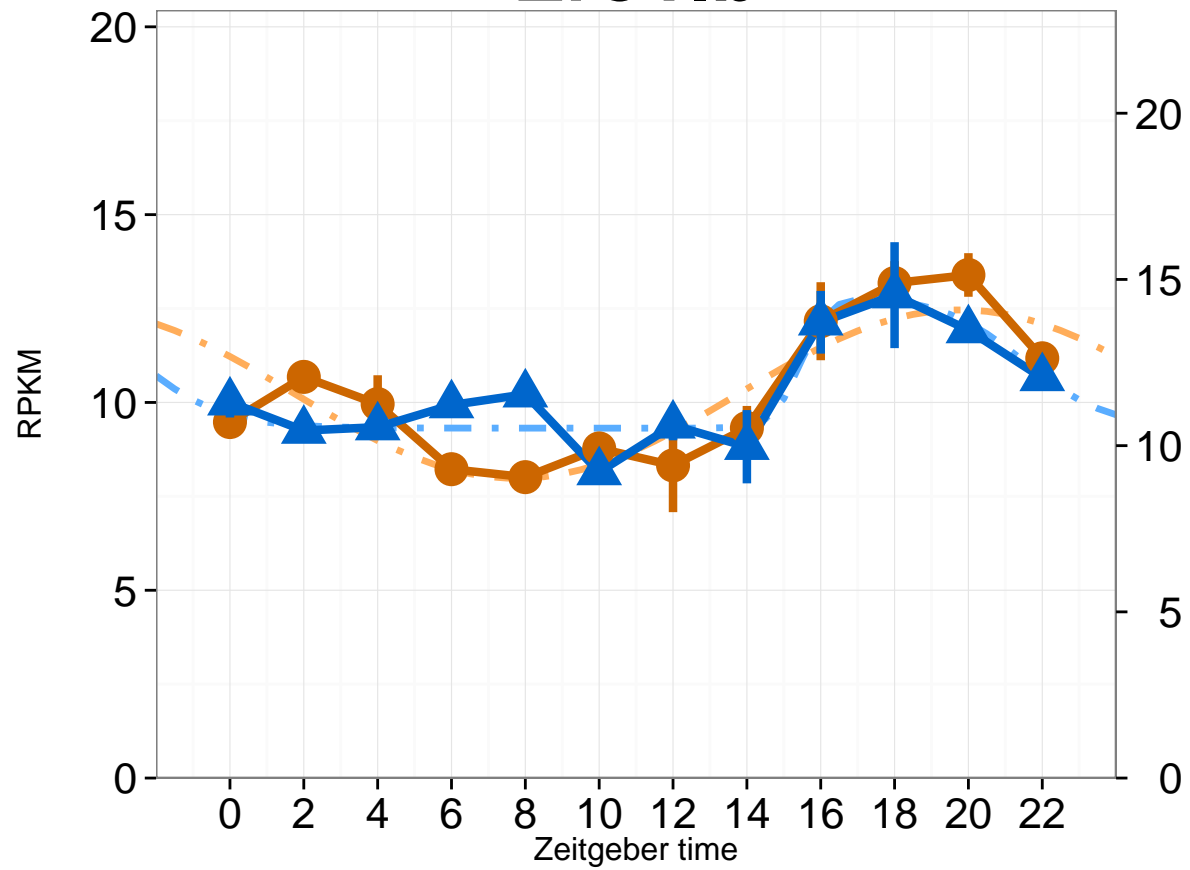

## Ero1lb

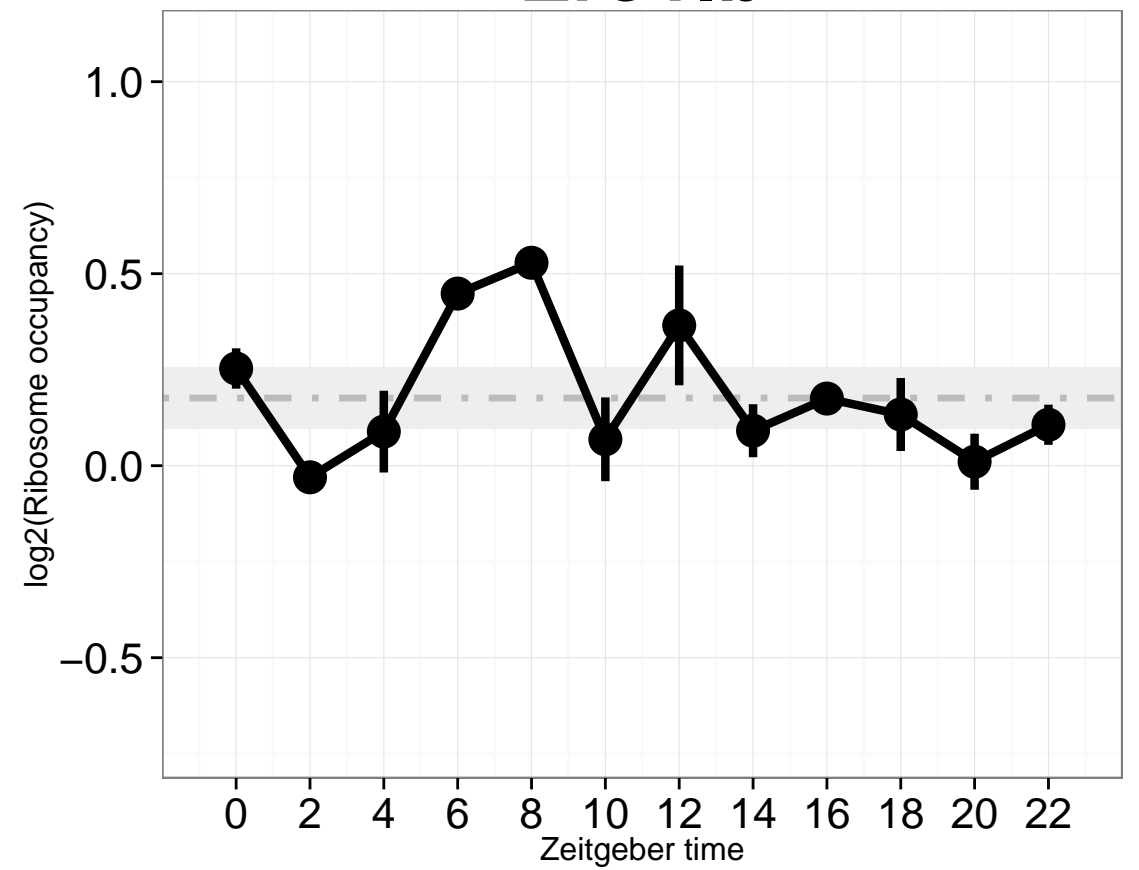

Supplement: Supplementary file 1443 [file 1]

## Cd36

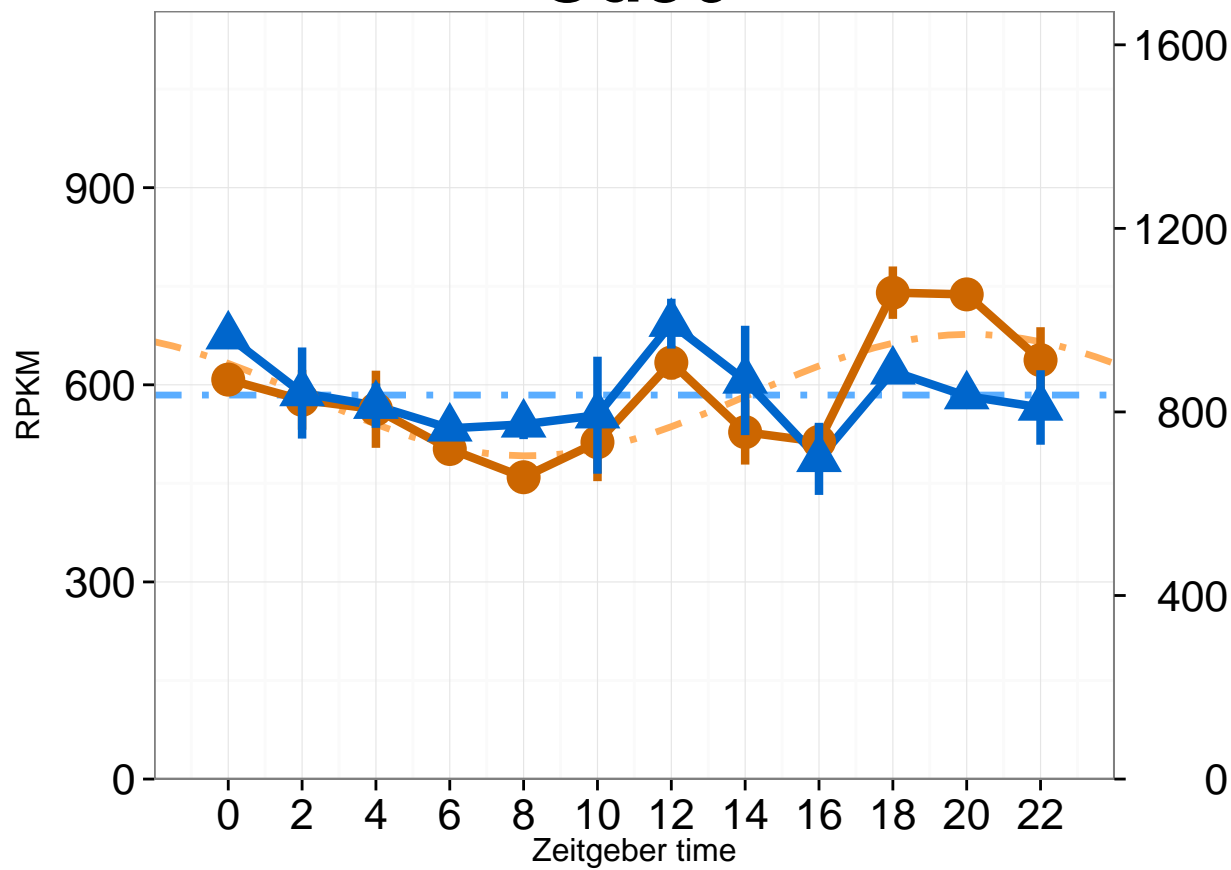

## Cd36

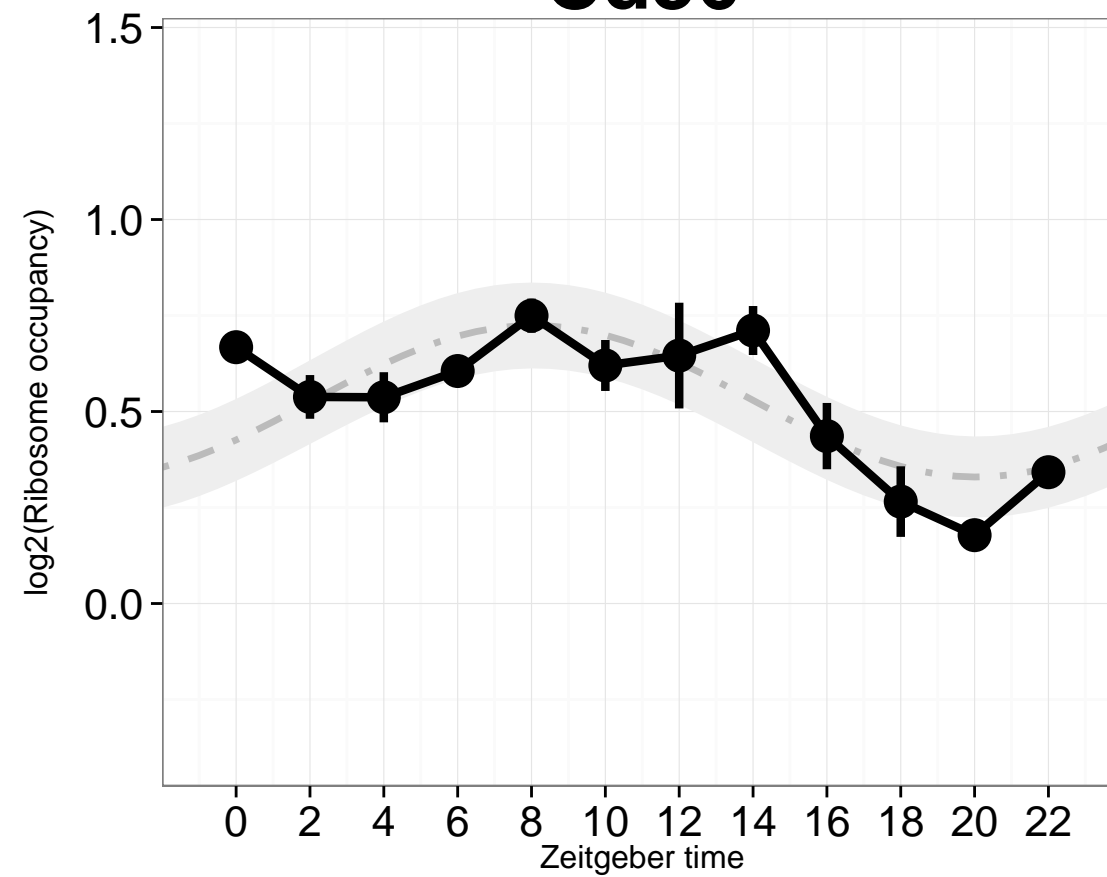

Supplement: Supplementary file 1444 [file 1]

## Rbx1

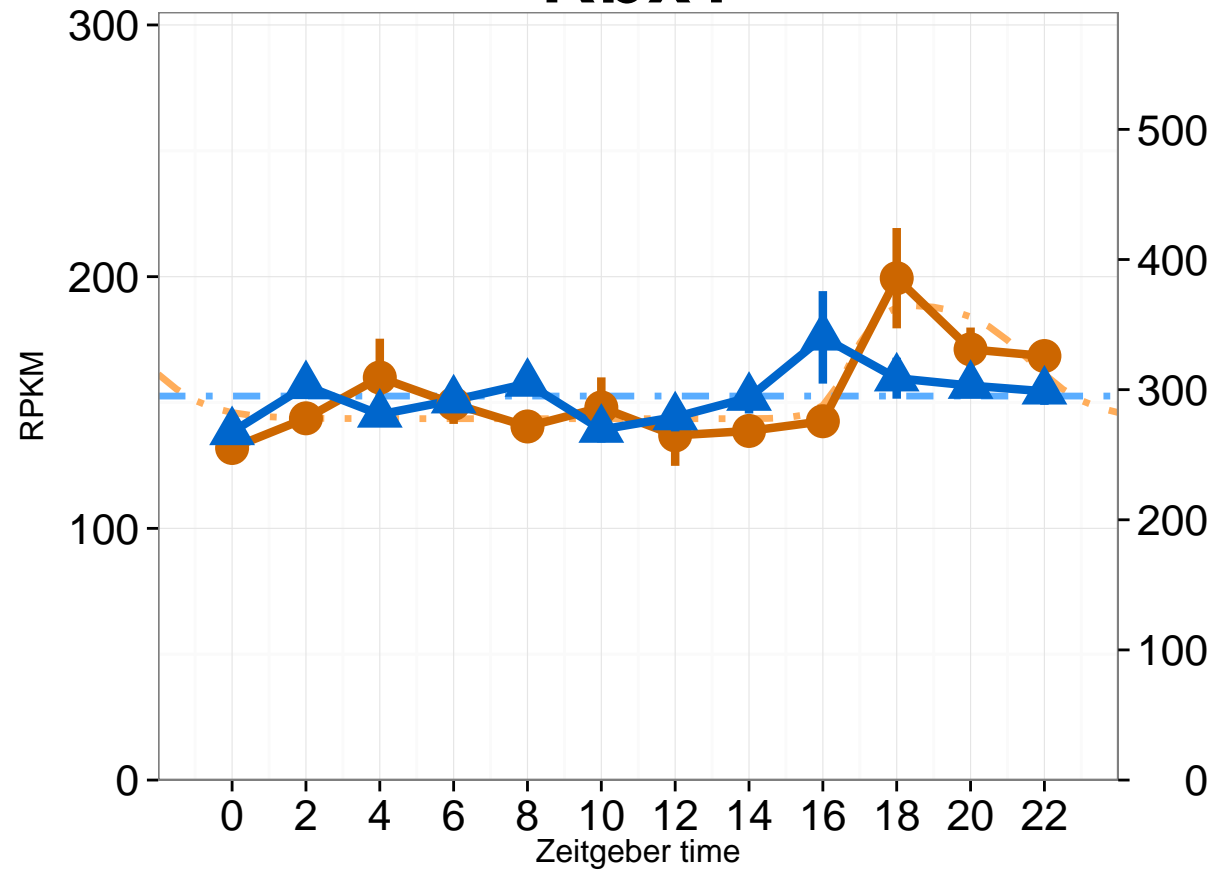

## Rbx1

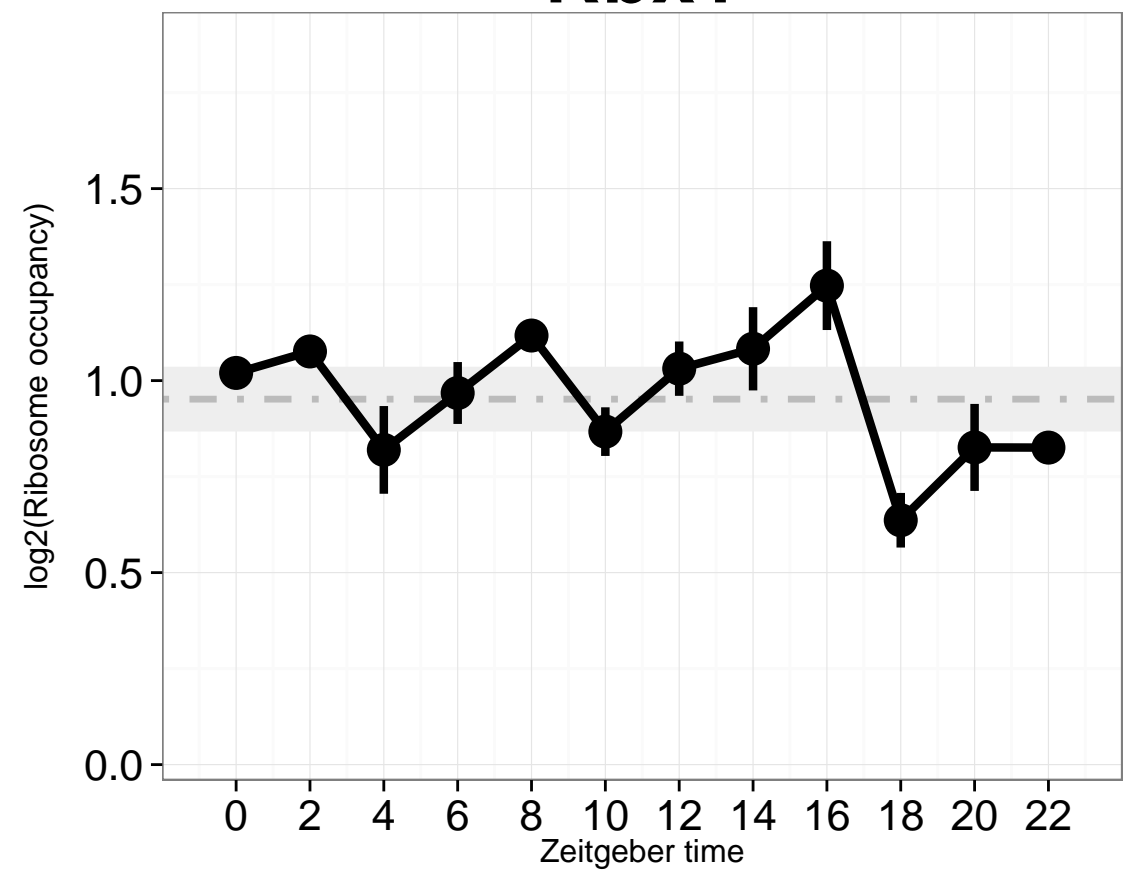

Supplement: Supplementary file 1445 [file 1]

## Gnptab

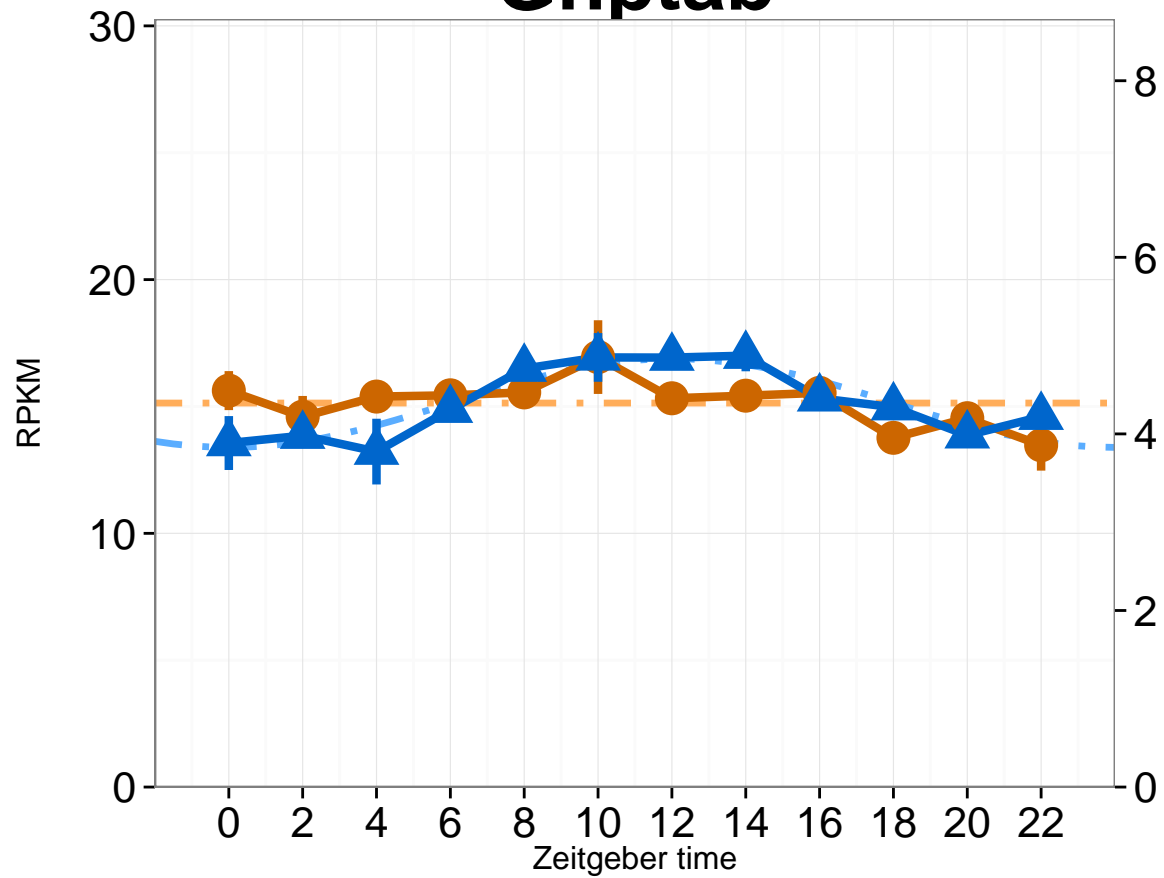

## Gnptab

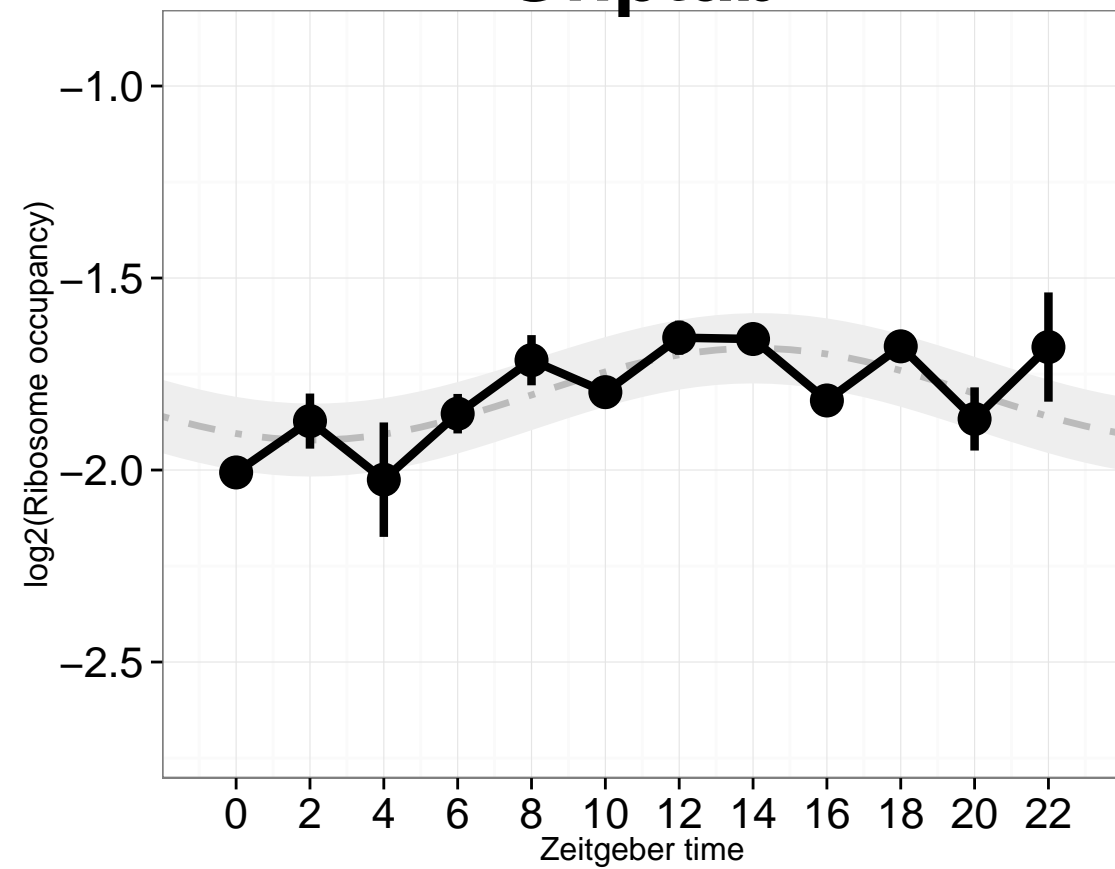

Supplement: Supplementary file 1446 [file 1]

# Myh11

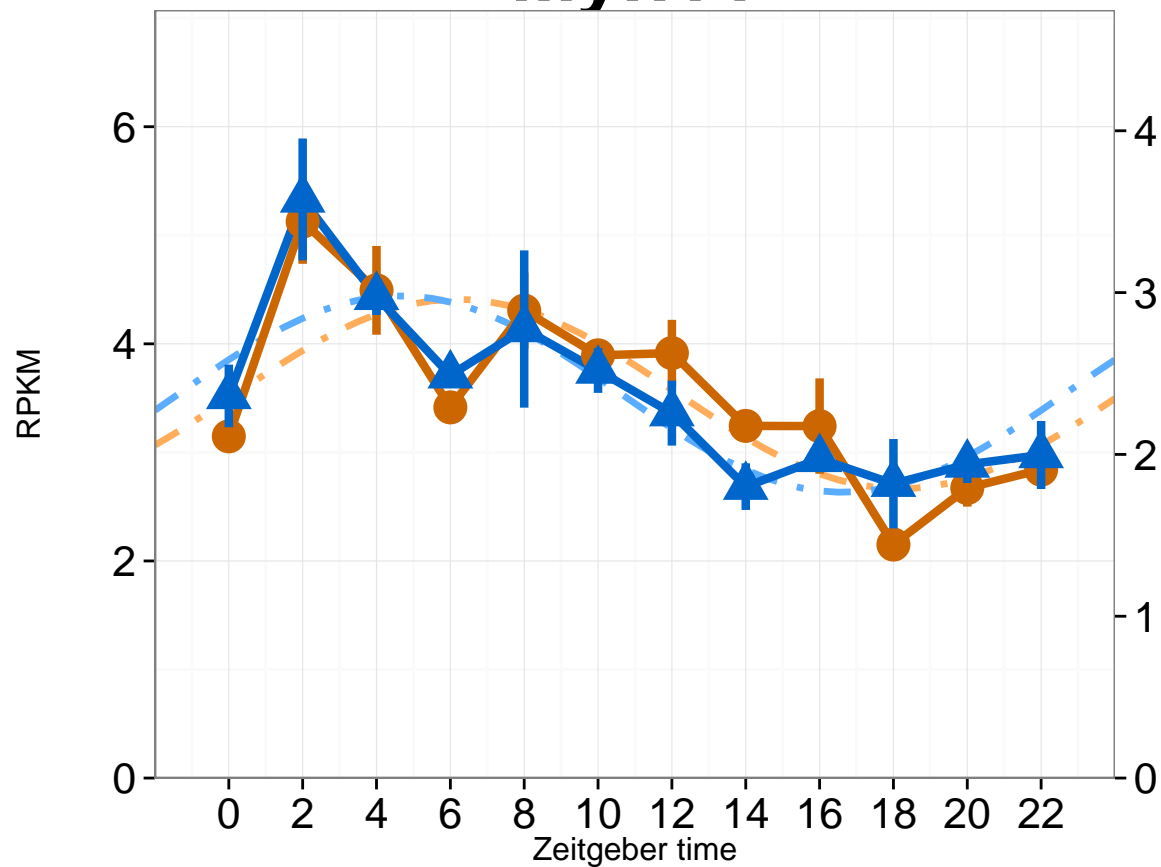

# Myh11

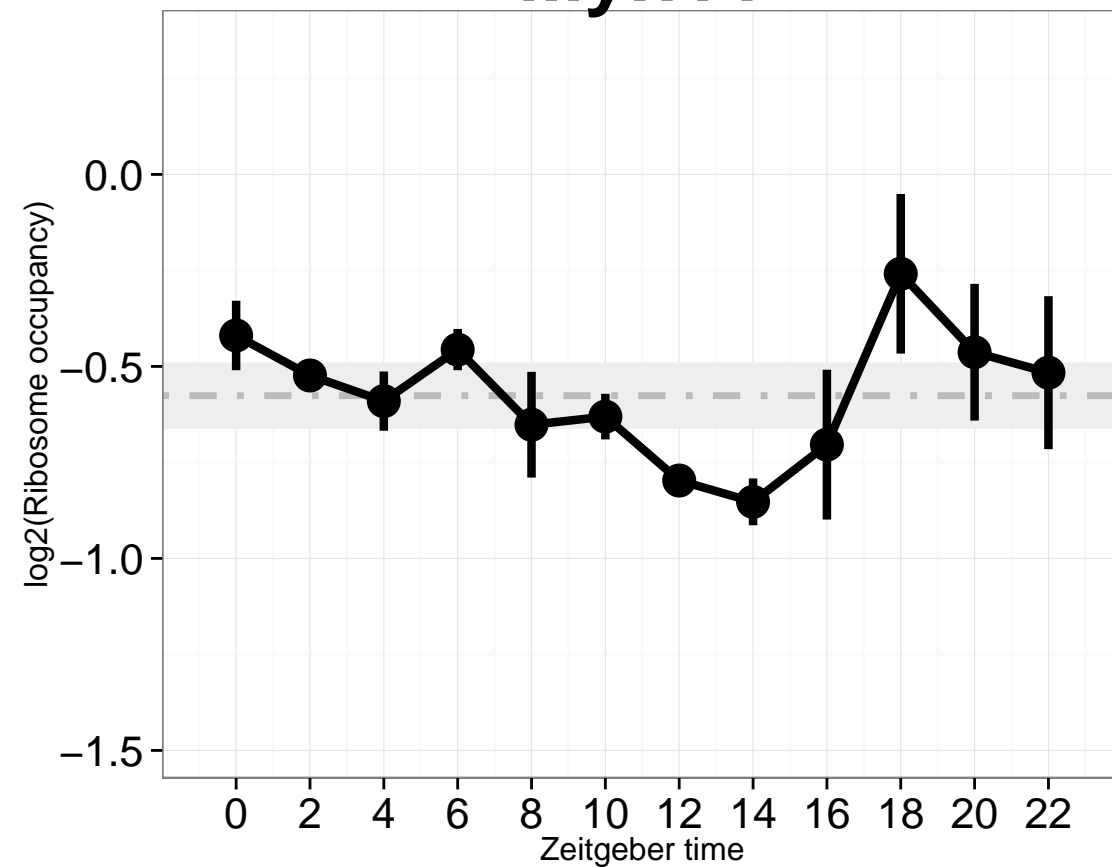

Supplement: Supplementary file 1447 [file 1]

## Cenpa

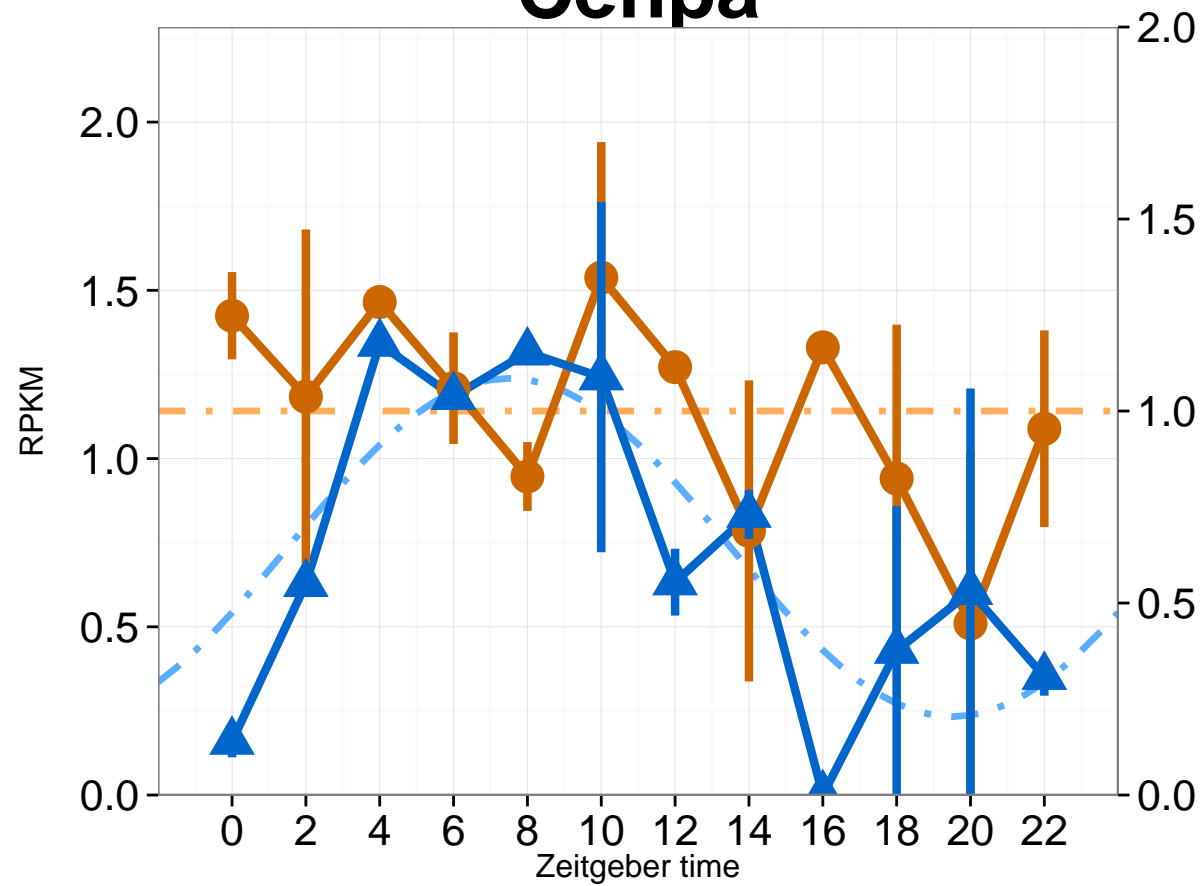

## Cenpa

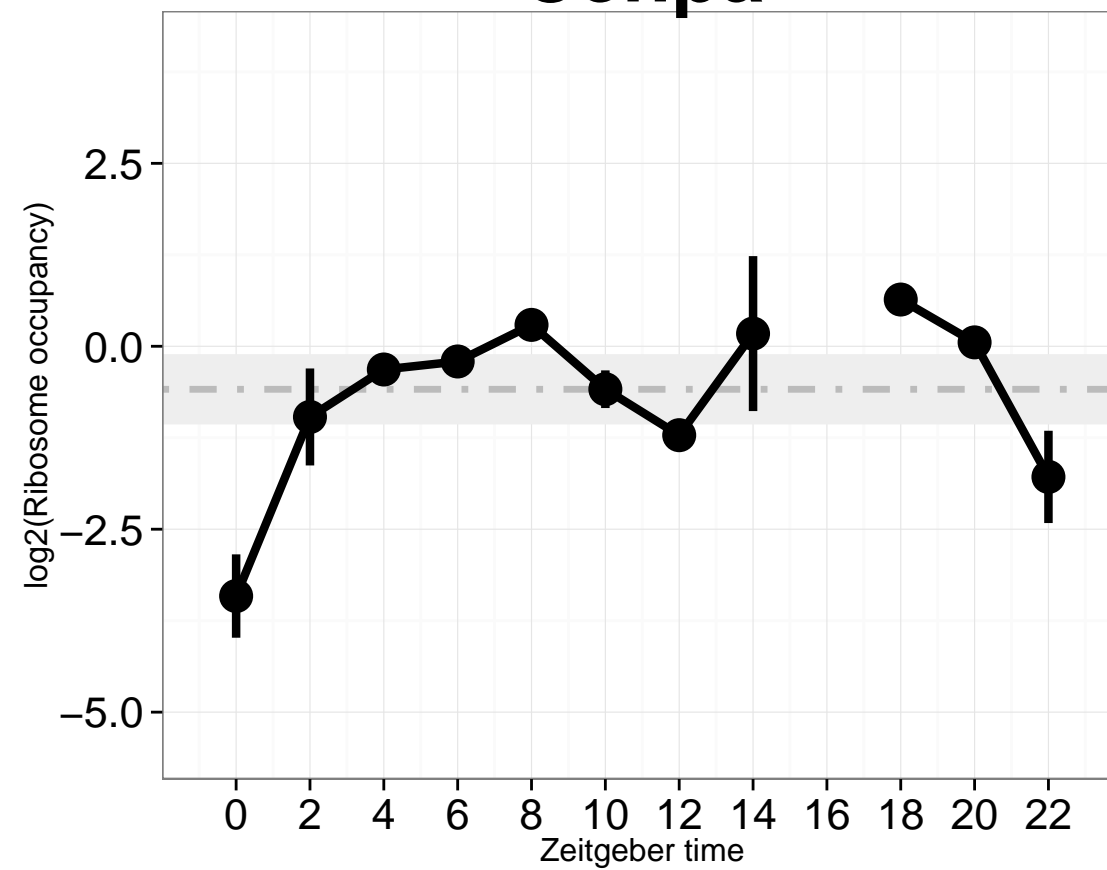

Supplement: Supplementary file 1448 [file 1]

# N4bp2

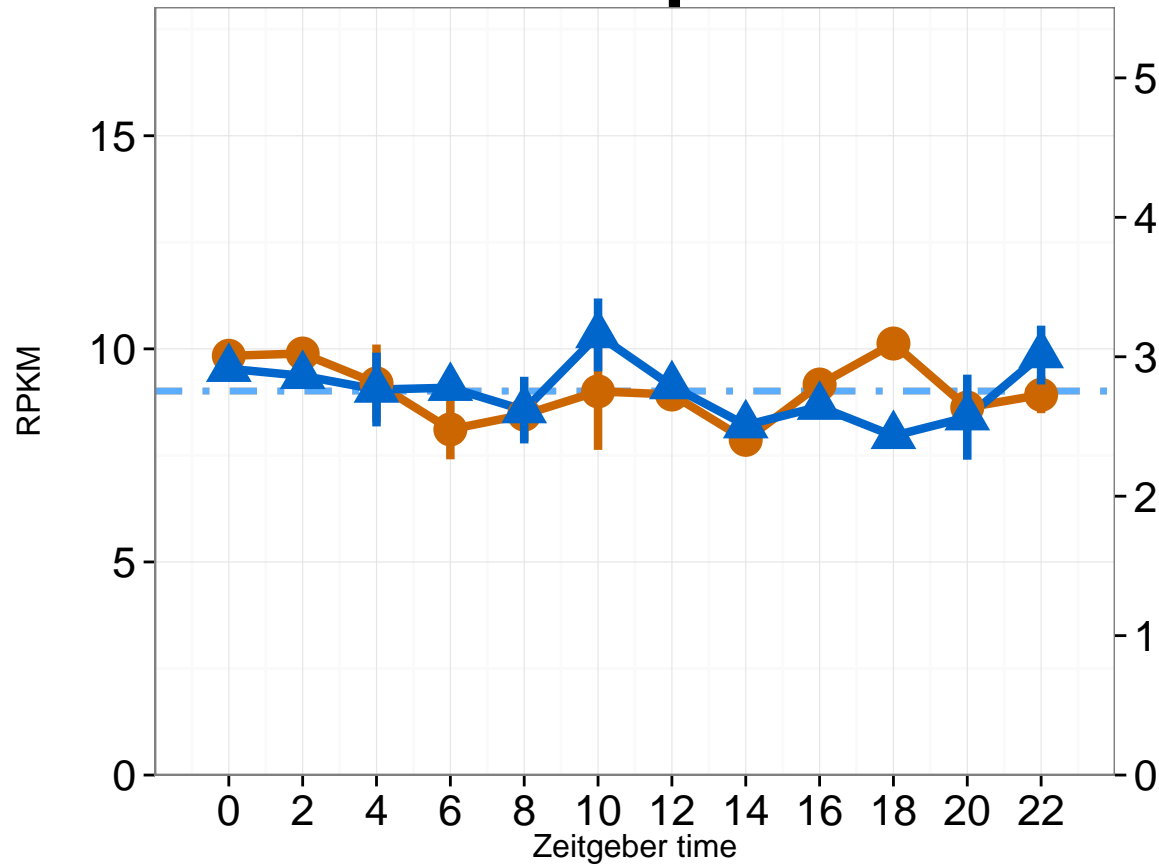

# N4bp2

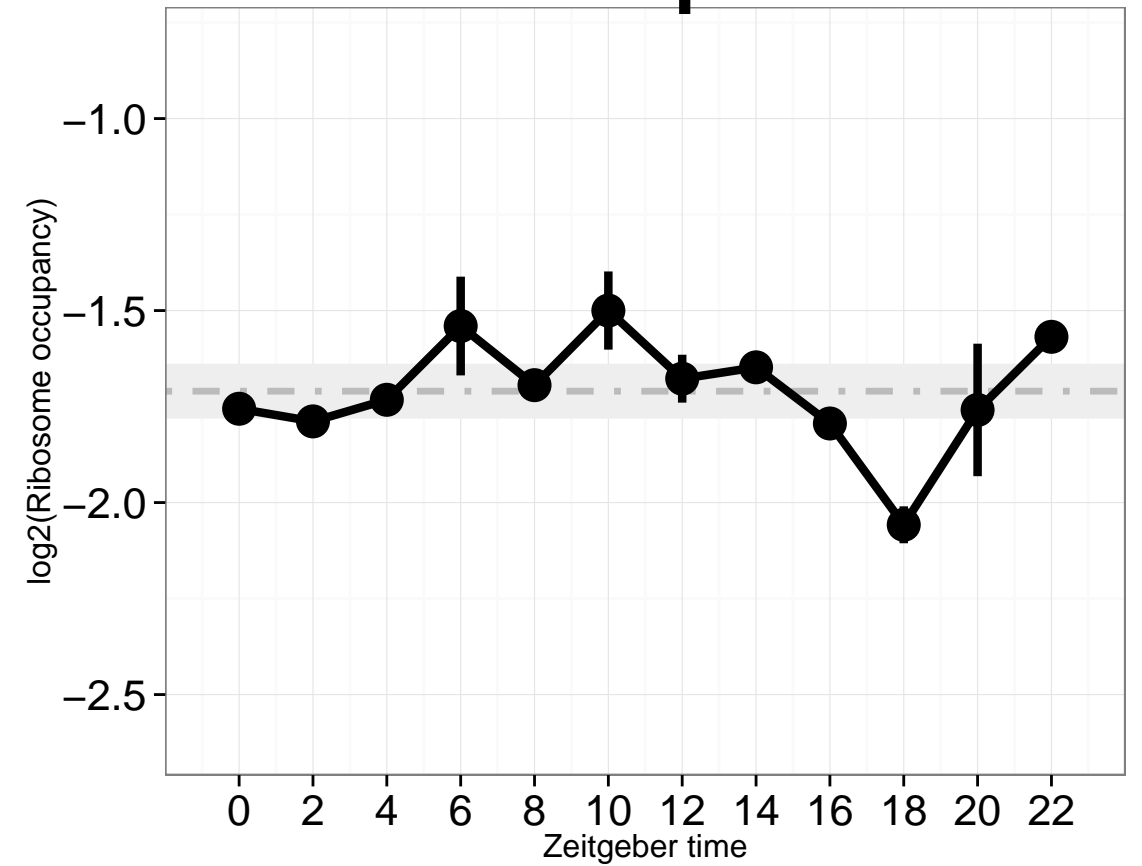

Supplement: Supplementary file 1449 [file 1]

## Naa50

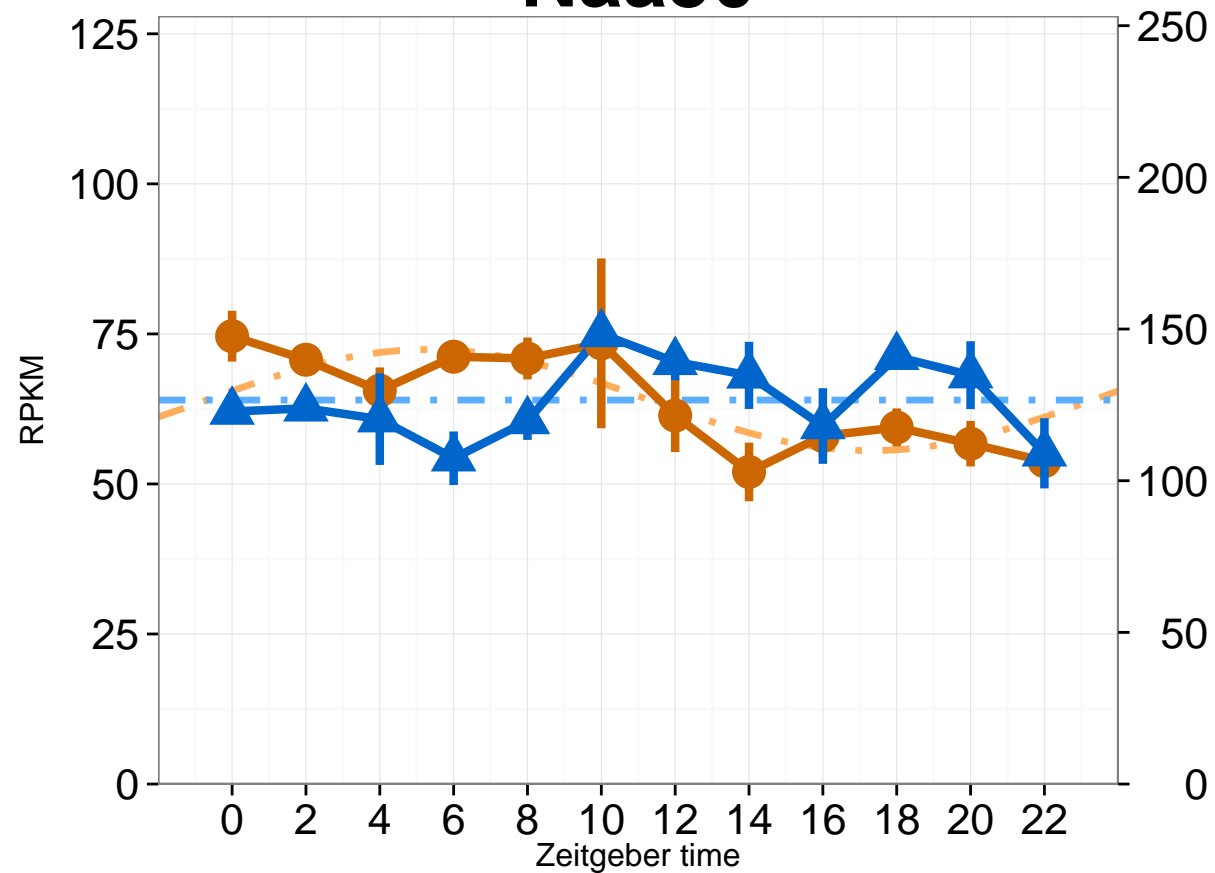

## Naa50

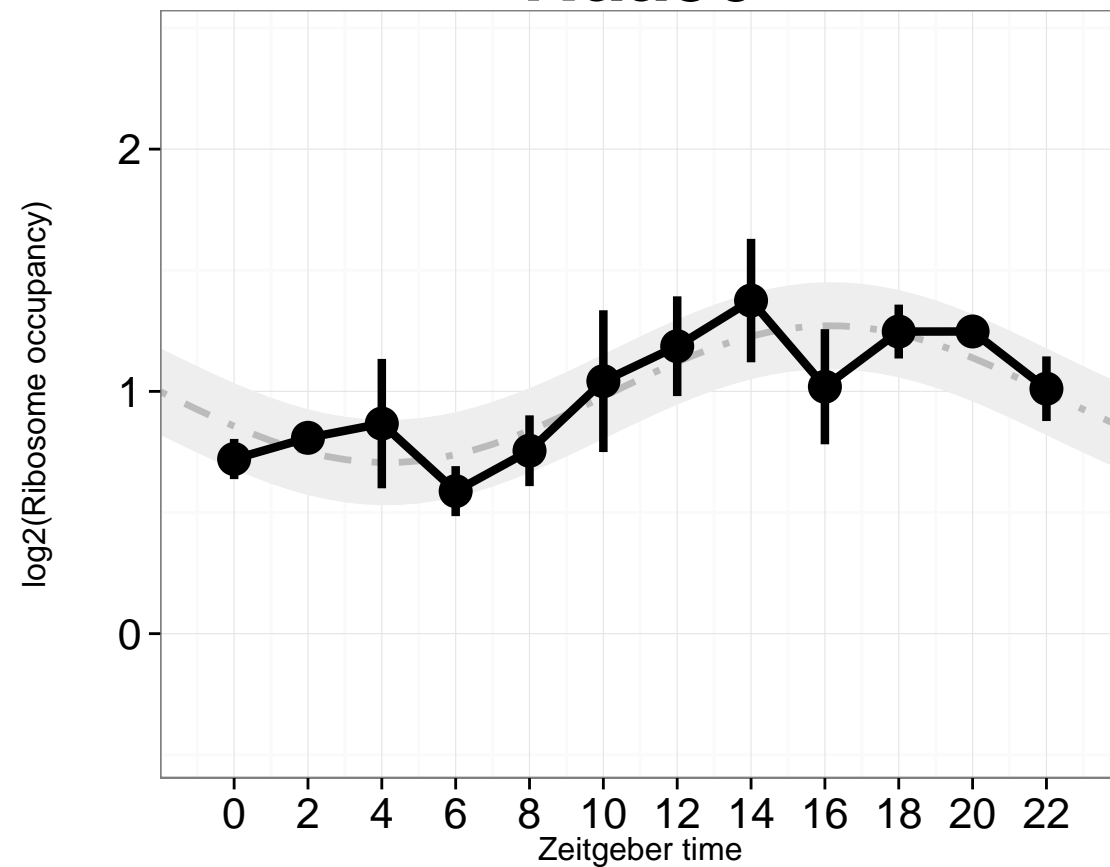

Supplement: Supplementary file 1450 [file 1]

## Adamts1

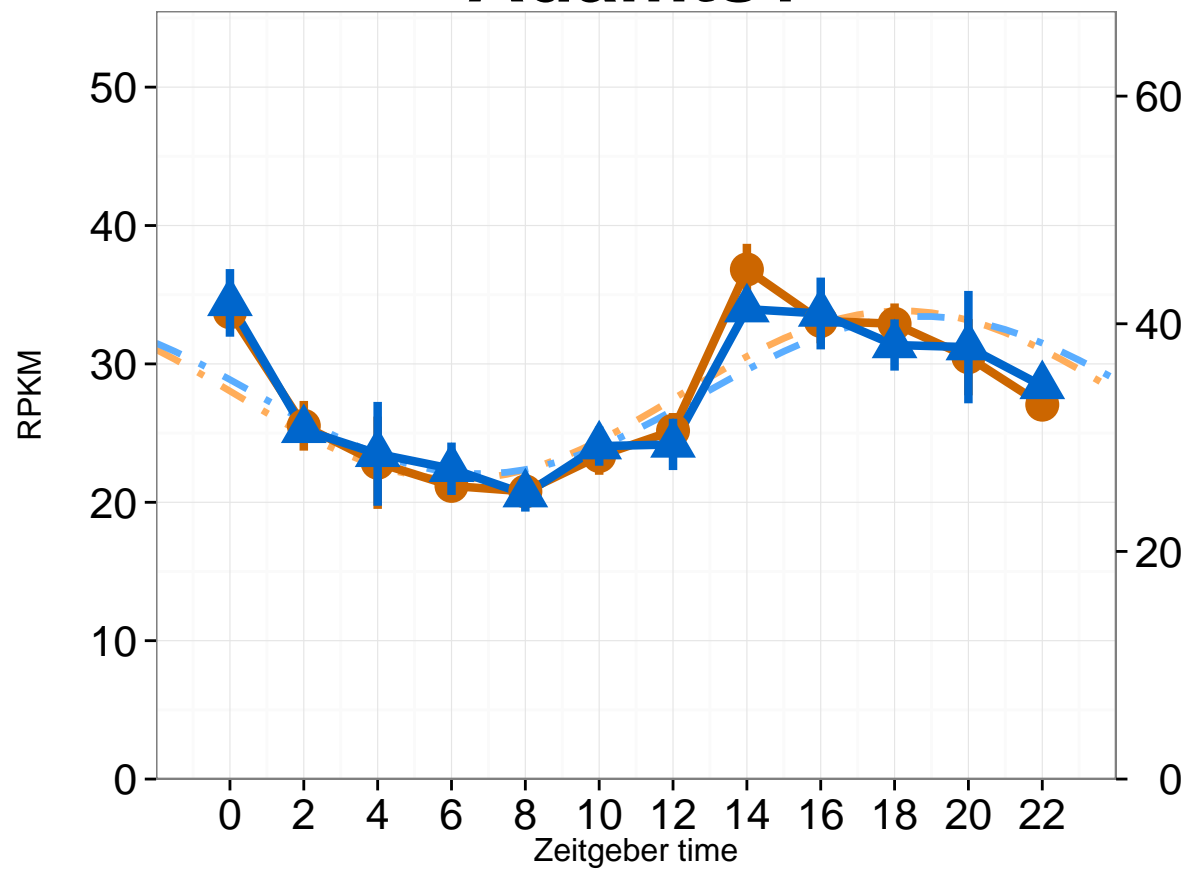

## Adamts1

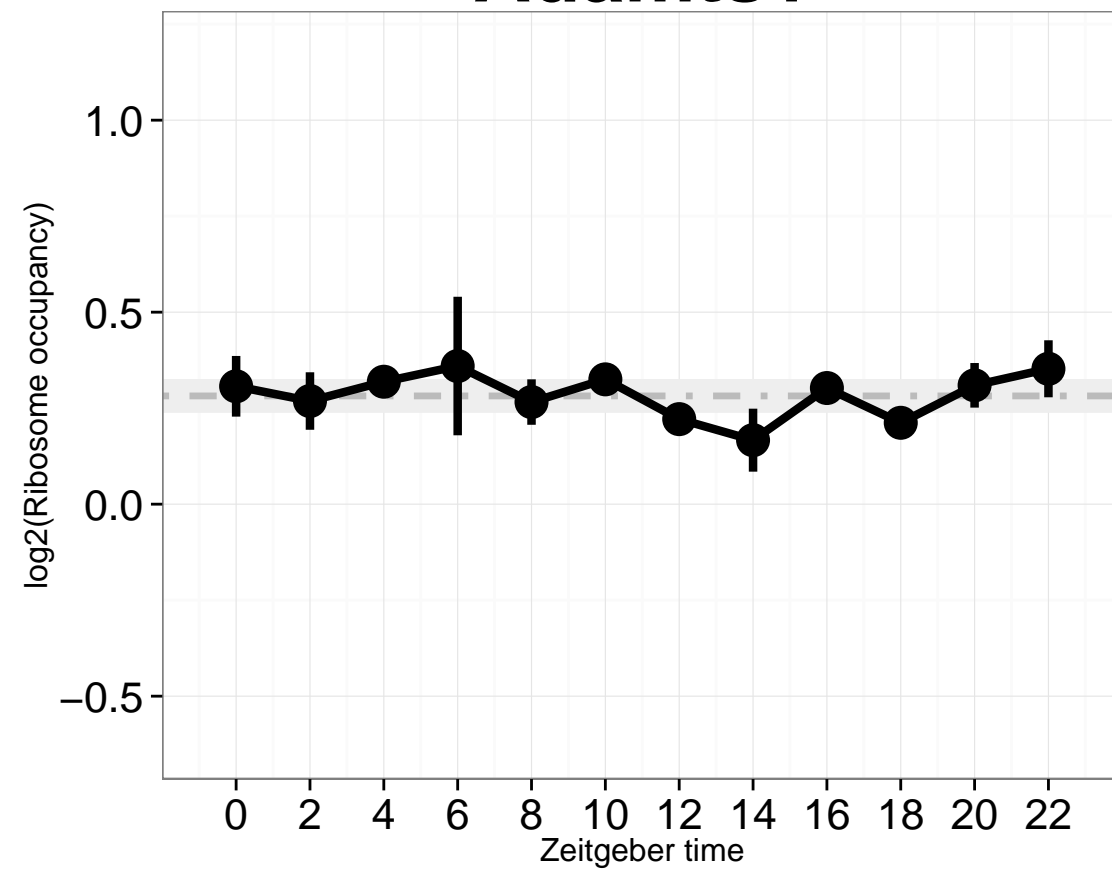

Supplement: Supplementary file 1451 [file 1]

## Omd

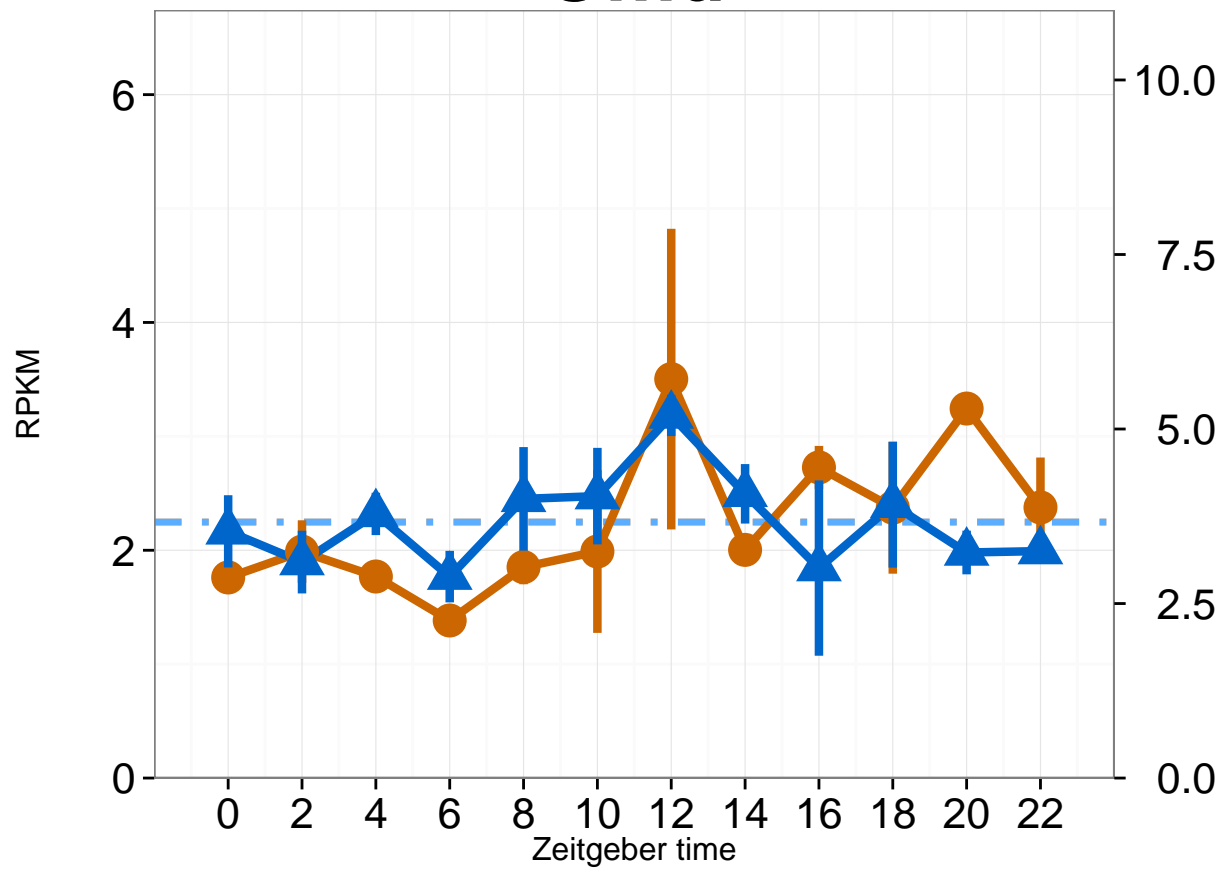

## Omd

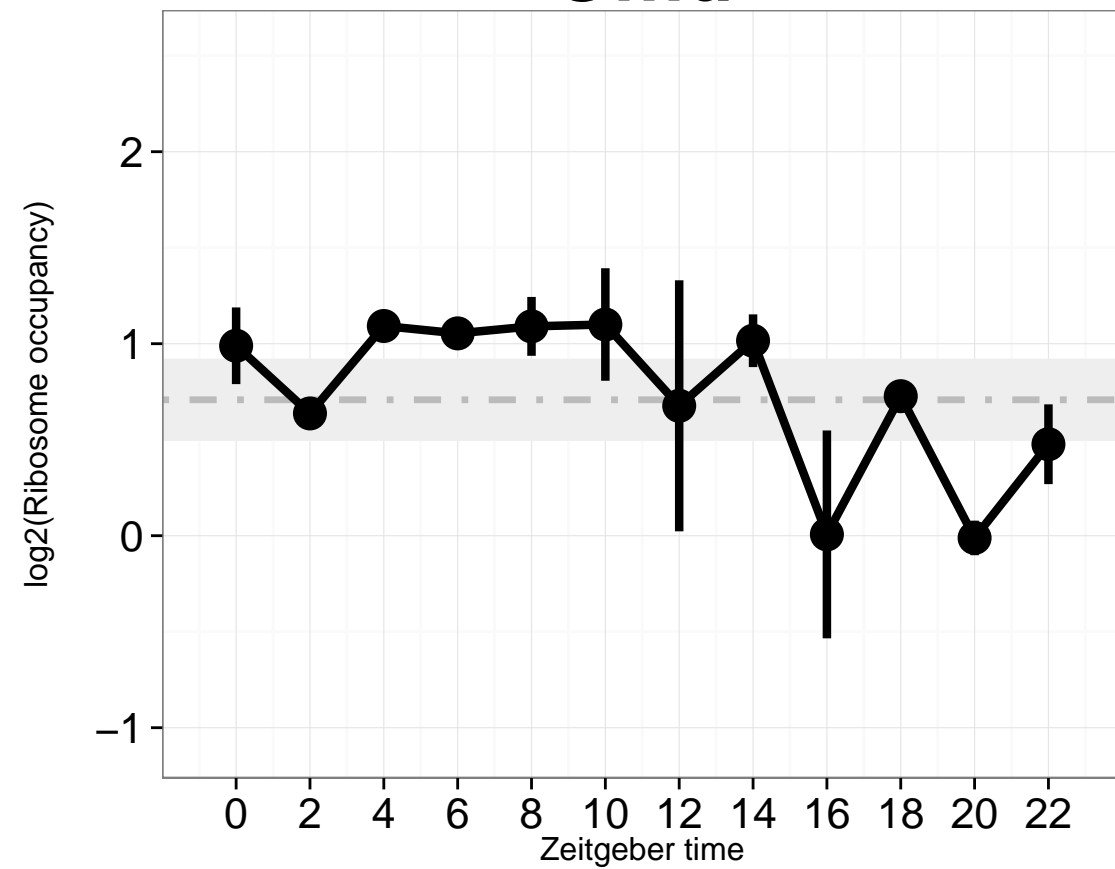

Supplement: Supplementary file 1452 [file 1]

# Srgap3

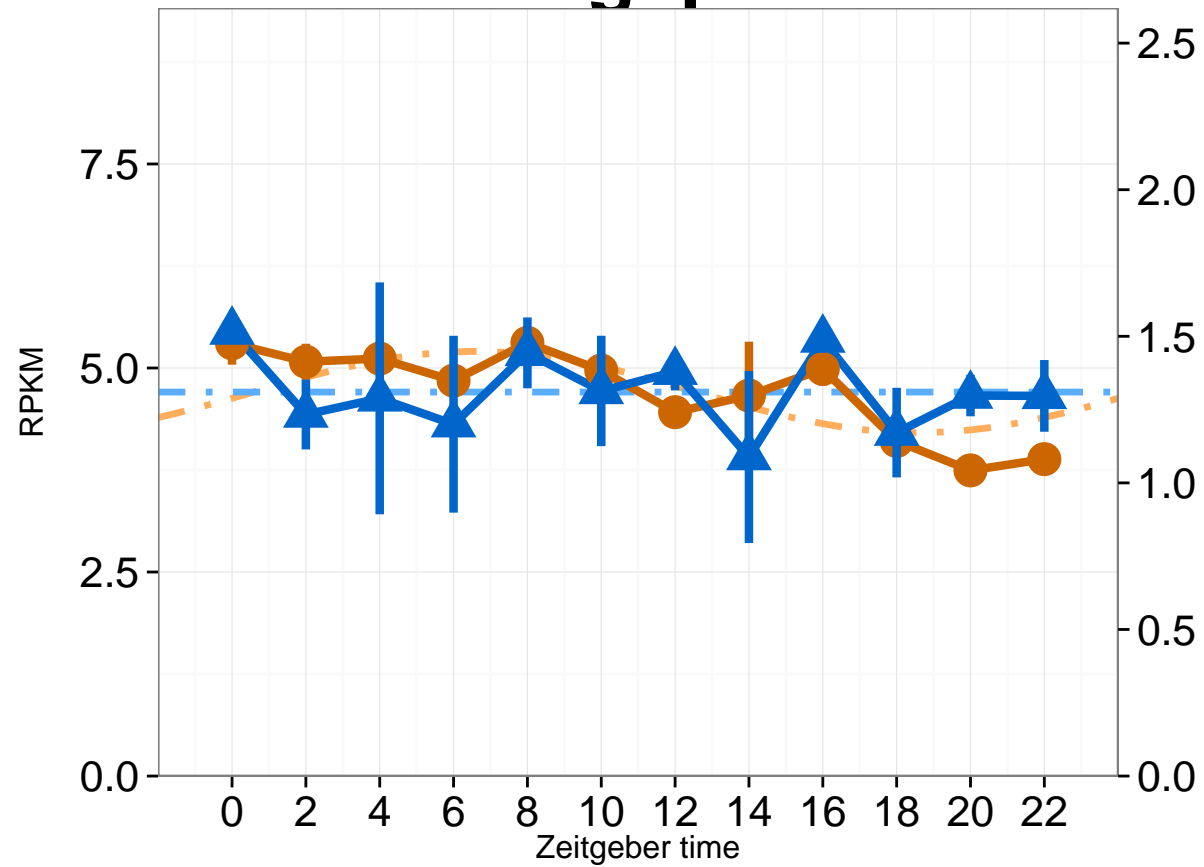

# Srgap3

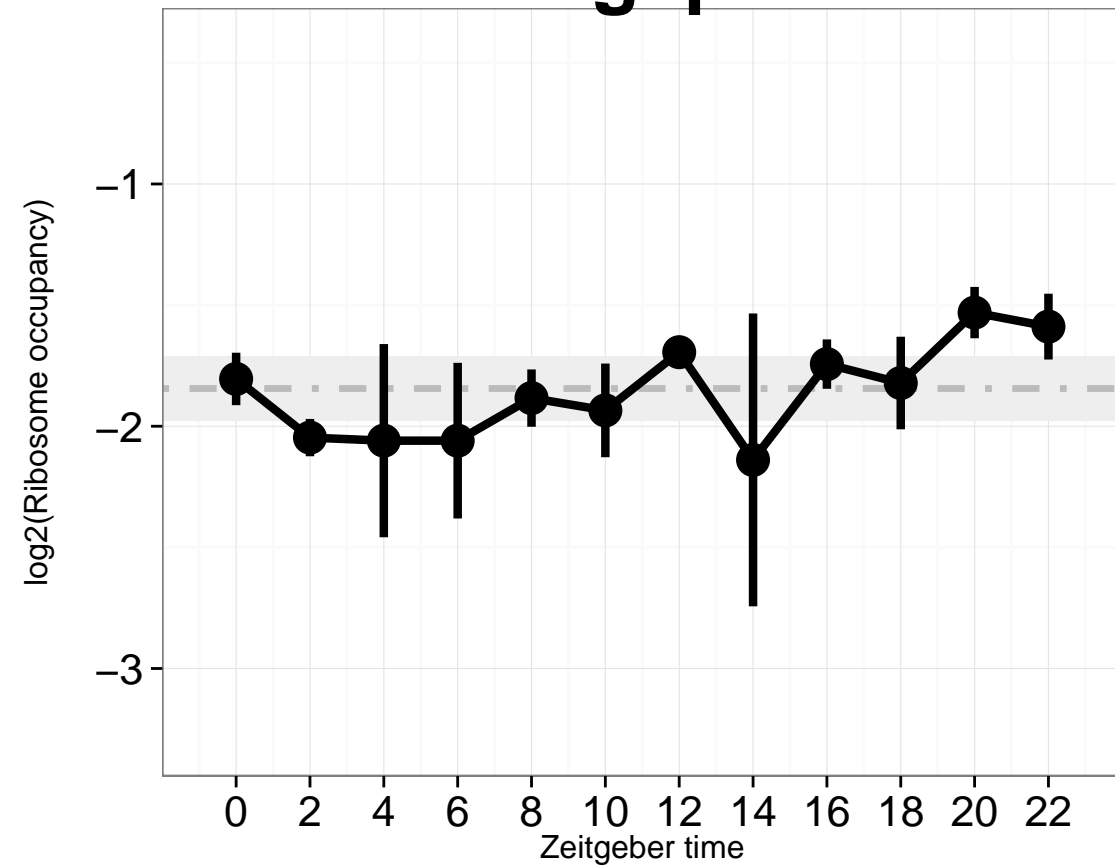

Supplement: Supplementary file 1453 [file 1]

## Fkbp5

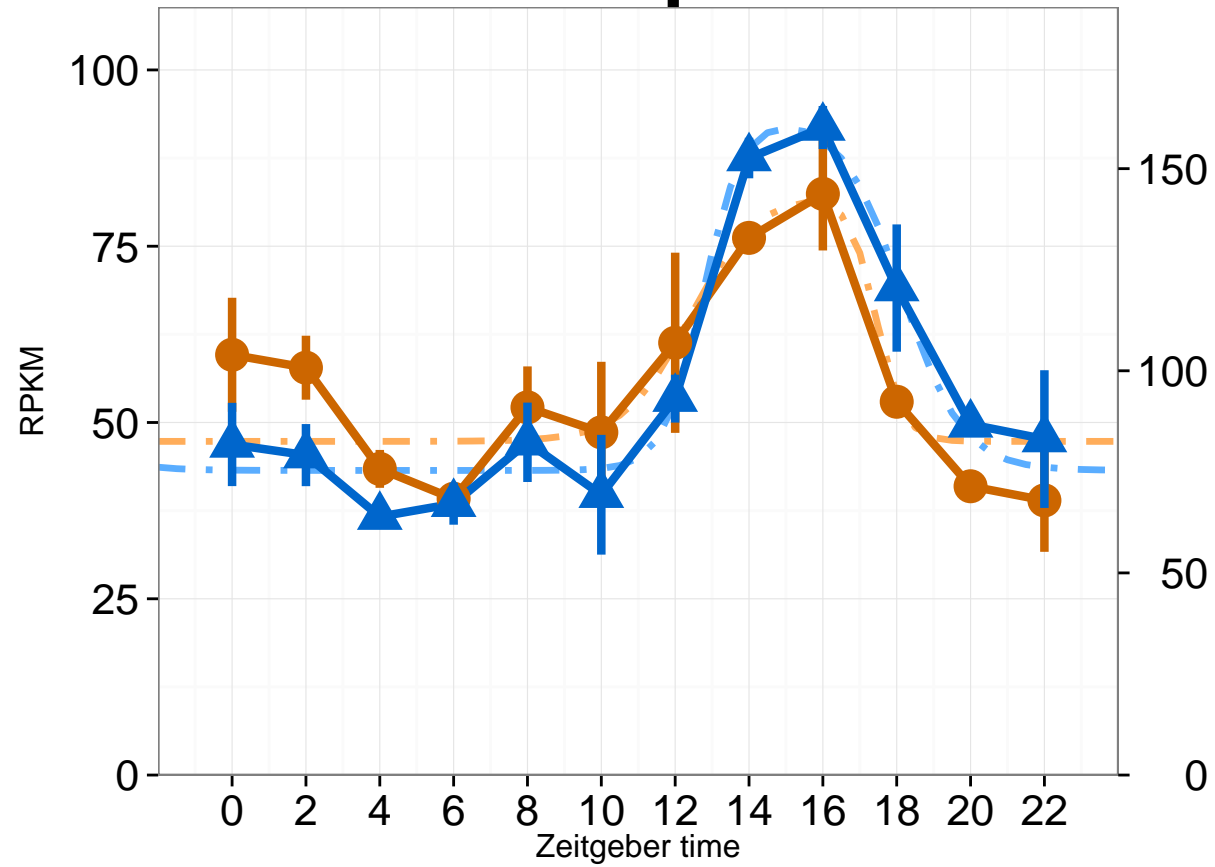

## Fkbp5

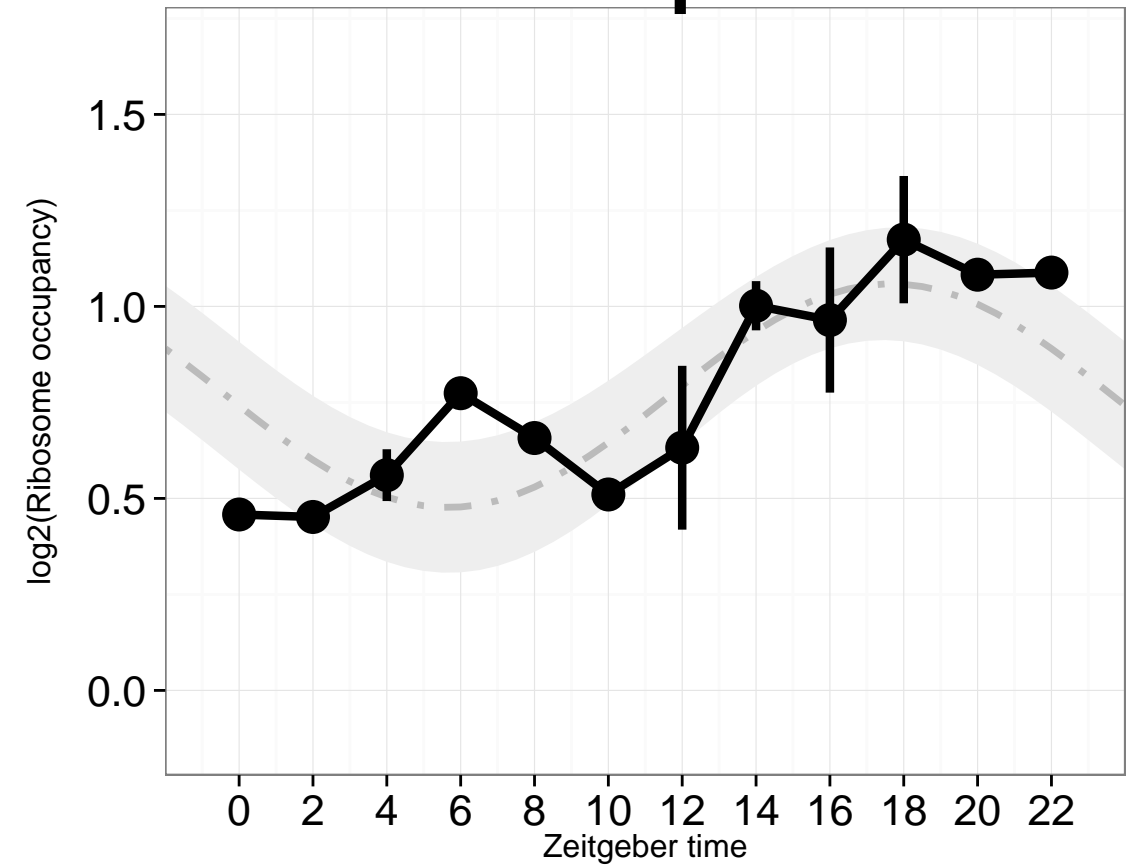

Supplement: Supplementary file 1454 [file 1]

## Dcaf11

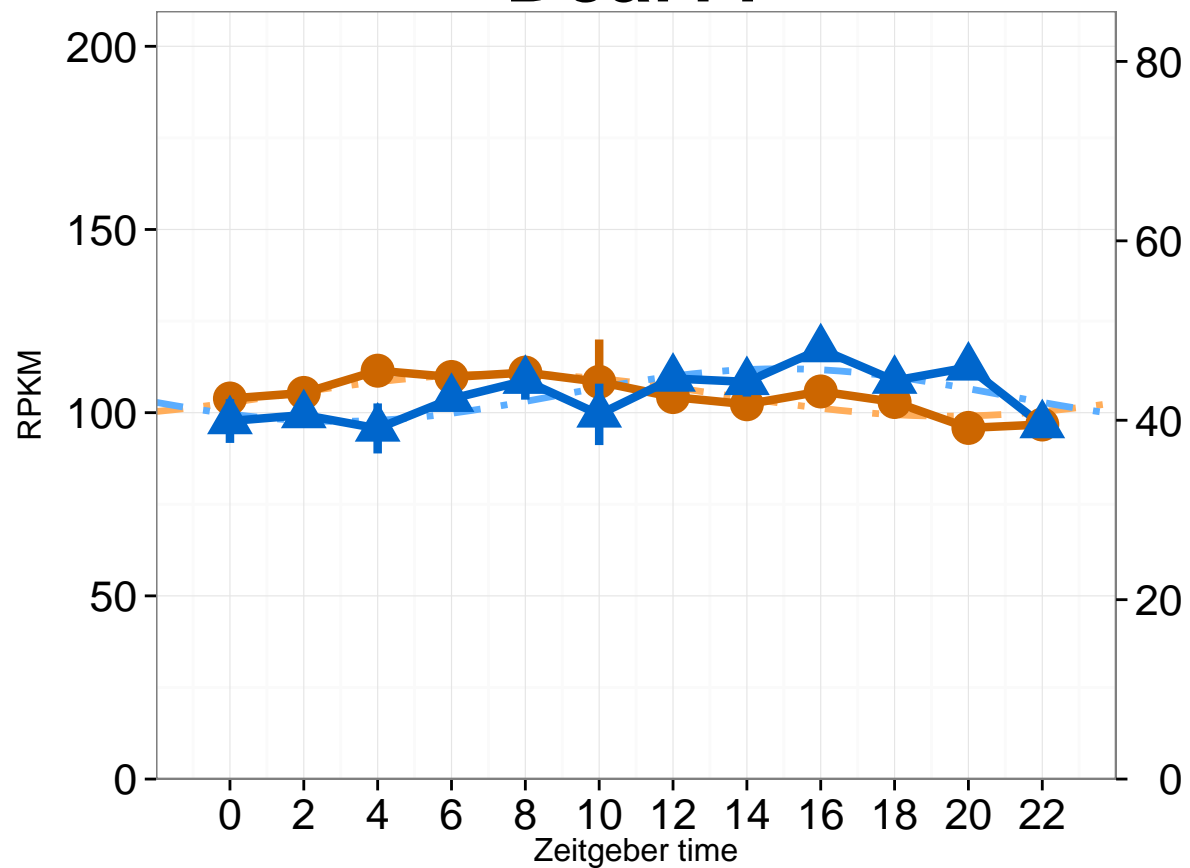

## Dcaf11

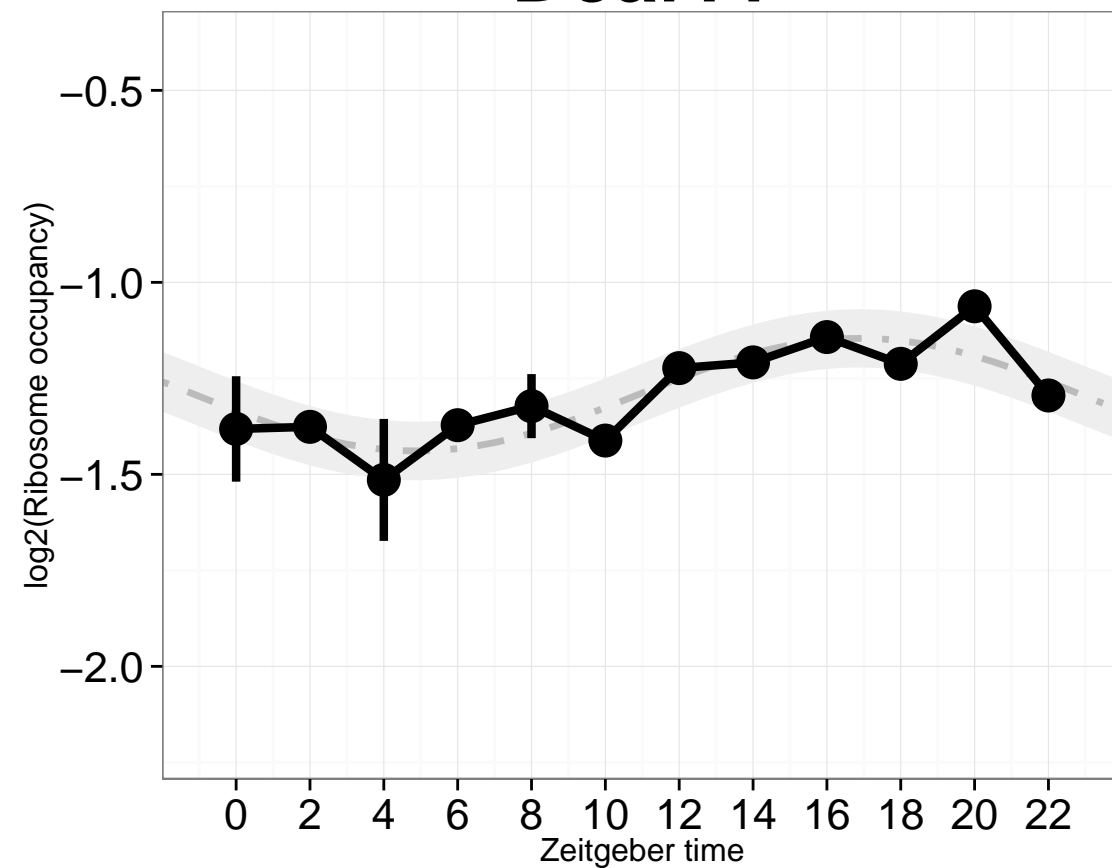

Supplement: Supplementary file 1455 [file 1]

## Hao2

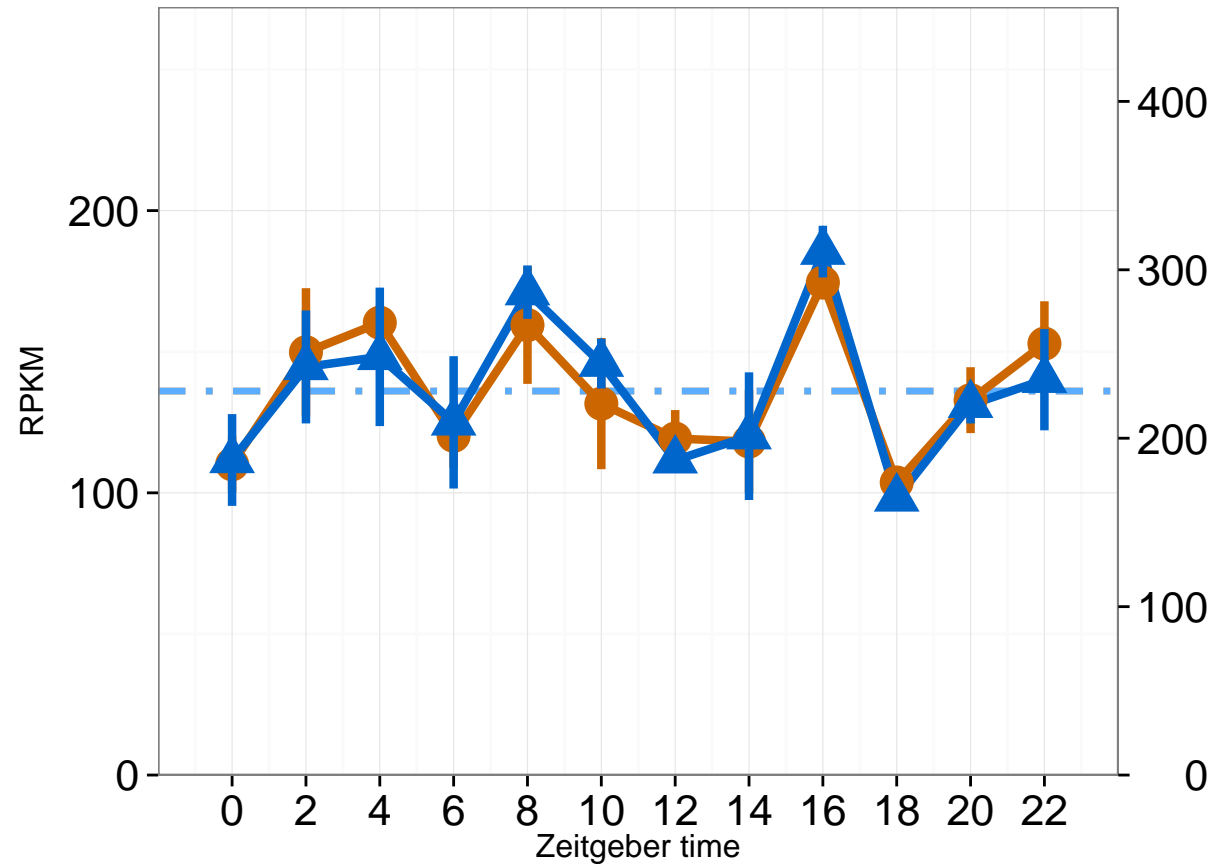

## Hao2

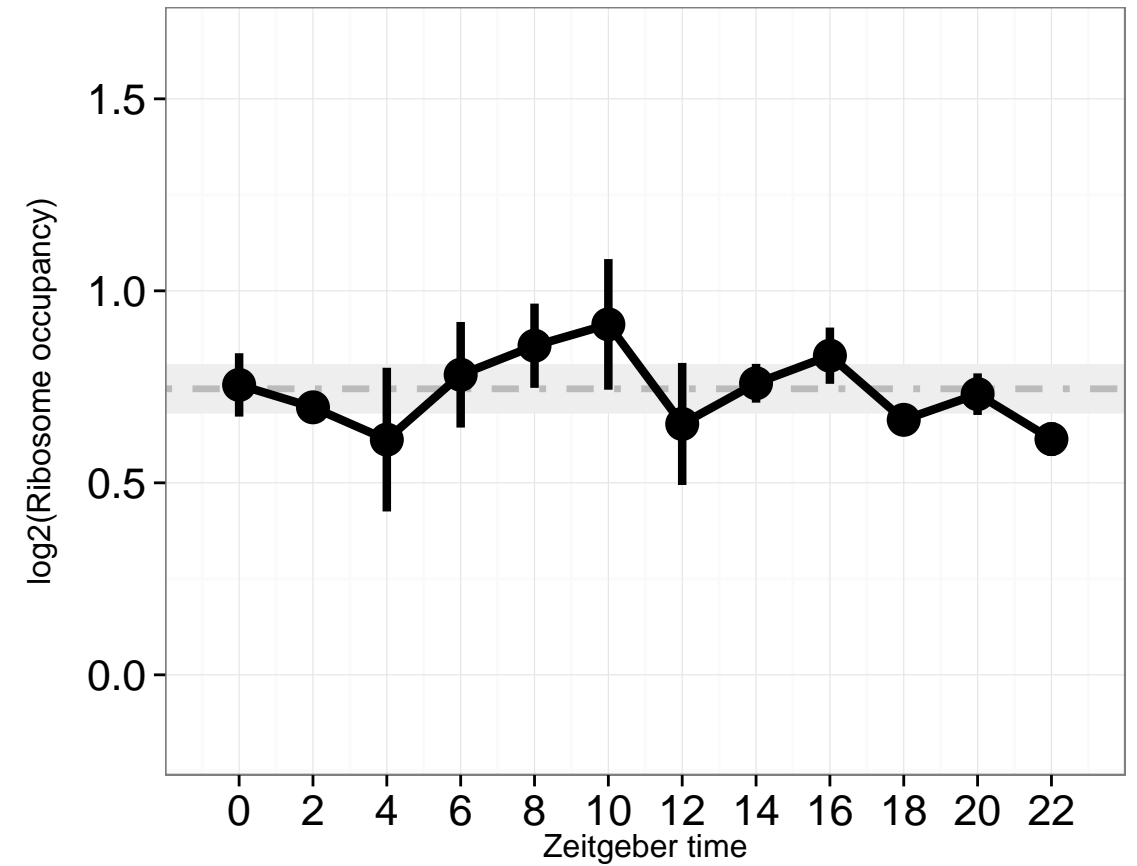

Supplement: Supplementary file 1456 [file 1]

# Zfp207

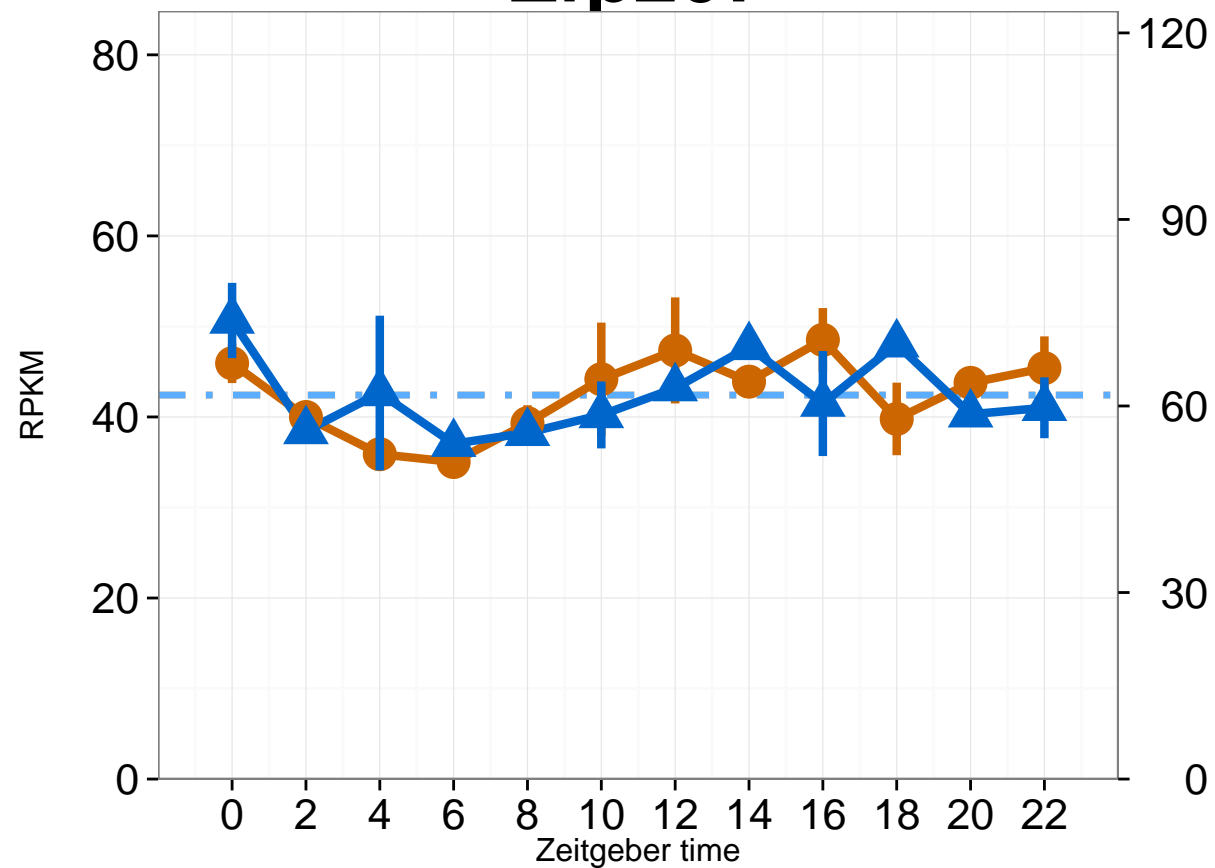

# Zfp207

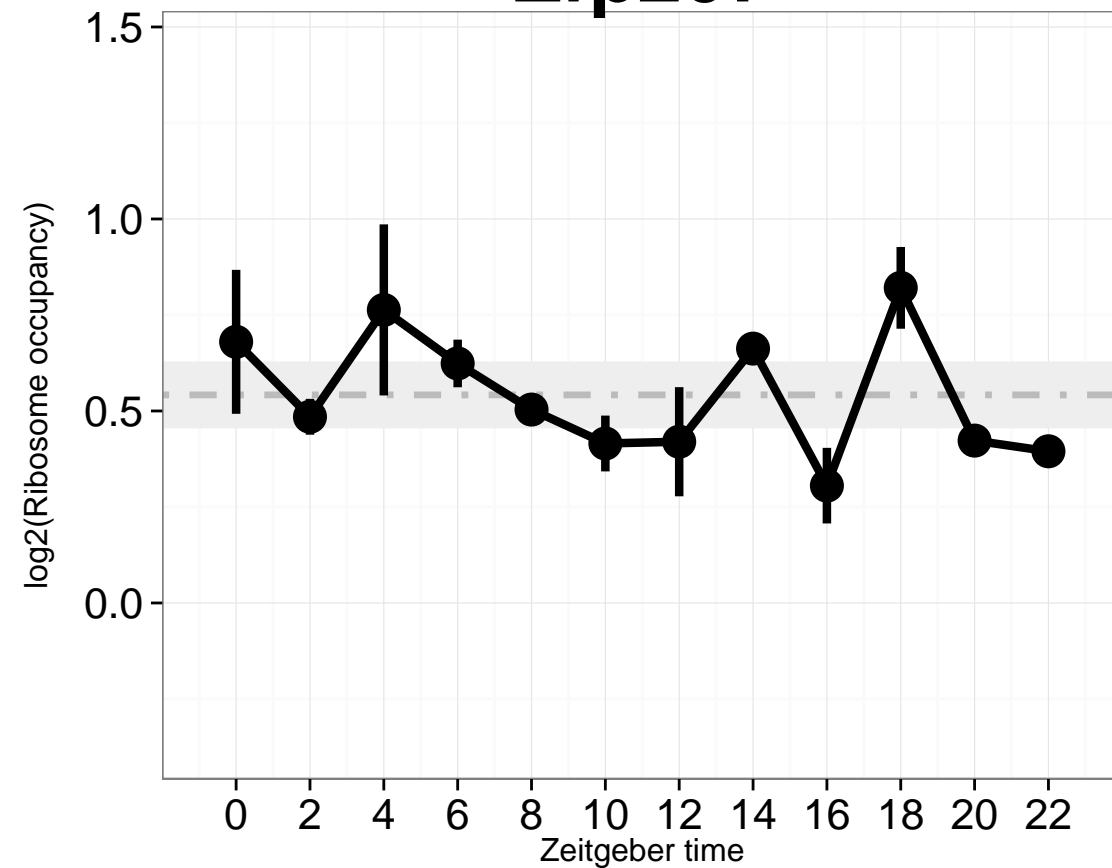

Supplement: Supplementary file 1457 [file 1]

# Gfra1

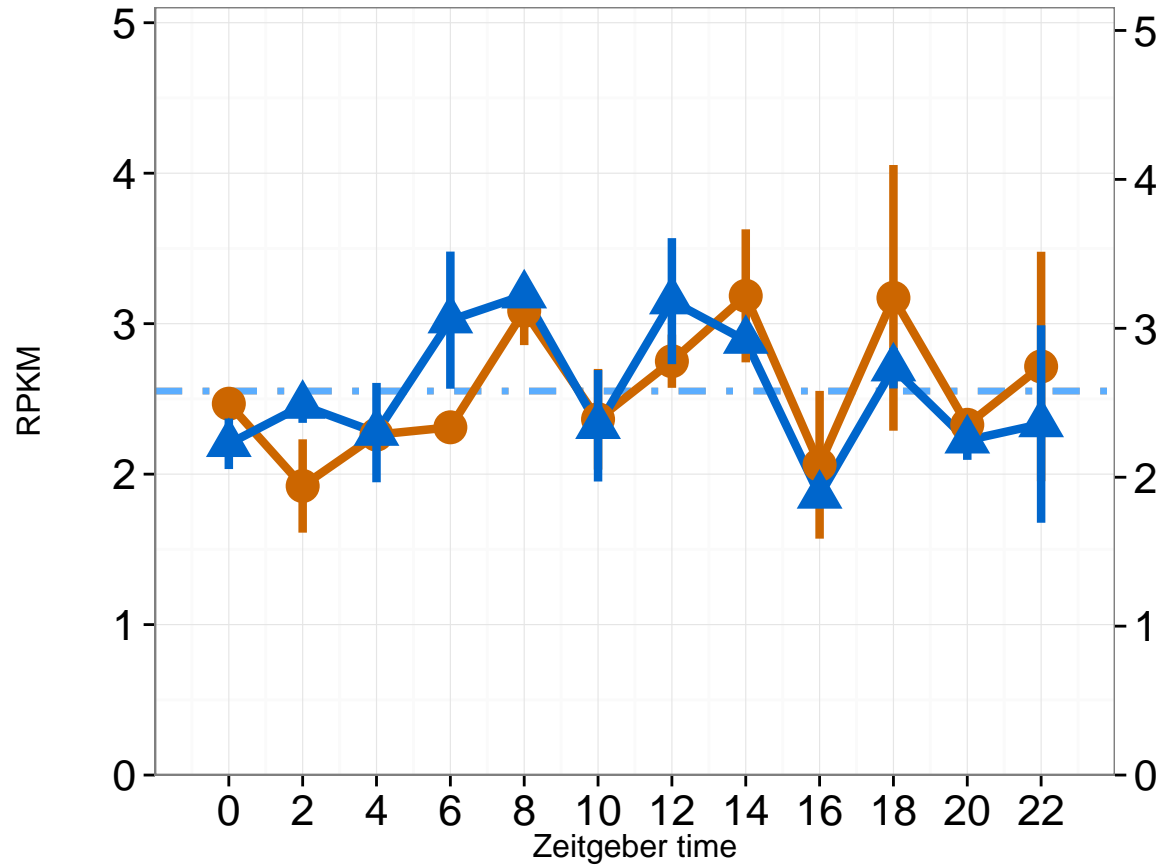

# Gfra1

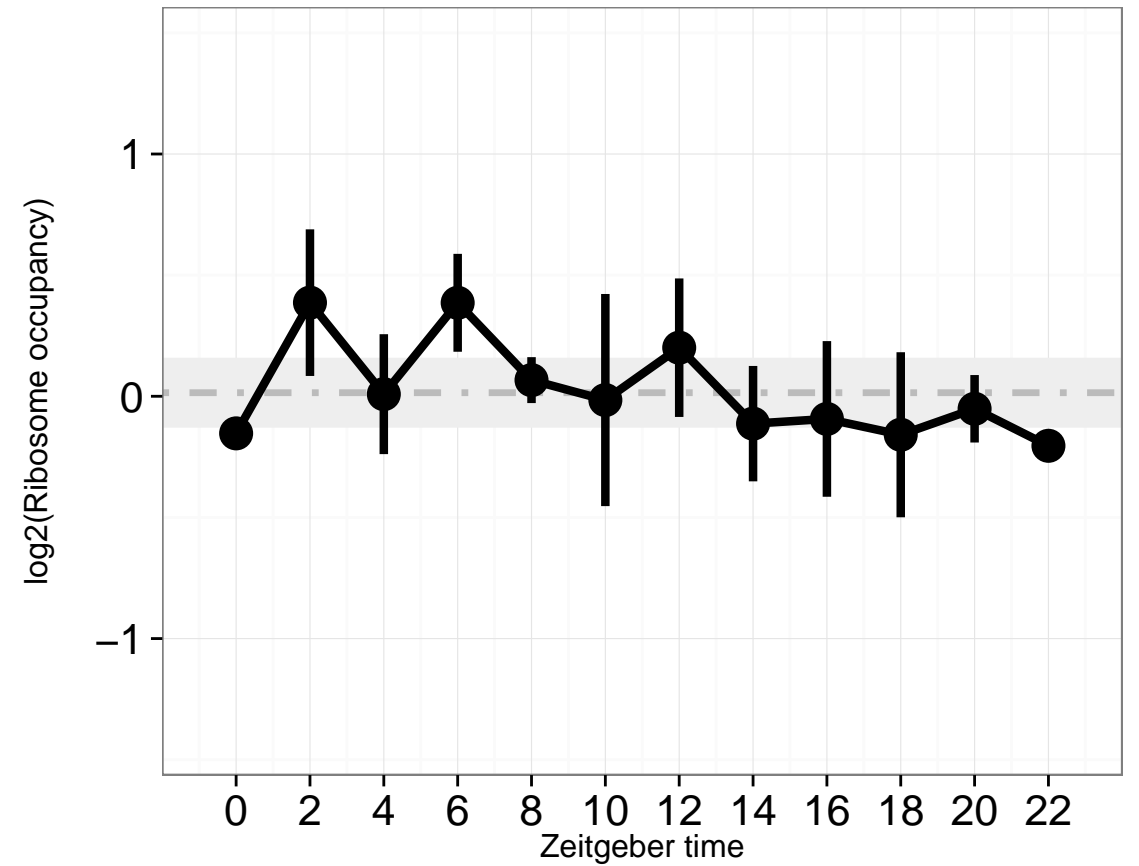

Supplement: Supplementary file 1458 [file 1]

## St3gal2

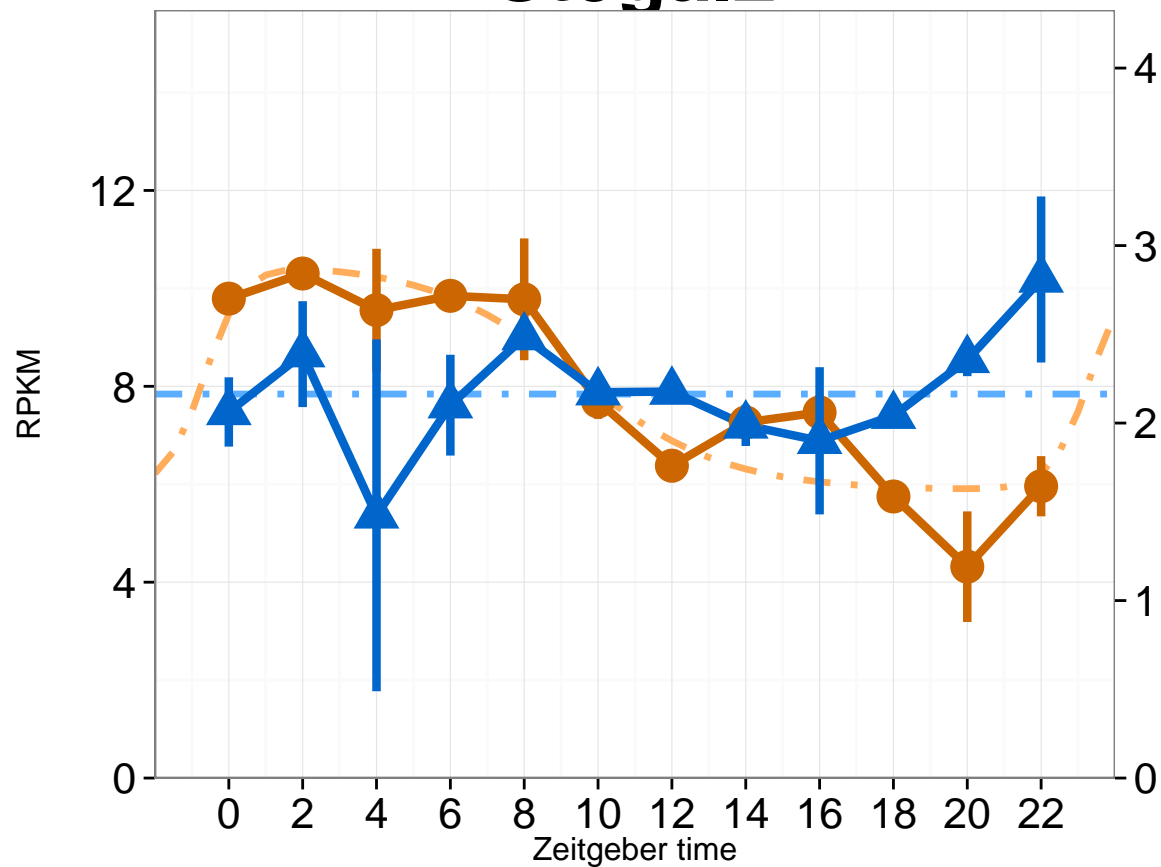

## St3gal2

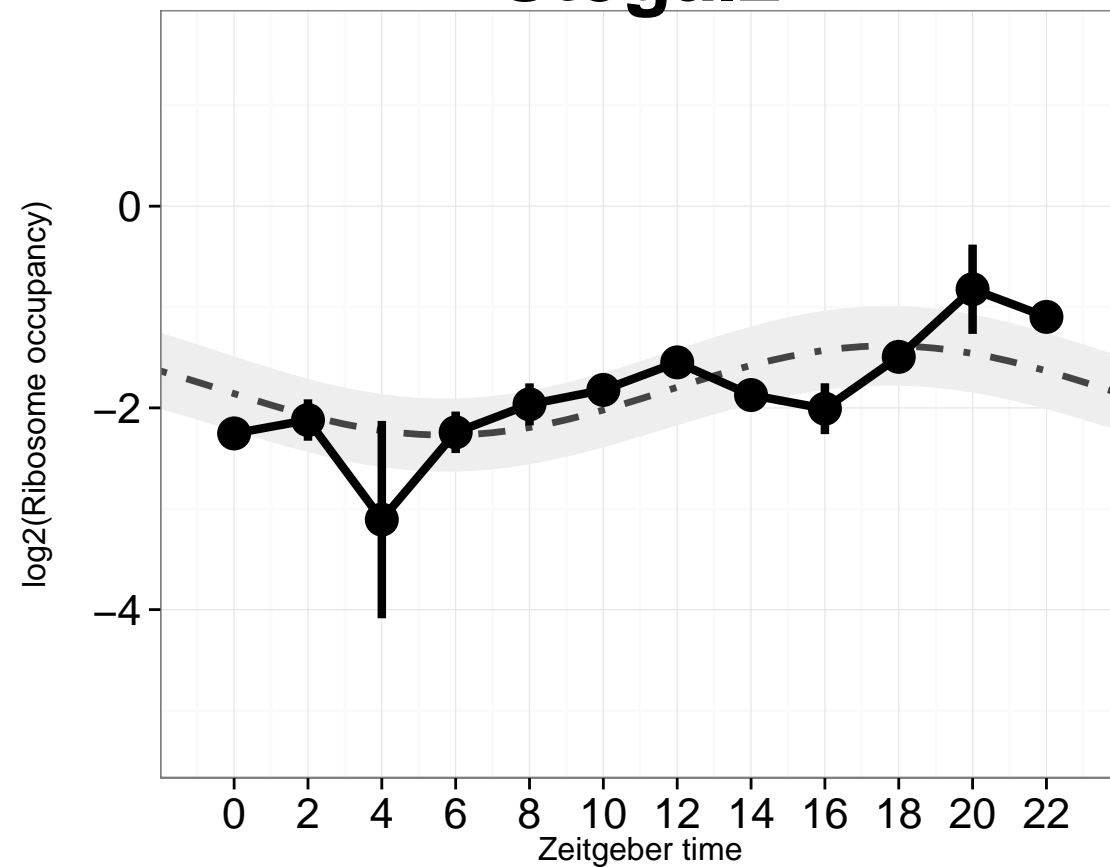

Supplement: Supplementary file 1459 [file 1]

# Klh13

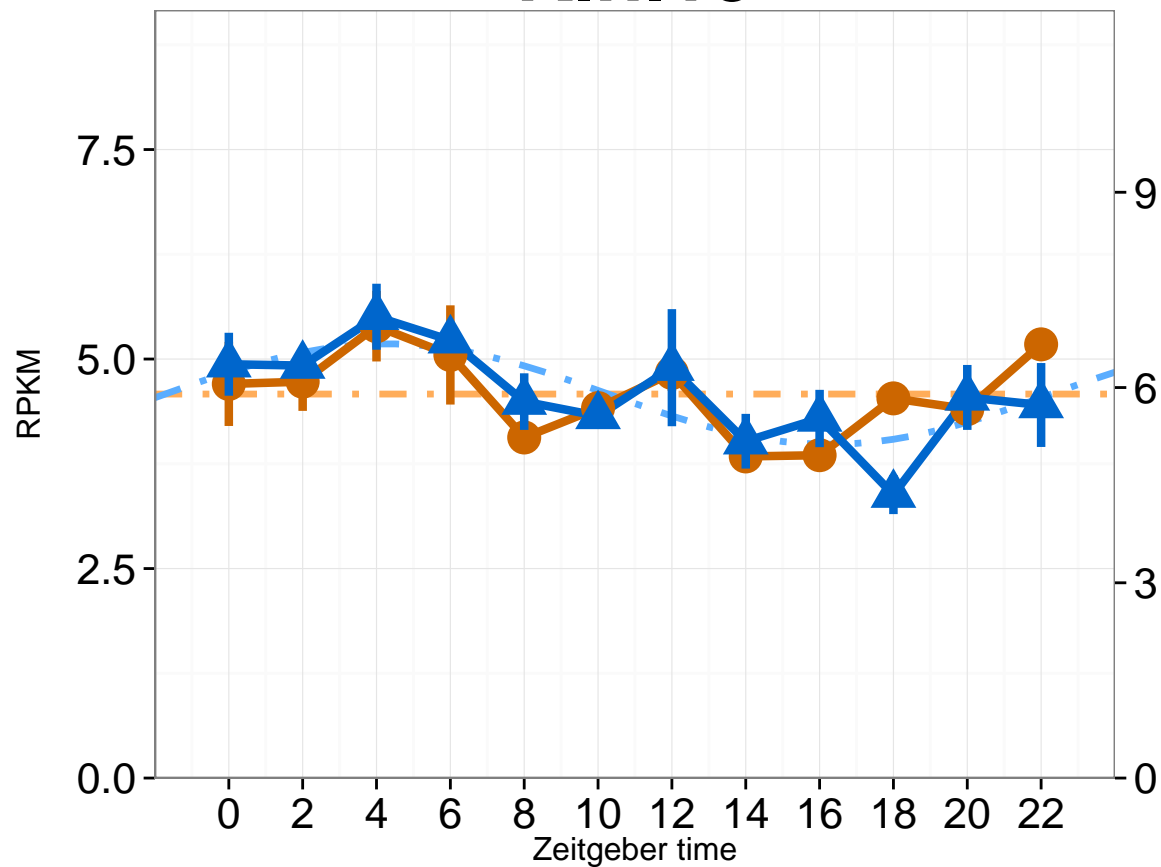

# Klh13

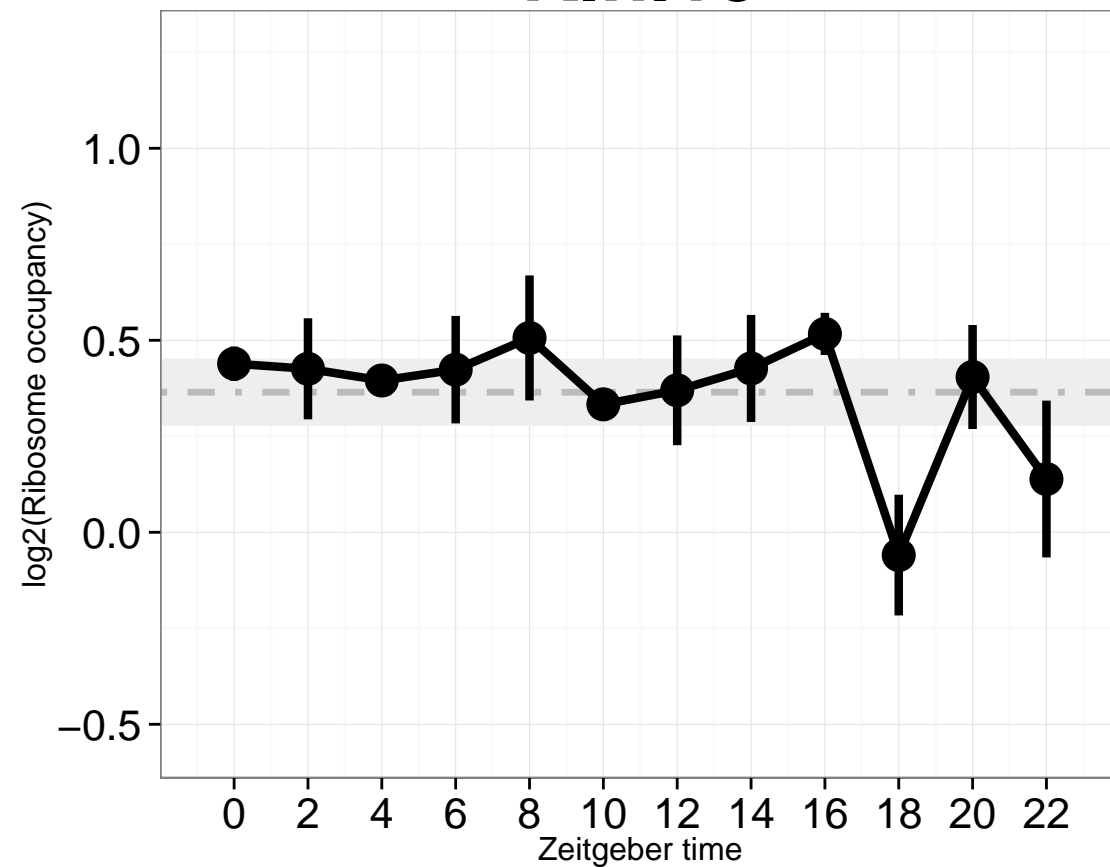

Supplement: Supplementary file 1460 [file 1]

## Itfg3

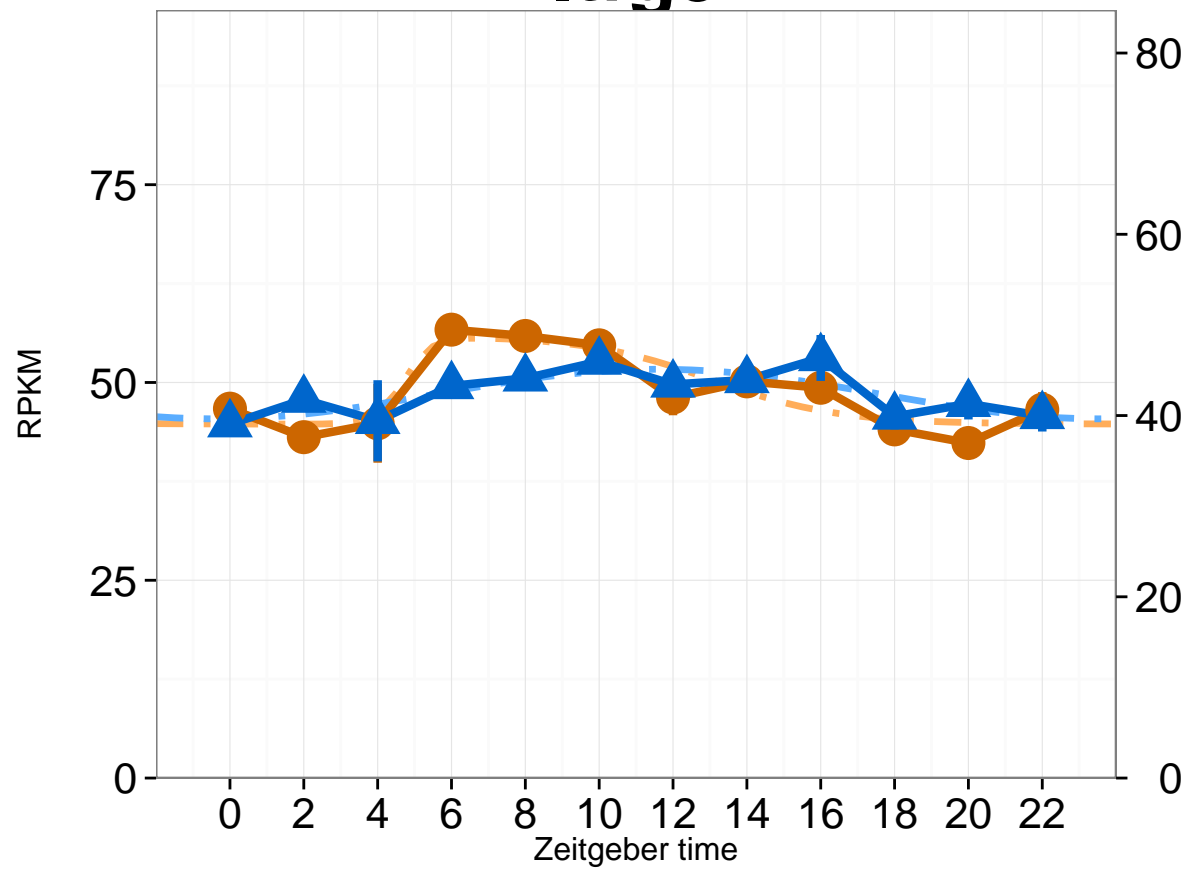

## Itfg3

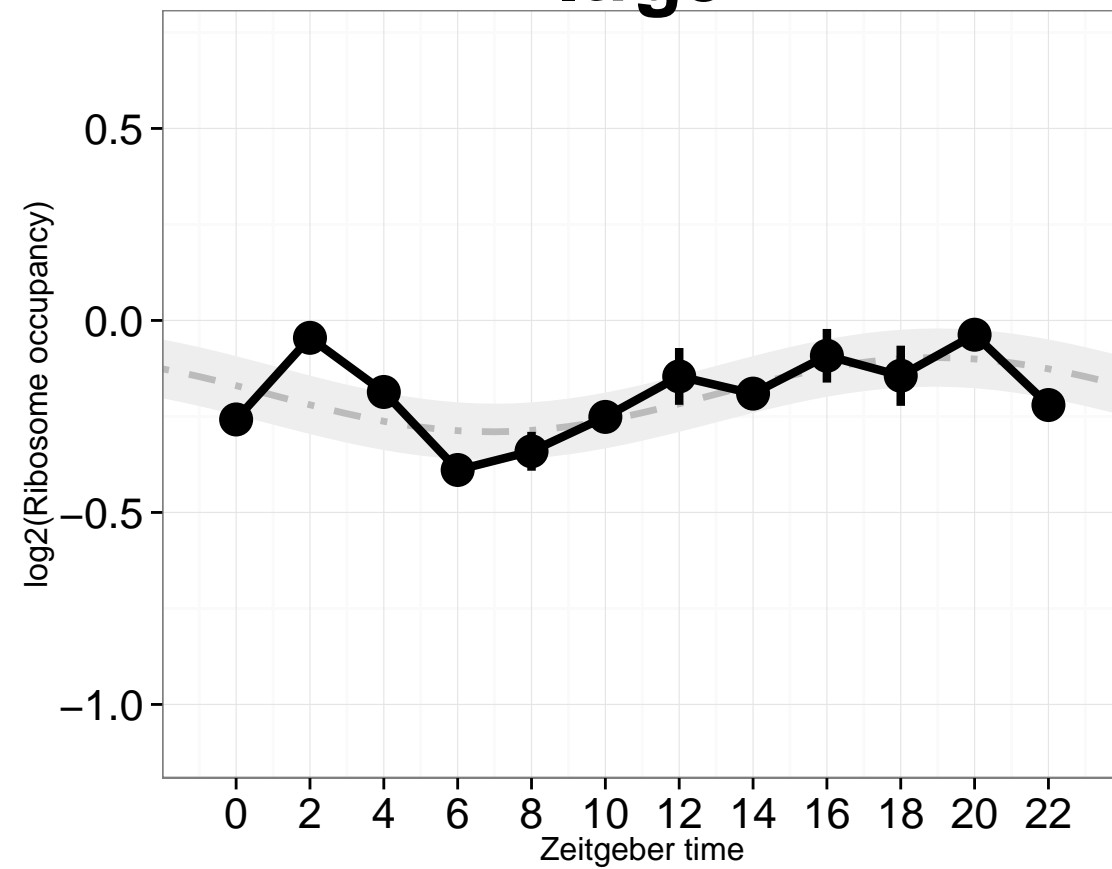

Supplement: Supplementary file 1461 [file 1]

## Acox2

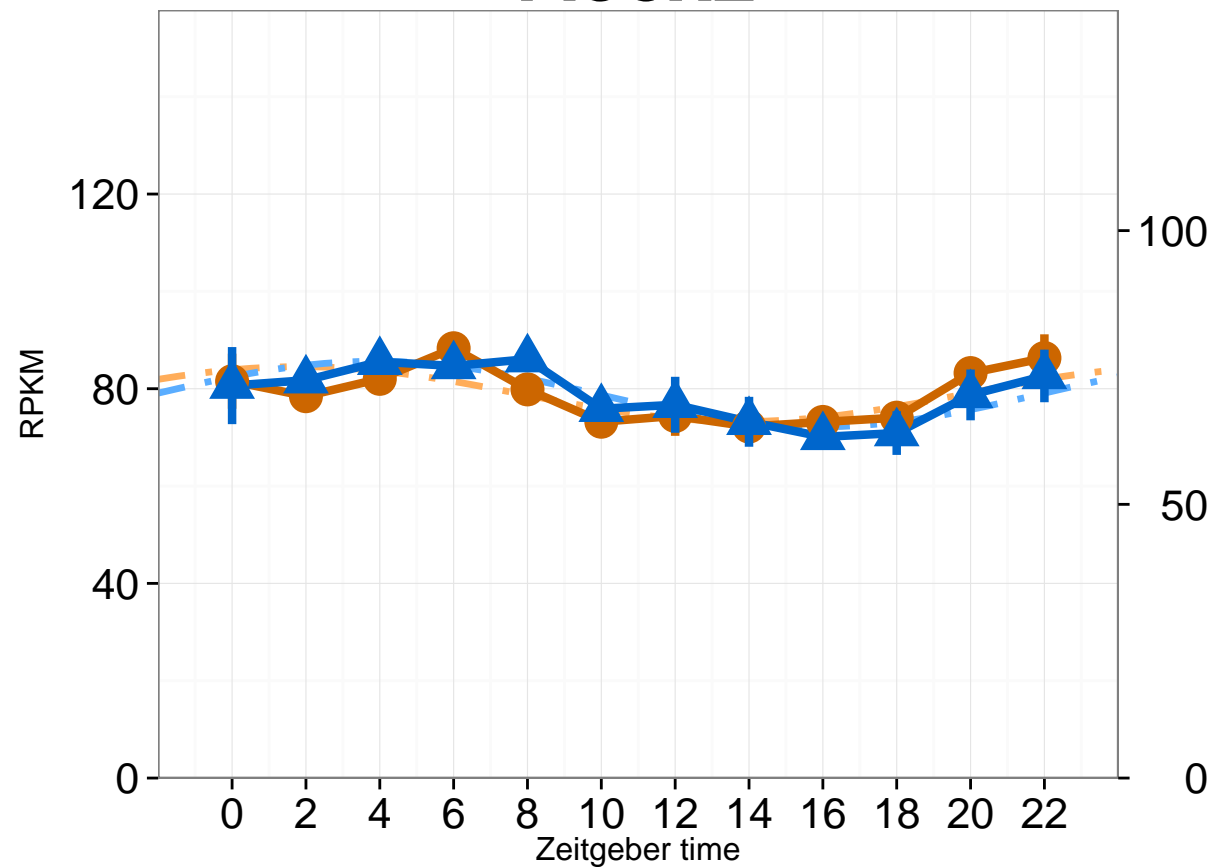

## Acox2

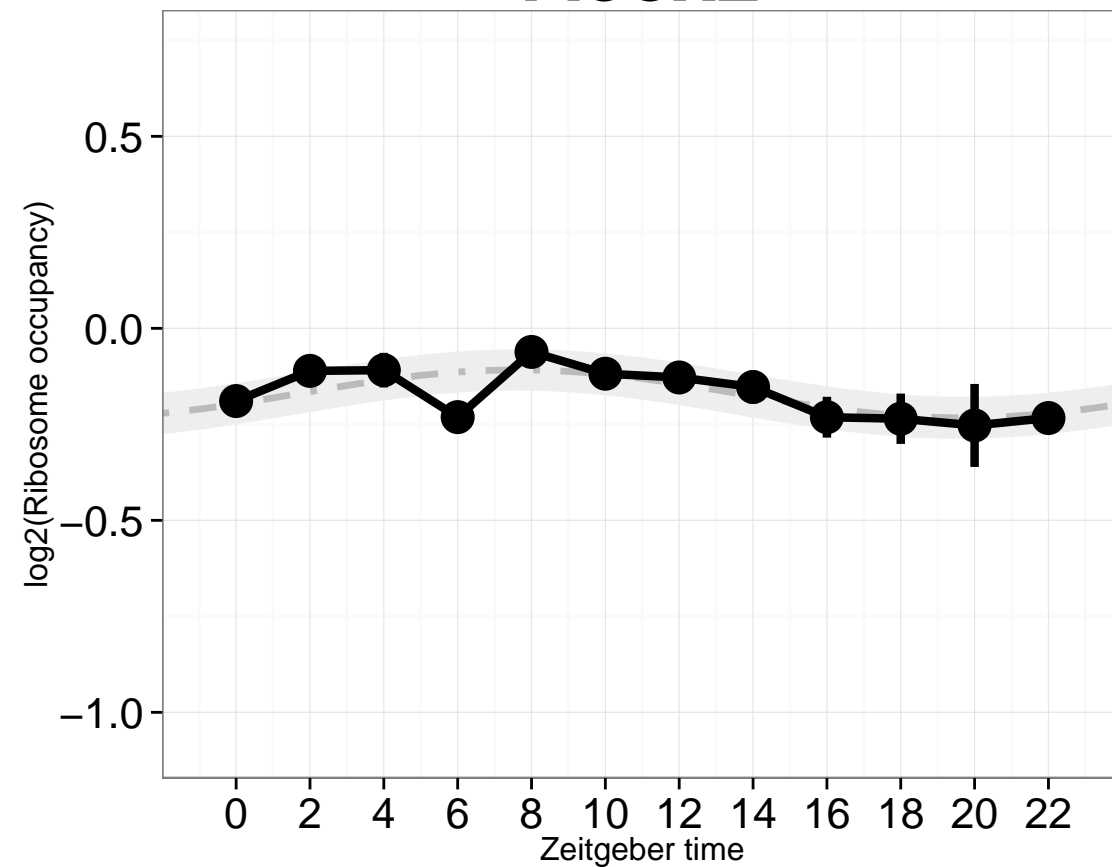

Supplement: Supplementary file 1462 [file 1]

## Tulp3

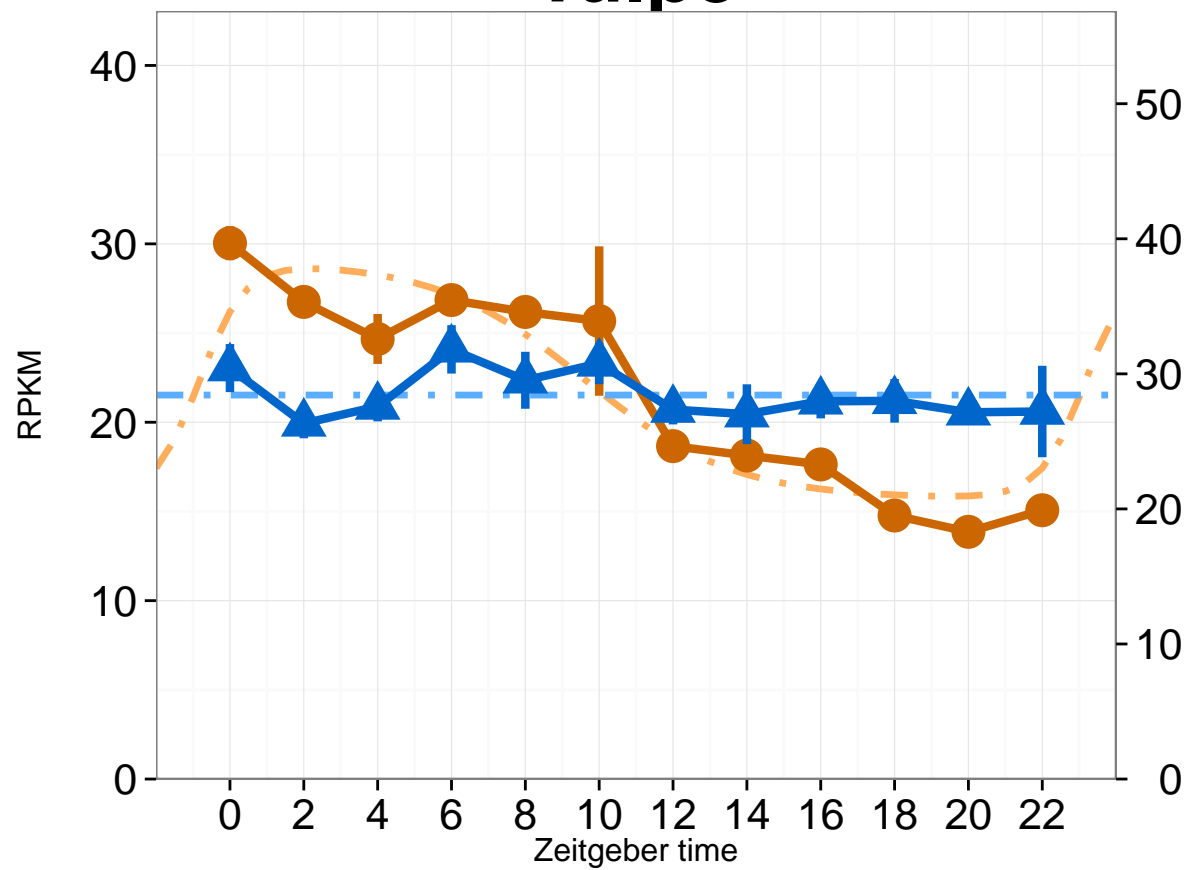

## Tulp3

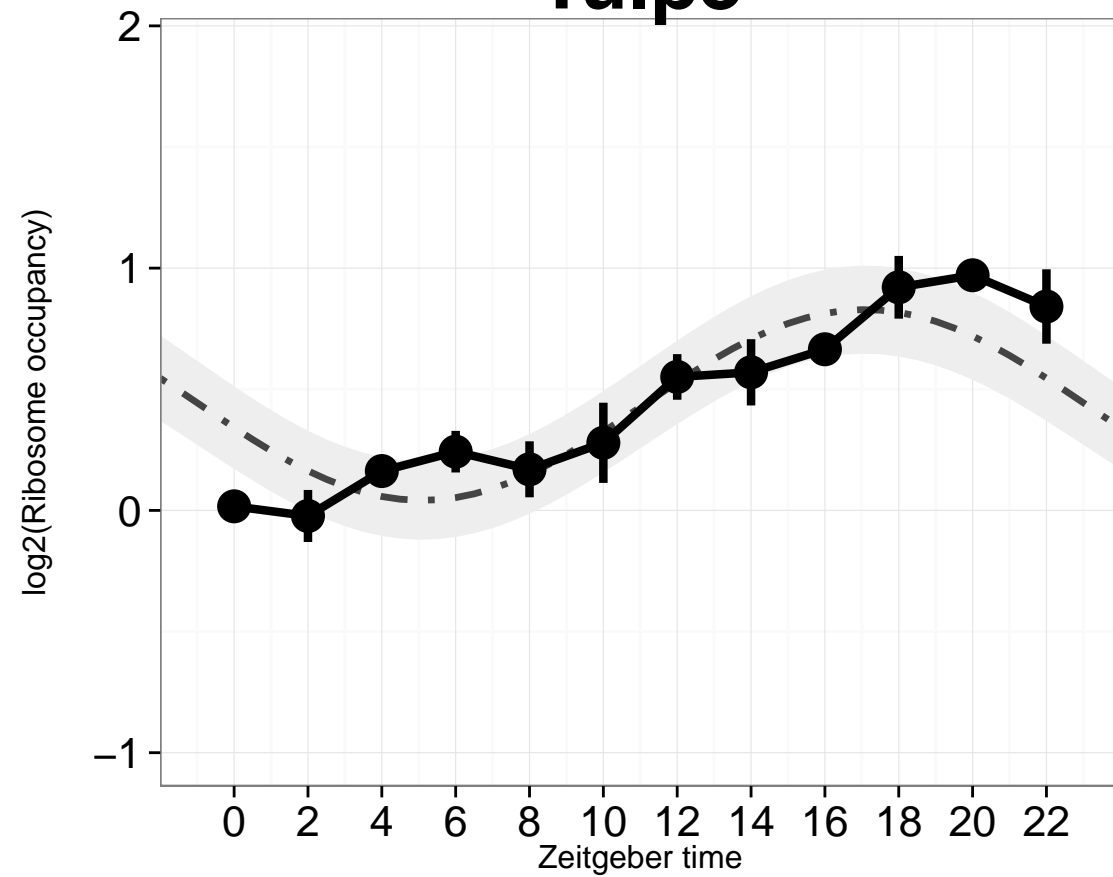

Supplement: Supplementary file 1463 [file 1]

## Smg9

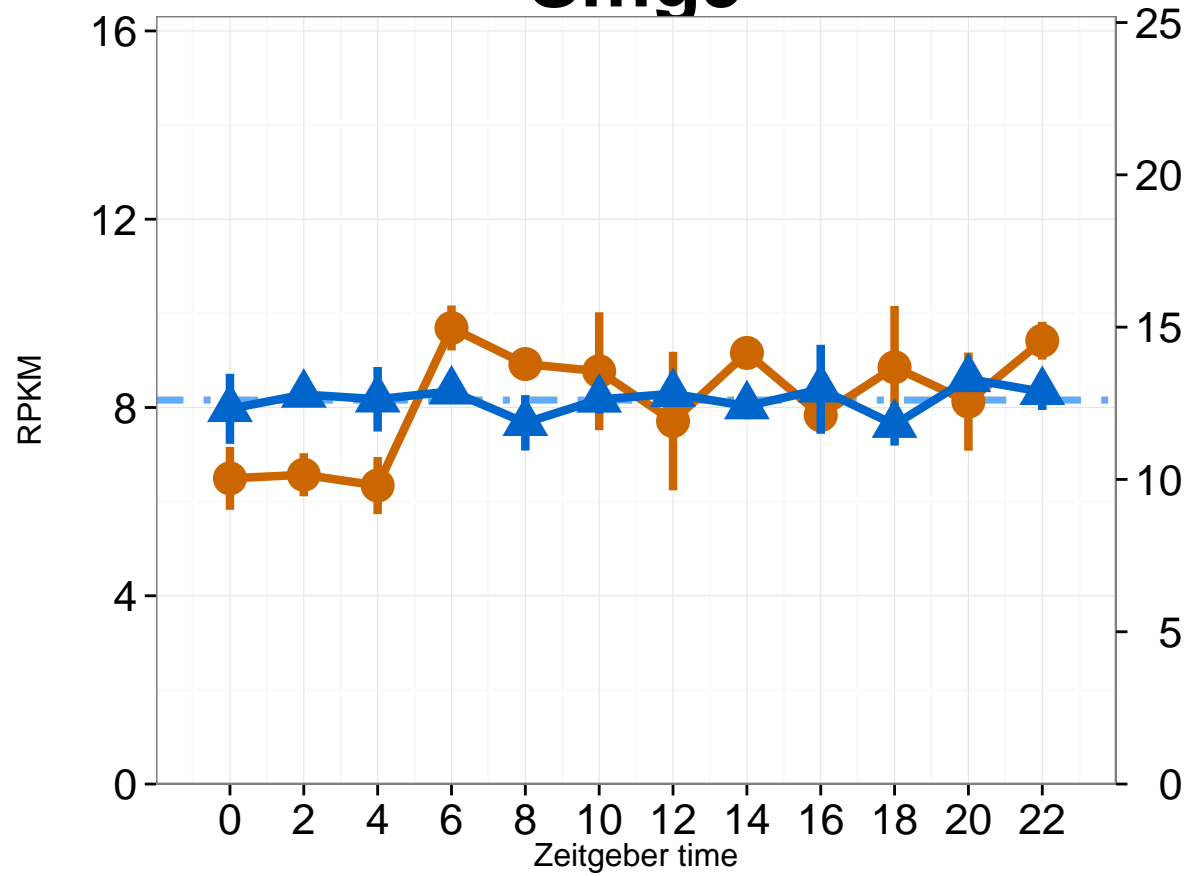

## Smg9

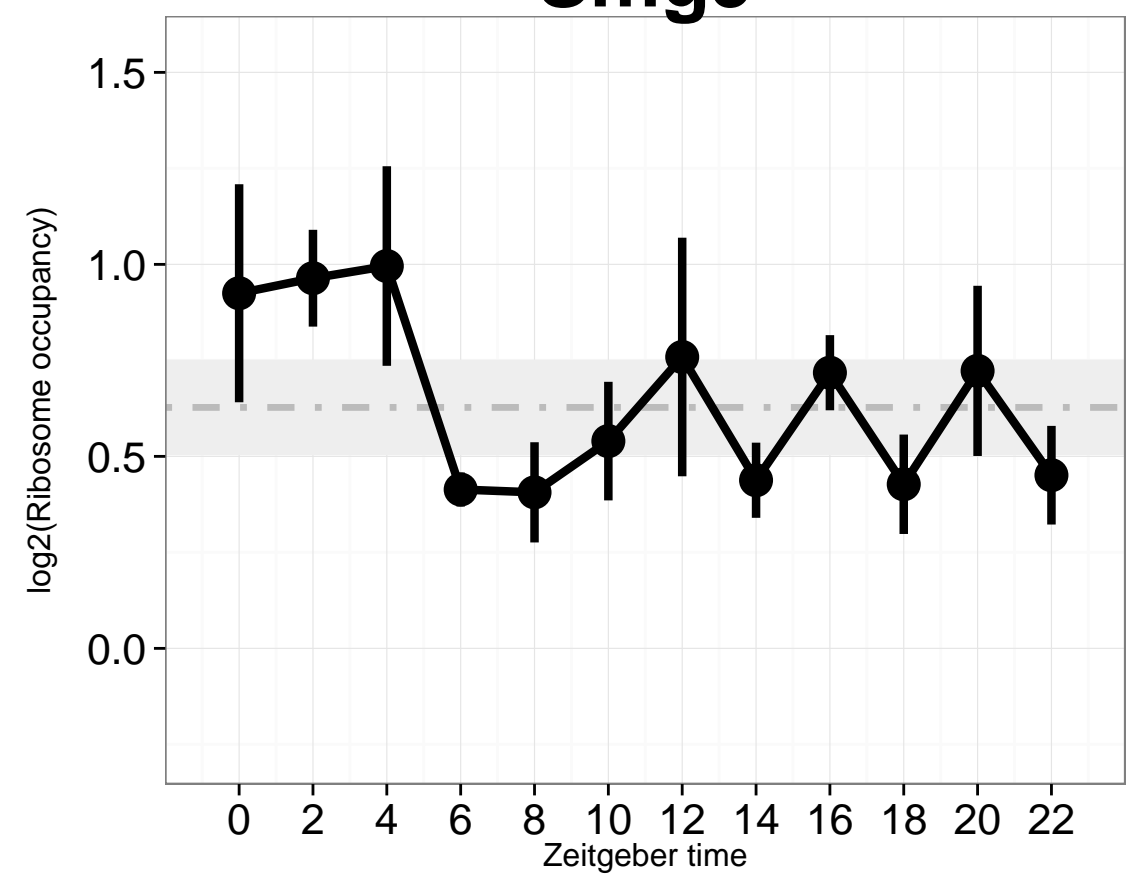

Supplement: Supplementary file 1464 [file 1]

# Bsdc1

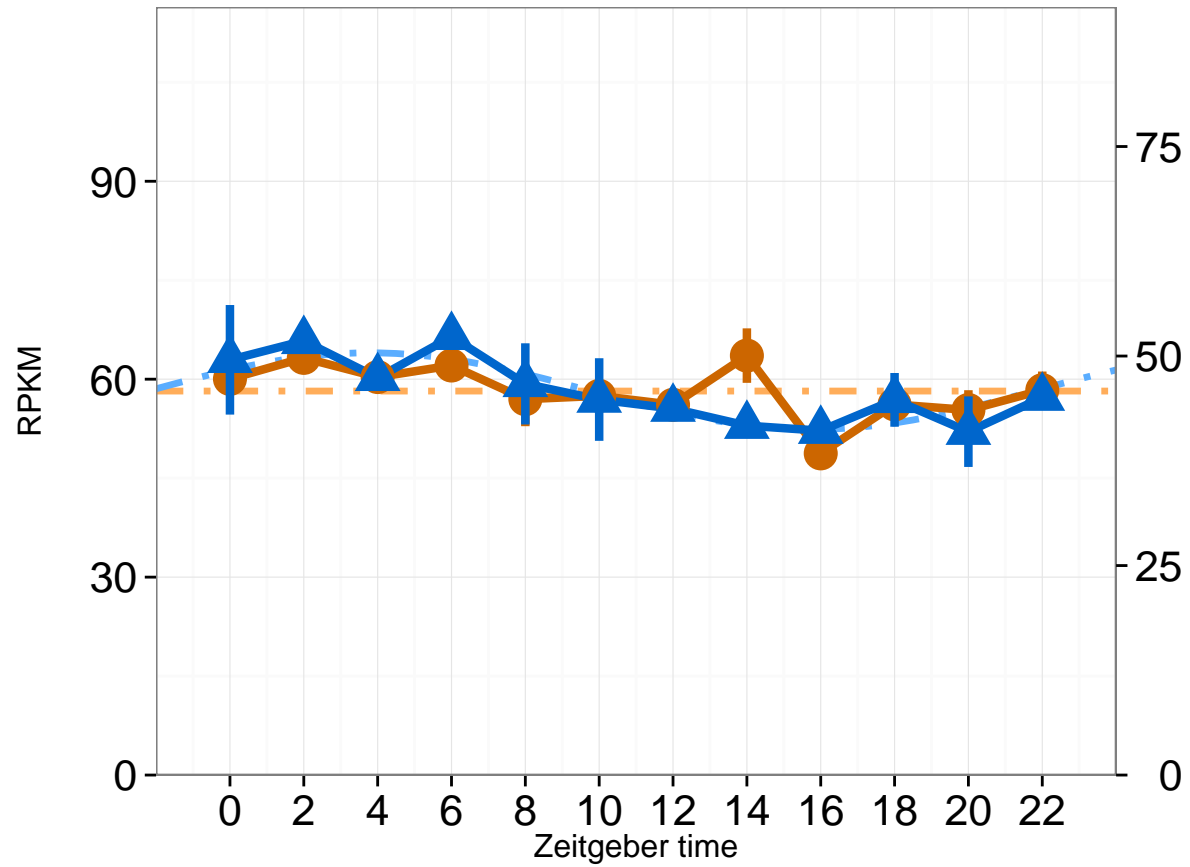

# Bsdc1

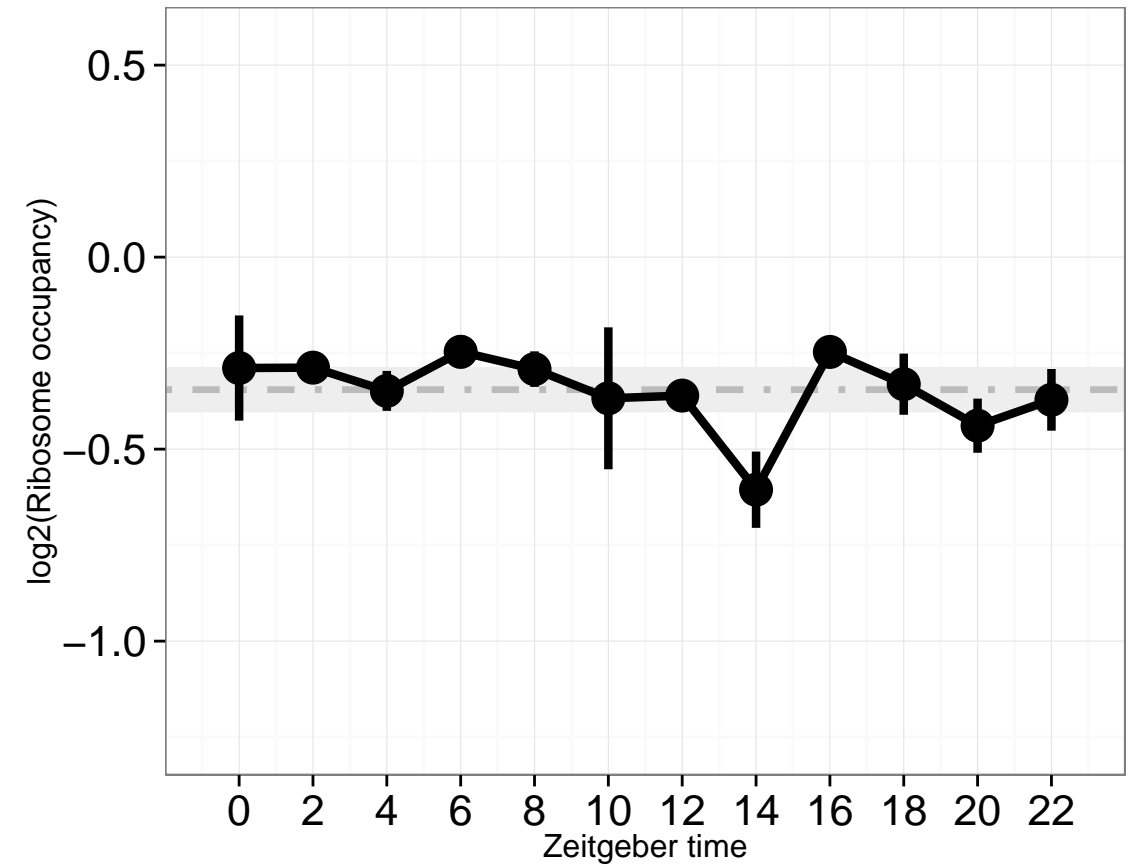

Supplement: Supplementary file 1465 [file 1]

## Rab15

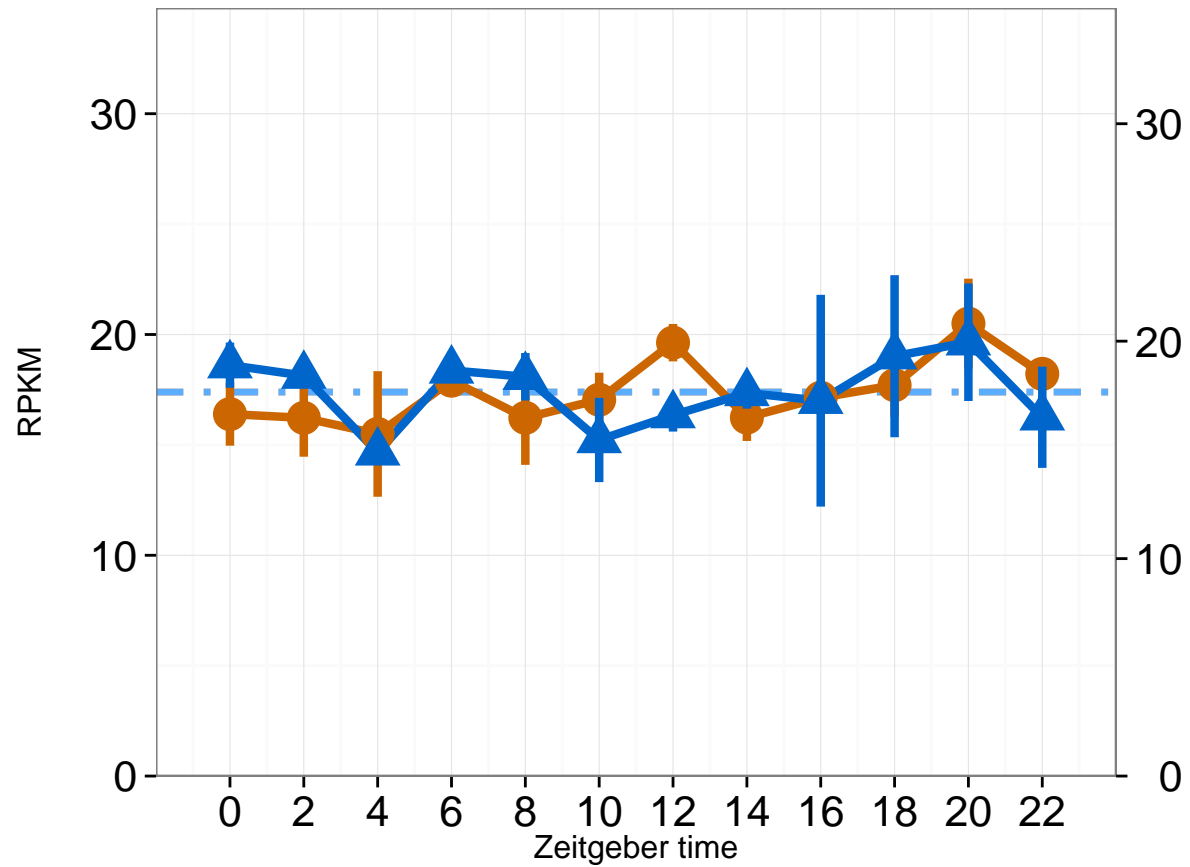

## Rab15

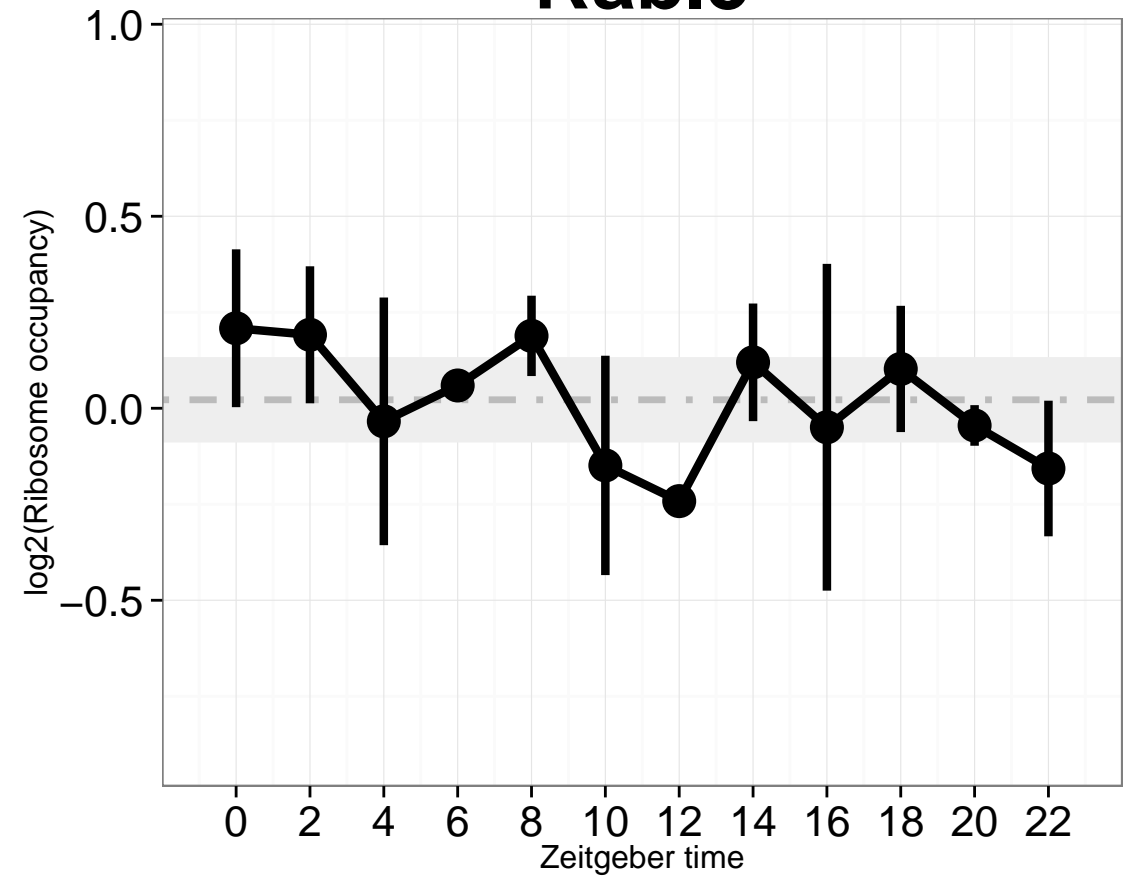

Supplement: Supplementary file 1466 [file 1]

## Eid1

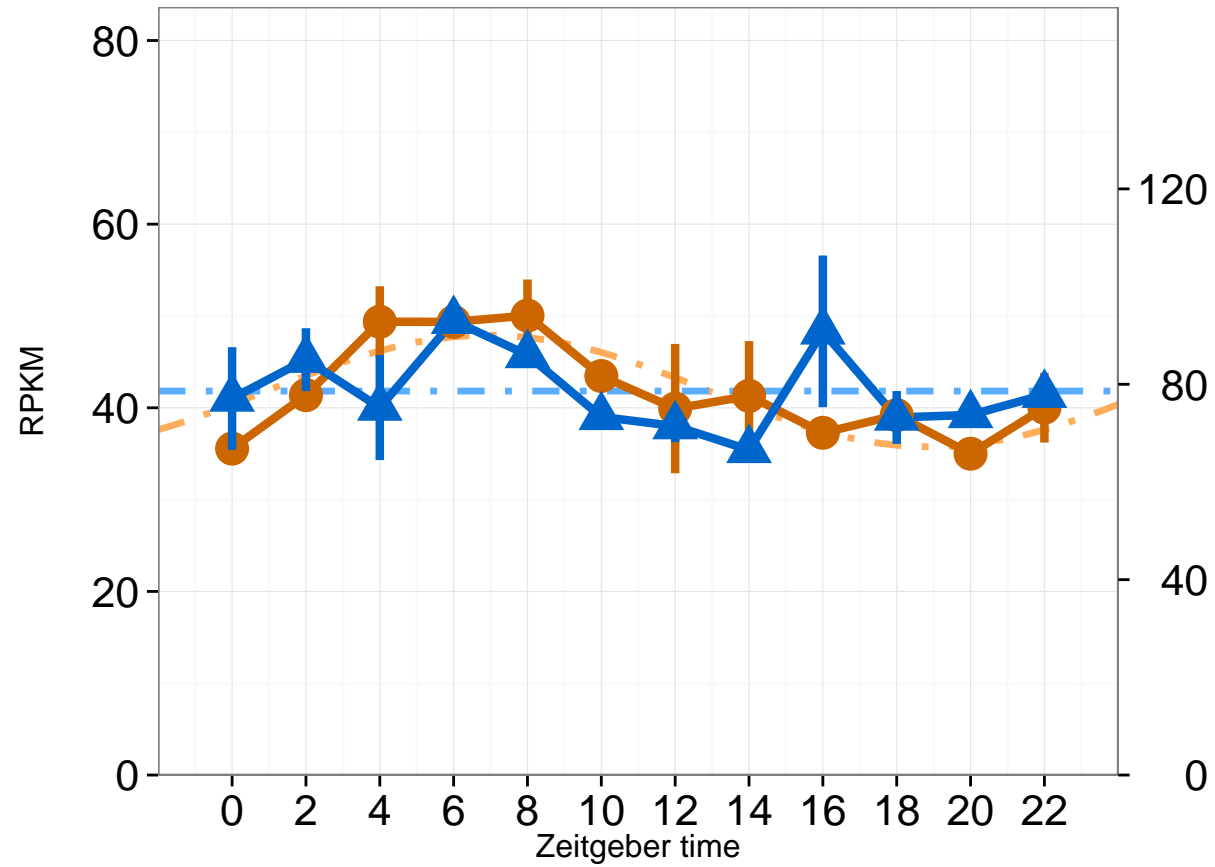

## Eid1

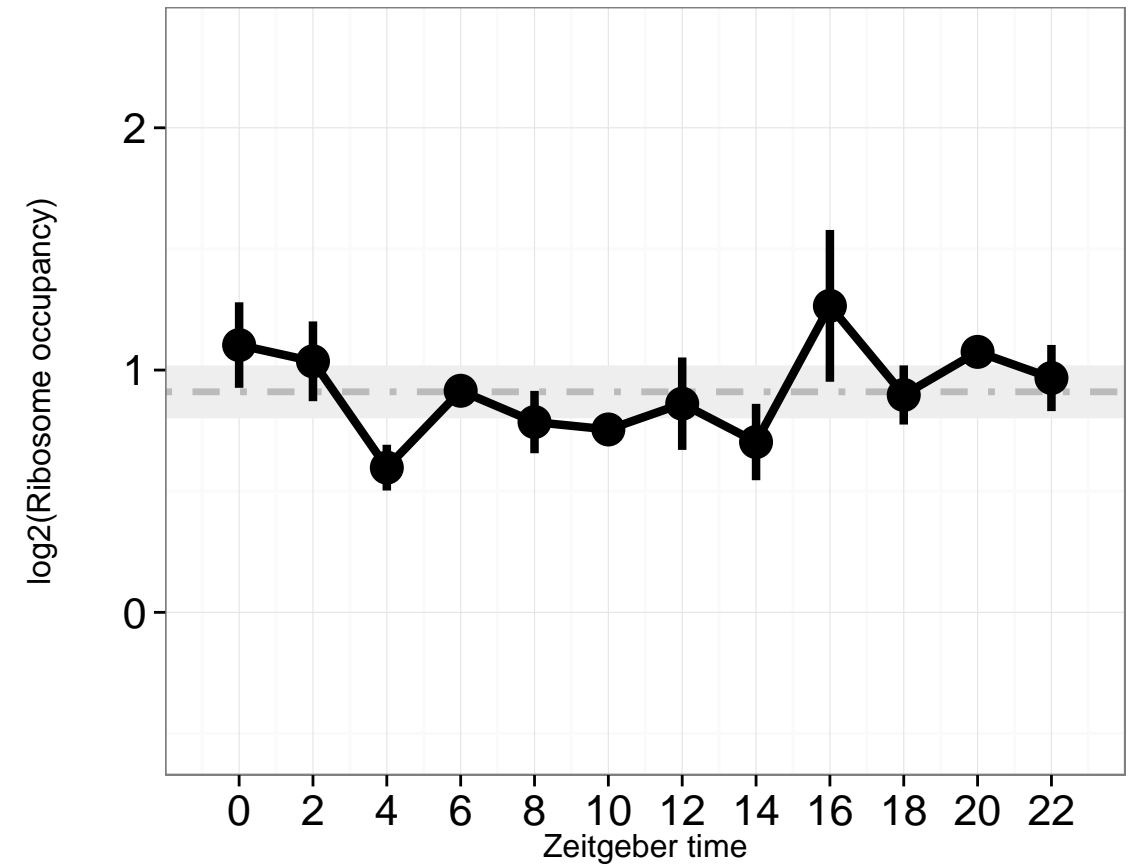

Supplement: Supplementary file 1467 [file 1]

# Tmem87a

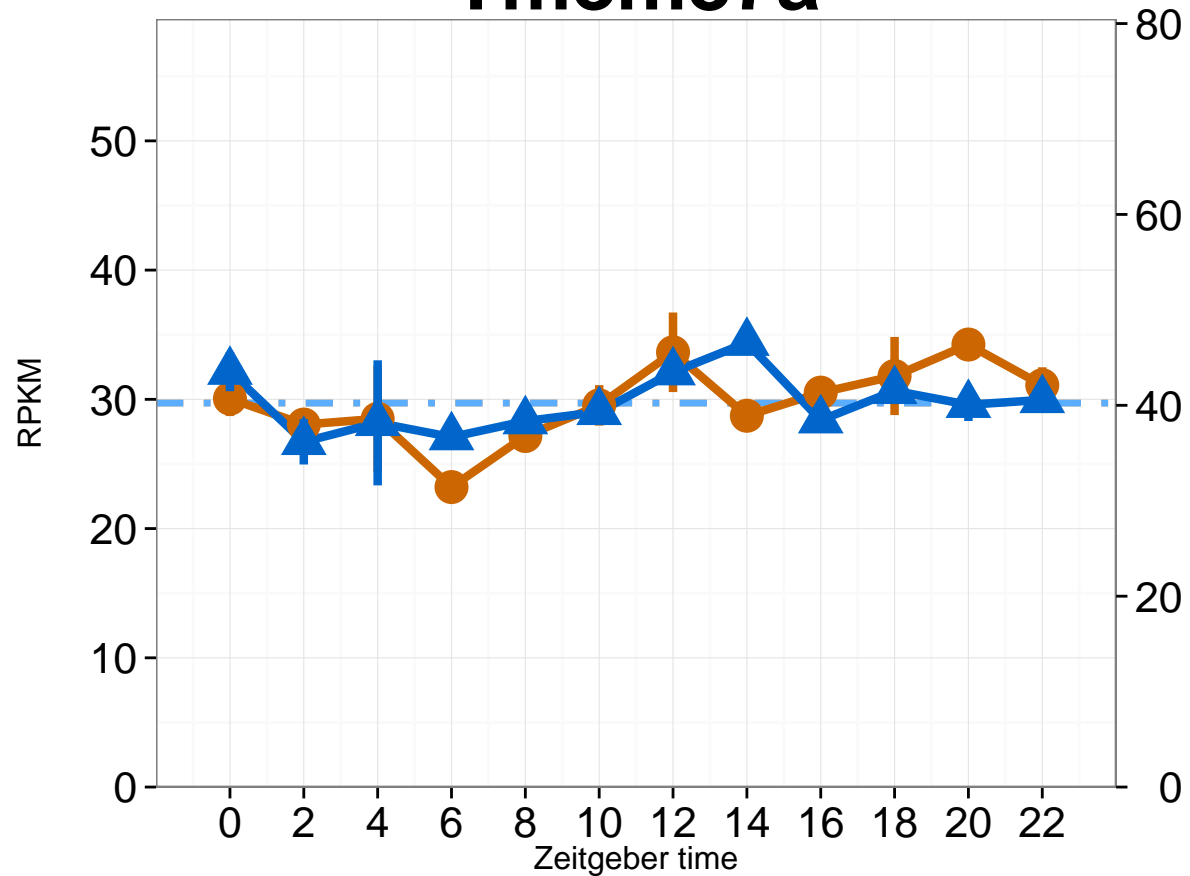

# Tmem87a

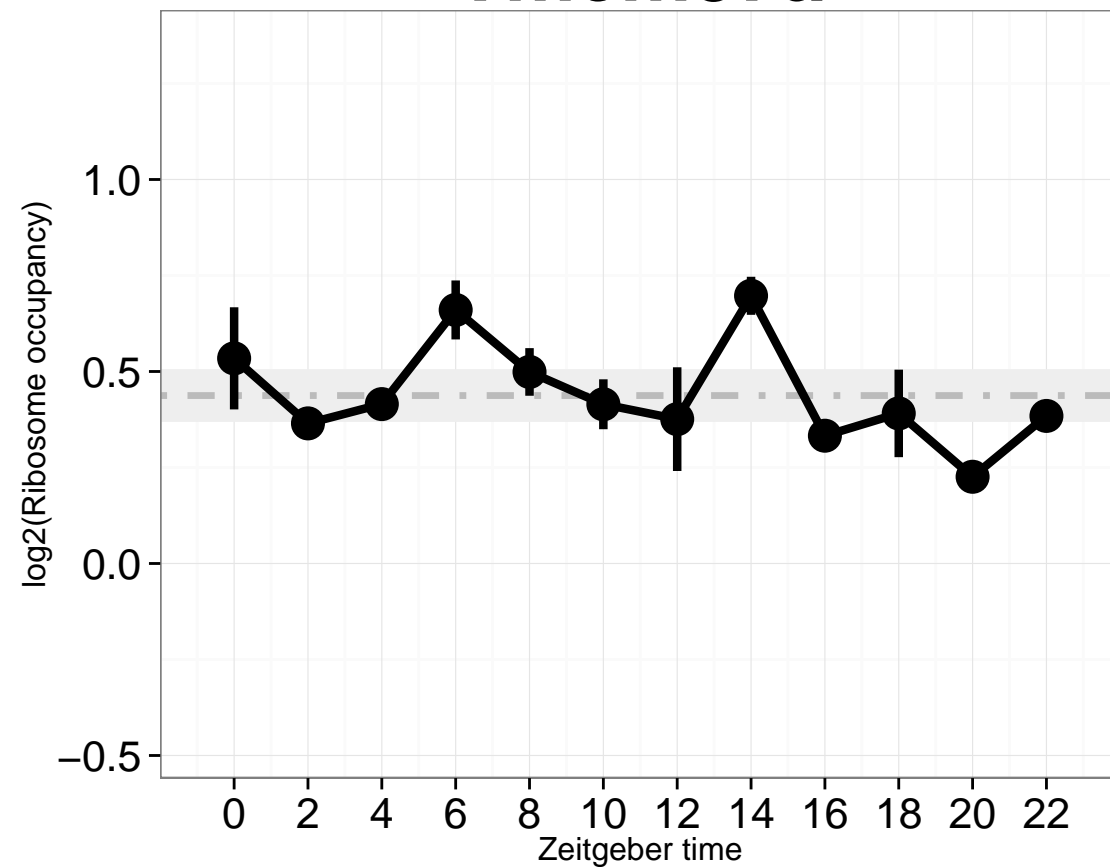

Supplement: Supplementary file 1468 [file 1]

# Rad17

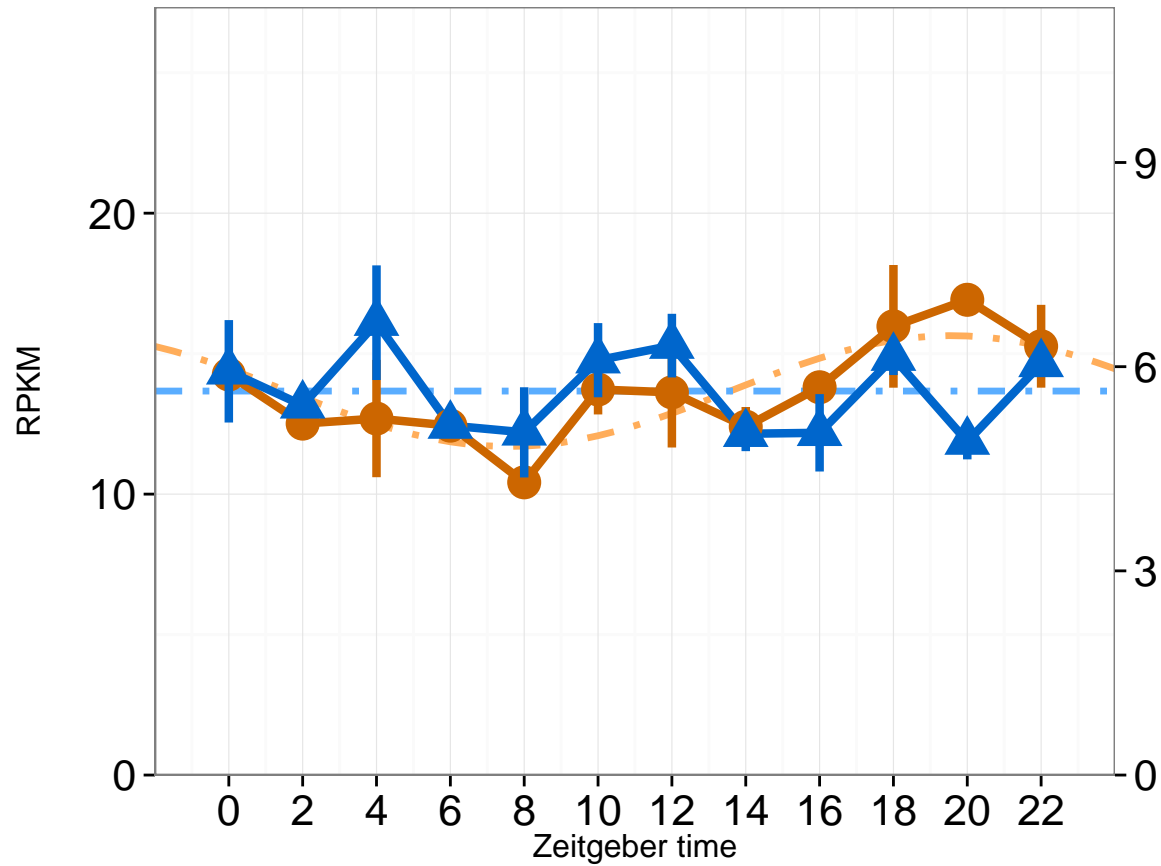

# Rad17

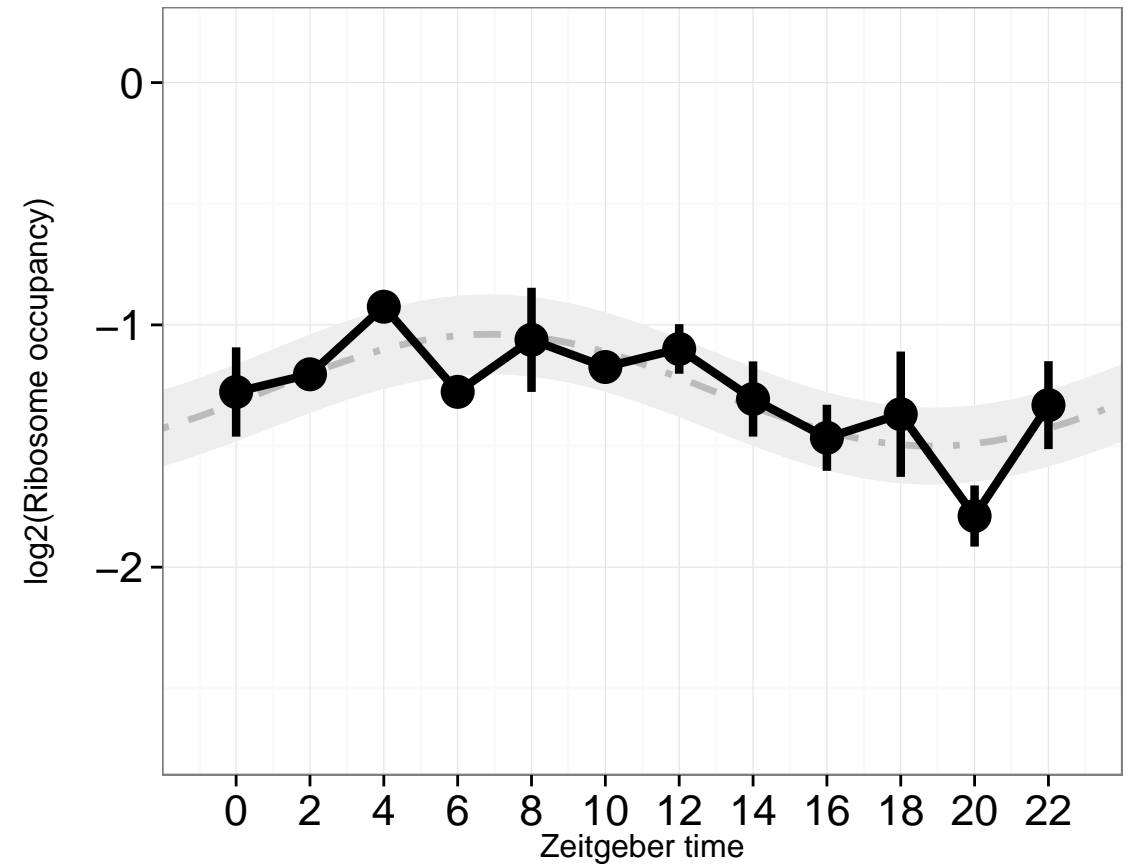

Supplement: Supplementary file 1469 [file 1]

# Ccdc111

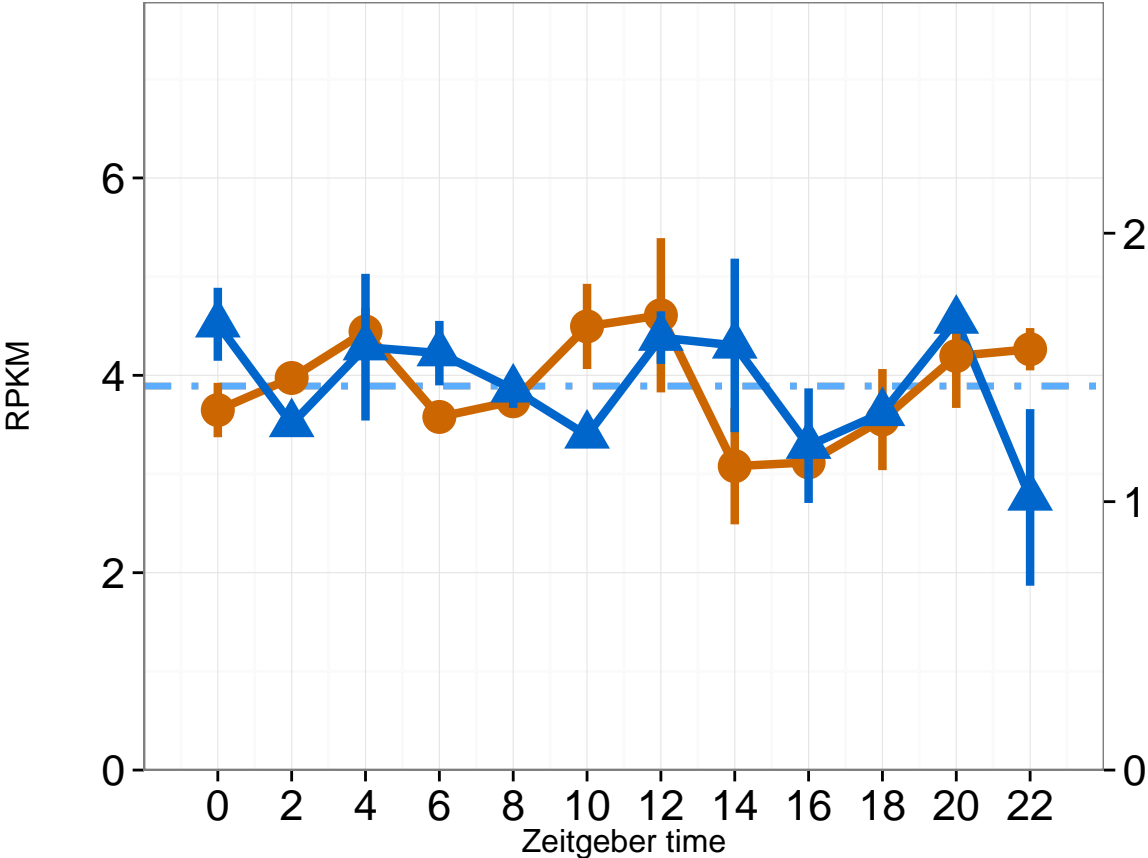

# Ccdc111

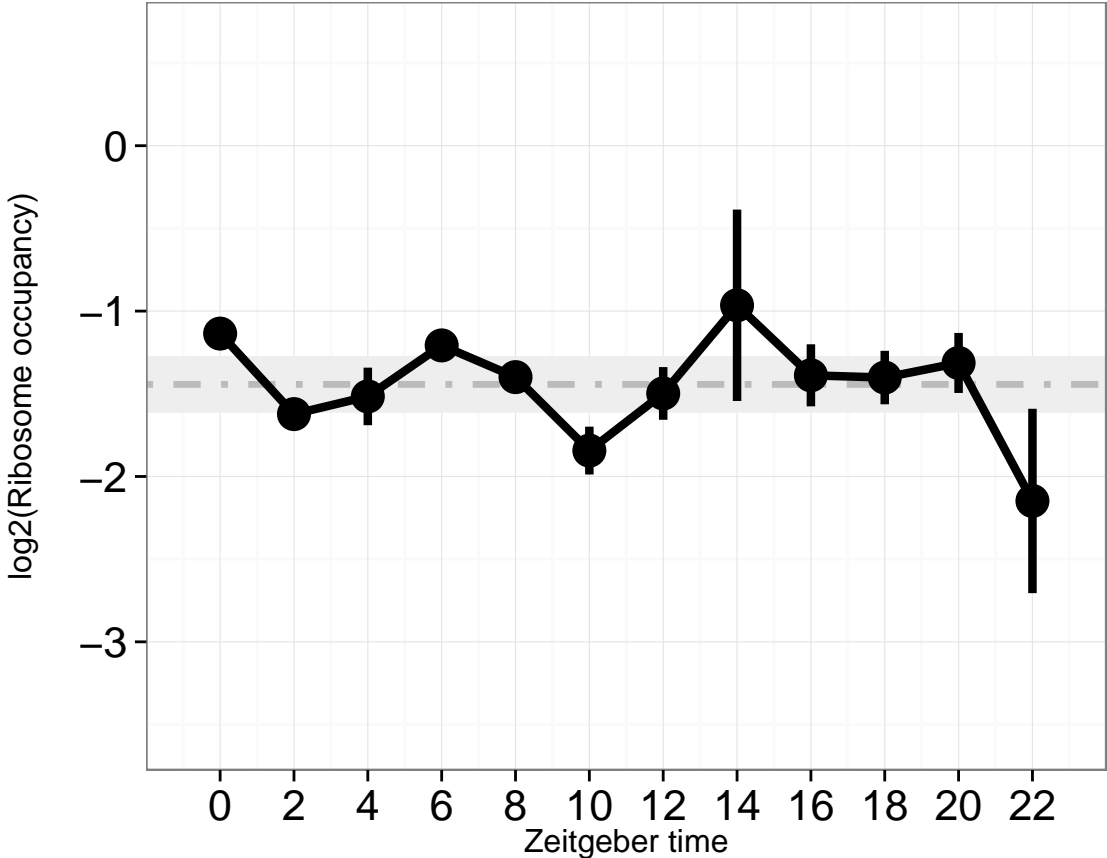

Supplement: Supplementary file 1470 [file 1]

**Psmd10**

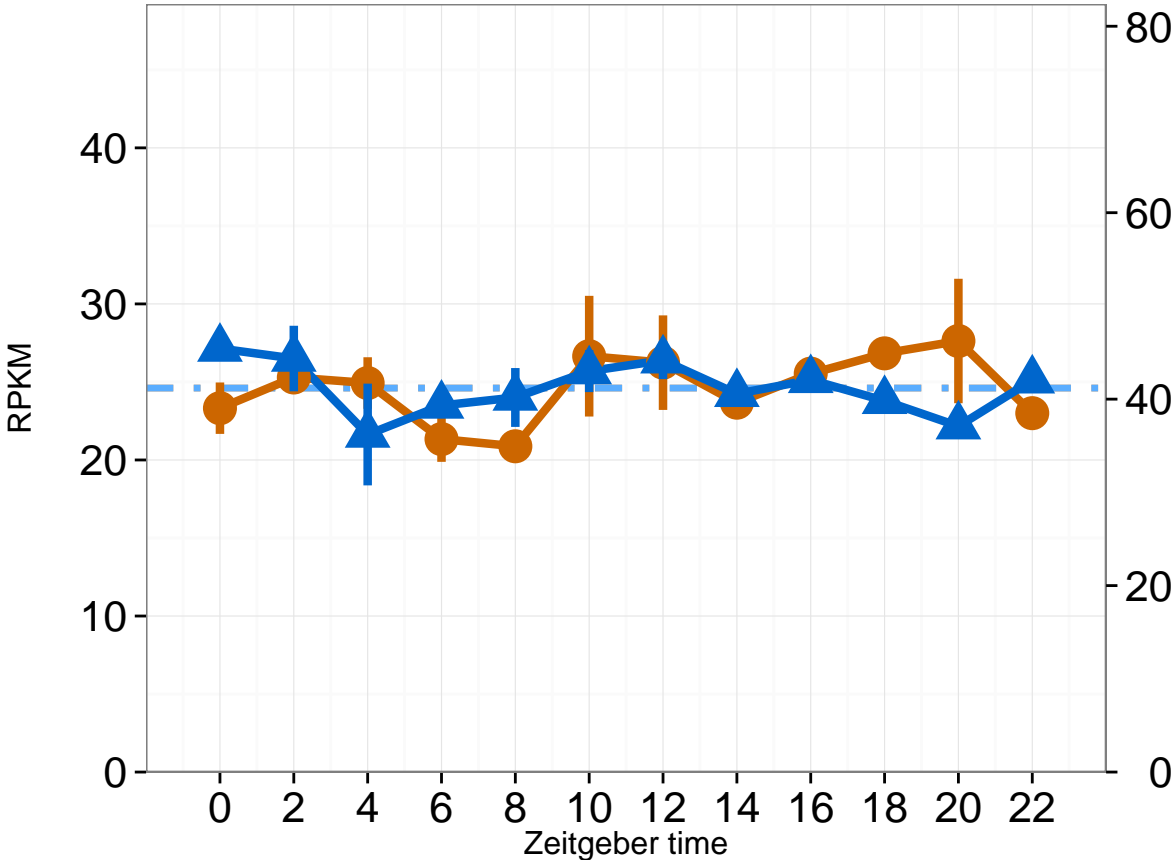

**Psmd10**

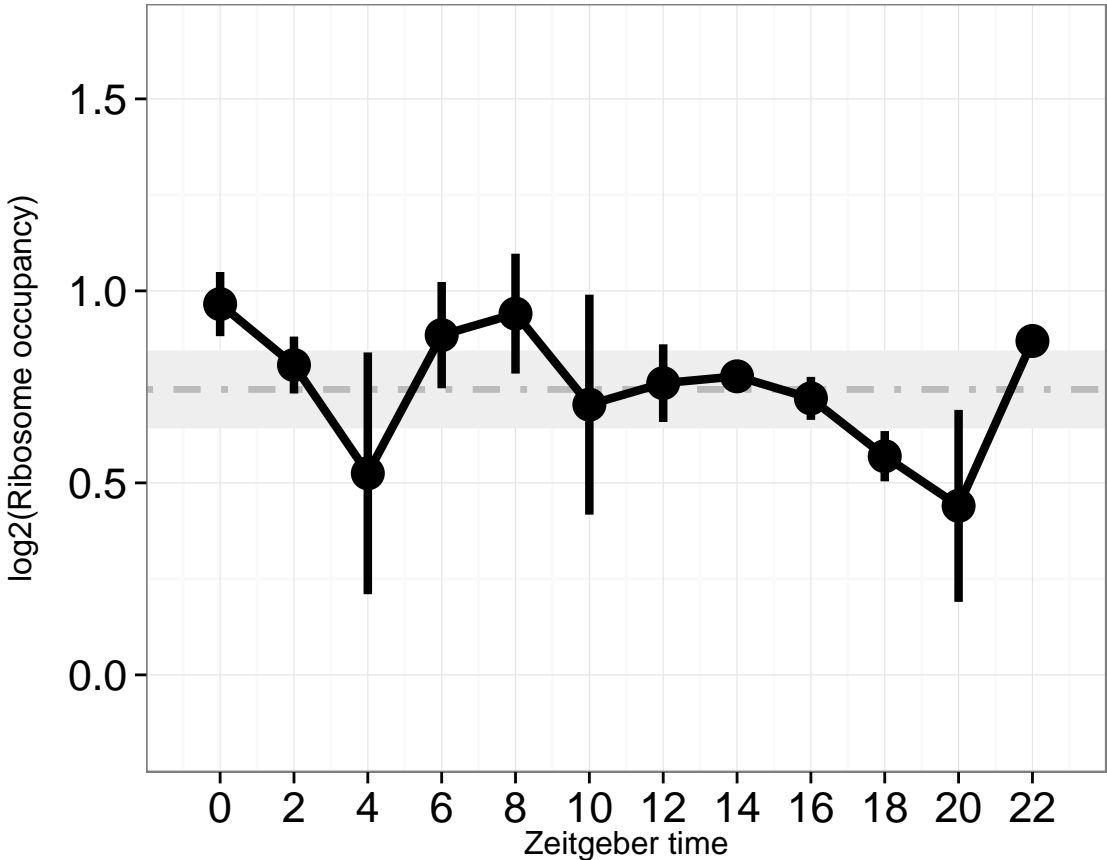

Supplement: Supplementary file 1471 [file 1]

## Rnf103

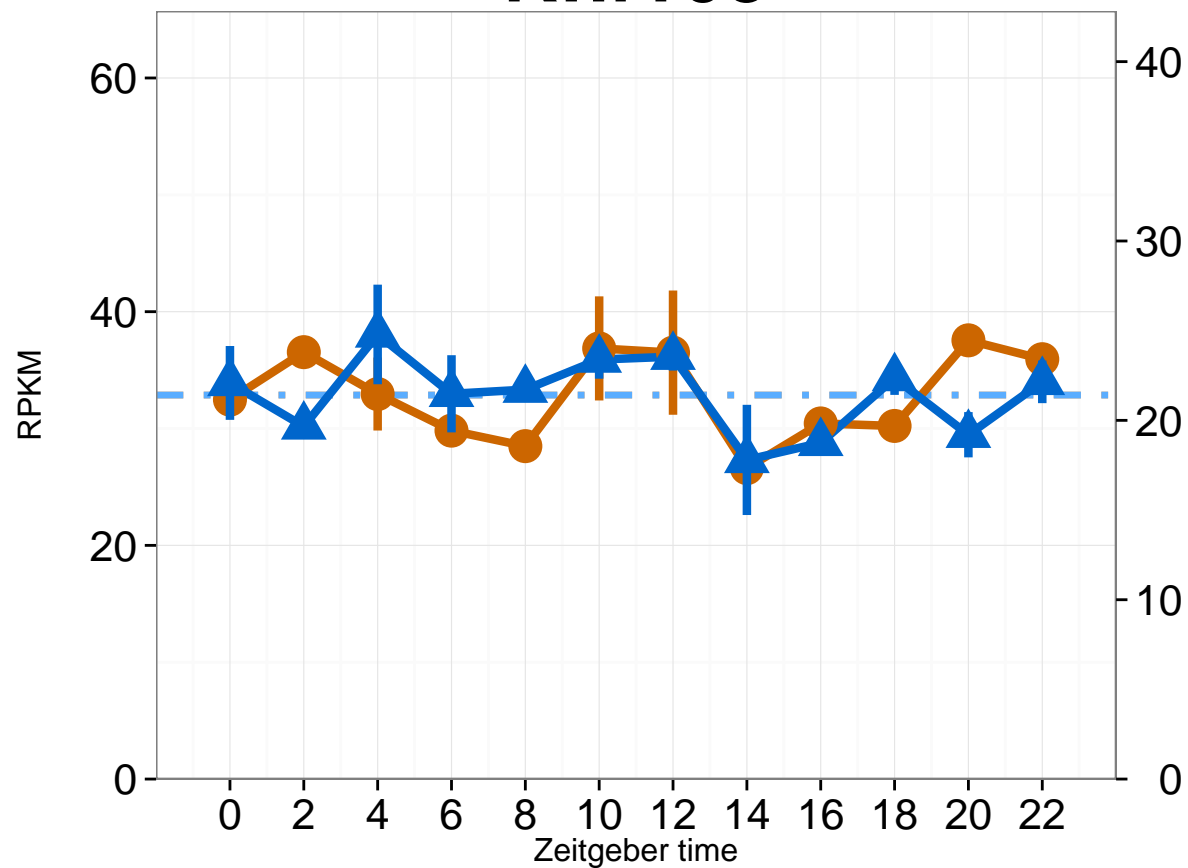

## Rnf103

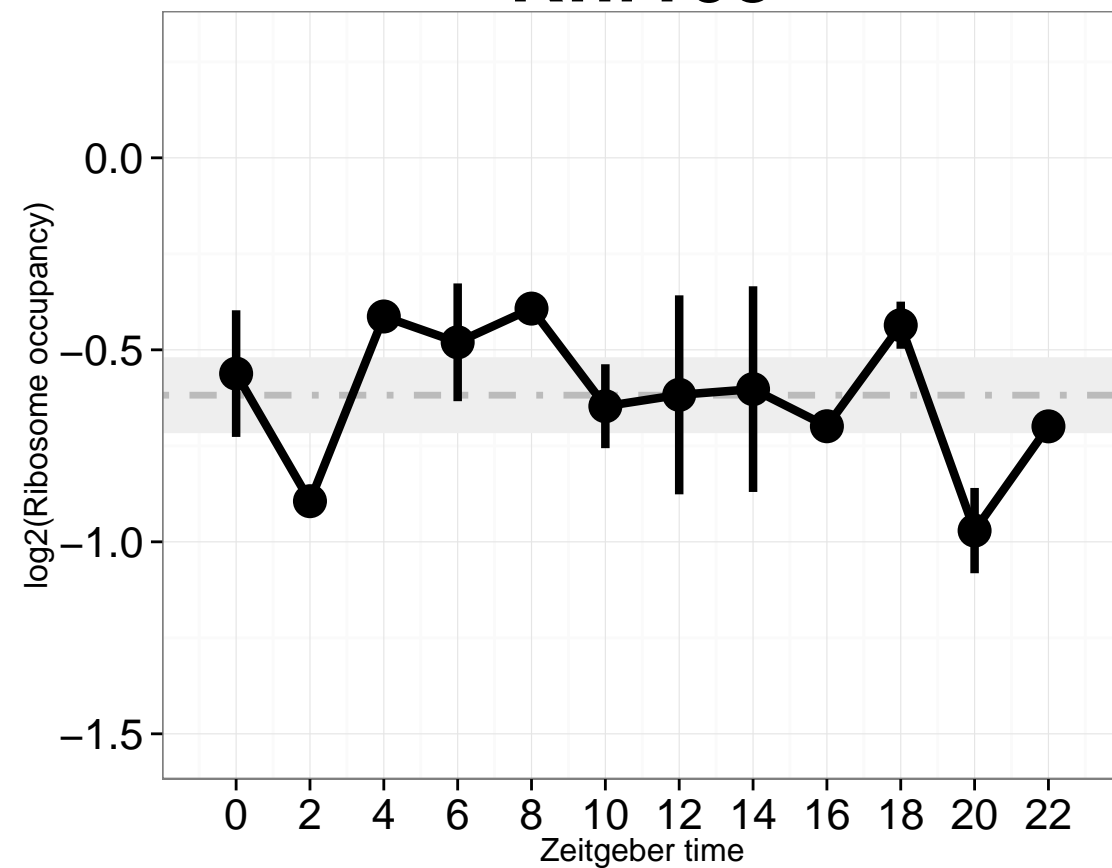

Supplement: Supplementary file 1472 [file 1]

## Cbr2

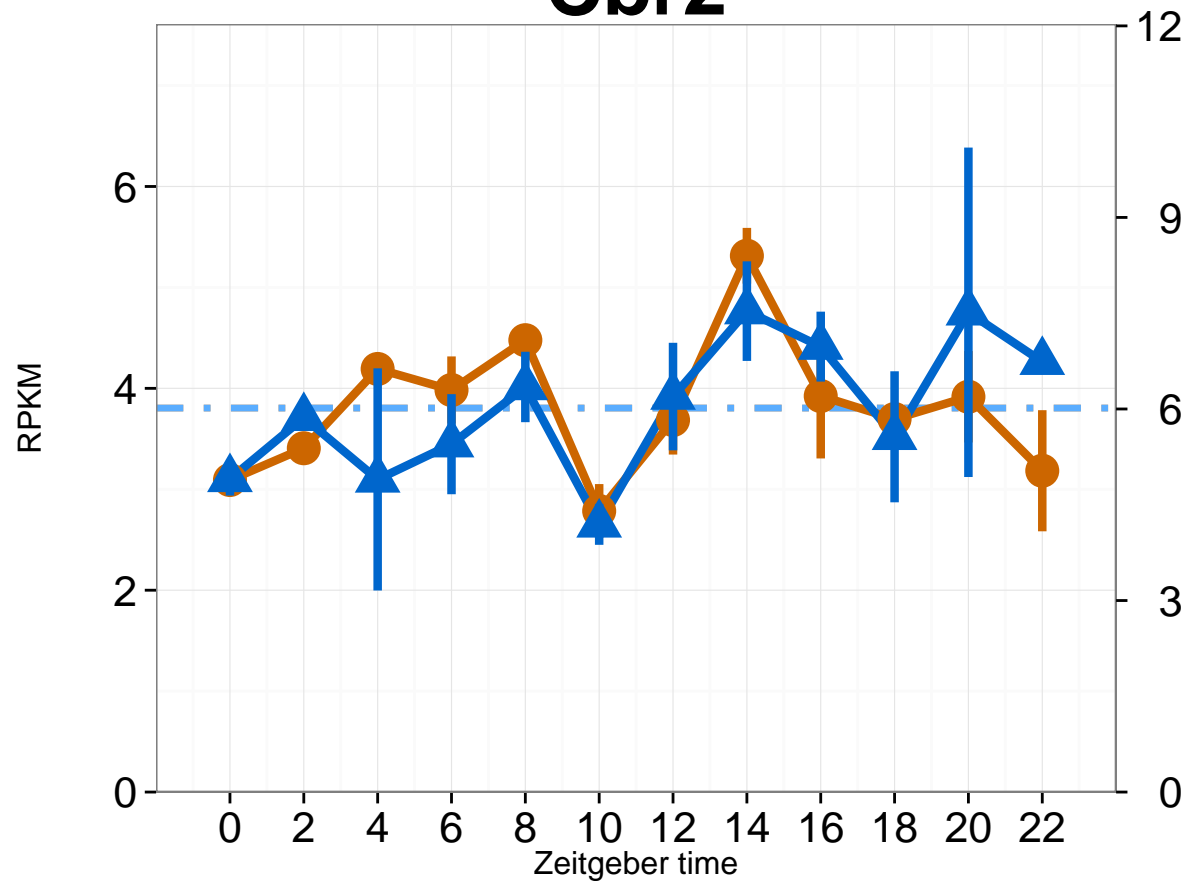

## Cbr2

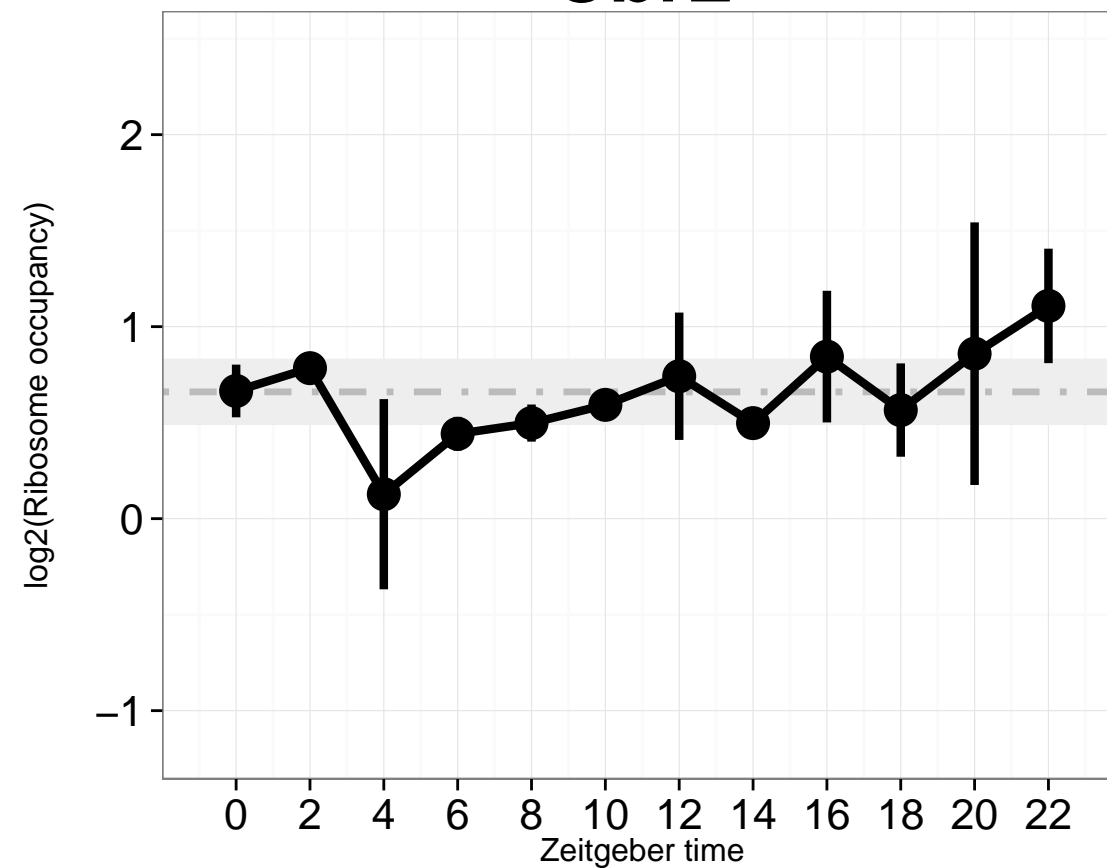

Supplement: Supplementary file 1473 [file 1]

## Faim

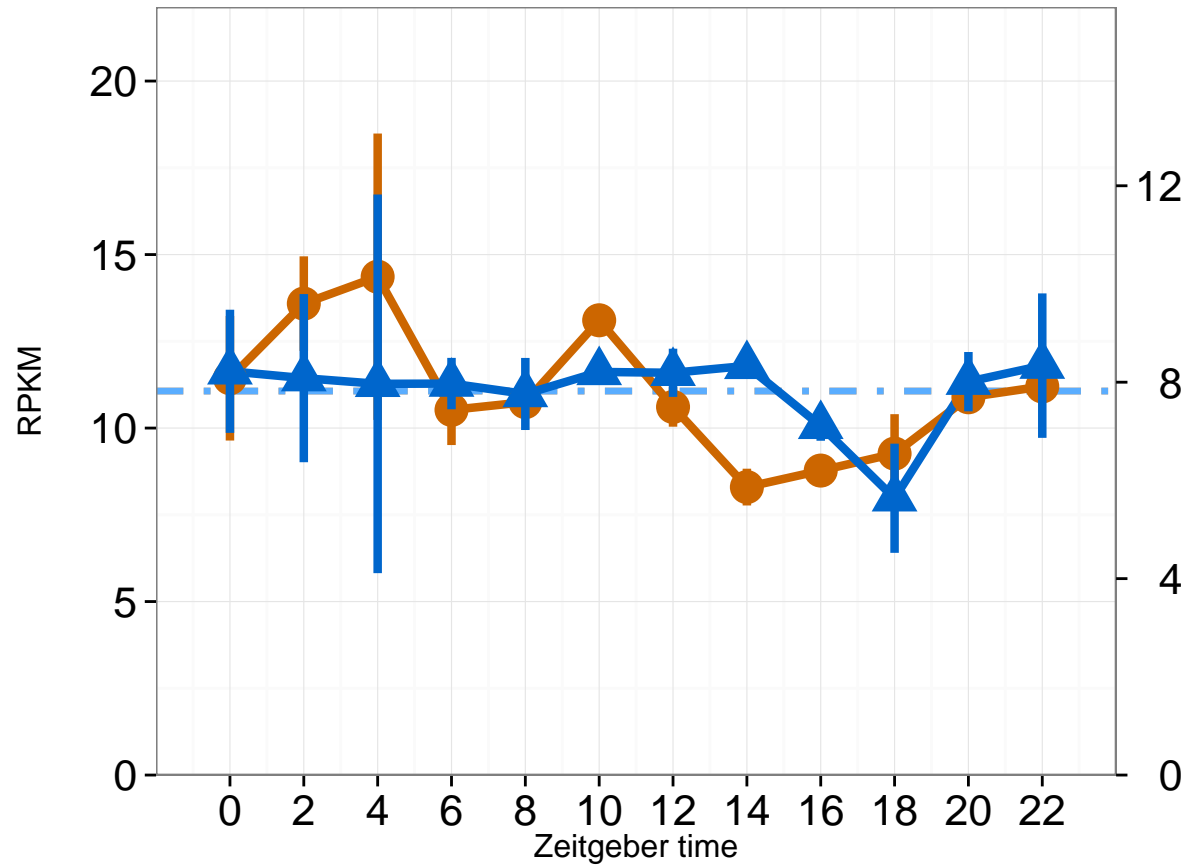

## Faim

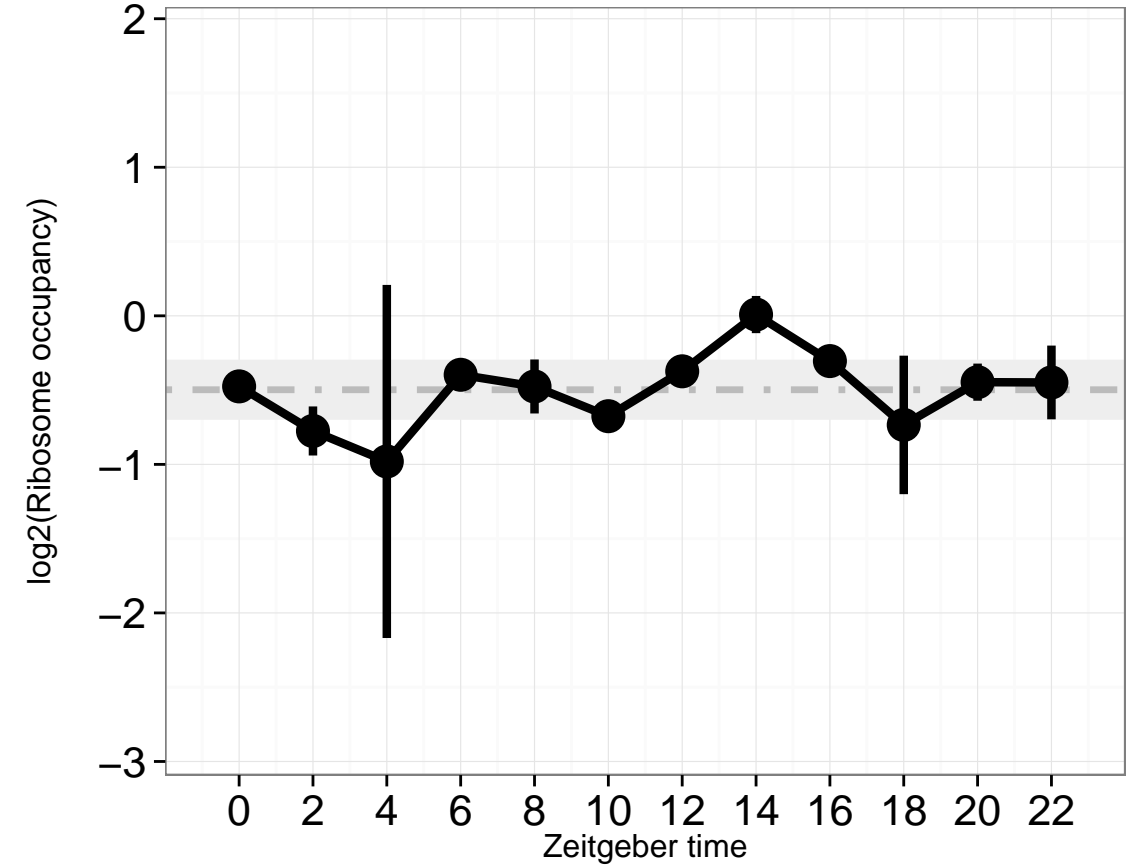

Supplement: Supplementary file 1474 [file 1]

## Urgcp

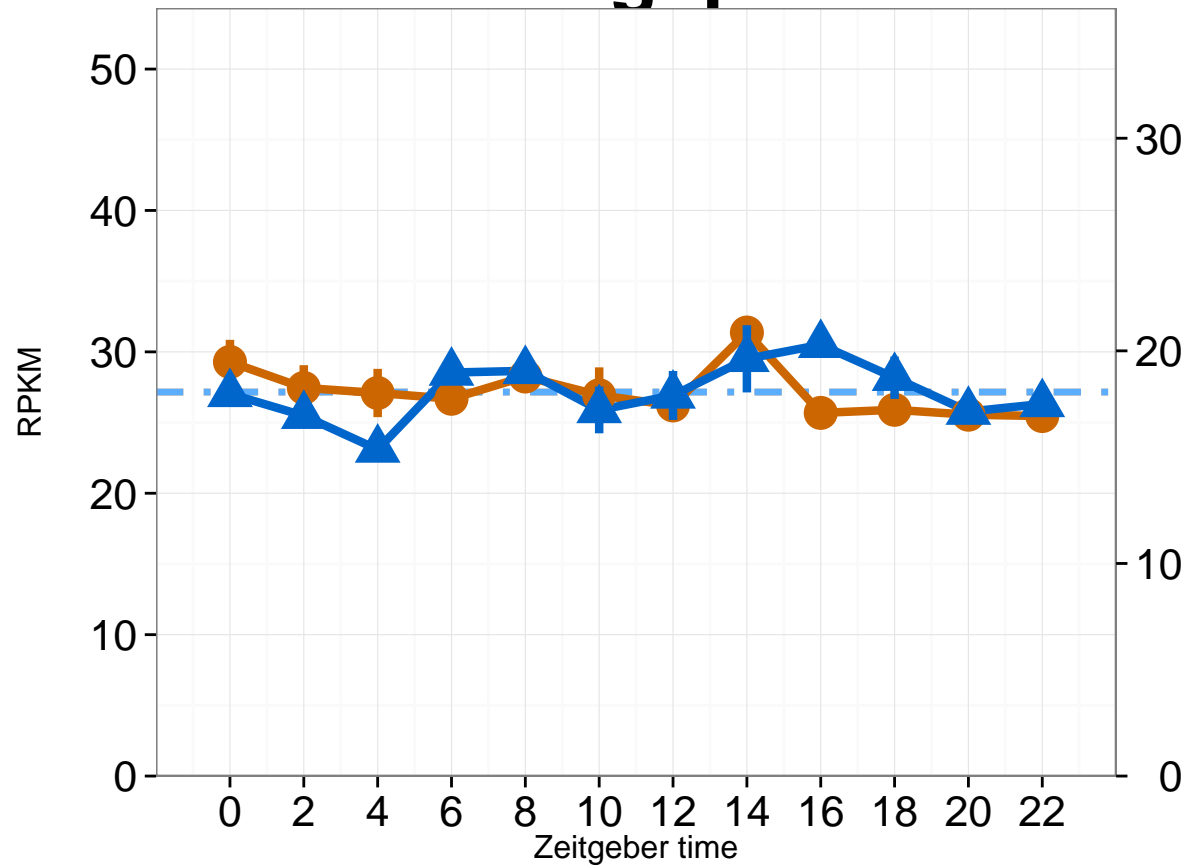

## Urgcp

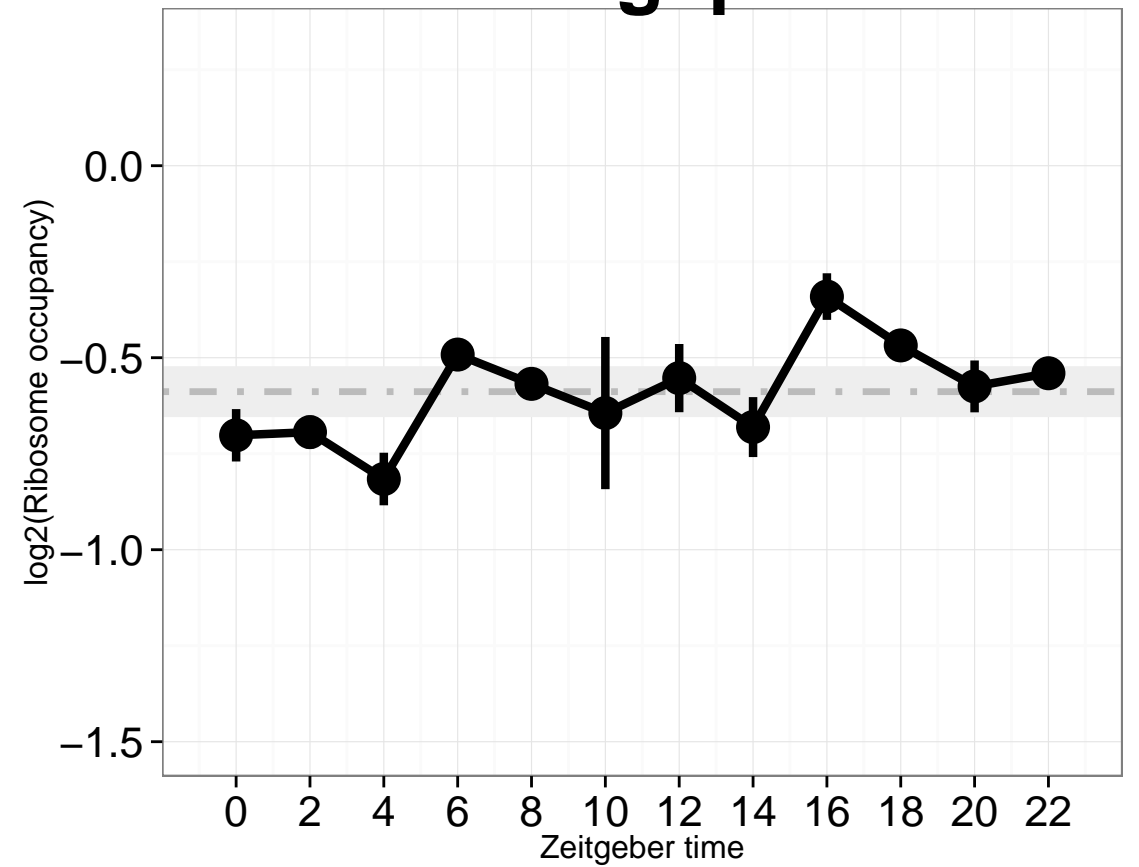

Supplement: Supplementary file 1475 [file 1]

# Fam134a

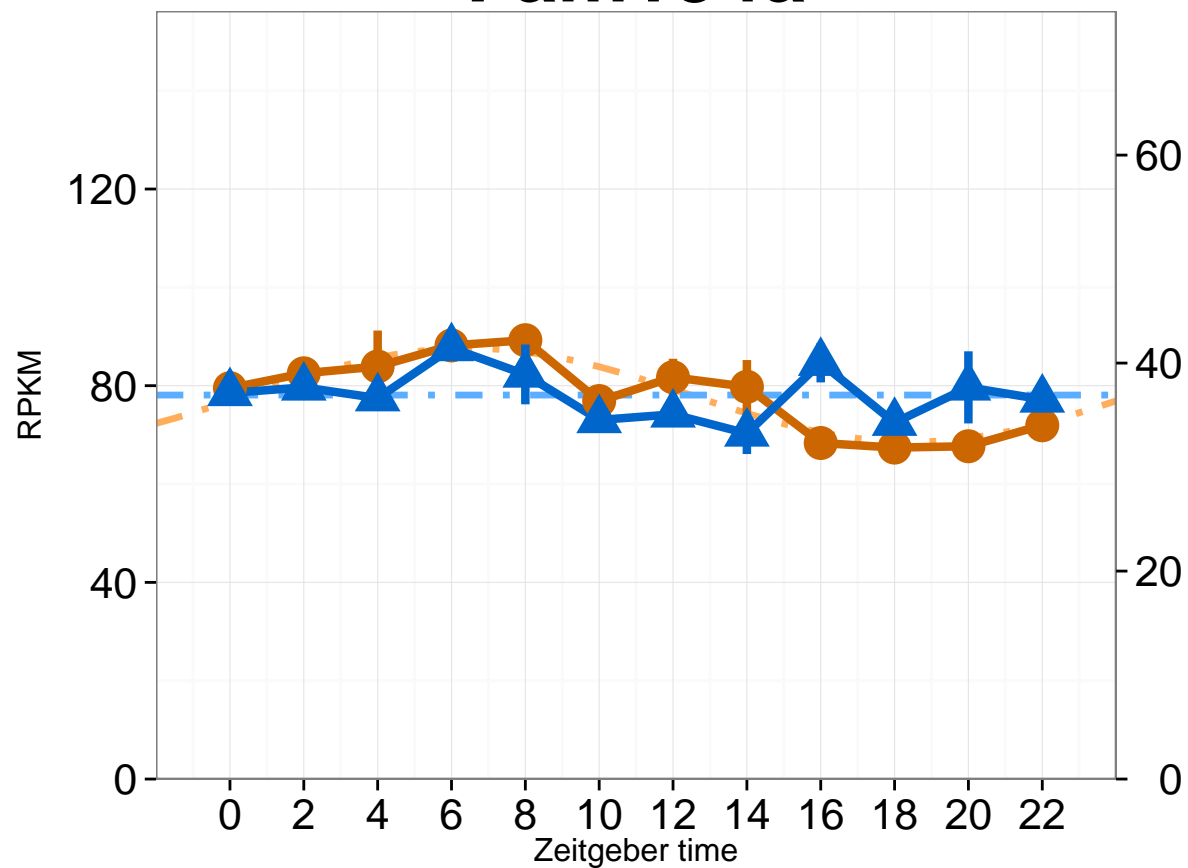

# Fam134a

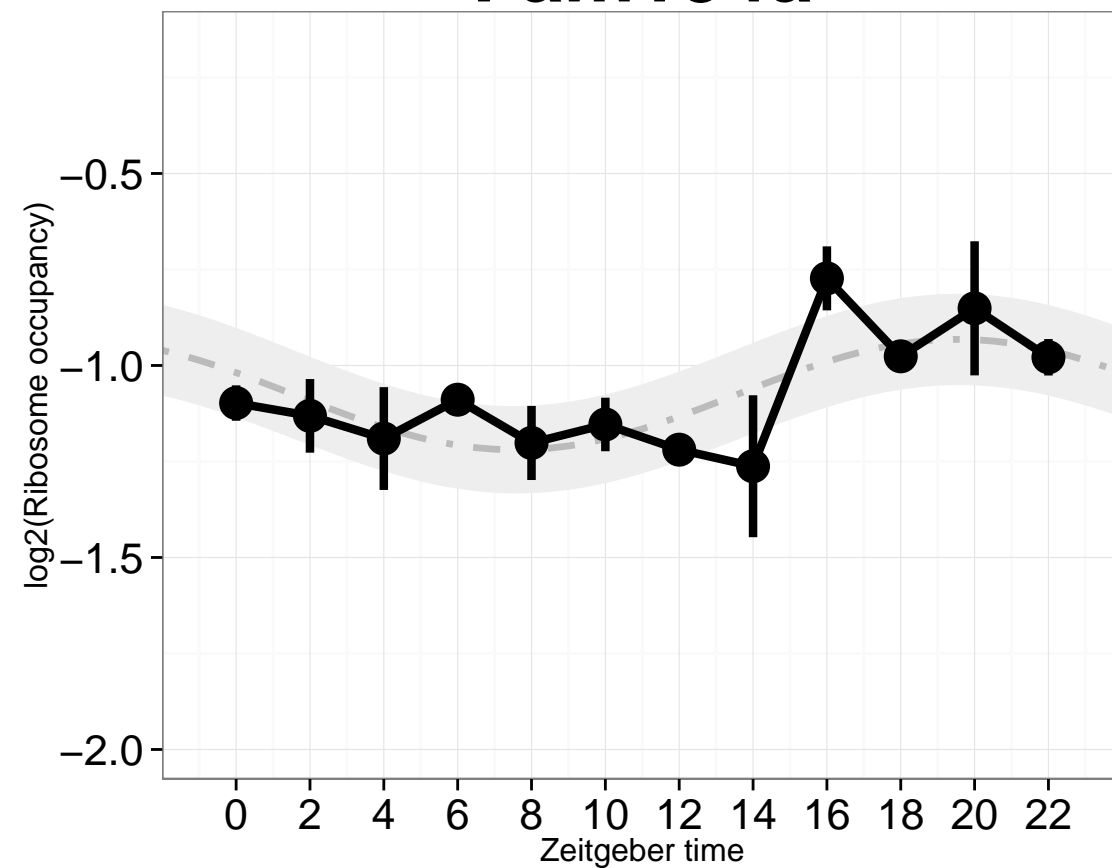

Supplement: Supplementary file 1476 [file 1]

## Mtg1

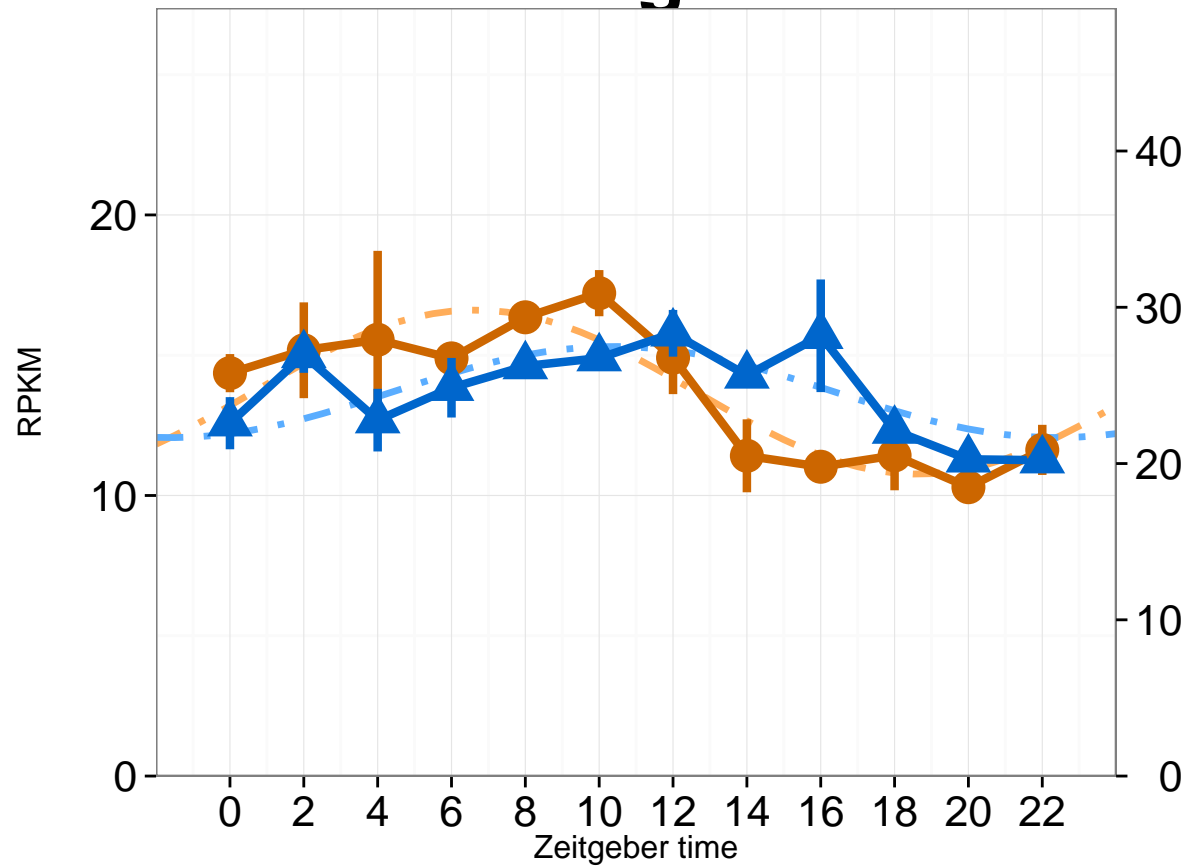

## Mtg1

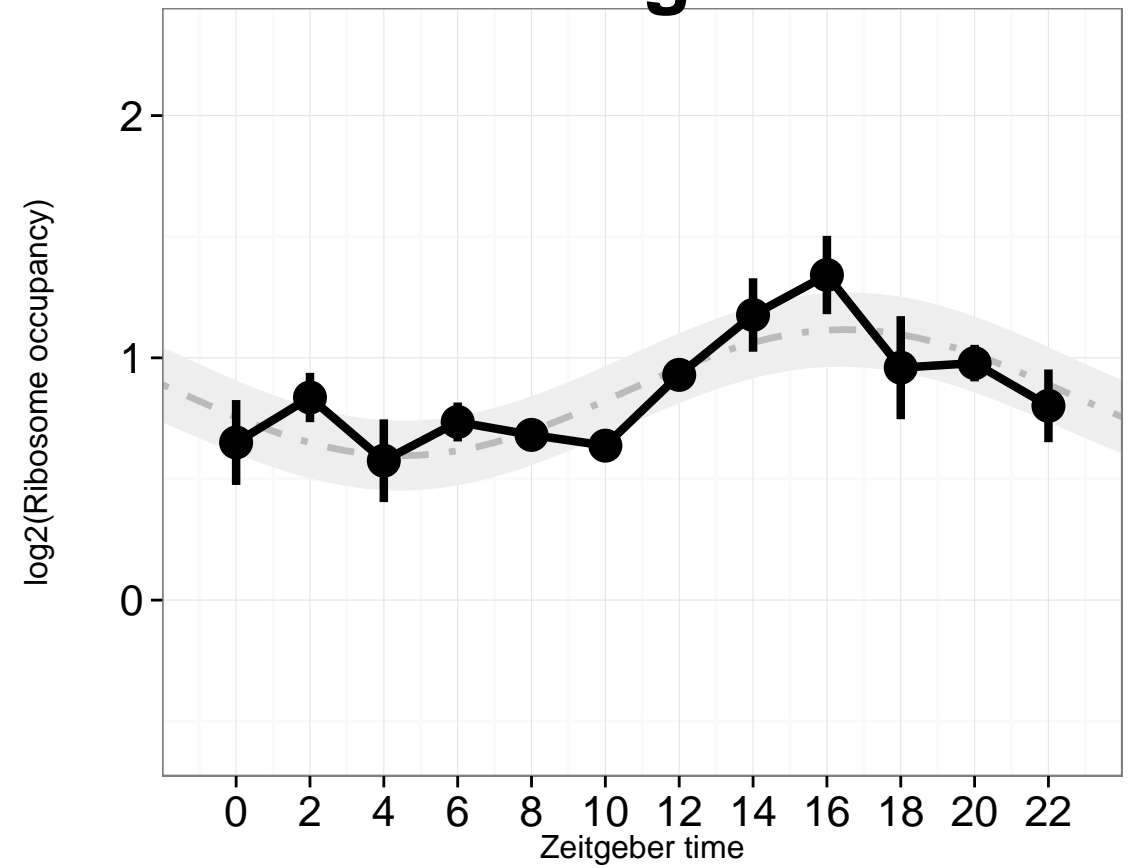

Supplement: Supplementary file 1477 [file 1]

## Prkra

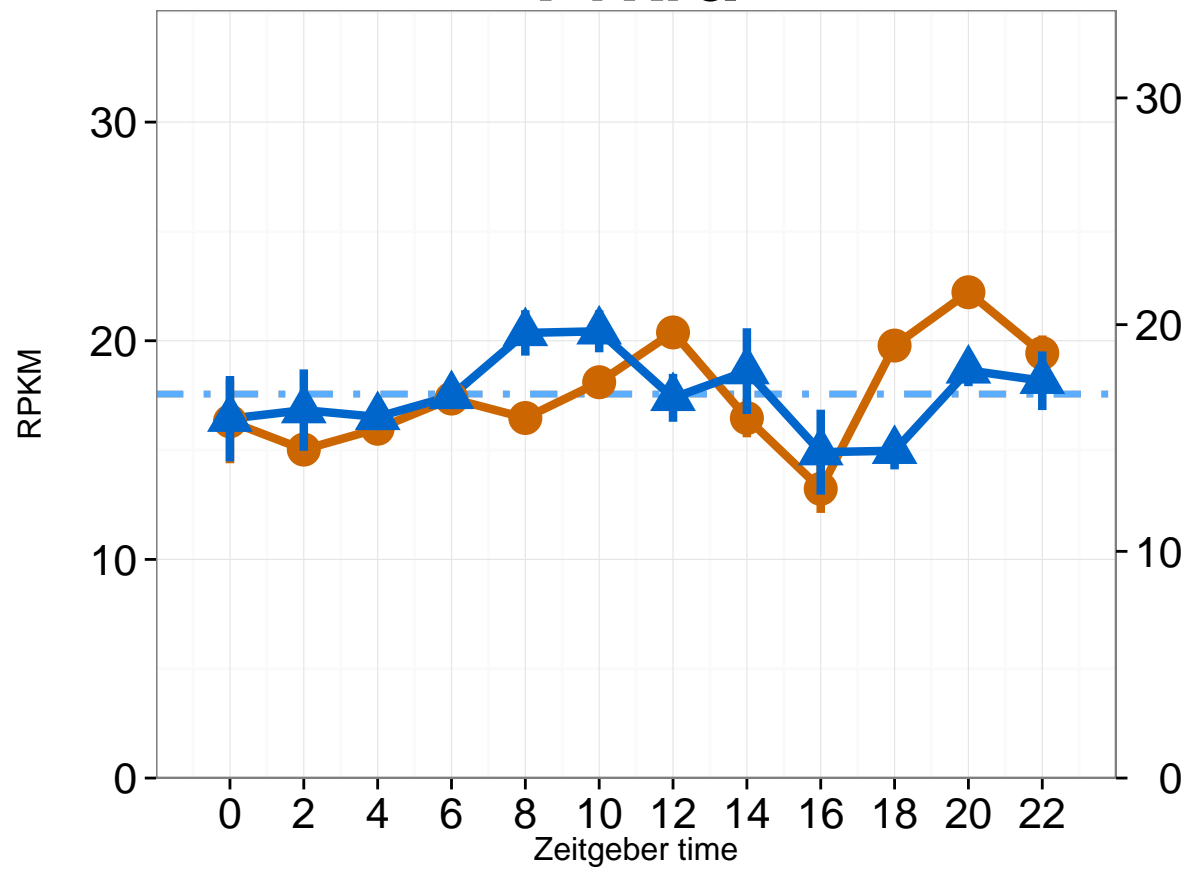

## Prkra

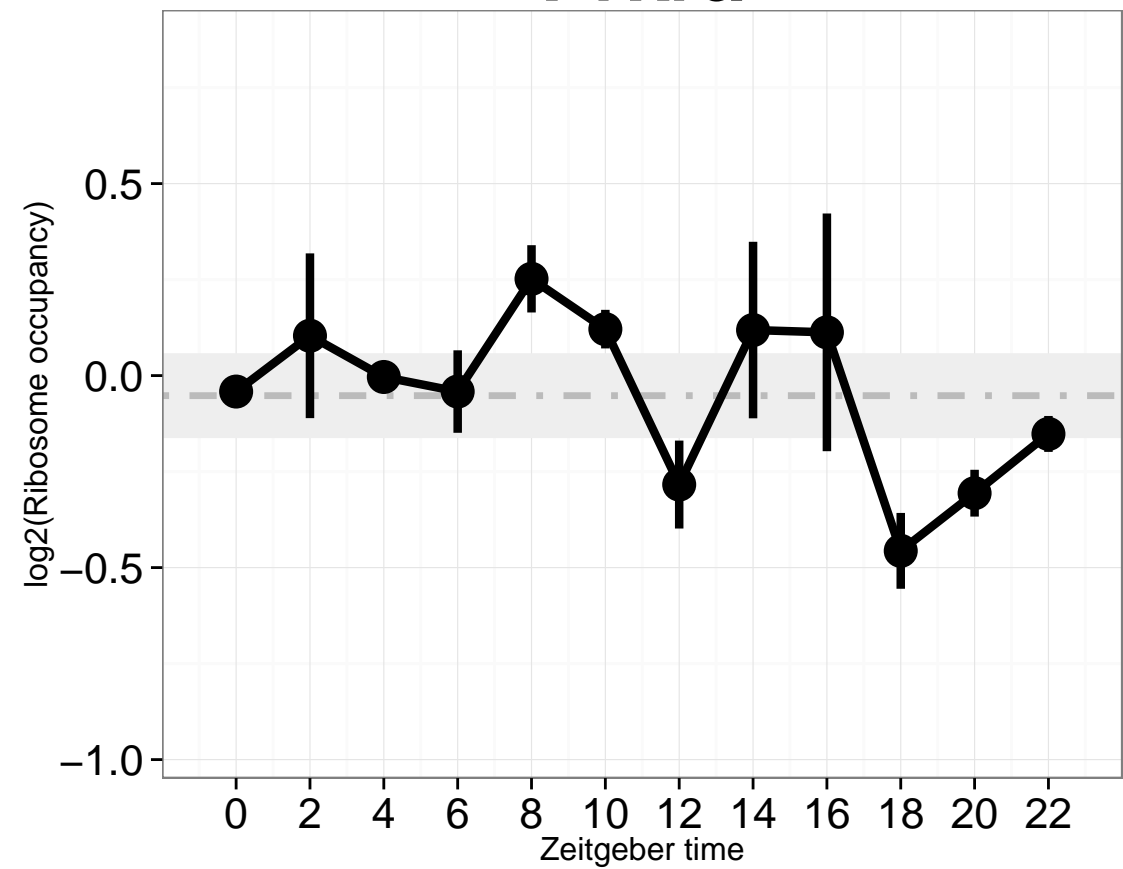

Supplement: Supplementary file 1478 [file 1]

# Whamm

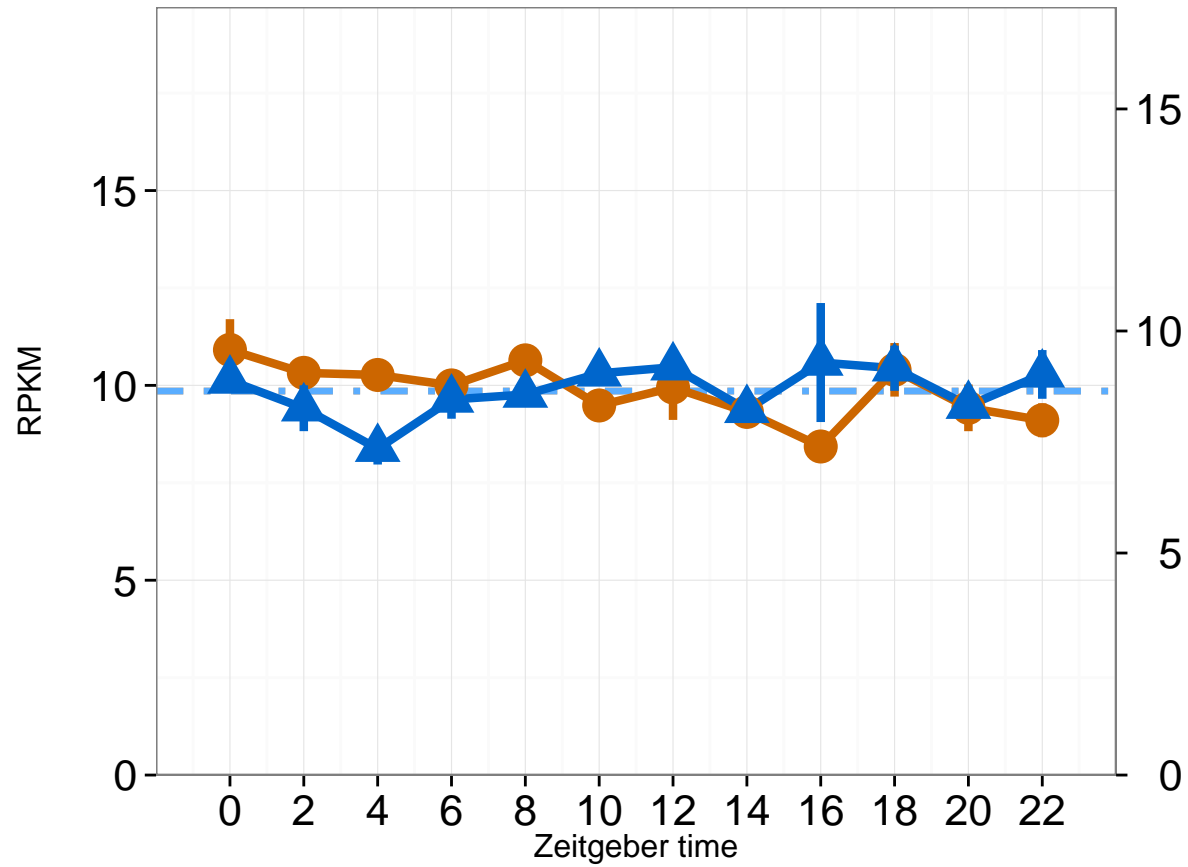

# Whamm

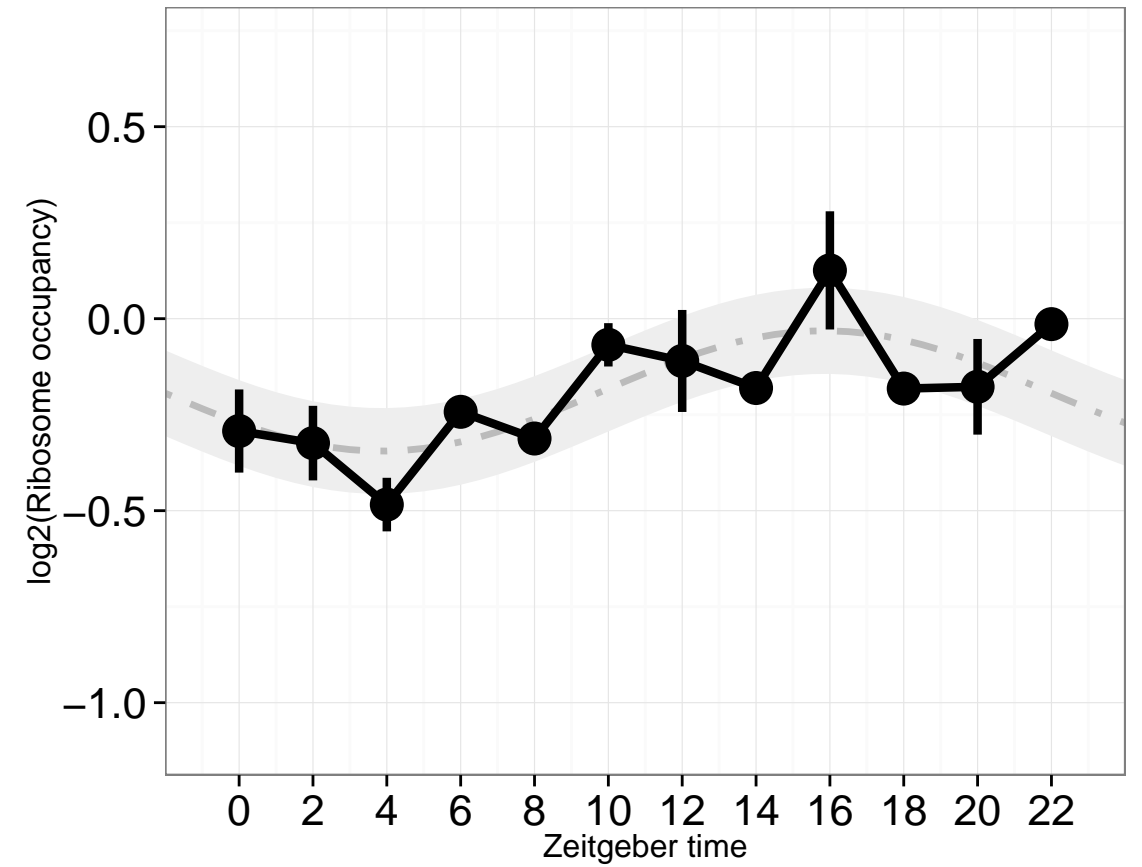

Supplement: Supplementary file 1479 [file 1]

## Irs2

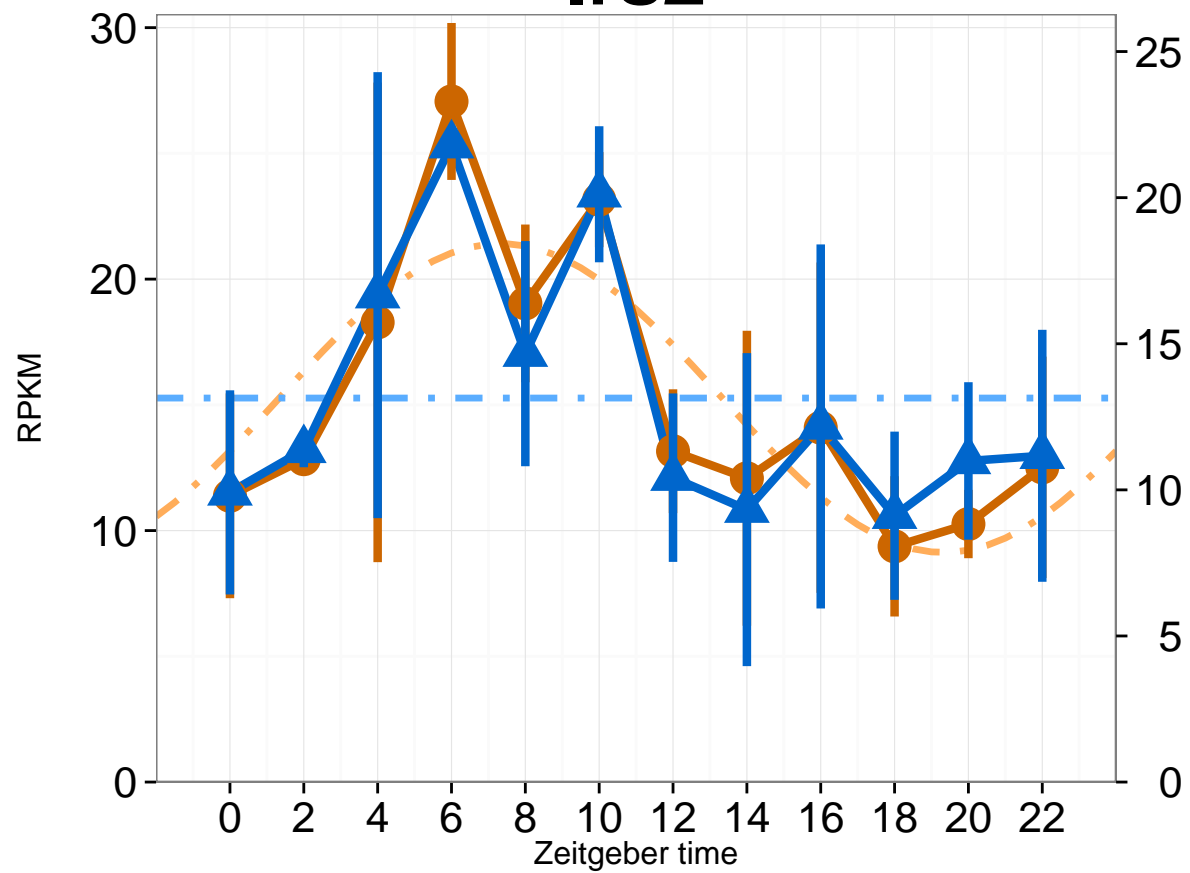

## Irs2

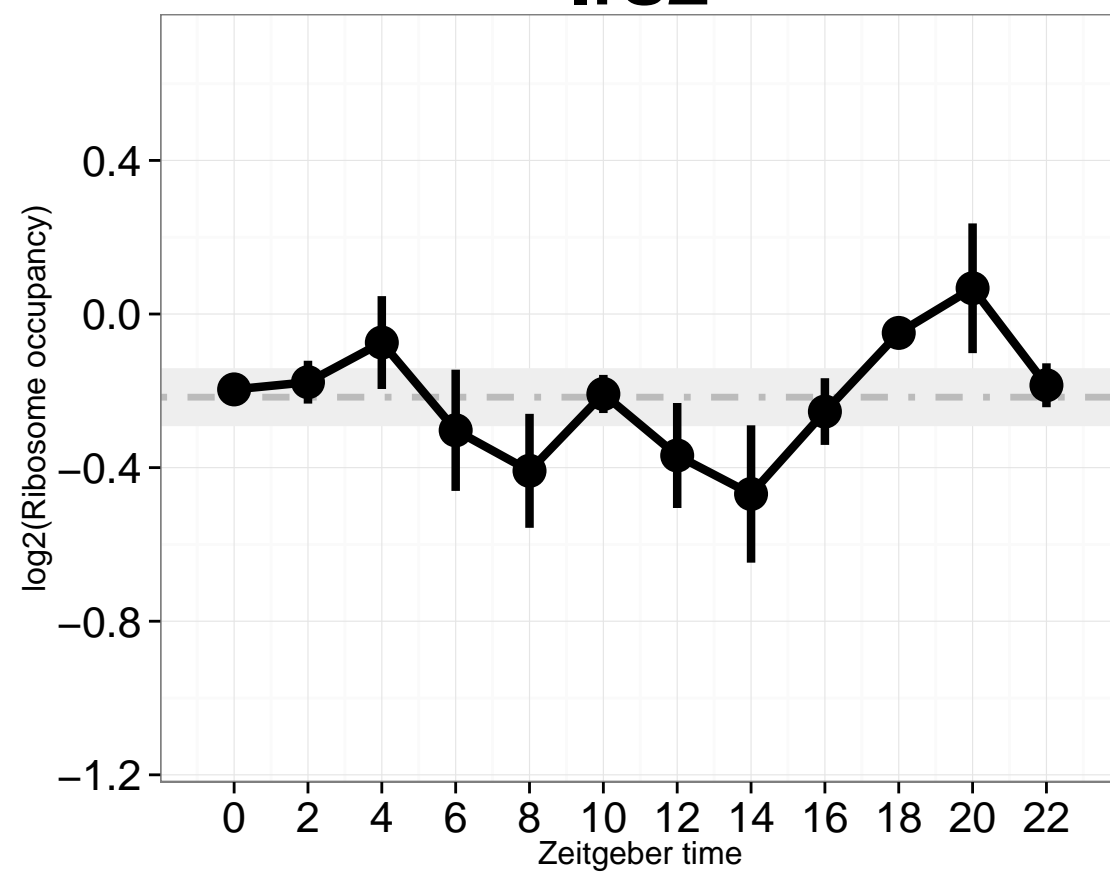

Supplement: Supplementary file 1480 [file 1]

# Spag9

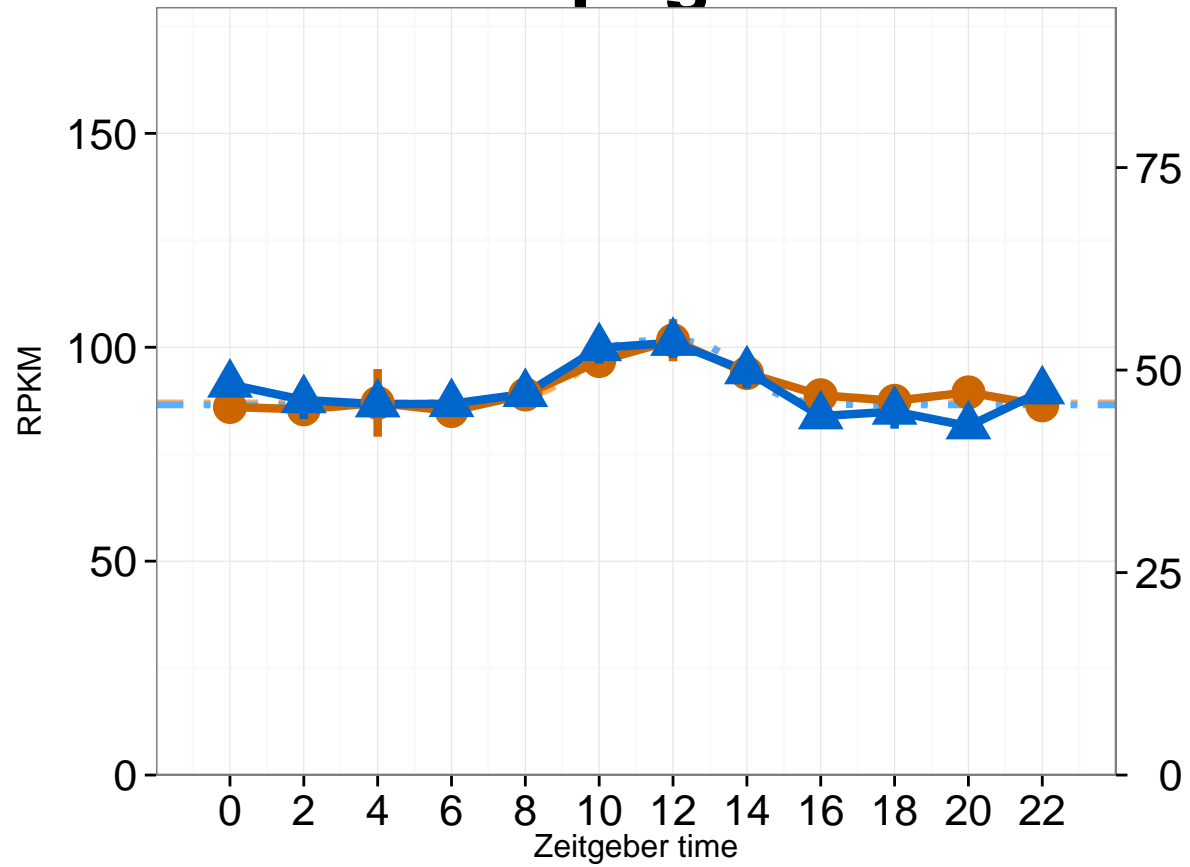

# Spag9

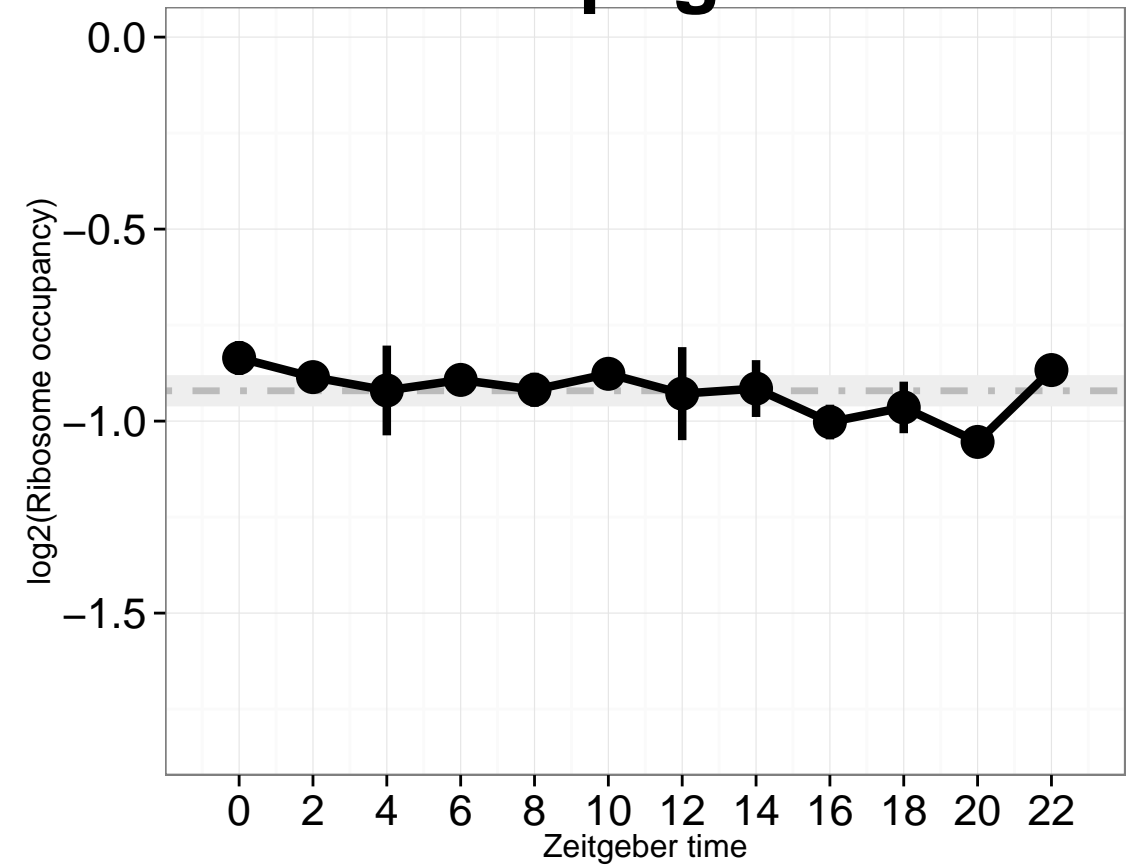

Supplement: Supplementary file 1481 [file 1]

# Lrrc59

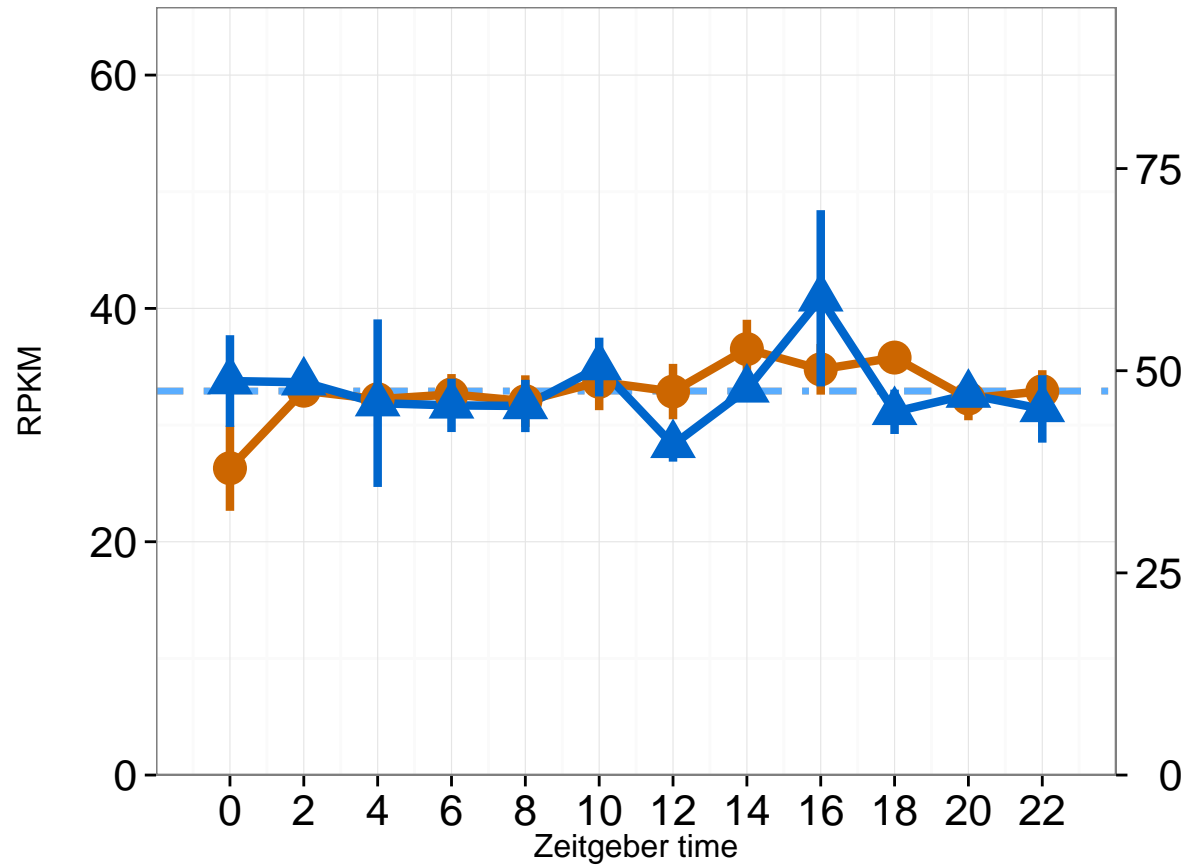

# Lrrc59

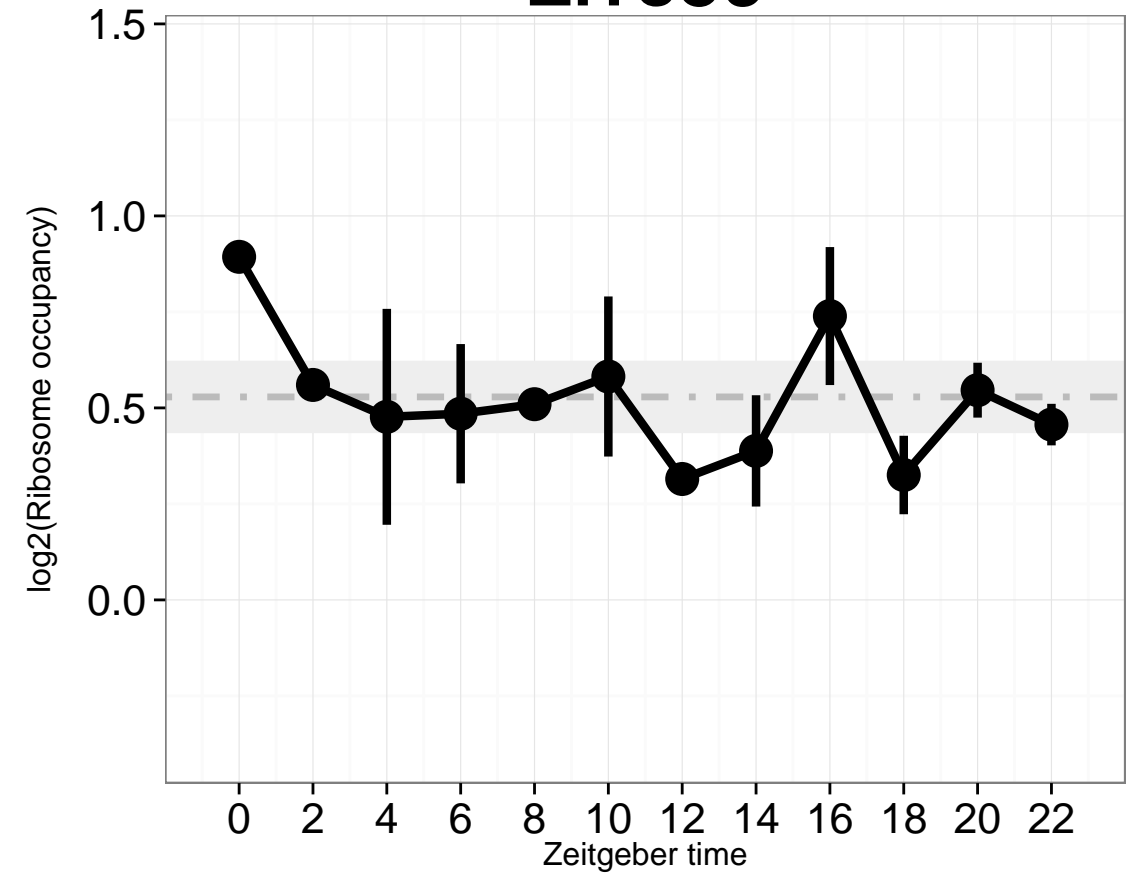

Supplement: Supplementary file 1482 [file 1]

# Fkbp5

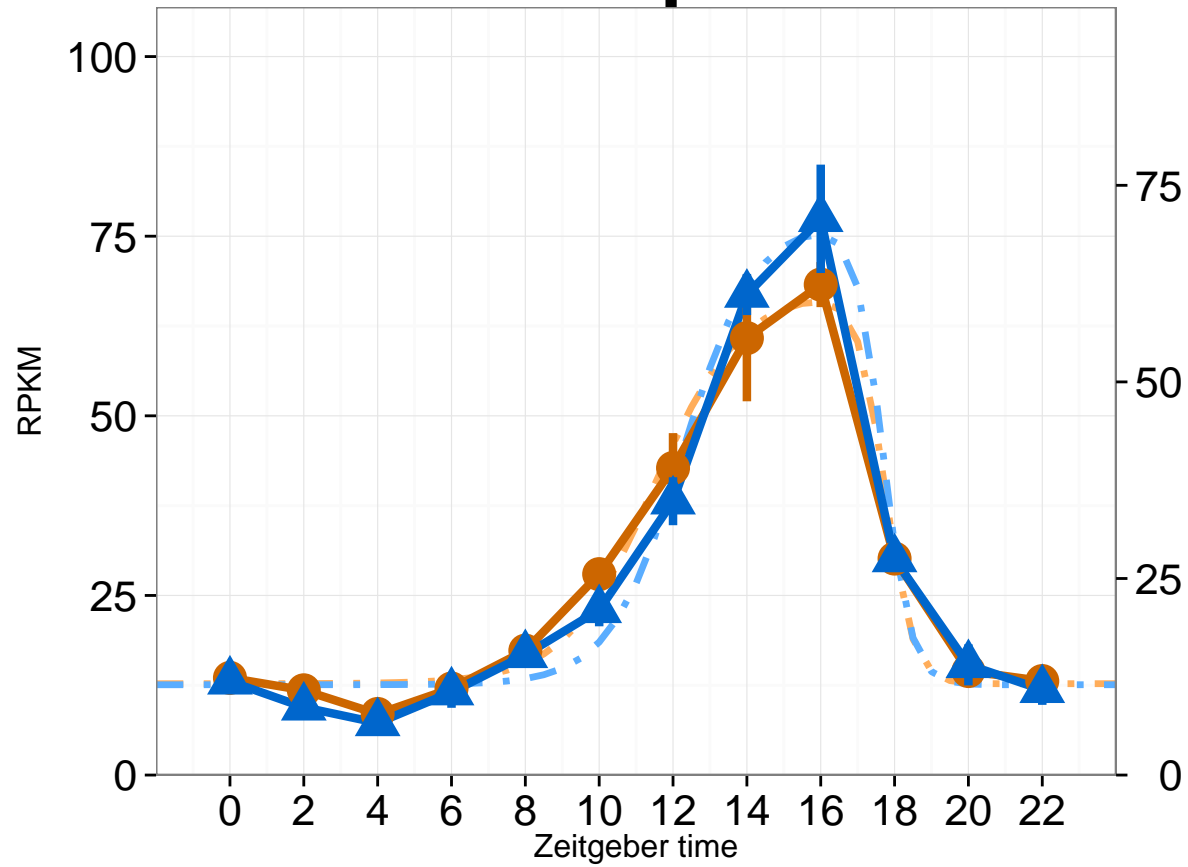

# Fkbp5

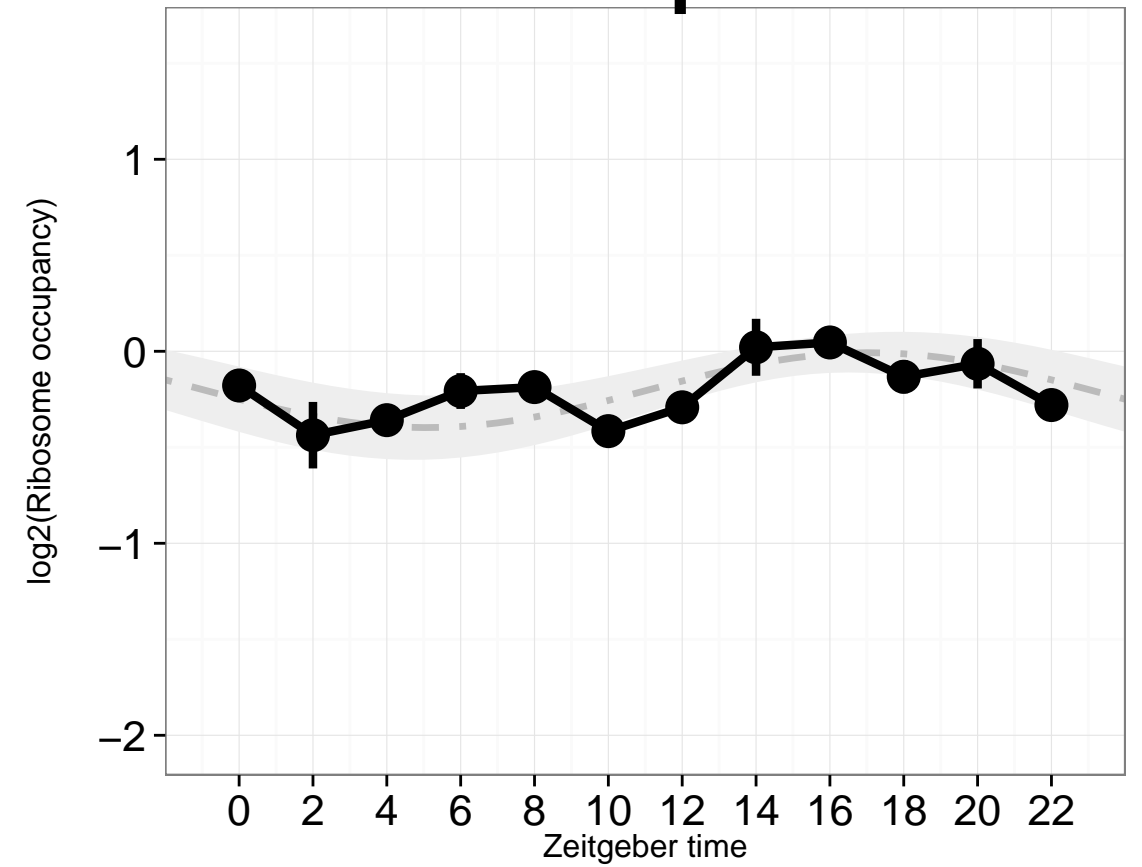

Supplement: Supplementary file 1483 [file 1]

# Tax1bp3

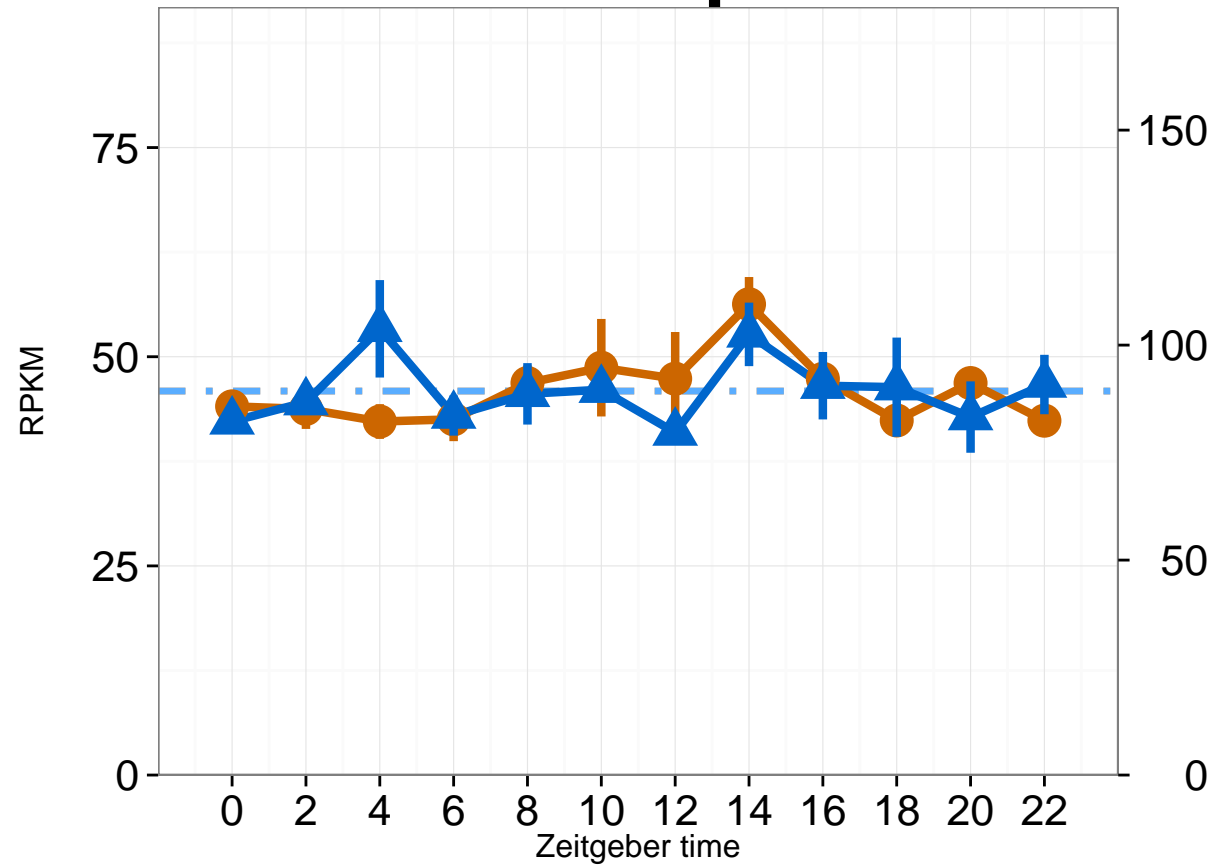

# Tax1bp3

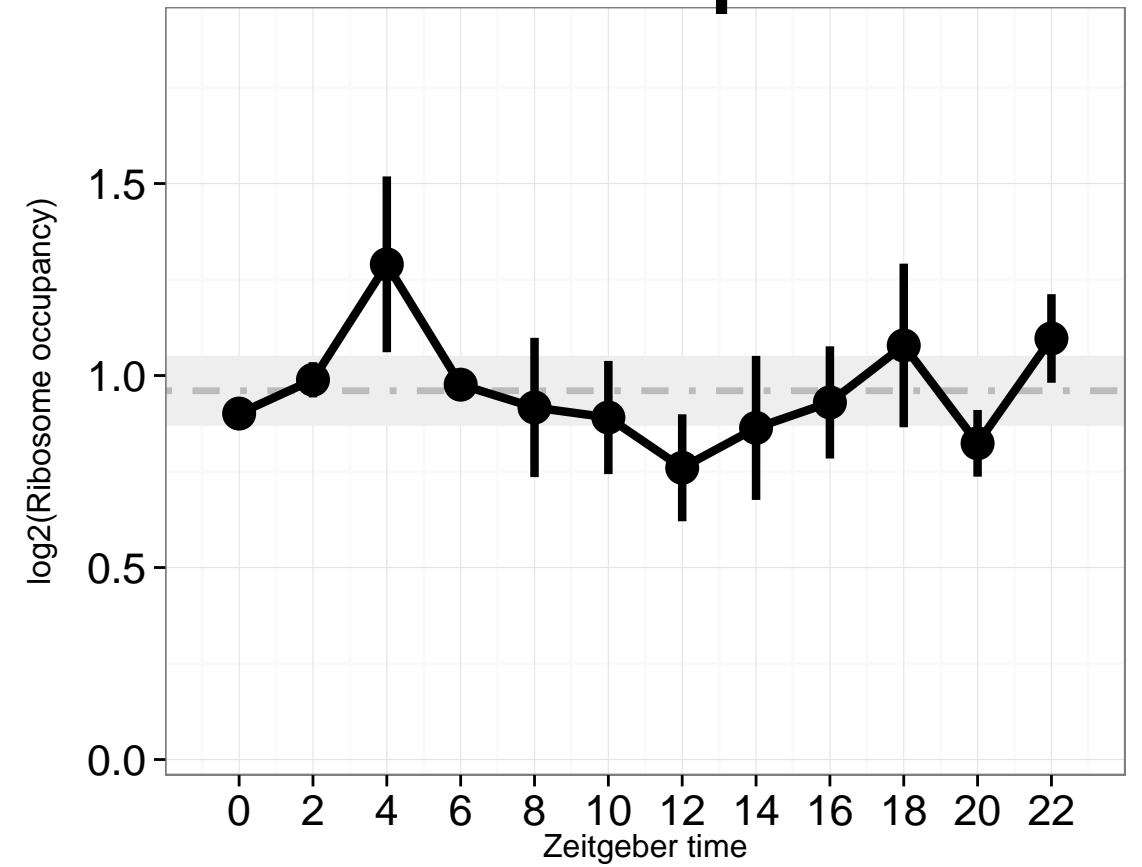

Supplement: Supplementary file 1484 [file 1]

## Gltscr2

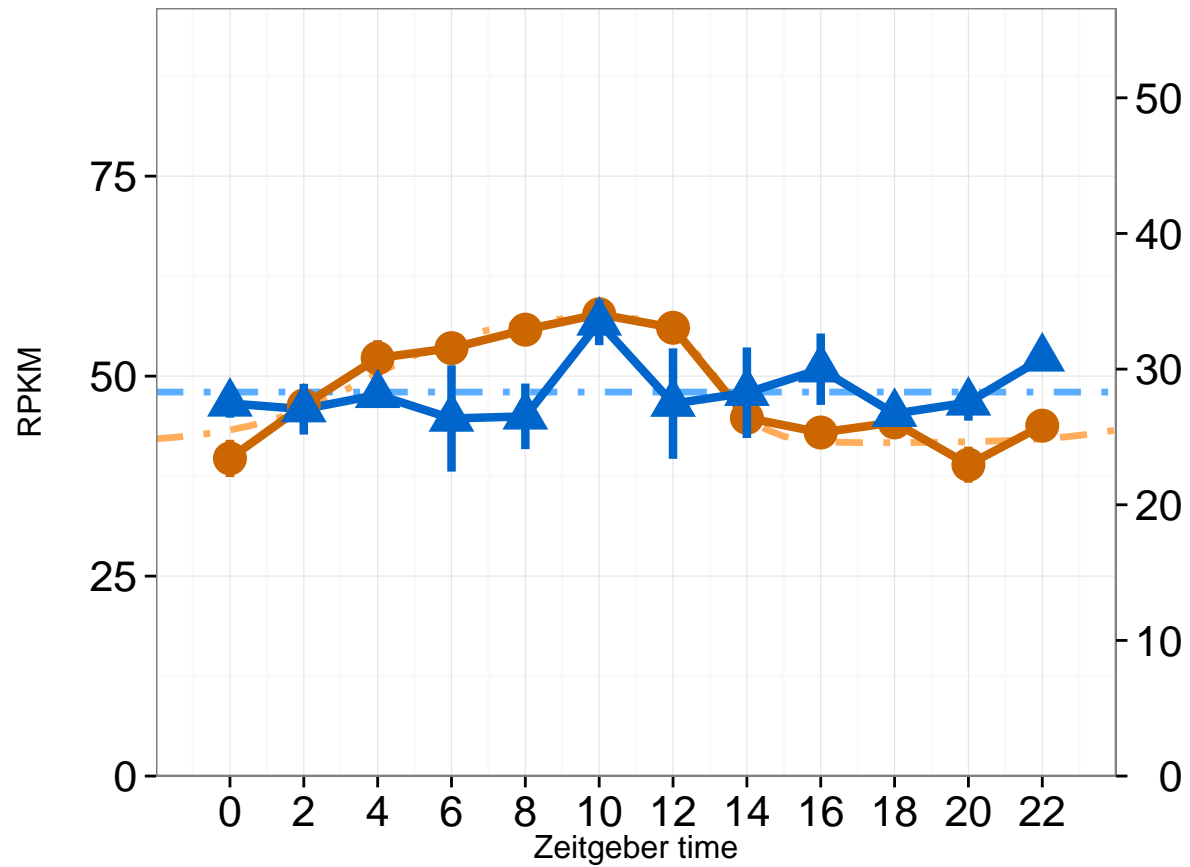

## Gltscr2

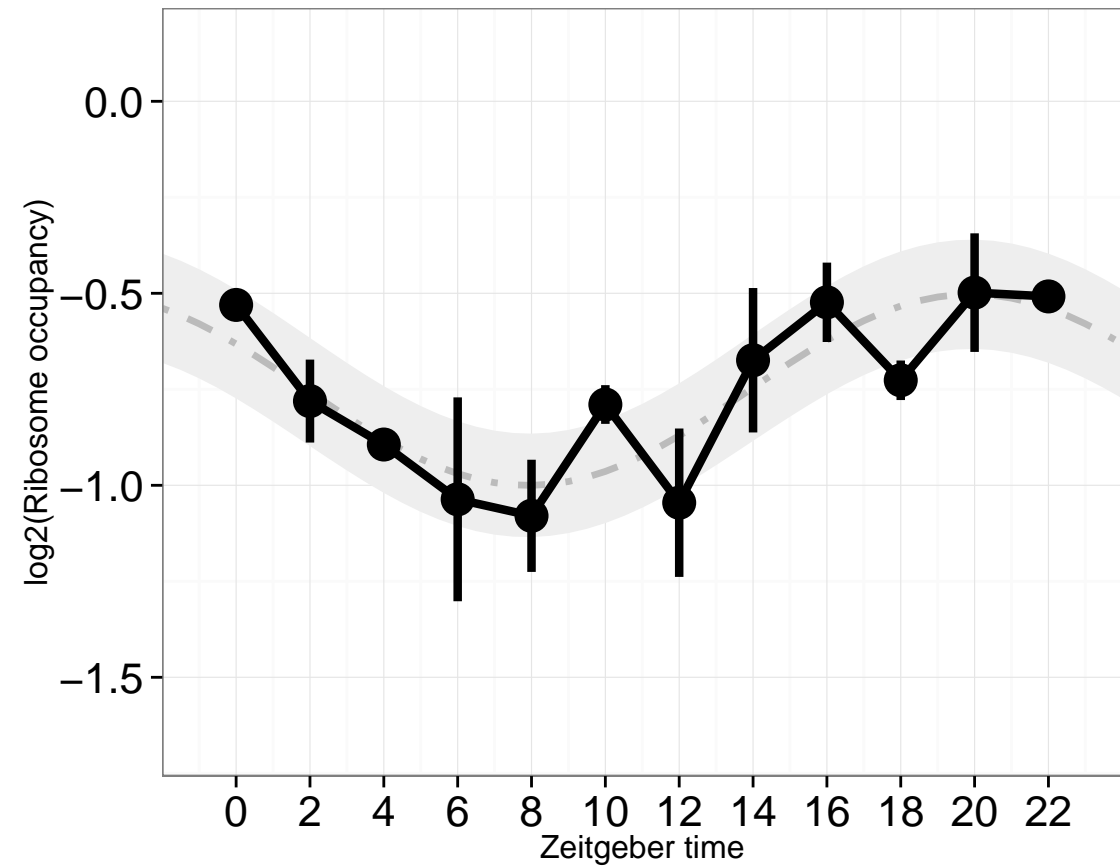

Supplement: Supplementary file 1485 [file 1]

# Fam117b

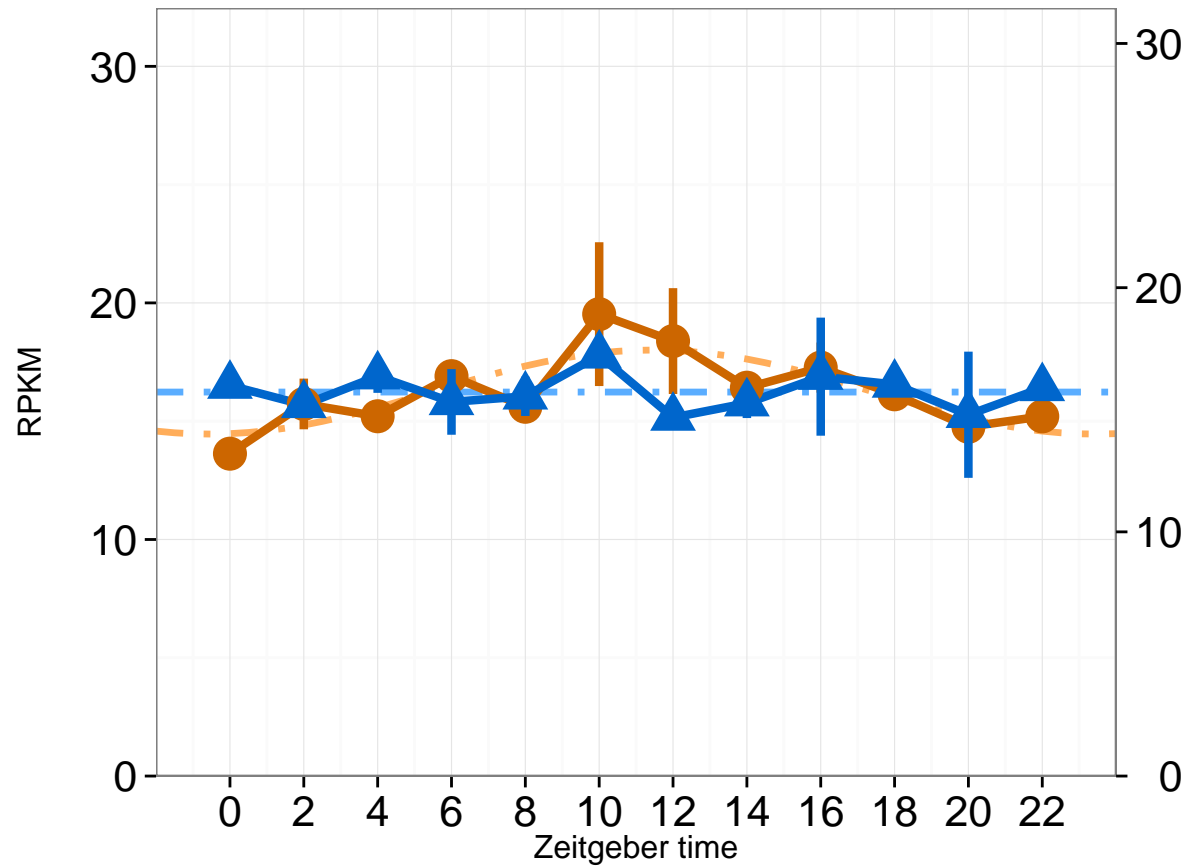

# Fam117b

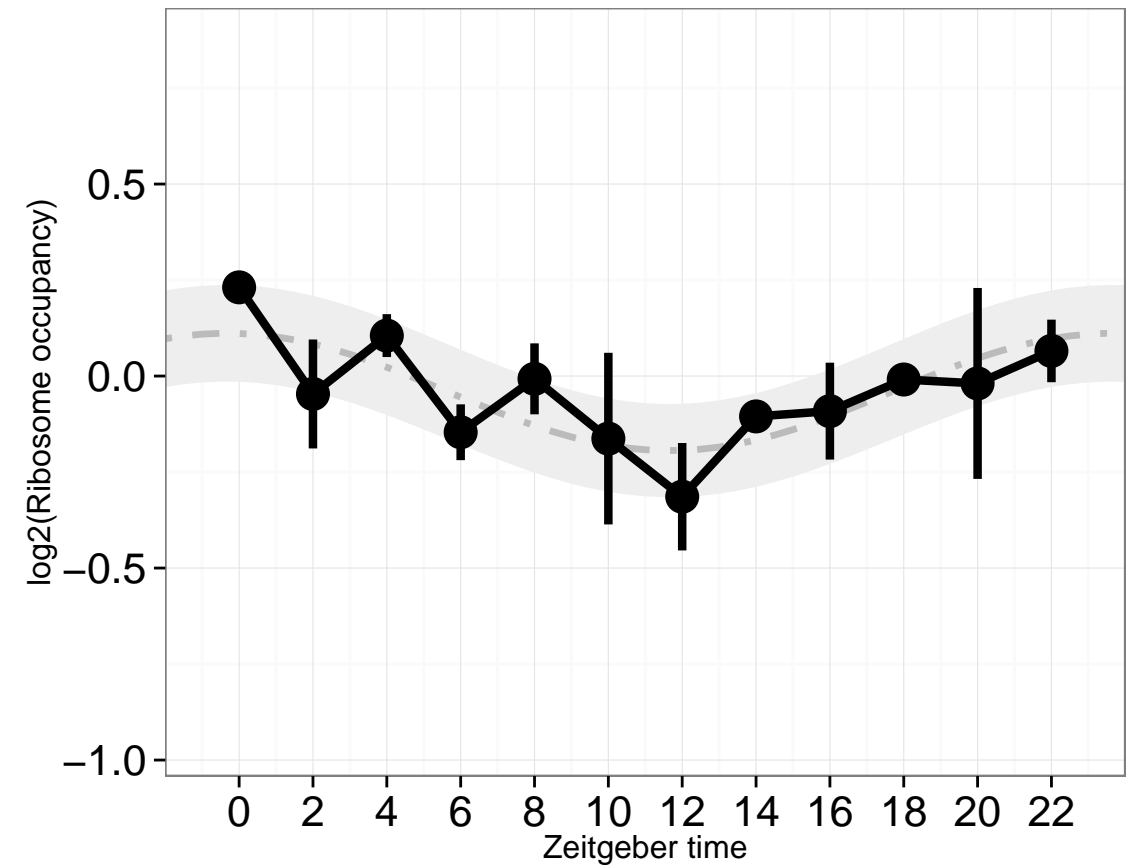

Supplement: Supplementary file 1486 [file 1]

## Csnk1d

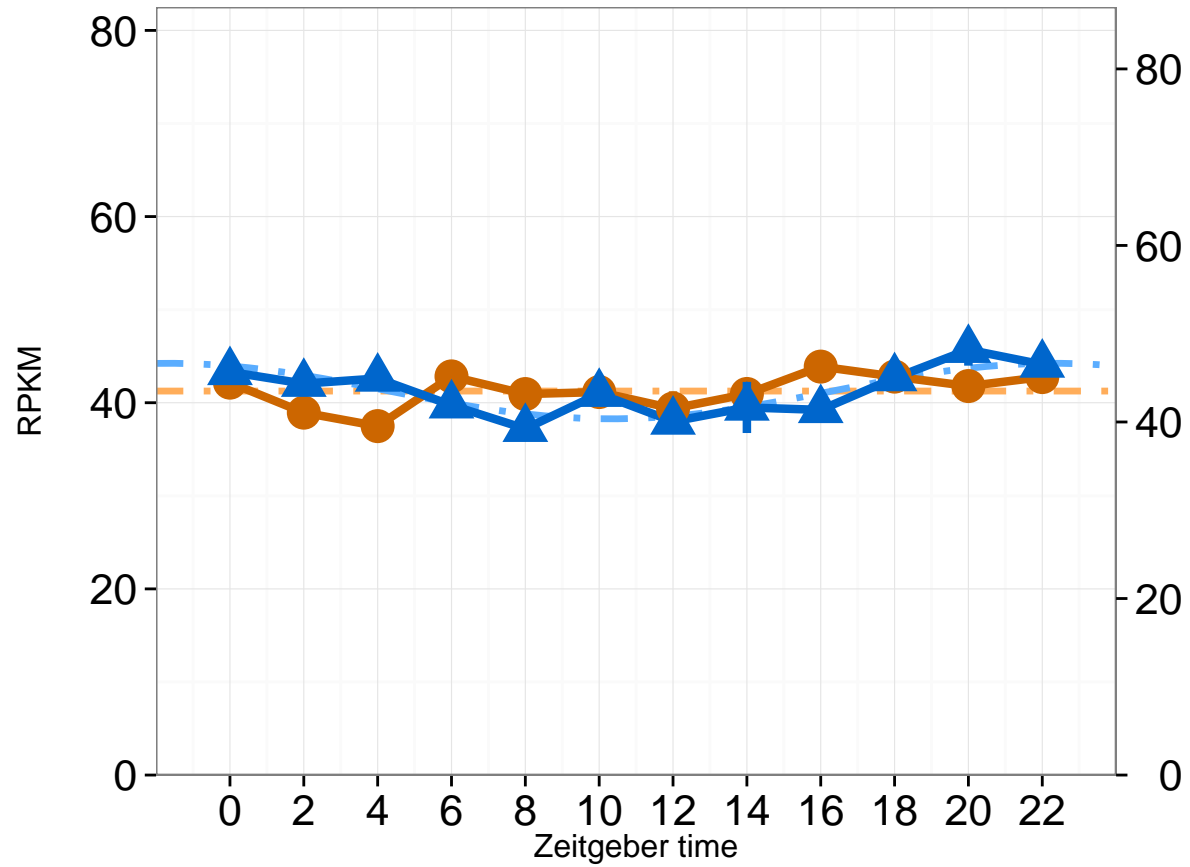

## Csnk1d

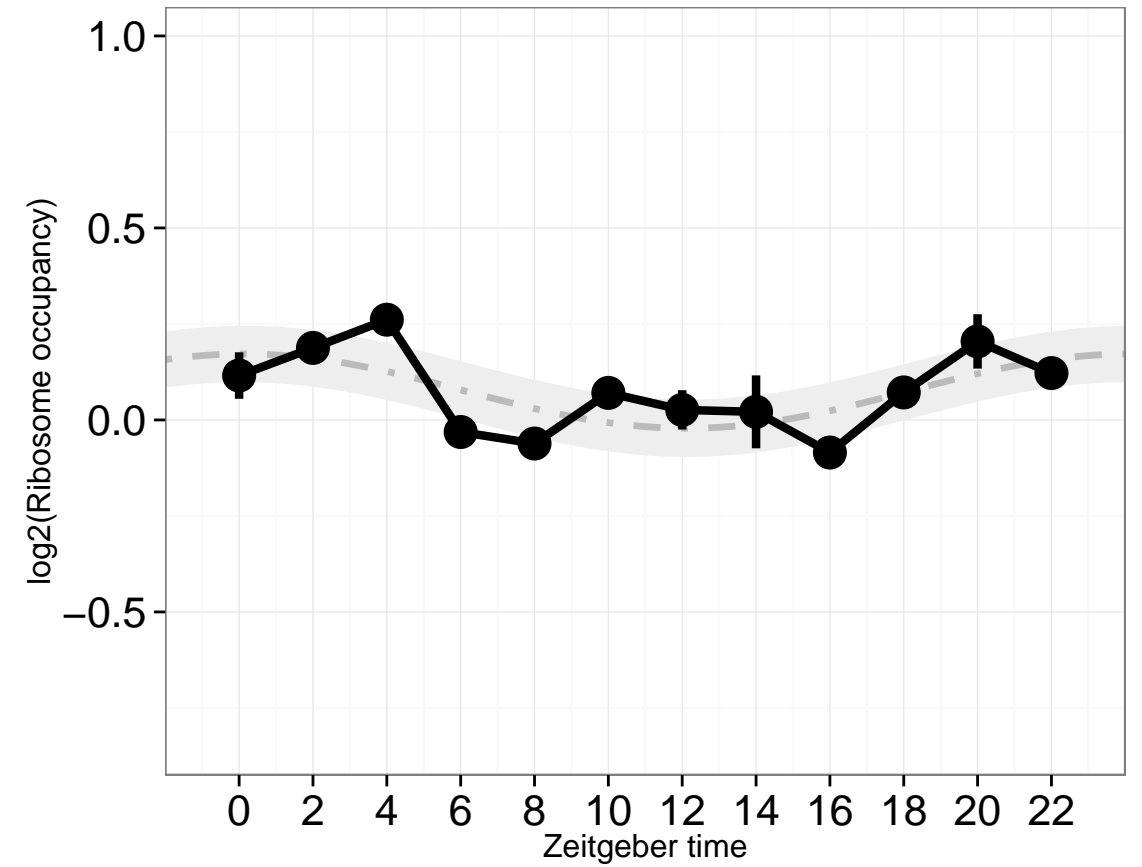

Supplement: Supplementary file 1487 [file 1]

# Fut8

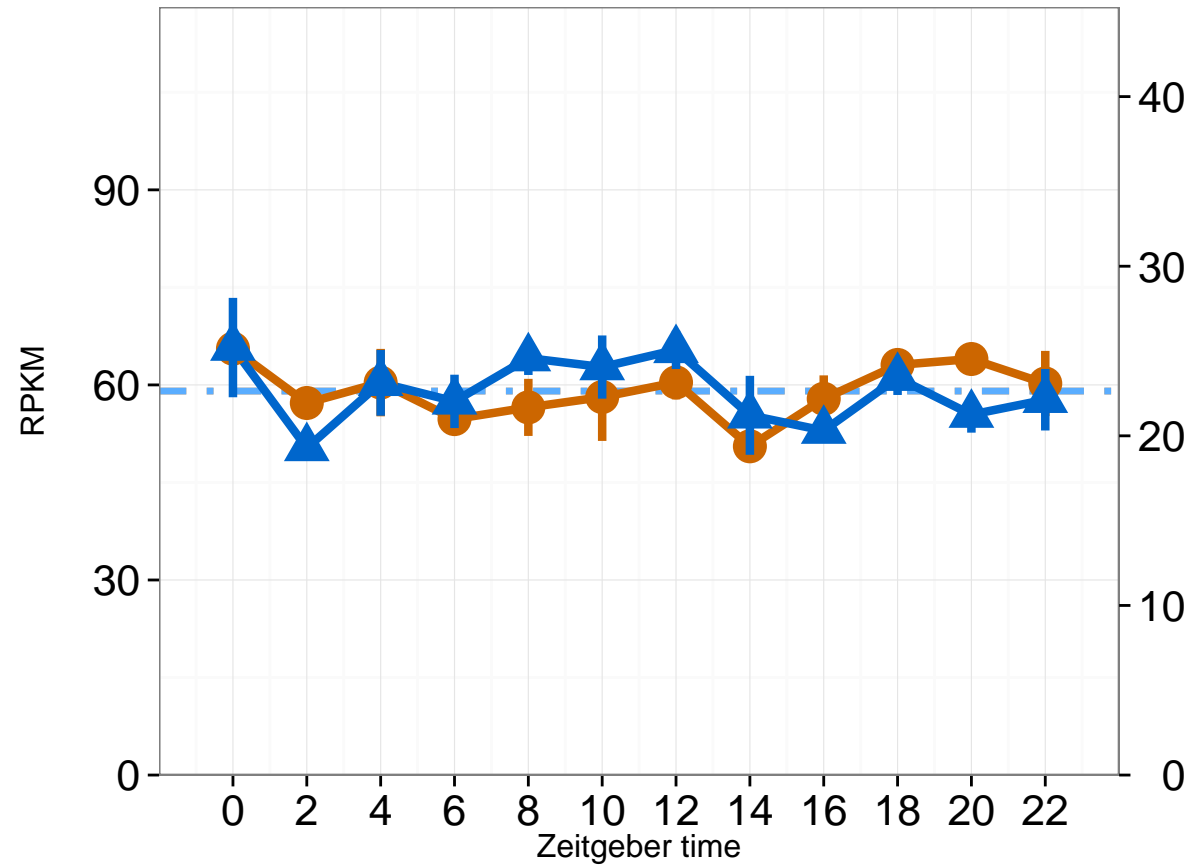

# Fut8

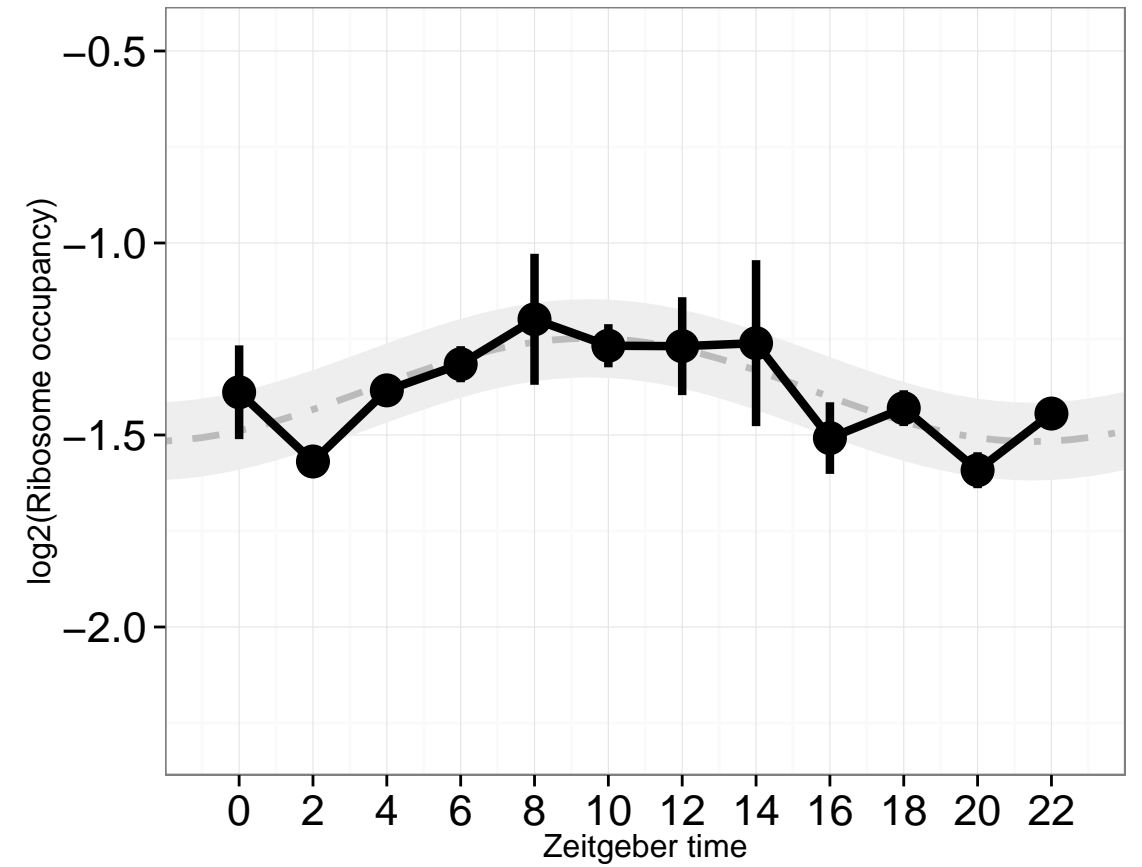

Supplement: Supplementary file 1488 [file 1]

## Tpx2

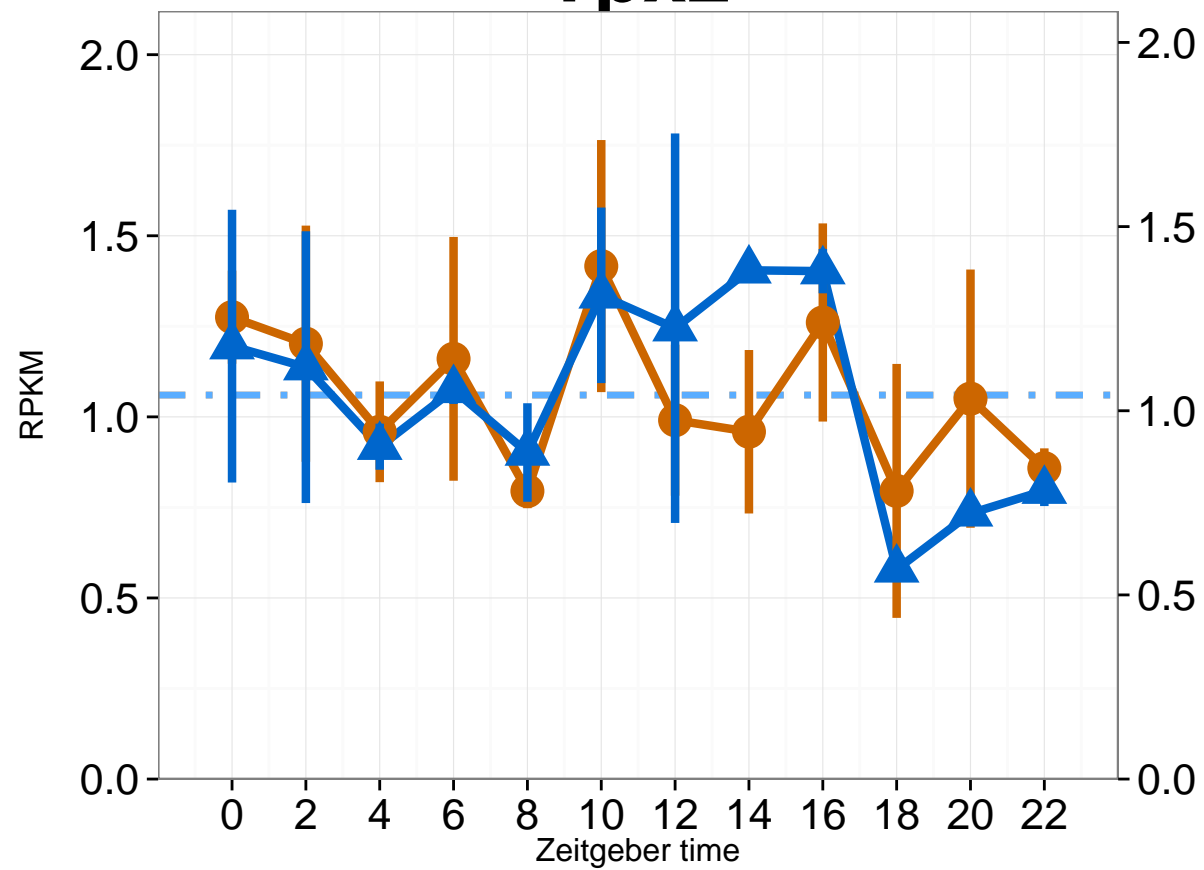

## Tpx2

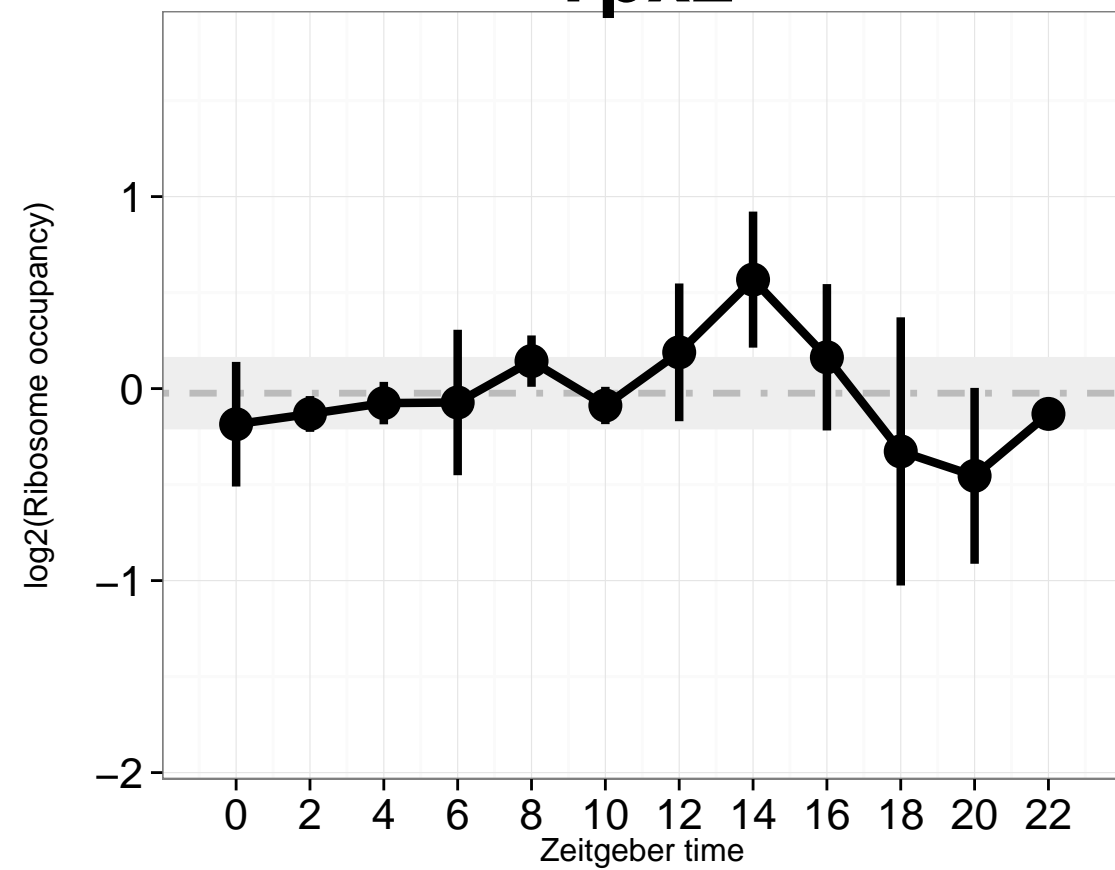

Supplement: Supplementary file 1489 [file 1]

## Gnas

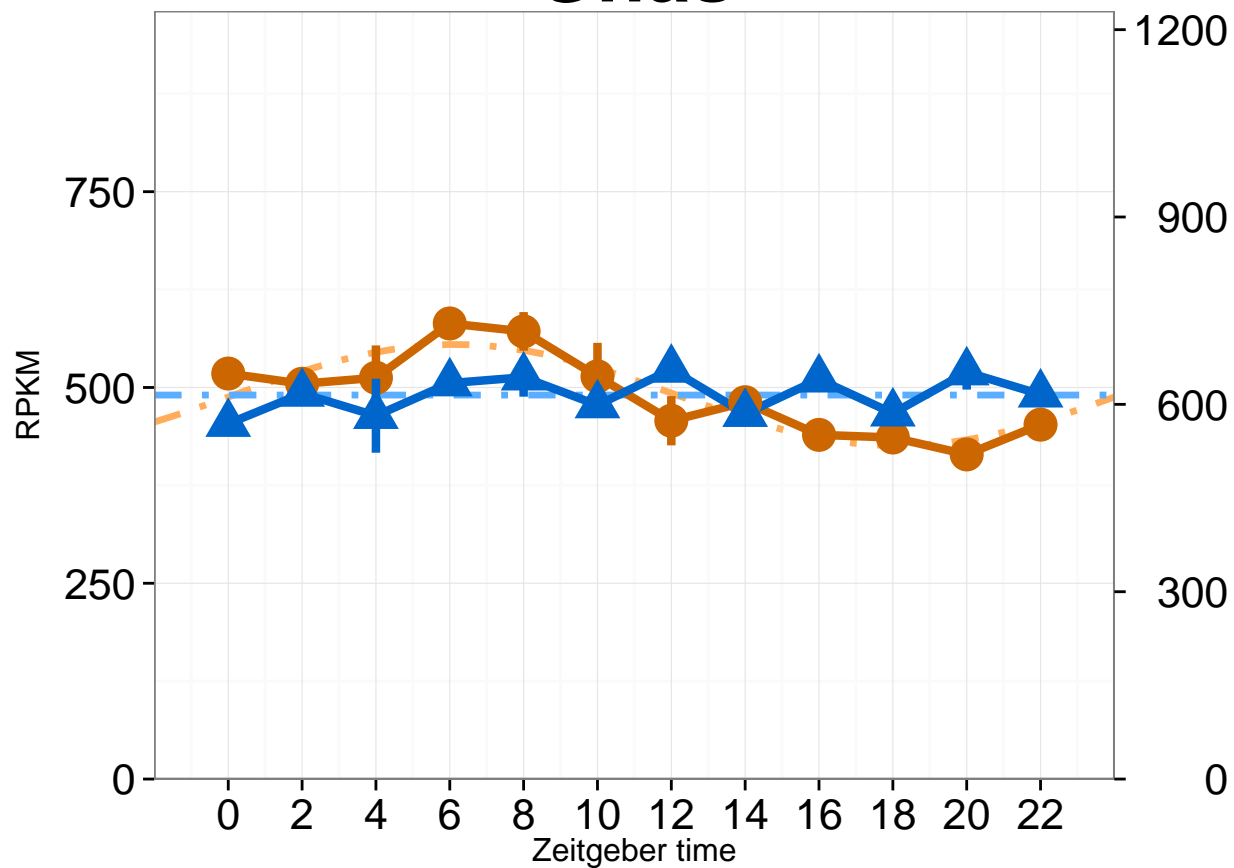

## Gnas

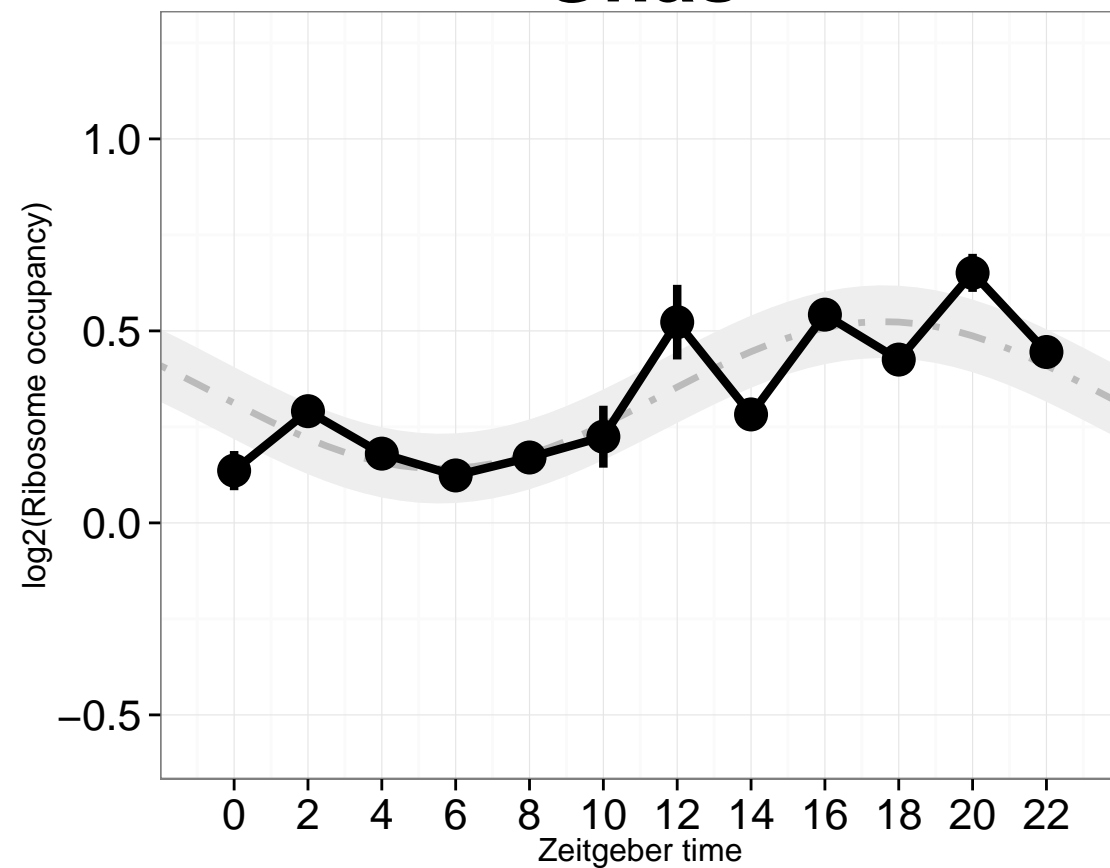

Supplement: Supplementary file 1490 [file 1]

## Nop56

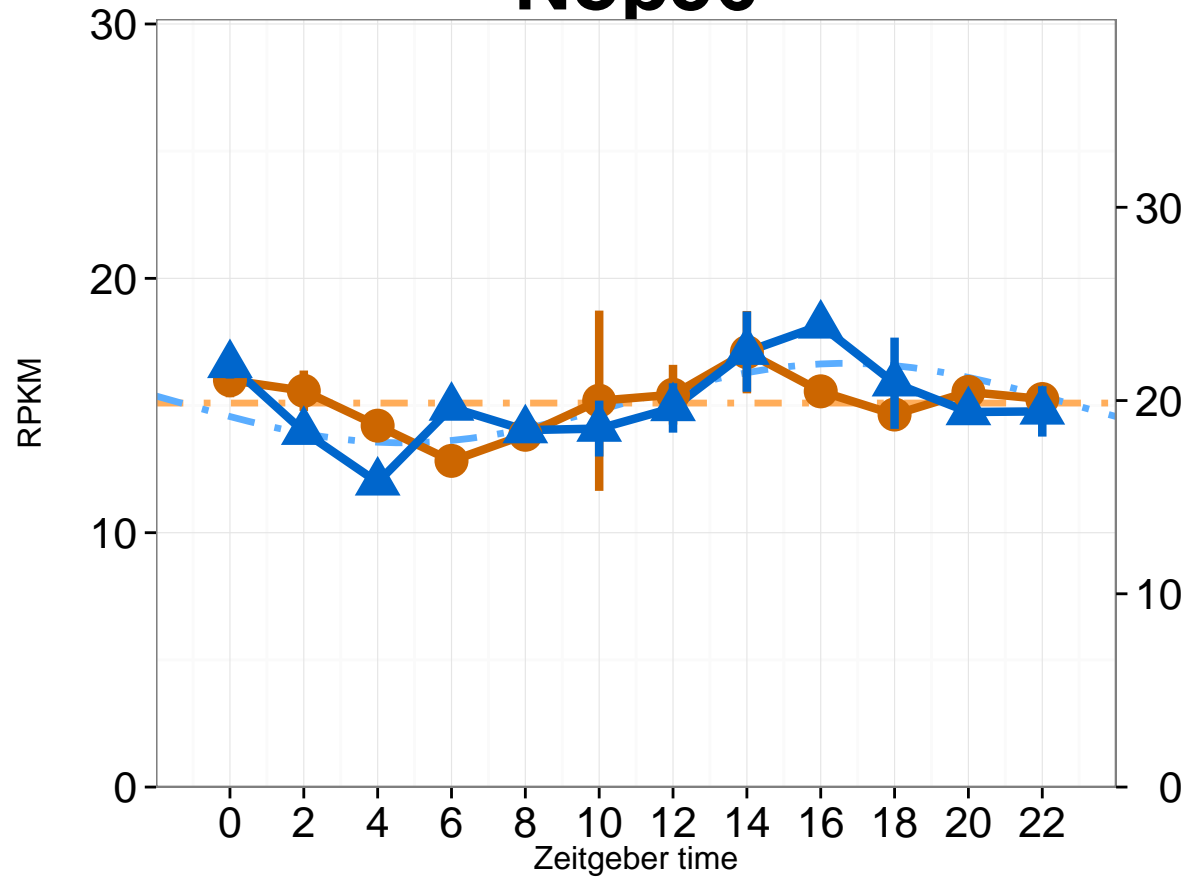

## Nop56

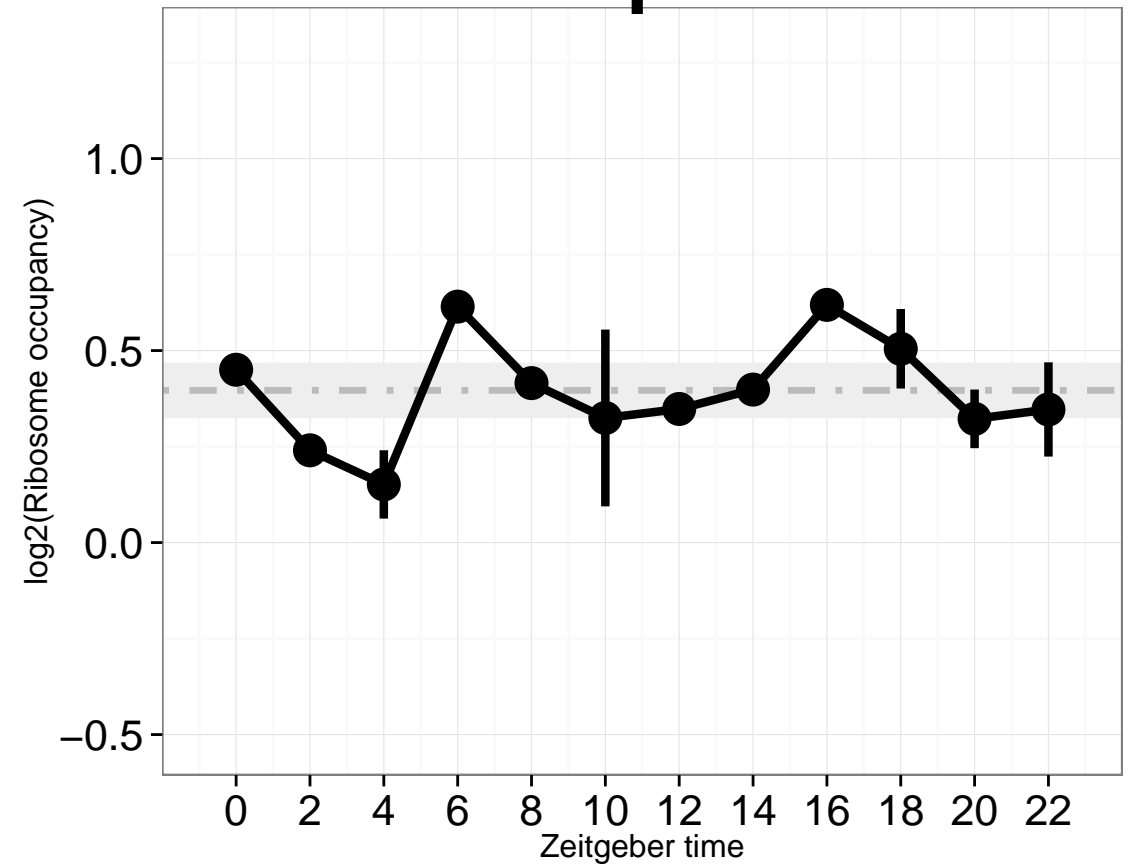

Supplement: Supplementary file 1491 [file 1]

## Gtf3c4

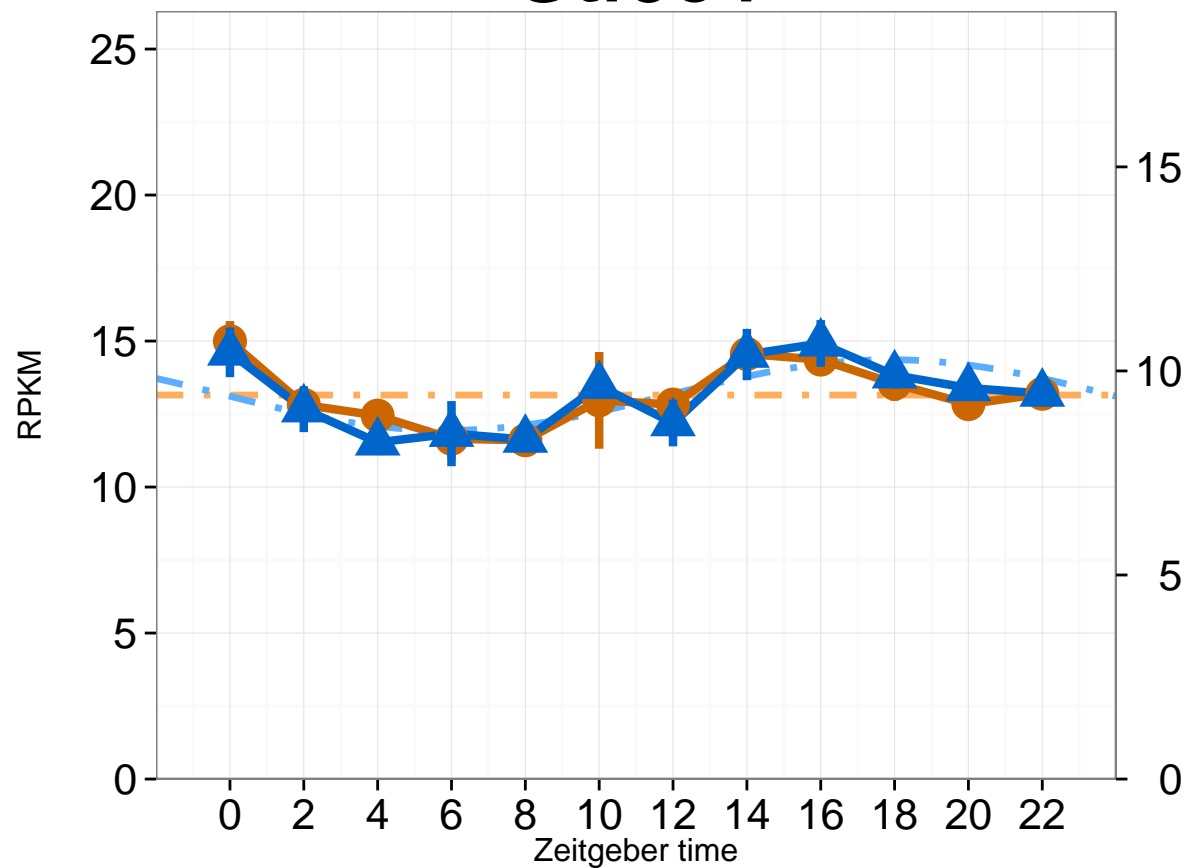

## Gtf3c4

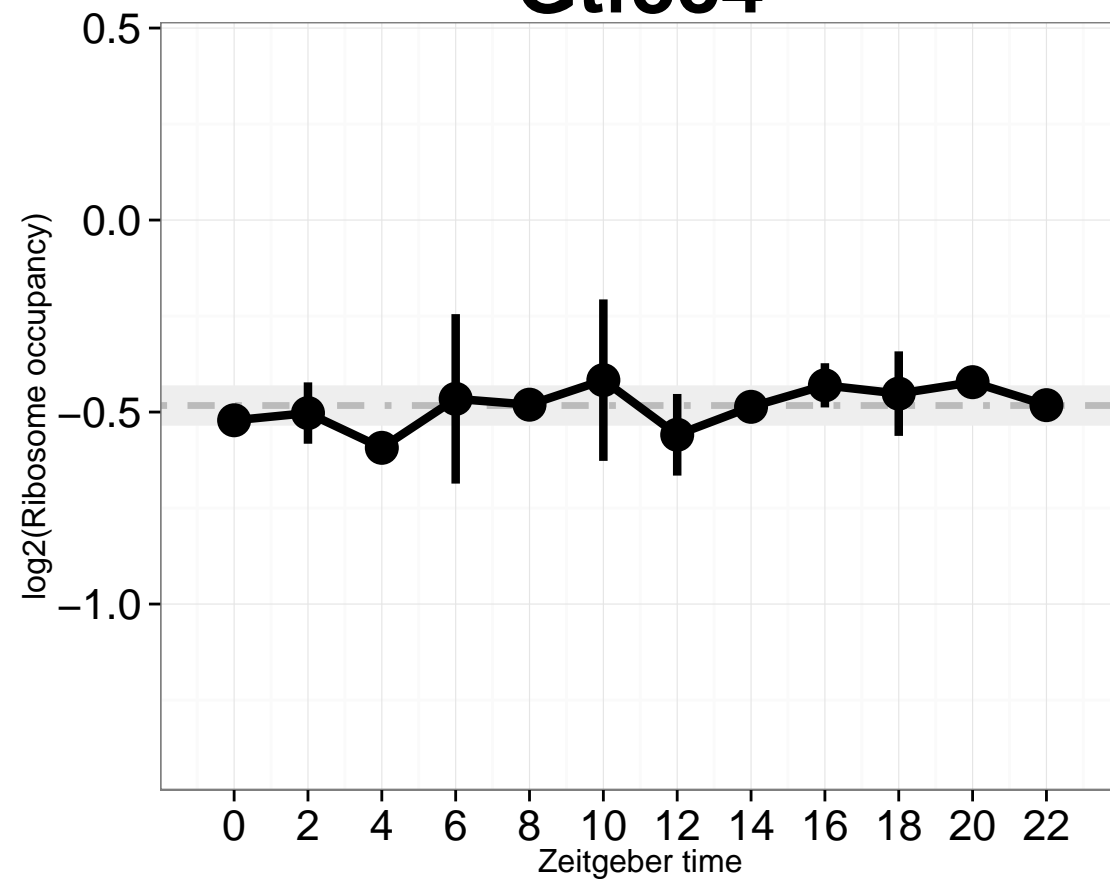

Supplement: Supplementary file 1492 [file 1]

# Dnajb4

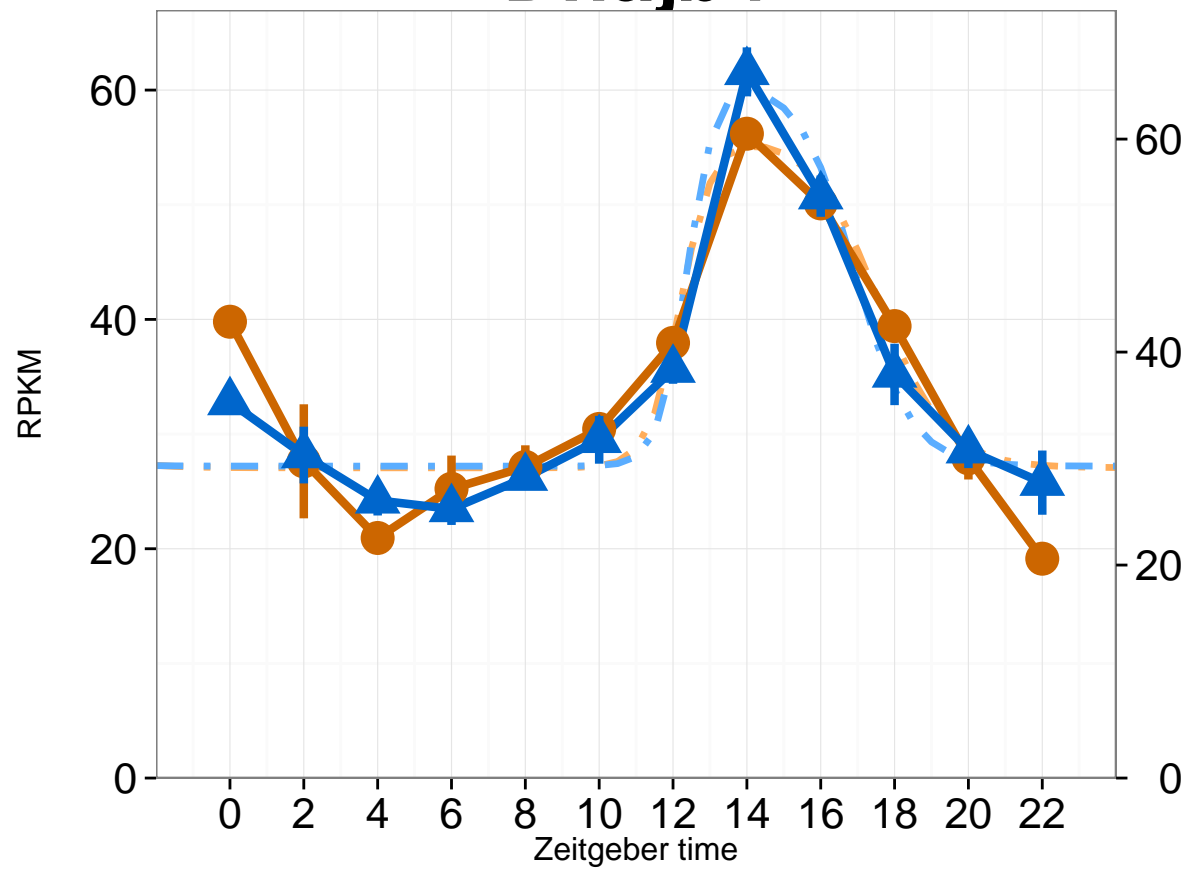

# Dnajb4

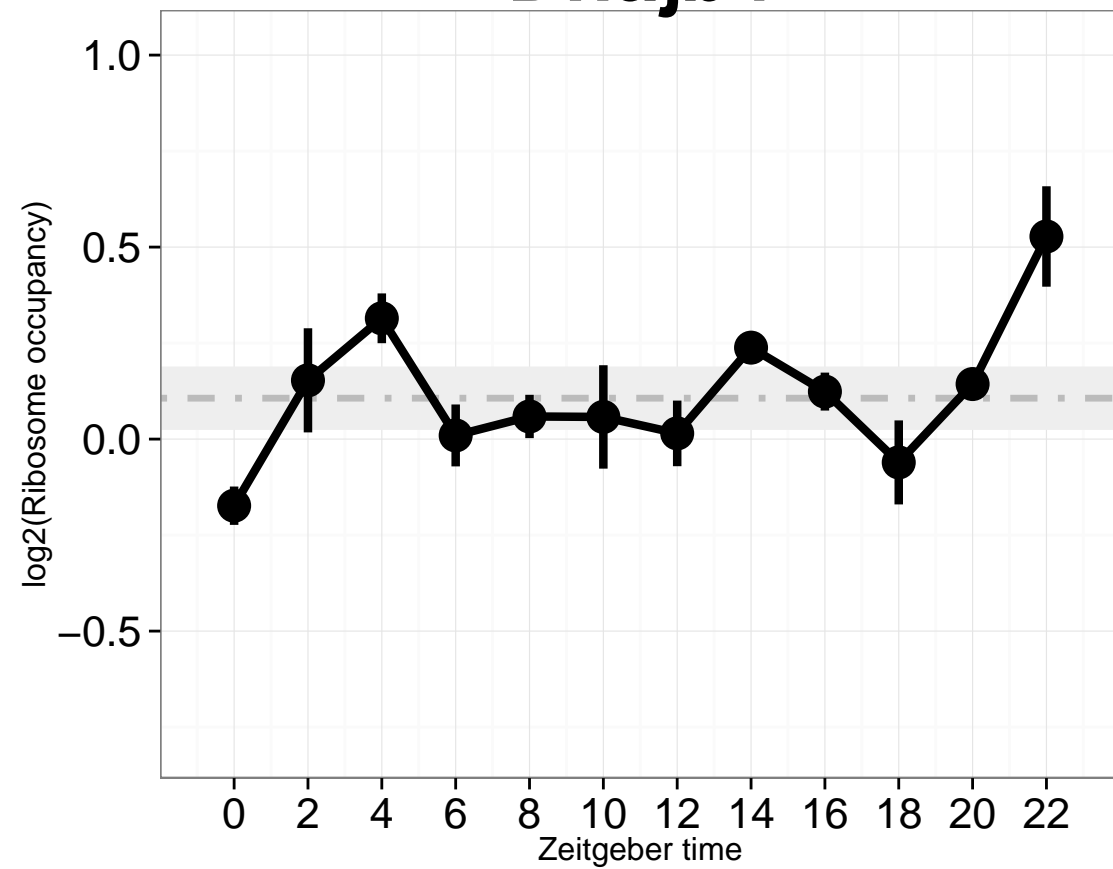

Supplement: Supplementary file 1493 [file 1]

# Tbc1d30

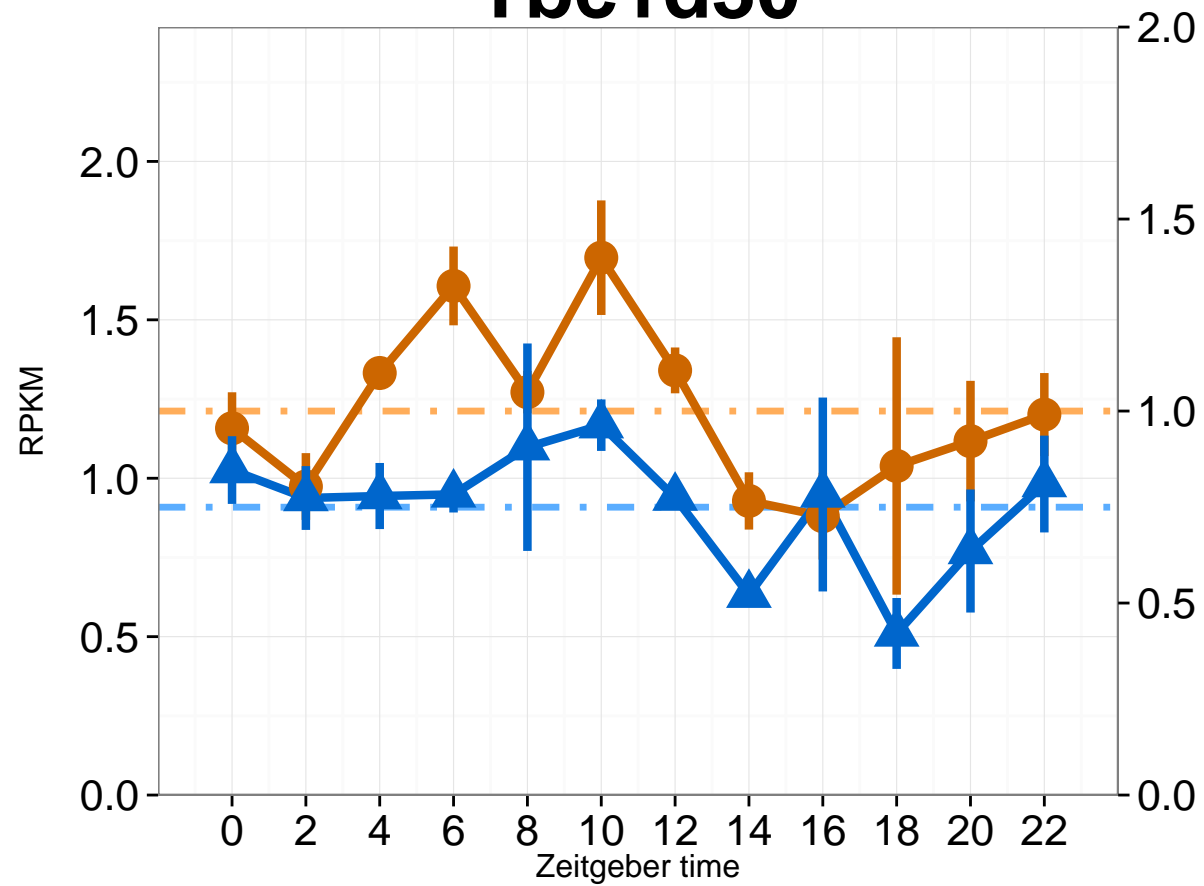

# Tbc1d30

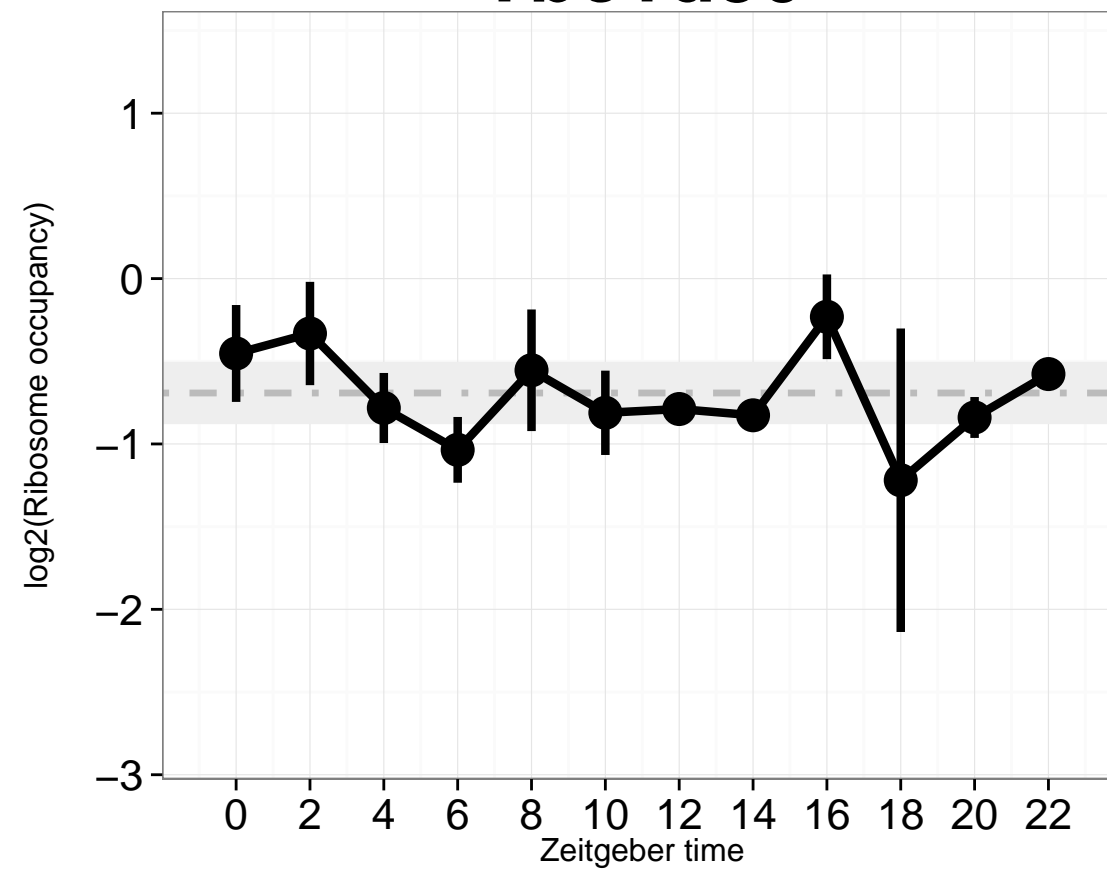

Supplement: Supplementary file 1494 [file 1]

# Tmem41b

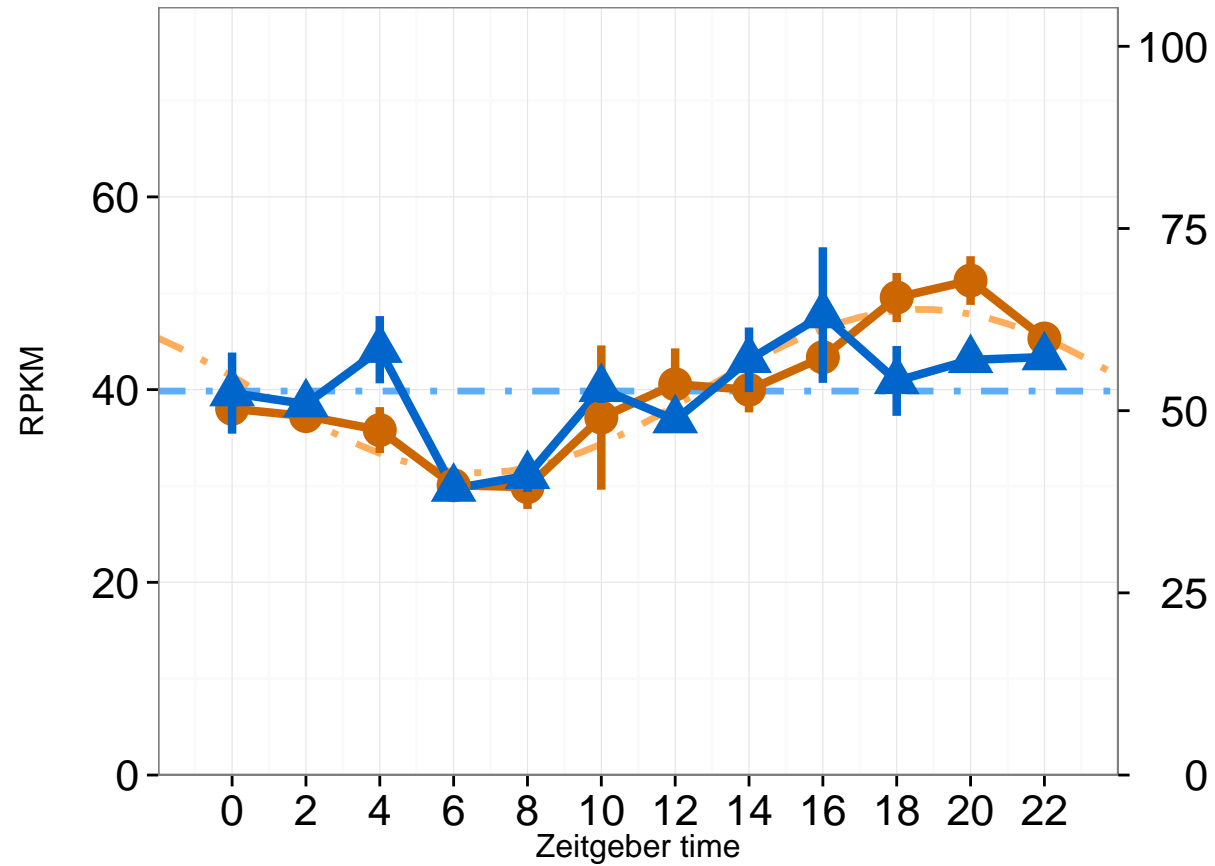

# Tmem41b

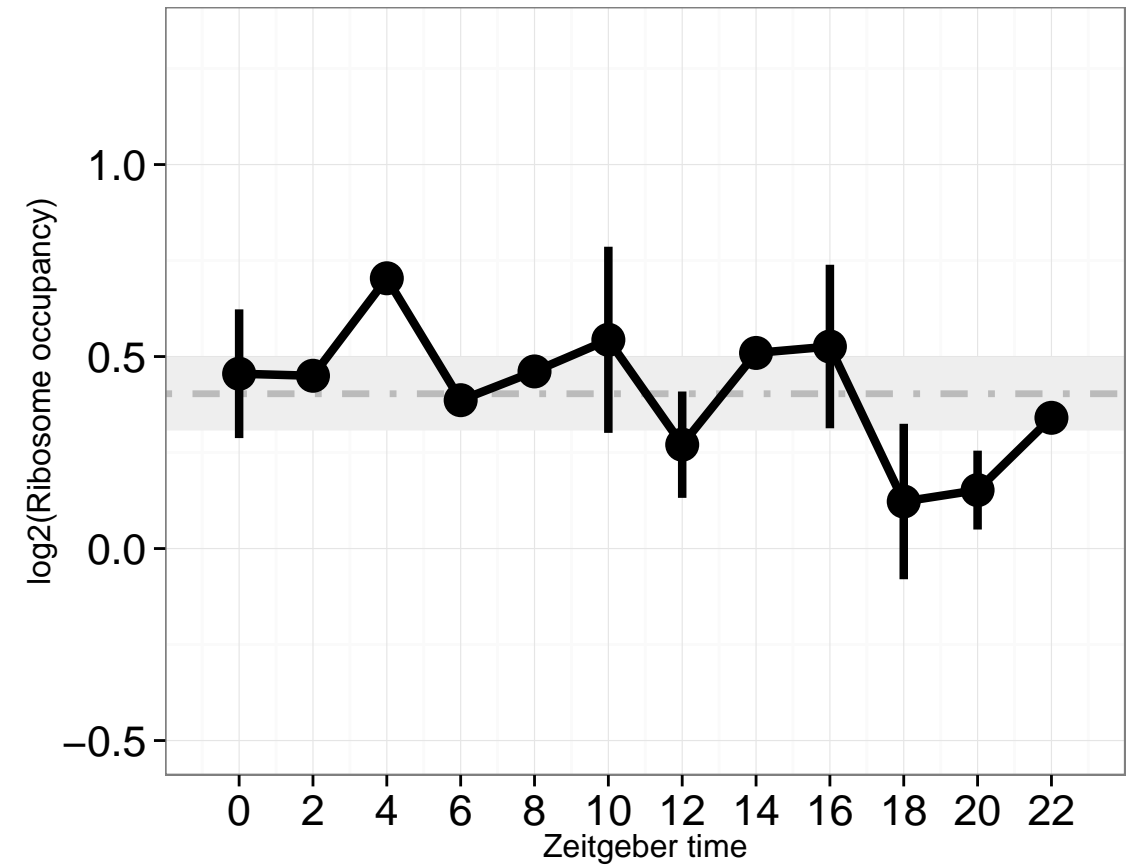

Supplement: Supplementary file 1495 [file 1]

# Ticam1

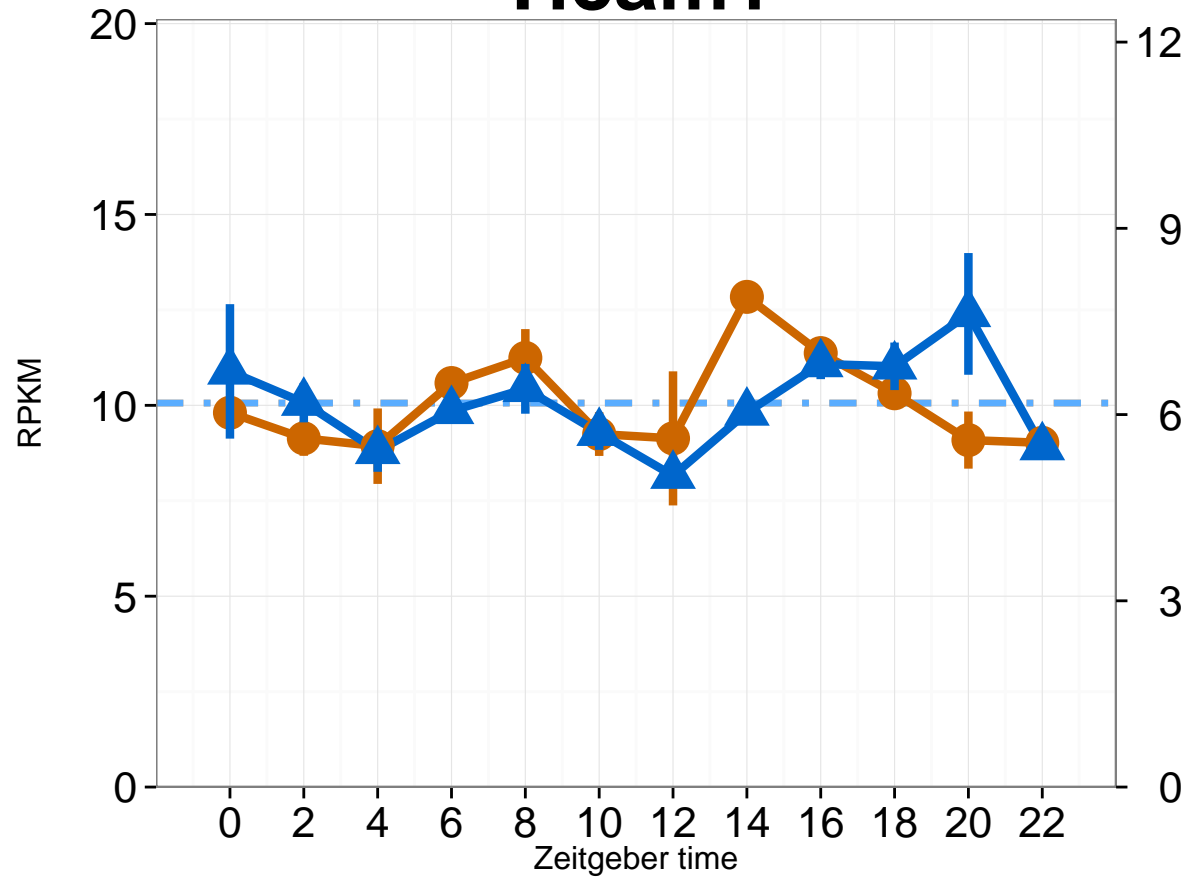

# Ticam1

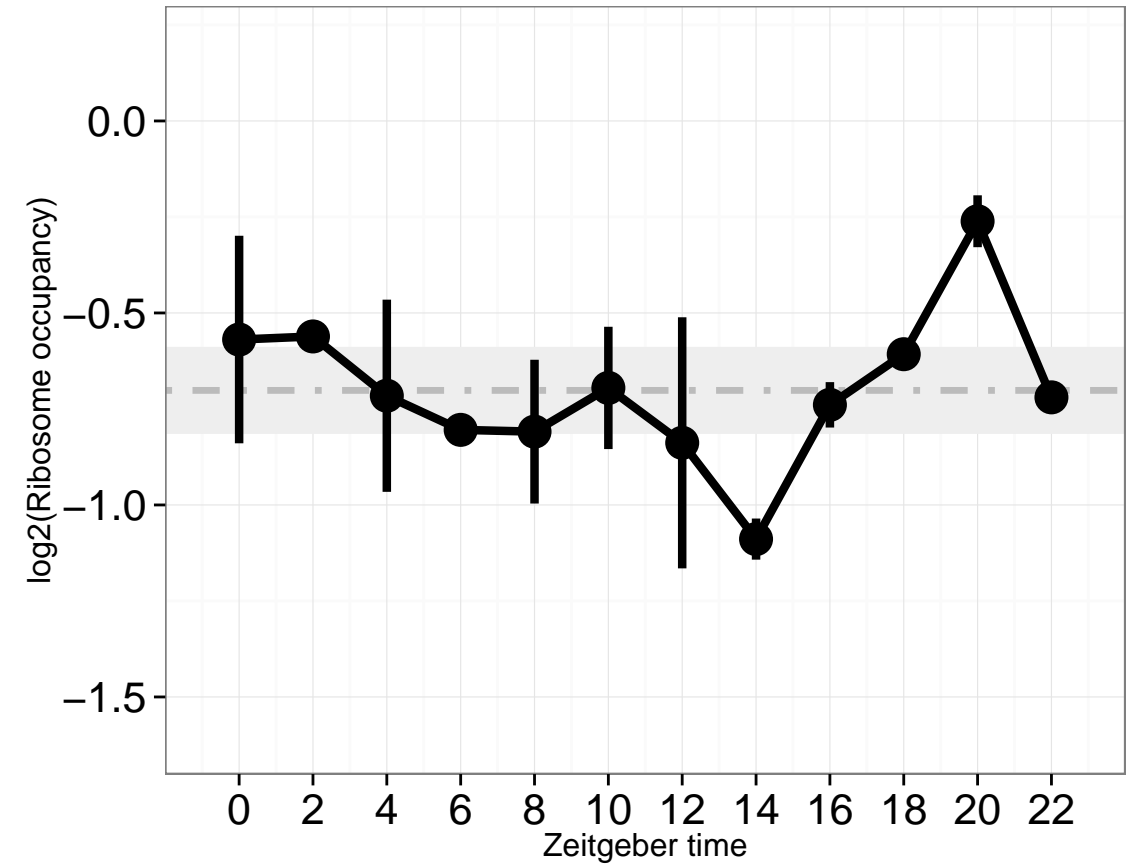

Supplement: Supplementary file 1496 [file 1]

## Exoc3

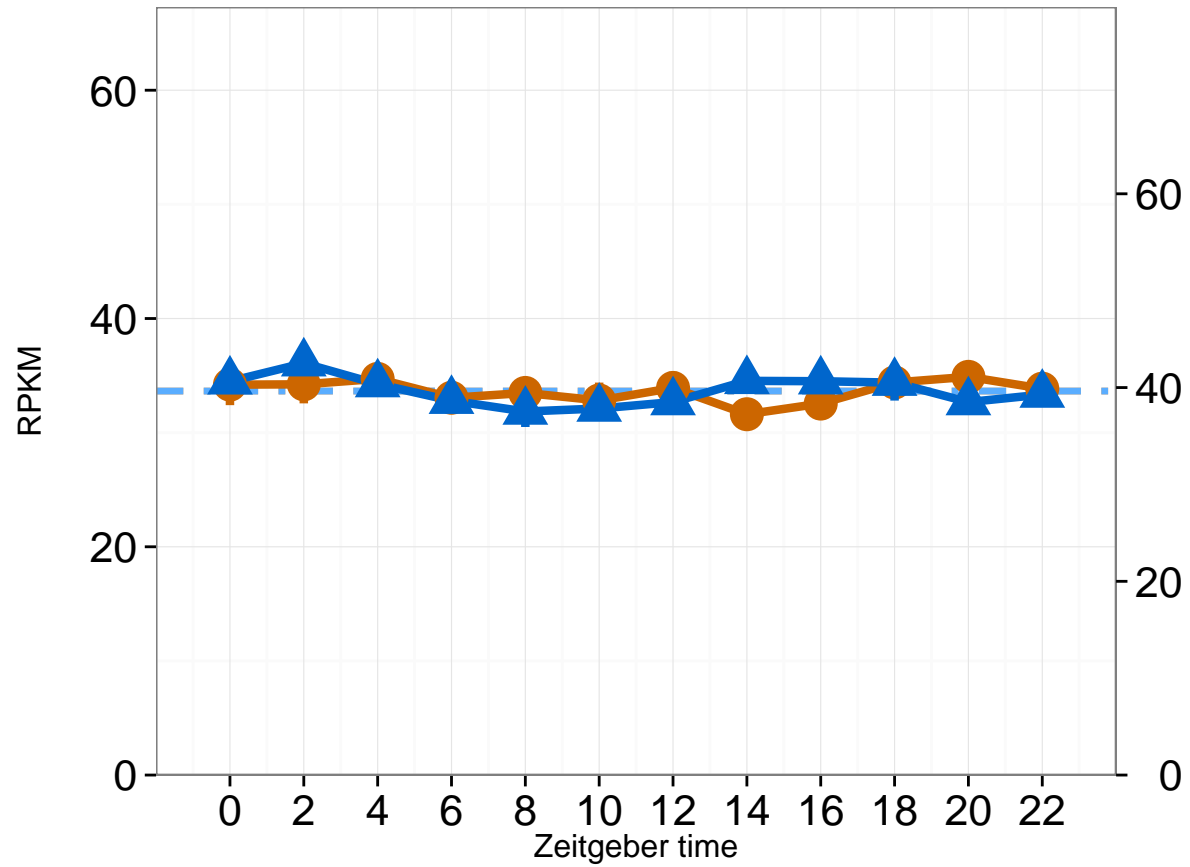

## Exoc3

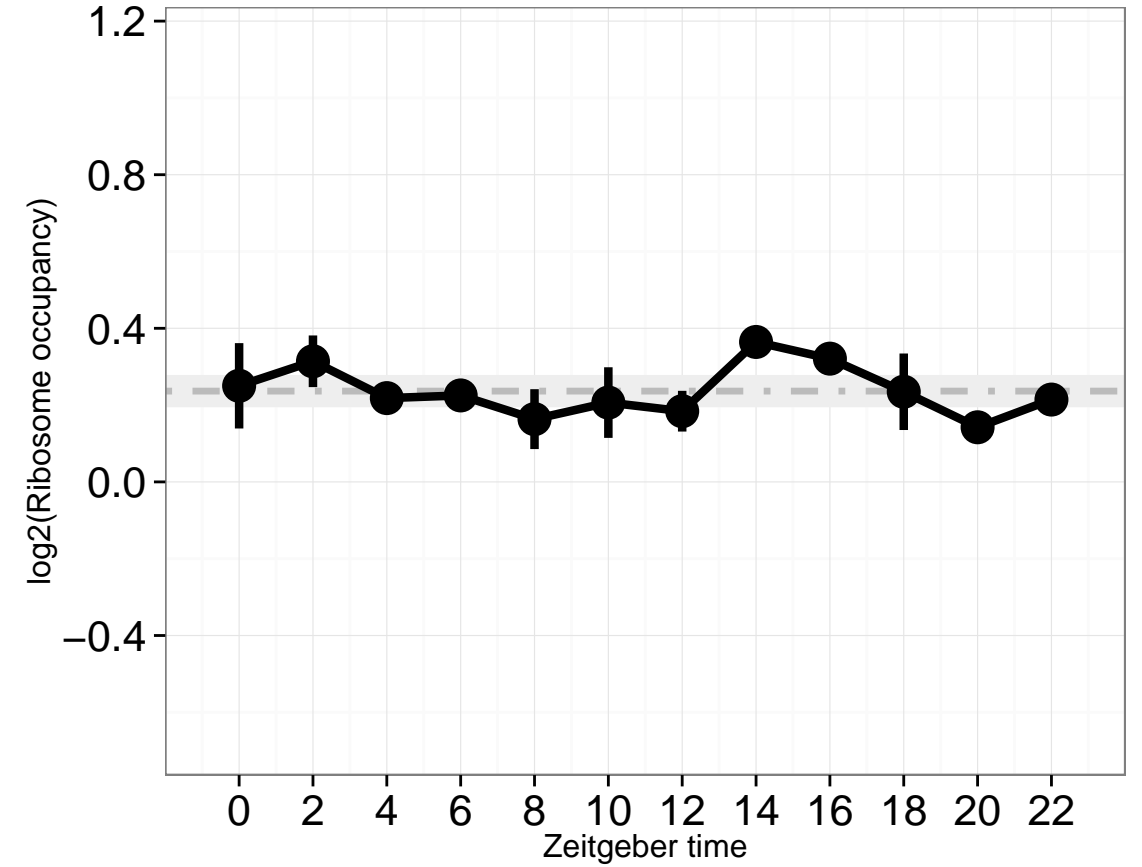

Supplement: Supplementary file 1497 [file 1]

# Coq10b

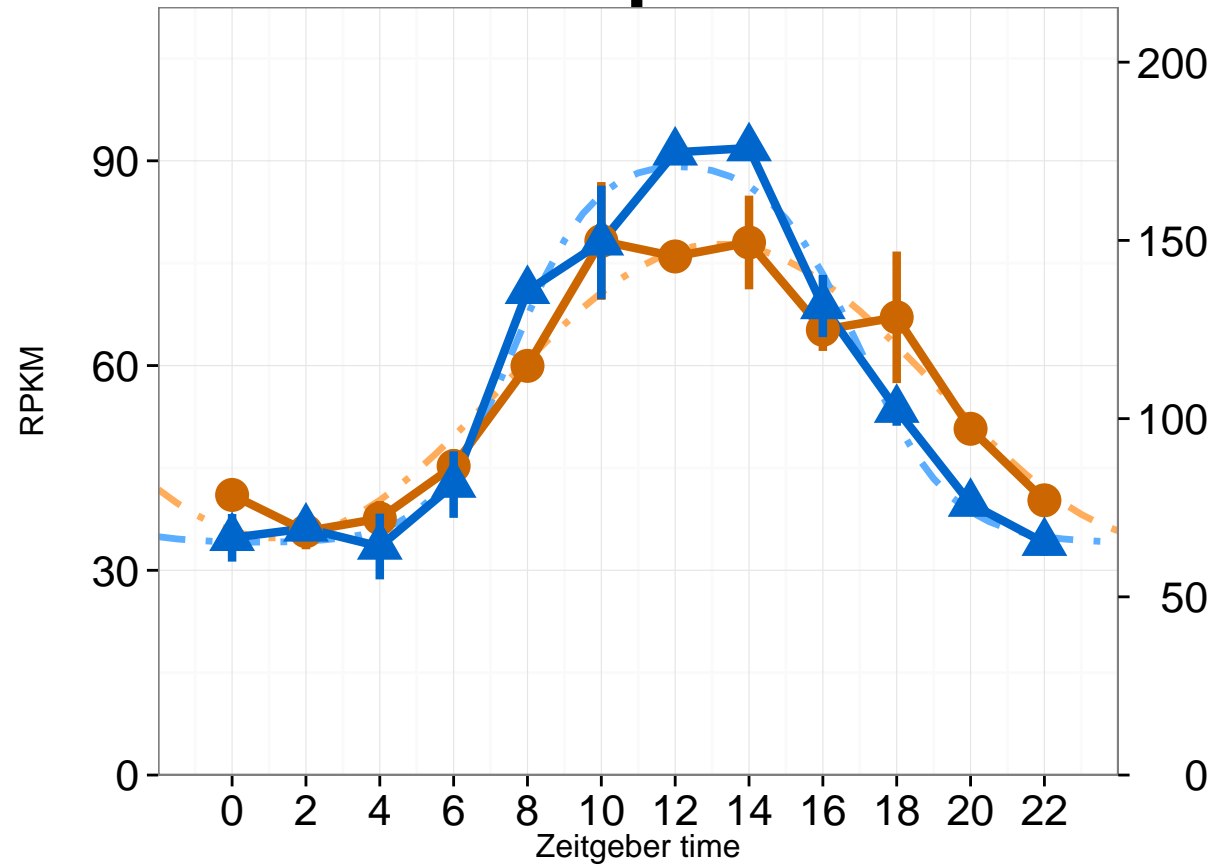

# Coq10b

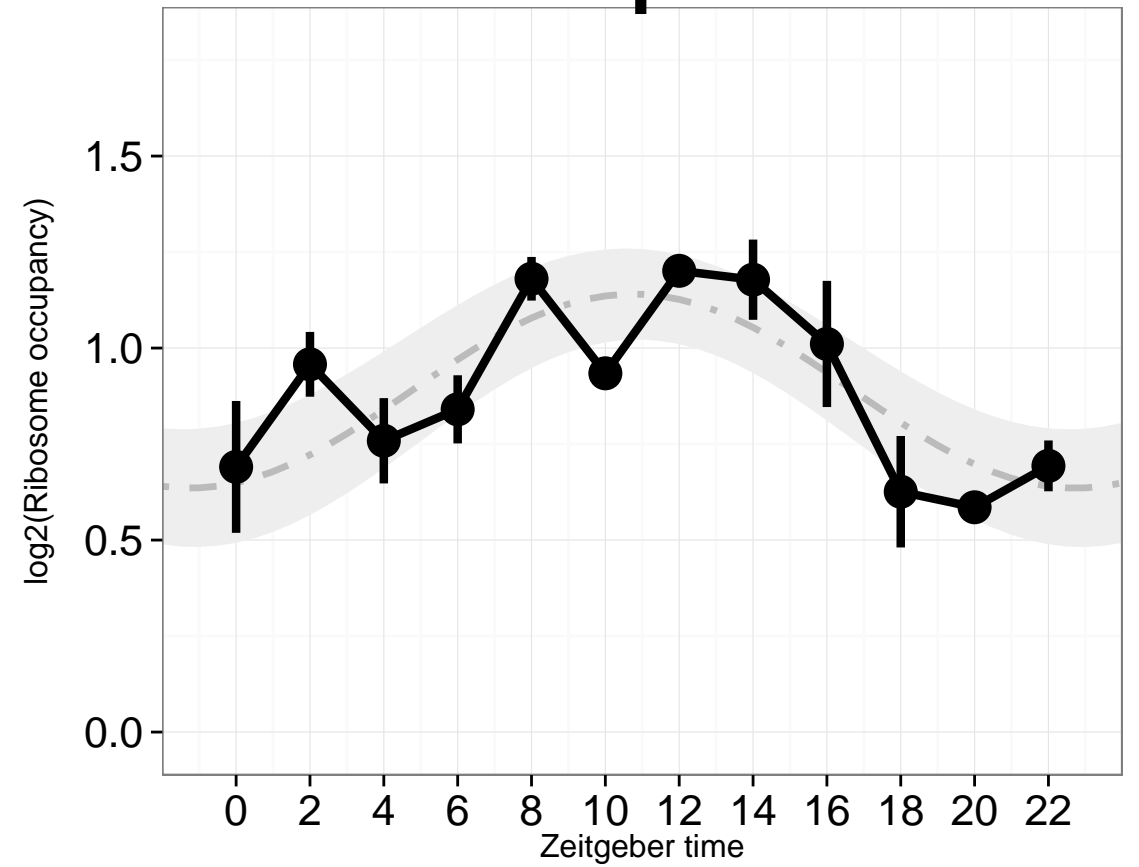

Supplement: Supplementary file 1498 [file 1]

# Mark4

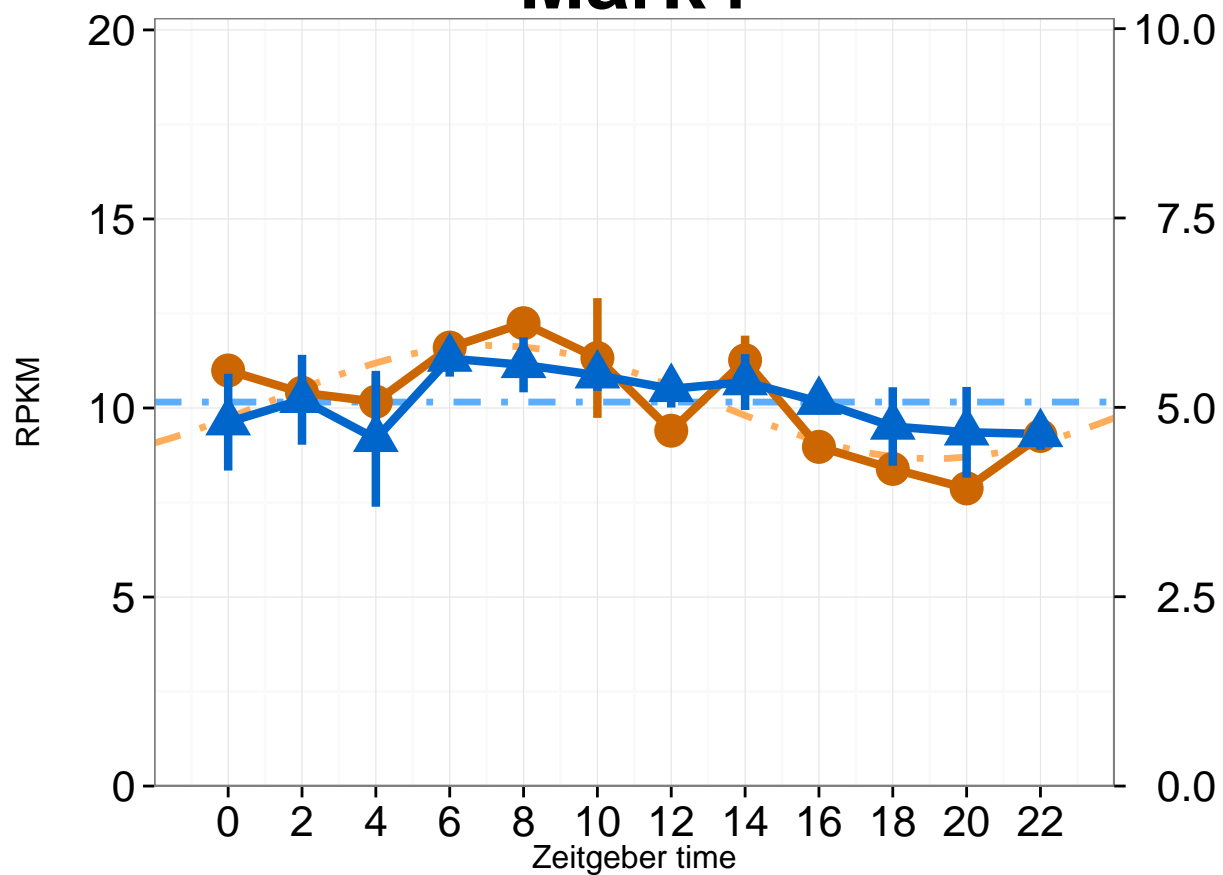

# Mark4

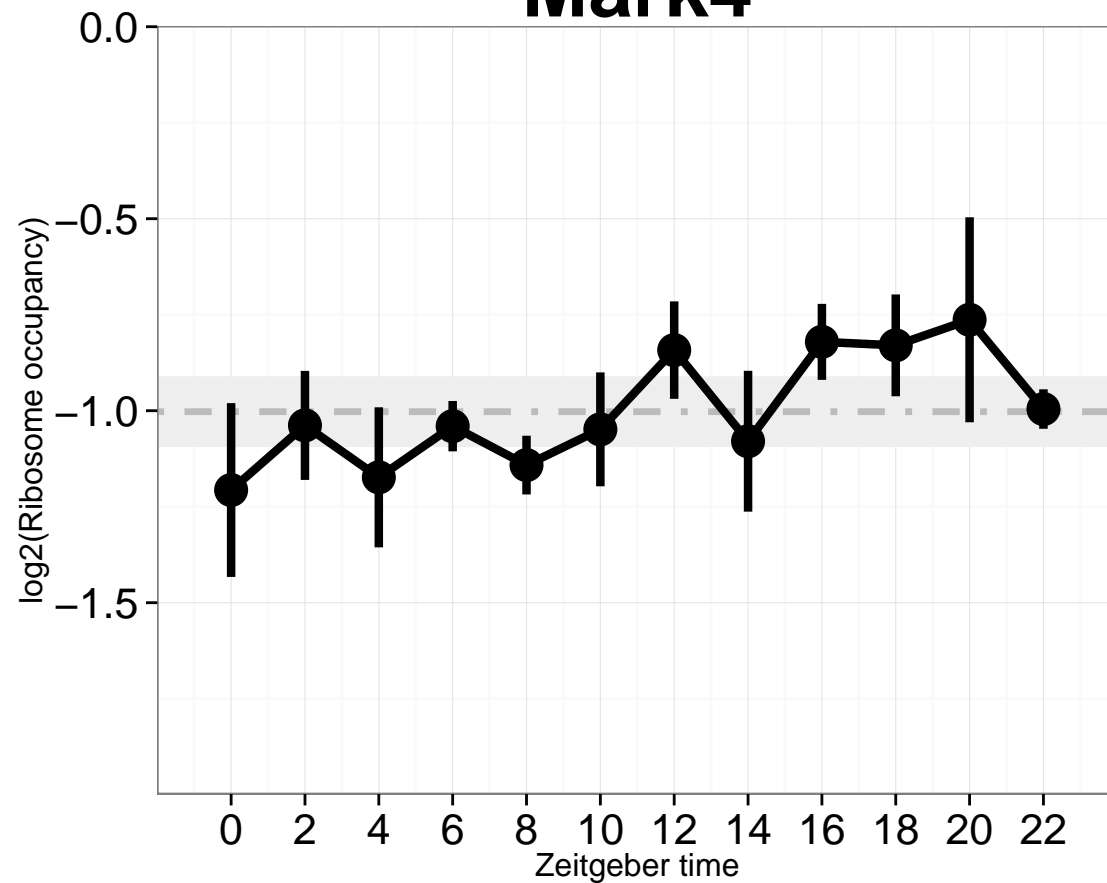

Supplement: Supplementary file 1499 [file 1]

## Sel1l3

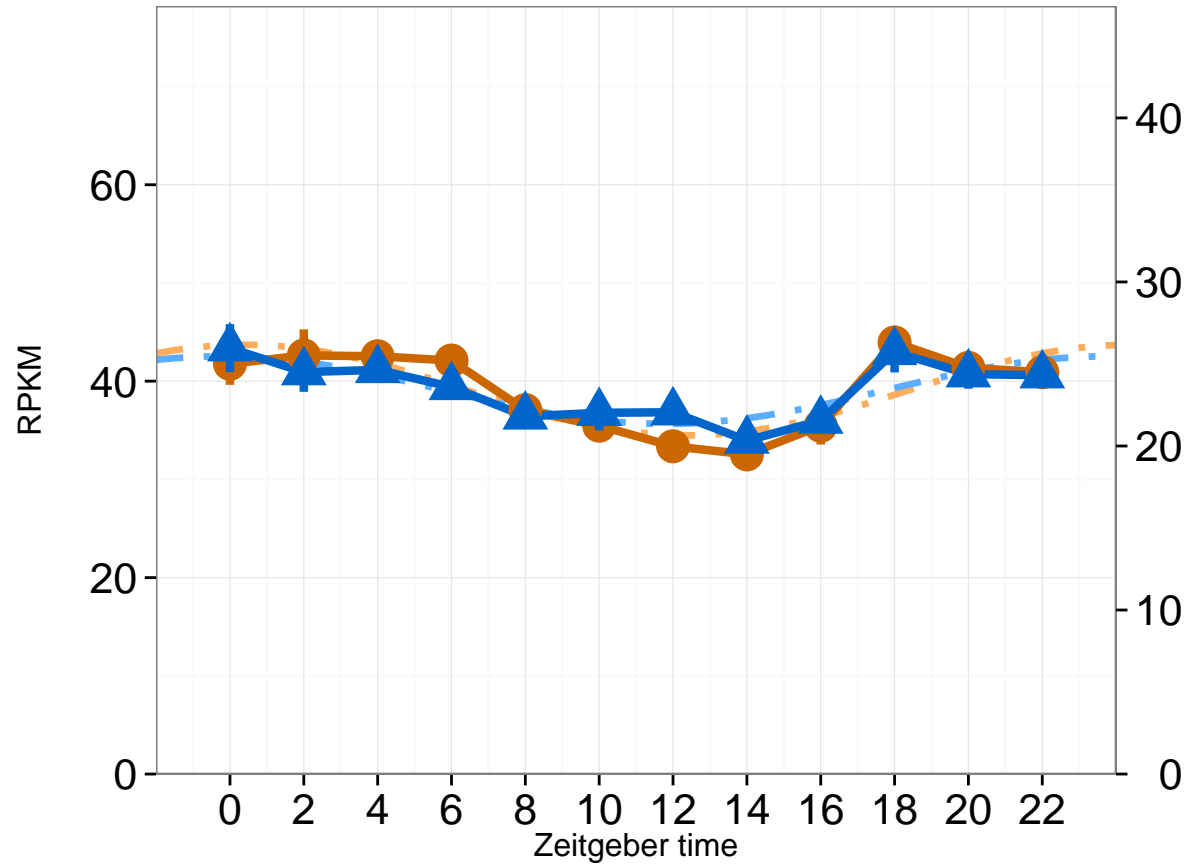

## Sel1l3

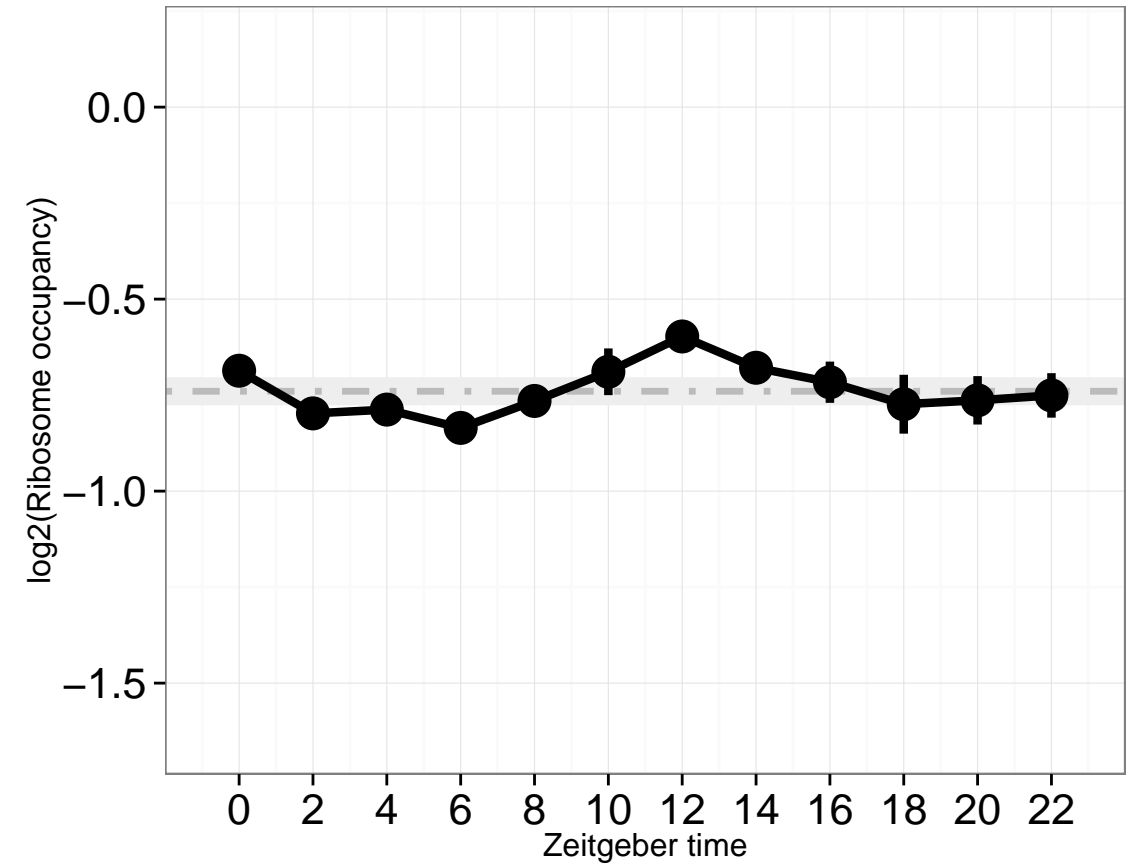

Supplement: Supplementary file 1500 [file 1]

## Chrd

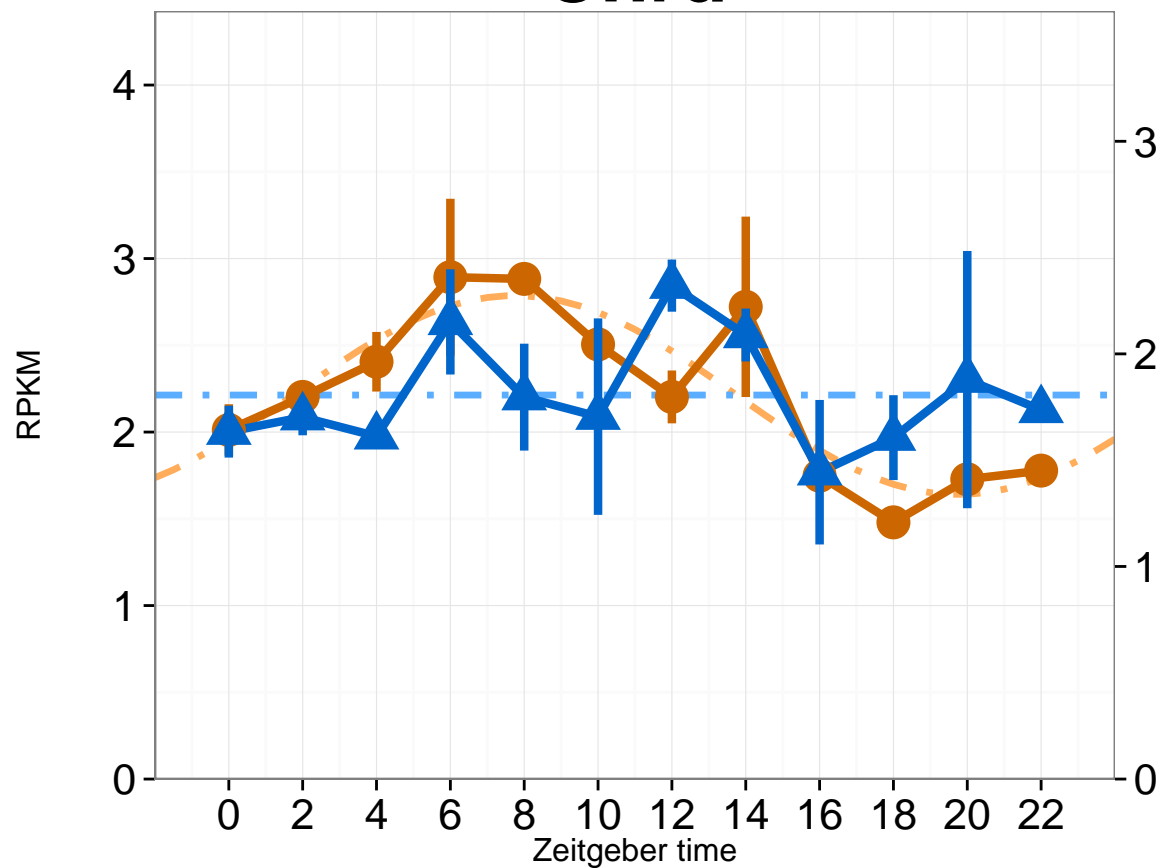

## Chrd

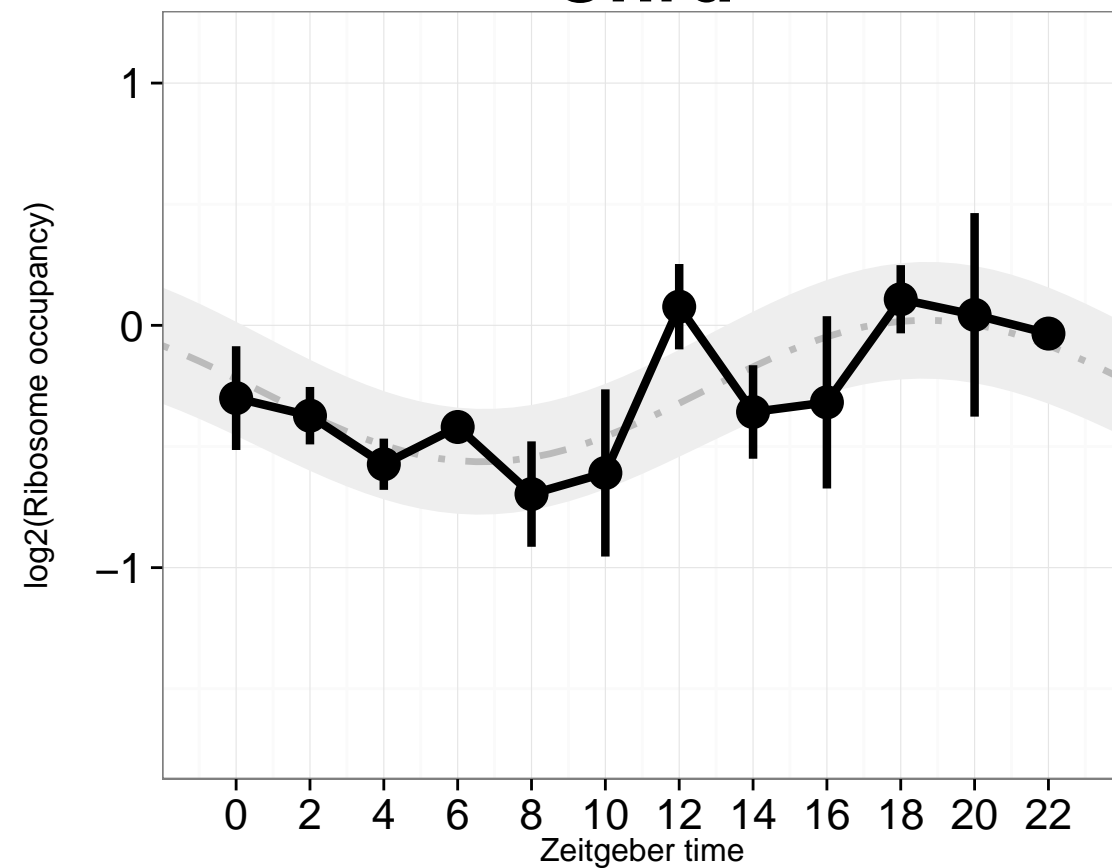

Supplement: Supplementary file 1501 [file 1]

# Clec2h

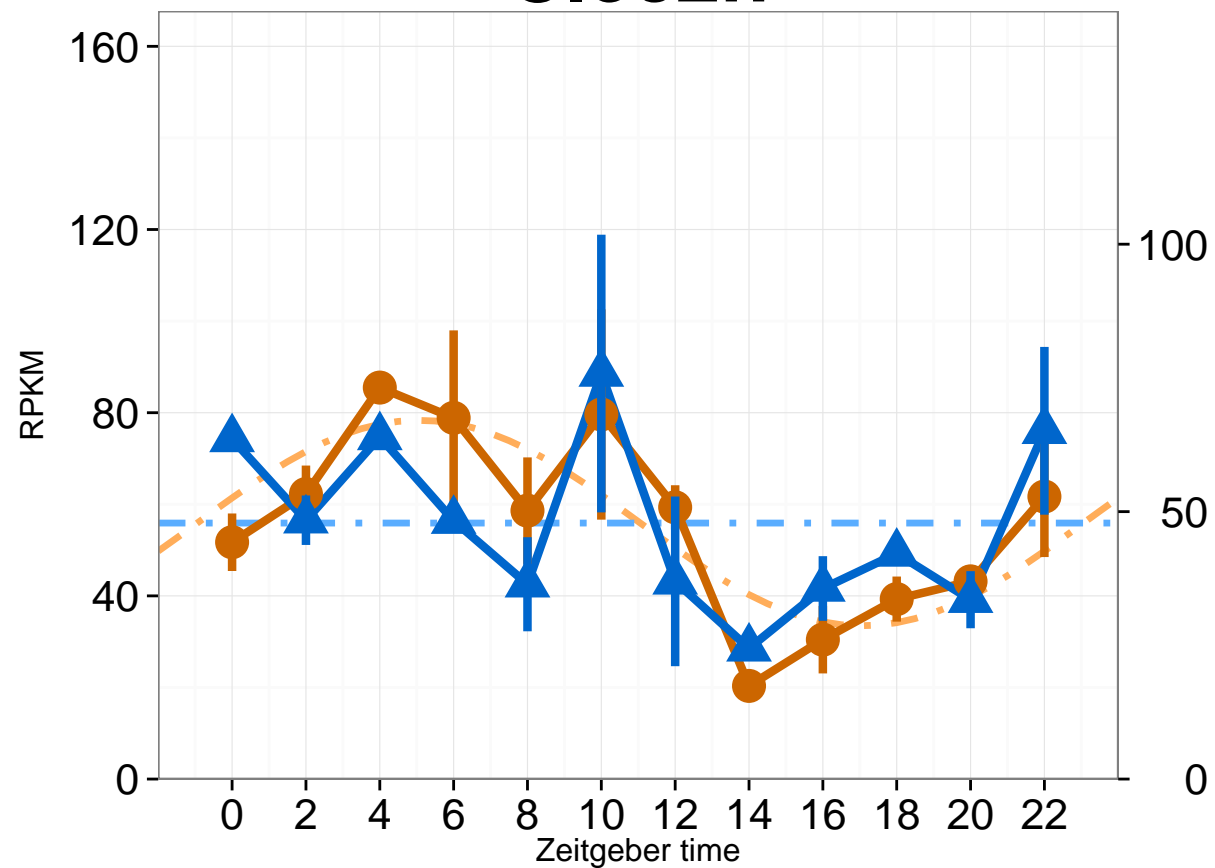

# Clec2h

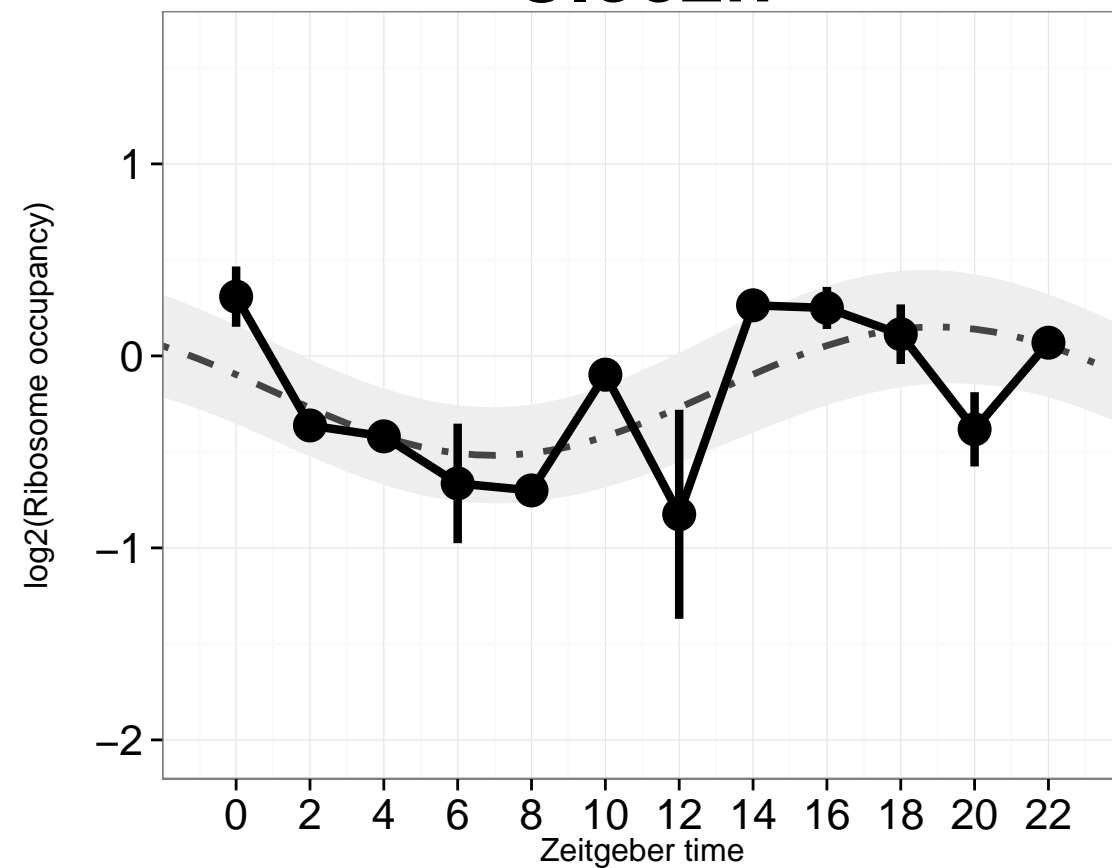

Supplement: Supplementary file 1502 [file 1]

## Fryl

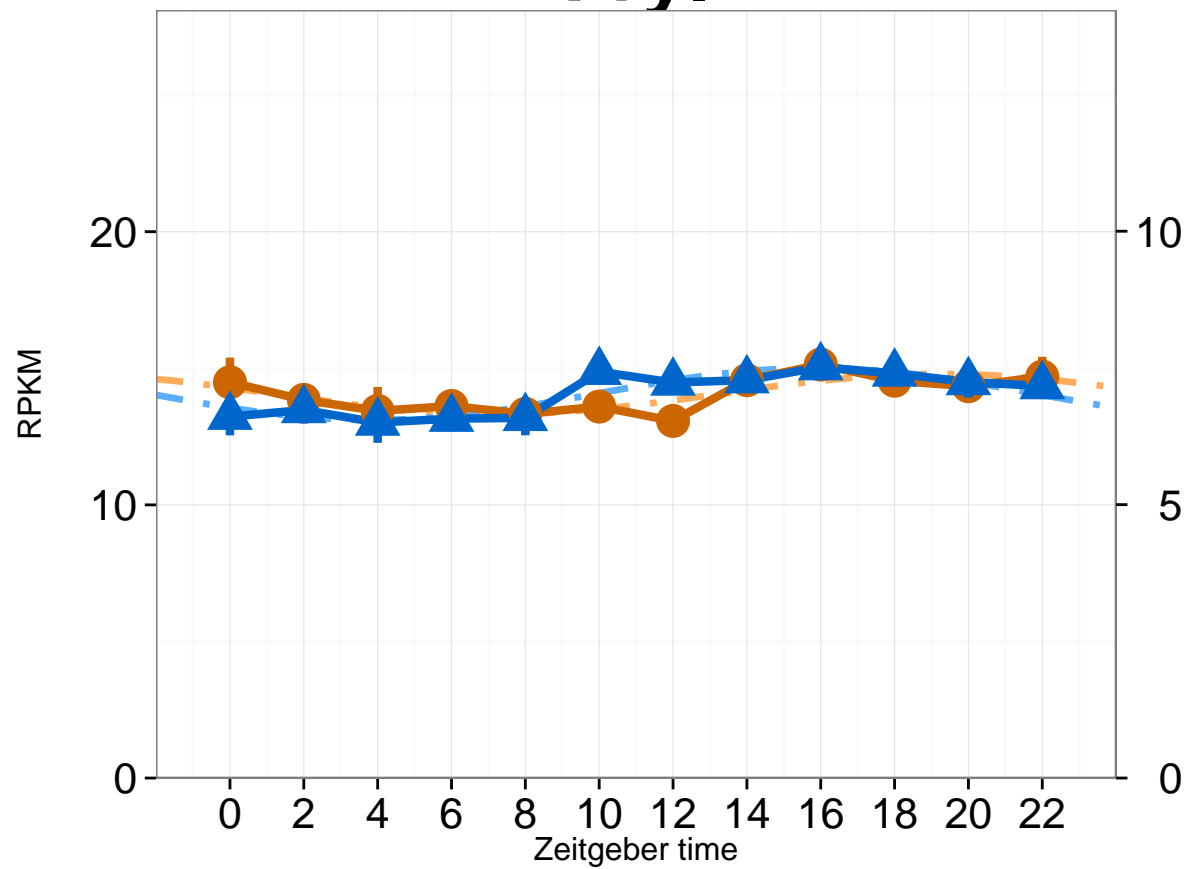

## Fryl

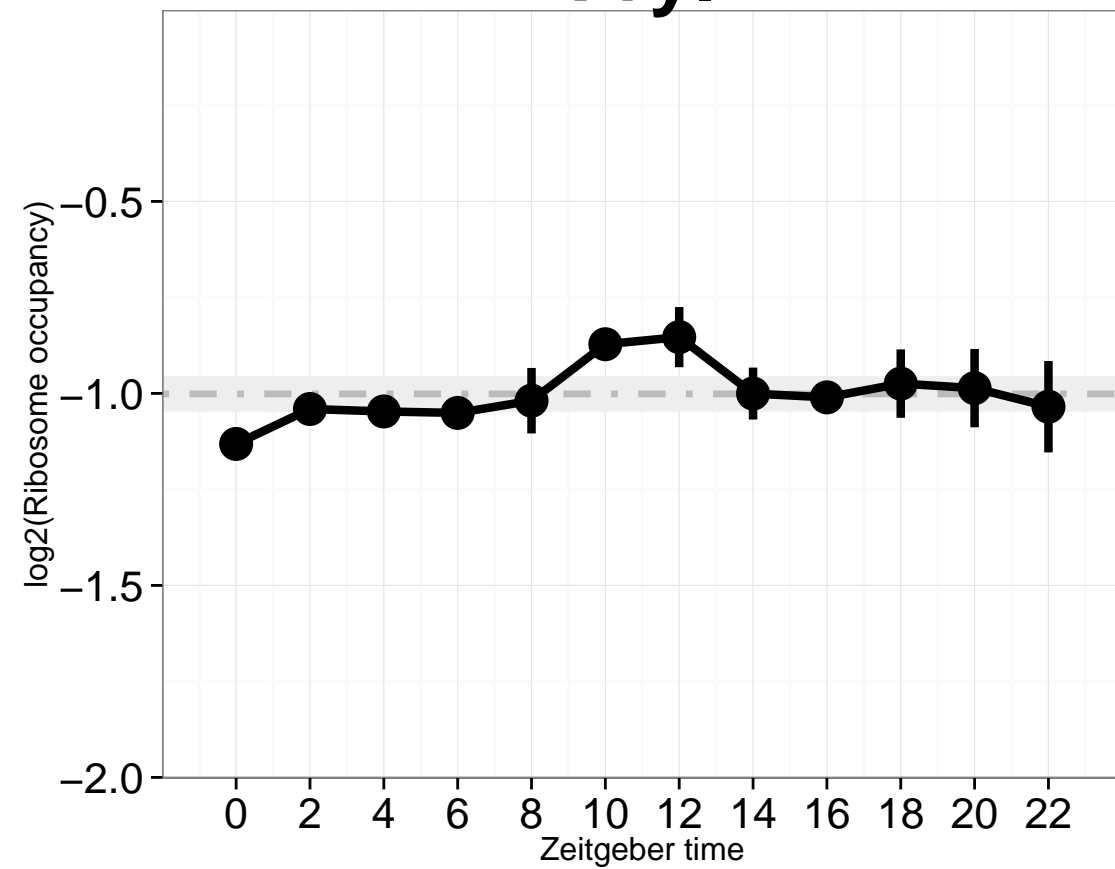

Supplement: Supplementary file 1503 [file 1]

## Plxna3

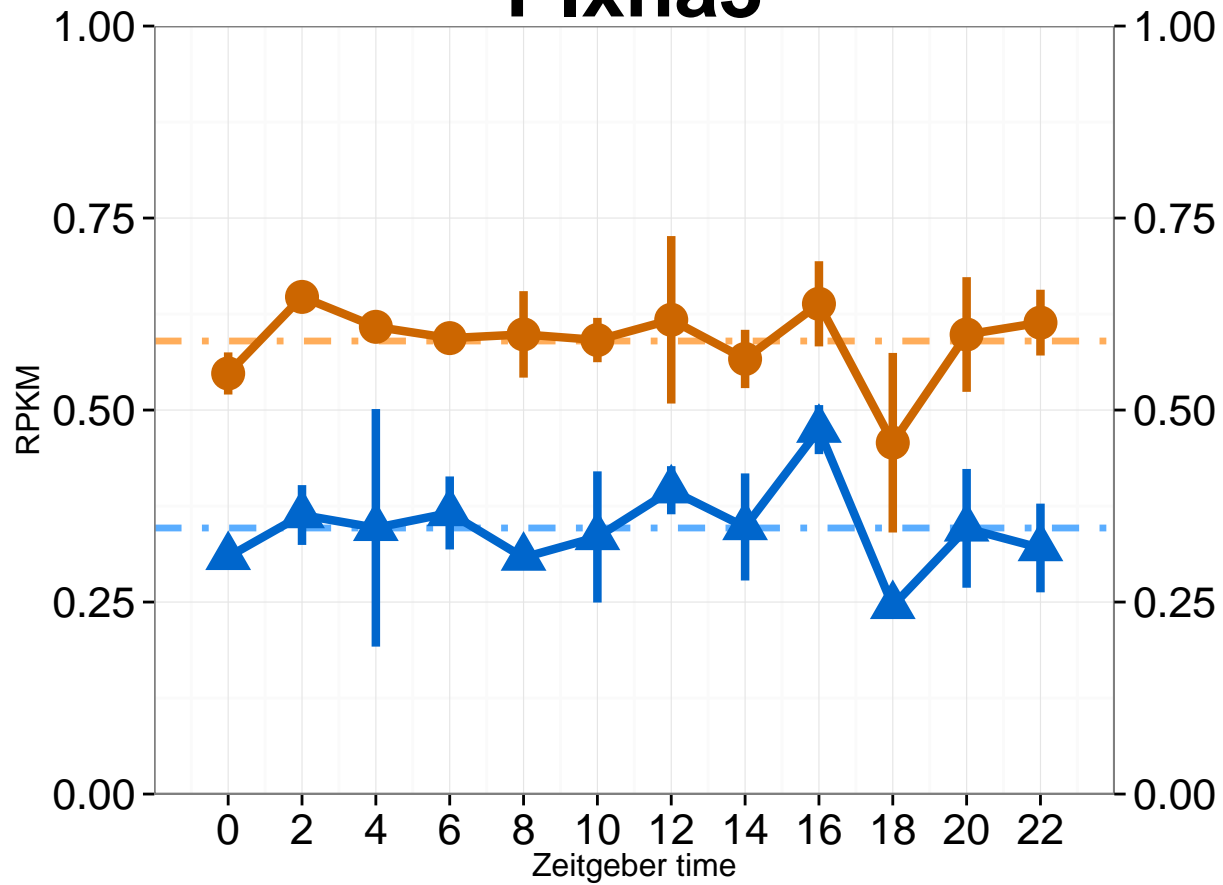

## Plxna3

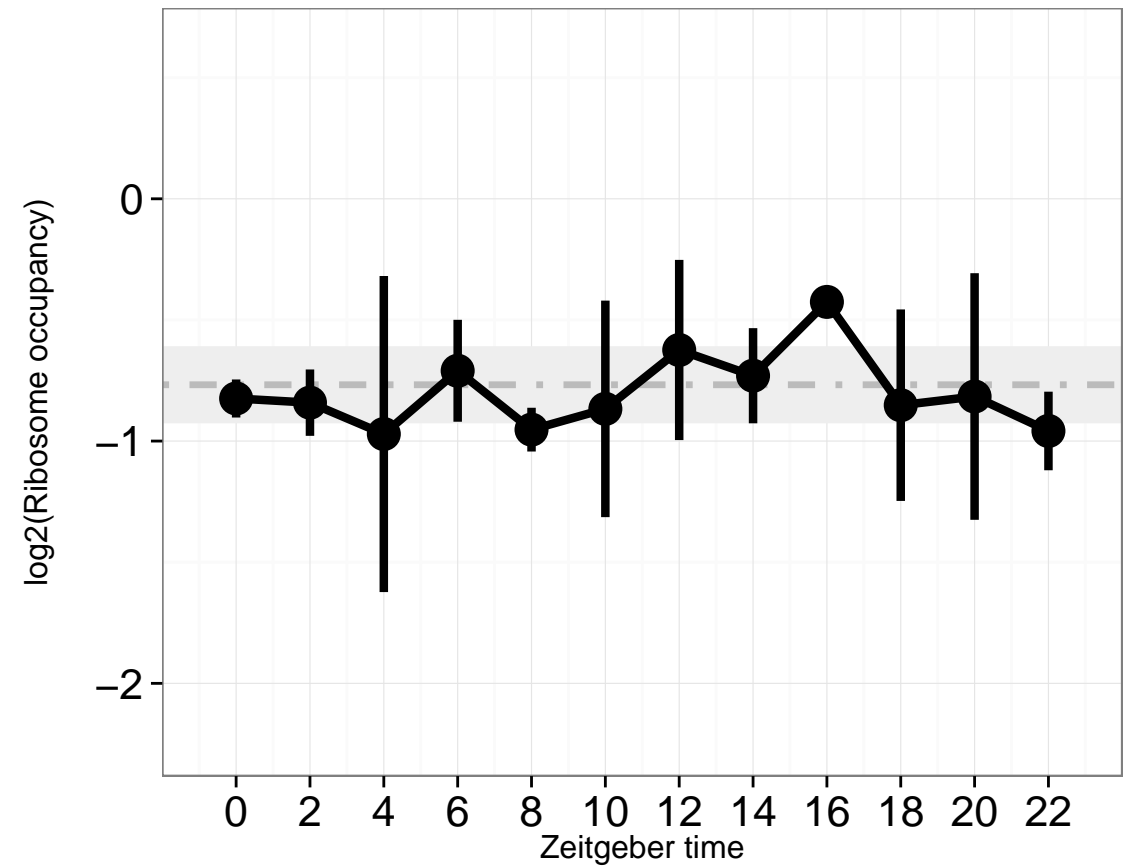

Supplement: Supplementary file 1504 [file 1]

**Scgb1c1 TR**

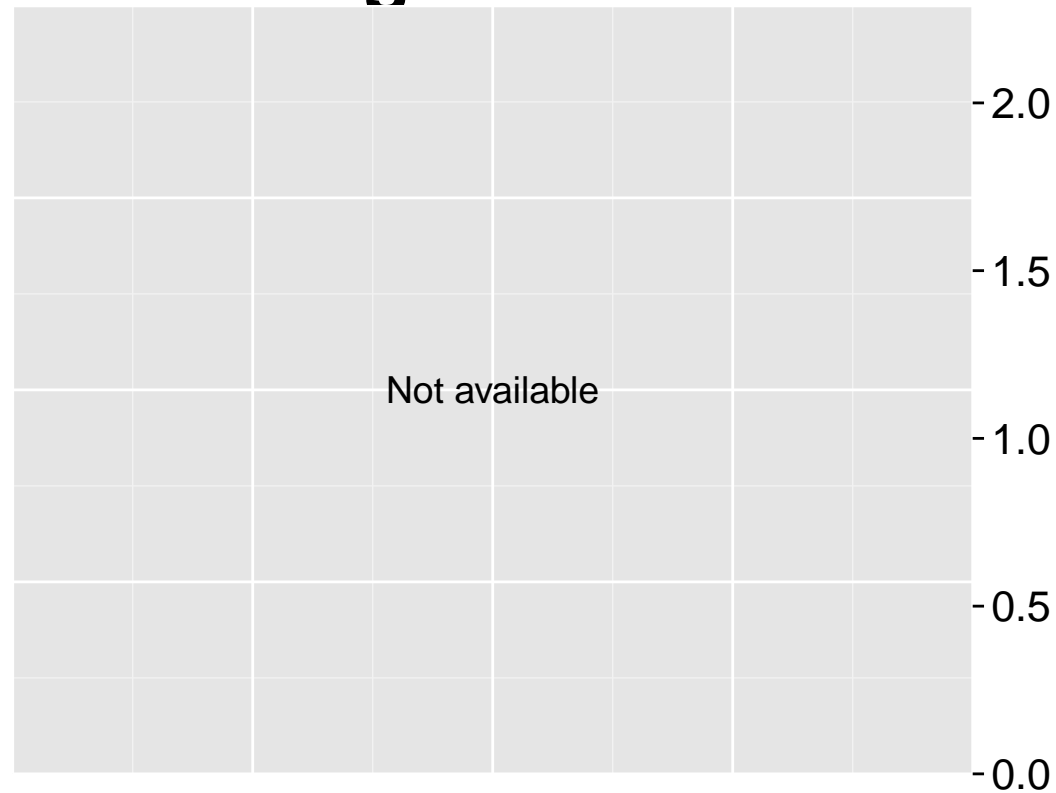

**Scgb1c1 log2(Ribosome occupanc**

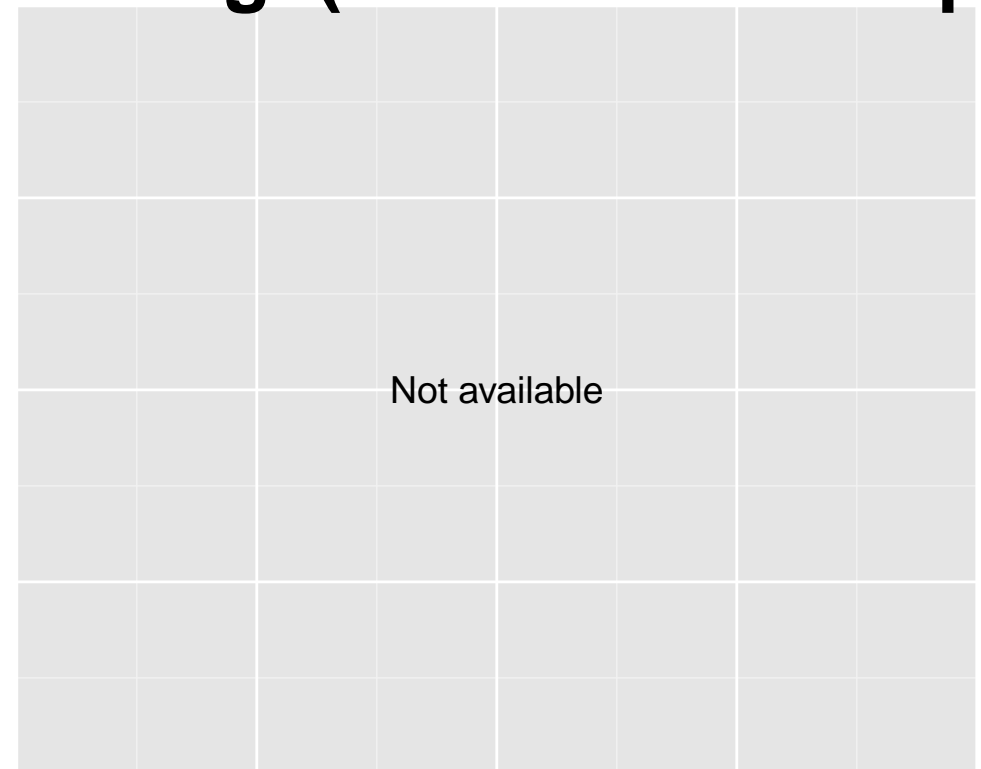

Supplement: Supplementary file 1505 [file 1]

## Glb1l2

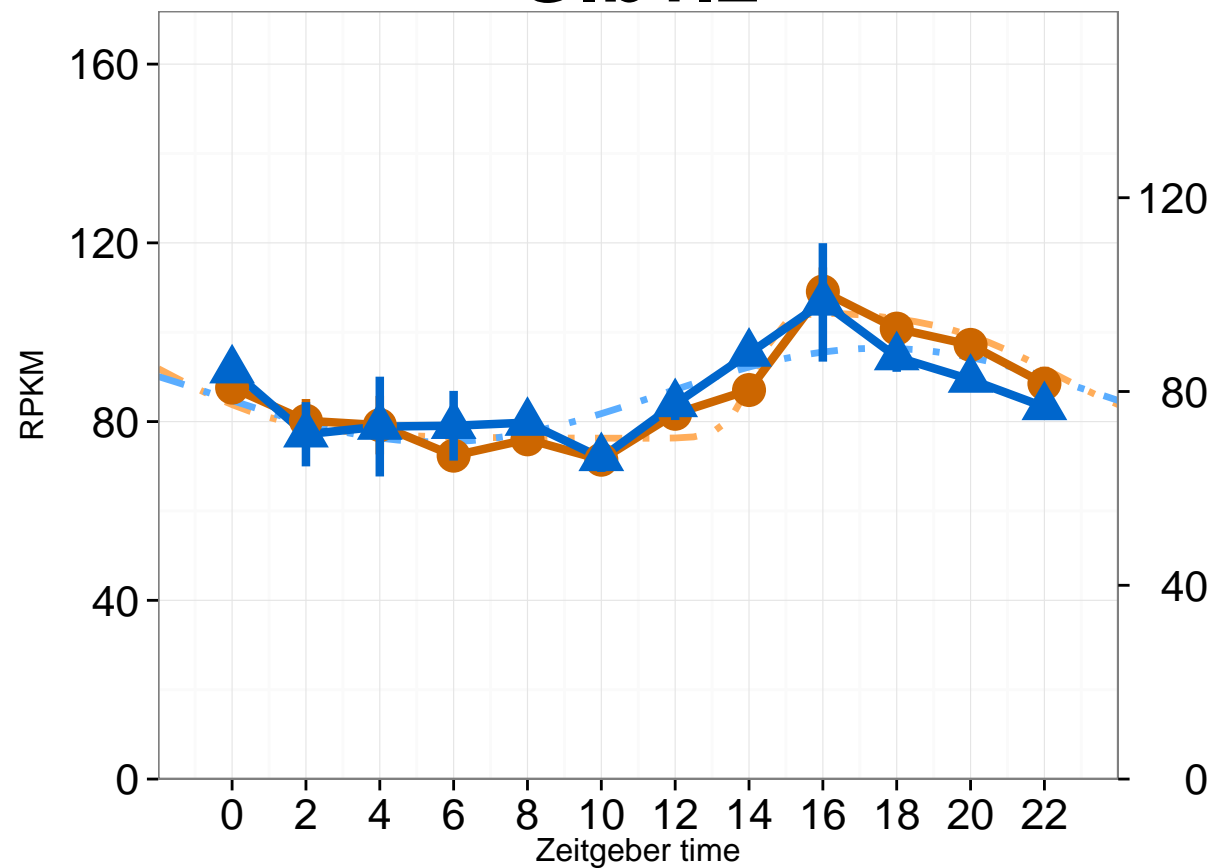

## Glb1l2

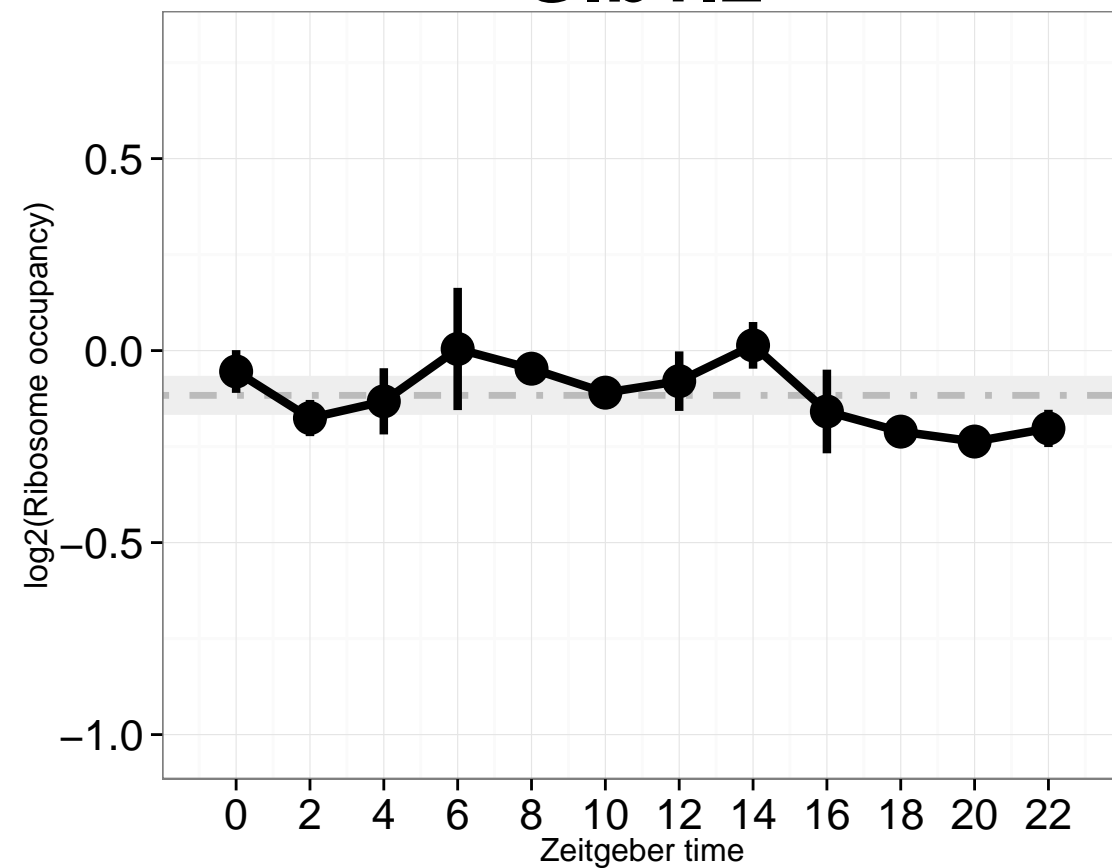

Supplement: Supplementary file 1506 [file 1]
