# Supplementary material (part 16 of 133)
Source: publisher figshare collection journal article supplement (https://springernature.figshare.com/articles/dataset/_/4903193)

# Map3k14

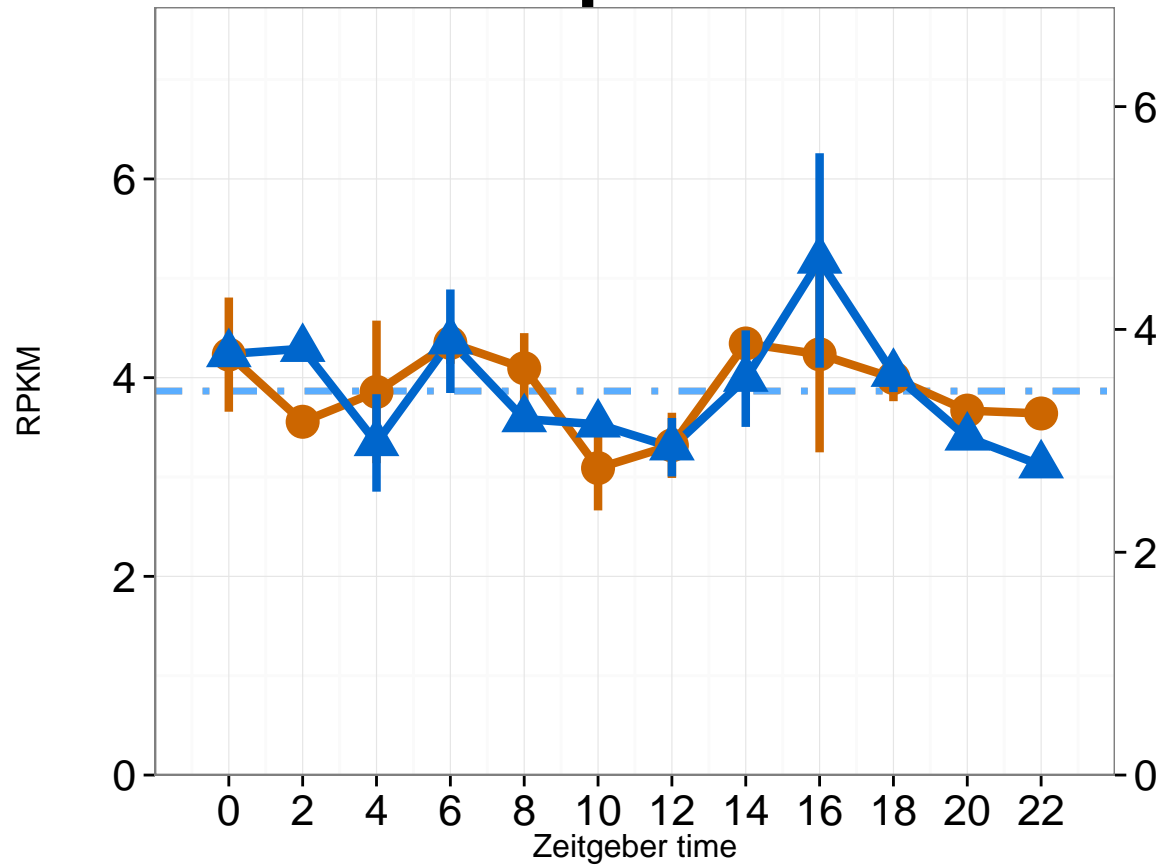

# Map3k14

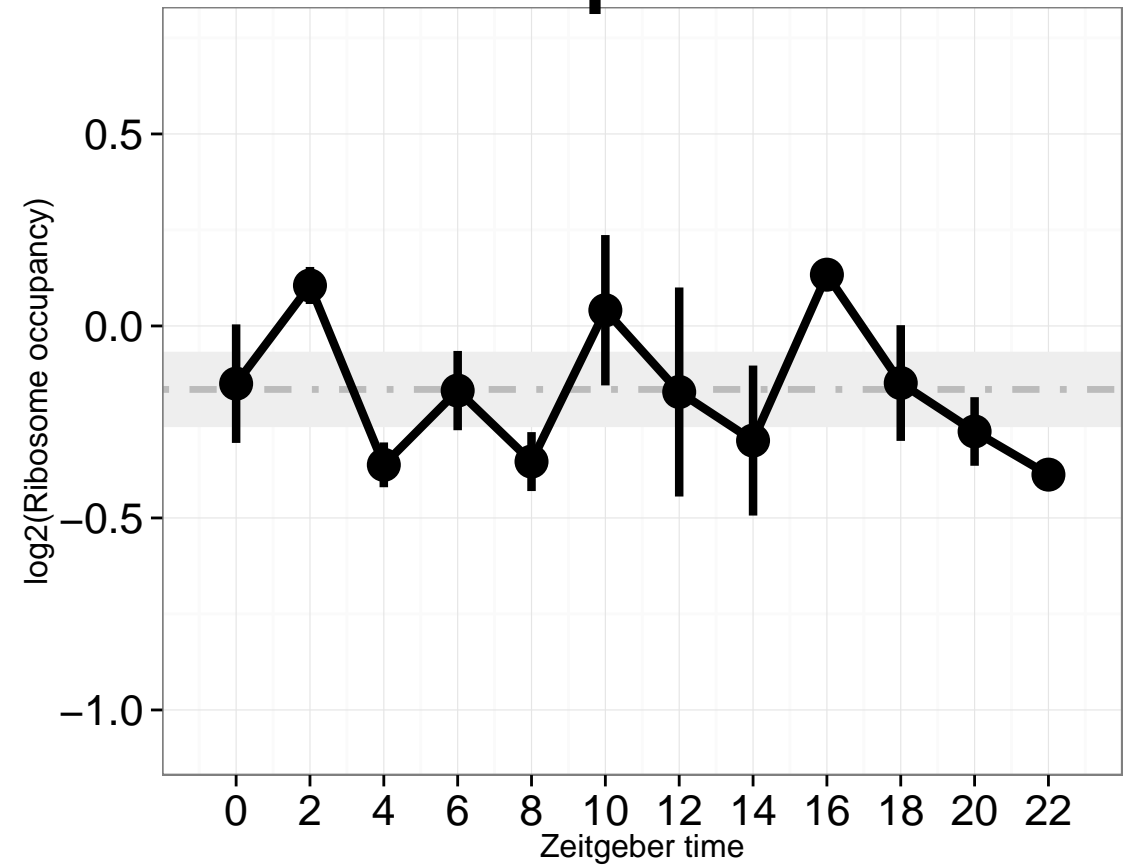

Supplement: Supplementary file 1507 [file 1]

# Cox14

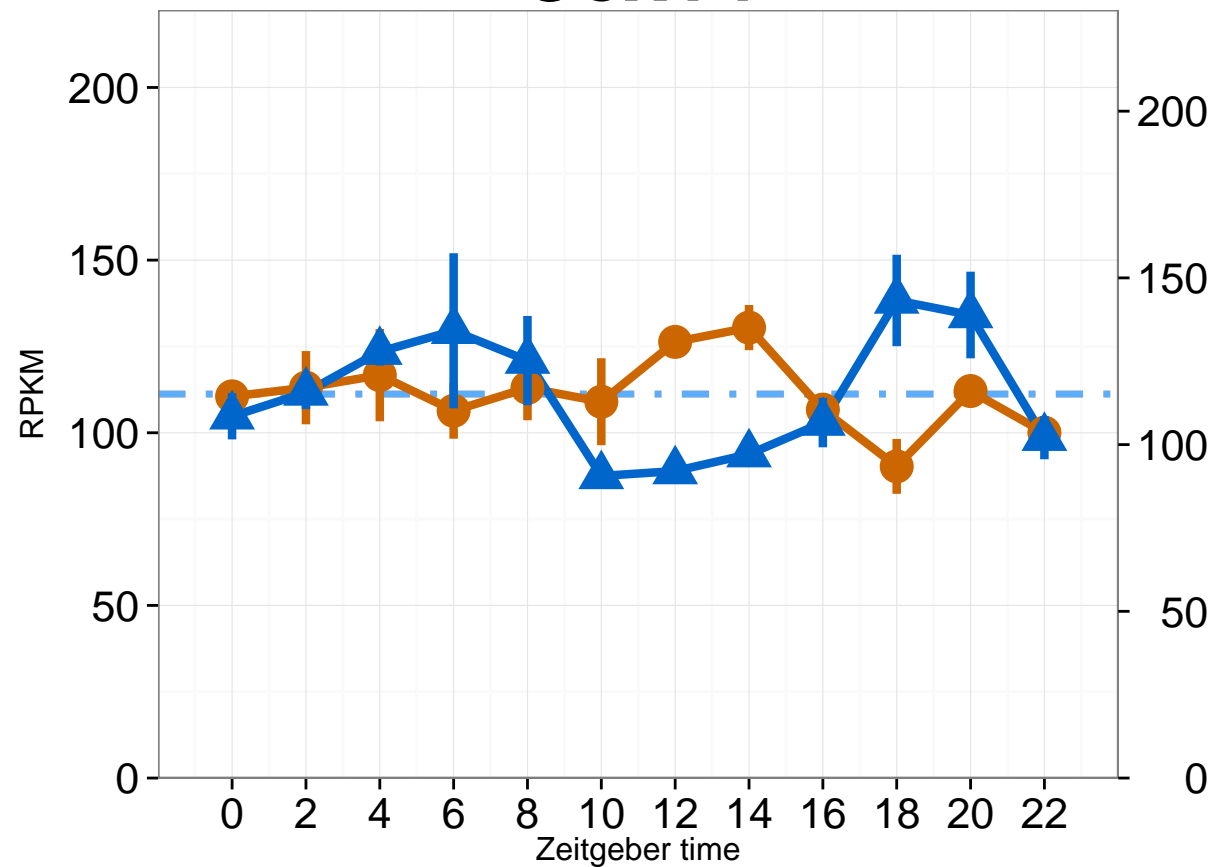

# Cox14

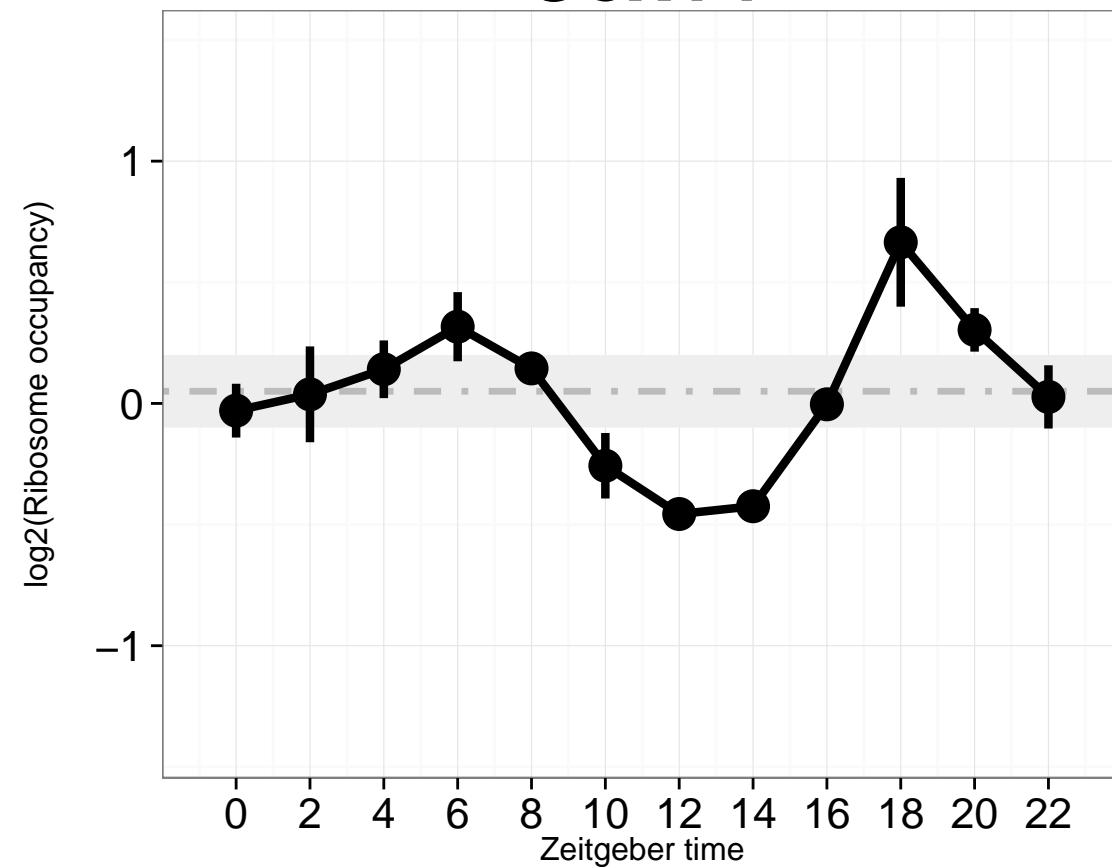

Supplement: Supplementary file 1508 [file 1]

## Ajuba

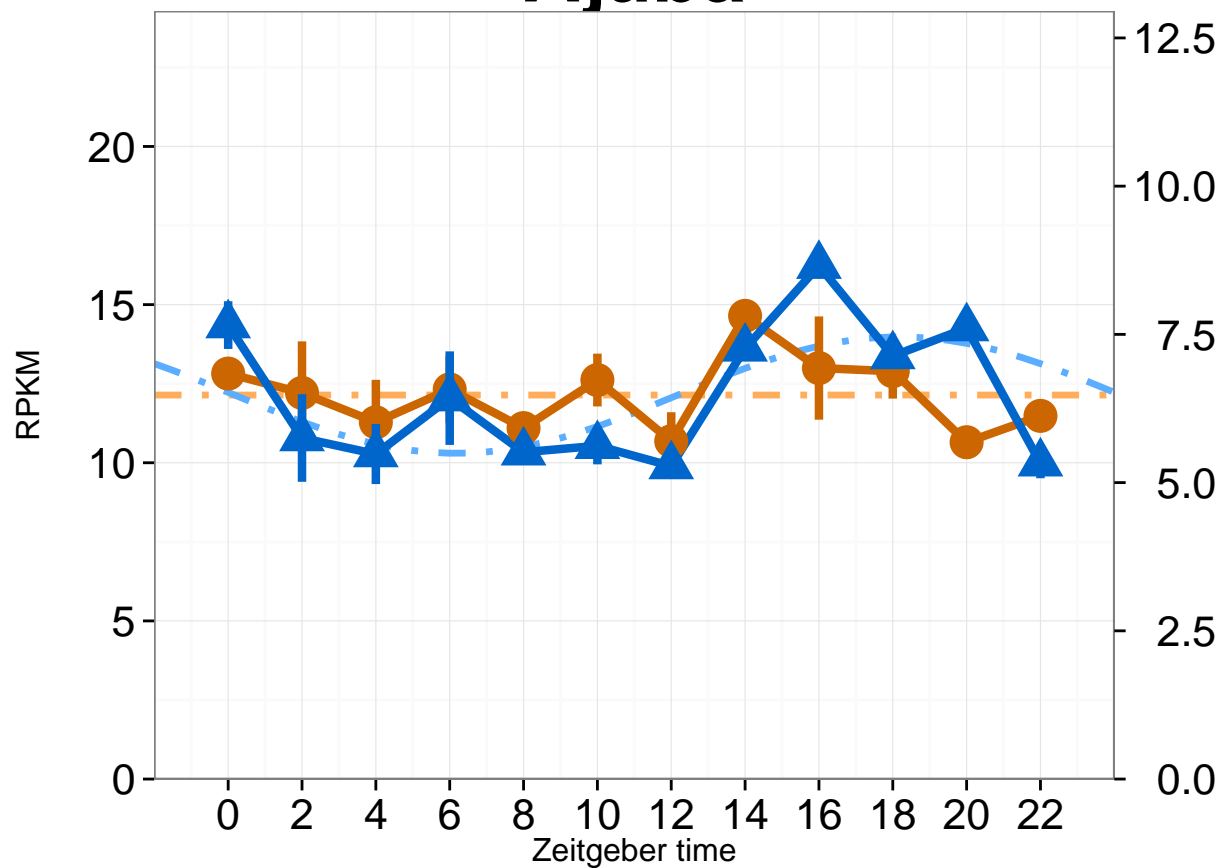

## Ajuba

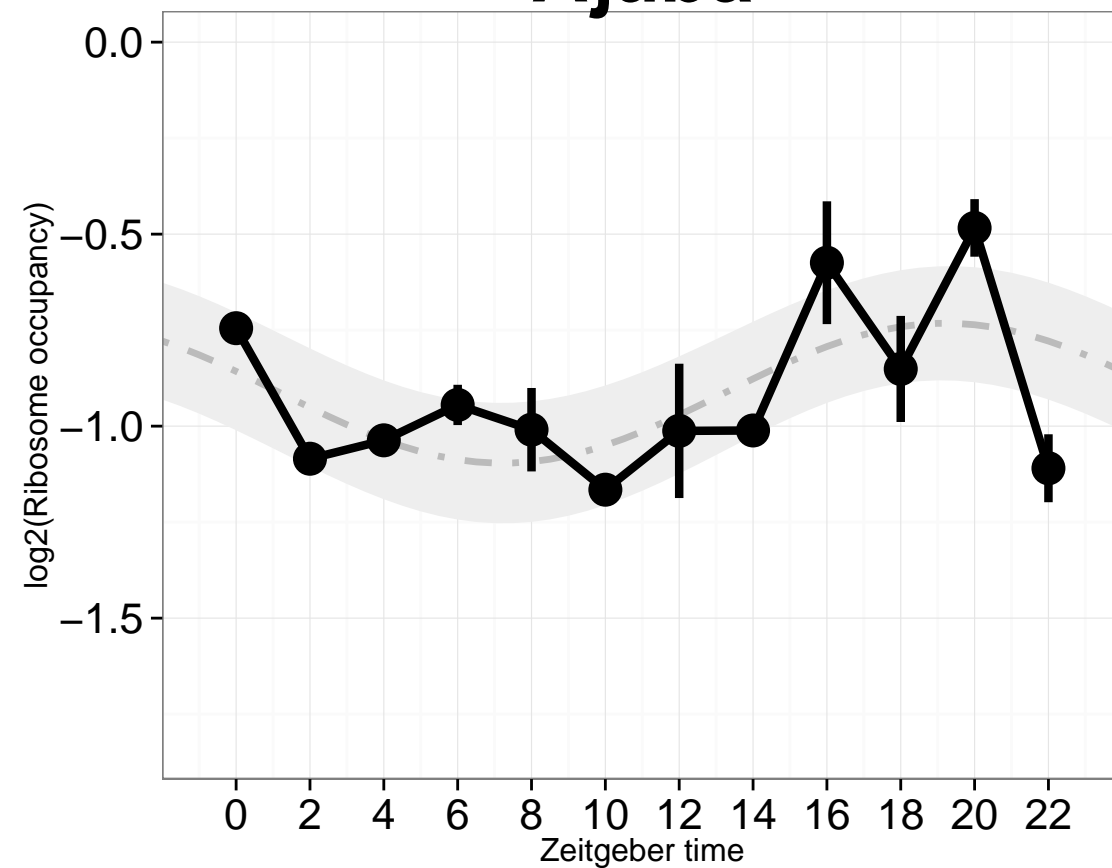

Supplement: Supplementary file 1509 [file 1]

## Npr2

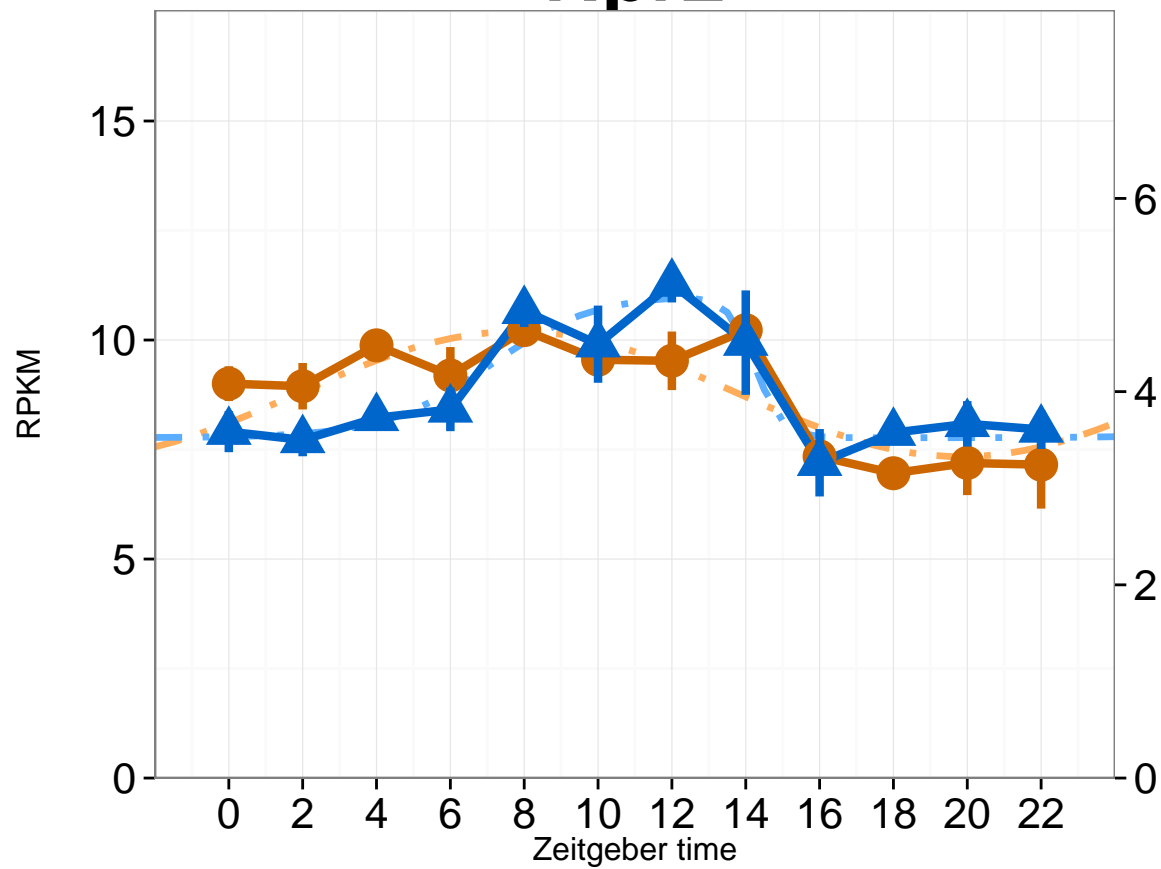

## Npr2

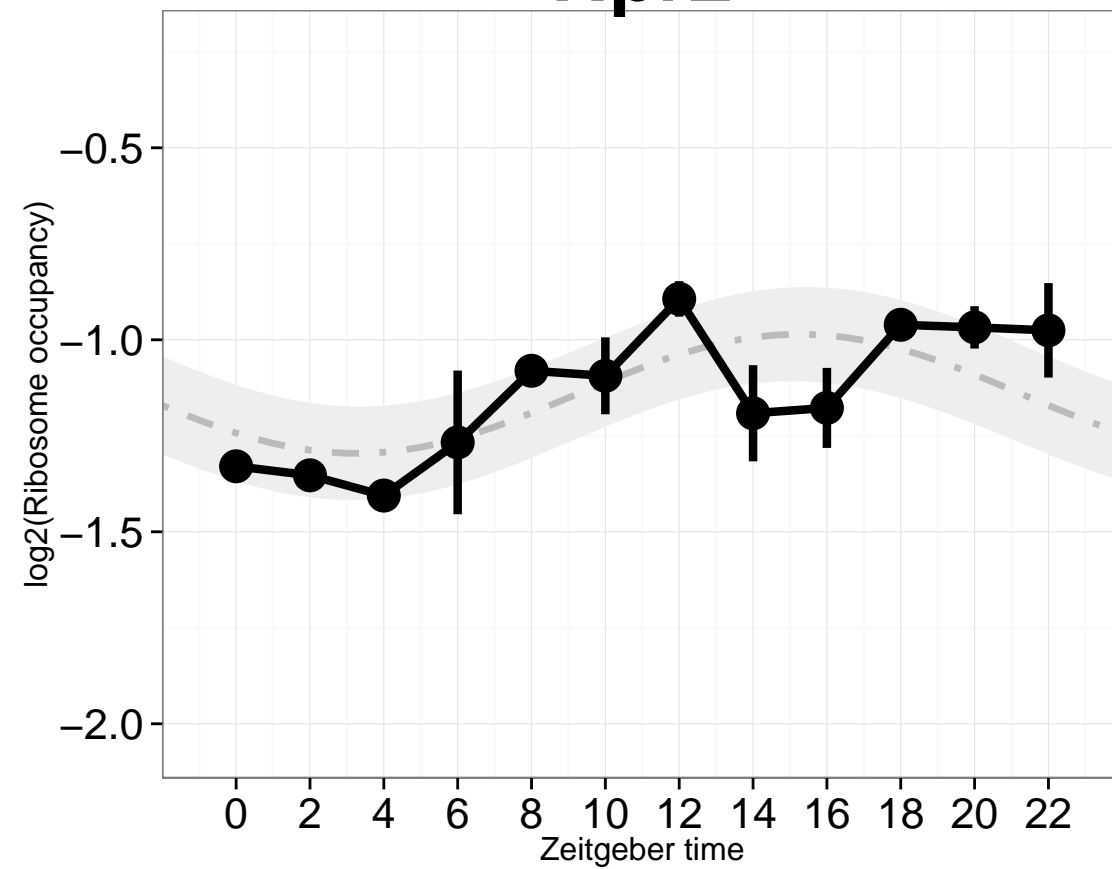

Supplement: Supplementary file 1510 [file 1]

# Lrrcc1

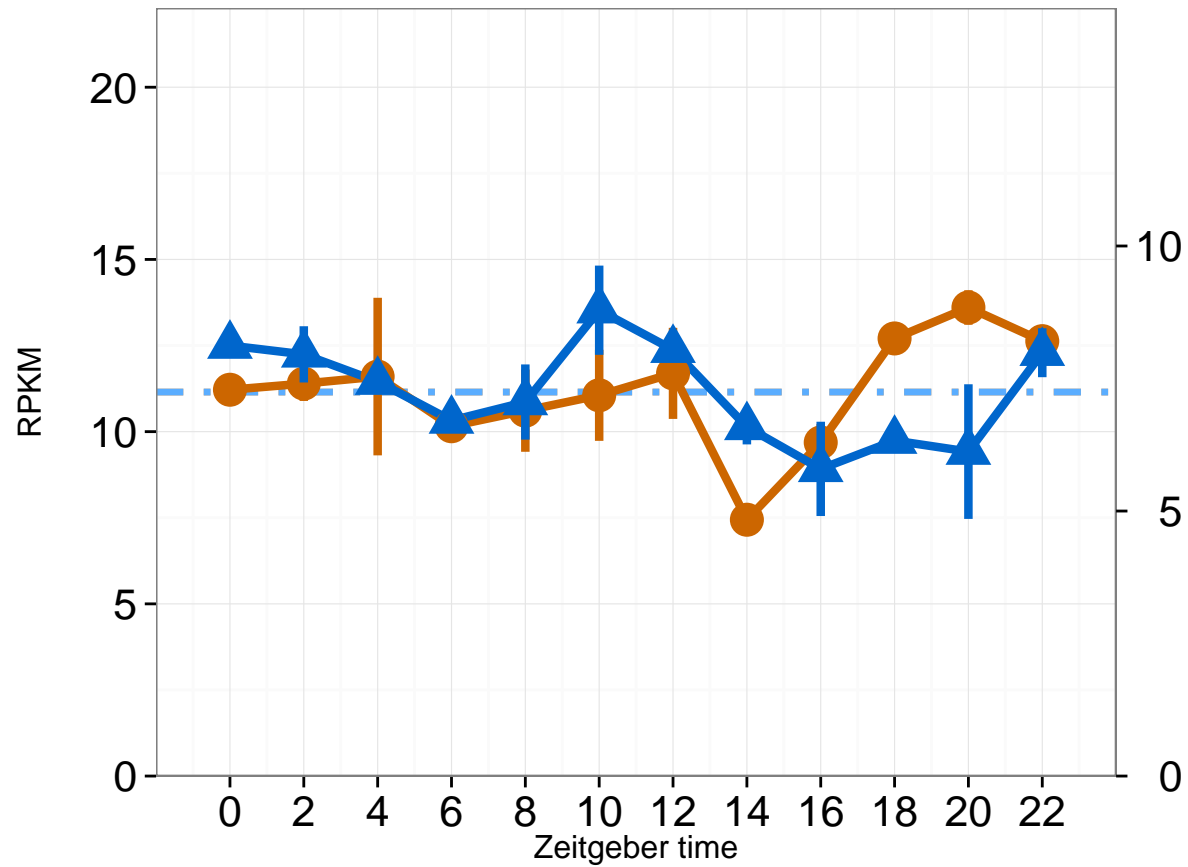

# Lrrcc1

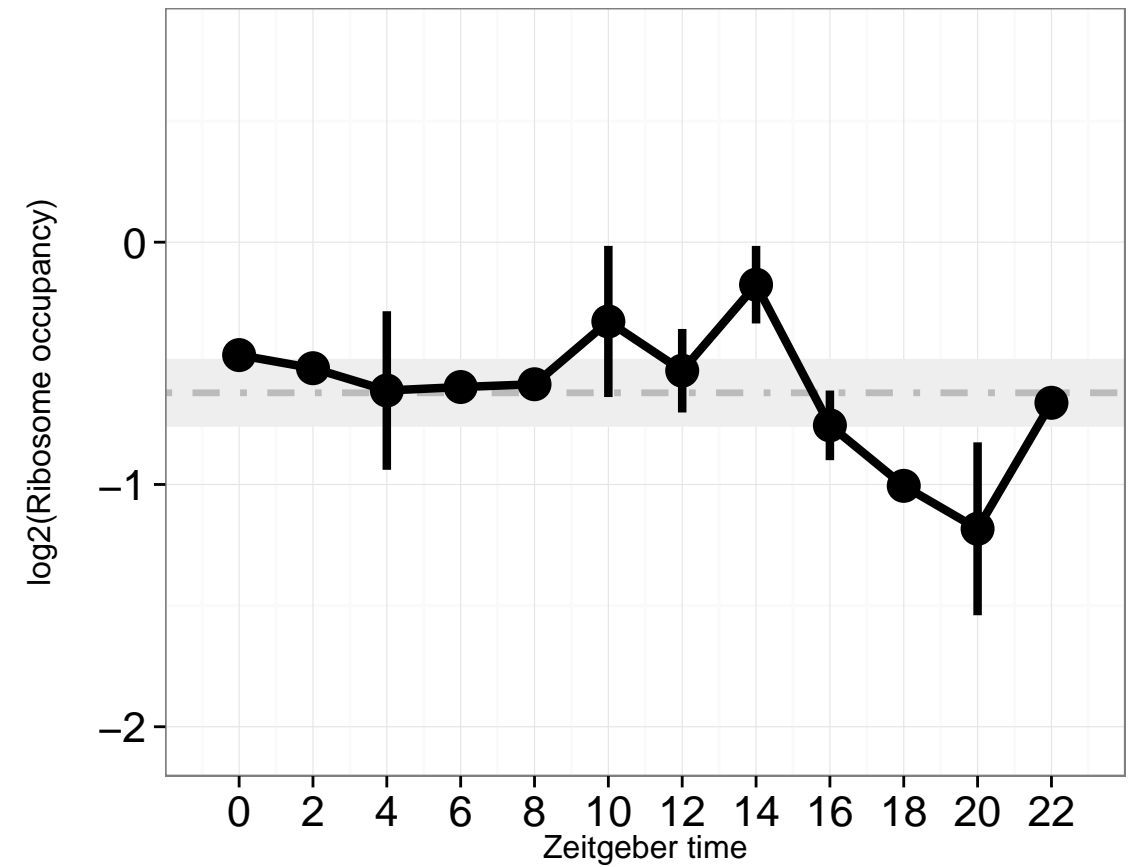

Supplement: Supplementary file 1511 [file 1]

# Tctn1

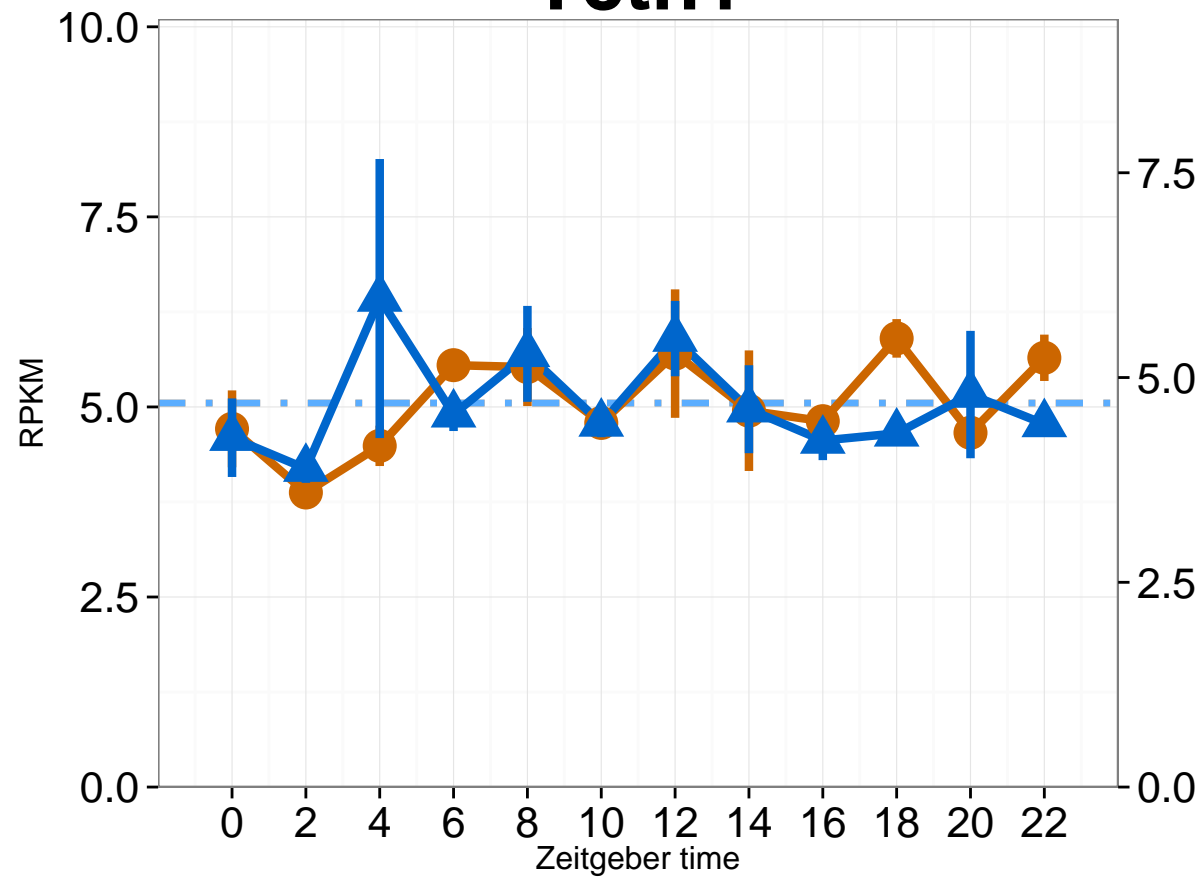

# Tctn1

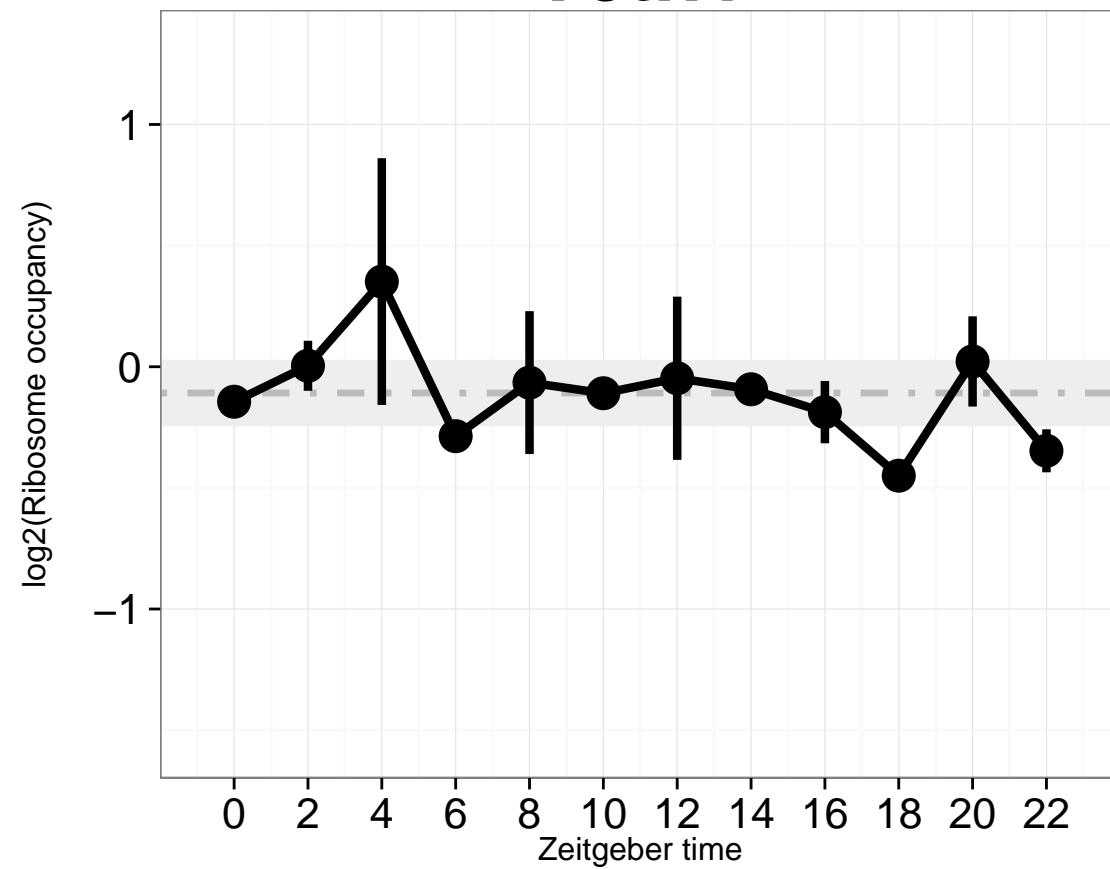

Supplement: Supplementary file 1512 [file 1]

# Ndufv2

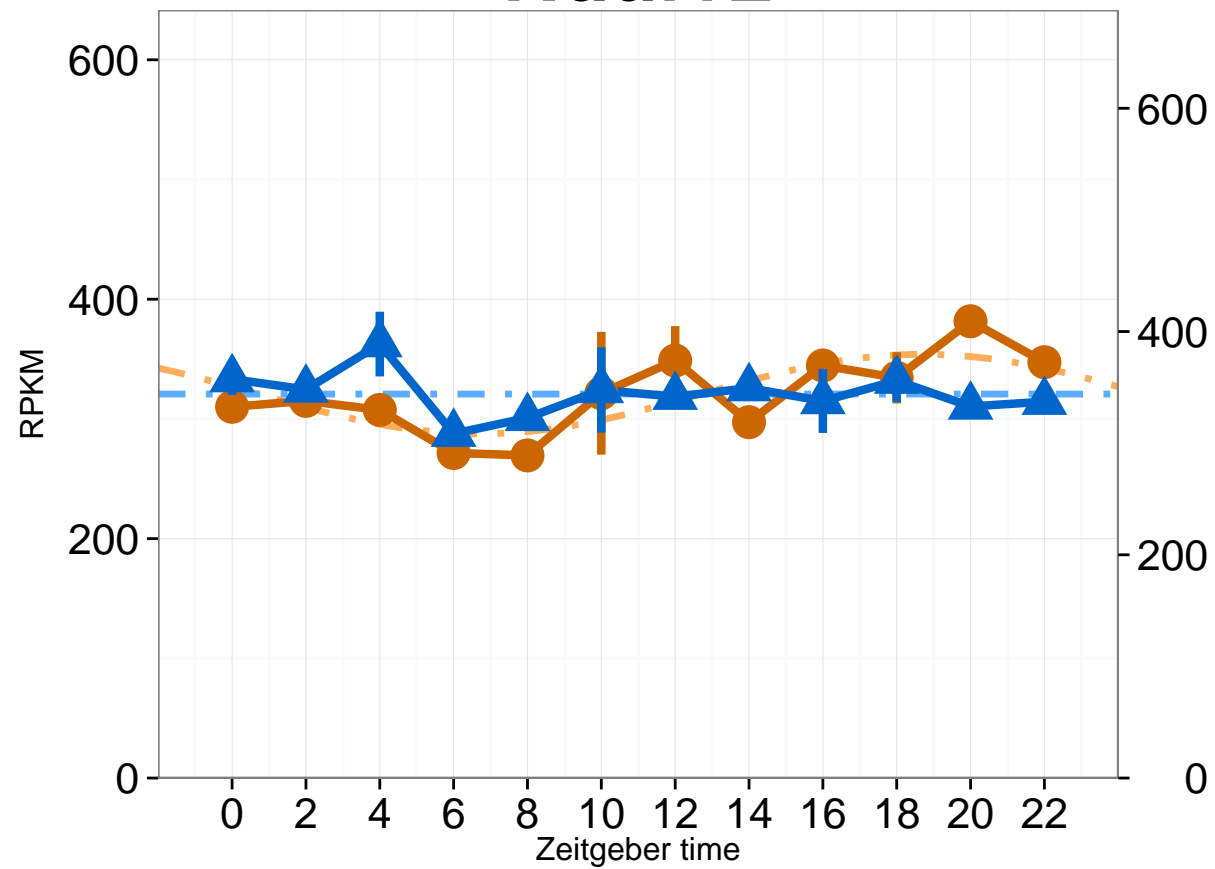

# Ndufv2

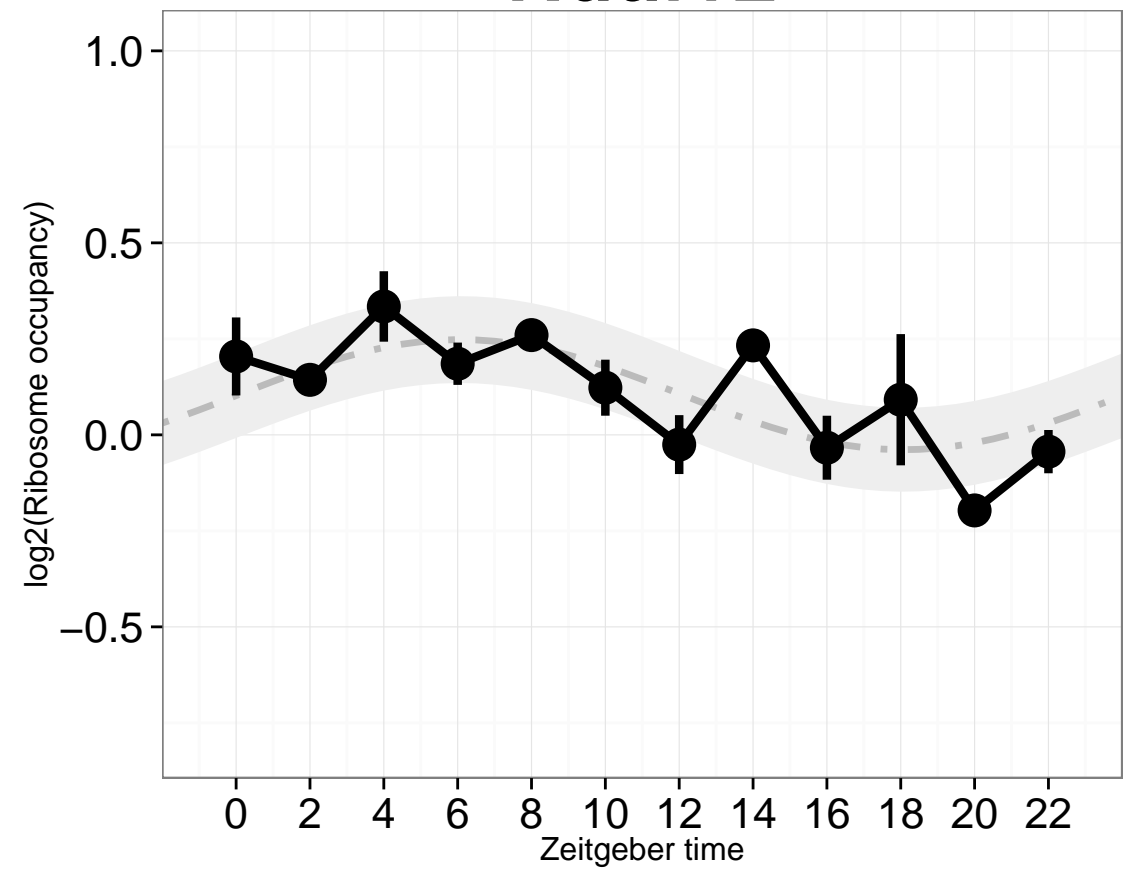

Supplement: Supplementary file 1513 [file 1]

## Dusp12

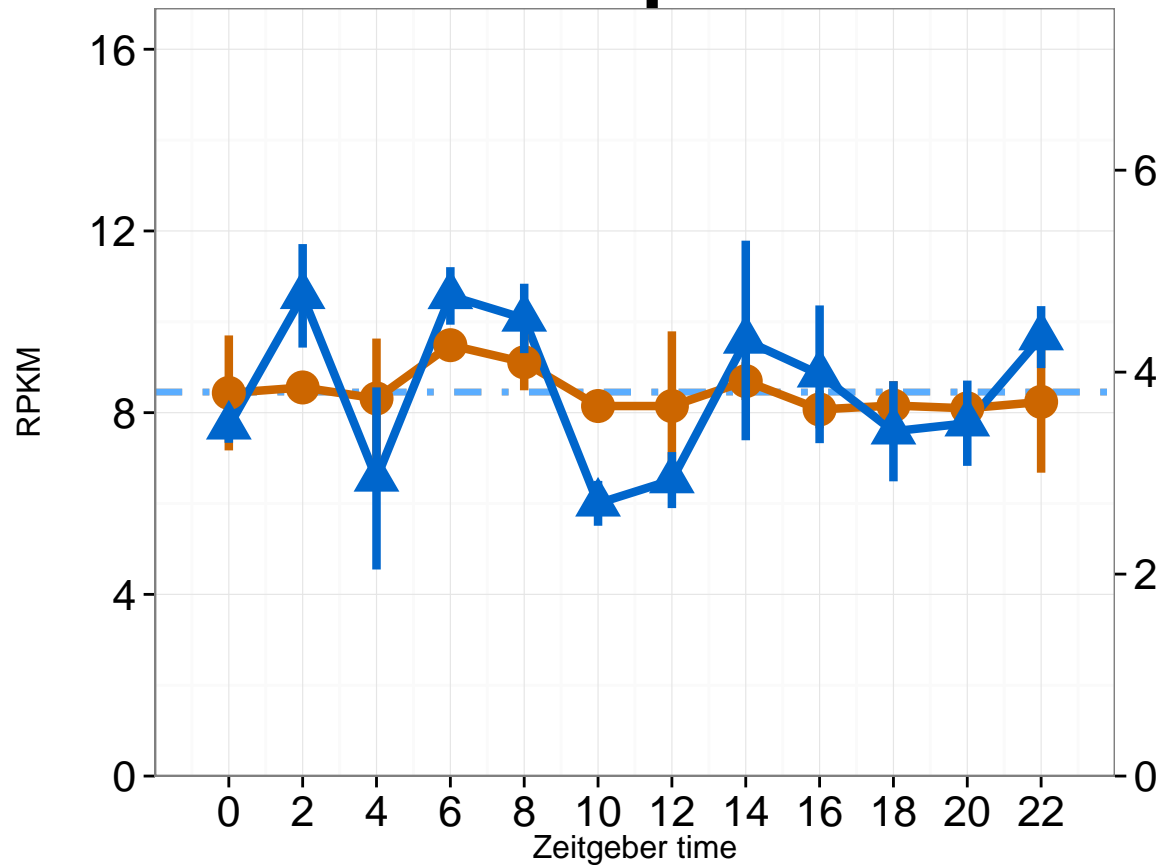

## Dusp12

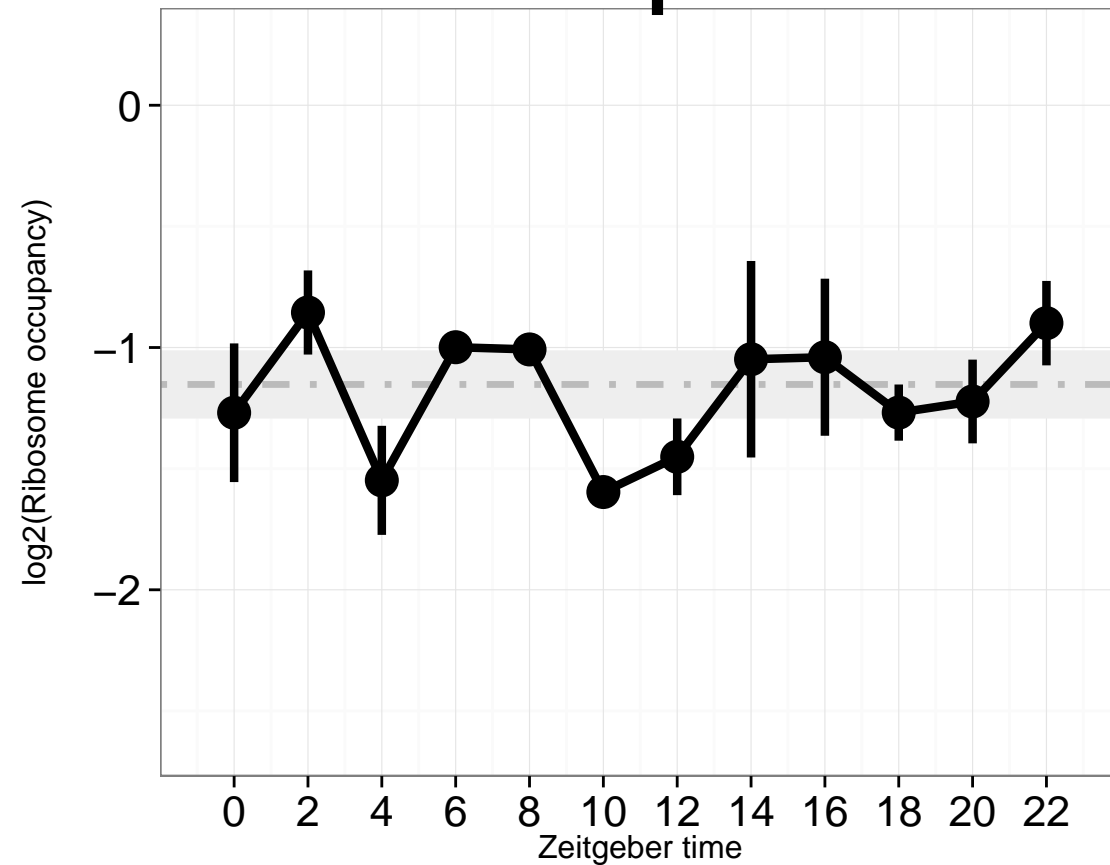

Supplement: Supplementary file 1514 [file 1]

# Slc7a4

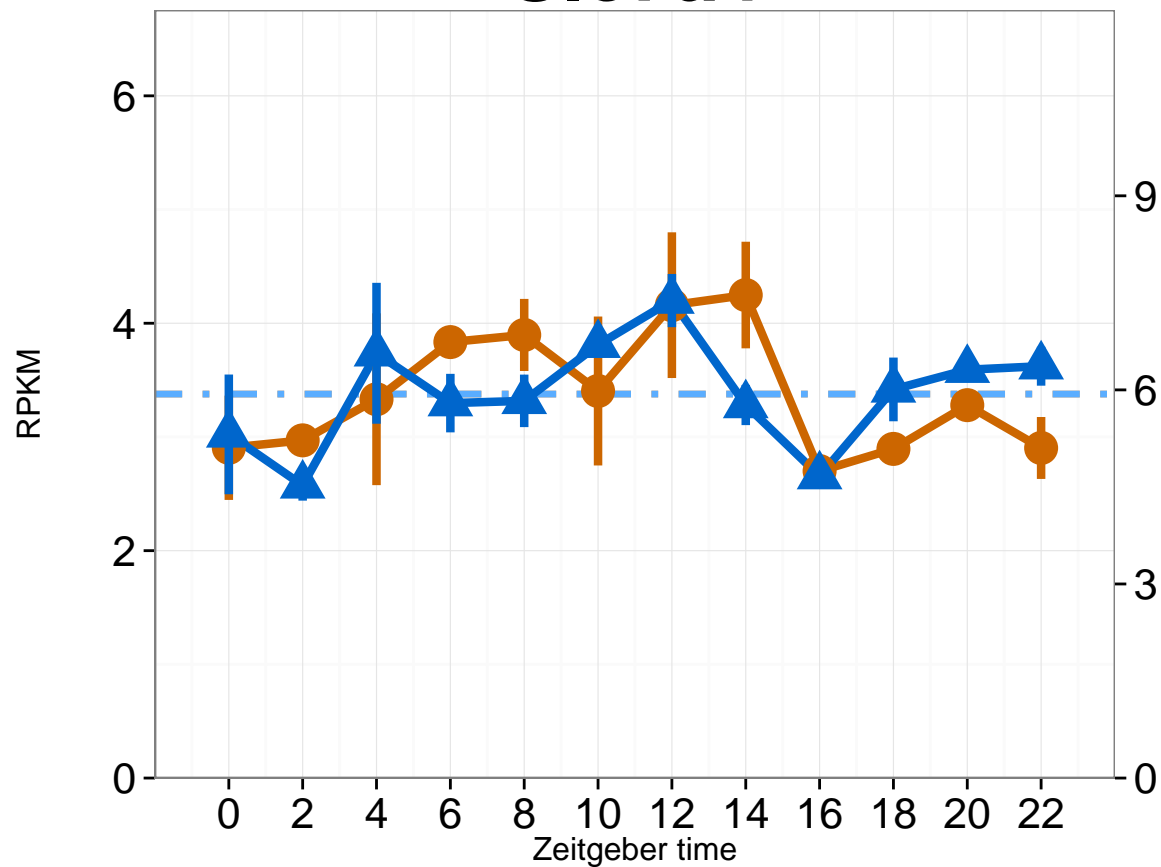

# Slc7a4

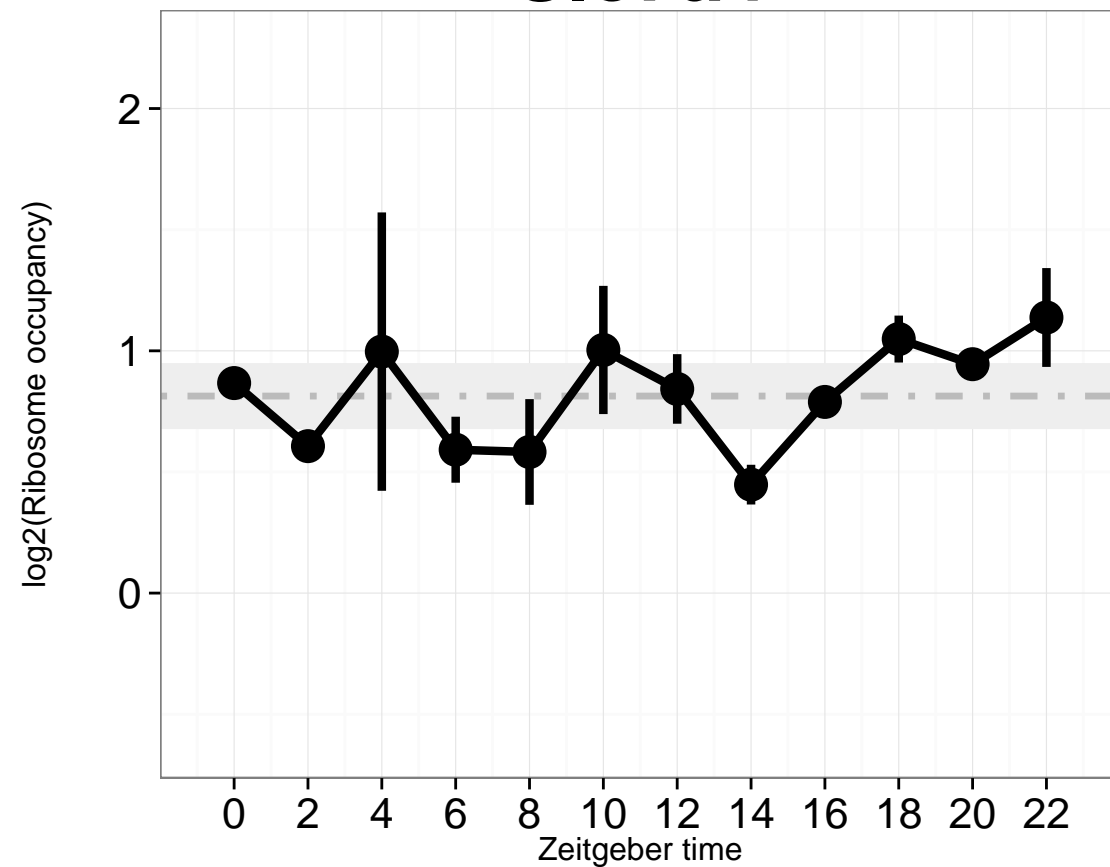

Supplement: Supplementary file 1515 [file 1]

## Plcxd1

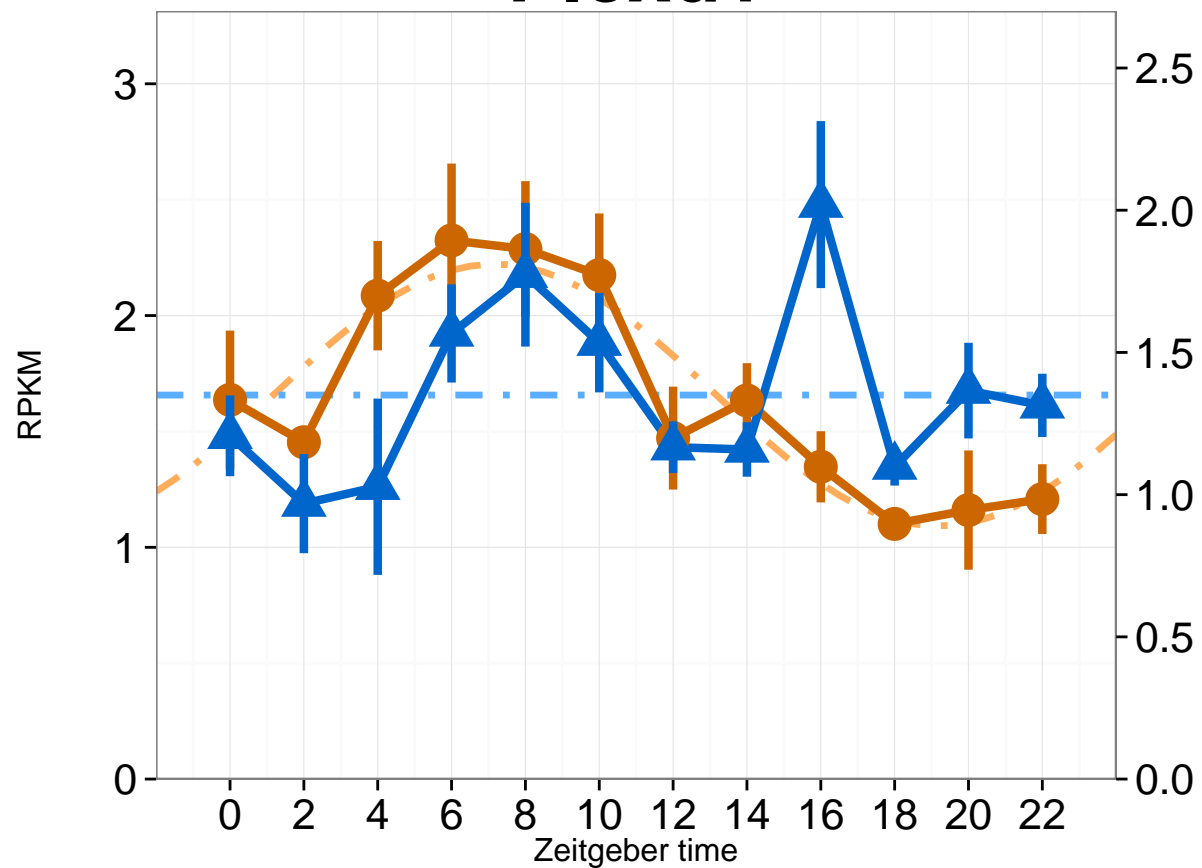

## Plcxd1

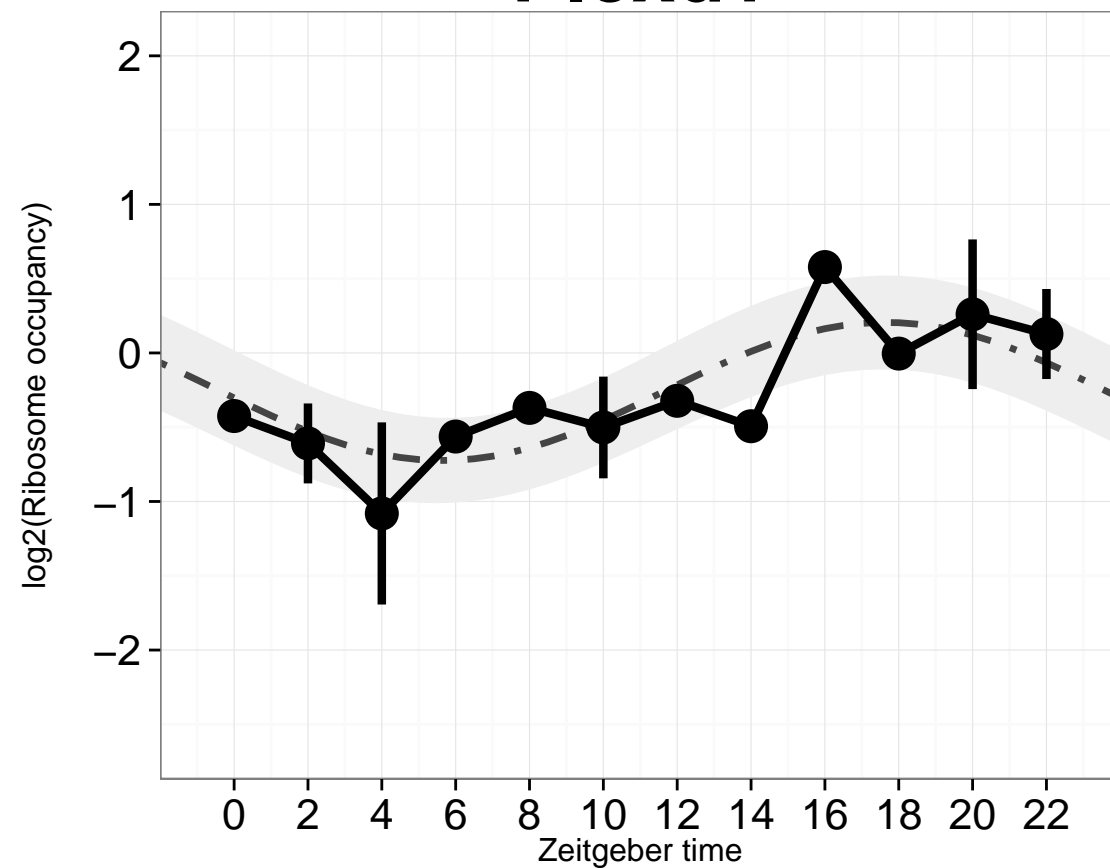

Supplement: Supplementary file 1516 [file 1]

# Mdc1

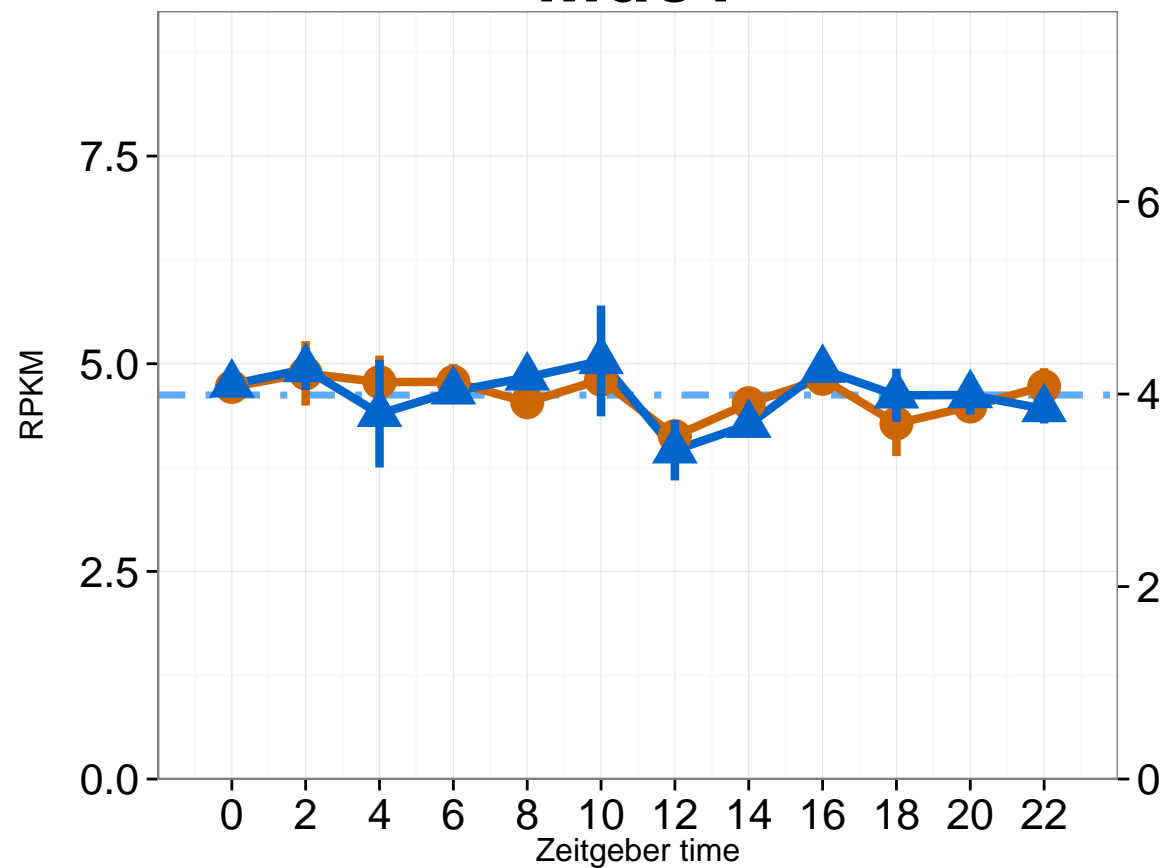

# Mdc1

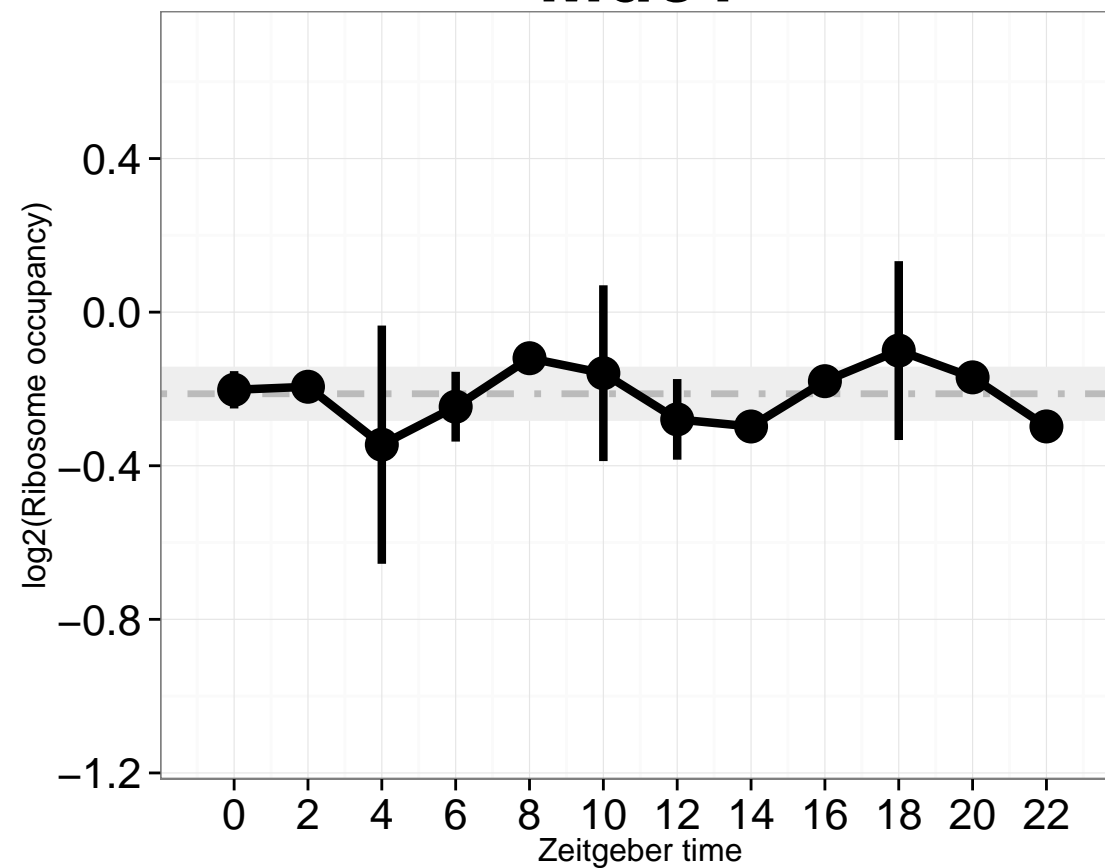

Supplement: Supplementary file 1517 [file 1]

# Trp53i11

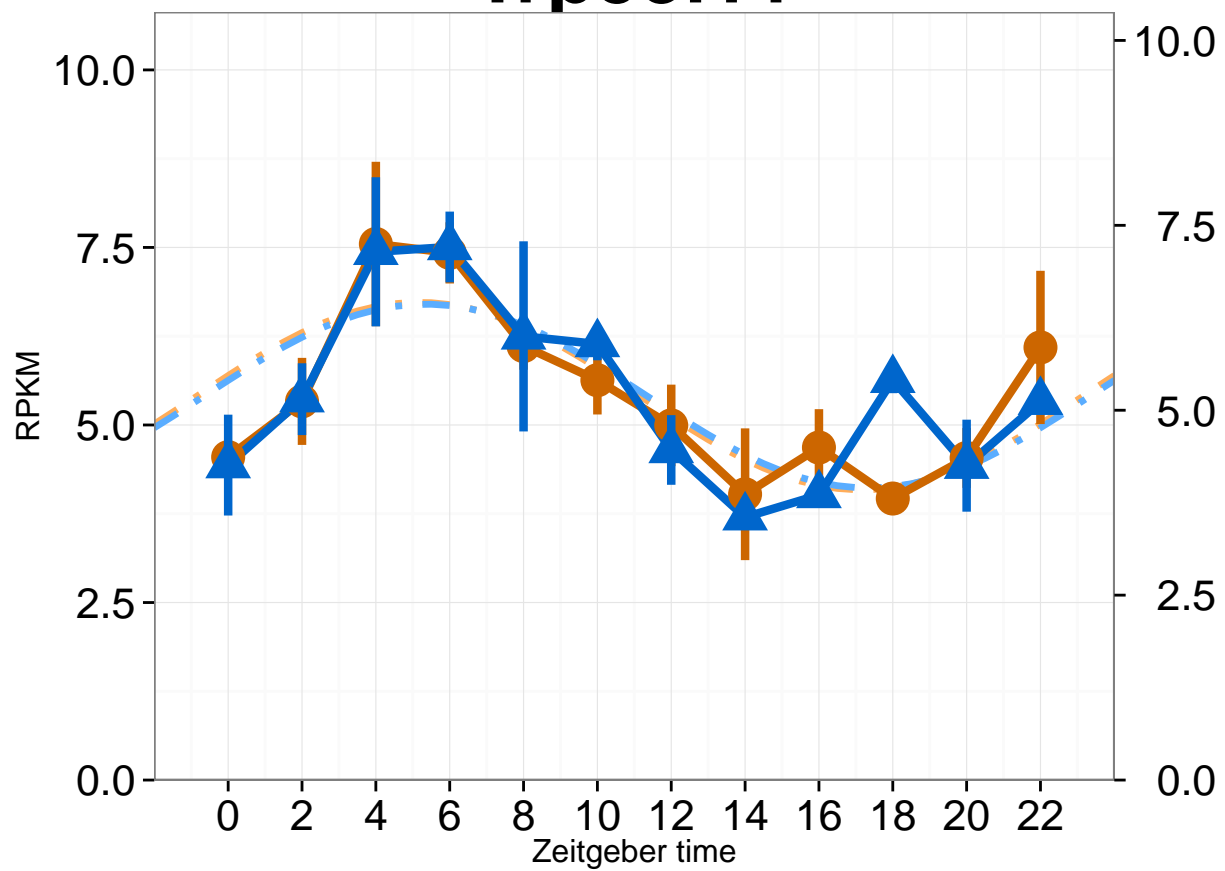

# Trp53i11

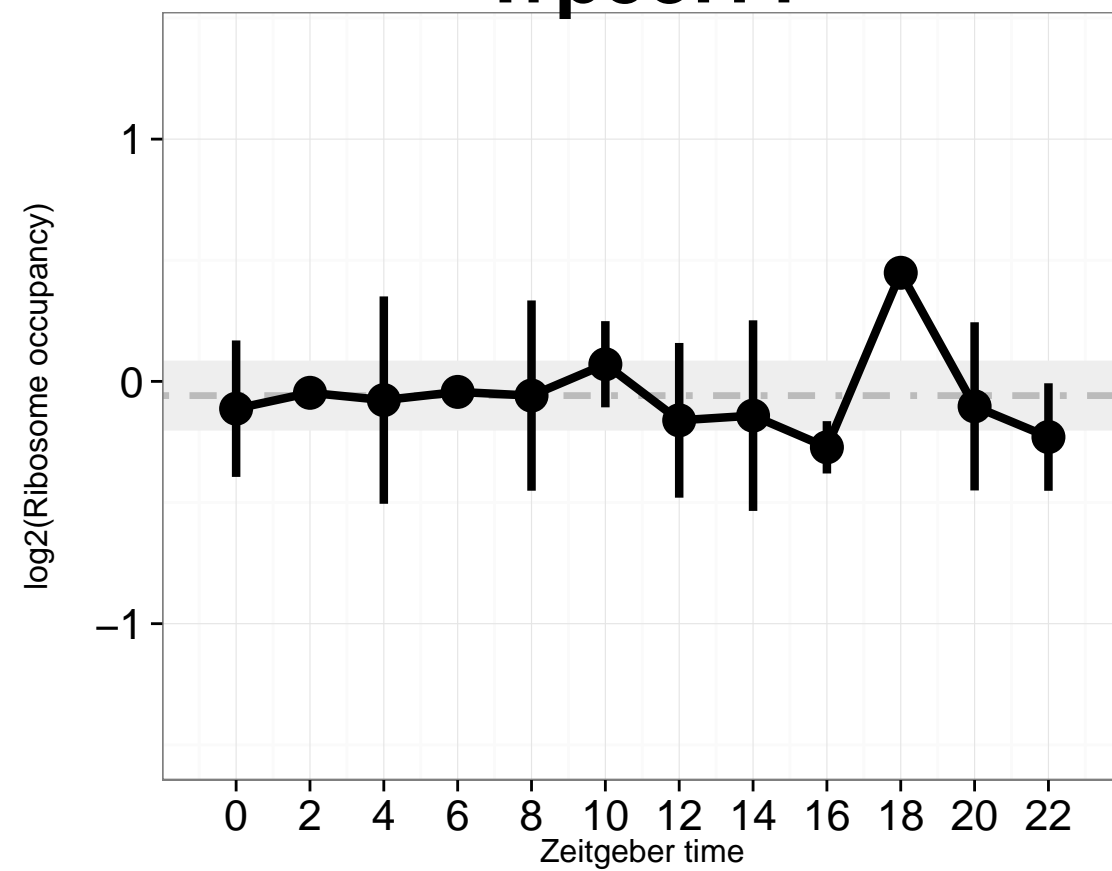

Supplement: Supplementary file 1518 [file 1]

## Immt

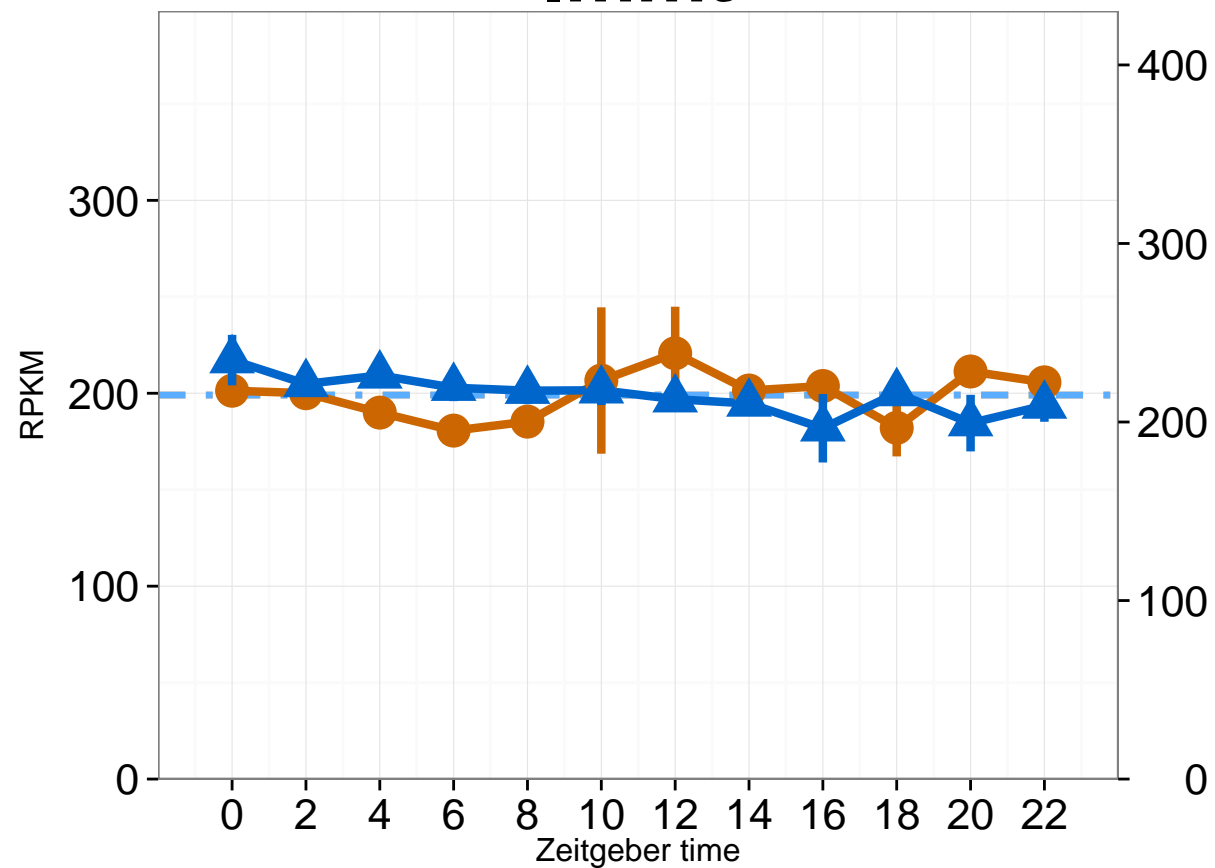

## Immt

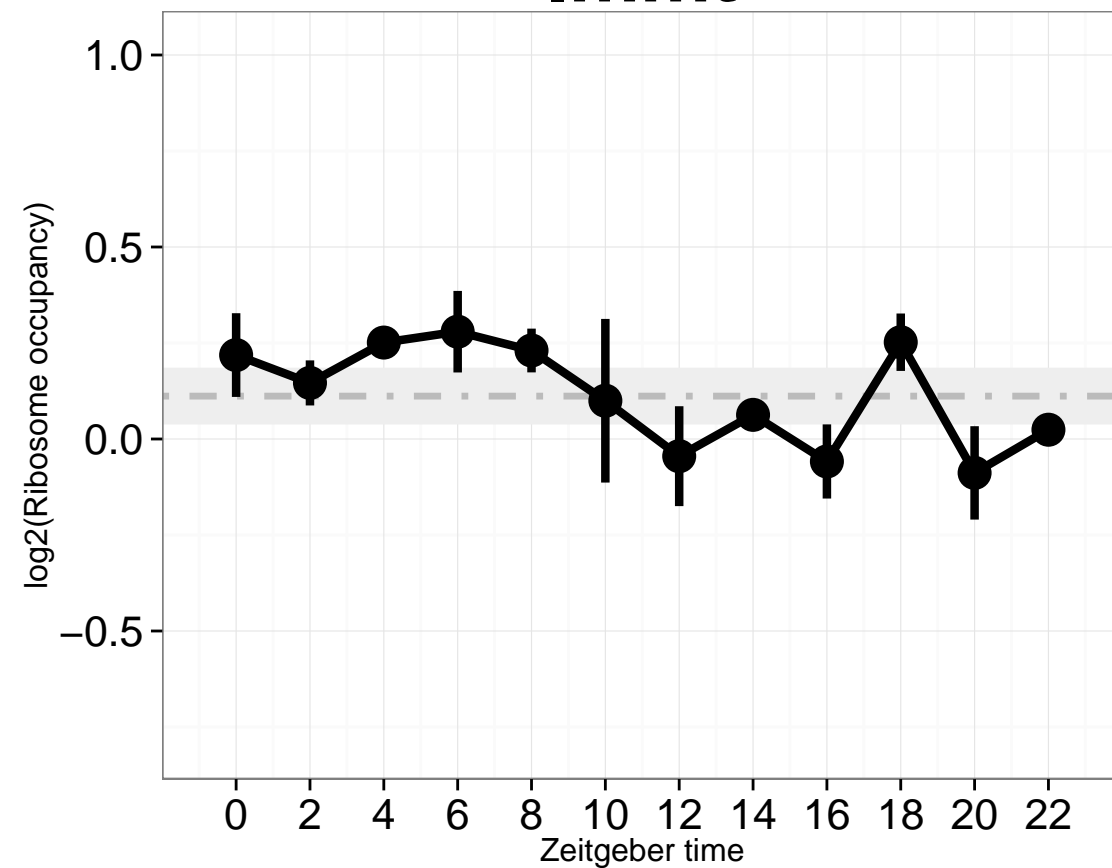

Supplement: Supplementary file 1519 [file 1]

# Zcchc18

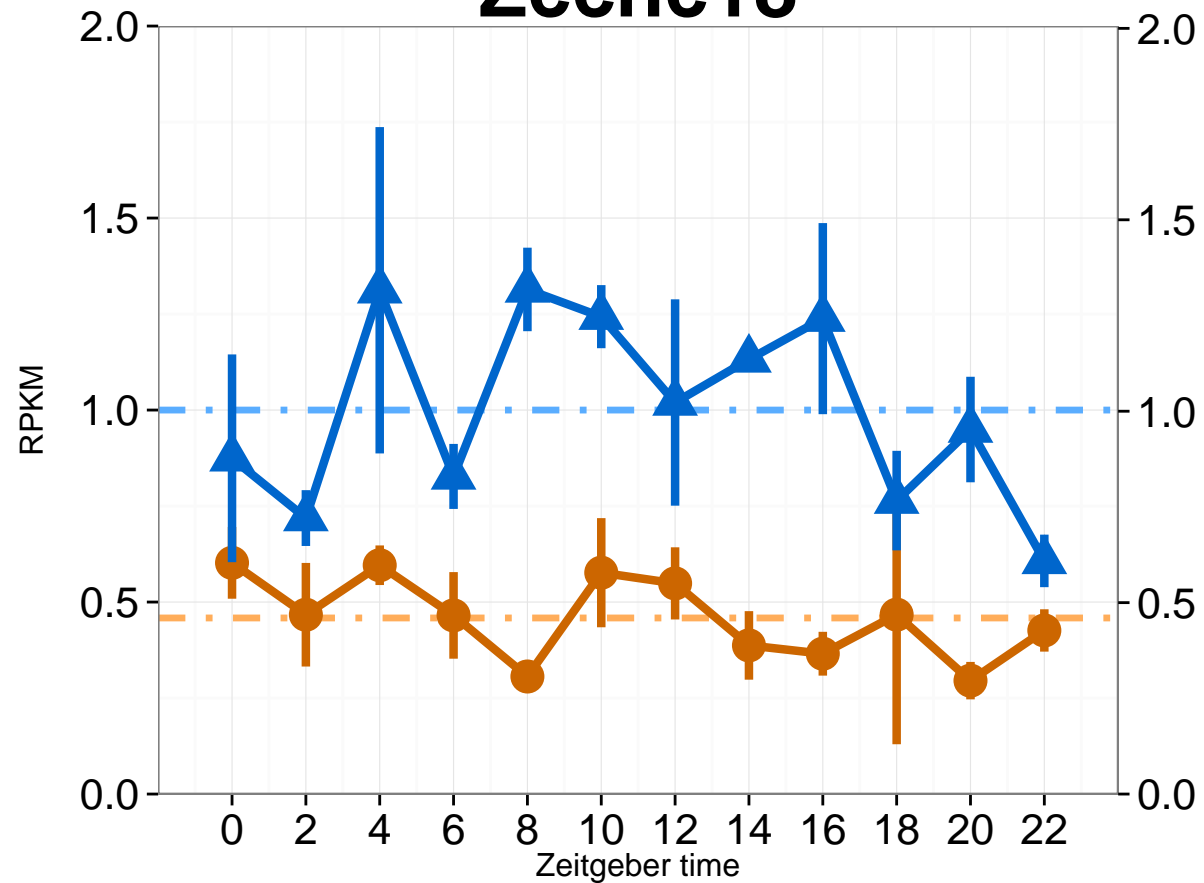

# Zcchc18

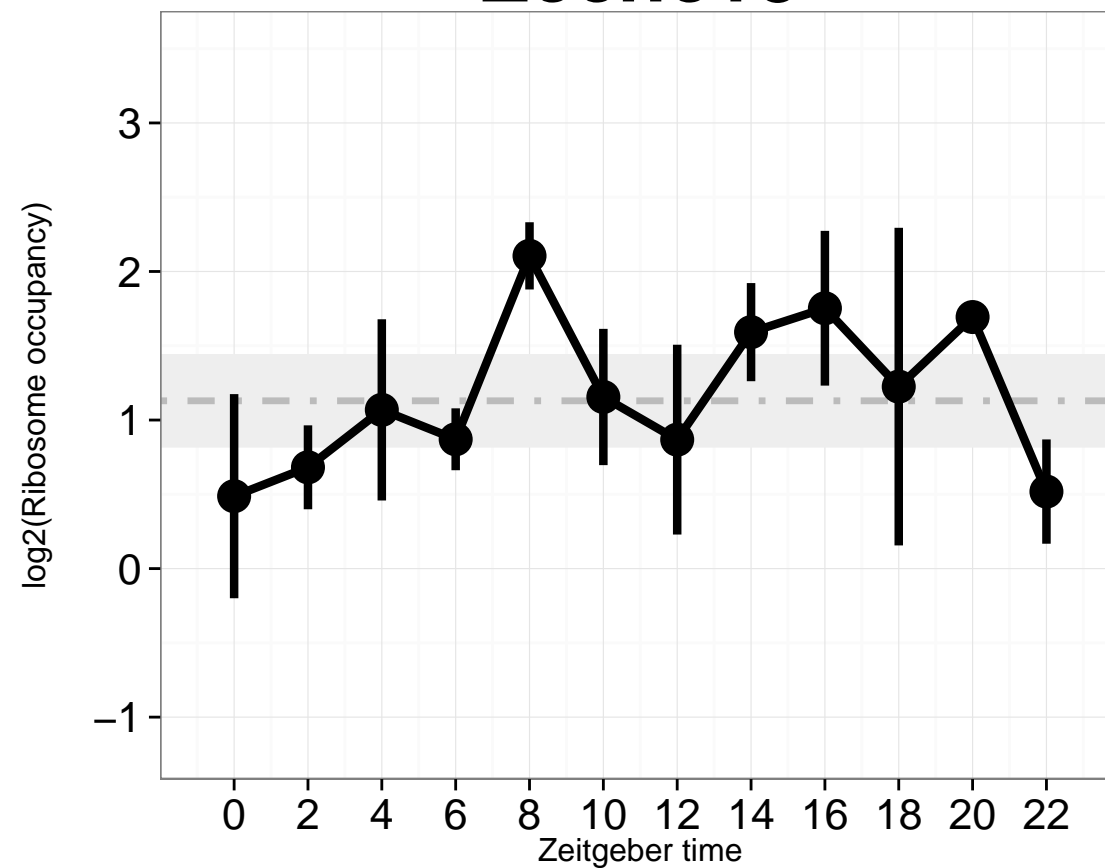

Supplement: Supplementary file 1520 [file 1]

# Chn2

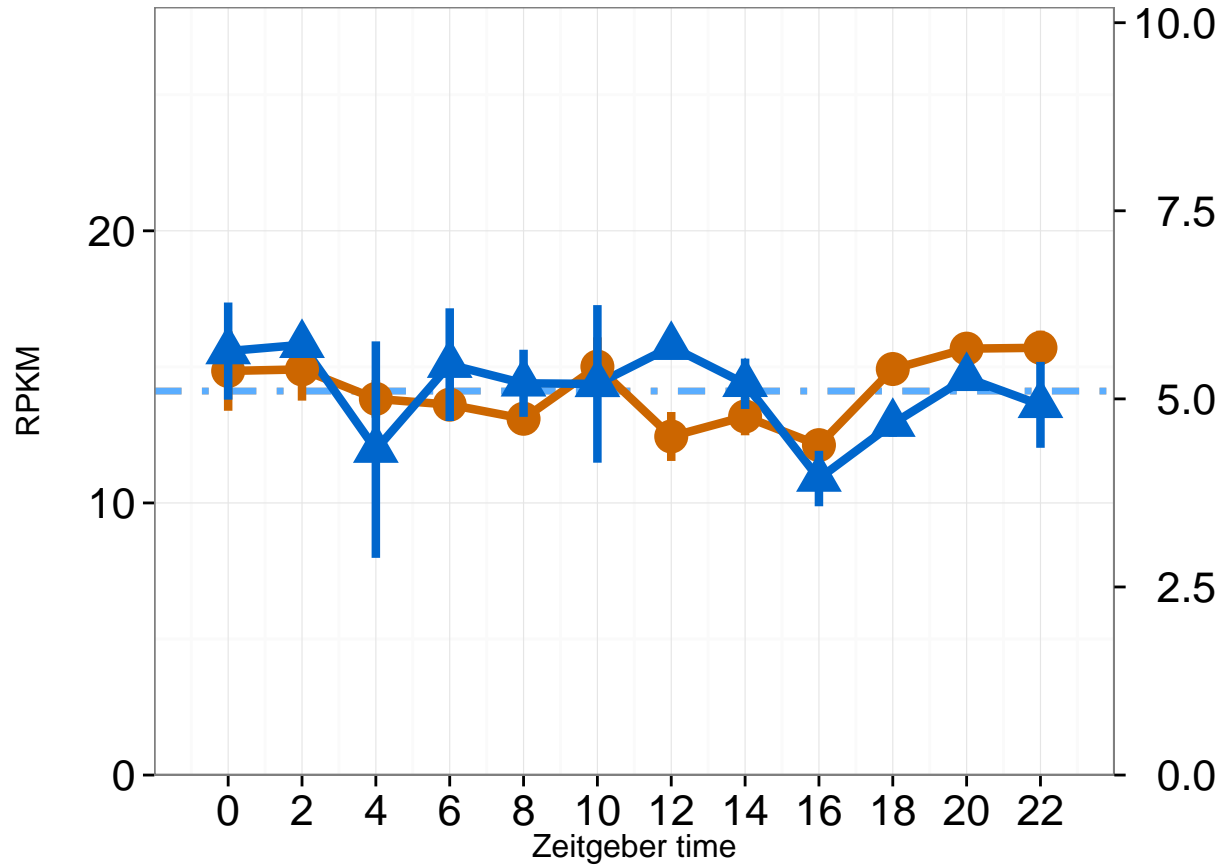

# Chn2

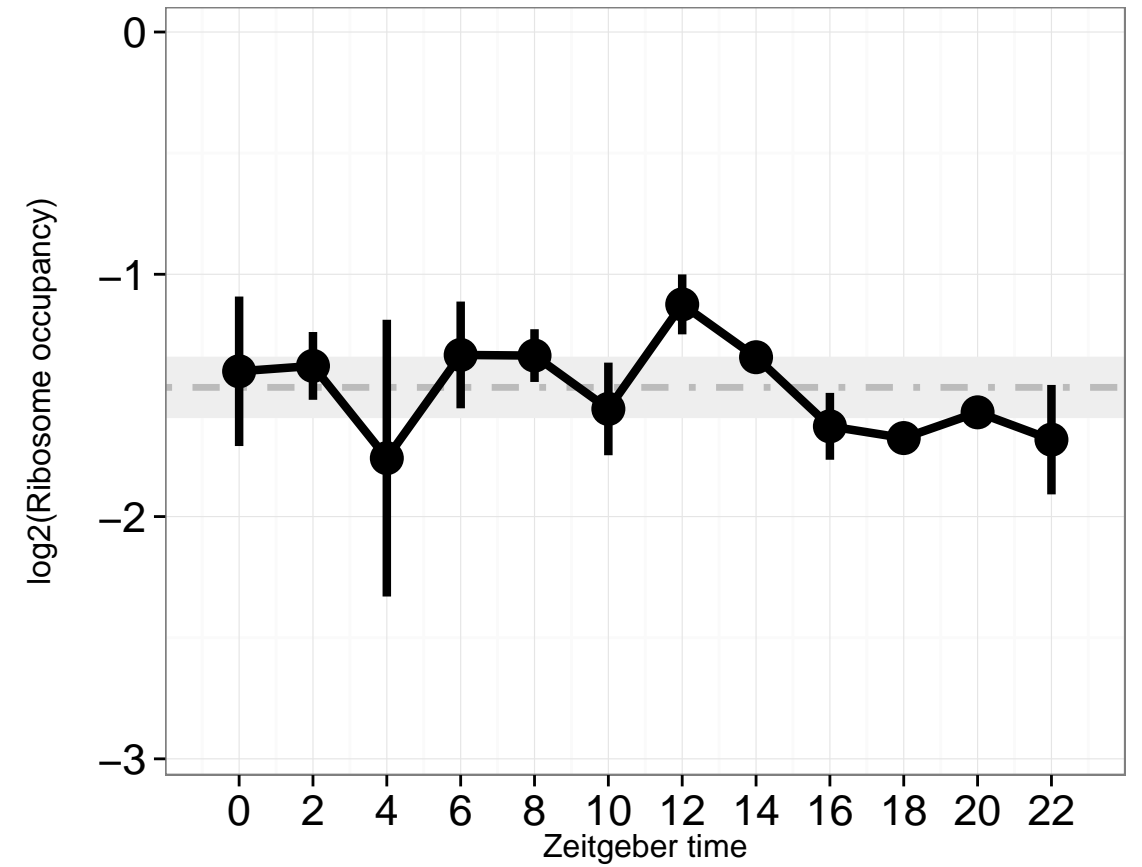

Supplement: Supplementary file 1521 [file 1]

# Scnn1g

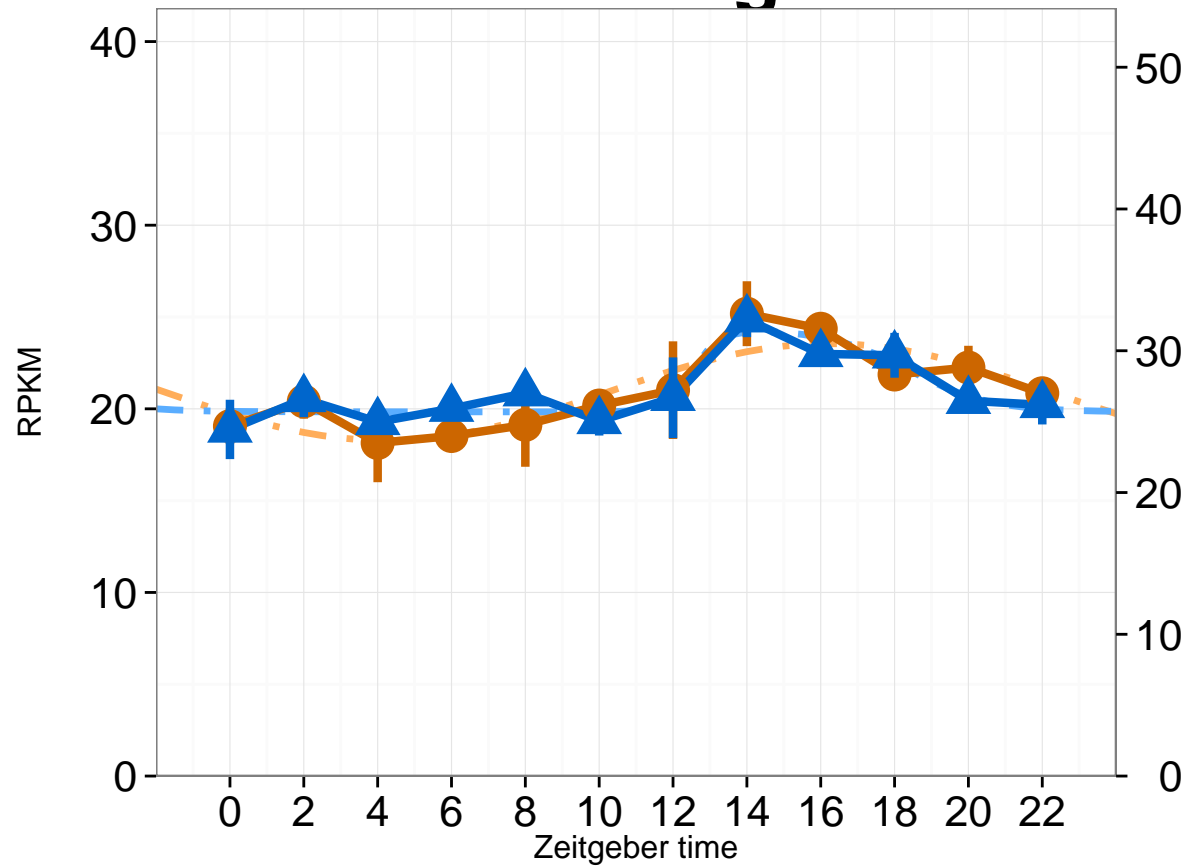

# Scnn1g

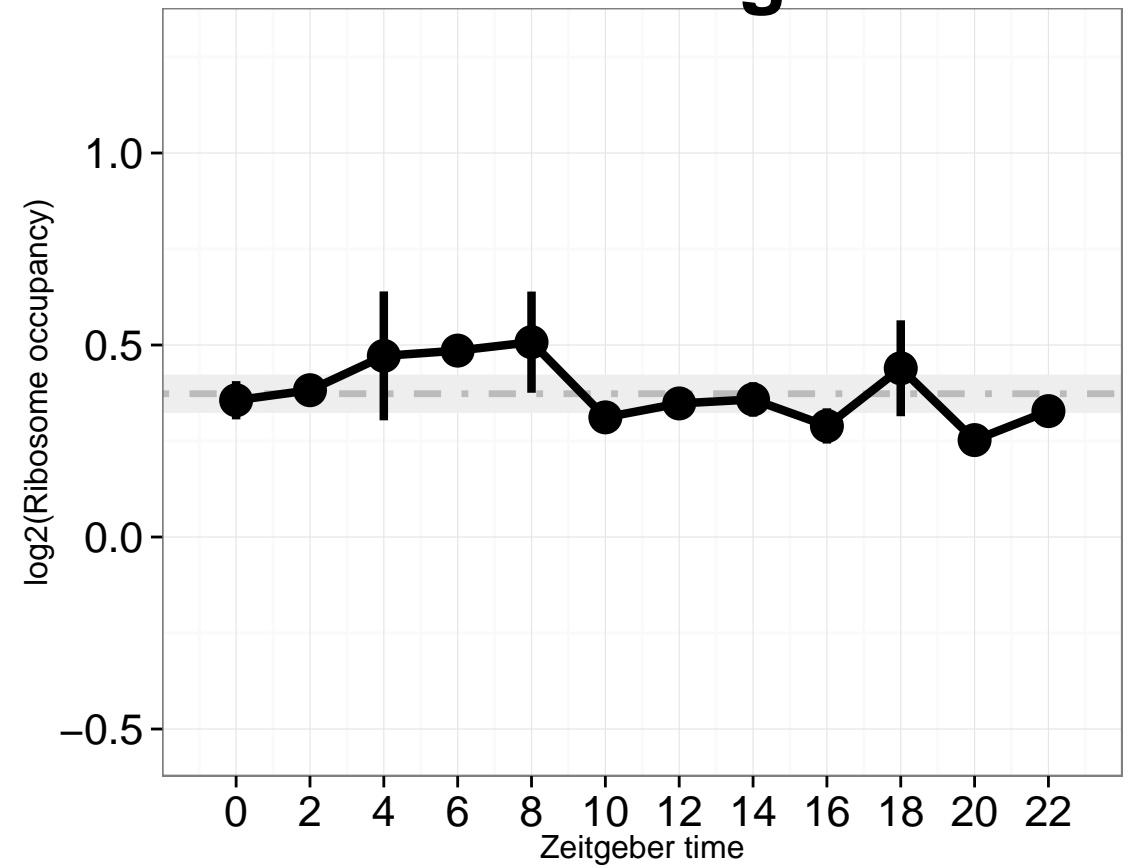

Supplement: Supplementary file 1522 [file 1]

## Rorc

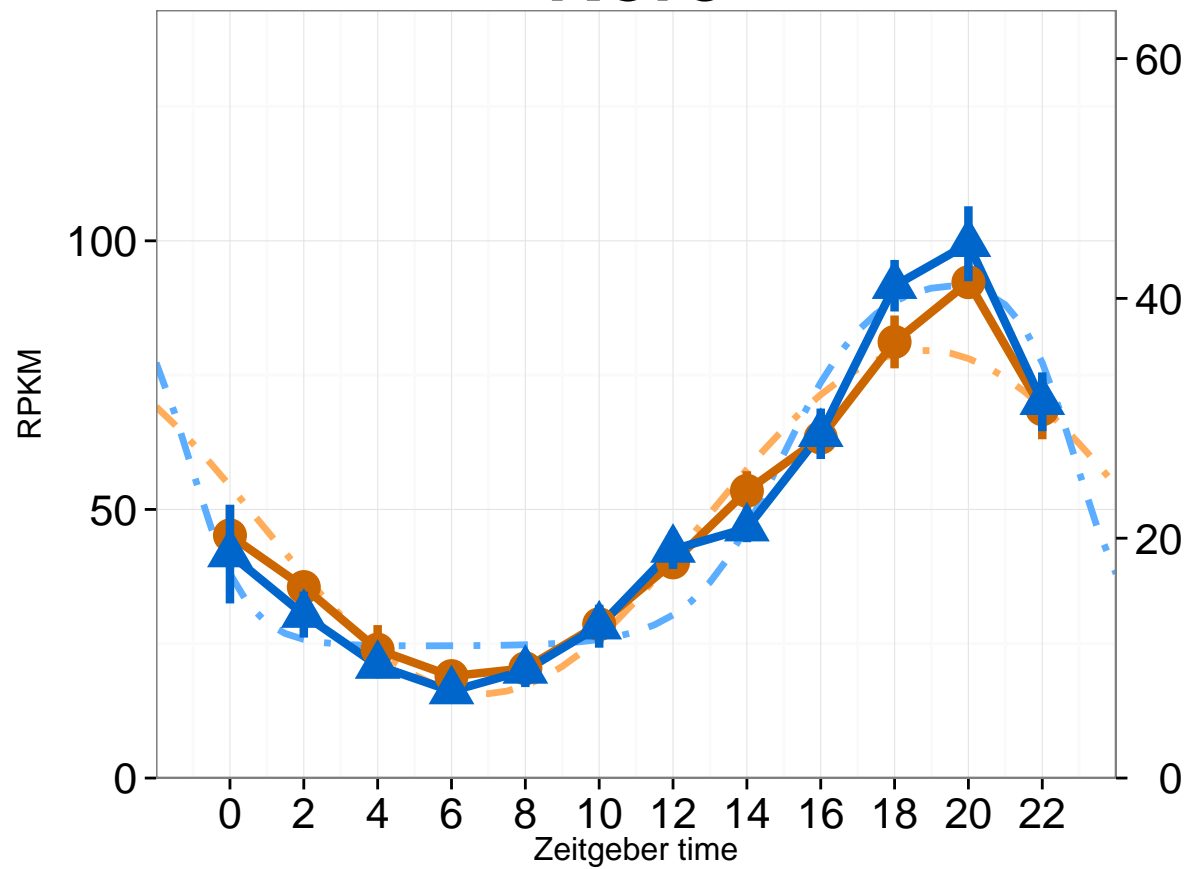

## Rorc

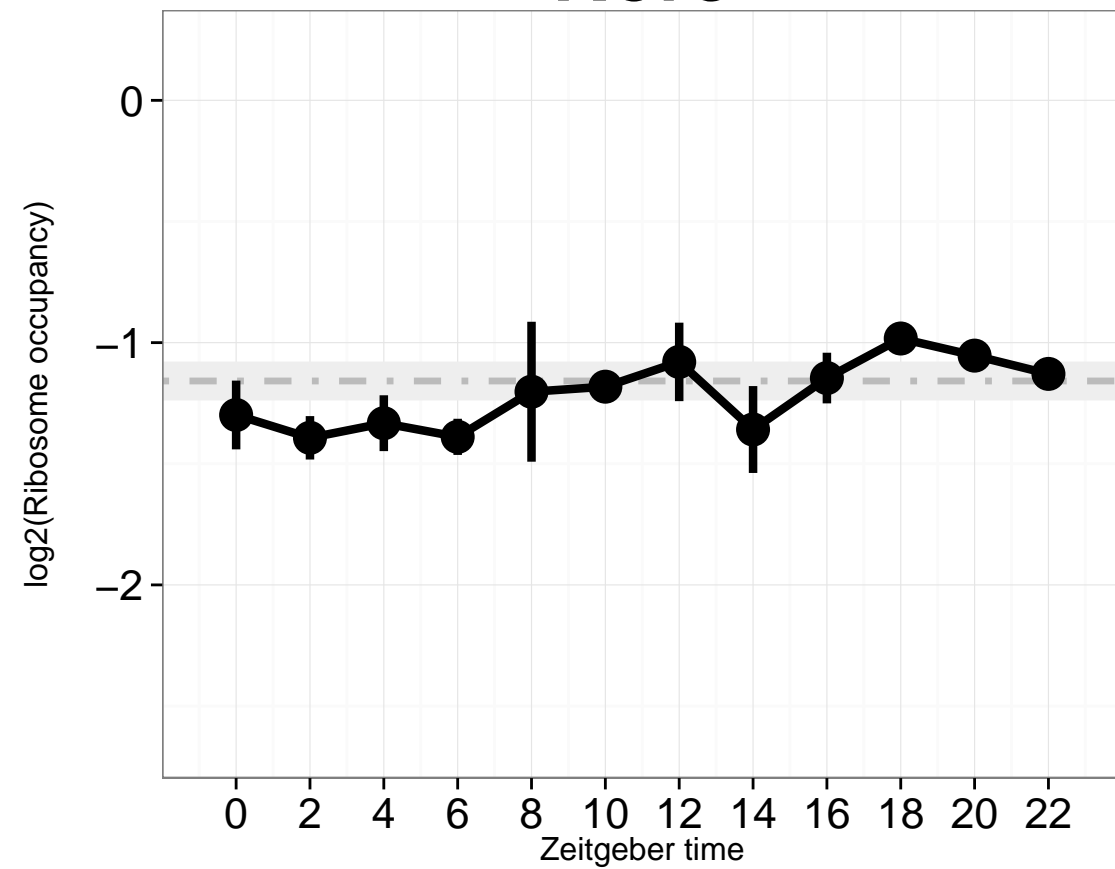

Supplement: Supplementary file 1523 [file 1]

## Ccni

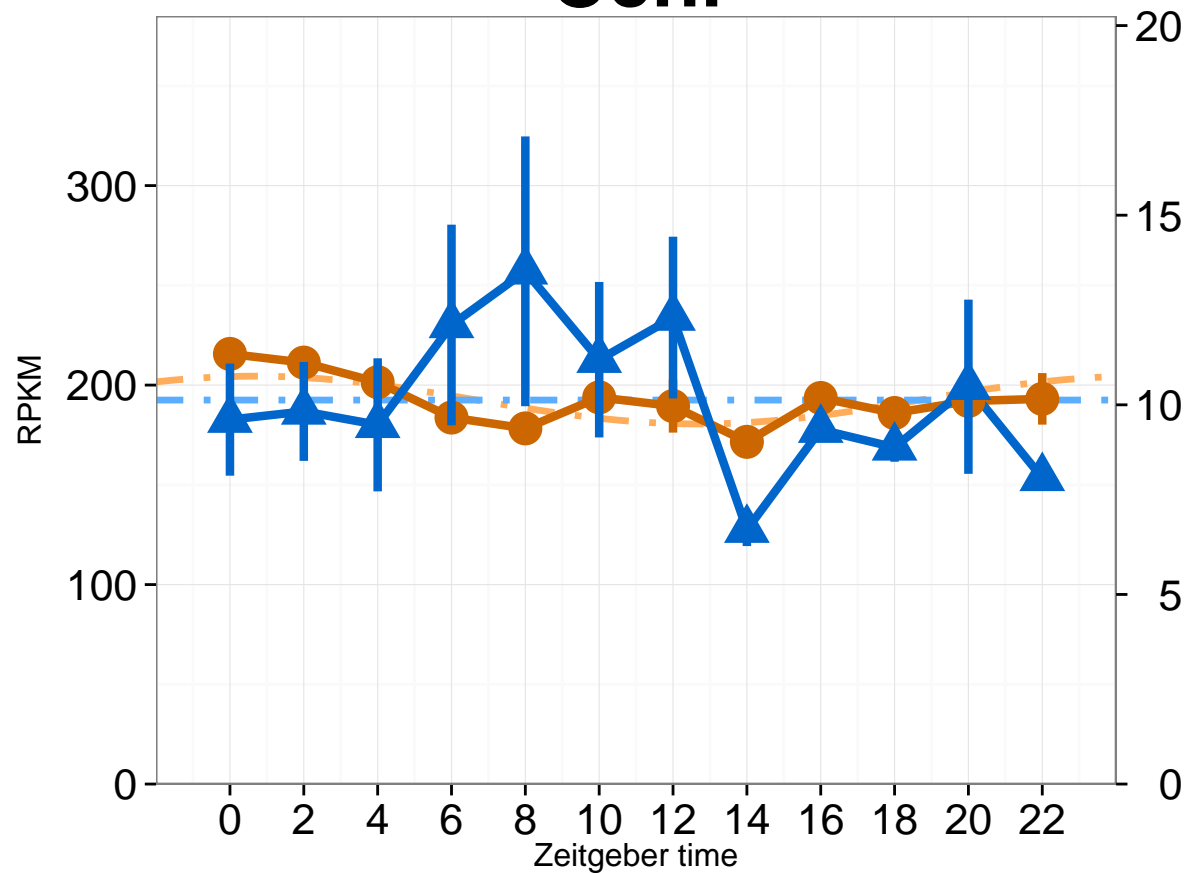

## Ccni

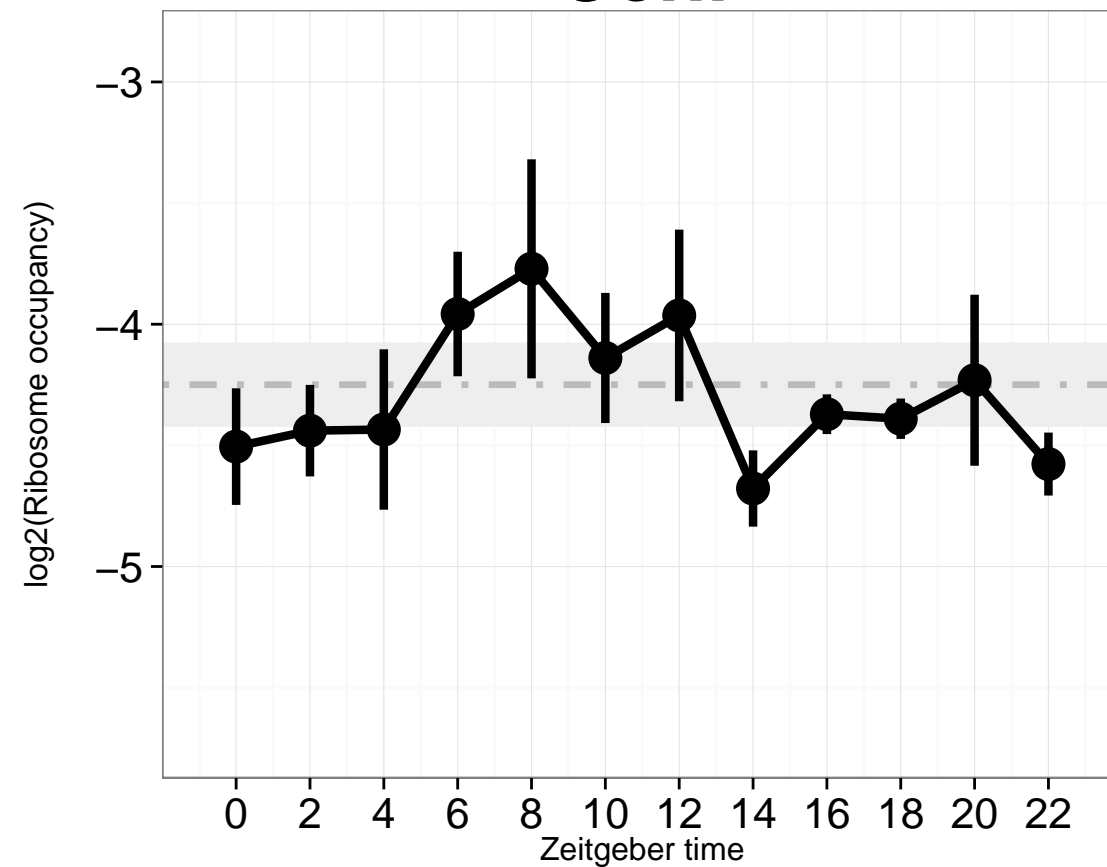

Supplement: Supplementary file 1524 [file 1]

## Sh3gl2

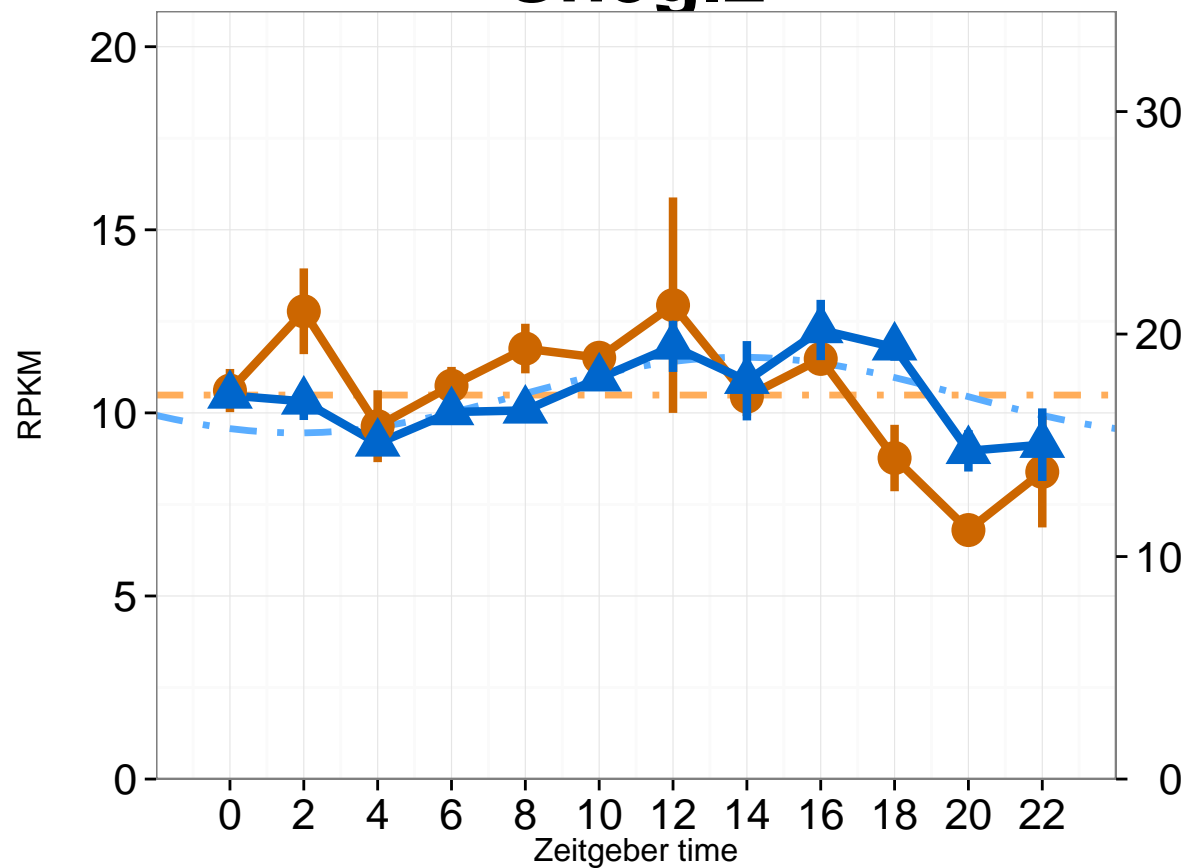

## Sh3gl2

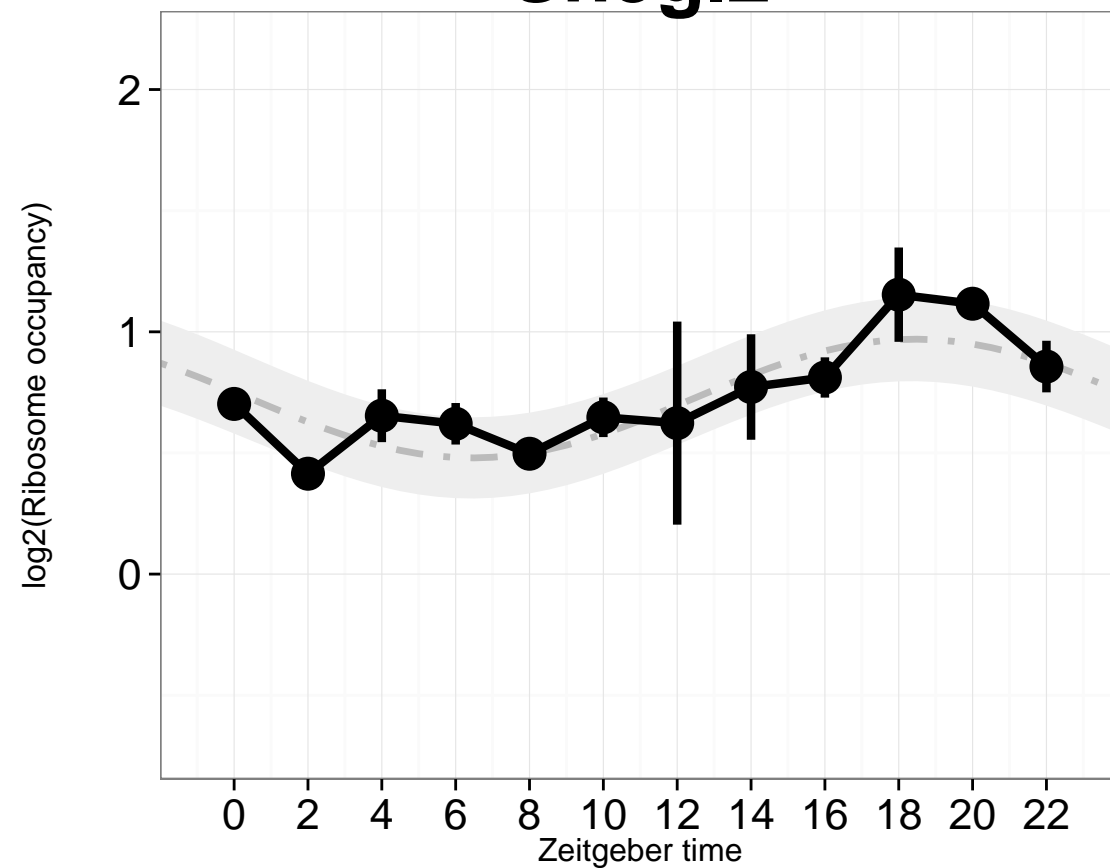

Supplement: Supplementary file 1525 [file 1]

# Alg10b

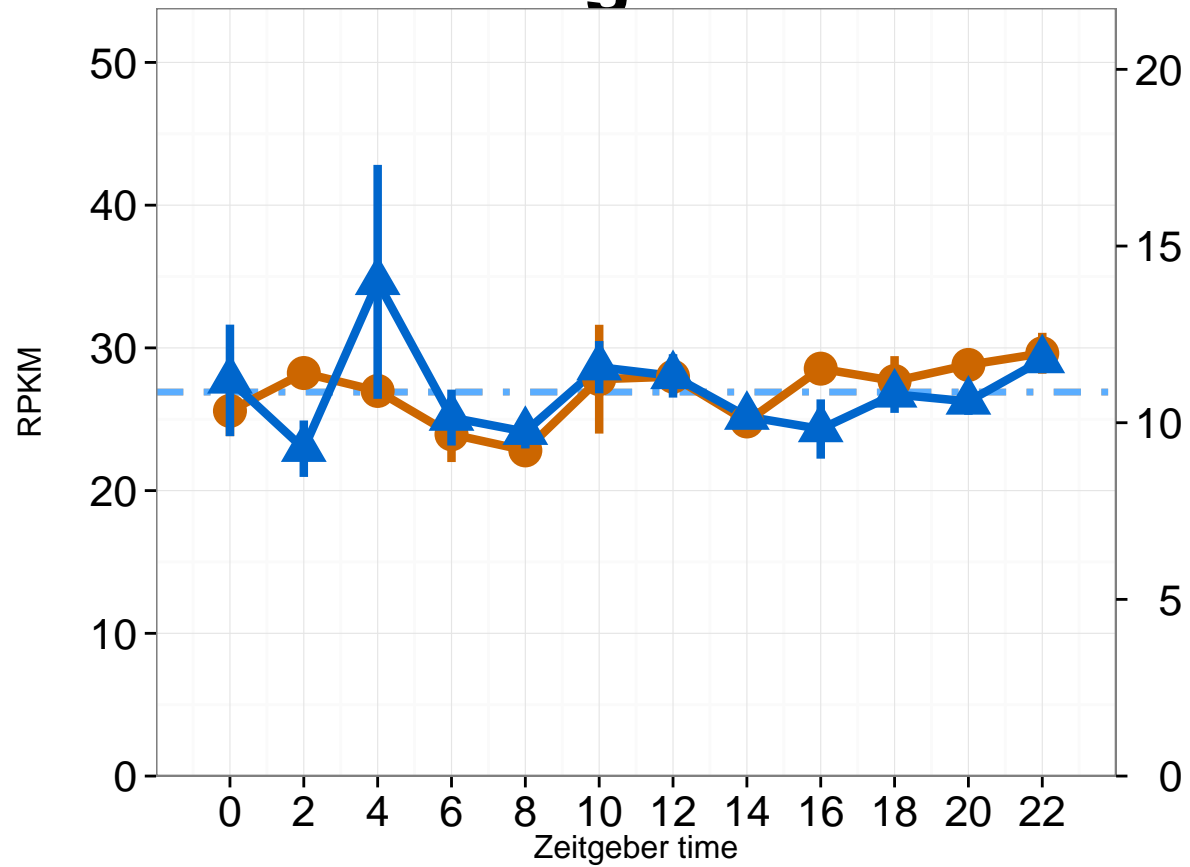

# Alg10b

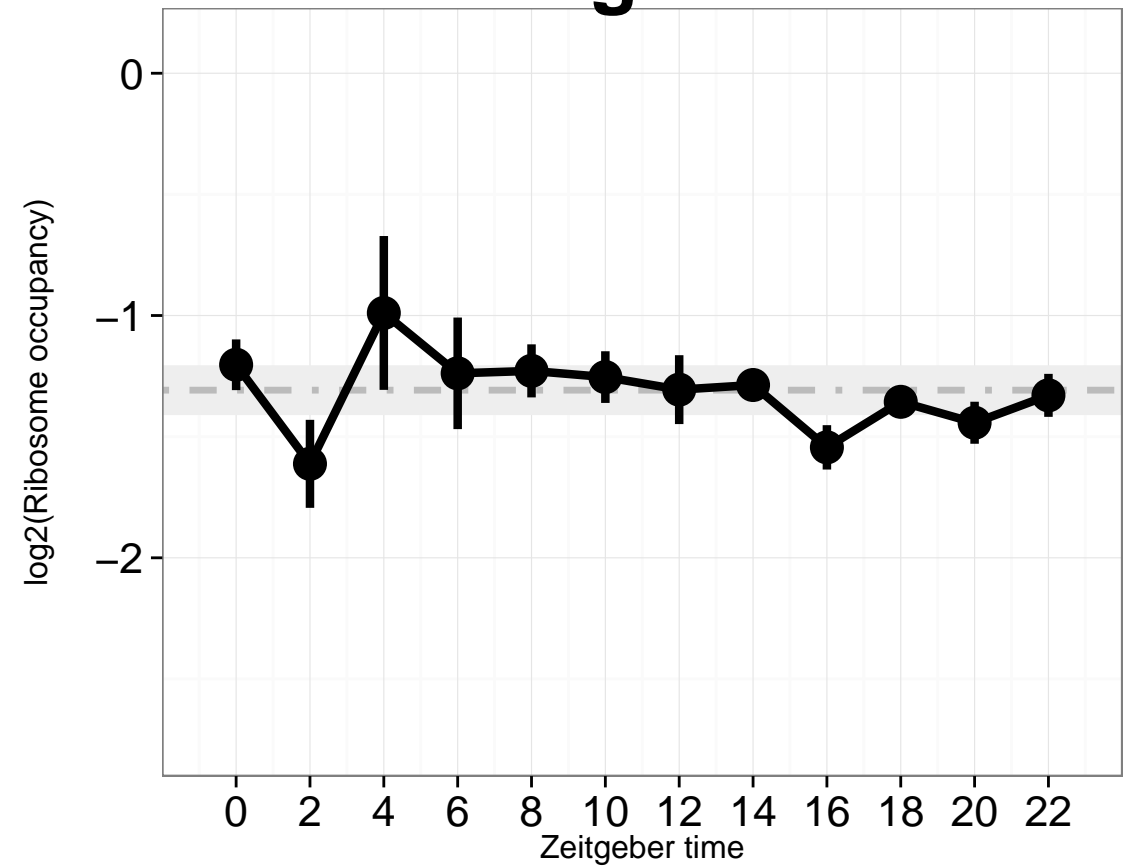

Supplement: Supplementary file 1526 [file 1]

## Als2

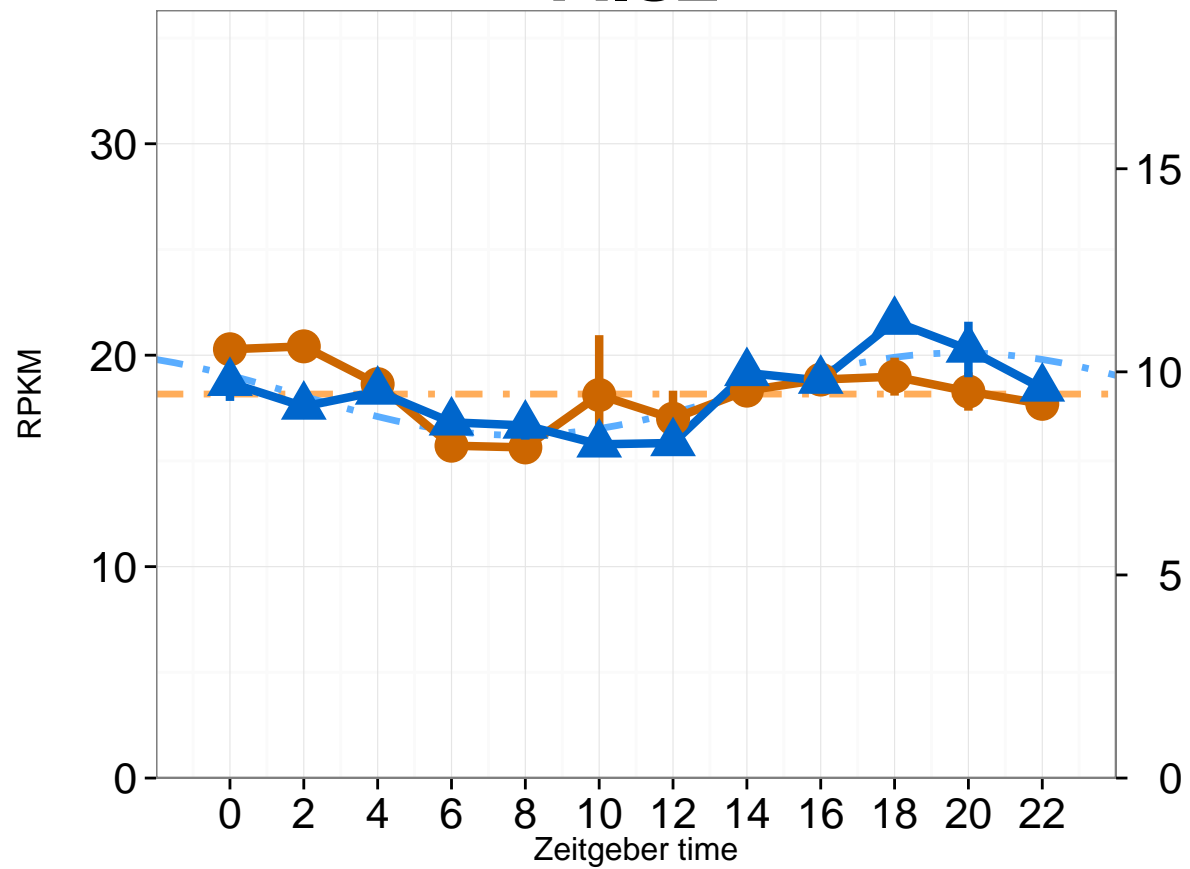

## Als2

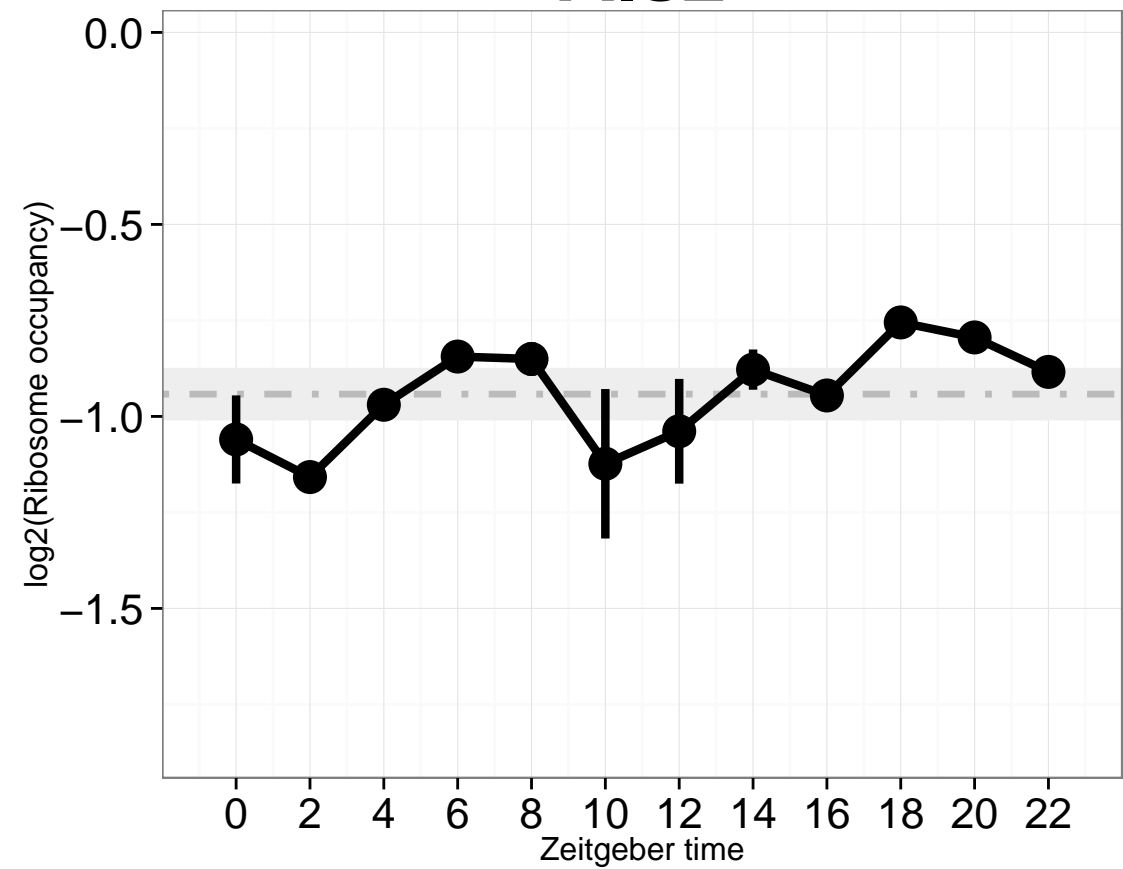

Supplement: Supplementary file 1527 [file 1]

## Ces1f

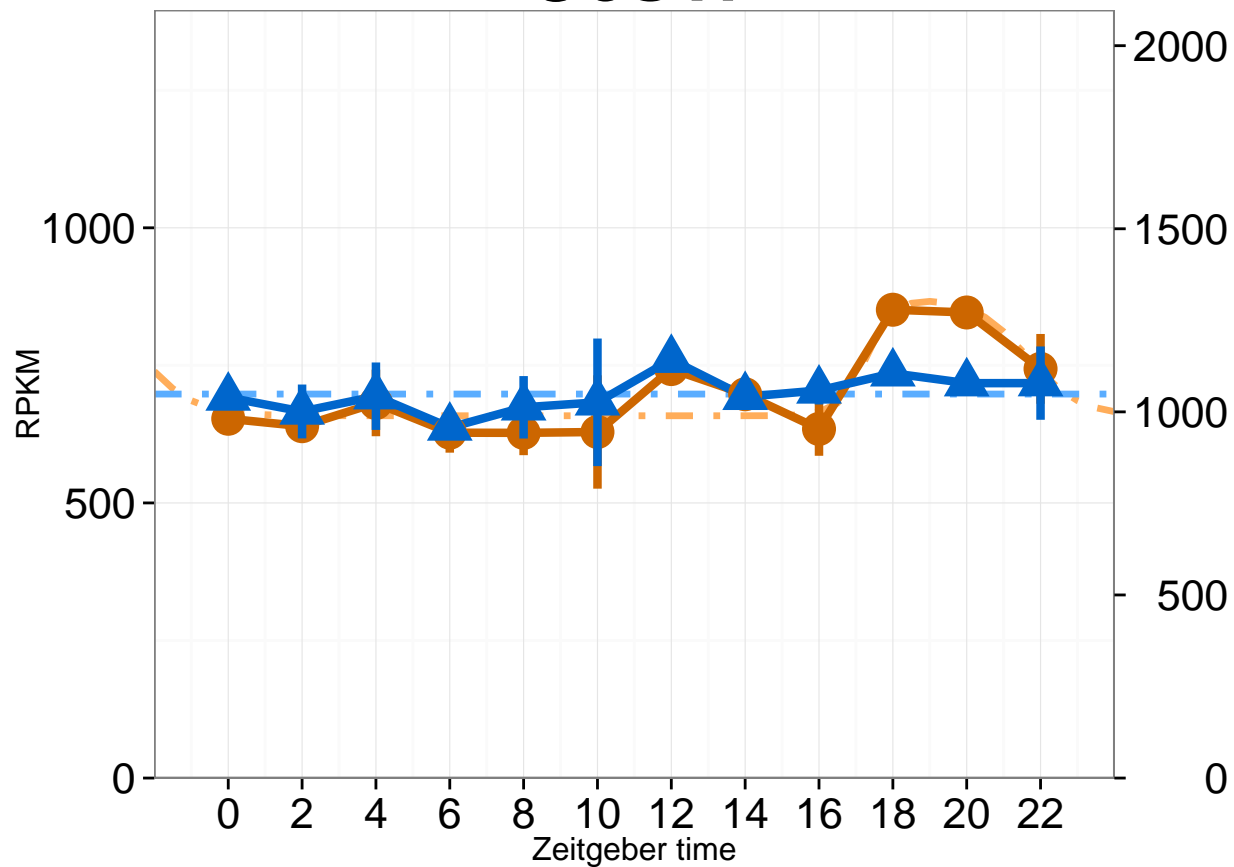

## Ces1f

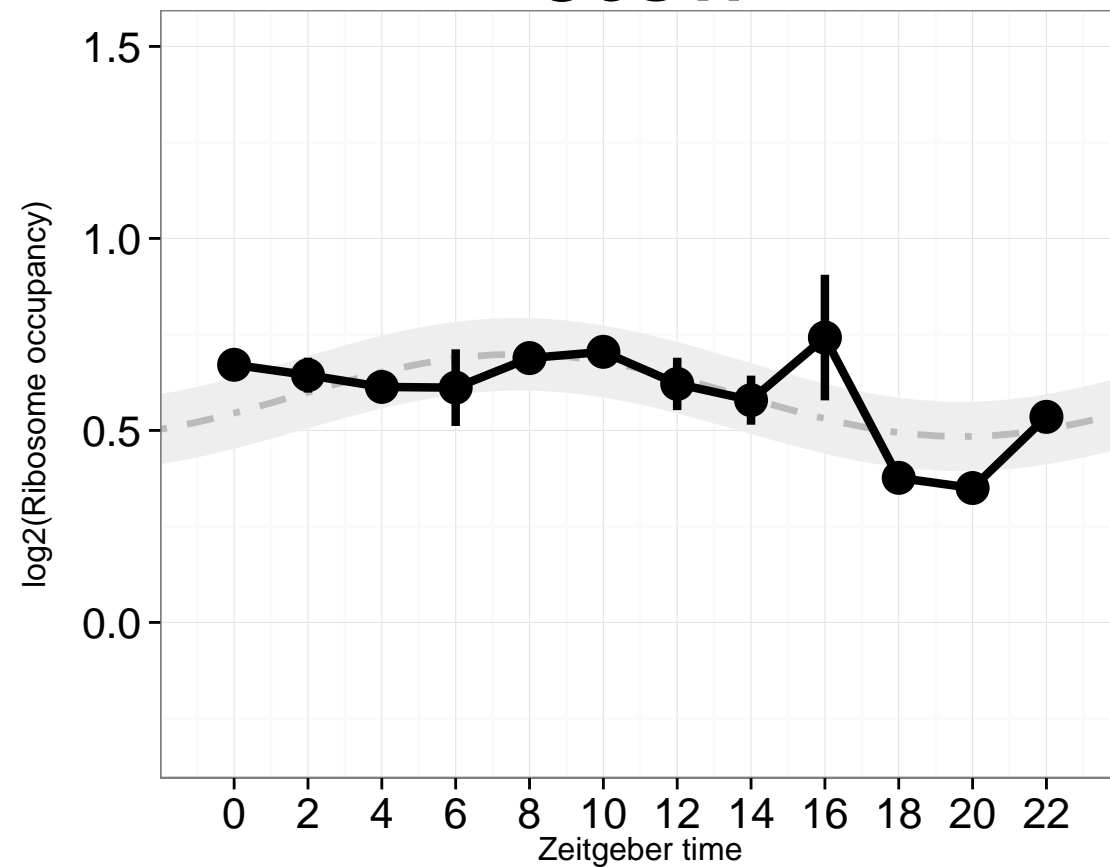

Supplement: Supplementary file 1528 [file 1]

# Timp3

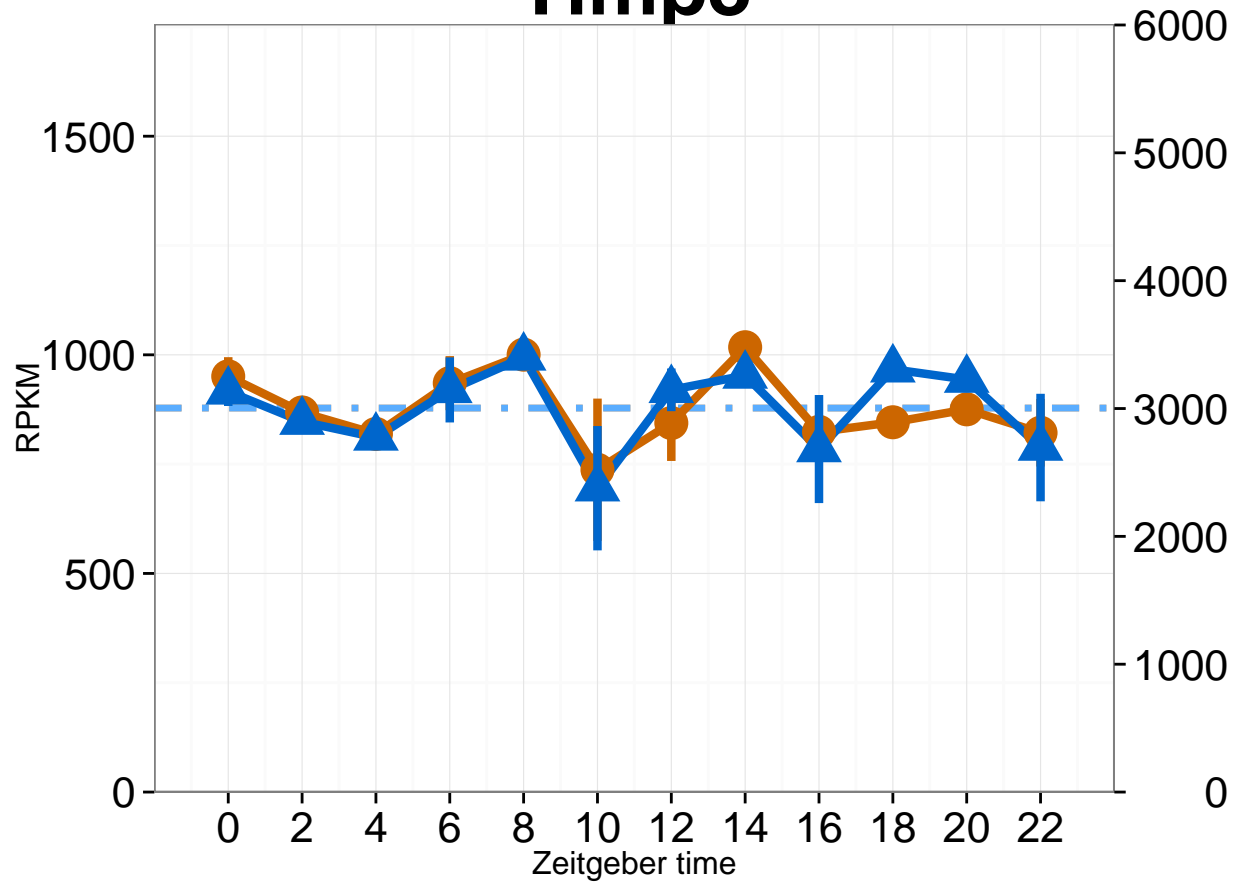

# Timp3

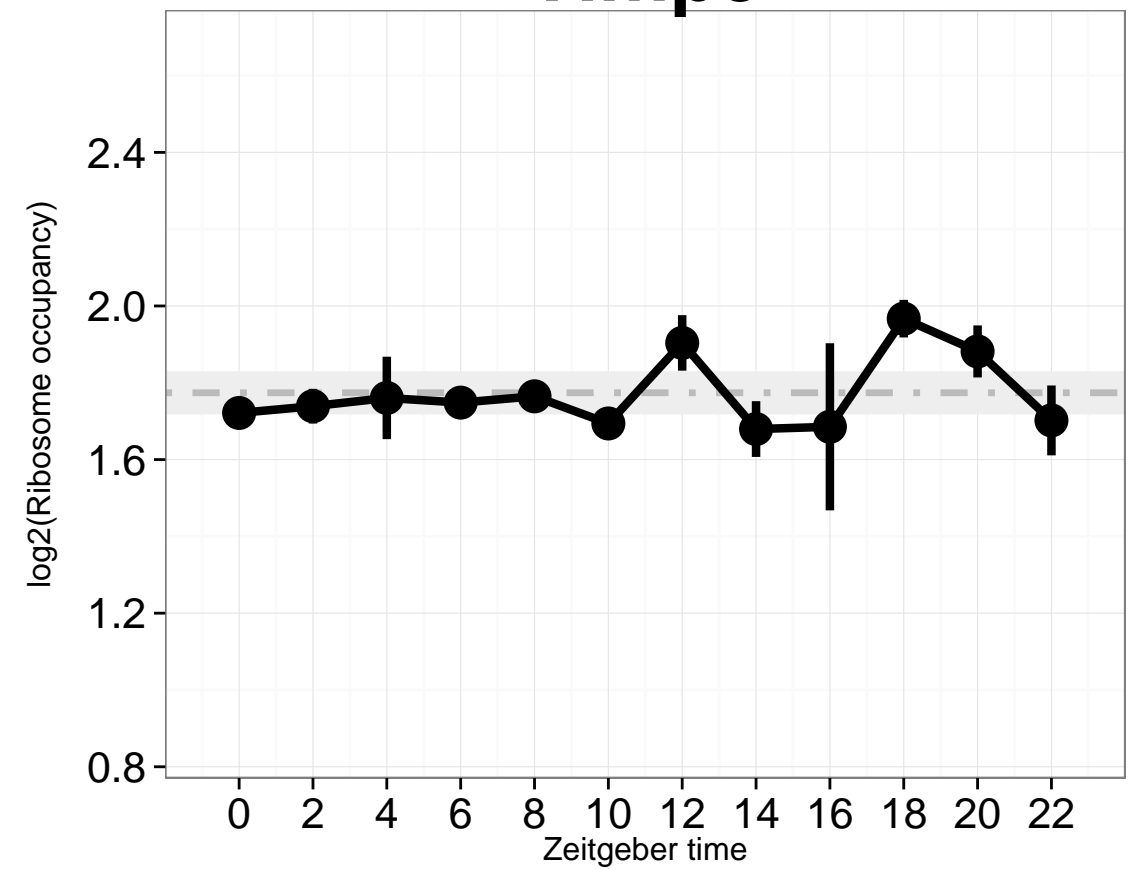

Supplement: Supplementary file 1529 [file 1]

**Sept7**

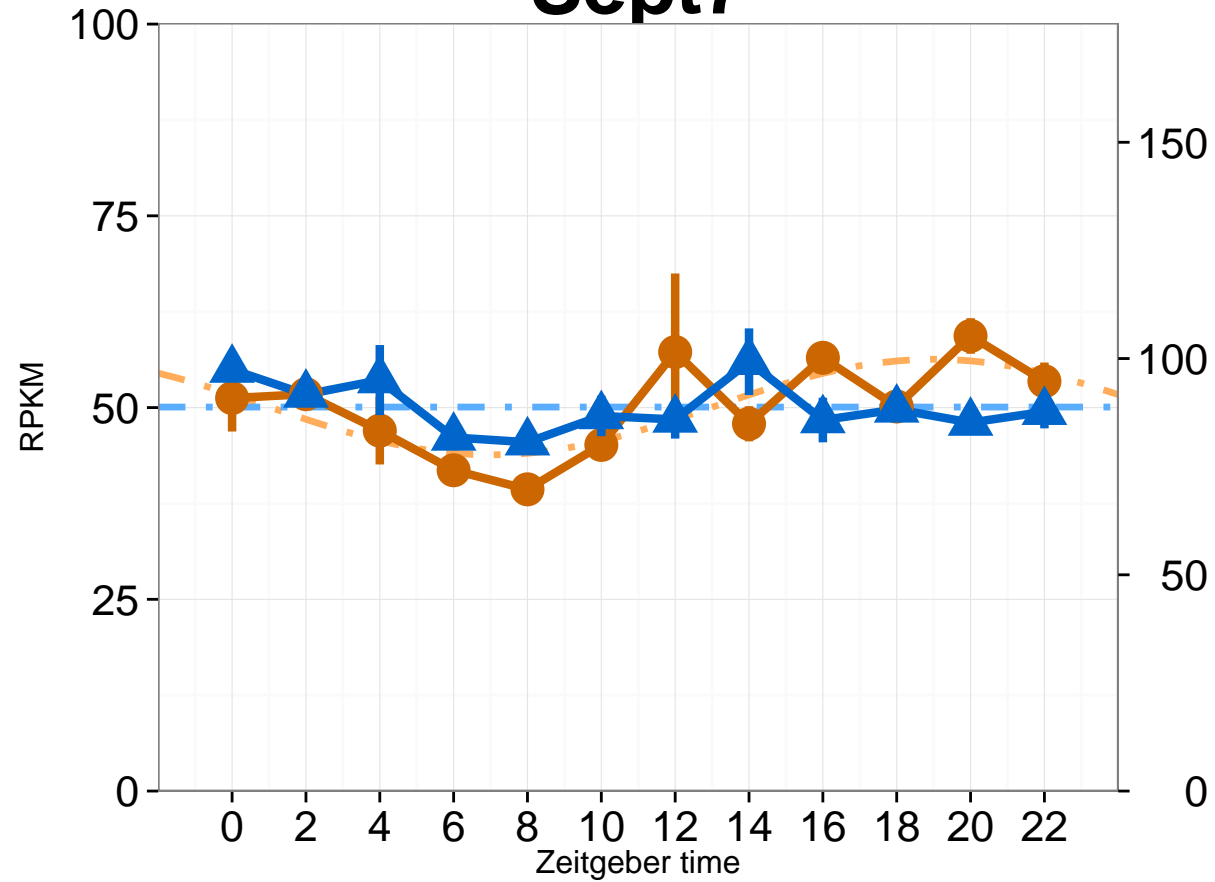

**Sept7**

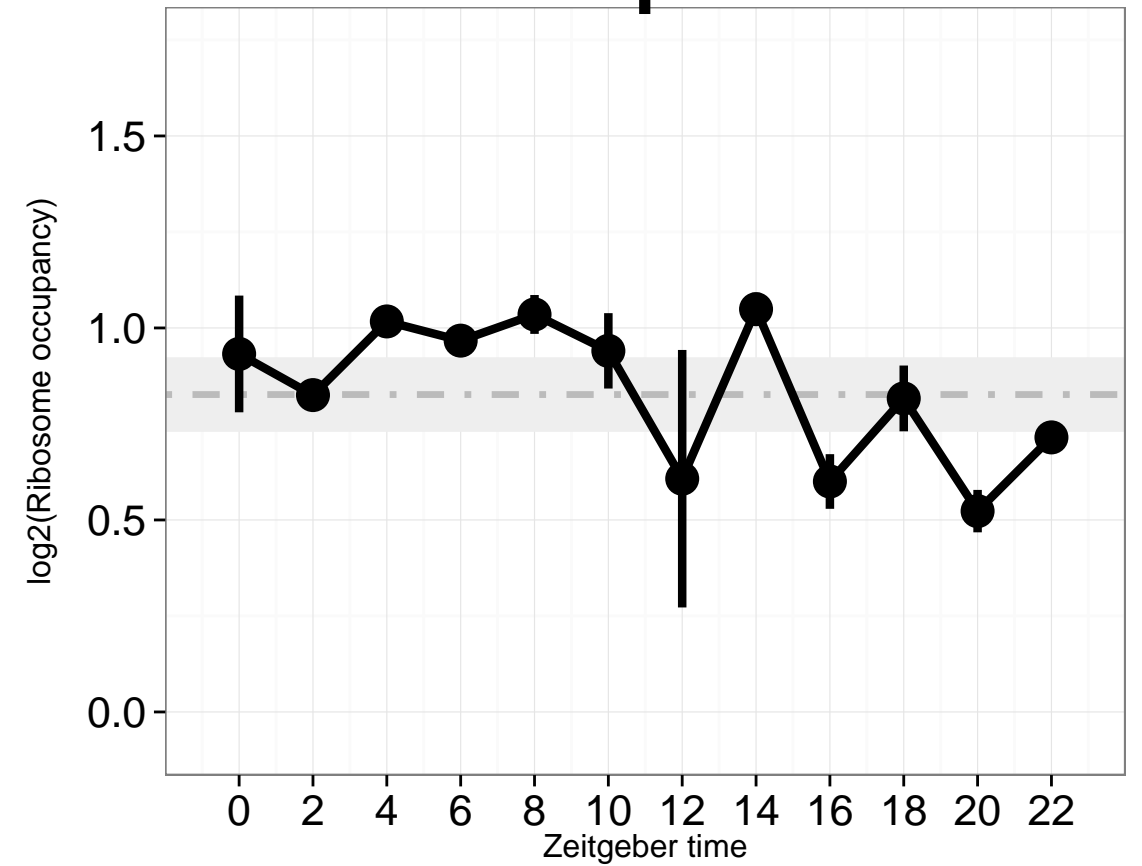

Supplement: Supplementary file 1530 [file 1]

## Glis1

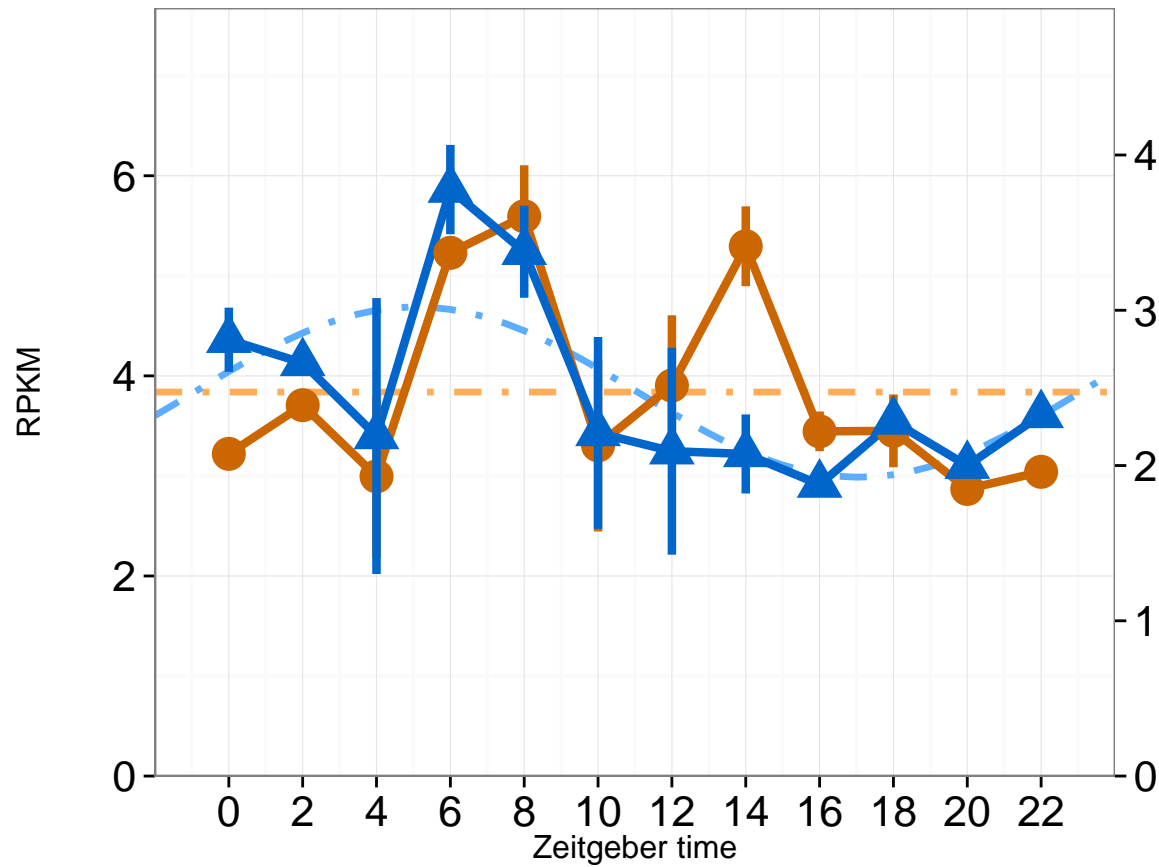

## Glis1

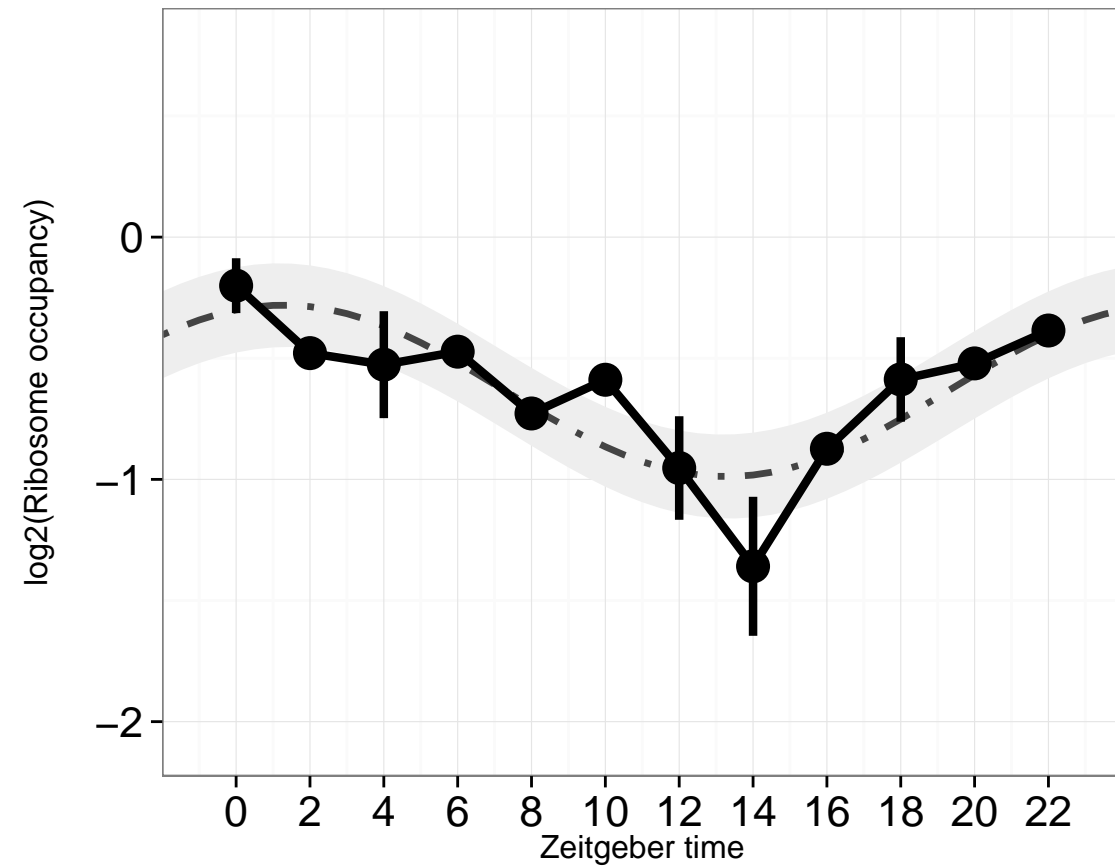

Supplement: Supplementary file 1531 [file 1]

## Ifi205

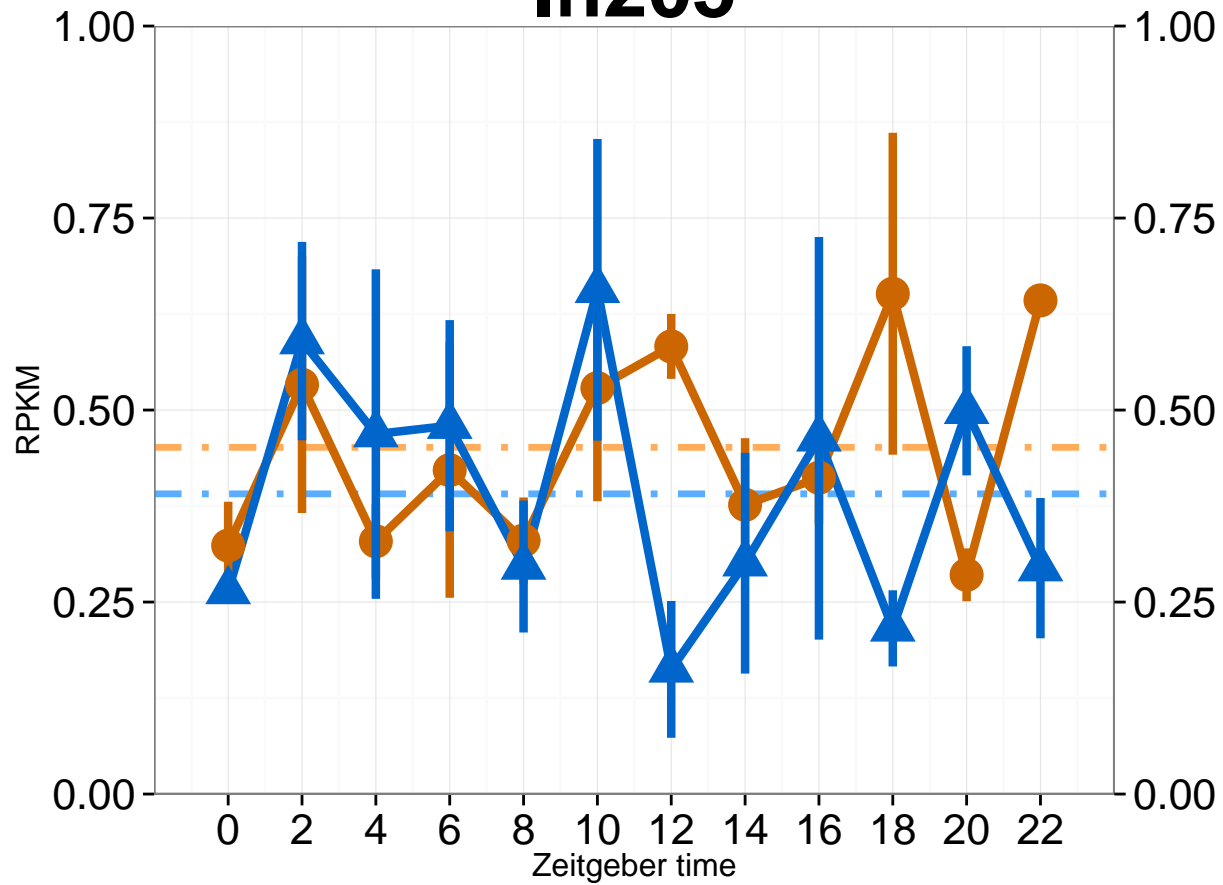

## Ifi205

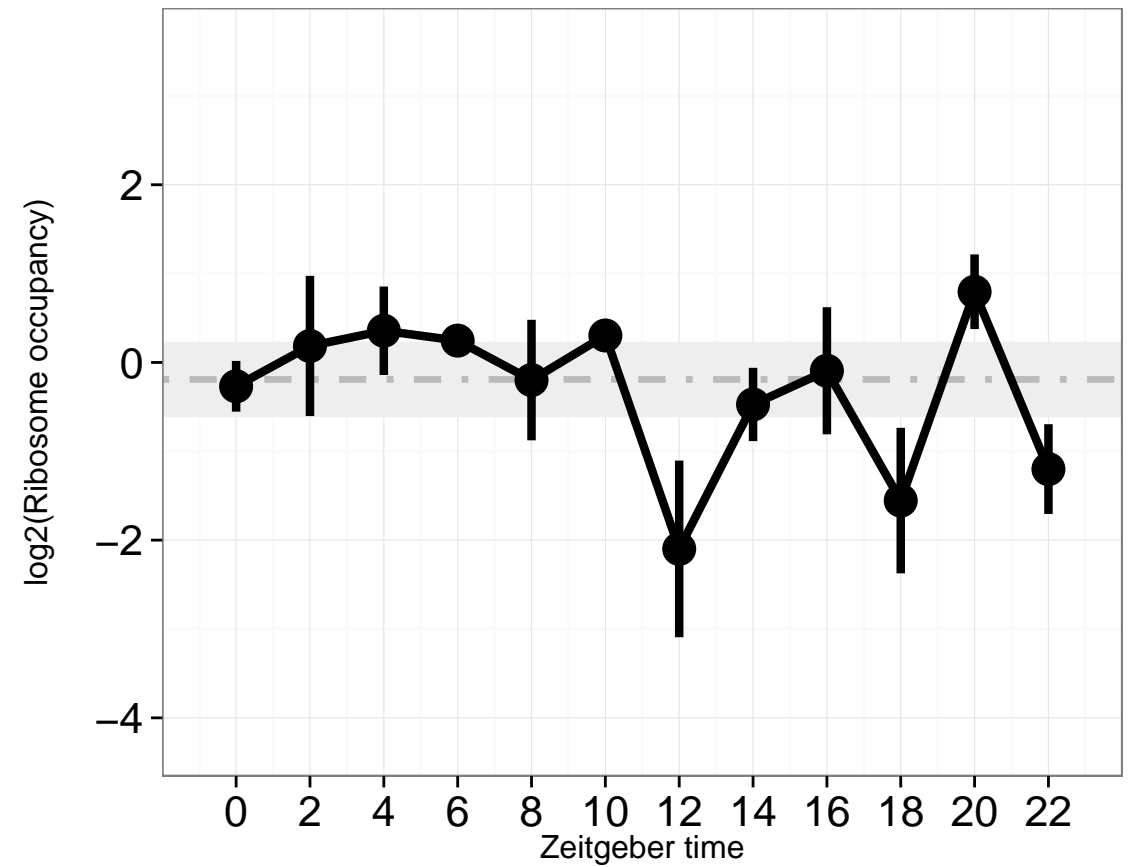

Supplement: Supplementary file 1532 [file 1]

**Csdc2 TR**

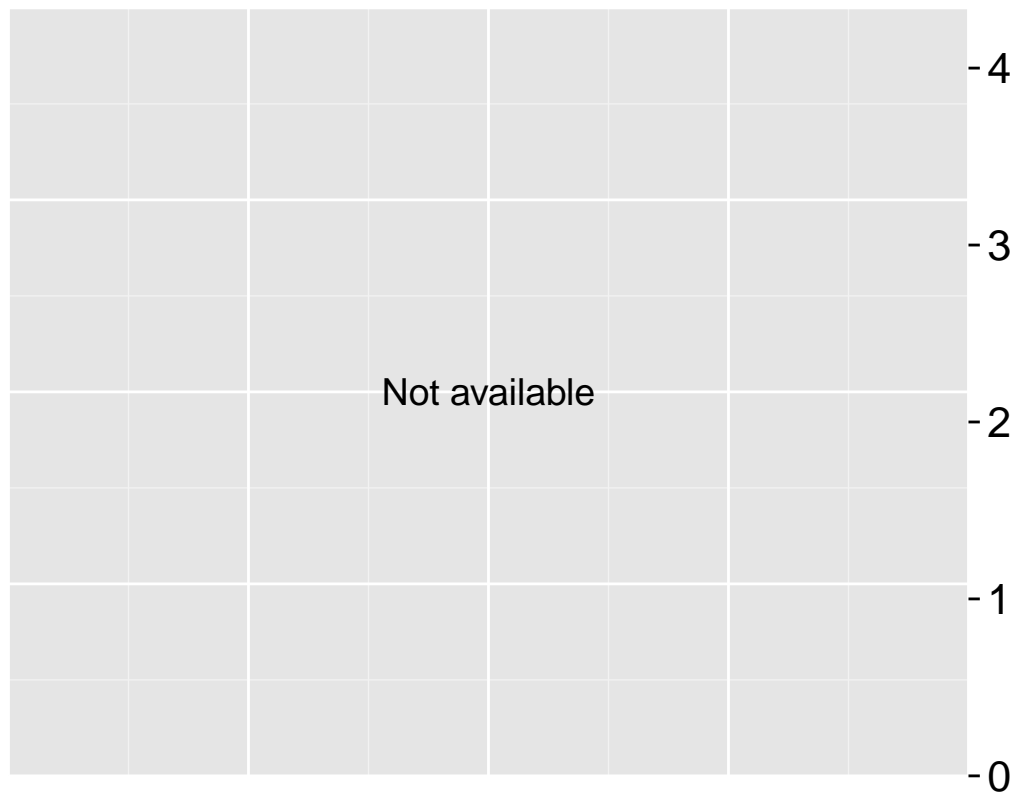

**Csdc2 log2(Ribosome occupancy**

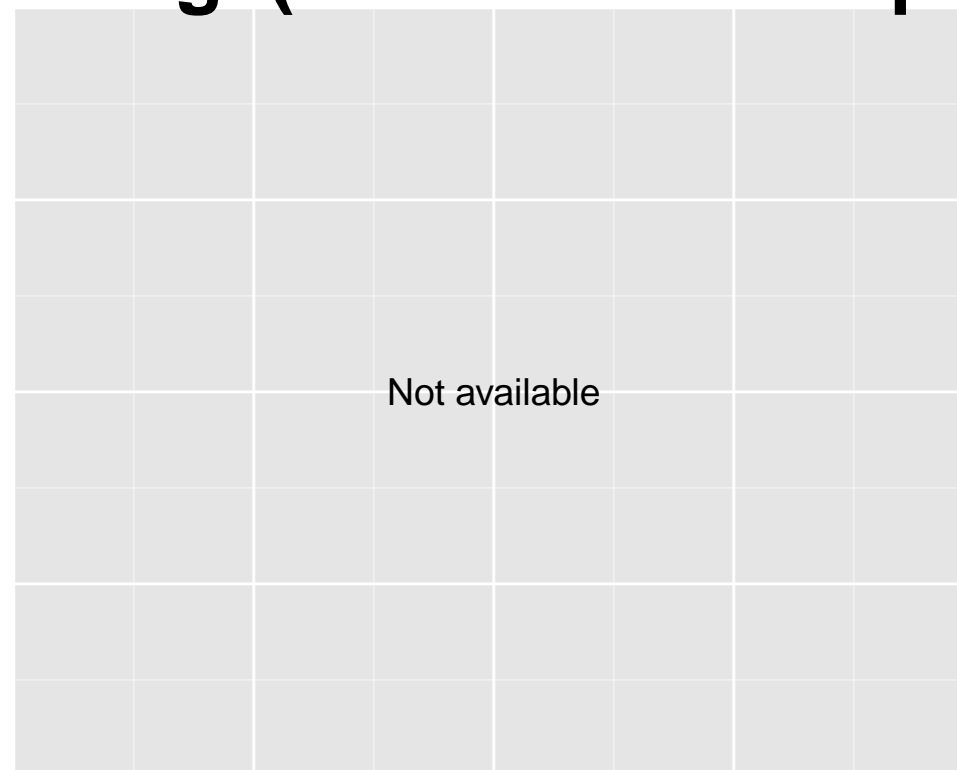

Supplement: Supplementary file 1533 [file 1]

# Ggt6

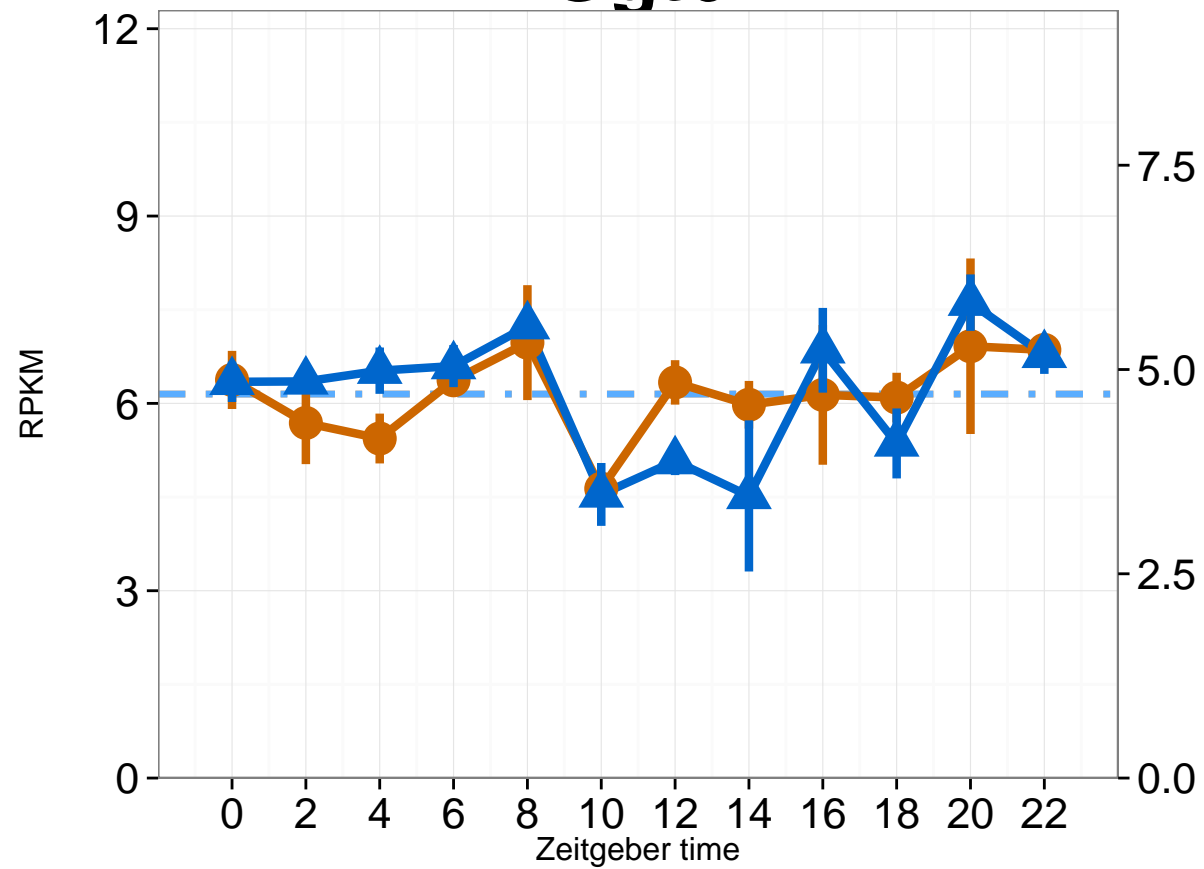

# Ggt6

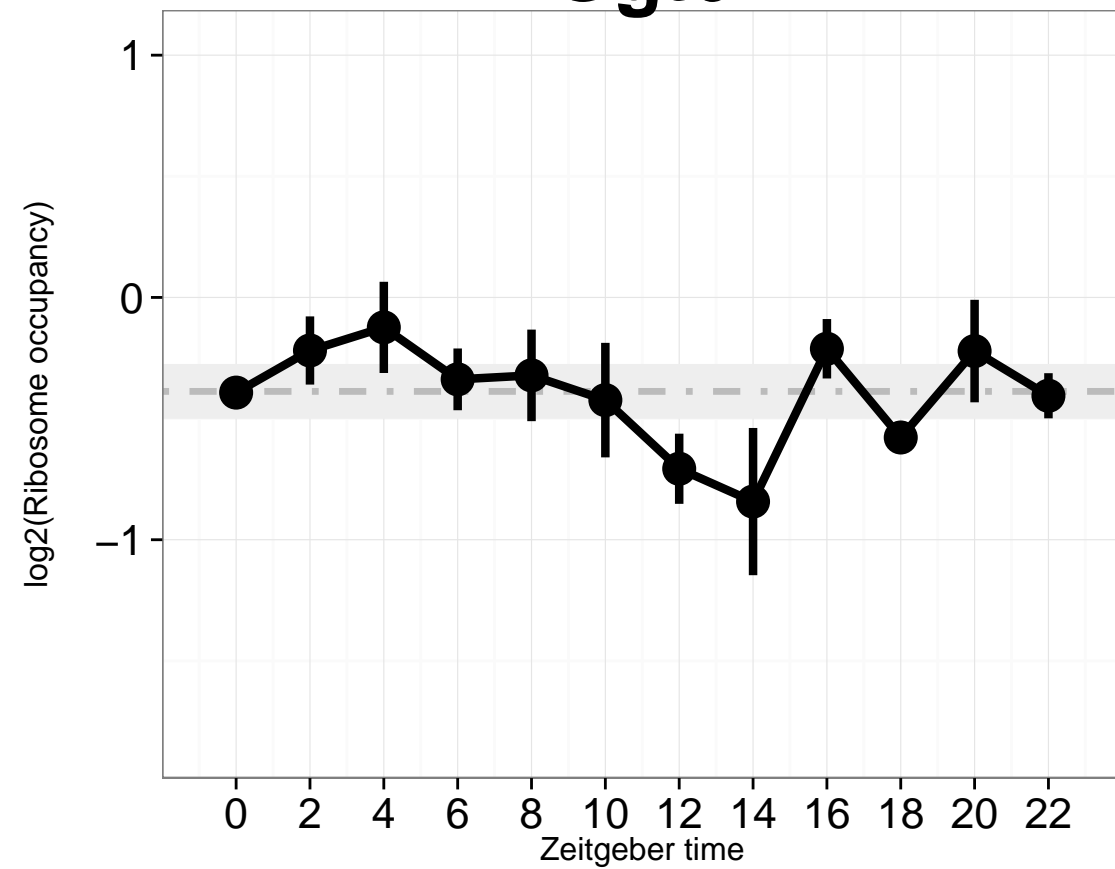

Supplement: Supplementary file 1534 [file 1]

## Phc1

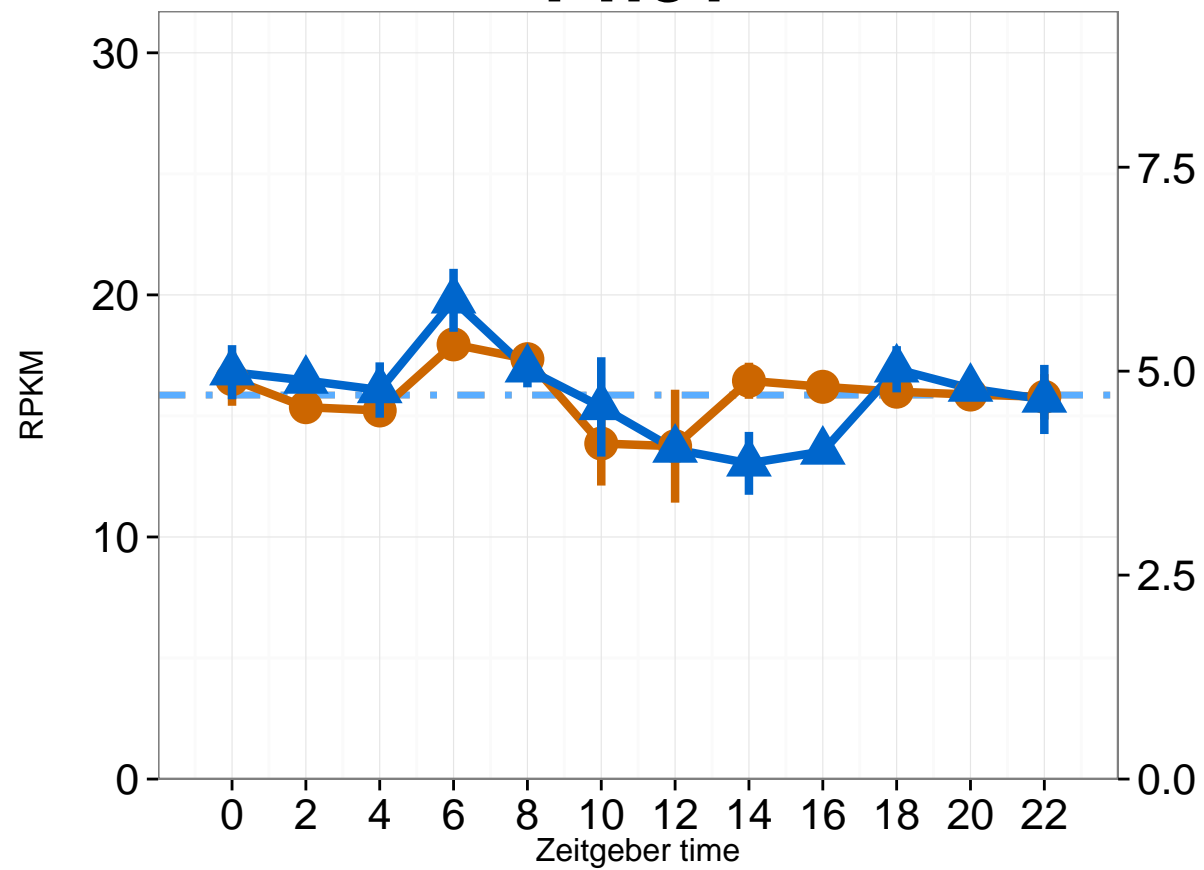

## Phc1

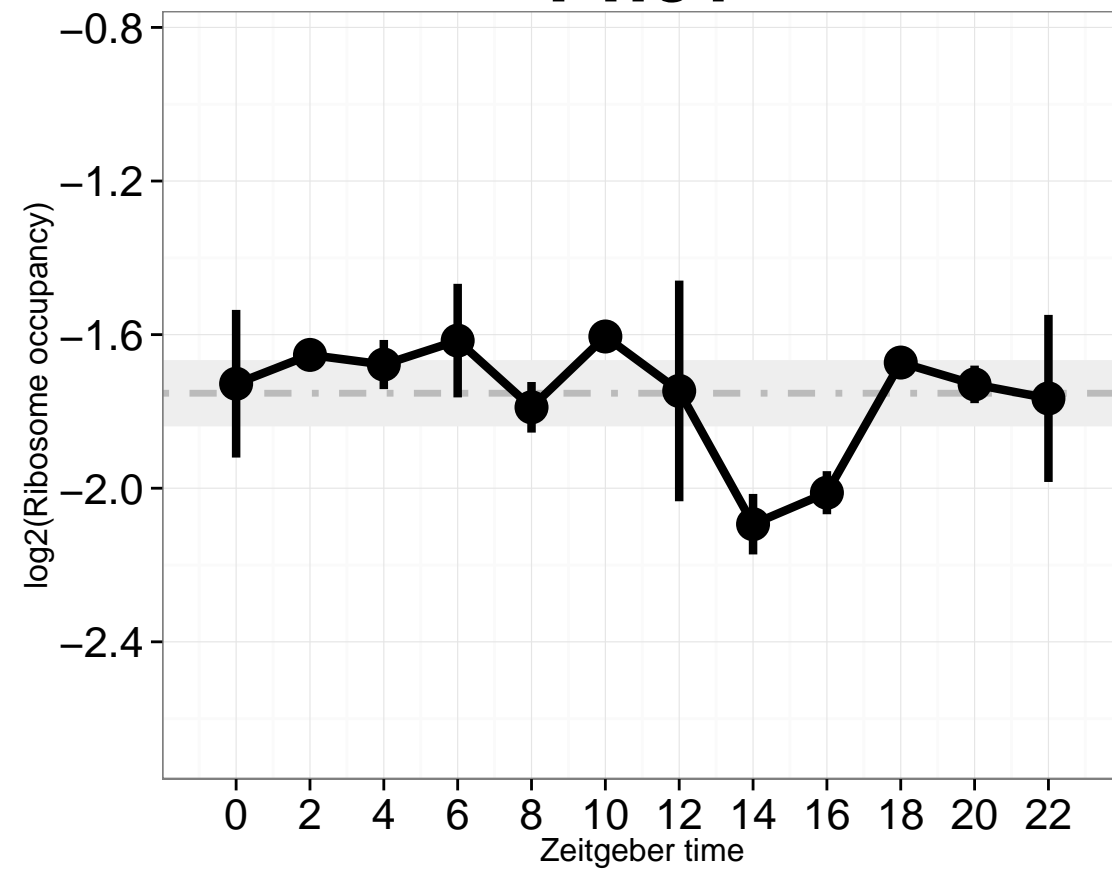

Supplement: Supplementary file 1535 [file 1]

# Impad1

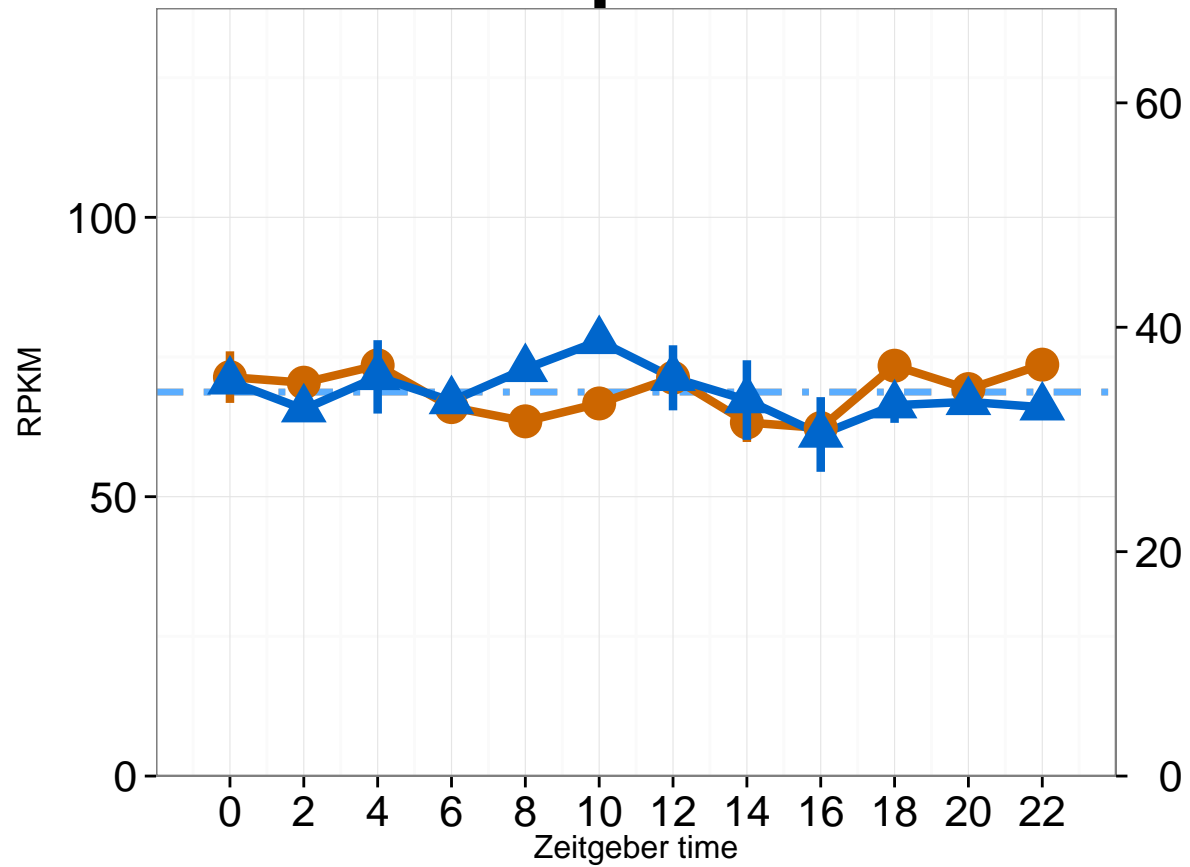

# Impad1

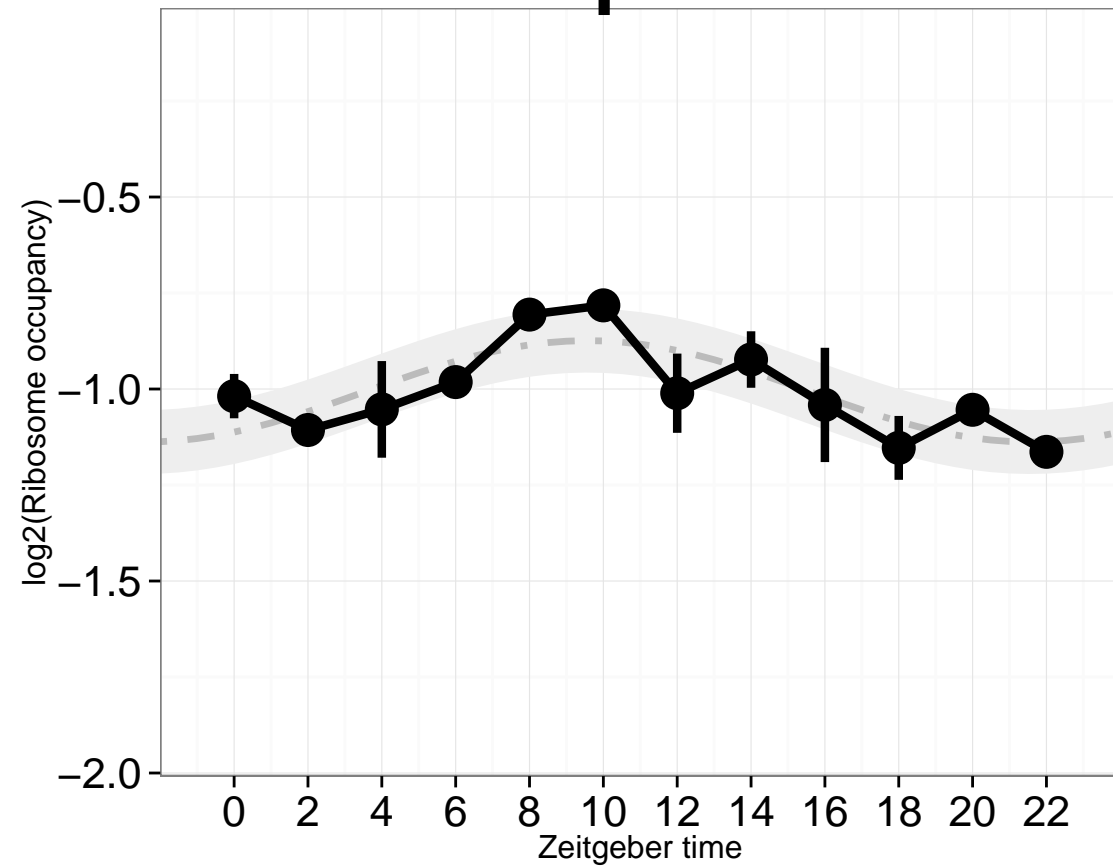

Supplement: Supplementary file 1536 [file 1]

# Mex3c

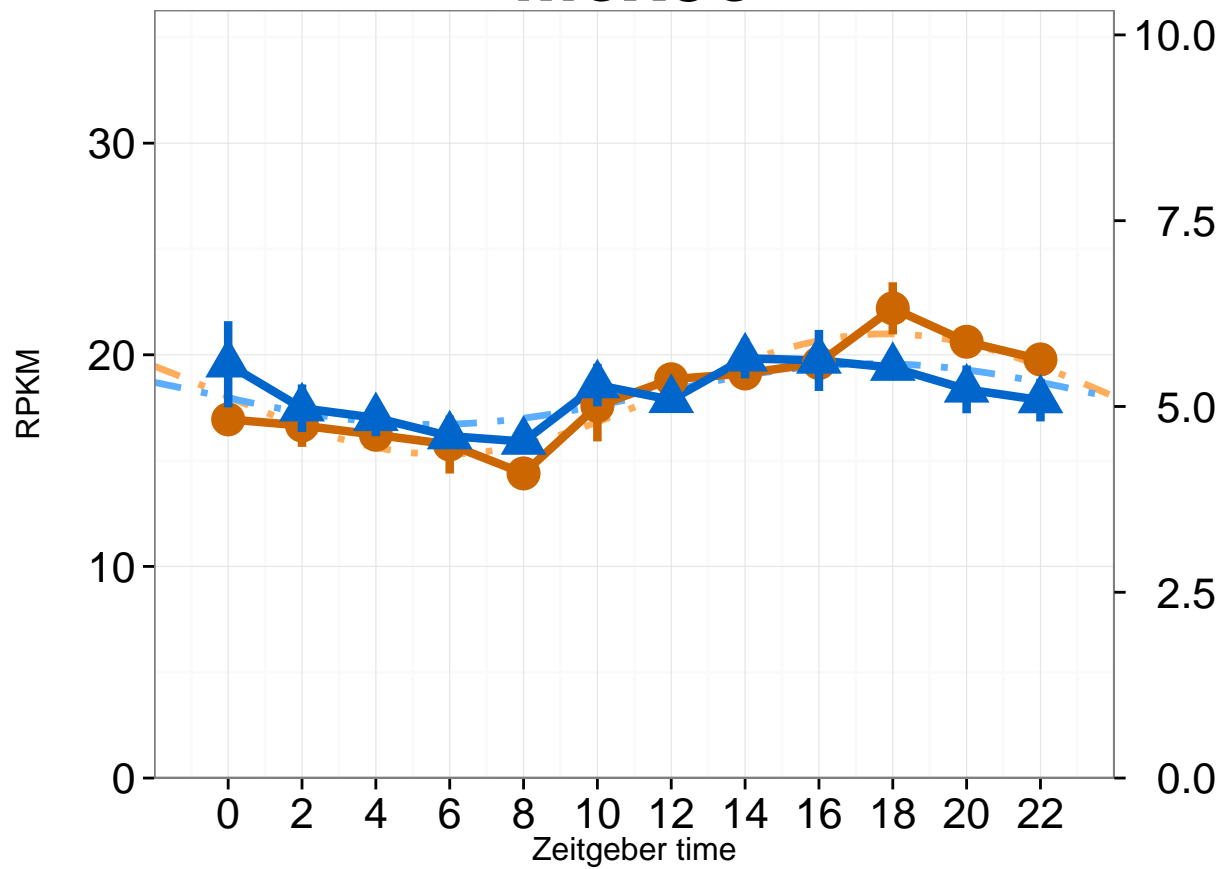

# Mex3c

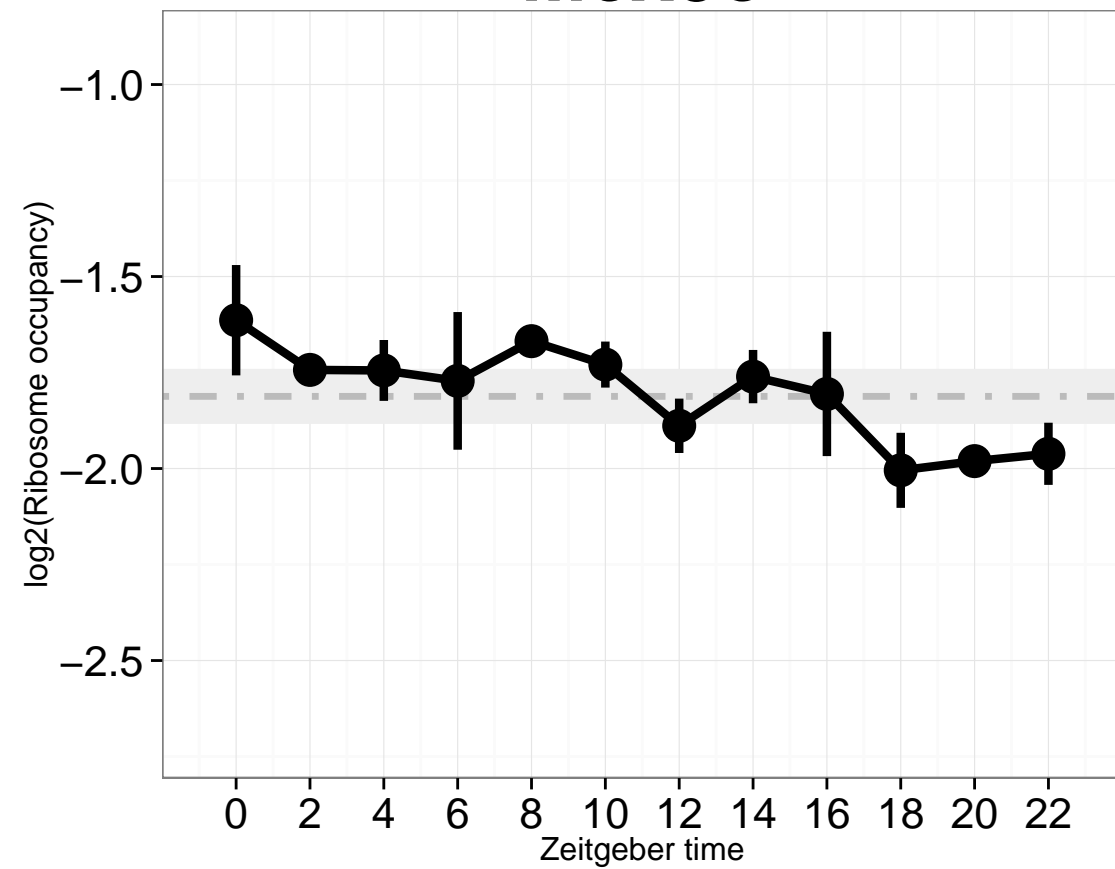

Supplement: Supplementary file 1537 [file 1]

## Cers5

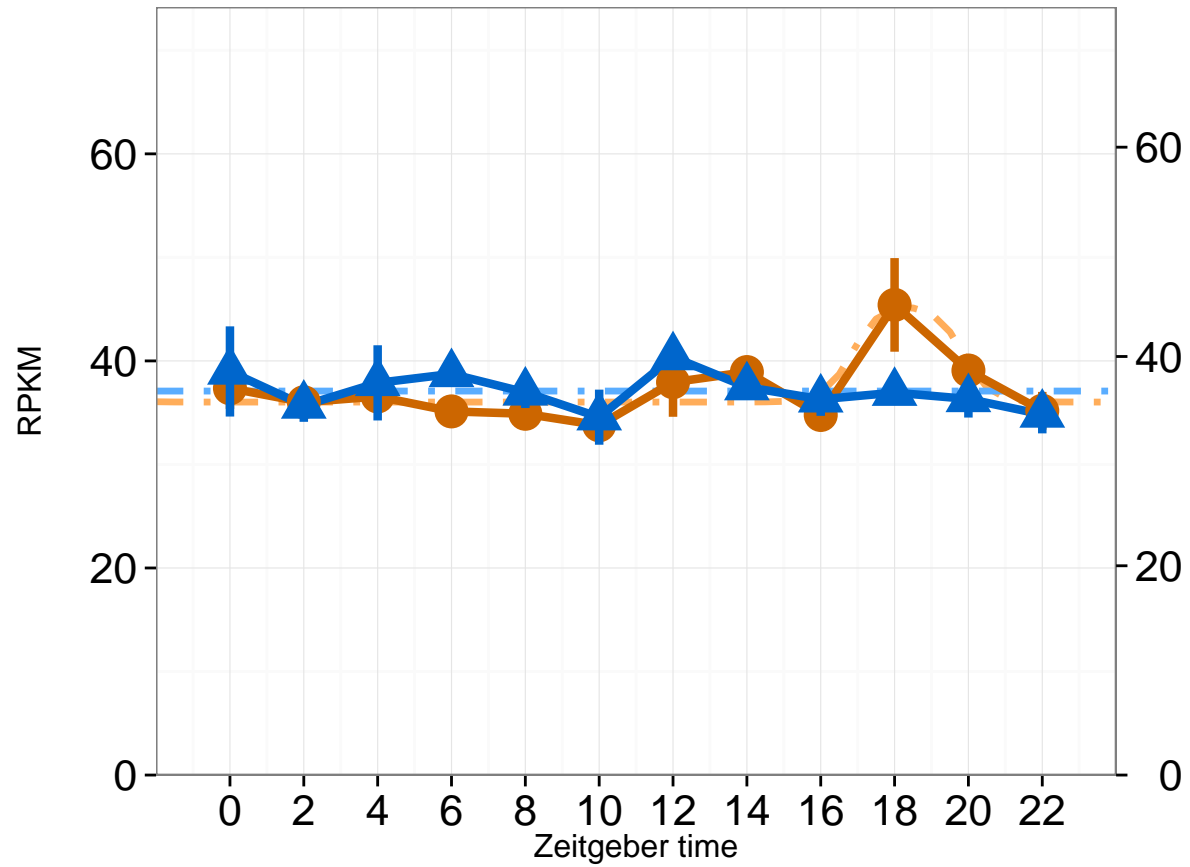

## Cers5

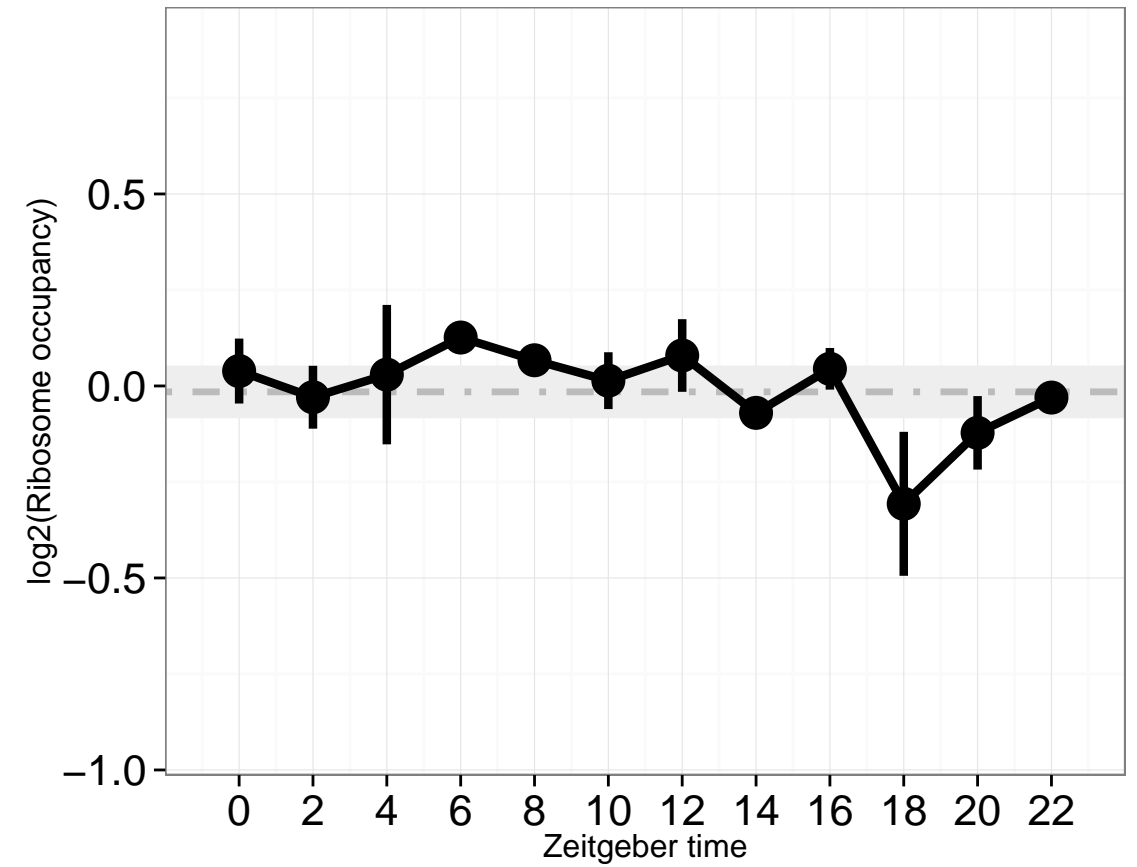

Supplement: Supplementary file 1538 [file 1]

## lqce

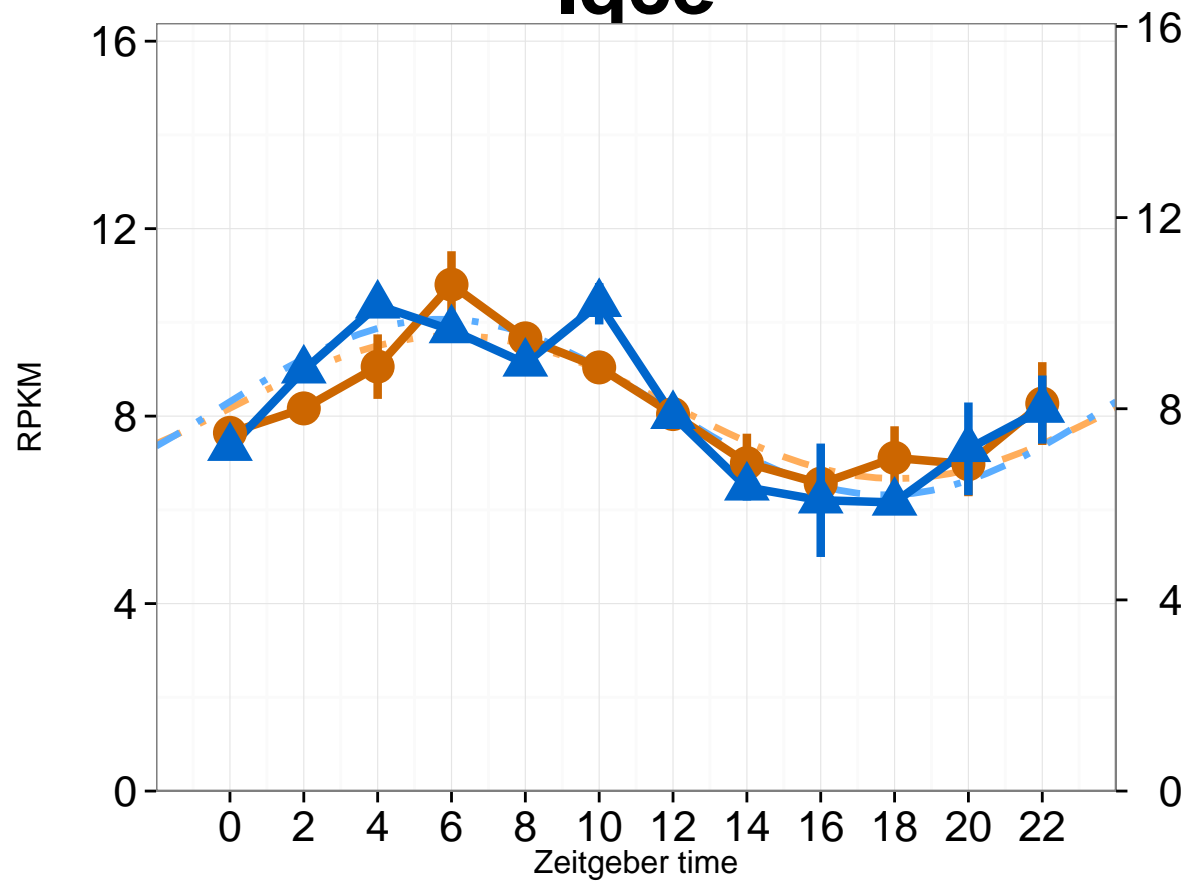

## lqce

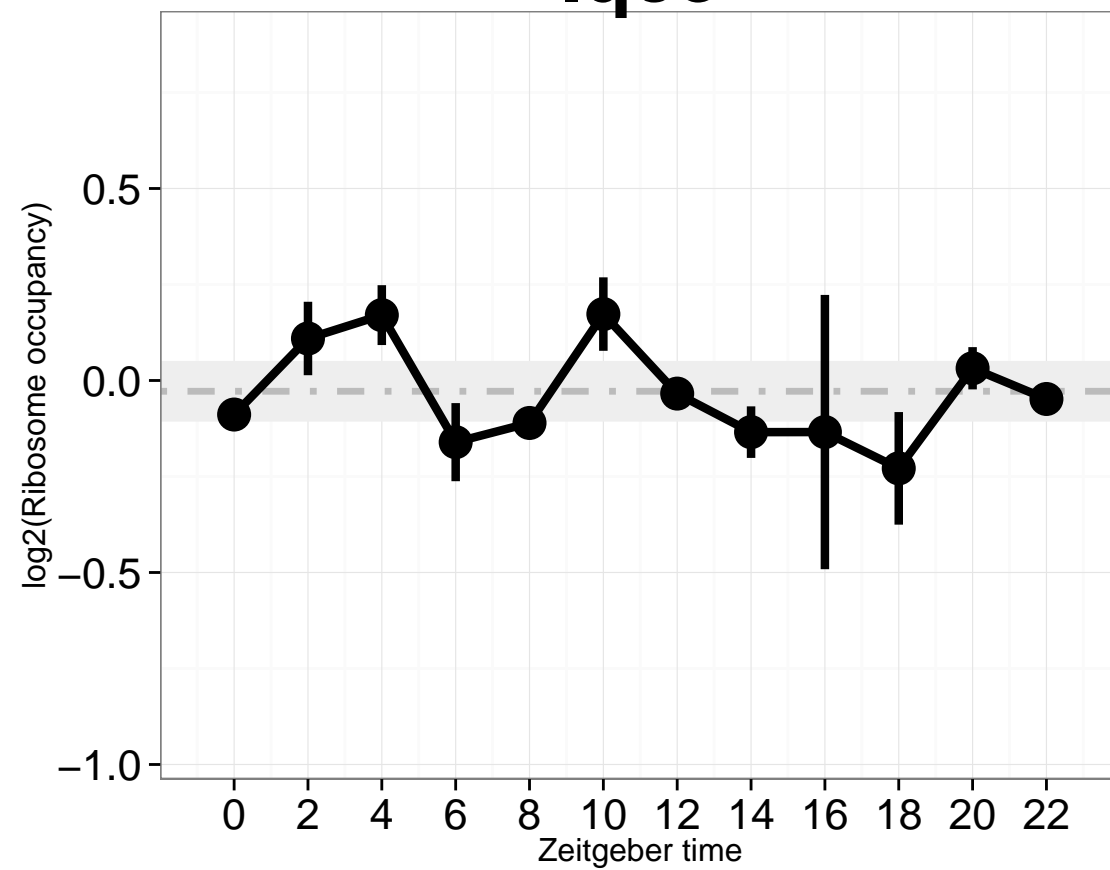

Supplement: Supplementary file 1539 [file 1]

## Jrkl

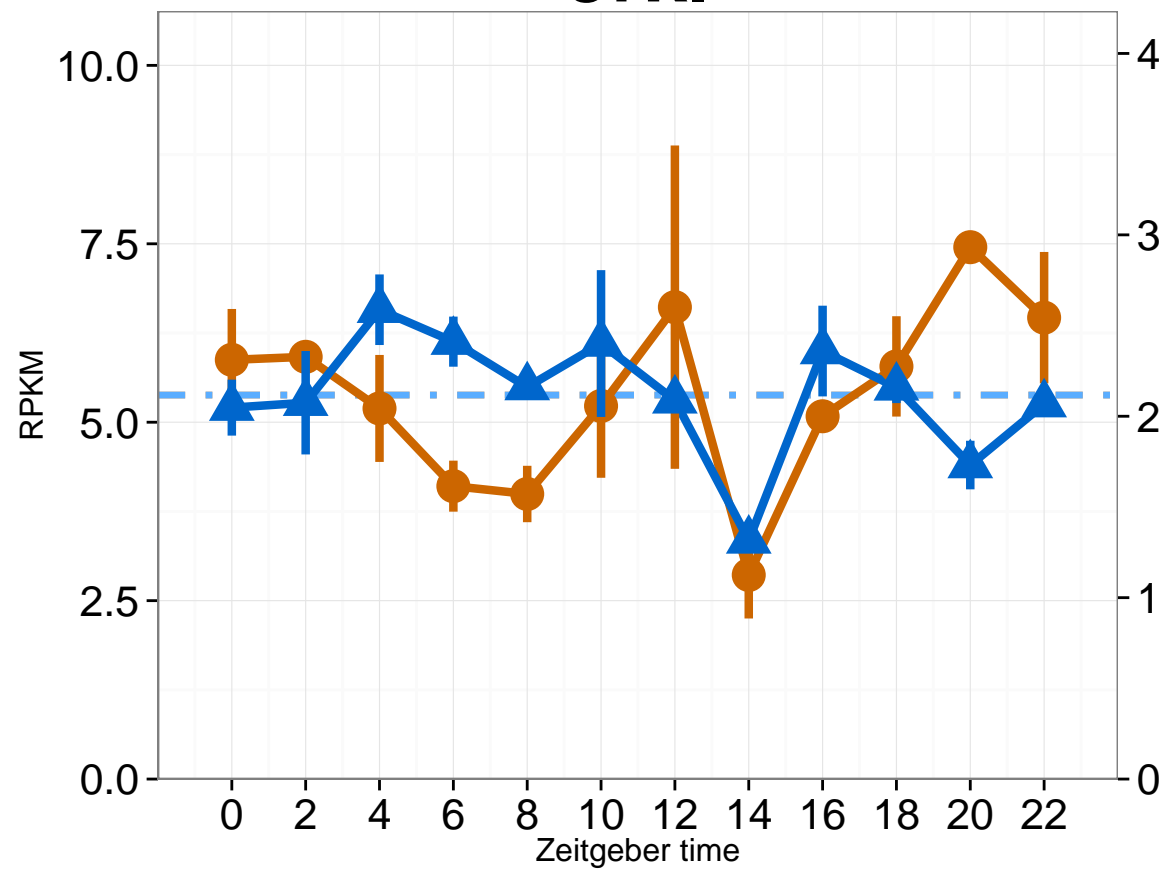

## Jrkl

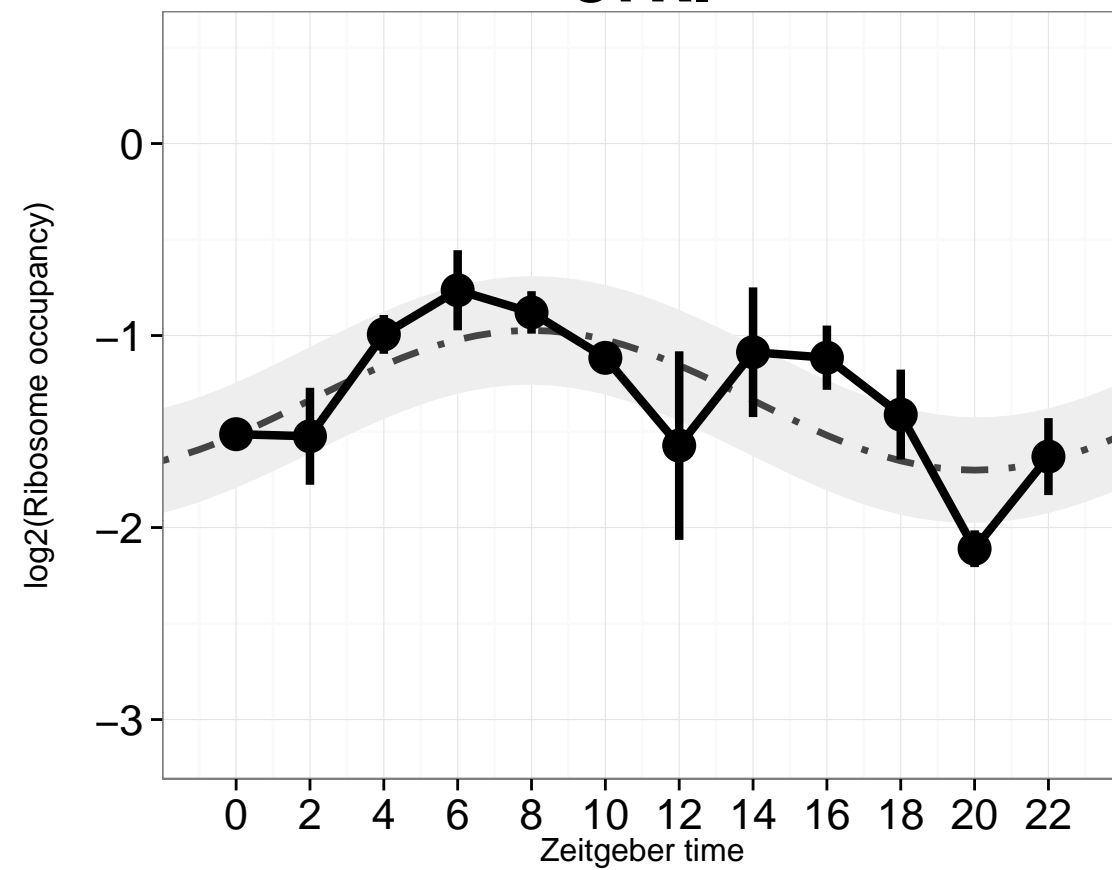

Supplement: Supplementary file 1540 [file 1]

# Ltf

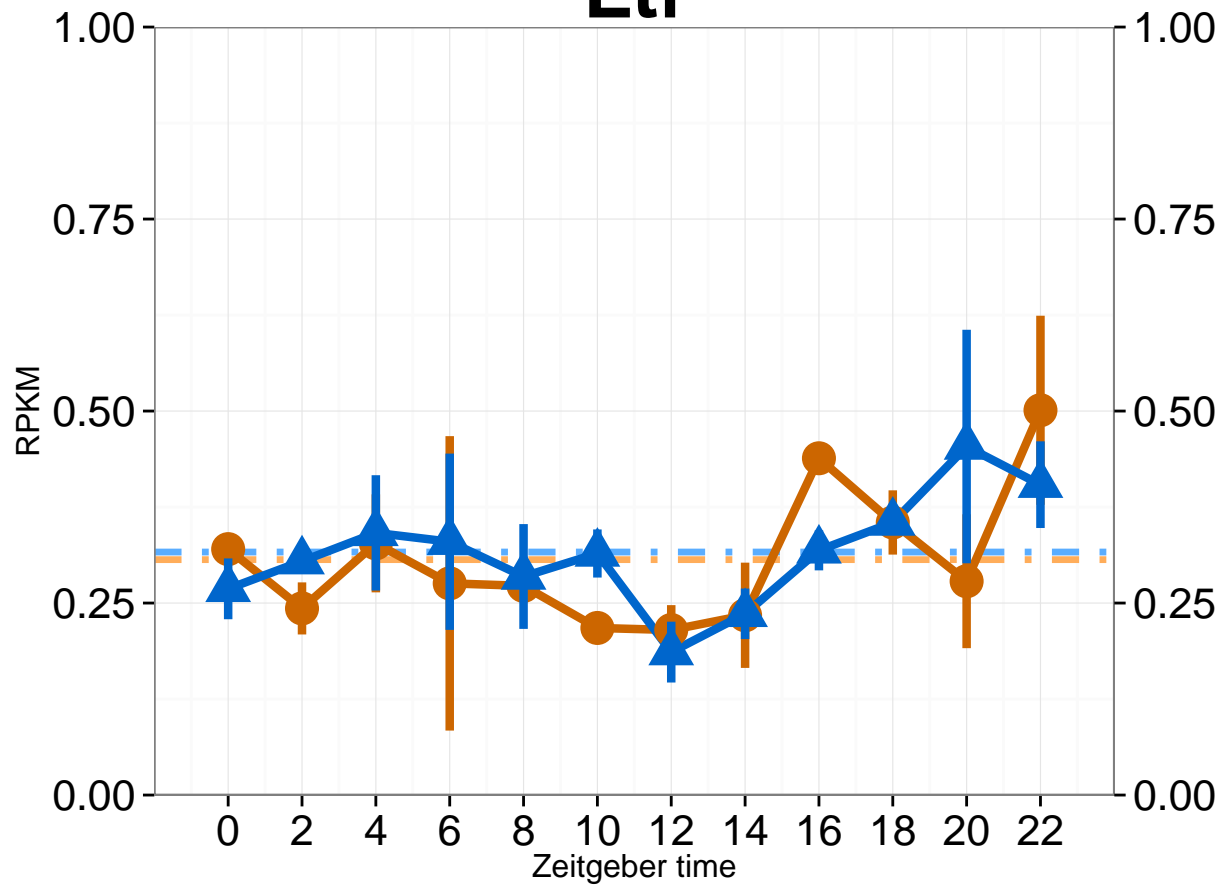

# Ltf

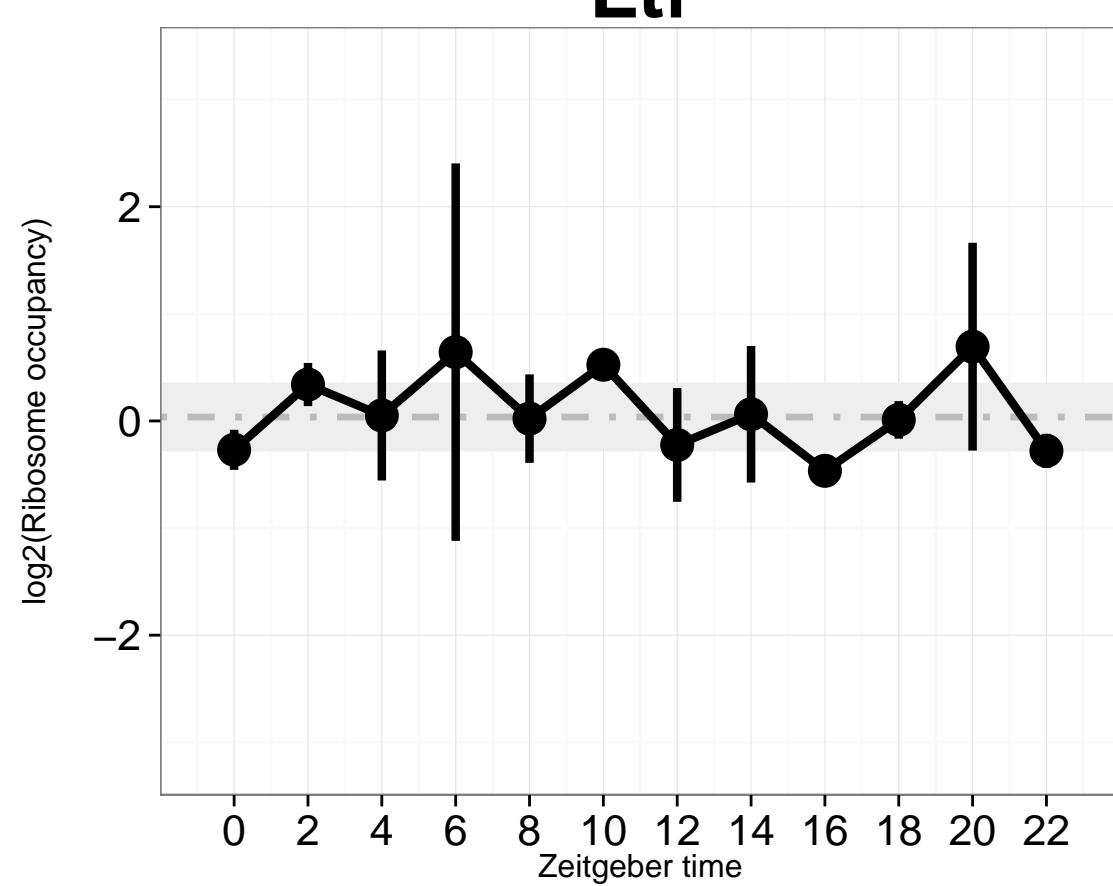

Supplement: Supplementary file 1541 [file 1]

# Cep135

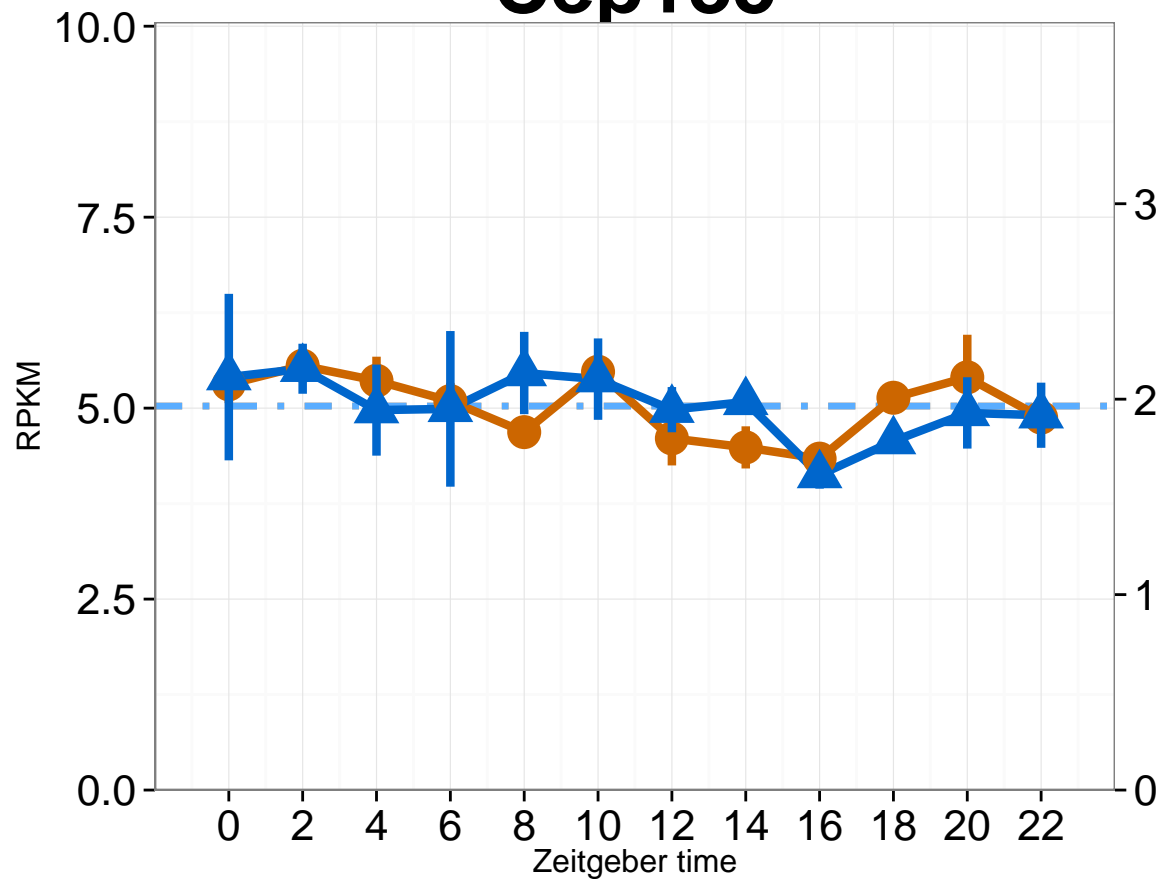

# Cep135

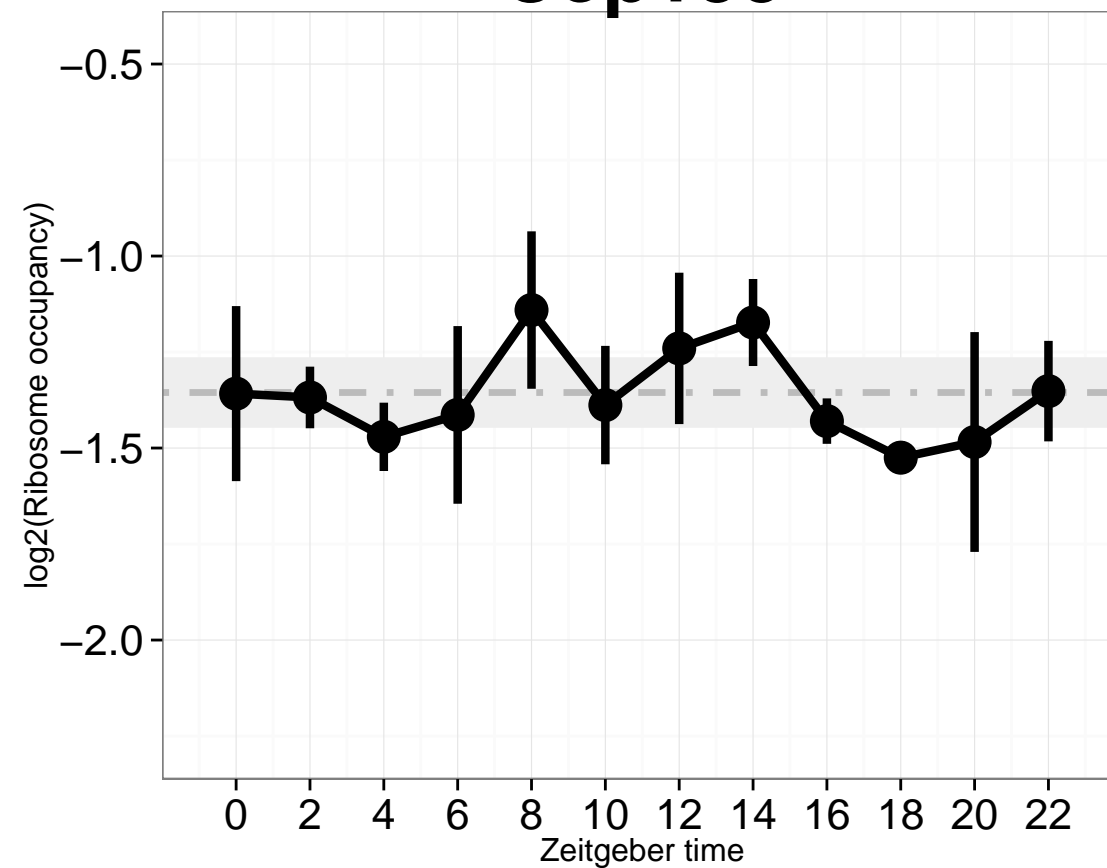

Supplement: Supplementary file 1542 [file 1]

# Fam188a

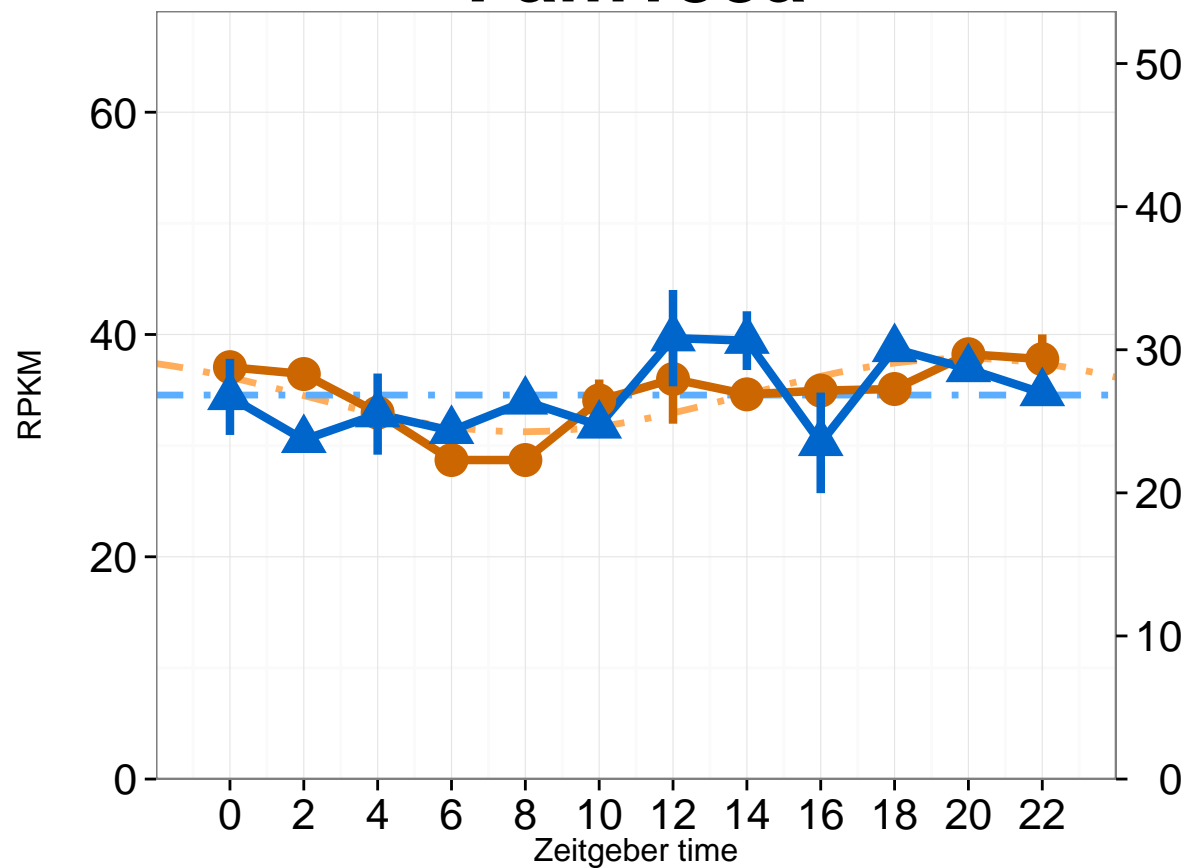

# Fam188a

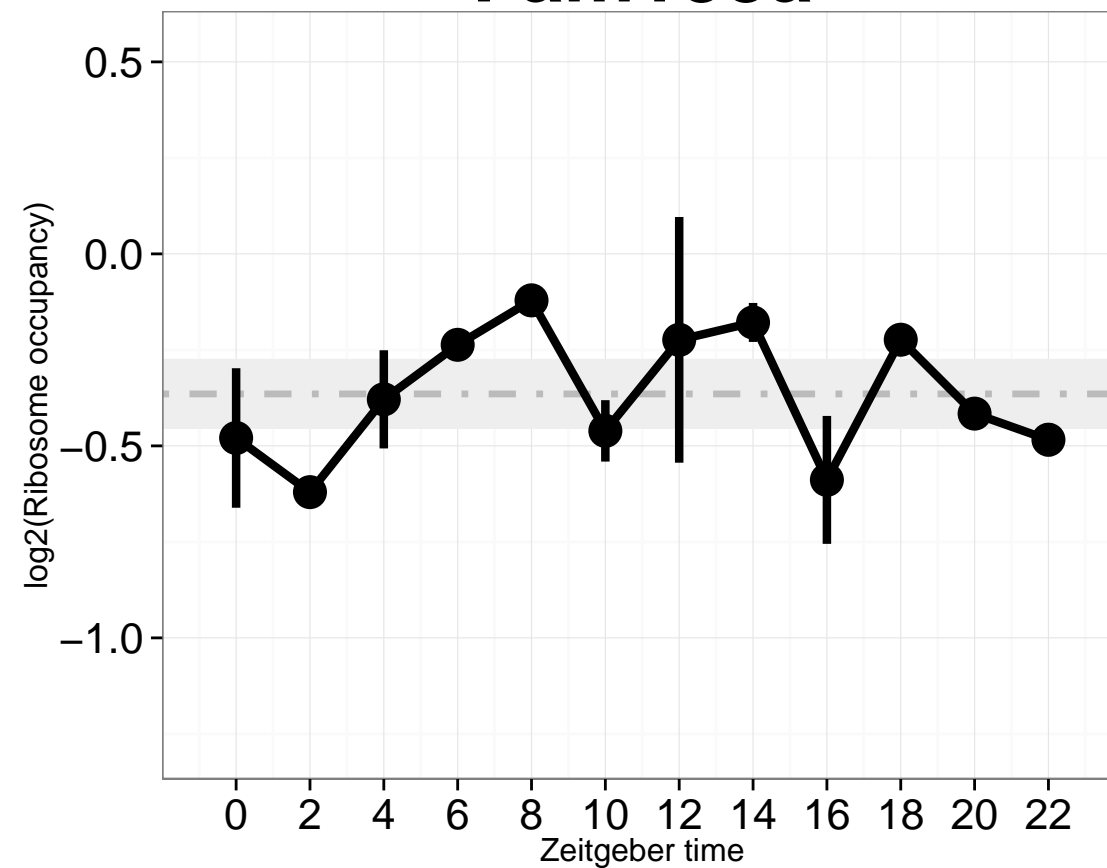

Supplement: Supplementary file 1543 [file 1]

## Cdc16

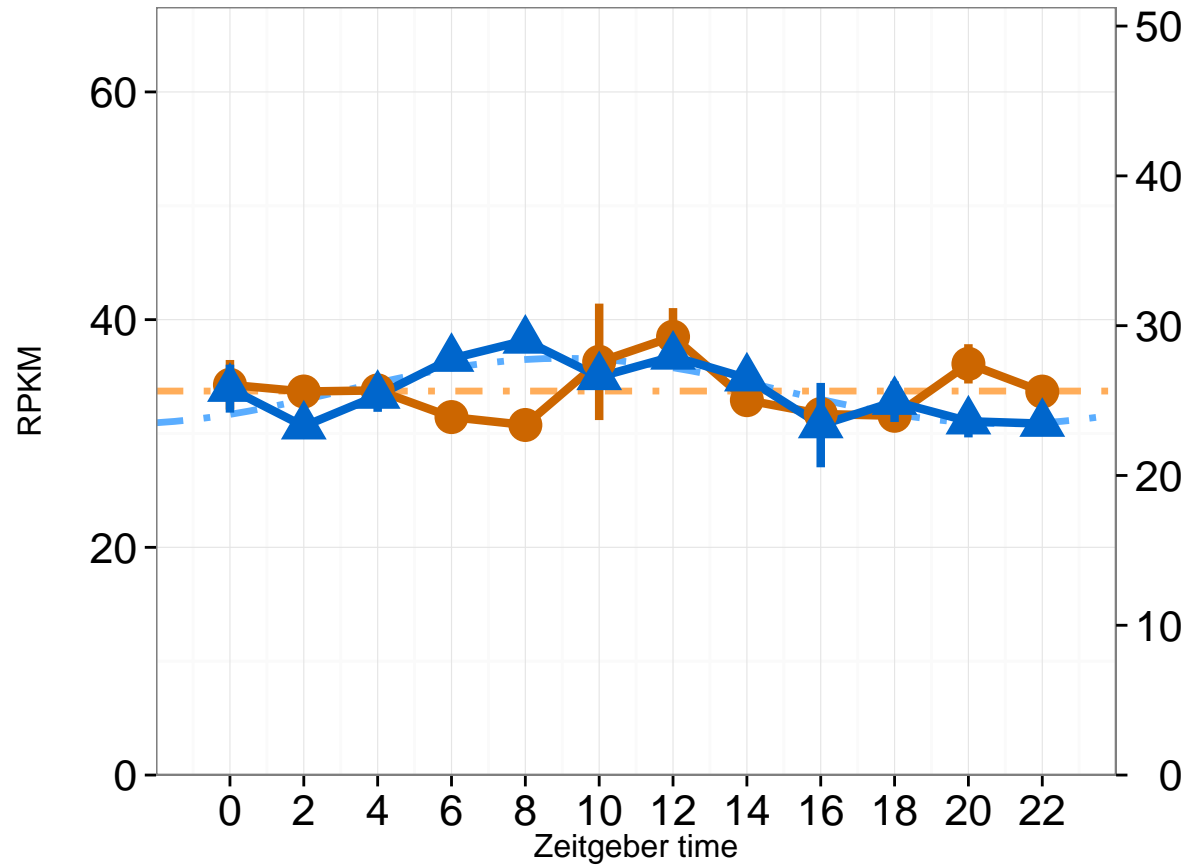

## Cdc16

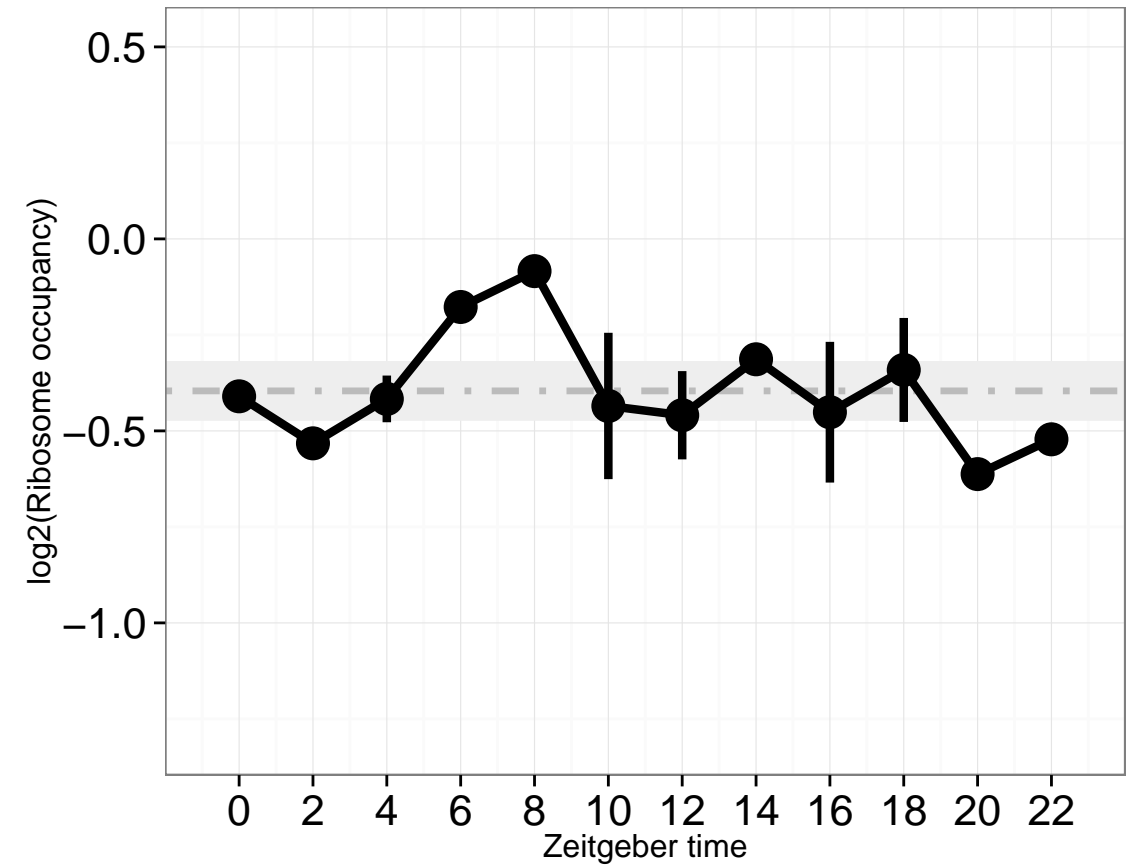

Supplement: Supplementary file 1544 [file 1]

## Fmo2

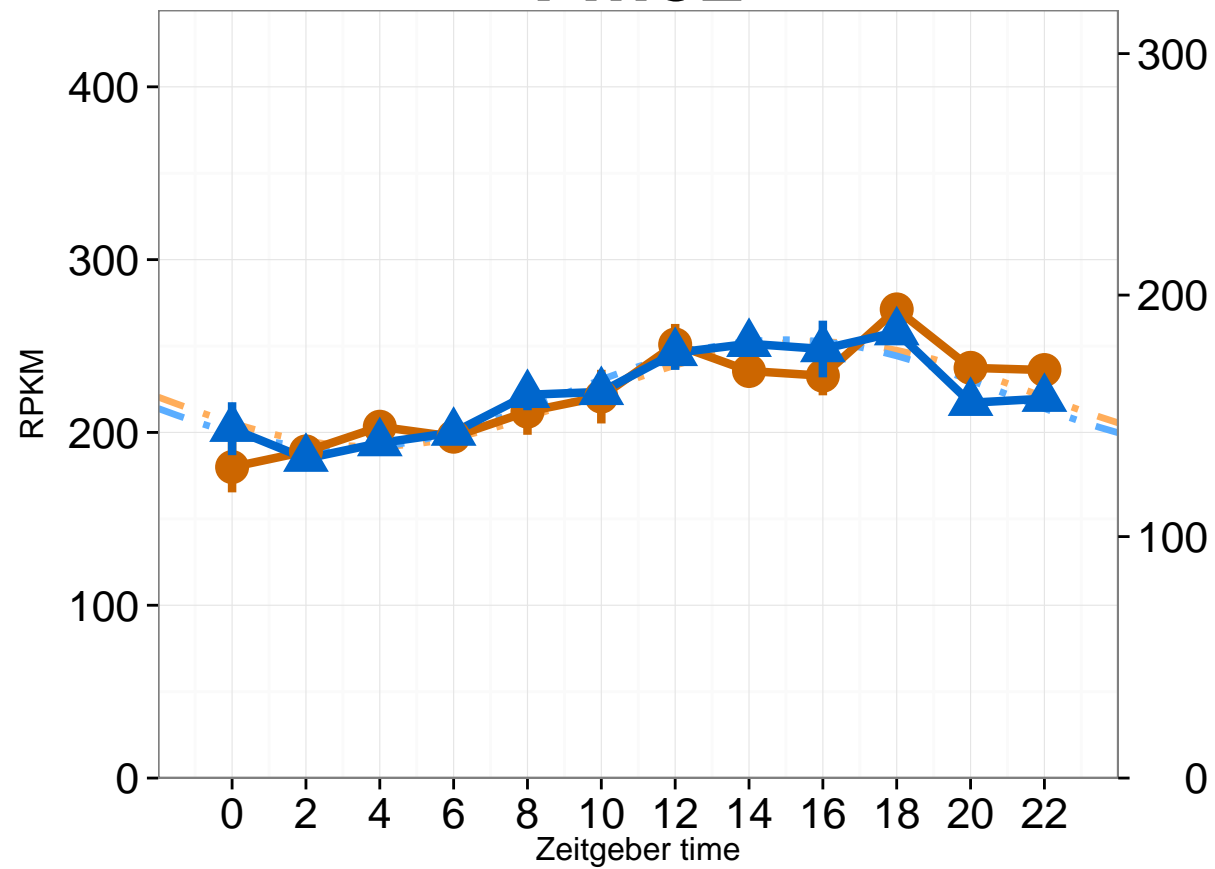

## Fmo2

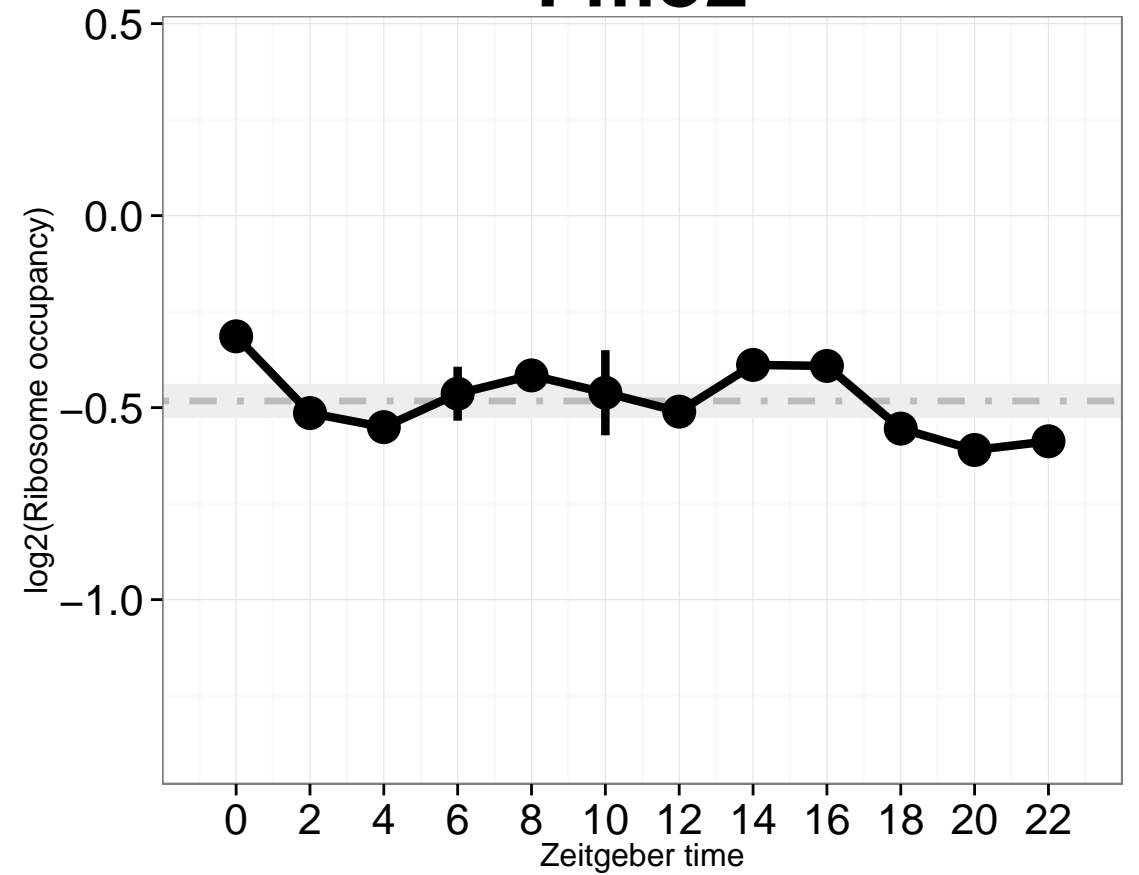

Supplement: Supplementary file 1545 [file 1]

# Gja1

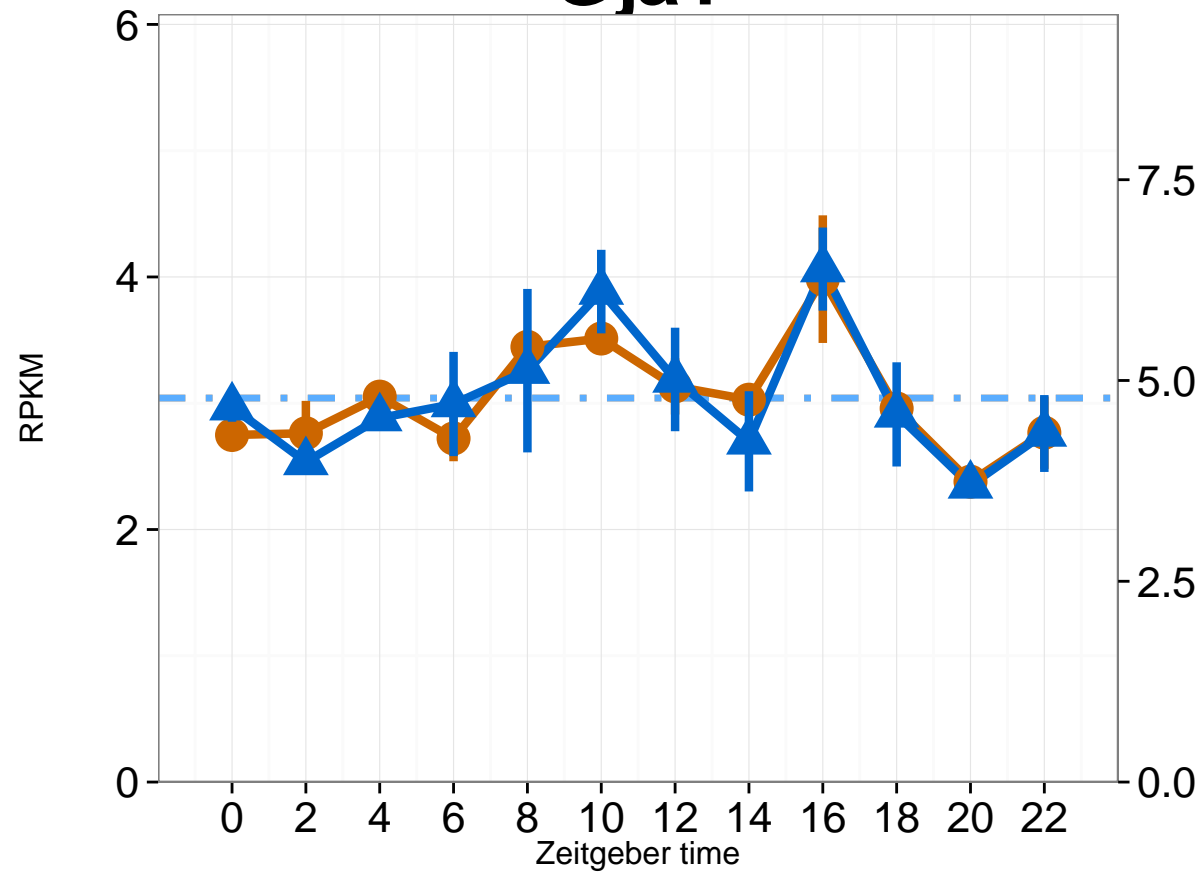

# Gja1

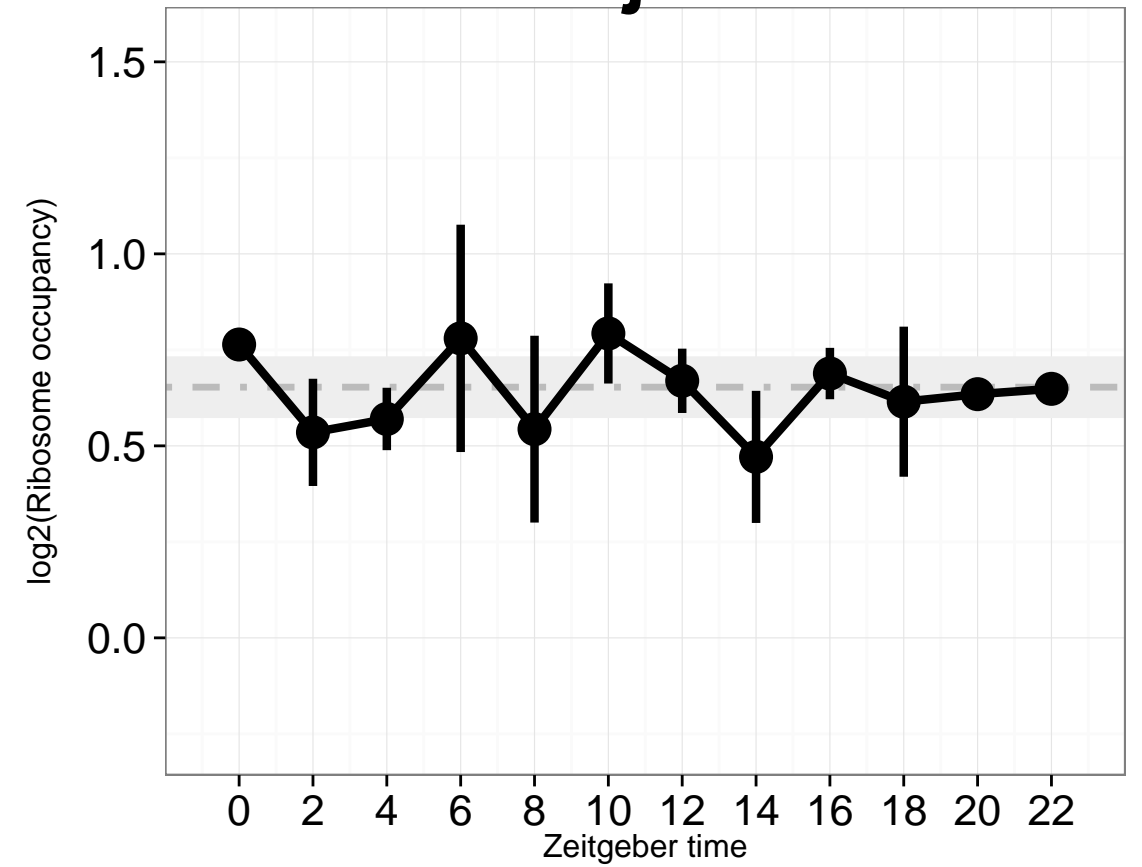

Supplement: Supplementary file 1546 [file 1]

# Phf11d

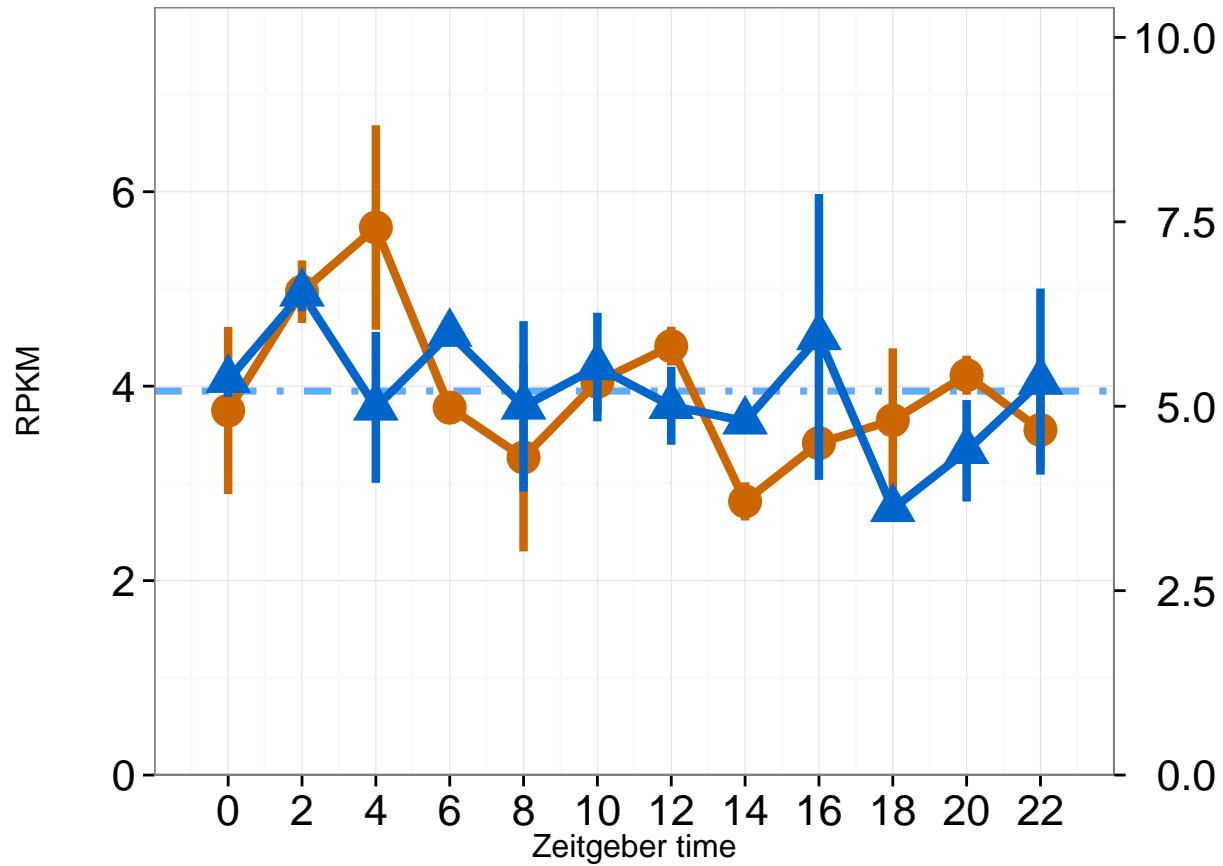

# Phf11d

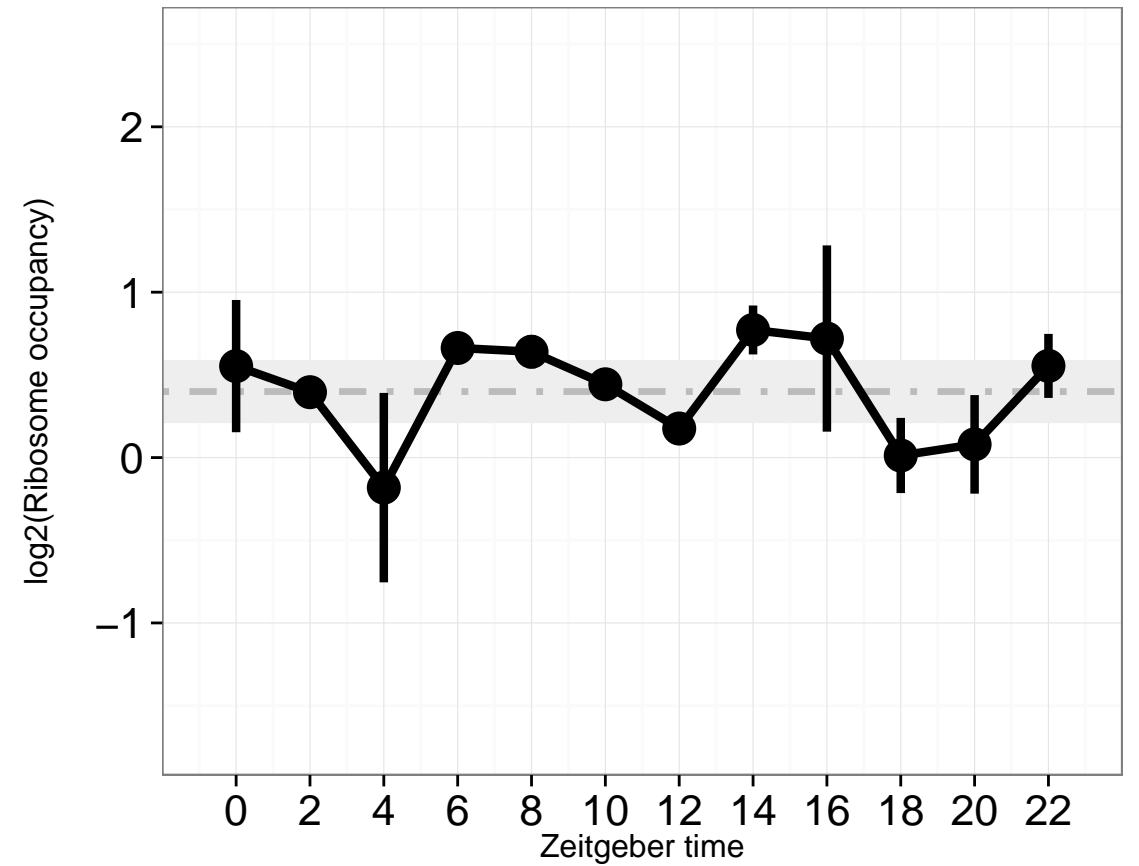

Supplement: Supplementary file 1547 [file 1]

## Cd84

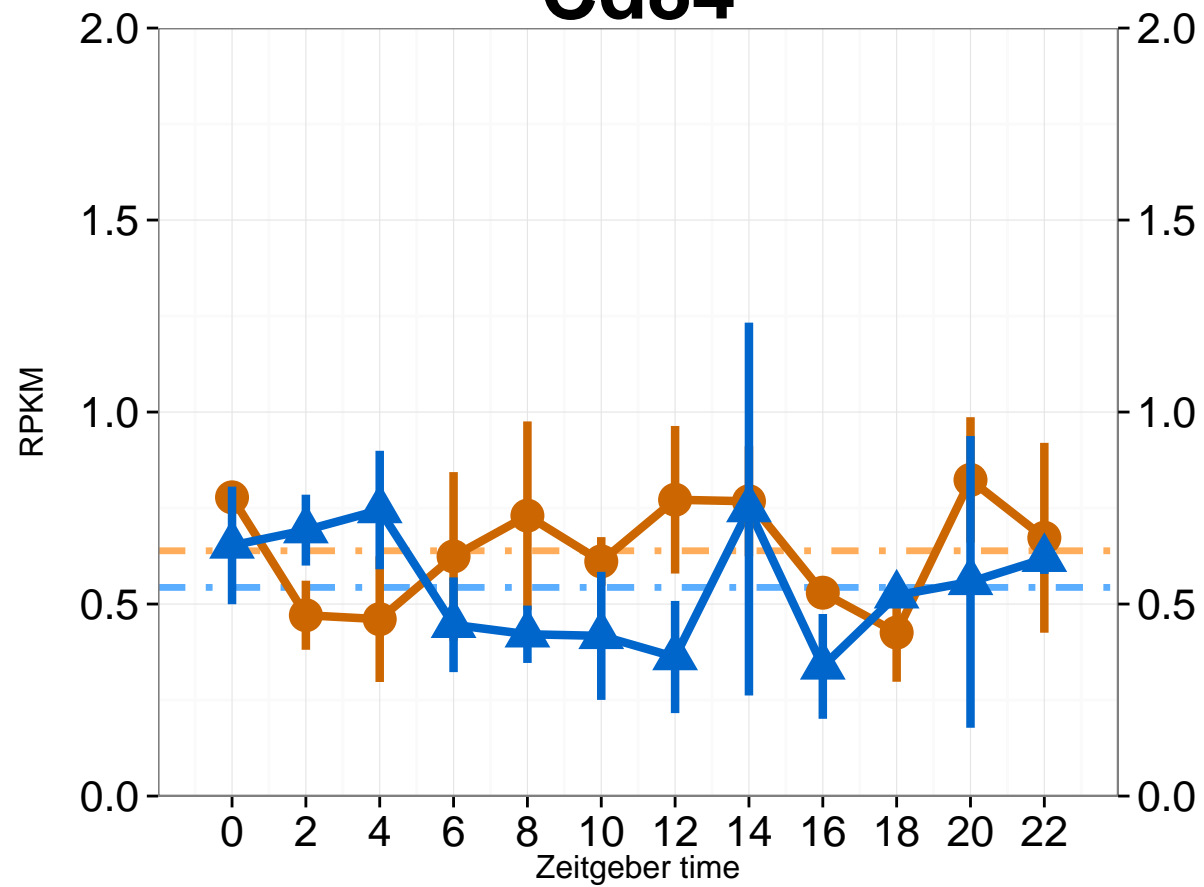

## Cd84

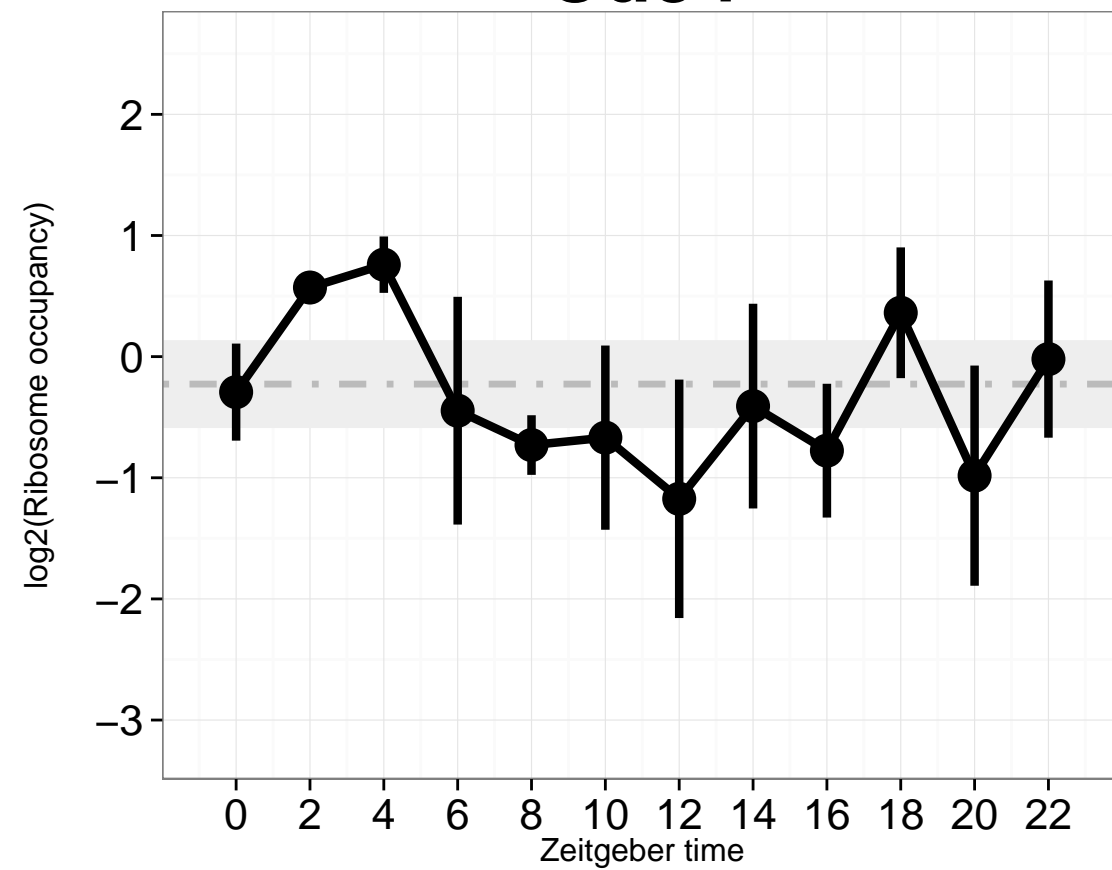

Supplement: Supplementary file 1548 [file 1]

## Rheb1

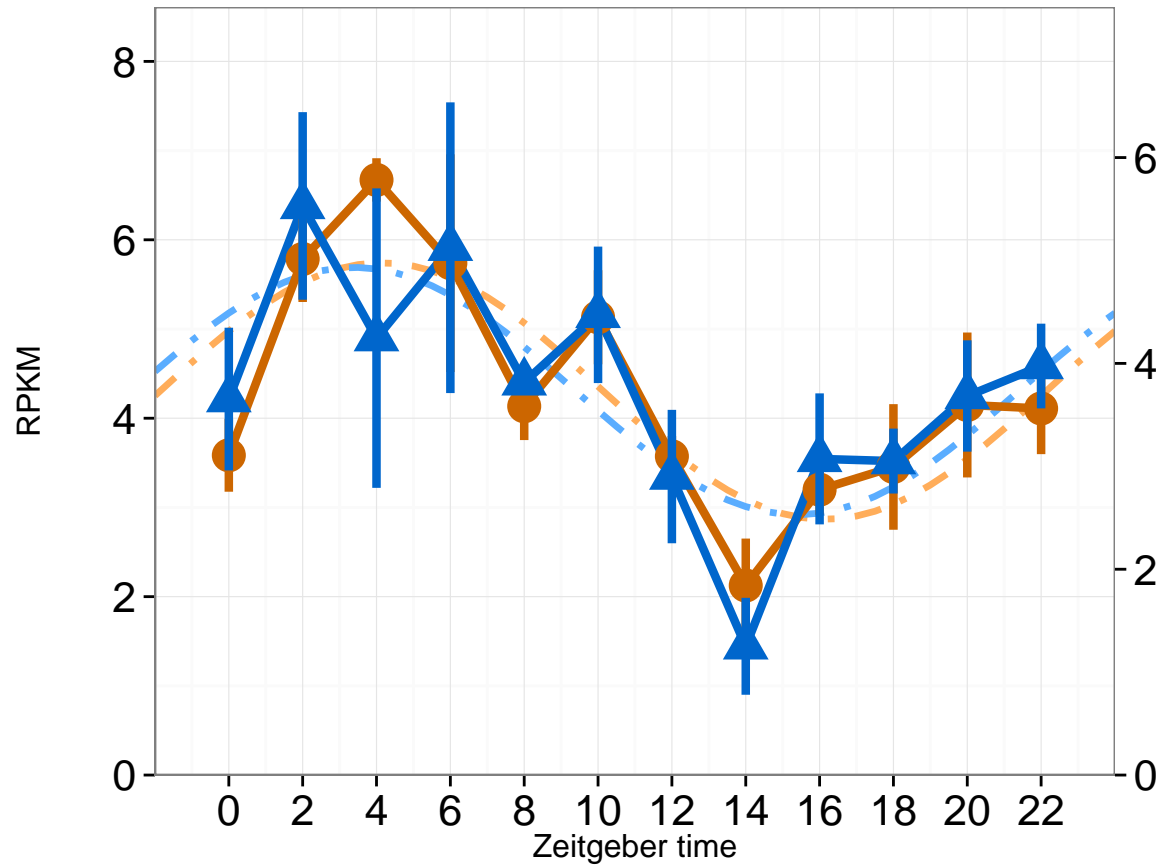

## Rheb1

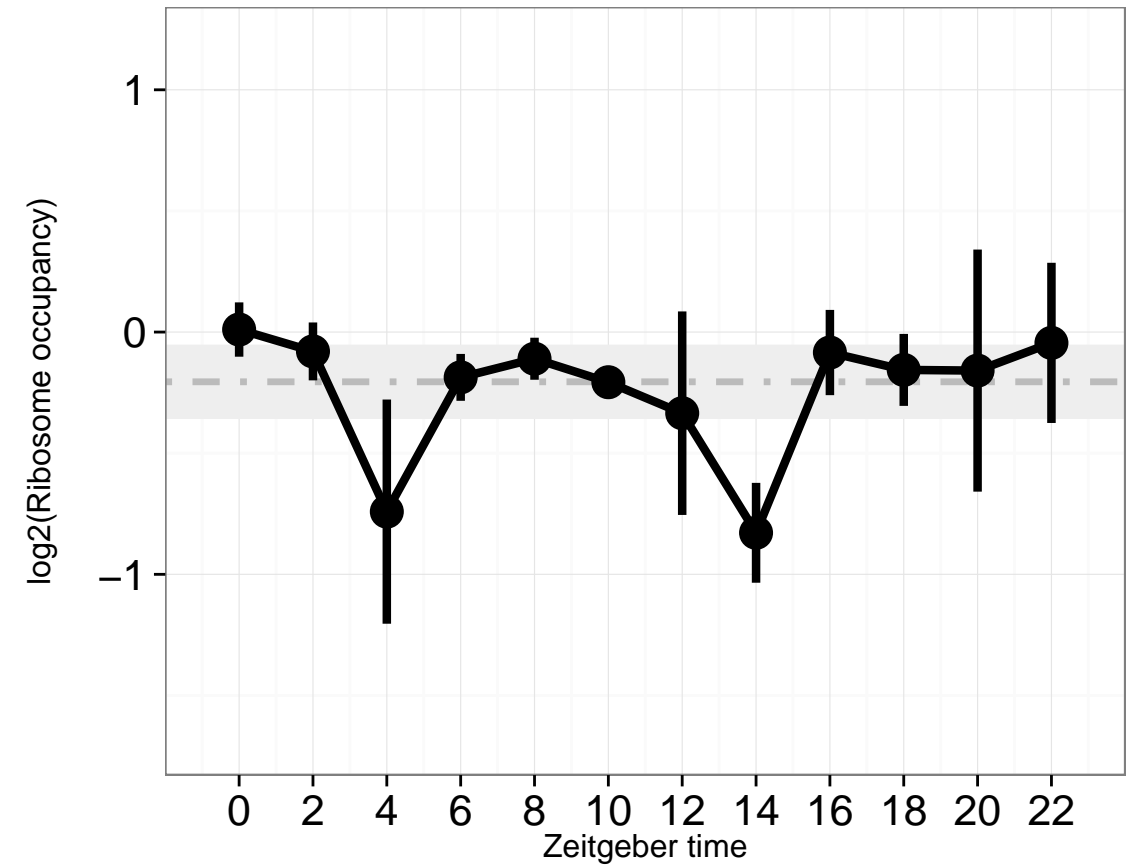

Supplement: Supplementary file 1549 [file 1]

## Cdk1

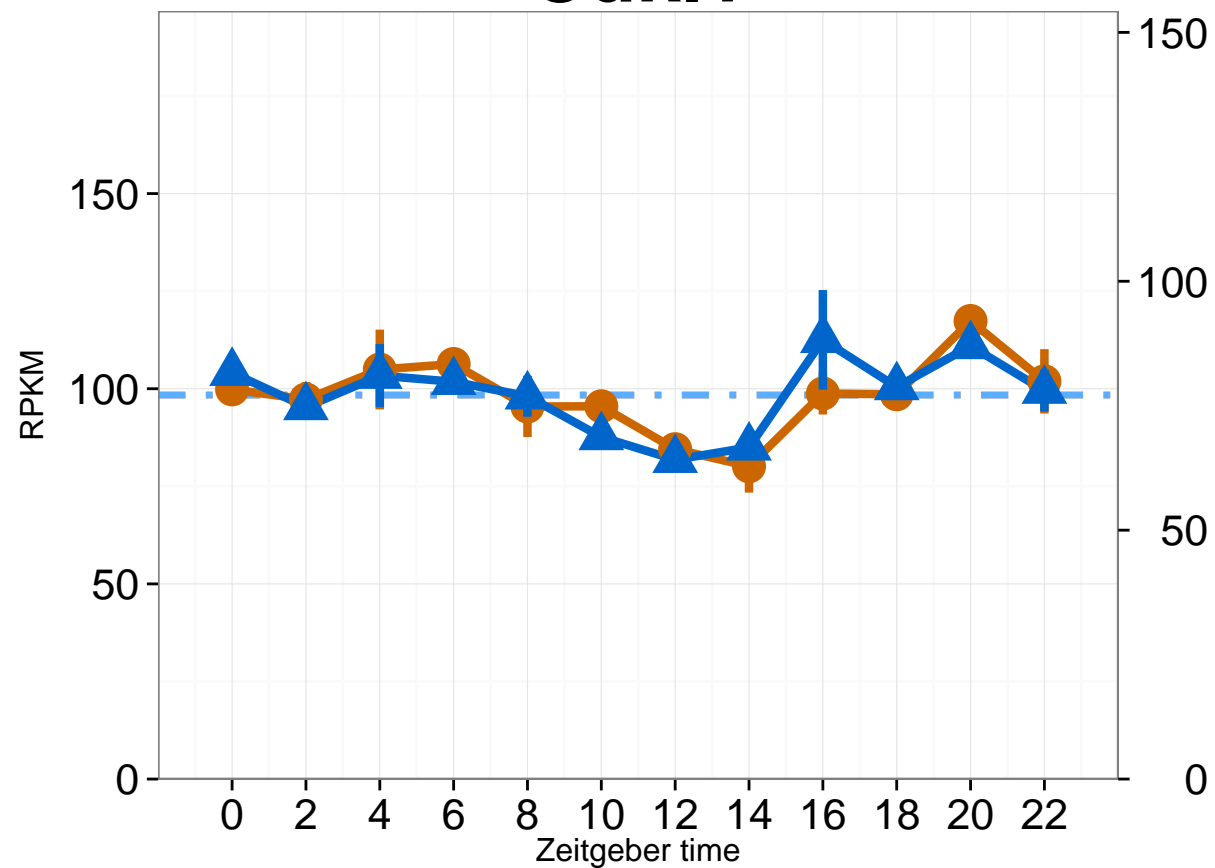

## Cdk1

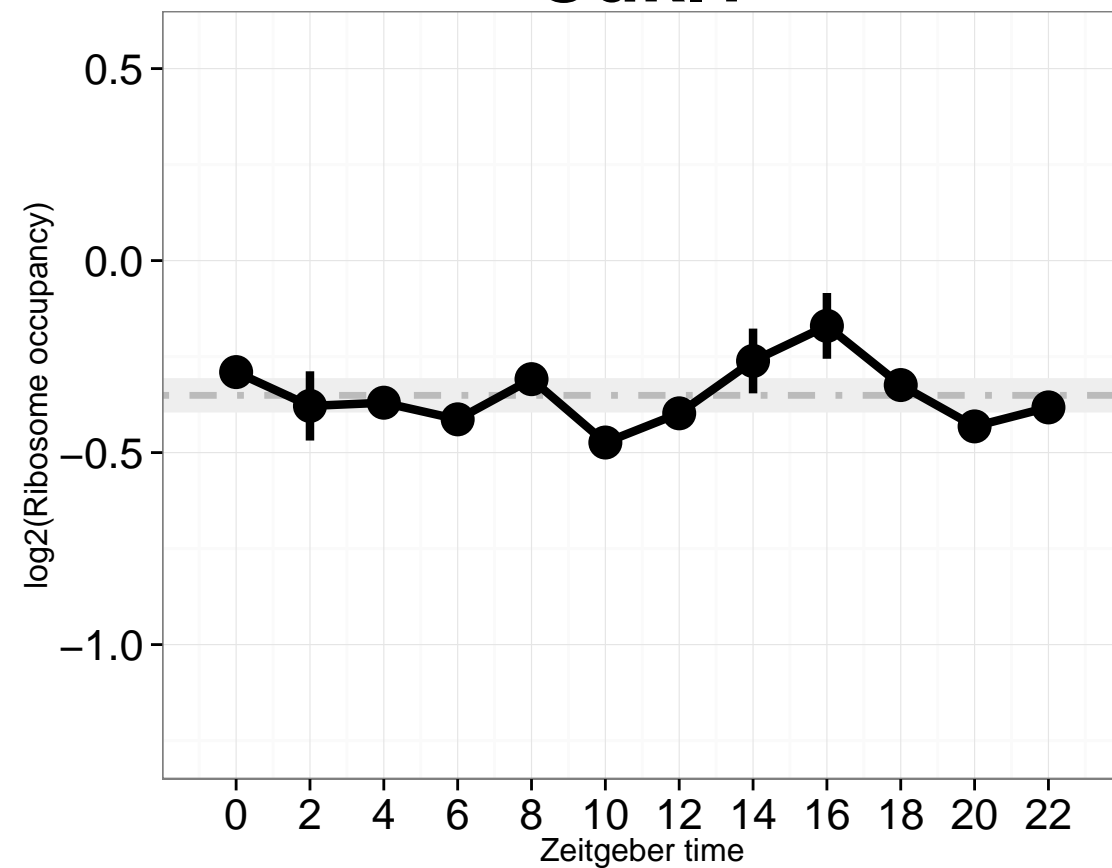

Supplement: Supplementary file 1550 [file 1]

## Ick

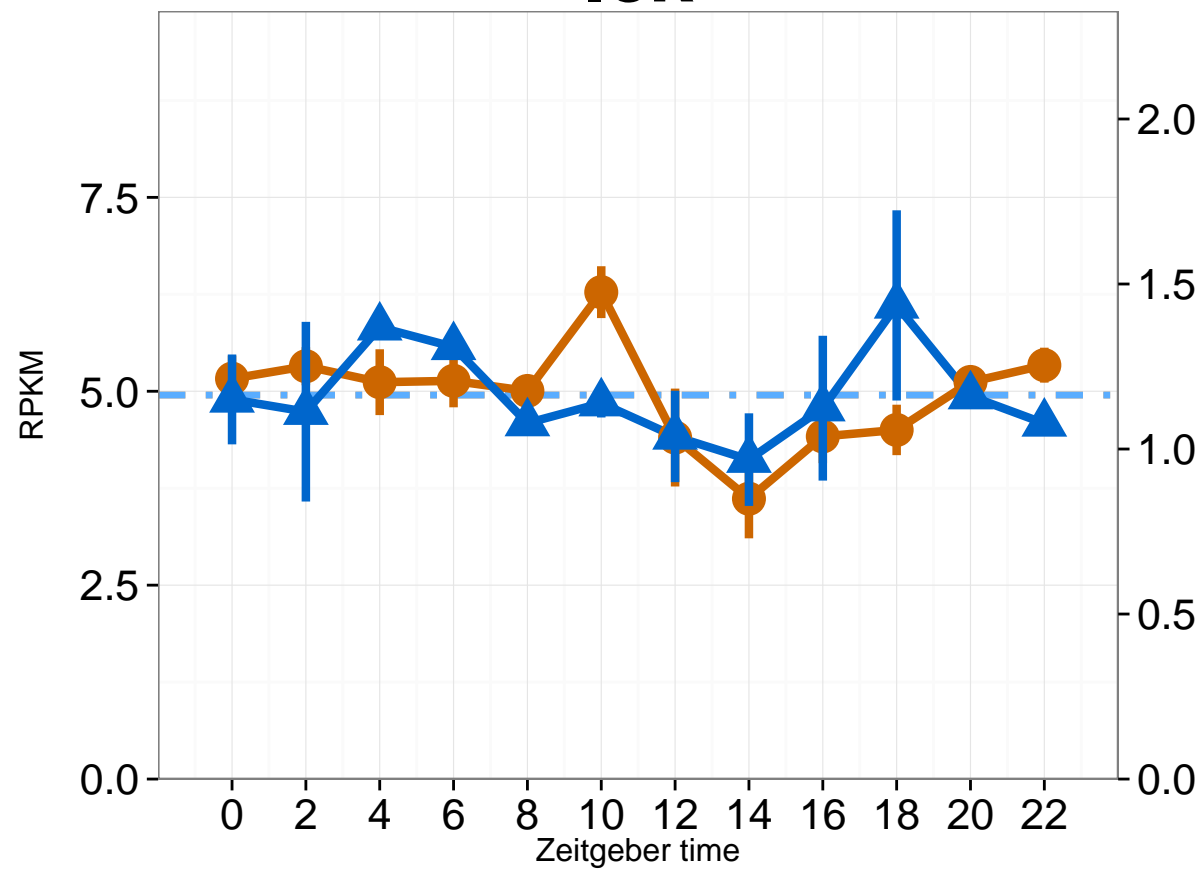

## Ick

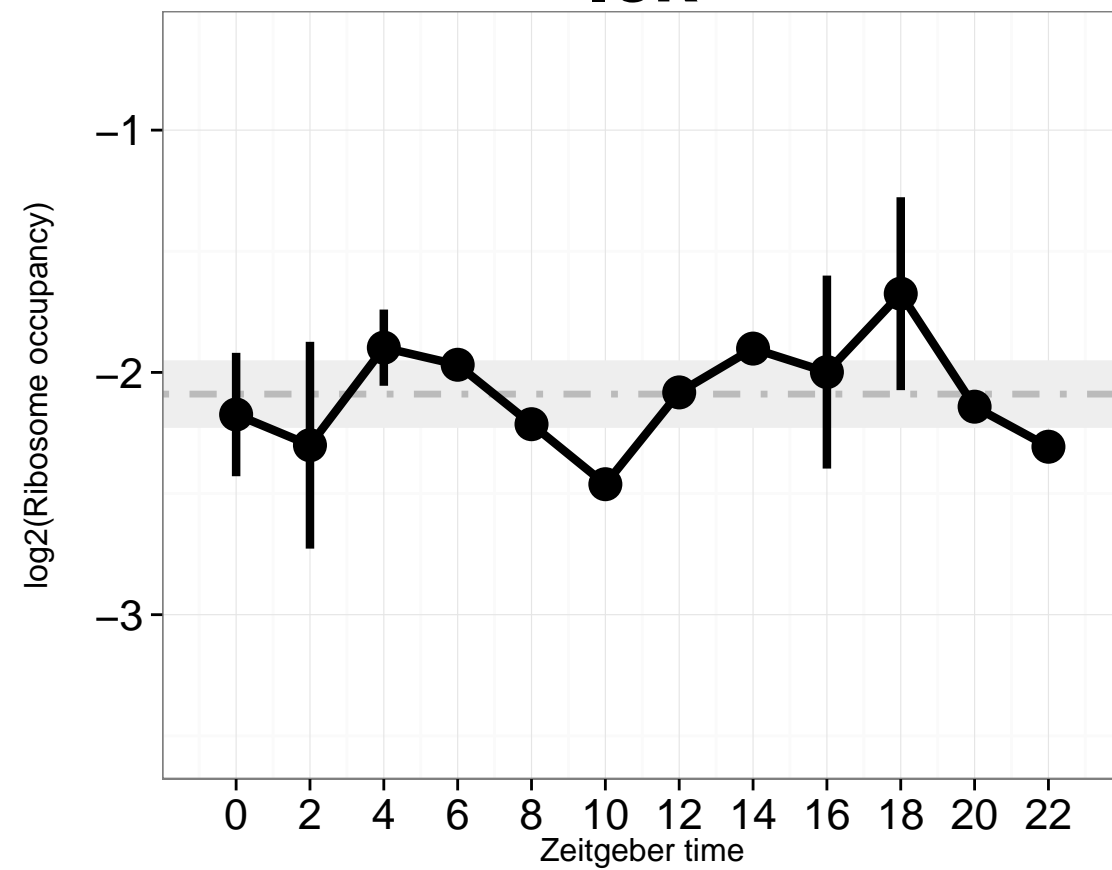

Supplement: Supplementary file 1551 [file 1]

## Specc1l

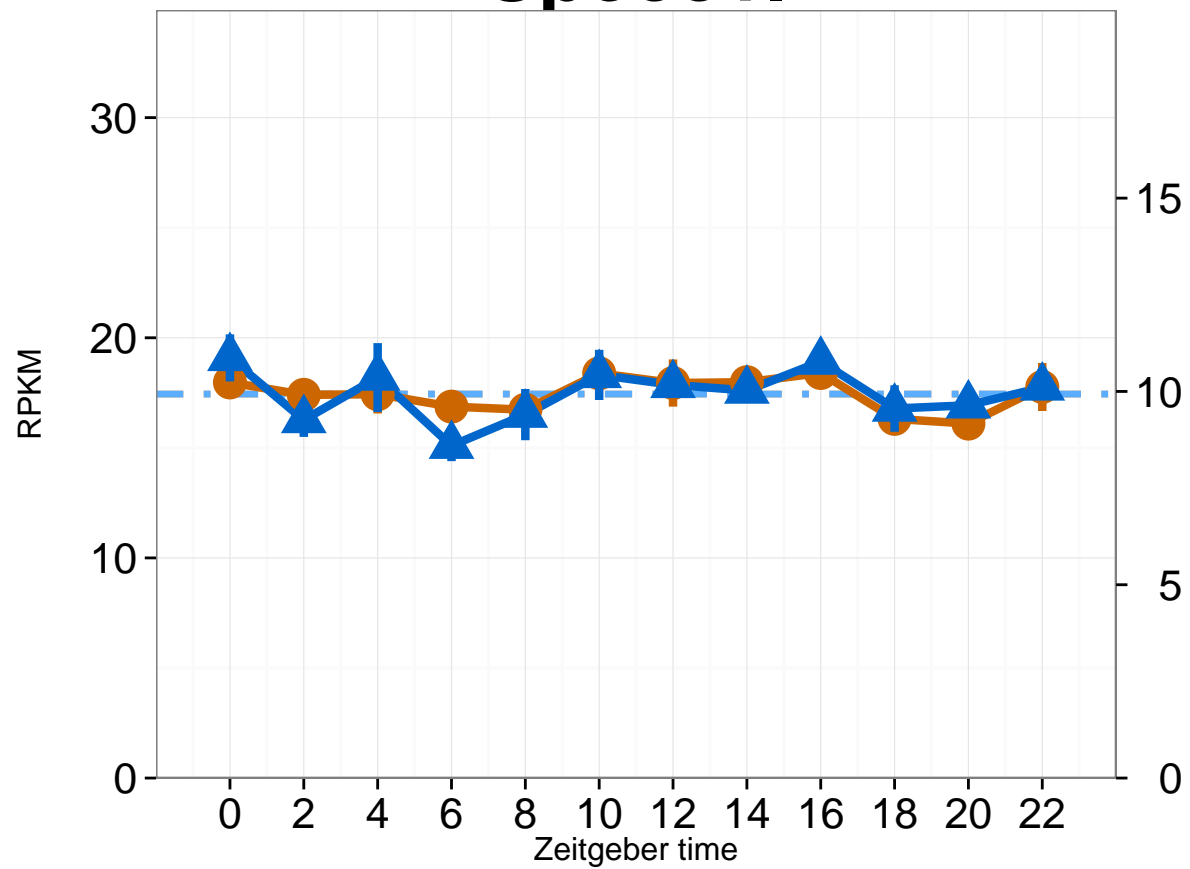

## Specc1l

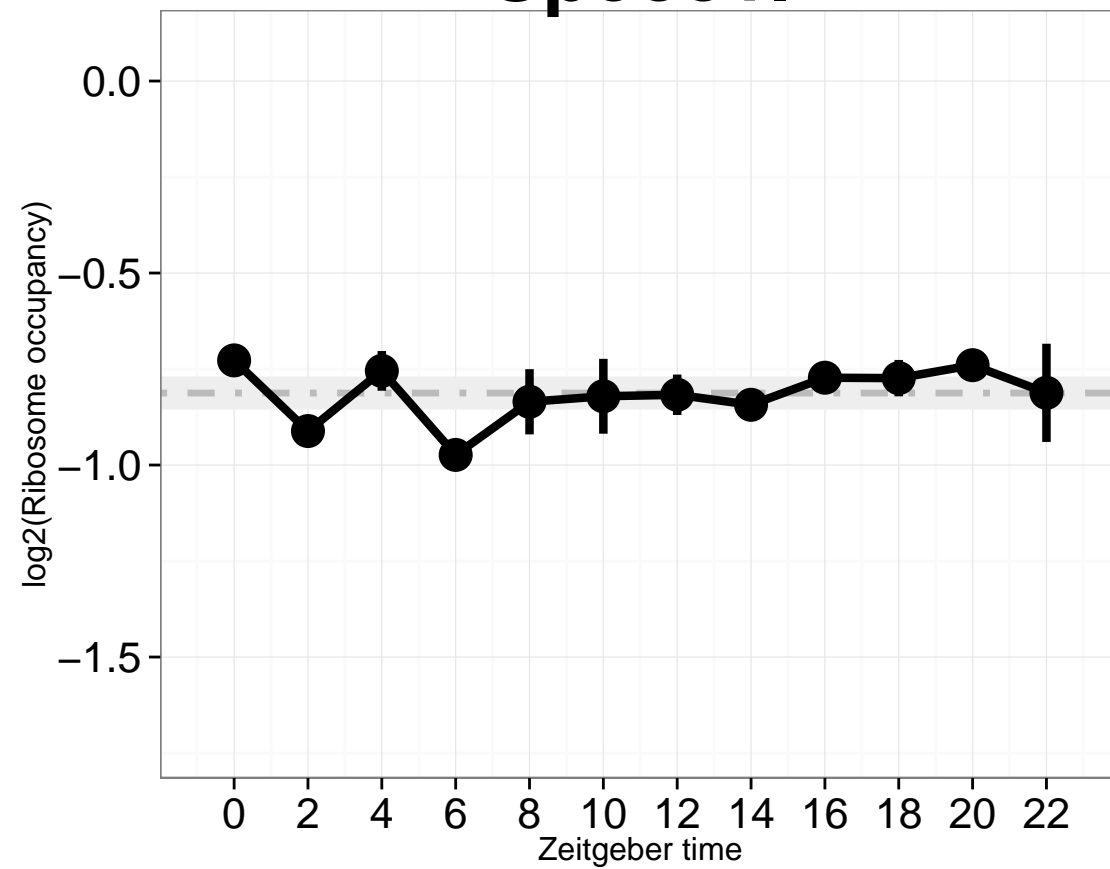

Supplement: Supplementary file 1552 [file 1]

# Arhgef19

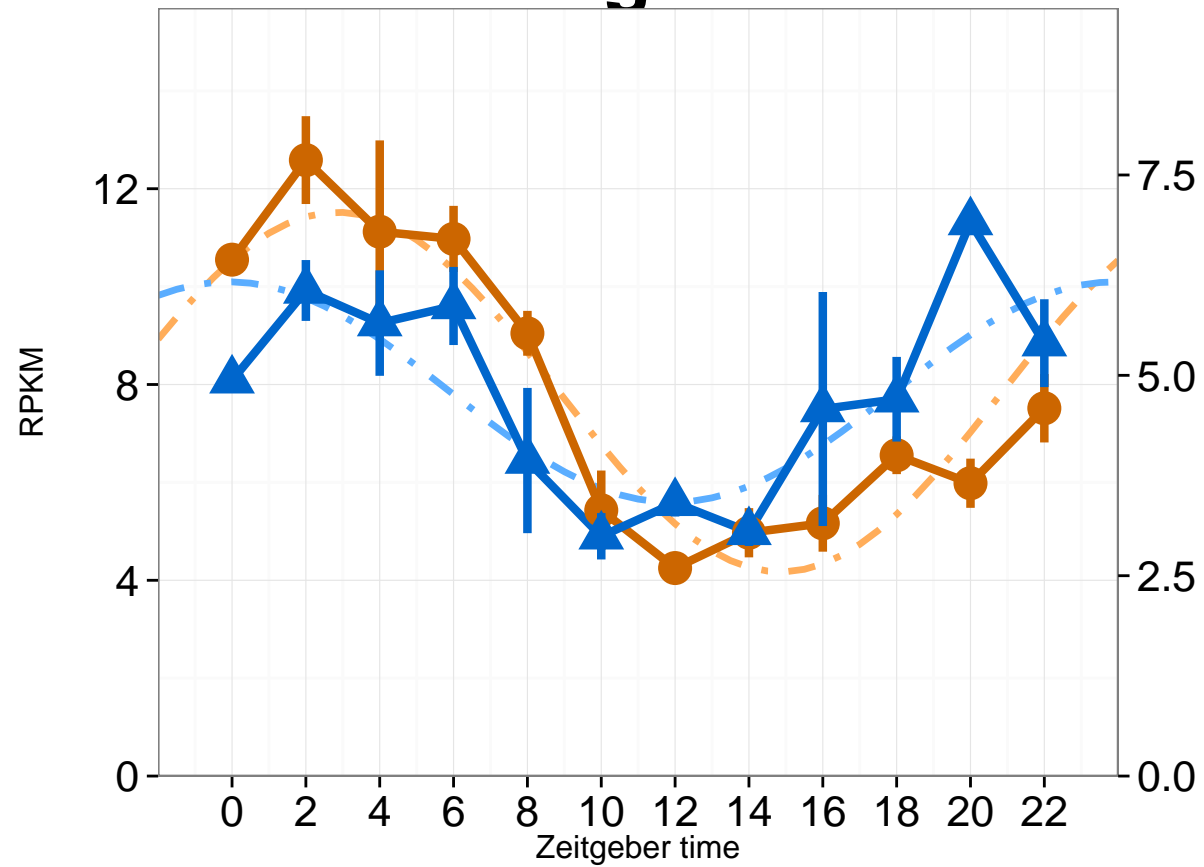

# Arhgef19

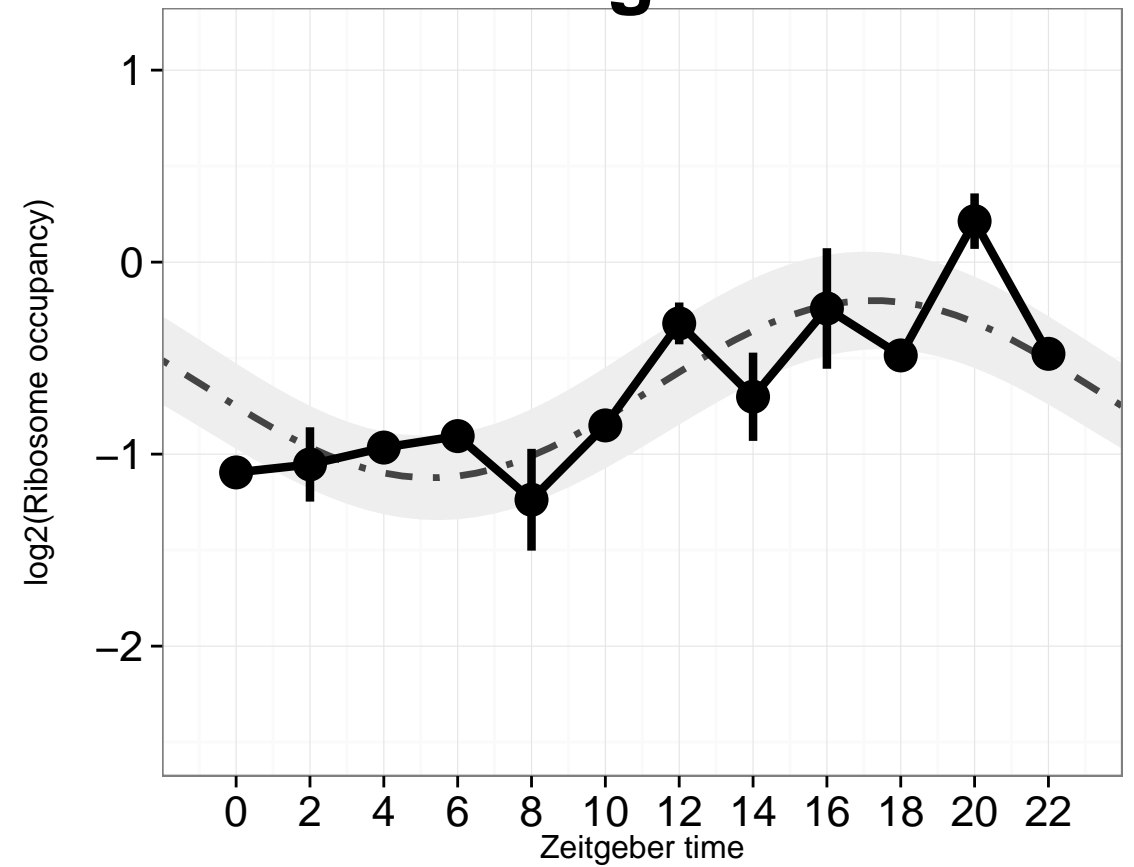

Supplement: Supplementary file 1553 [file 1]

# Sec11a

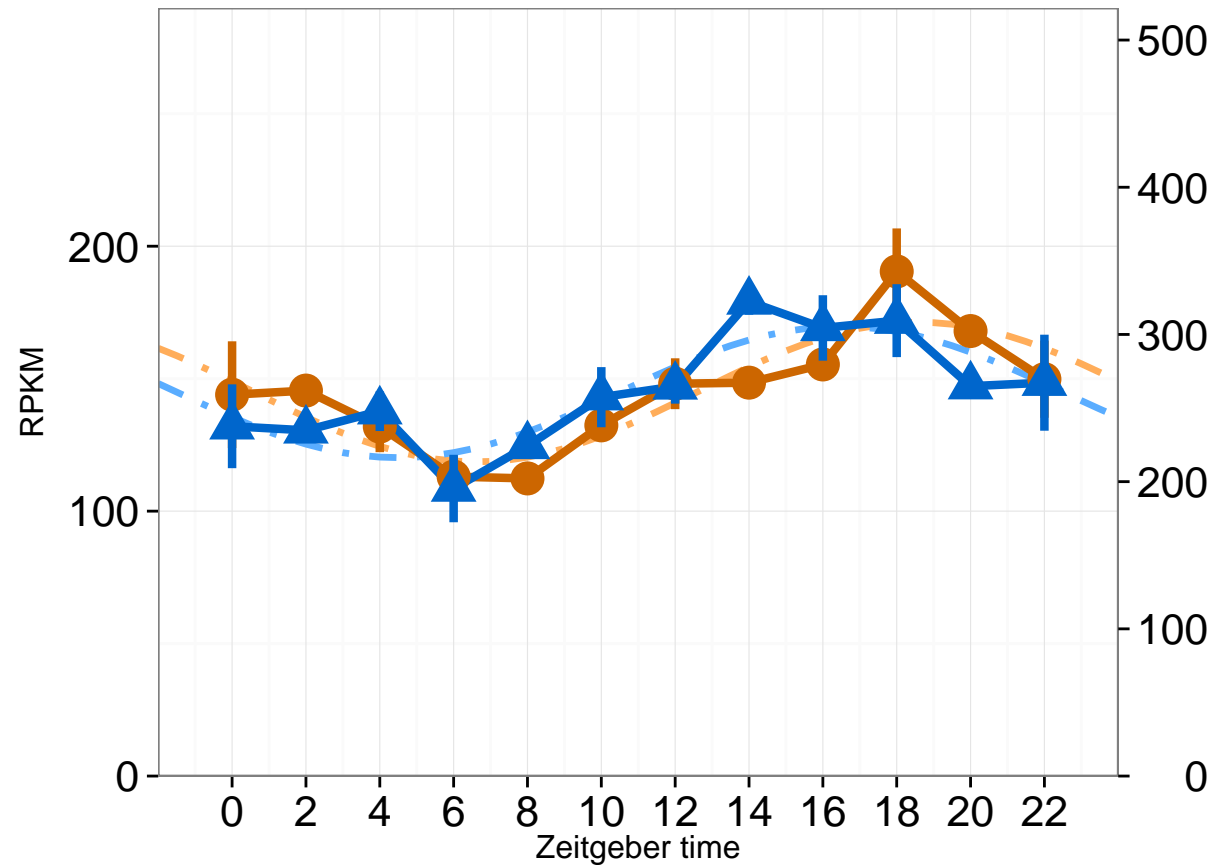

# Sec11a

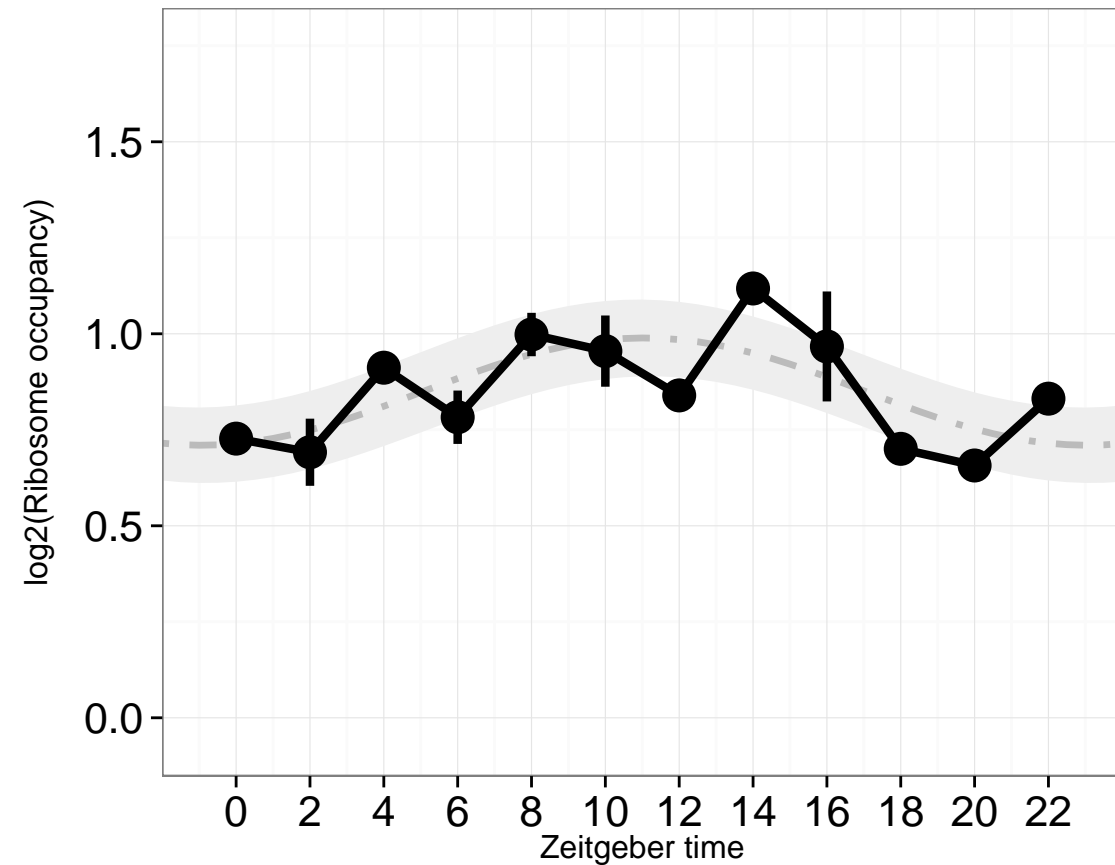

Supplement: Supplementary file 1554 [file 1]

# Pts

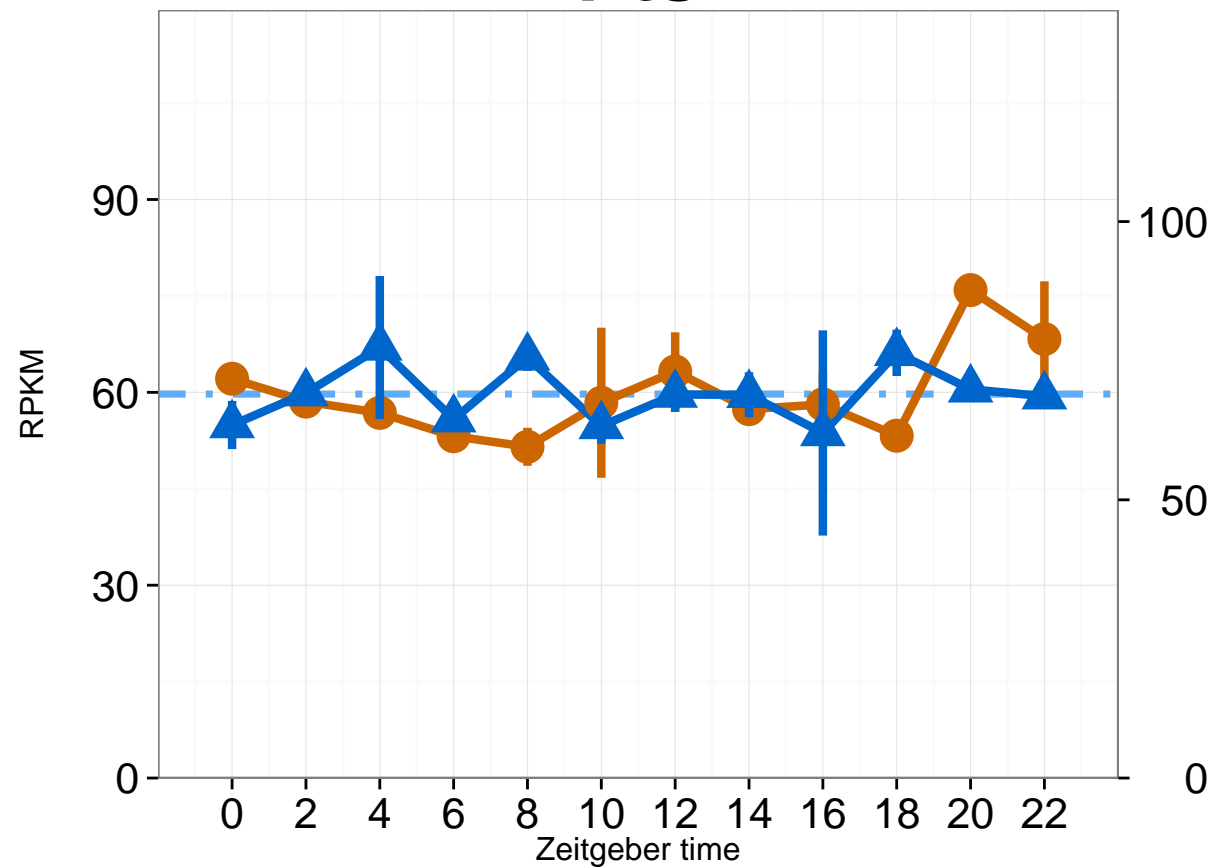

# Pts

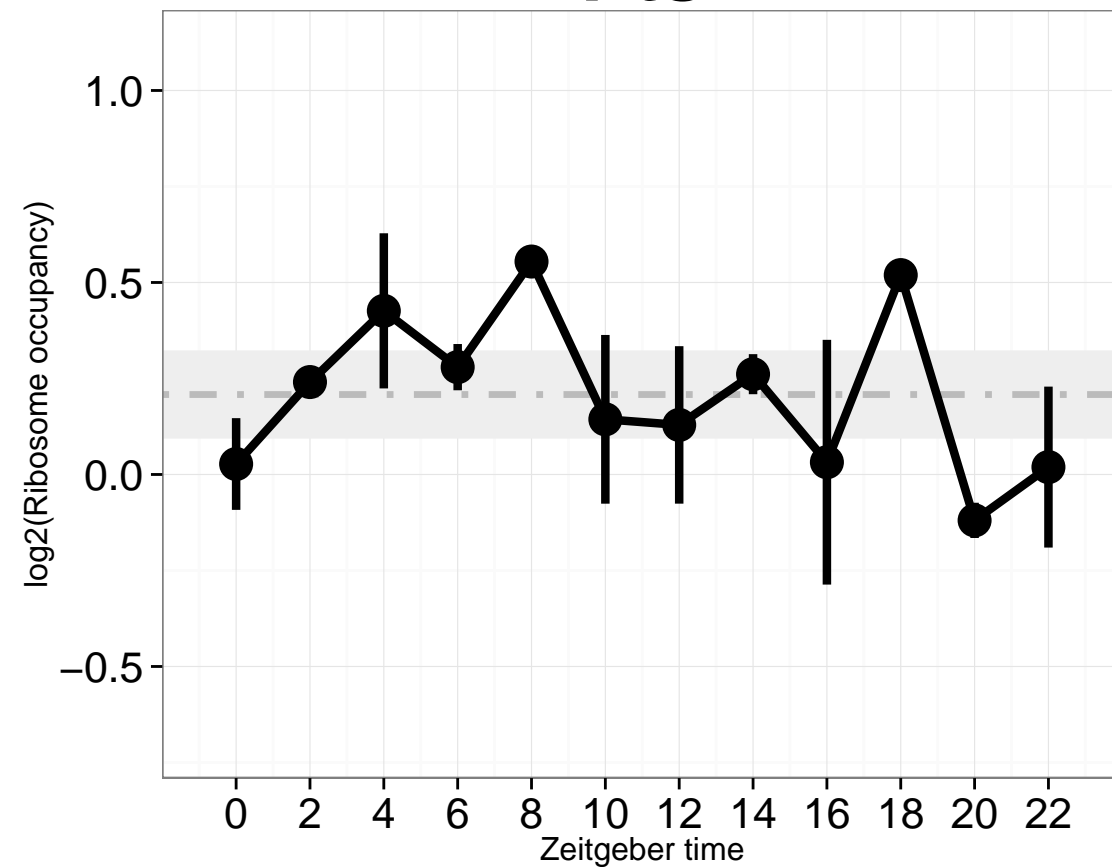

Supplement: Supplementary file 1555 [file 1]

## Hus1

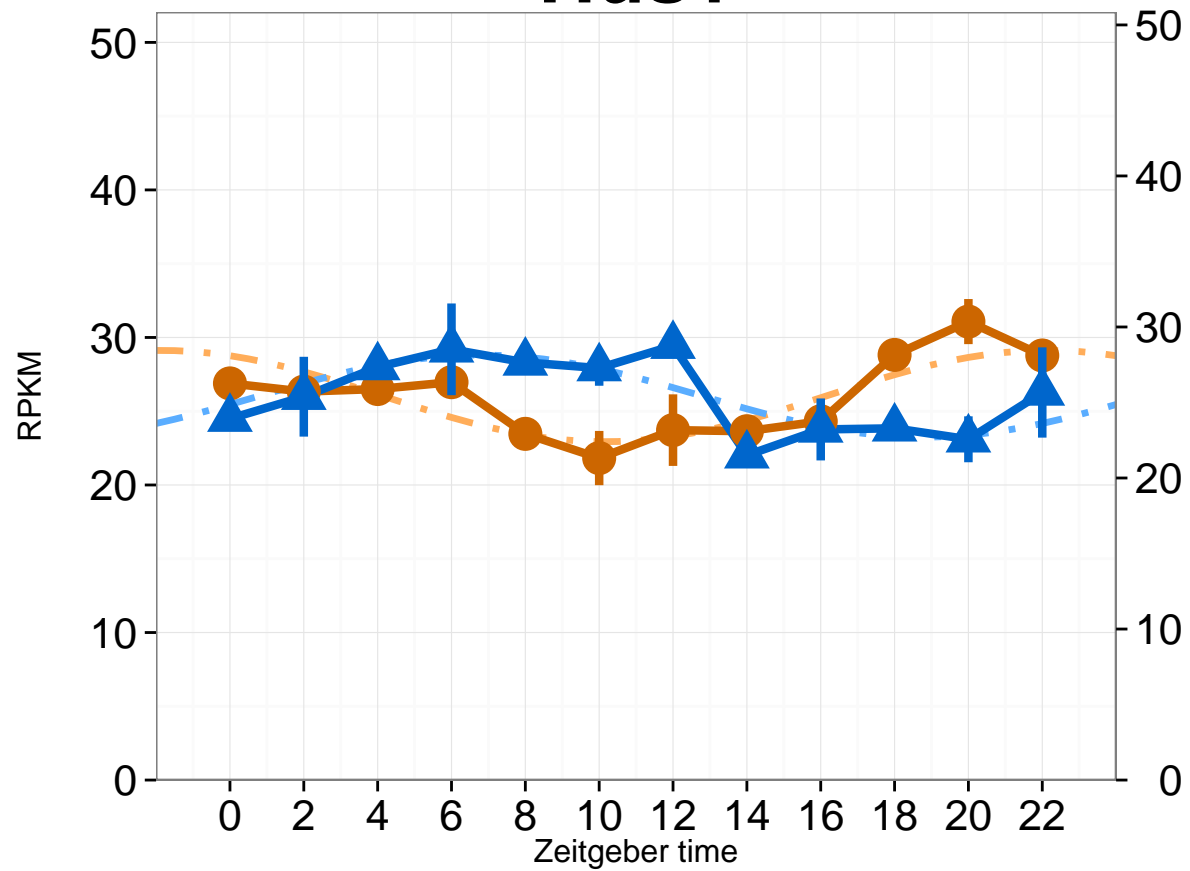

## Hus1

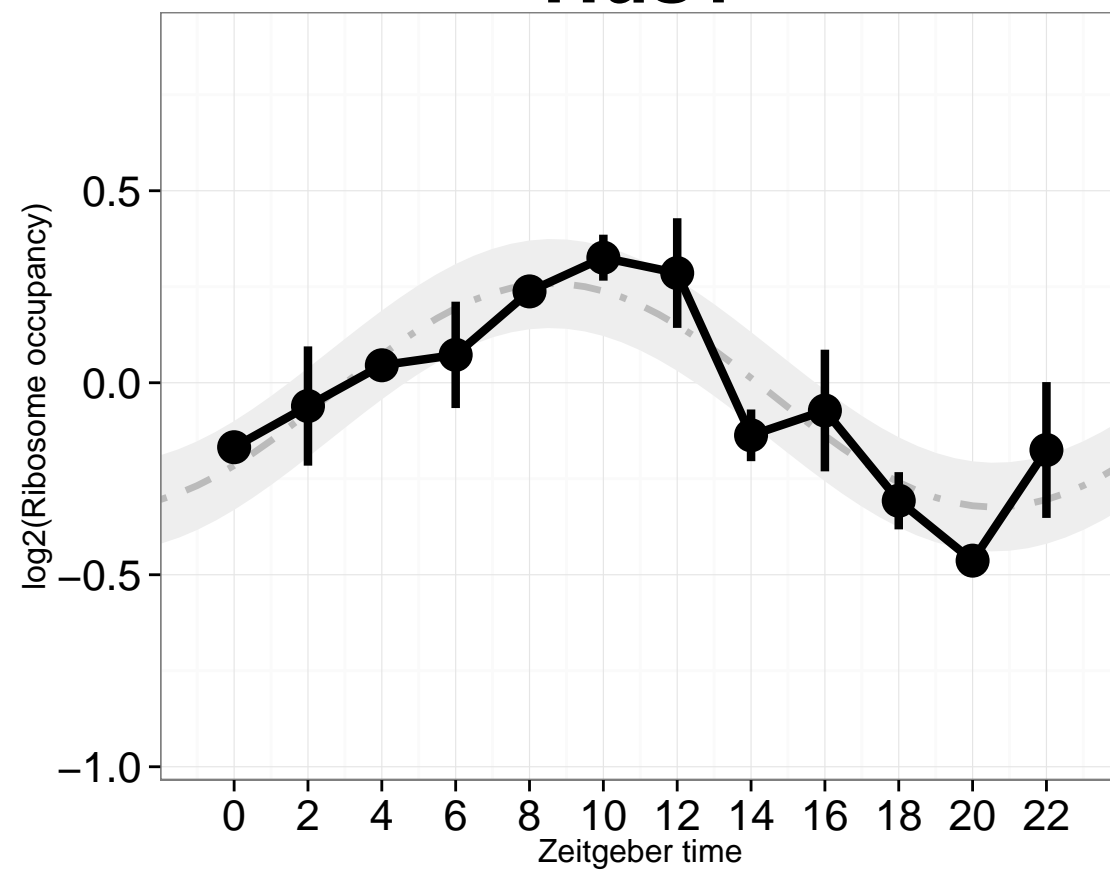

Supplement: Supplementary file 1556 [file 1]

## Aldh5a1

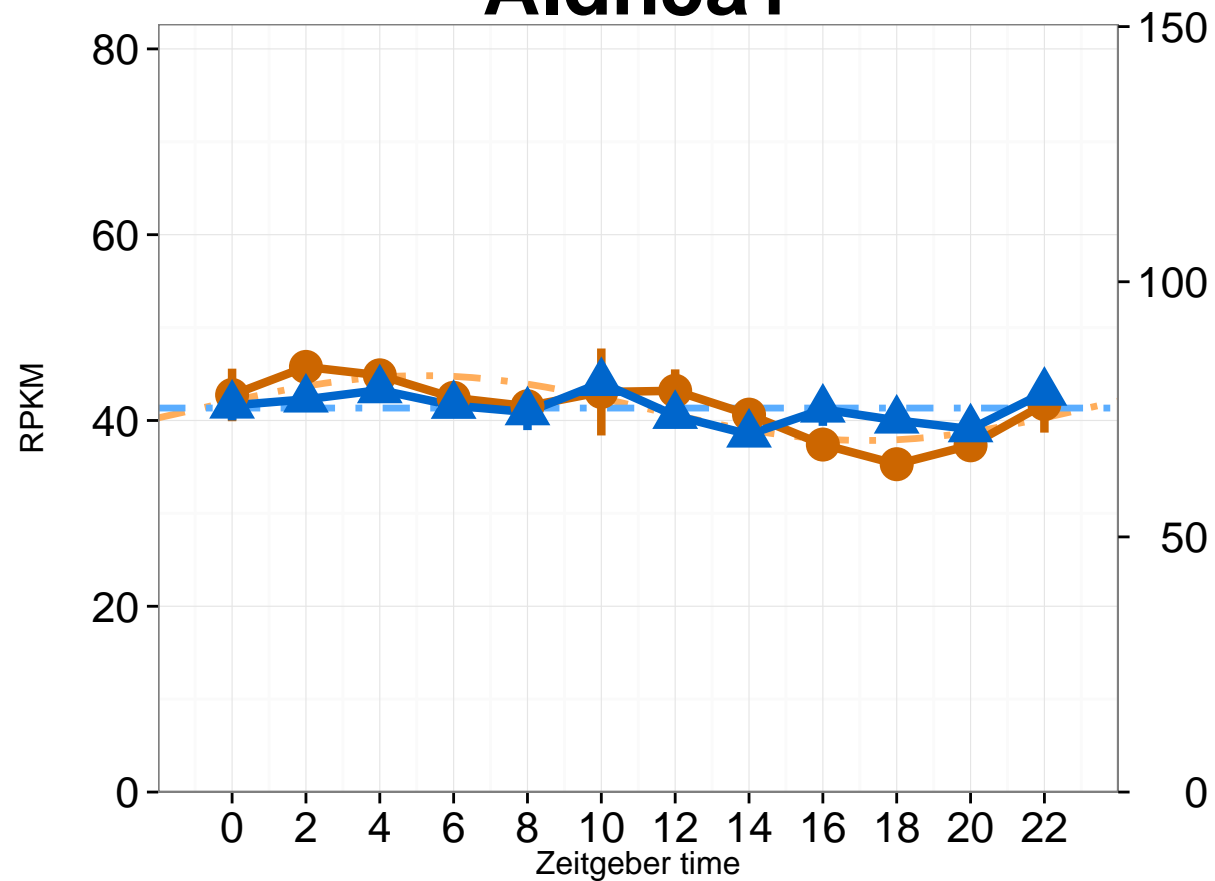

## Aldh5a1

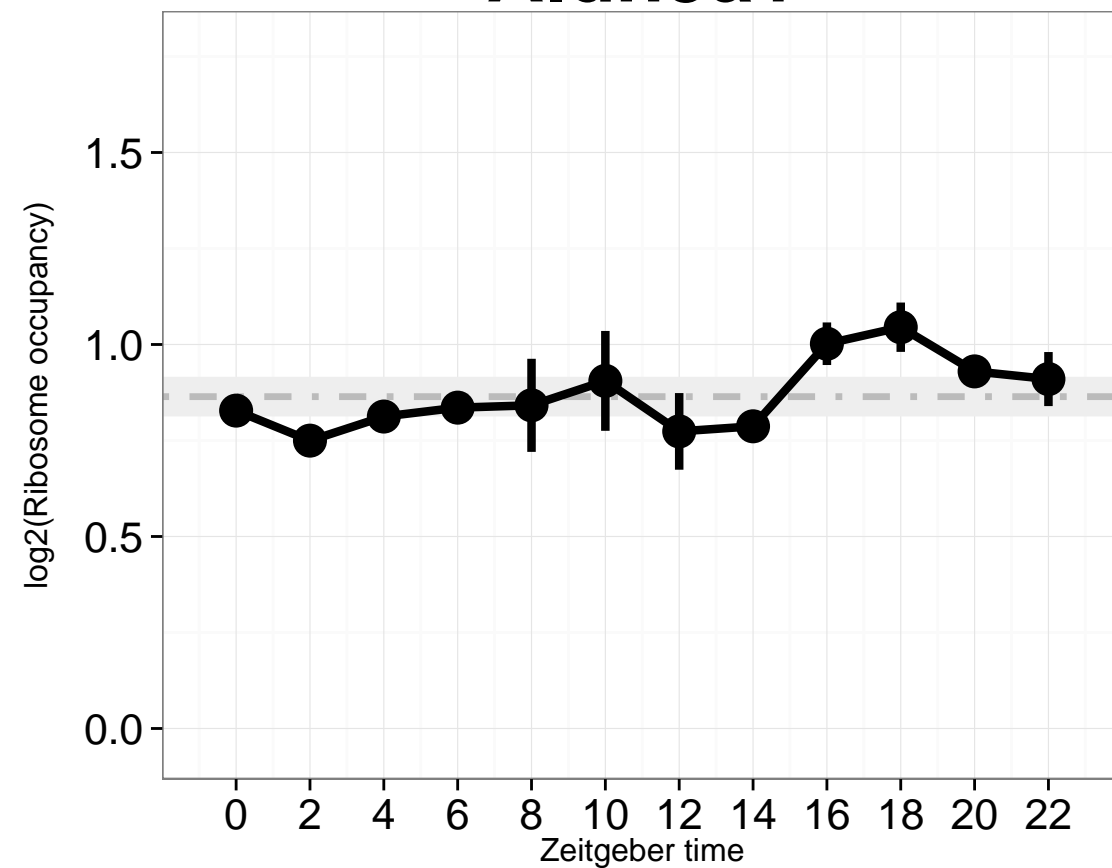

Supplement: Supplementary file 1557 [file 1]

## Vrk3

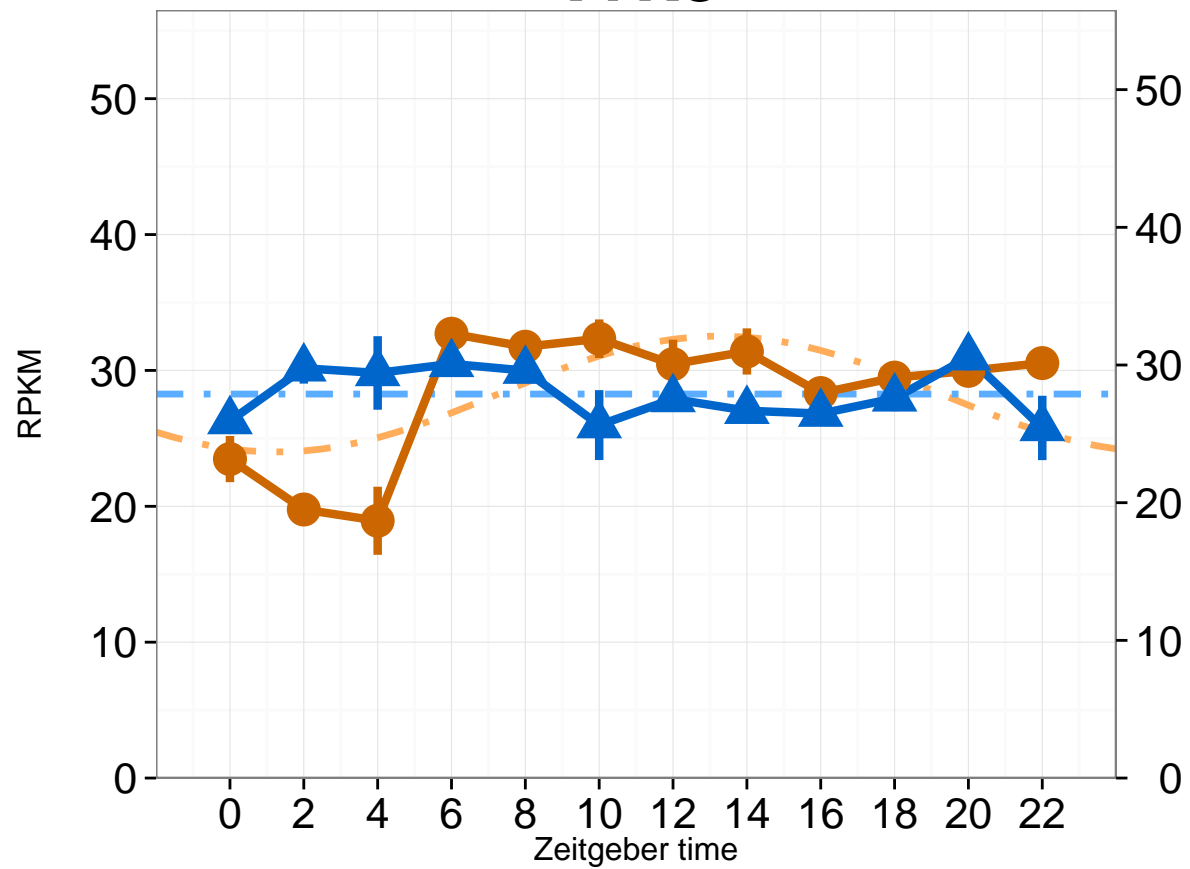

## Vrk3

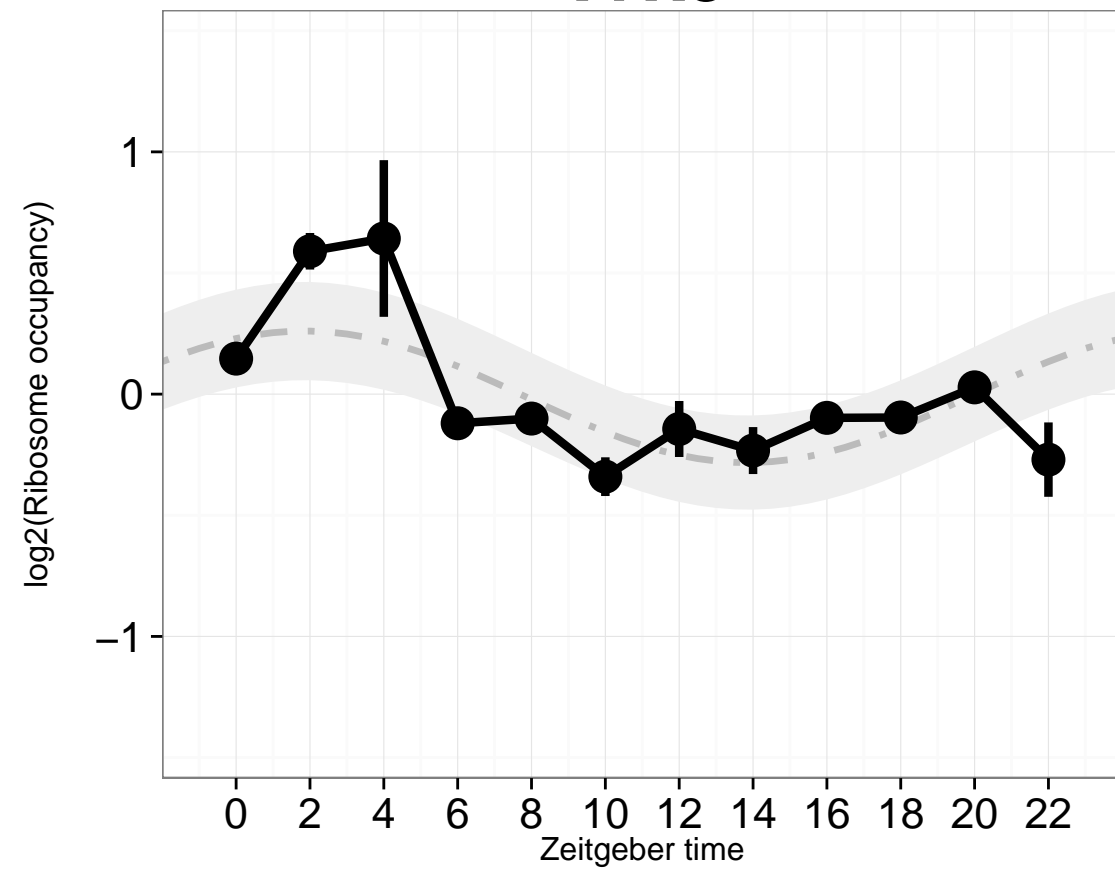

Supplement: Supplementary file 1558 [file 1]

# Dusp22

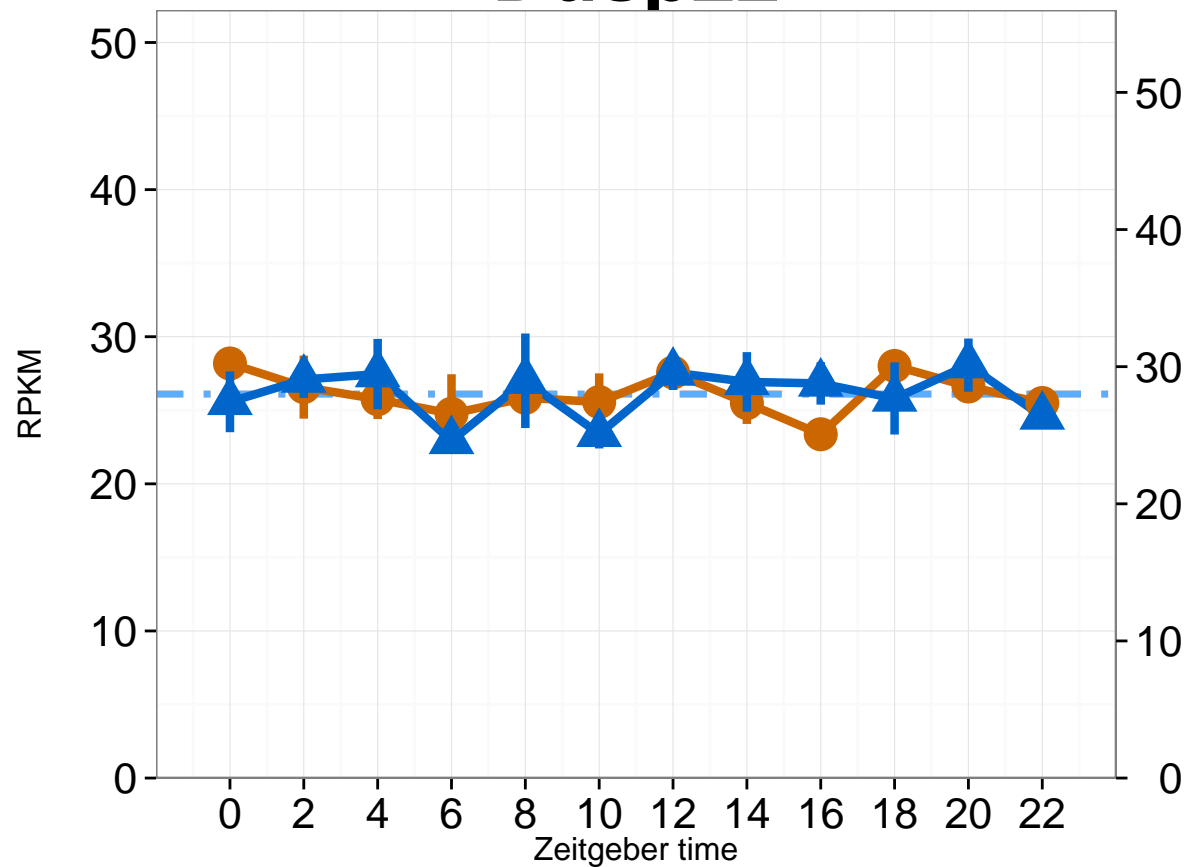

# Dusp22

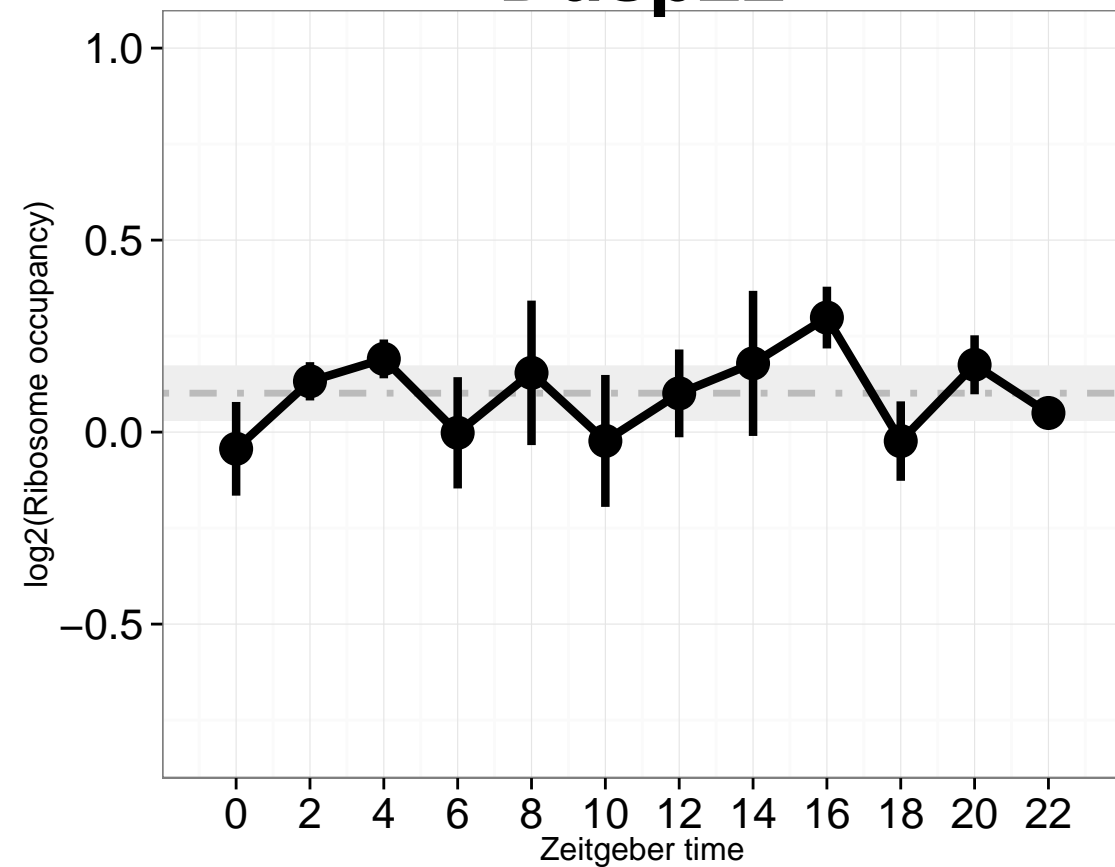

Supplement: Supplementary file 1559 [file 1]

## Sec23b

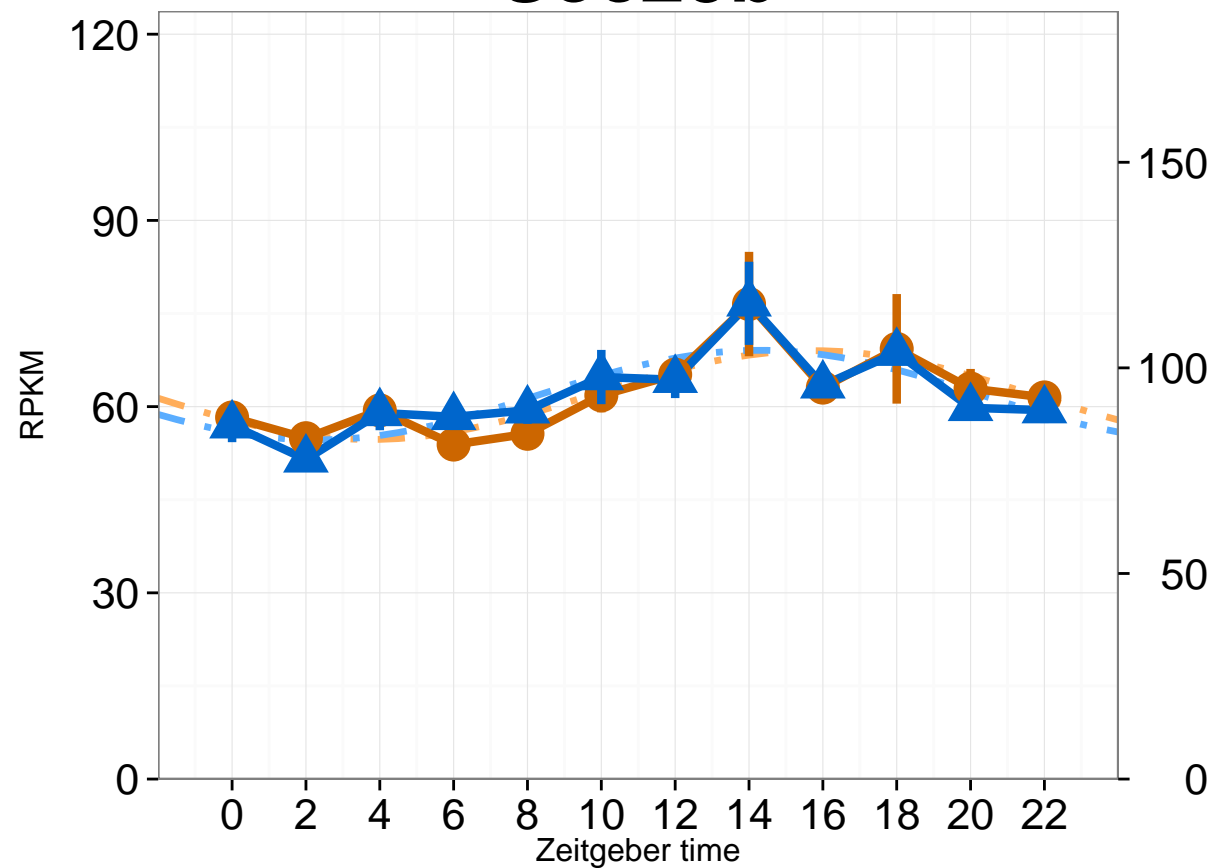

## Sec23b

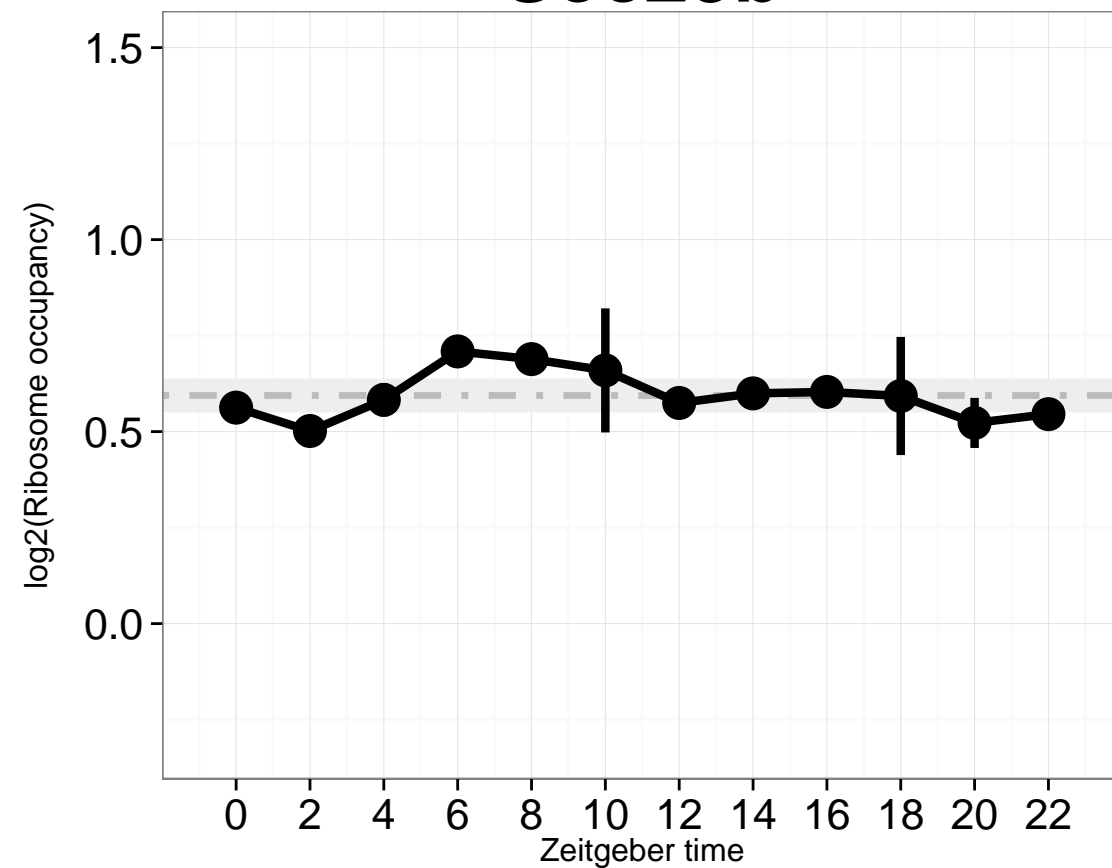

Supplement: Supplementary file 1560 [file 1]

## Pdp2

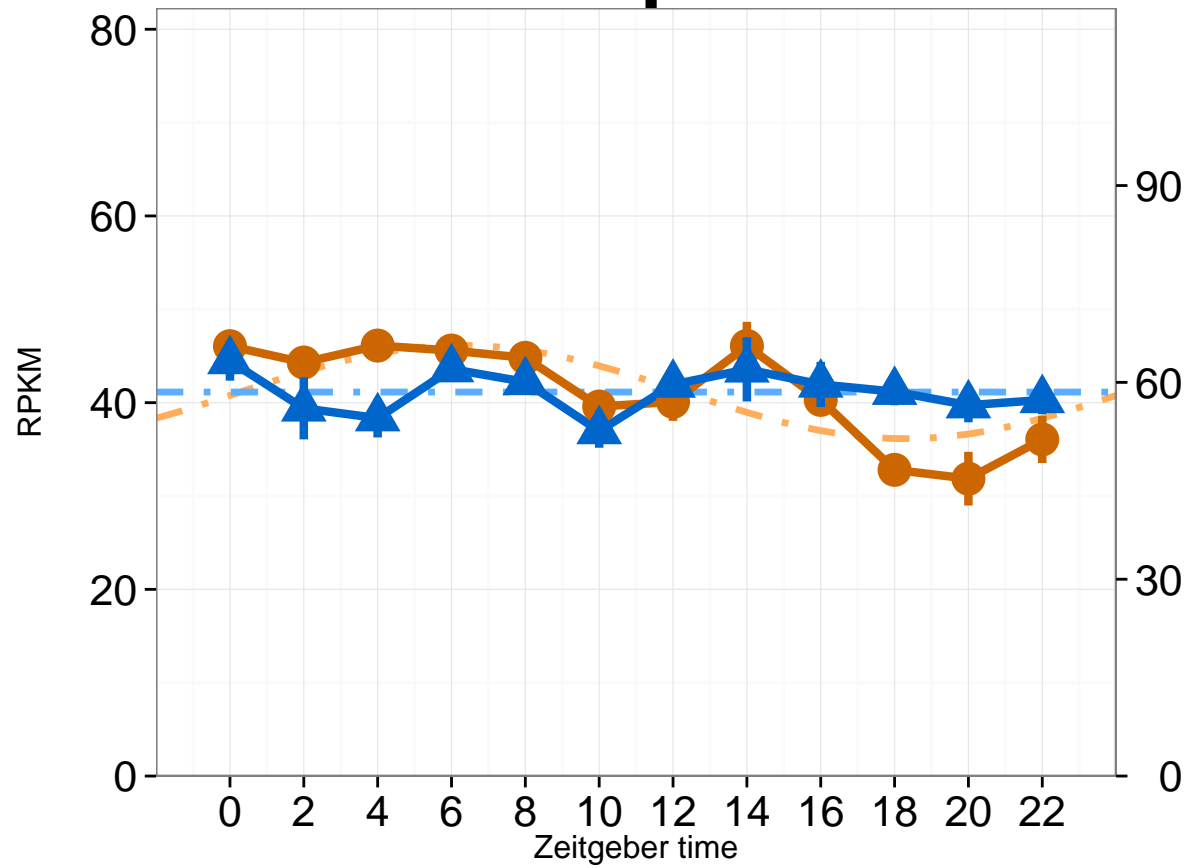

## Pdp2

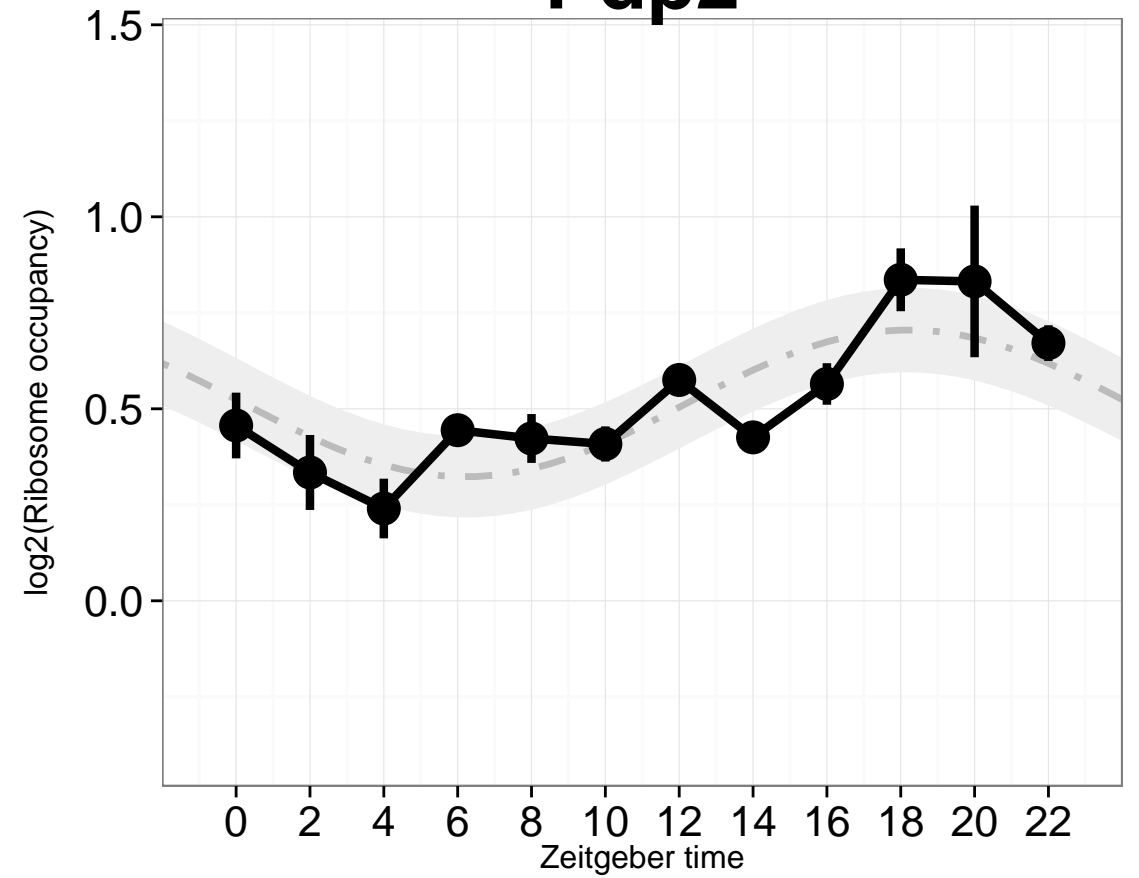

Supplement: Supplementary file 1561 [file 1]

# Igf2bp1

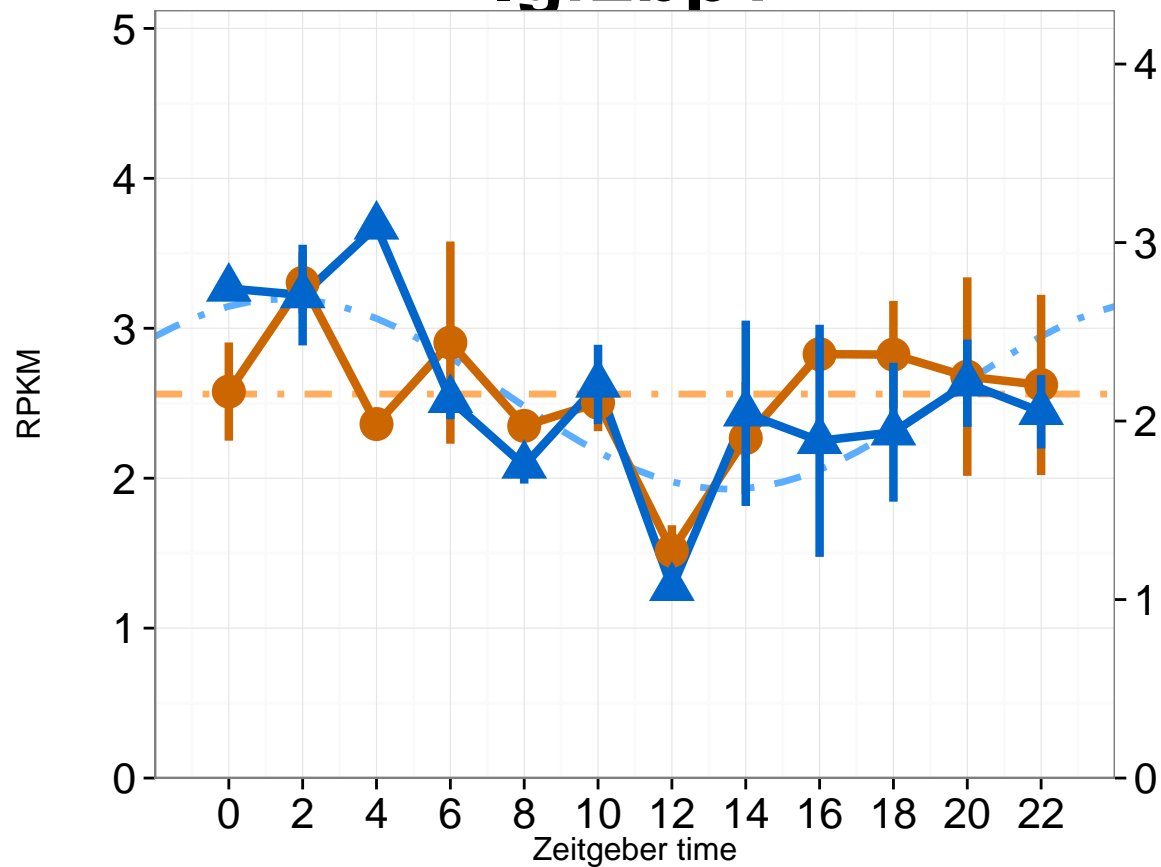

# Igf2bp1

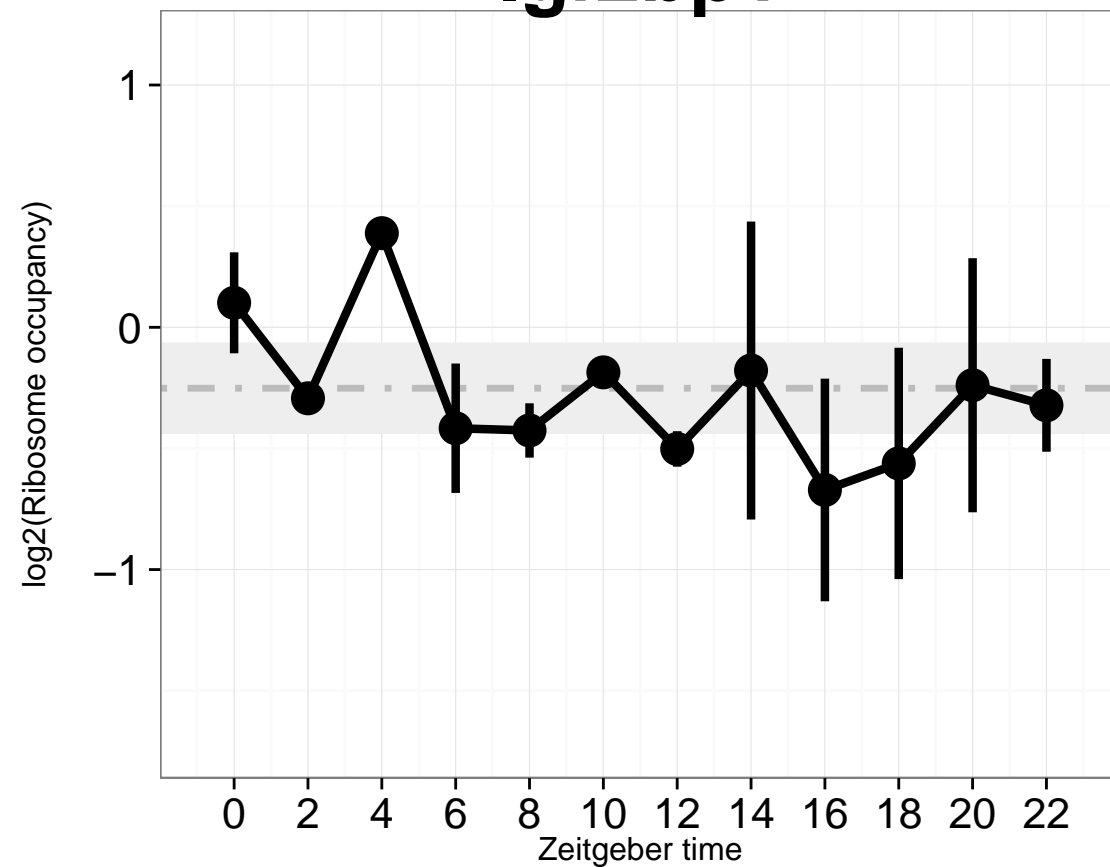

Supplement: Supplementary file 1562 [file 1]

## Slc25a10

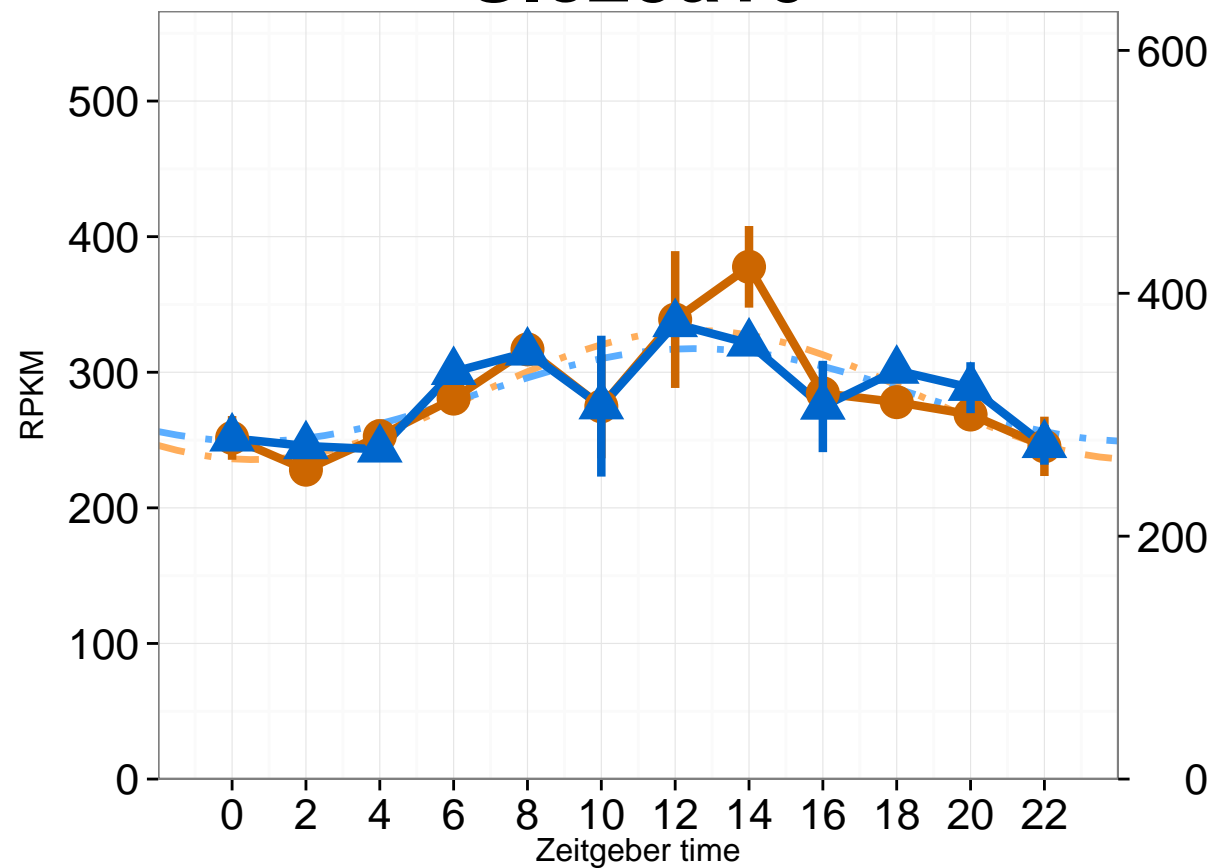

## Slc25a10

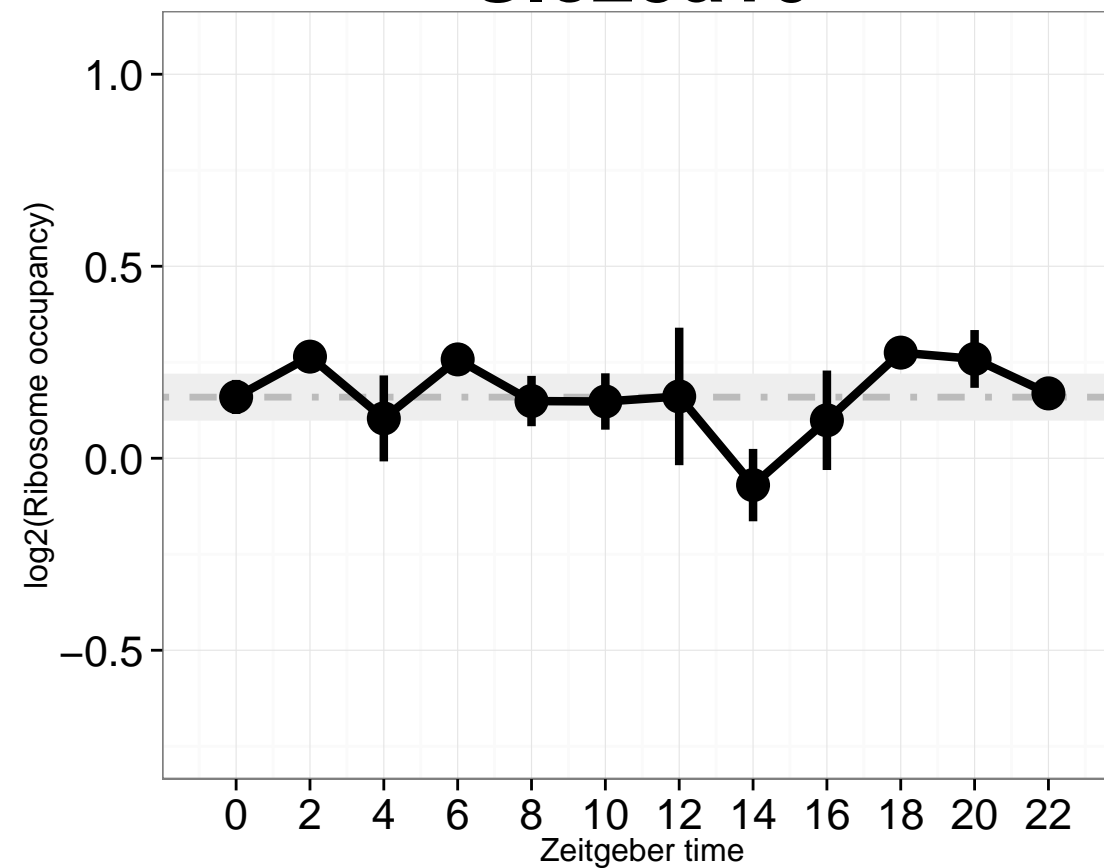

Supplement: Supplementary file 1563 [file 1]

# Daglb

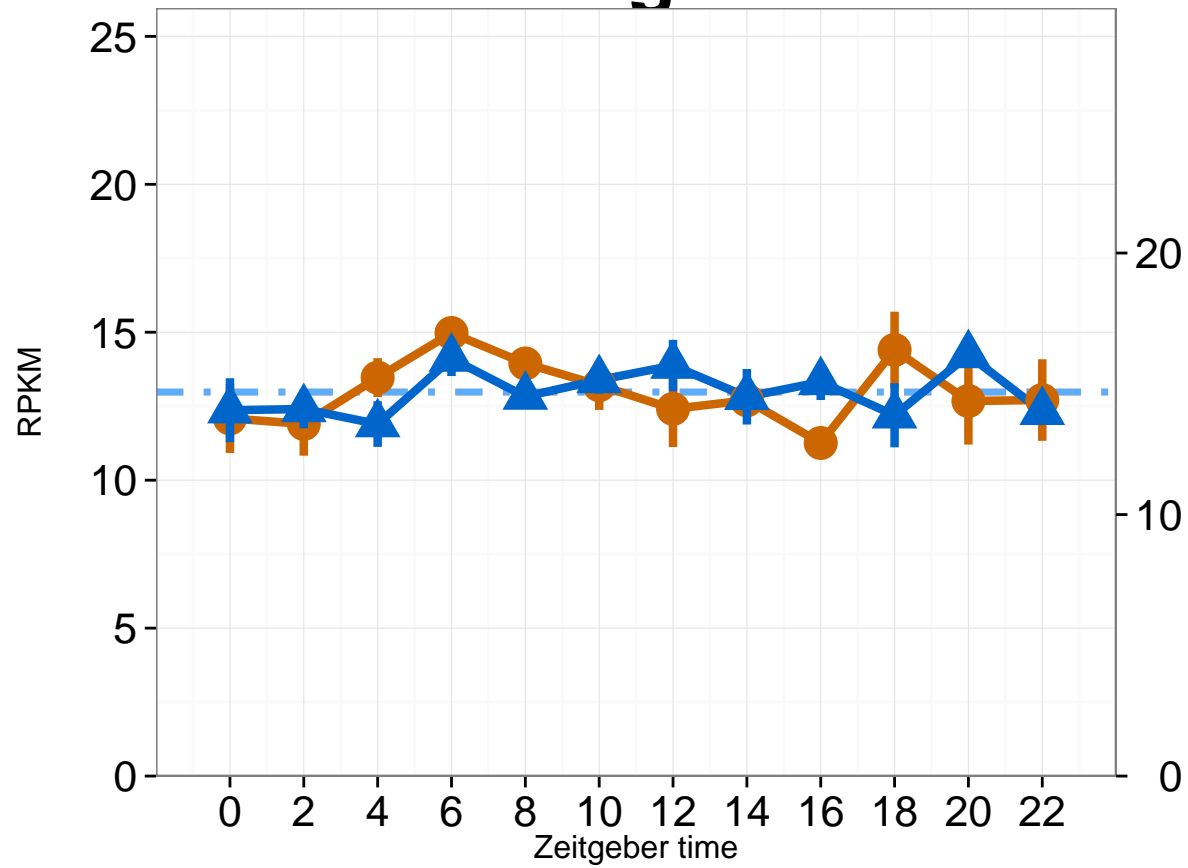

# Daglb

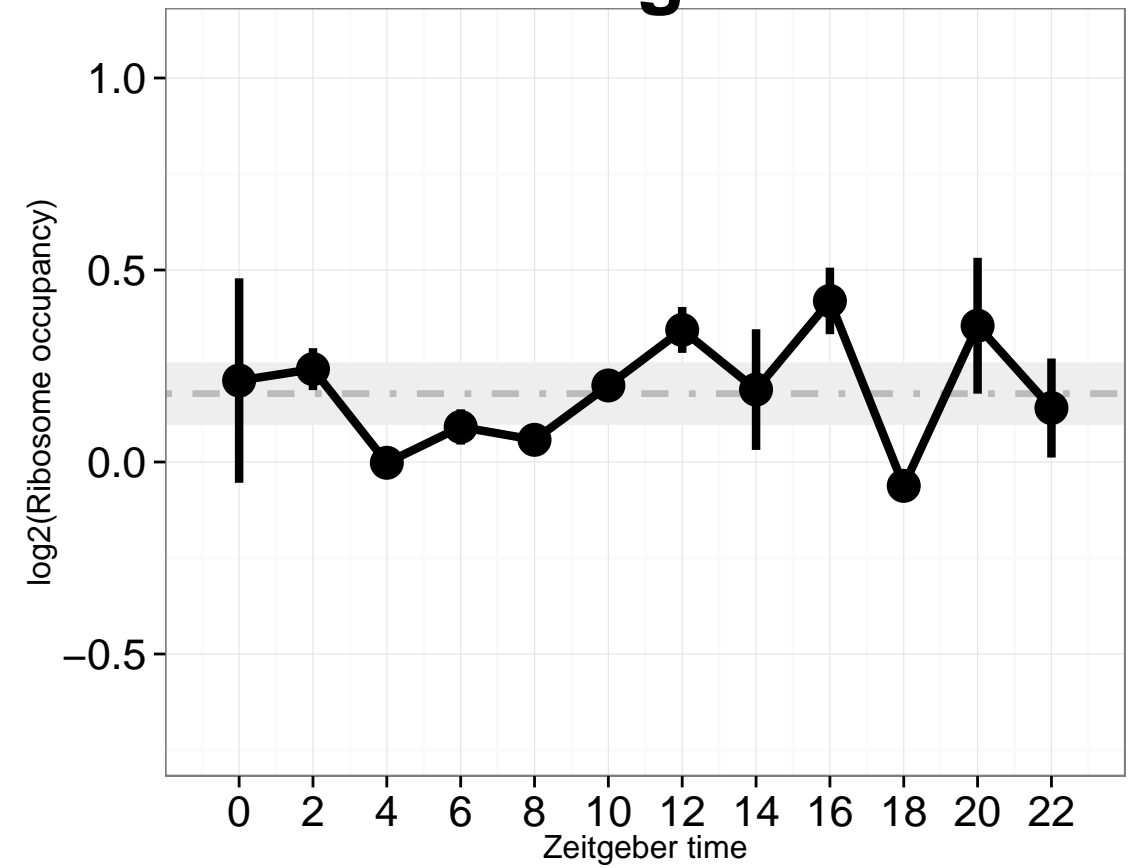

Supplement: Supplementary file 1564 [file 1]

# Mpped2

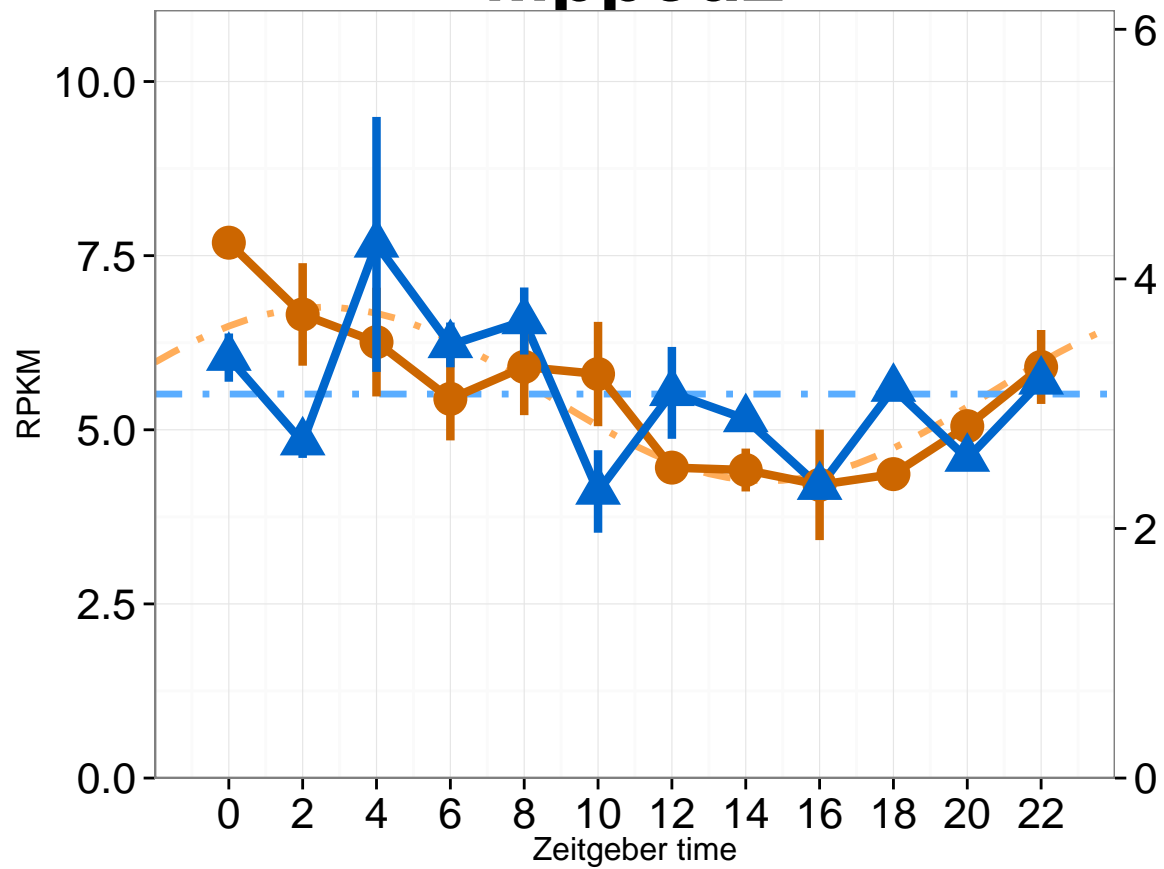

# Mpped2

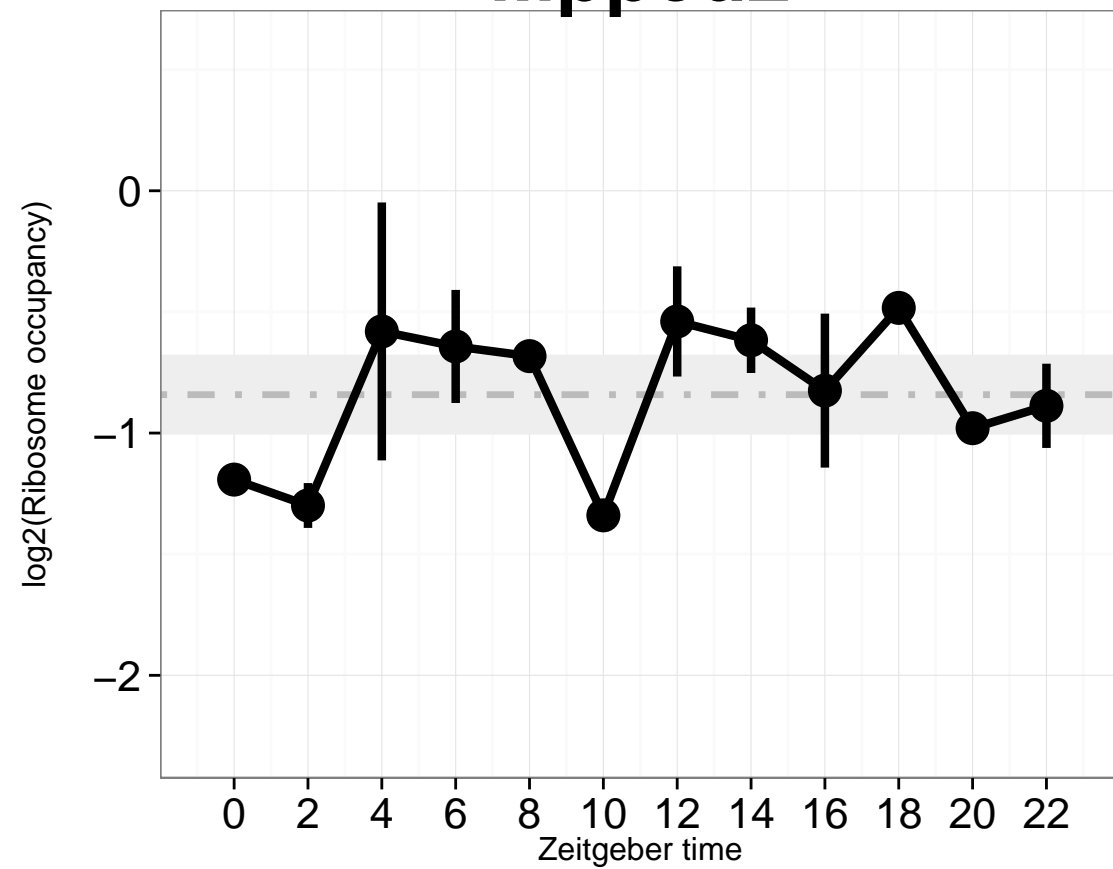

Supplement: Supplementary file 1565 [file 1]

## Zfp185

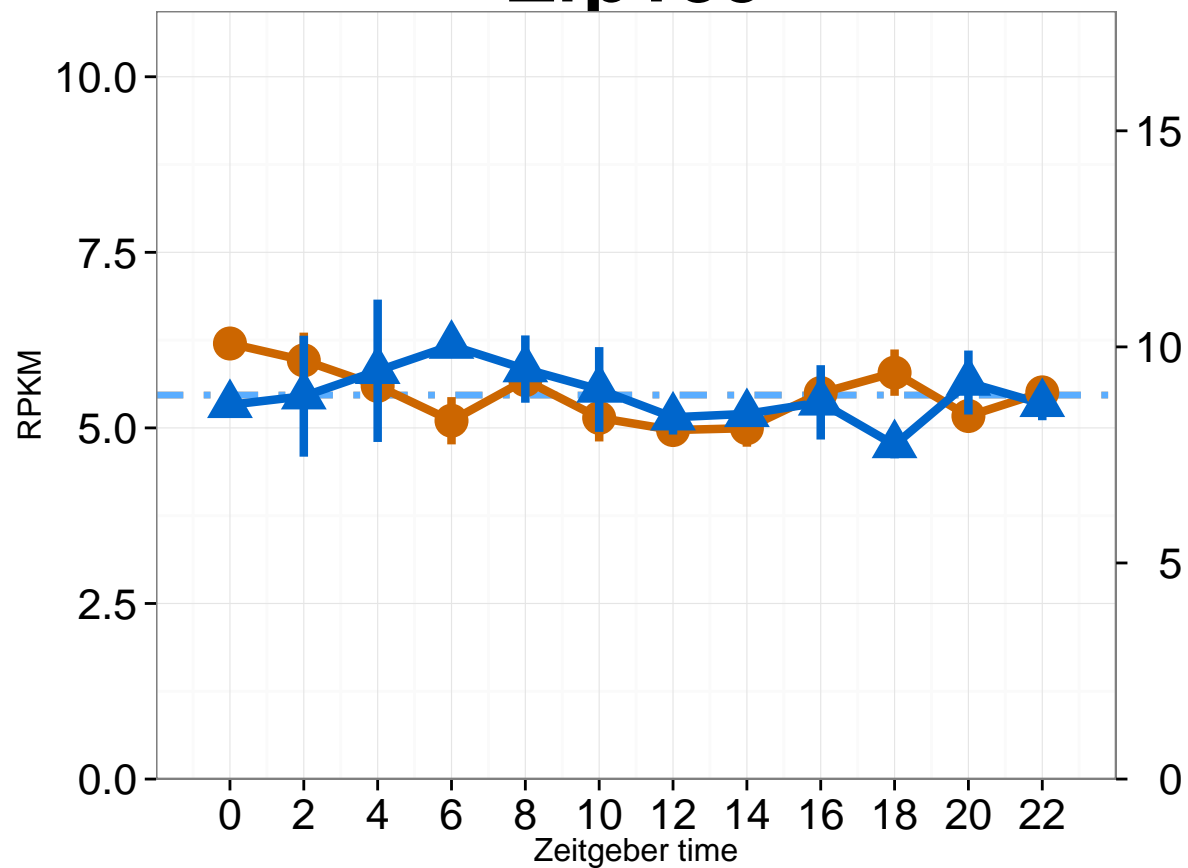

## Zfp185

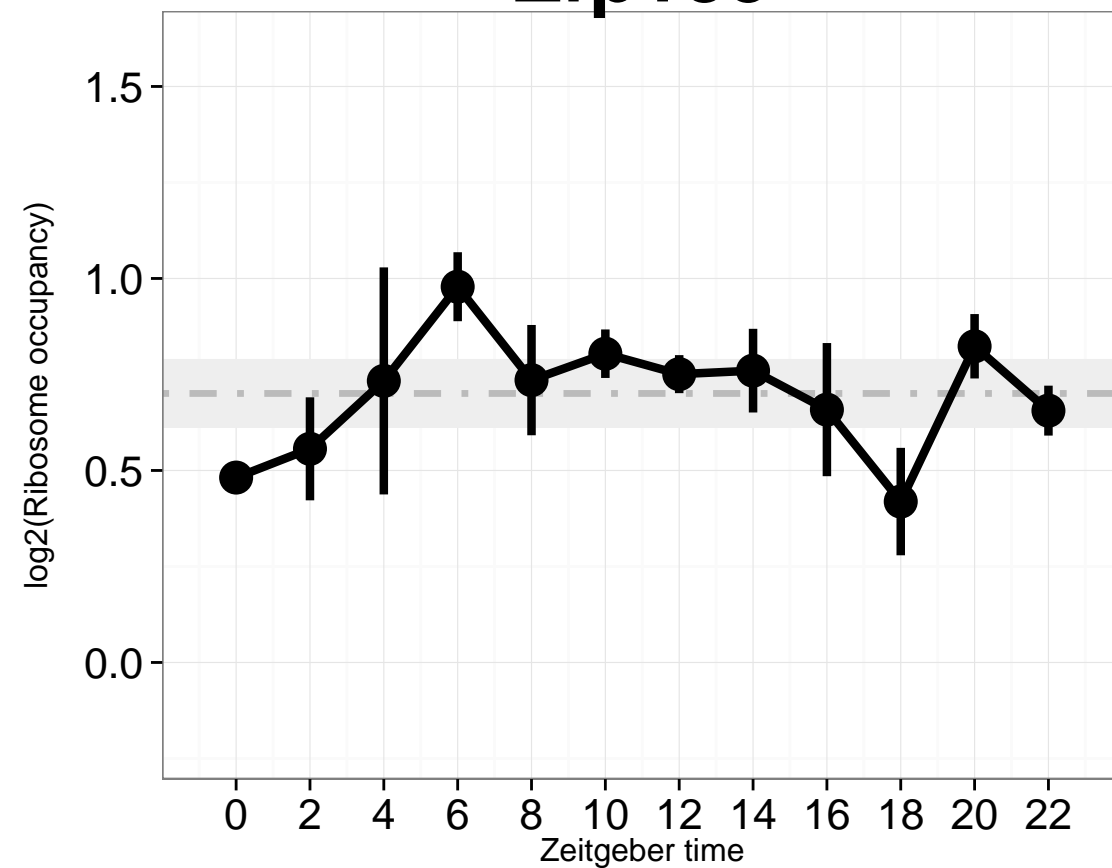

Supplement: Supplementary file 1566 [file 1]

# Setd6

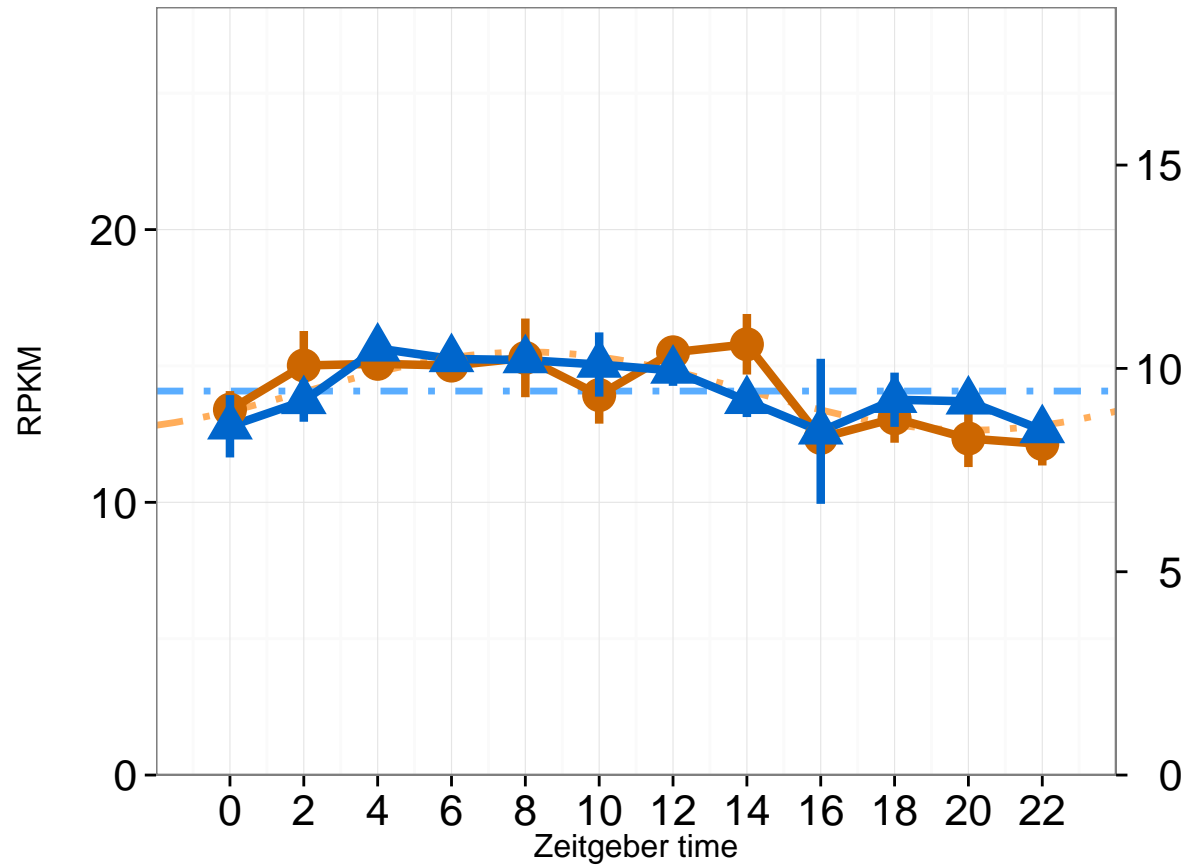

# Setd6

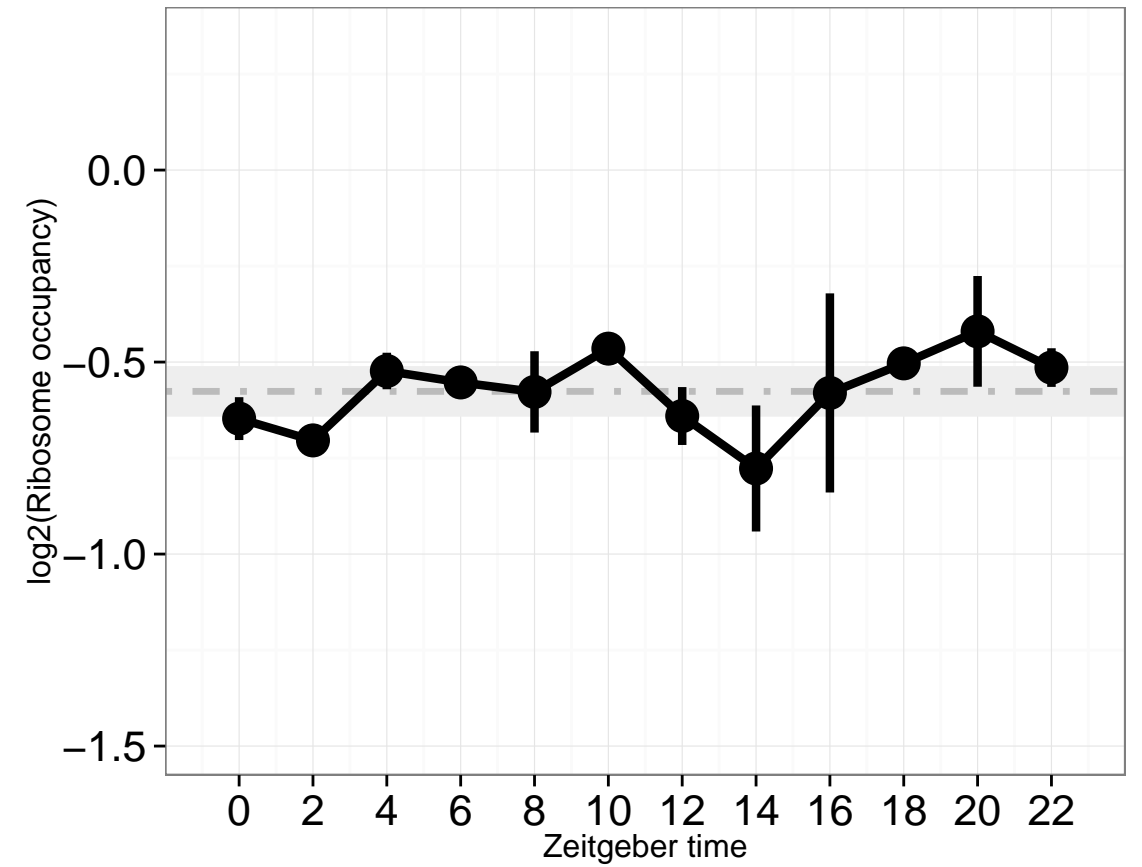

Supplement: Supplementary file 1567 [file 1]

# 2310030G06Rik

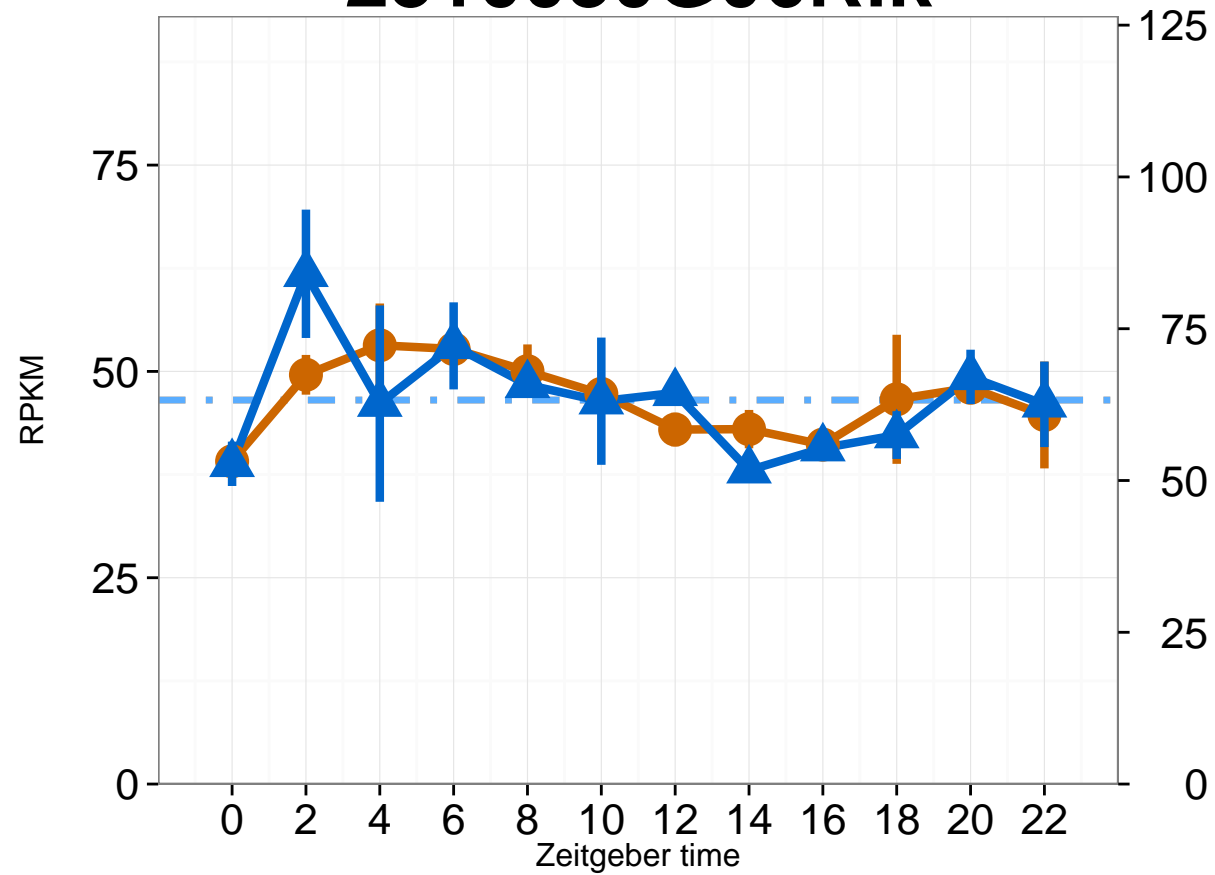

# 2310030G06Rik

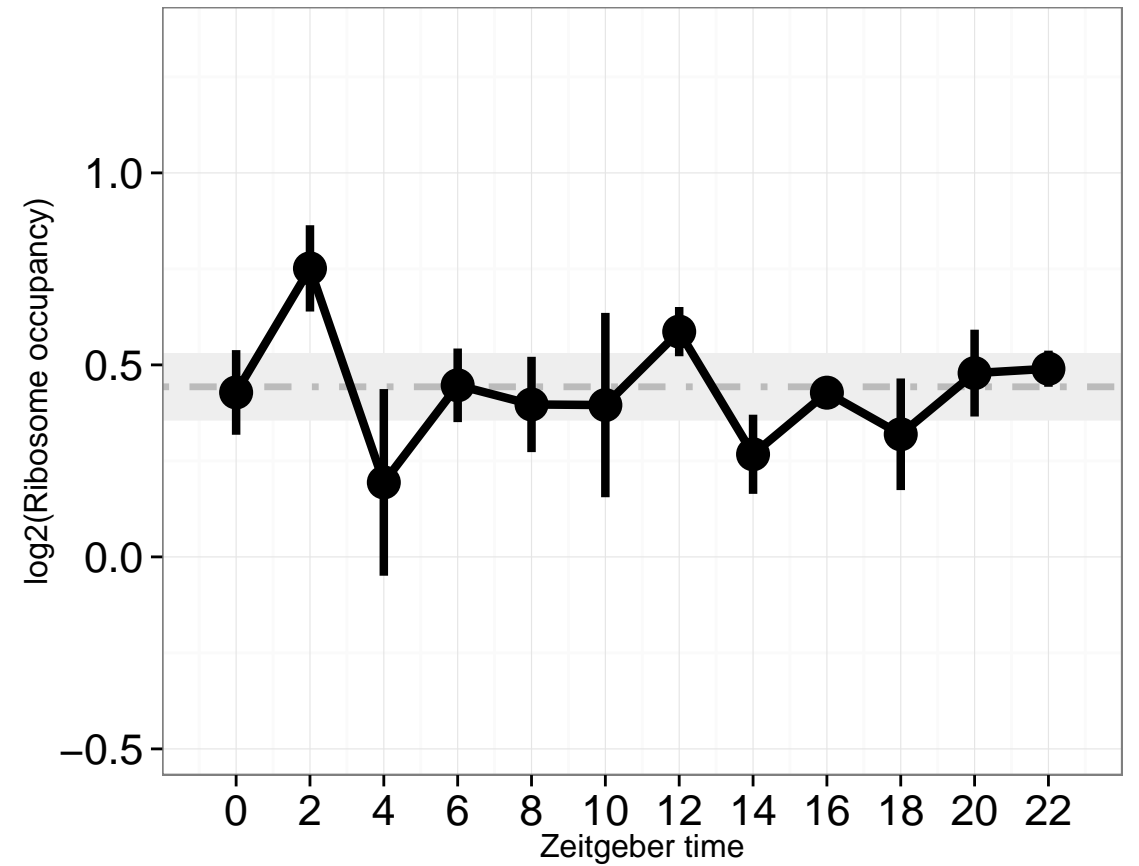

Supplement: Supplementary file 1568 [file 1]

## Slc6a12

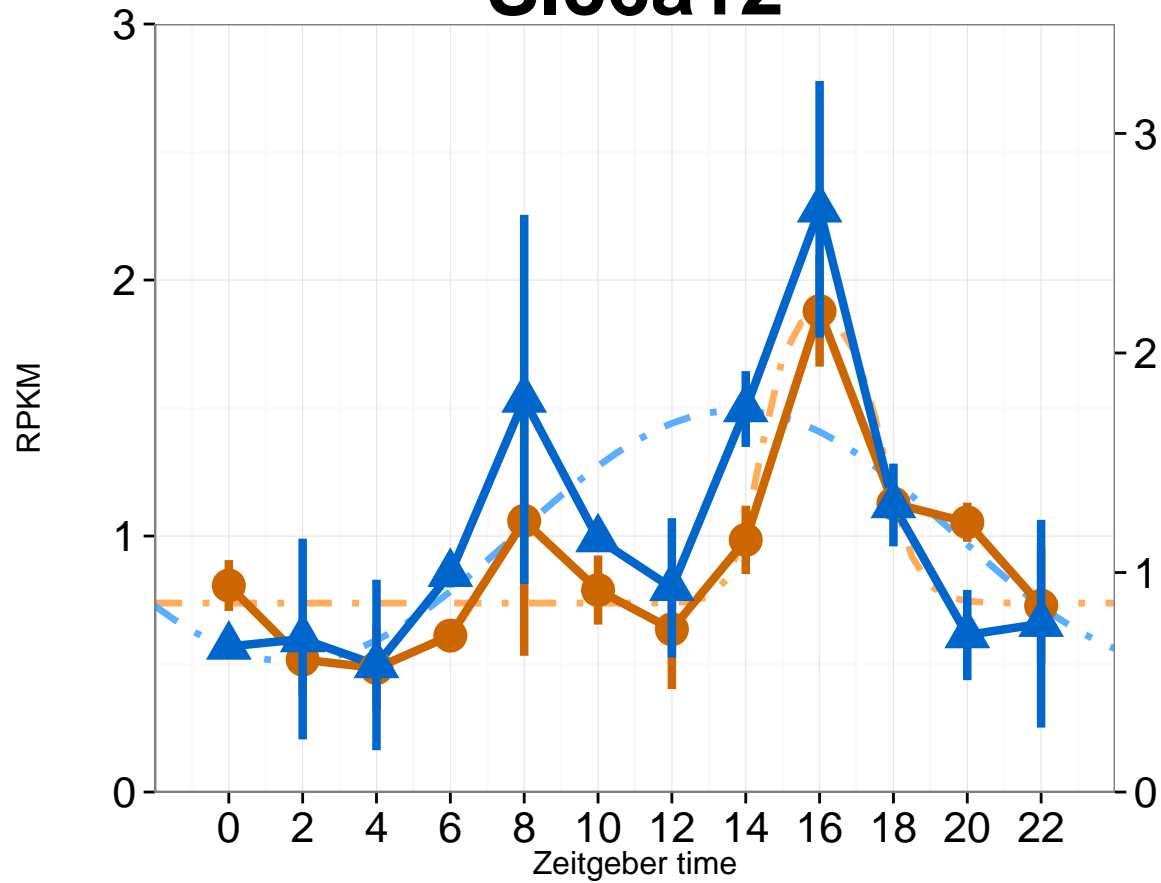

## Slc6a12

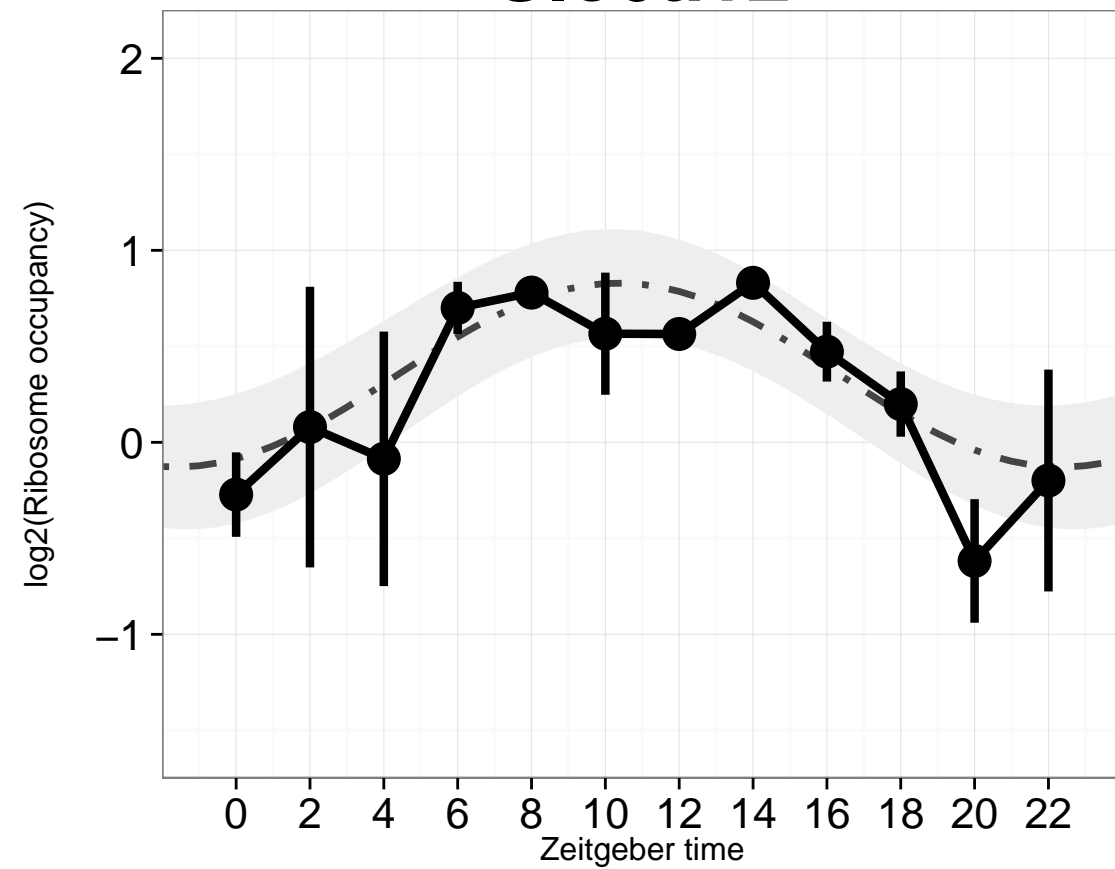

Supplement: Supplementary file 1569 [file 1]

# N4bp2l2

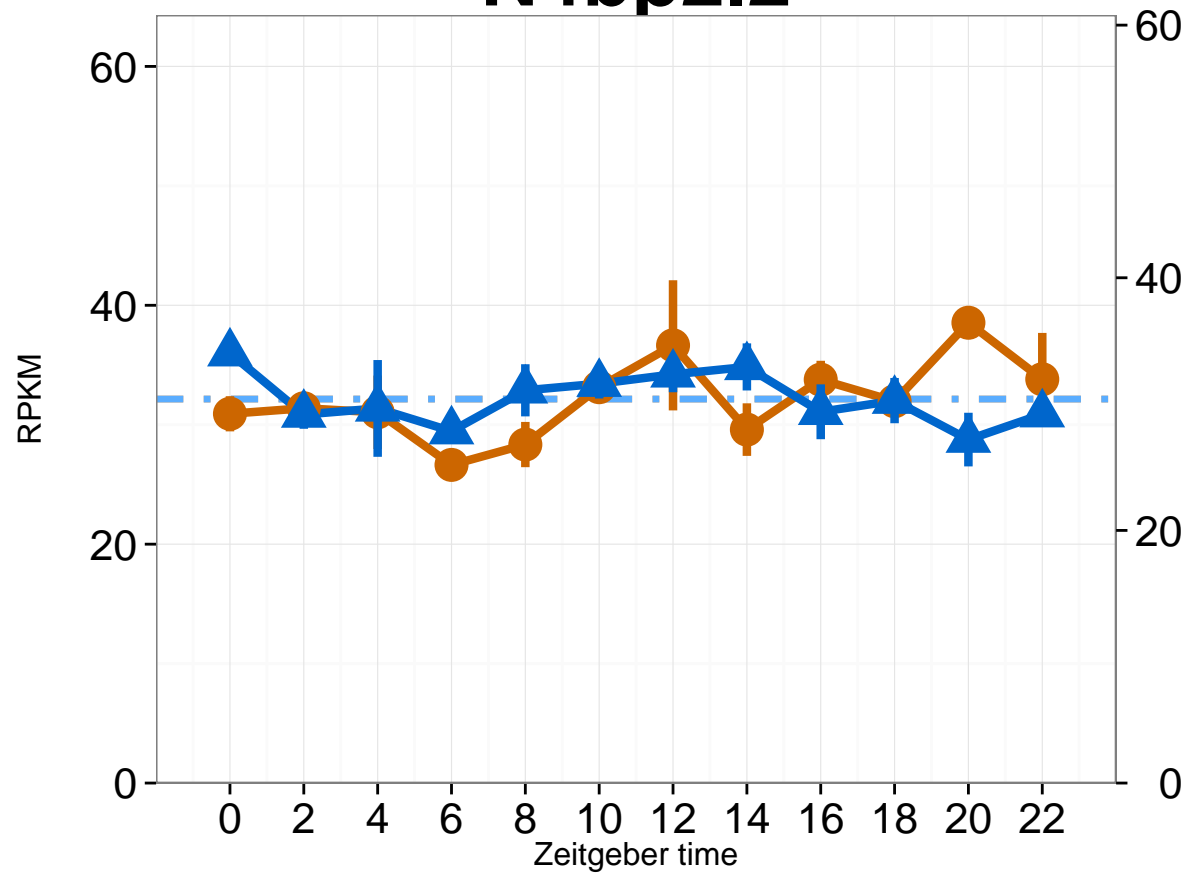

# N4bp2l2

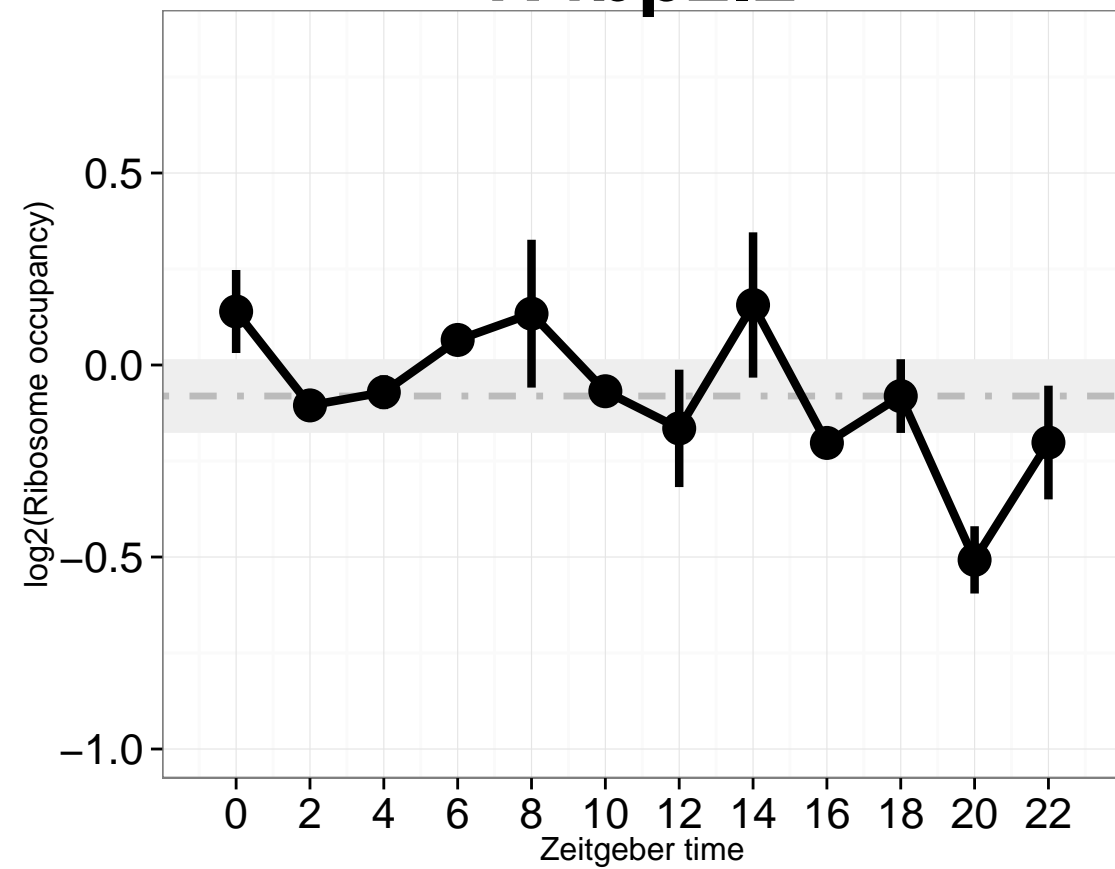

Supplement: Supplementary file 1570 [file 1]

# C230081A13Rik

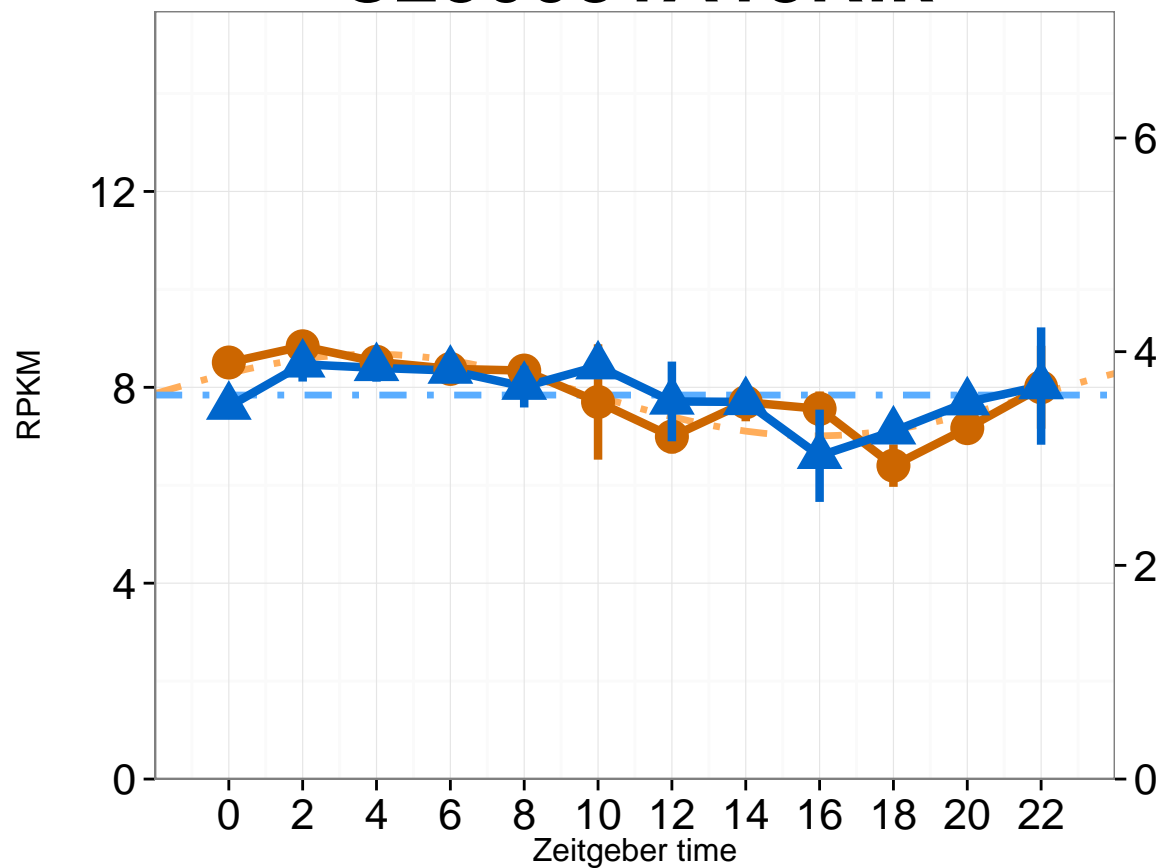

# C230081A13Rik

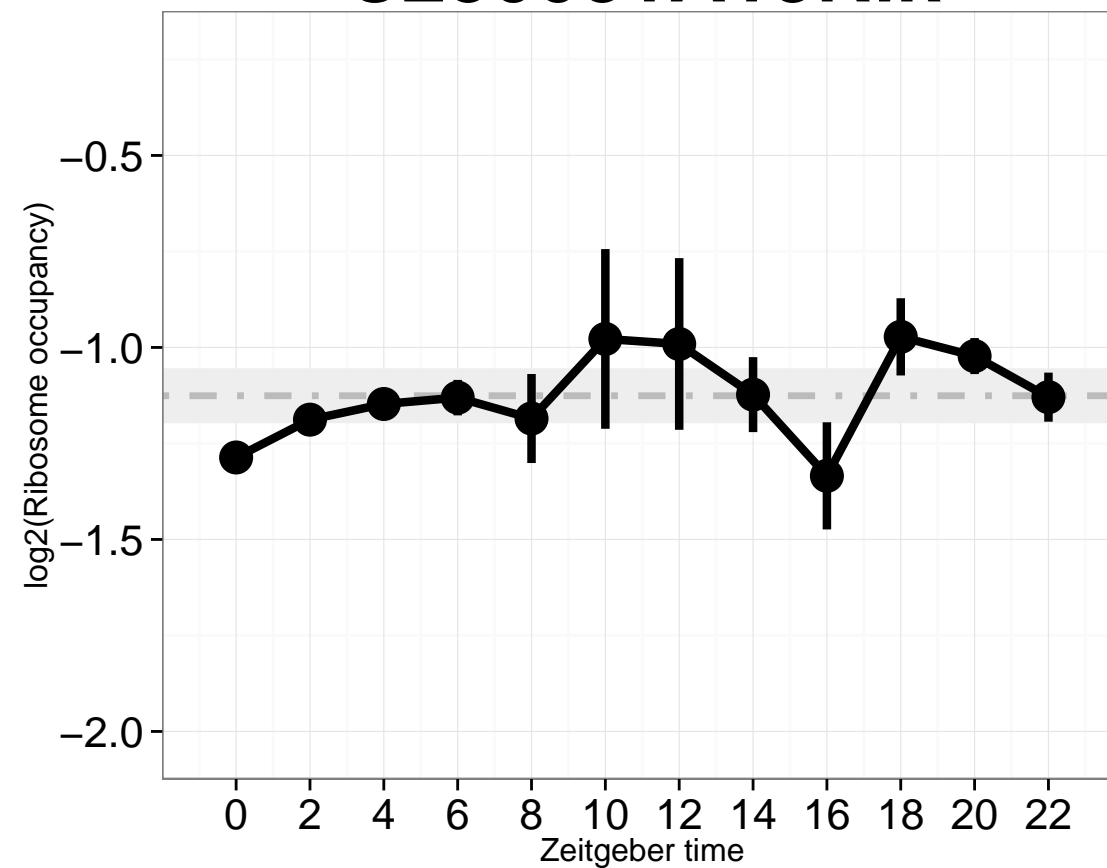

Supplement: Supplementary file 1571 [file 1]

## Adhfe1

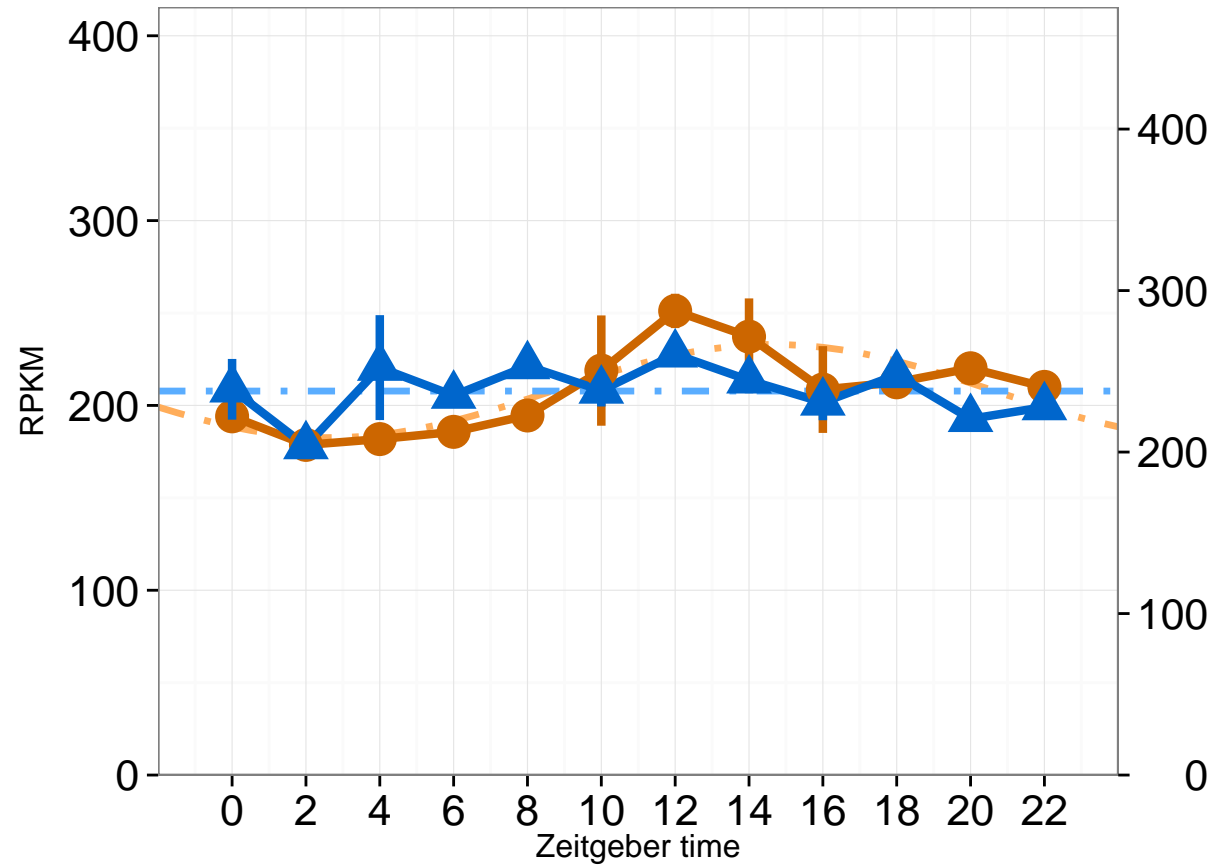

## Adhfe1

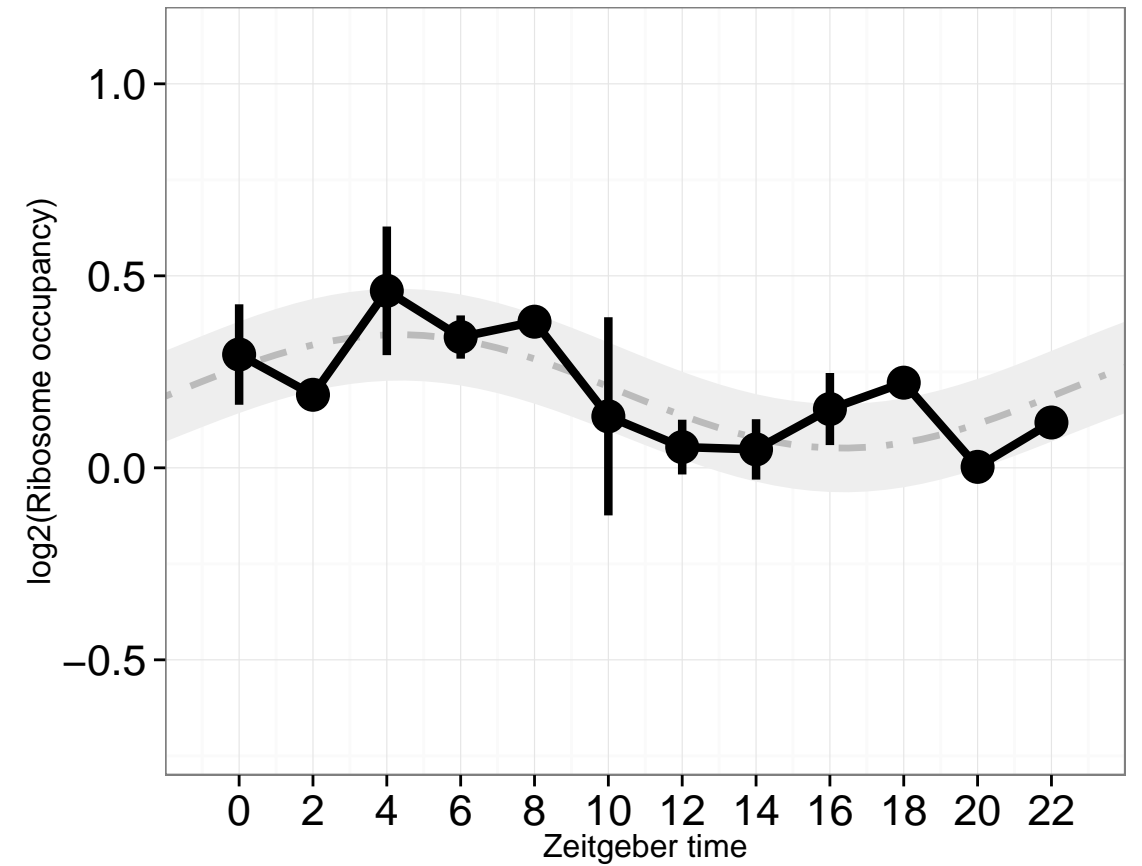

Supplement: Supplementary file 1572 [file 1]

## Ahsg

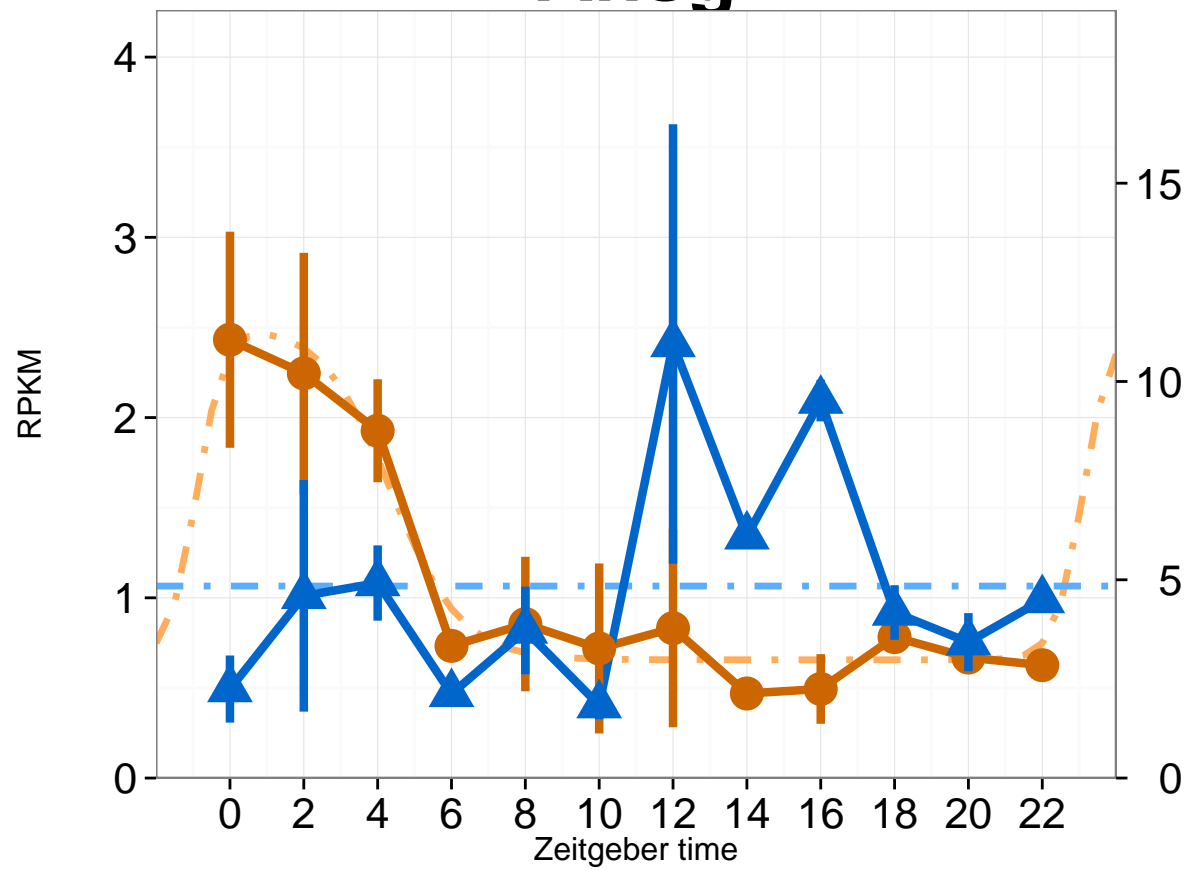

## Ahsg

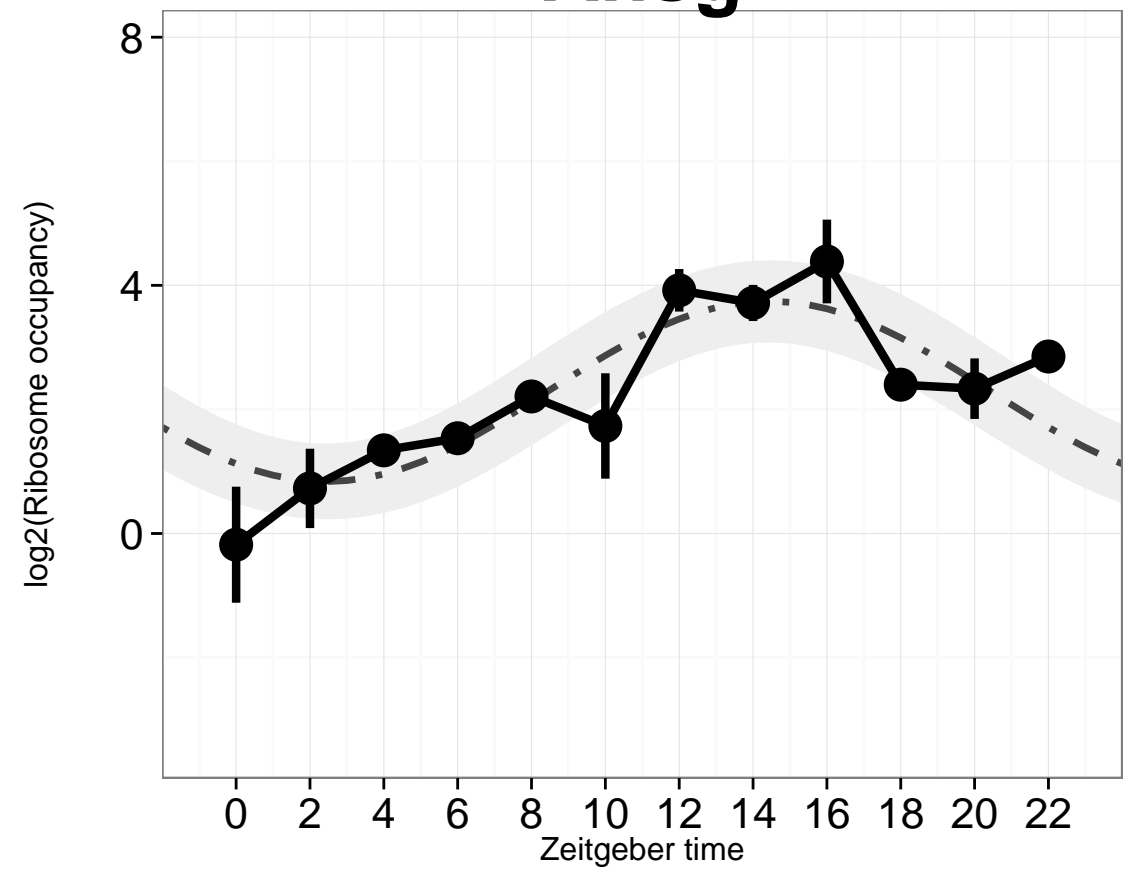

Supplement: Supplementary file 1573 [file 1]

## TtII5

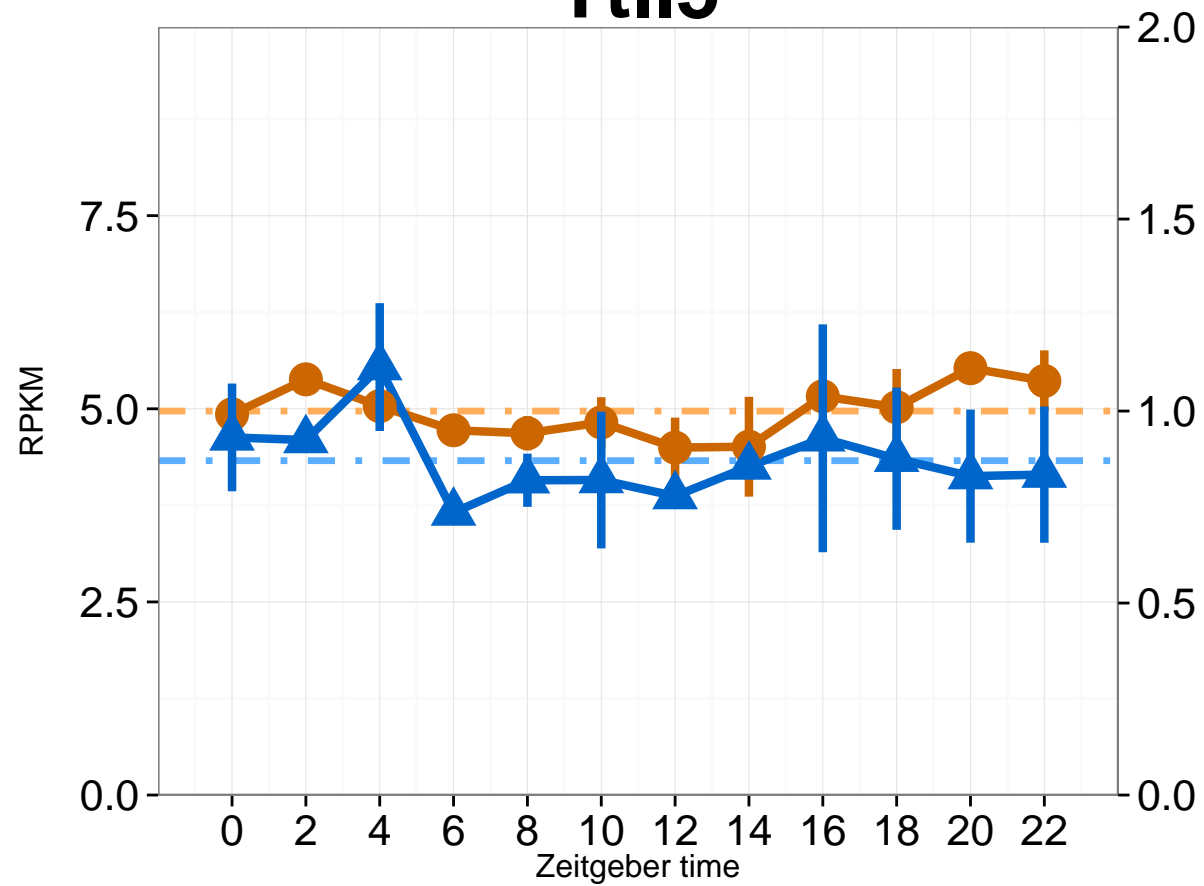

## TtII5

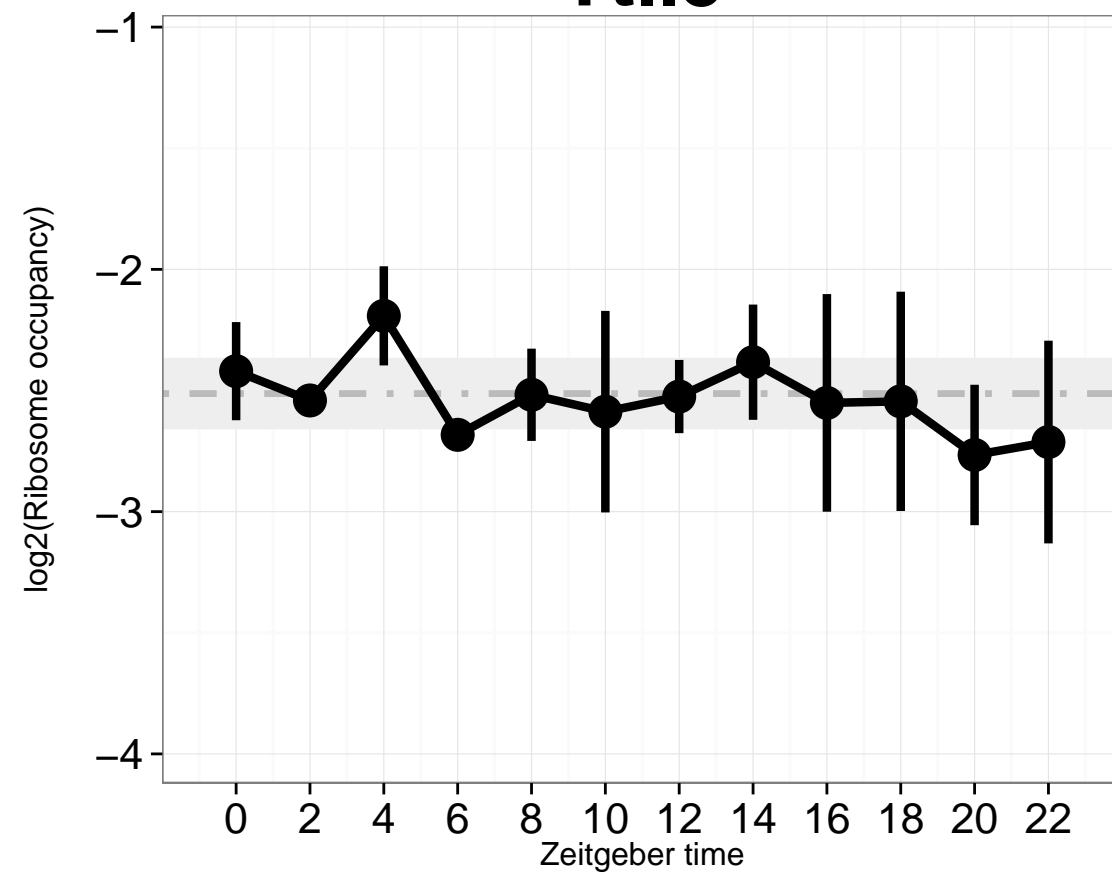

Supplement: Supplementary file 1574 [file 1]

# Fhod1

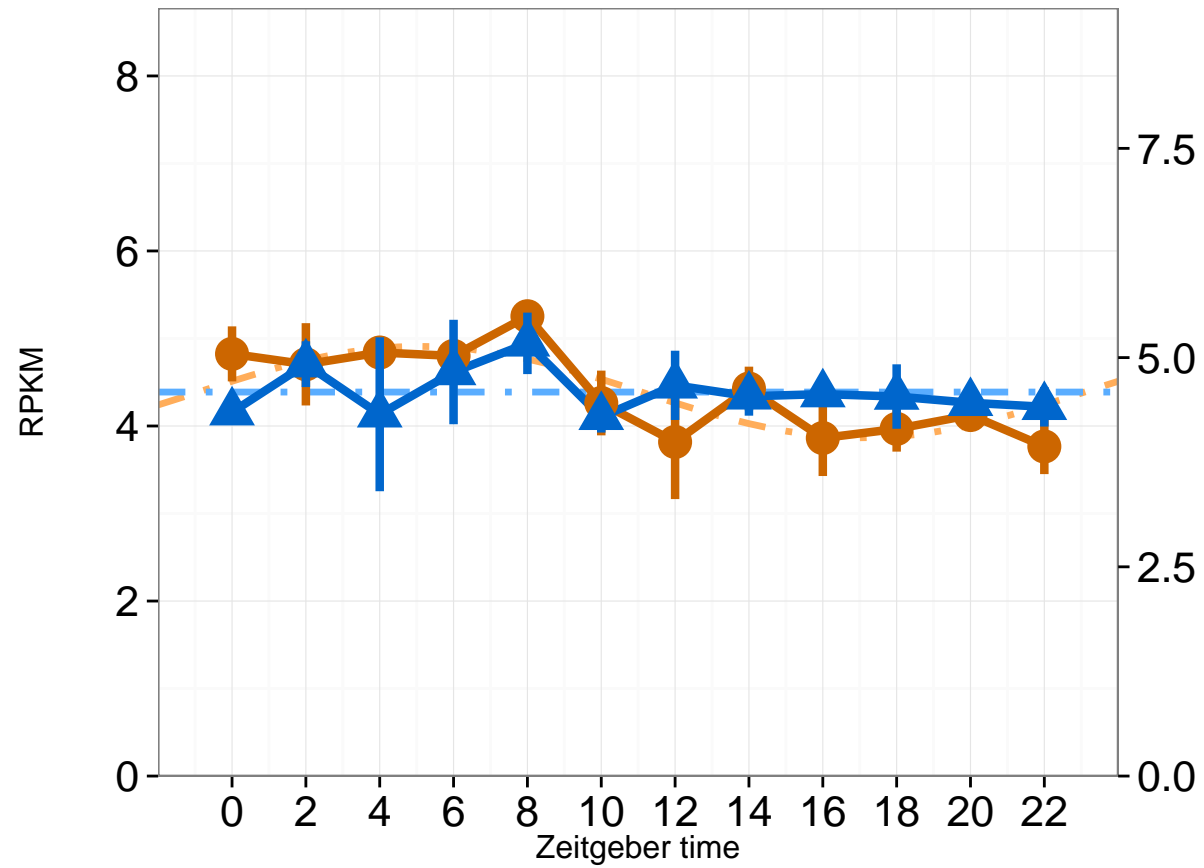

# Fhod1

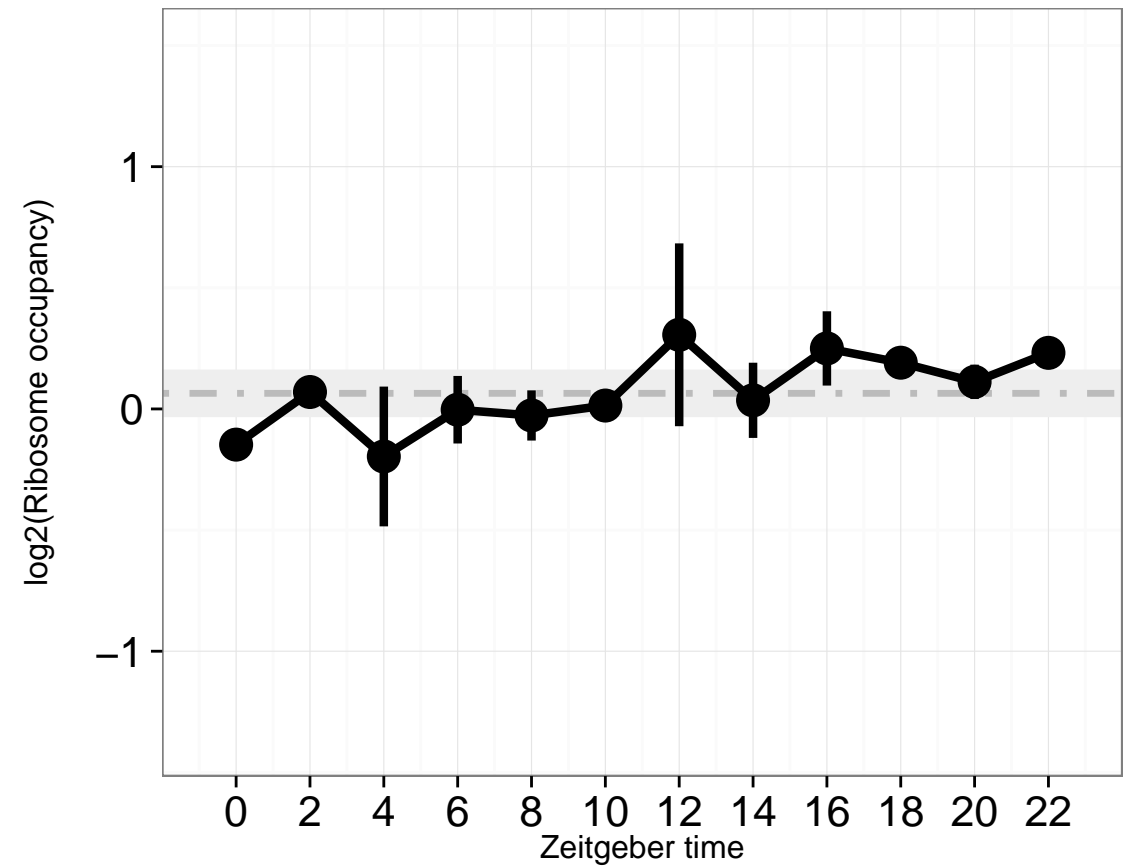

Supplement: Supplementary file 1575 [file 1]

## Nabp1

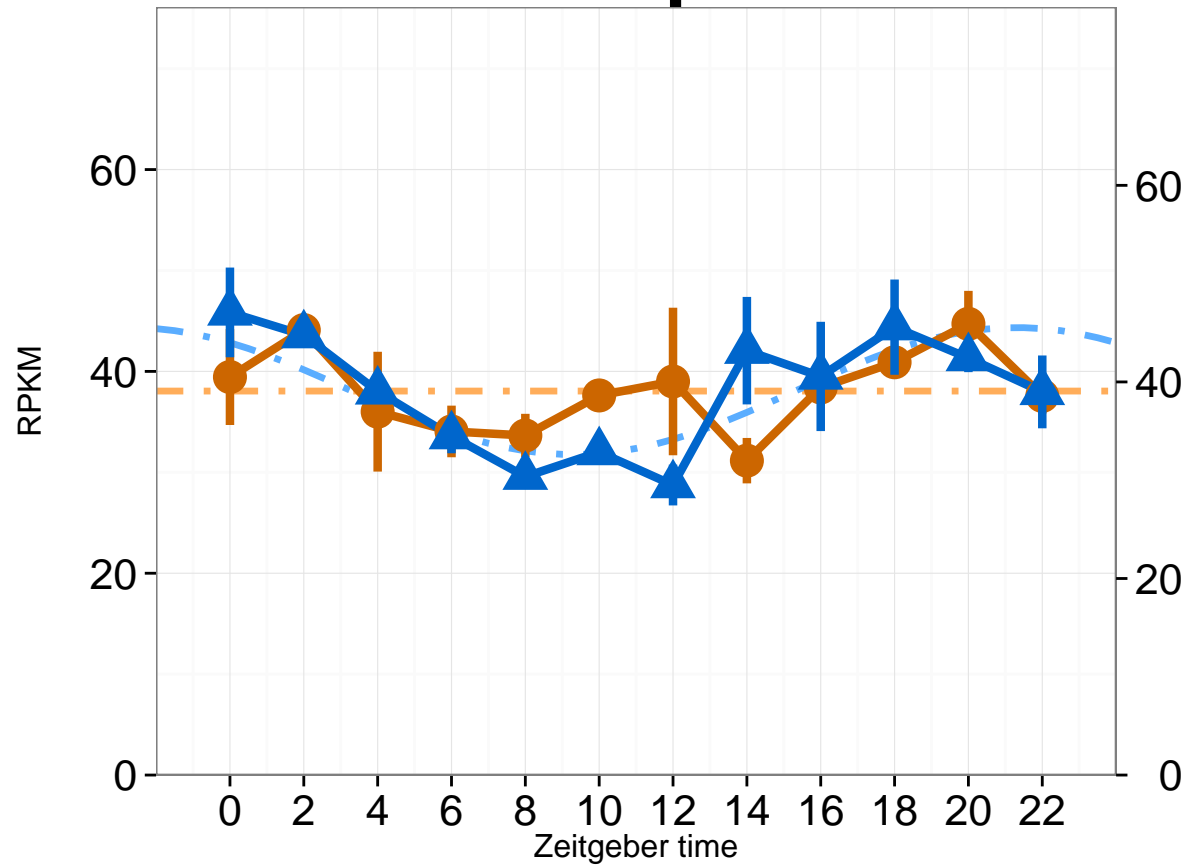

## Nabp1

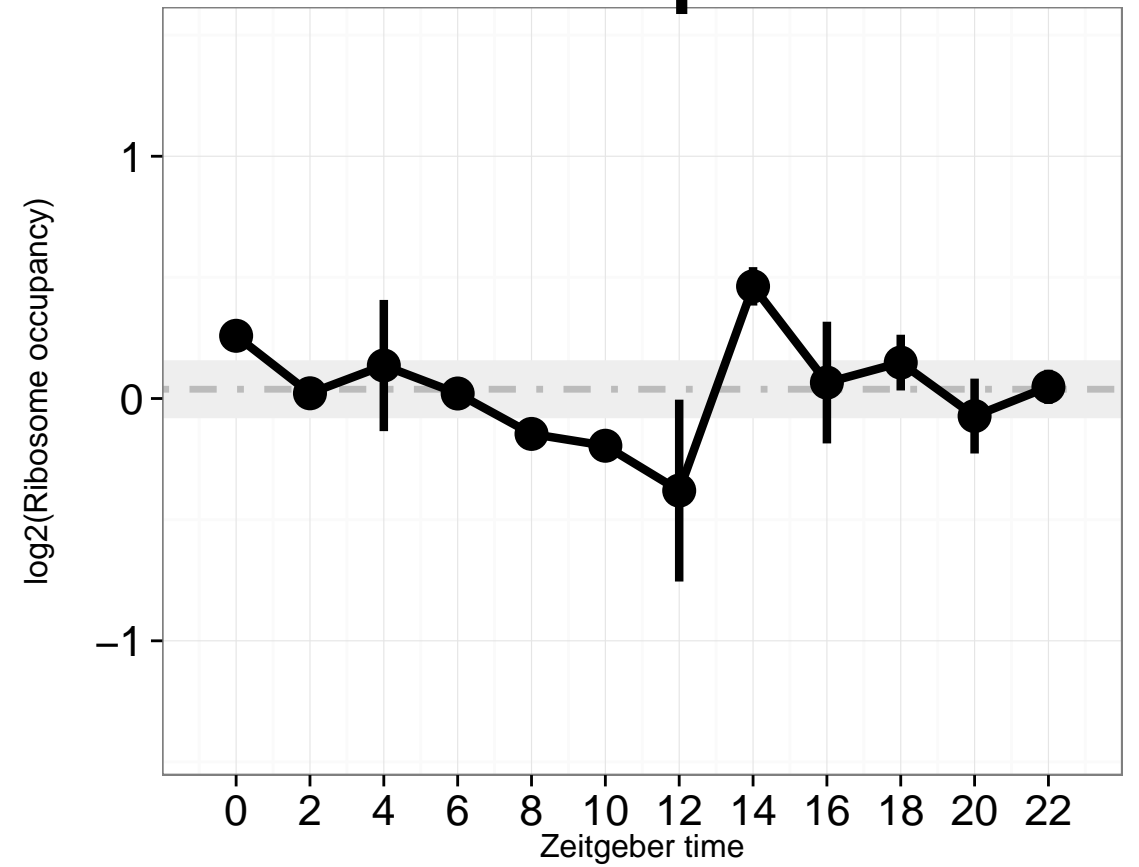

Supplement: Supplementary file 1576 [file 1]

# C1qtnf7

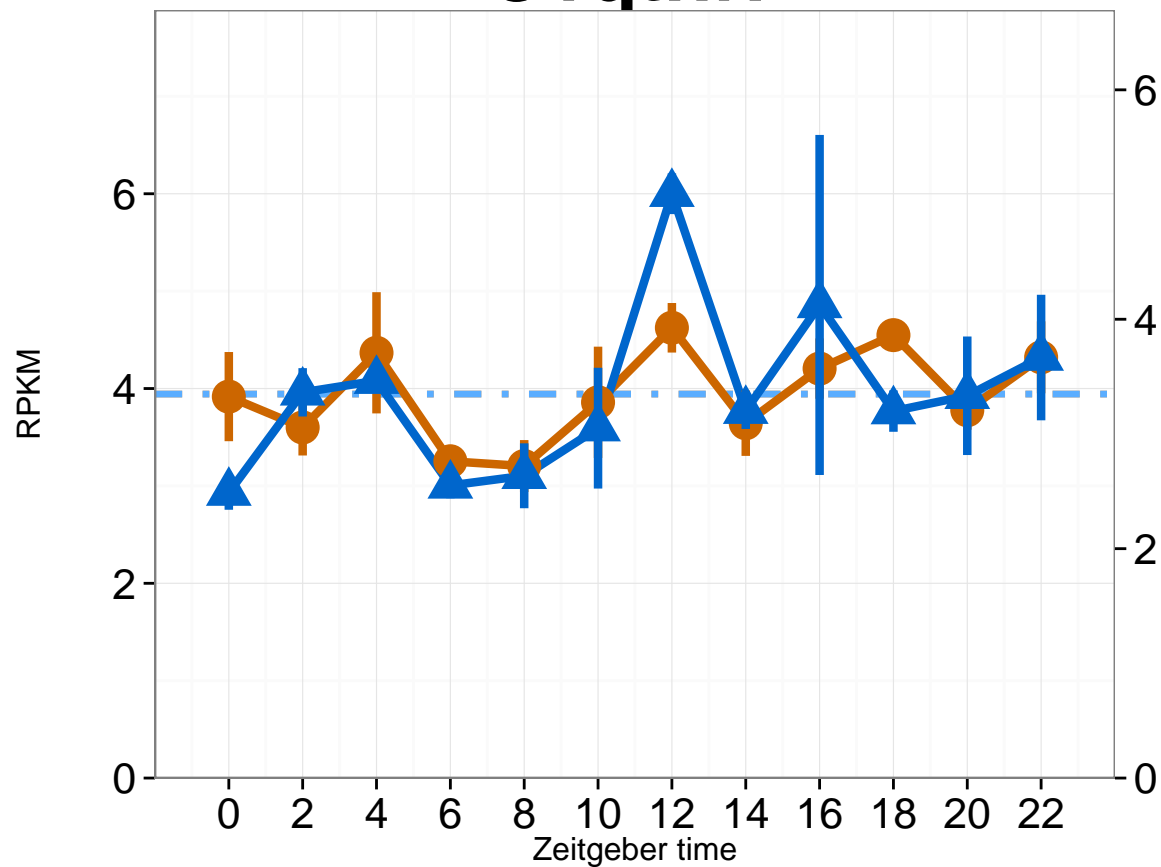

# C1qtnf7

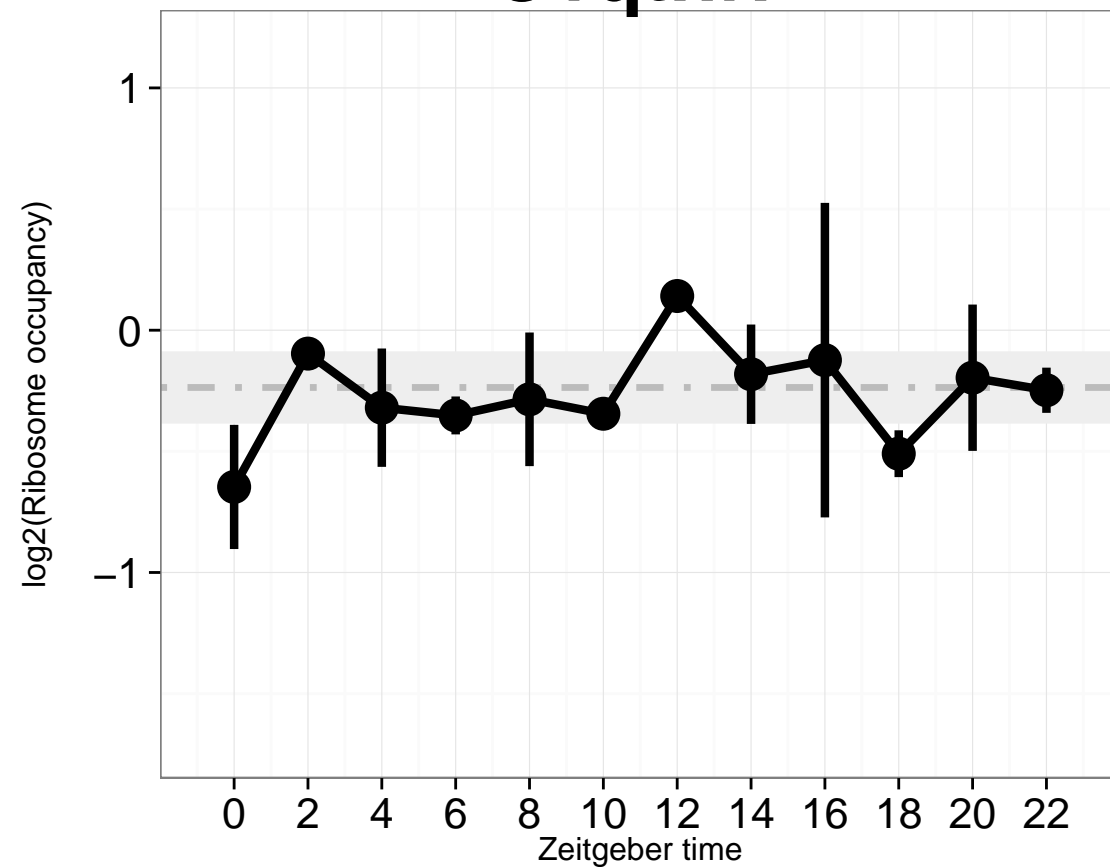

Supplement: Supplementary file 1577 [file 1]

# Mrpl38

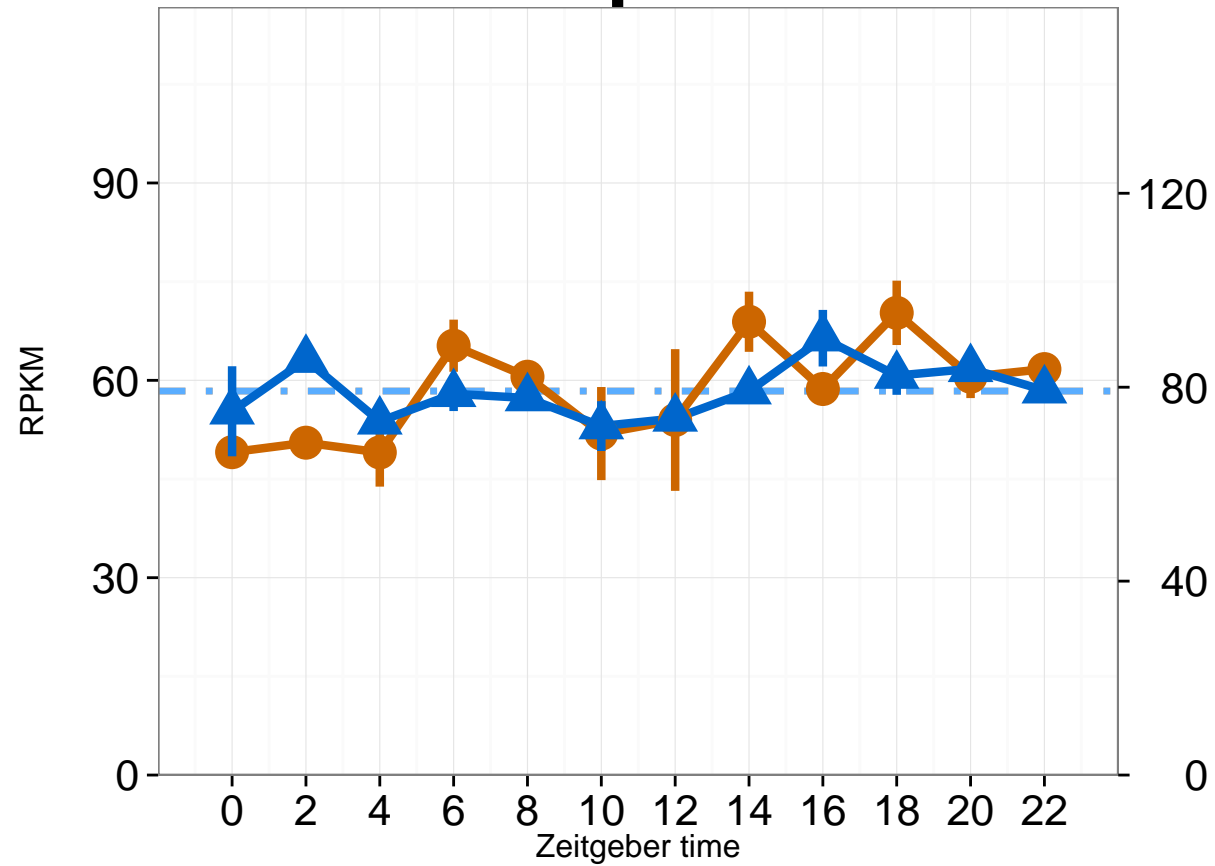

# Mrpl38

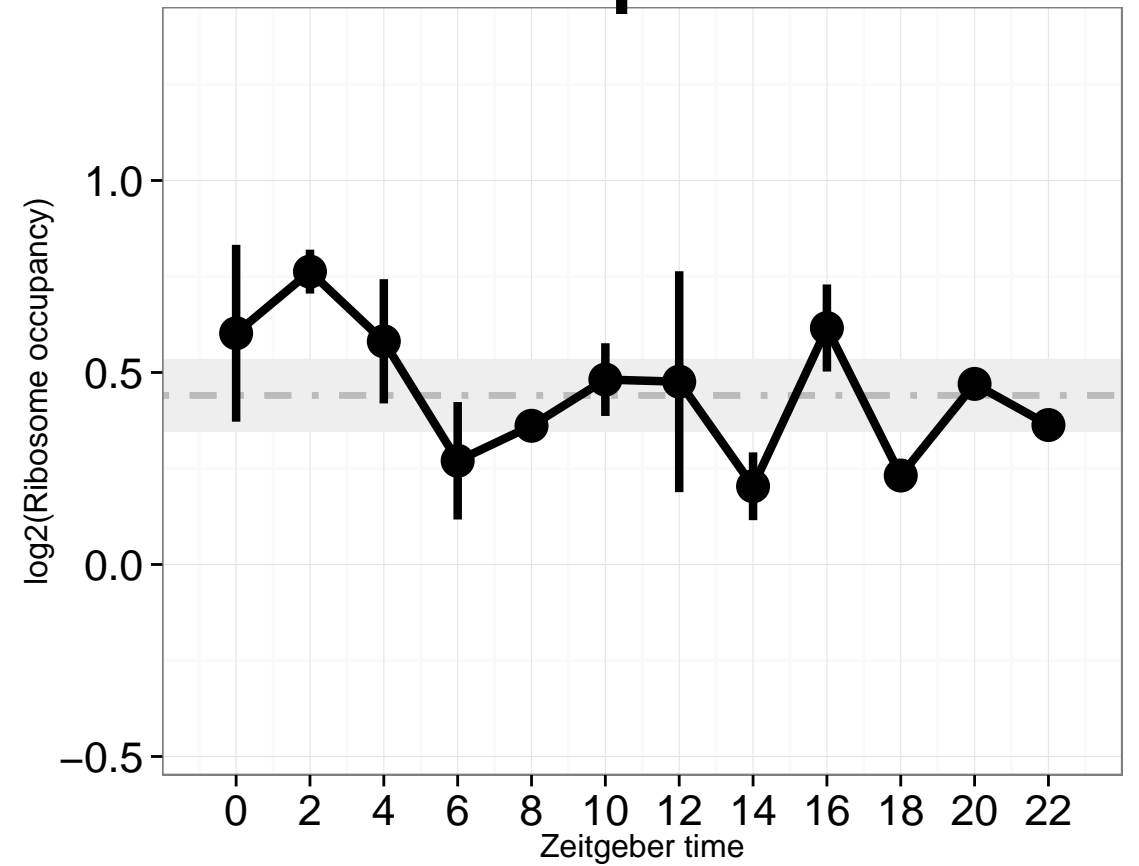

Supplement: Supplementary file 1578 [file 1]

## Gdi1

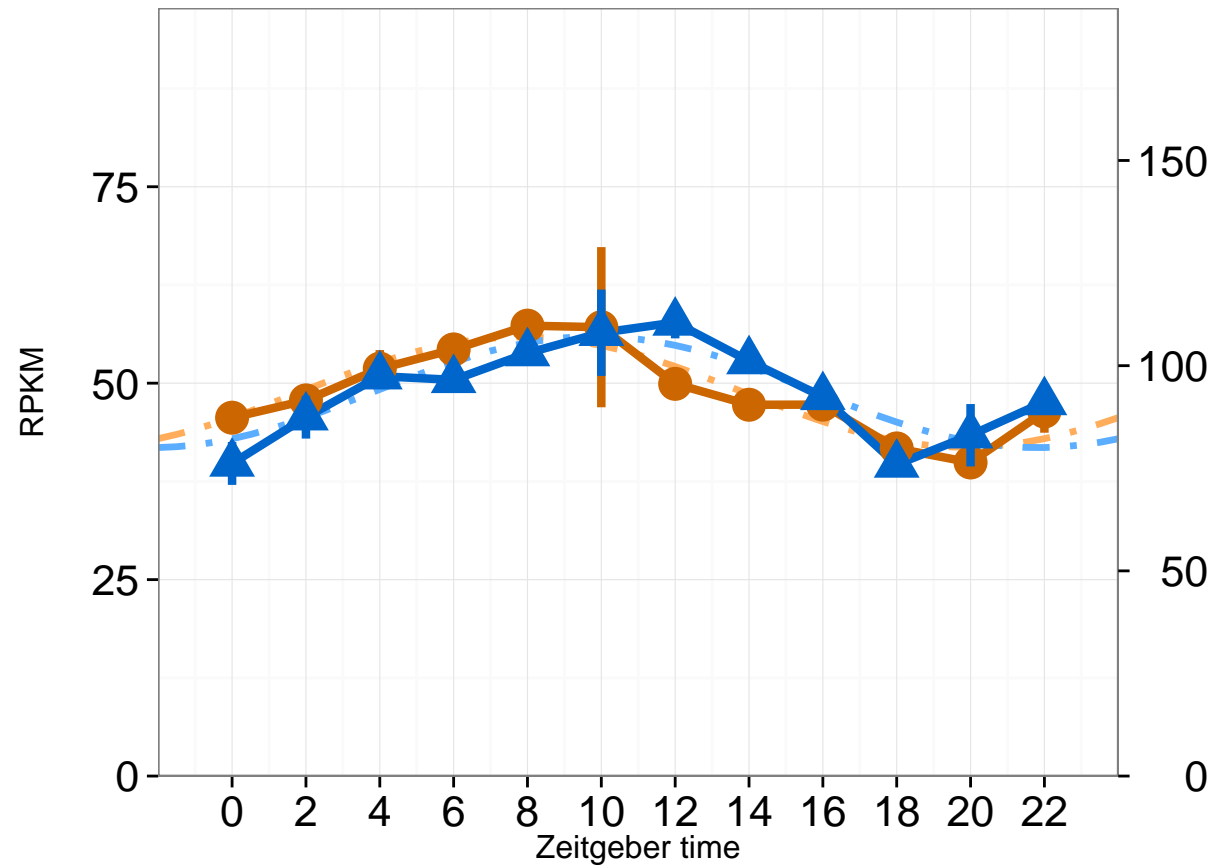

## Gdi1

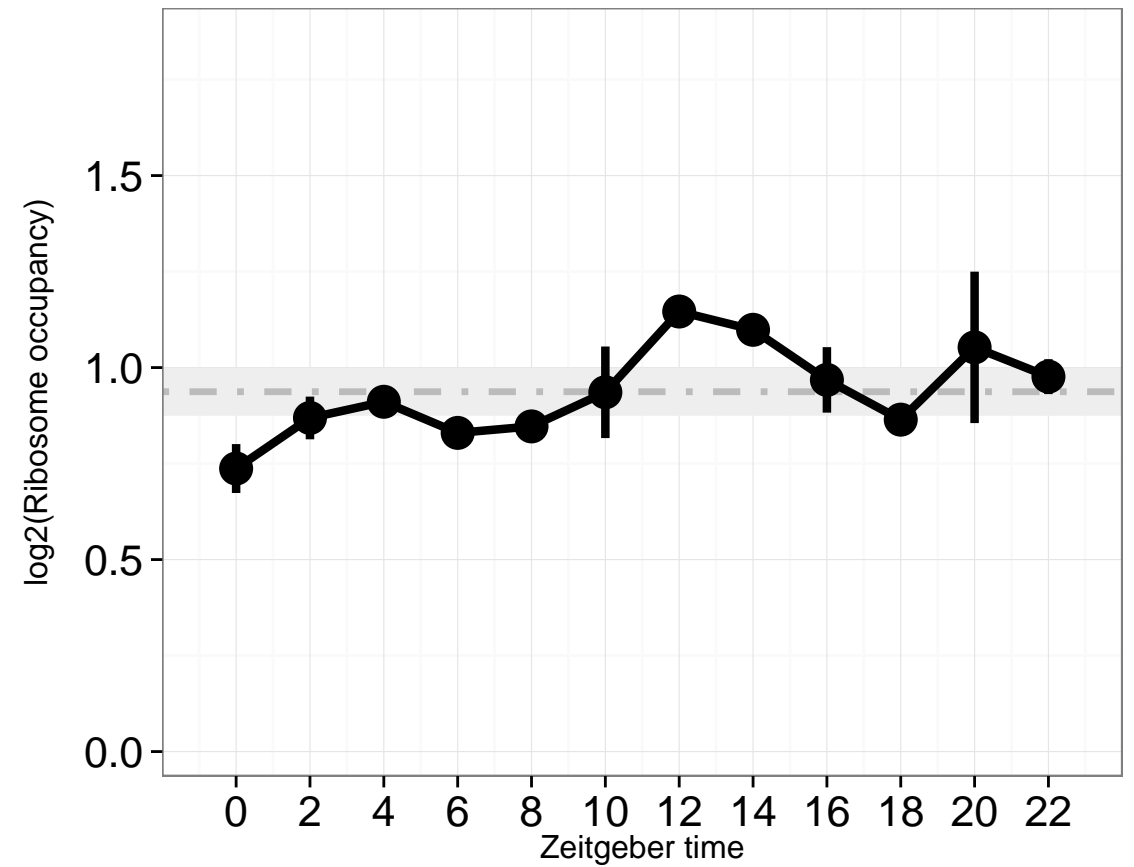

Supplement: Supplementary file 1579 [file 1]

## Lrrc3

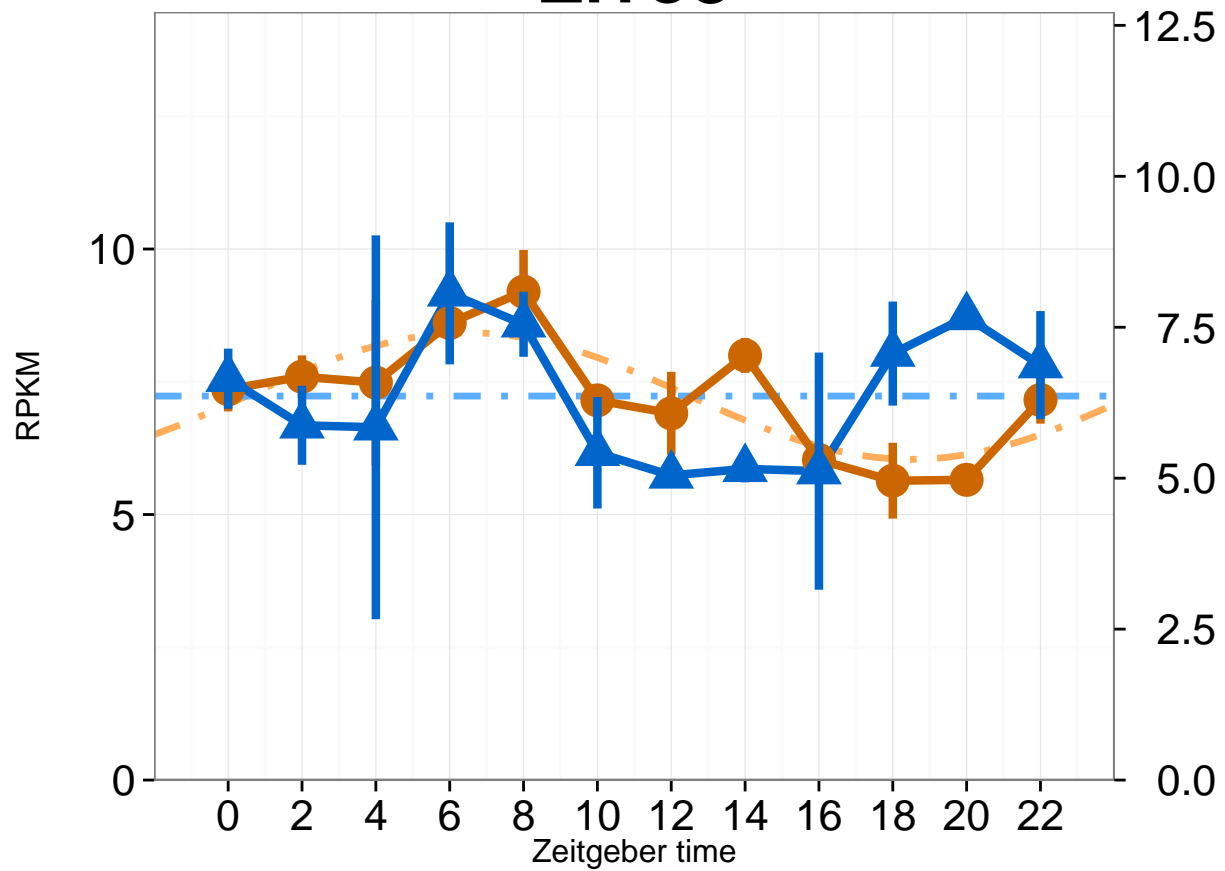

## Lrrc3

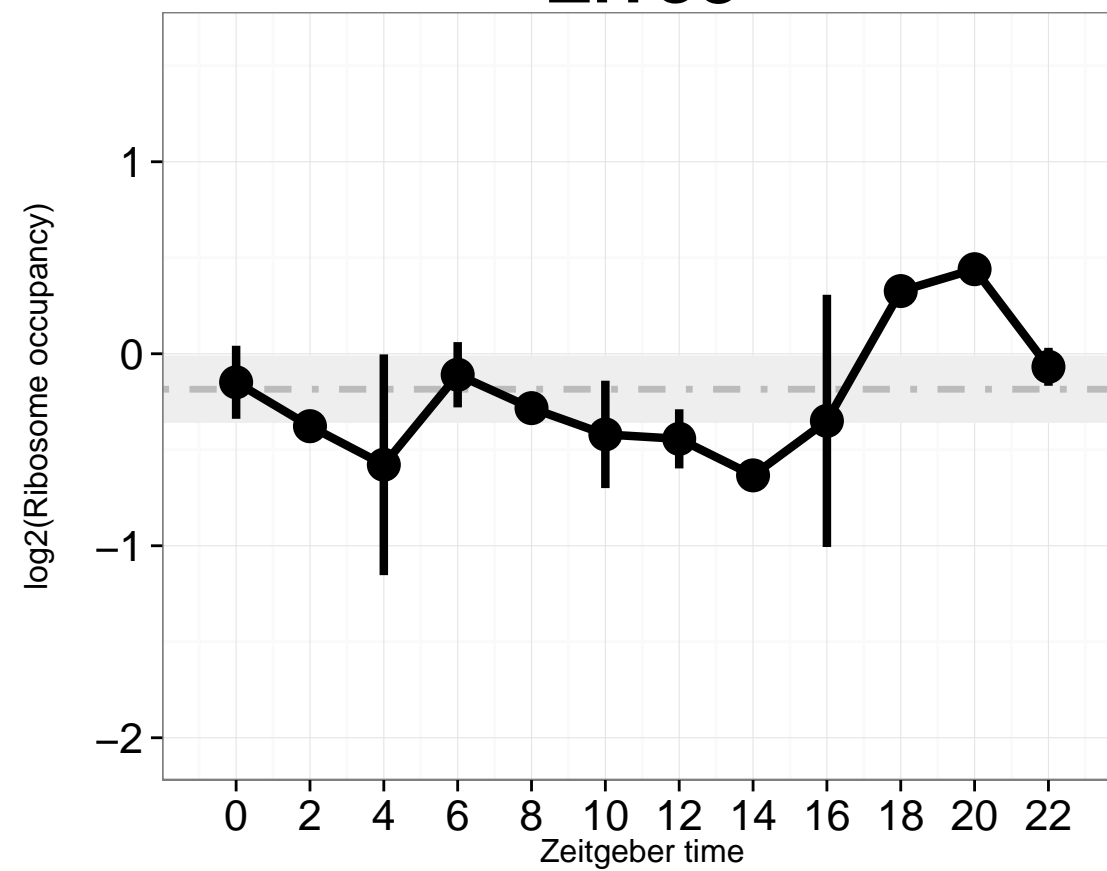

Supplement: Supplementary file 1580 [file 1]

## Arhgef18

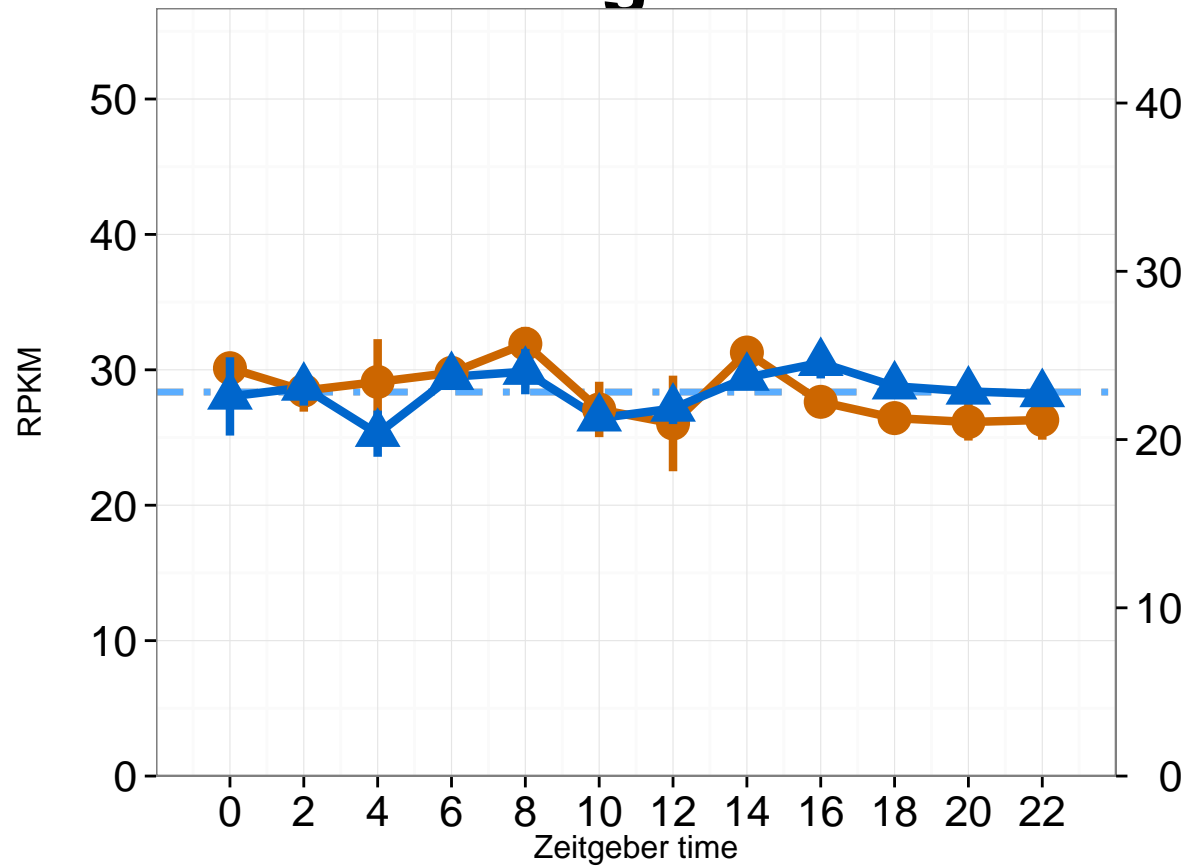

## Arhgef18

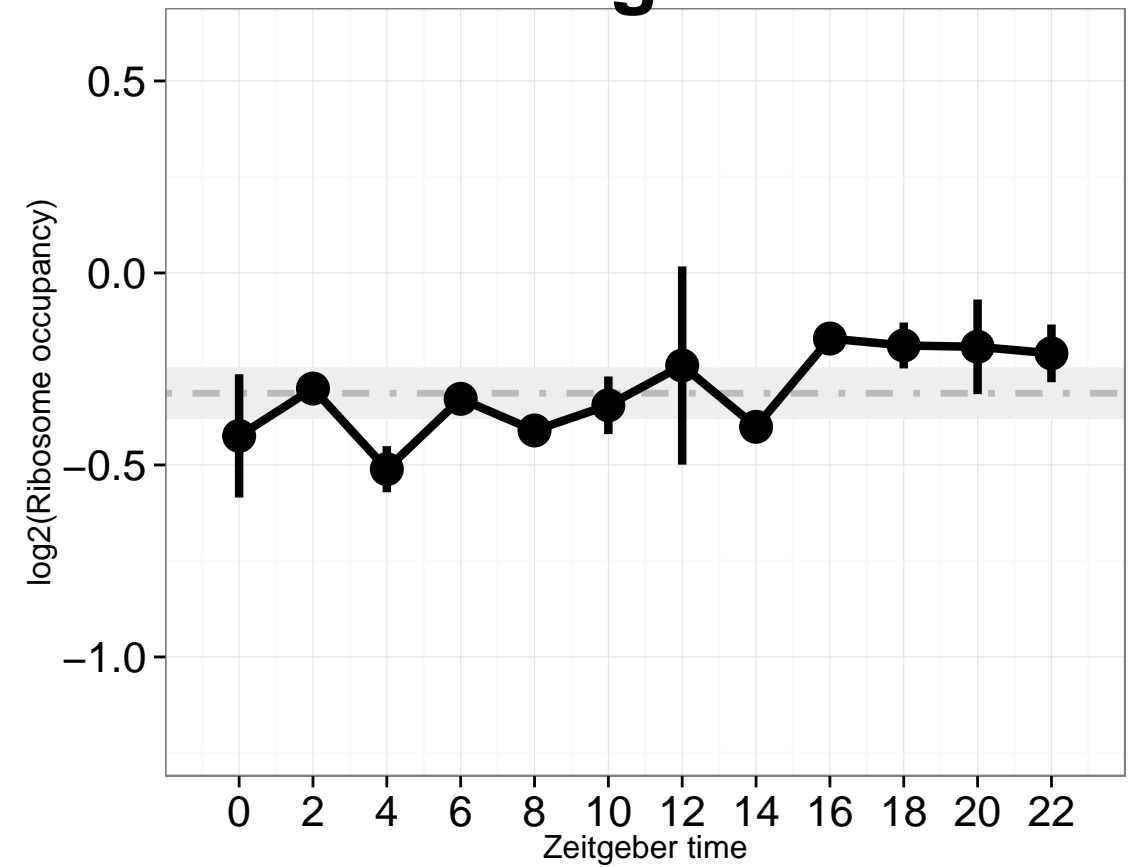

Supplement: Supplementary file 1581 [file 1]

## Elmo3

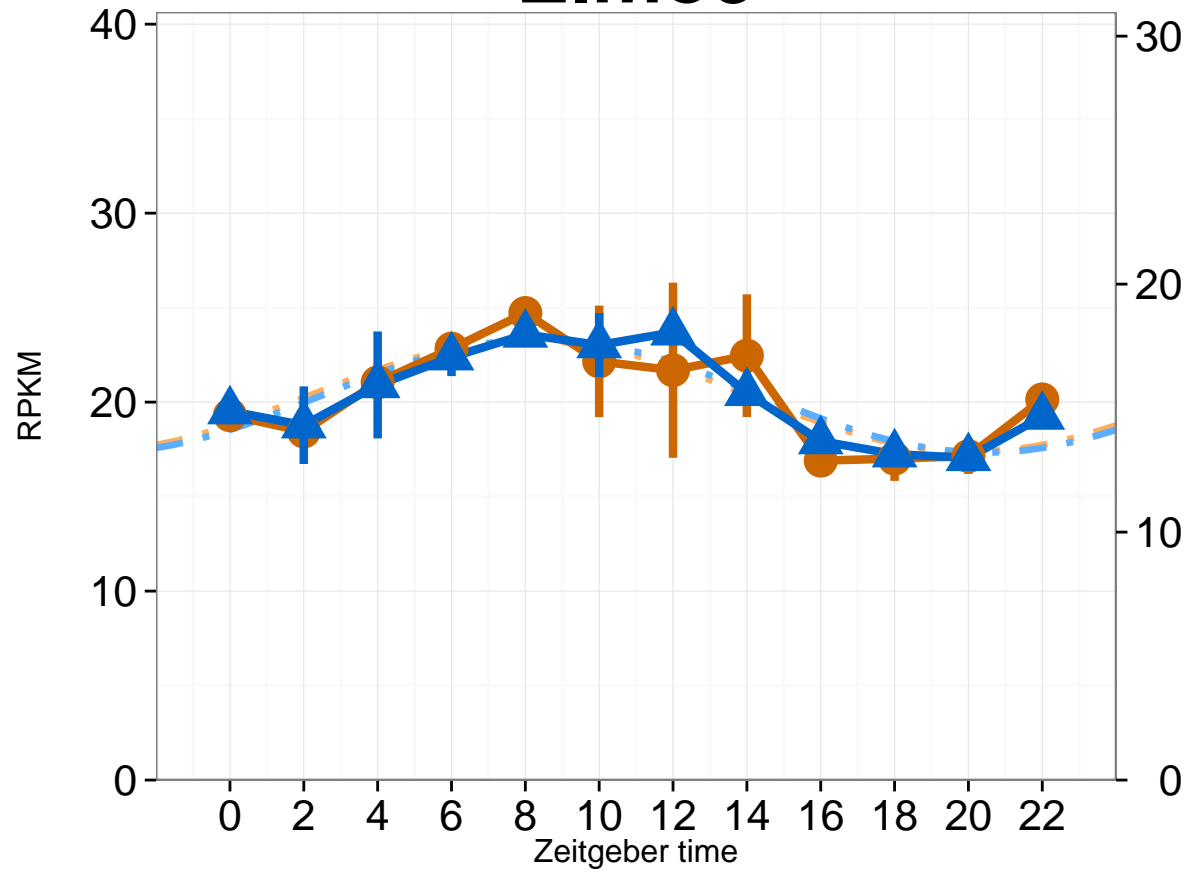

## Elmo3

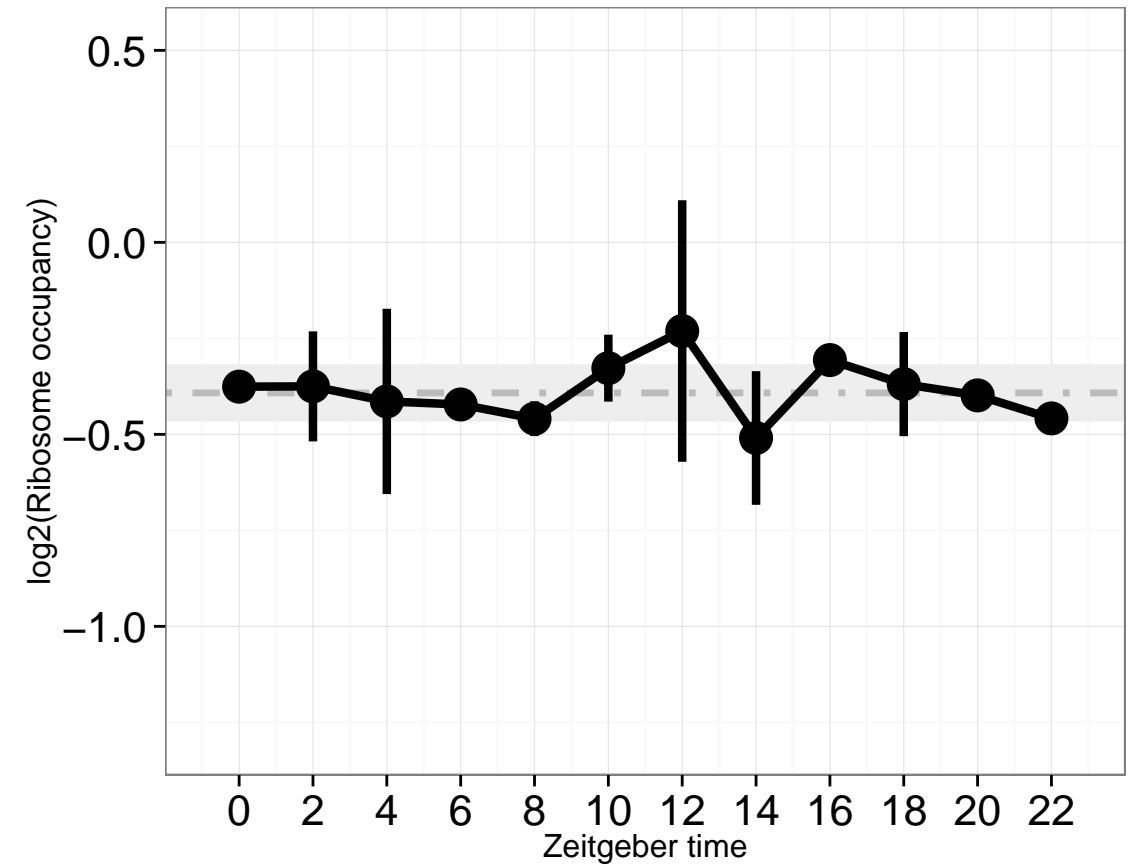

Supplement: Supplementary file 1582 [file 1]

## Ccnd3

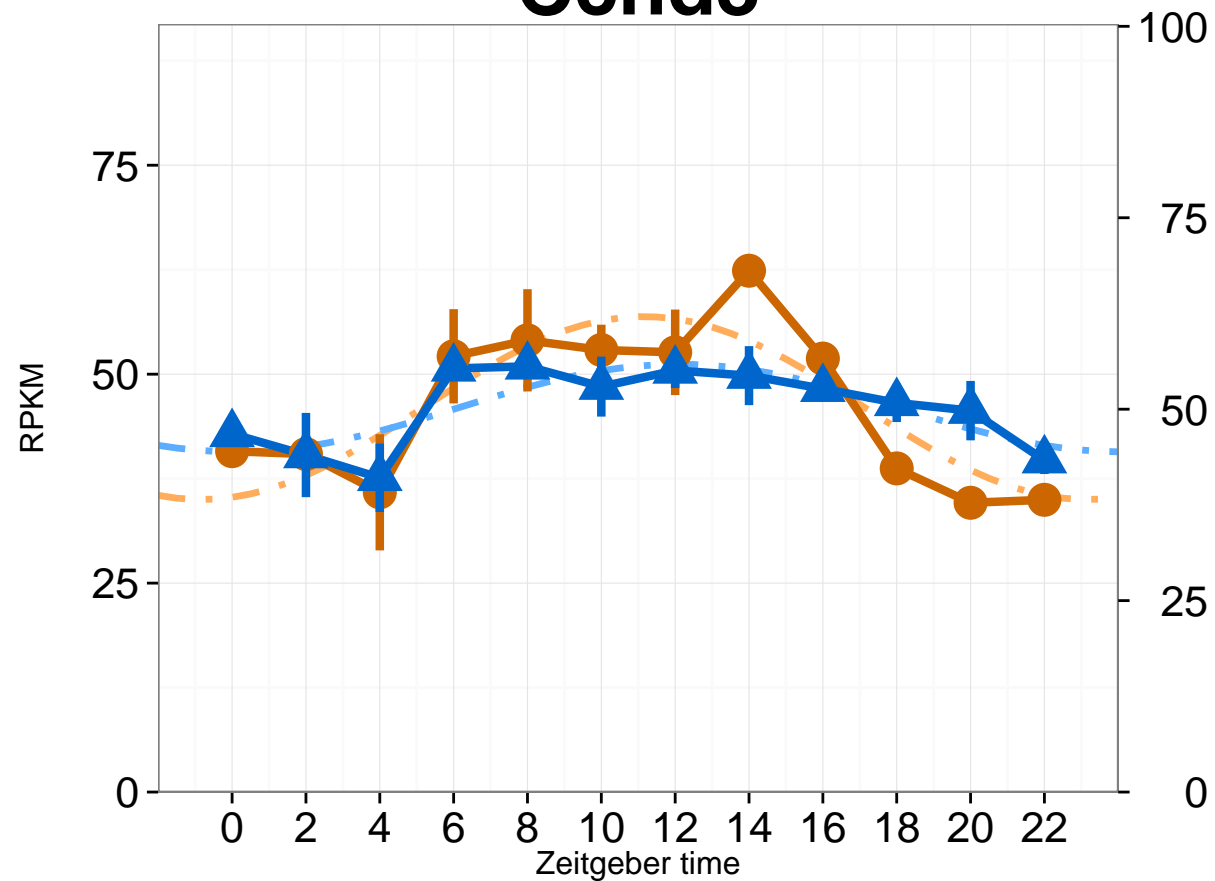

## Ccnd3

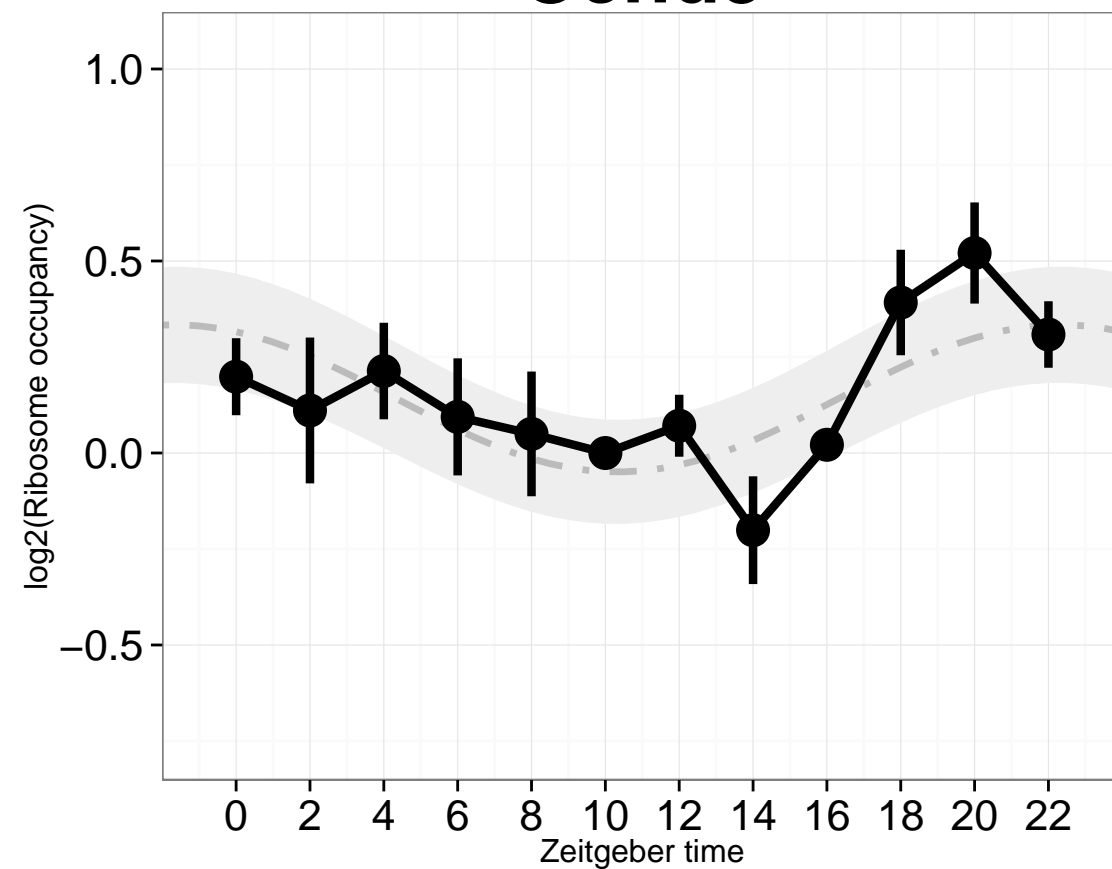

Supplement: Supplementary file 1583 [file 1]

## Mcm10

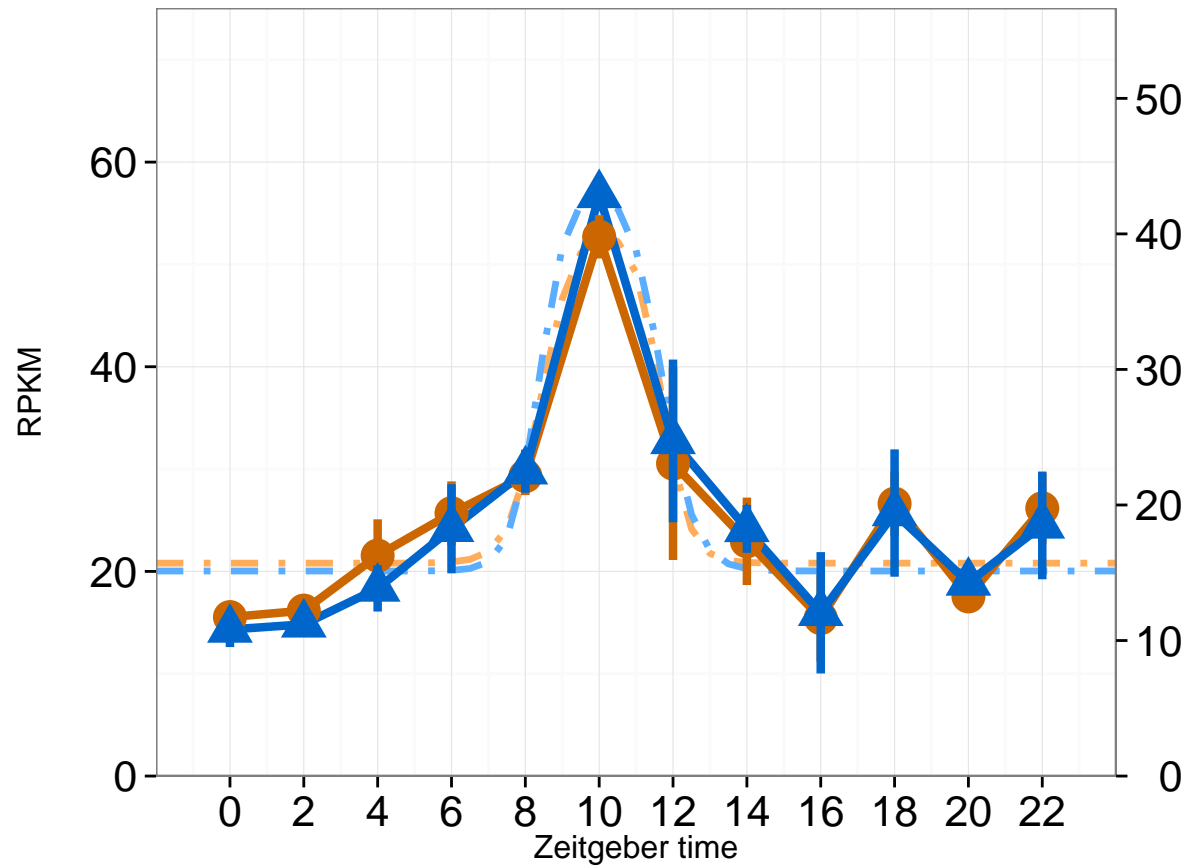

## Mcm10

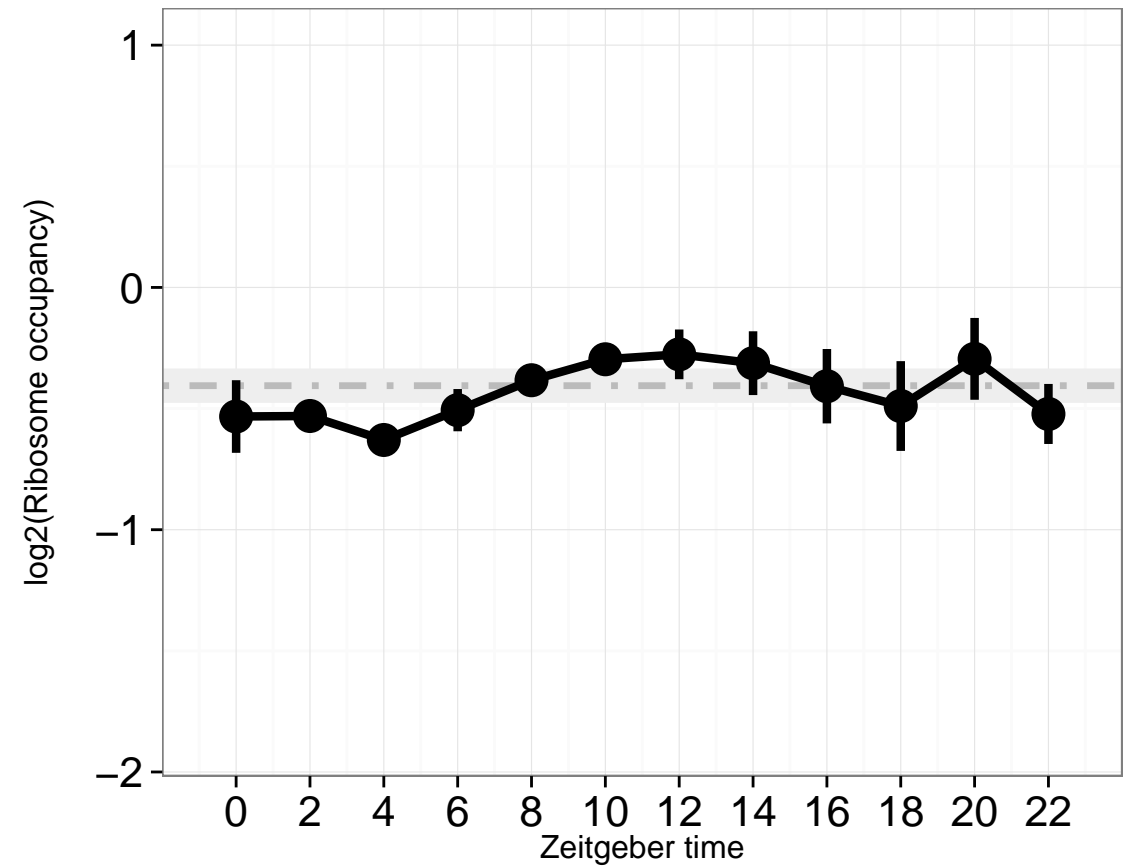

Supplement: Supplementary file 1584 [file 1]

## Vcp

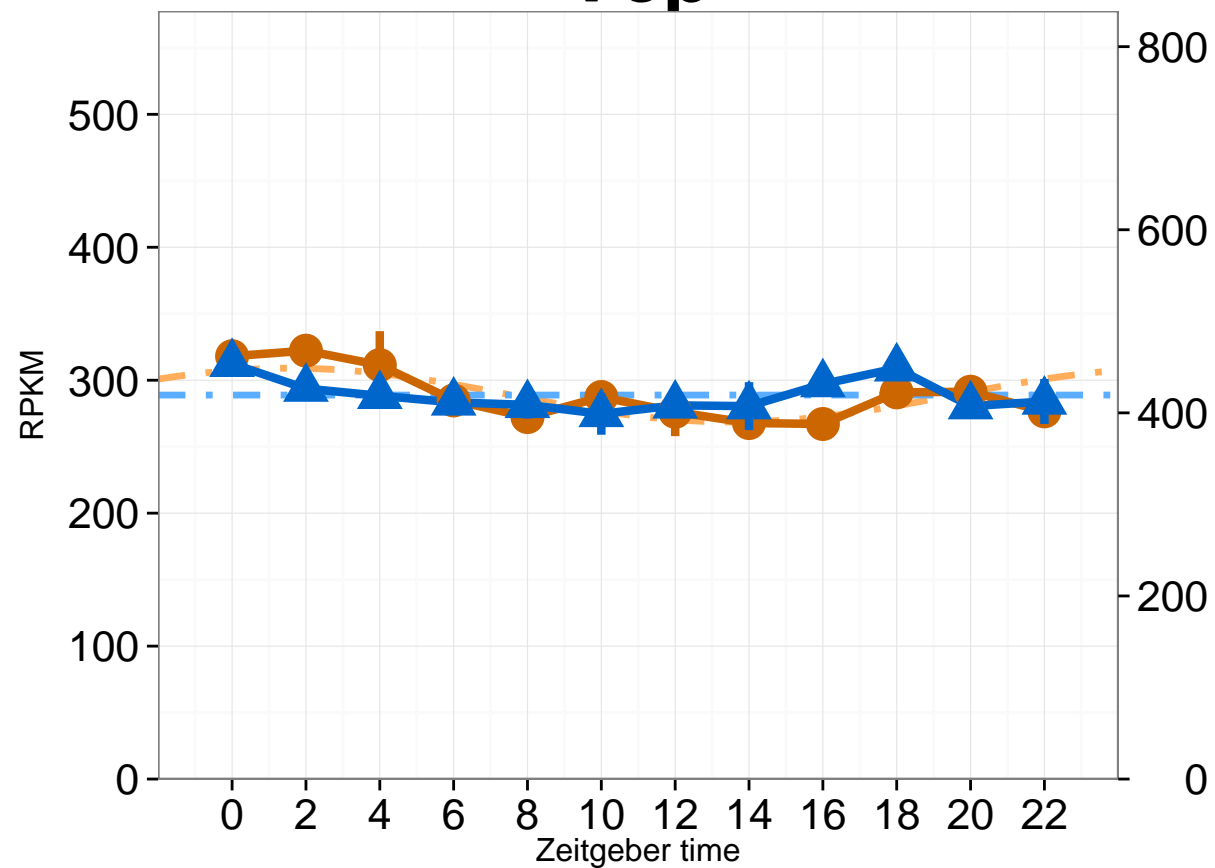

## Vcp

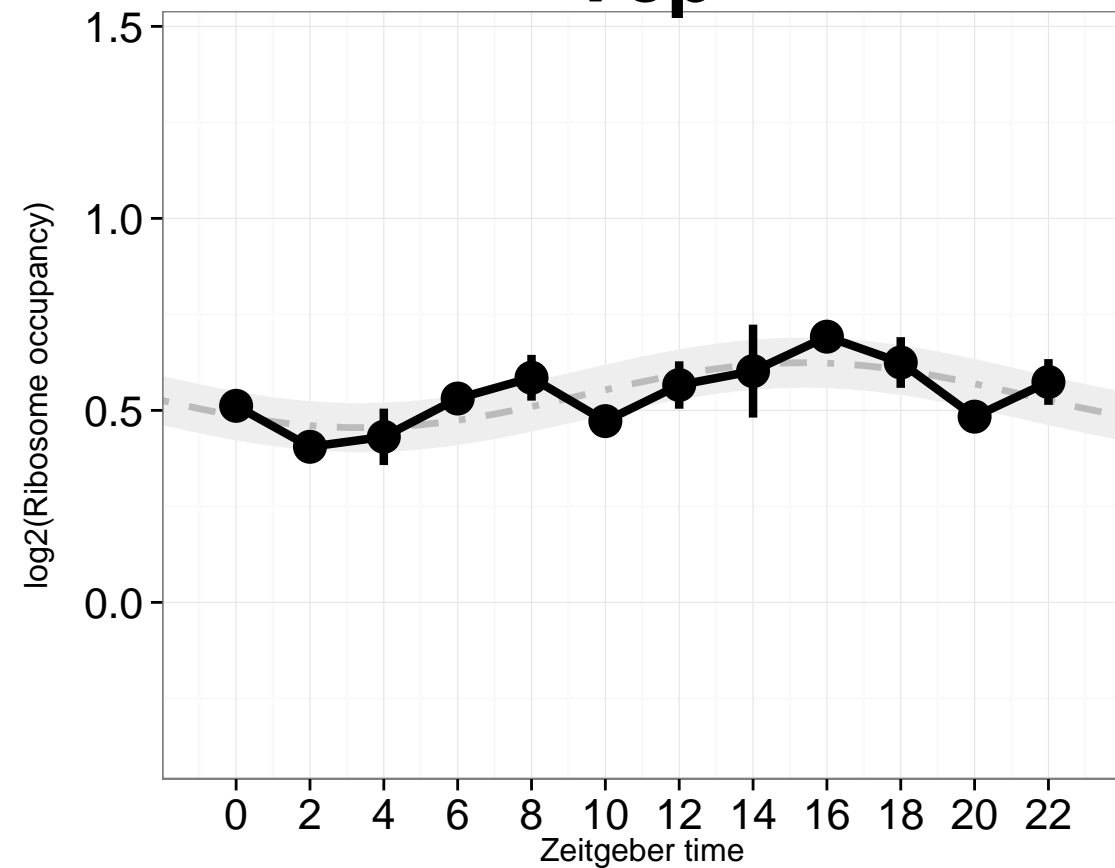

Supplement: Supplementary file 1585 [file 1]

## Ssh2

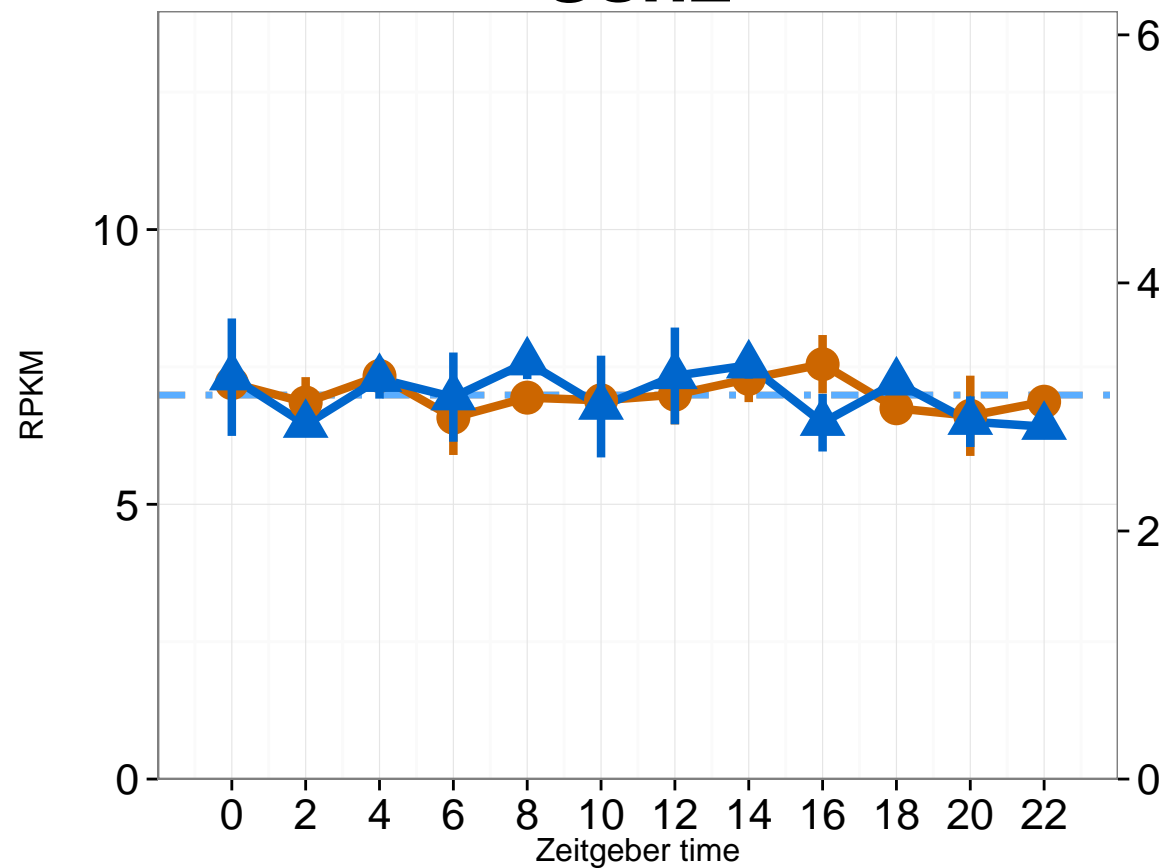

## Ssh2

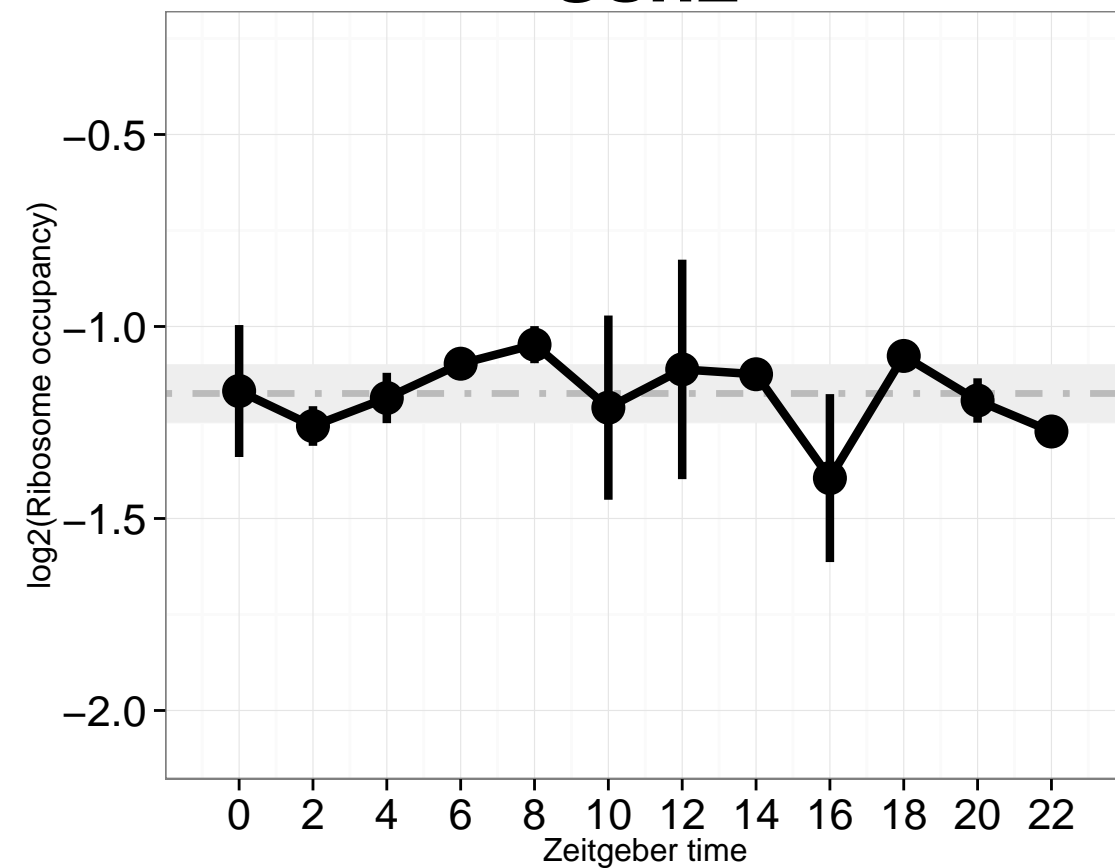

Supplement: Supplementary file 1586 [file 1]

## Reck

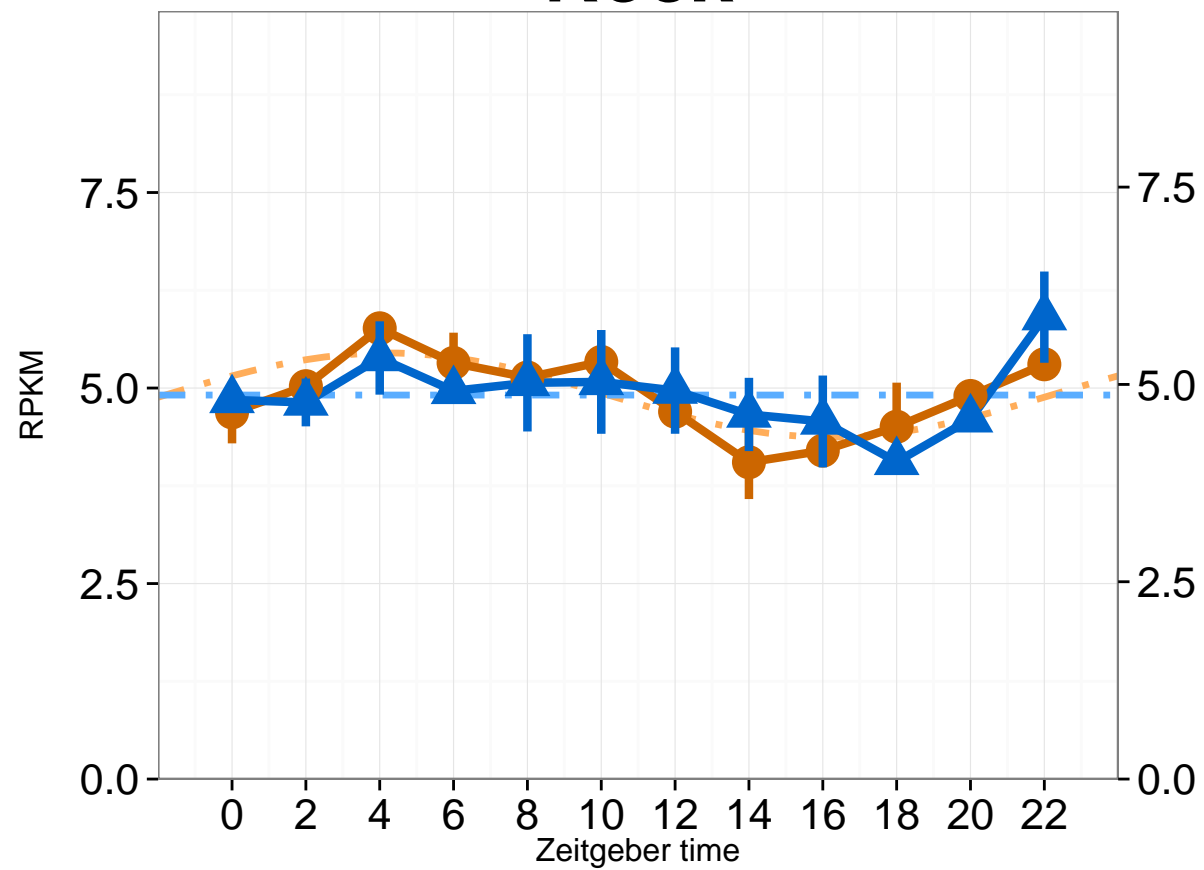

## Reck

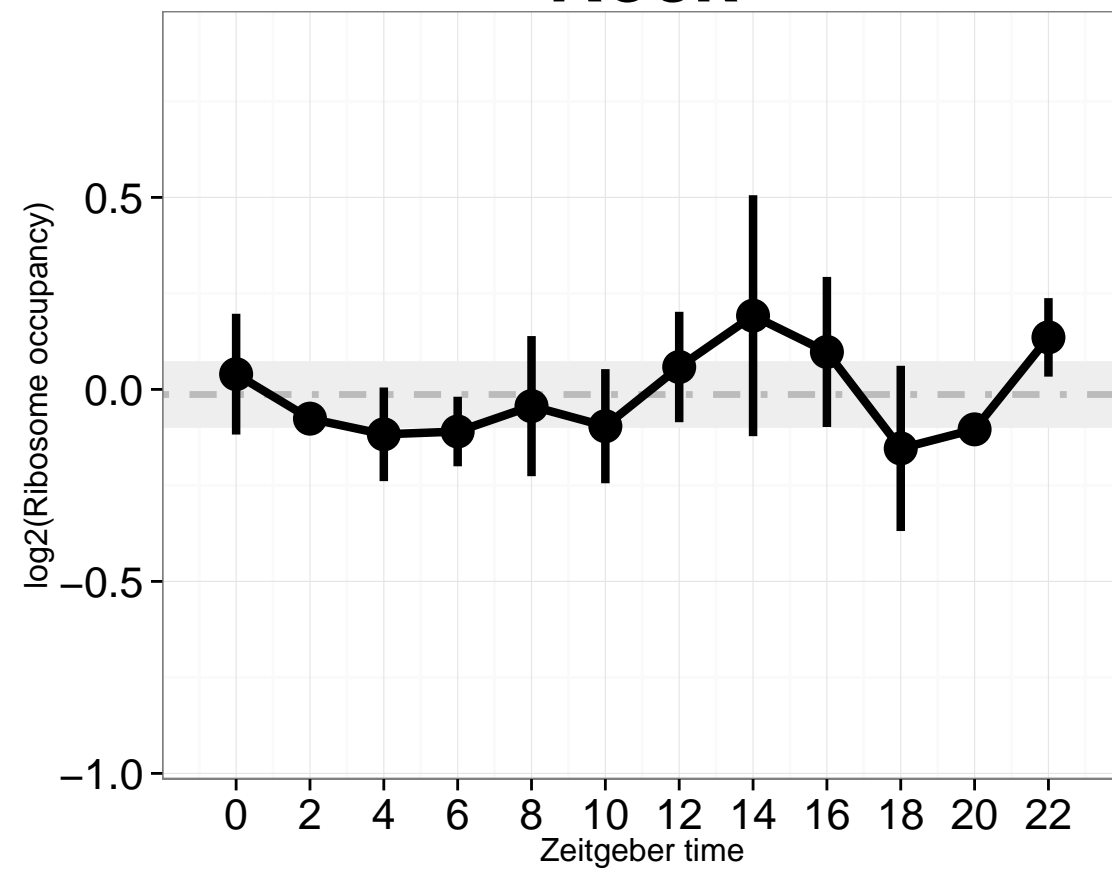

Supplement: Supplementary file 1587 [file 1]

## Zdhhc8

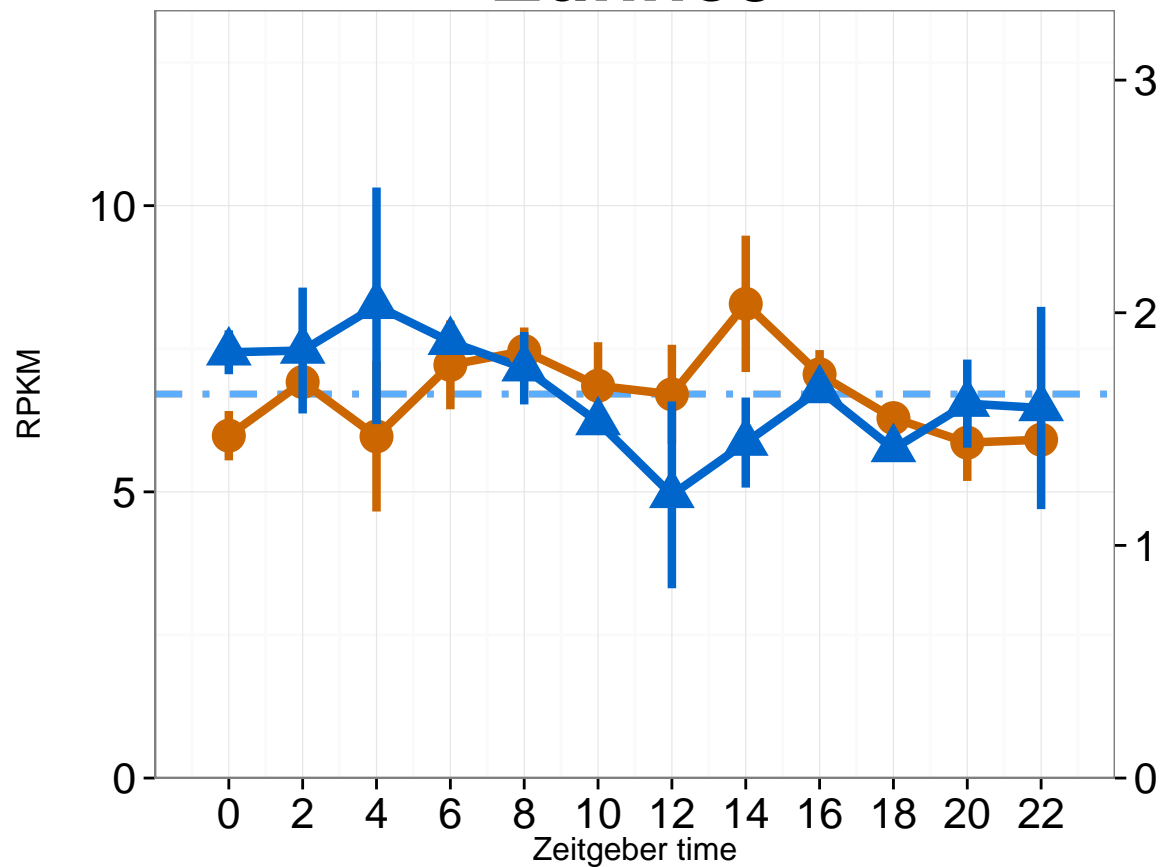

## Zdhhc8

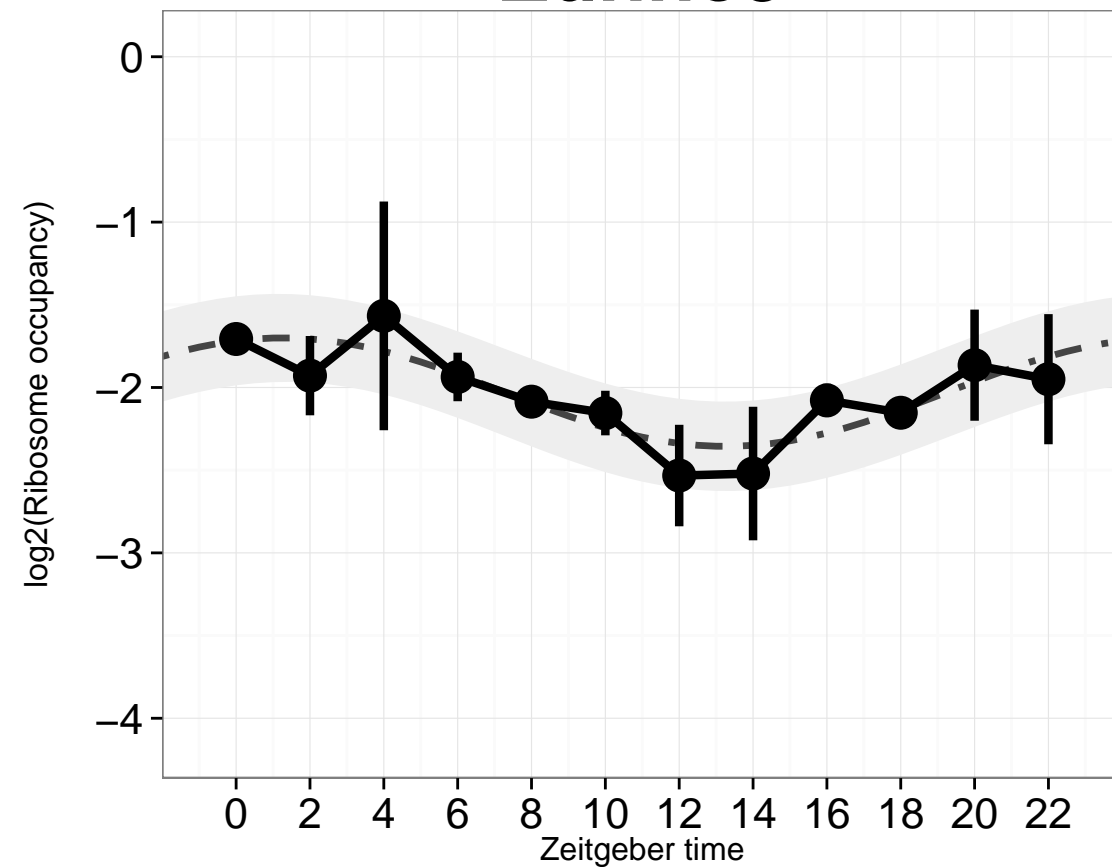

Supplement: Supplementary file 1588 [file 1]

## Gbas

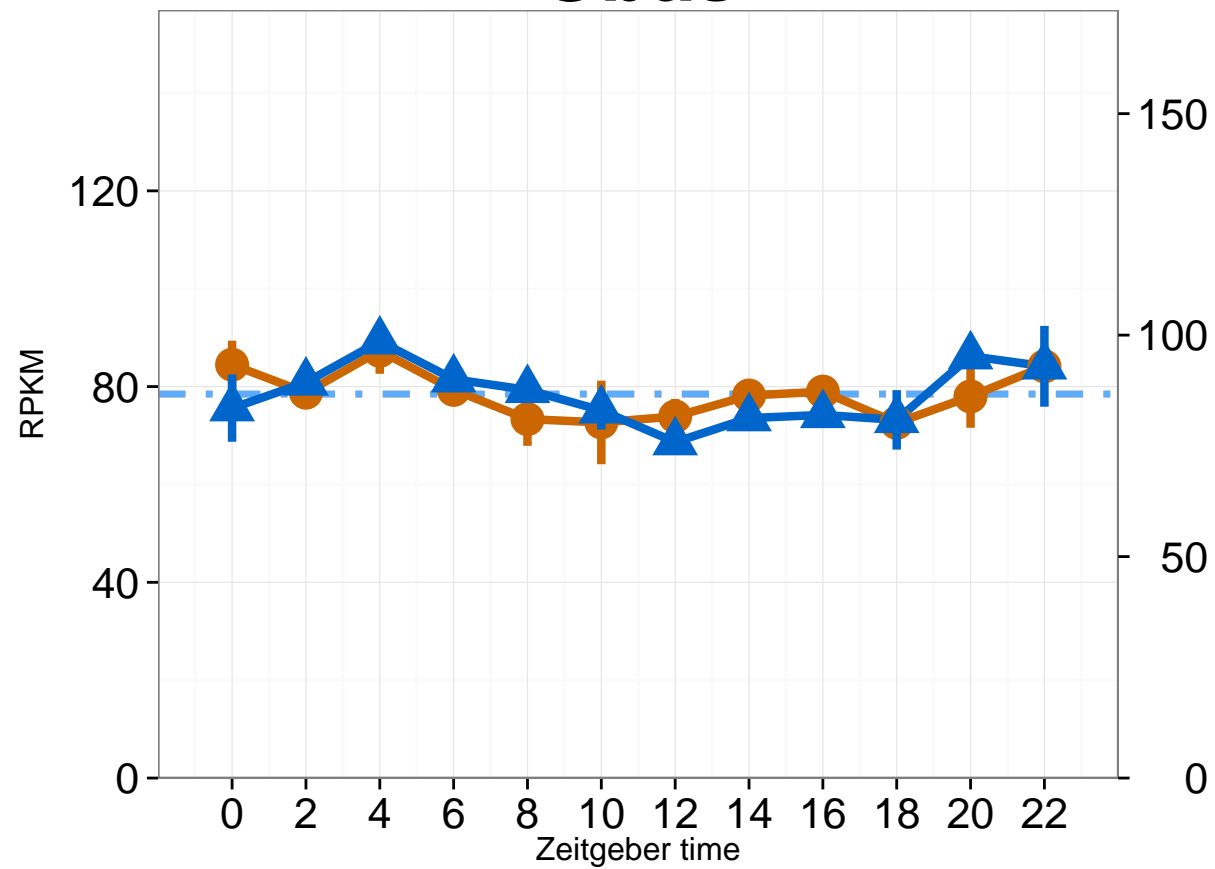

## Gbas

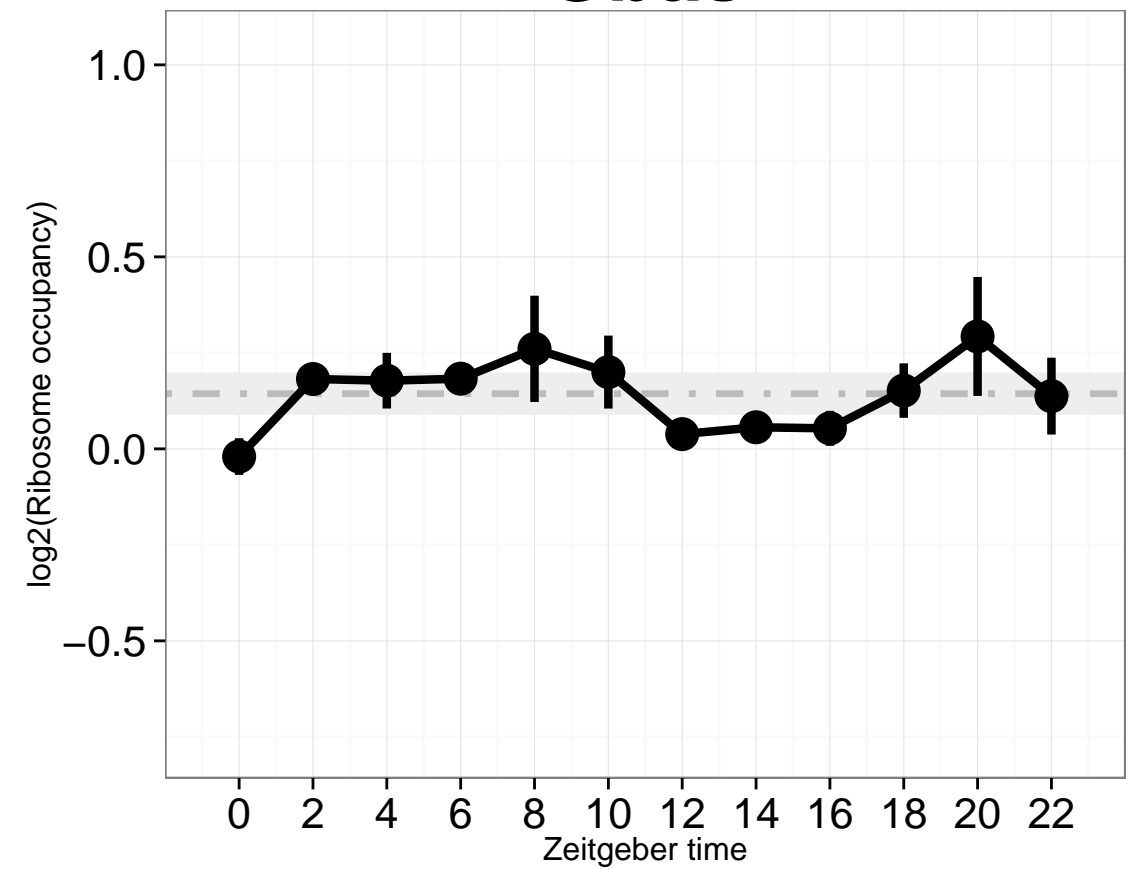

Supplement: Supplementary file 1589 [file 1]

# Nup214

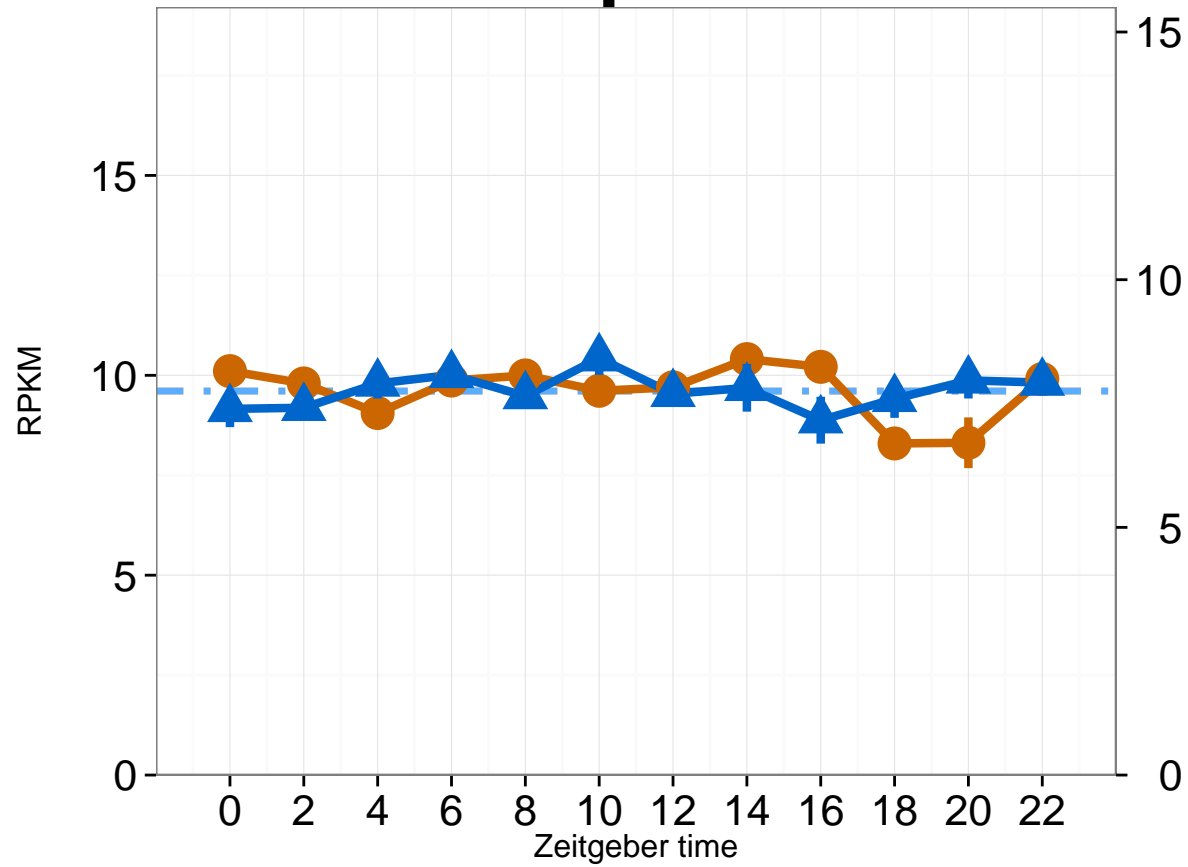

# Nup214

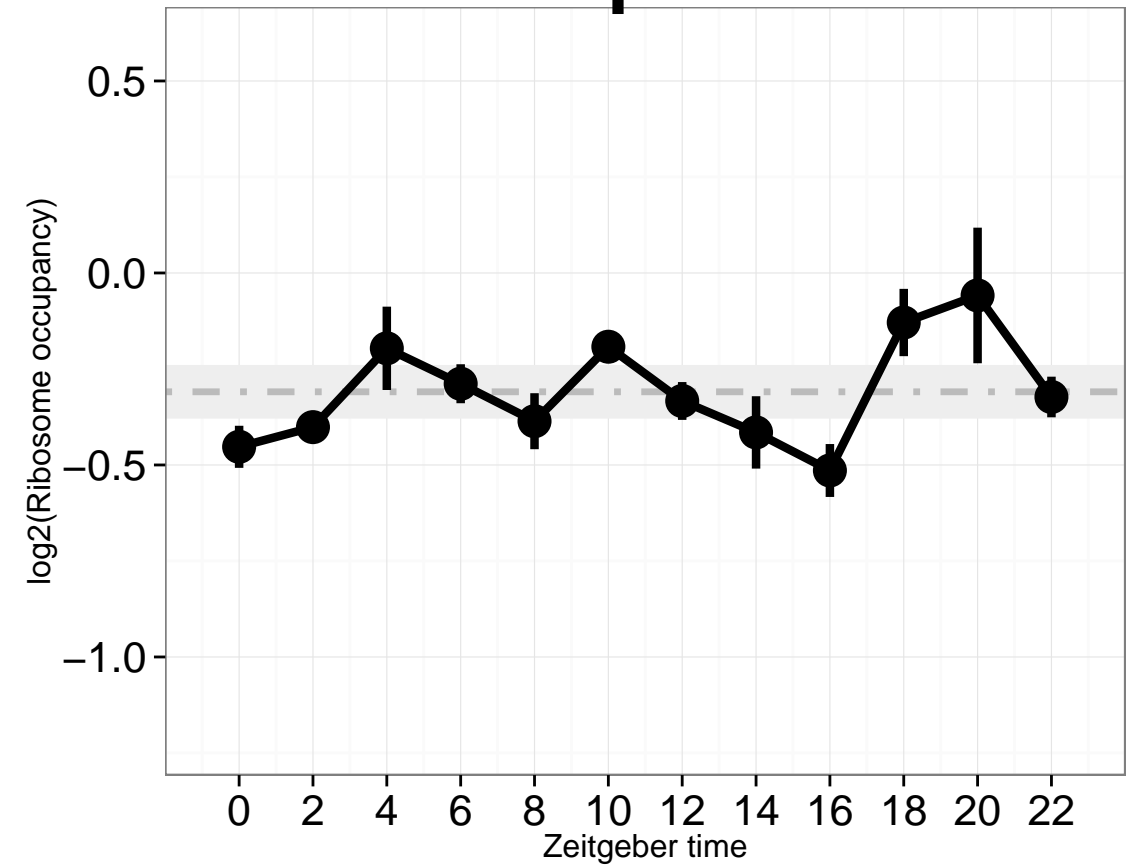

Supplement: Supplementary file 1590 [file 1]

## Proz

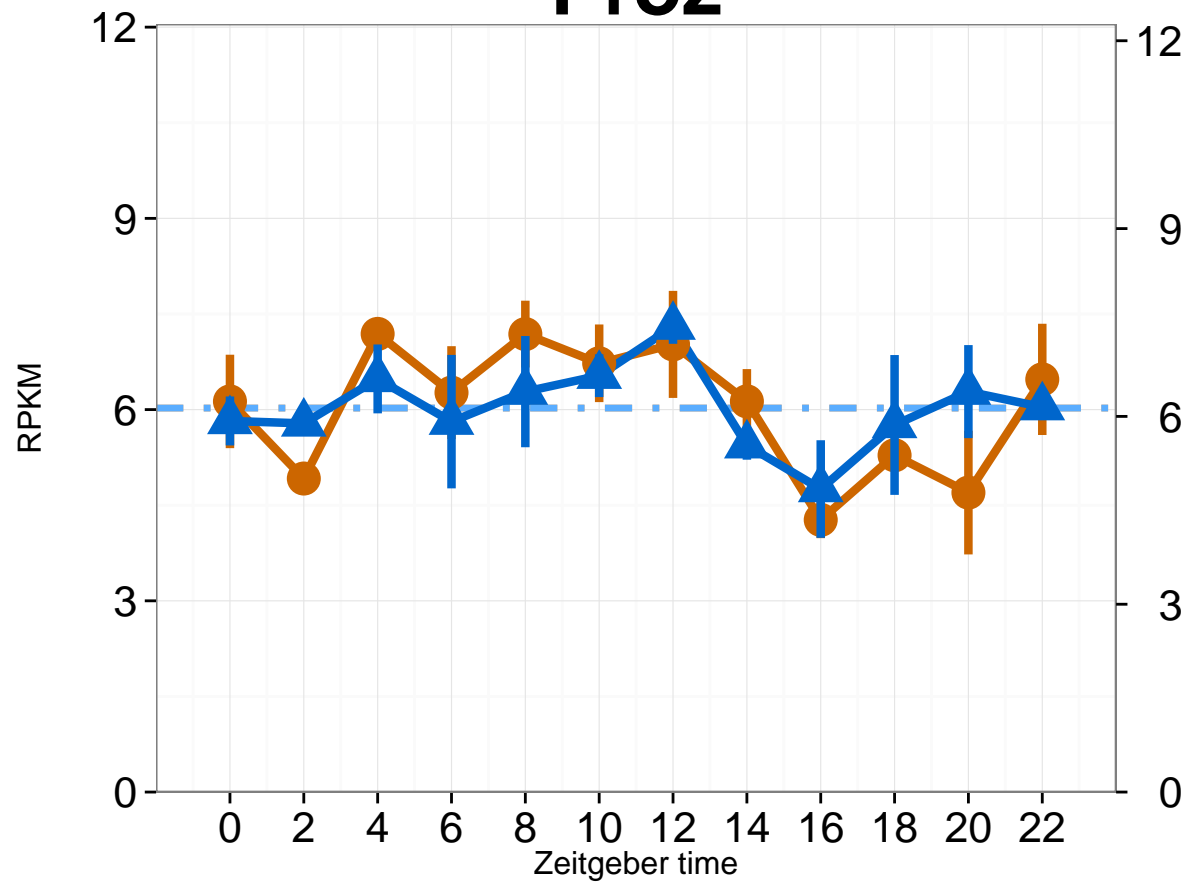

## Proz

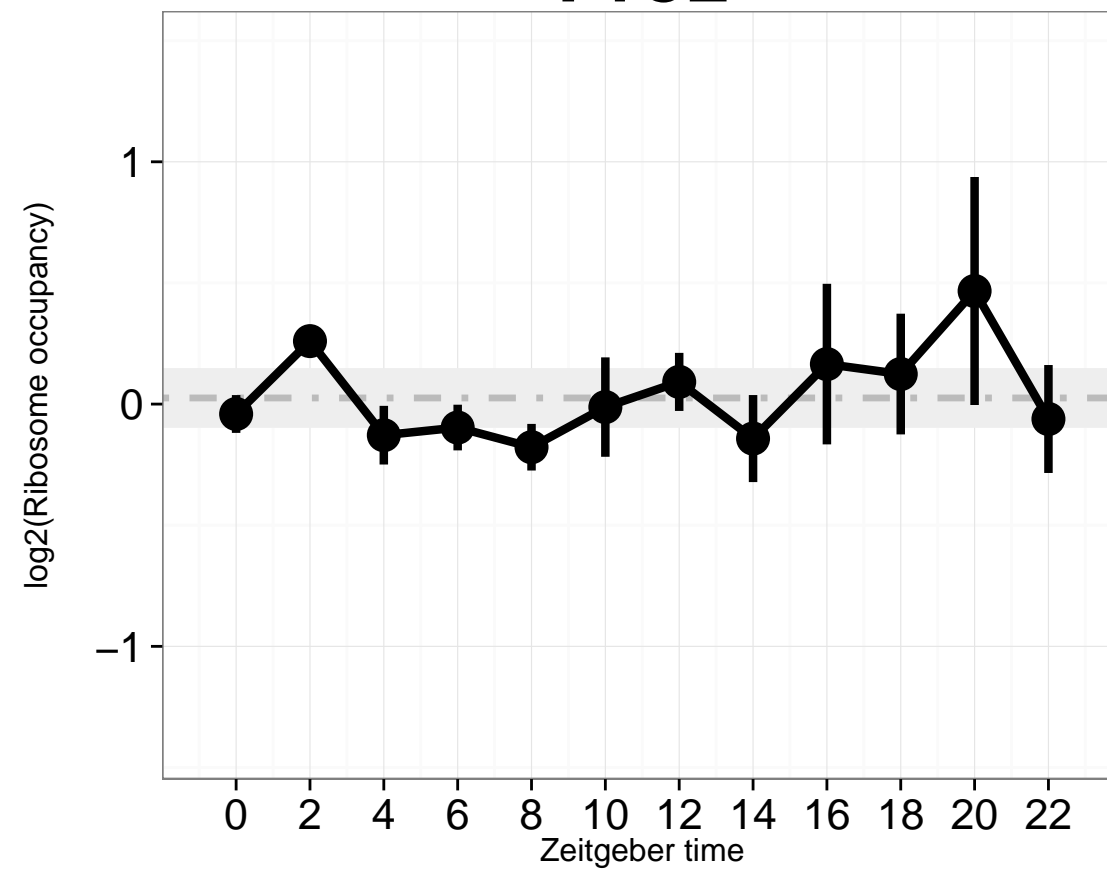

Supplement: Supplementary file 1591 [file 1]

## Pkia

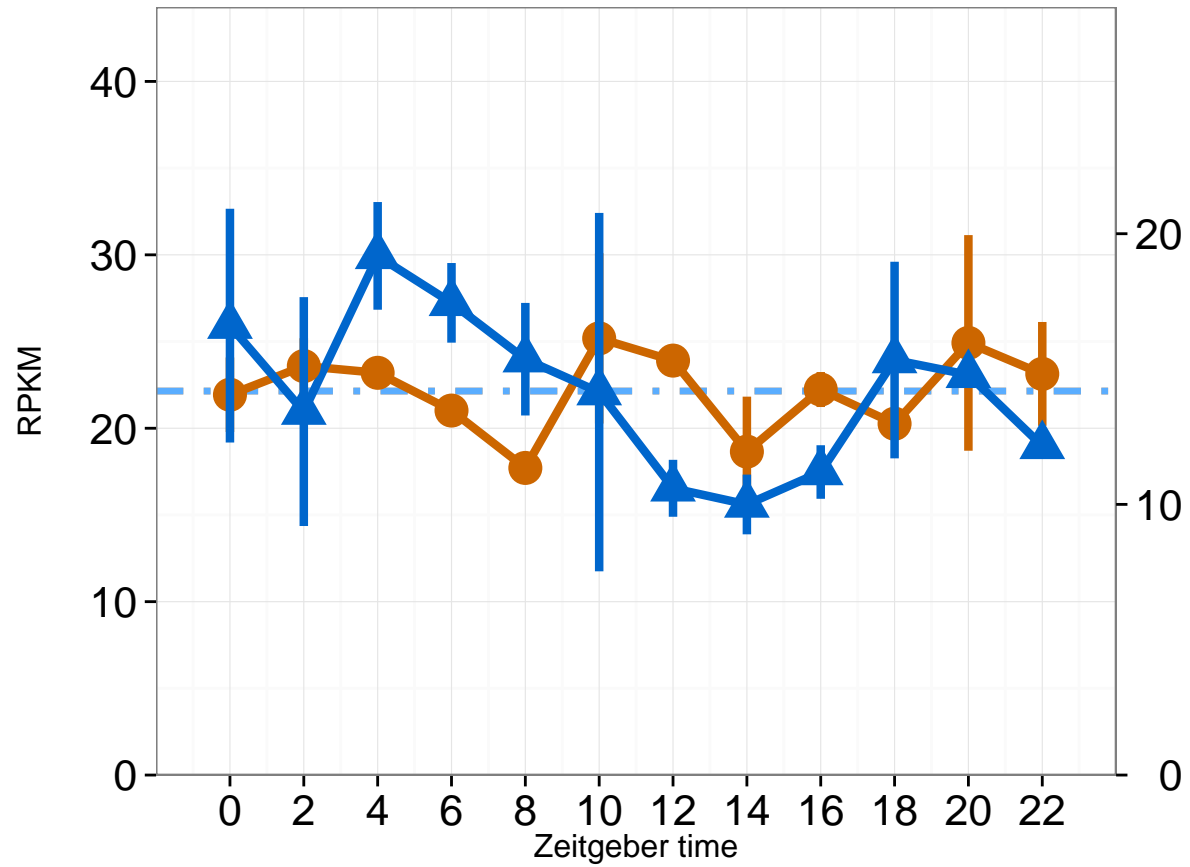

## Pkia

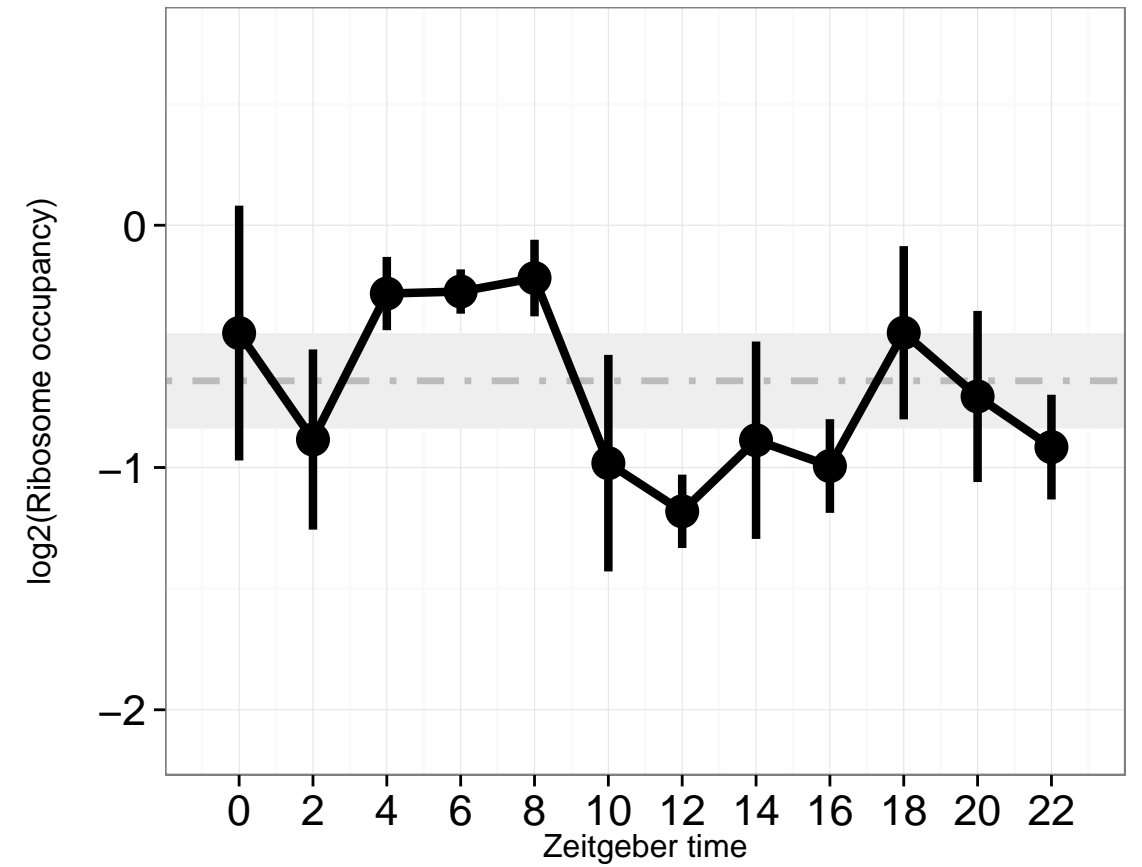

Supplement: Supplementary file 1592 [file 1]

# Cct6a

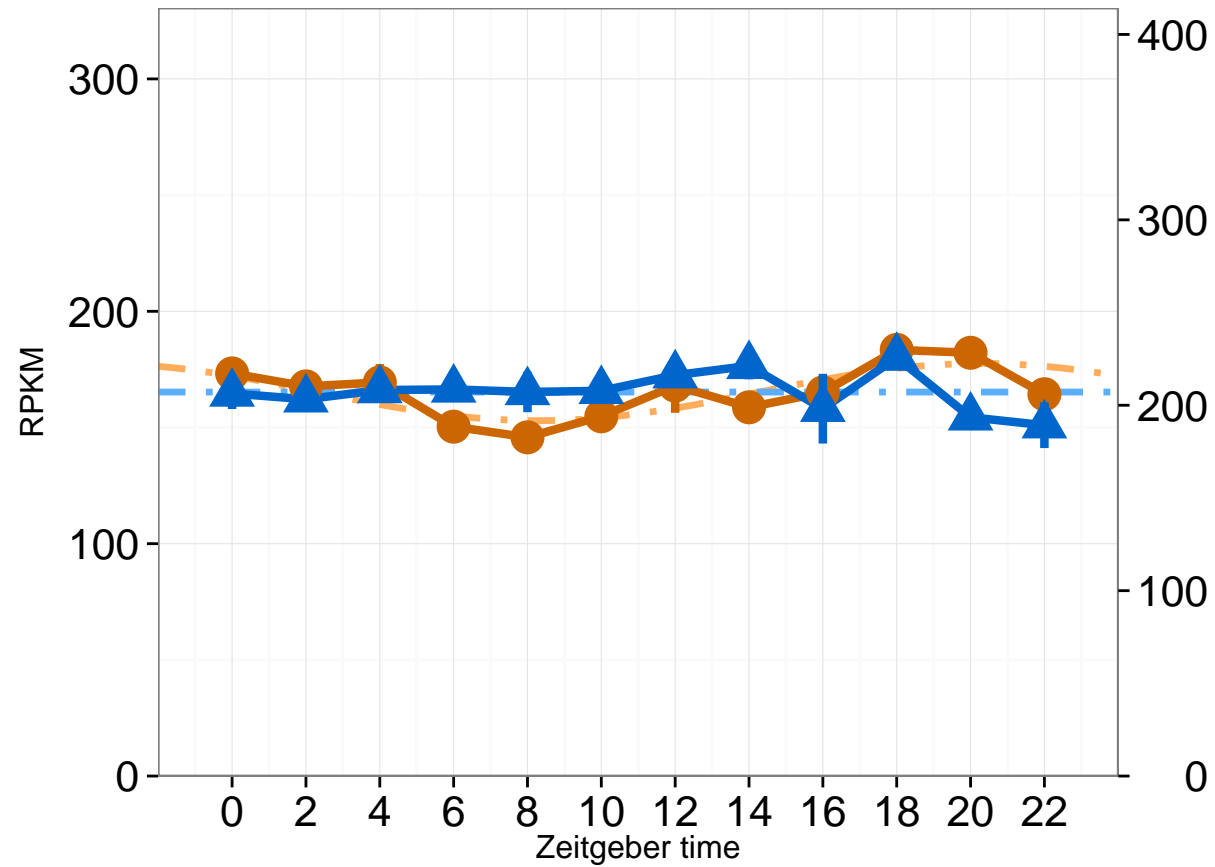

# Cct6a

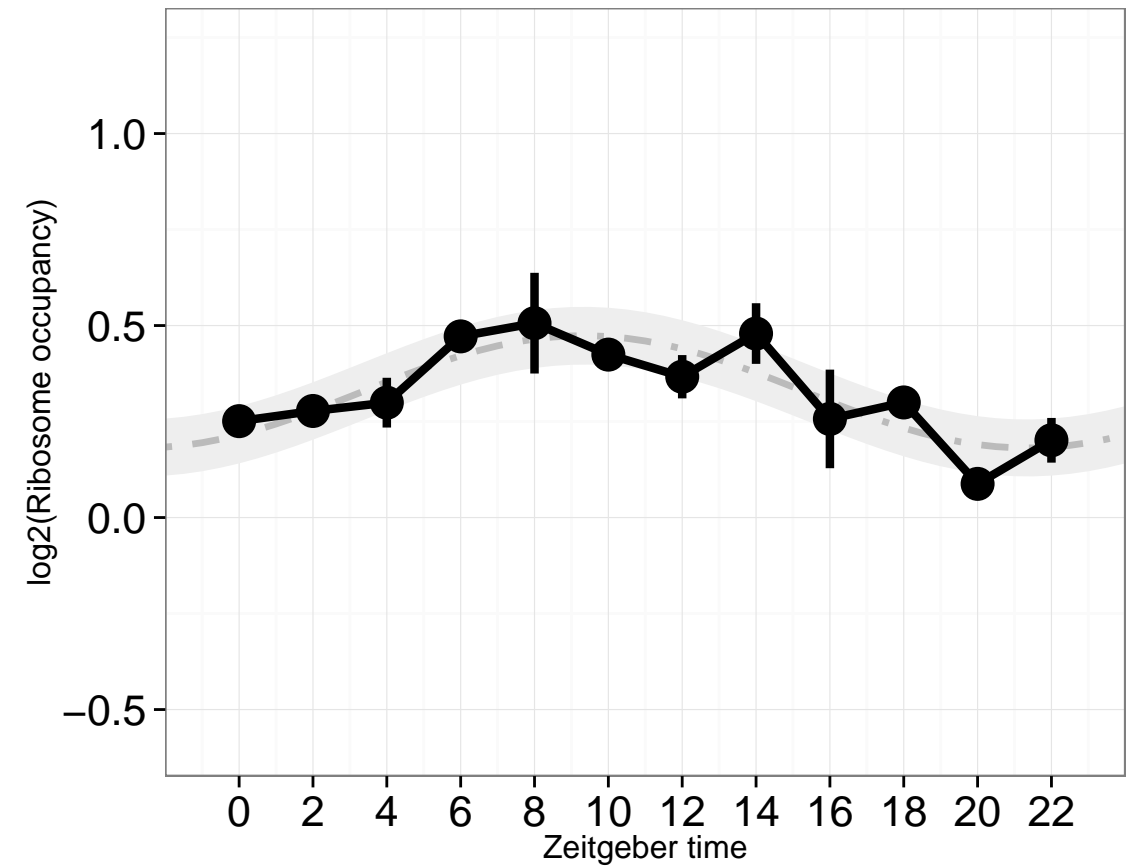

Supplement: Supplementary file 1593 [file 1]

# Fnbp4

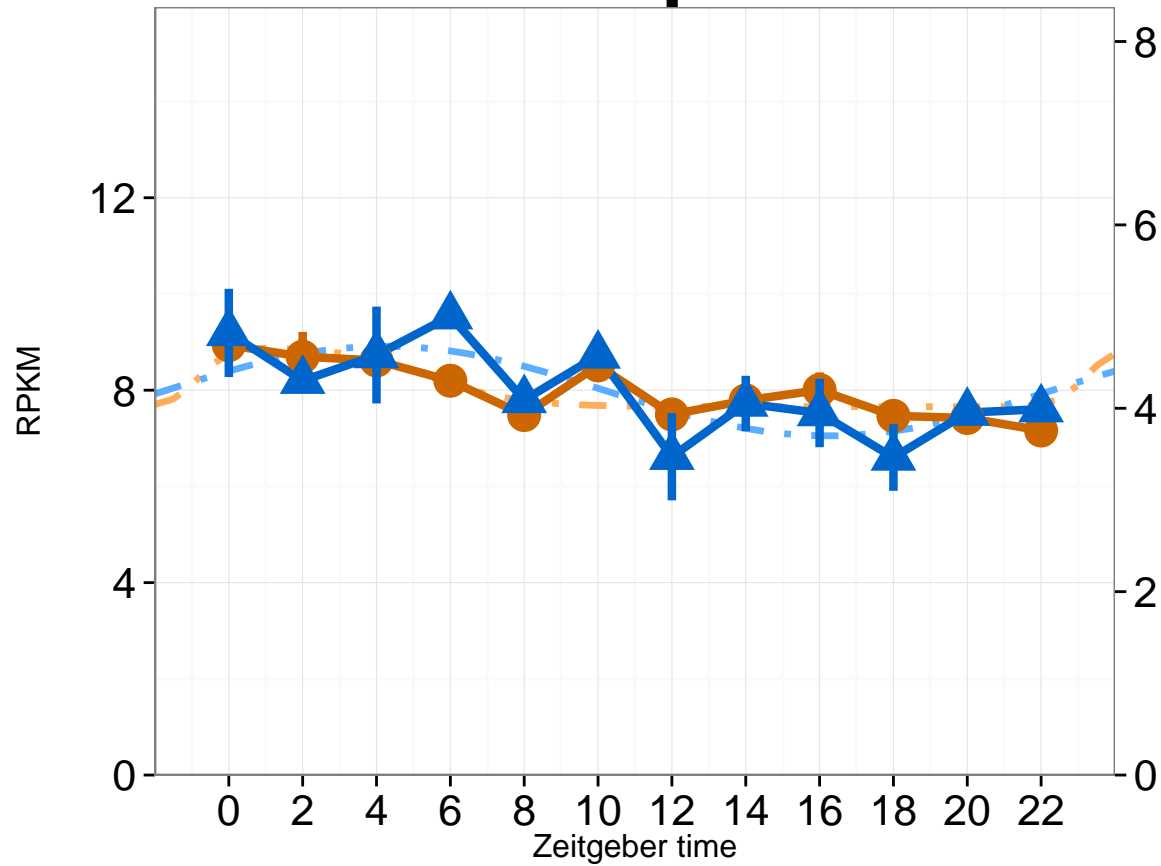

# Fnbp4

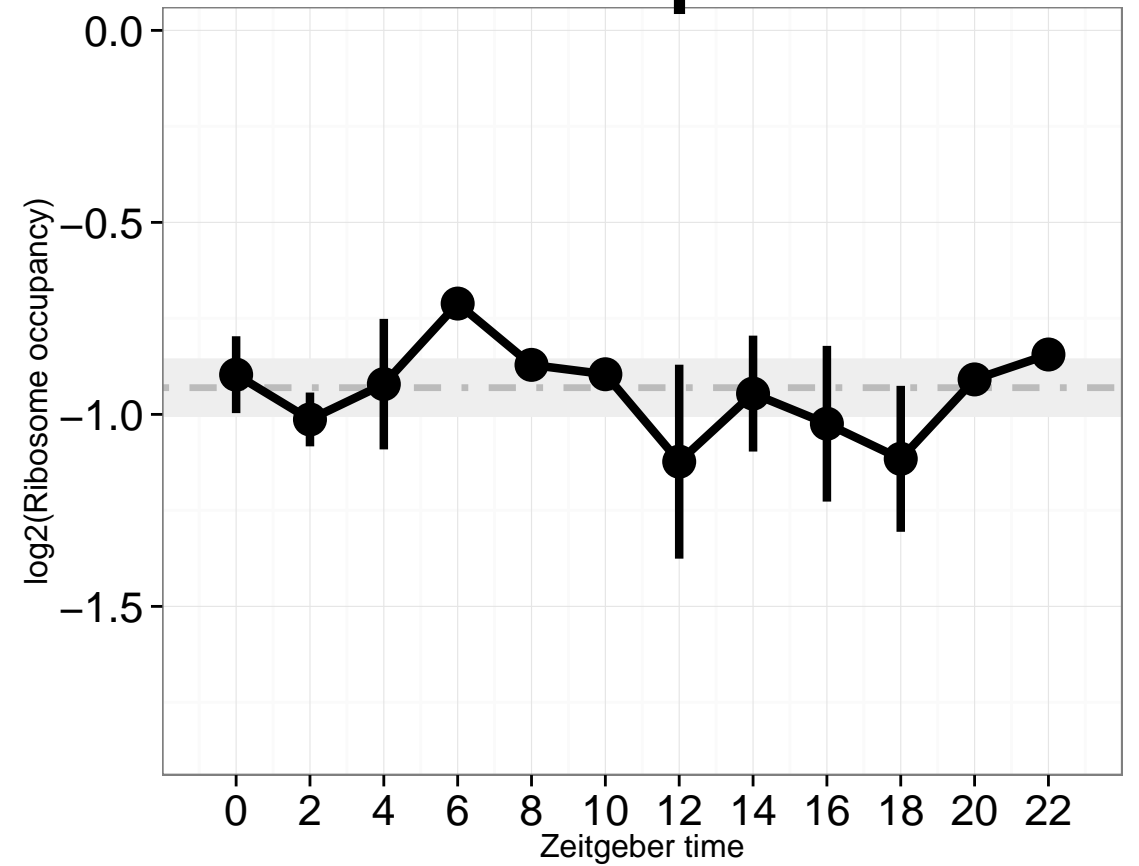

Supplement: Supplementary file 1594 [file 1]

# Fancd2

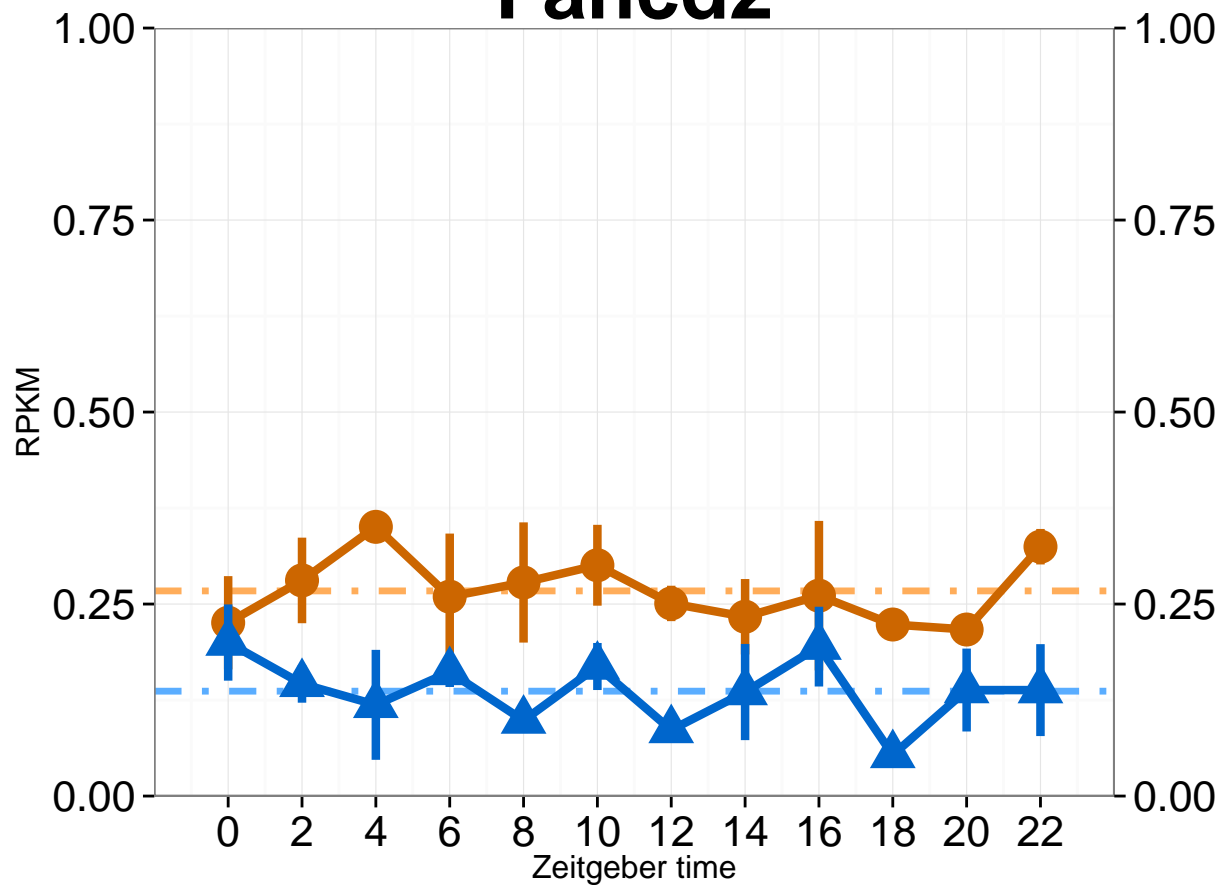

# Fancd2

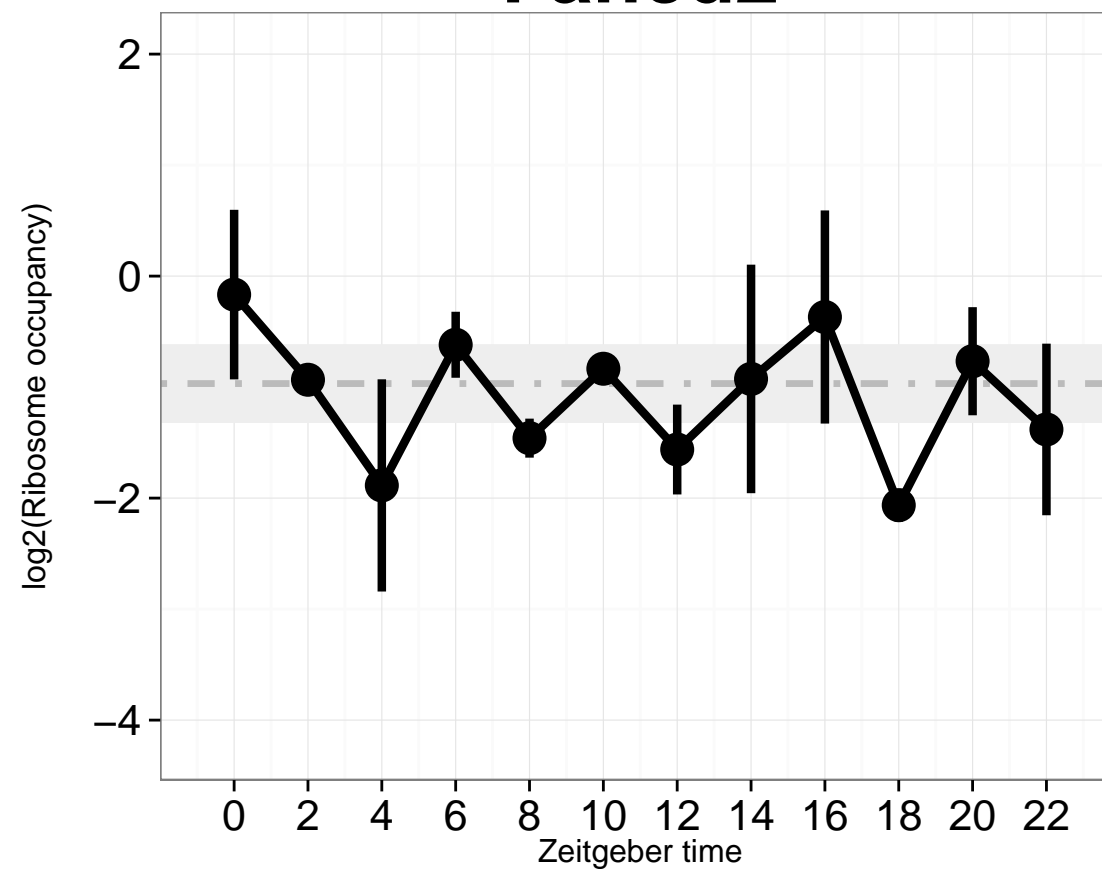

Supplement: Supplementary file 1595 [file 1]

## Nostrin

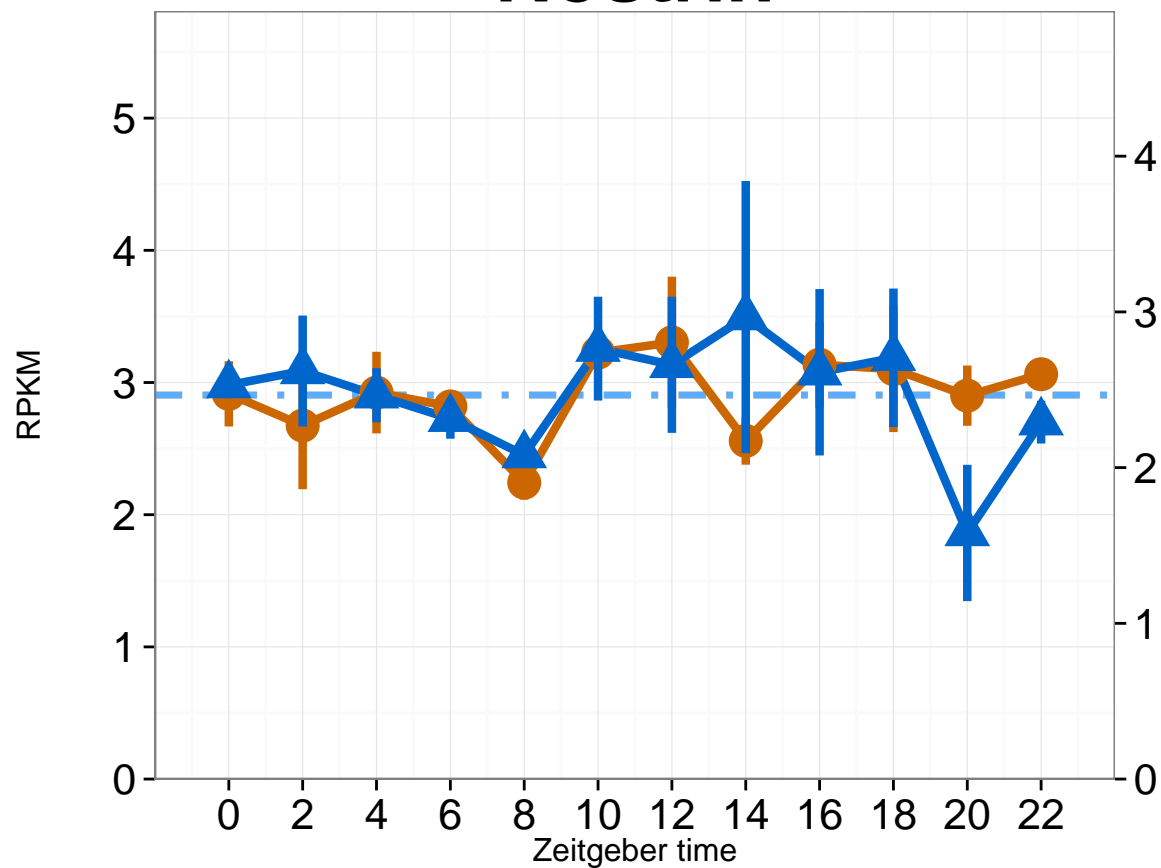

## Nostrin

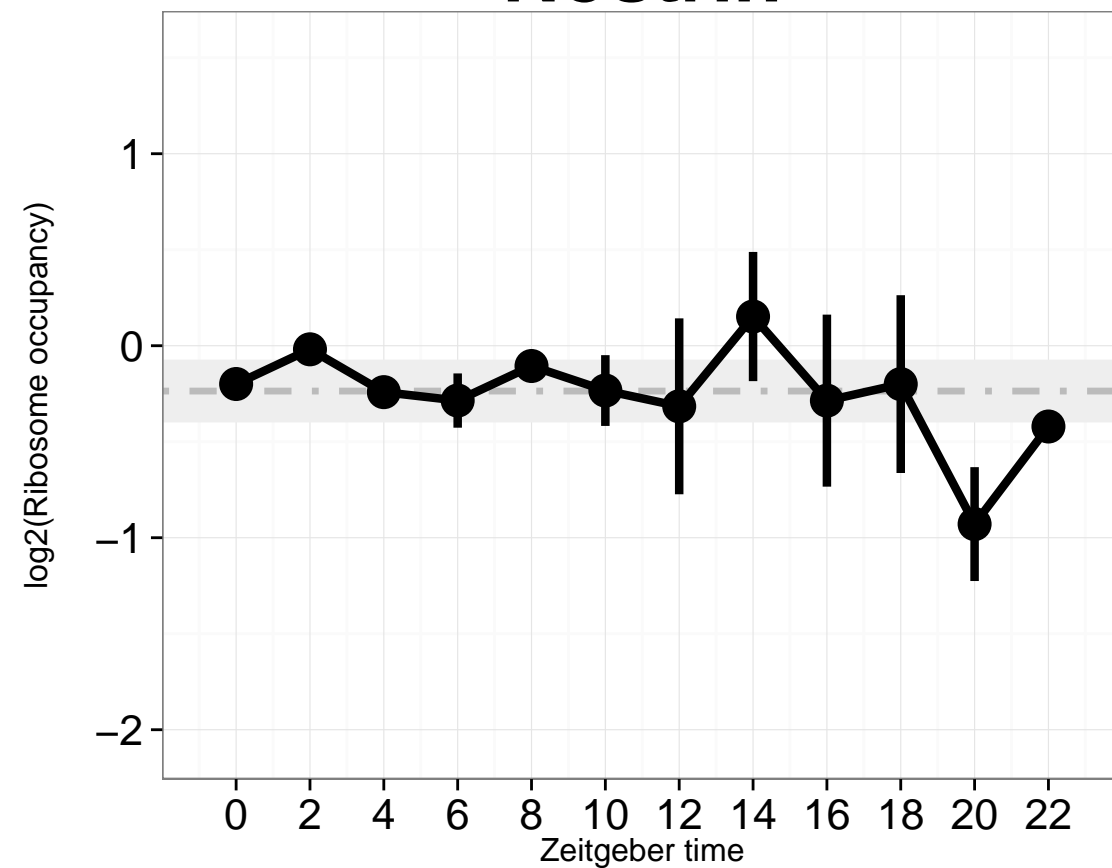

Supplement: Supplementary file 1596 [file 1]

## Dusp19

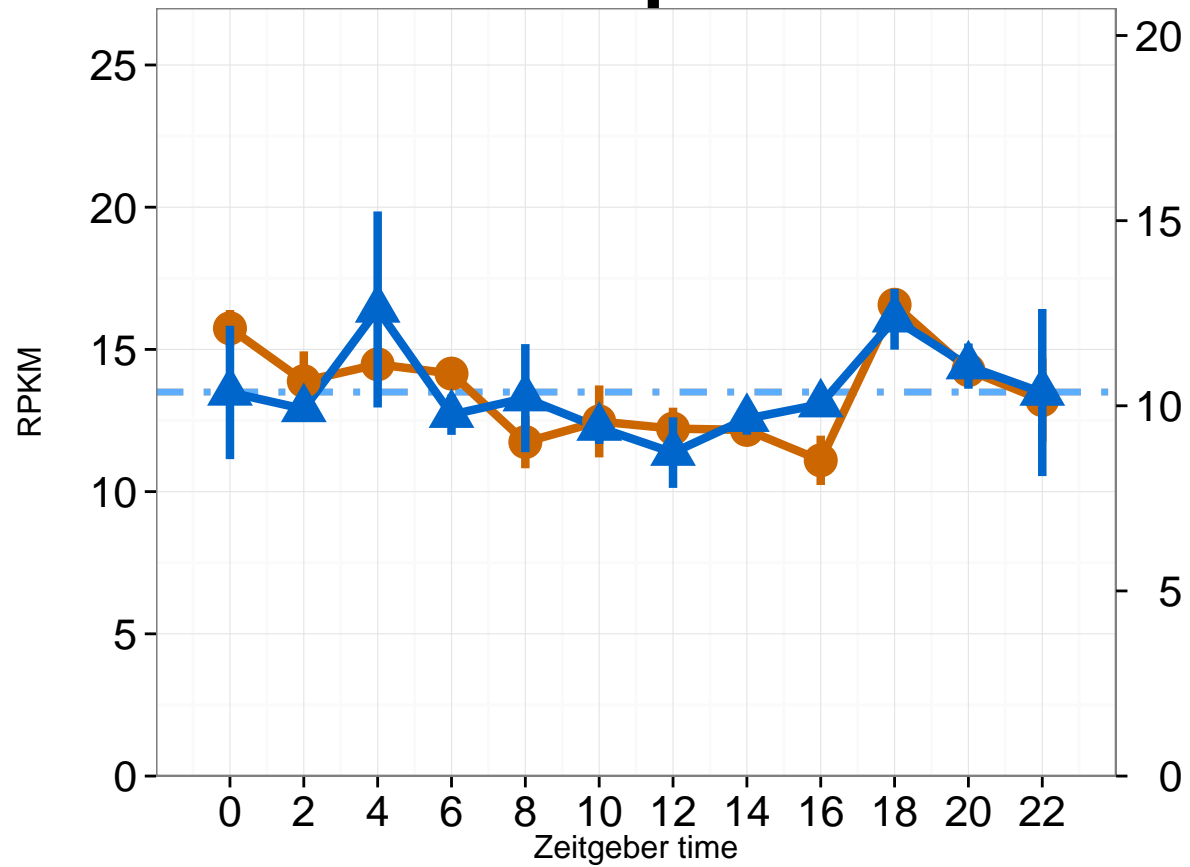

## Dusp19

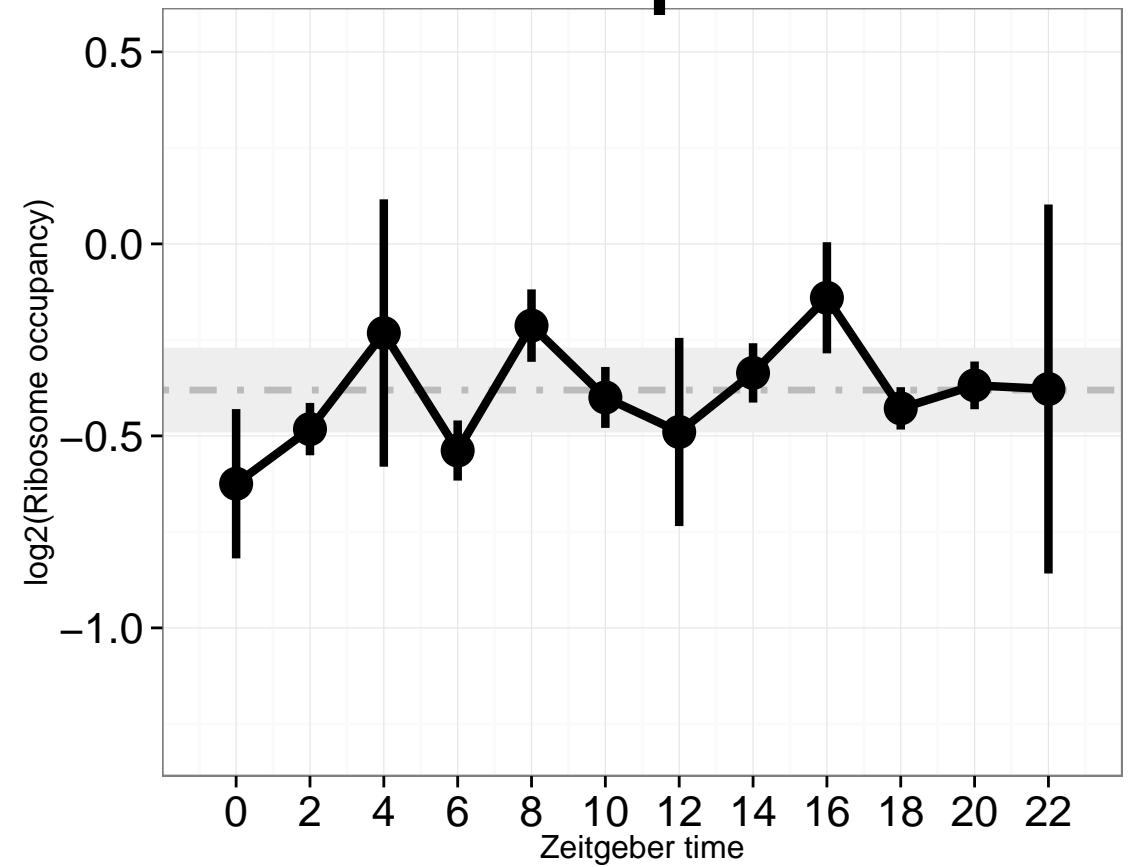

Supplement: Supplementary file 1597 [file 1]

**Xcr1 TR**

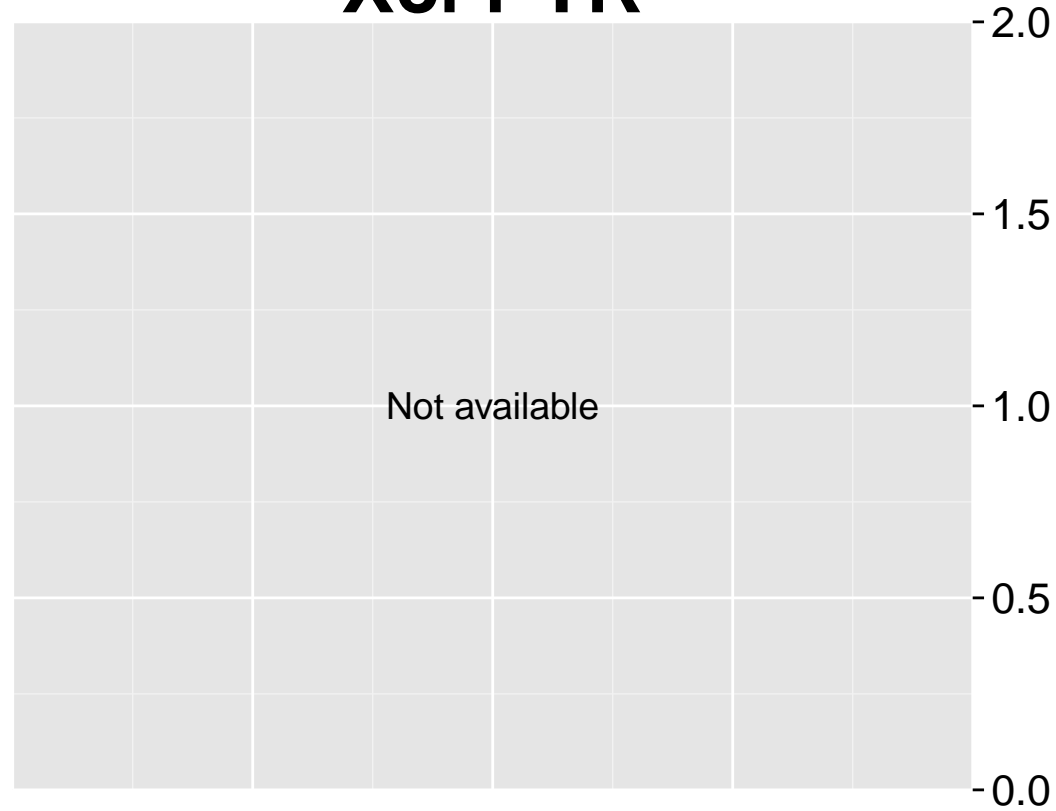

**Xcr1 log2(Ribosome occupancy)**

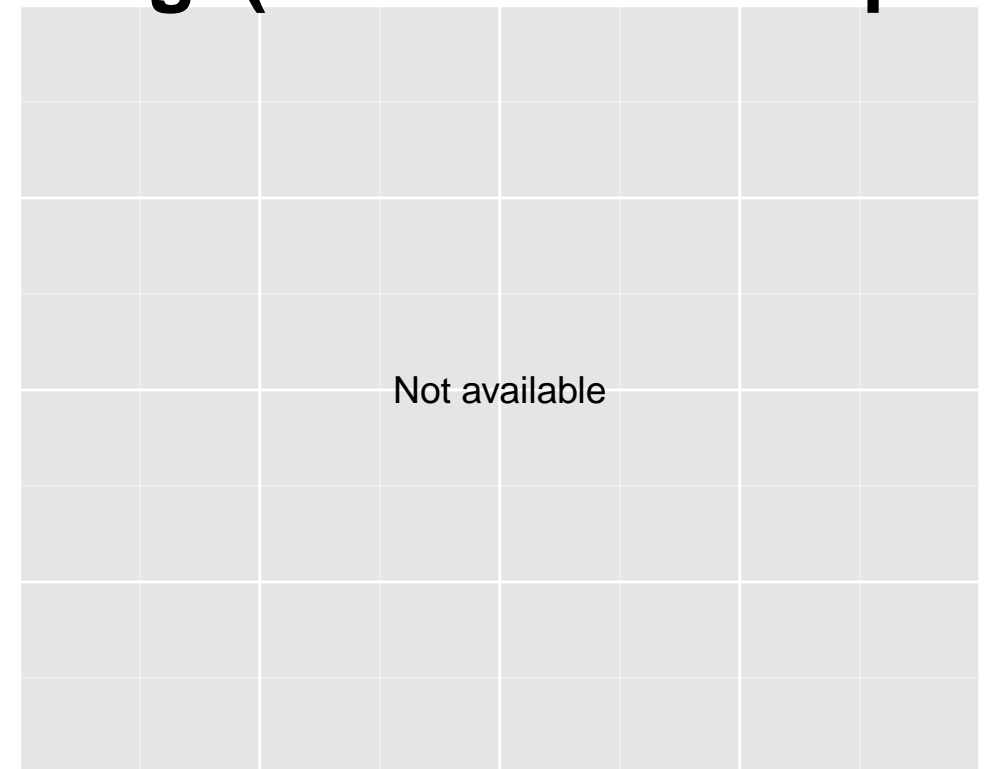

Supplement: Supplementary file 1598 [file 1]

## Acmsd

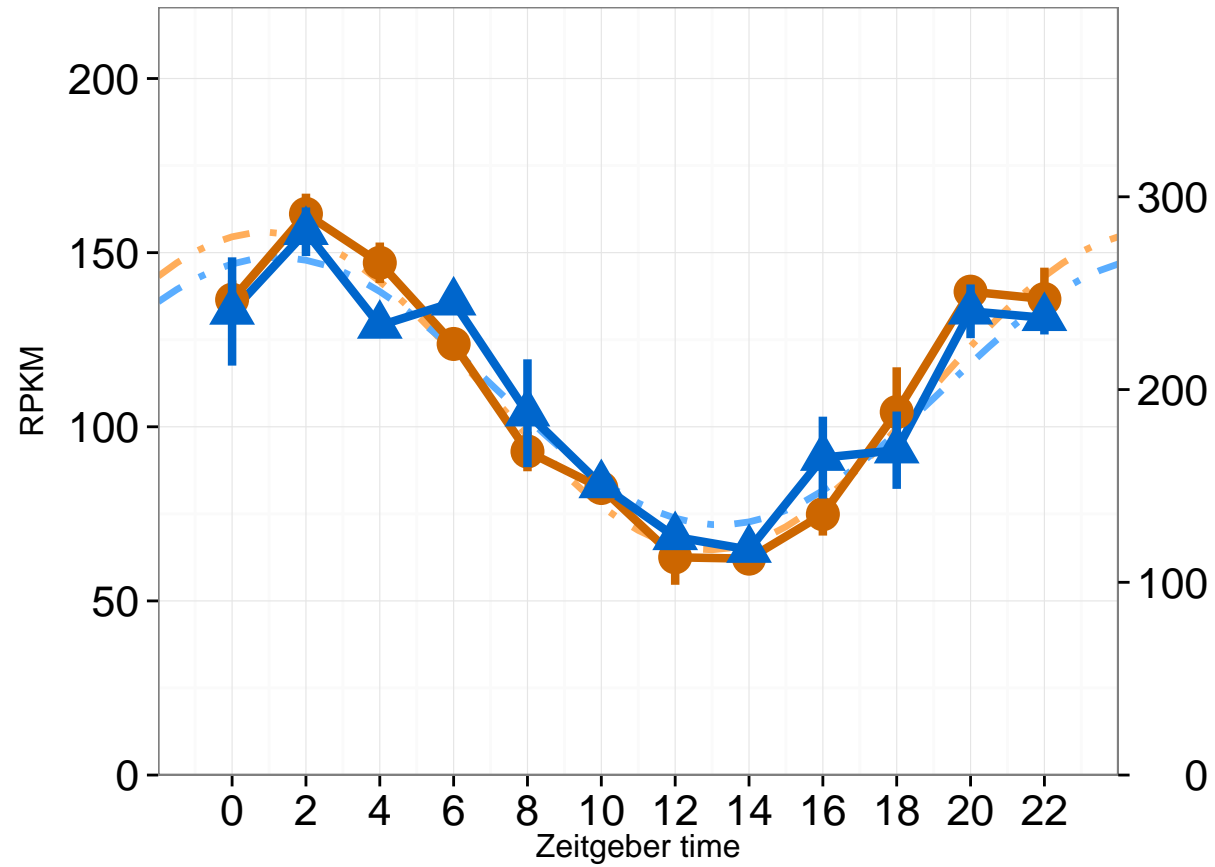

## Acmsd

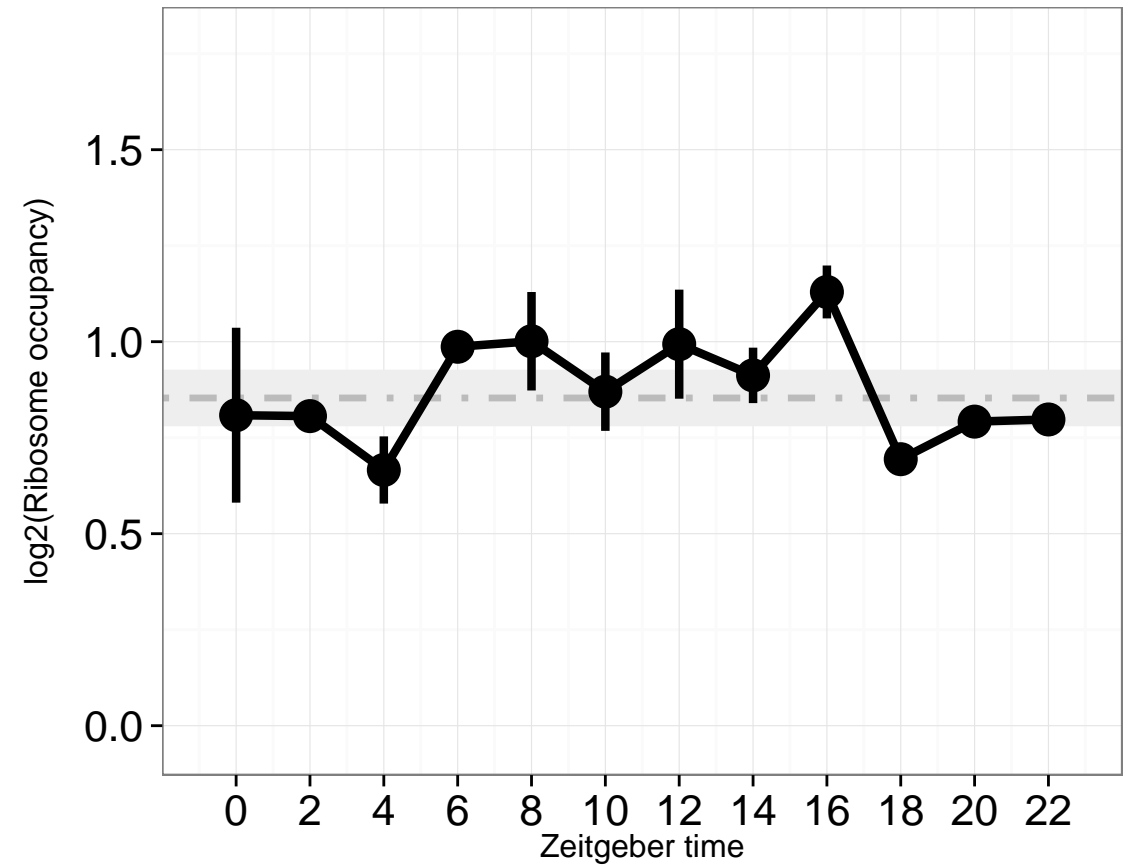

Supplement: Supplementary file 1599 [file 1]

# Ndst1

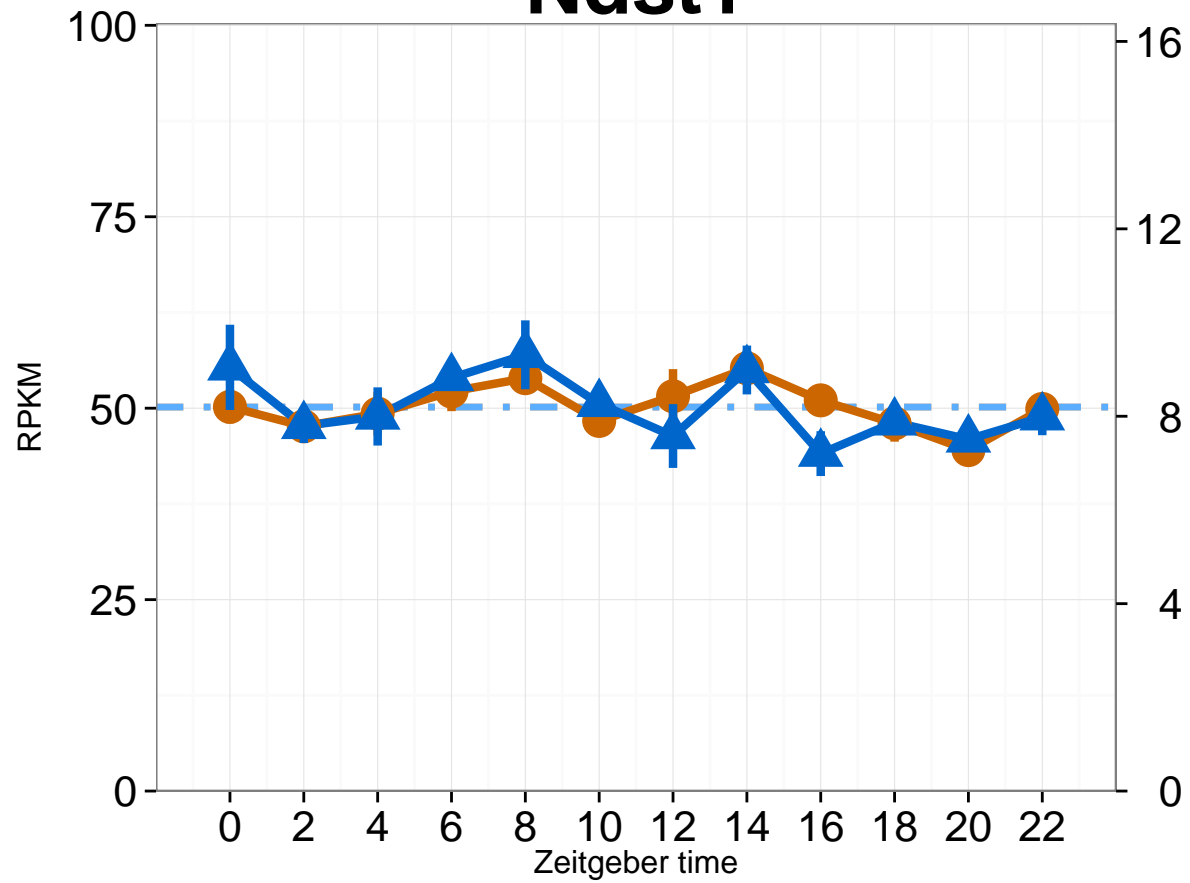

# Ndst1

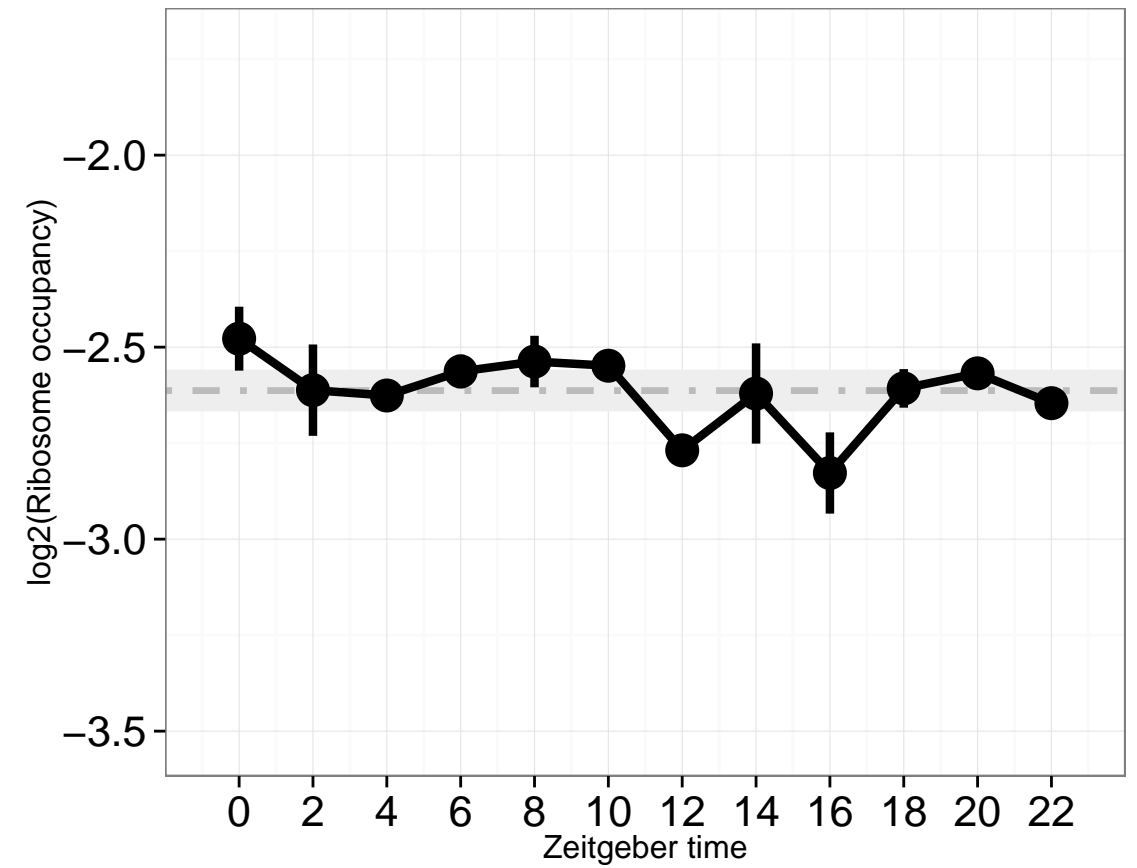

Supplement: Supplementary file 1600 [file 1]

## Ppara

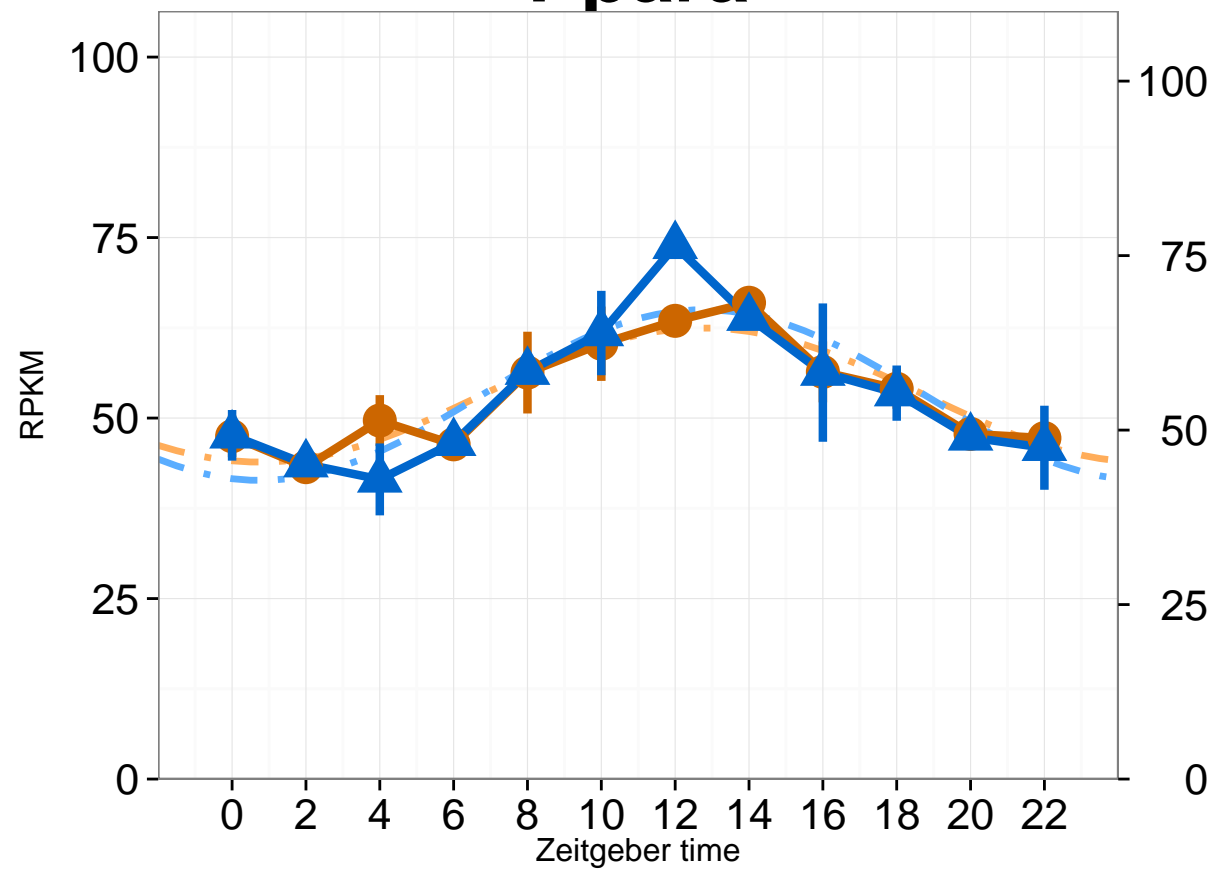

## Ppara

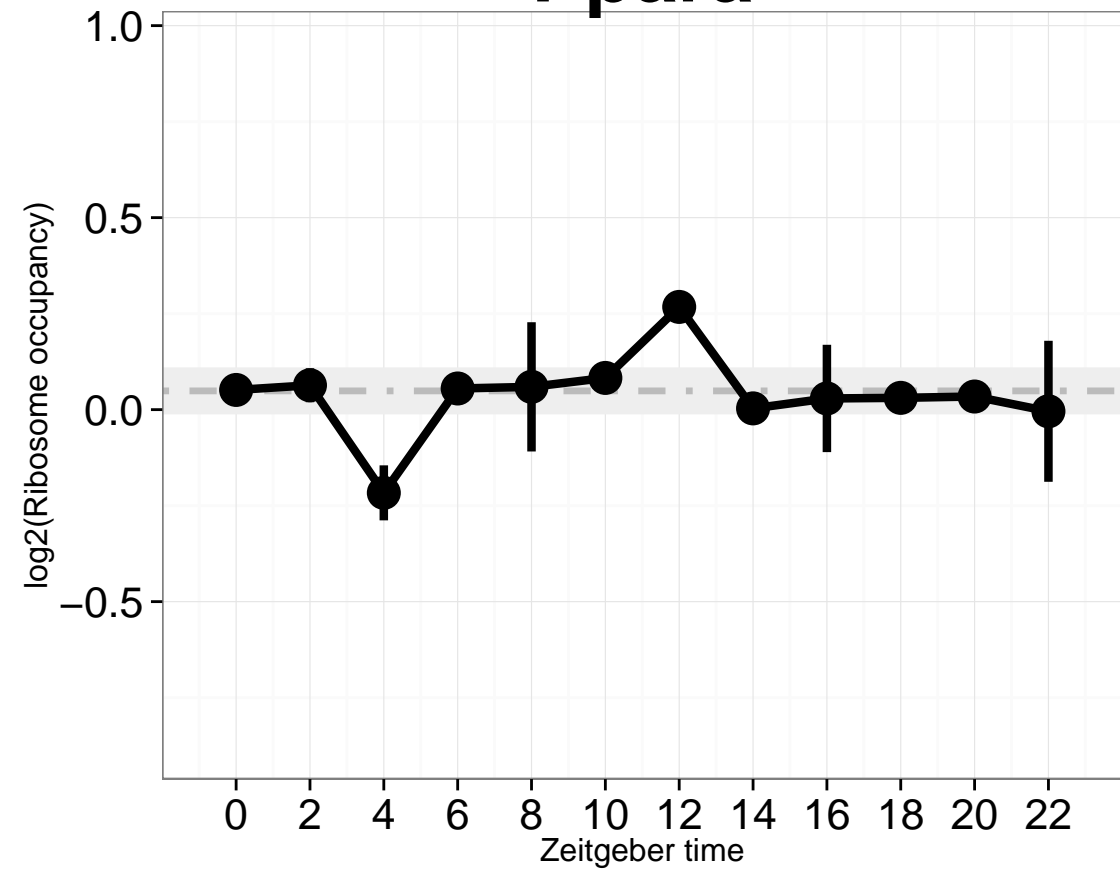

Supplement: Supplementary file 1601 [file 1]

## Smad2

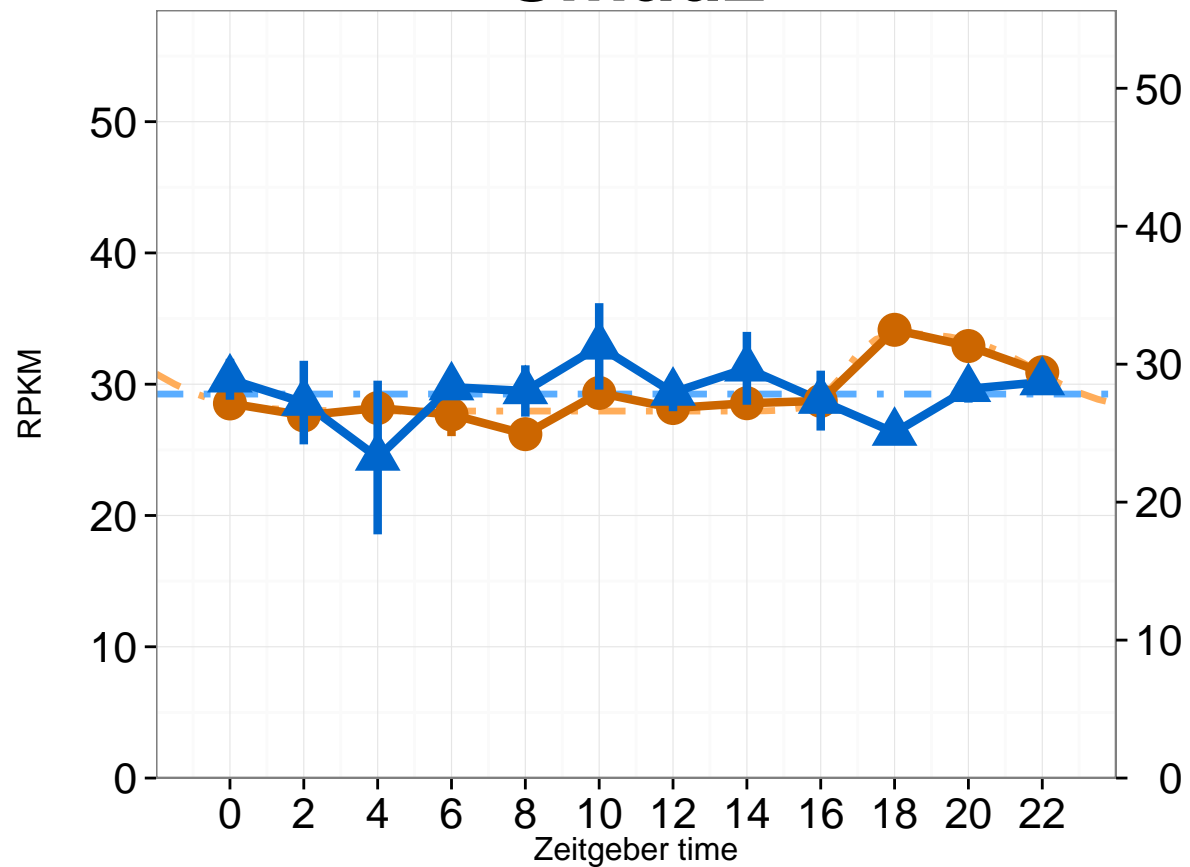

## Smad2

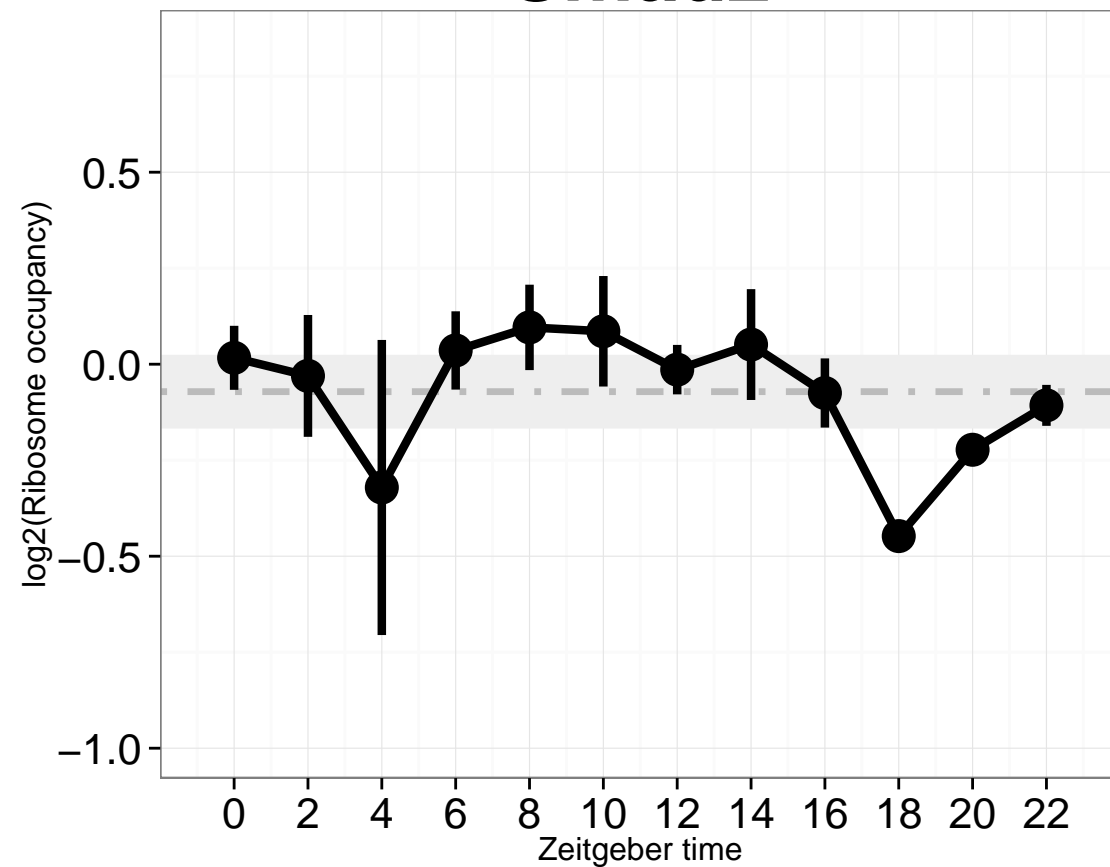

Supplement: Supplementary file 1602 [file 1]

## Sfmbt1

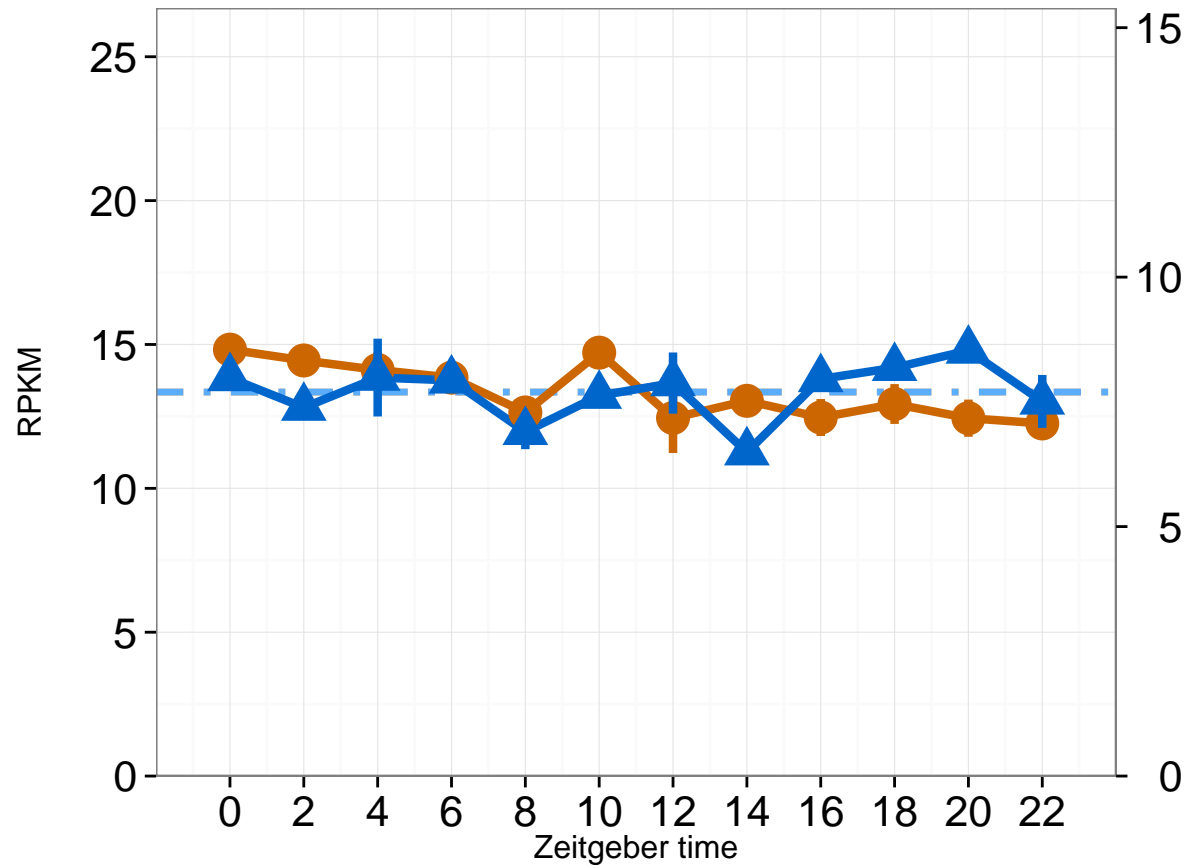

## Sfmbt1

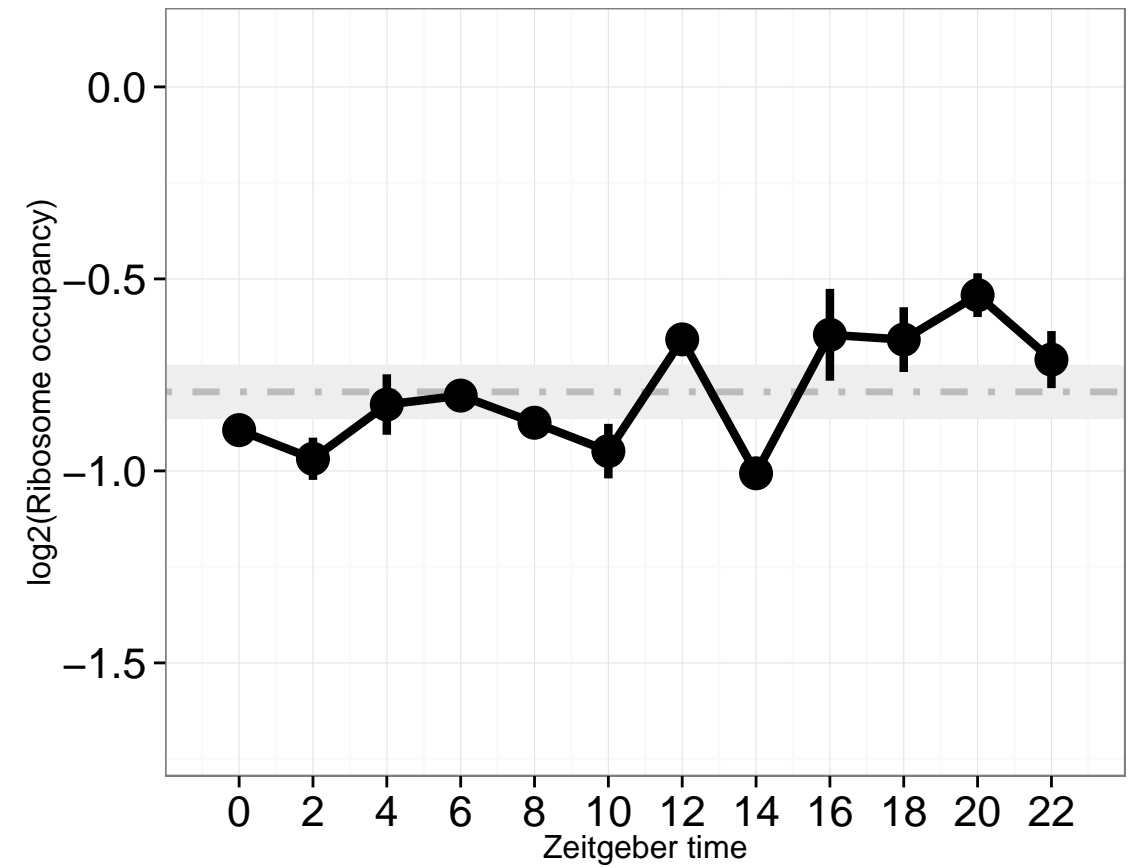

Supplement: Supplementary file 1603 [file 1]

## Heatr3

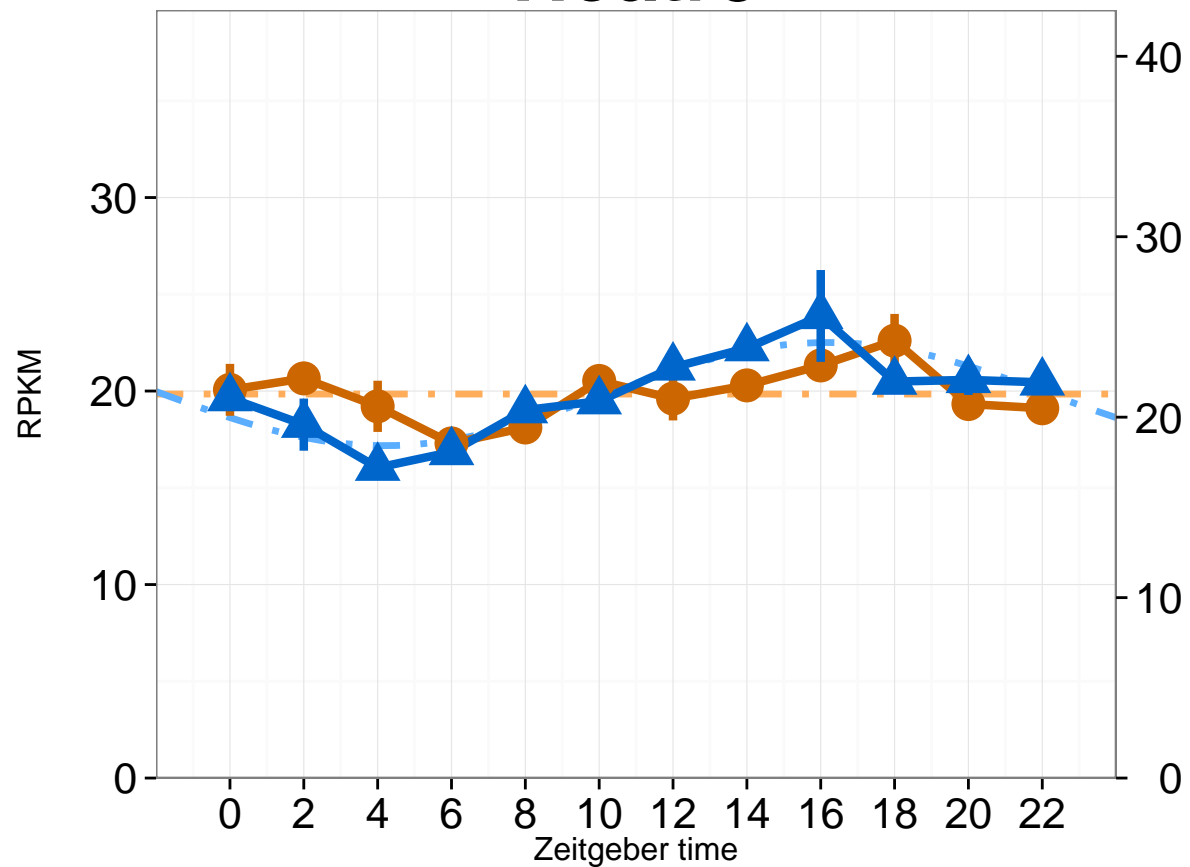

## Heatr3

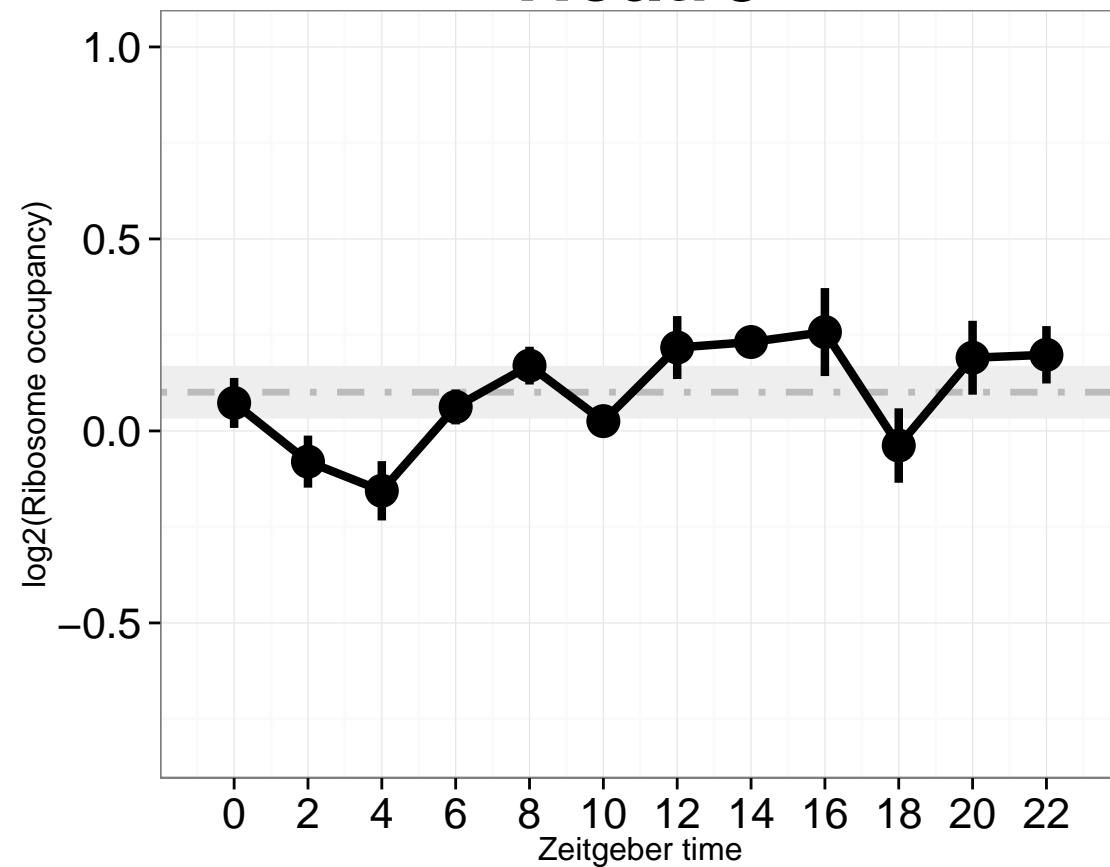

Supplement: Supplementary file 1604 [file 1]

# Pigyl

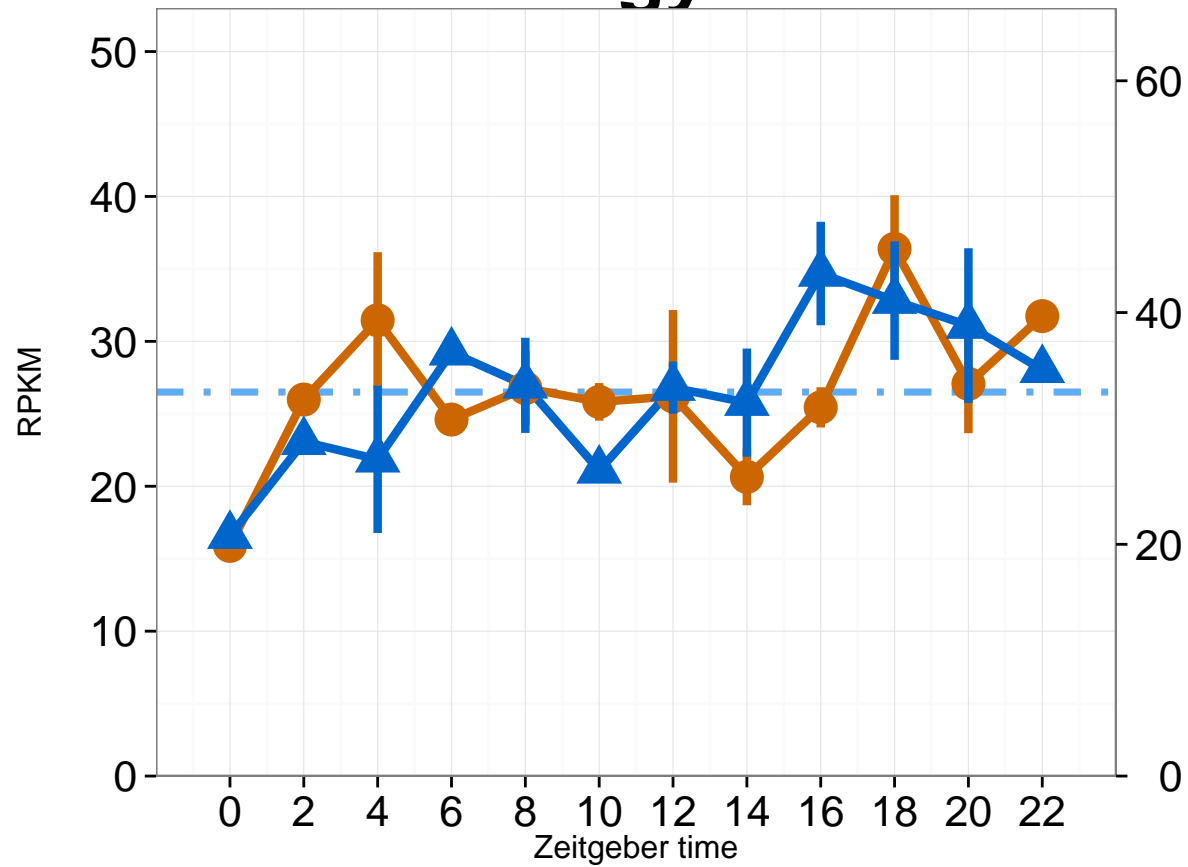

# Pigyl

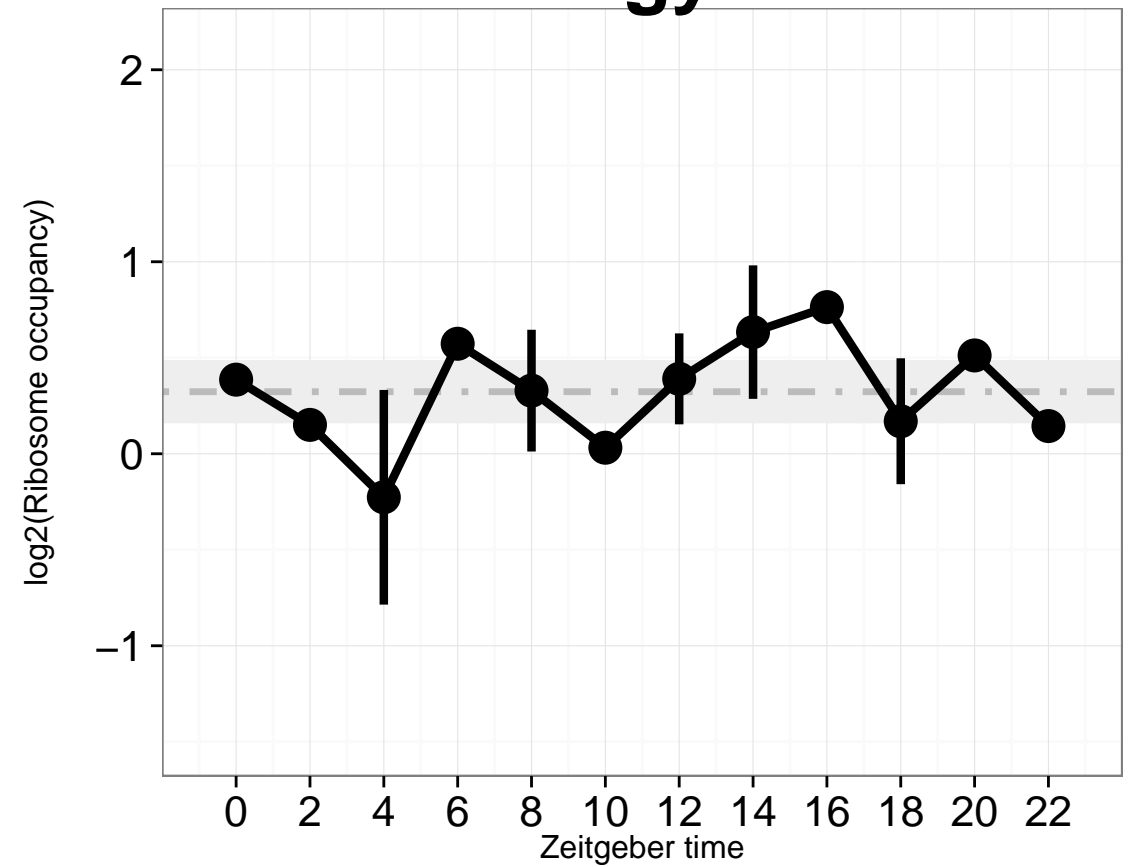

Supplement: Supplementary file 1605 [file 1]

# Trappc13

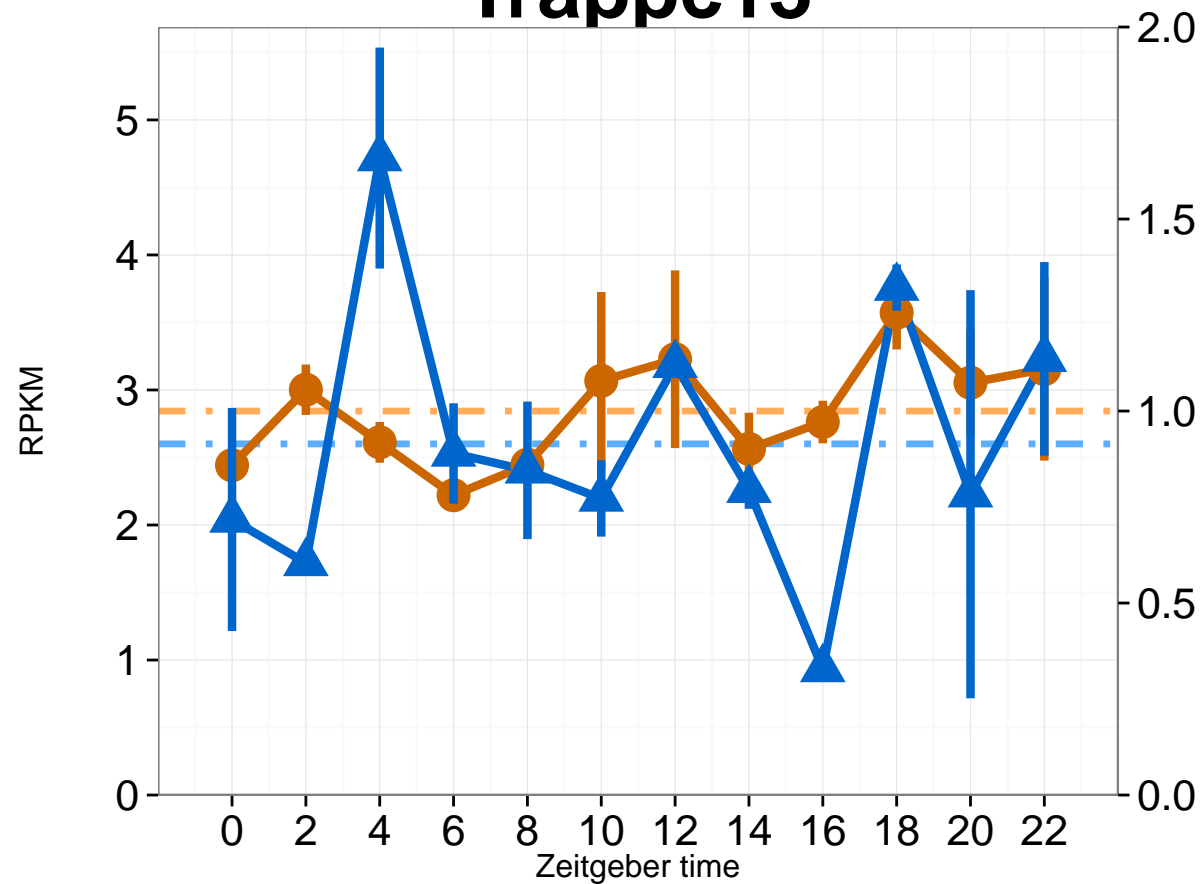

# Trappc13

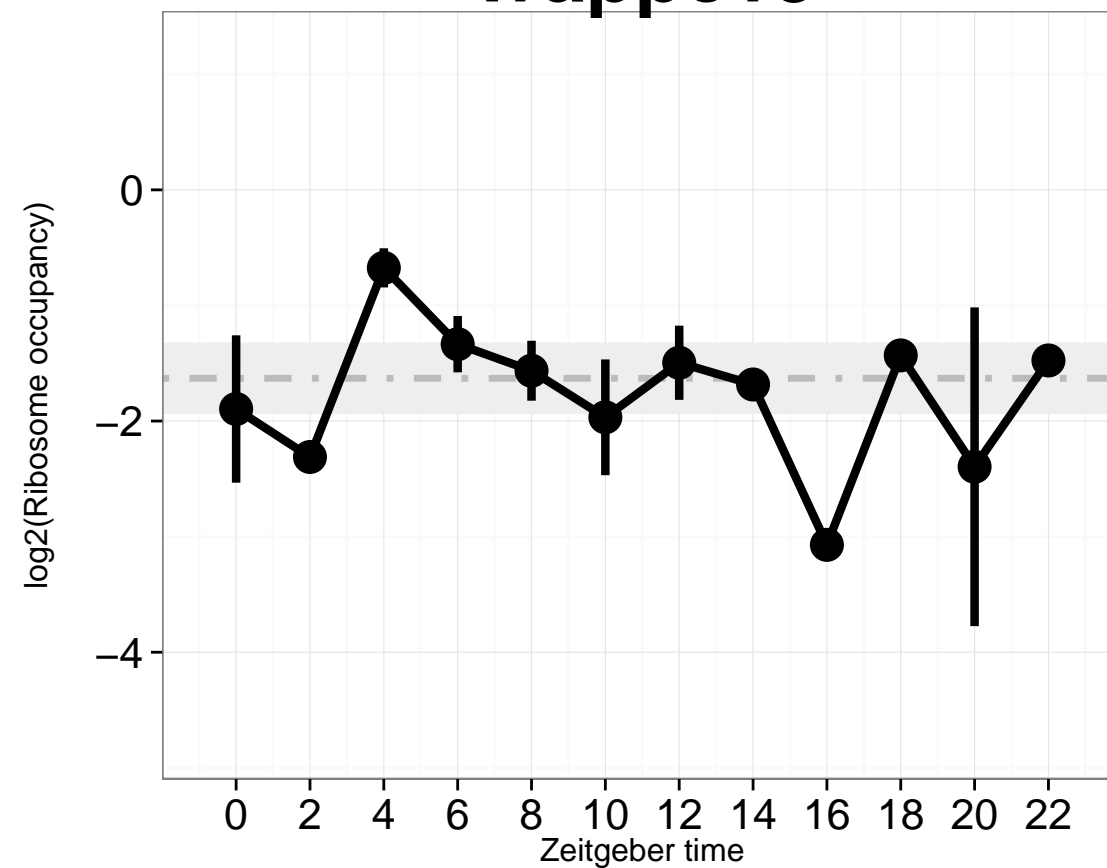

Supplement: Supplementary file 1606 [file 1]
