# Supplementary material (part 17 of 133)
Source: publisher figshare collection journal article supplement (https://springernature.figshare.com/articles/dataset/_/4903193)

## Rab19

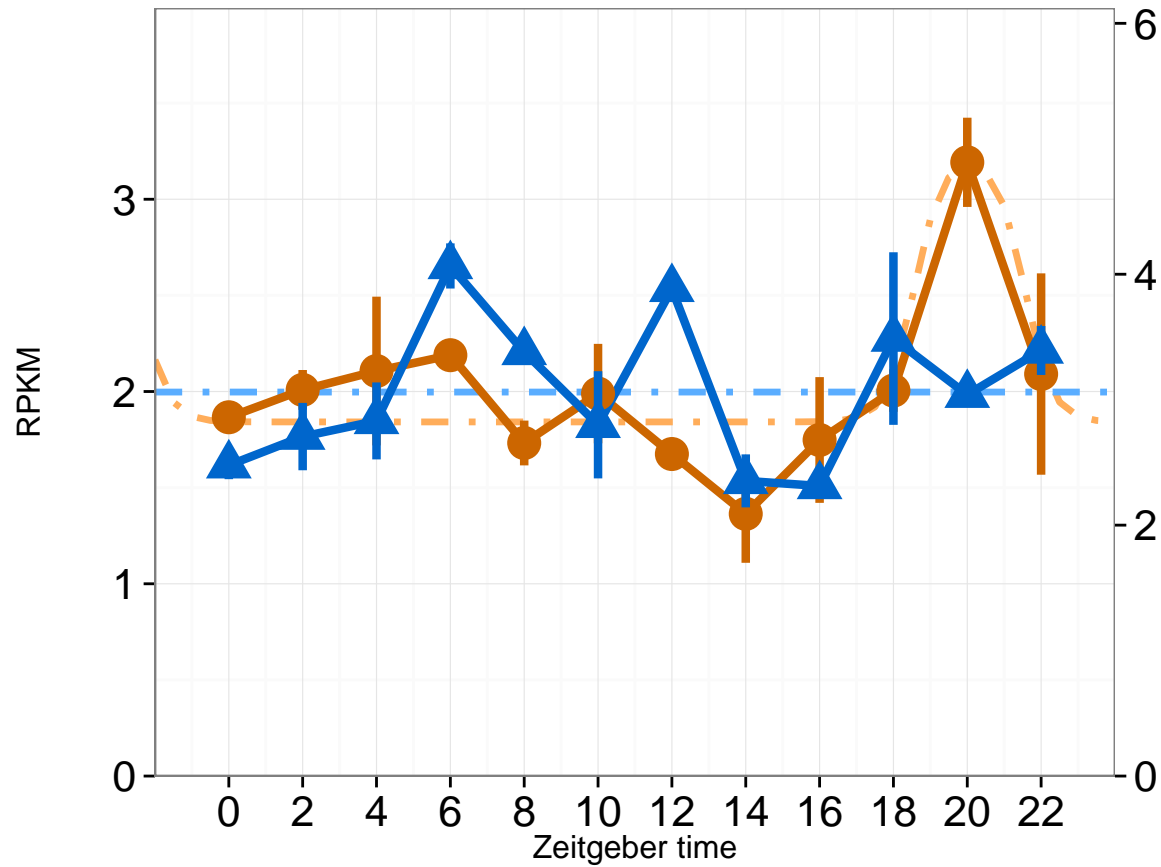

## Rab19

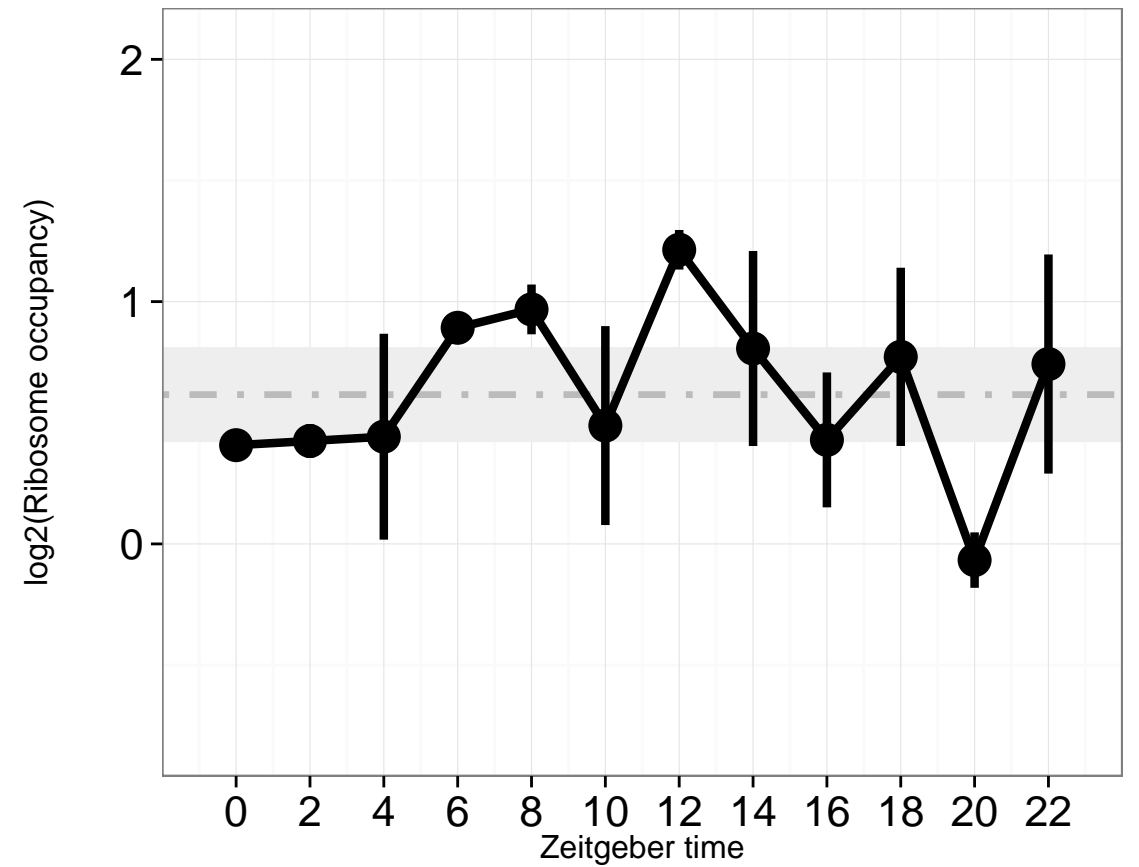

Supplement: Supplementary file 1607 [file 1]

## Elovl7

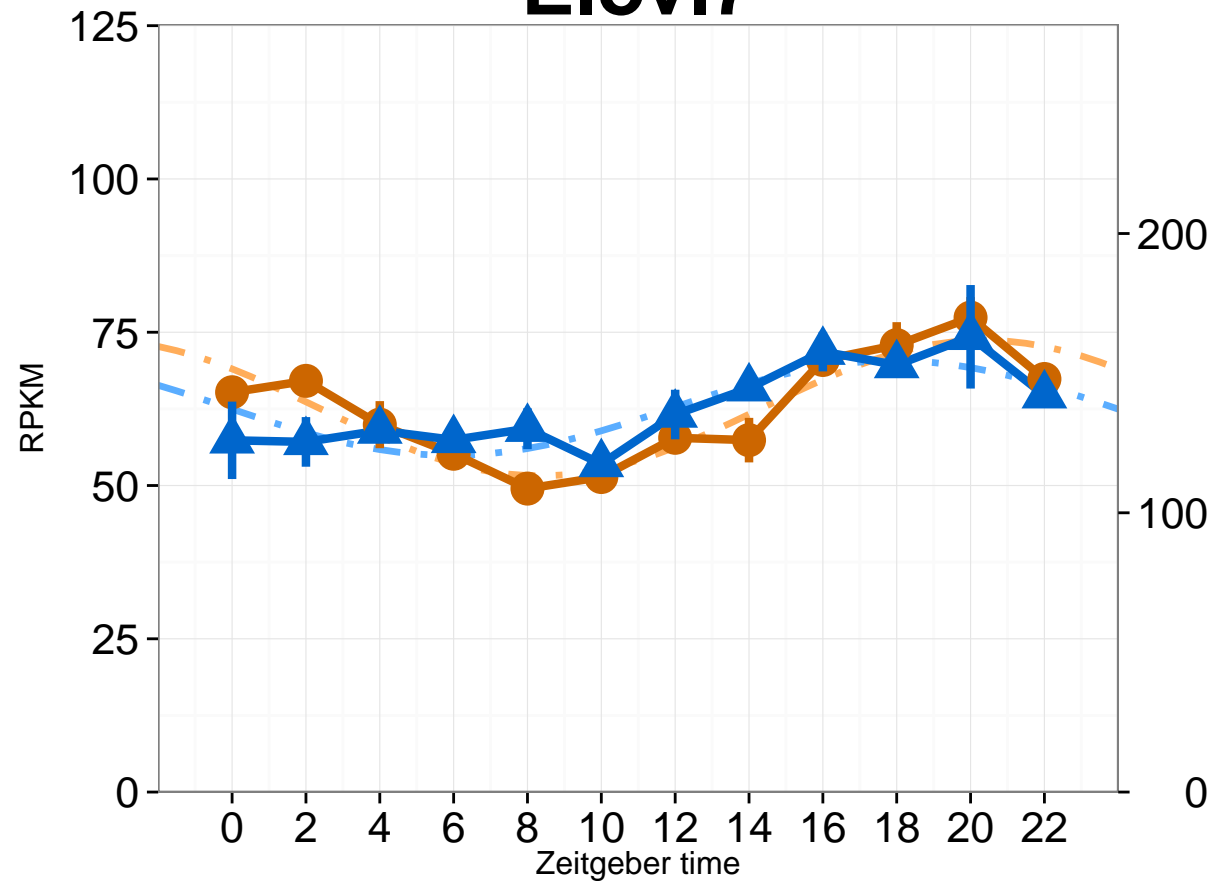

## Elovl7

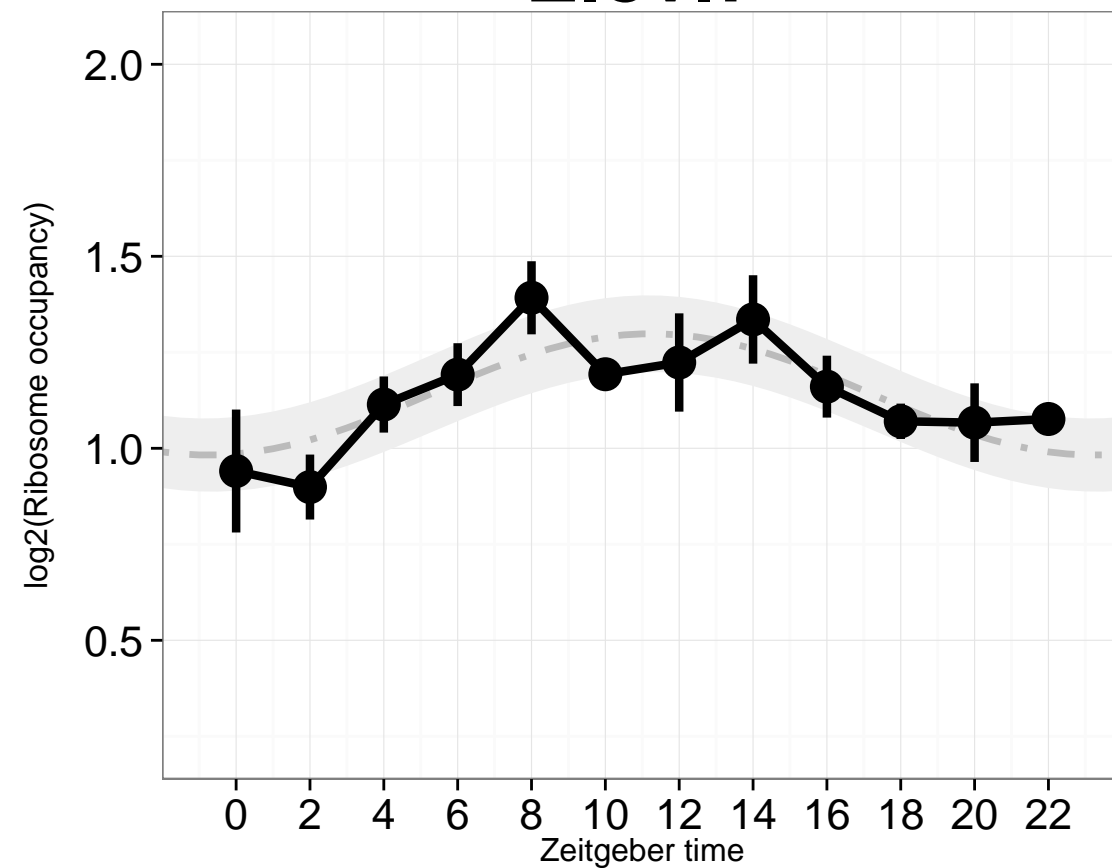

Supplement: Supplementary file 1608 [file 1]

## Slc47a1

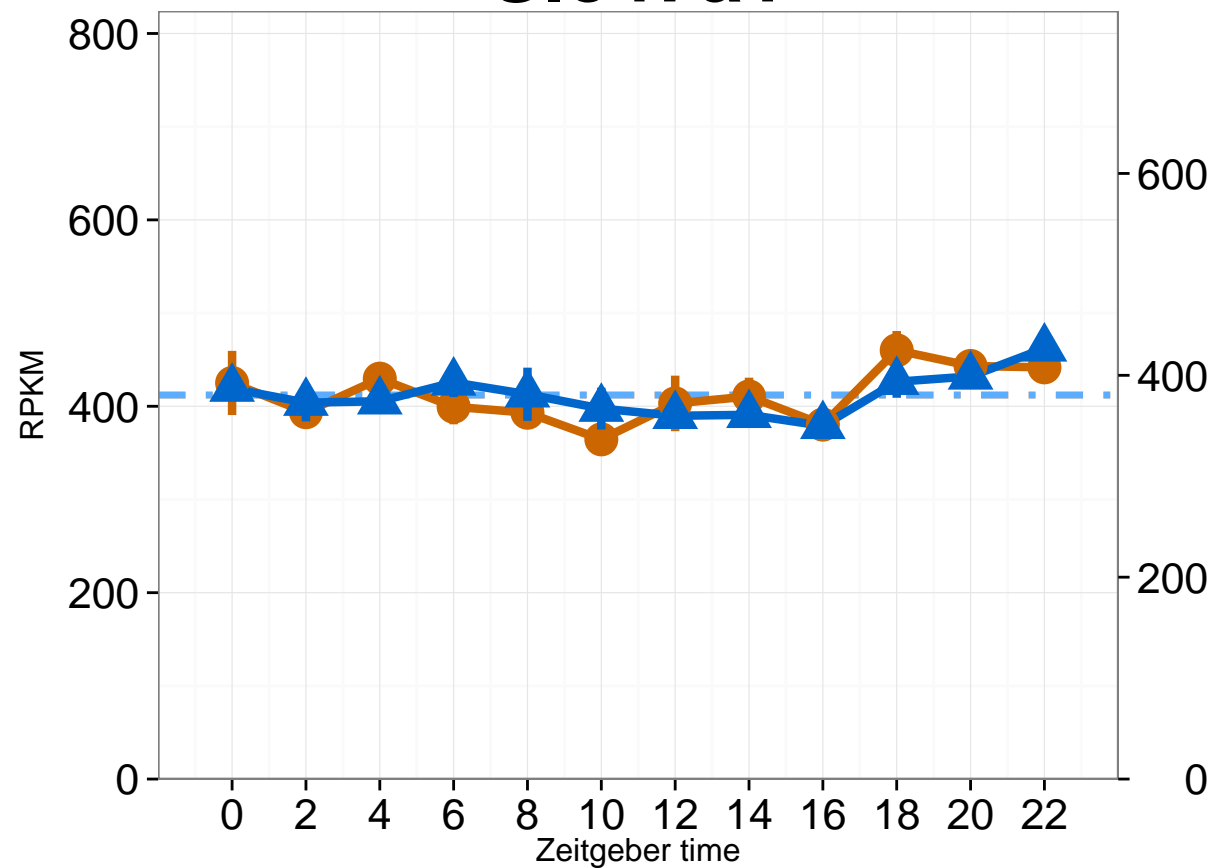

## Slc47a1

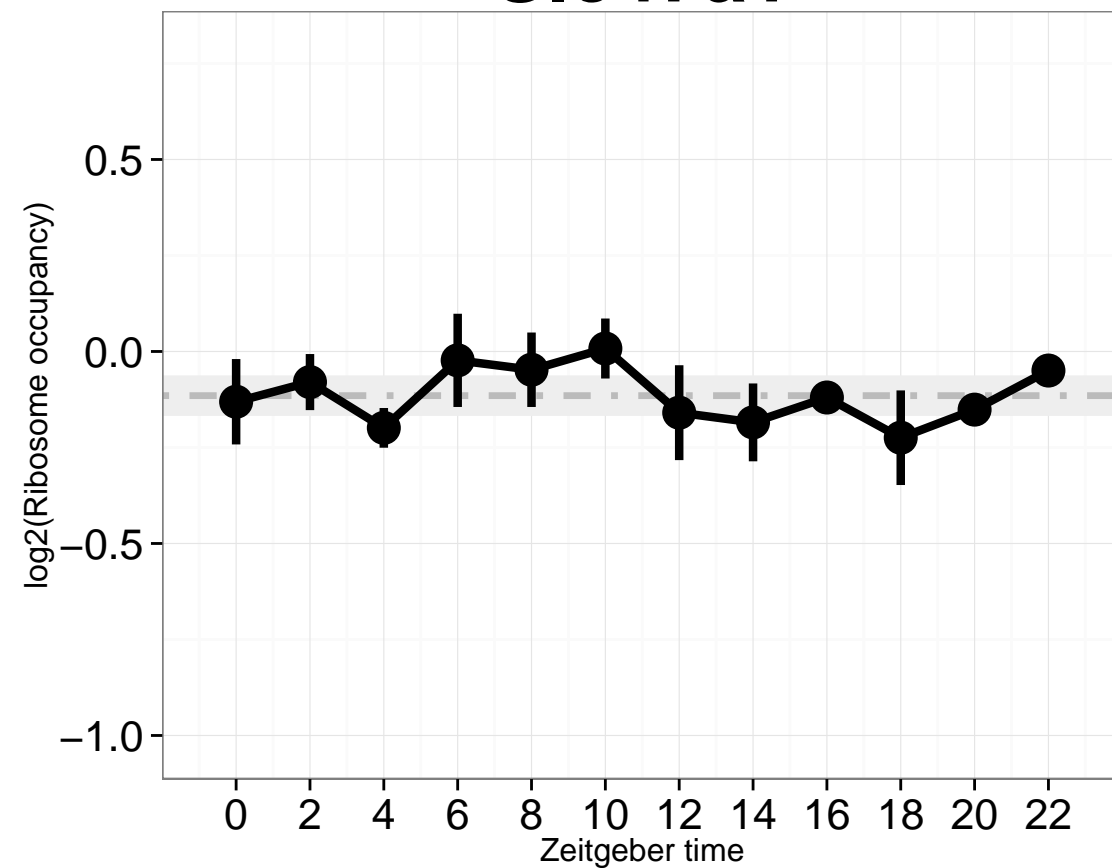

Supplement: Supplementary file 1609 [file 1]

# Dnajb9

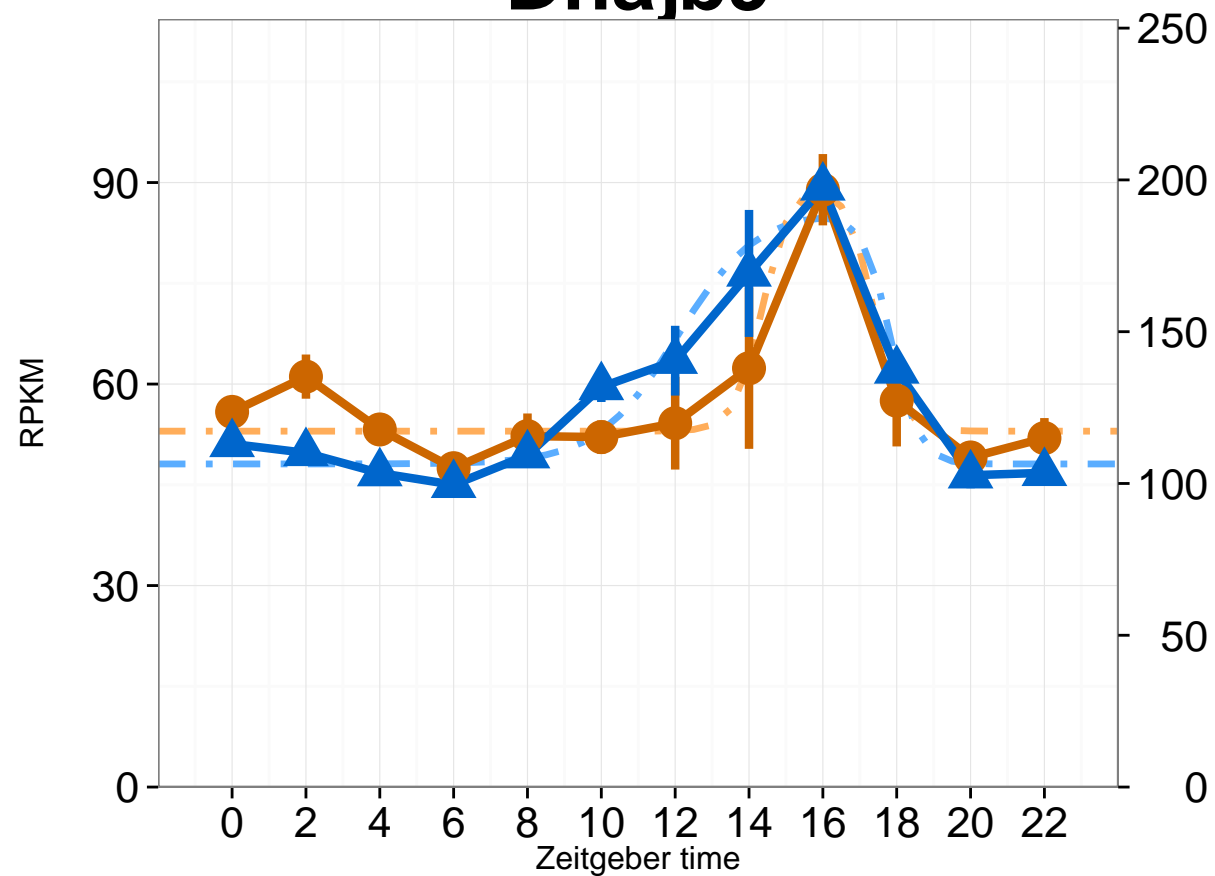

# Dnajb9

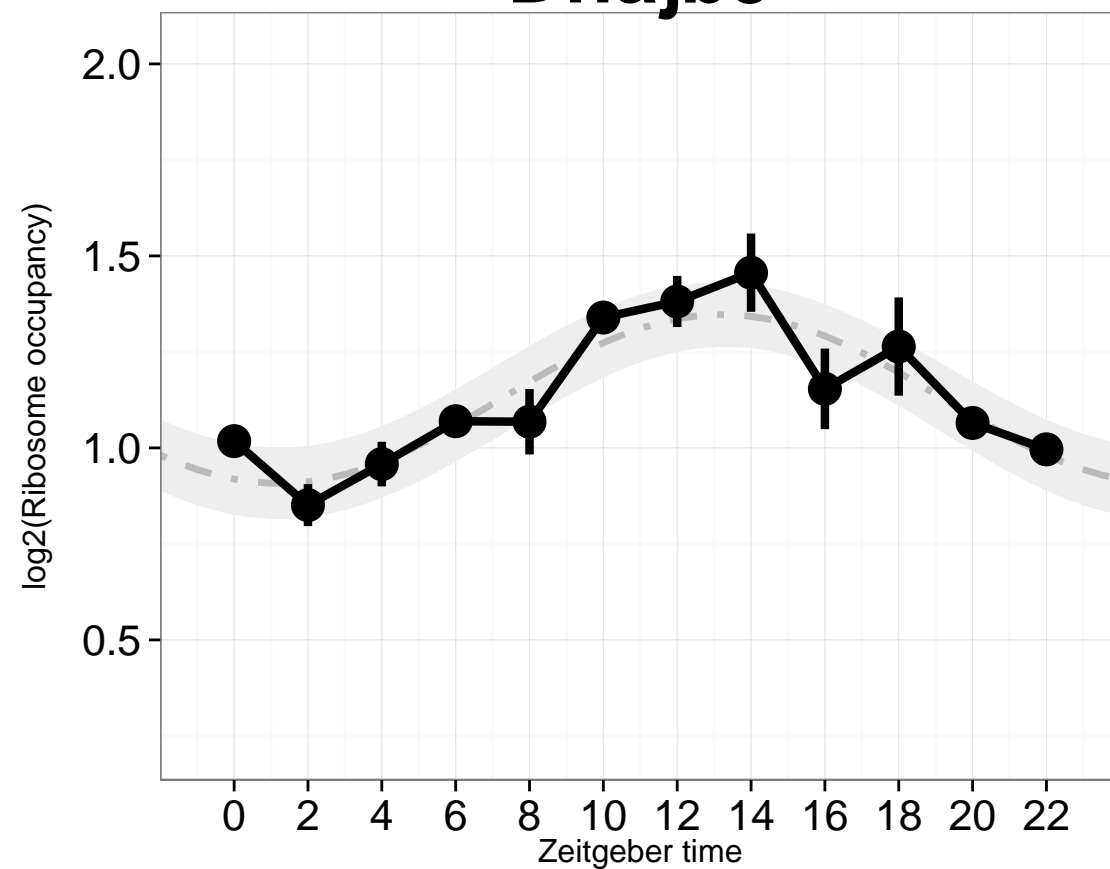

Supplement: Supplementary file 1610 [file 1]

# Tbrg1

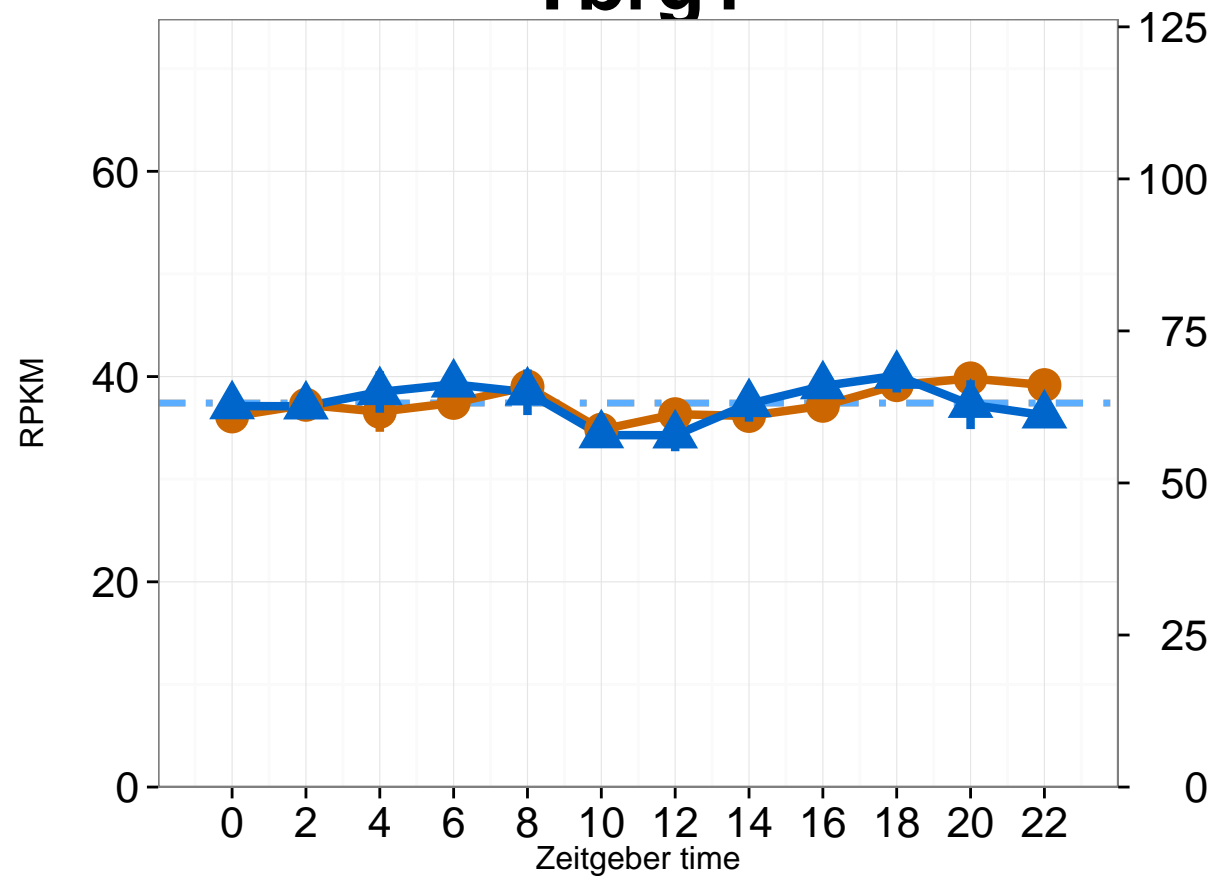

# Tbrg1

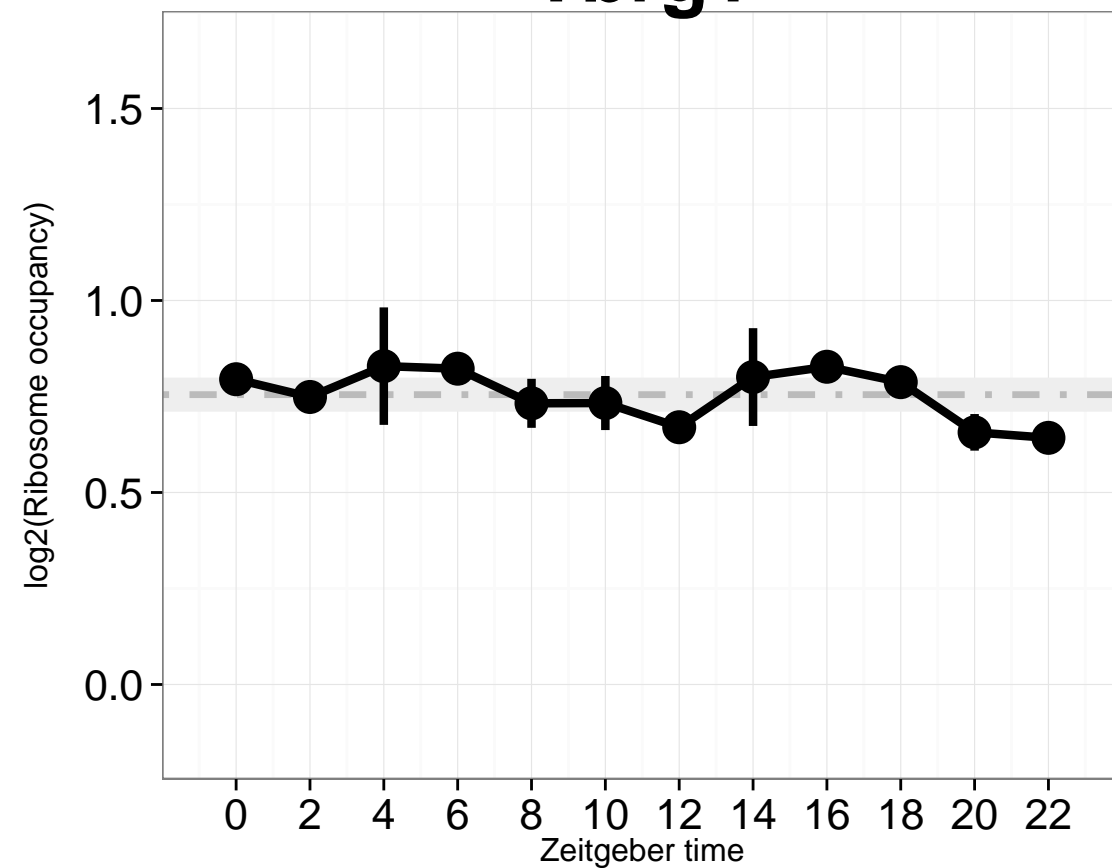

Supplement: Supplementary file 1611 [file 1]

## Cd63

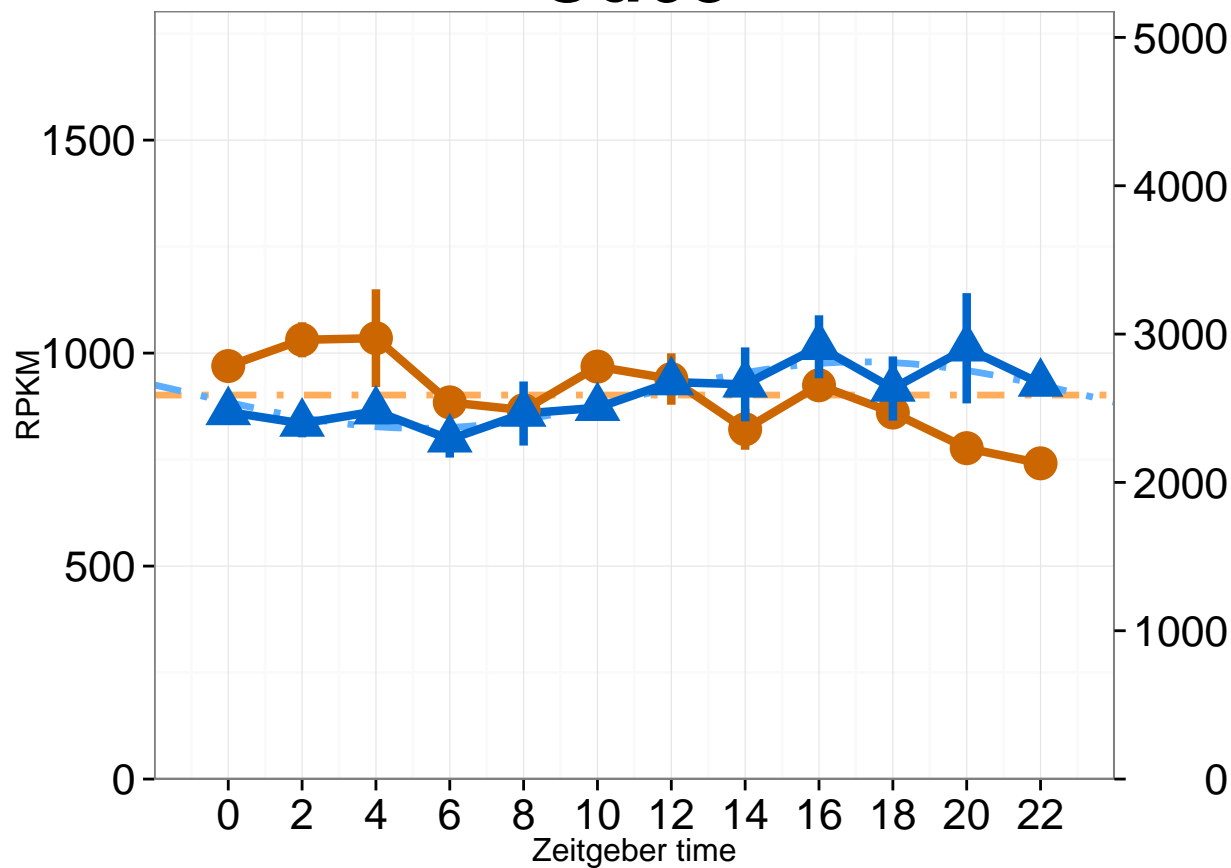

## Cd63

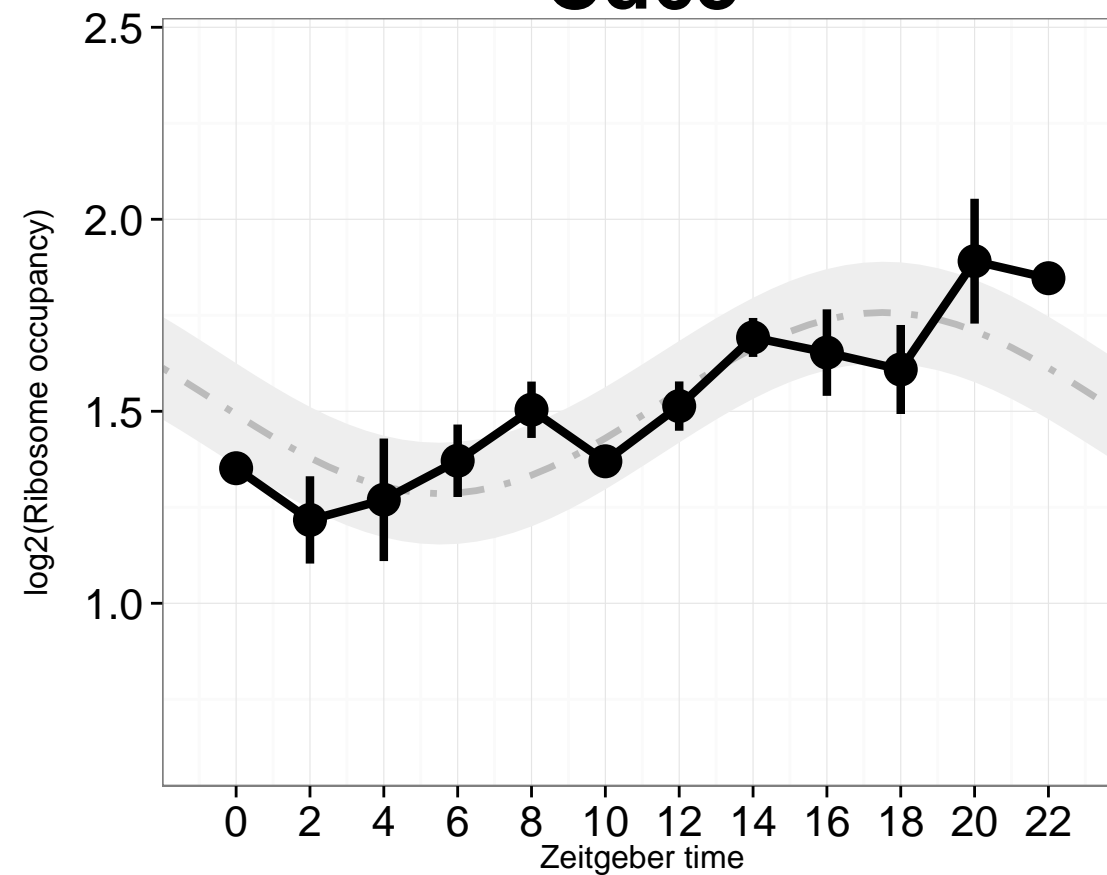

Supplement: Supplementary file 1612 [file 1]

## Unc119

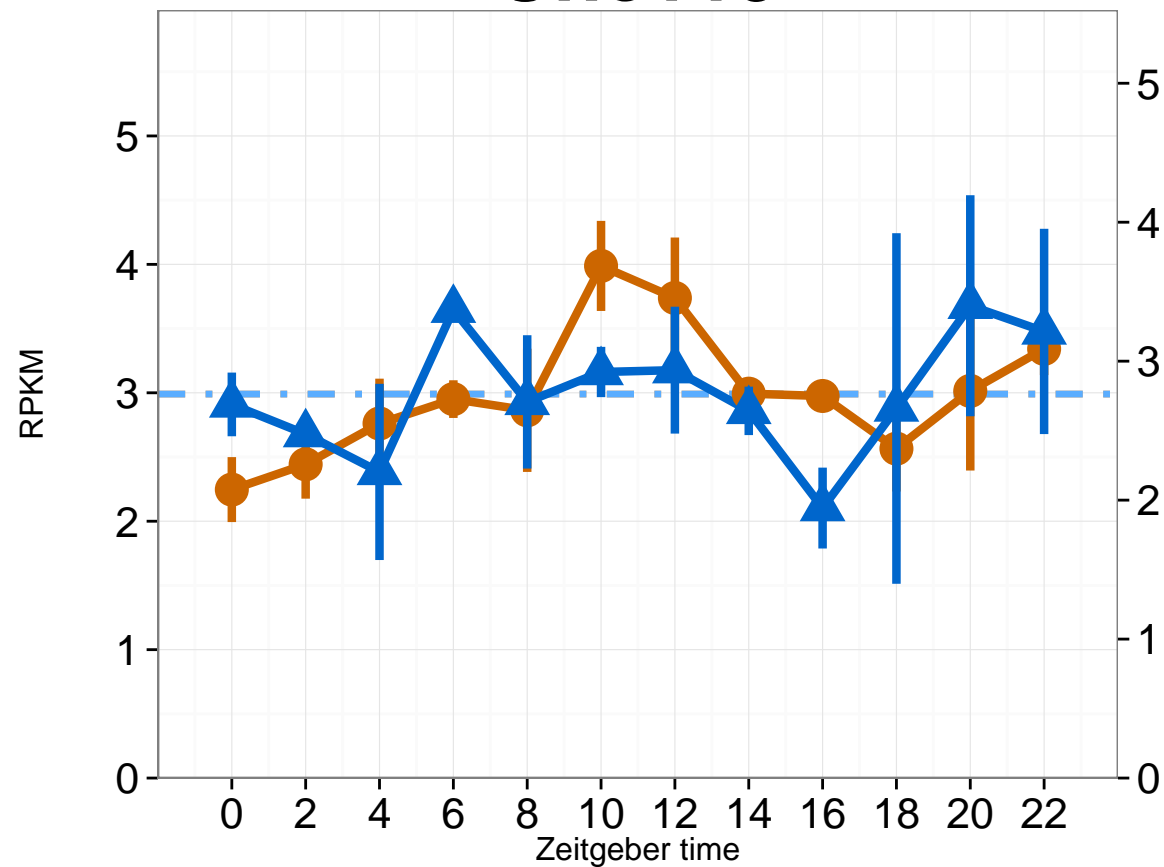

## Unc119

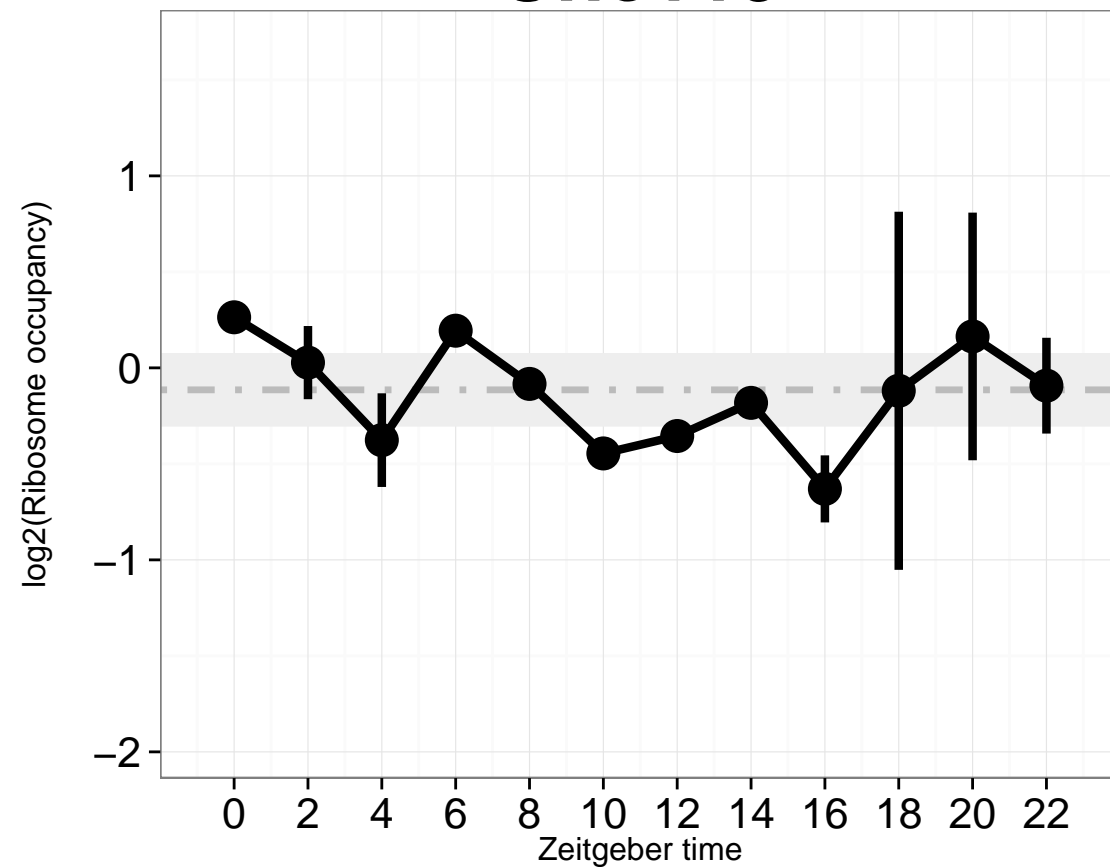

Supplement: Supplementary file 1613 [file 1]

## Cul2

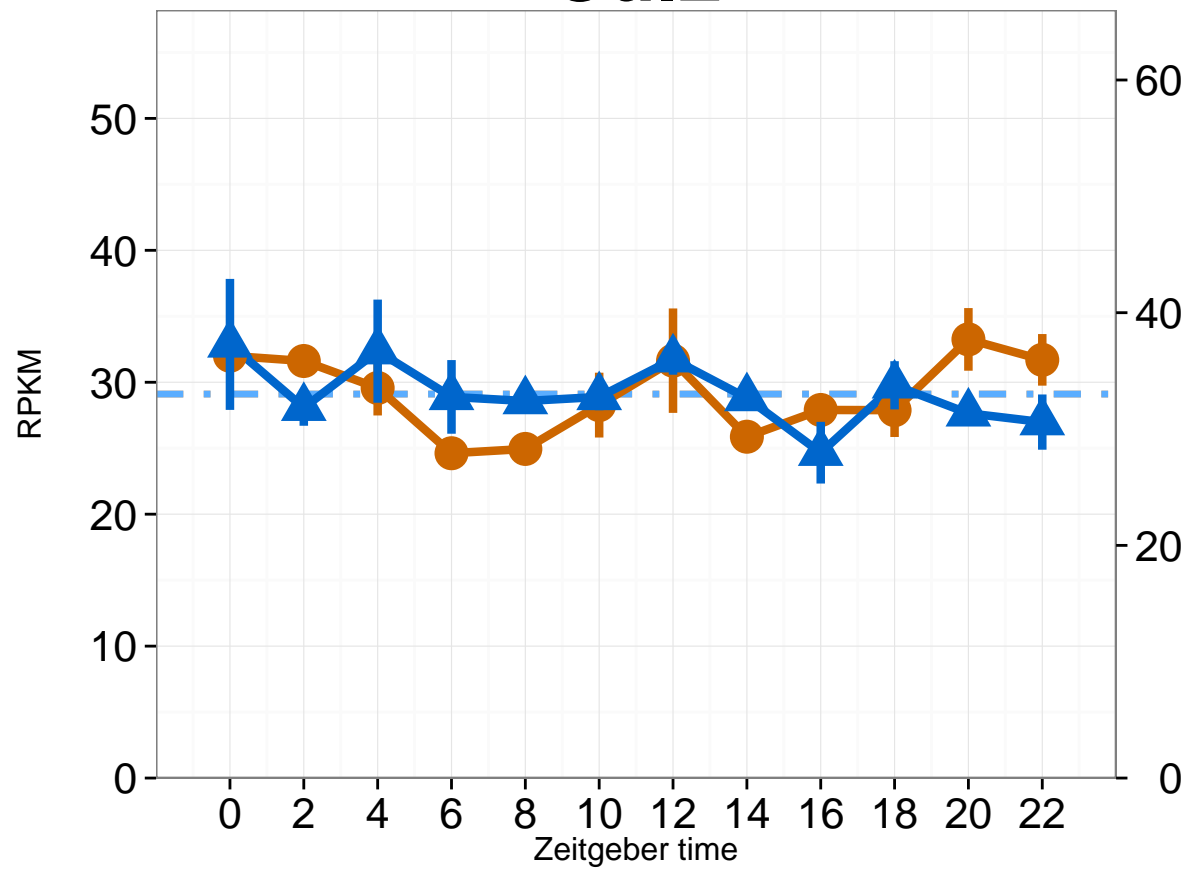

## Cul2

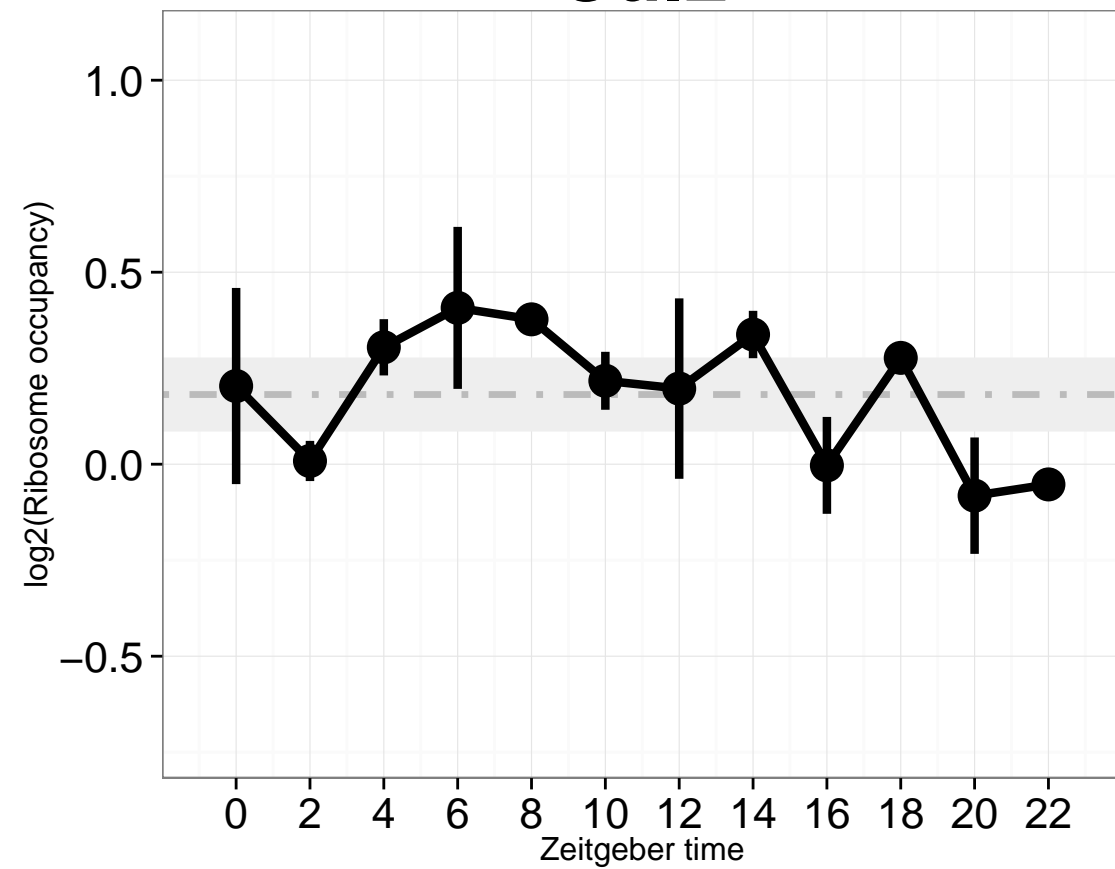

Supplement: Supplementary file 1614 [file 1]

## Aven

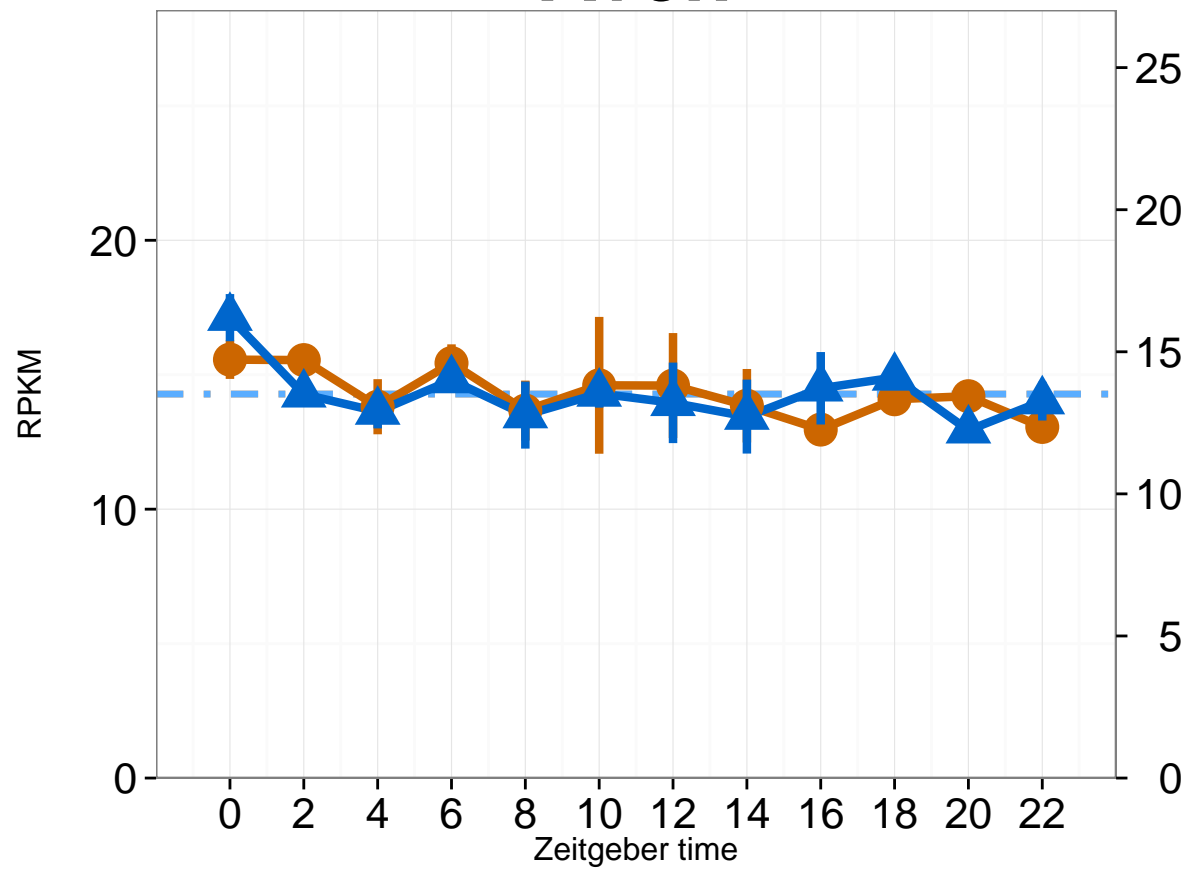

## Aven

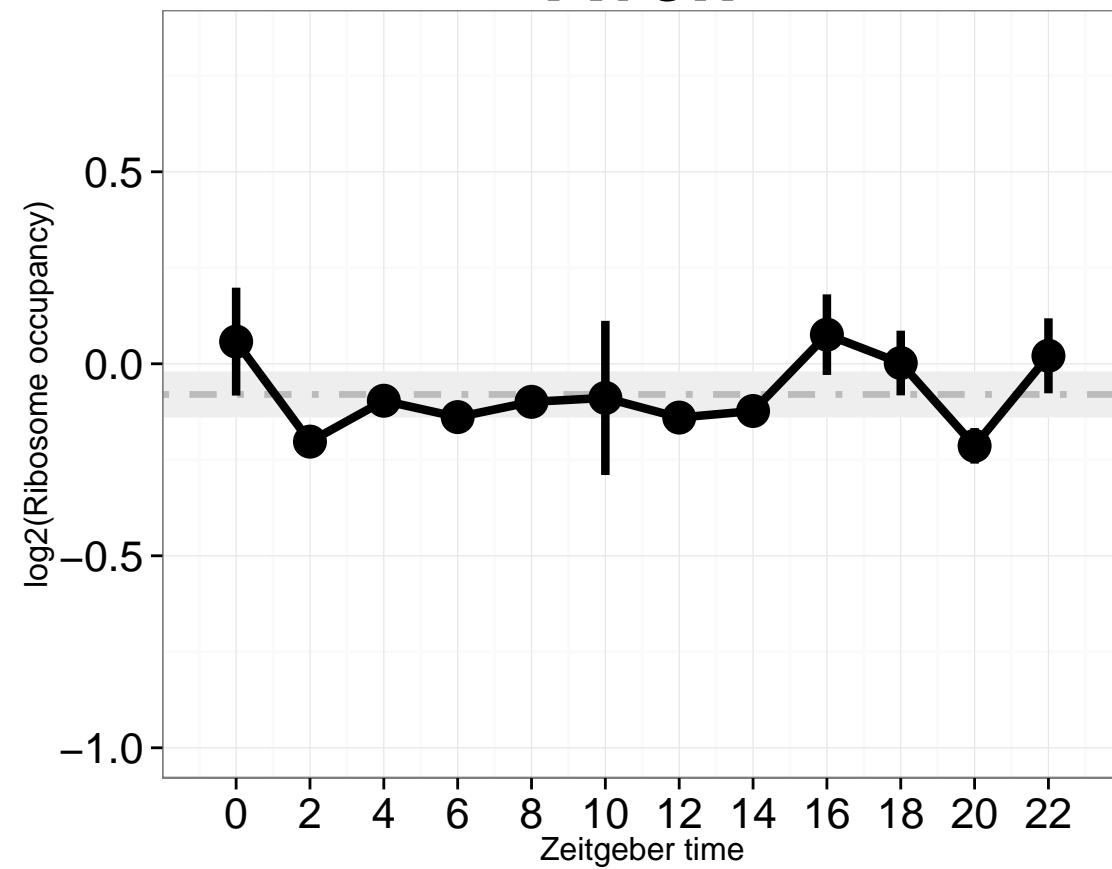

Supplement: Supplementary file 1615 [file 1]

# Gramd4

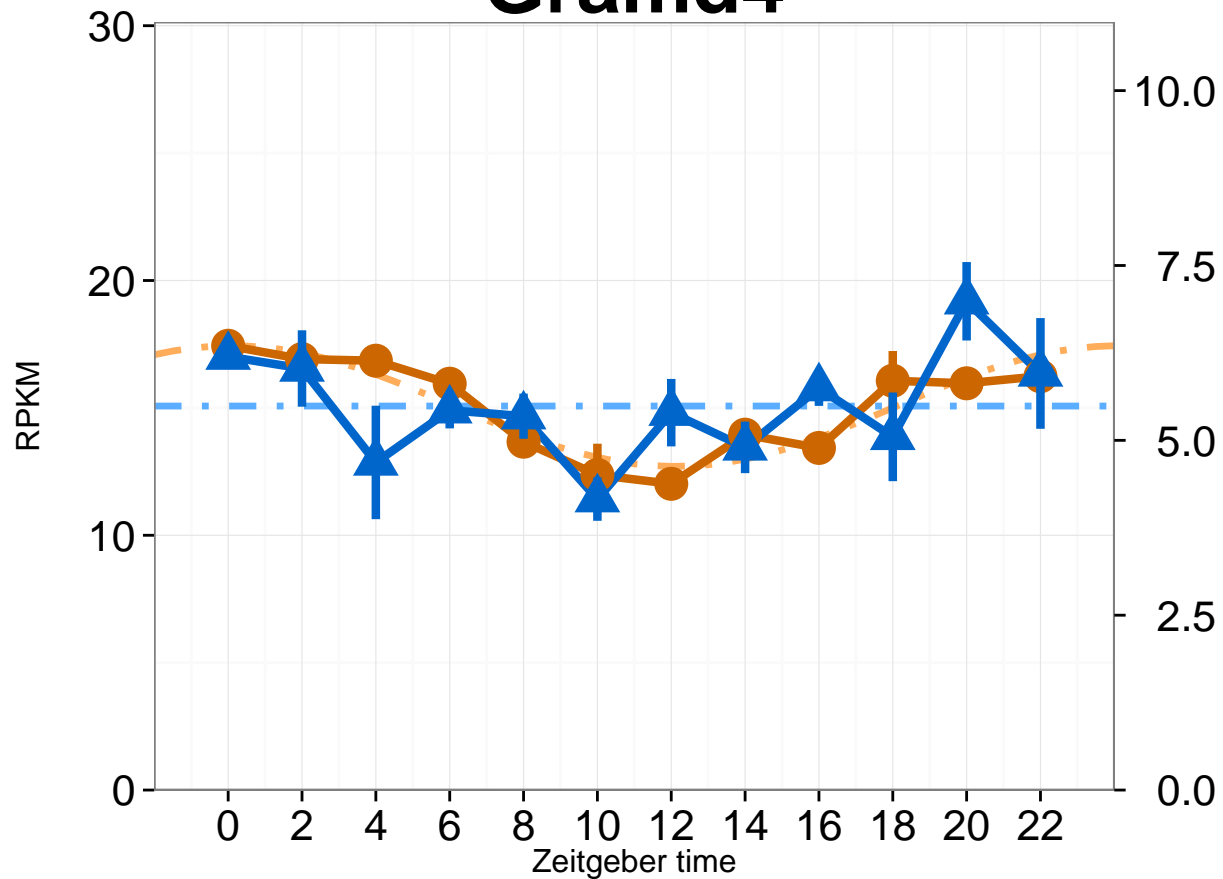

# Gramd4

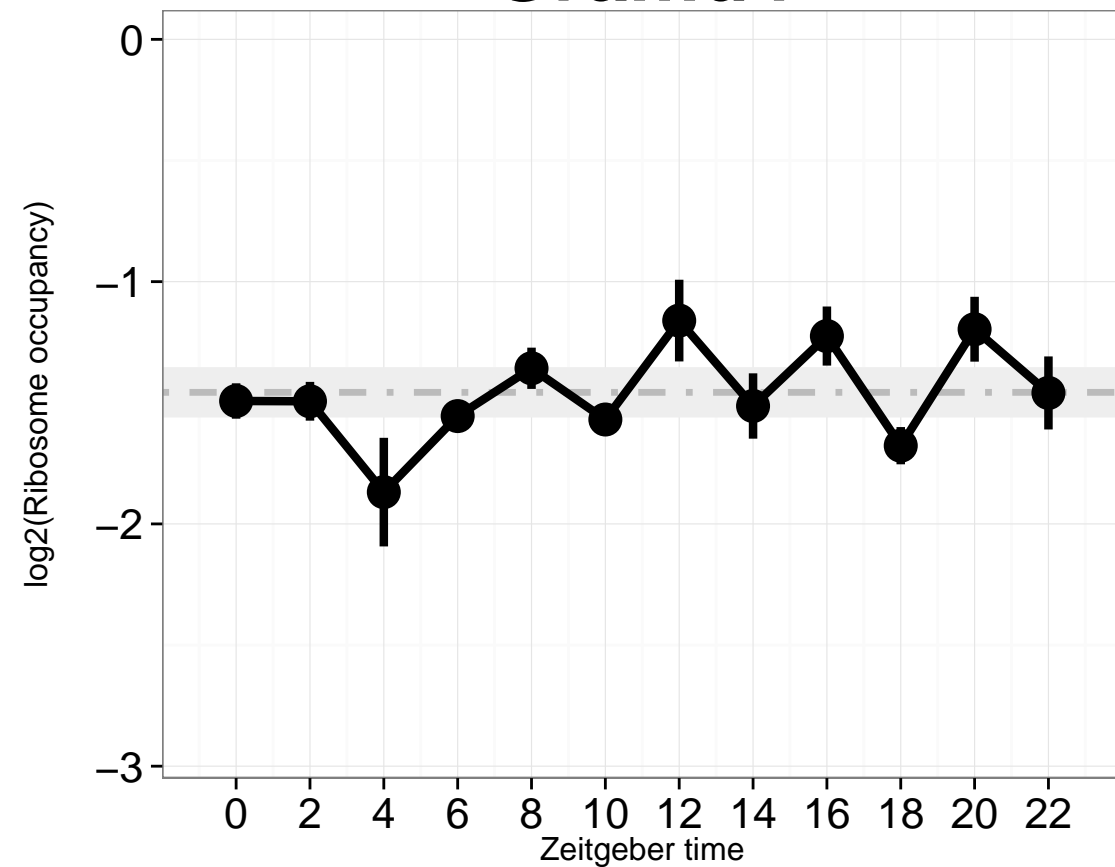

Supplement: Supplementary file 1616 [file 1]

# Ripk1

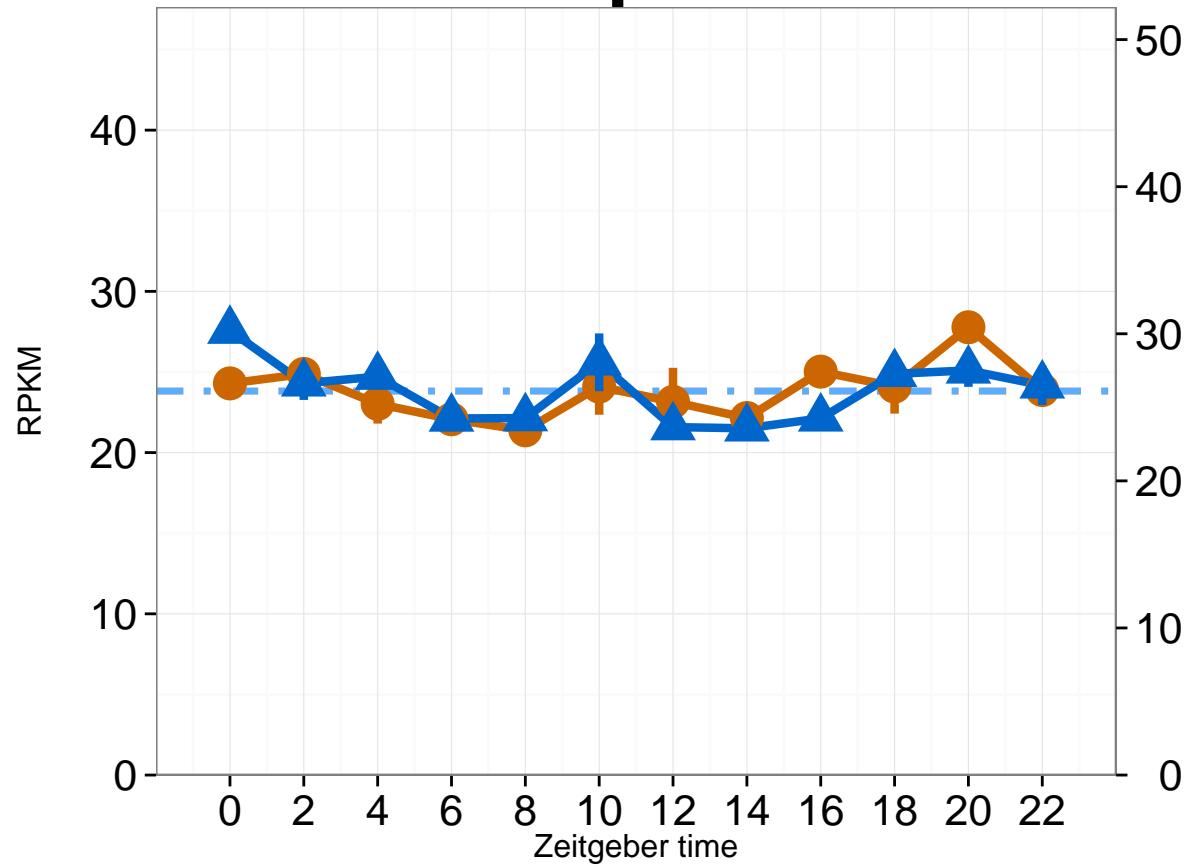

# Ripk1

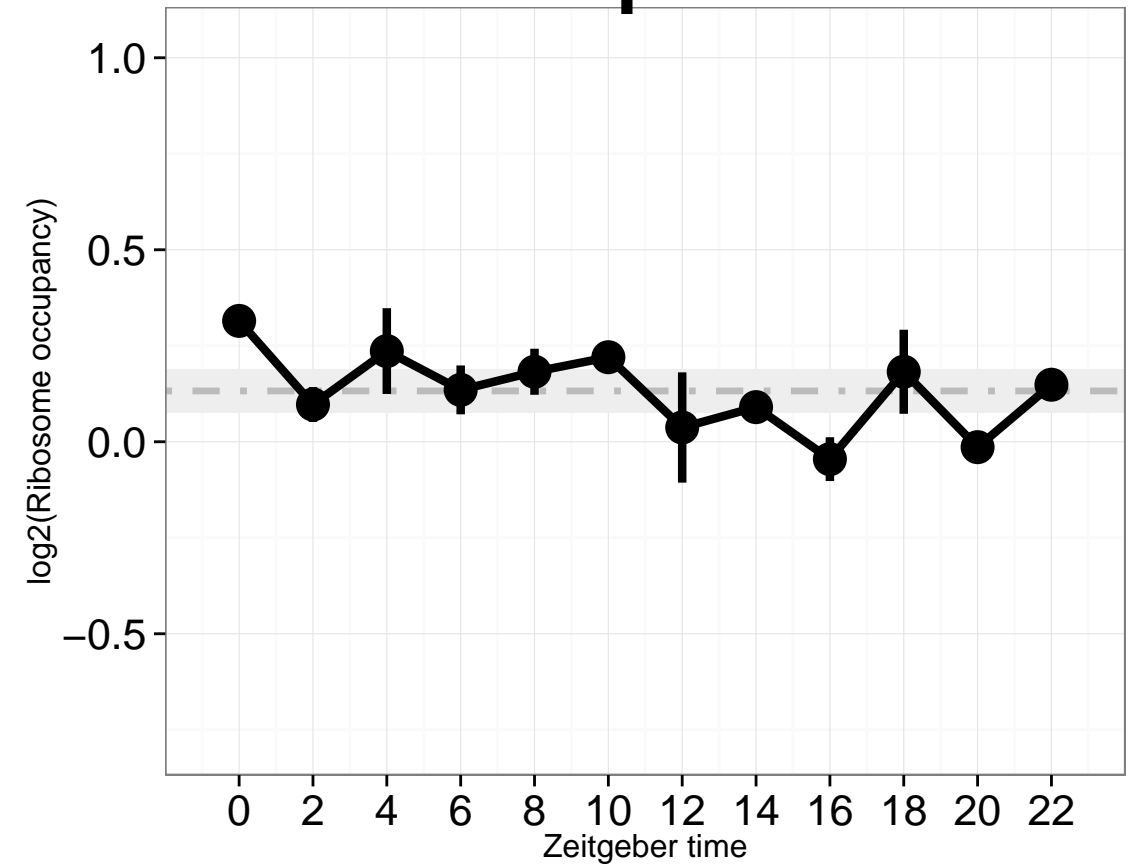

Supplement: Supplementary file 1617 [file 1]

## Dclk2

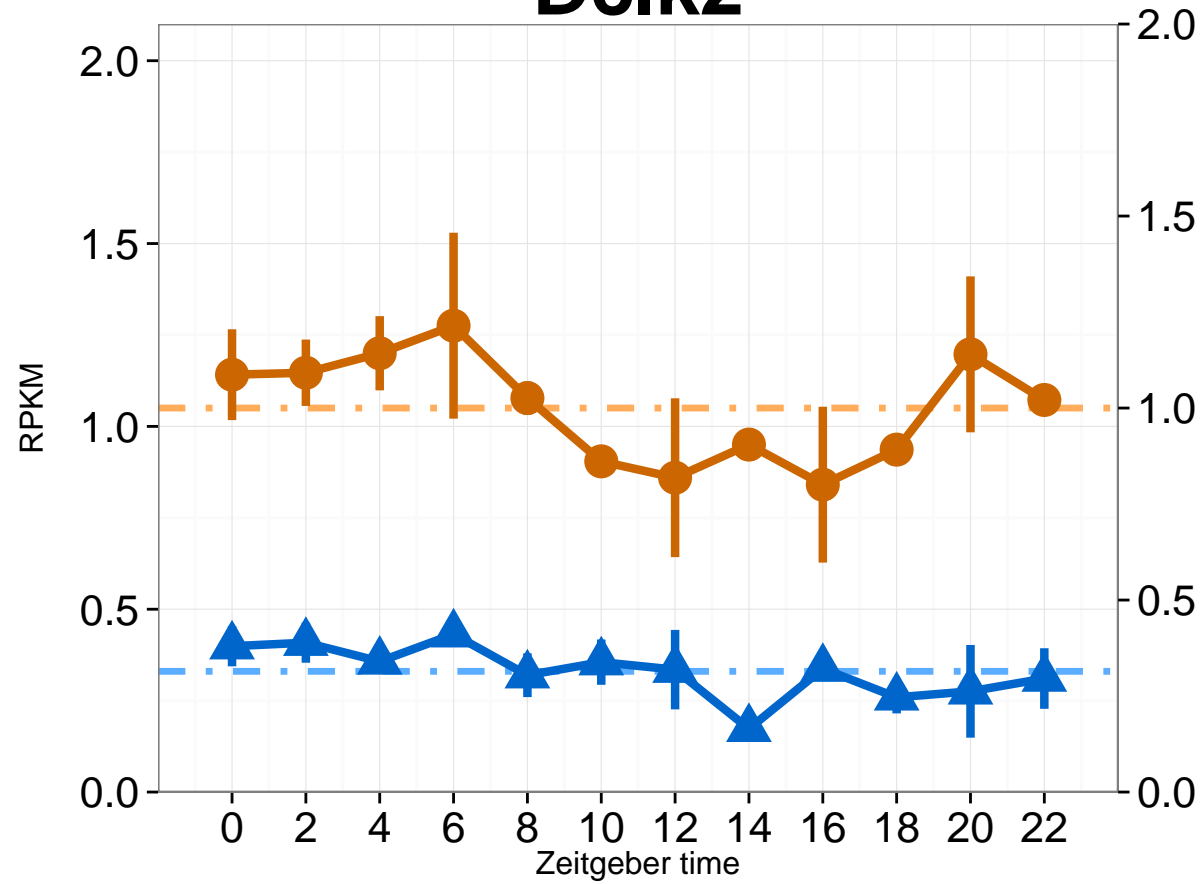

## Dclk2

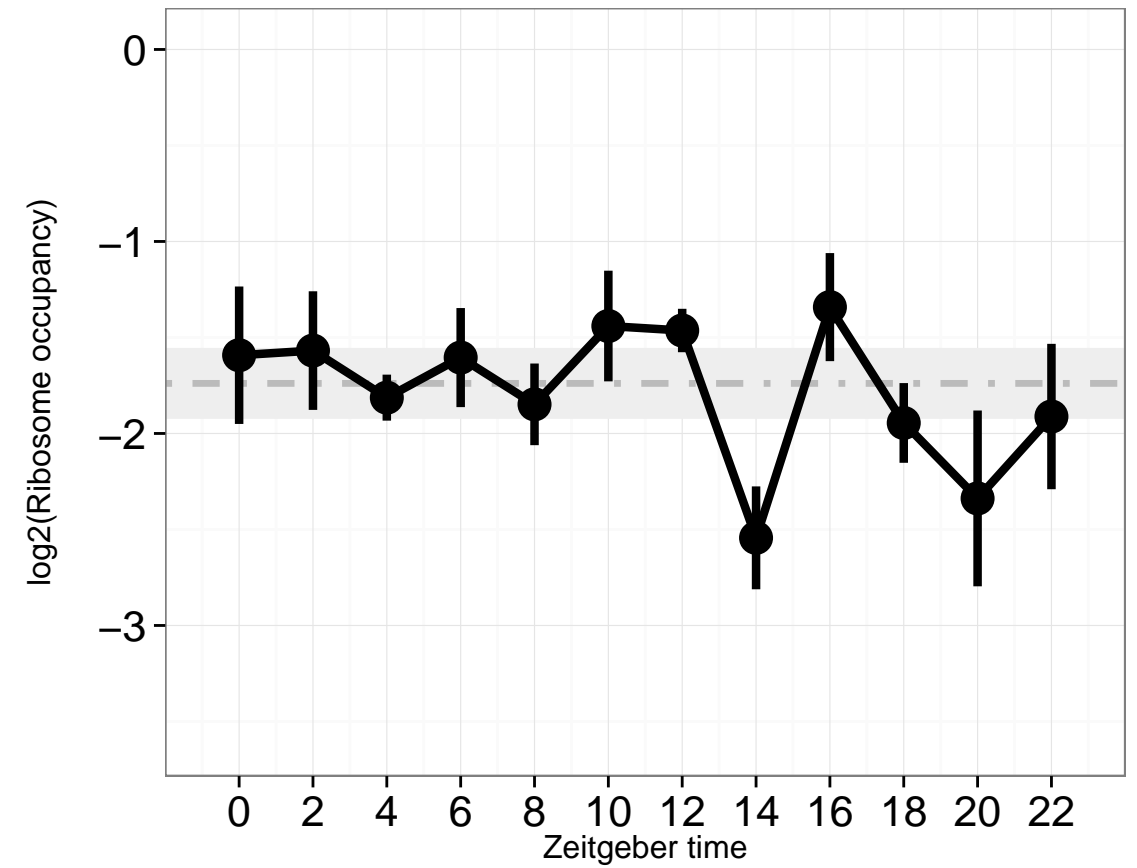

Supplement: Supplementary file 1618 [file 1]

## Pusl1

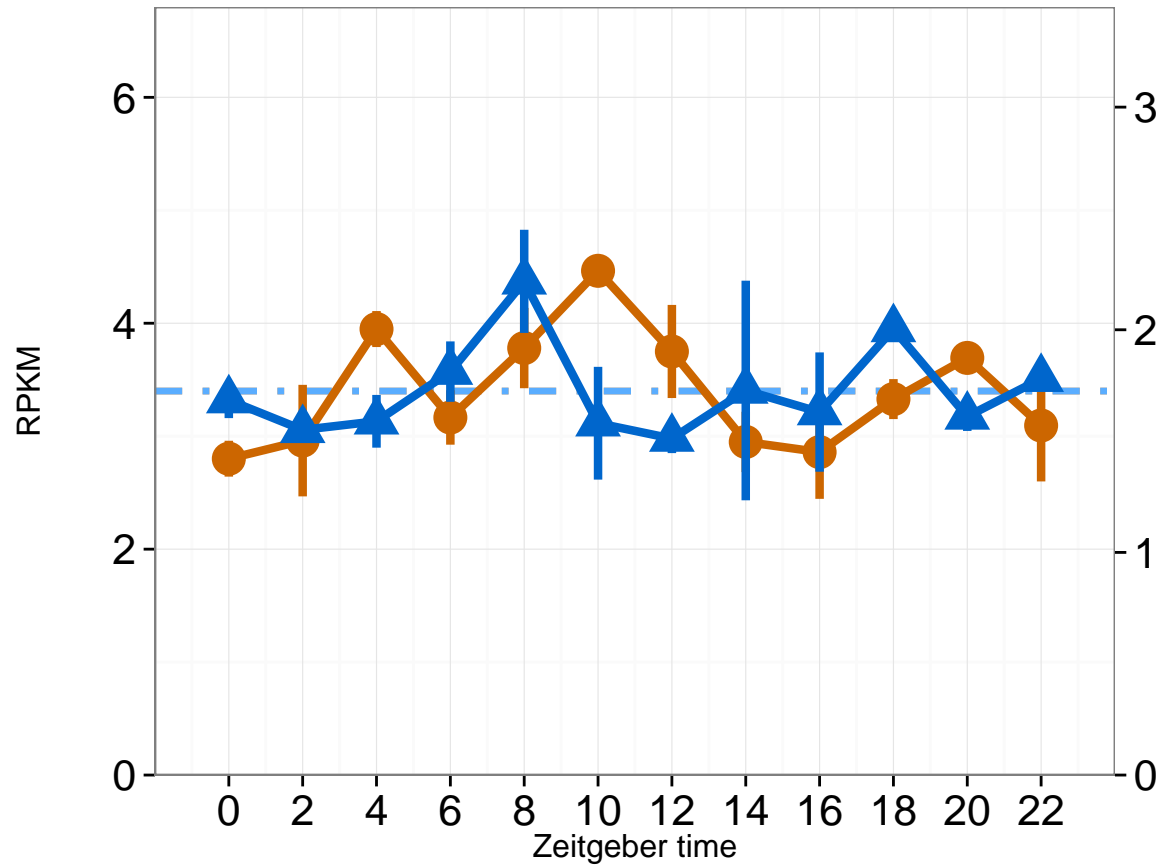

## Pusl1

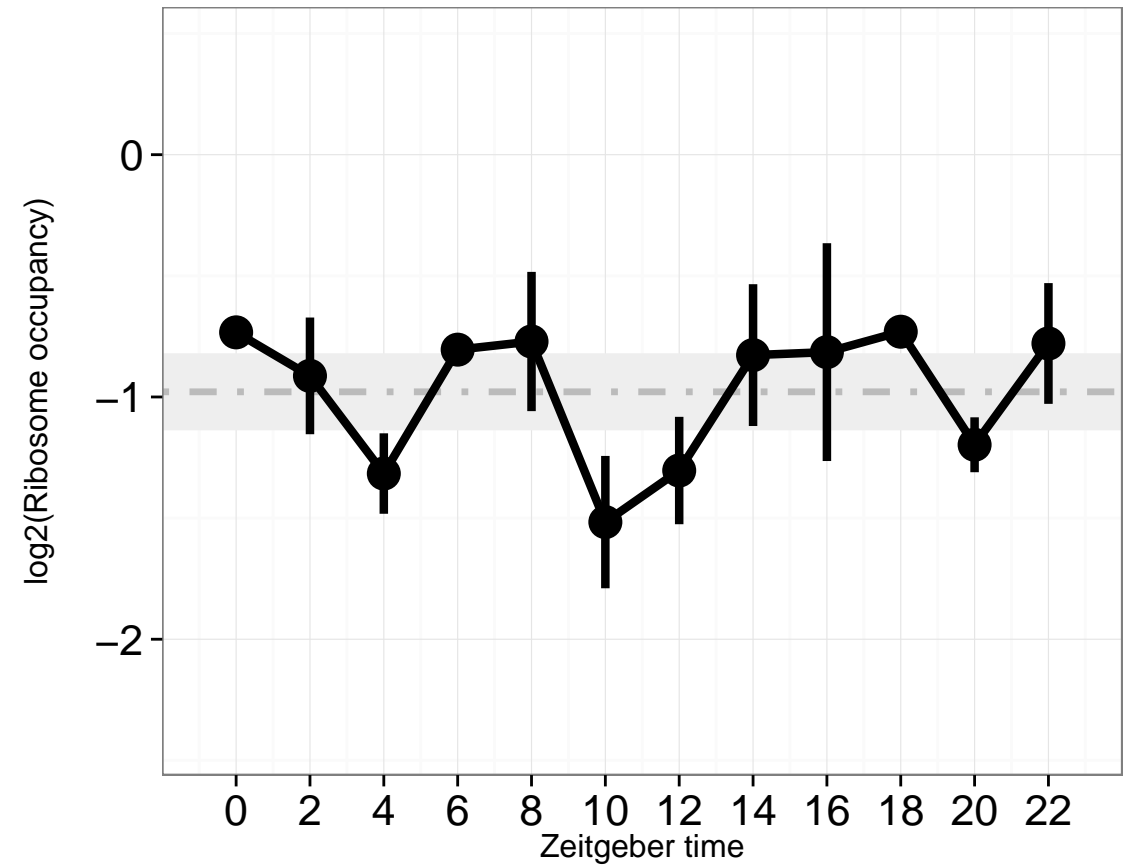

Supplement: Supplementary file 1619 [file 1]

## Mcoln1

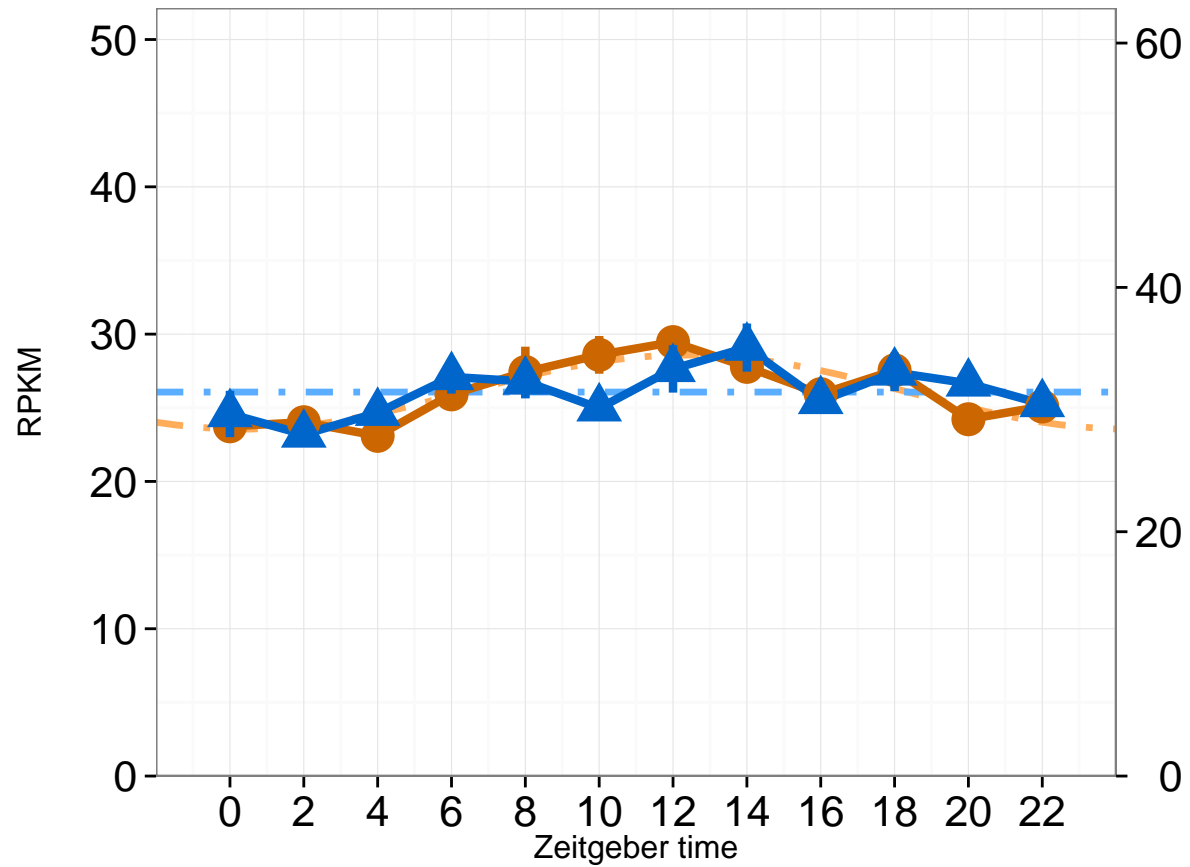

## Mcoln1

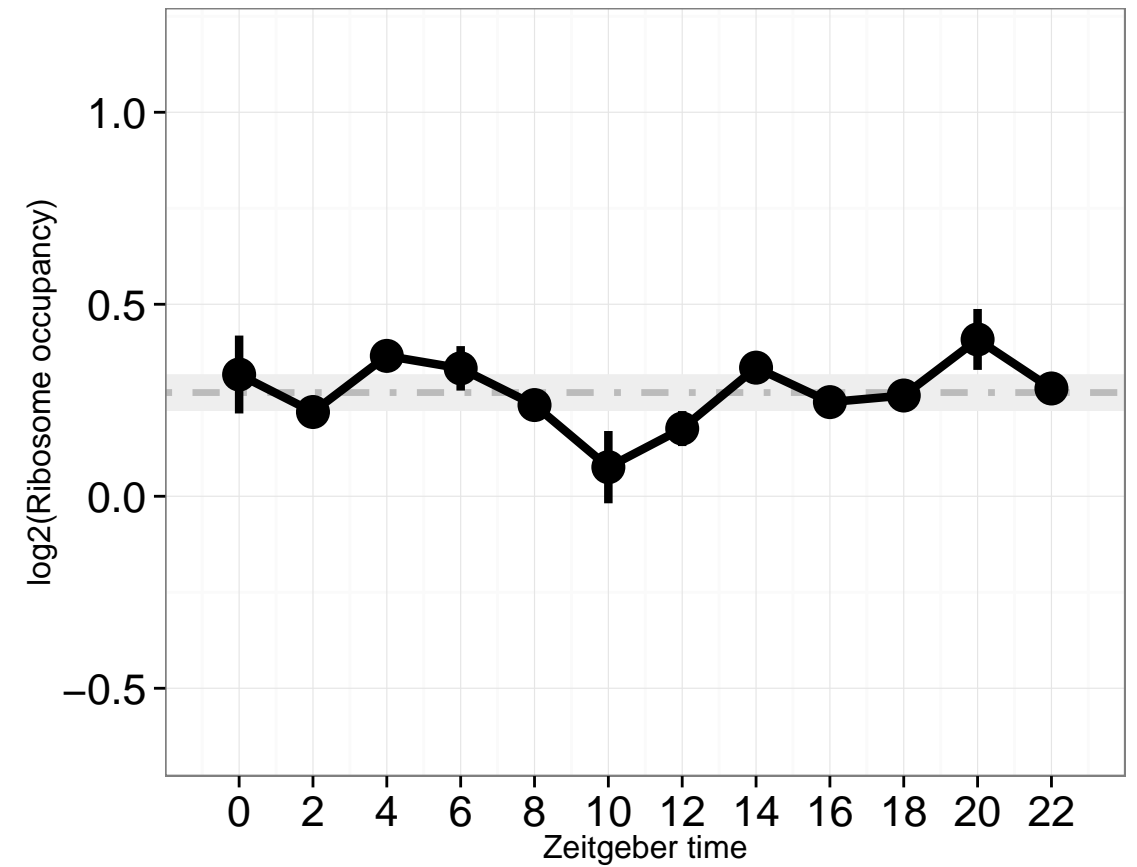

Supplement: Supplementary file 1620 [file 1]

## Plekhn1

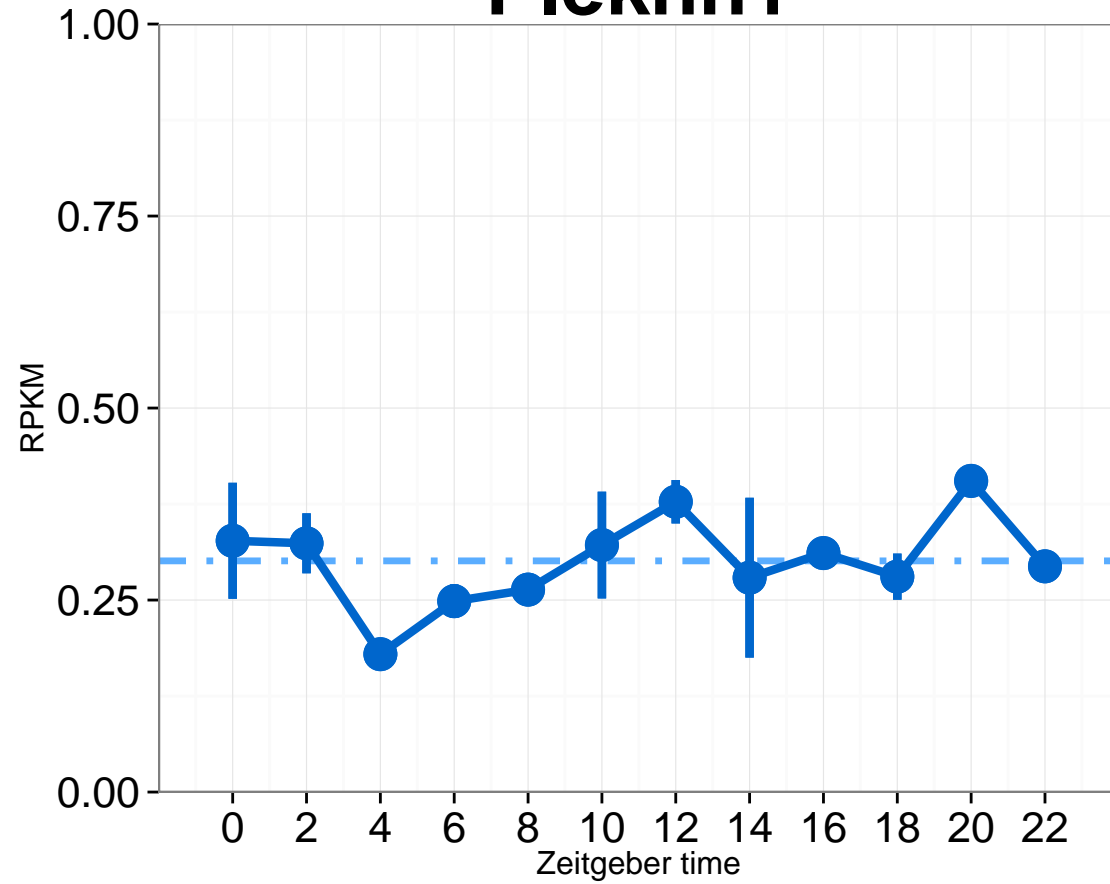

## Plekhn1 log2(Ribosome occupancy)

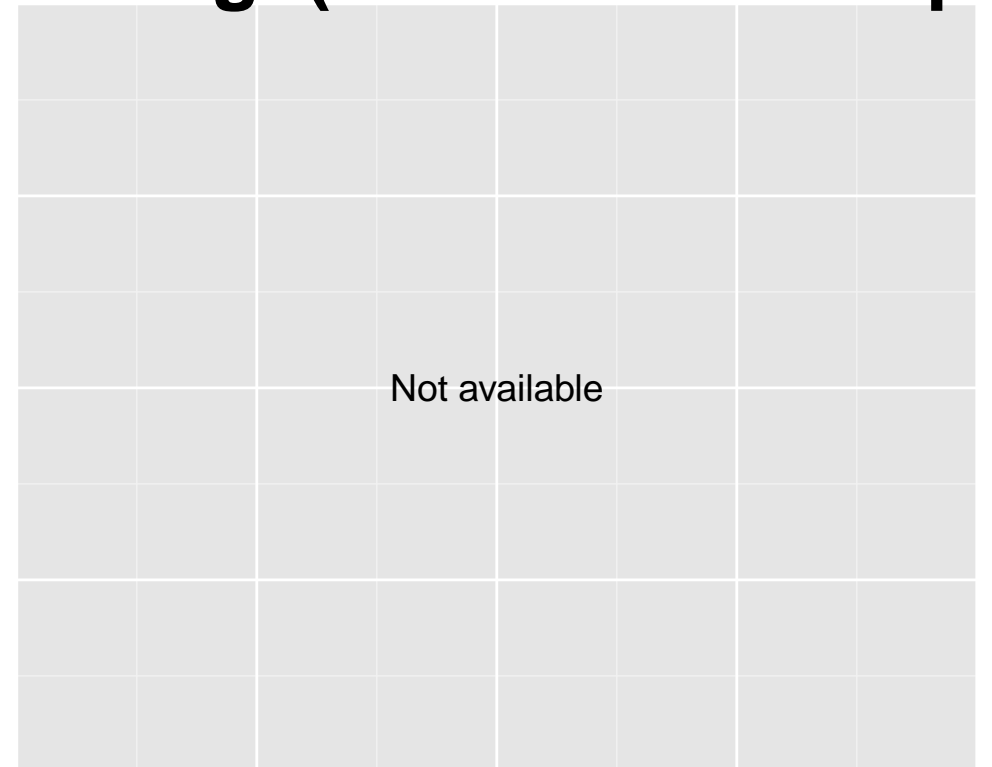

Supplement: Supplementary file 1621 [file 1]

# Gm129

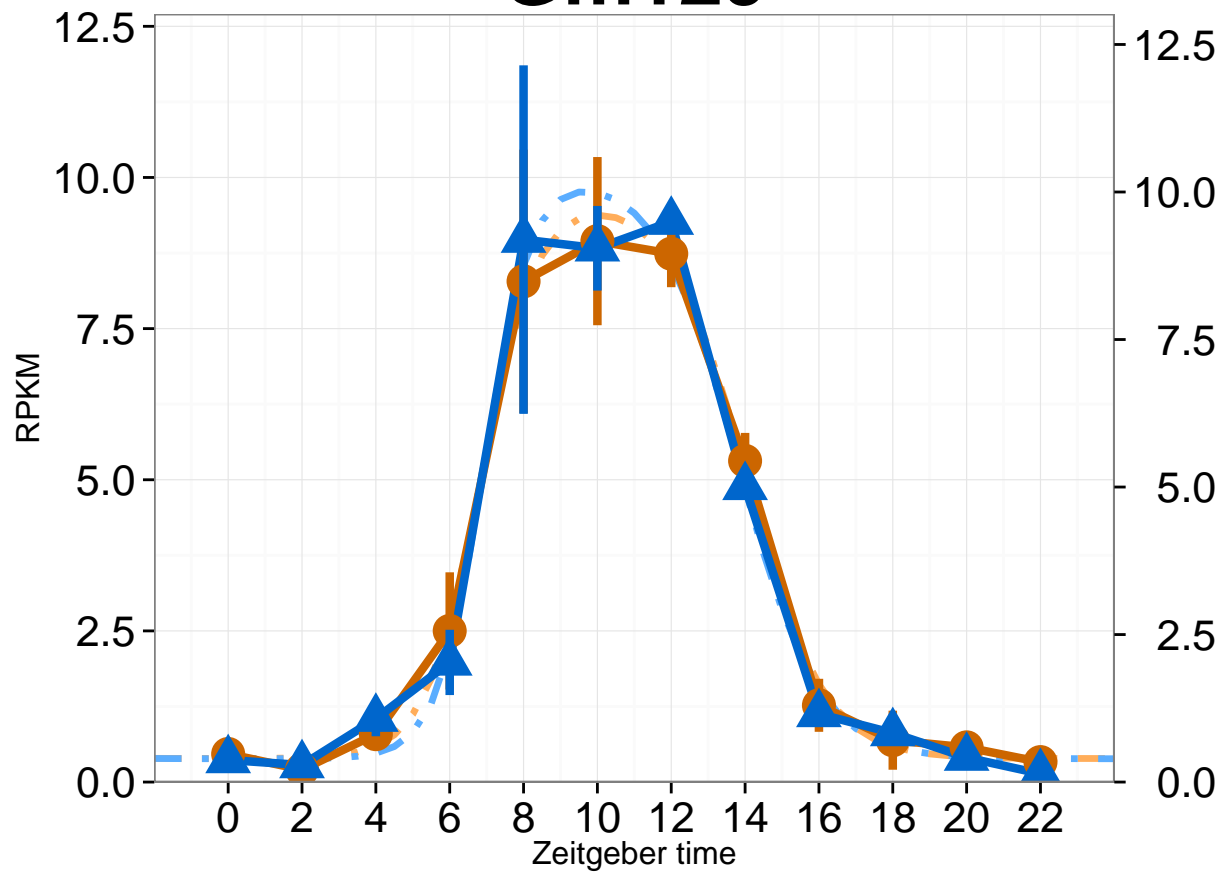

# Gm129

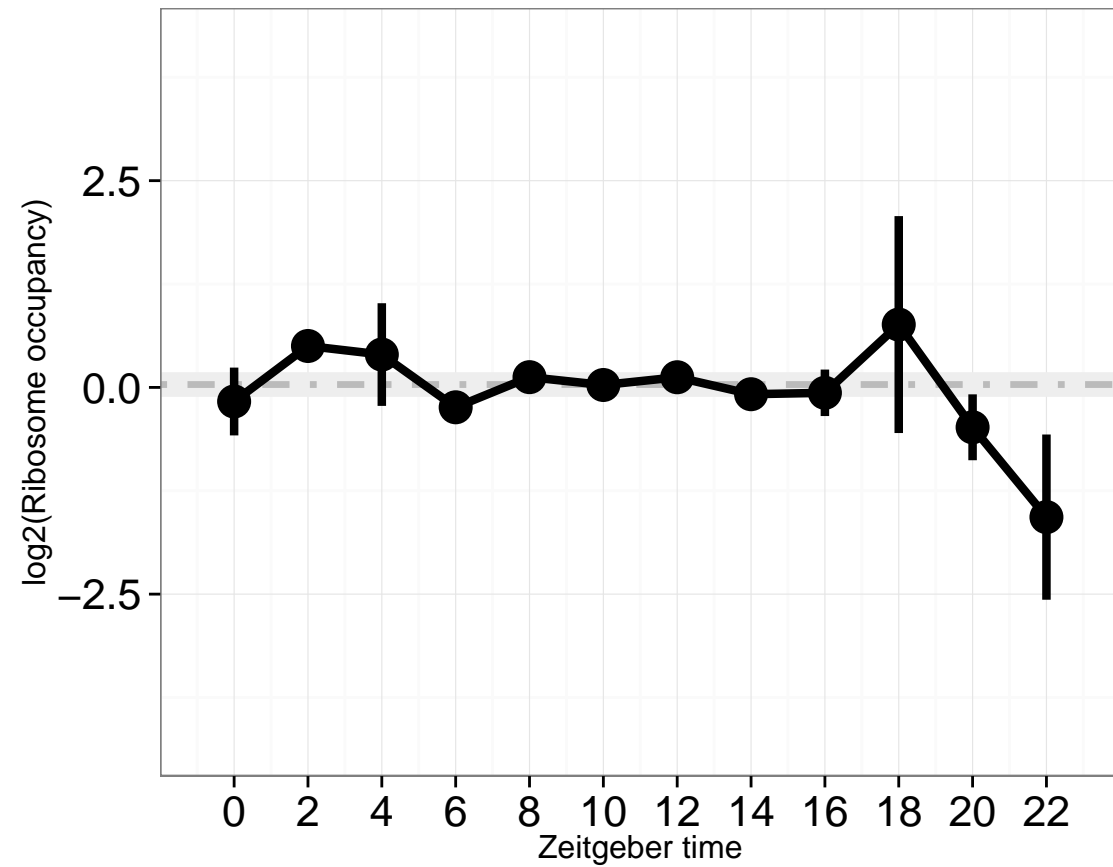

Supplement: Supplementary file 1622 [file 1]

# Prr12

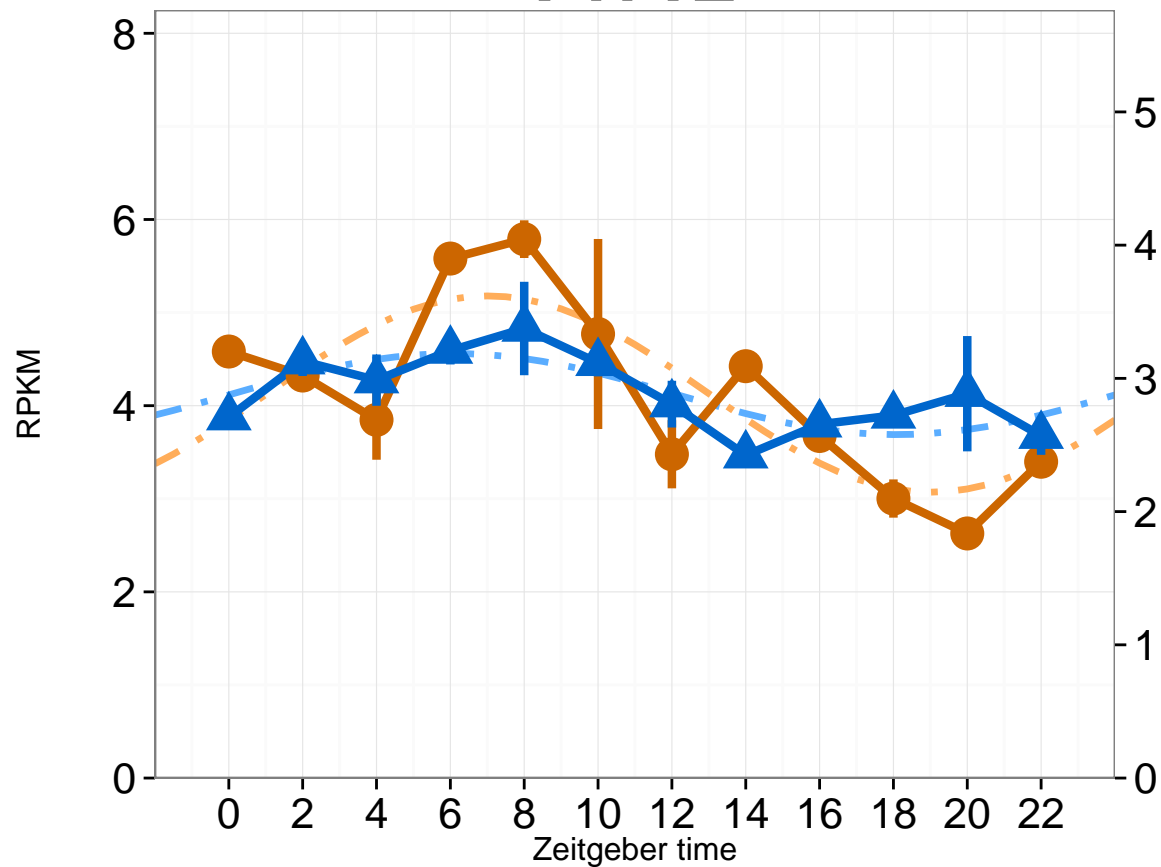

# Prr12

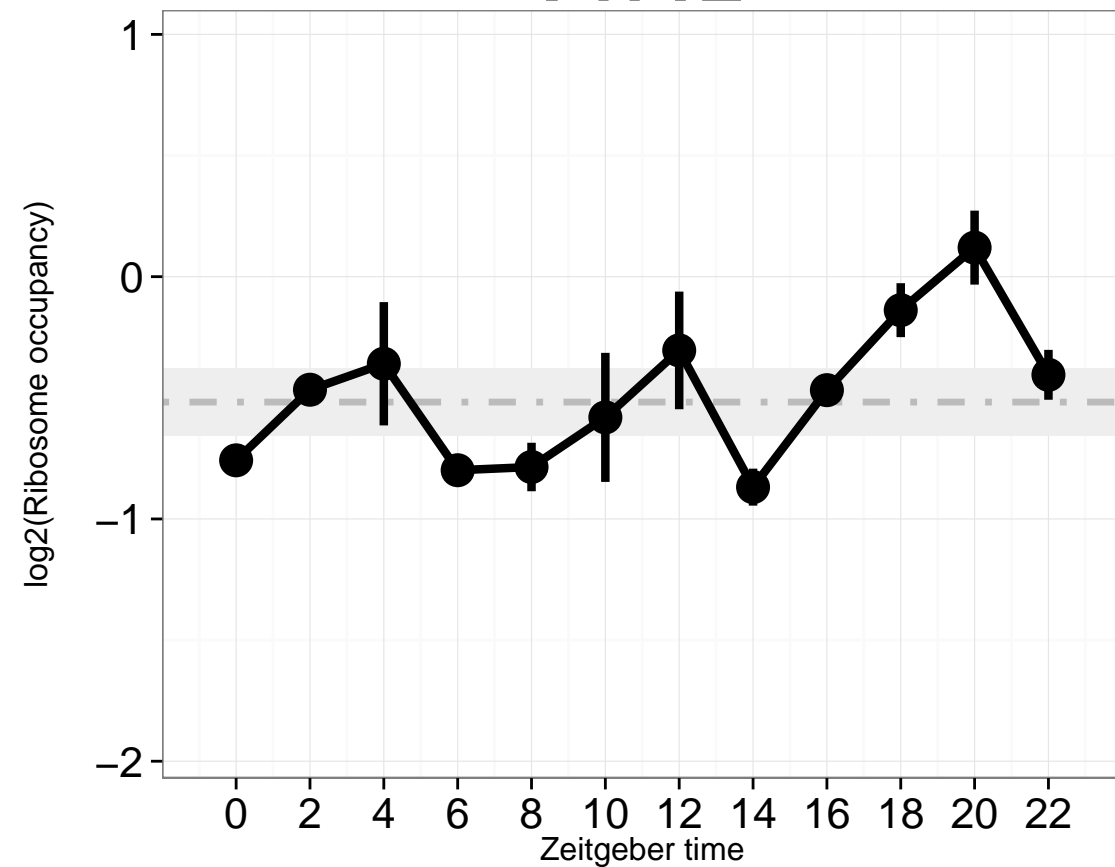

Supplement: Supplementary file 1623 [file 1]

# Rcan1

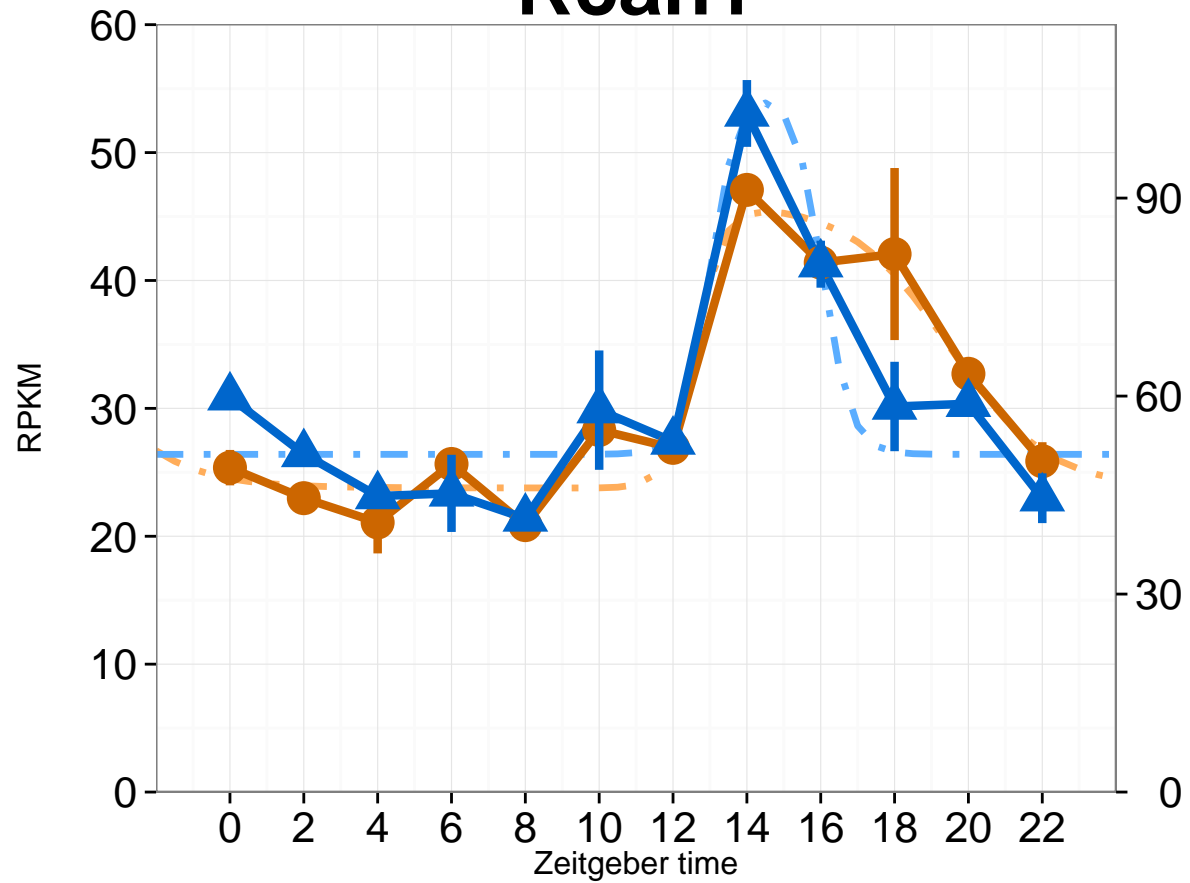

# Rcan1

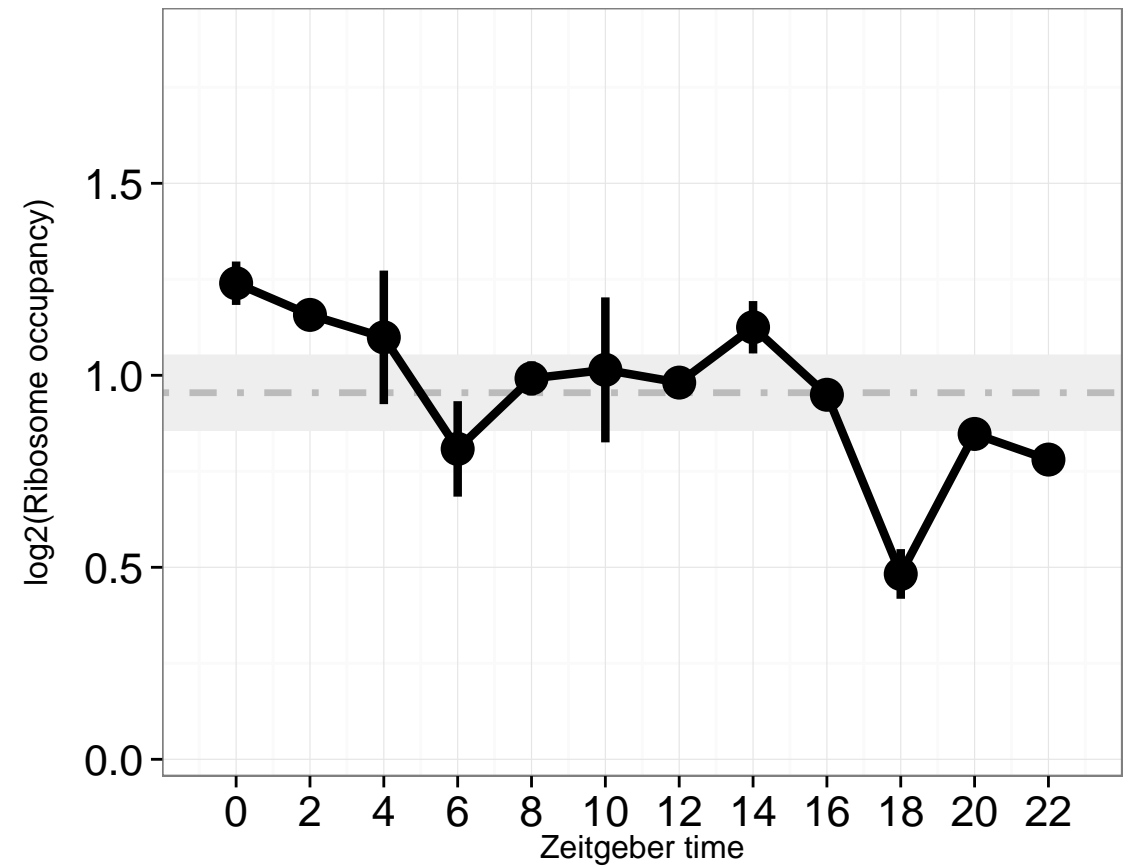

Supplement: Supplementary file 1624 [file 1]

# Zfp109

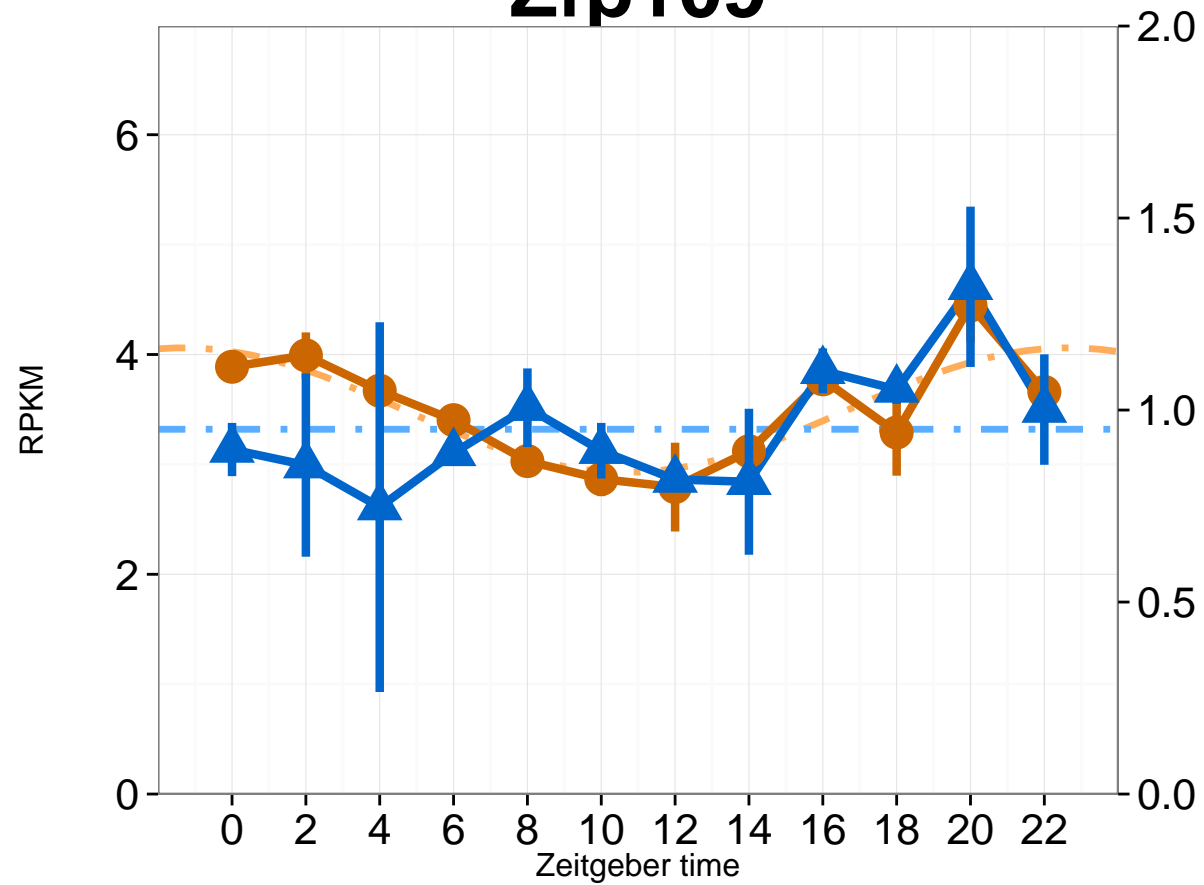

# Zfp109

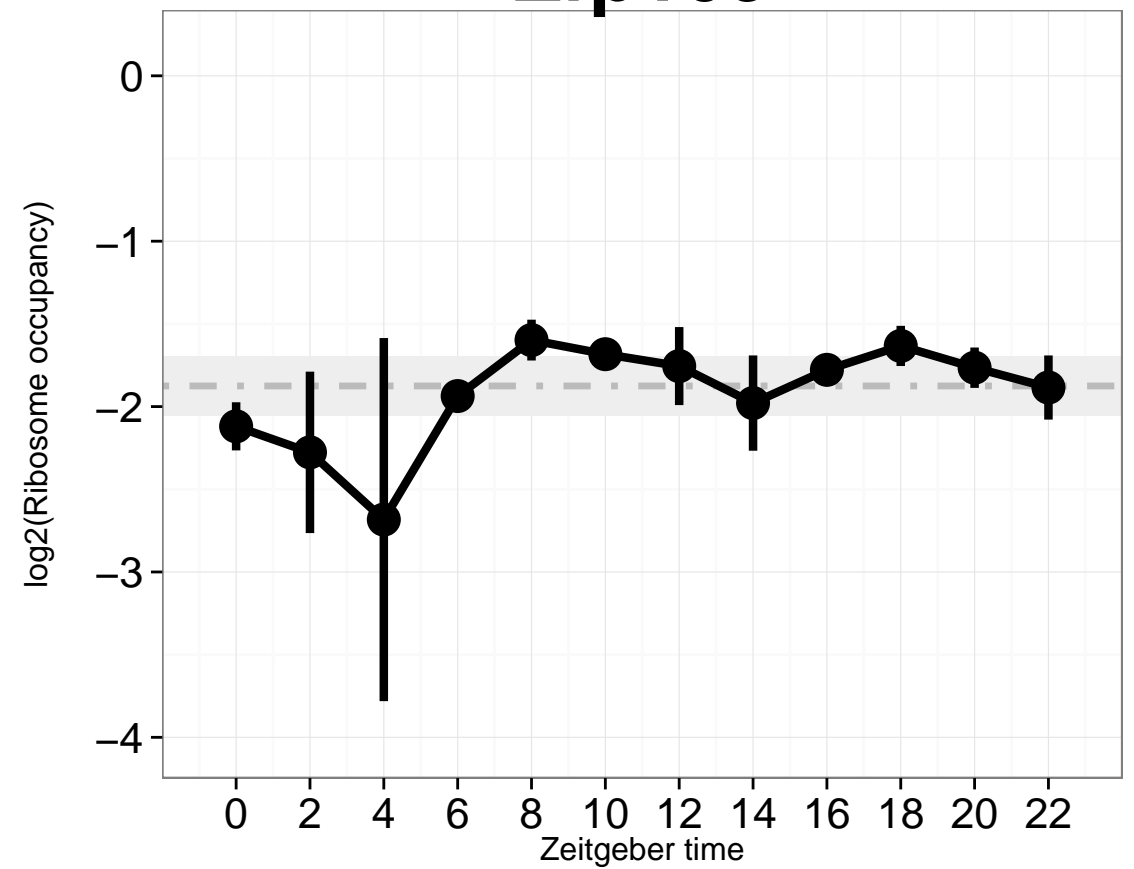

Supplement: Supplementary file 1625 [file 1]

## Pus7

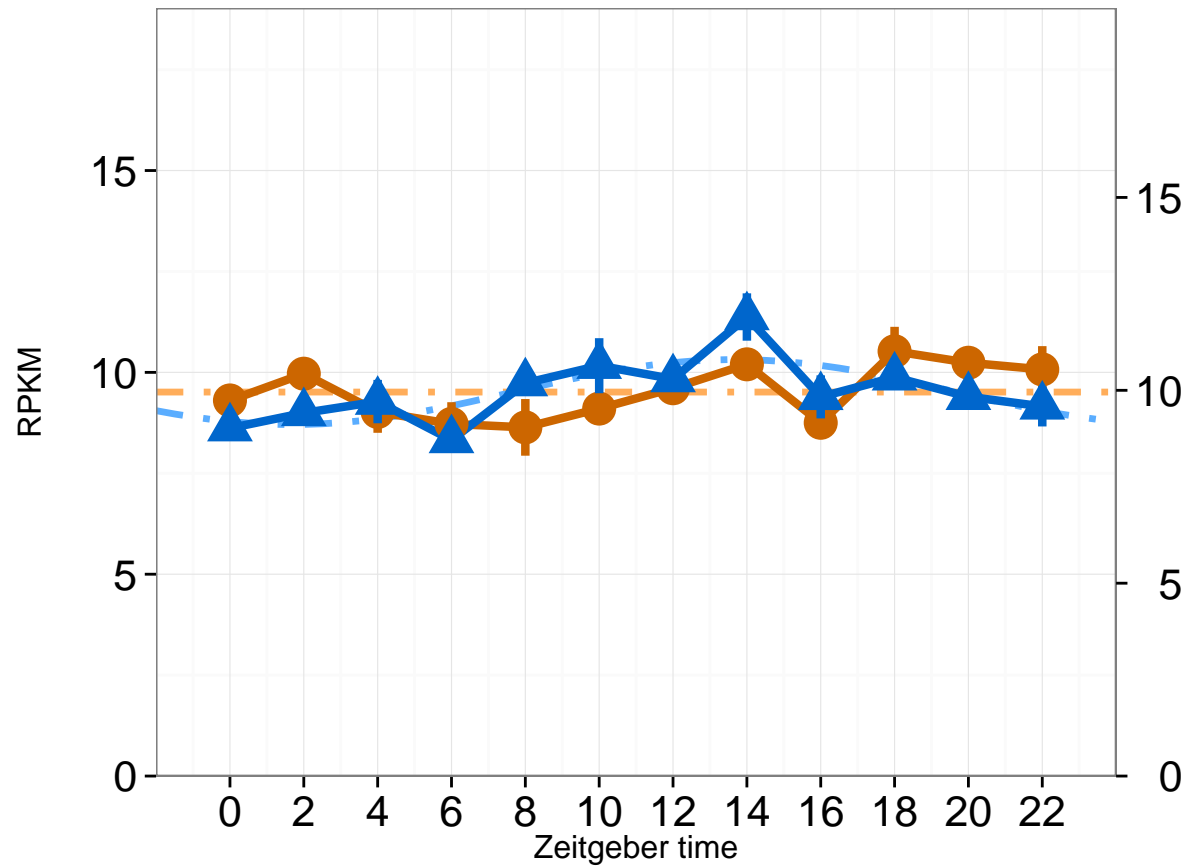

## Pus7

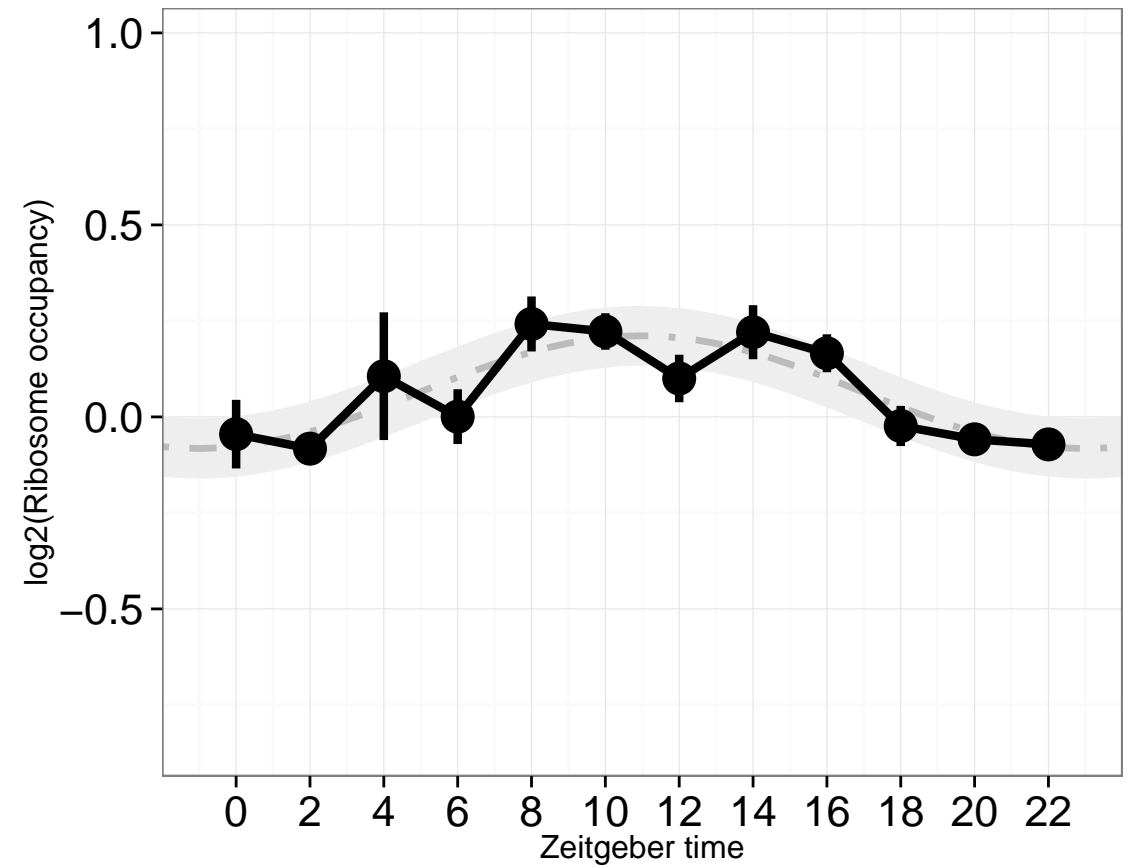

Supplement: Supplementary file 1626 [file 1]

## Zswim5

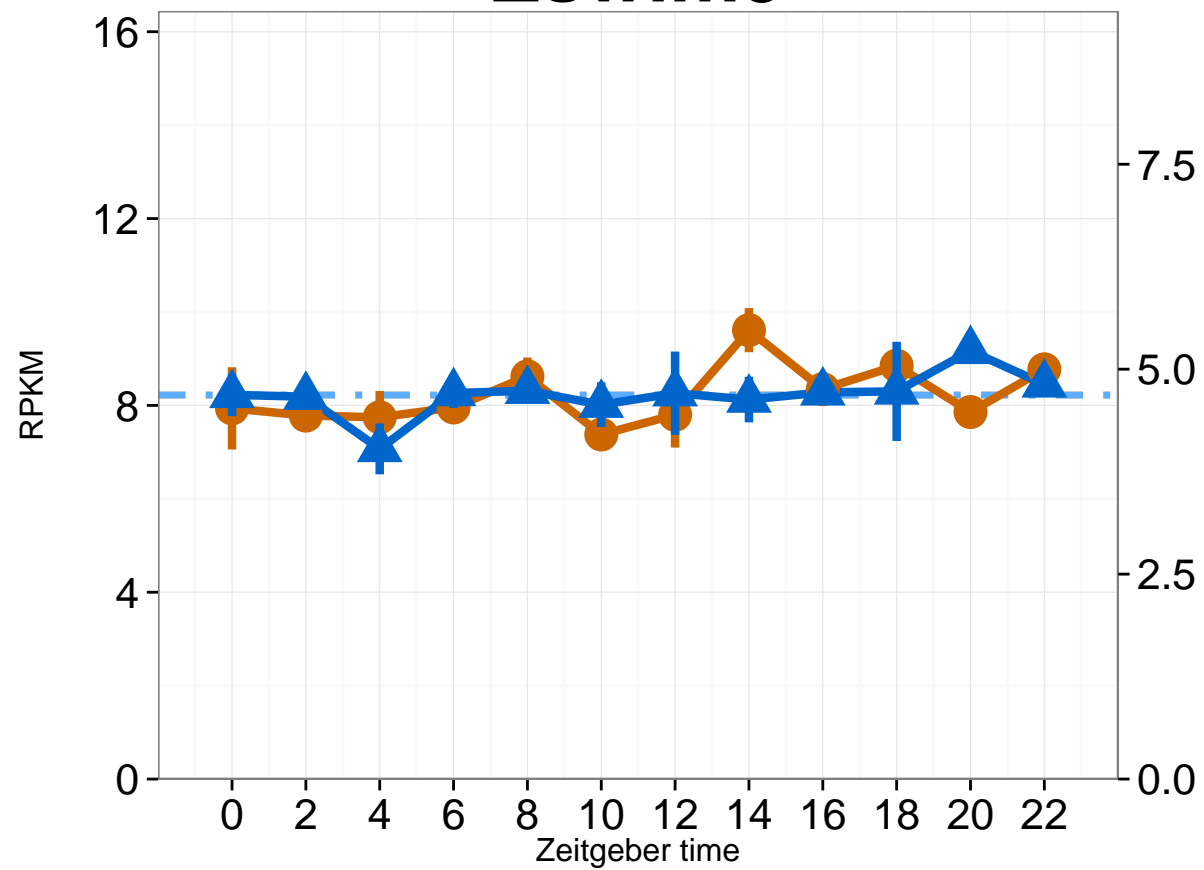

## Zswim5

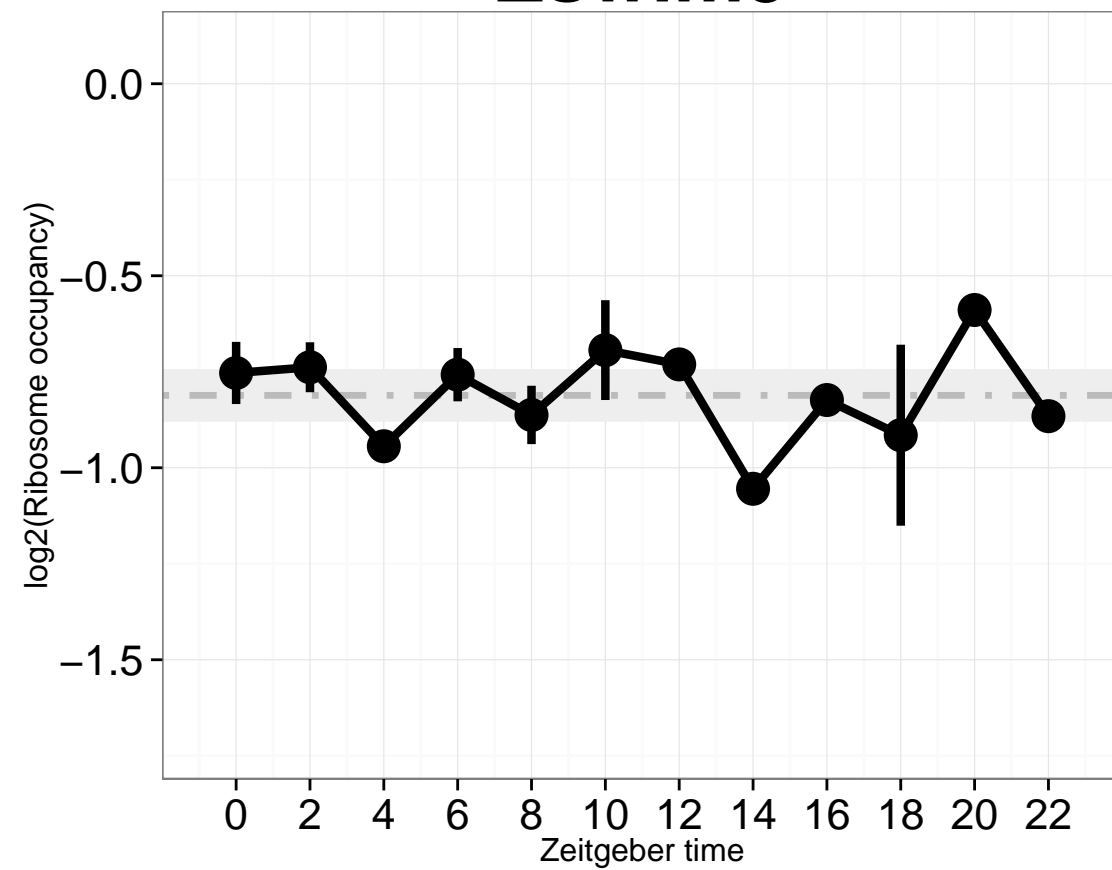

Supplement: Supplementary file 1627 [file 1]

# Krt222

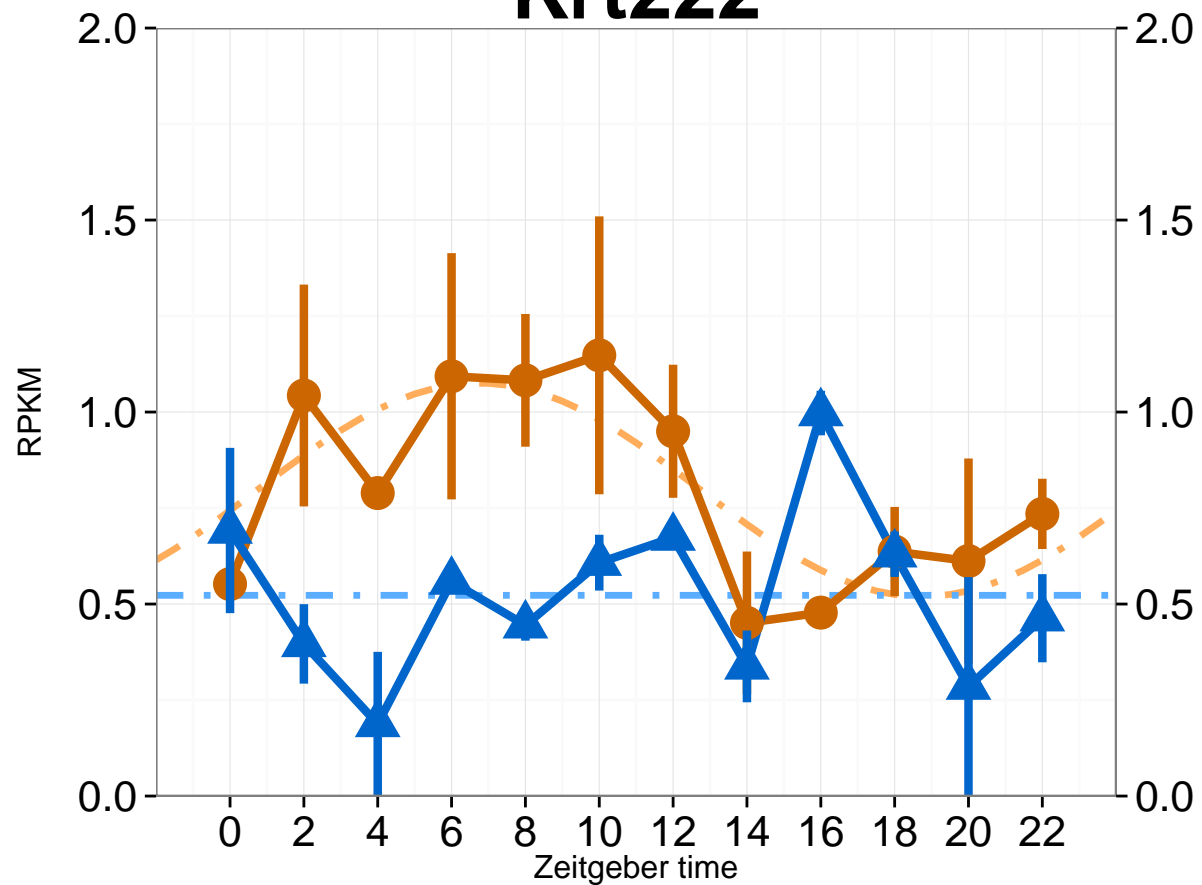

# Krt222

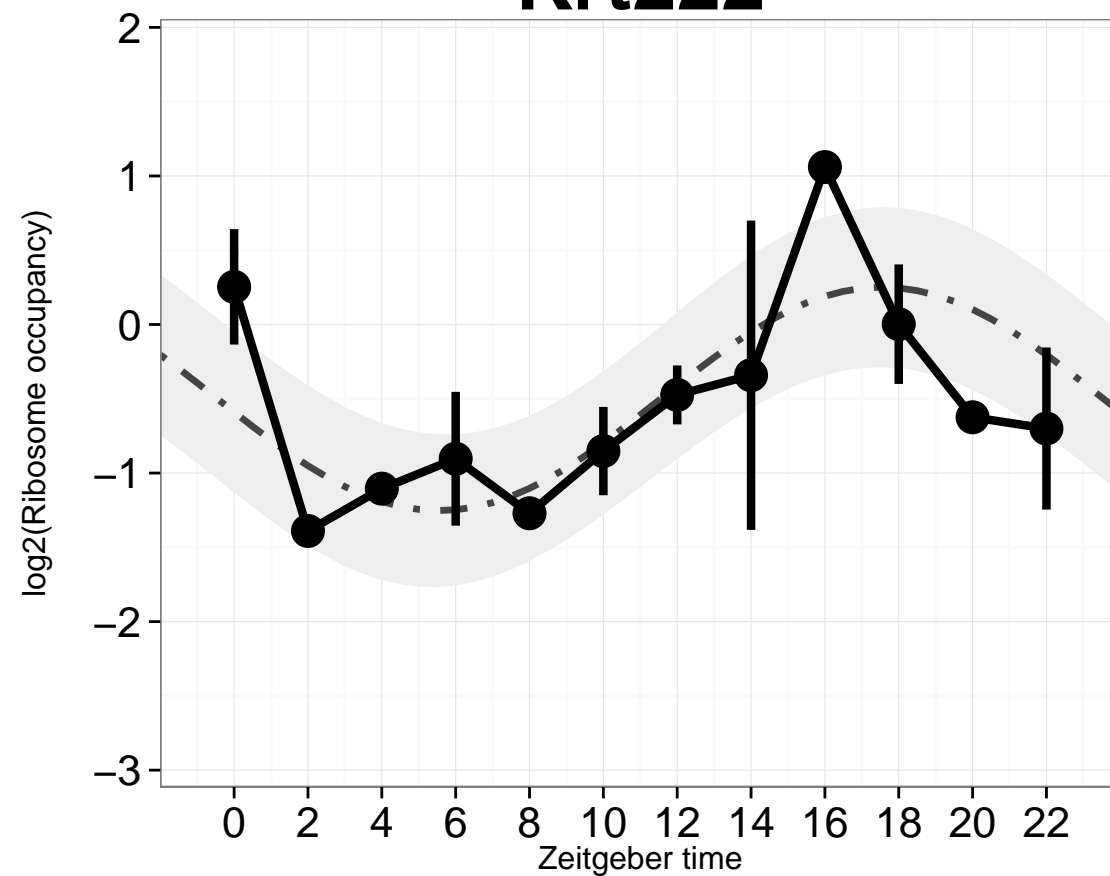

Supplement: Supplementary file 1628 [file 1]

# Jmjd7

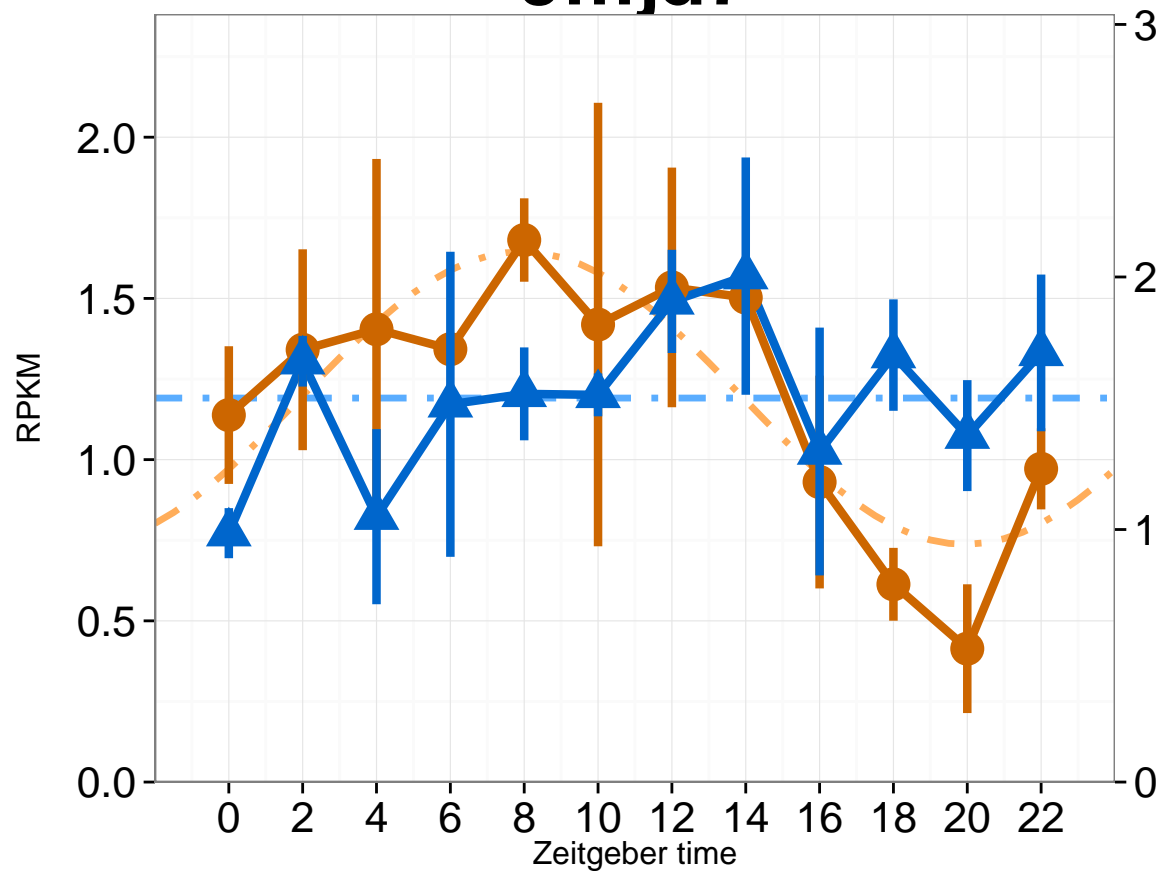

# Jmjd7

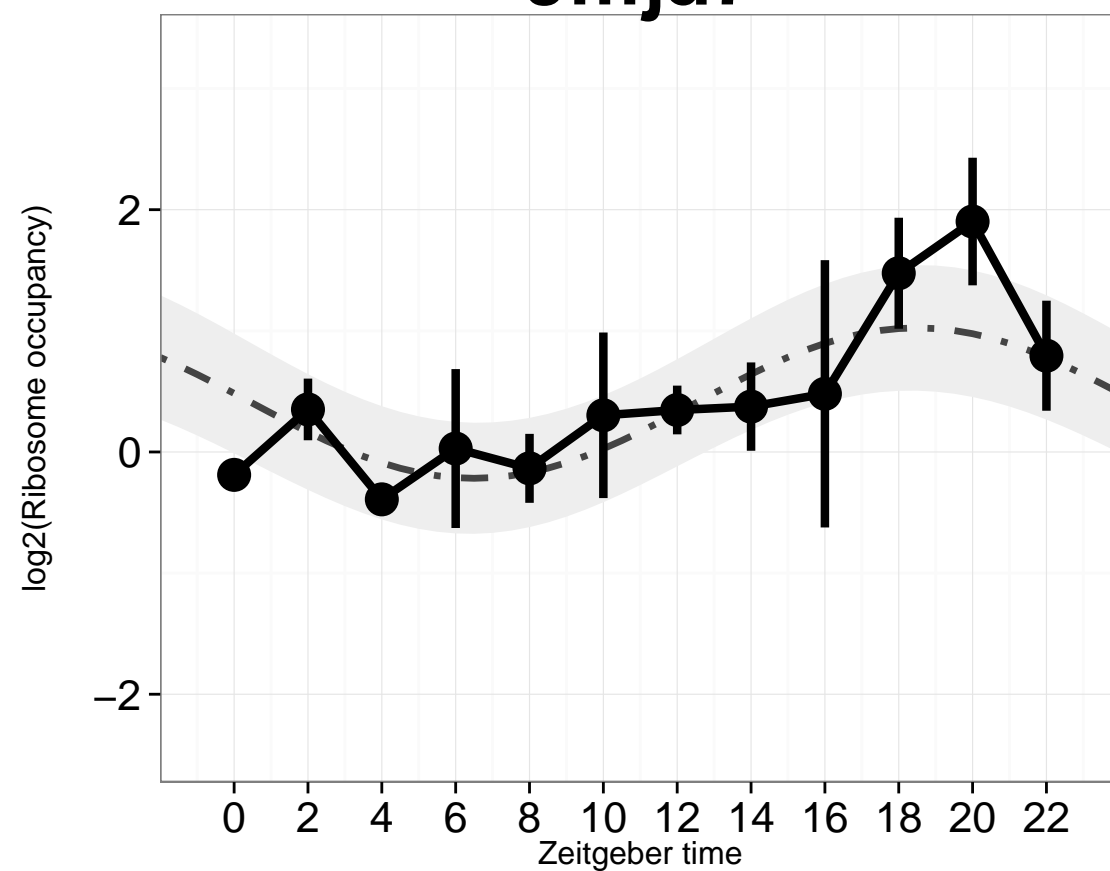

Supplement: Supplementary file 1629 [file 1]

## Pdgfc

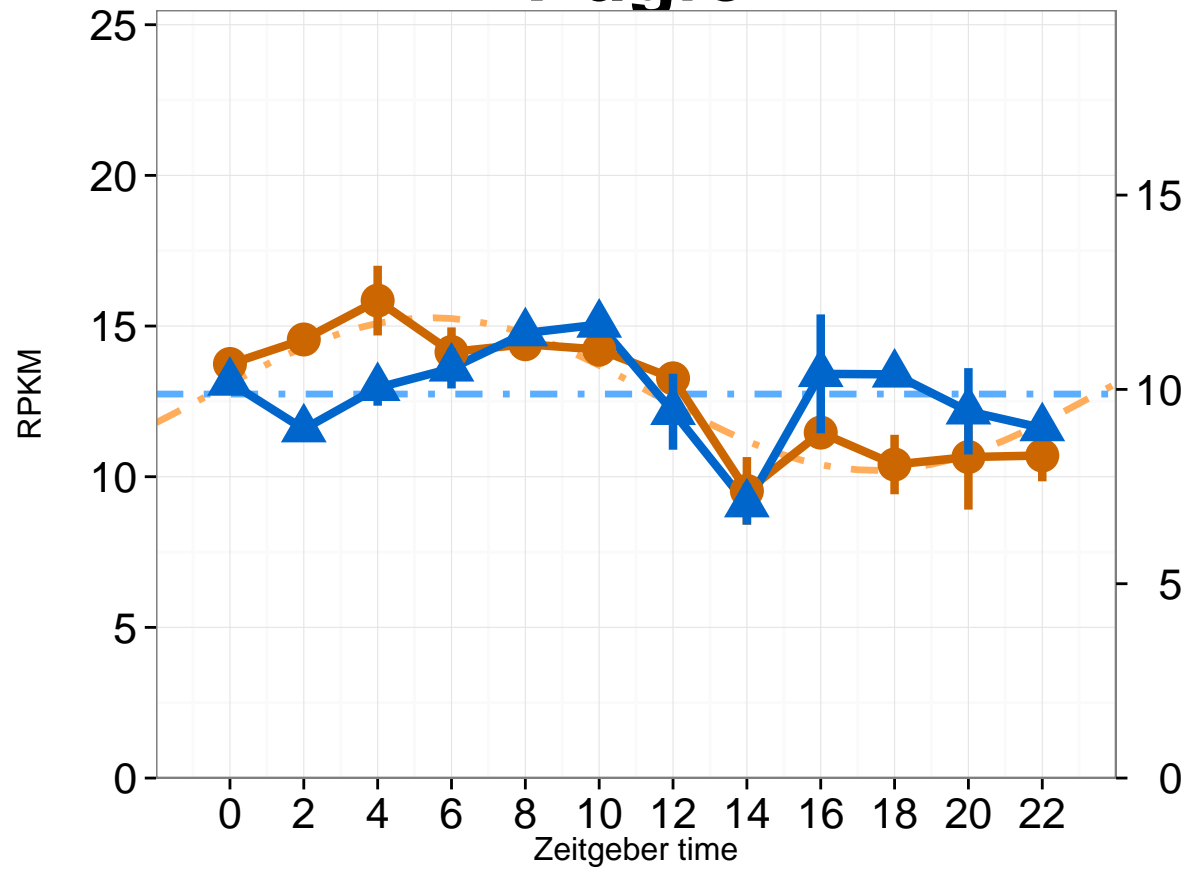

## Pdgfc

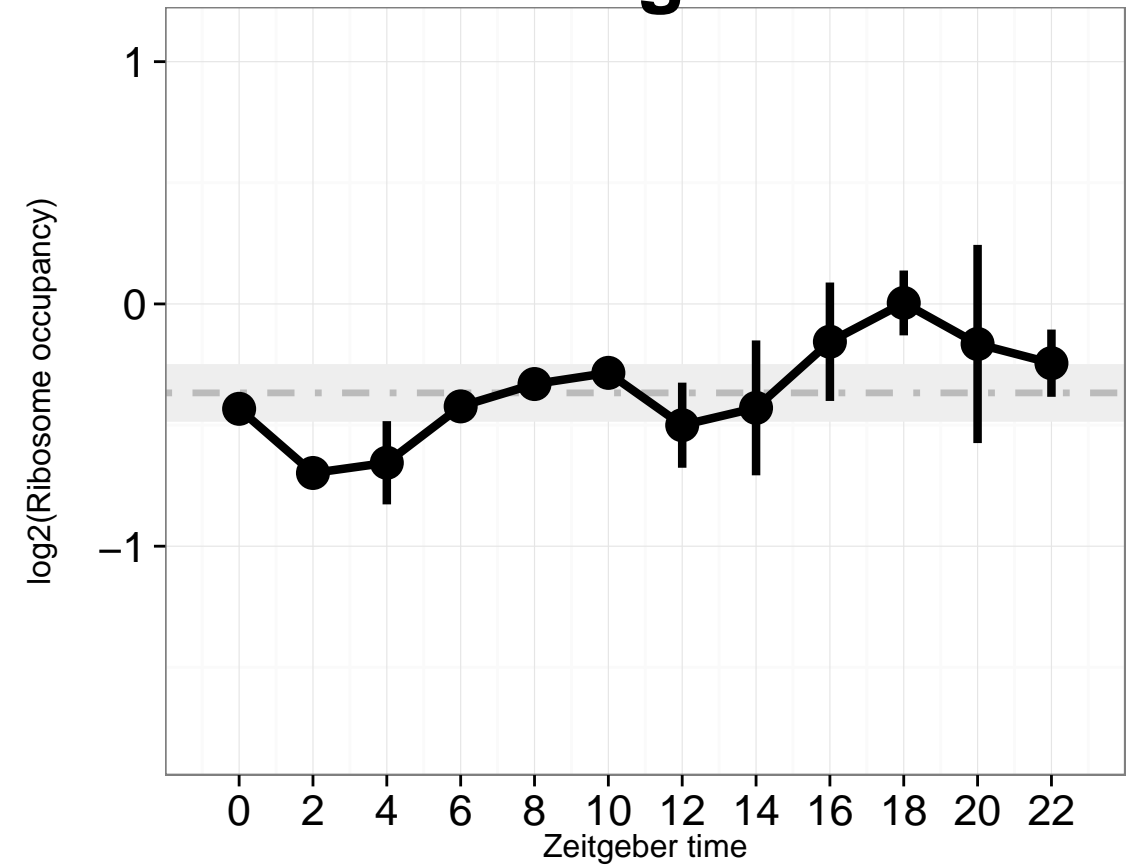

Supplement: Supplementary file 1630 [file 1]

# Mrpl54

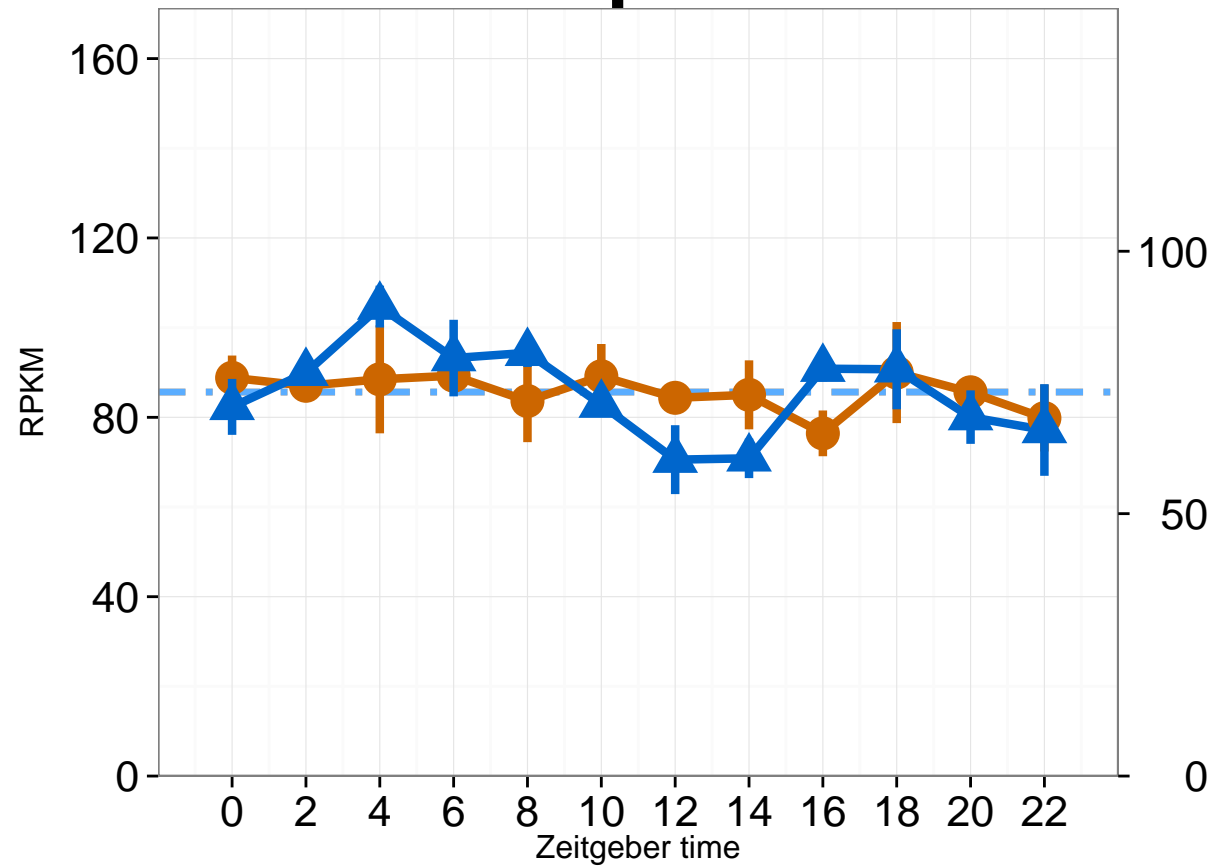

# Mrpl54

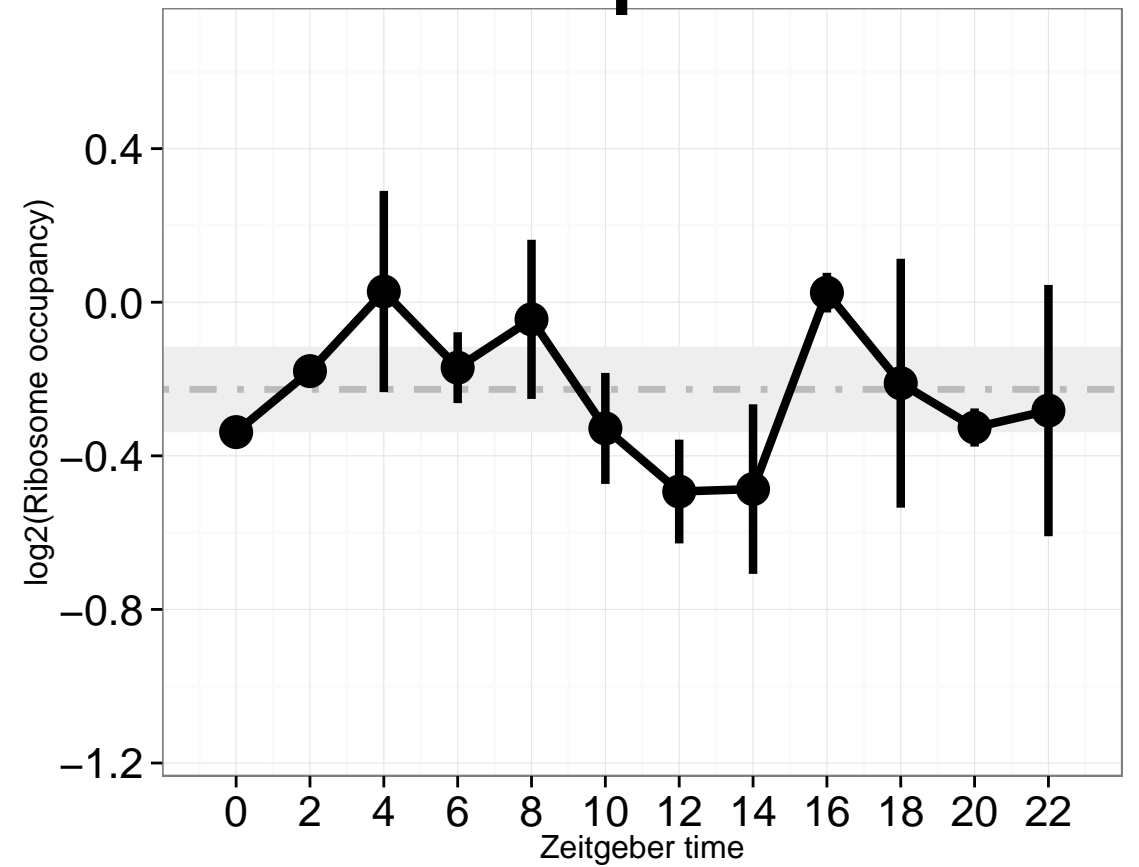

Supplement: Supplementary file 1631 [file 1]

## Nexn

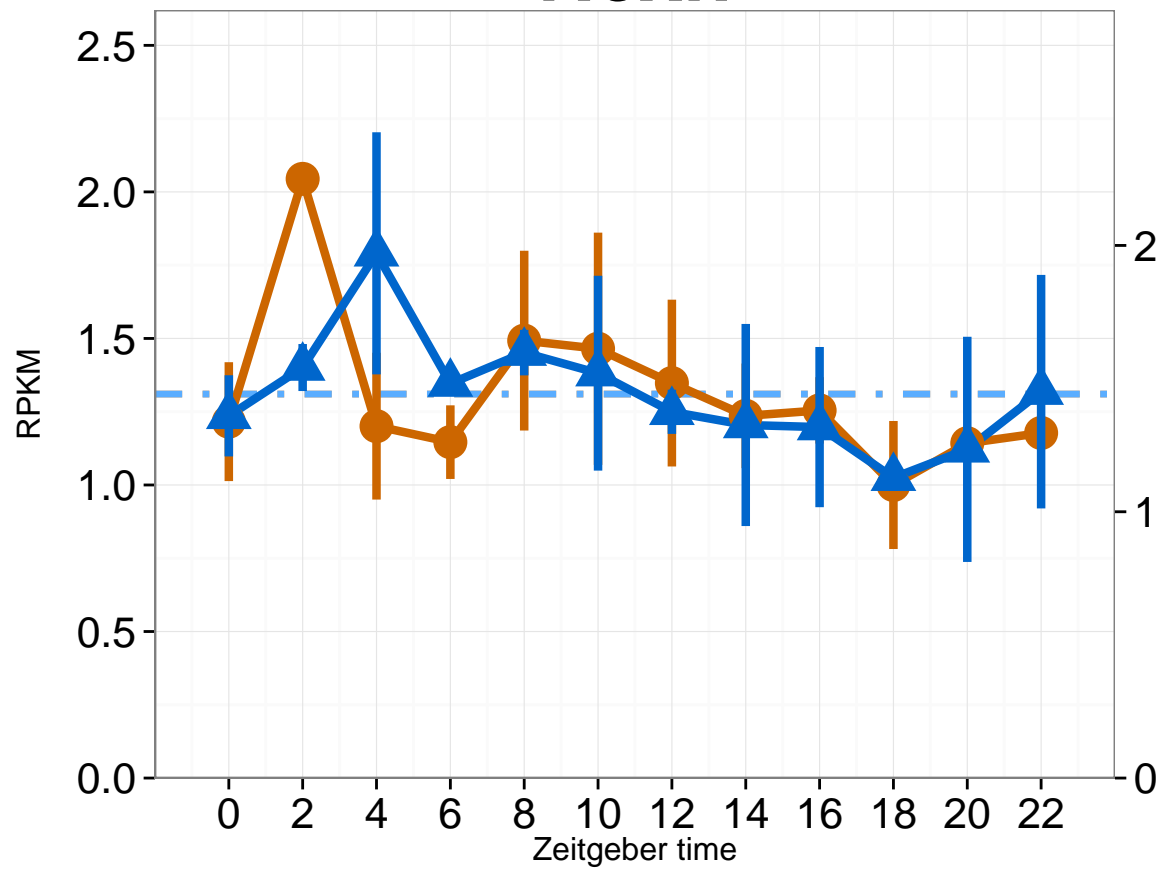

## Nexn

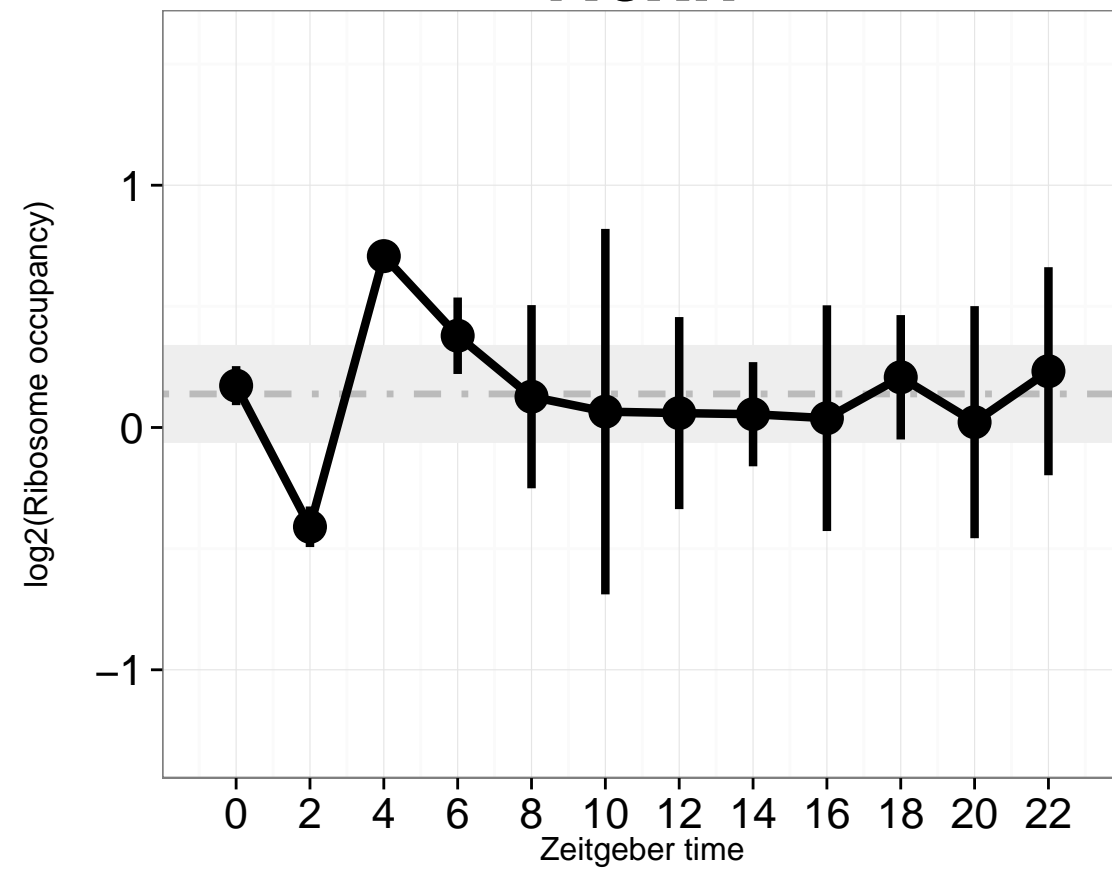

Supplement: Supplementary file 1632 [file 1]

# Zfp292

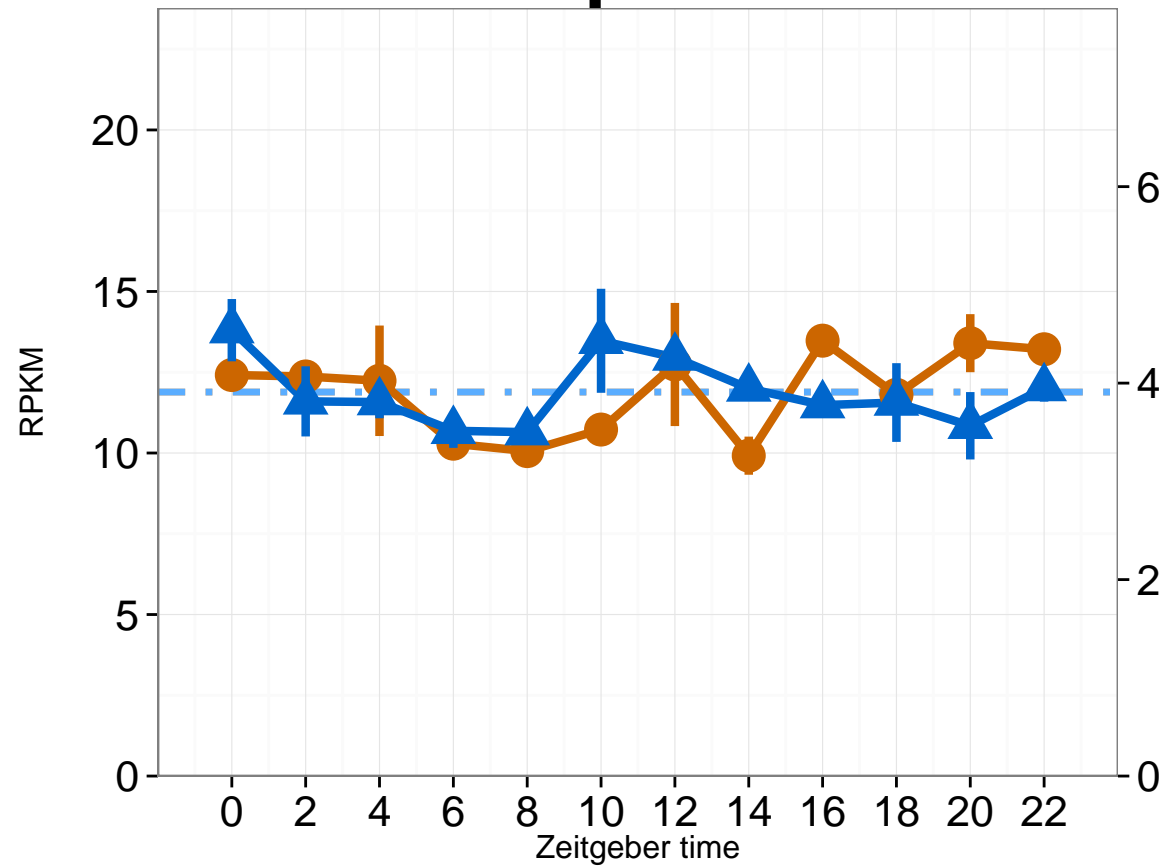

# Zfp292

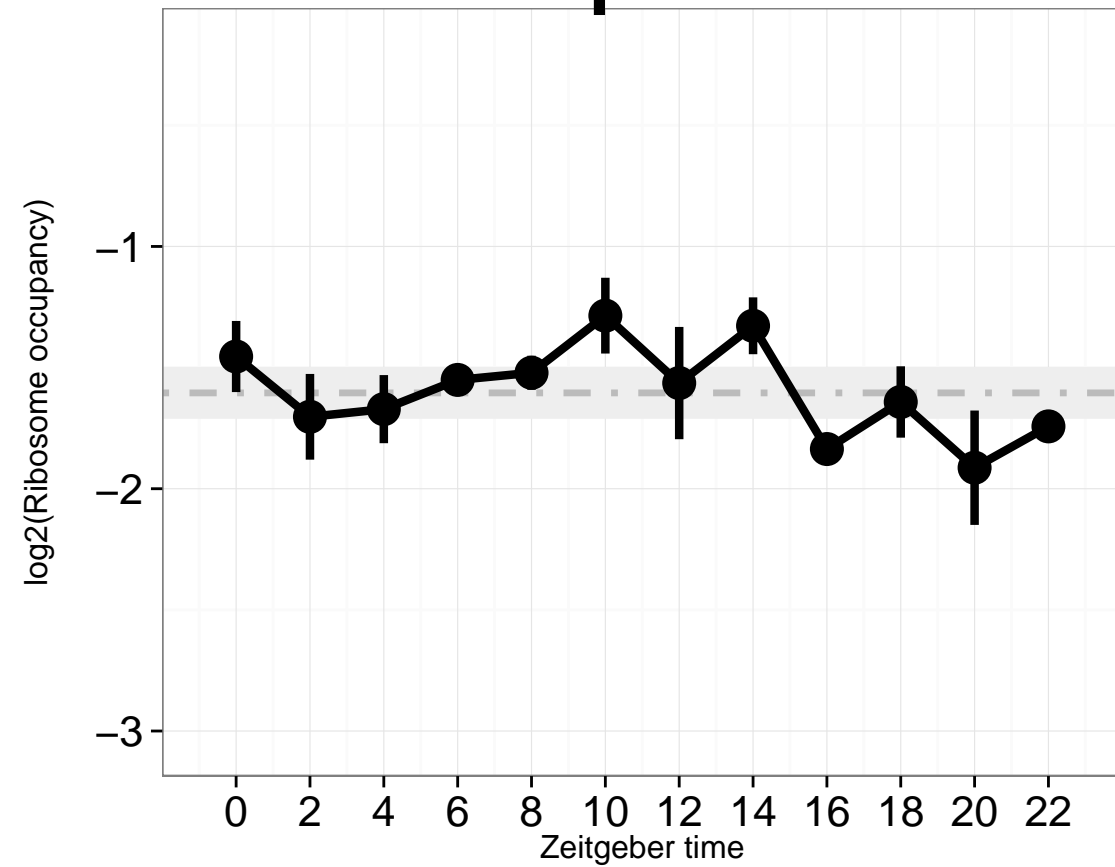

Supplement: Supplementary file 1633 [file 1]

# Simc1

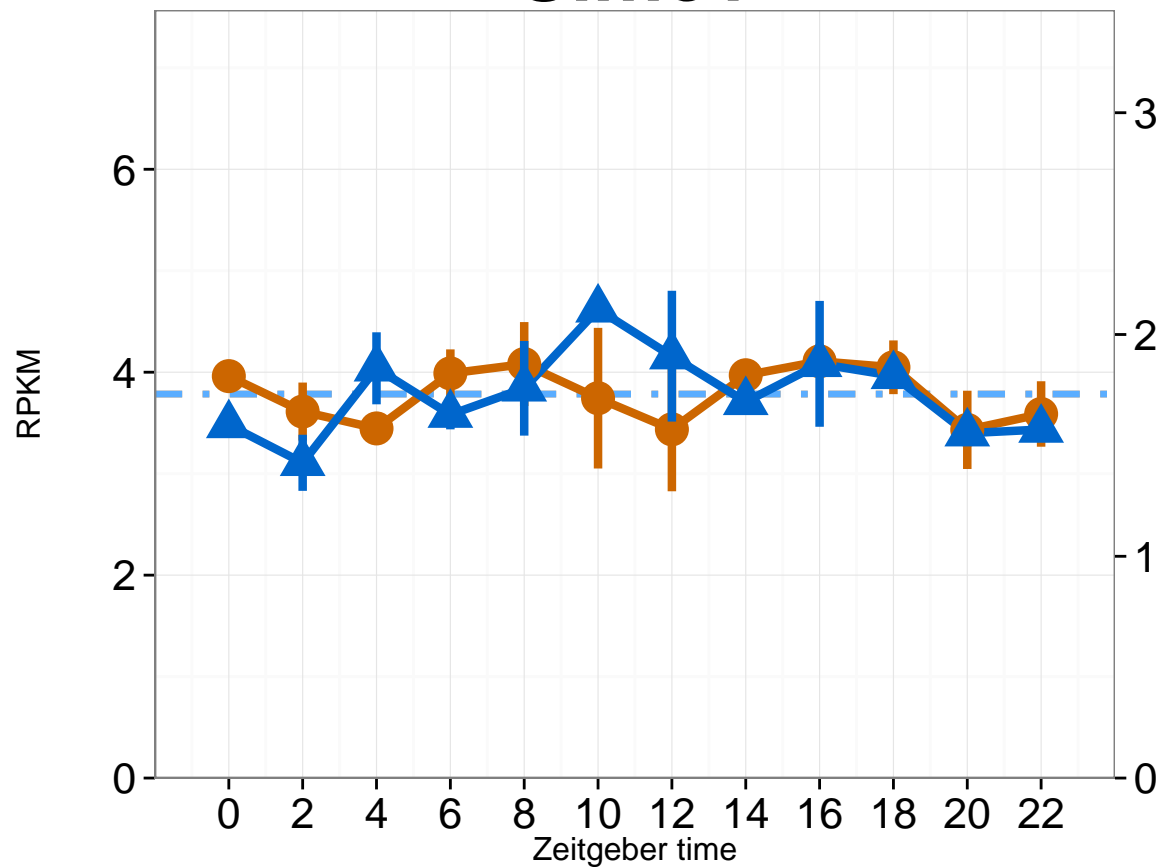

# Simc1

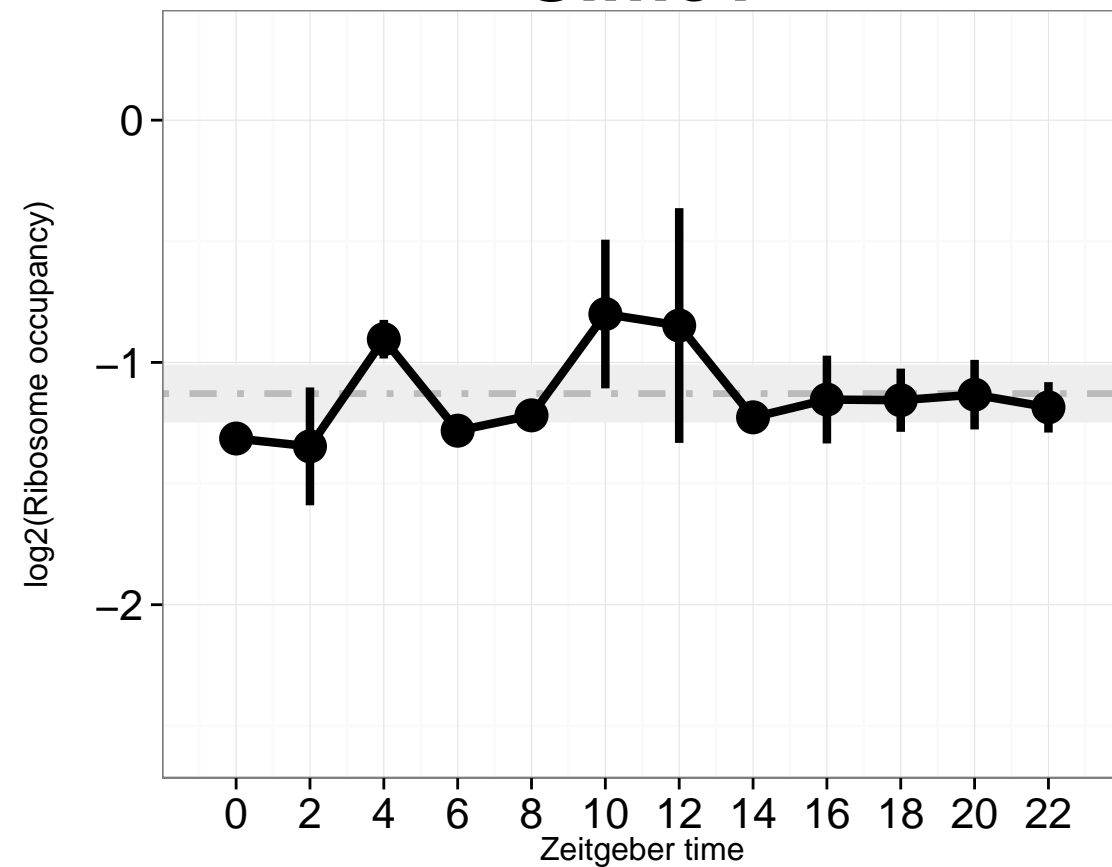

Supplement: Supplementary file 1634 [file 1]

## Cirh1a

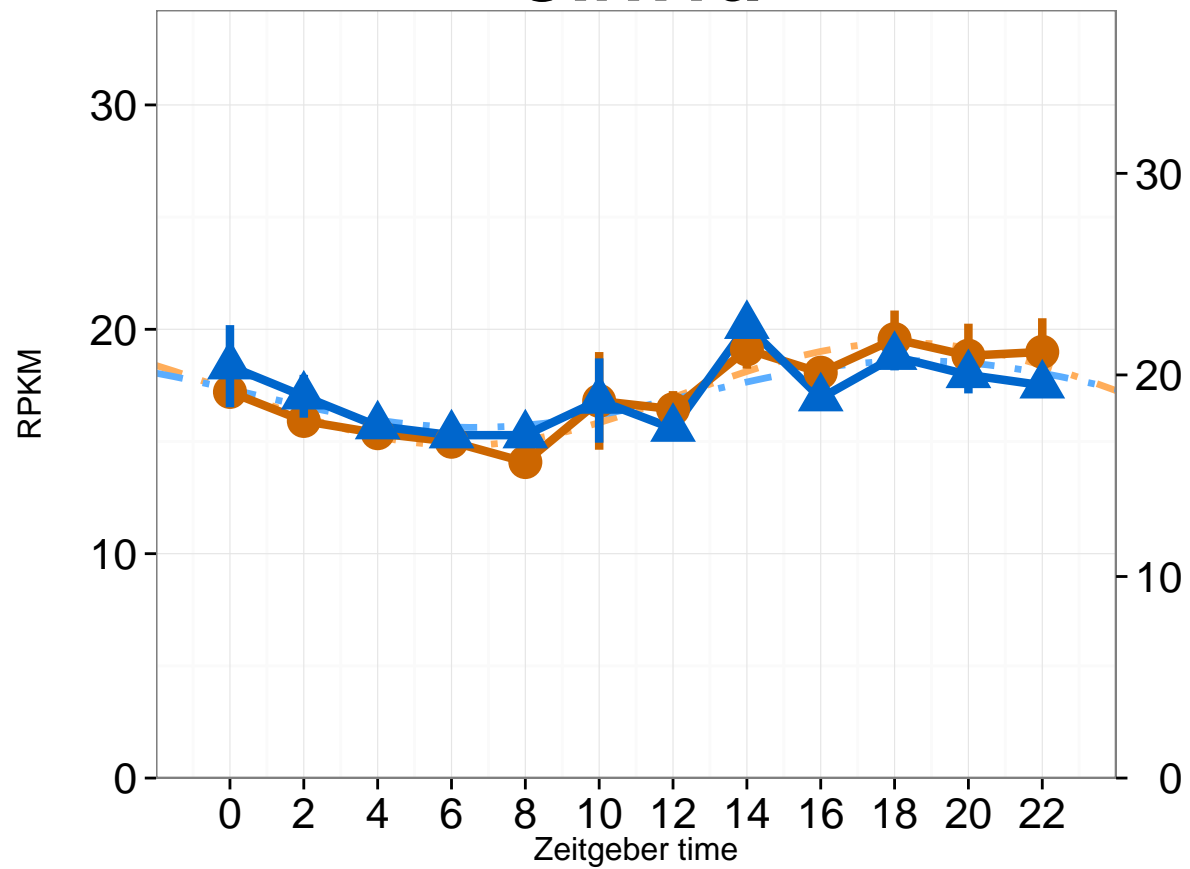

## Cirh1a

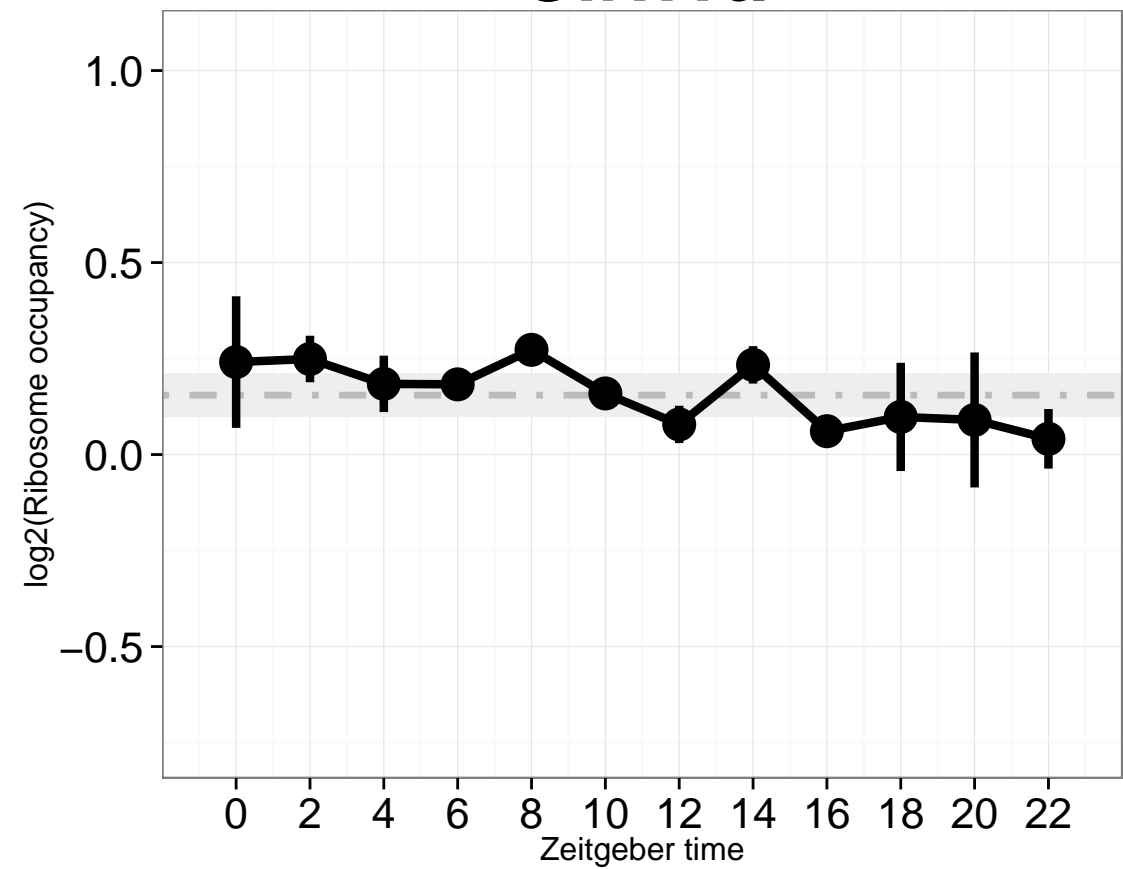

Supplement: Supplementary file 1635 [file 1]

## Aadat

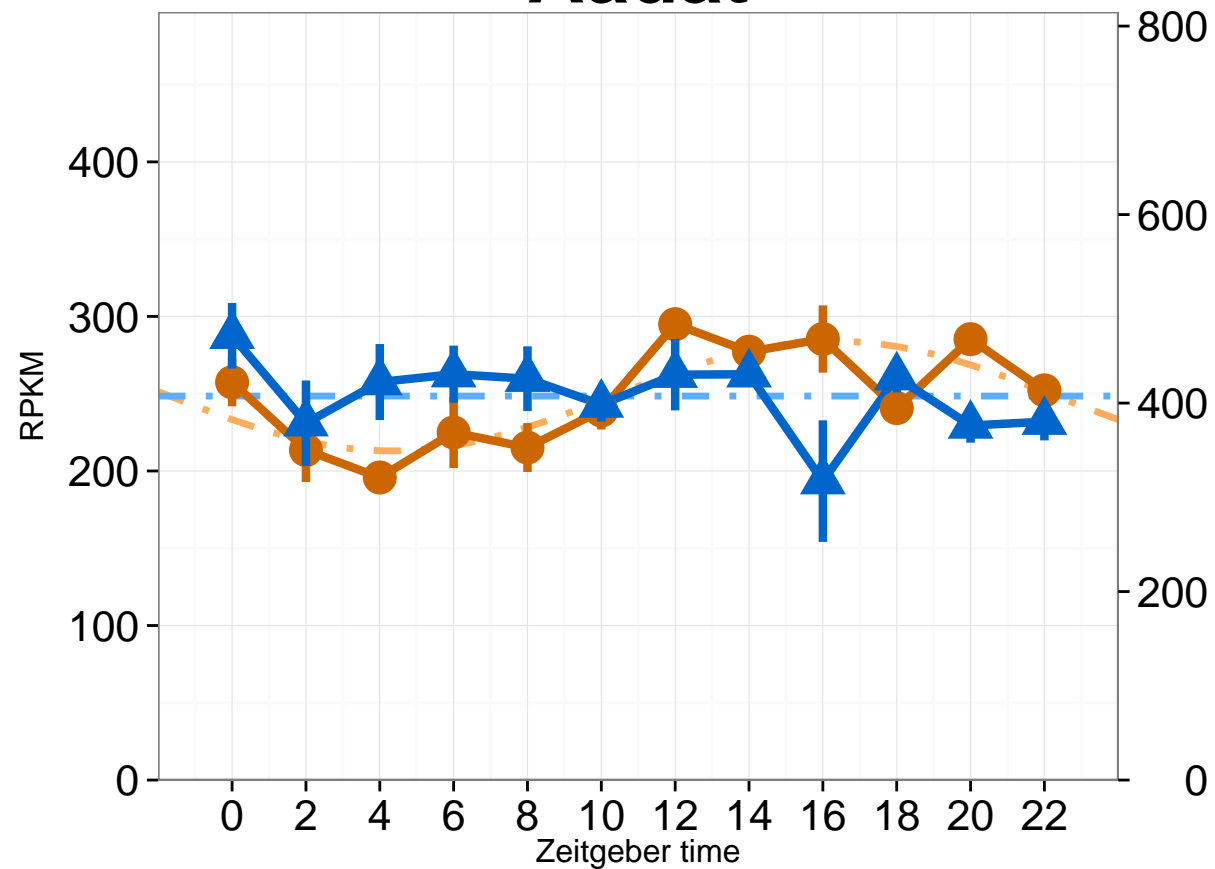

## Aadat

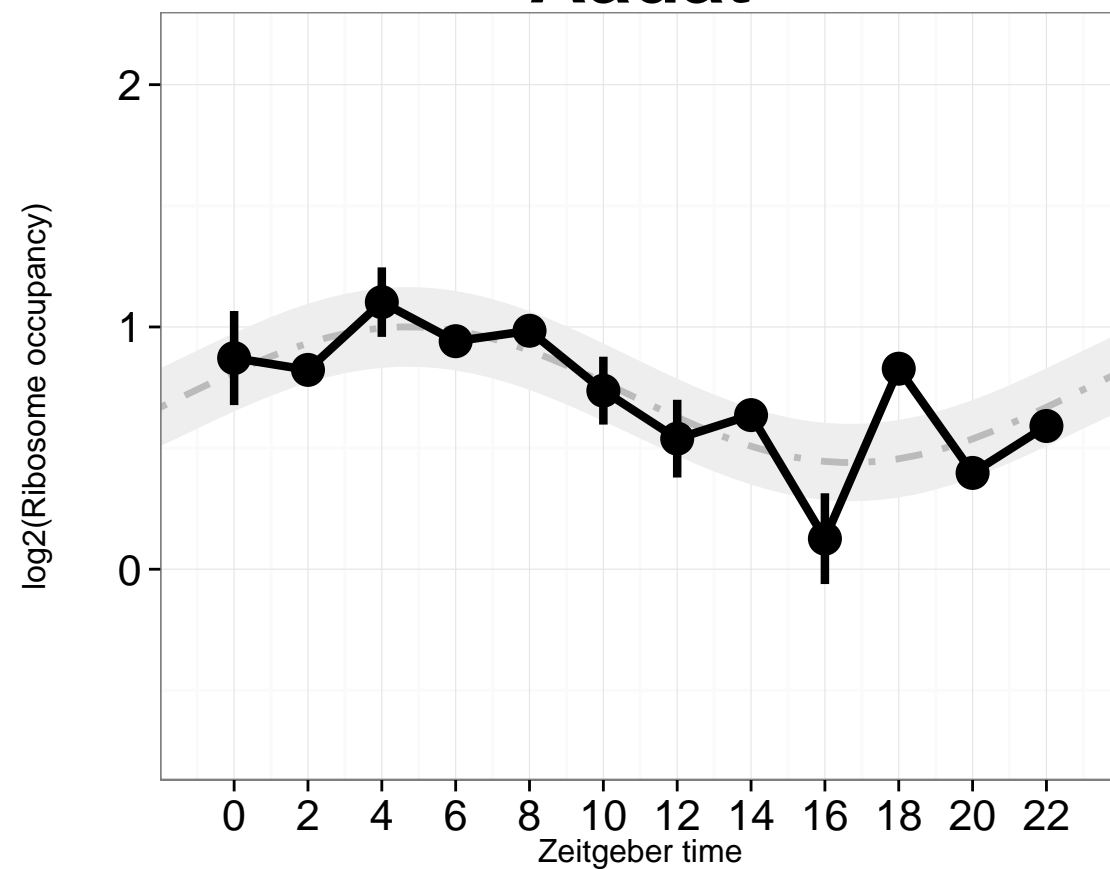

Supplement: Supplementary file 1636 [file 1]

# Tcerg1

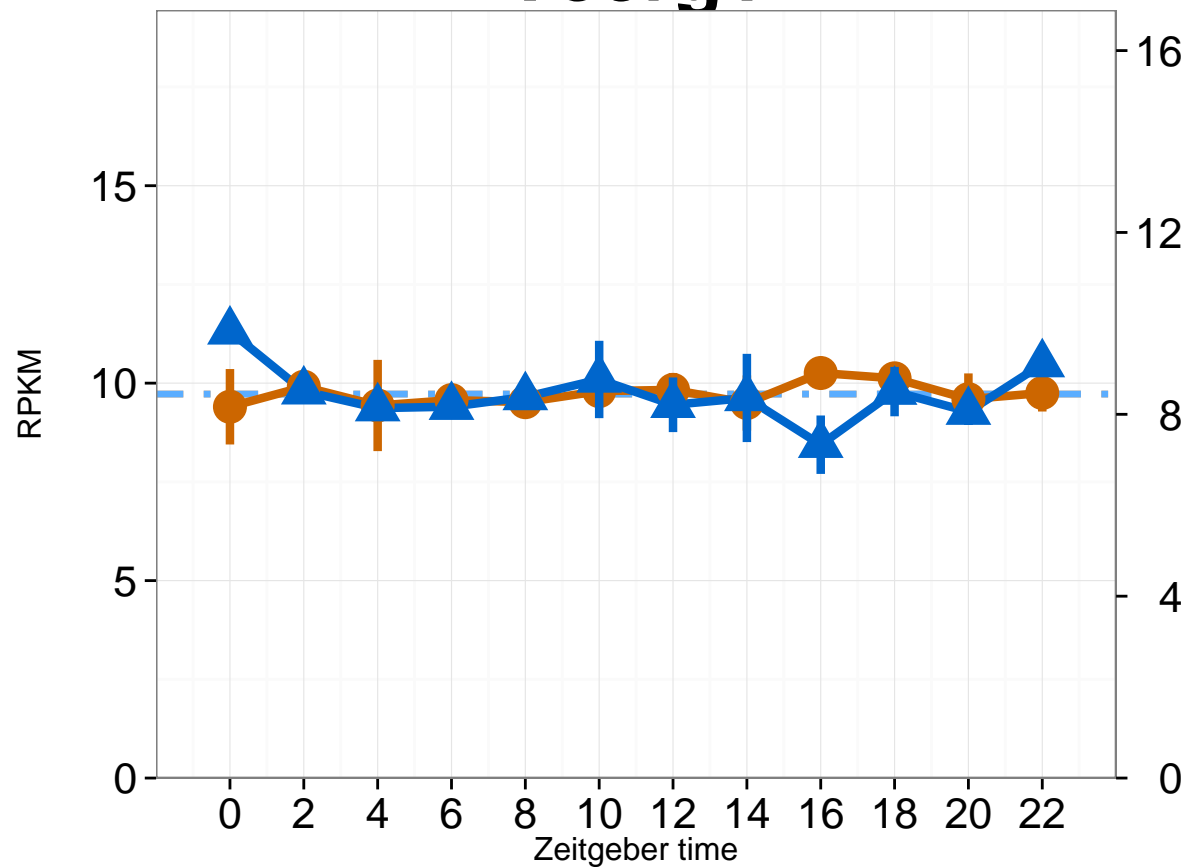

# Tcerg1

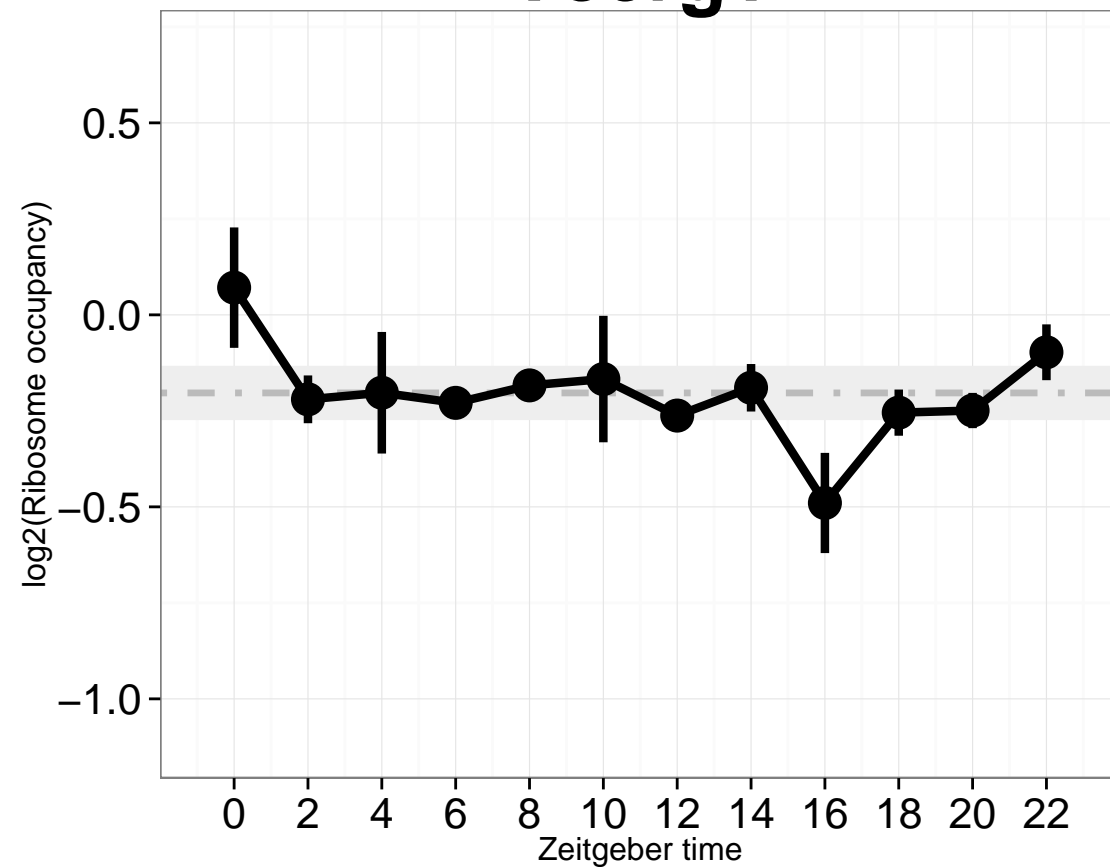

Supplement: Supplementary file 1637 [file 1]

## Mff

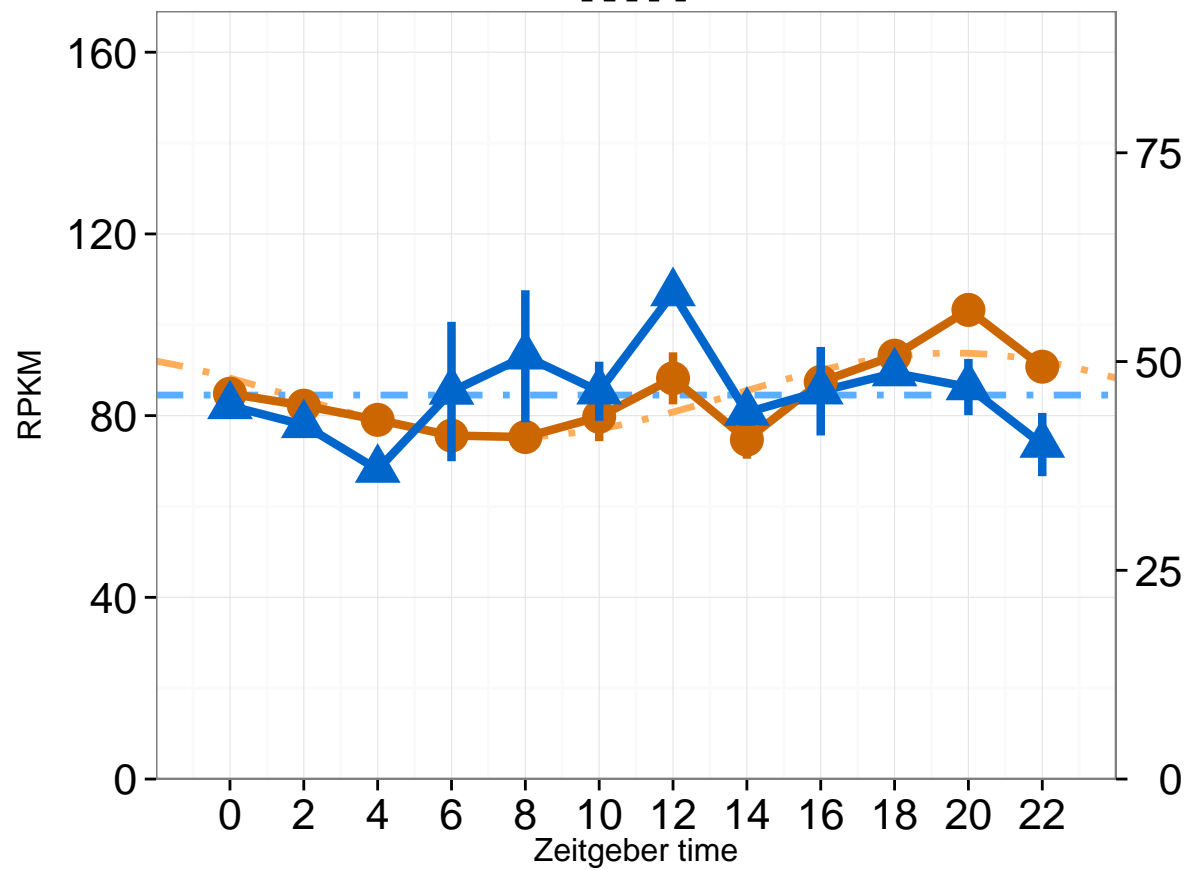

## Mff

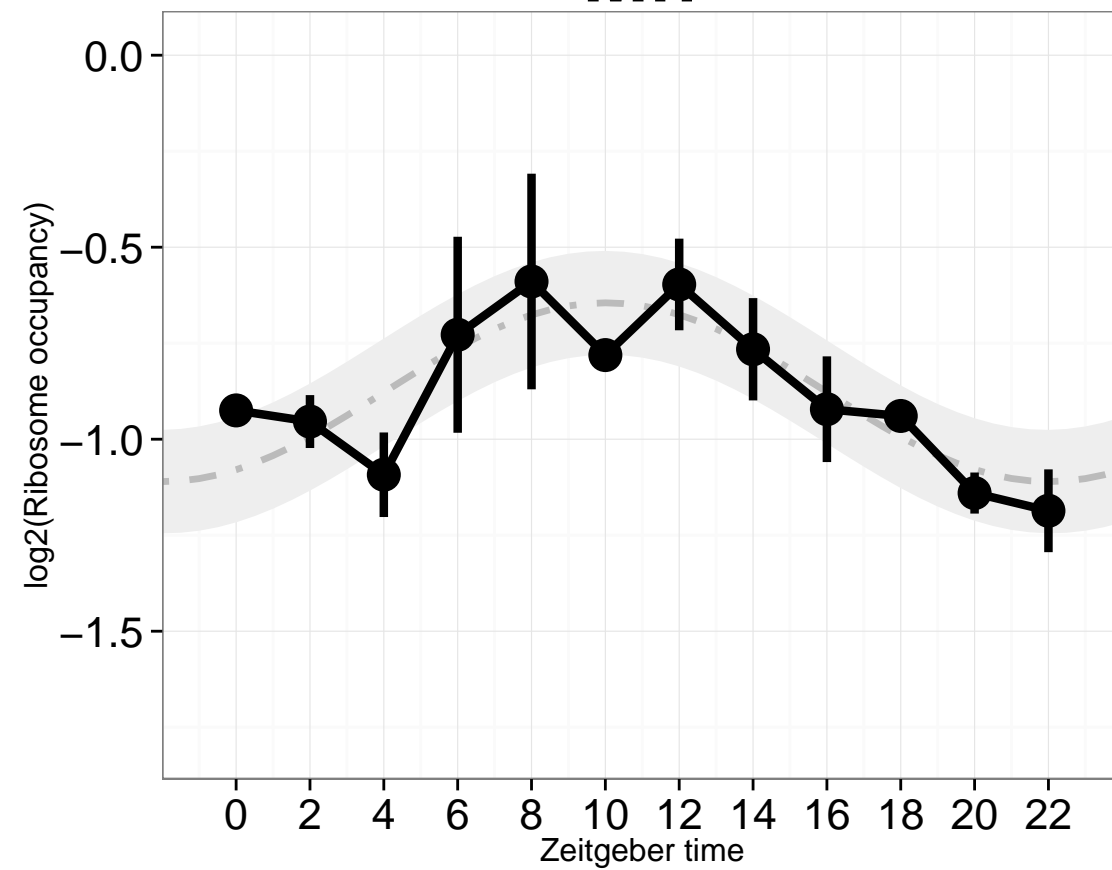

Supplement: Supplementary file 1638 [file 1]

# Apba1

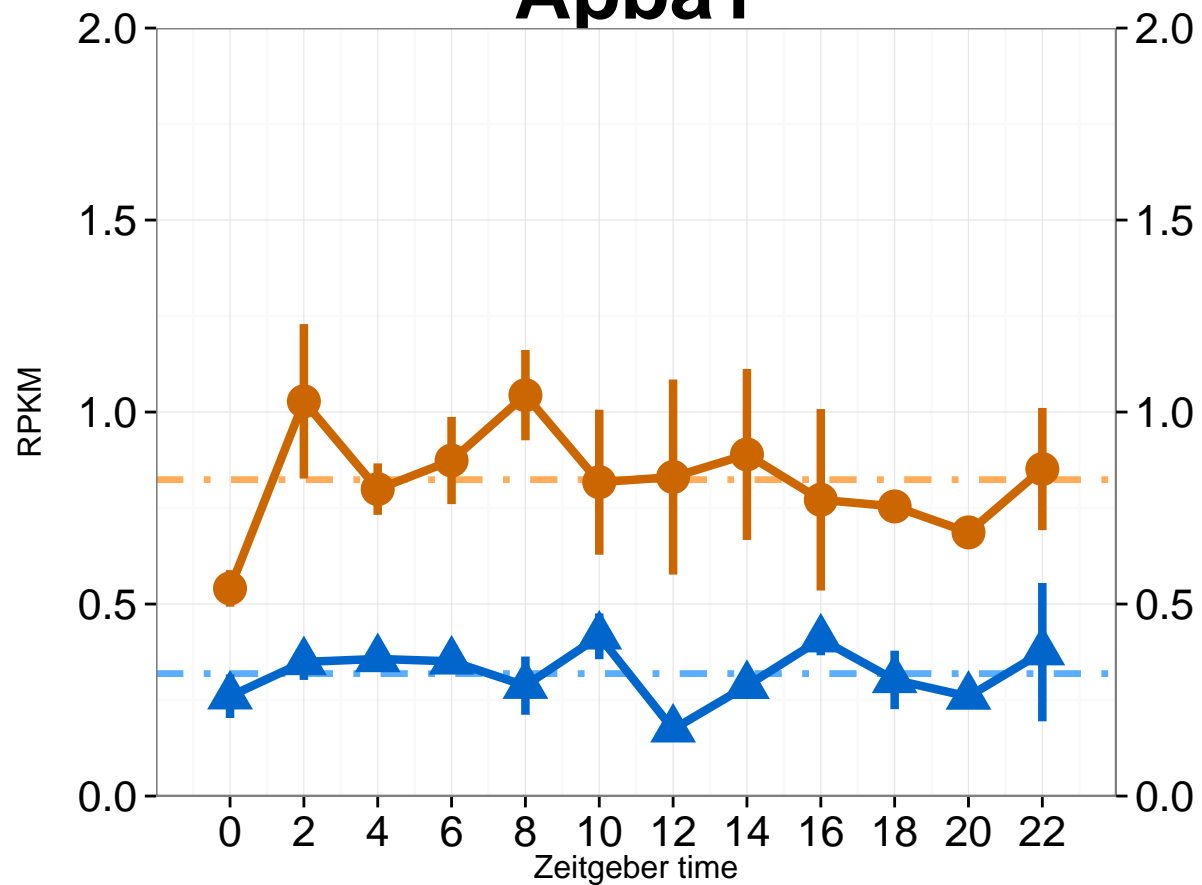

# Apba1

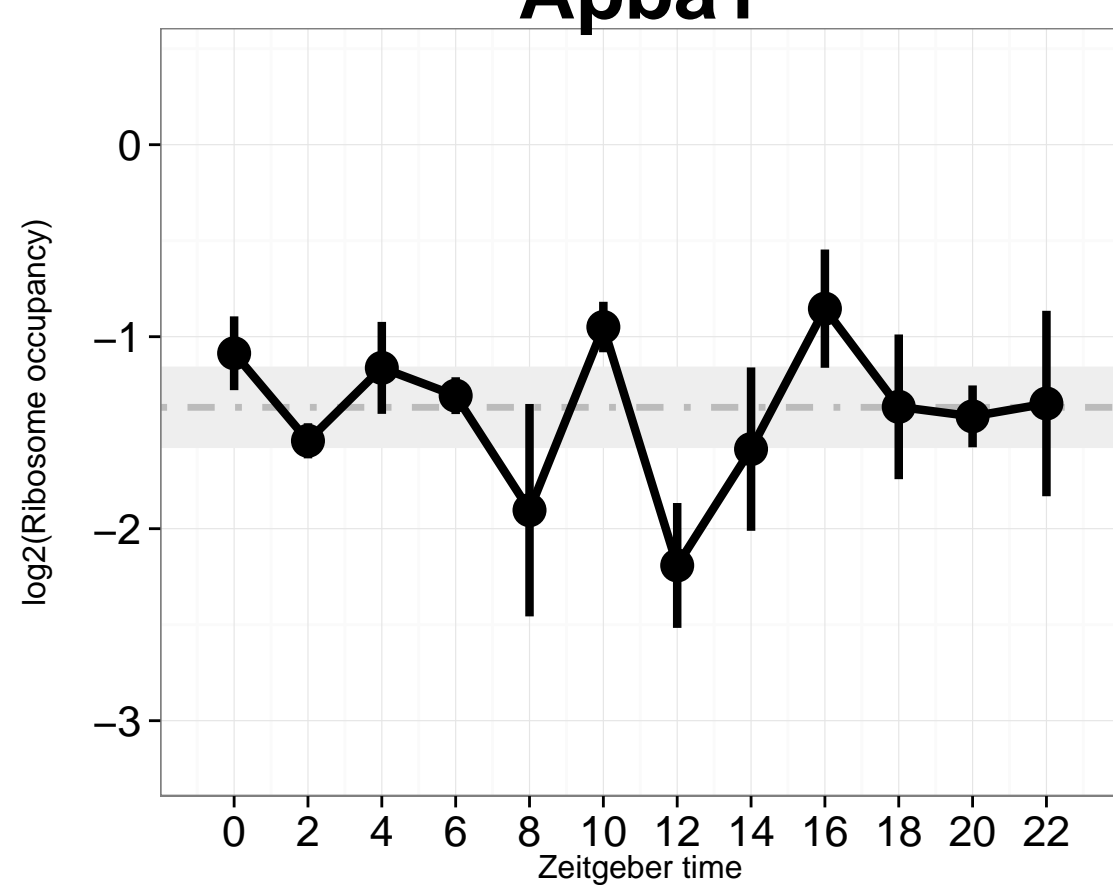

Supplement: Supplementary file 1639 [file 1]

## Cry2

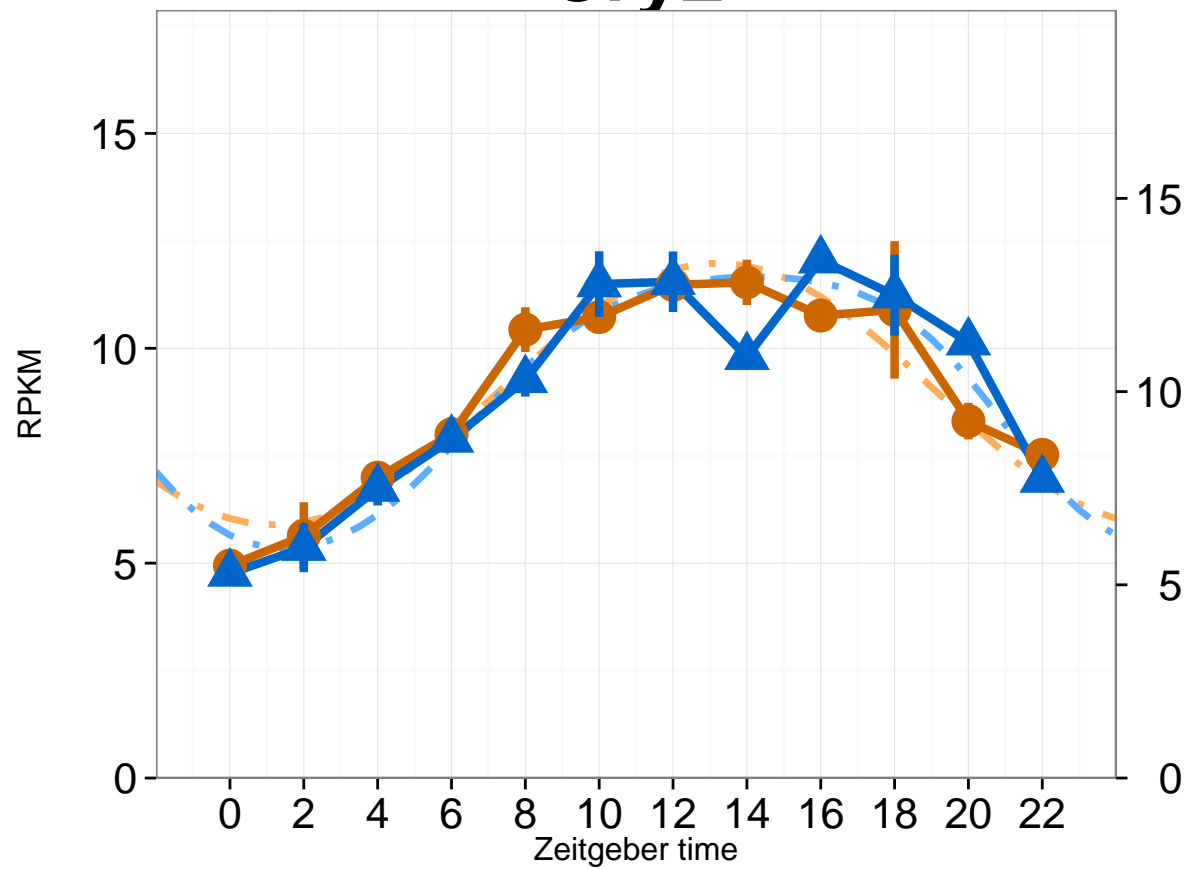

## Cry2

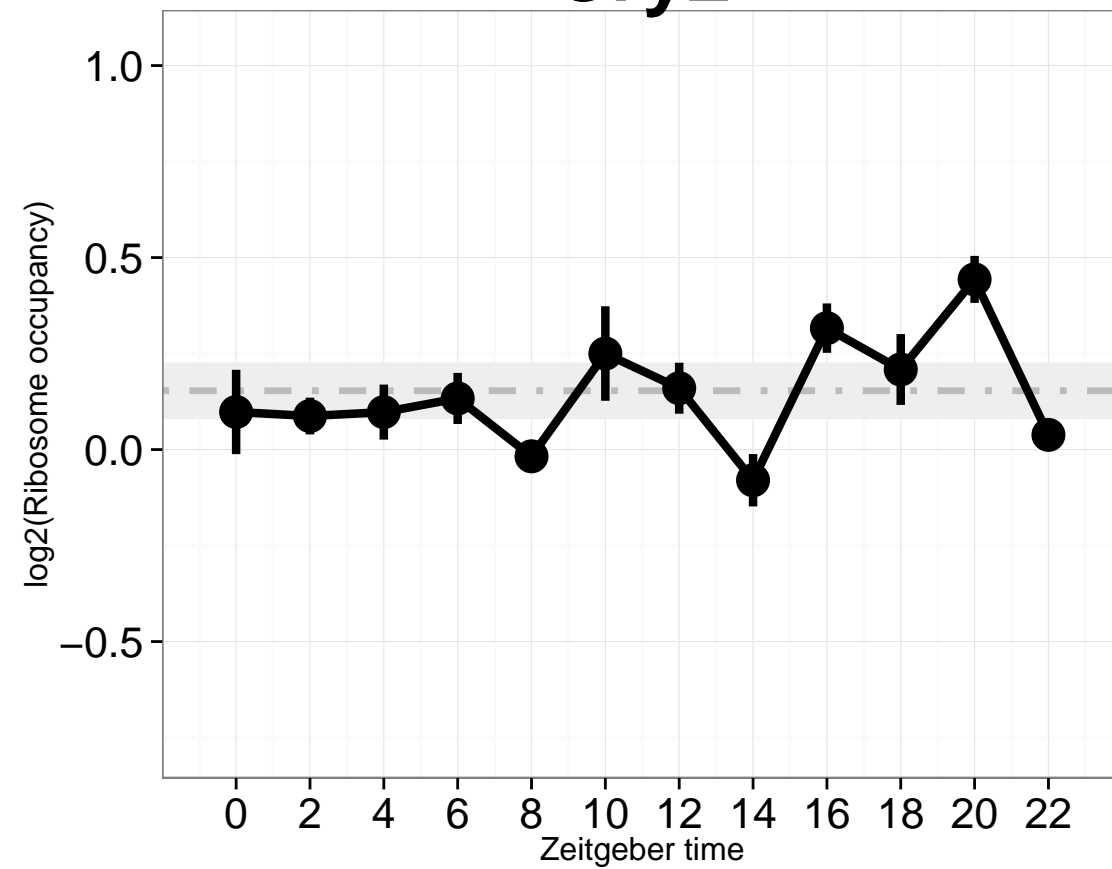

Supplement: Supplementary file 1640 [file 1]

## Dhx58

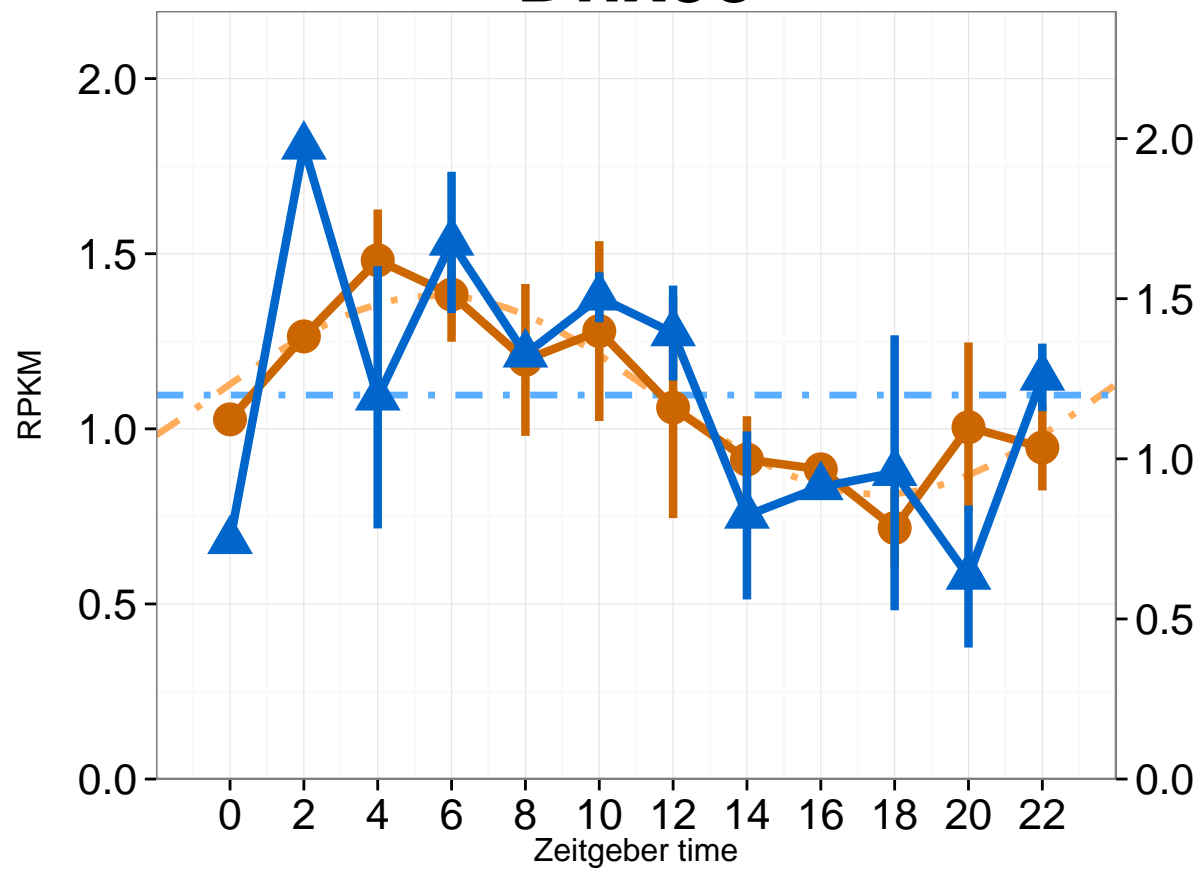

## Dhx58

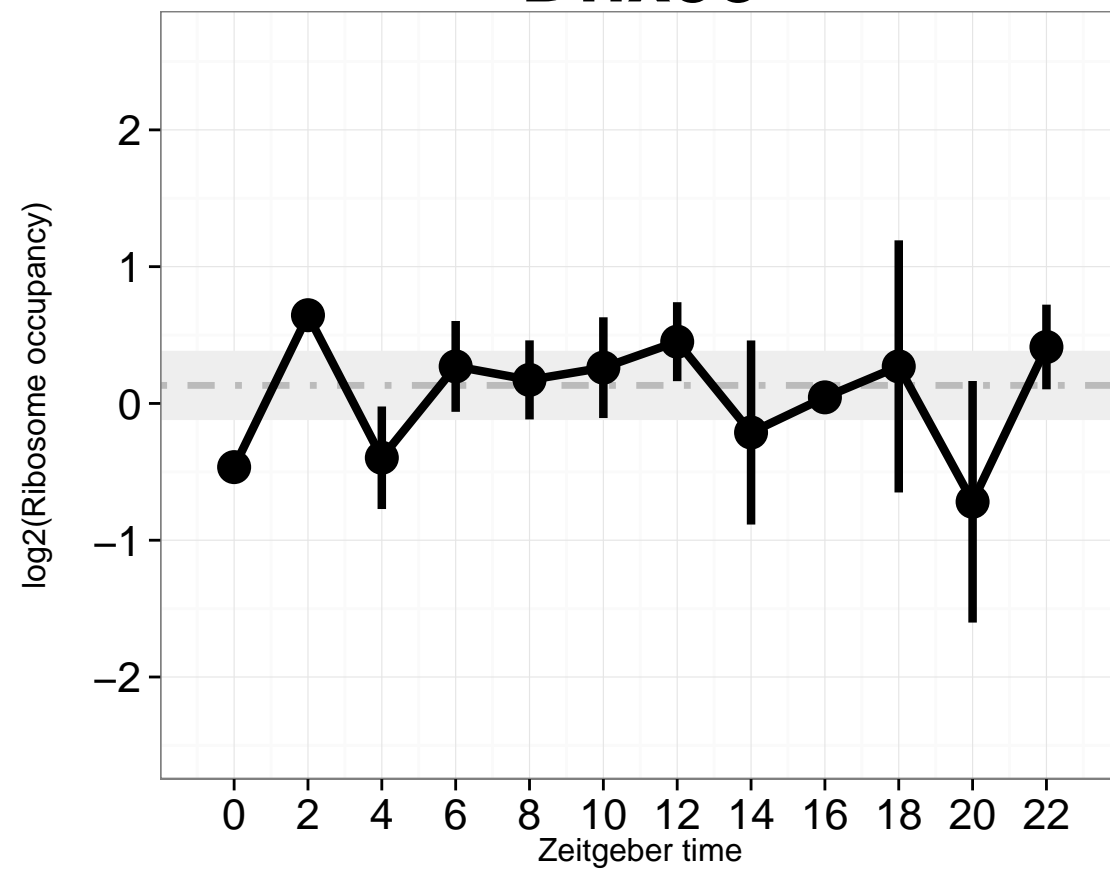

Supplement: Supplementary file 1641 [file 1]

# Mysm1

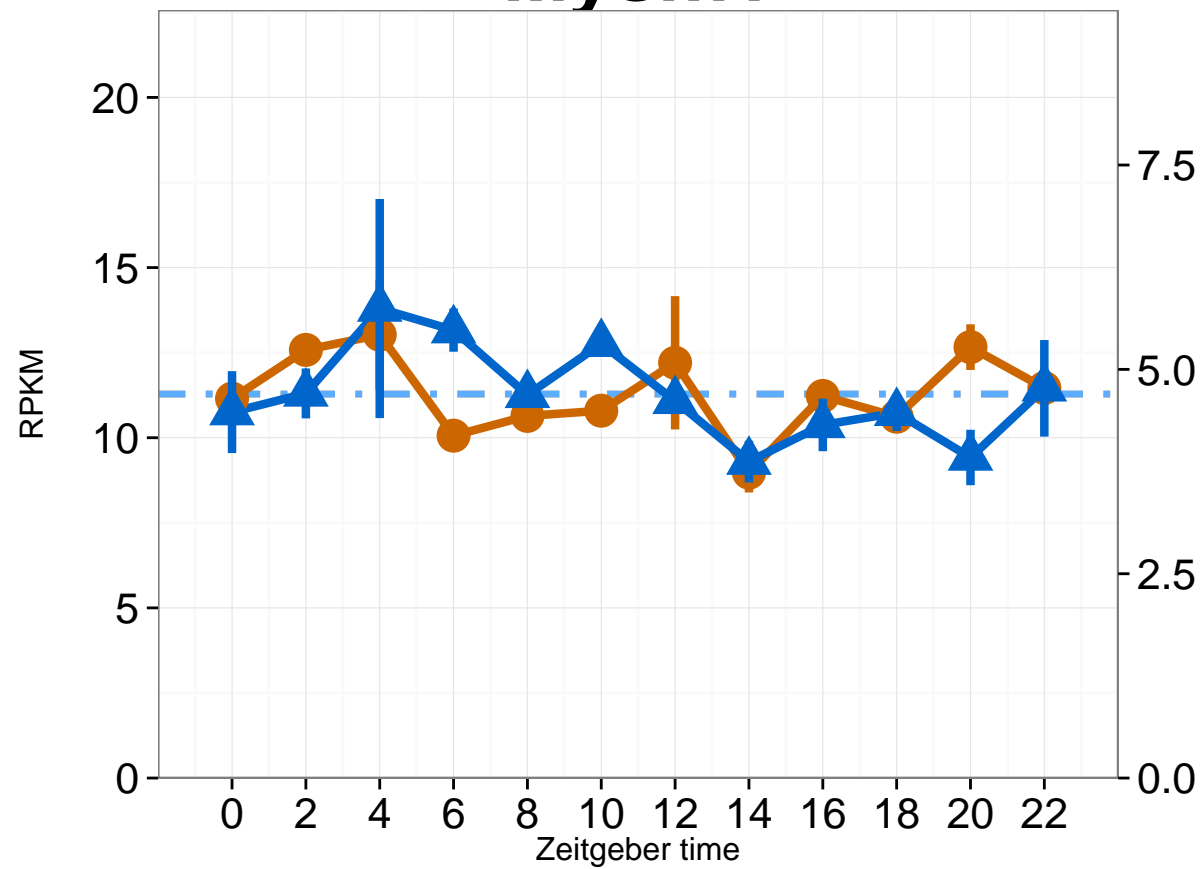

# Mysm1

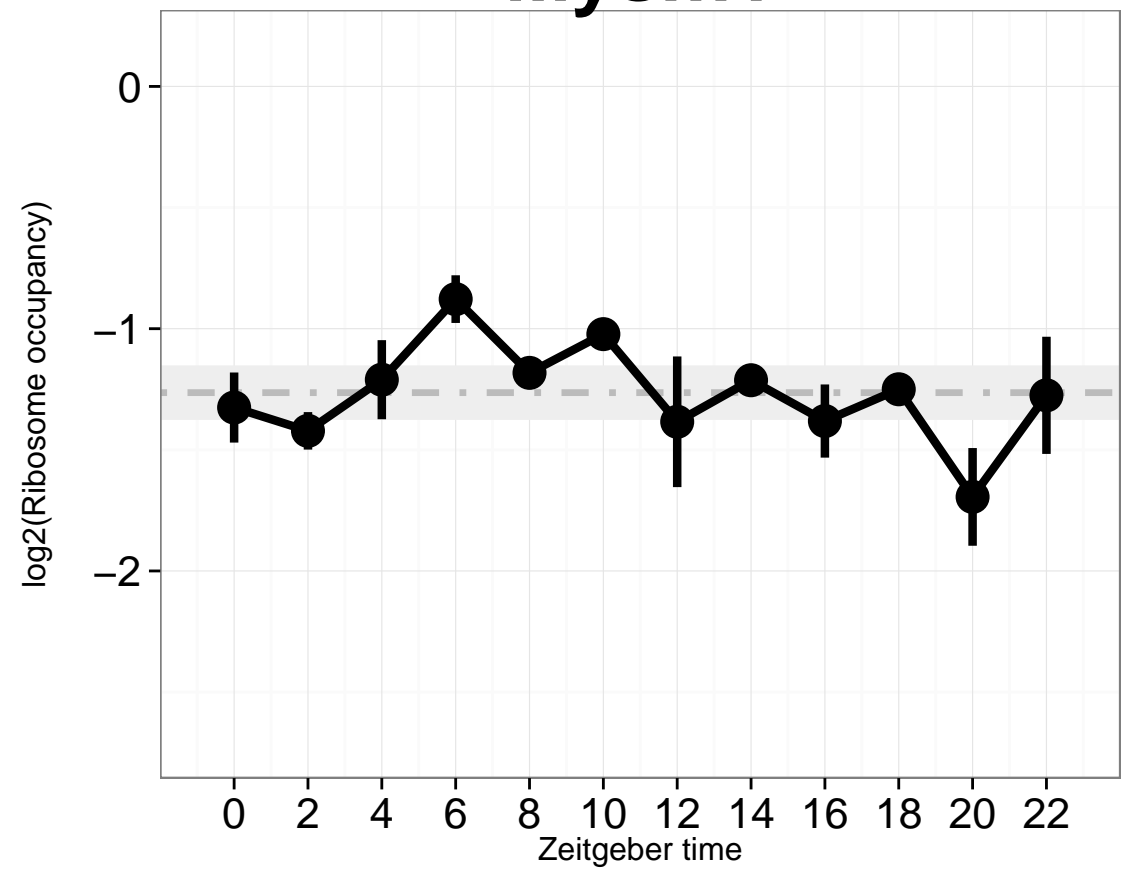

Supplement: Supplementary file 1642 [file 1]

# Dnajc6

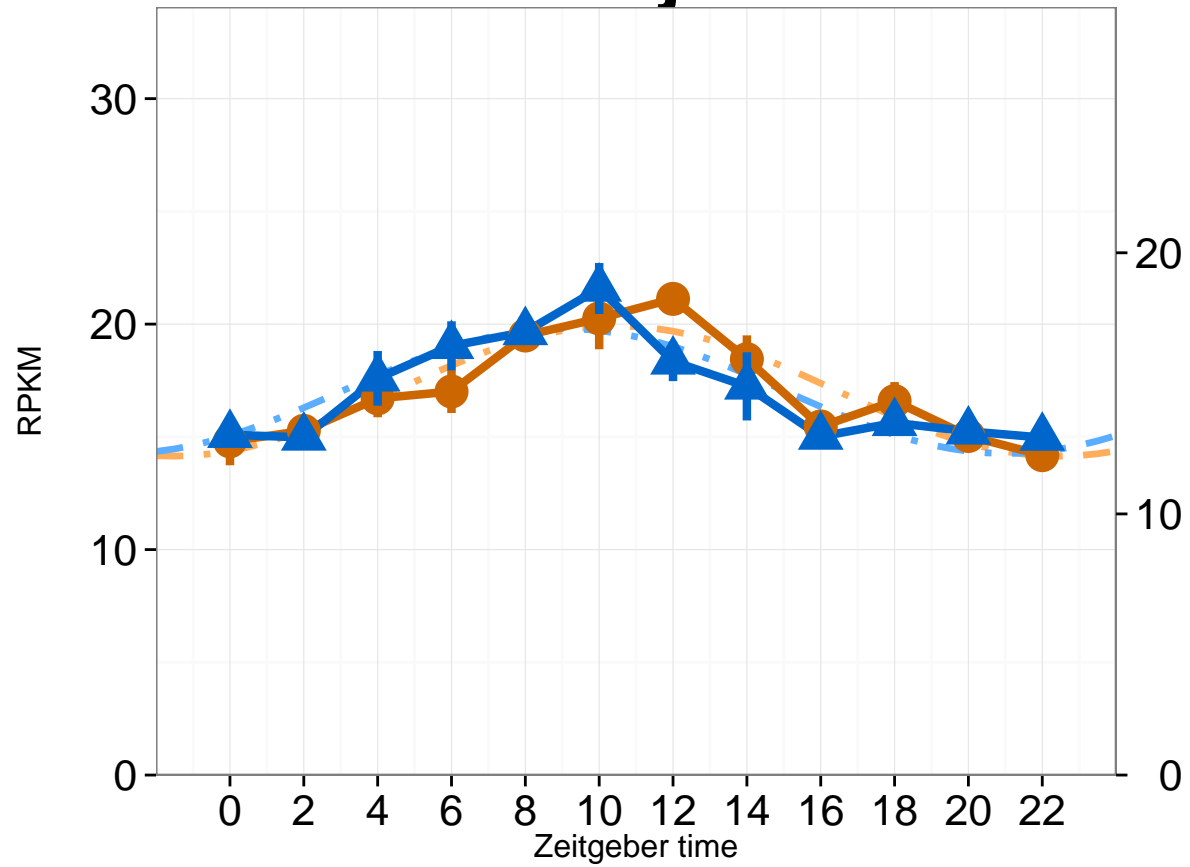

# Dnajc6

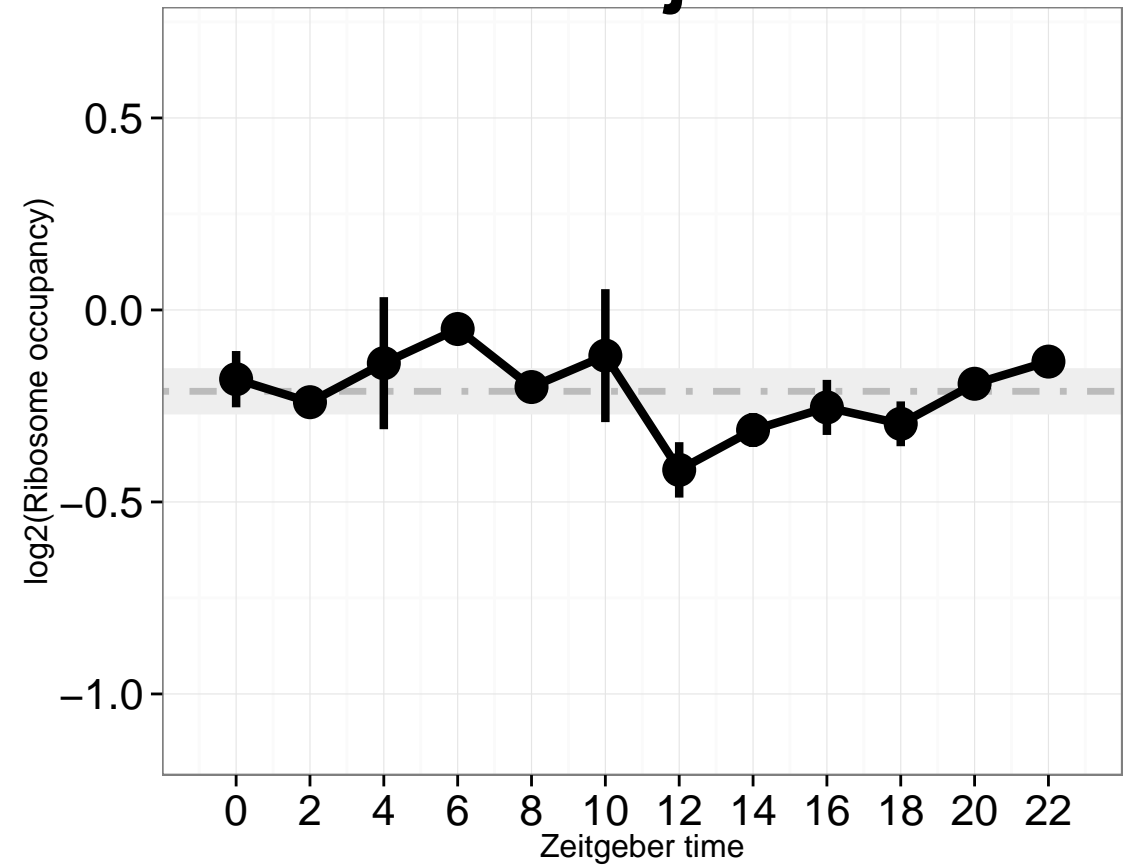

Supplement: Supplementary file 1643 [file 1]

# Trmt1

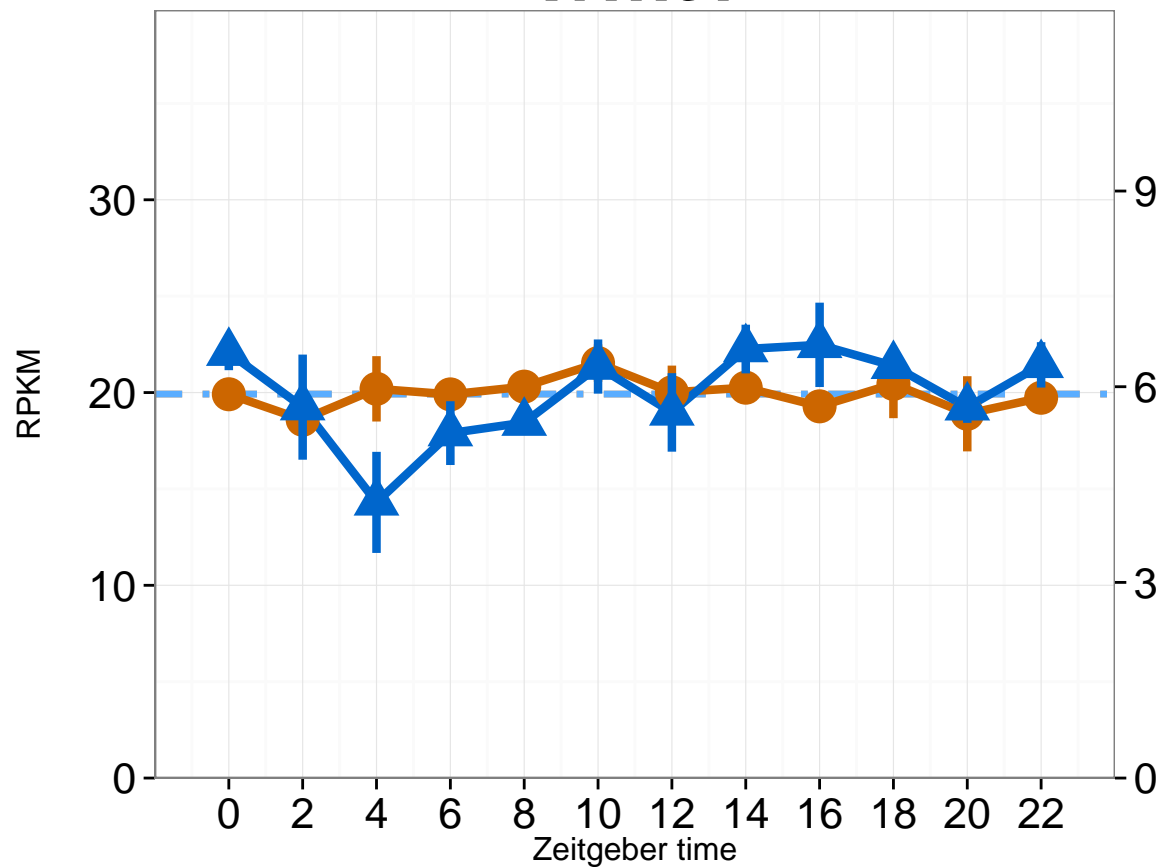

# Trmt1

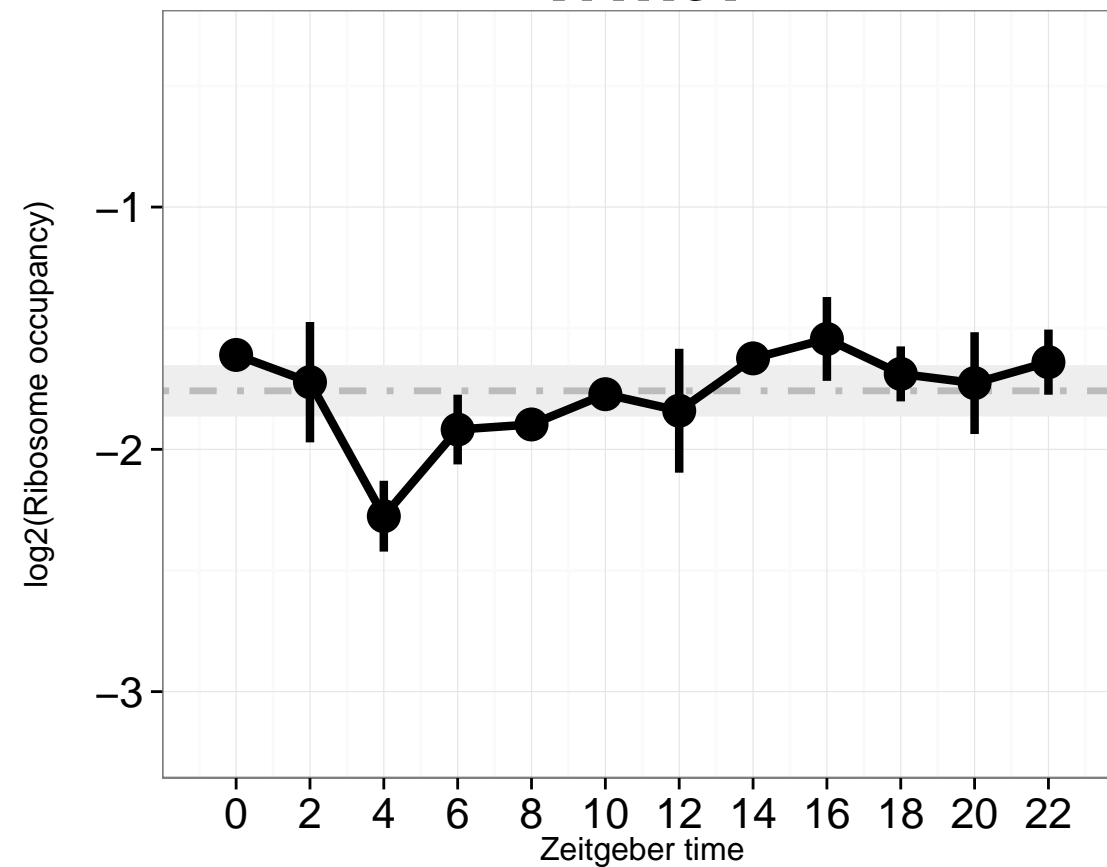

Supplement: Supplementary file 1644 [file 1]

## Ctcf

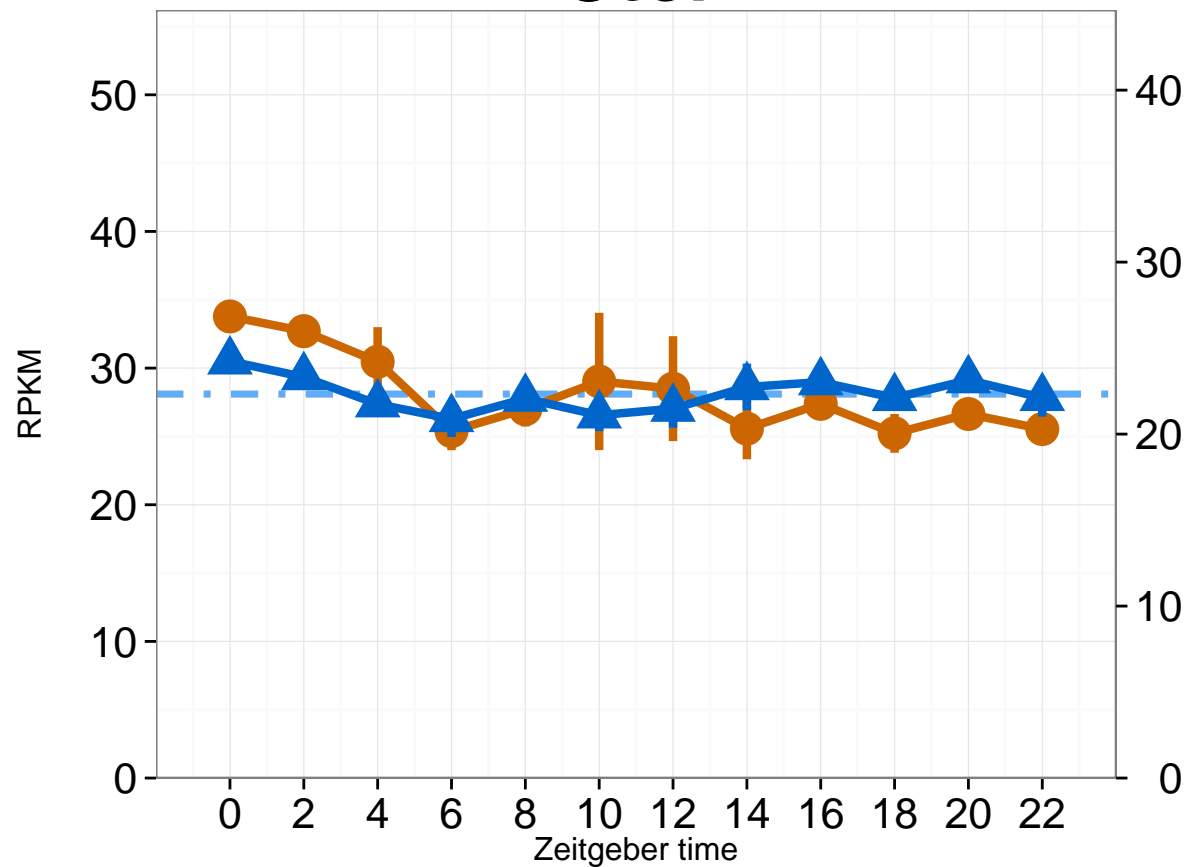

## Ctcf

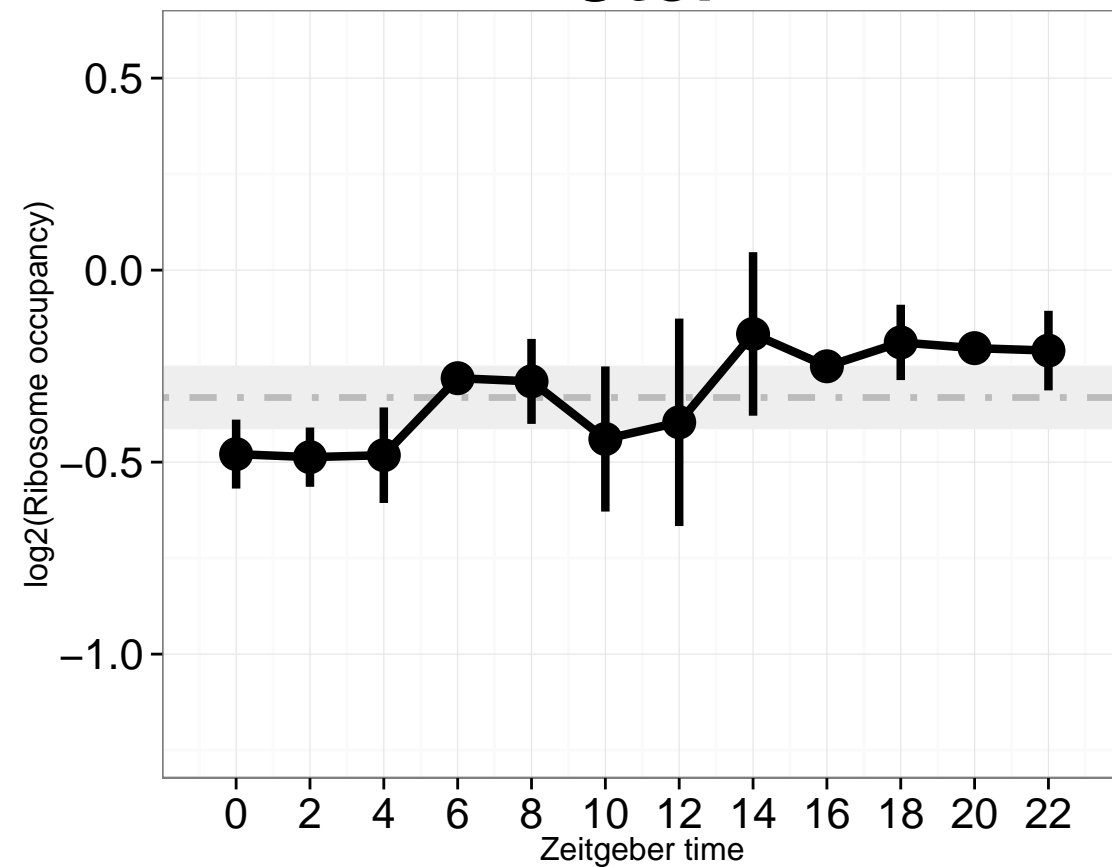

Supplement: Supplementary file 1645 [file 1]

## Fkbpl

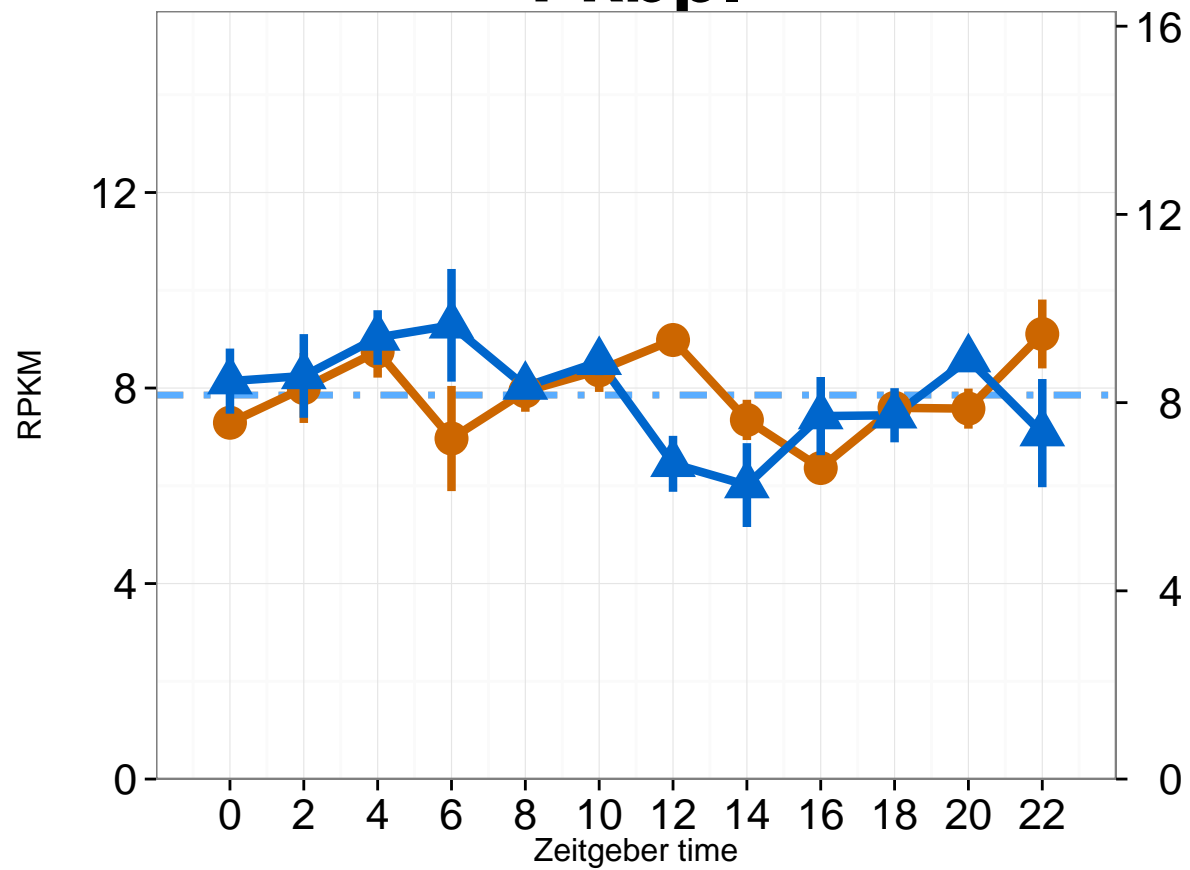

## Fkbpl

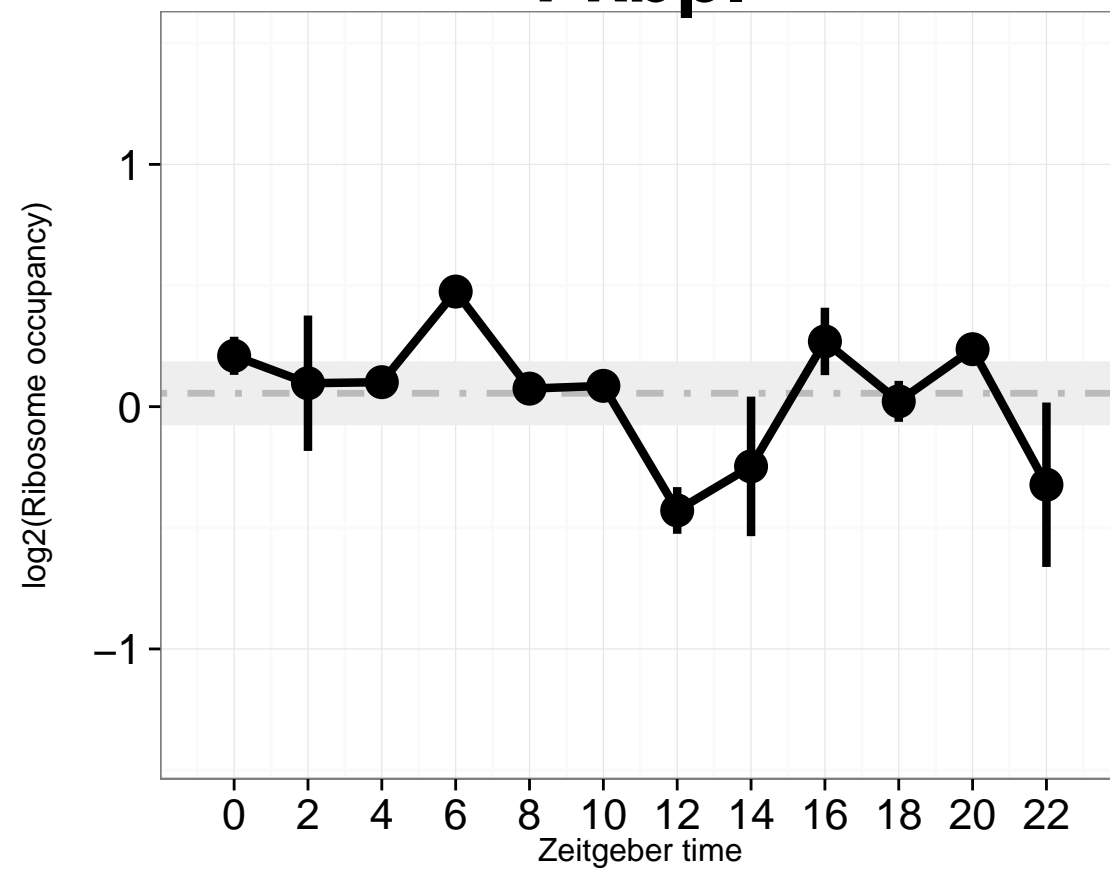

Supplement: Supplementary file 1646 [file 1]

## Des

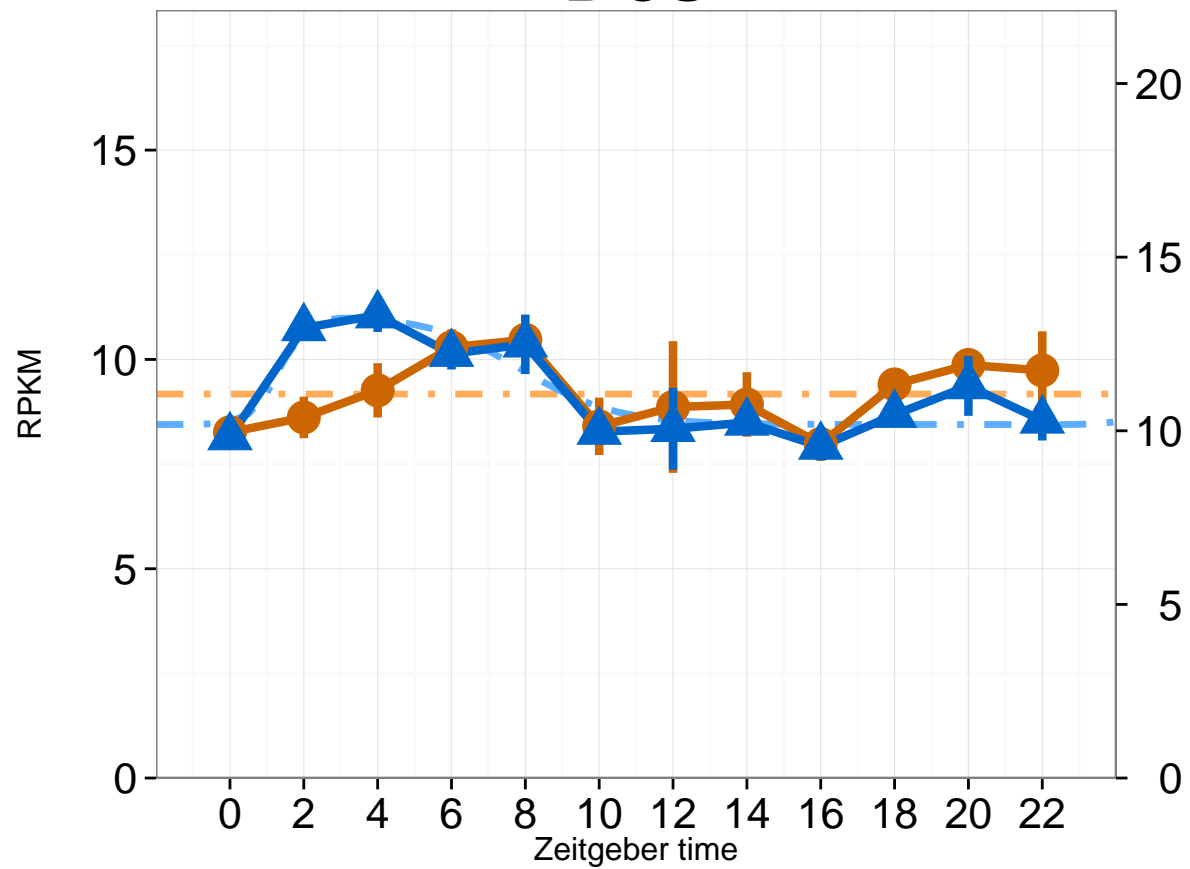

## Des

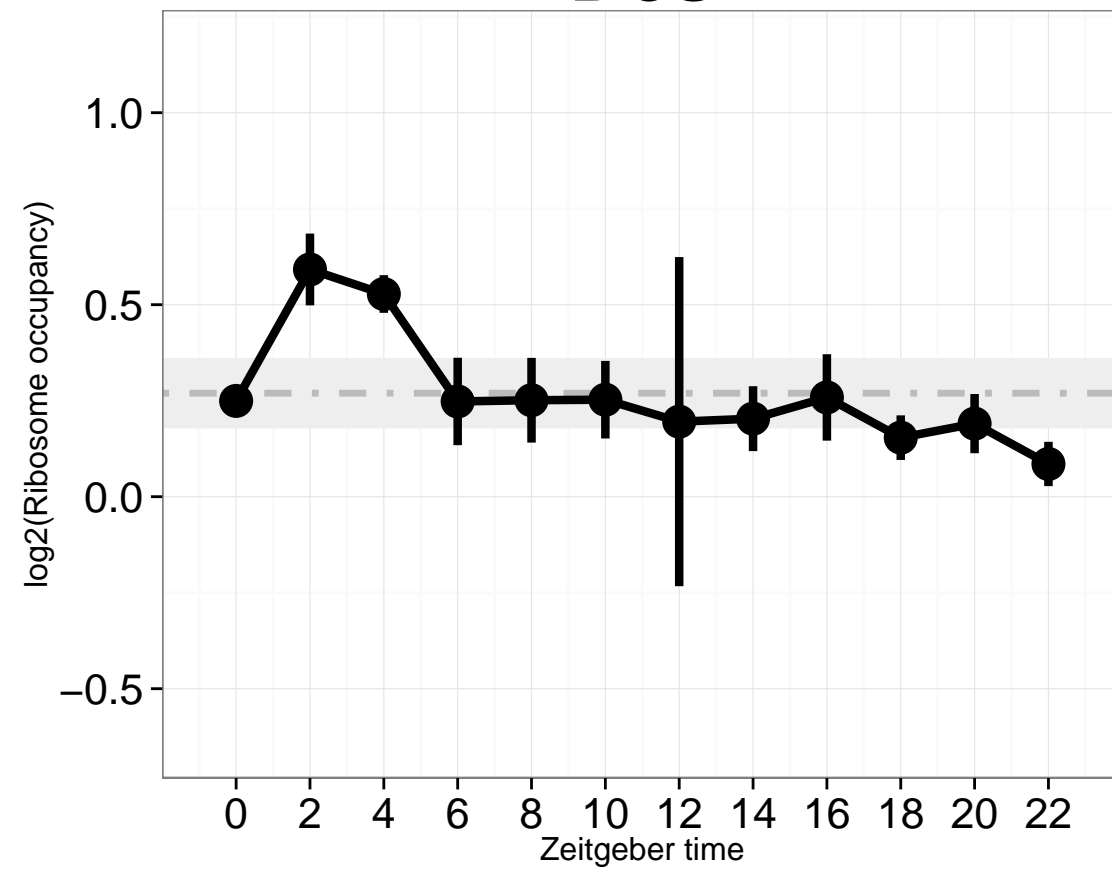

Supplement: Supplementary file 1647 [file 1]

# Rhobtb3

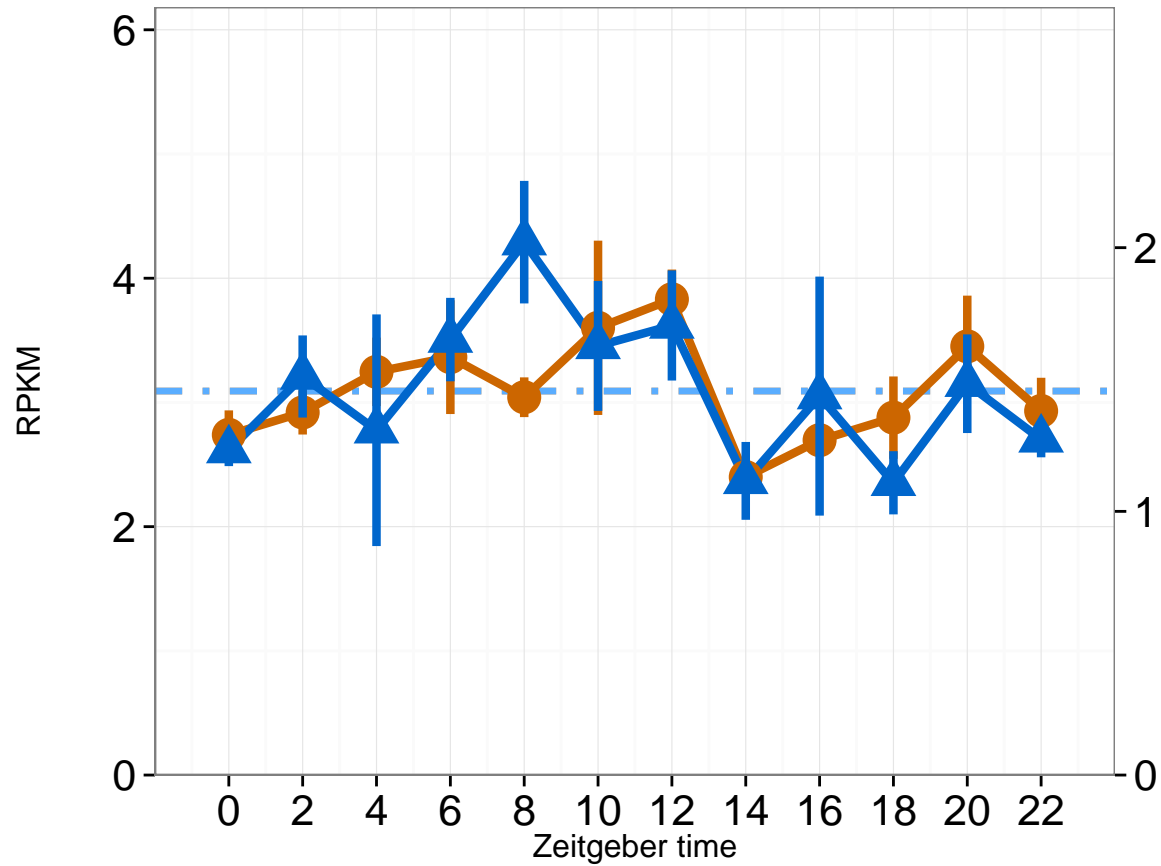

# Rhobtb3

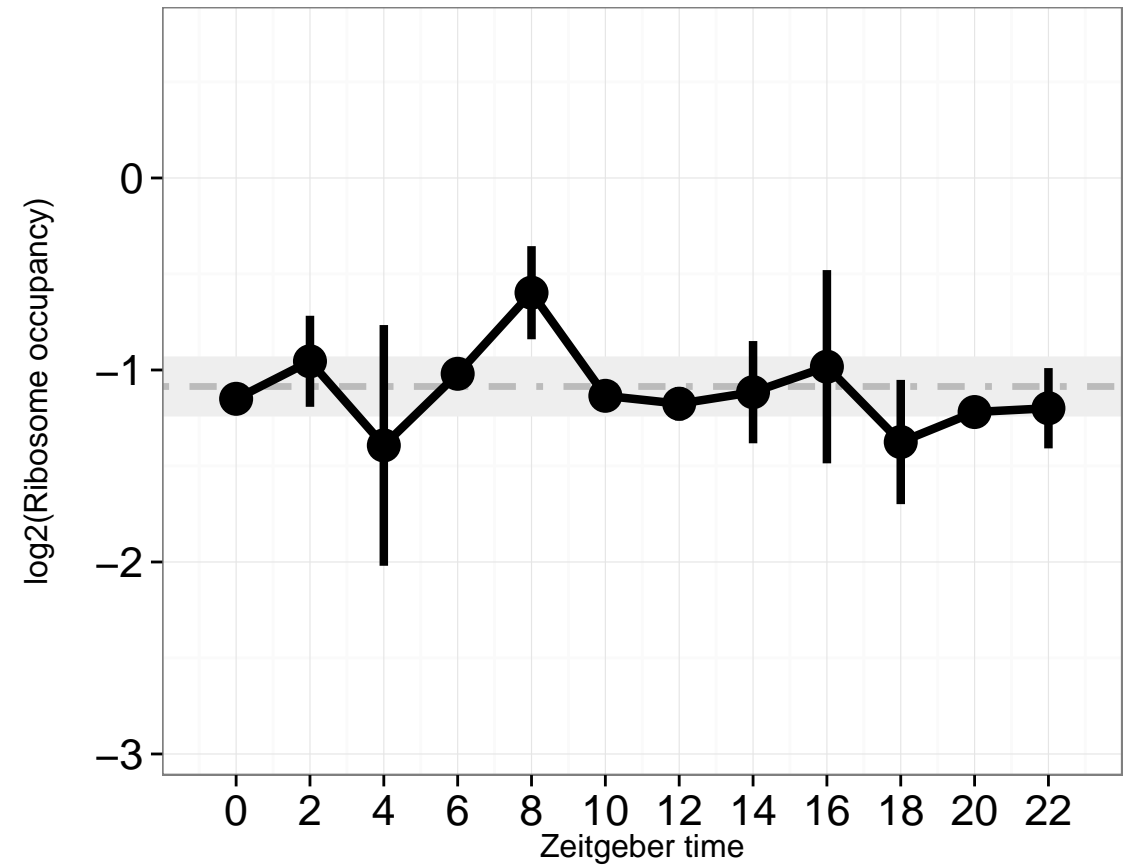

Supplement: Supplementary file 1648 [file 1]

# Smdt1

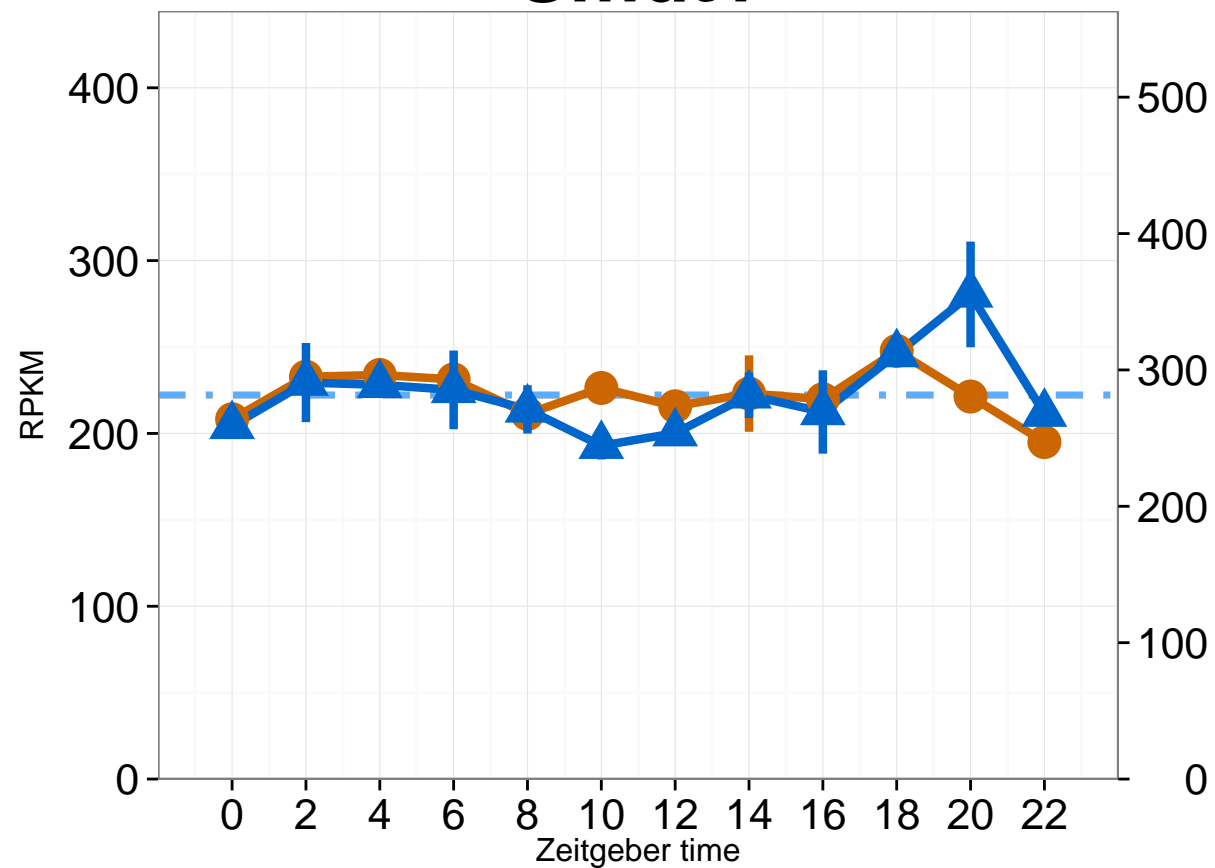

# Smdt1

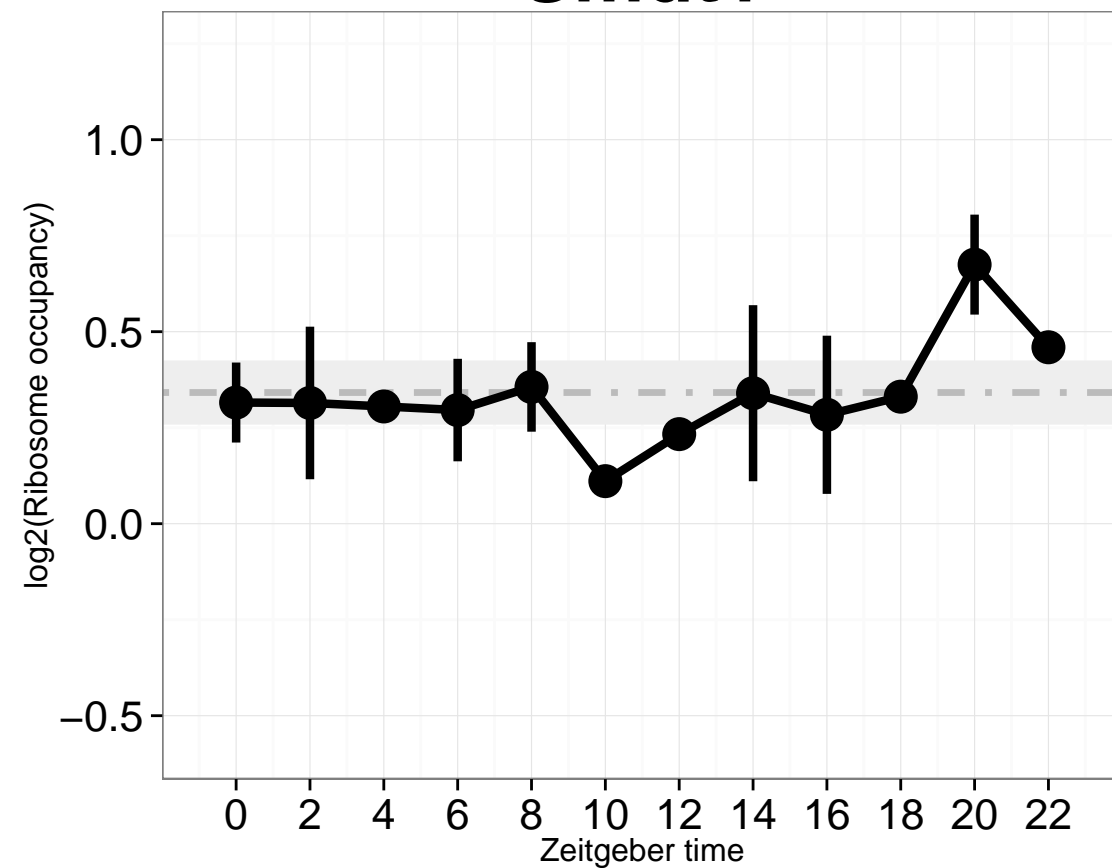

Supplement: Supplementary file 1649 [file 1]

# Pwp2

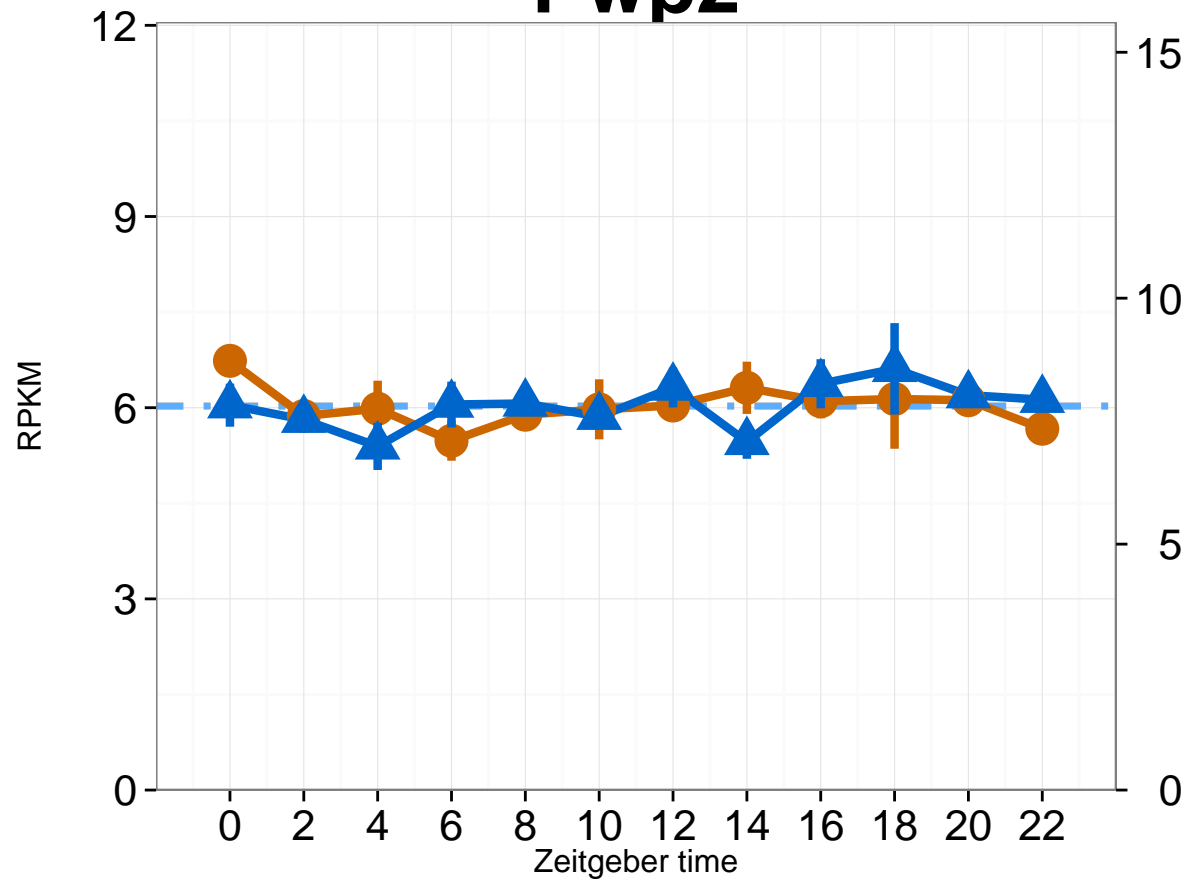

# Pwp2

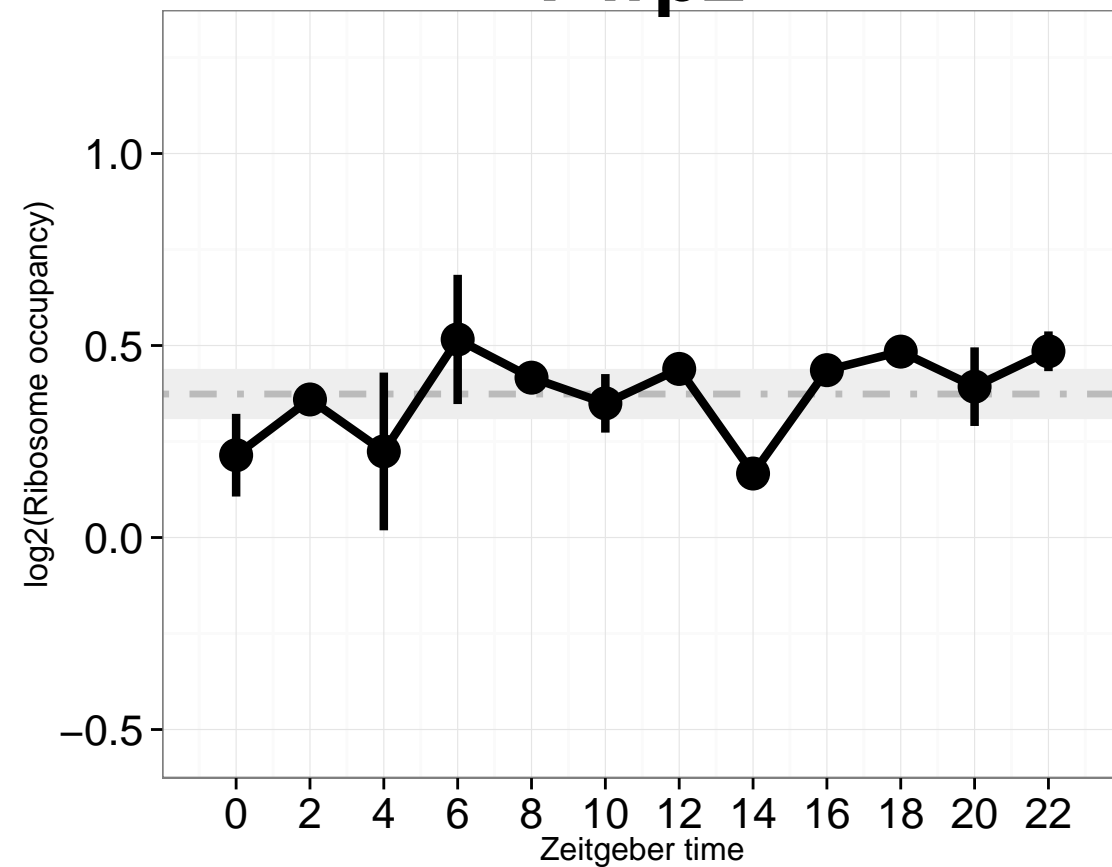

Supplement: Supplementary file 1650 [file 1]

# Acnat1

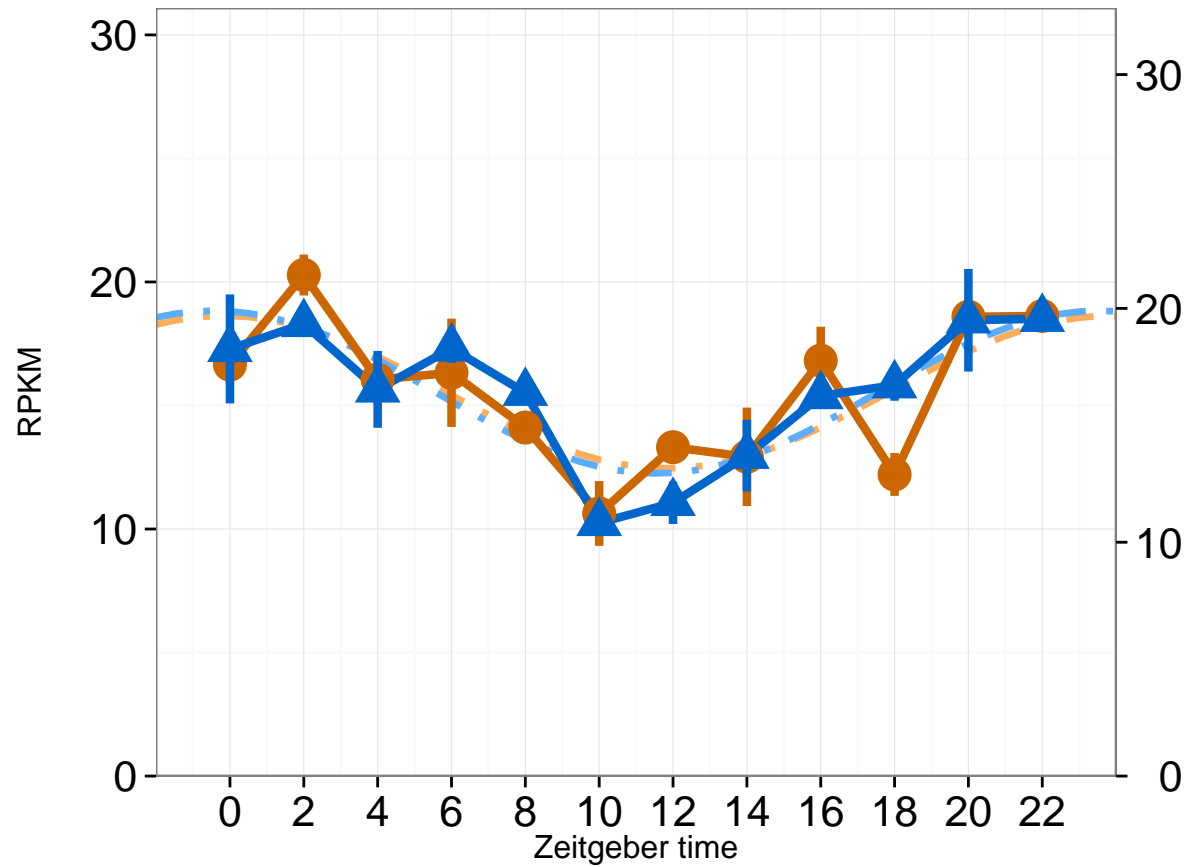

# Acnat1

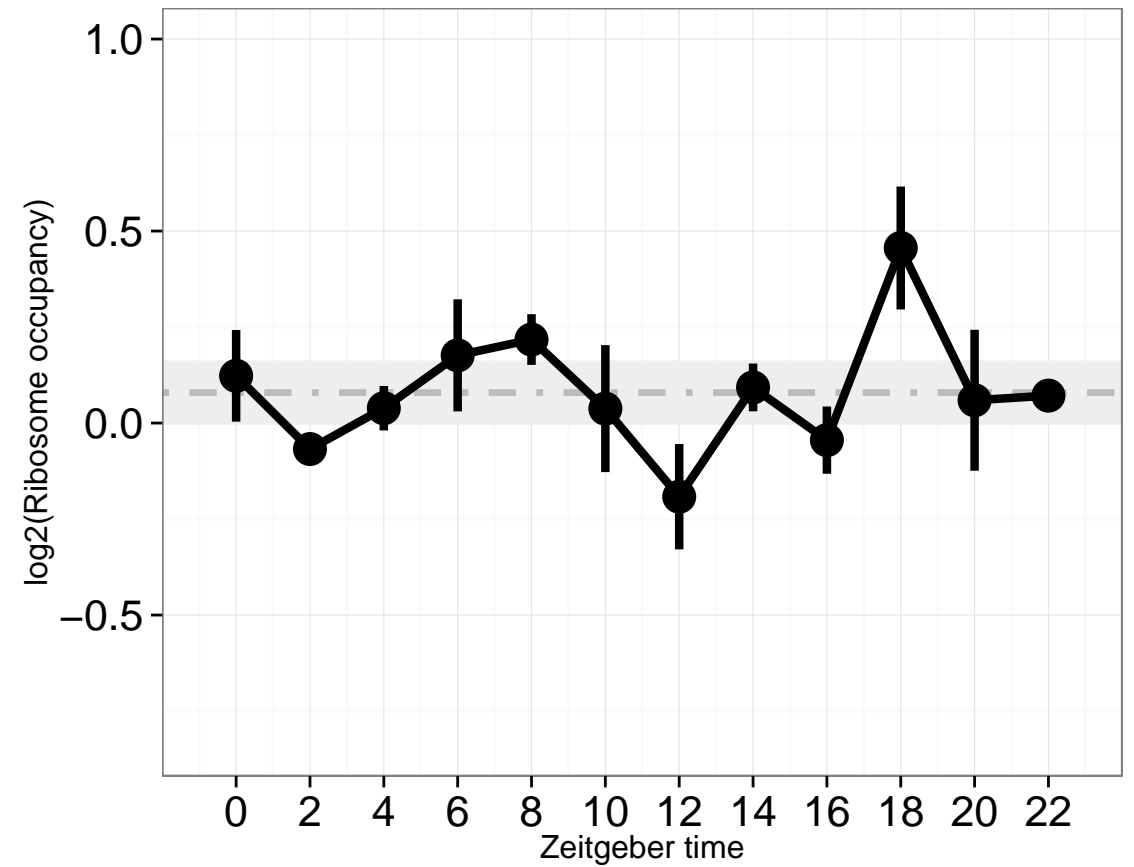

Supplement: Supplementary file 1651 [file 1]

## Fkbp5

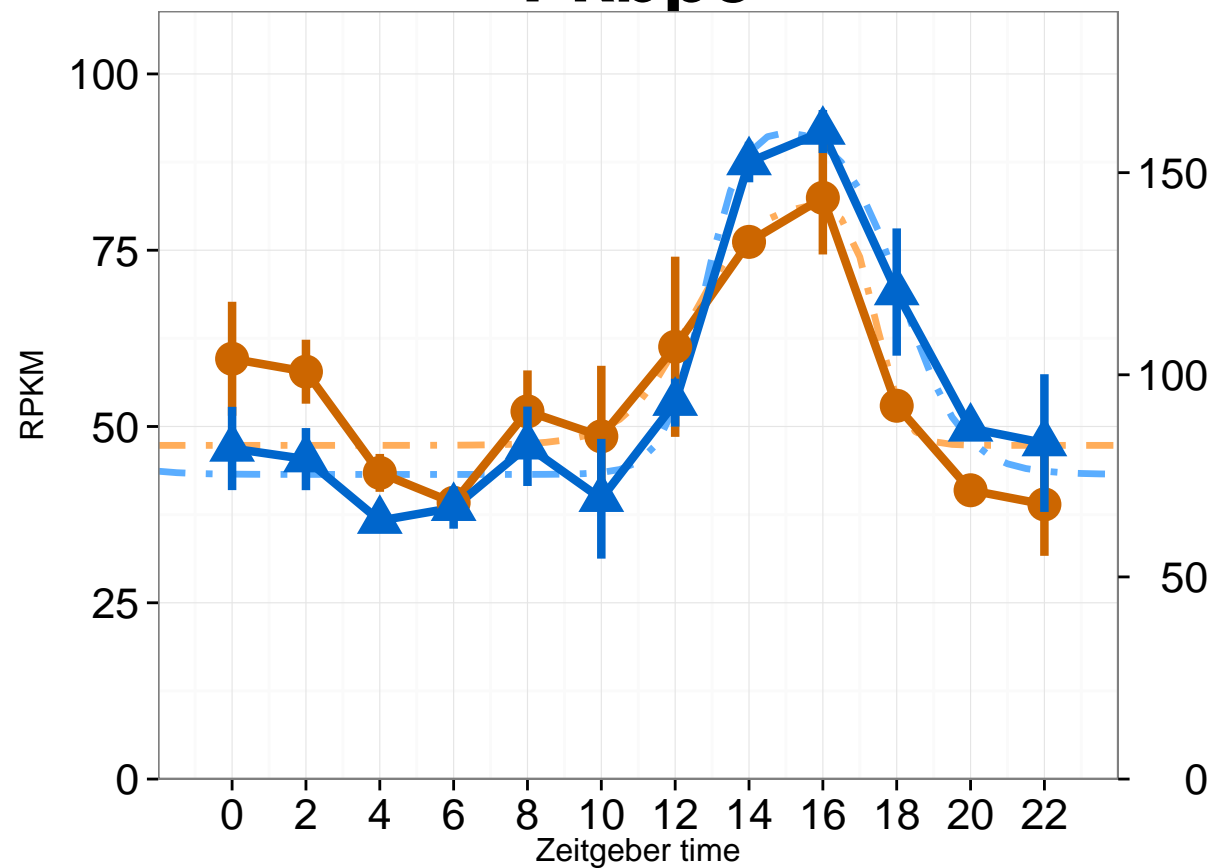

## Fkbp5

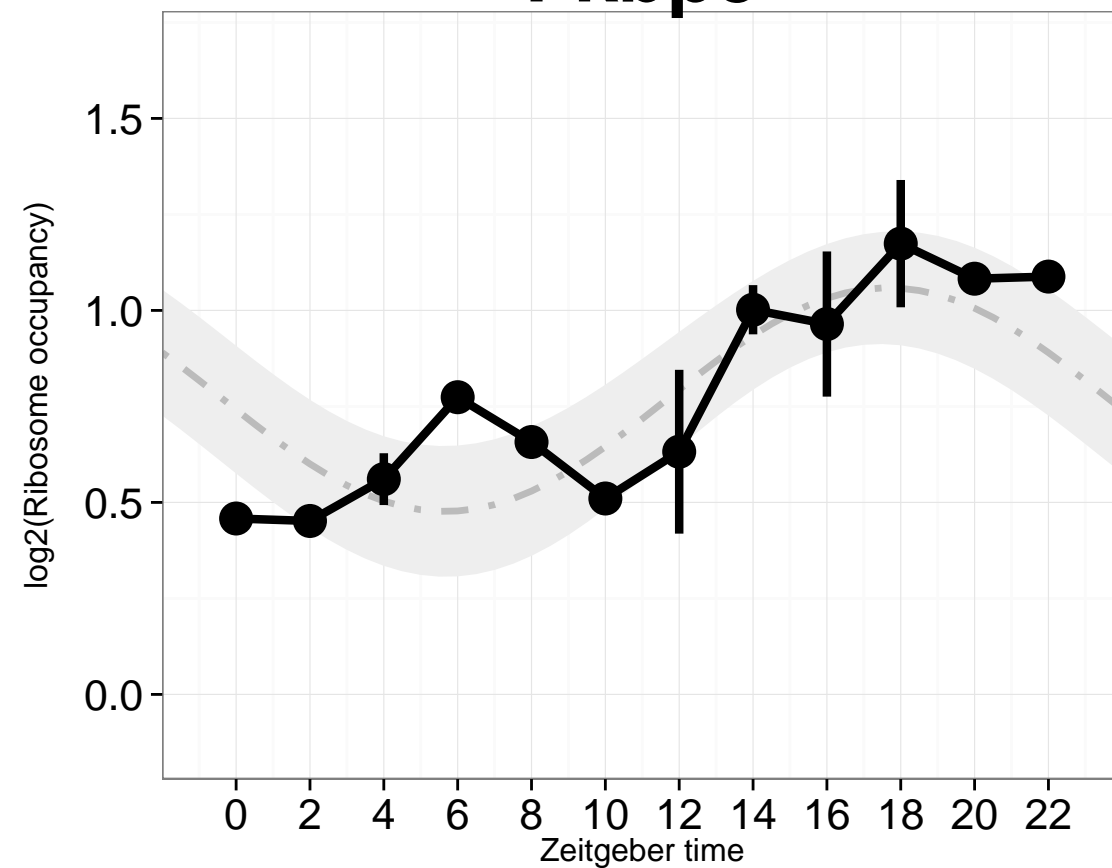

Supplement: Supplementary file 1652 [file 1]

# Trpm7

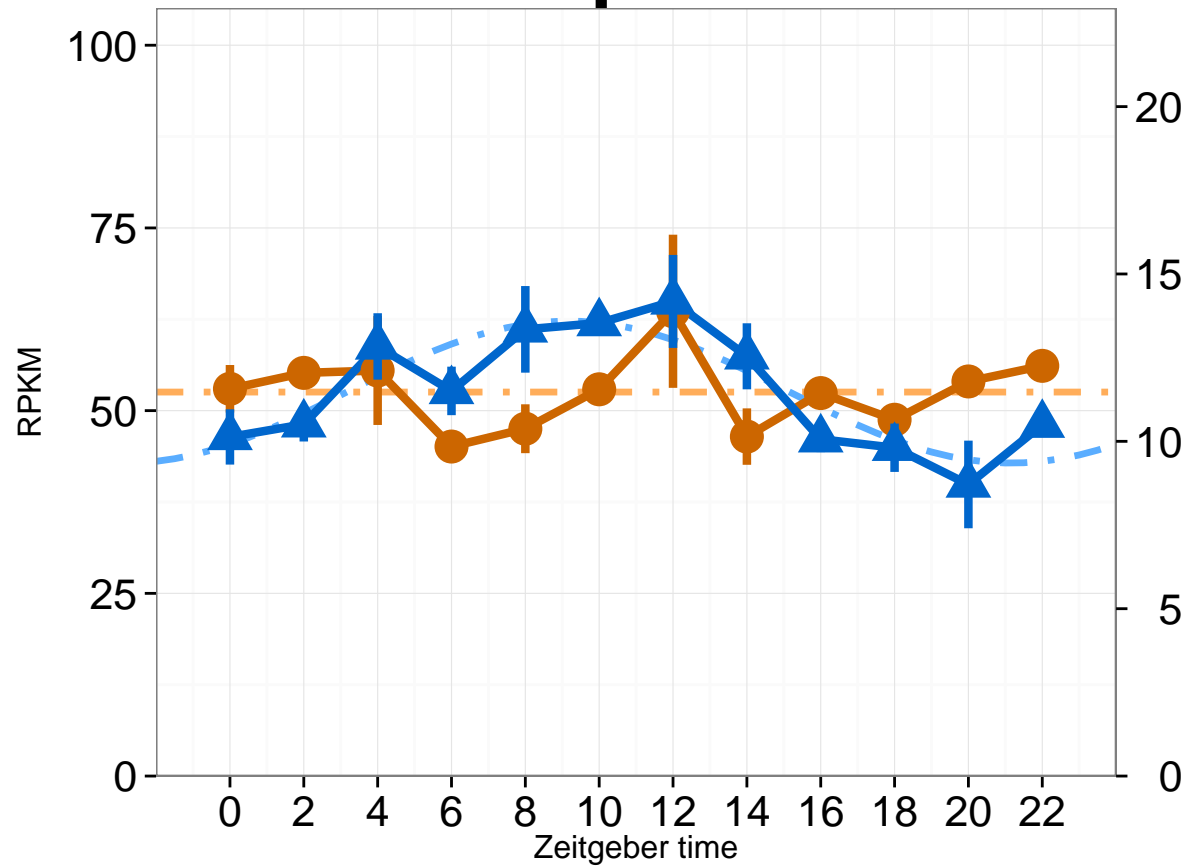

# Trpm7

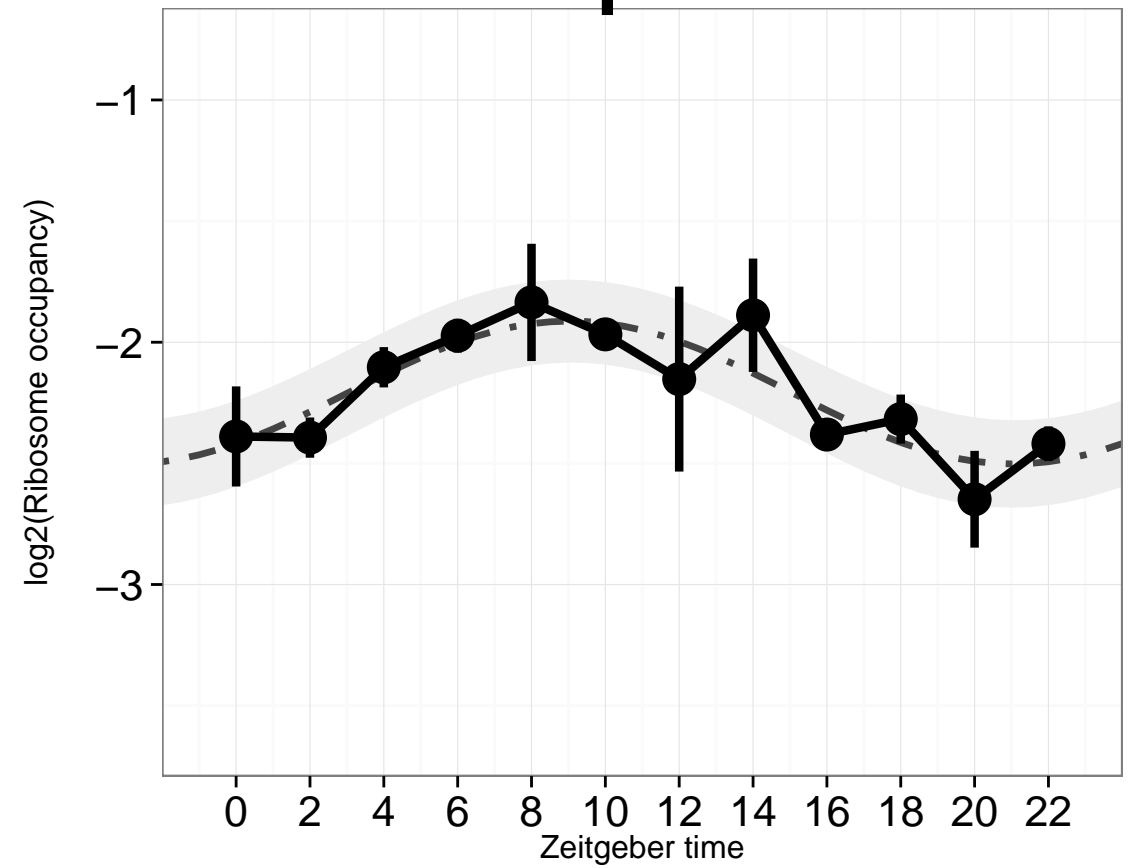

Supplement: Supplementary file 1653 [file 1]

# Zfp626

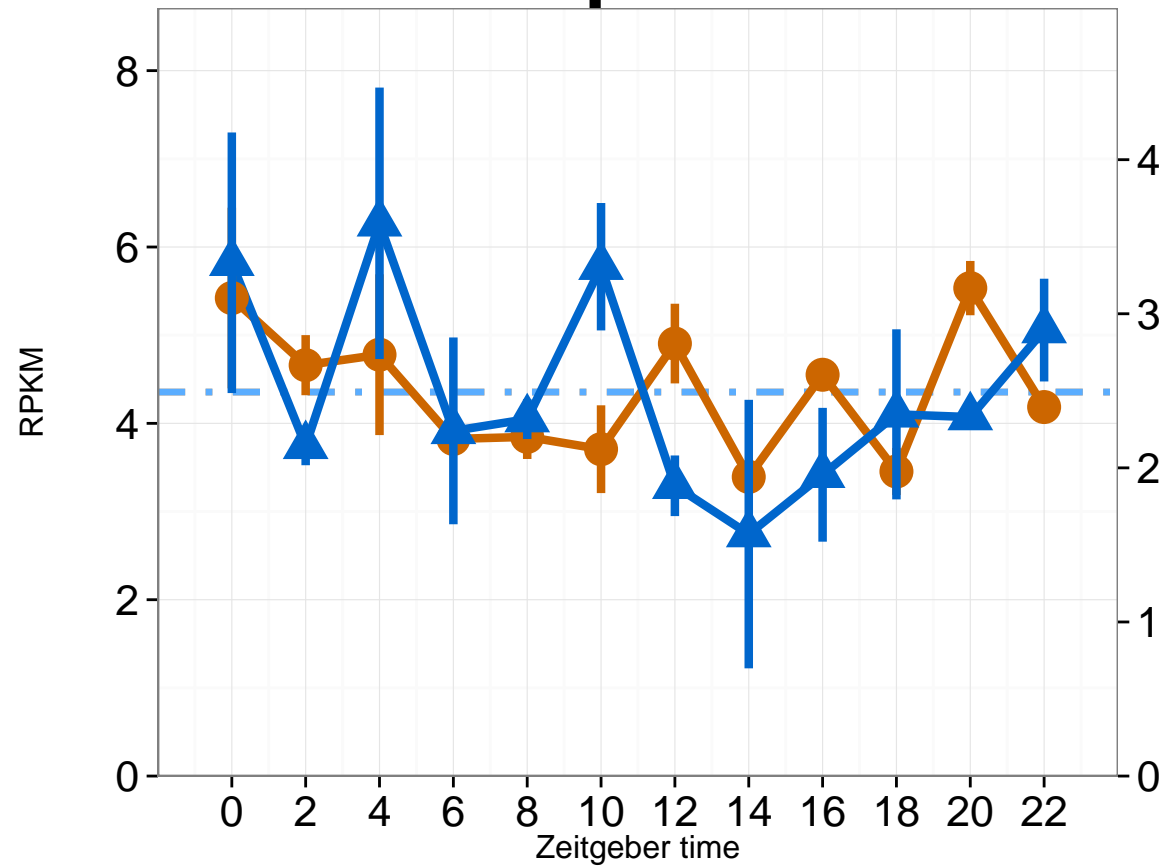

# Zfp626

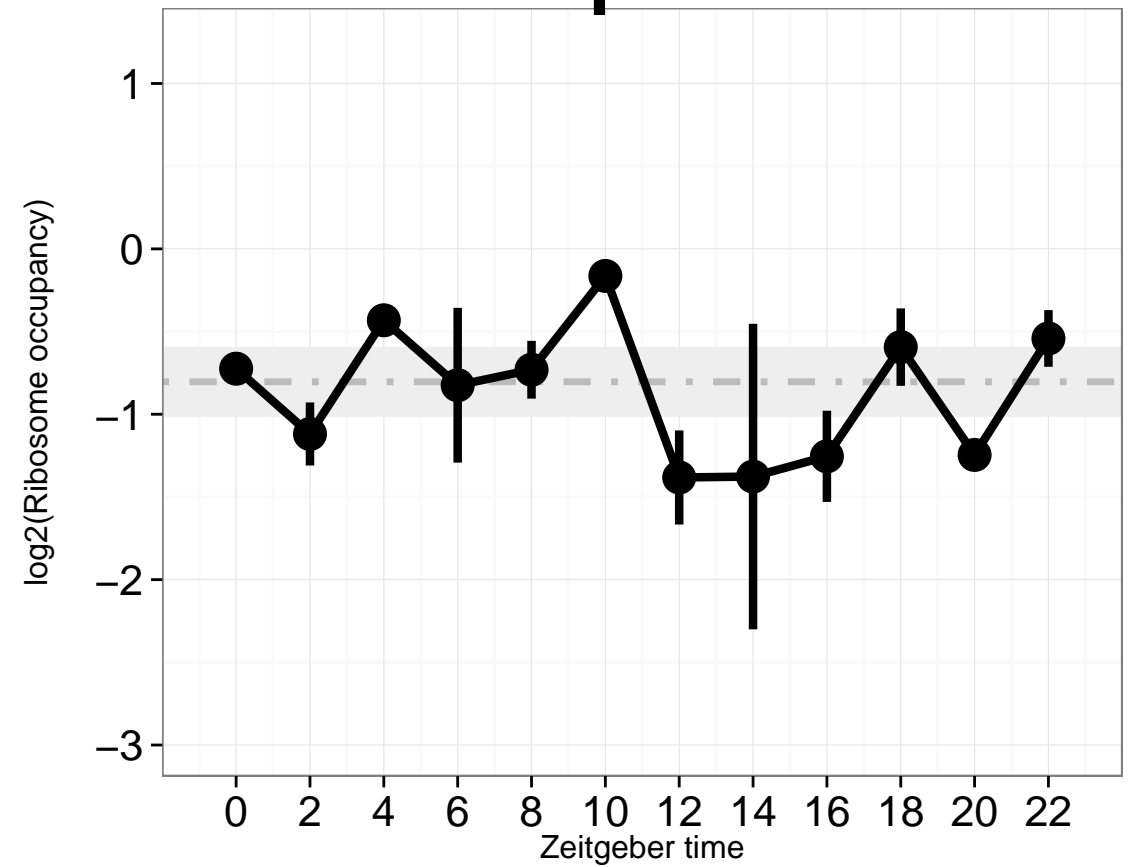

Supplement: Supplementary file 1654 [file 1]

# Prkab1

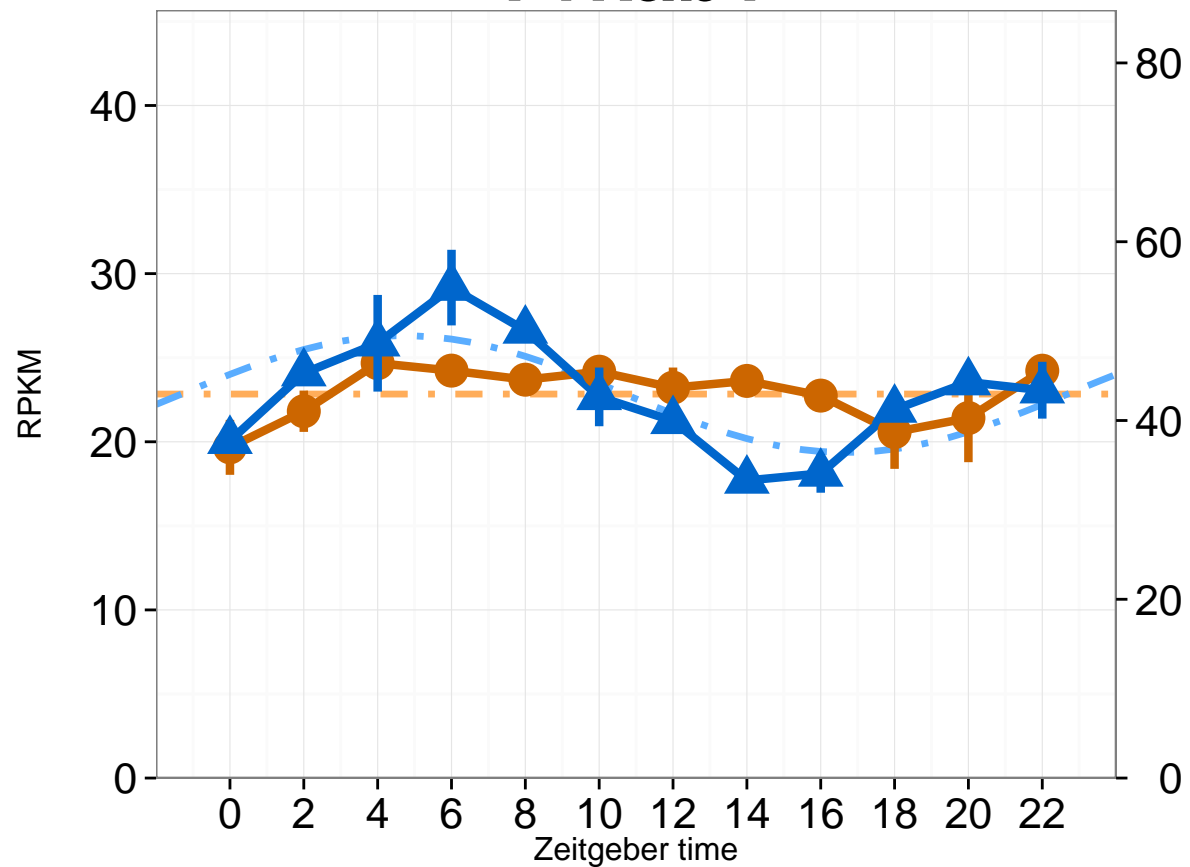

# Prkab1

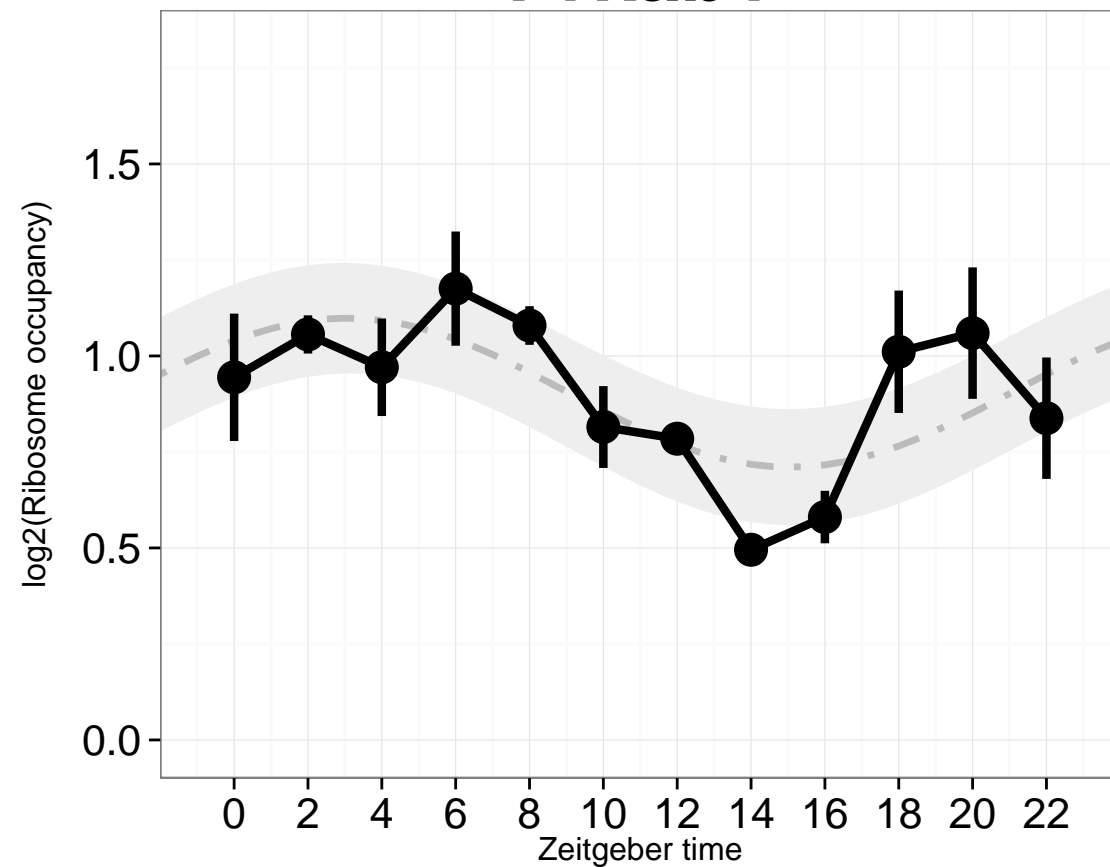

Supplement: Supplementary file 1655 [file 1]

## Siae

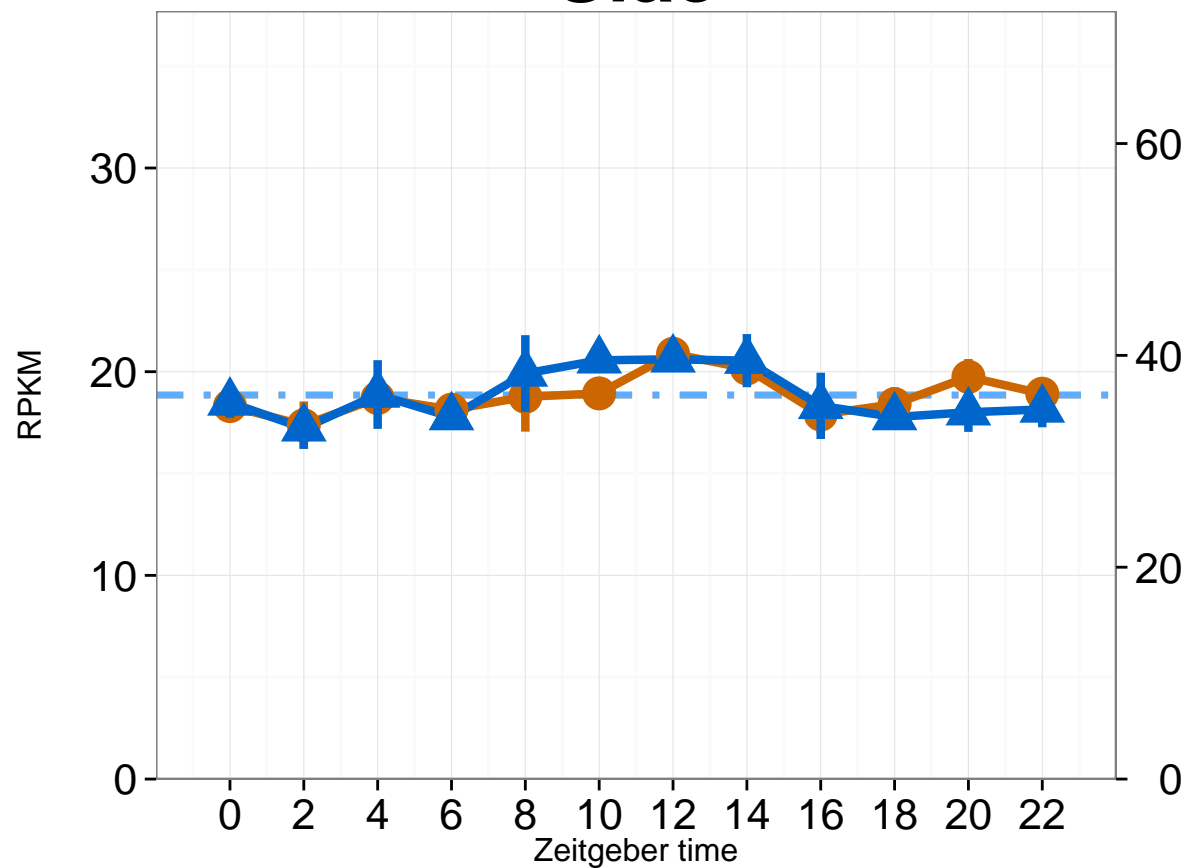

## Siae

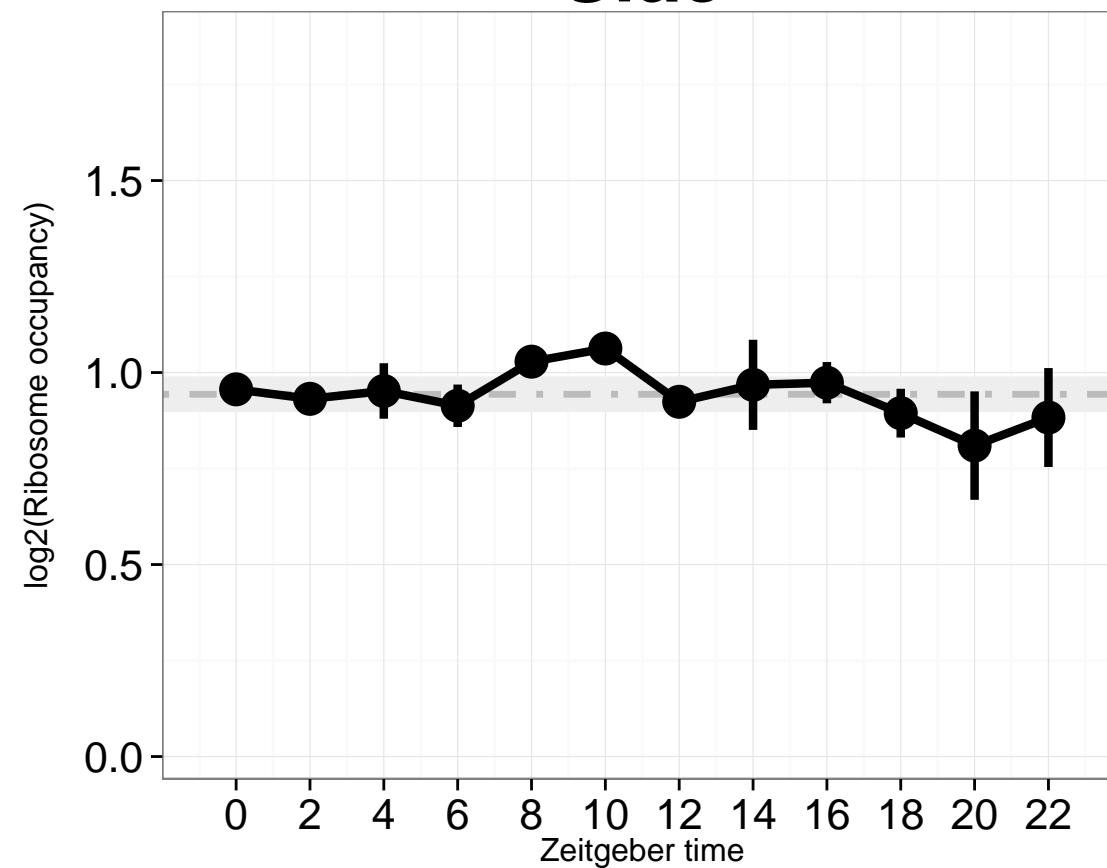

Supplement: Supplementary file 1656 [file 1]

## Rpusd3

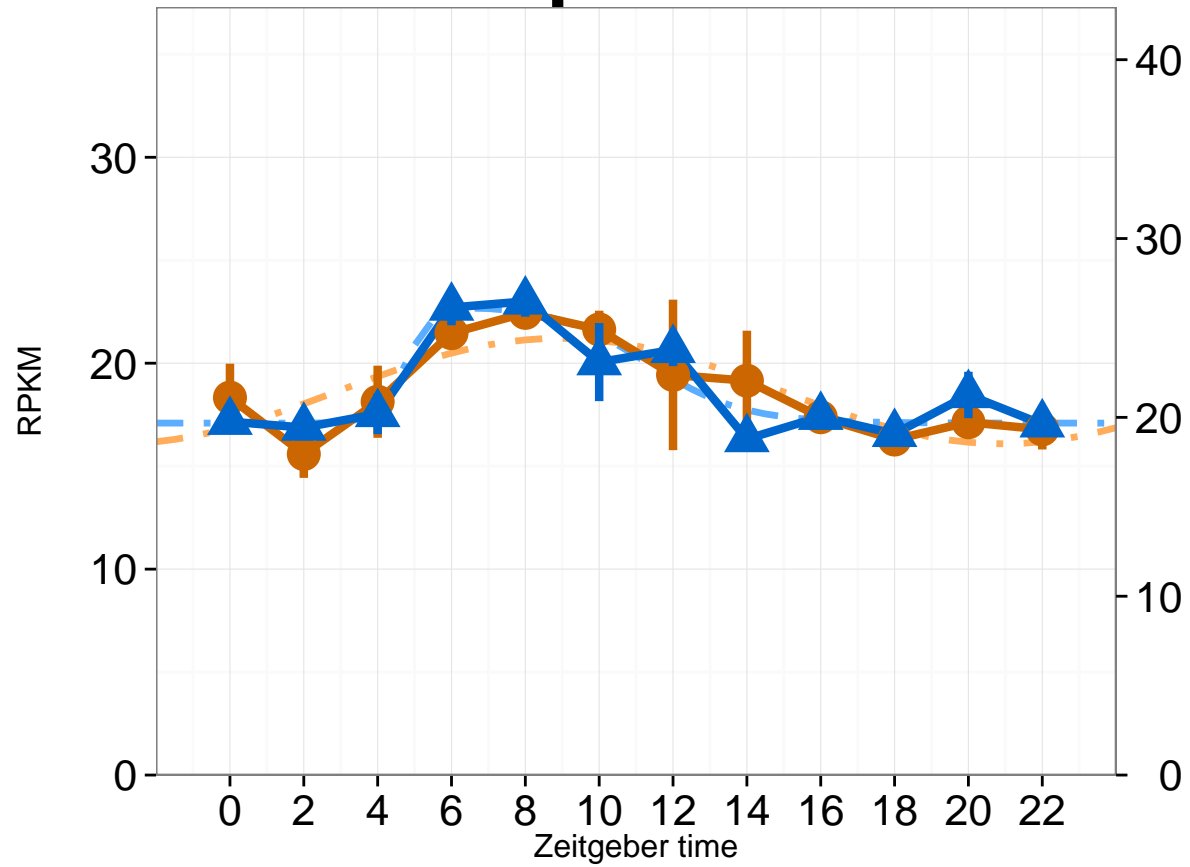

## Rpusd3

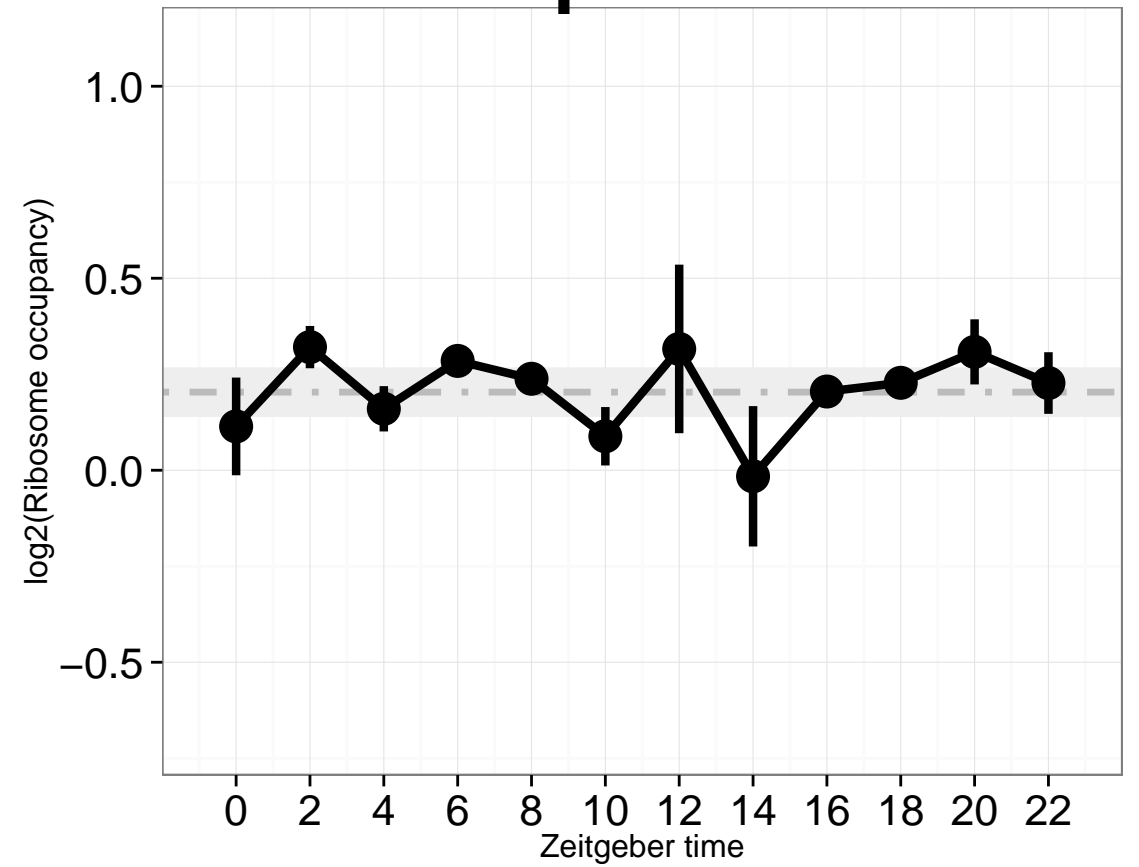

Supplement: Supplementary file 1657 [file 1]

## Hdac7

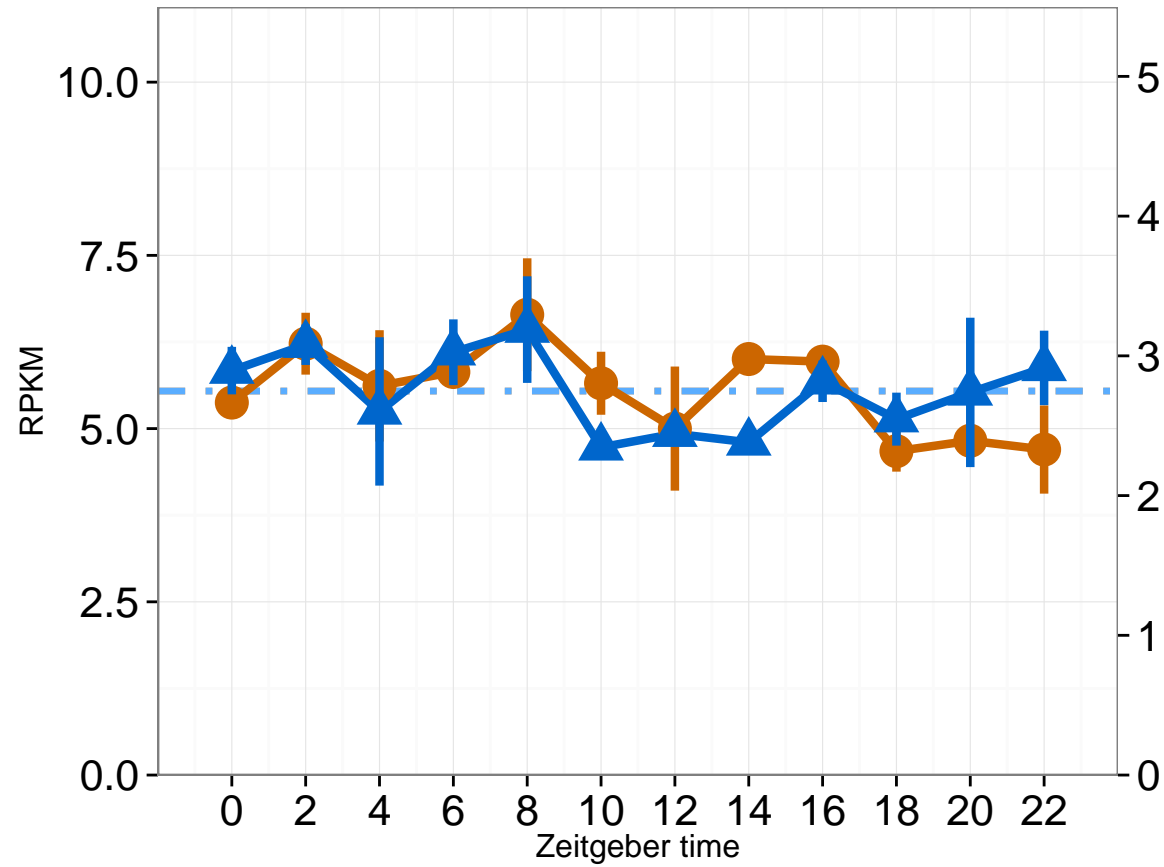

## Hdac7

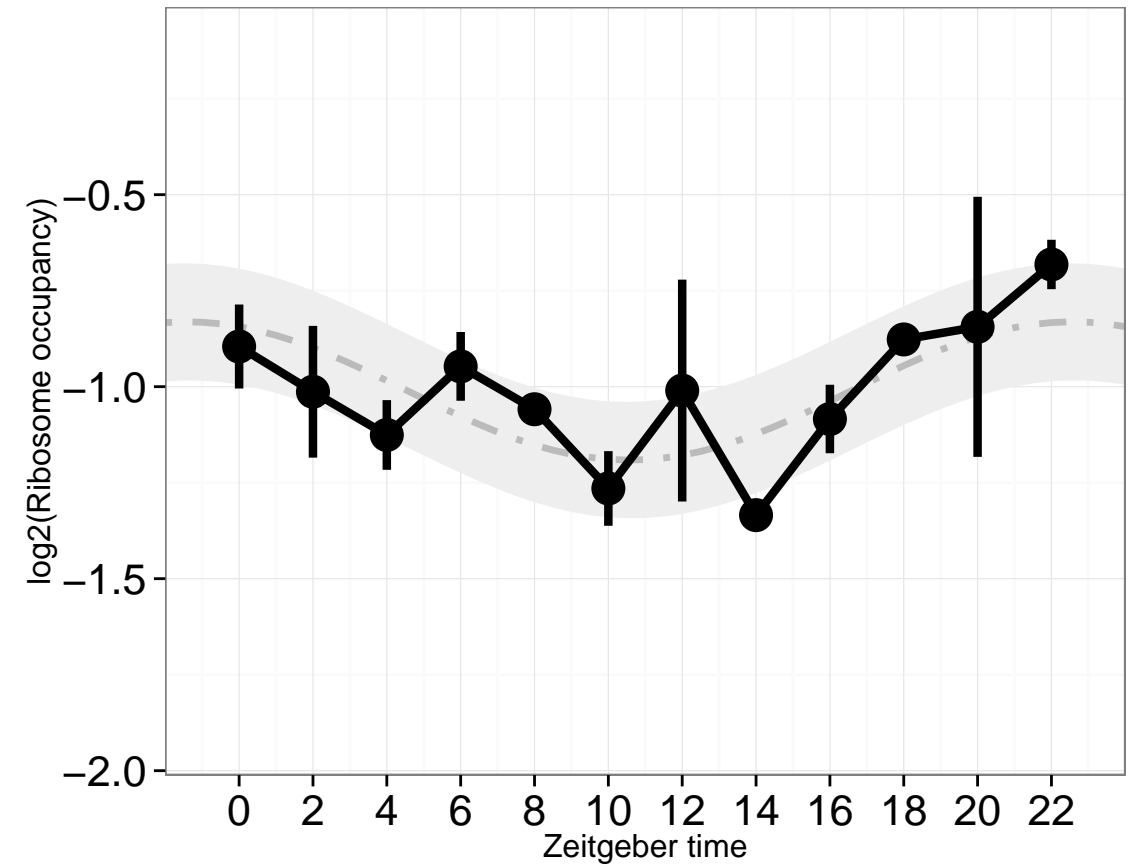

Supplement: Supplementary file 1658 [file 1]

# Hist1h4b

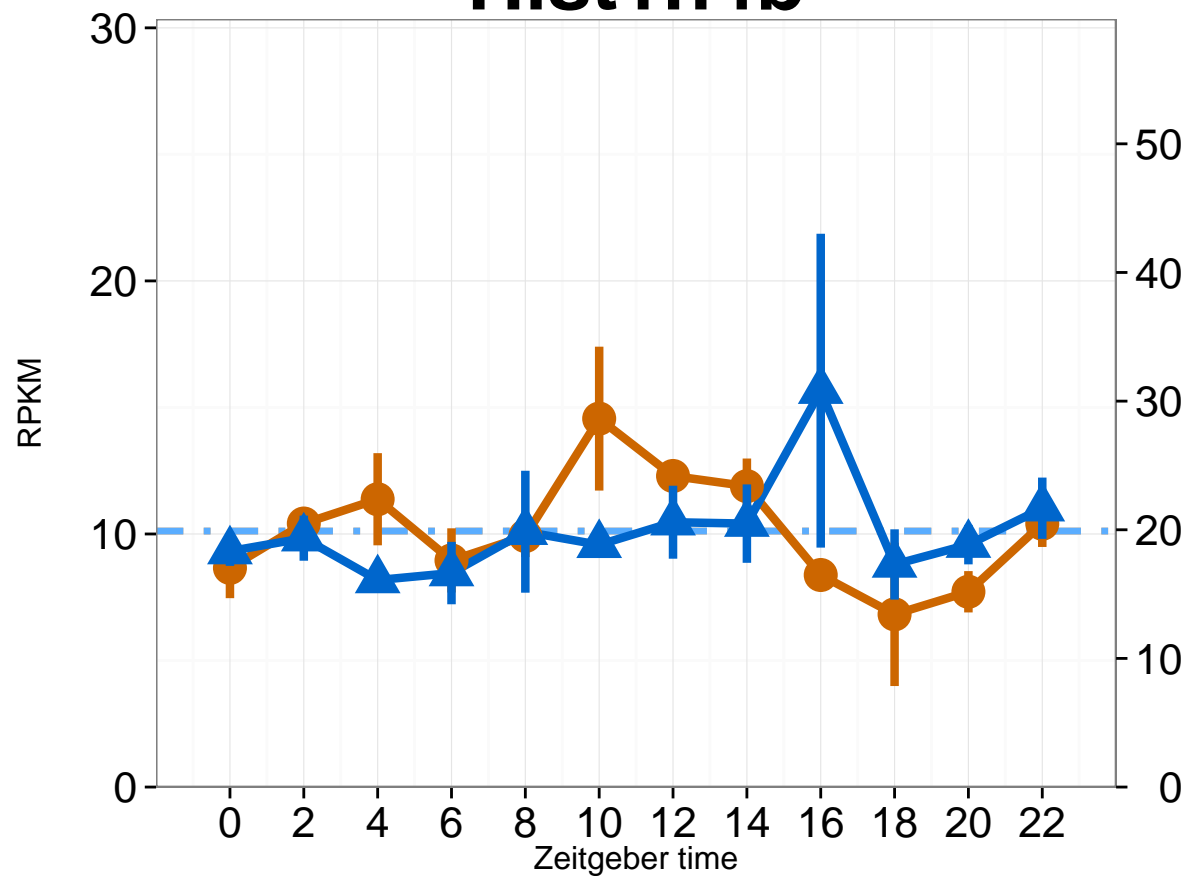

# Hist1h4b

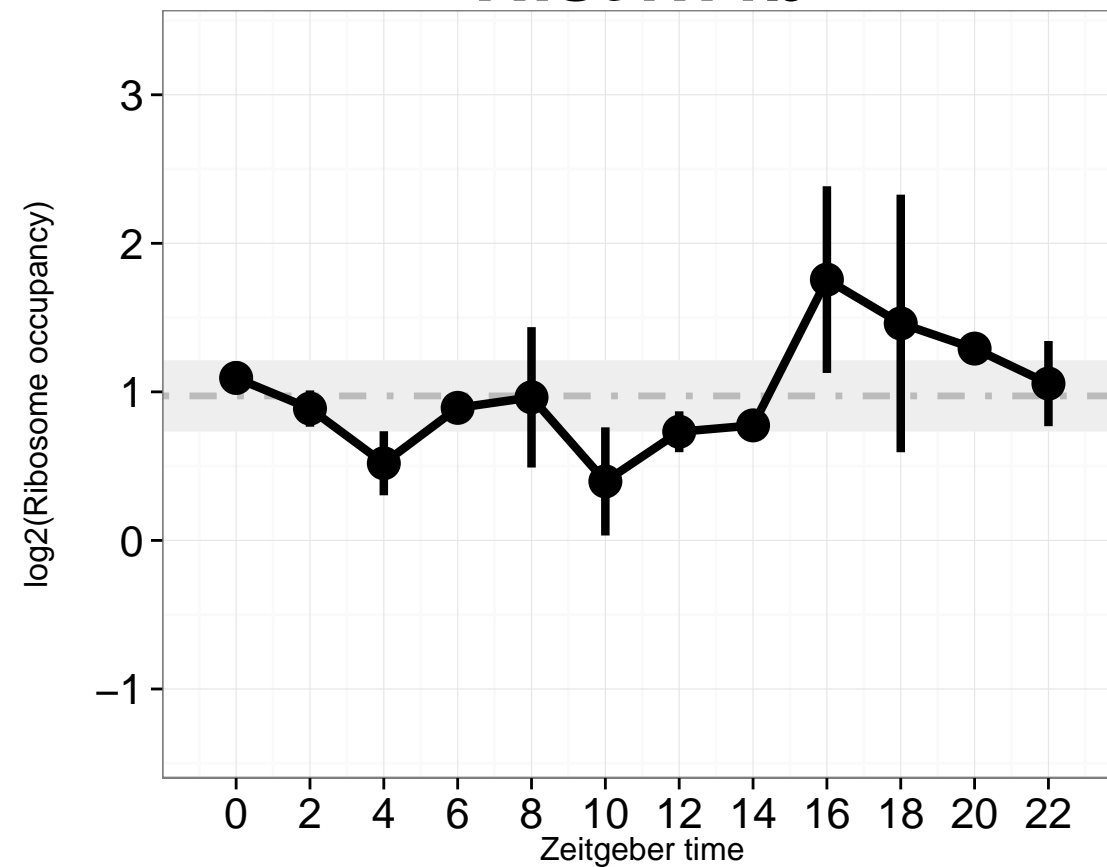

Supplement: Supplementary file 1659 [file 1]

# Mrp63

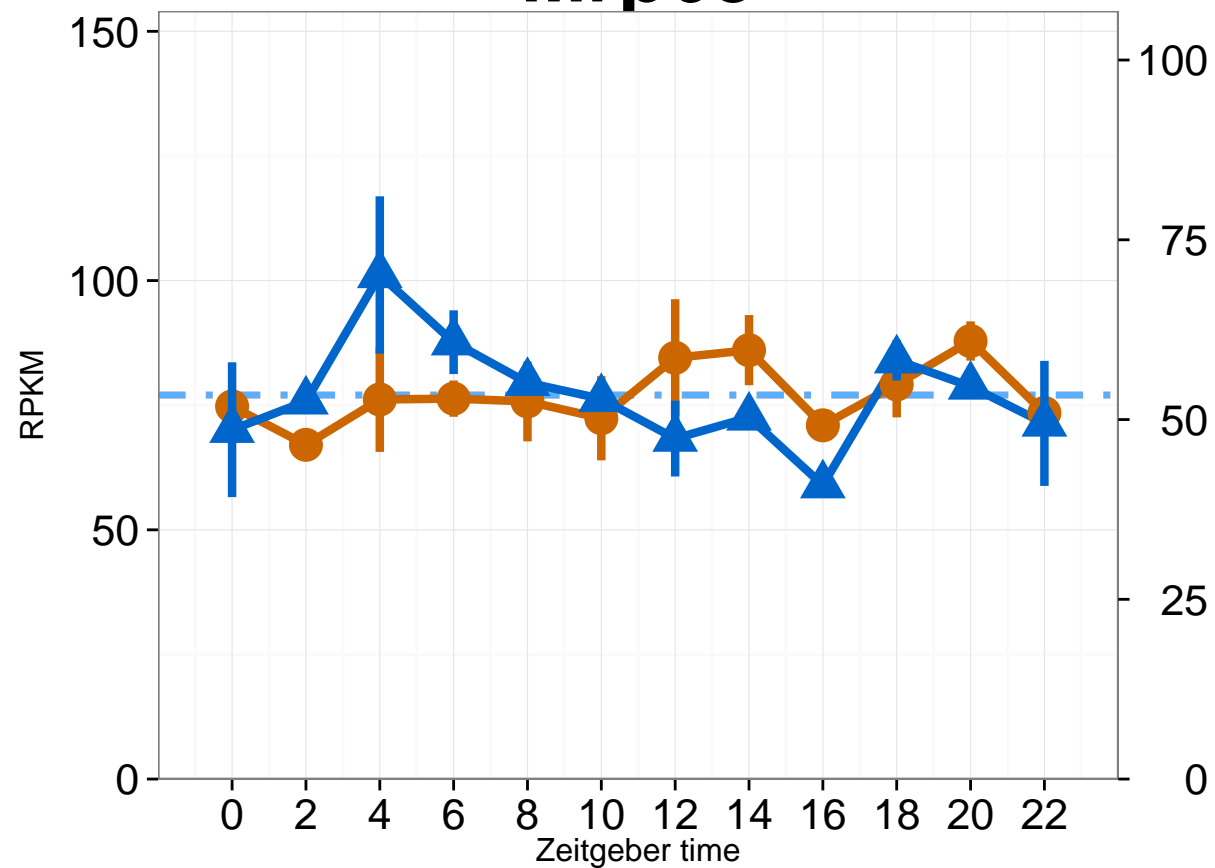

# Mrp63

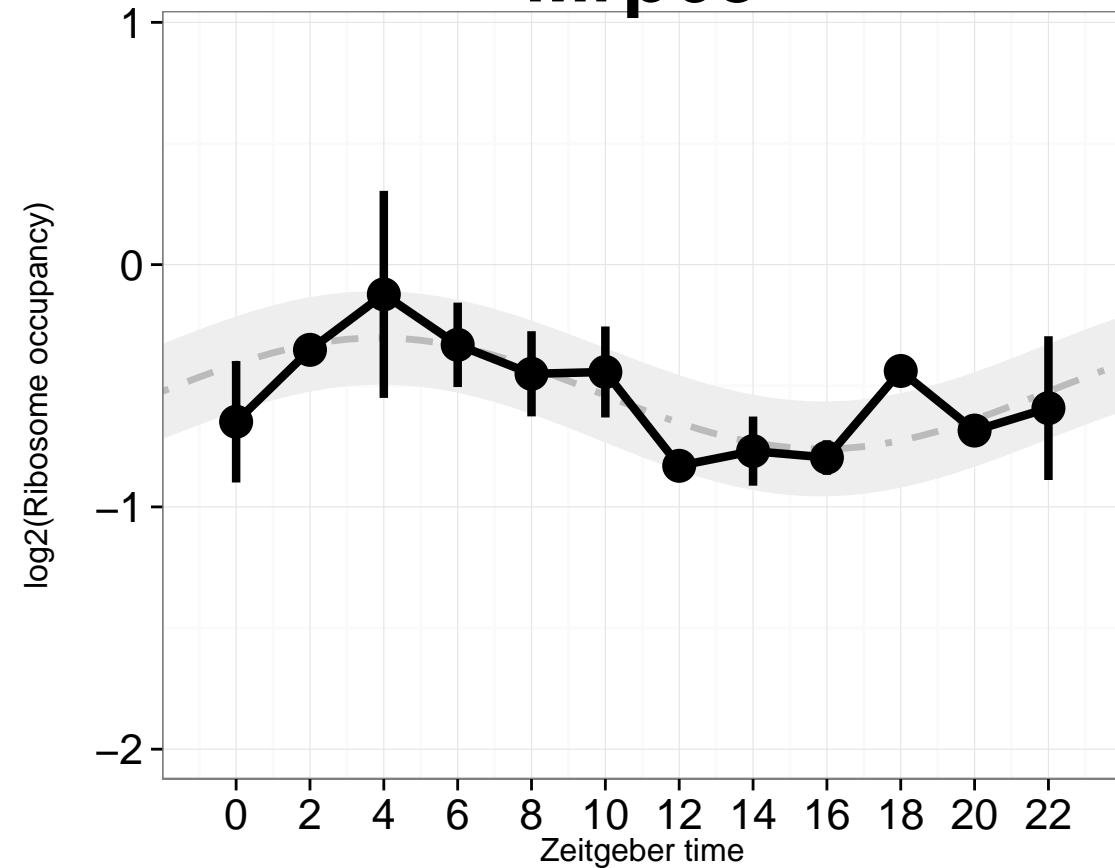

Supplement: Supplementary file 1660 [file 1]

# Mrps24

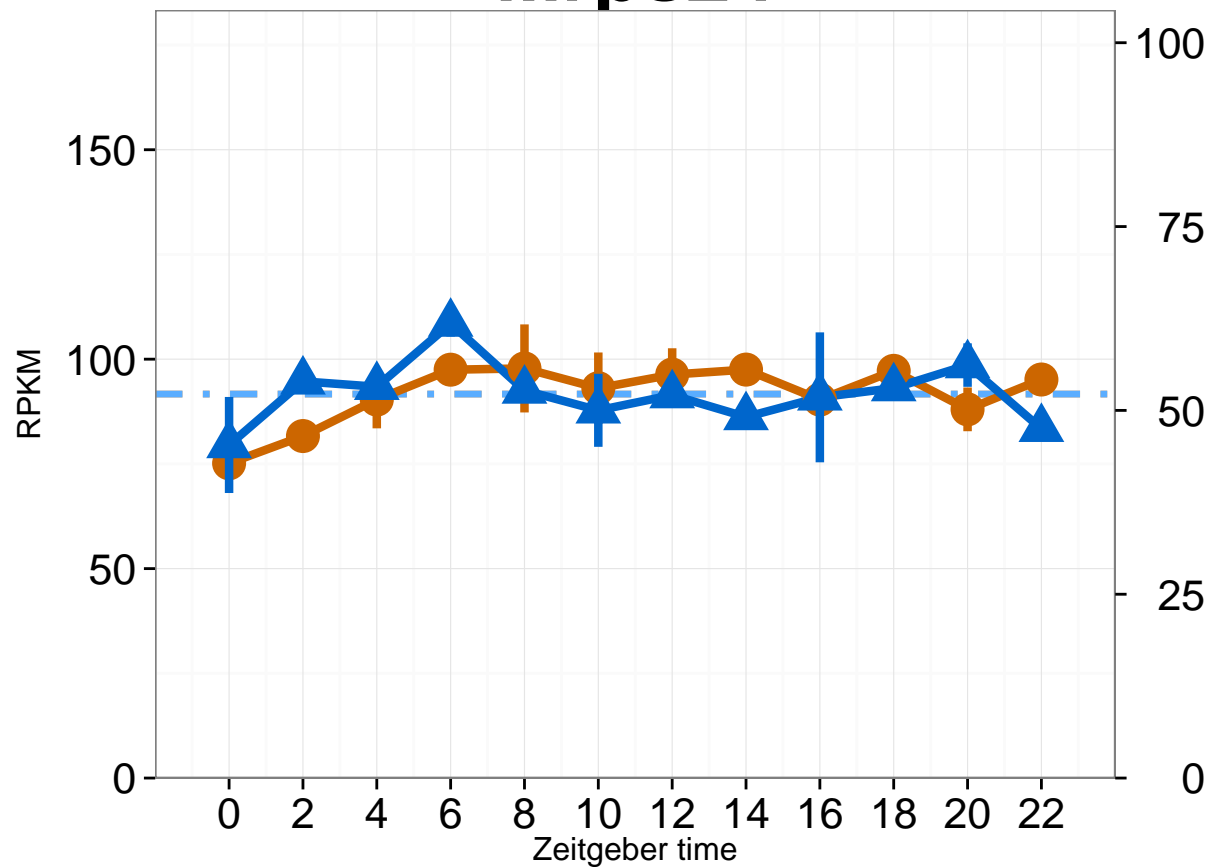

# Mrps24

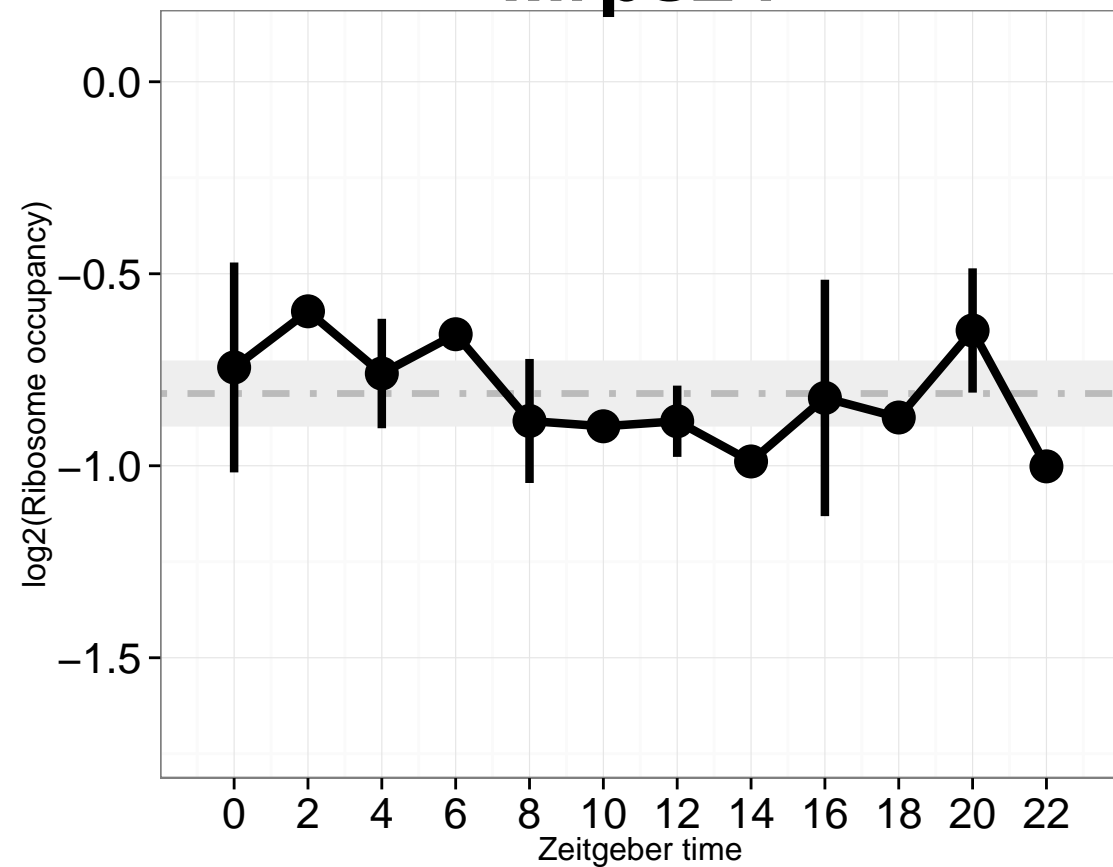

Supplement: Supplementary file 1661 [file 1]

# Cox7c

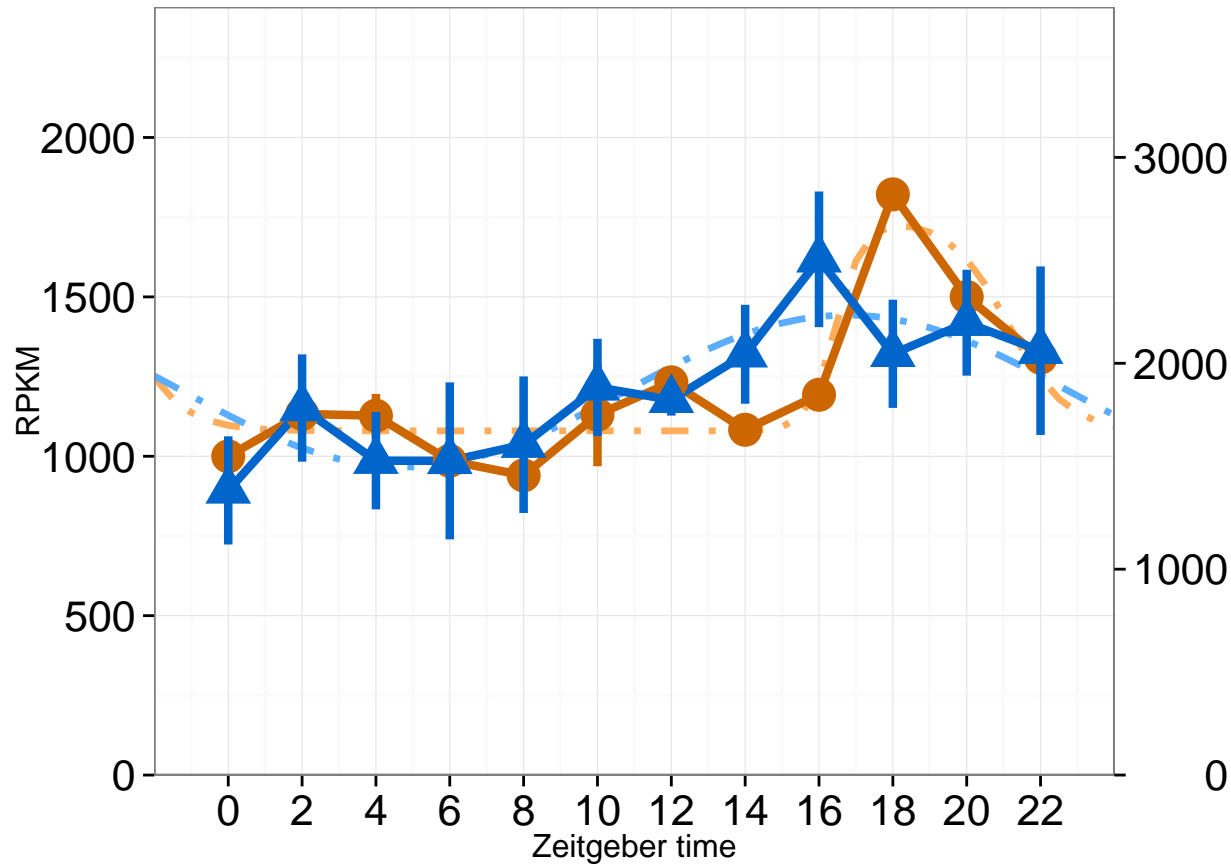

# Cox7c

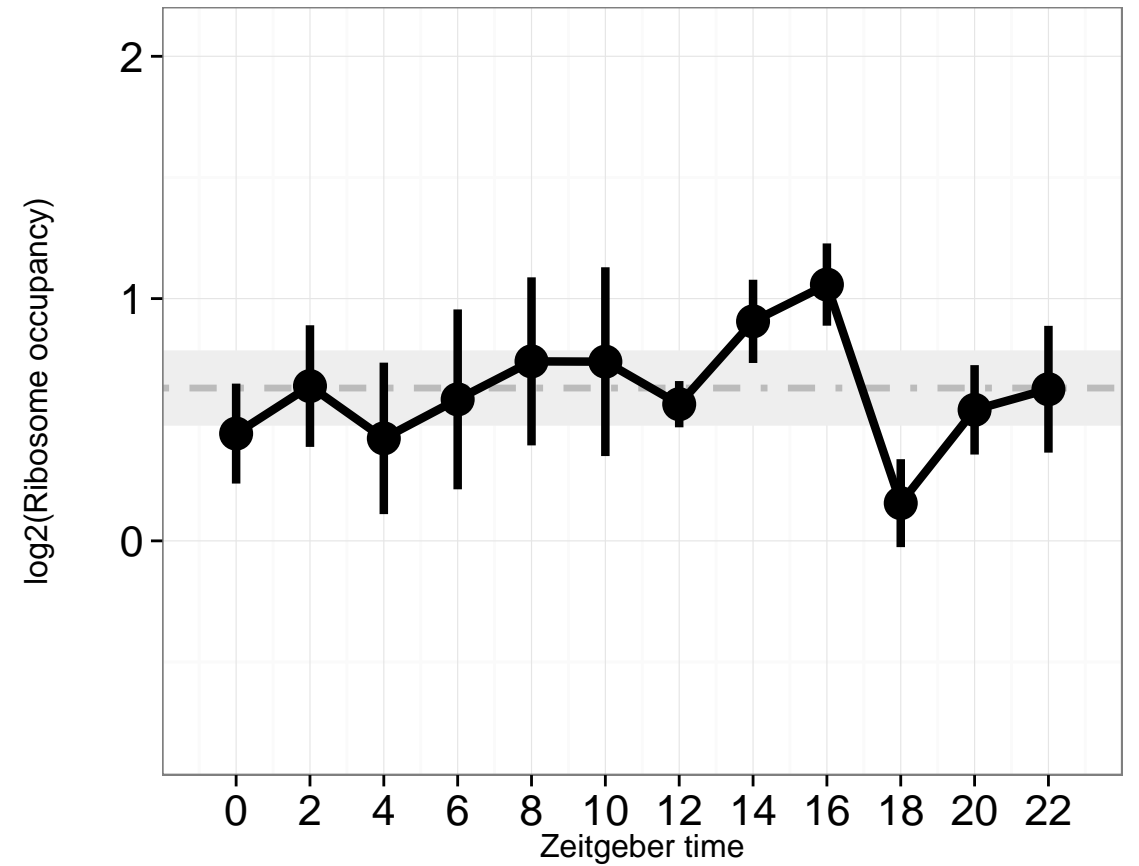

Supplement: Supplementary file 1662 [file 1]

# Tubb5

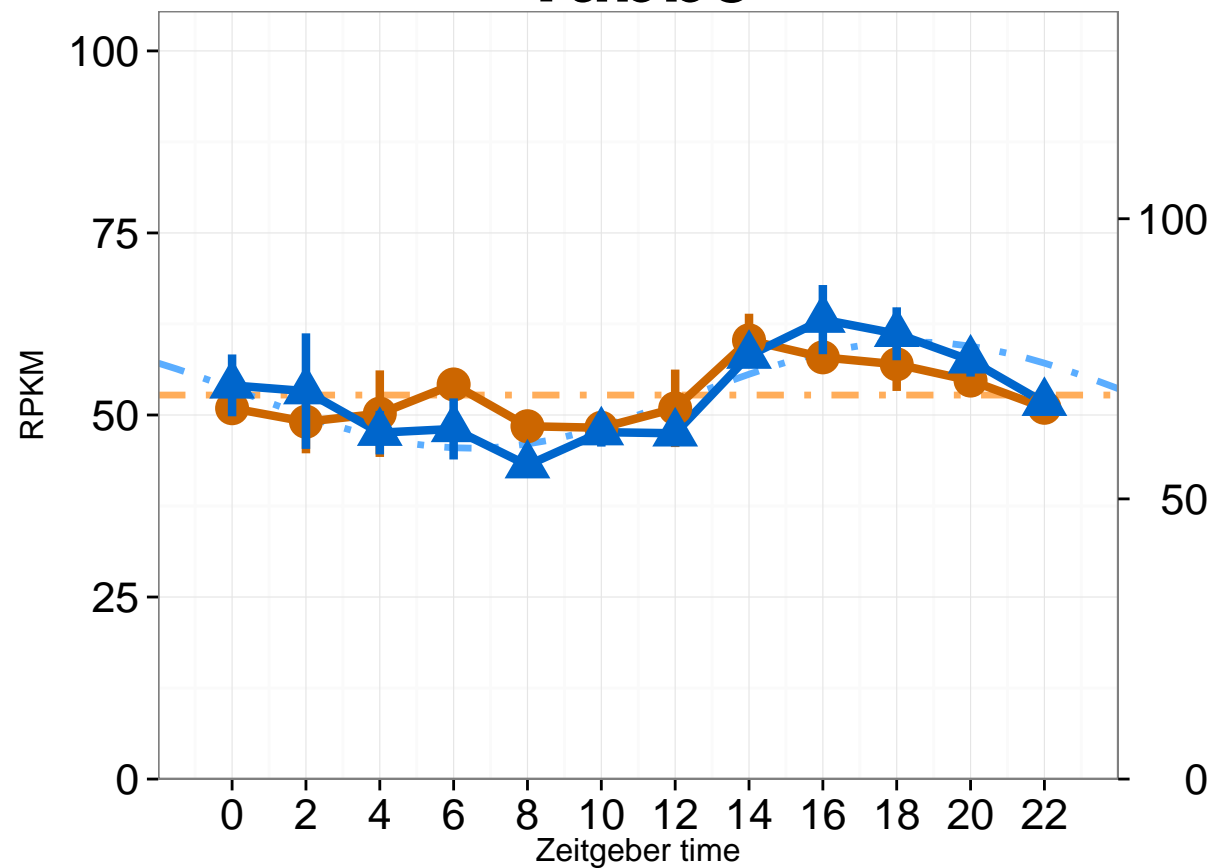

# Tubb5

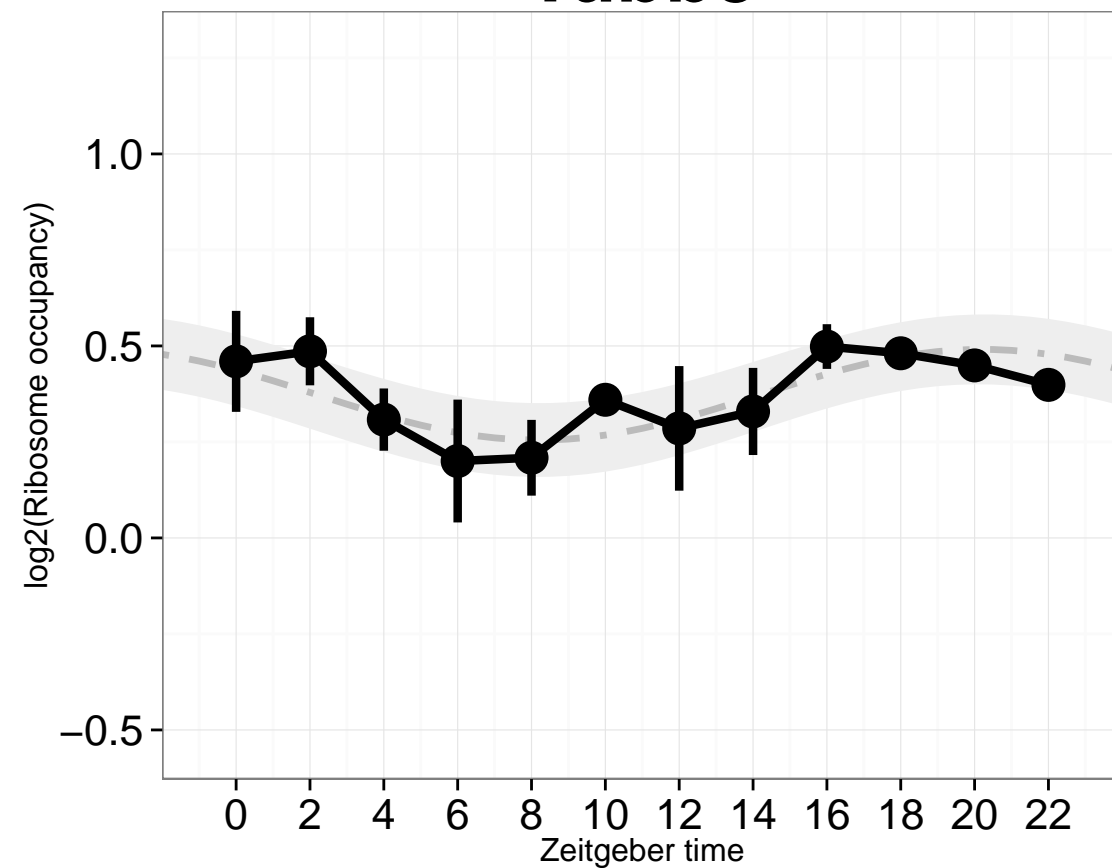

Supplement: Supplementary file 1663 [file 1]

## Trpc6

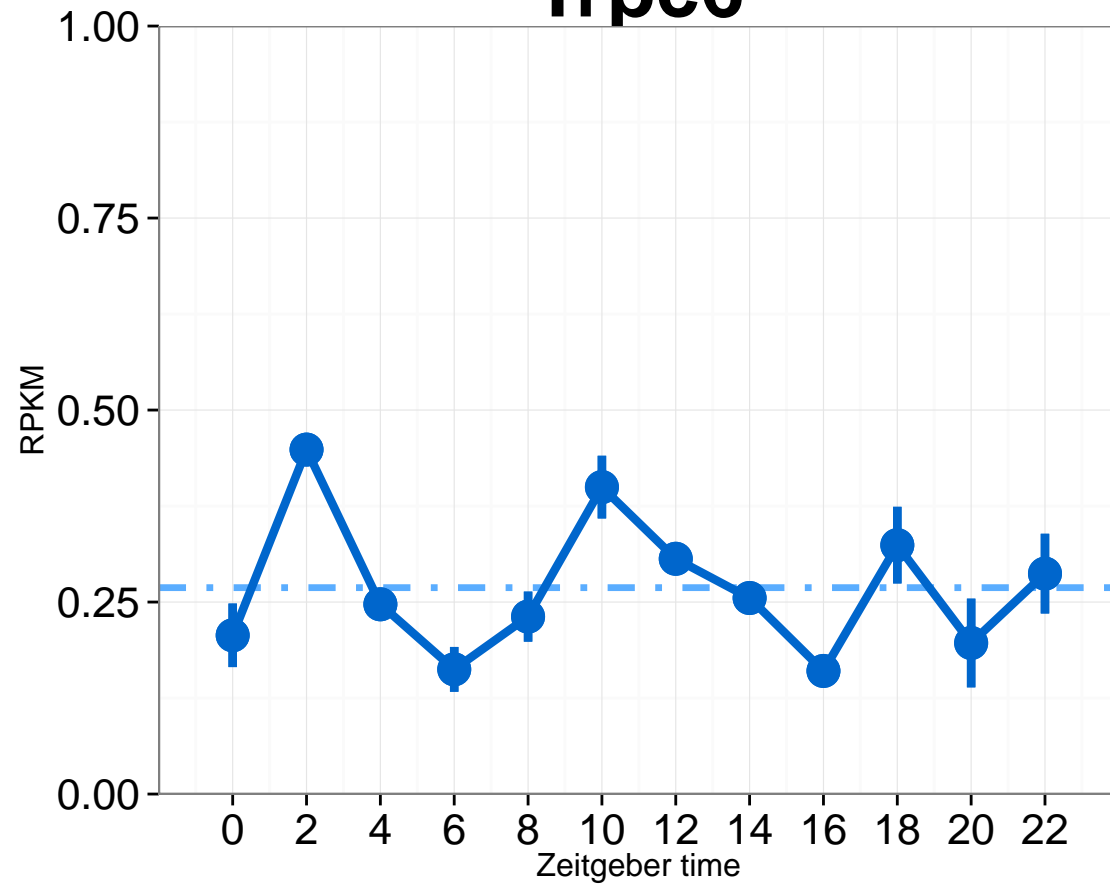

## Trpc6 log2(Ribosome occupancy)

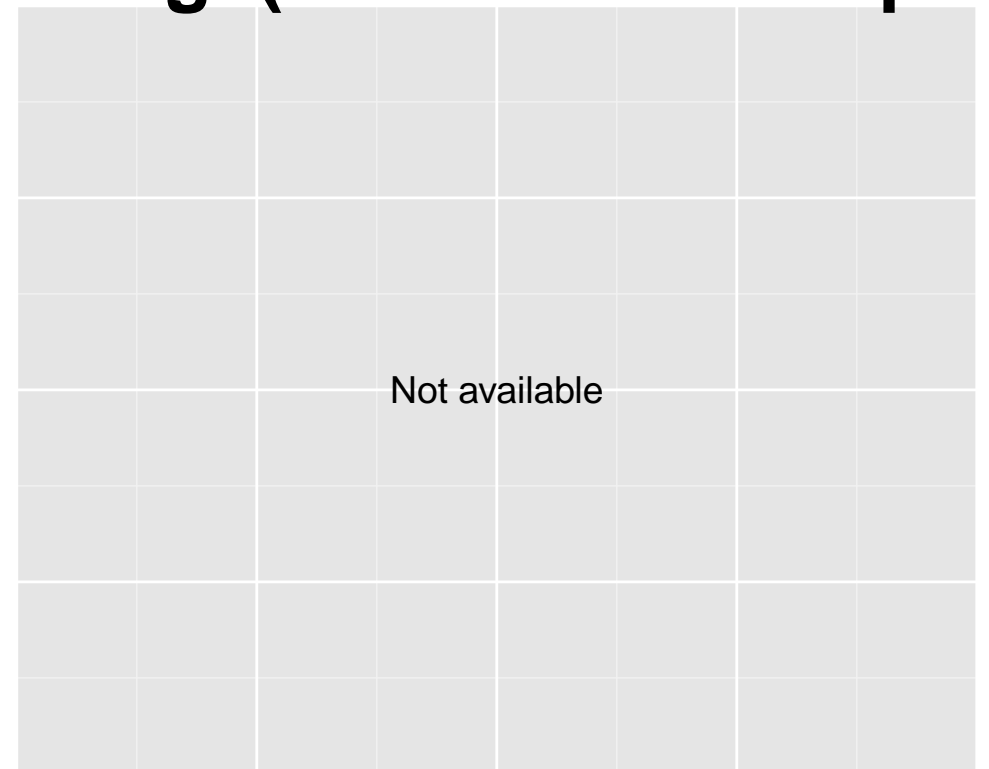

Supplement: Supplementary file 1664 [file 1]

## Ube2s

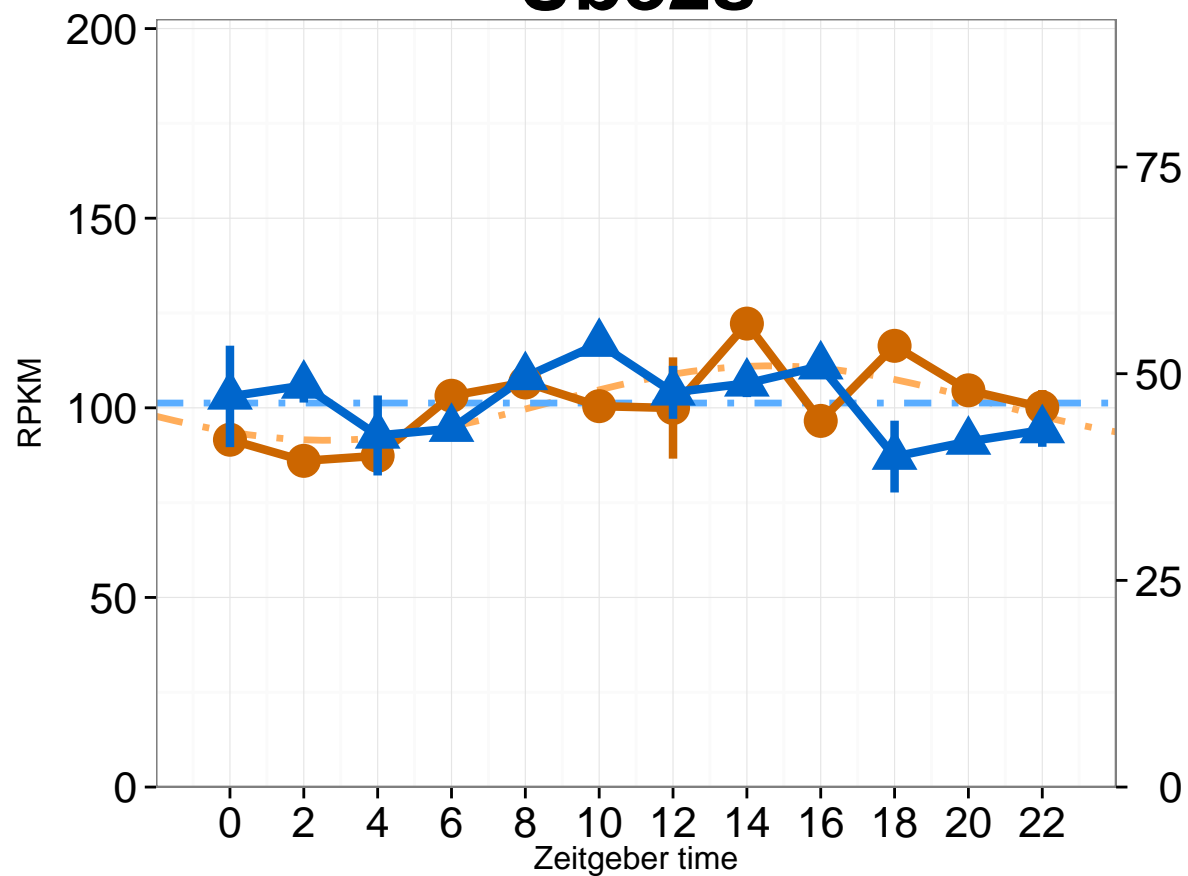

## Ube2s

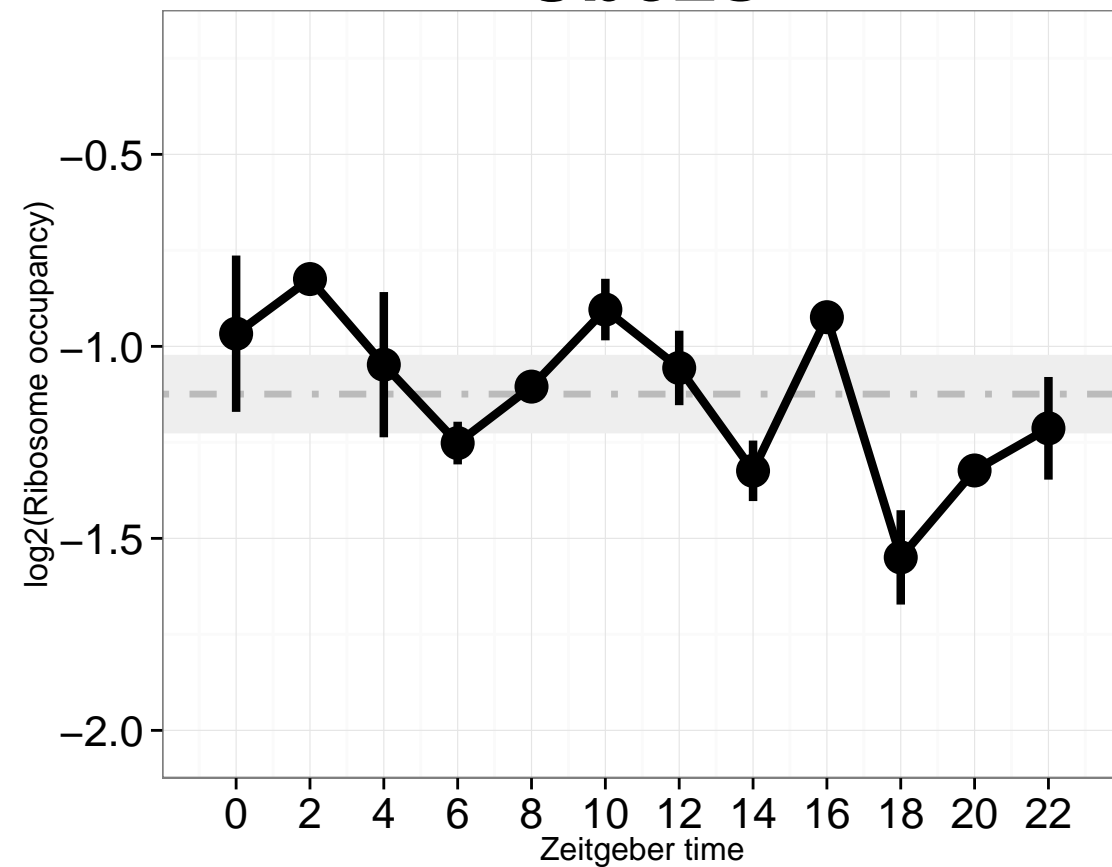

Supplement: Supplementary file 1665 [file 1]

# Rpl36

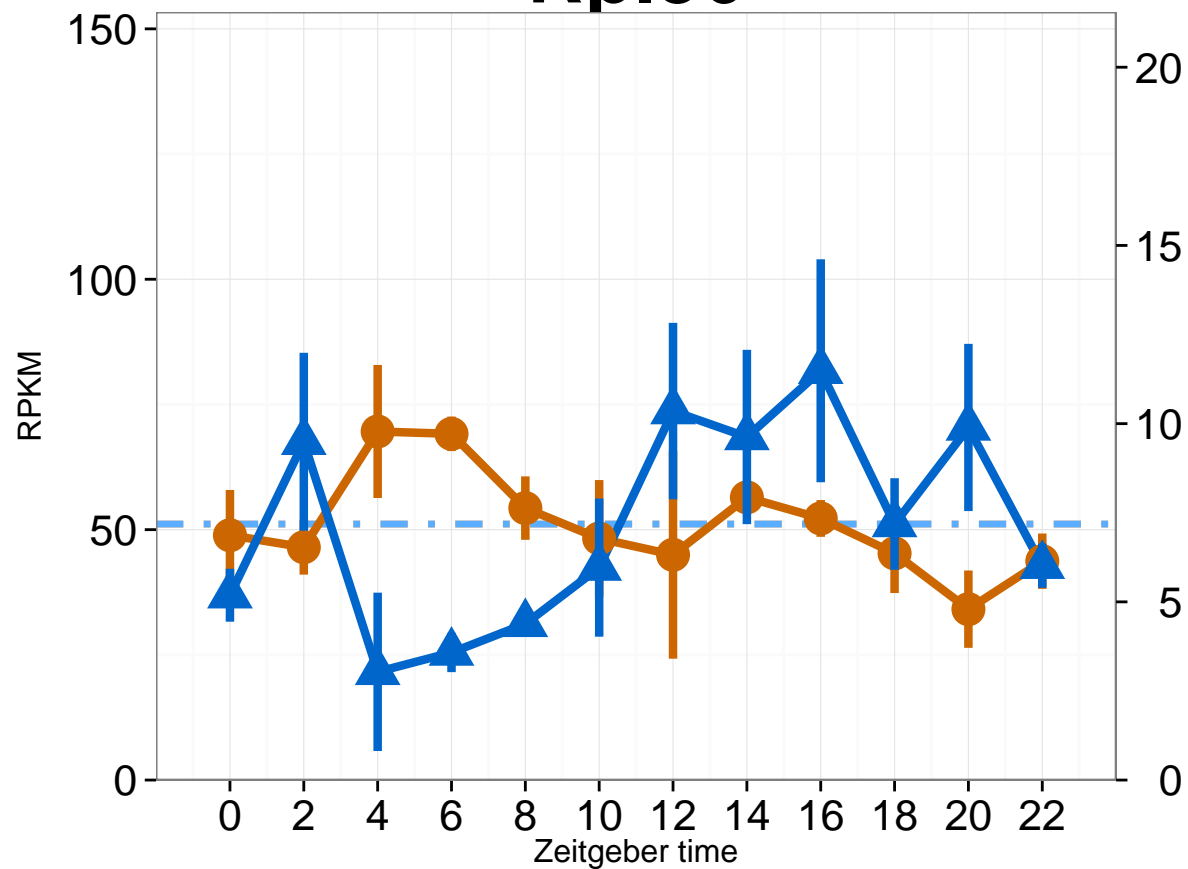

# Rpl36

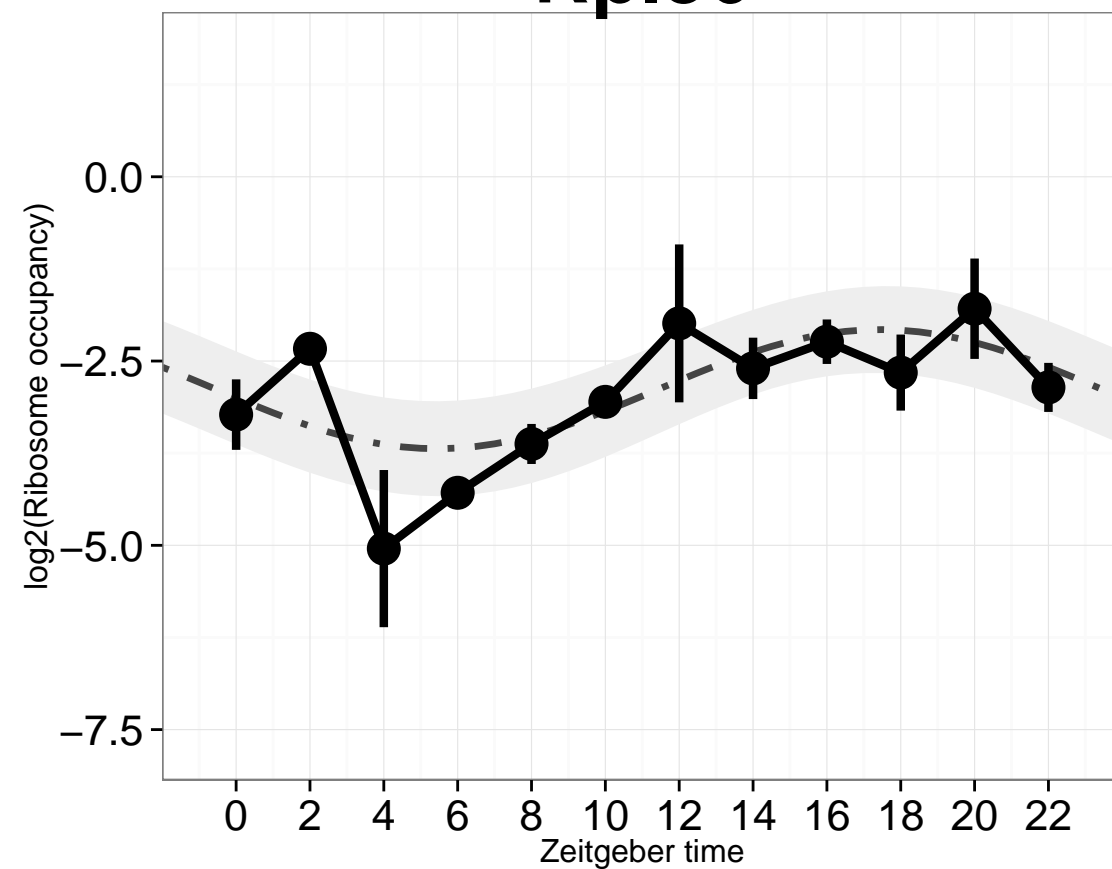

Supplement: Supplementary file 1666 [file 1]

# Wbscr27

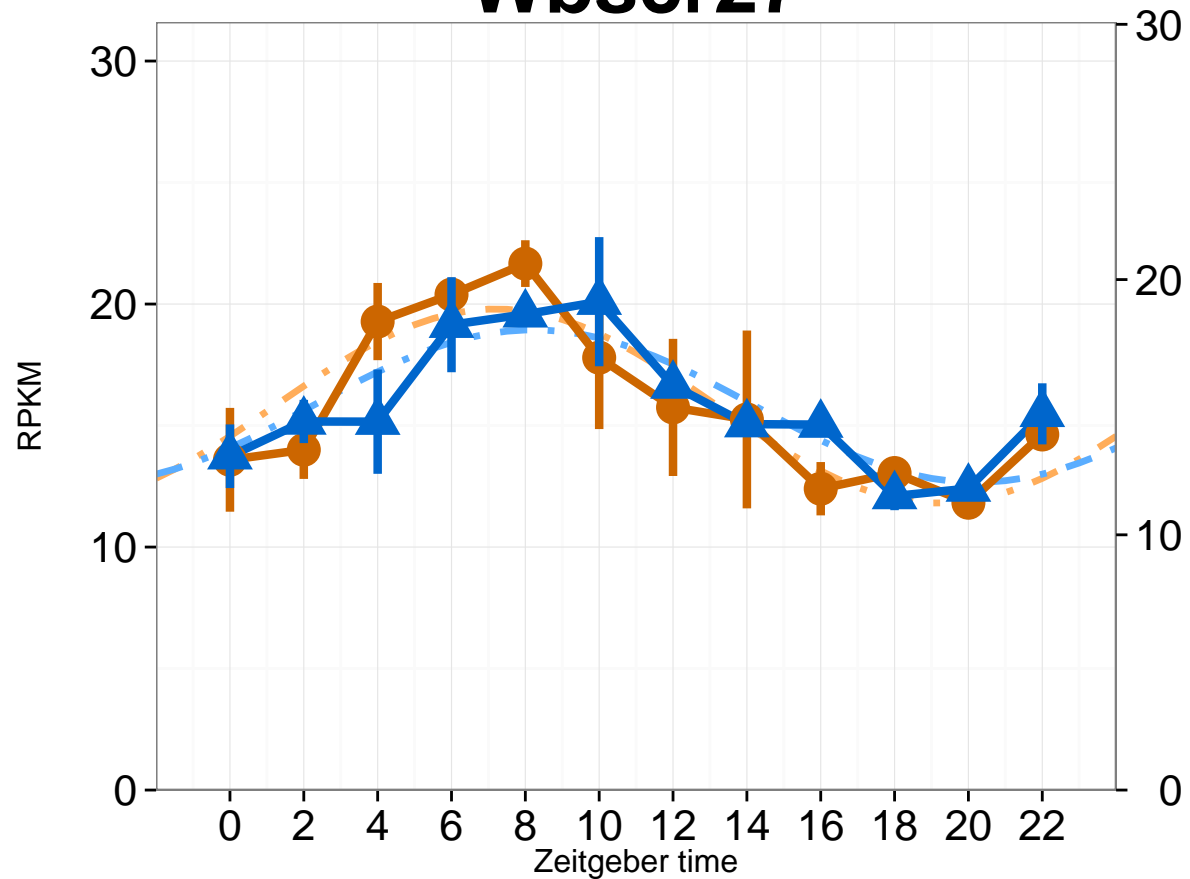

# Wbscr27

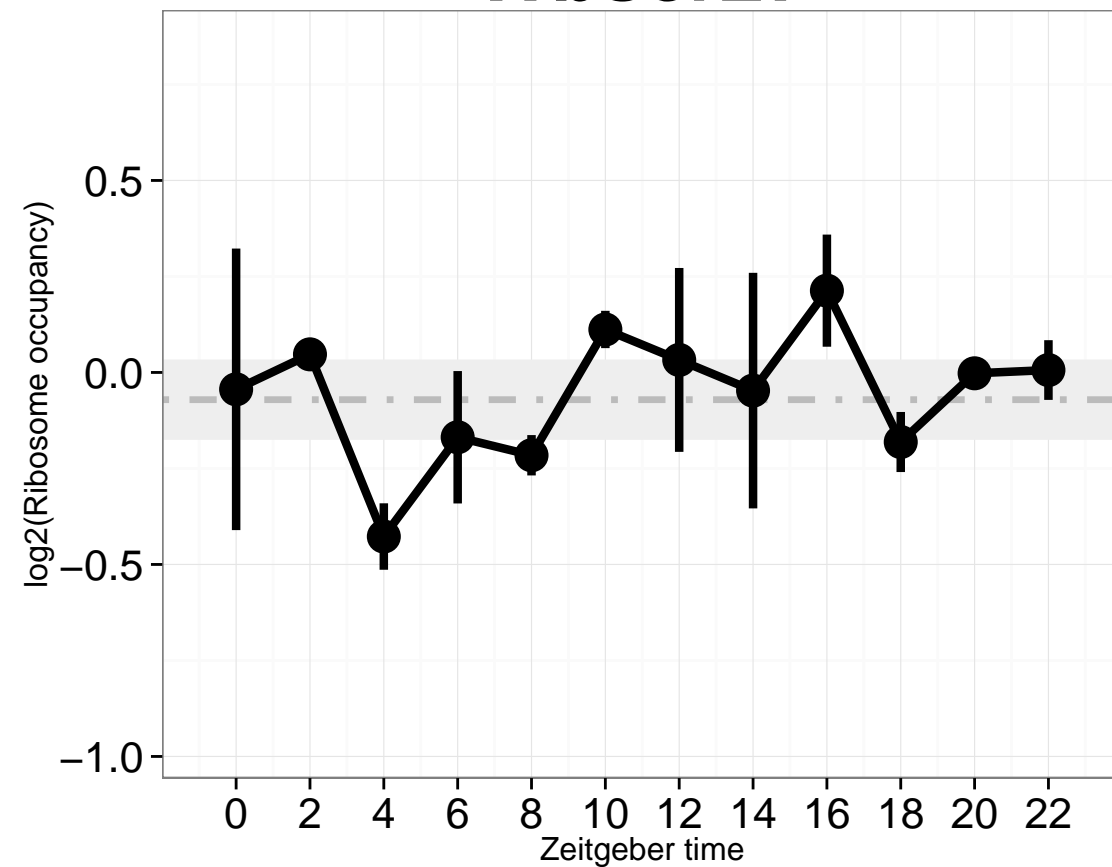

Supplement: Supplementary file 1667 [file 1]

## Asb9

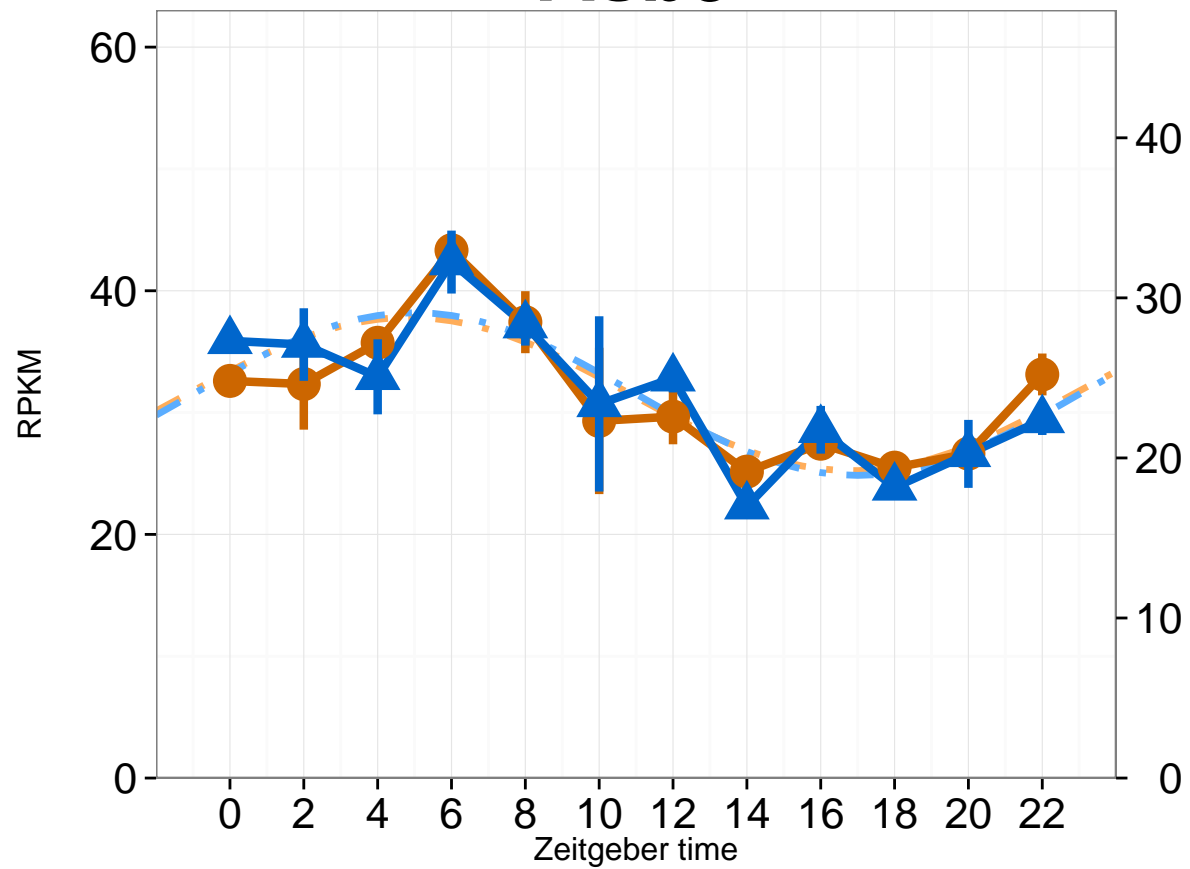

## Asb9

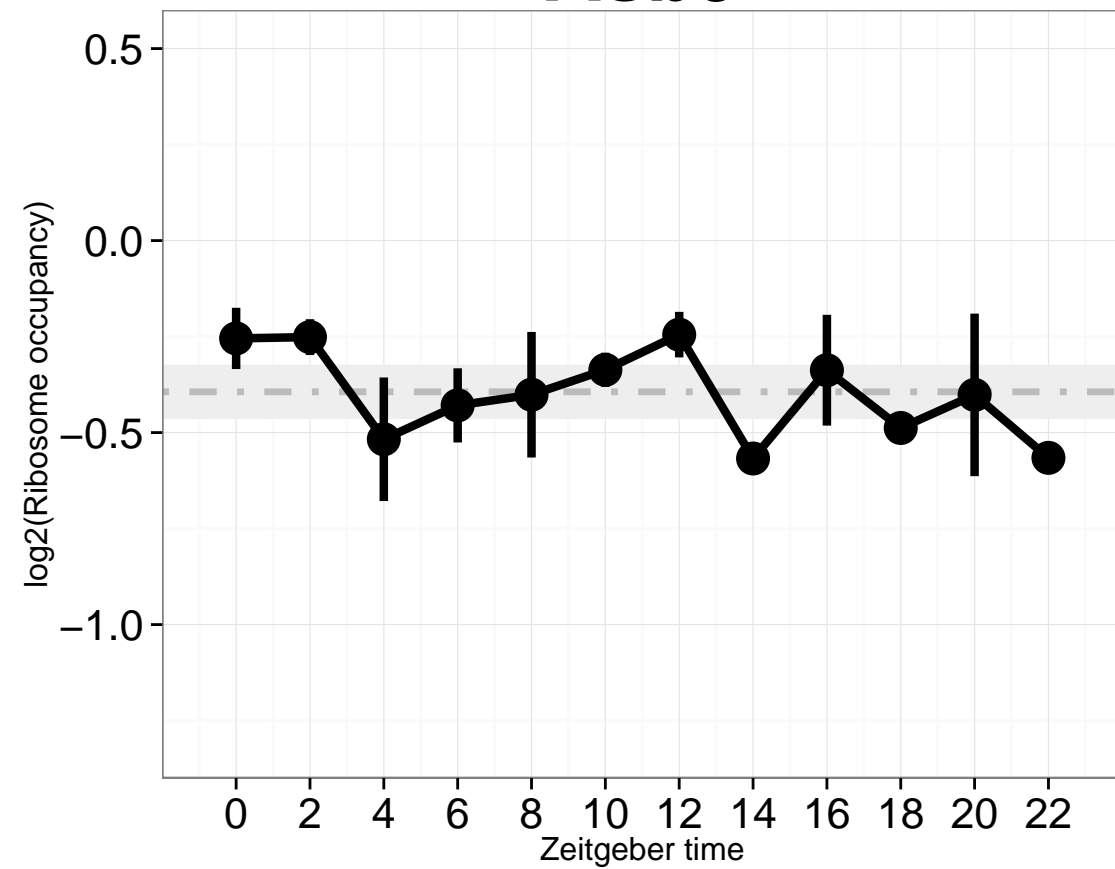

Supplement: Supplementary file 1668 [file 1]

## Nkiras1

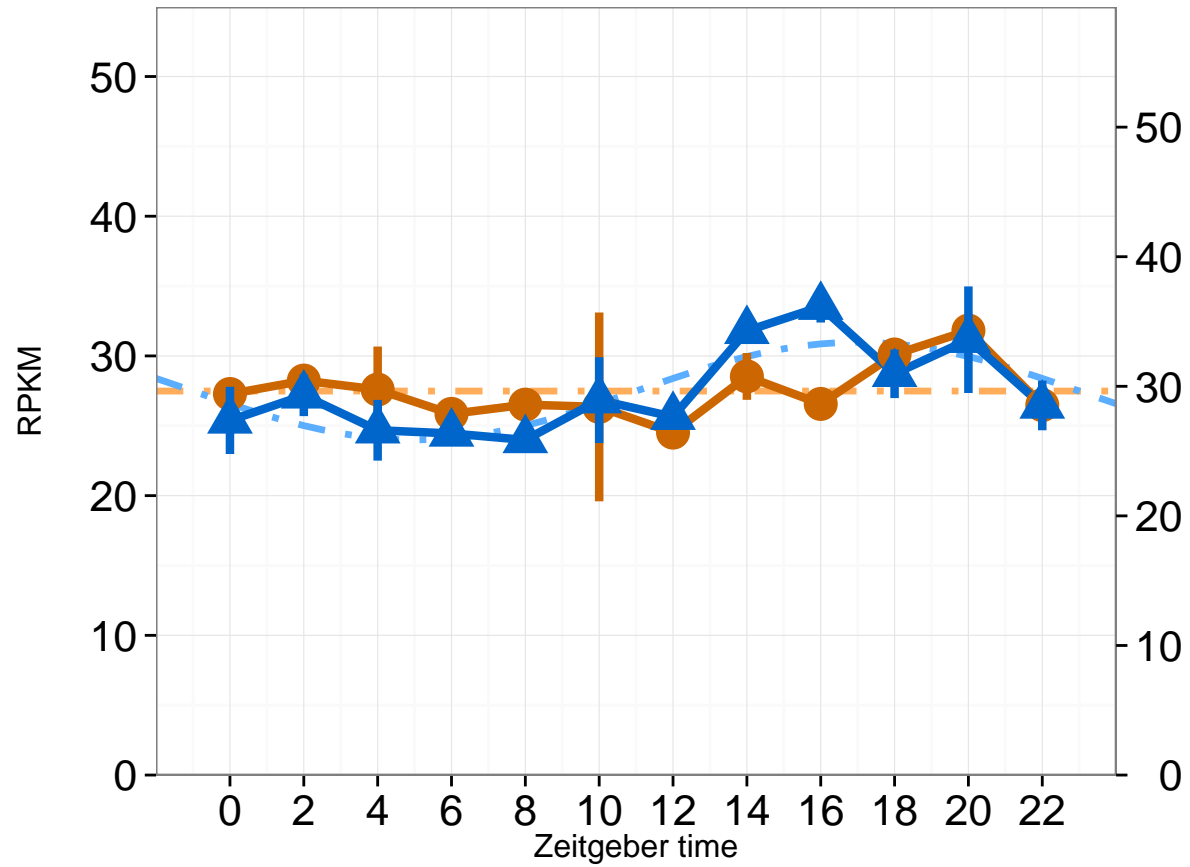

## Nkiras1

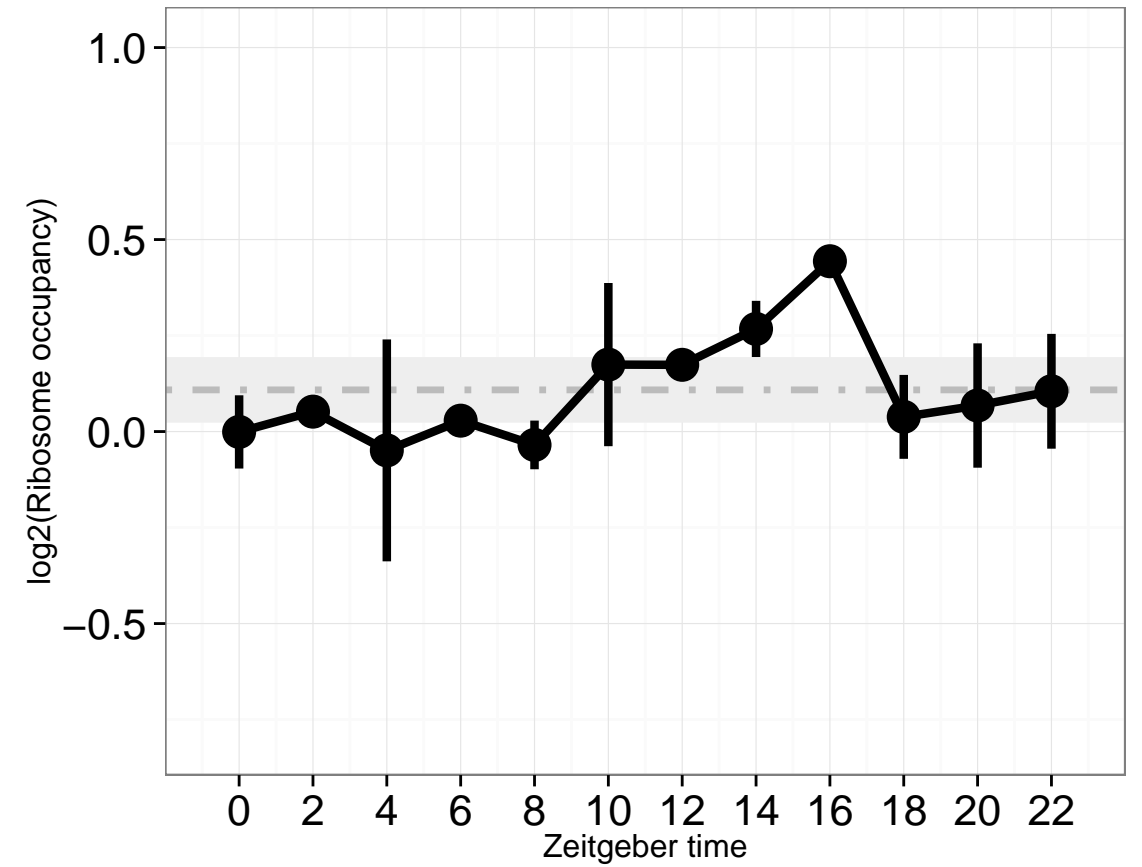

Supplement: Supplementary file 1669 [file 1]

## Stk11

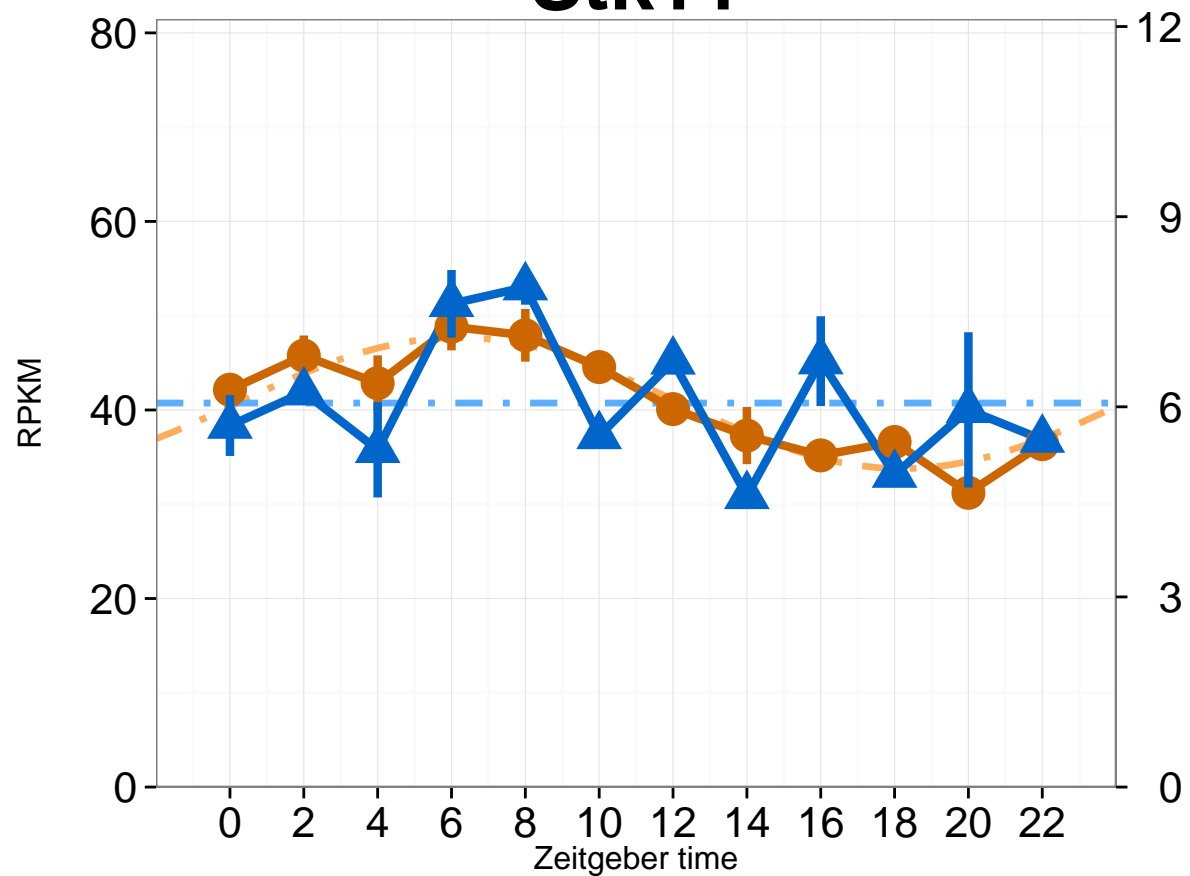

## Stk11

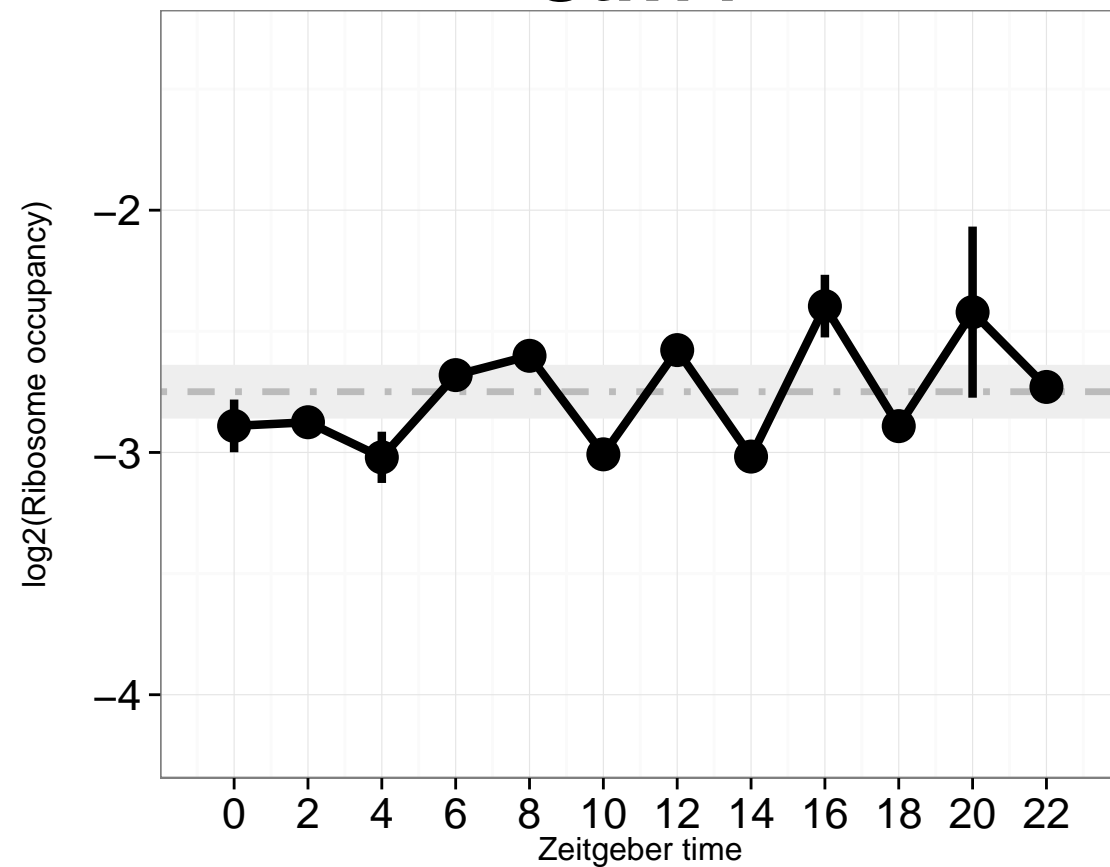

Supplement: Supplementary file 1670 [file 1]

## Zbtb2

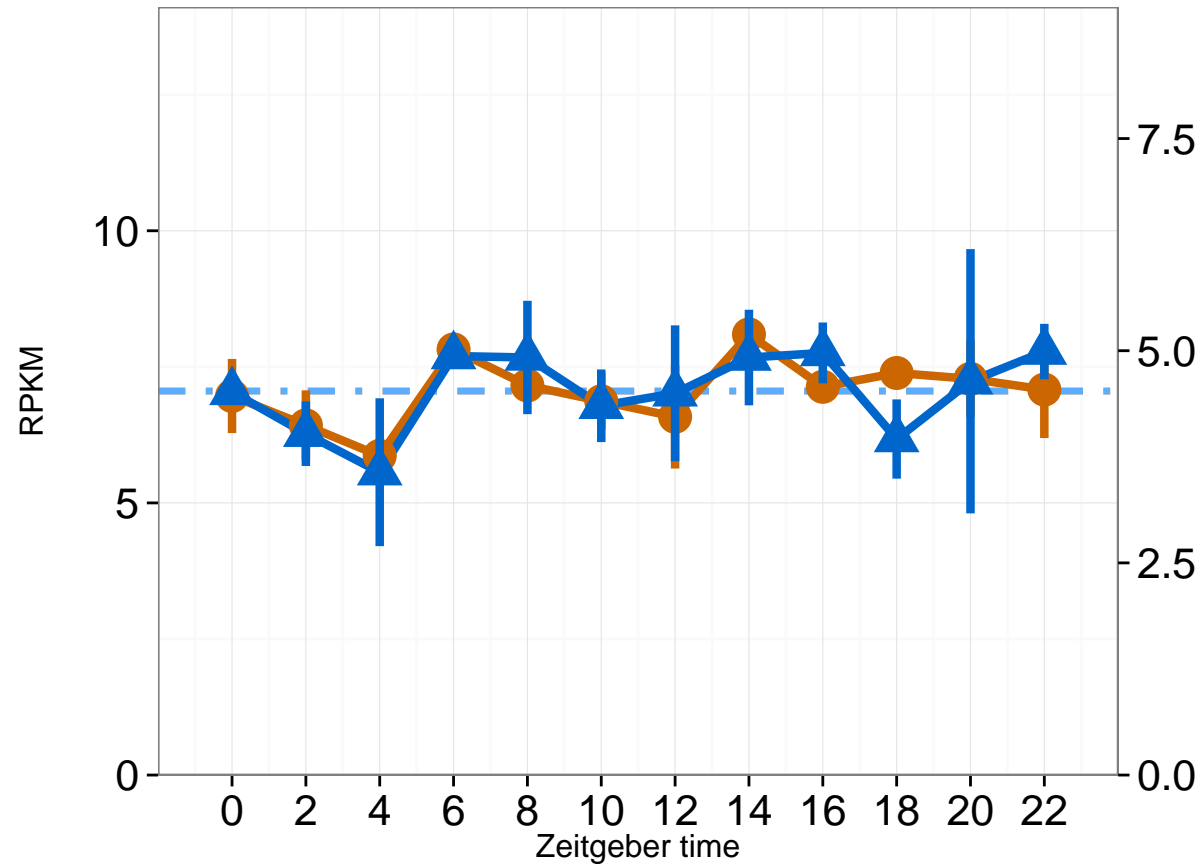

## Zbtb2

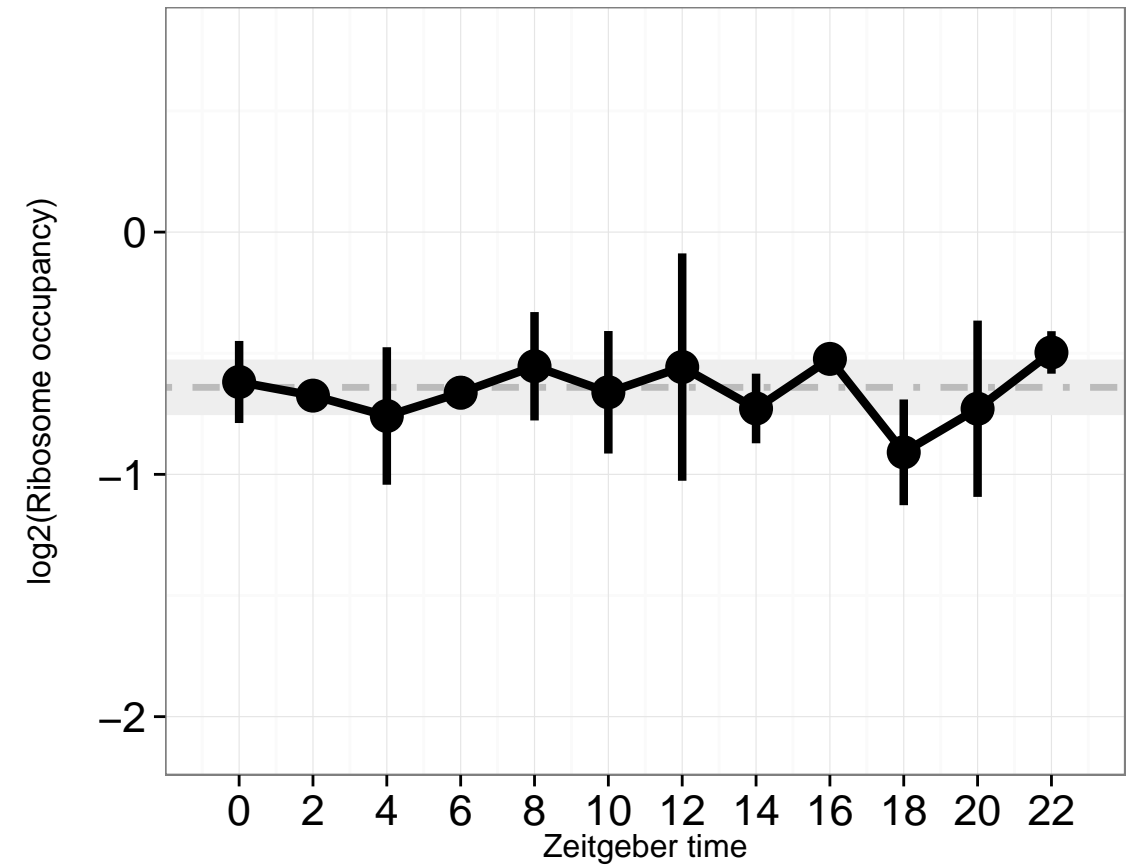

Supplement: Supplementary file 1671 [file 1]

## Slc36a4

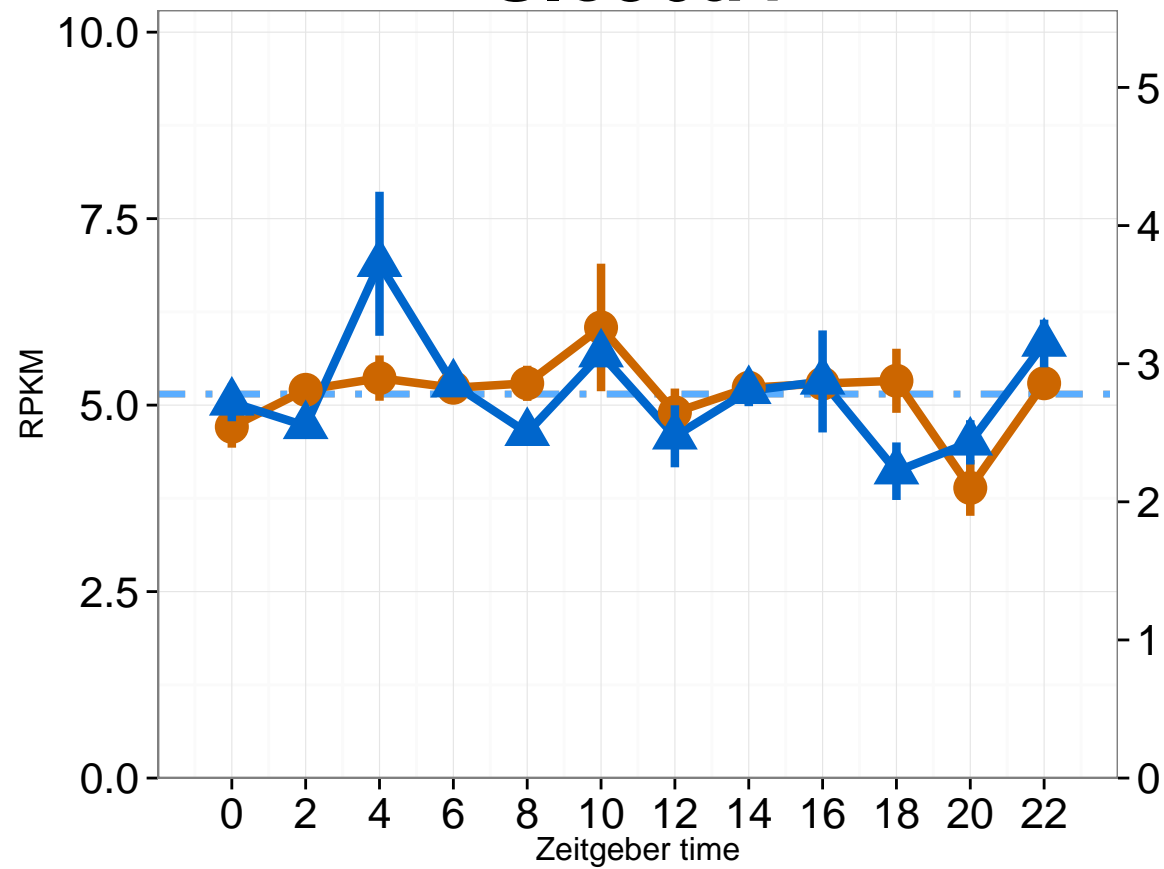

## Slc36a4

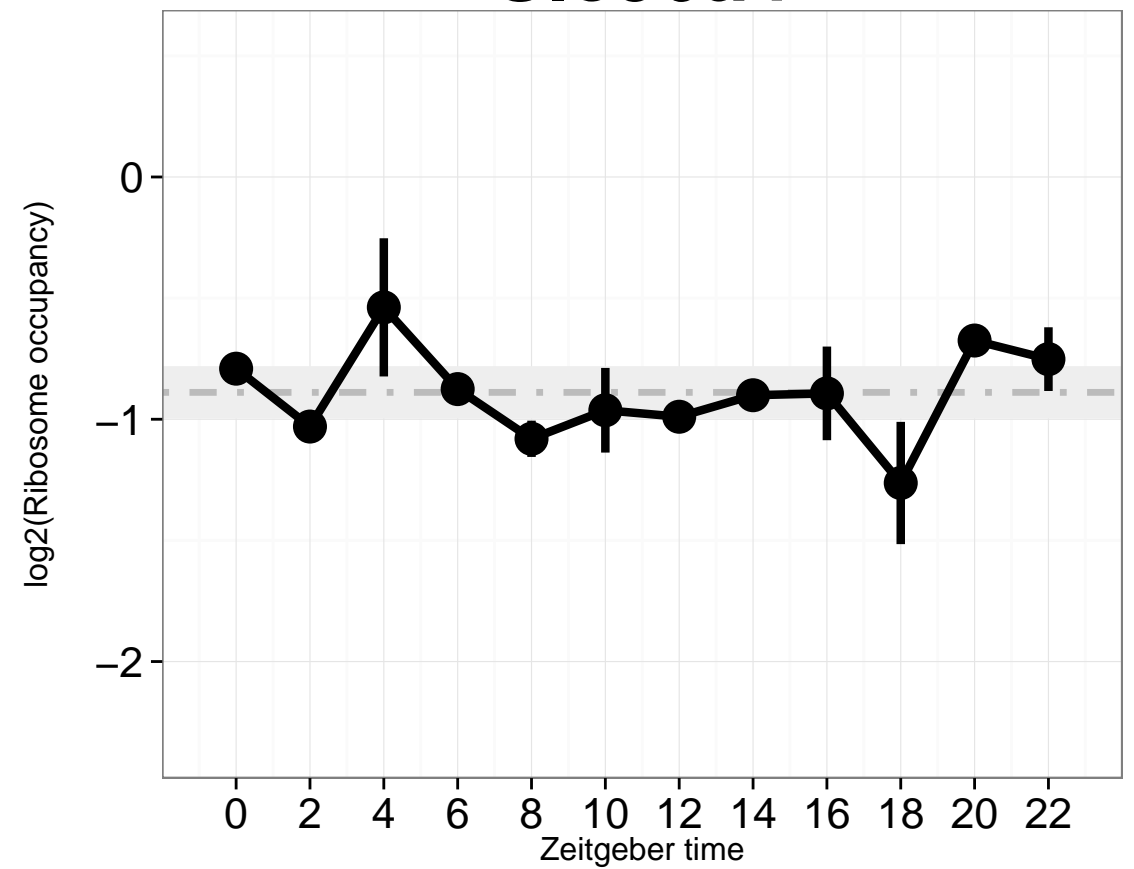

Supplement: Supplementary file 1672 [file 1]

## Ccdc12

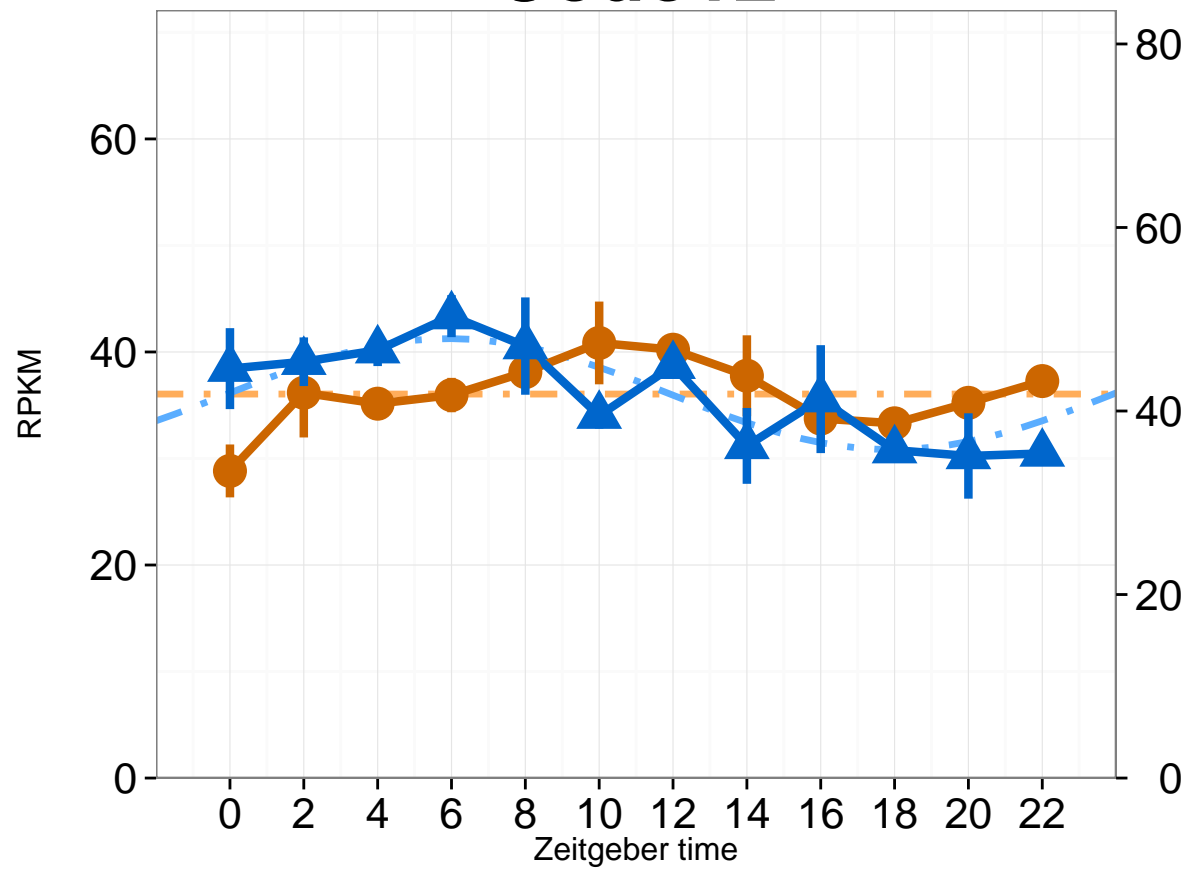

## Ccdc12

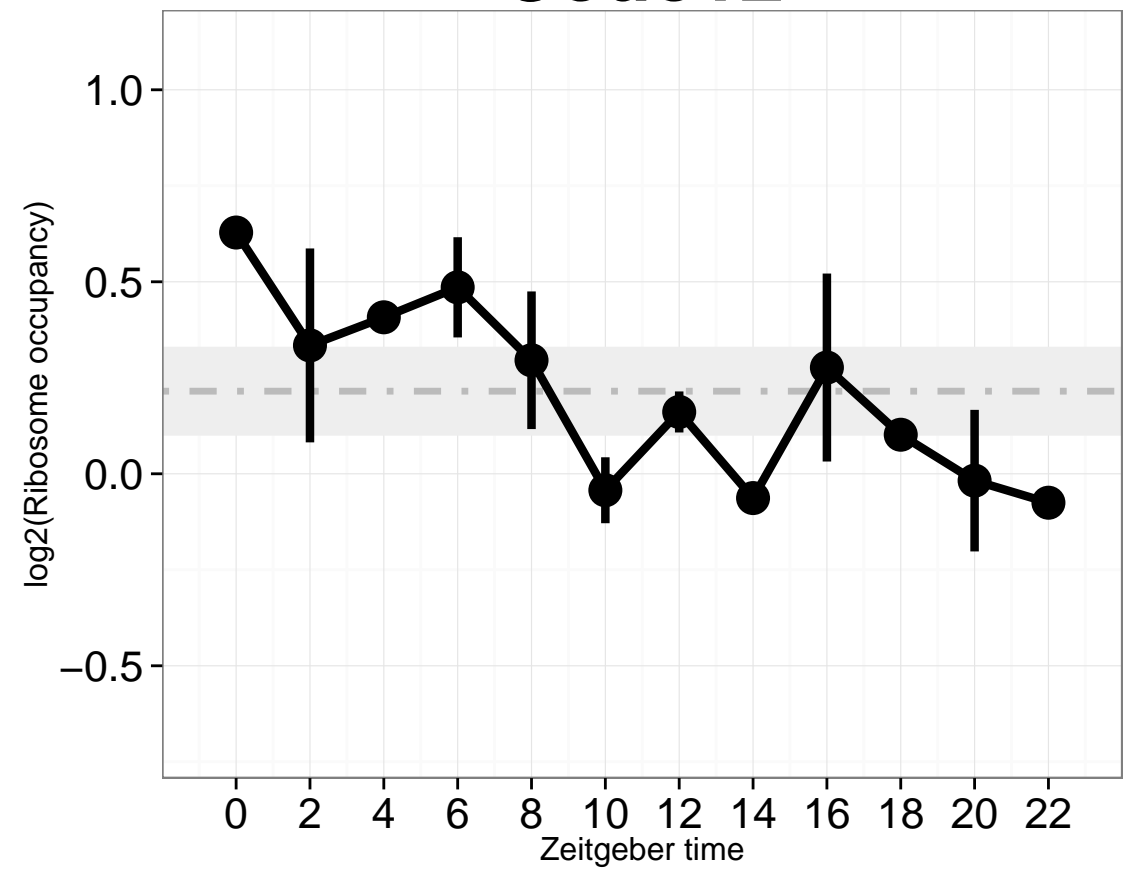

Supplement: Supplementary file 1673 [file 1]

# Map3k6

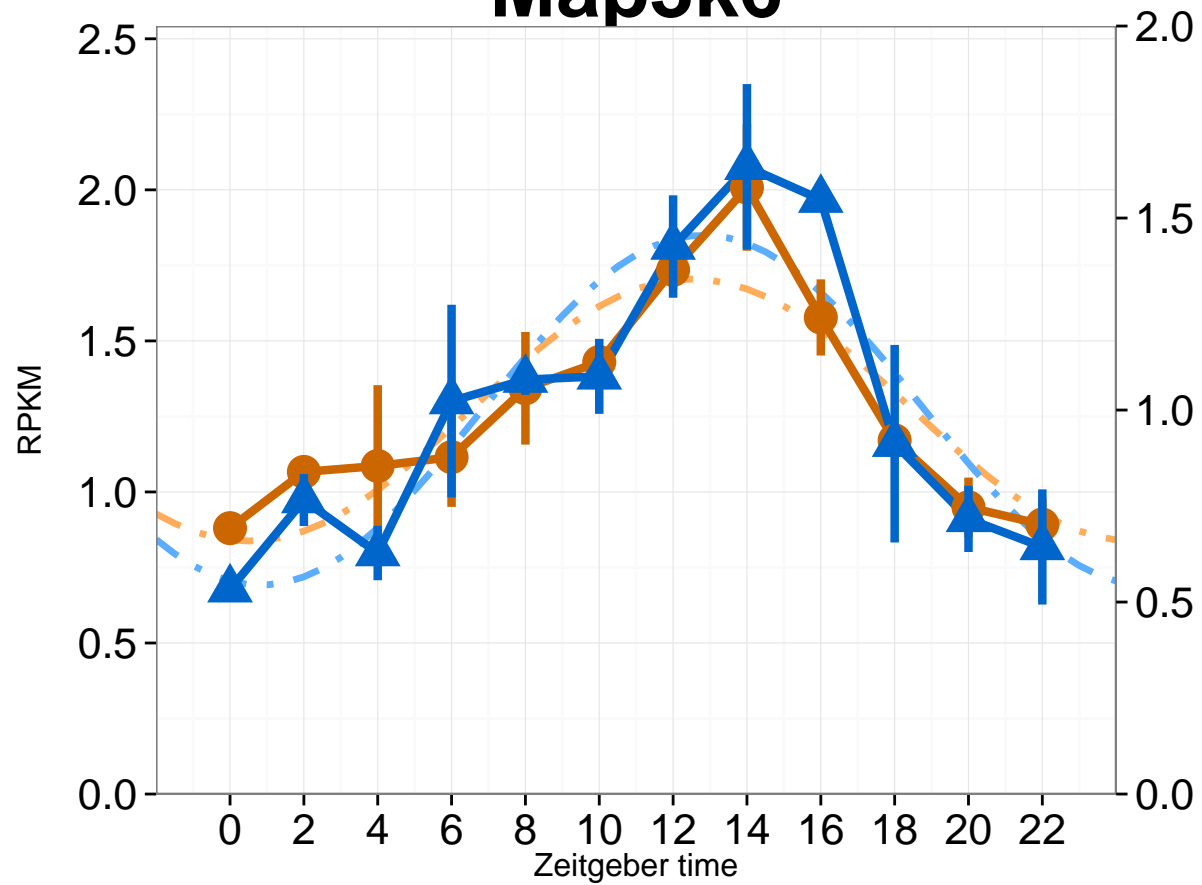

# Map3k6

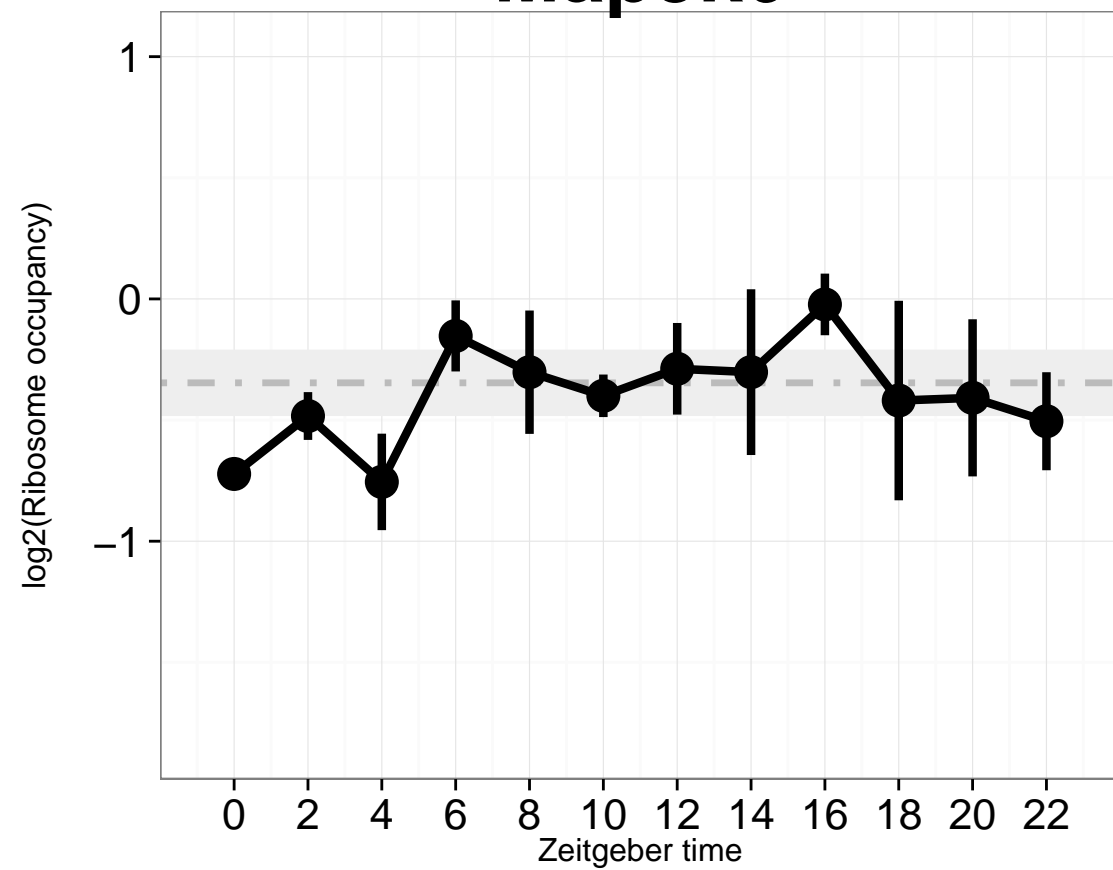

Supplement: Supplementary file 1674 [file 1]

## Mbnl2

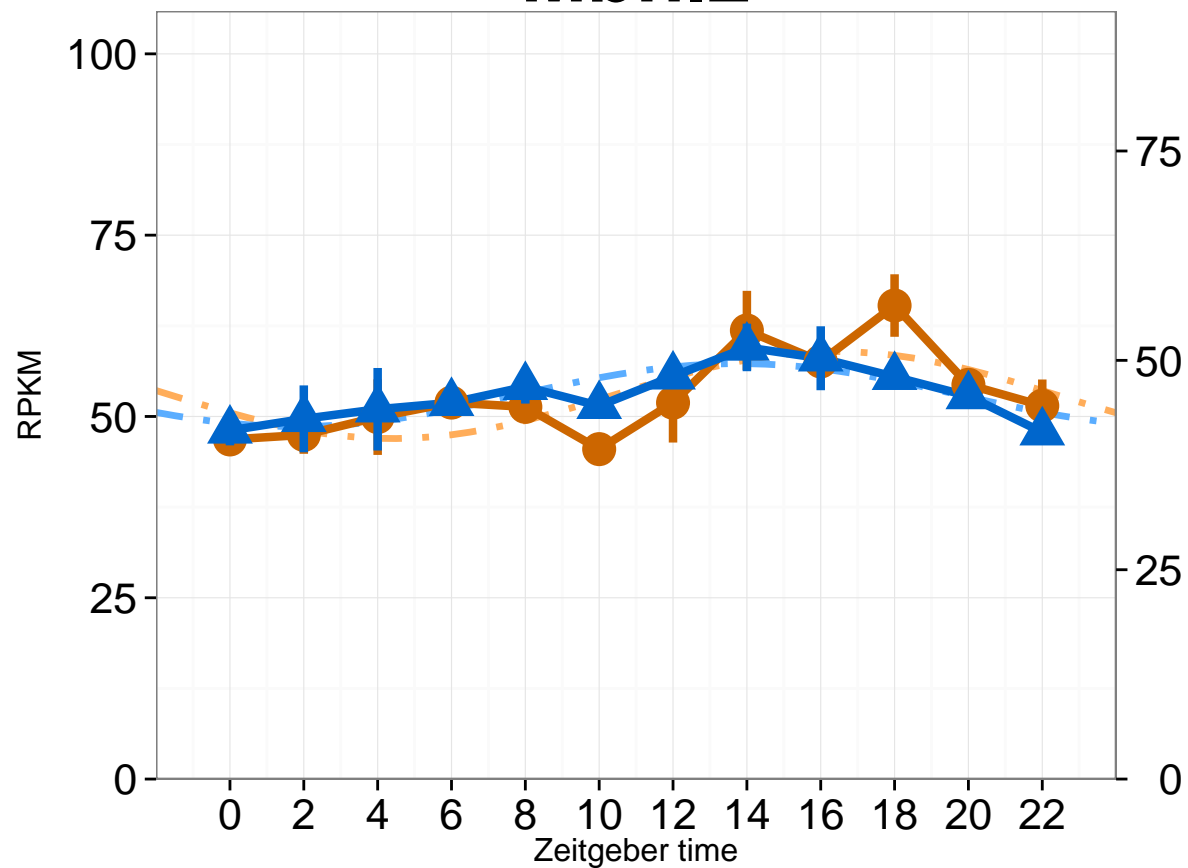

## Mbnl2

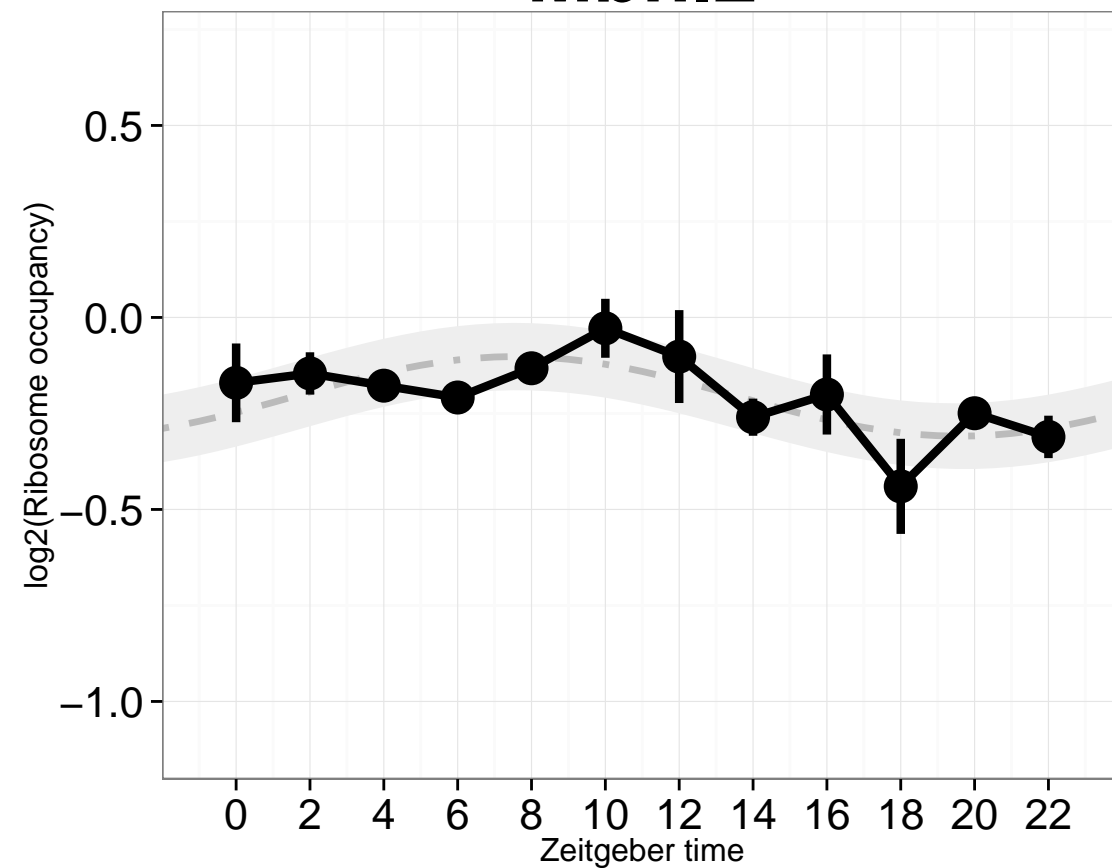

Supplement: Supplementary file 1675 [file 1]

# Pde7b

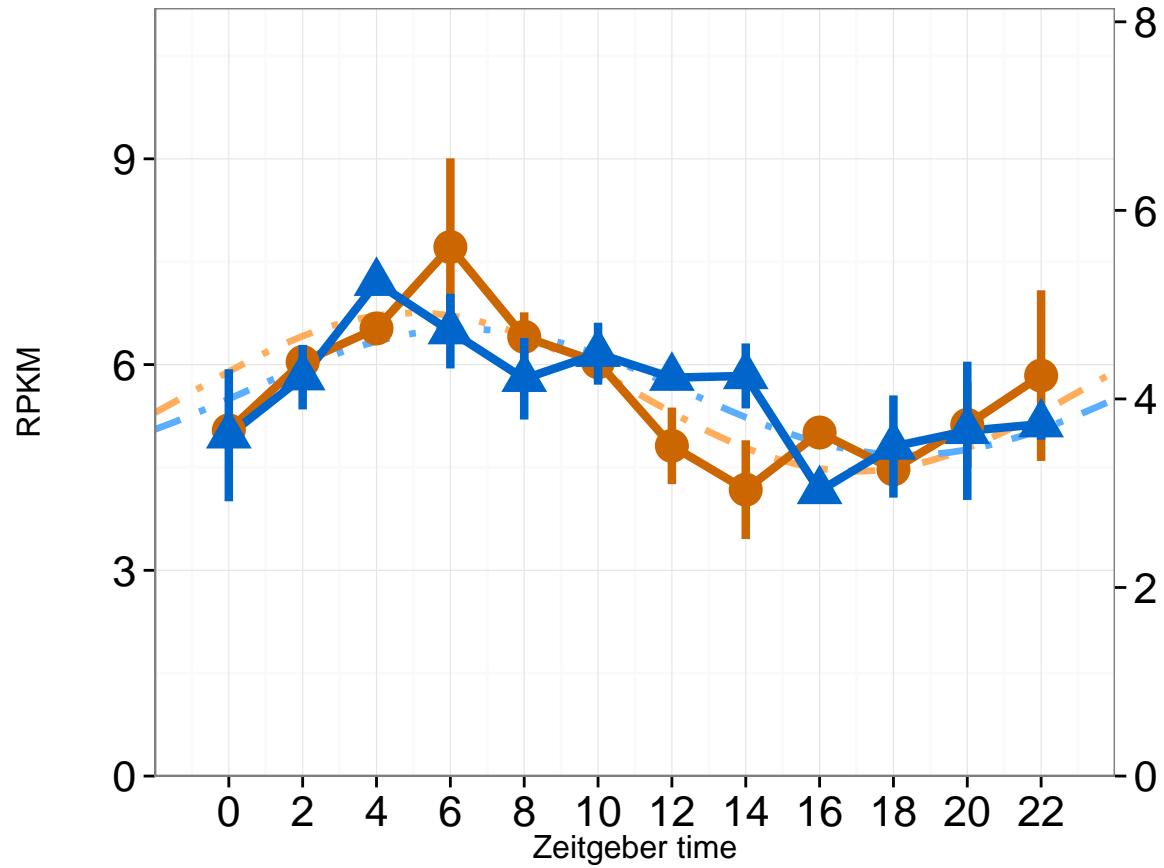

# Pde7b

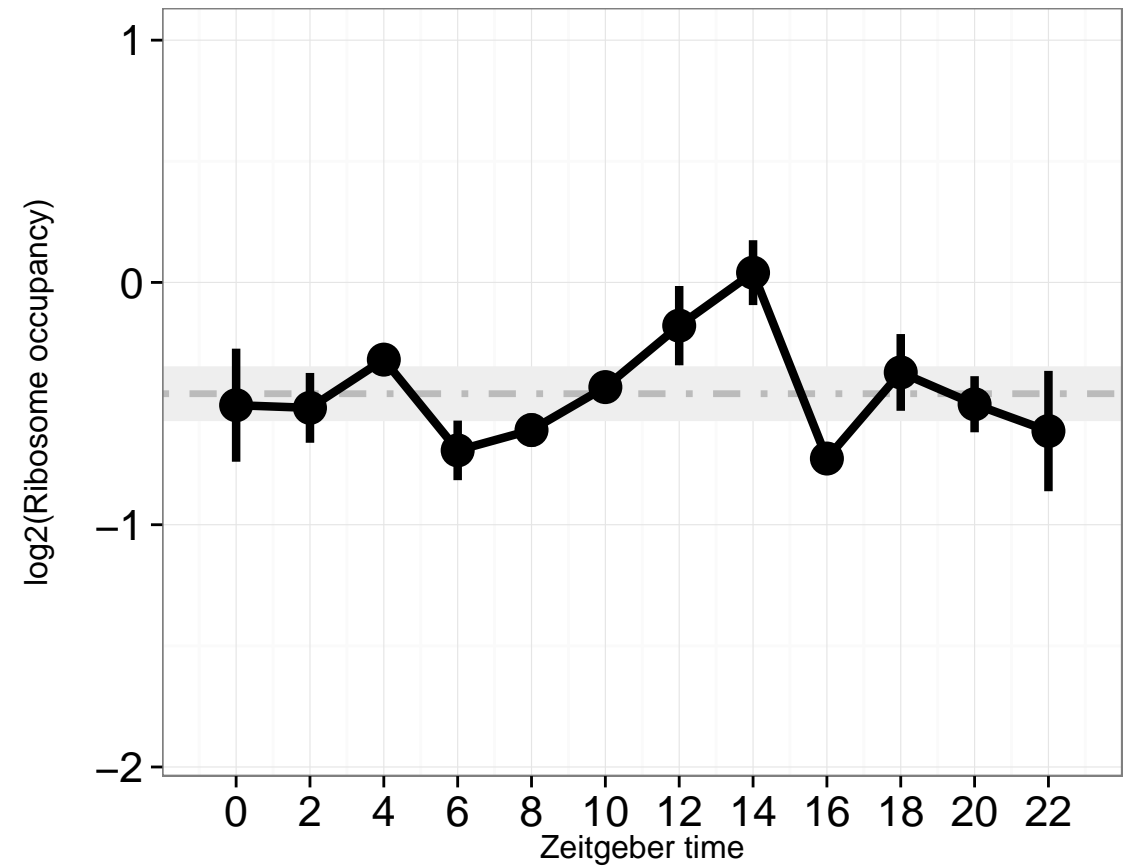

Supplement: Supplementary file 1676 [file 1]

## Efcab2

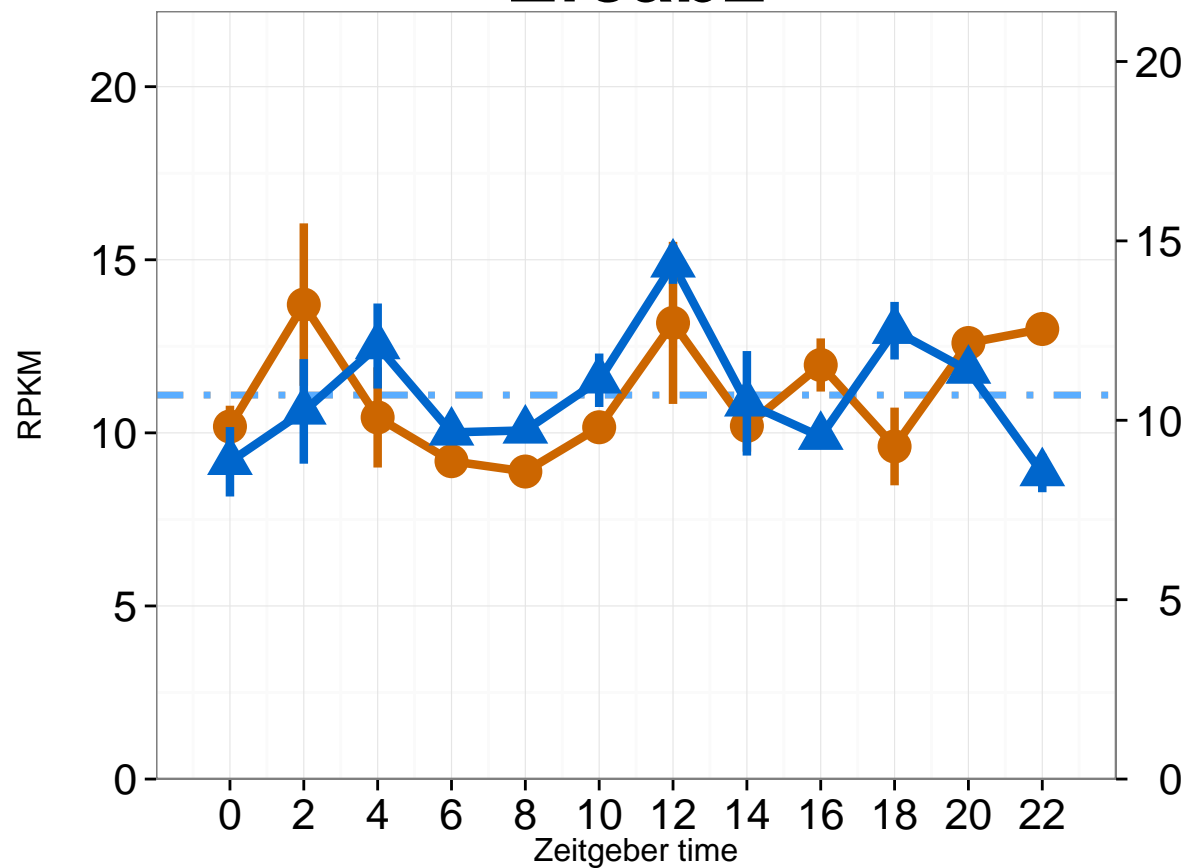

## Efcab2

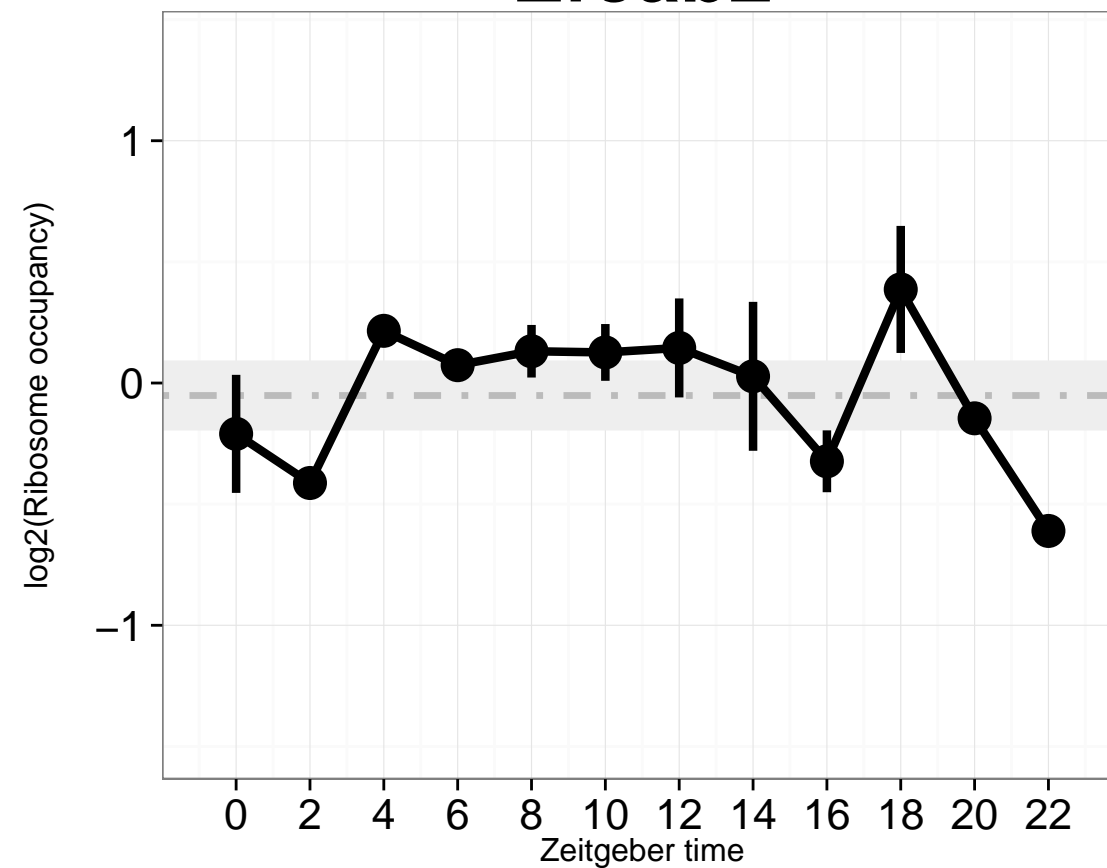

Supplement: Supplementary file 1677 [file 1]

## Rad52

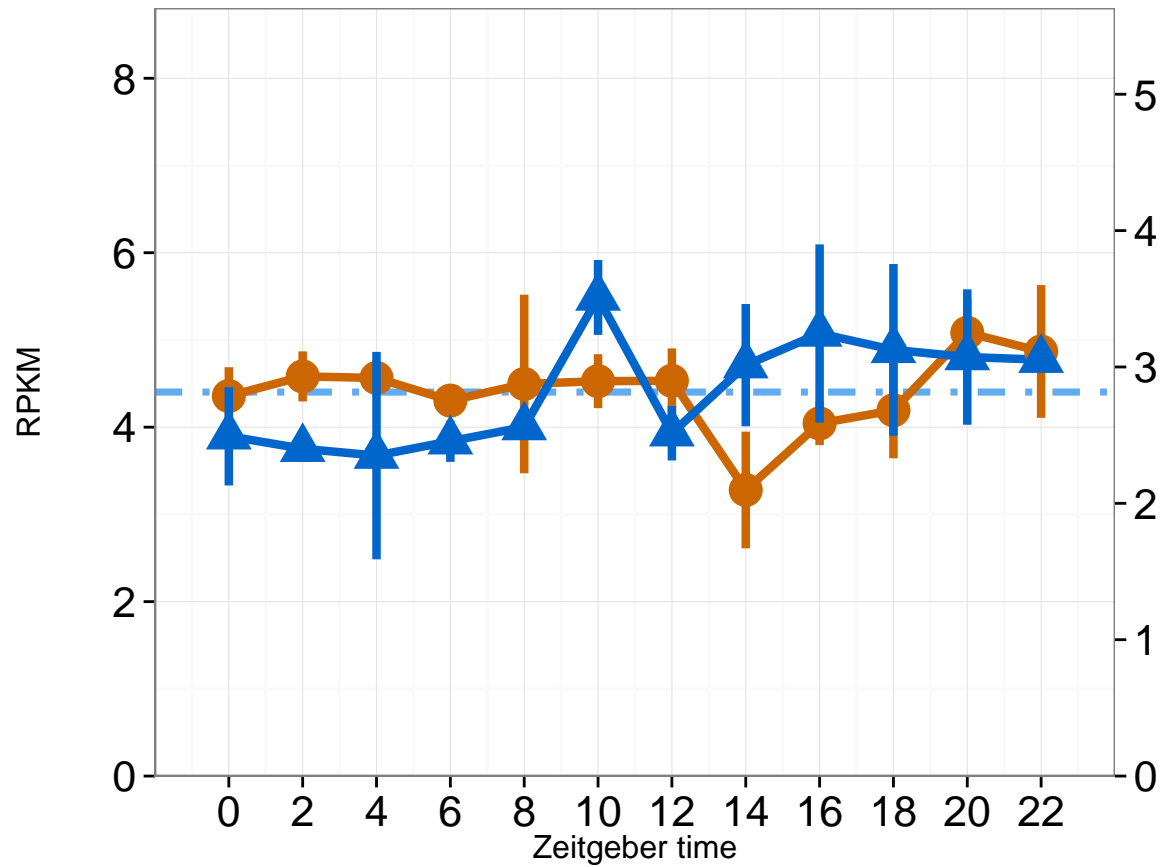

## Rad52

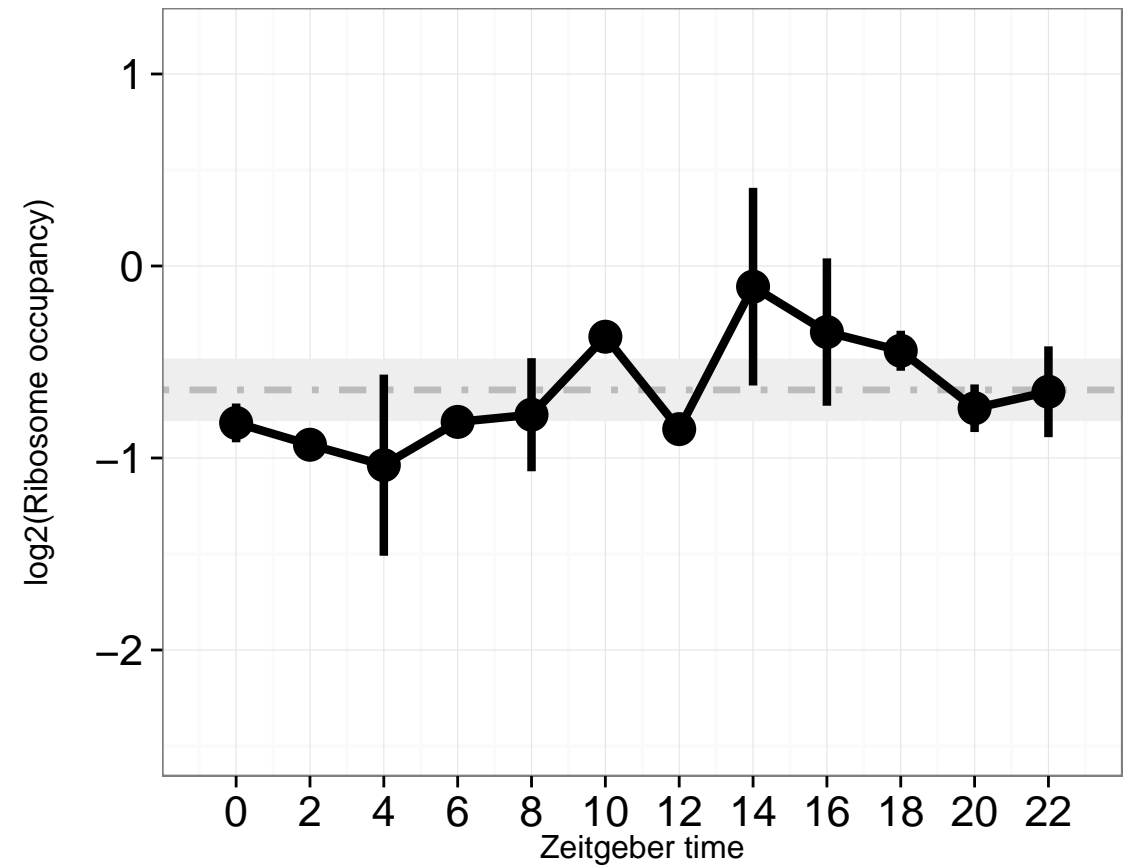

Supplement: Supplementary file 1678 [file 1]

## Ddx3x

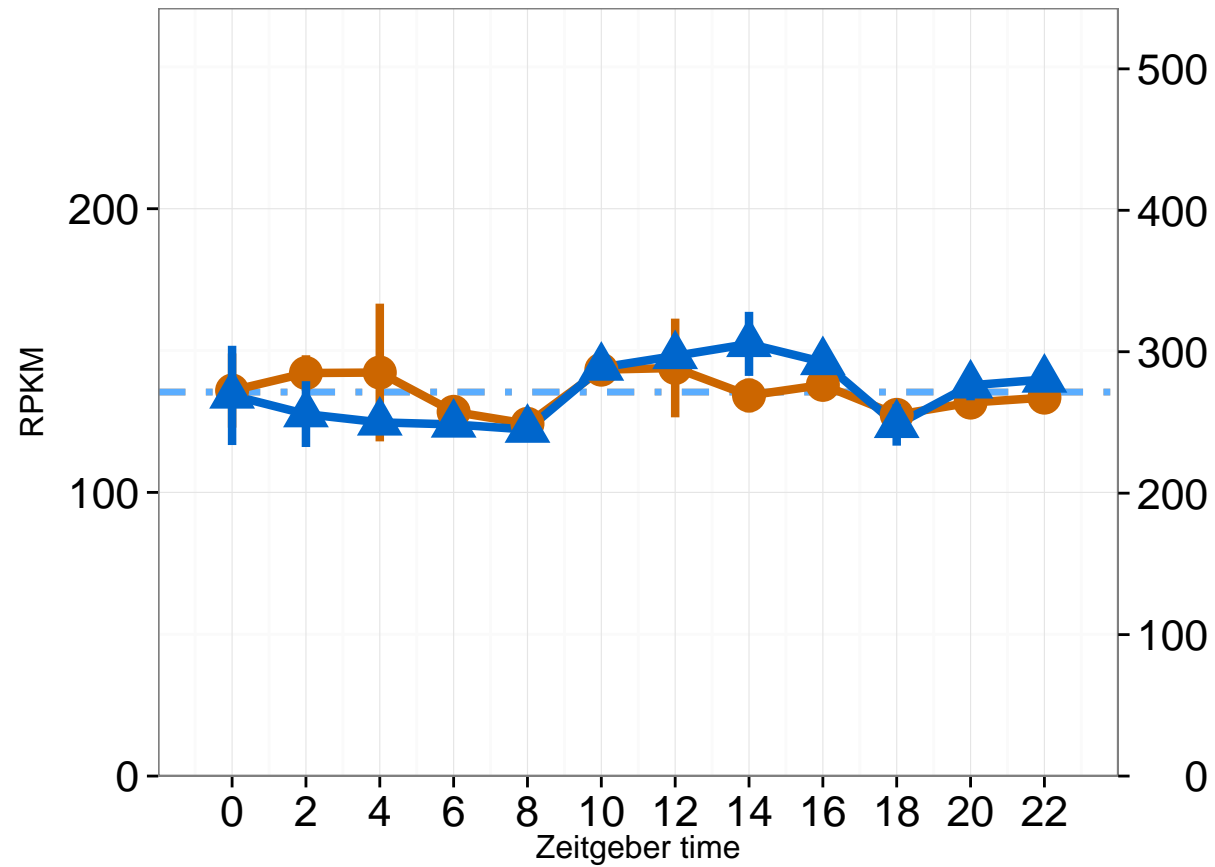

## Ddx3x

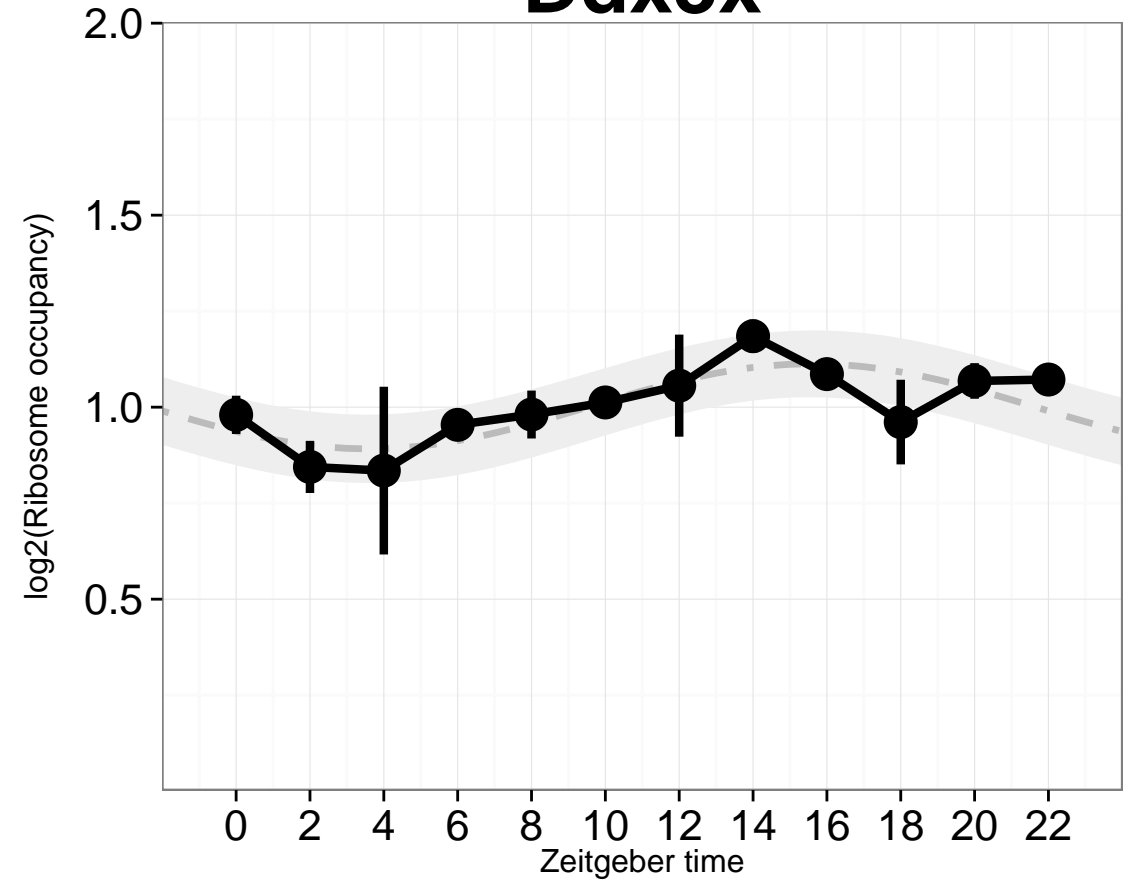

Supplement: Supplementary file 1679 [file 1]

# Pkn3

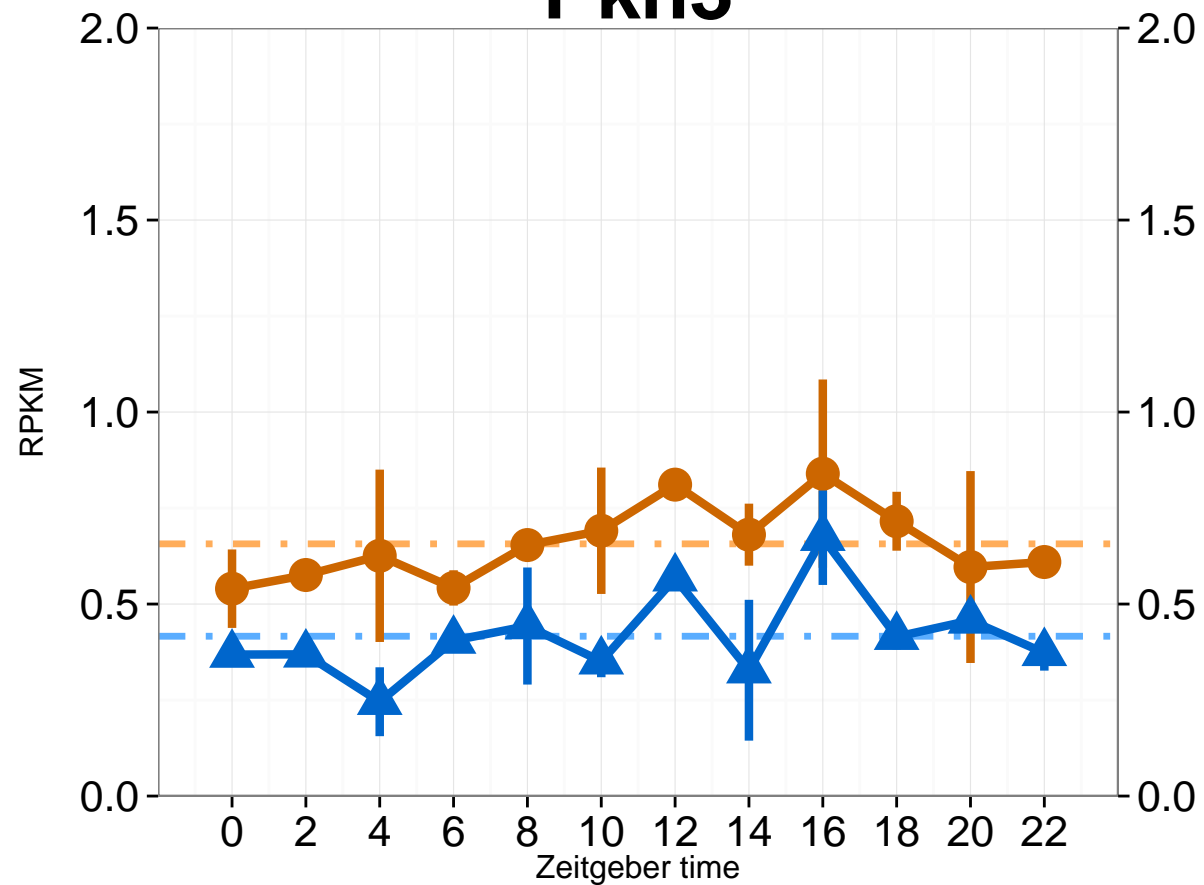

# Pkn3

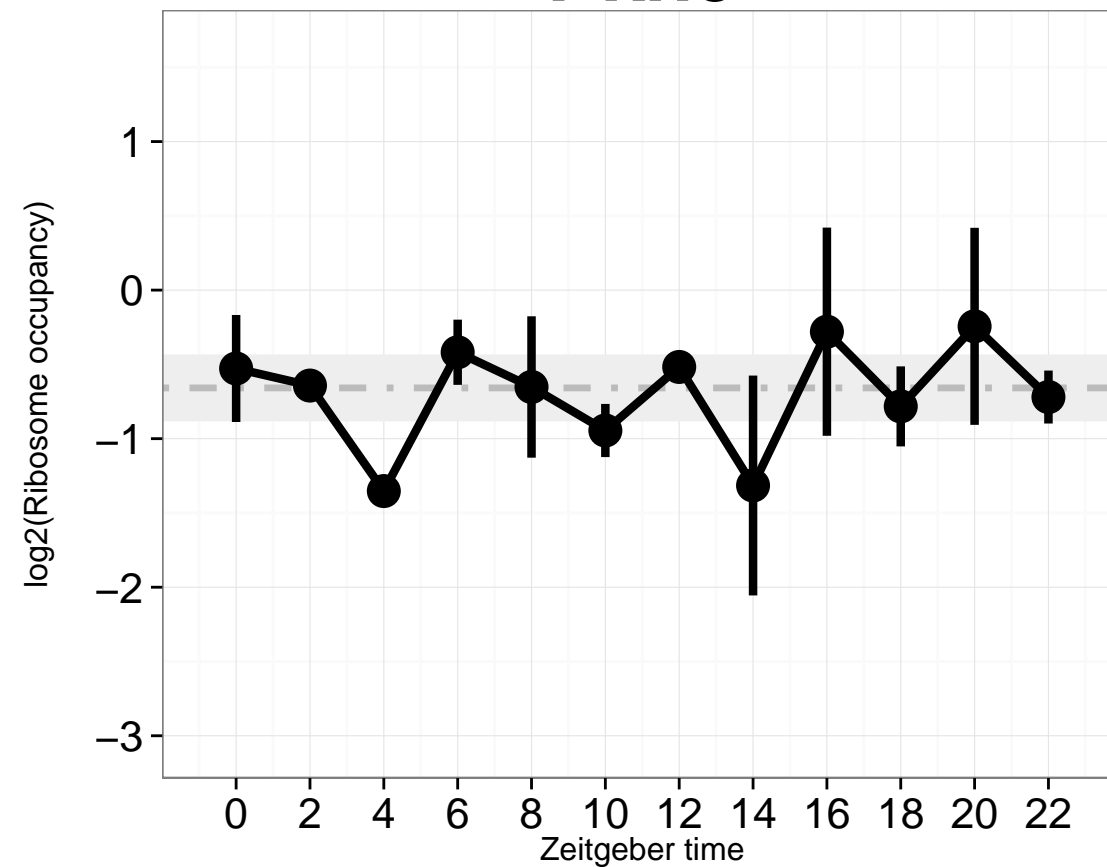

Supplement: Supplementary file 1680 [file 1]

## Eif2s2

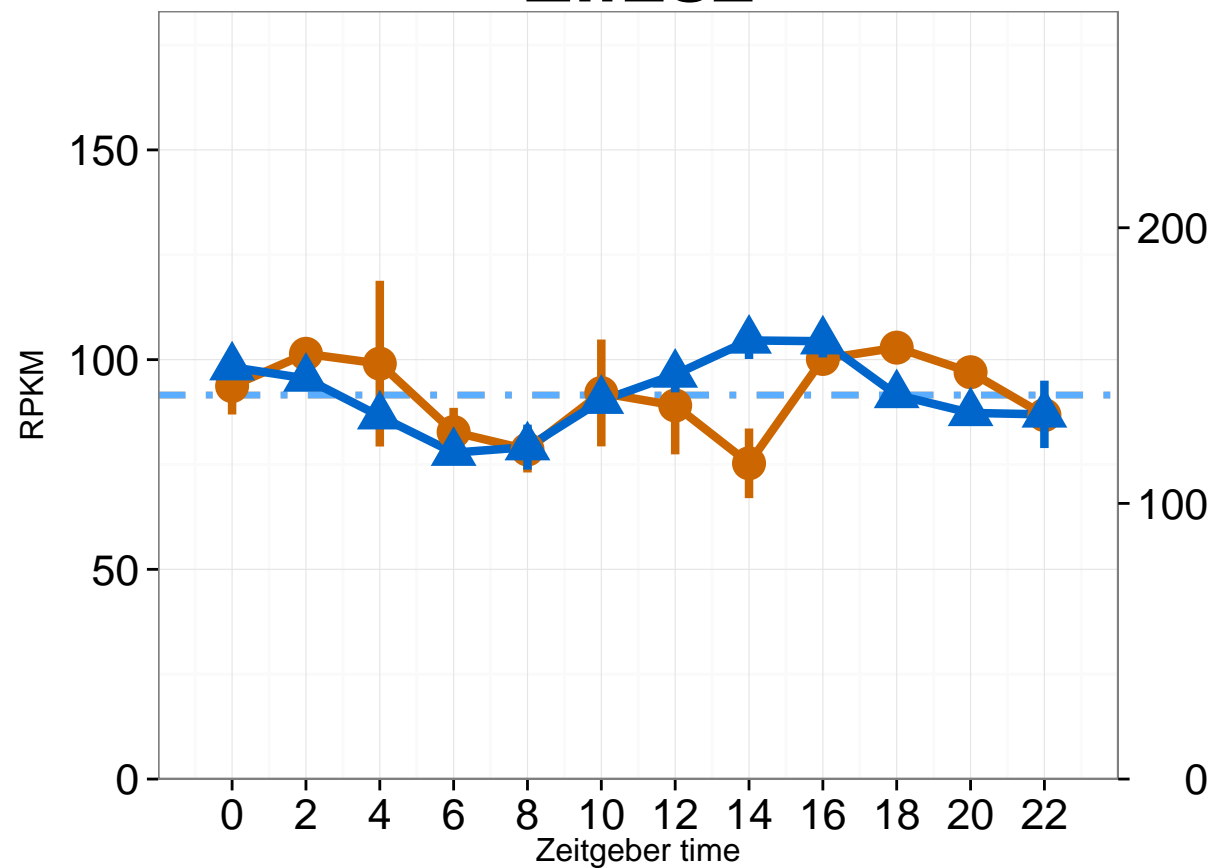

## Eif2s2

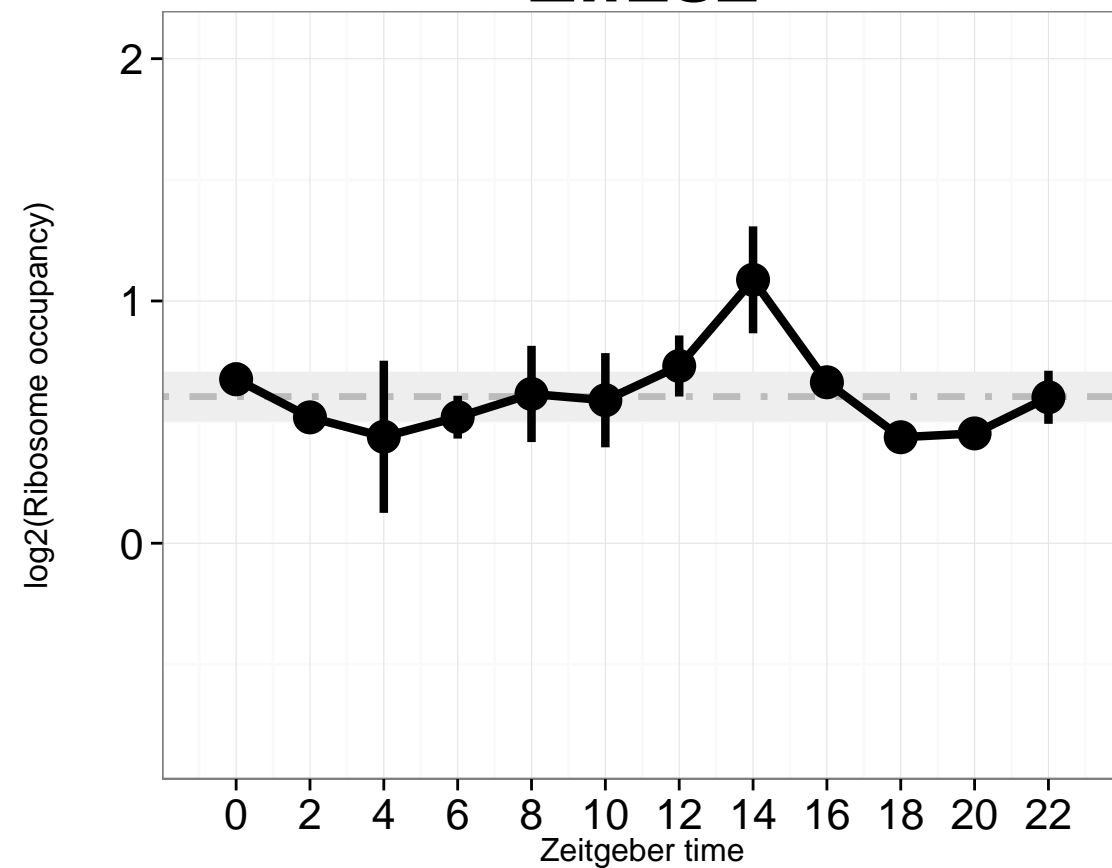

Supplement: Supplementary file 1681 [file 1]

## Rilpl2

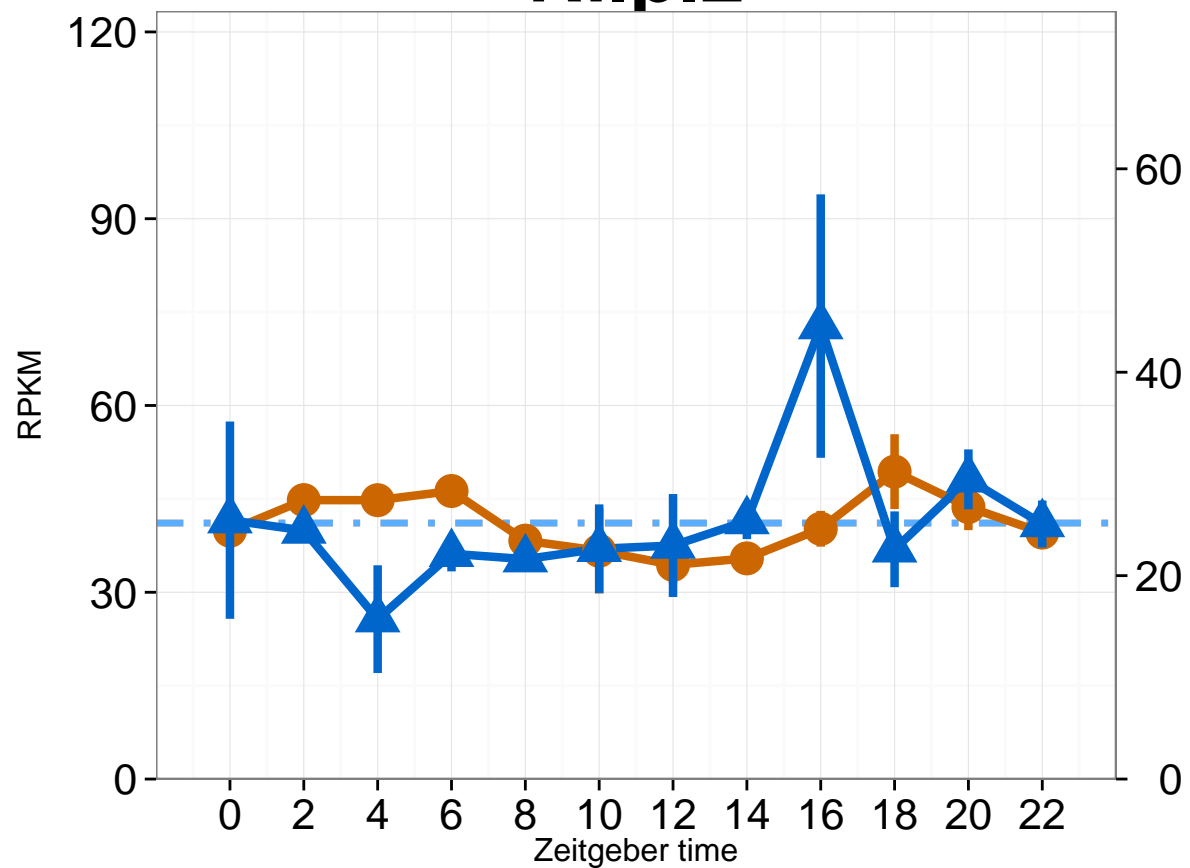

## Rilpl2

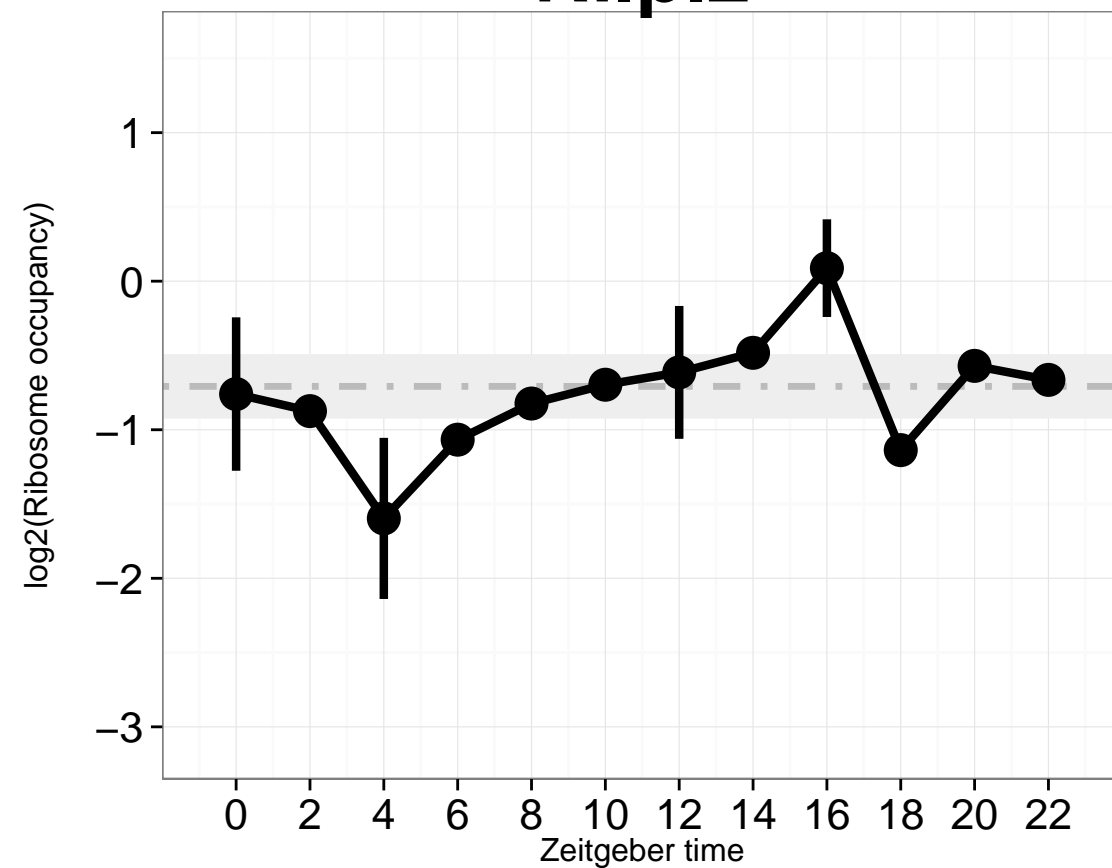

Supplement: Supplementary file 1682 [file 1]

## Uchl5

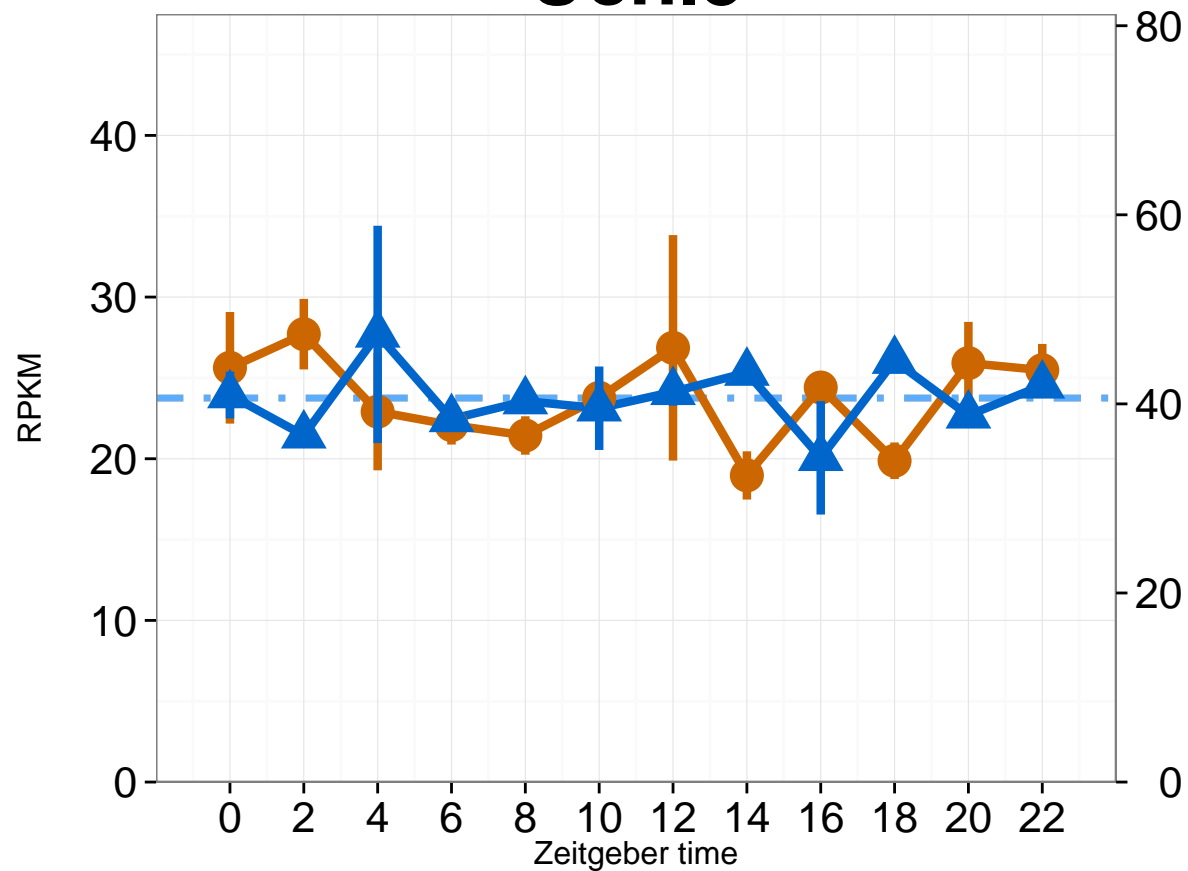

## Uchl5

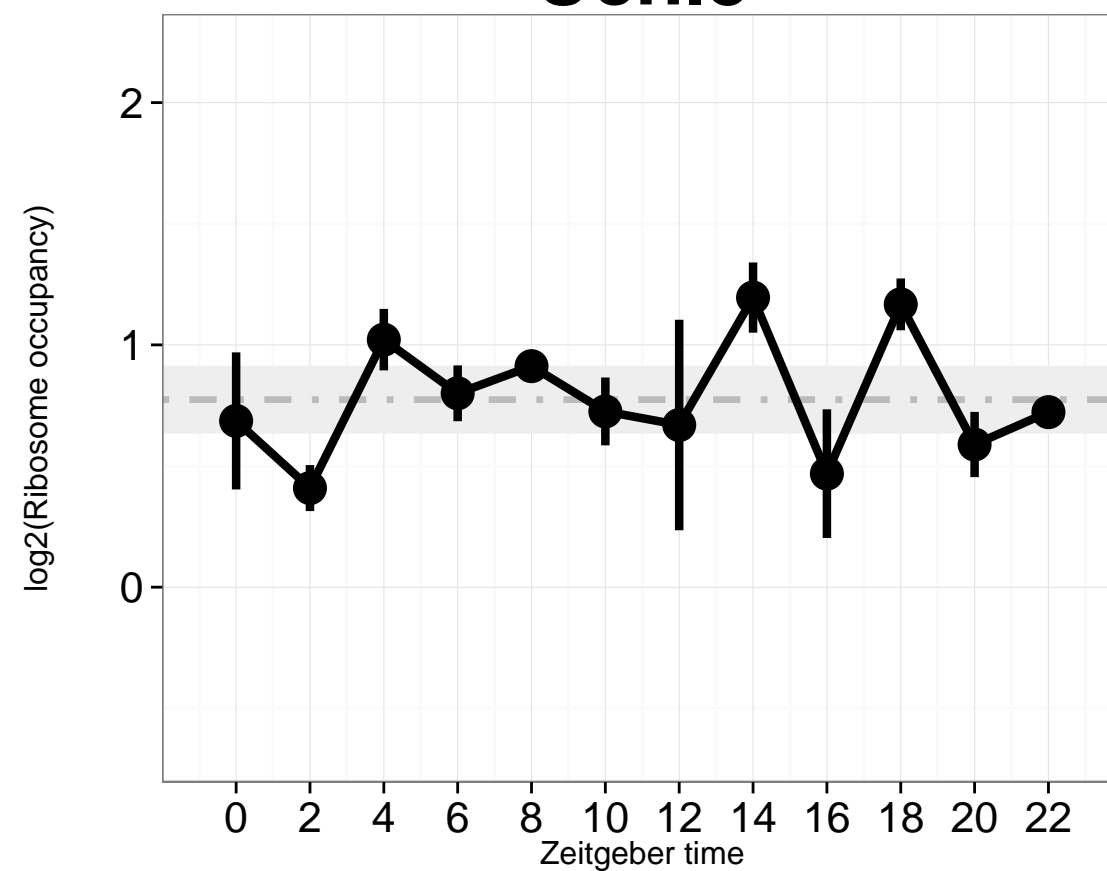

Supplement: Supplementary file 1683 [file 1]

## Ptk2

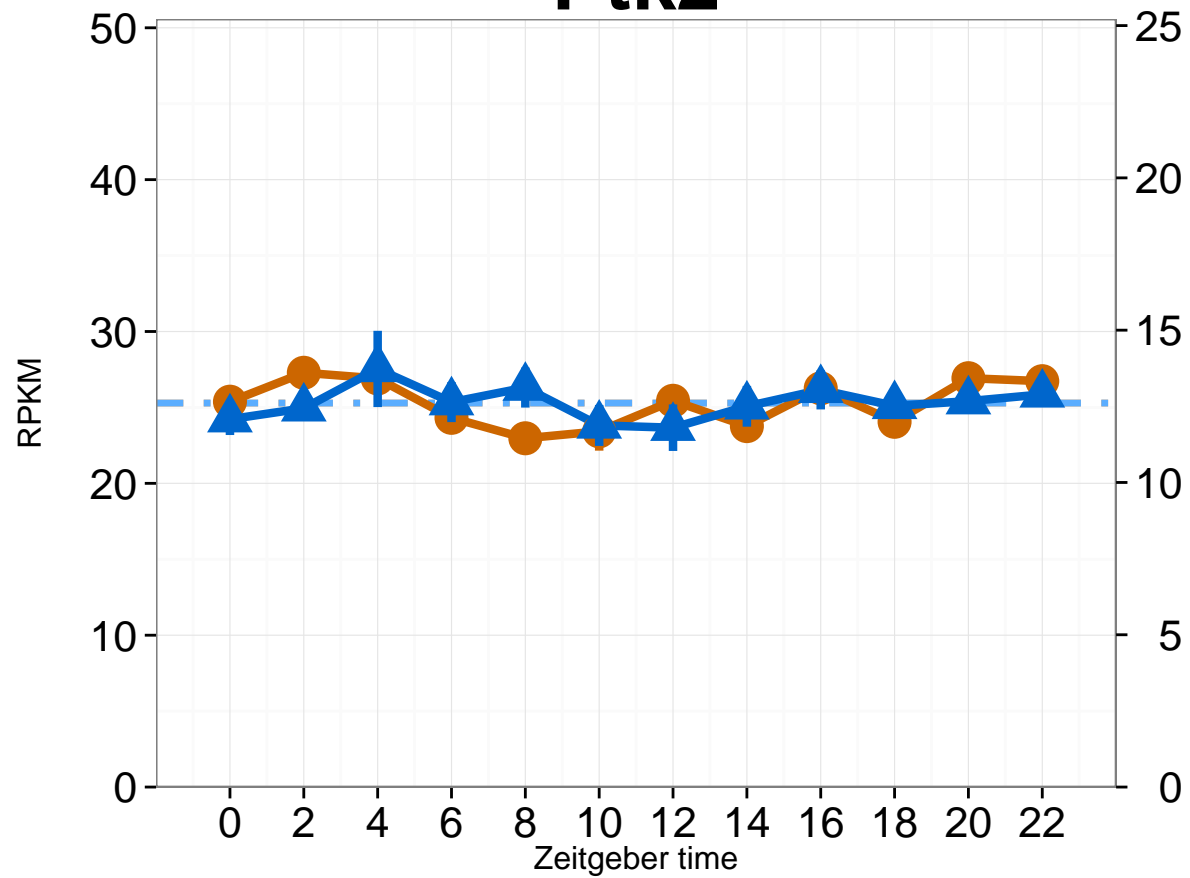

## Ptk2

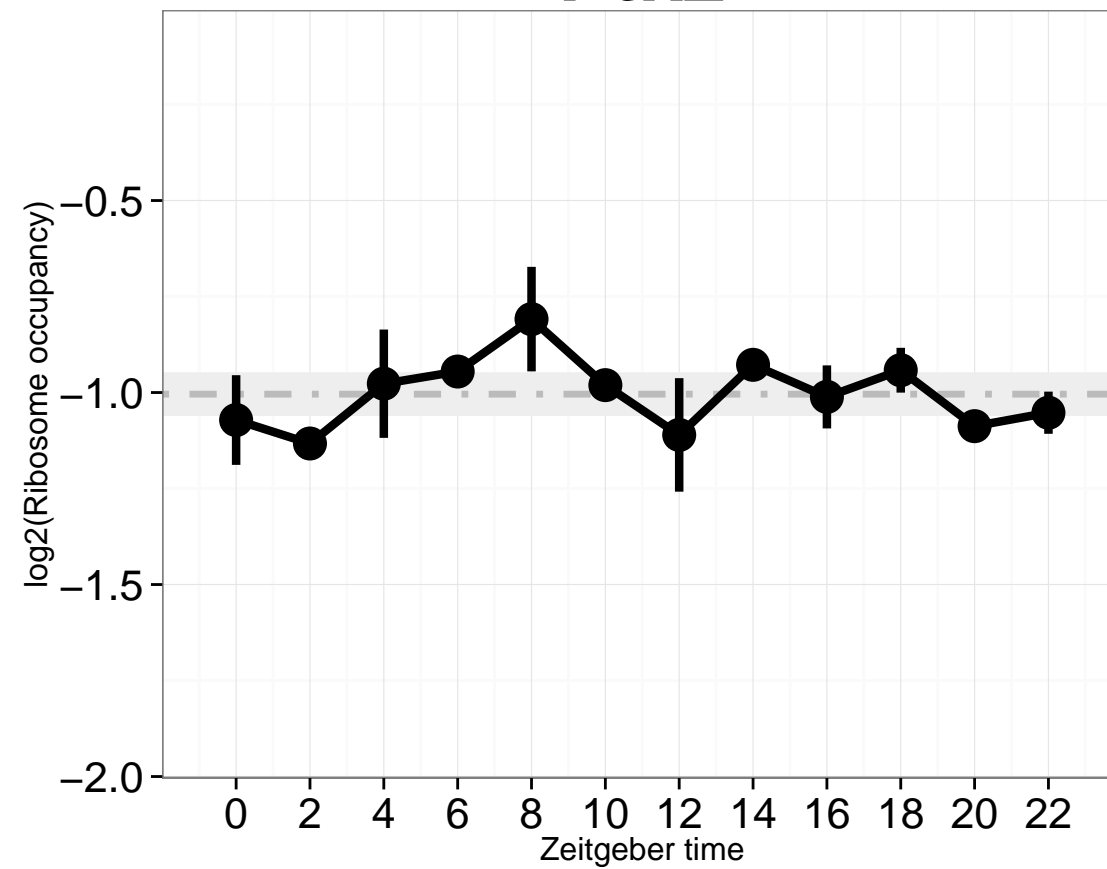

Supplement: Supplementary file 1684 [file 1]

## Stam

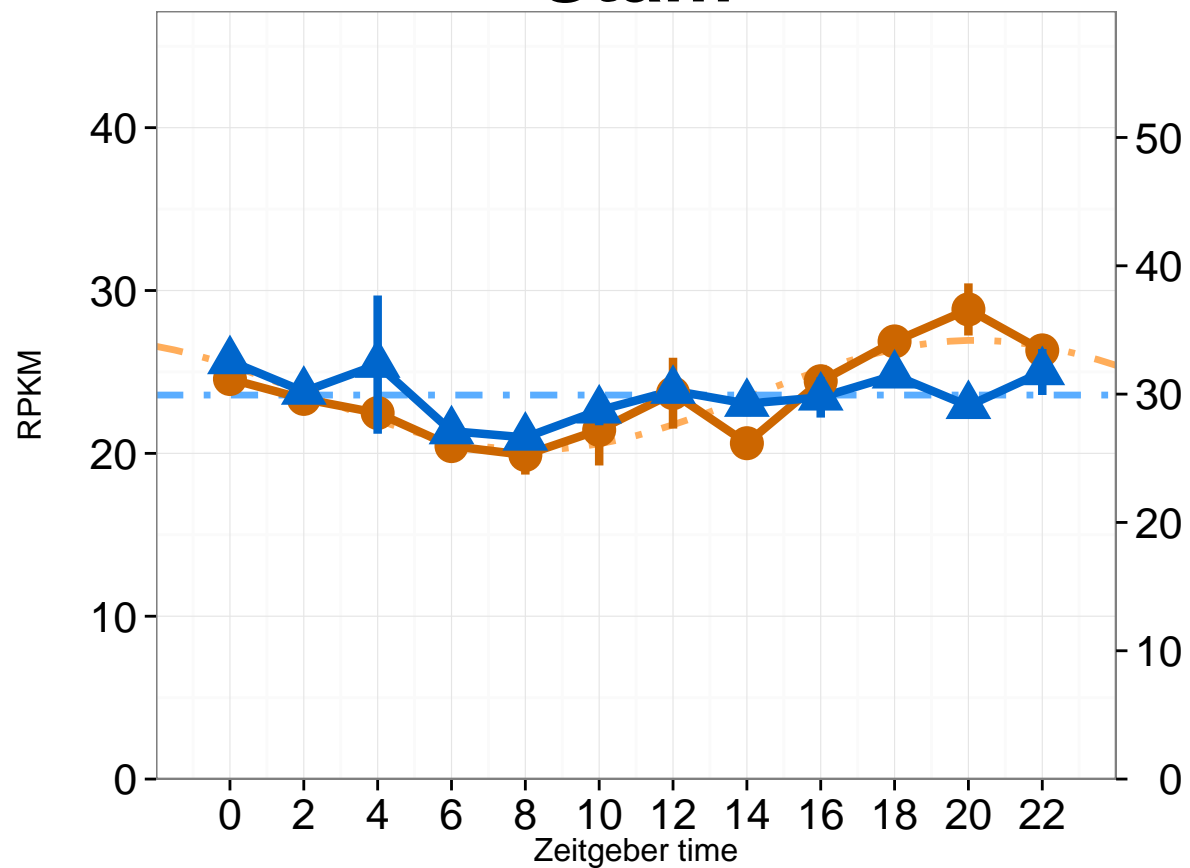

## Stam

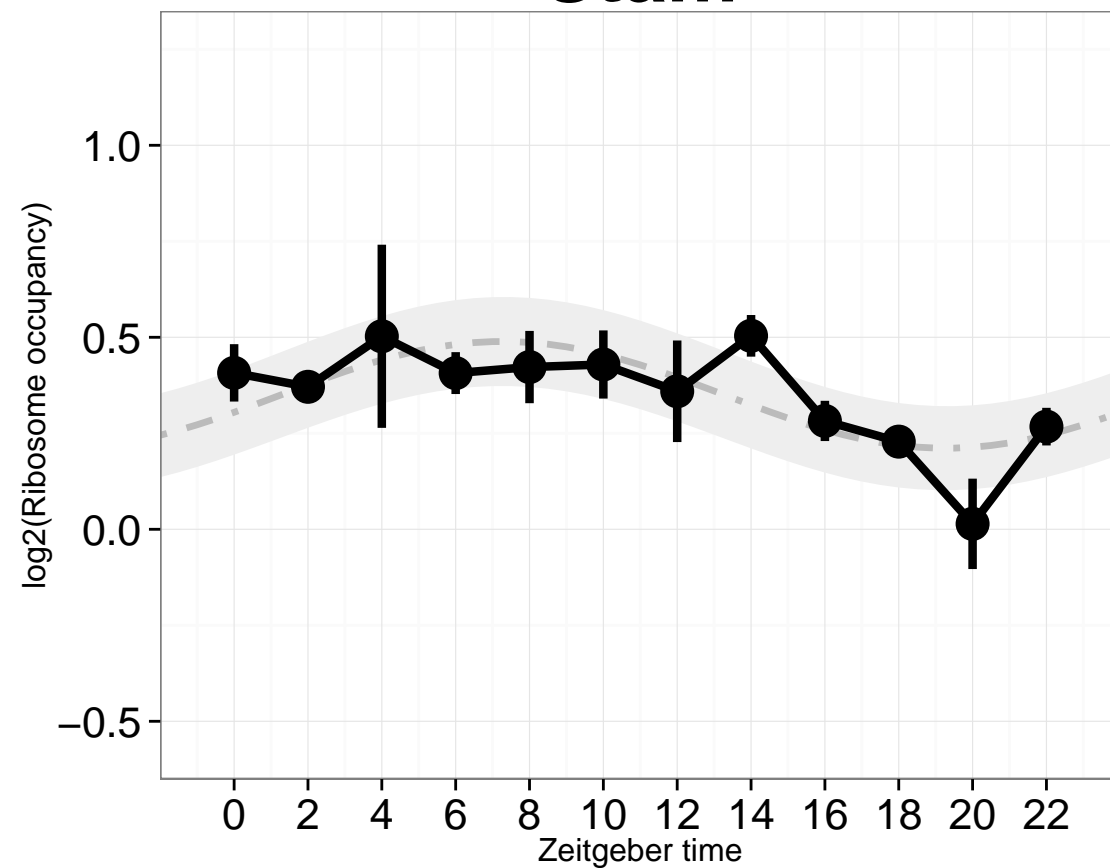

Supplement: Supplementary file 1685 [file 1]

## Syde2

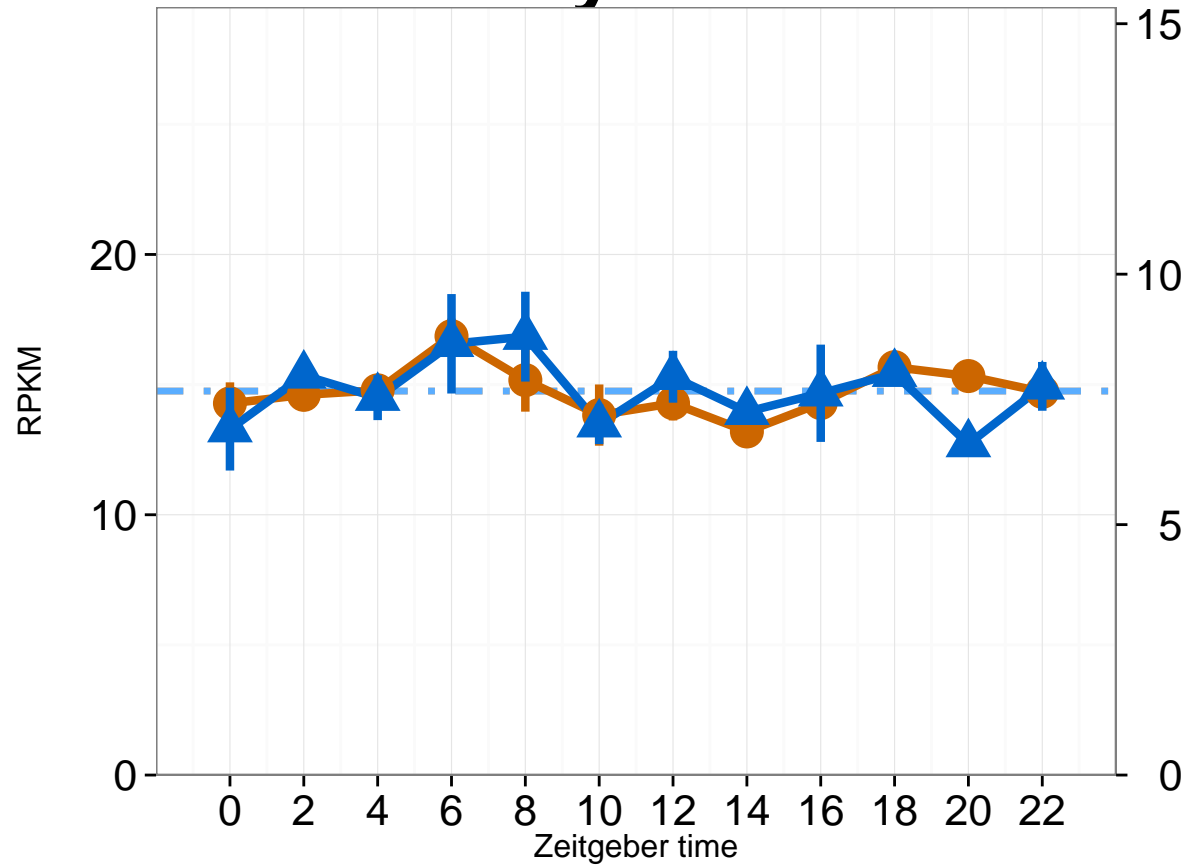

## Syde2

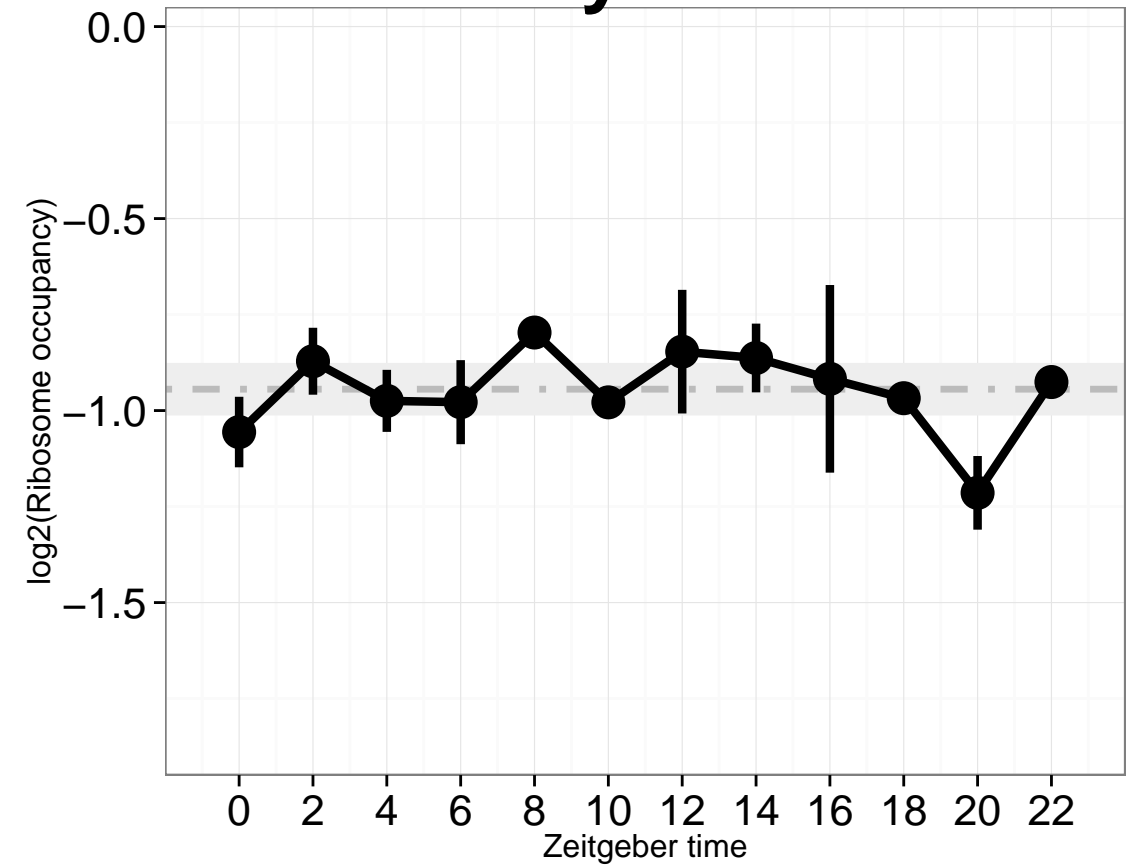

Supplement: Supplementary file 1686 [file 1]

# Mbp

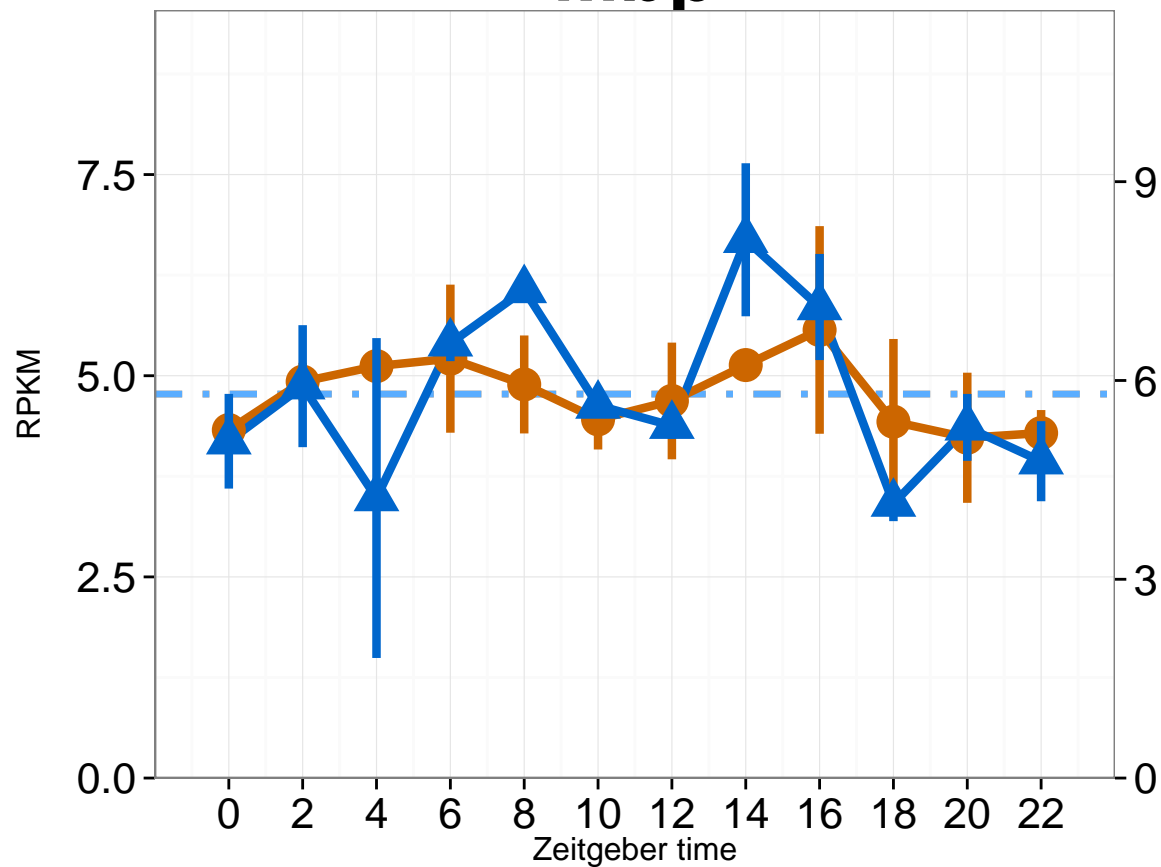

# Mbp

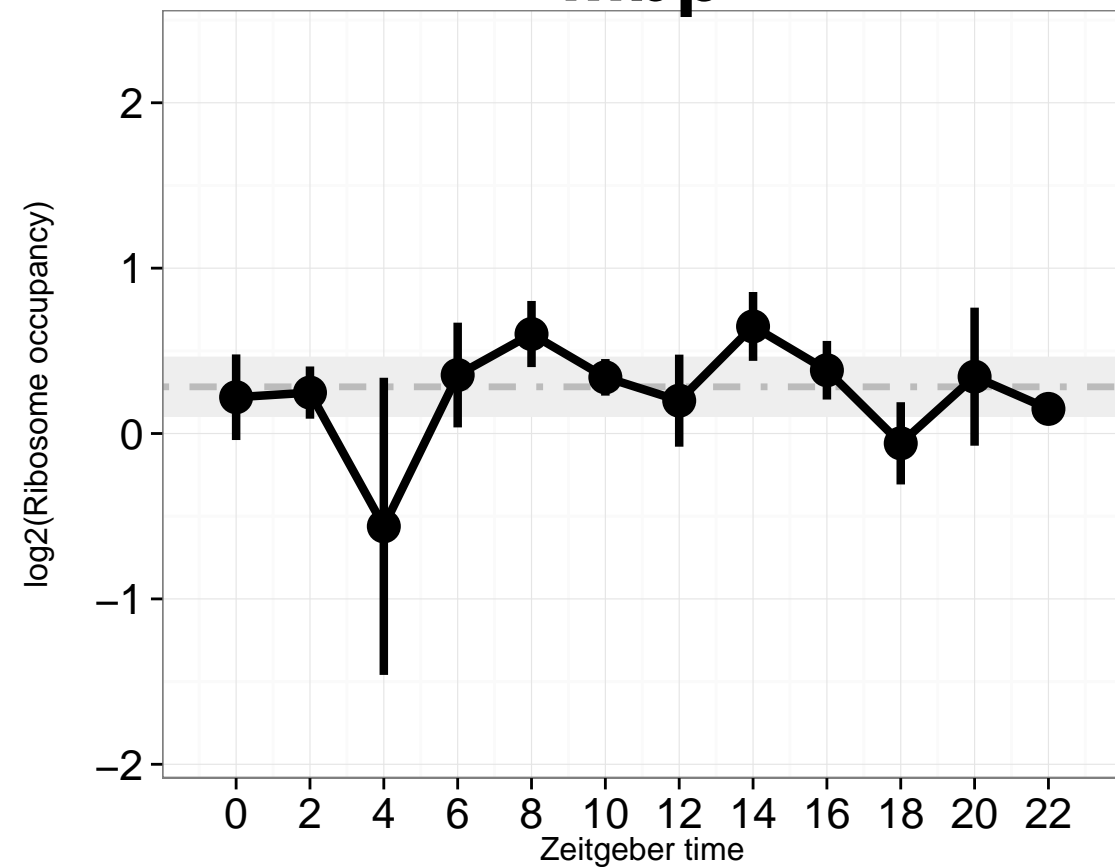

Supplement: Supplementary file 1687 [file 1]

## Cul7

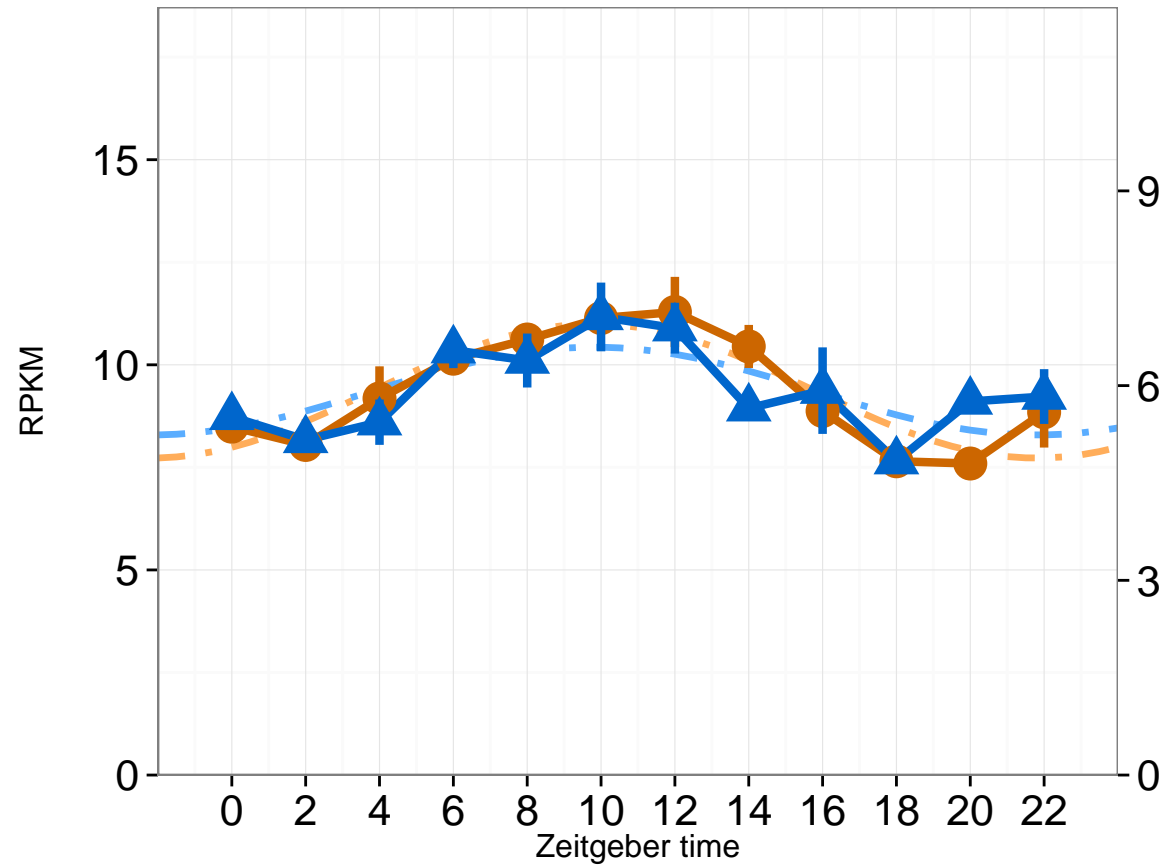

## Cul7

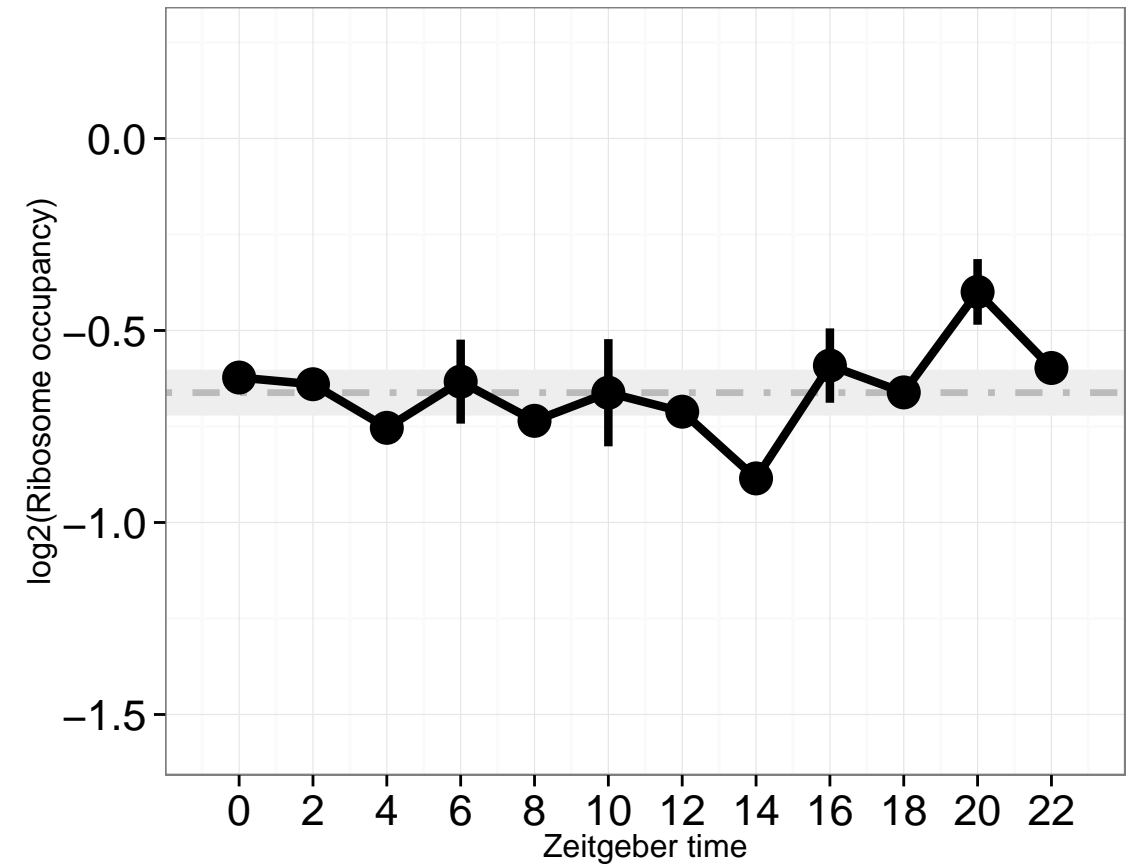

Supplement: Supplementary file 1688 [file 1]

# Trim44

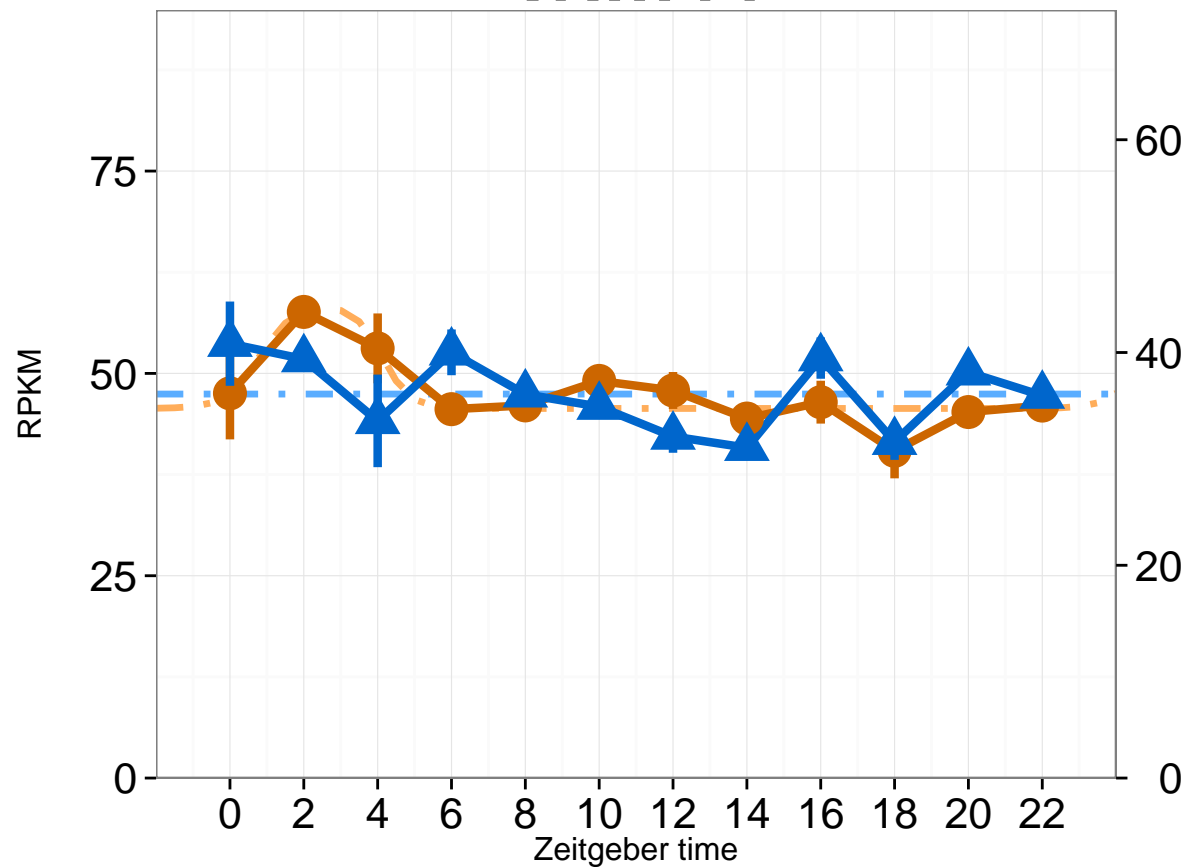

# Trim44

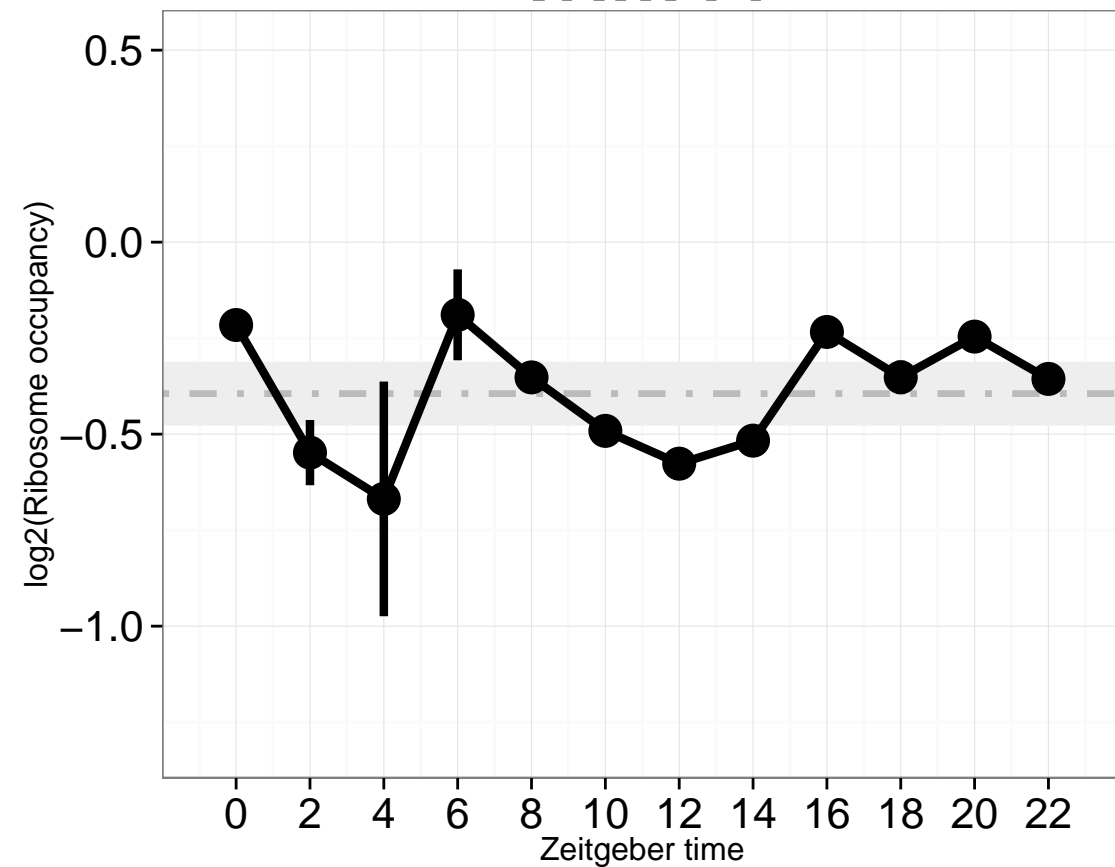

Supplement: Supplementary file 1689 [file 1]

# Ift20

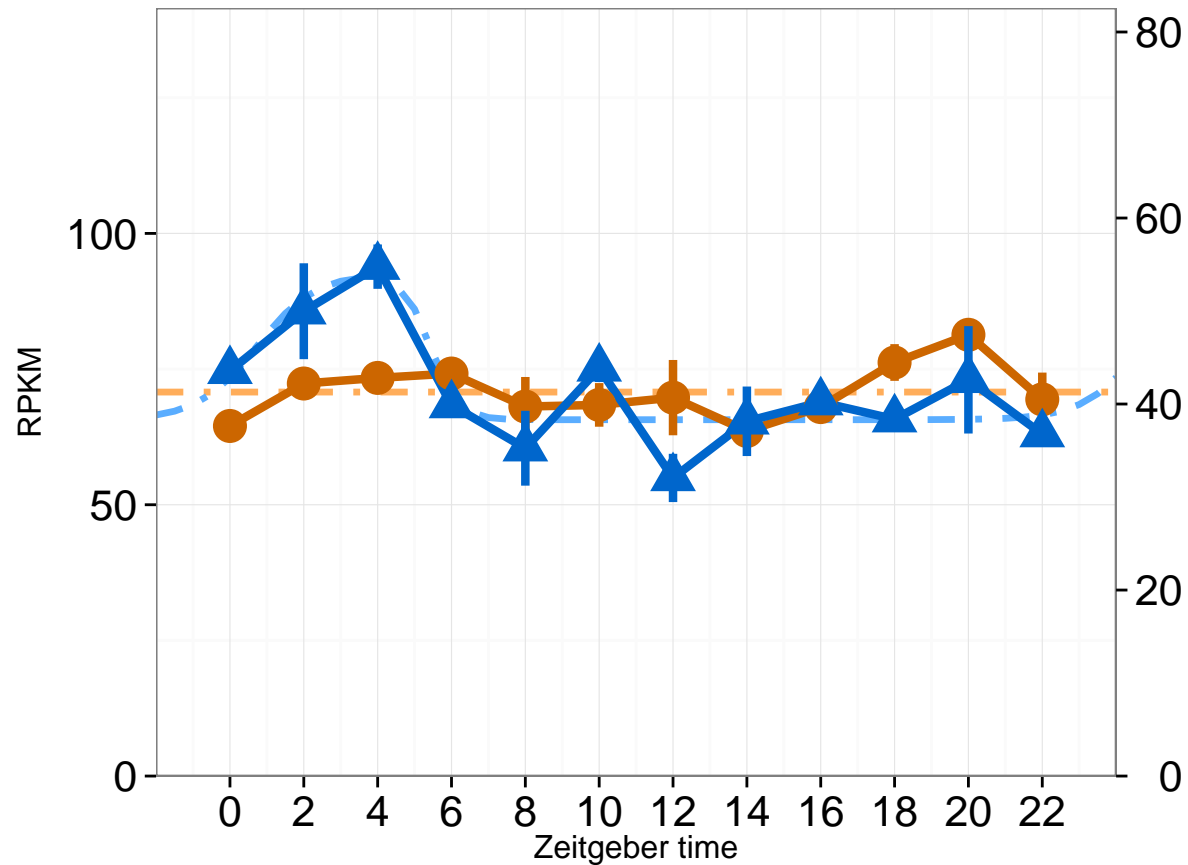

# Ift20

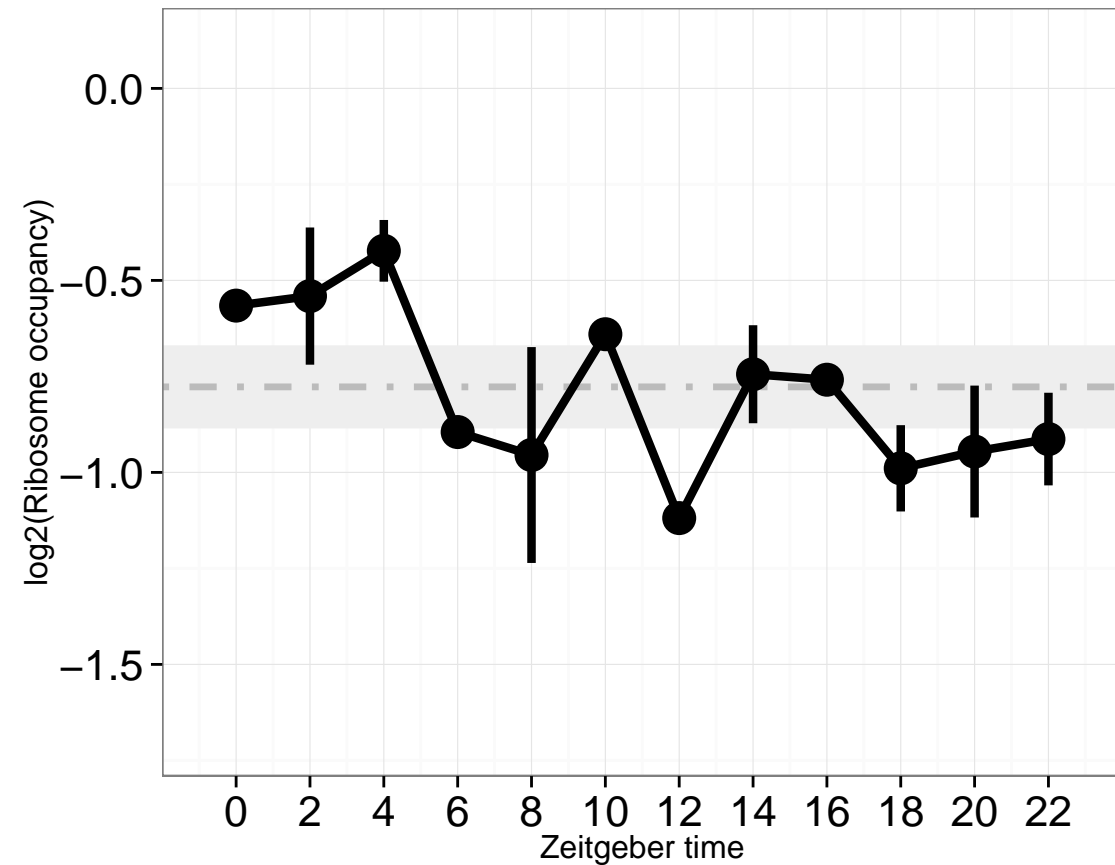

Supplement: Supplementary file 1690 [file 1]

## Cnih4

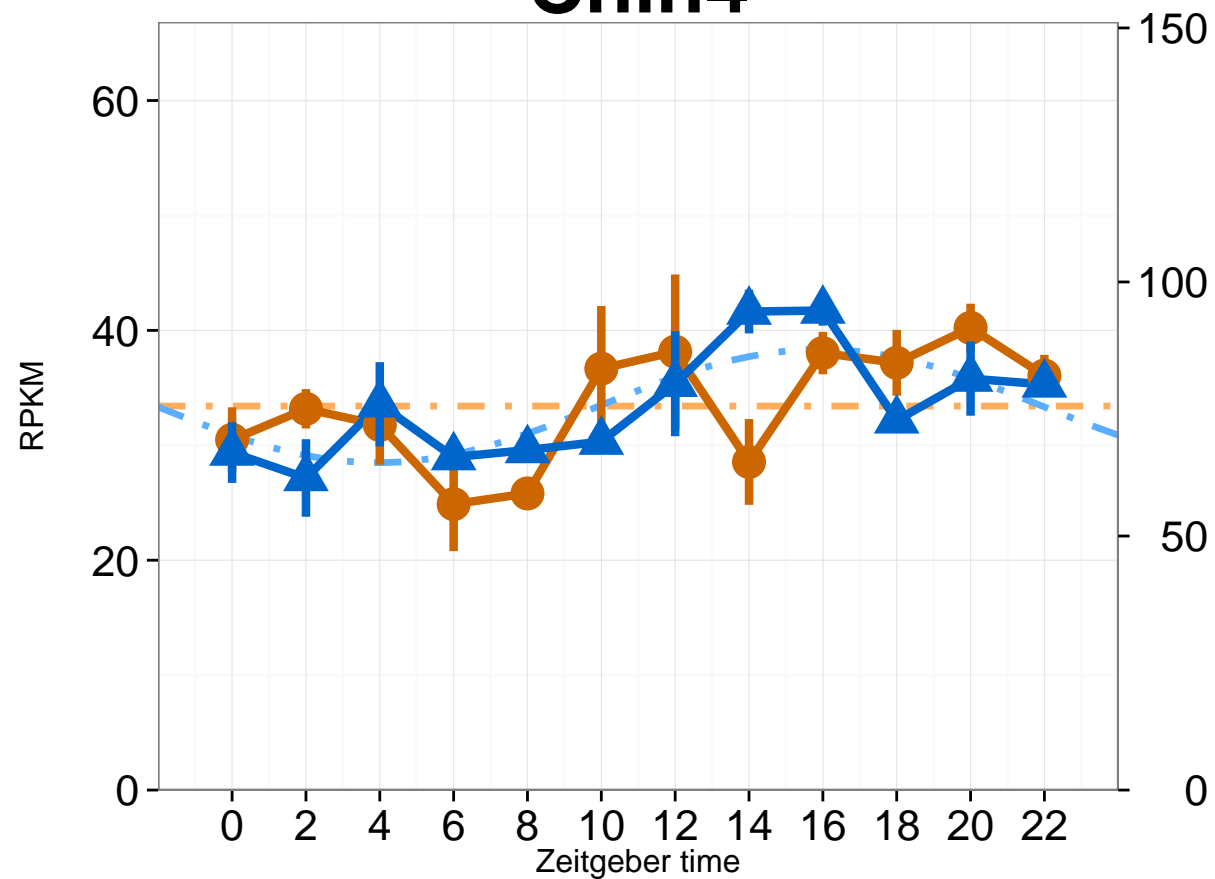

## Cnih4

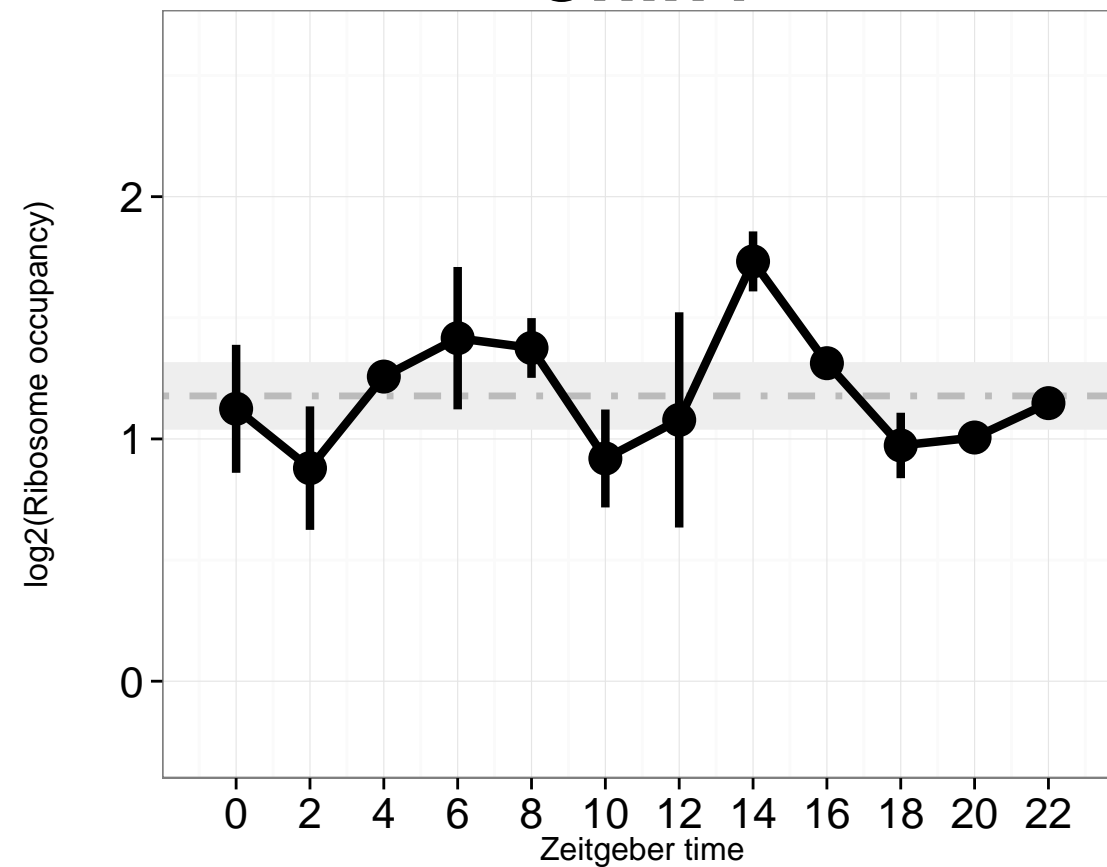

Supplement: Supplementary file 1691 [file 1]

## Wdr72

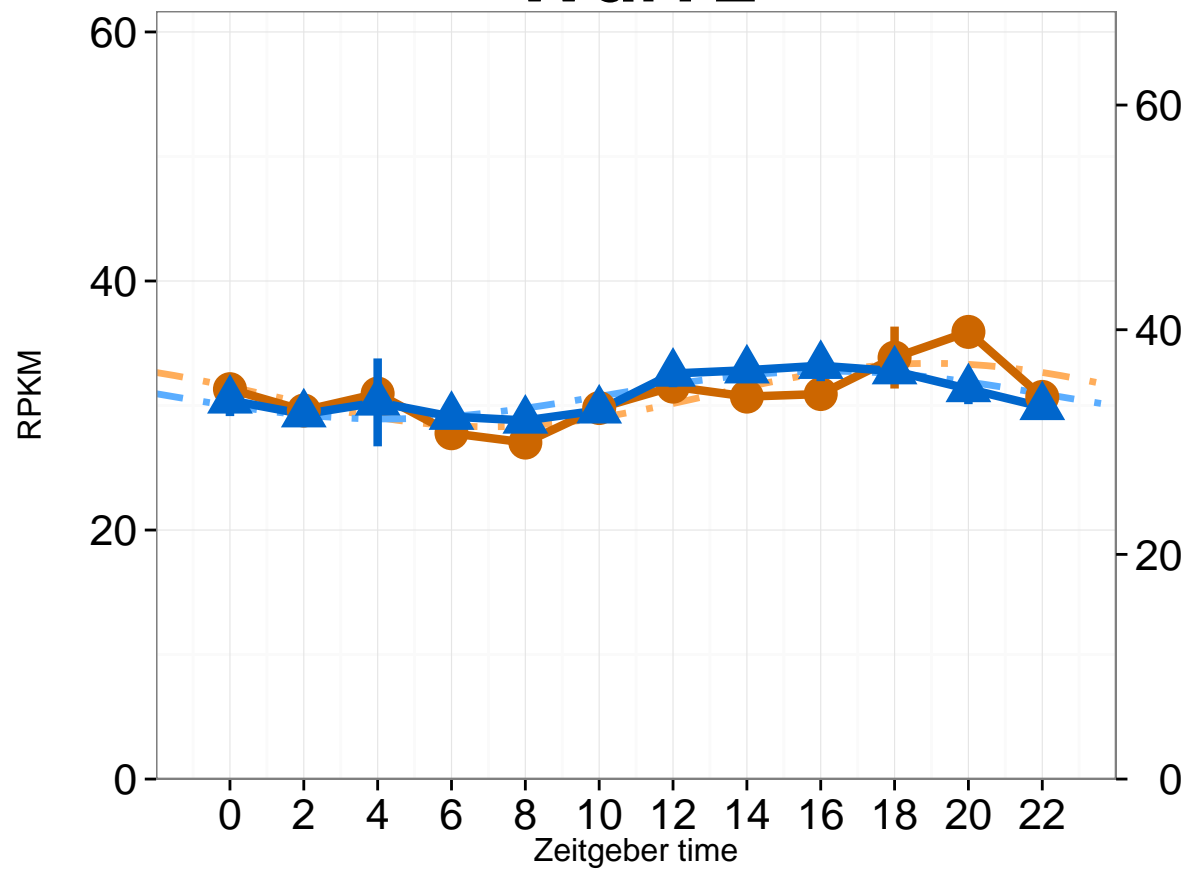

## Wdr72

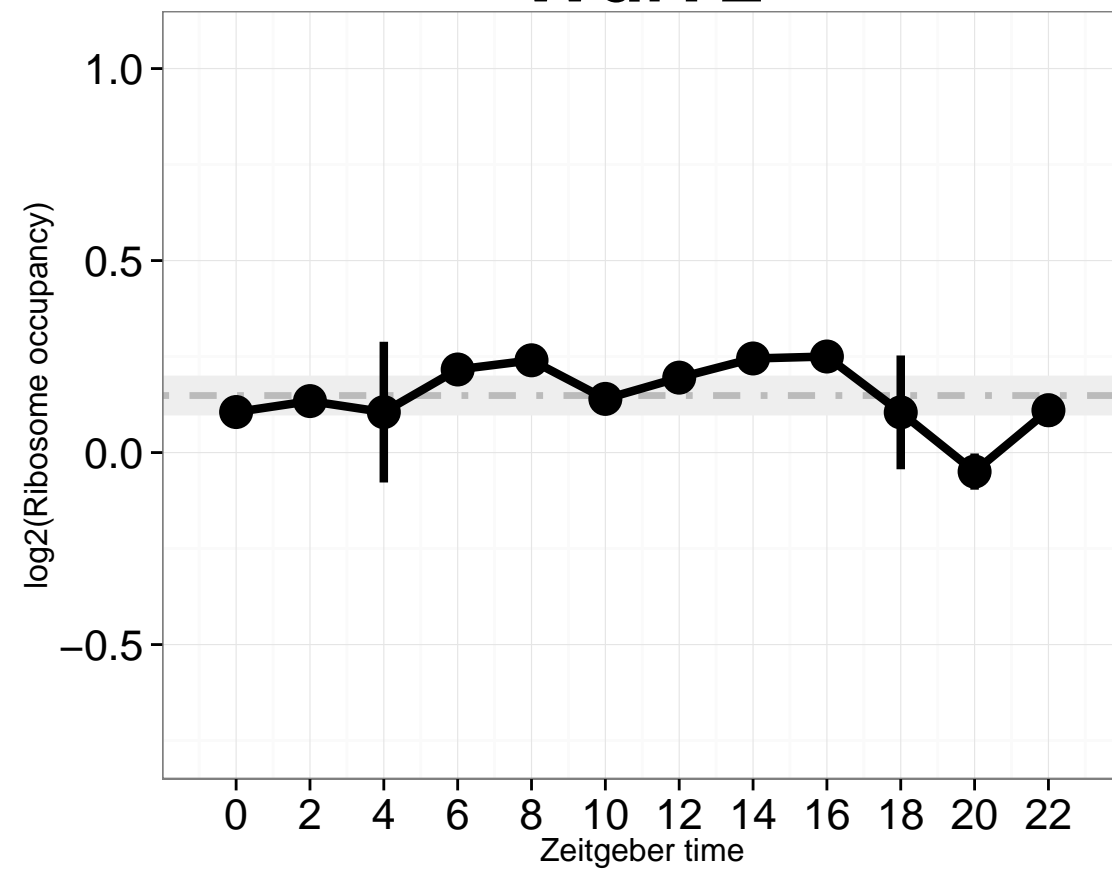

Supplement: Supplementary file 1692 [file 1]

## Ankrd40

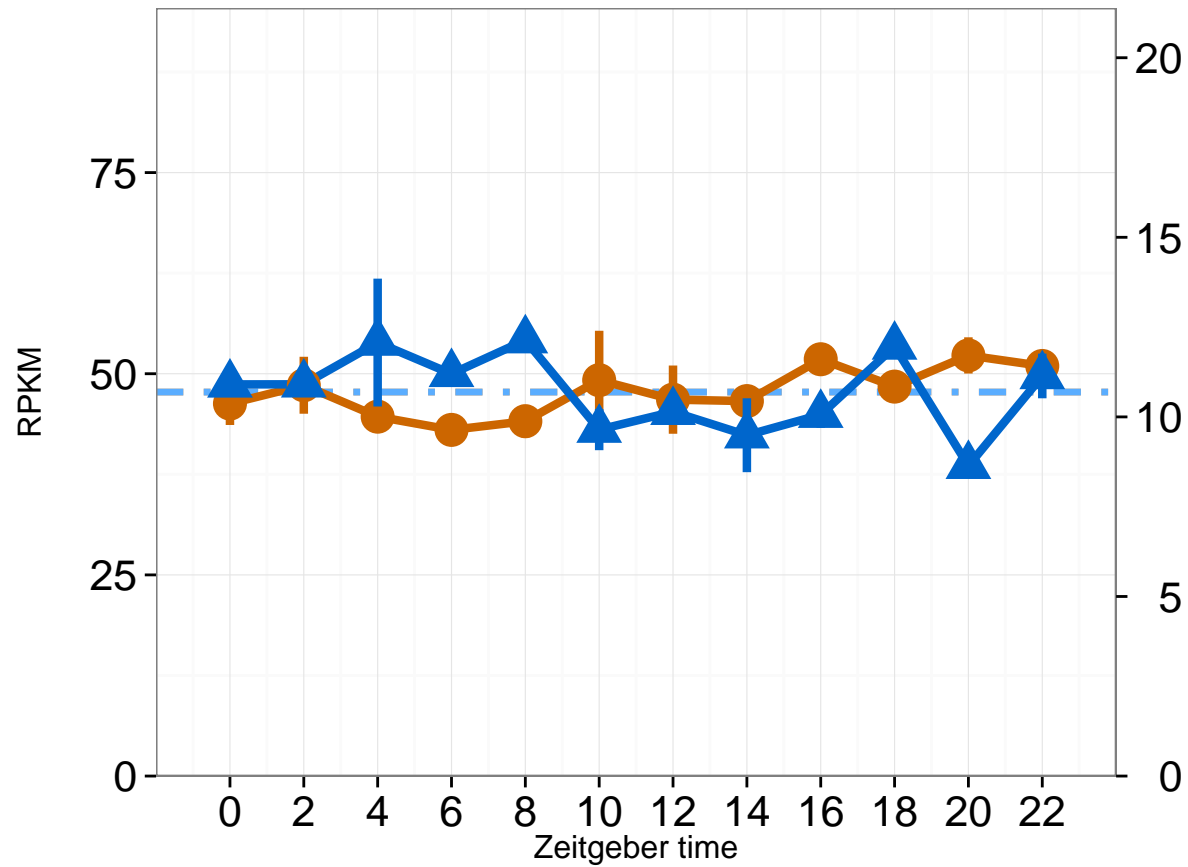

## Ankrd40

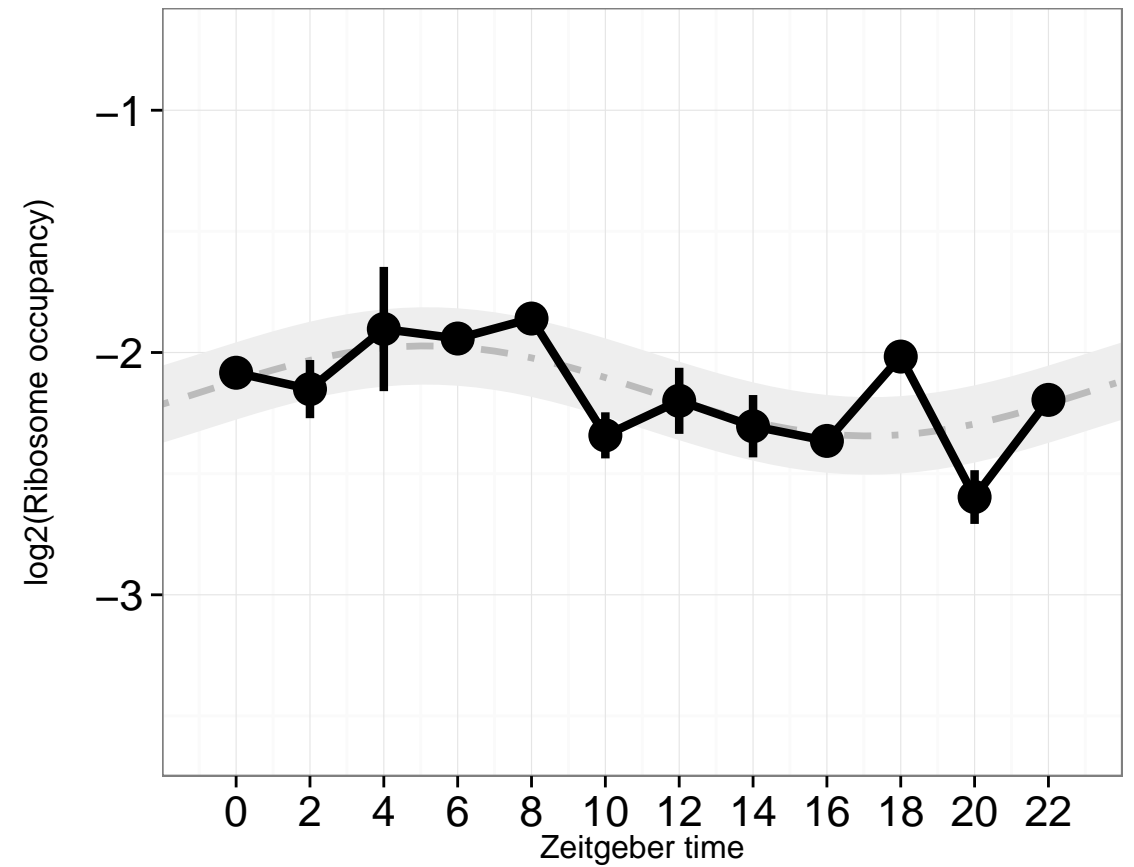

Supplement: Supplementary file 1693 [file 1]

## Nubpl

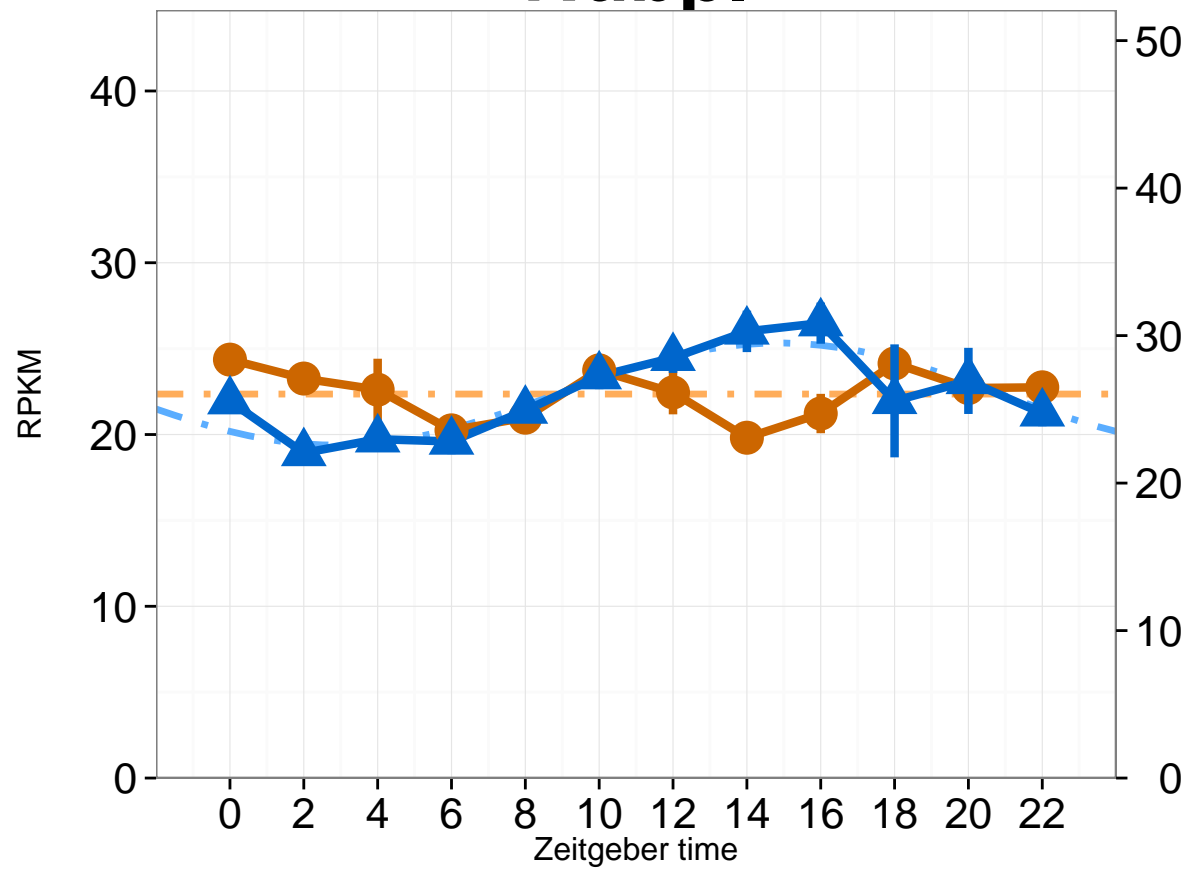

## Nubpl

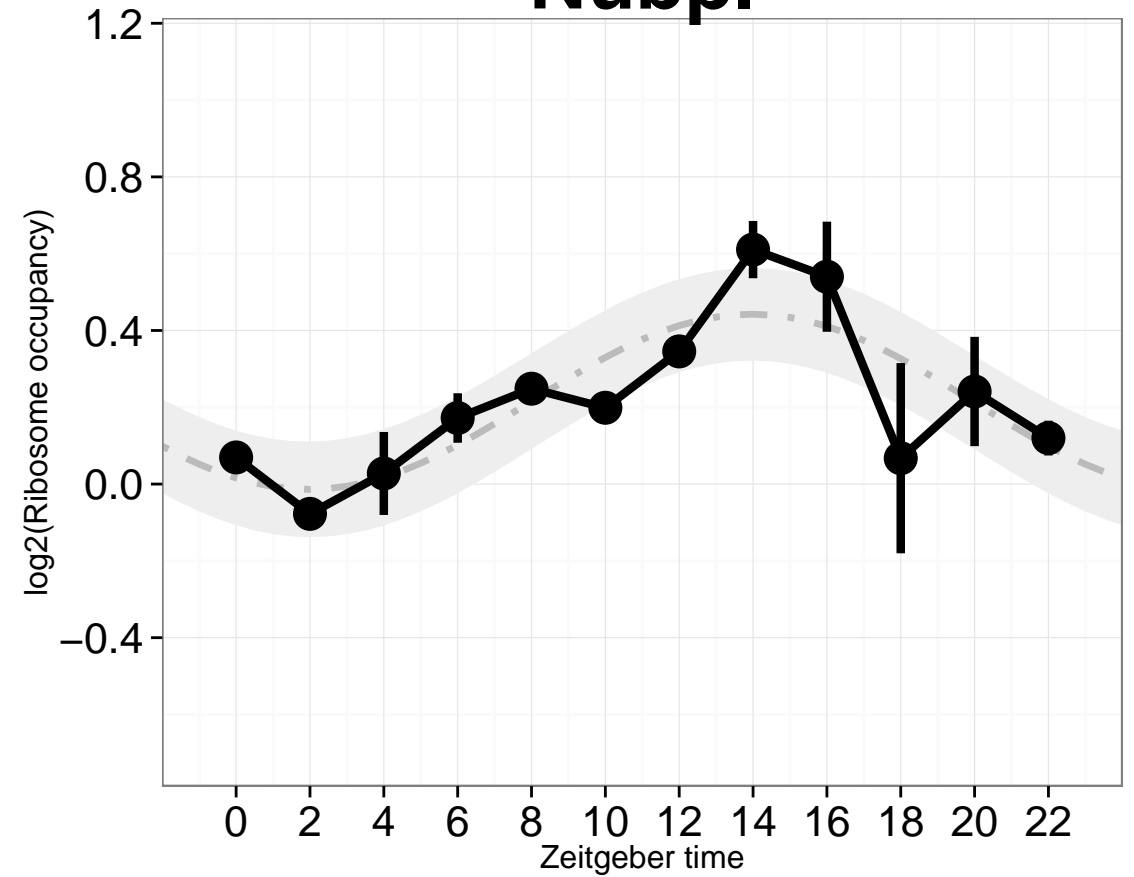

Supplement: Supplementary file 1694 [file 1]

## Gpatch2

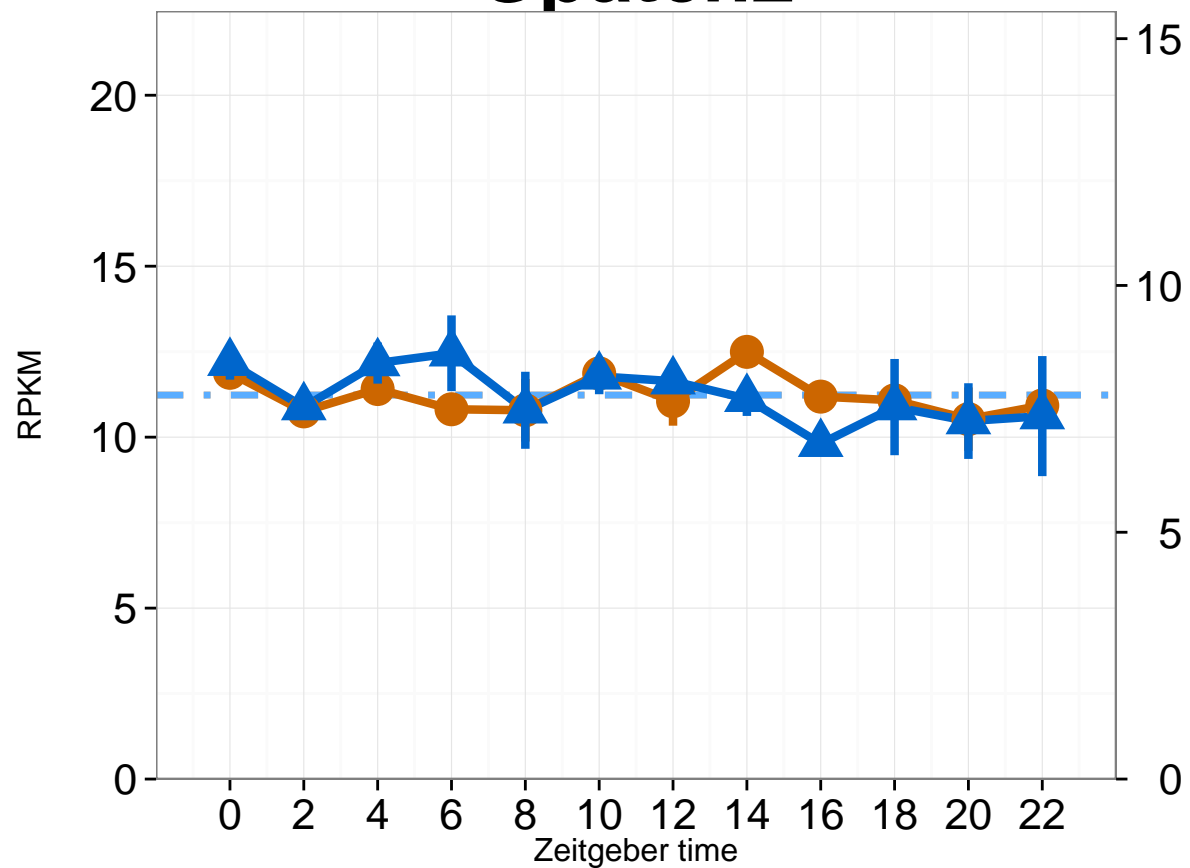

## Gpatch2

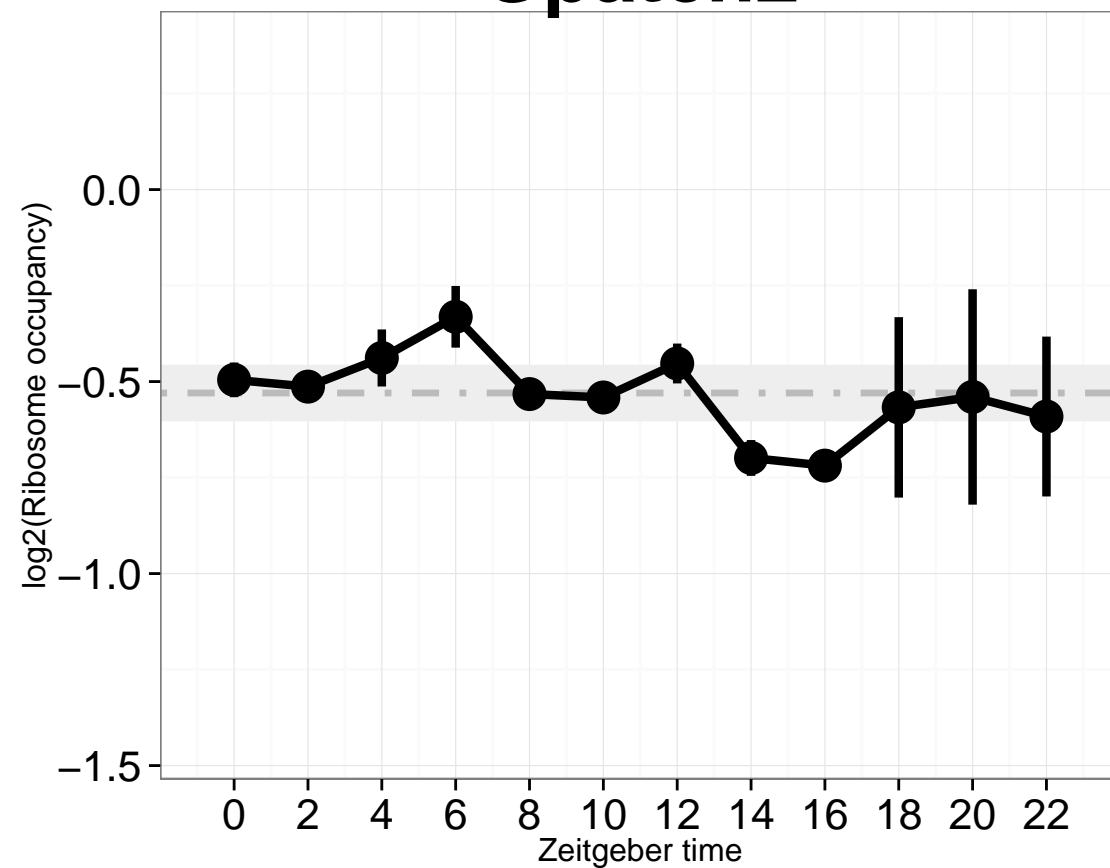

Supplement: Supplementary file 1695 [file 1]

## Fbrs

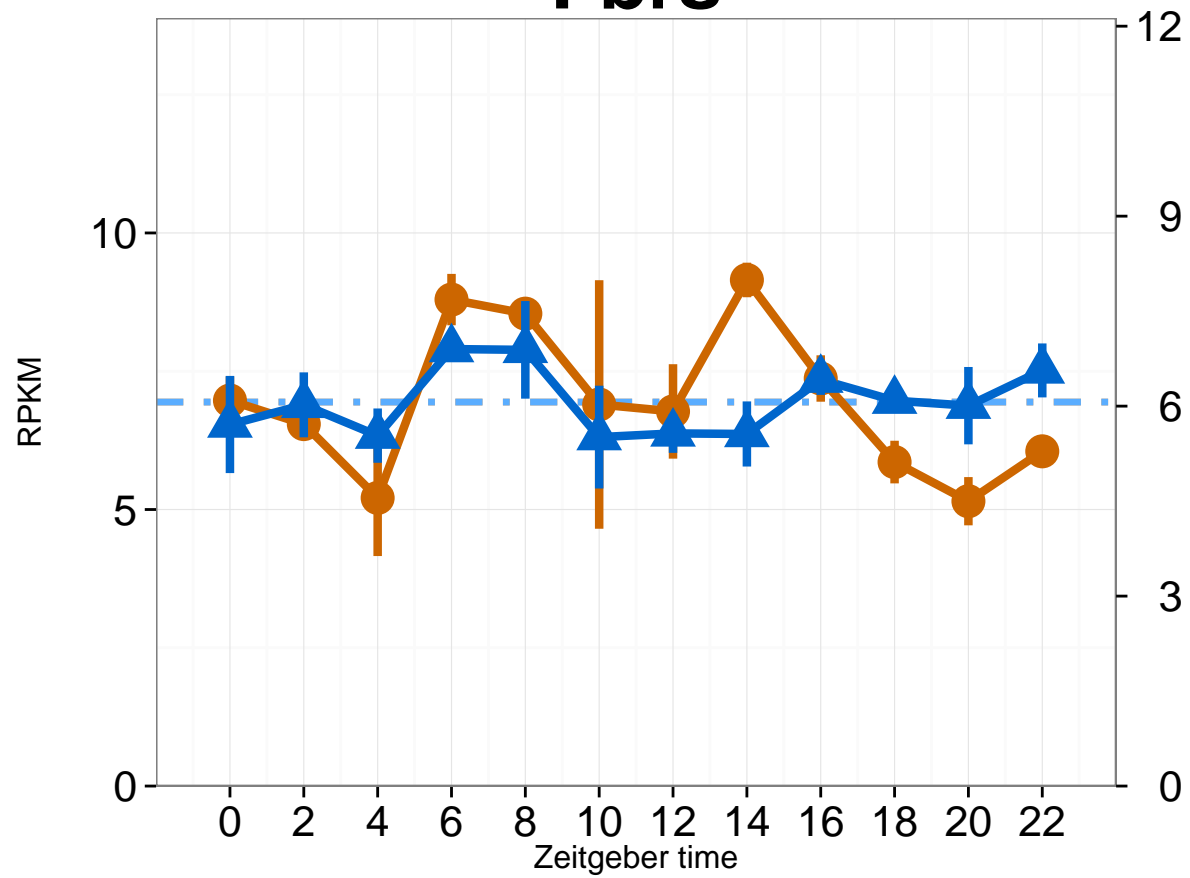

## Fbrs

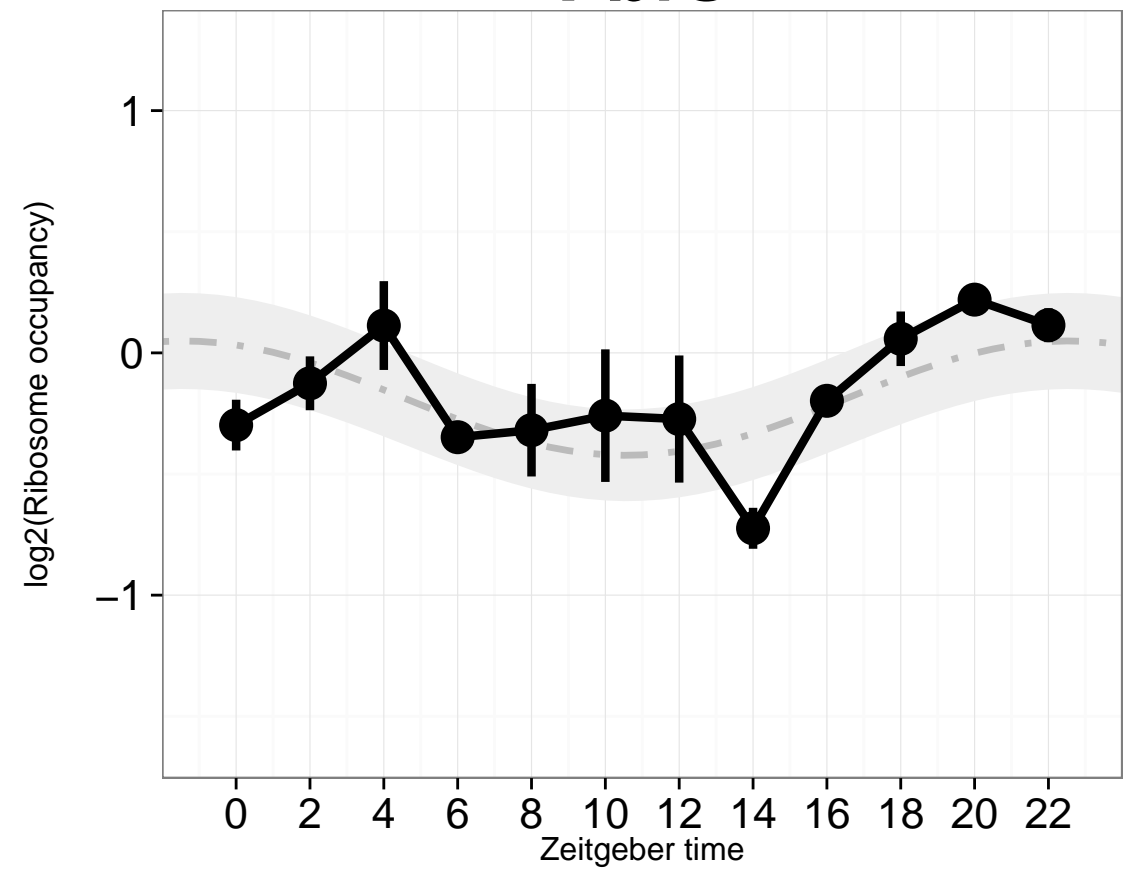

Supplement: Supplementary file 1696 [file 1]

**Ccdc69 TR**

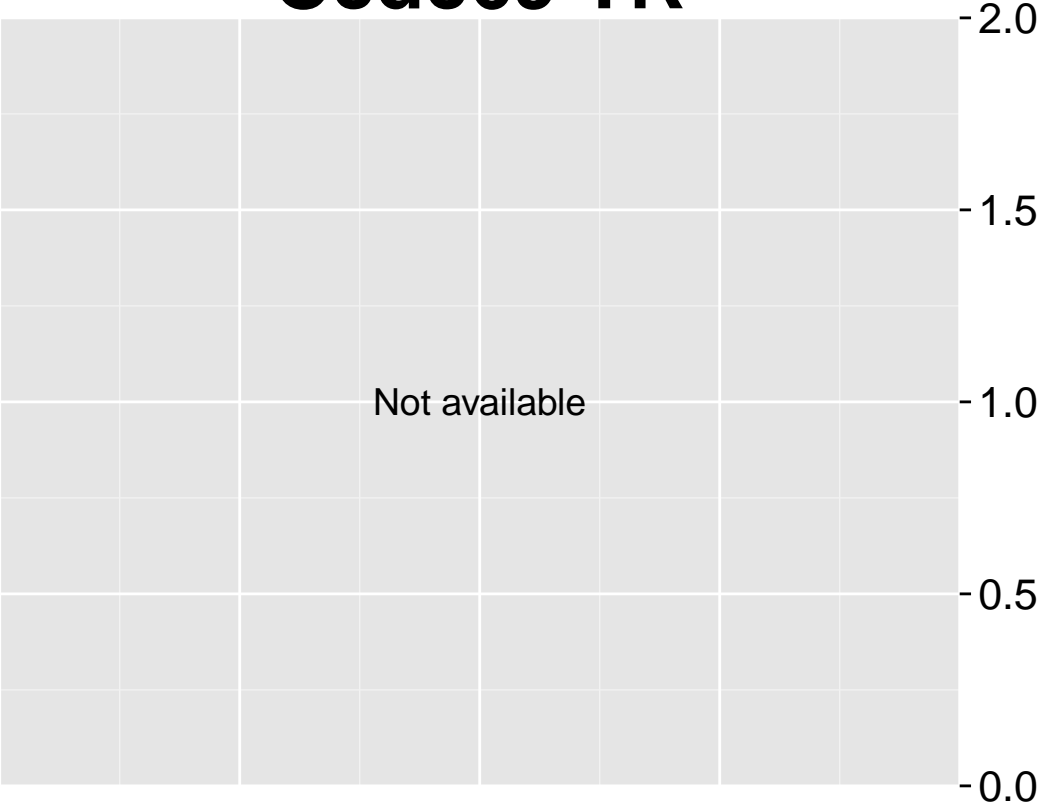

**Ccdc69 log2(Ribosome occupancy**

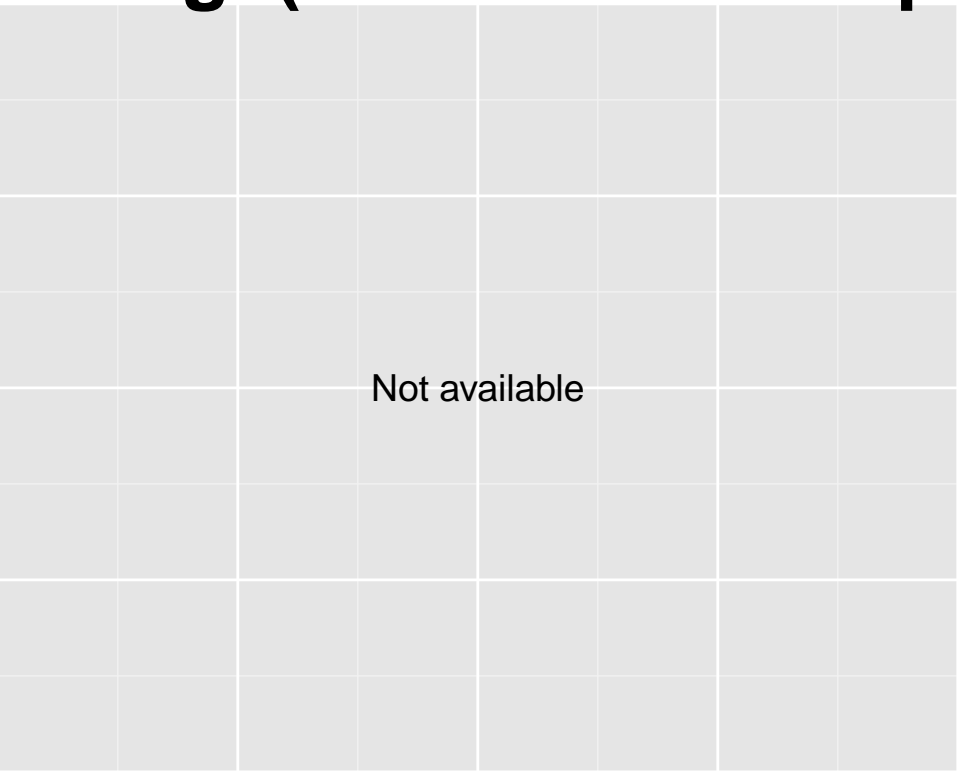

Supplement: Supplementary file 1697 [file 1]

# Mkrn1

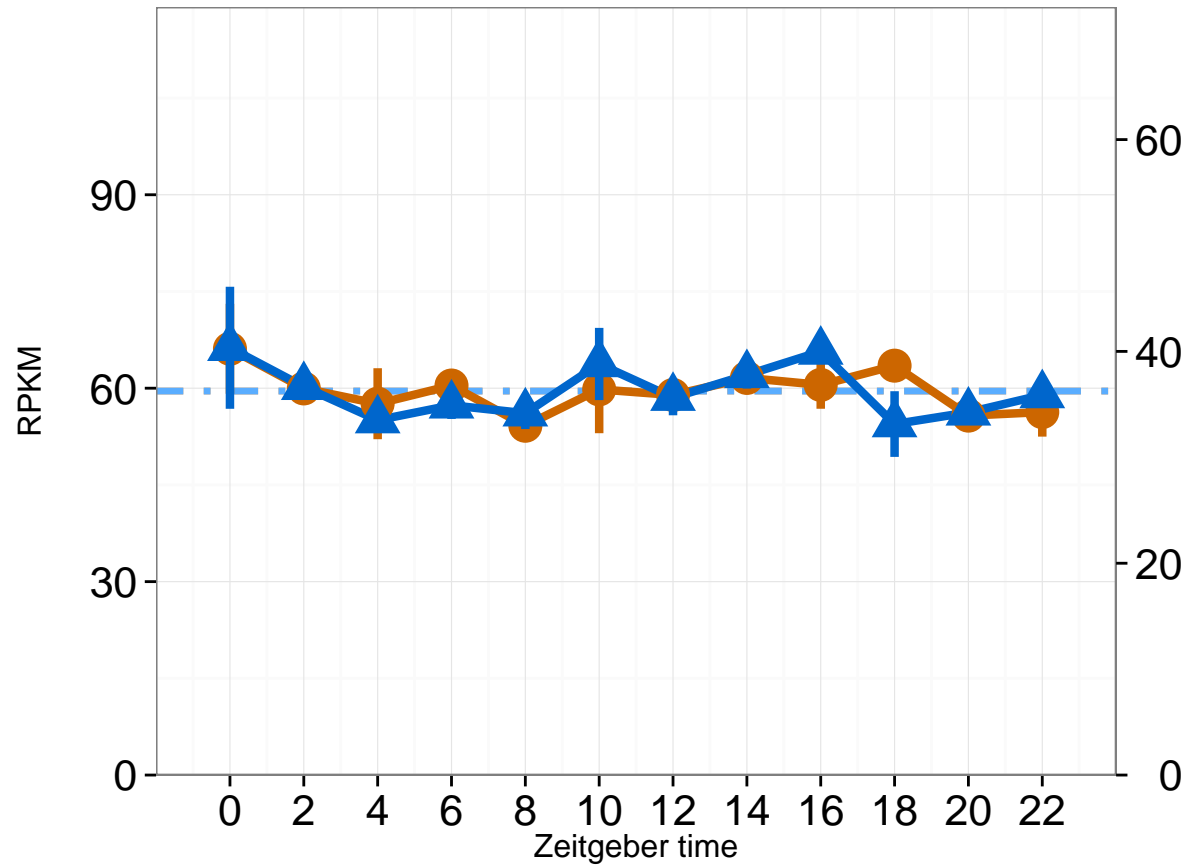

# Mkrn1

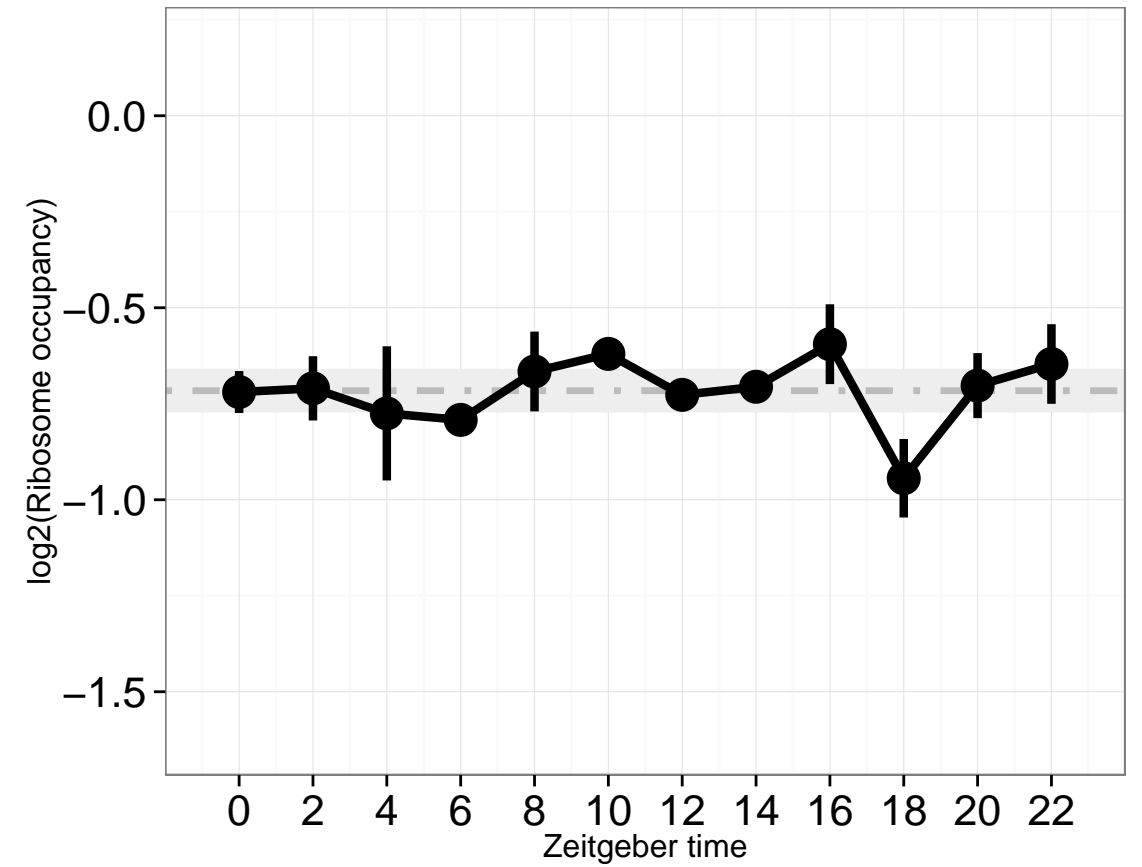

Supplement: Supplementary file 1698 [file 1]

# Acap2

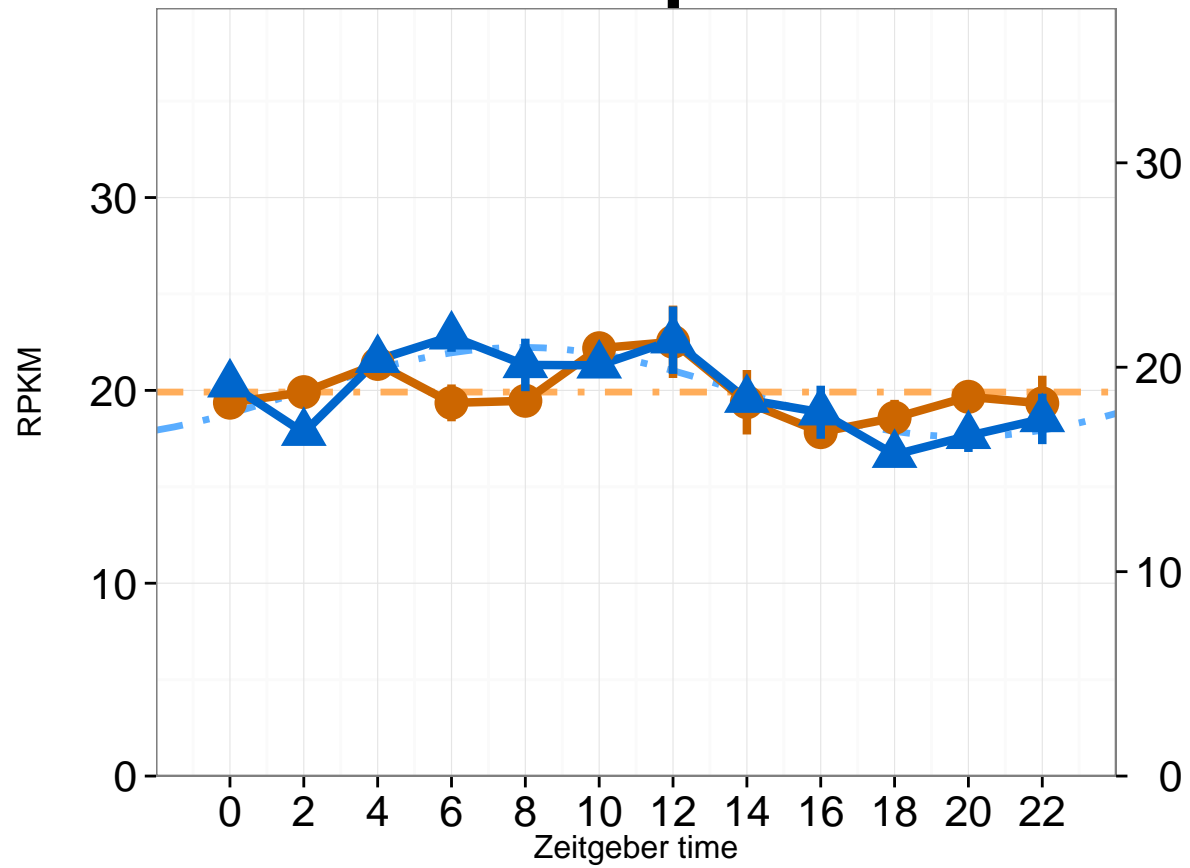

# Acap2

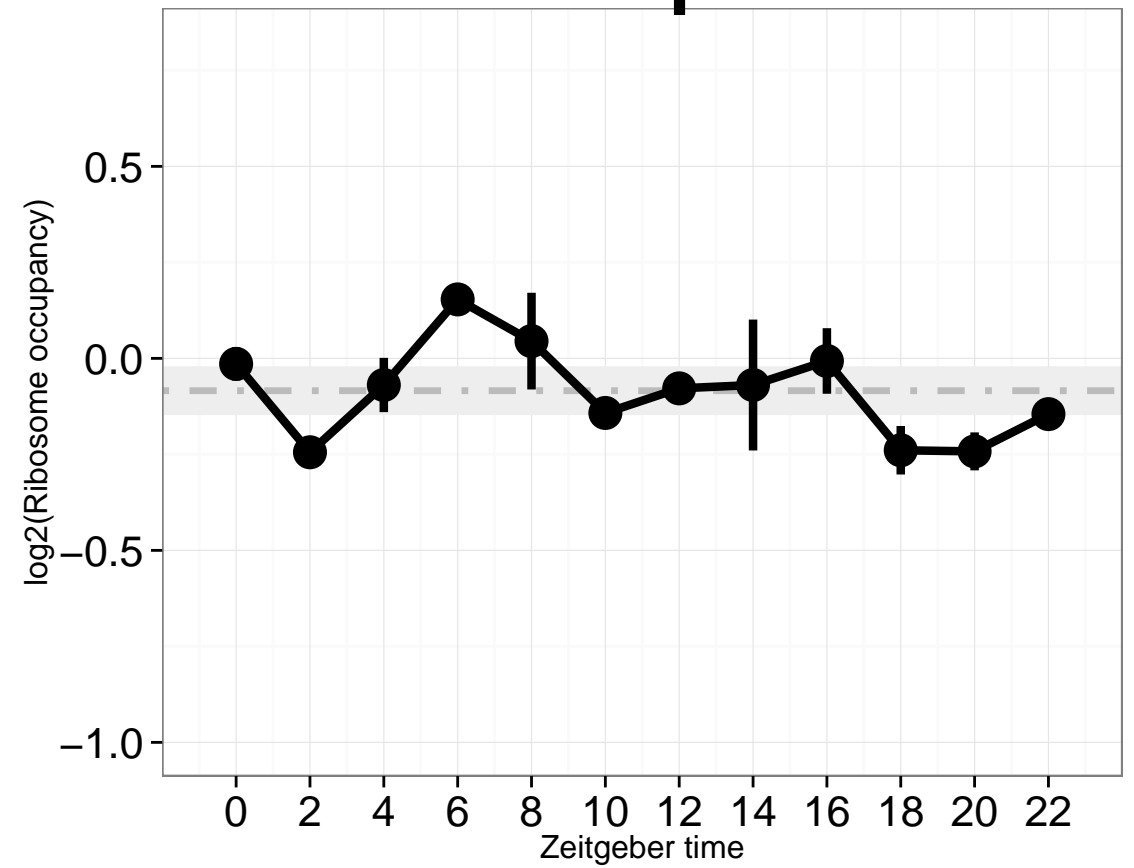

Supplement: Supplementary file 1699 [file 1]

## Armc1

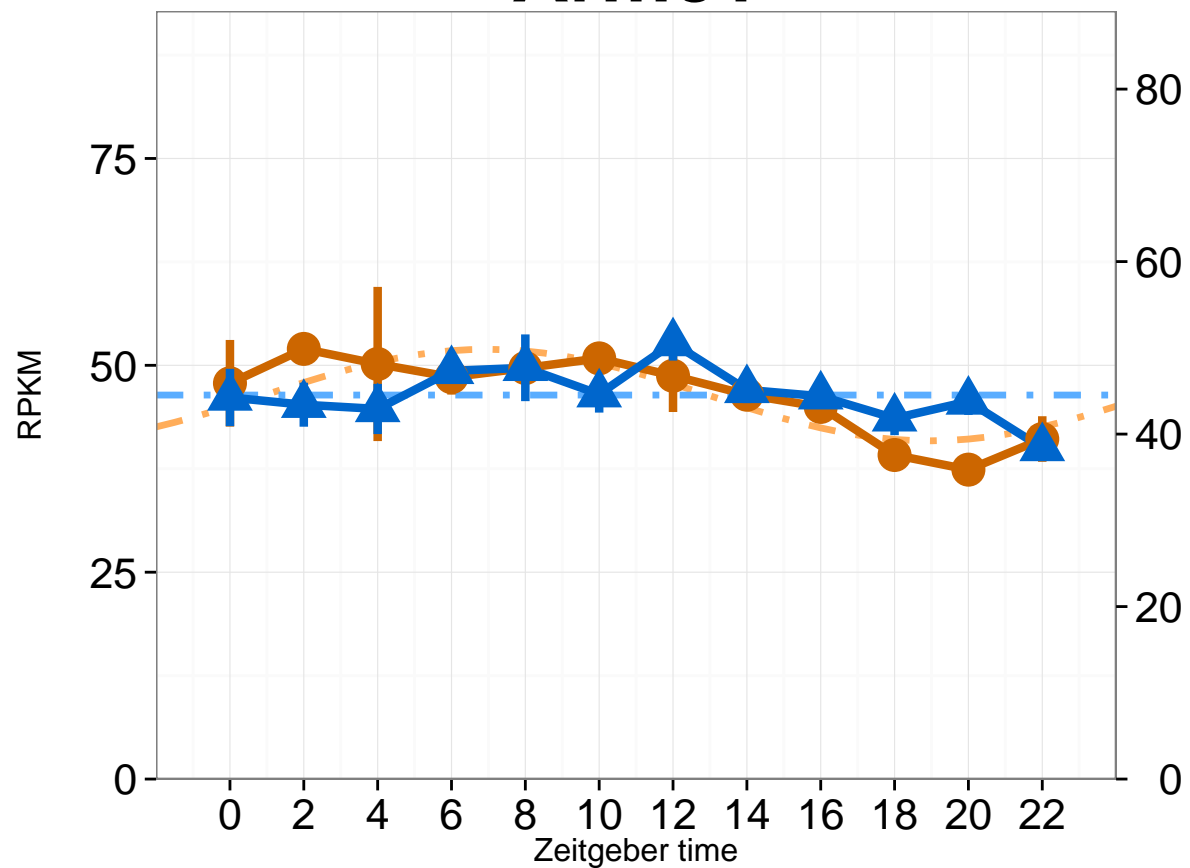

## Armc1

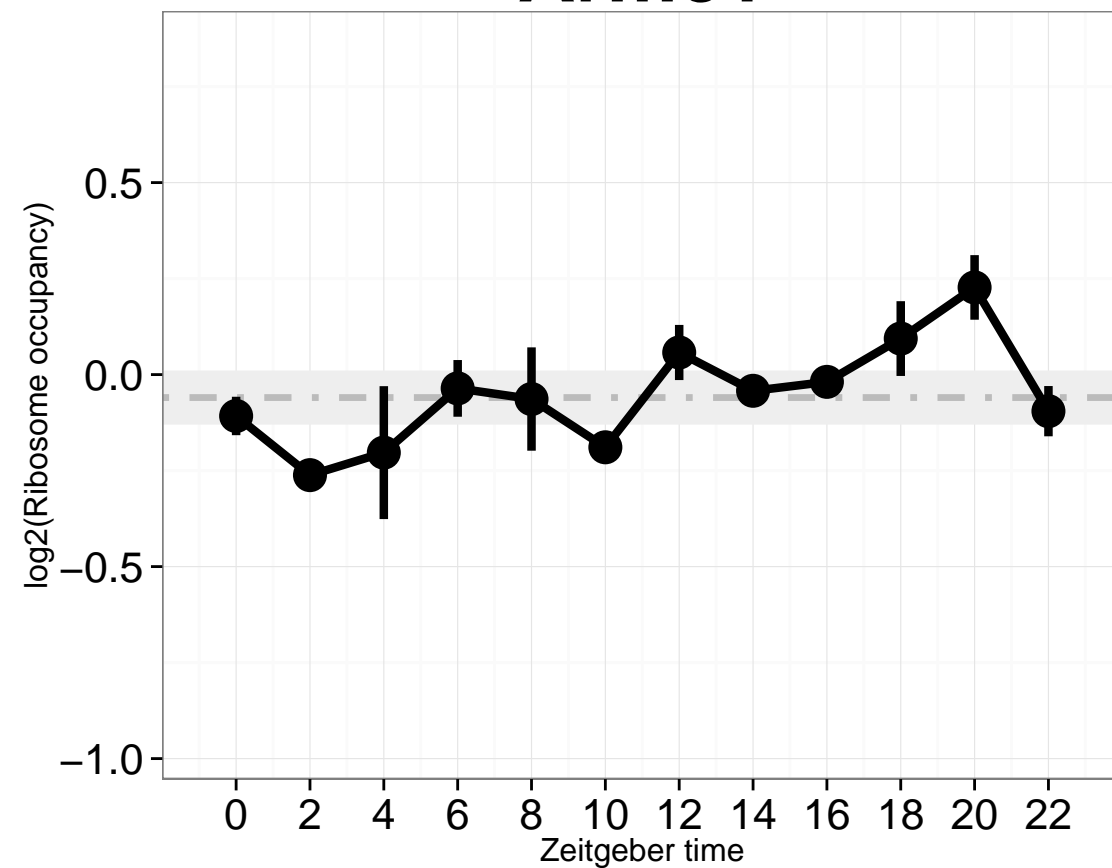

Supplement: Supplementary file 1700 [file 1]

## Clasrp

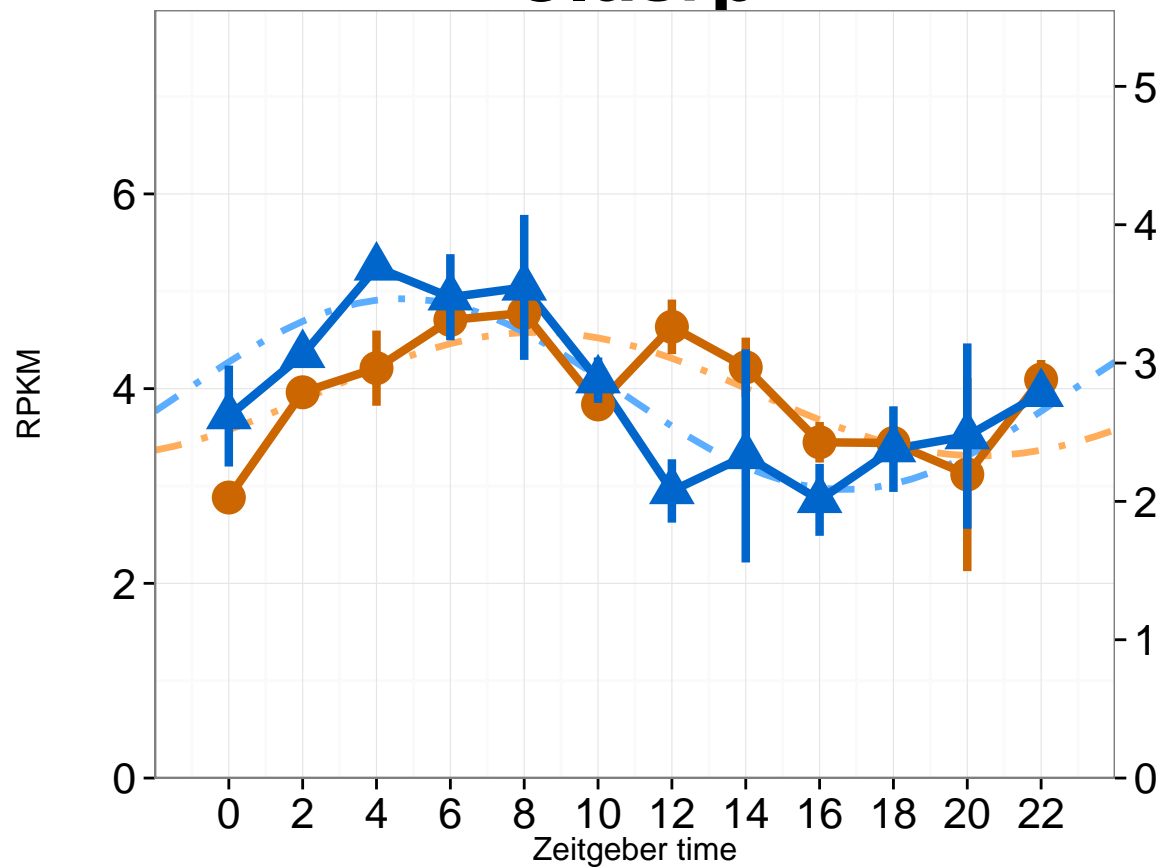

## Clasrp

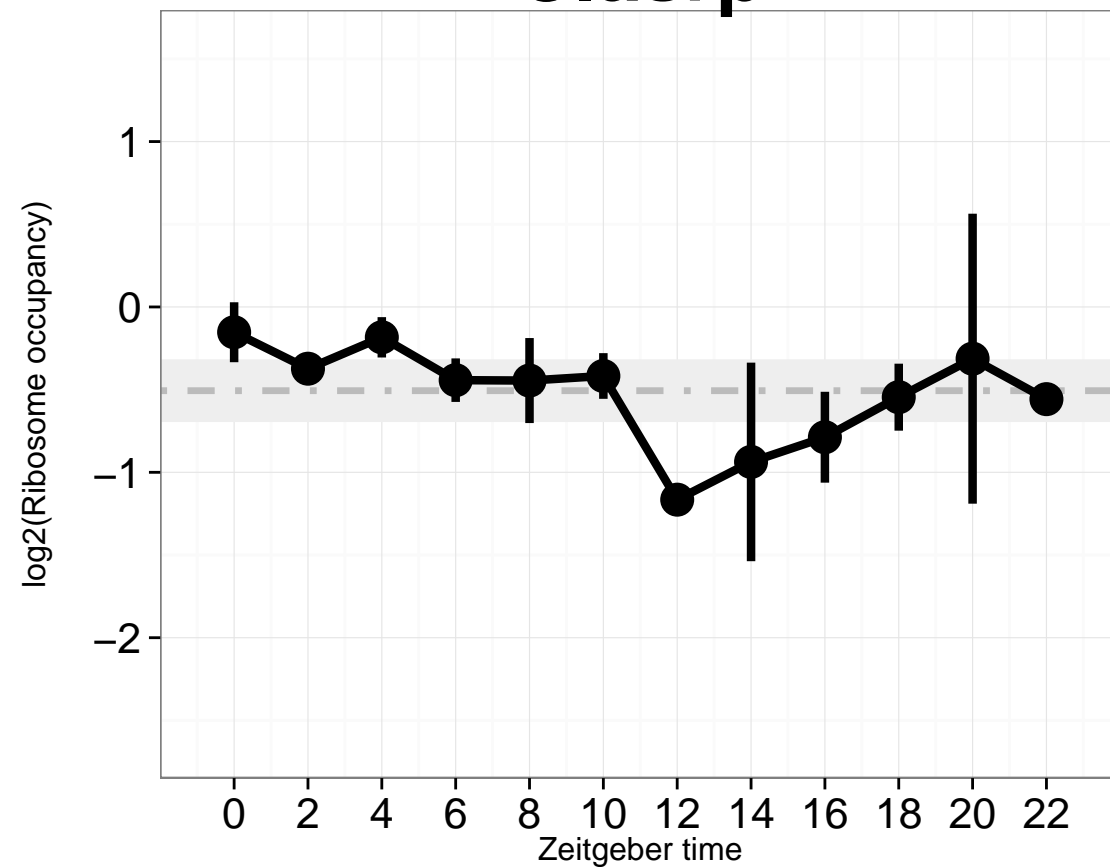

Supplement: Supplementary file 1701 [file 1]

## Mapre3

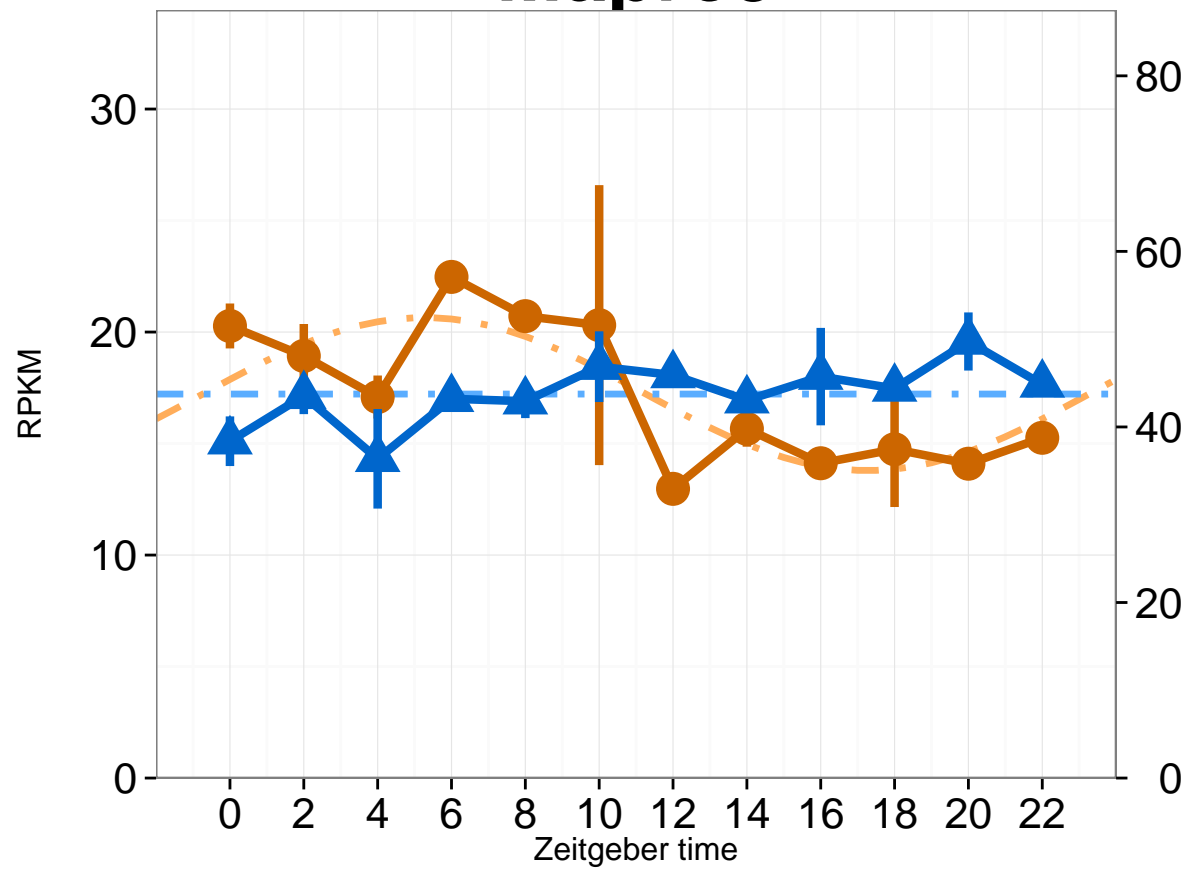

## Mapre3

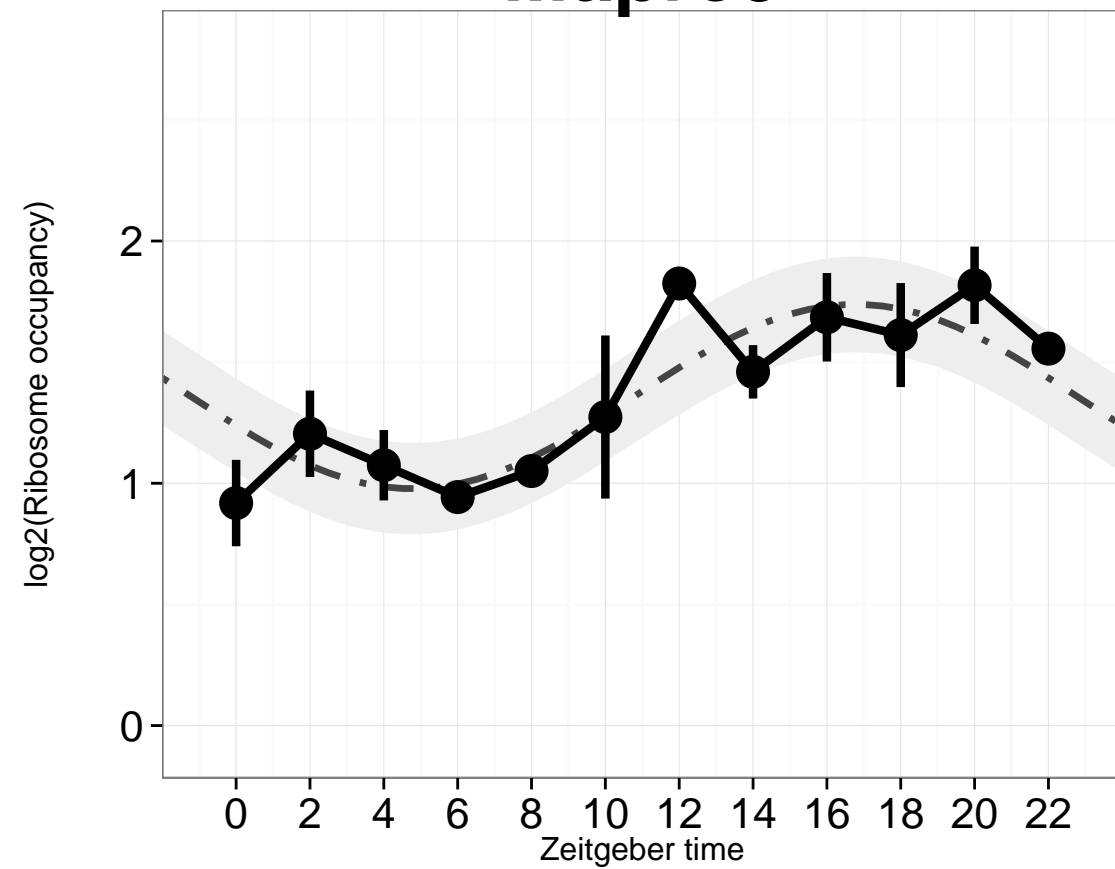

Supplement: Supplementary file 1702 [file 1]

# Ddx6

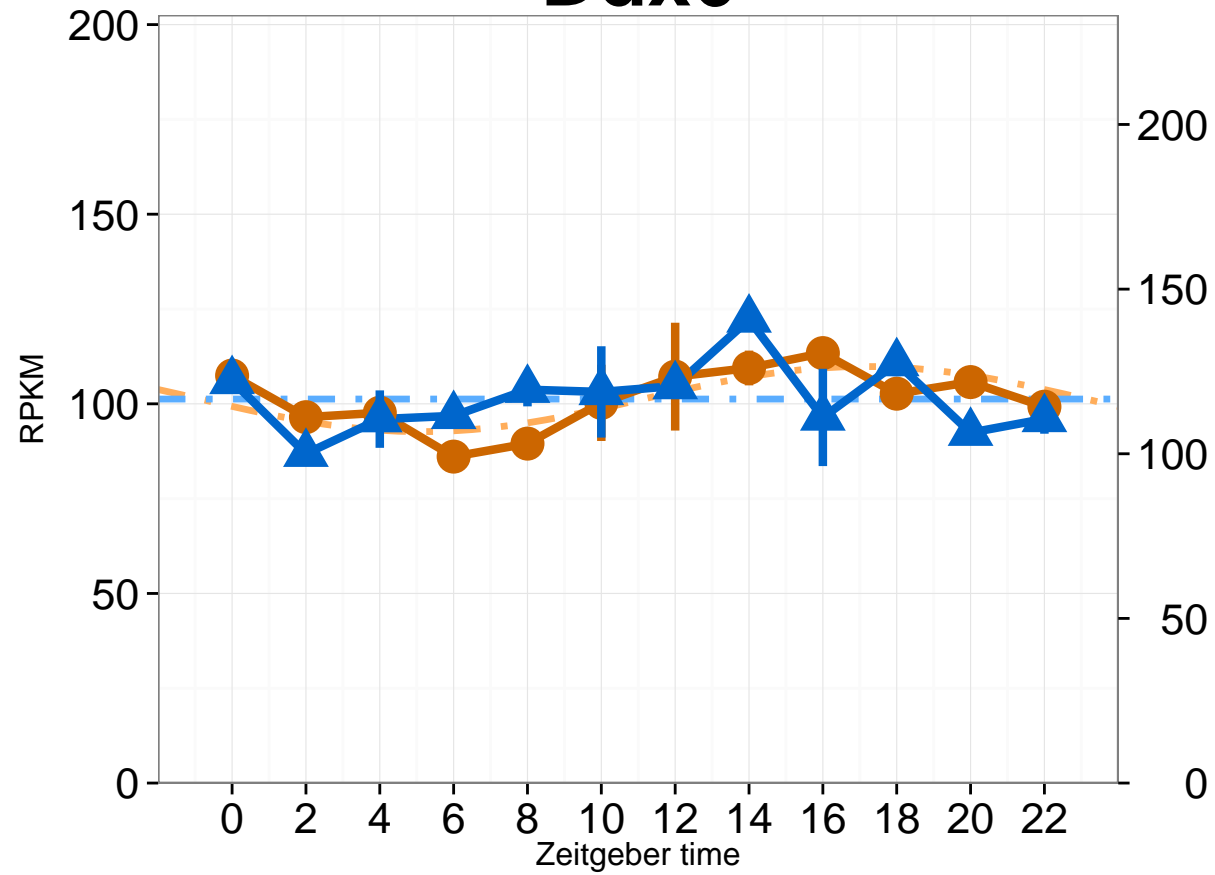

# Ddx6

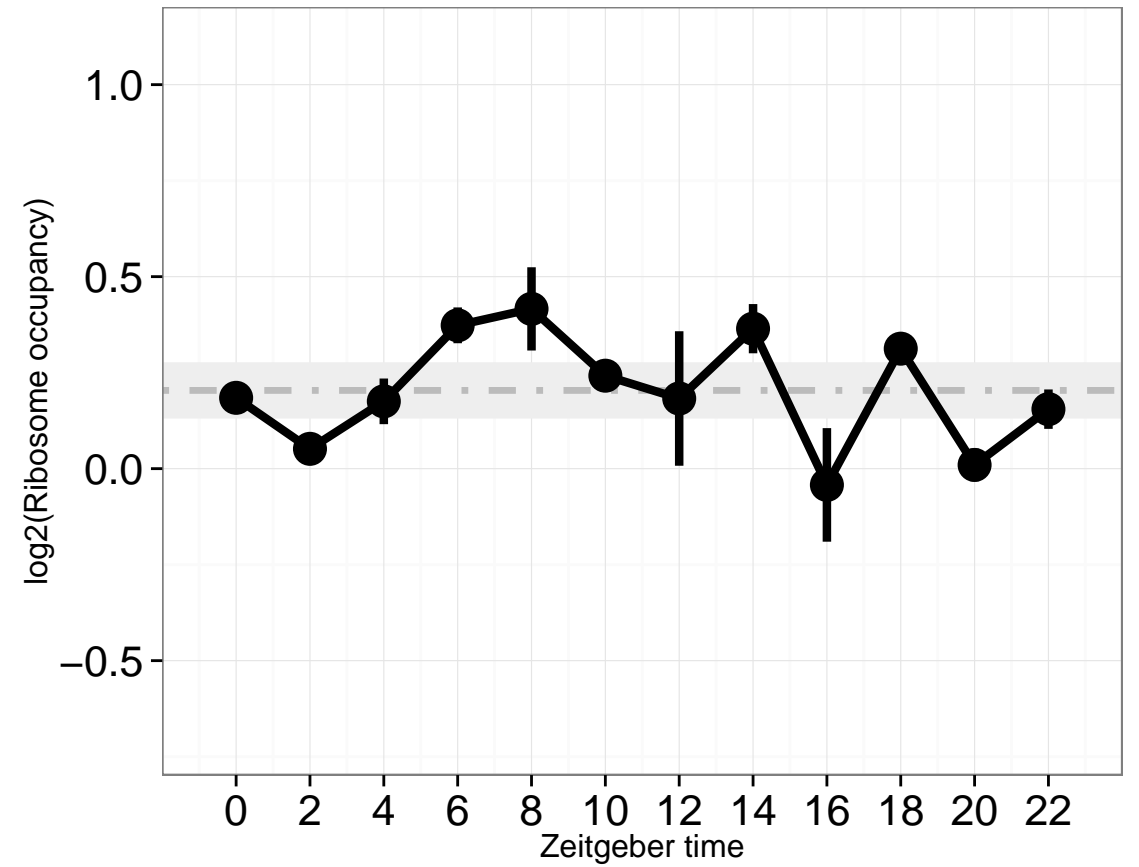

Supplement: Supplementary file 1703 [file 1]

## Ccdc47

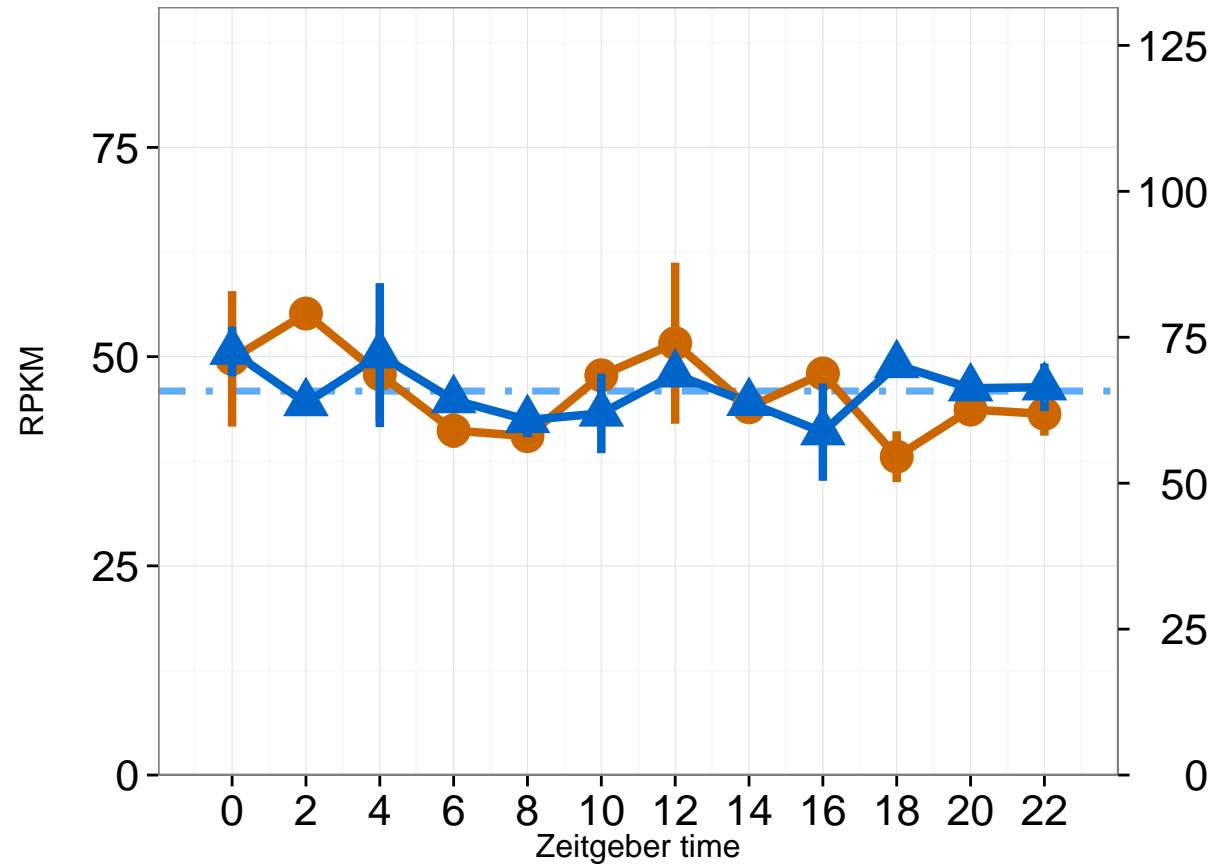

## Ccdc47

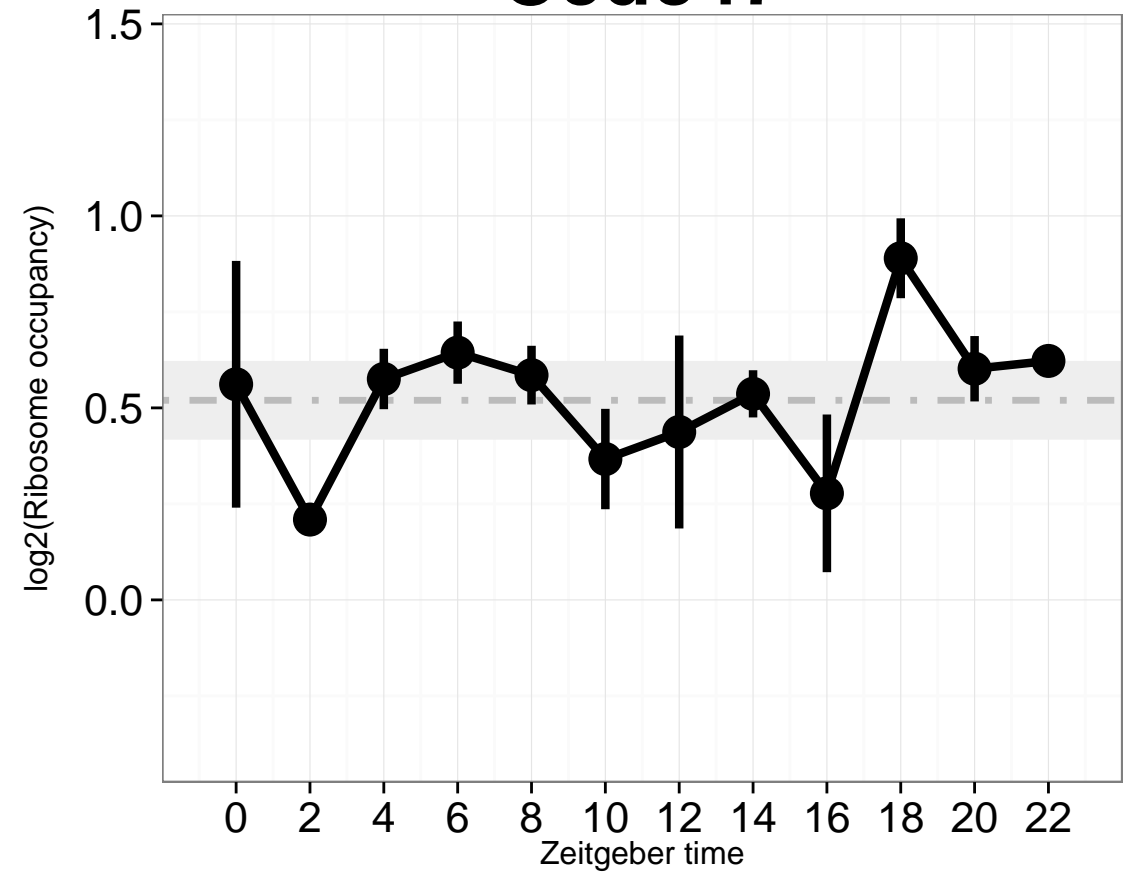

Supplement: Supplementary file 1704 [file 1]

# Morn2

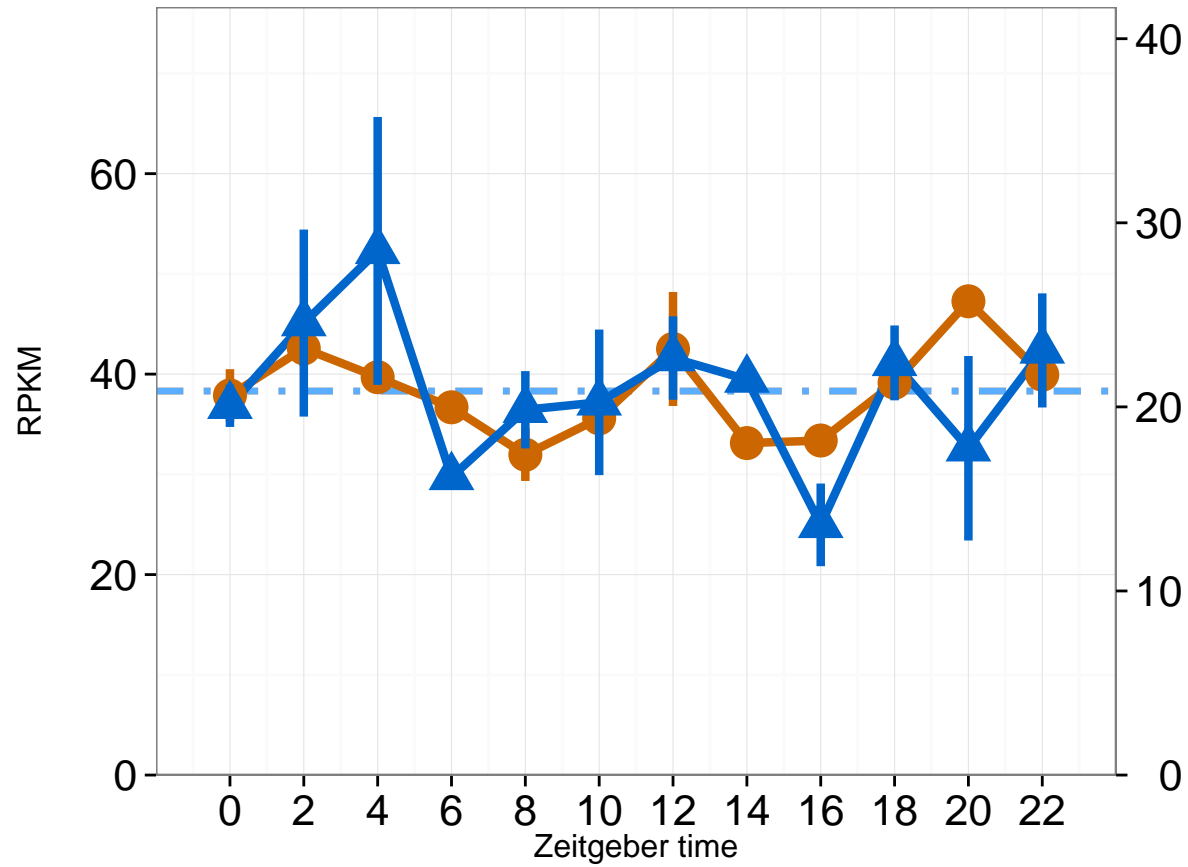

# Morn2

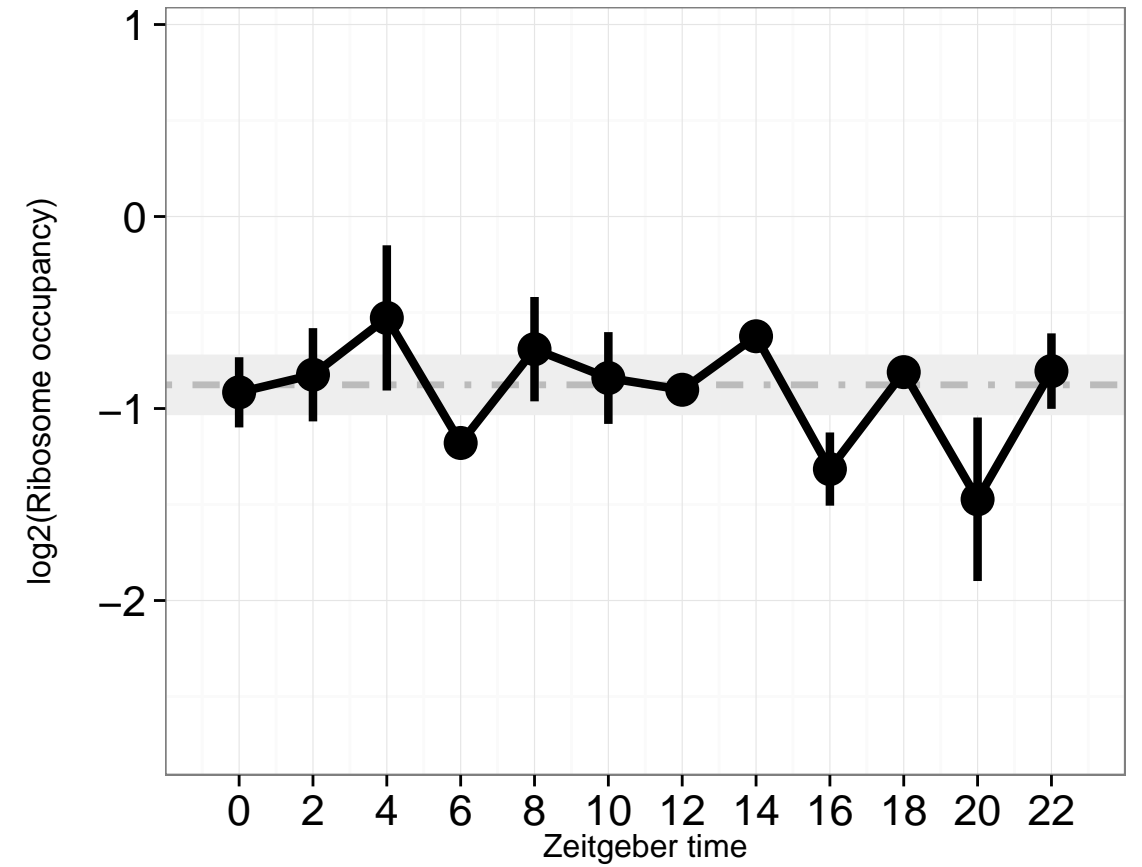

Supplement: Supplementary file 1705 [file 1]

## Marc2

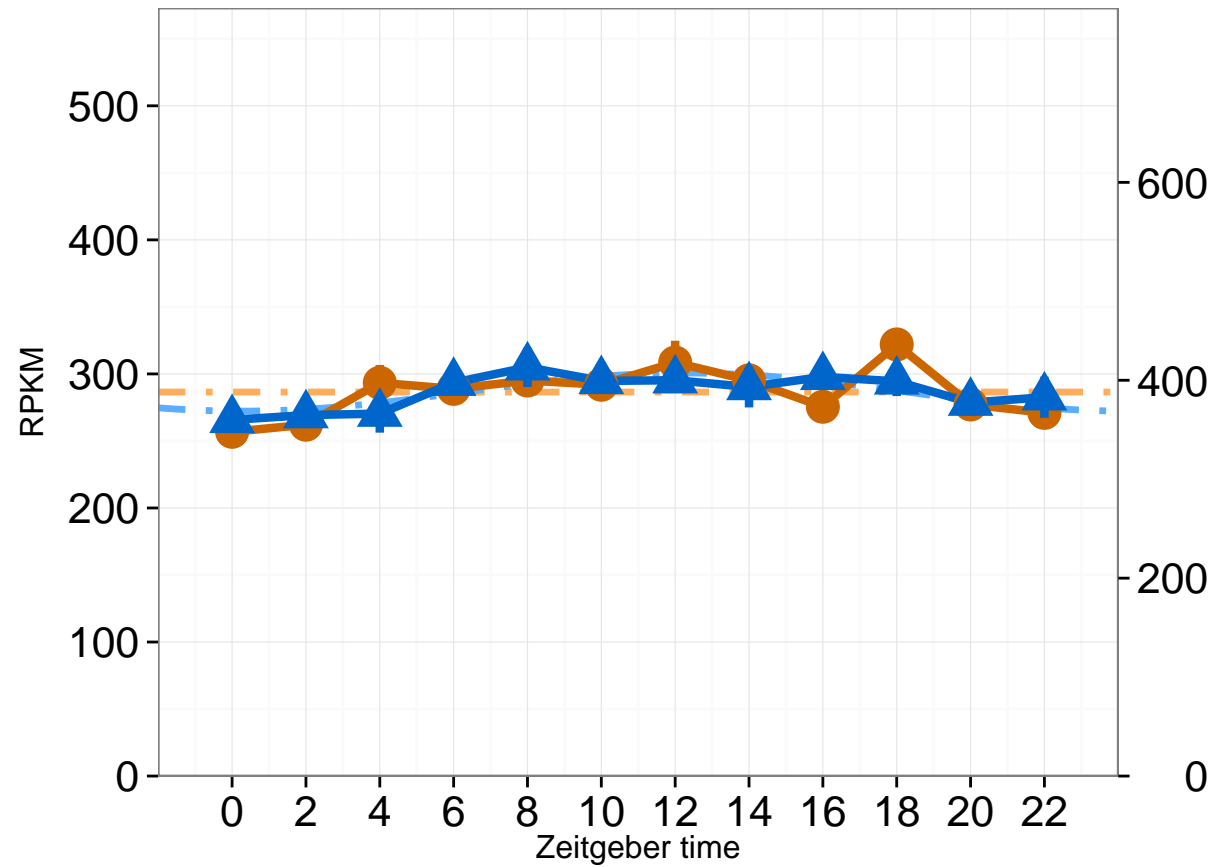

## Marc2

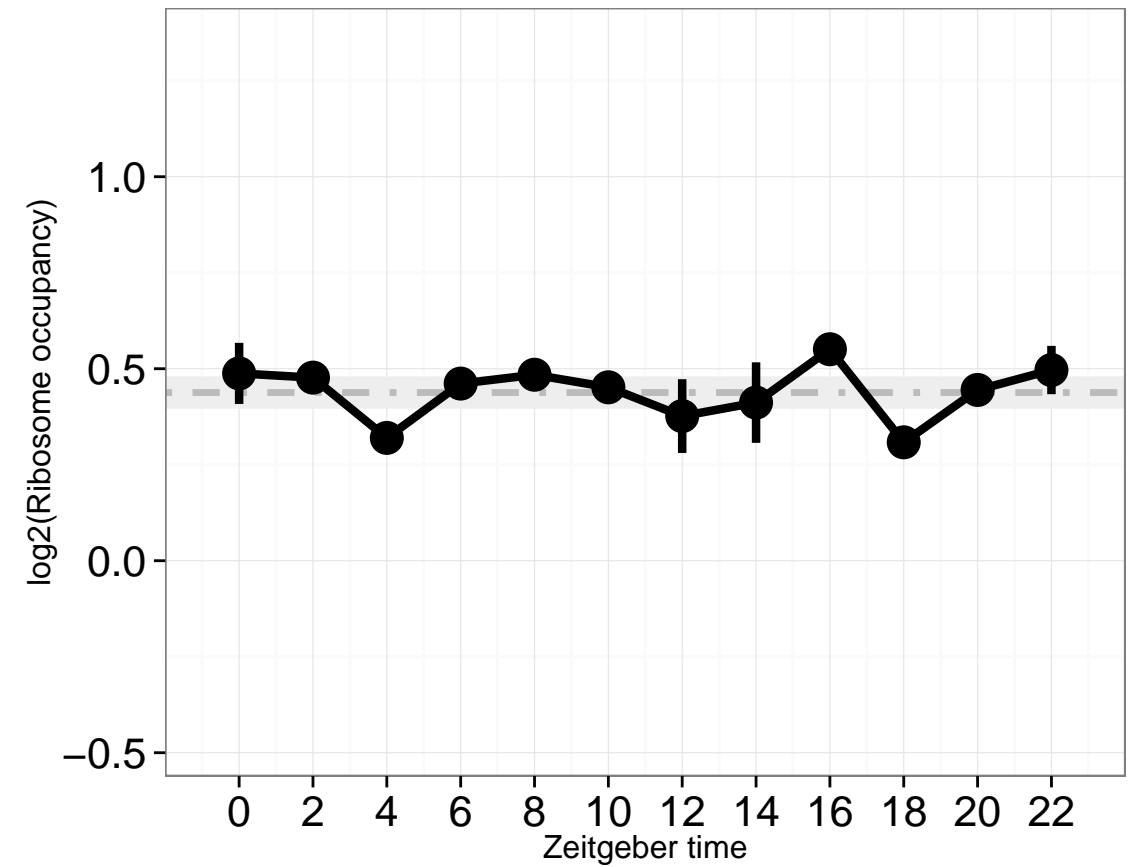

Supplement: Supplementary file 1706 [file 1]
