# Supplementary material (part 18 of 133)
Source: publisher figshare collection journal article supplement (https://springernature.figshare.com/articles/dataset/_/4903193)

# Mvb12a

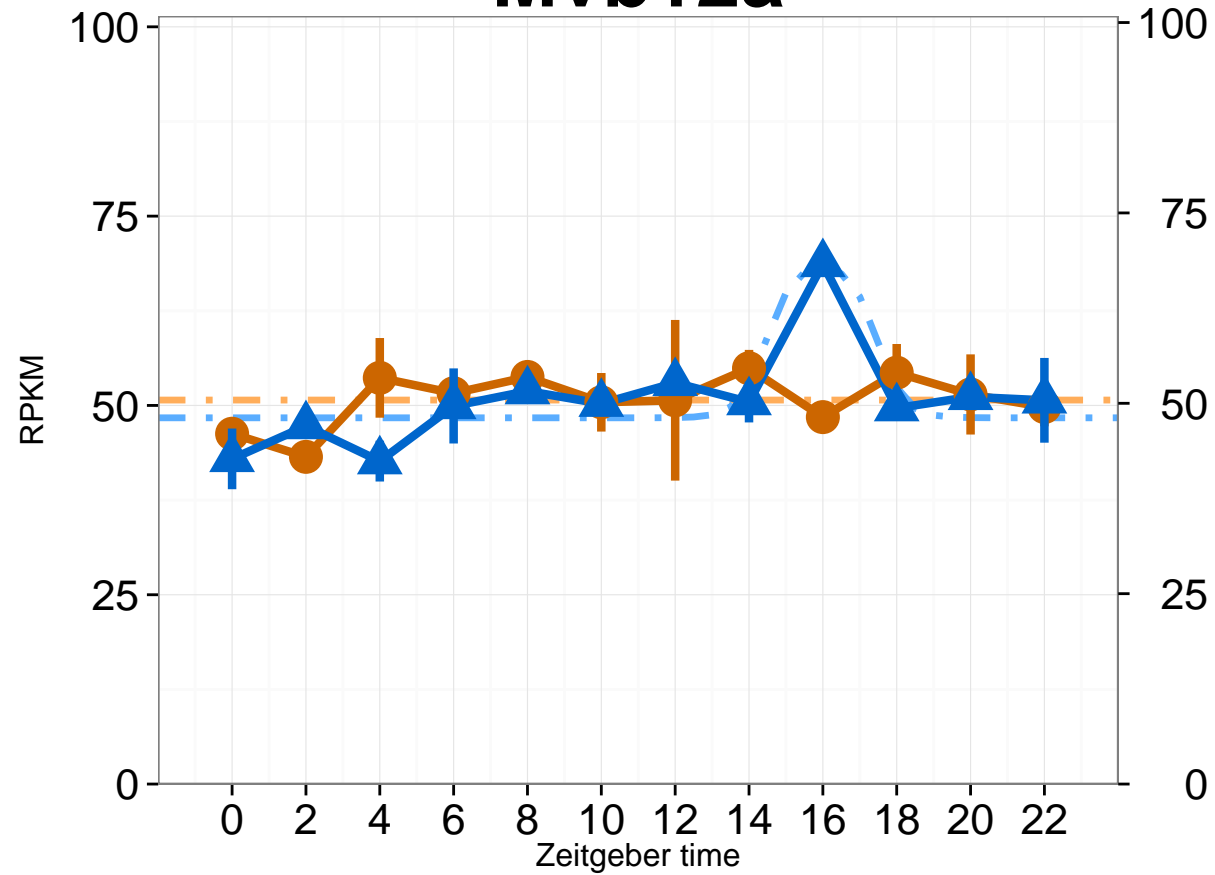

# Mvb12a

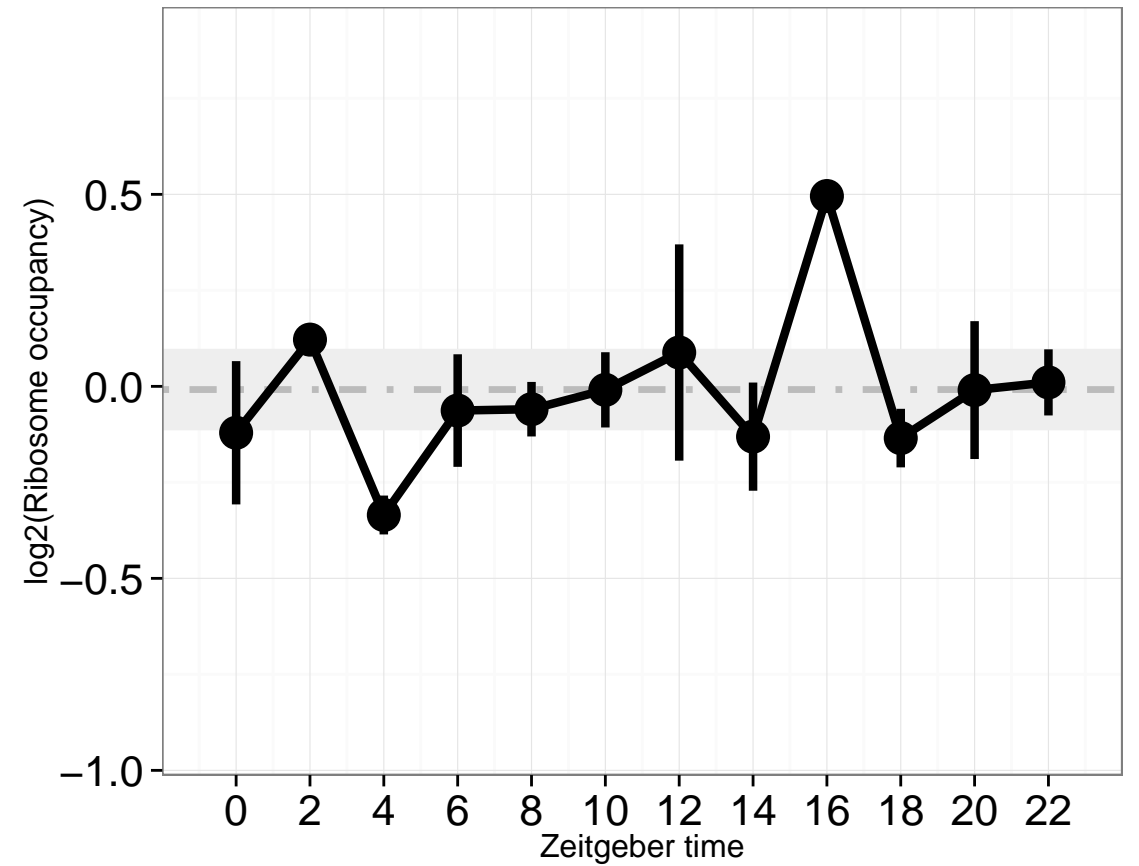

Supplement: Supplementary file 1707 [file 1]

# Rbm39

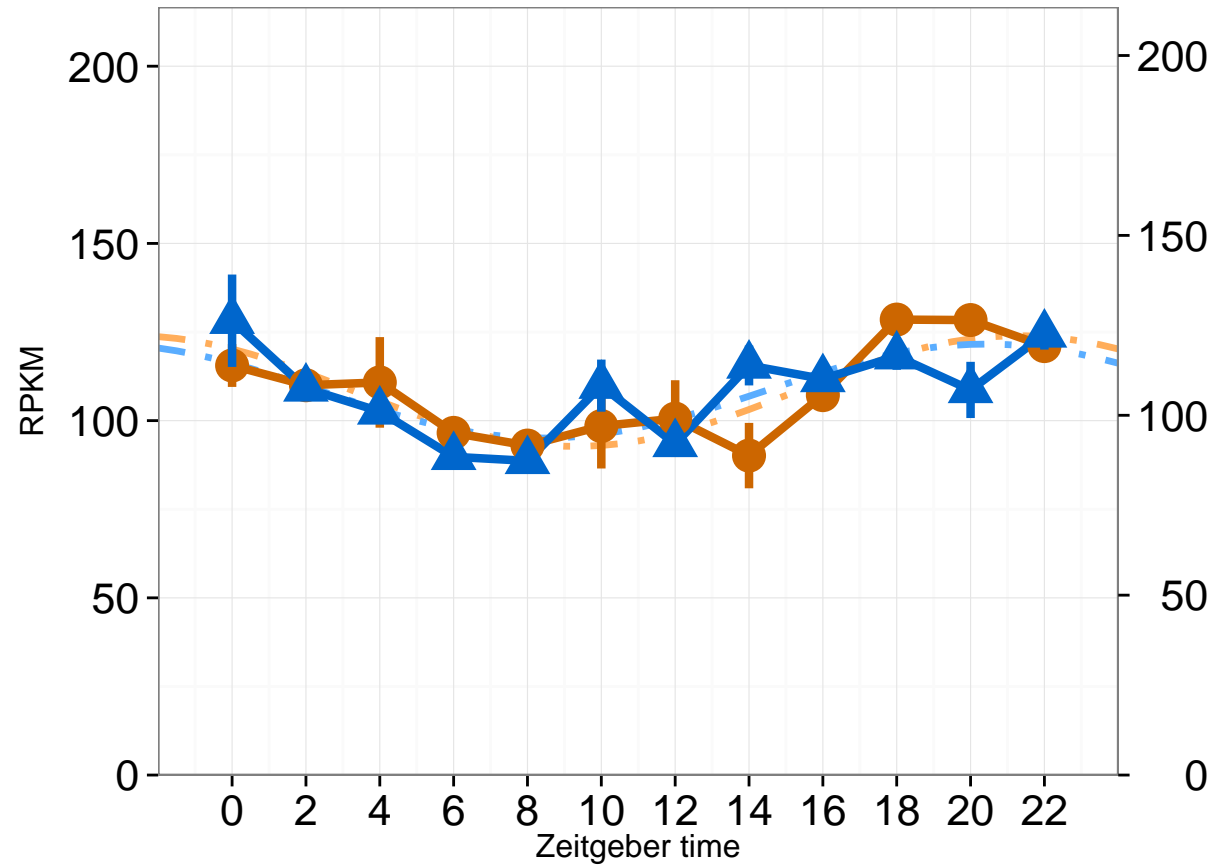

# Rbm39

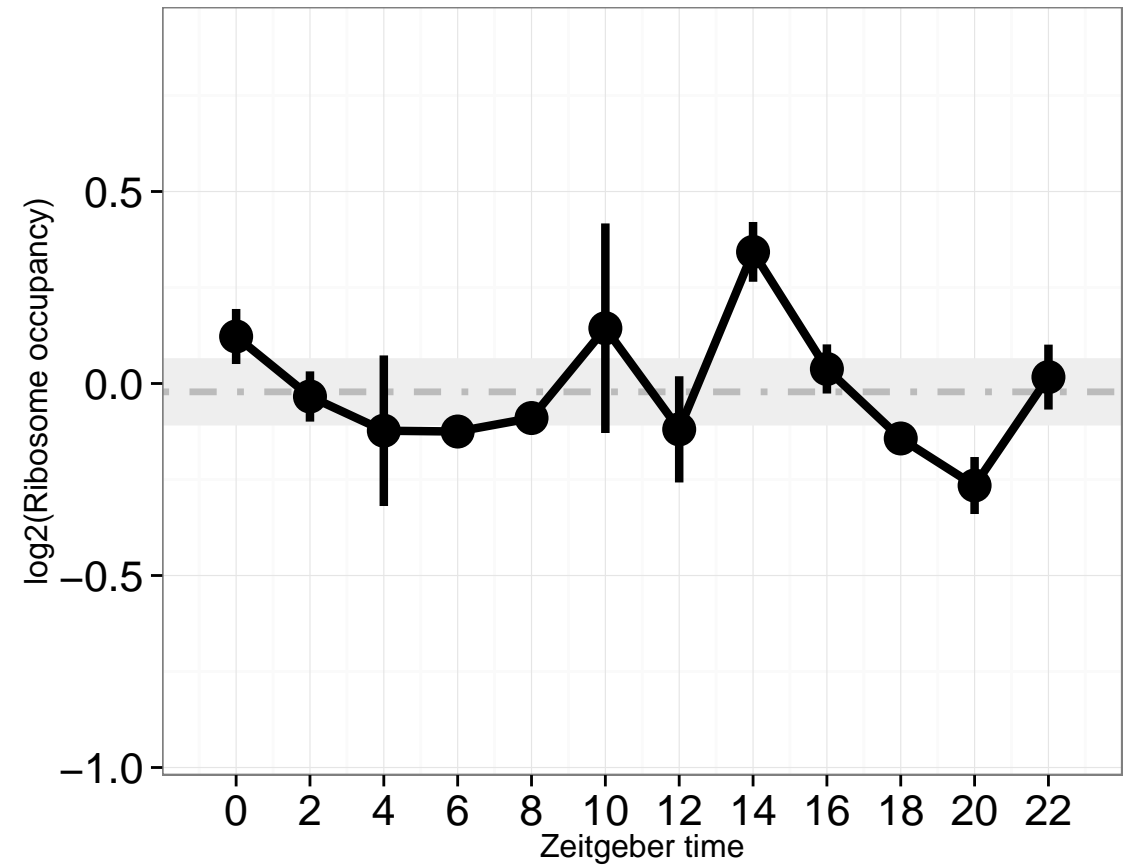

Supplement: Supplementary file 1708 [file 1]

# Sirpb1a

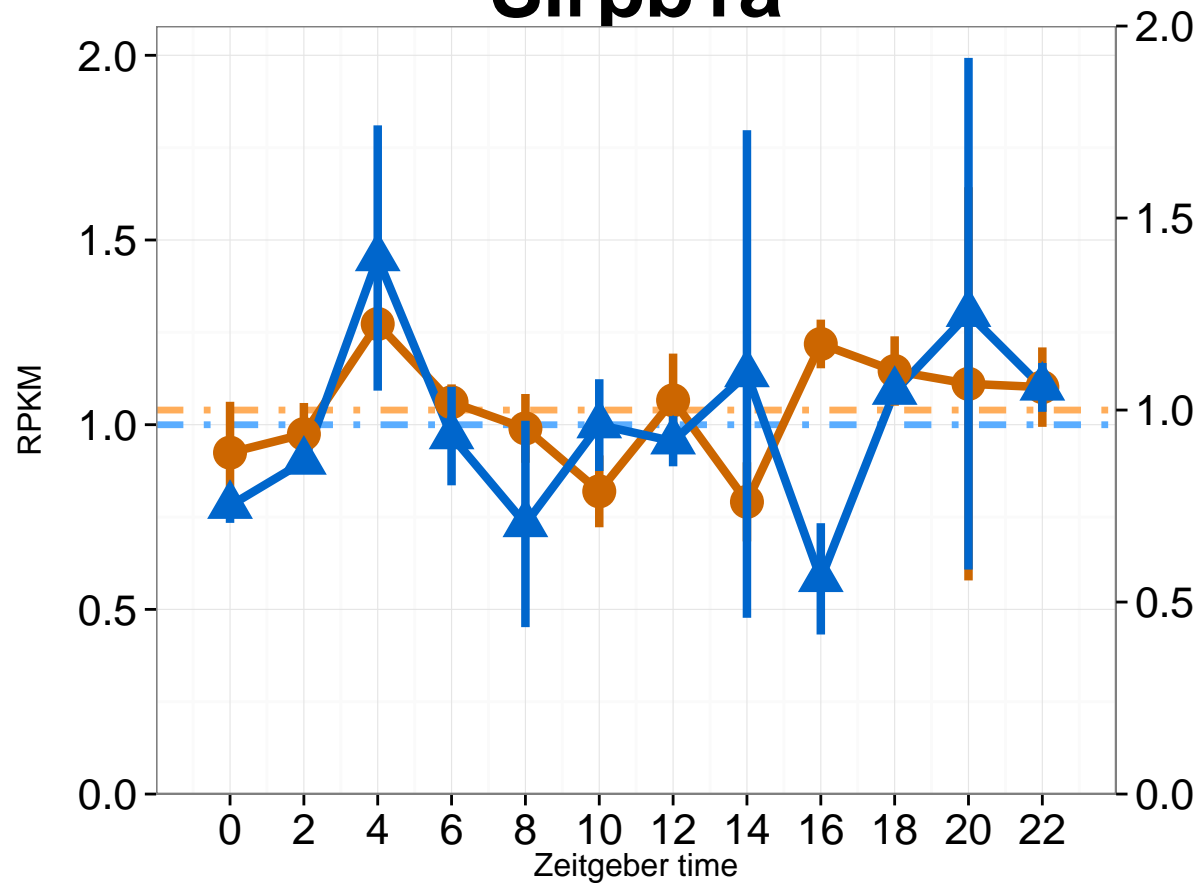

# Sirpb1a

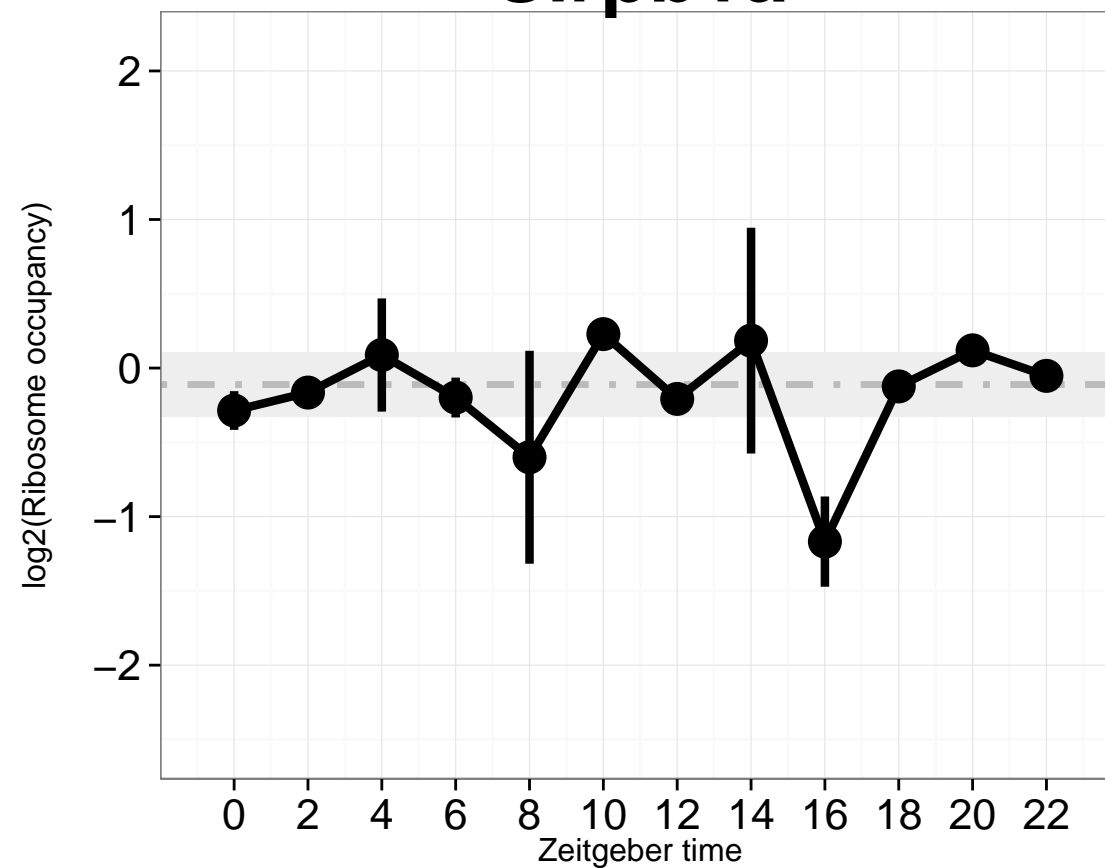

Supplement: Supplementary file 1709 [file 1]

## Rb1cc1

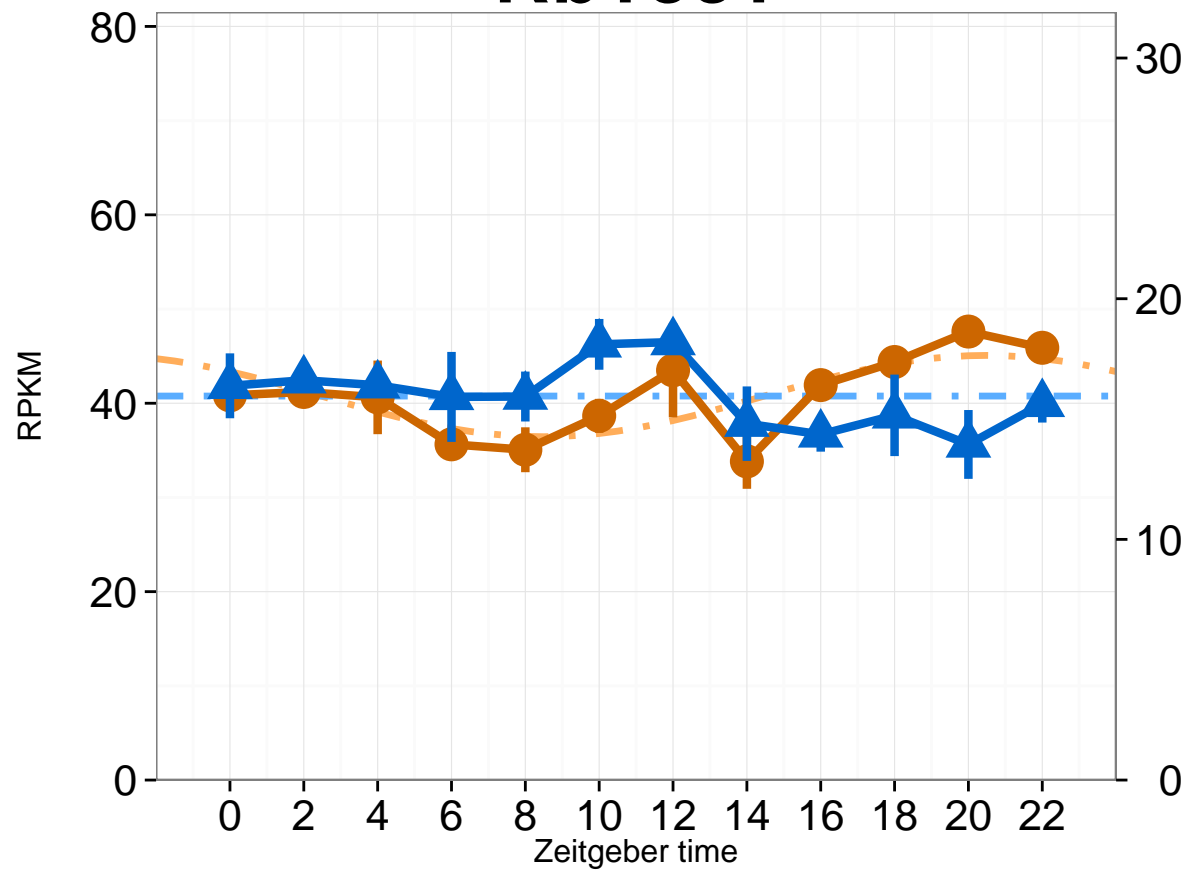

## Rb1cc1

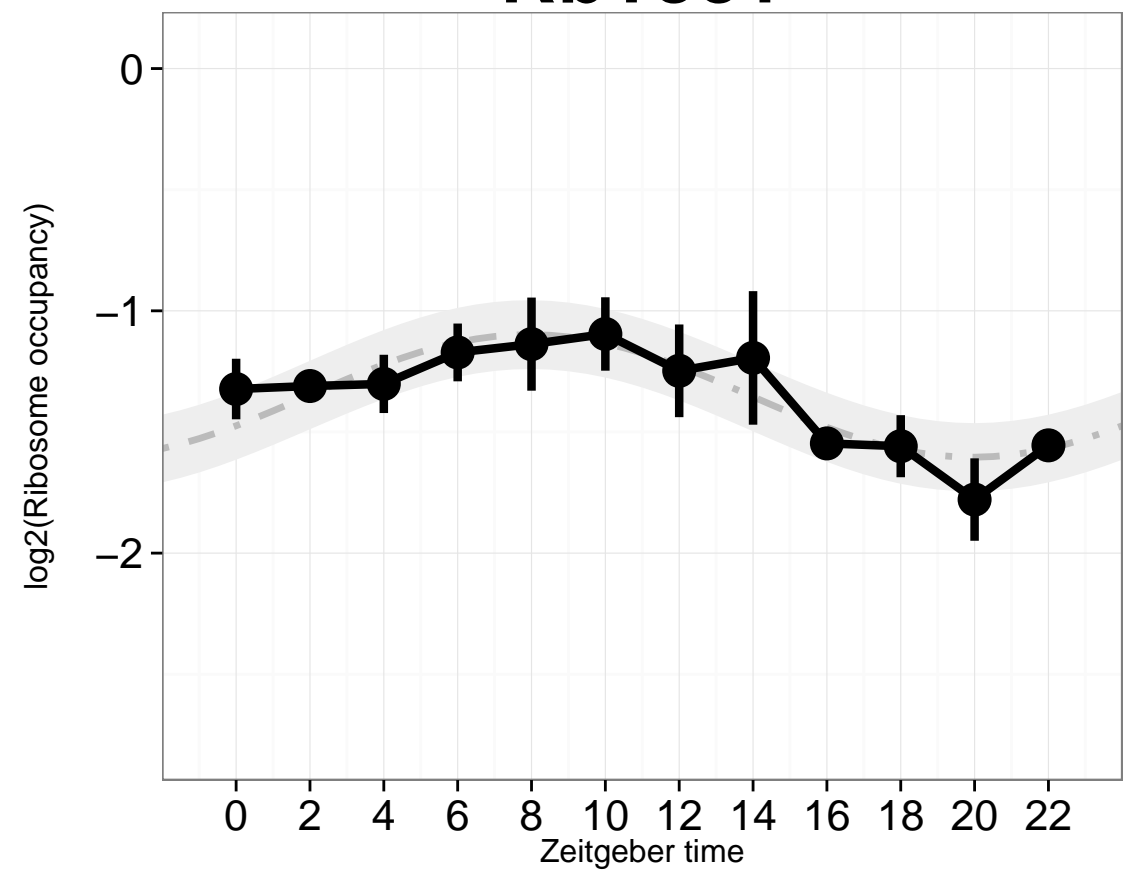

Supplement: Supplementary file 1710 [file 1]

## Tek

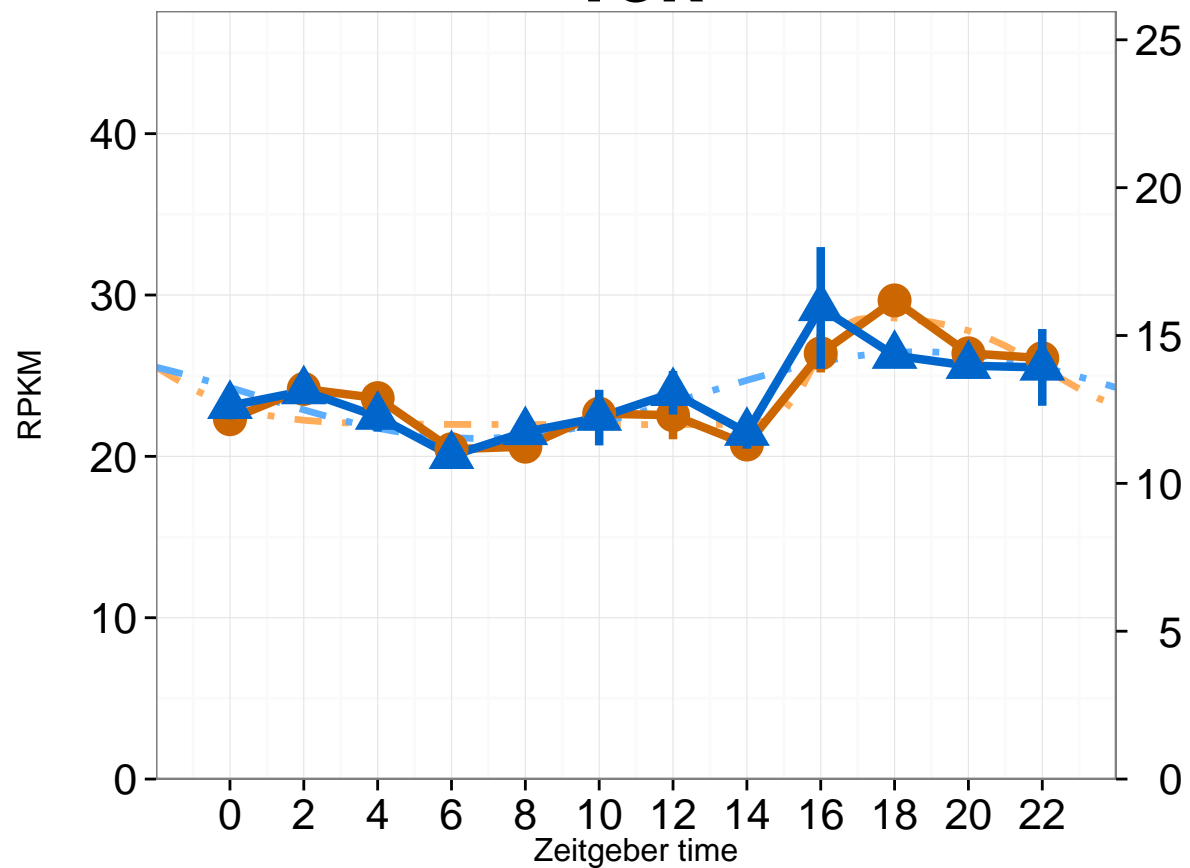

## Tek

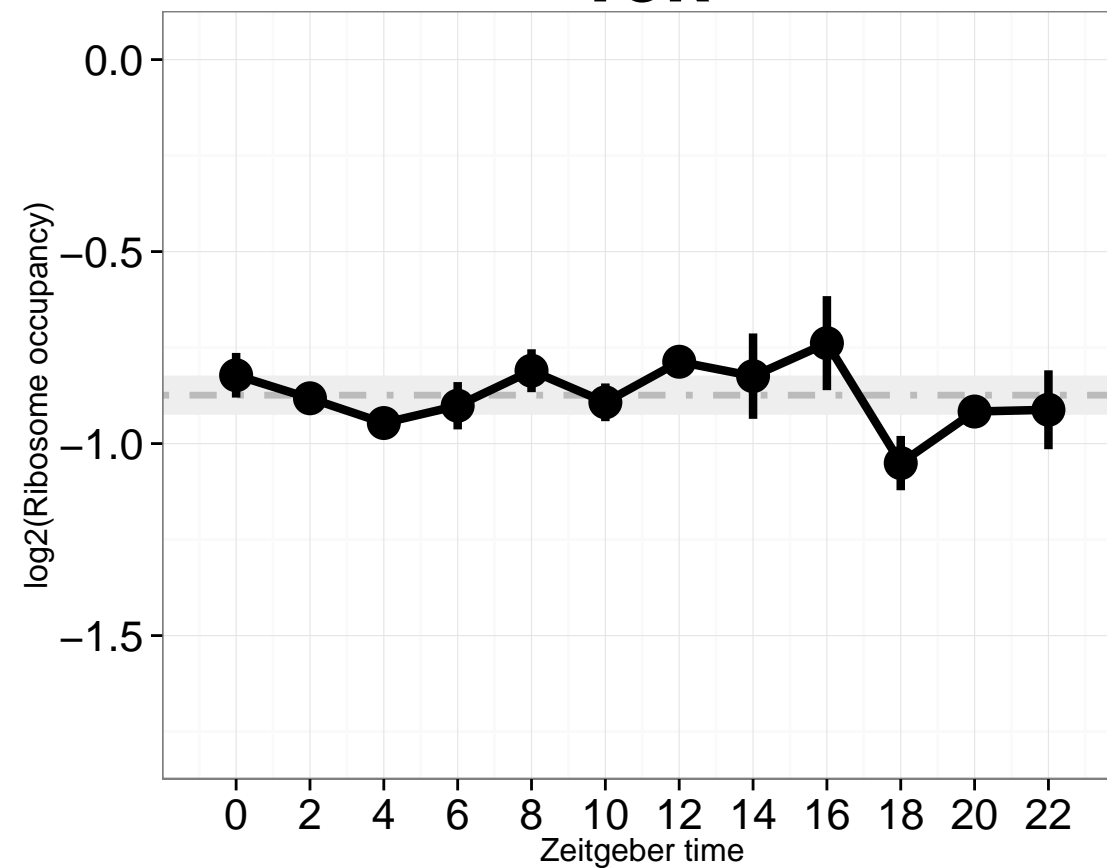

Supplement: Supplementary file 1711 [file 1]

# Surf6

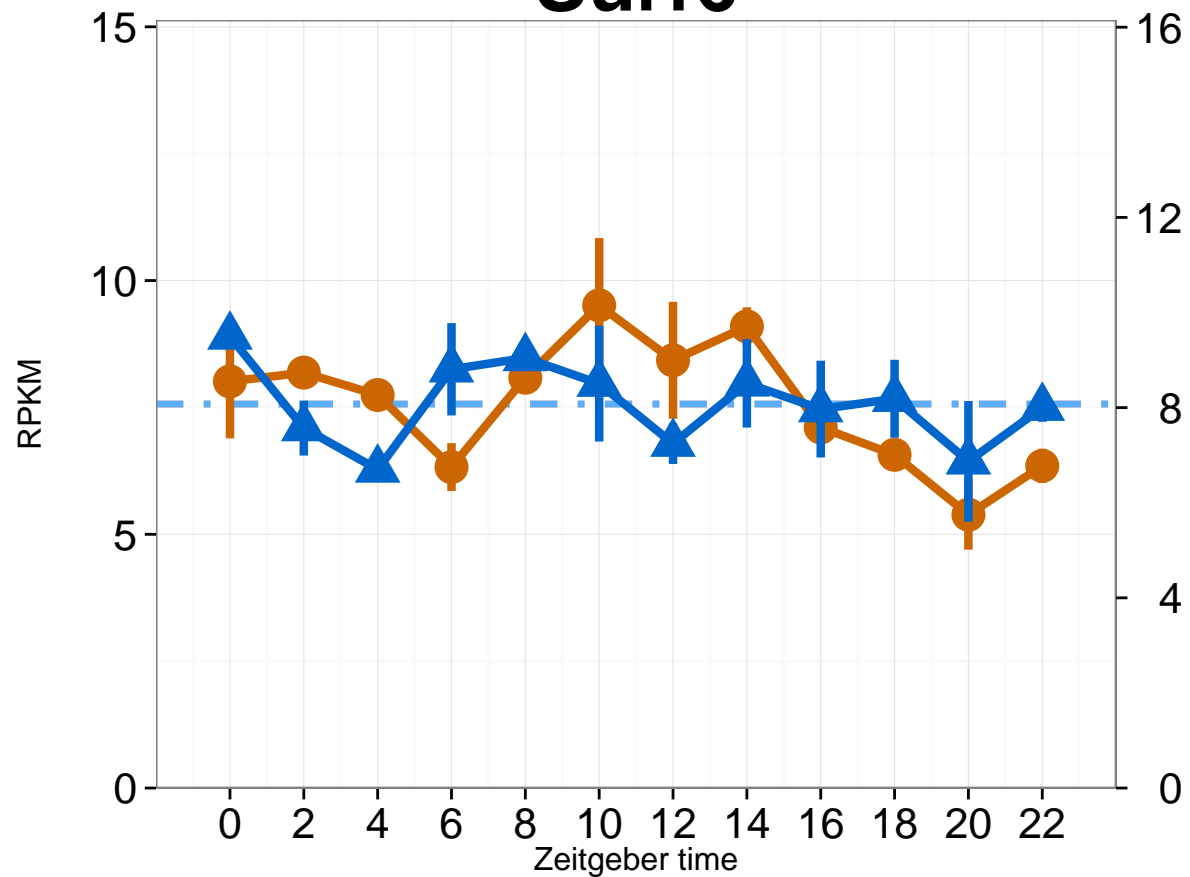

# Surf6

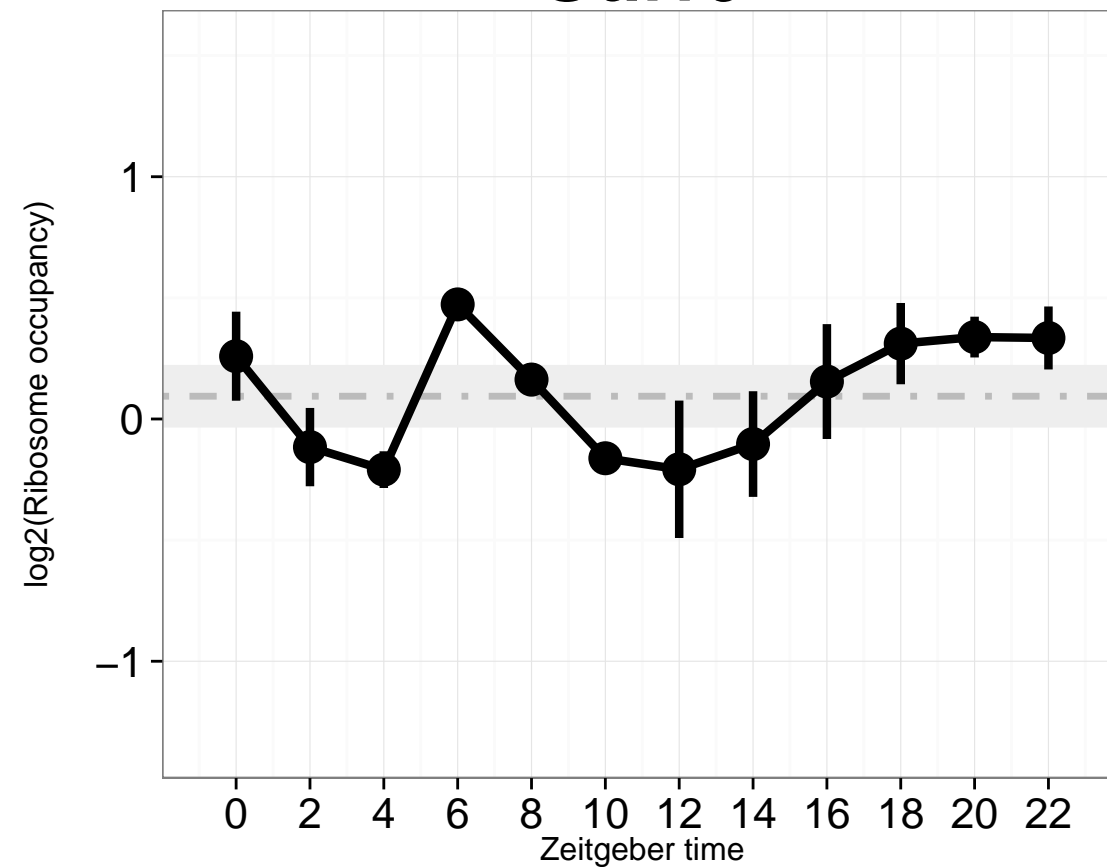

Supplement: Supplementary file 1712 [file 1]

# Oraov1

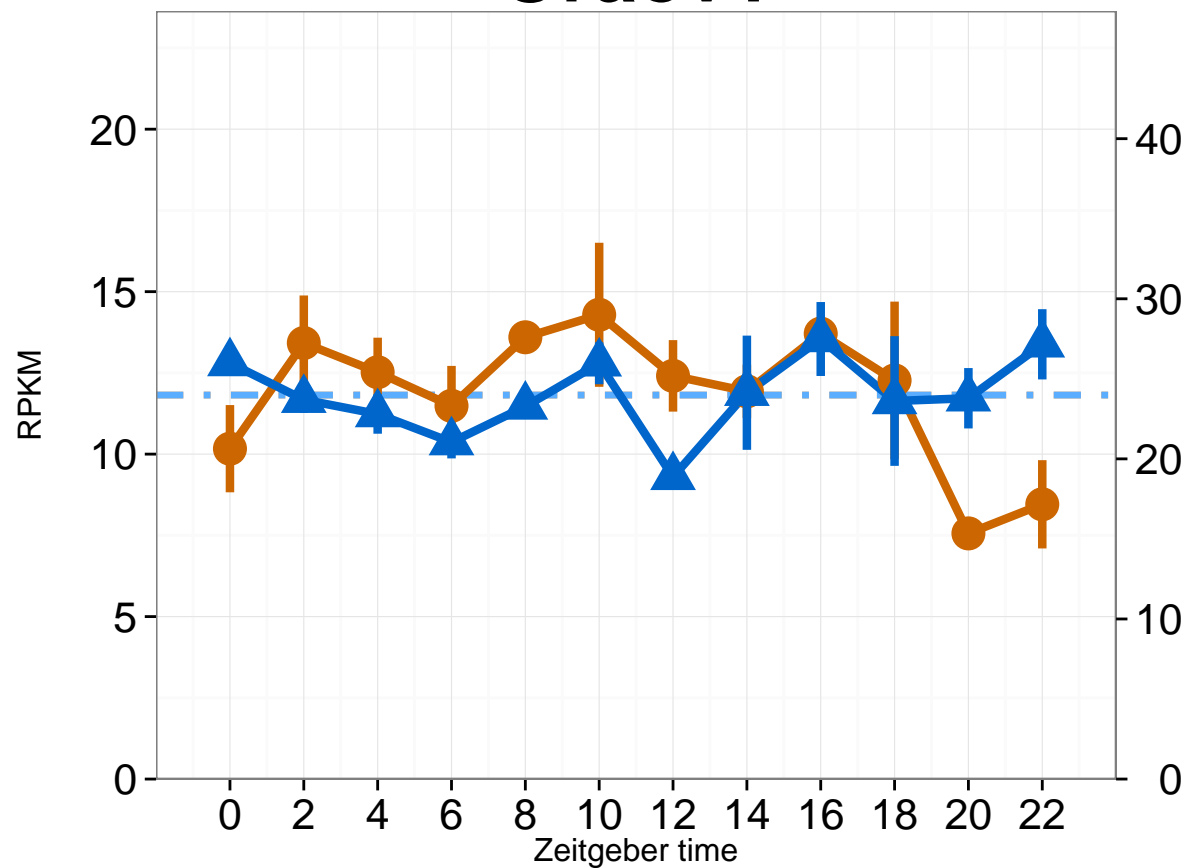

# Oraov1

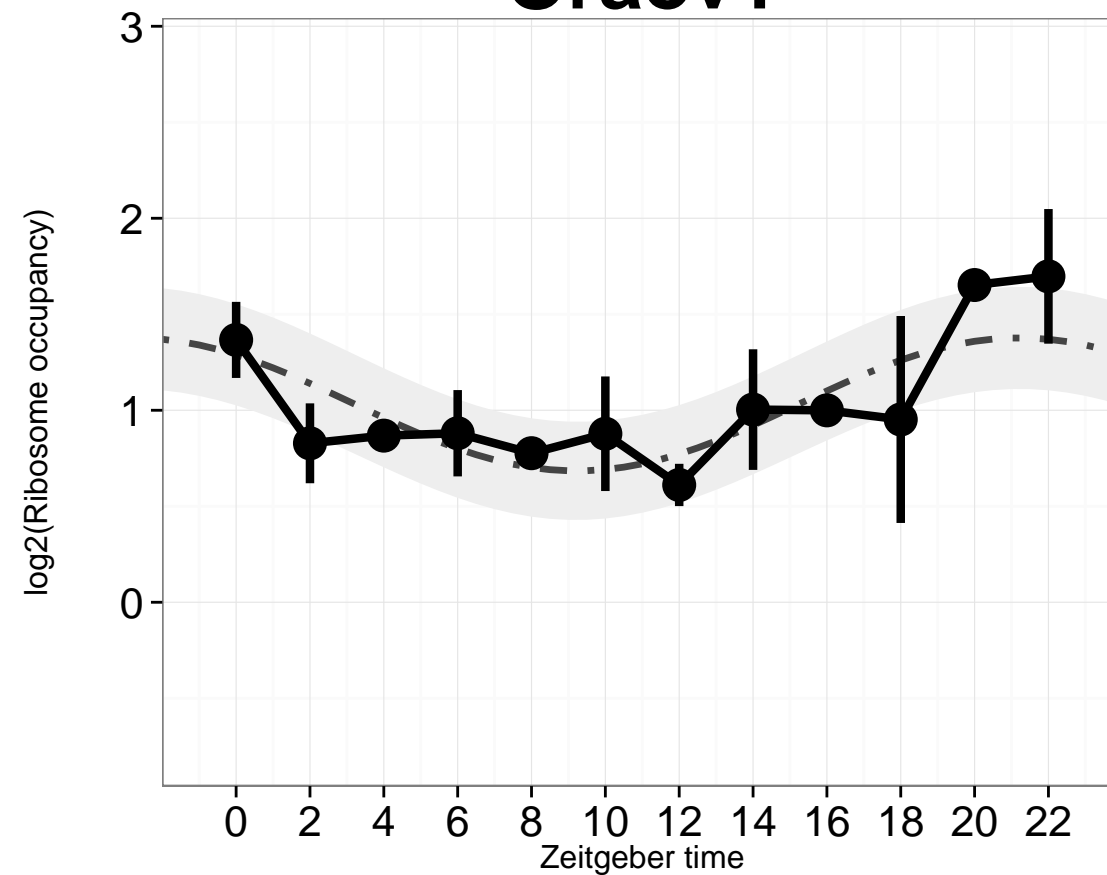

Supplement: Supplementary file 1713 [file 1]

# Prmt5

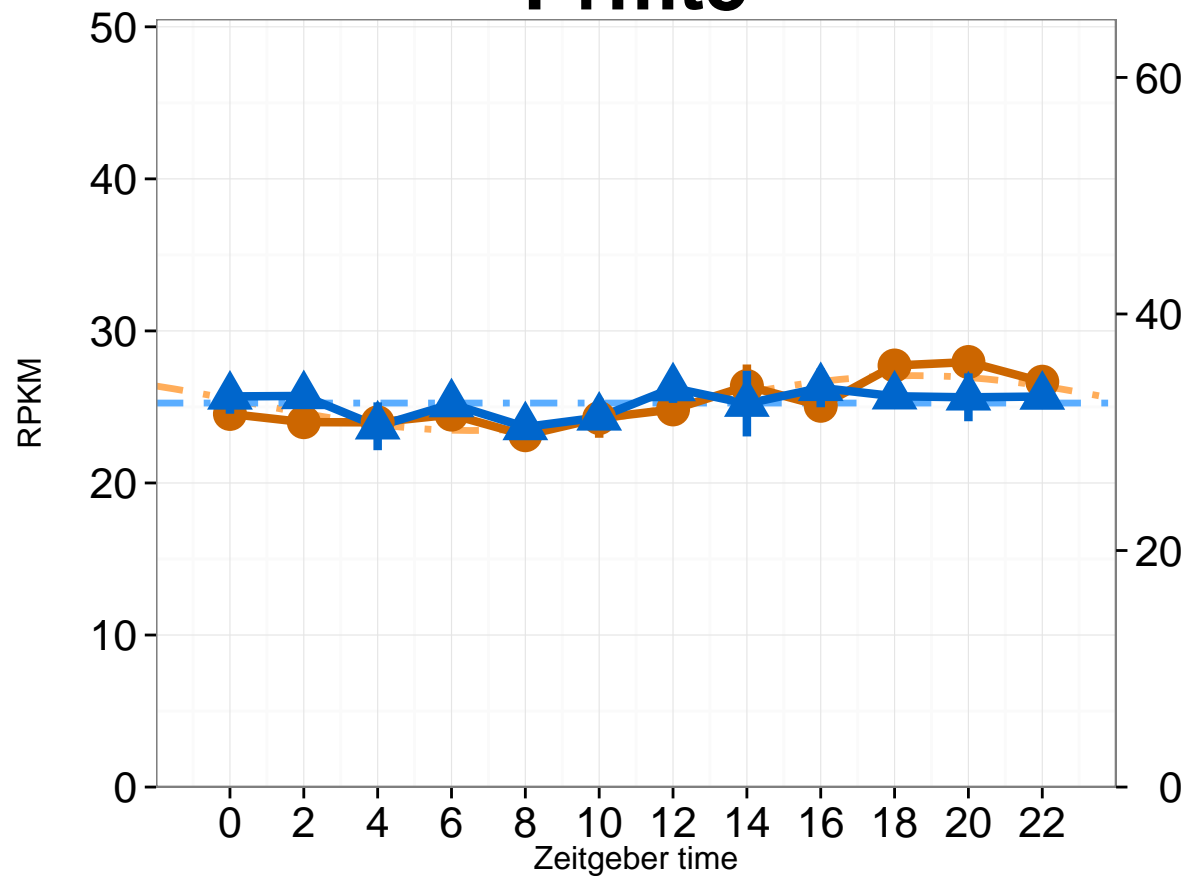

# Prmt5

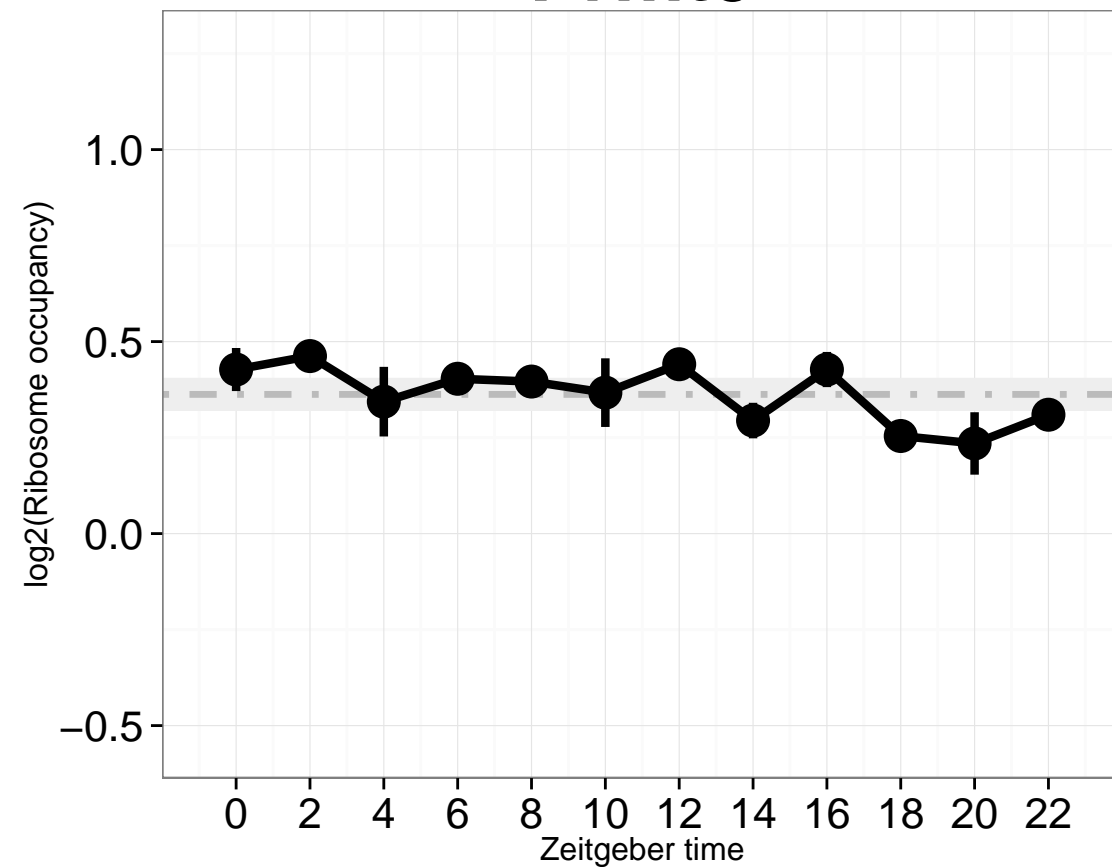

Supplement: Supplementary file 1714 [file 1]

# Cpsf3

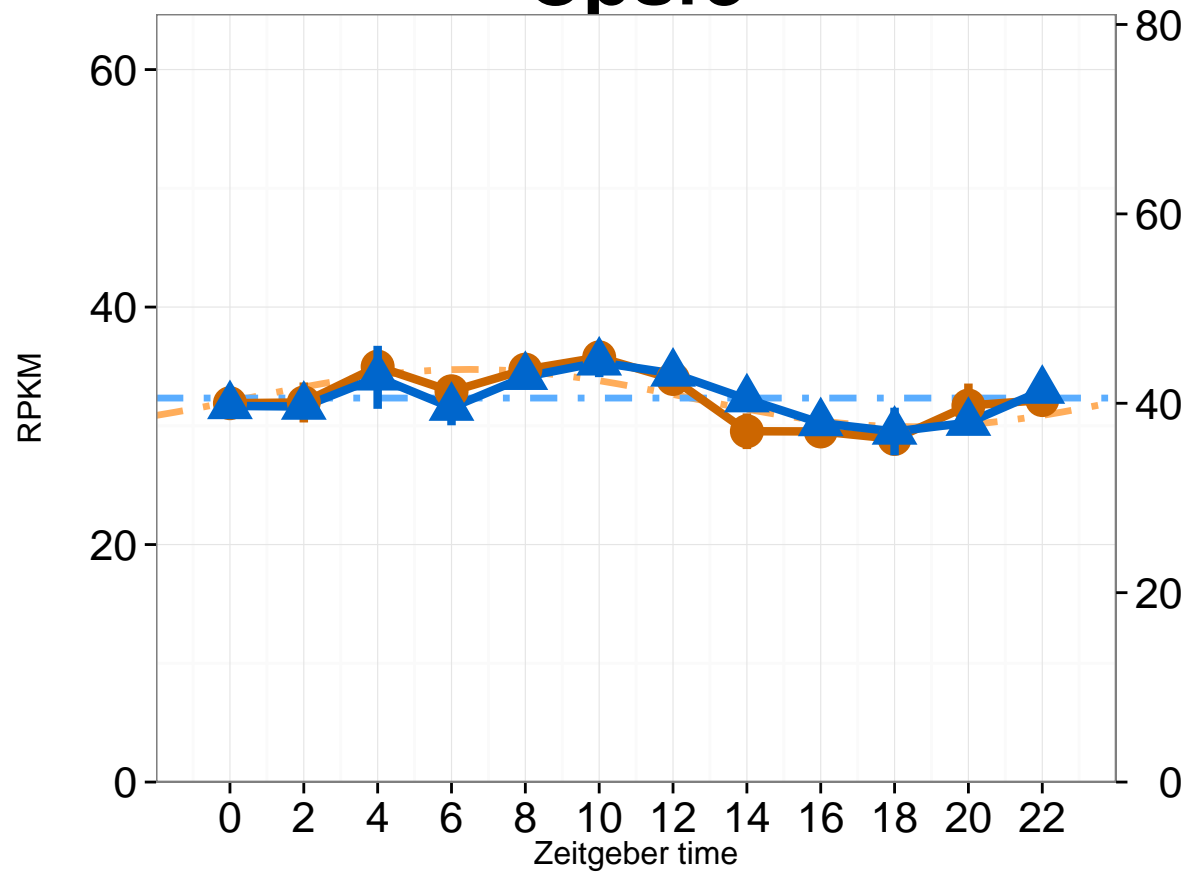

# Cpsf3

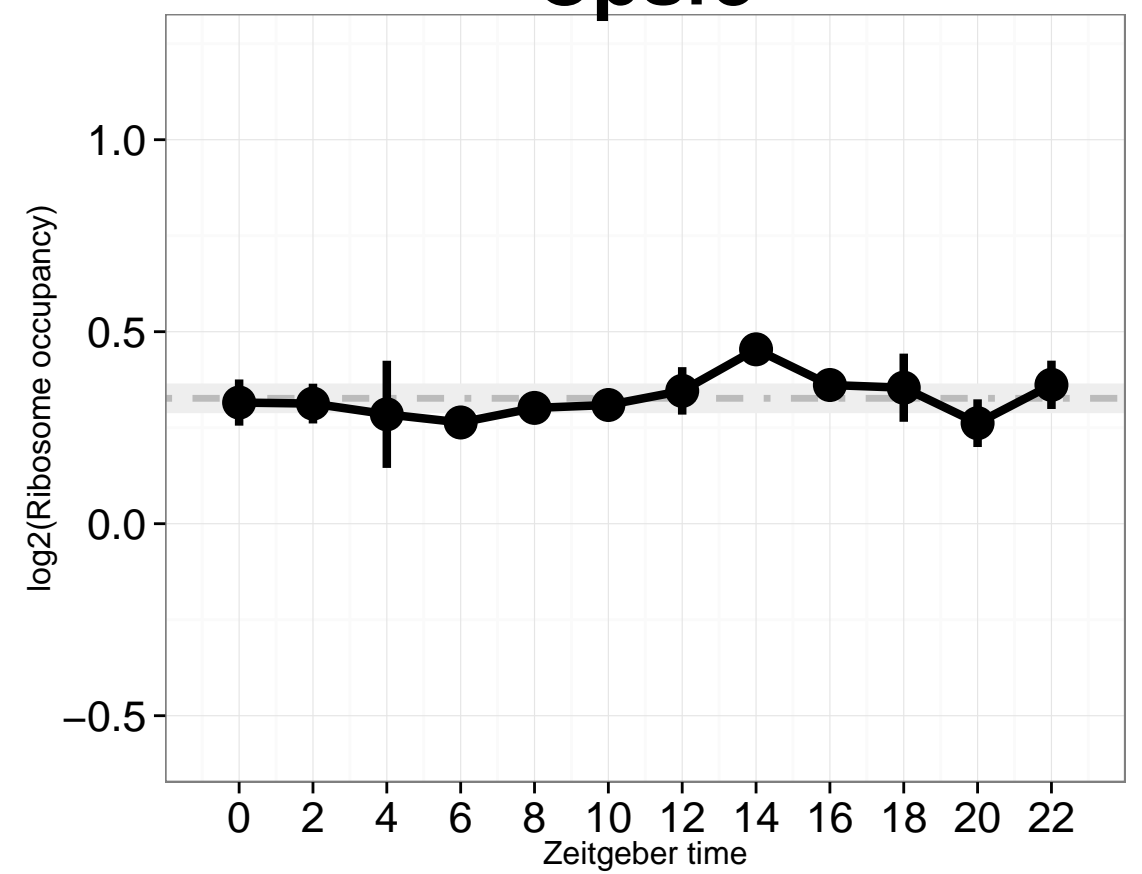

Supplement: Supplementary file 1715 [file 1]

## Cluh

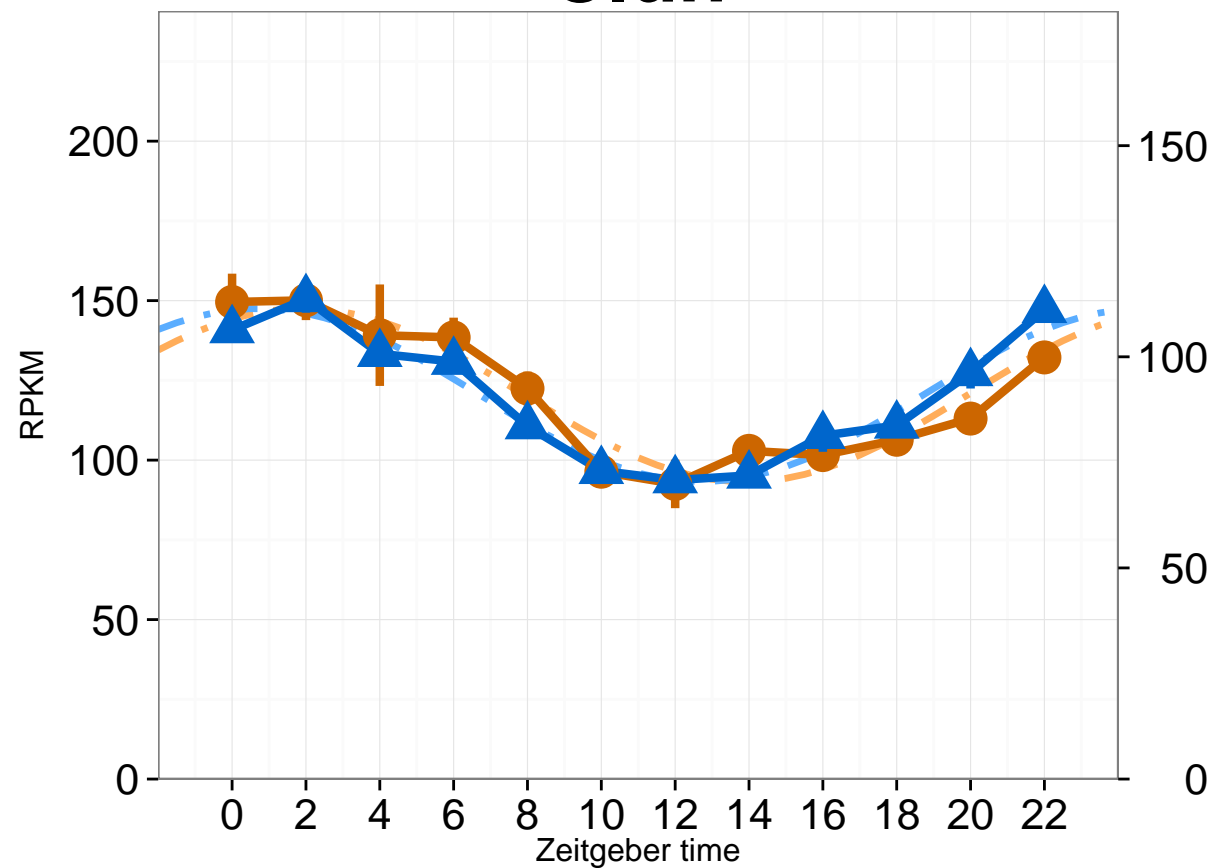

## Cluh

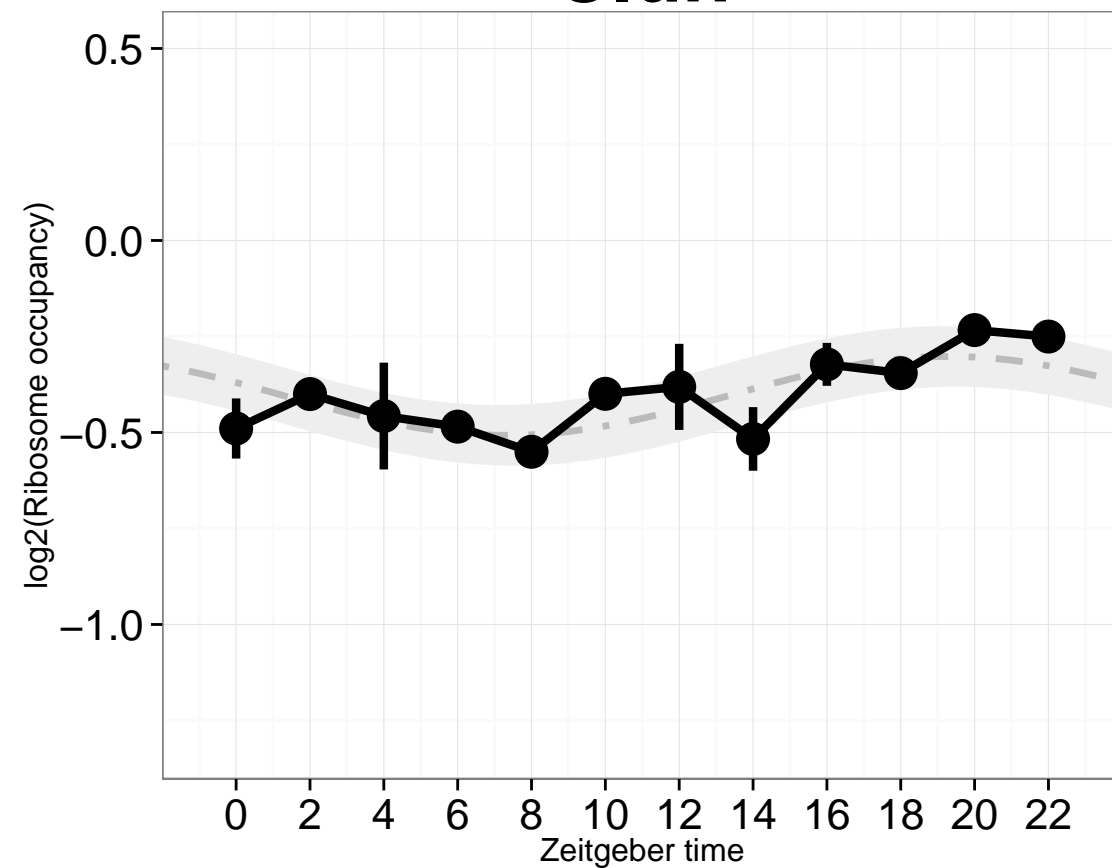

Supplement: Supplementary file 1716 [file 1]

# Wdfy2

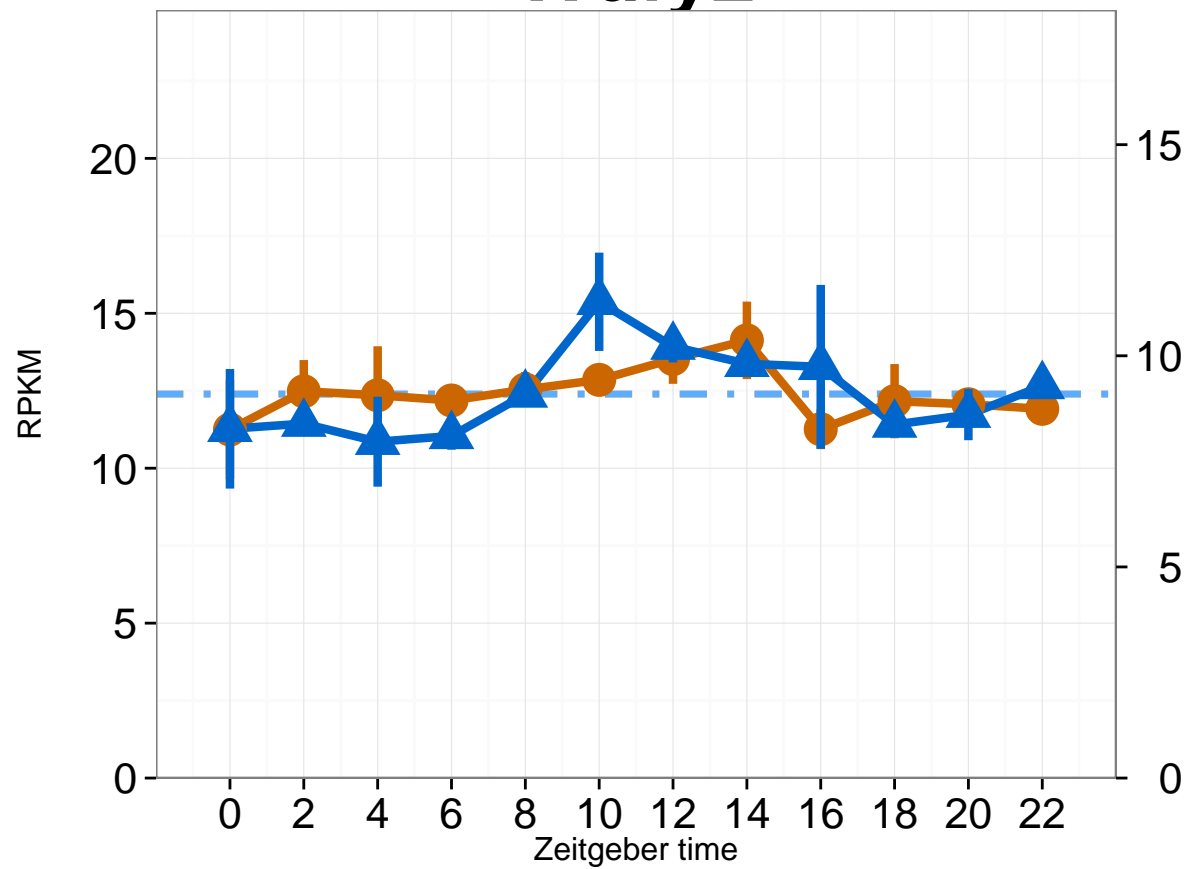

# Wdfy2

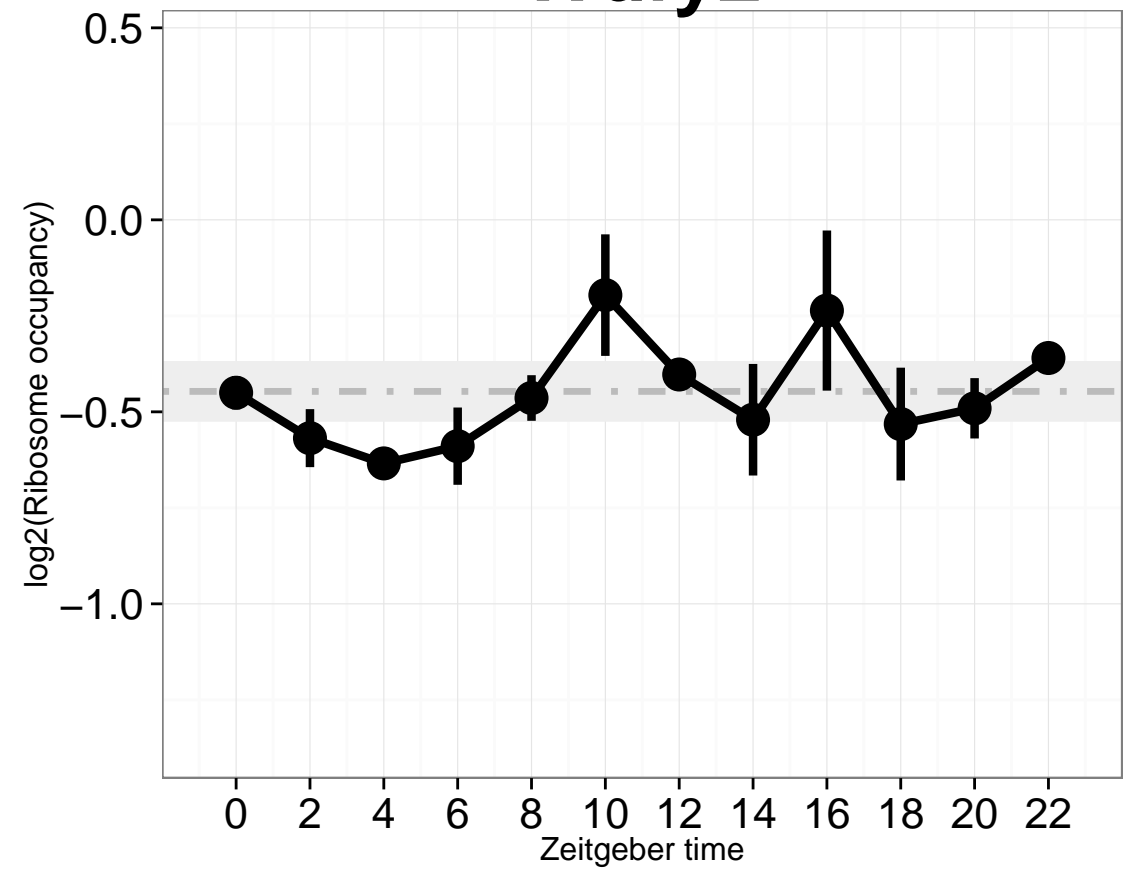

Supplement: Supplementary file 1717 [file 1]

# Prdx1

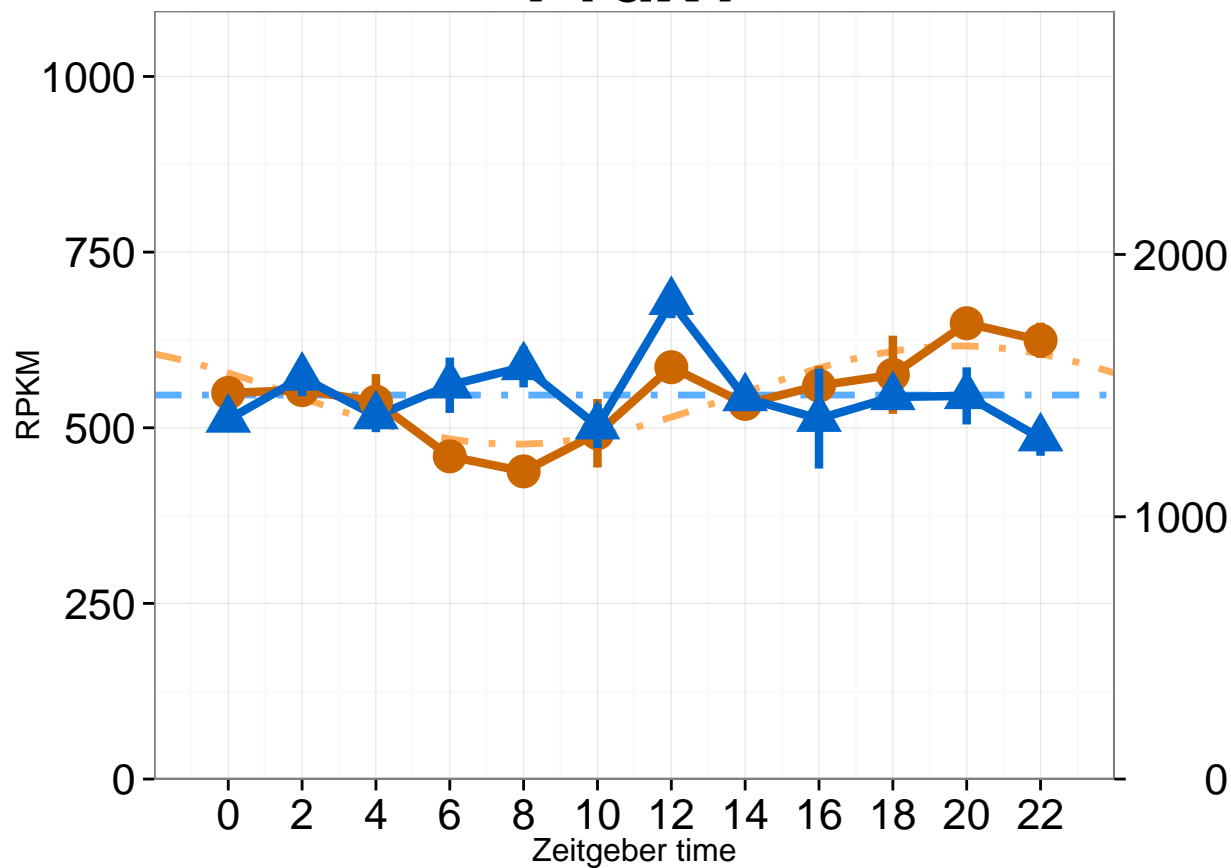

# Prdx1

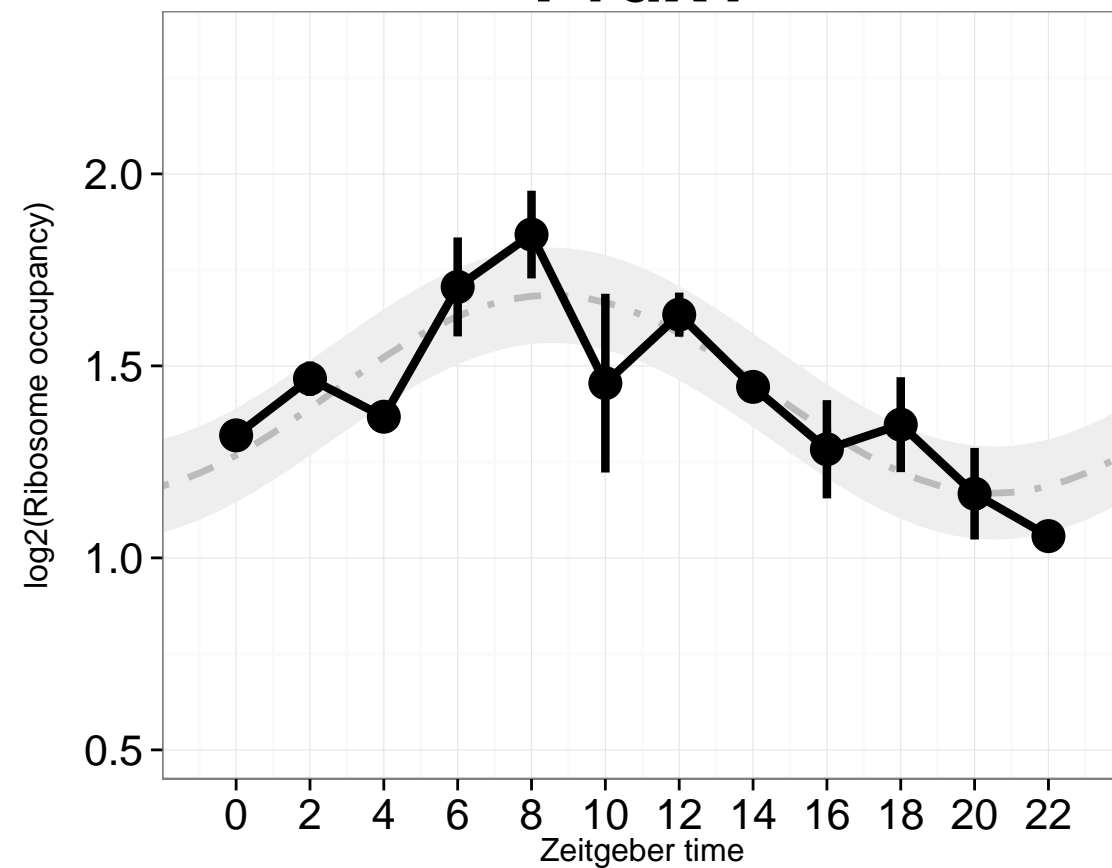

Supplement: Supplementary file 1718 [file 1]

## Sirt1

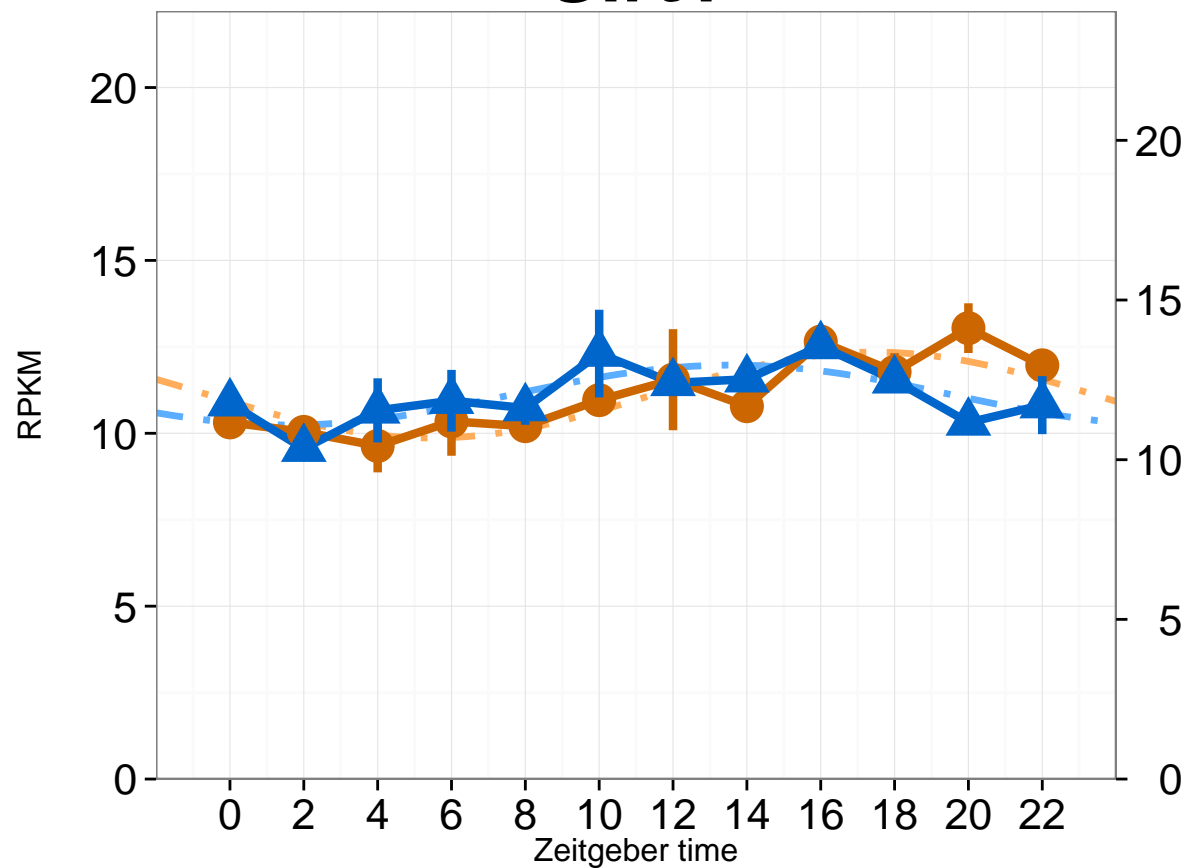

## Sirt1

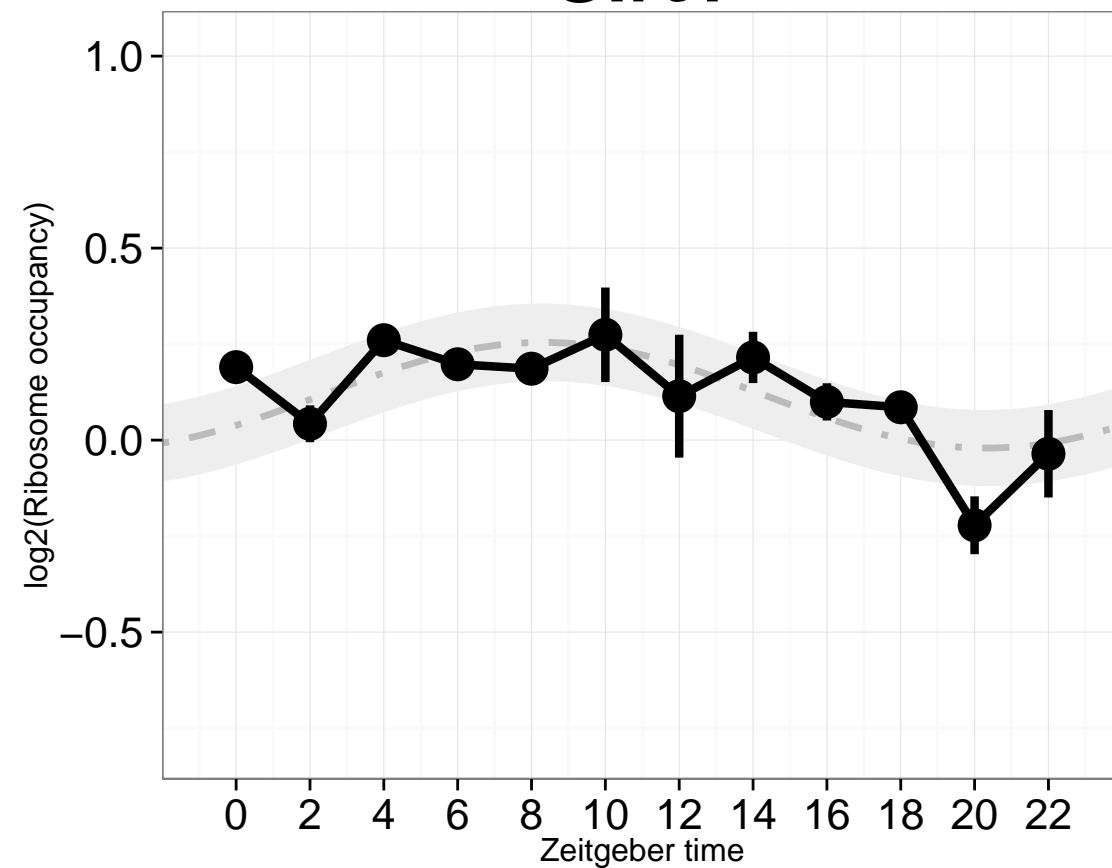

Supplement: Supplementary file 1719 [file 1]

## Glod4

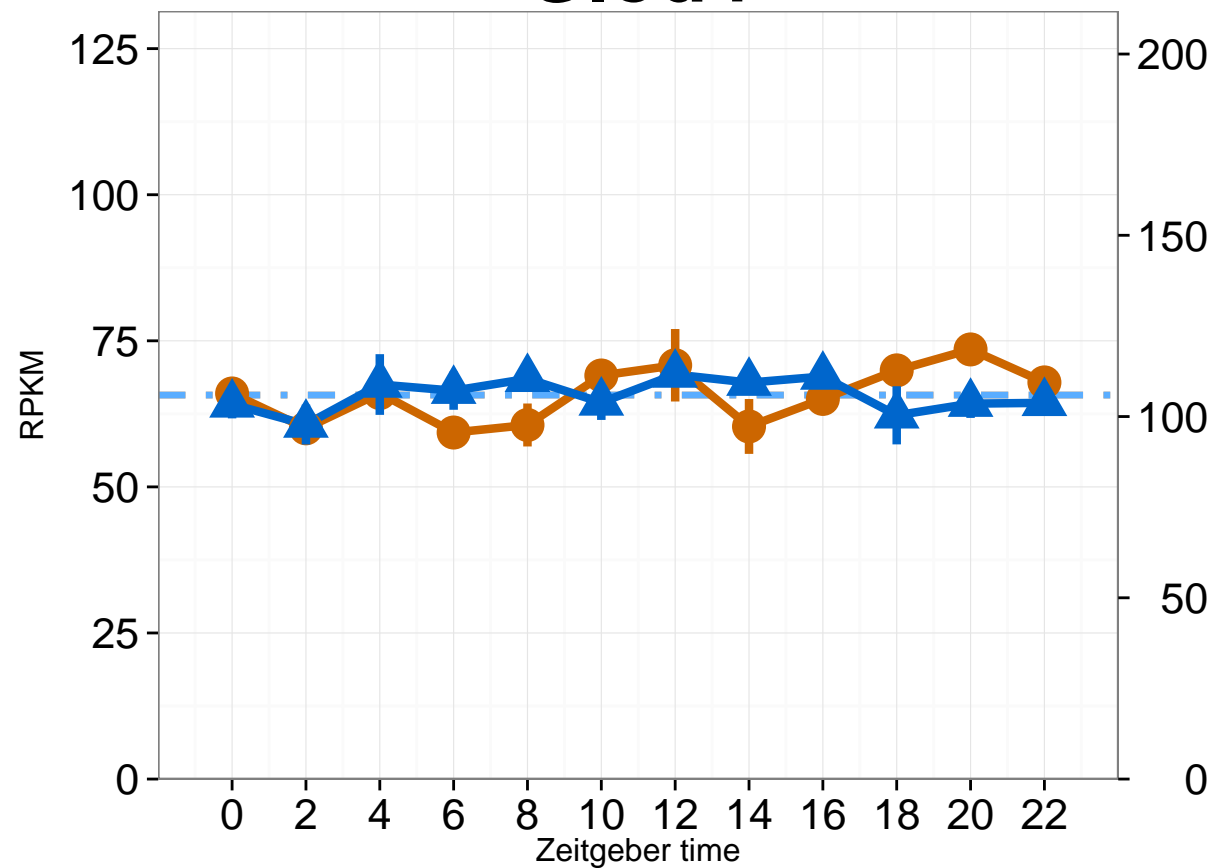

## Glod4

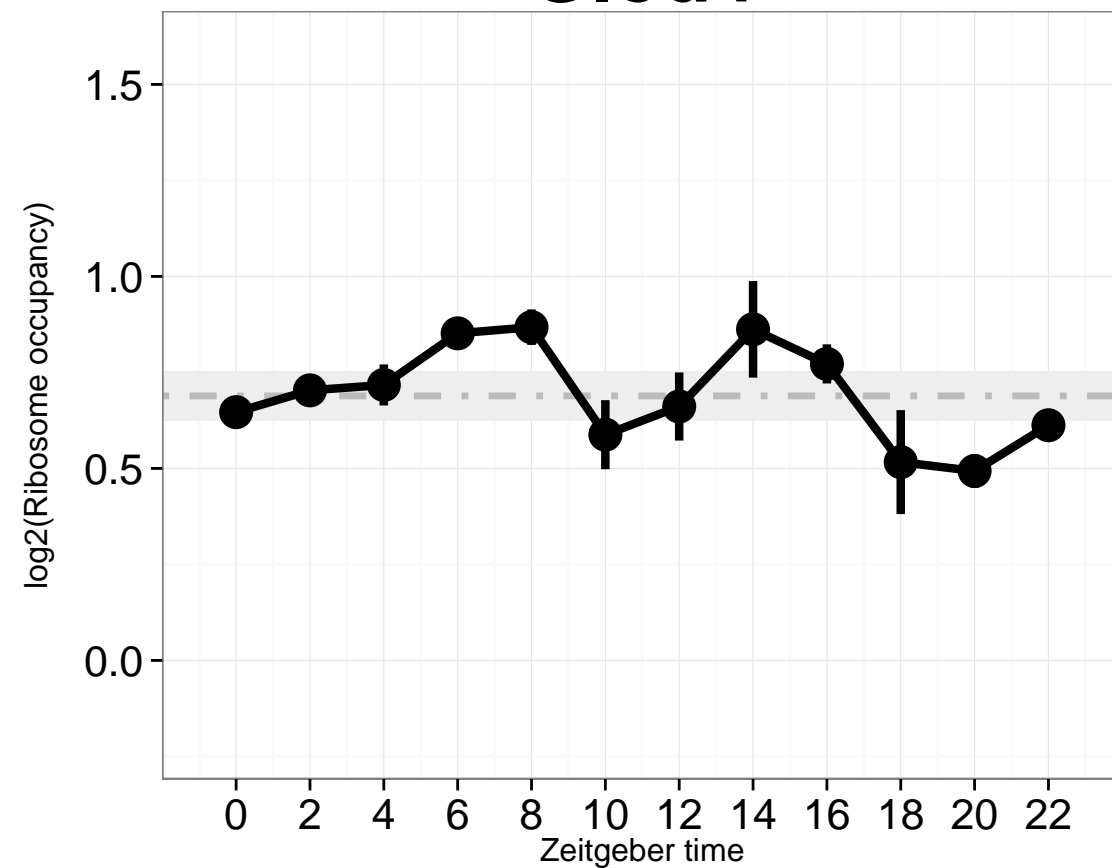

Supplement: Supplementary file 1720 [file 1]

## Dpyd

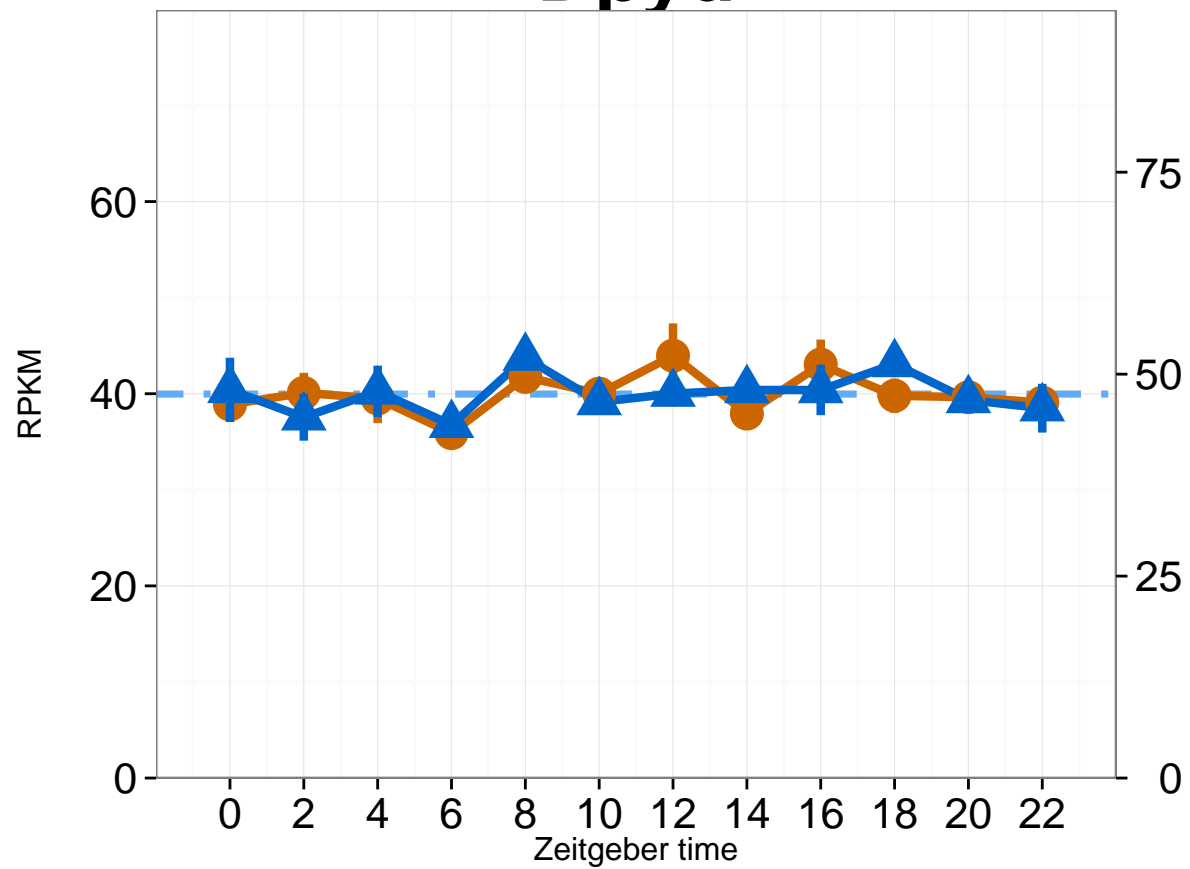

## Dpyd

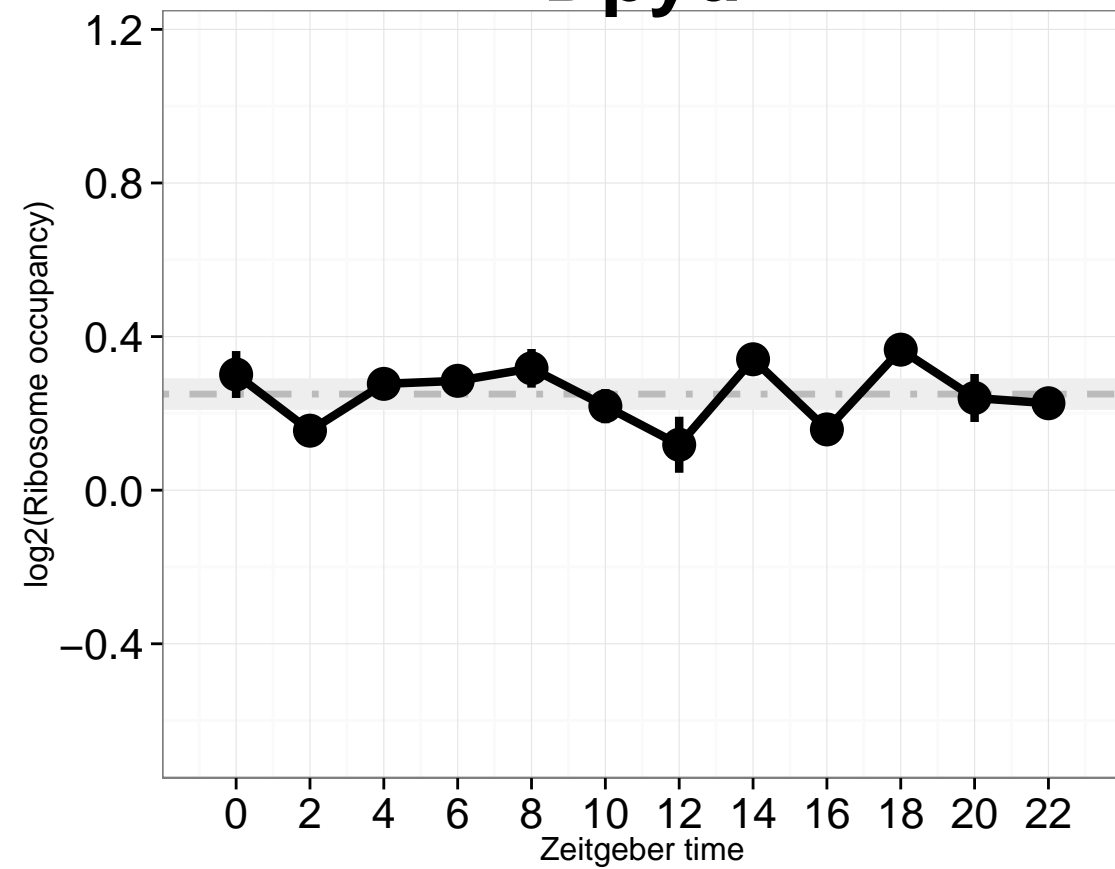

Supplement: Supplementary file 1721 [file 1]

## Camsap2

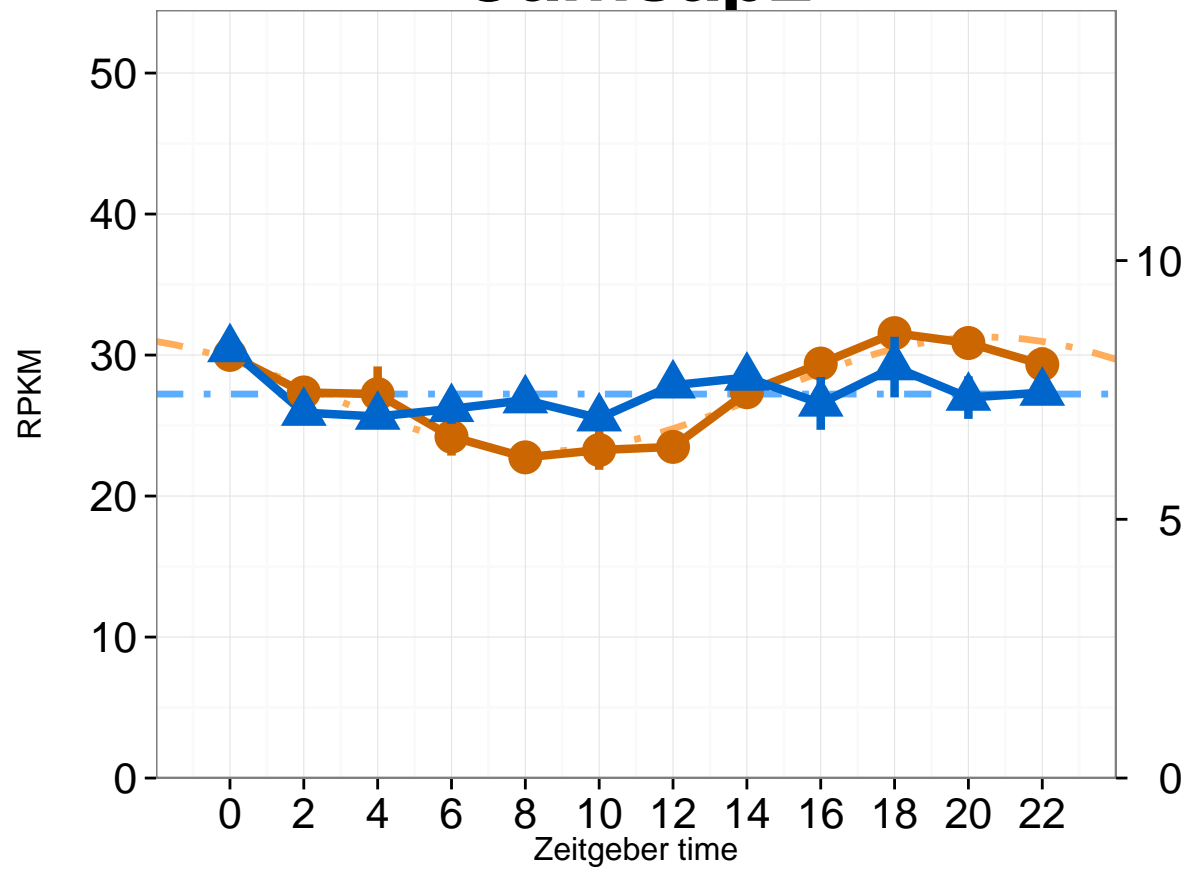

## Camsap2

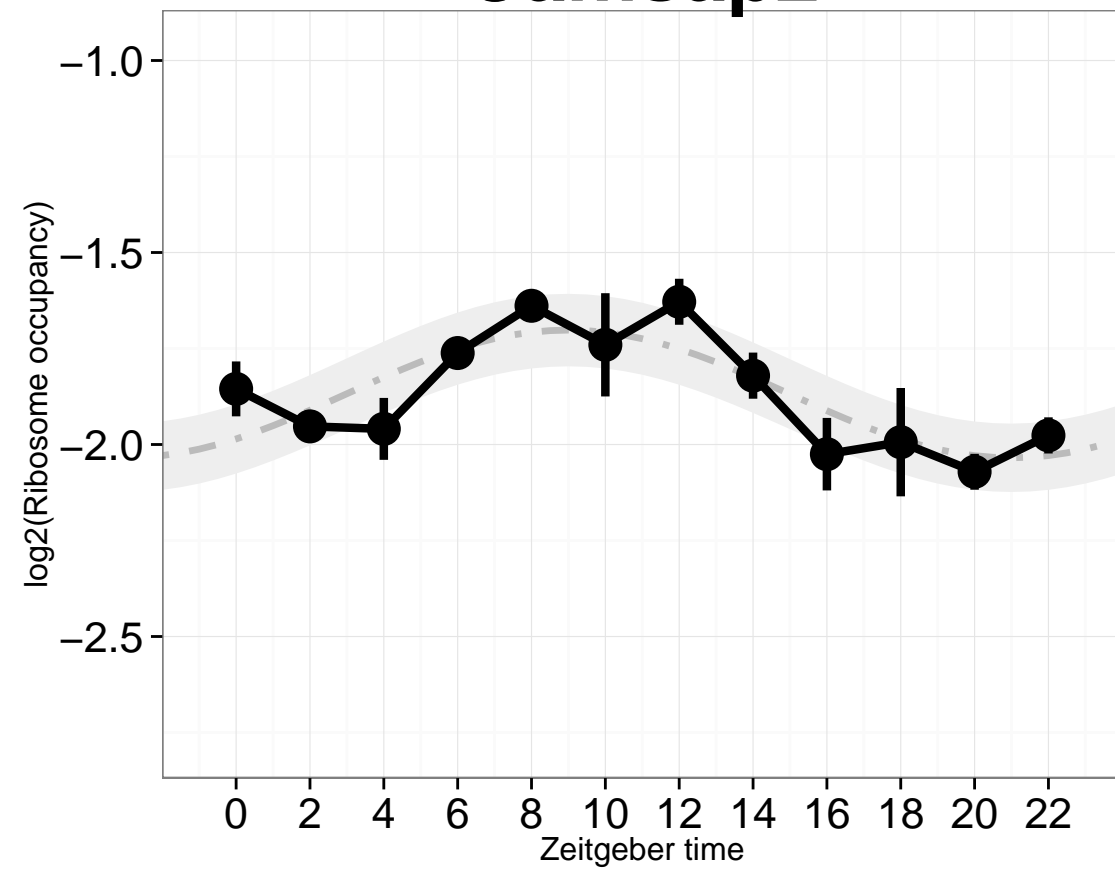

Supplement: Supplementary file 1722 [file 1]

## Hoxd9

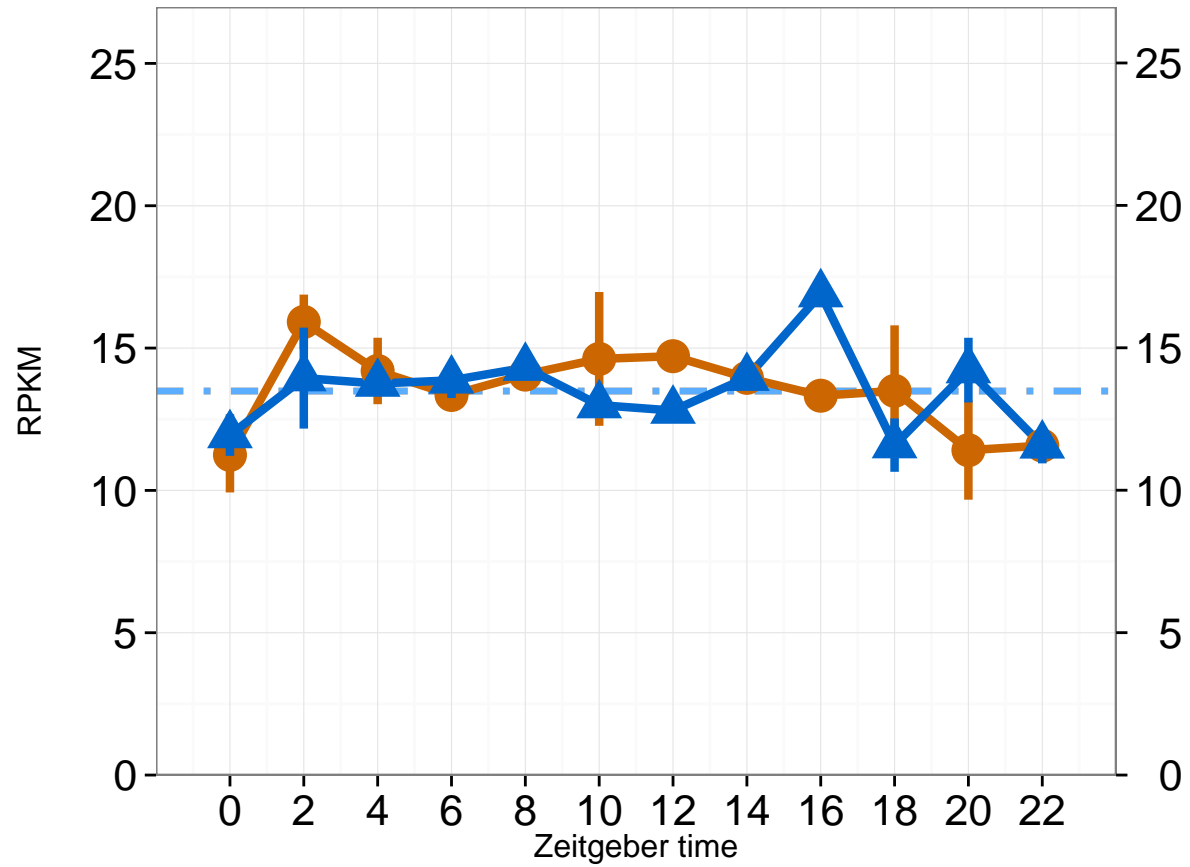

## Hoxd9

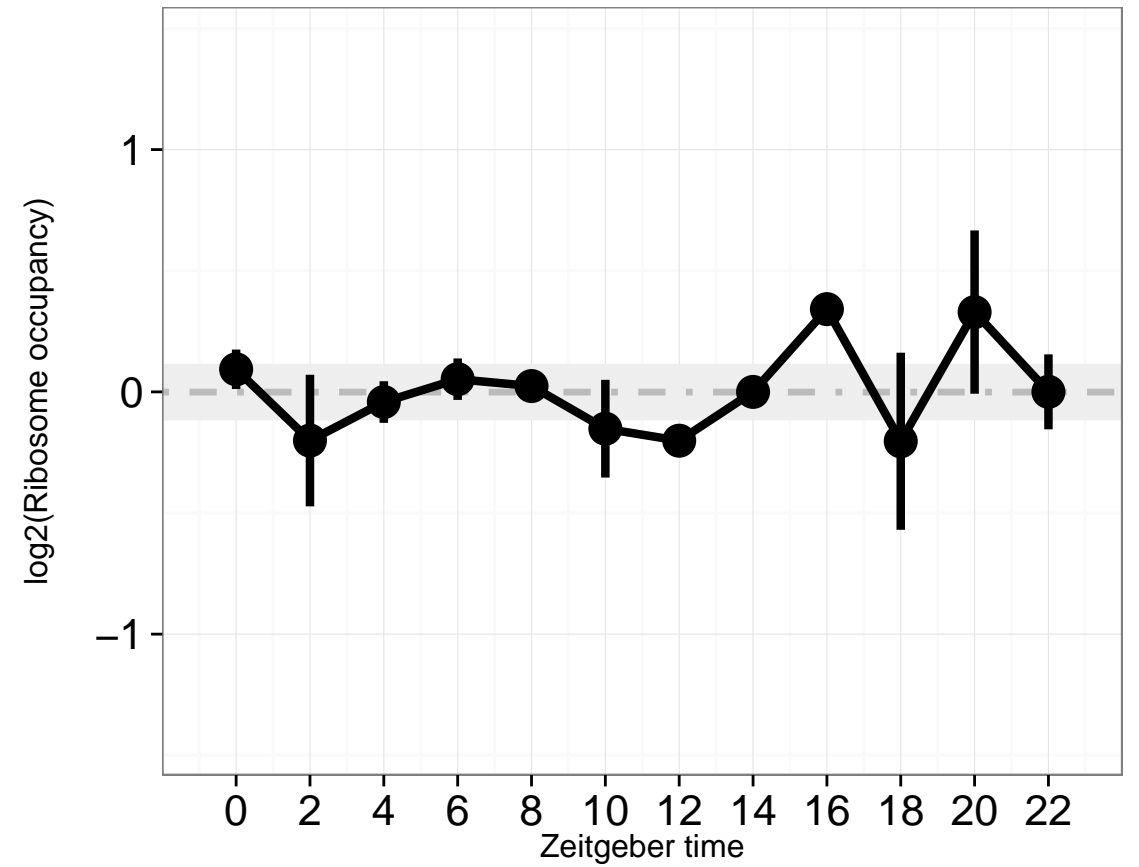

Supplement: Supplementary file 1723 [file 1]

## Naip5

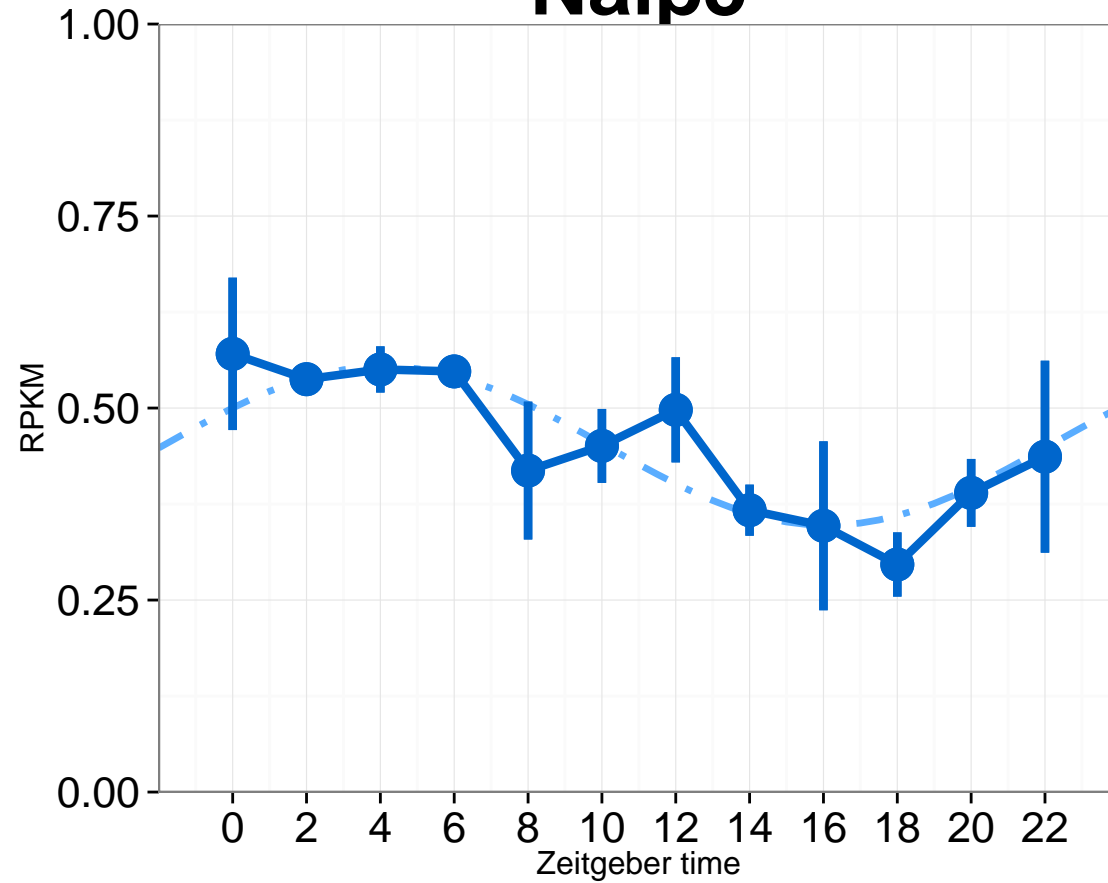

## Naip5 log2(Ribosome occupancy)

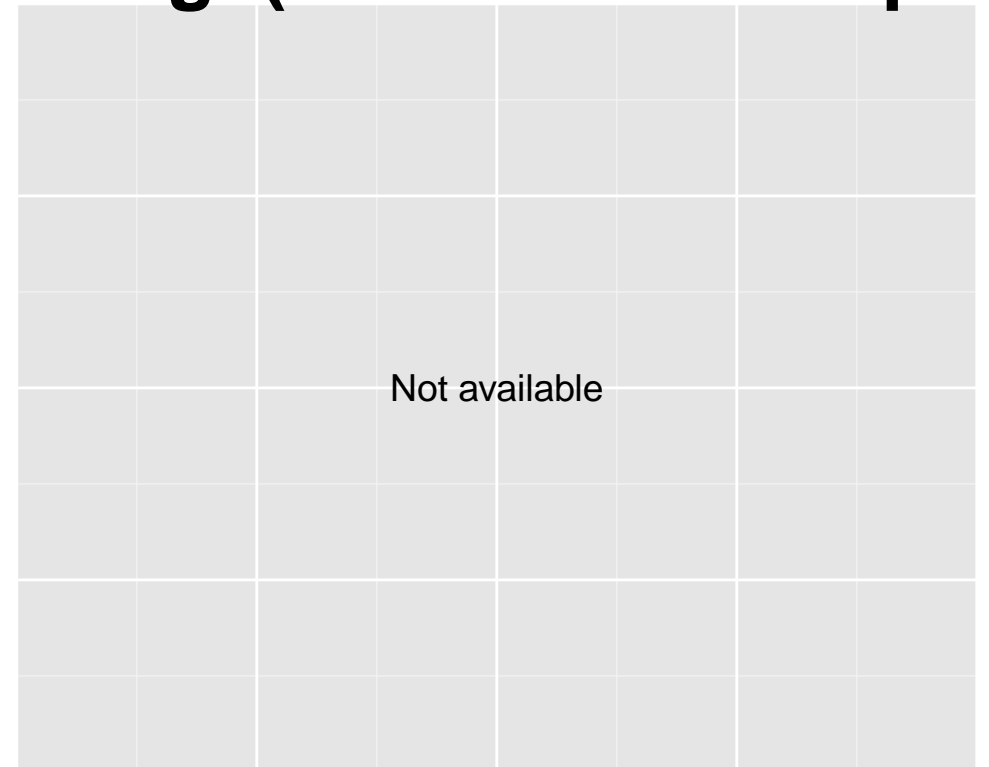

Supplement: Supplementary file 1724 [file 1]

# Chac1

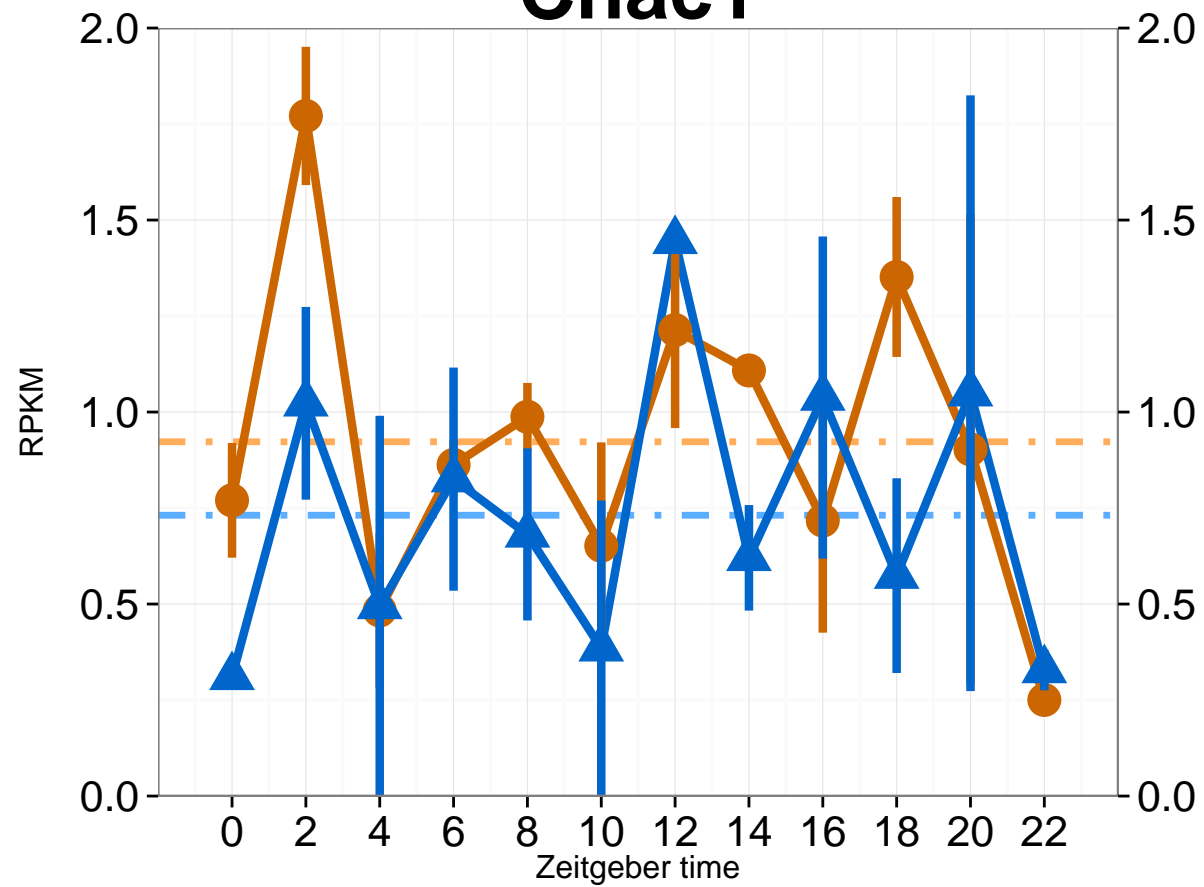

# Chac1

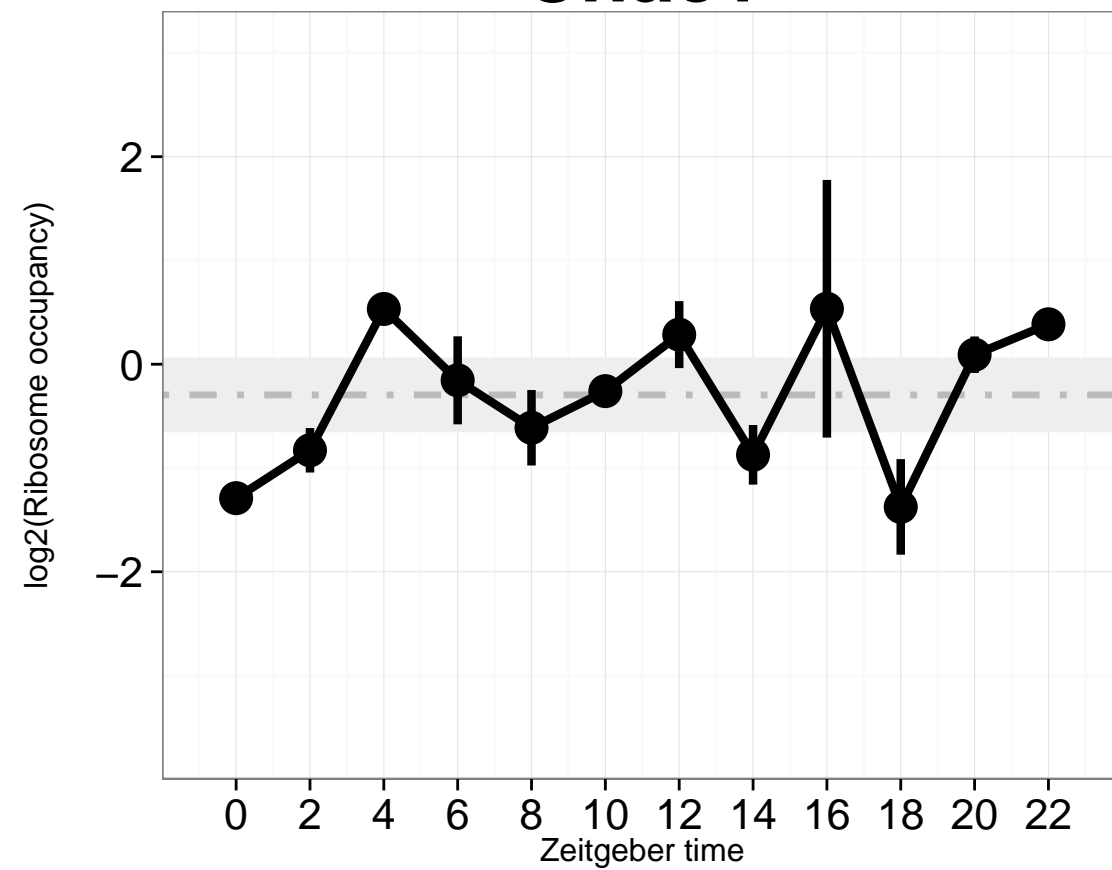

Supplement: Supplementary file 1725 [file 1]

## Vwa1

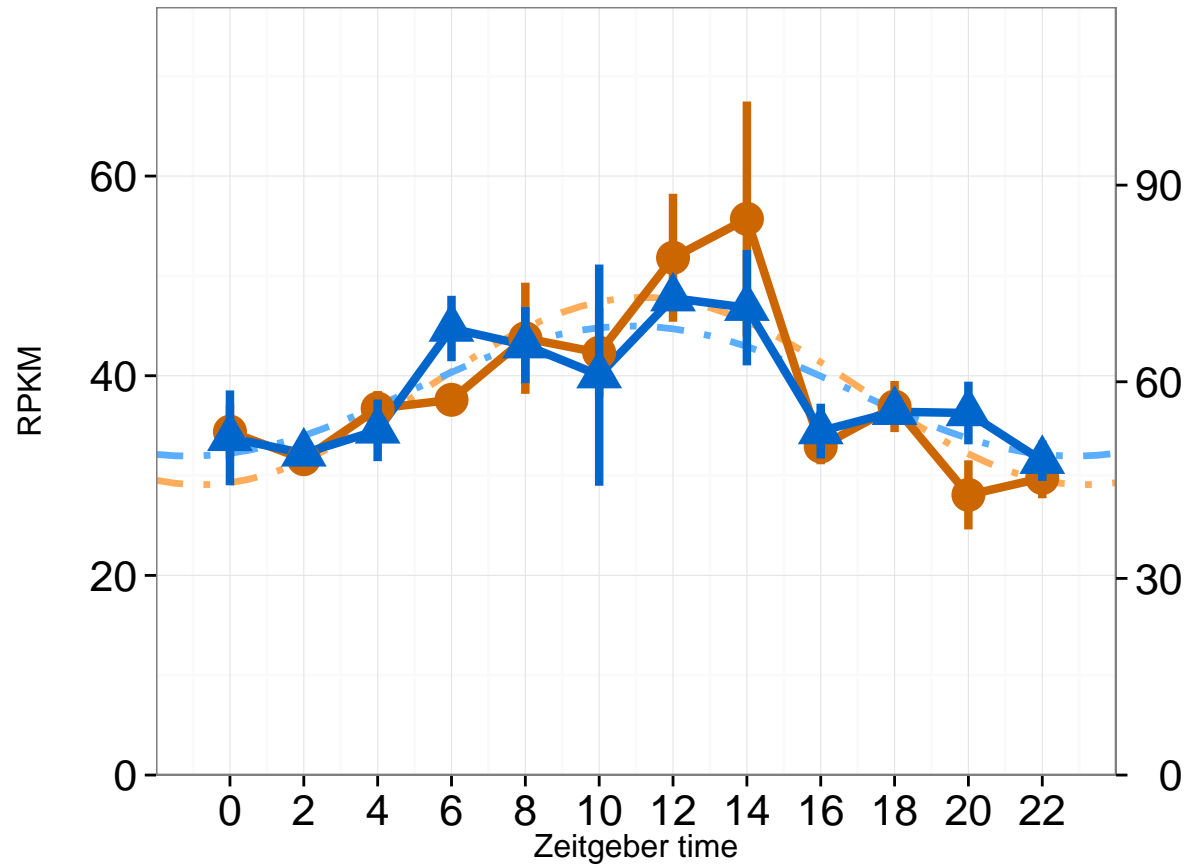

## Vwa1

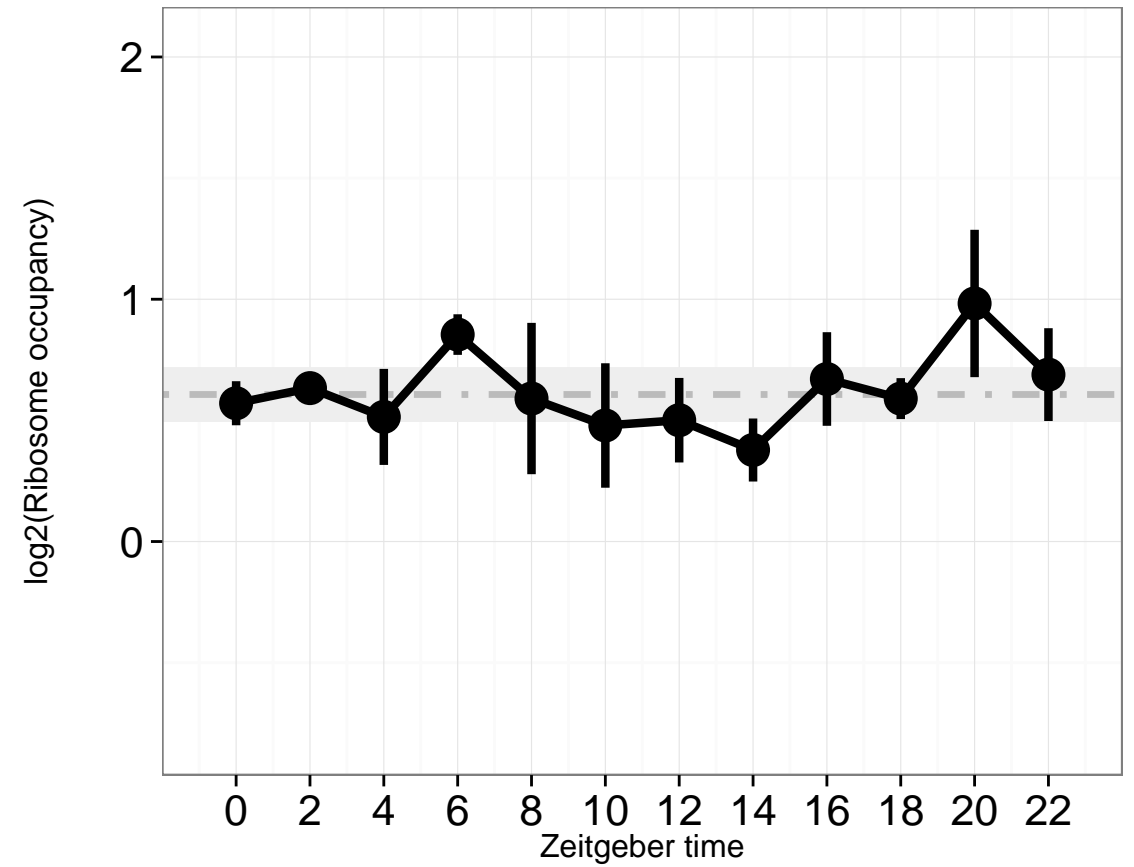

Supplement: Supplementary file 1726 [file 1]

# Fam133b

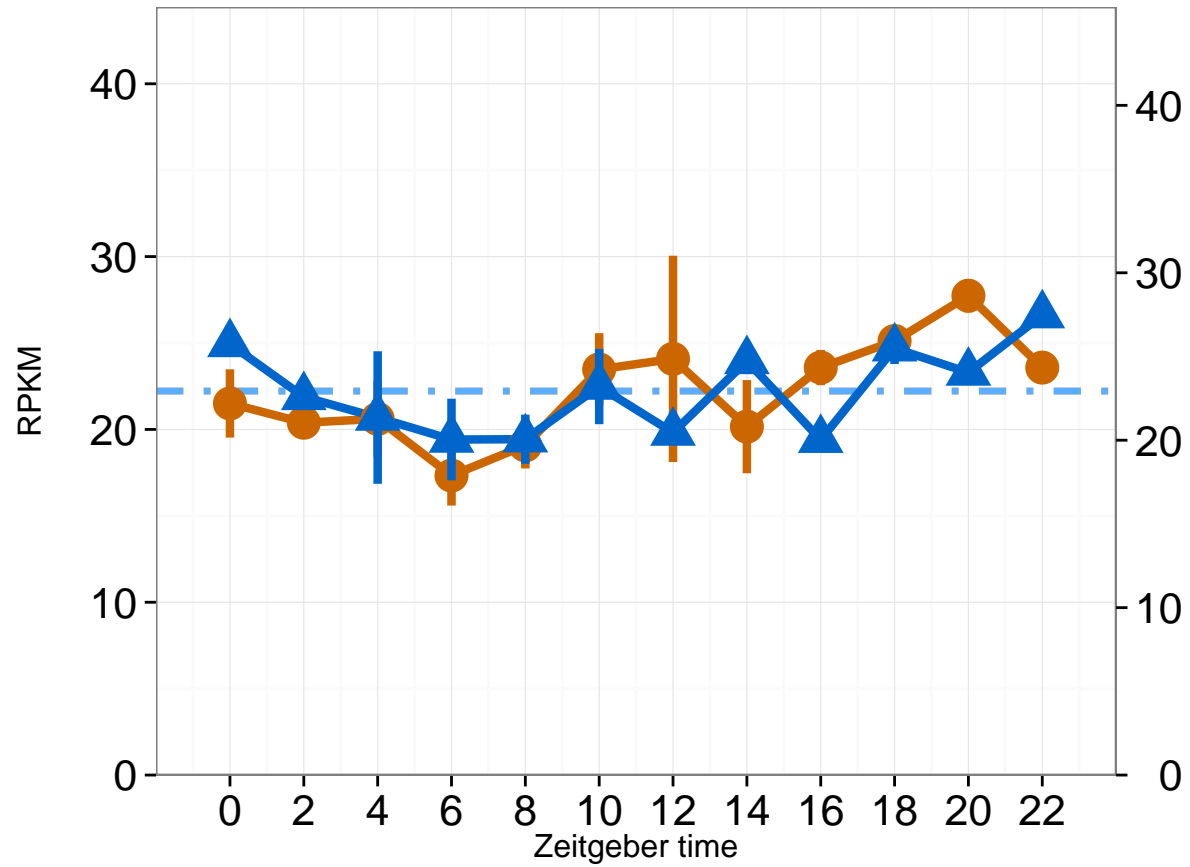

# Fam133b

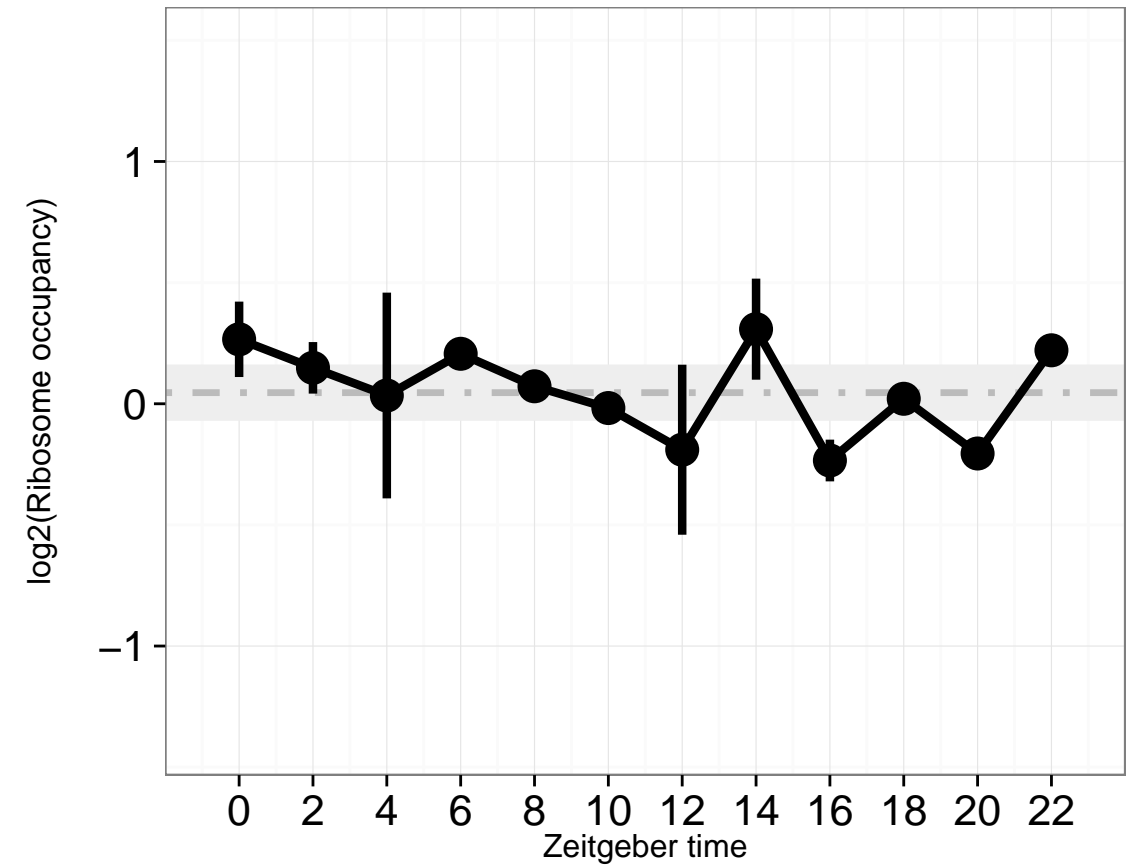

Supplement: Supplementary file 1727 [file 1]

## Reep4

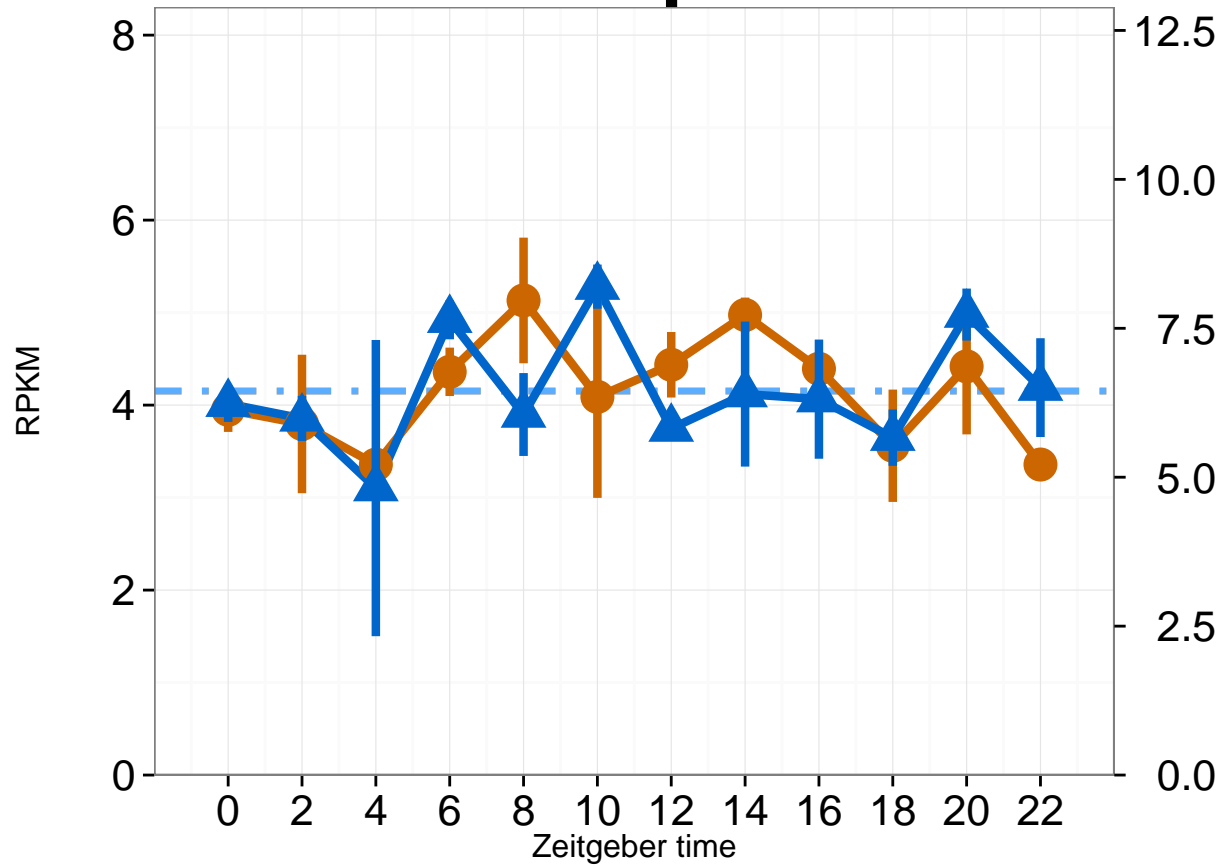

## Reep4

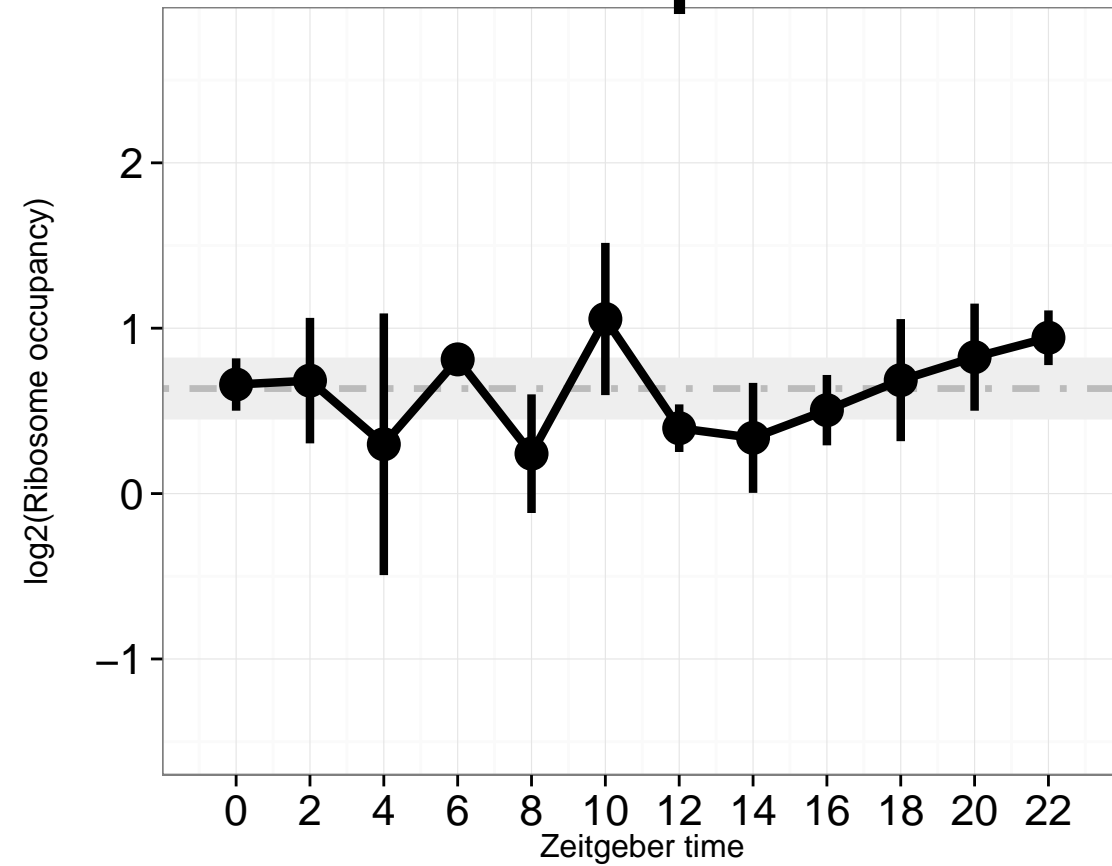

Supplement: Supplementary file 1728 [file 1]

# Pgs1

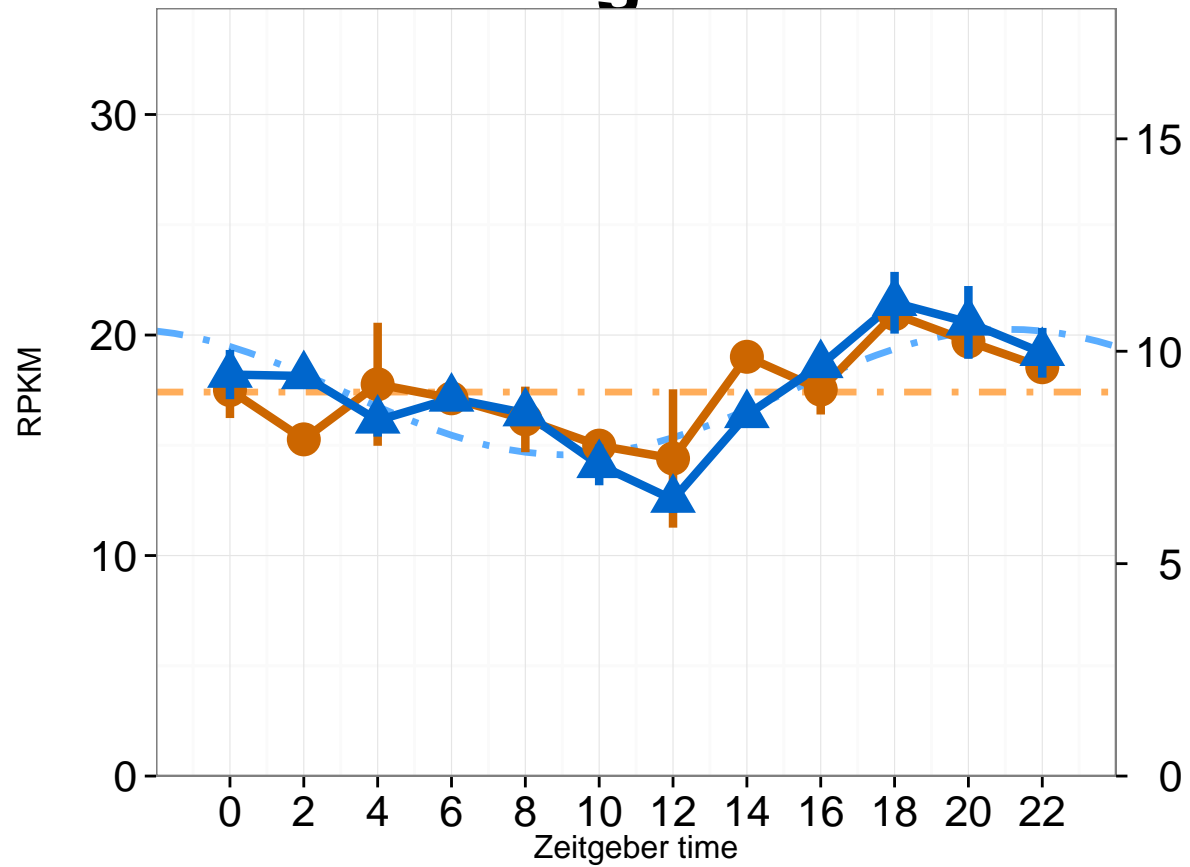

# Pgs1

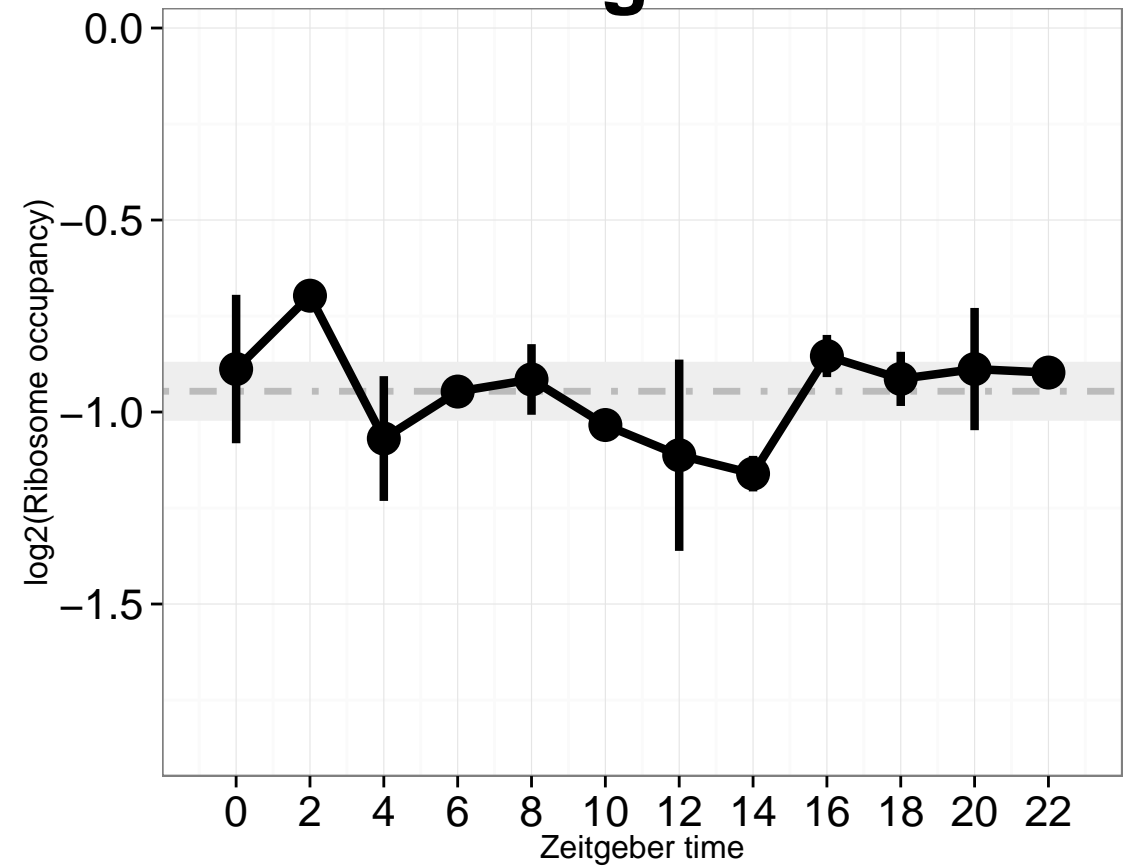

Supplement: Supplementary file 1729 [file 1]

## Notch3

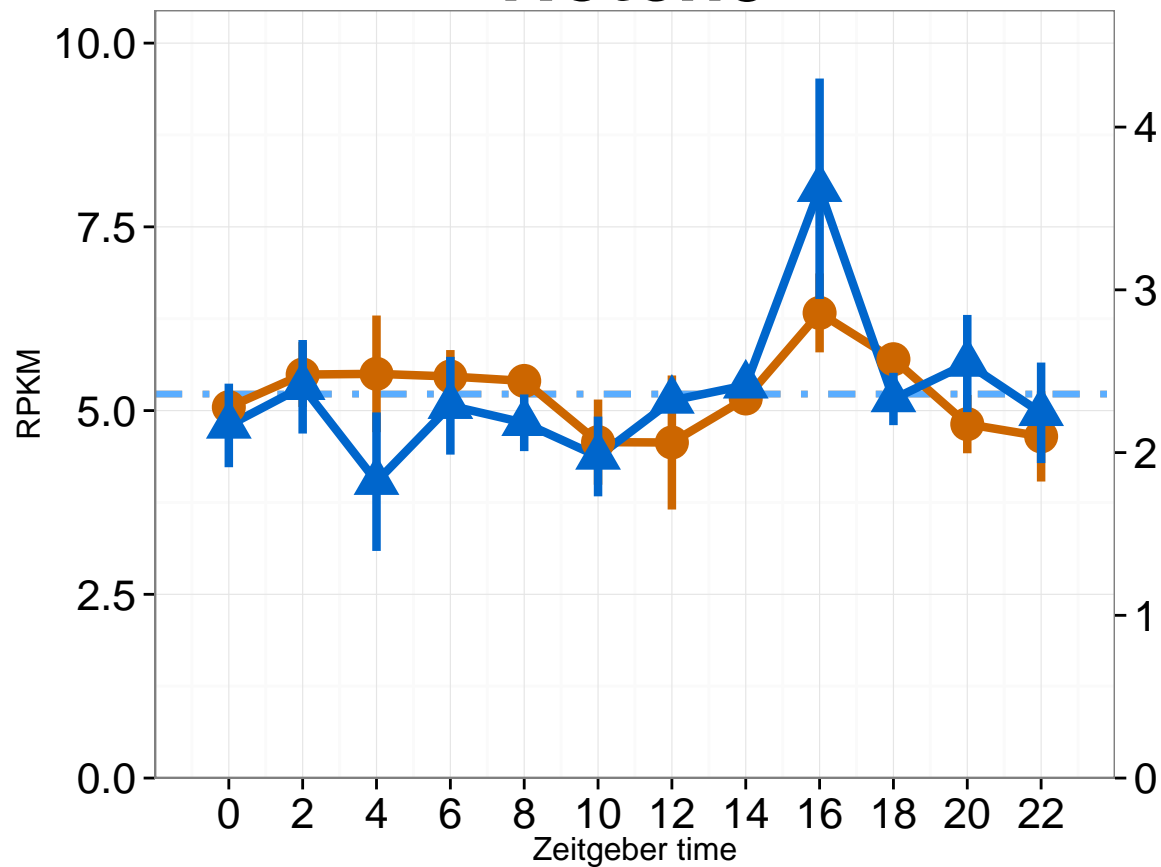

## Notch3

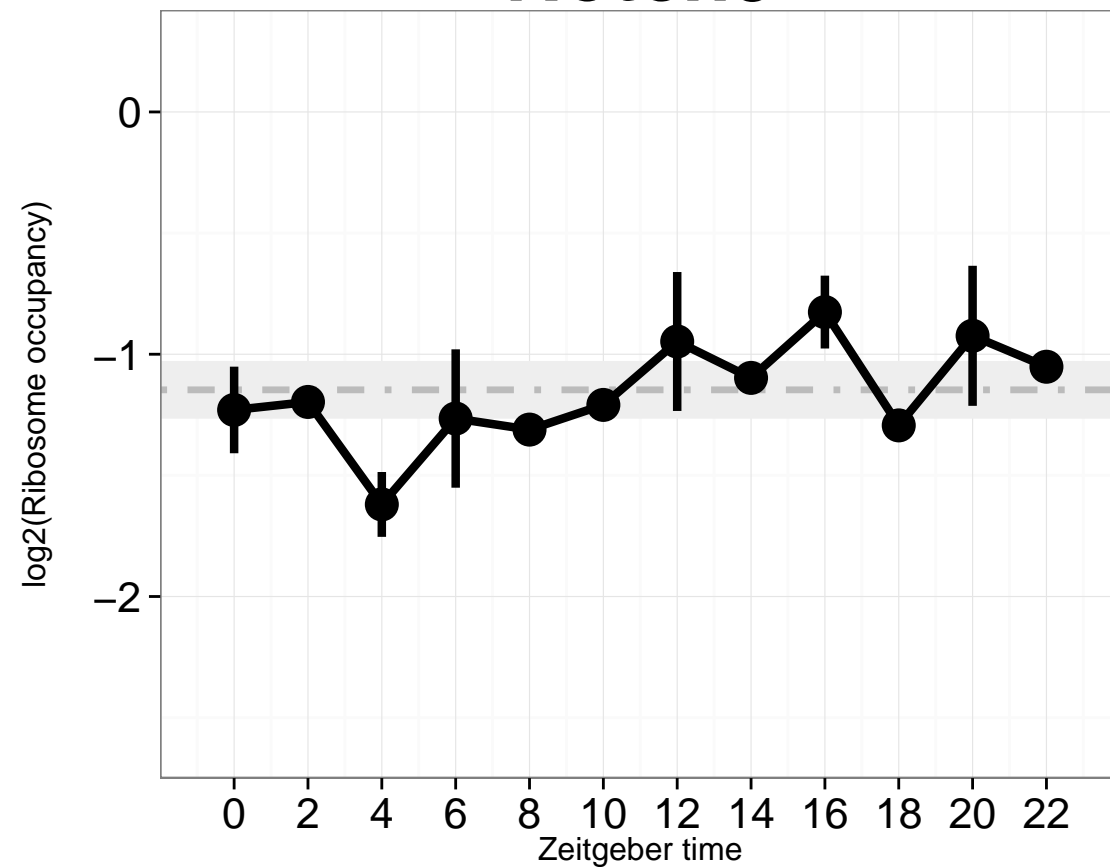

Supplement: Supplementary file 1730 [file 1]

## Nup85

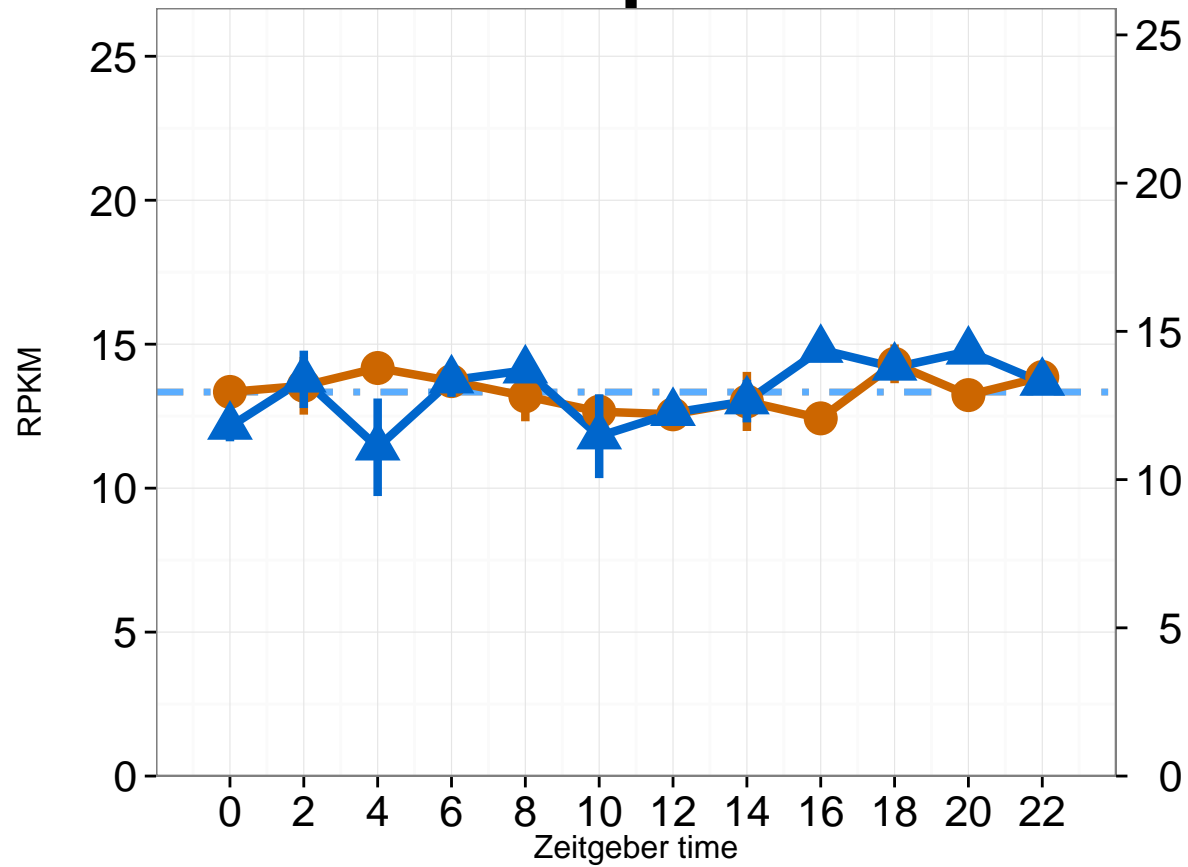

## Nup85

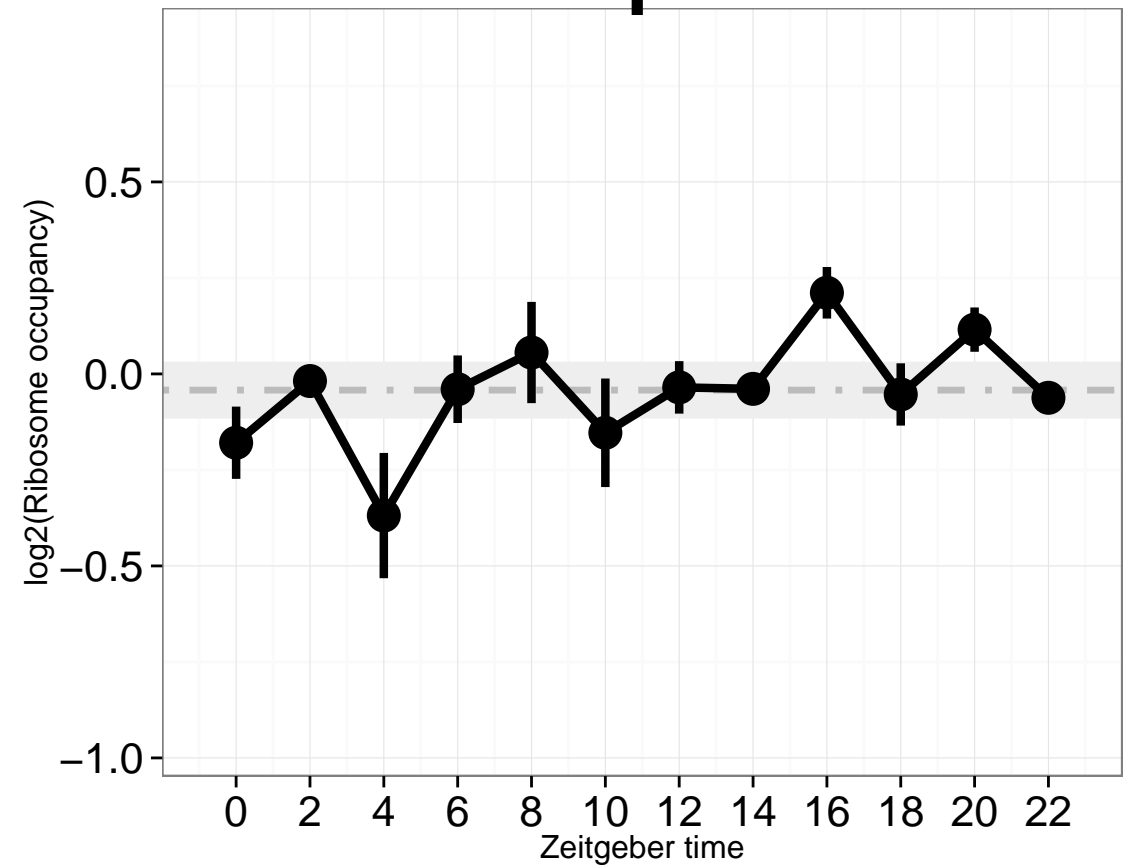

Supplement: Supplementary file 1731 [file 1]

## Got1

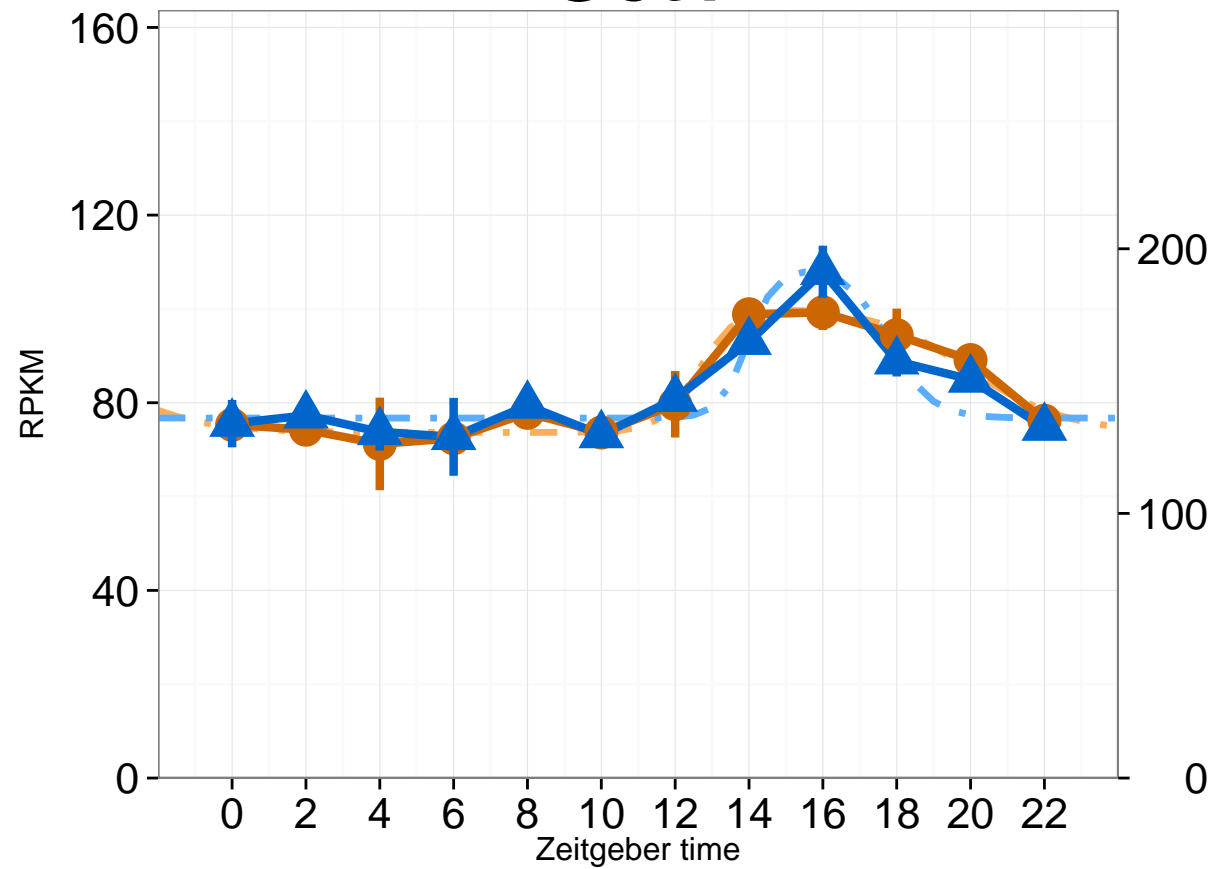

## Got1

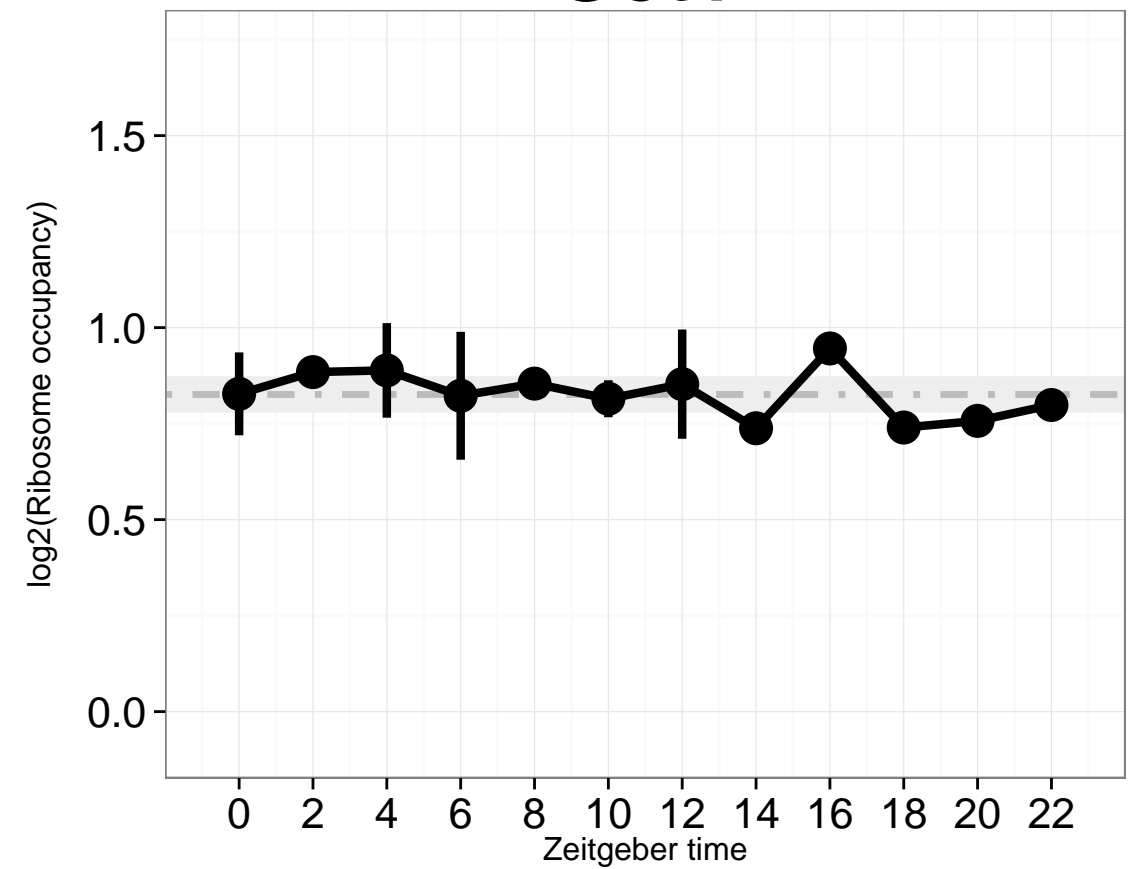

Supplement: Supplementary file 1732 [file 1]

# Tmem107

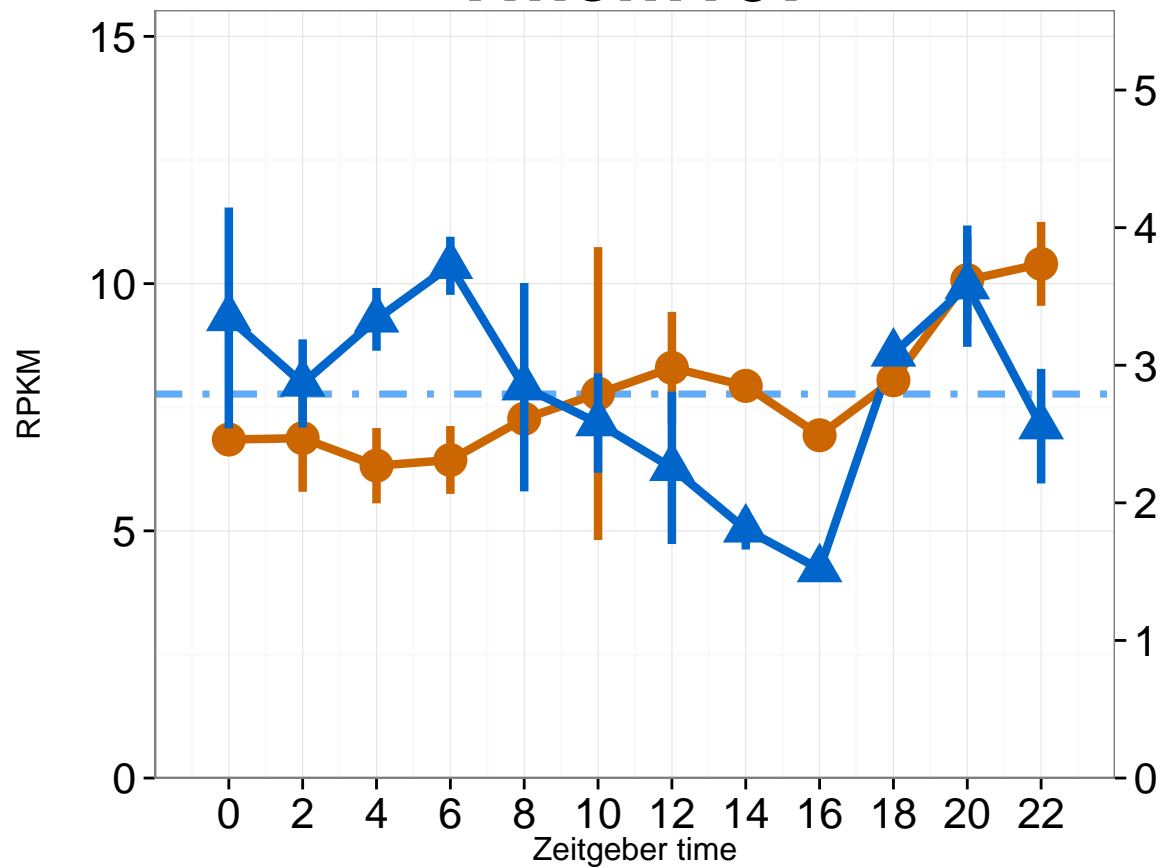

# Tmem107

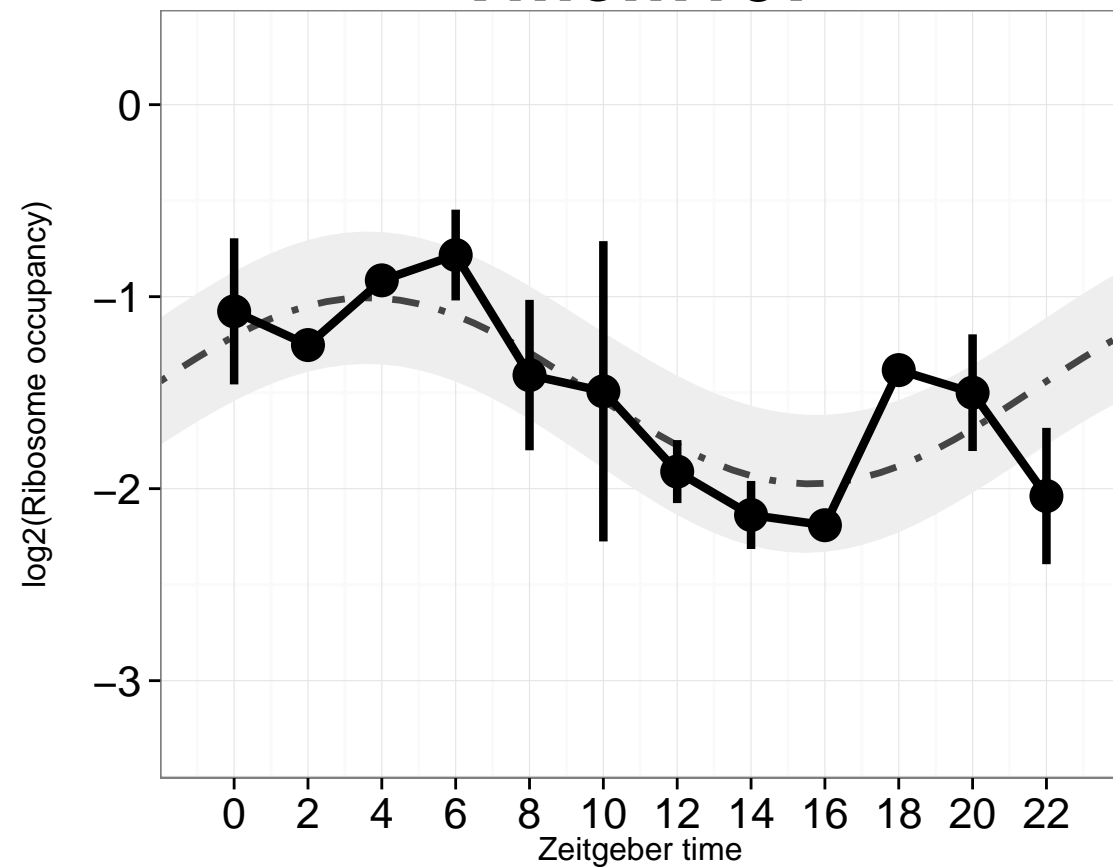

Supplement: Supplementary file 1733 [file 1]

# Zfp318

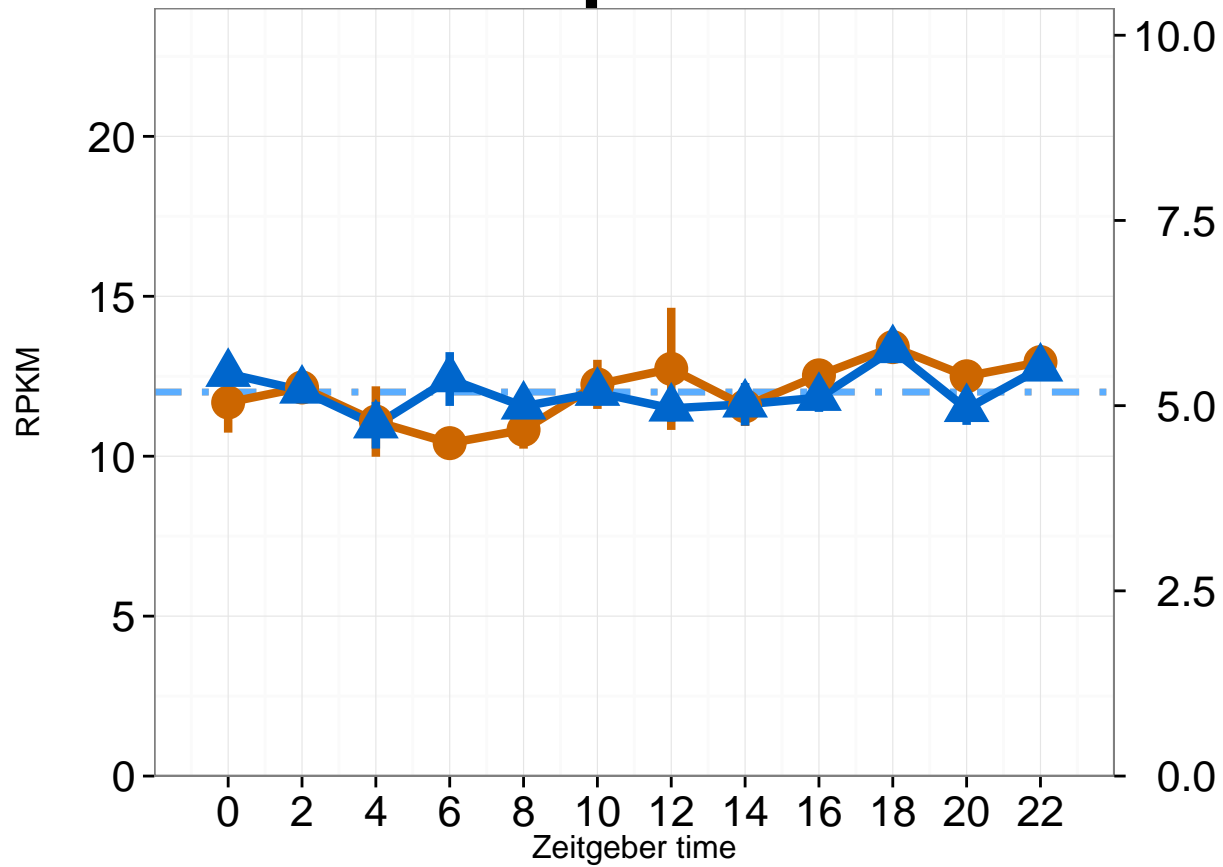

# Zfp318

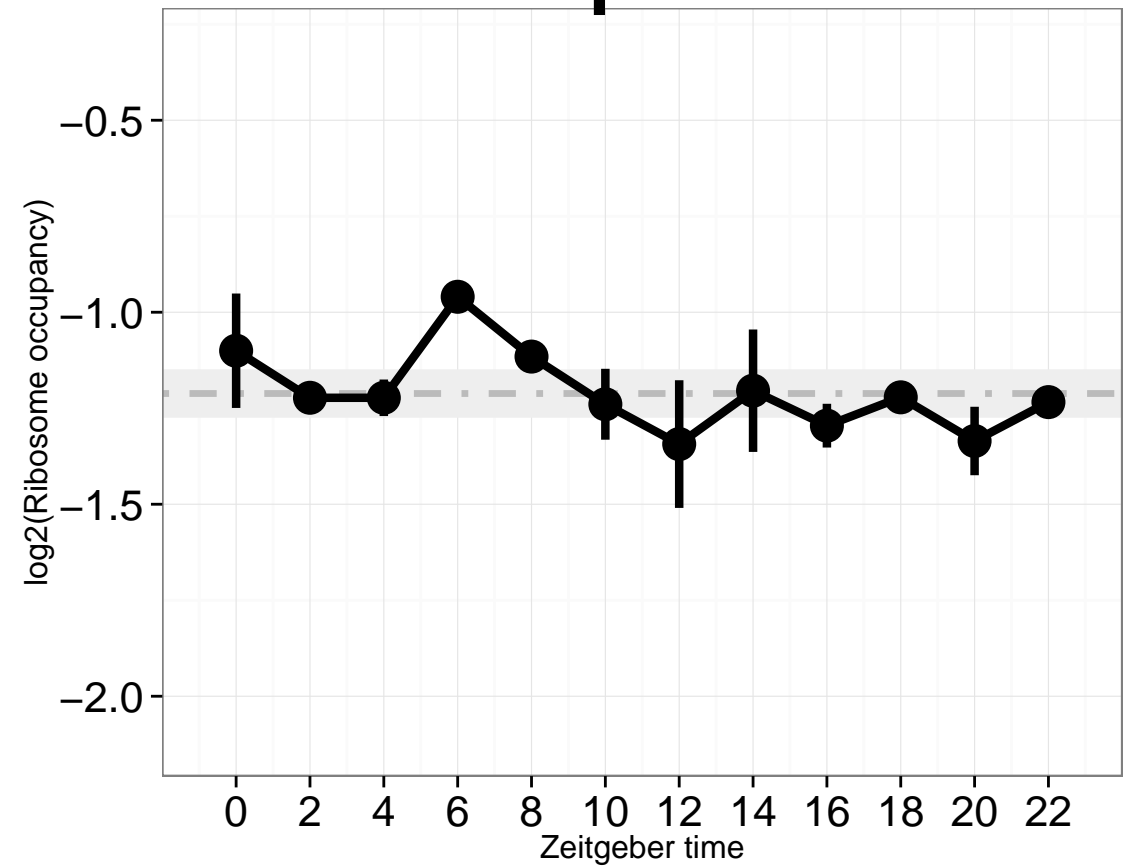

Supplement: Supplementary file 1734 [file 1]

## Fut4

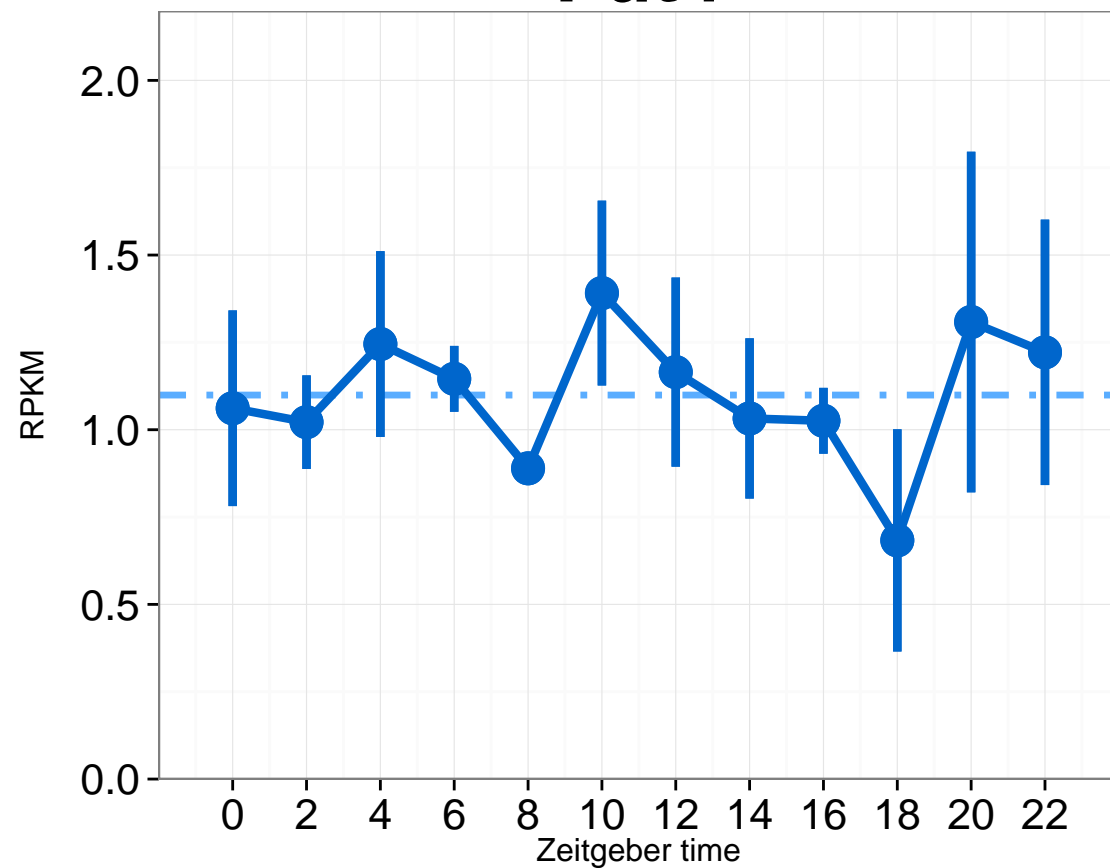

## Fut4 log2(Ribosome occupancy)

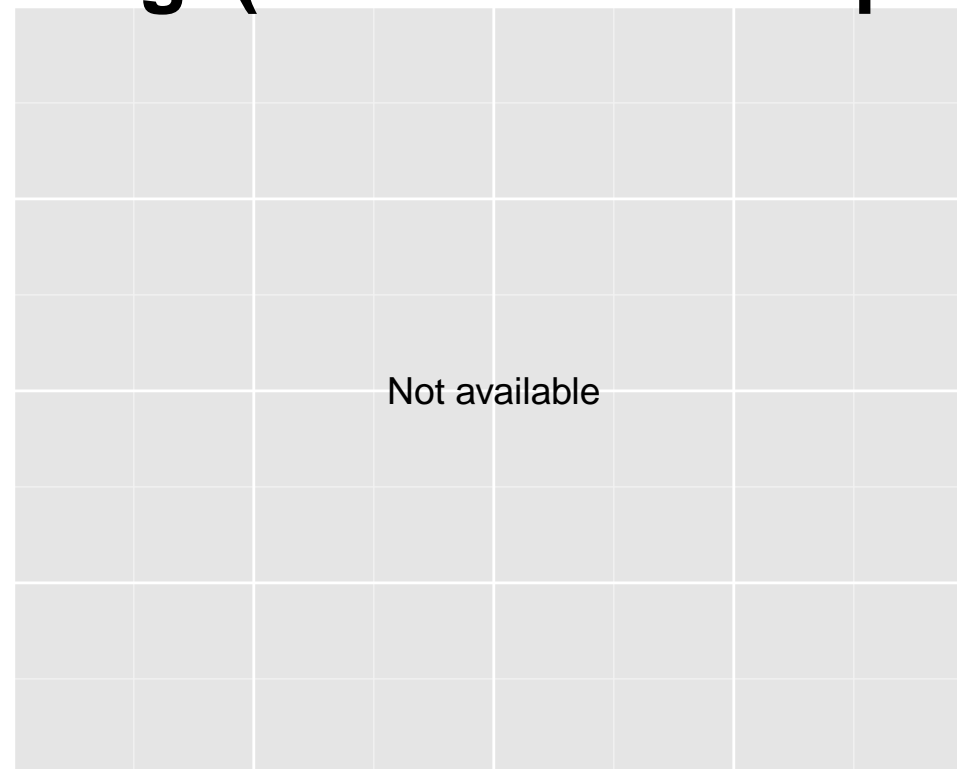

Supplement: Supplementary file 1735 [file 1]

## Cbx2

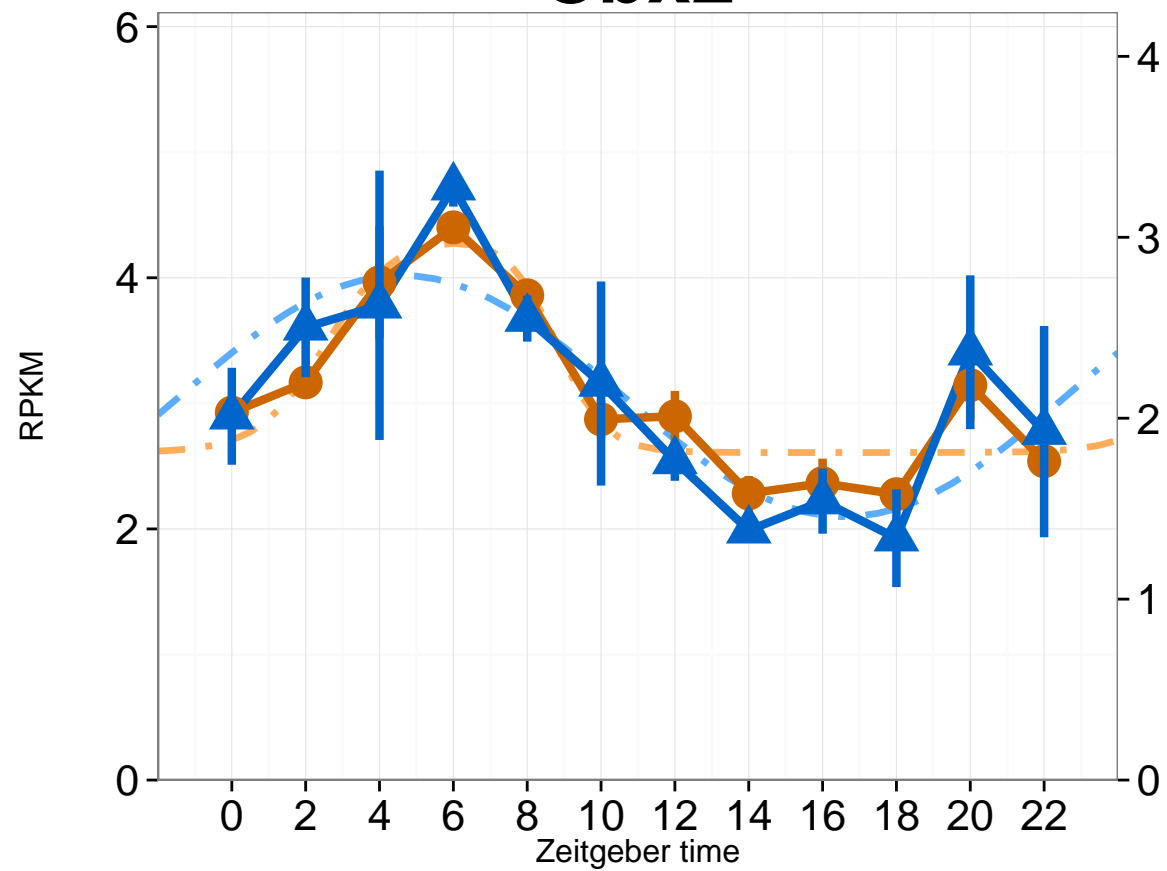

## Cbx2

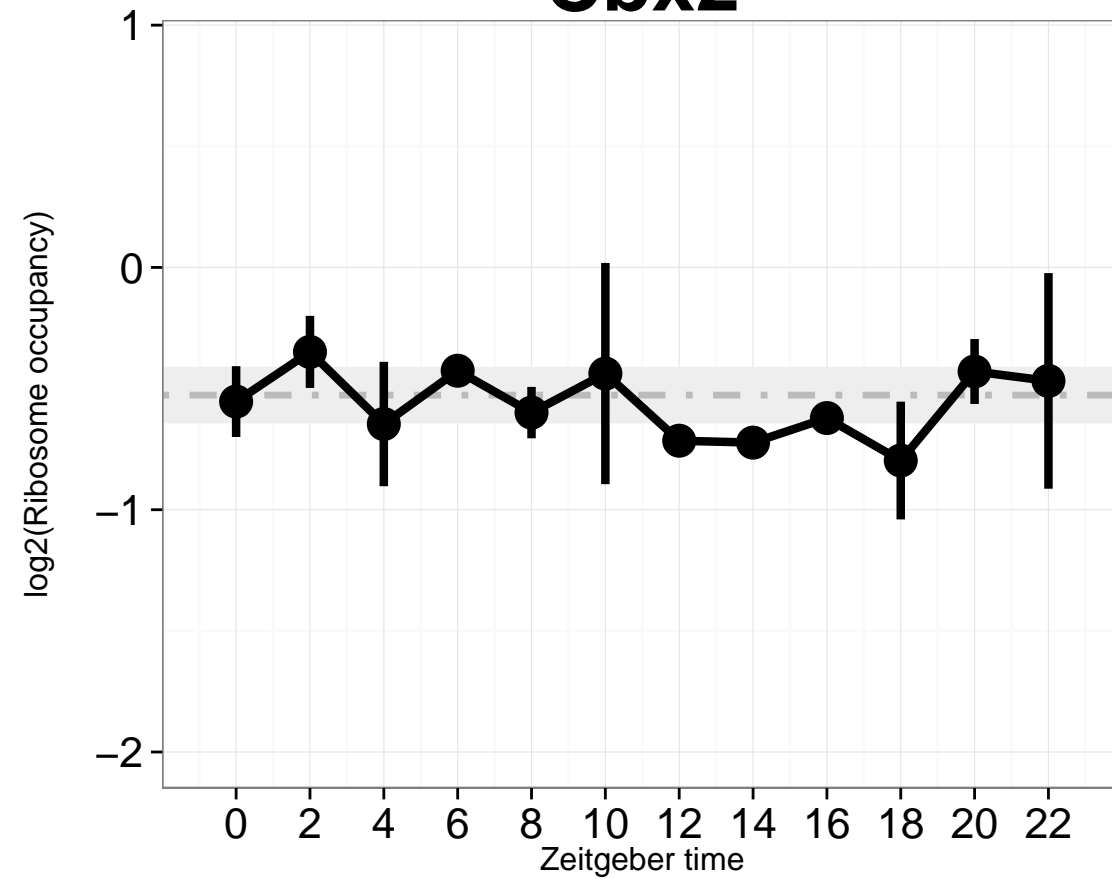

Supplement: Supplementary file 1736 [file 1]

## Rassf10

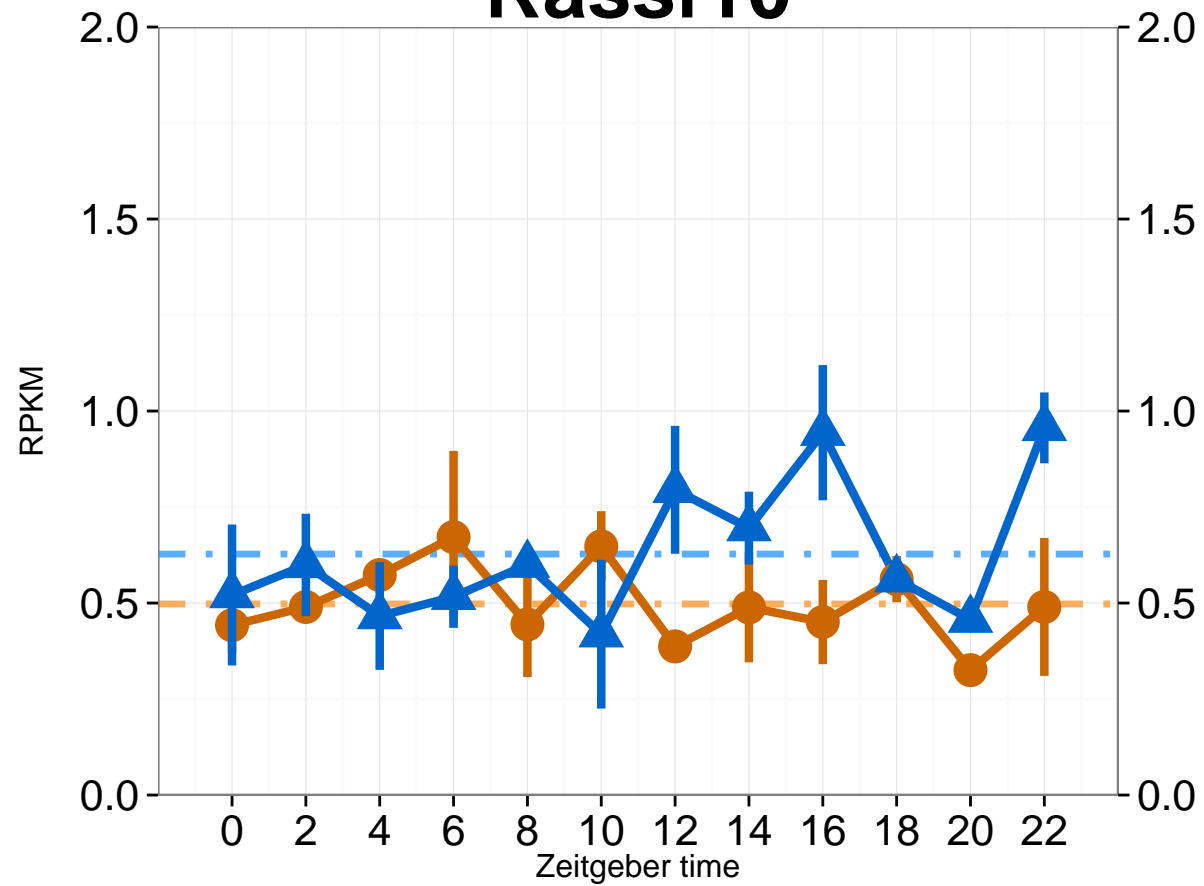

## Rassf10

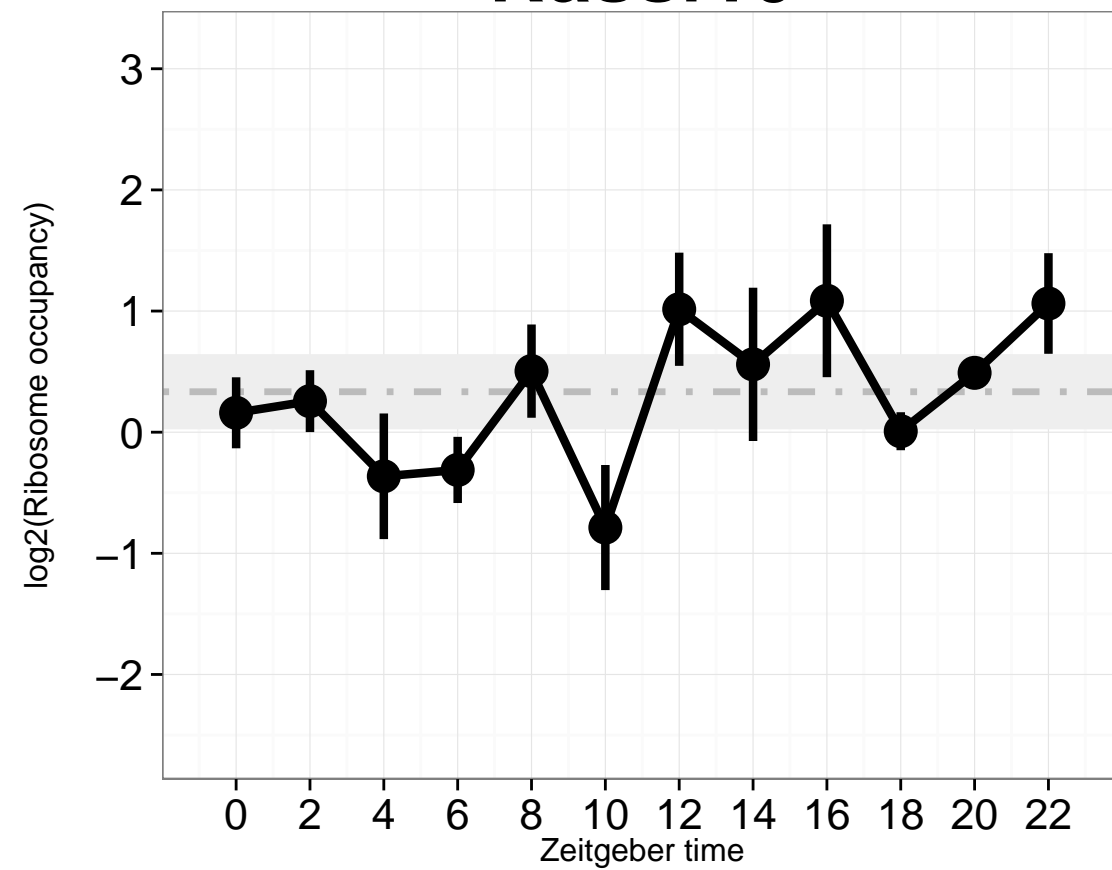

Supplement: Supplementary file 1737 [file 1]

# Pm20d1

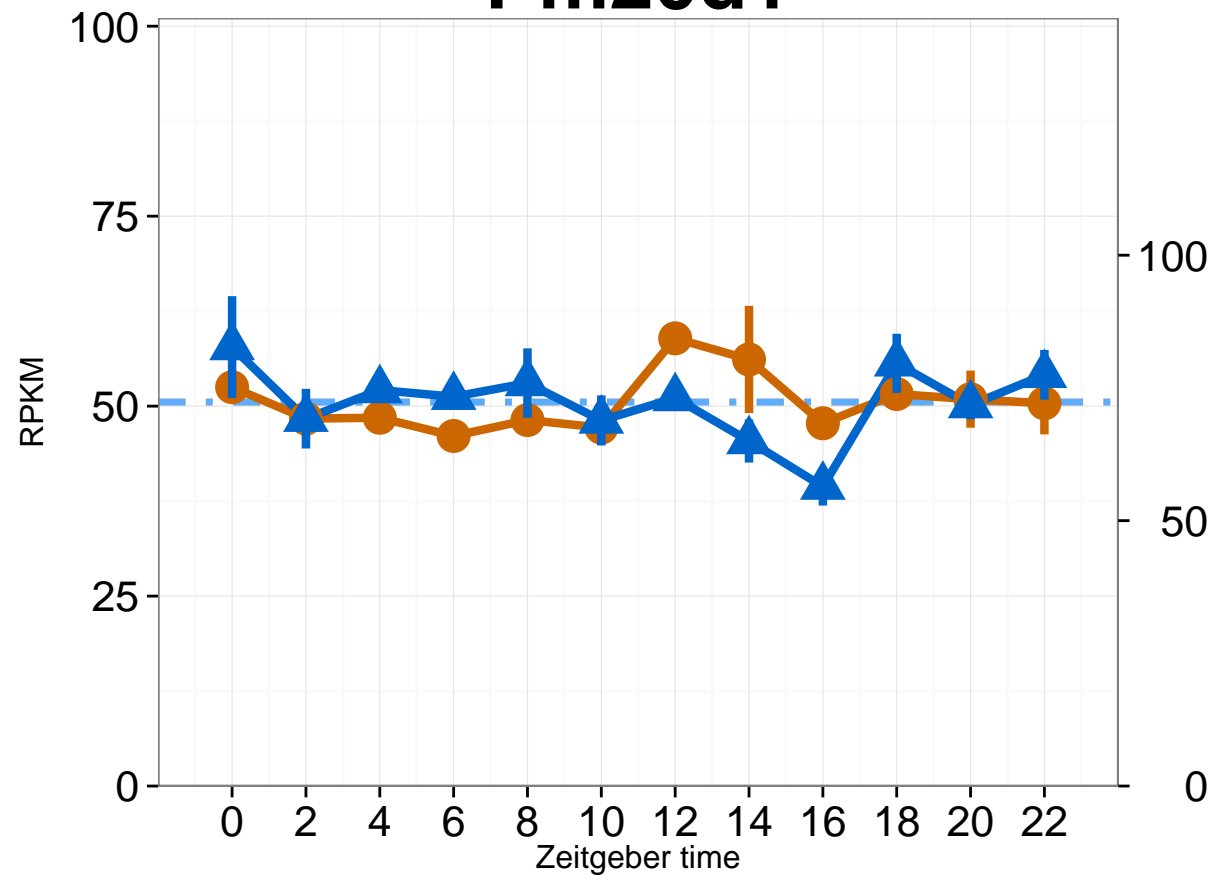

# Pm20d1

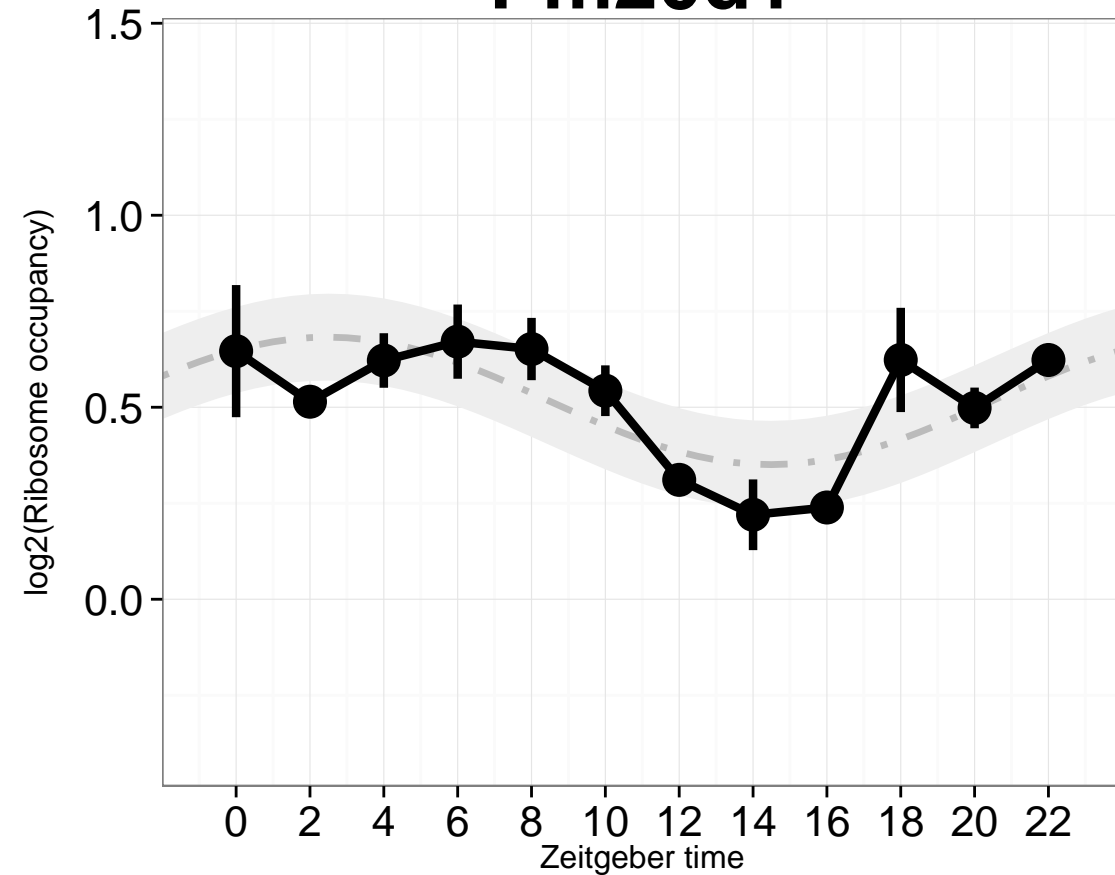

Supplement: Supplementary file 1738 [file 1]

## Rrm1

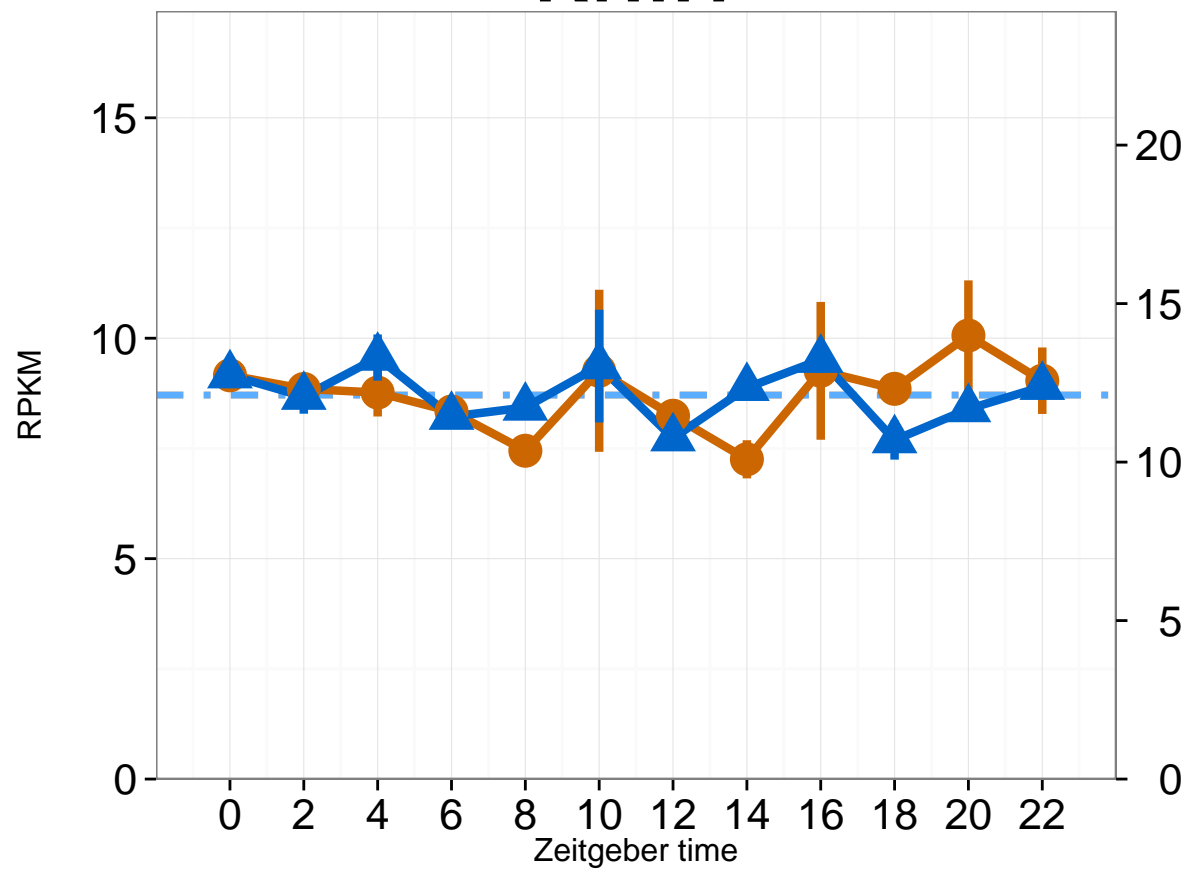

## Rrm1

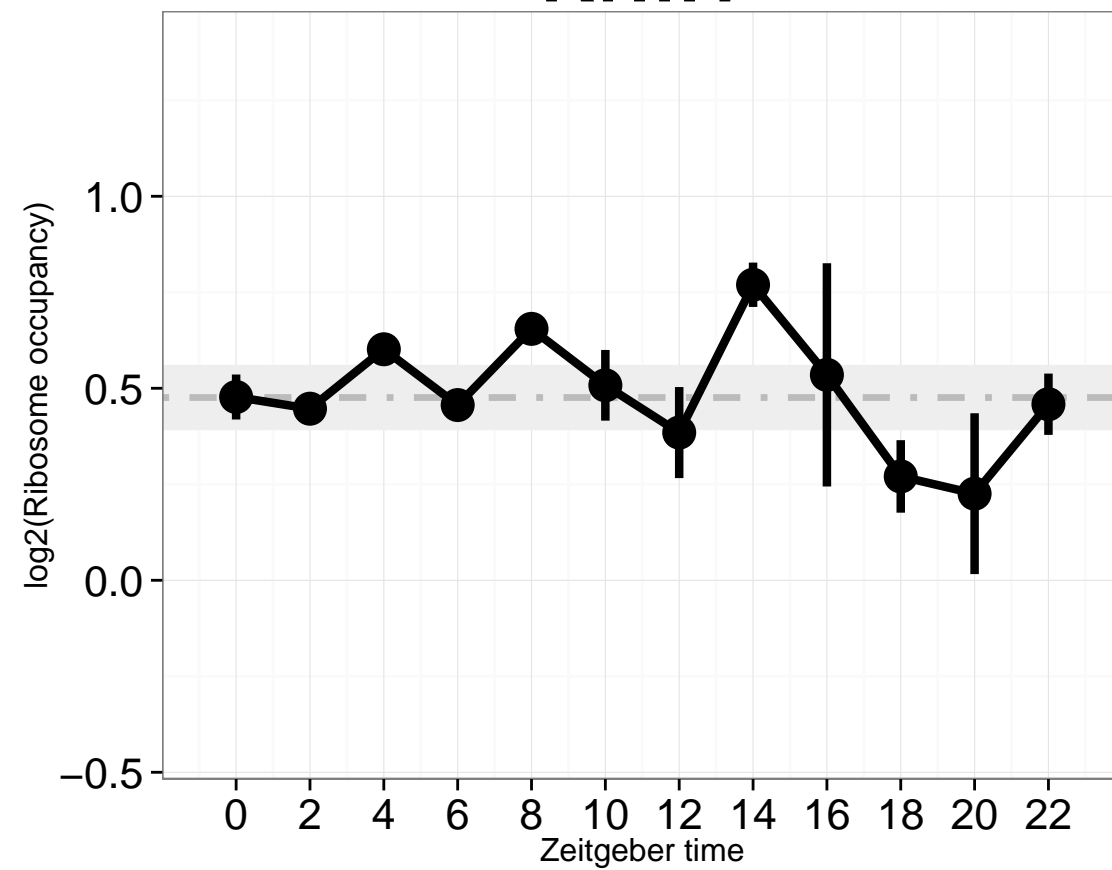

Supplement: Supplementary file 1739 [file 1]

# Pcdh19

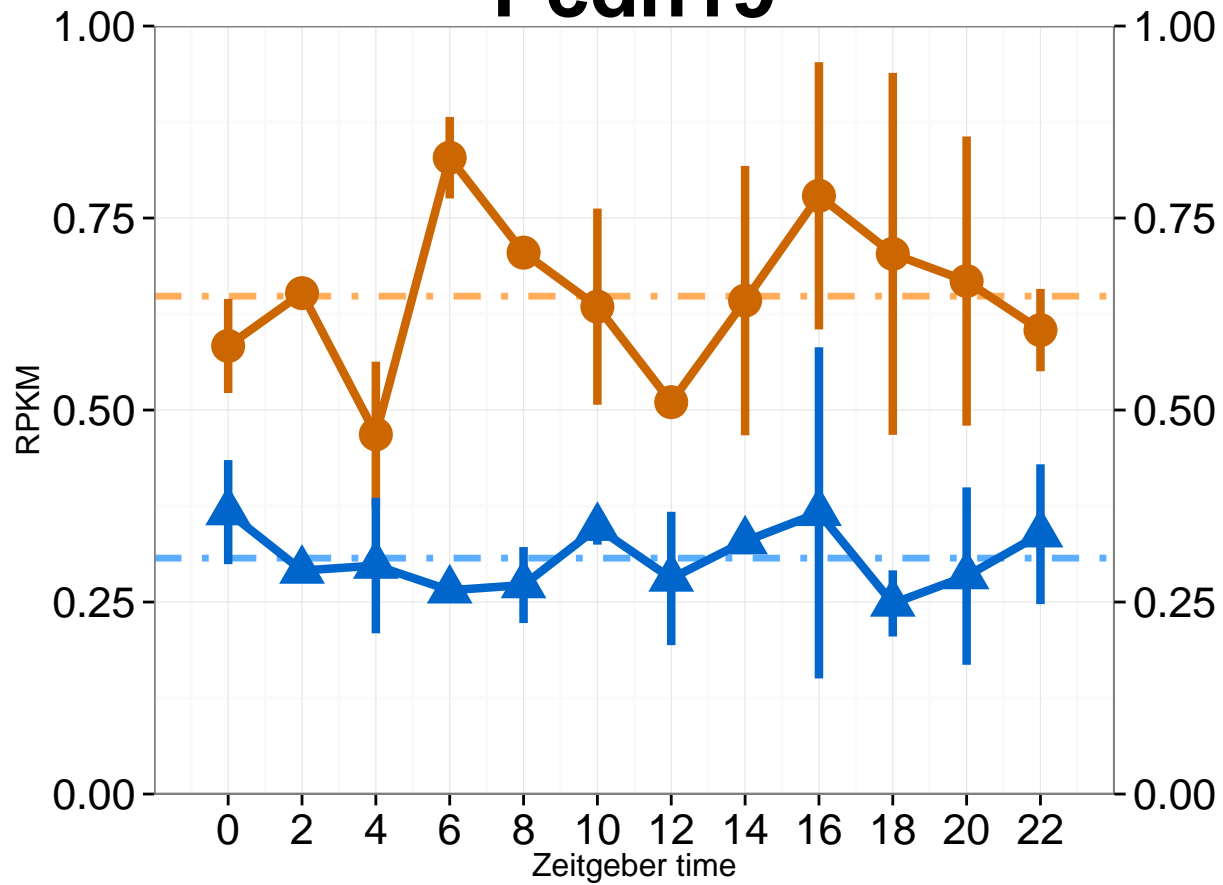

# Pcdh19

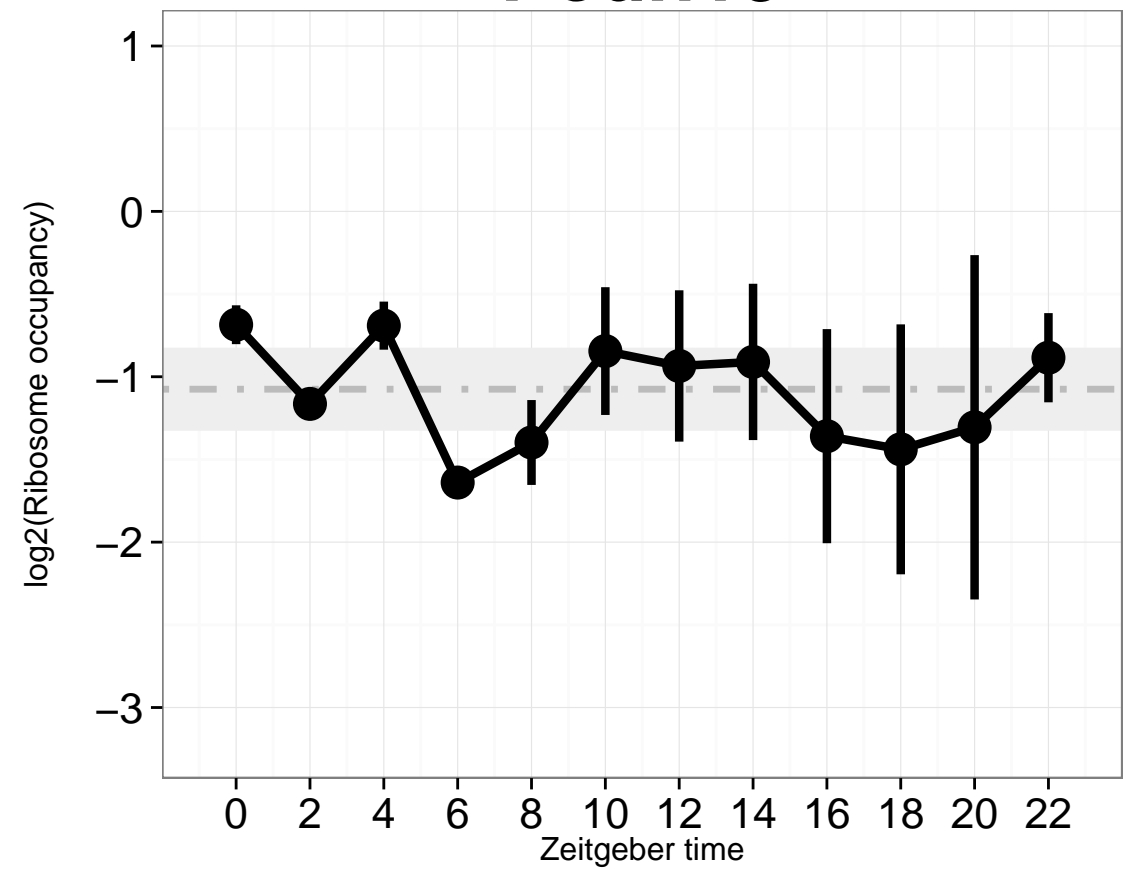

Supplement: Supplementary file 1740 [file 1]

## Phactr4

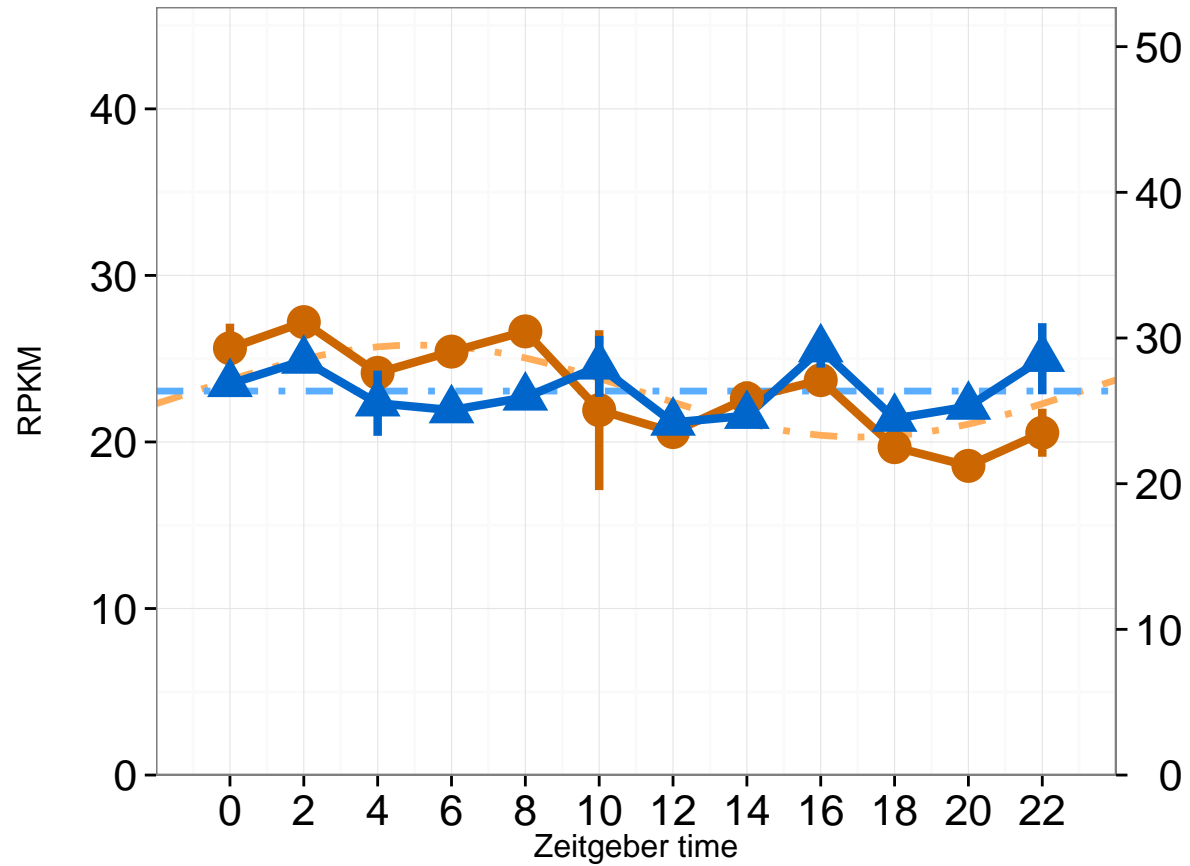

## Phactr4

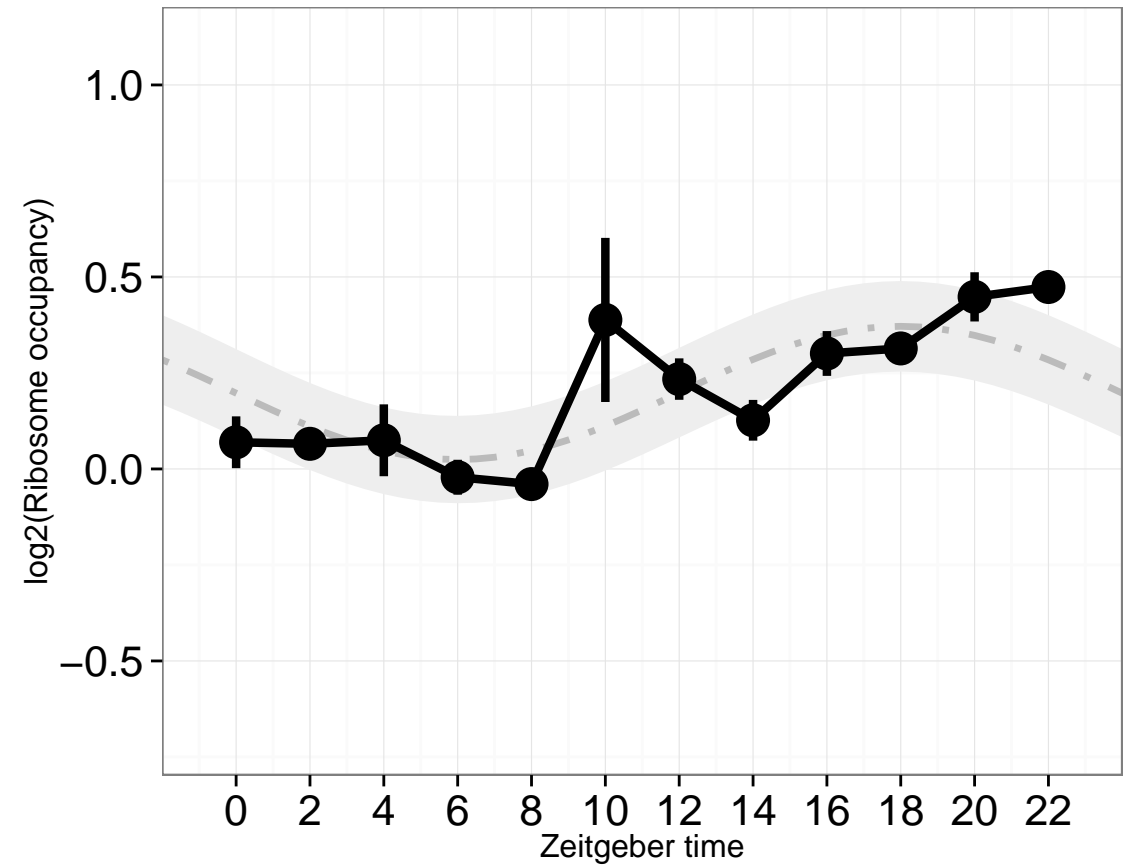

Supplement: Supplementary file 1741 [file 1]

## Nhej1

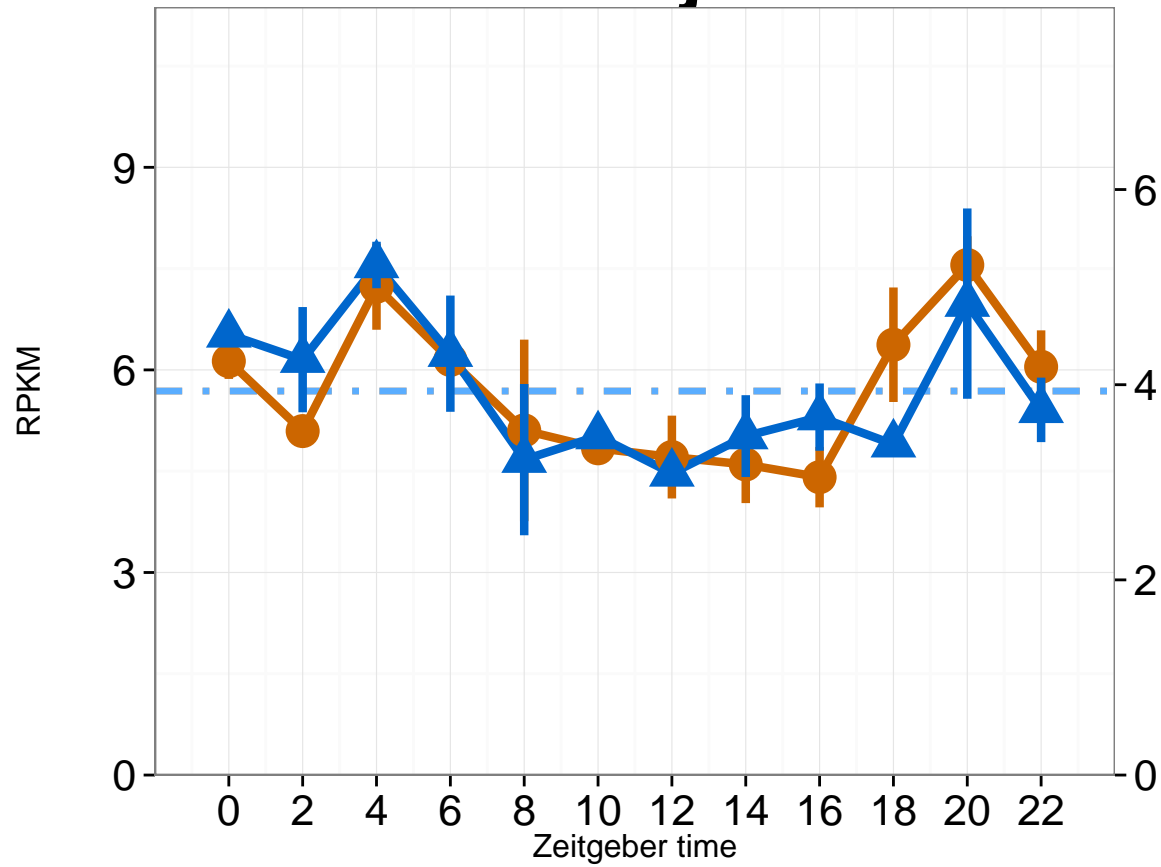

## Nhej1

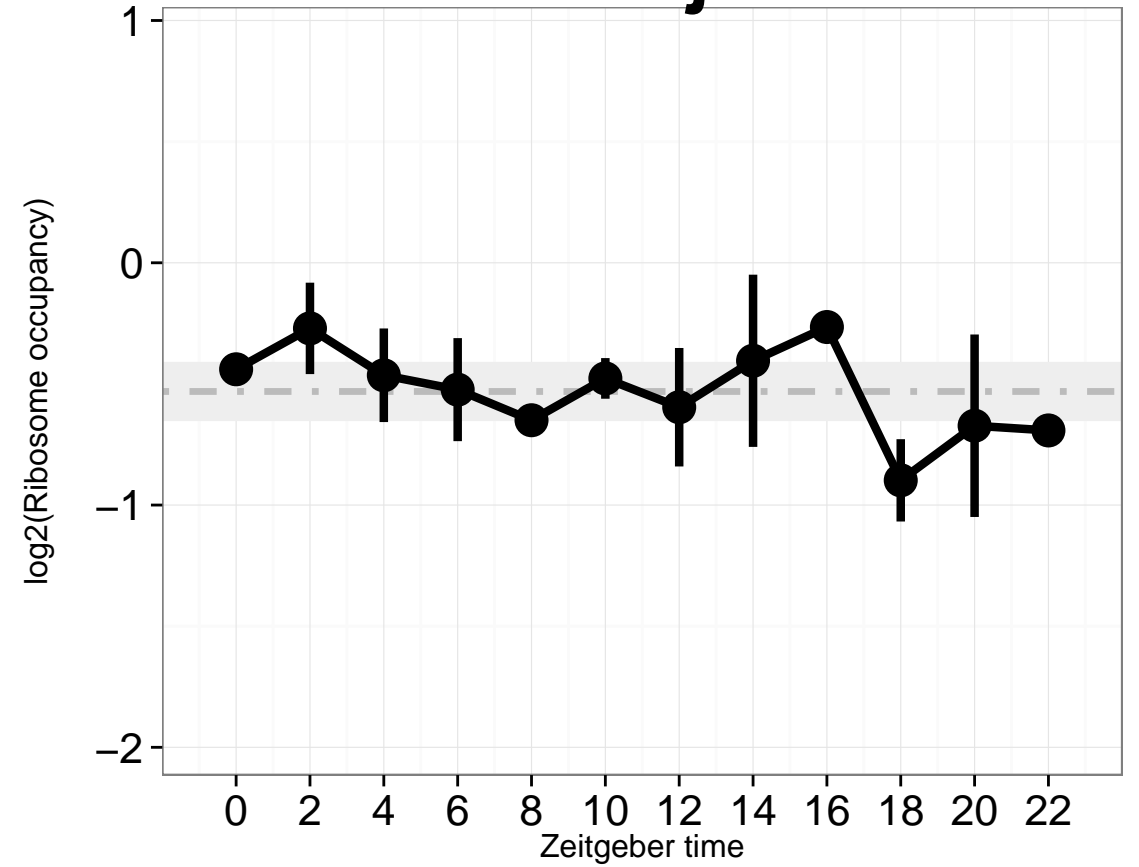

Supplement: Supplementary file 1742 [file 1]

## Ercc3

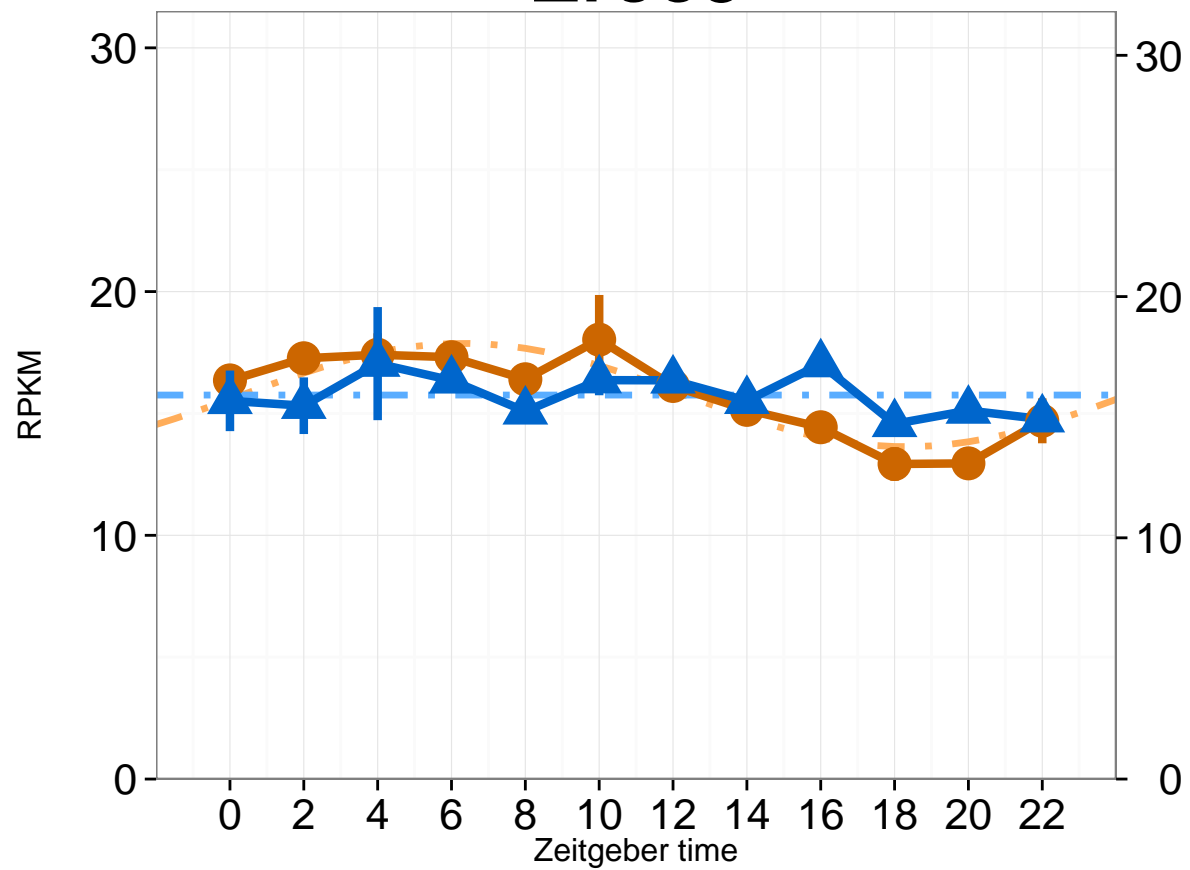

## Ercc3

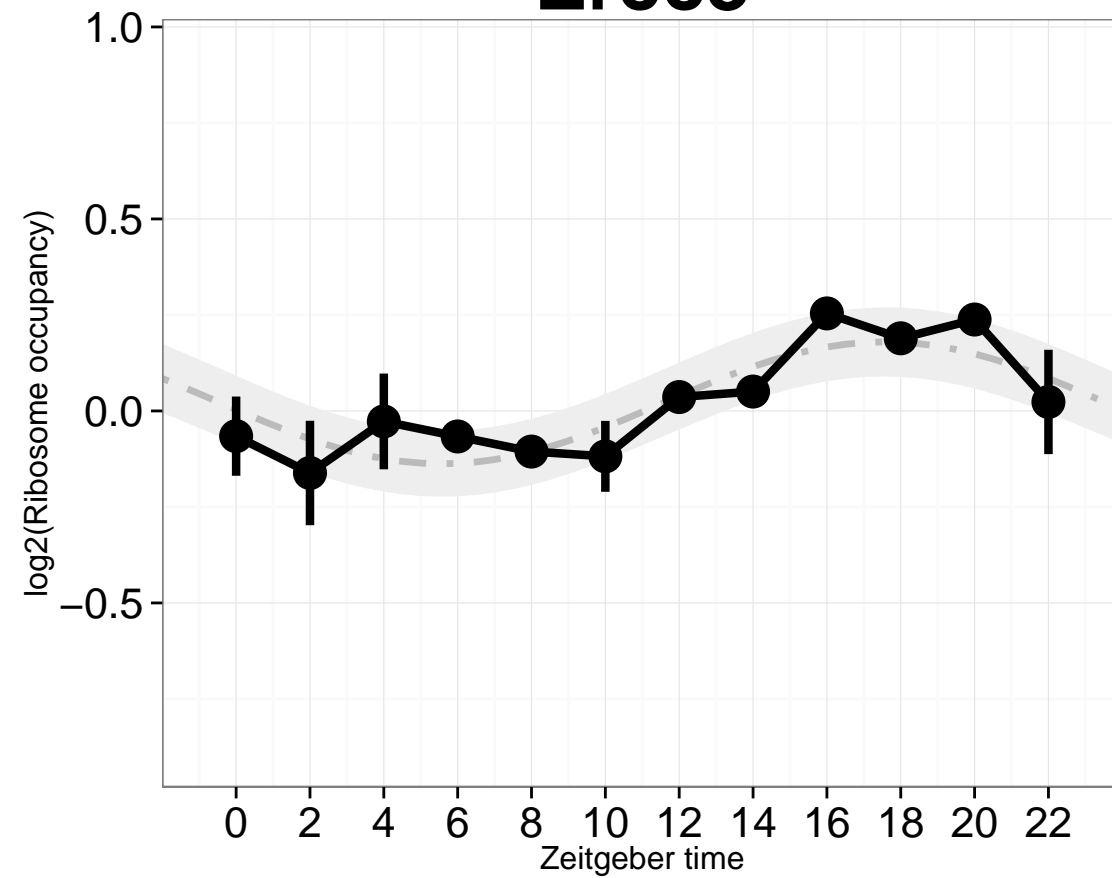

Supplement: Supplementary file 1743 [file 1]

## Tardbp

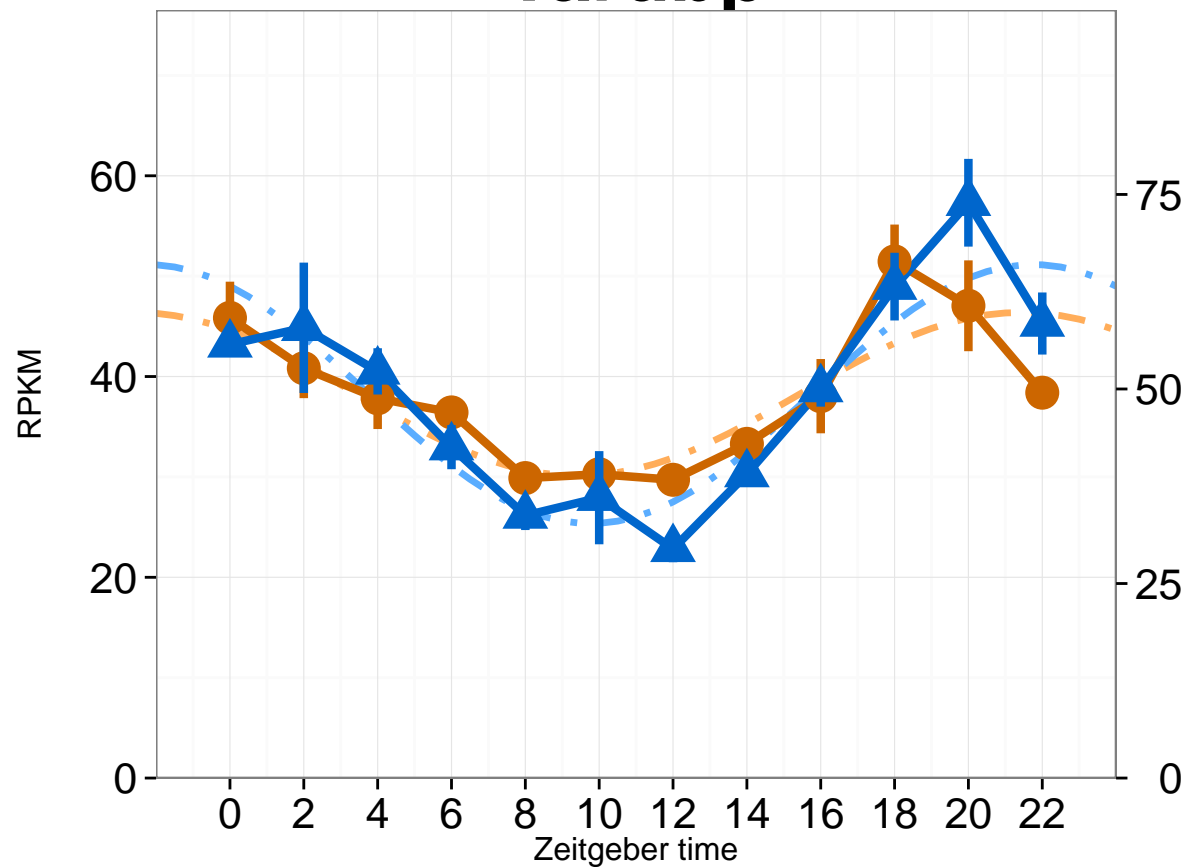

## Tardbp

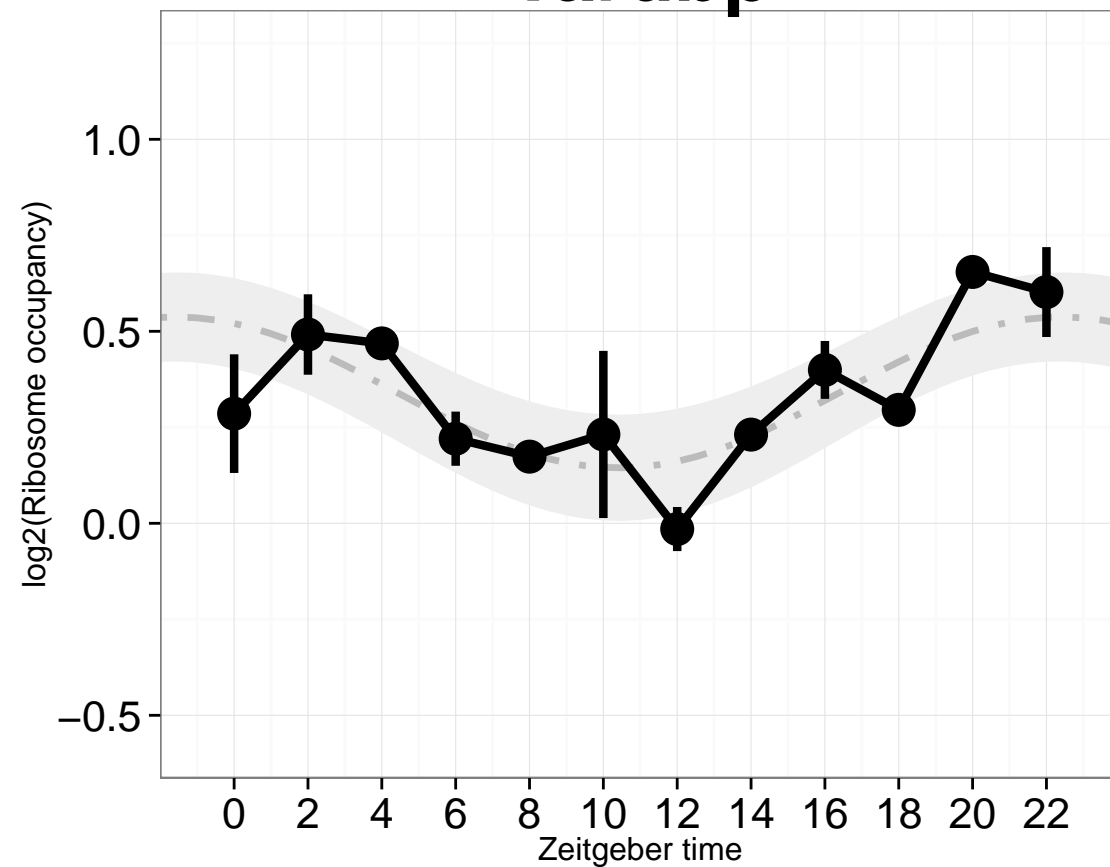

Supplement: Supplementary file 1744 [file 1]

# Tmem80

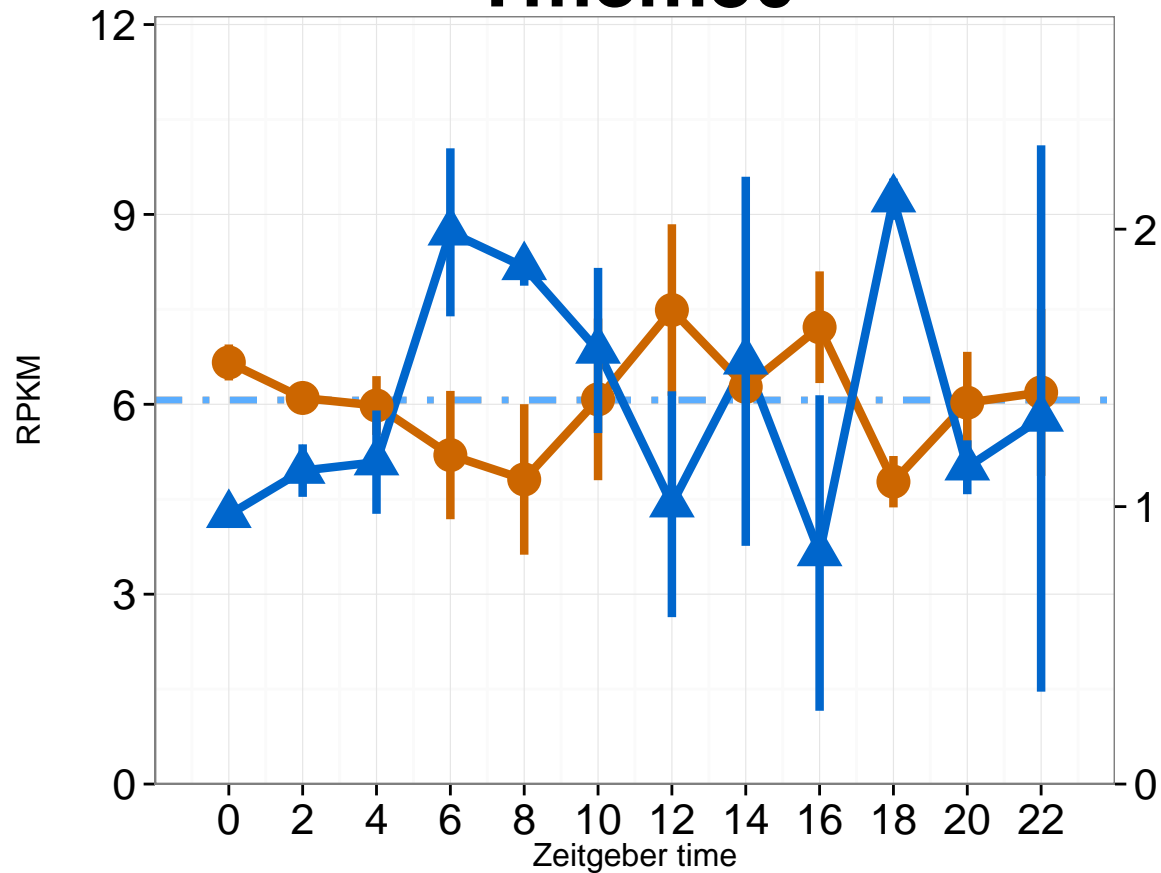

# Tmem80

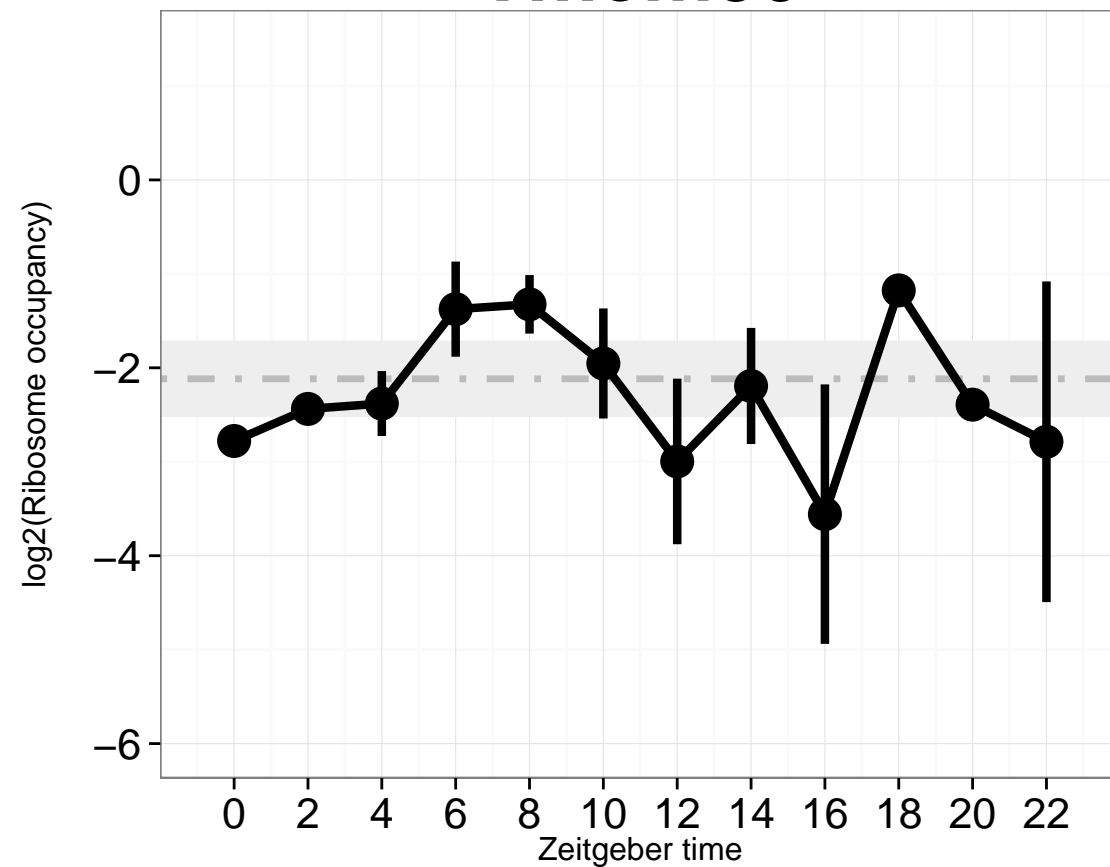

Supplement: Supplementary file 1745 [file 1]

# Zfp74

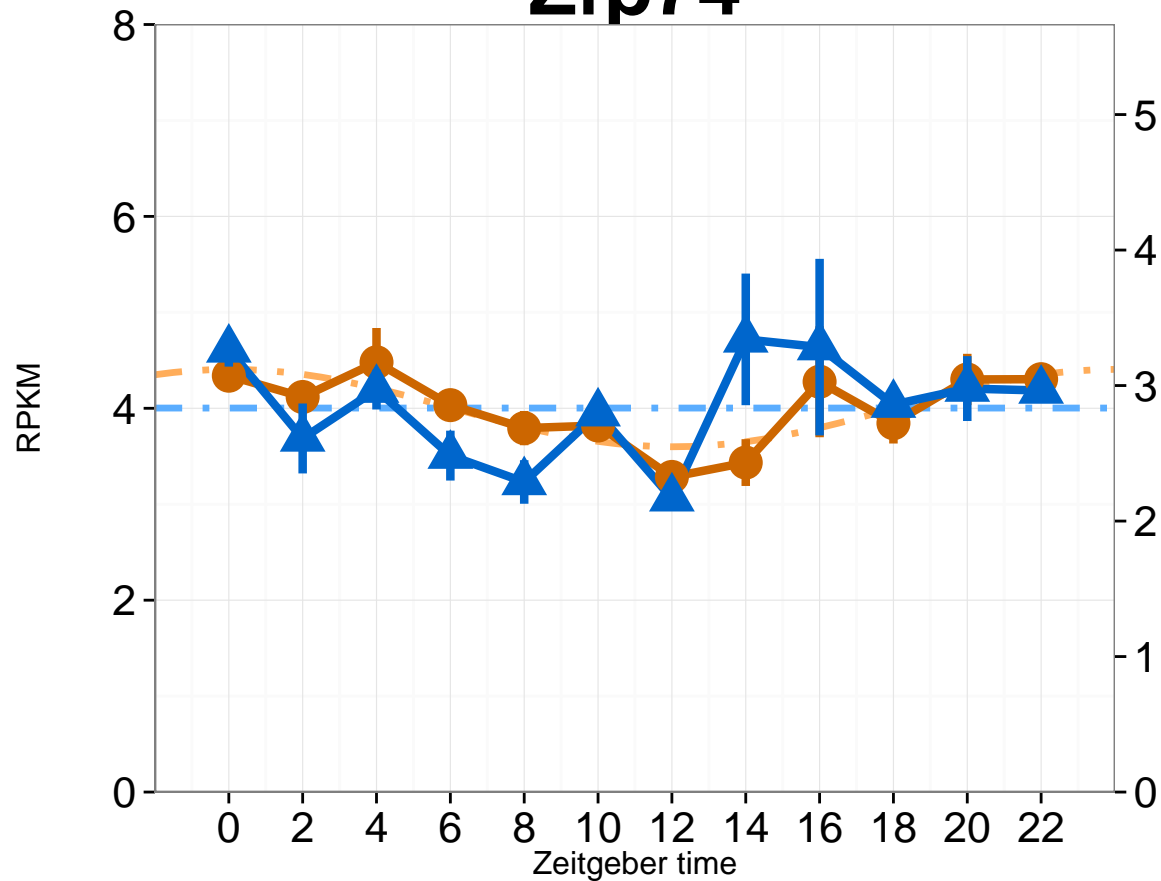

# Zfp74

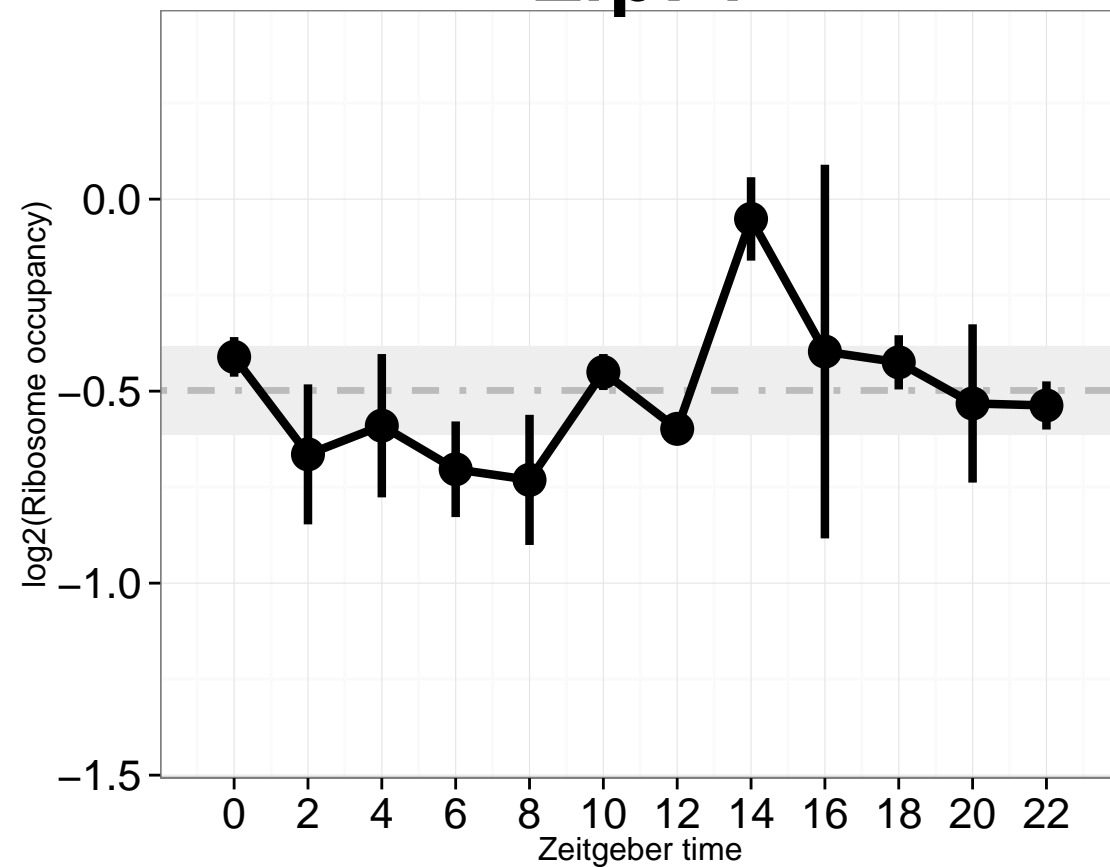

Supplement: Supplementary file 1746 [file 1]

## Prkaca

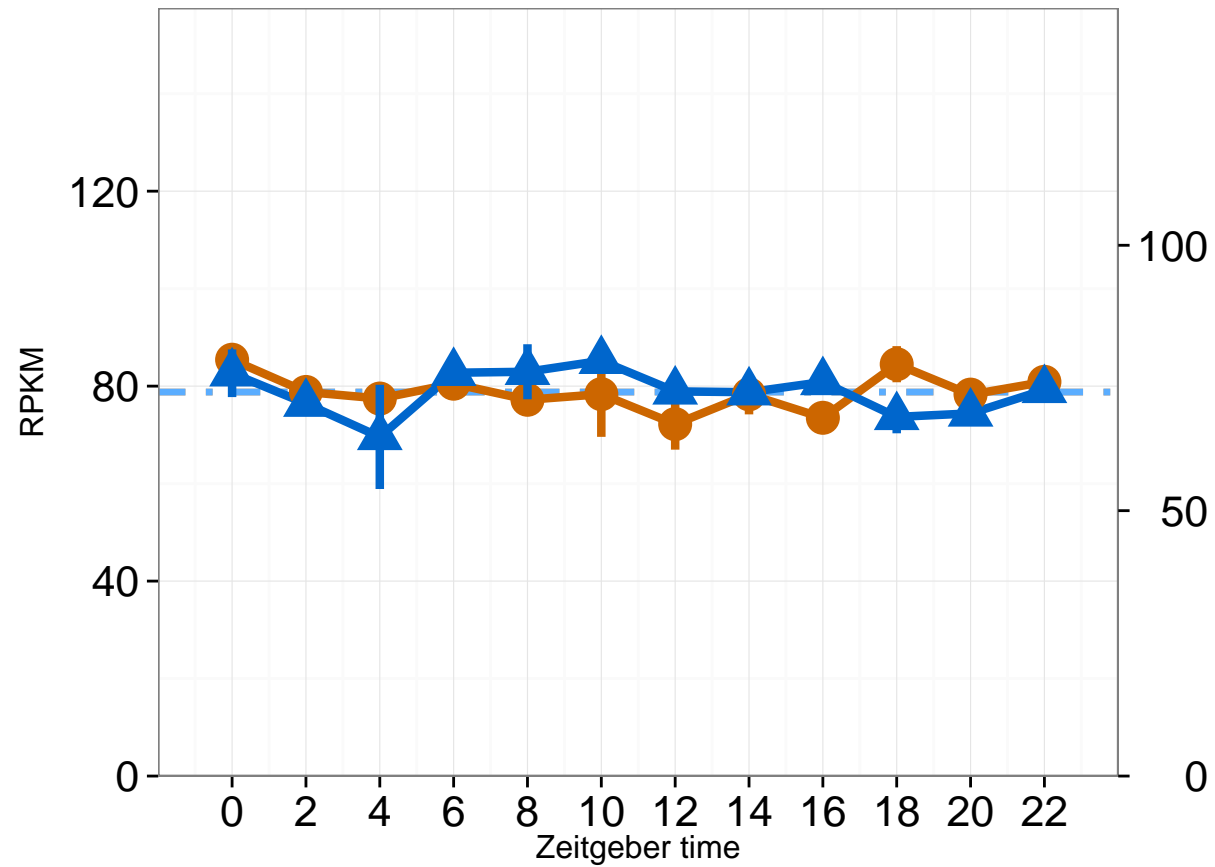

## Prkaca

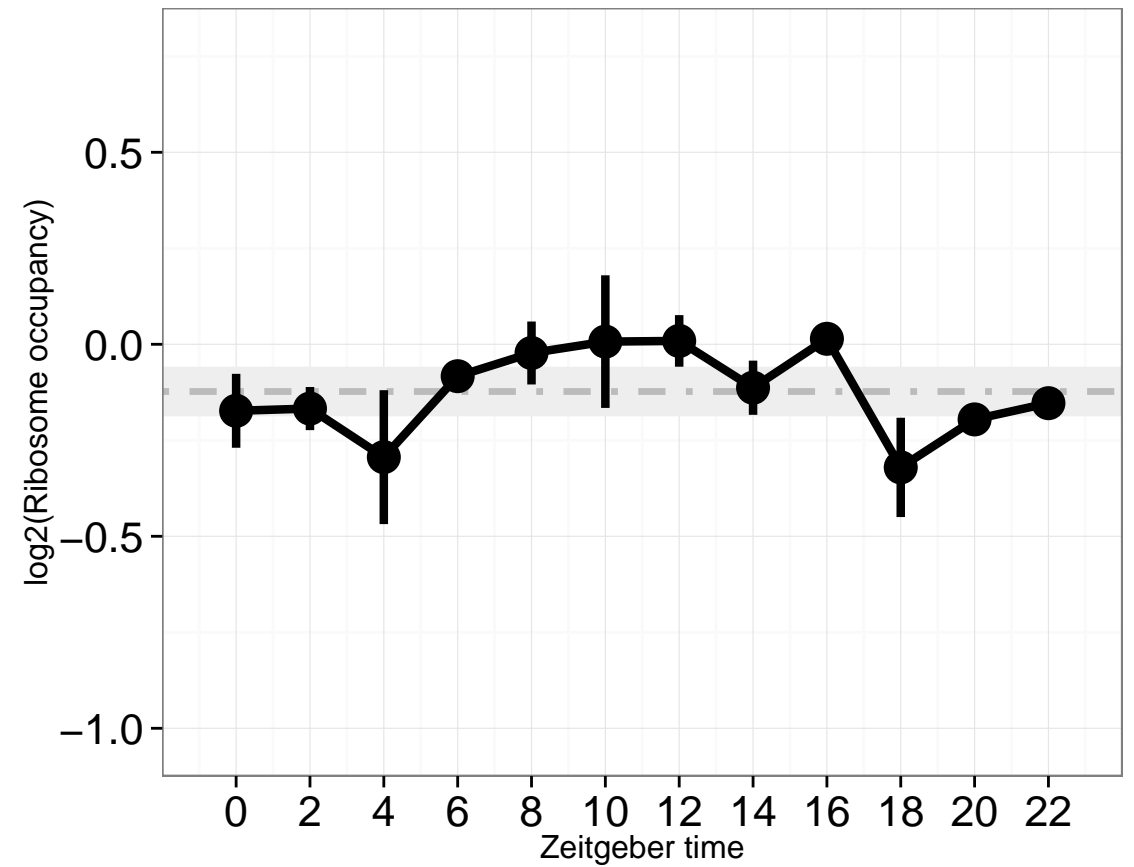

Supplement: Supplementary file 1747 [file 1]

## Spast

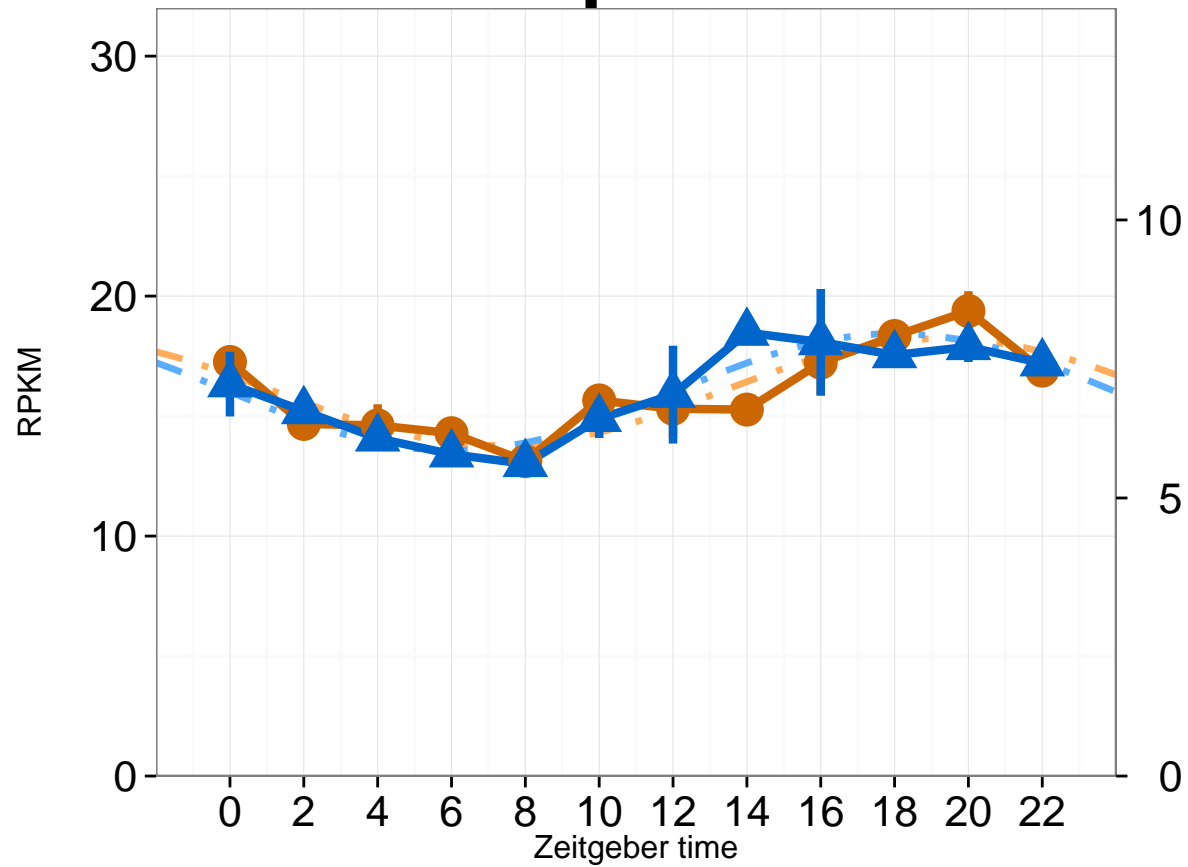

## Spast

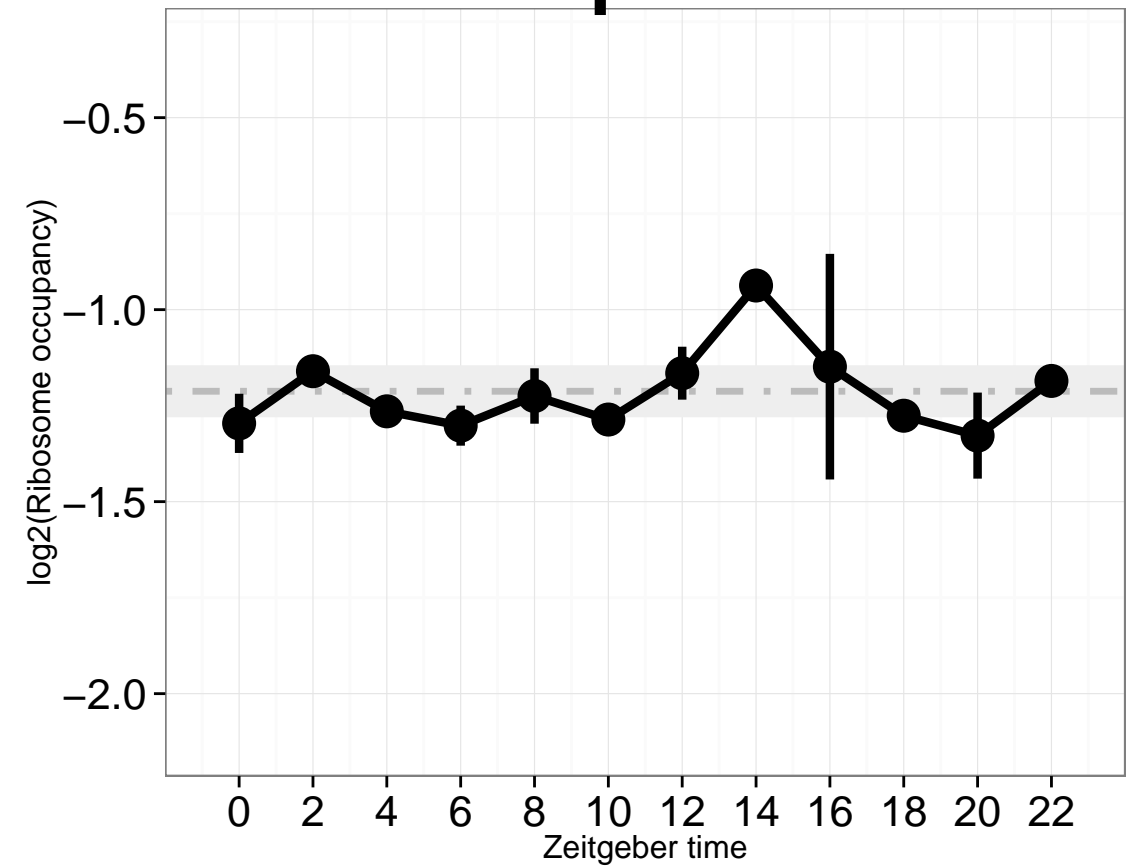

Supplement: Supplementary file 1748 [file 1]

# Zfp493

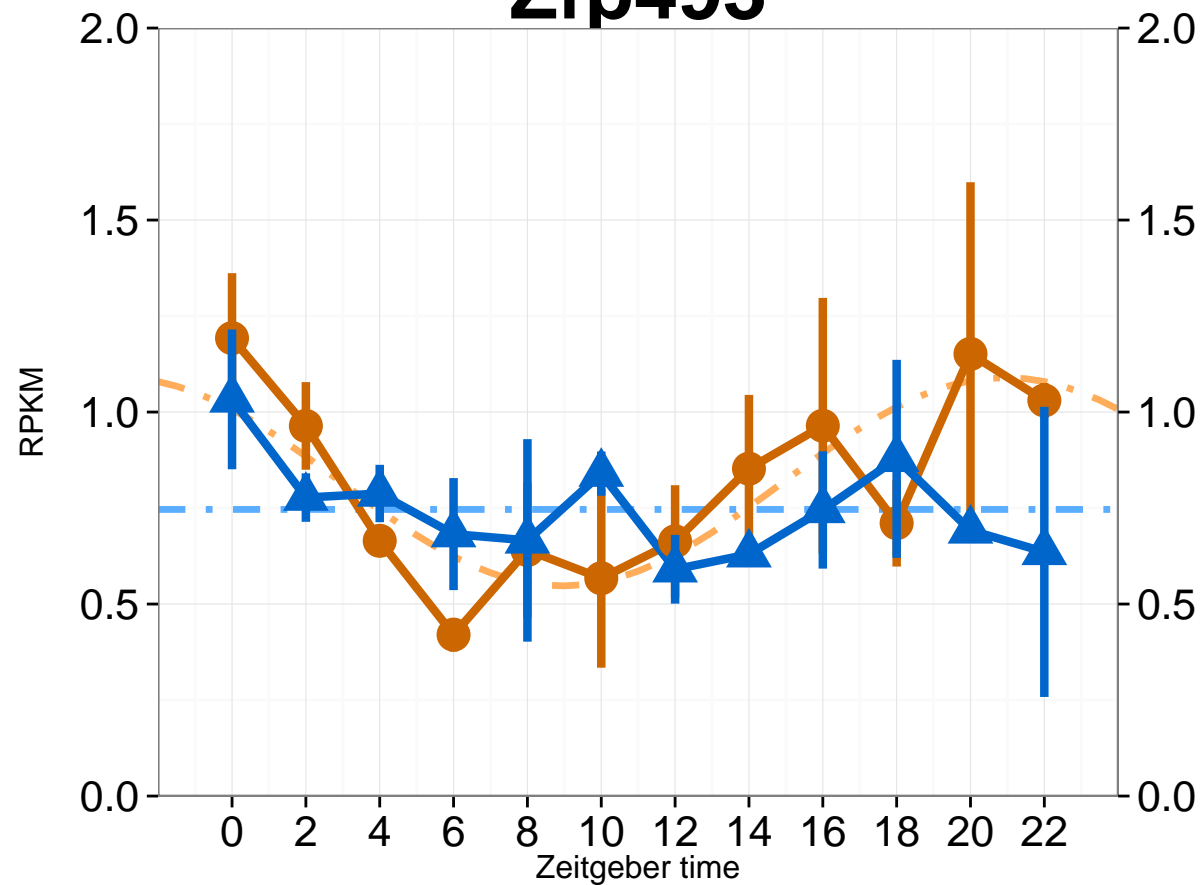

# Zfp493

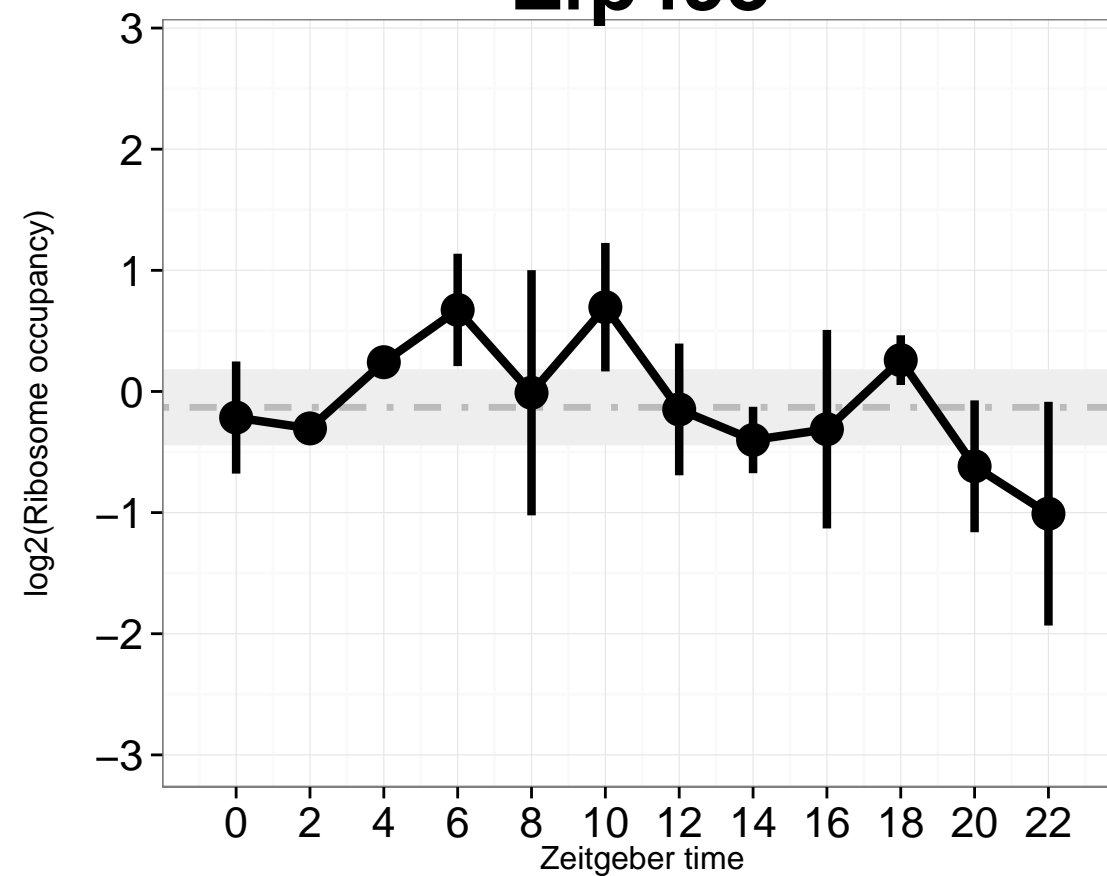

Supplement: Supplementary file 1749 [file 1]

# Gprc5b

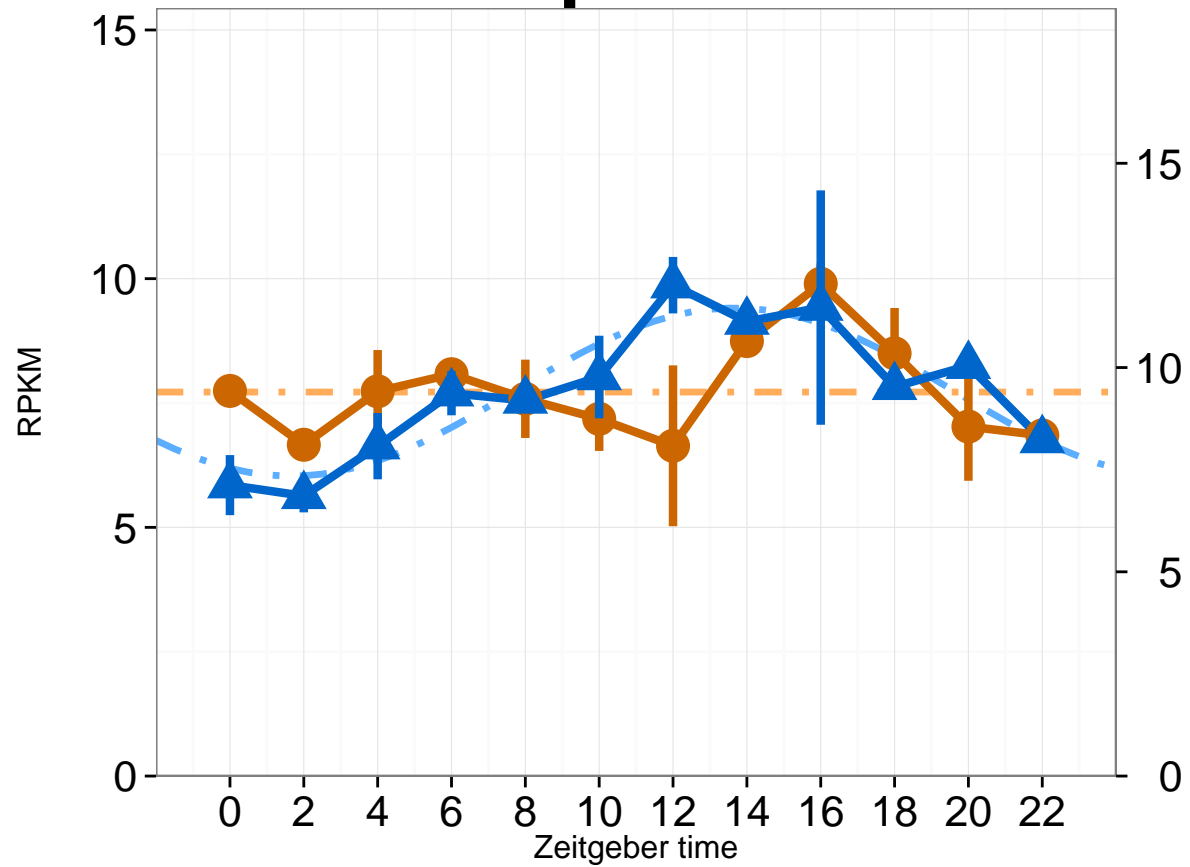

# Gprc5b

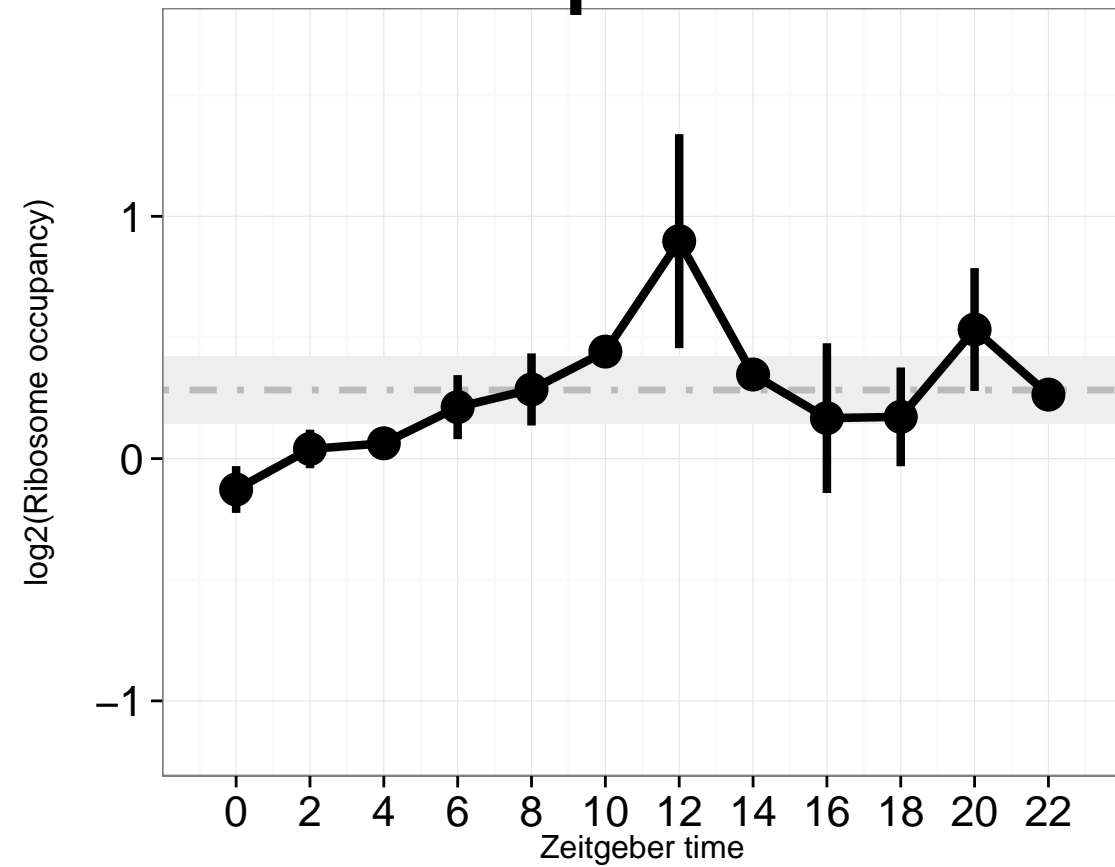

Supplement: Supplementary file 1750 [file 1]

## Ankle2

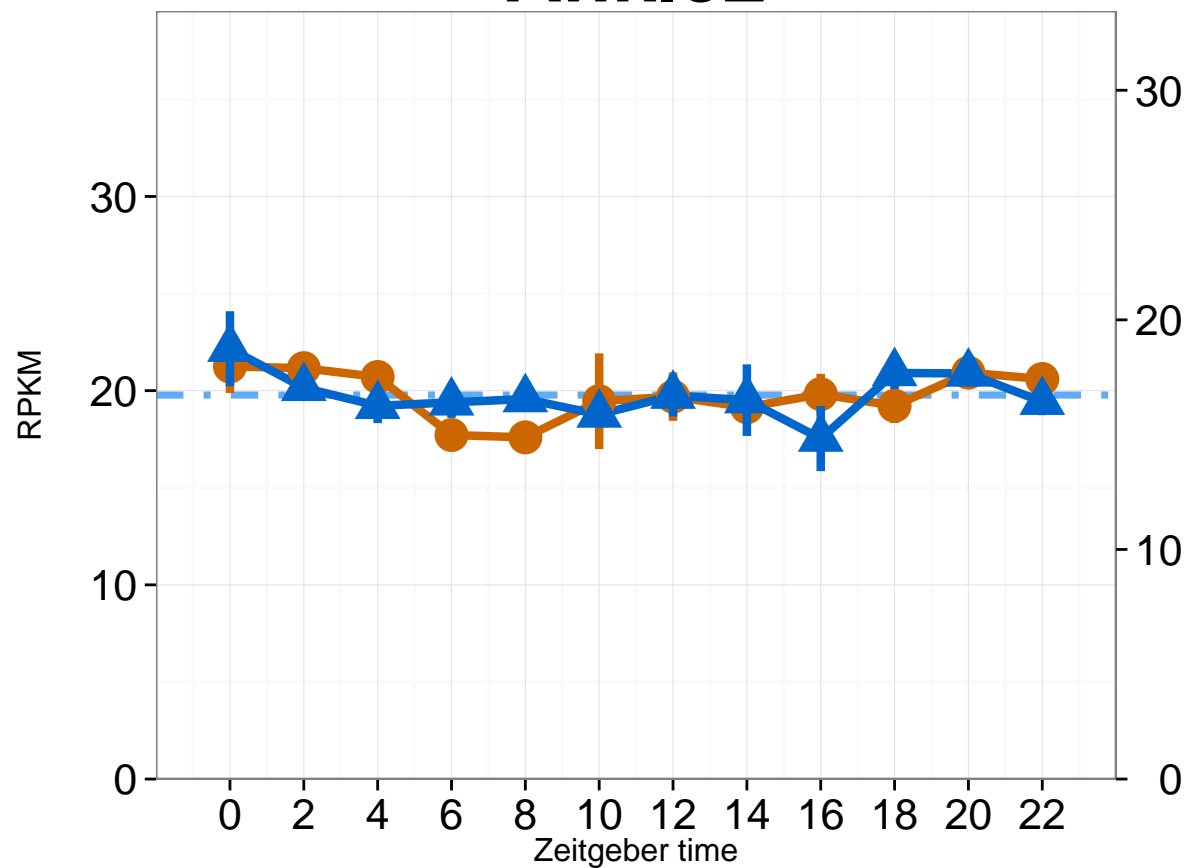

## Ankle2

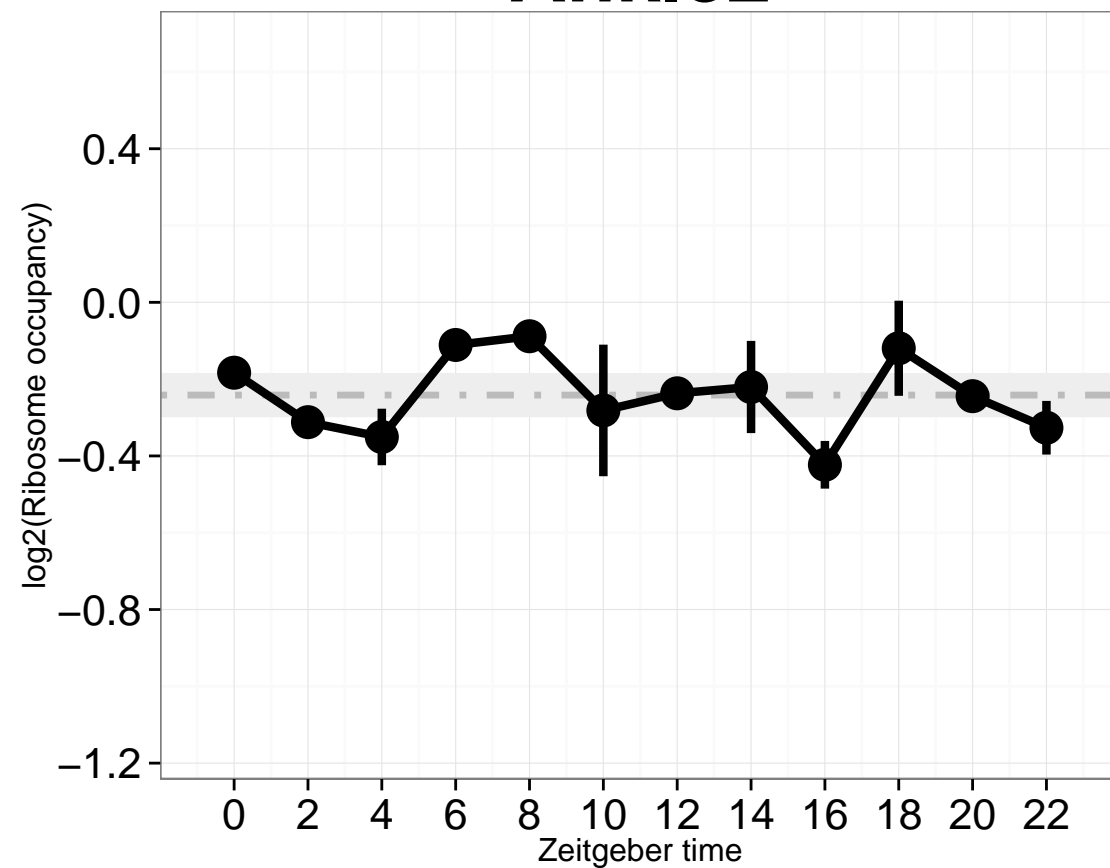

Supplement: Supplementary file 1751 [file 1]

## Nipa2

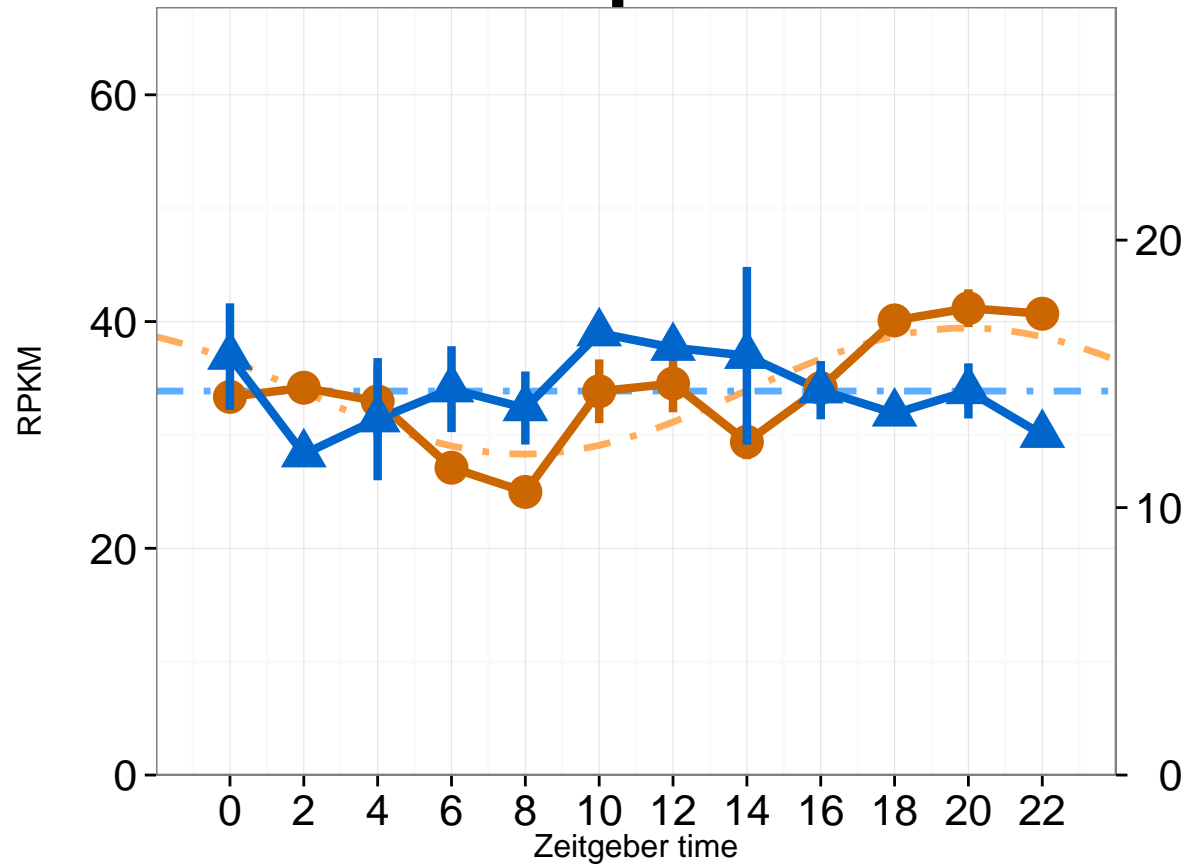

## Nipa2

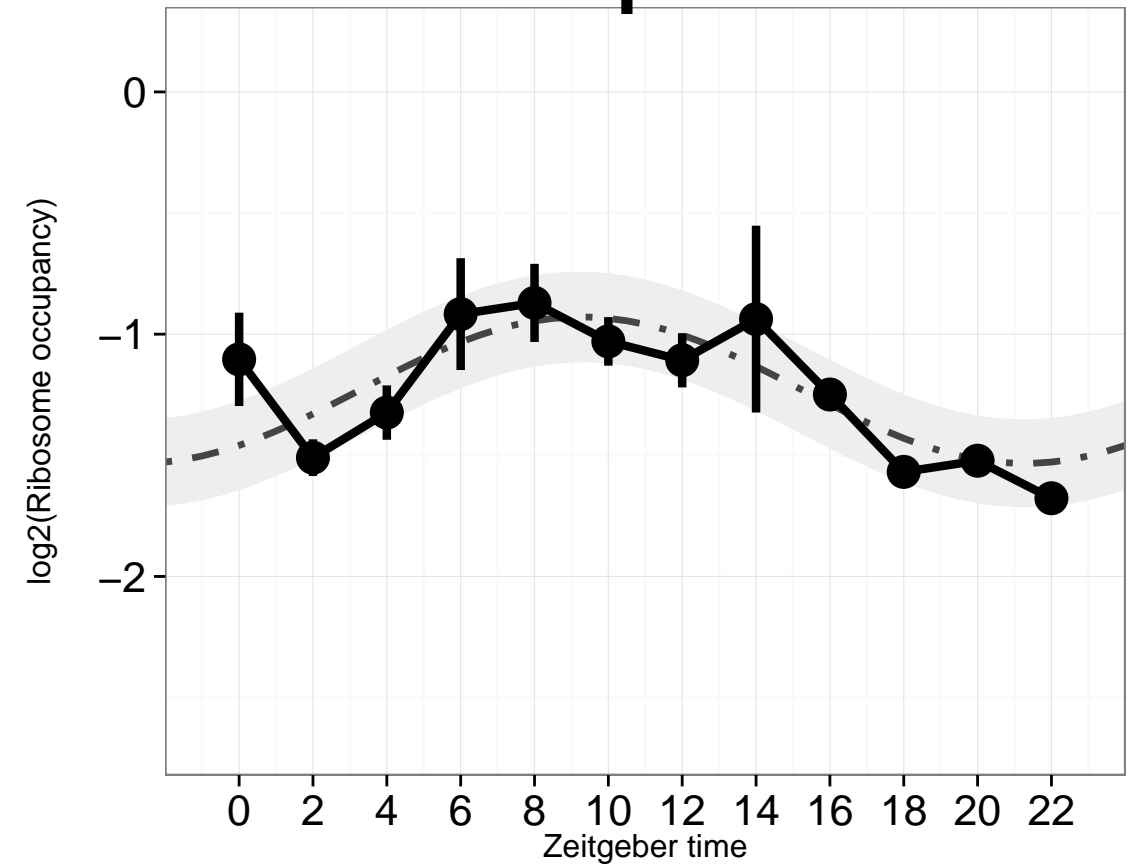

Supplement: Supplementary file 1752 [file 1]

## Cd302

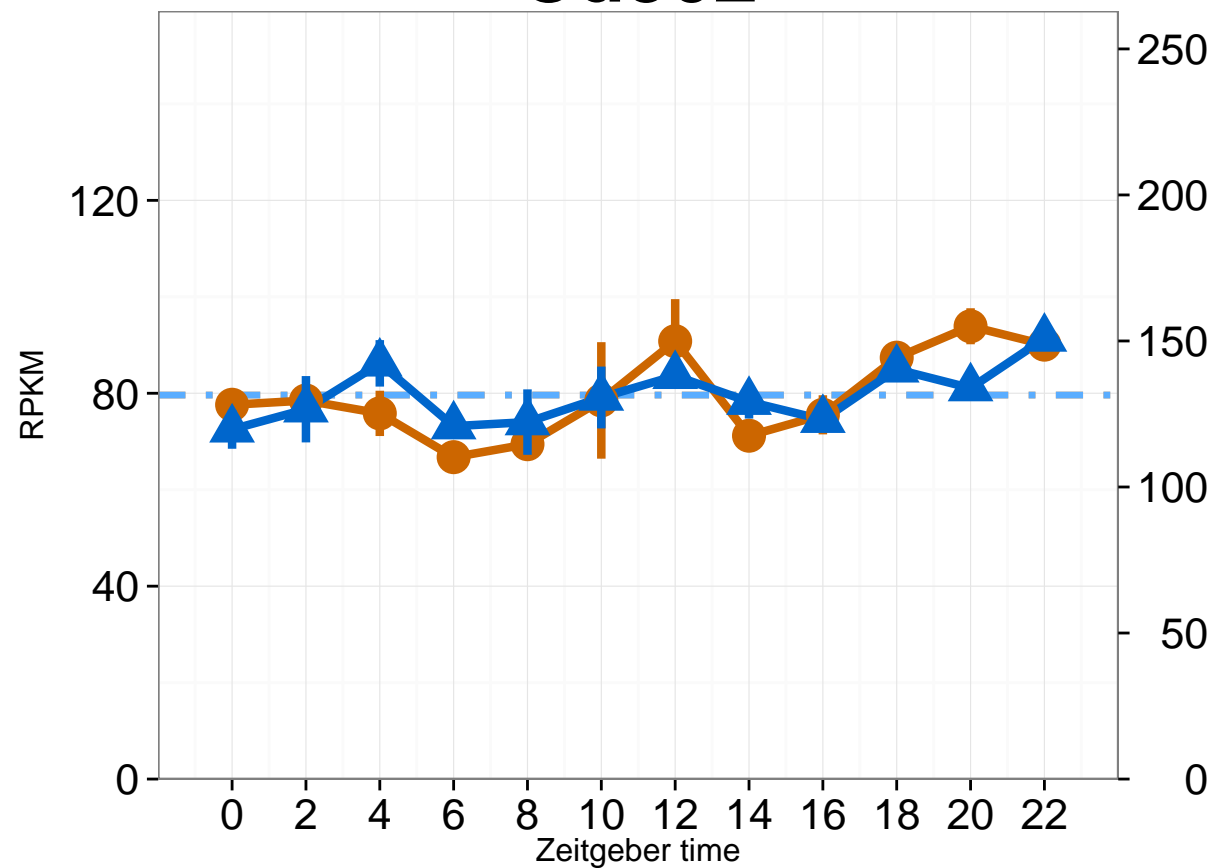

## Cd302

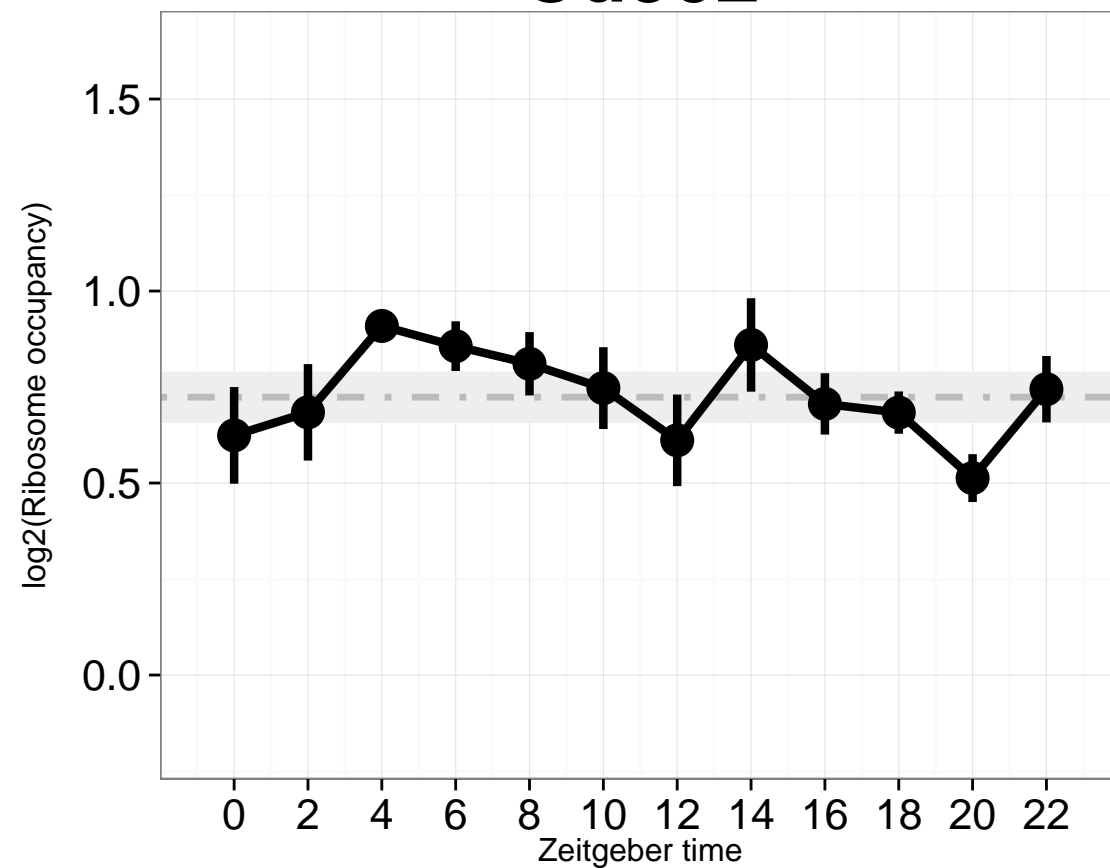

Supplement: Supplementary file 1753 [file 1]

## Tmem181b-ps

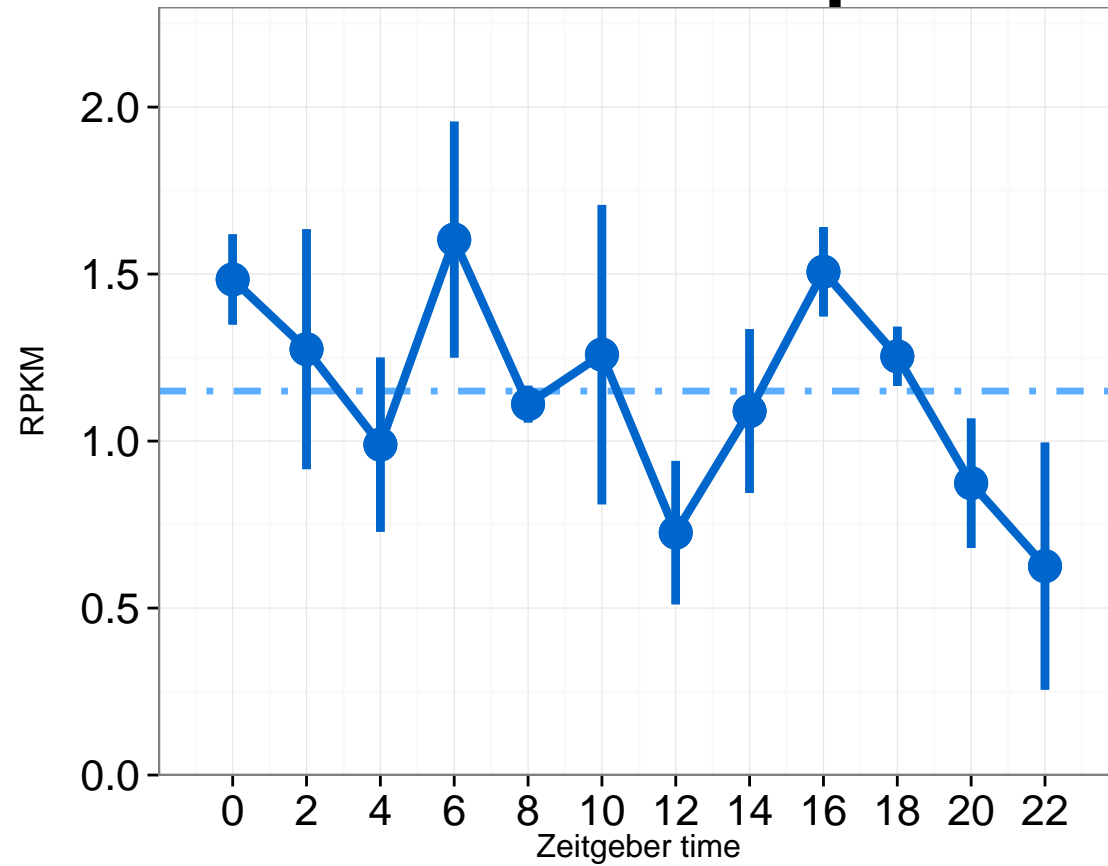

## Tmem181b-ps log2(Ribosome occupancy)

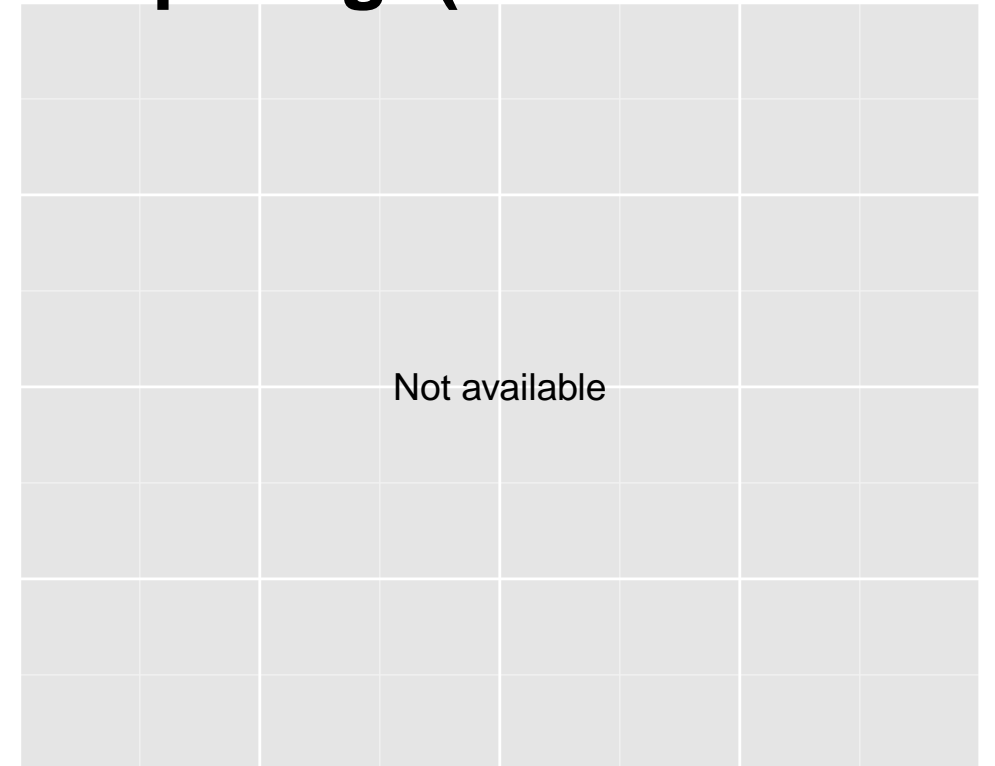

Supplement: Supplementary file 1754 [file 1]

# Zbtb25

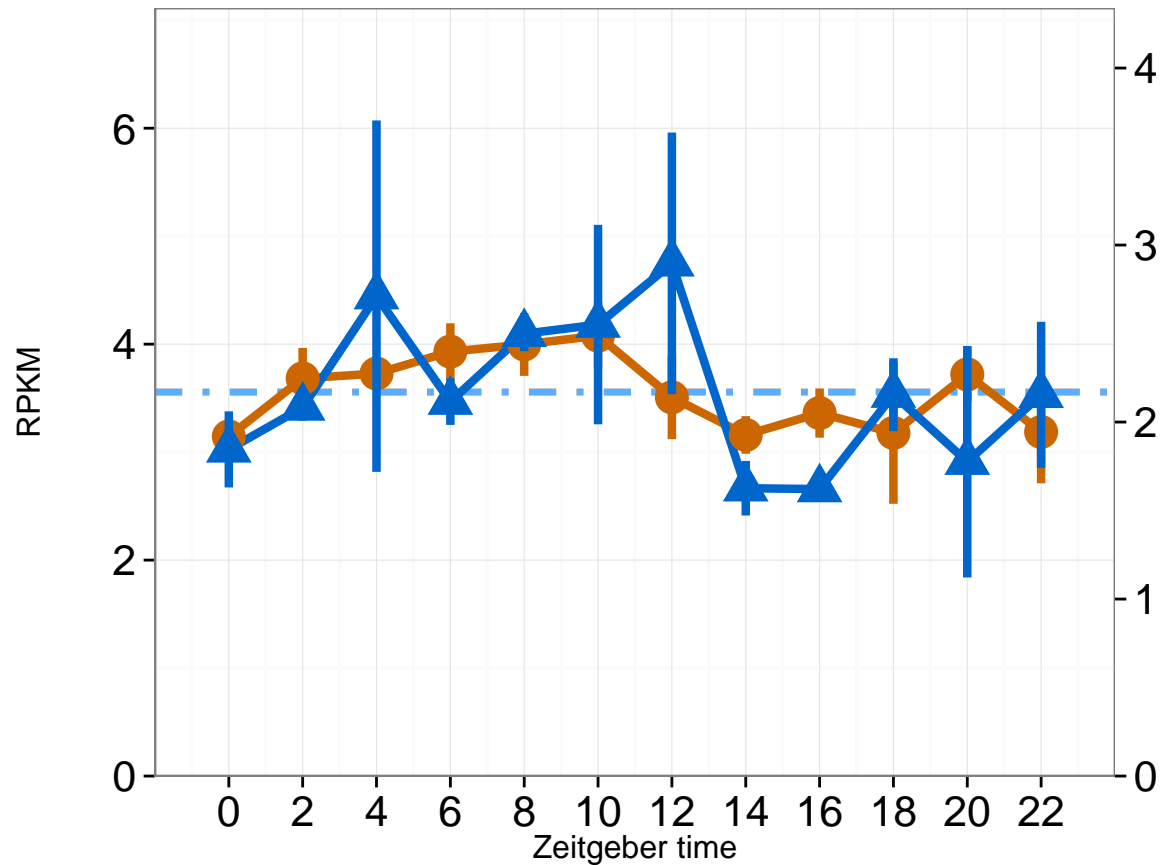

# Zbtb25

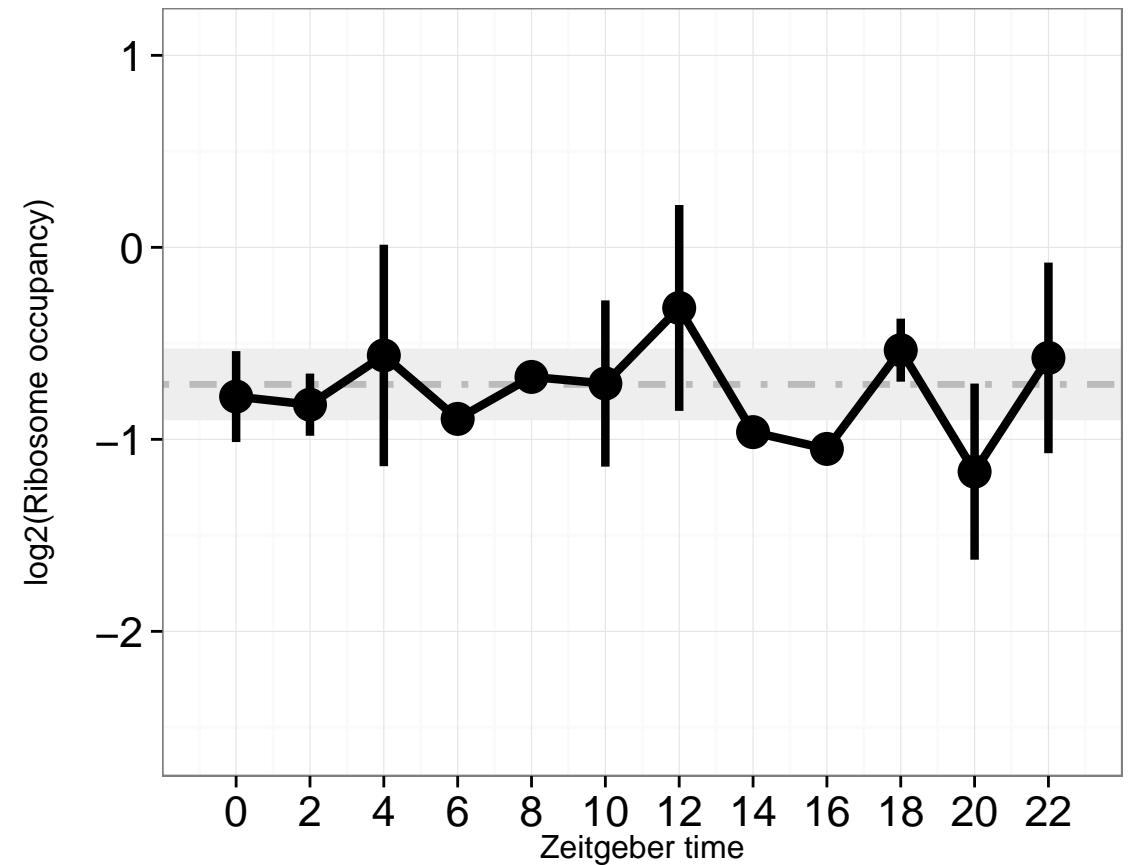

Supplement: Supplementary file 1755 [file 1]

## Clk2

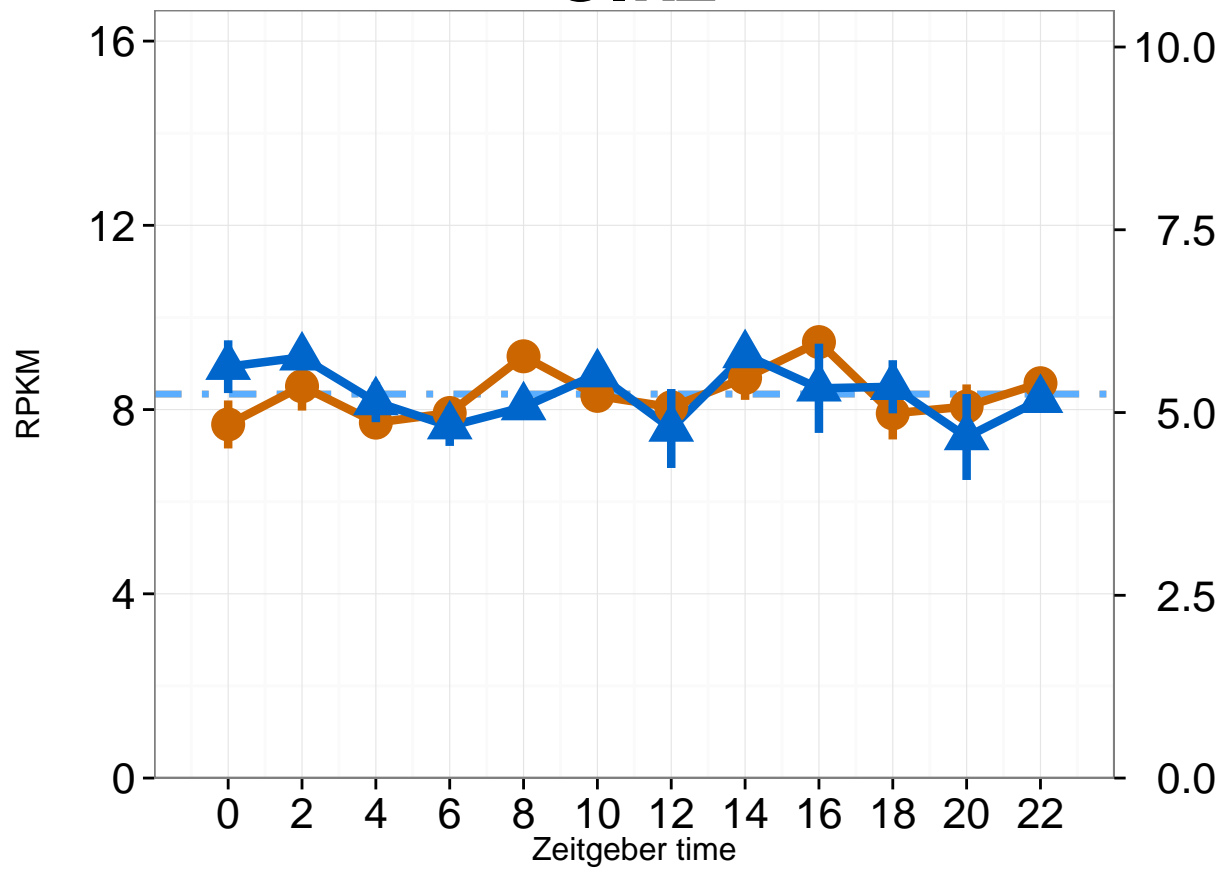

## Clk2

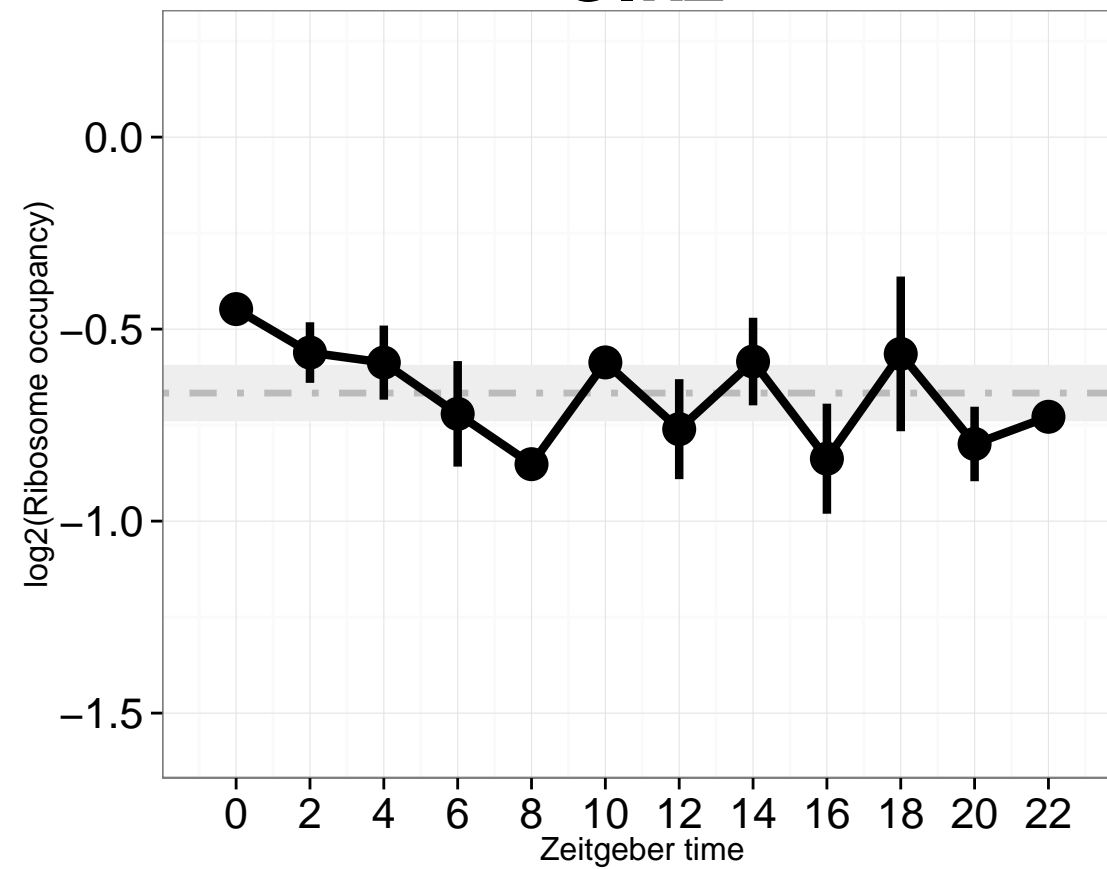

Supplement: Supplementary file 1756 [file 1]

## Suv39h1

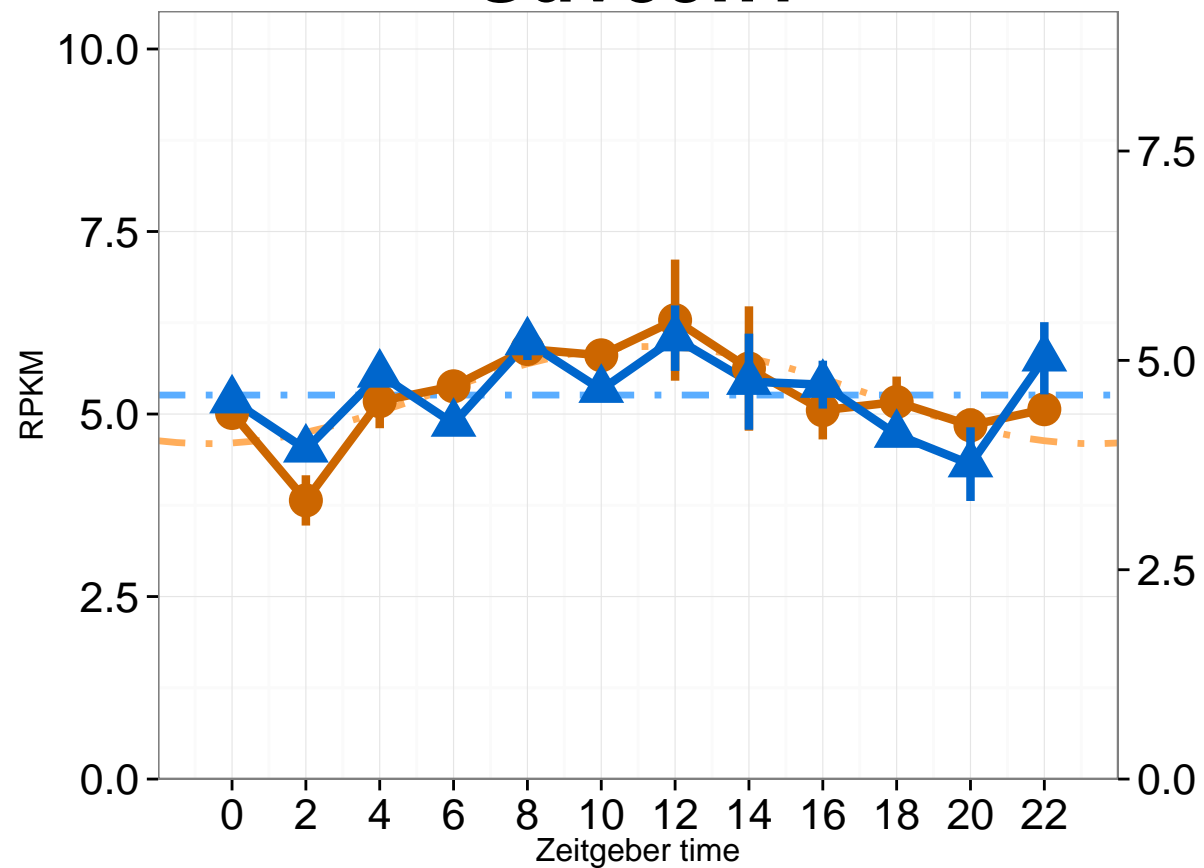

## Suv39h1

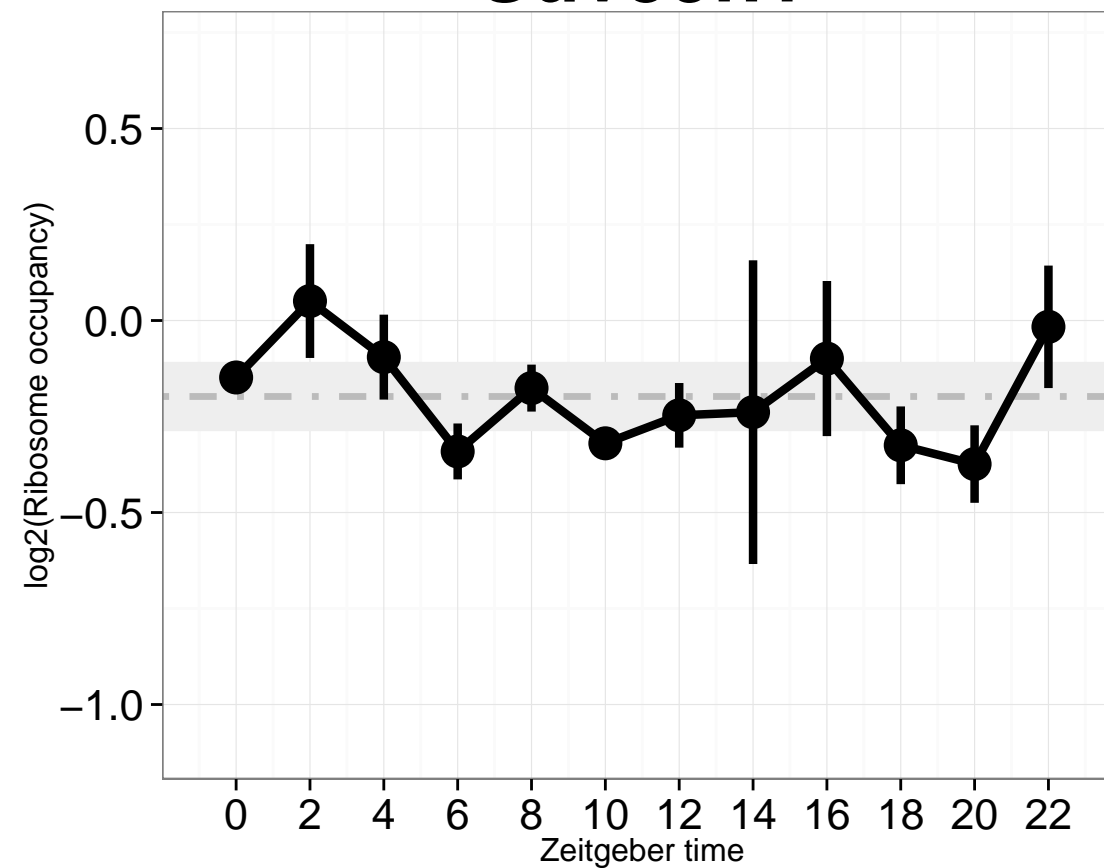

Supplement: Supplementary file 1757 [file 1]

## Gm10576

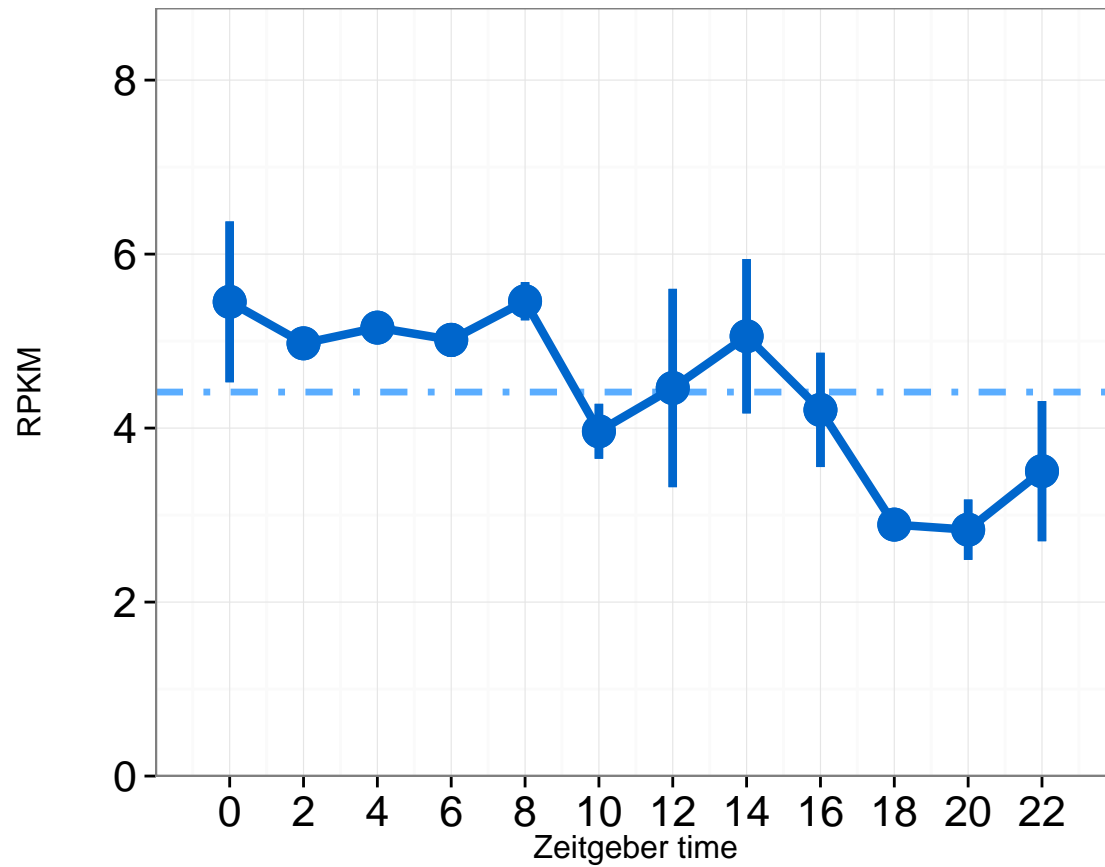

## Gm10576 log2(Ribosome occupanc

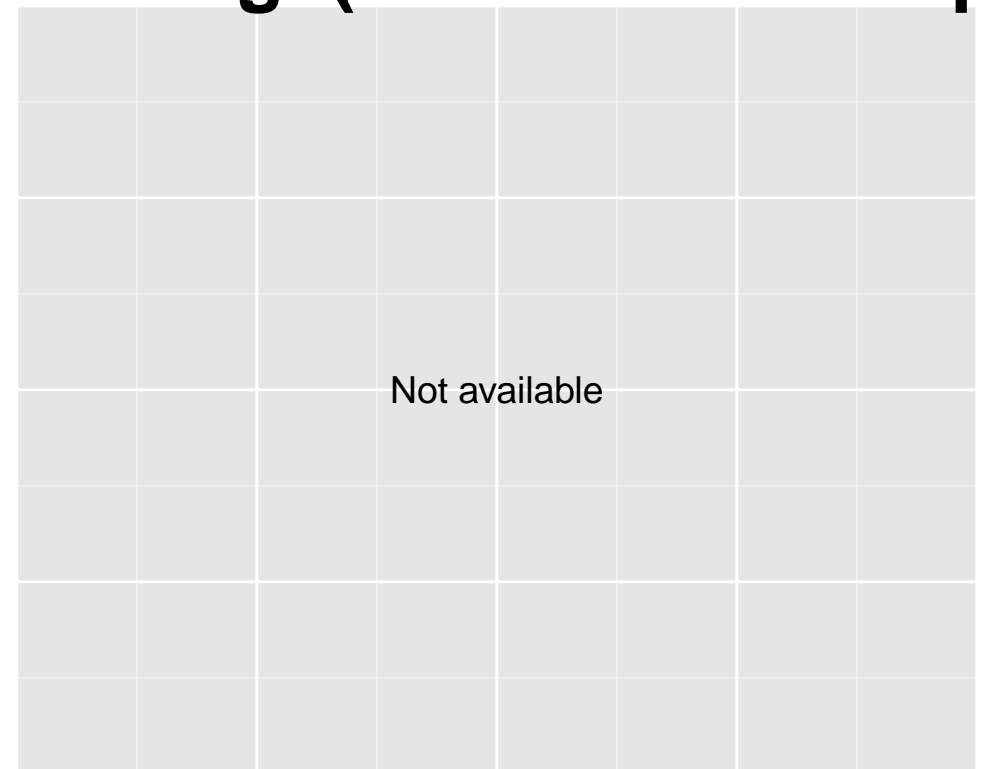

Supplement: Supplementary file 1758 [file 1]

## Degs2

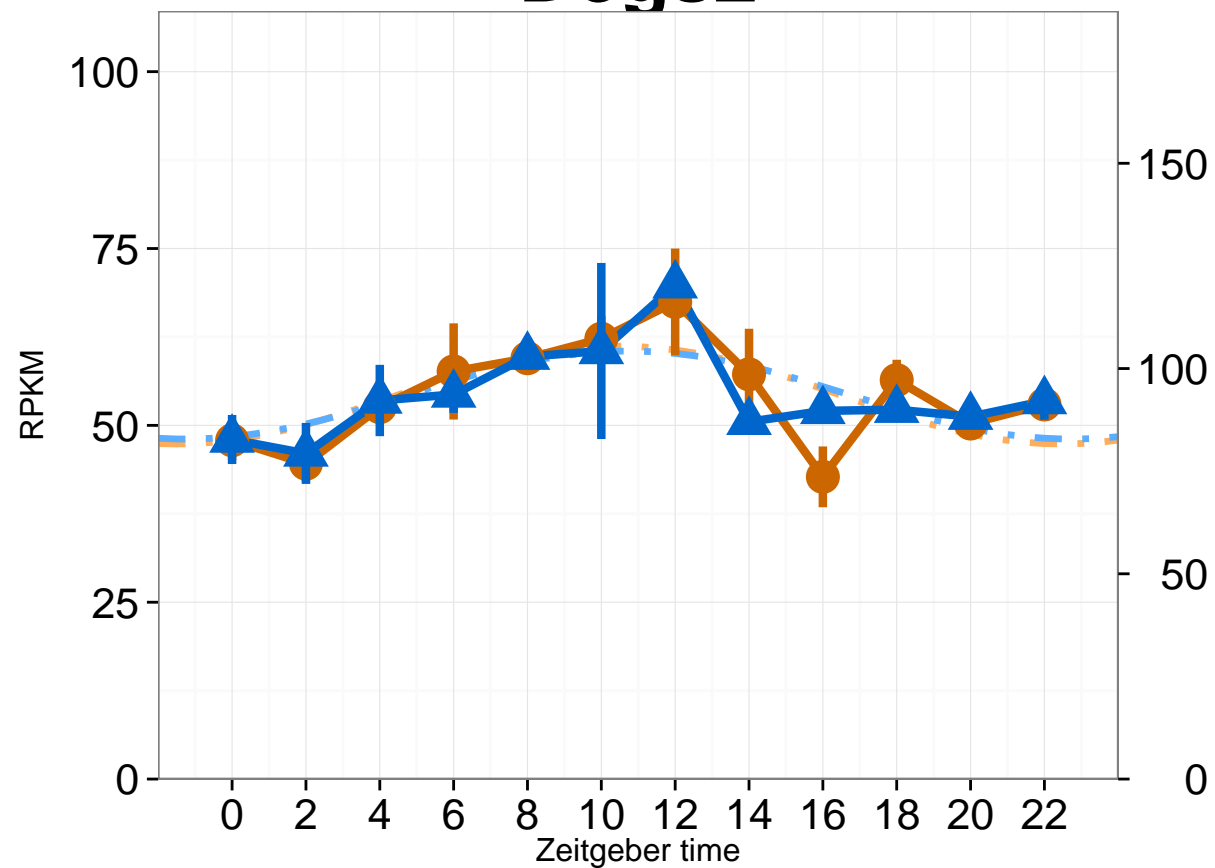

## Degs2

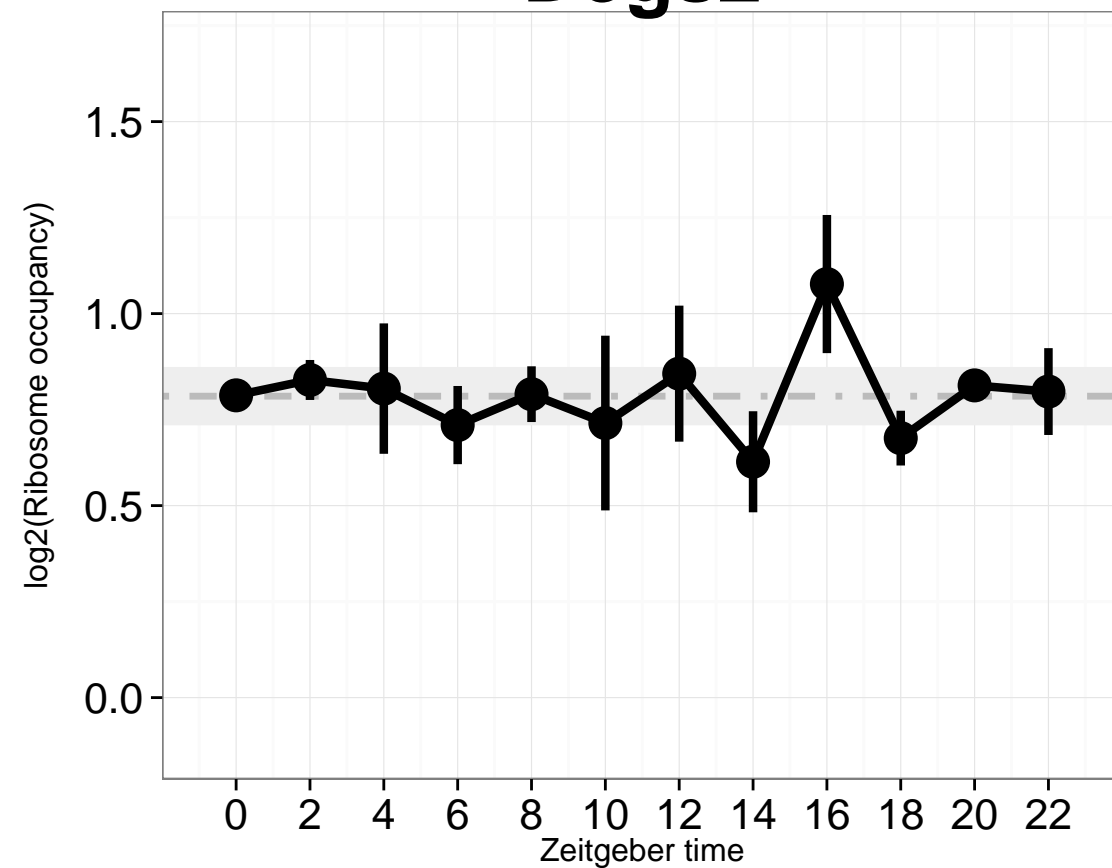

Supplement: Supplementary file 1759 [file 1]

# Fam131c

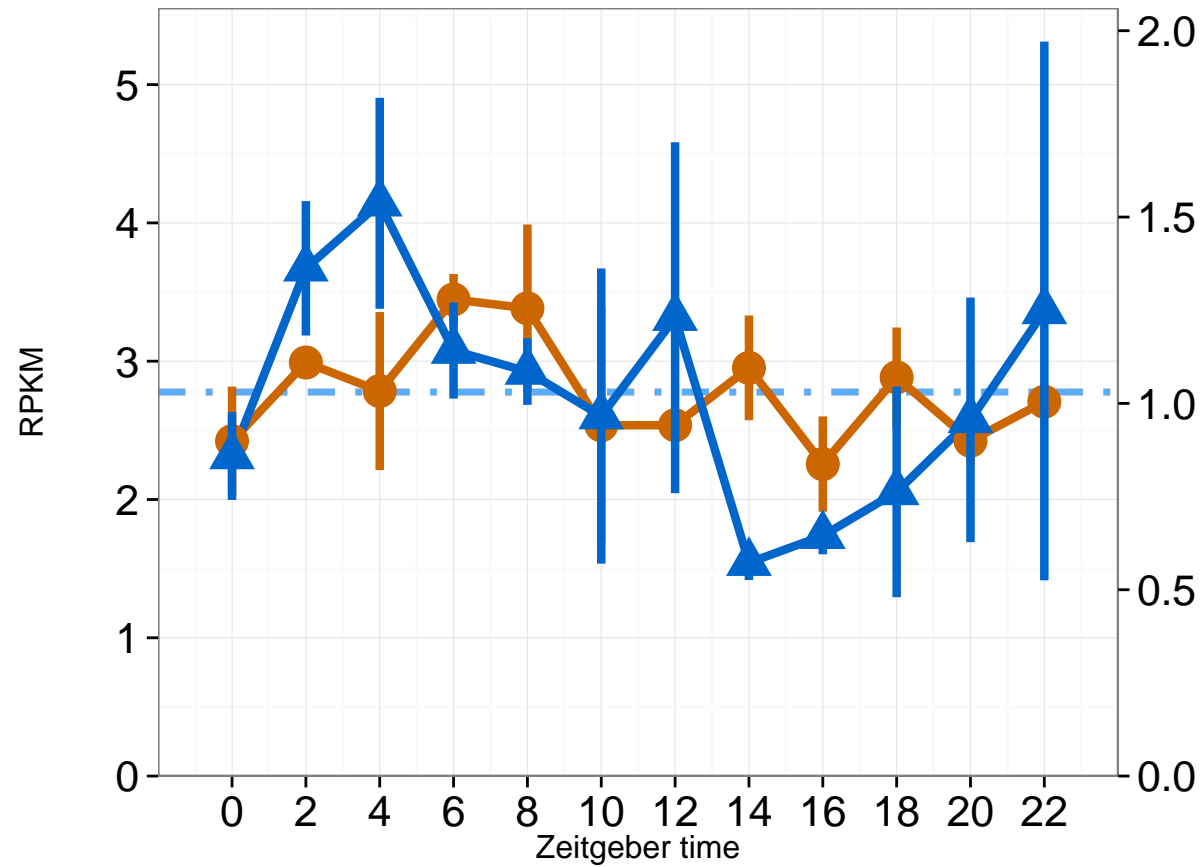

# Fam131c

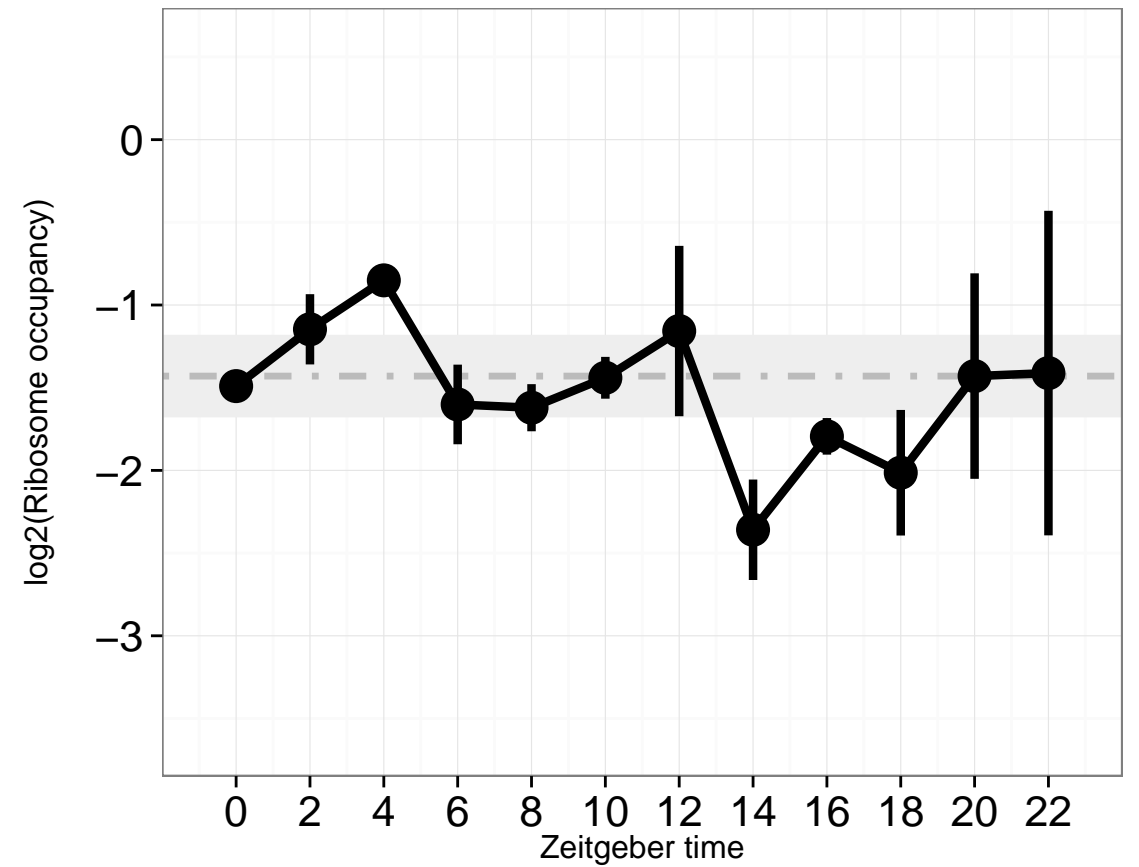

Supplement: Supplementary file 1760 [file 1]

# Dgat1

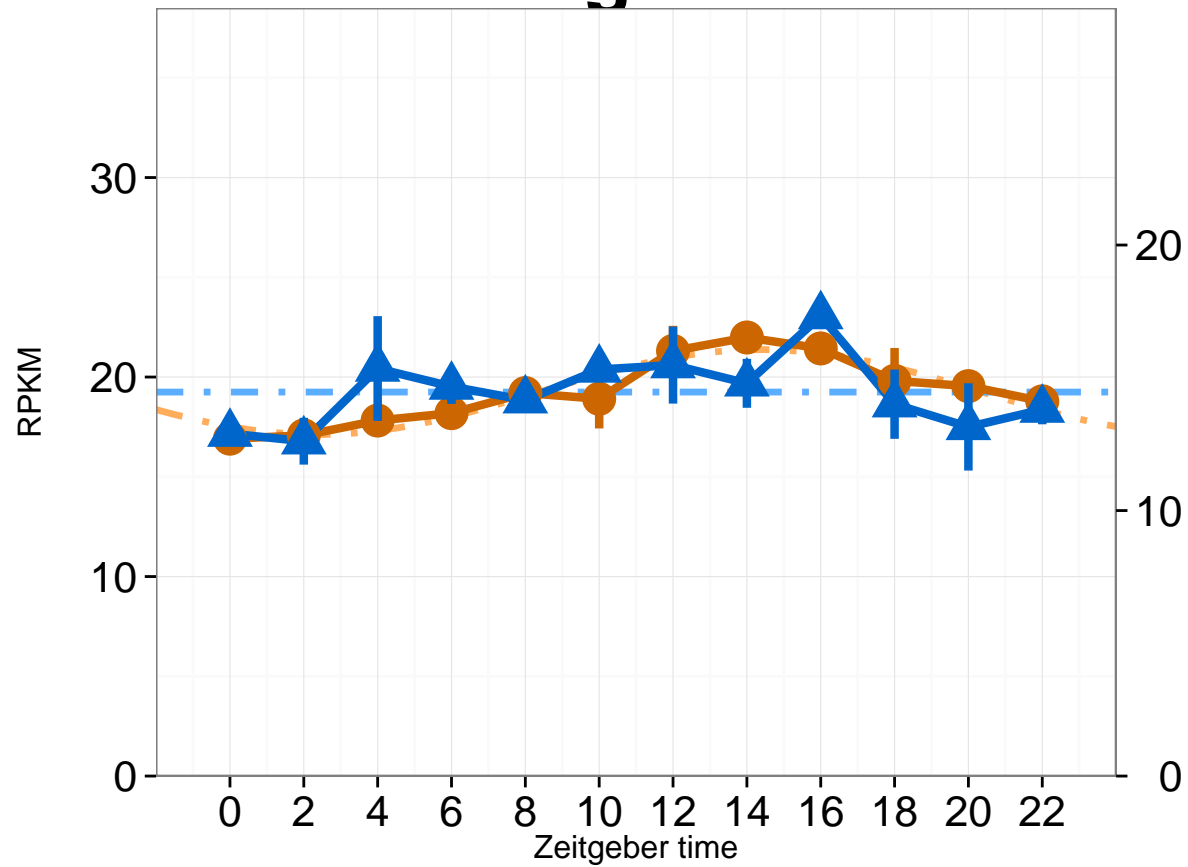

# Dgat1

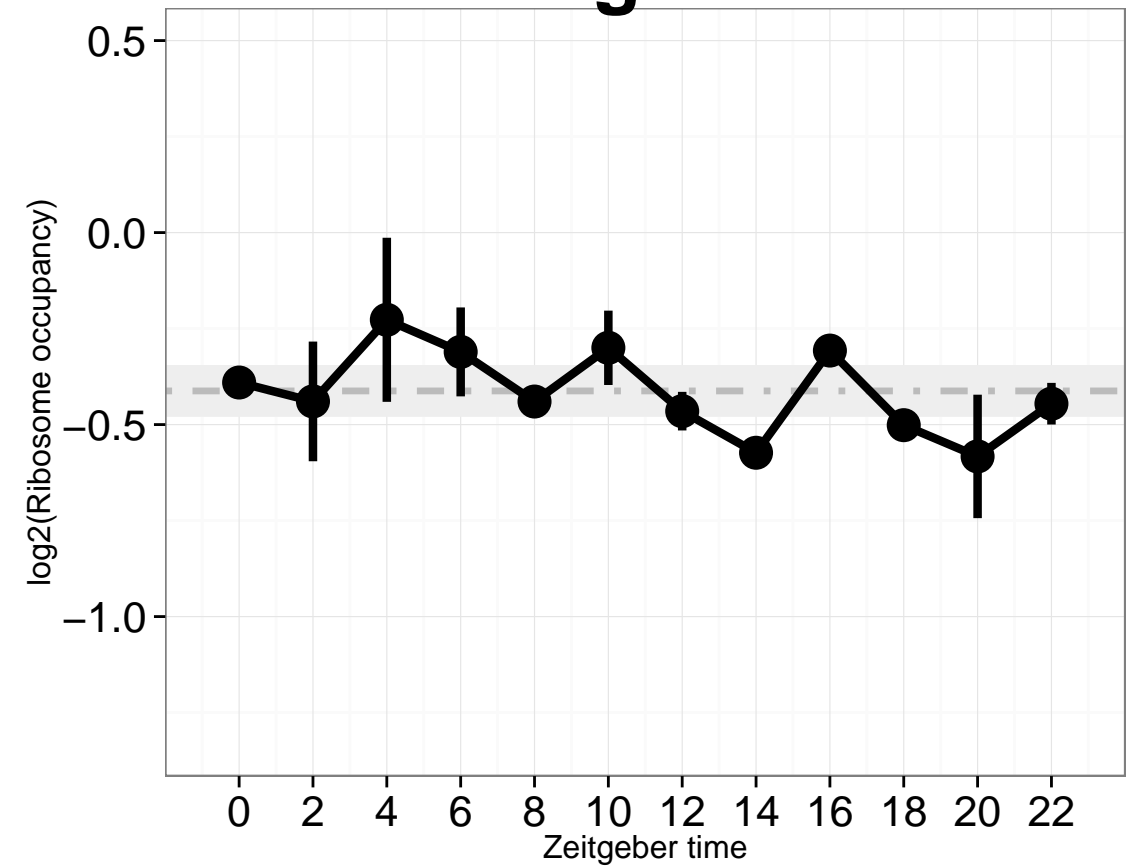

Supplement: Supplementary file 1761 [file 1]

## Ccdc66

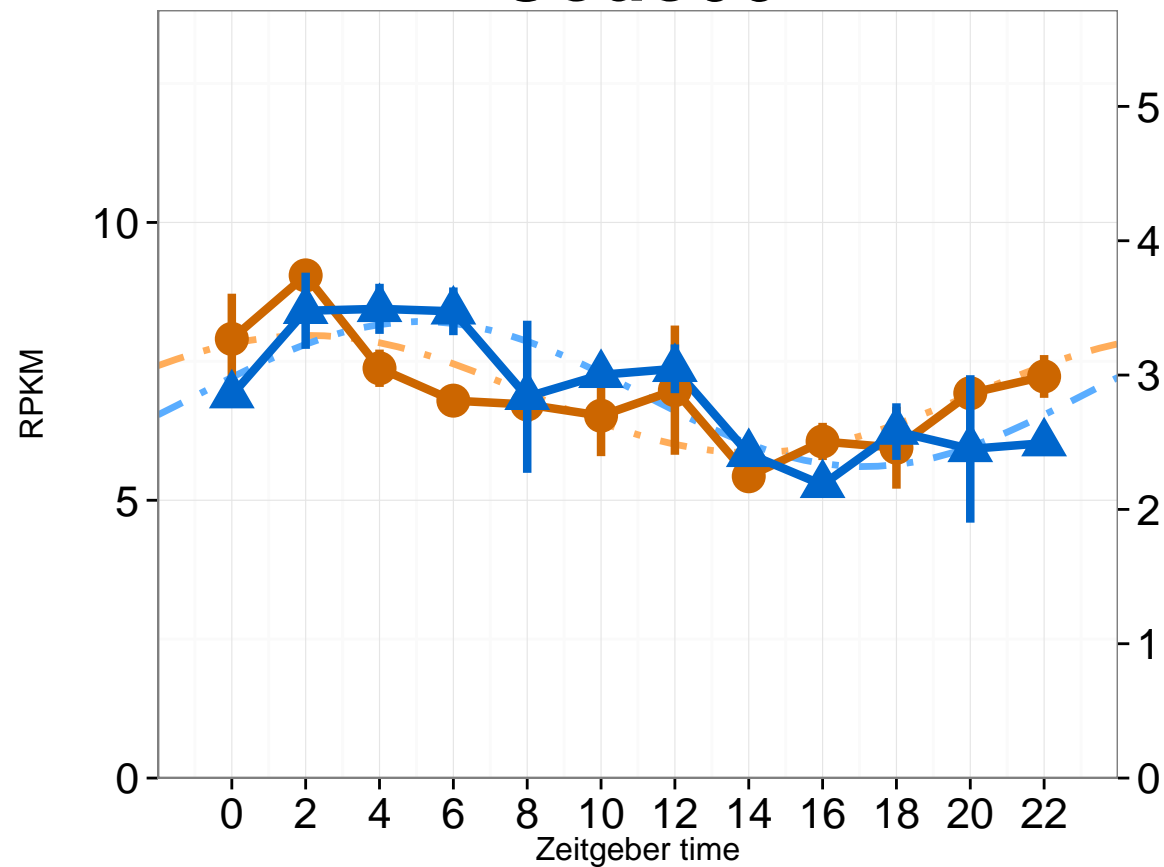

## Ccdc66

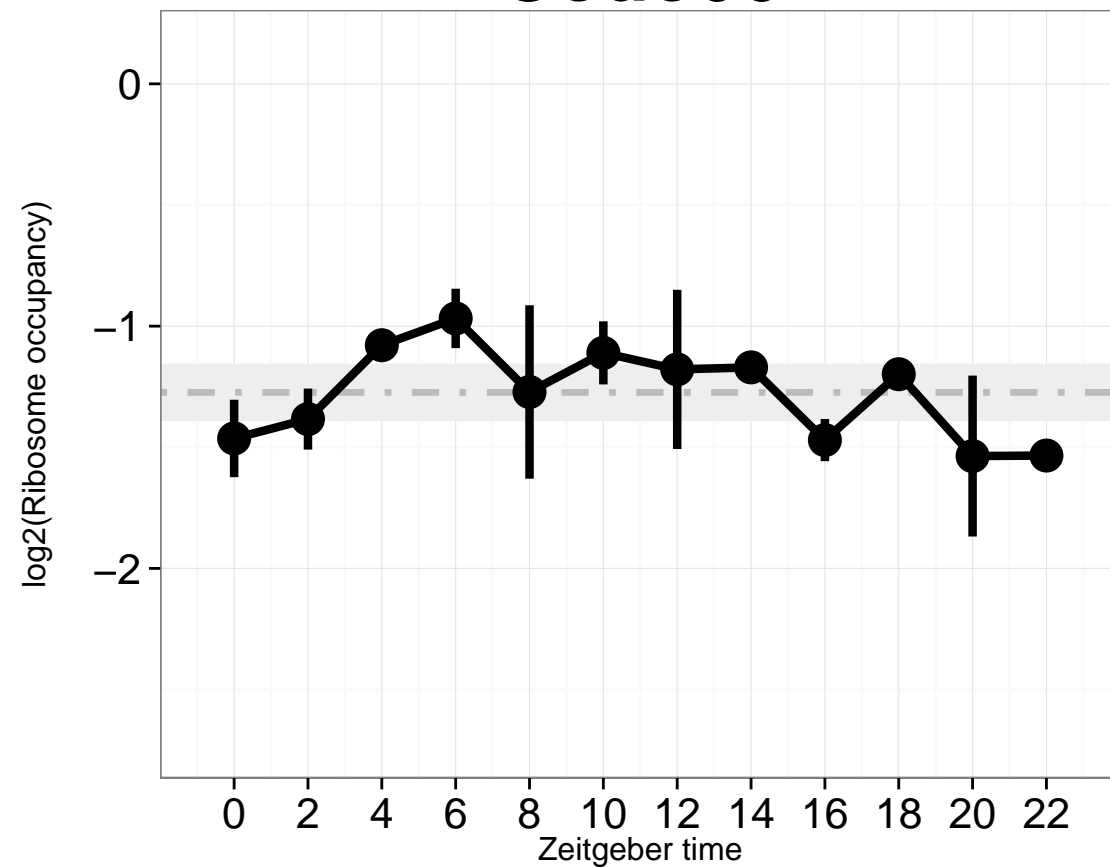

Supplement: Supplementary file 1762 [file 1]

## Brd9

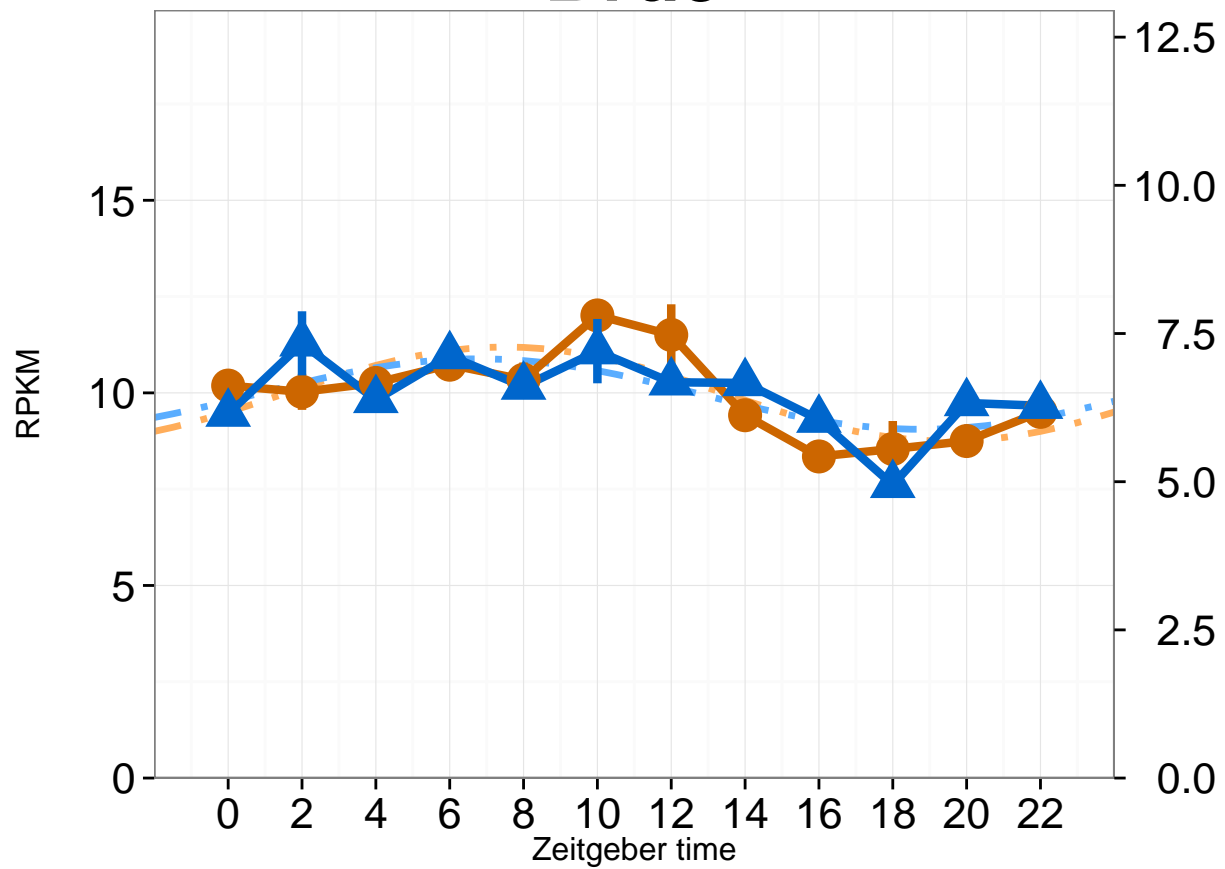

## Brd9

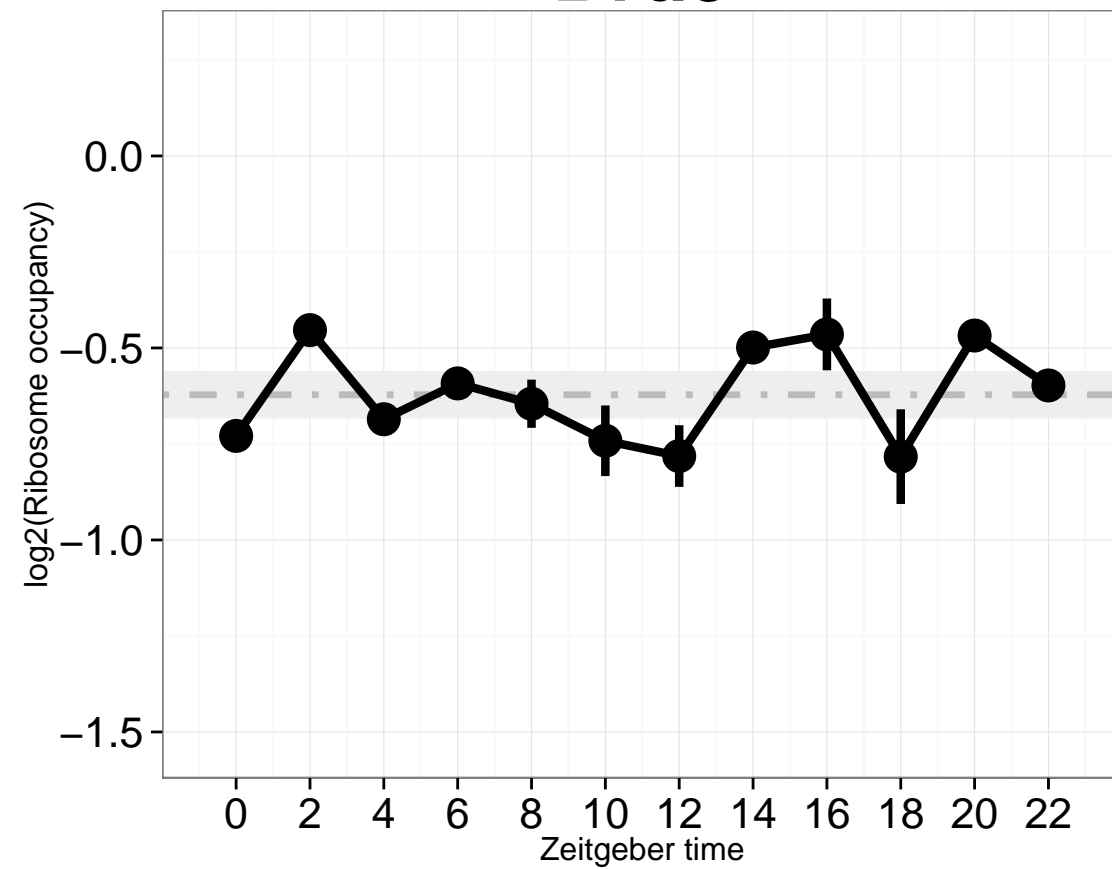

Supplement: Supplementary file 1763 [file 1]

# Agap1

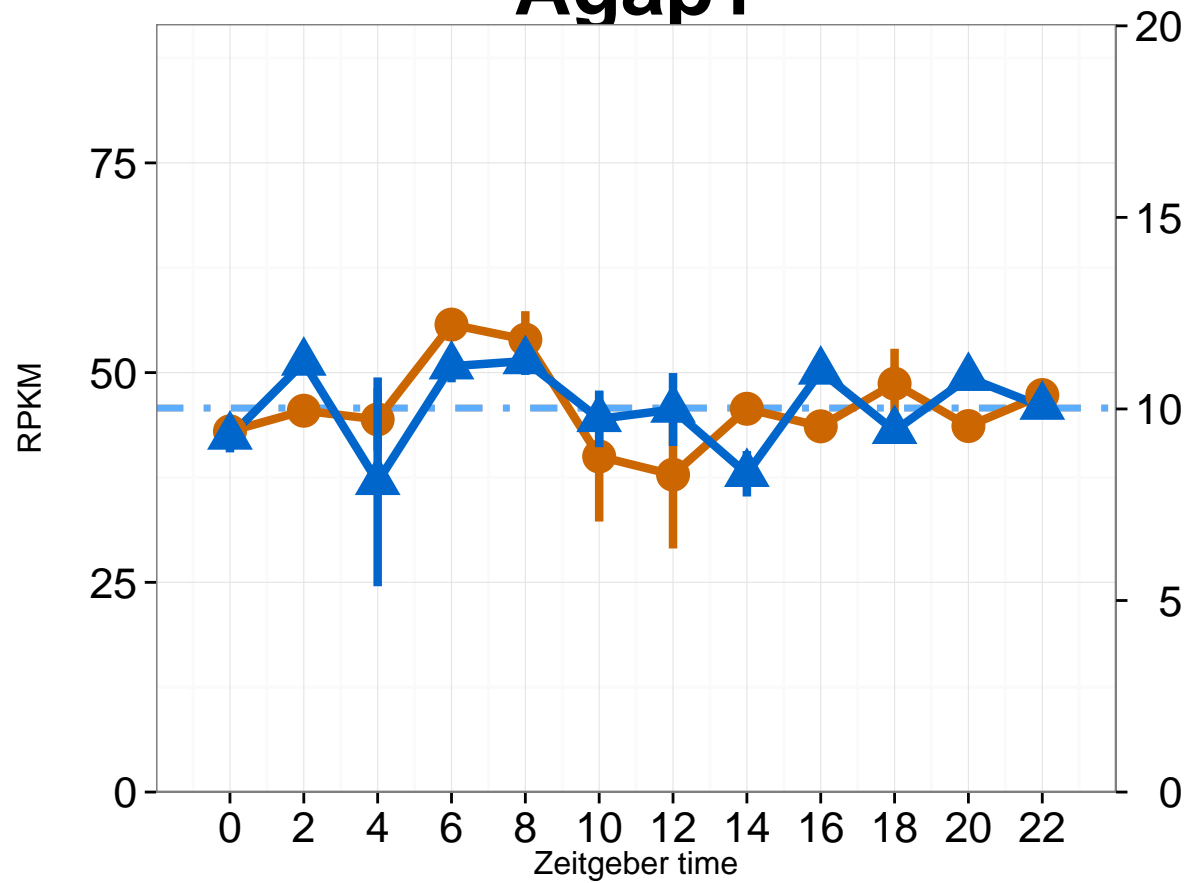

# Agap1

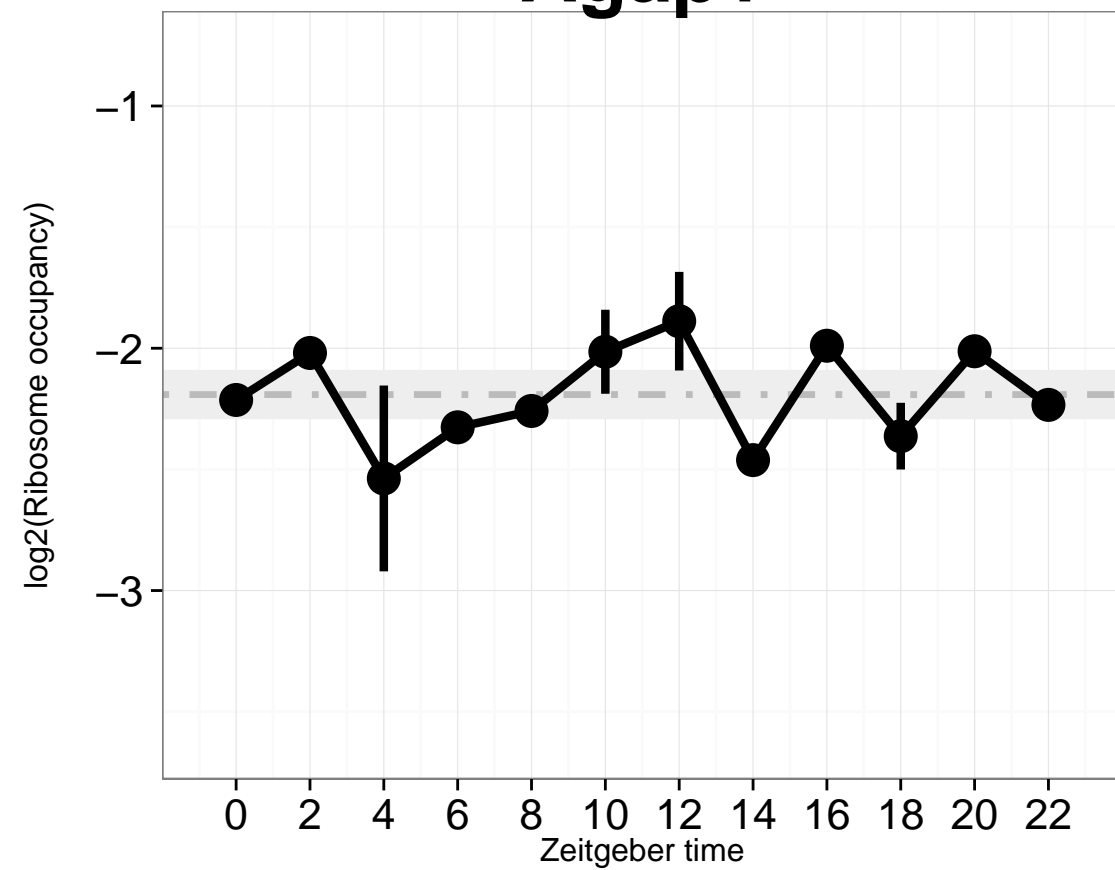

Supplement: Supplementary file 1764 [file 1]

## Ntrk2

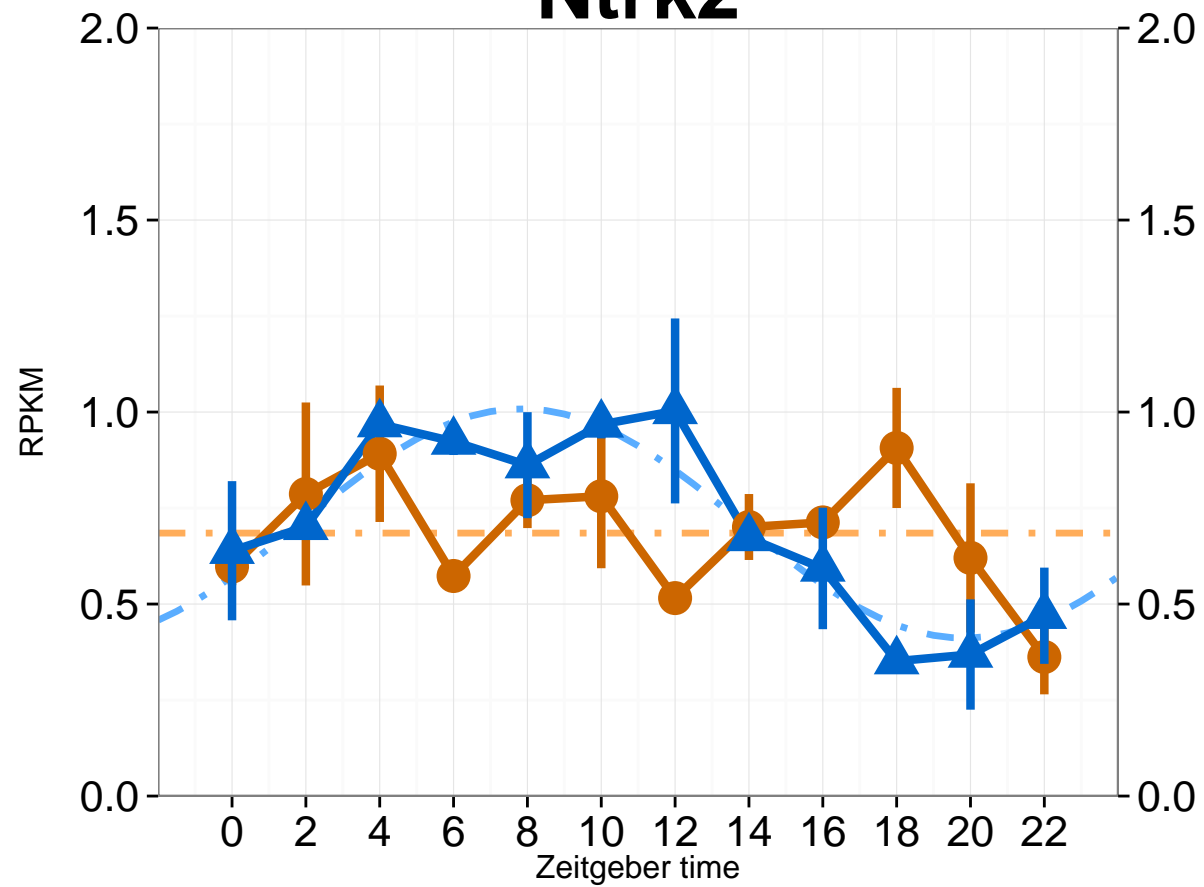

## Ntrk2

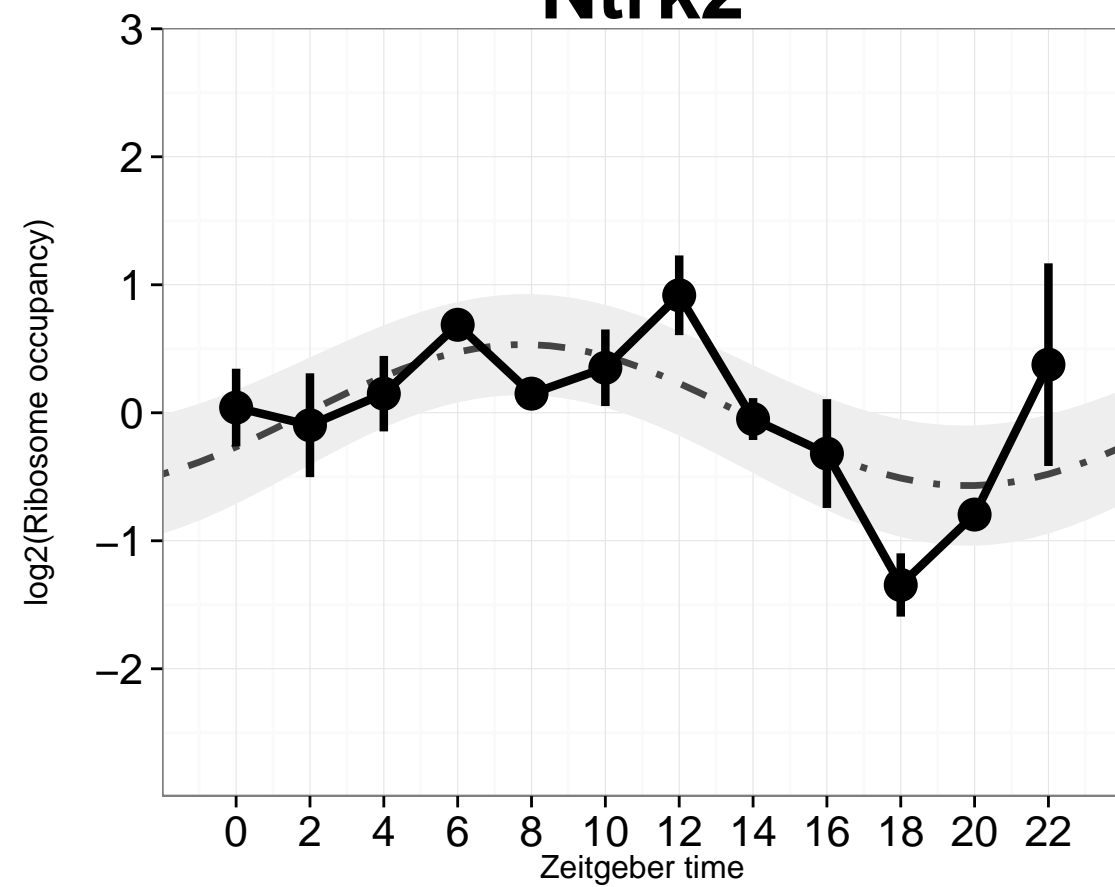

Supplement: Supplementary file 1765 [file 1]

## Cops5

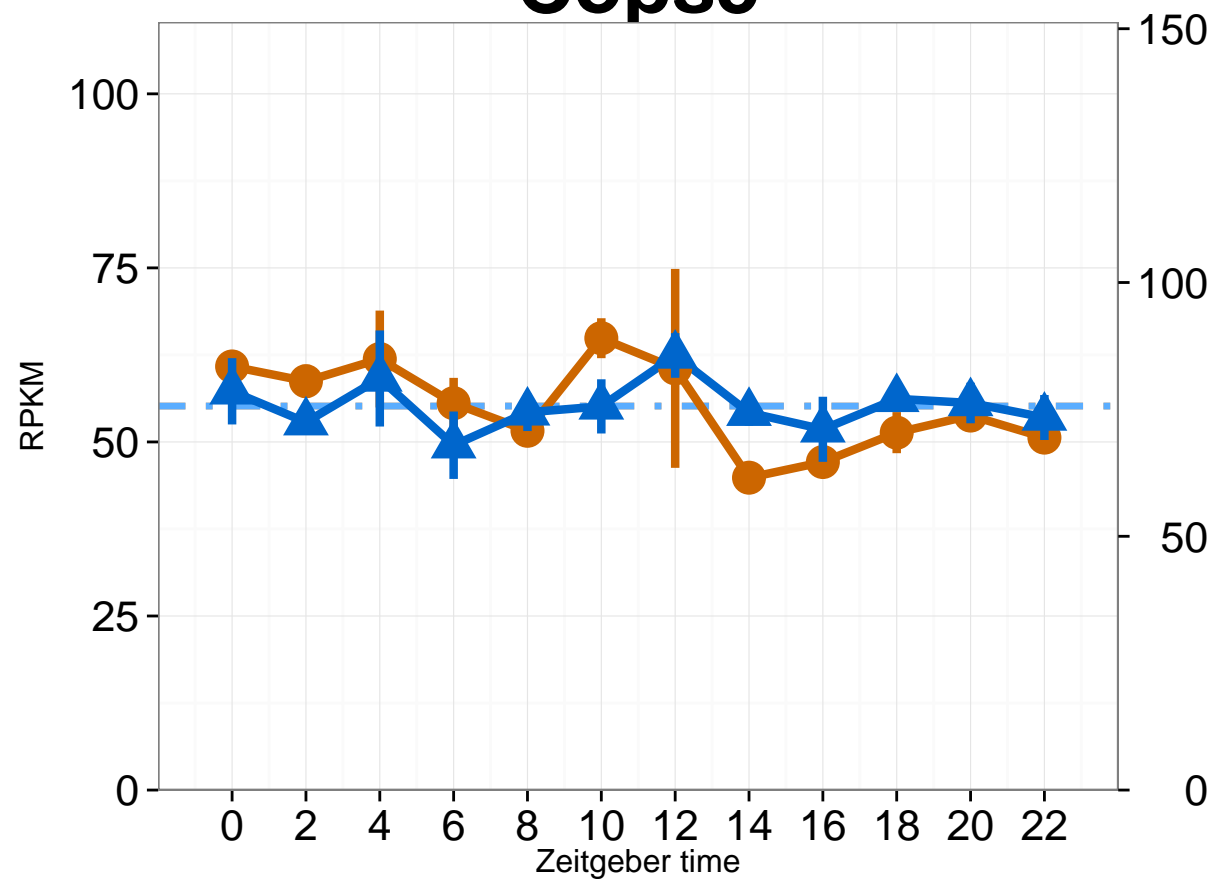

## Cops5

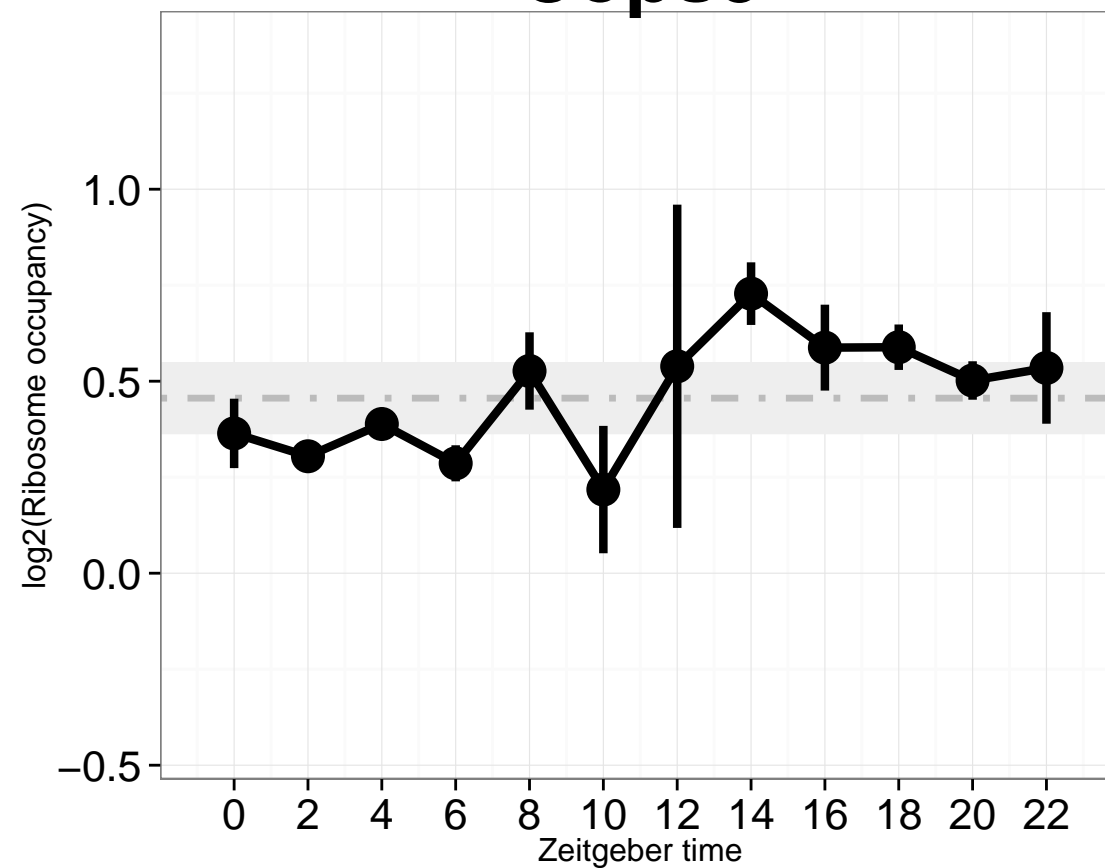

Supplement: Supplementary file 1766 [file 1]

# Qtrtd1

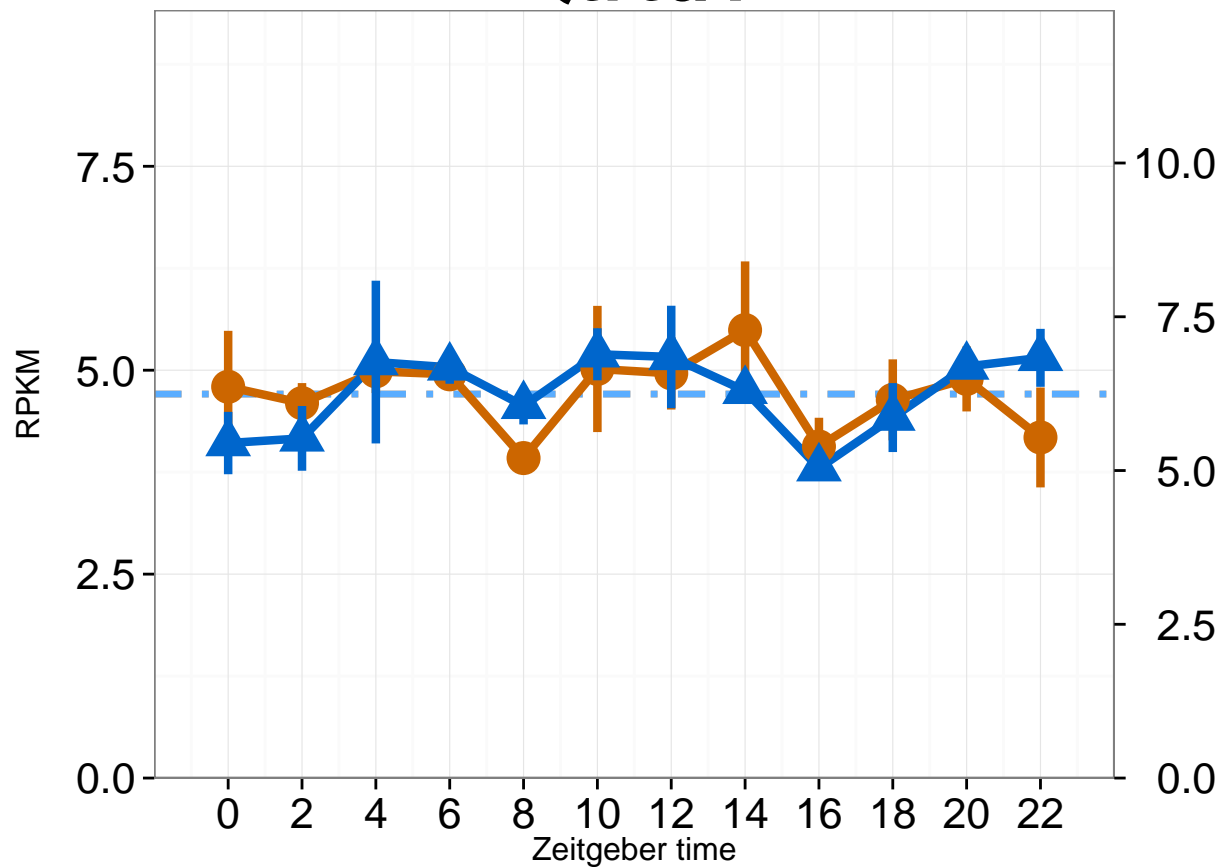

# Qtrtd1

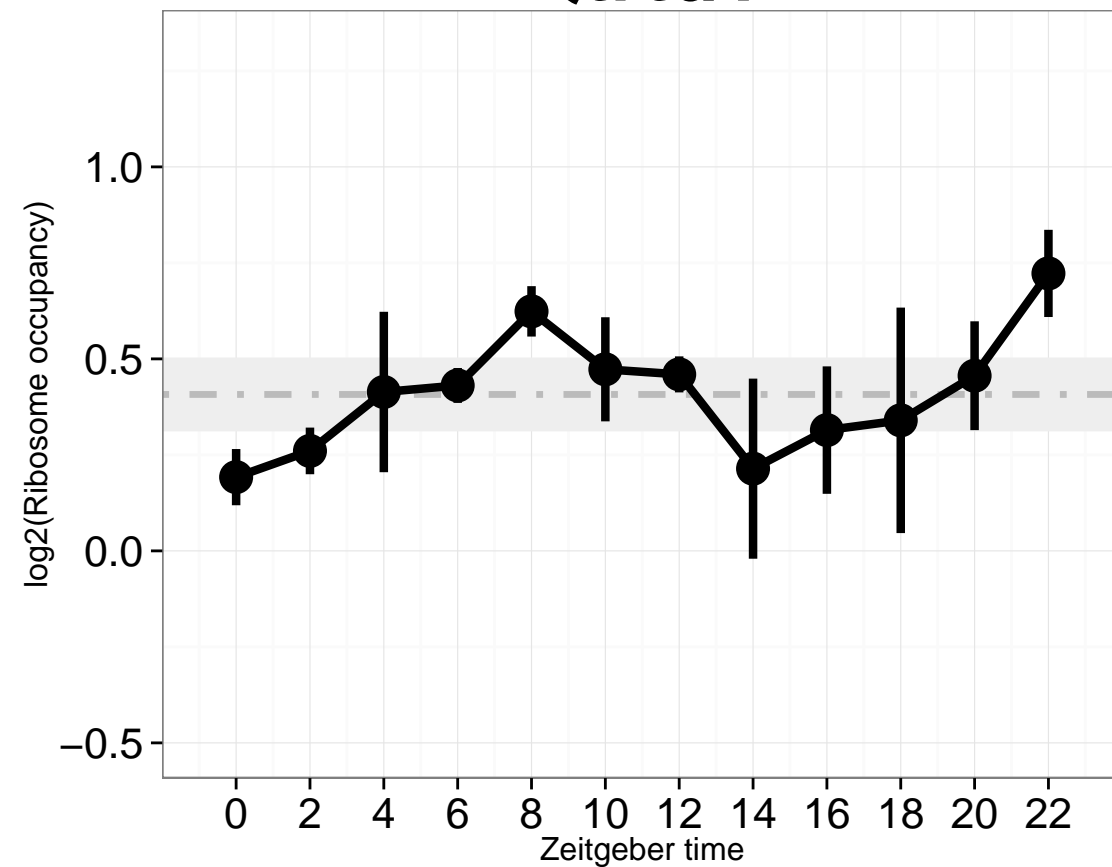

Supplement: Supplementary file 1767 [file 1]

## Ccdc6

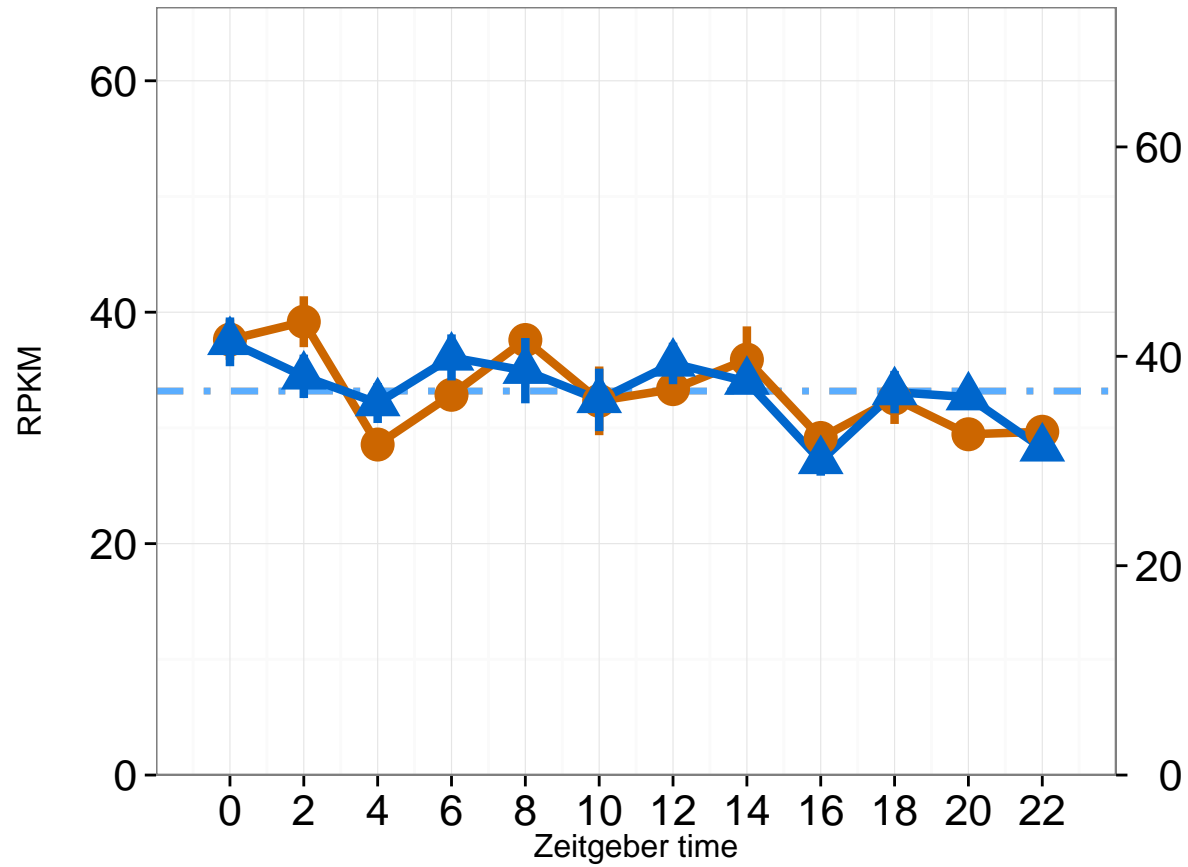

## Ccdc6

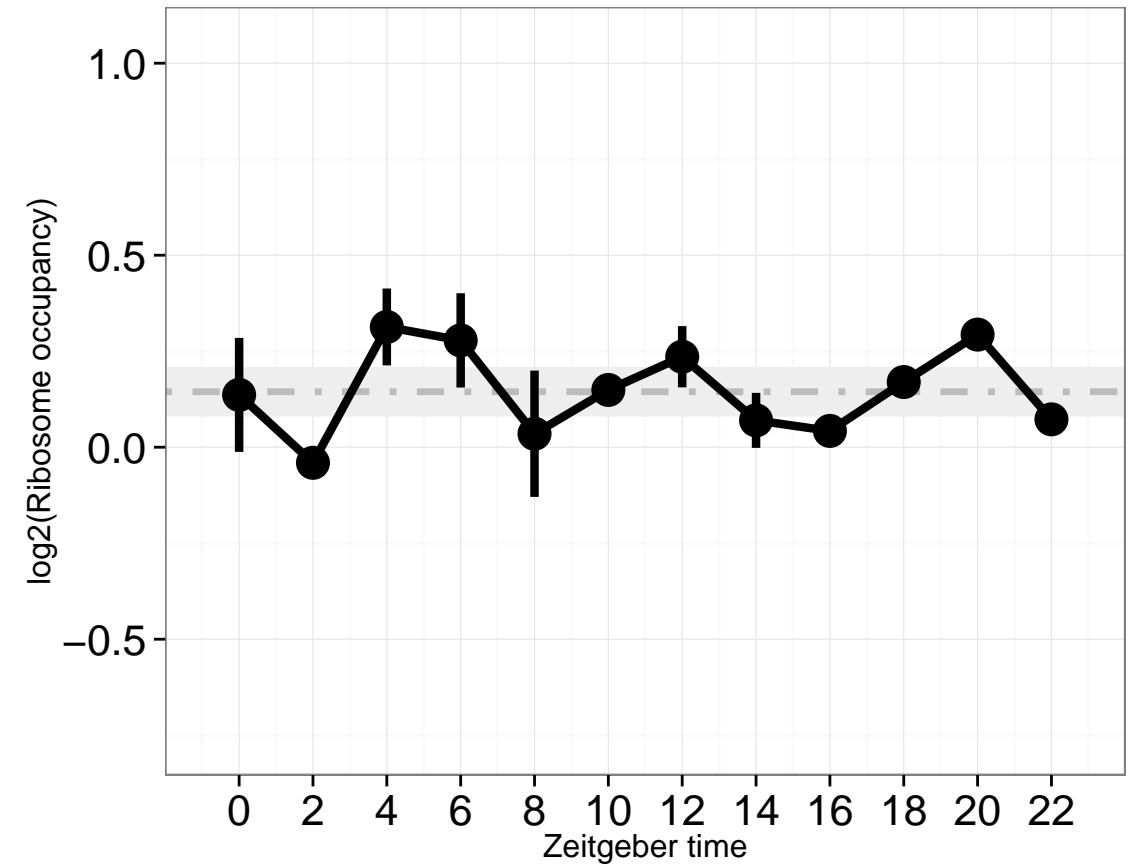

Supplement: Supplementary file 1768 [file 1]

## Tox

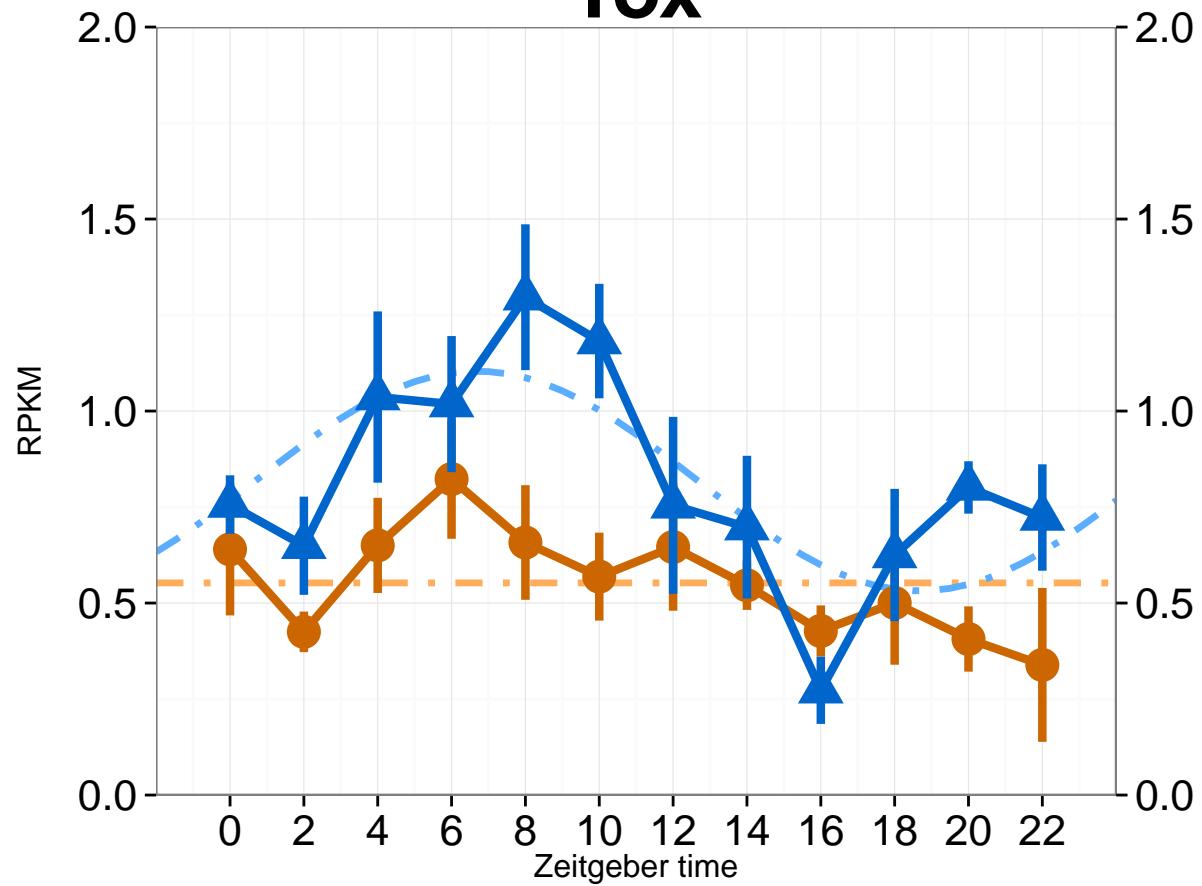

## Tox

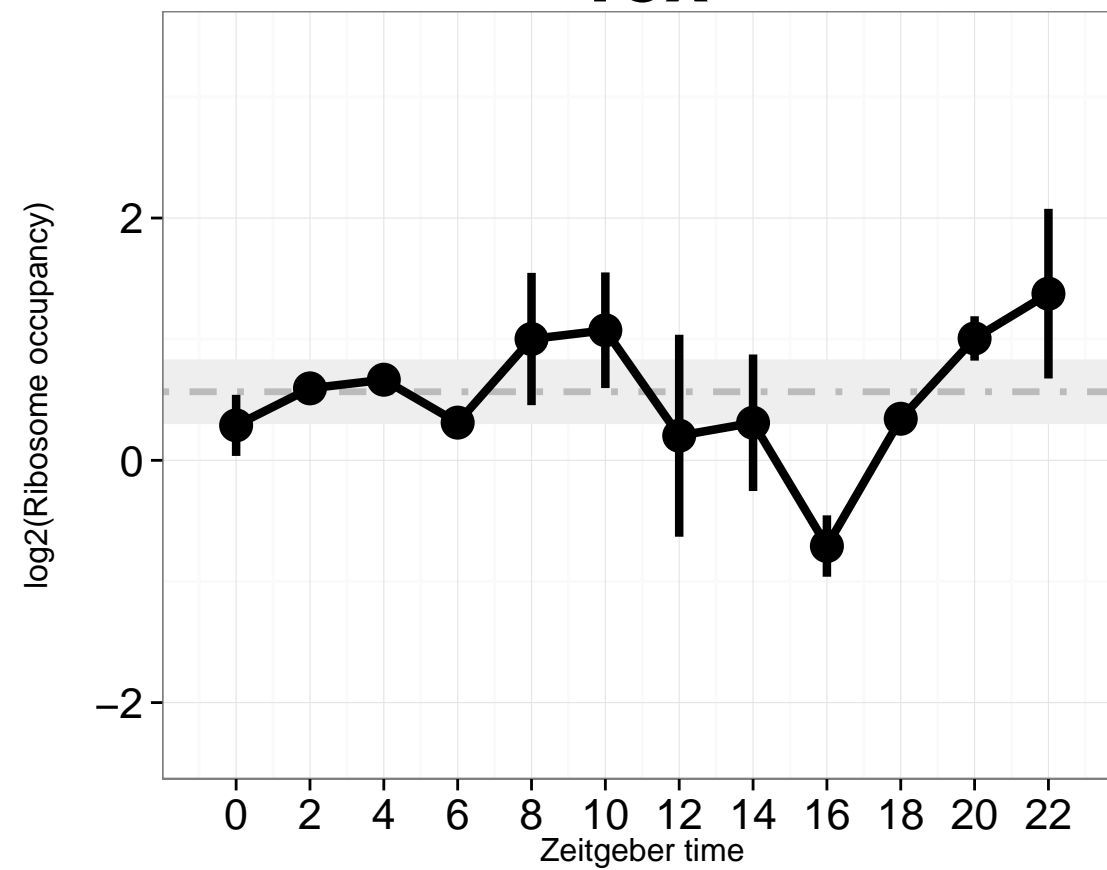

Supplement: Supplementary file 1769 [file 1]

# Nudt16

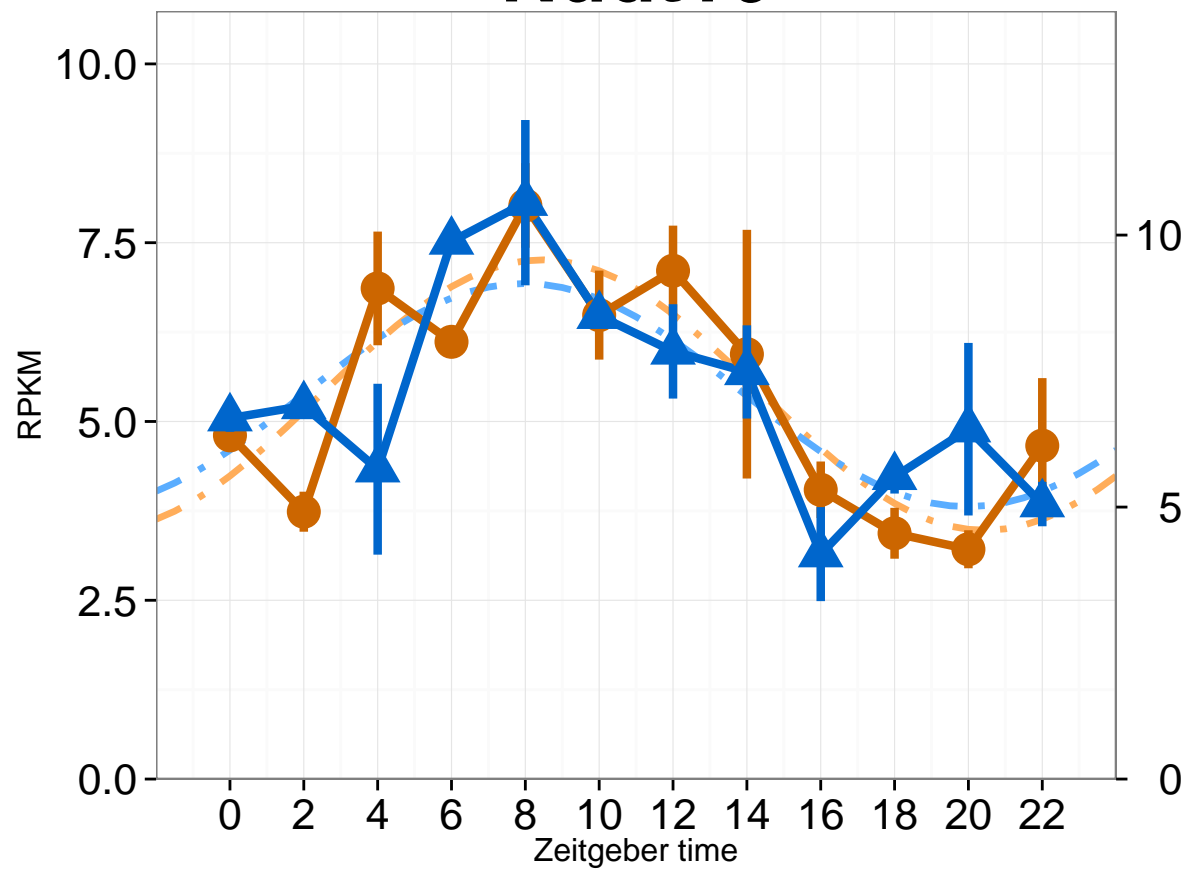

# Nudt16

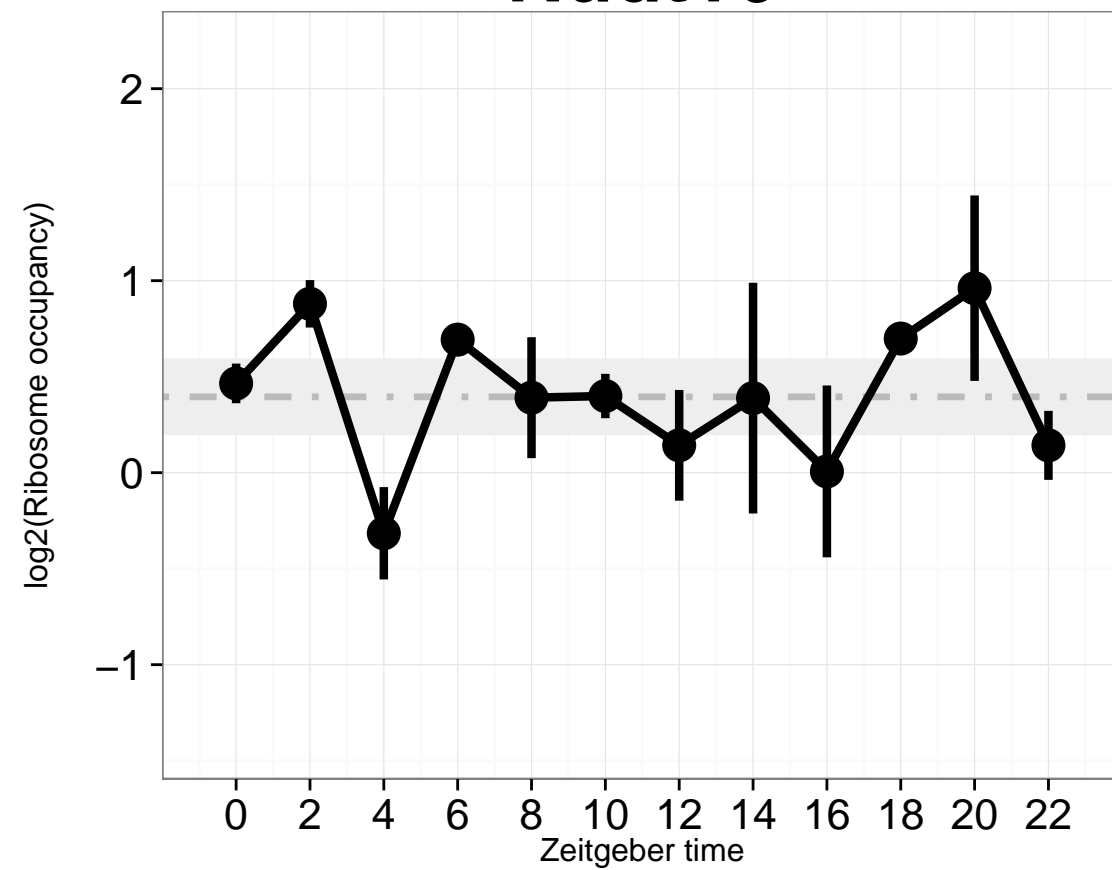

Supplement: Supplementary file 1770 [file 1]

# Gimap1

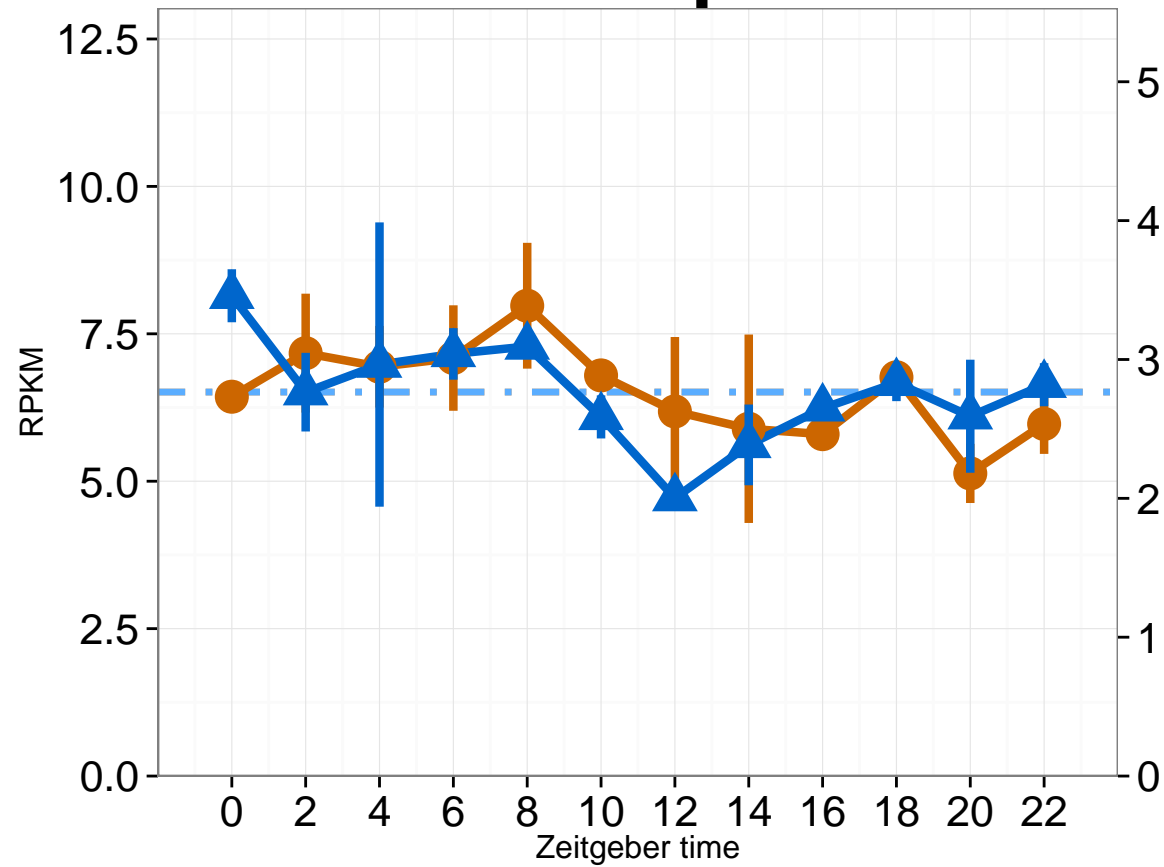

# Gimap1

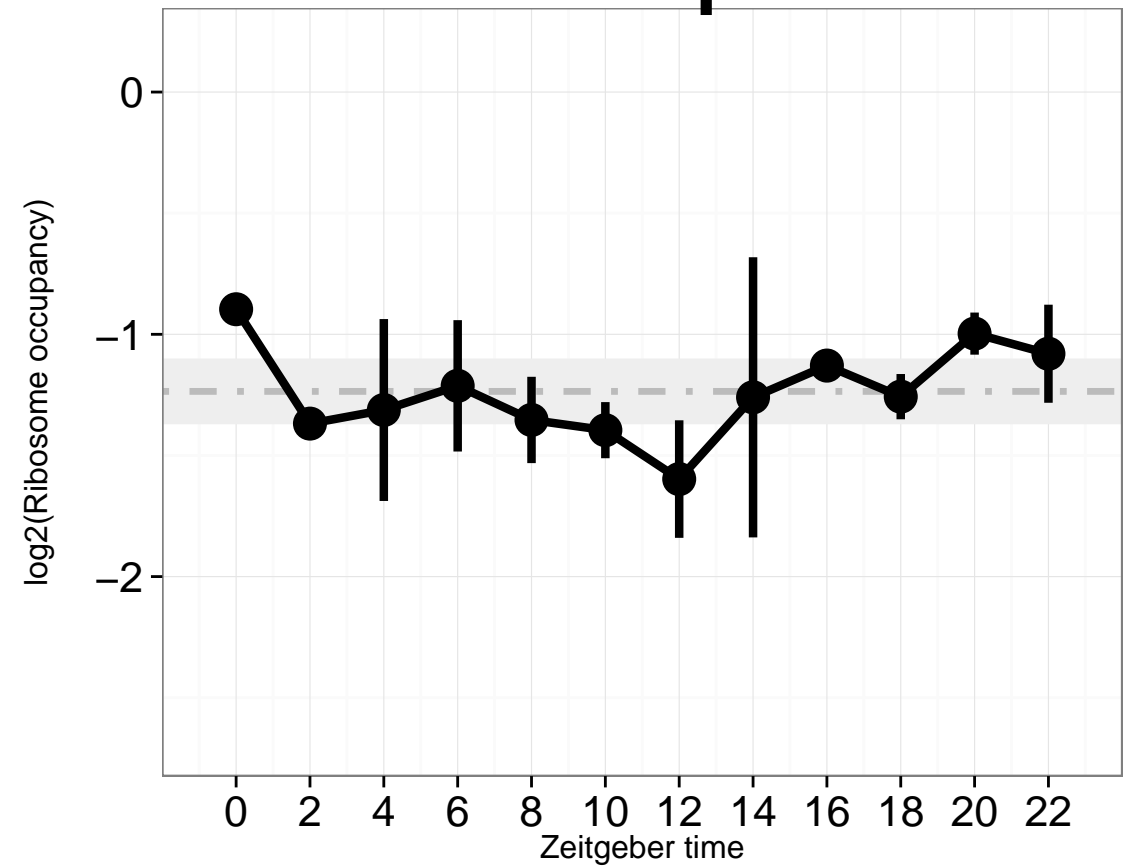

Supplement: Supplementary file 1771 [file 1]

## Tfe3

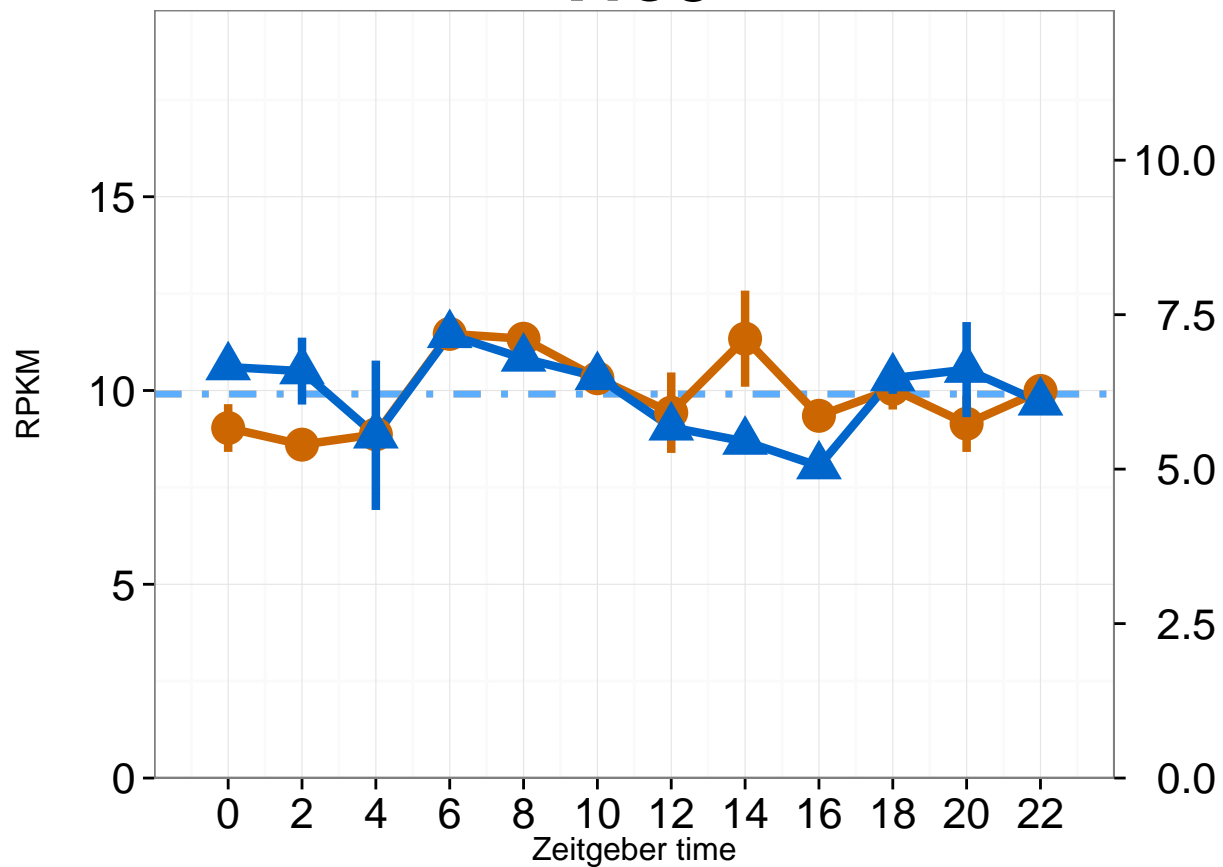

## Tfe3

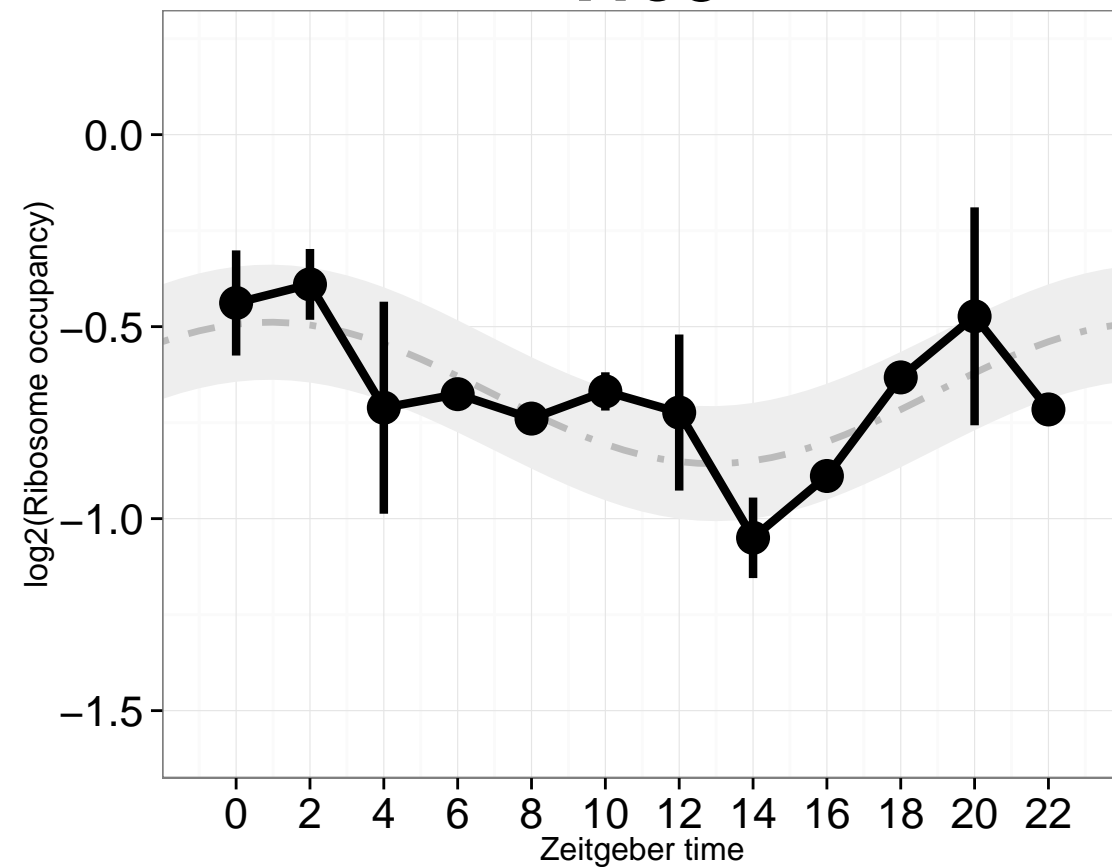

Supplement: Supplementary file 1772 [file 1]

## Ewsr1

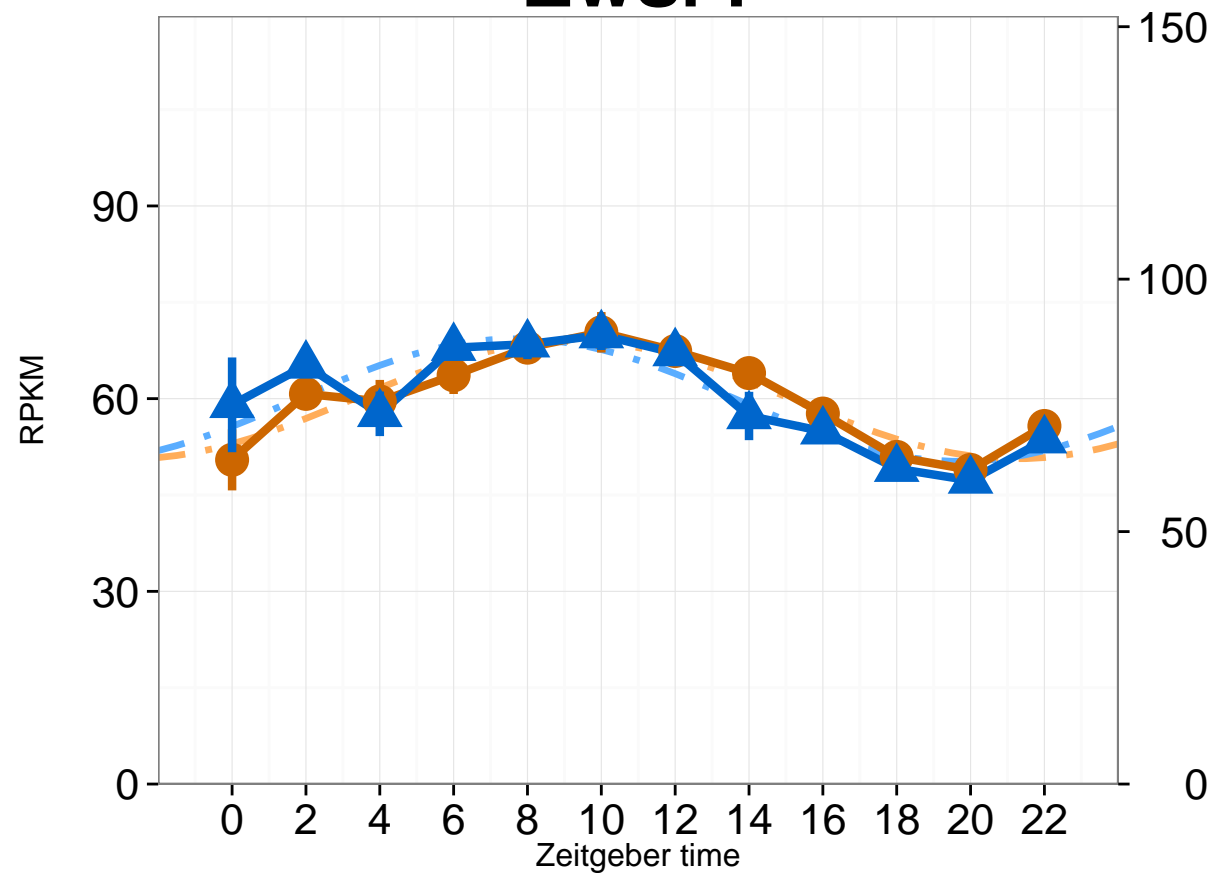

## Ewsr1

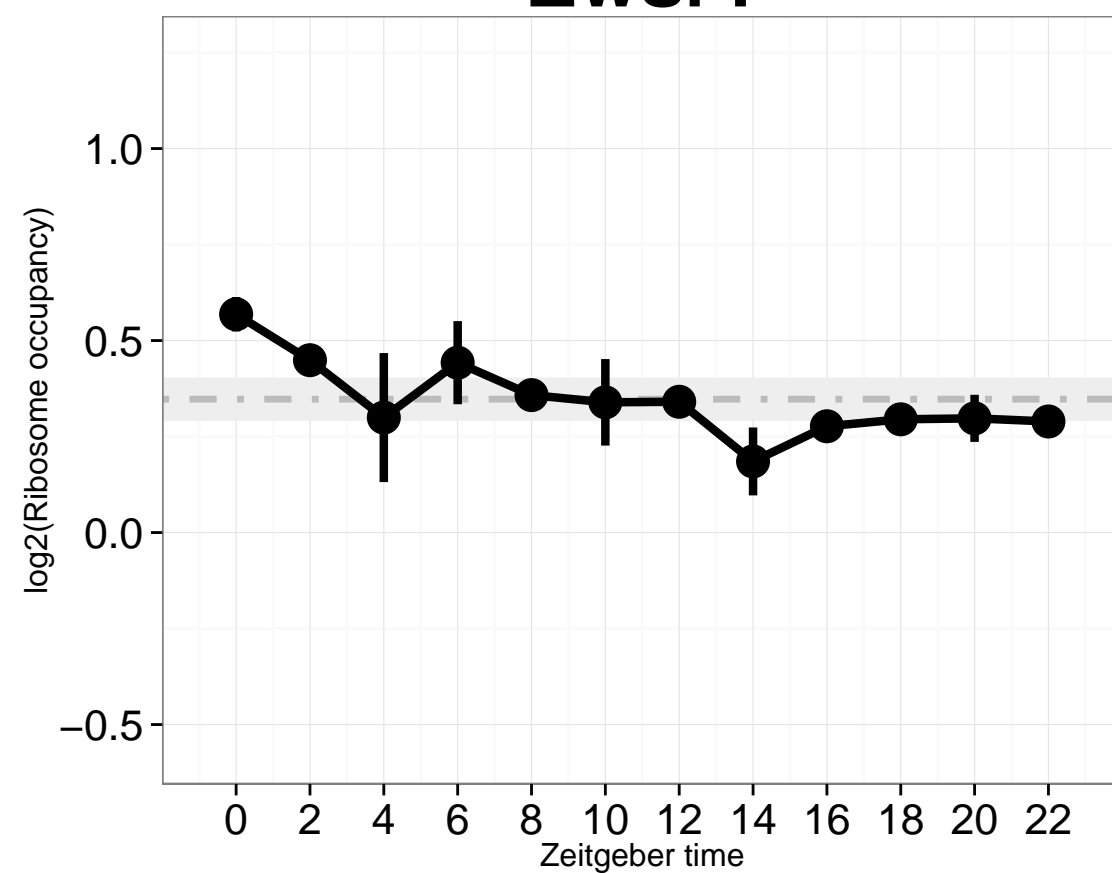

Supplement: Supplementary file 1773 [file 1]

## Ssr2

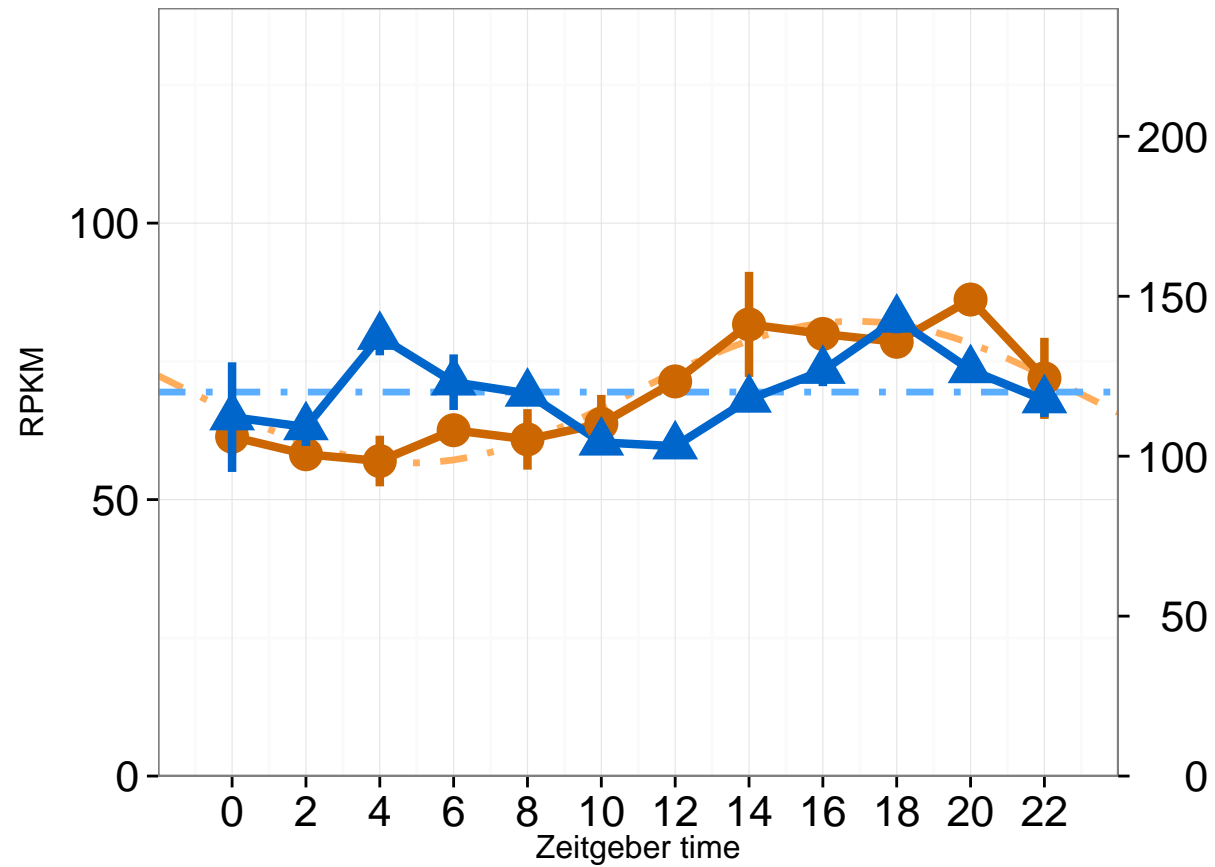

## Ssr2

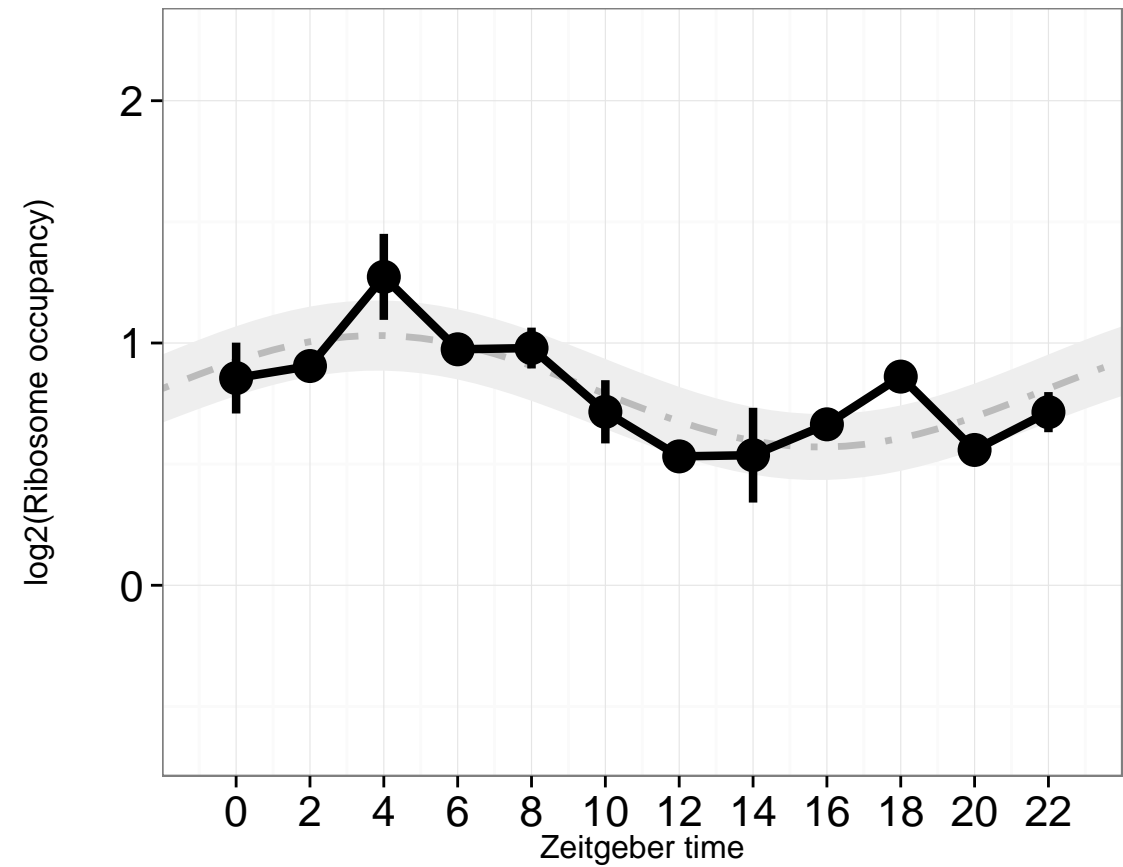

Supplement: Supplementary file 1774 [file 1]

# Tuba4a

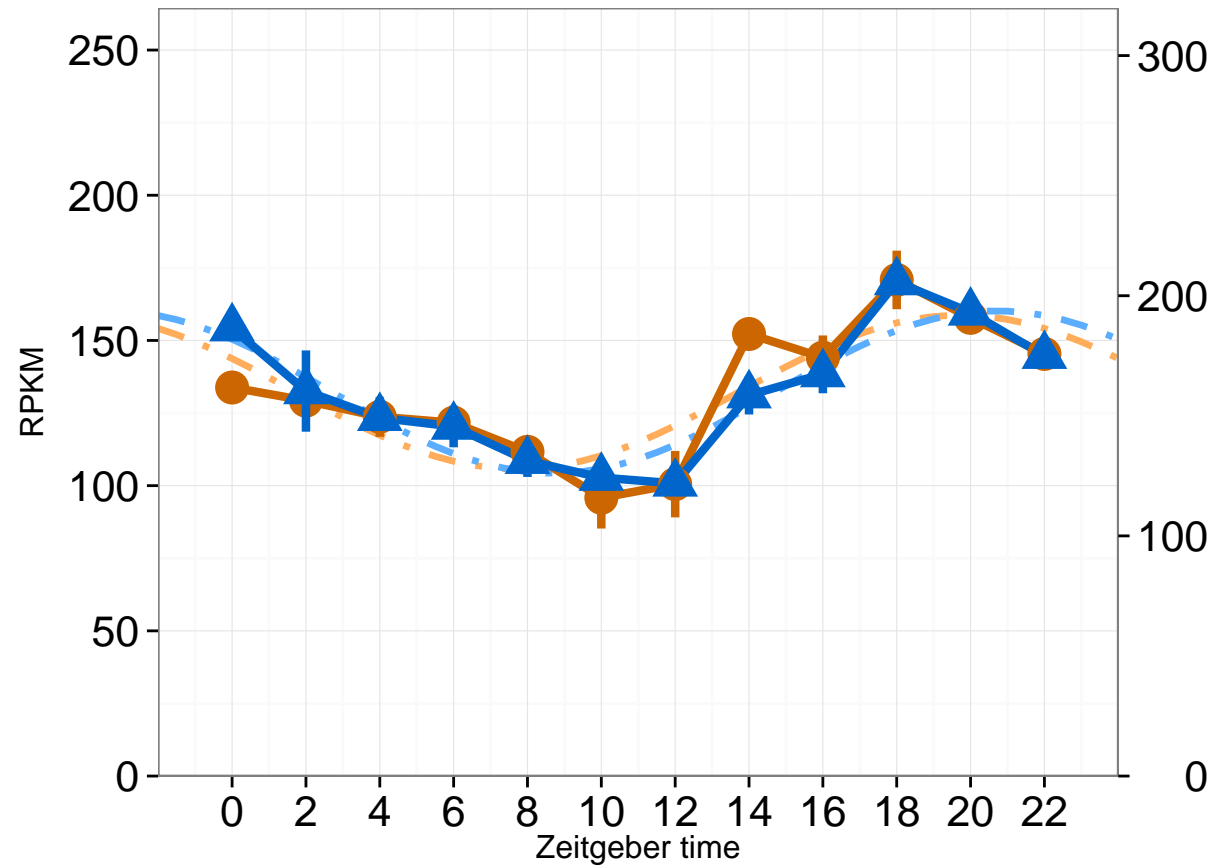

# Tuba4a

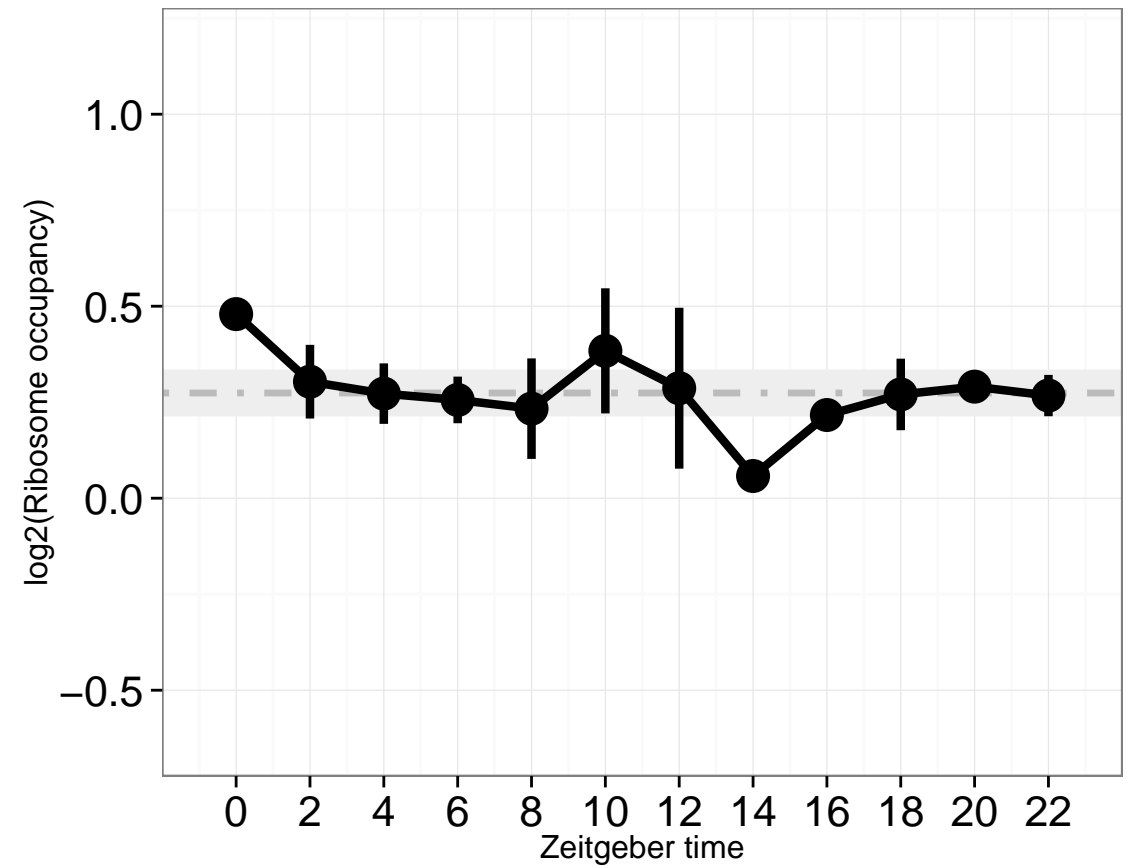

Supplement: Supplementary file 1775 [file 1]

## Txndc11

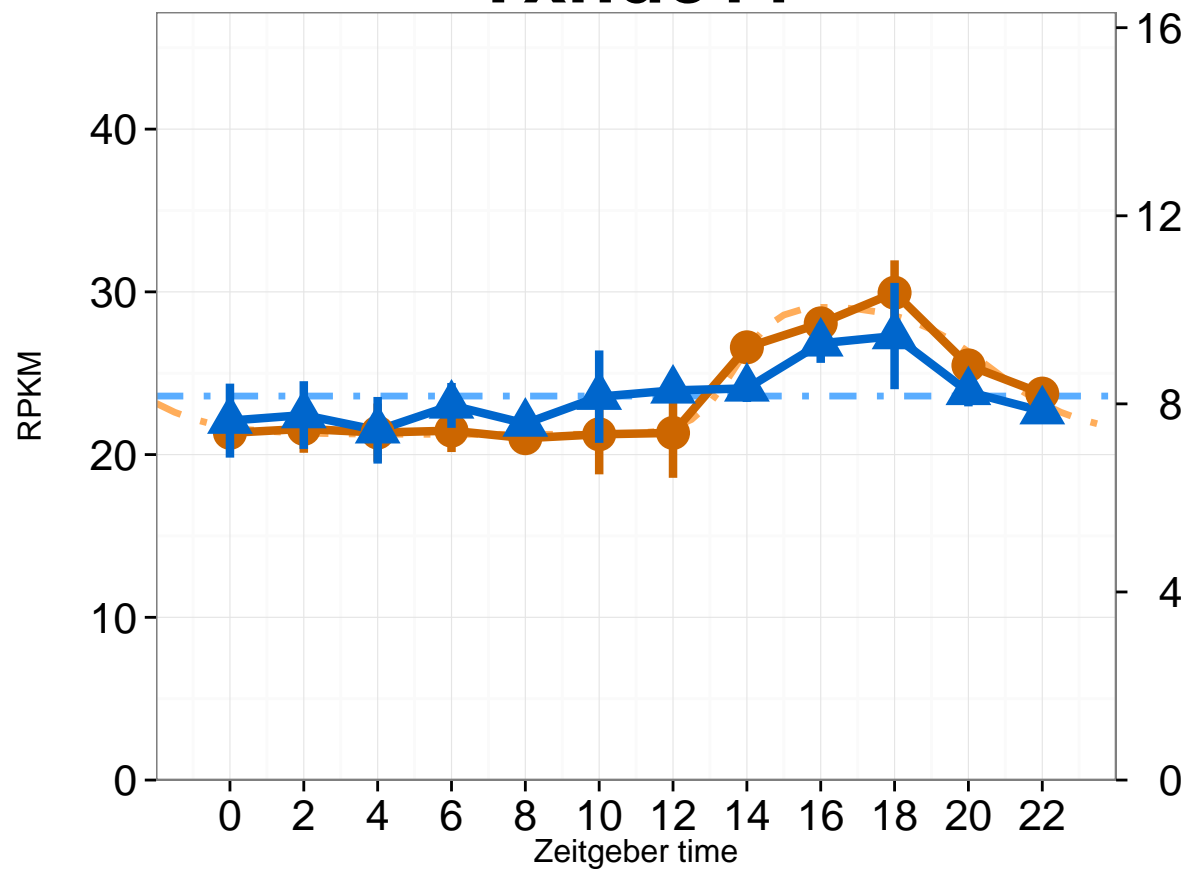

## Txndc11

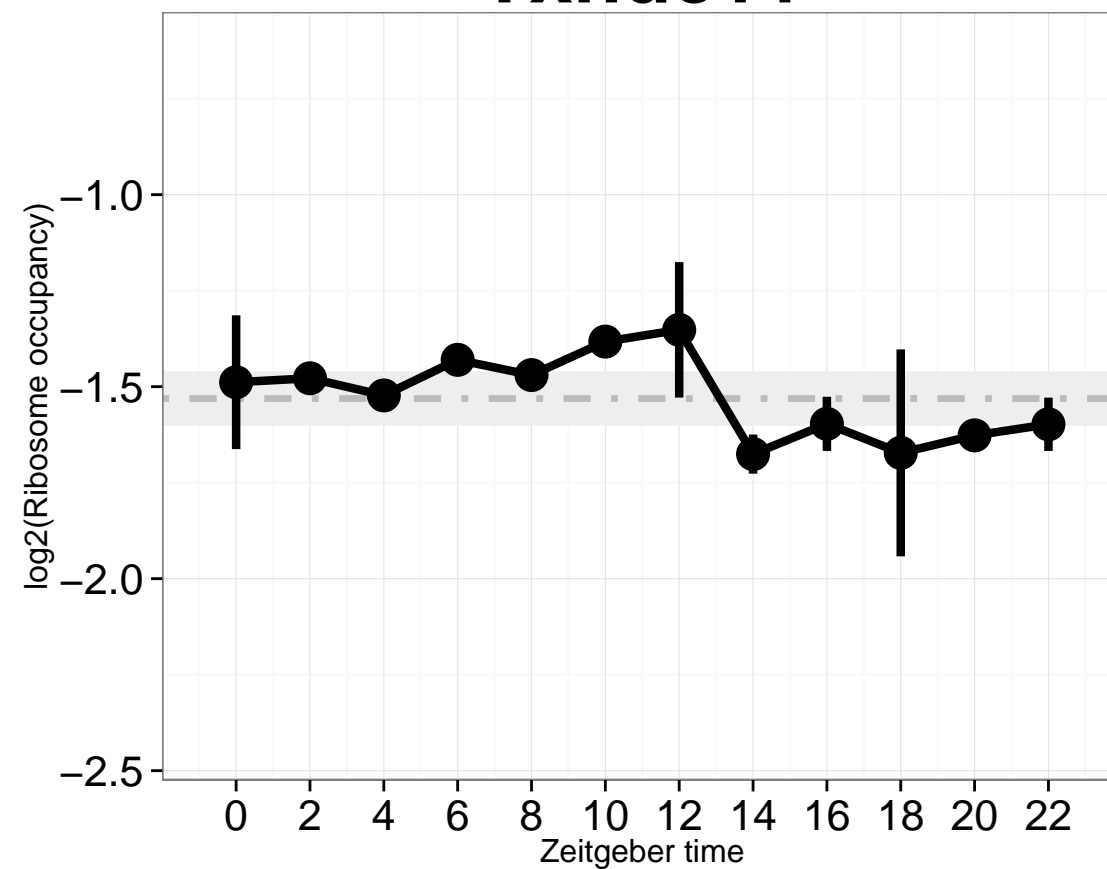

Supplement: Supplementary file 1776 [file 1]

# Rap1gds1

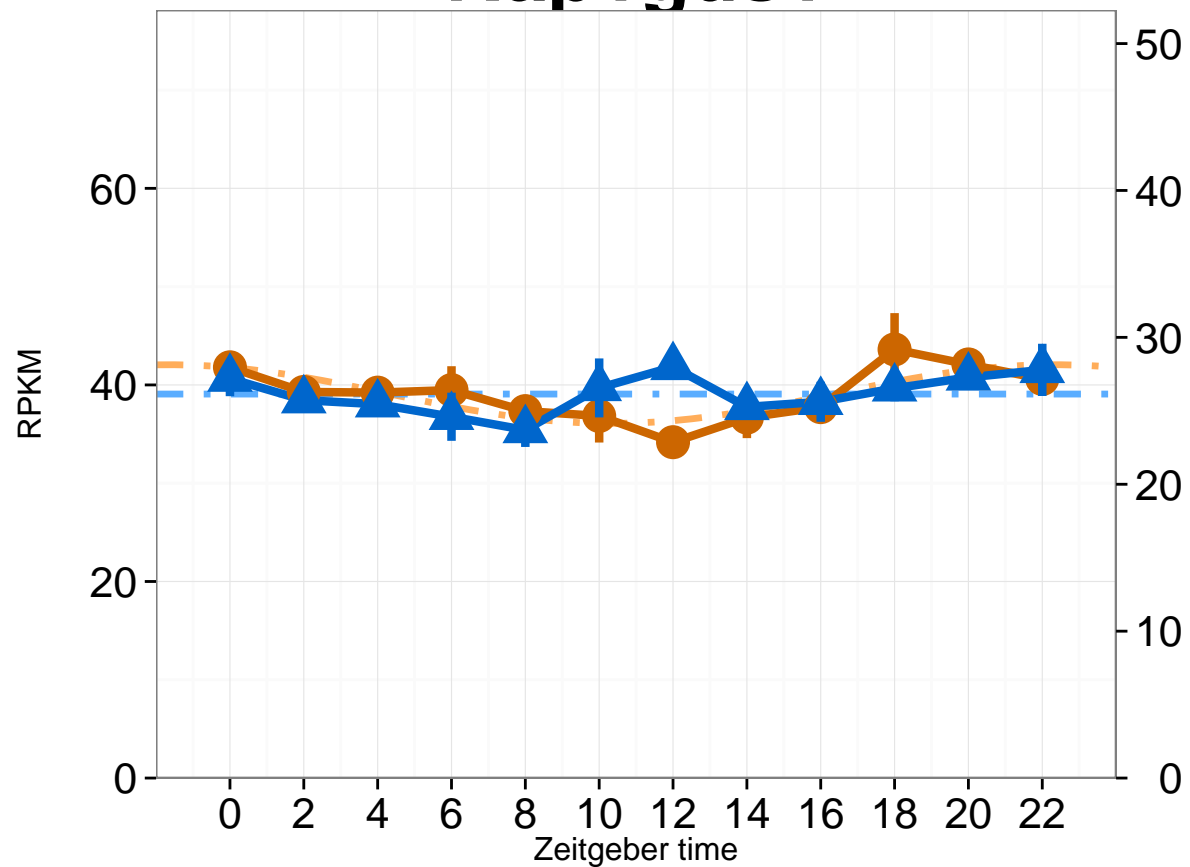

# Rap1gds1

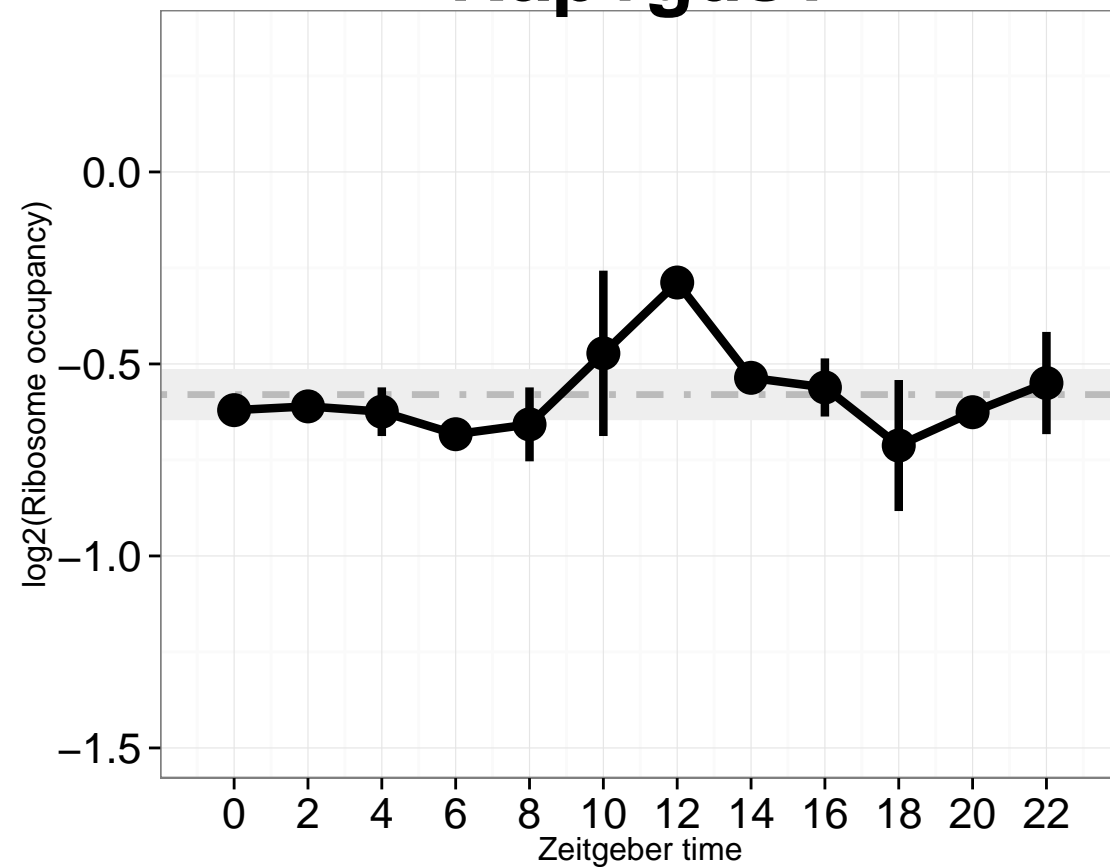

Supplement: Supplementary file 1778 [file 1]

# Rpl36a

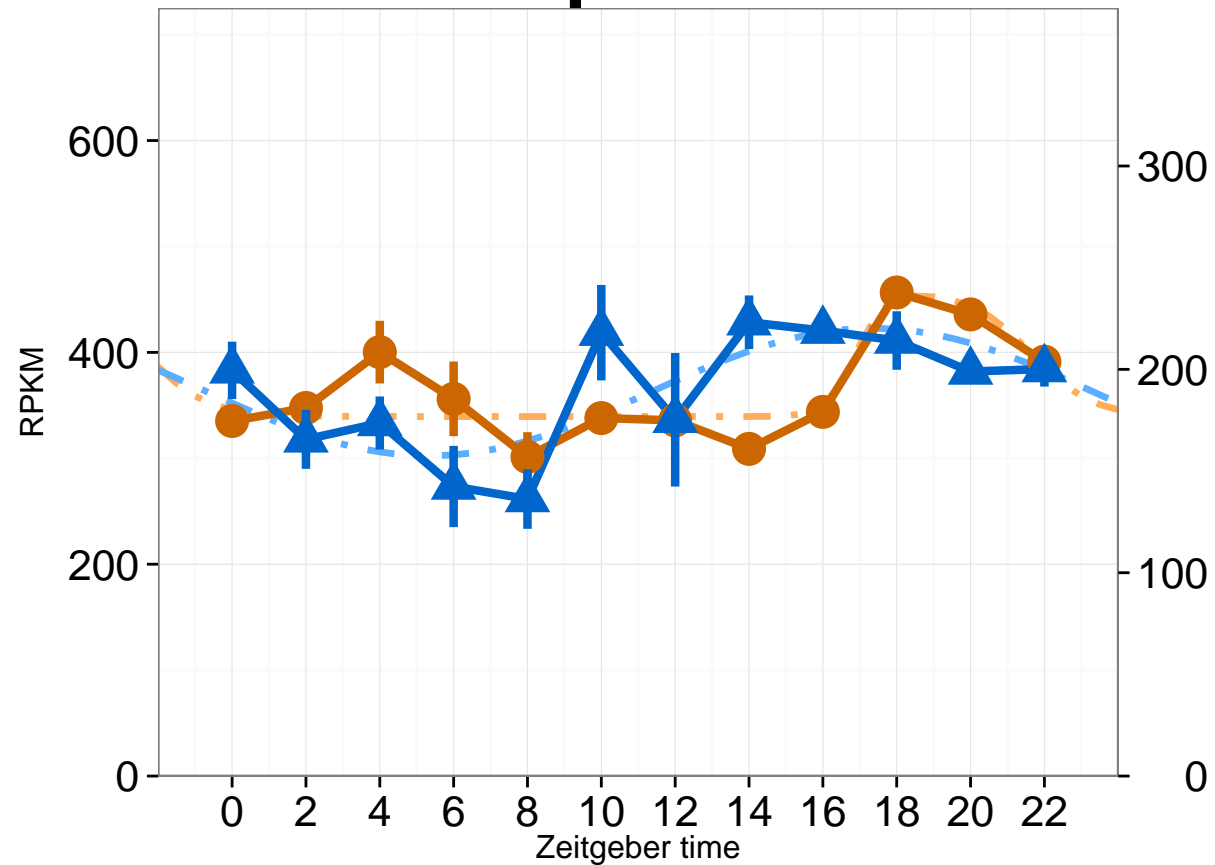

# Rpl36a

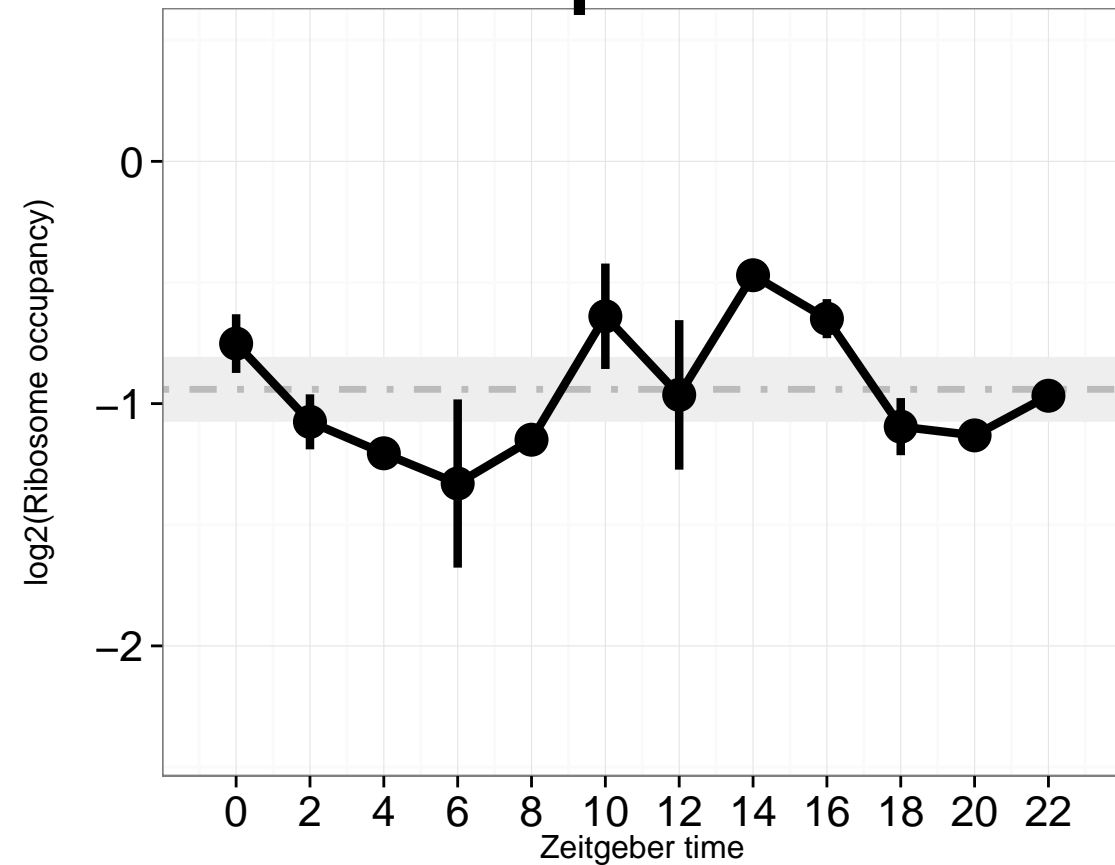

Supplement: Supplementary file 1779 [file 1]

## Lars2

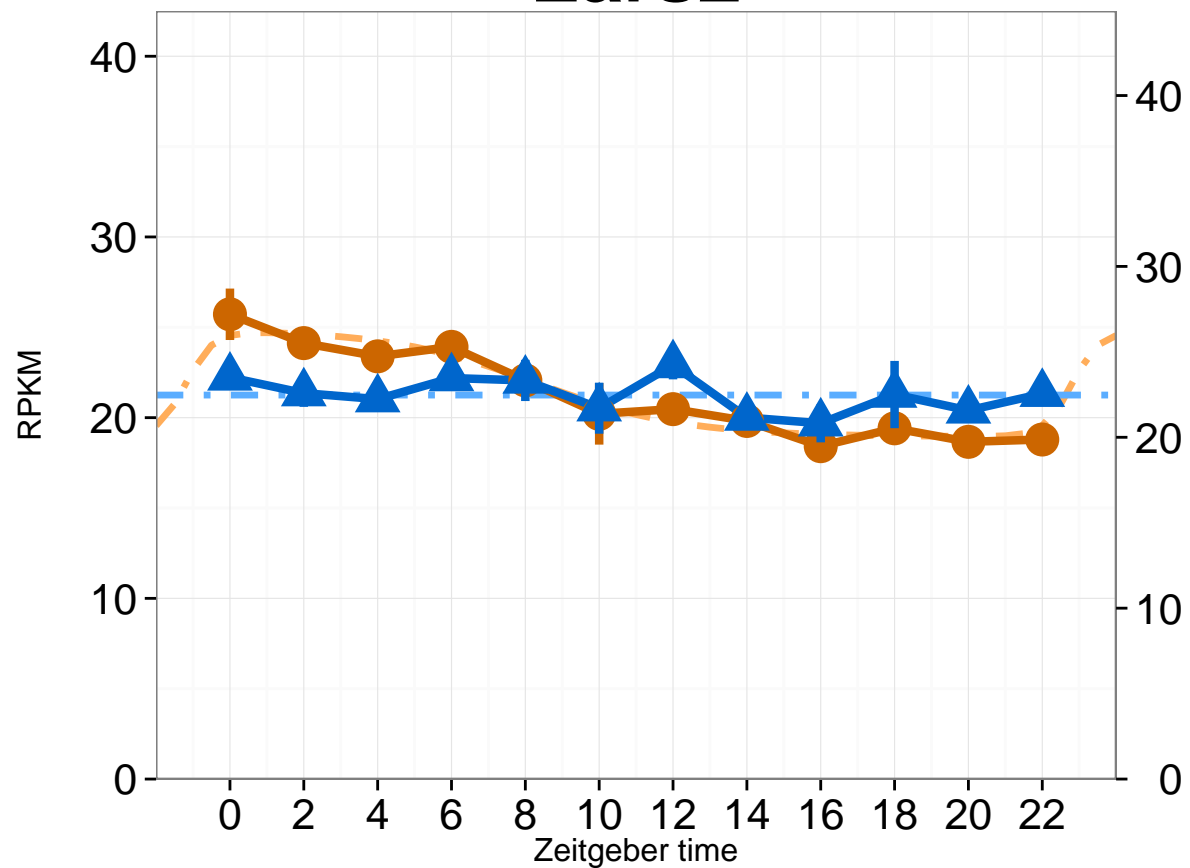

## Lars2

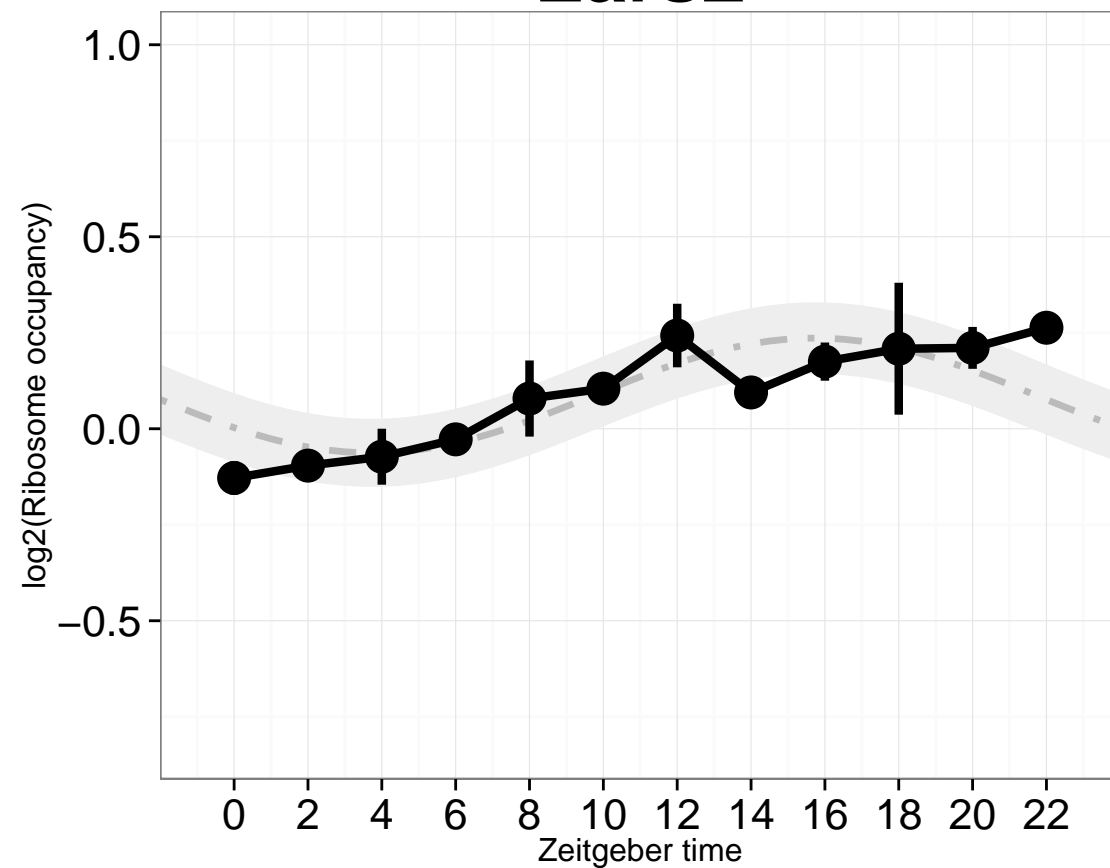

Supplement: Supplementary file 1780 [file 1]

## Ube3a

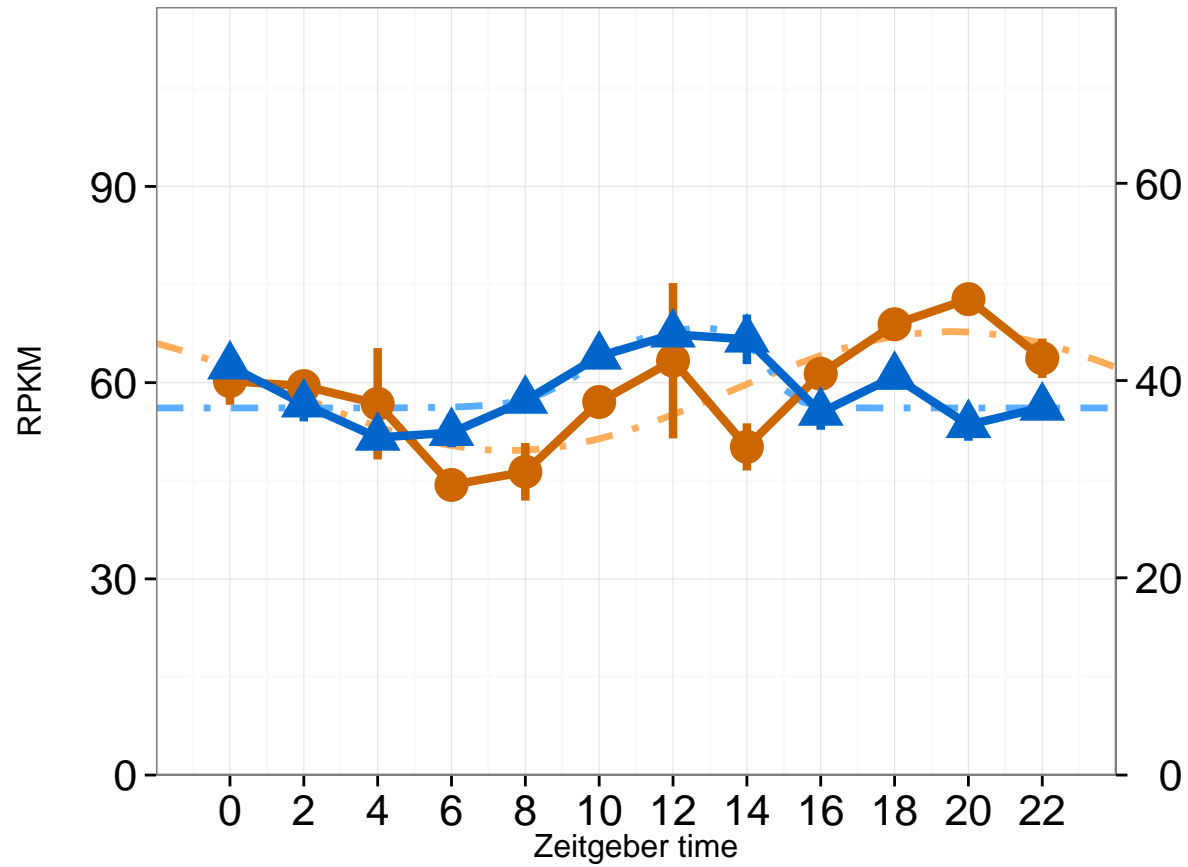

## Ube3a

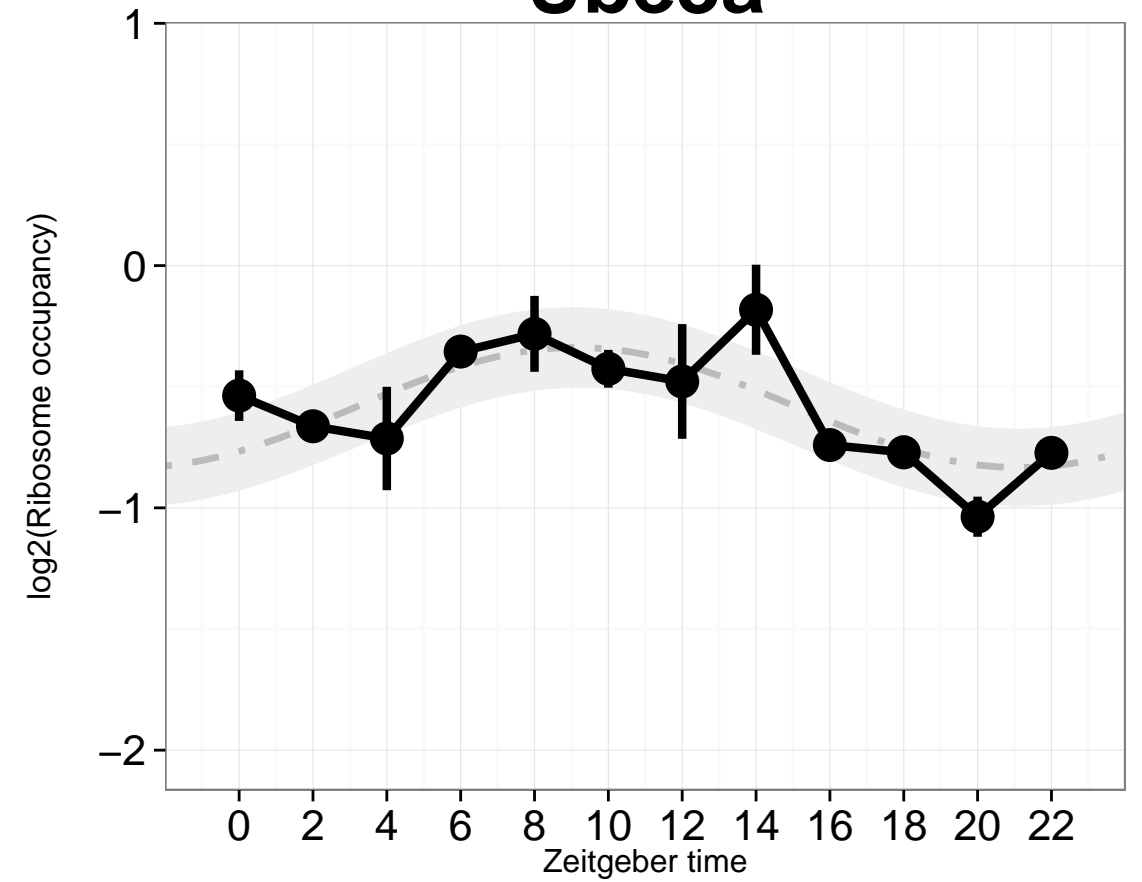

Supplement: Supplementary file 1781 [file 1]

## Gm9958

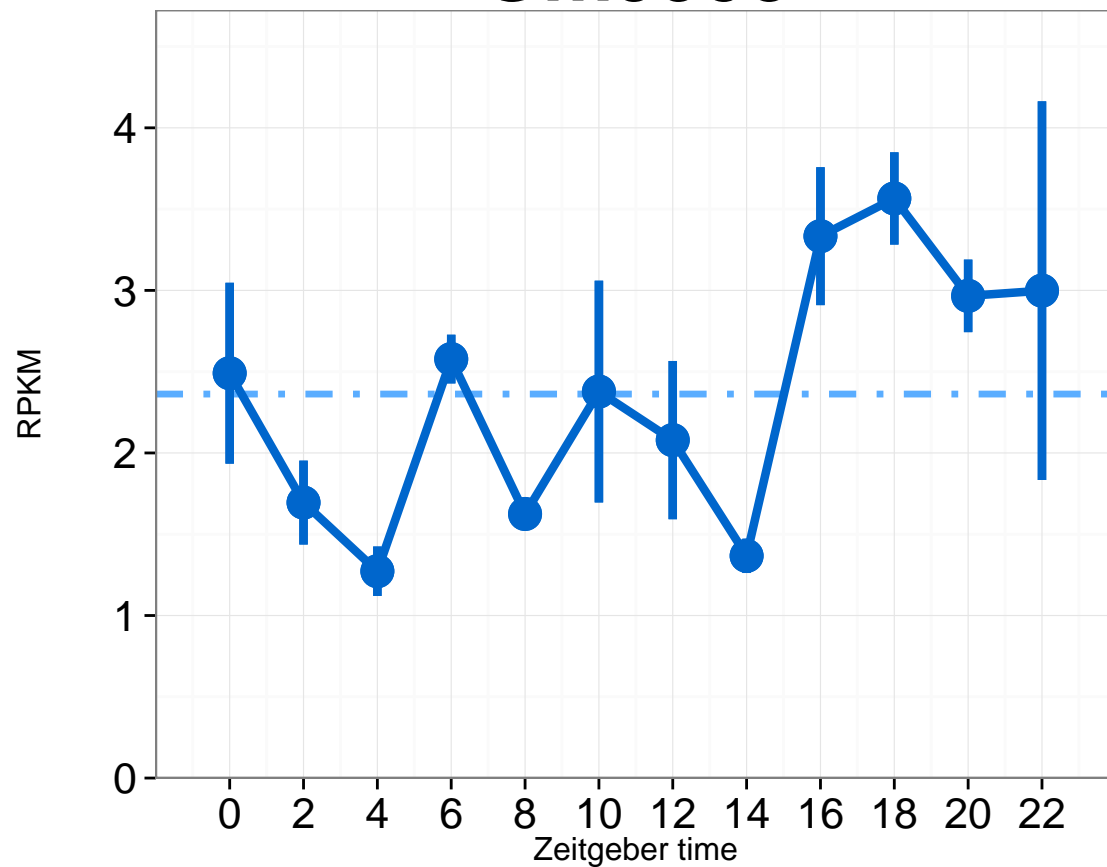

## Gm9958 log2(Ribosome occupanc

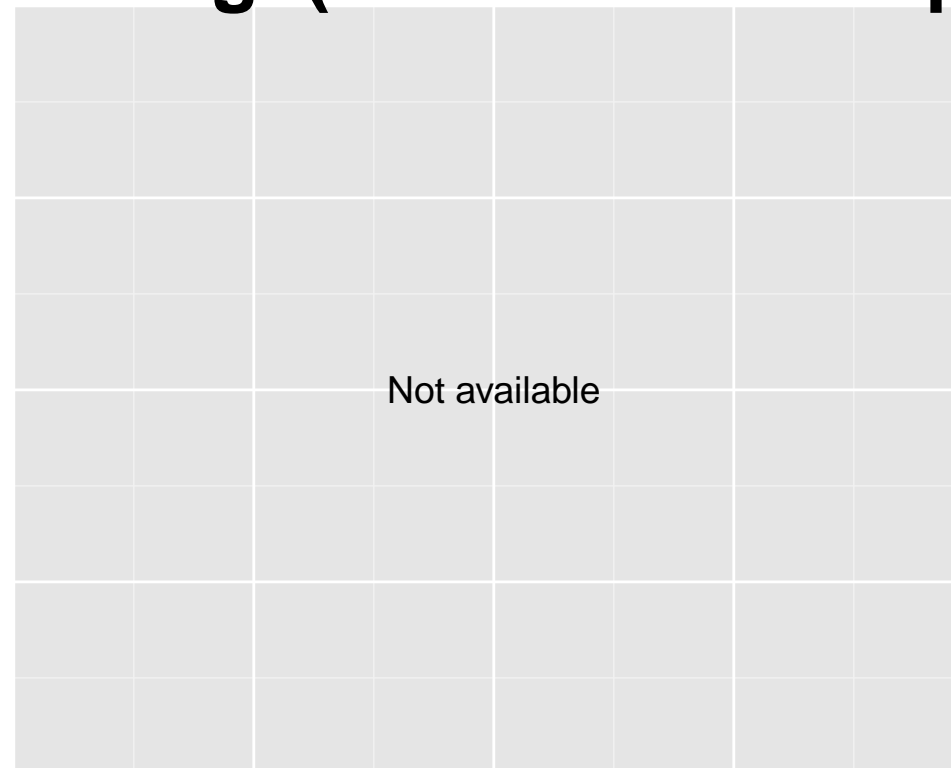

Supplement: Supplementary file 1782 [file 1]

## Cul9

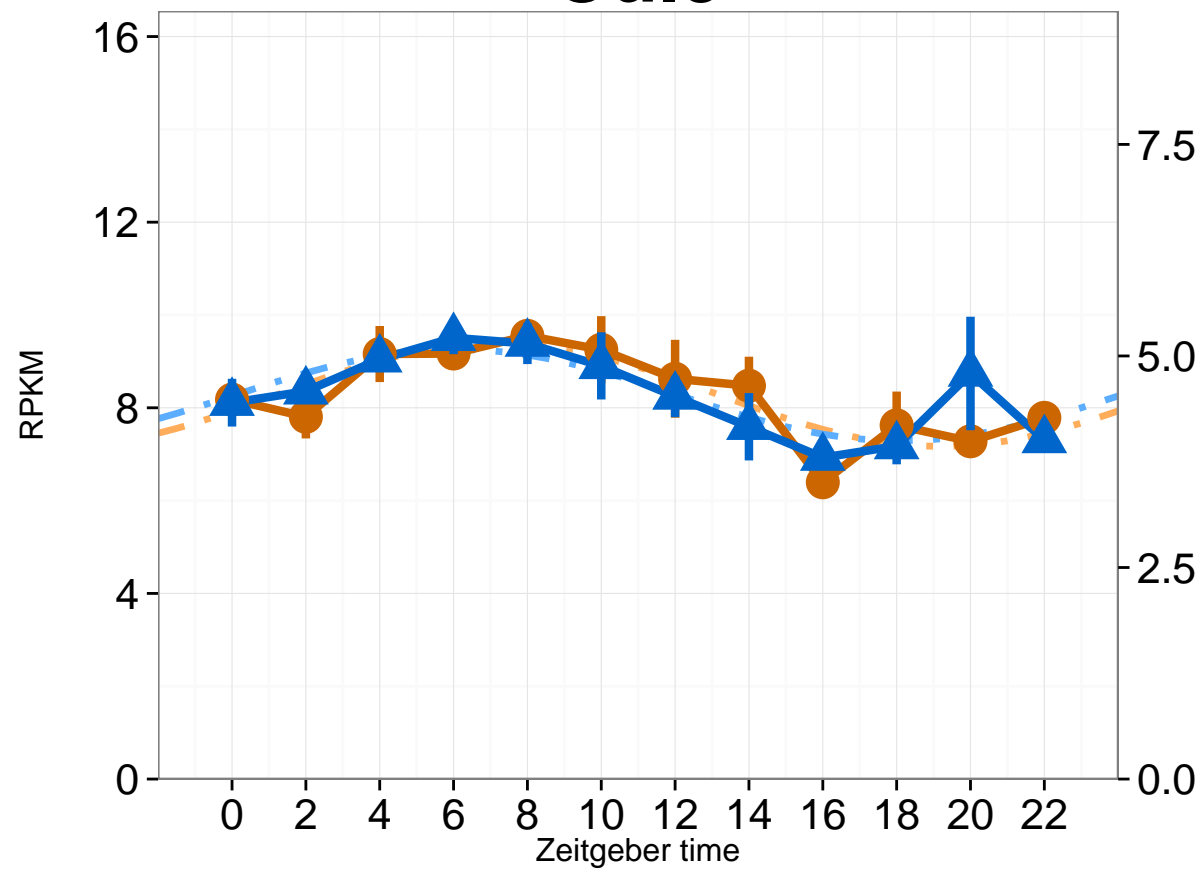

## Cul9

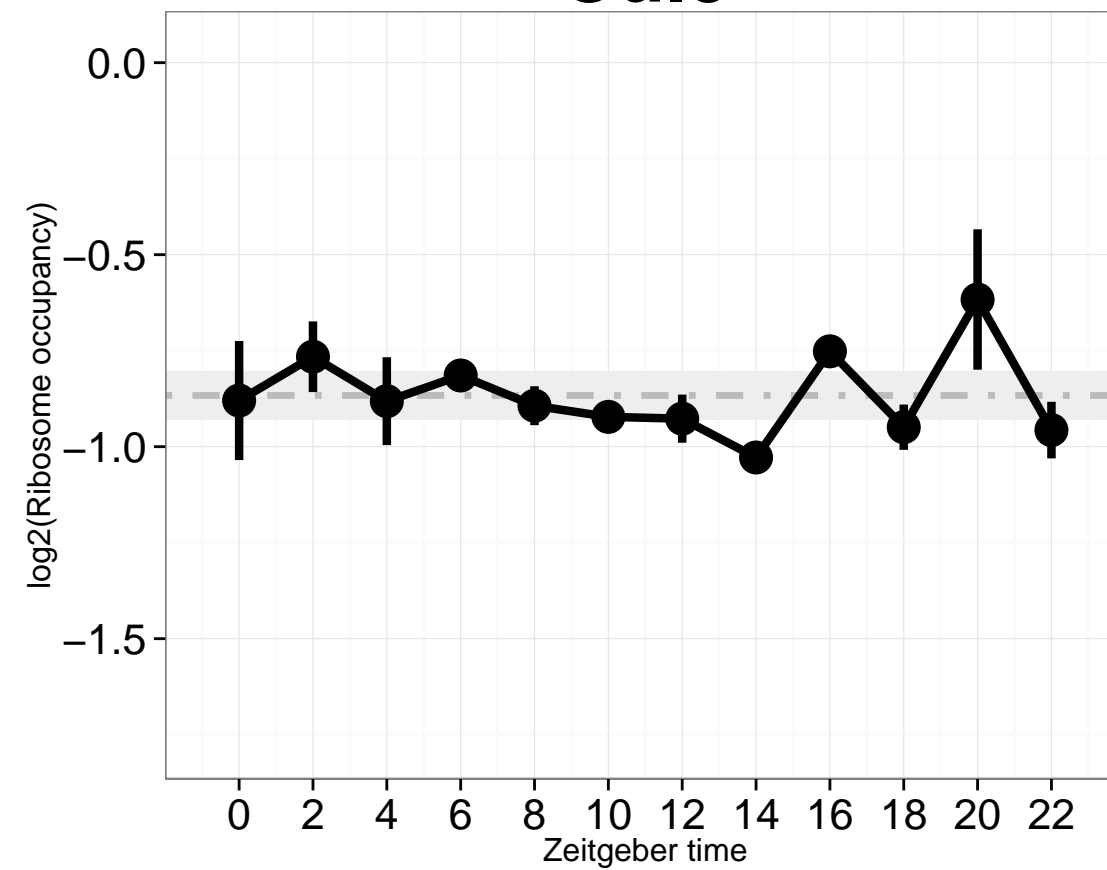

Supplement: Supplementary file 1783 [file 1]

## Sh3bgrl2

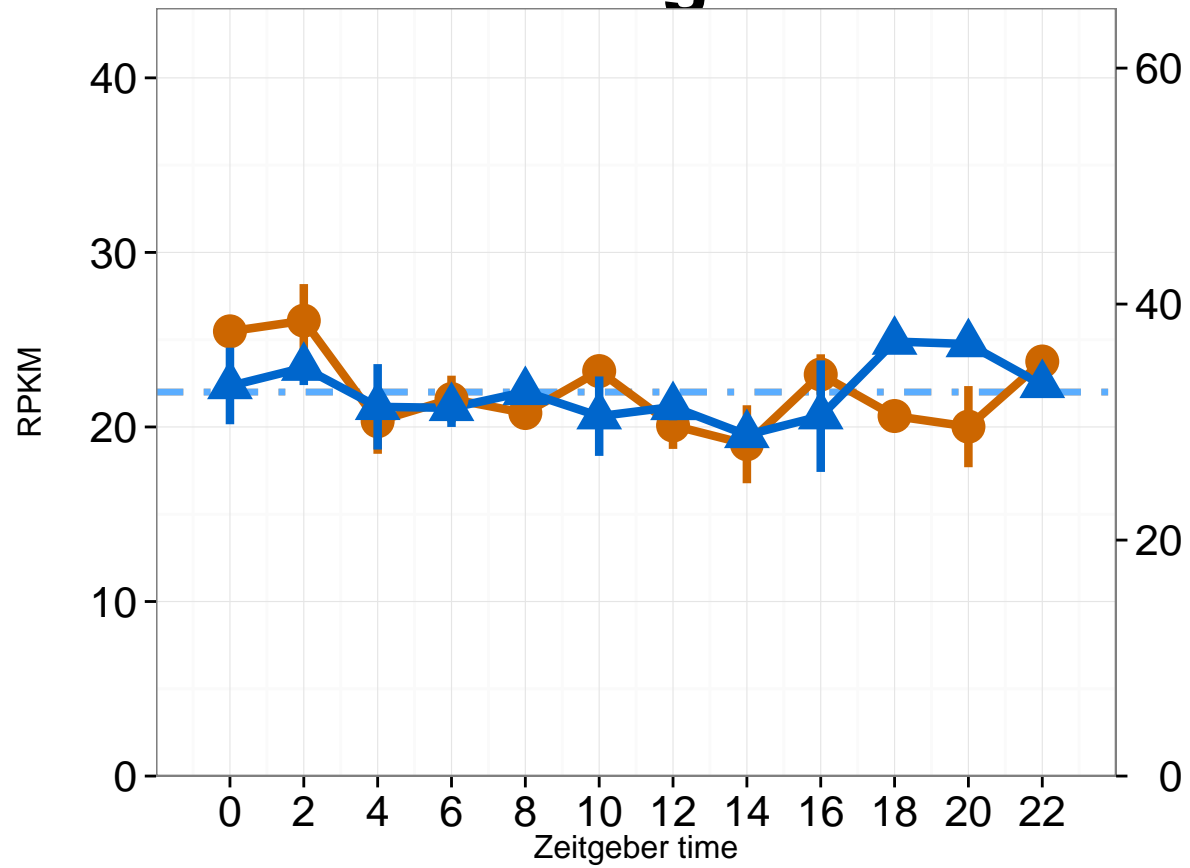

## Sh3bgrl2

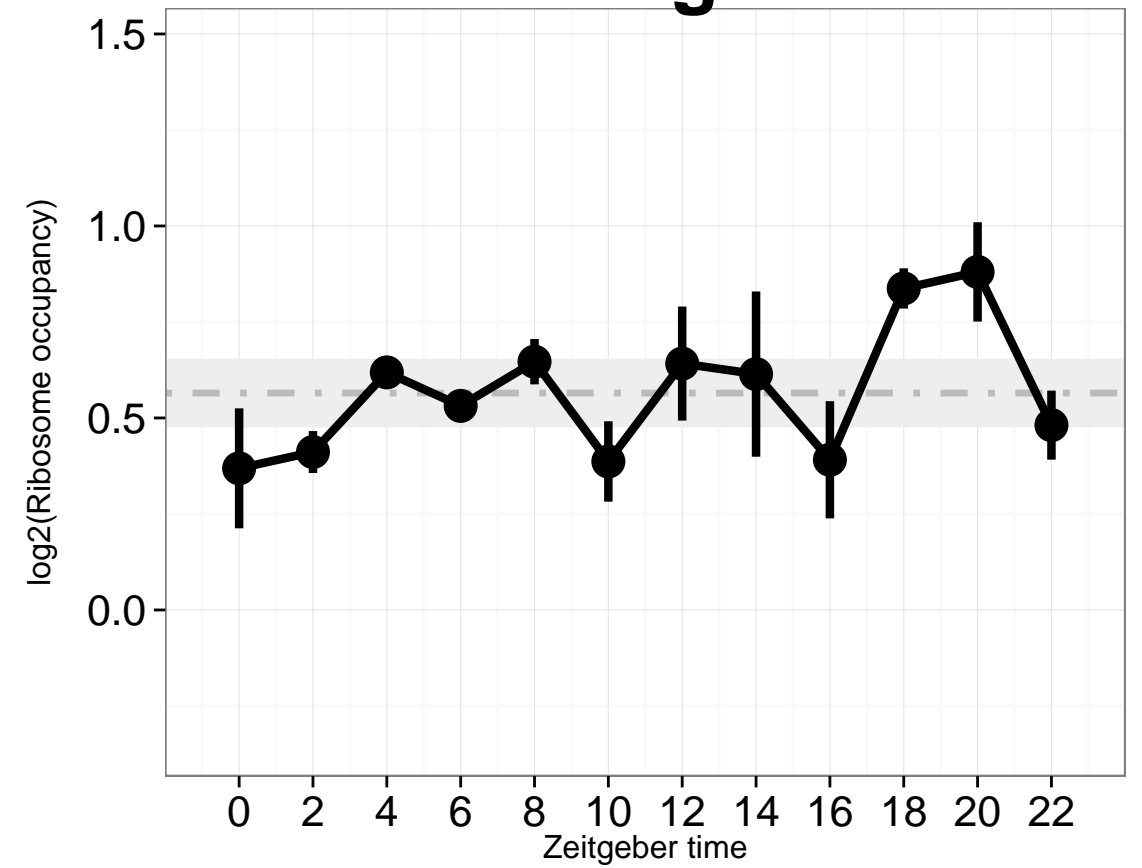

Supplement: Supplementary file 1784 [file 1]

# Zfp329

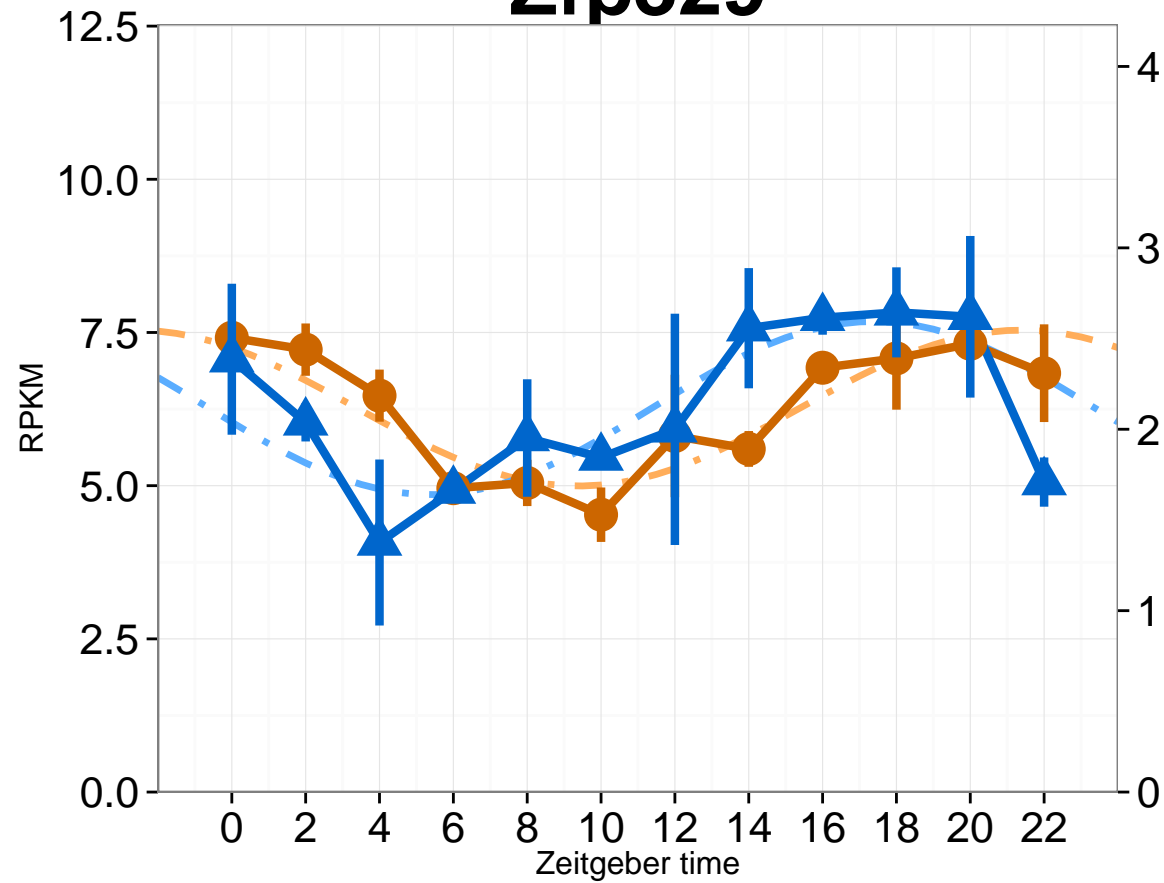

# Zfp329

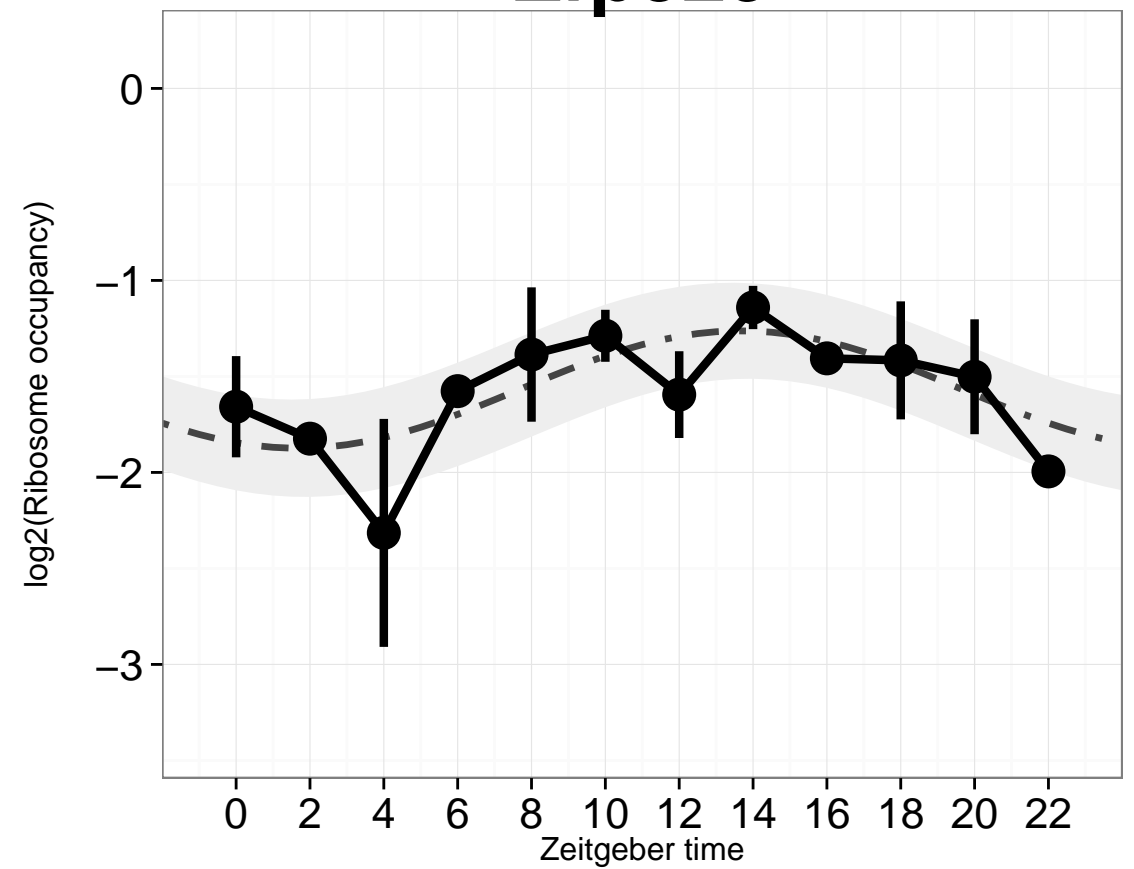

Supplement: Supplementary file 1785 [file 1]

## Cst3

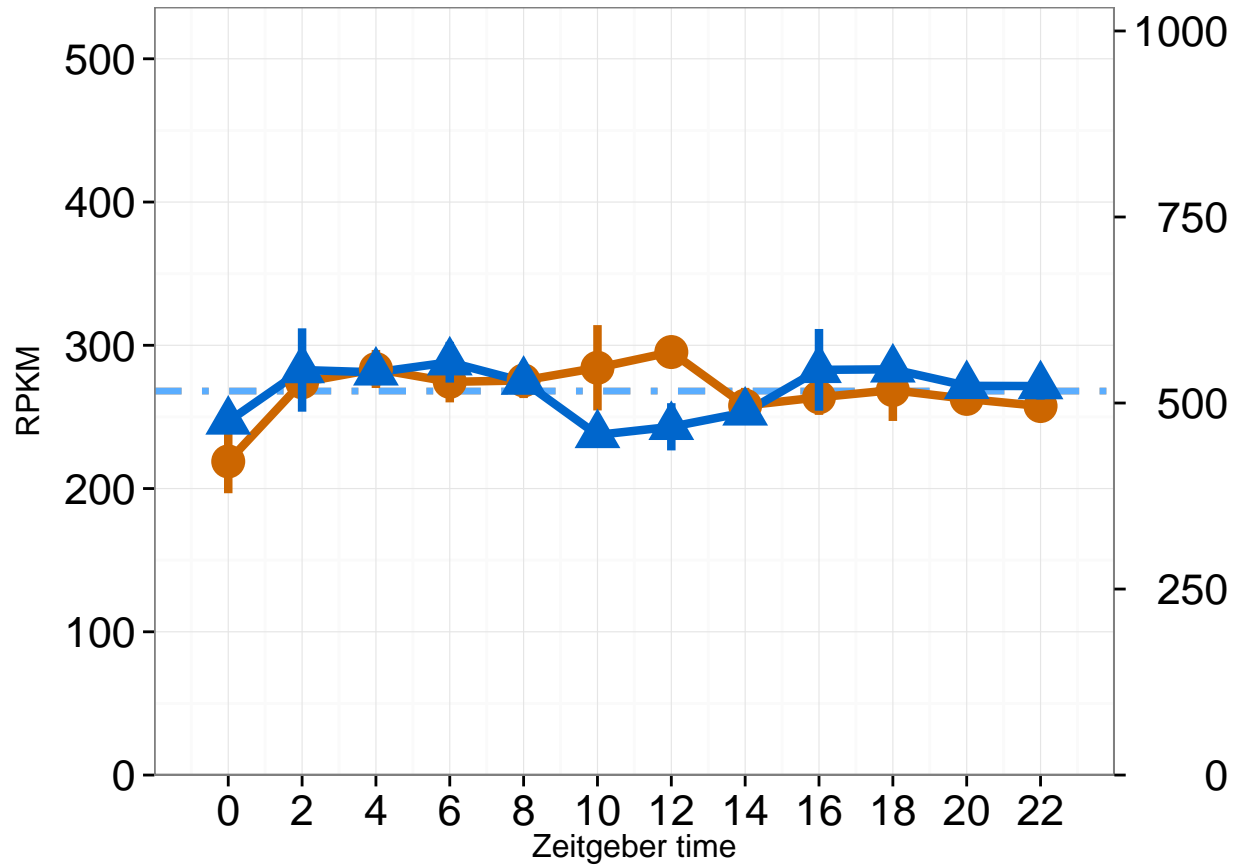

## Cst3

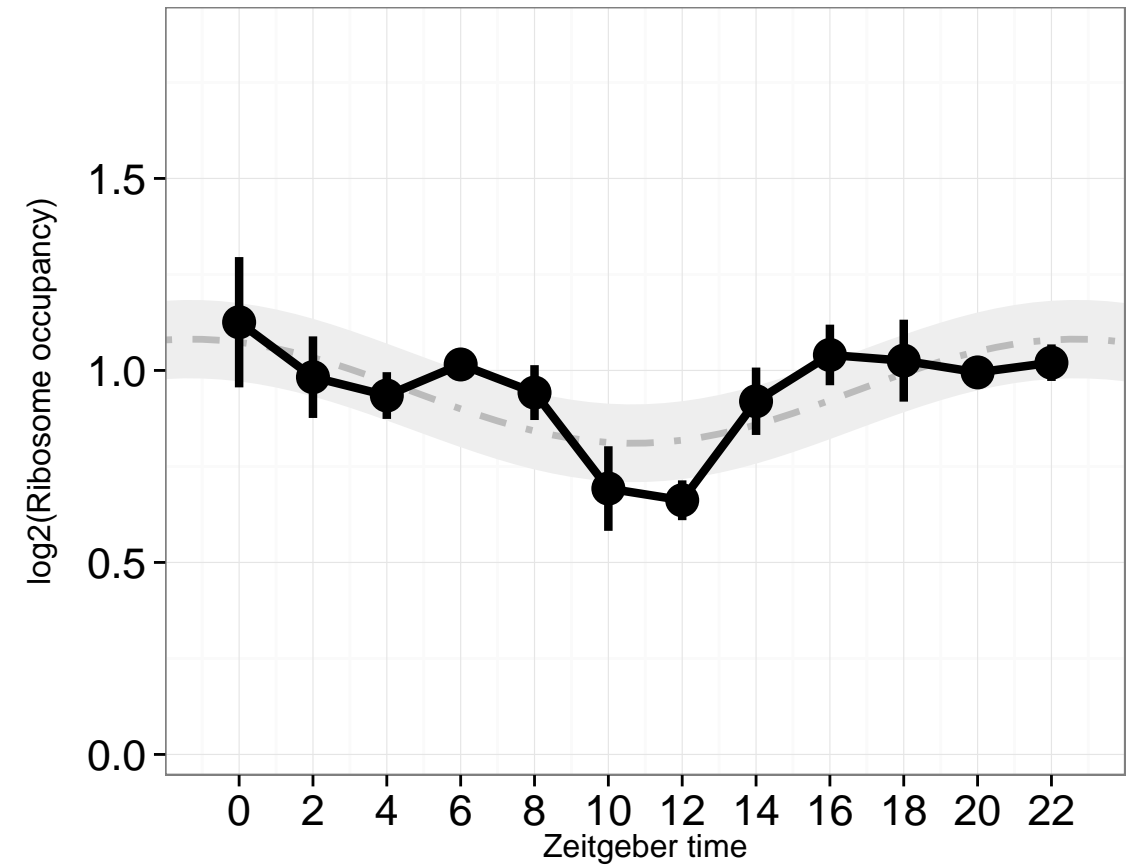

Supplement: Supplementary file 1786 [file 1]

## Oas2

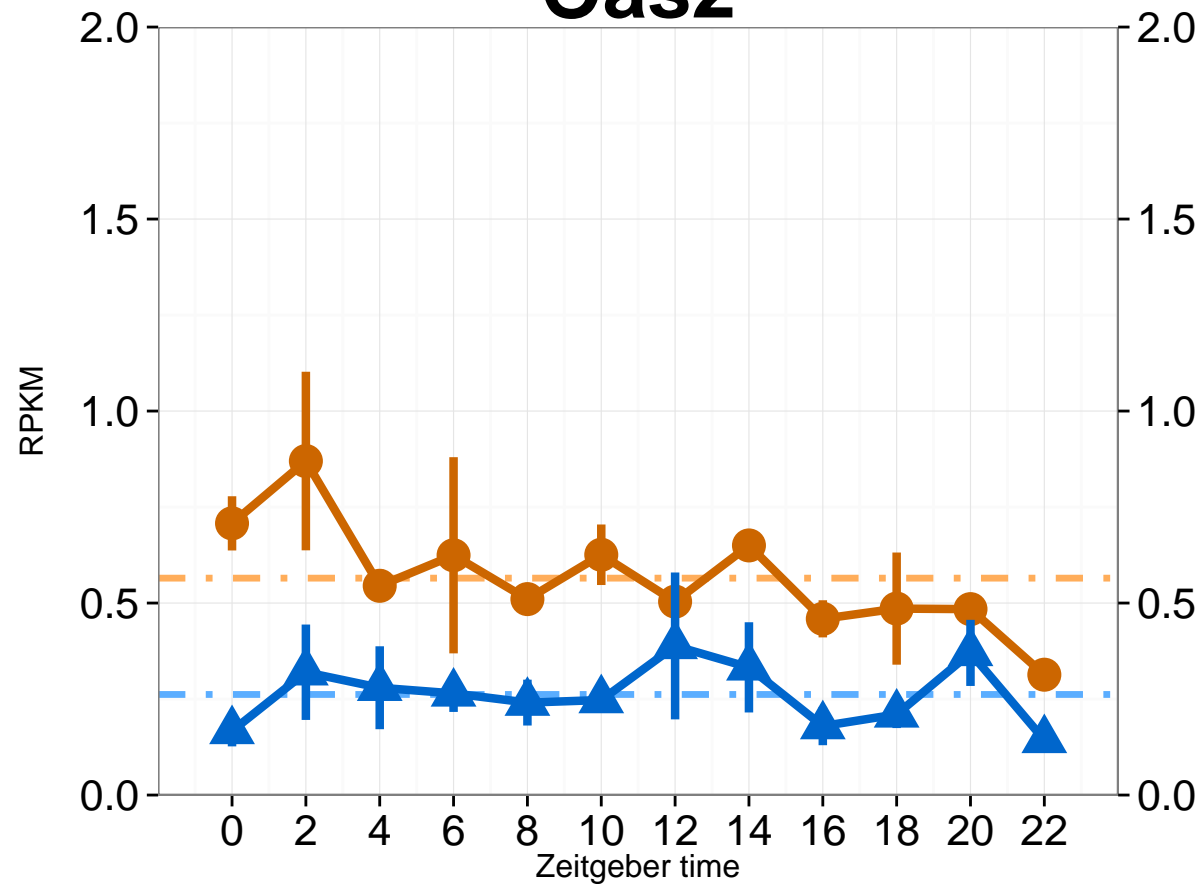

## Oas2

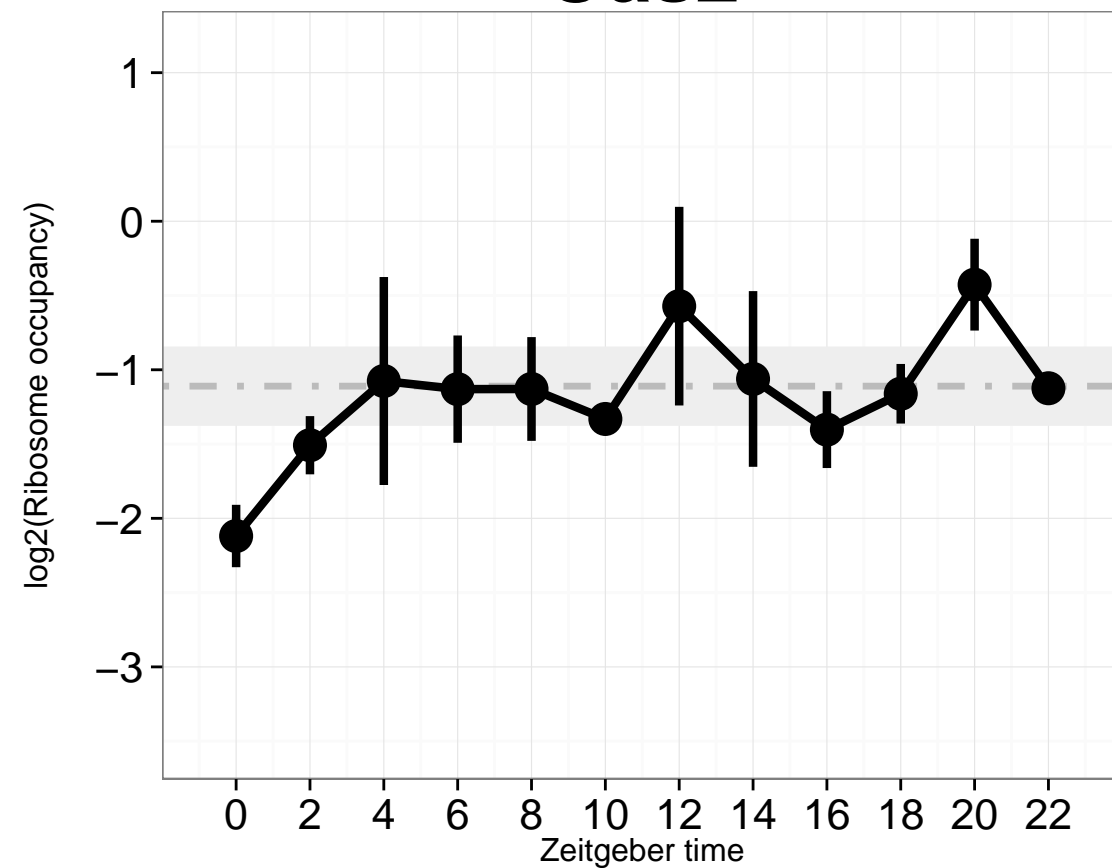

Supplement: Supplementary file 1787 [file 1]

## Pbk

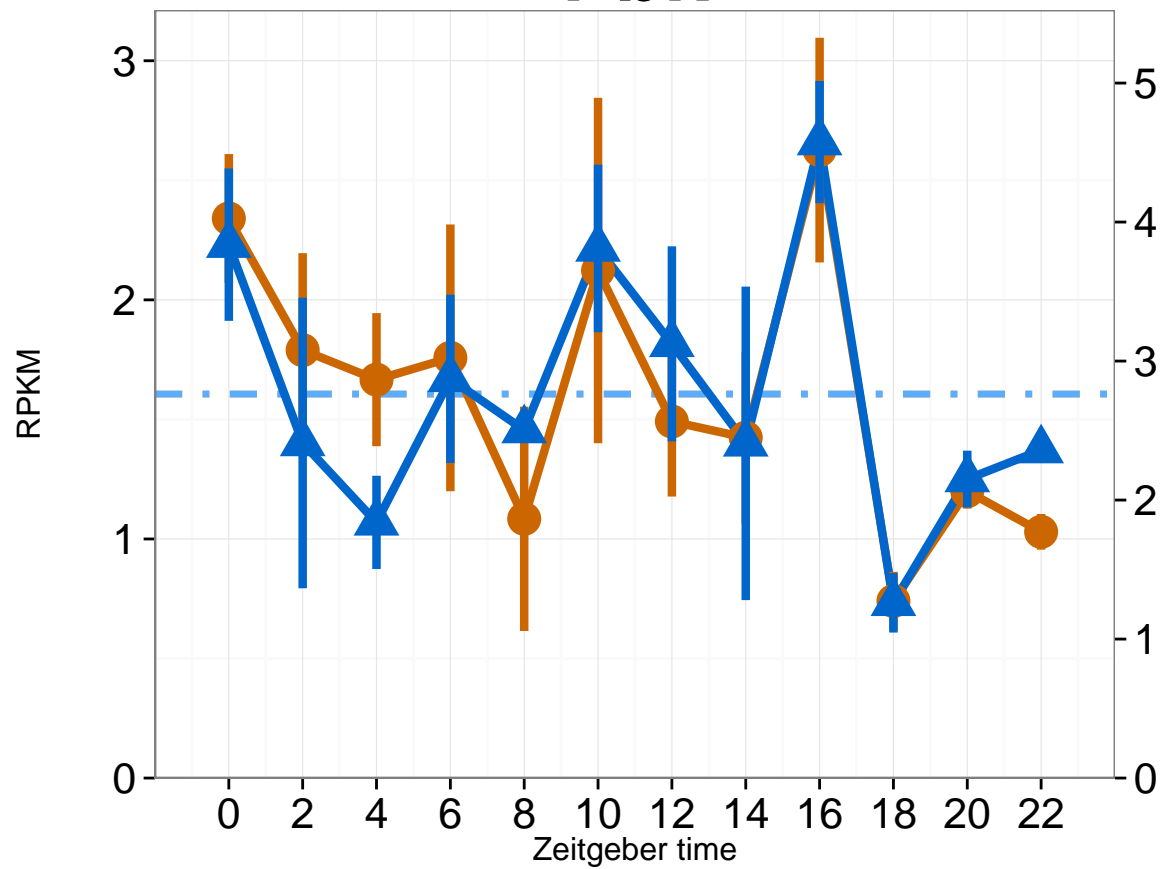

## Pbk

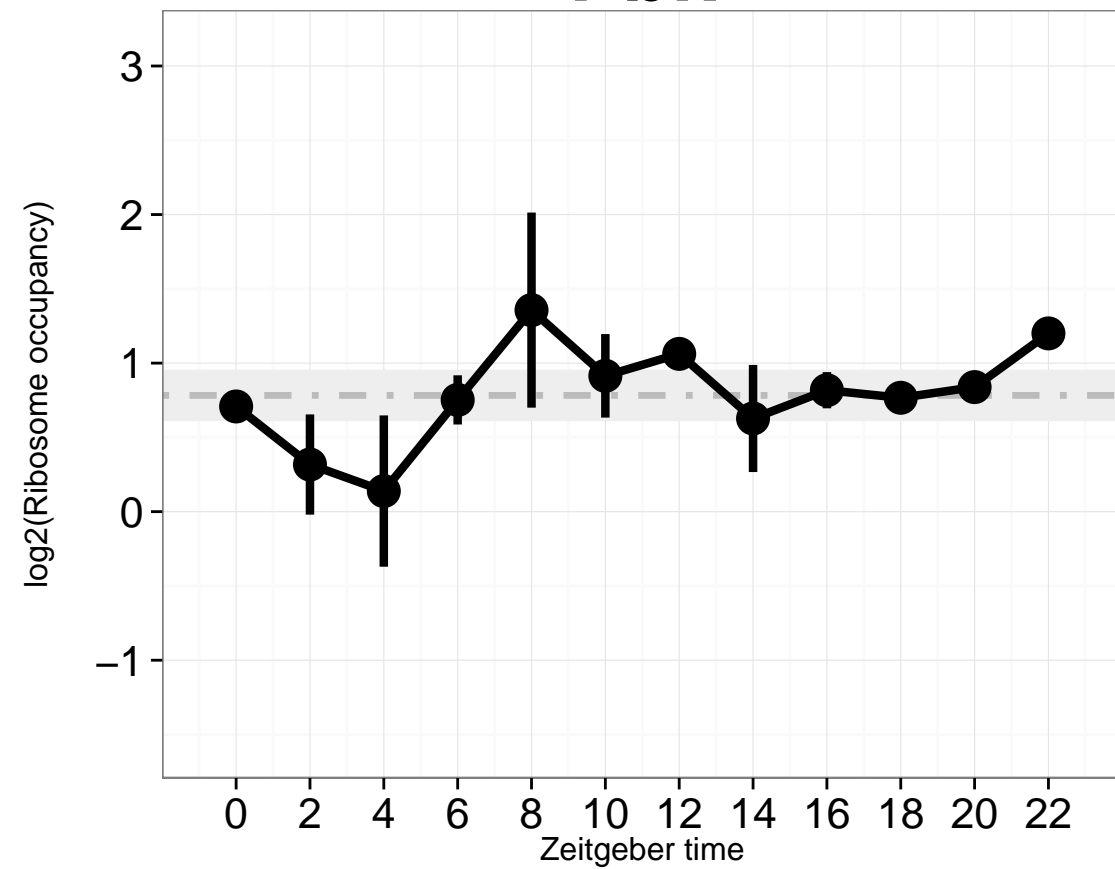

Supplement: Supplementary file 1788 [file 1]

# Eftud1

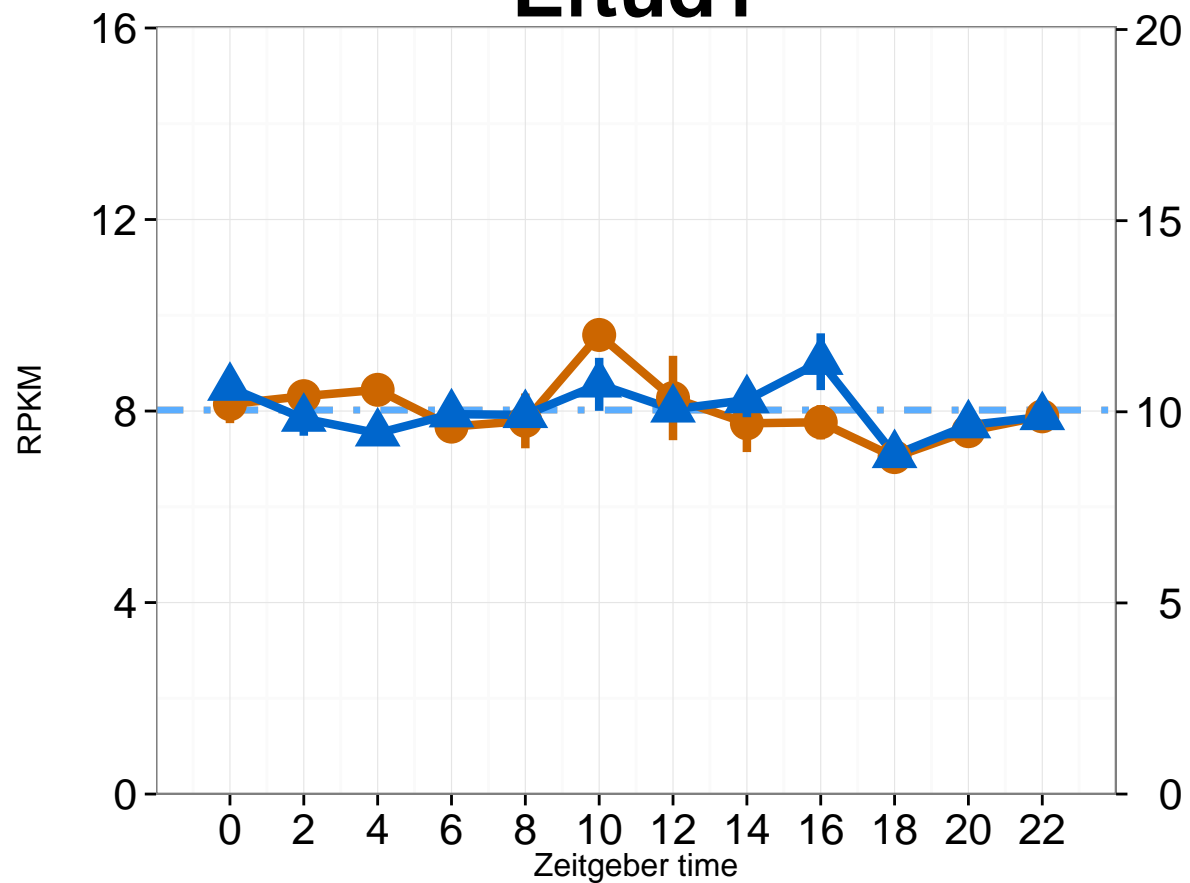

# Eftud1

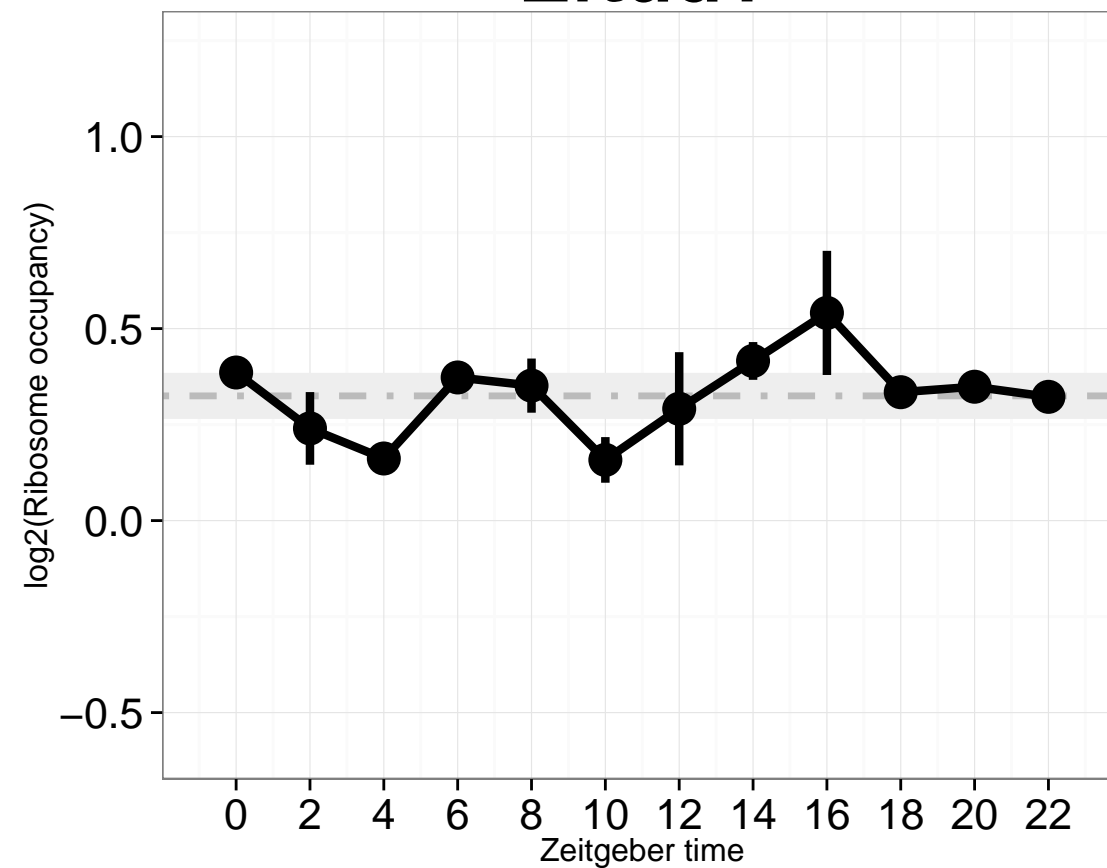

Supplement: Supplementary file 1789 [file 1]

## Sdsl

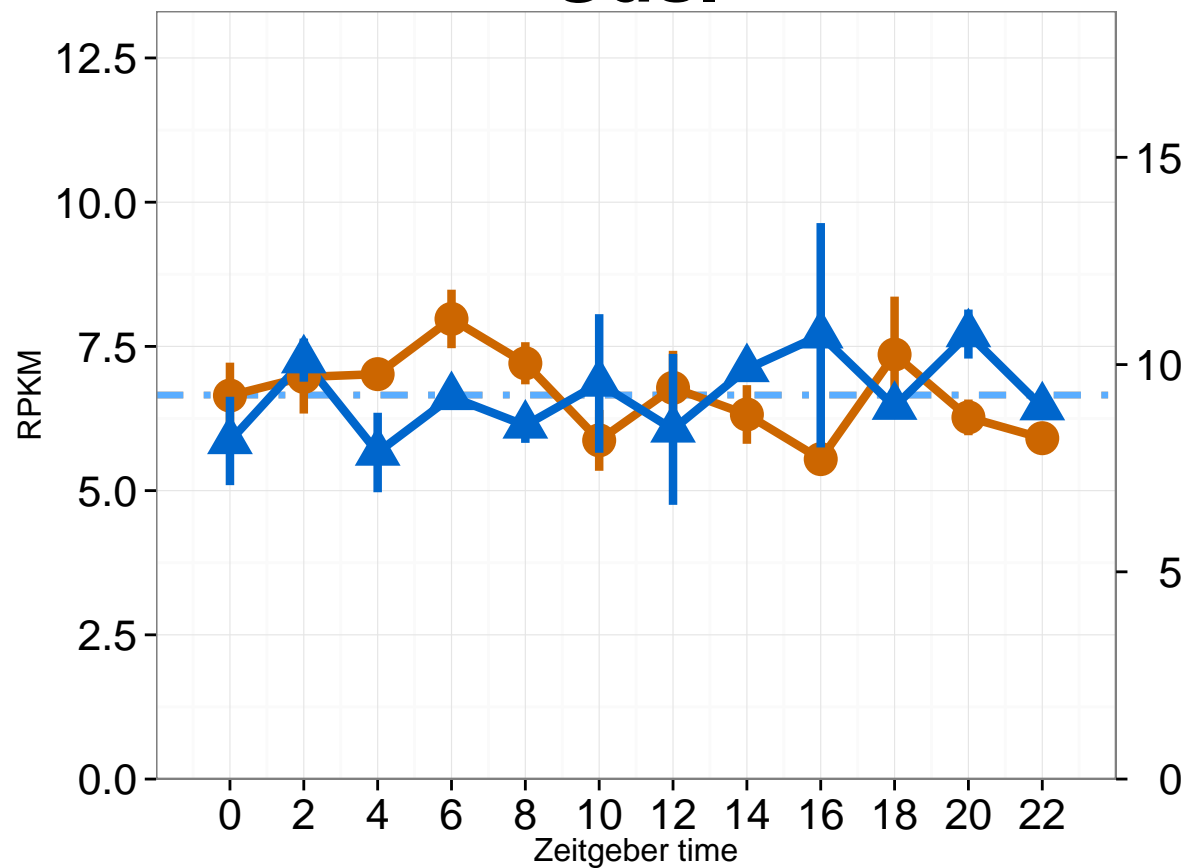

## SdsI

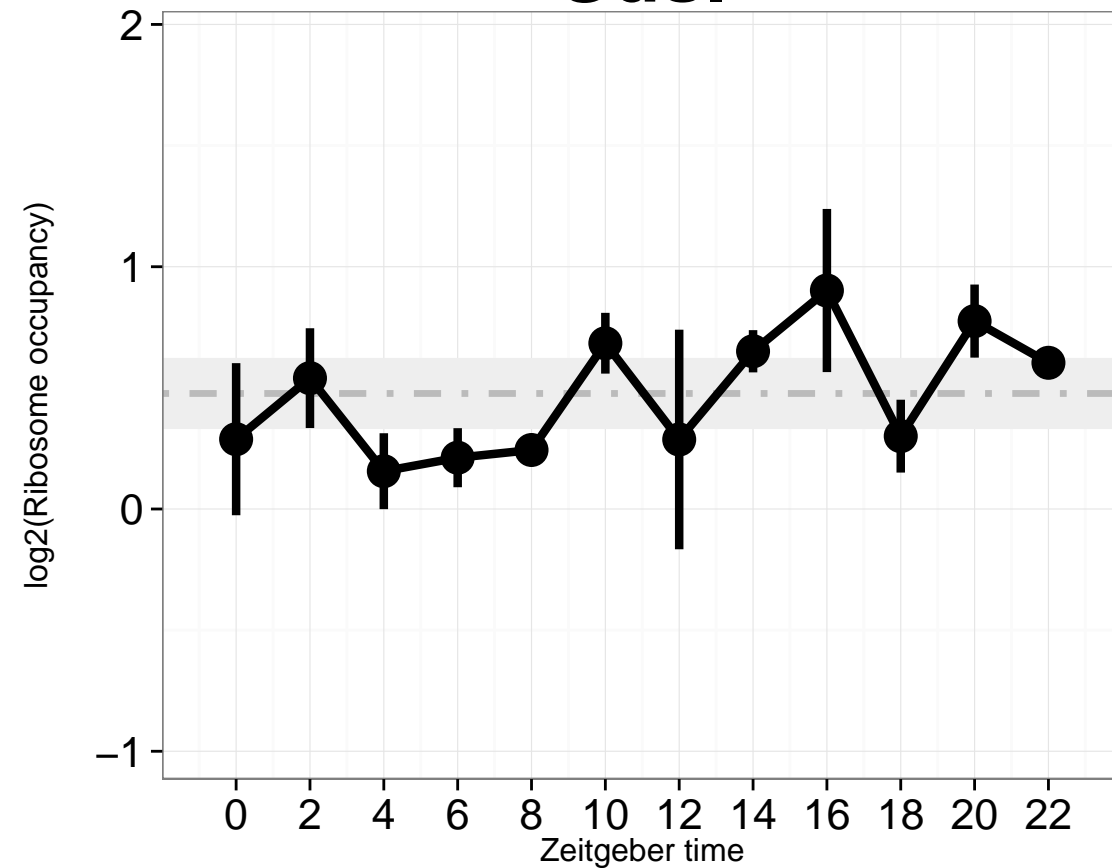

Supplement: Supplementary file 1790 [file 1]

## Rgs5

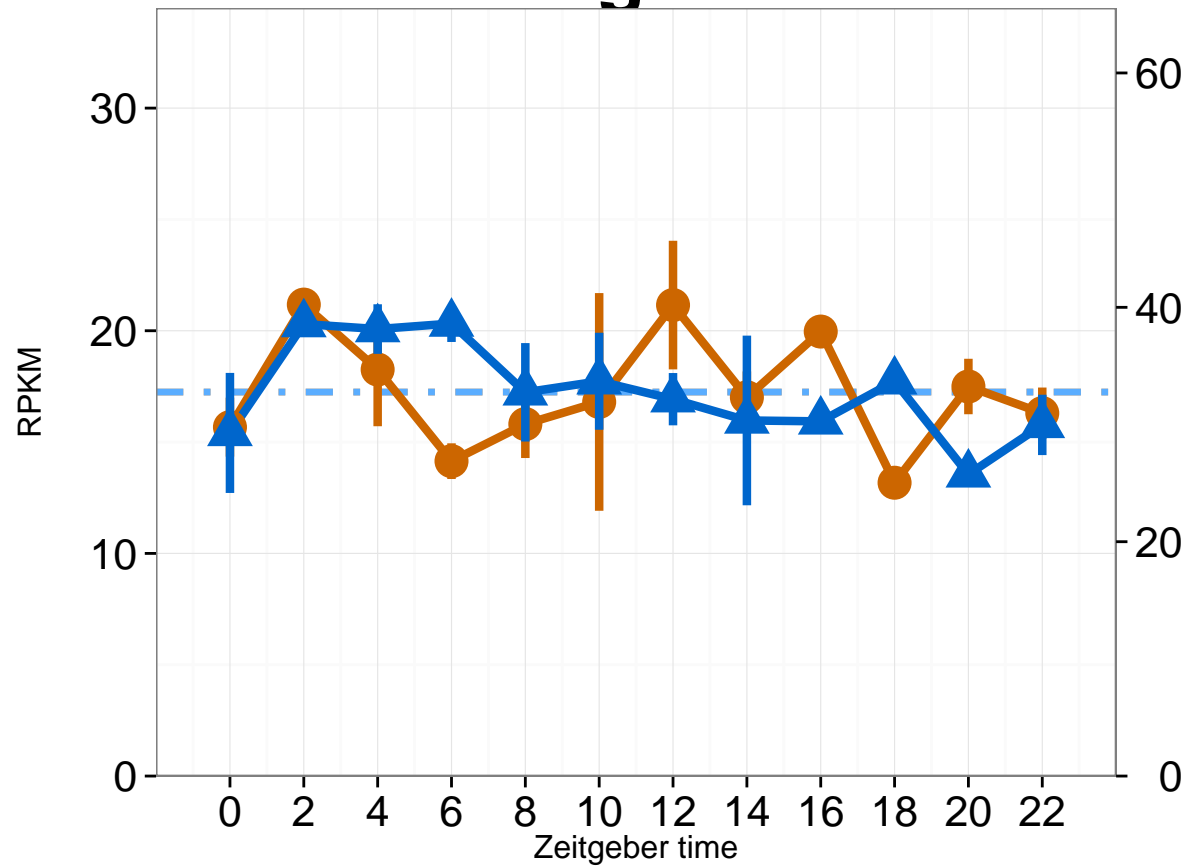

## Rgs5

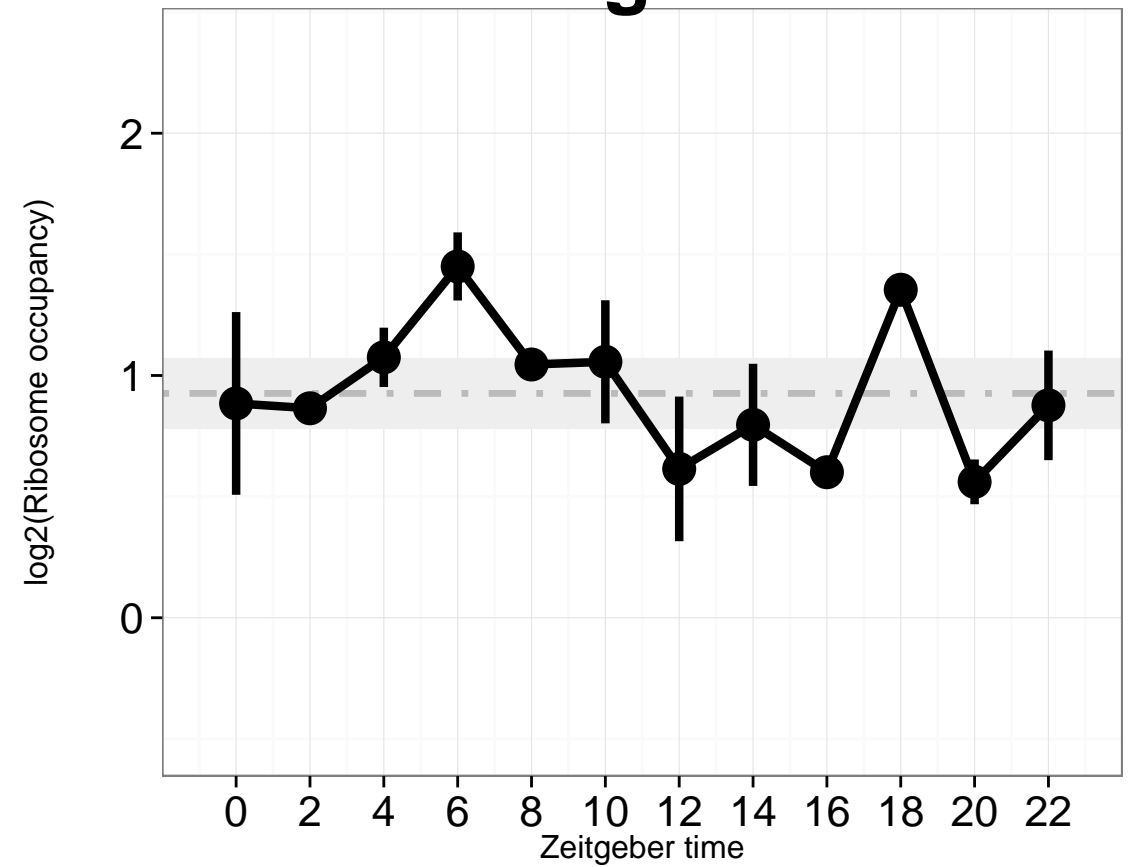

Supplement: Supplementary file 1791 [file 1]

# Slc39a11

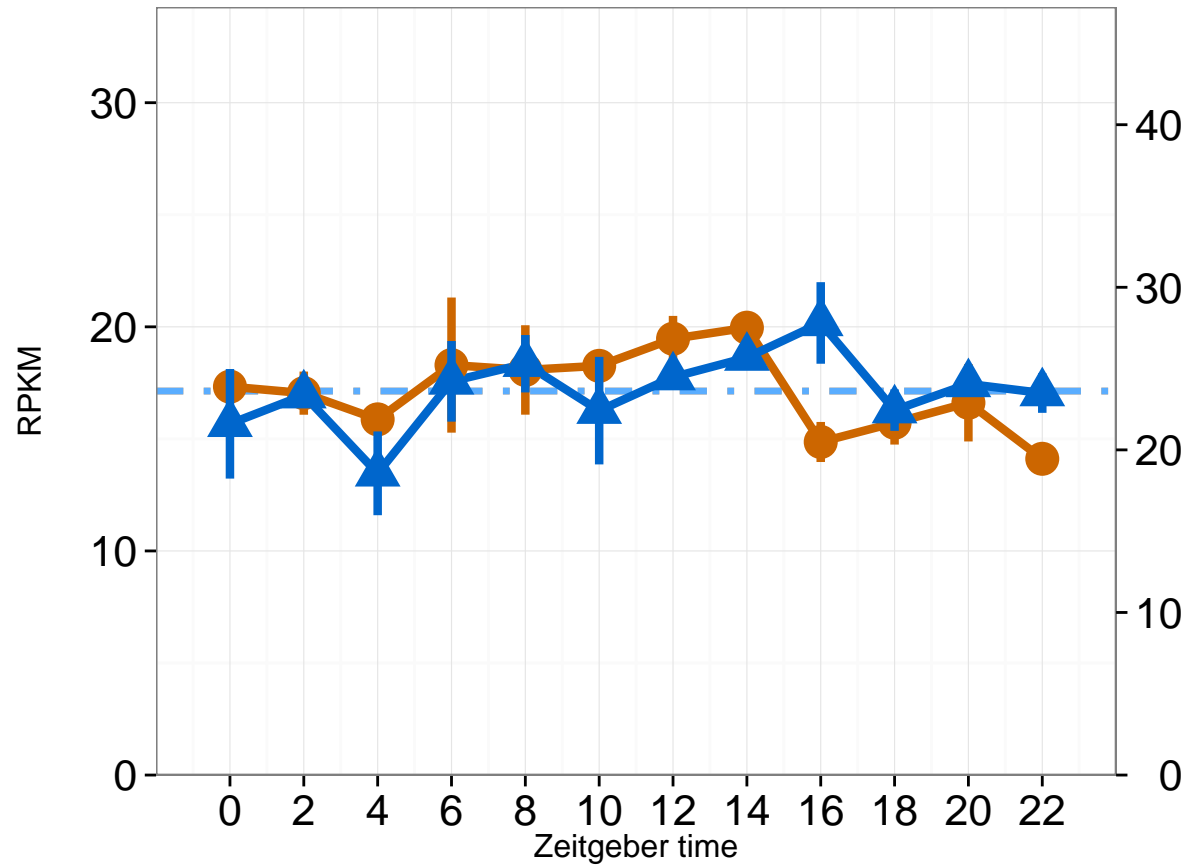

# Slc39a11

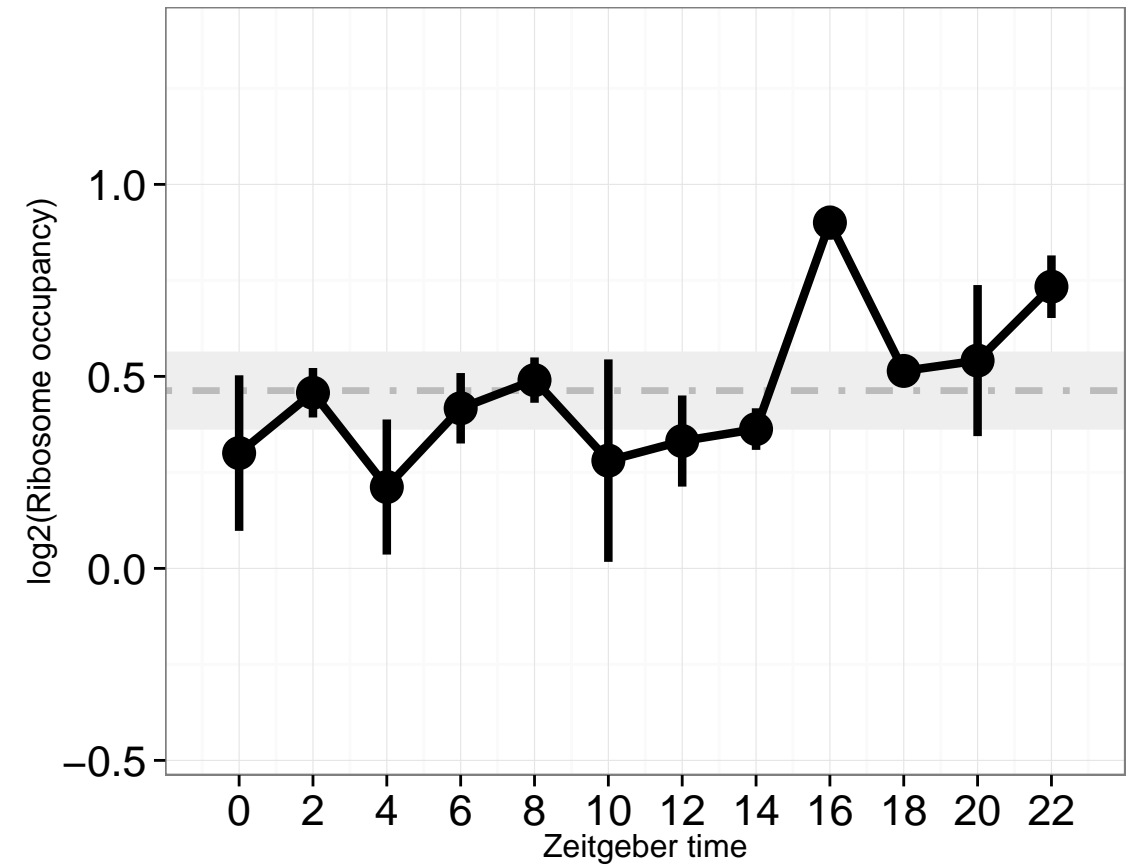

Supplement: Supplementary file 1792 [file 1]

## Flywch2

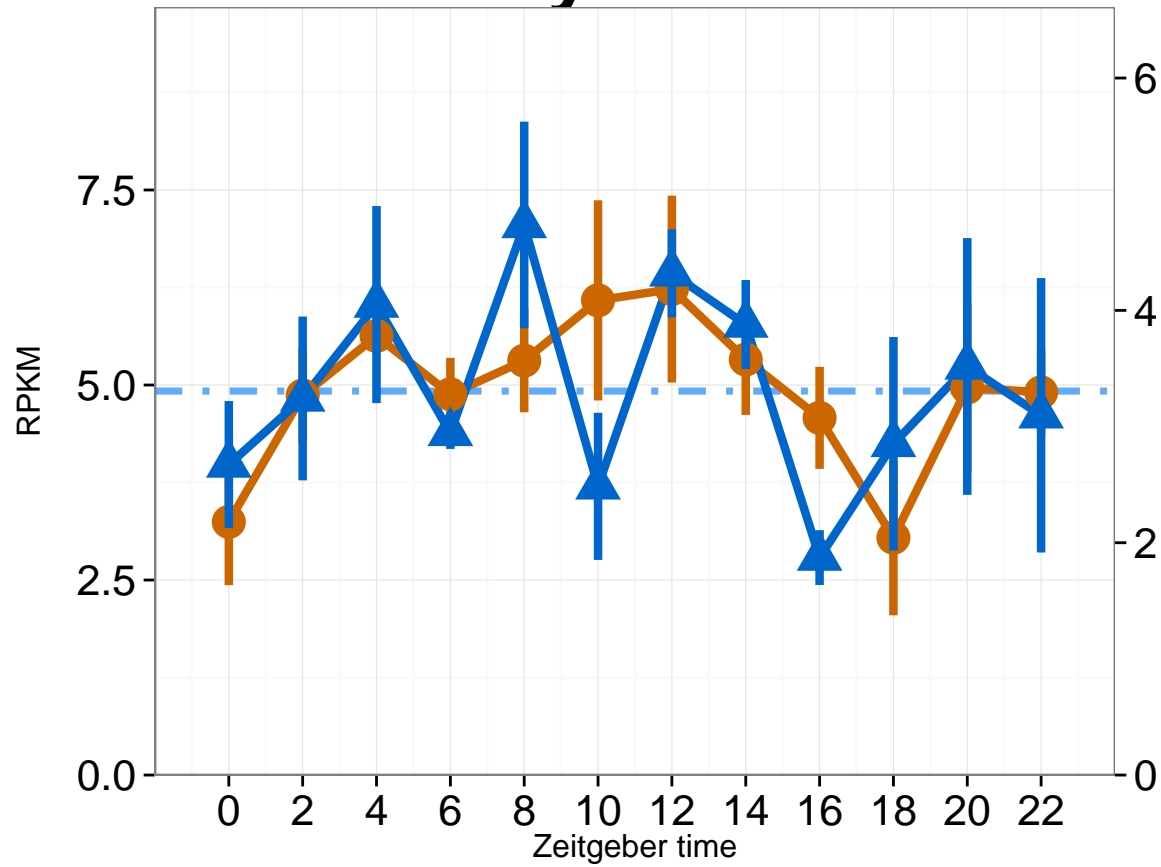

## Flywch2

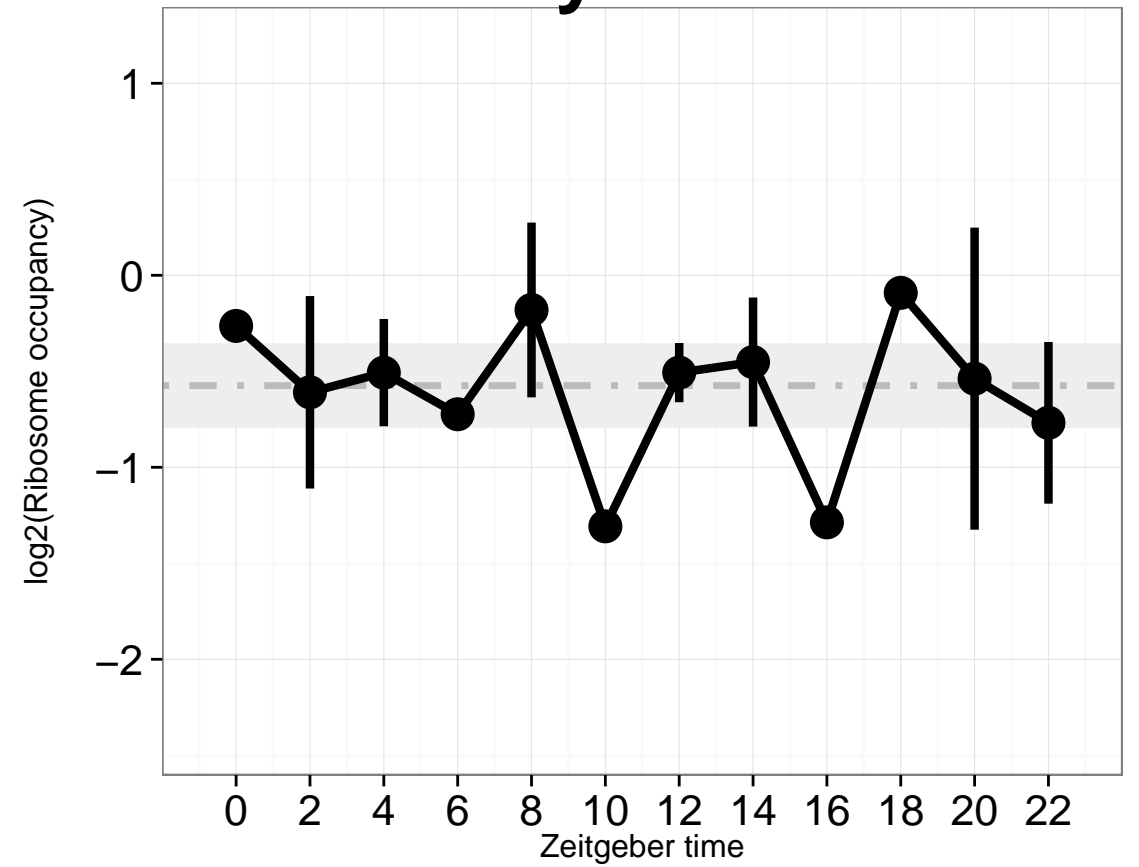

Supplement: Supplementary file 1793 [file 1]

## Tmed5

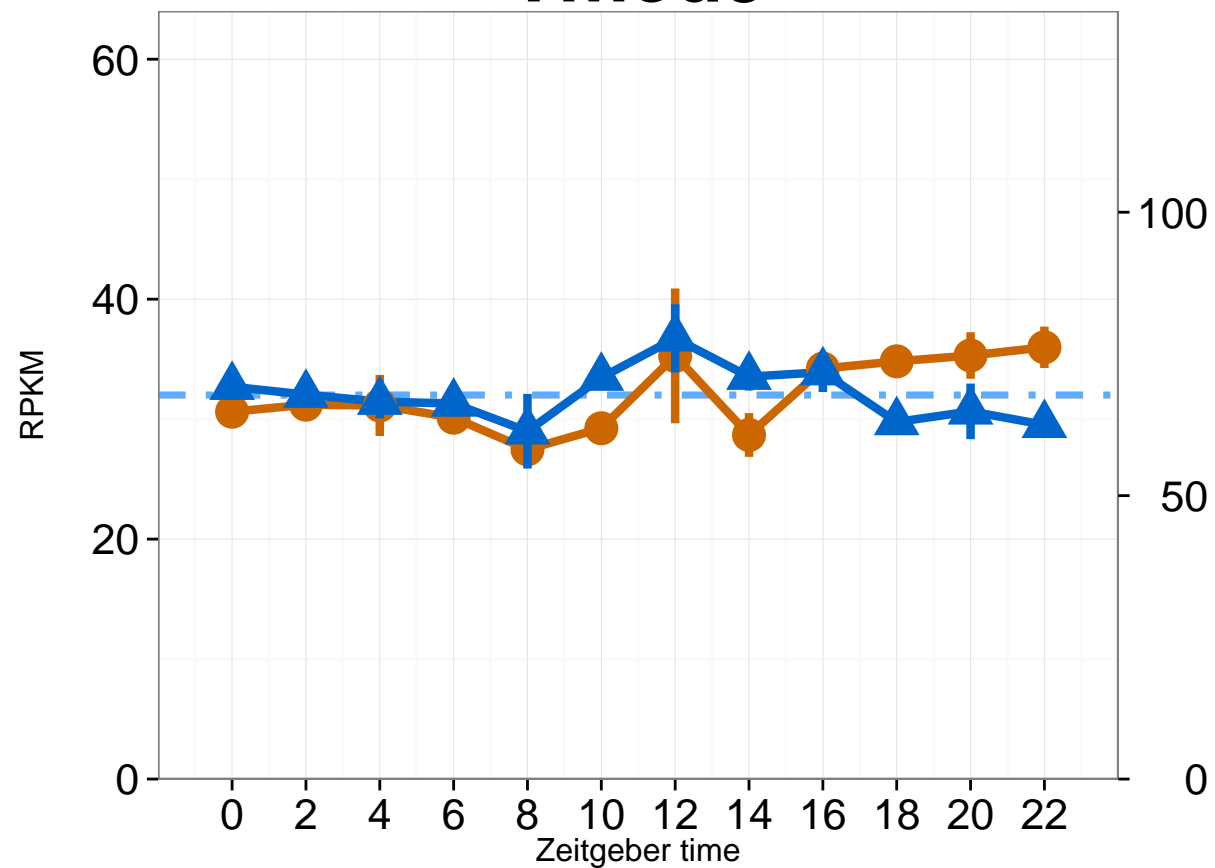

## Tmed5

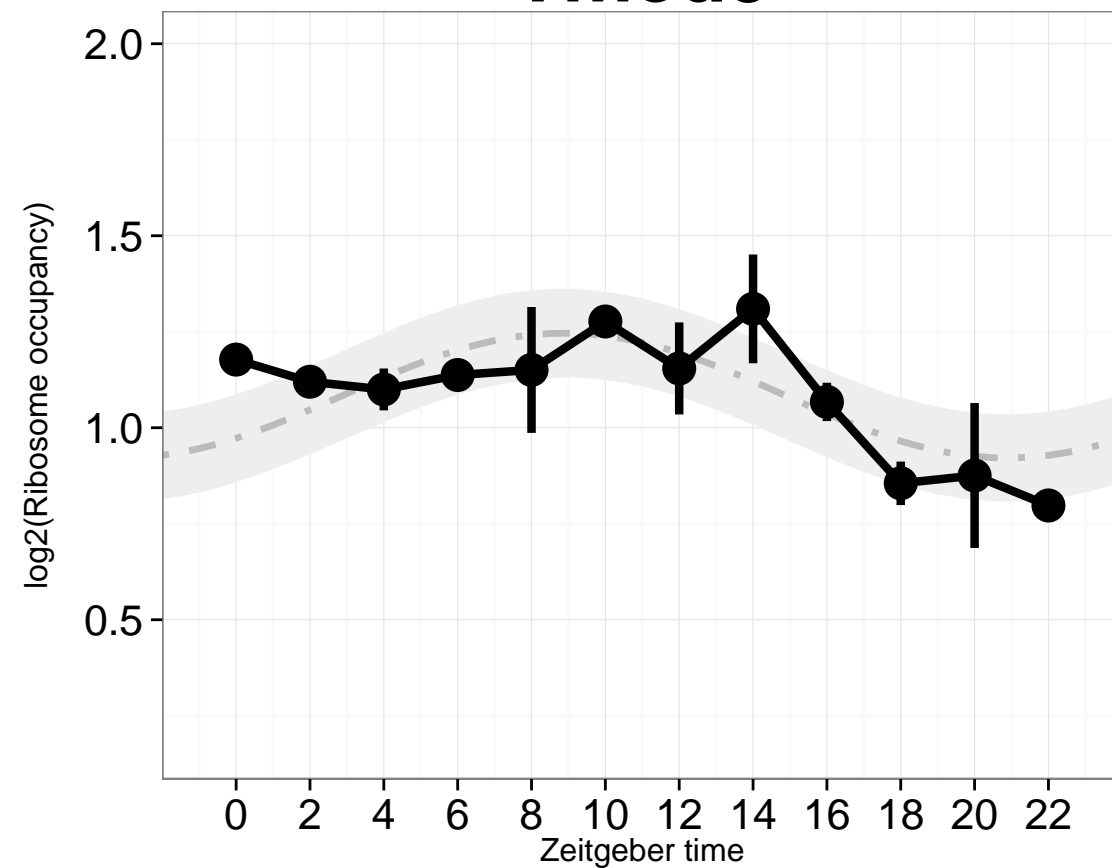

Supplement: Supplementary file 1794 [file 1]

## Idh2

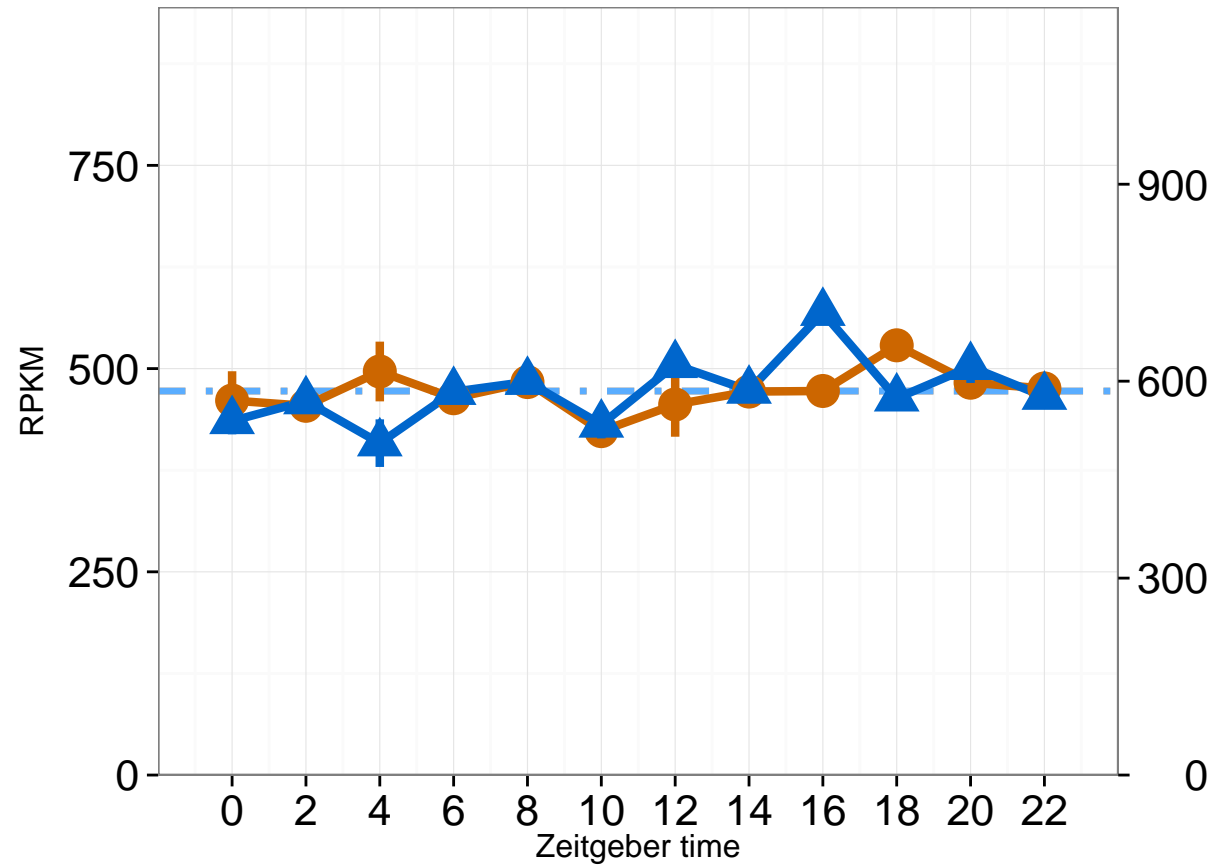

## Idh2

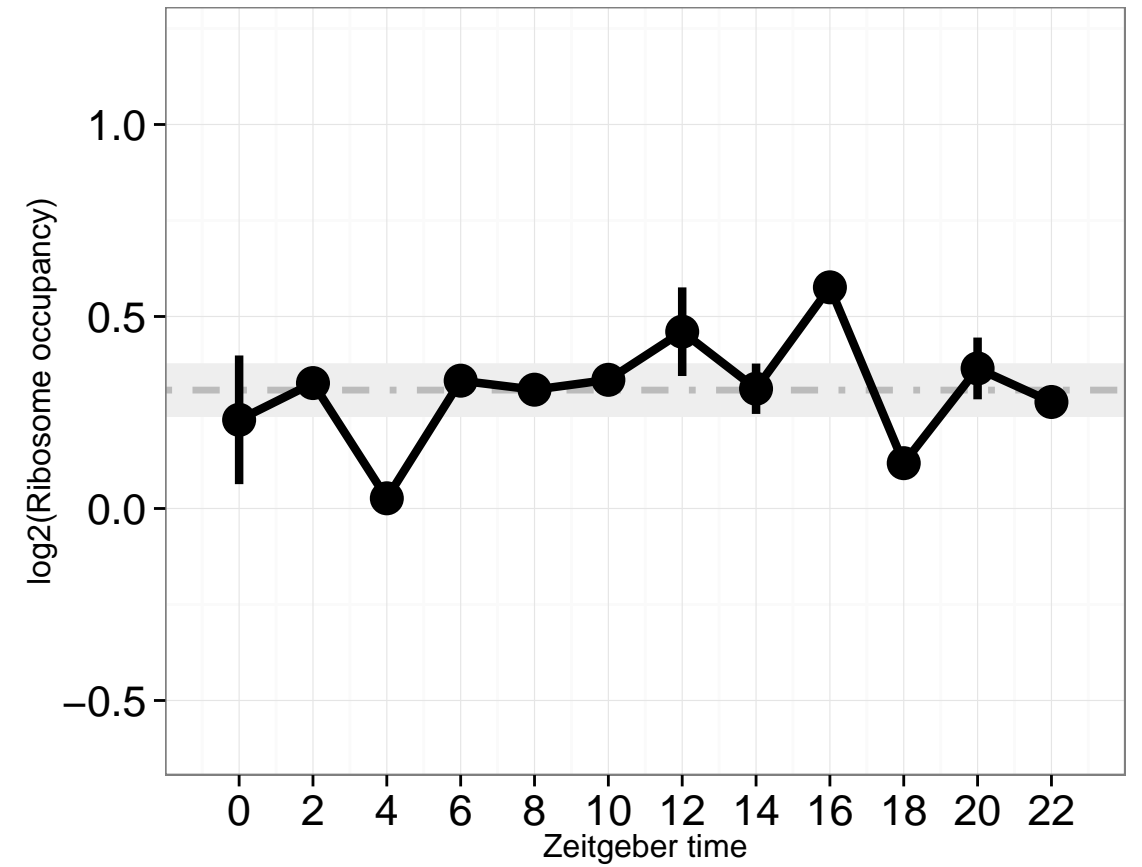

Supplement: Supplementary file 1795 [file 1]

# A430033K04Rik

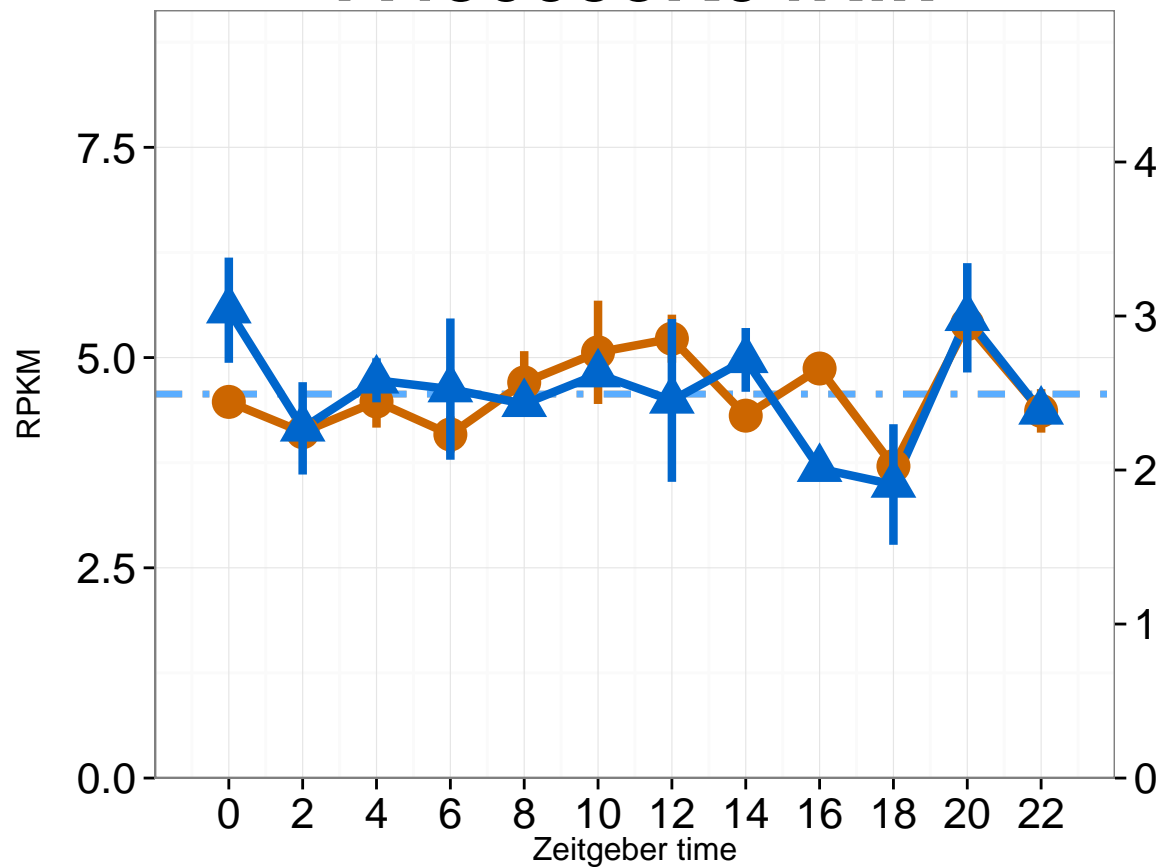

# A430033K04Rik

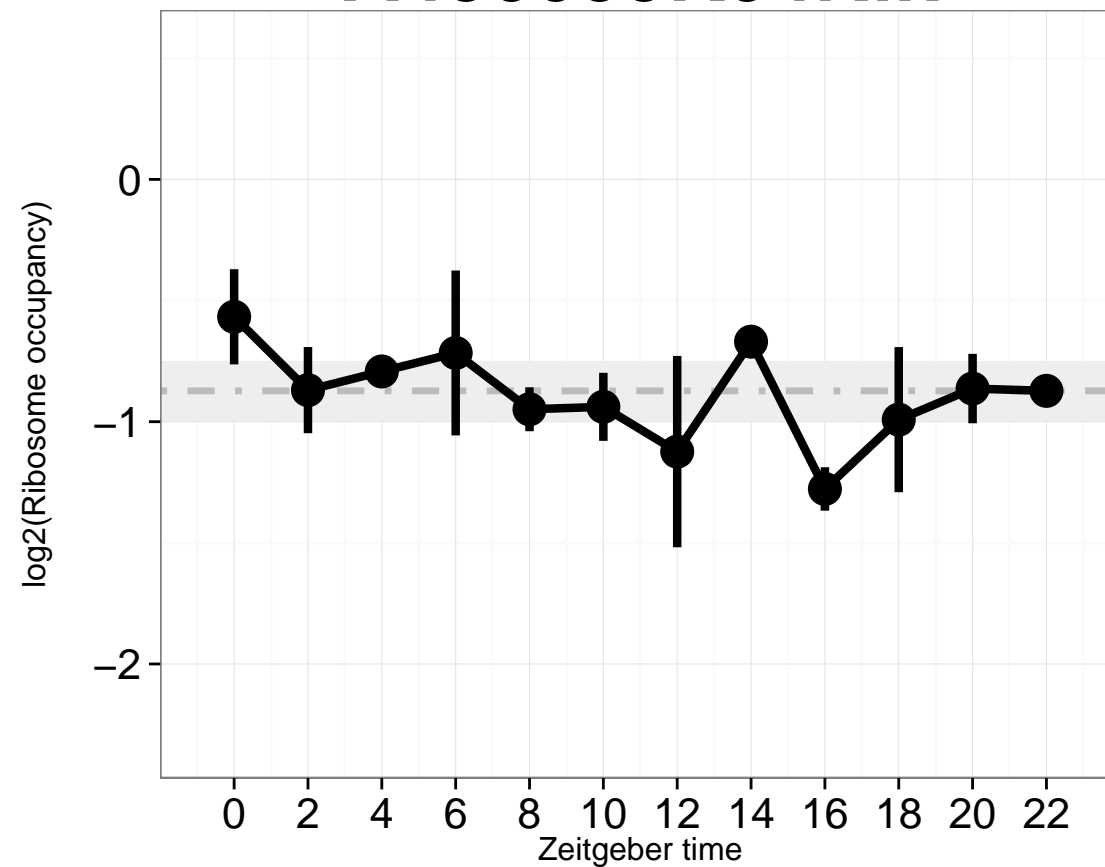

Supplement: Supplementary file 1796 [file 1]

## Sarnp

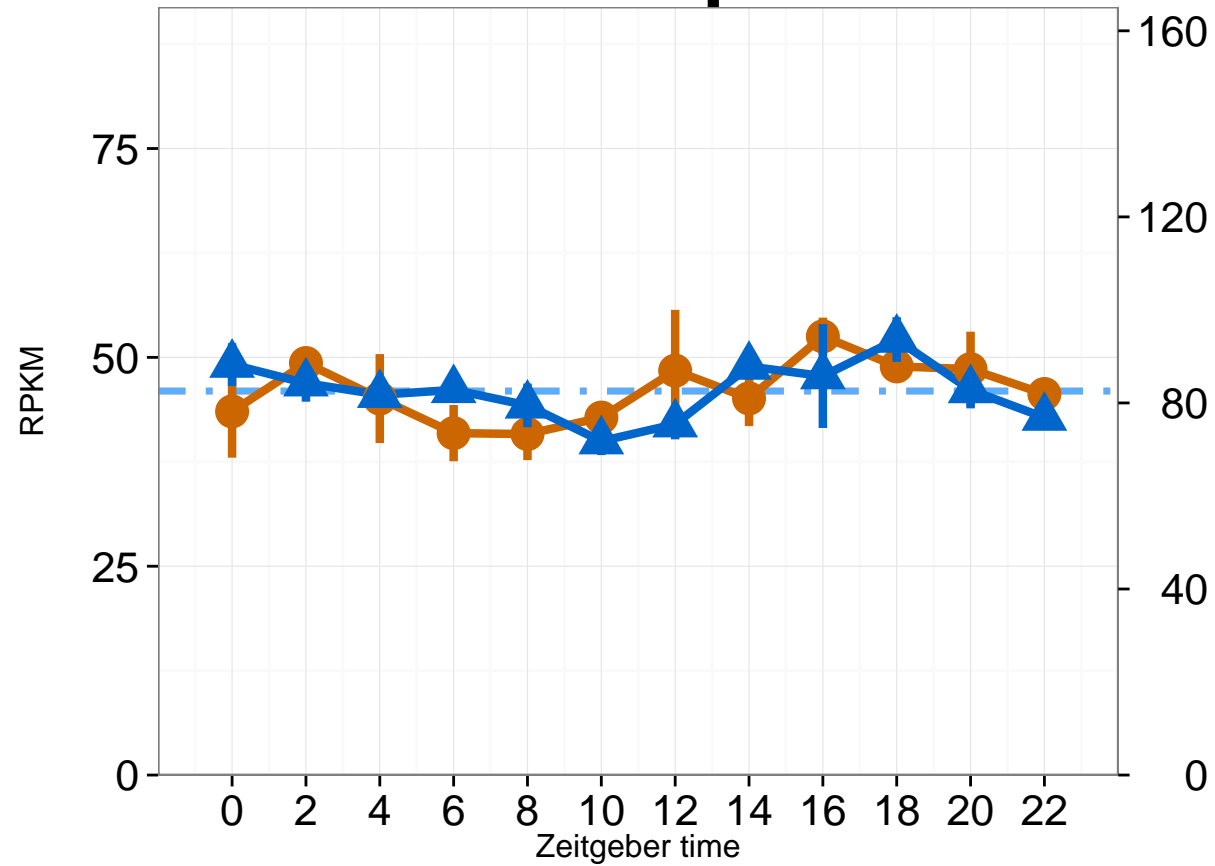

## Sarnp

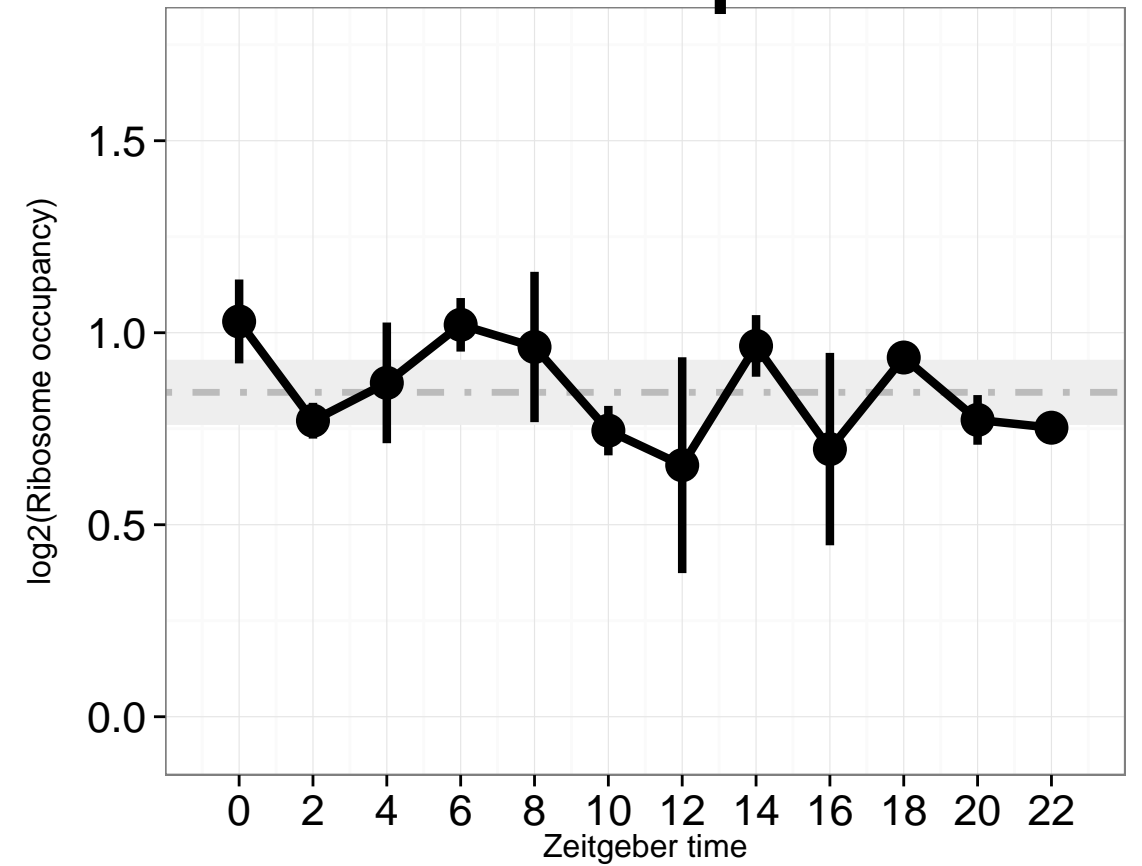

Supplement: Supplementary file 1797 [file 1]

# Nat6

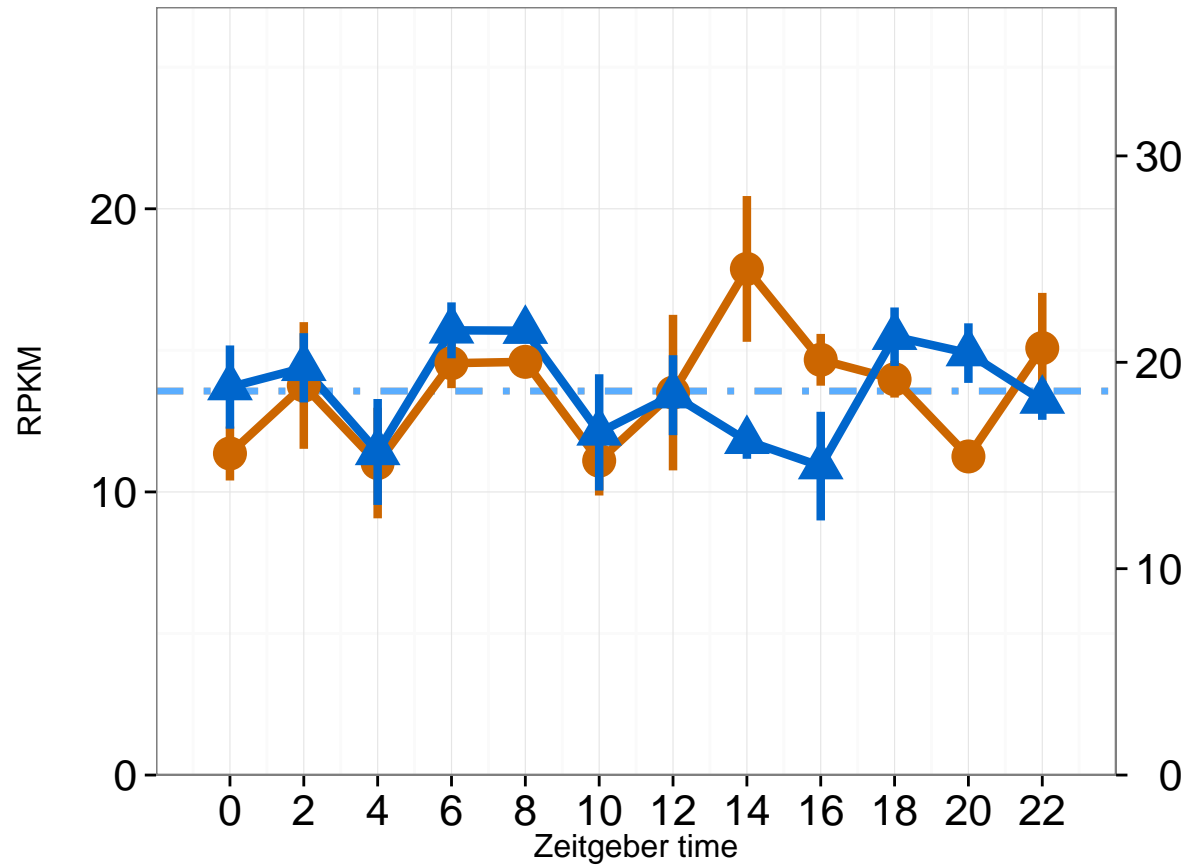

# Nat6

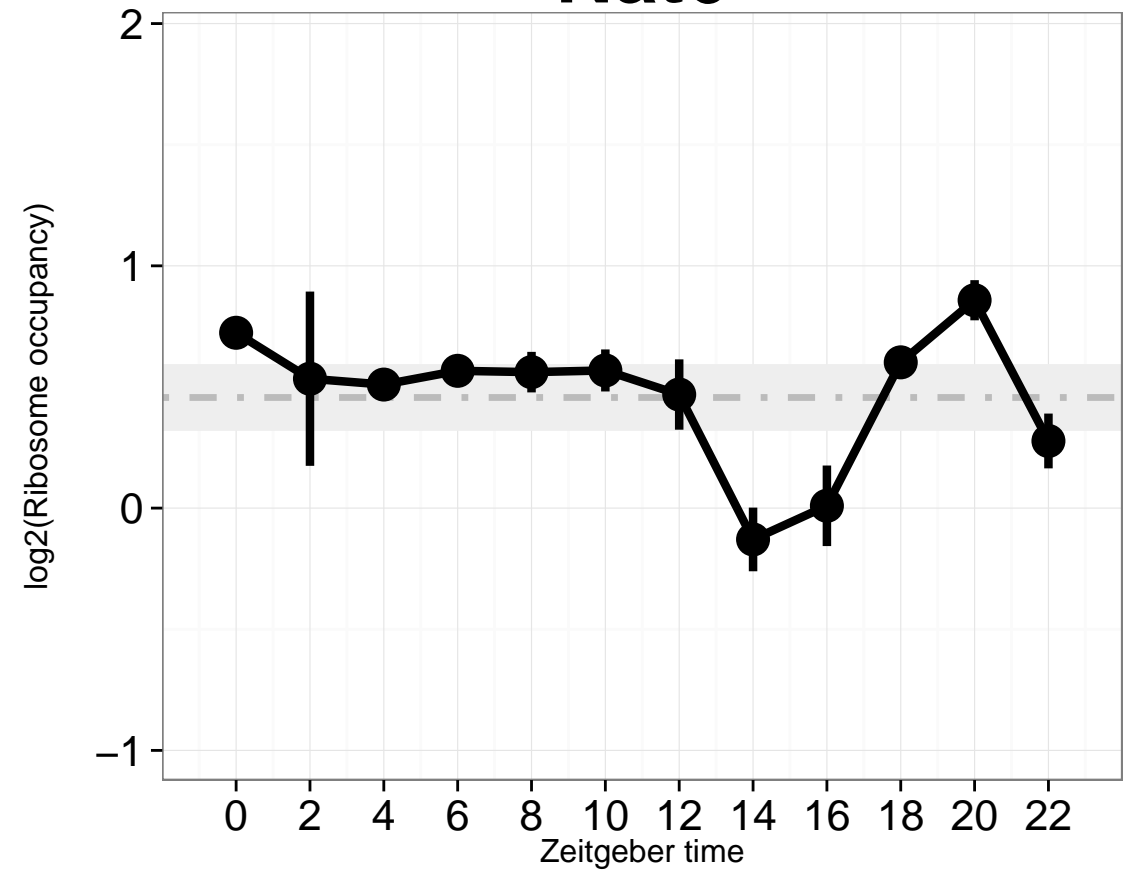

Supplement: Supplementary file 1798 [file 1]

# Fam134c

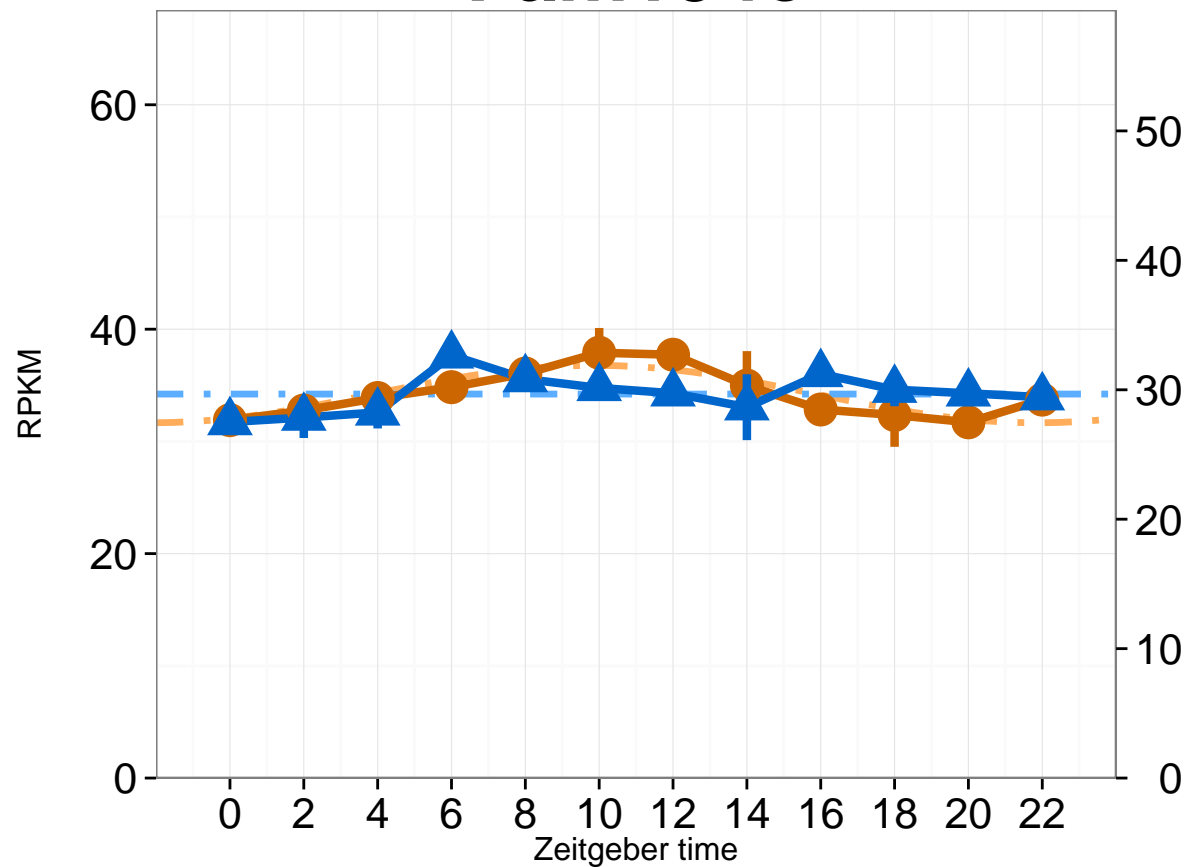

# Fam134c

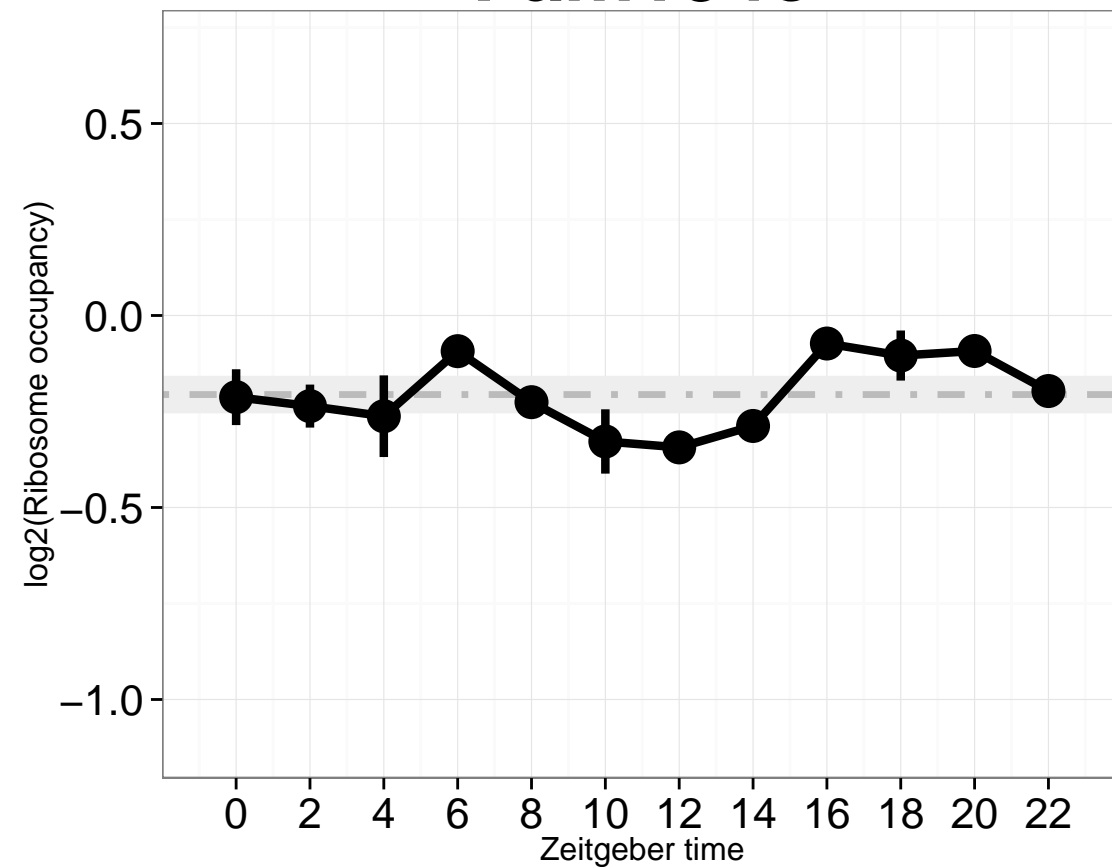

Supplement: Supplementary file 1799 [file 1]

# D830050J10Rik

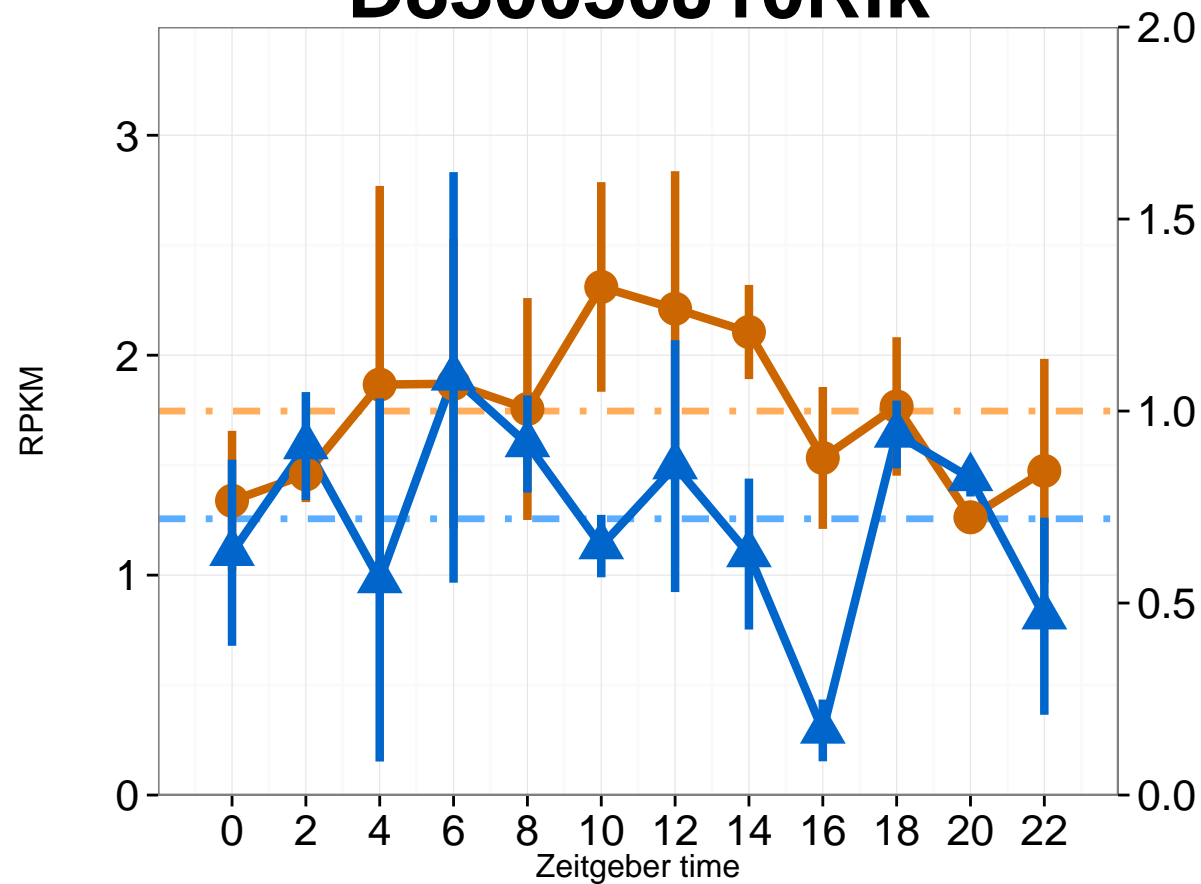

# D830050J10Rik

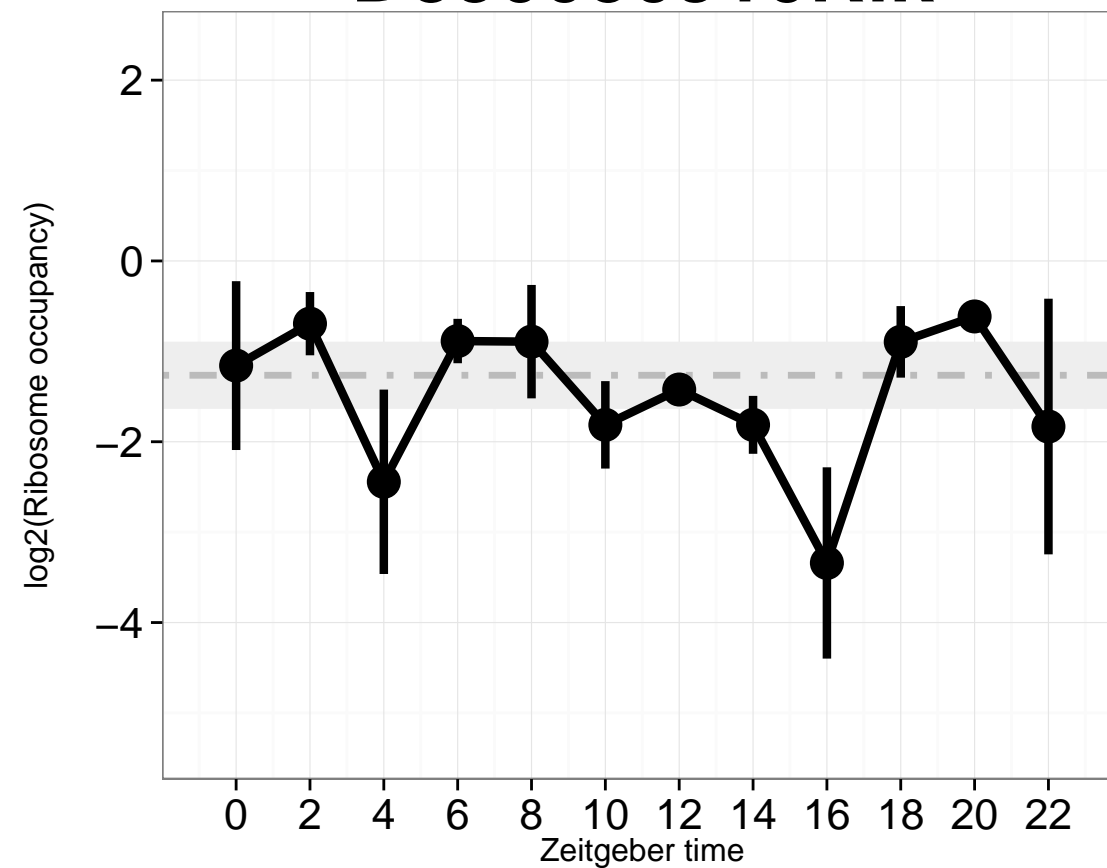

Supplement: Supplementary file 1800 [file 1]

# Lsm7

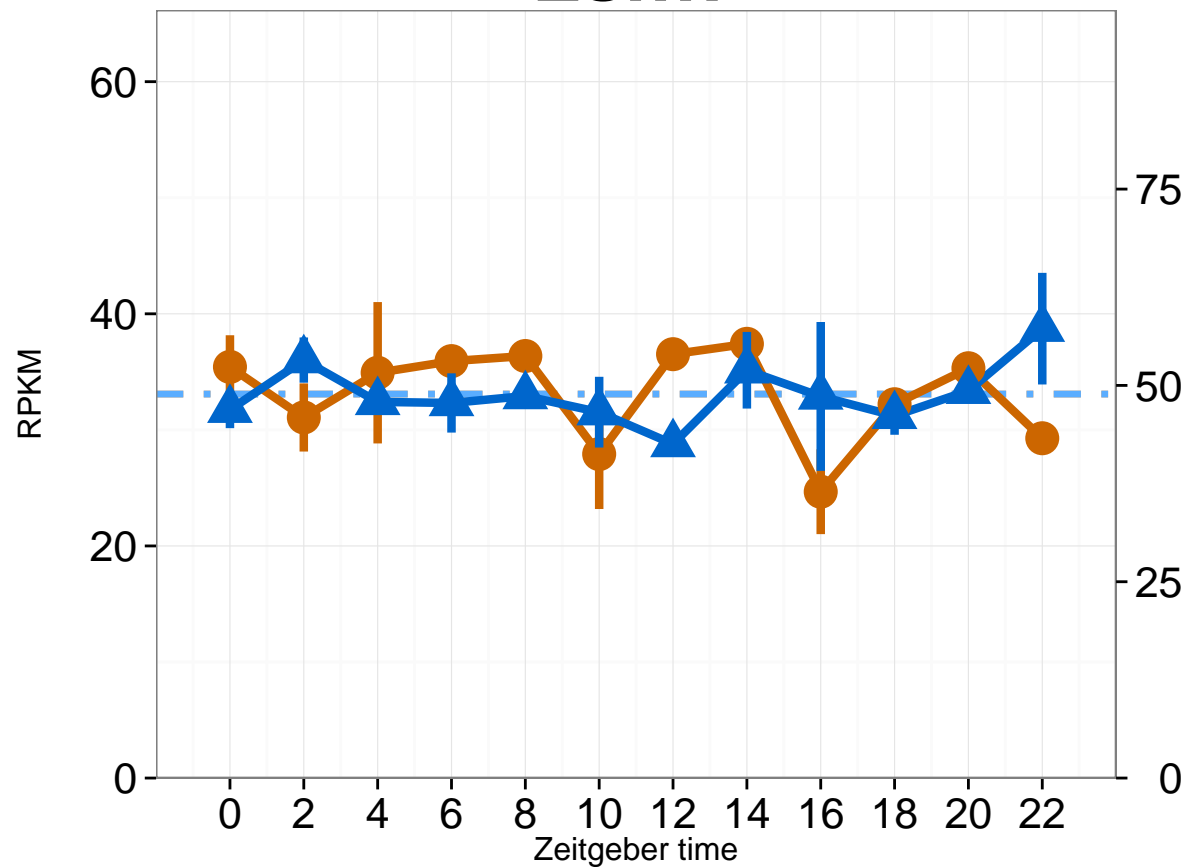

# Lsm7

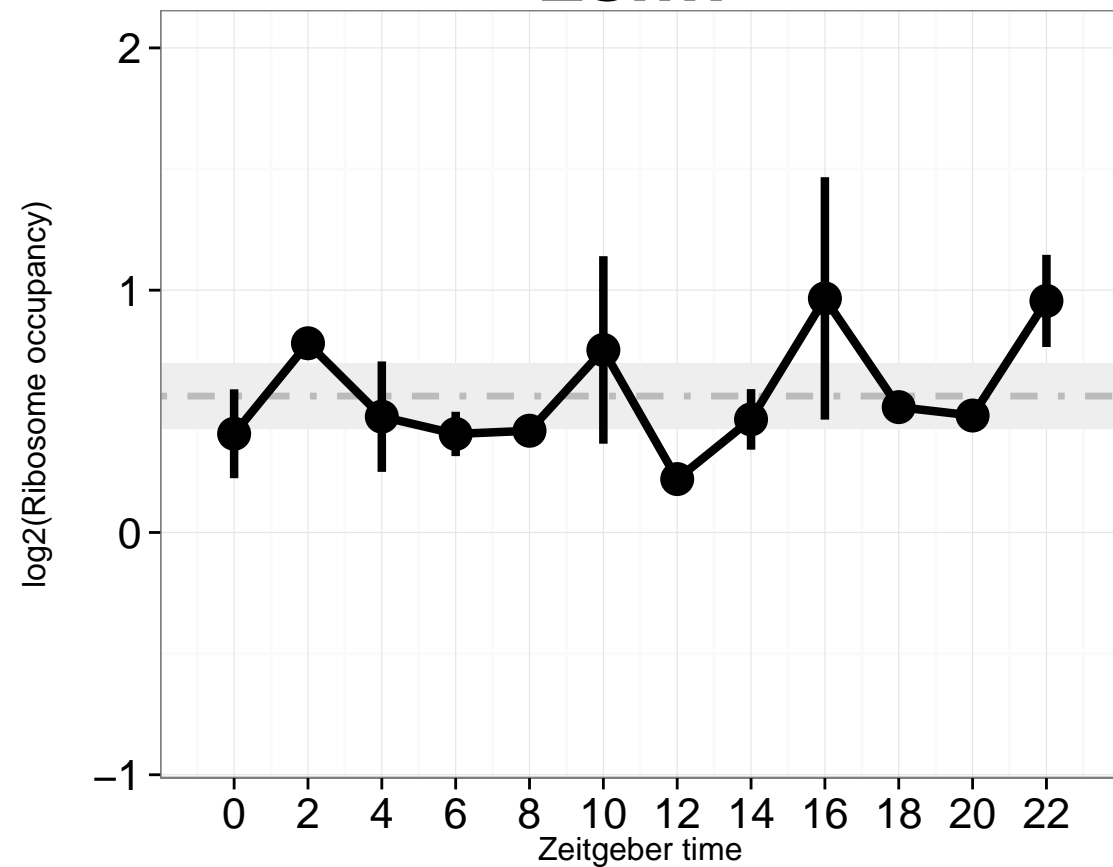

Supplement: Supplementary file 1801 [file 1]

## Txn2

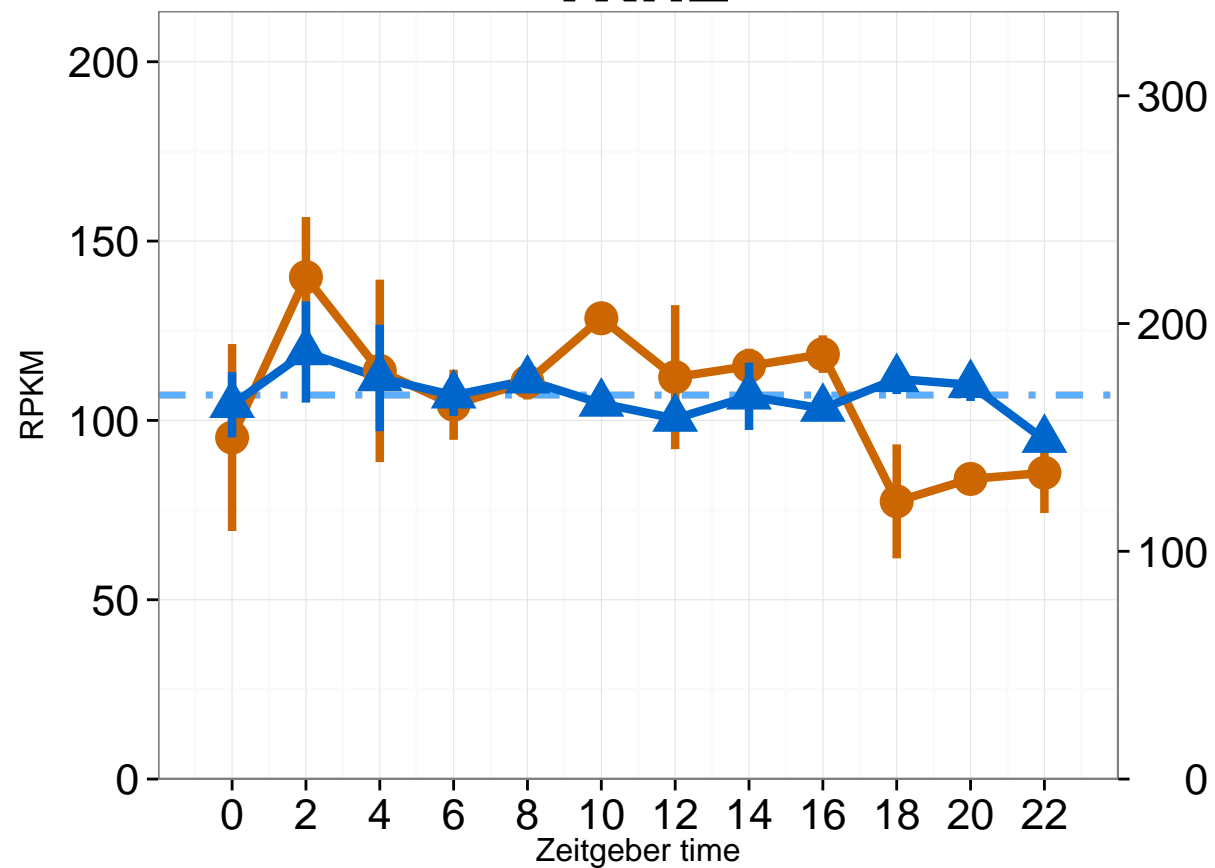

## Txn2

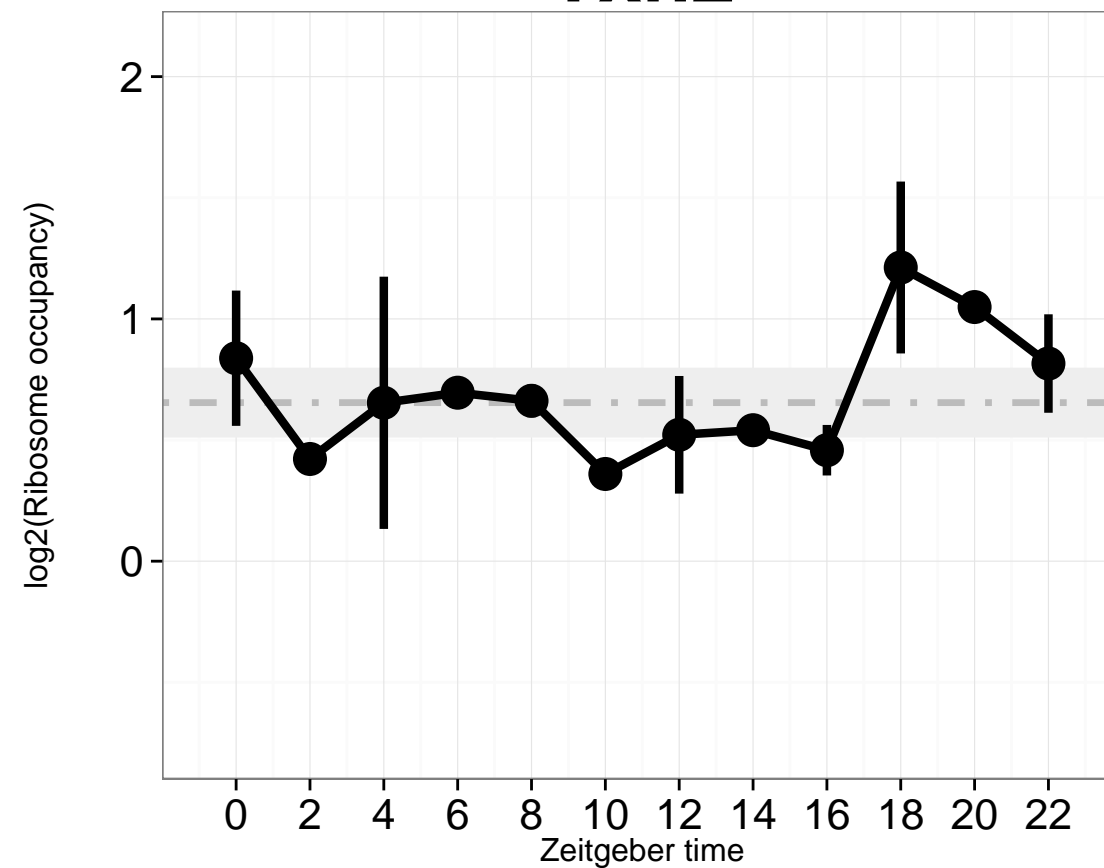

Supplement: Supplementary file 1802 [file 1]

## Dmd

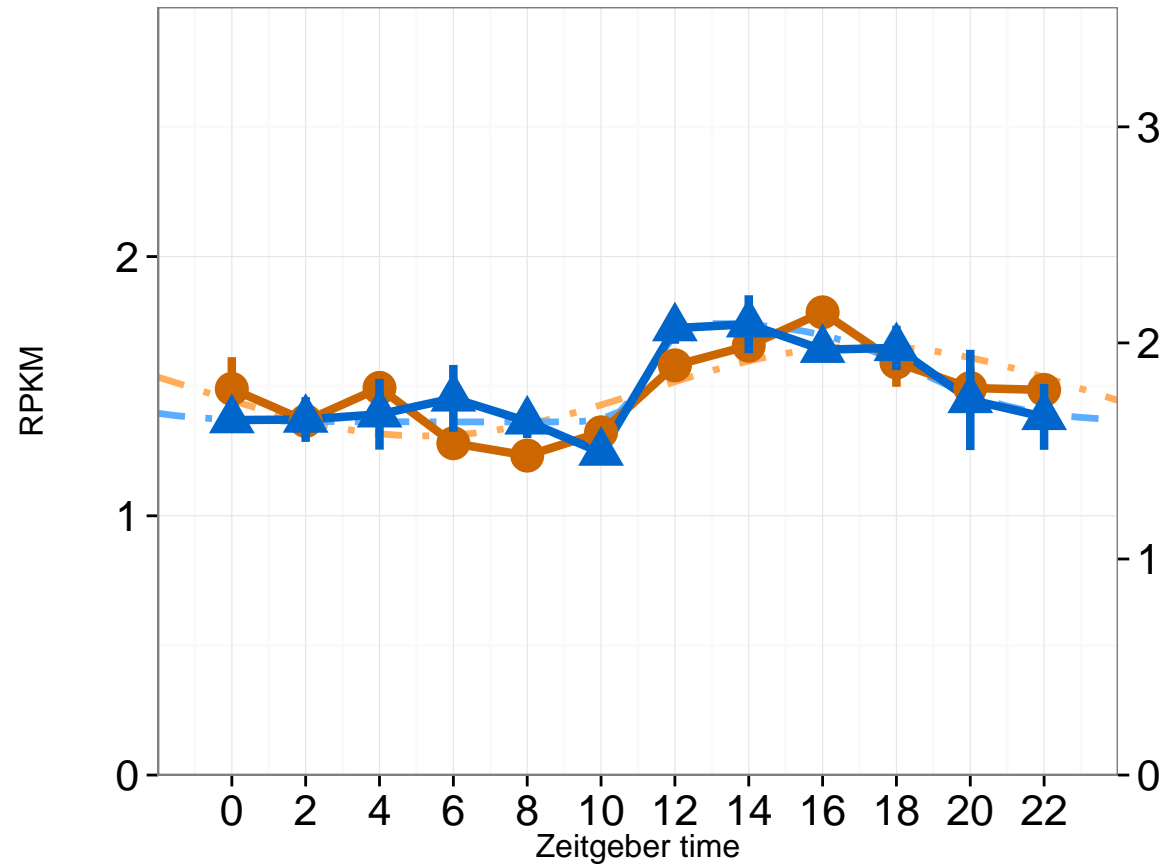

## Dmd

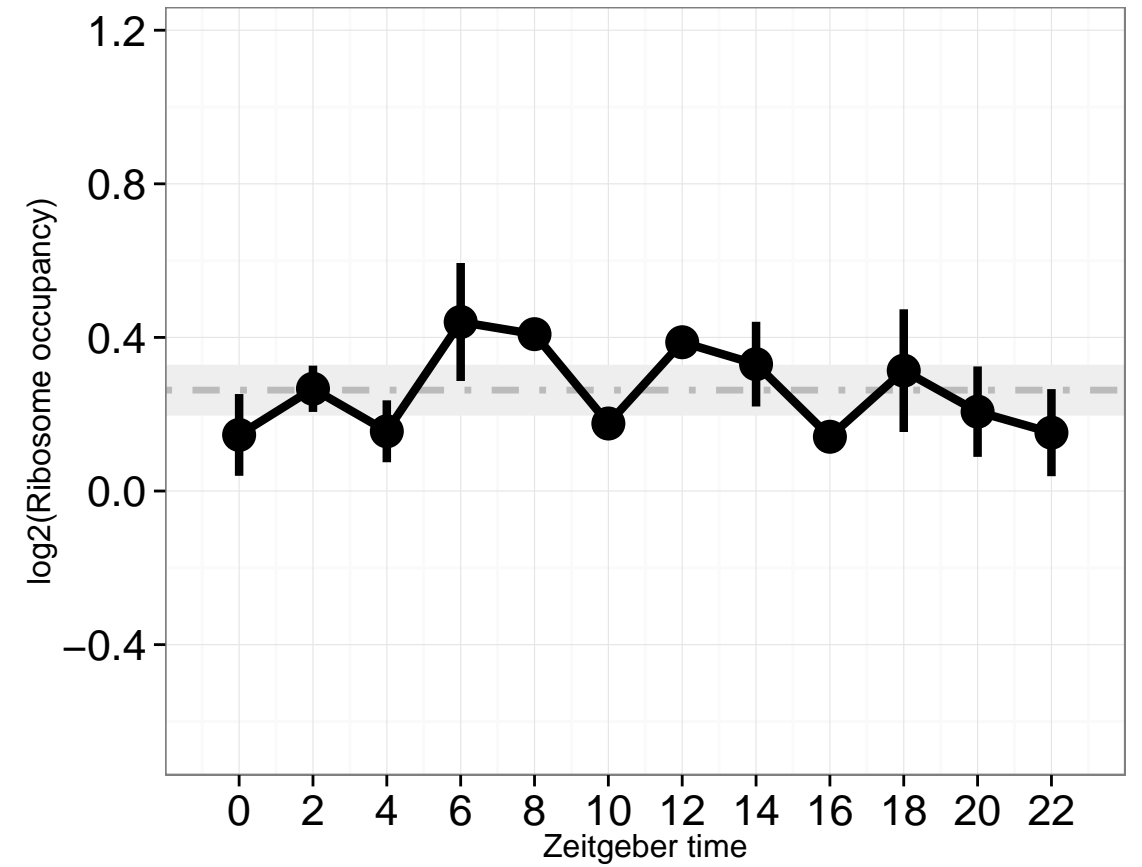

Supplement: Supplementary file 1803 [file 1]

## Rapgef4

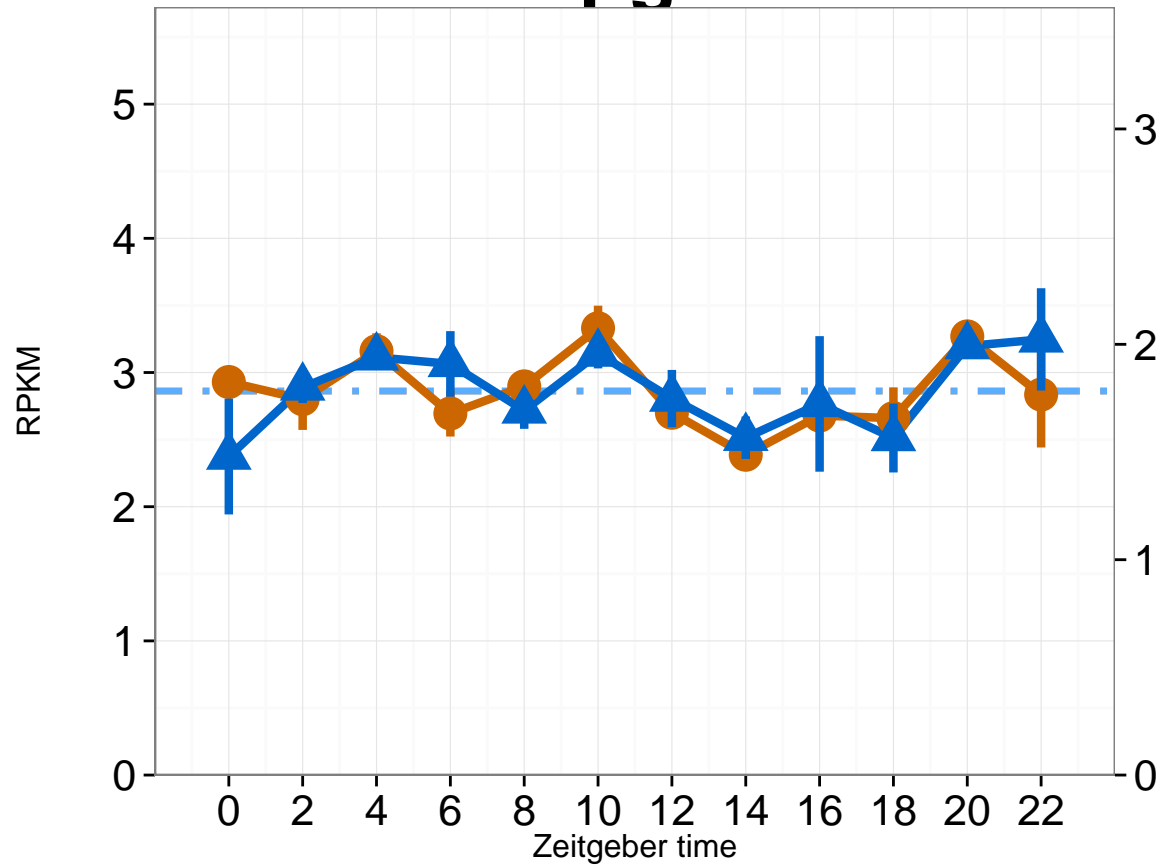

## Rapgef4

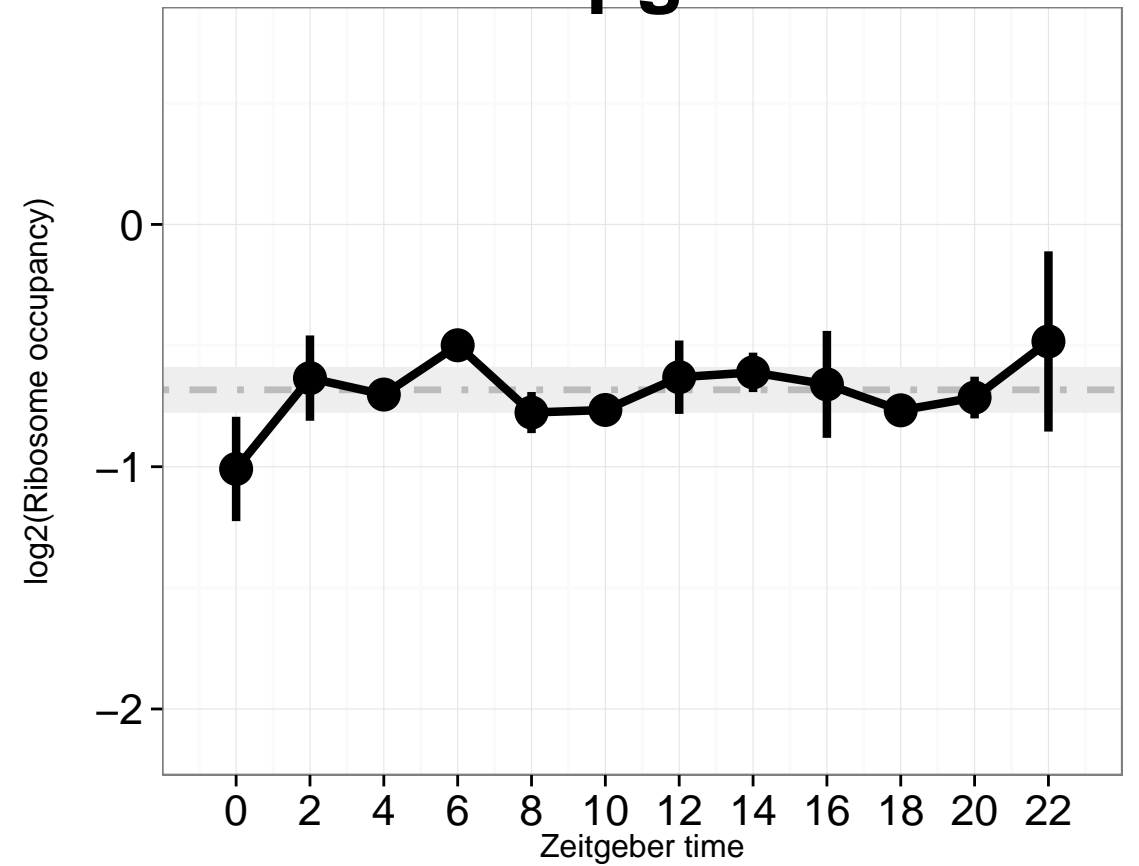

Supplement: Supplementary file 1804 [file 1]

# Nif3I1

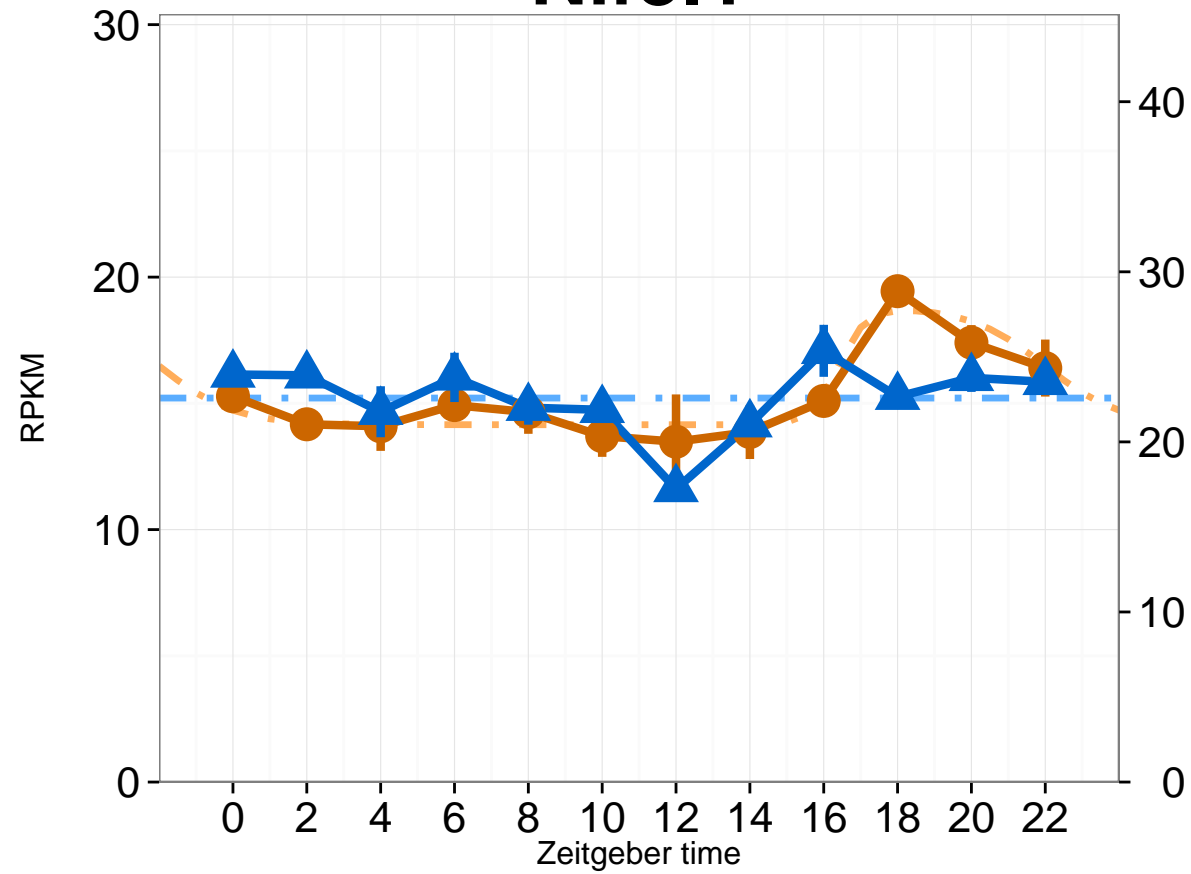

# Nif3I1

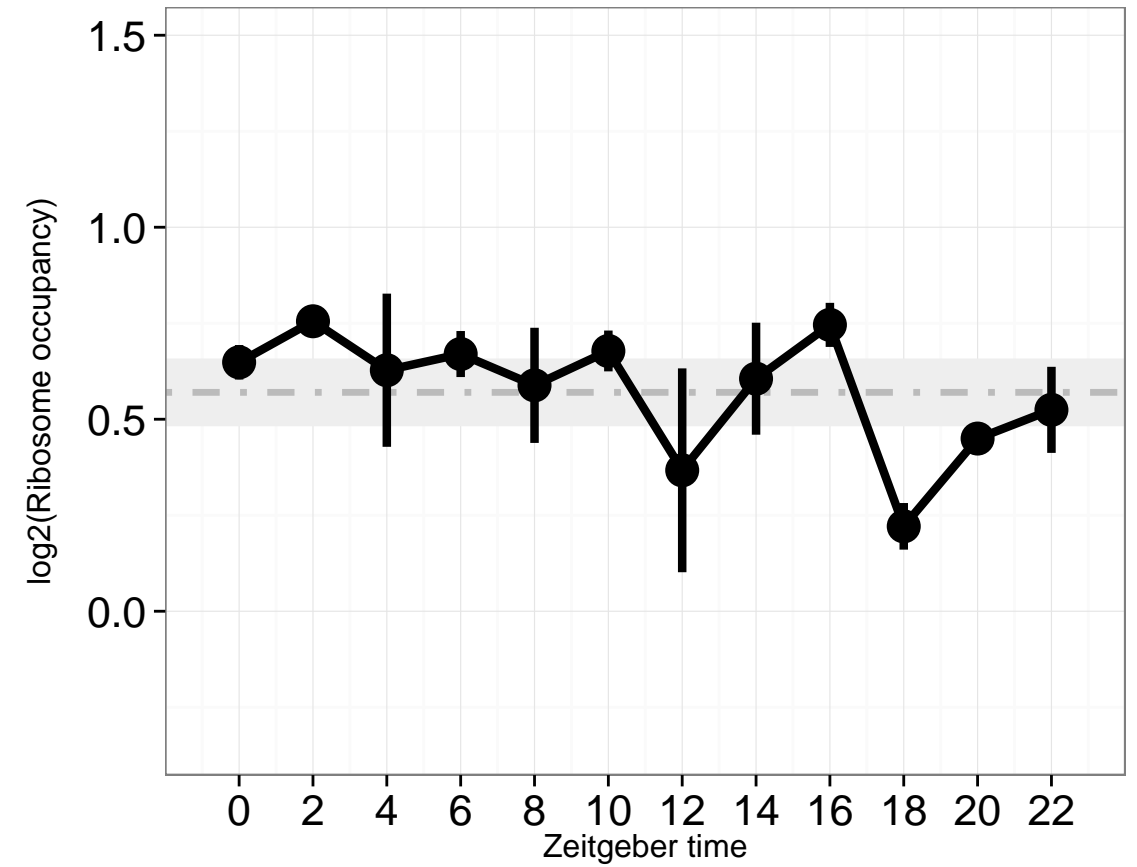

Supplement: Supplementary file 1805 [file 1]

## Nfkbie

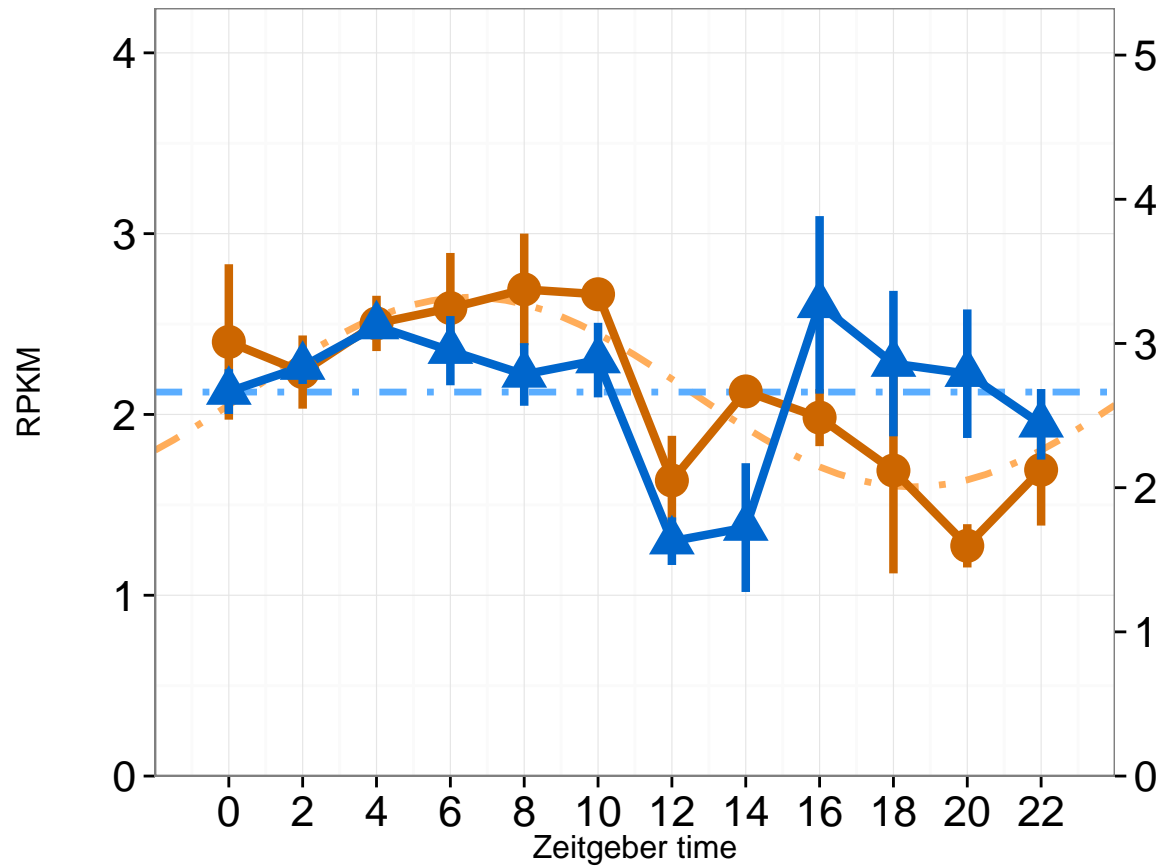

## Nfkbie

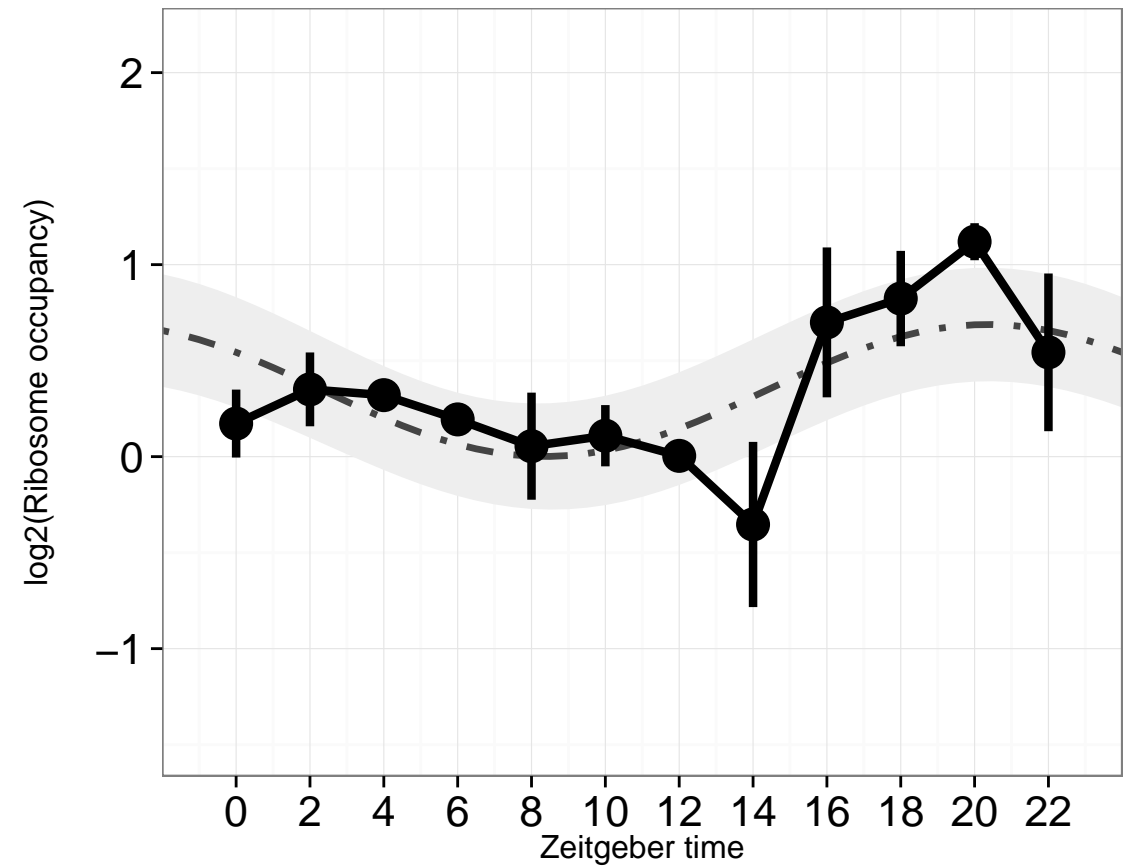

Supplement: Supplementary file 1806 [file 1]

## Slc10a2

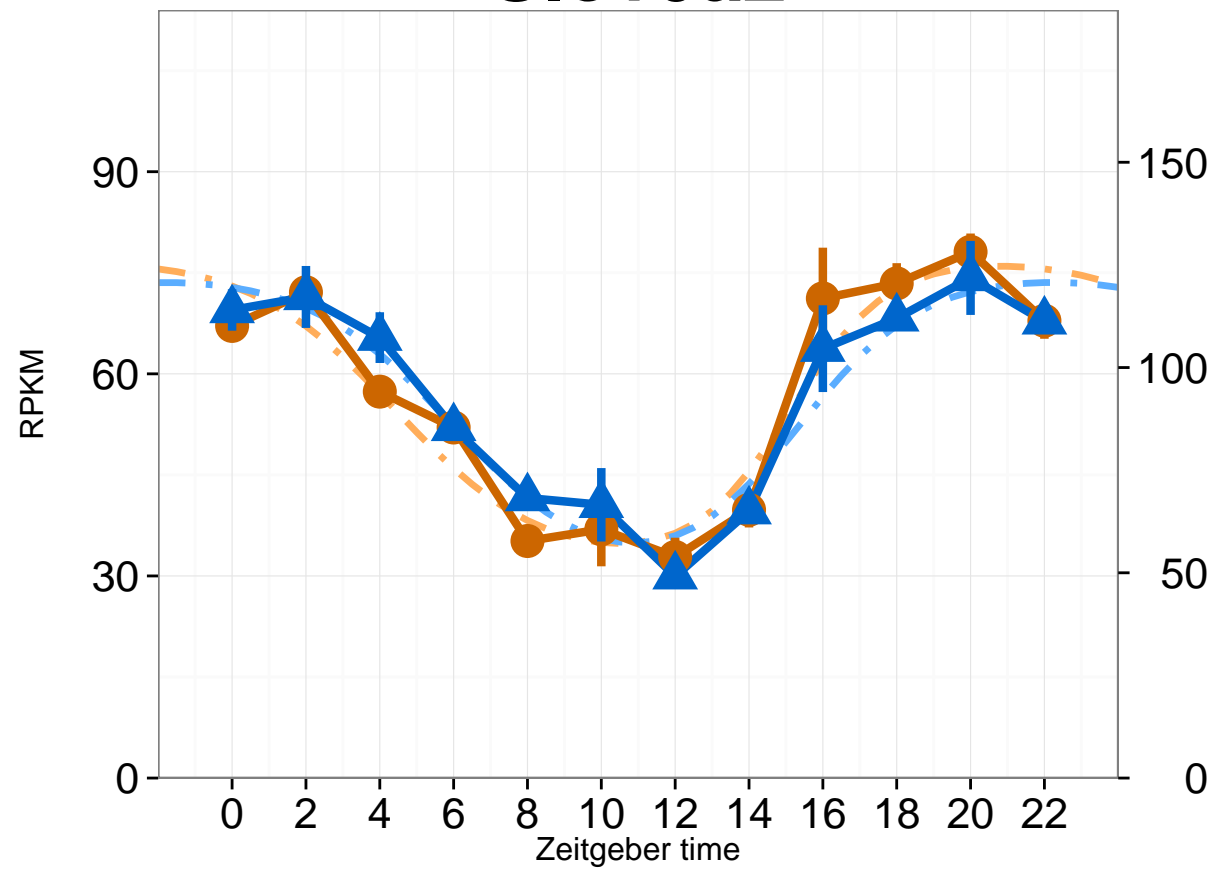

## Slc10a2

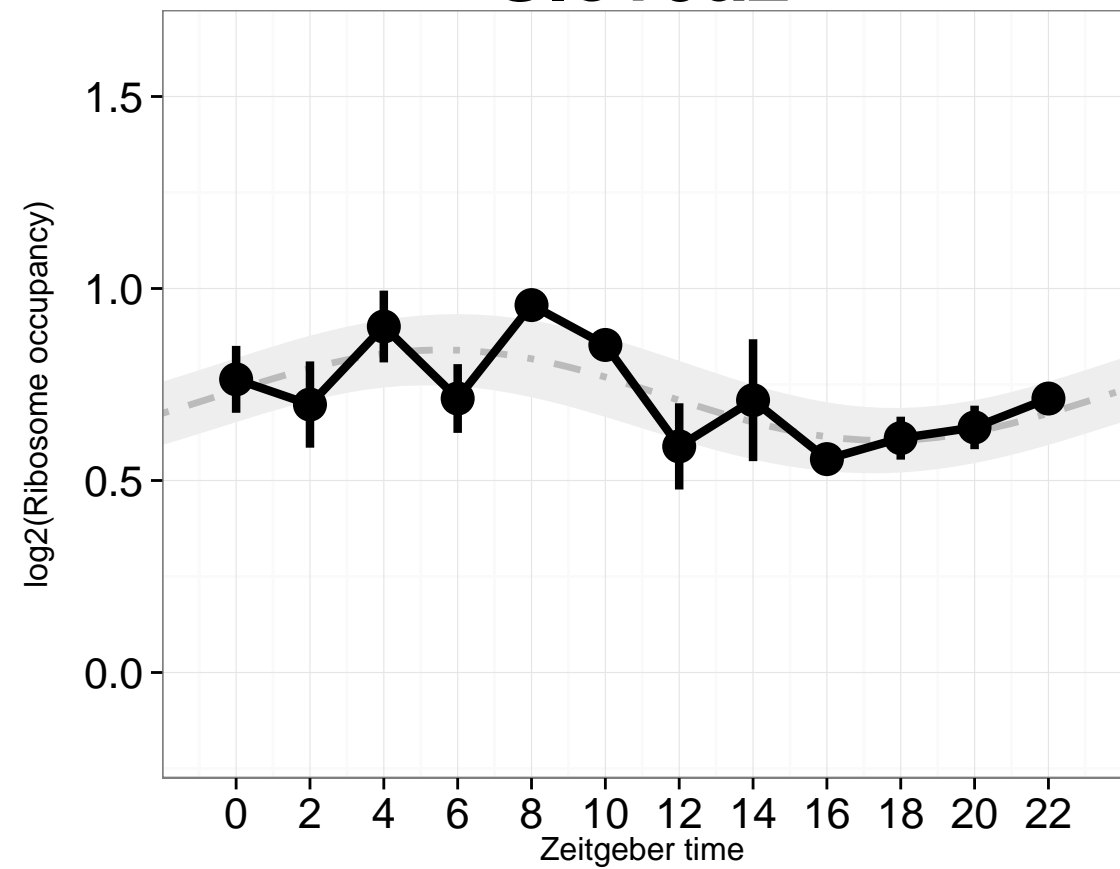

Supplement: Supplementary file 1807 [file 1]
