# Supplementary material (part 19 of 133)
Source: publisher figshare collection journal article supplement (https://springernature.figshare.com/articles/dataset/_/4903193)

# Atp6v1e1

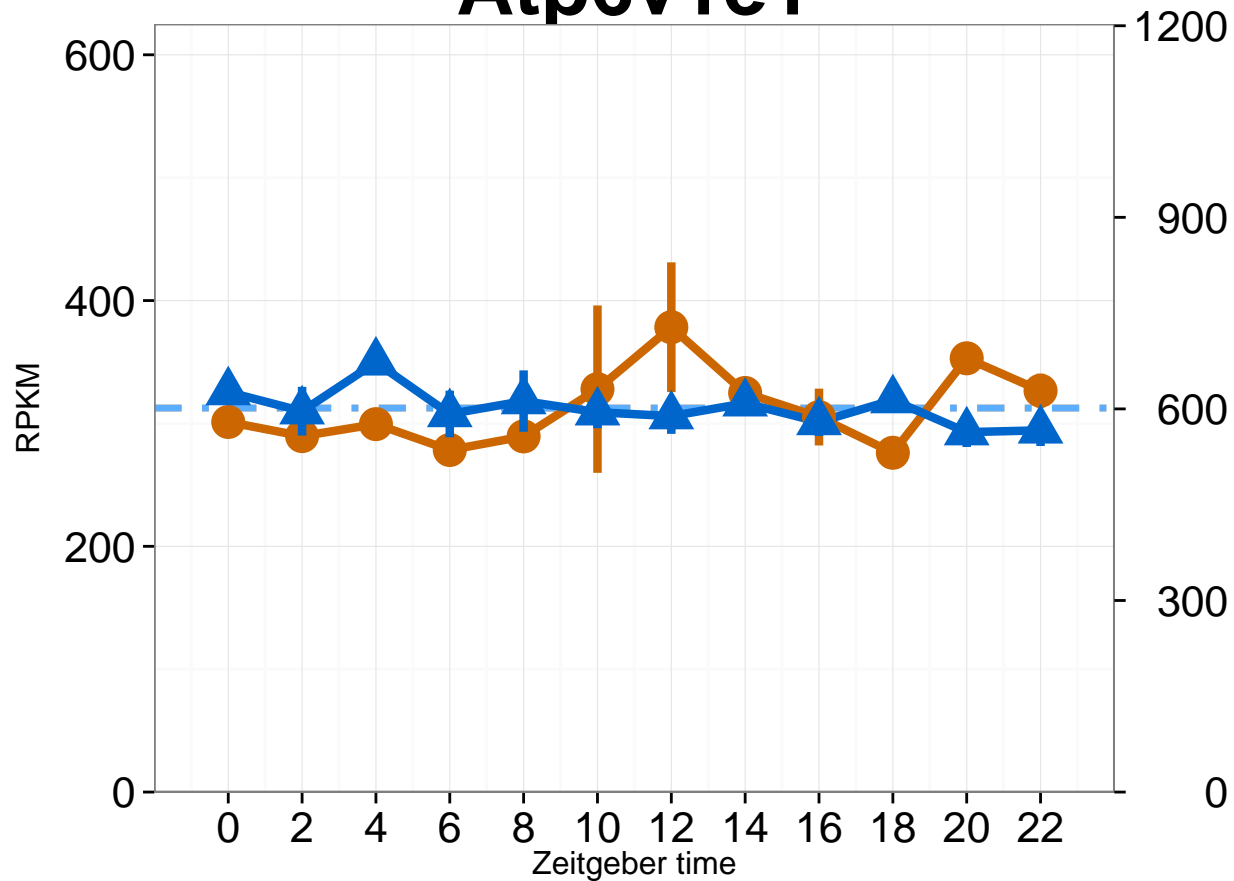

# Atp6v1e1

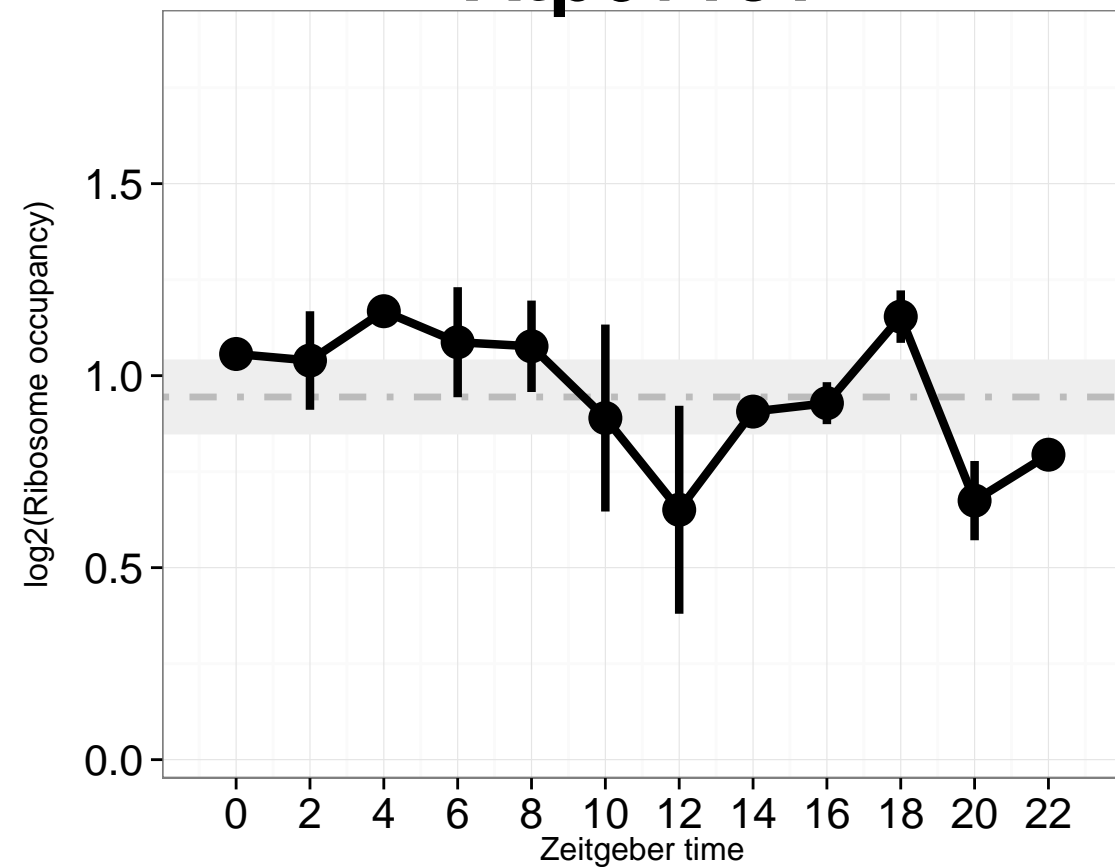

Supplement: Supplementary file 1808 [file 1]

## Sbno2

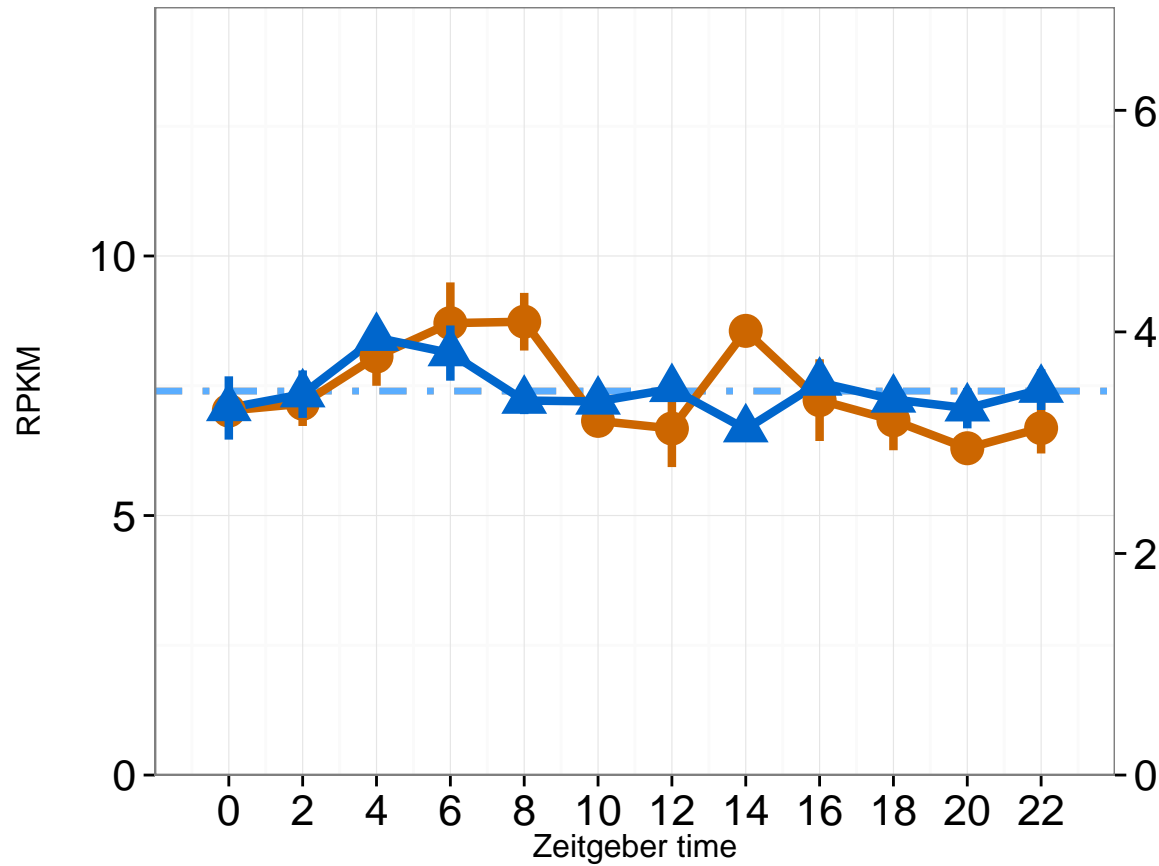

## Sbno2

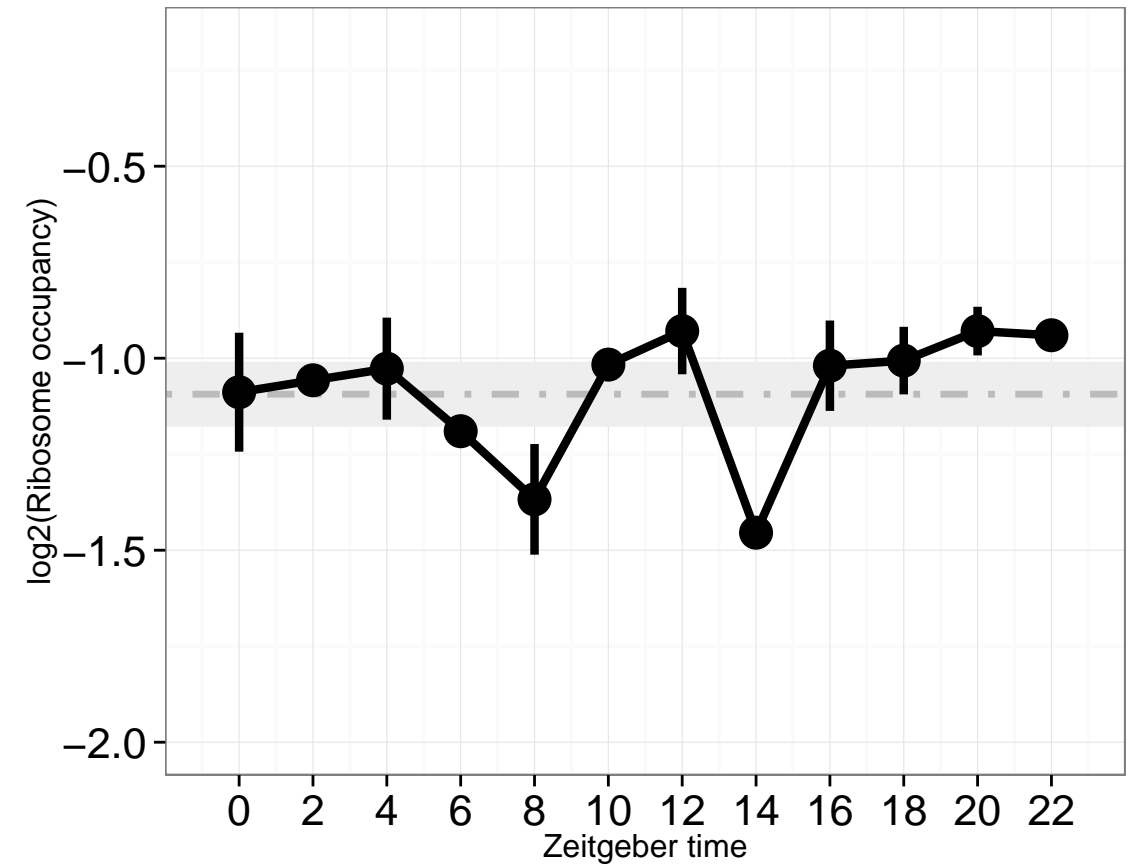

Supplement: Supplementary file 1809 [file 1]

## Zswim6

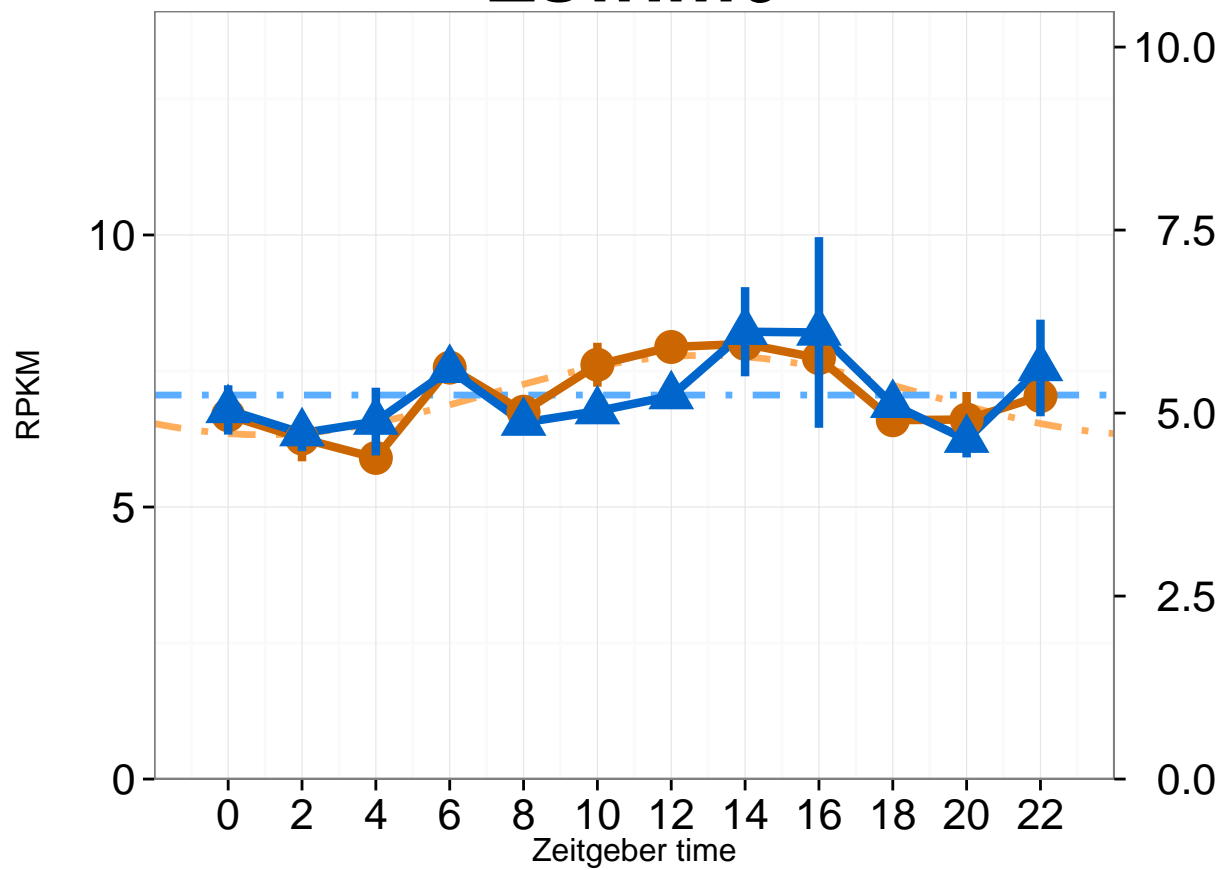

## Zswim6

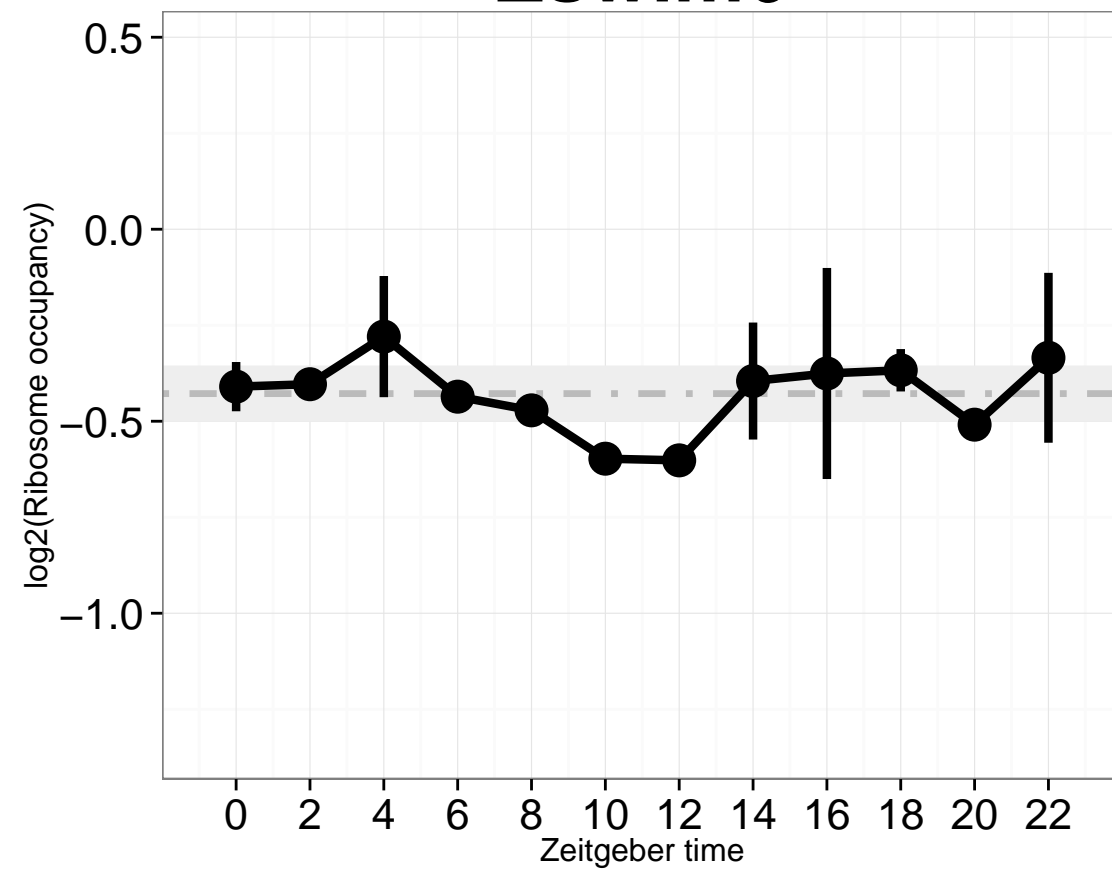

Supplement: Supplementary file 1810 [file 1]

# Ift43

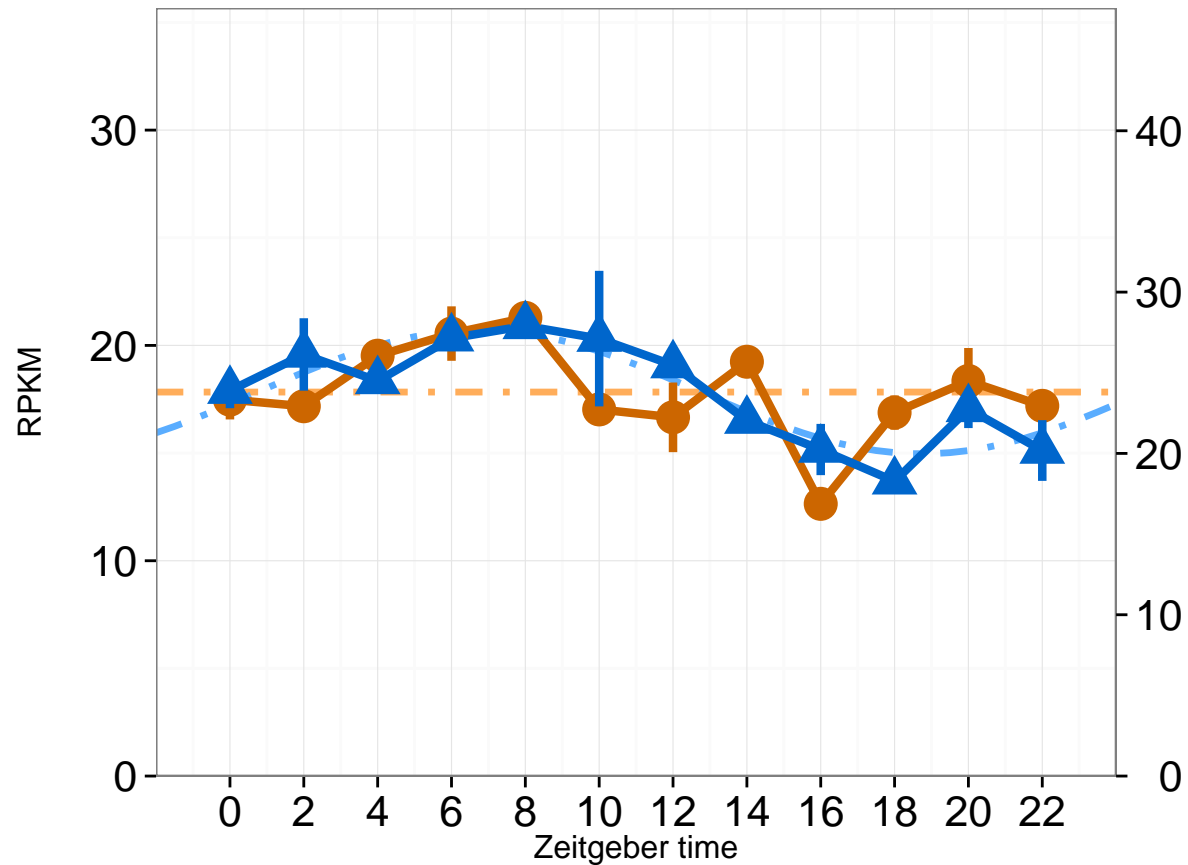

# Ift43

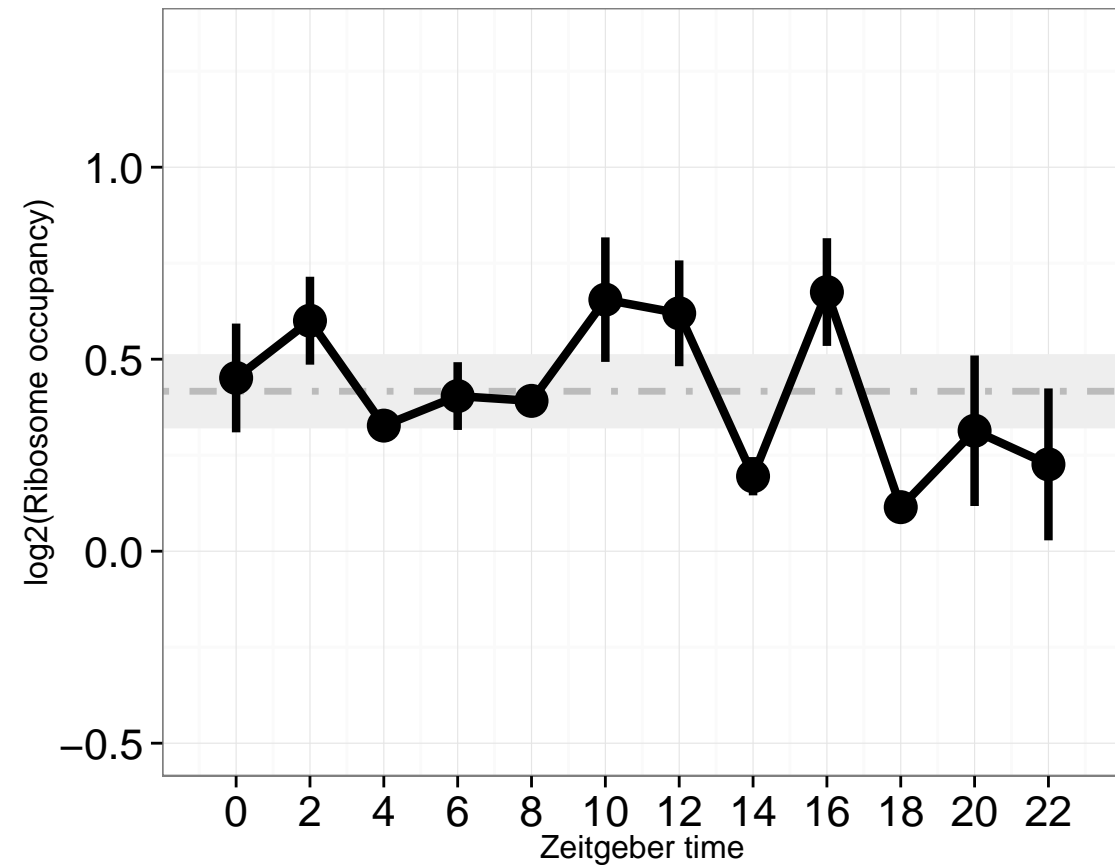

Supplement: Supplementary file 1811 [file 1]

# Ppp1r13l

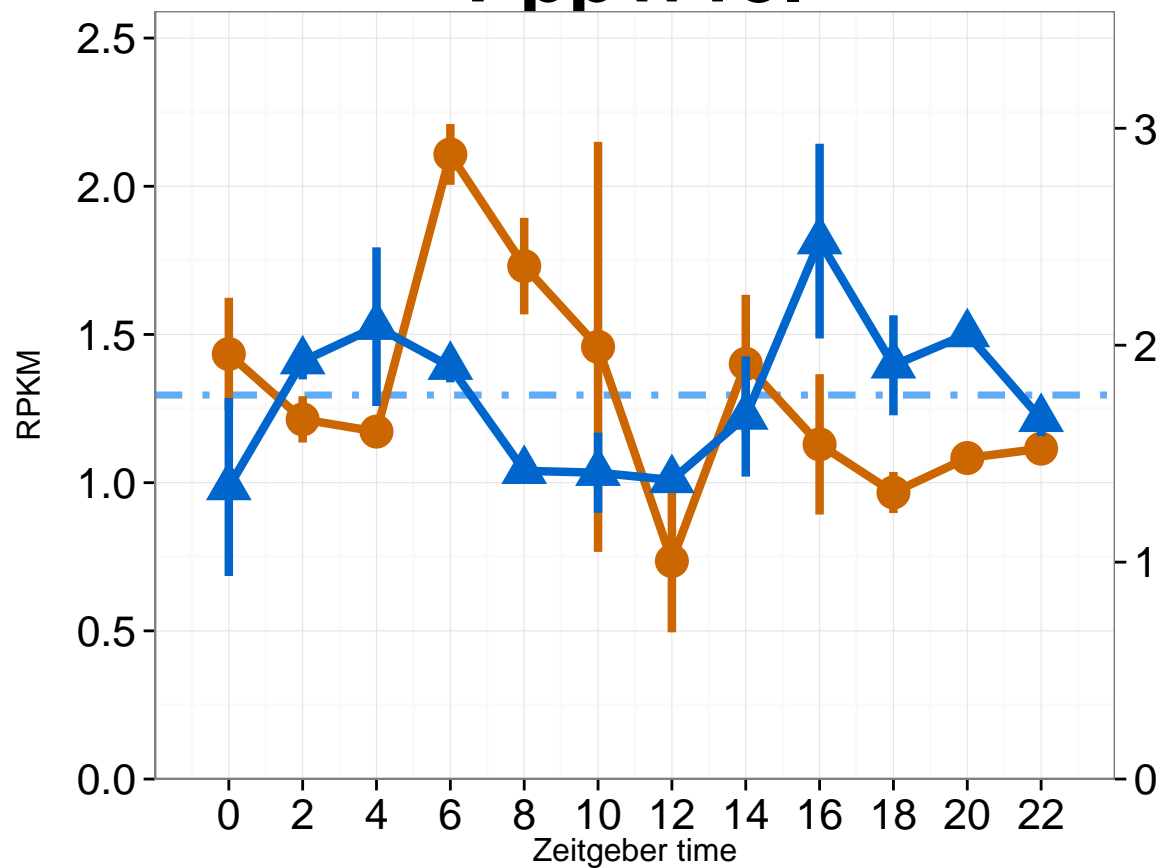

# Ppp1r13l

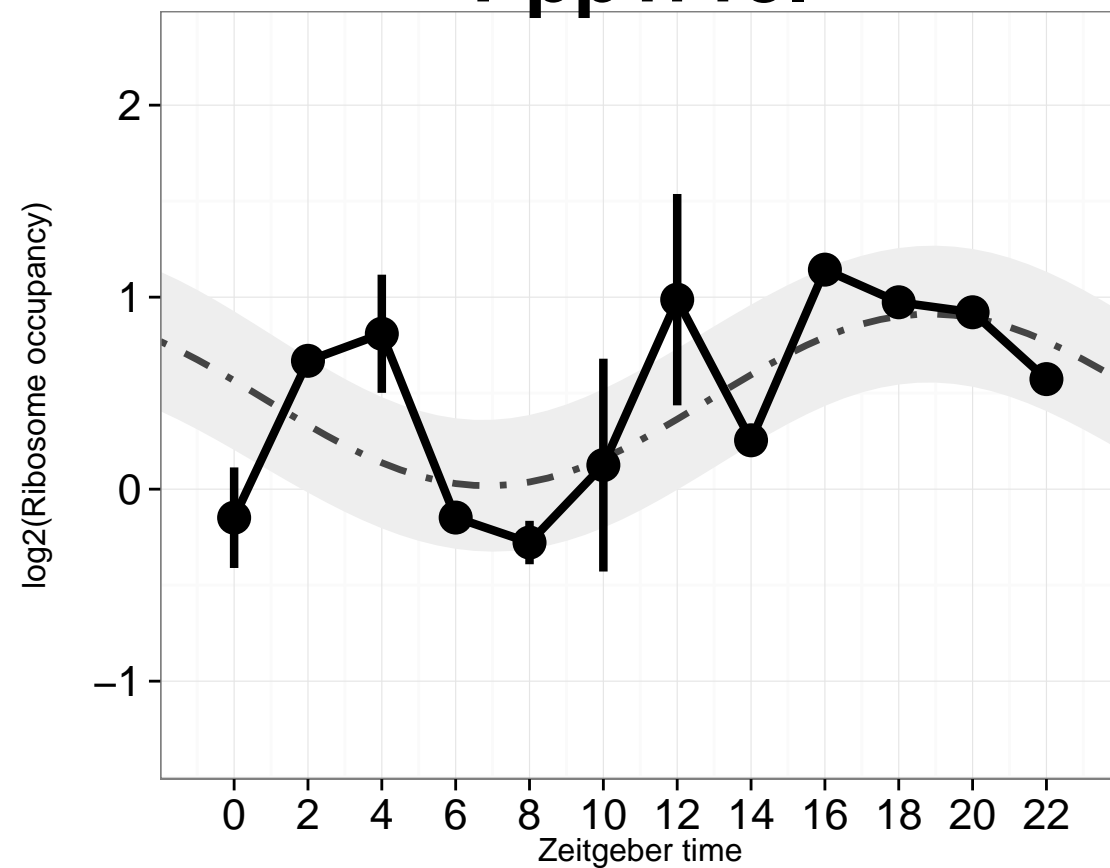

Supplement: Supplementary file 1812 [file 1]

# Gbp2

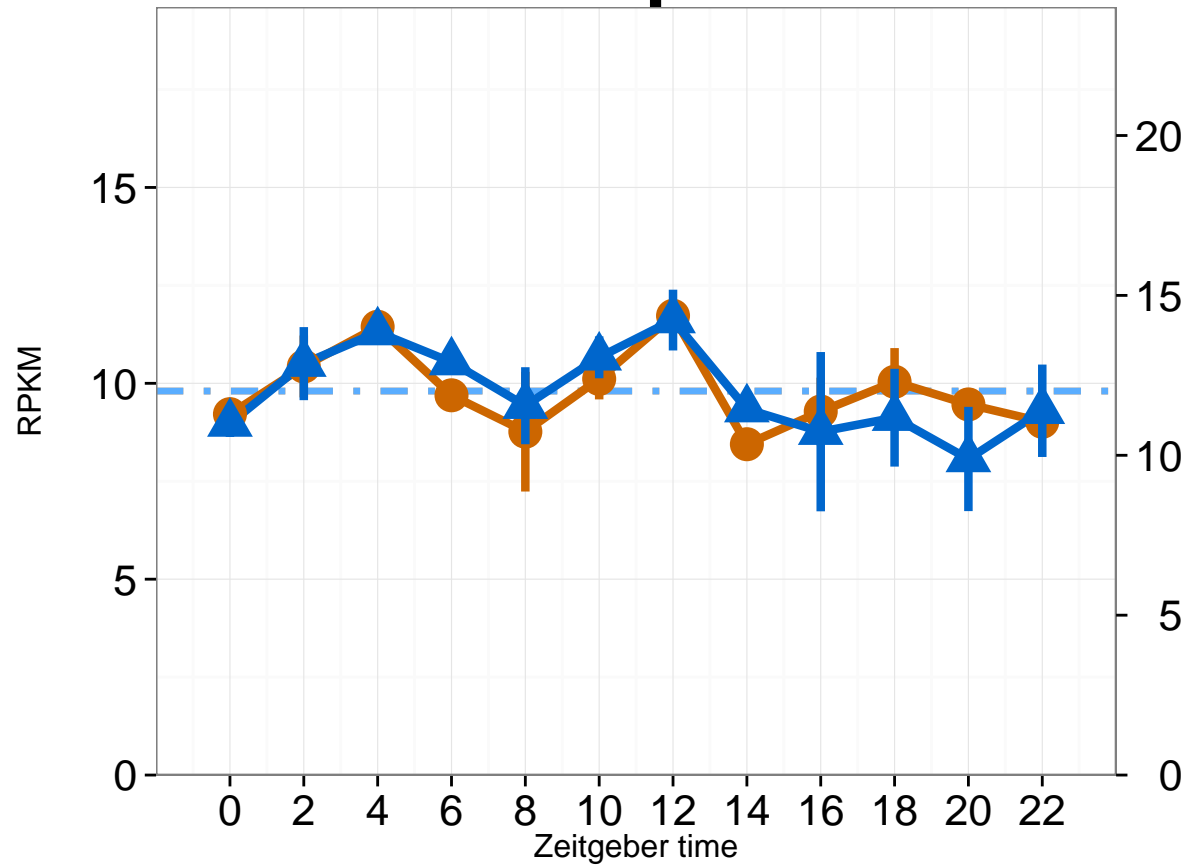

# Gbp2

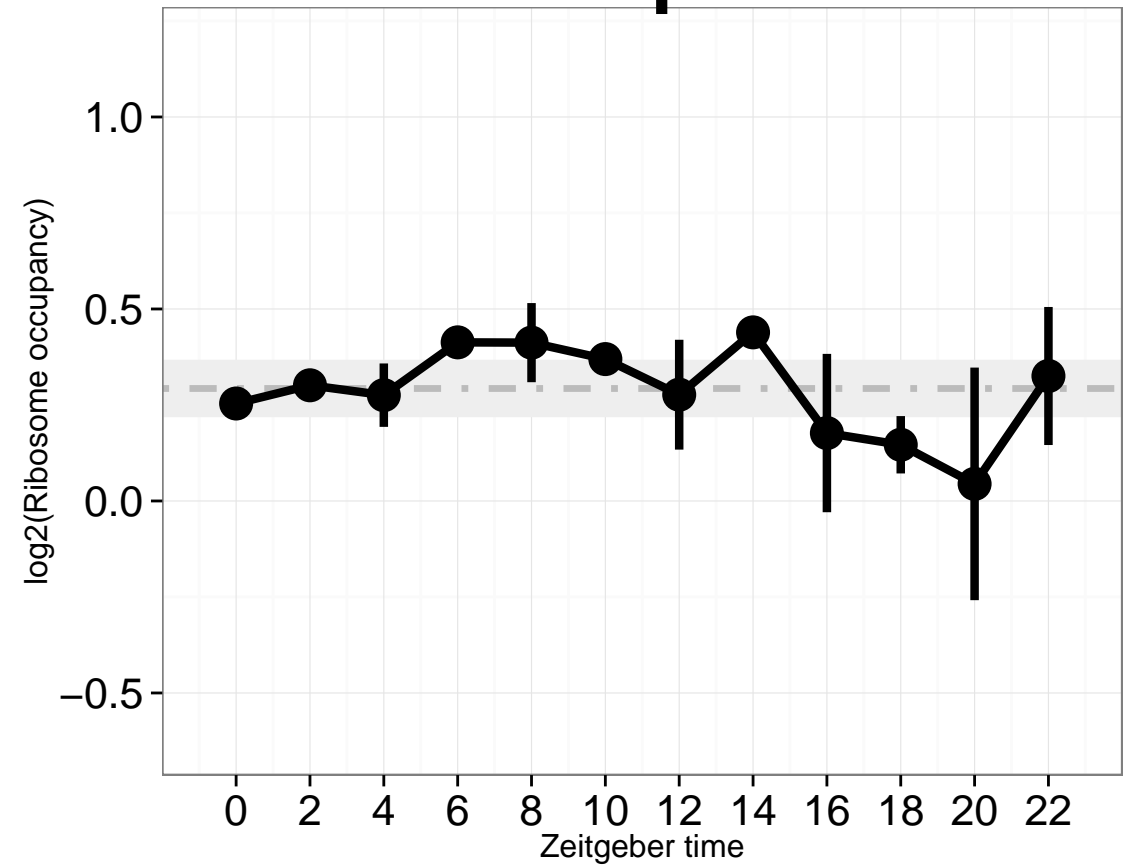

Supplement: Supplementary file 1813 [file 1]

# Atp8b1

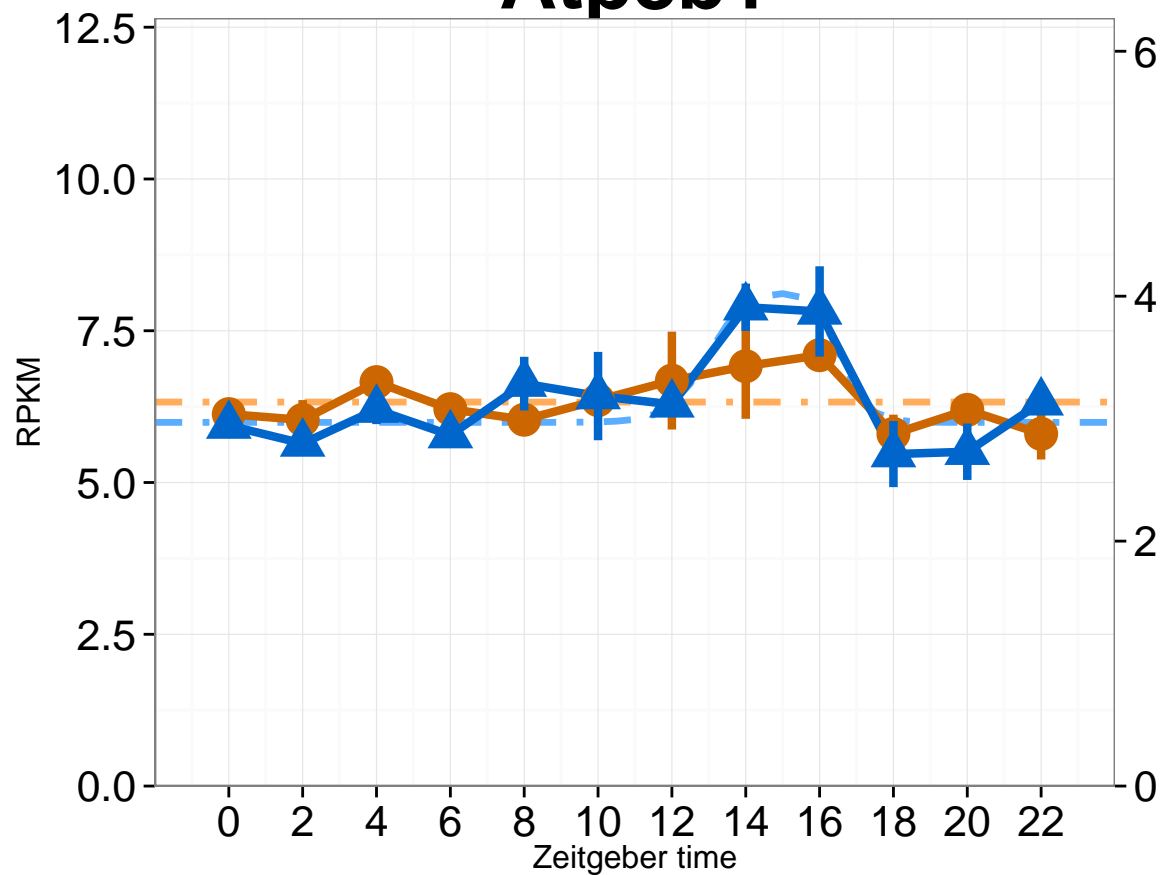

# Atp8b1

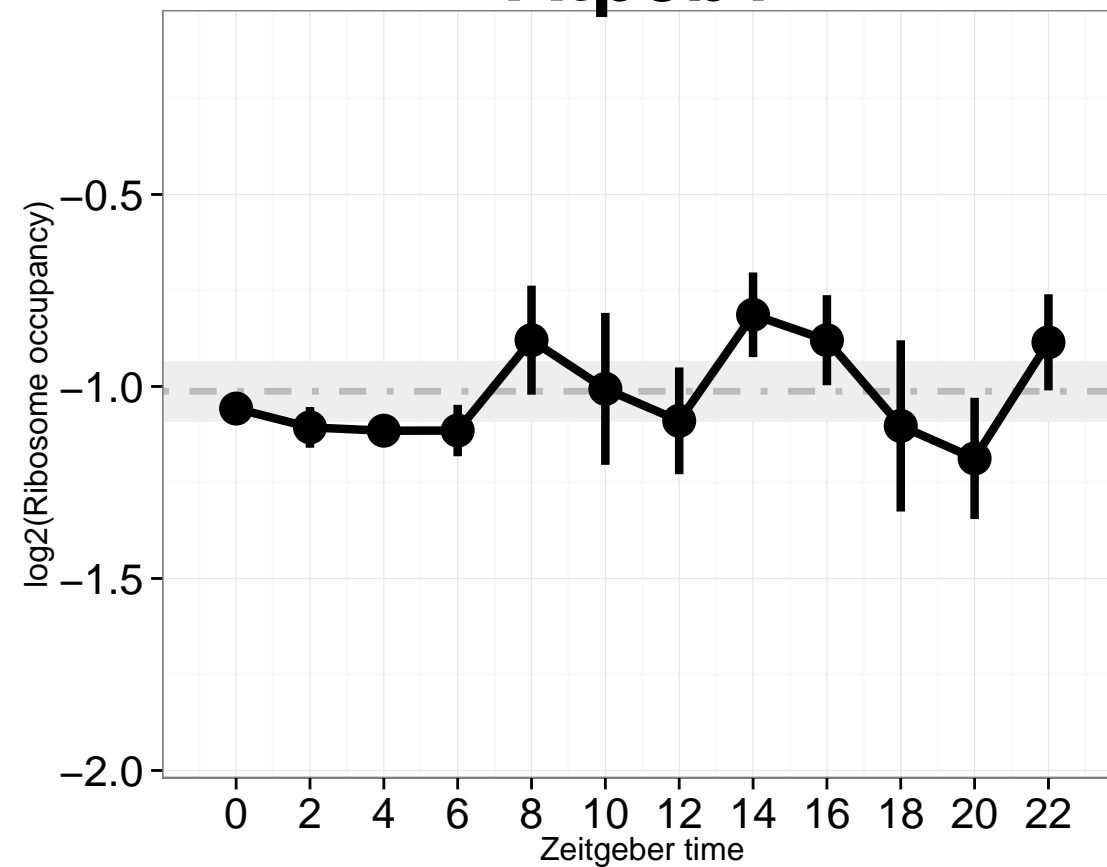

Supplement: Supplementary file 1814 [file 1]

## Jak1

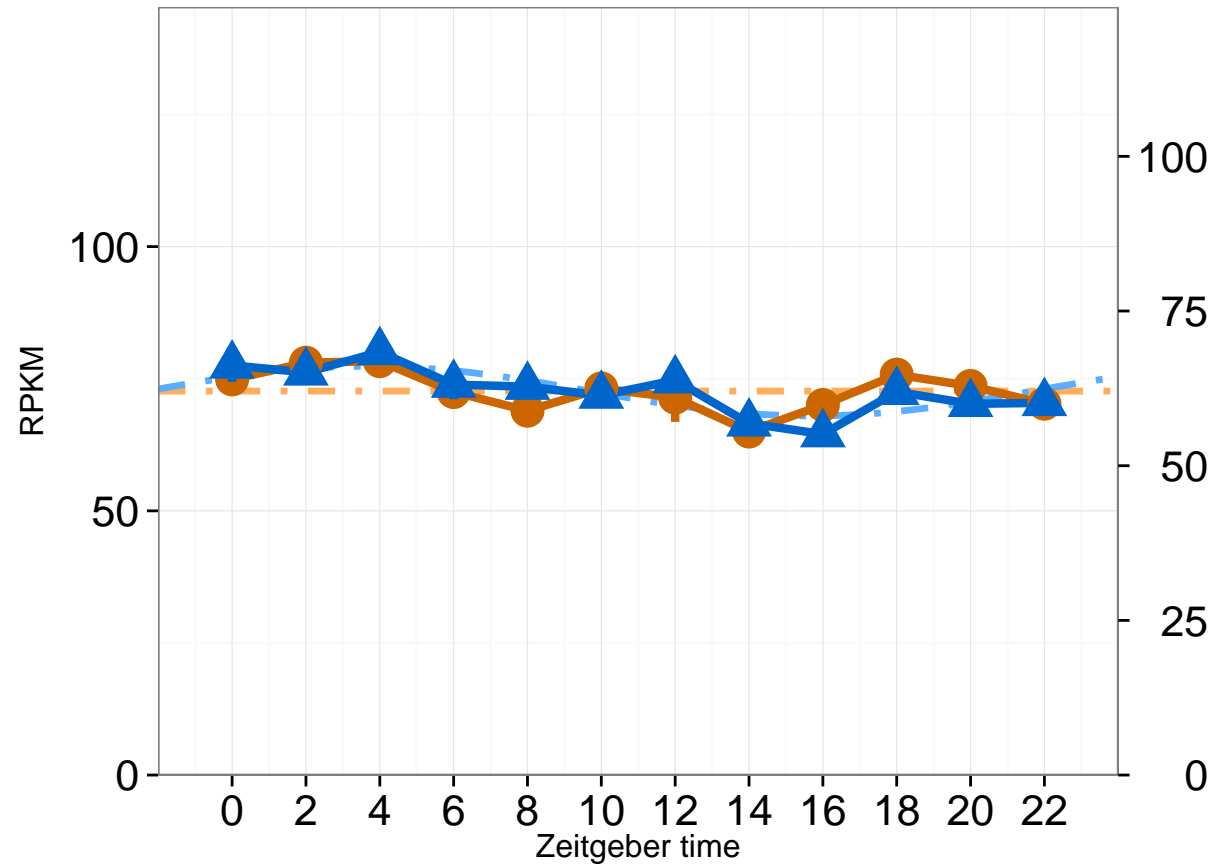

## Jak1

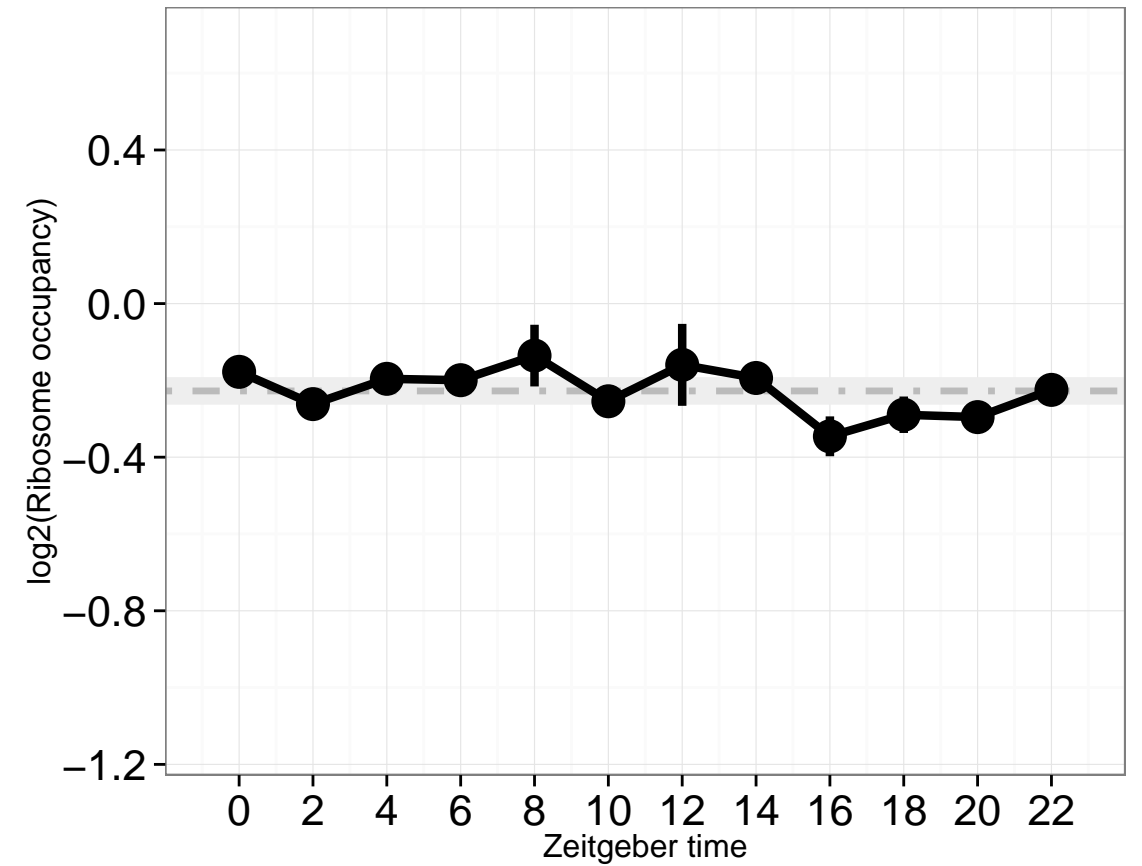

Supplement: Supplementary file 1815 [file 1]

## Uvssa

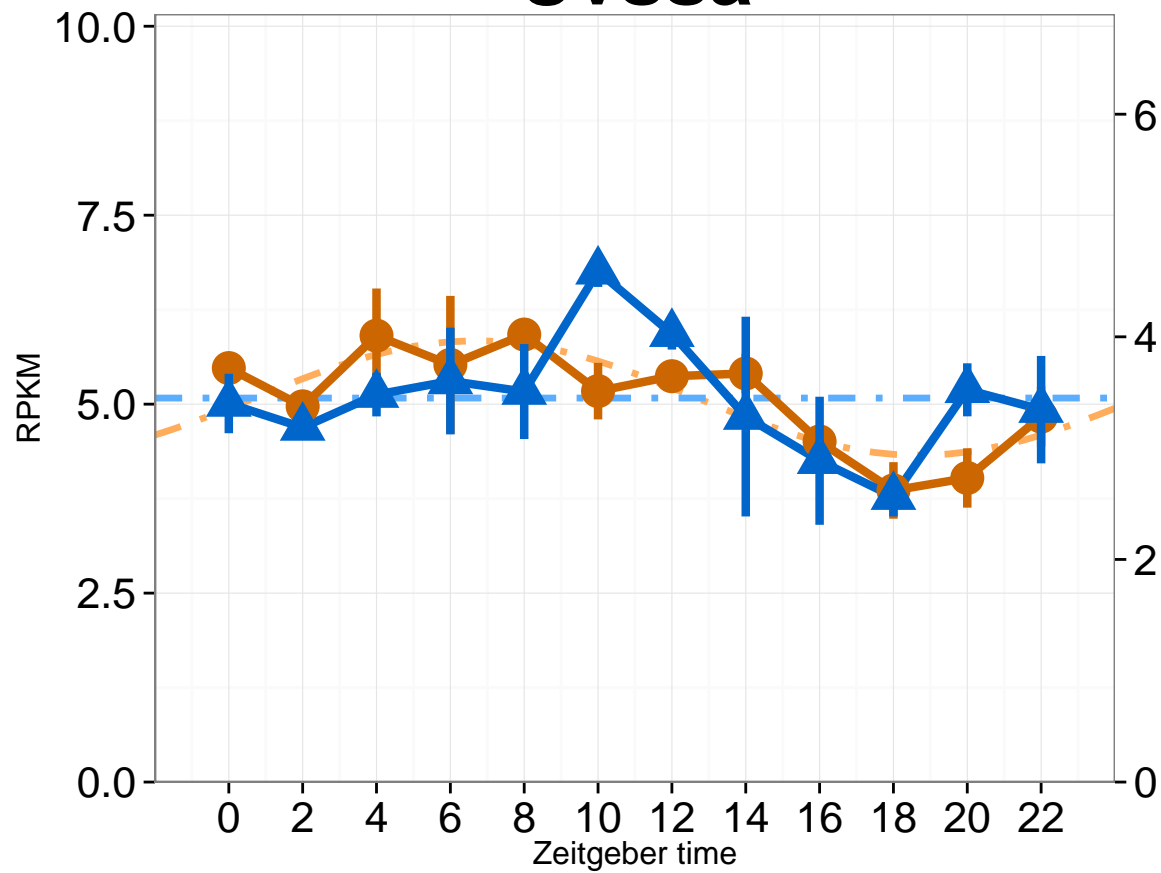

## Uvssa

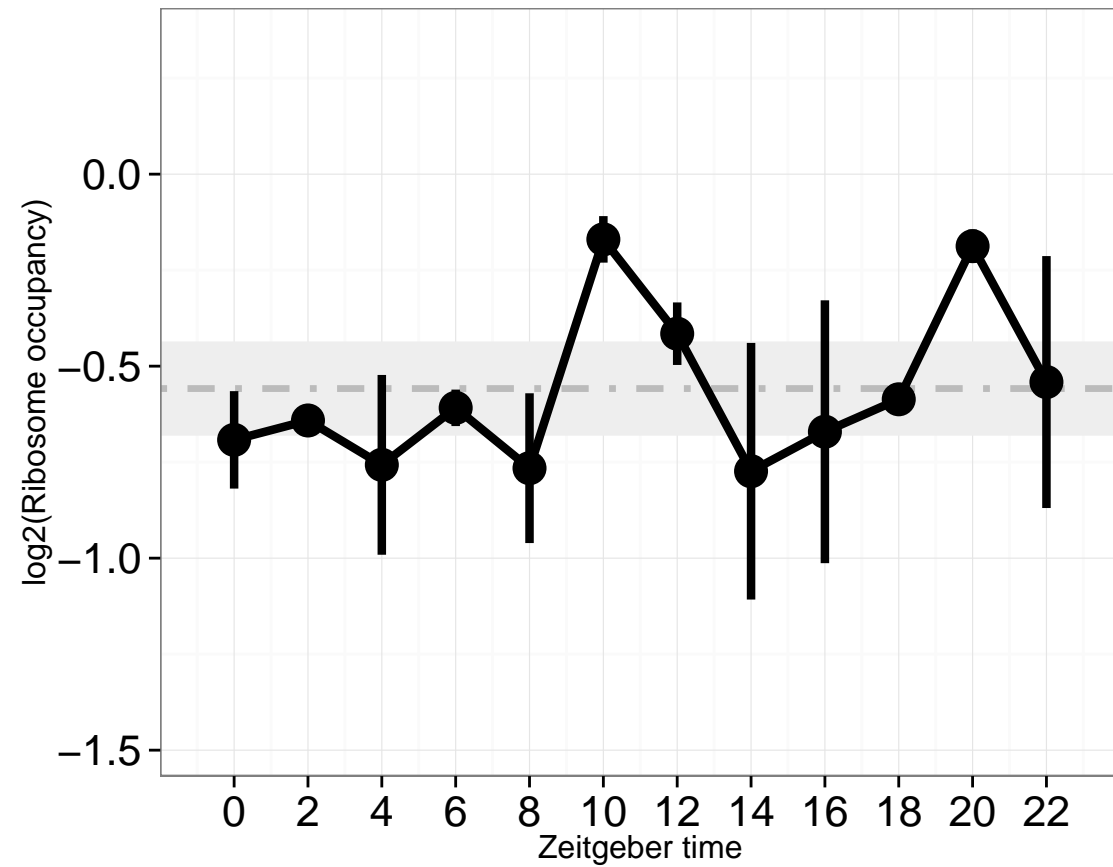

Supplement: Supplementary file 1816 [file 1]

# Trim26

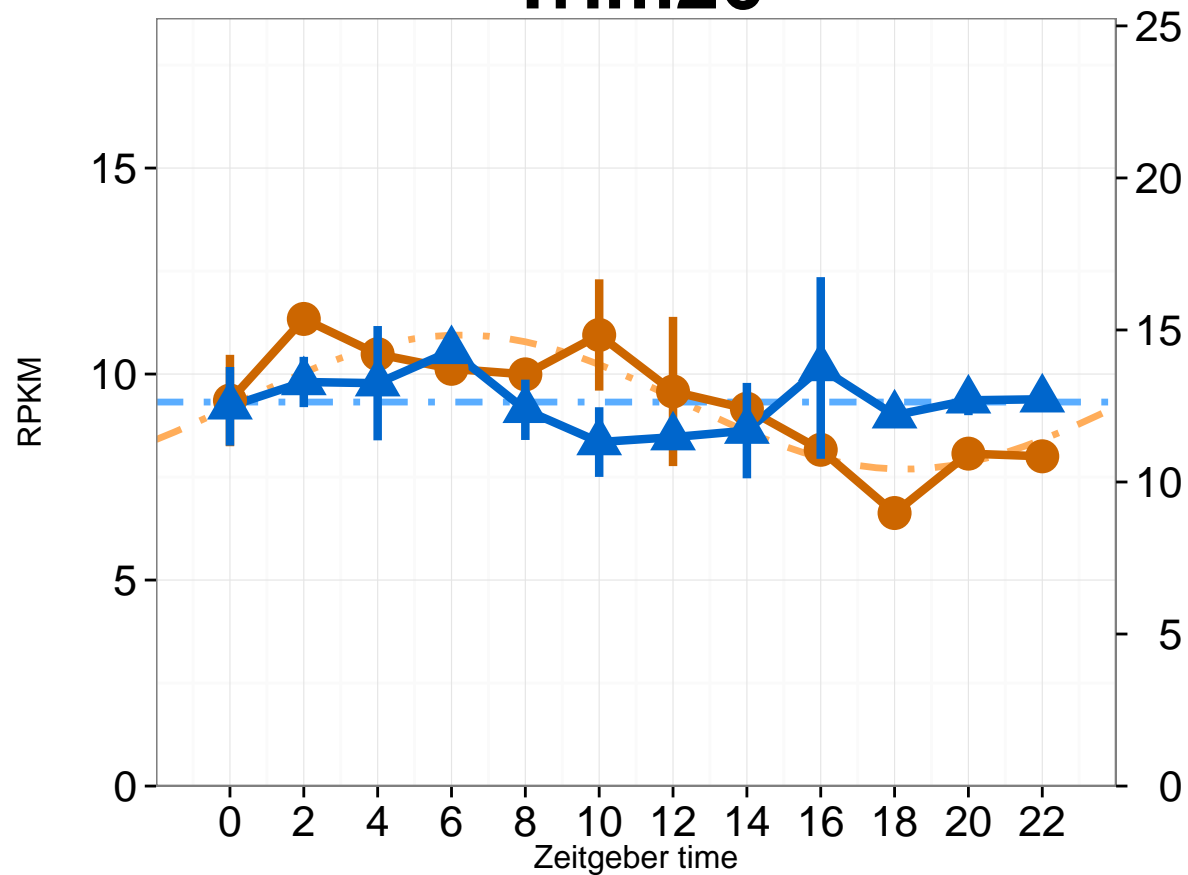

# Trim26

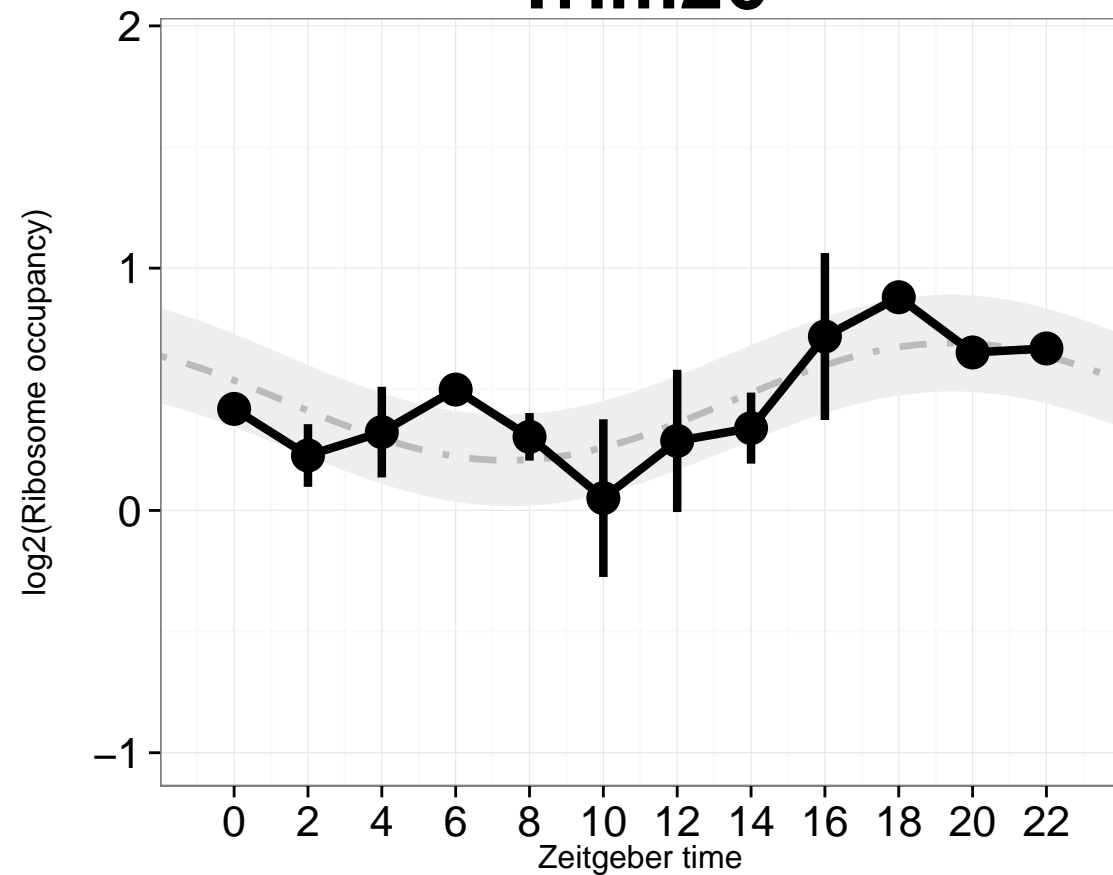

Supplement: Supplementary file 1817 [file 1]

# Sec31b

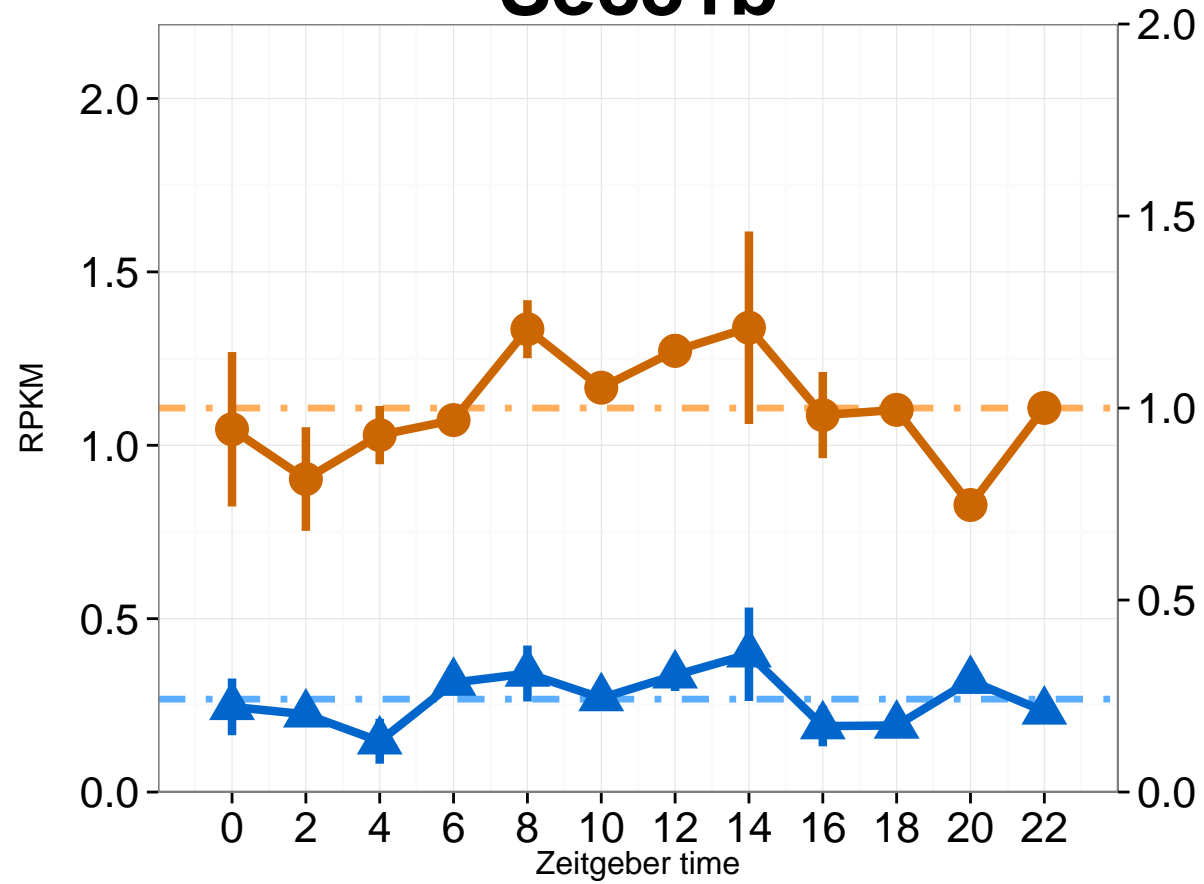

# Sec31b

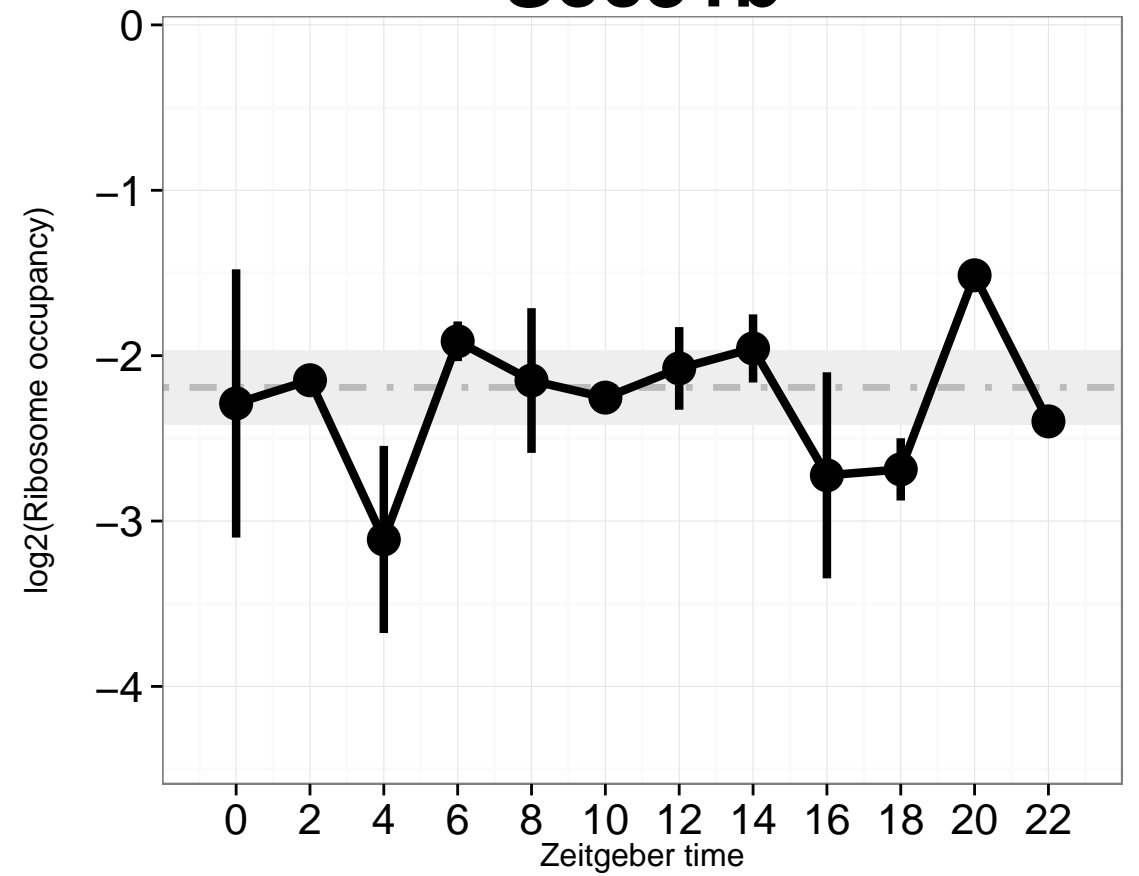

Supplement: Supplementary file 1818 [file 1]

# Chaf1b

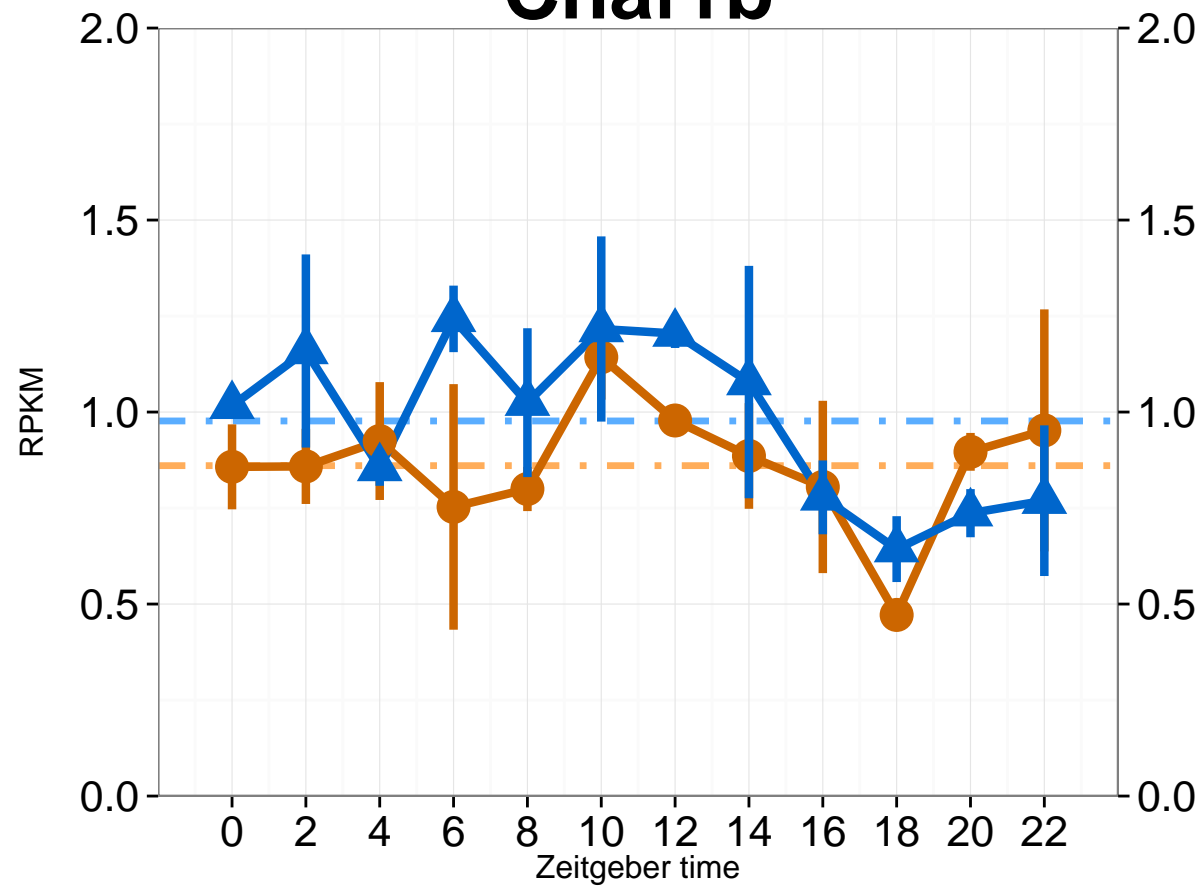

# Chaf1b

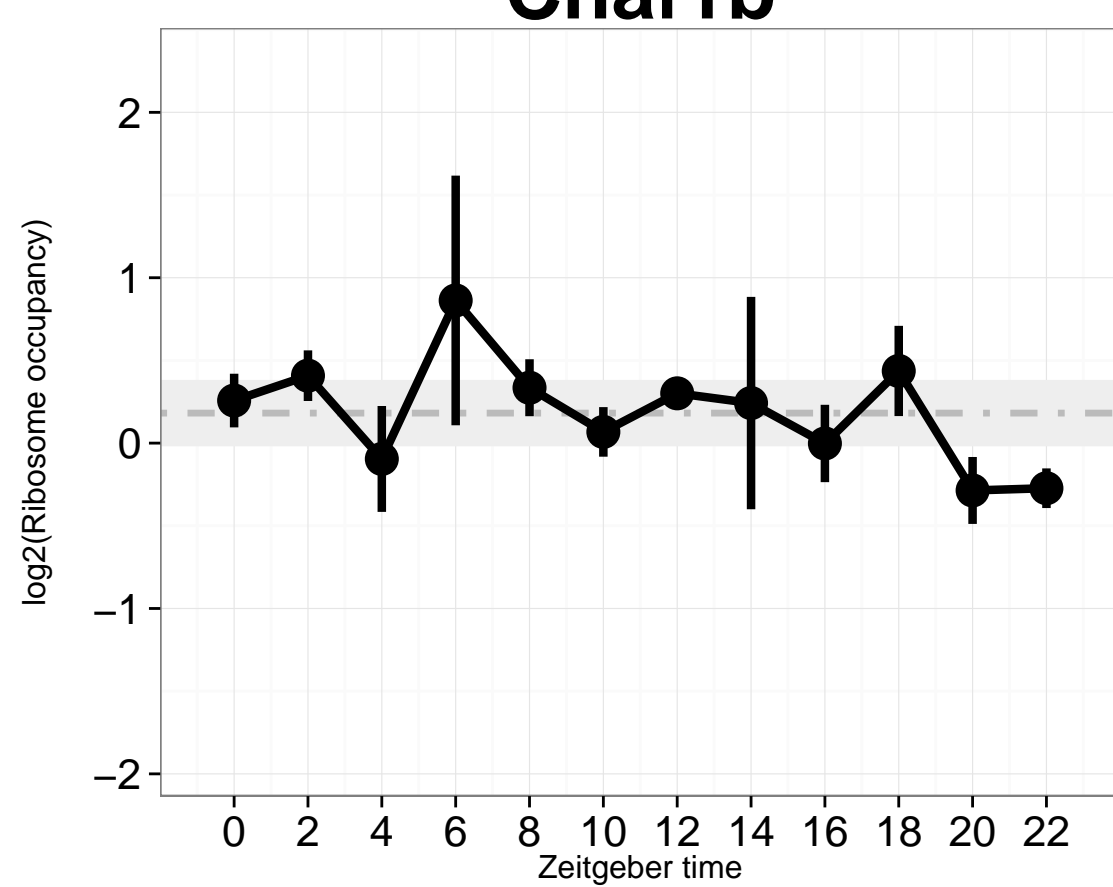

Supplement: Supplementary file 1819 [file 1]

# LiPe

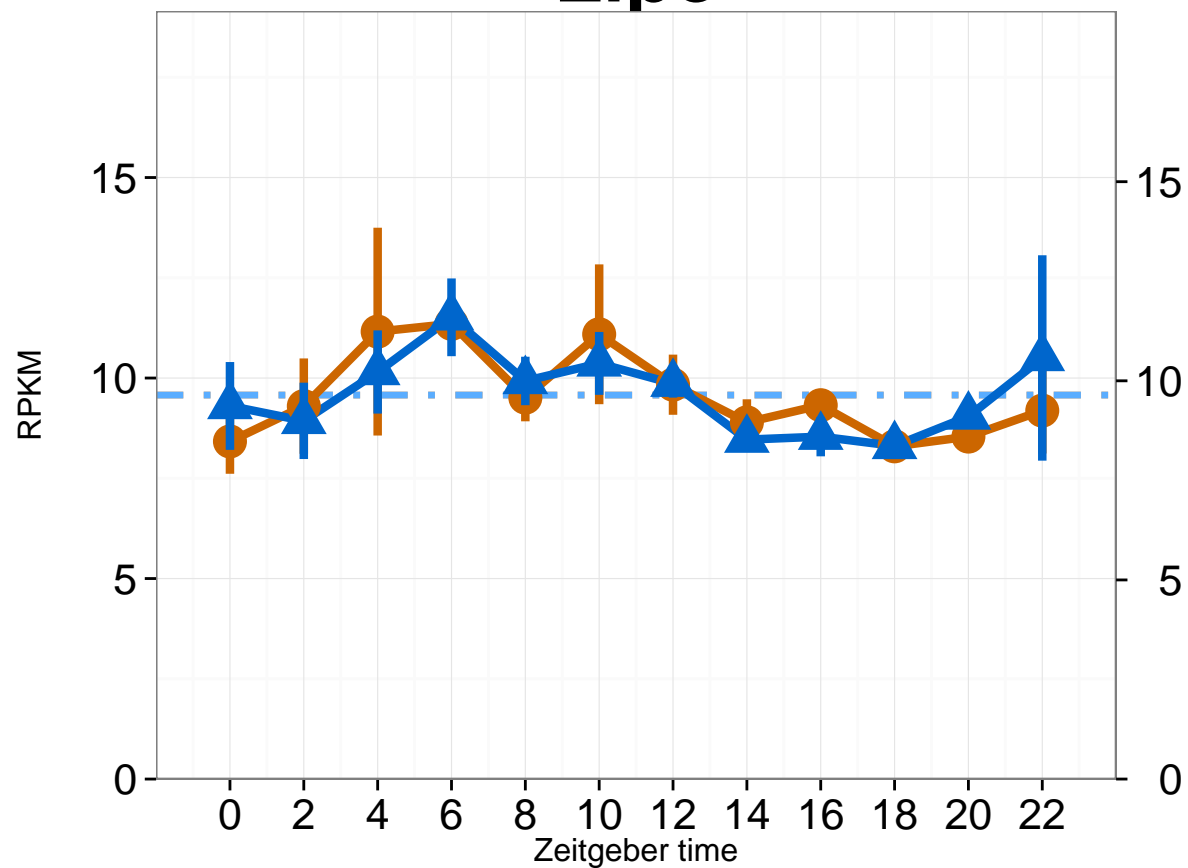

# LiPe

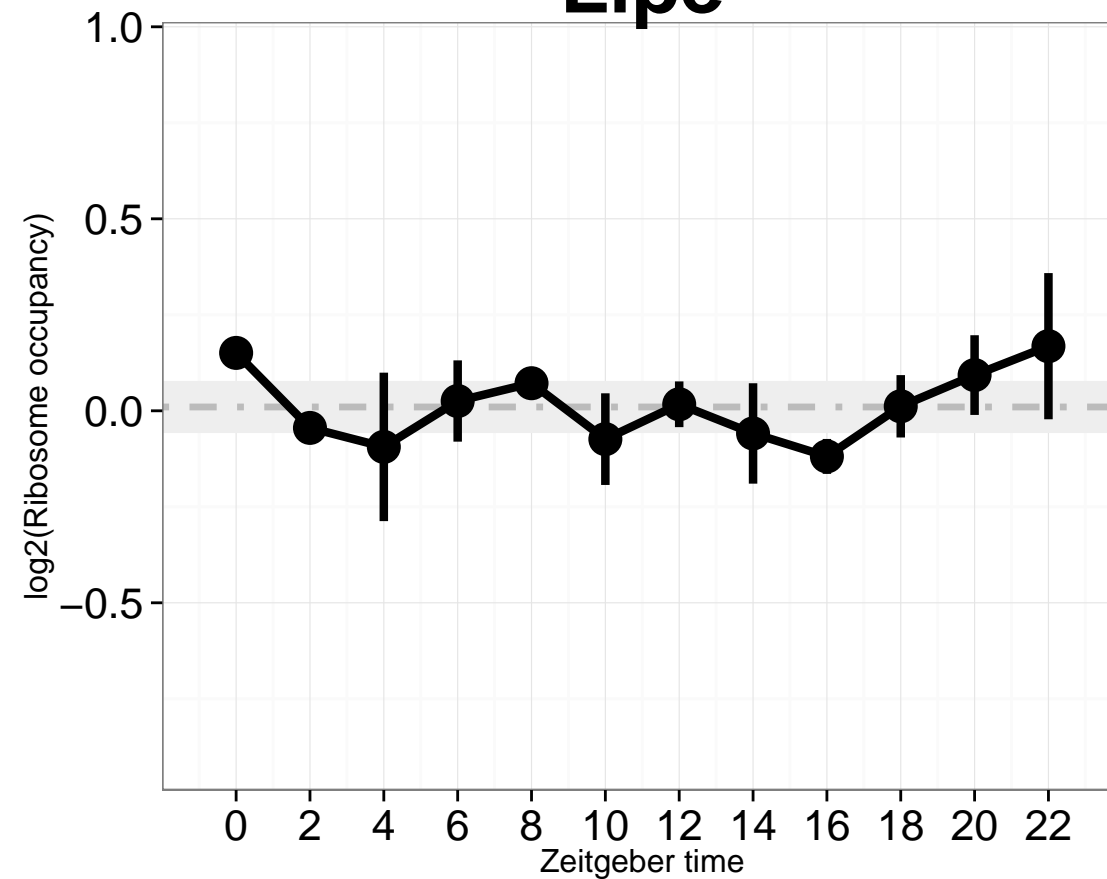

Supplement: Supplementary file 1820 [file 1]

## Synpr

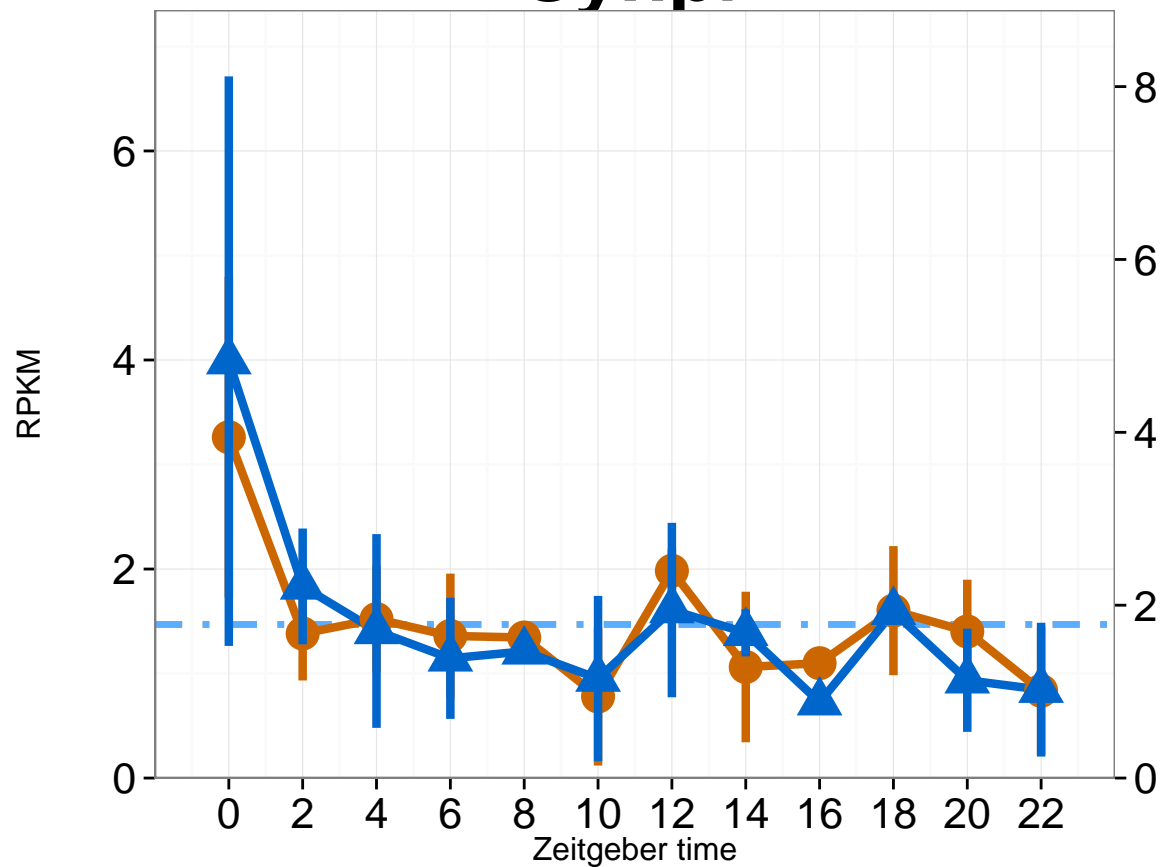

## Synpr

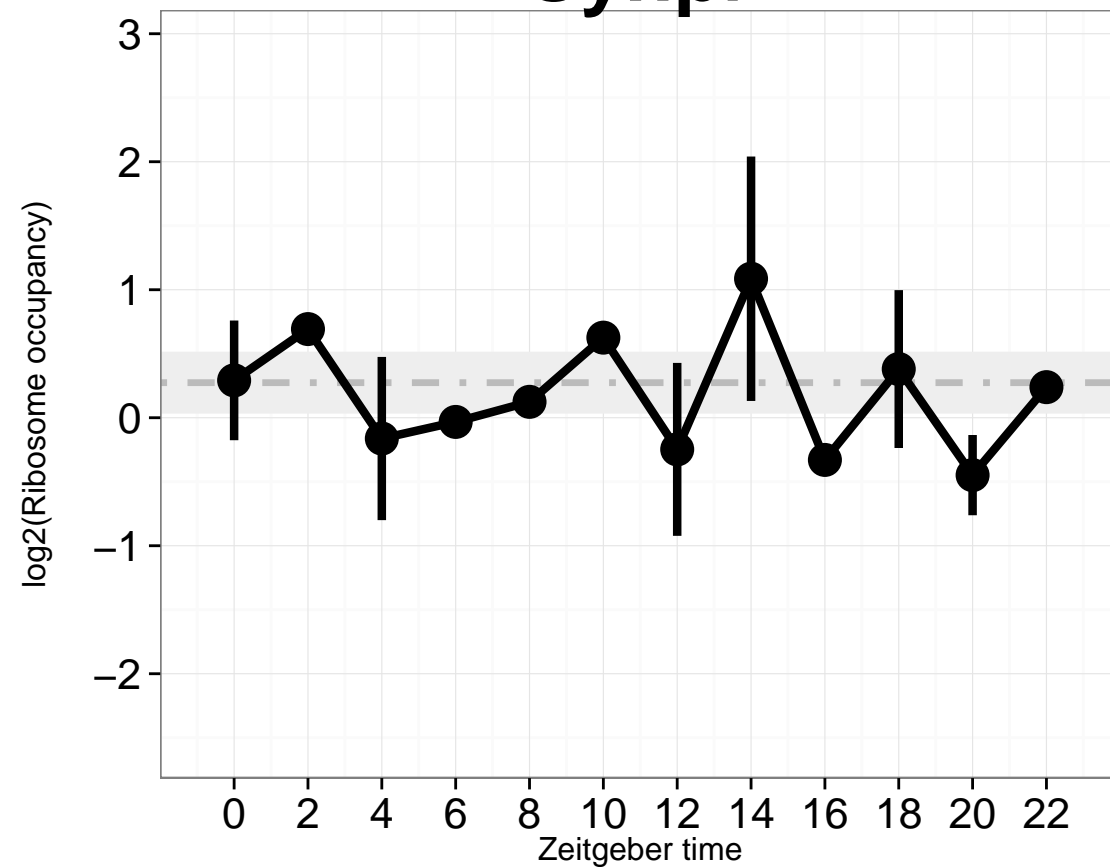

Supplement: Supplementary file 1821 [file 1]

## Esco1

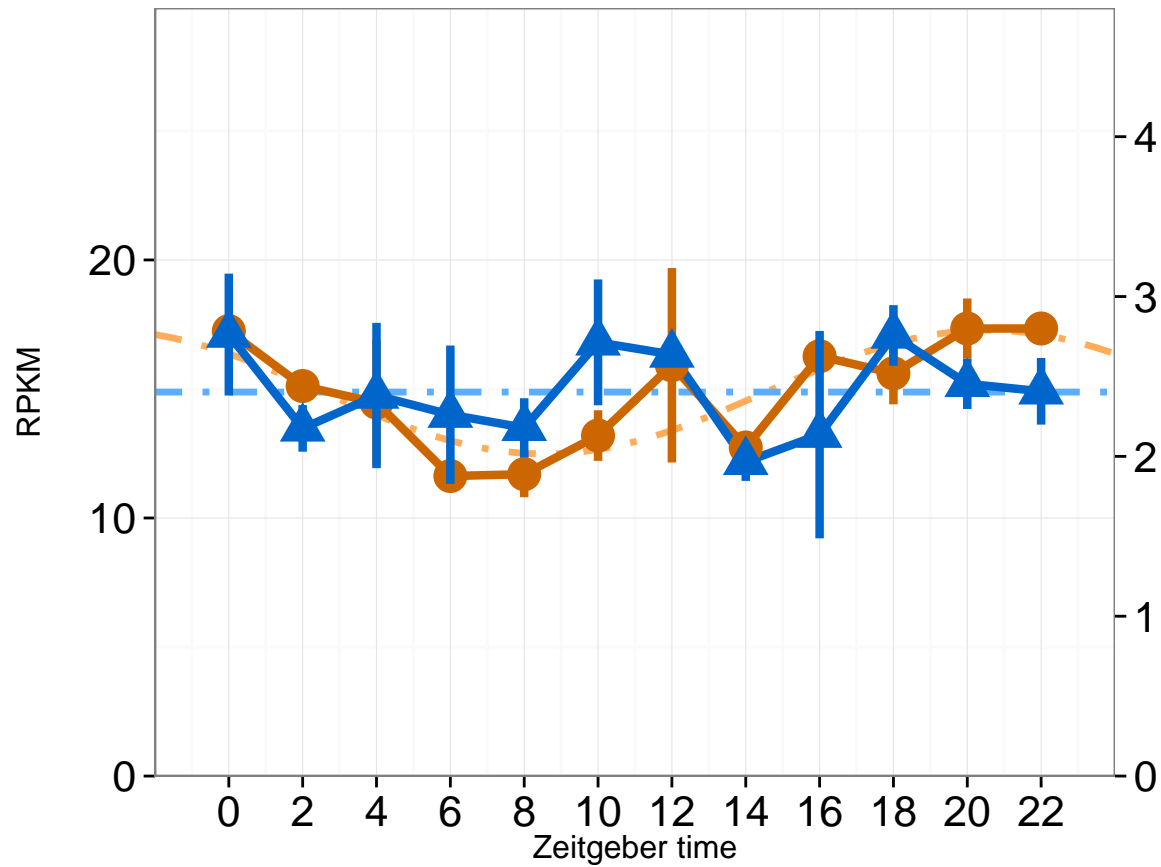

## Esco1

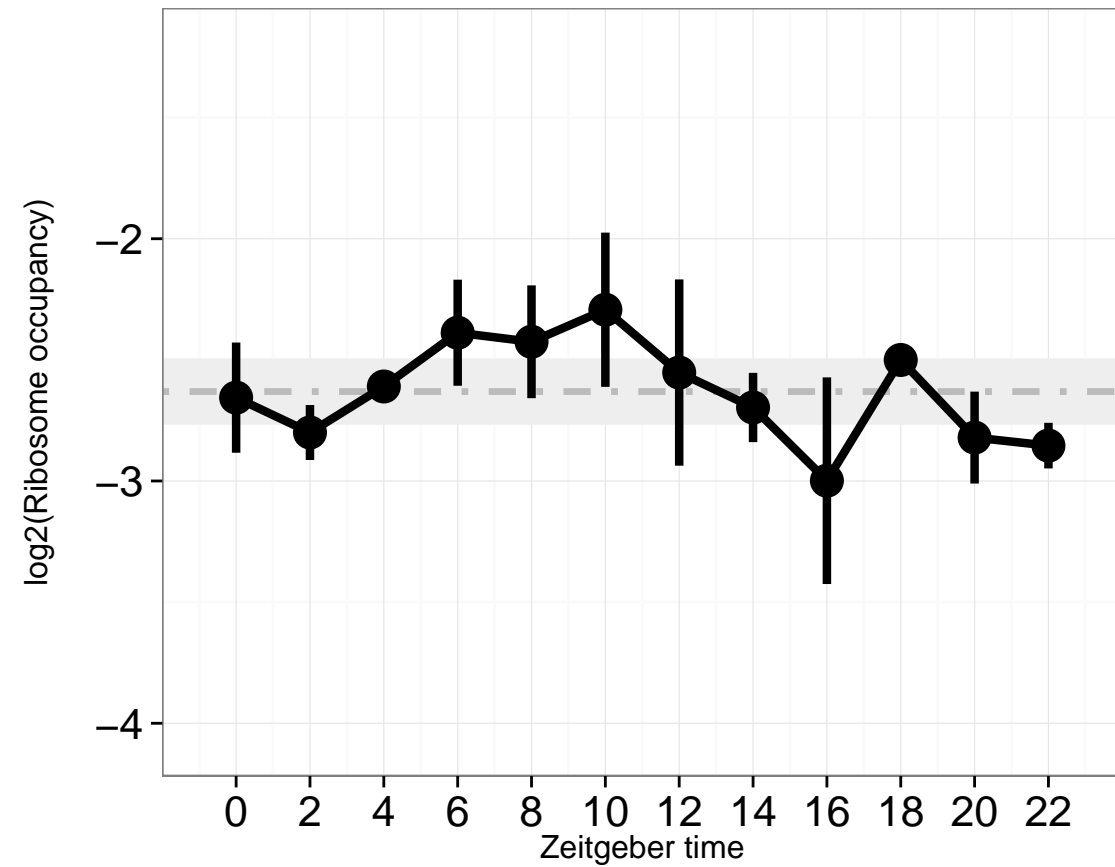

Supplement: Supplementary file 1822 [file 1]

# Ccdc108

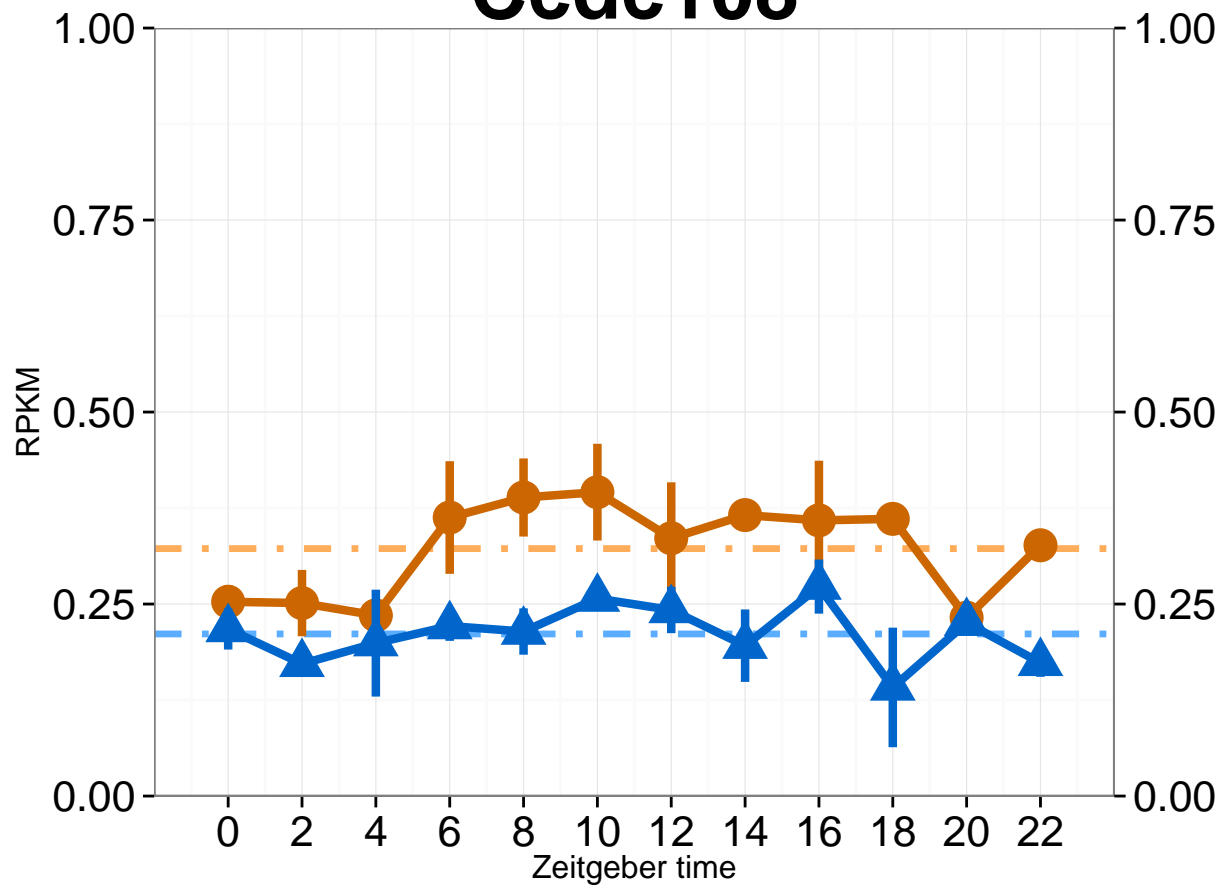

# Ccdc108

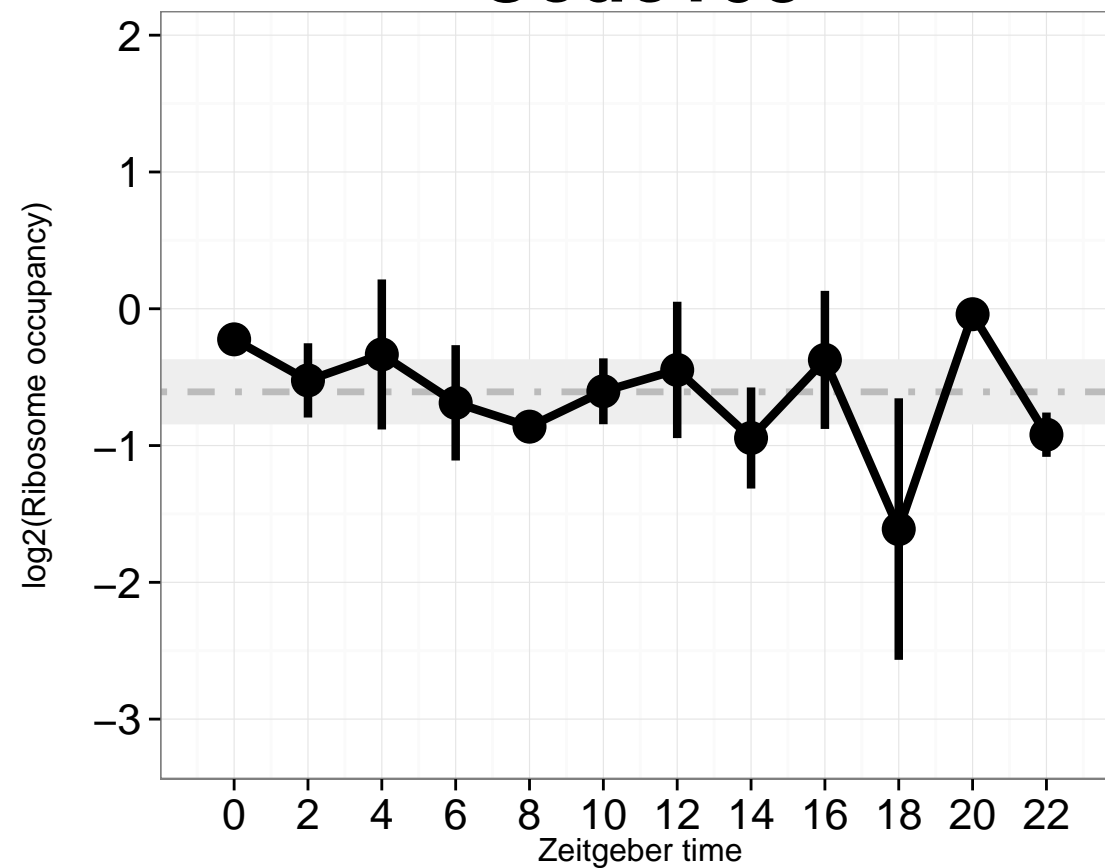

Supplement: Supplementary file 1823 [file 1]

## Prcc

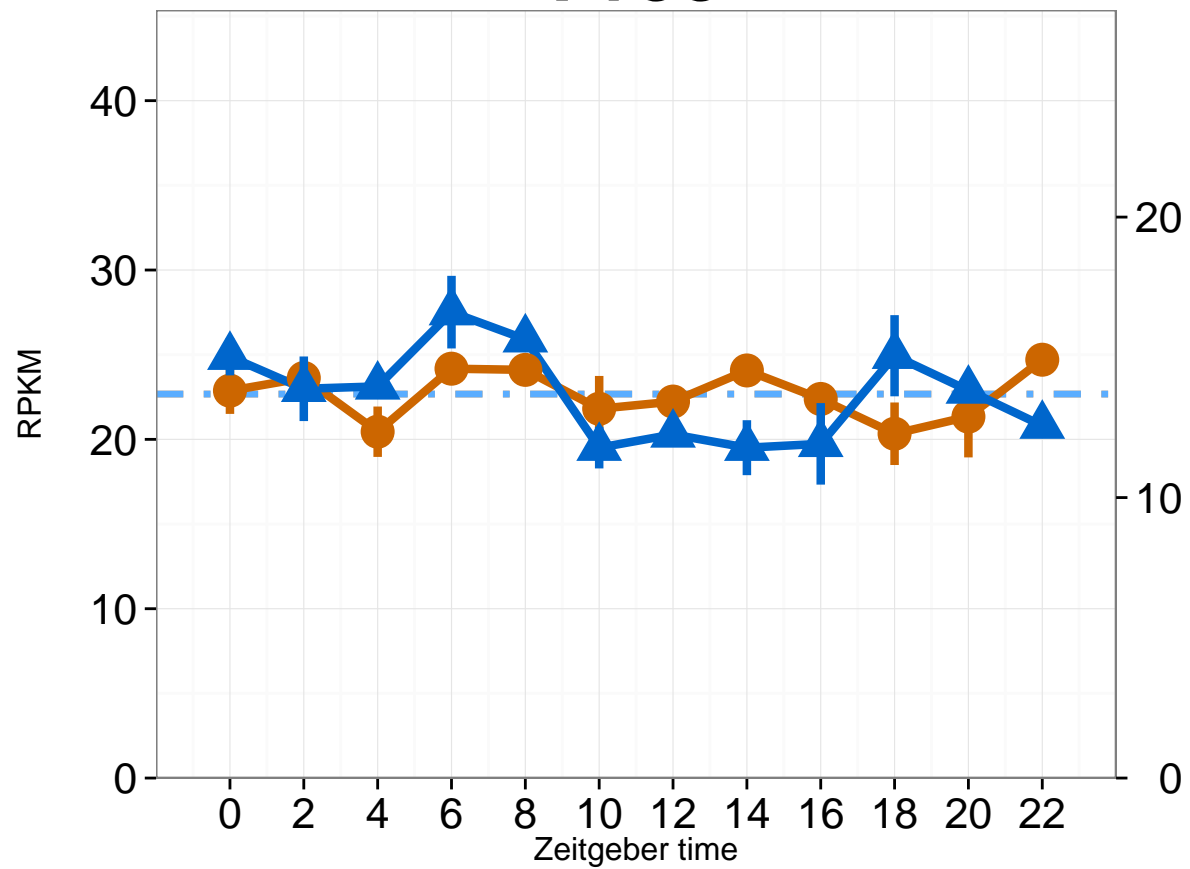

## Prcc

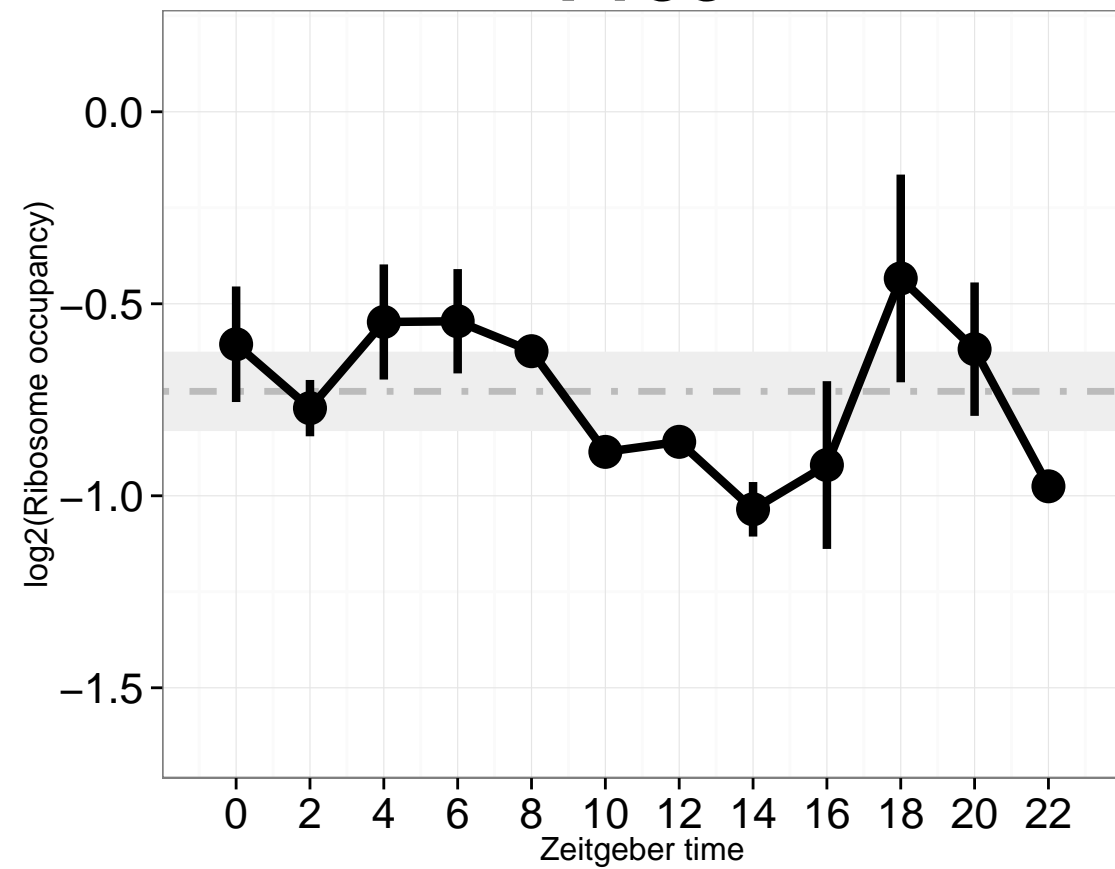

Supplement: Supplementary file 1824 [file 1]

## Kctd20

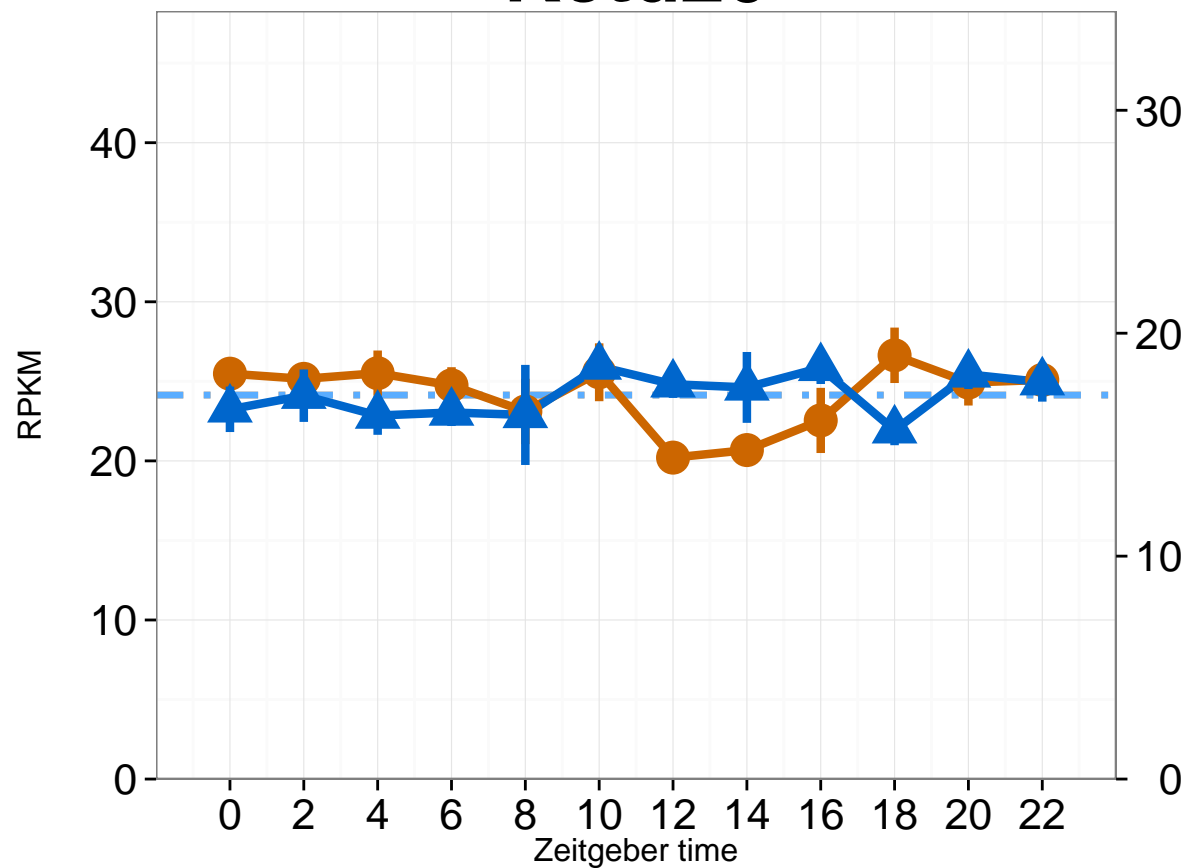

## Kctd20

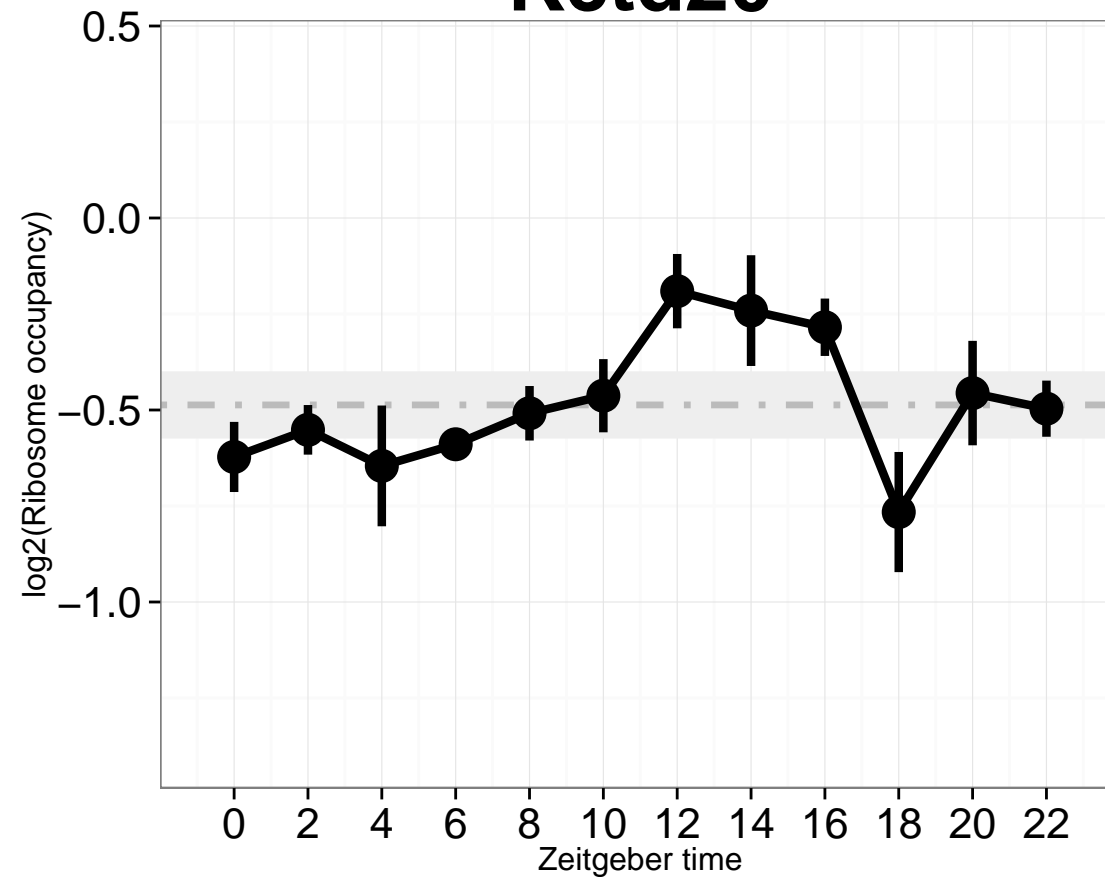

Supplement: Supplementary file 1825 [file 1]

# Tmem119

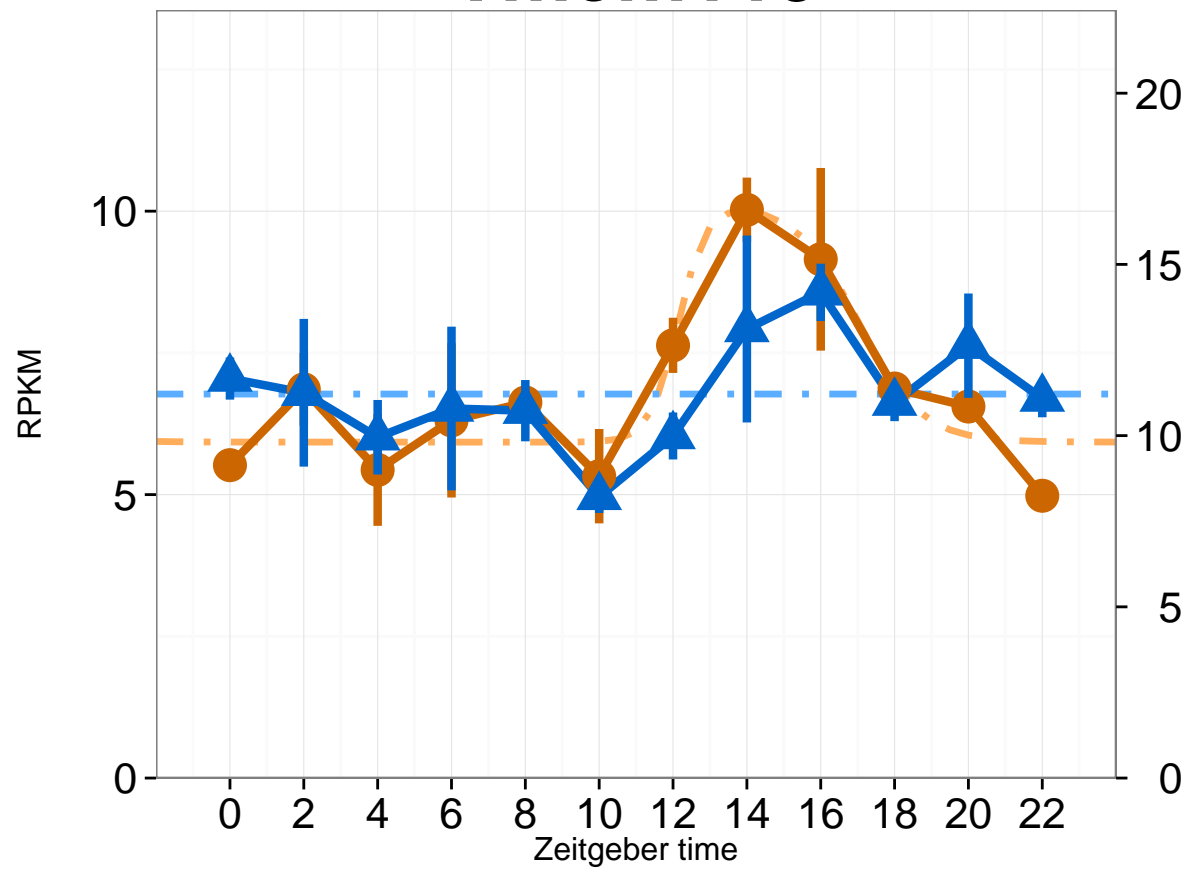

# Tmem119

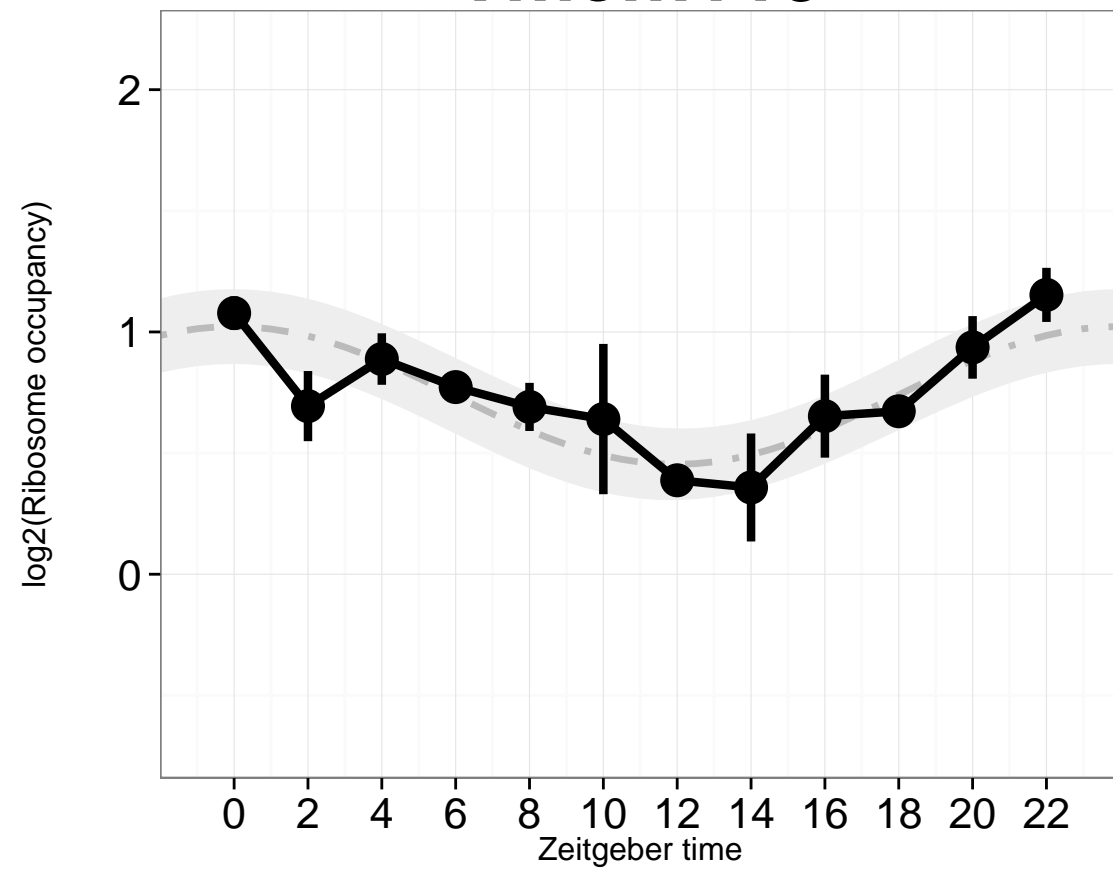

Supplement: Supplementary file 1826 [file 1]

## Elp2

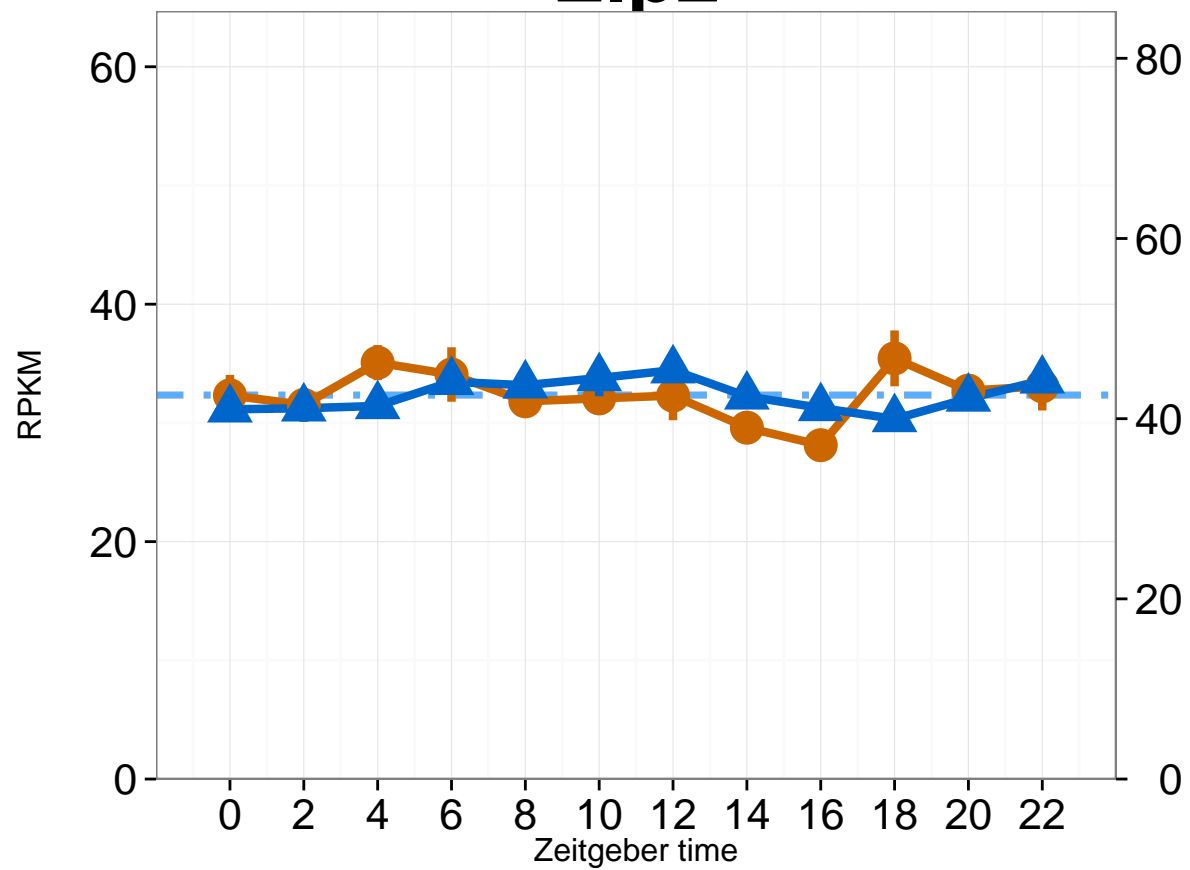

## Elp2

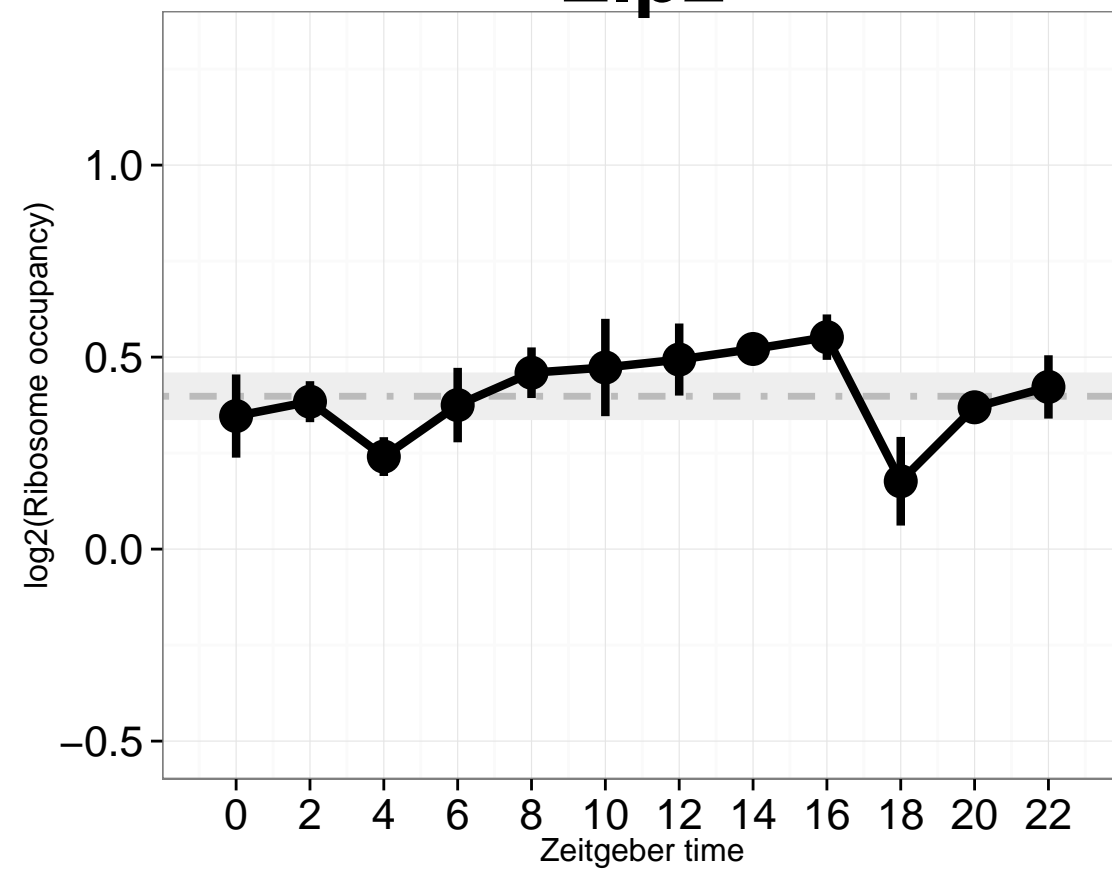

Supplement: Supplementary file 1827 [file 1]

# Cited4

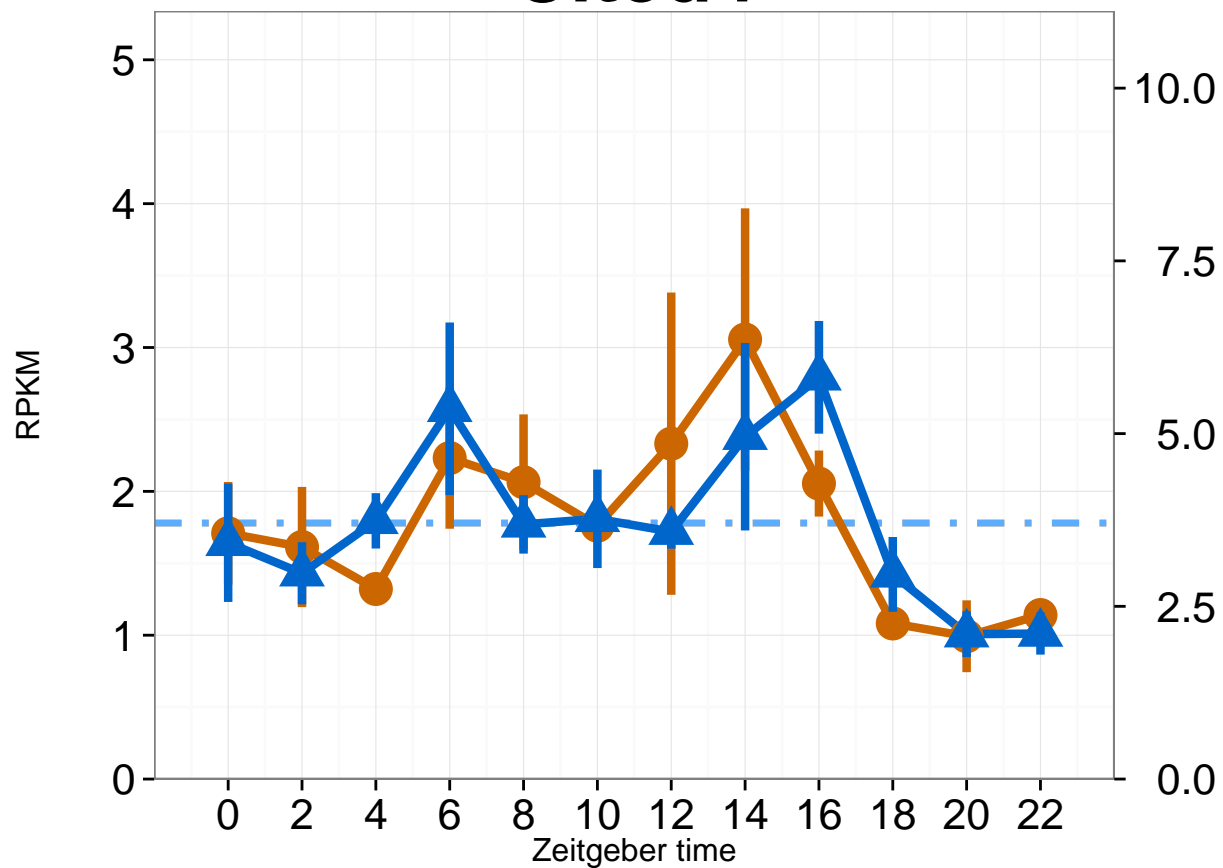

# Cited4

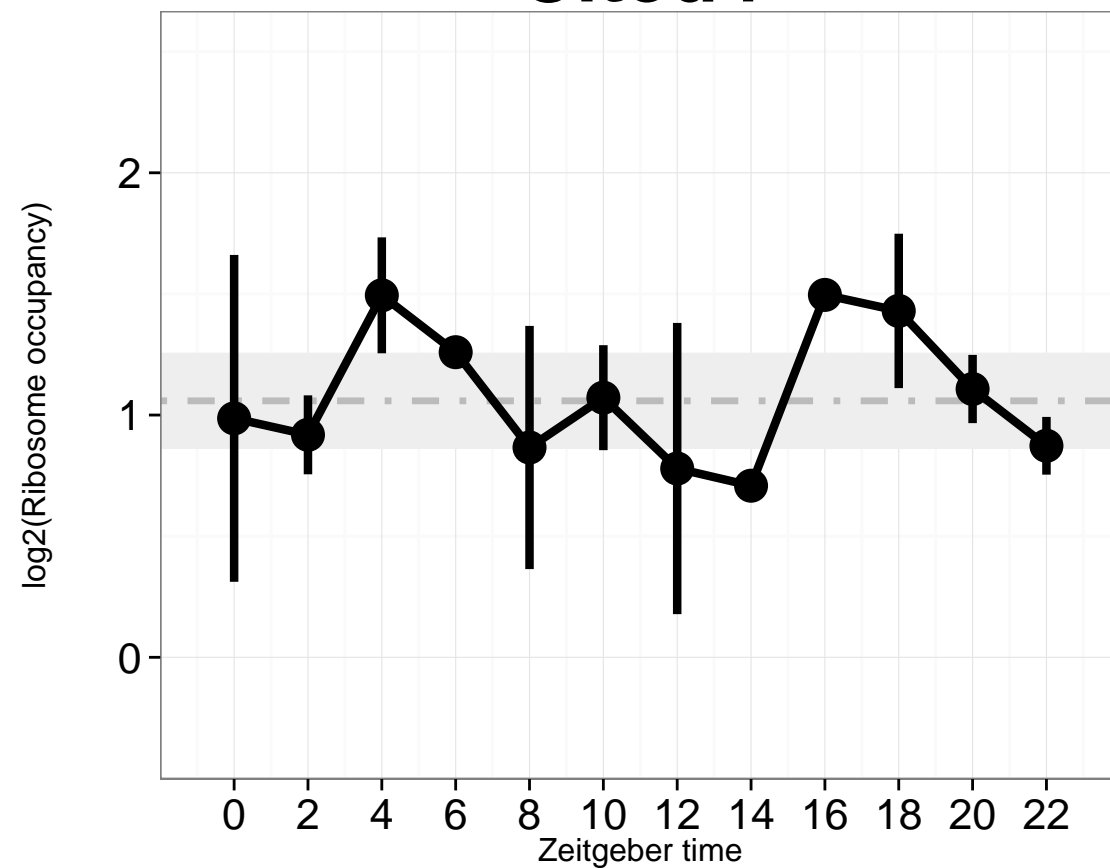

Supplement: Supplementary file 1828 [file 1]

# Tmem183a

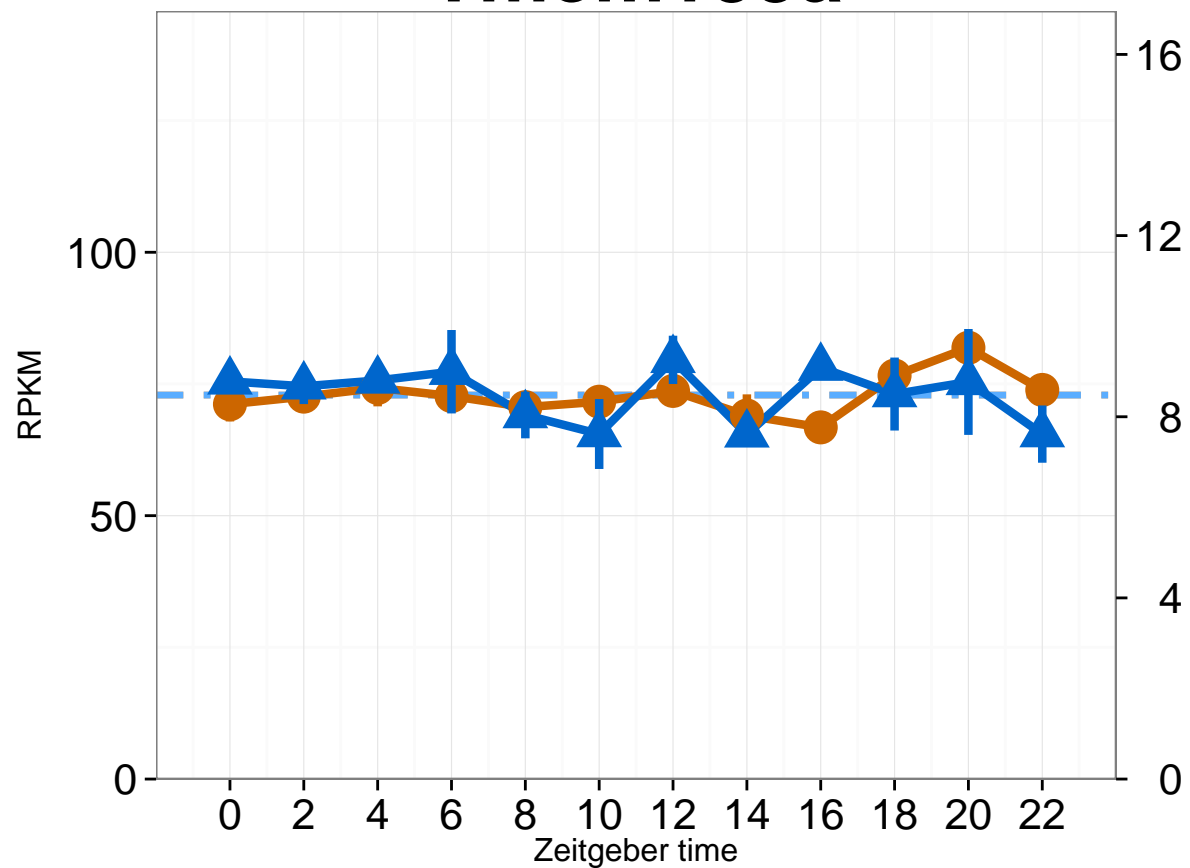

# Tmem183a

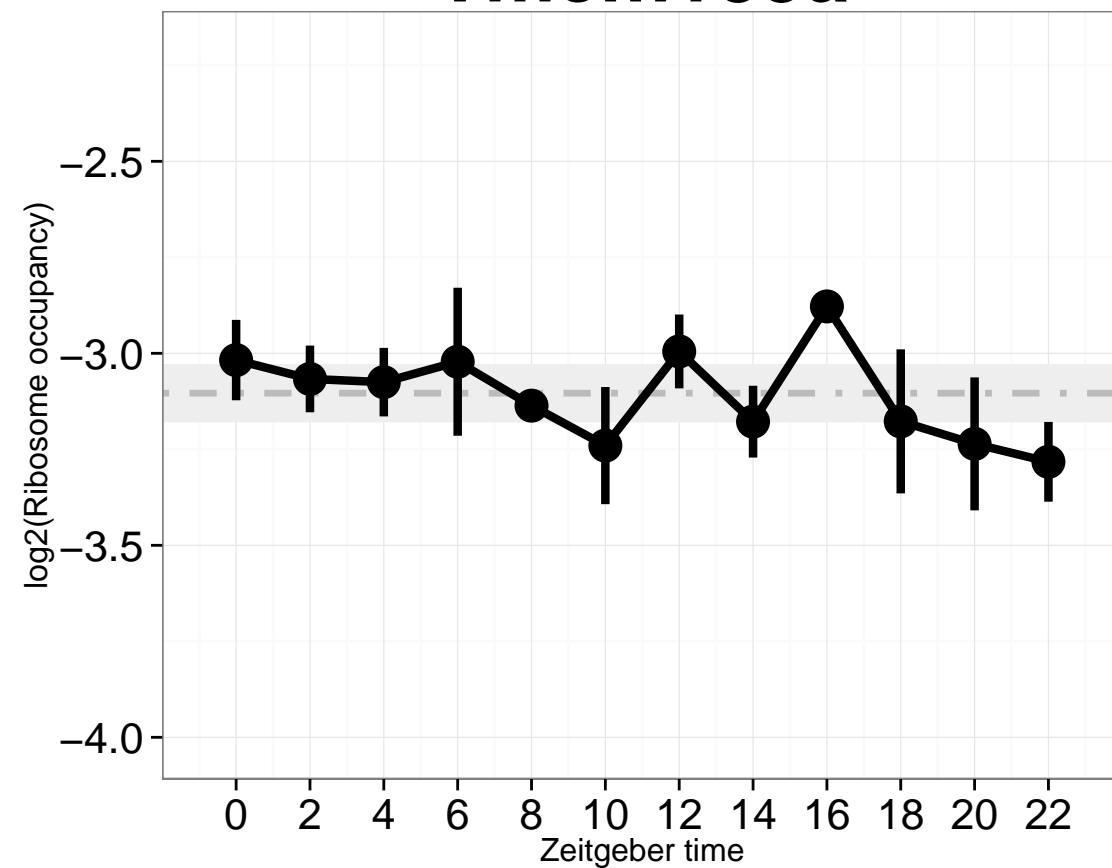

Supplement: Supplementary file 1829 [file 1]

## Nudt14

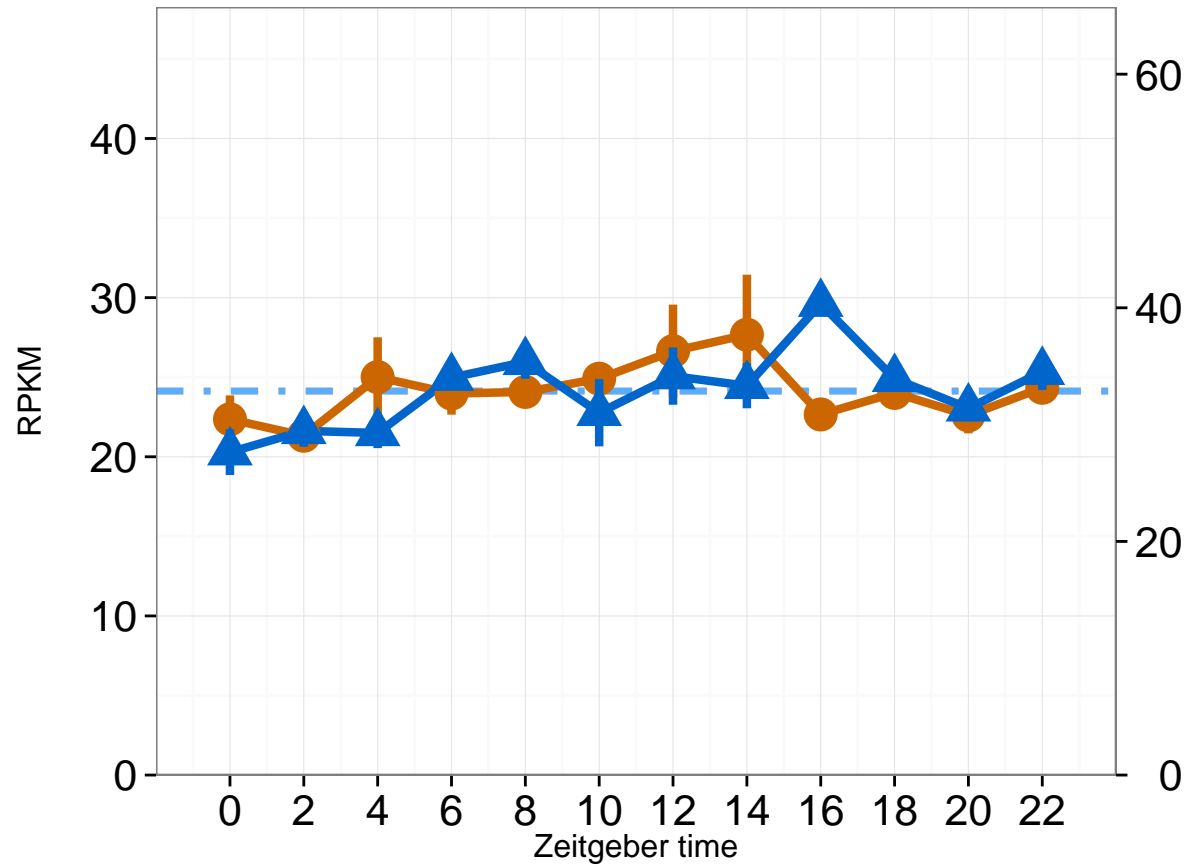

## Nudt14

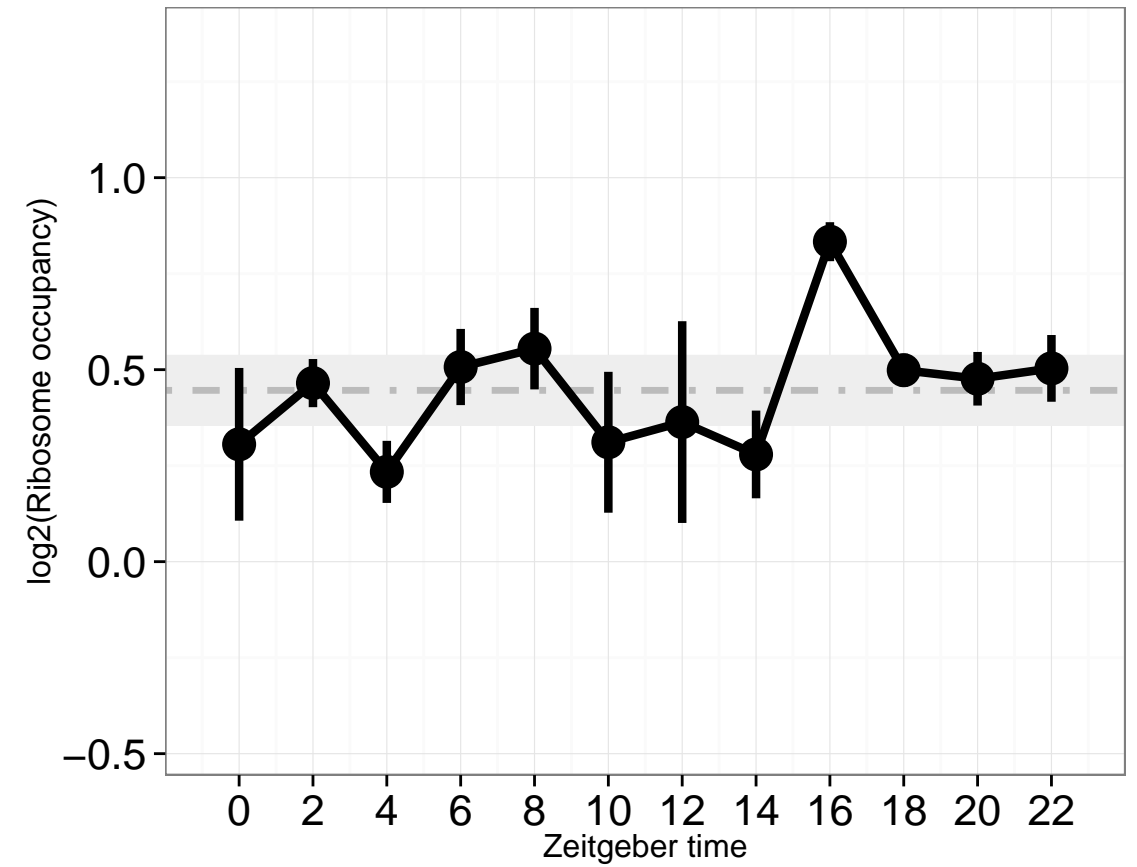

Supplement: Supplementary file 1830 [file 1]

## Robo4

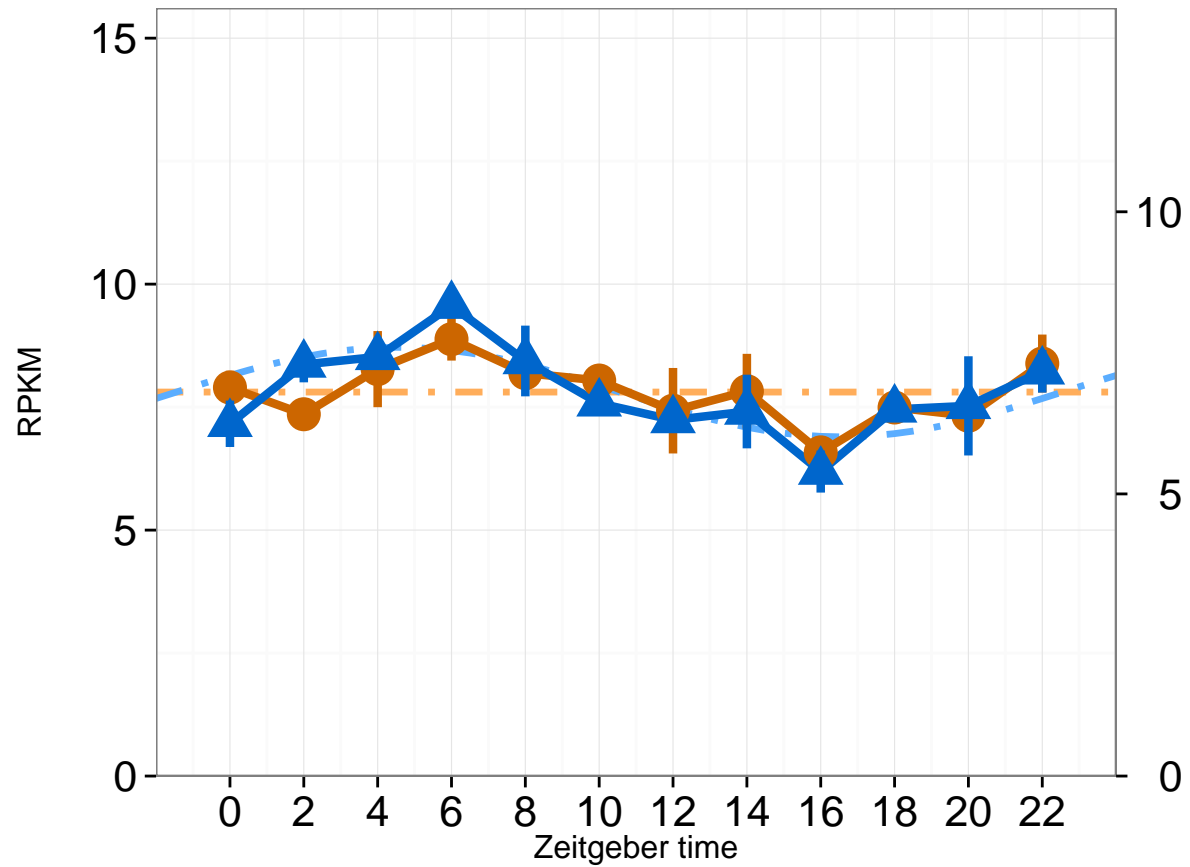

## Robo4

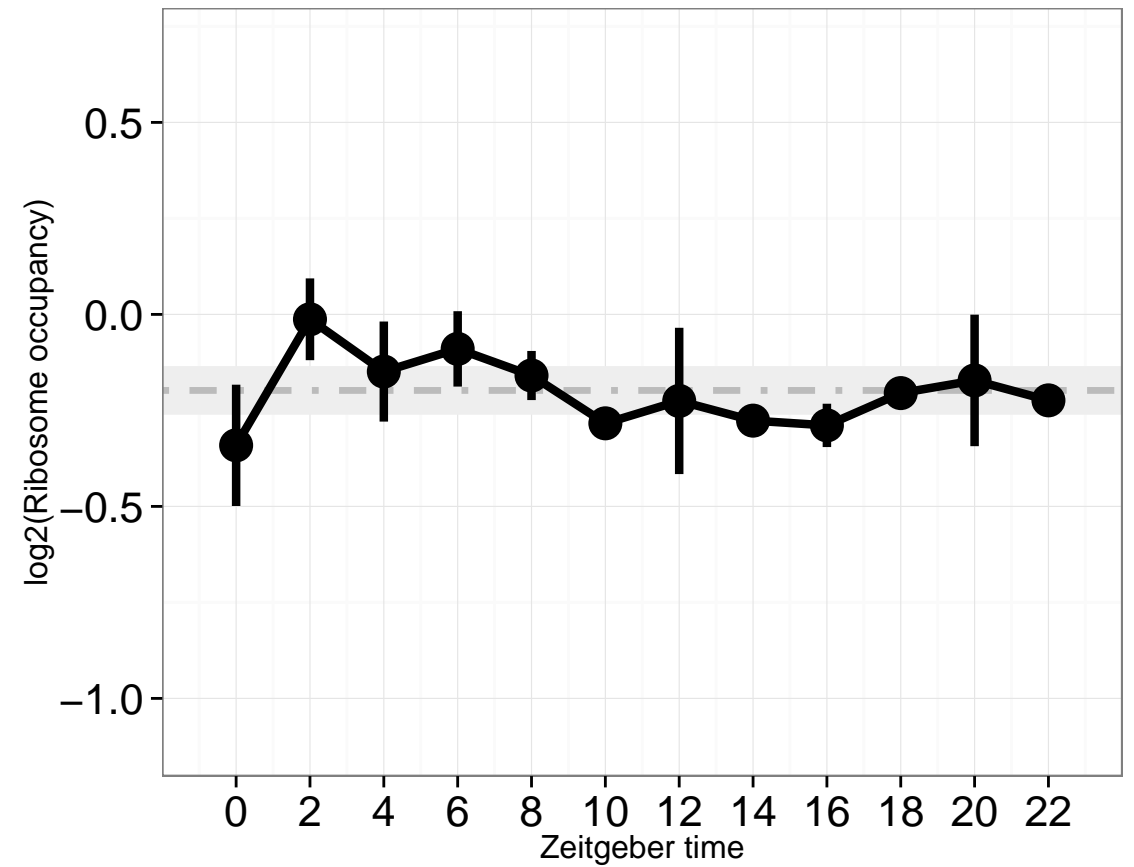

Supplement: Supplementary file 1831 [file 1]

## Gimap6

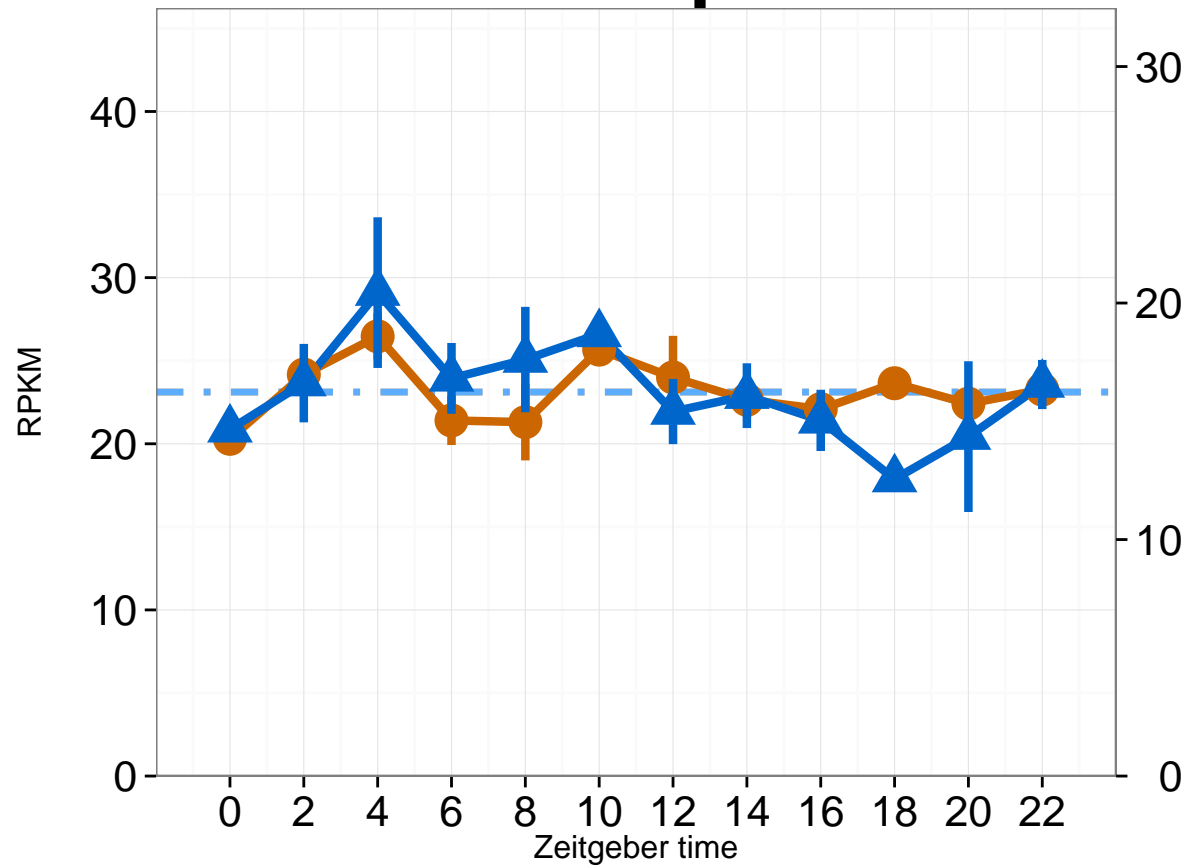

## Gimap6

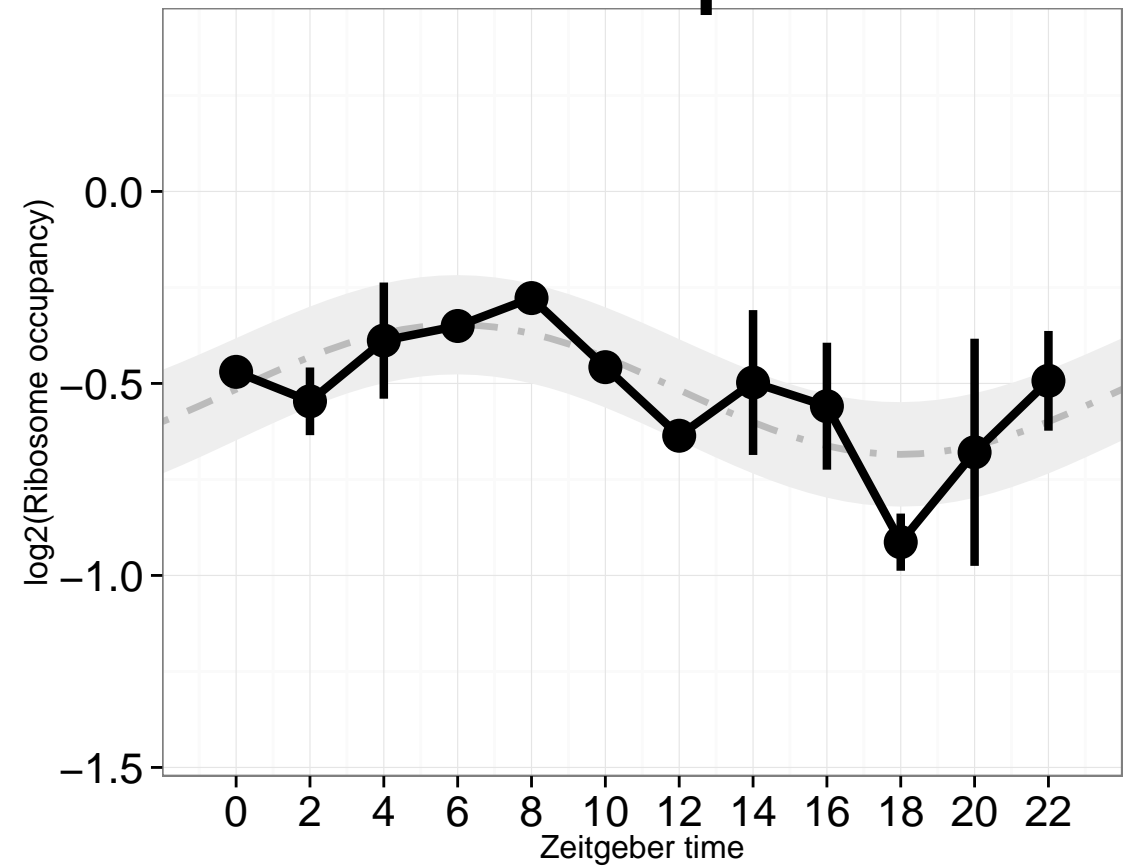

Supplement: Supplementary file 1832 [file 1]

## Kif2c

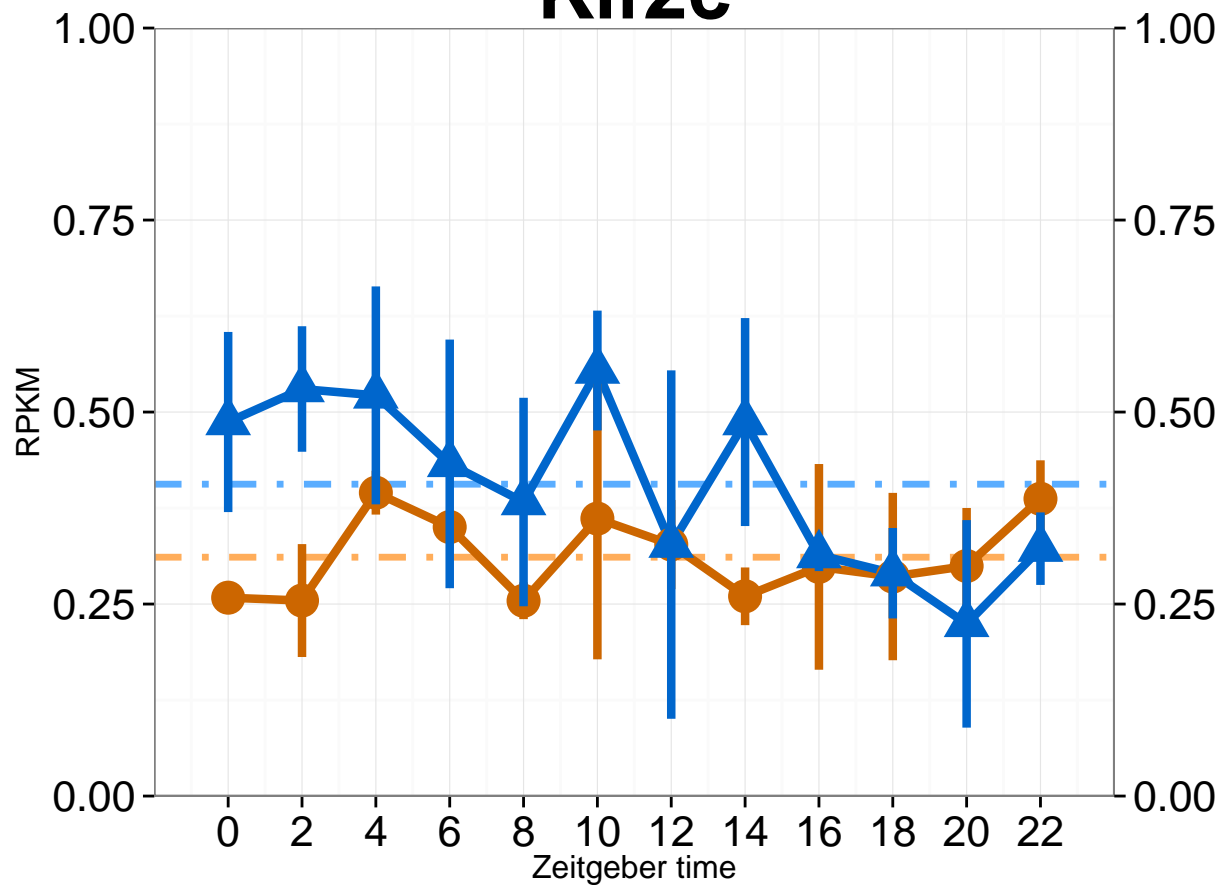

## Kif2c

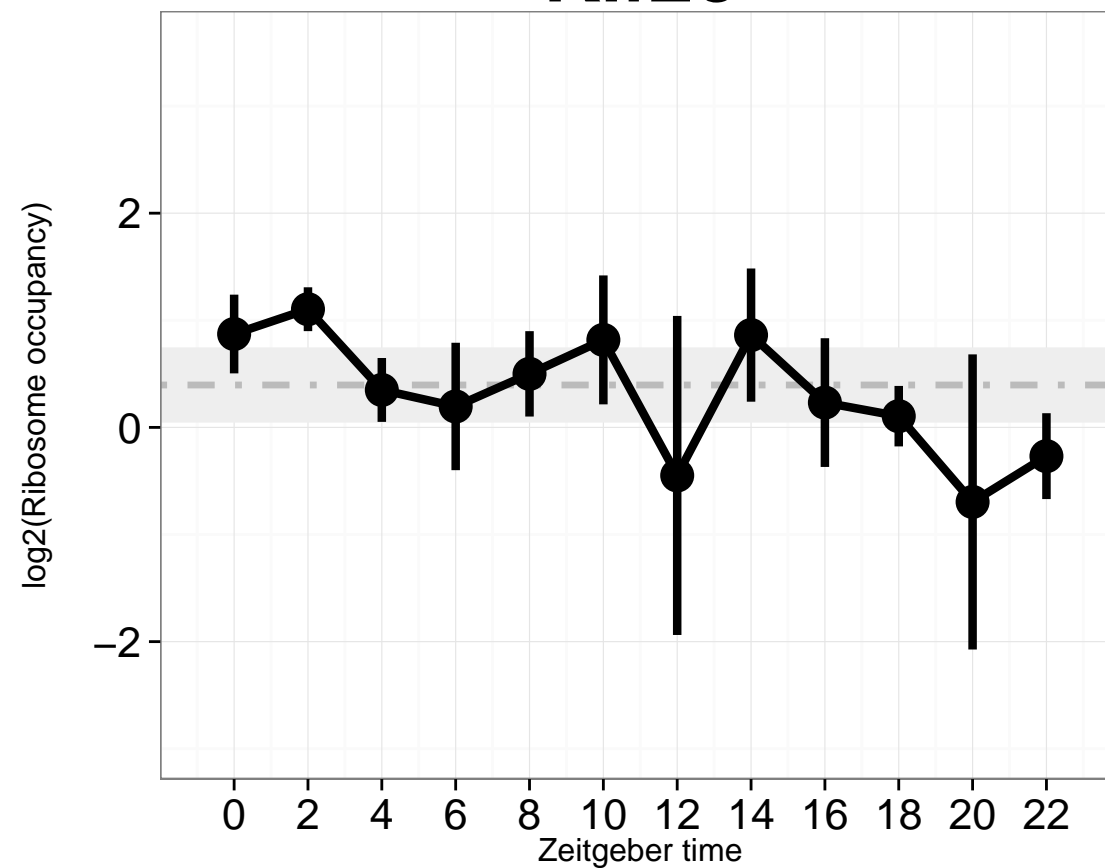

Supplement: Supplementary file 1833 [file 1]

## Elac1

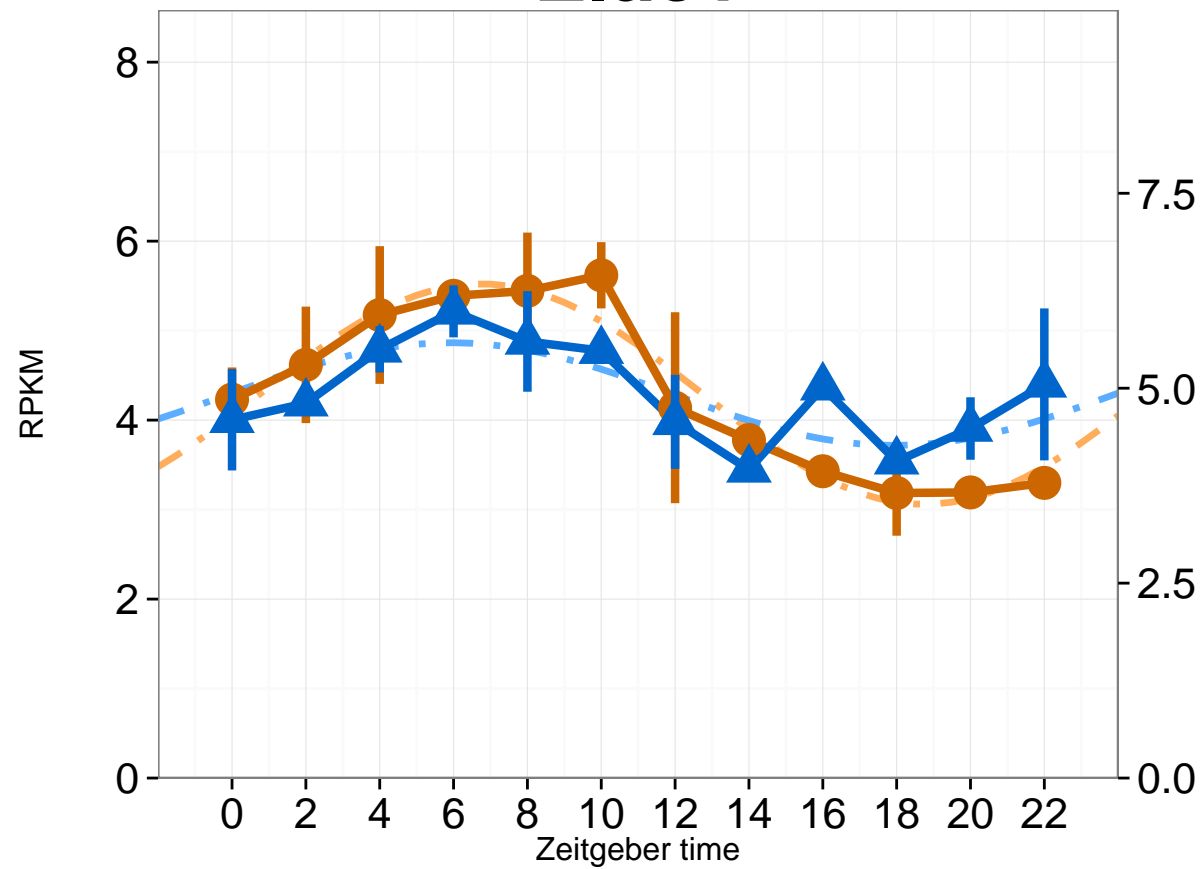

## Elac1

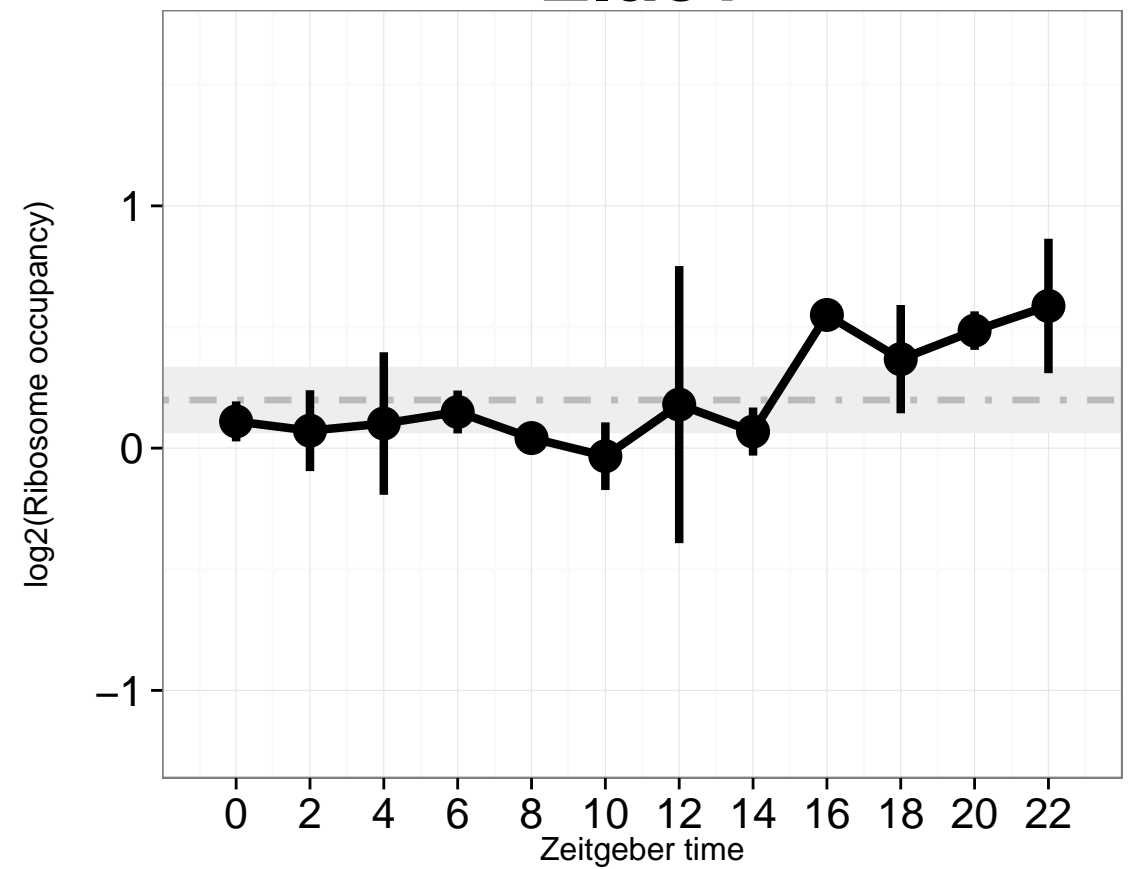

Supplement: Supplementary file 1834 [file 1]

# E2f1

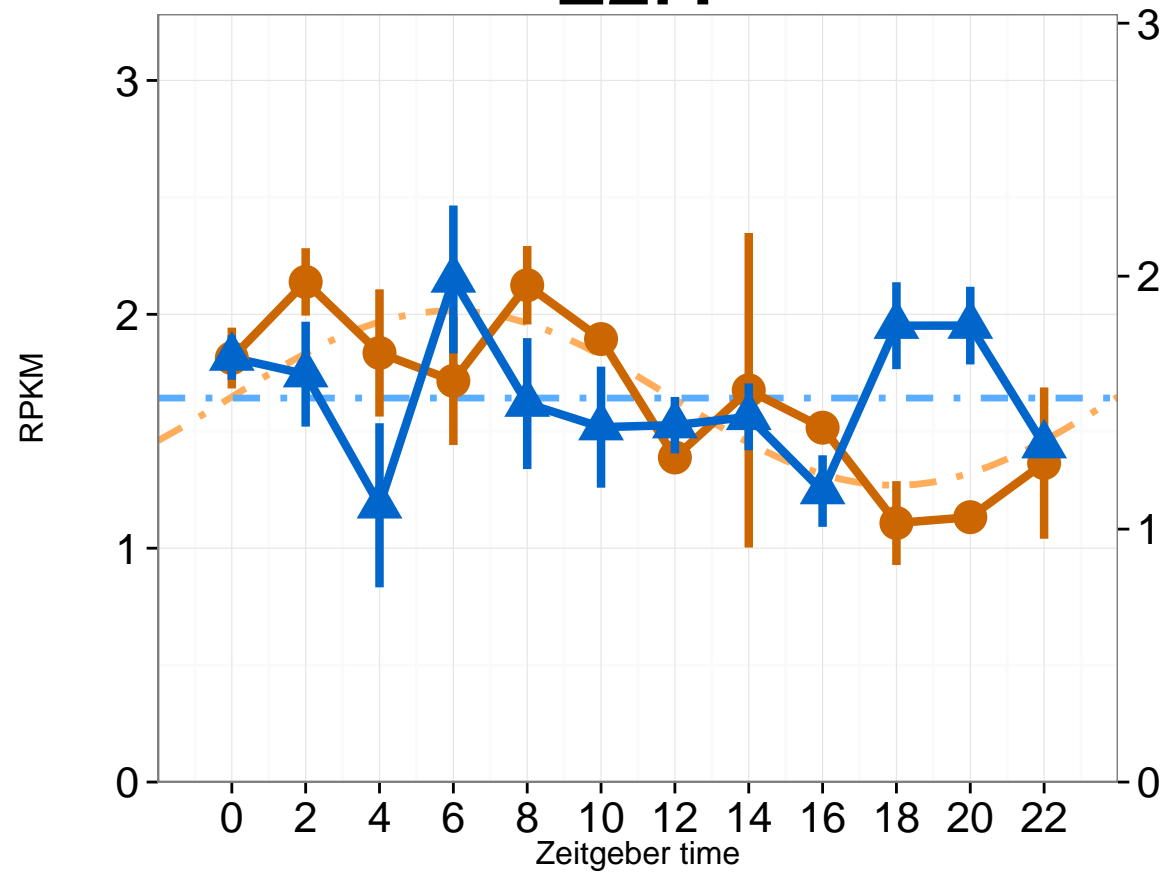

# E2f1

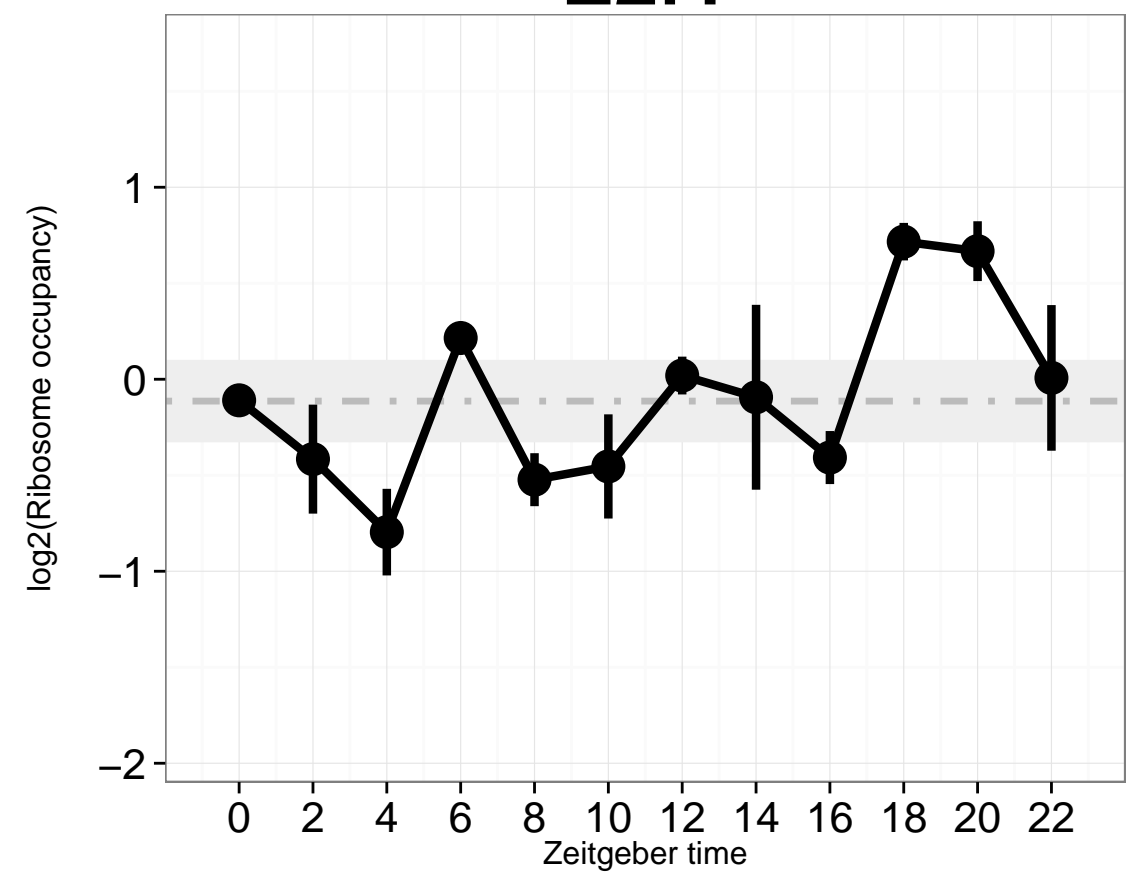

Supplement: Supplementary file 1835 [file 1]

## Araf

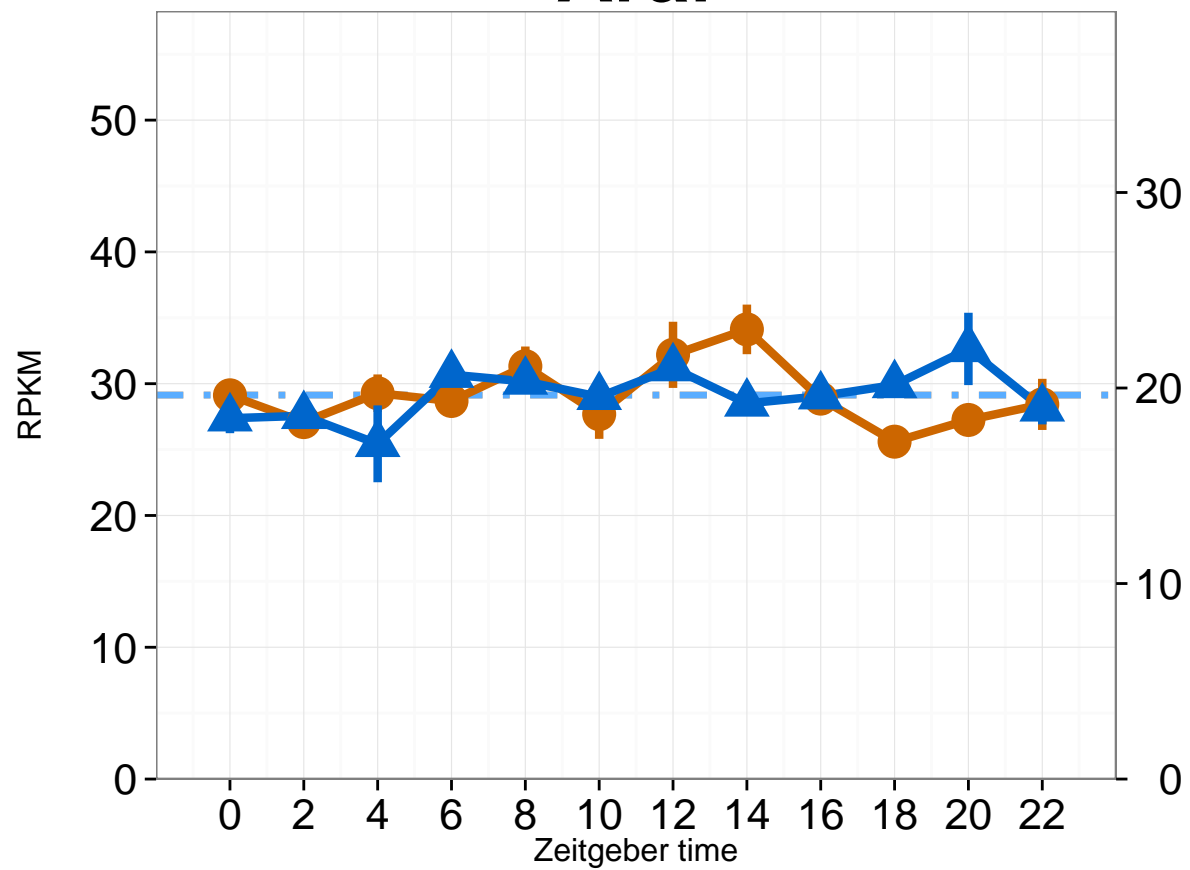

## Araf

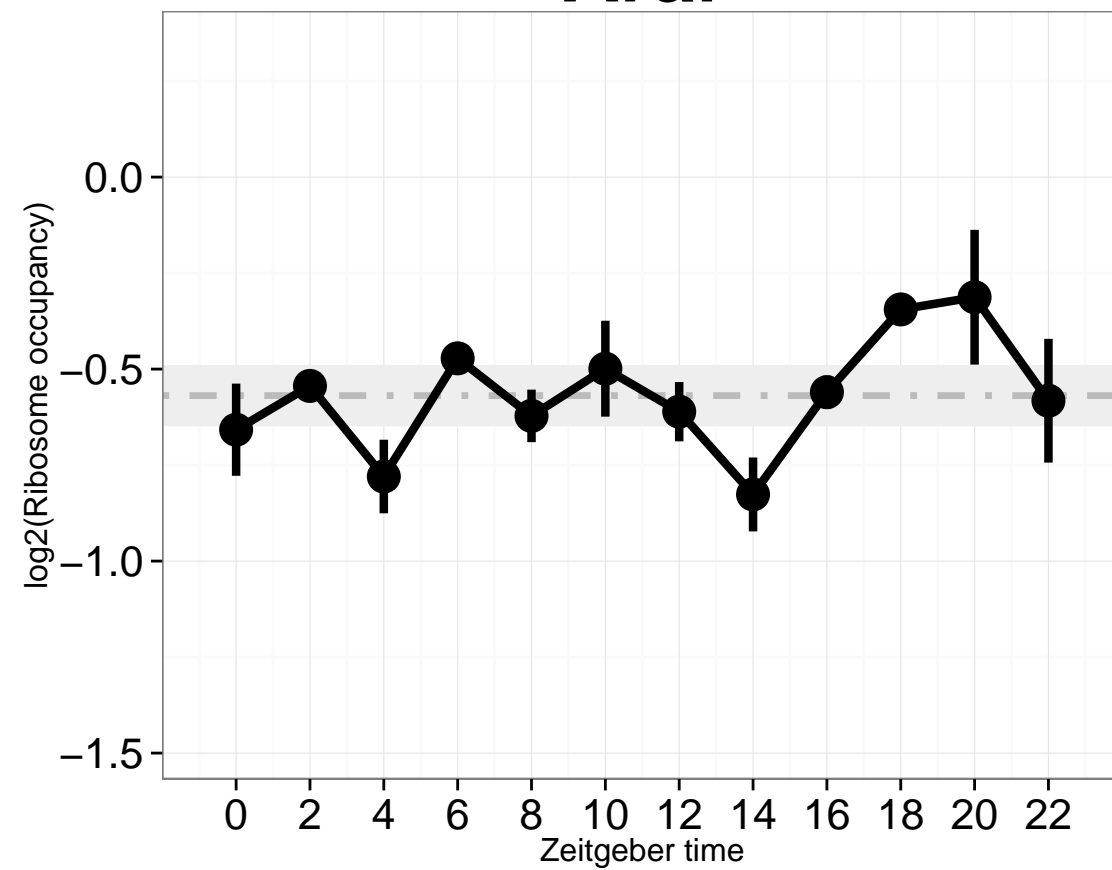

Supplement: Supplementary file 1836 [file 1]

# Rbck1

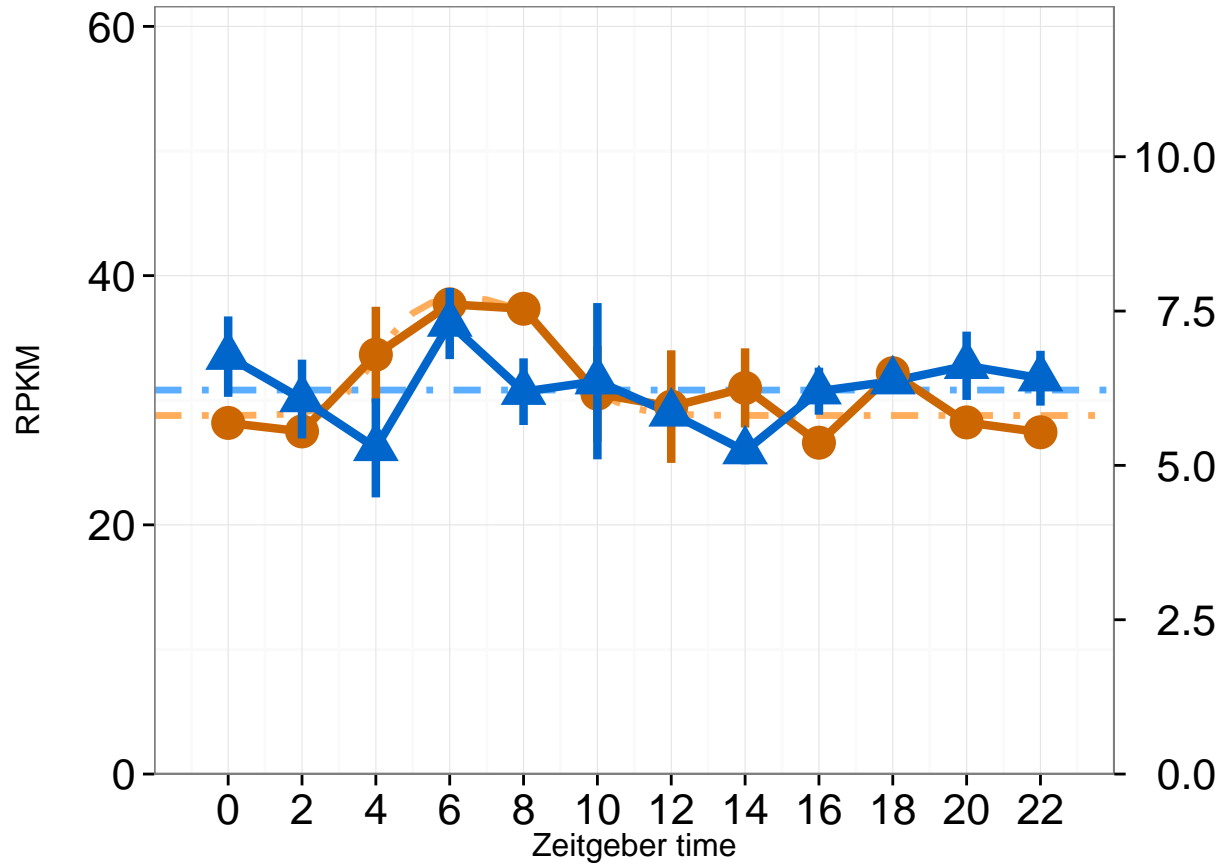

# Rbck1

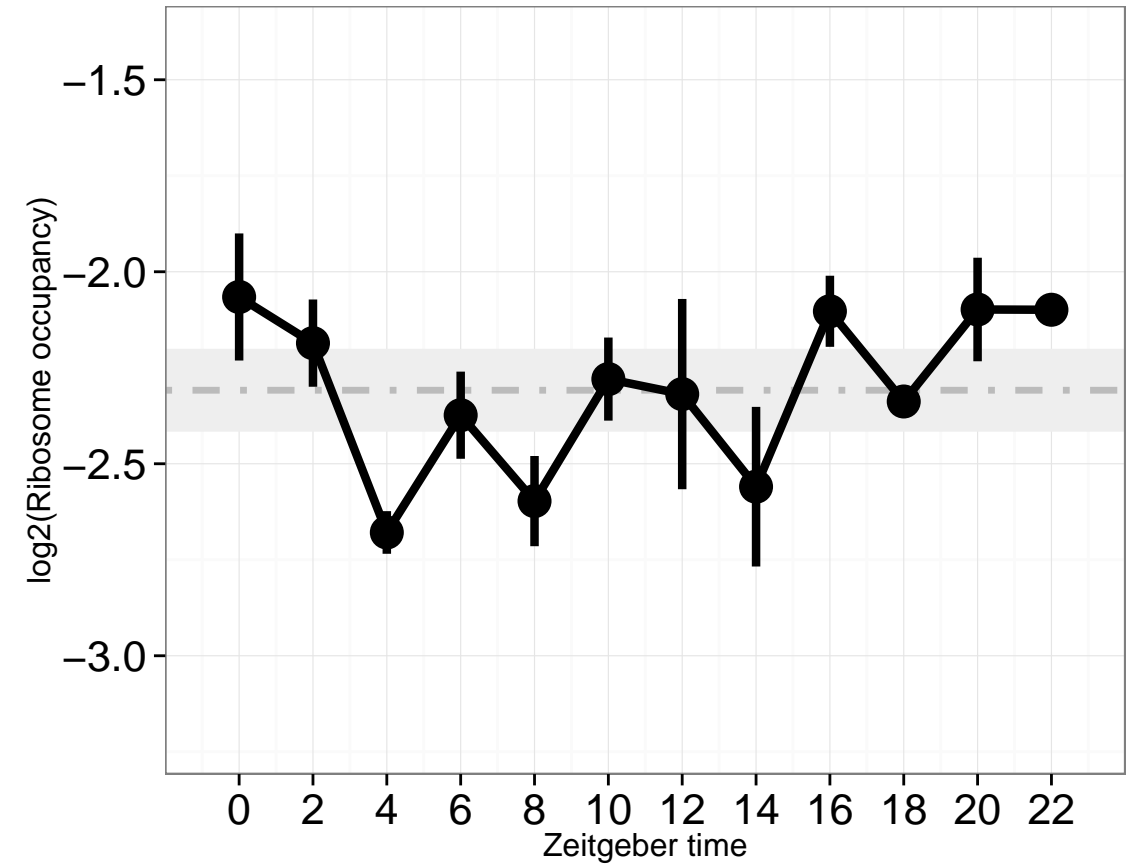

Supplement: Supplementary file 1837 [file 1]

## Rin2

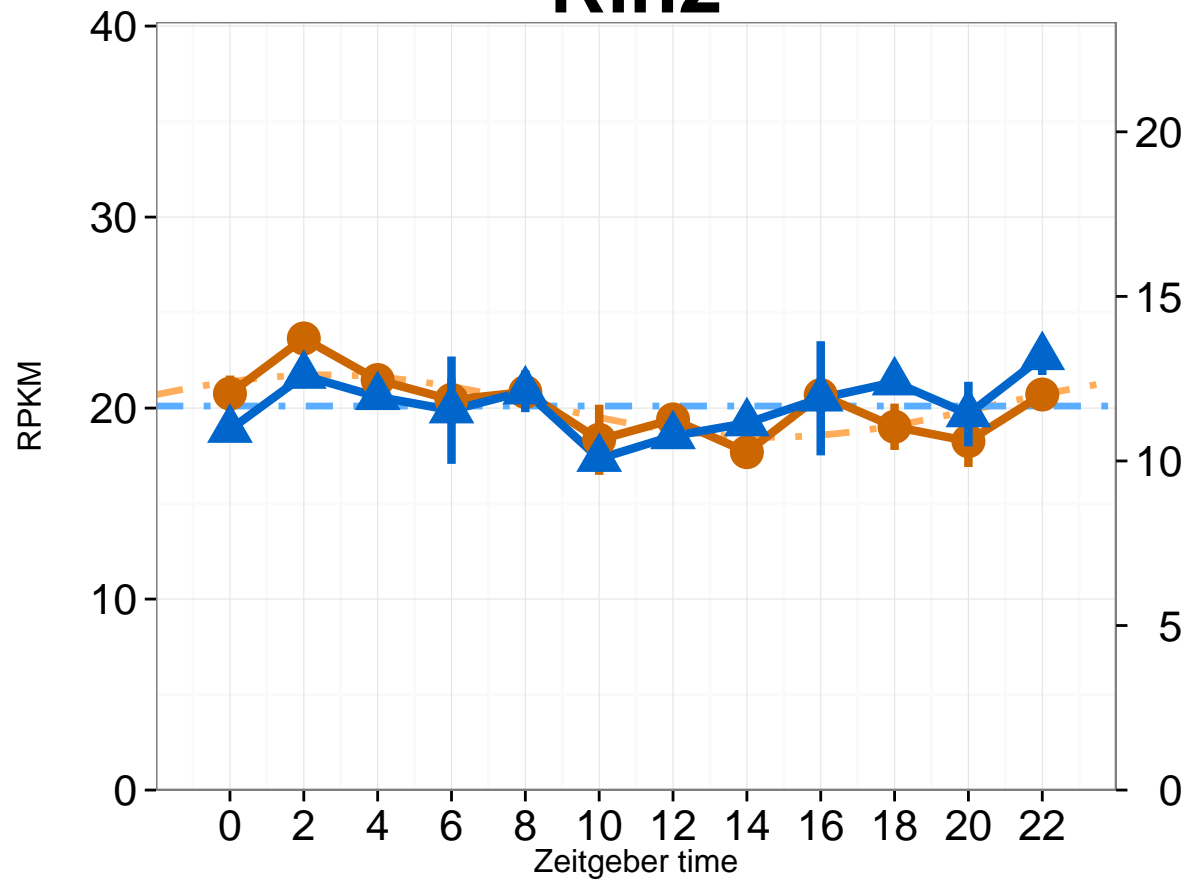

## Rin2

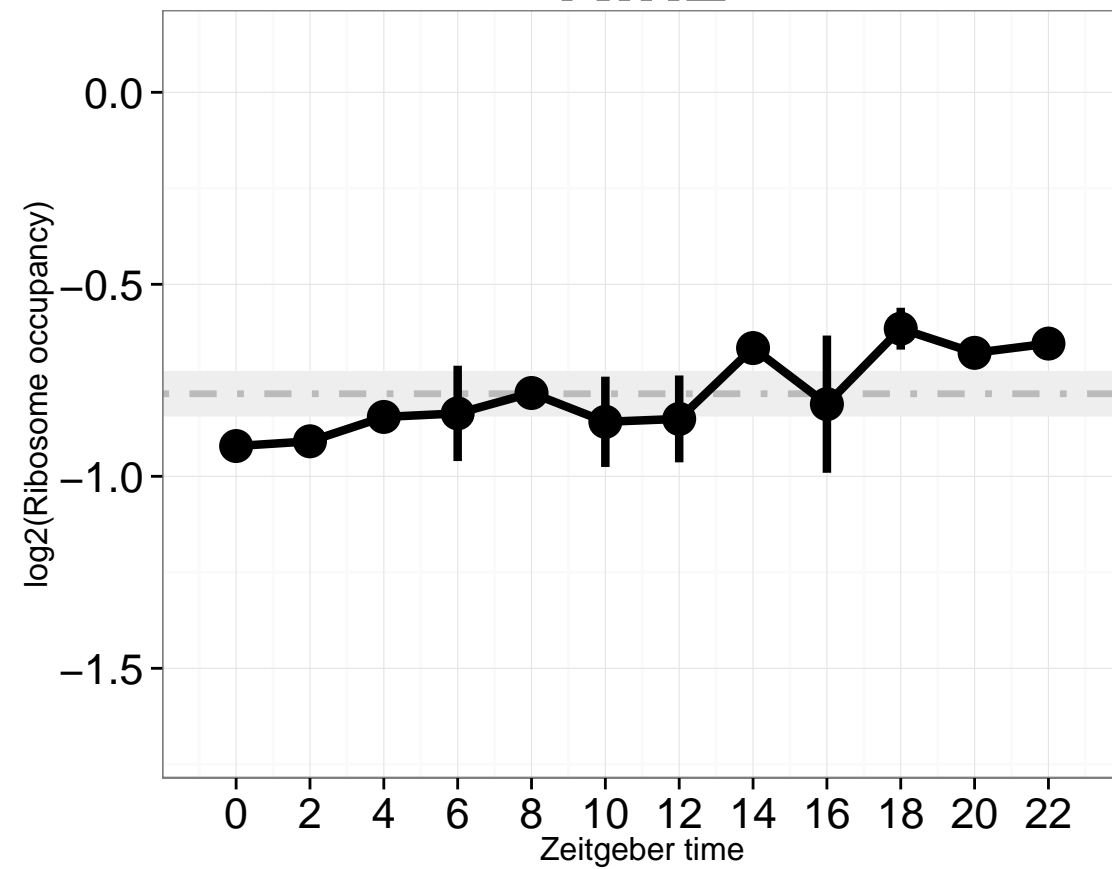

Supplement: Supplementary file 1838 [file 1]

## Cpeb1

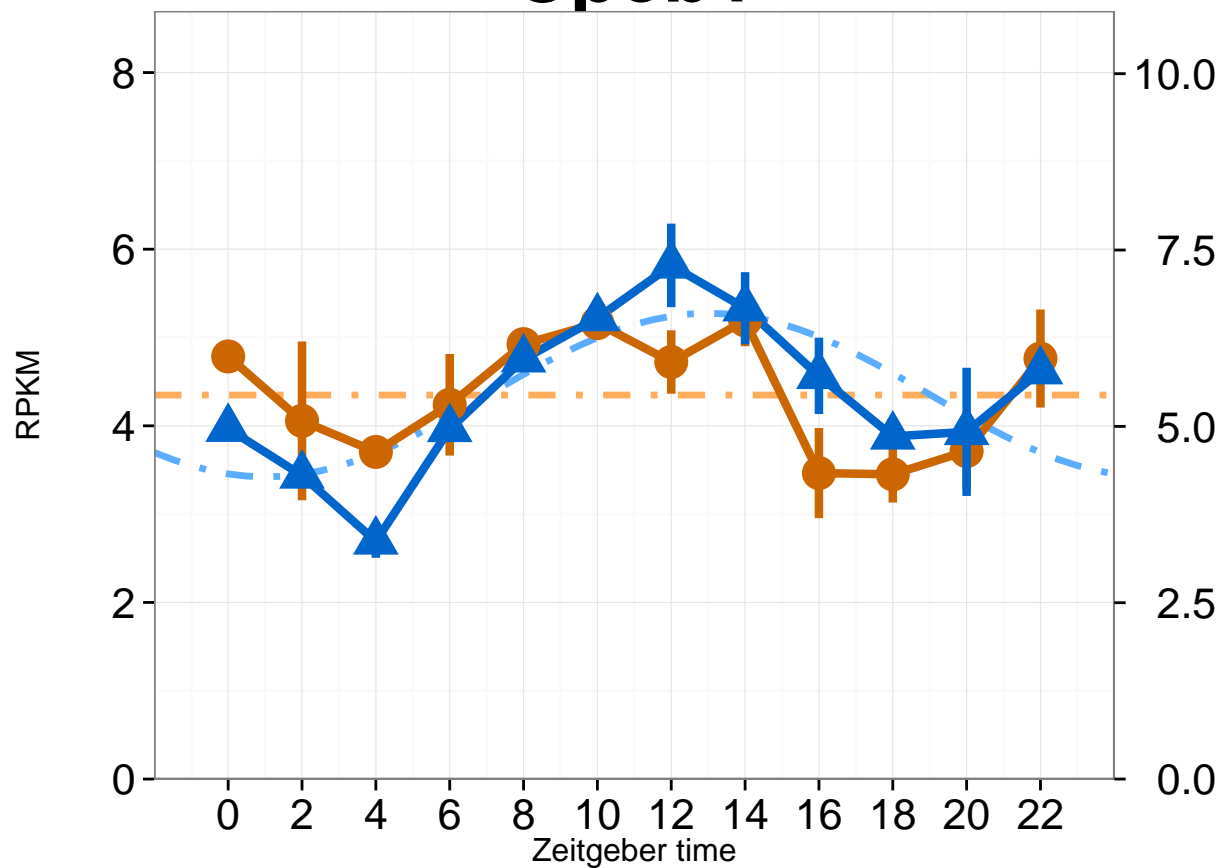

## Cpeb1

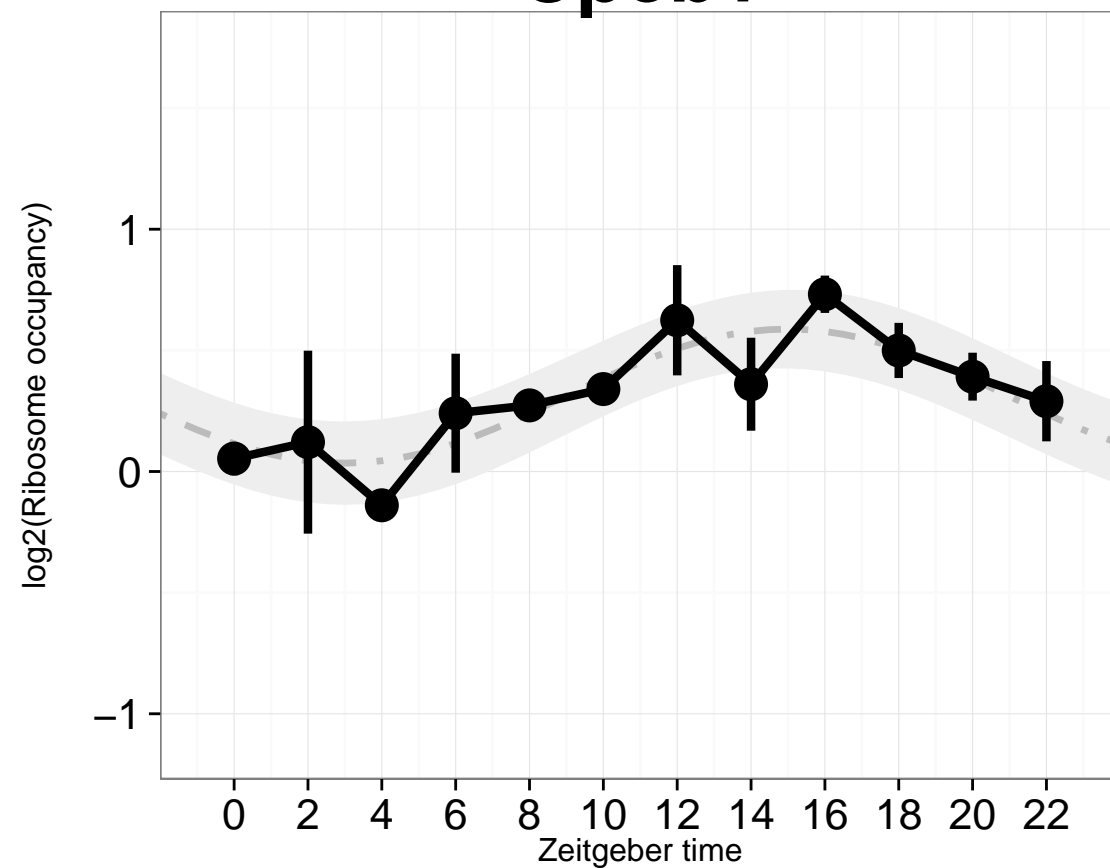

Supplement: Supplementary file 1839 [file 1]

## Nsf

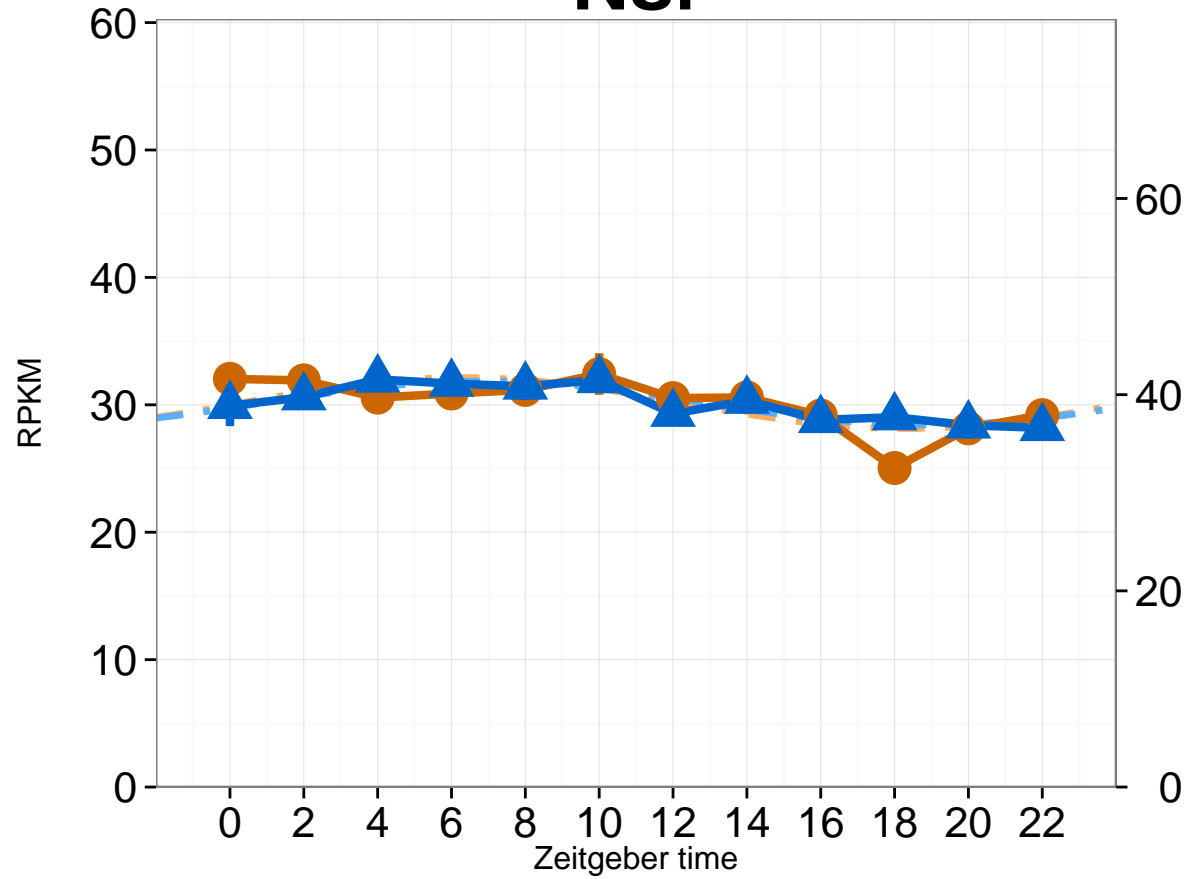

## Nsf

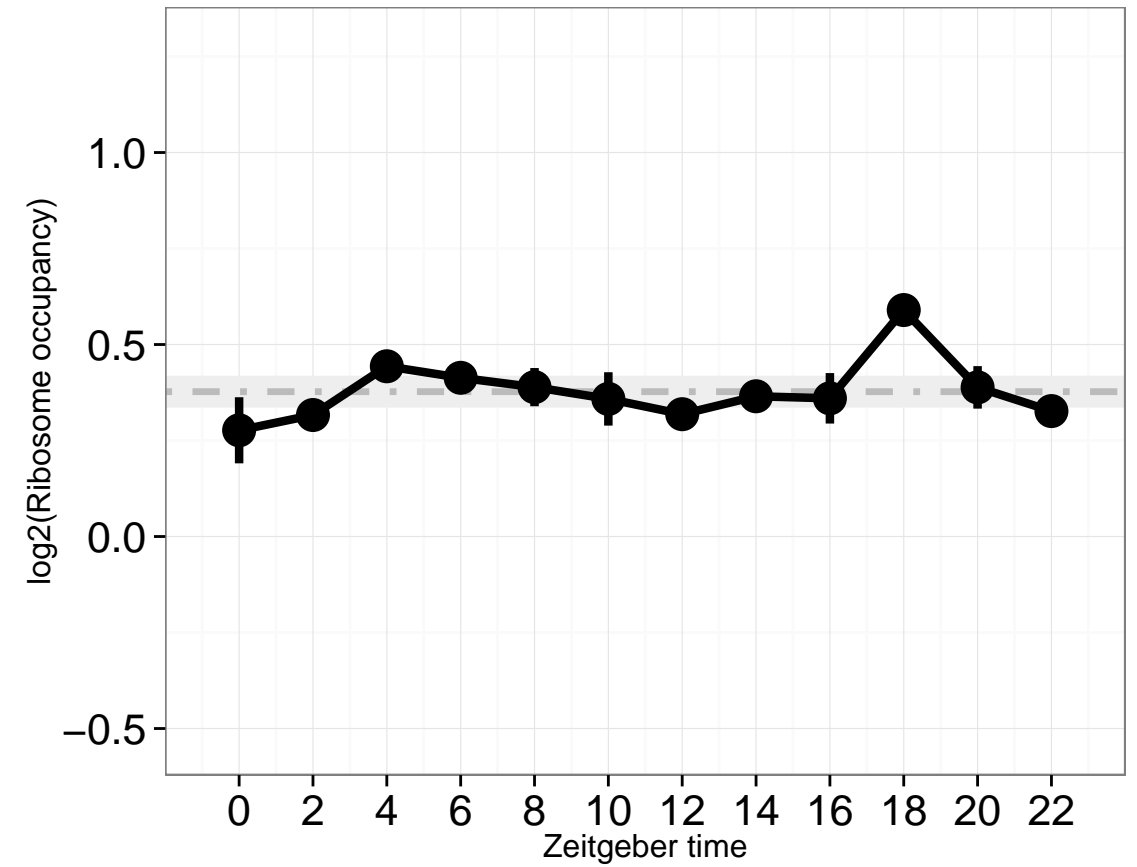

Supplement: Supplementary file 1840 [file 1]

## Slc35c2

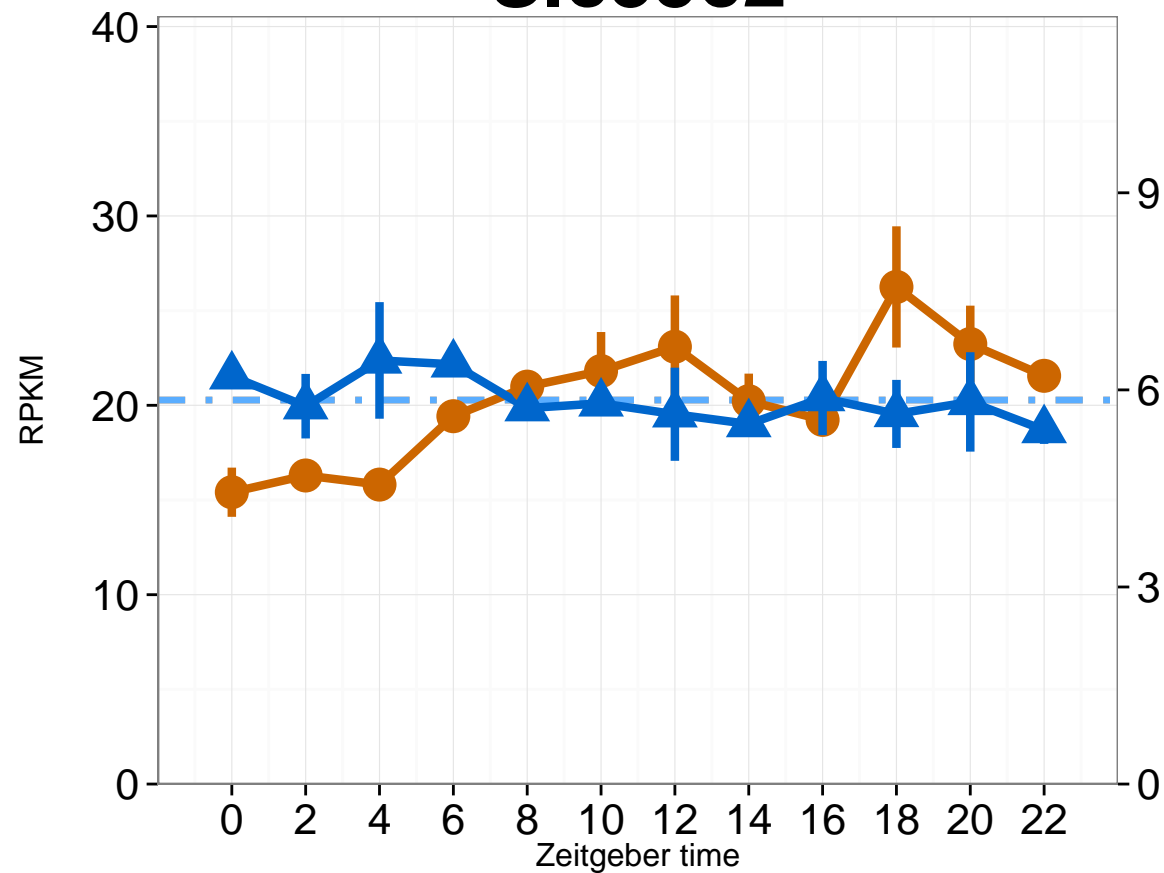

## Slc35c2

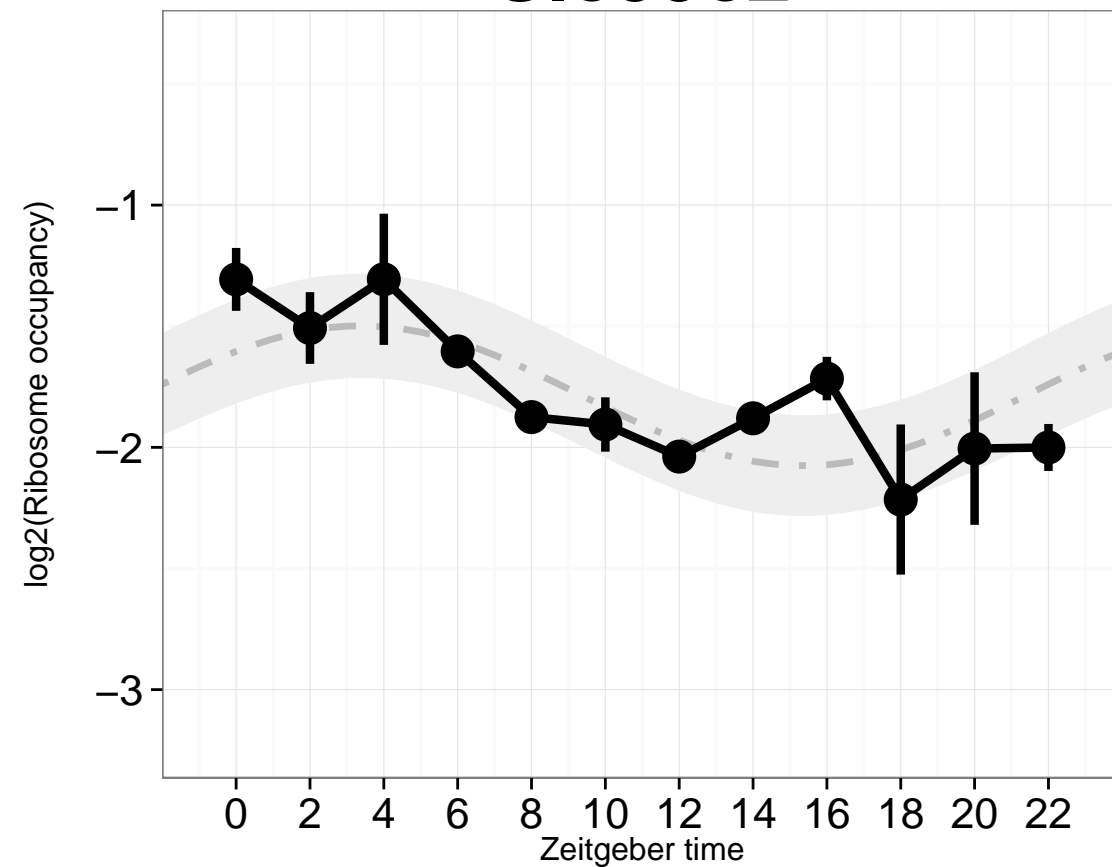

Supplement: Supplementary file 1841 [file 1]

# Elof1

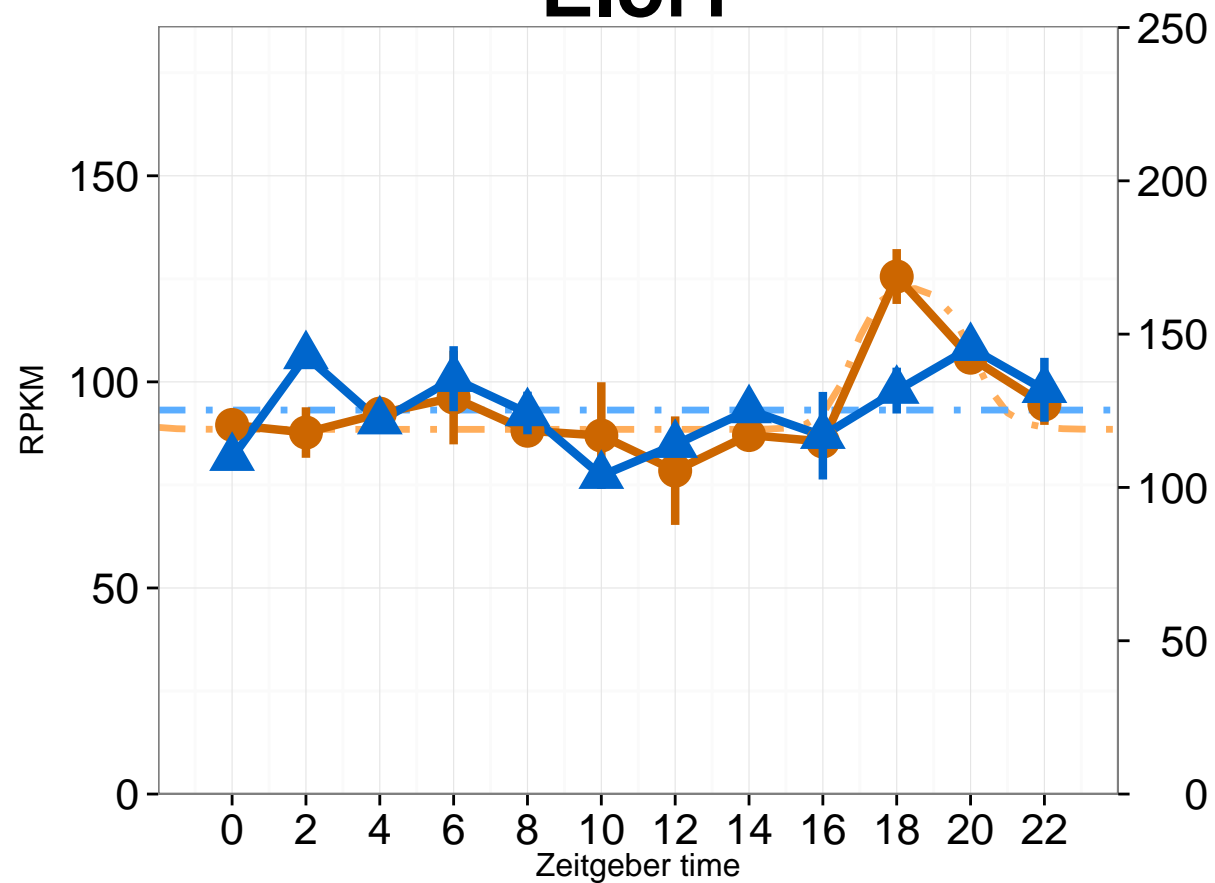

# Elof1

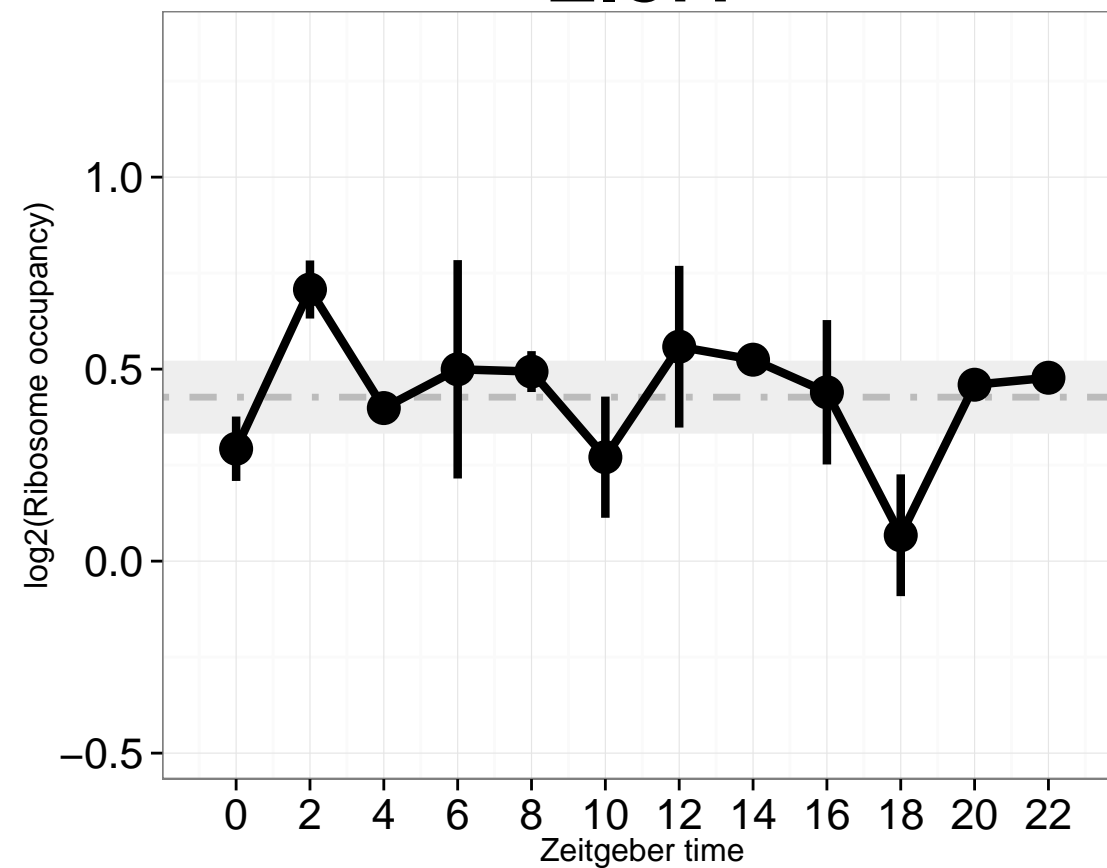

Supplement: Supplementary file 1842 [file 1]

# Comp

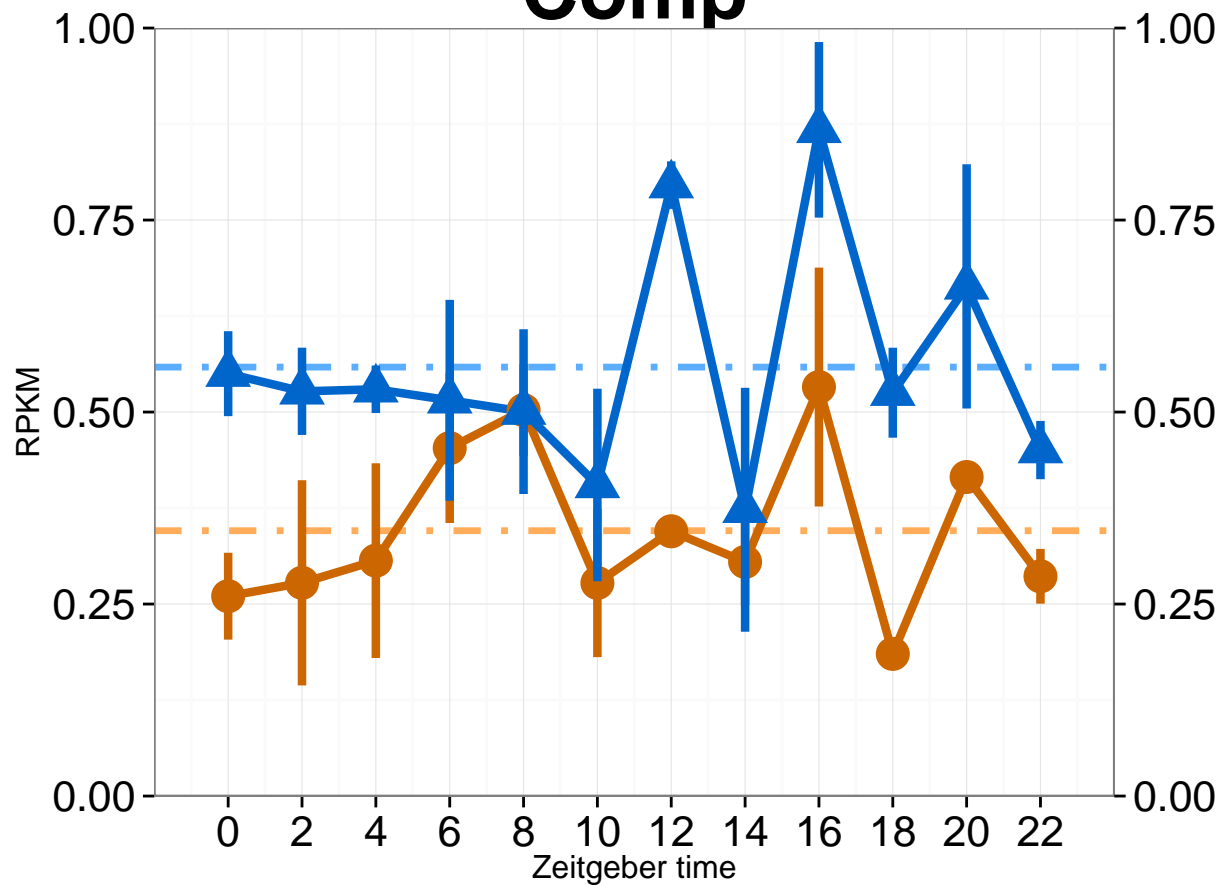

# Comp

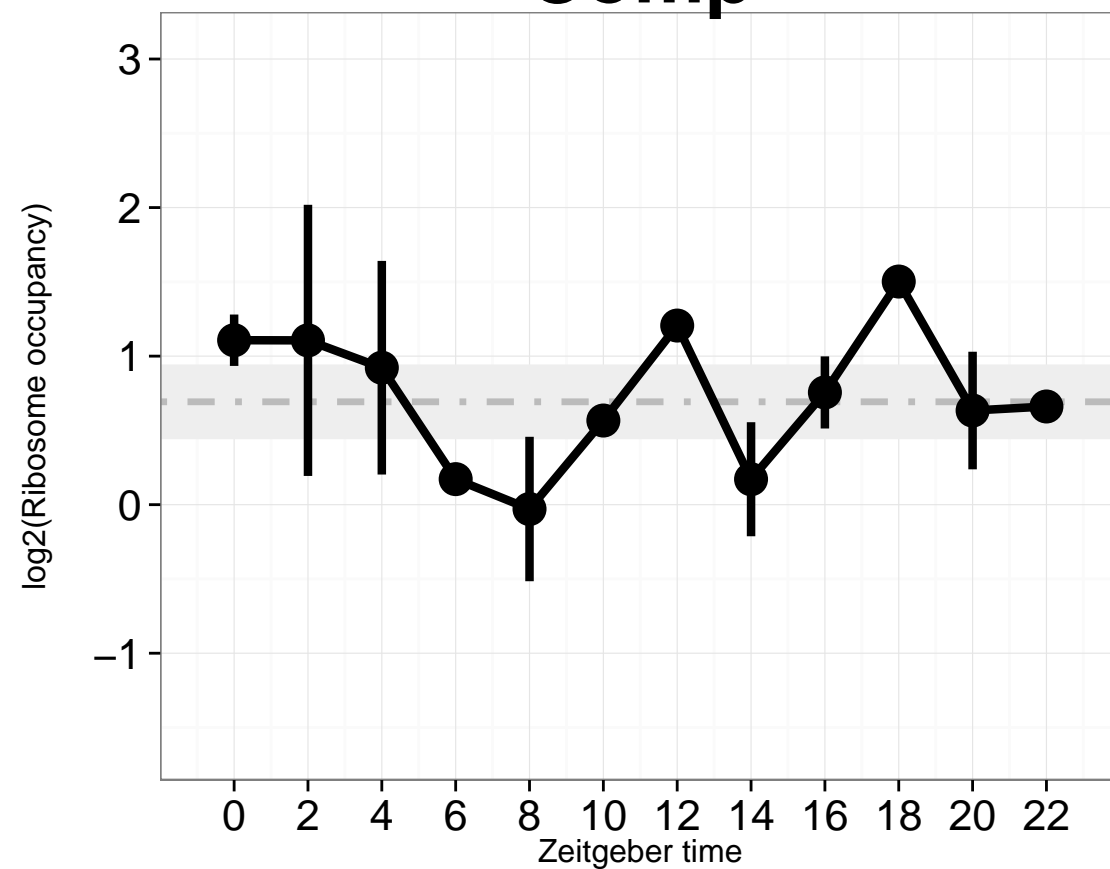

Supplement: Supplementary file 1843 [file 1]

# Sgsm1

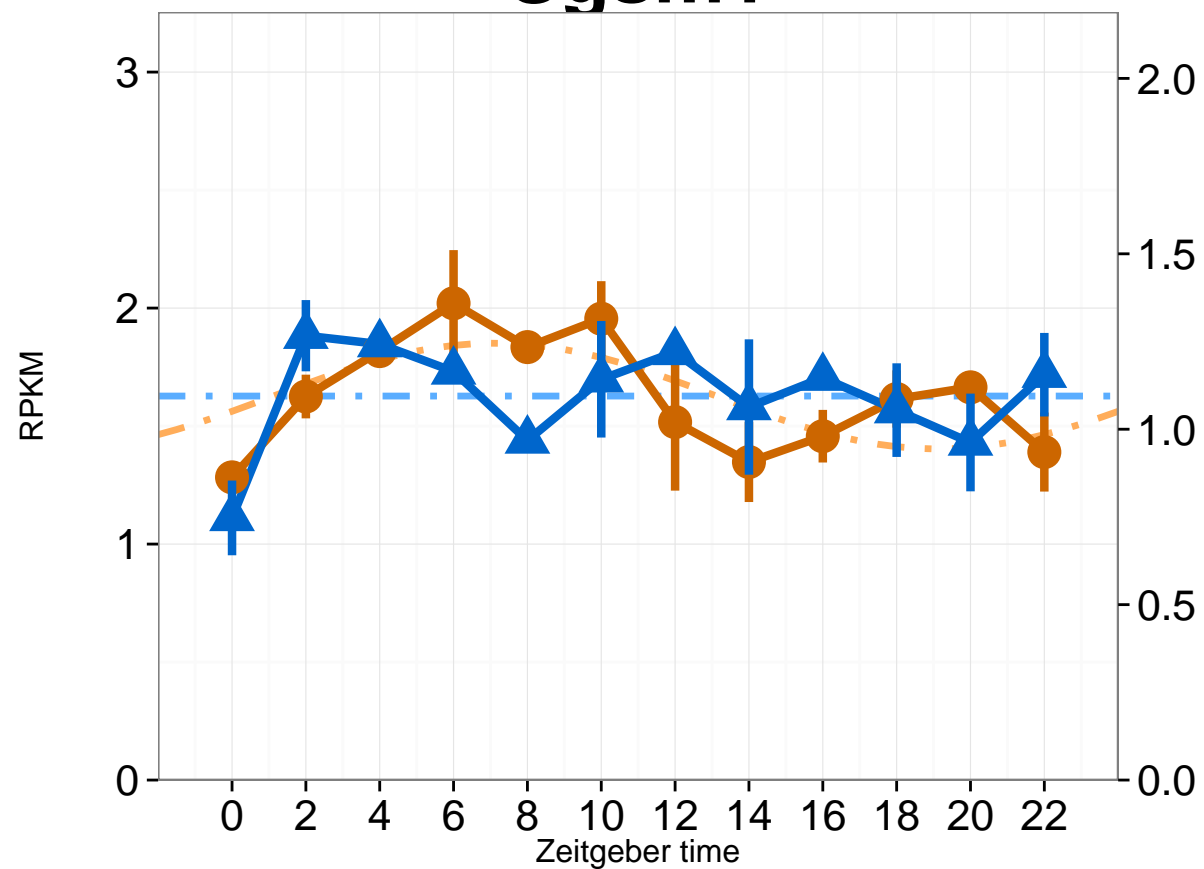

# Sgsm1

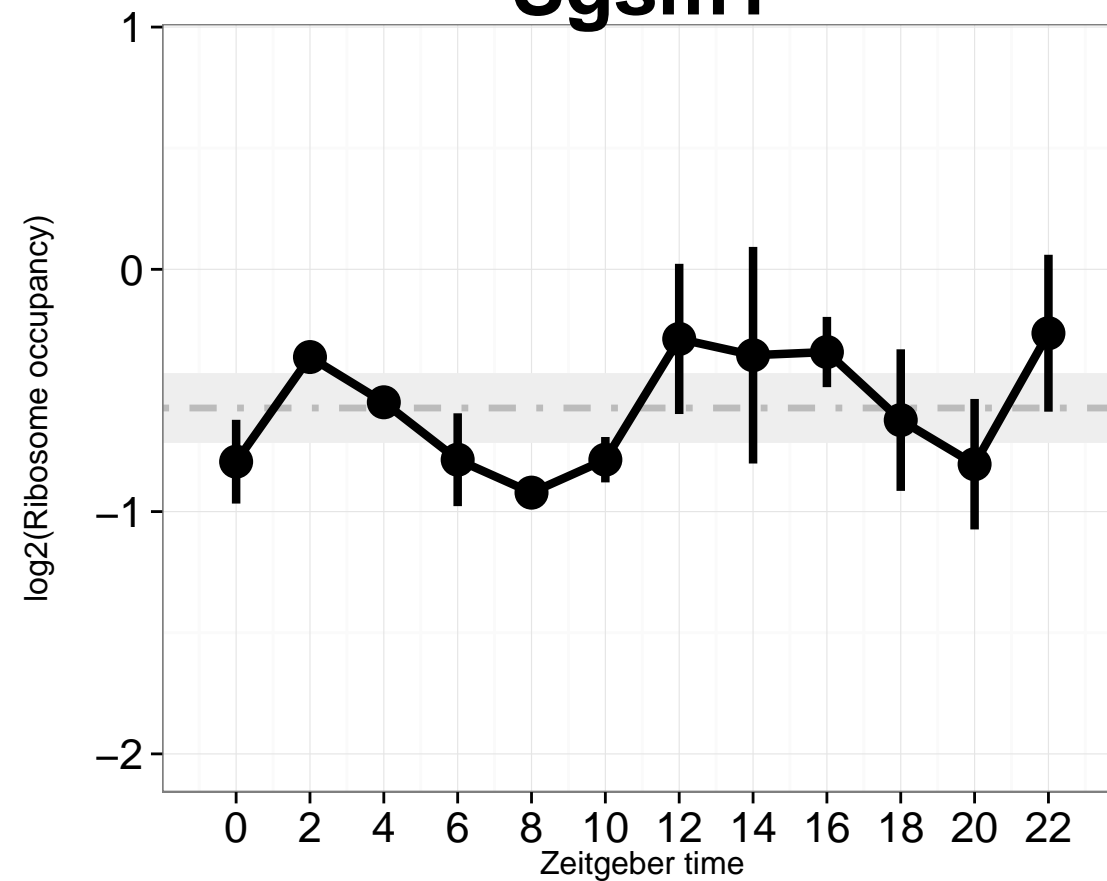

Supplement: Supplementary file 1844 [file 1]

**Eddm3b TR**

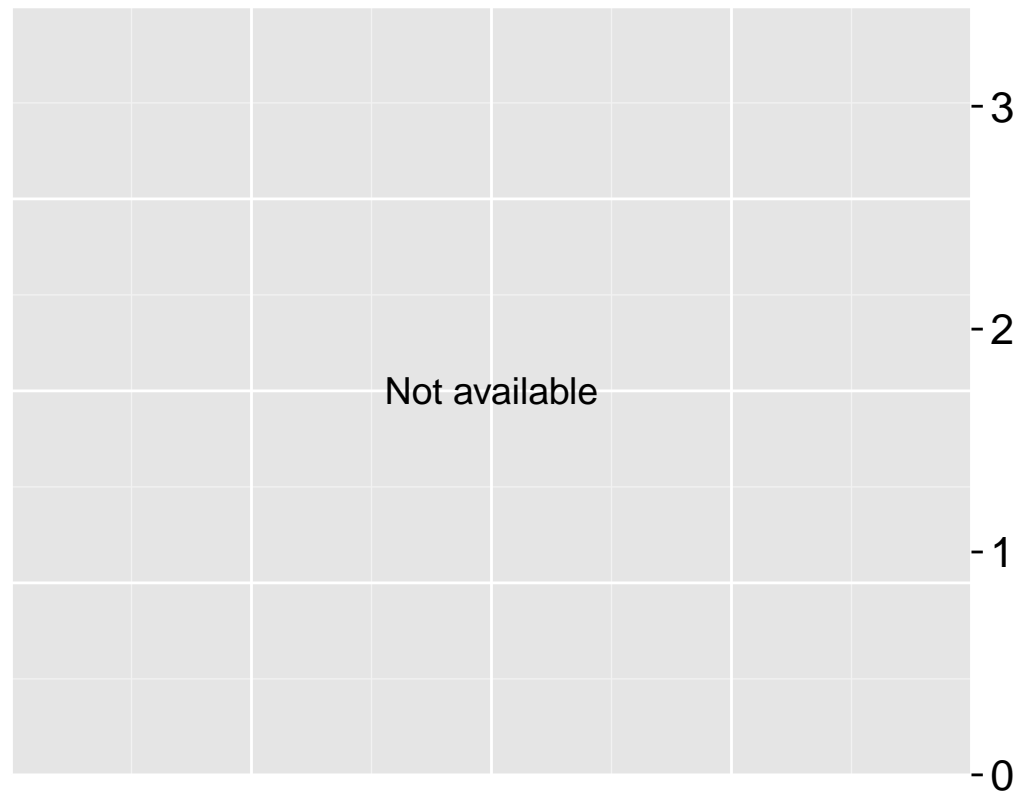

**Eddm3b log2(Ribosome occupanc**

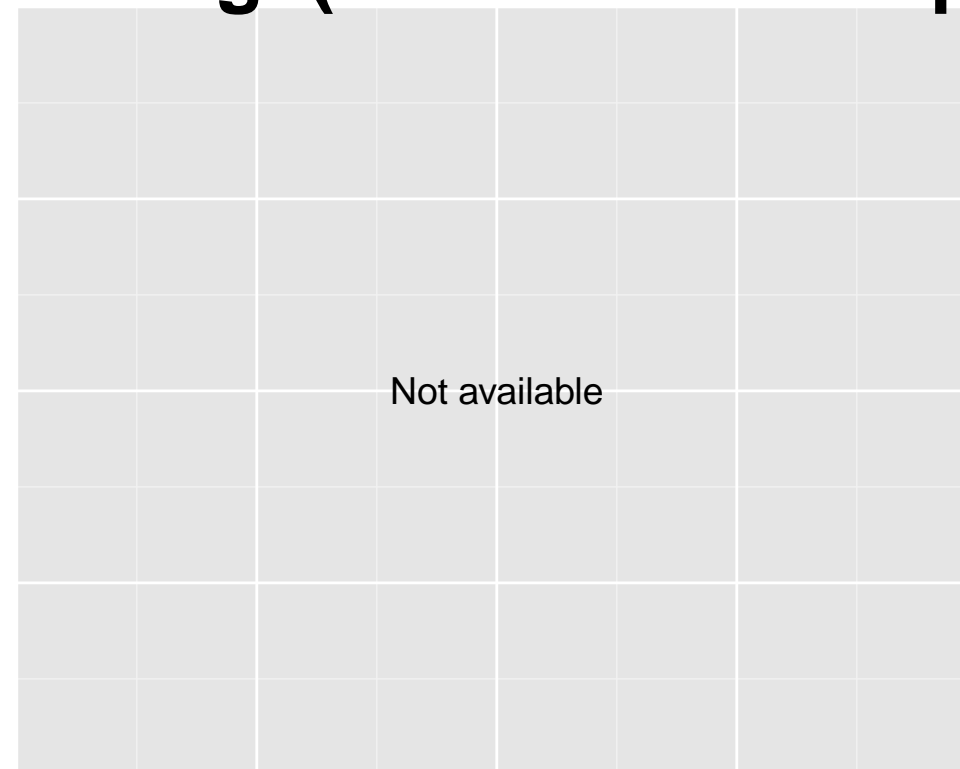

Supplement: Supplementary file 1845 [file 1]

## Gm129

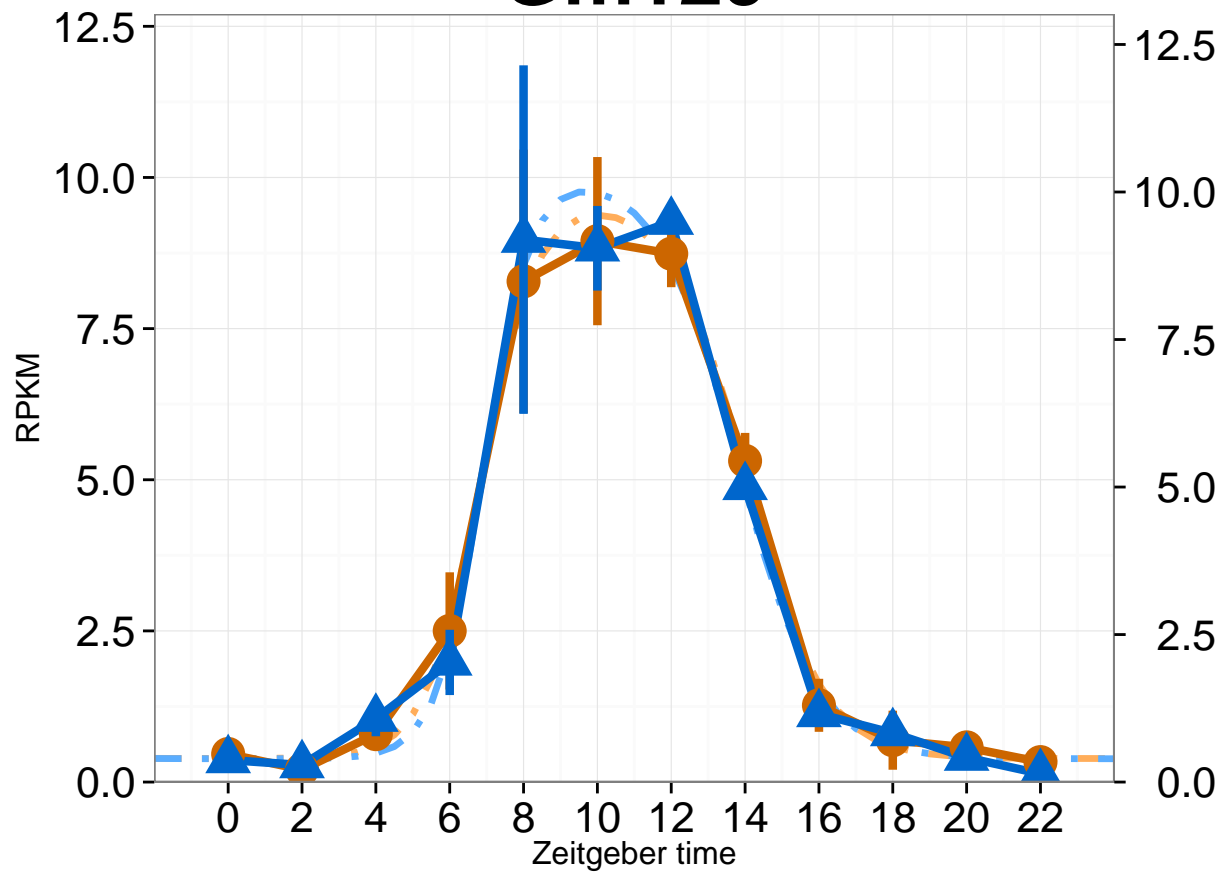

## Gm129

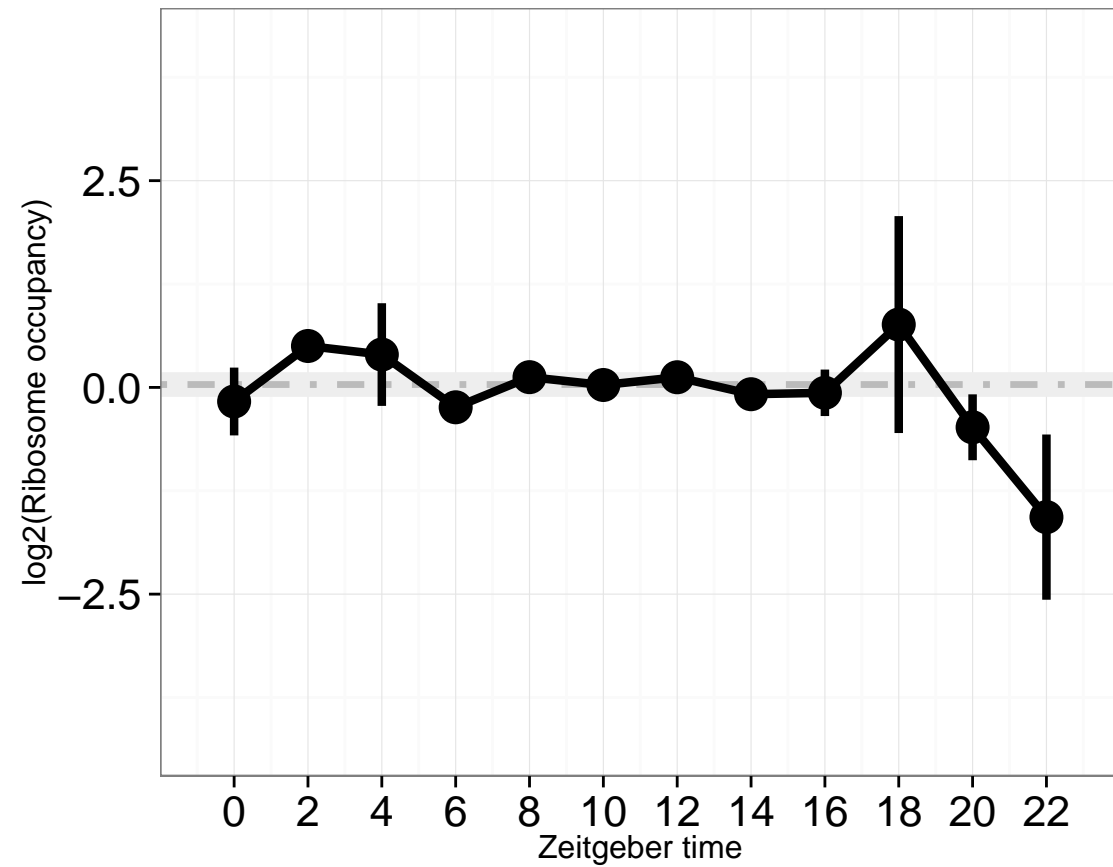

Supplement: Supplementary file 1846 [file 1]

## Rnf170

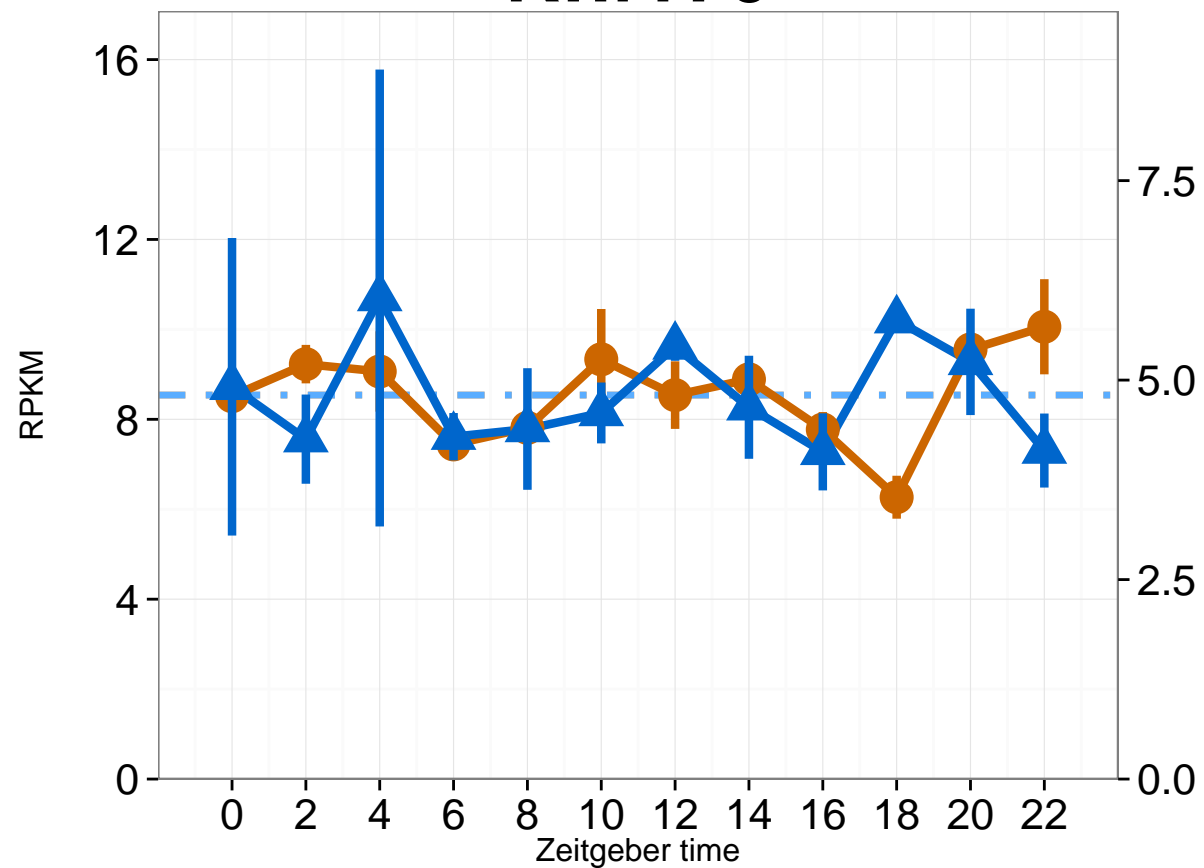

## Rnf170

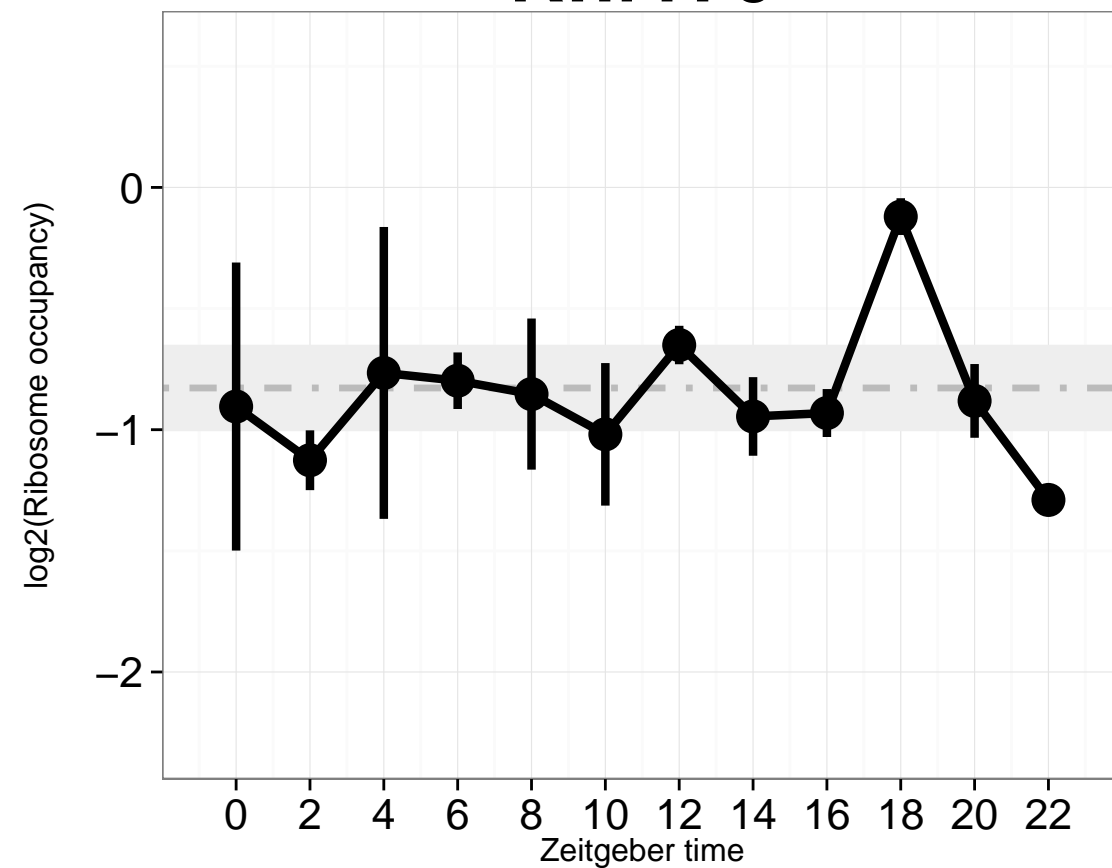

Supplement: Supplementary file 1847 [file 1]

## Furin

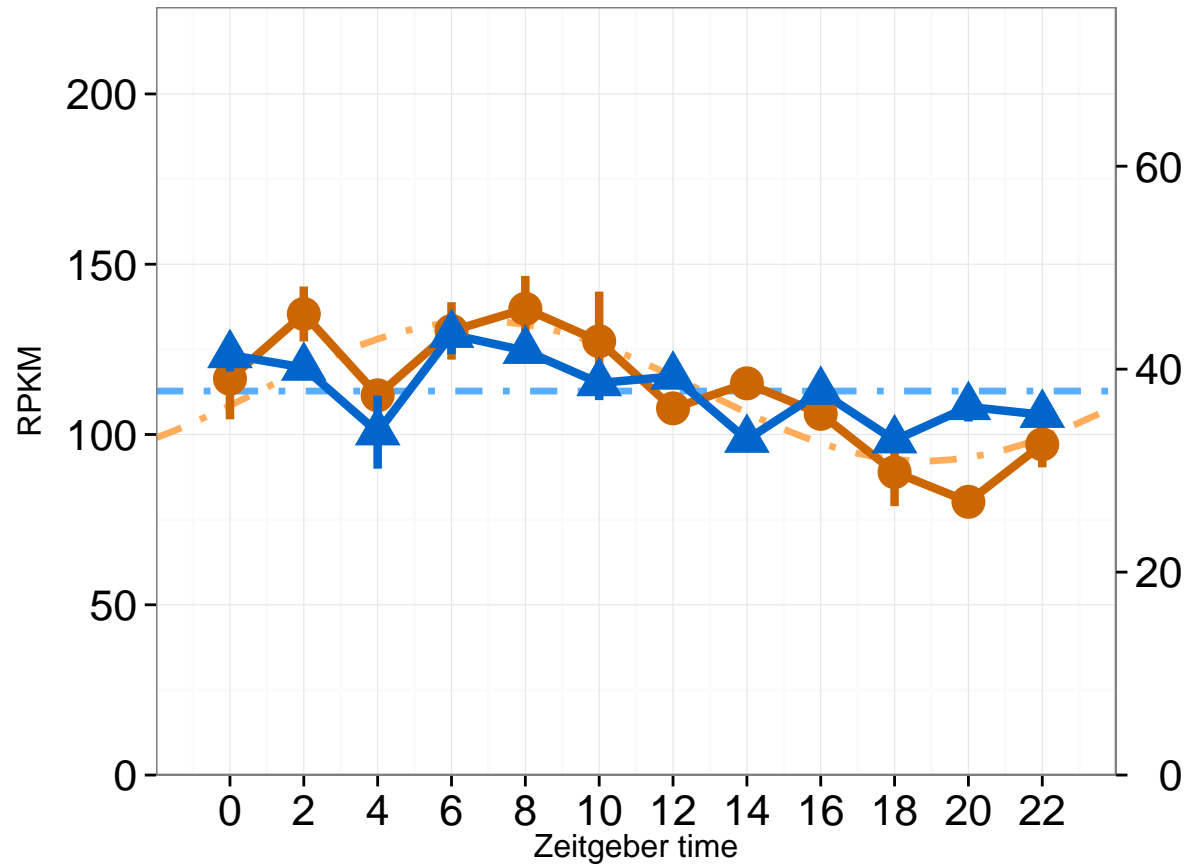

## Furin

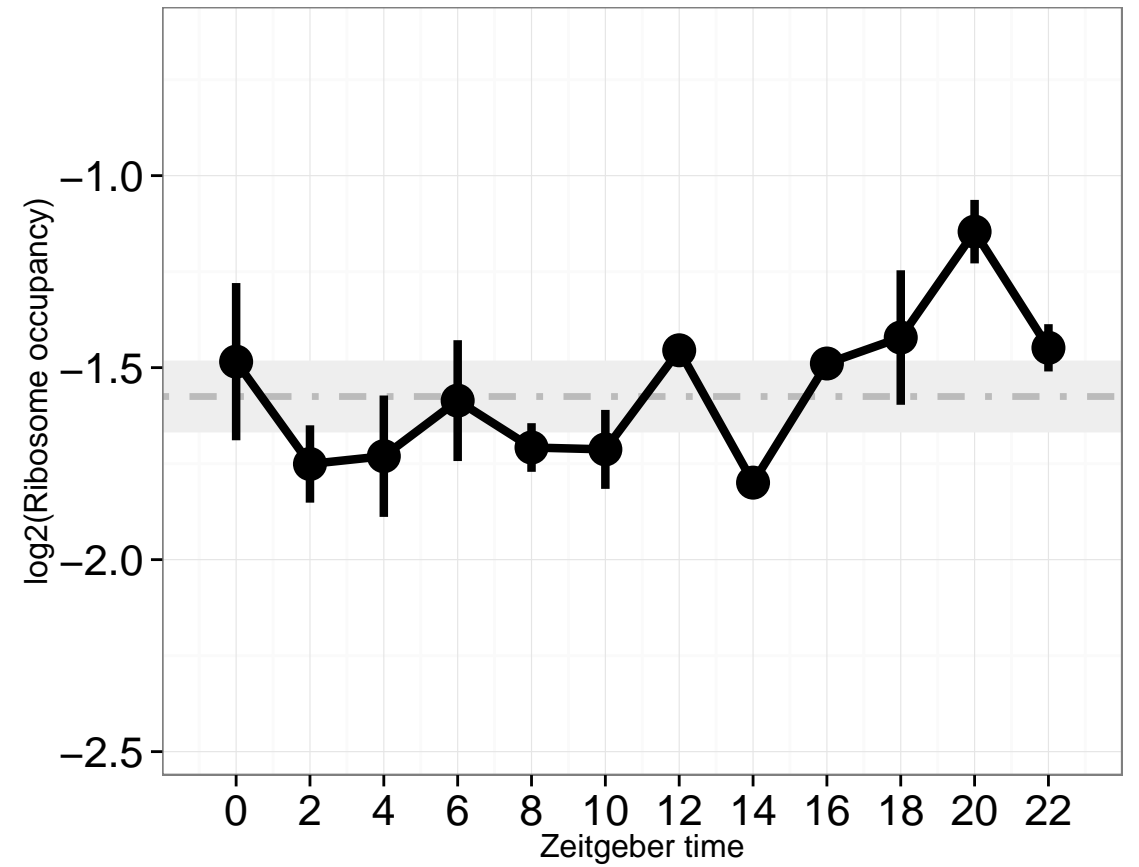

Supplement: Supplementary file 1848 [file 1]

## Dbr1

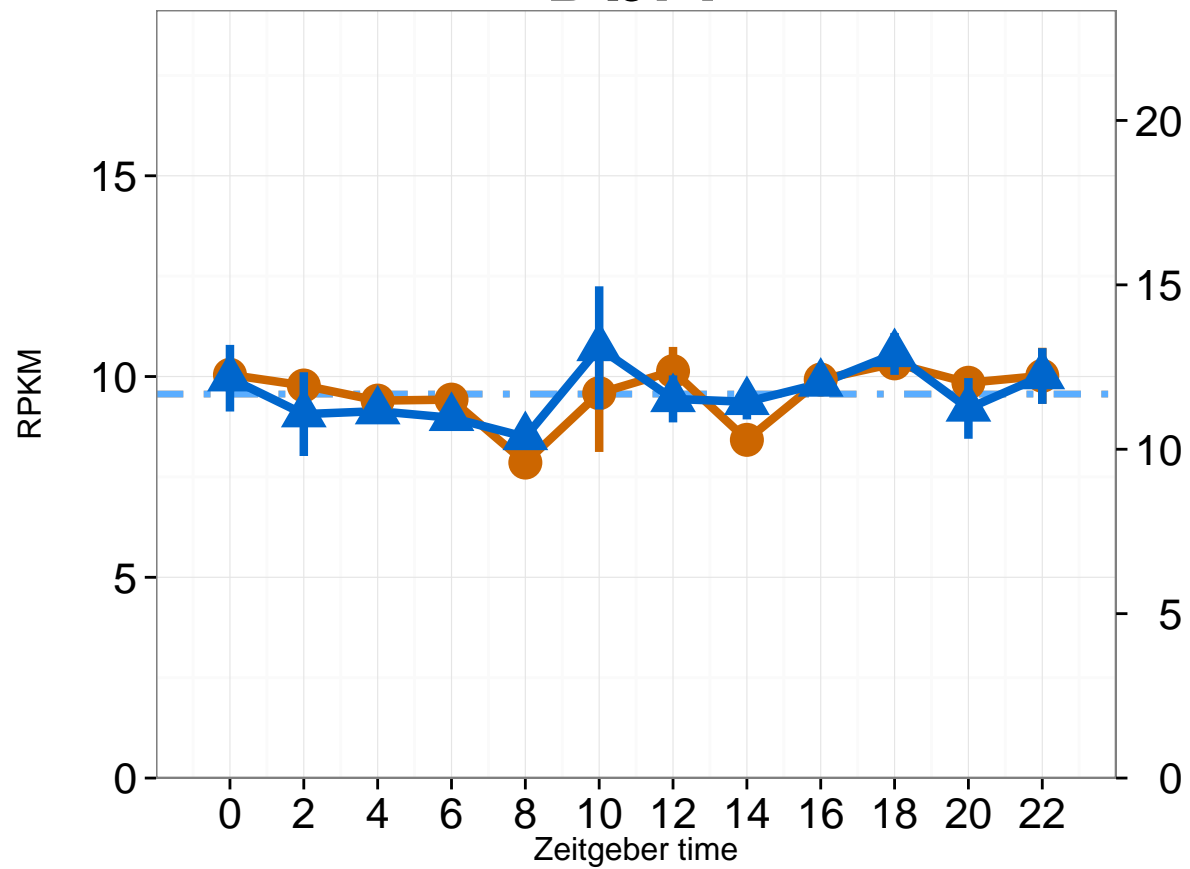

## Dbr1

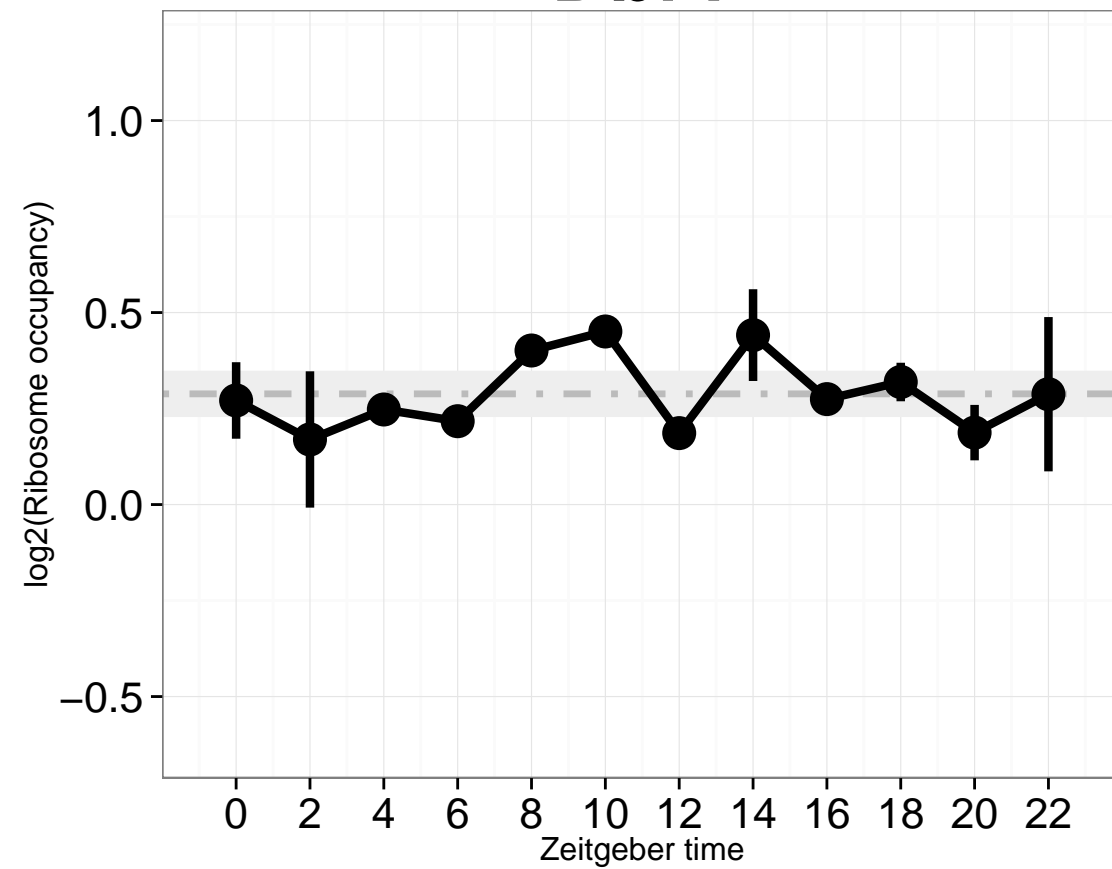

Supplement: Supplementary file 1849 [file 1]

## Psmg3

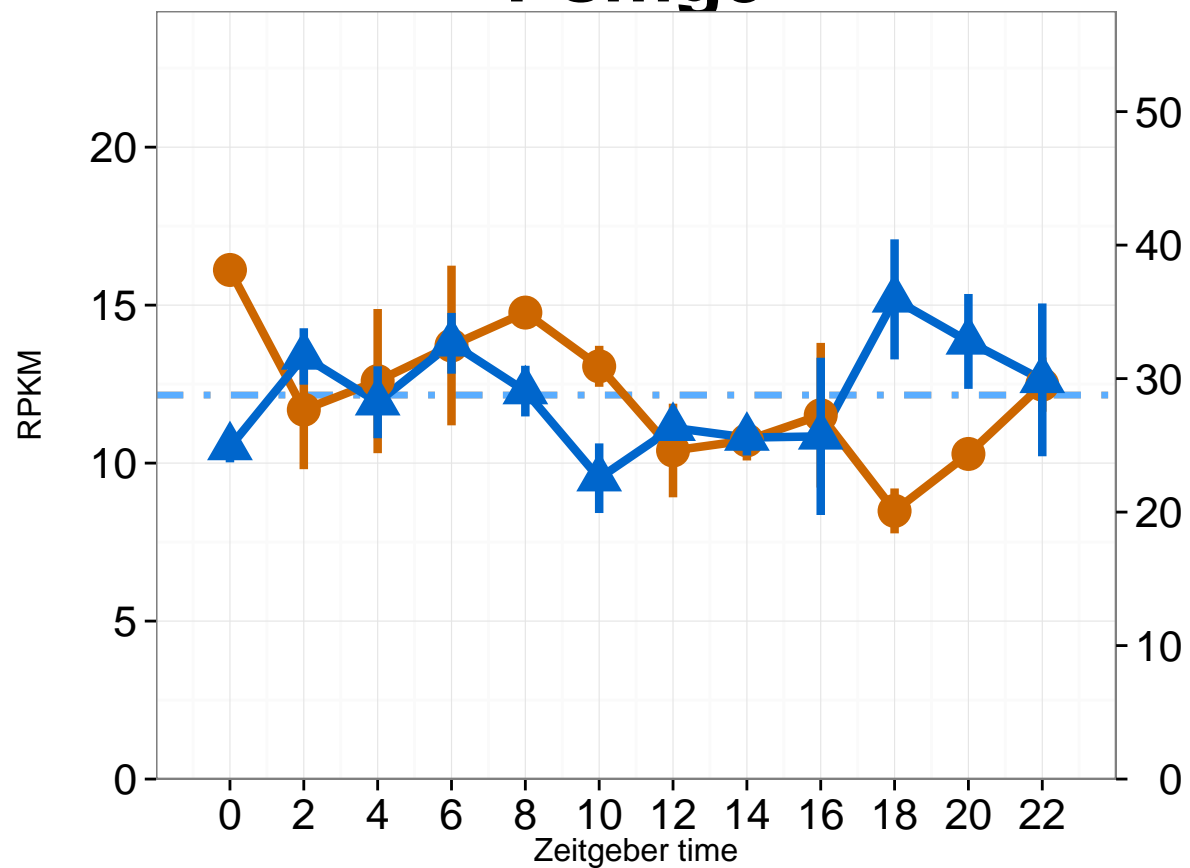

## Psmg3

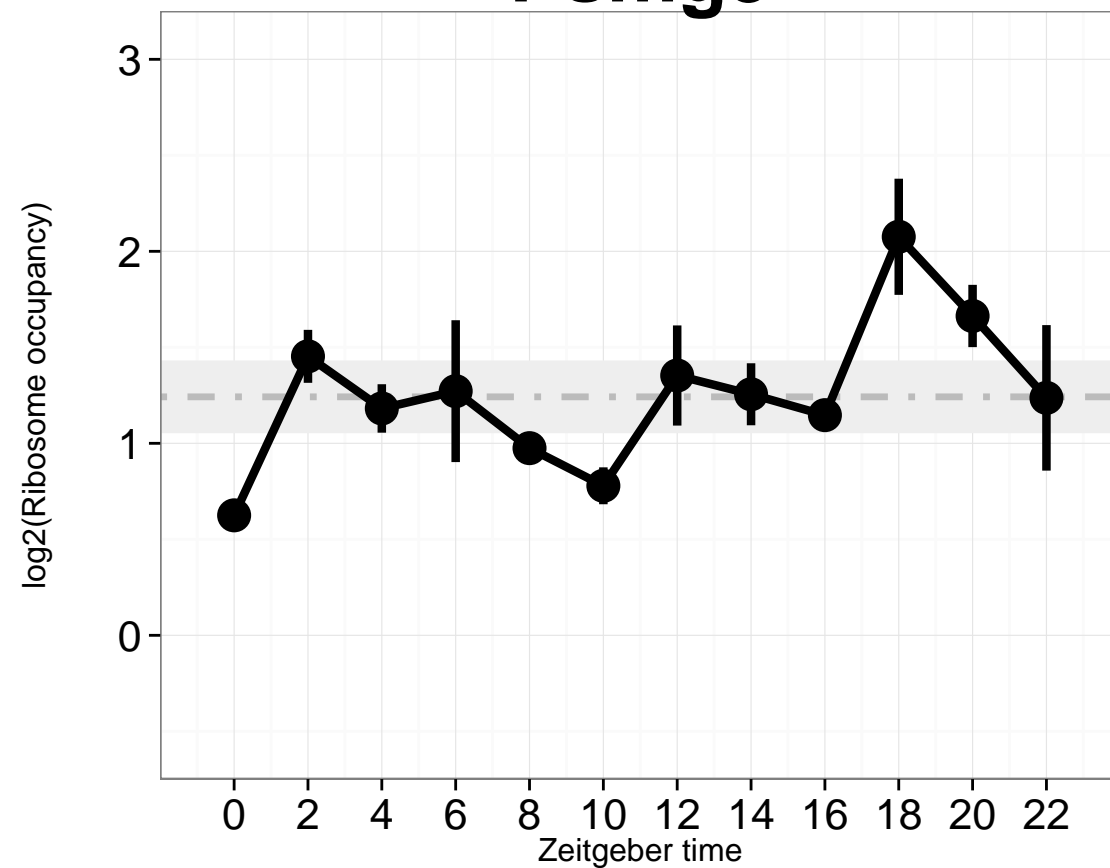

Supplement: Supplementary file 1850 [file 1]

## Hdac2

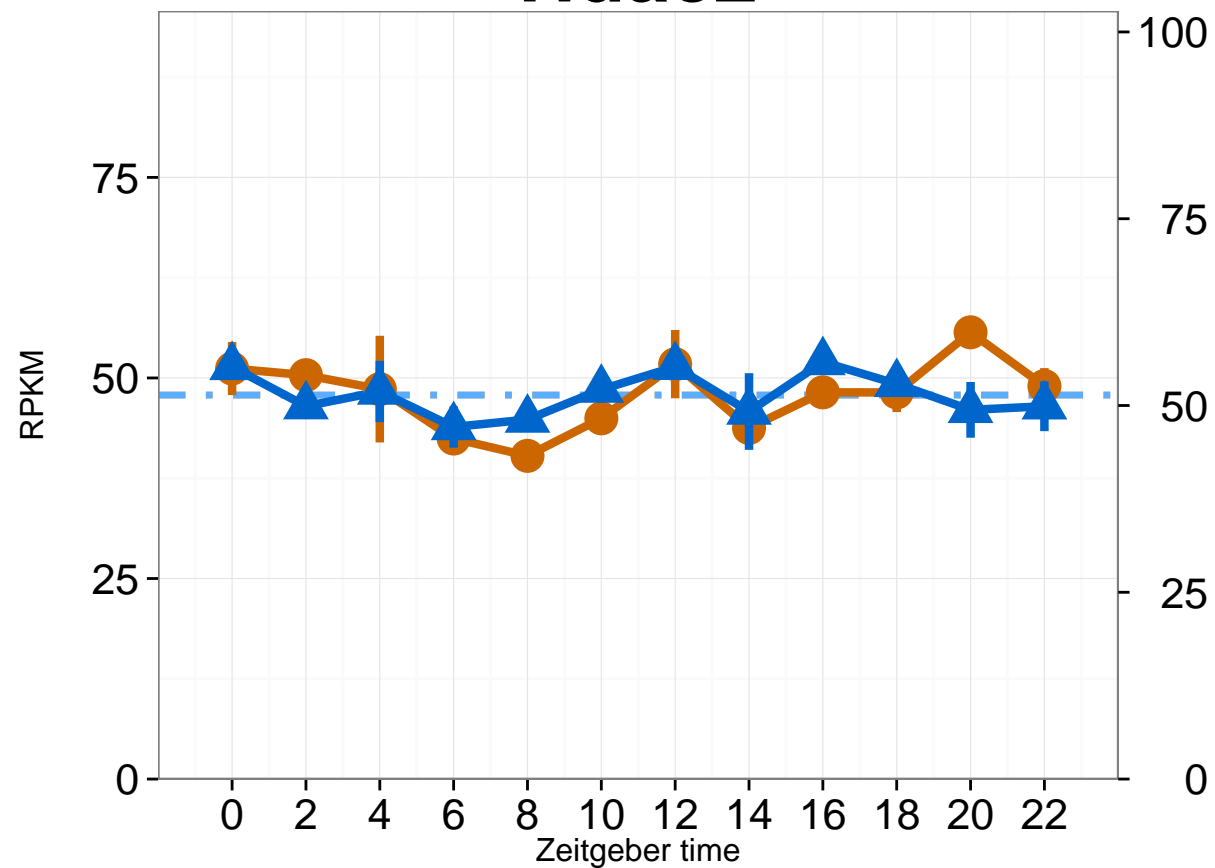

## Hdac2

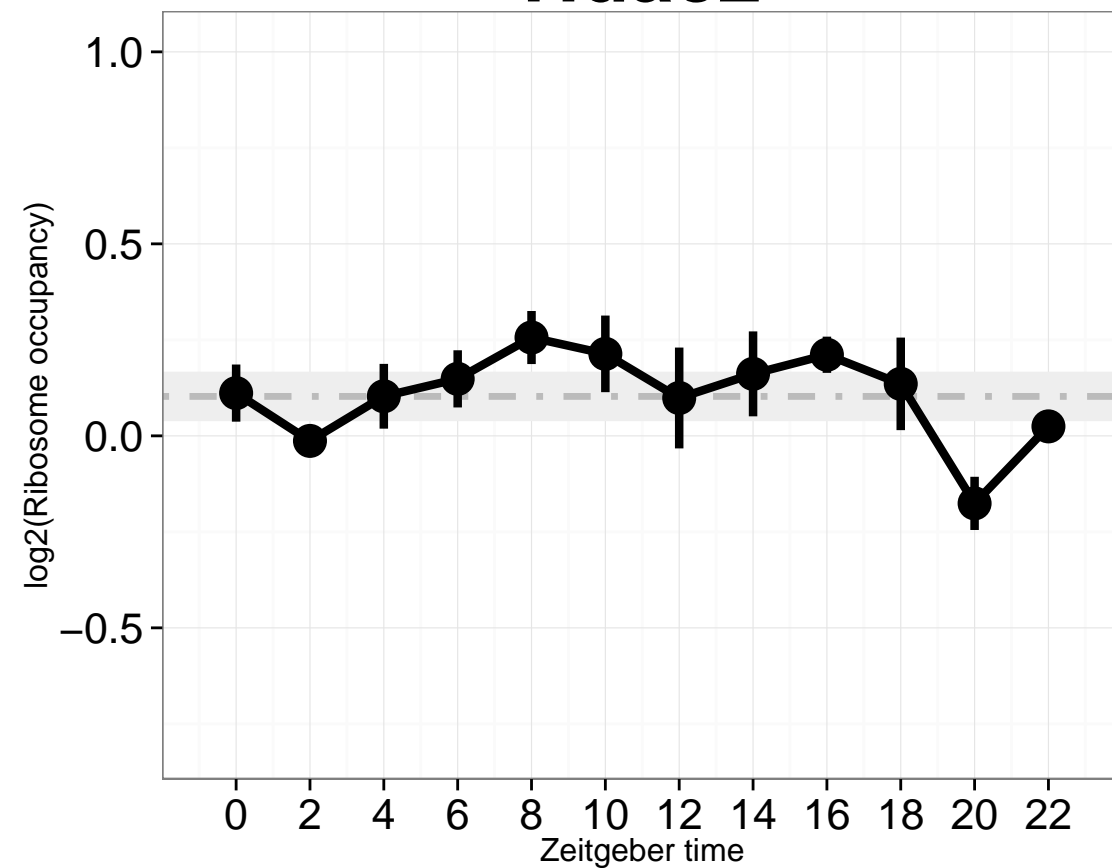

Supplement: Supplementary file 1851 [file 1]

# Wdr20a

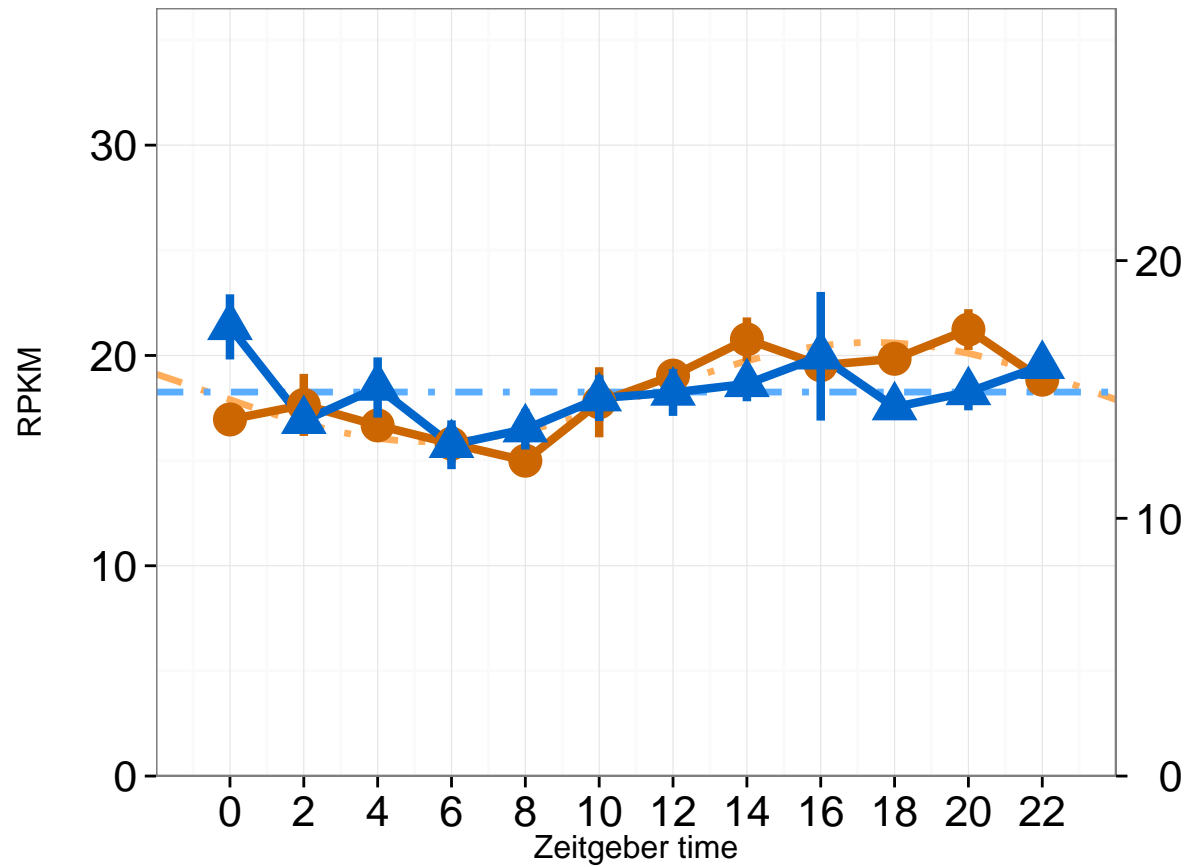

# Wdr20a

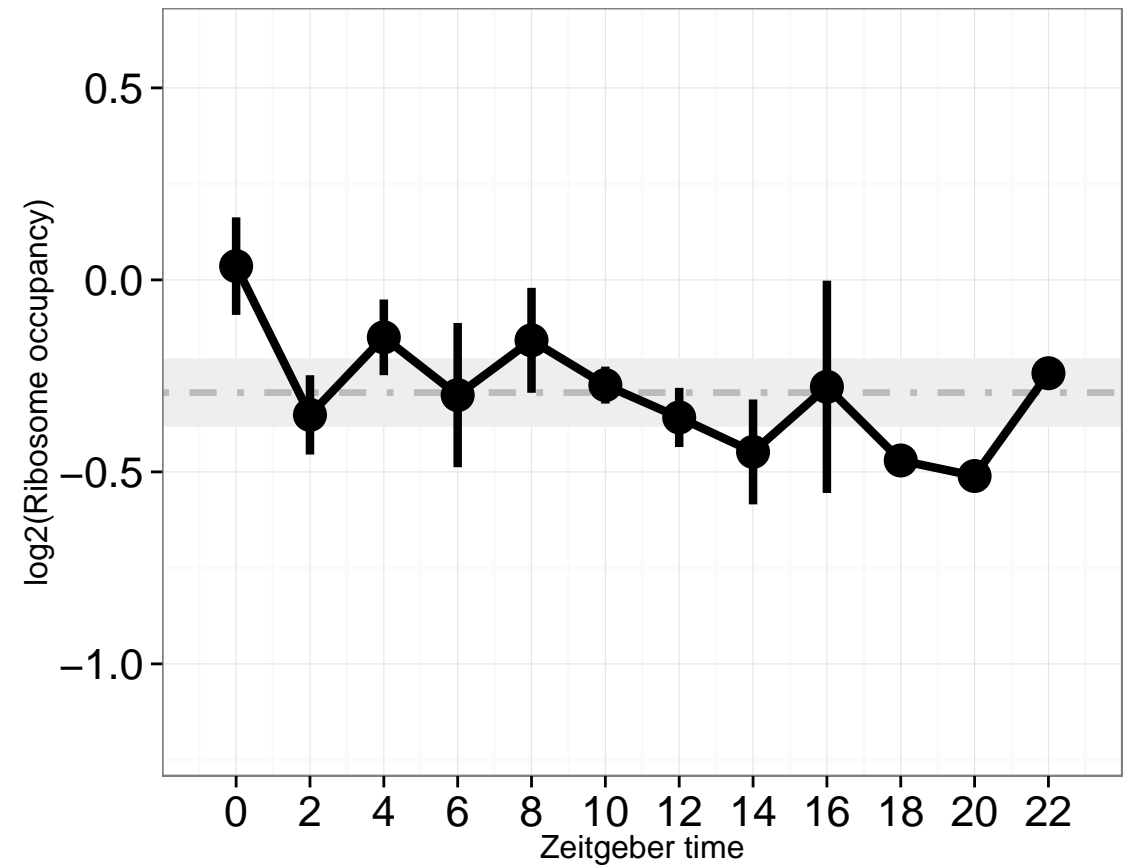

Supplement: Supplementary file 1852 [file 1]

# 6430573F11Rik

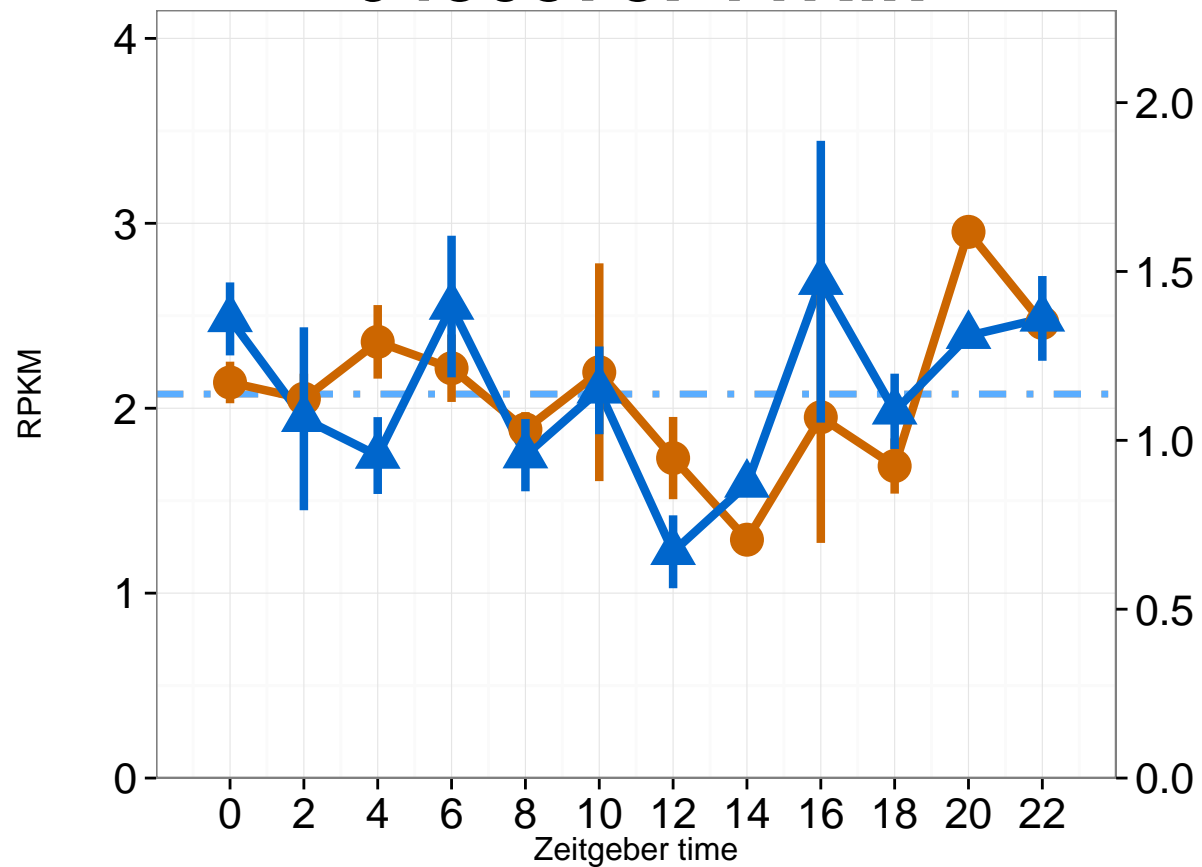

# 6430573F11Rik

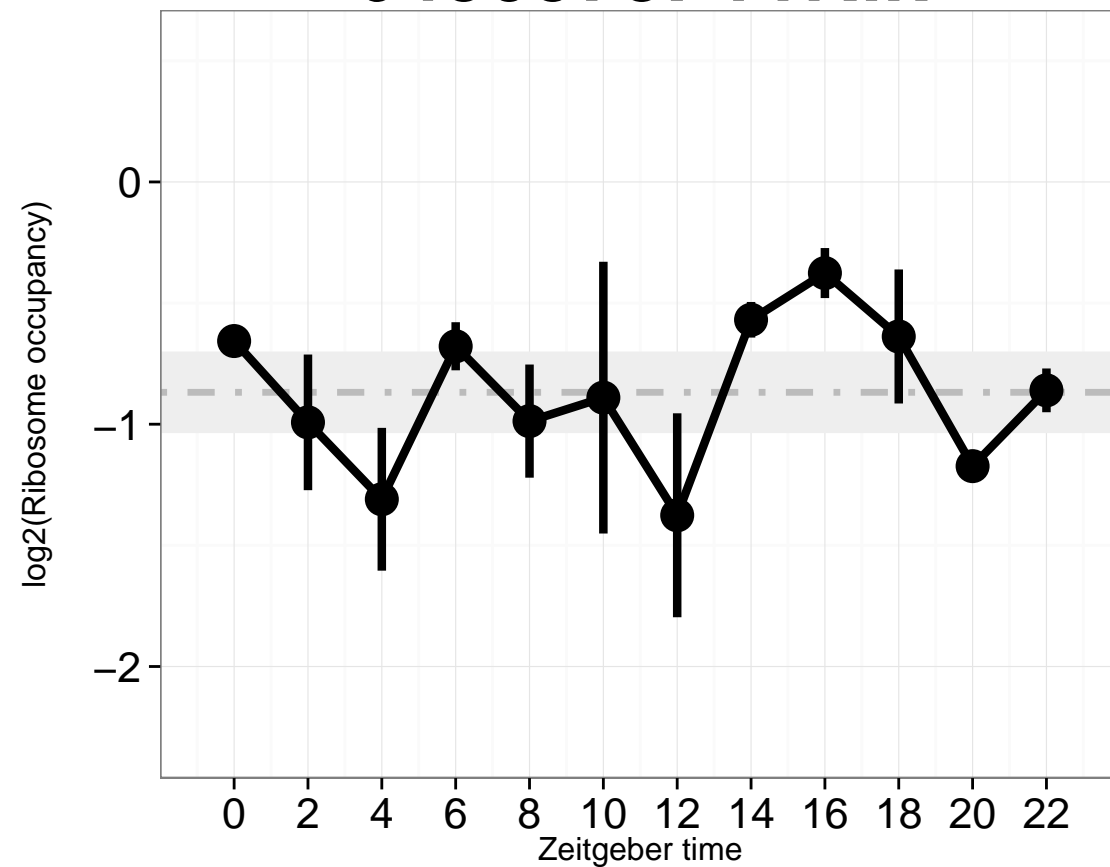

Supplement: Supplementary file 1853 [file 1]

# Lrrc29

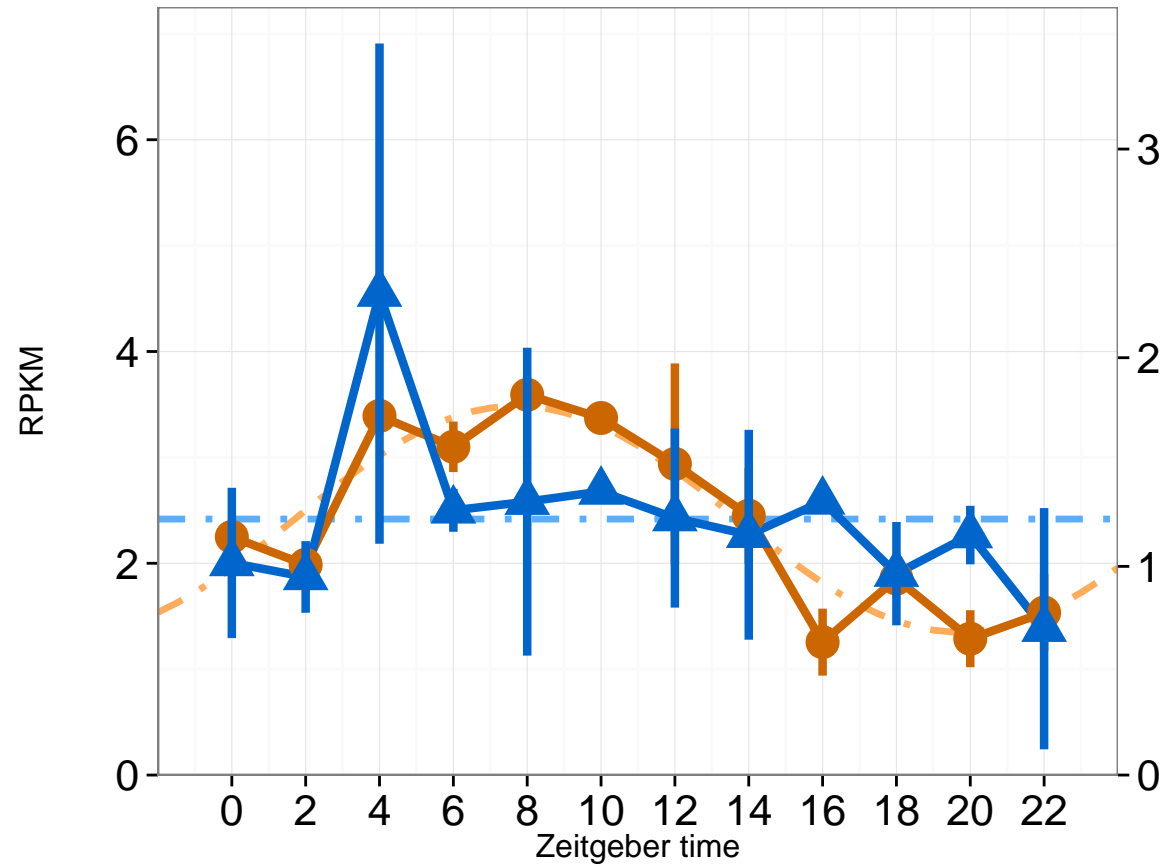

# Lrrc29

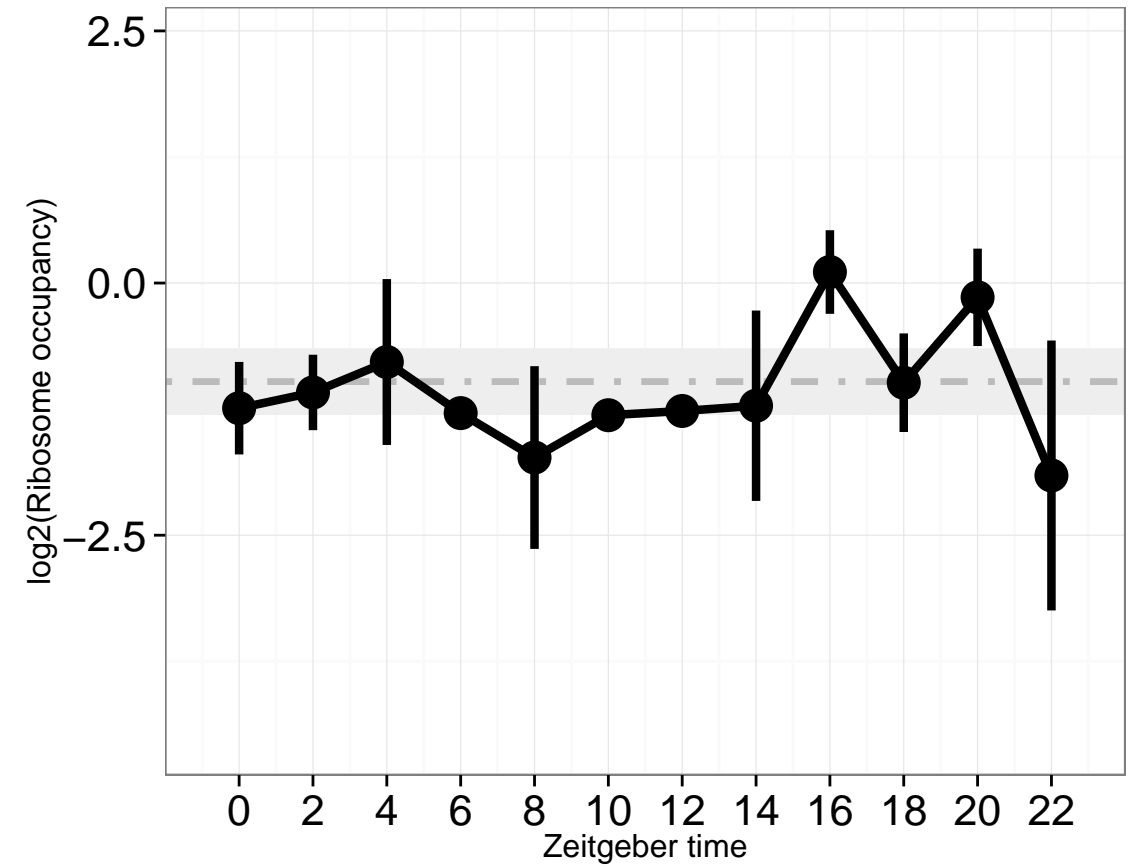

Supplement: Supplementary file 1854 [file 1]

# Snapc4

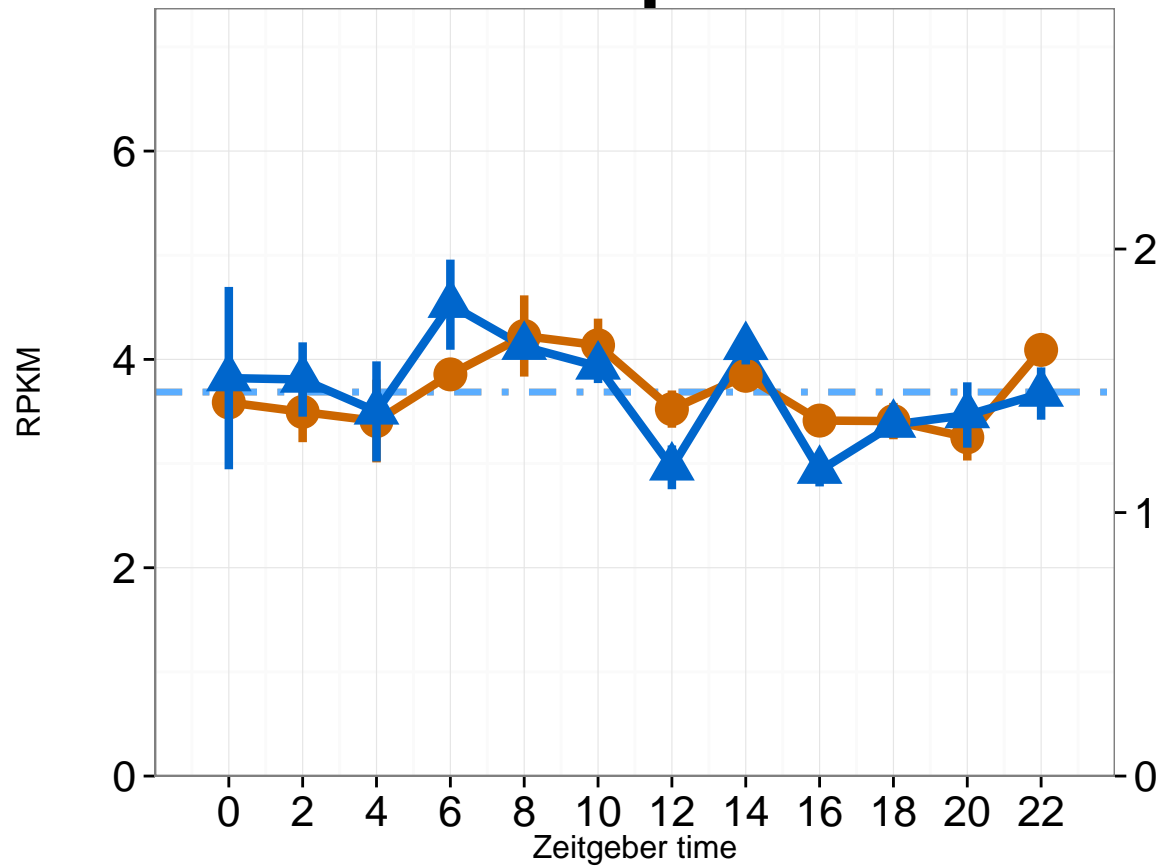

# Snapc4

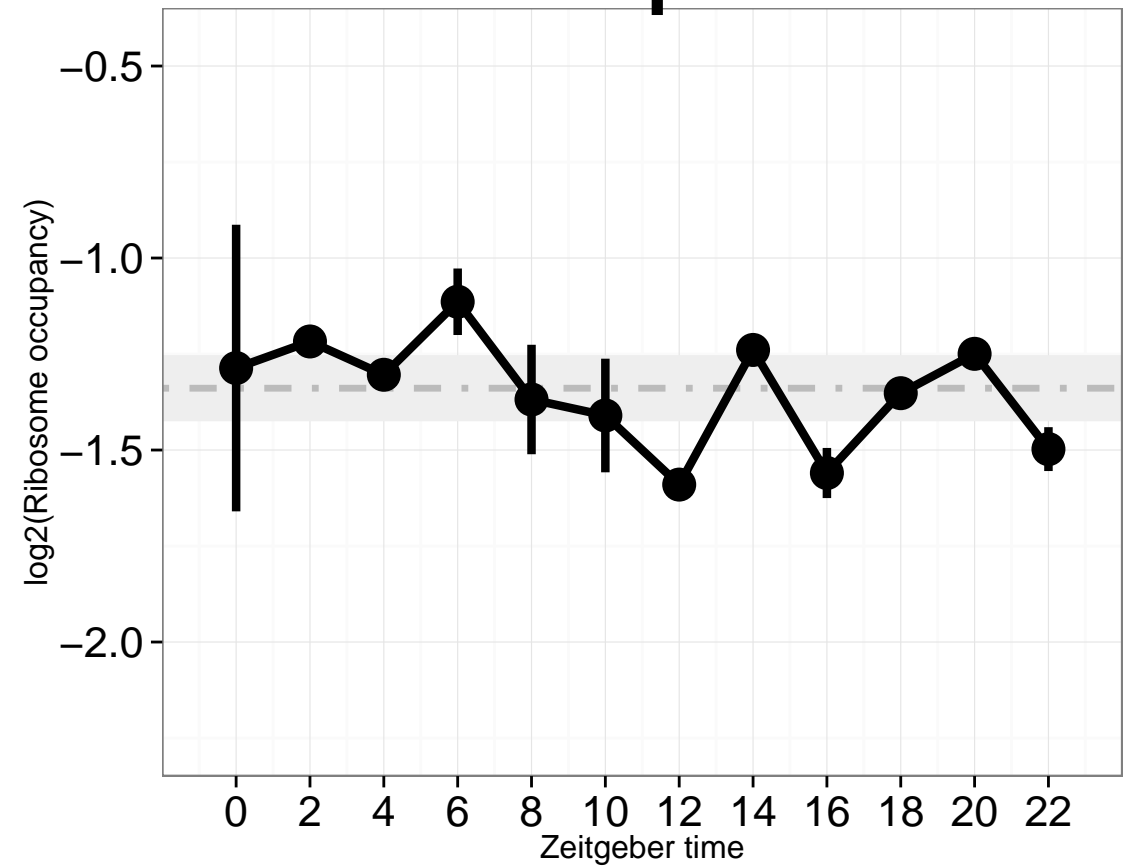

Supplement: Supplementary file 1855 [file 1]

## Gmnn

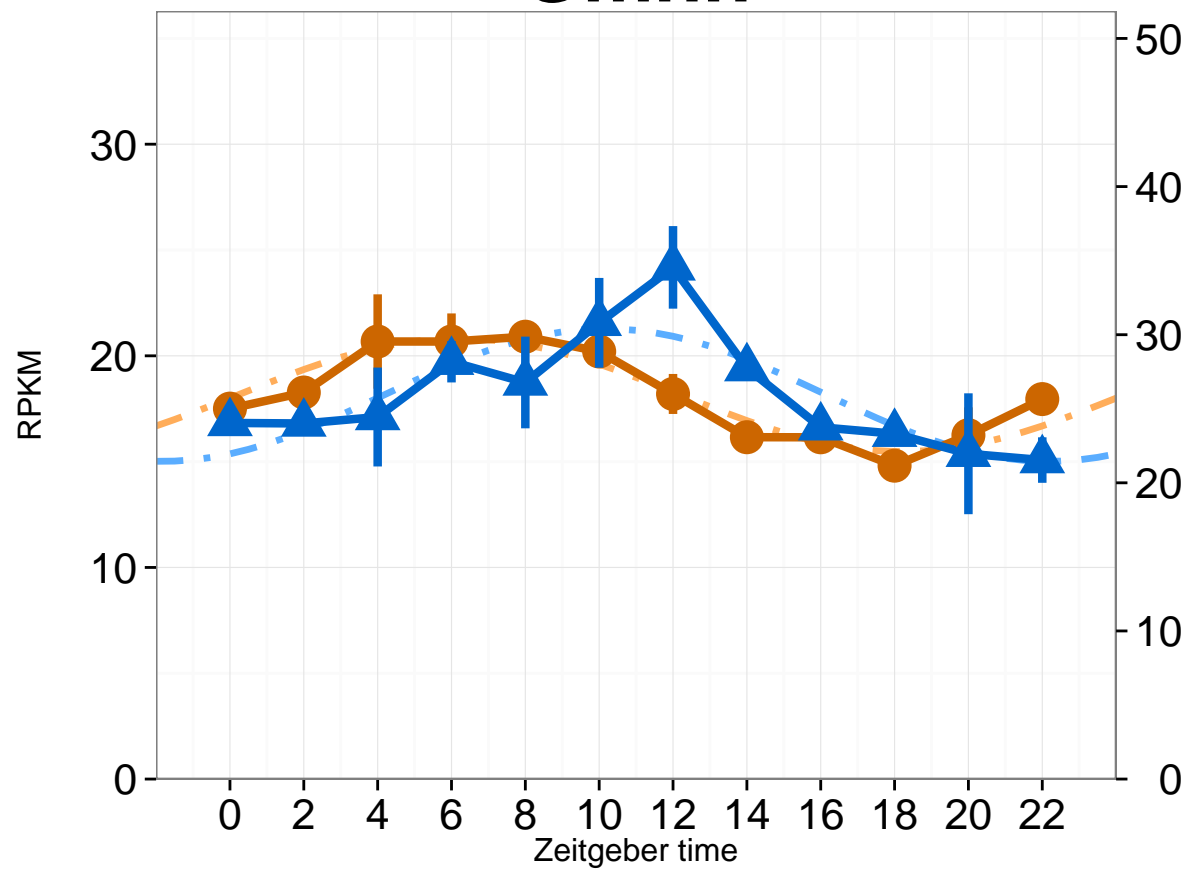

## Gmnn

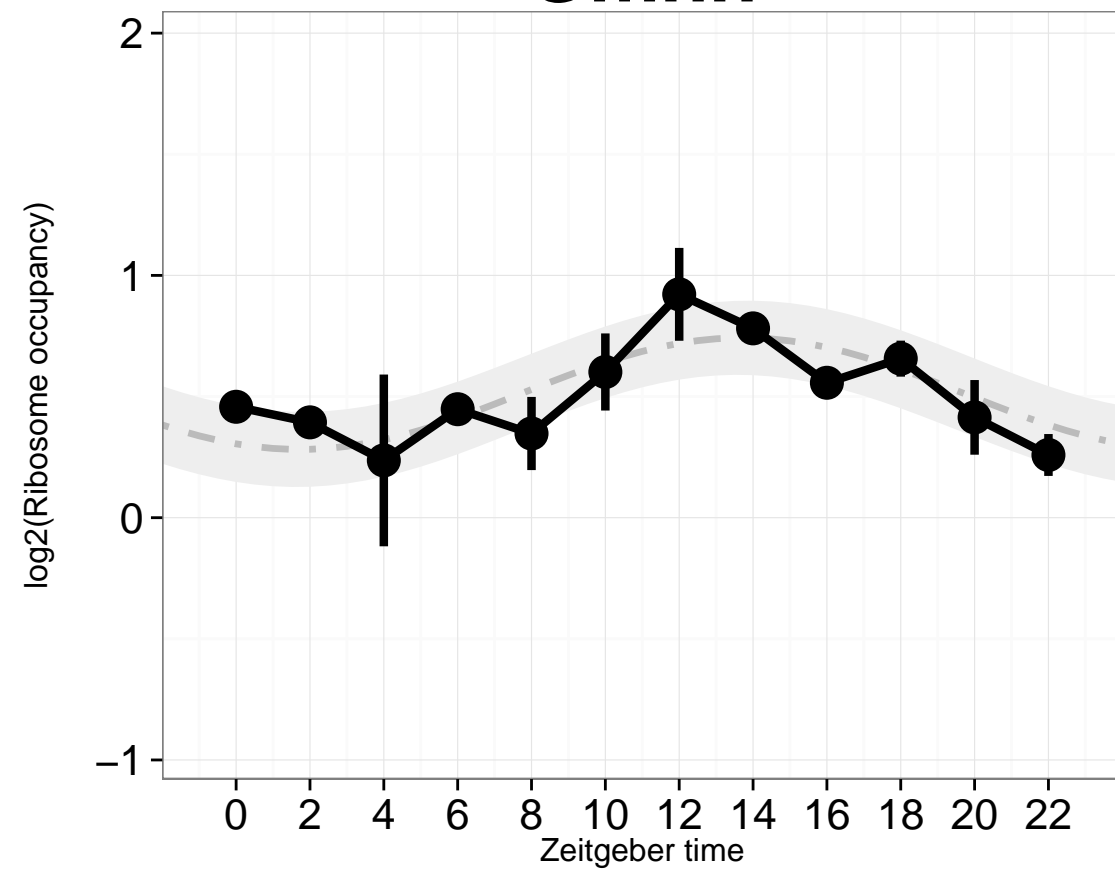

Supplement: Supplementary file 1856 [file 1]

**C3**

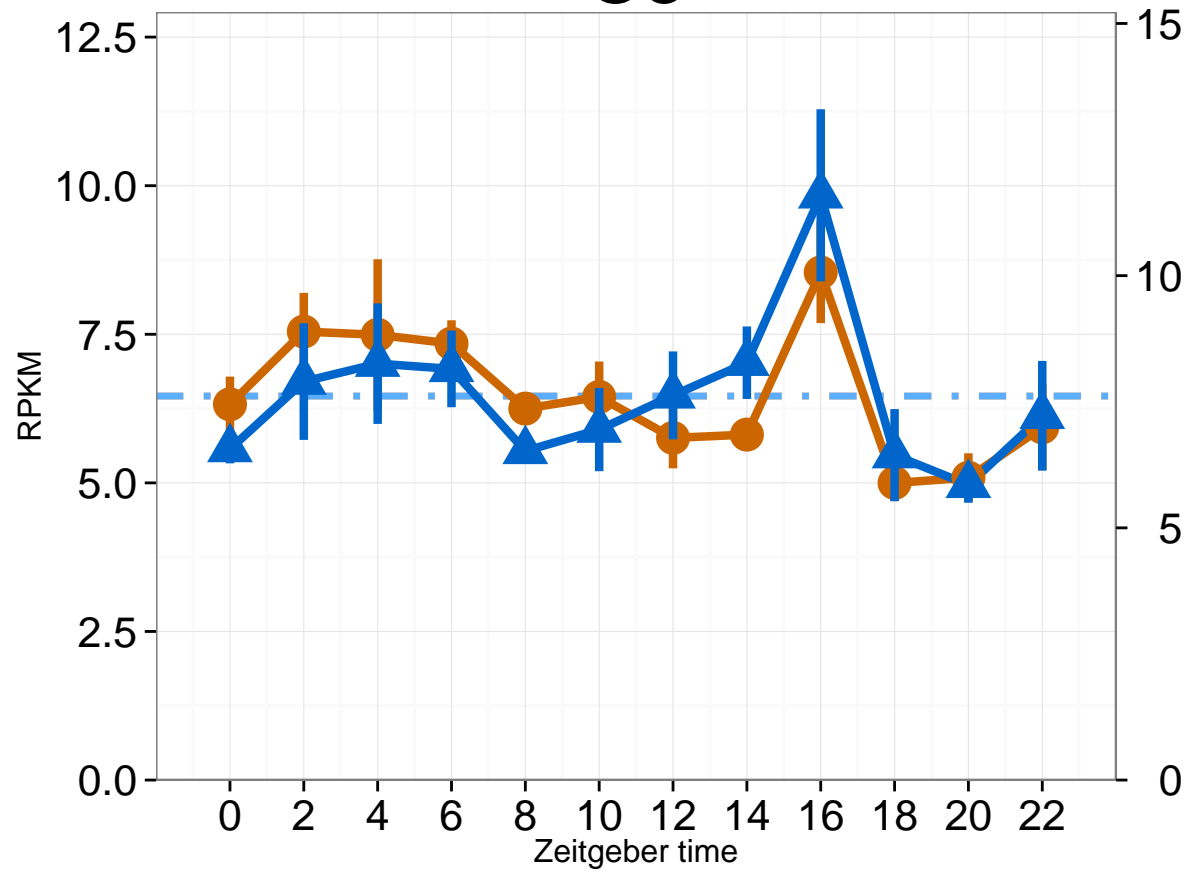

**C3**

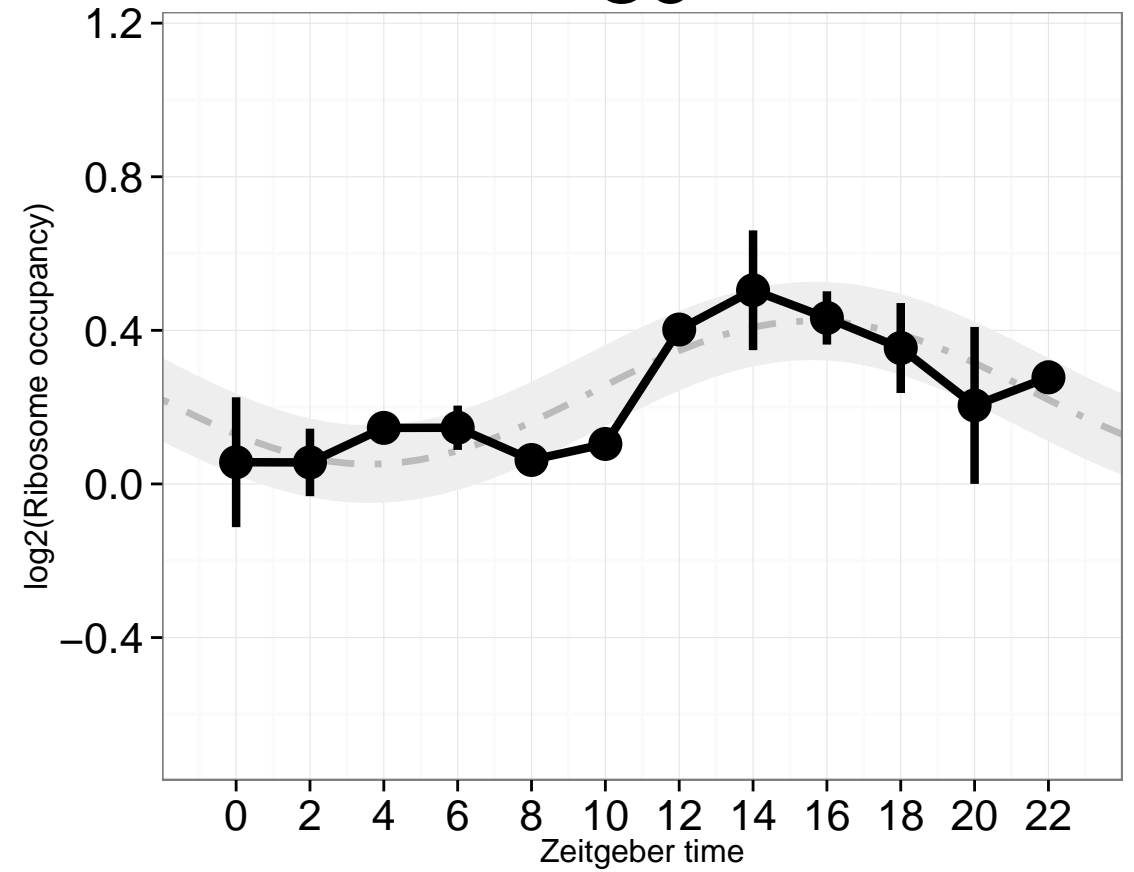

Supplement: Supplementary file 1857 [file 1]

## Klra2

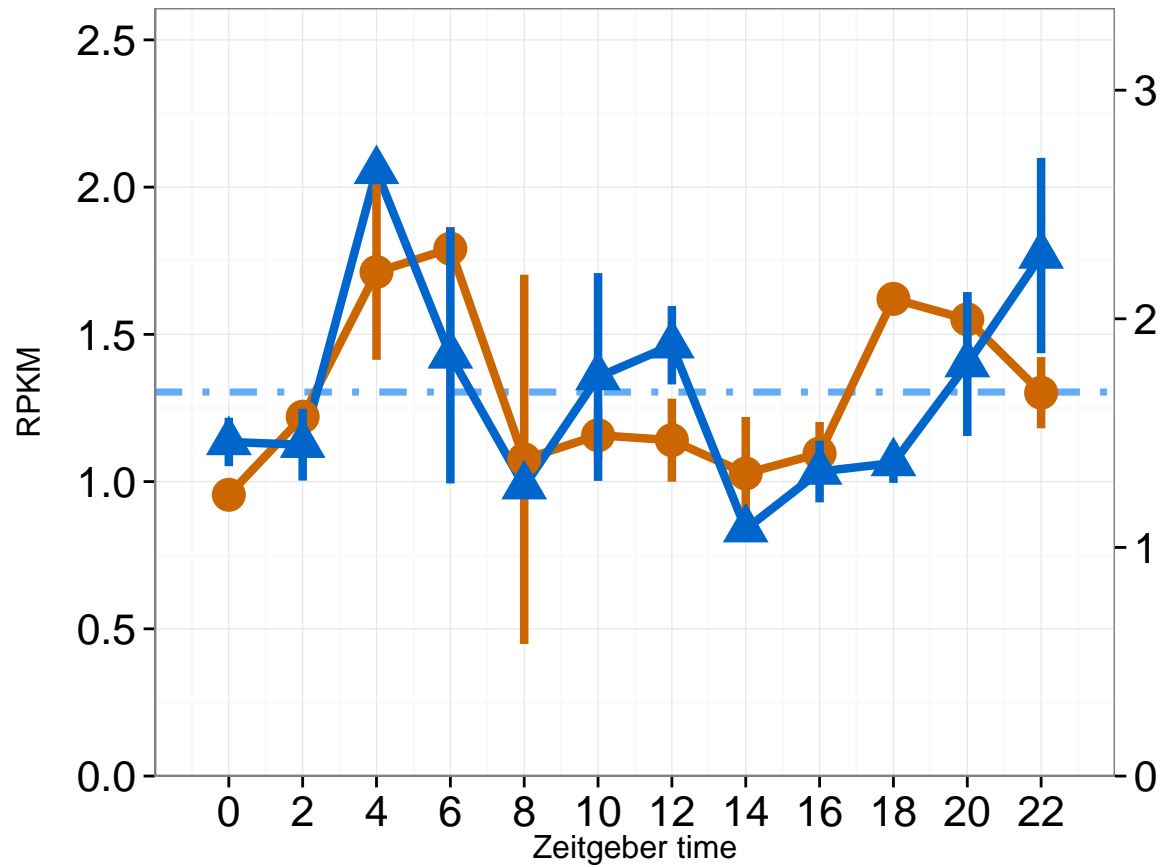

## Klra2

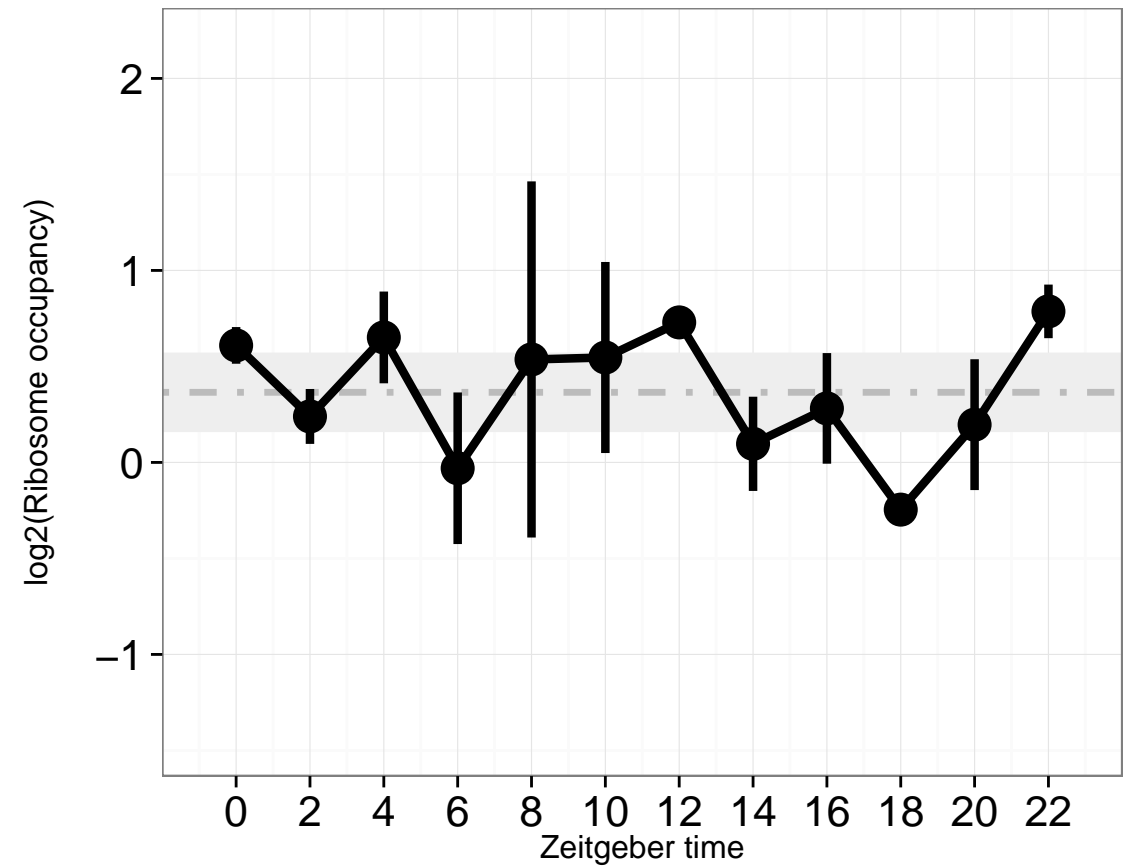

Supplement: Supplementary file 1858 [file 1]

# Psme2

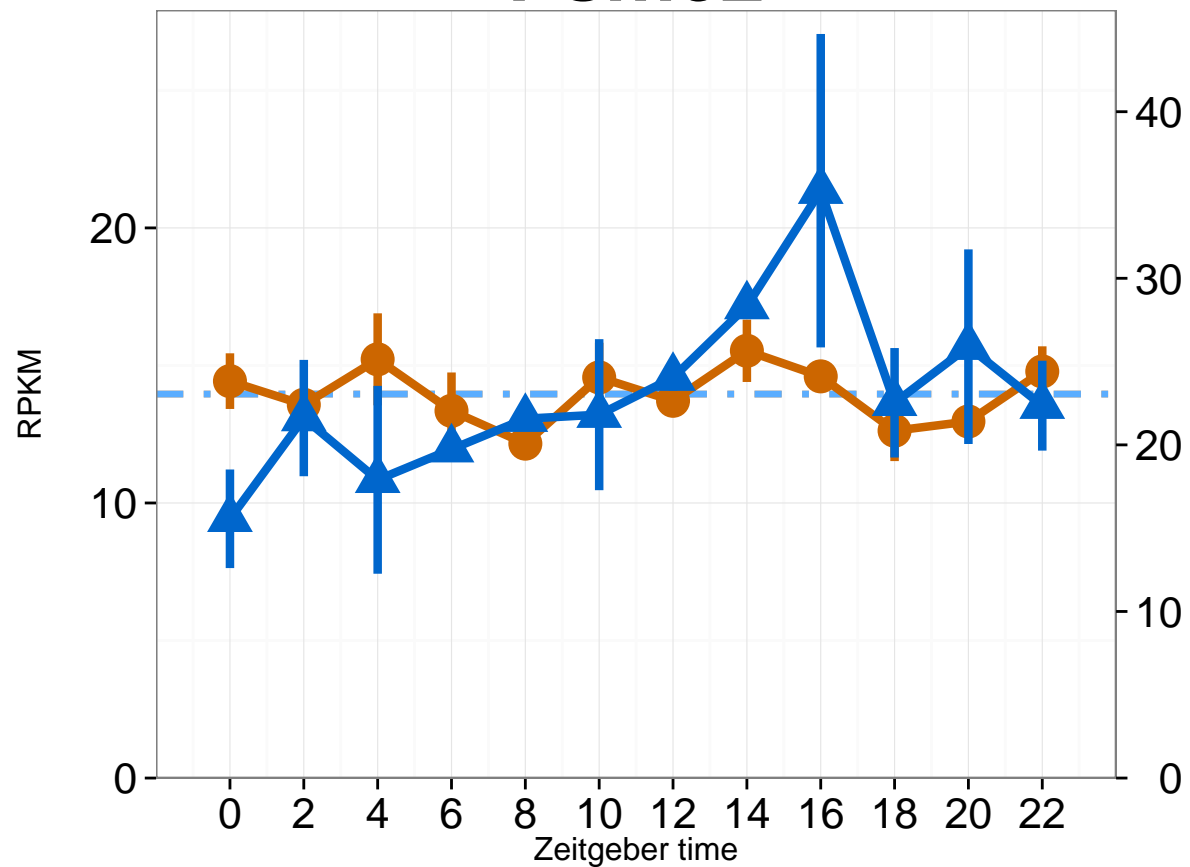

# Psme2

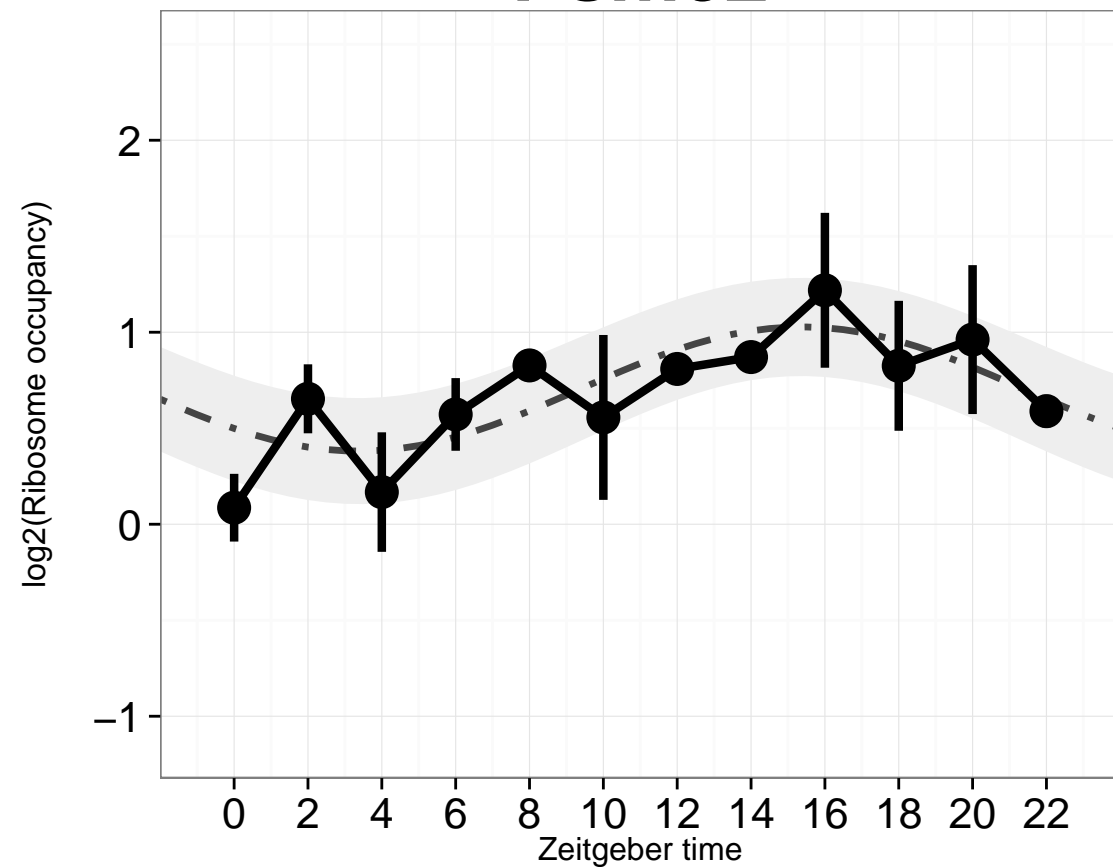

Supplement: Supplementary file 1859 [file 1]

# Harbi1

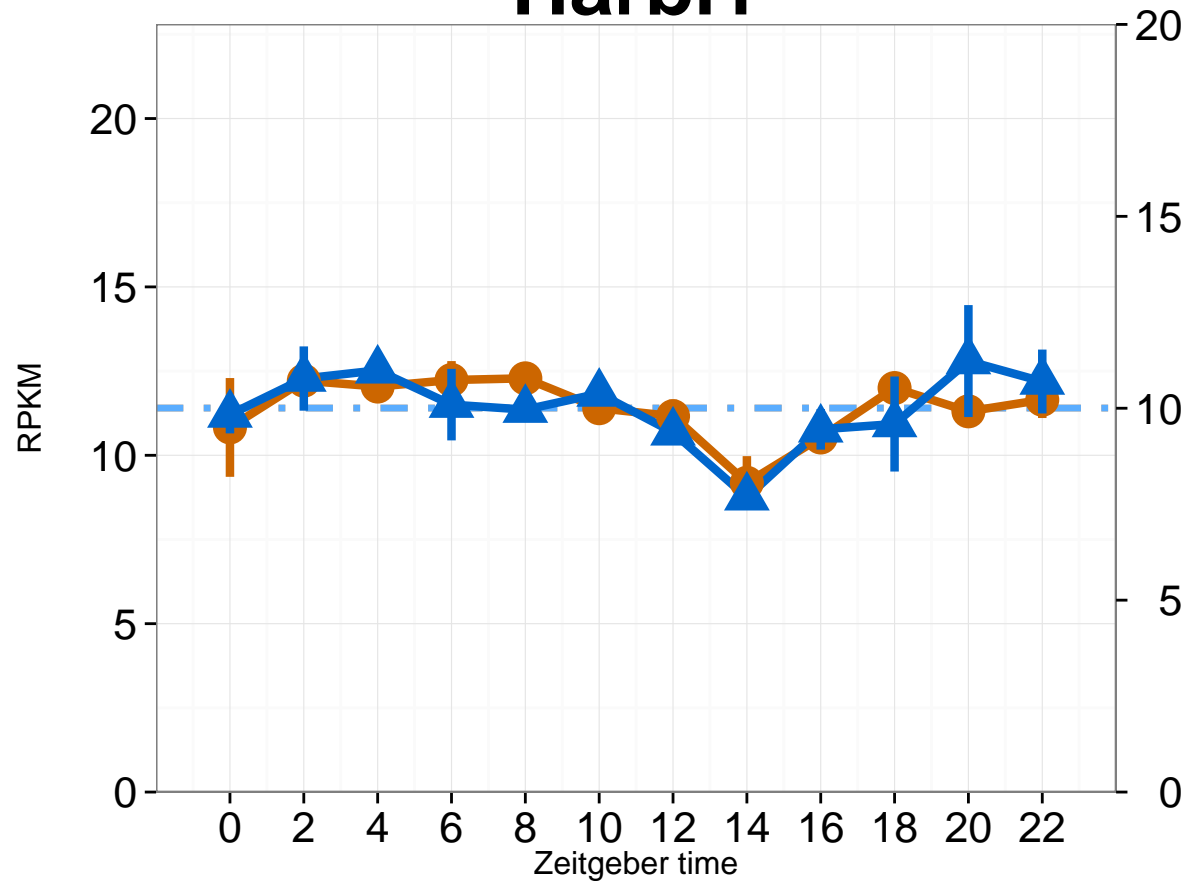

# Harbi1

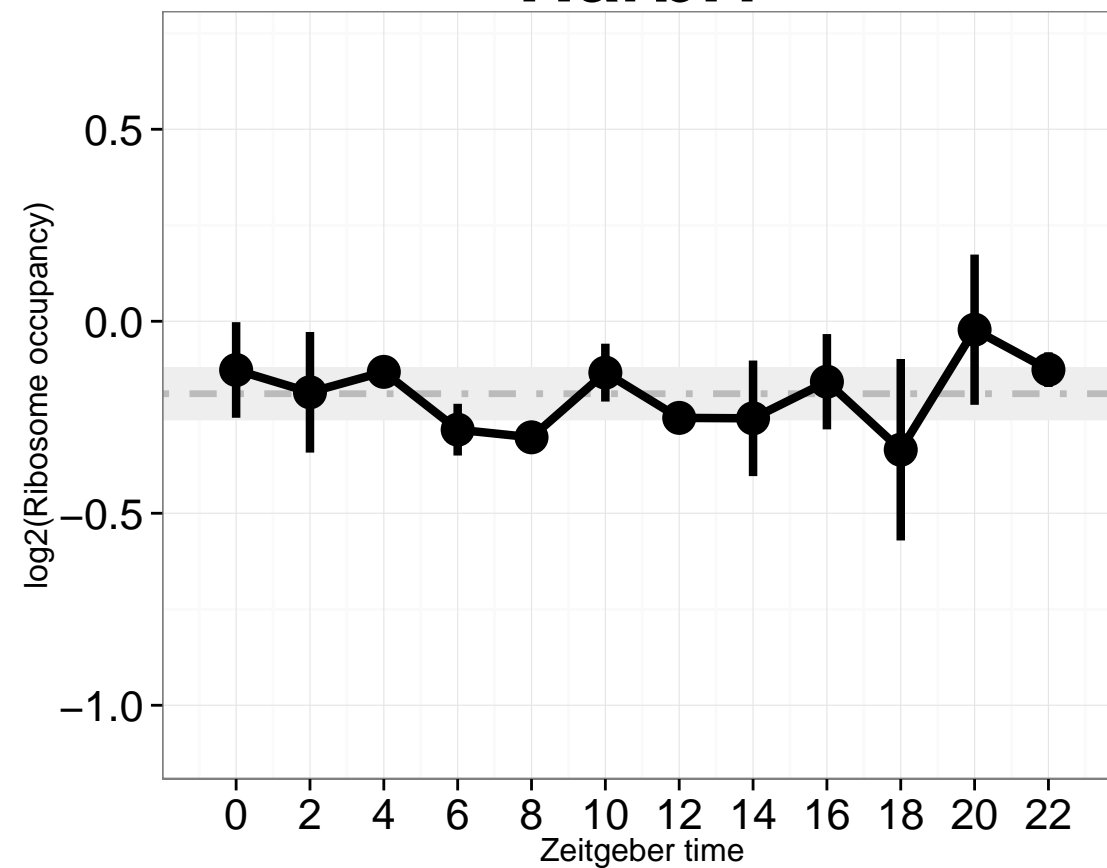

Supplement: Supplementary file 1860 [file 1]

# Utp6

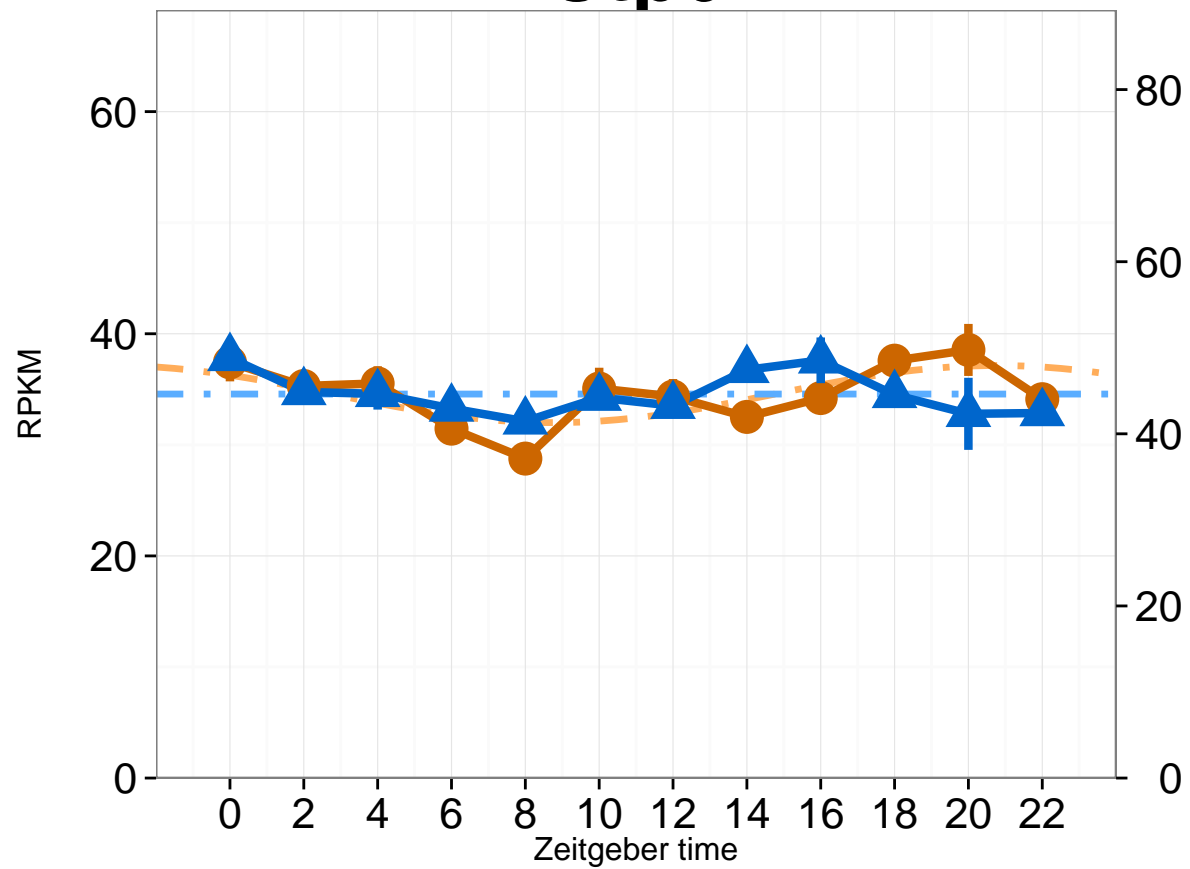

# Utp6

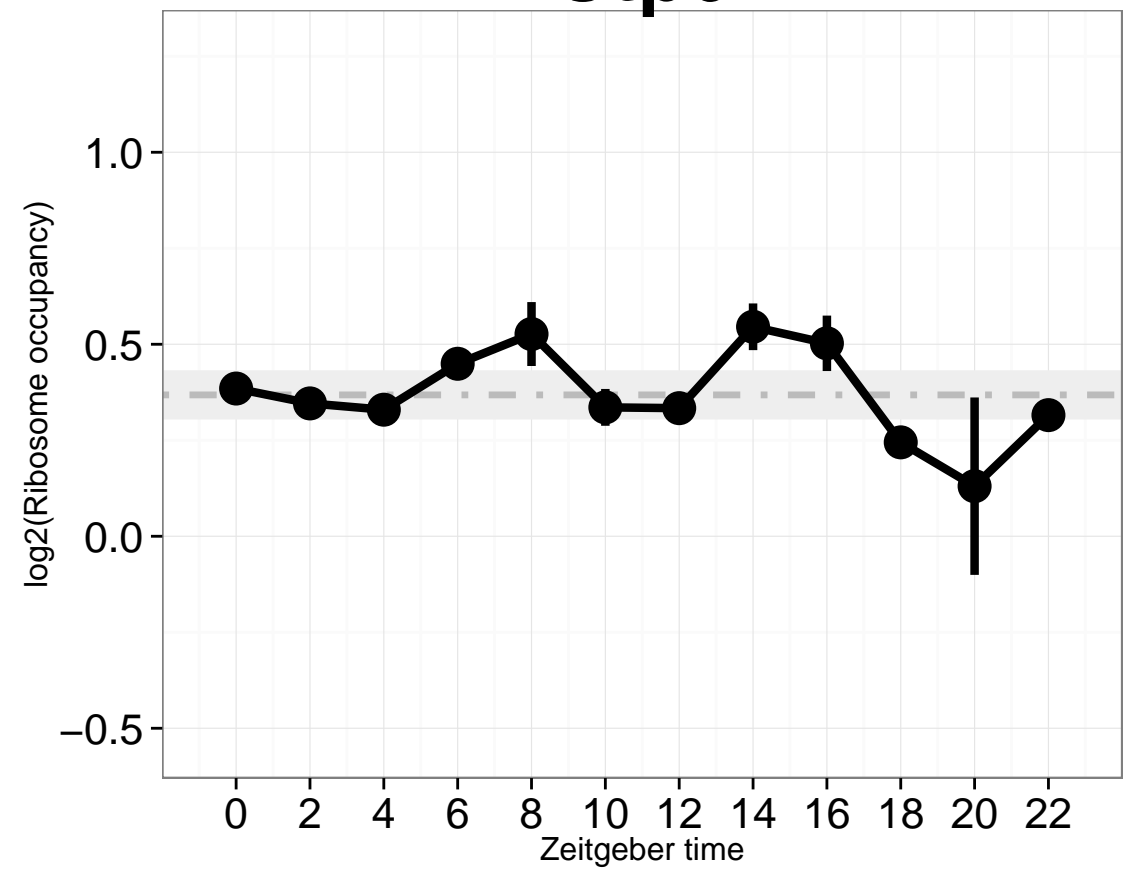

Supplement: Supplementary file 1861 [file 1]

# Chrm3

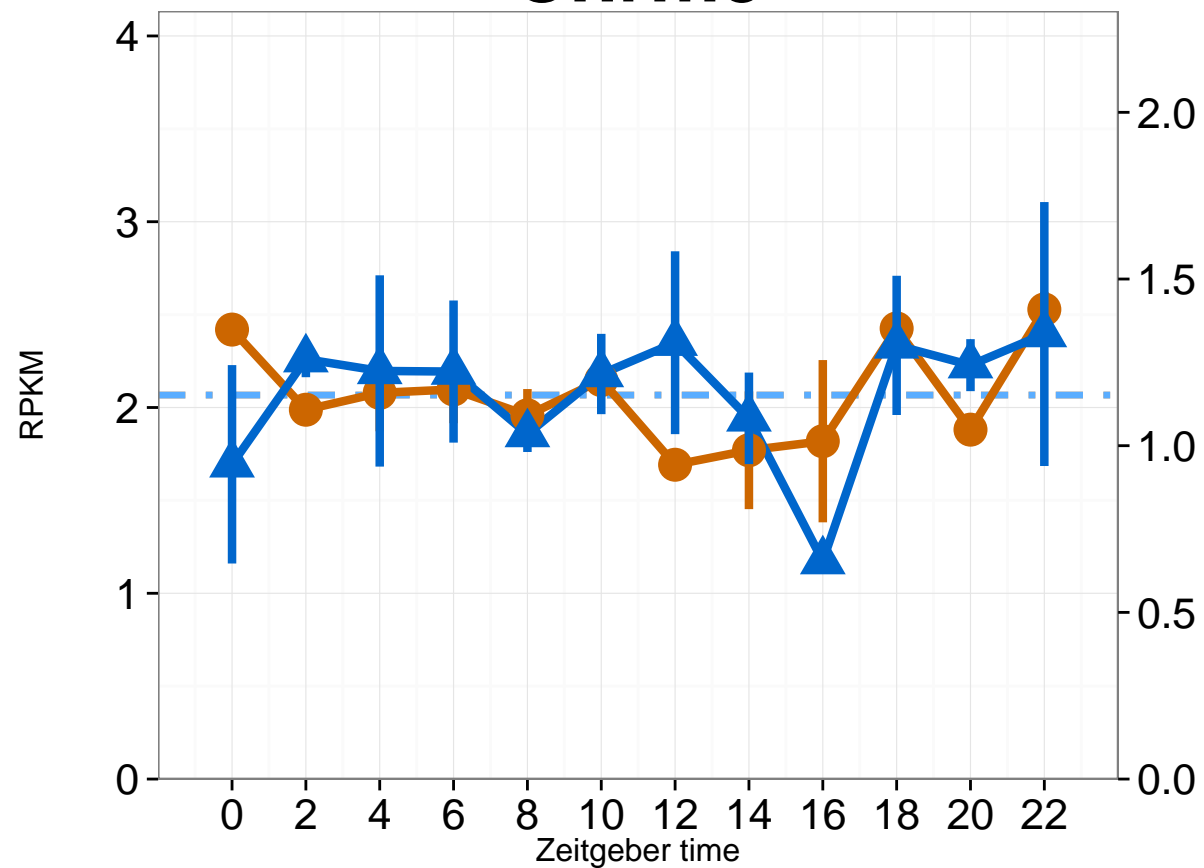

# Chrm3

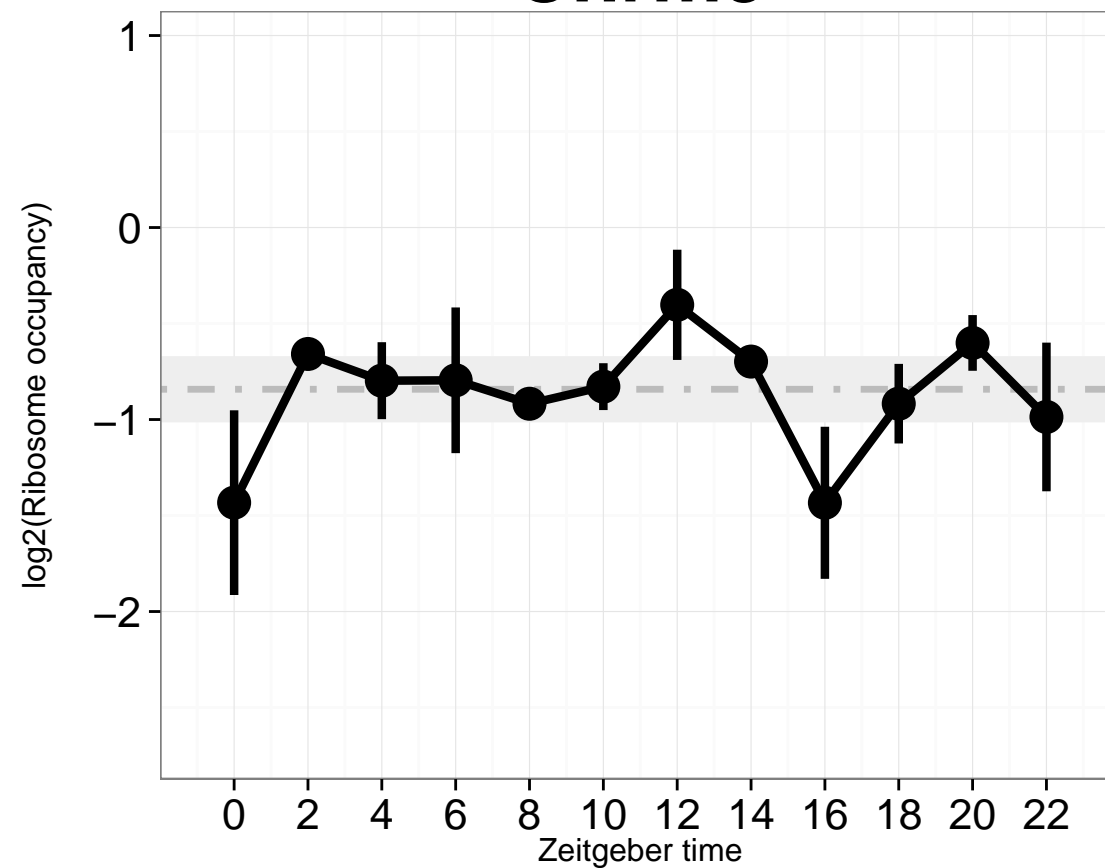

Supplement: Supplementary file 1862 [file 1]

# Dock6

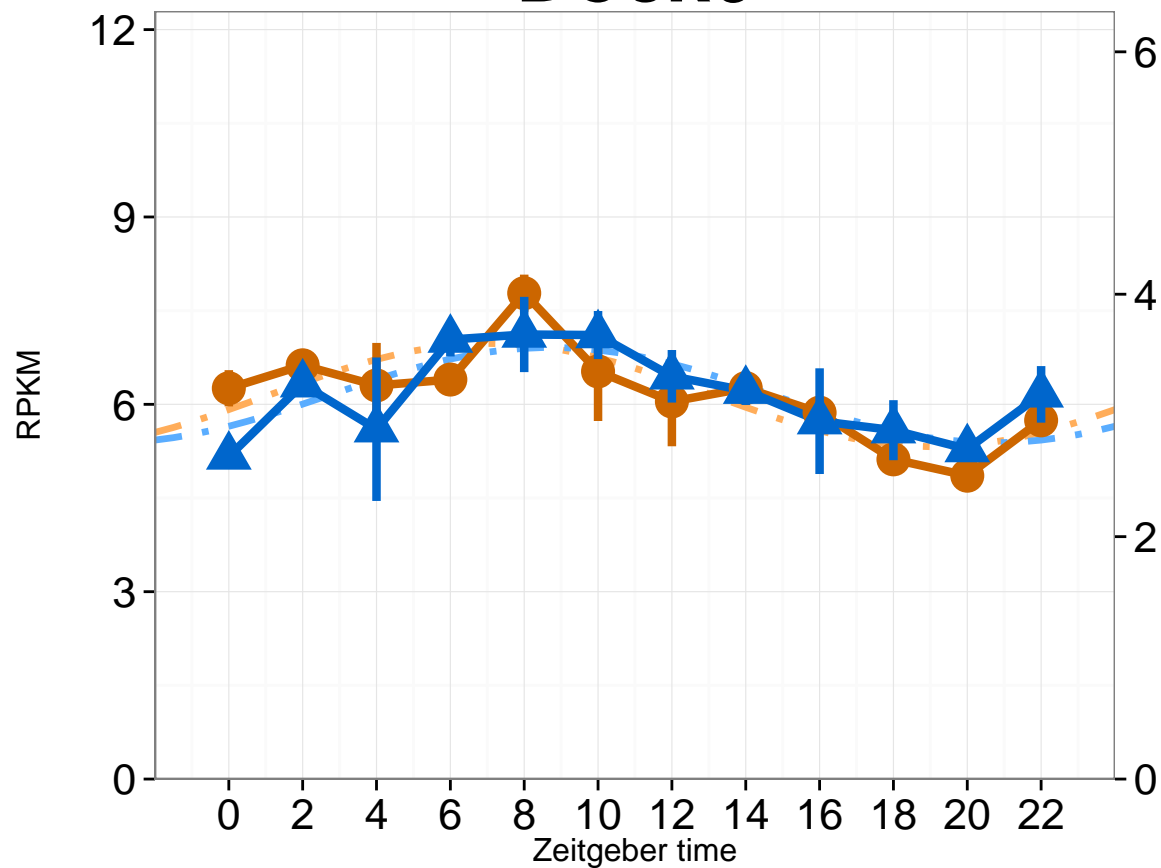

# Dock6

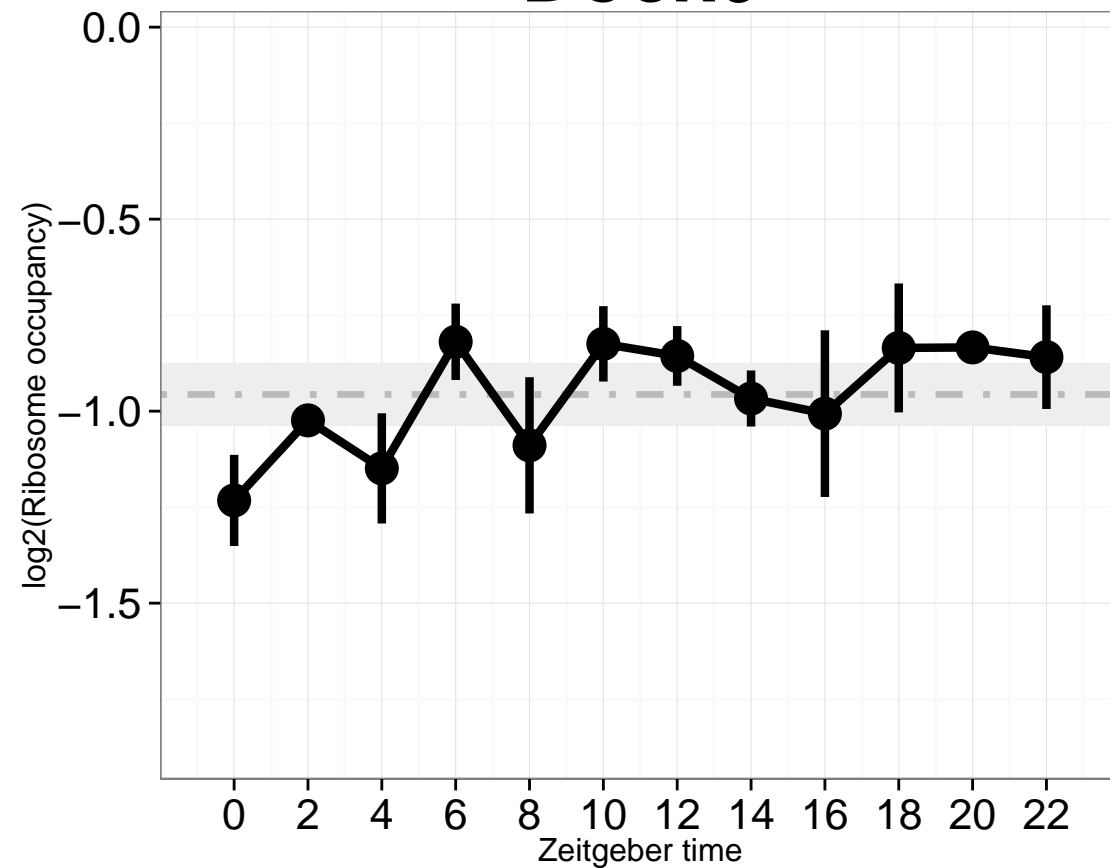

Supplement: Supplementary file 1863 [file 1]

## Catsper2

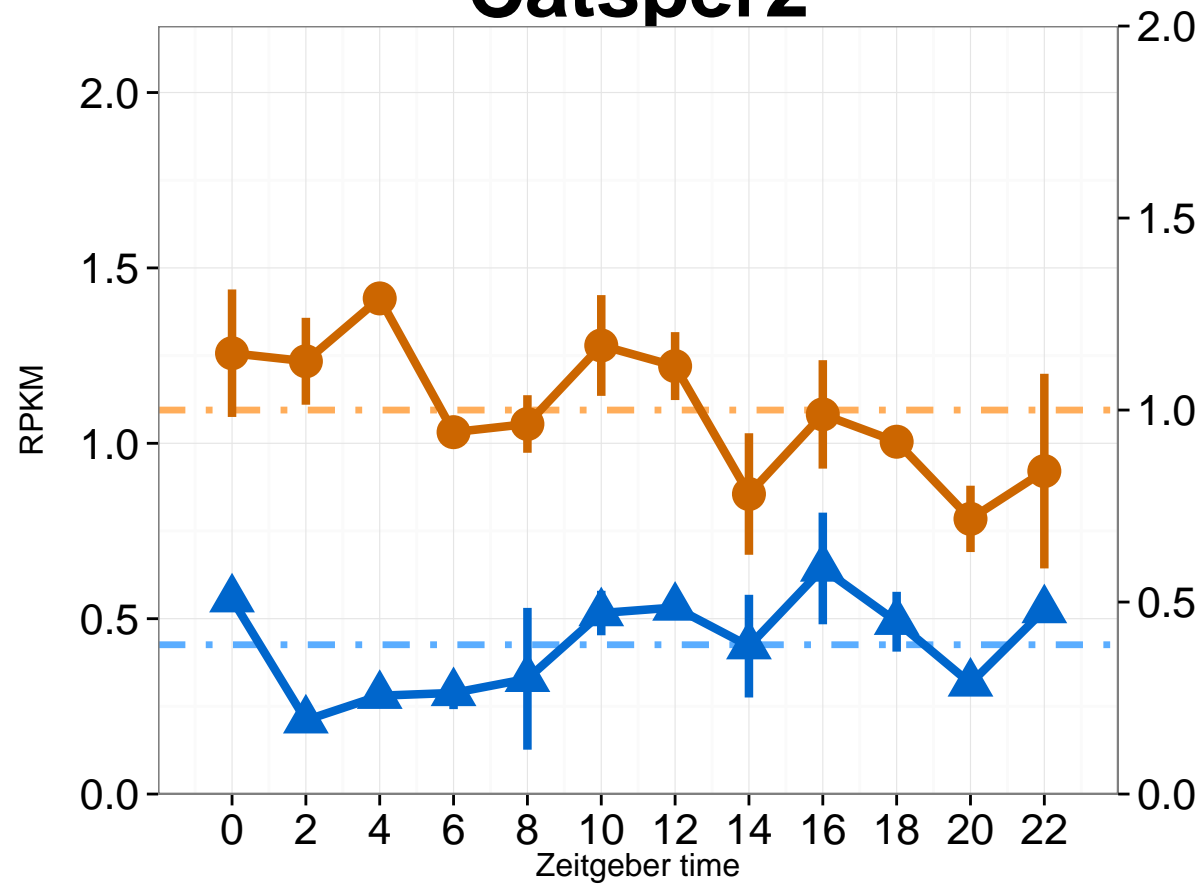

## Catsper2

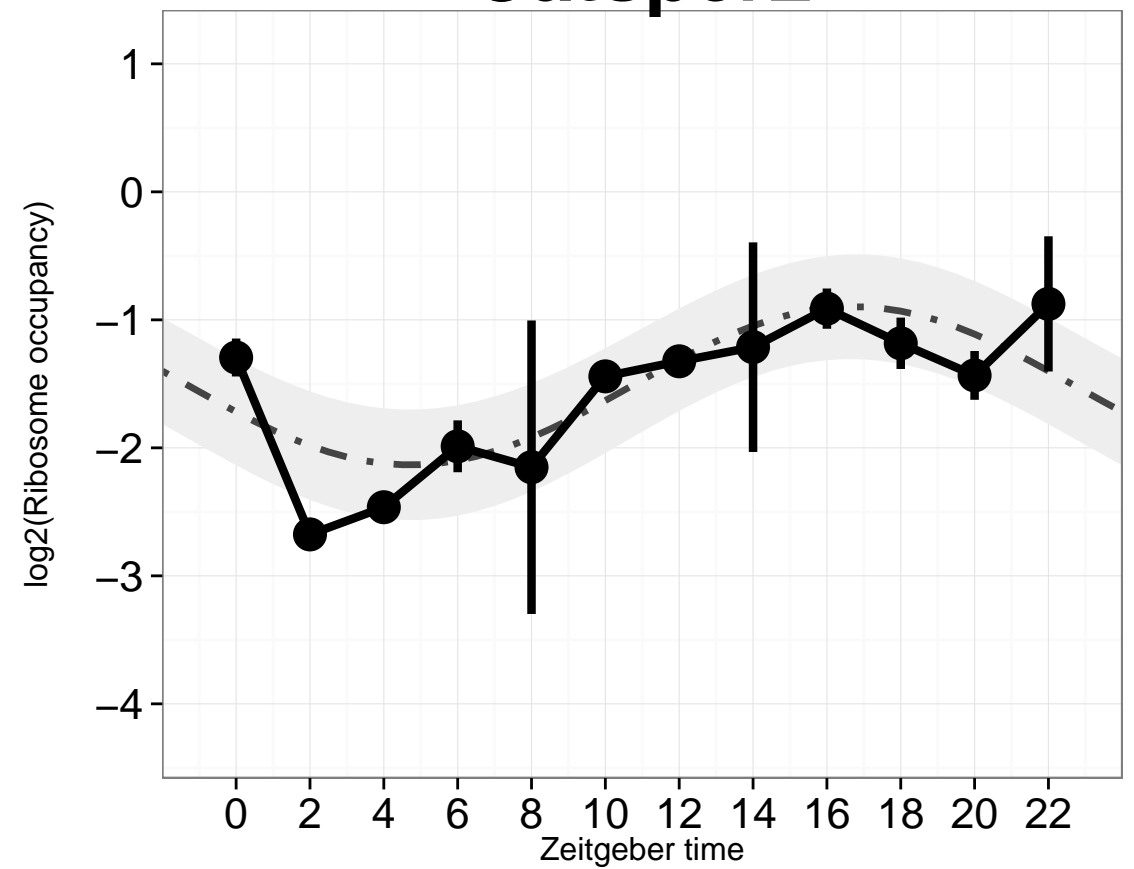

Supplement: Supplementary file 1864 [file 1]

# Slc39a6

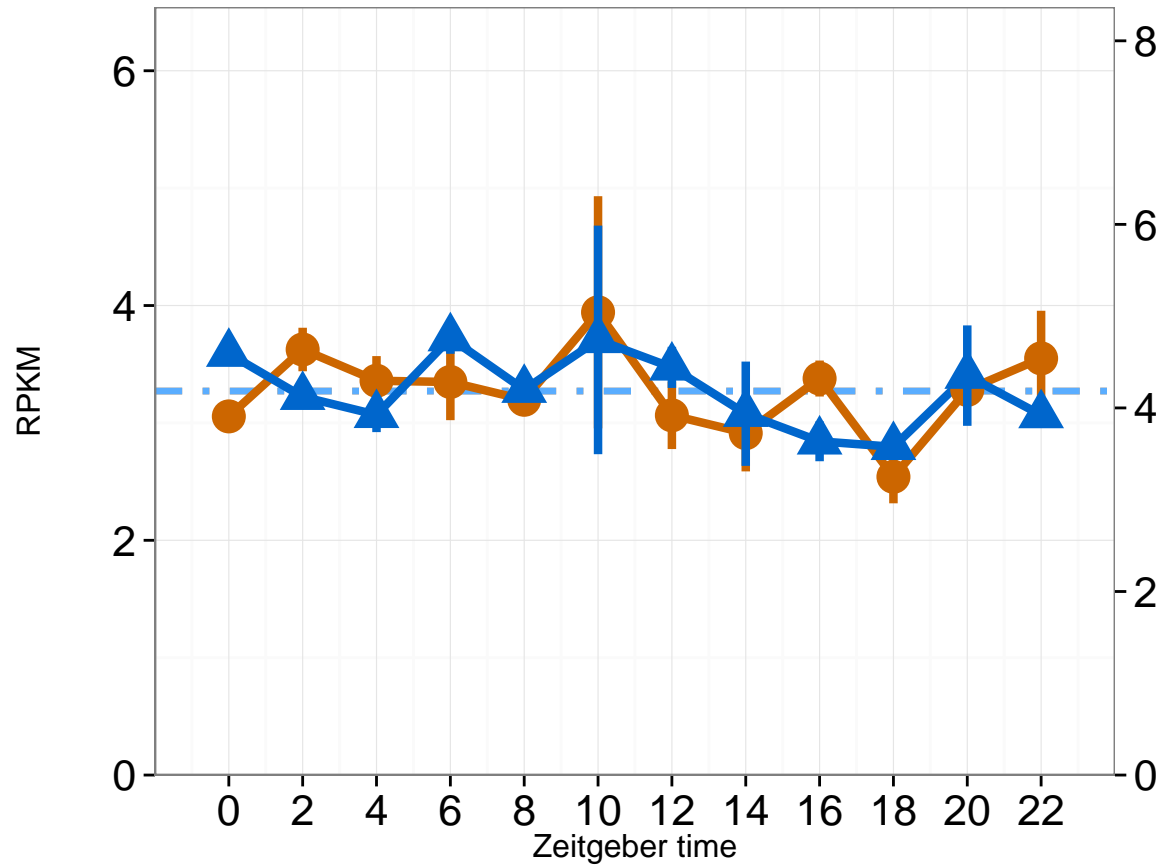

# Slc39a6

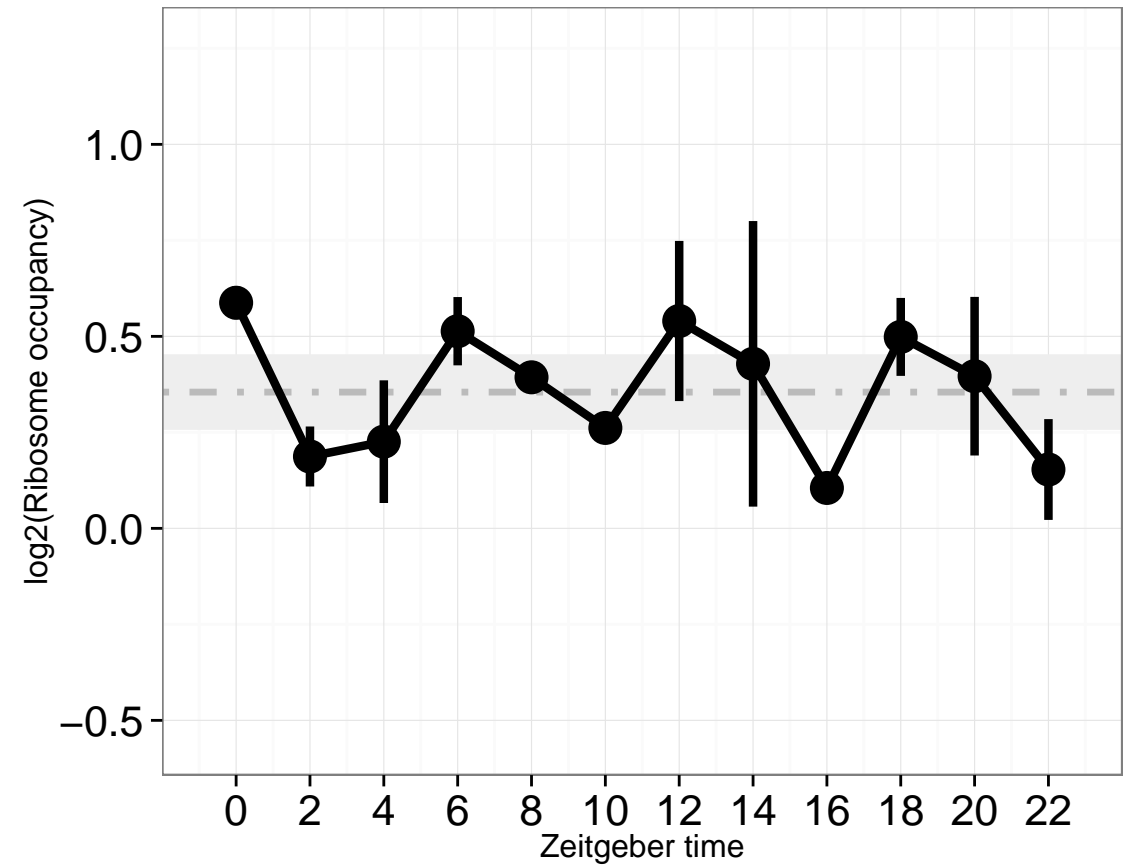

Supplement: Supplementary file 1865 [file 1]

# Kctd15

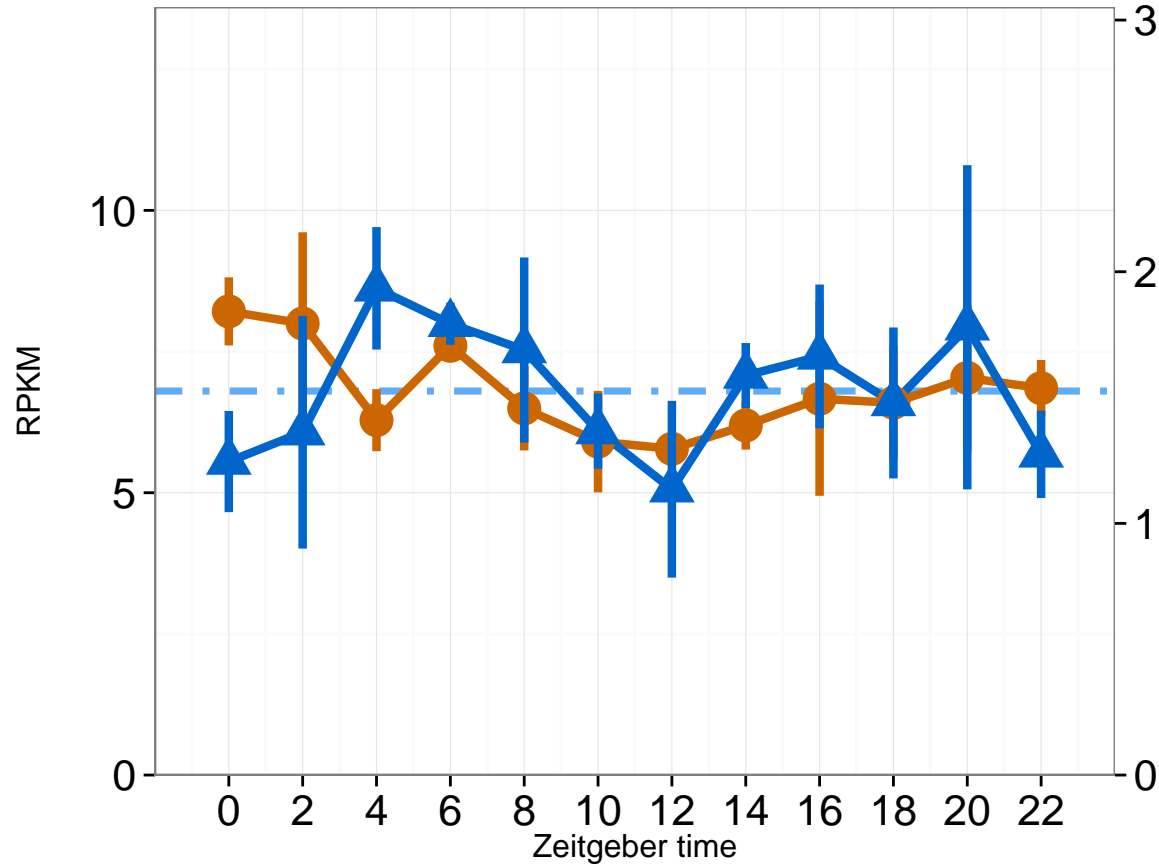

# Kctd15

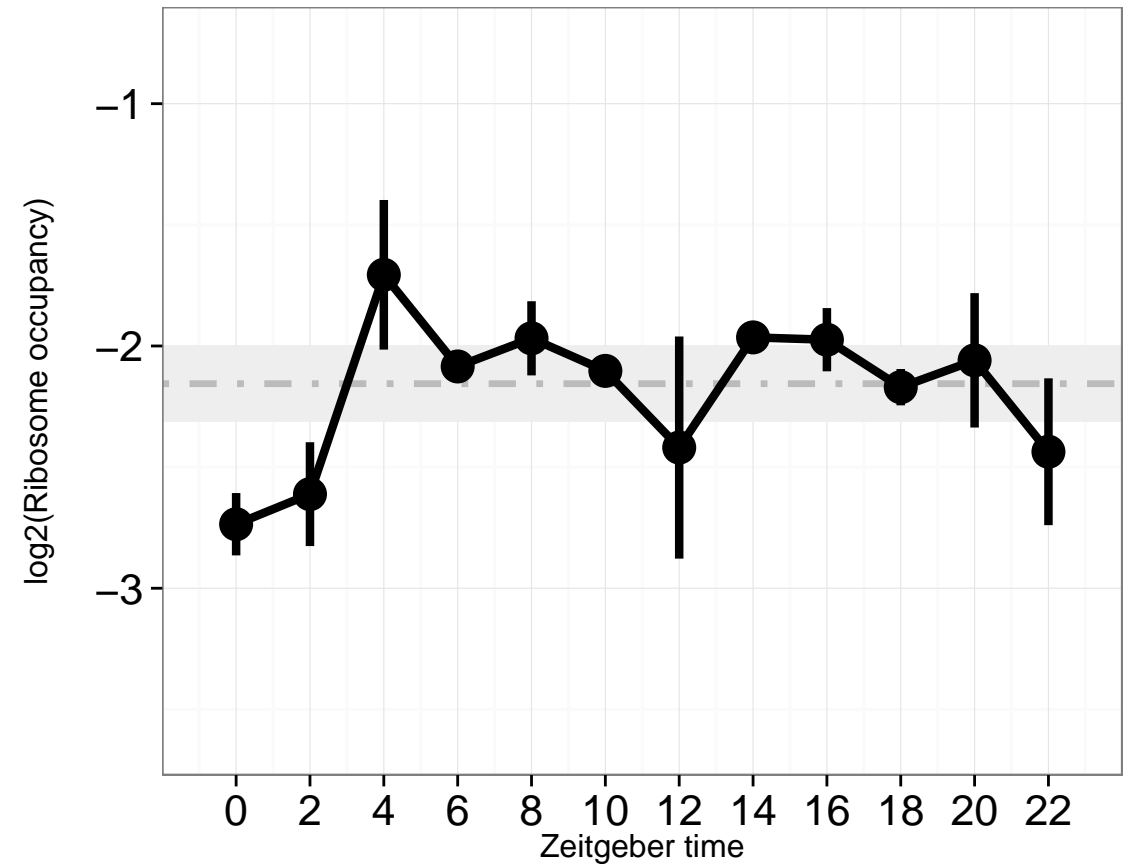

Supplement: Supplementary file 1866 [file 1]

# Coq6

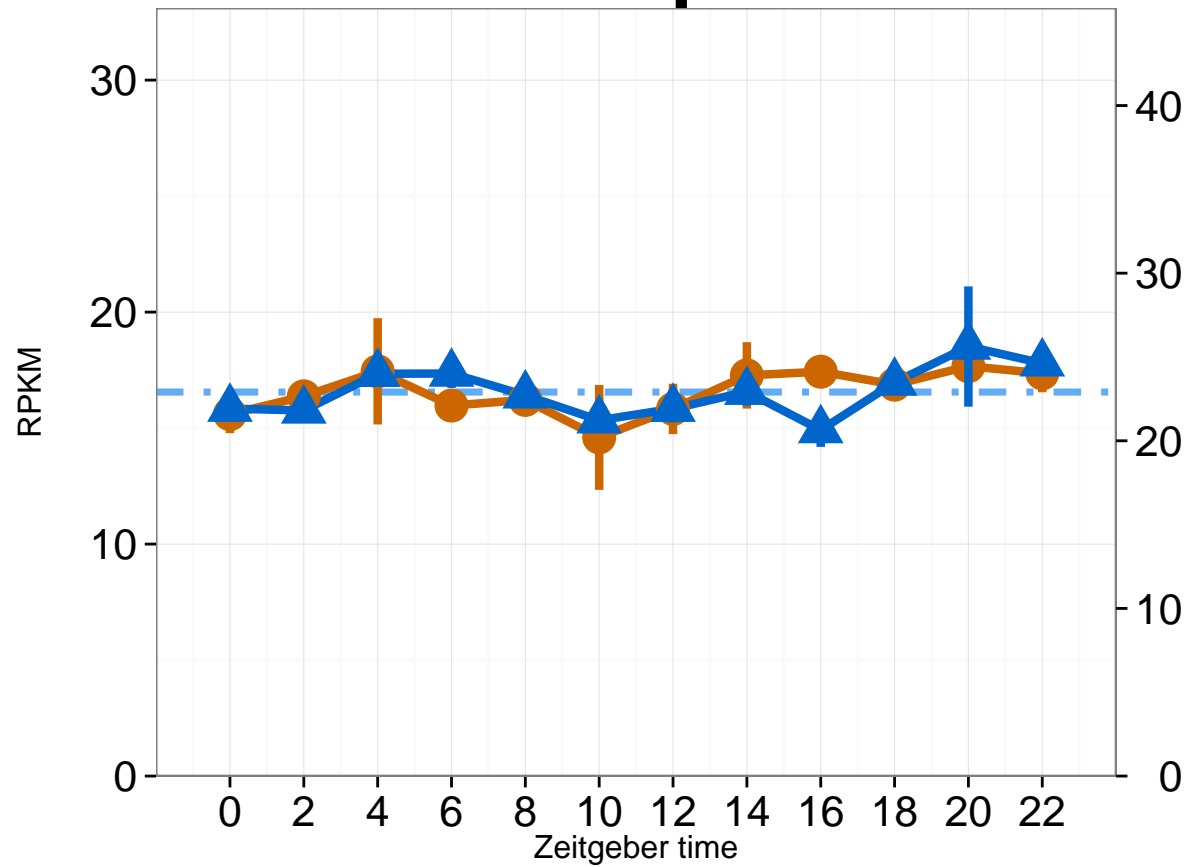

# Coq6

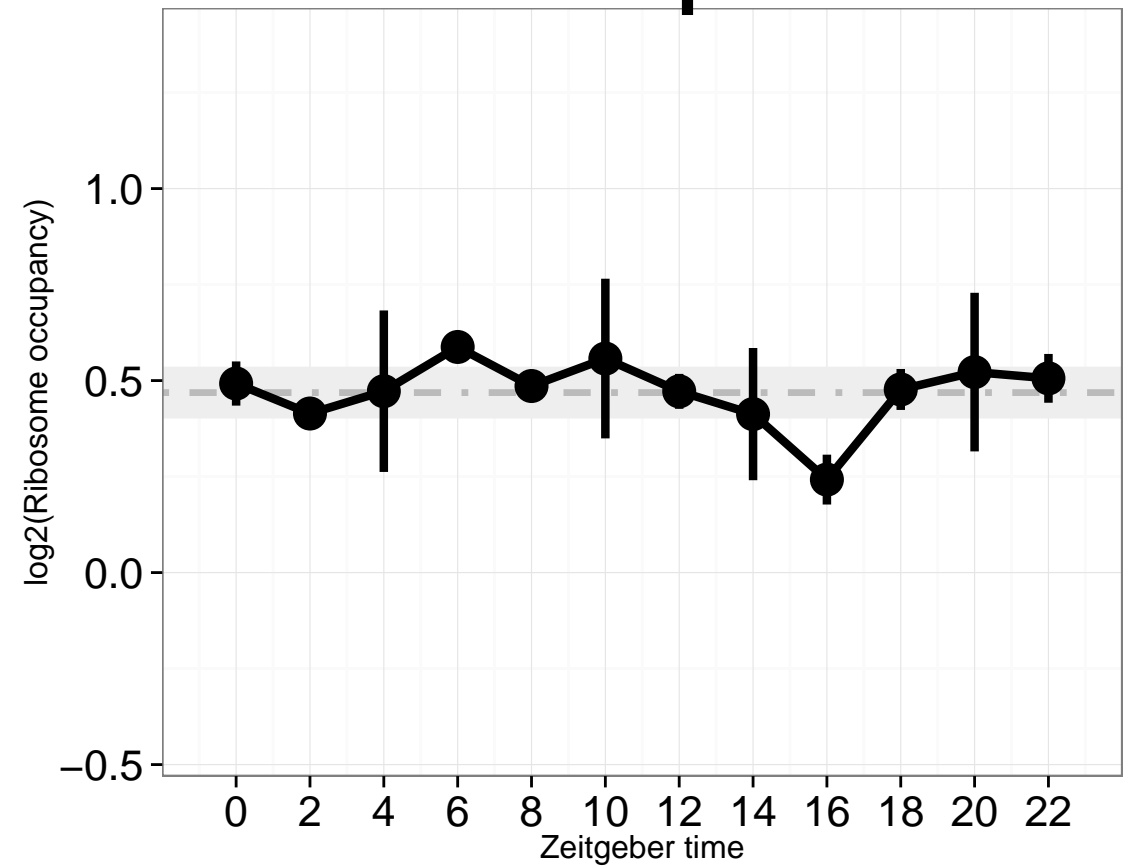

Supplement: Supplementary file 1867 [file 1]

# N4bp1

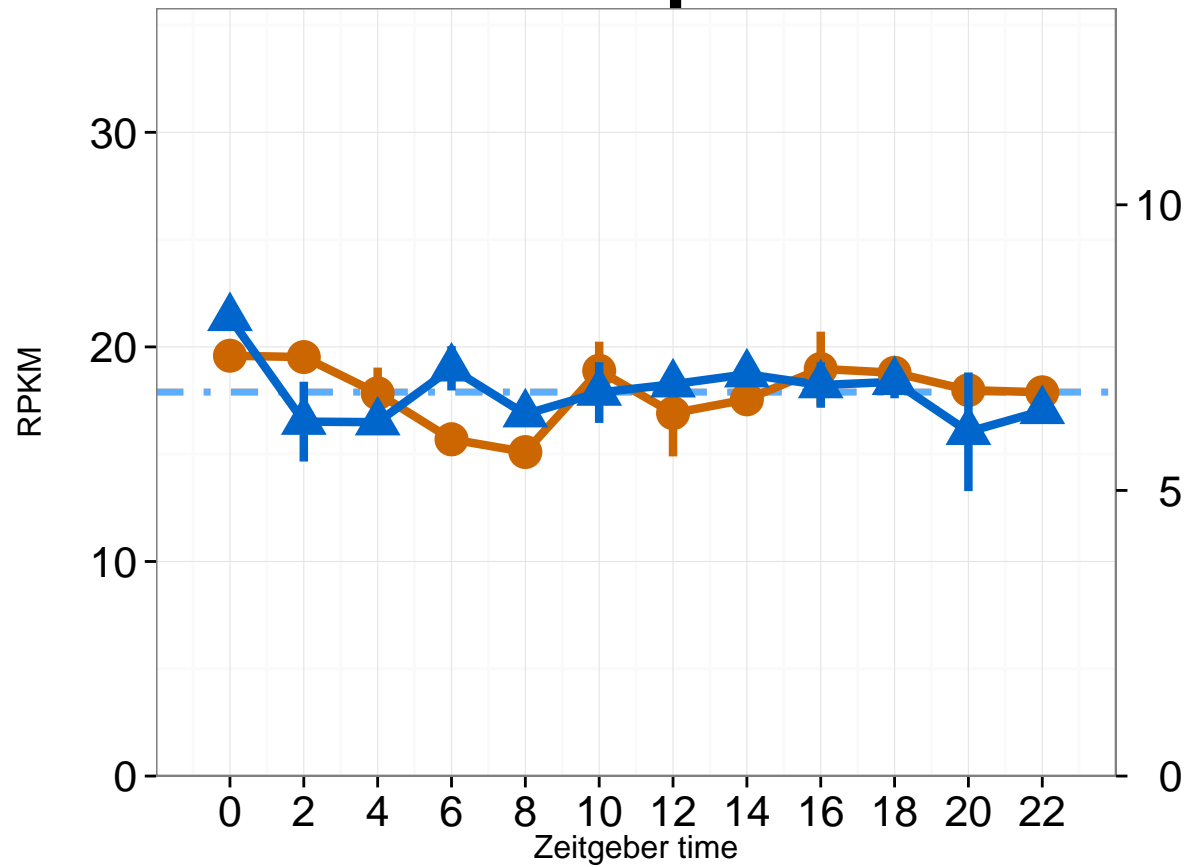

# N4bp1

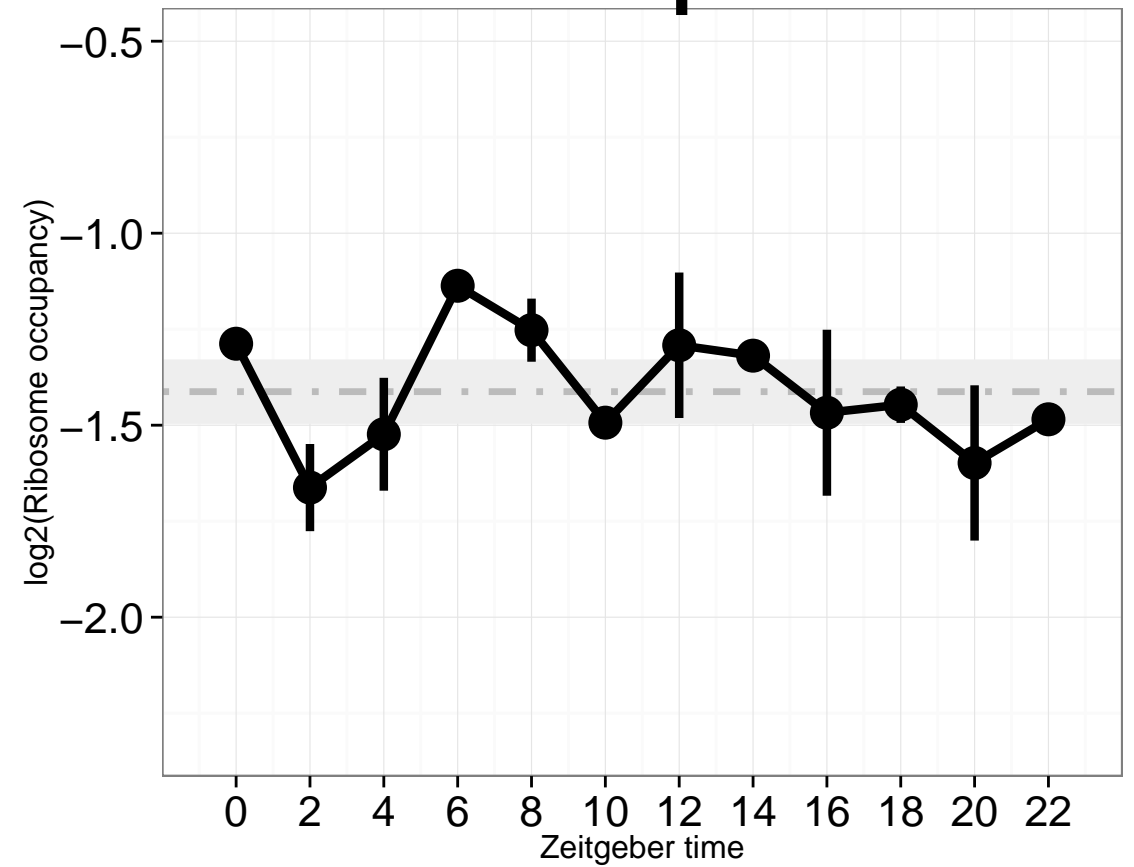

Supplement: Supplementary file 1868 [file 1]

# Eva1a

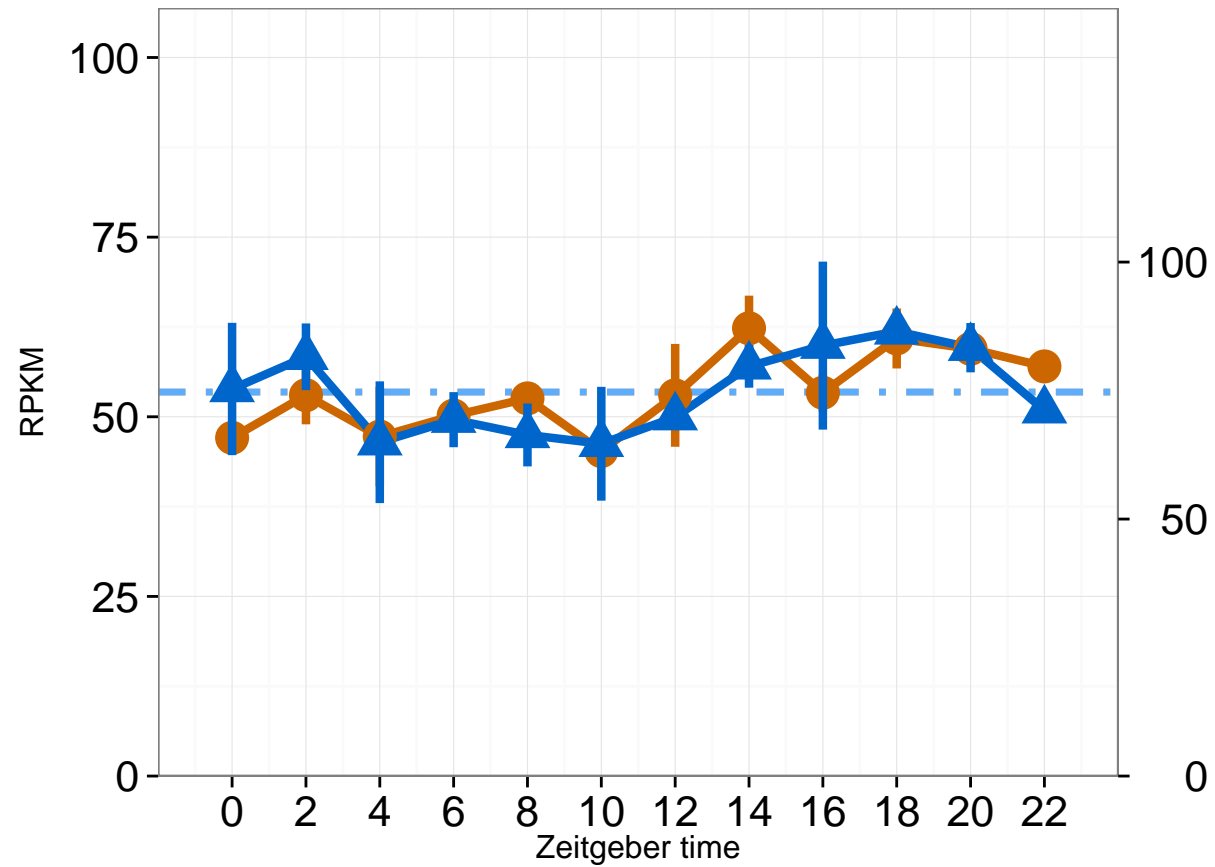

# Eva1a

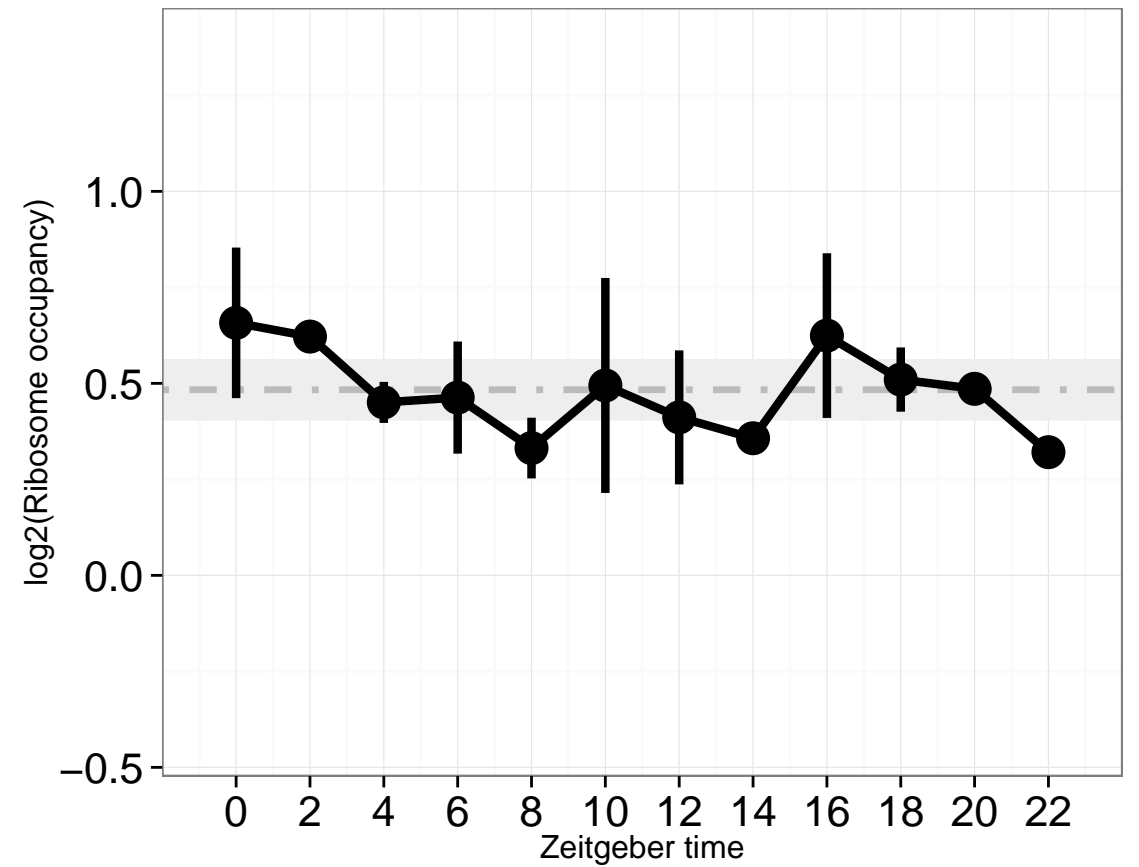

Supplement: Supplementary file 1869 [file 1]

# Mrpl4

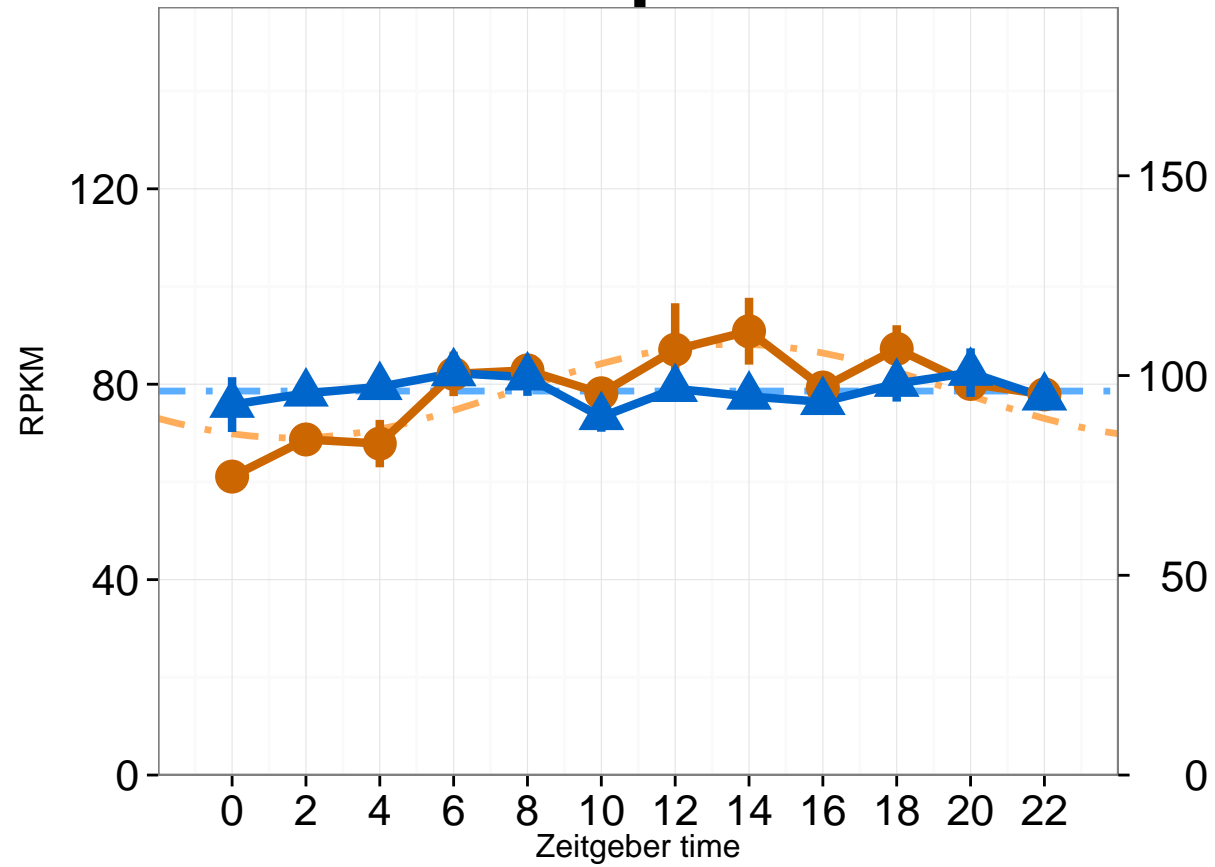

# Mrpl4

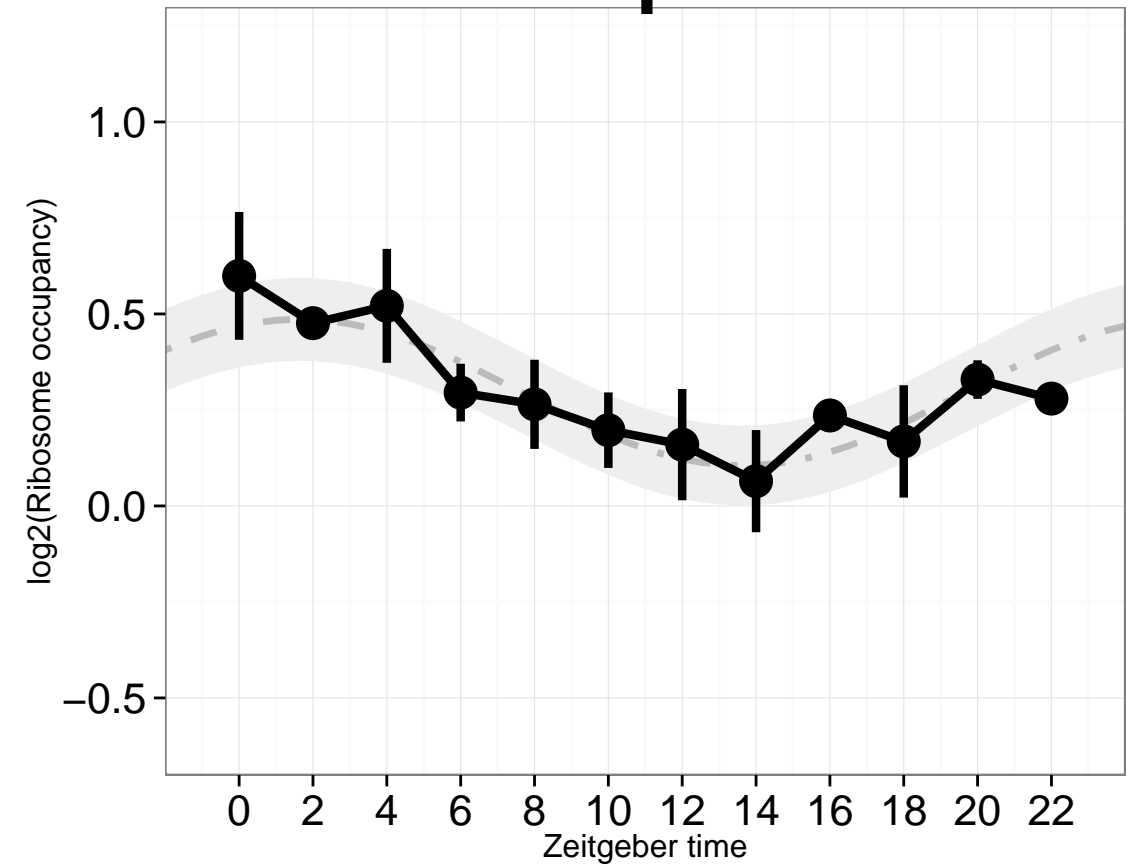

Supplement: Supplementary file 1870 [file 1]

# Mfap5

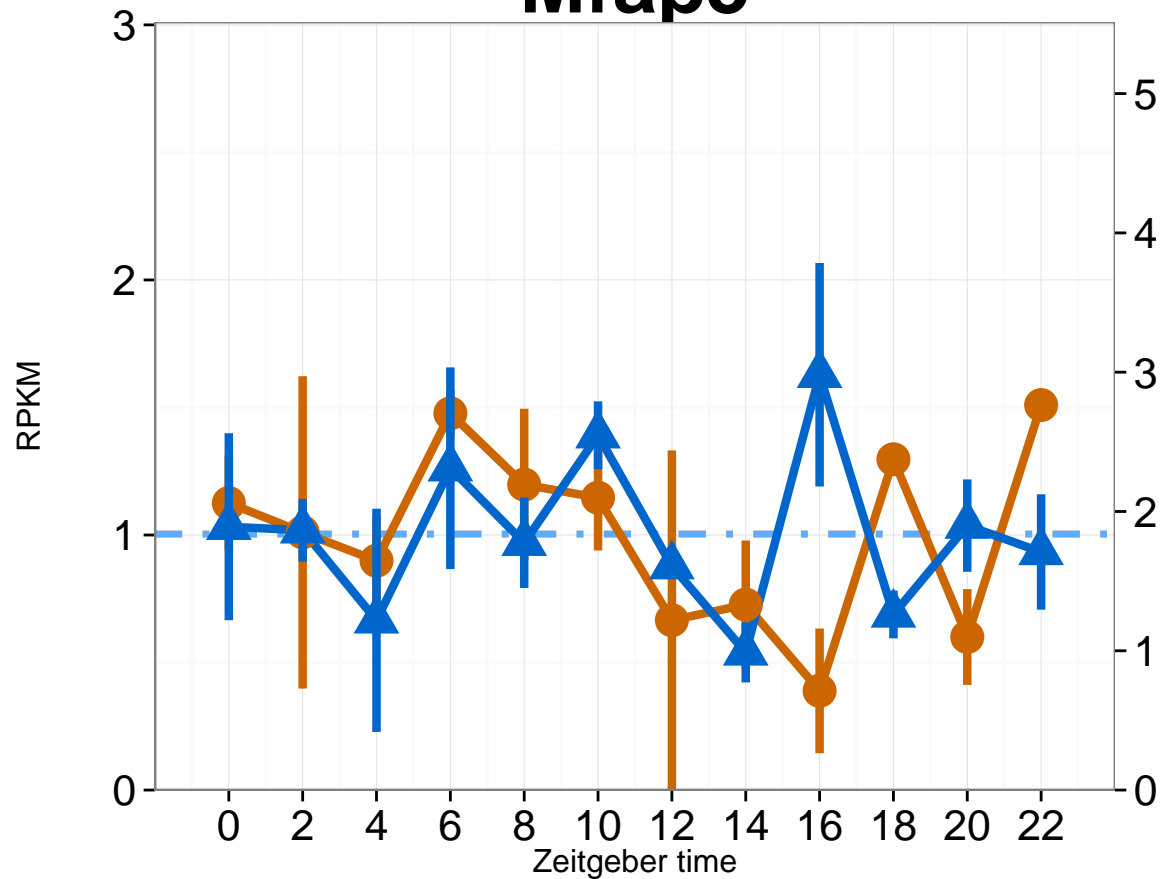

# Mfap5

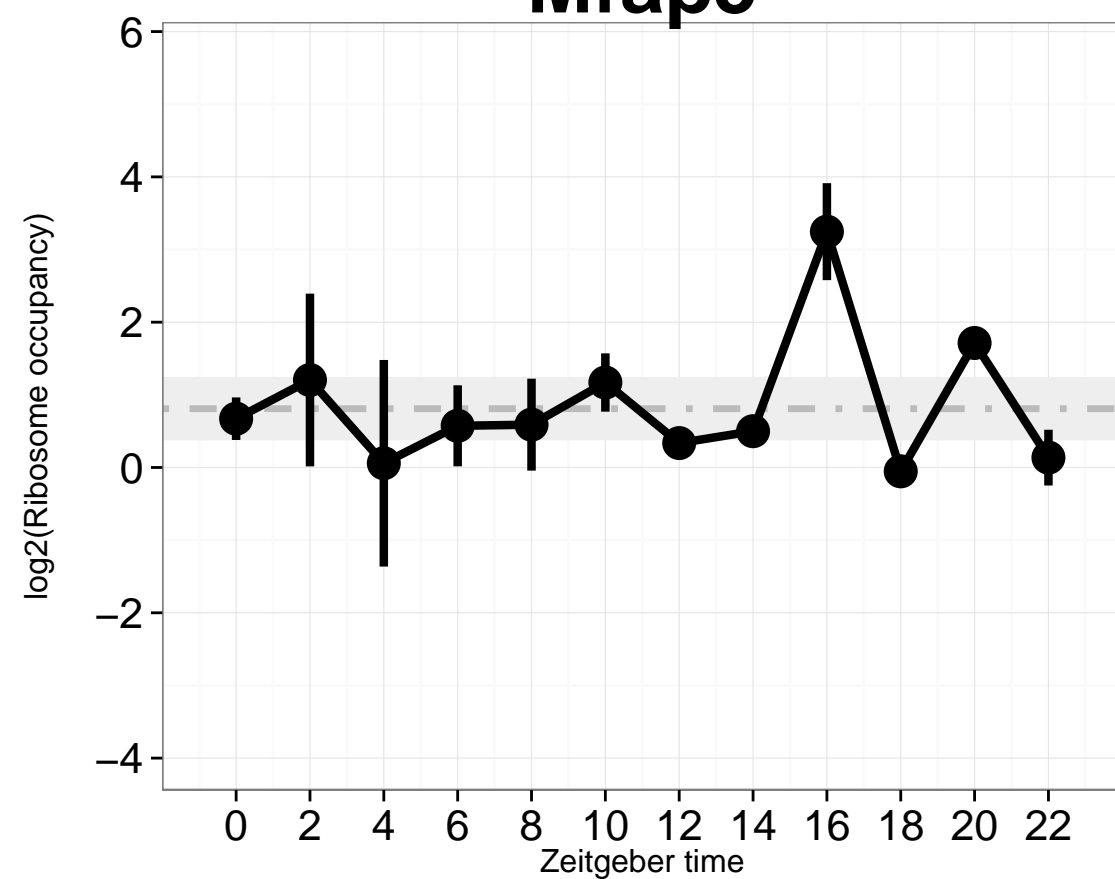

Supplement: Supplementary file 1871 [file 1]

# Pgm3

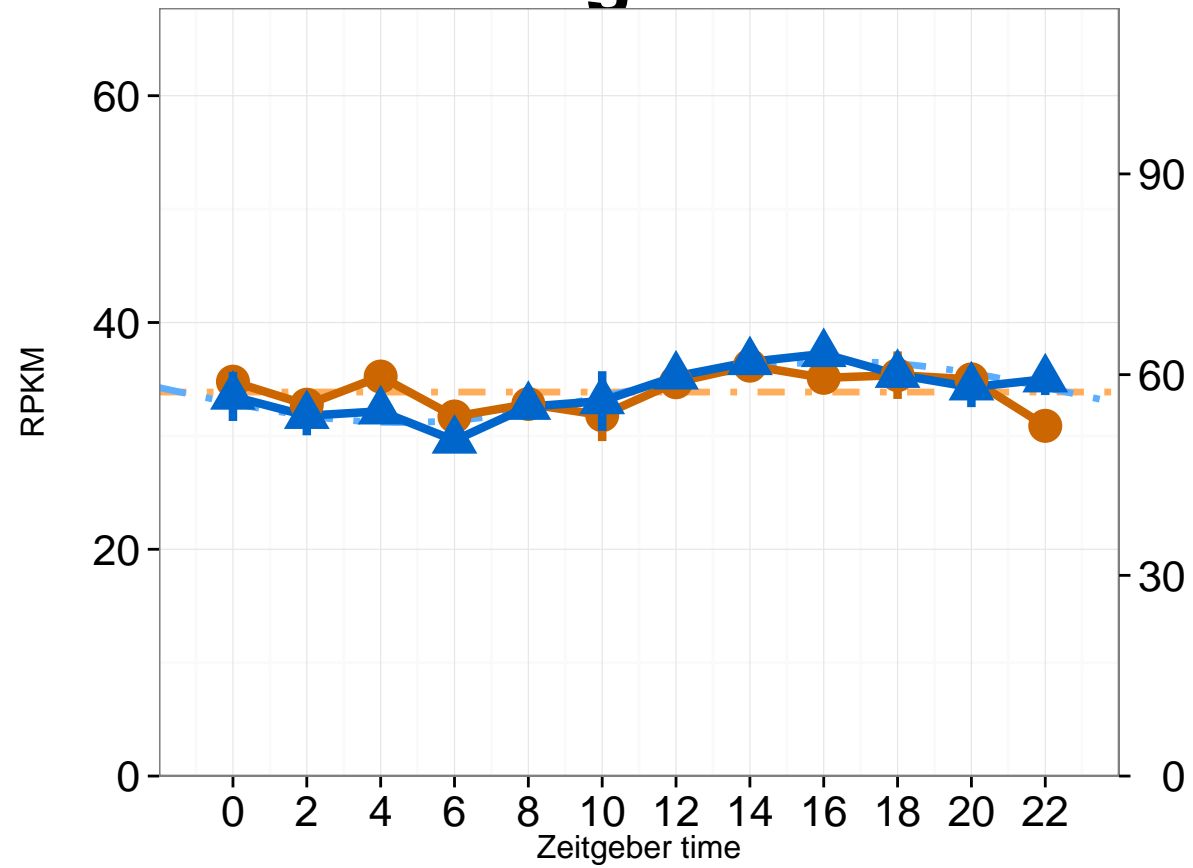

# Pgm3

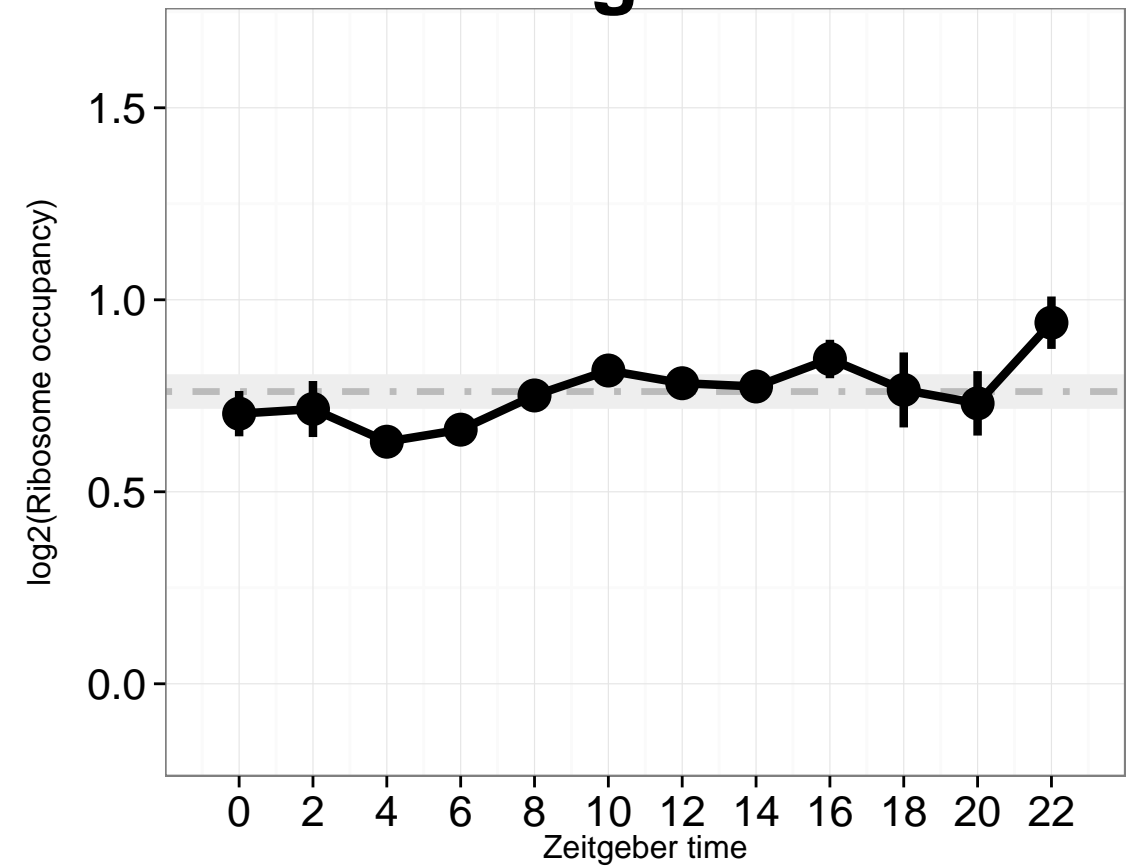

Supplement: Supplementary file 1872 [file 1]

## Efs

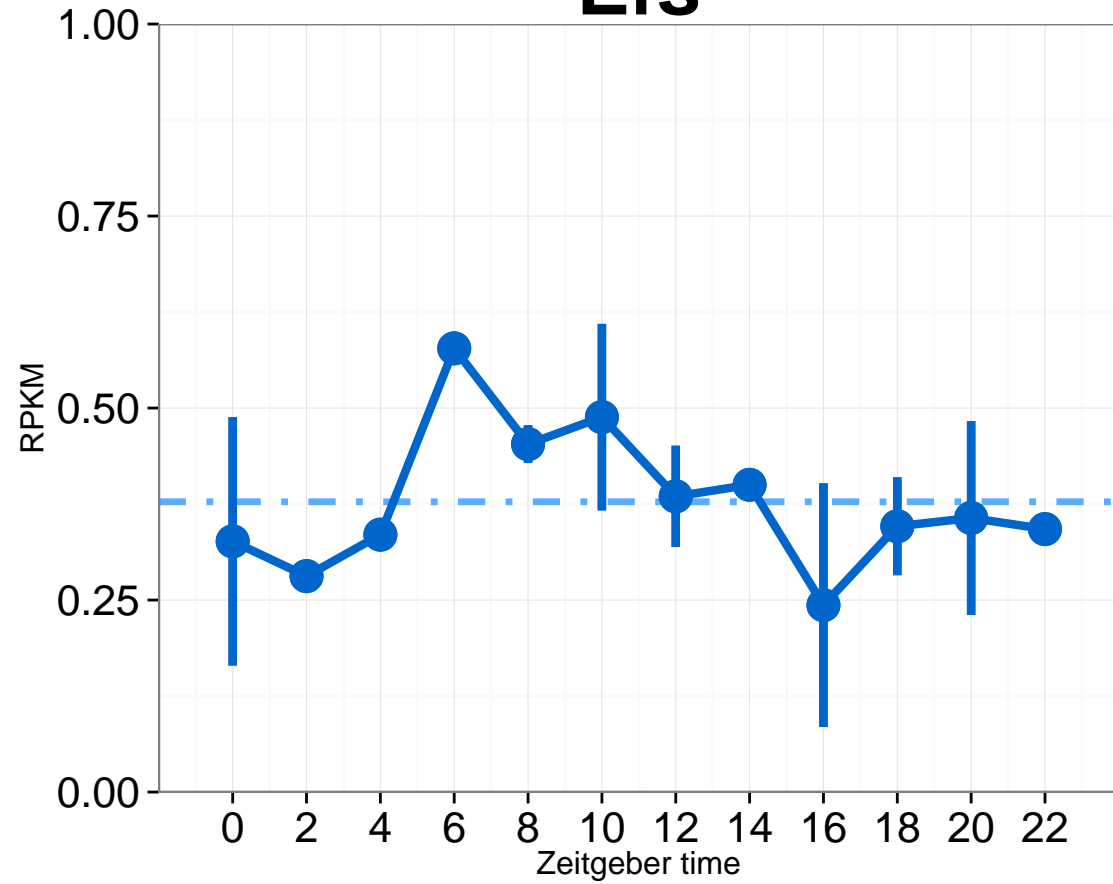

## Efs log2(Ribosome occupancy)

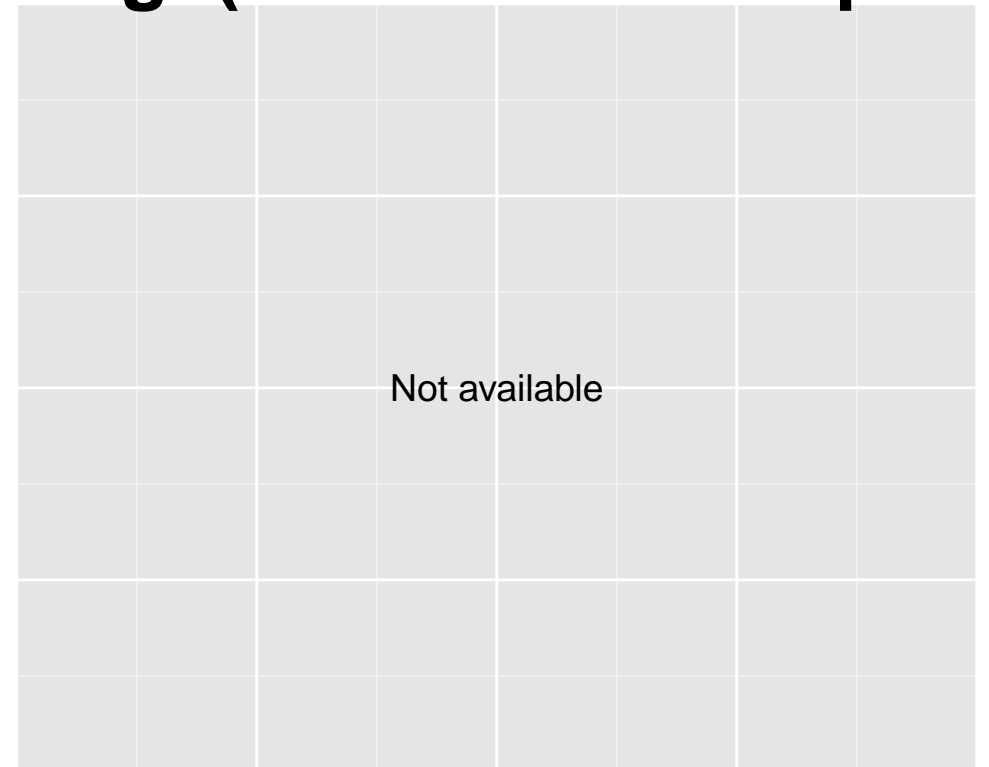

Supplement: Supplementary file 1873 [file 1]

## Chd6

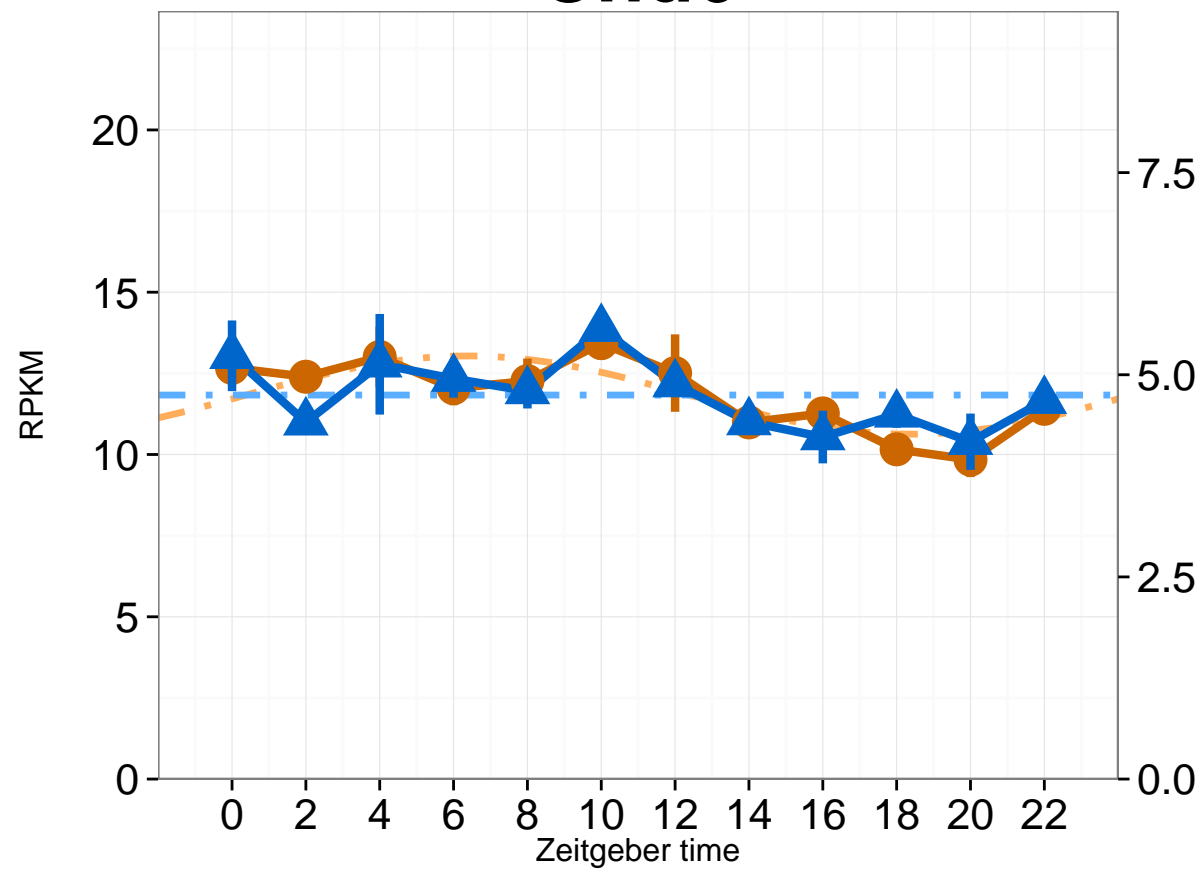

## Chd6

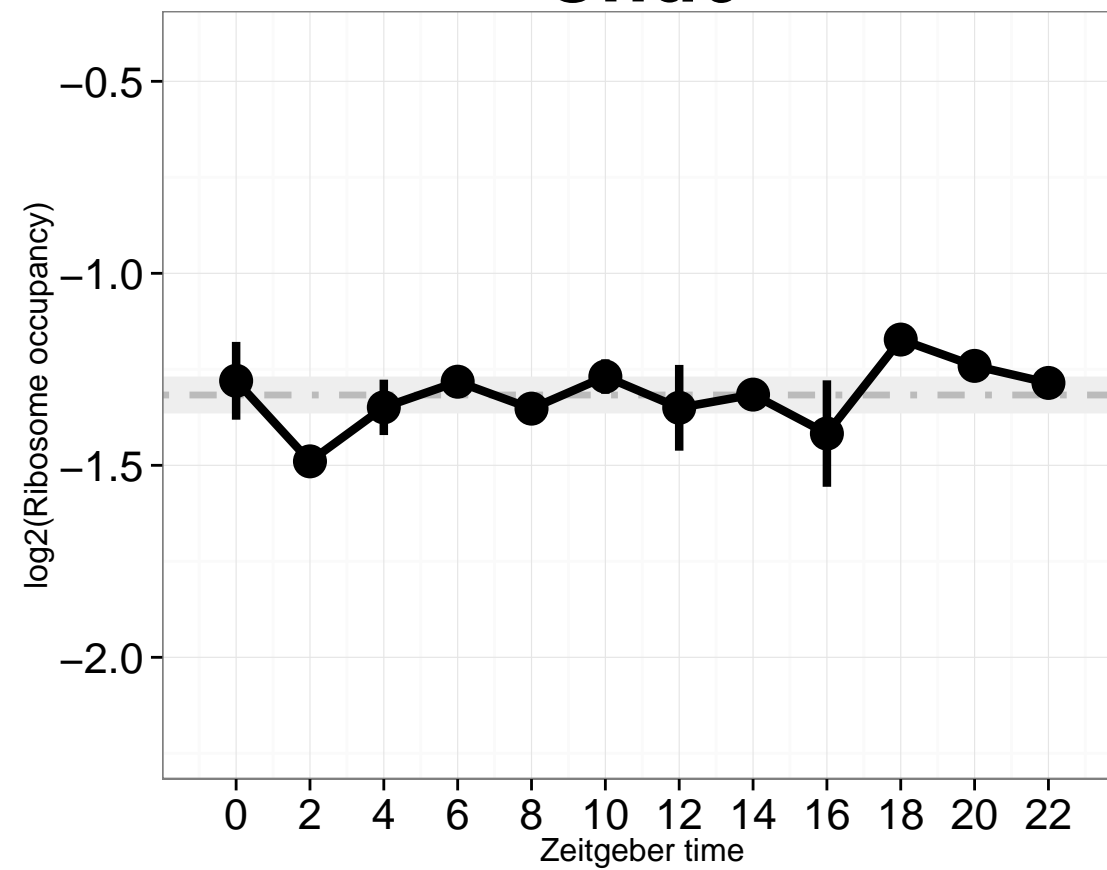

Supplement: Supplementary file 1874 [file 1]

# Itgb3bp

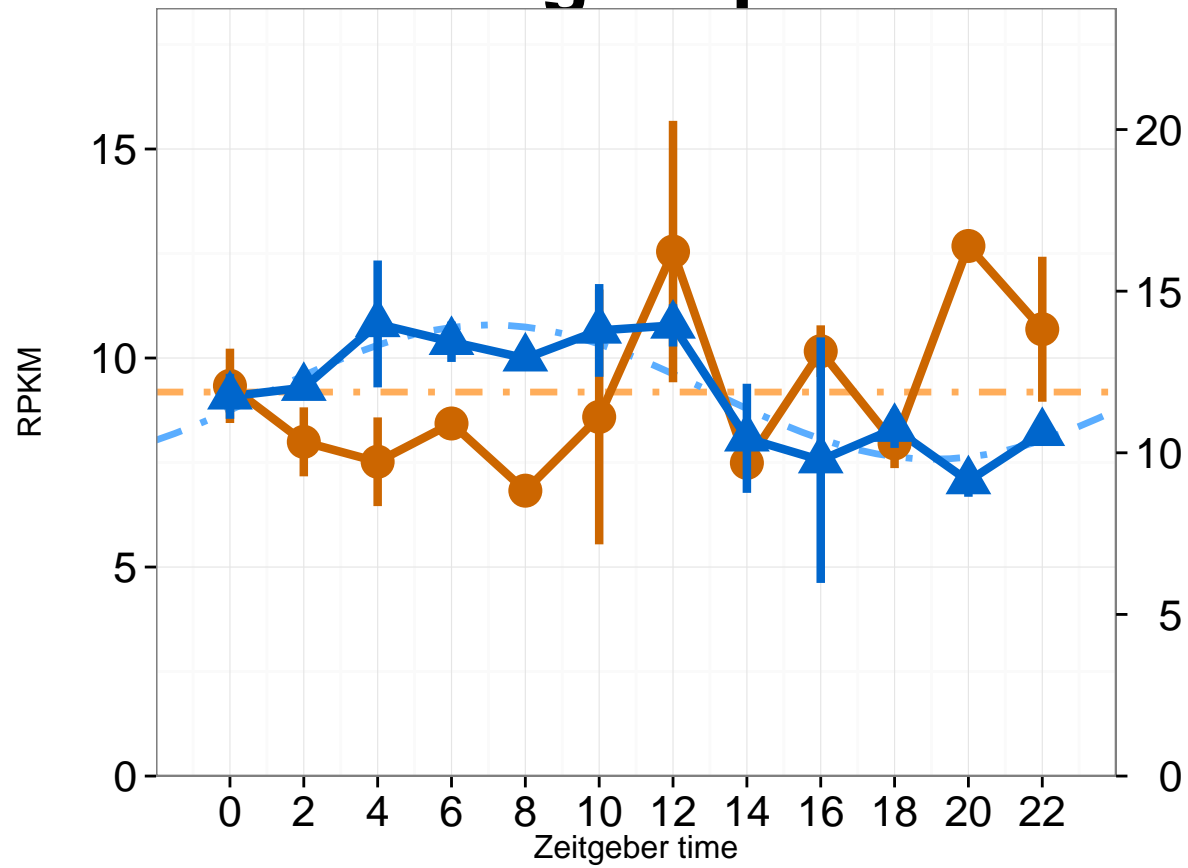

# Itgb3bp

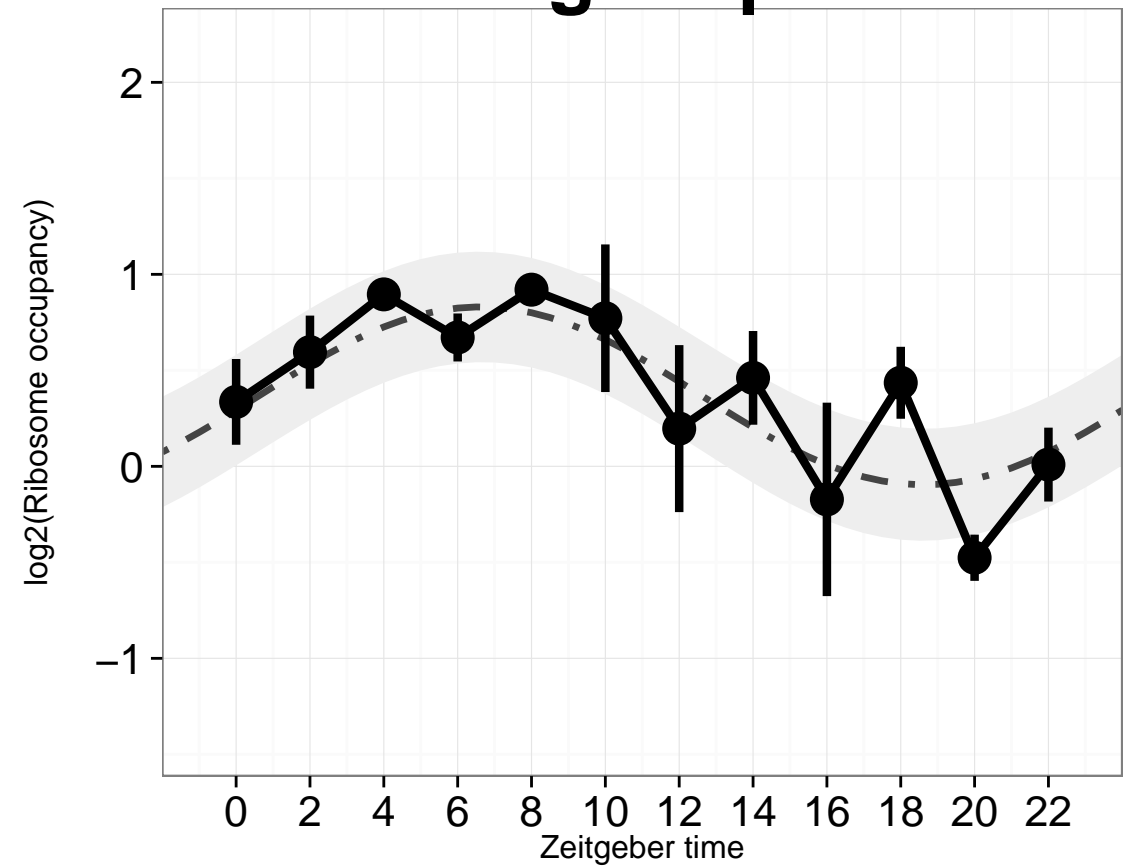

Supplement: Supplementary file 1875 [file 1]

**Pdgfrl TR**

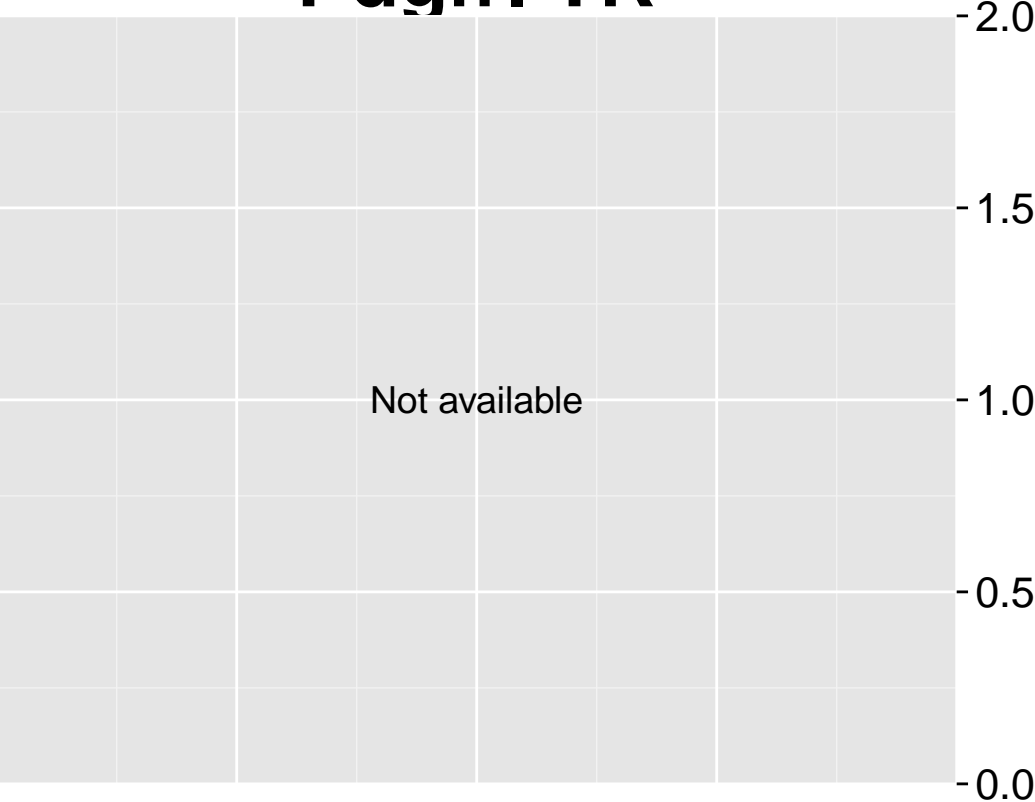

**Pdgfrl log2(Ribosome occupancy**

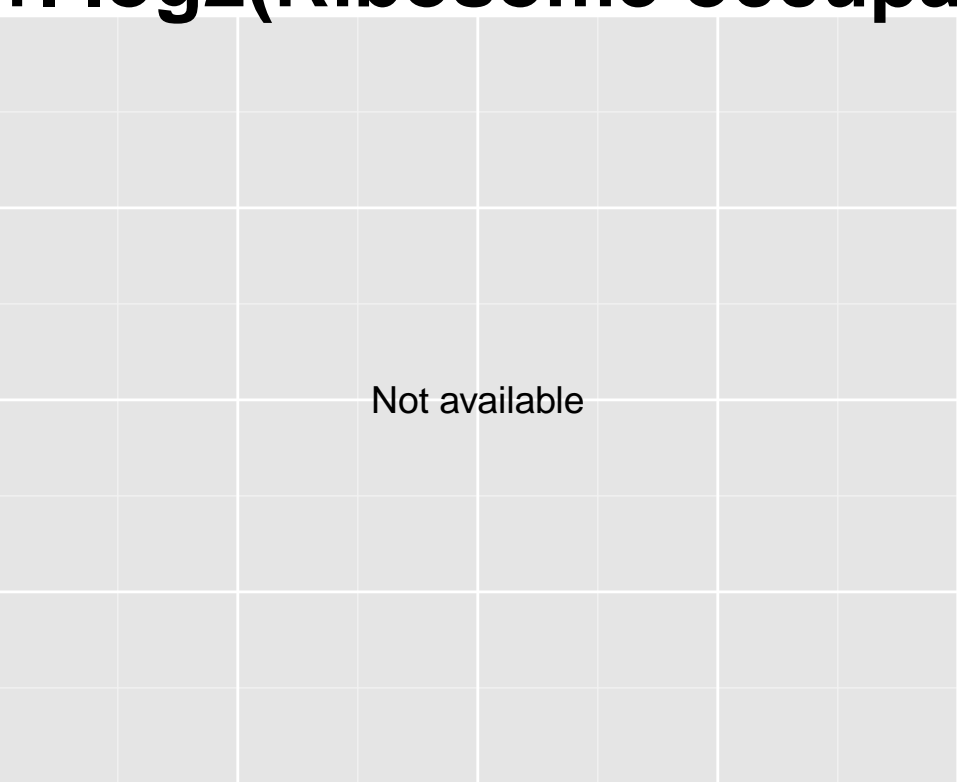

Supplement: Supplementary file 1876 [file 1]

# Zfp184

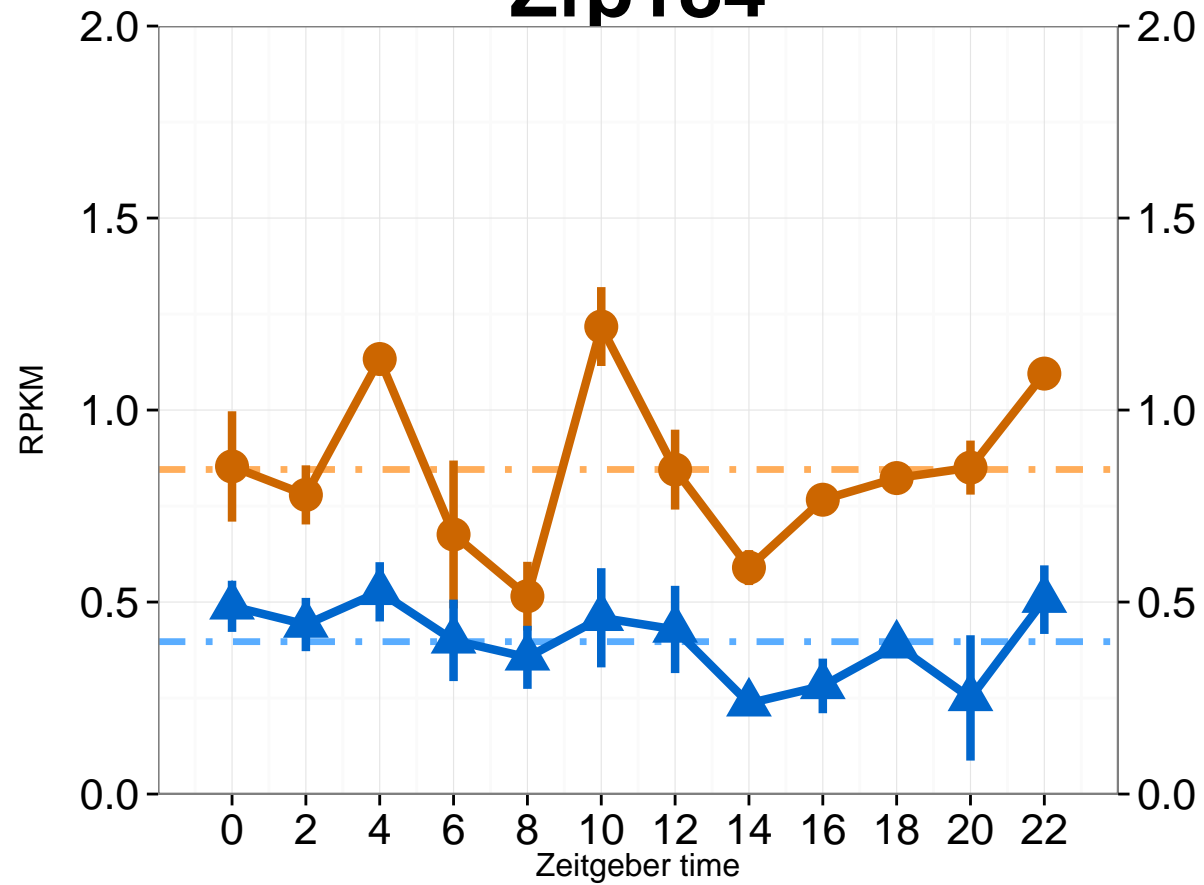

# Zfp184

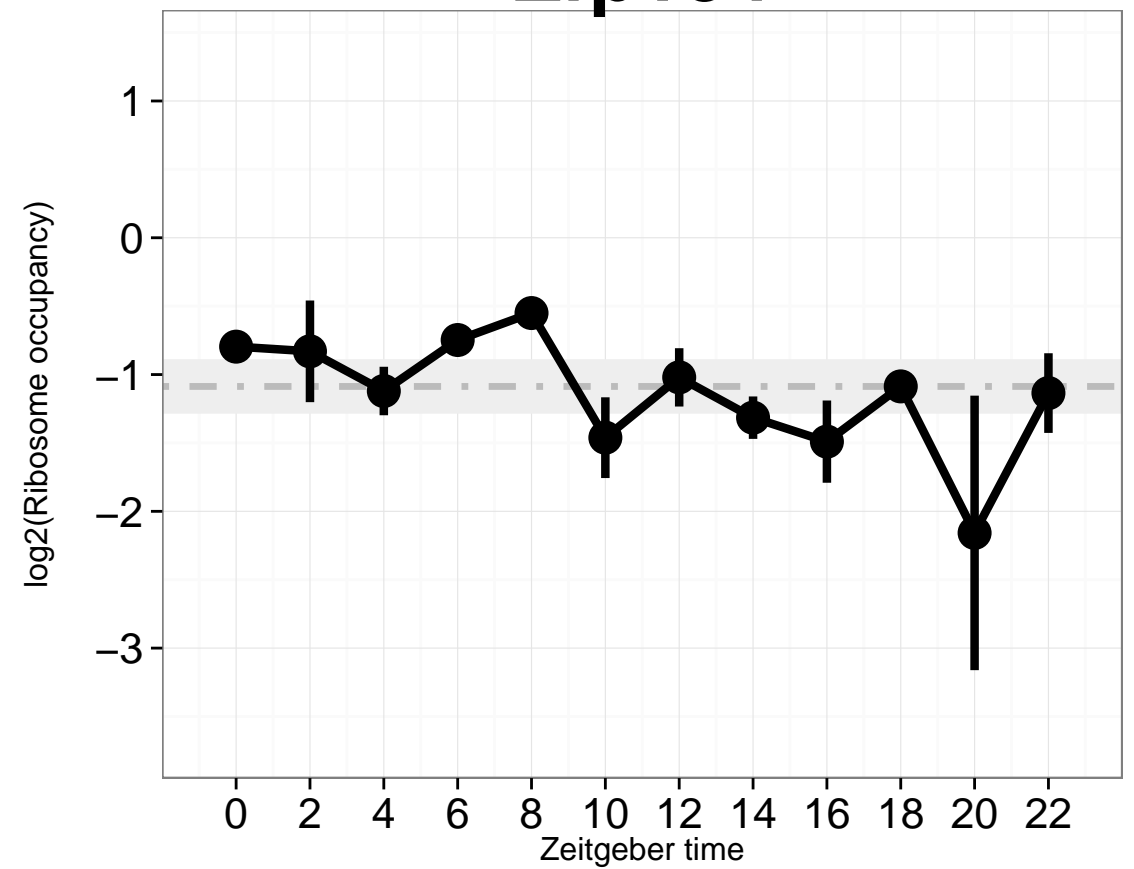

Supplement: Supplementary file 1877 [file 1]

# Hnf4a

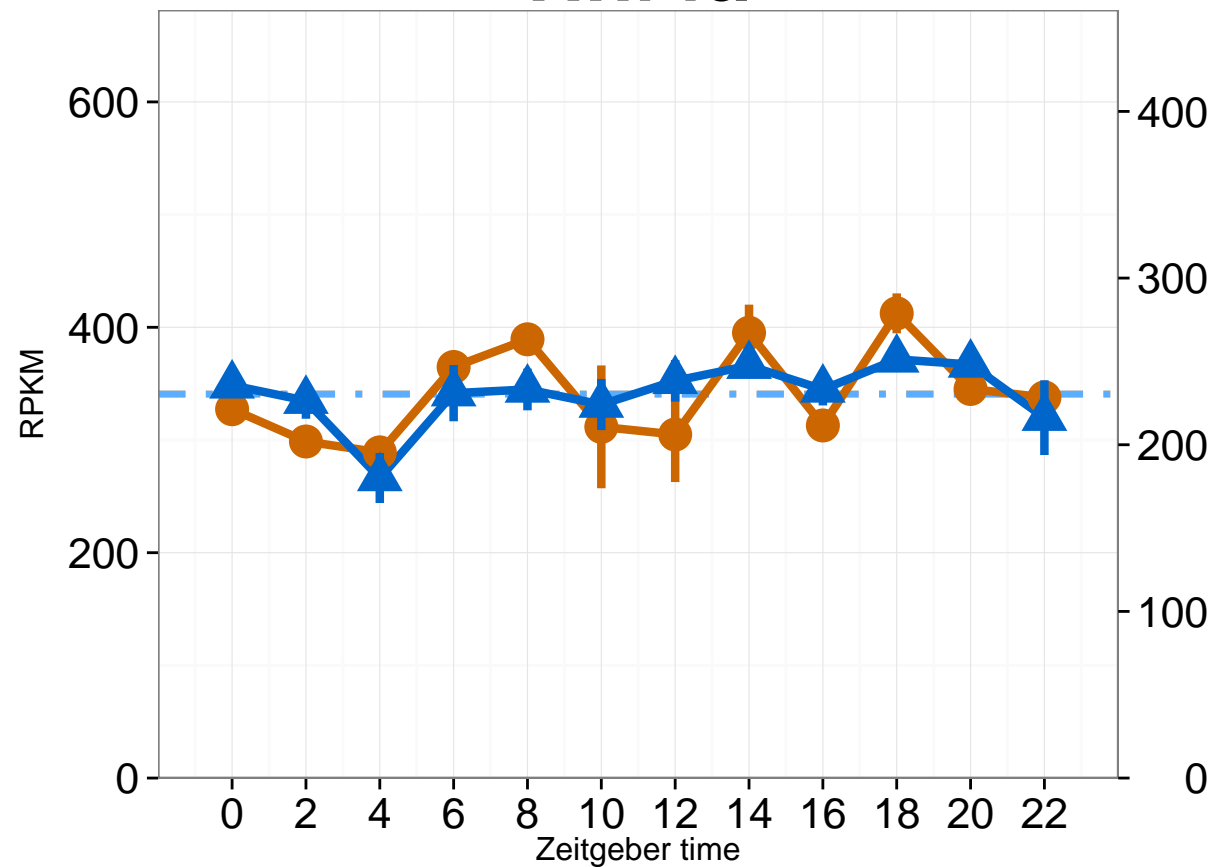

# Hnf4a

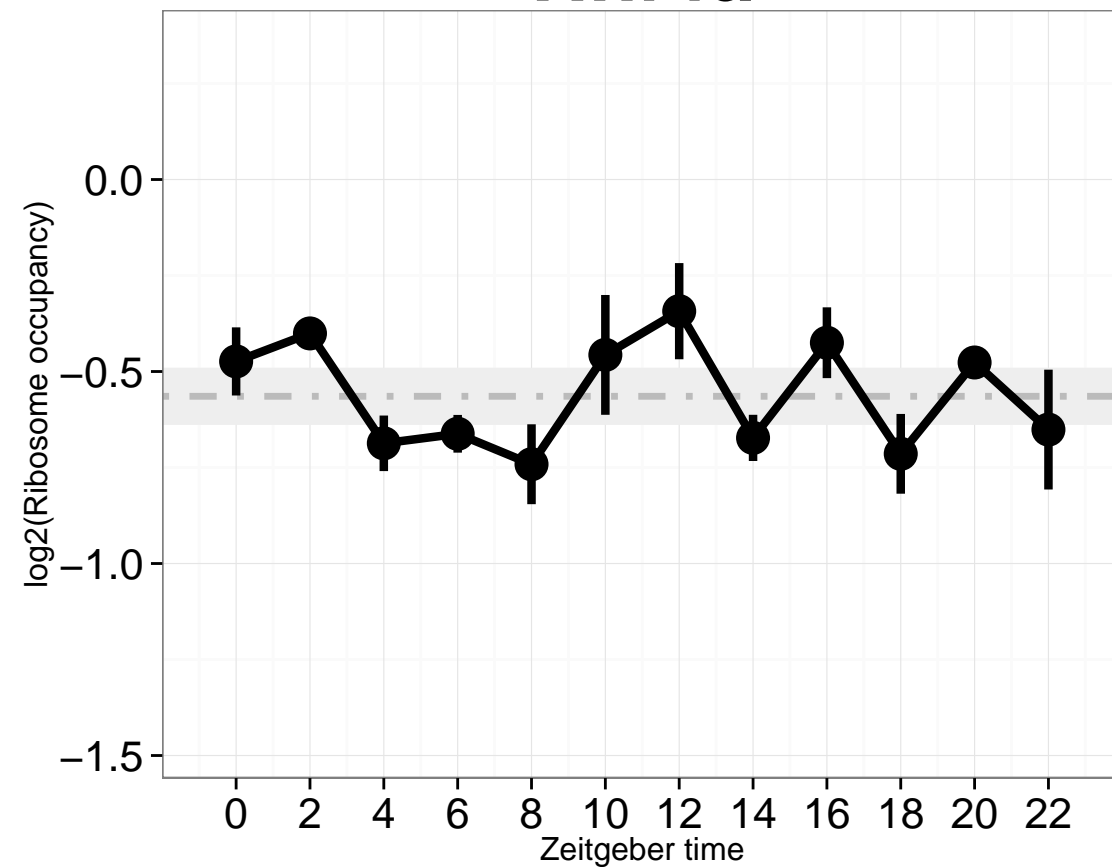

Supplement: Supplementary file 1878 [file 1]

## Exoc1

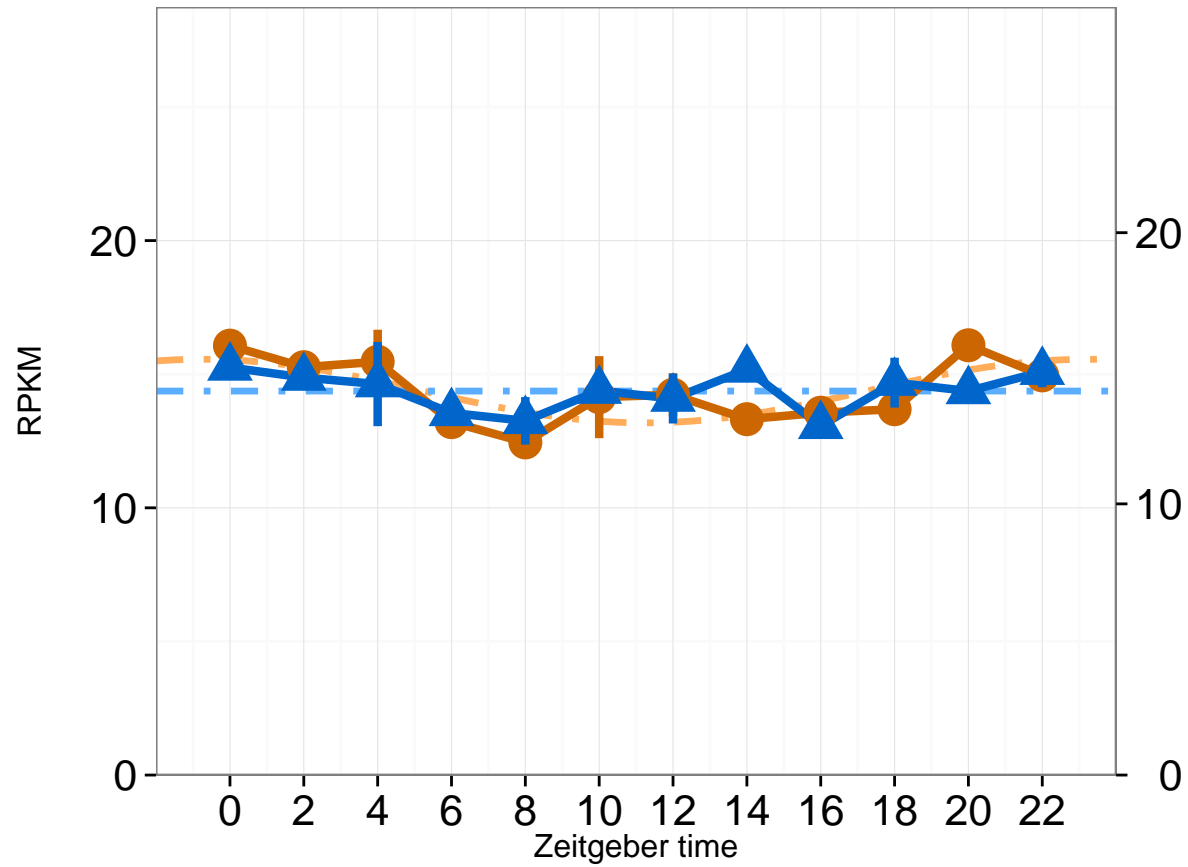

## Exoc1

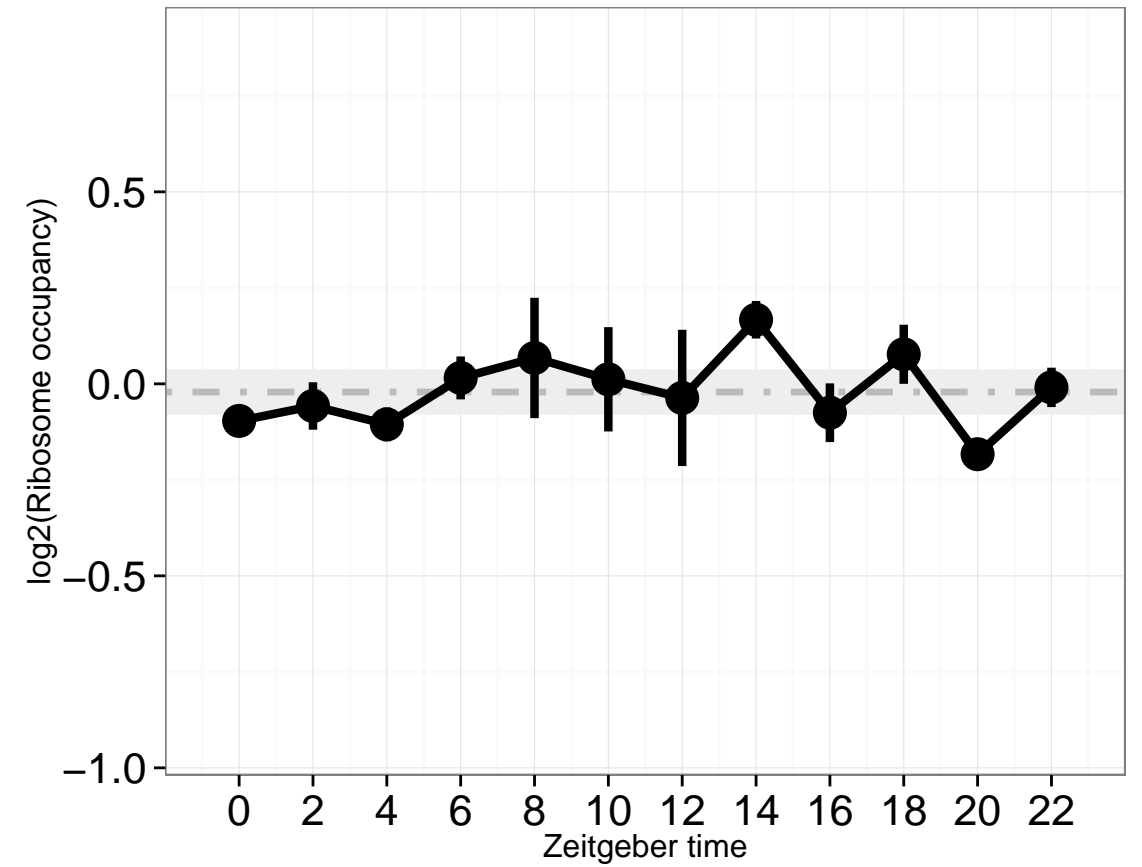

Supplement: Supplementary file 1879 [file 1]

# 0610040J01Rik

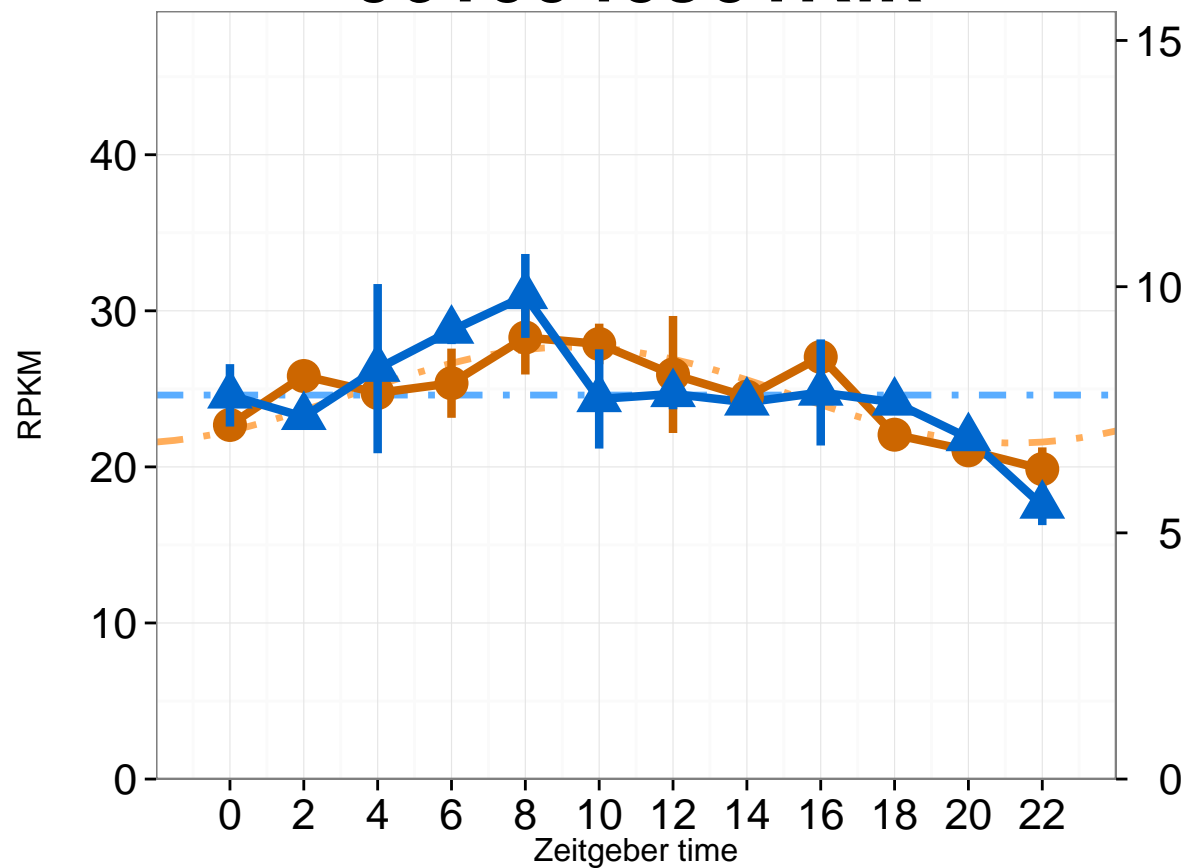

# 0610040J01Rik

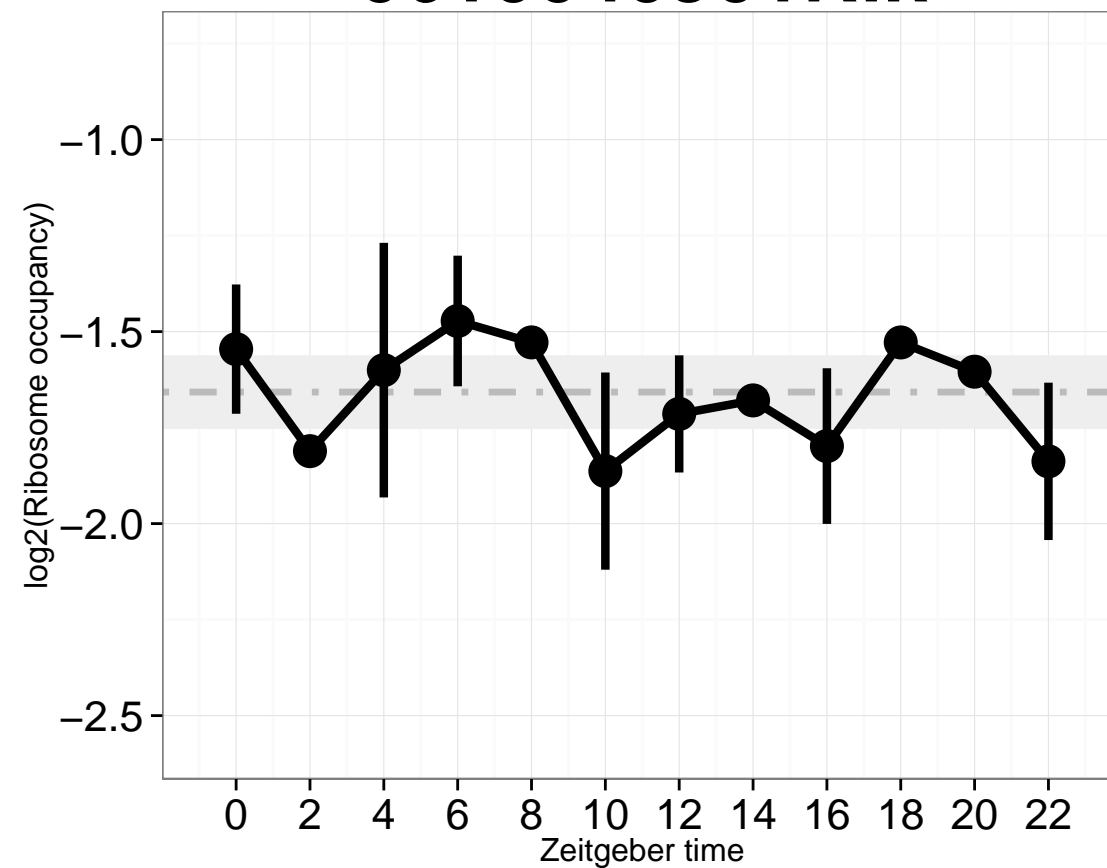

Supplement: Supplementary file 1880 [file 1]

## Smg7

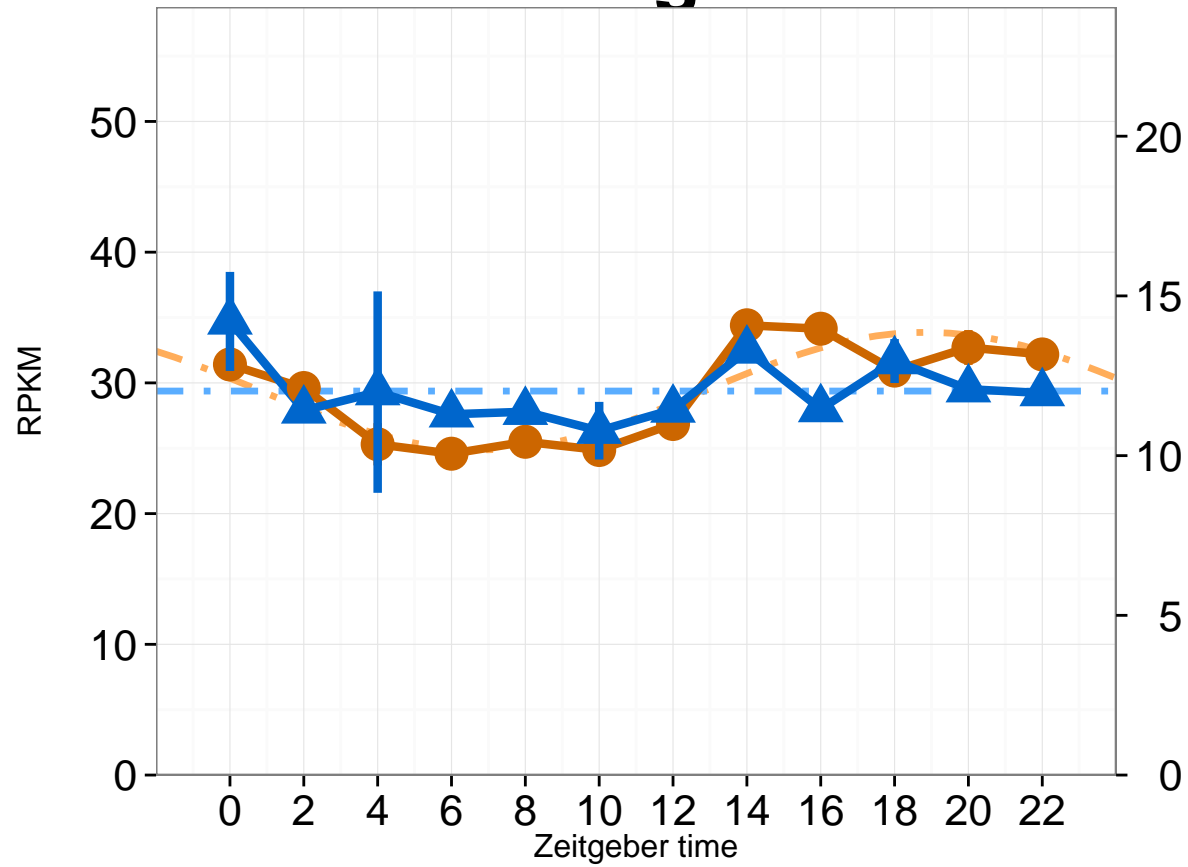

## Smg7

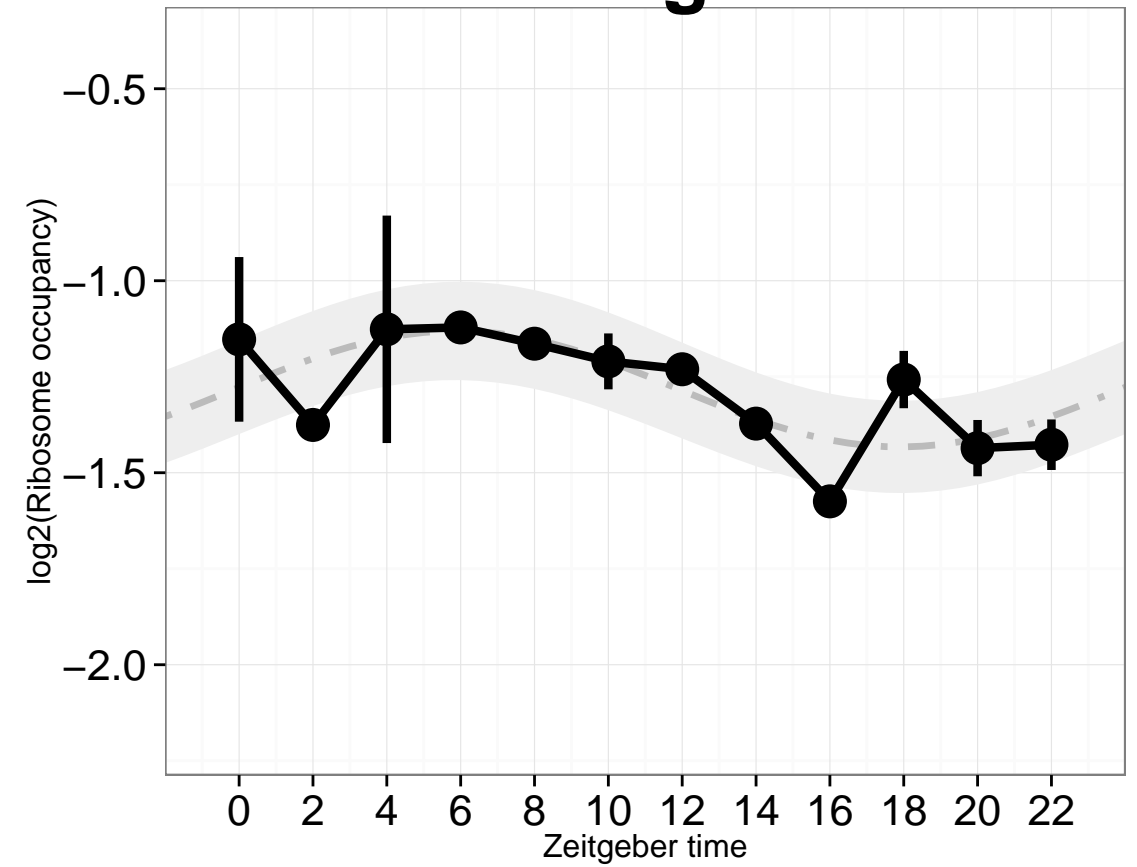

Supplement: Supplementary file 1881 [file 1]

## Esam

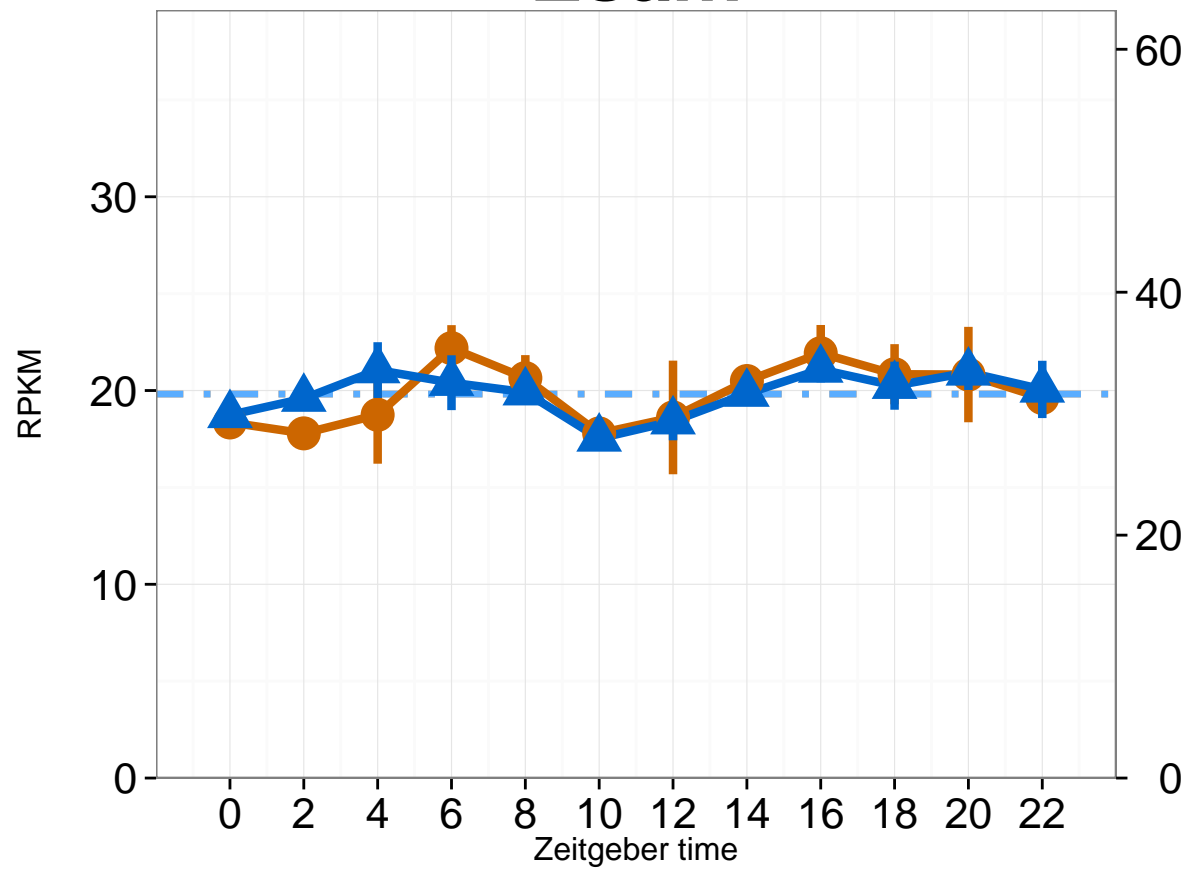

## Esam

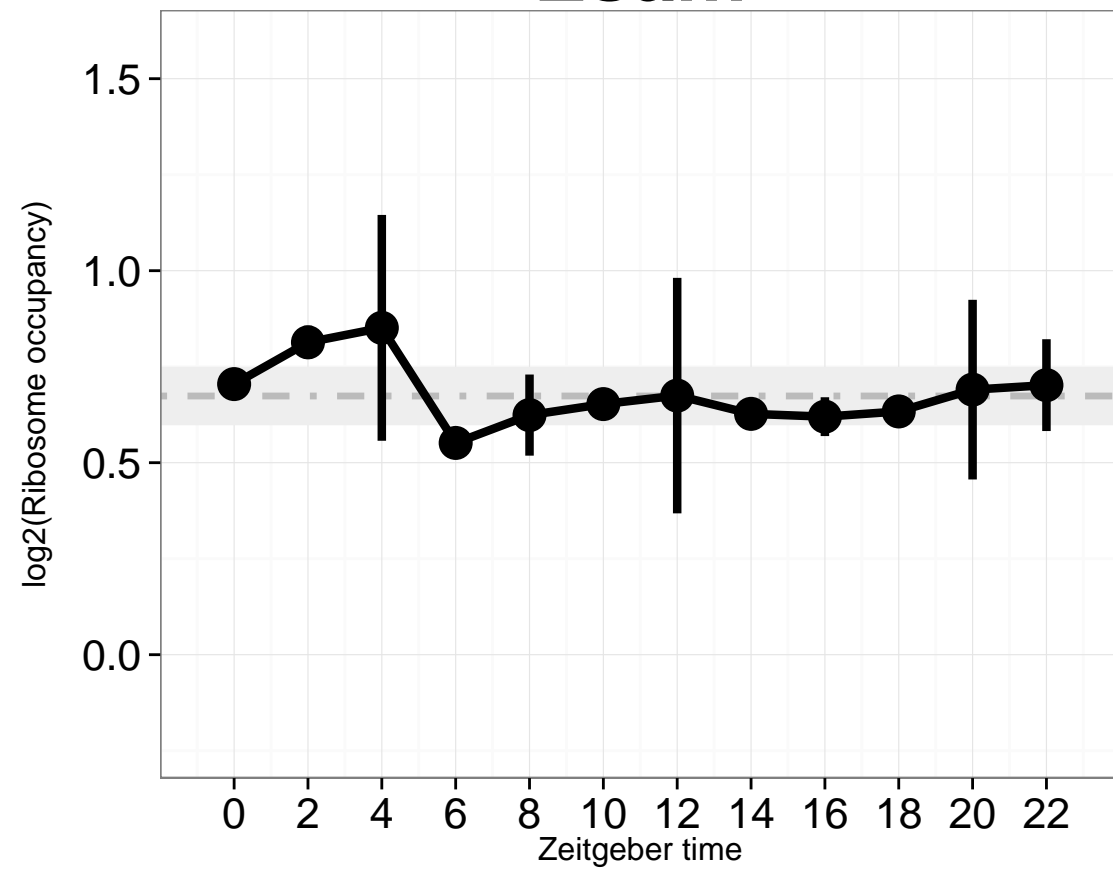

Supplement: Supplementary file 1882 [file 1]

## Arl6

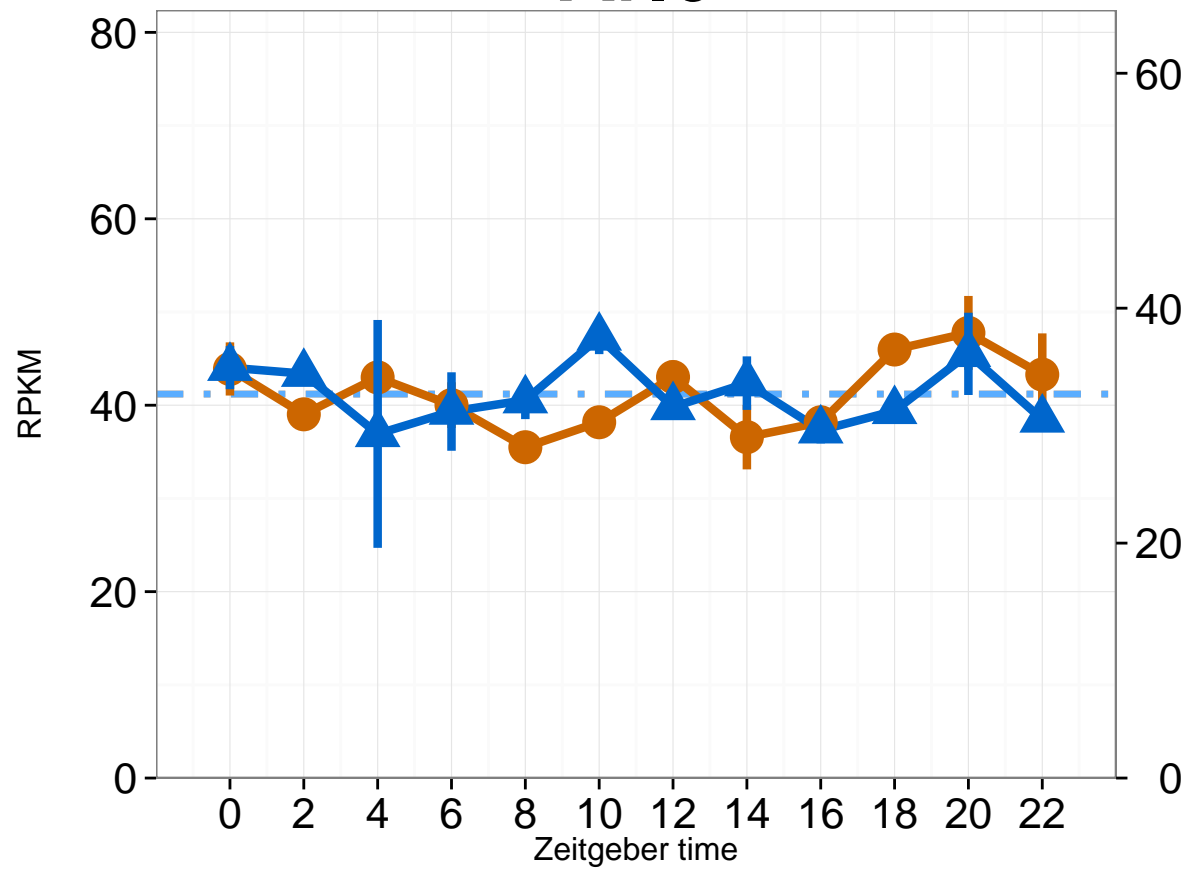

## Arl6

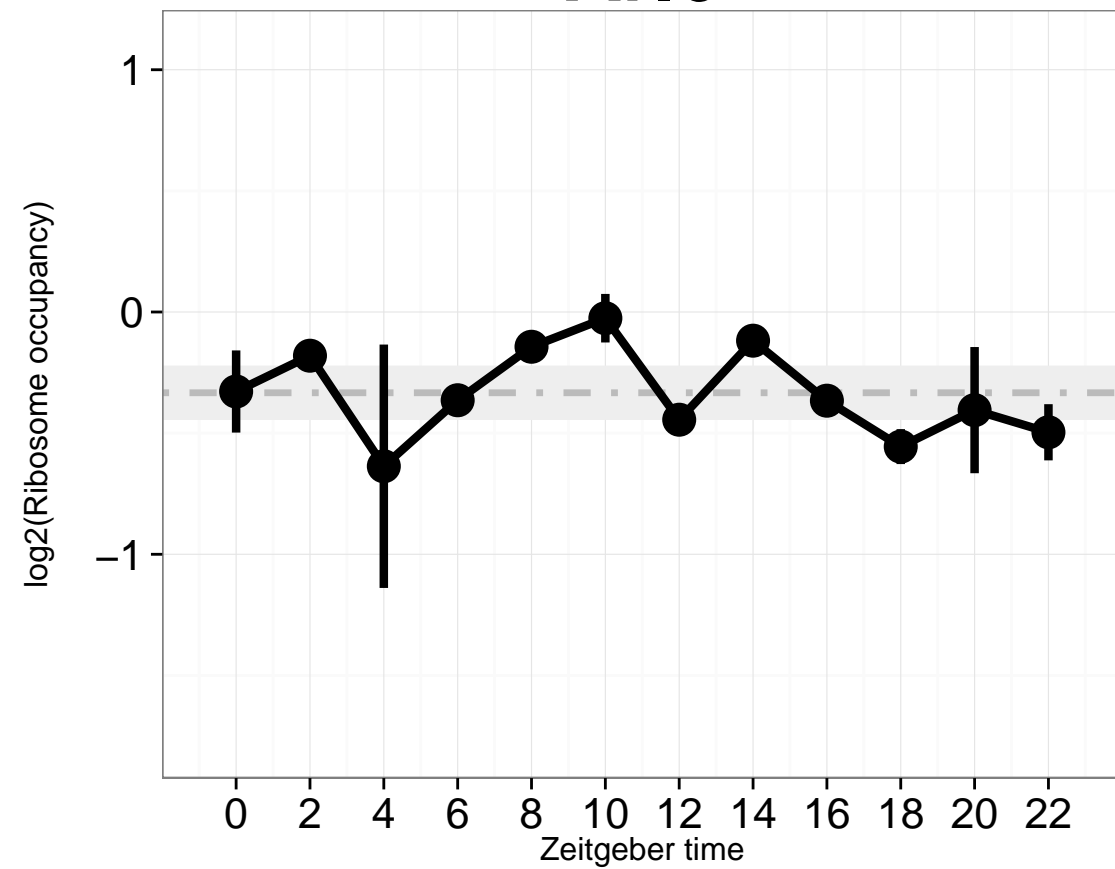

Supplement: Supplementary file 1883 [file 1]

# Pde10a

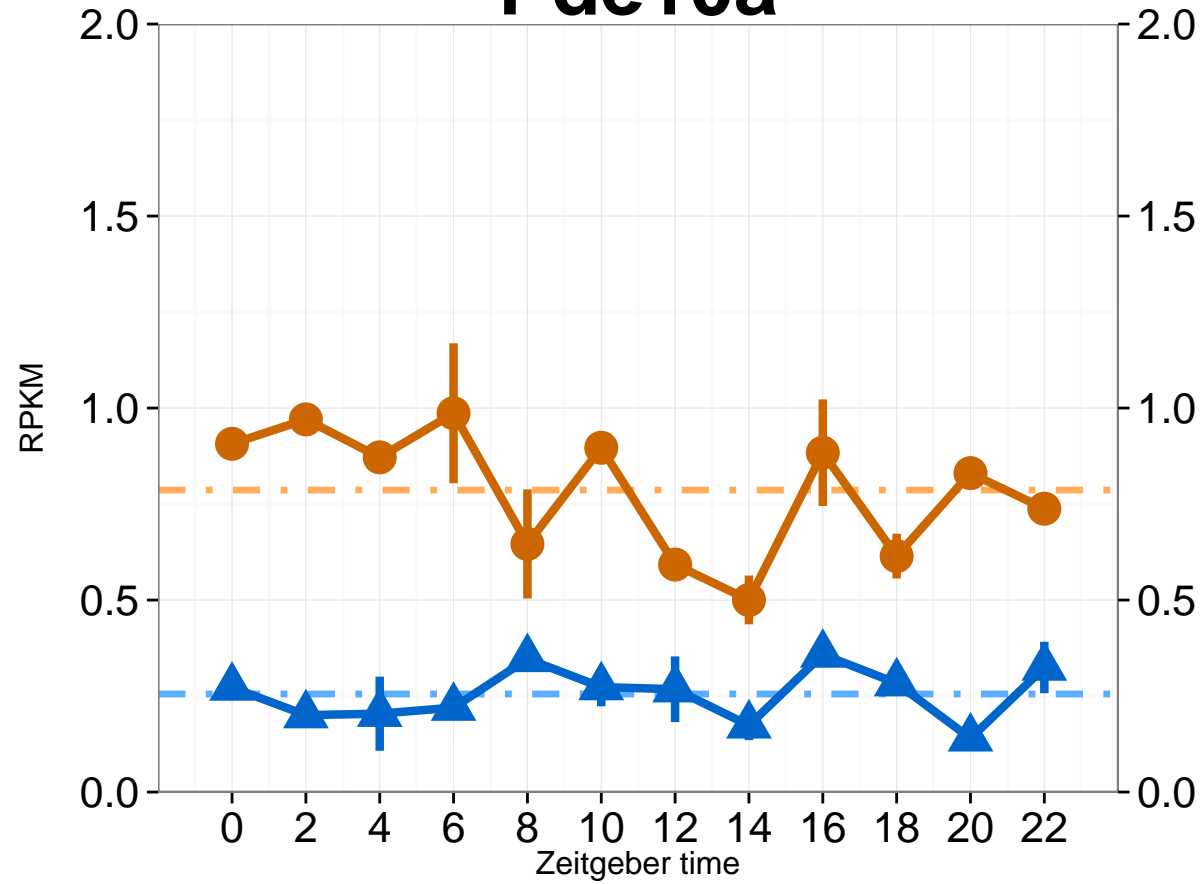

# Pde10a

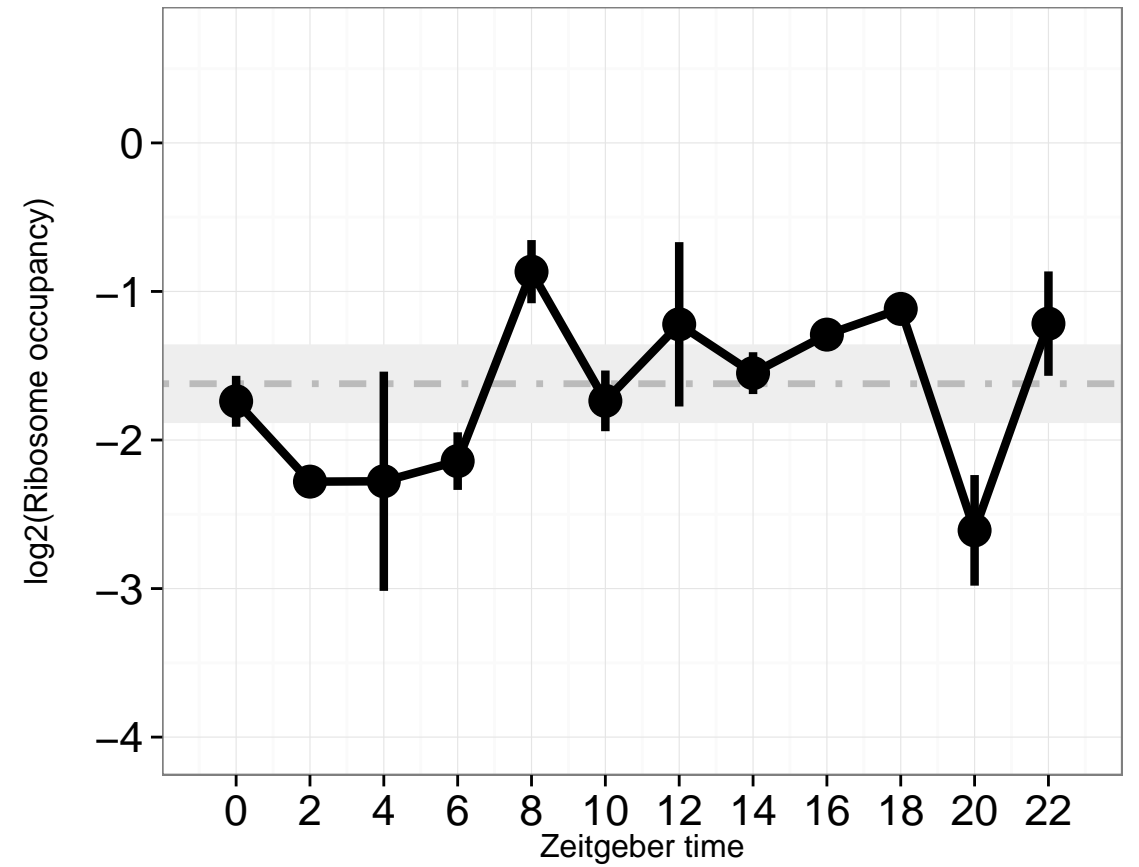

Supplement: Supplementary file 1884 [file 1]

**Mrgpre TR**

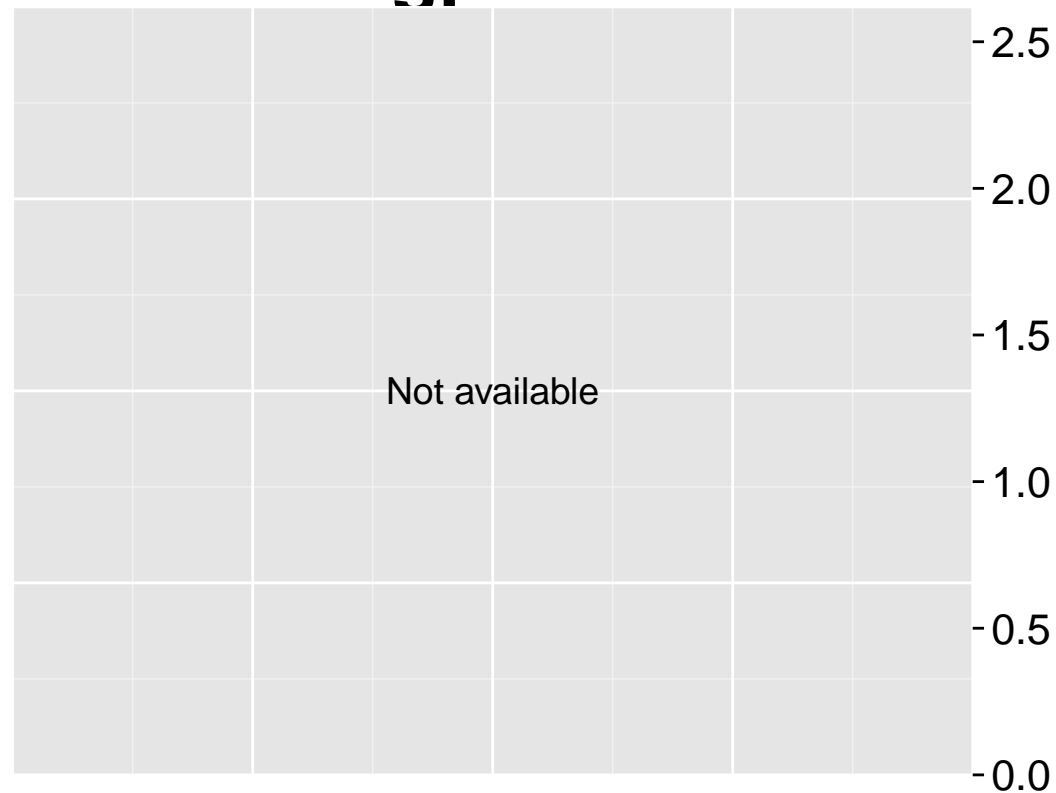

**Mrgpre log2(Ribosome occupancy**

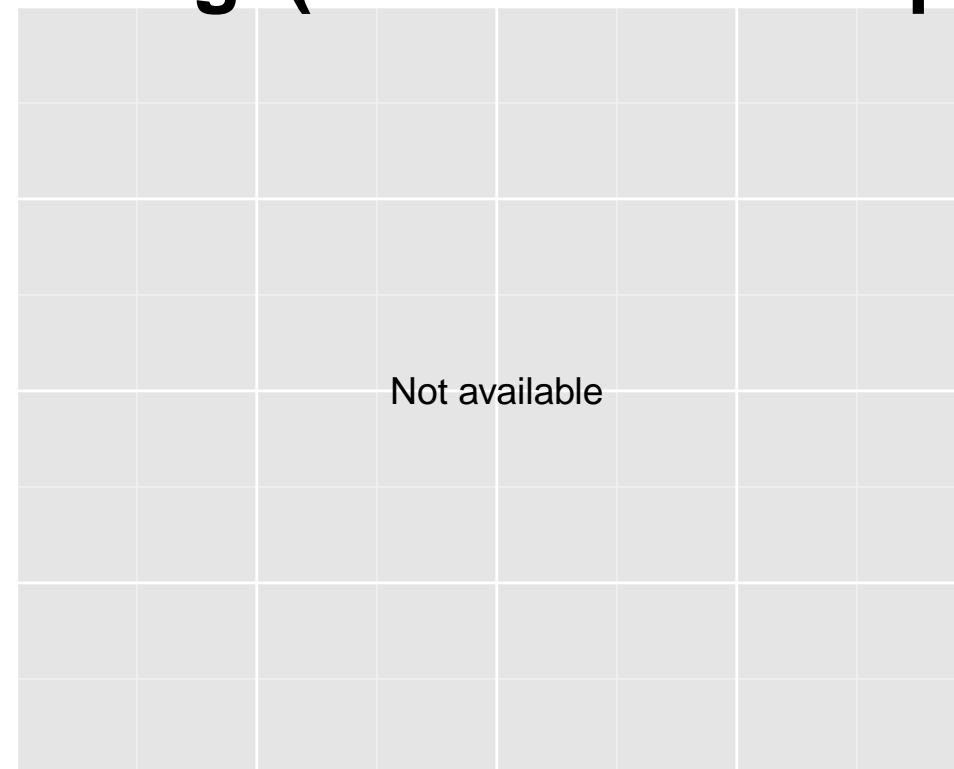

Supplement: Supplementary file 1885 [file 1]

# Slc16a6

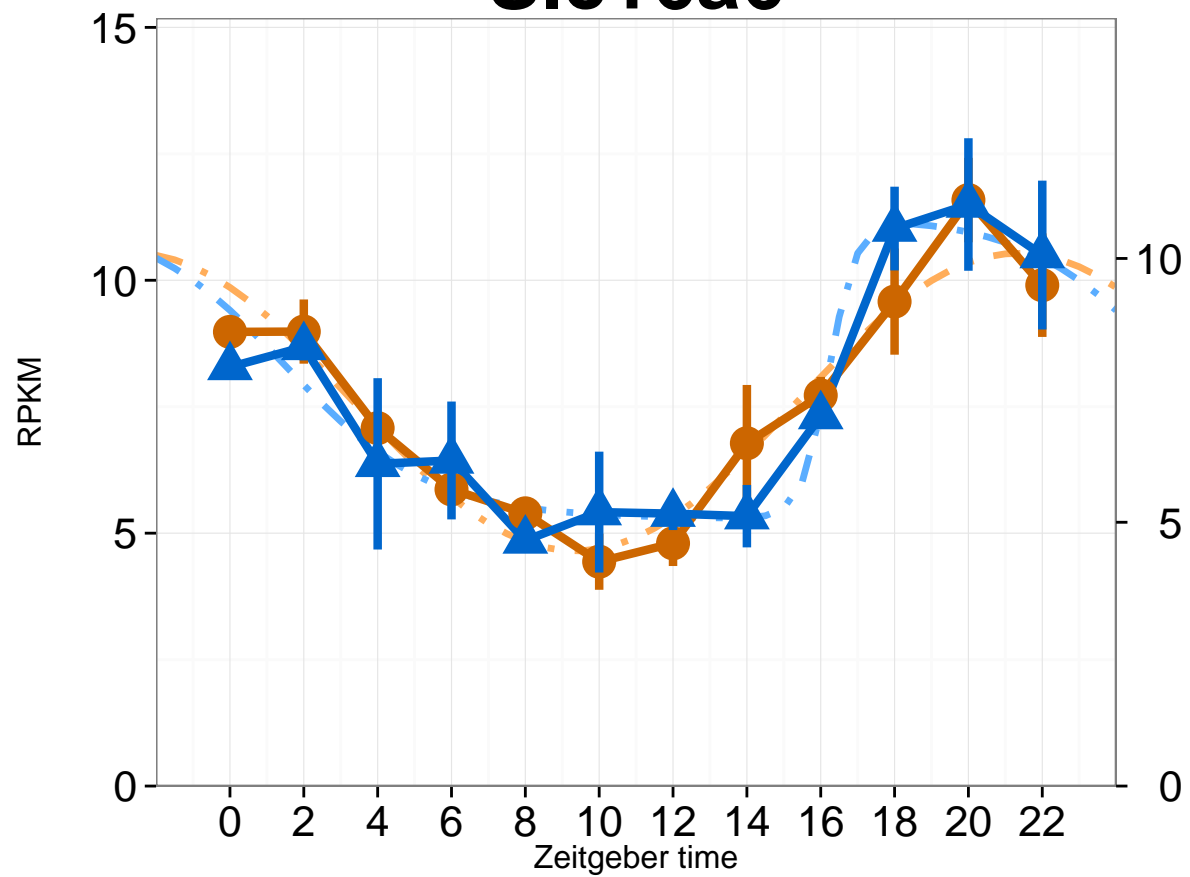

# Slc16a6

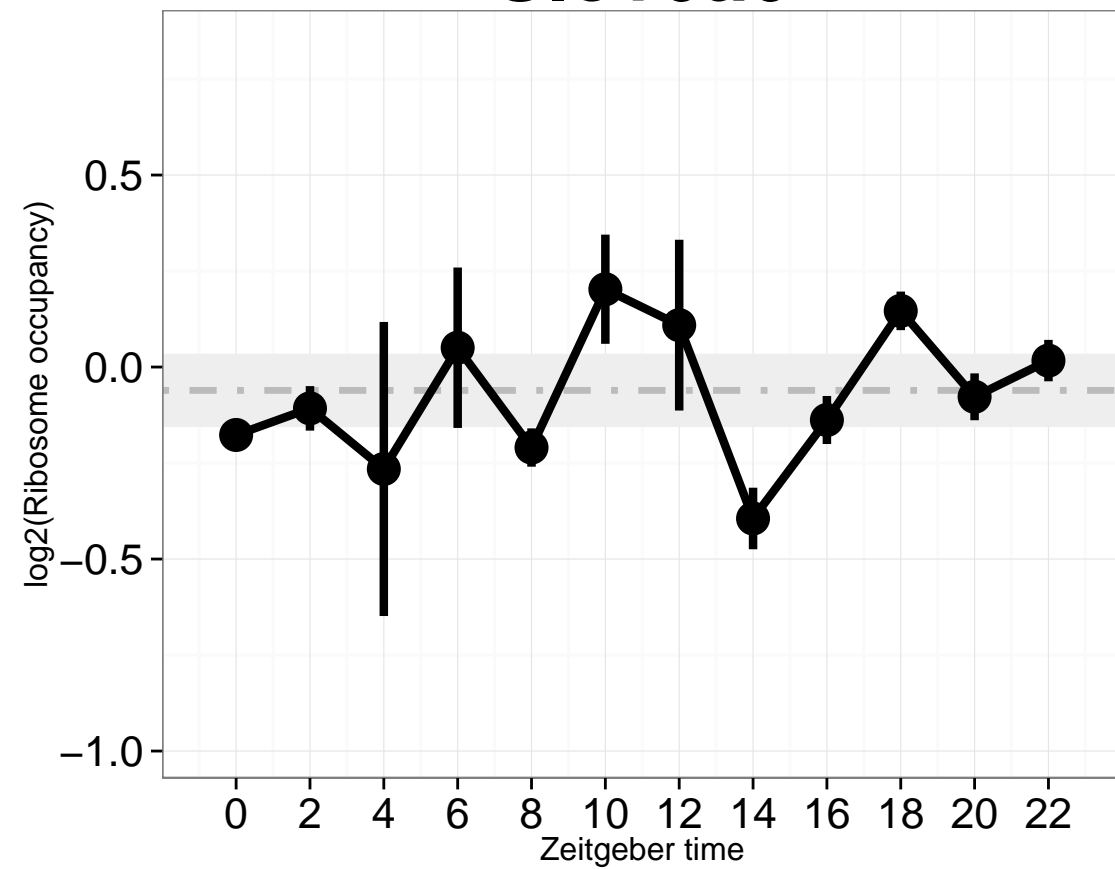

Supplement: Supplementary file 1886 [file 1]

## Enc1

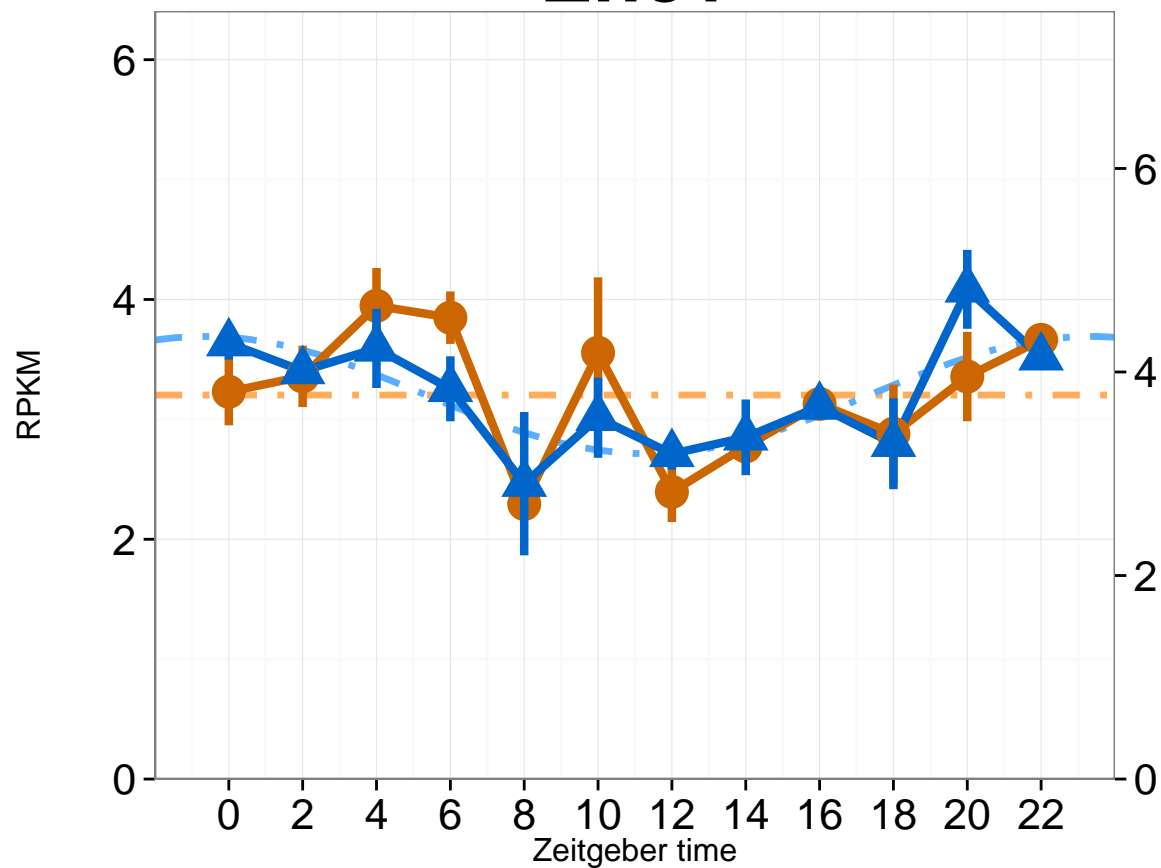

## Enc1

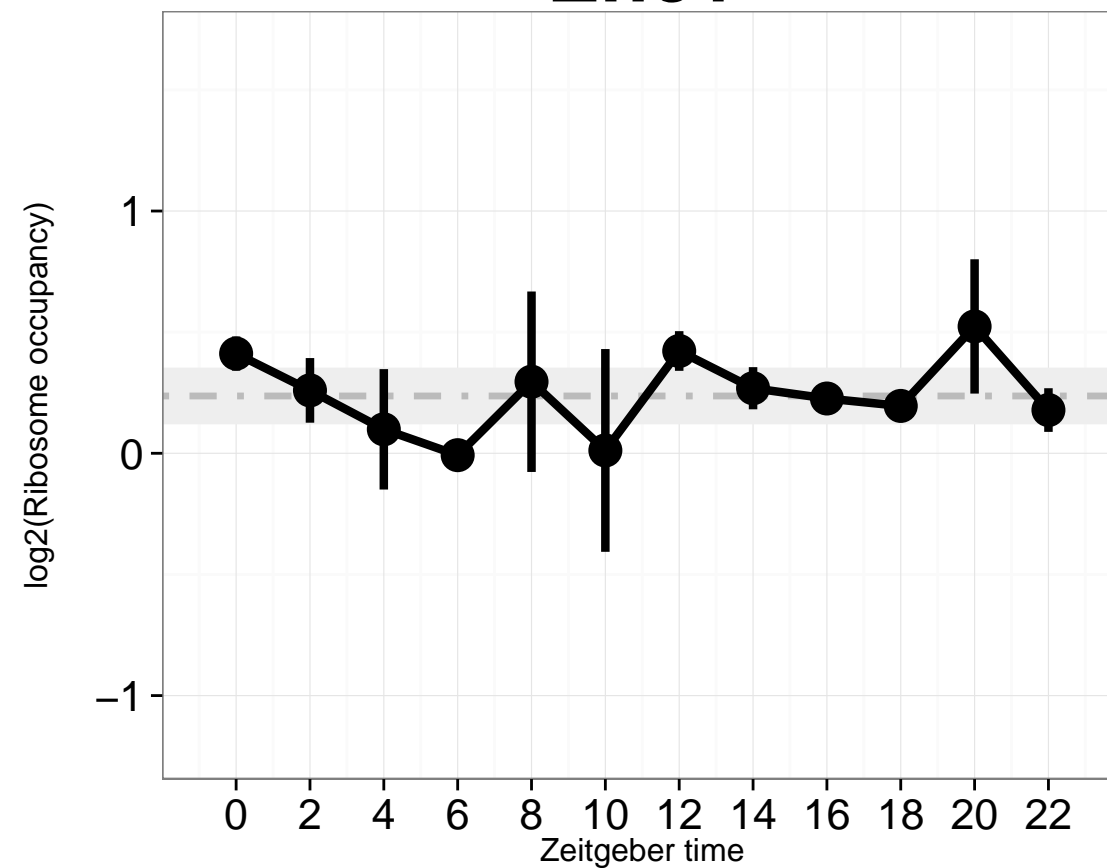

Supplement: Supplementary file 1887 [file 1]

## Ubac1

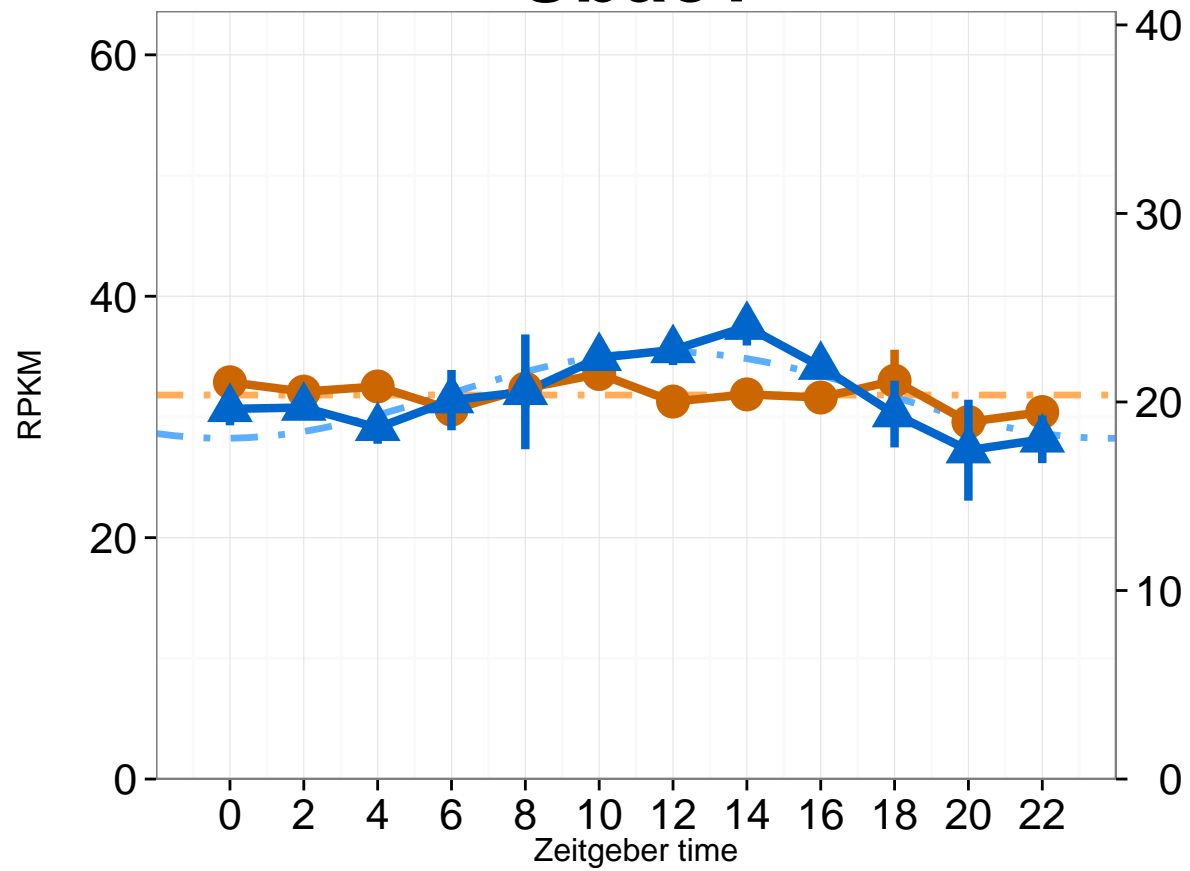

## Ubac1

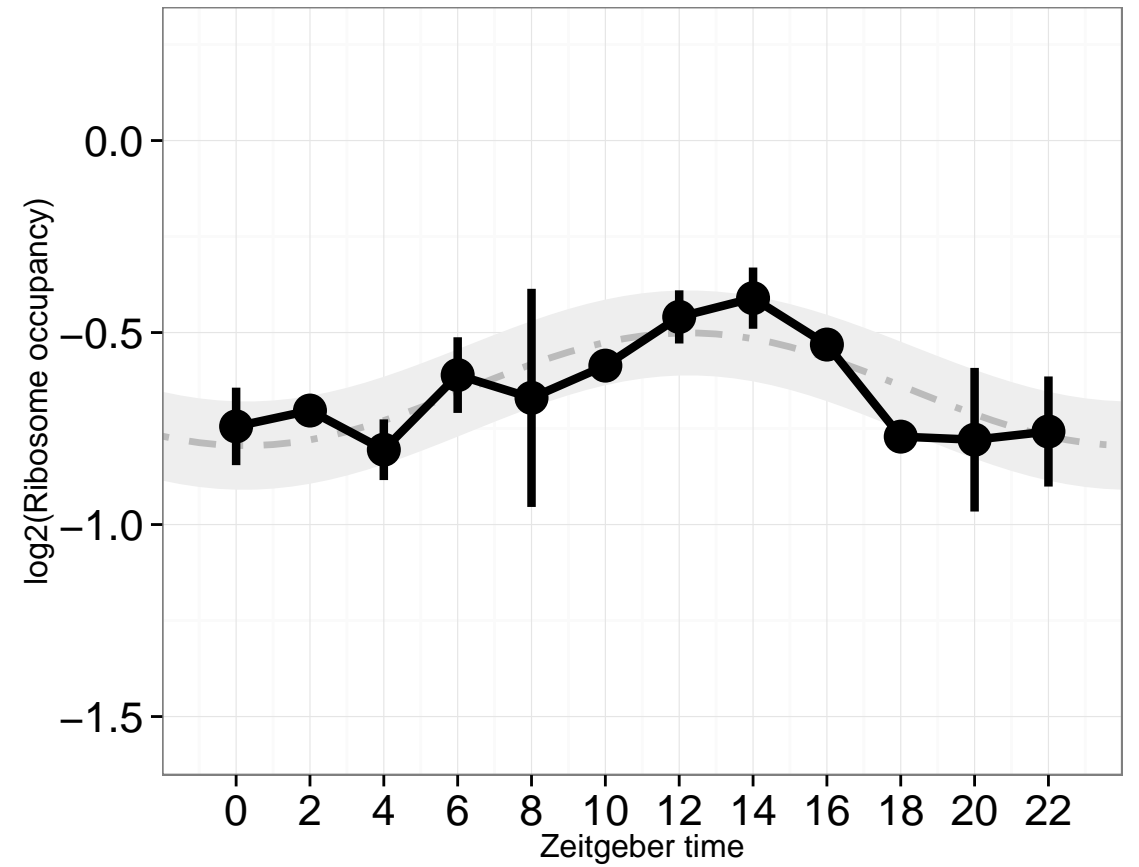

Supplement: Supplementary file 1888 [file 1]

## Ehmt2

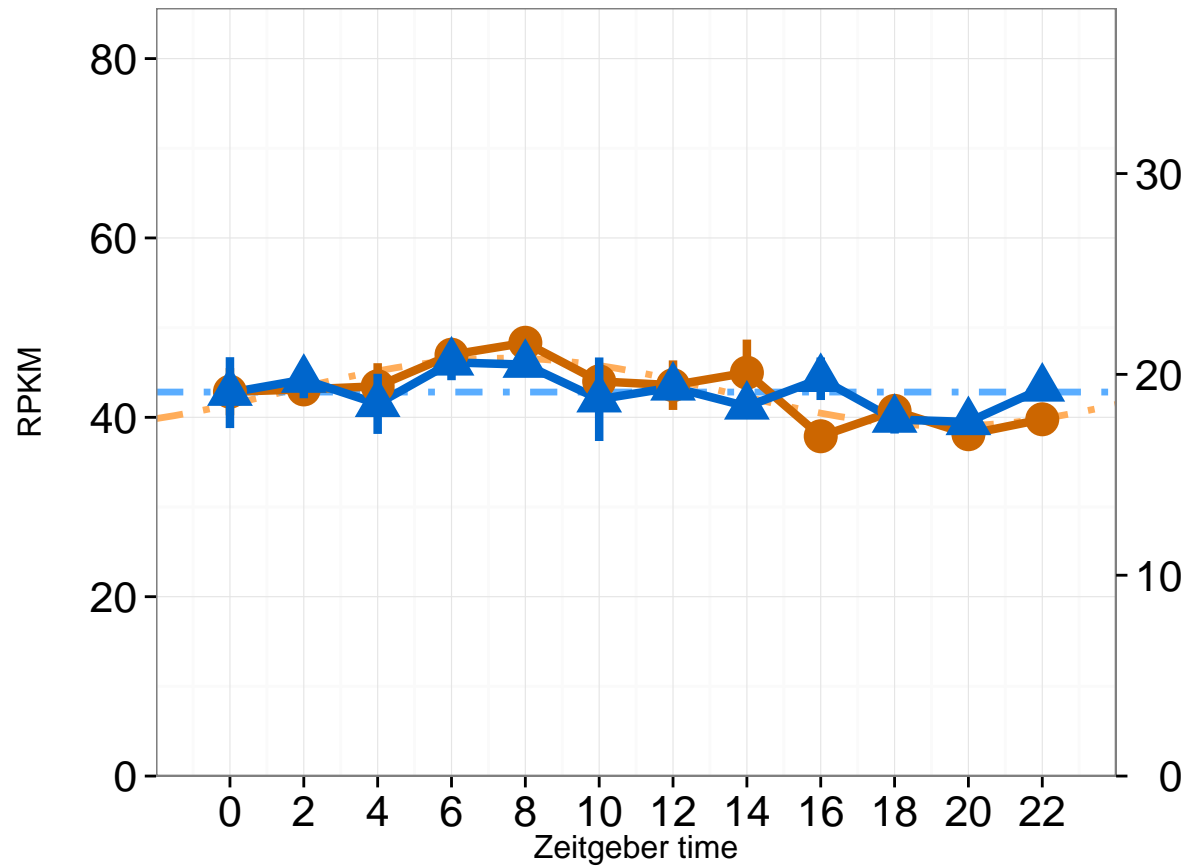

## Ehmt2

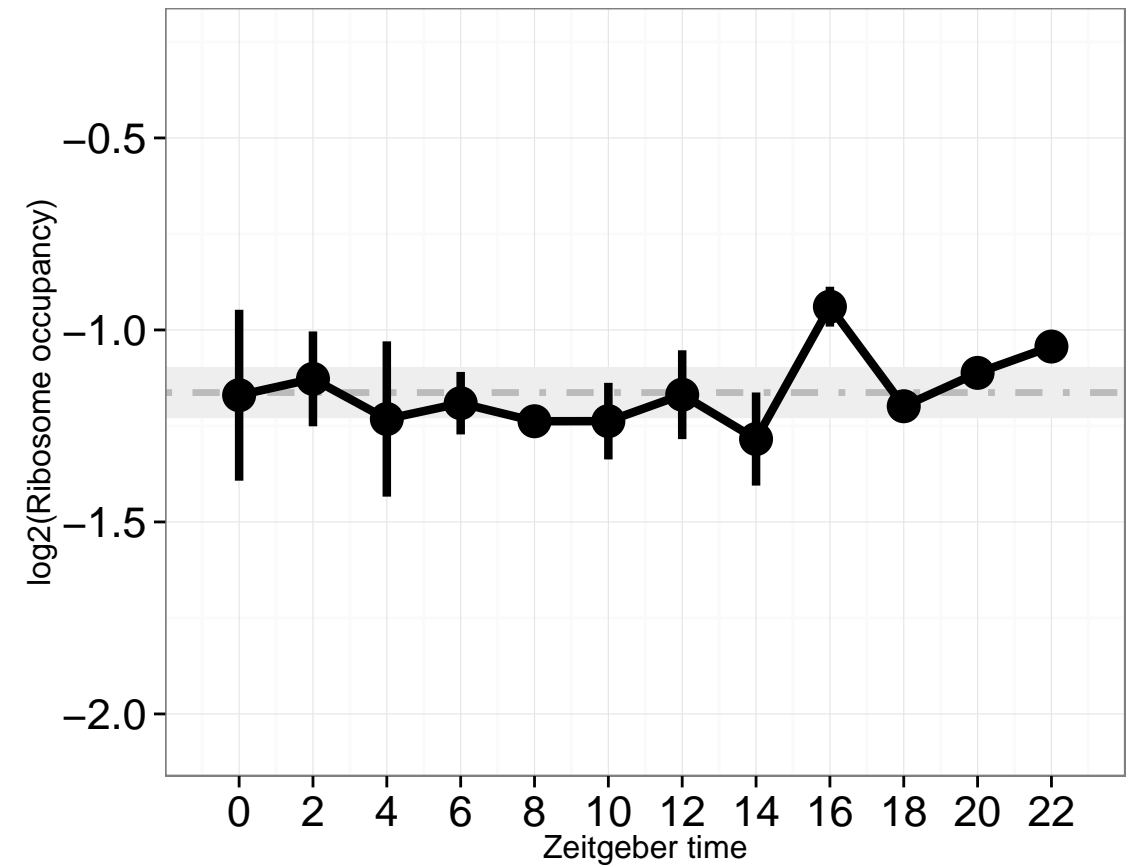

Supplement: Supplementary file 1889 [file 1]

## Tsc22d2

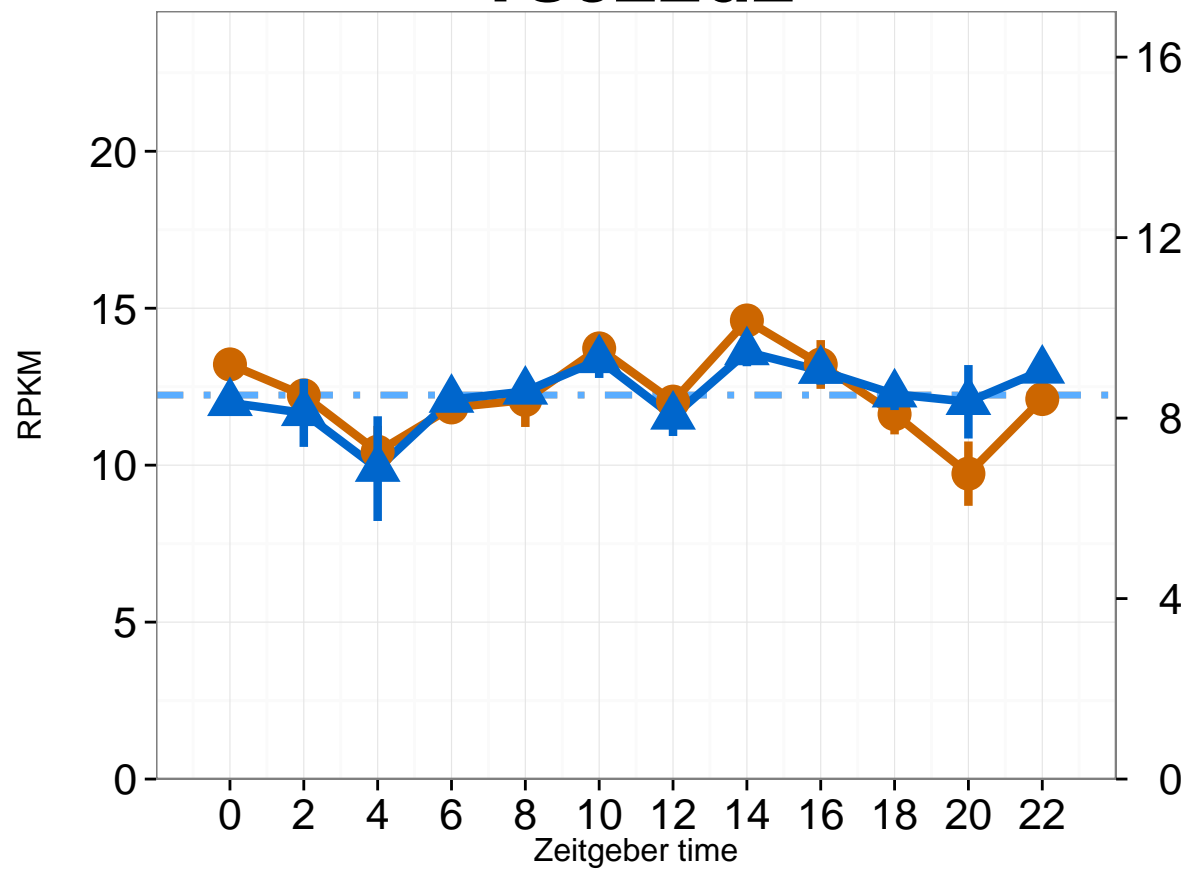

## Tsc22d2

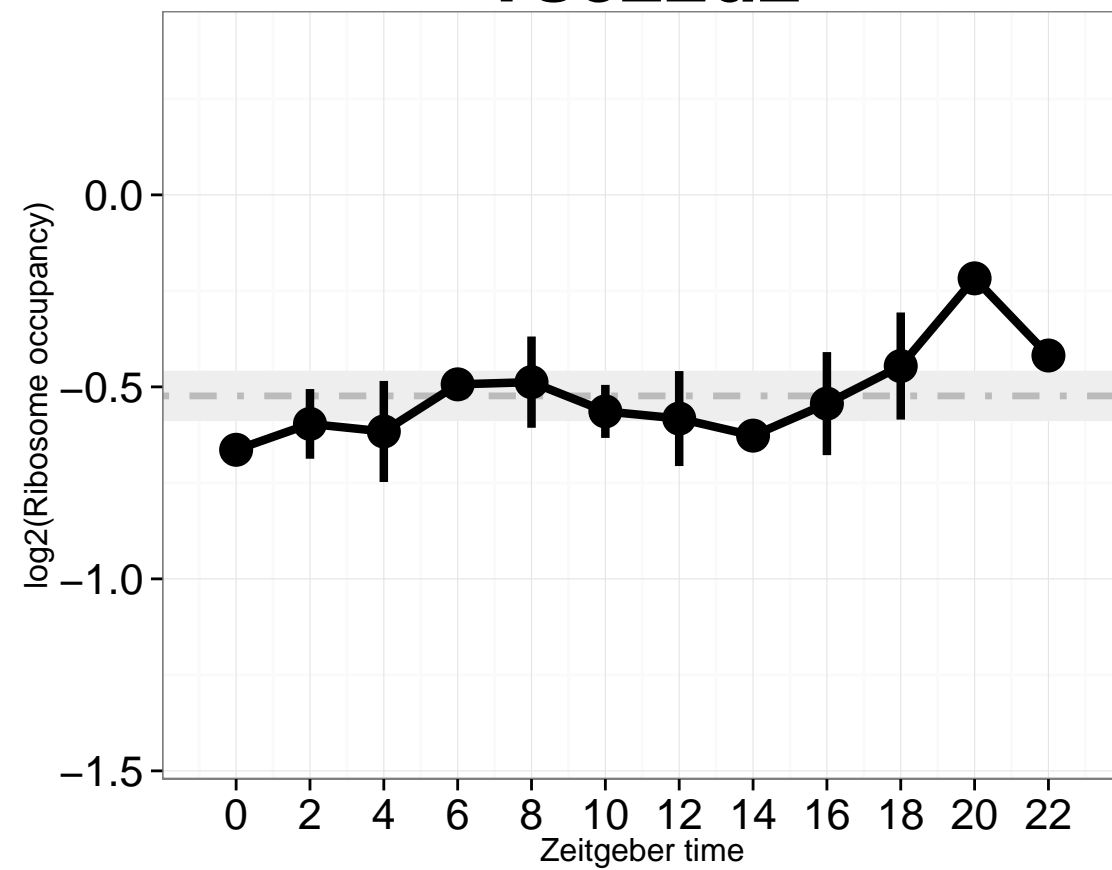

Supplement: Supplementary file 1890 [file 1]

## Stard4

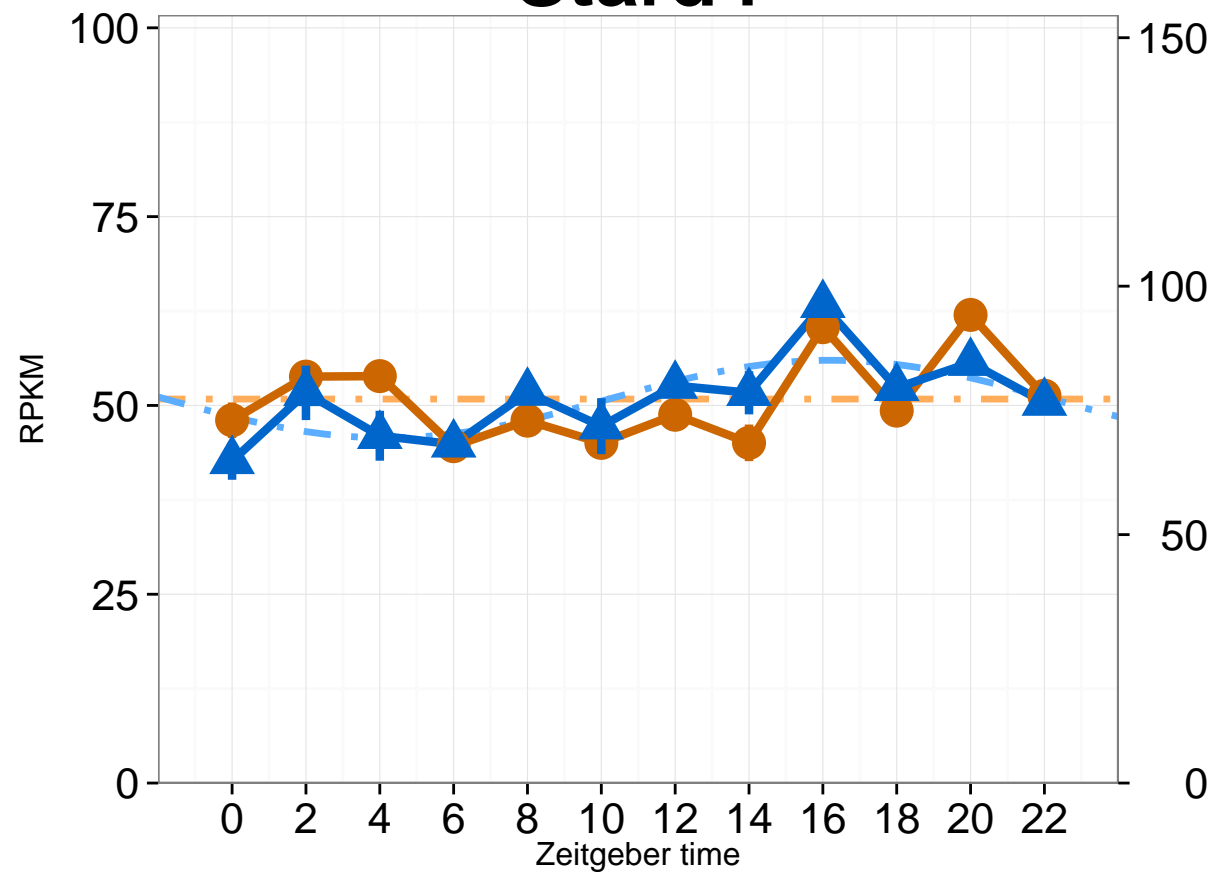

## Stard4

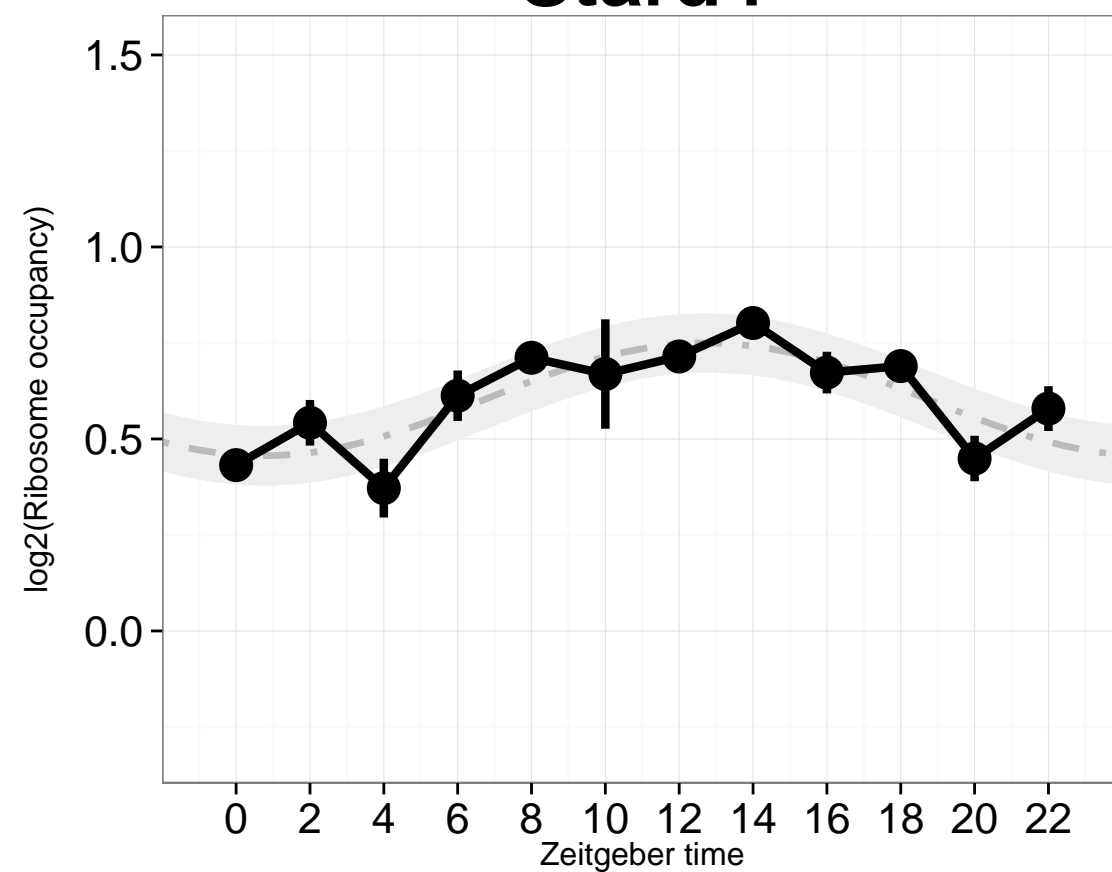

Supplement: Supplementary file 1891 [file 1]

## Tm4sf4

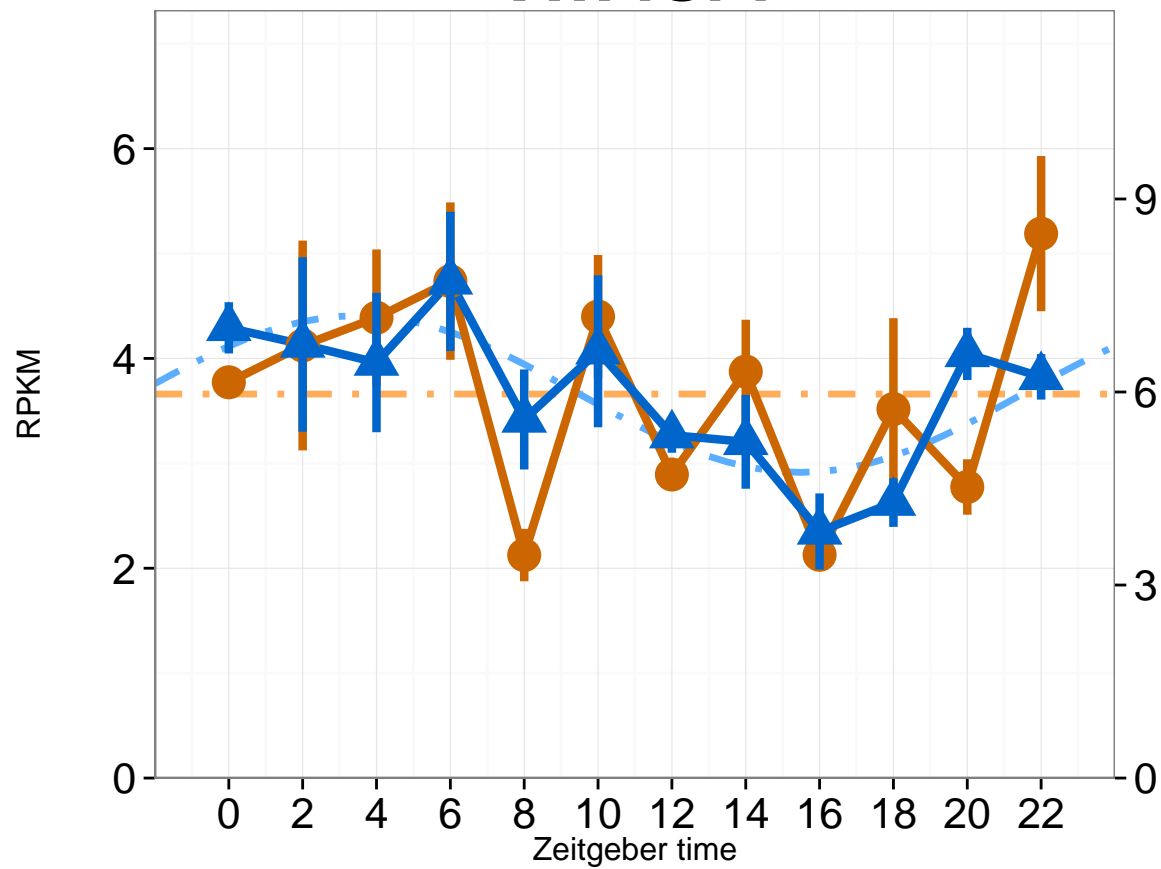

## Tm4sf4

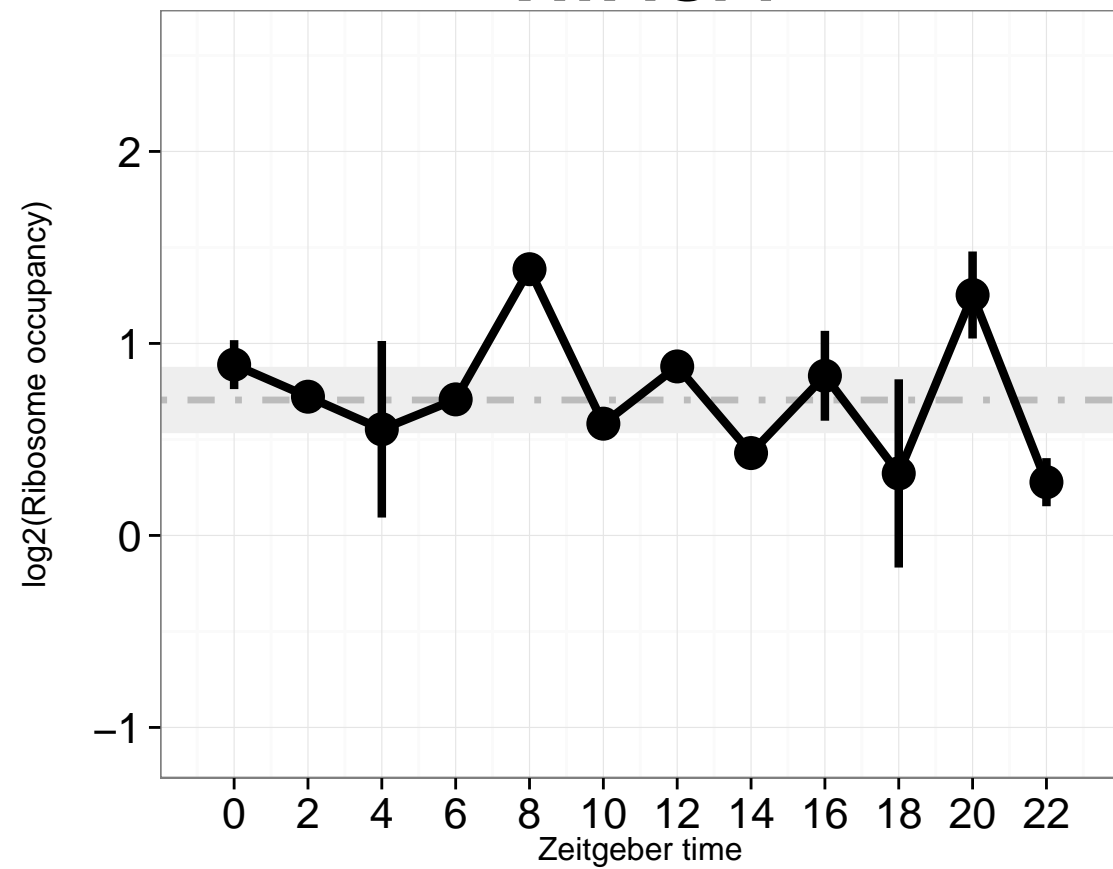

Supplement: Supplementary file 1892 [file 1]

## Usp2

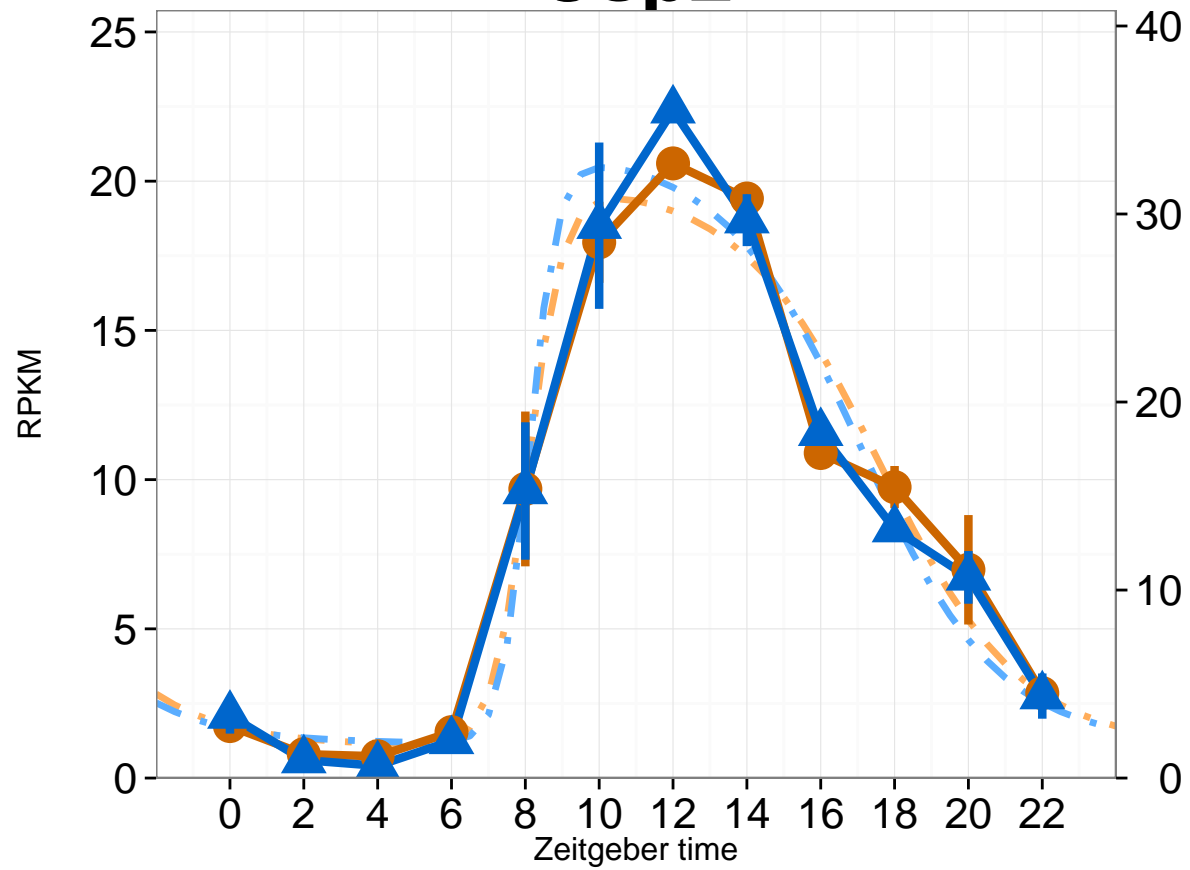

## Usp2

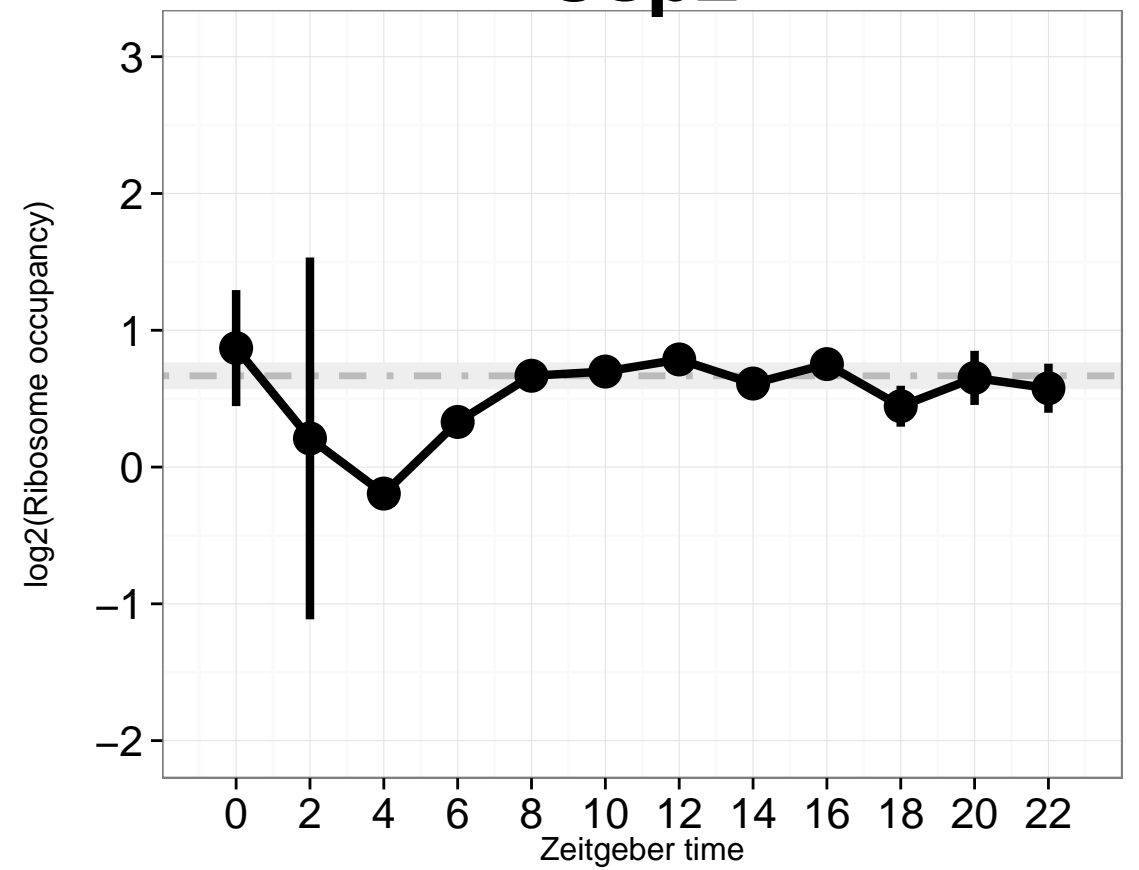

Supplement: Supplementary file 1893 [file 1]

## Kif11

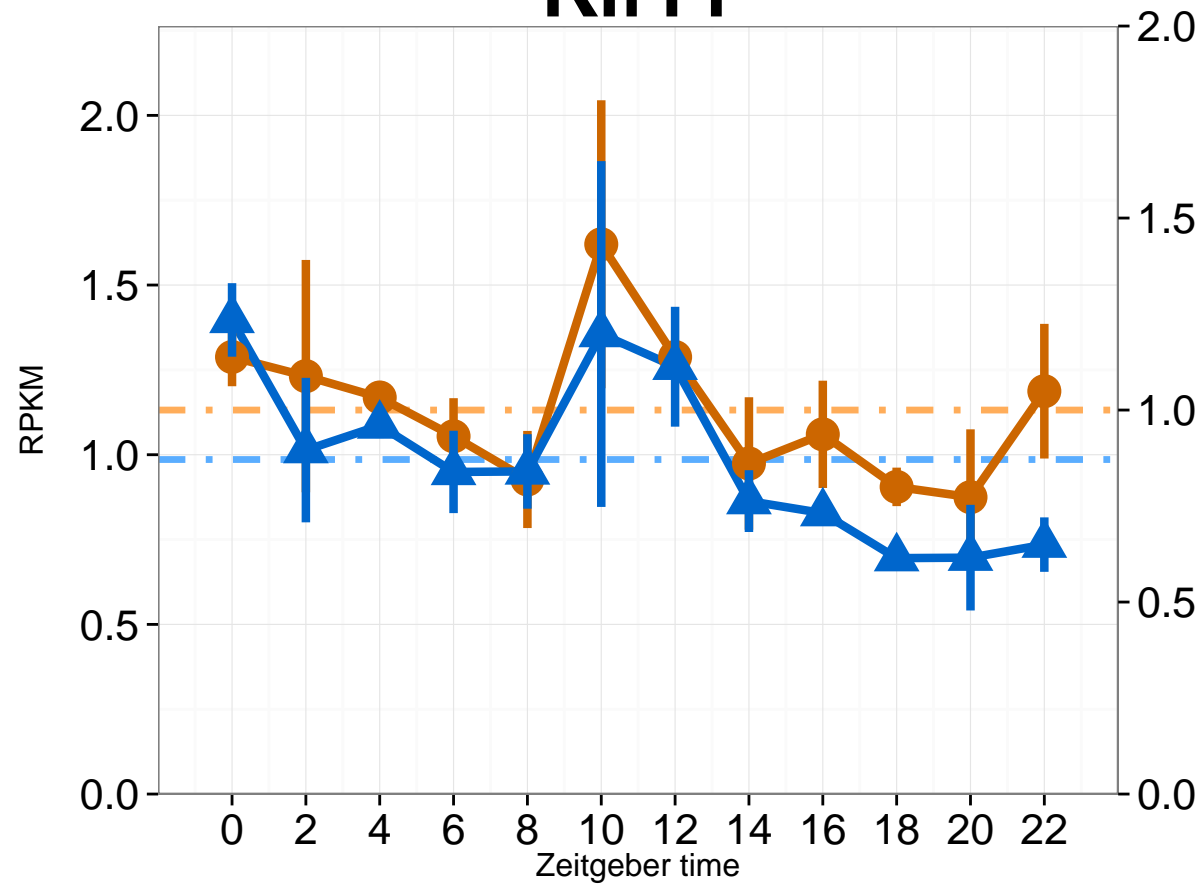

## Kif11

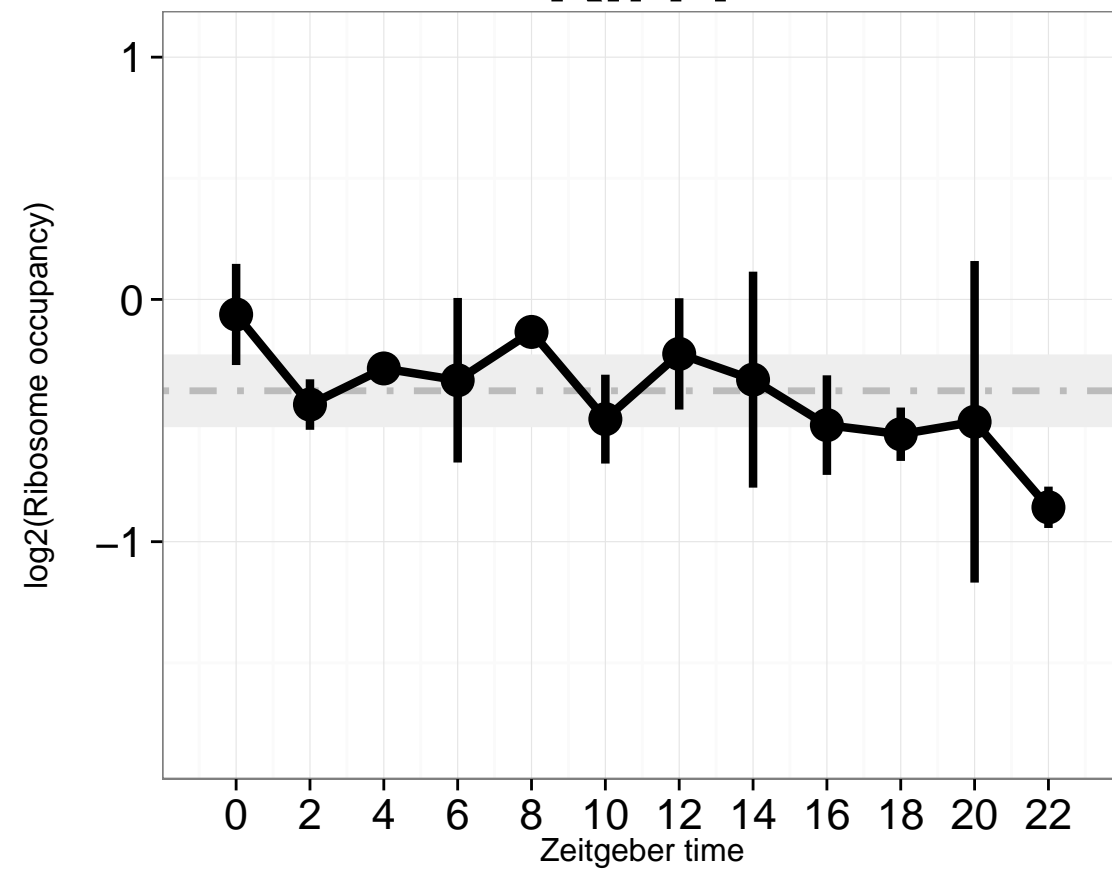

Supplement: Supplementary file 1894 [file 1]

# Zfp651

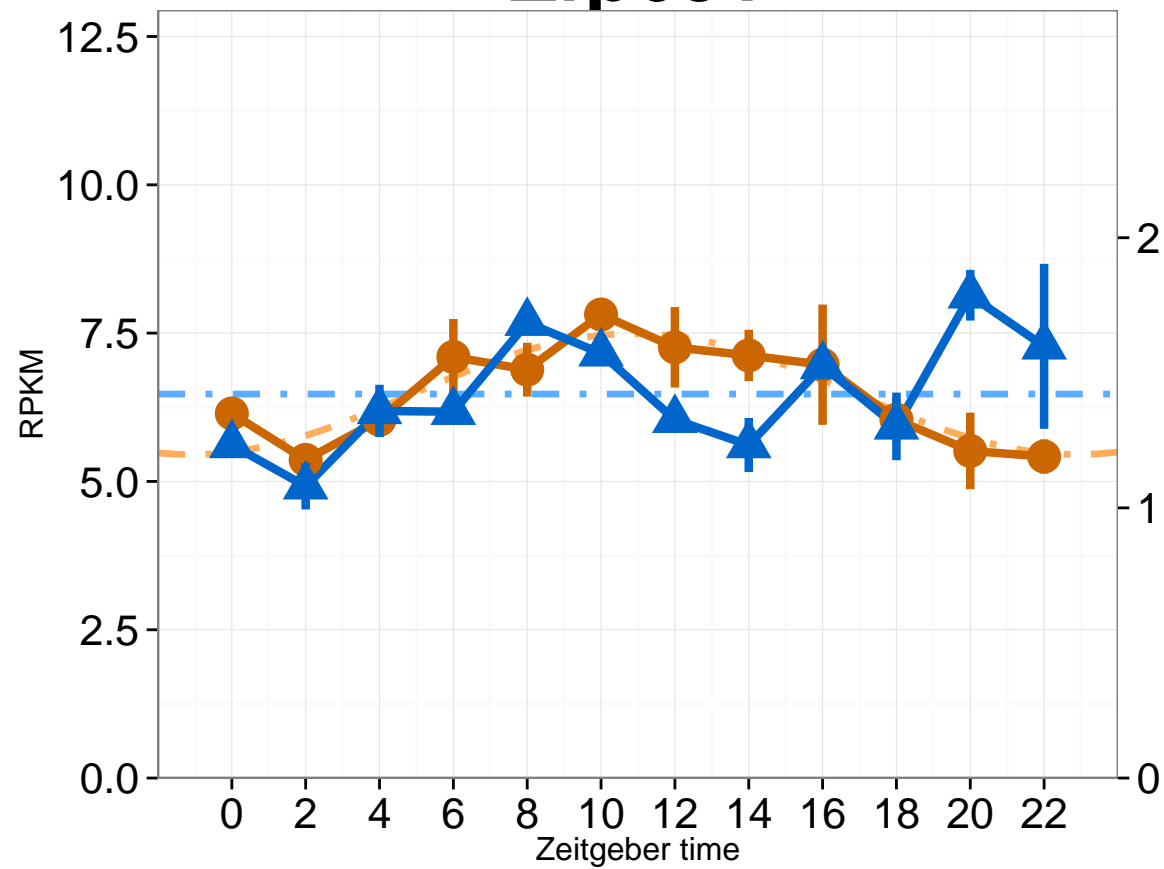

# Zfp651

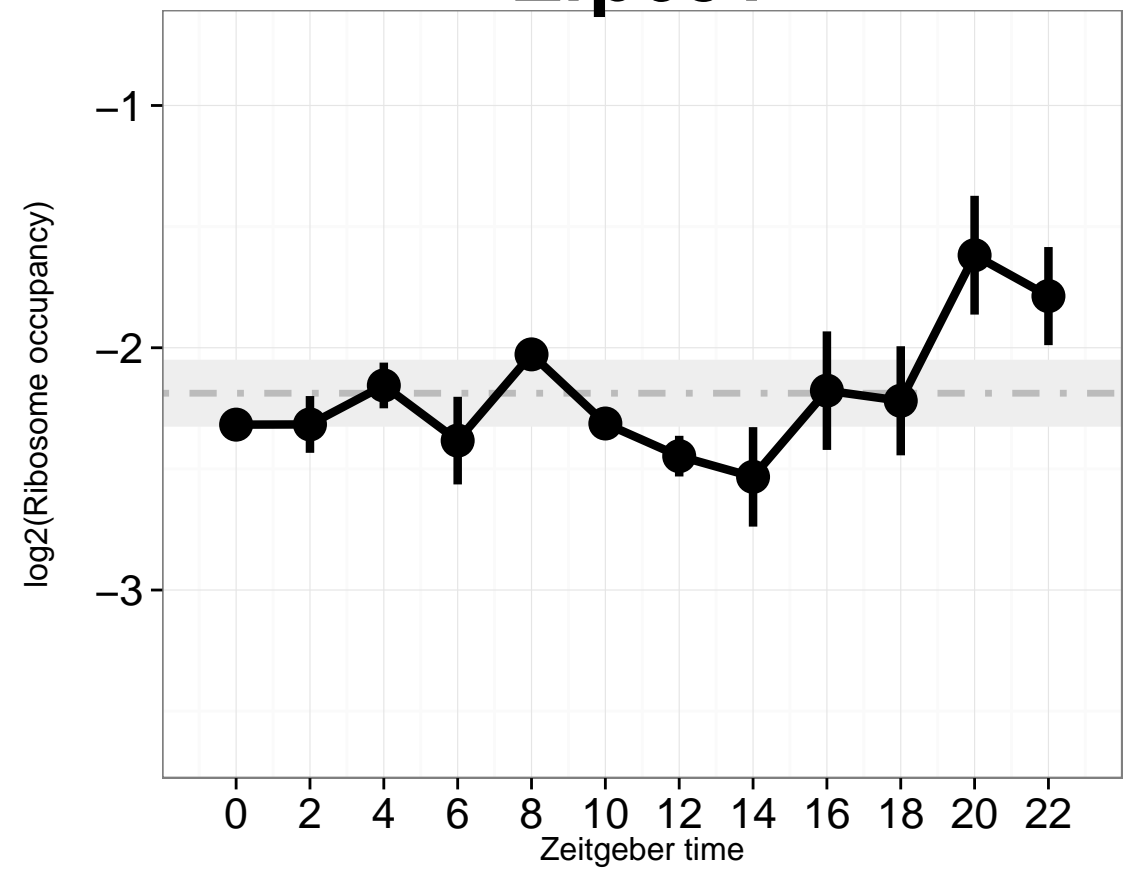

Supplement: Supplementary file 1895 [file 1]

## Prmt3

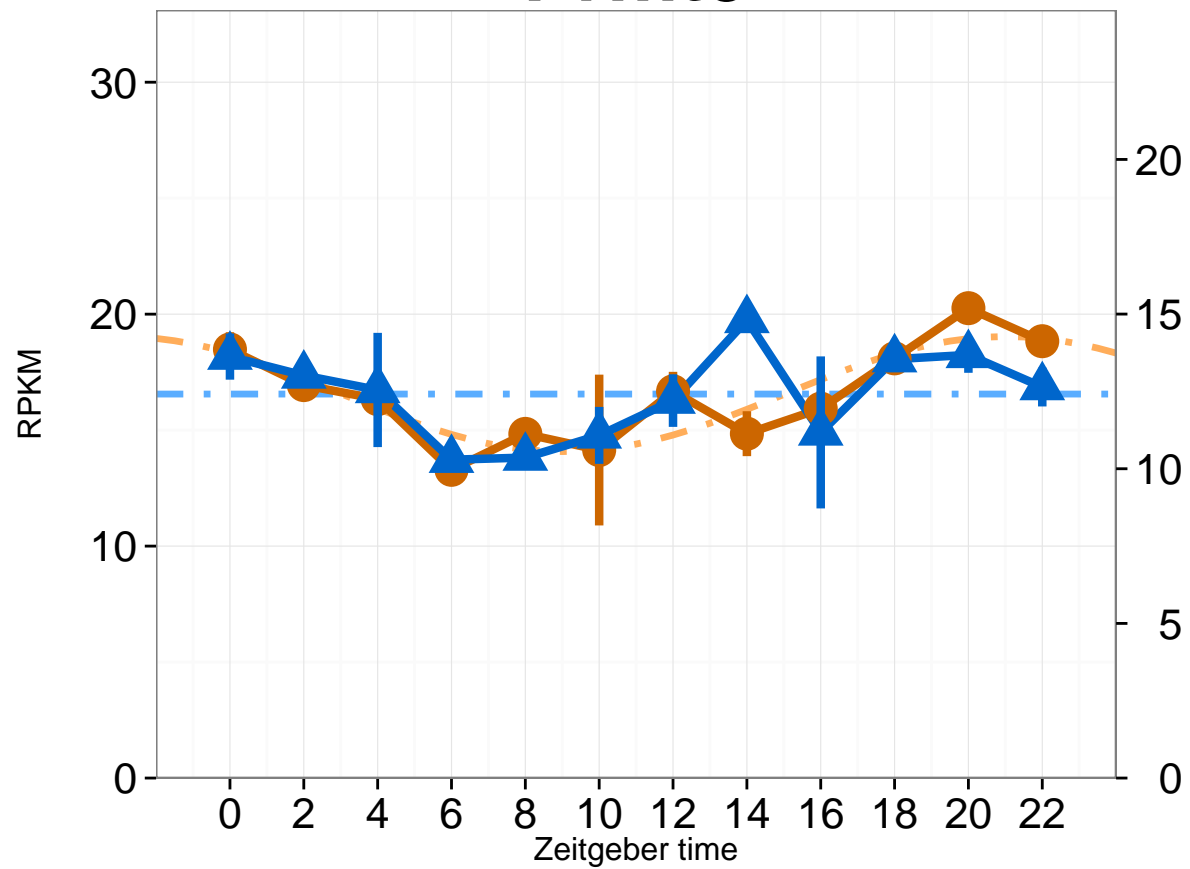

## Prmt3

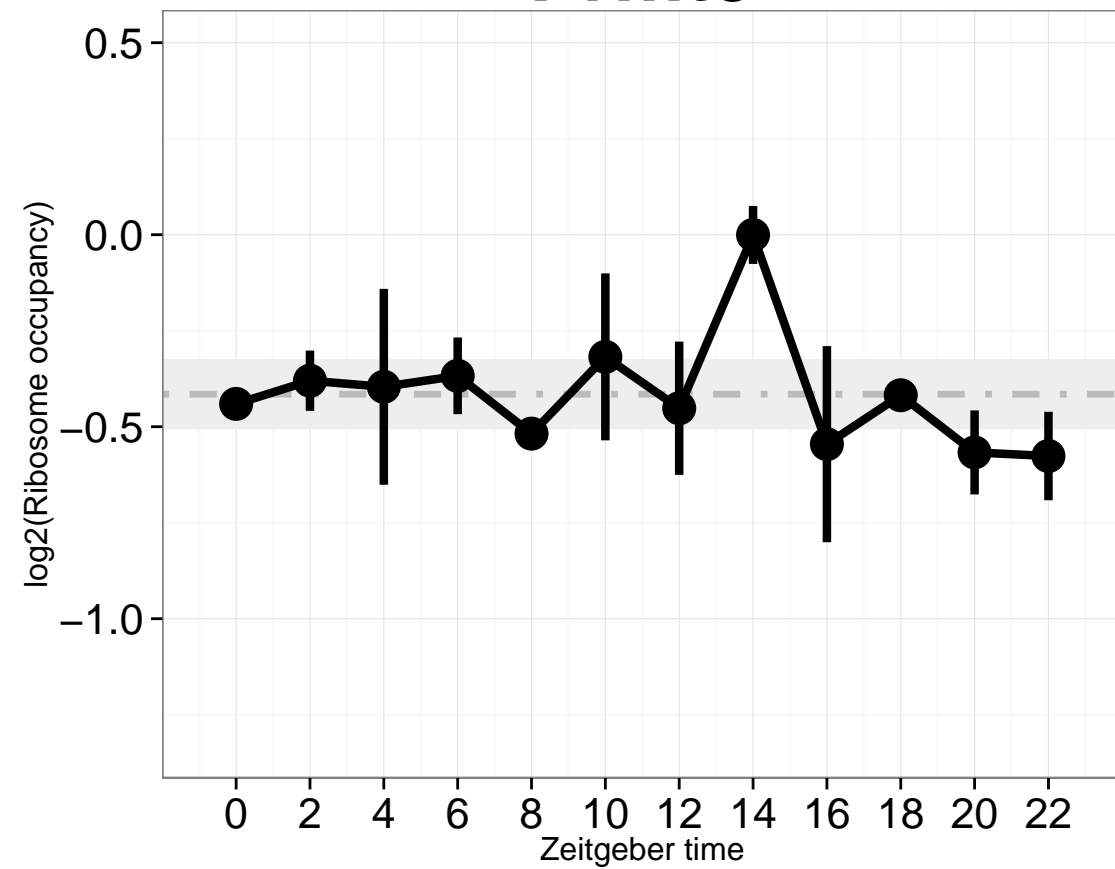

Supplement: Supplementary file 1896 [file 1]

# Lysmd4

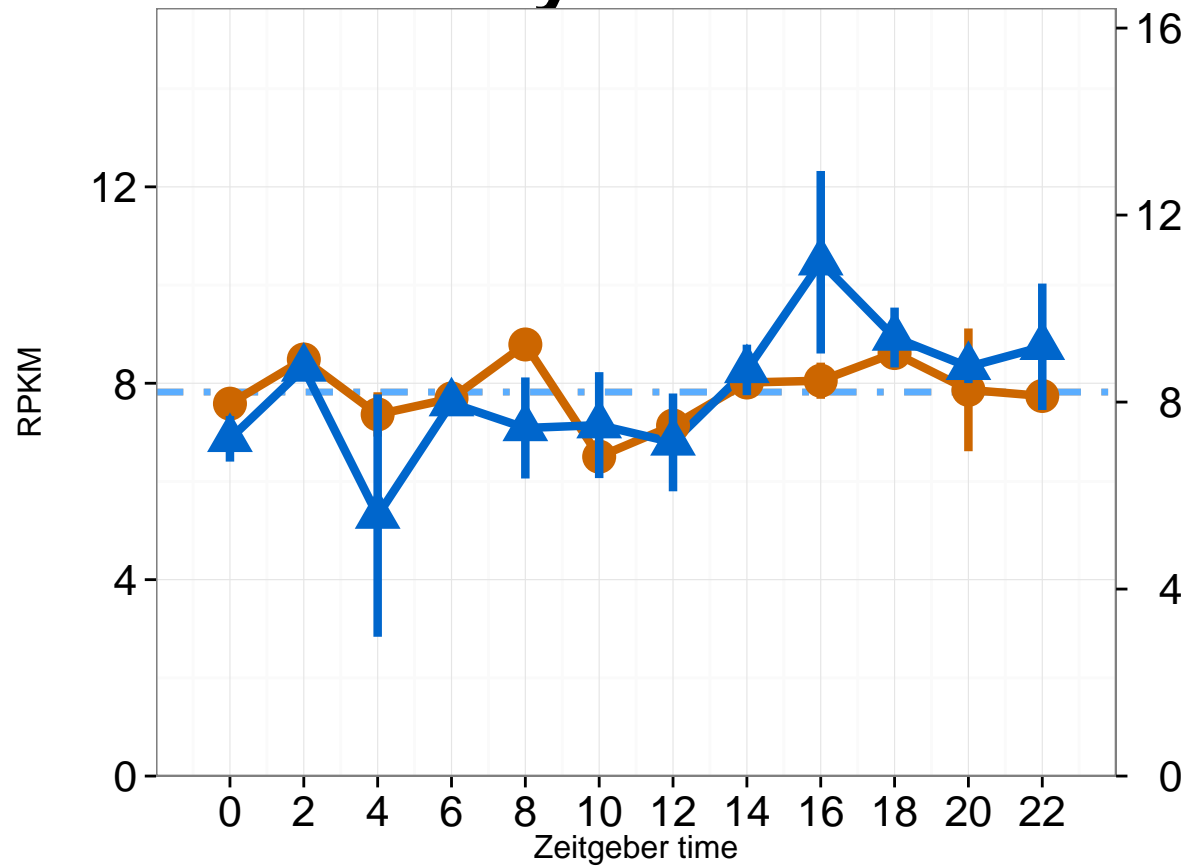

# Lysmd4

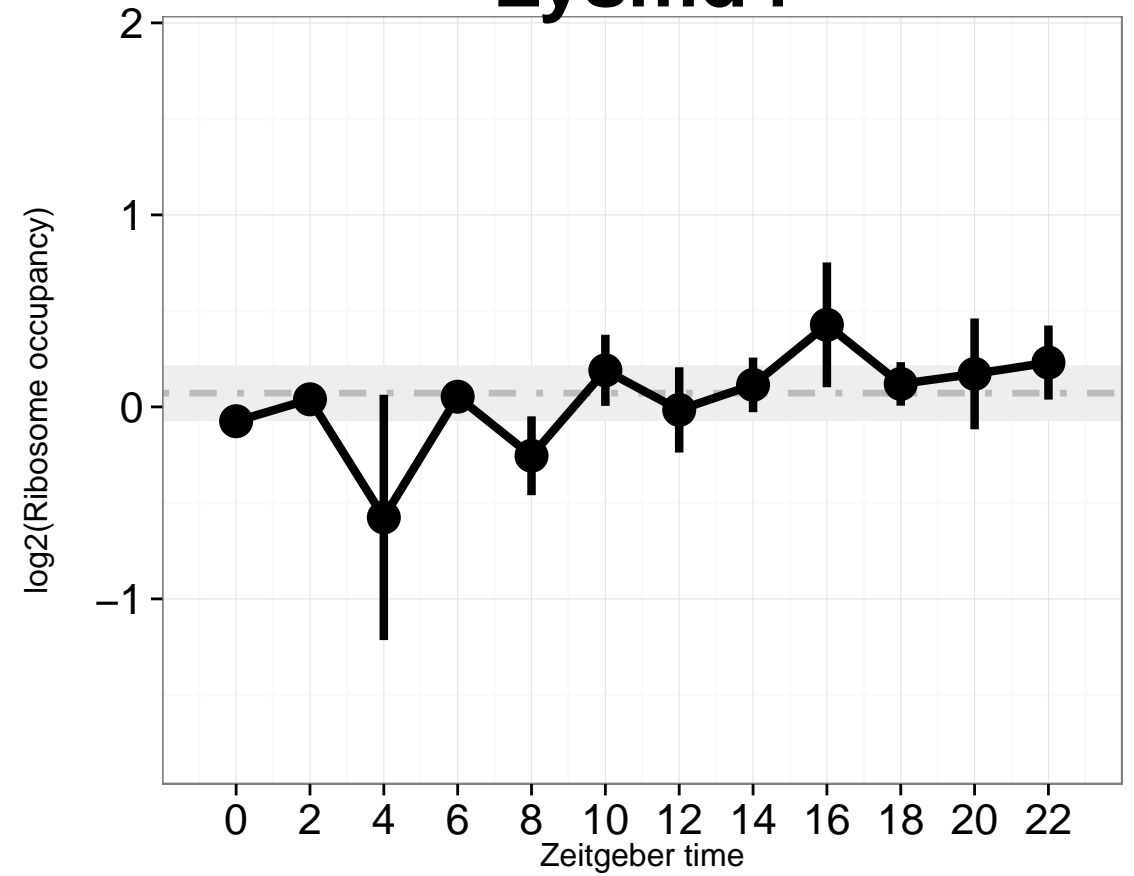

Supplement: Supplementary file 1897 [file 1]

## Cd68

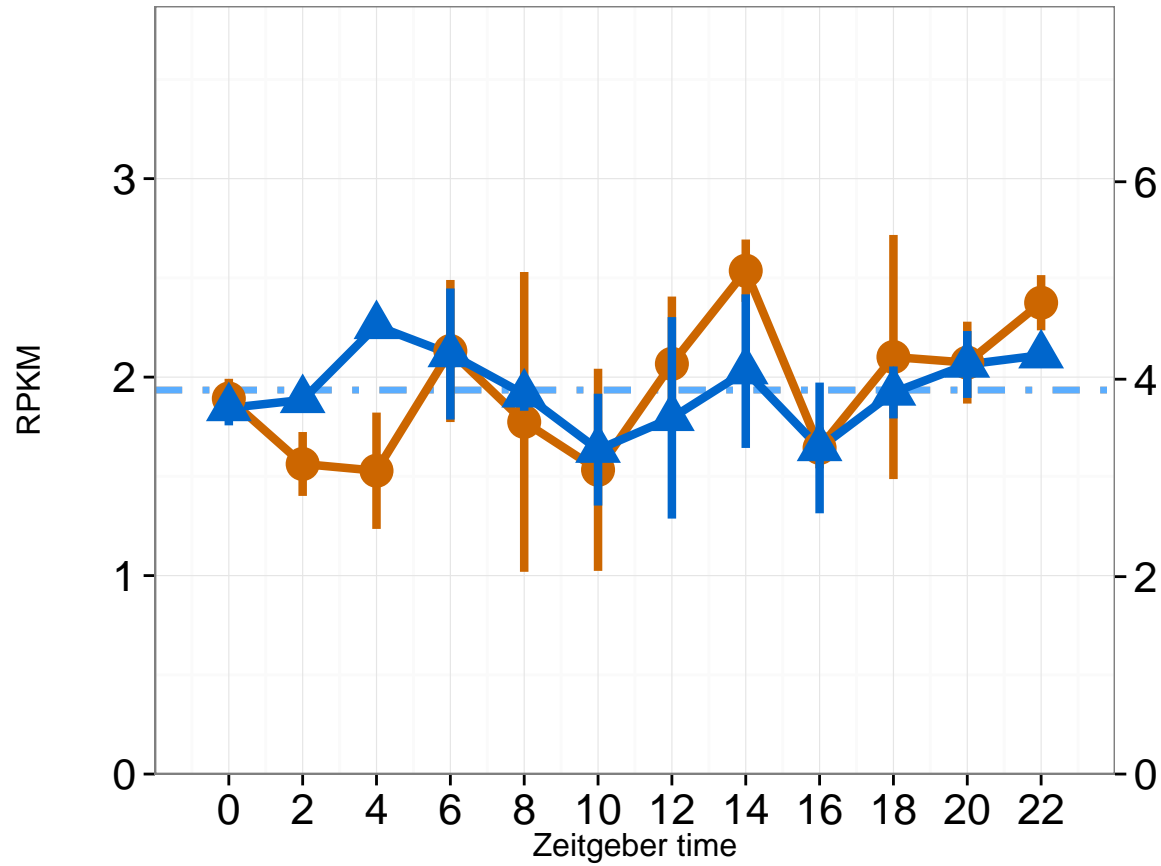

## Cd68

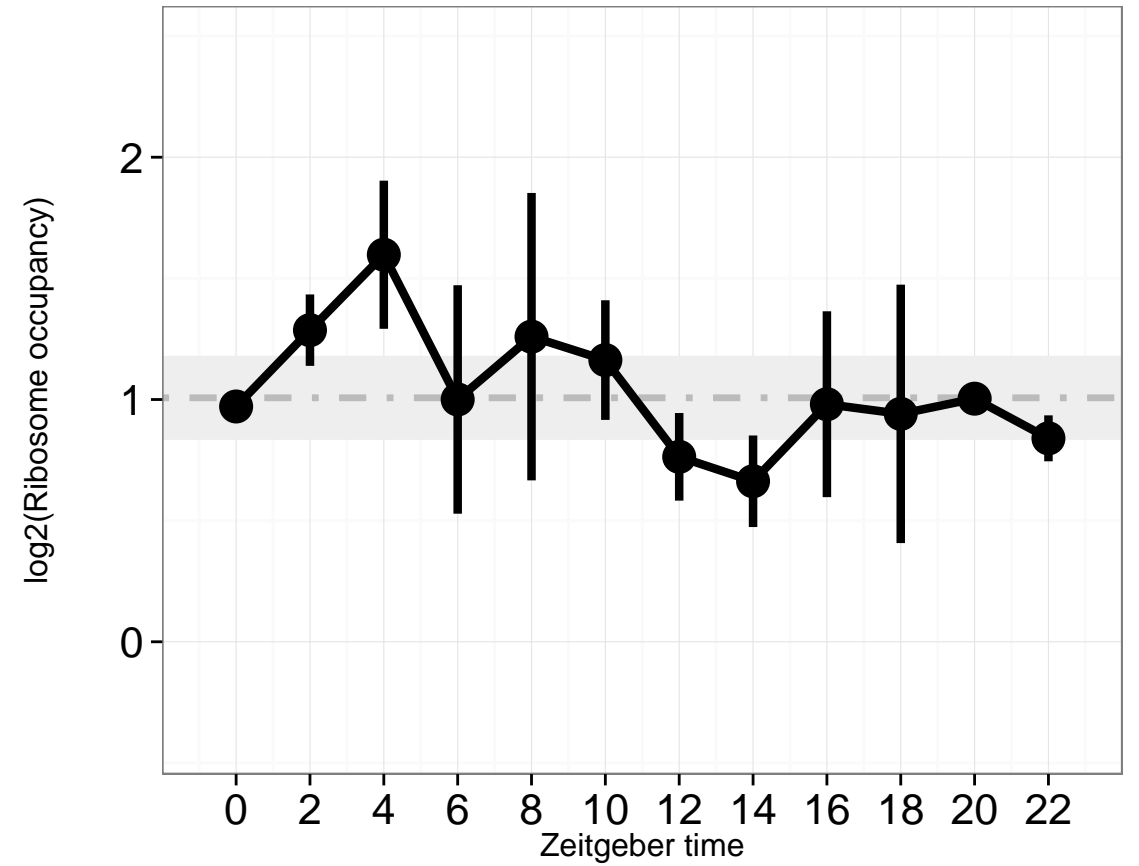

Supplement: Supplementary file 1898 [file 1]

# P2rx4

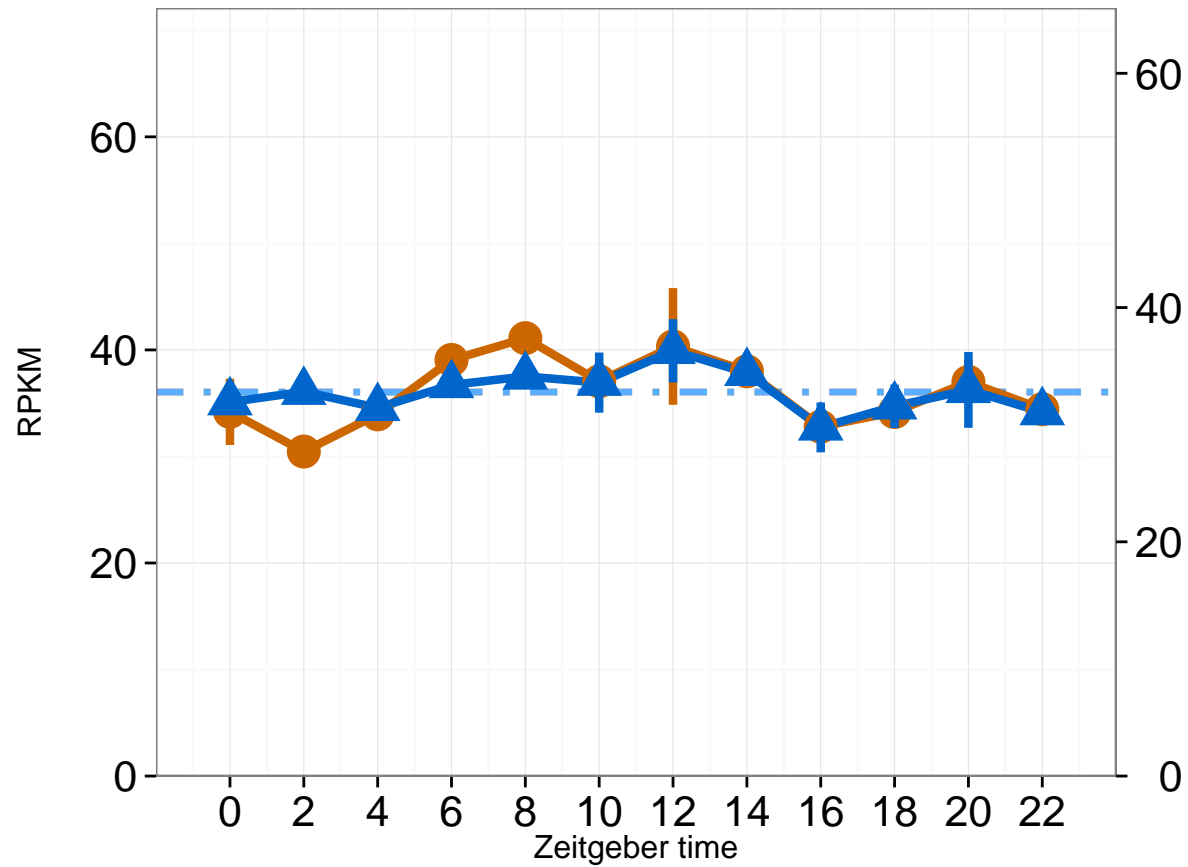

# P2rx4

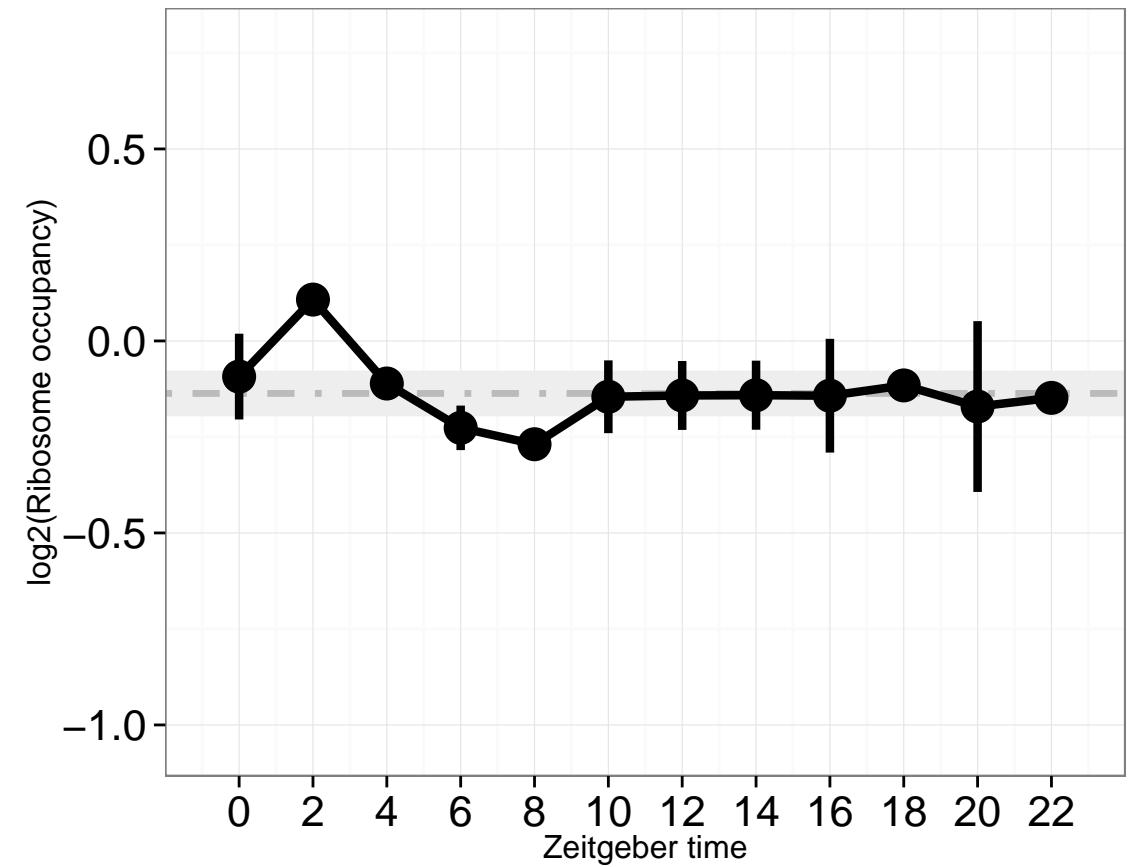

Supplement: Supplementary file 1899 [file 1]

# Astn1

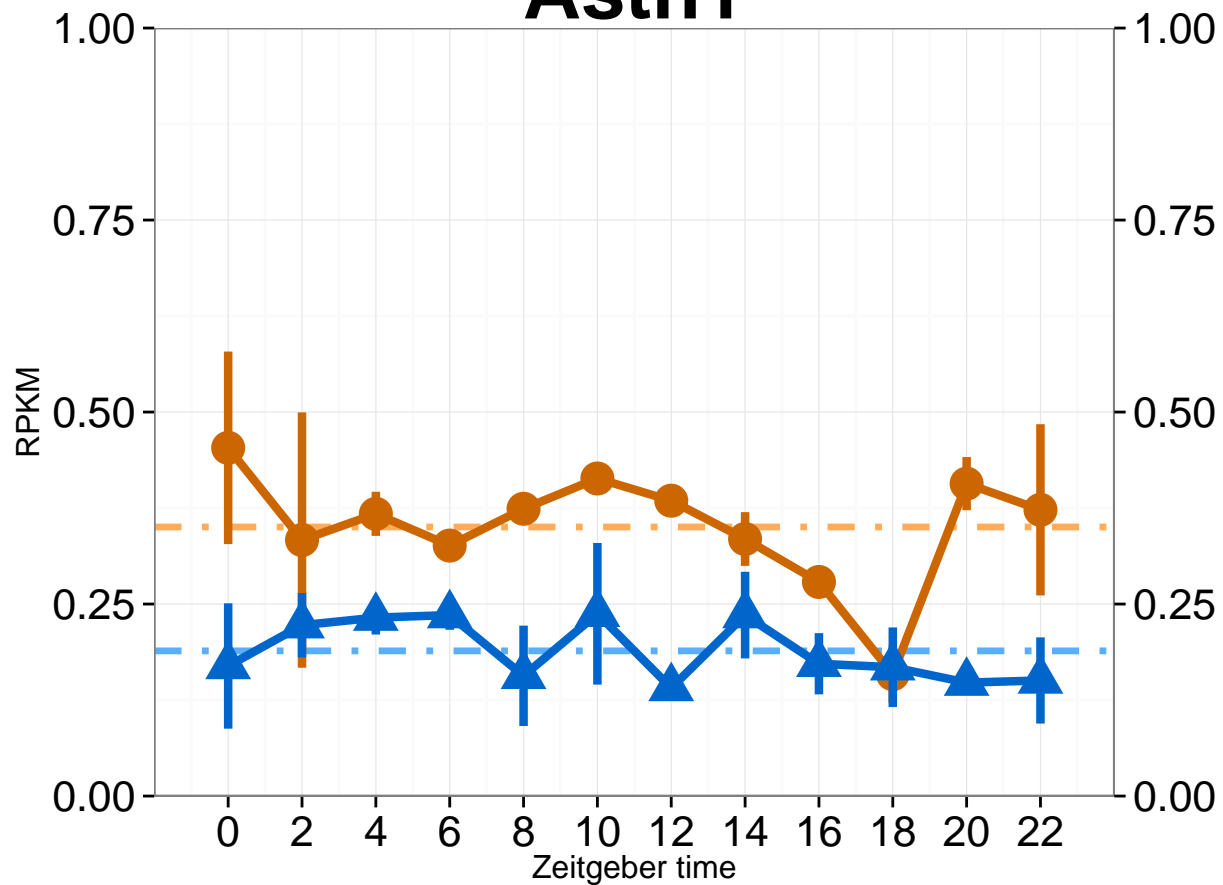

# Astn1

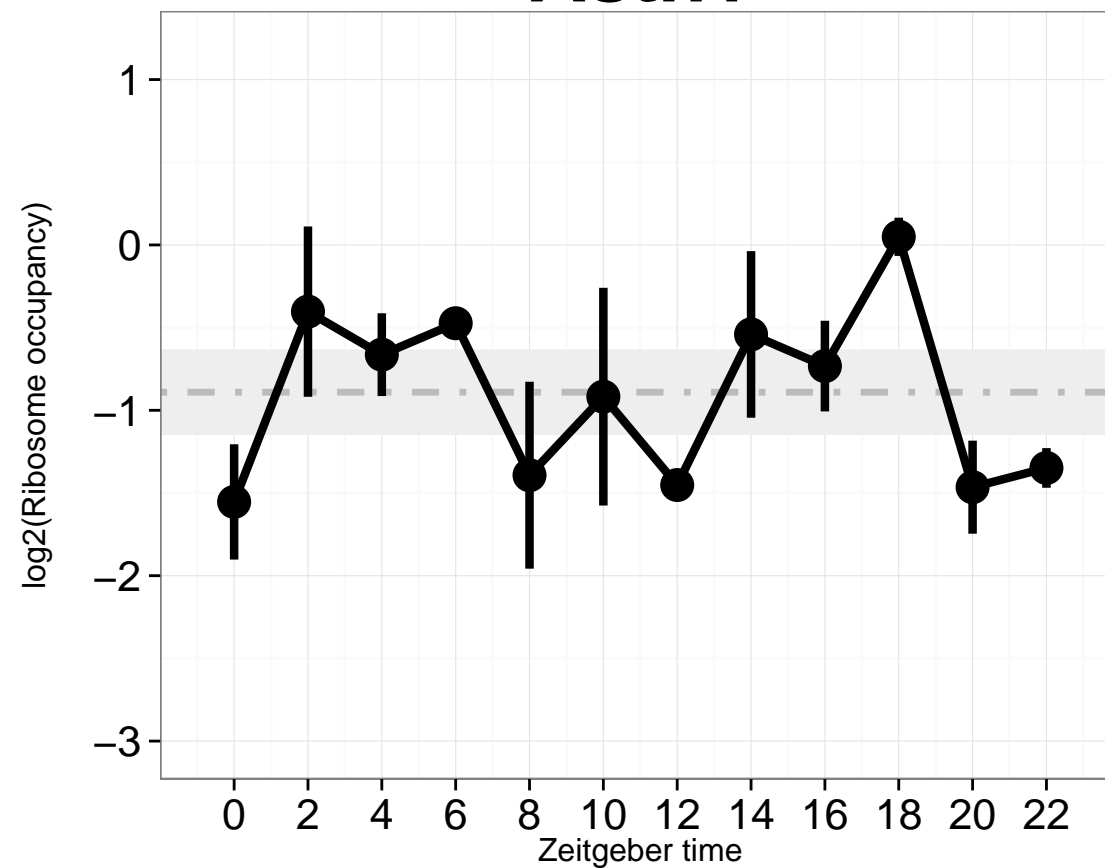

Supplement: Supplementary file 1900 [file 1]

## Btbd9

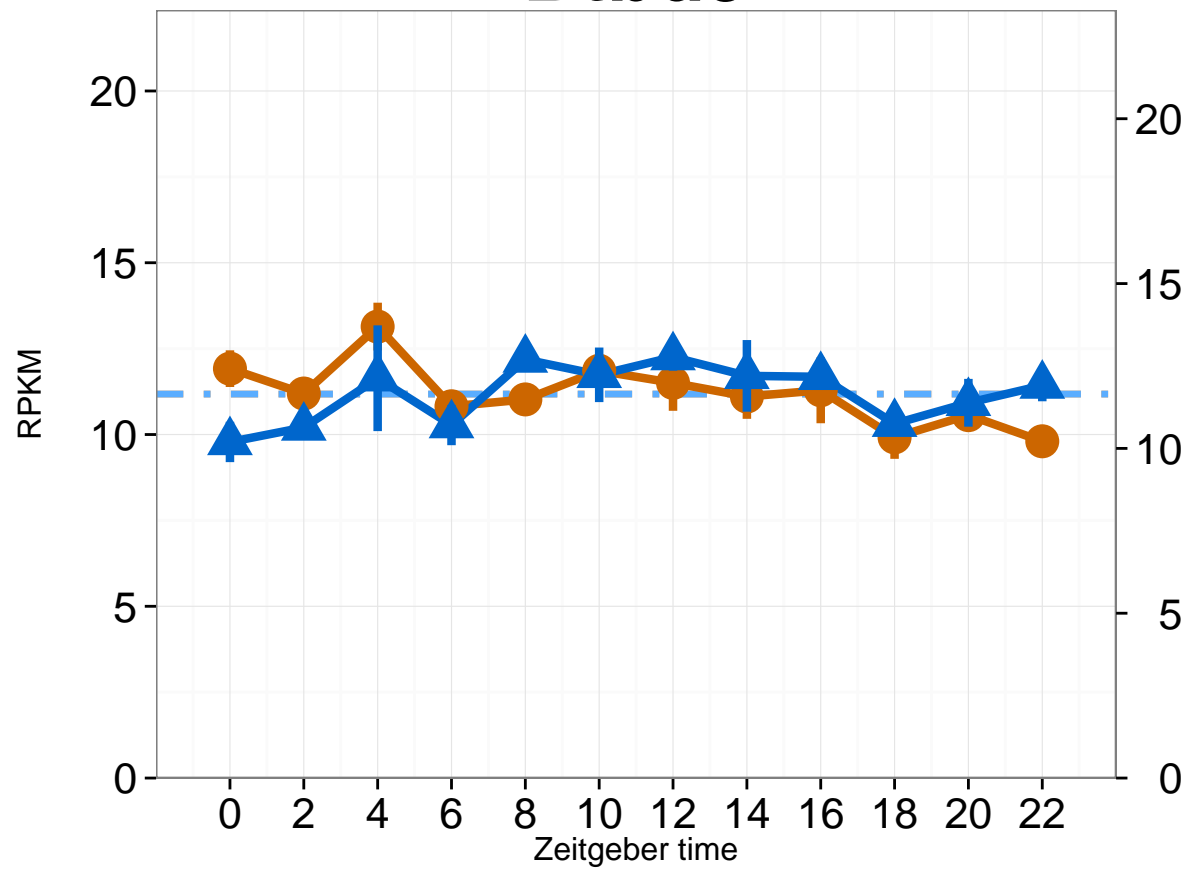

## Btbd9

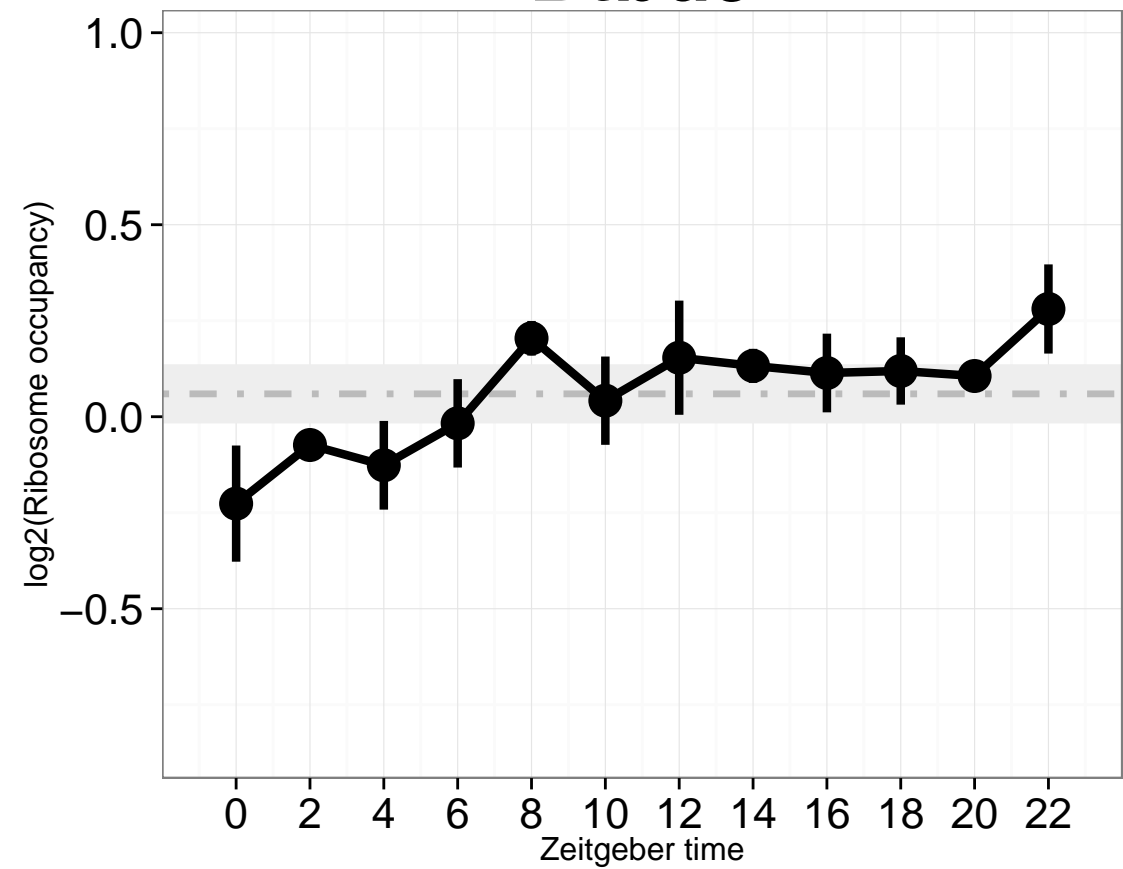

Supplement: Supplementary file 1901 [file 1]

# B230322F03Rik

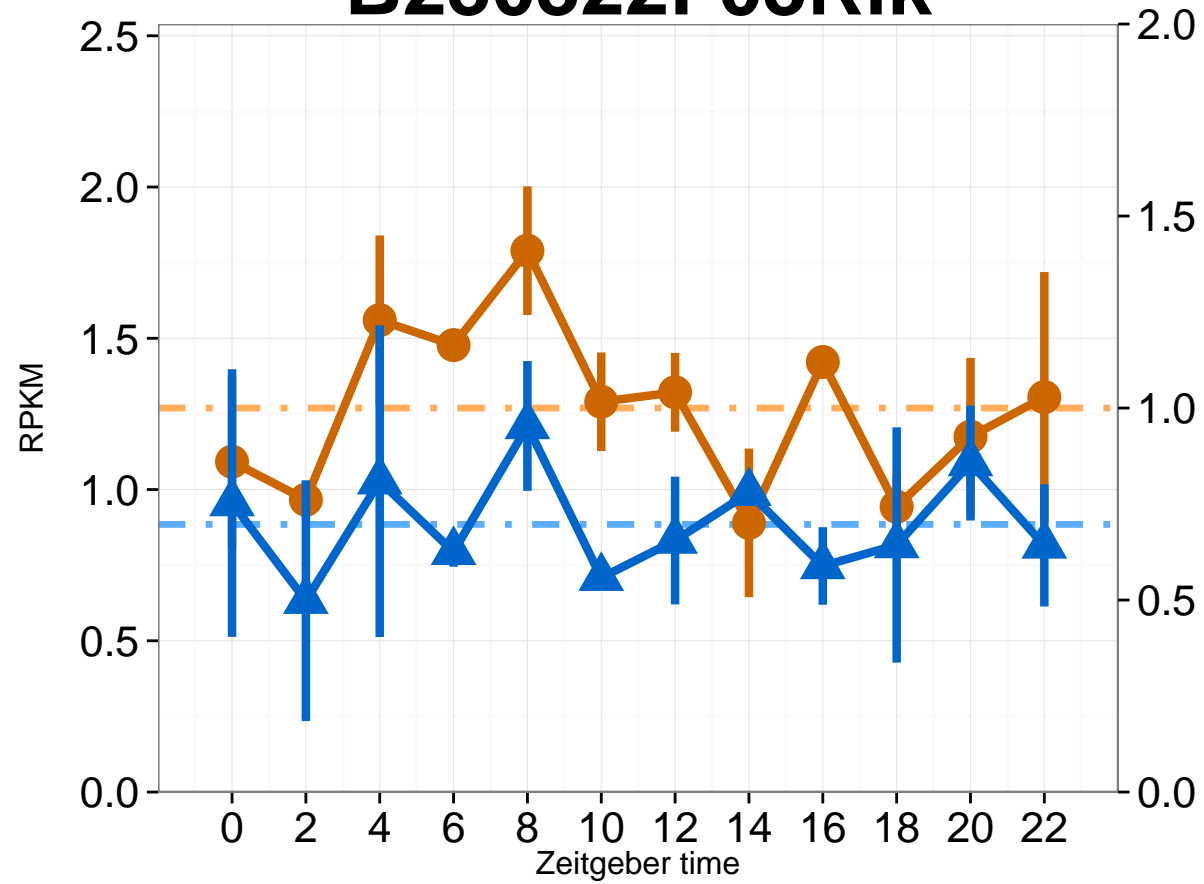

# B230322F03Rik

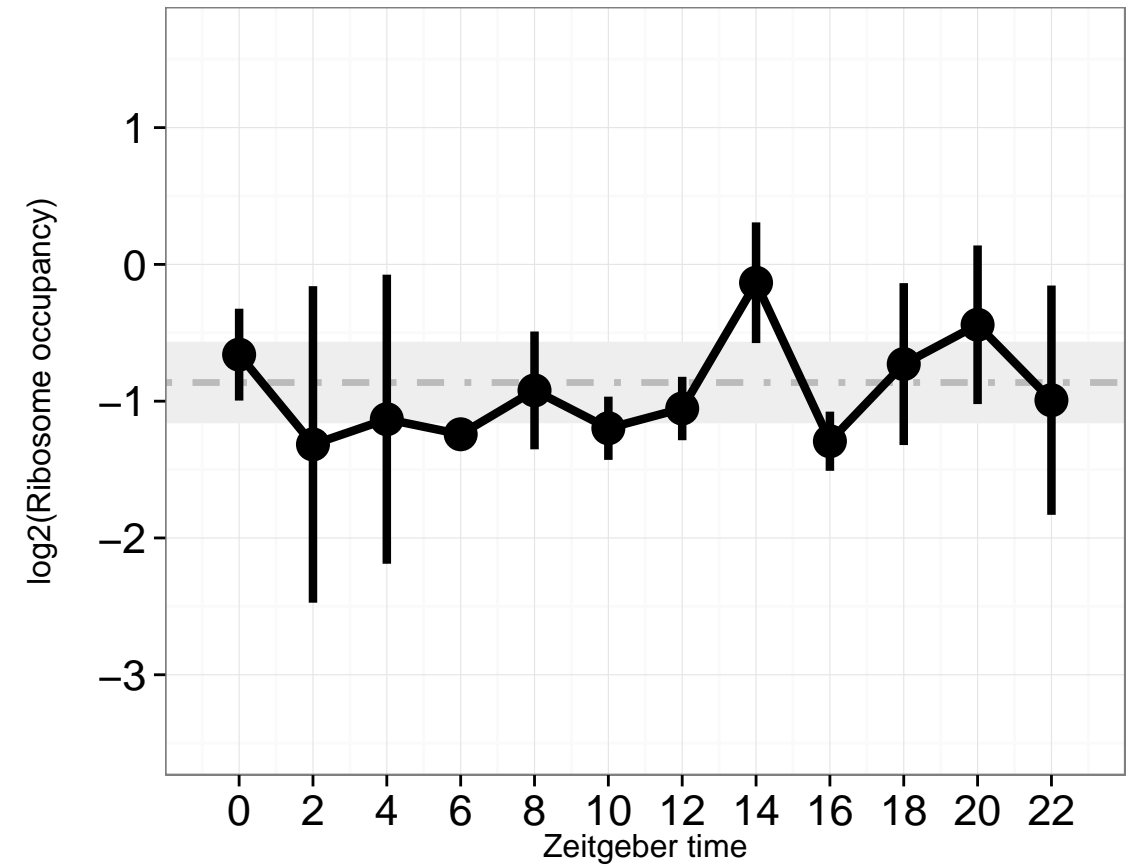

Supplement: Supplementary file 1902 [file 1]

# Zfp784

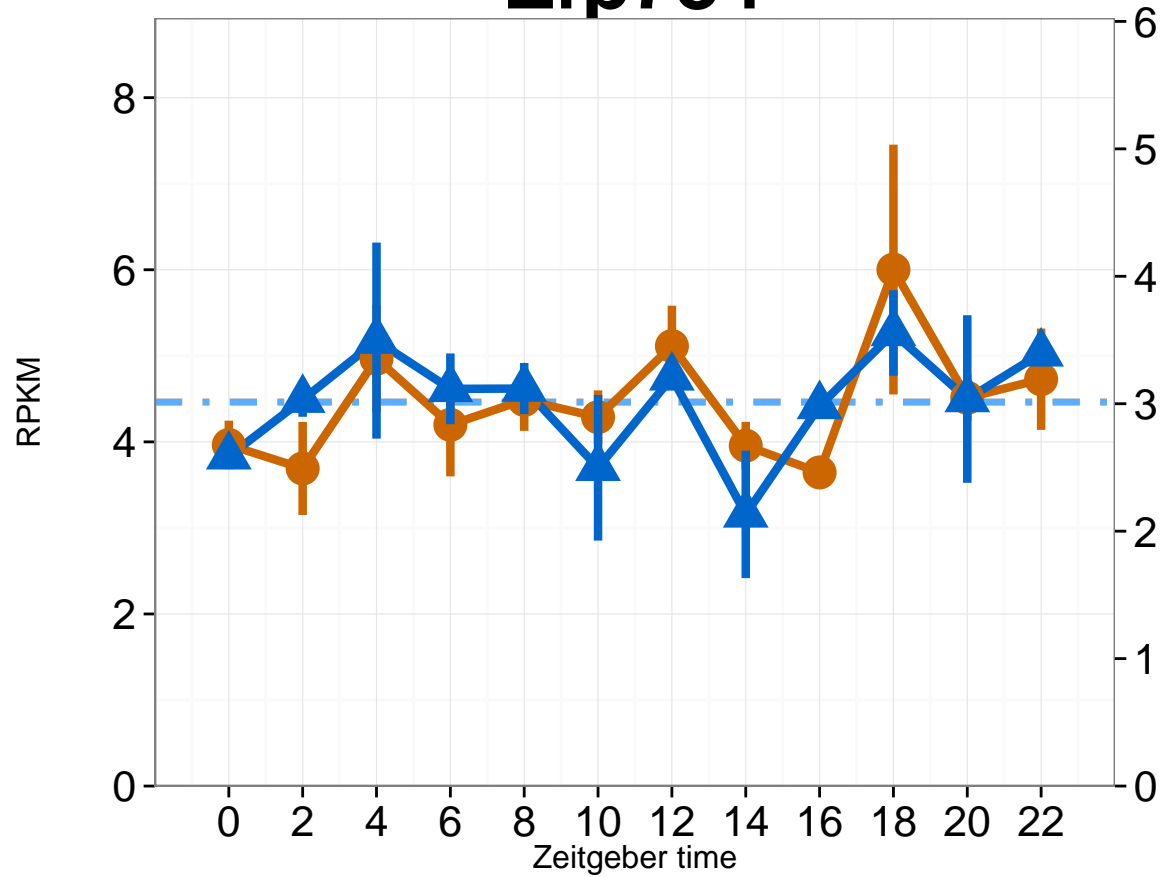

# Zfp784

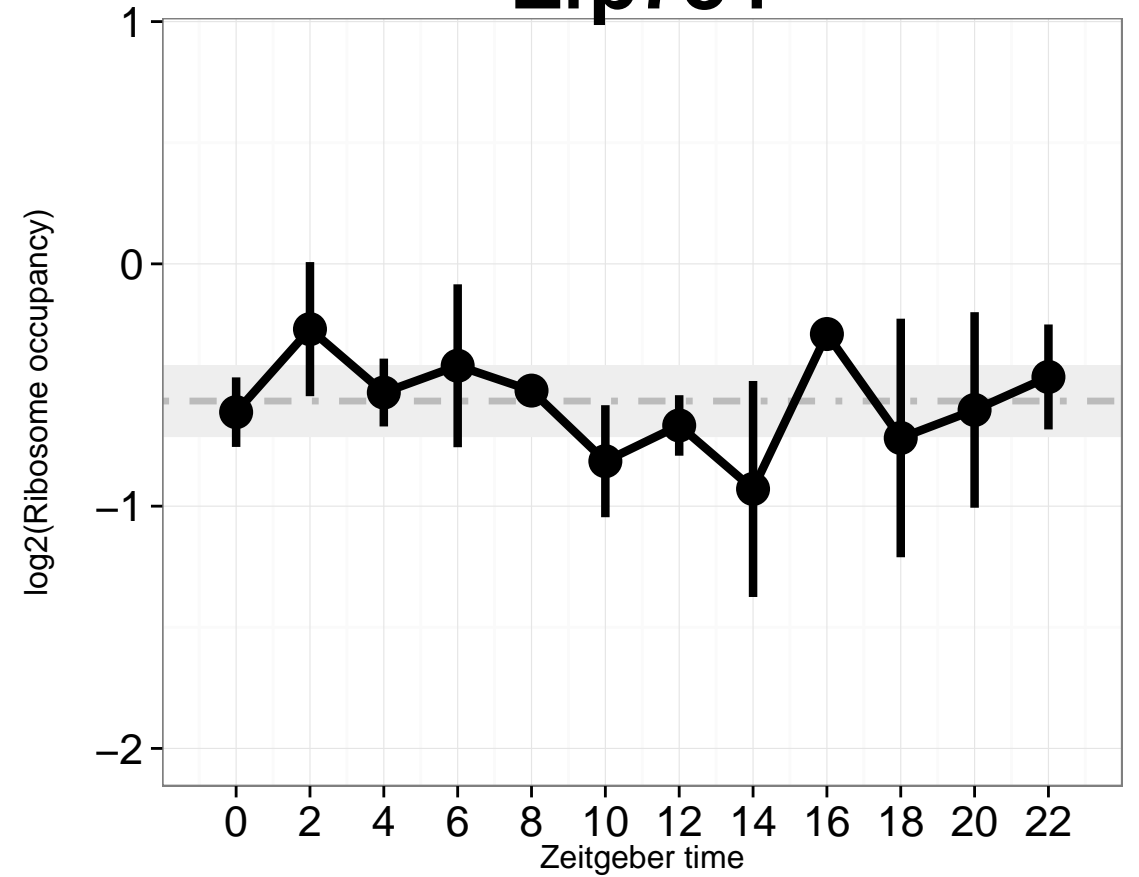

Supplement: Supplementary file 1903 [file 1]

## Lmo4

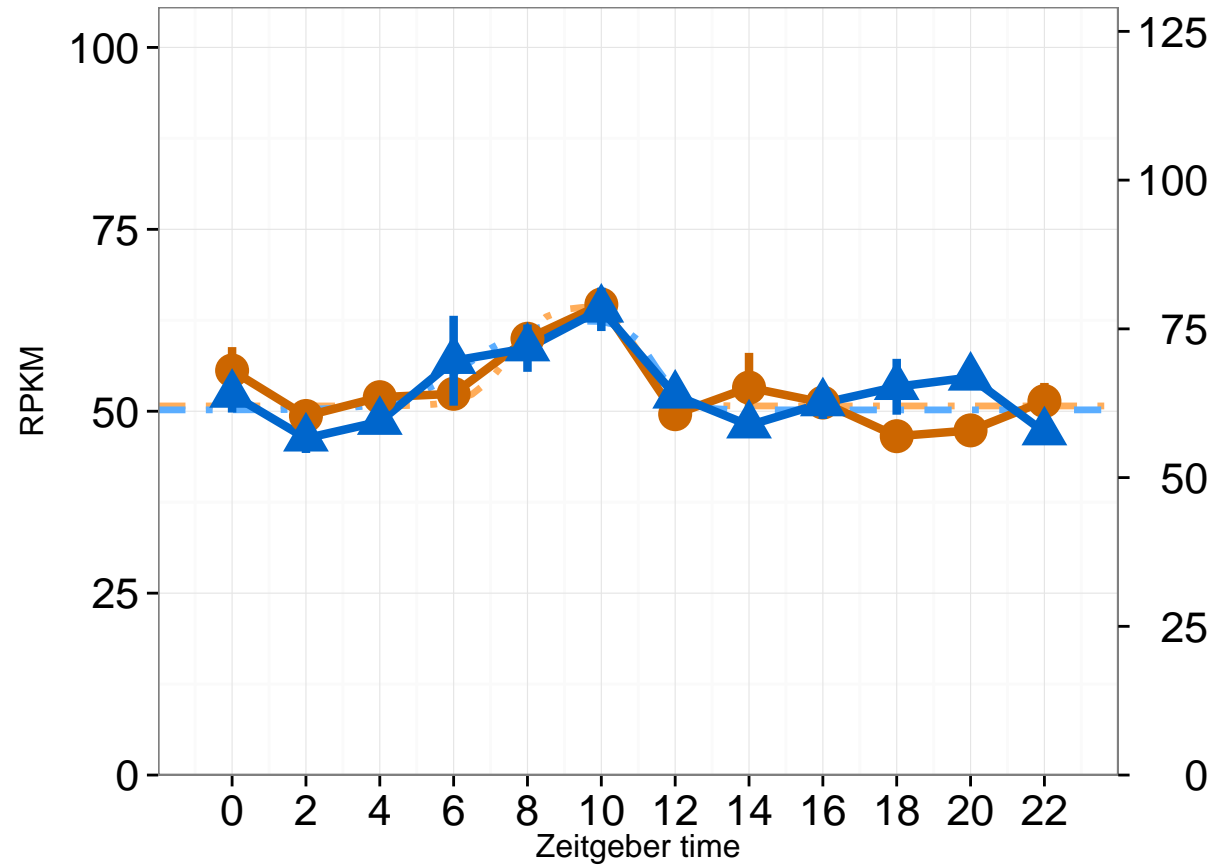

## Lmo4

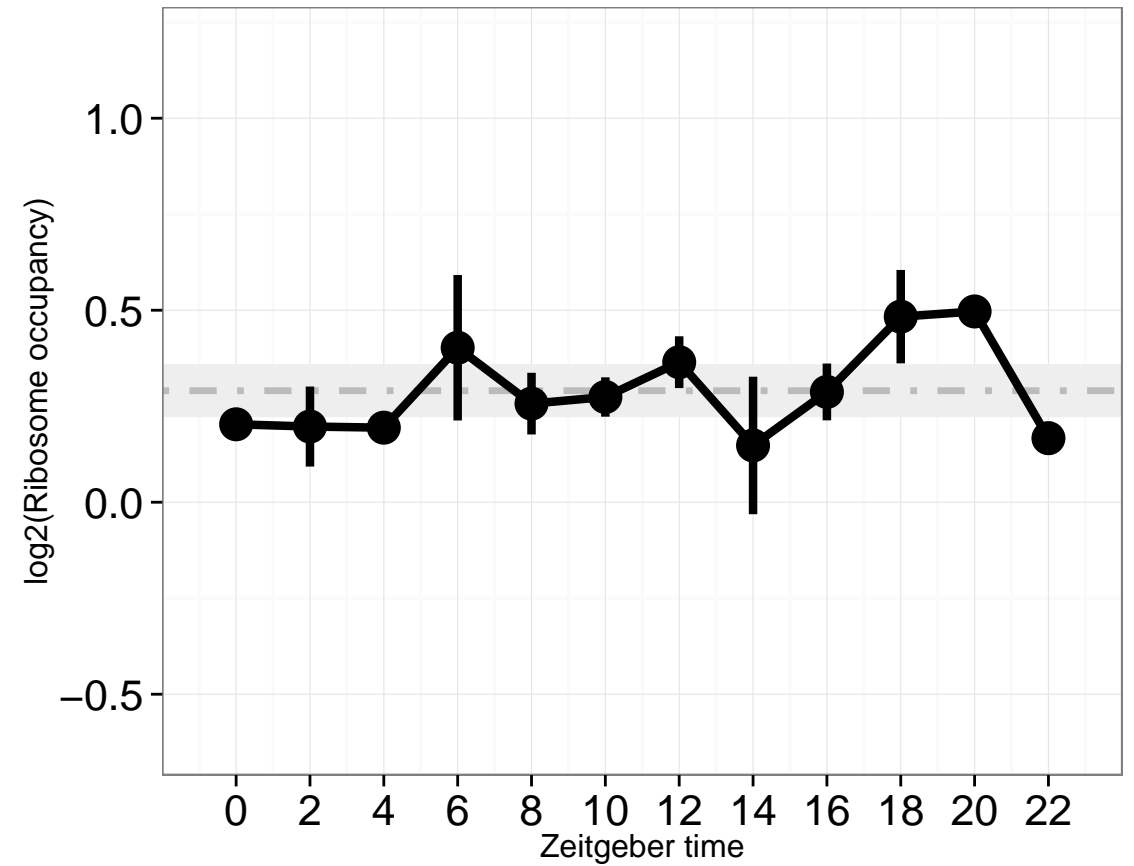

Supplement: Supplementary file 1904 [file 1]

# Myo9b

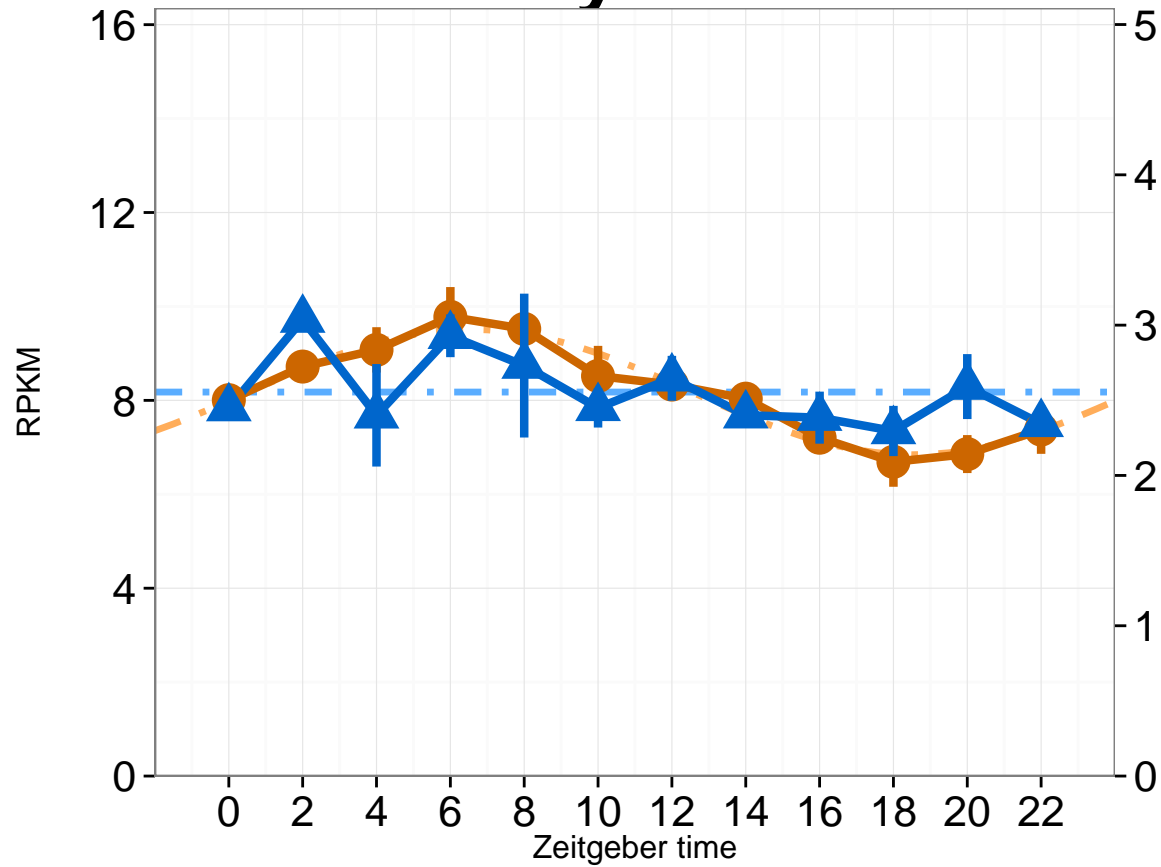

# Myo9b

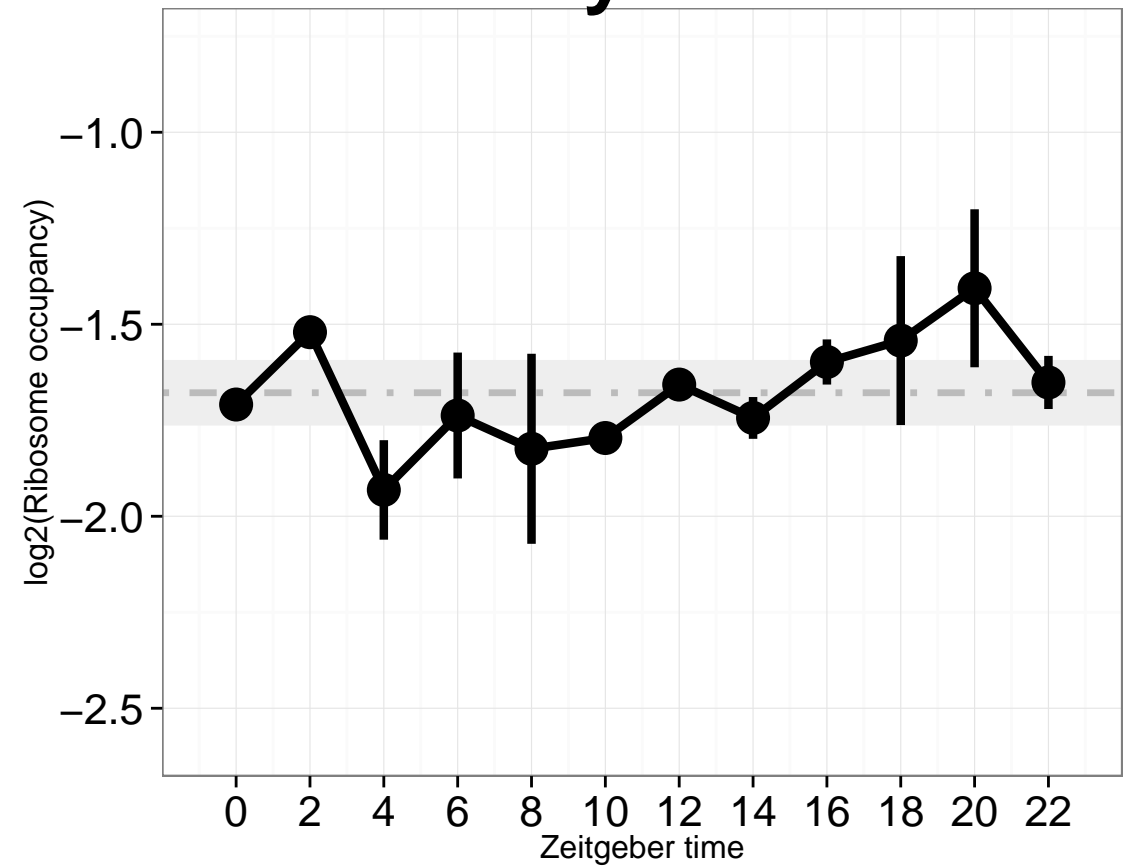

Supplement: Supplementary file 1905 [file 1]

# Efr3a

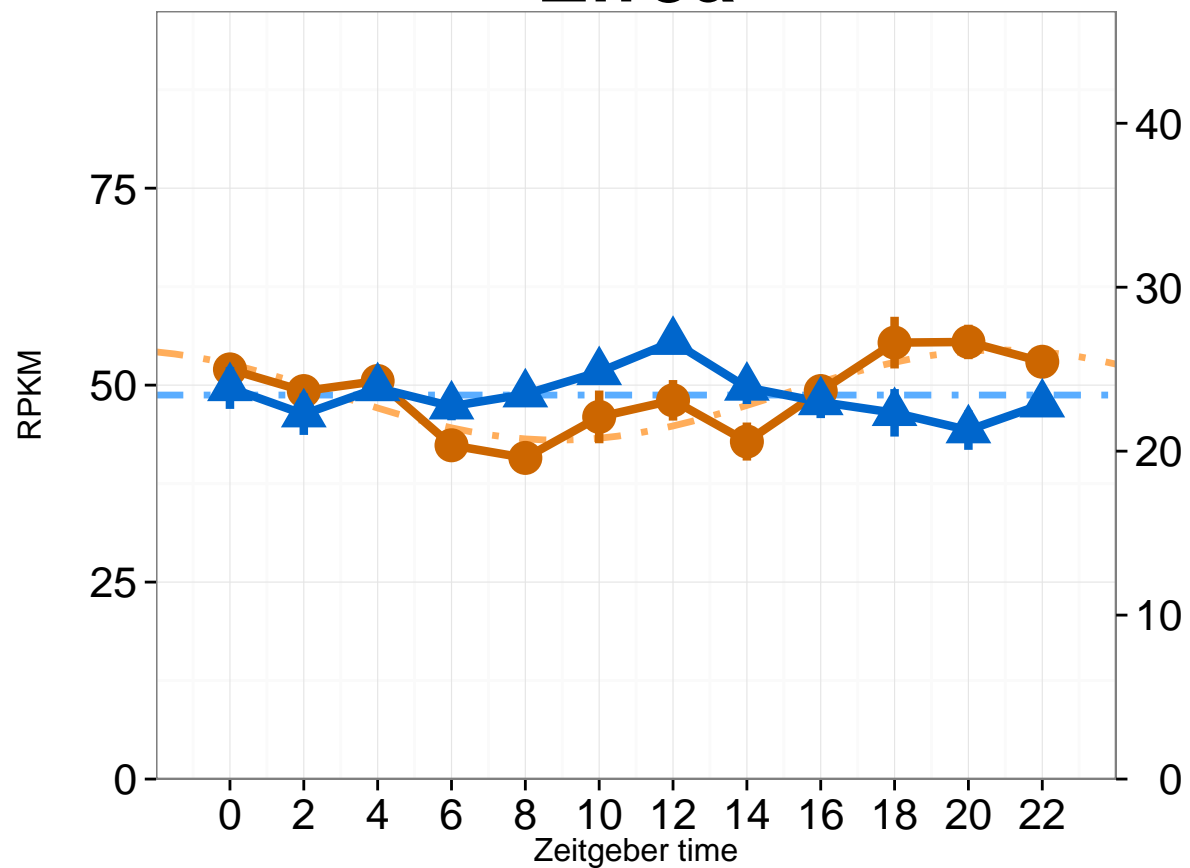

# Efr3a

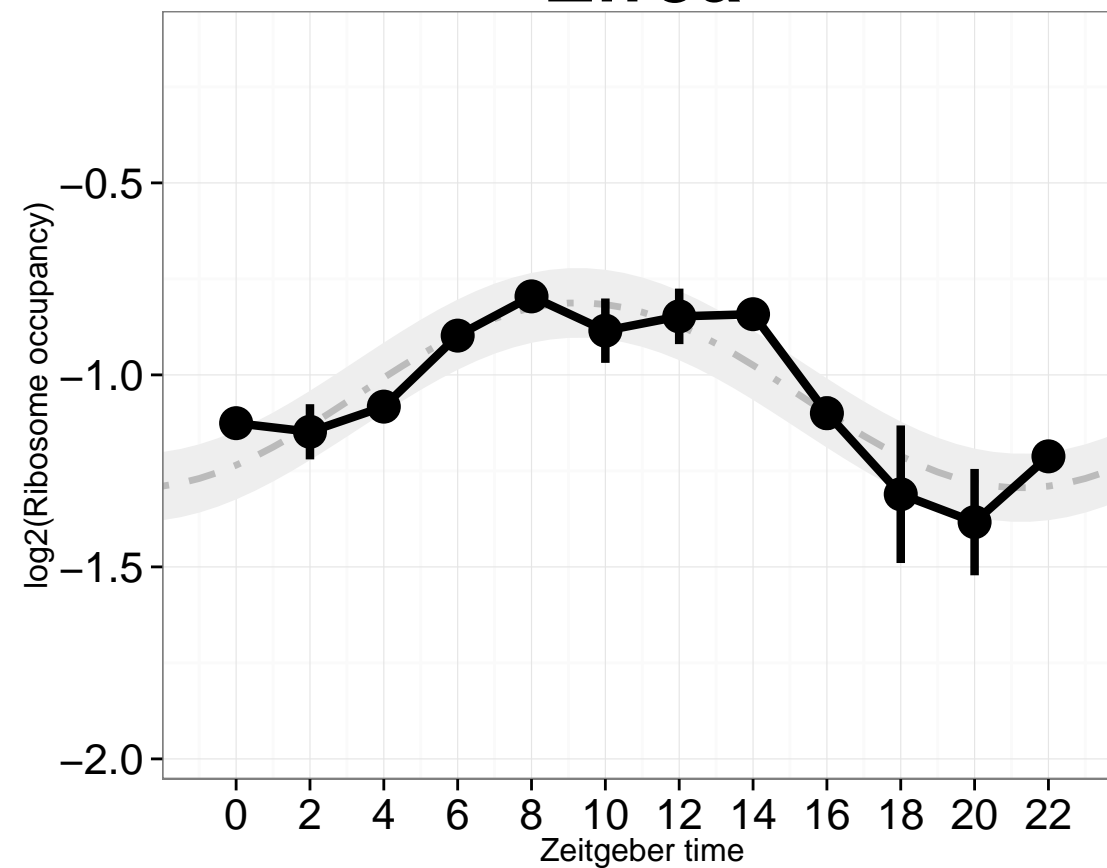

Supplement: Supplementary file 1906 [file 1]

# Ikzf4

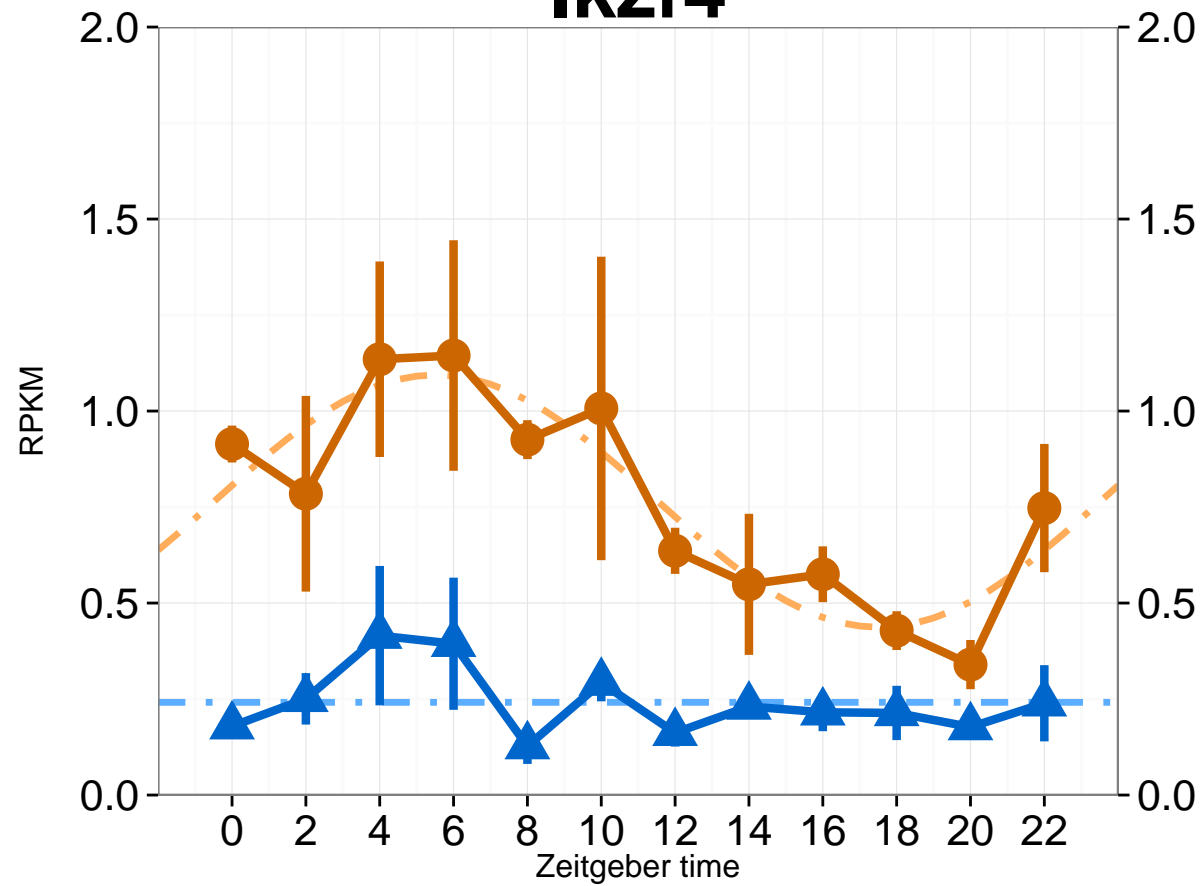

# Ikzf4

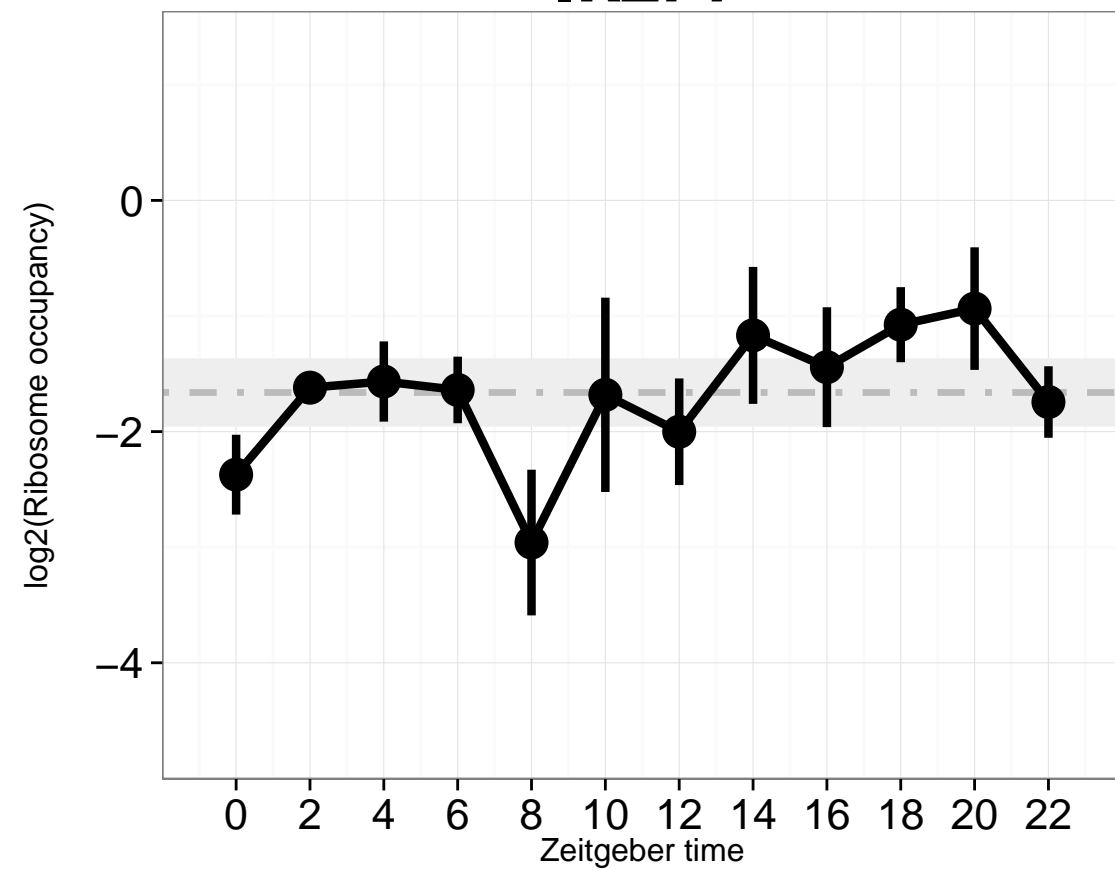

Supplement: Supplementary file 1907 [file 1]
