# Supplementary material (part 20 of 133)
Source: publisher figshare collection journal article supplement (https://springernature.figshare.com/articles/dataset/_/4903193)

## Lgals1

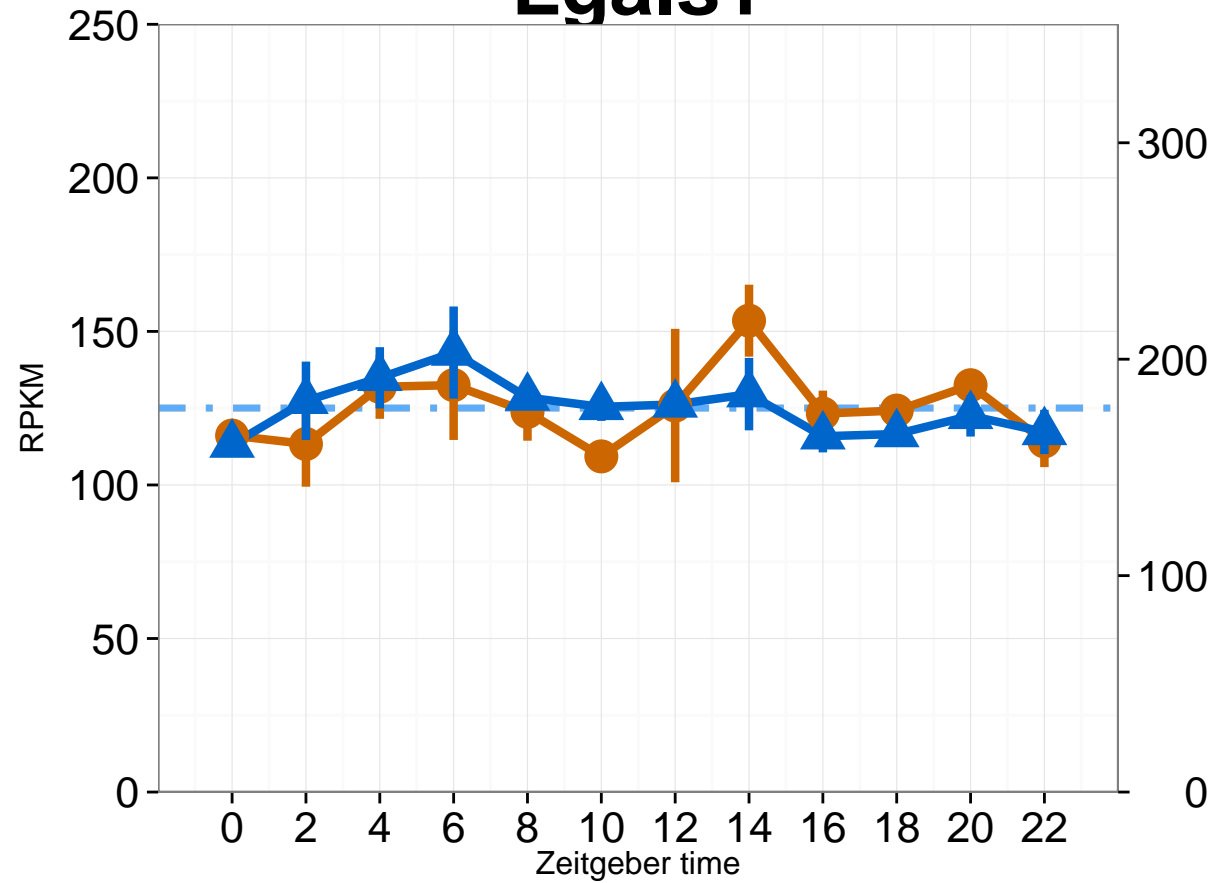

## Lgals1

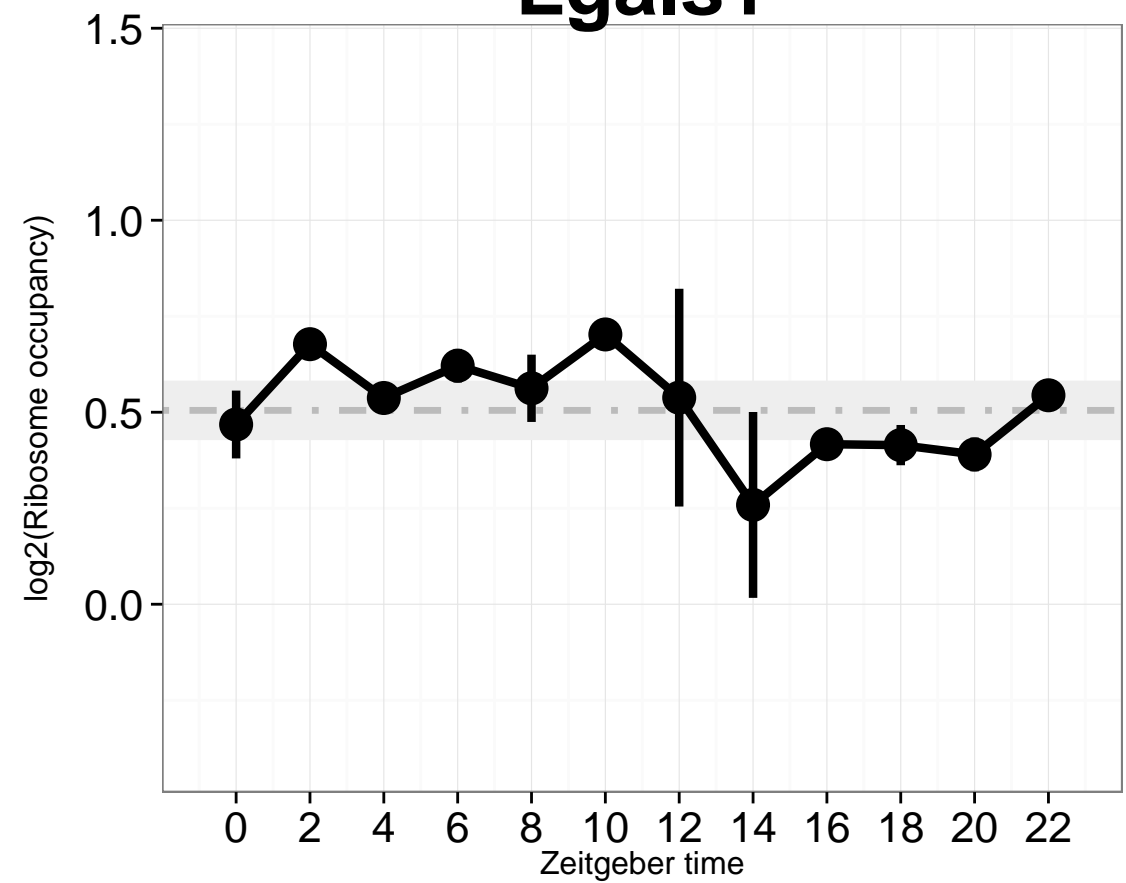

Supplement: Supplementary file 1908 [file 1]

# Ciao1

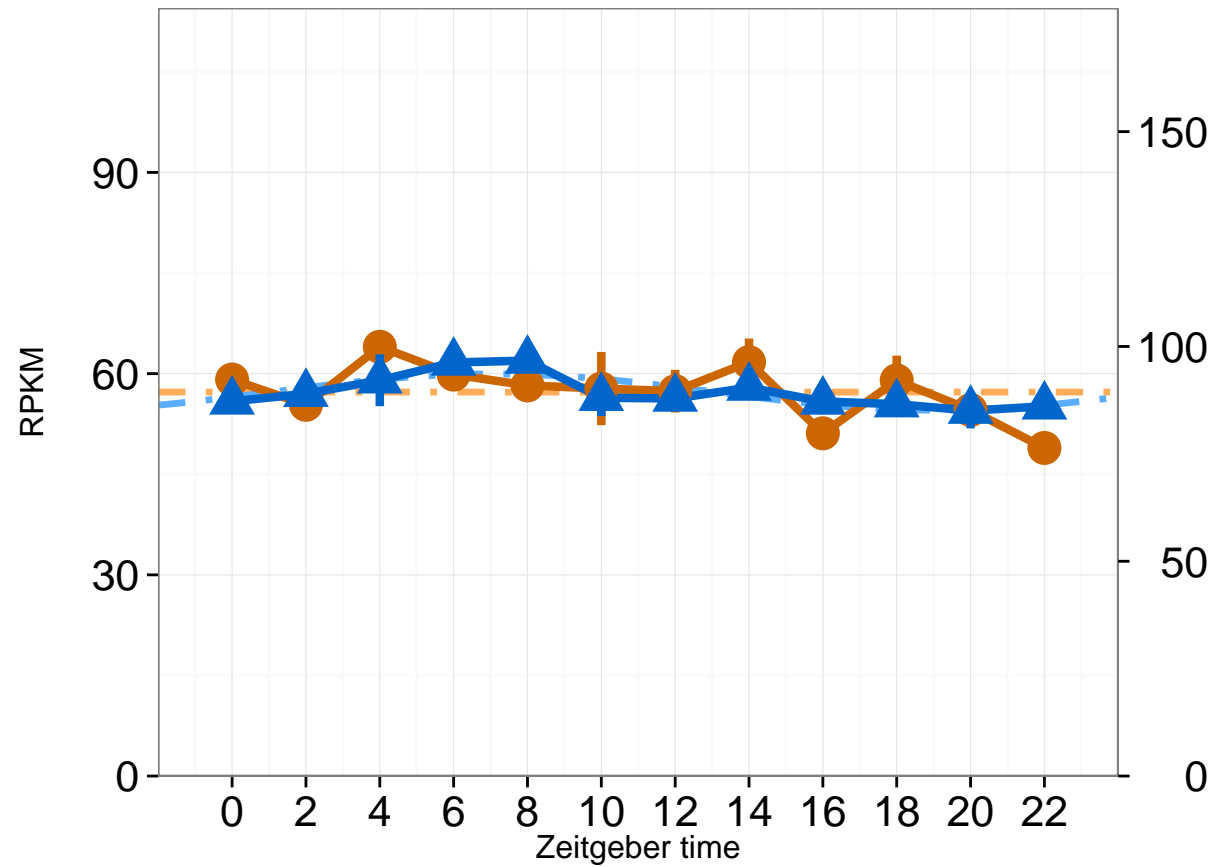

# Ciao1

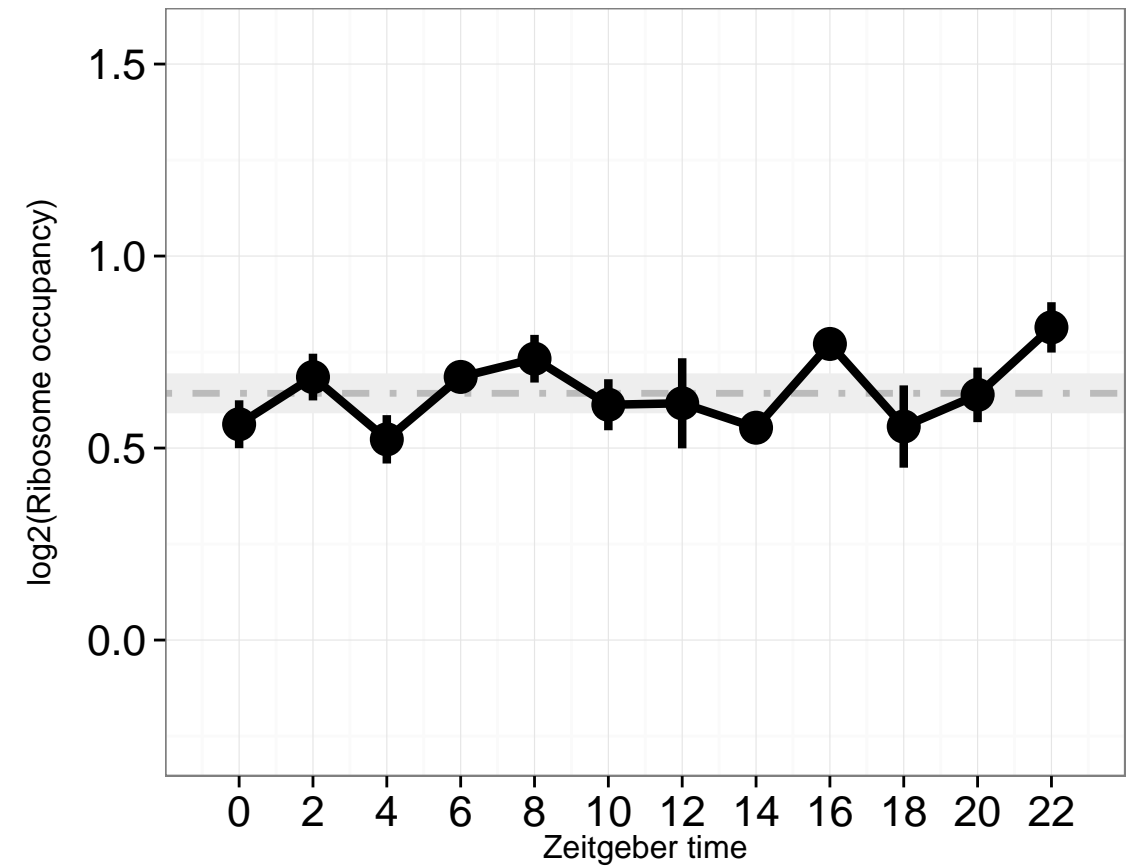

Supplement: Supplementary file 1909 [file 1]

# Atp7a

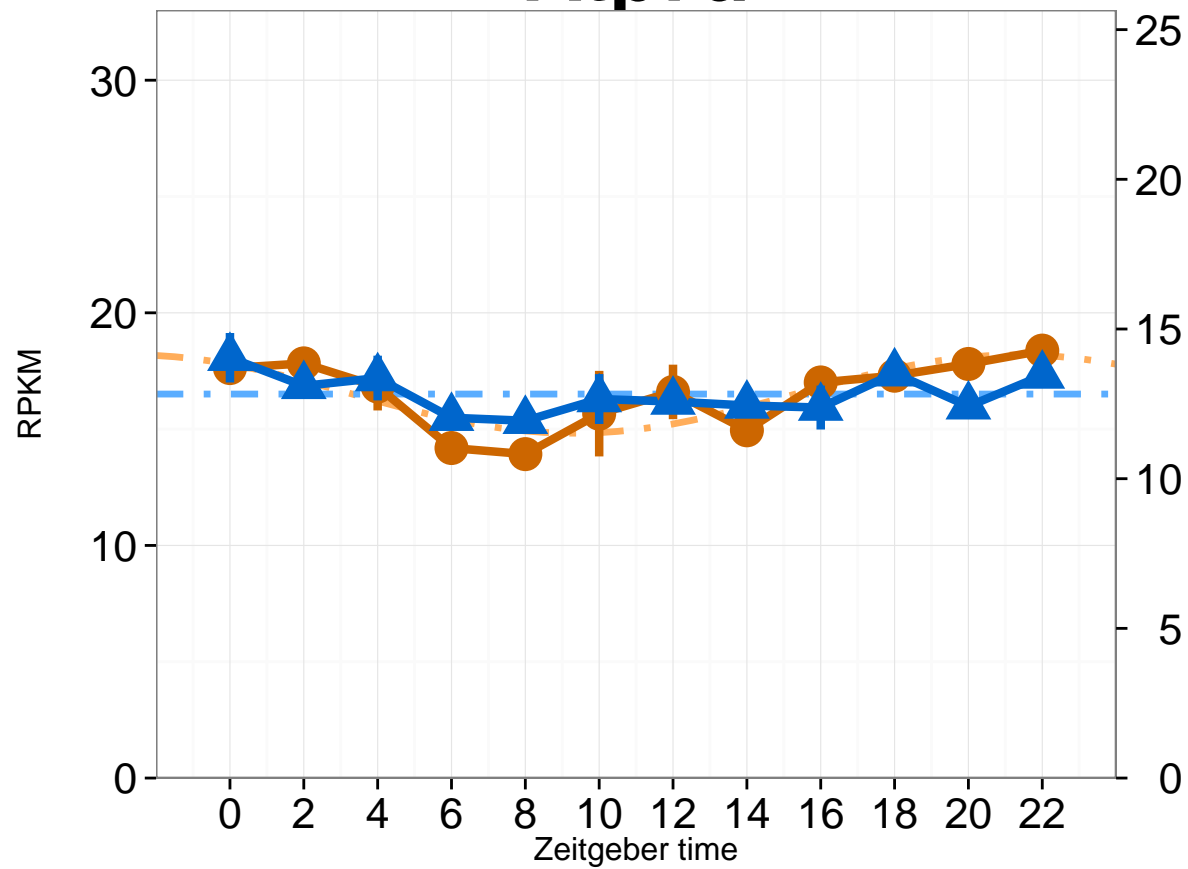

# Atp7a

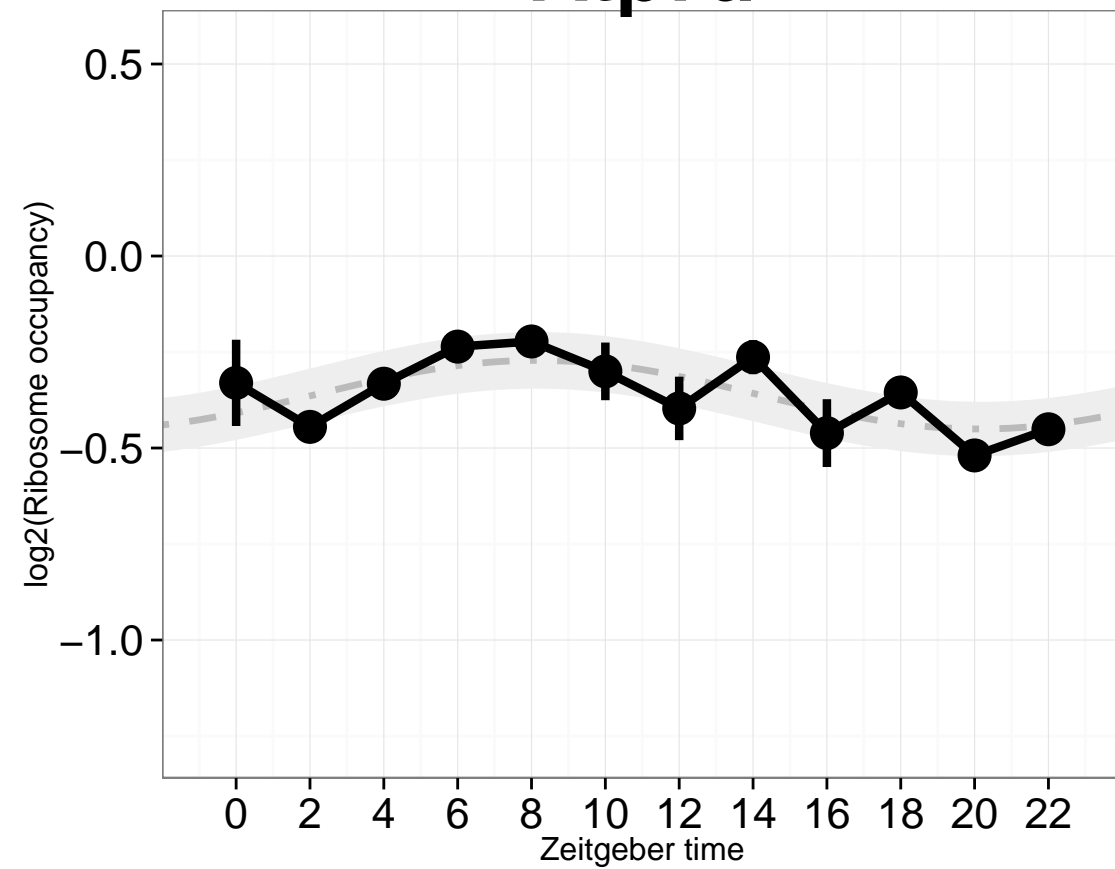

Supplement: Supplementary file 1910 [file 1]

## Zfp445

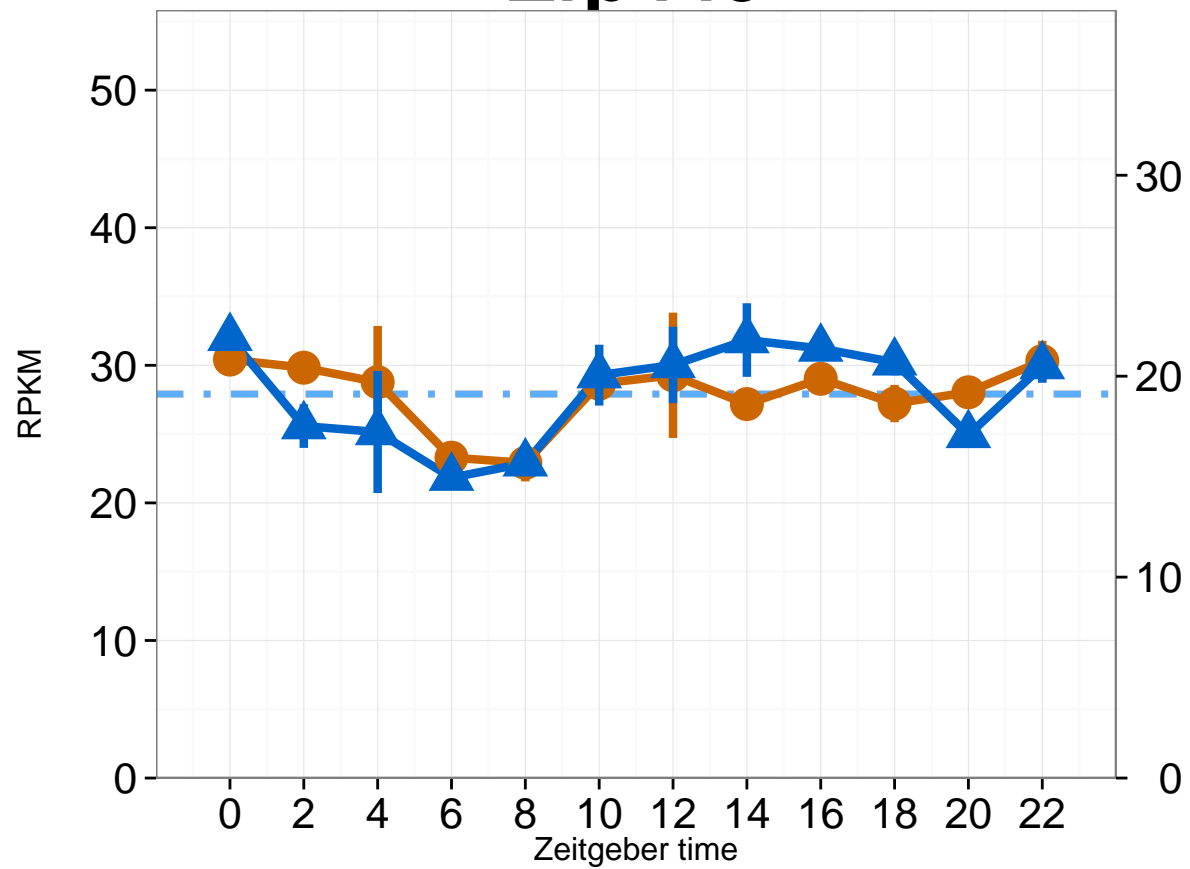

## Zfp445

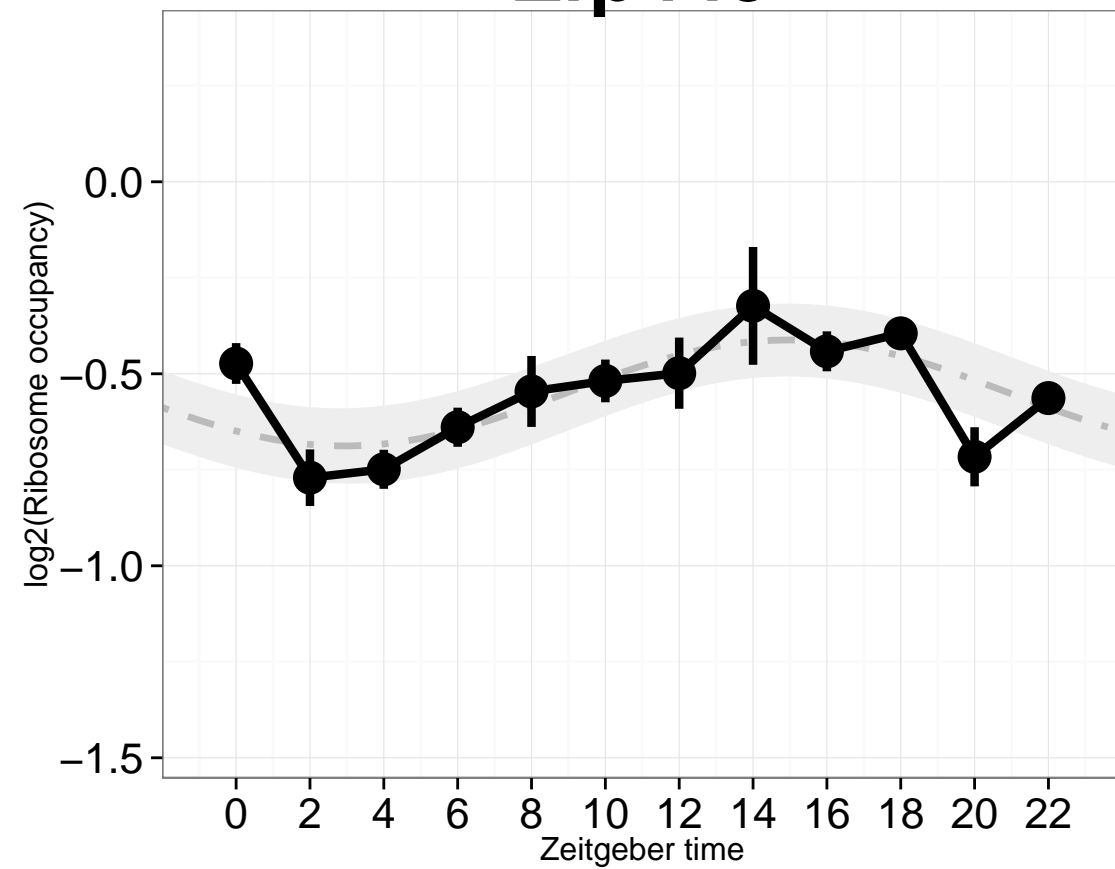

Supplement: Supplementary file 1911 [file 1]

# Coro2b

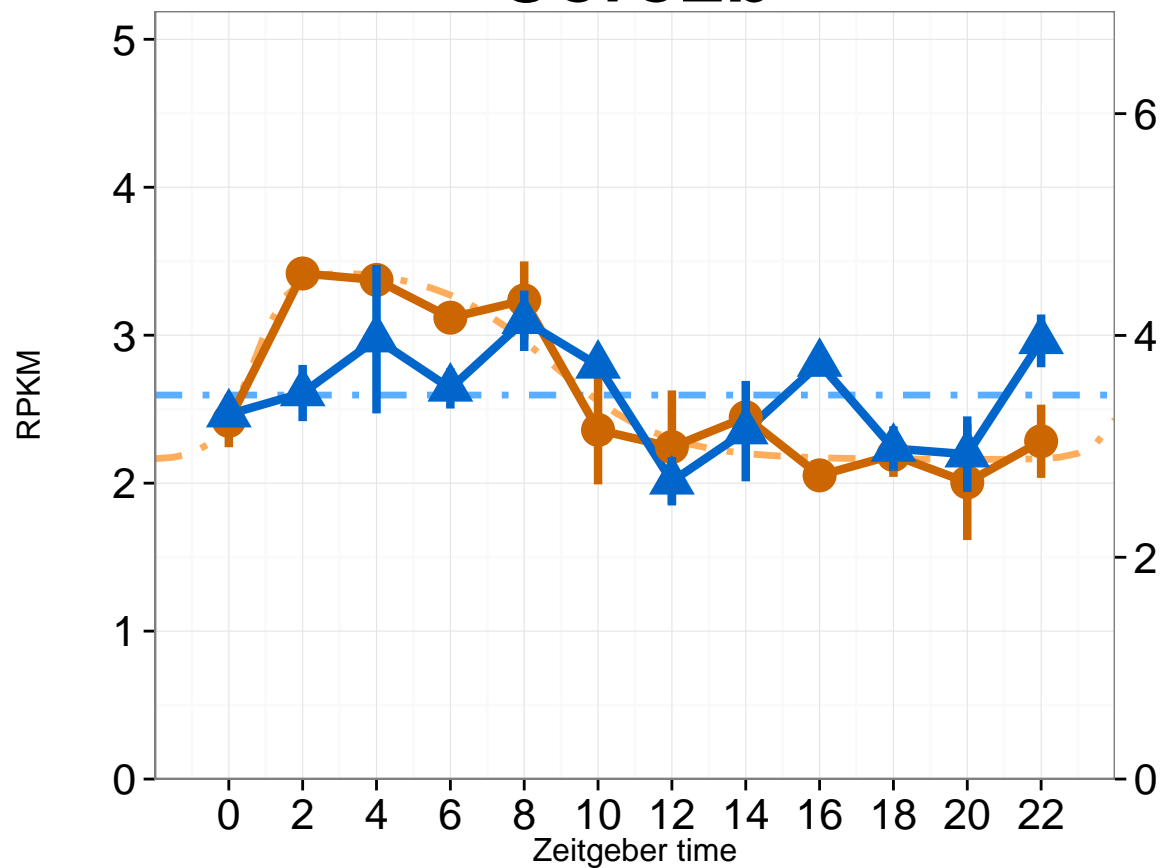

# Coro2b

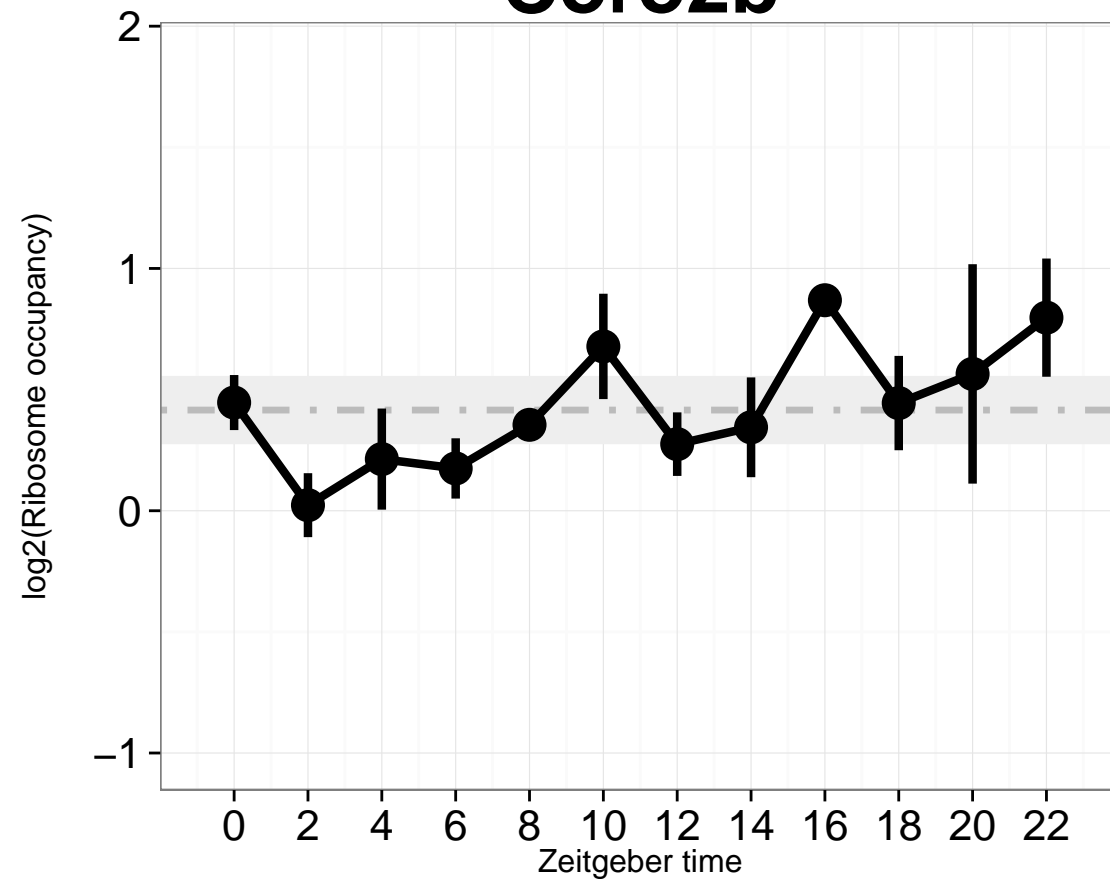

Supplement: Supplementary file 1912 [file 1]

## Casr

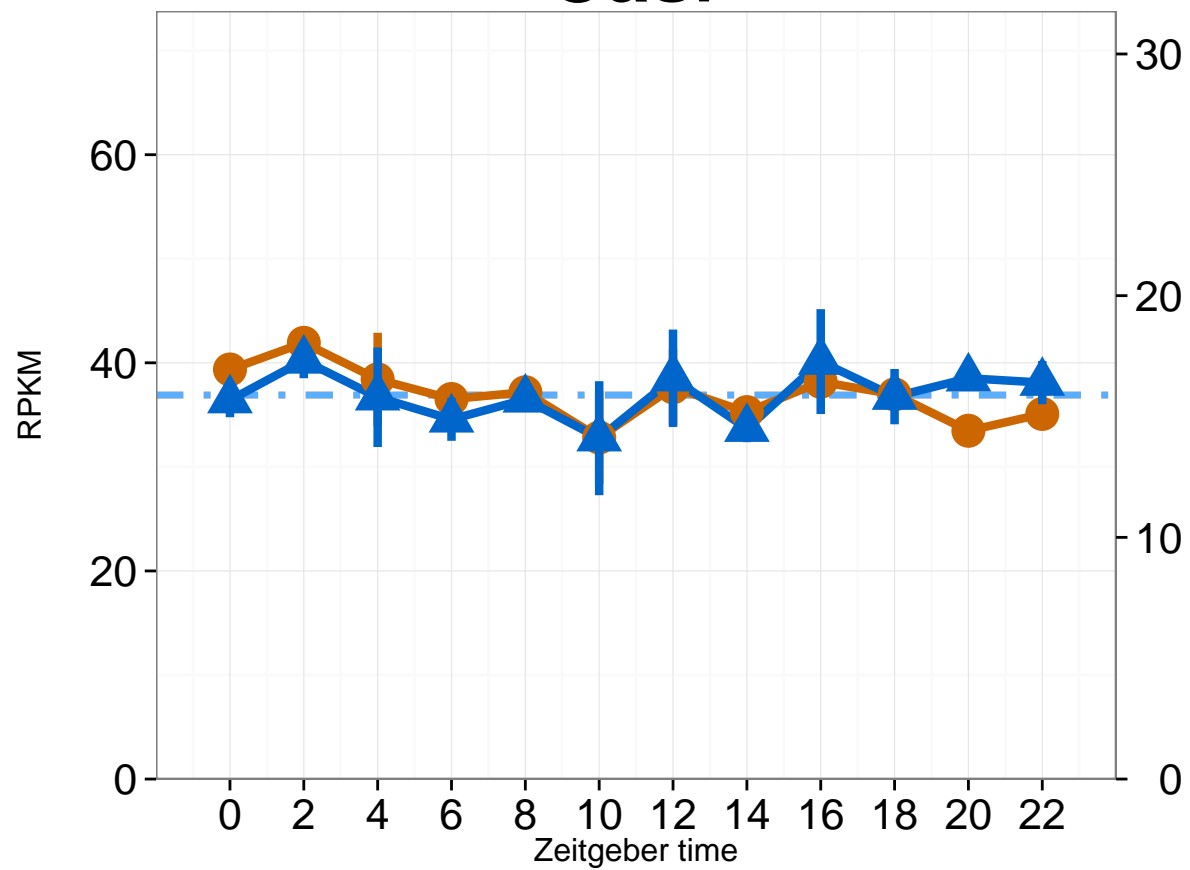

## Casr

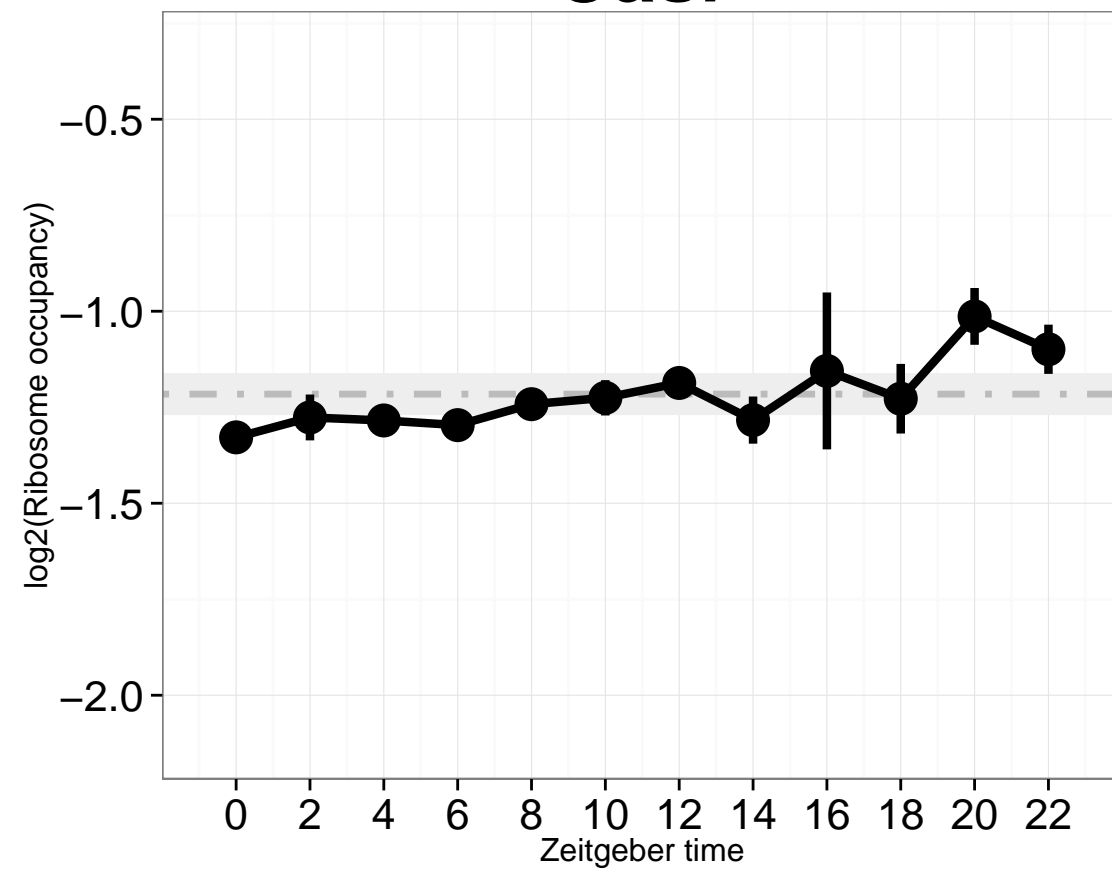

Supplement: Supplementary file 1913 [file 1]

# Rbm25

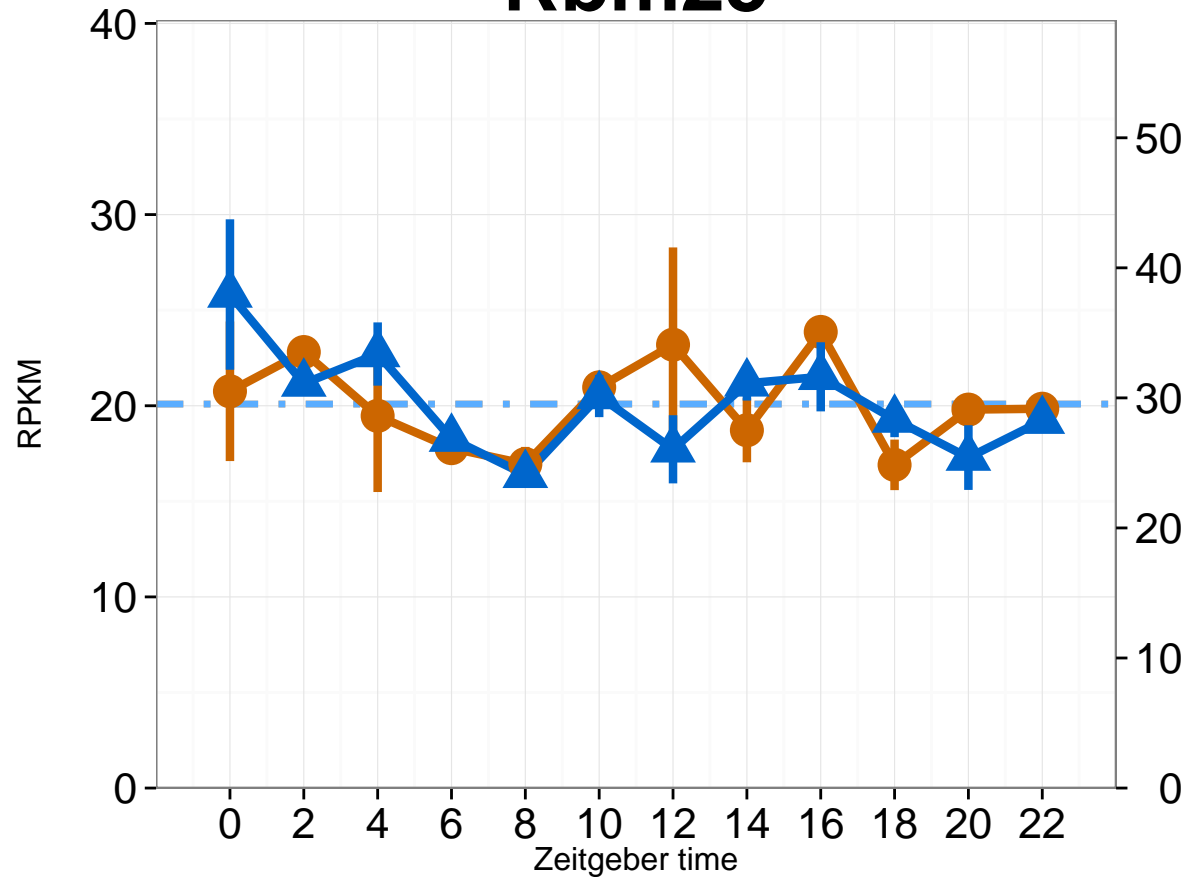

# Rbm25

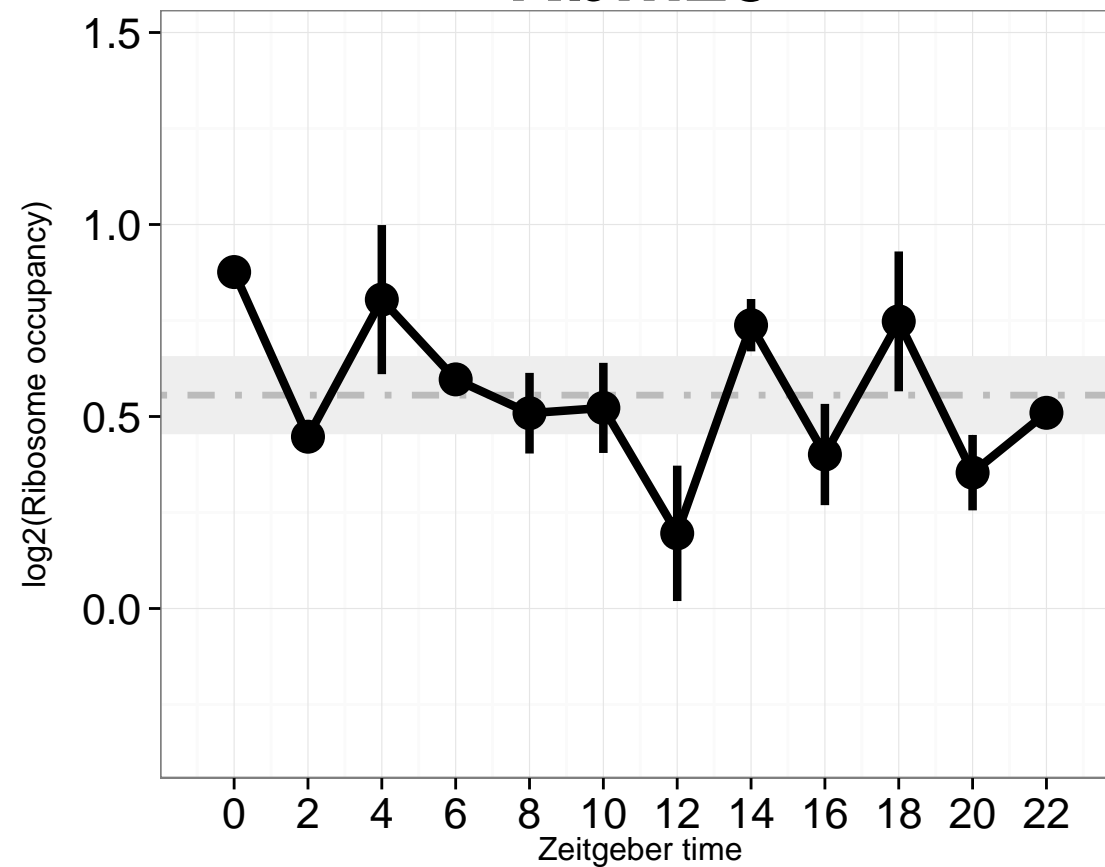

Supplement: Supplementary file 1914 [file 1]

## Mlxipl

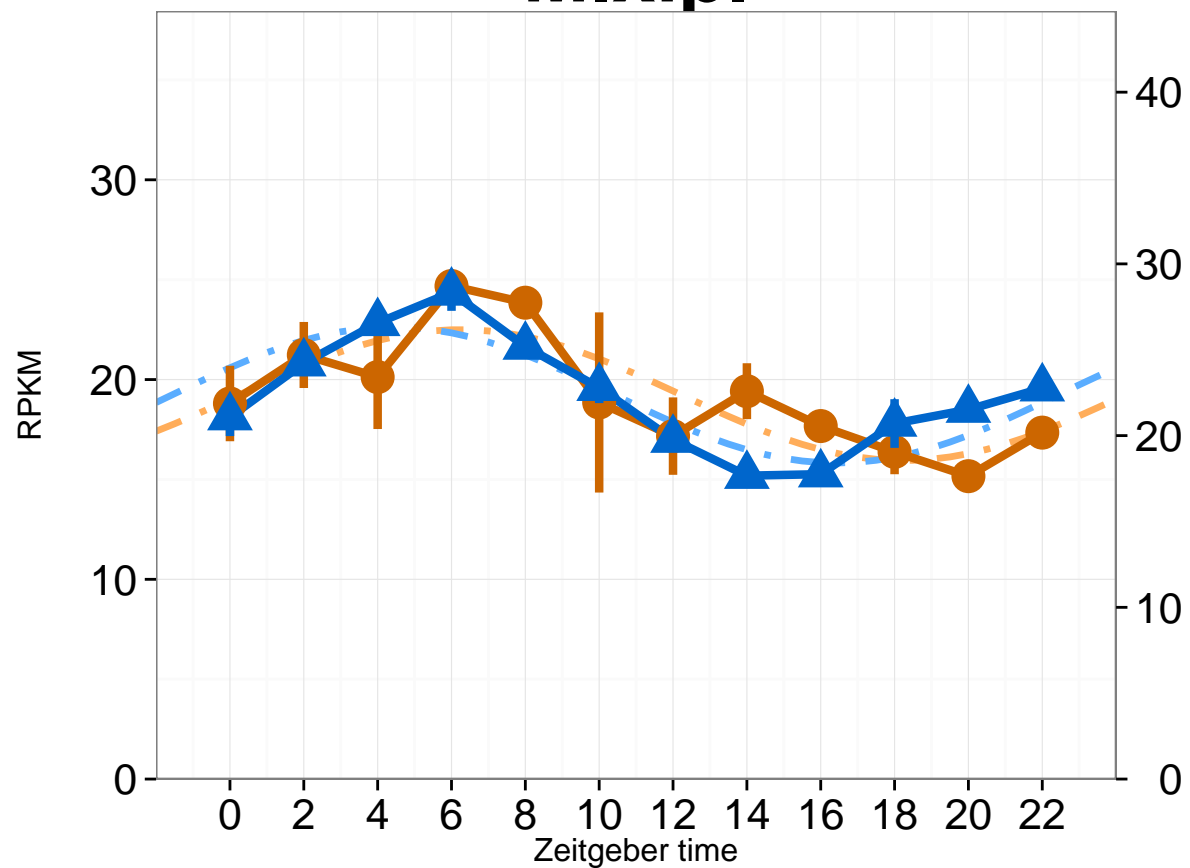

## Mlxipl

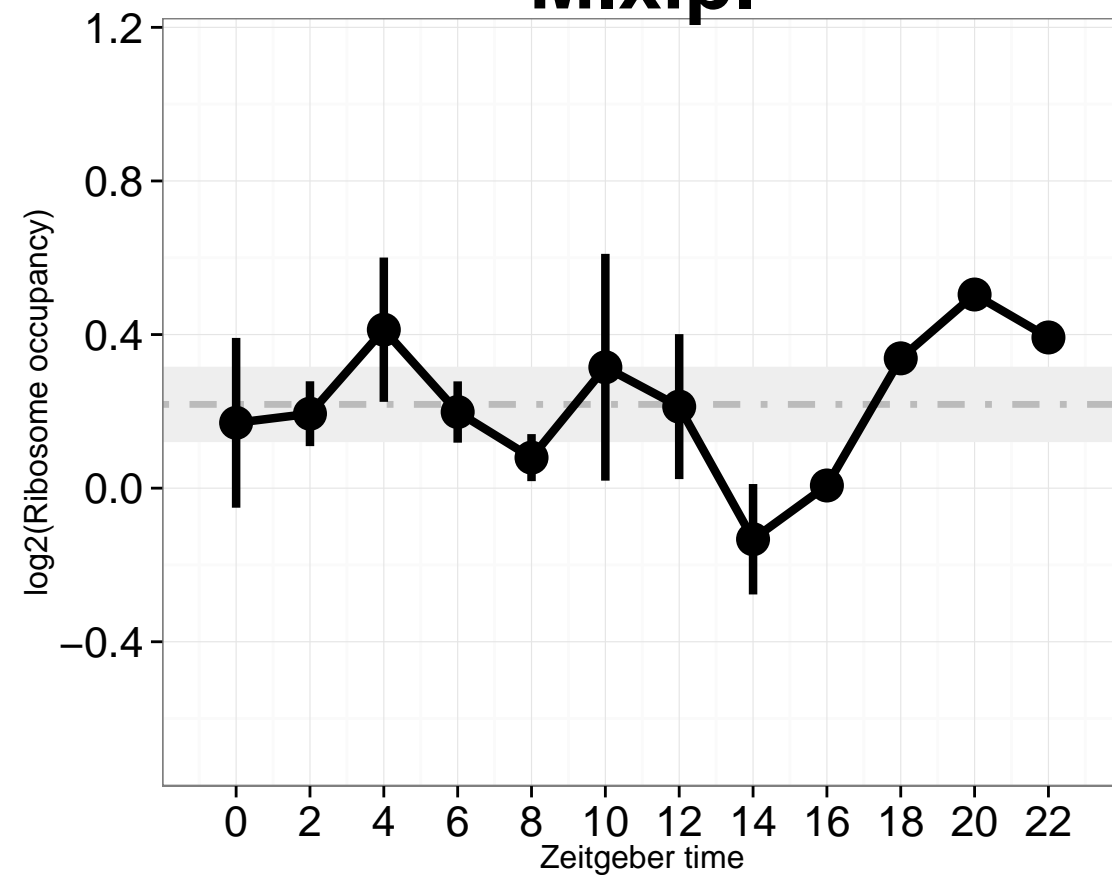

Supplement: Supplementary file 1915 [file 1]

## Rasl11a

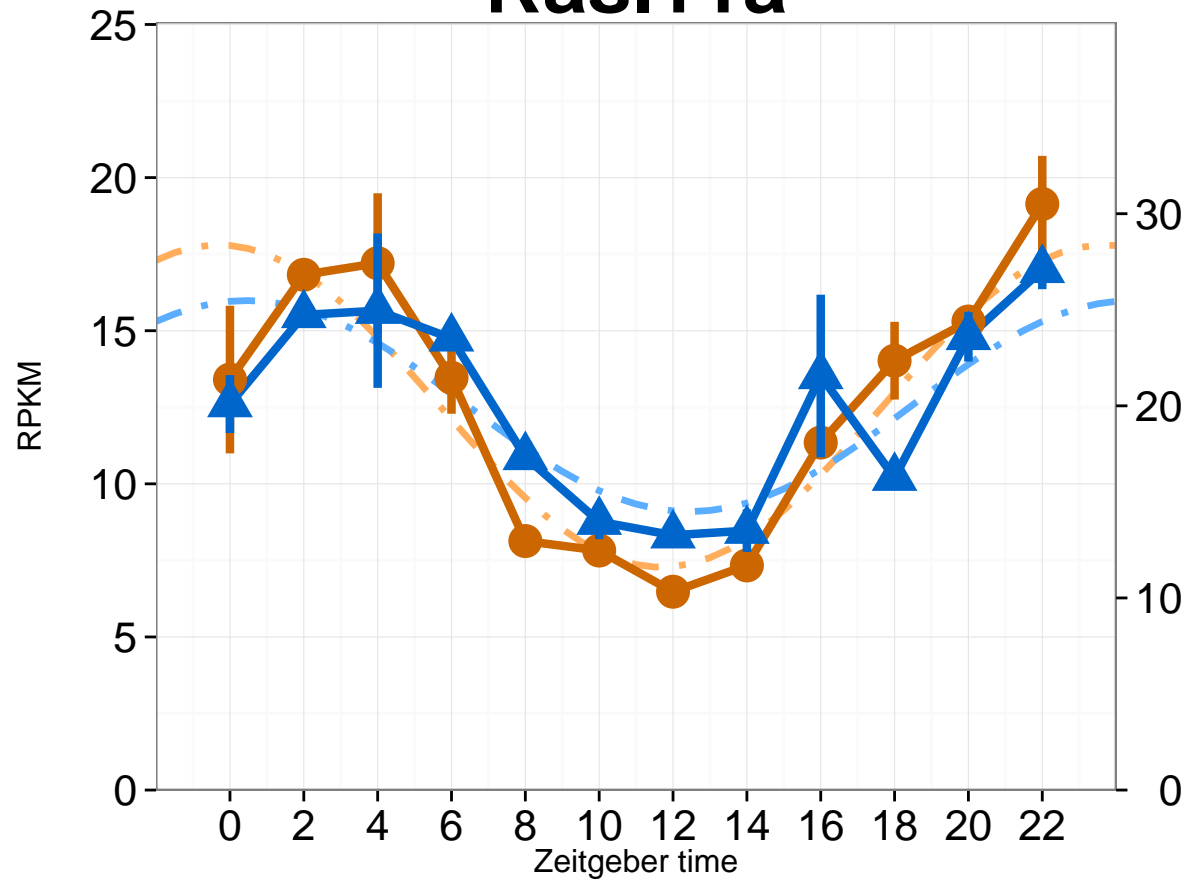

## Rasl11a

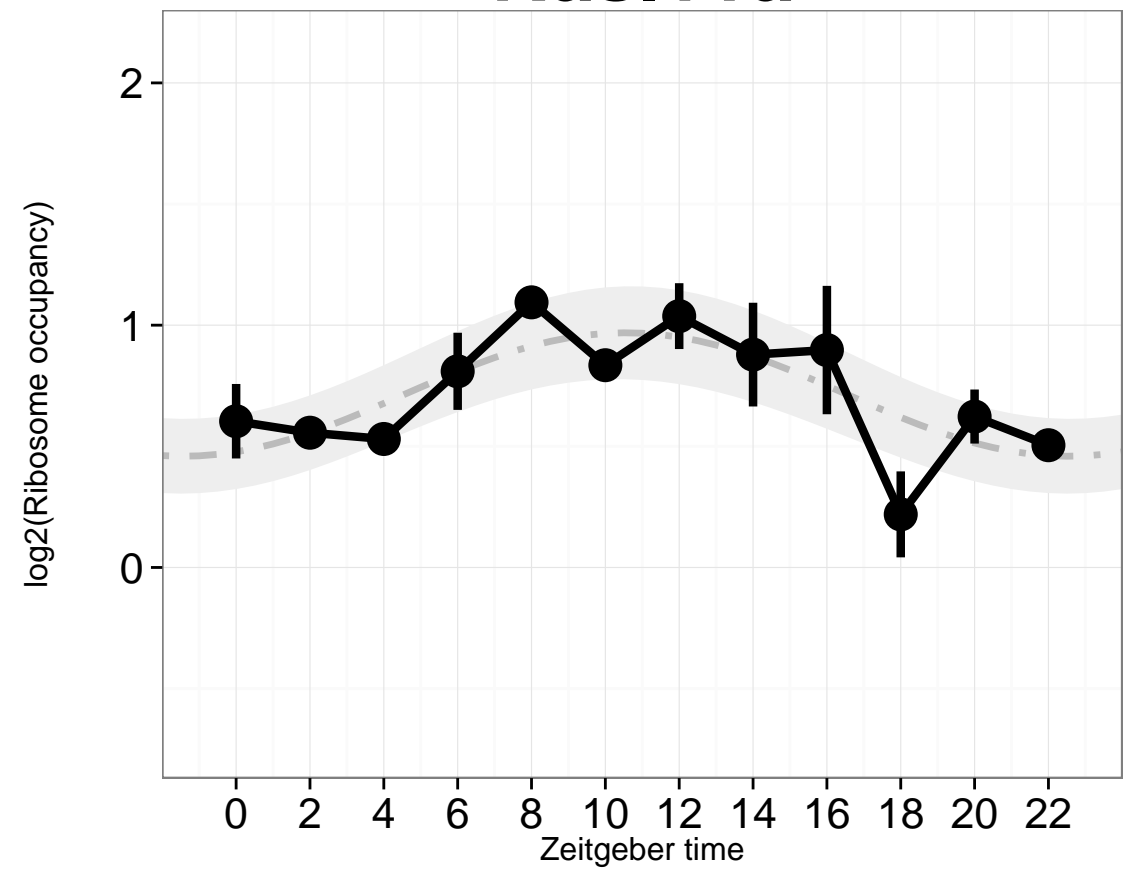

Supplement: Supplementary file 1916 [file 1]

## Sulf2

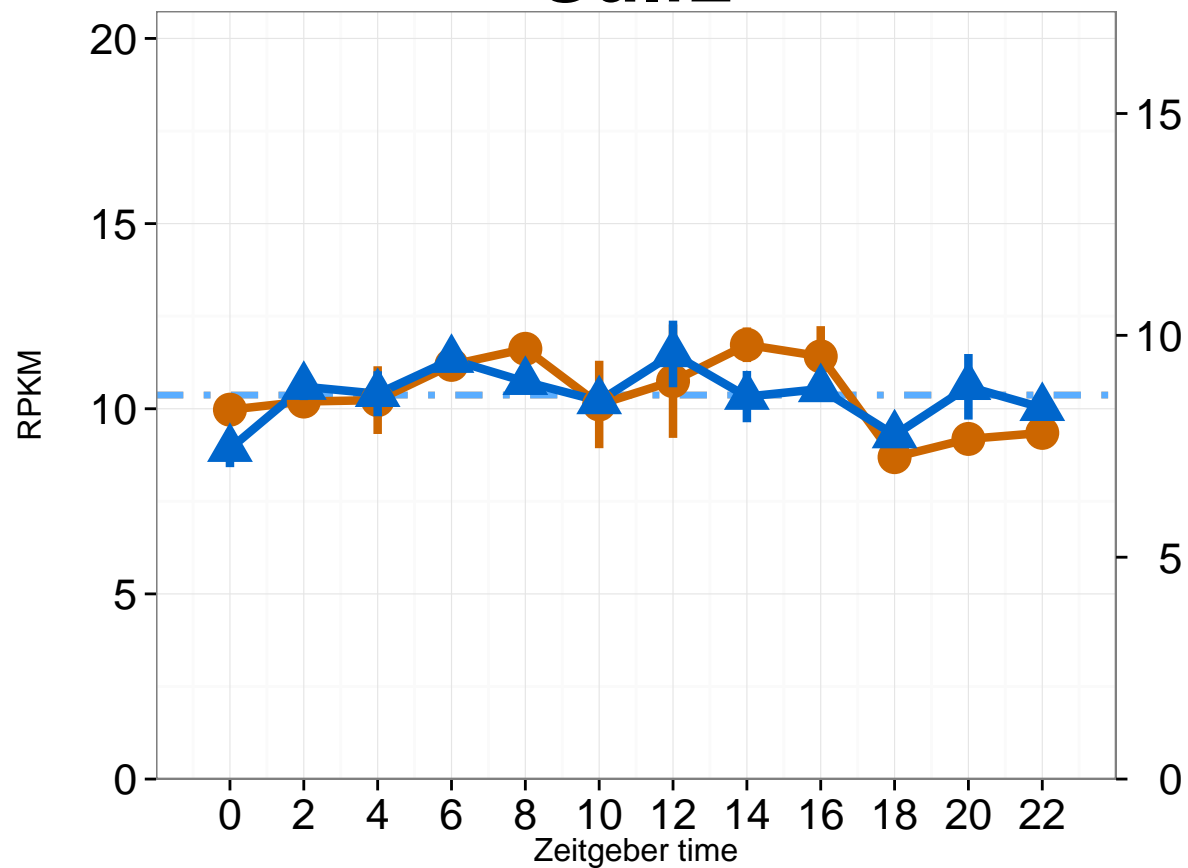

## Sulf2

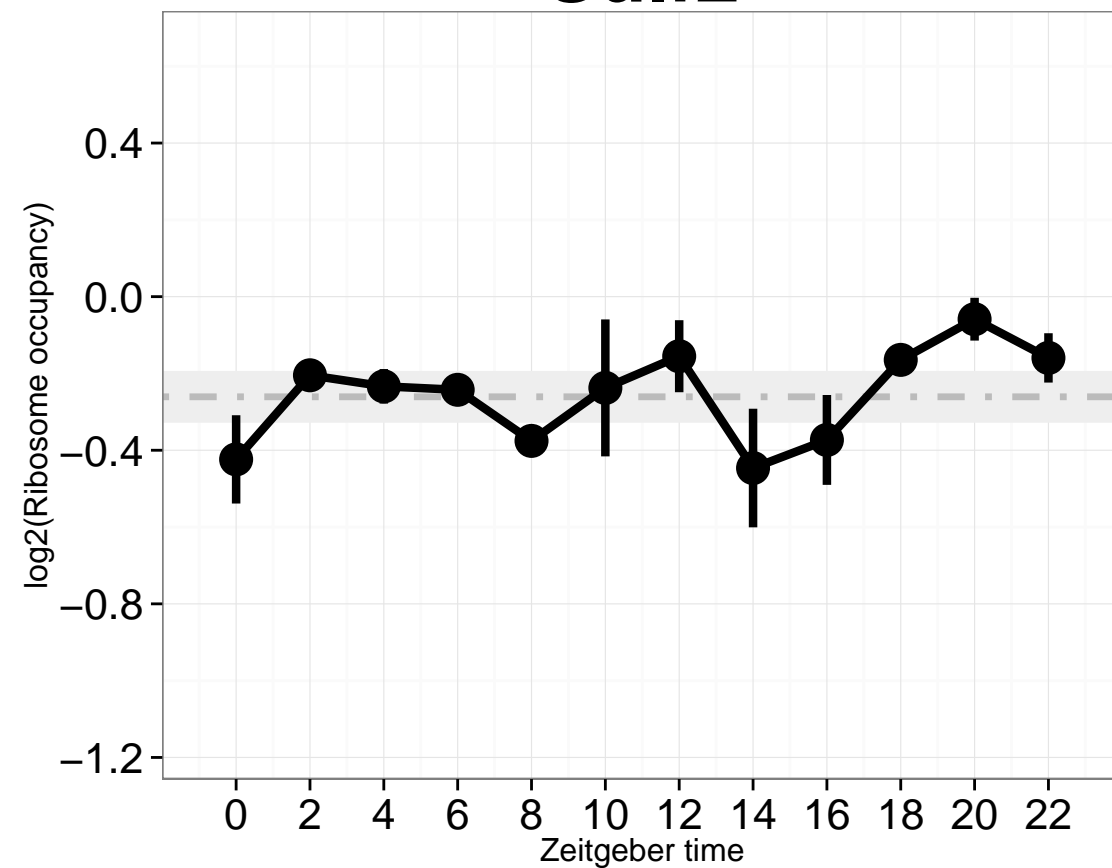

Supplement: Supplementary file 1917 [file 1]

# Dnaja1

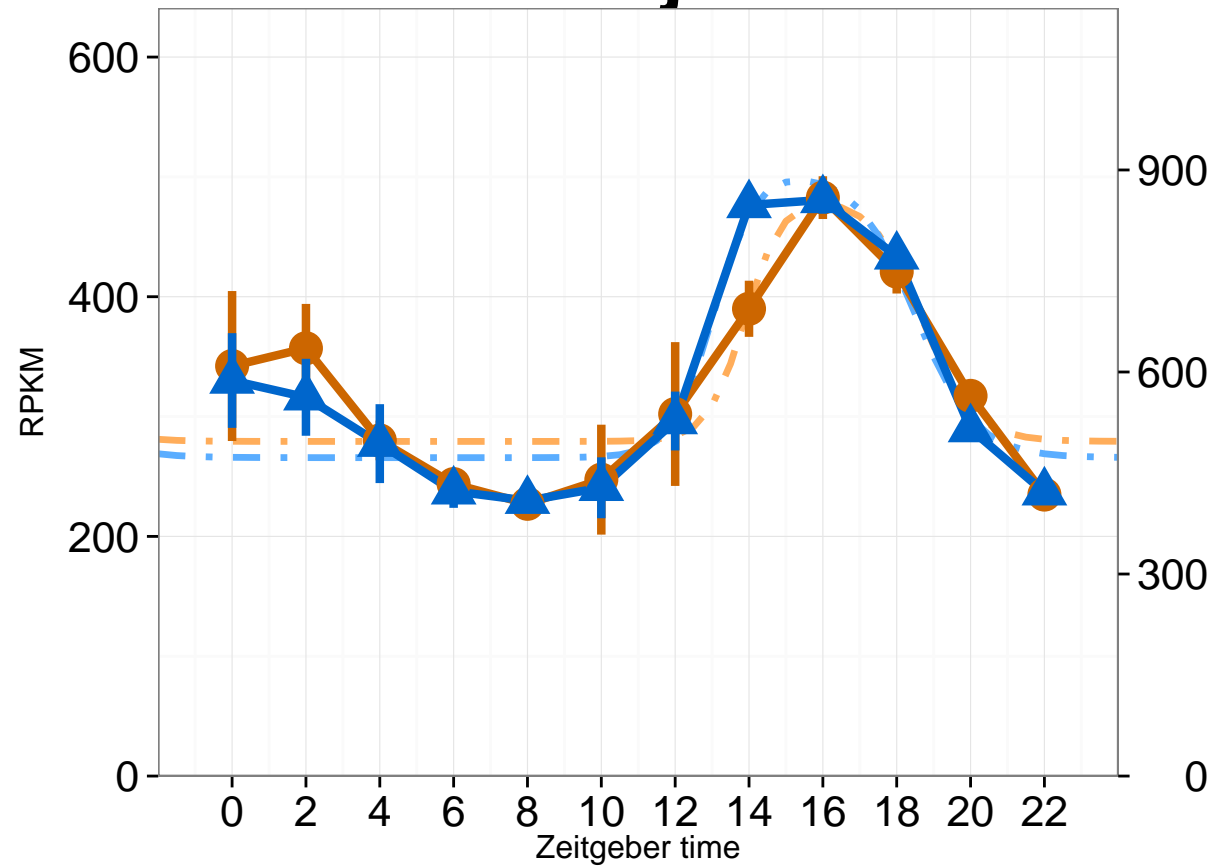

# Dnaja1

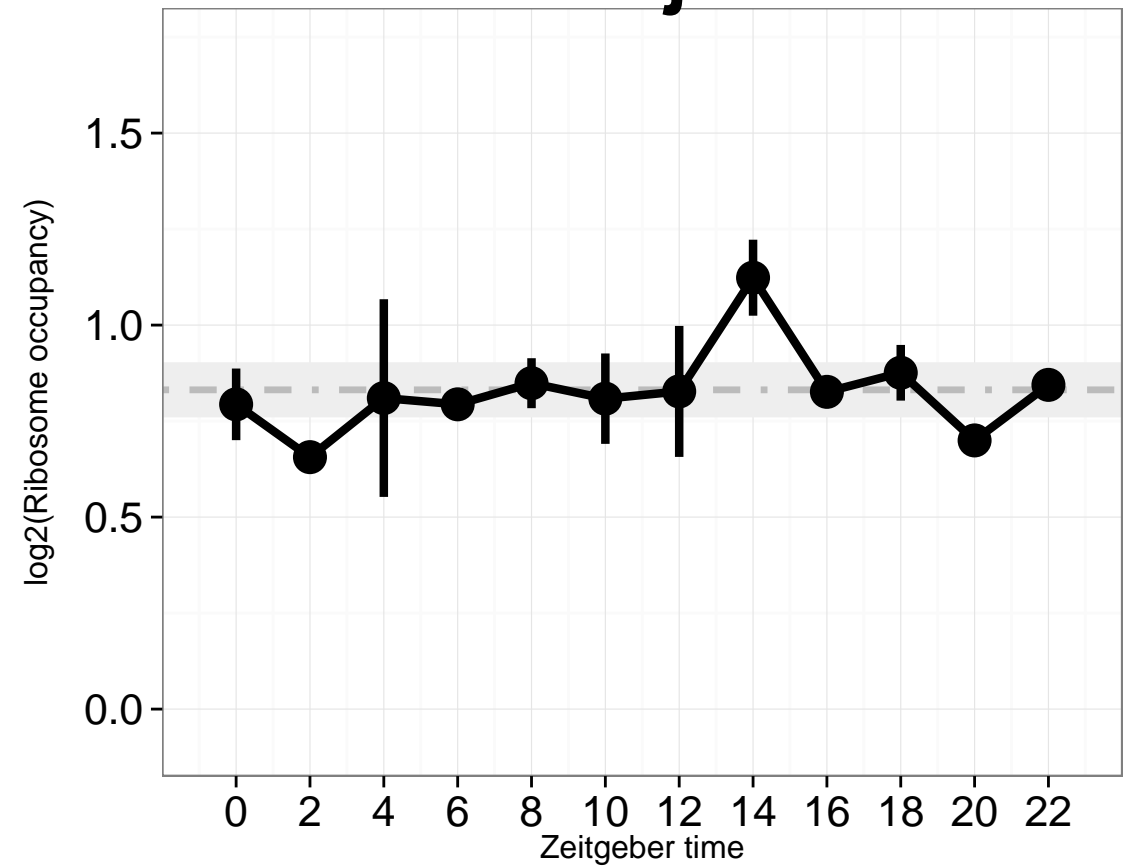

Supplement: Supplementary file 1918 [file 1]

# Gemin6

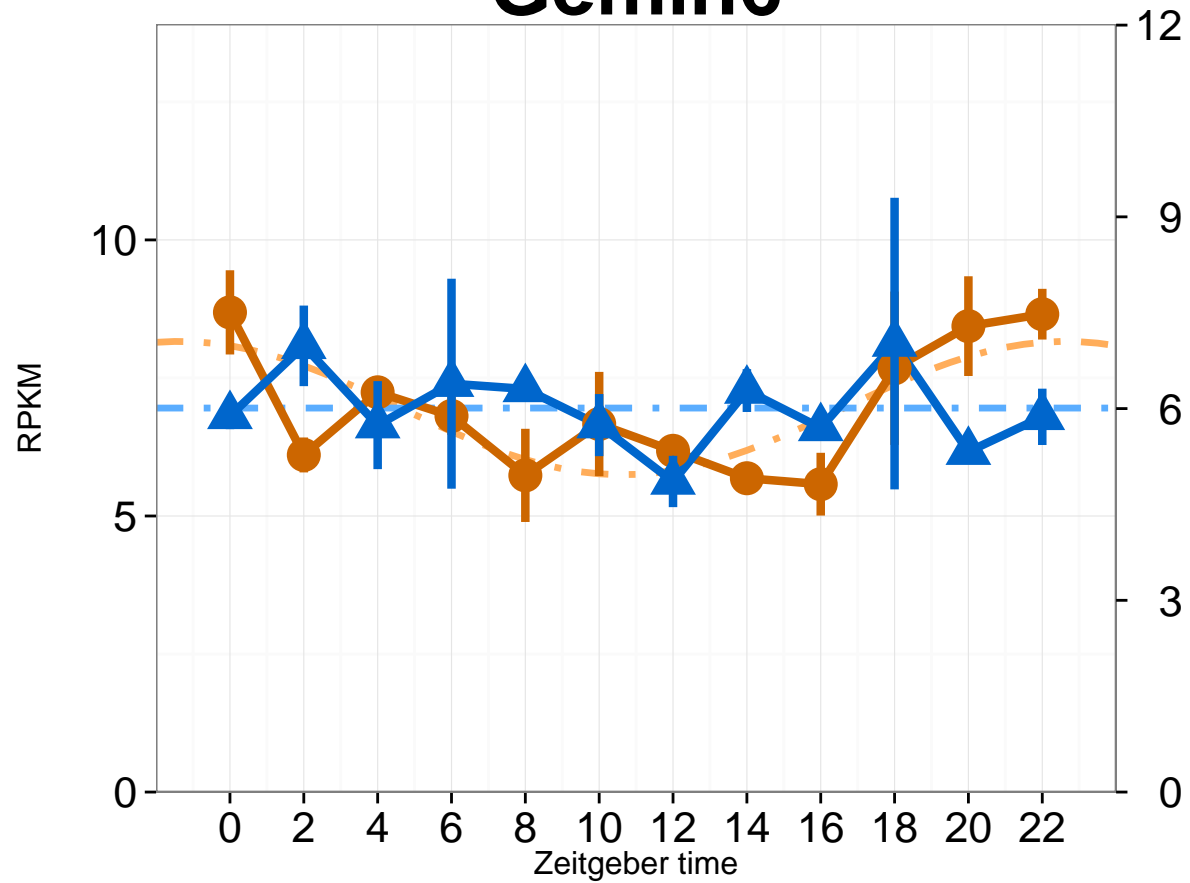

# Gemin6

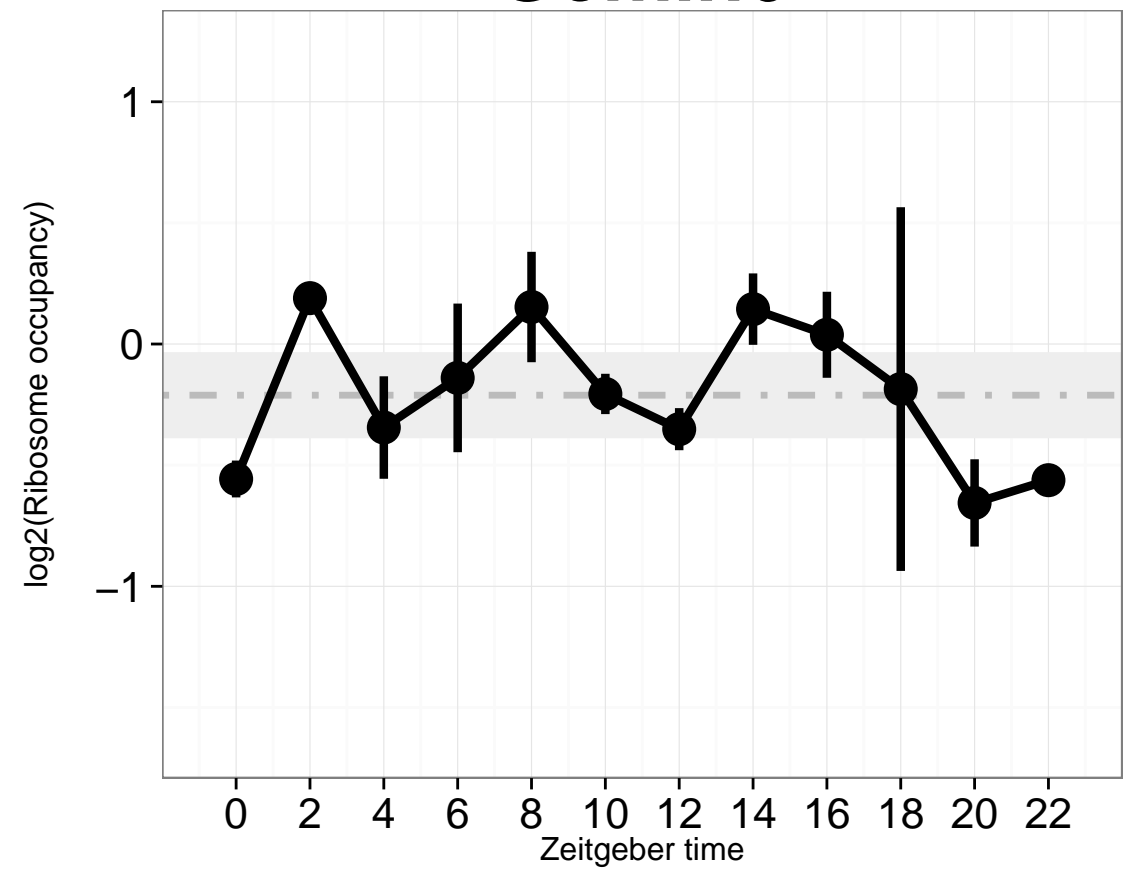

Supplement: Supplementary file 1919 [file 1]

## Spry4

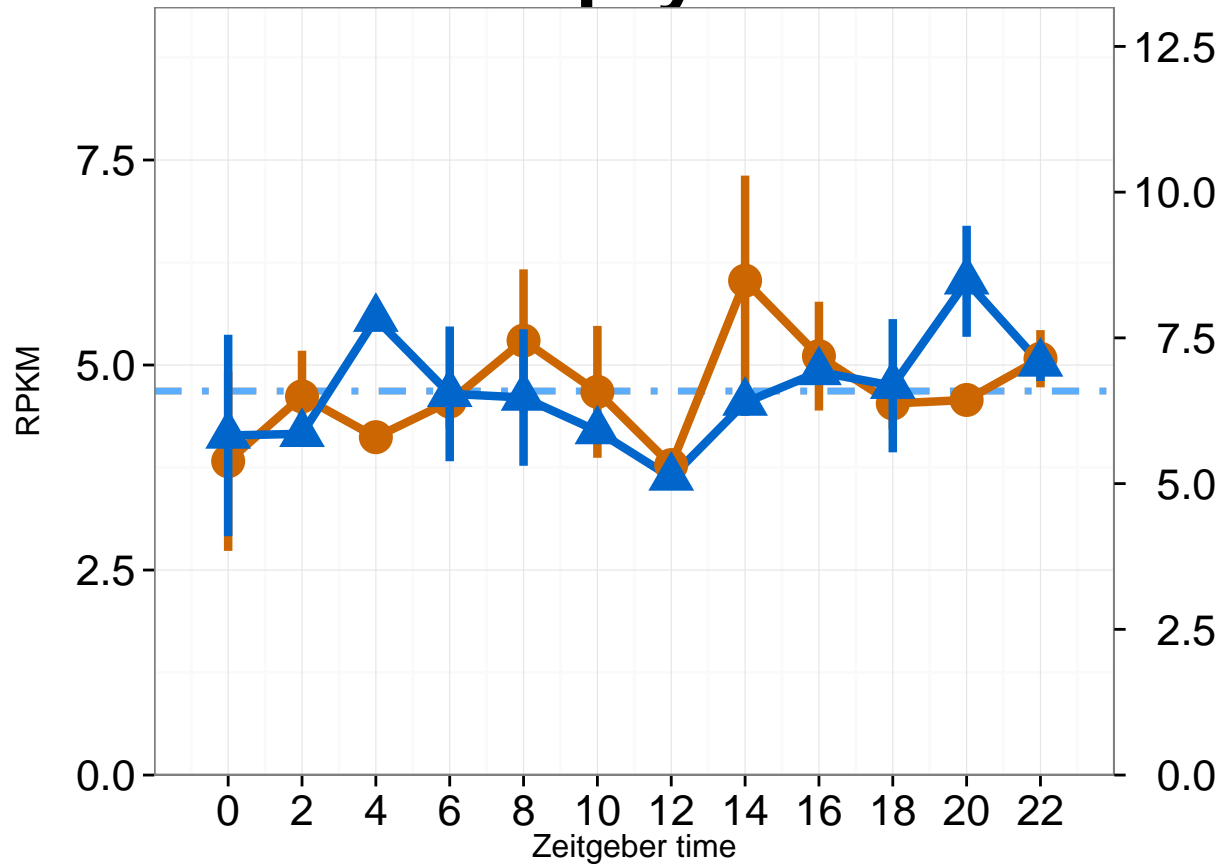

## Spry4

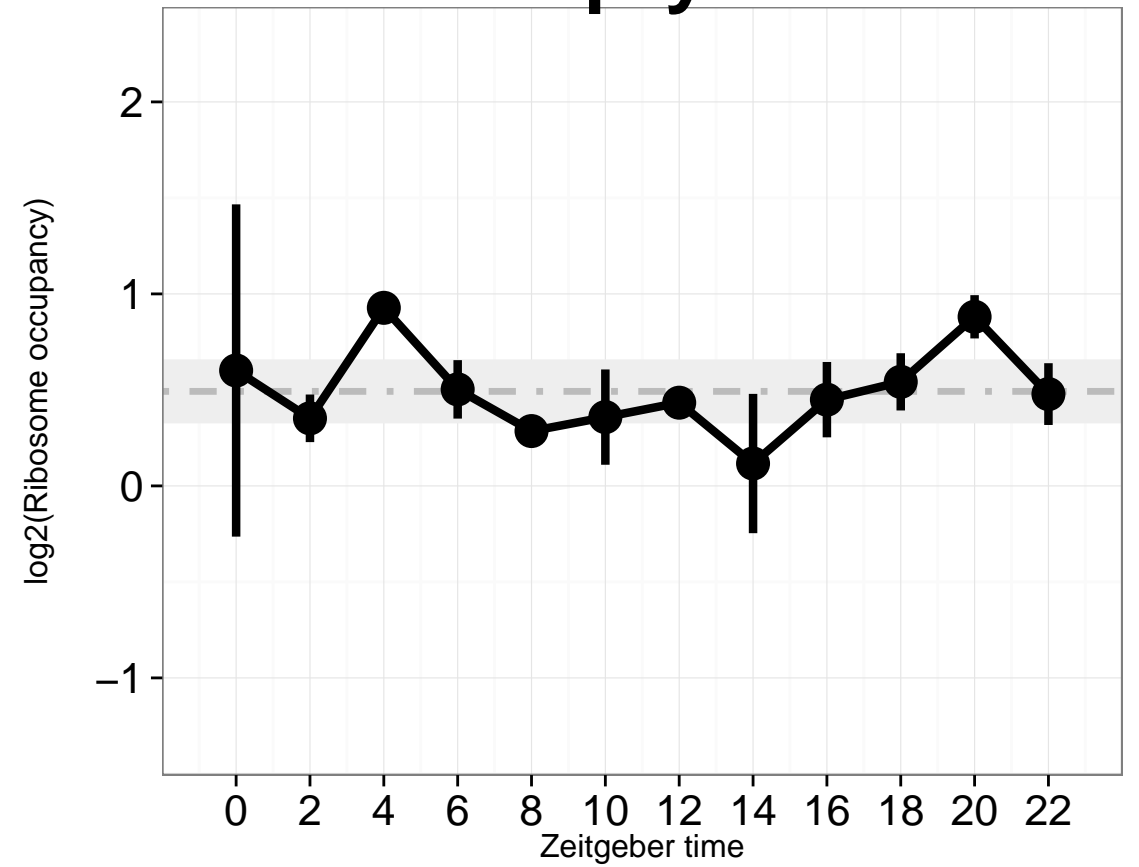

Supplement: Supplementary file 1920 [file 1]

# Hlf

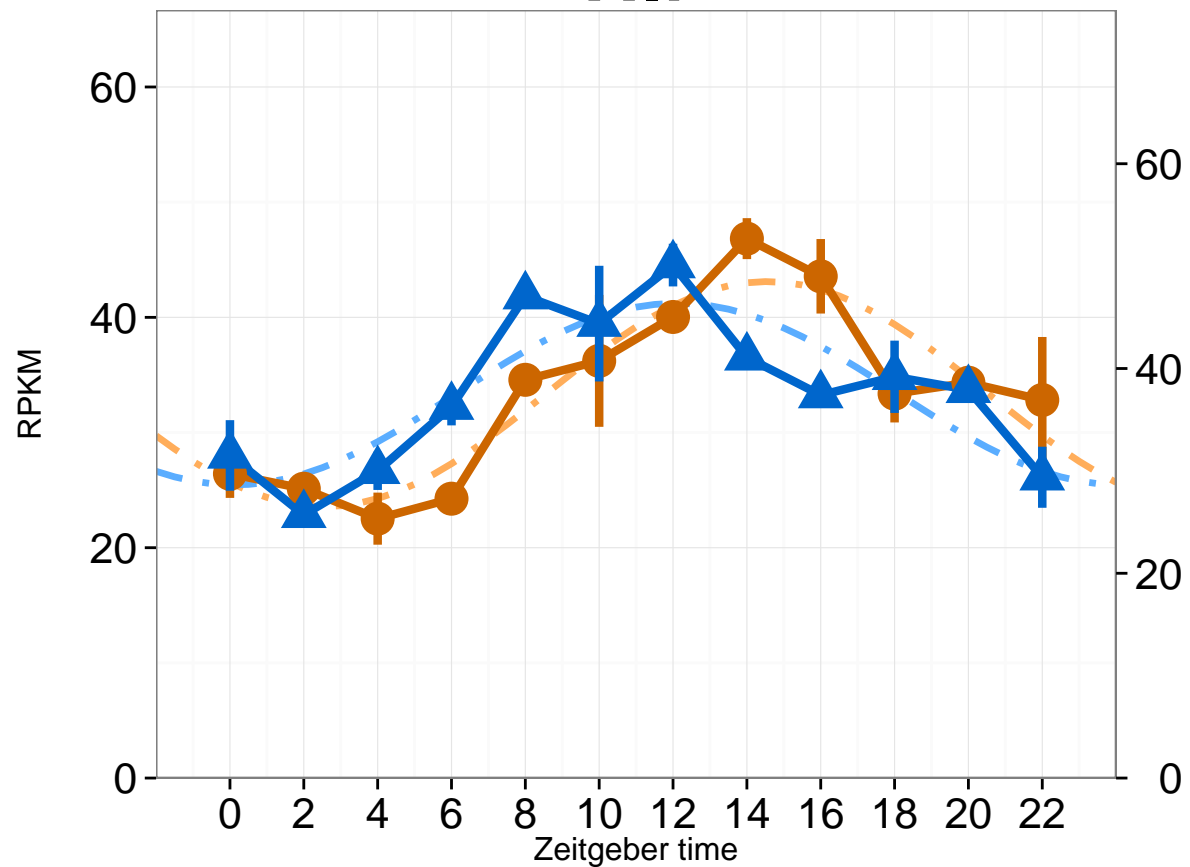

# Hlf

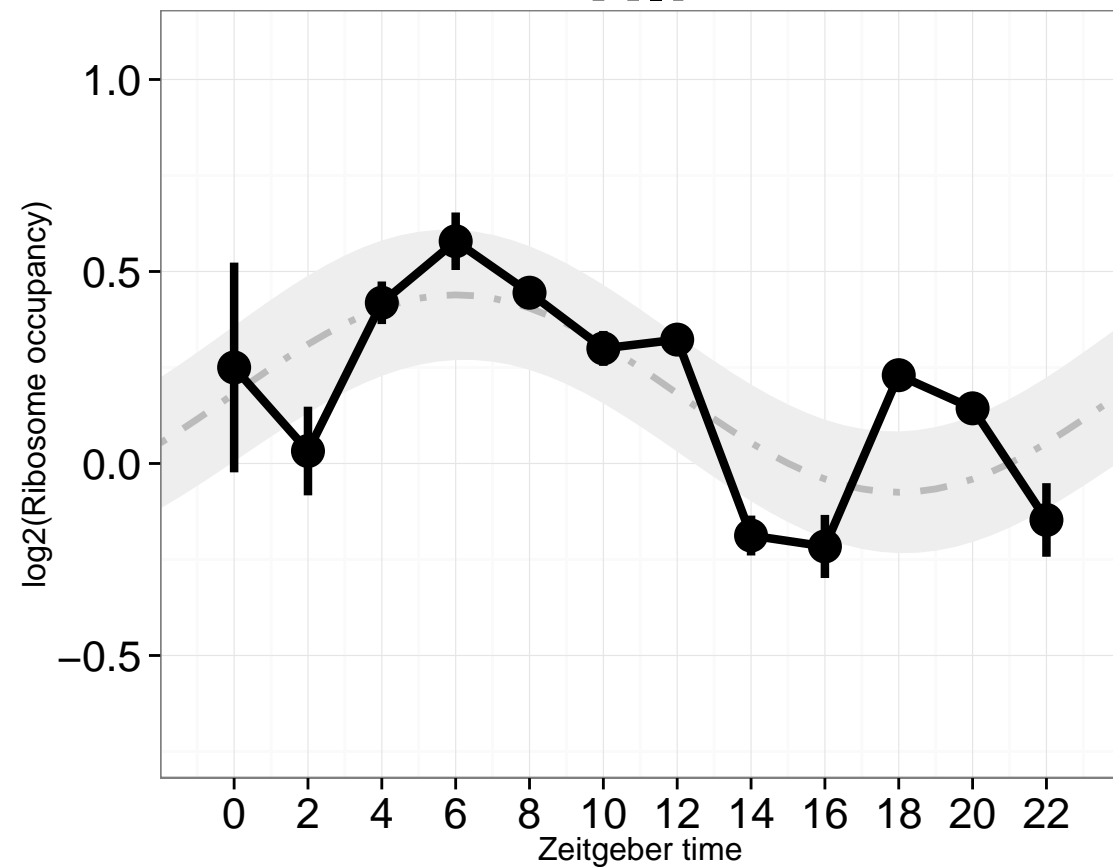

Supplement: Supplementary file 1921 [file 1]

# Fam228b

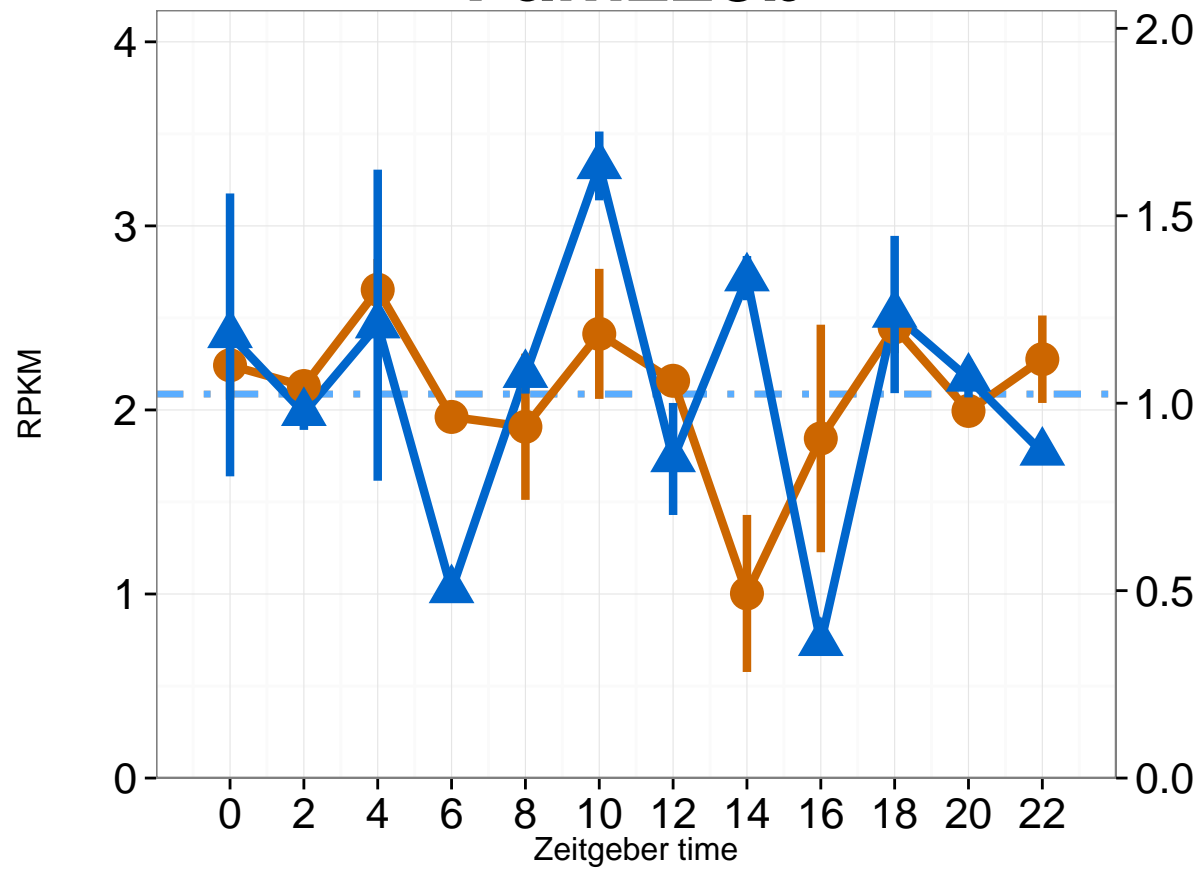

# Fam228b

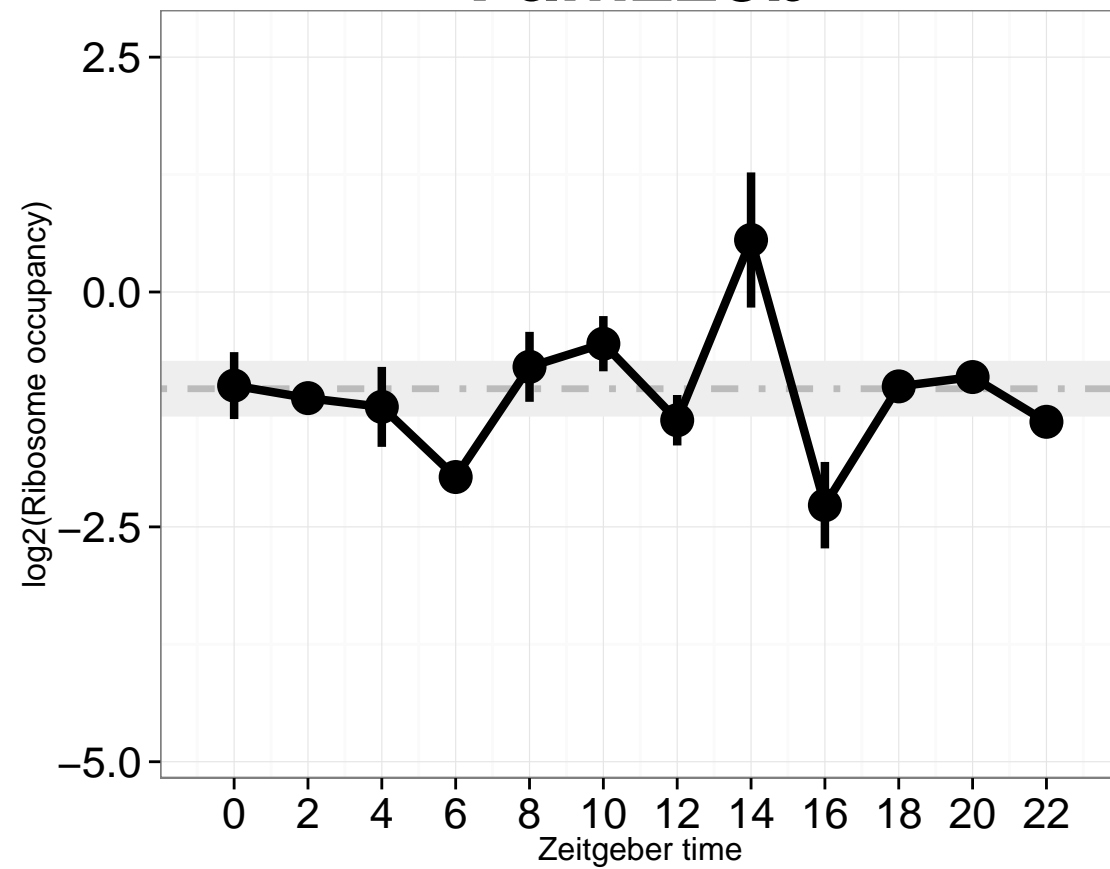

Supplement: Supplementary file 1922 [file 1]

# Atf6b

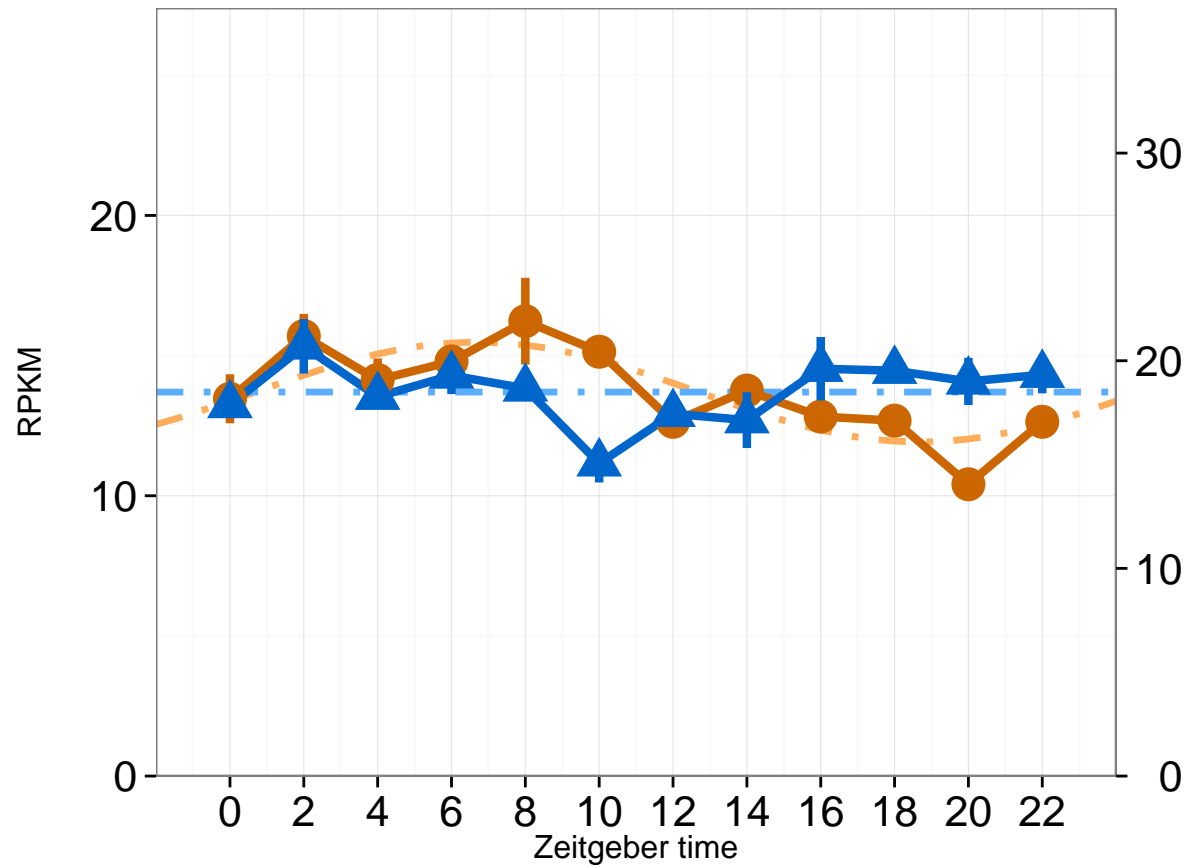

# Atf6b

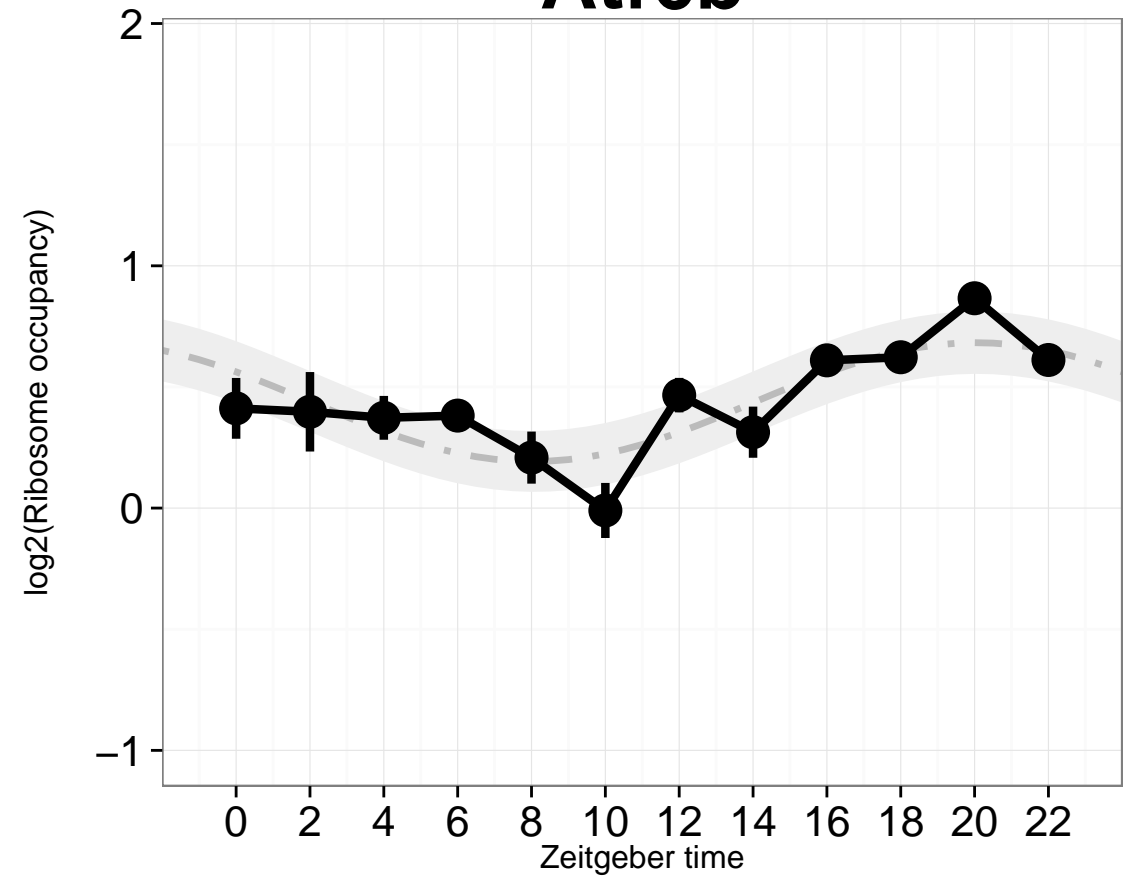

Supplement: Supplementary file 1923 [file 1]

# Vps33a

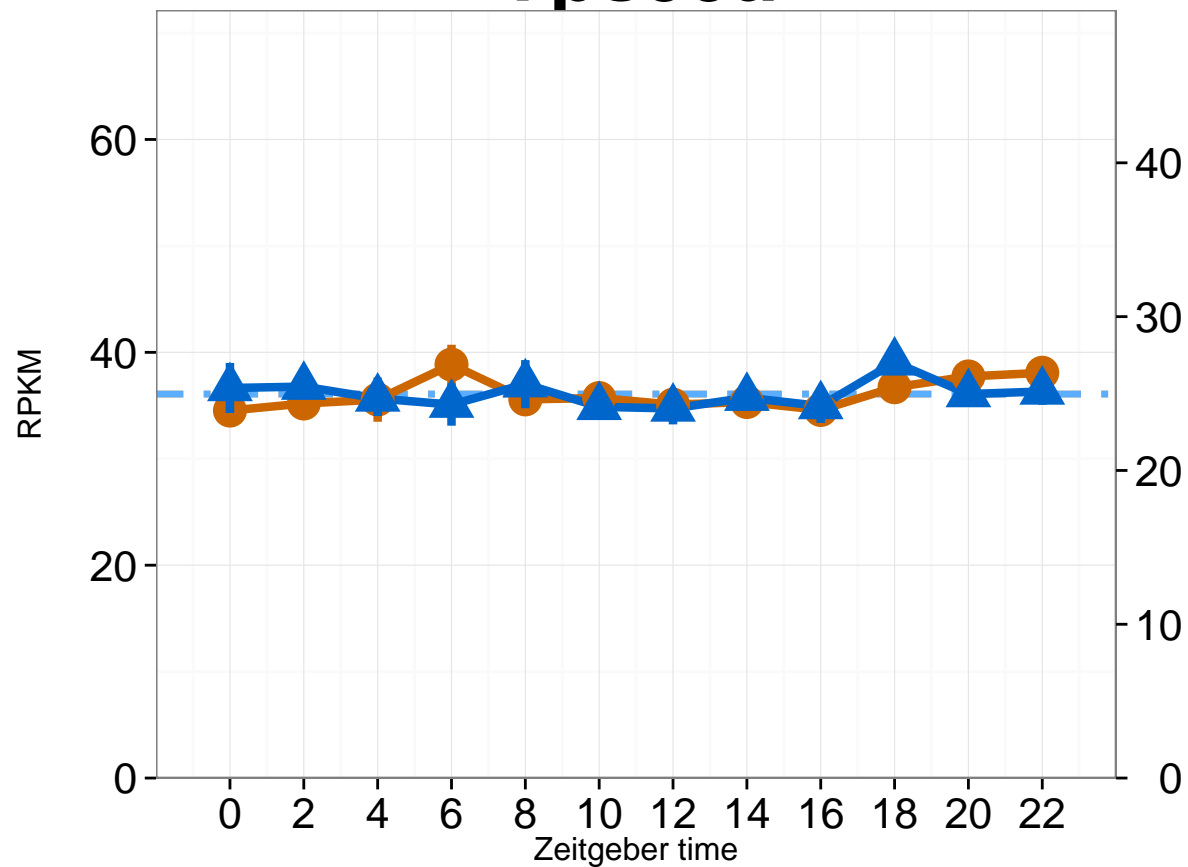

# Vps33a

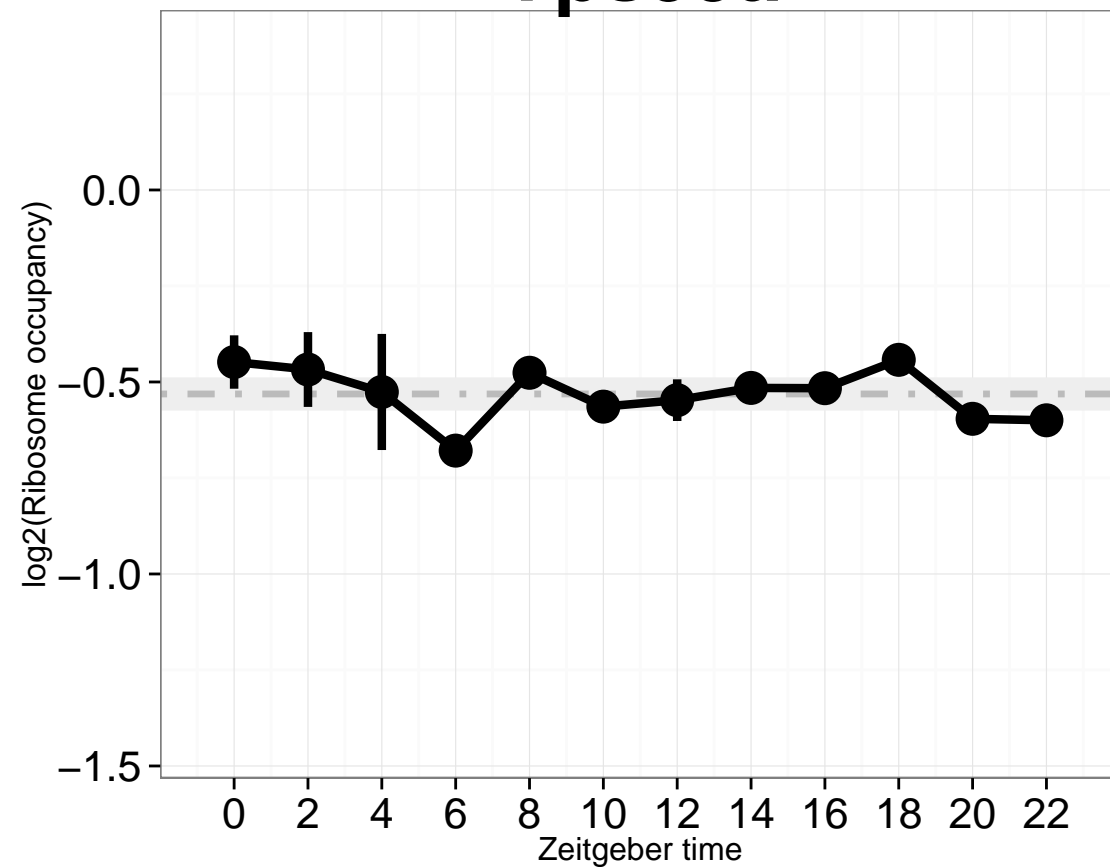

Supplement: Supplementary file 1924 [file 1]

# Morn4

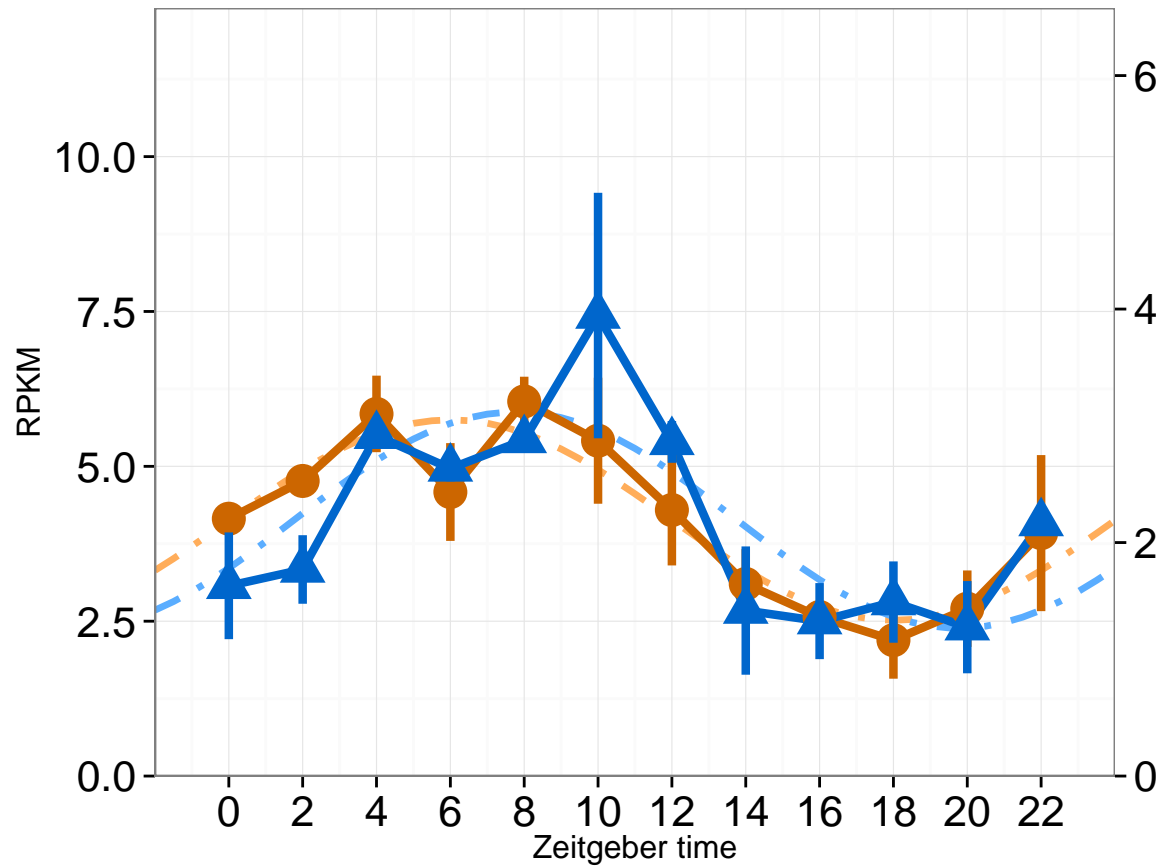

# Morn4

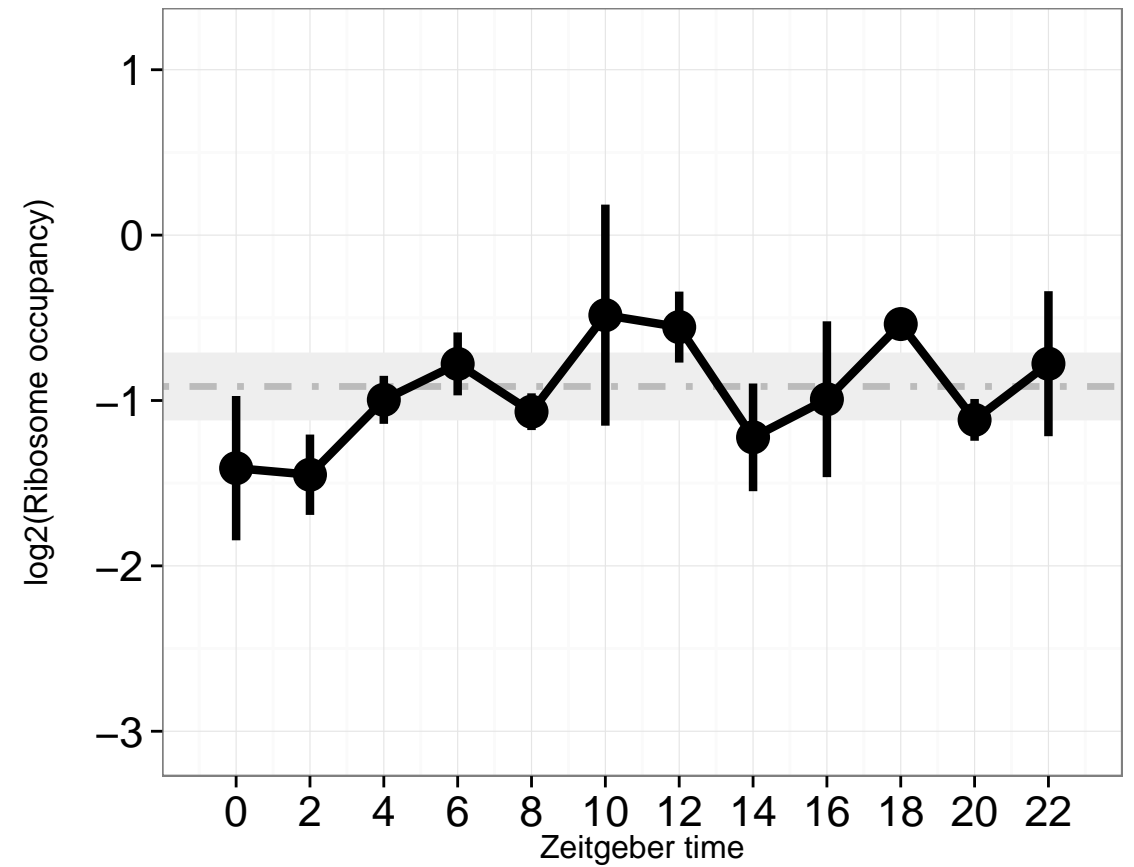

Supplement: Supplementary file 1925 [file 1]

# Zfp952

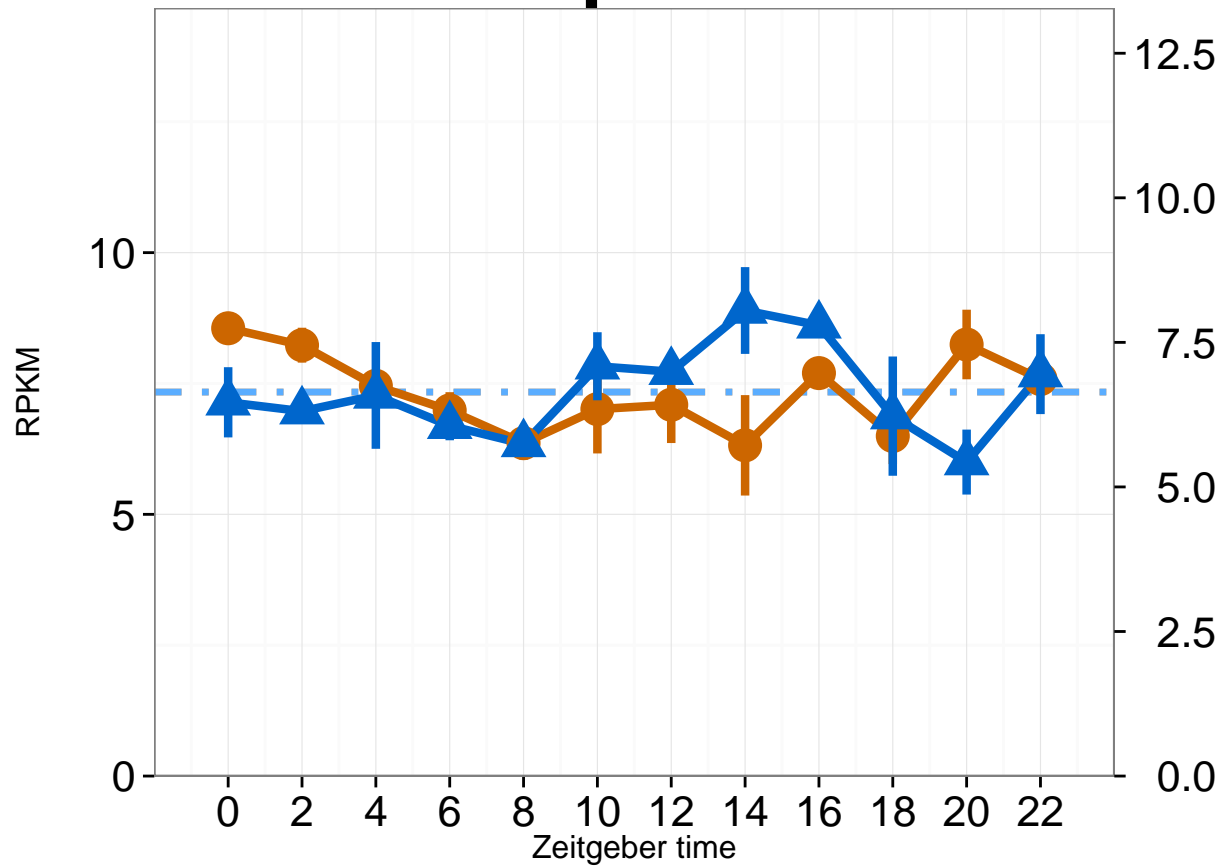

# Zfp952

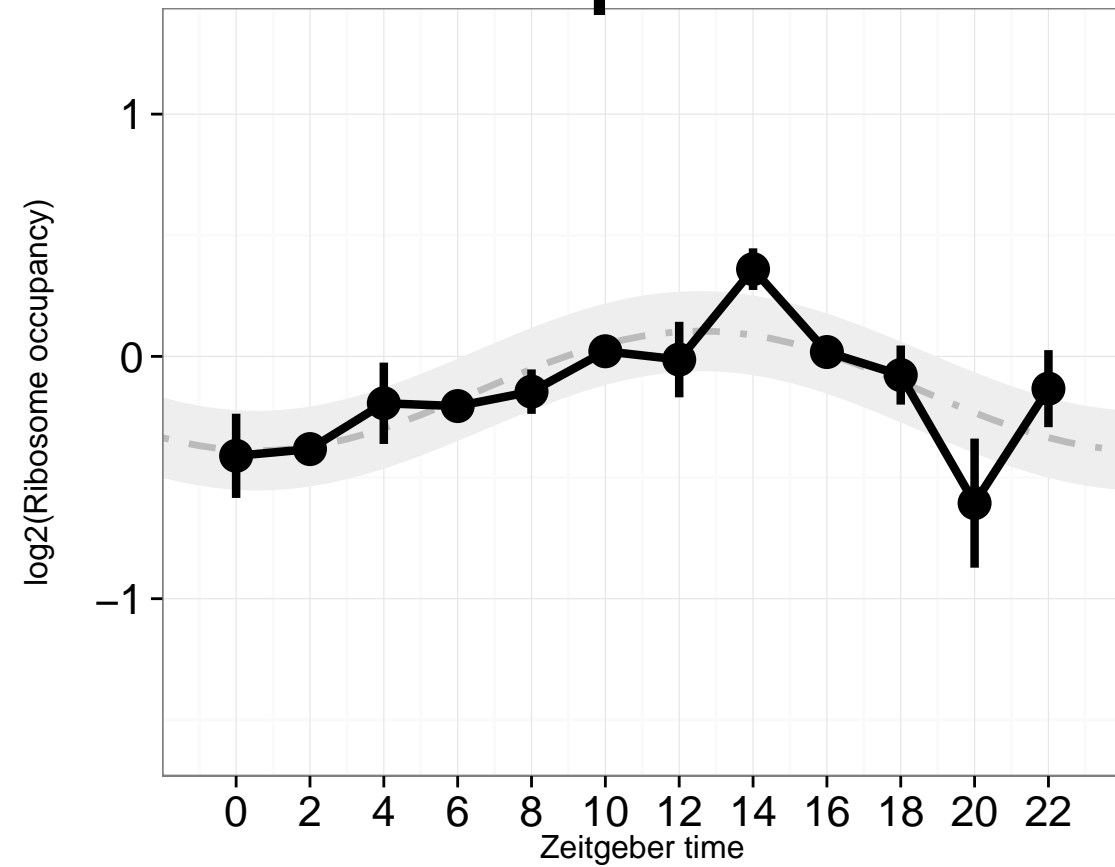

Supplement: Supplementary file 1926 [file 1]

## Dvl3

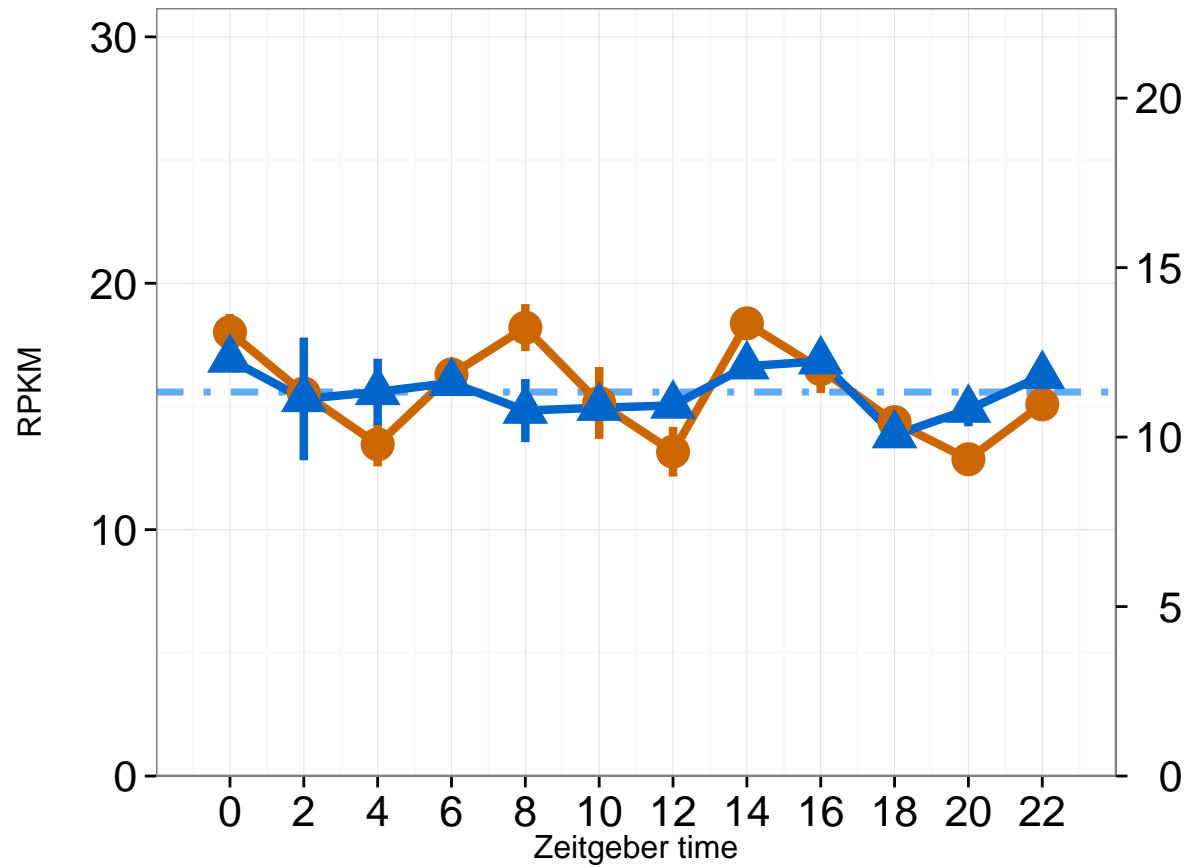

## Dvl3

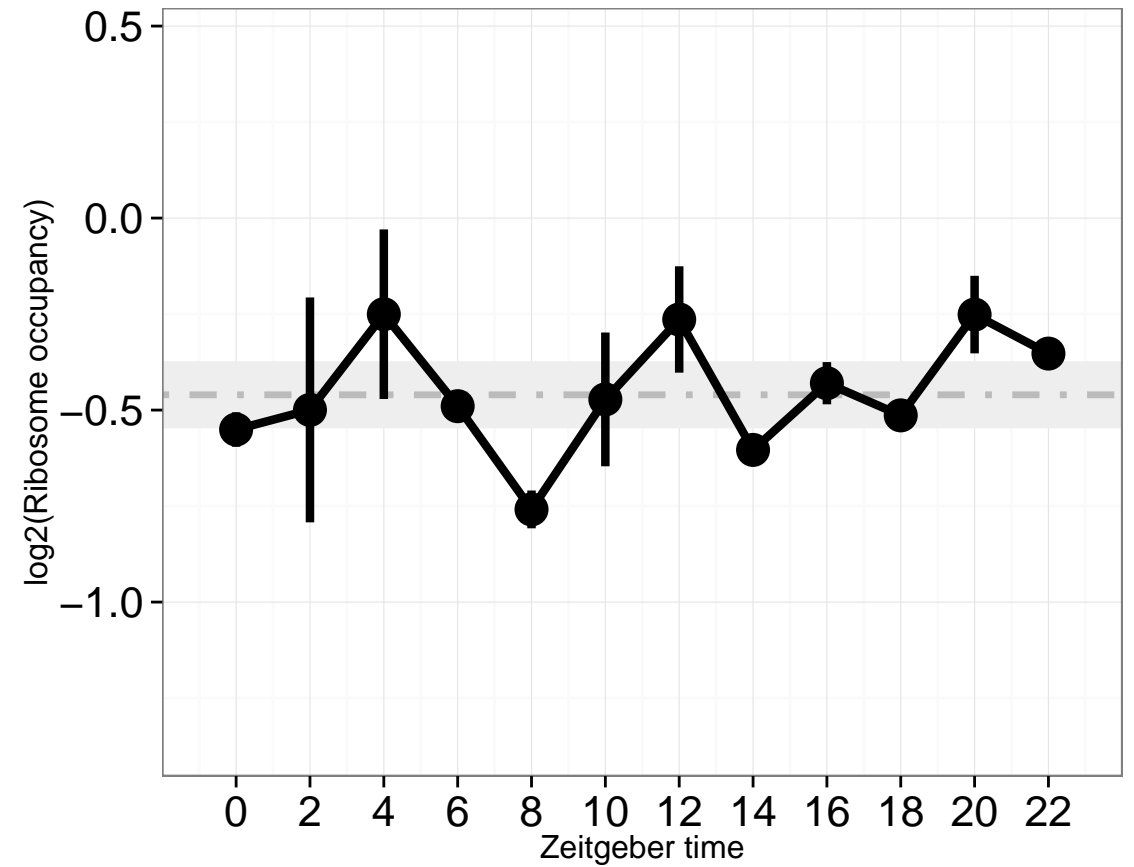

Supplement: Supplementary file 1927 [file 1]

# Rpl13a

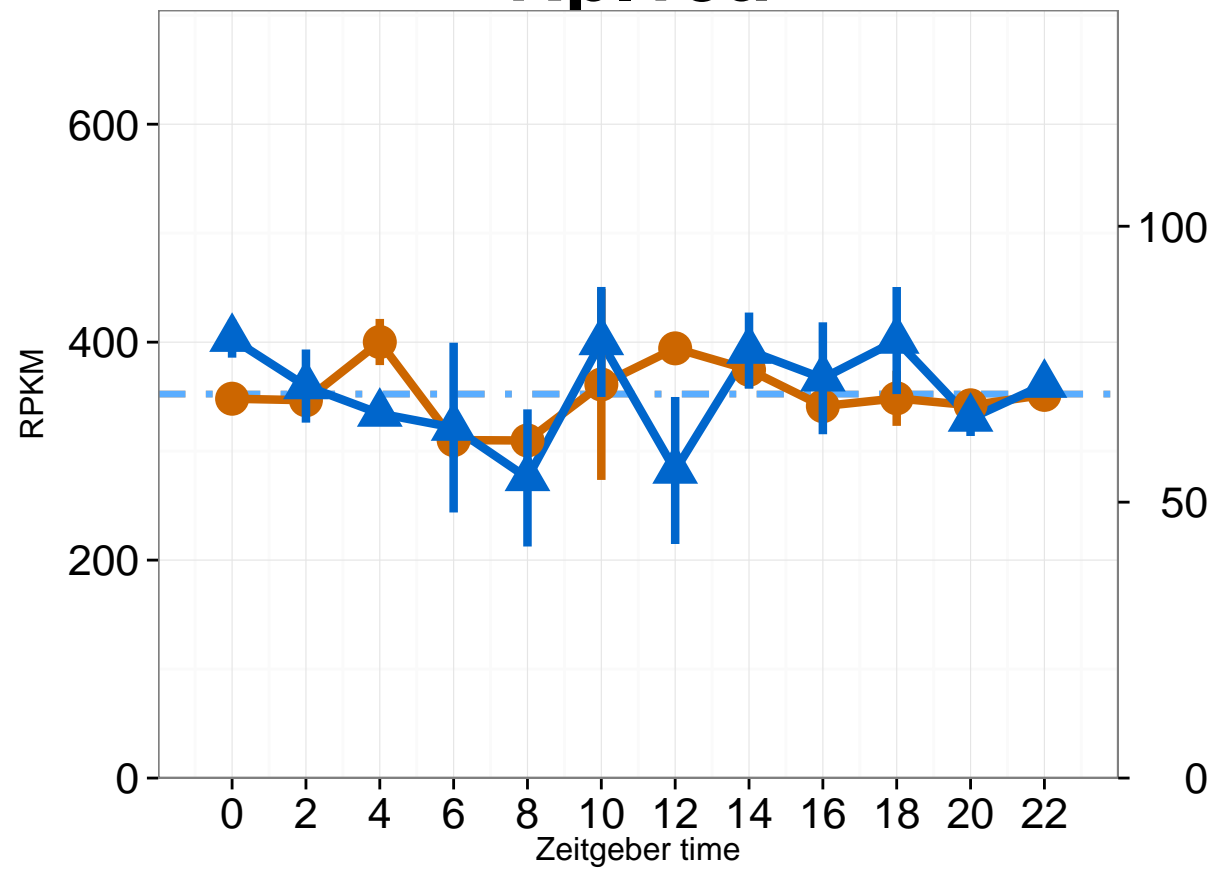

# Rpl13a

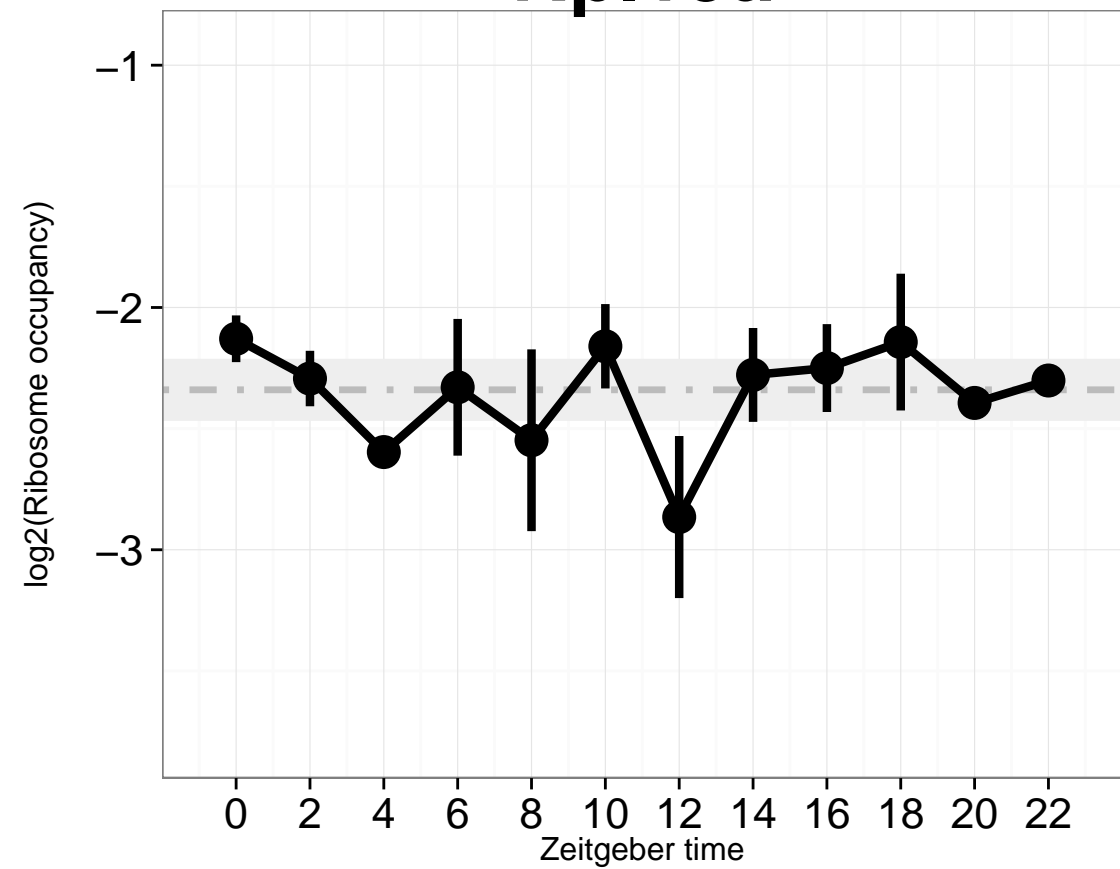

Supplement: Supplementary file 1928 [file 1]

# Wbscr27

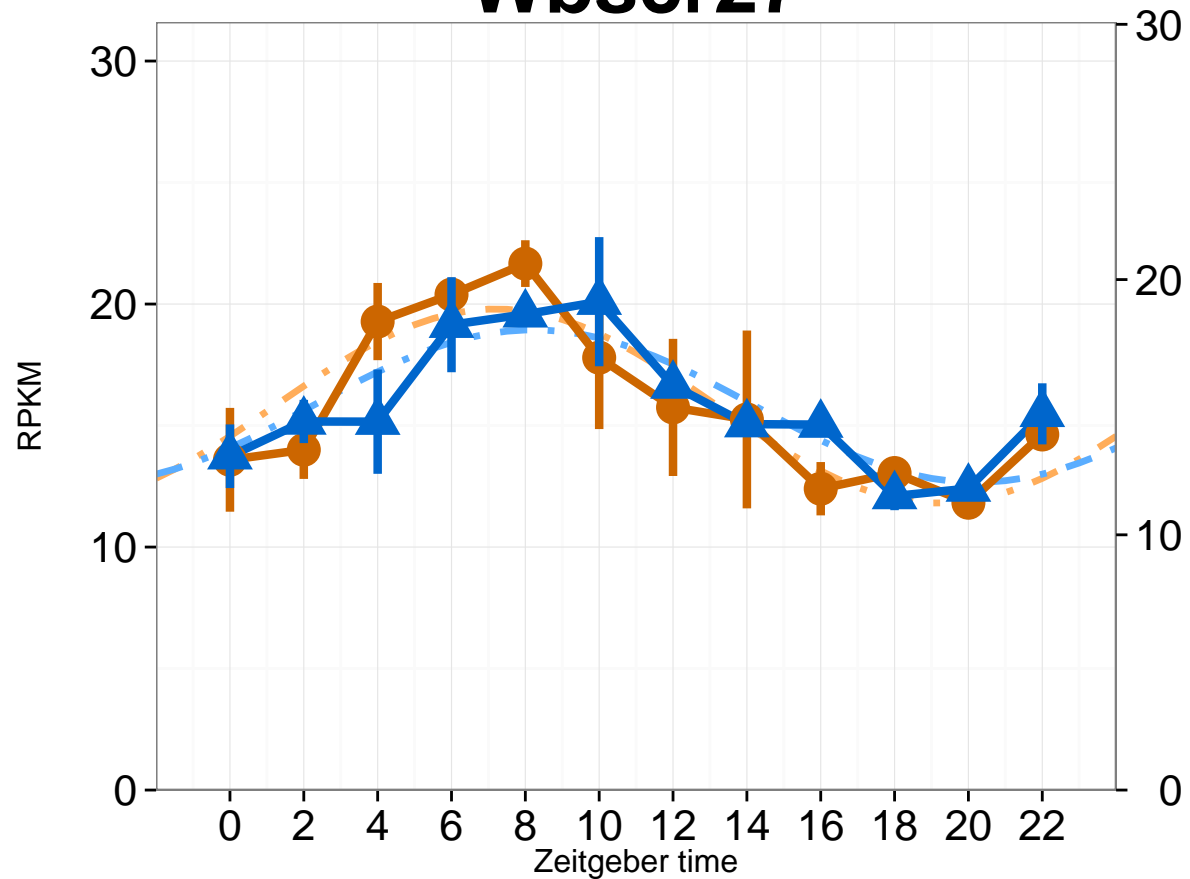

# Wbscr27

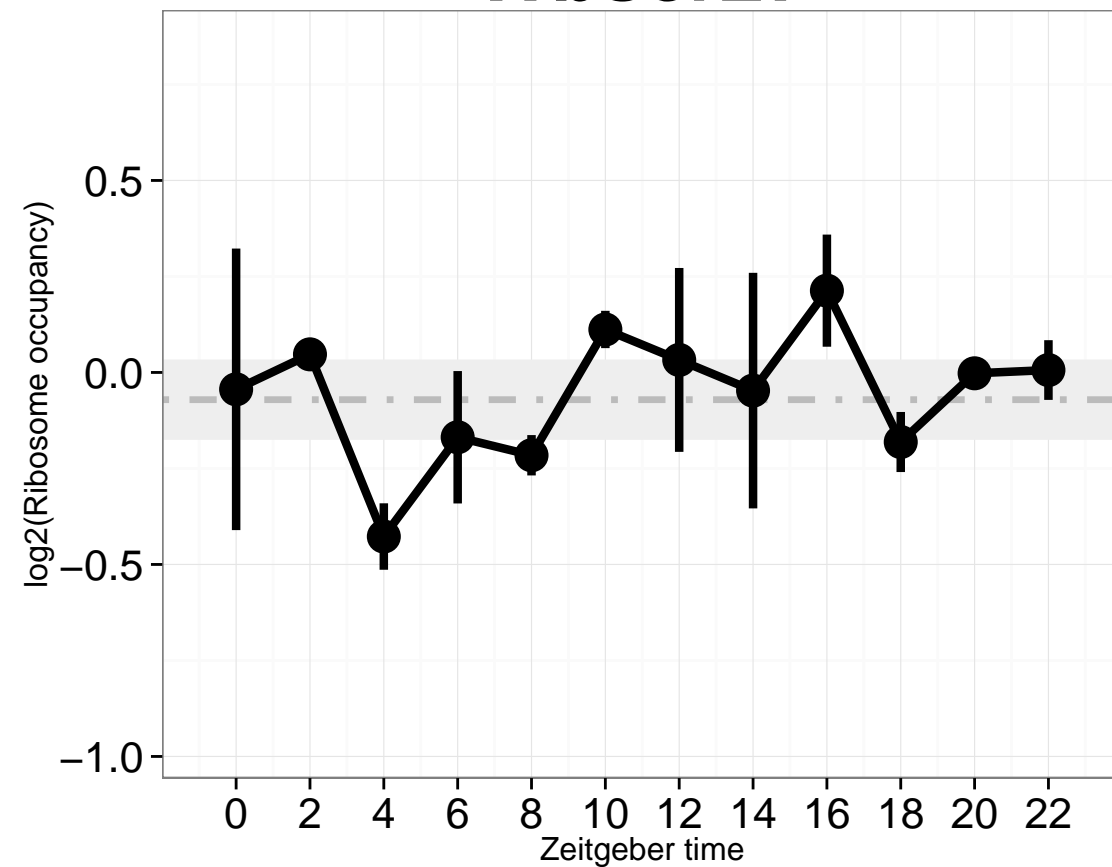

Supplement: Supplementary file 1929 [file 1]

## Ncbp1

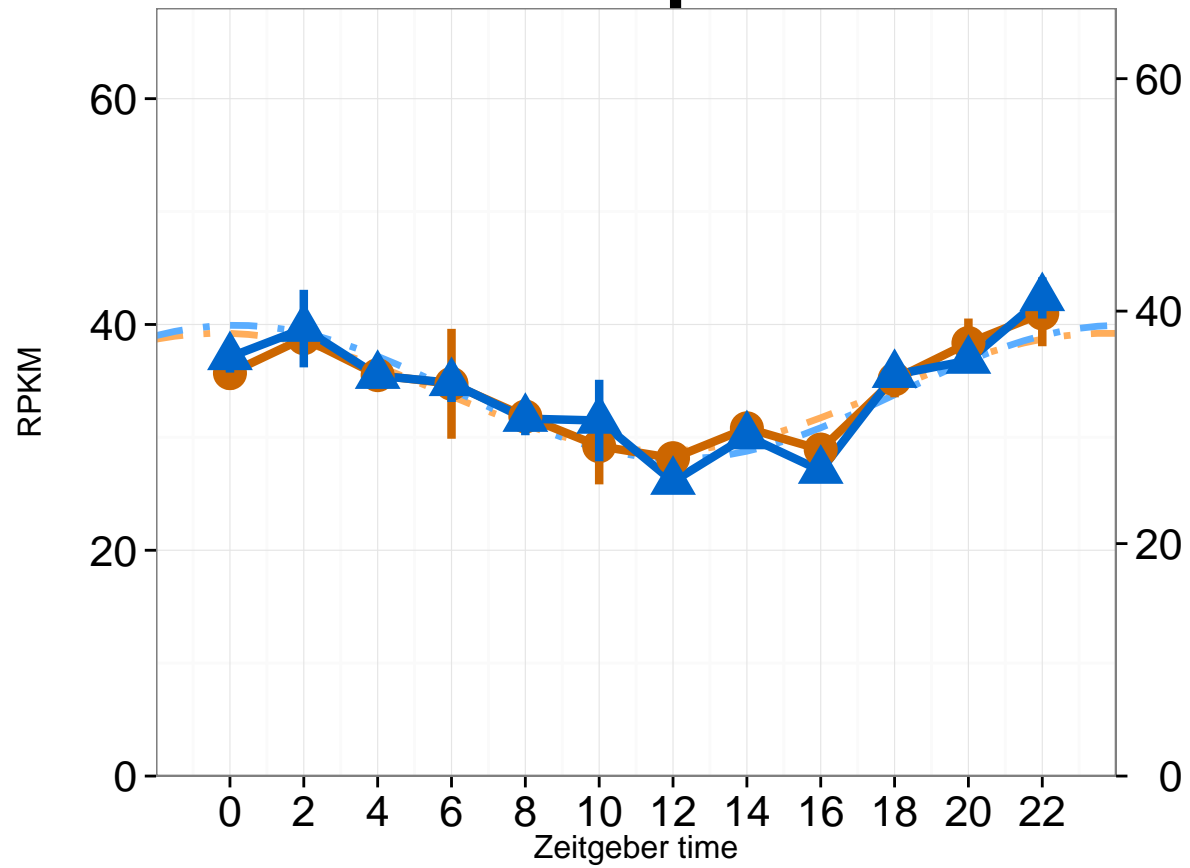

## Ncbp1

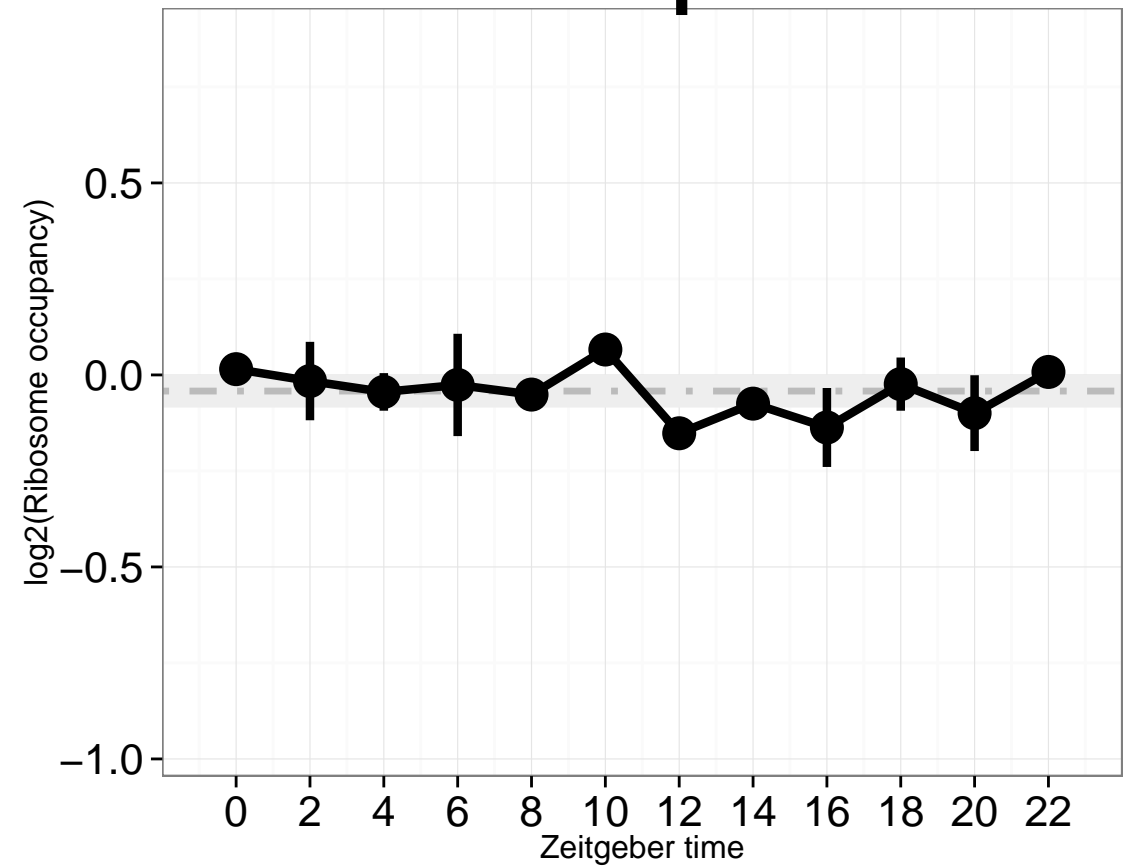

Supplement: Supplementary file 1930 [file 1]

# Samd8

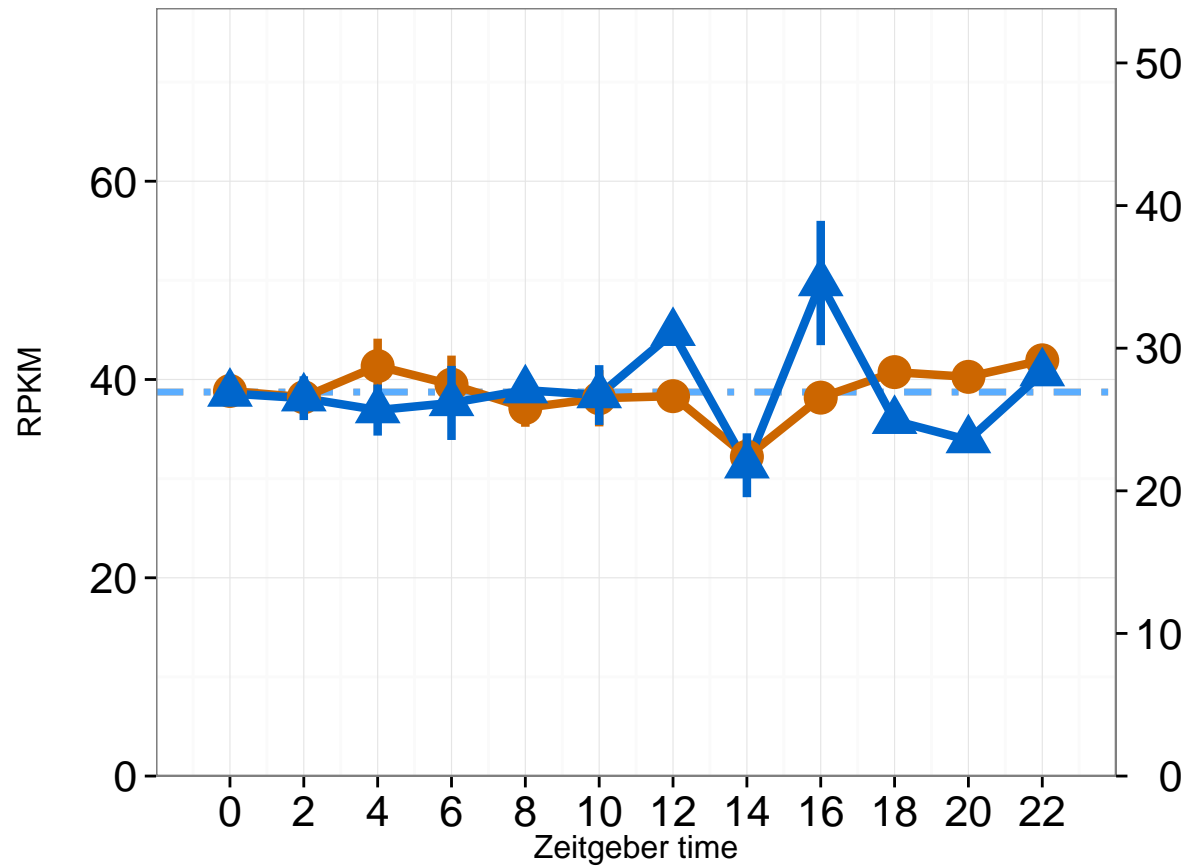

# Samd8

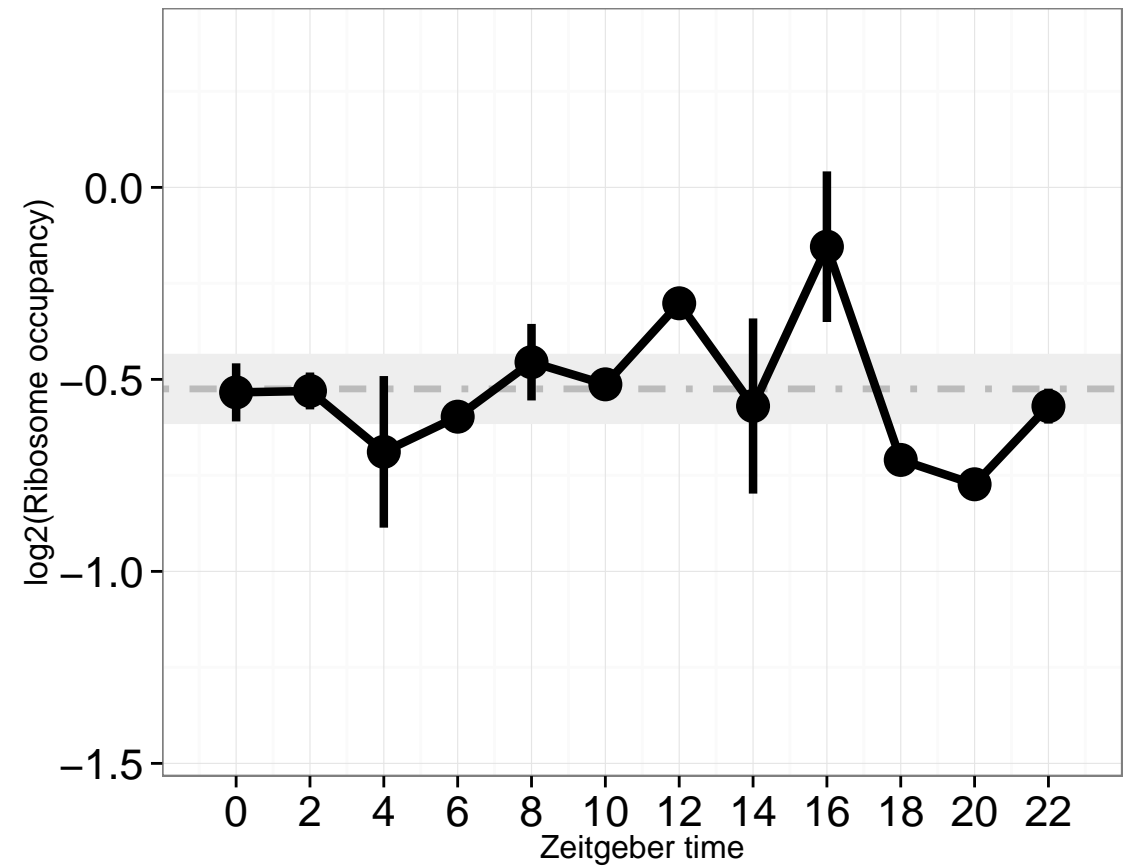

Supplement: Supplementary file 1931 [file 1]

## Tmed8

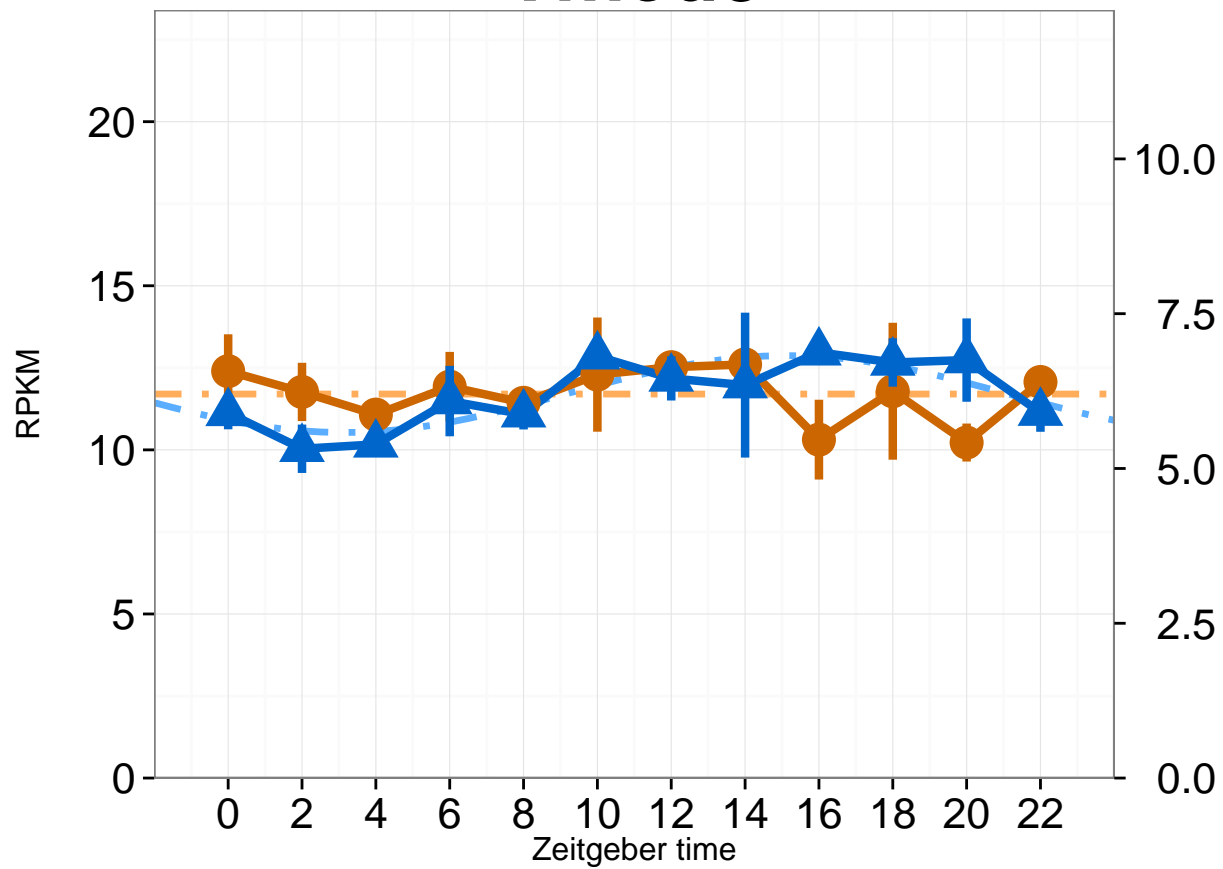

## Tmed8

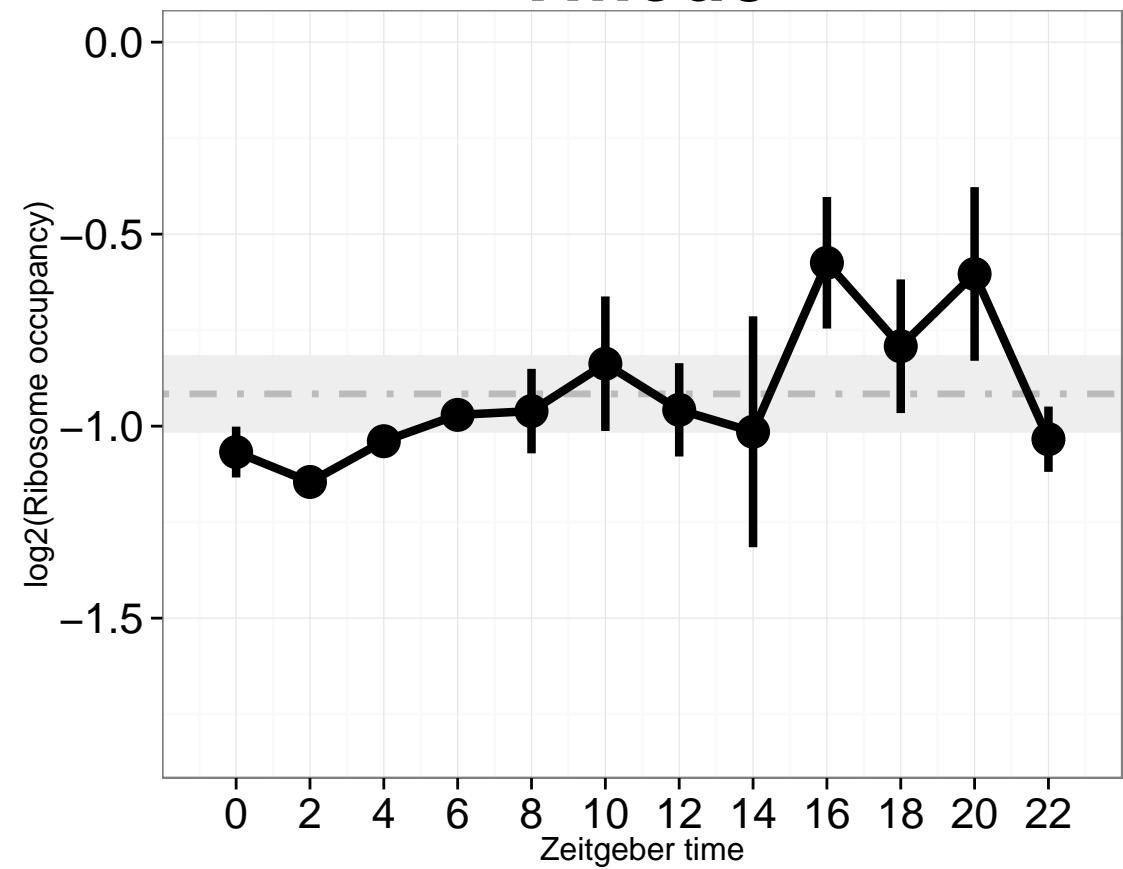

Supplement: Supplementary file 1932 [file 1]

## Gamt

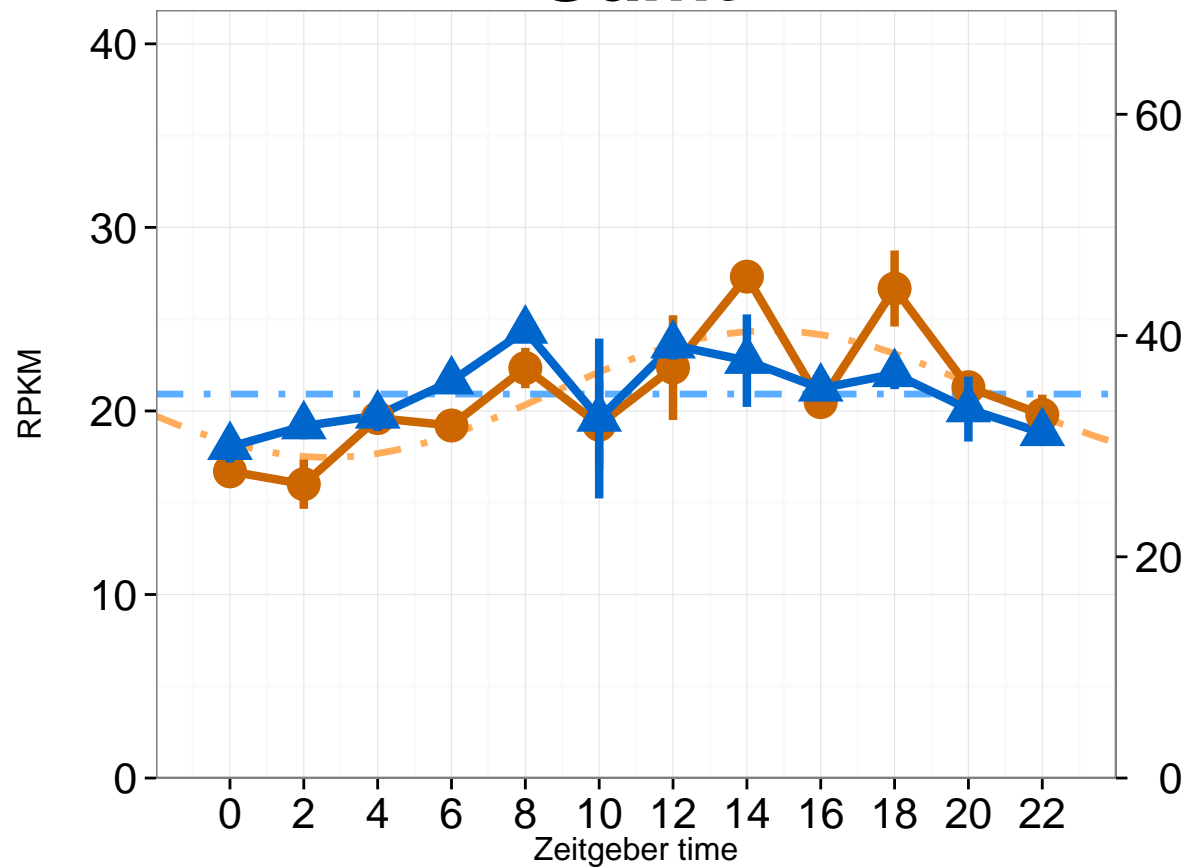

## Gamt

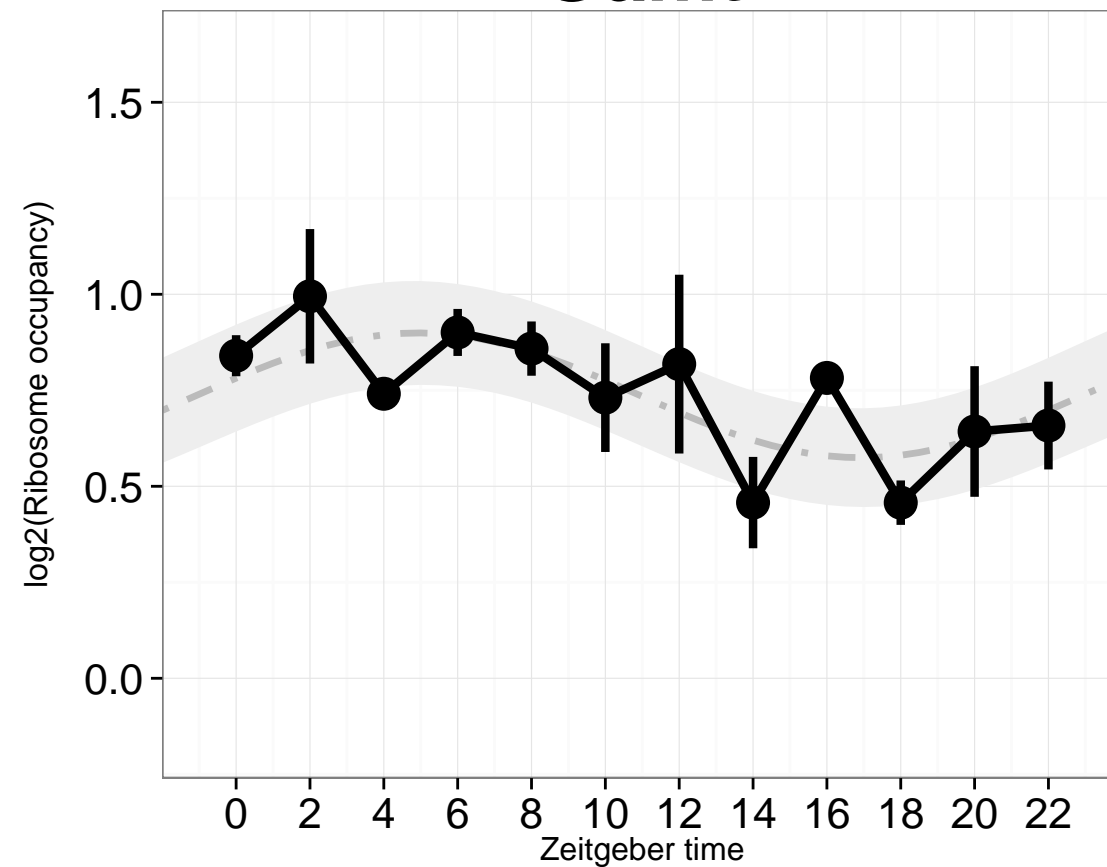

Supplement: Supplementary file 1933 [file 1]

## Brcc3

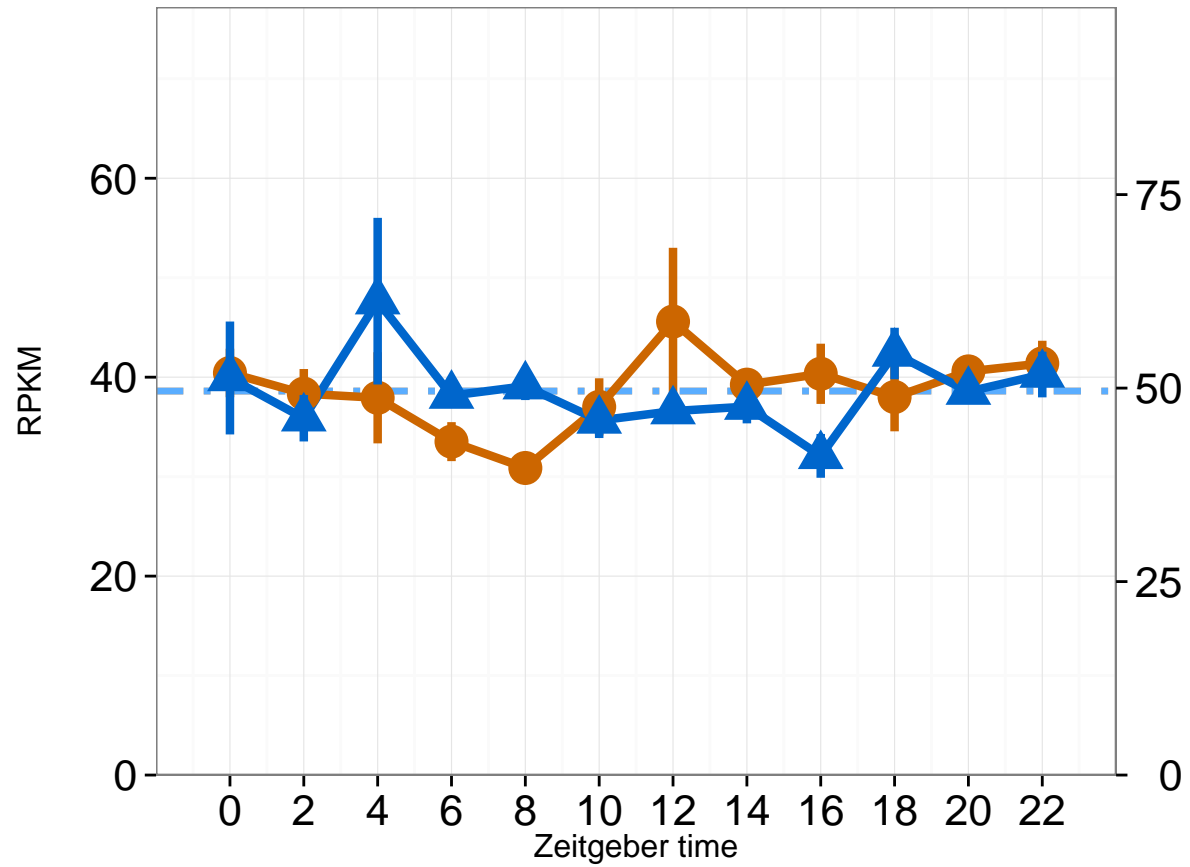

## Brcc3

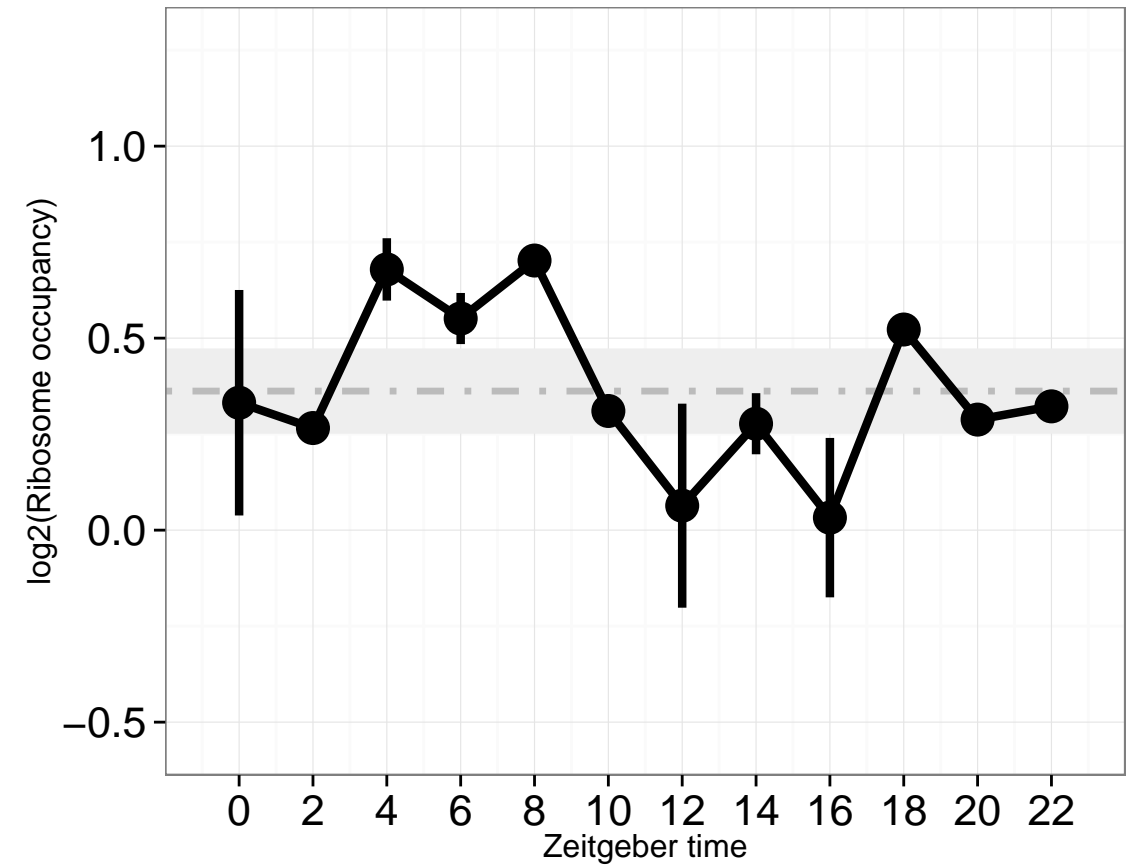

Supplement: Supplementary file 1934 [file 1]

## Stambp

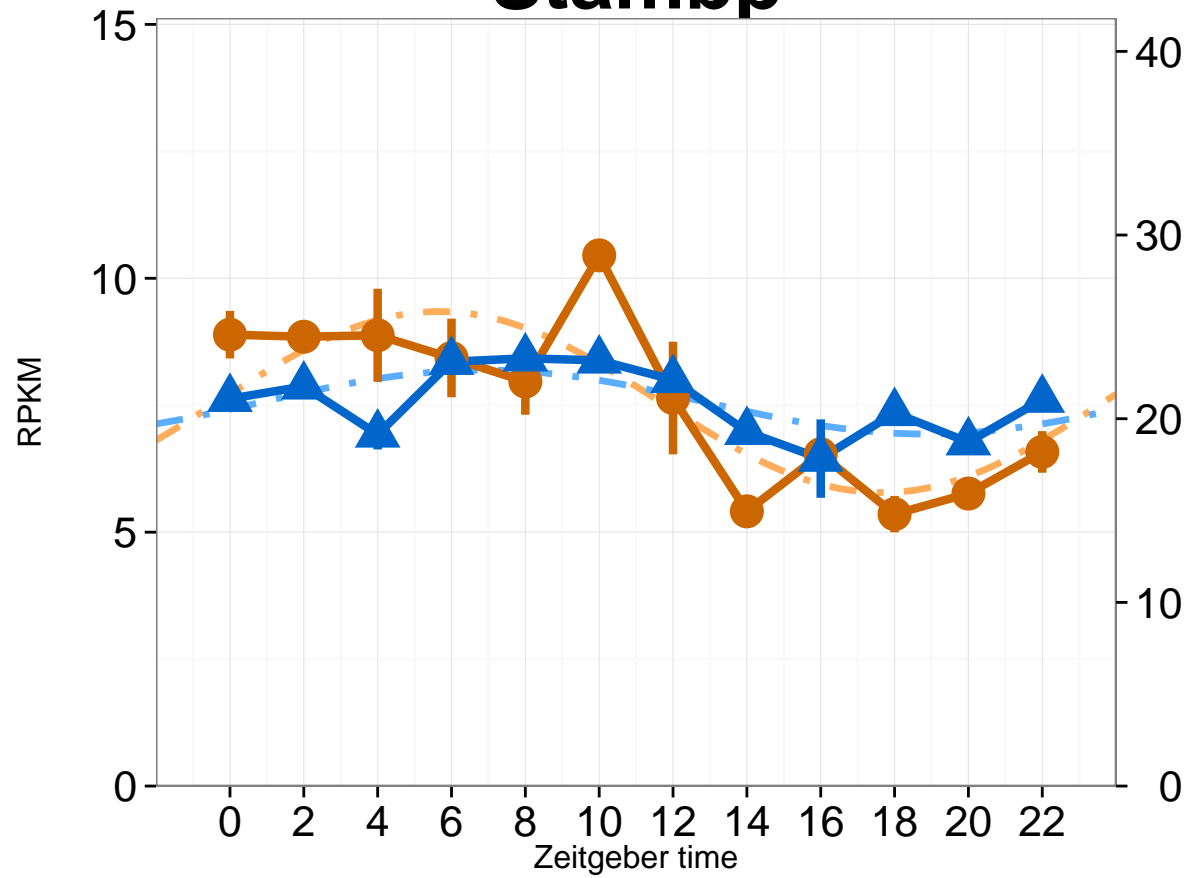

## Stambp

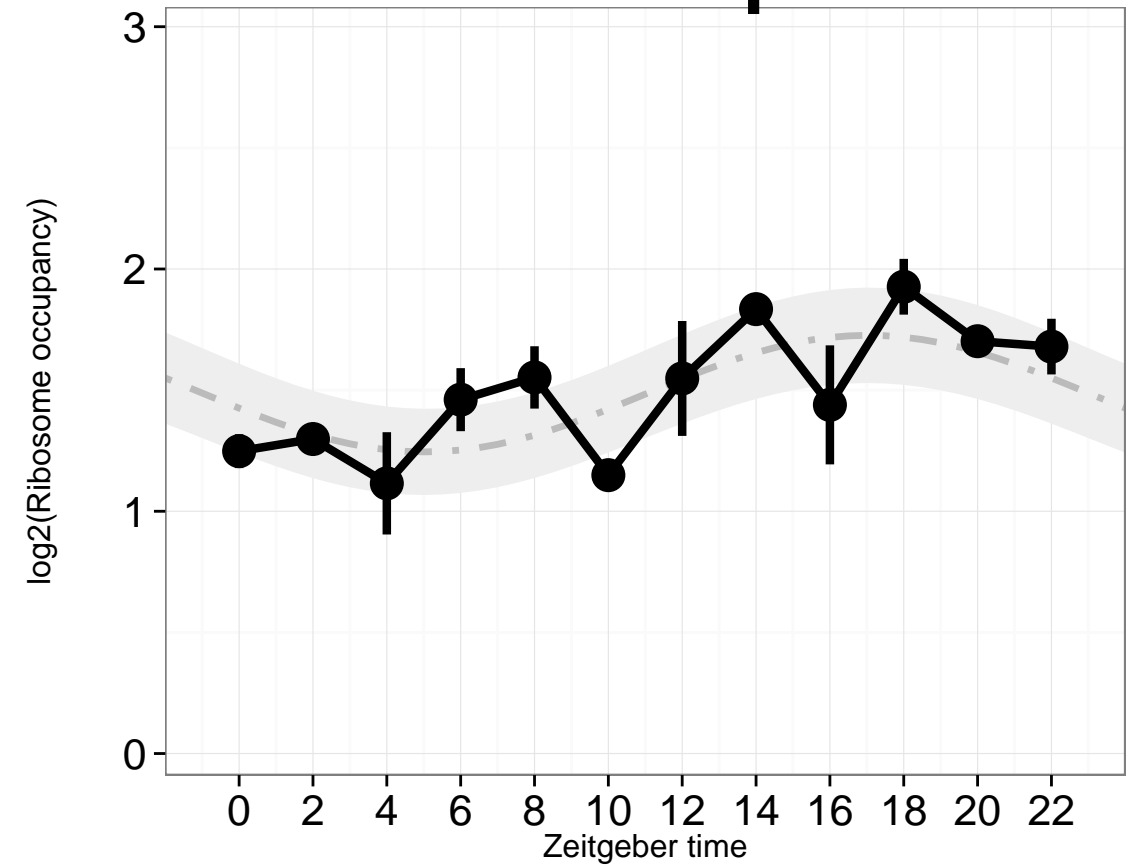

Supplement: Supplementary file 1935 [file 1]

## Spon1

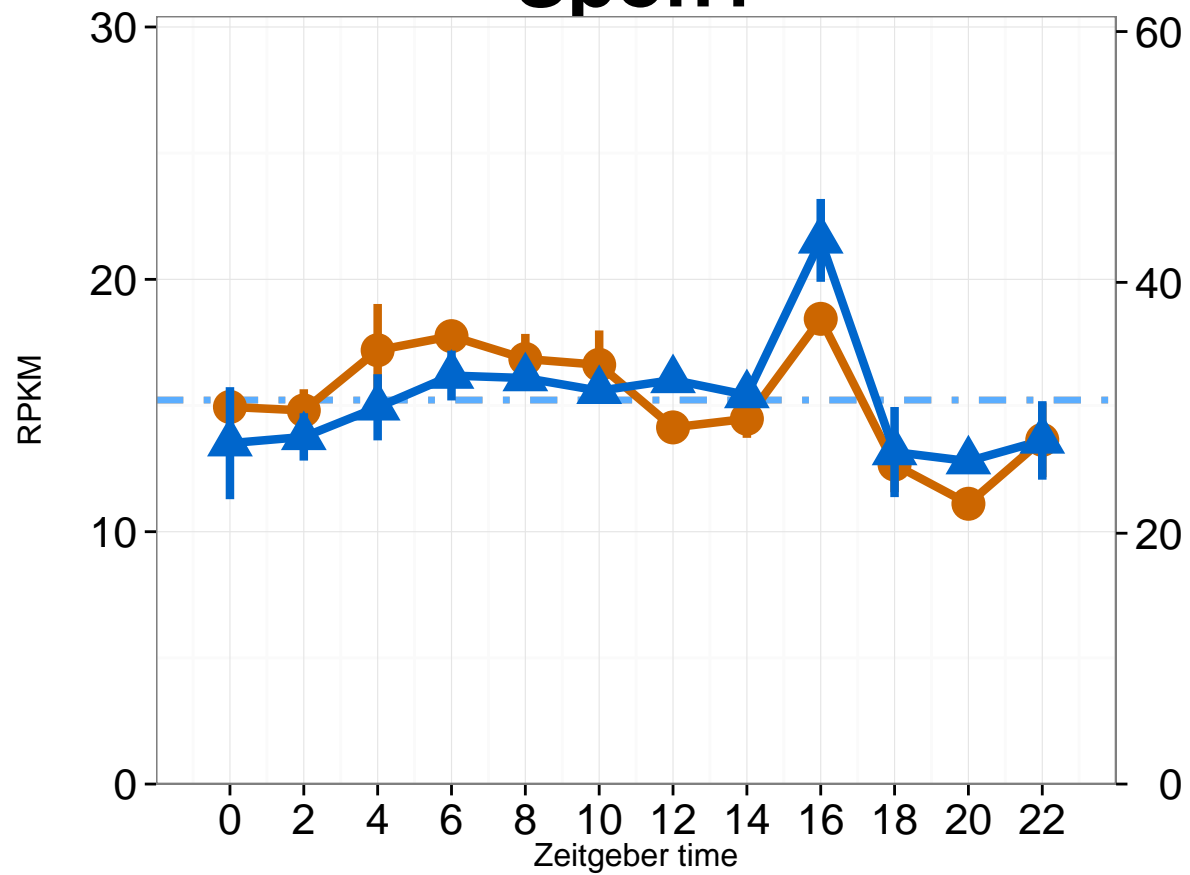

## Spon1

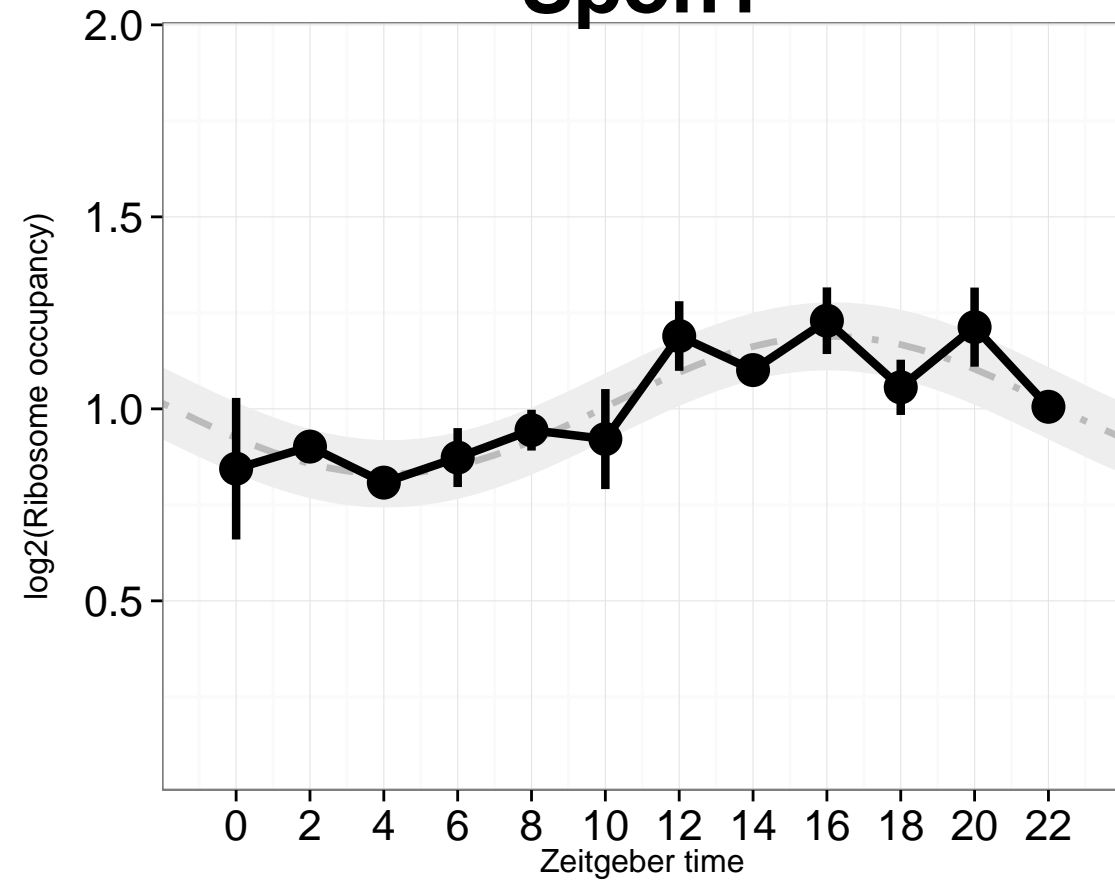

Supplement: Supplementary file 1936 [file 1]

# Clp1

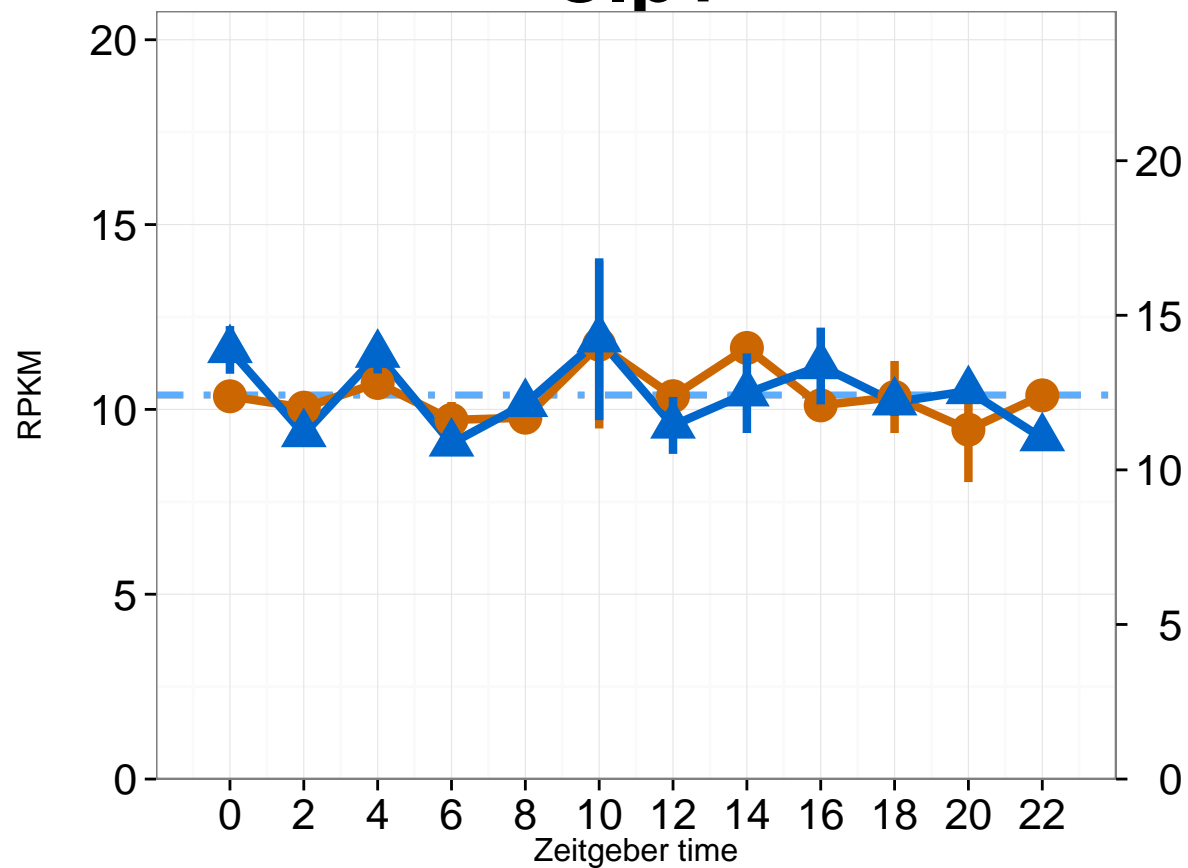

# Clp1

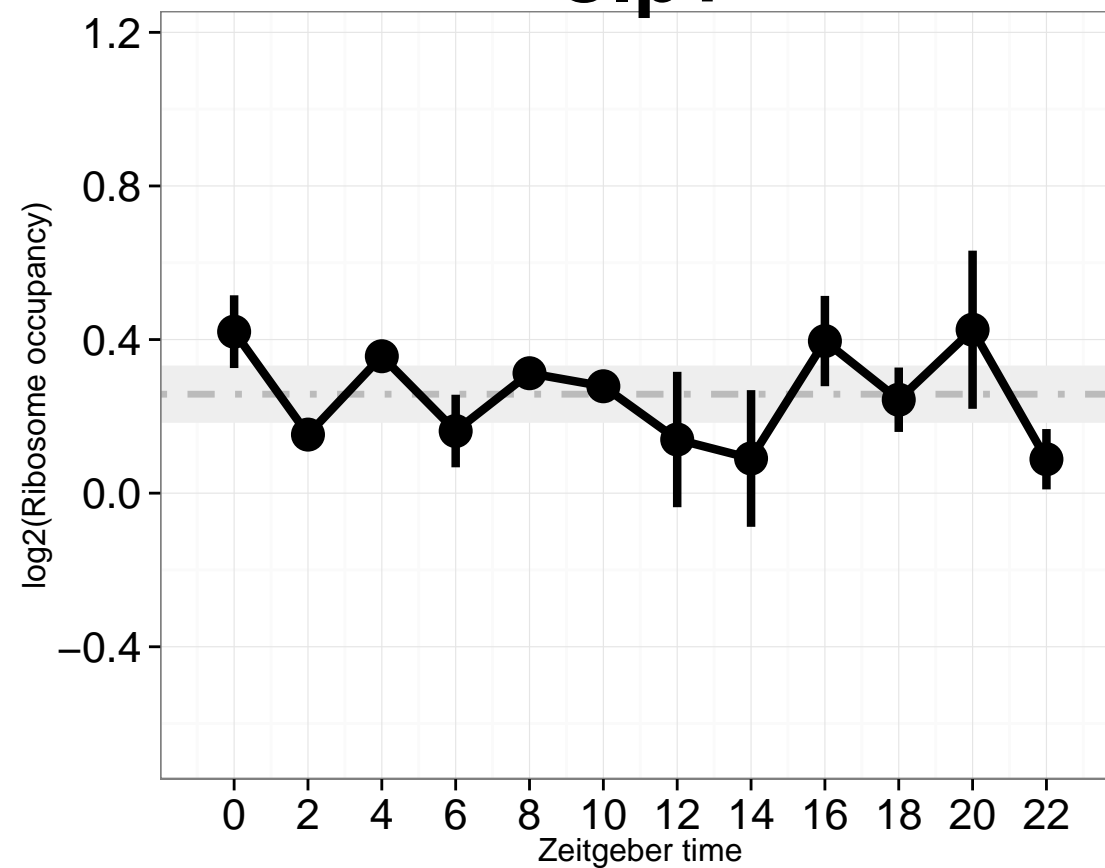

Supplement: Supplementary file 1937 [file 1]

## Adam17

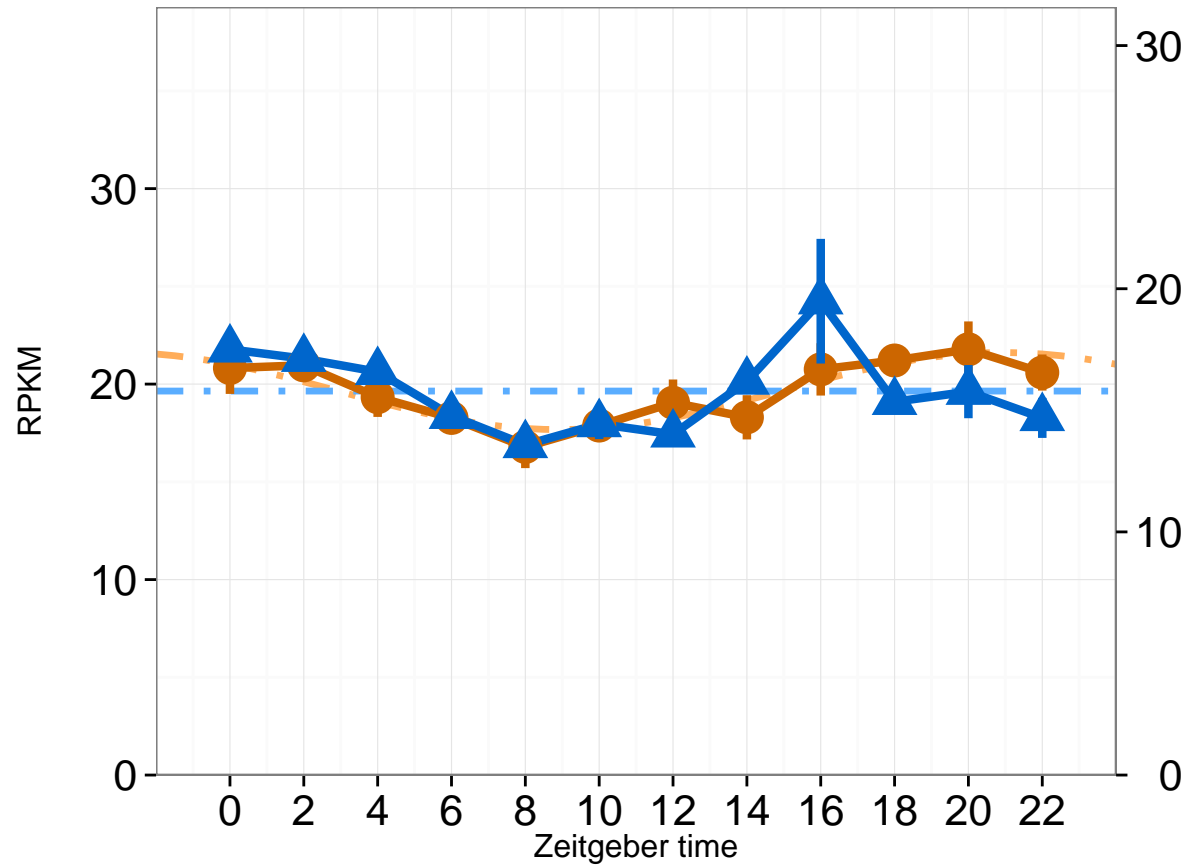

## Adam17

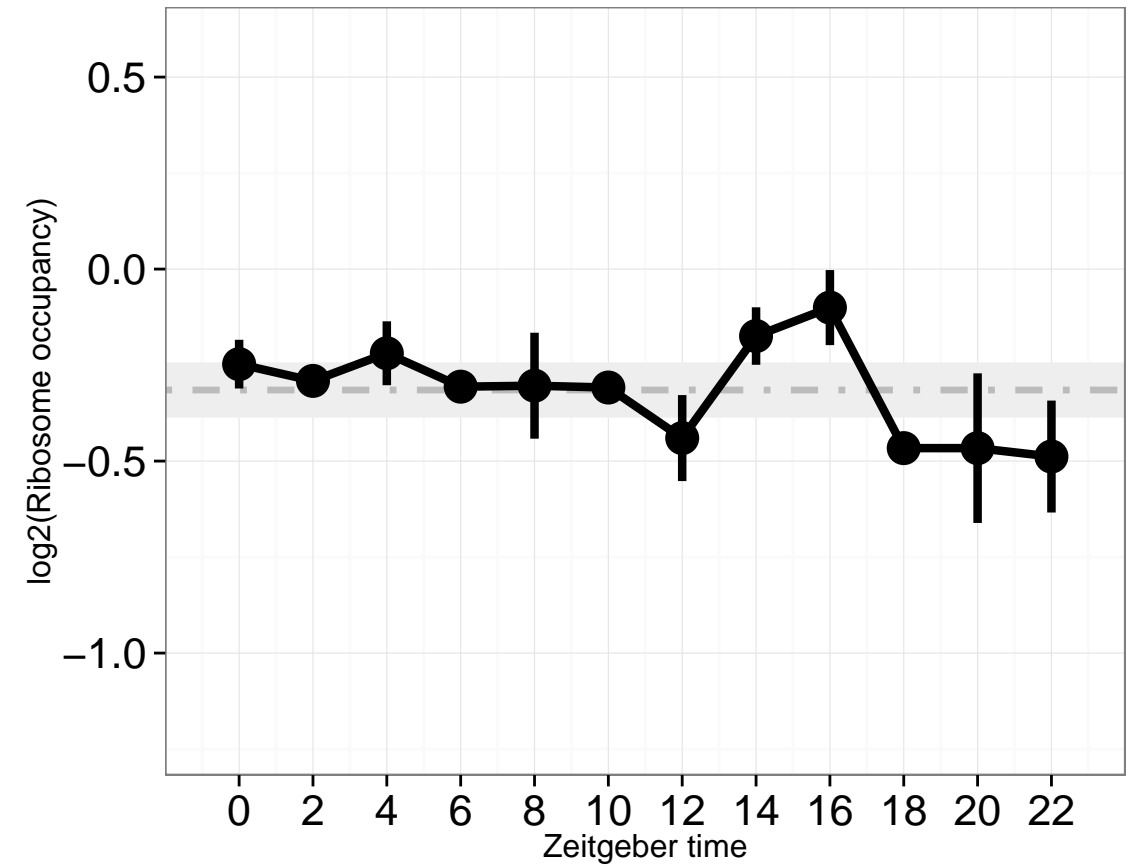

Supplement: Supplementary file 1938 [file 1]

# Ndufa4

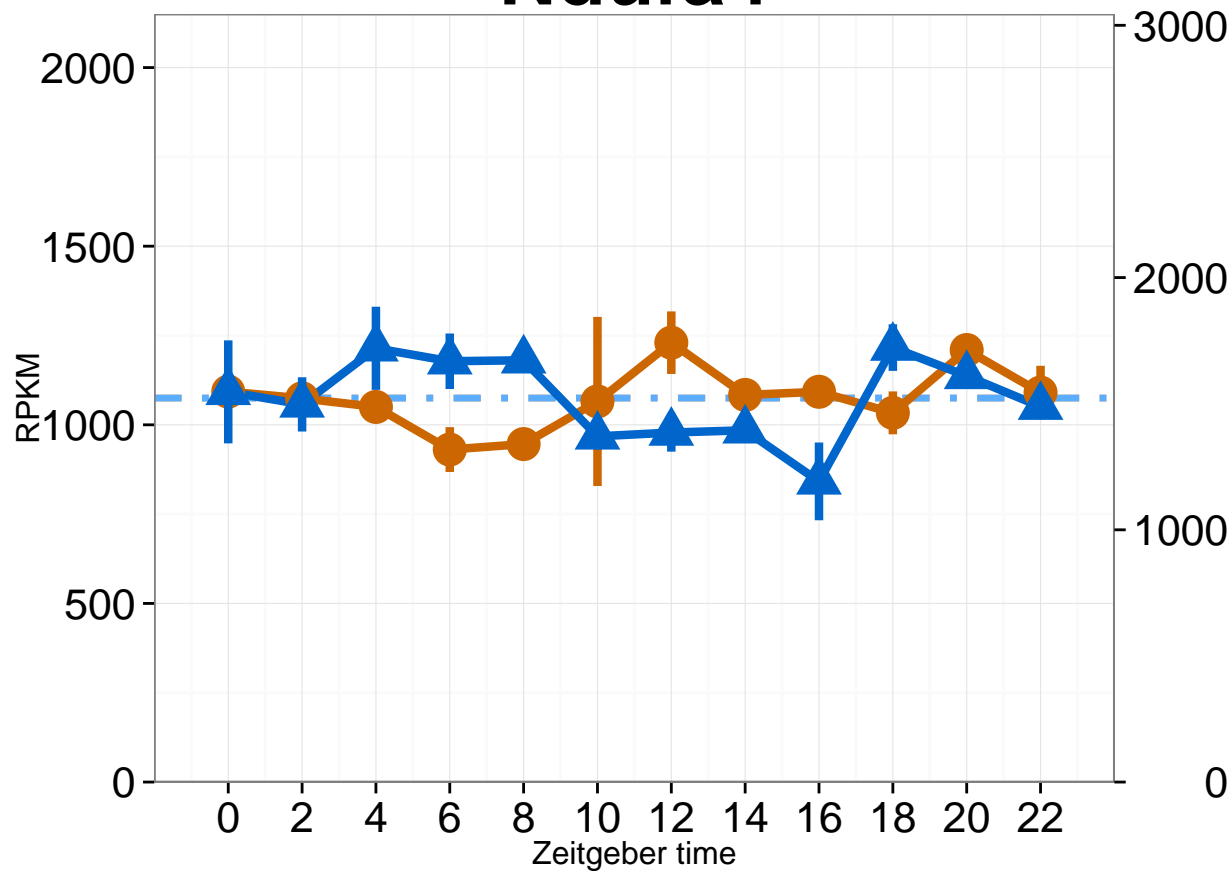

# Ndufa4

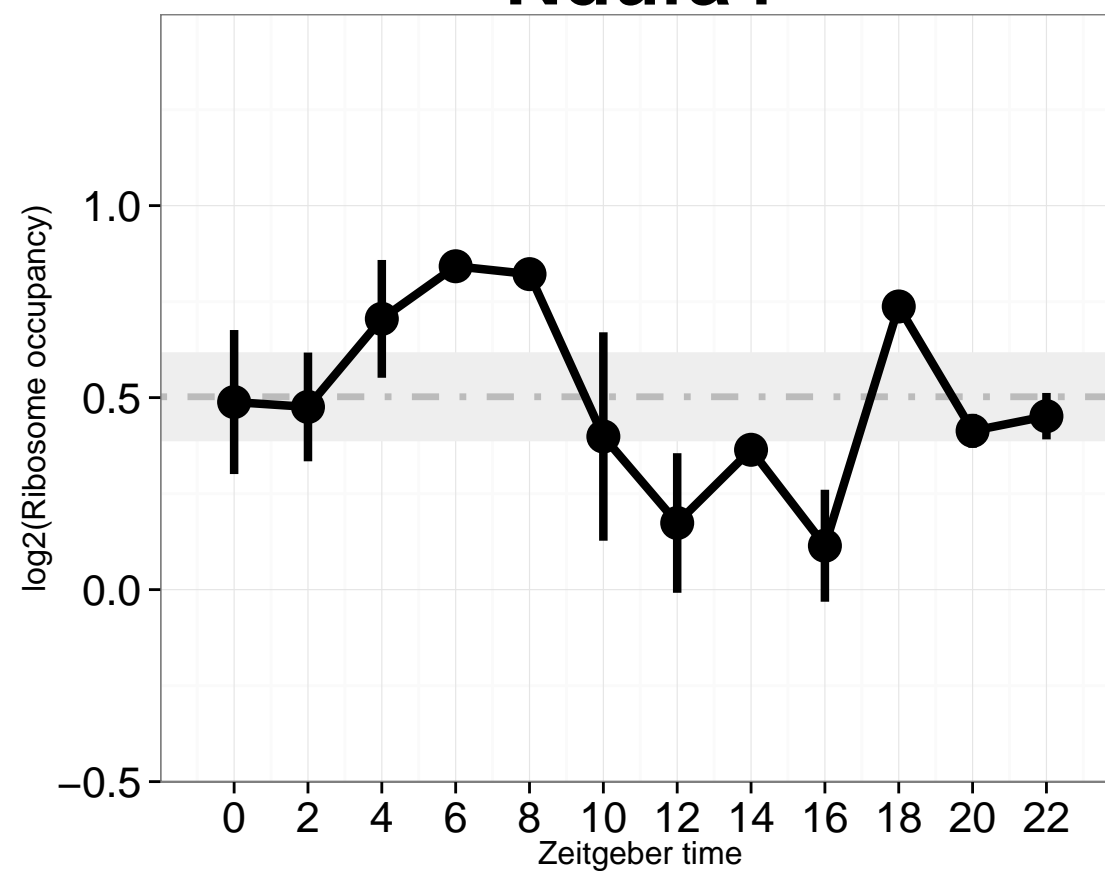

Supplement: Supplementary file 1939 [file 1]

## Exoc6

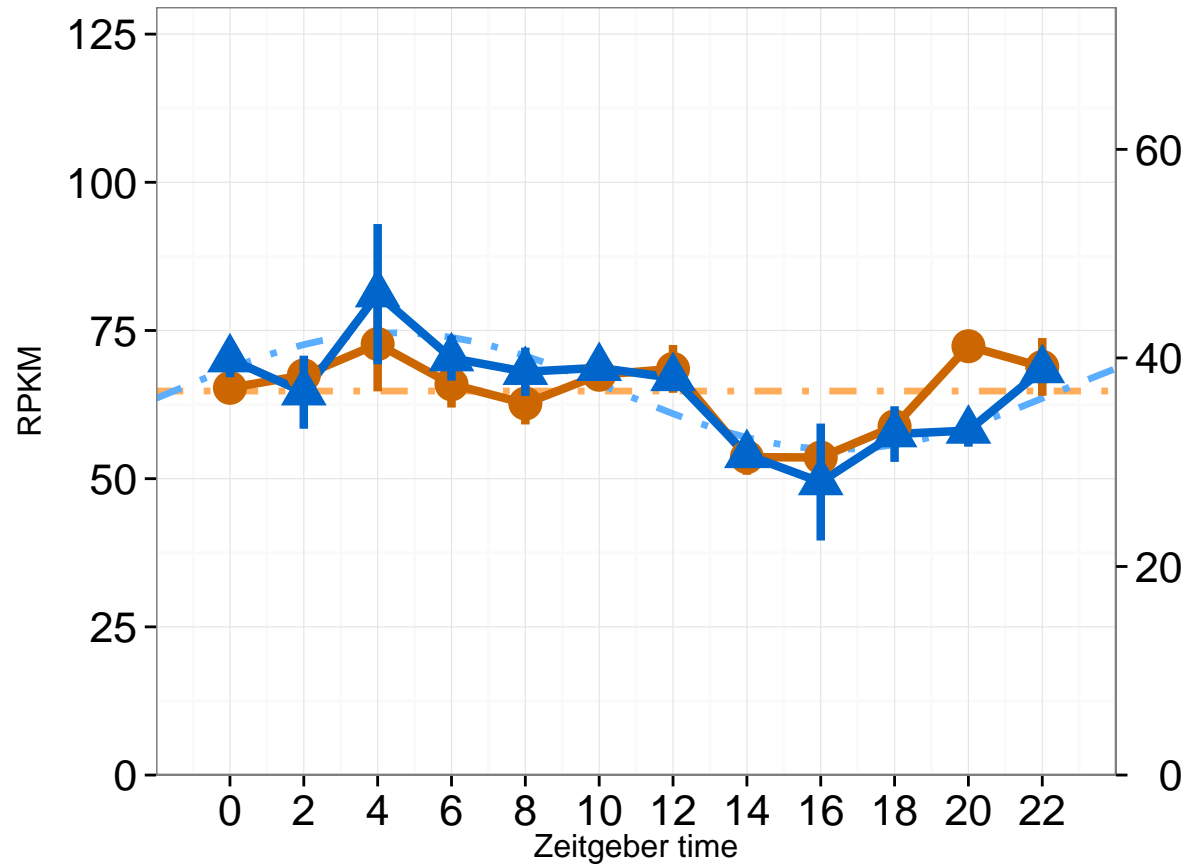

## Exoc6

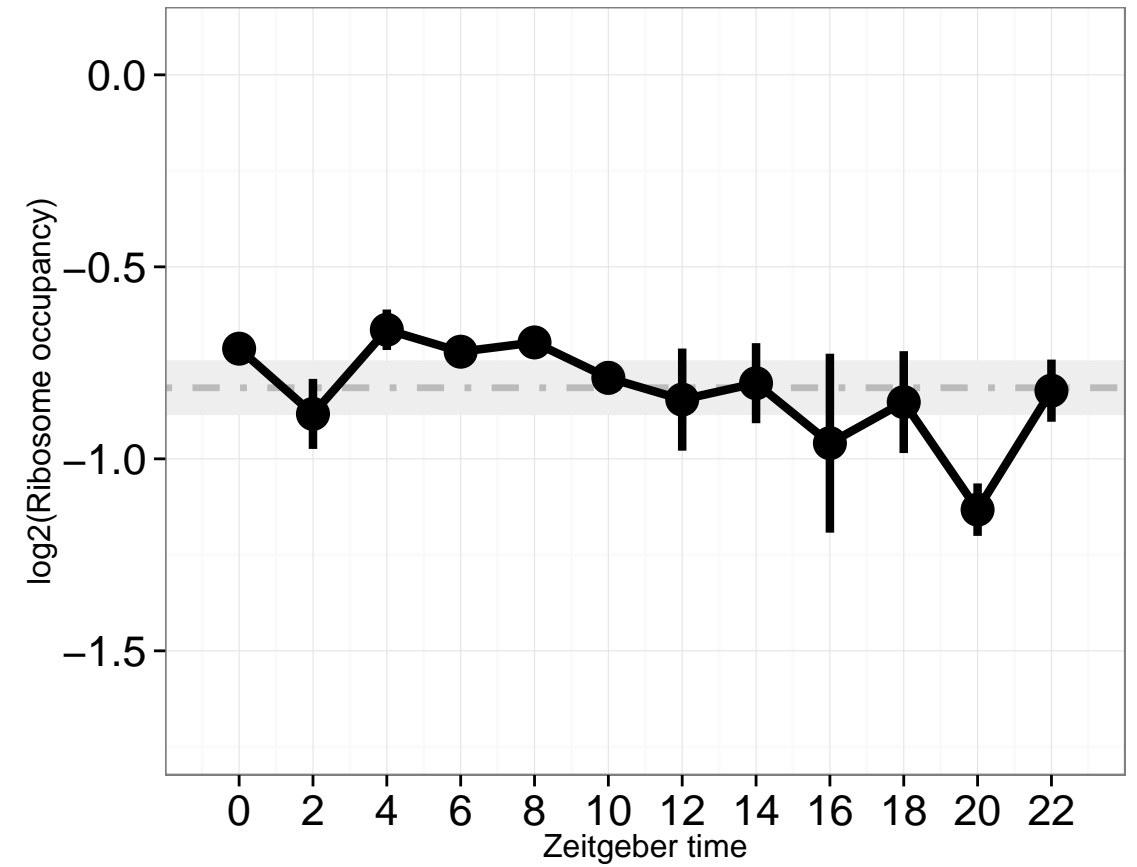

Supplement: Supplementary file 1940 [file 1]

## Cops4

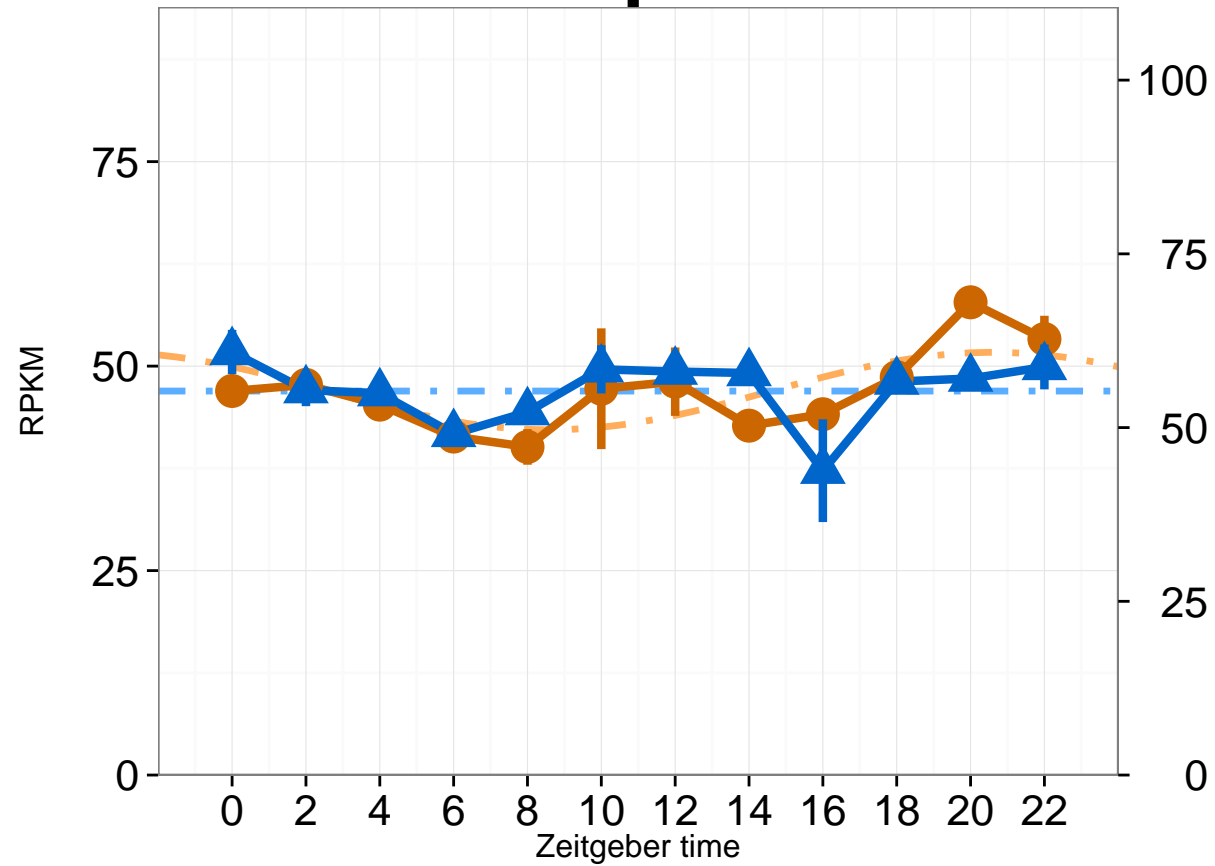

## Cops4

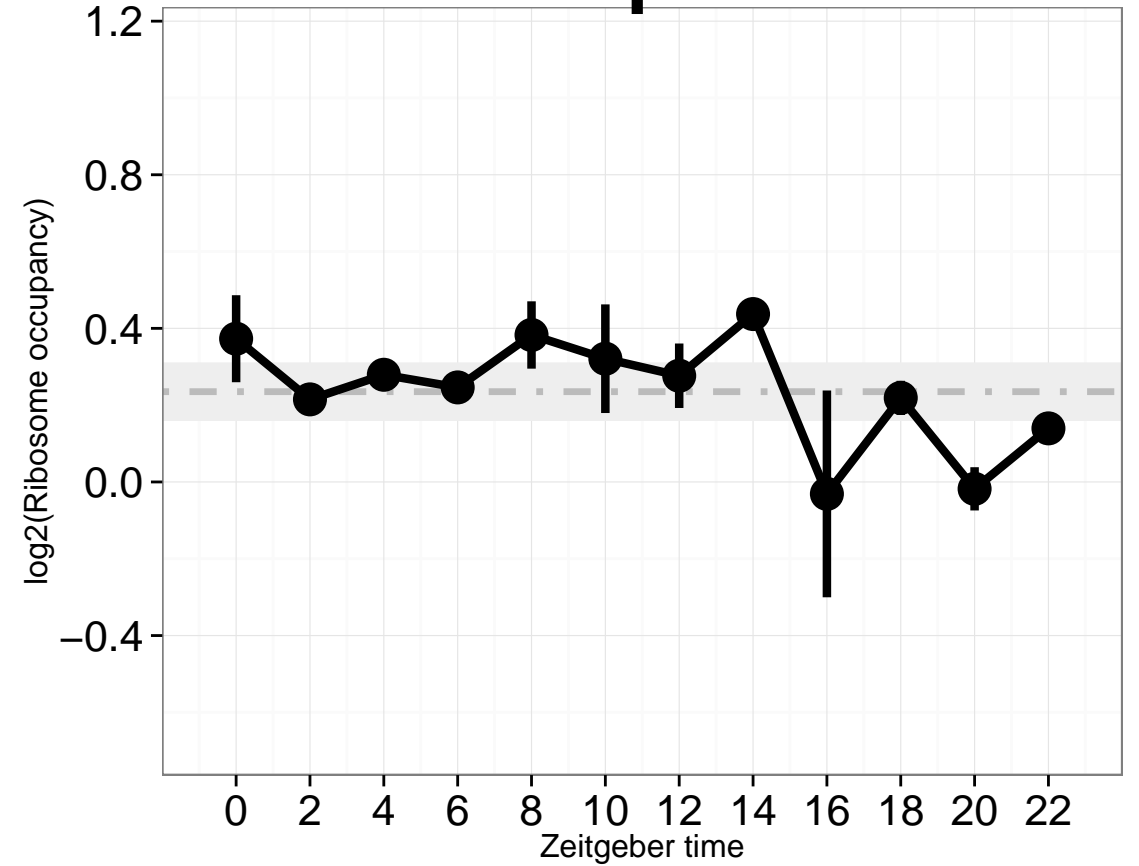

Supplement: Supplementary file 1941 [file 1]

# Pnpla3

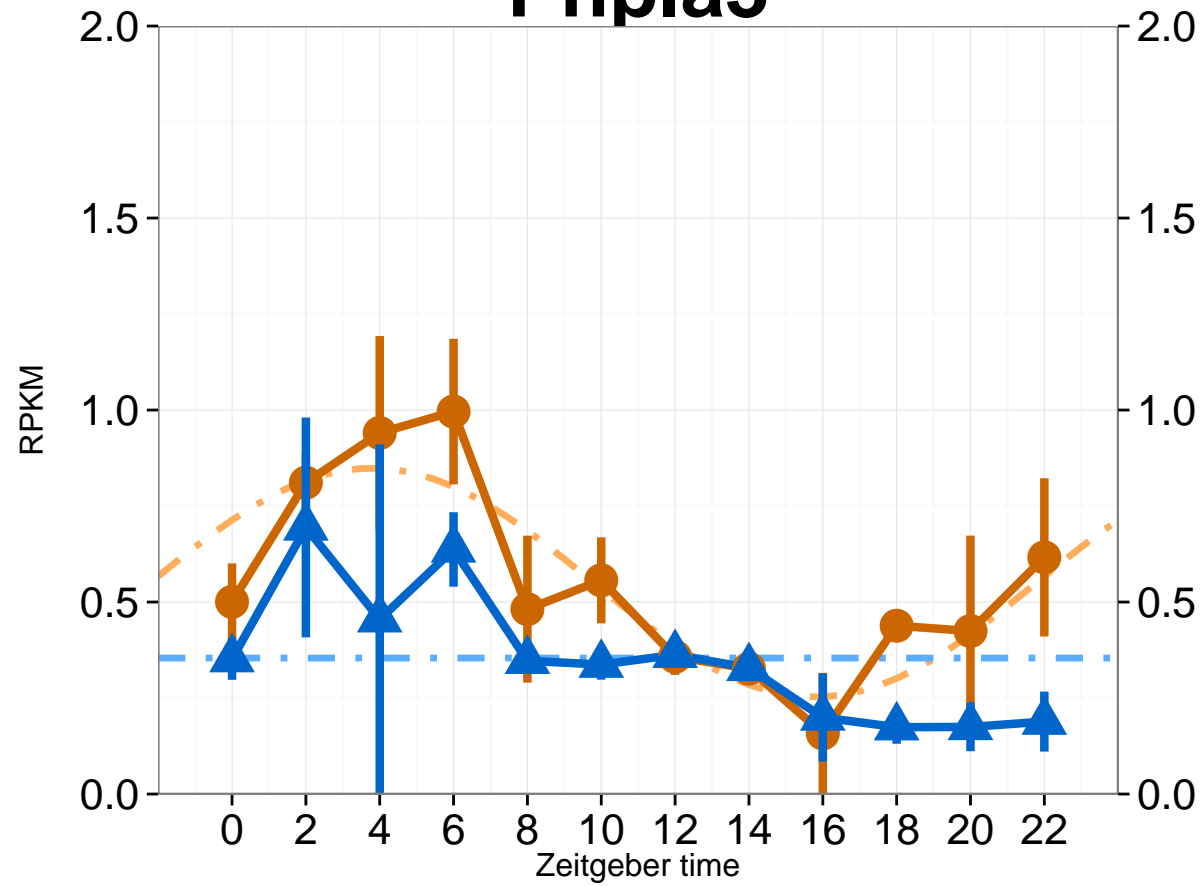

# Pnpla3

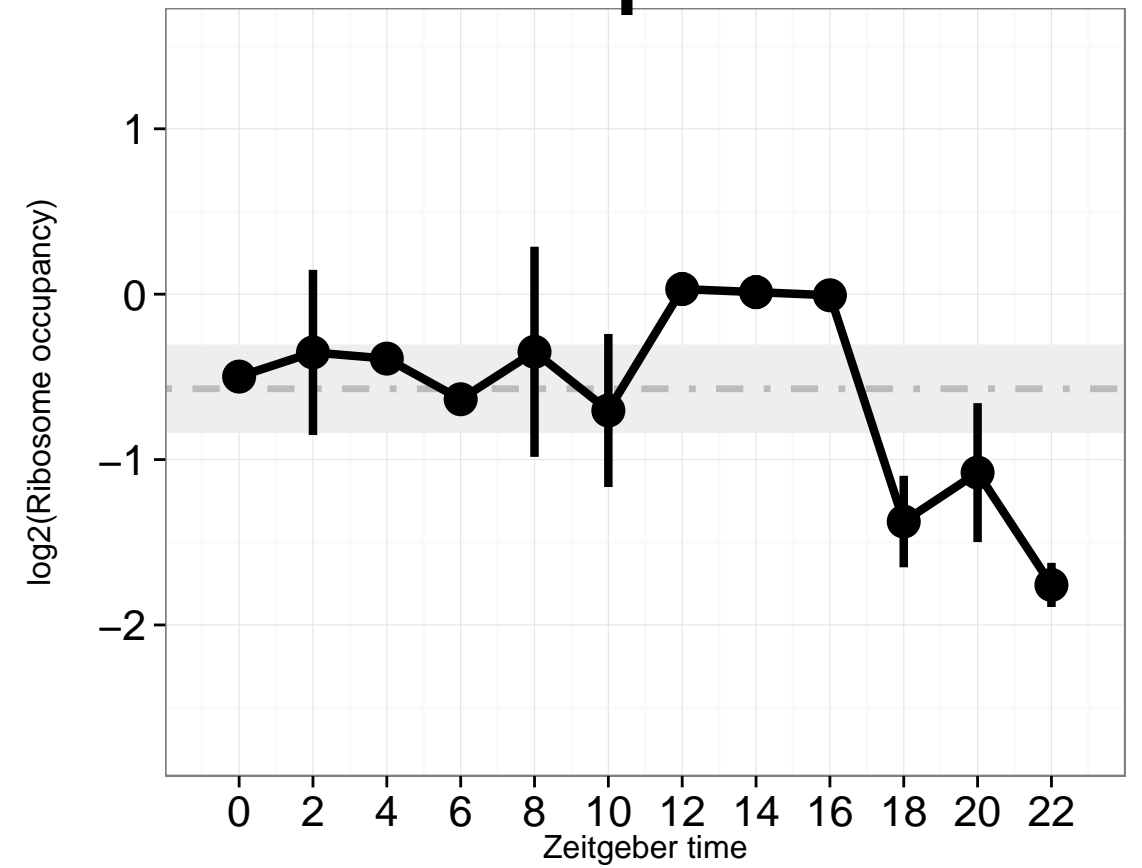

Supplement: Supplementary file 1942 [file 1]

# Nt5c3b

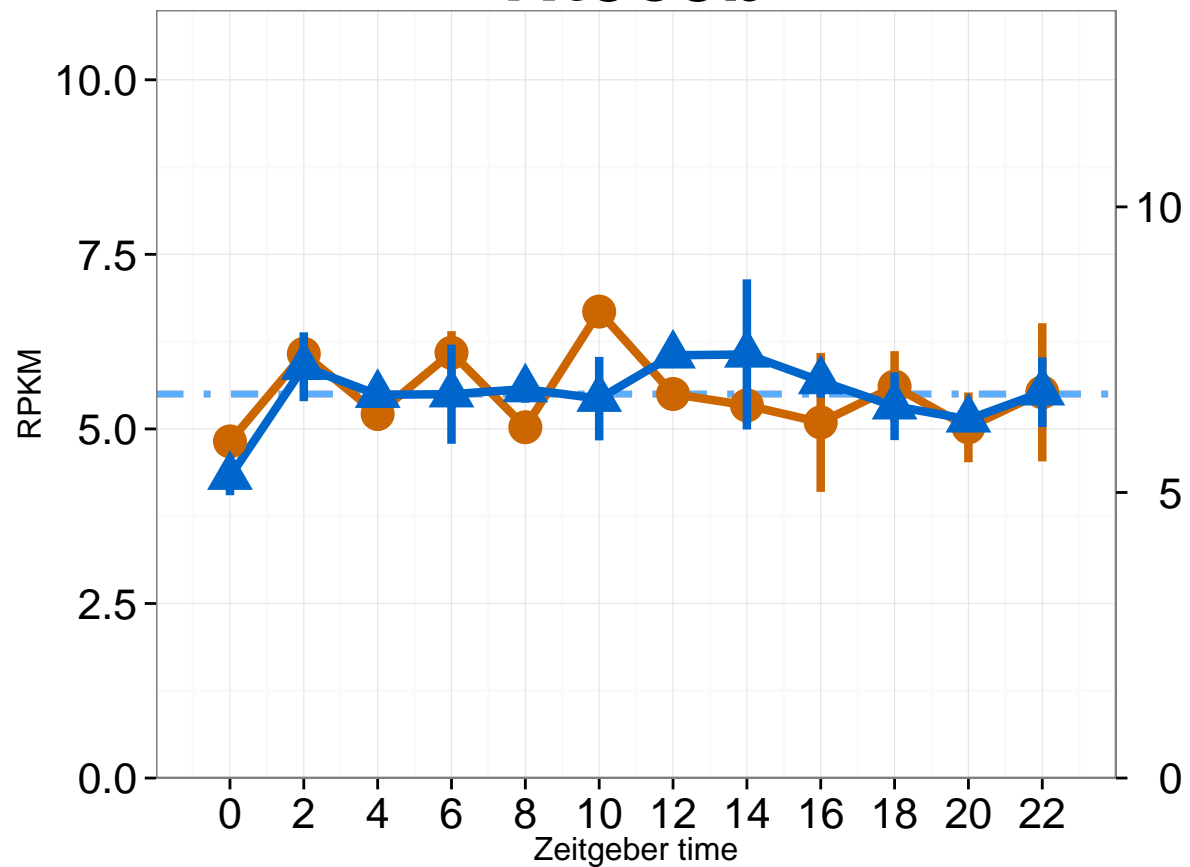

# Nt5c3b

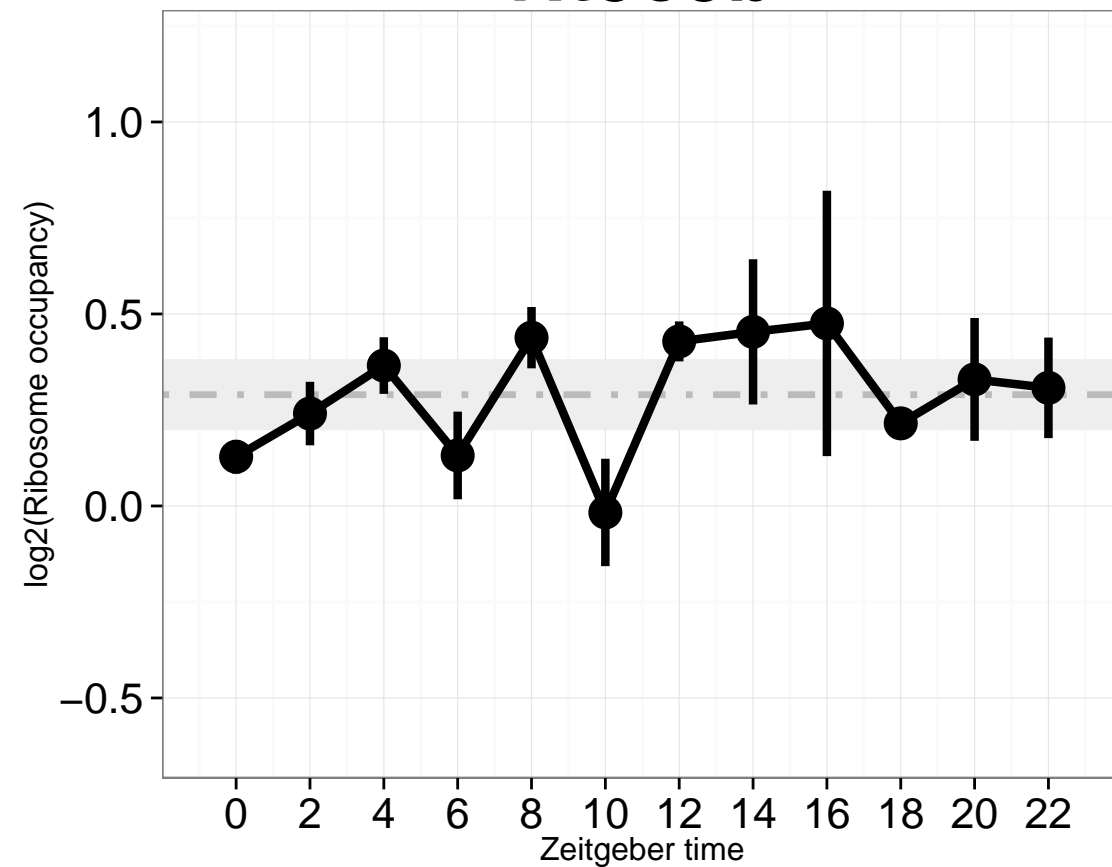

Supplement: Supplementary file 1943 [file 1]

# Macf1

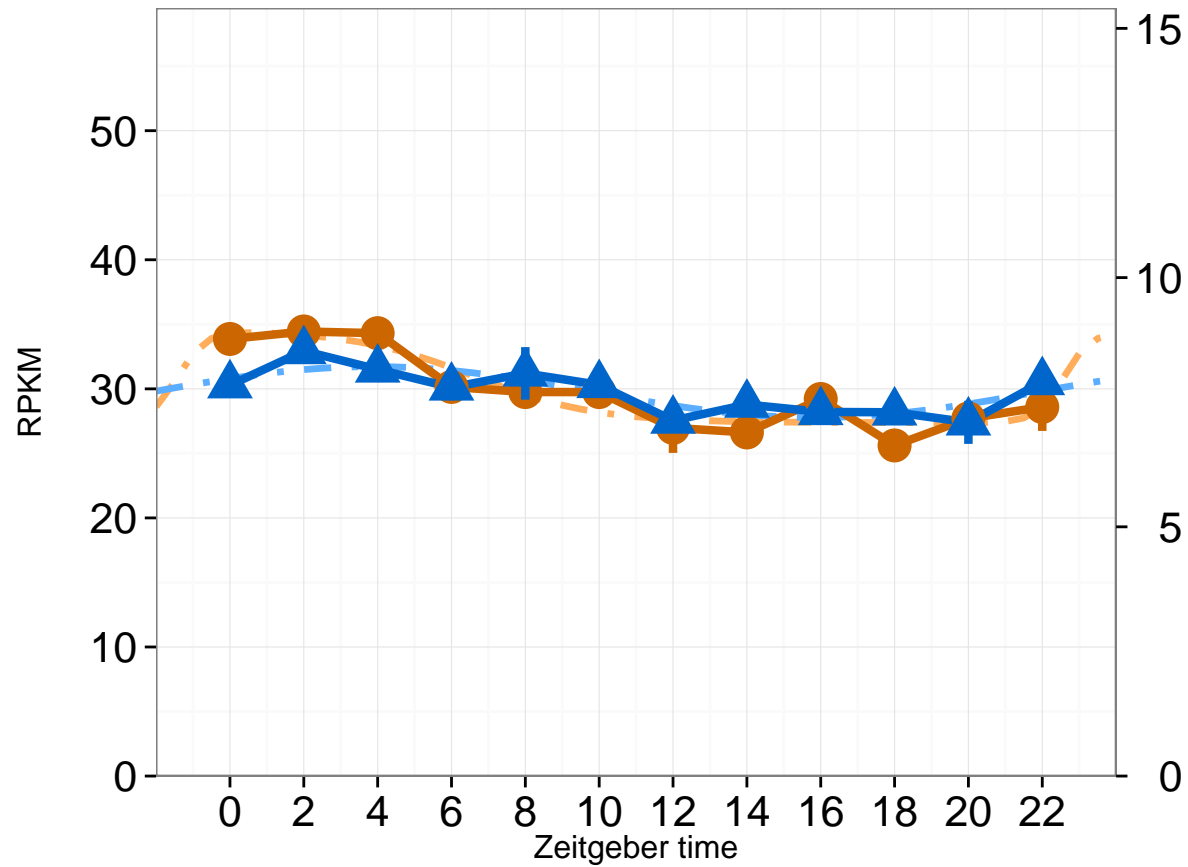

# Macf1

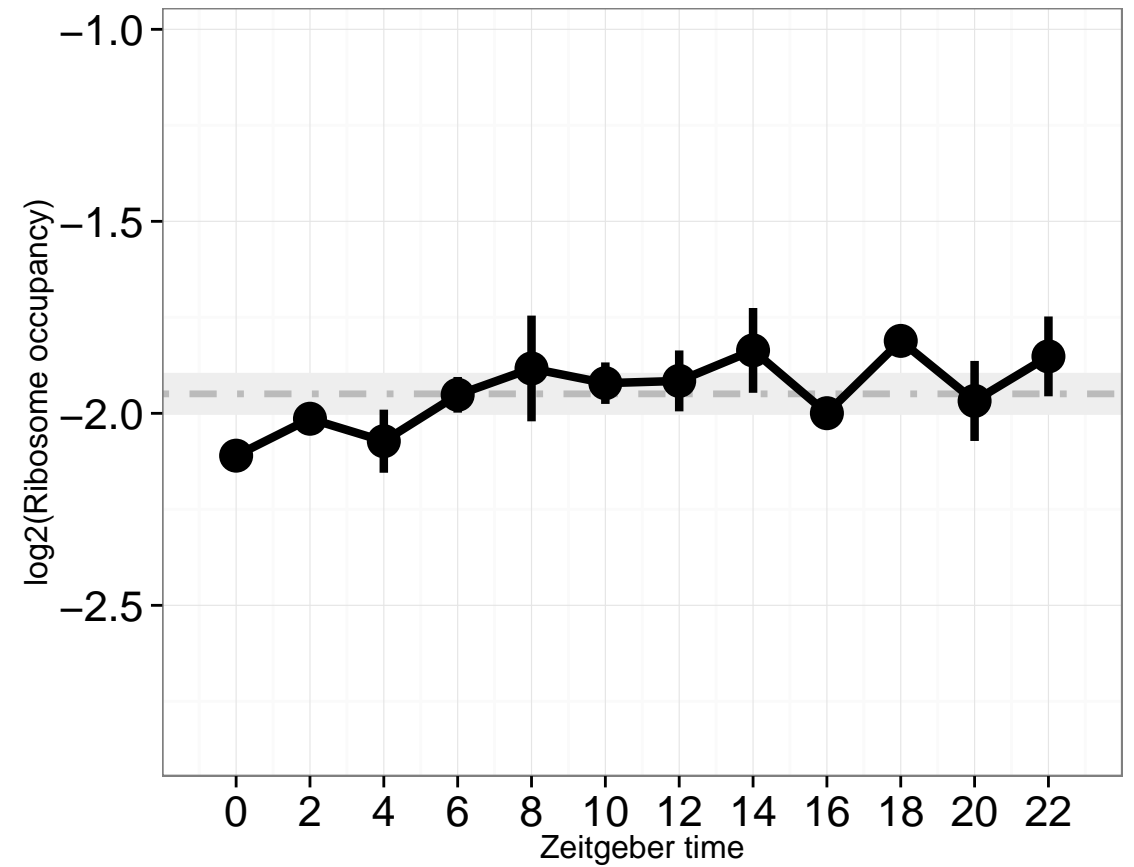

Supplement: Supplementary file 1944 [file 1]

## Cdhr2

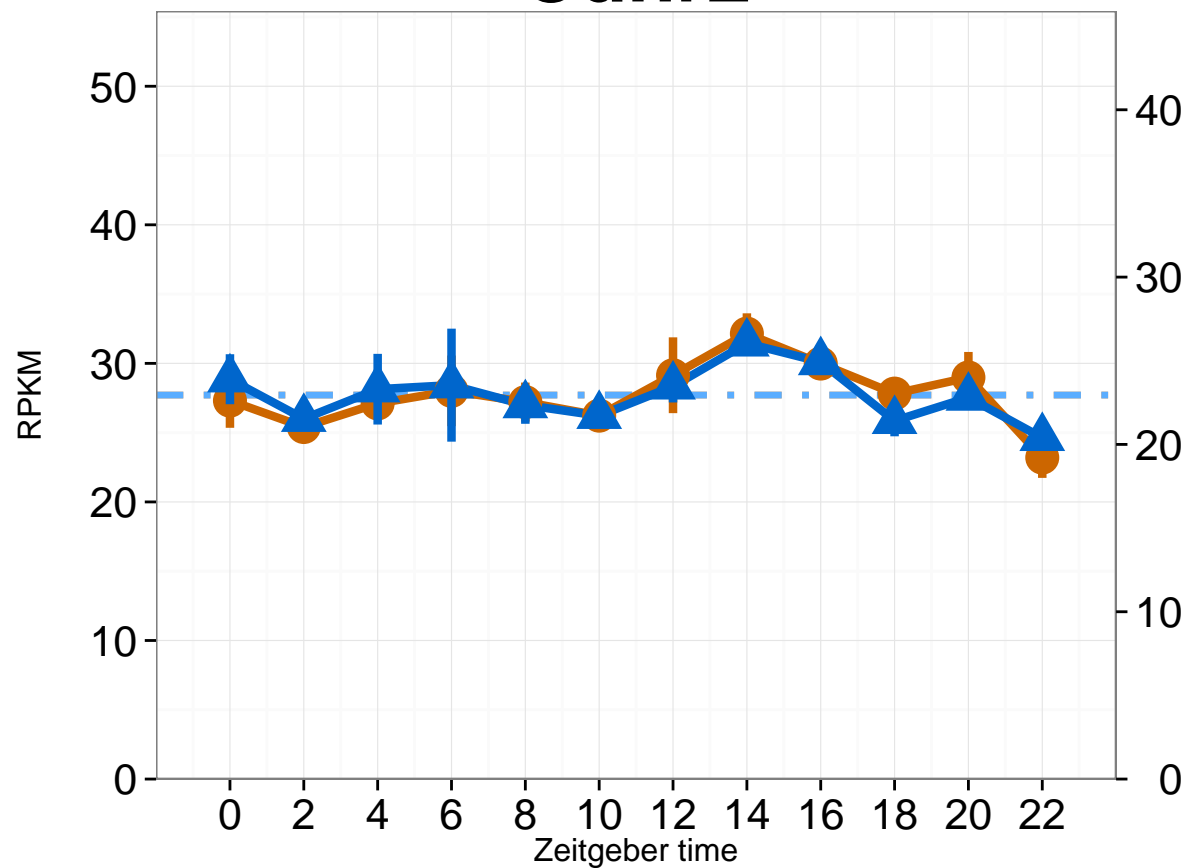

## Cdhr2

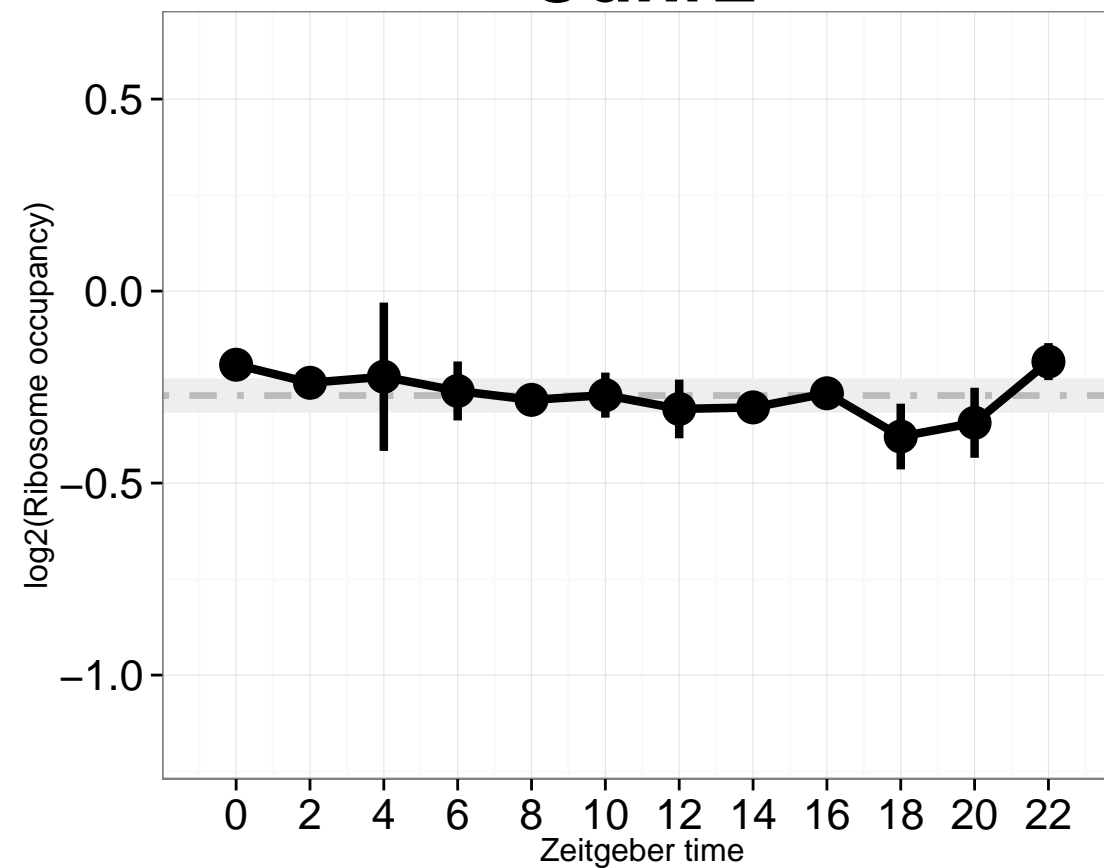

Supplement: Supplementary file 1945 [file 1]

**ligp1**

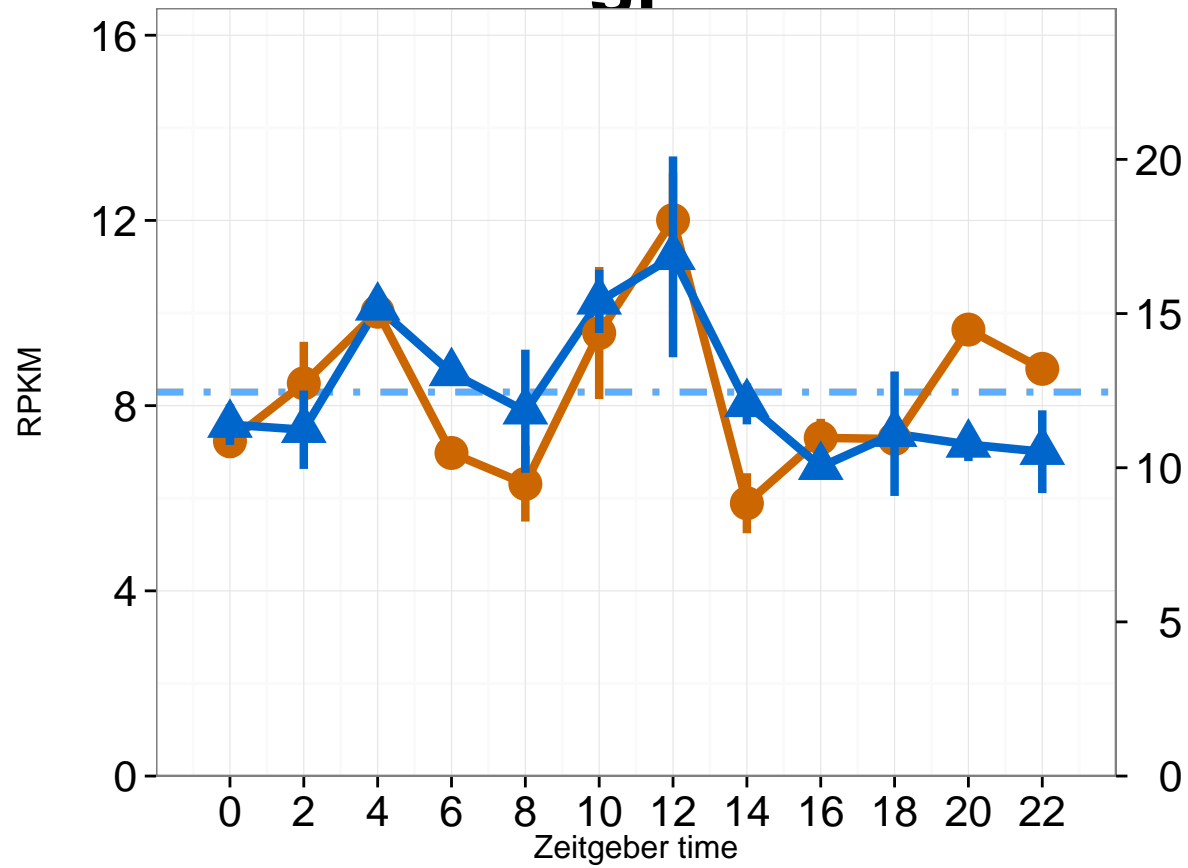

**ligp1**

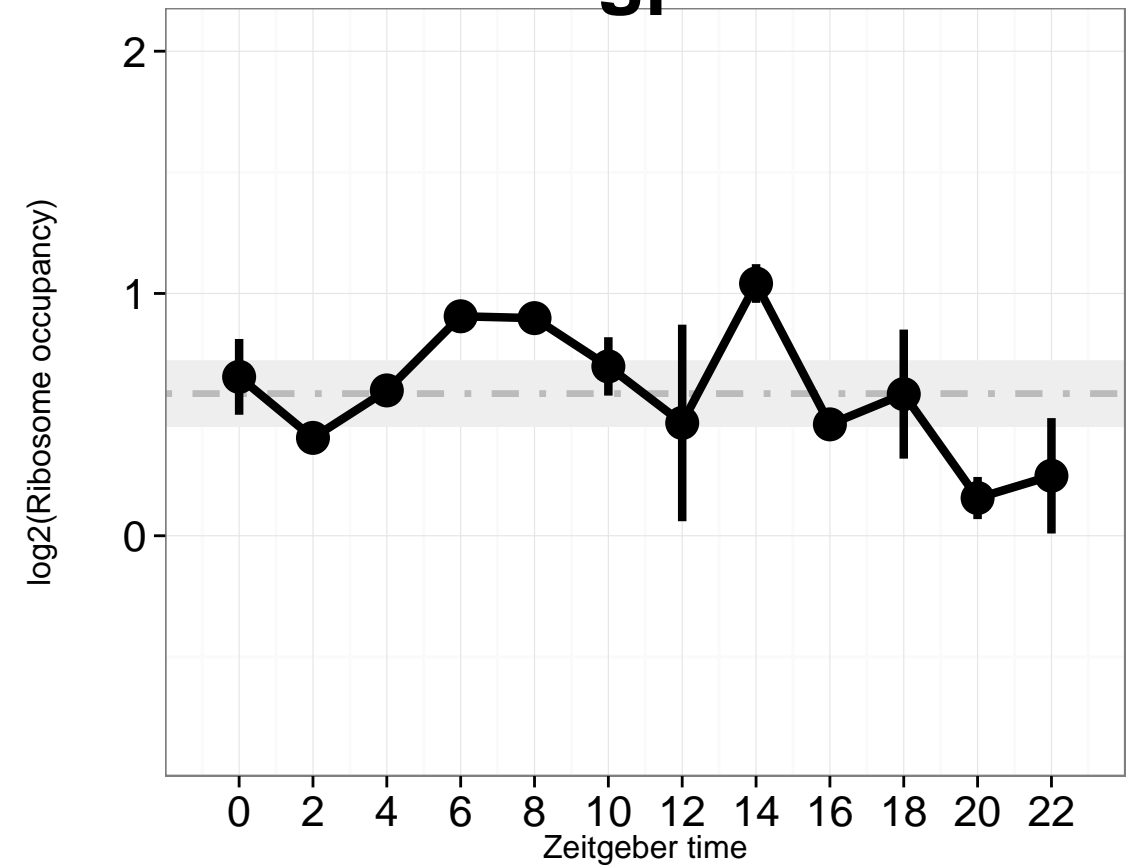

Supplement: Supplementary file 1946 [file 1]

## Ddx21

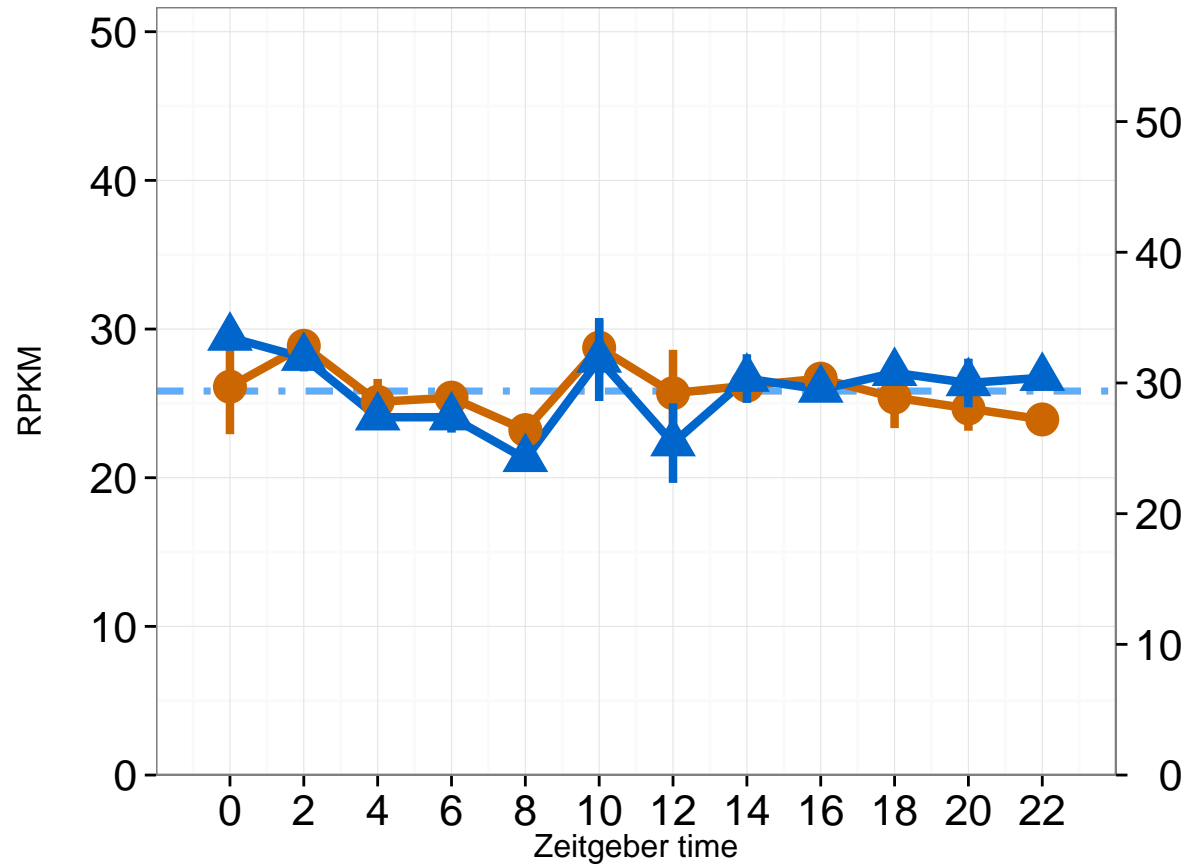

## Ddx21

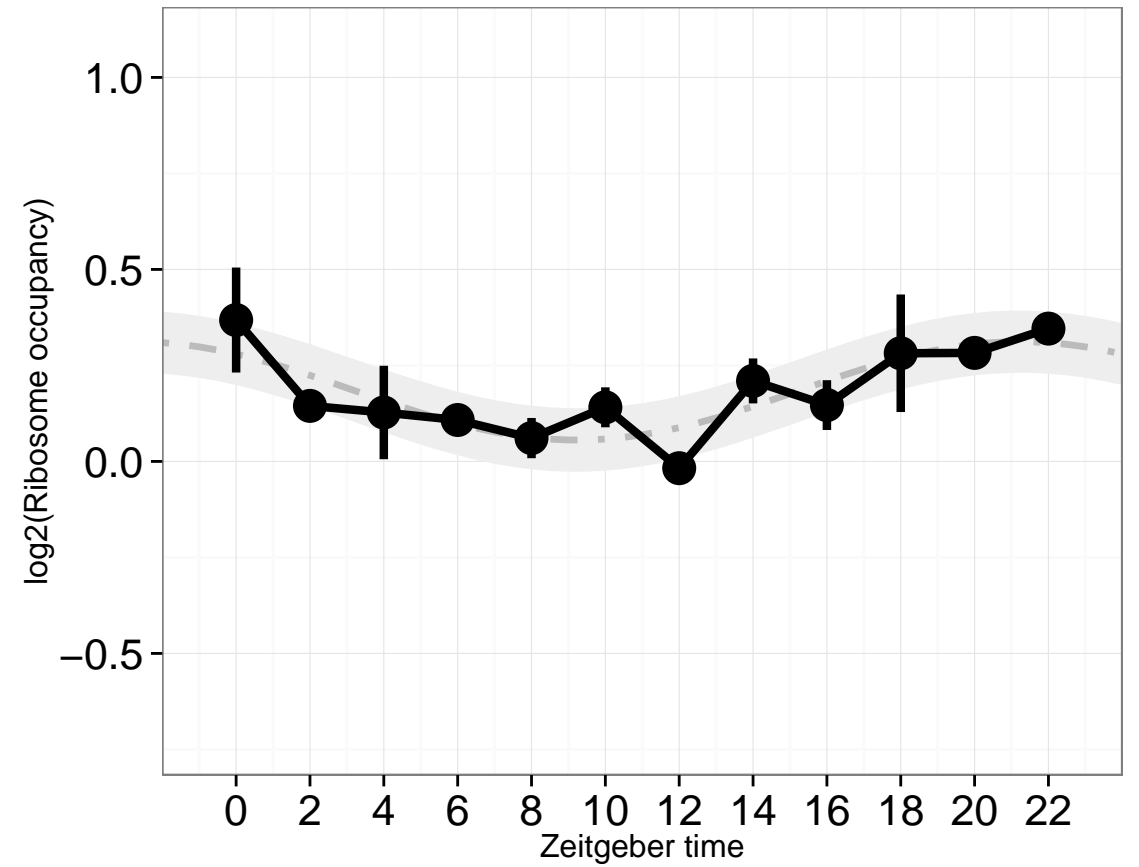

Supplement: Supplementary file 1947 [file 1]

## Nit2

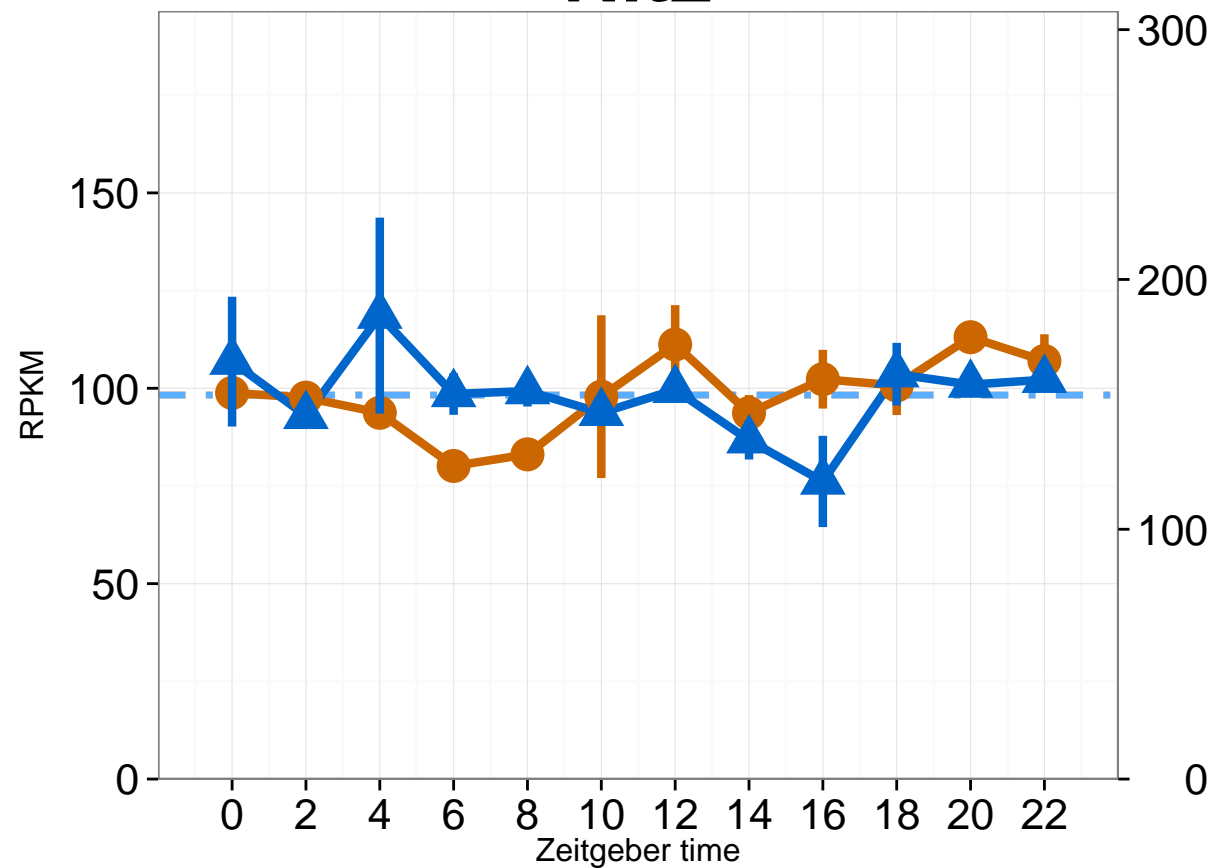

## Nit2

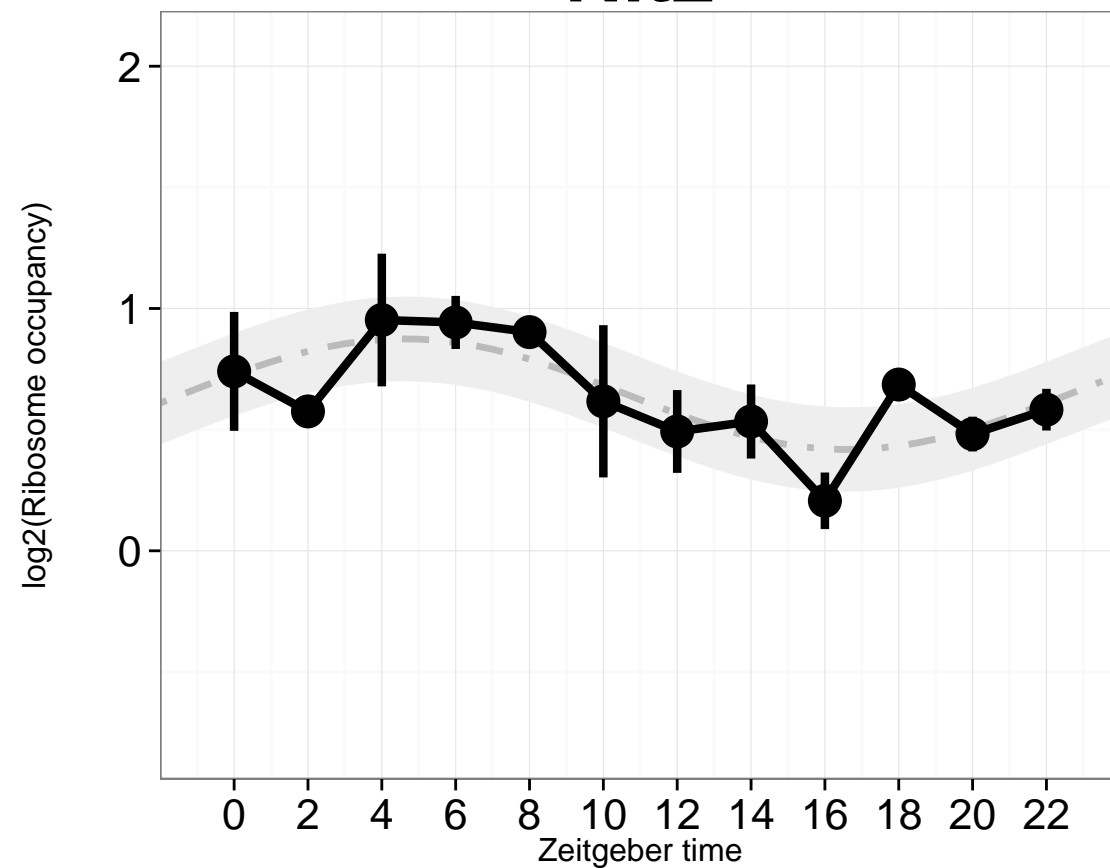

Supplement: Supplementary file 1948 [file 1]

## Usp33

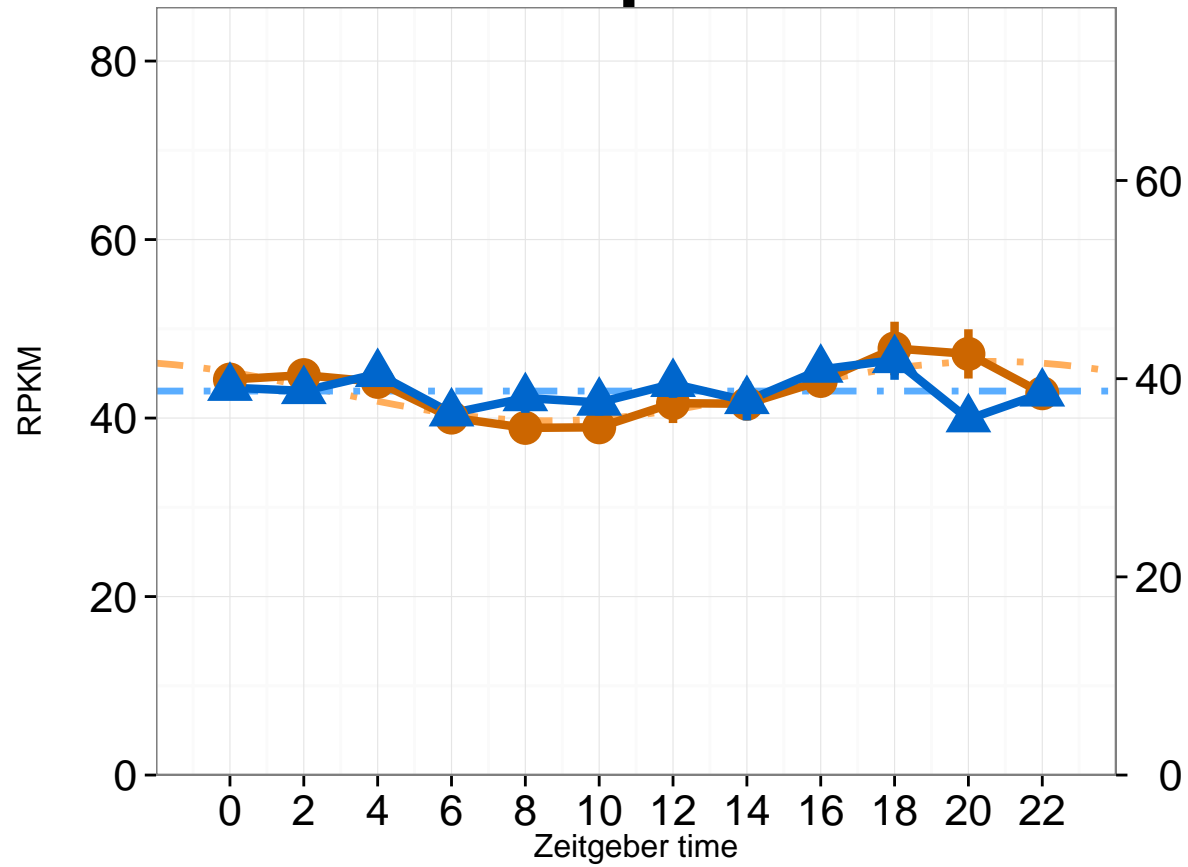

## Usp33

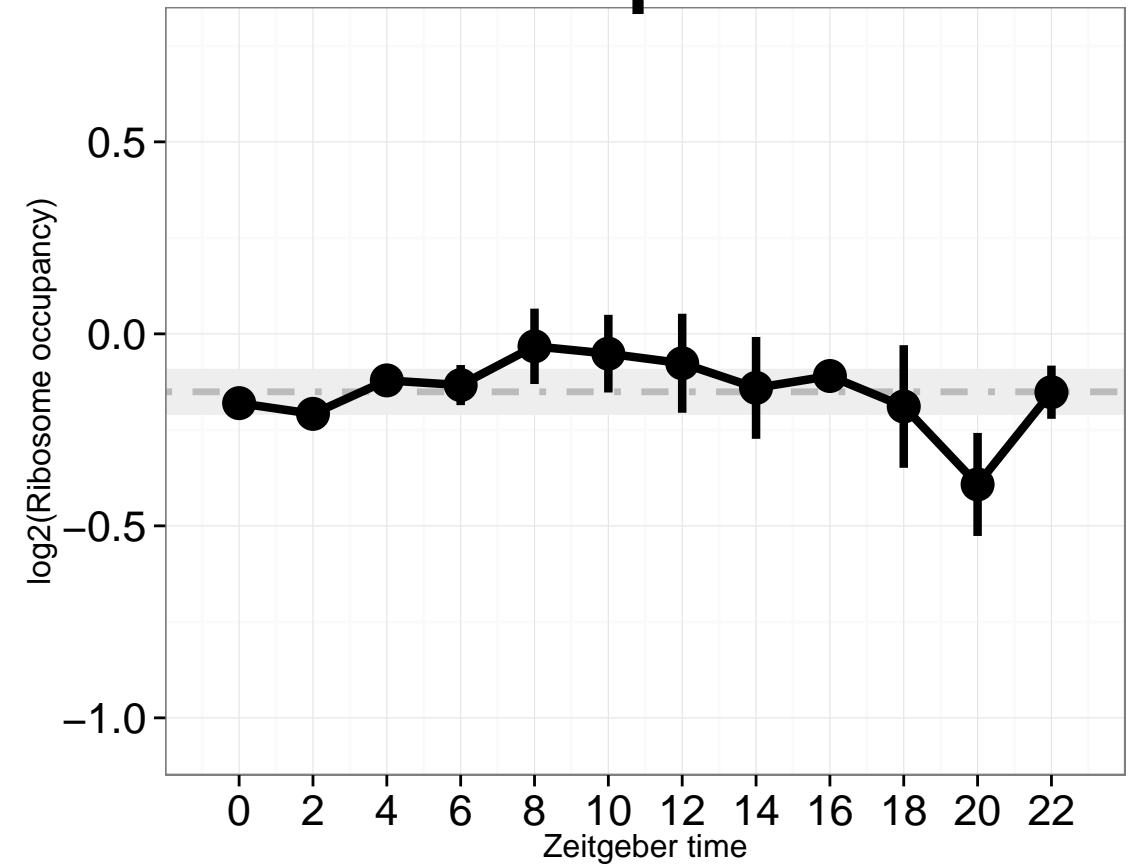

Supplement: Supplementary file 1949 [file 1]

# Fam198b

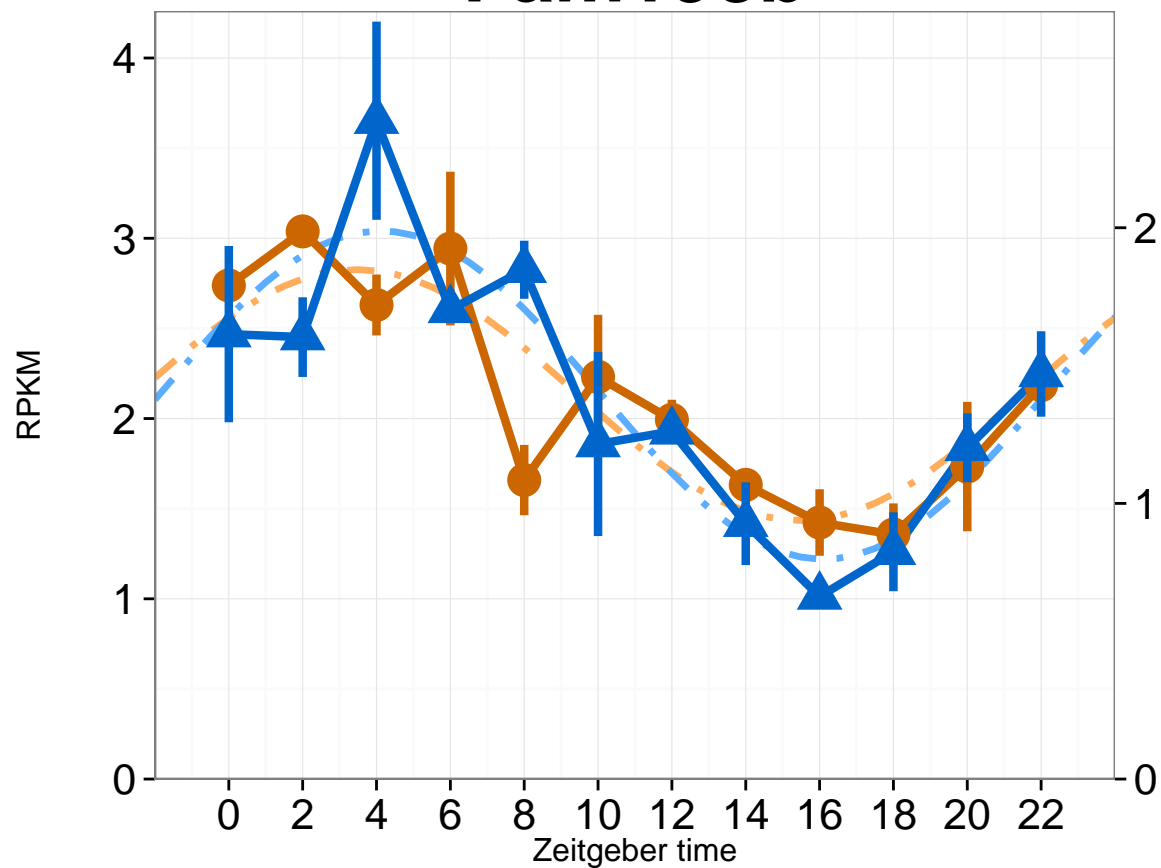

# Fam198b

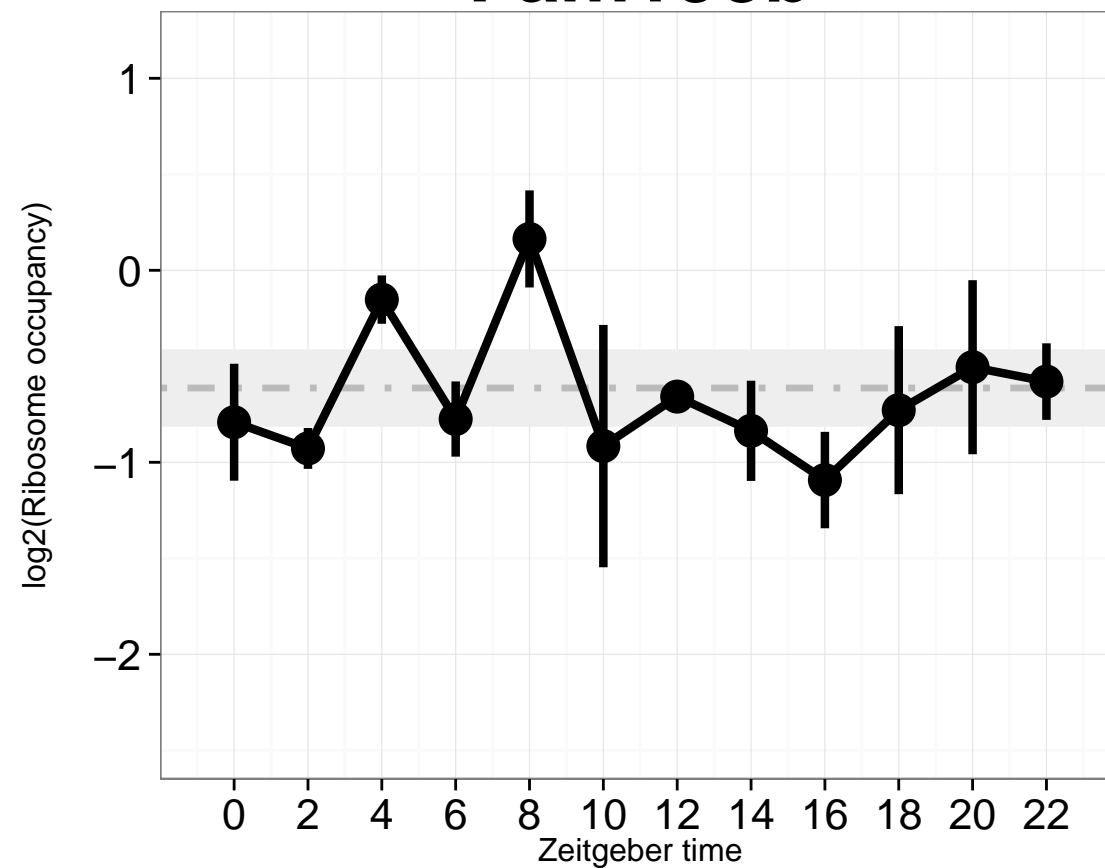

Supplement: Supplementary file 1950 [file 1]

# Cables1

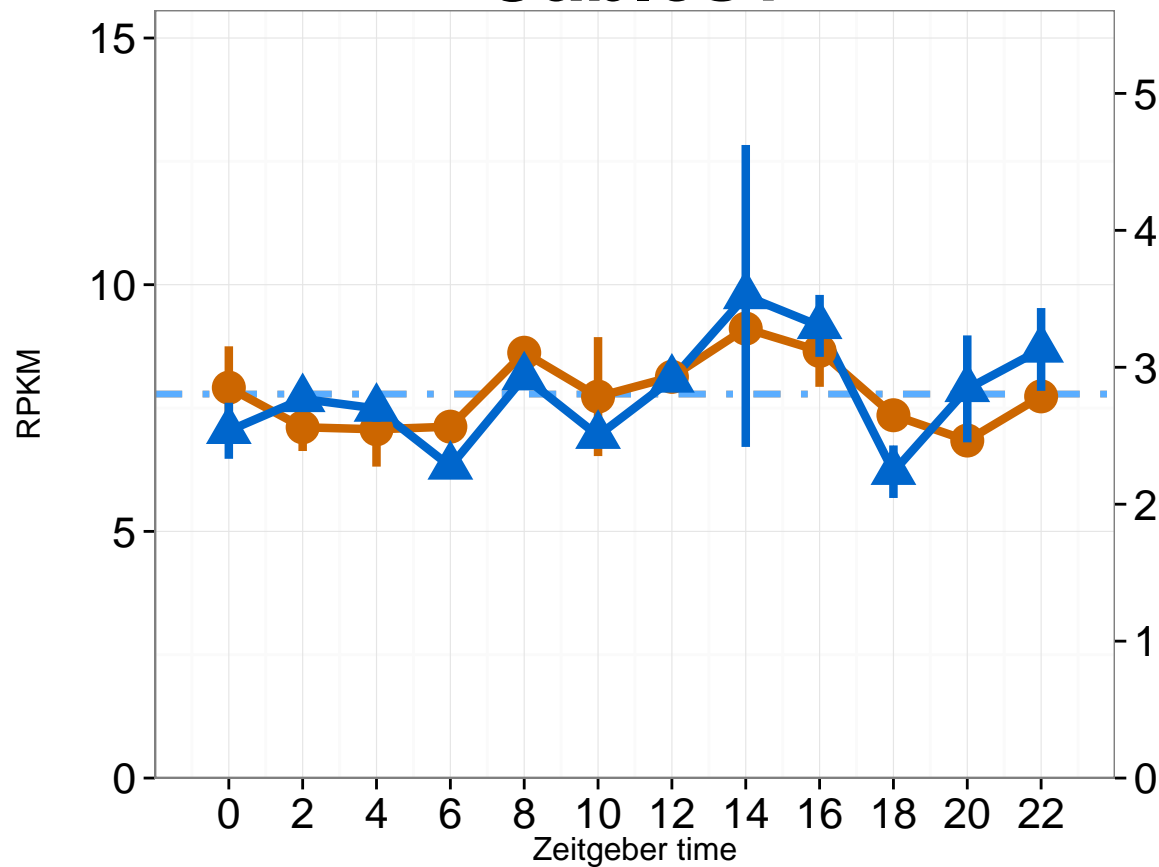

# Cables1

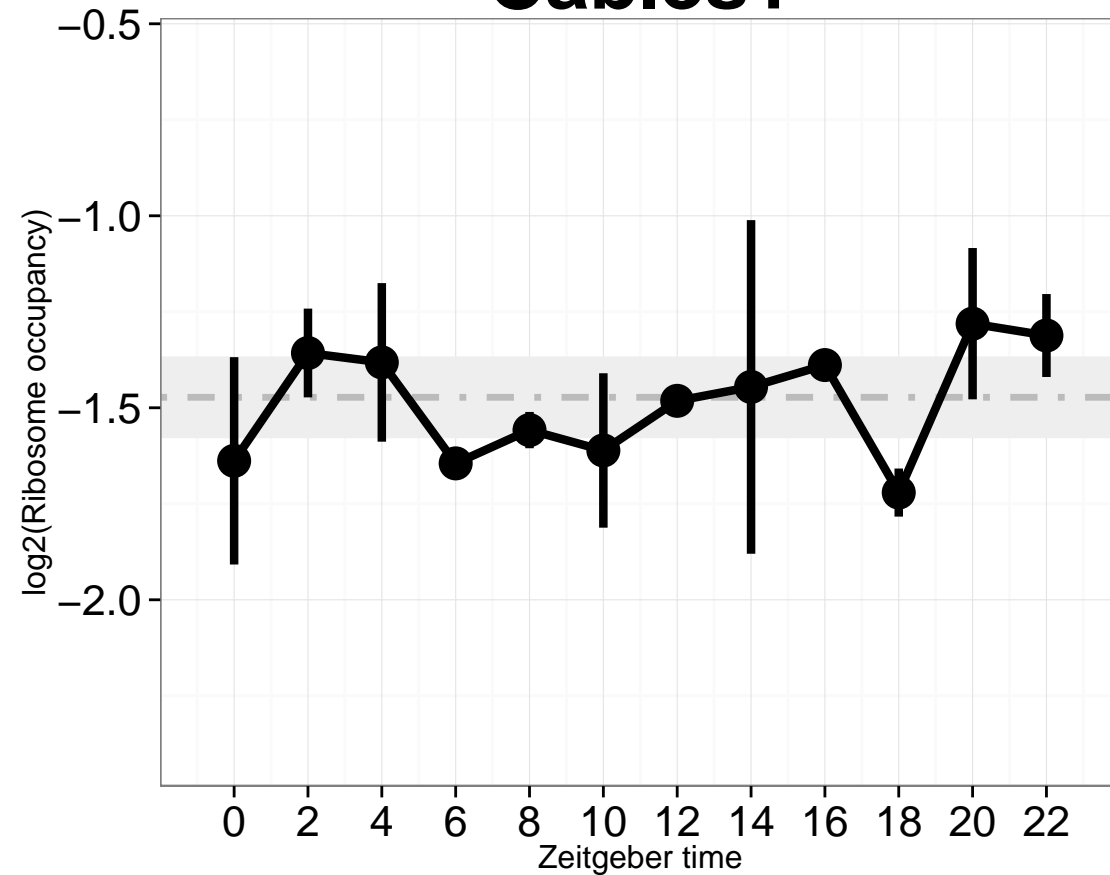

Supplement: Supplementary file 1951 [file 1]

## Btf3

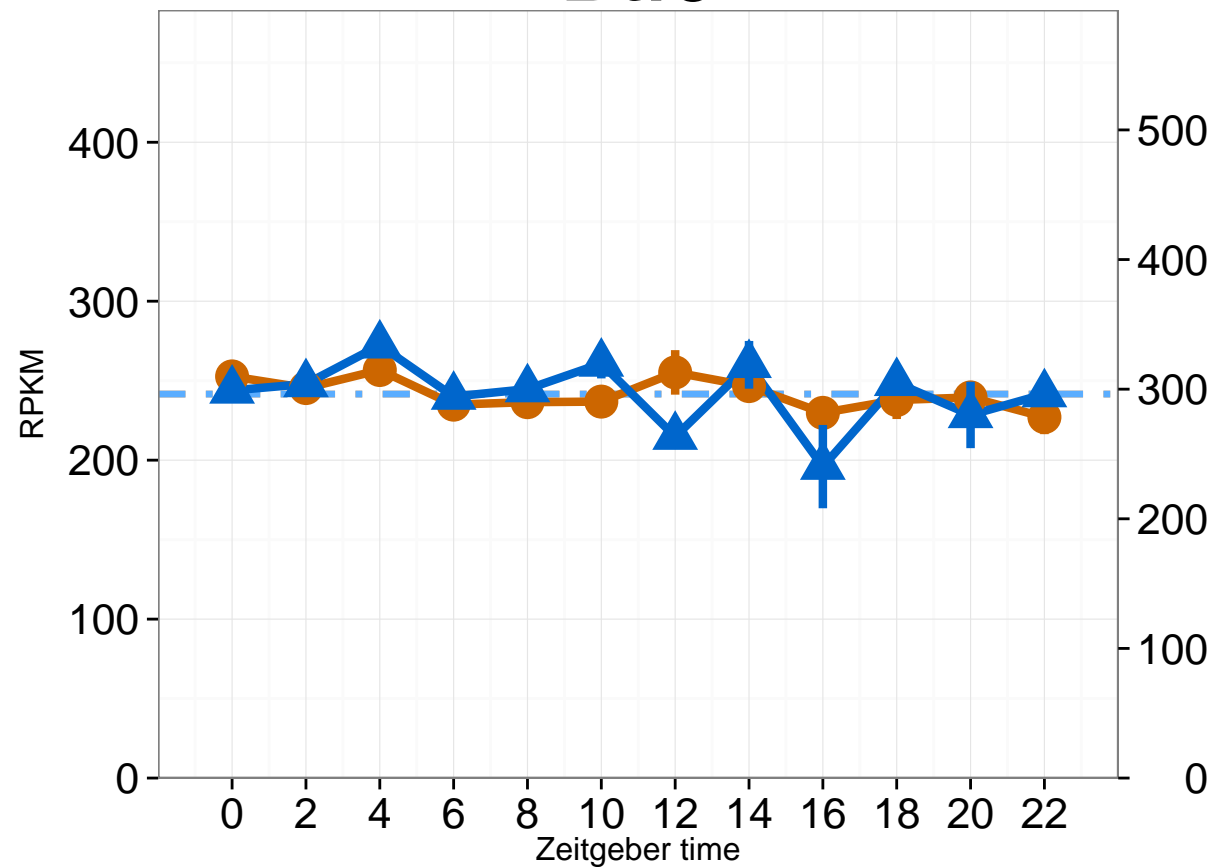

## Btf3

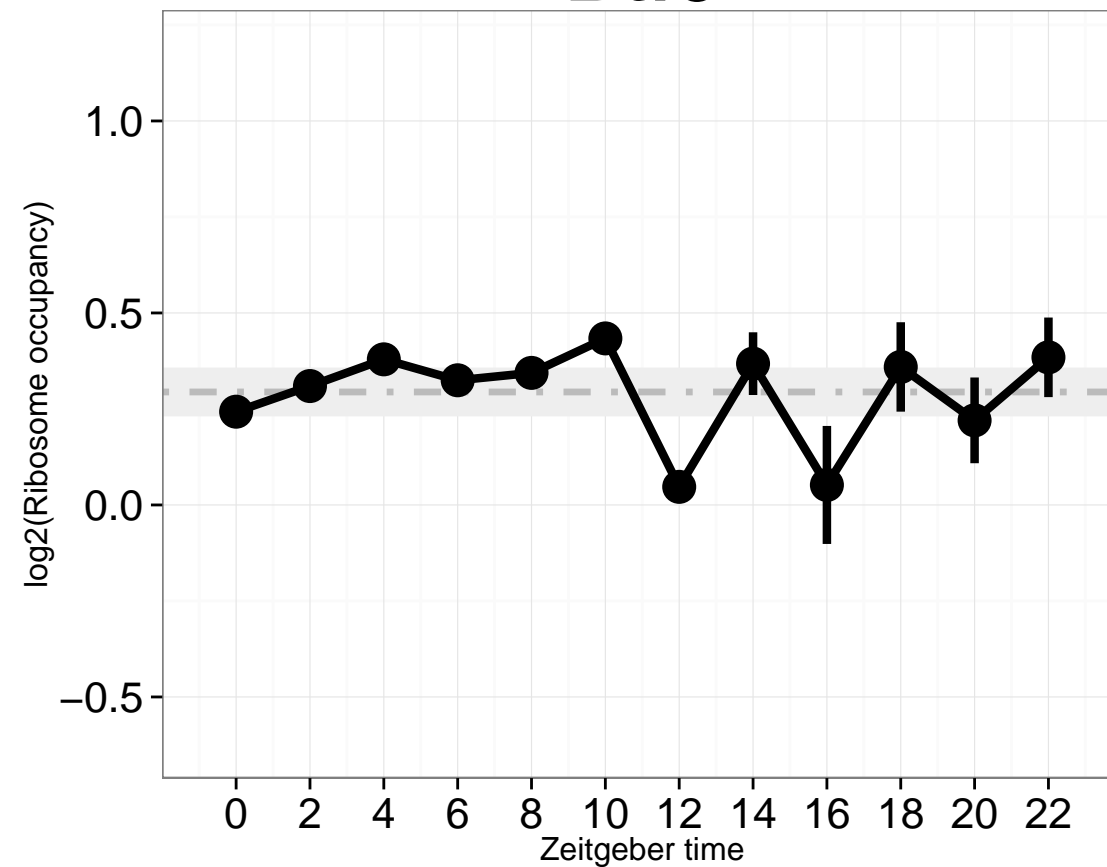

Supplement: Supplementary file 1953 [file 1]

# Tmem204

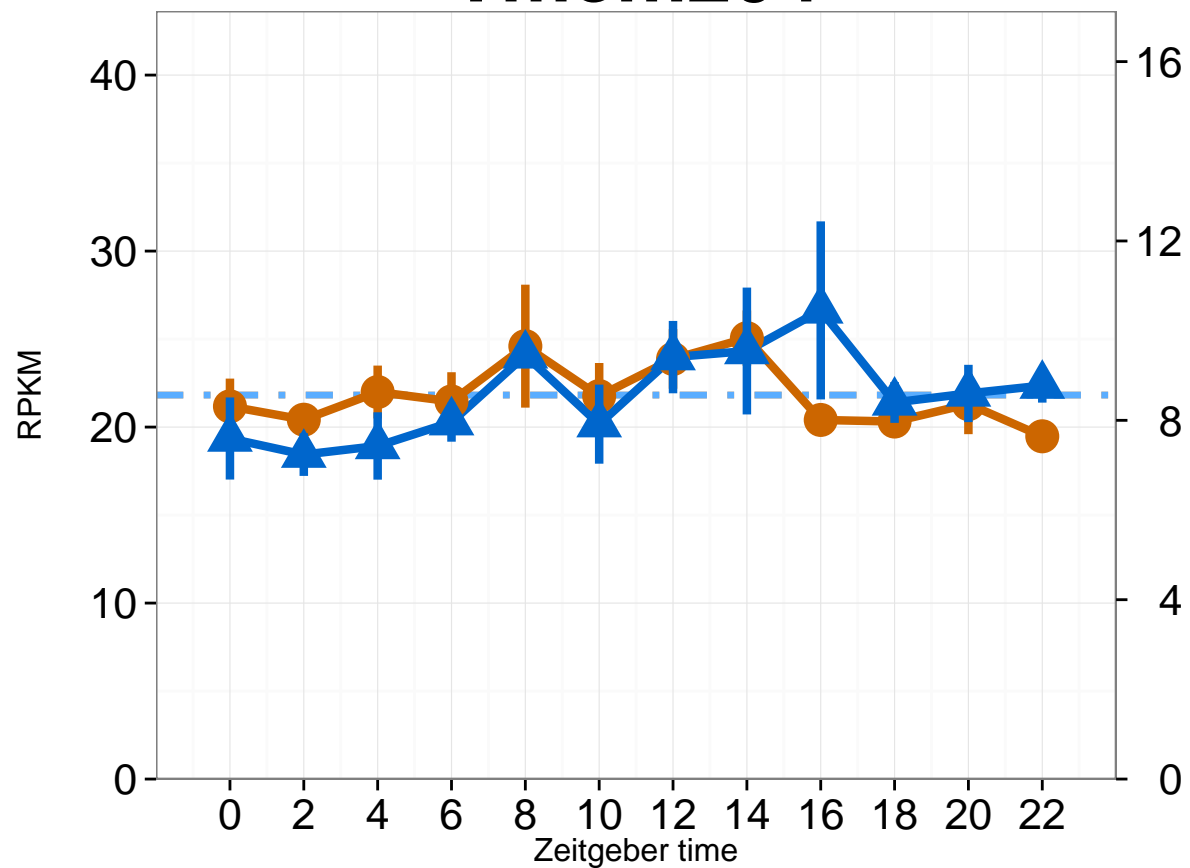

# Tmem204

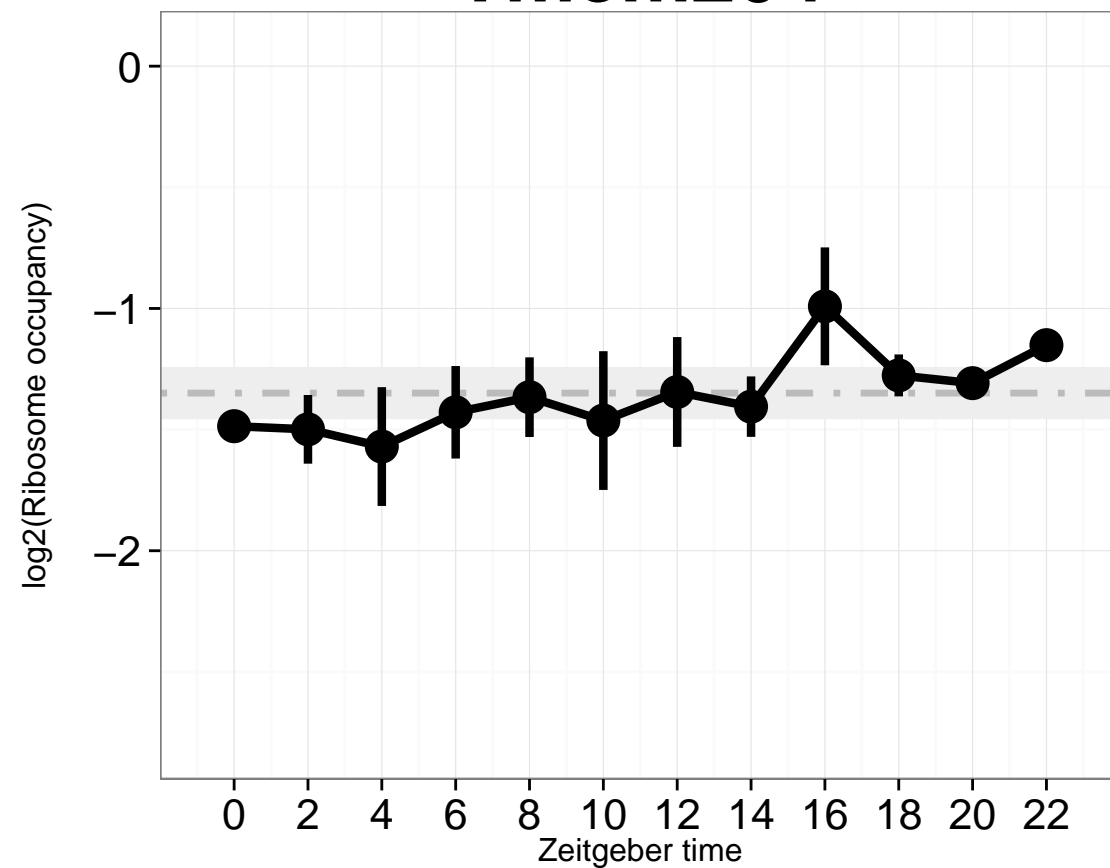

Supplement: Supplementary file 1954 [file 1]

## Ddit4

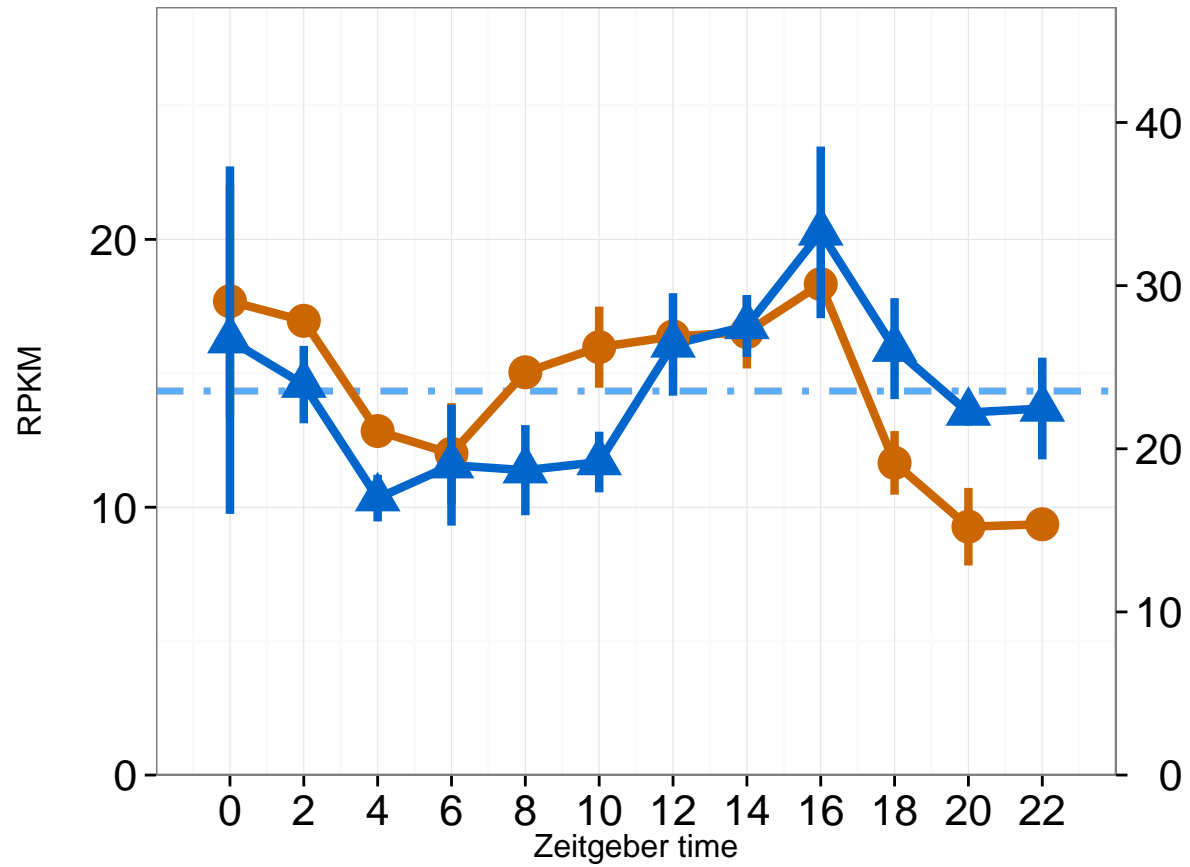

## Ddit4

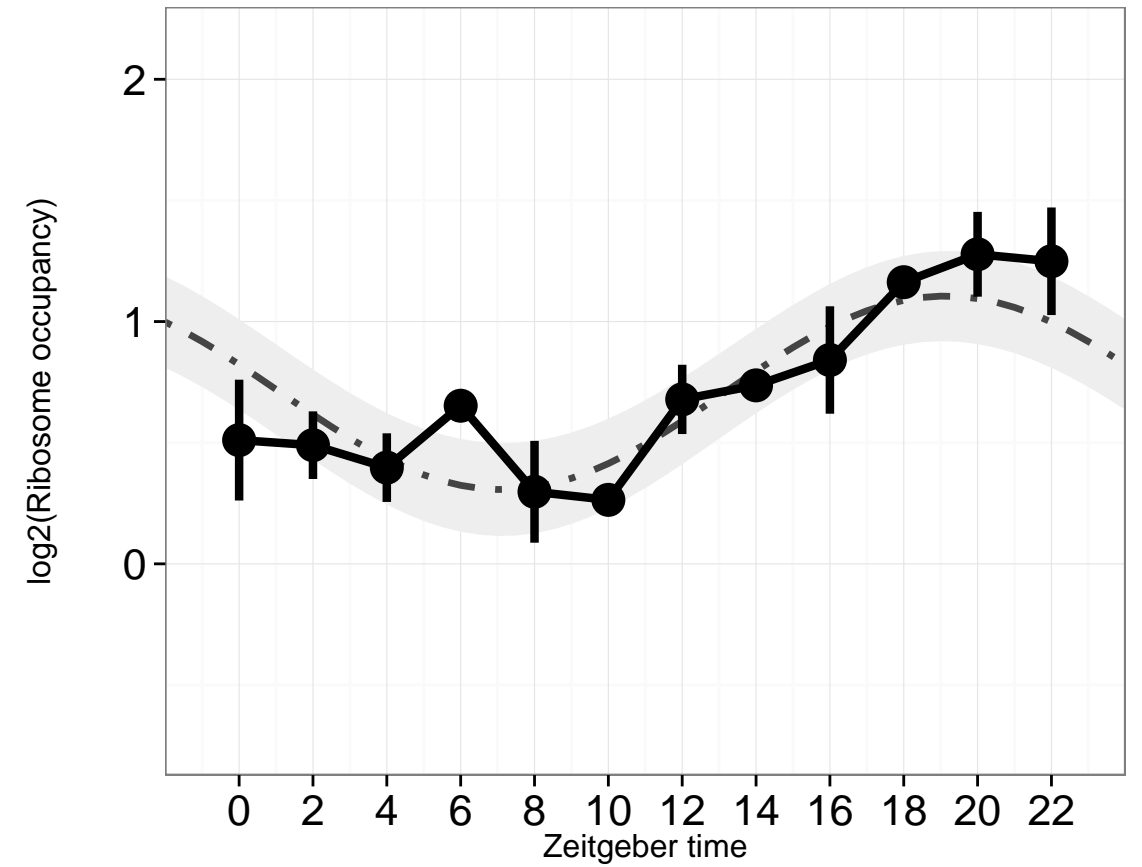

Supplement: Supplementary file 1955 [file 1]

# Zfp618

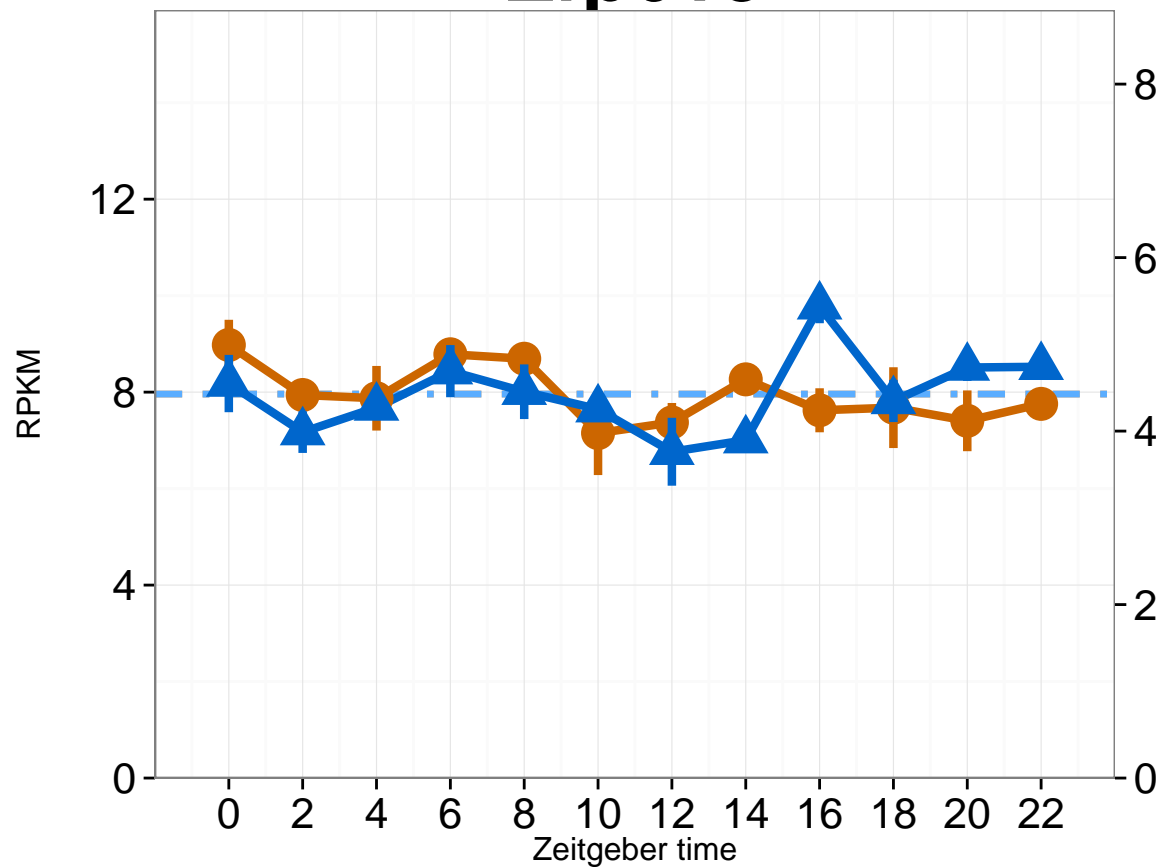

# Zfp618

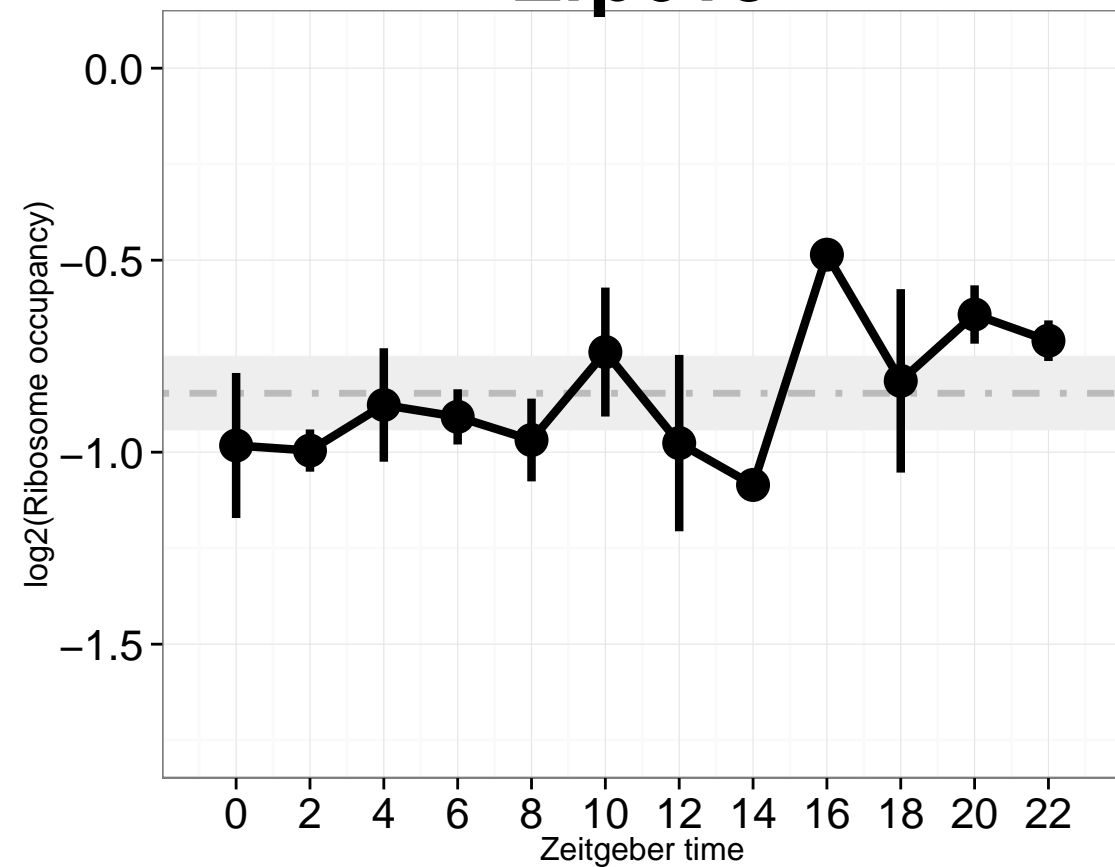

Supplement: Supplementary file 1956 [file 1]

## Slc19a1

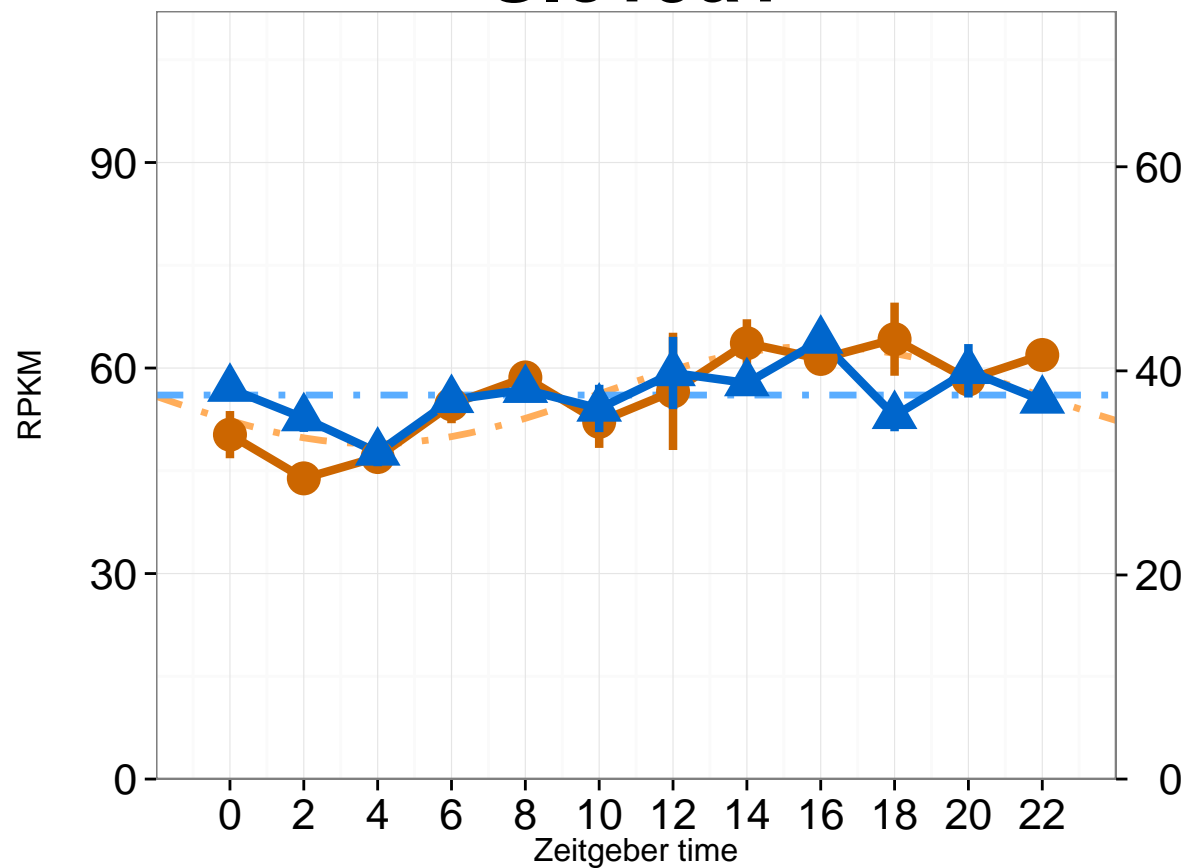

## Slc19a1

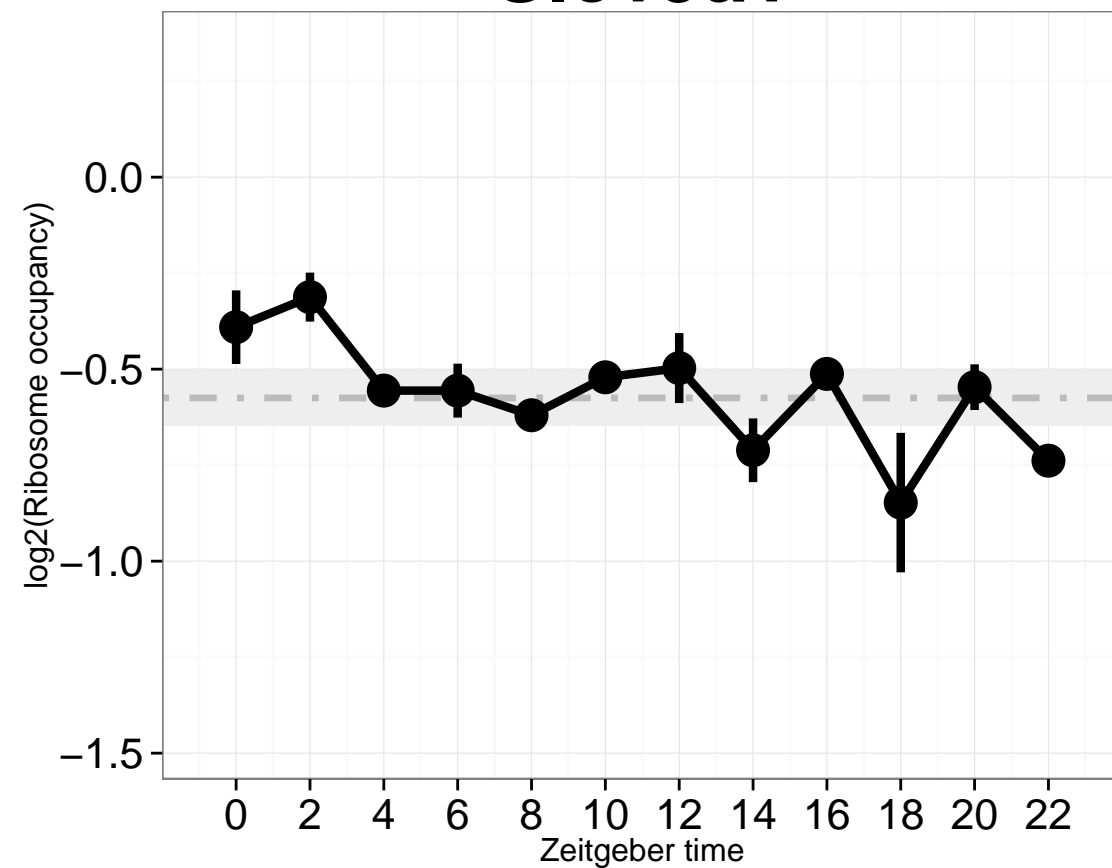

Supplement: Supplementary file 1957 [file 1]

## Dbp

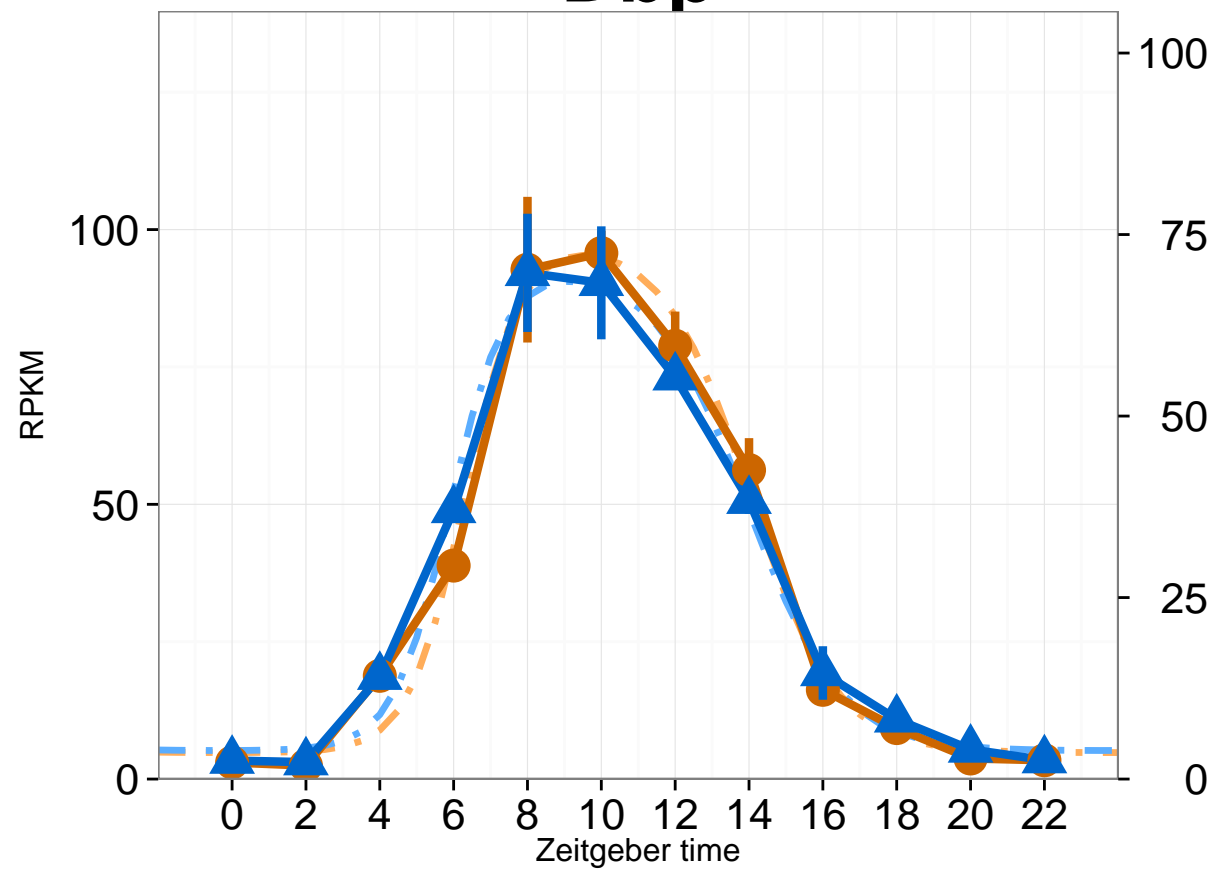

## Dbp

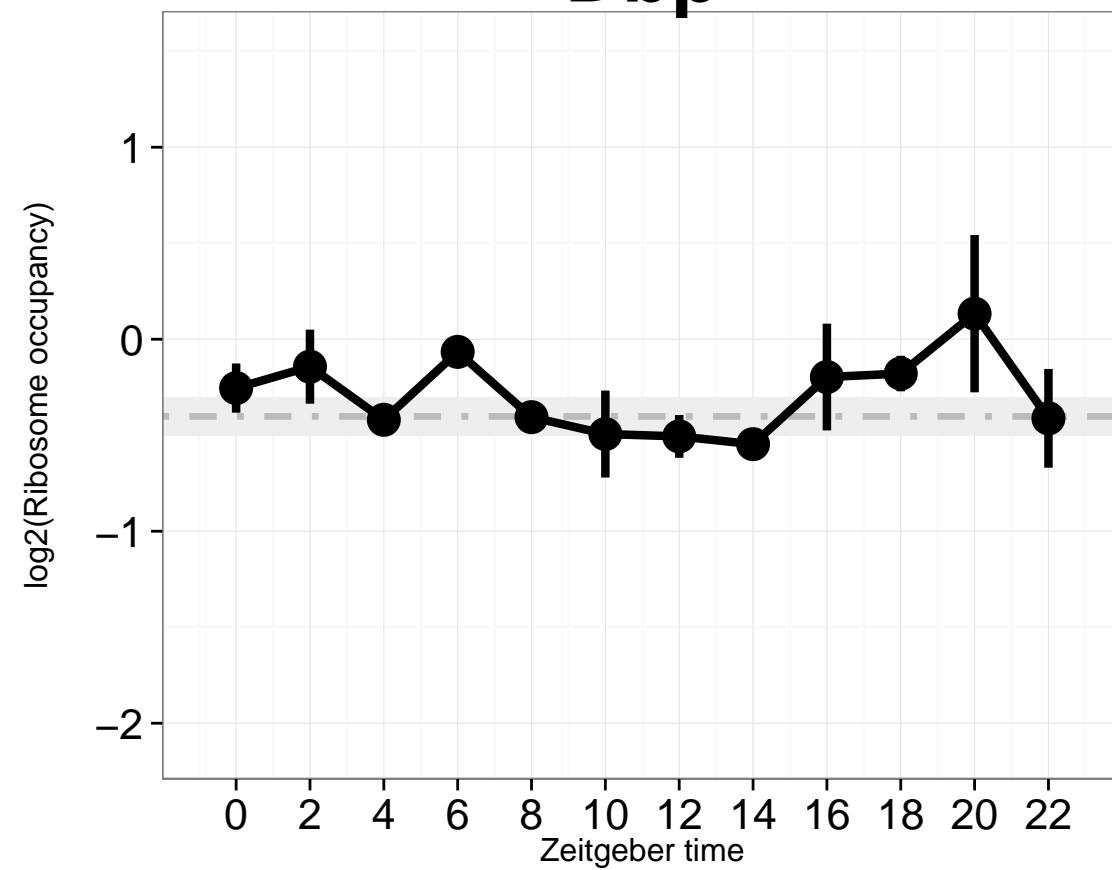

Supplement: Supplementary file 1958 [file 1]

## 5730455P16Rik

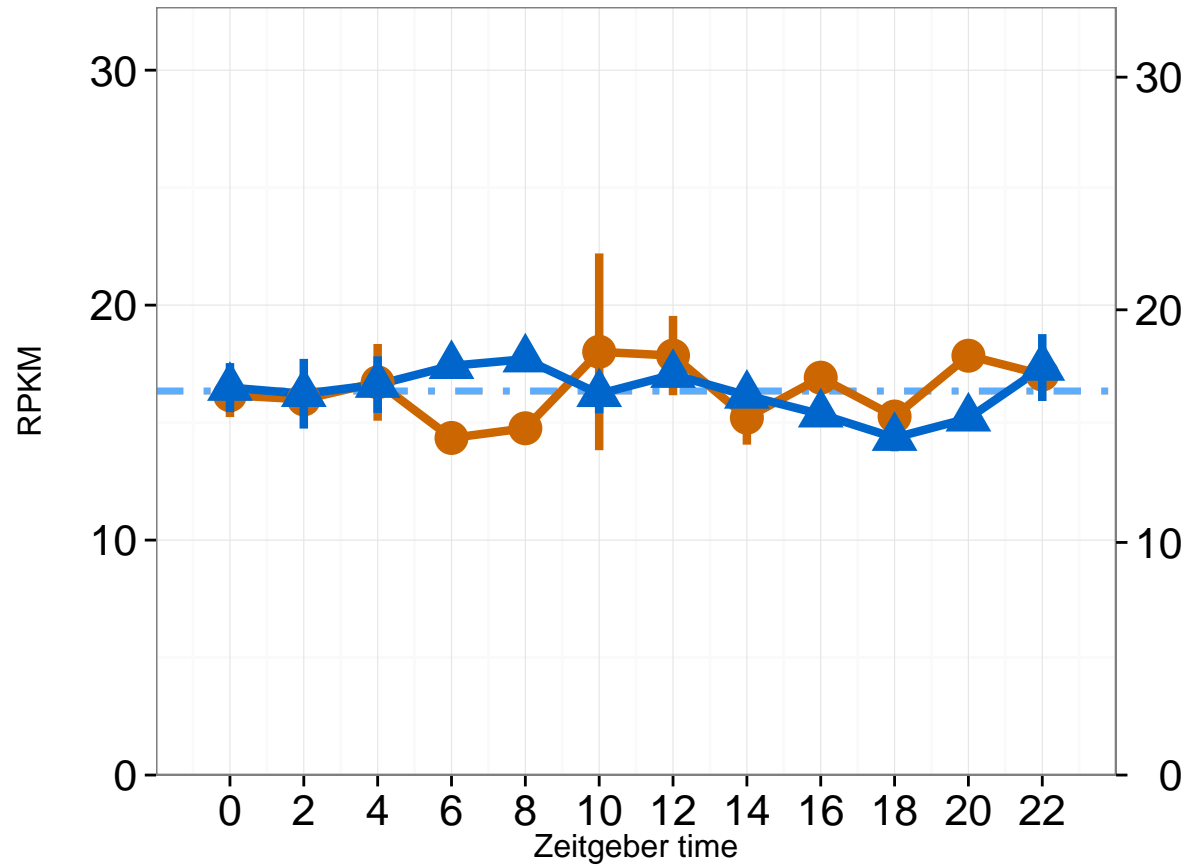

## 5730455P16Rik

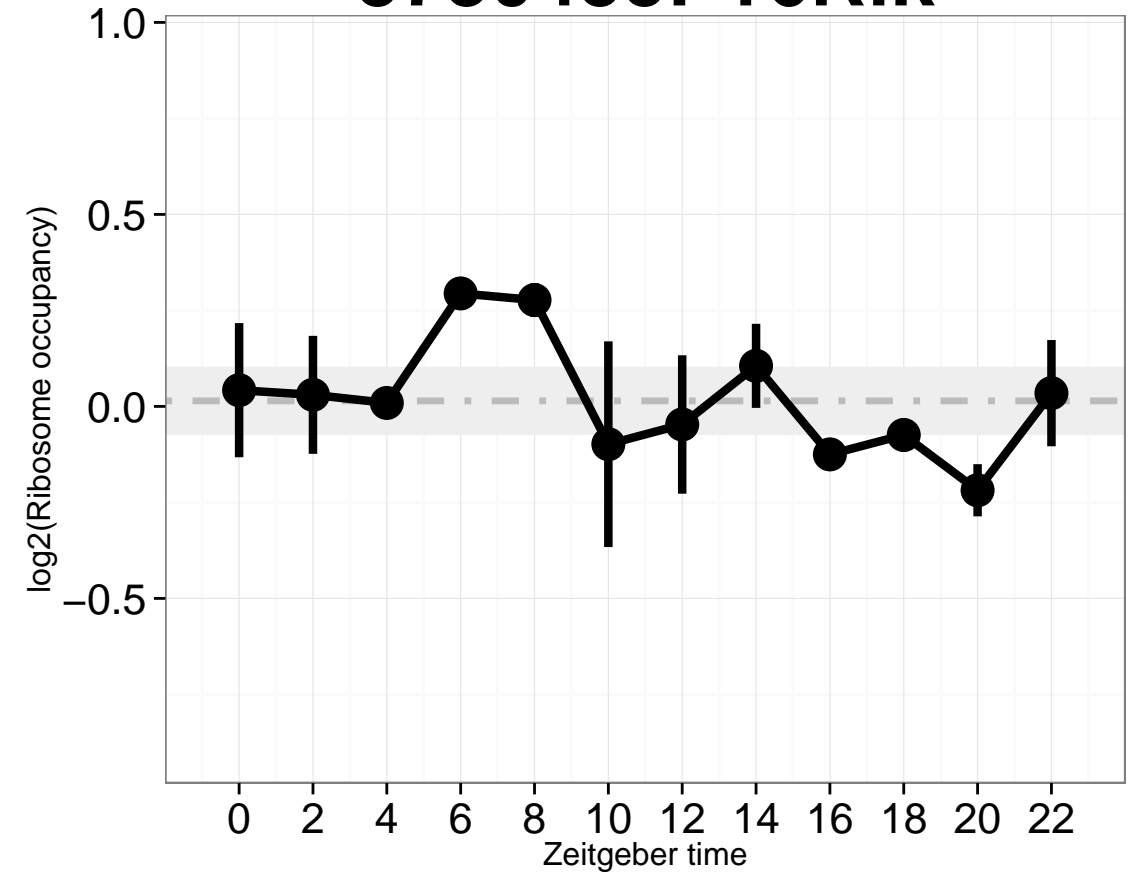

Supplement: Supplementary file 1959 [file 1]

## Ap1ar

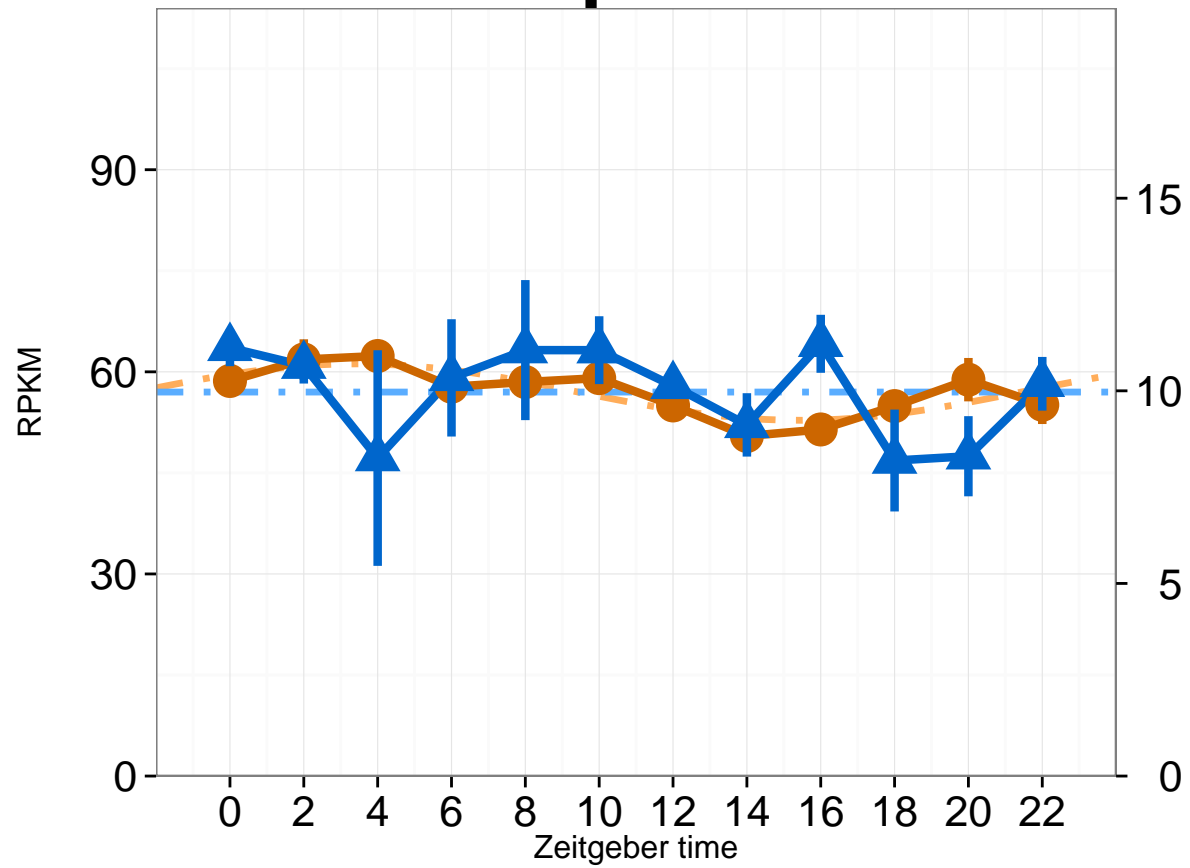

## Ap1ar

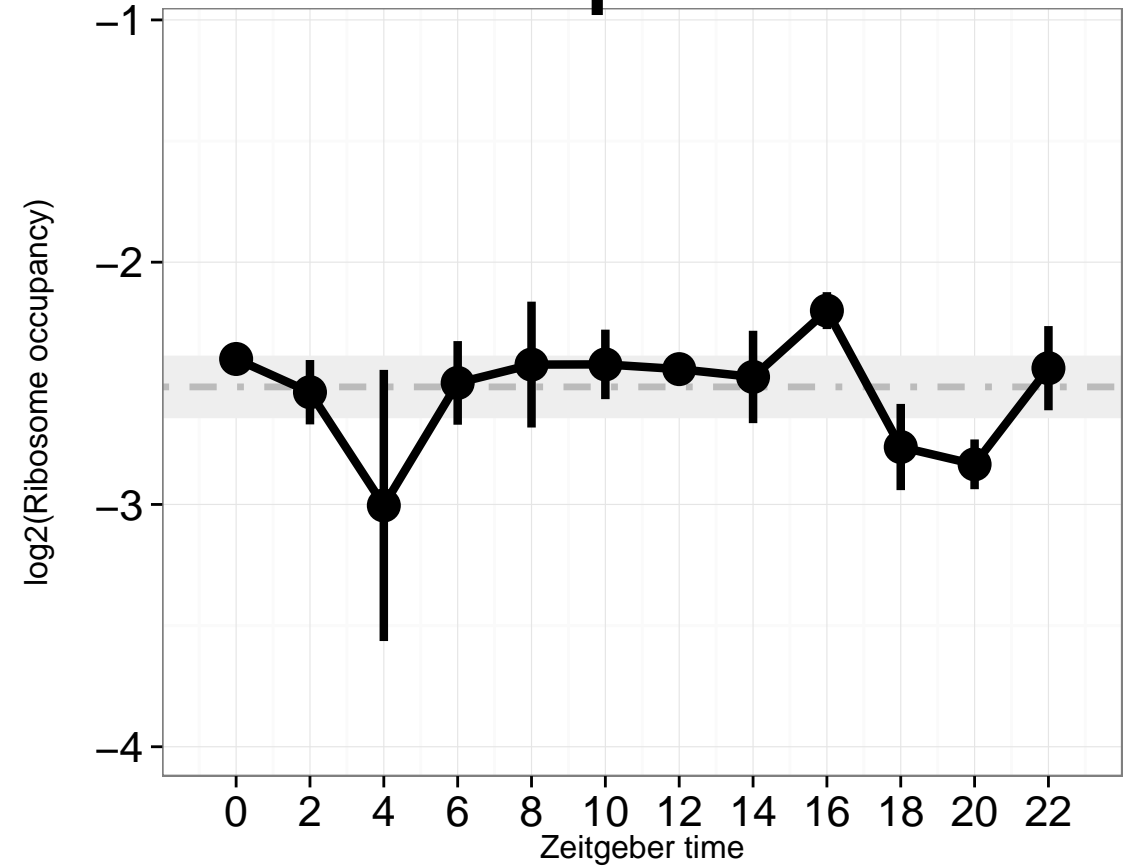

Supplement: Supplementary file 1960 [file 1]

# Ptp4a3

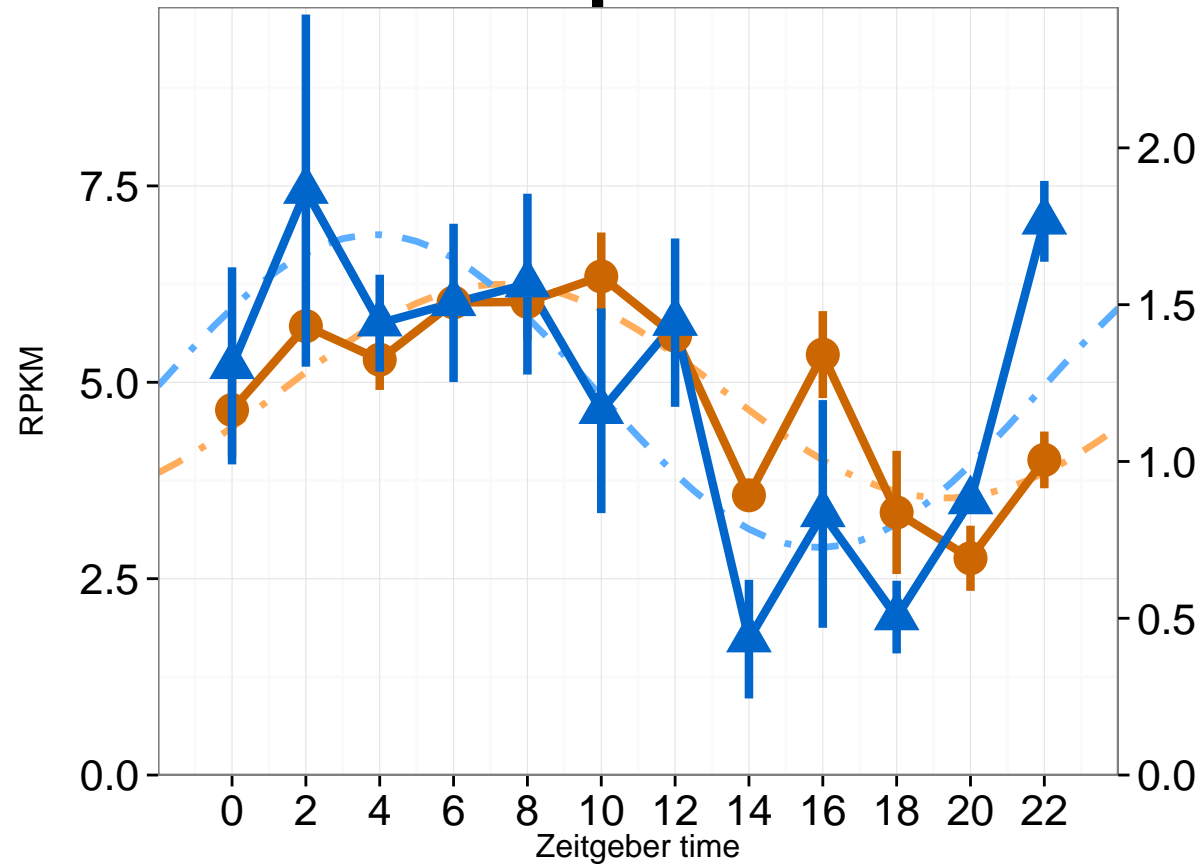

# Ptp4a3

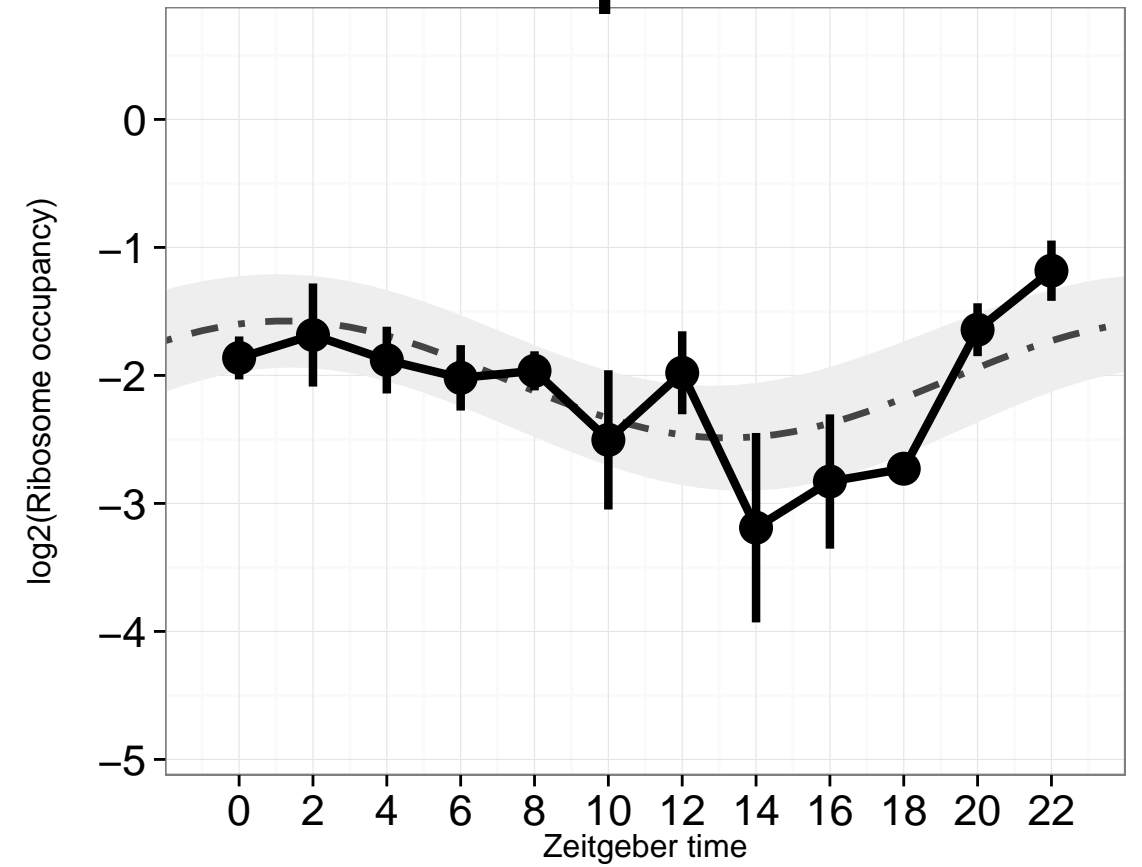

Supplement: Supplementary file 1961 [file 1]

# Arhgap8

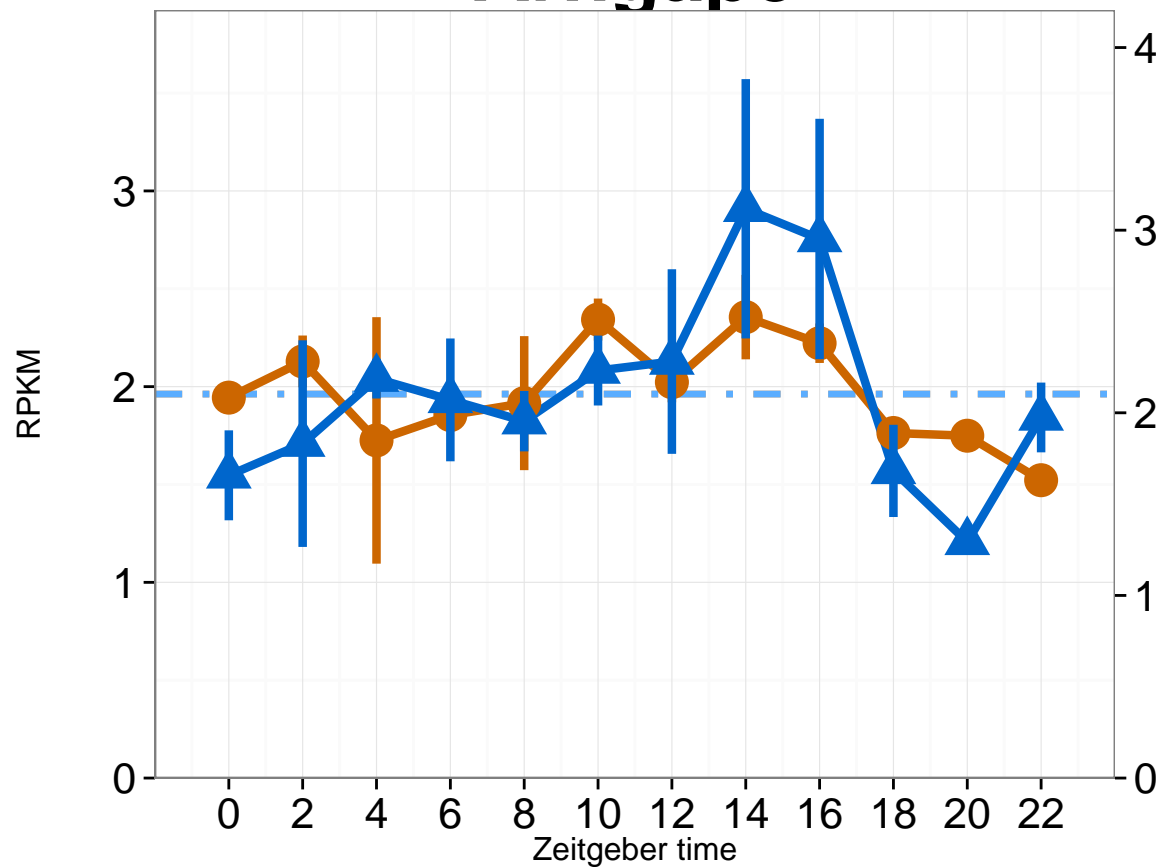

# Arhgap8

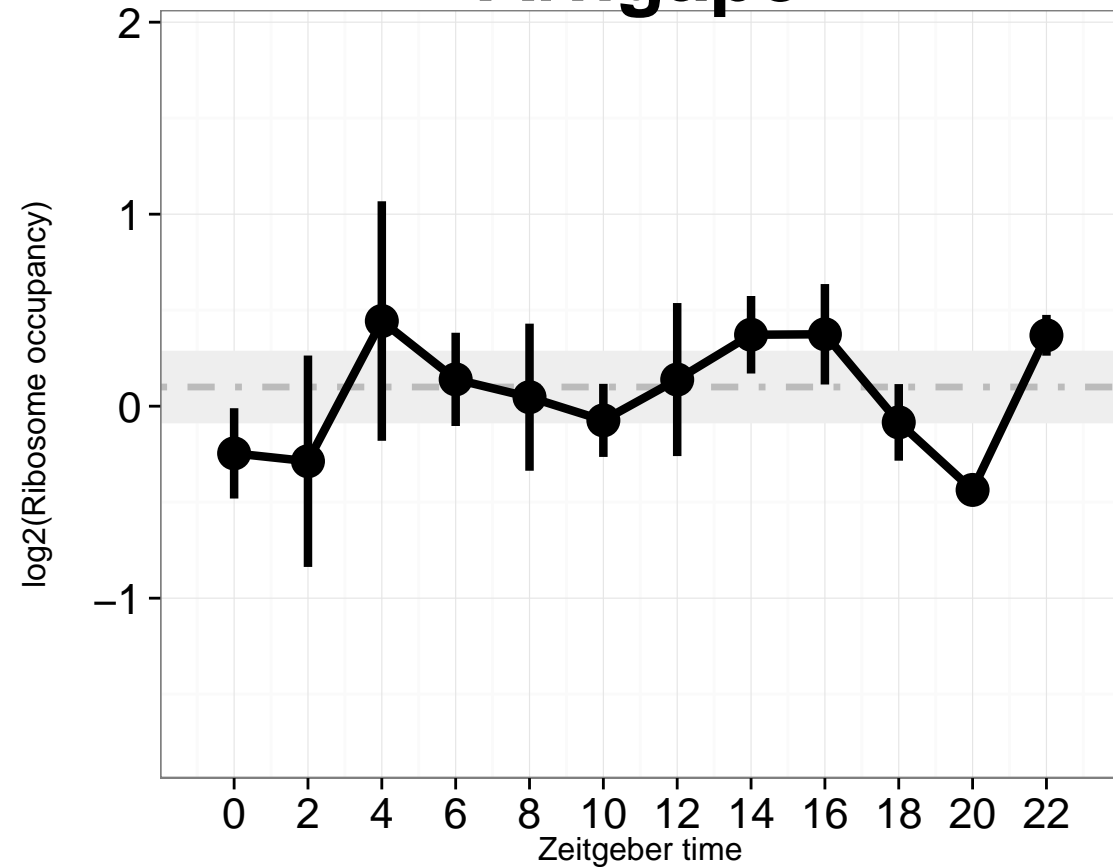

Supplement: Supplementary file 1962 [file 1]

# Dcun1d5

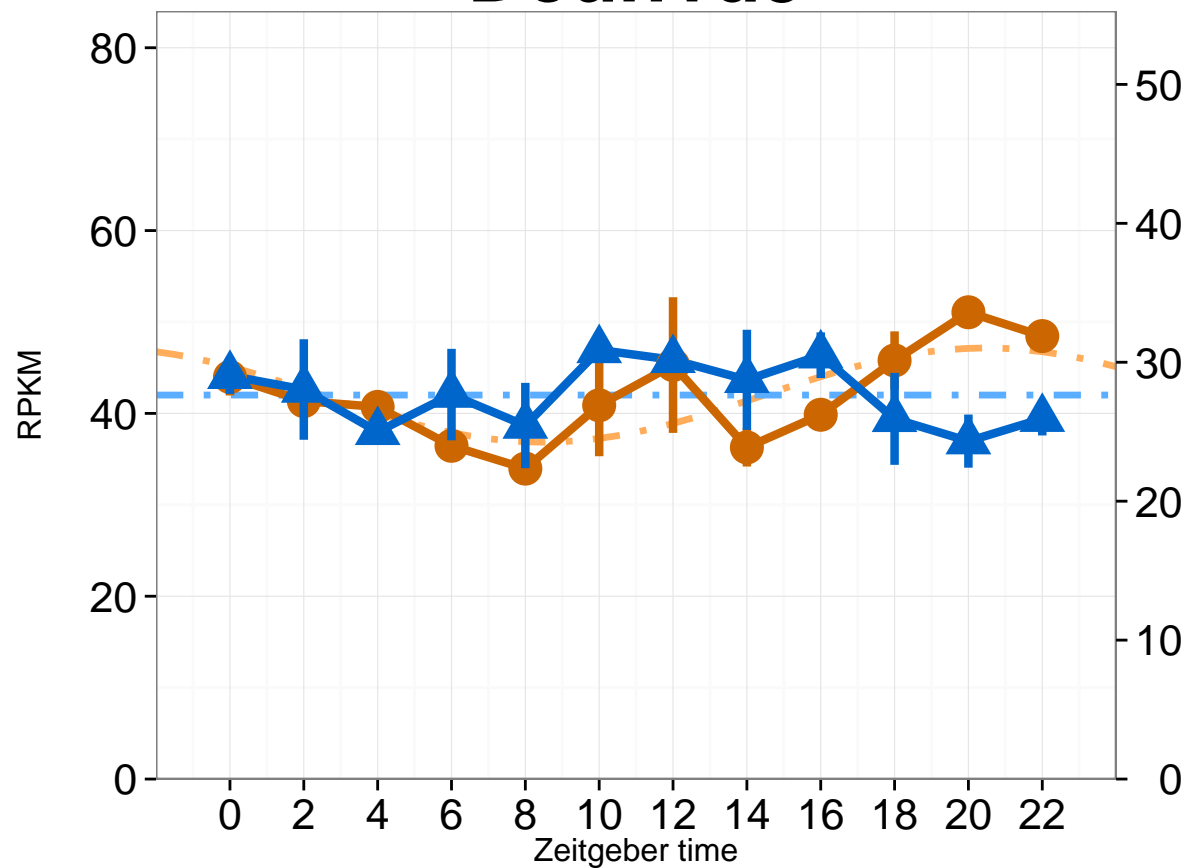

# Dcun1d5

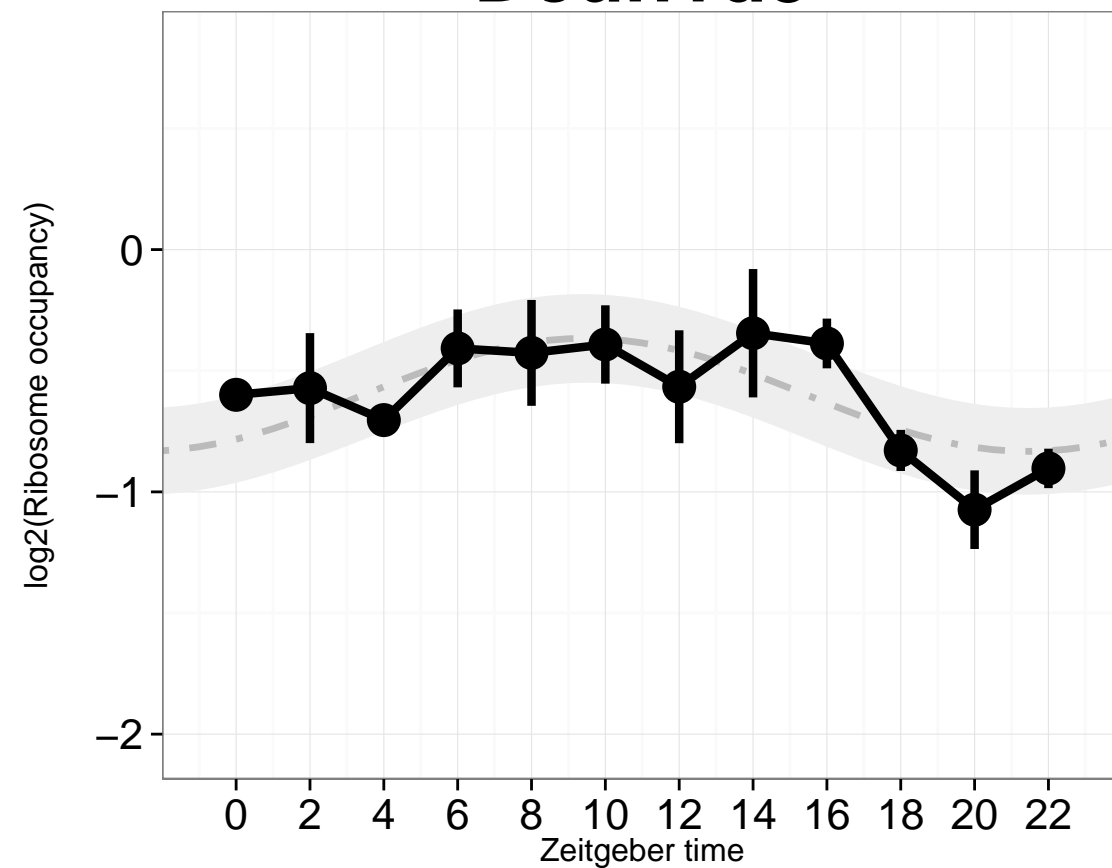

Supplement: Supplementary file 1963 [file 1]

## Polq

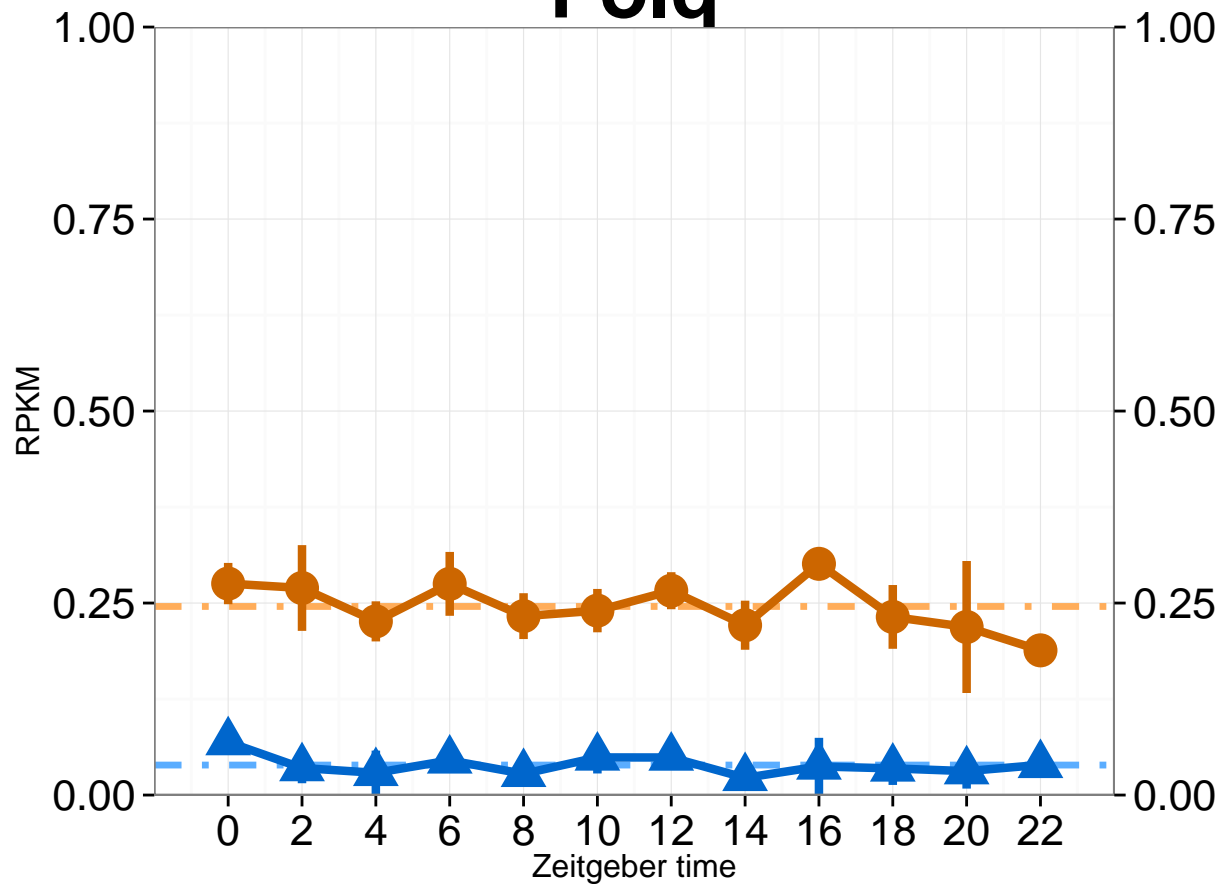

## Polq

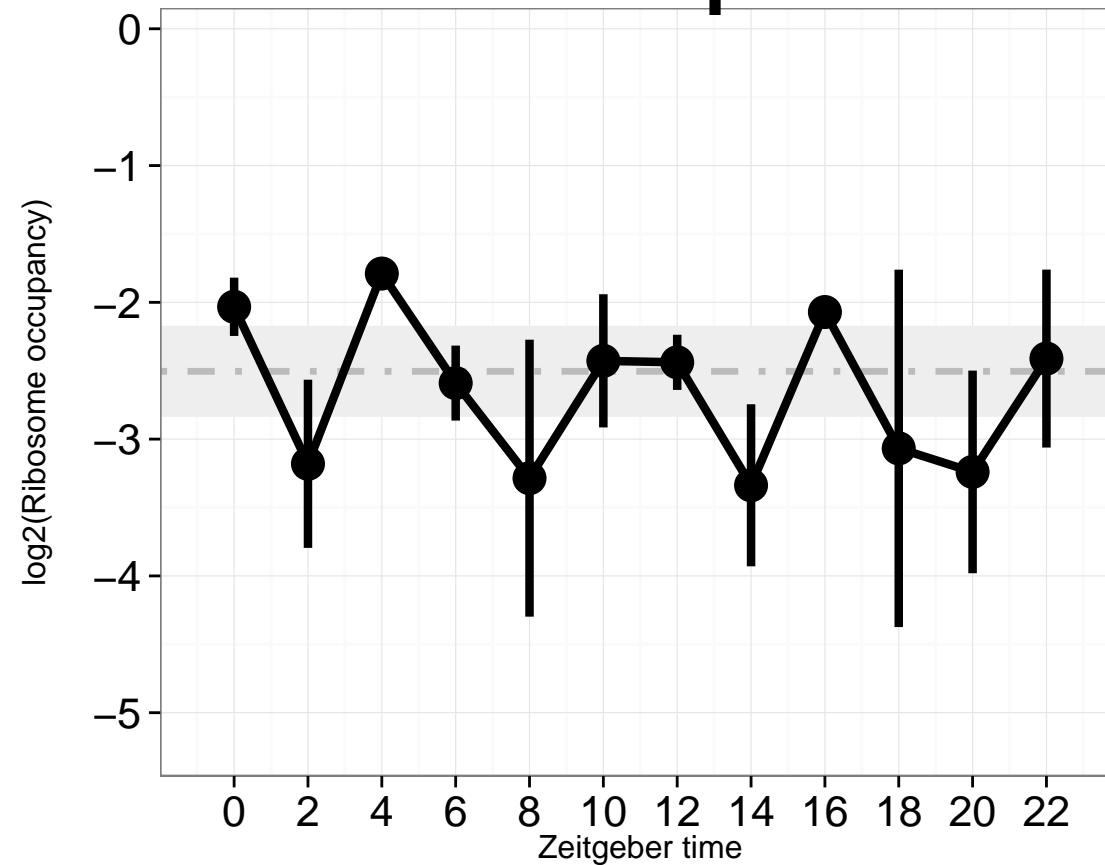

Supplement: Supplementary file 1964 [file 1]

## Hdlbp

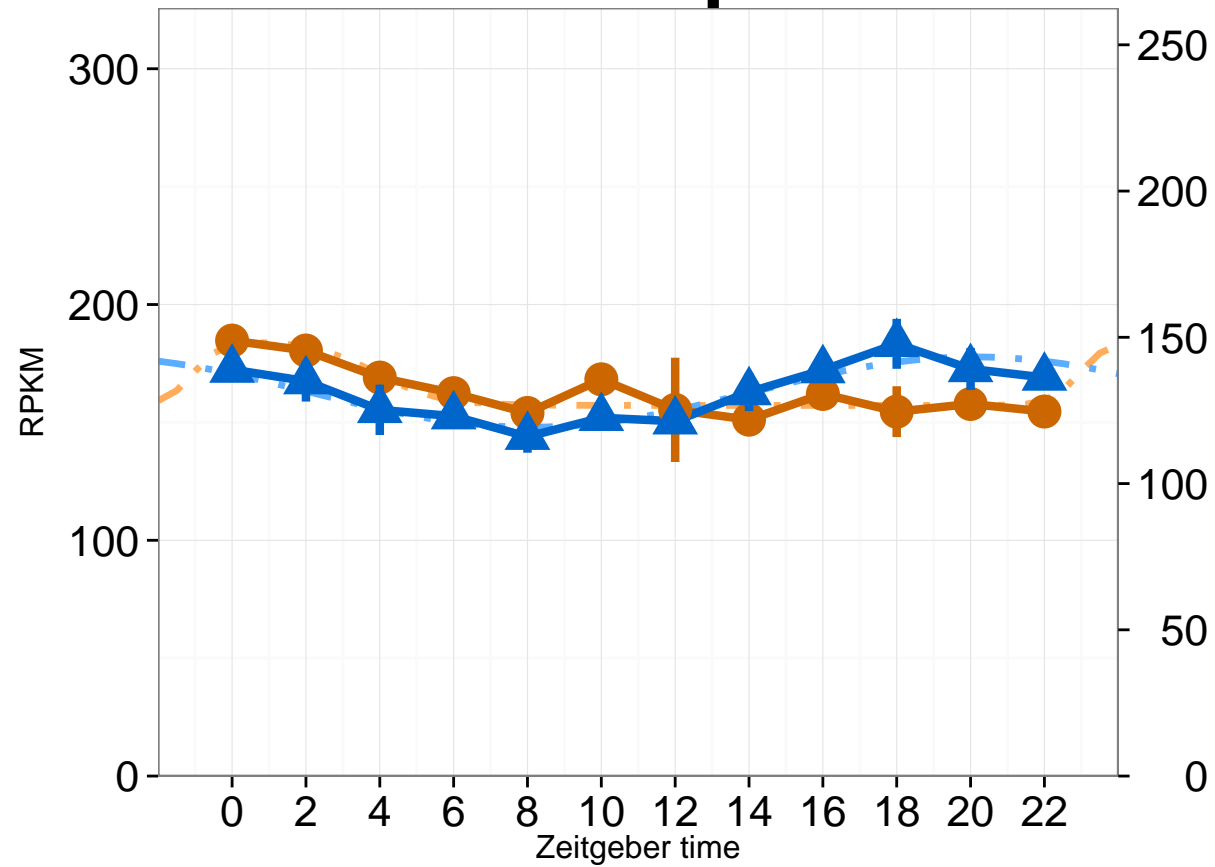

## Hdlbp

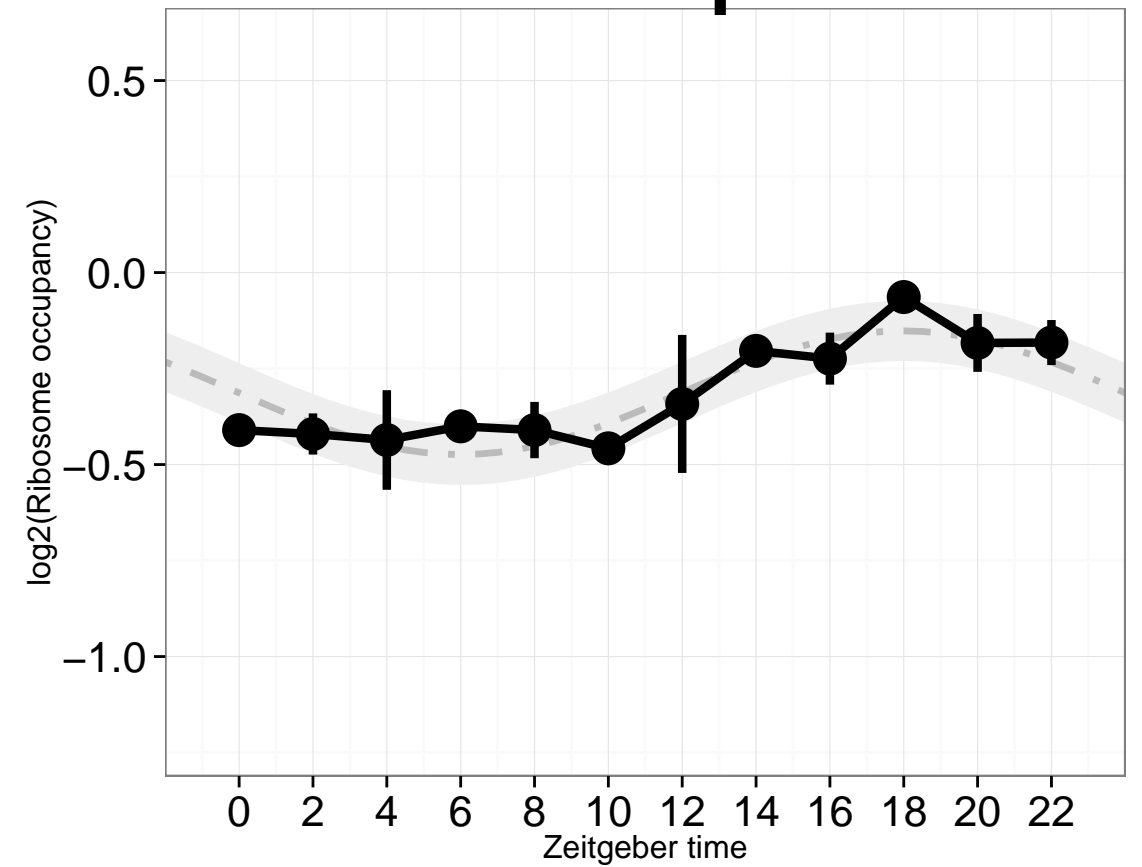

Supplement: Supplementary file 1965 [file 1]

# Hist2h2ab

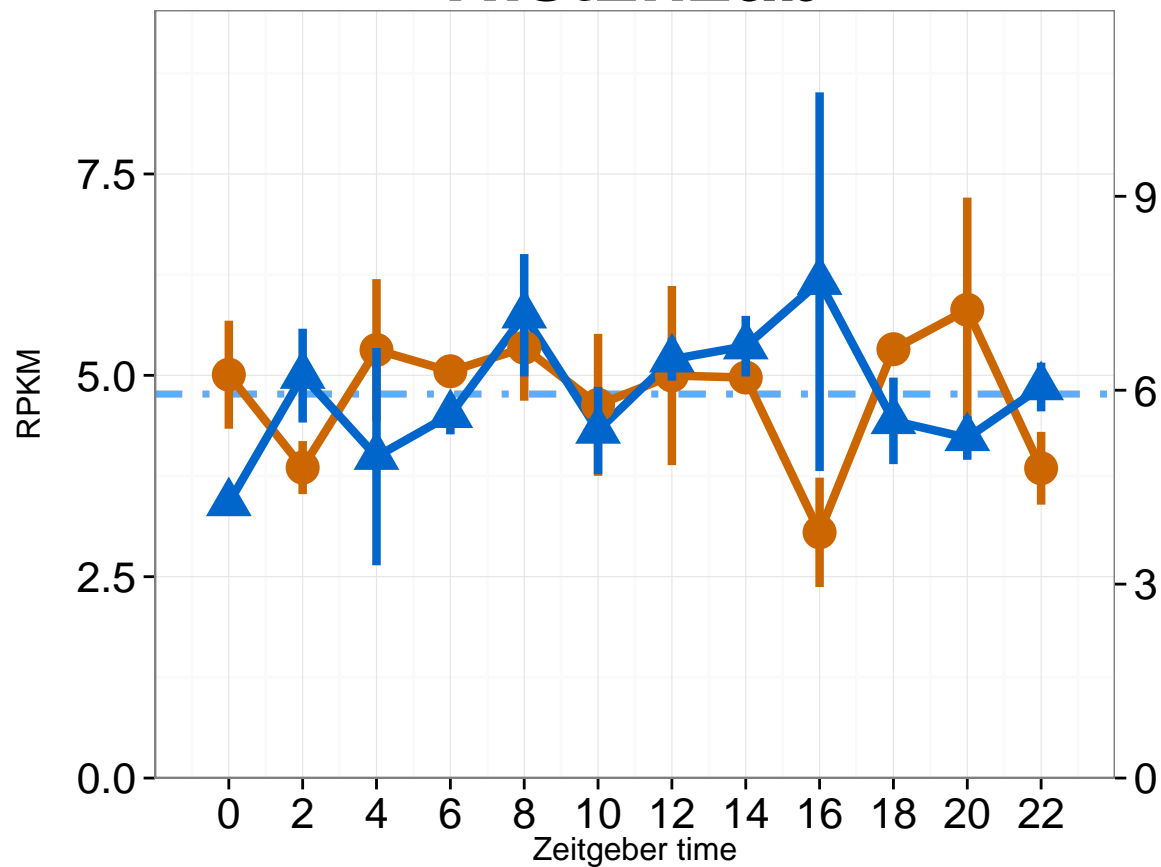

# Hist2h2ab

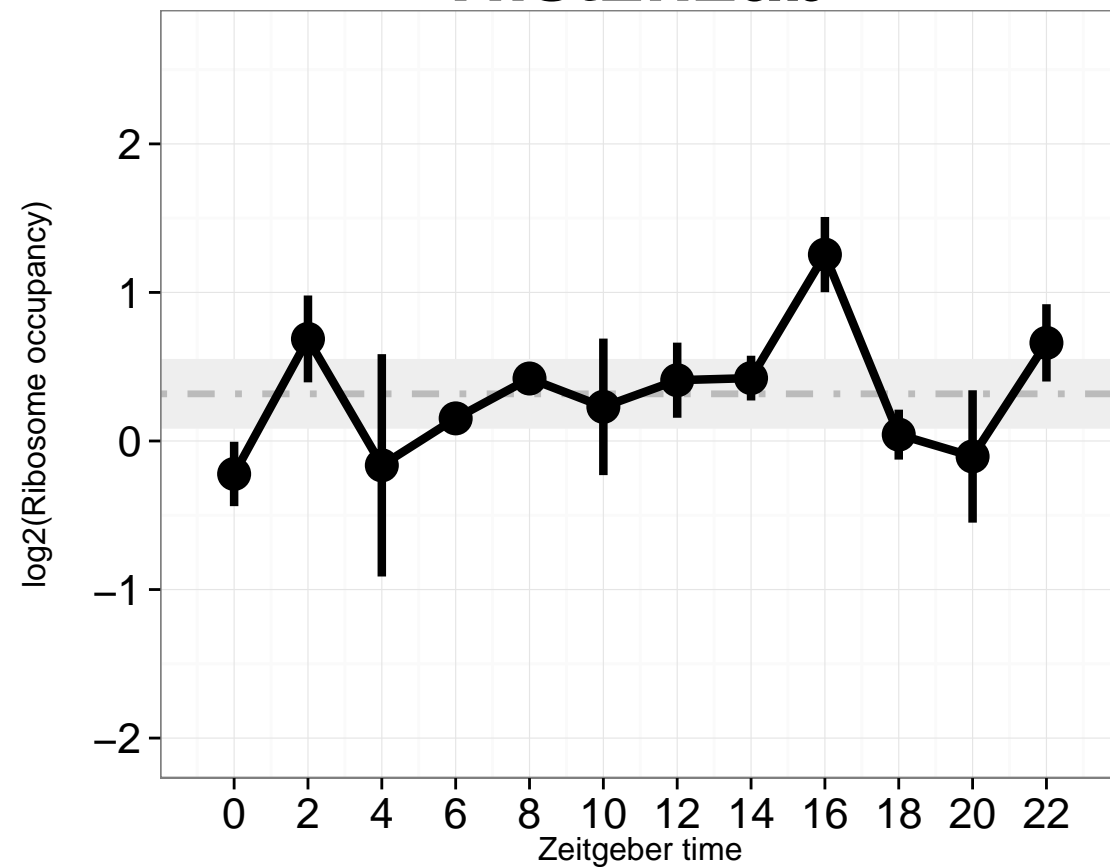

Supplement: Supplementary file 1966 [file 1]

## Cwf19l2

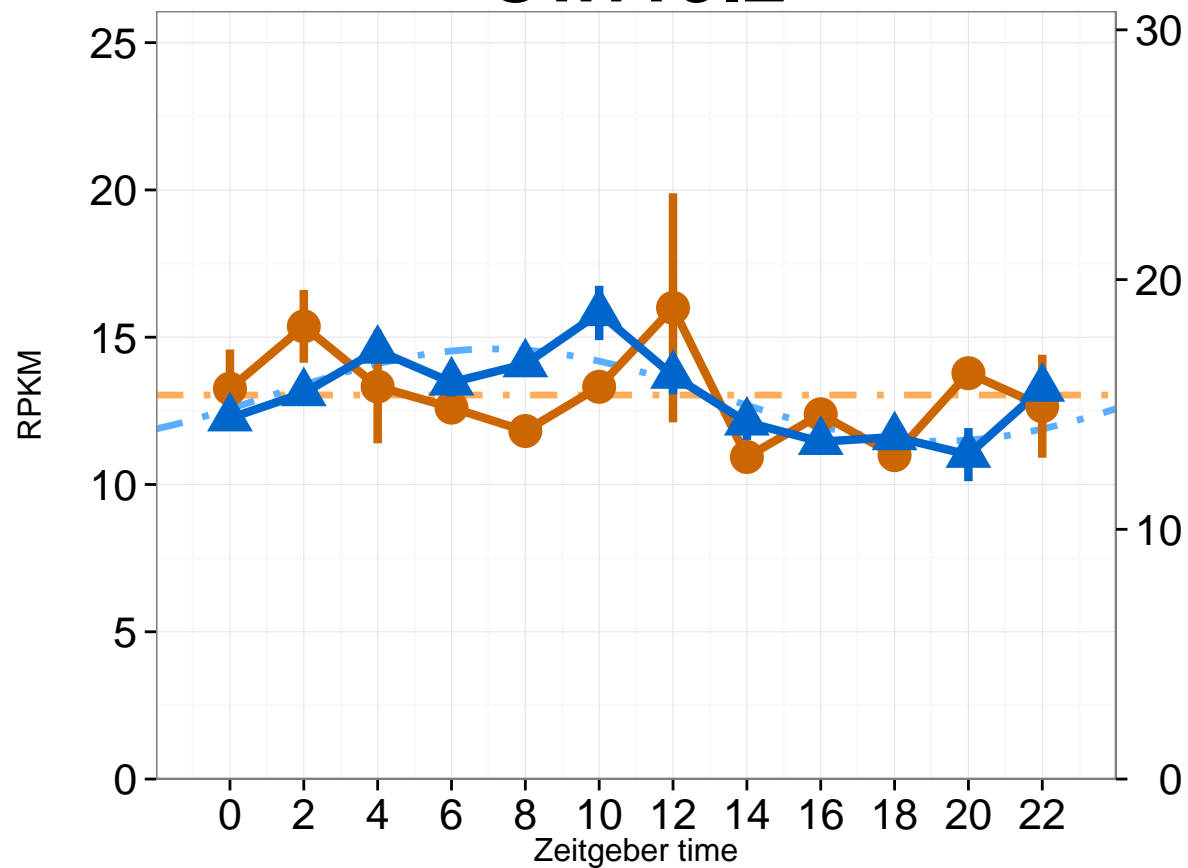

## Cwf19l2

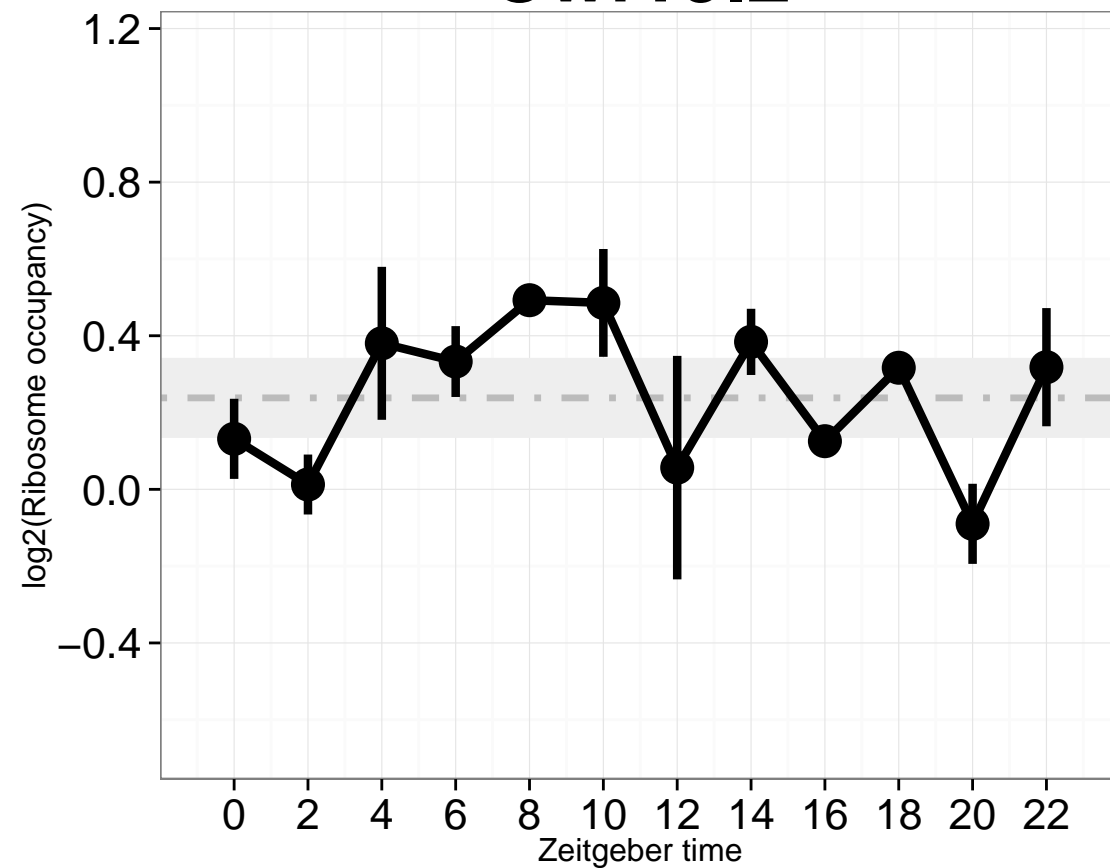

Supplement: Supplementary file 1967 [file 1]

# Zfp235

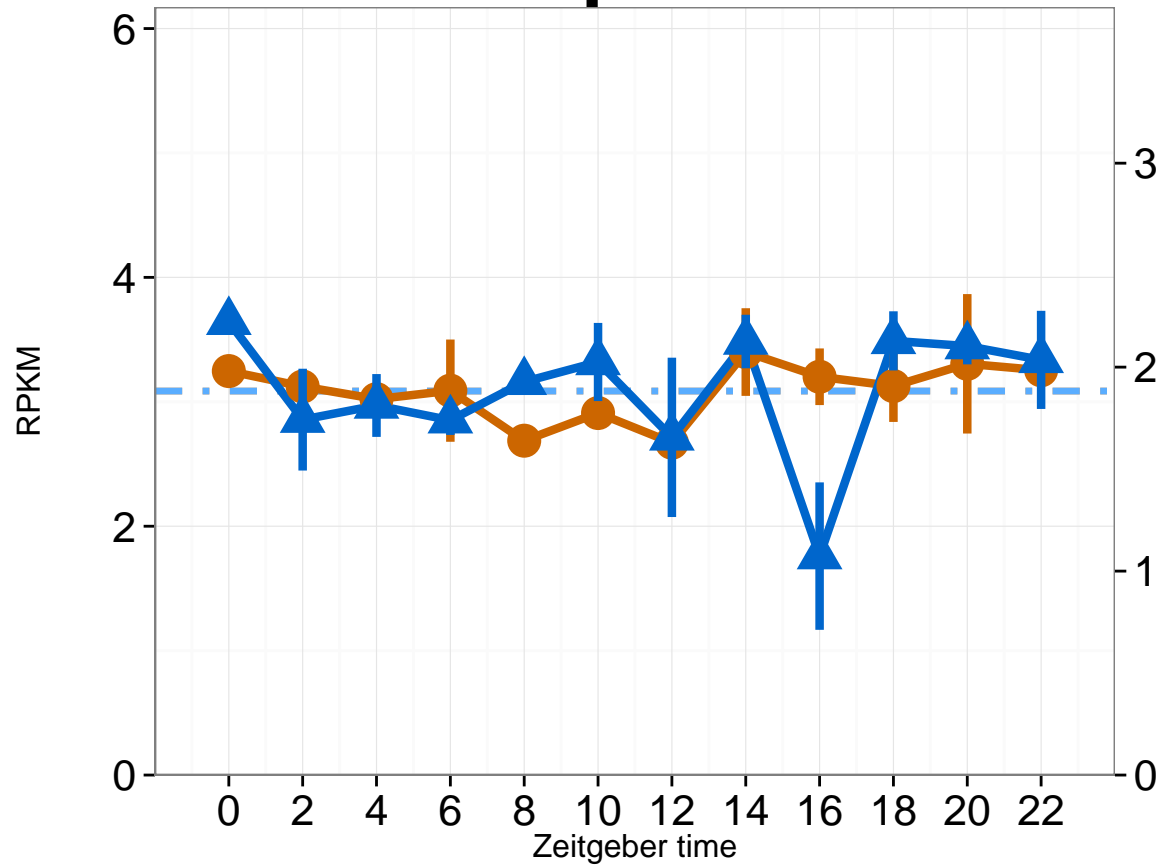

# Zfp235

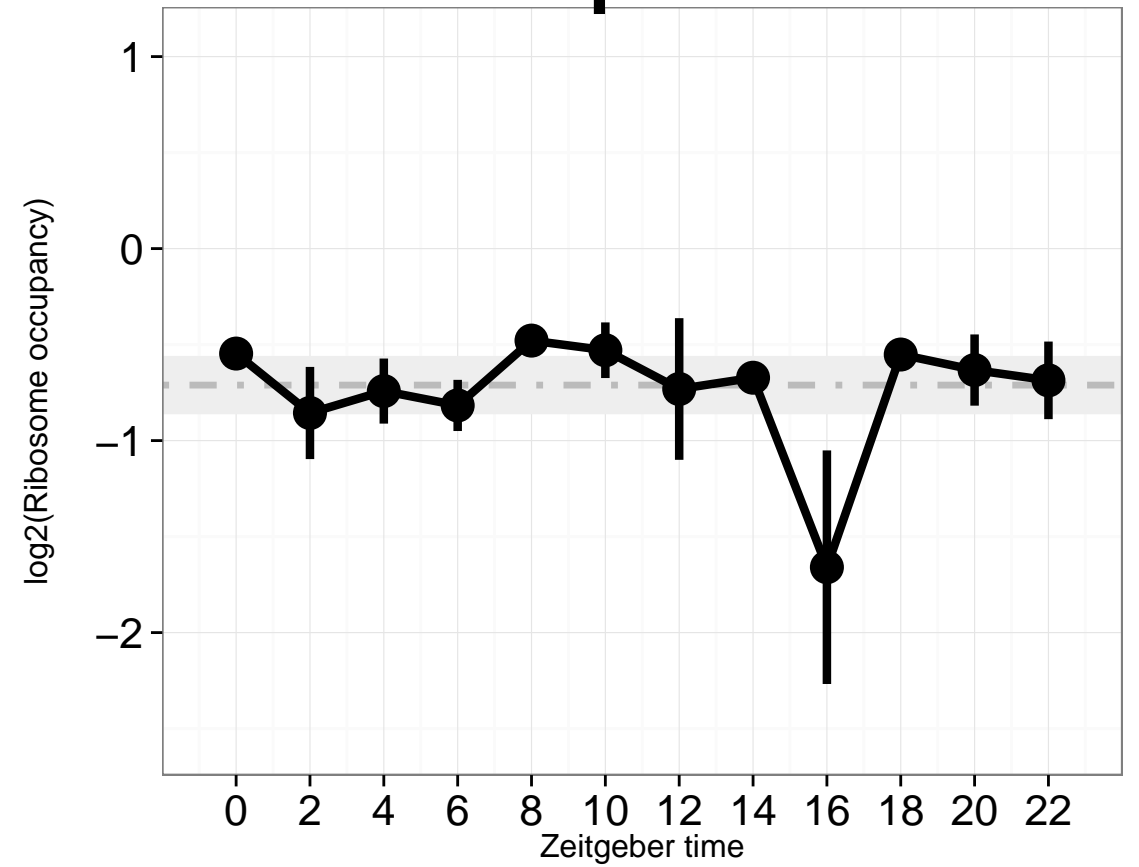

Supplement: Supplementary file 1968 [file 1]

# Dync2h1

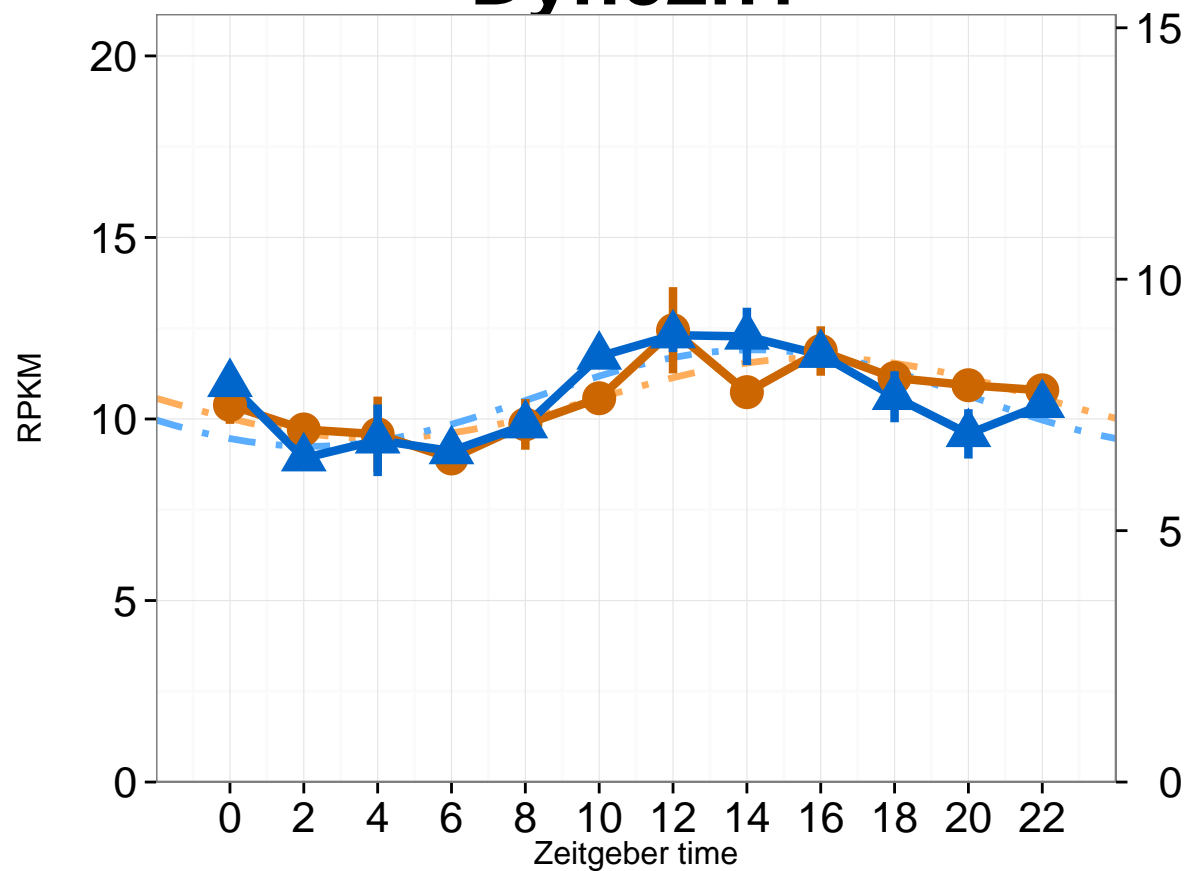

# Dync2h1

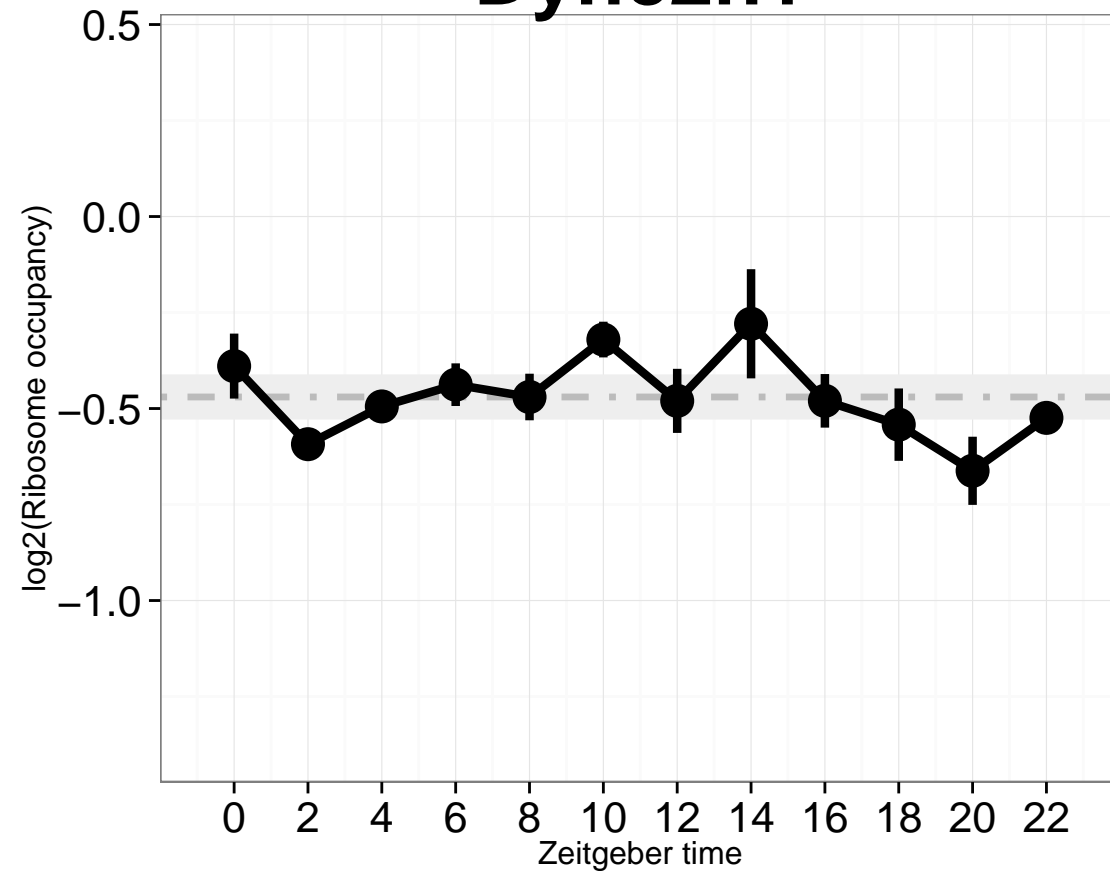

Supplement: Supplementary file 1969 [file 1]

## Rpp30

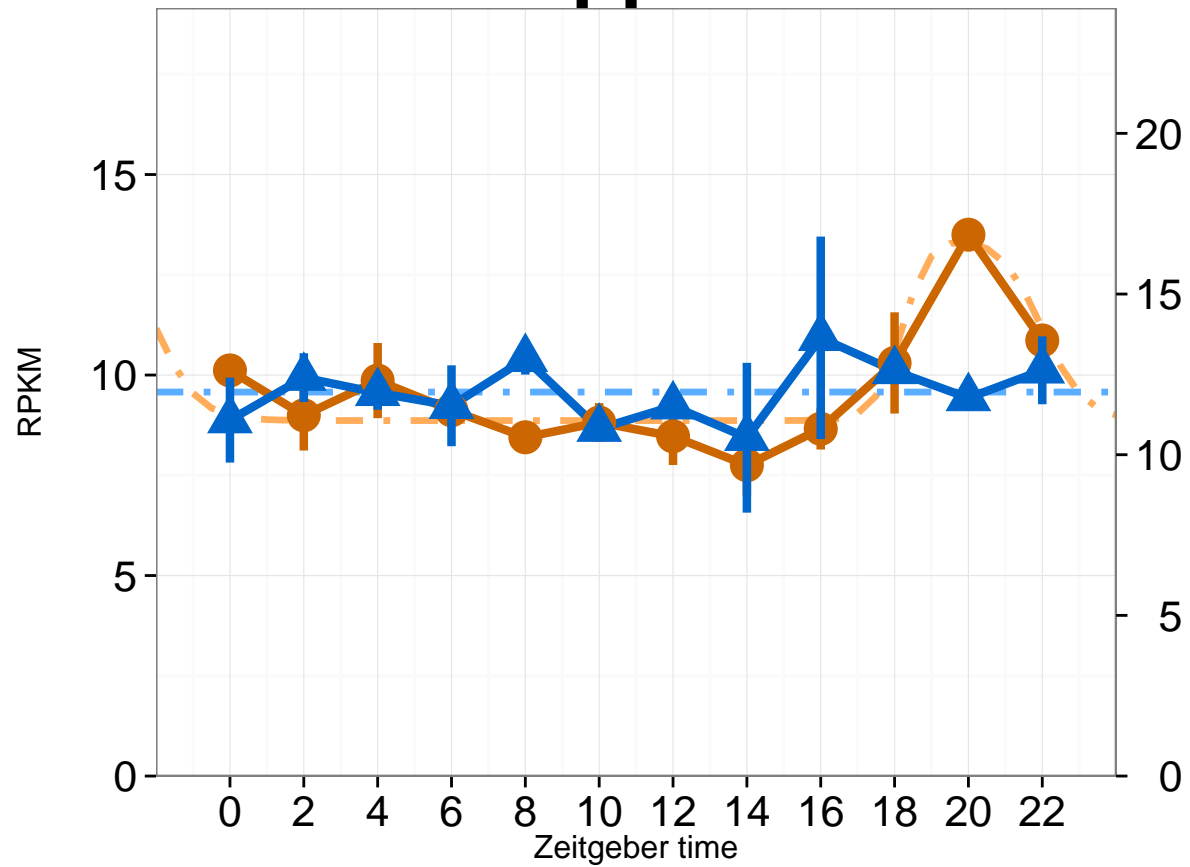

## Rpp30

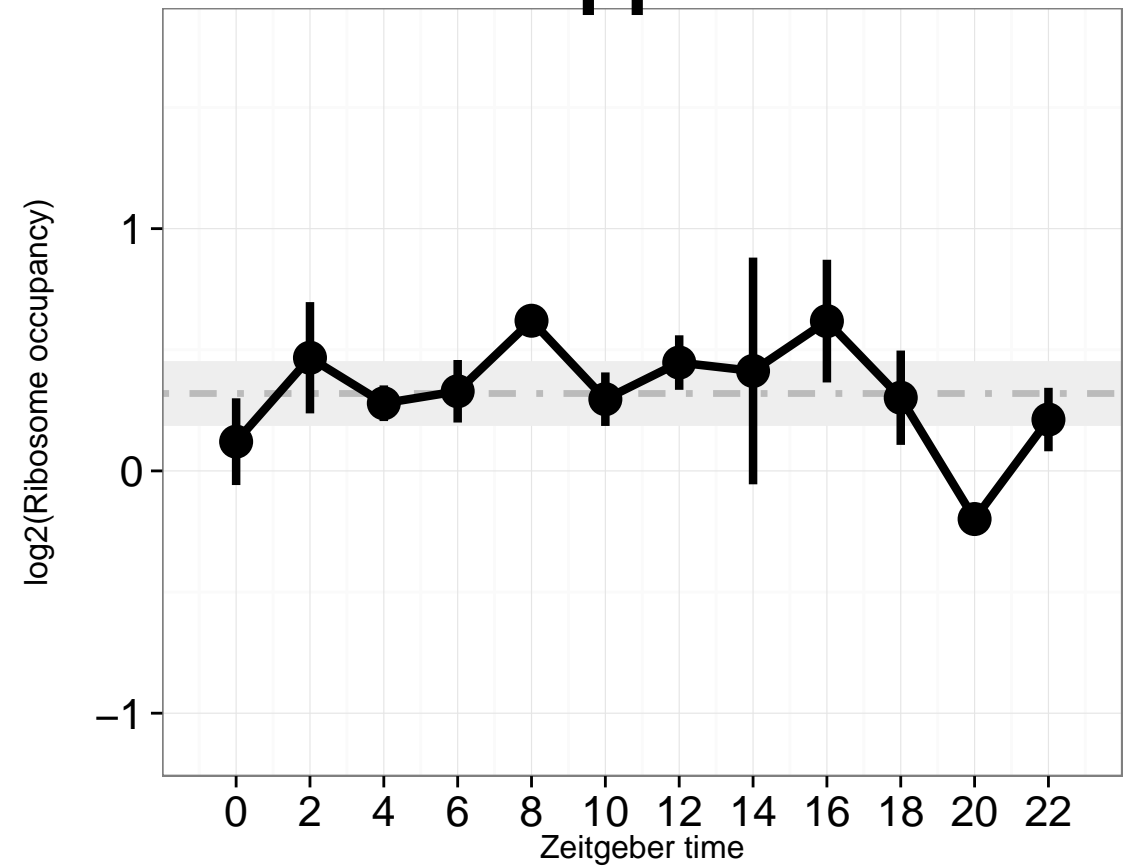

Supplement: Supplementary file 1970 [file 1]

# Supt16

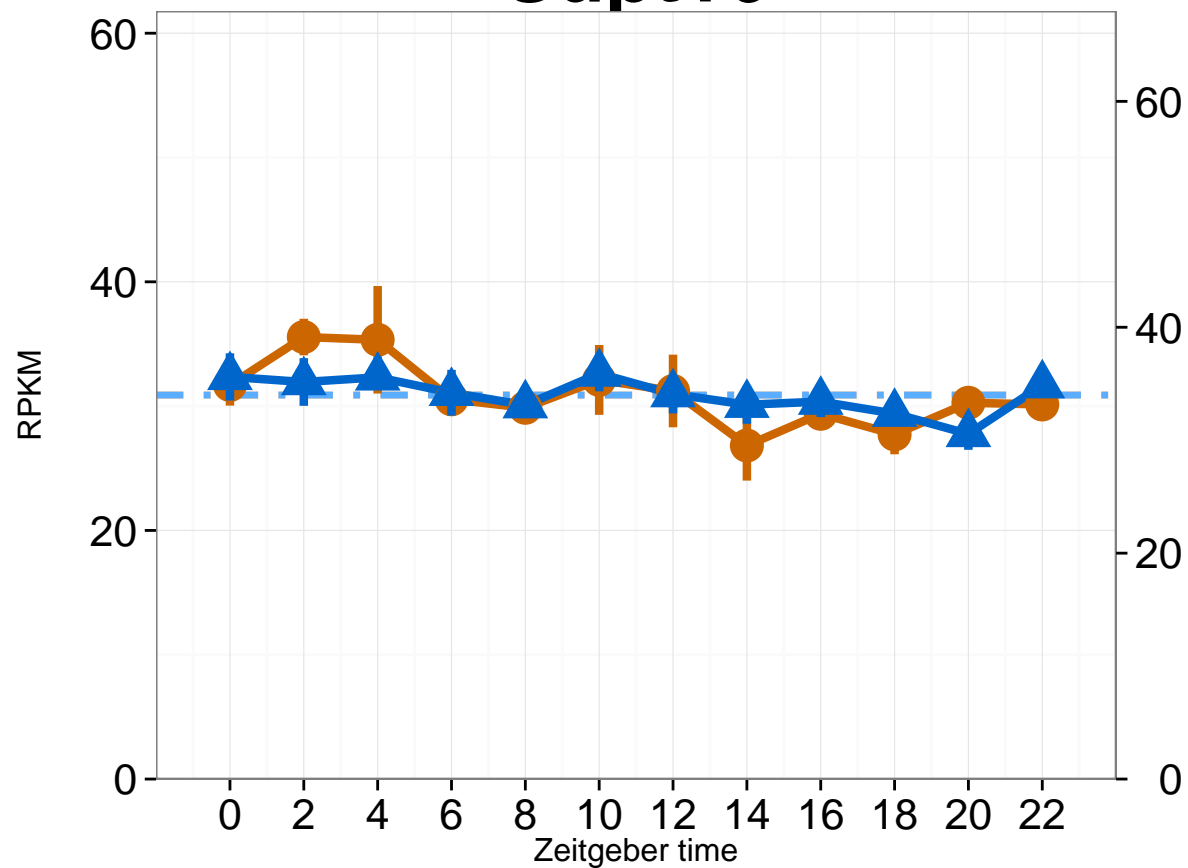

# Supt16

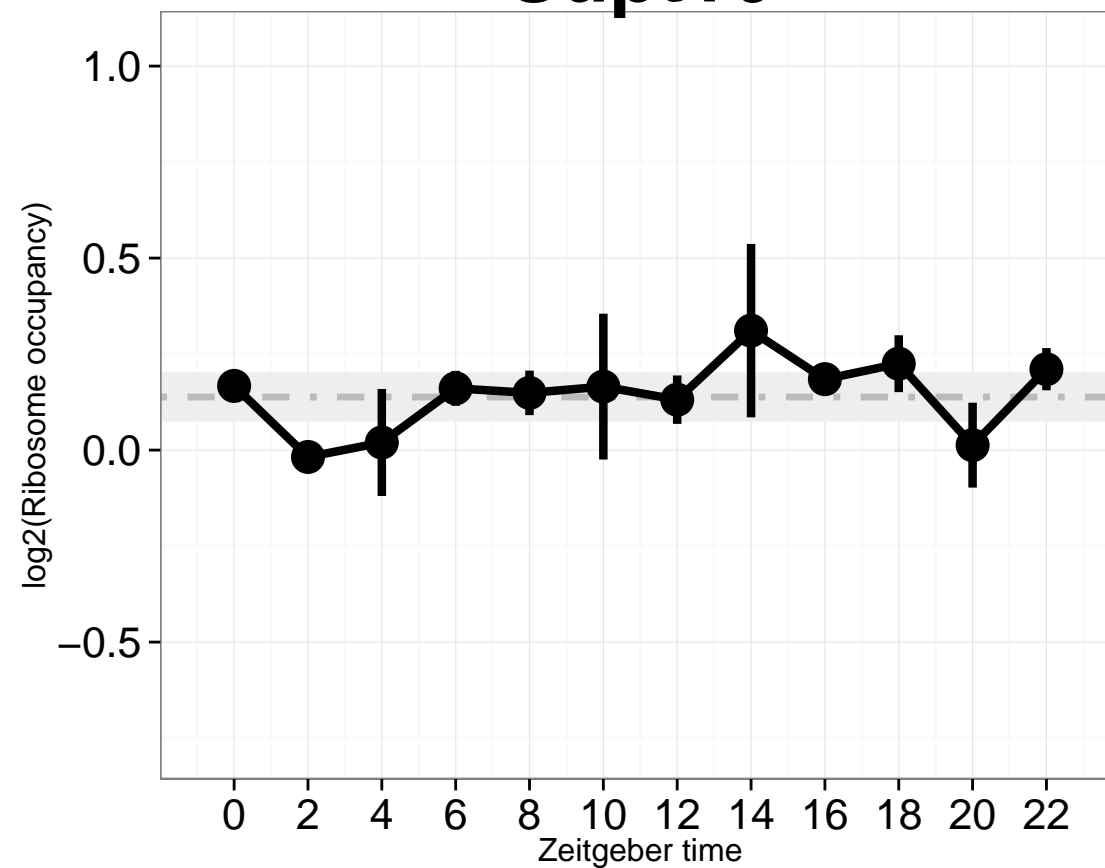

Supplement: Supplementary file 1971 [file 1]

## Vegfc

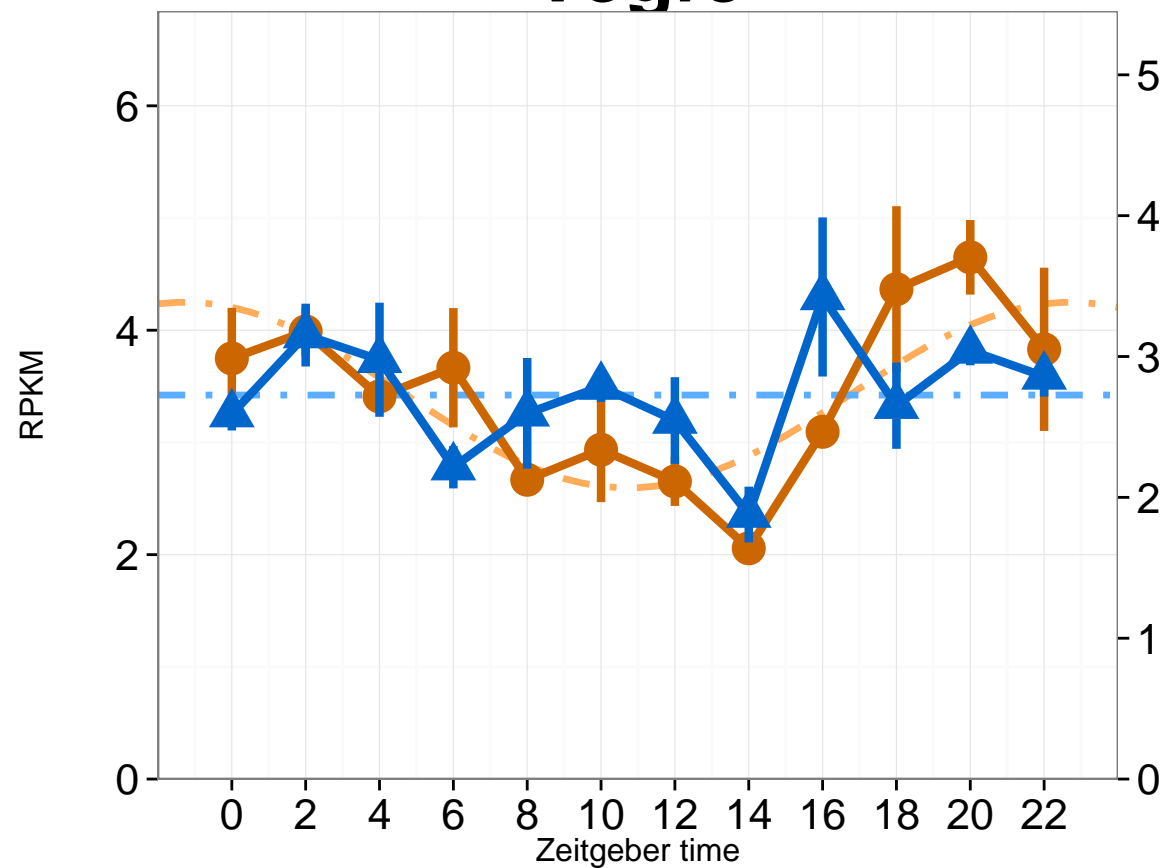

## Vegfc

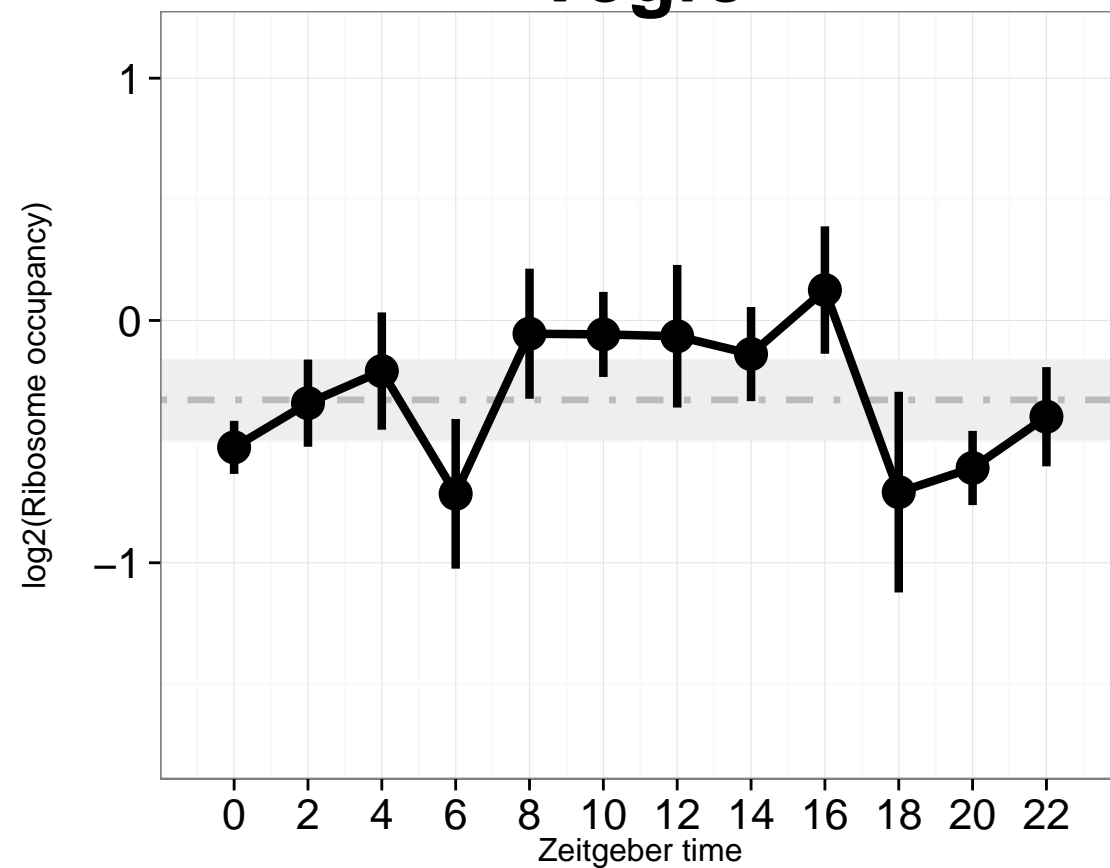

Supplement: Supplementary file 1972 [file 1]

# Map3k13

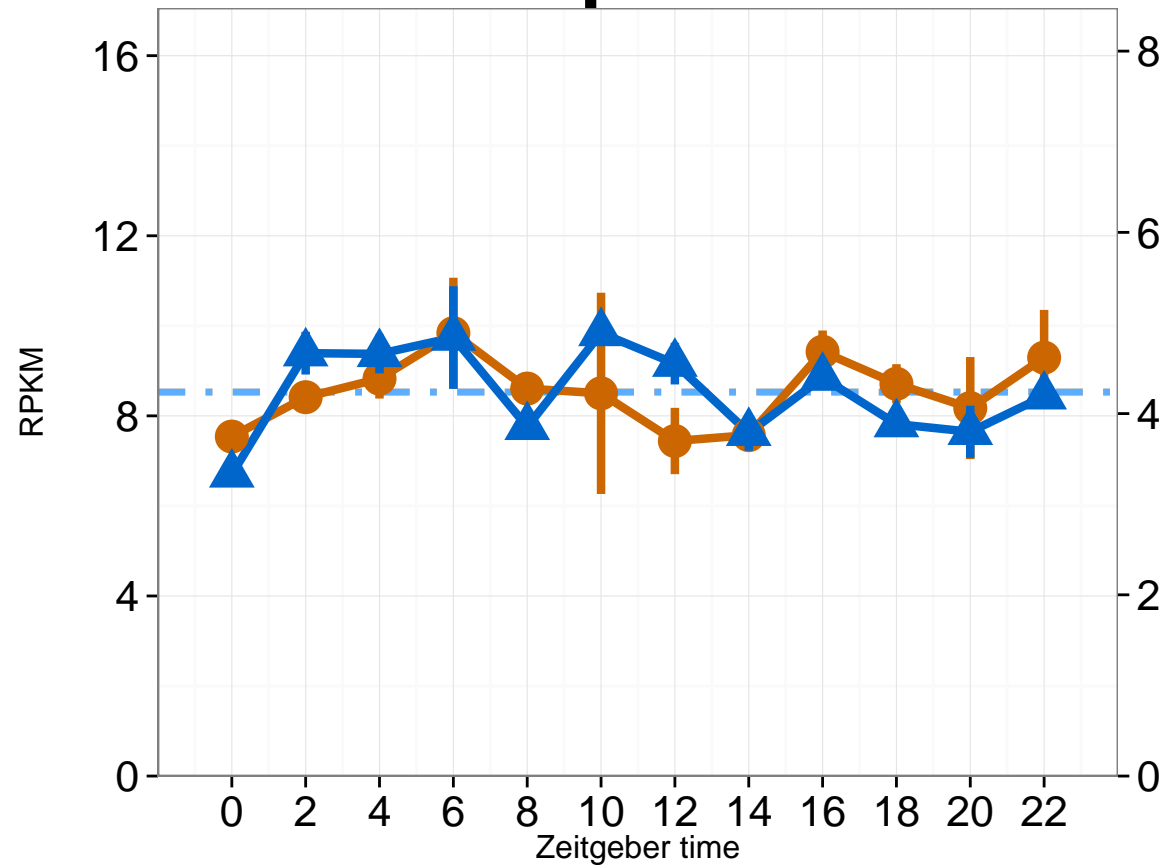

# Map3k13

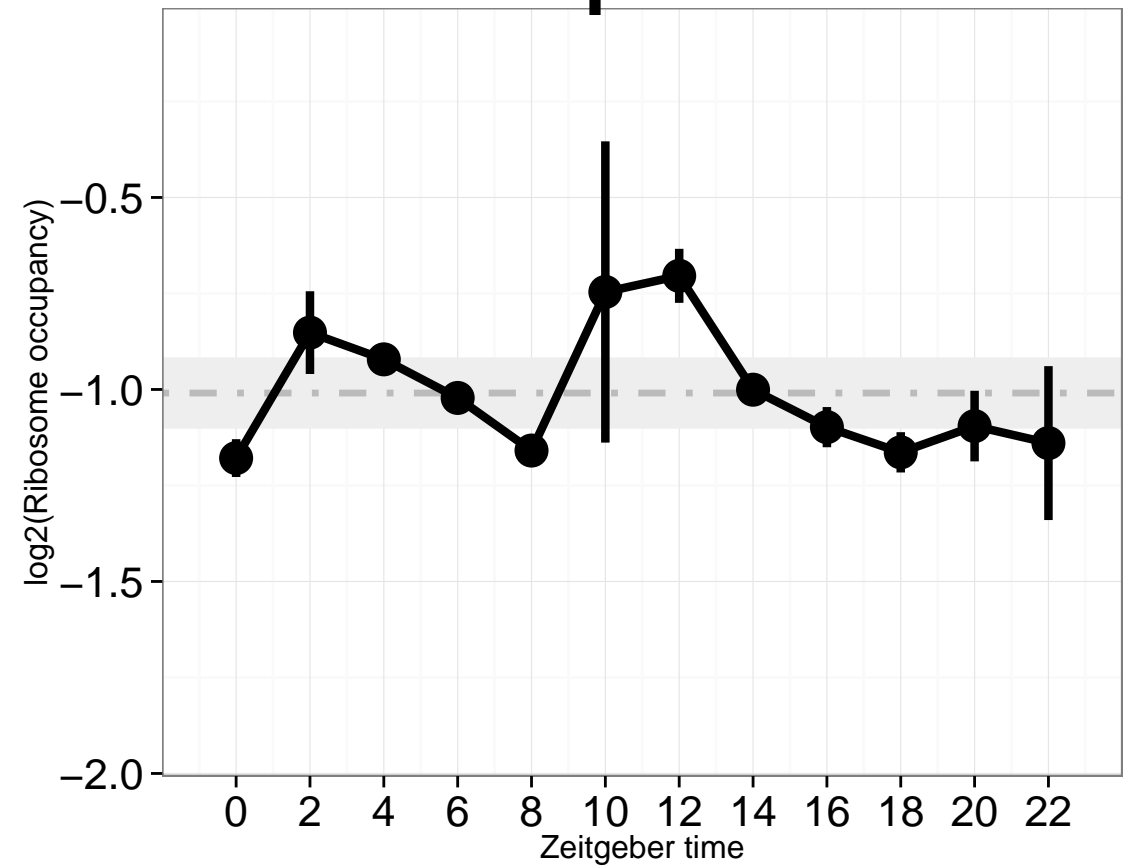

Supplement: Supplementary file 1973 [file 1]

# Clpp

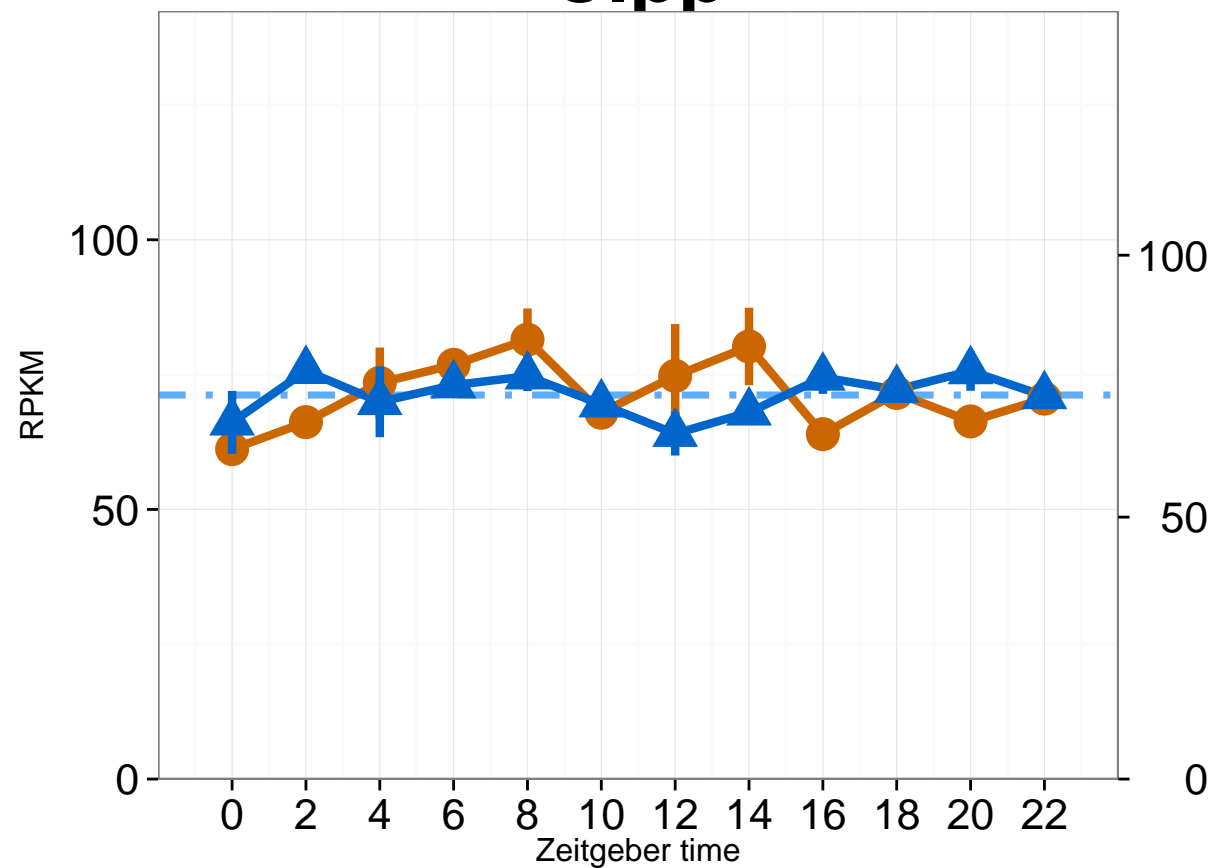

# Clpp

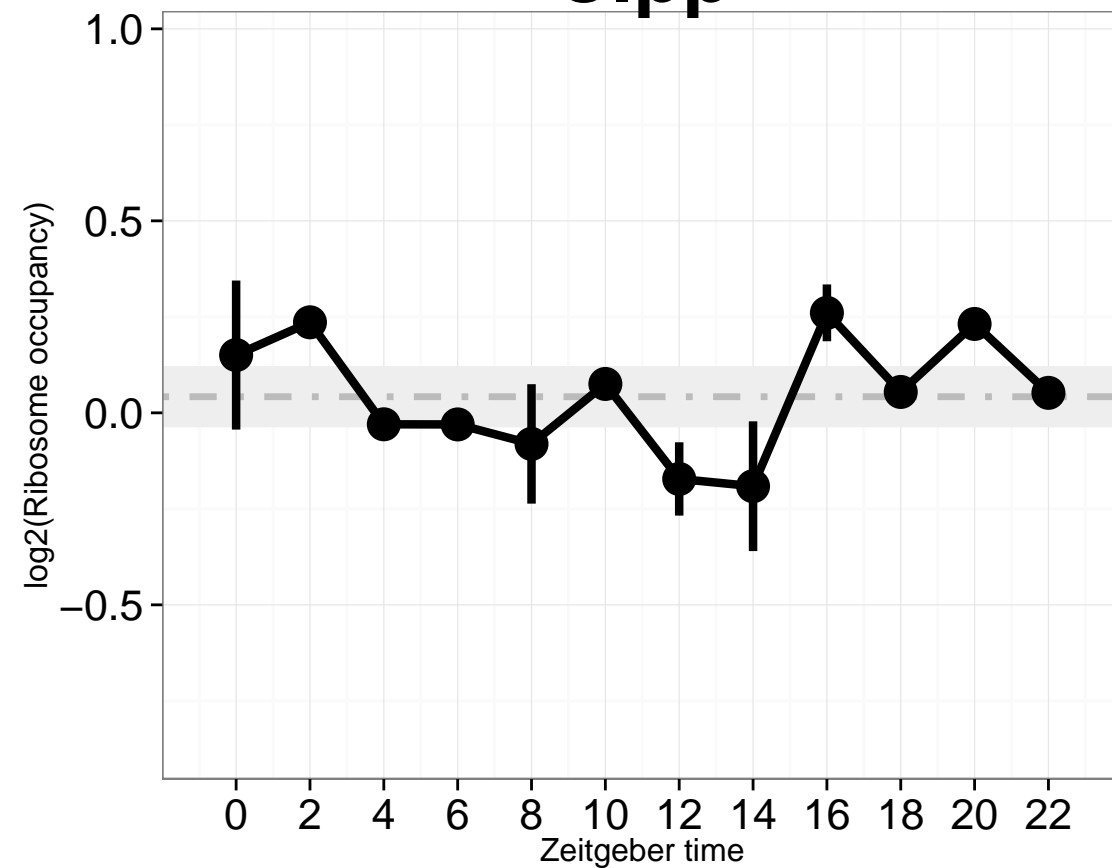

Supplement: Supplementary file 1974 [file 1]

## Gclm

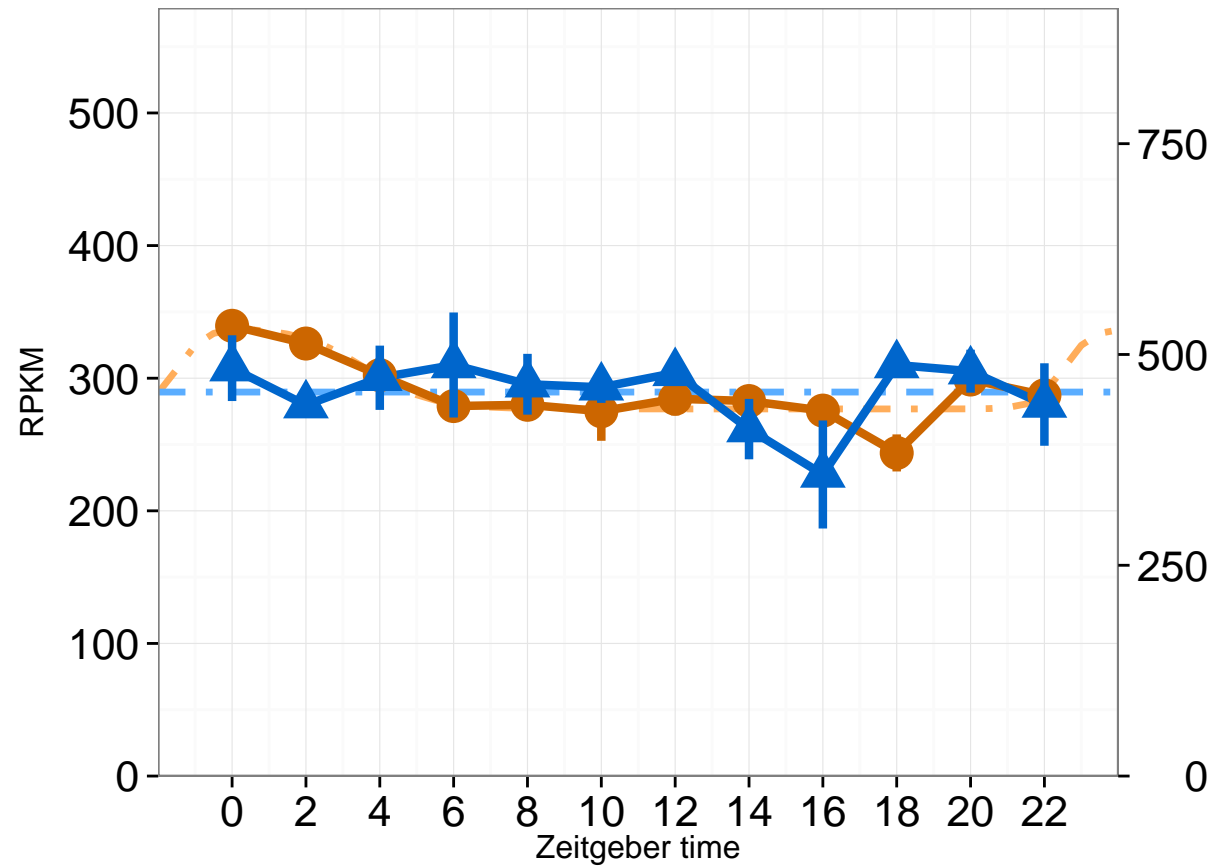

## Gclm

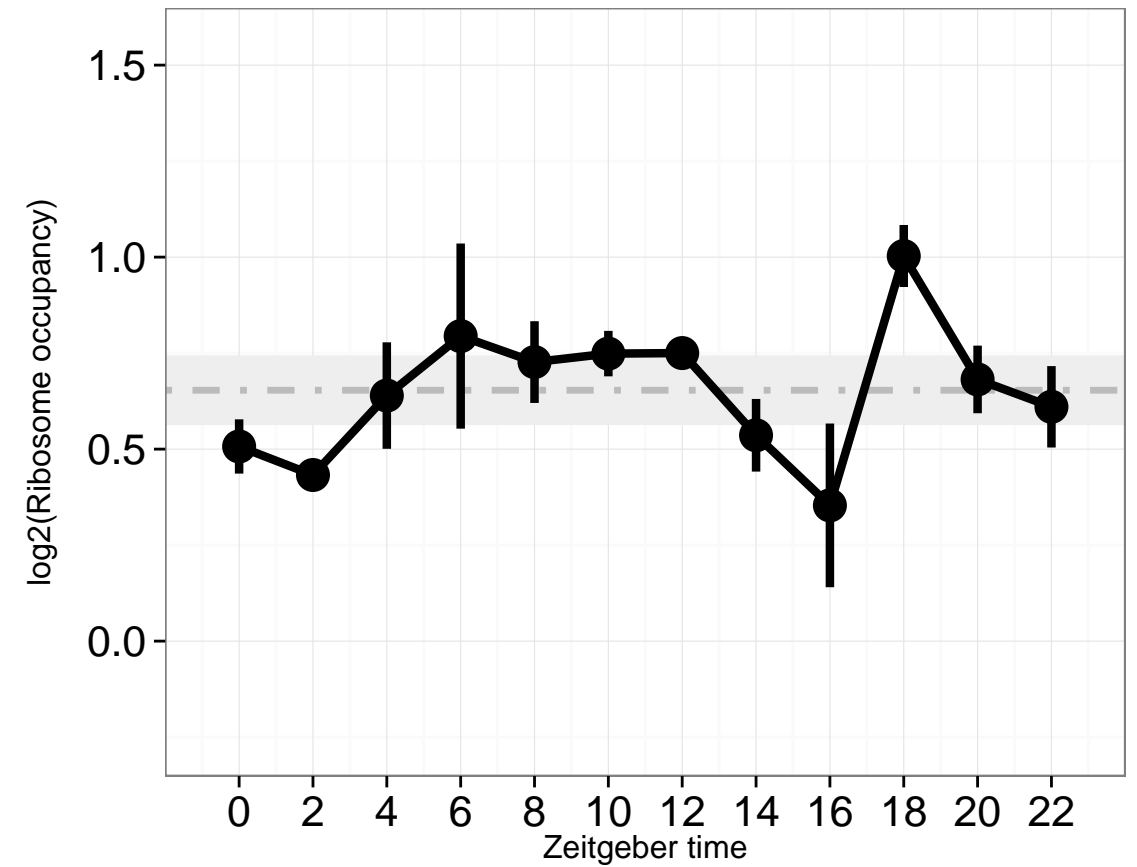

Supplement: Supplementary file 1975 [file 1]

## Cryga

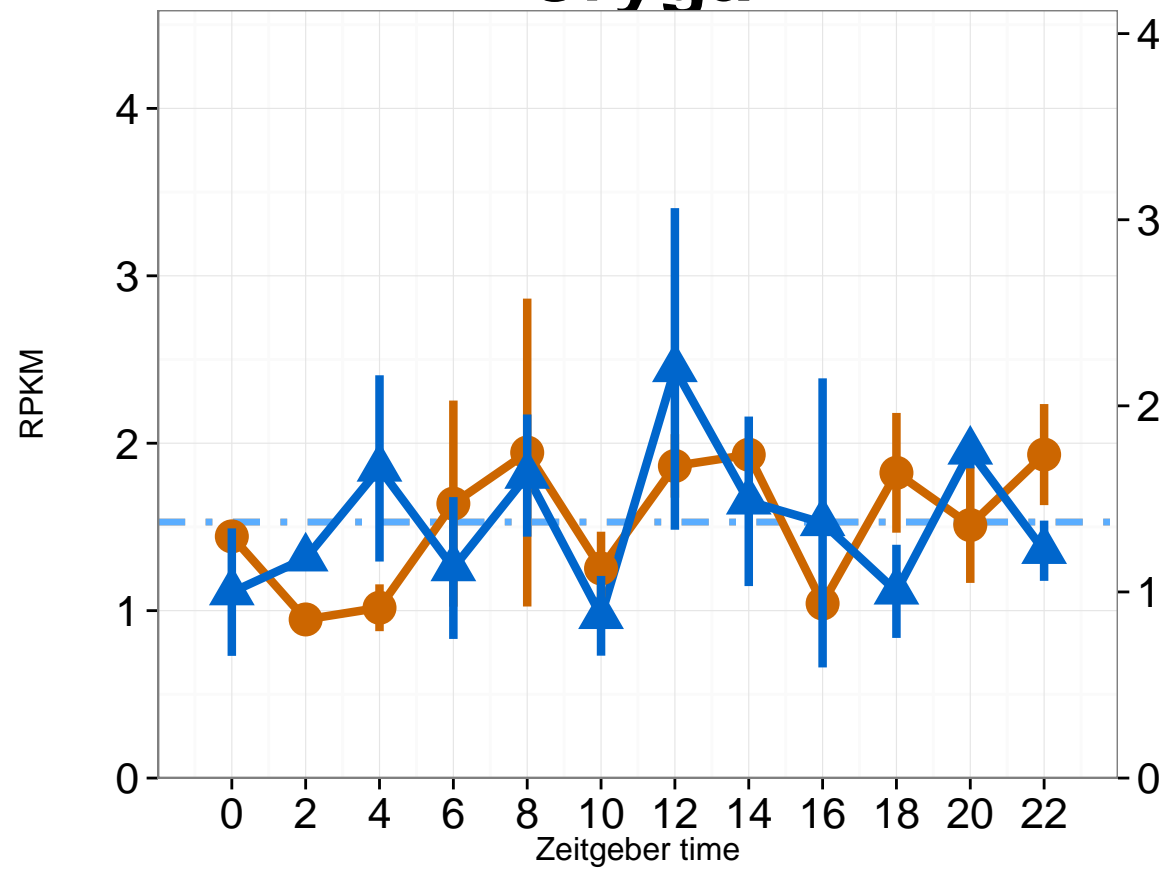

## Cryga

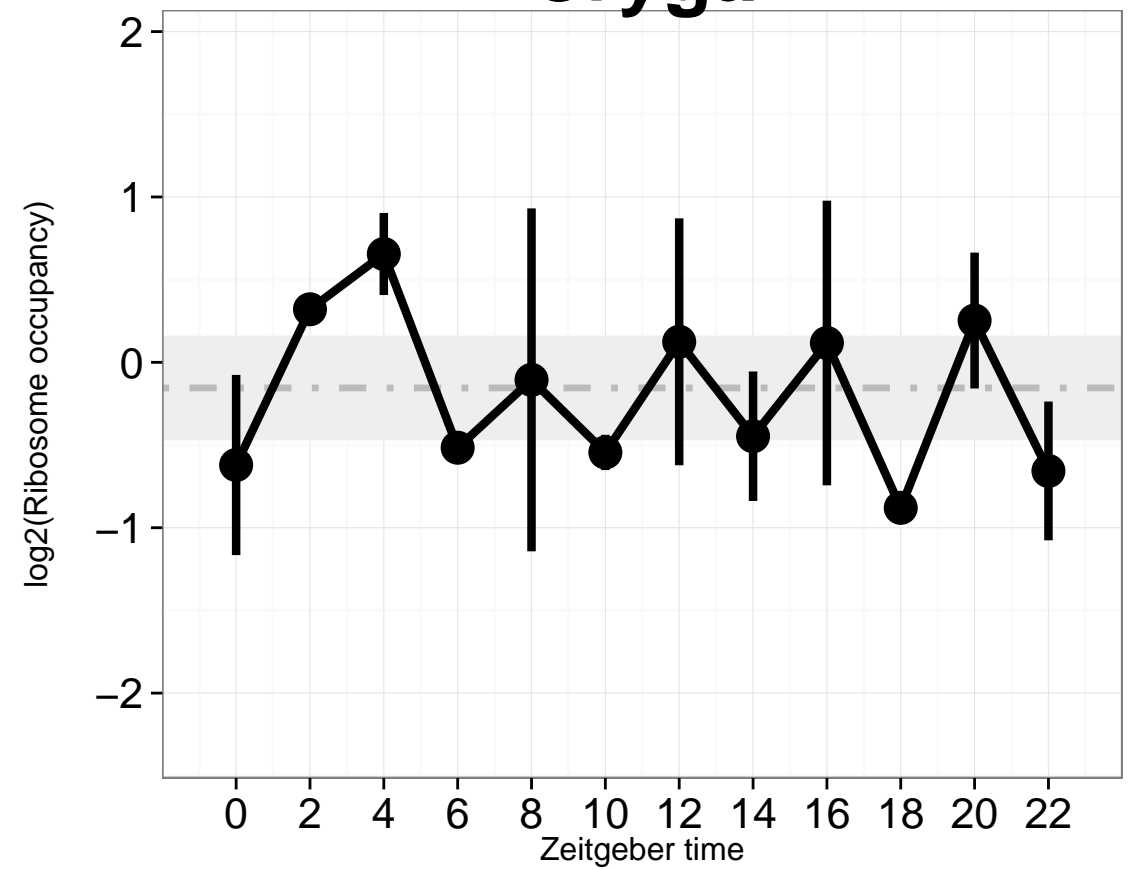

Supplement: Supplementary file 1976 [file 1]

## Pawr

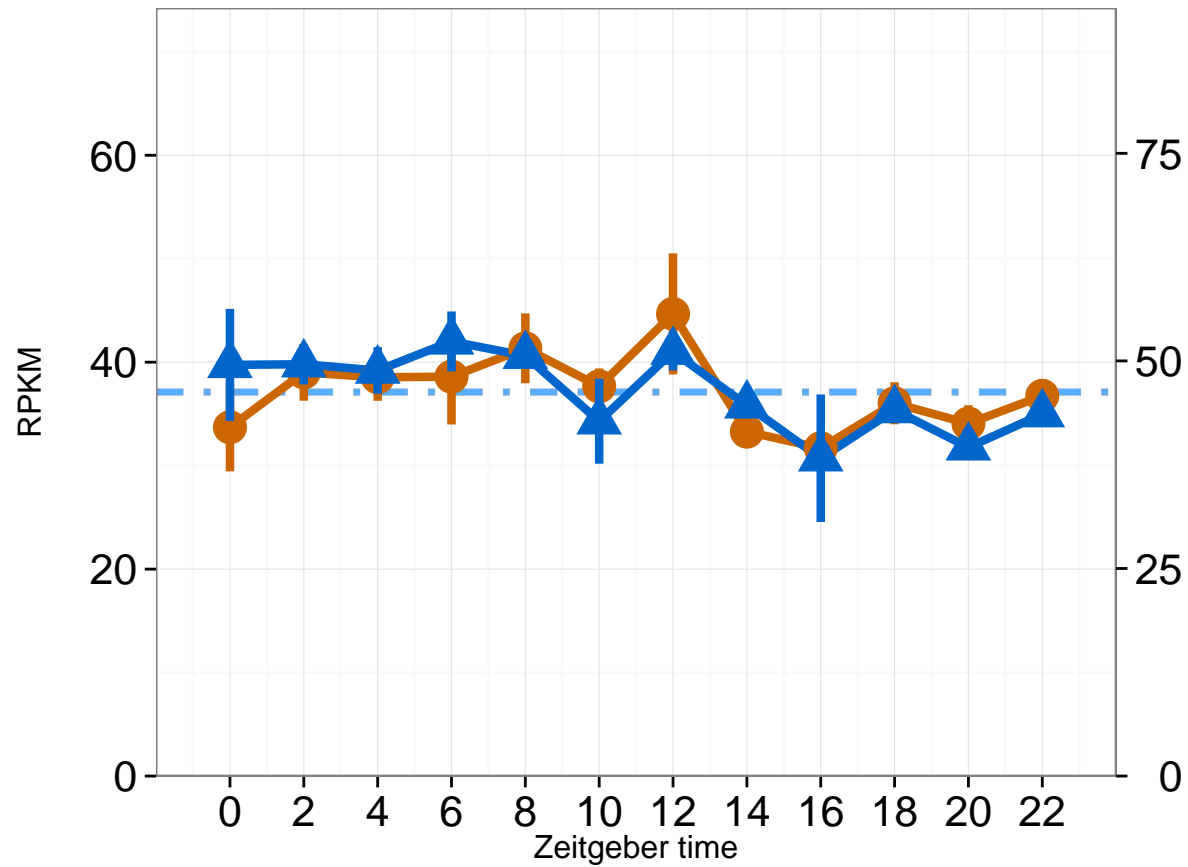

## Pawr

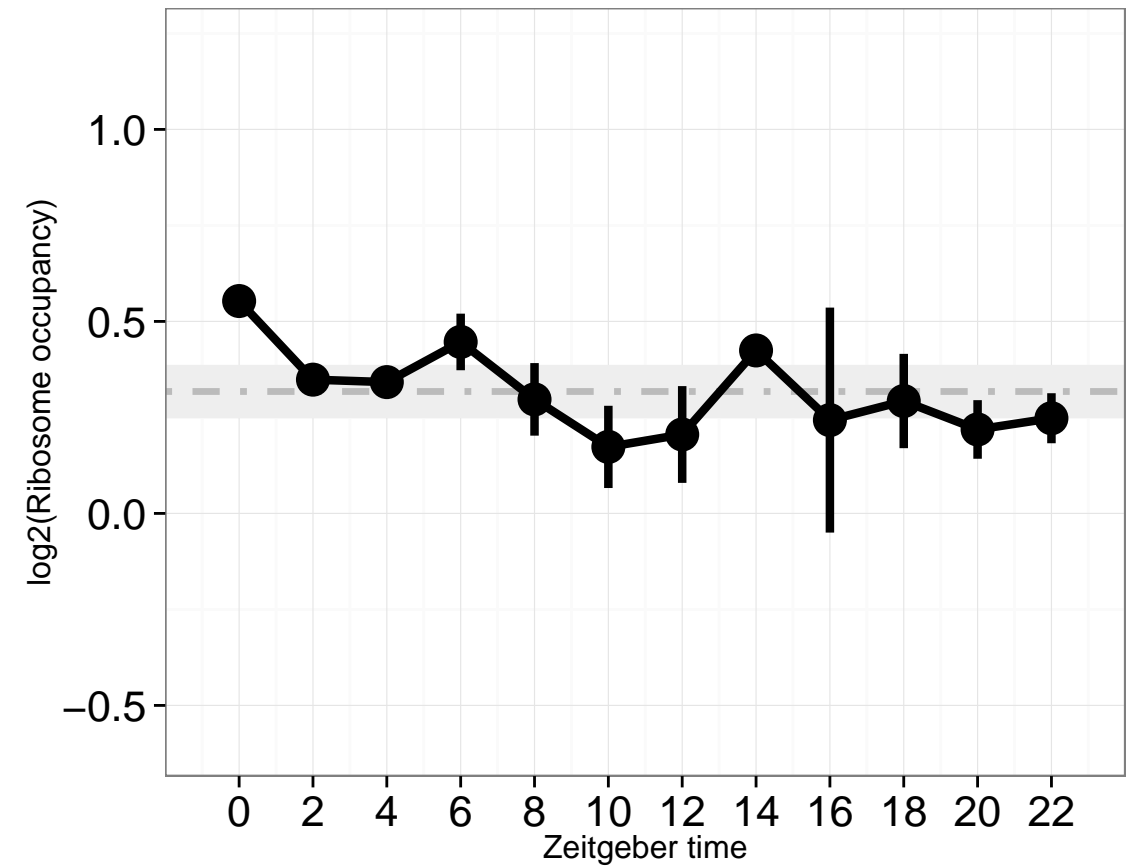

Supplement: Supplementary file 1977 [file 1]

## Flrt2

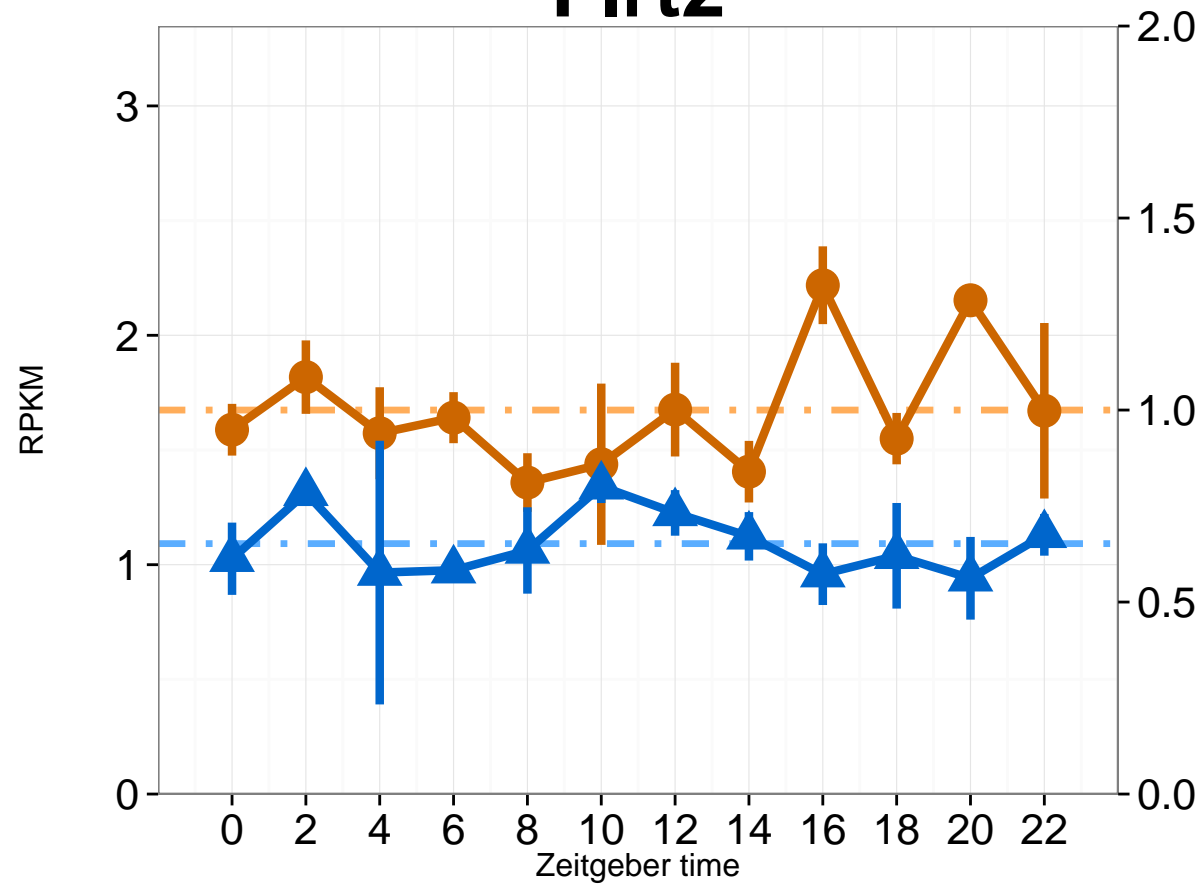

## Flrt2

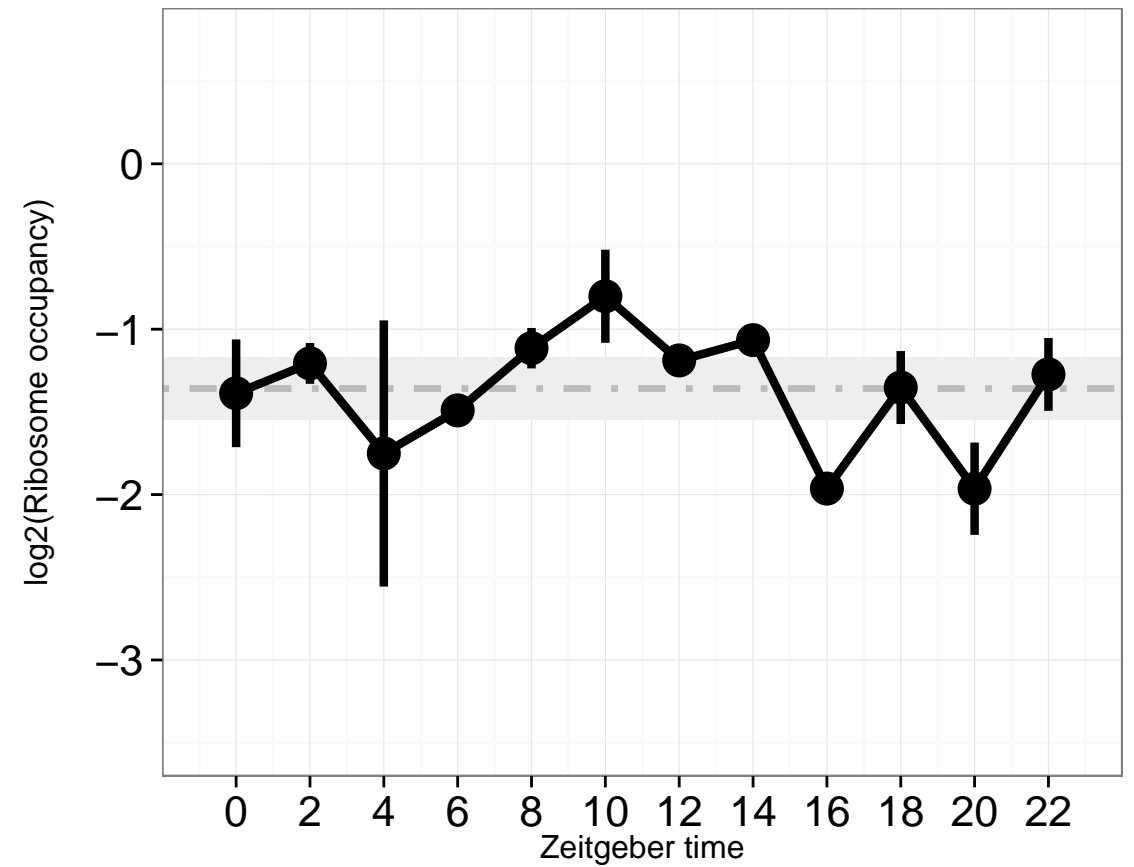

Supplement: Supplementary file 1978 [file 1]

## Dagla

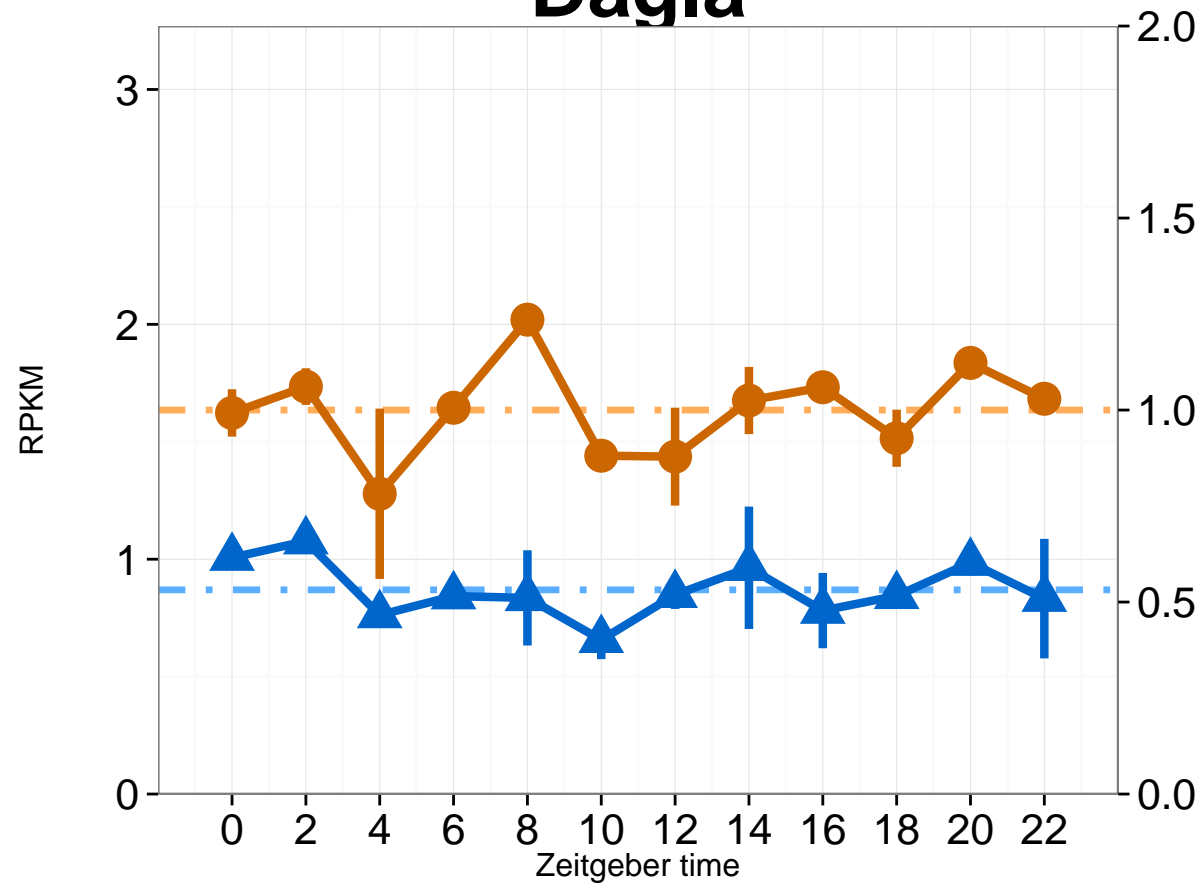

## Dagla

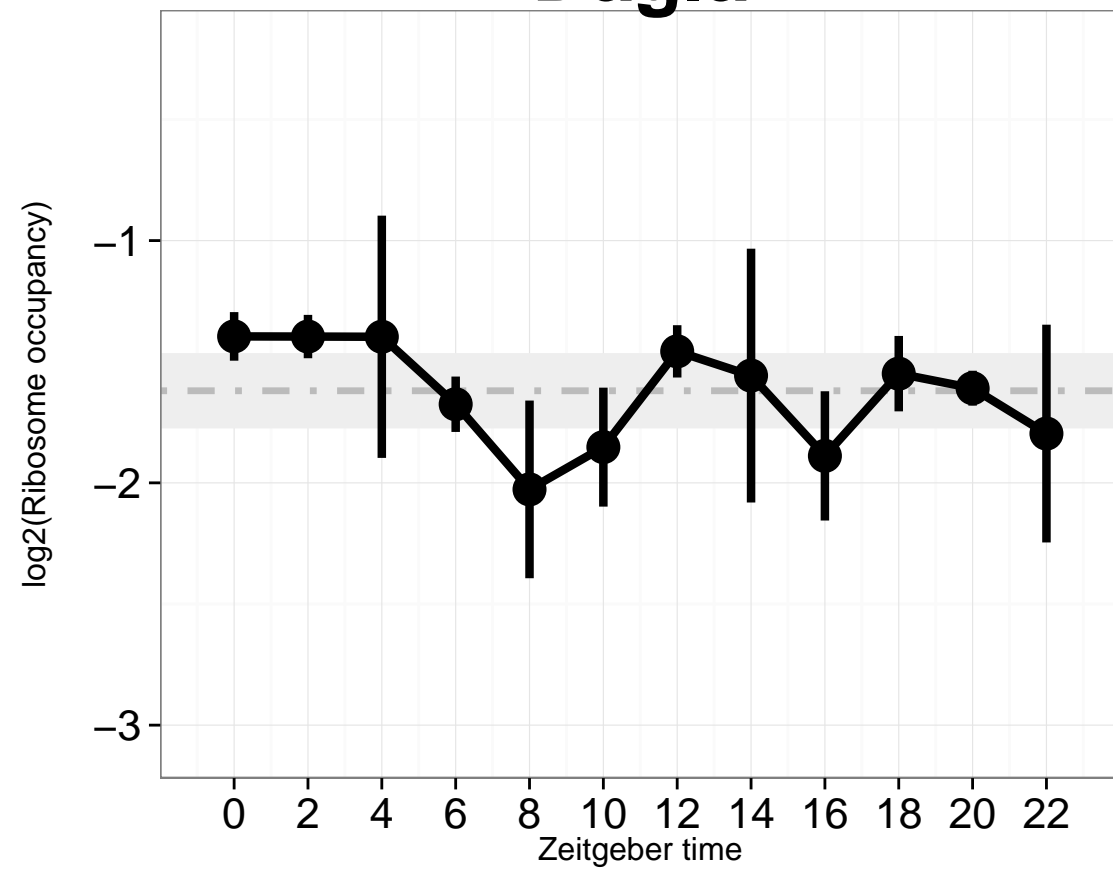

Supplement: Supplementary file 1979 [file 1]

## Rrn3

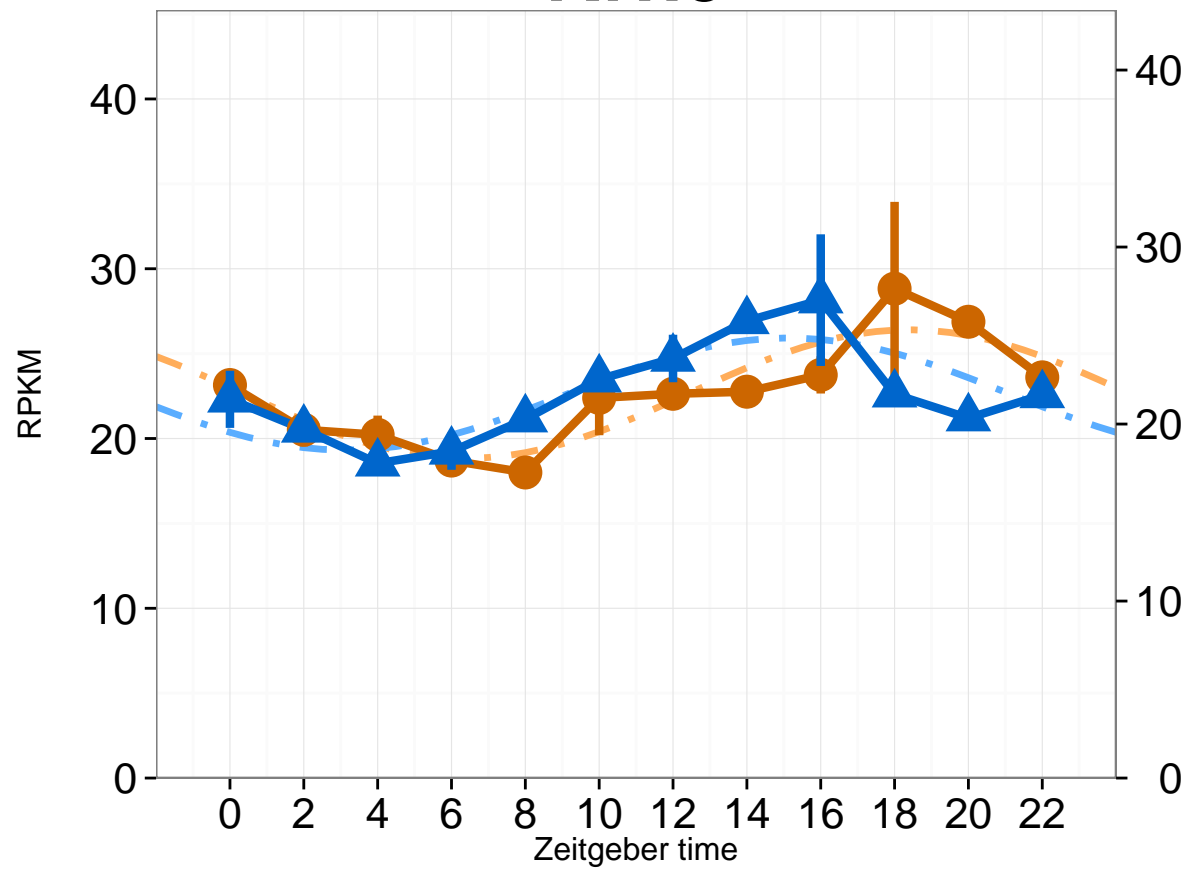

## Rrn3

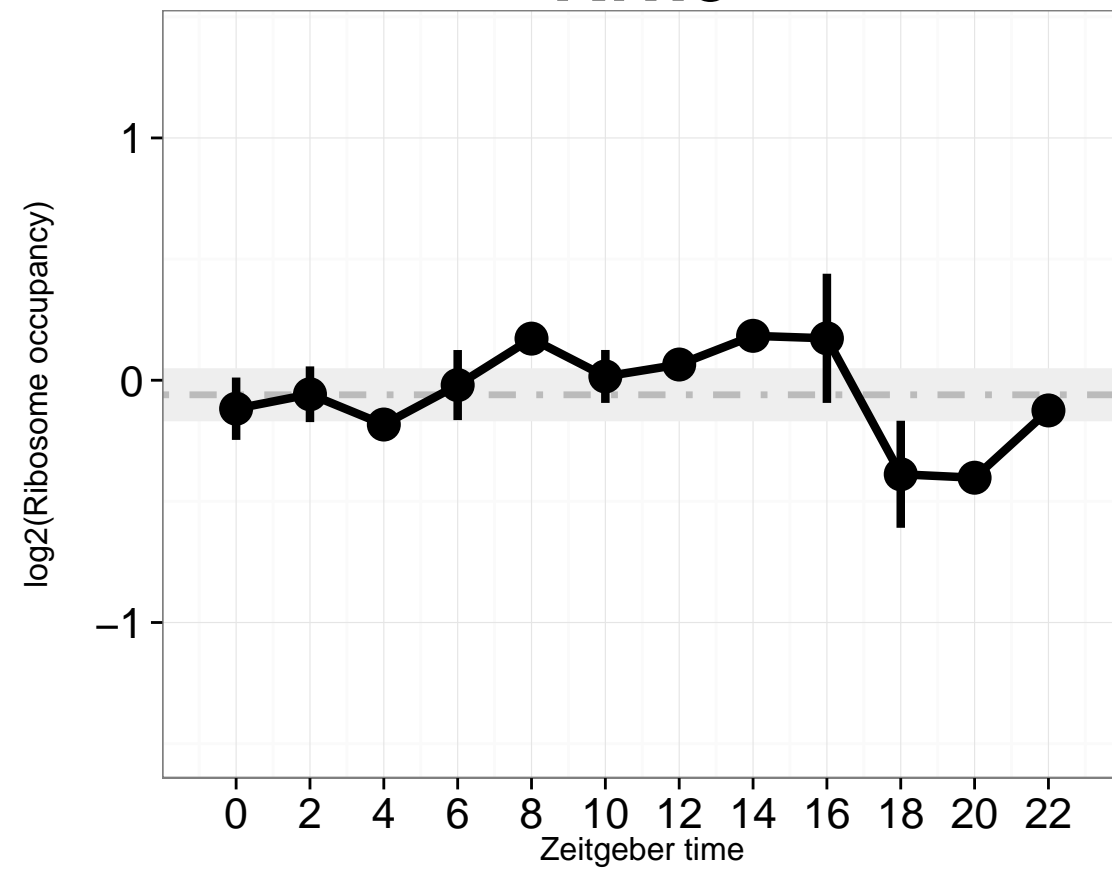

Supplement: Supplementary file 1980 [file 1]

## Tnks1bp1

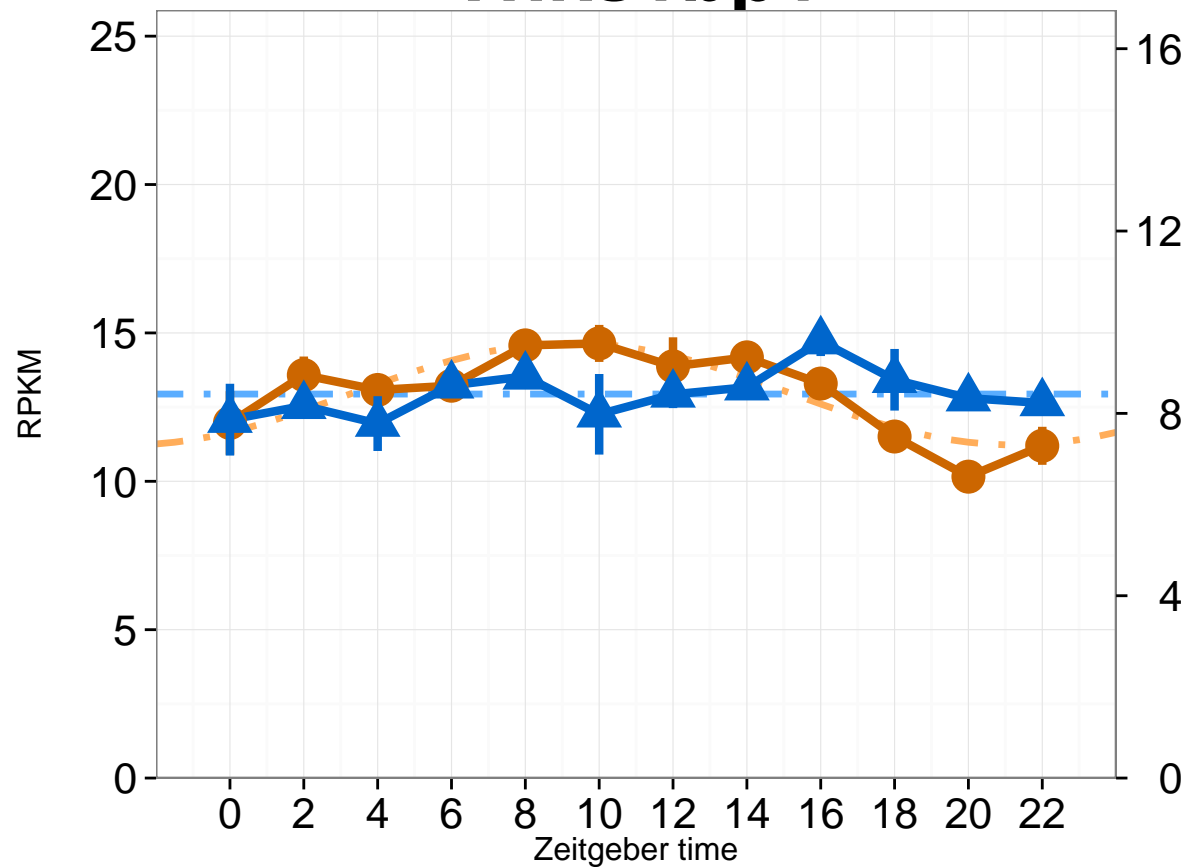

## Tnks1bp1

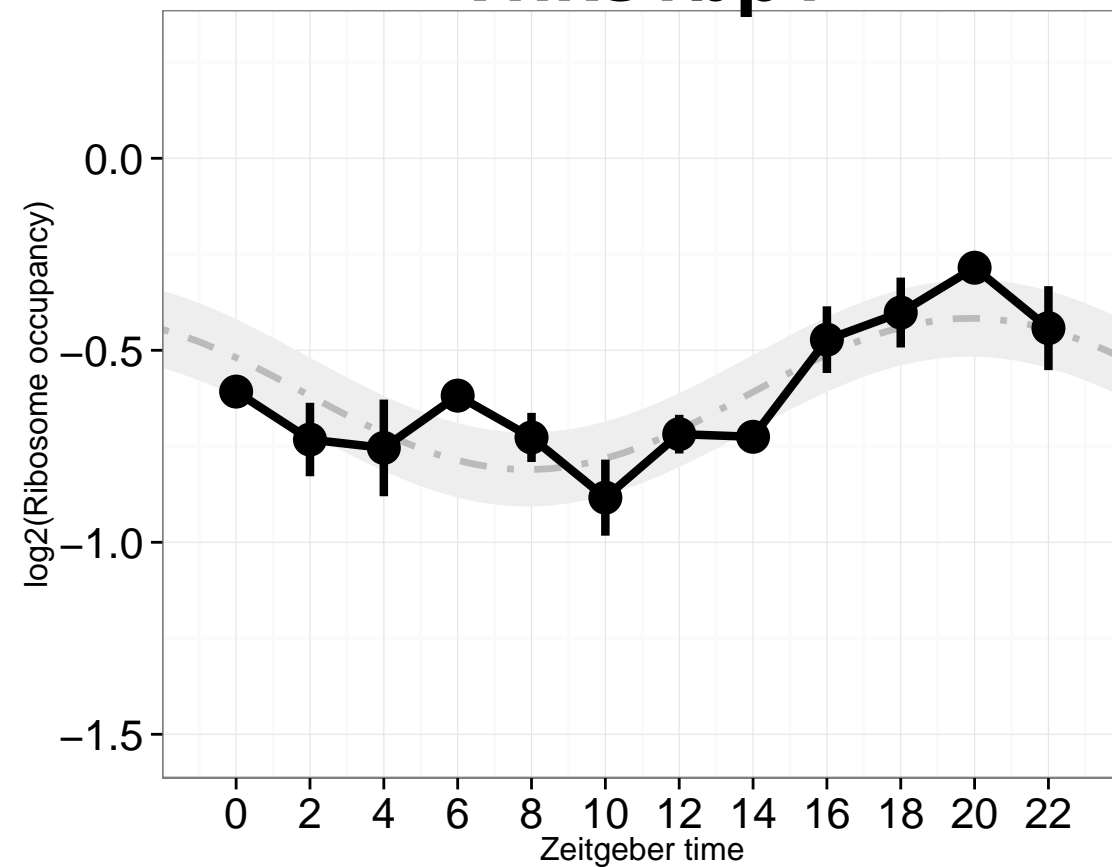

Supplement: Supplementary file 1981 [file 1]

# Steap4

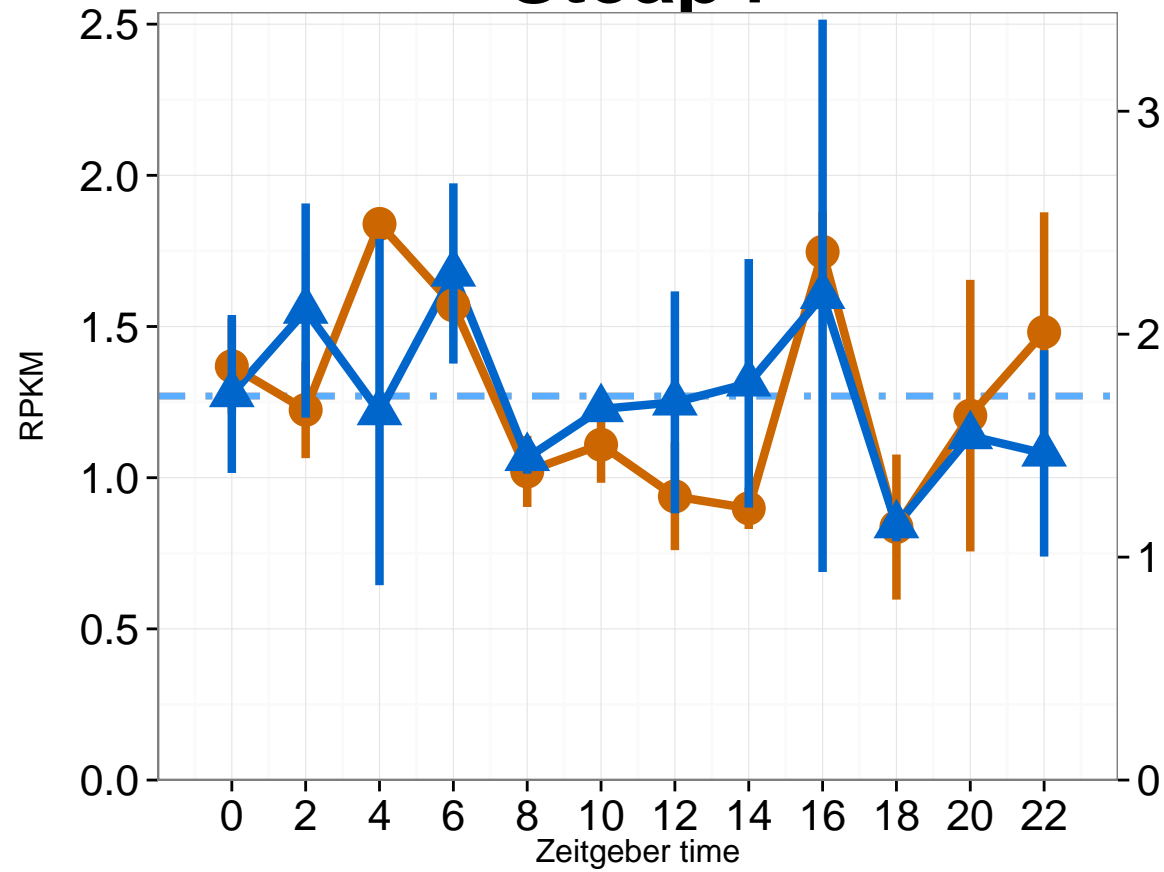

# Steap4

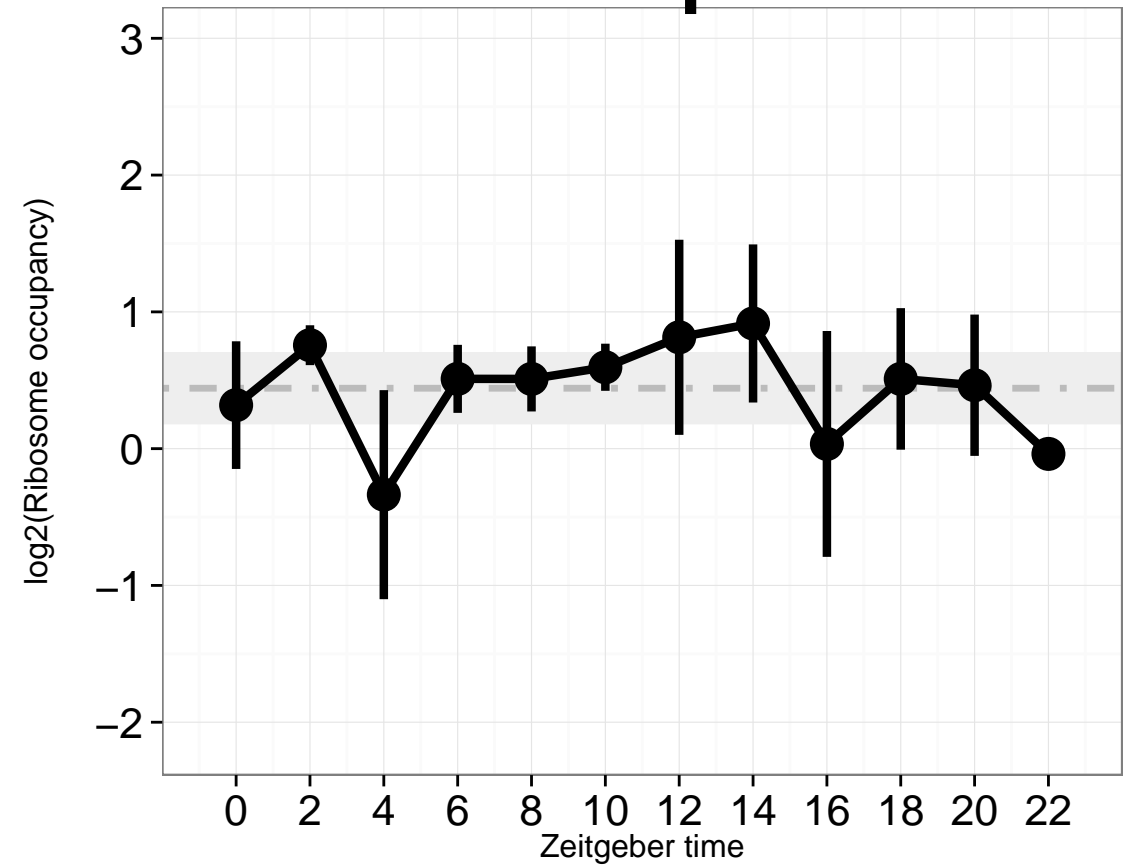

Supplement: Supplementary file 1982 [file 1]

## Slc12a9

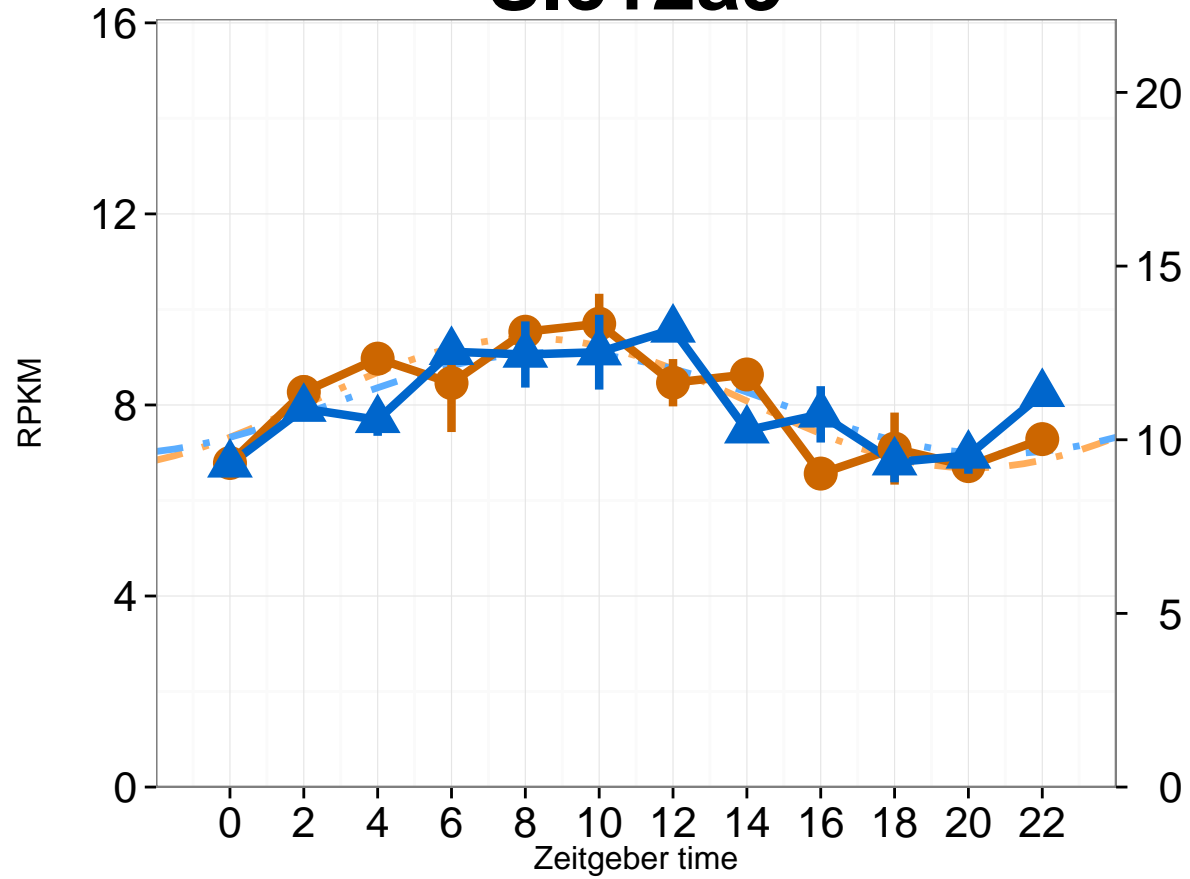

## Slc12a9

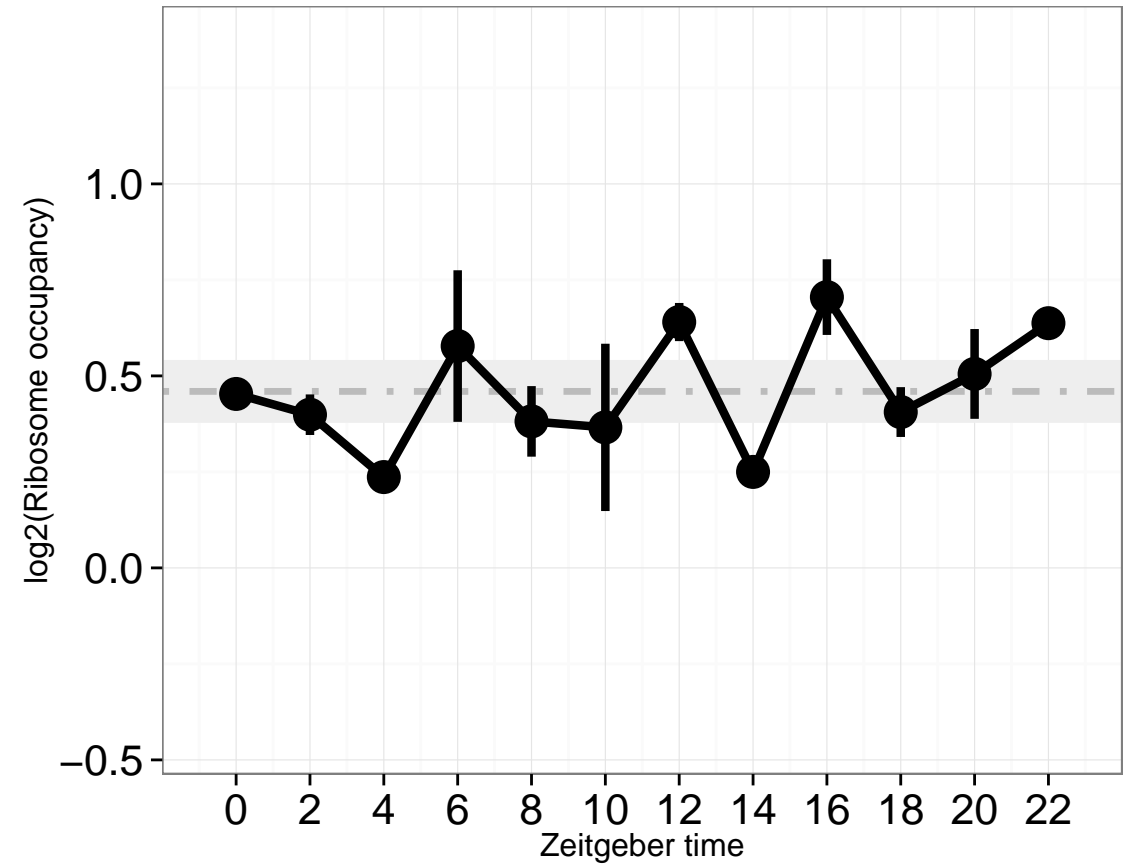

Supplement: Supplementary file 1983 [file 1]

# Prkg1

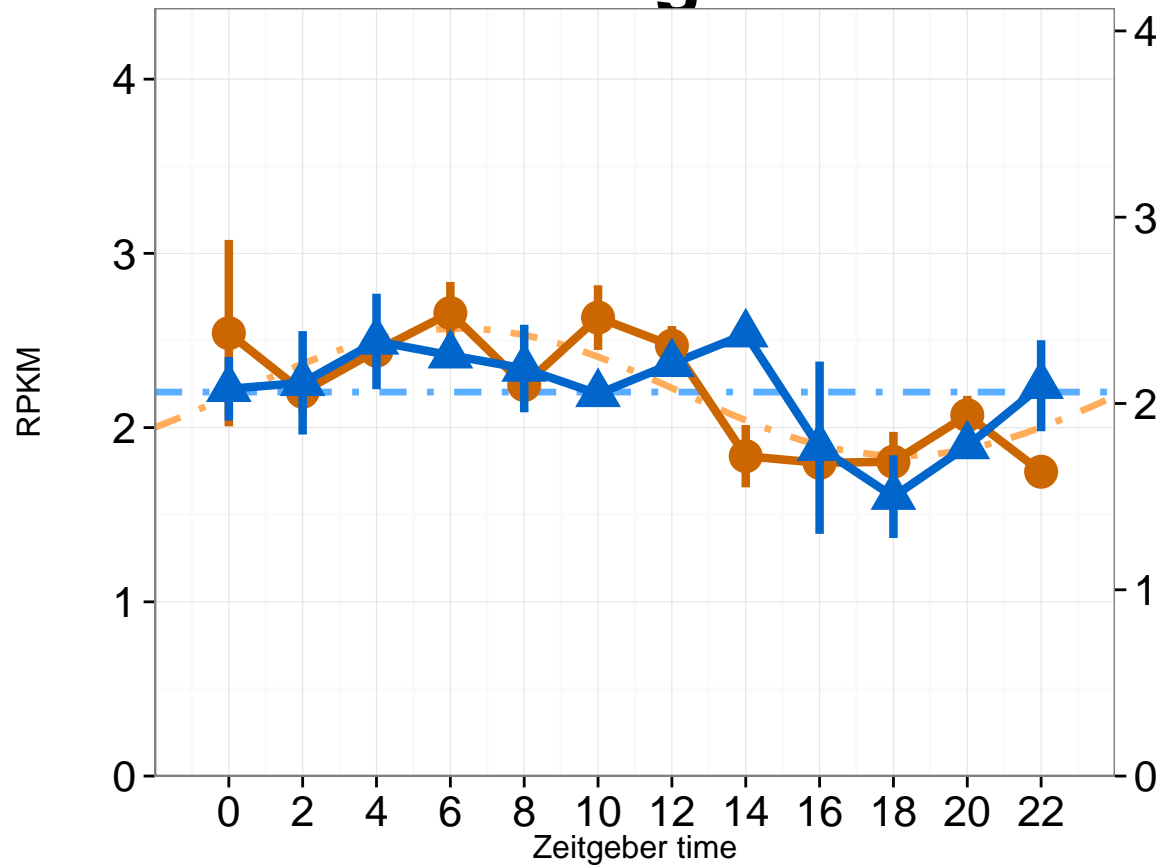

# Prkg1

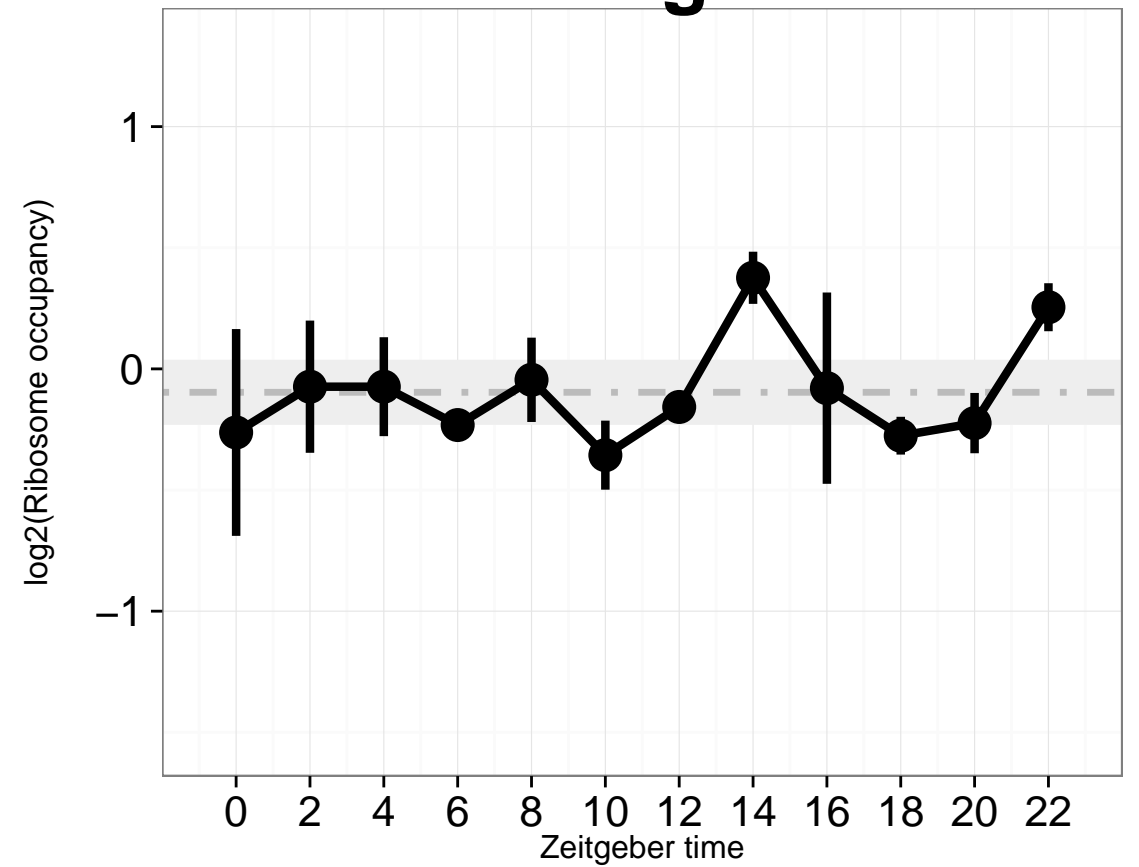

Supplement: Supplementary file 1984 [file 1]

## Lamtor5

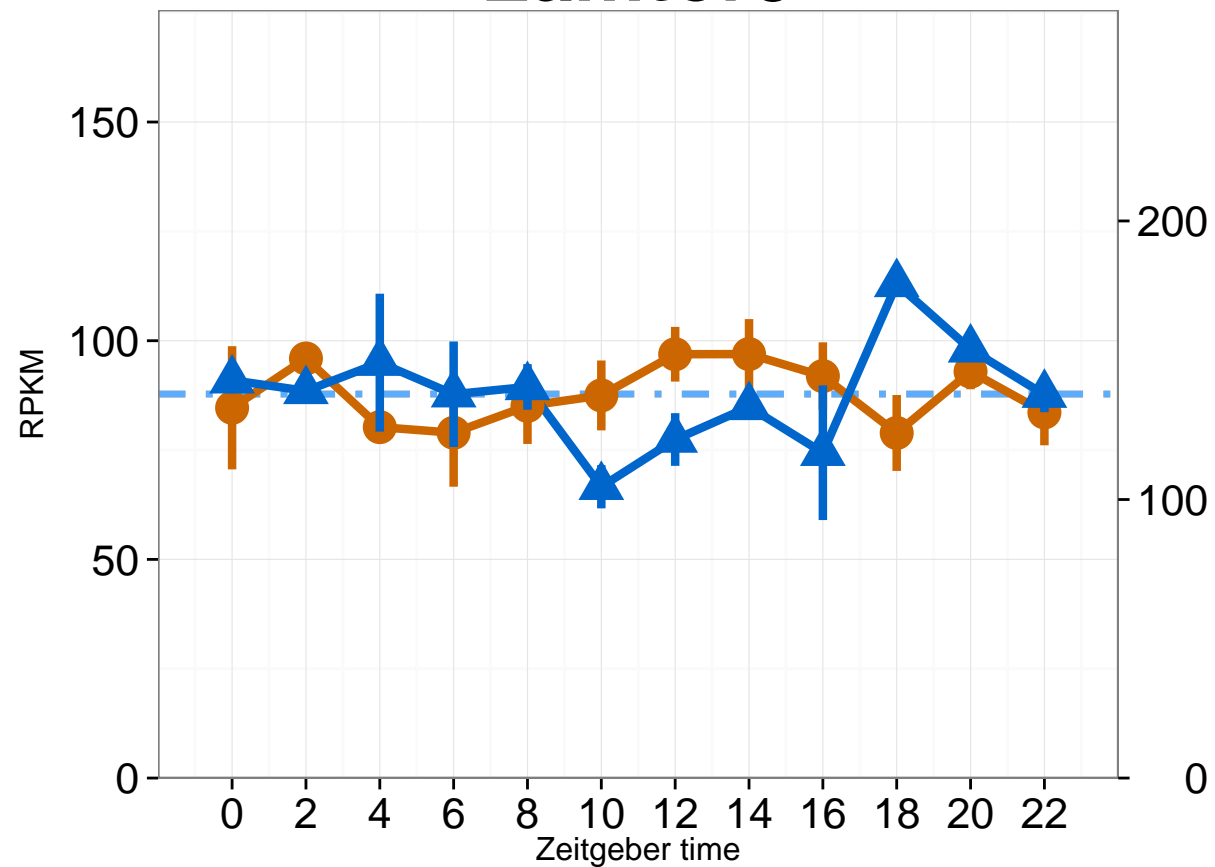

## Lamtor5

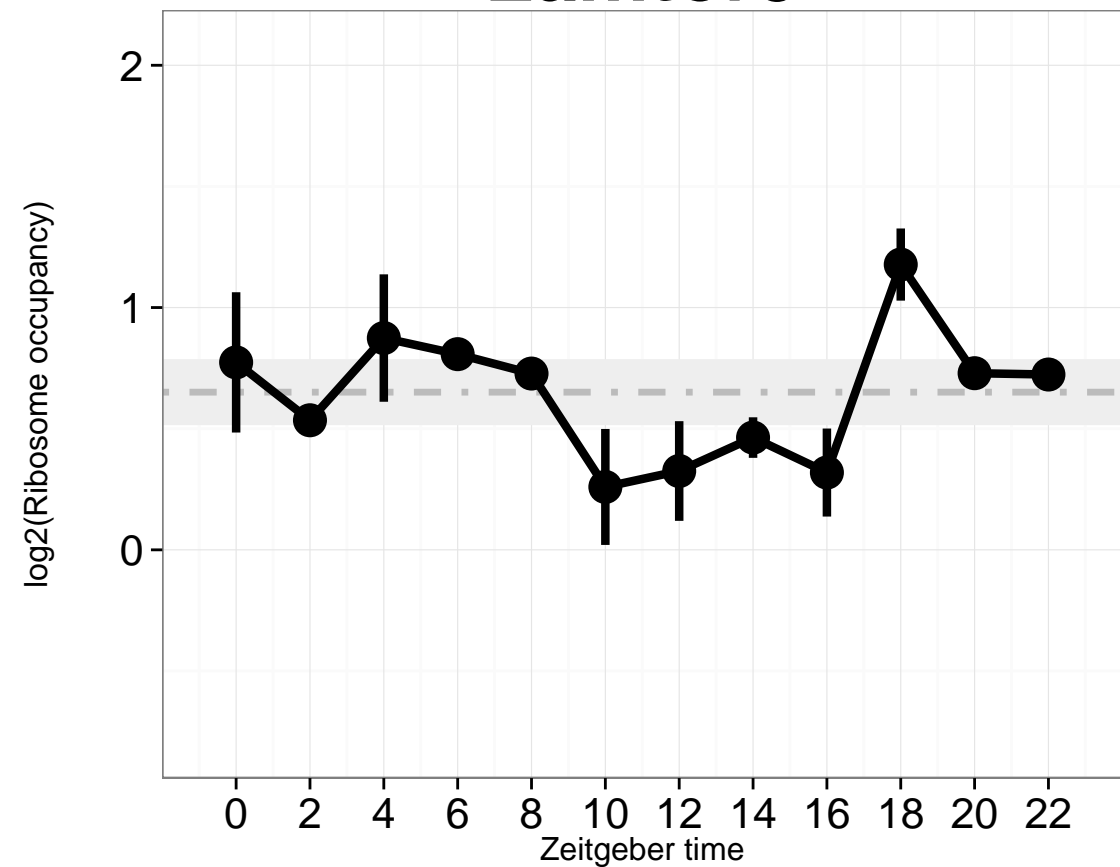

Supplement: Supplementary file 1985 [file 1]

## Snx33

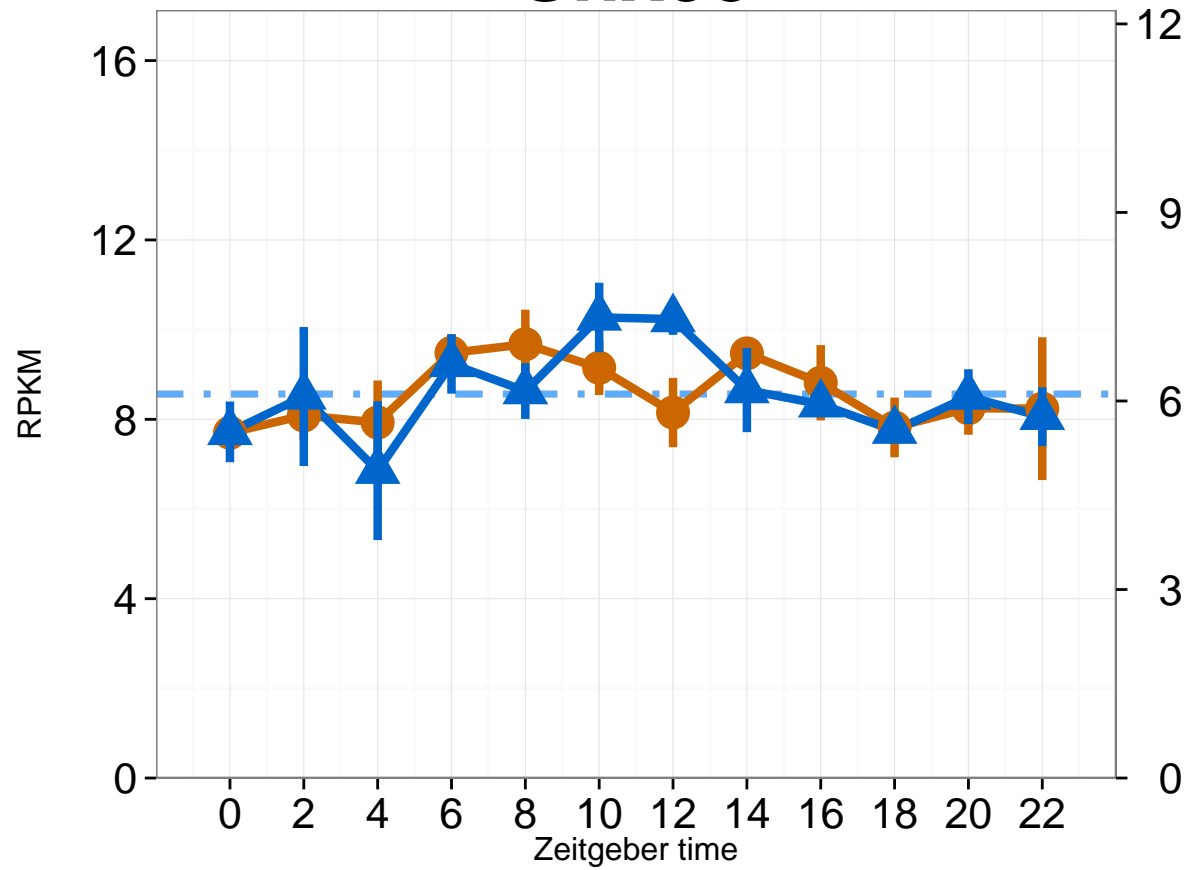

## Snx33

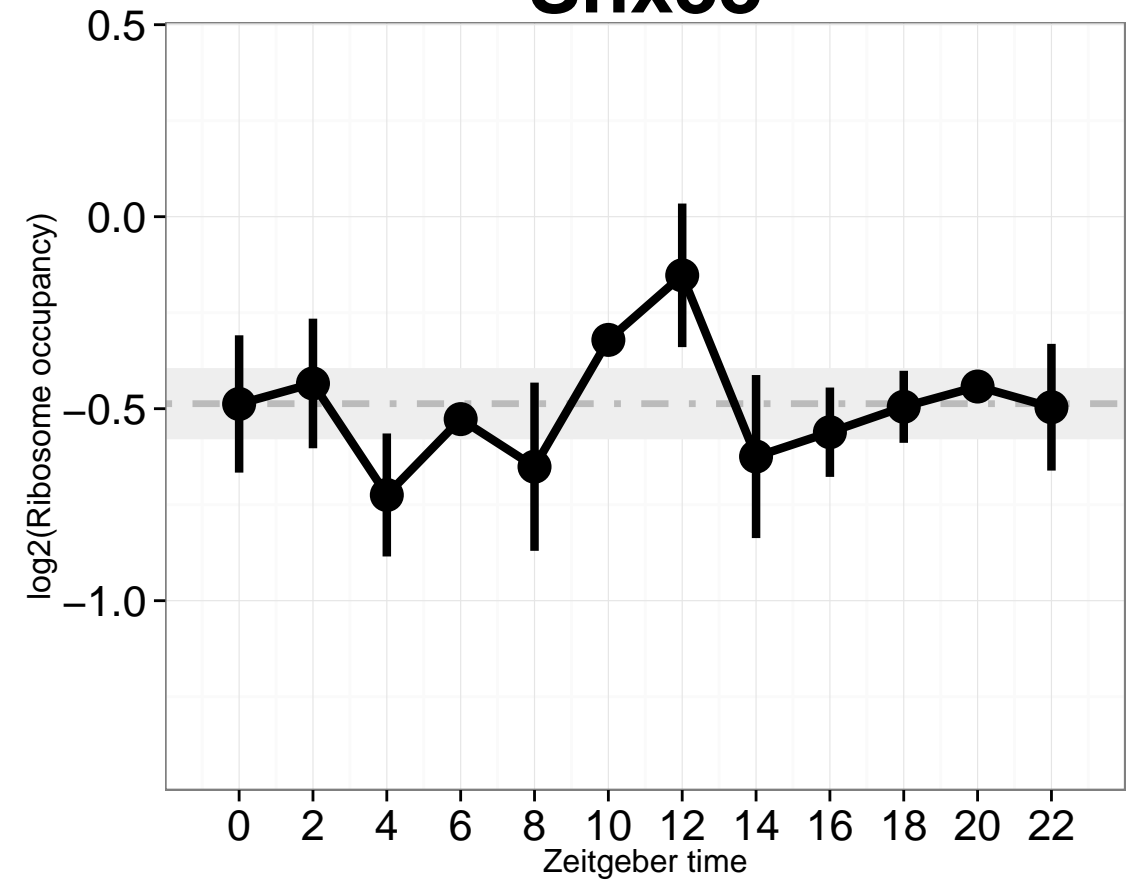

Supplement: Supplementary file 1986 [file 1]

# Hif

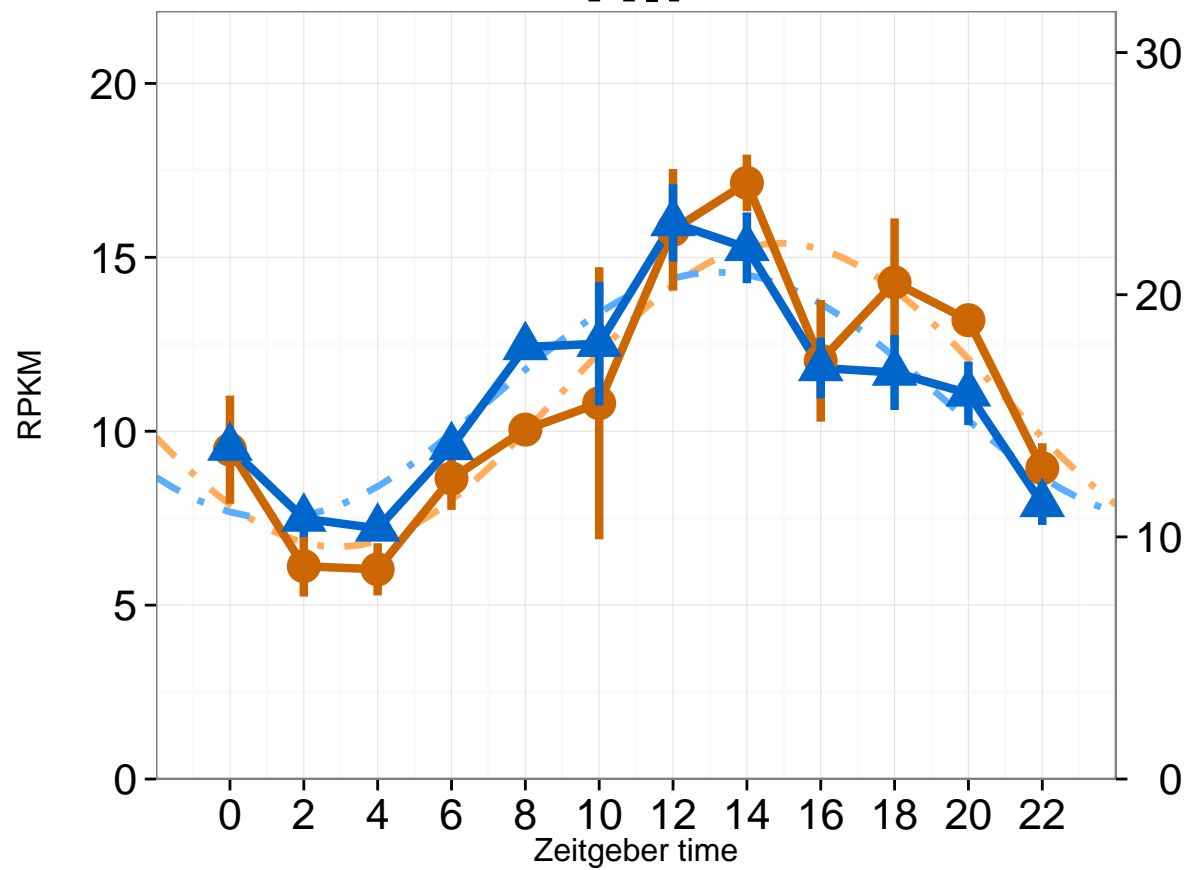

# Hif

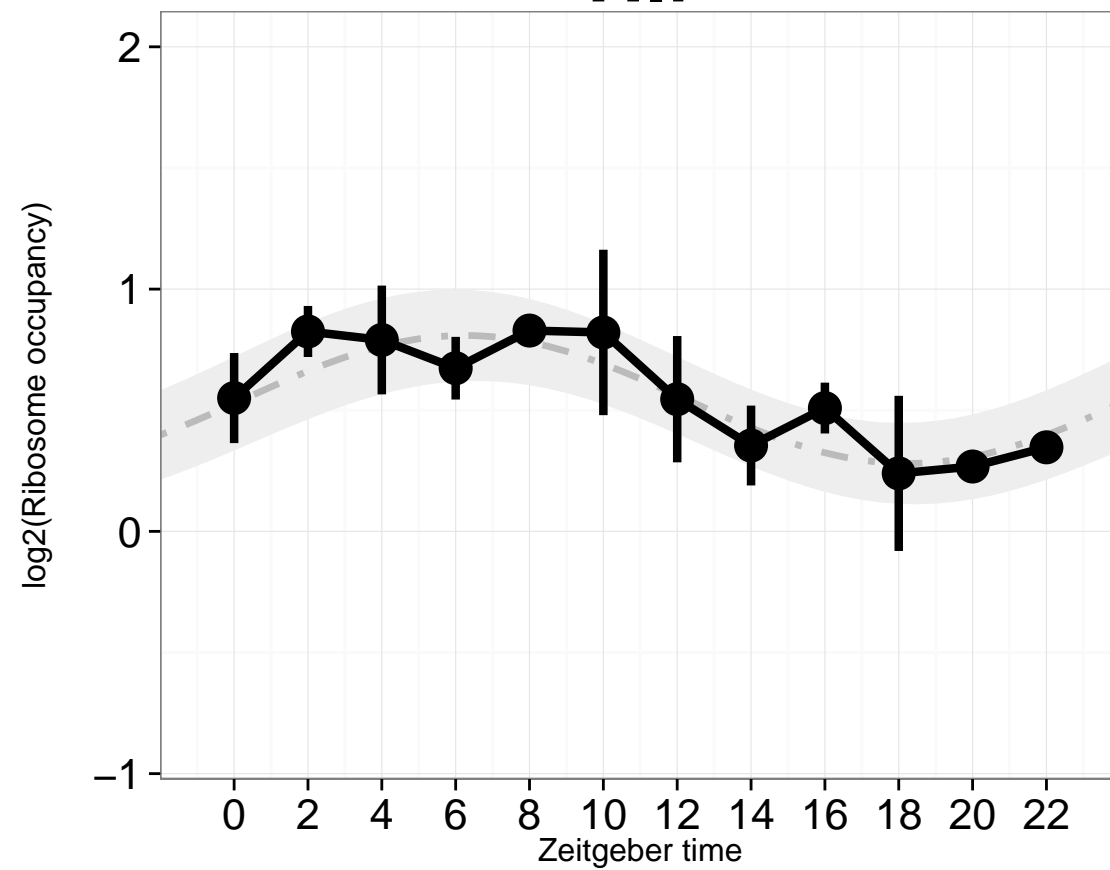

Supplement: Supplementary file 1987 [file 1]

# Filip1

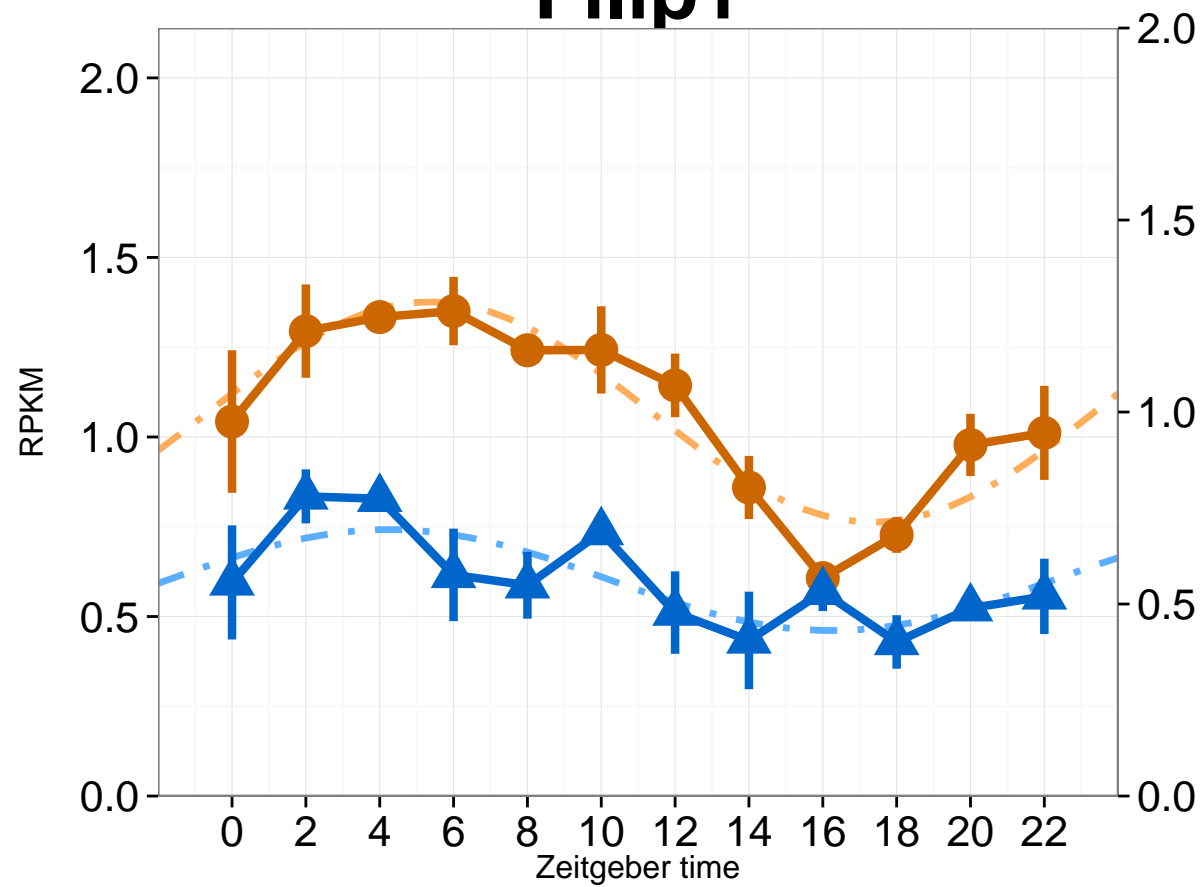

# Filip1

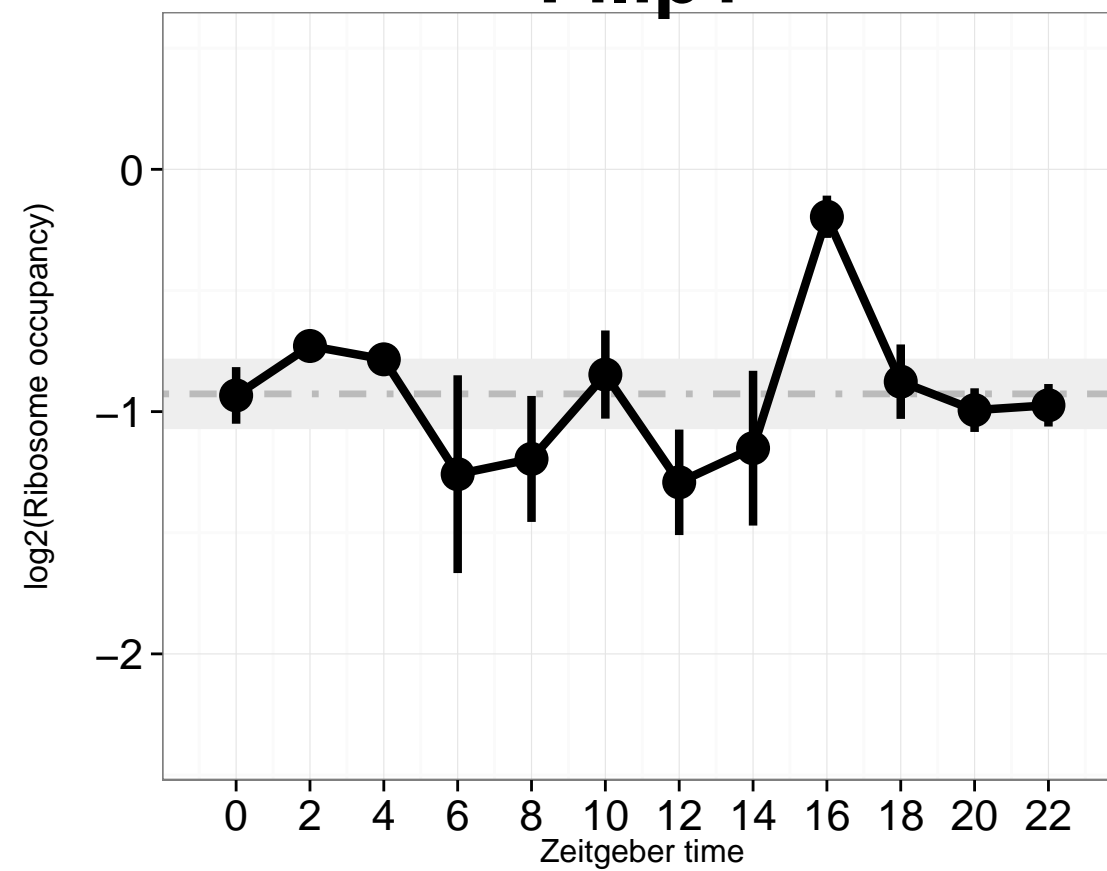

Supplement: Supplementary file 1988 [file 1]

## Ankrd26

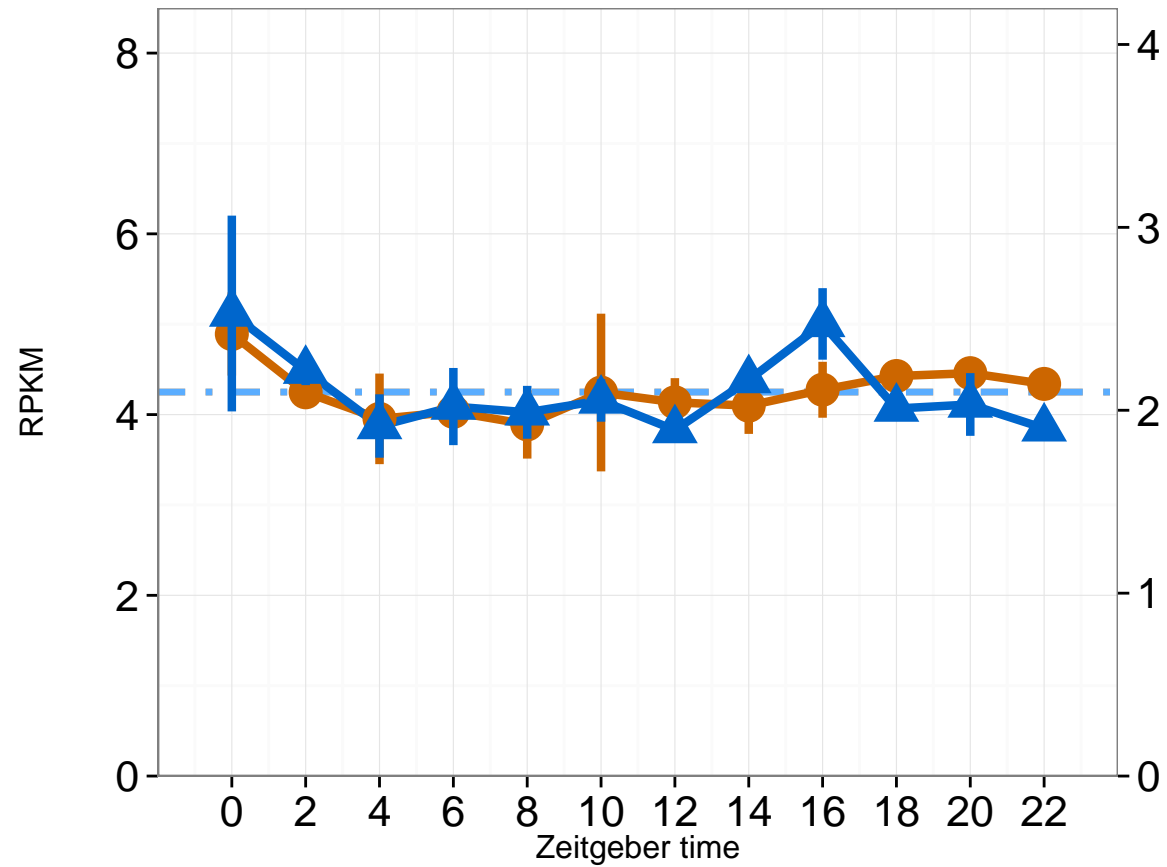

## Ankrd26

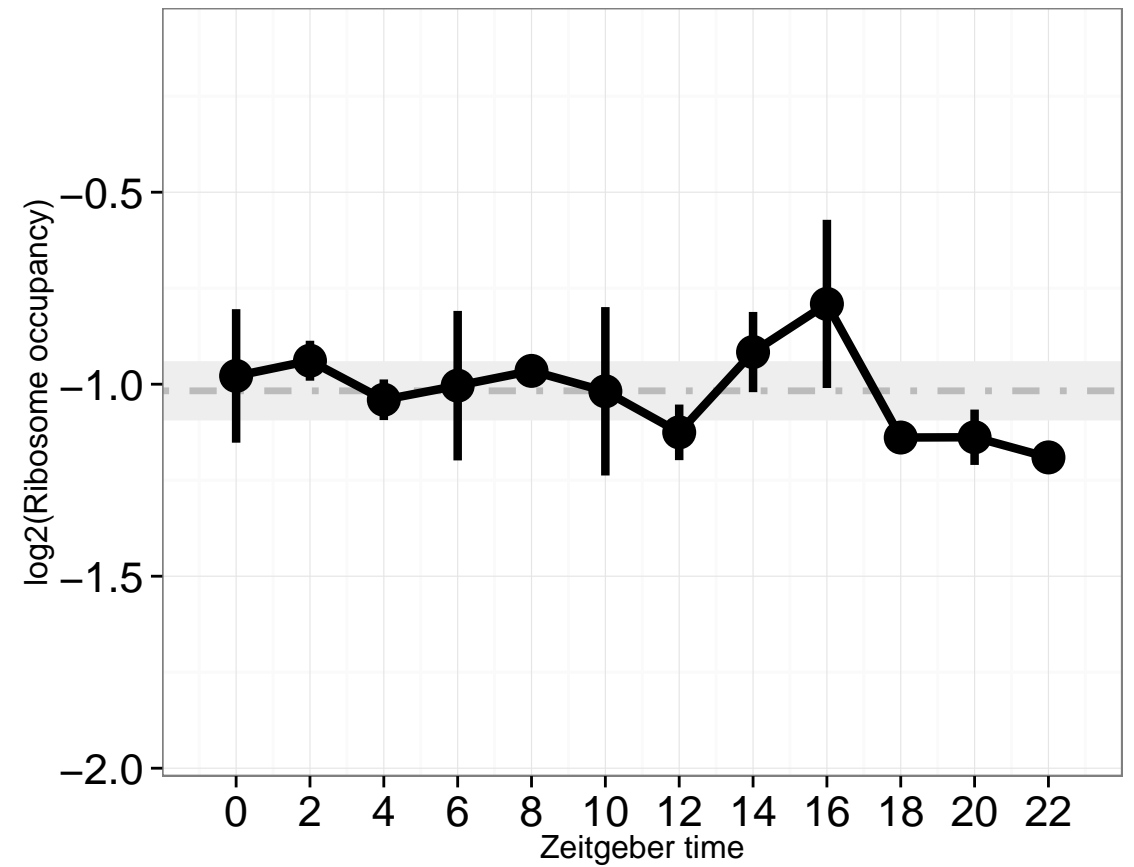

Supplement: Supplementary file 1989 [file 1]

## Cct5

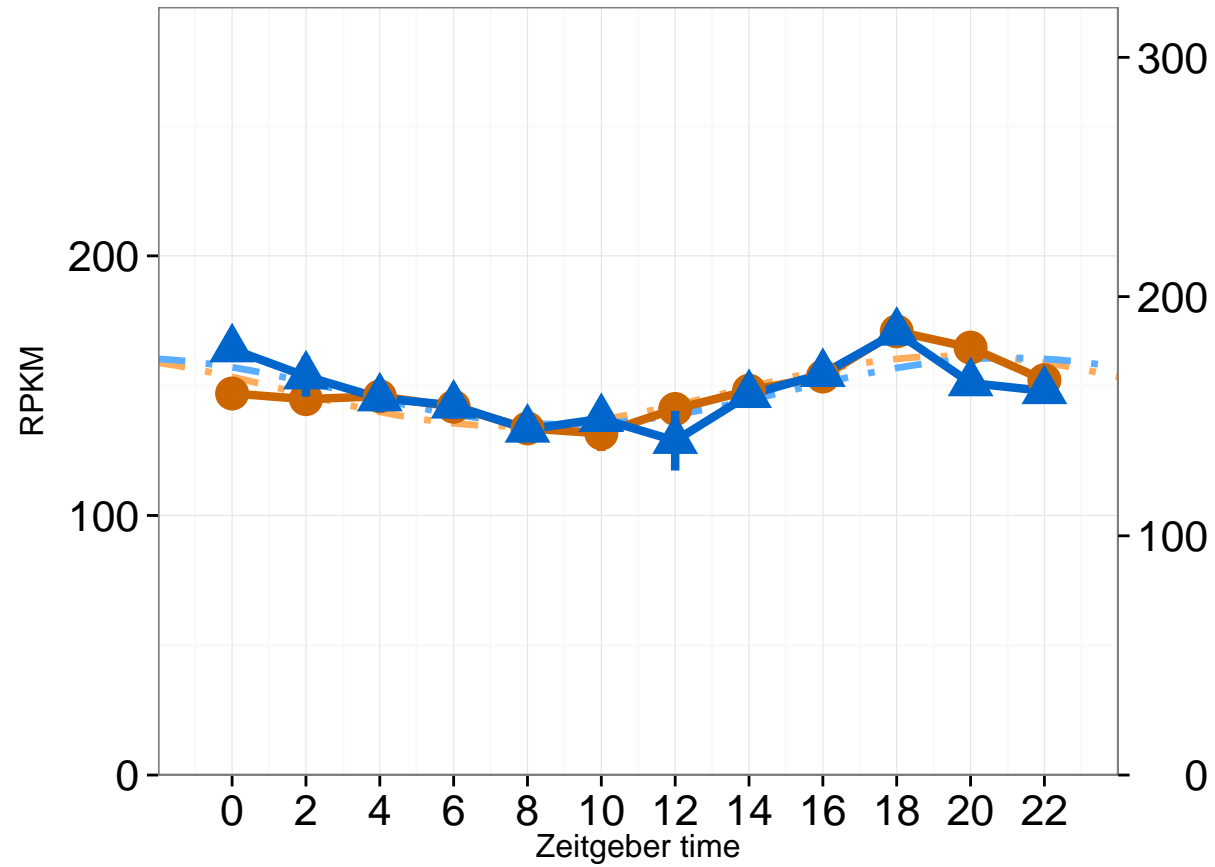

## Cct5

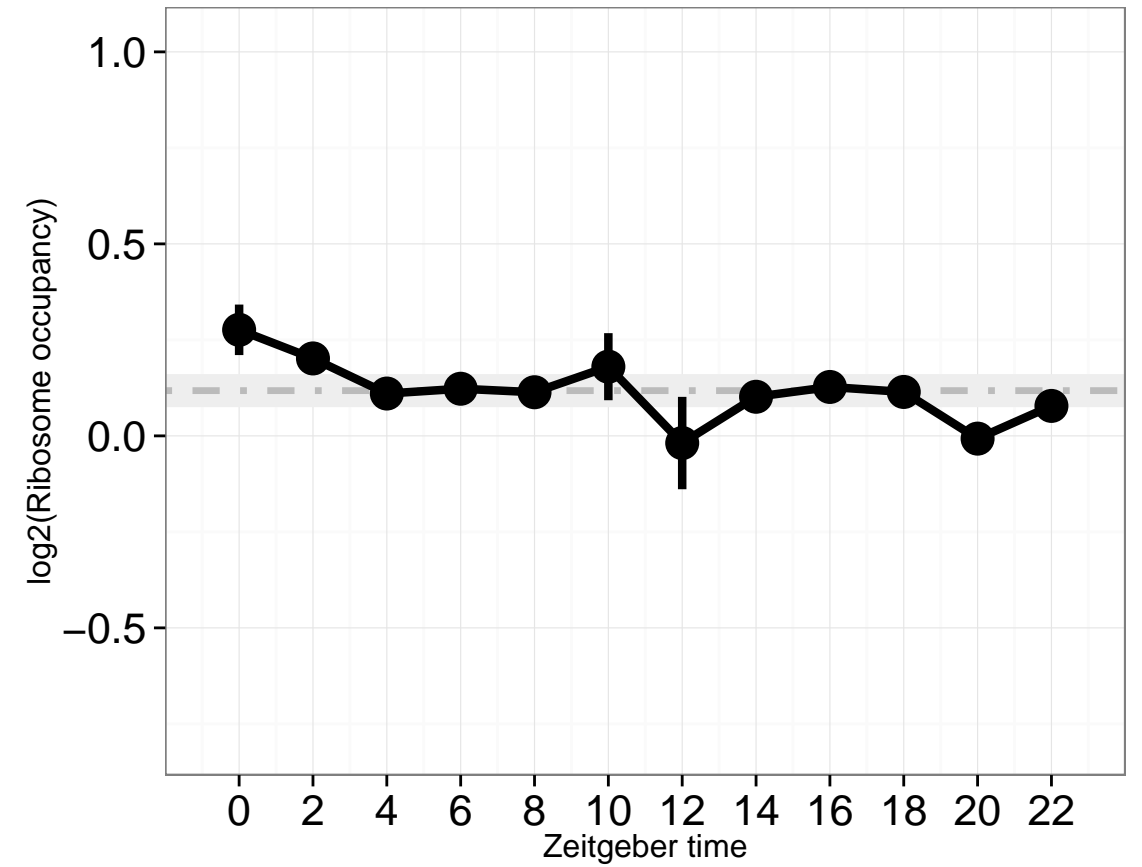

Supplement: Supplementary file 1990 [file 1]

## Kansl1

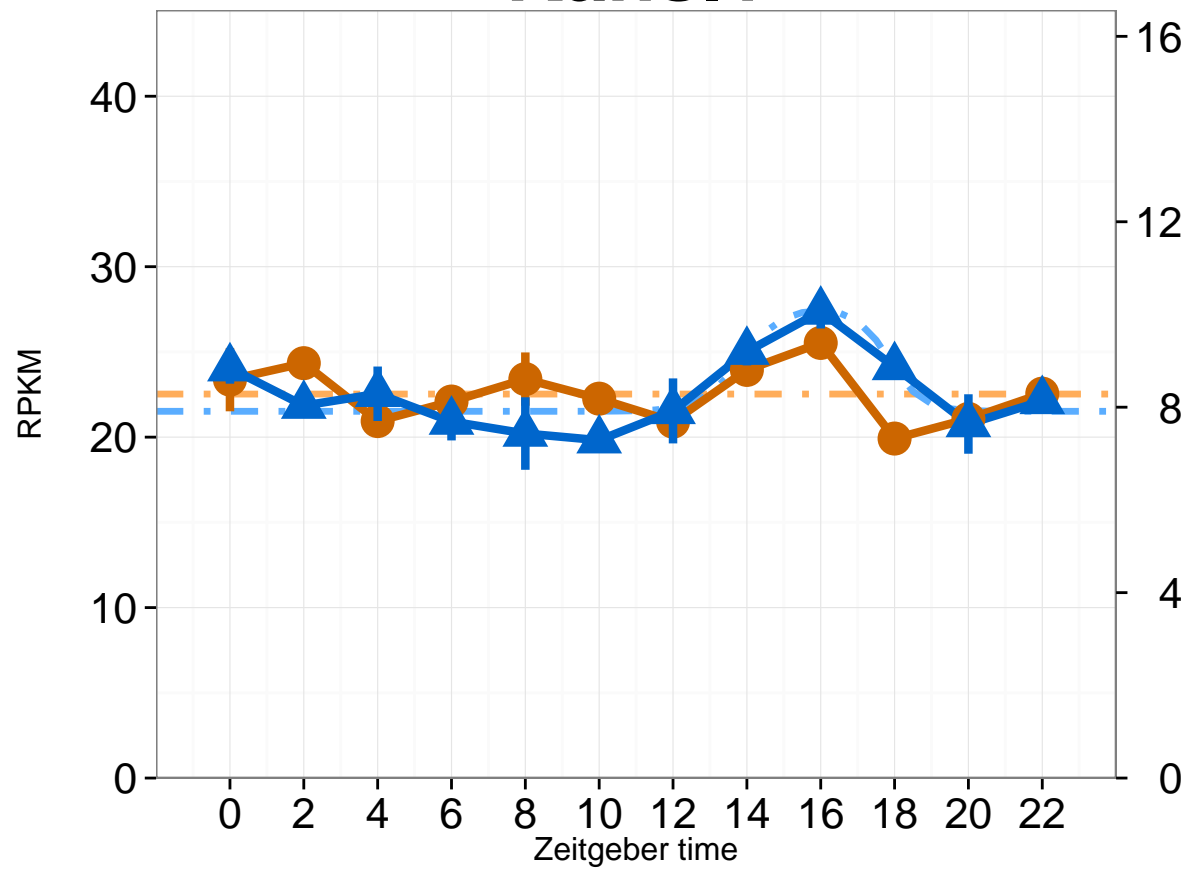

## Kansl1

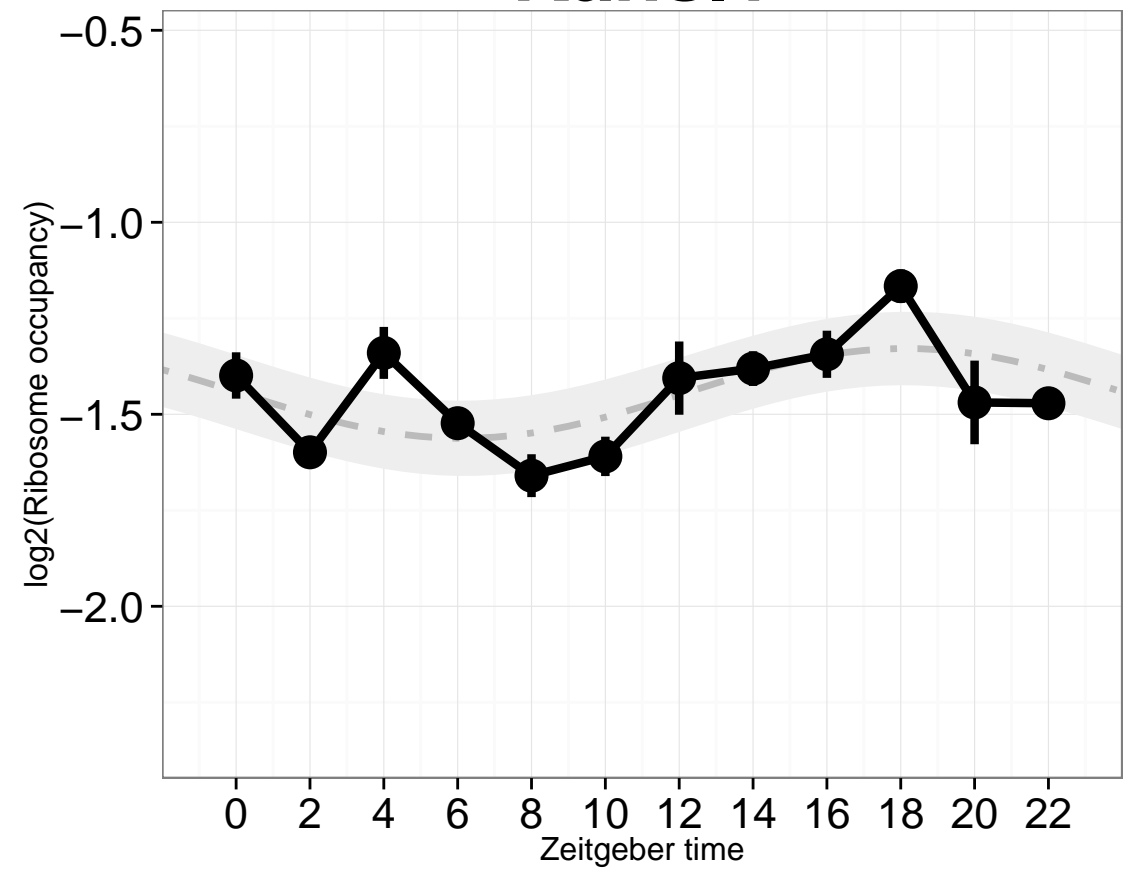

Supplement: Supplementary file 1991 [file 1]

# Adra2b

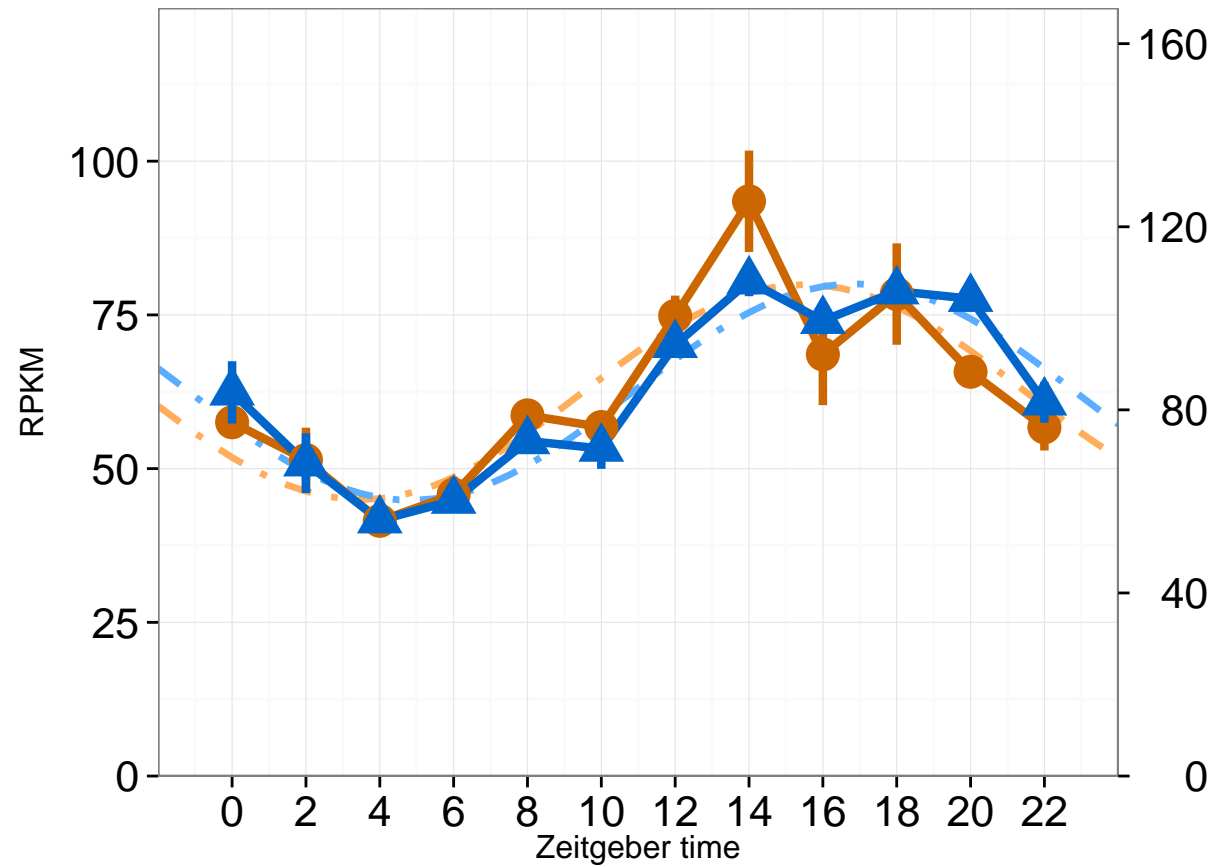

# Adra2b

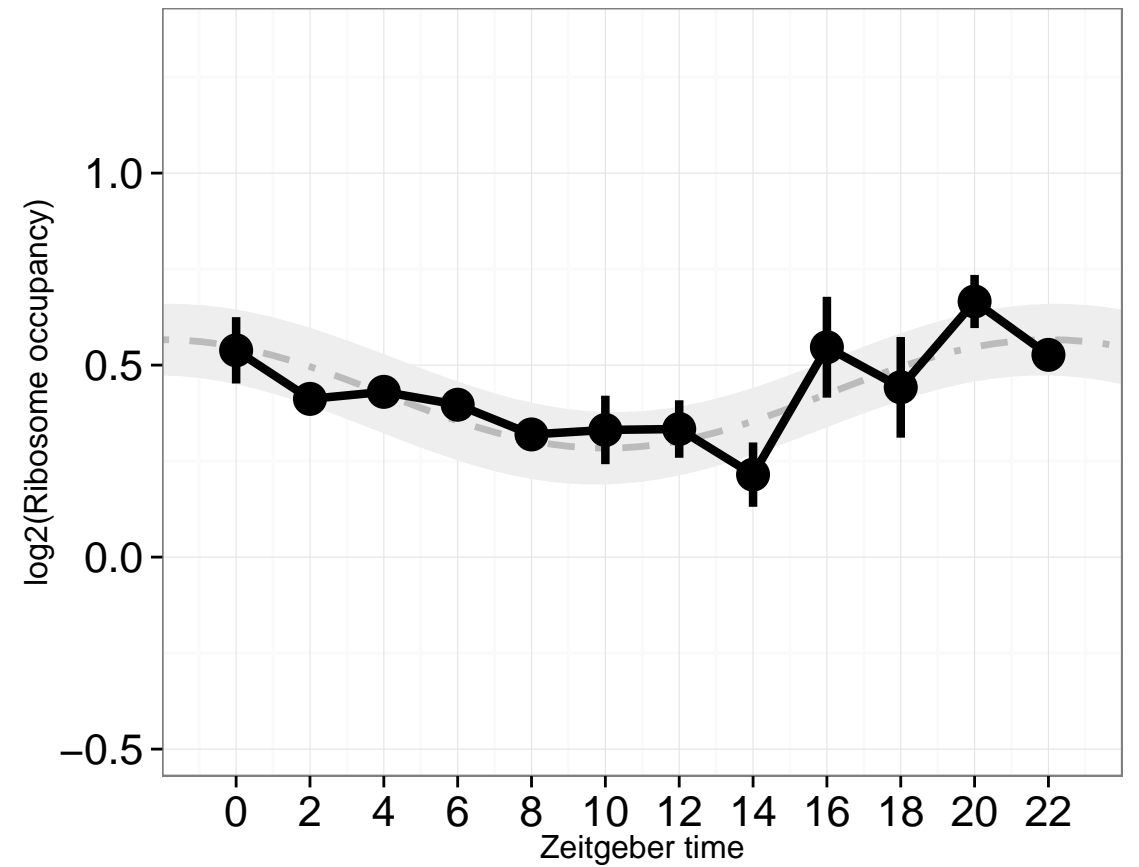

Supplement: Supplementary file 1992 [file 1]

# Hhat

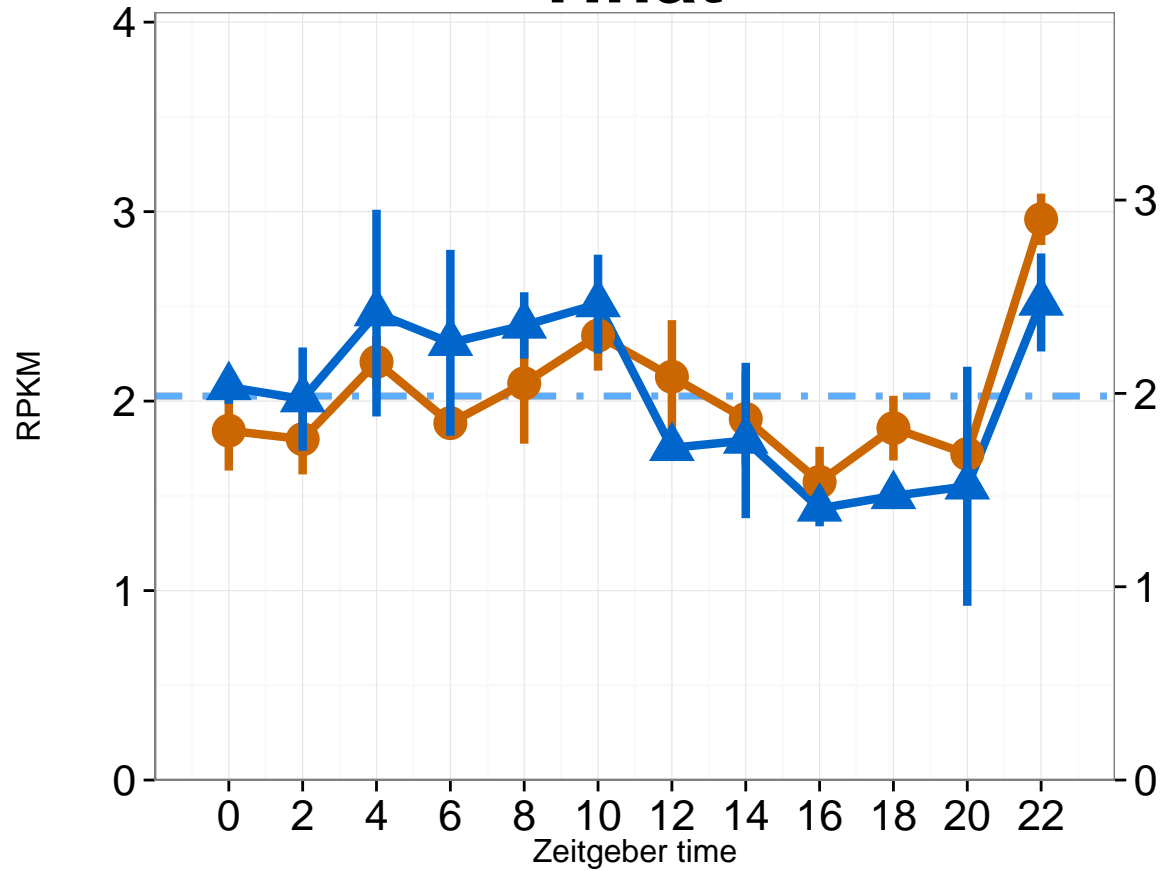

# Hhat

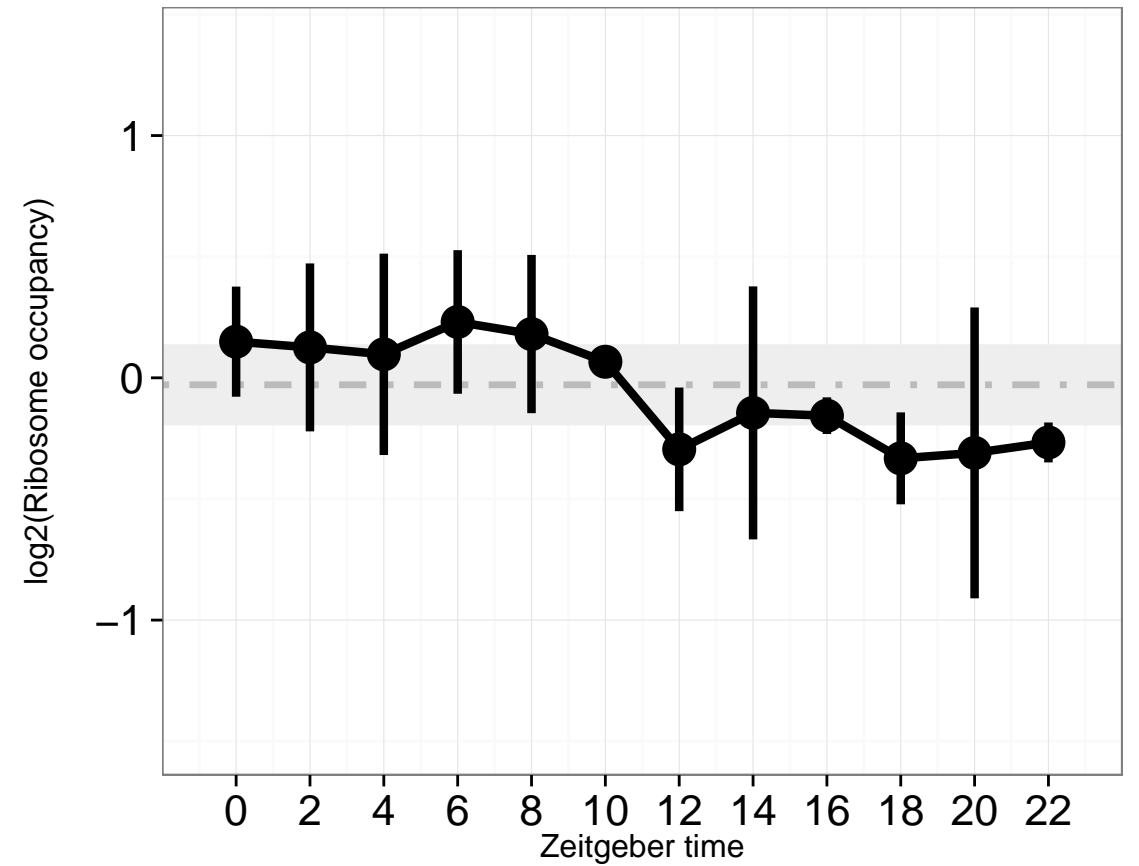

Supplement: Supplementary file 1993 [file 1]

## Ccnh

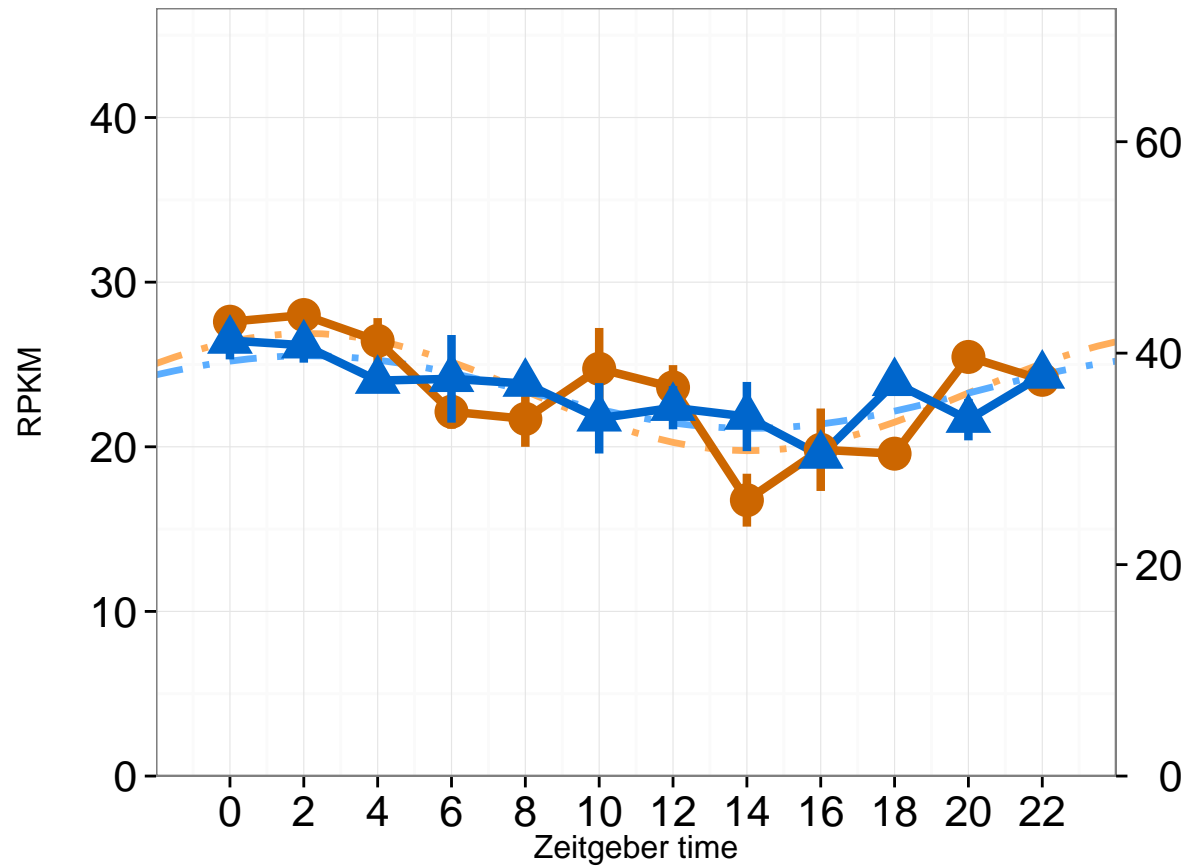

## Ccnh

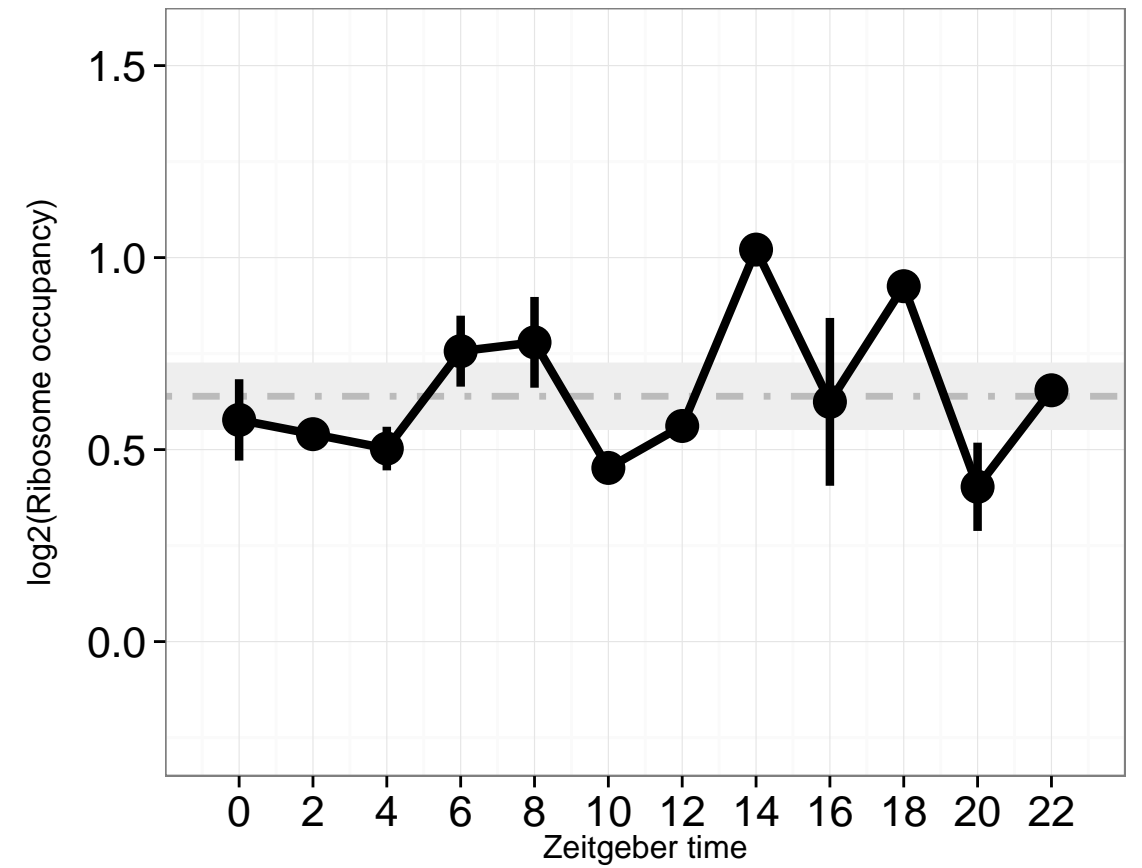

Supplement: Supplementary file 1994 [file 1]

# Hr

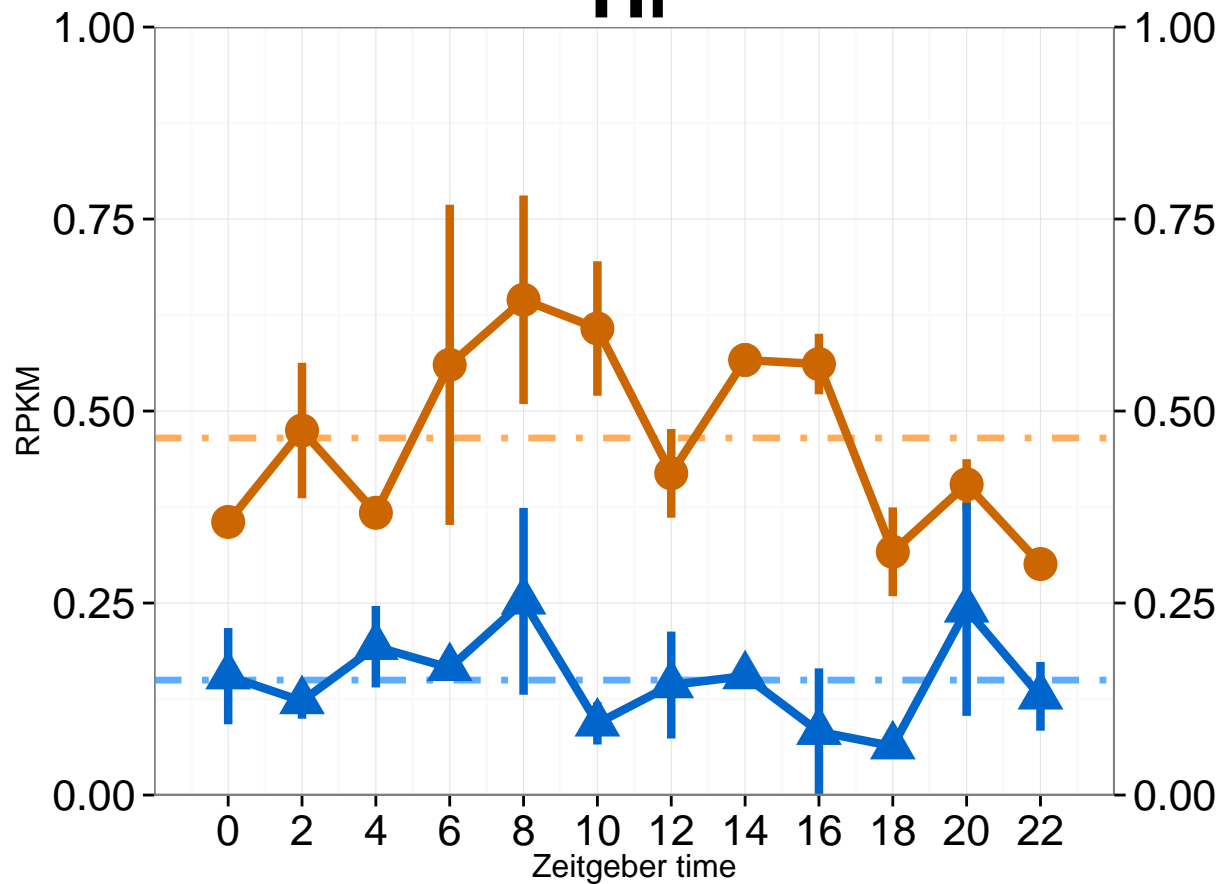

# Hr

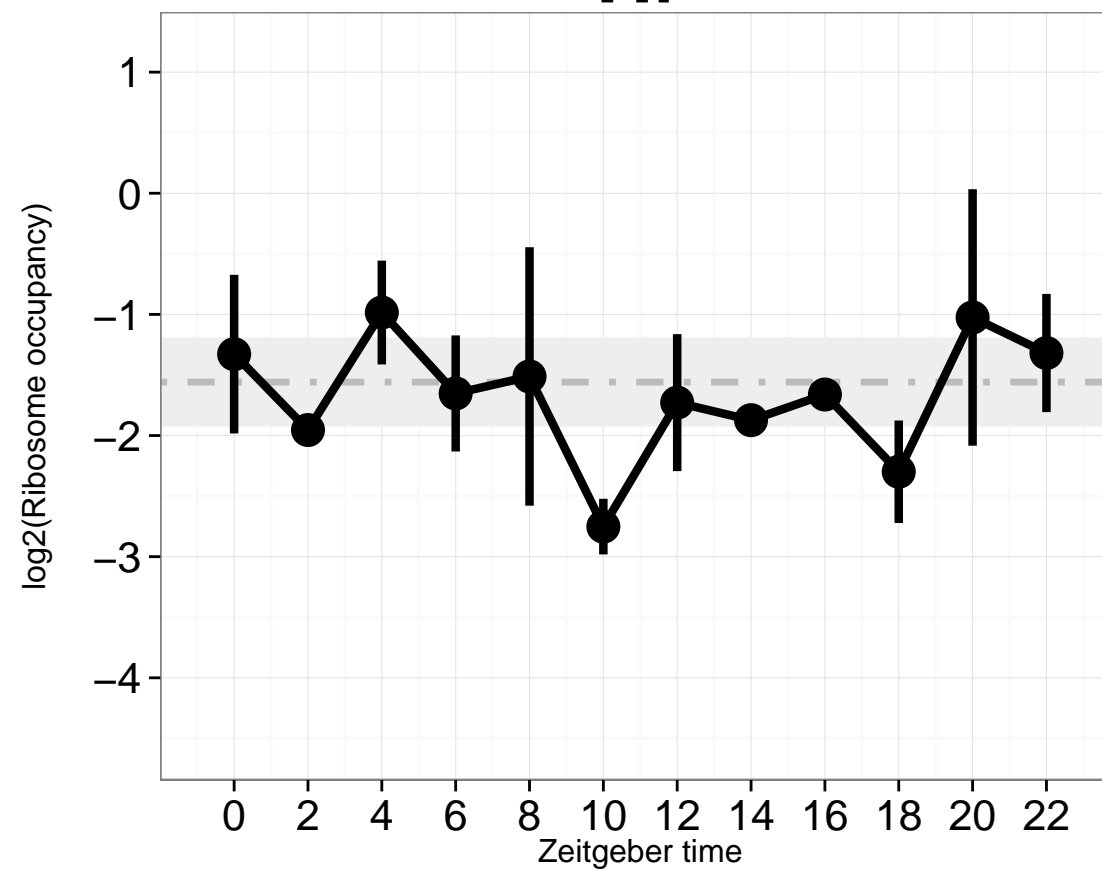

Supplement: Supplementary file 1995 [file 1]

# Gabpb1

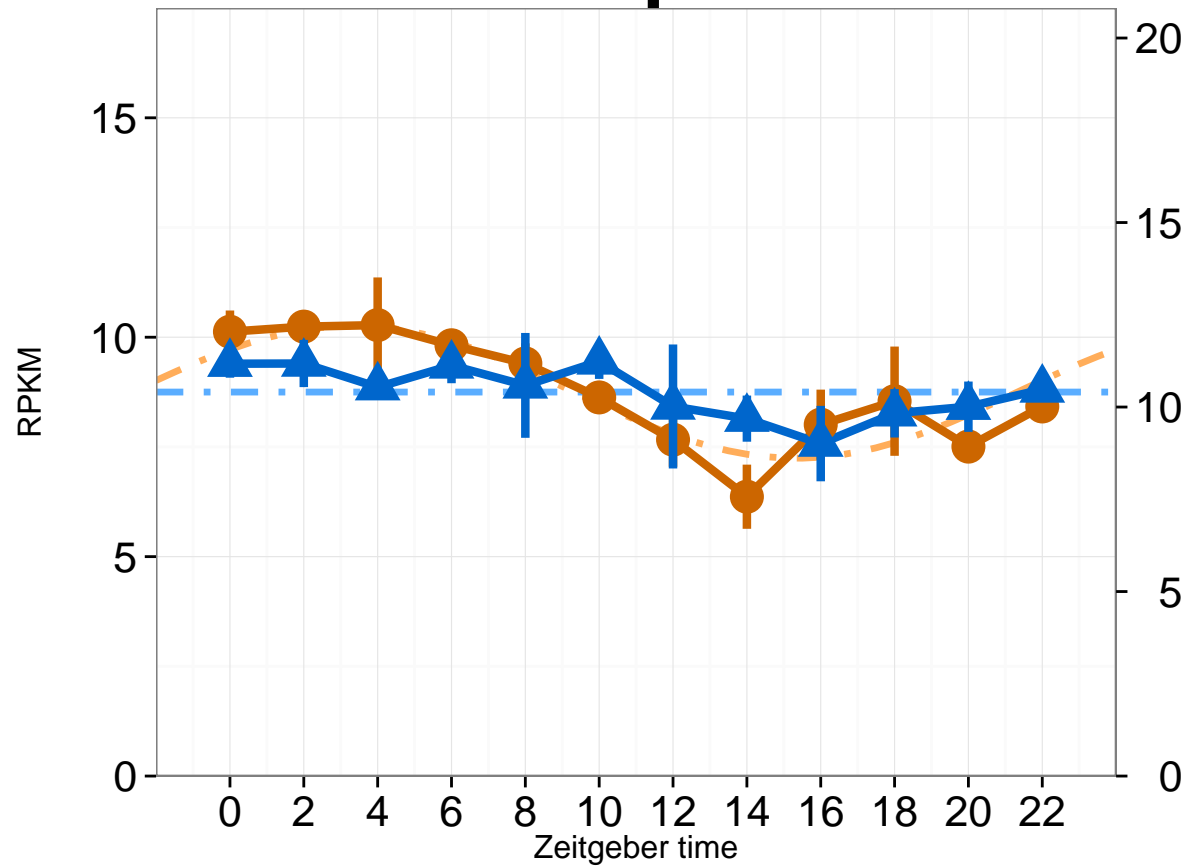

# Gabpb1

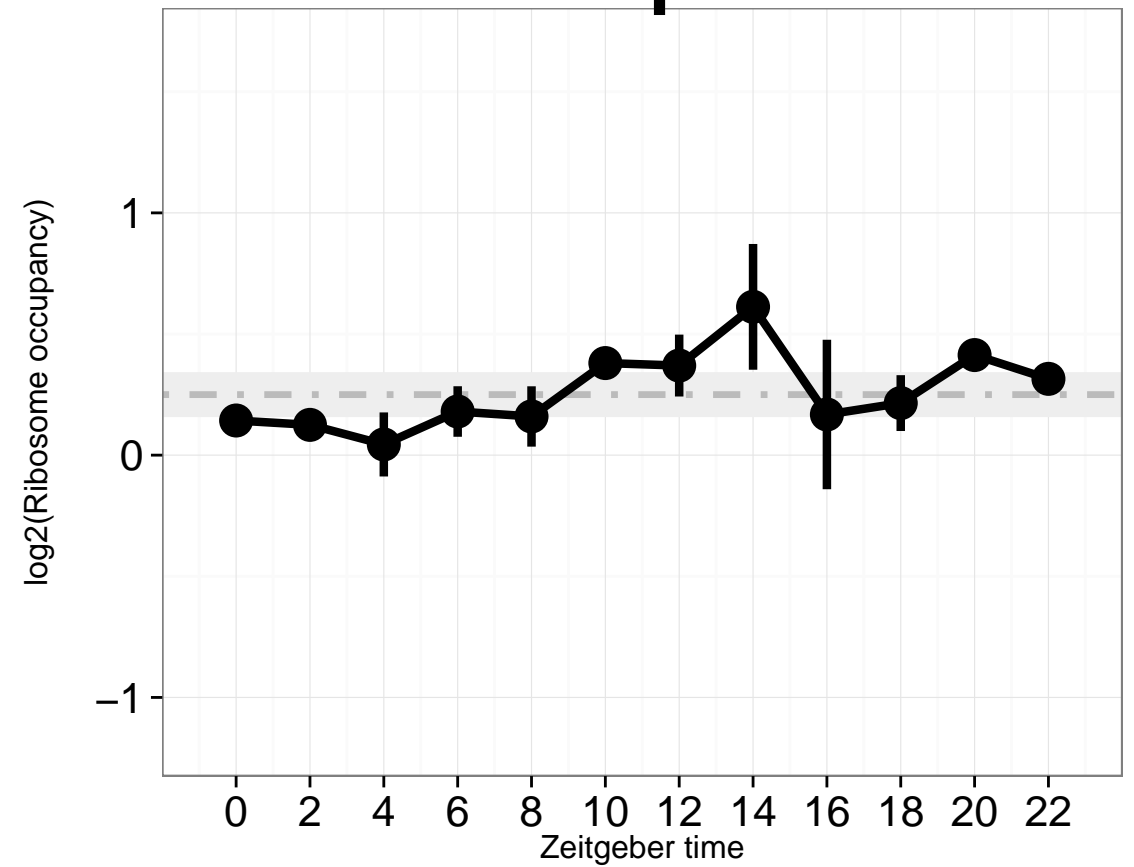

Supplement: Supplementary file 1996 [file 1]

## Vti1b

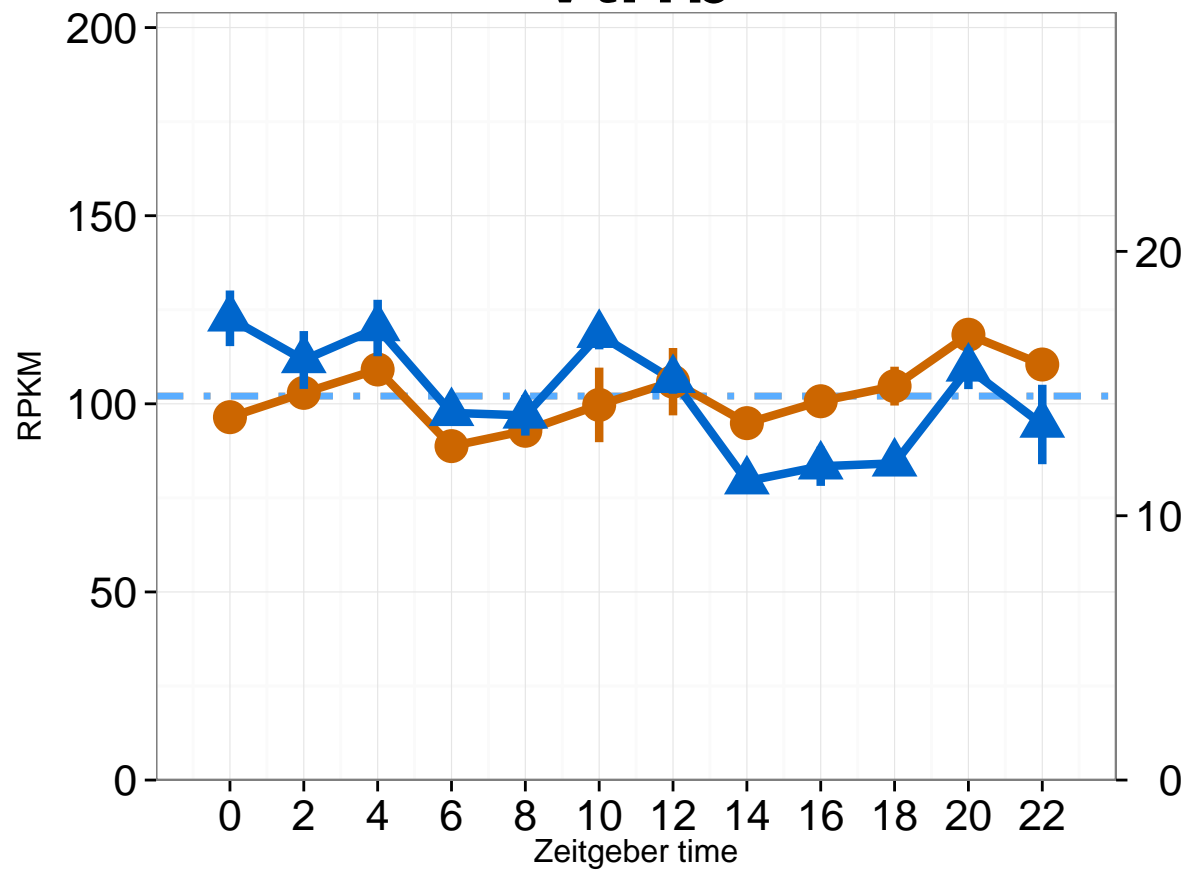

## Vti1b

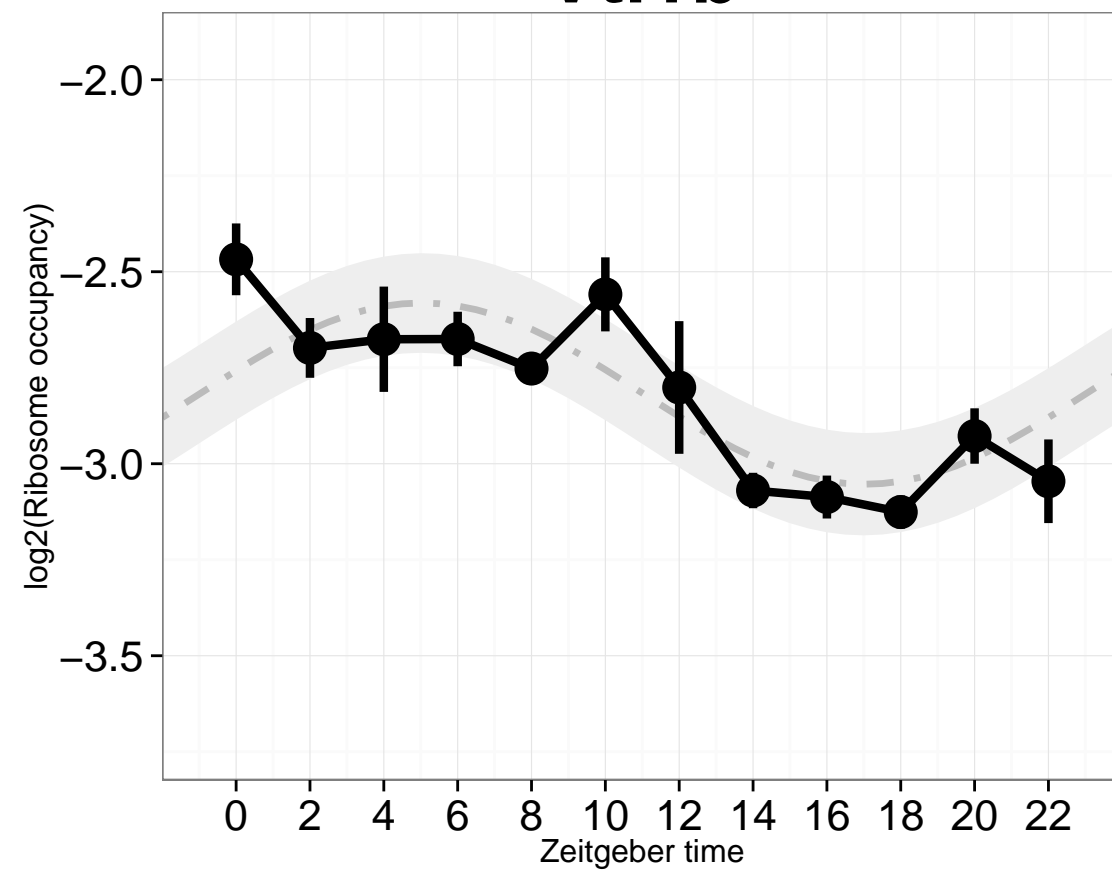

Supplement: Supplementary file 1997 [file 1]

## Fos

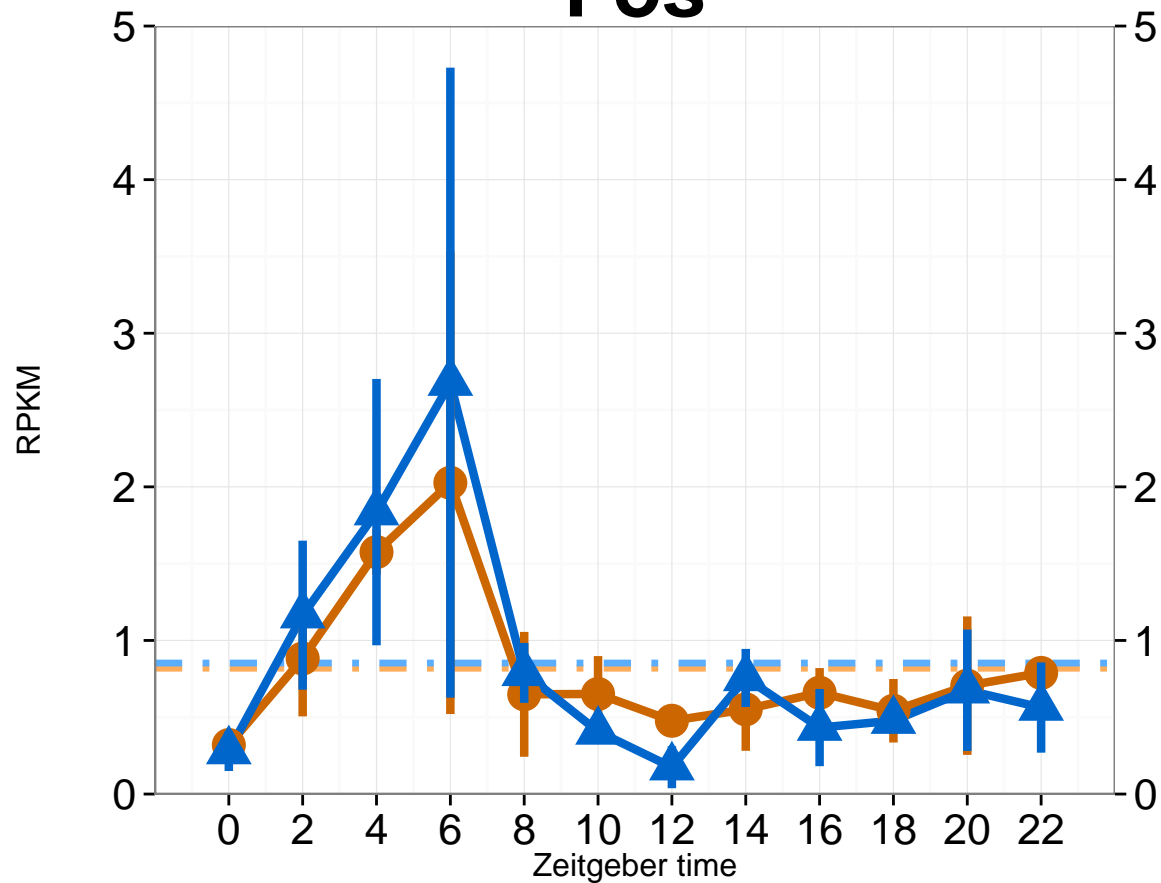

## Fos

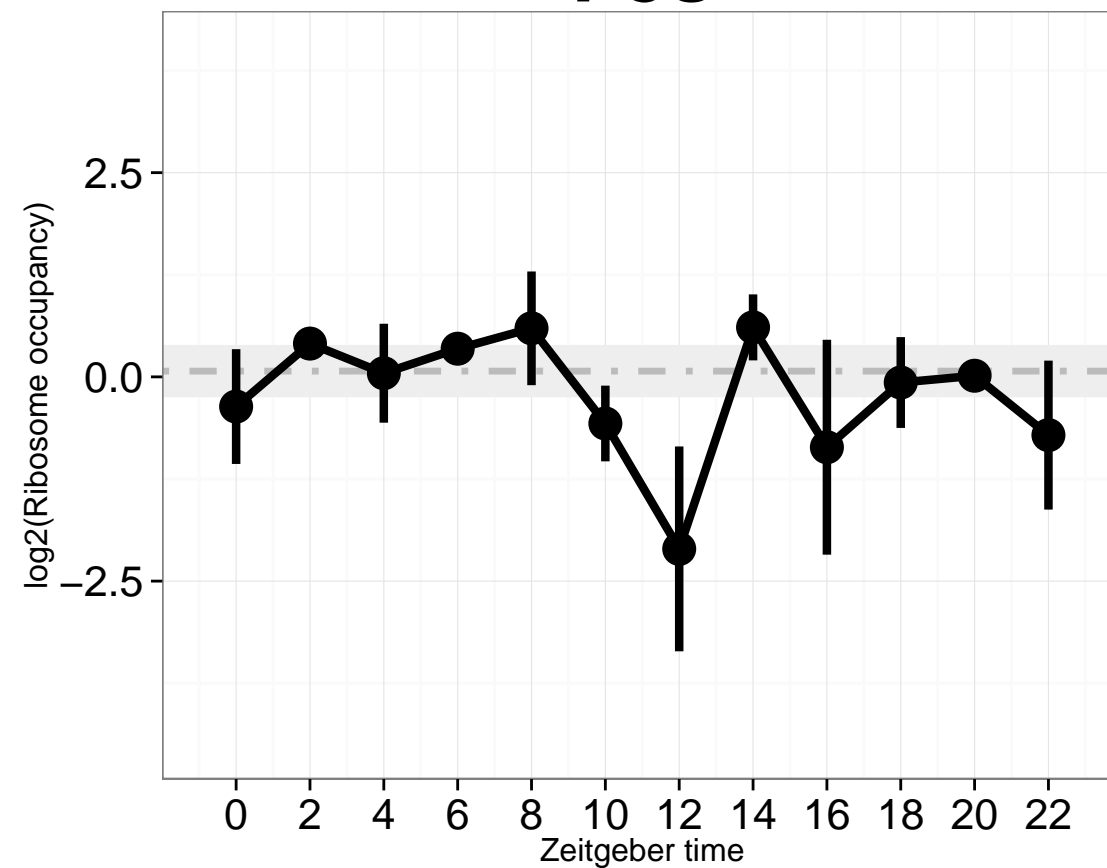

Supplement: Supplementary file 1998 [file 1]

## Kdm5b

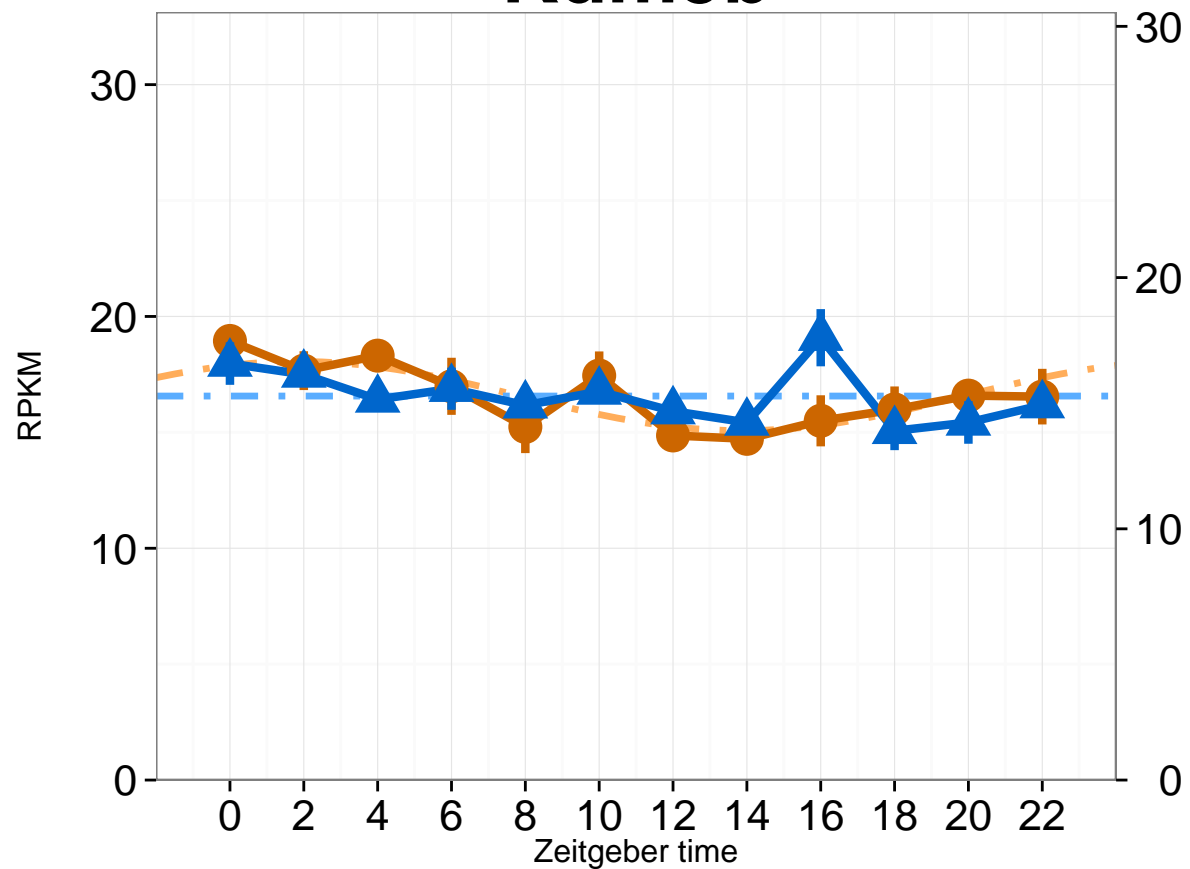

## Kdm5b

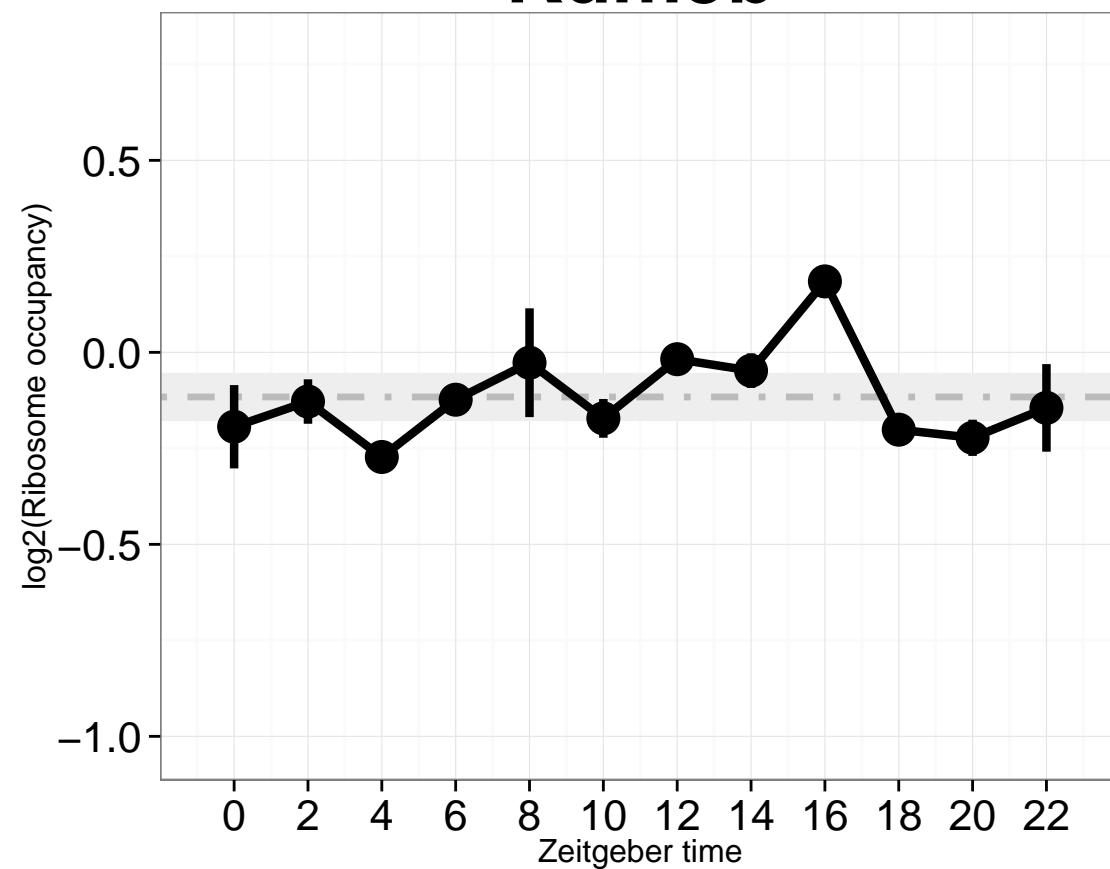

Supplement: Supplementary file 1999 [file 1]

## Eif2s3x

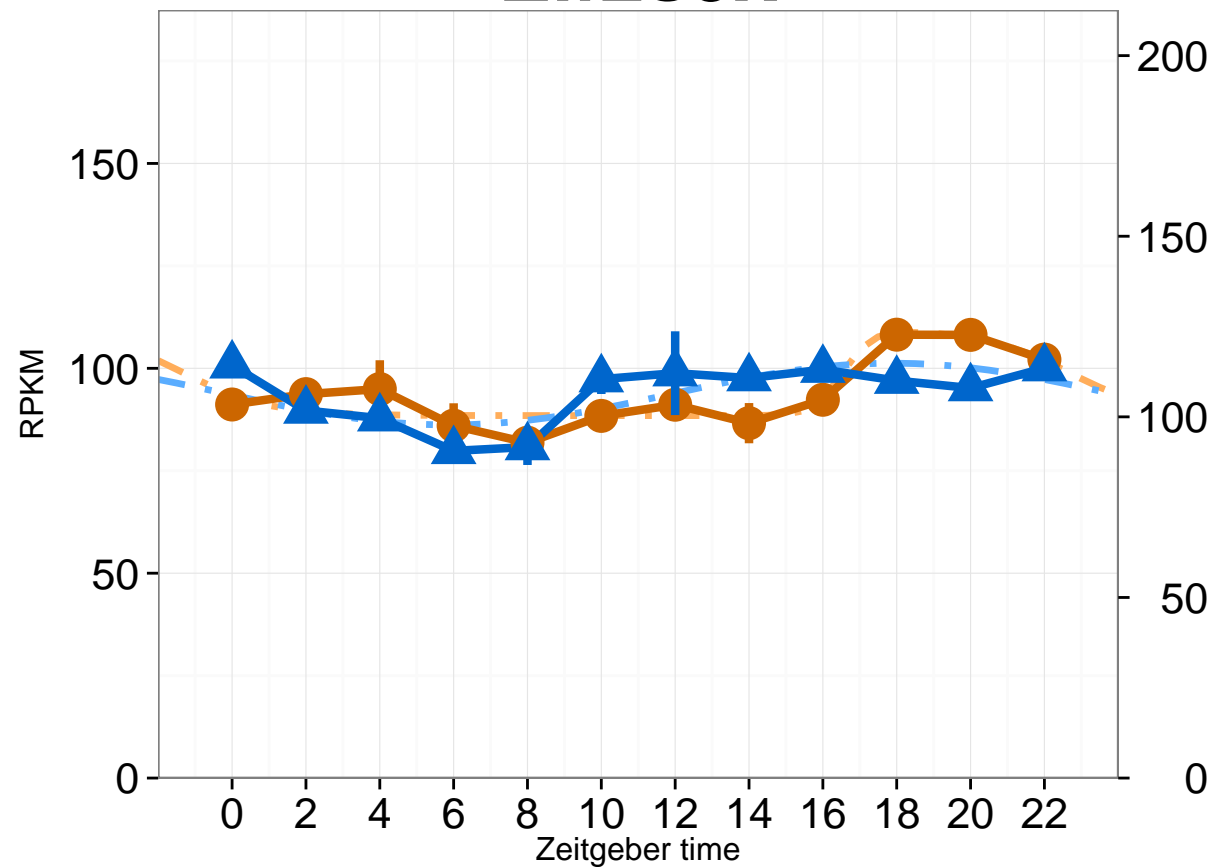

## Eif2s3x

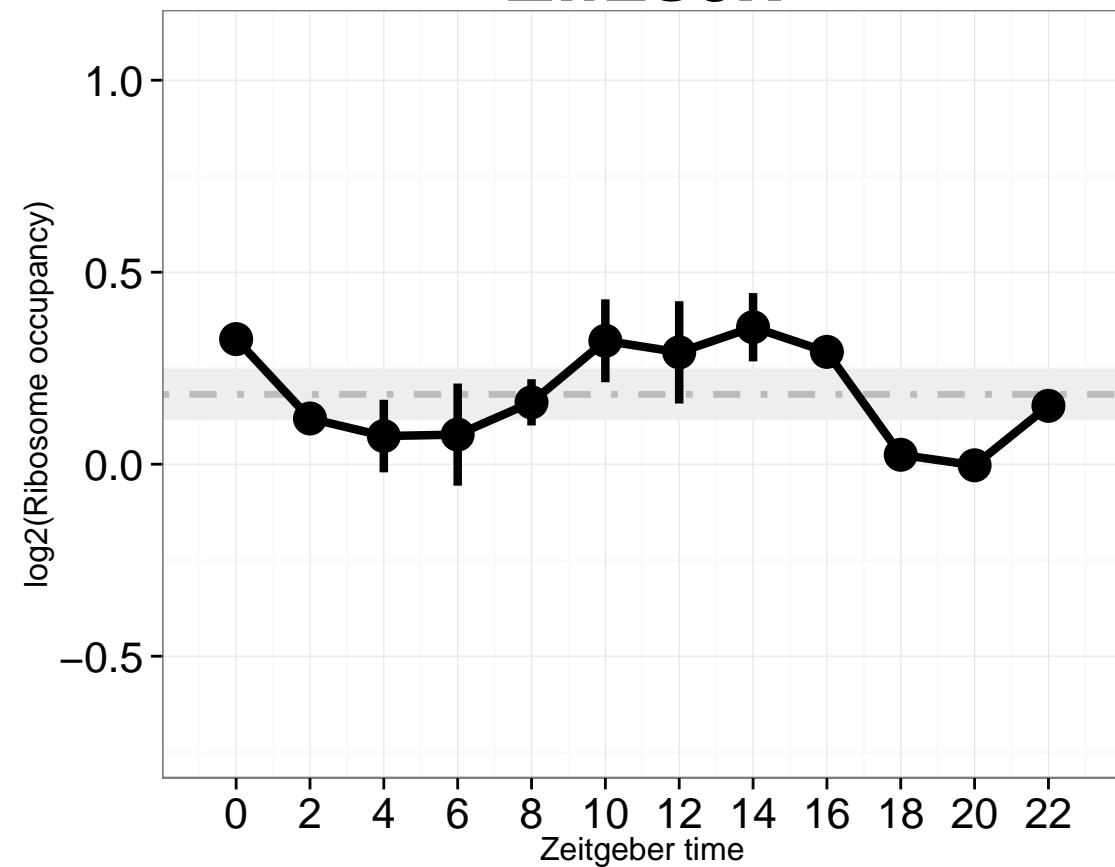

Supplement: Supplementary file 2000 [file 1]

# Gm561

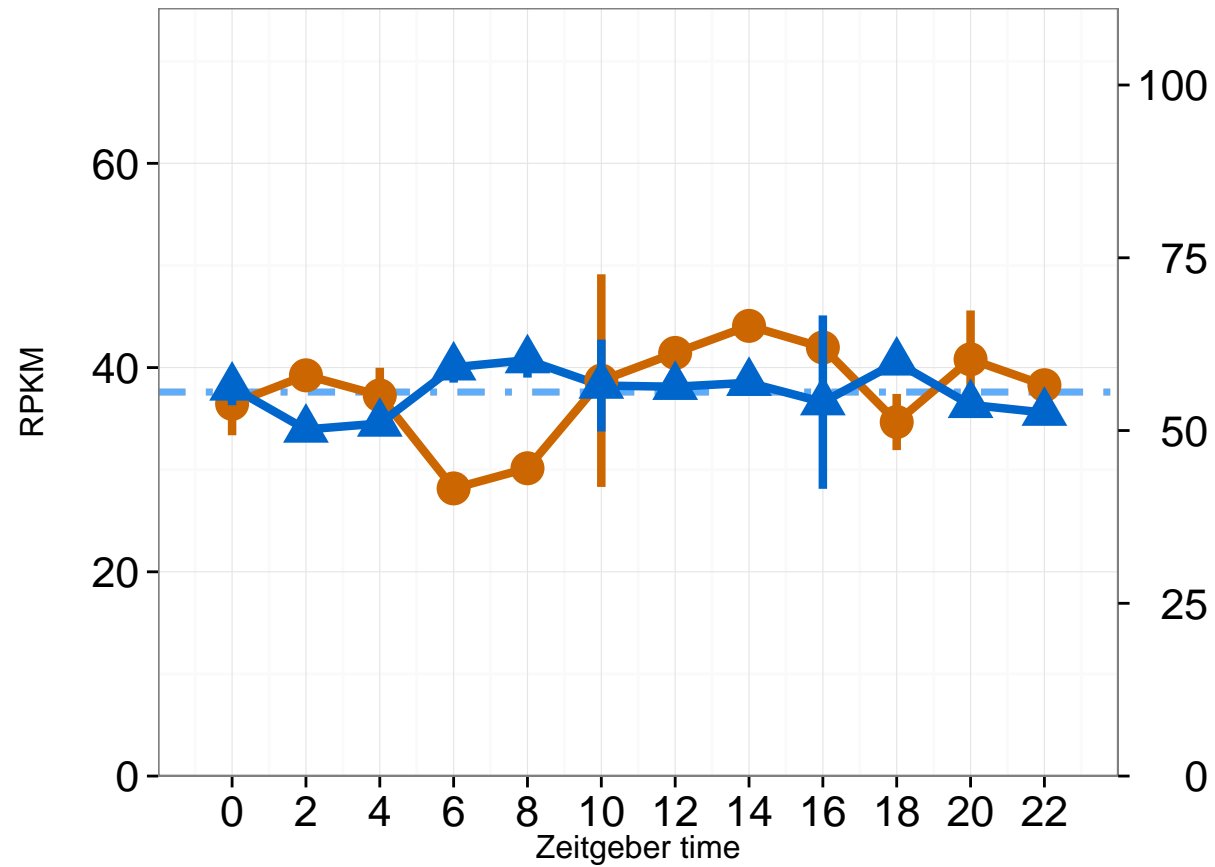

# Gm561

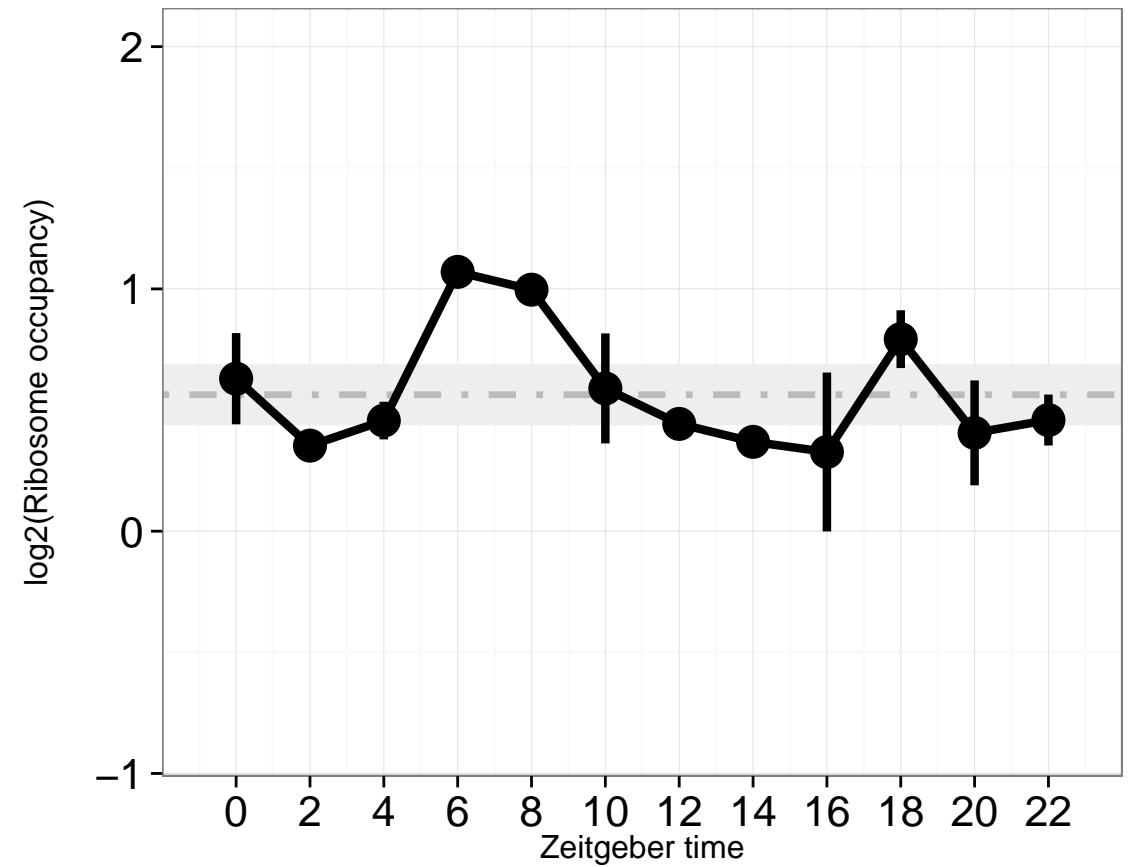

Supplement: Supplementary file 2001 [file 1]

## Snx13

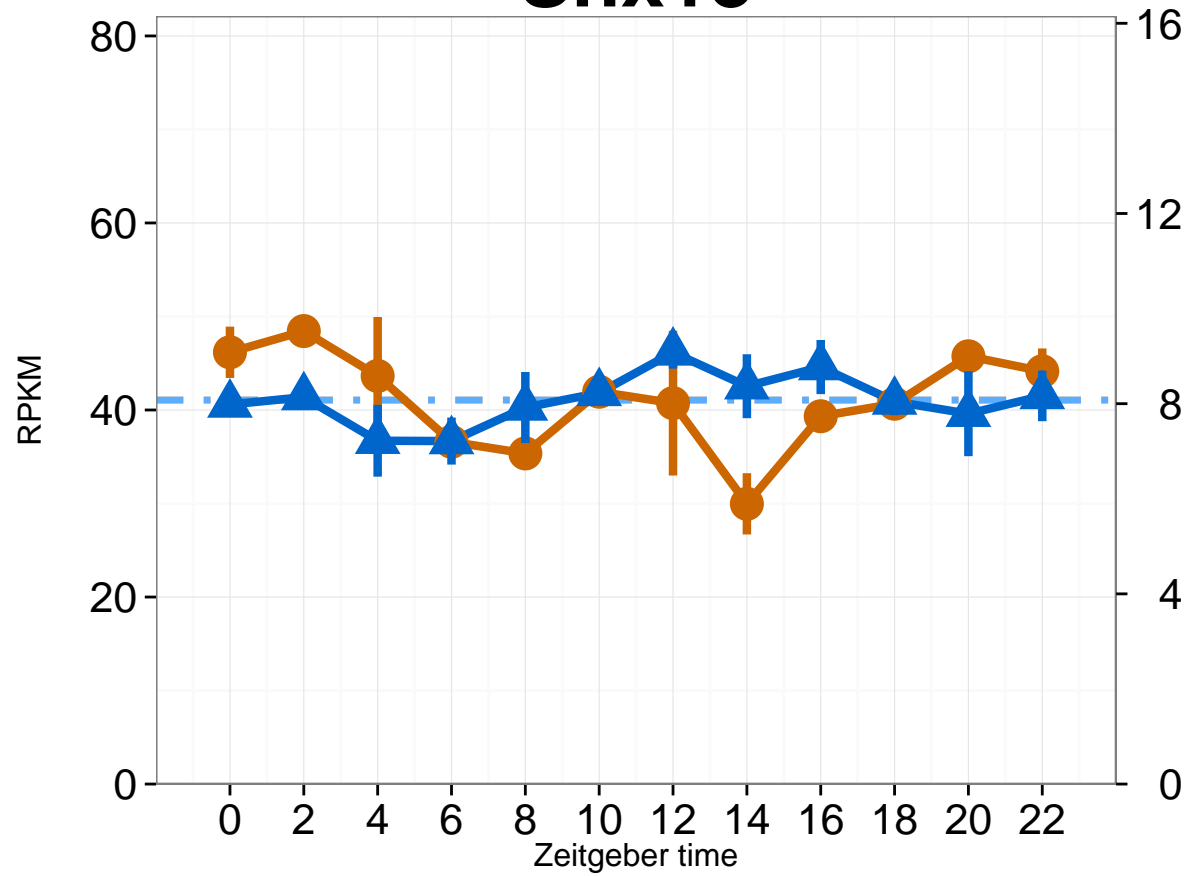

## Snx13

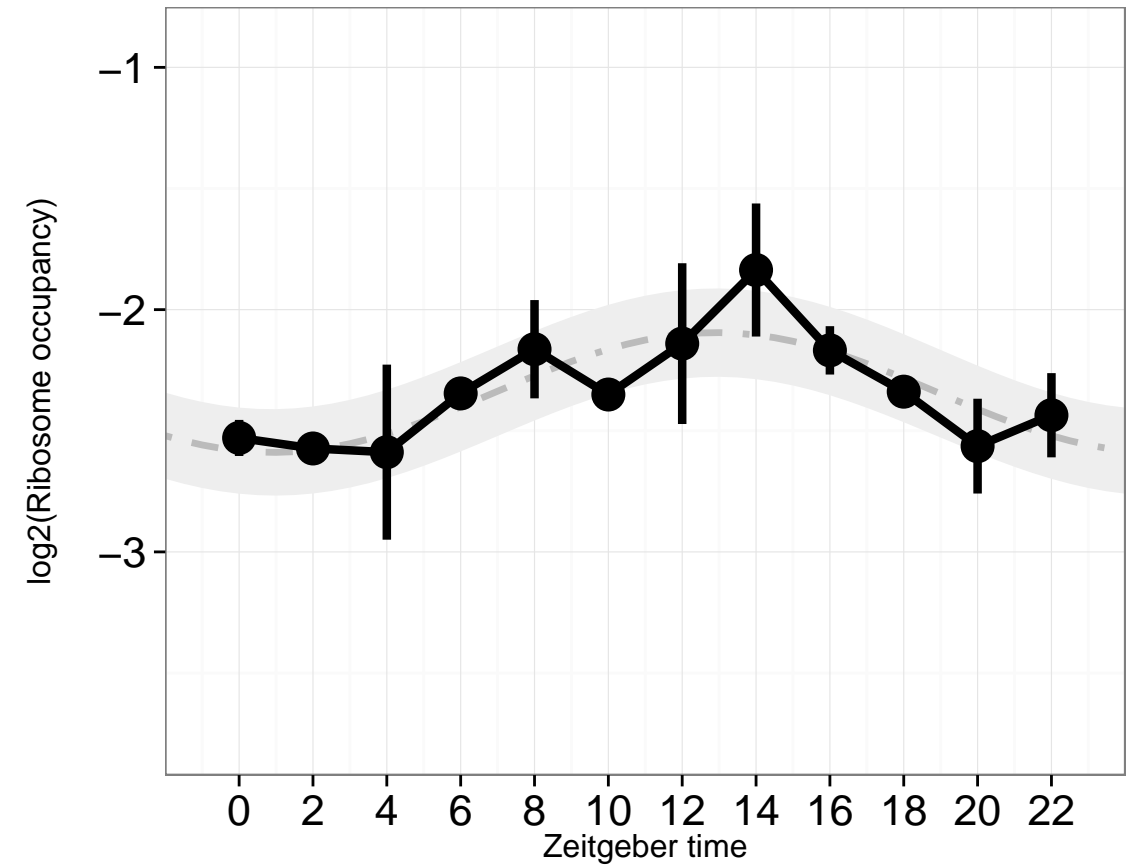

Supplement: Supplementary file 2002 [file 1]

## Ficd

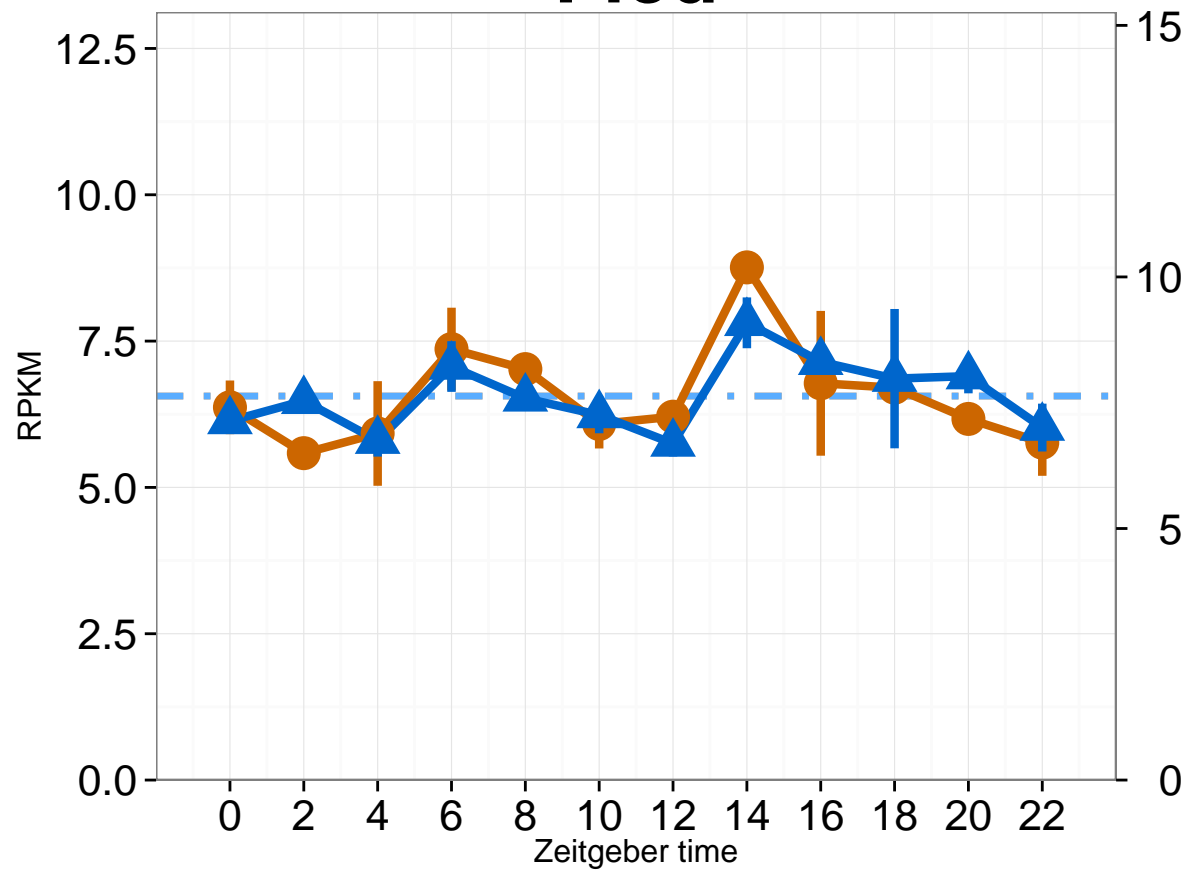

## Ficd

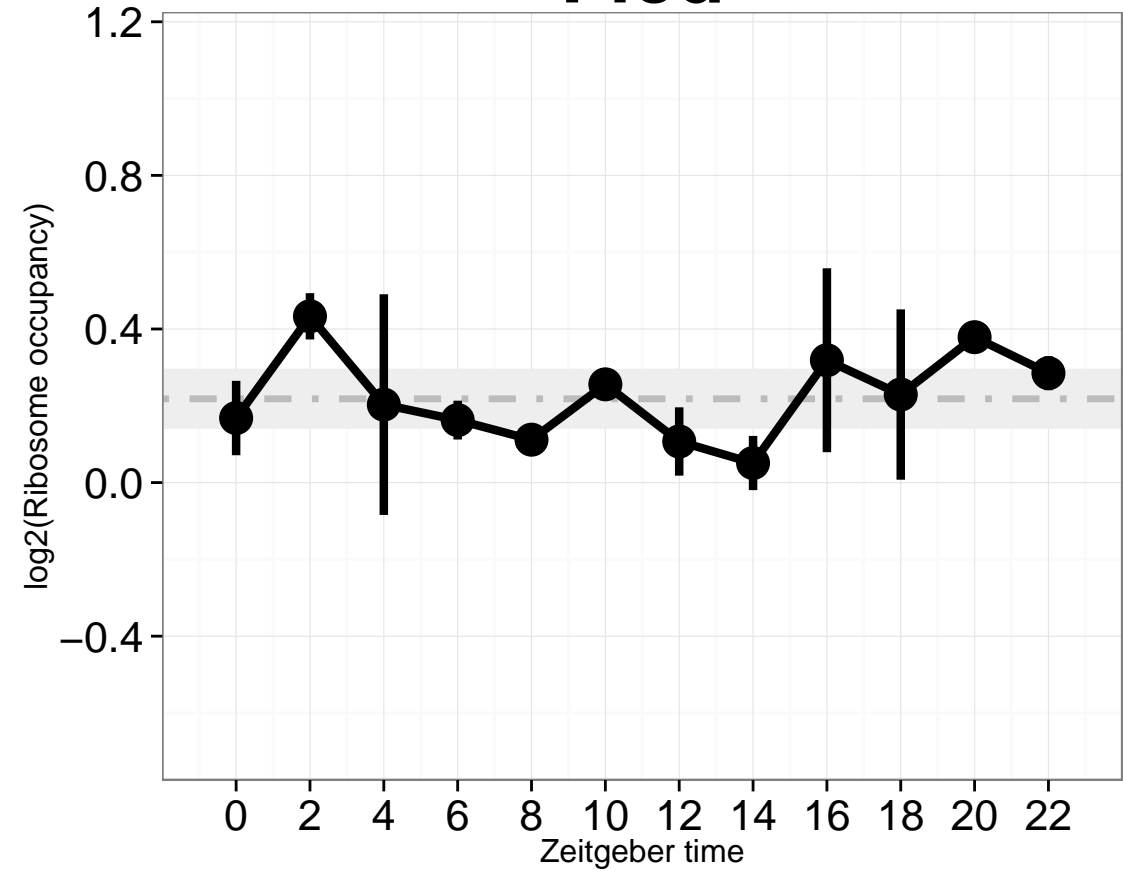

Supplement: Supplementary file 2003 [file 1]

# Ptp4a1

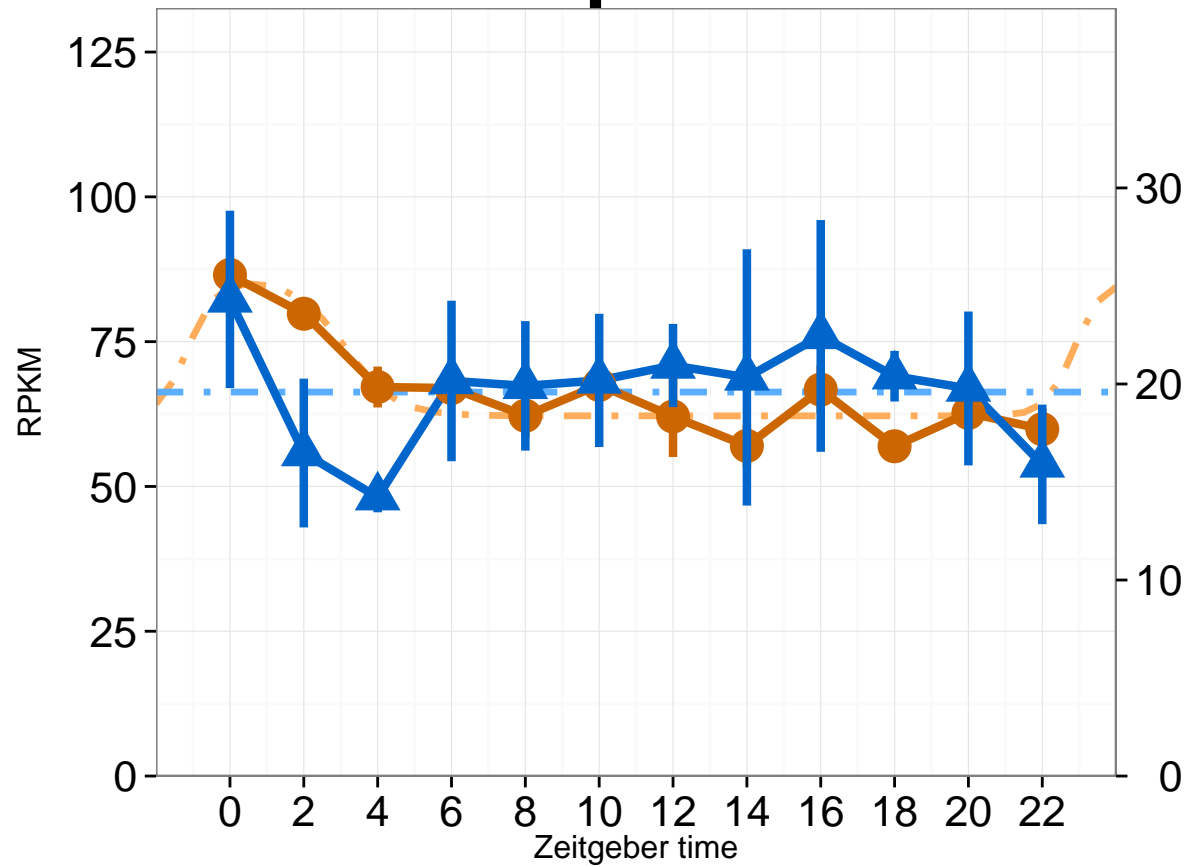

# Ptp4a1

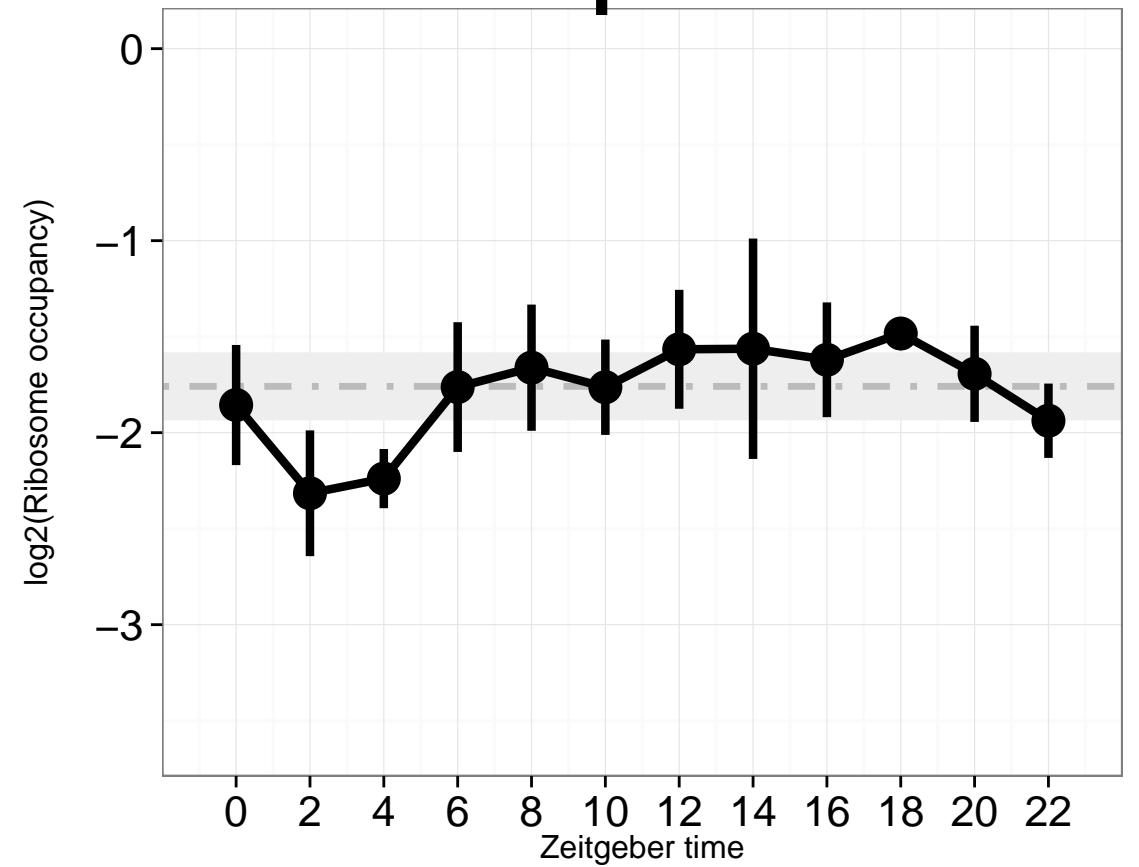

Supplement: Supplementary file 2004 [file 1]

## Eif4a2

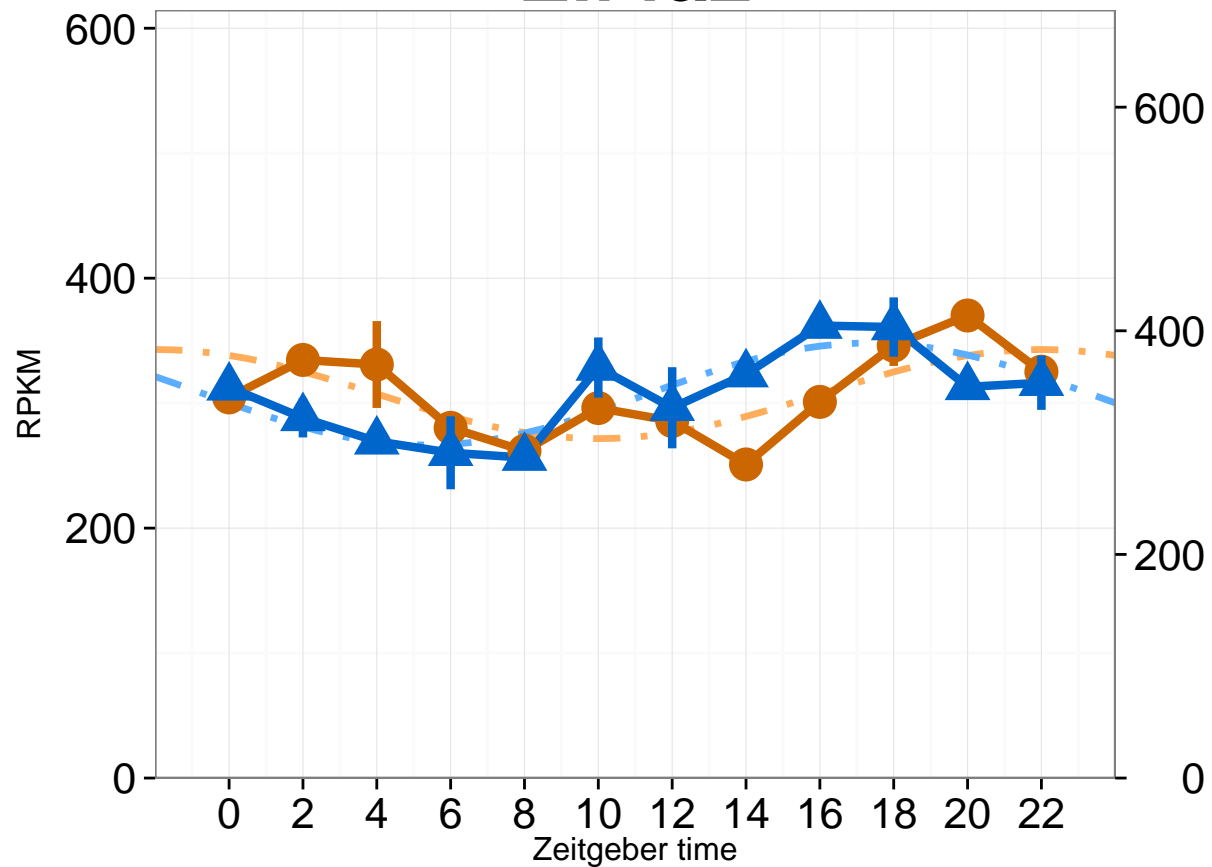

## Eif4a2

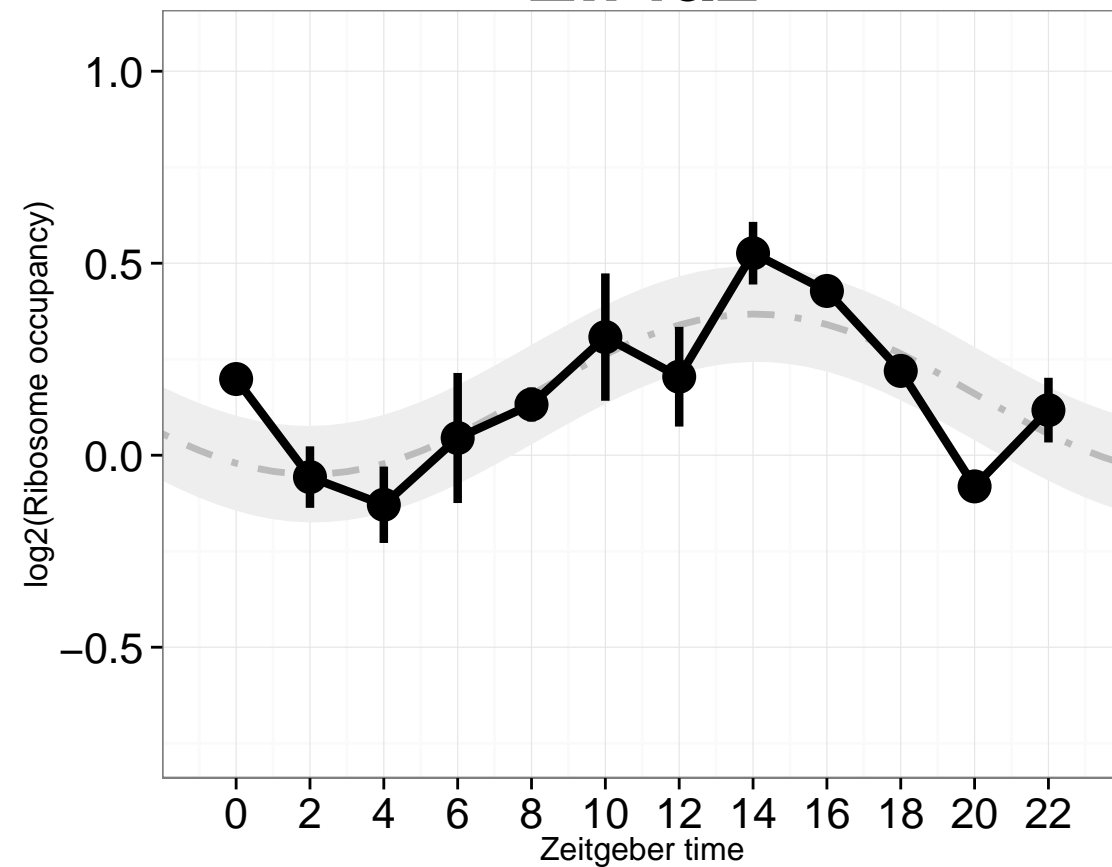

Supplement: Supplementary file 2005 [file 1]

## Zscan22

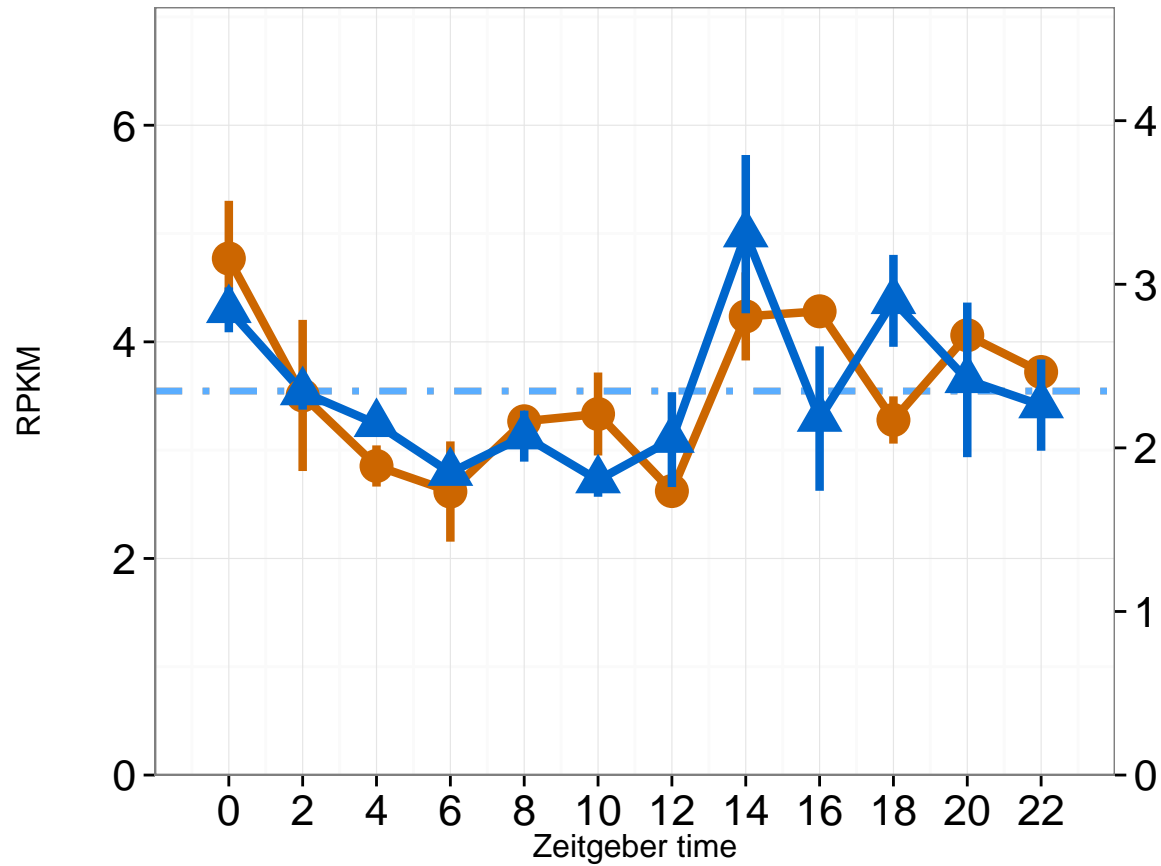

## Zscan22

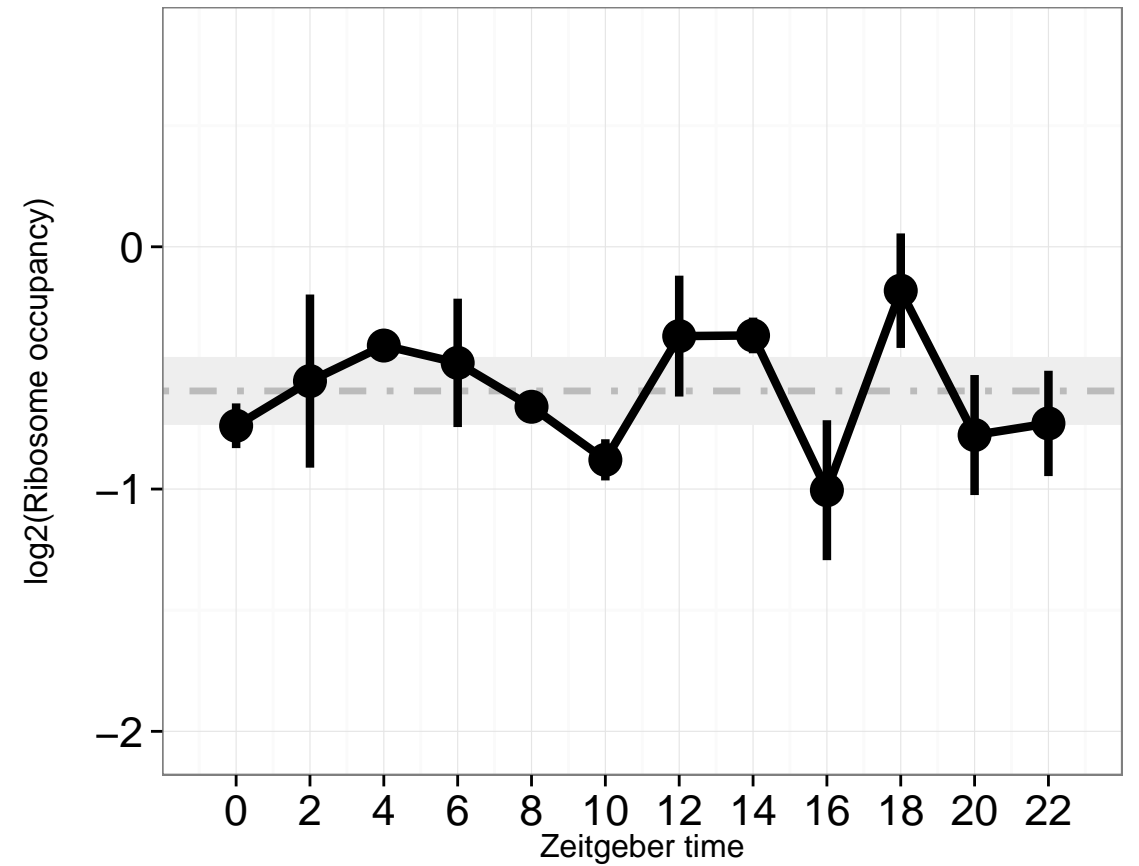

Supplement: Supplementary file 2006 [file 1]

## Tdrkh

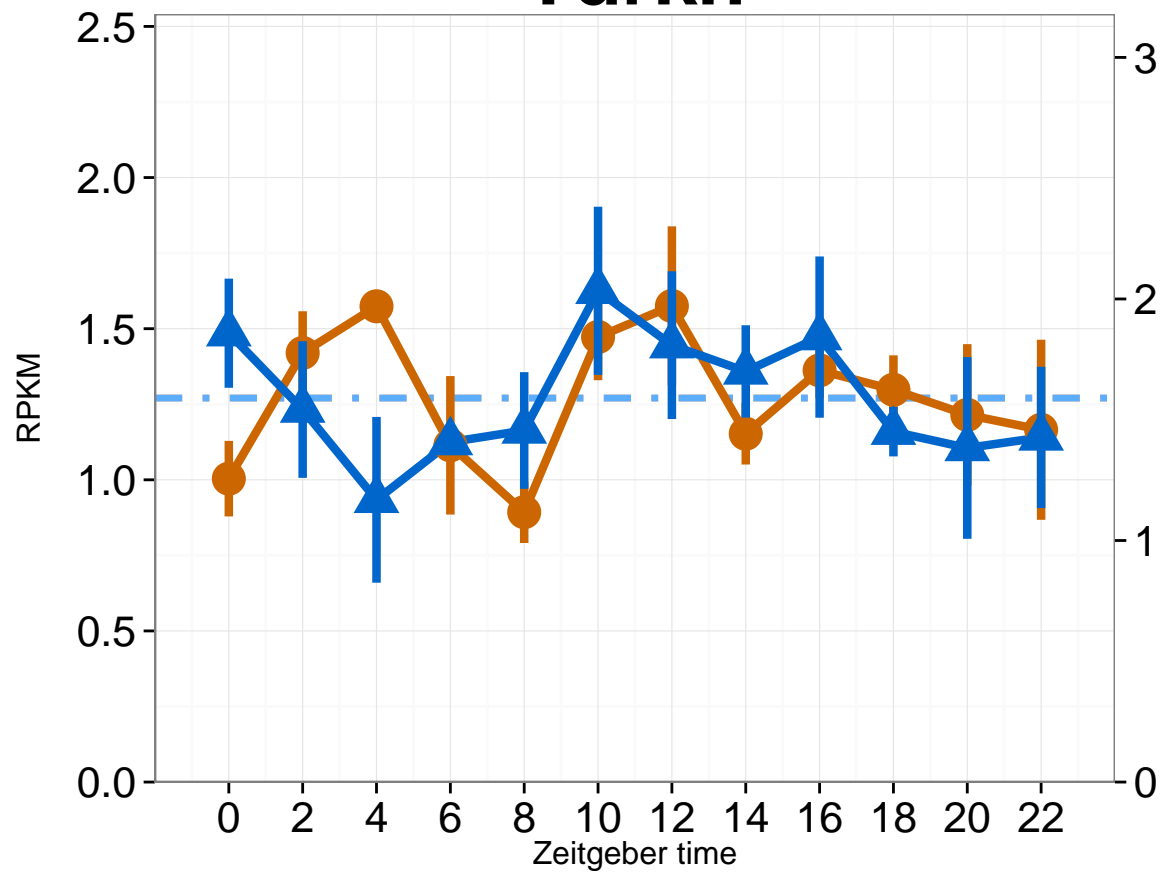

## Tdrkh

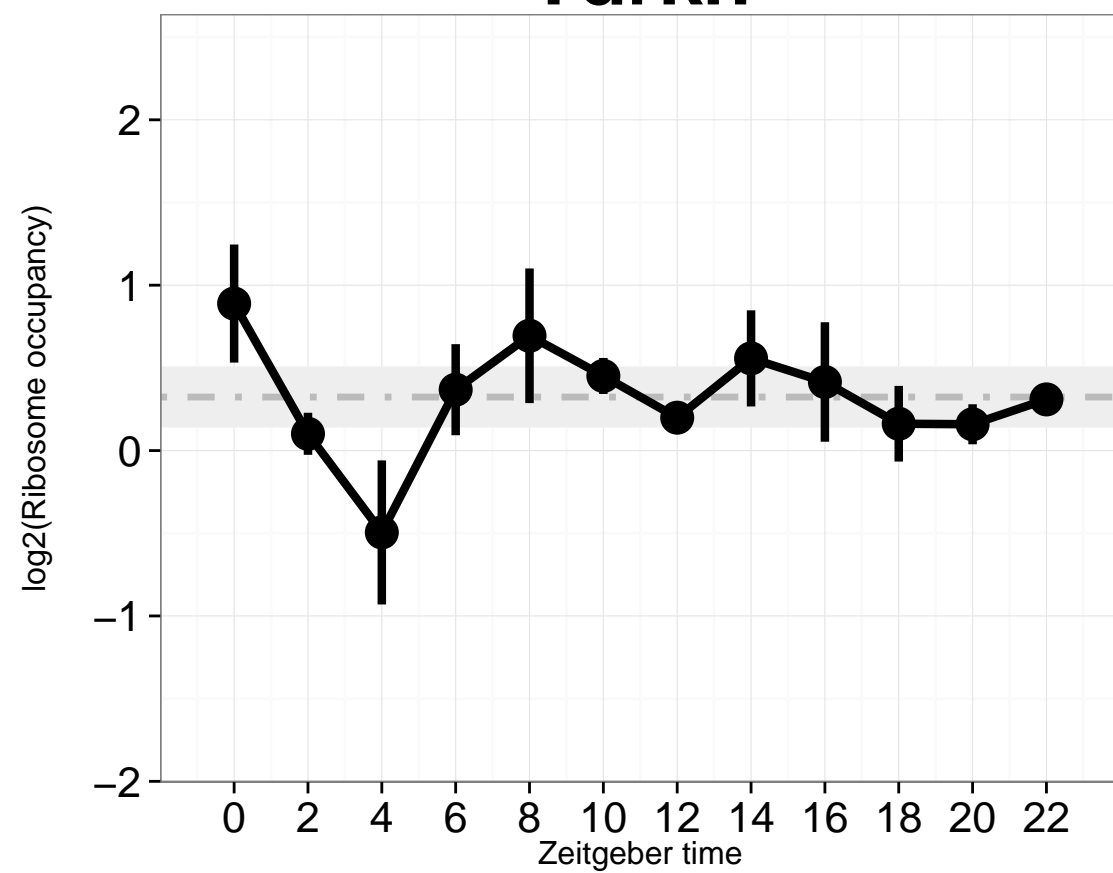

Supplement: Supplementary file 2007 [file 1]

# Tpm3

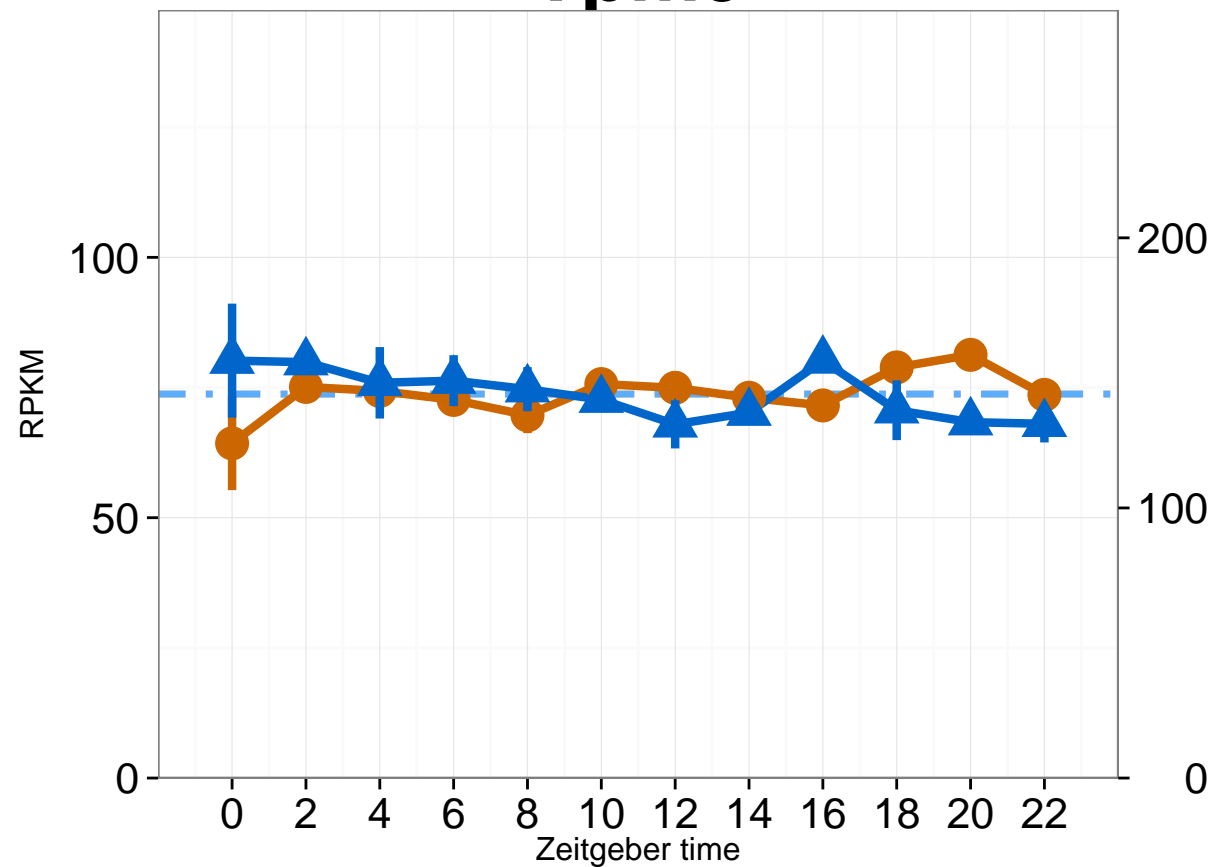

# Tpm3

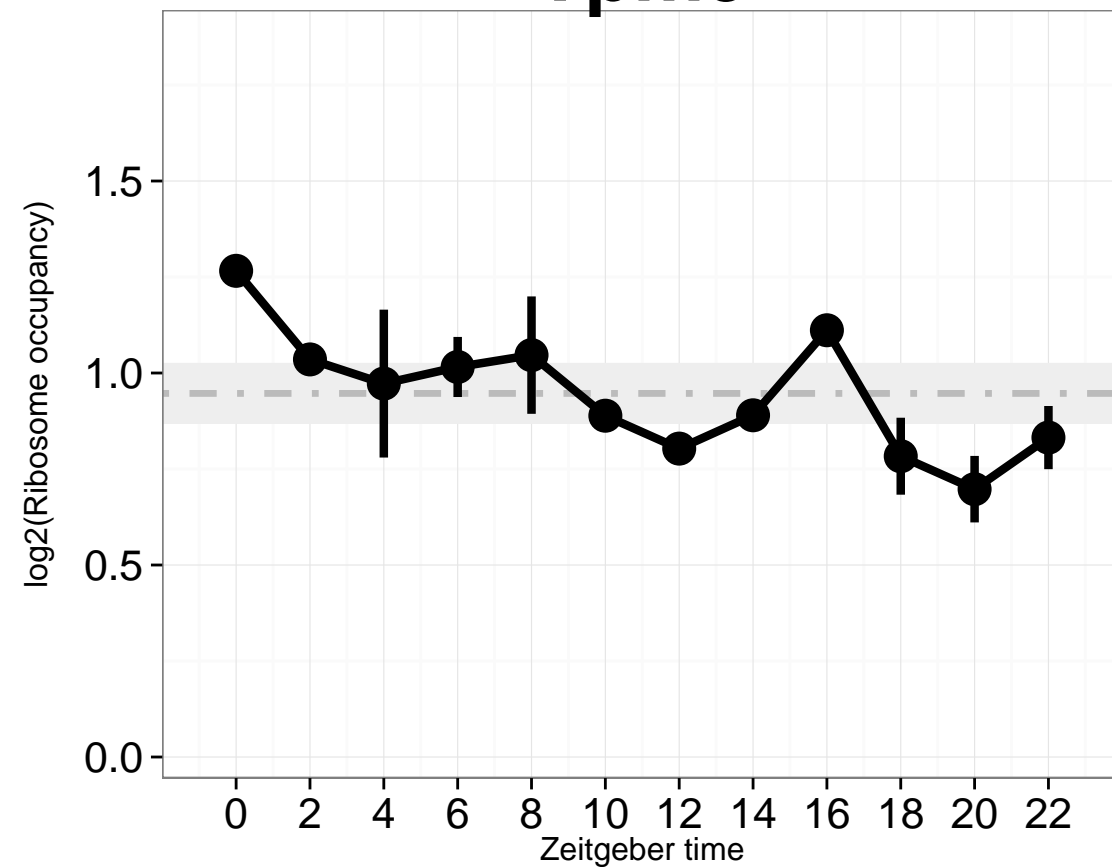

Supplement: Supplementary file 2008 [file 1]
