# Supplementary material (part 21 of 133)
Source: publisher figshare collection journal article supplement (https://springernature.figshare.com/articles/dataset/_/4903193)

# Tmem11

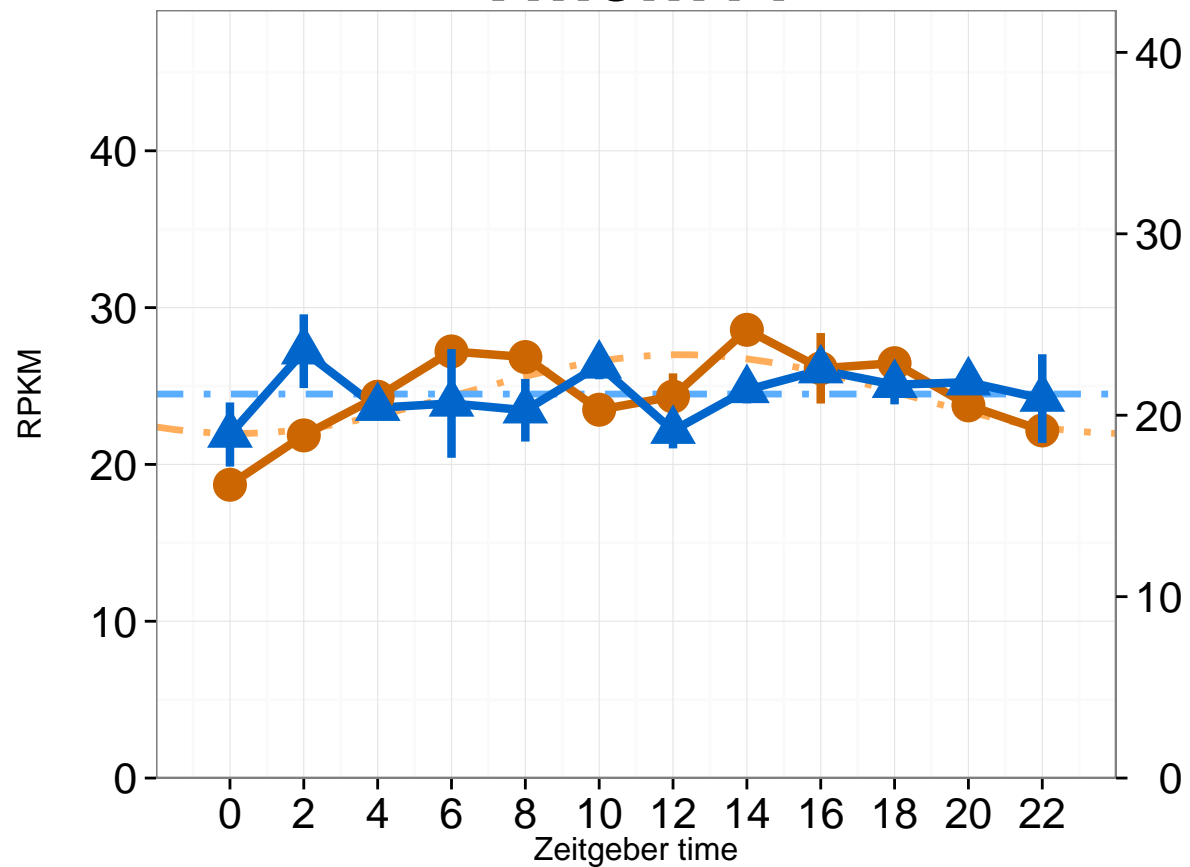

# Tmem11

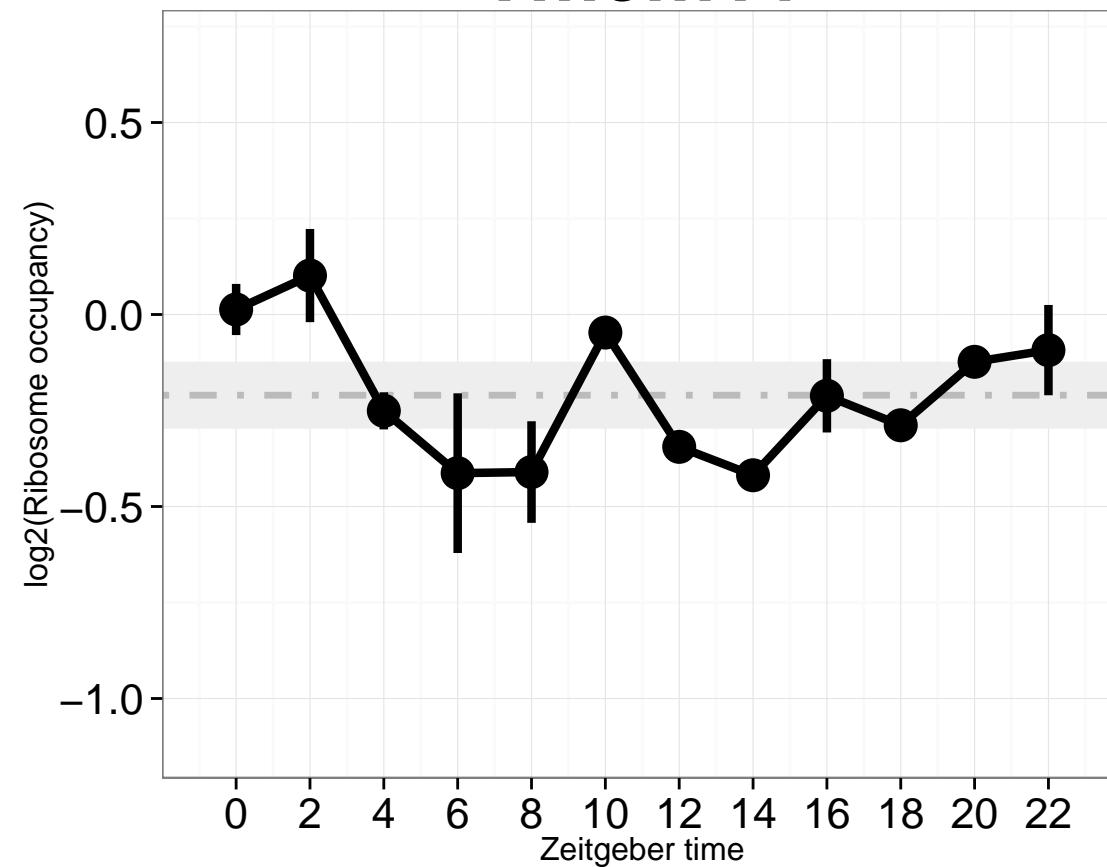

Supplement: Supplementary file 2009 [file 1]

## Afmid

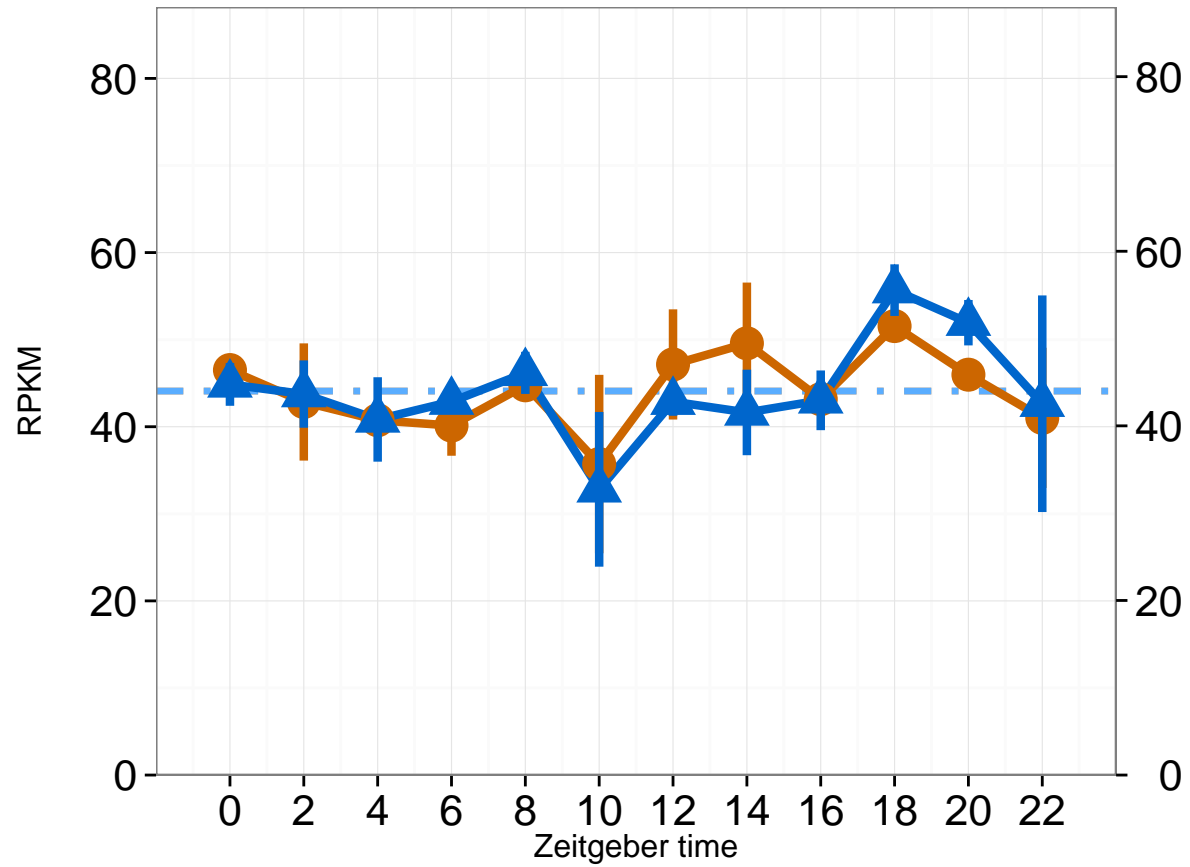

## Afmid

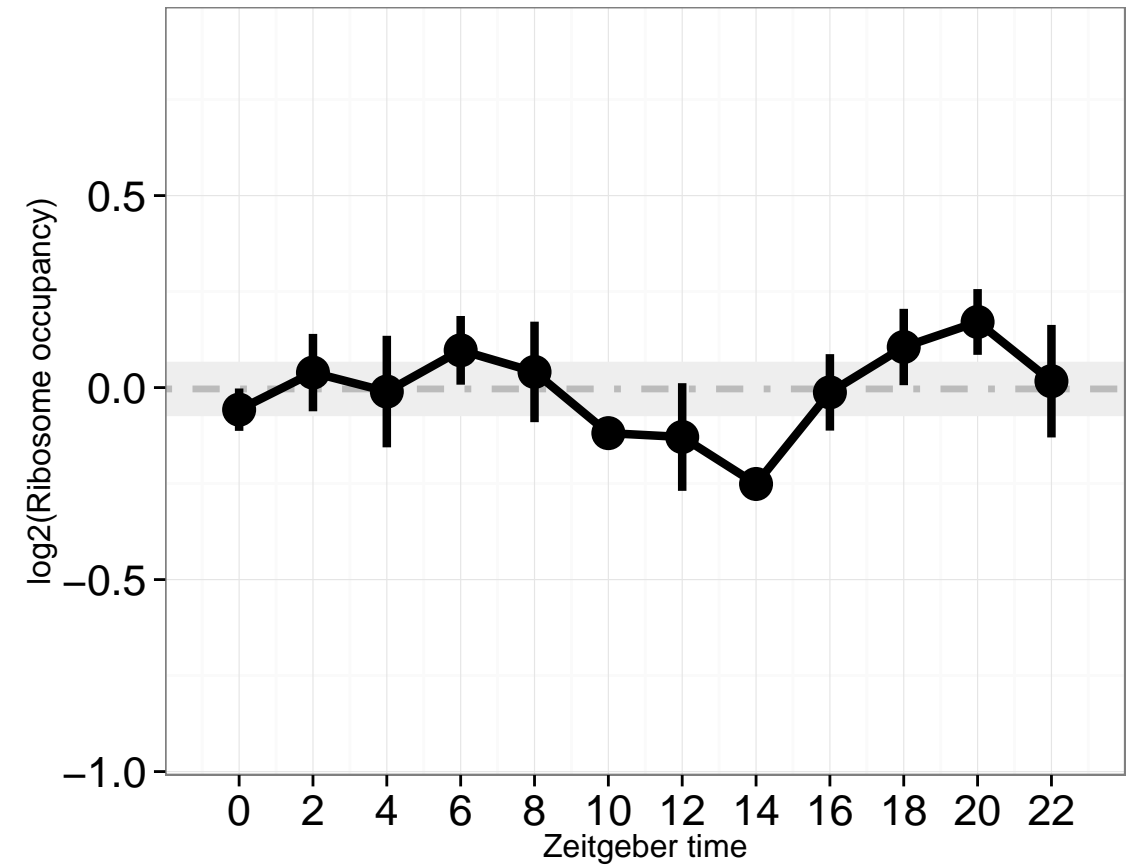

Supplement: Supplementary file 2010 [file 1]

## Glb1

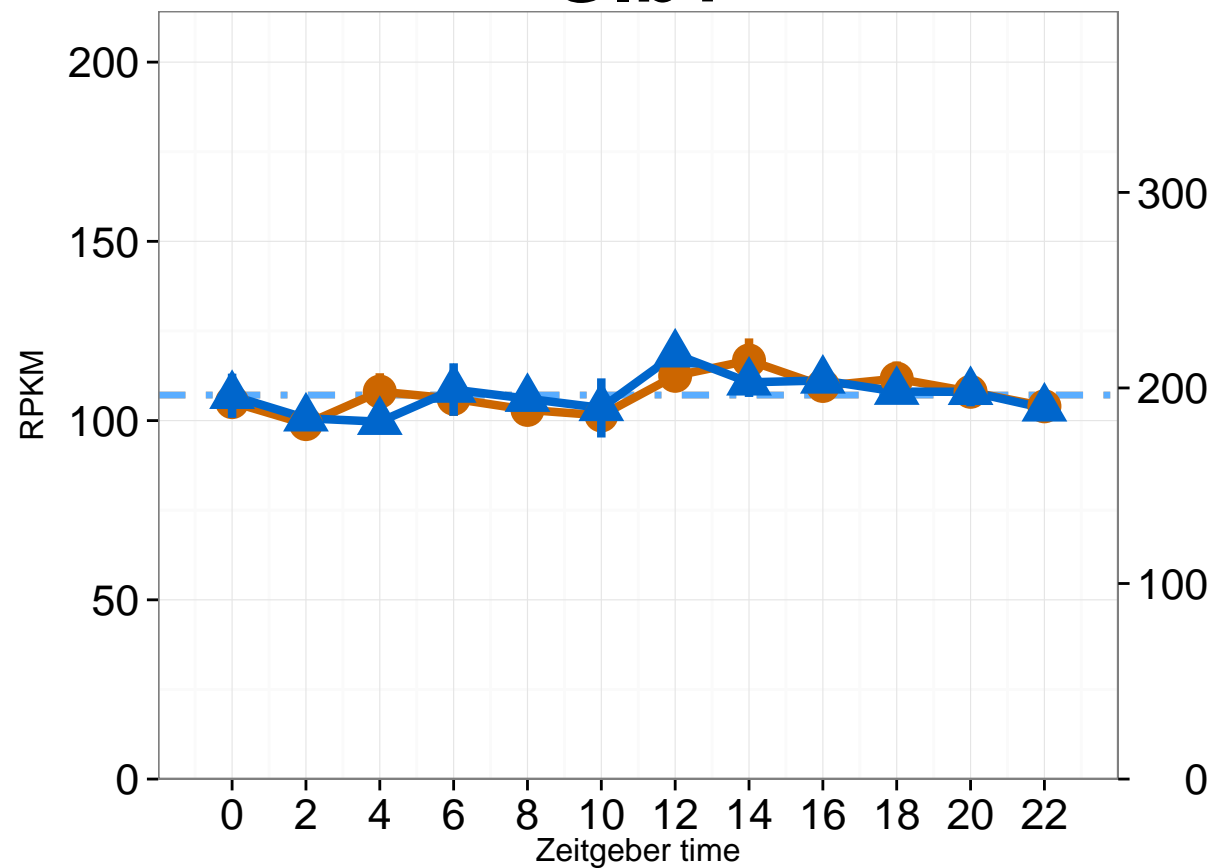

## Glb1

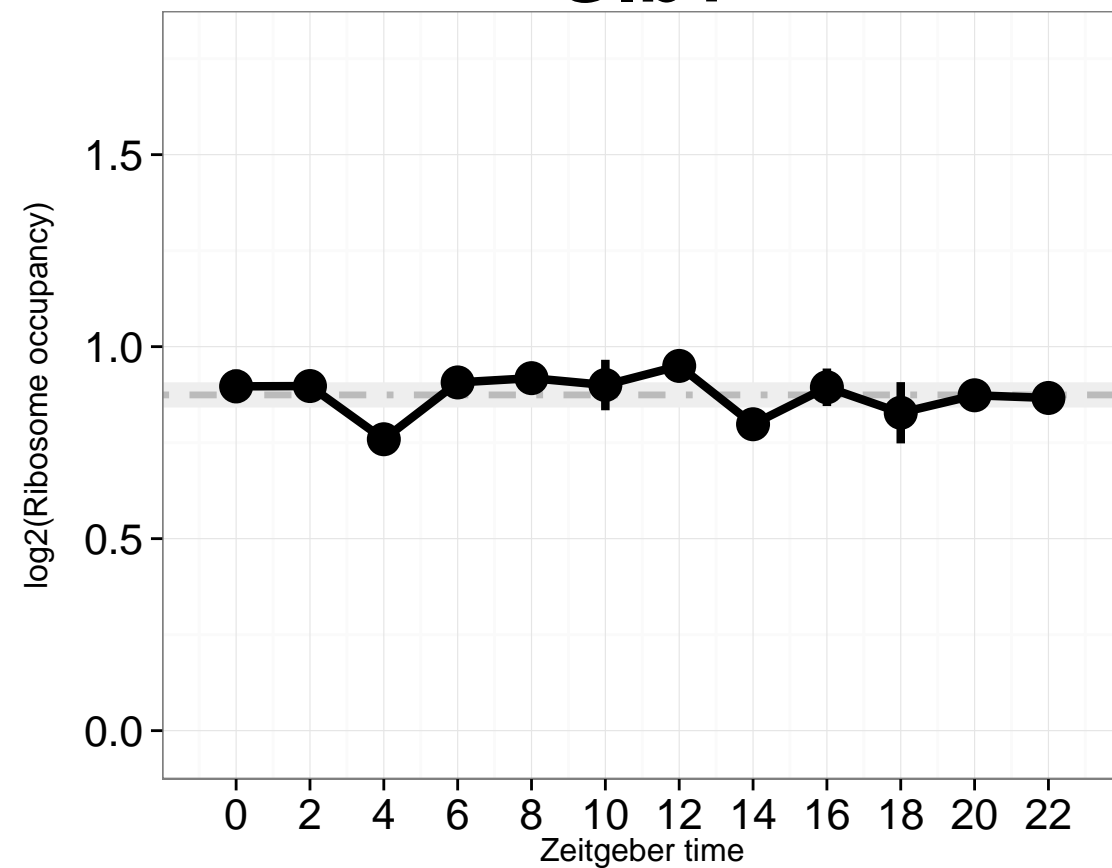

Supplement: Supplementary file 2011 [file 1]

# Pip5k1b

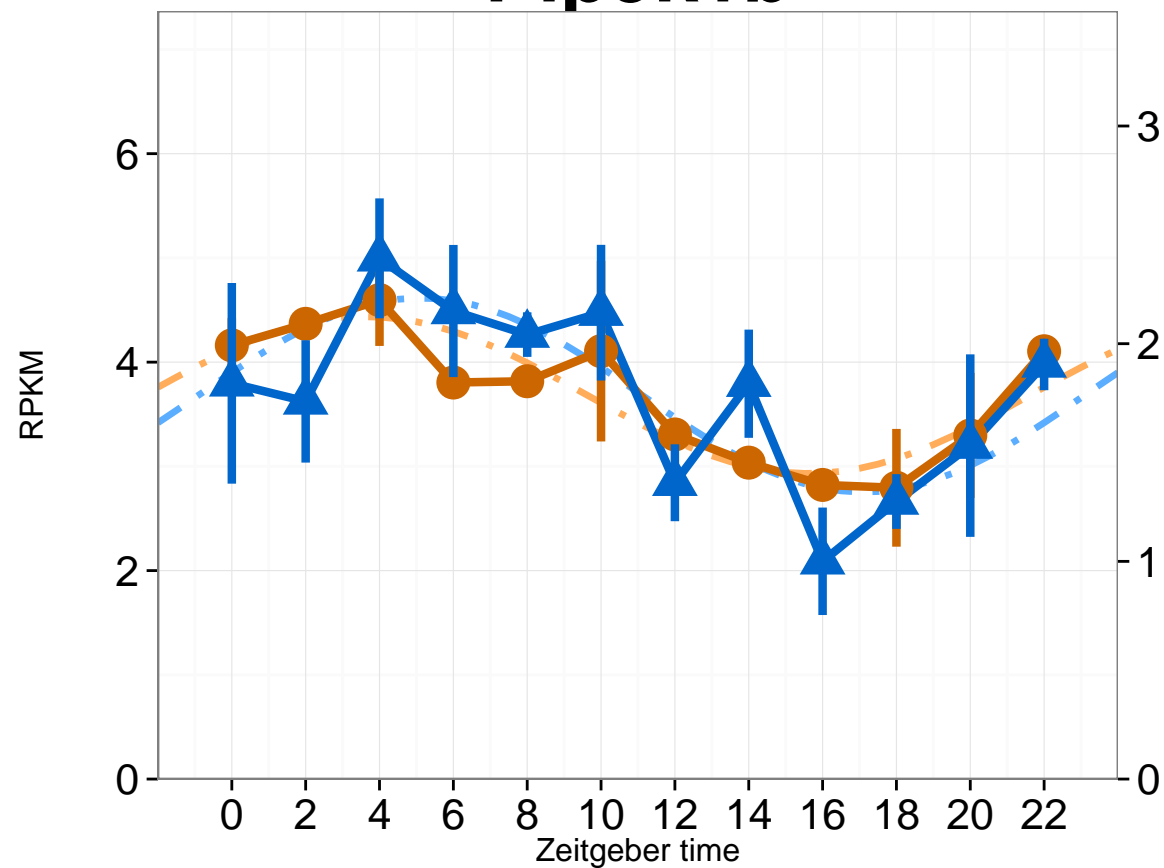

# Pip5k1b

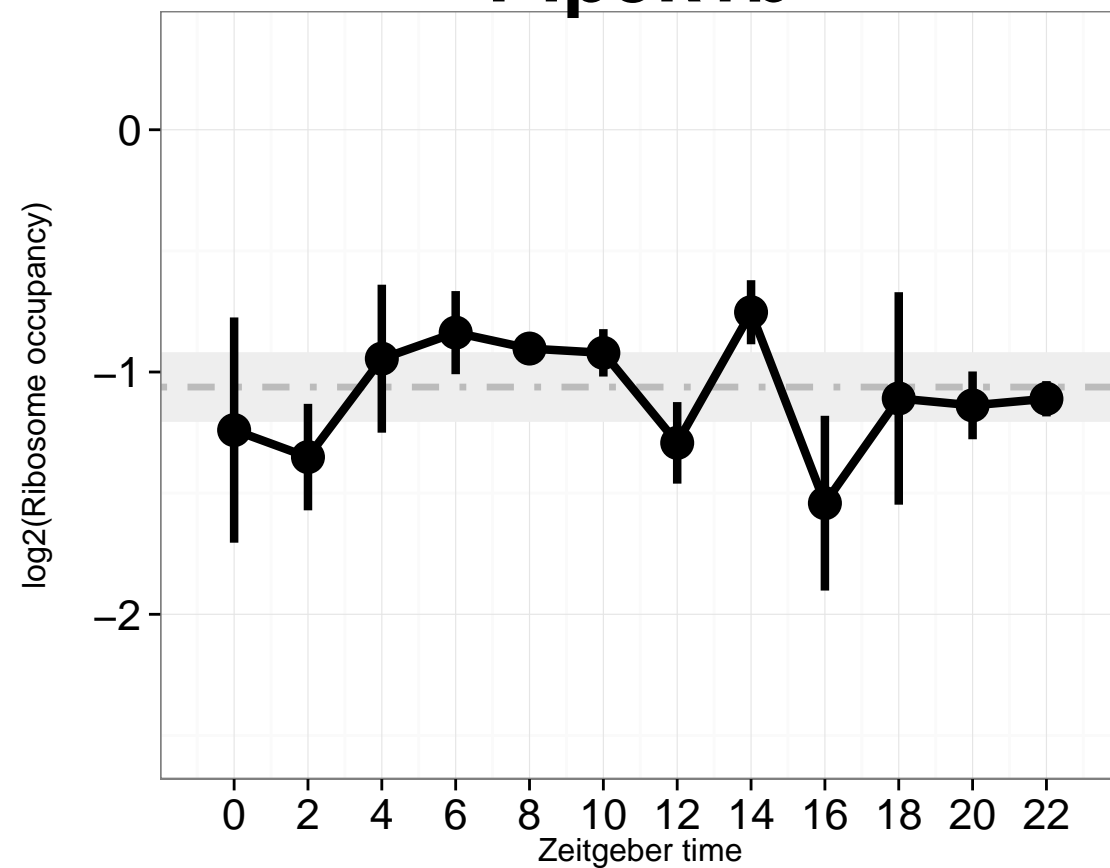

Supplement: Supplementary file 2012 [file 1]

# Hspbp1

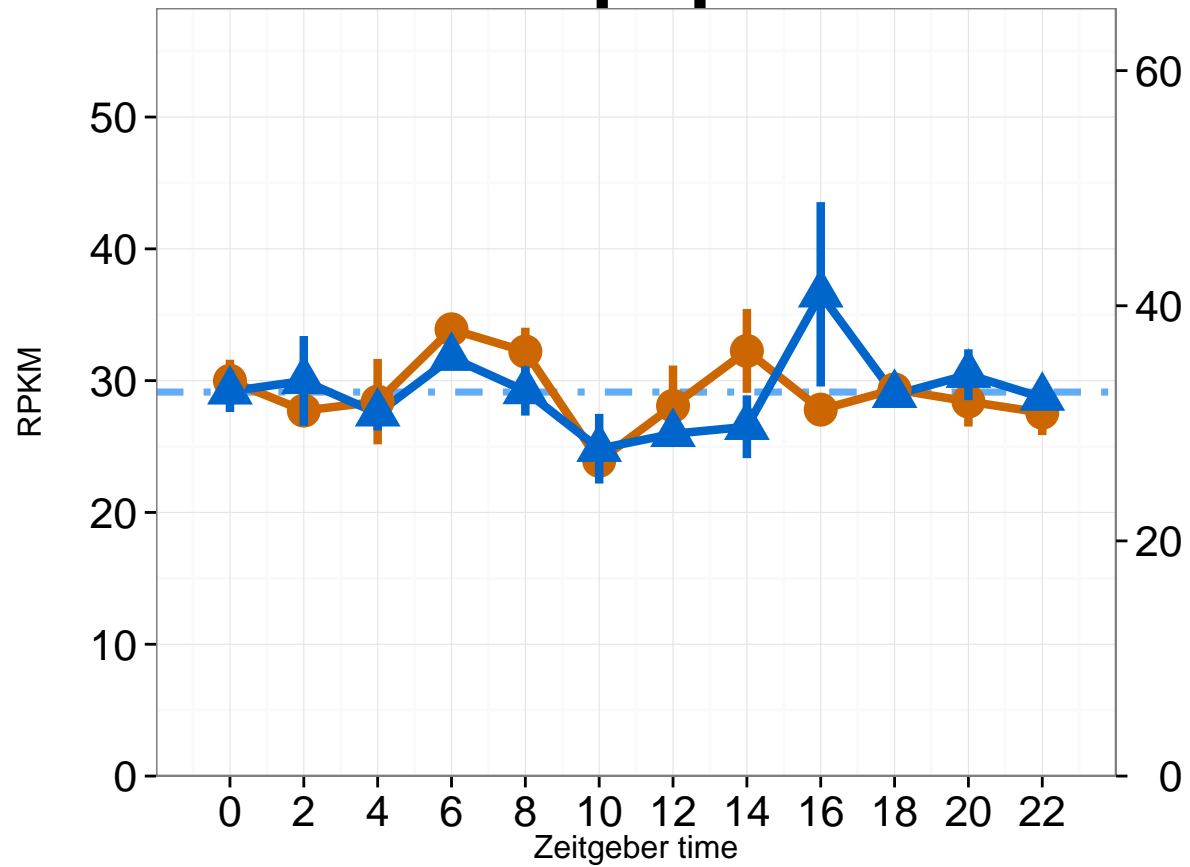

# Hspbp1

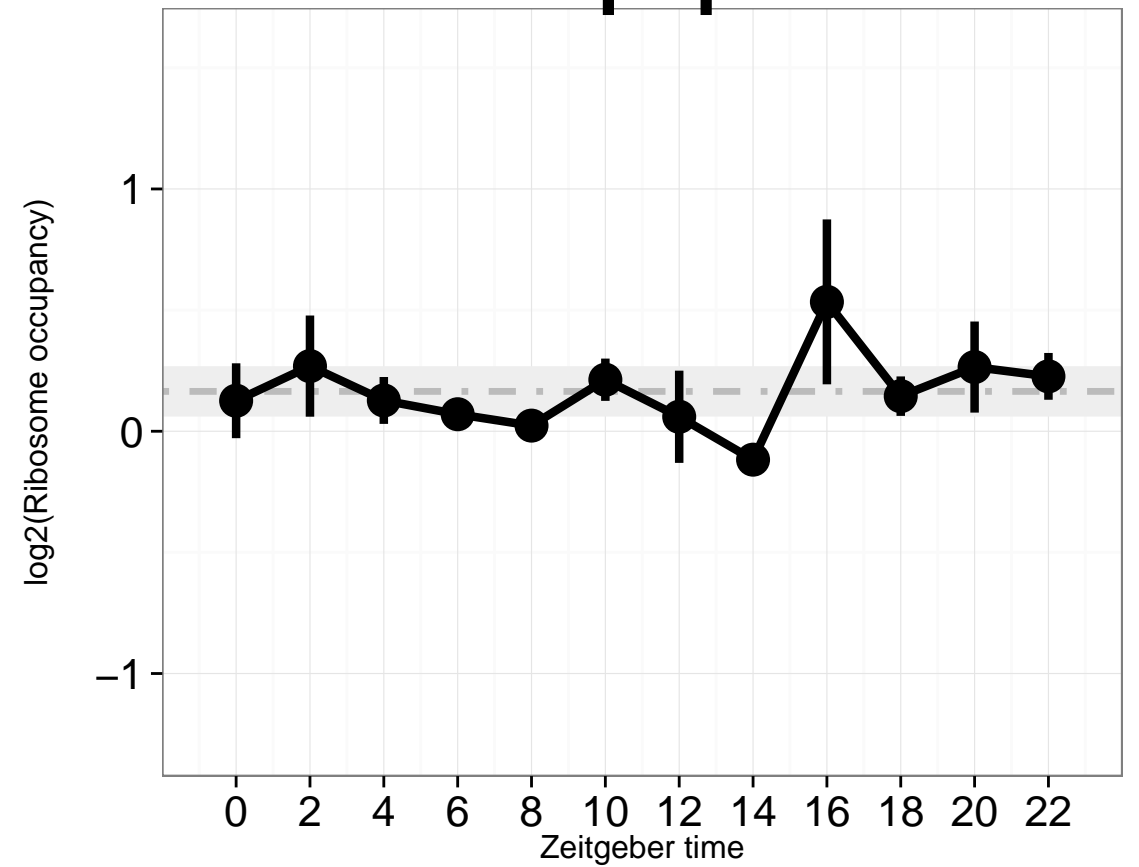

Supplement: Supplementary file 2013 [file 1]

# Zfp747

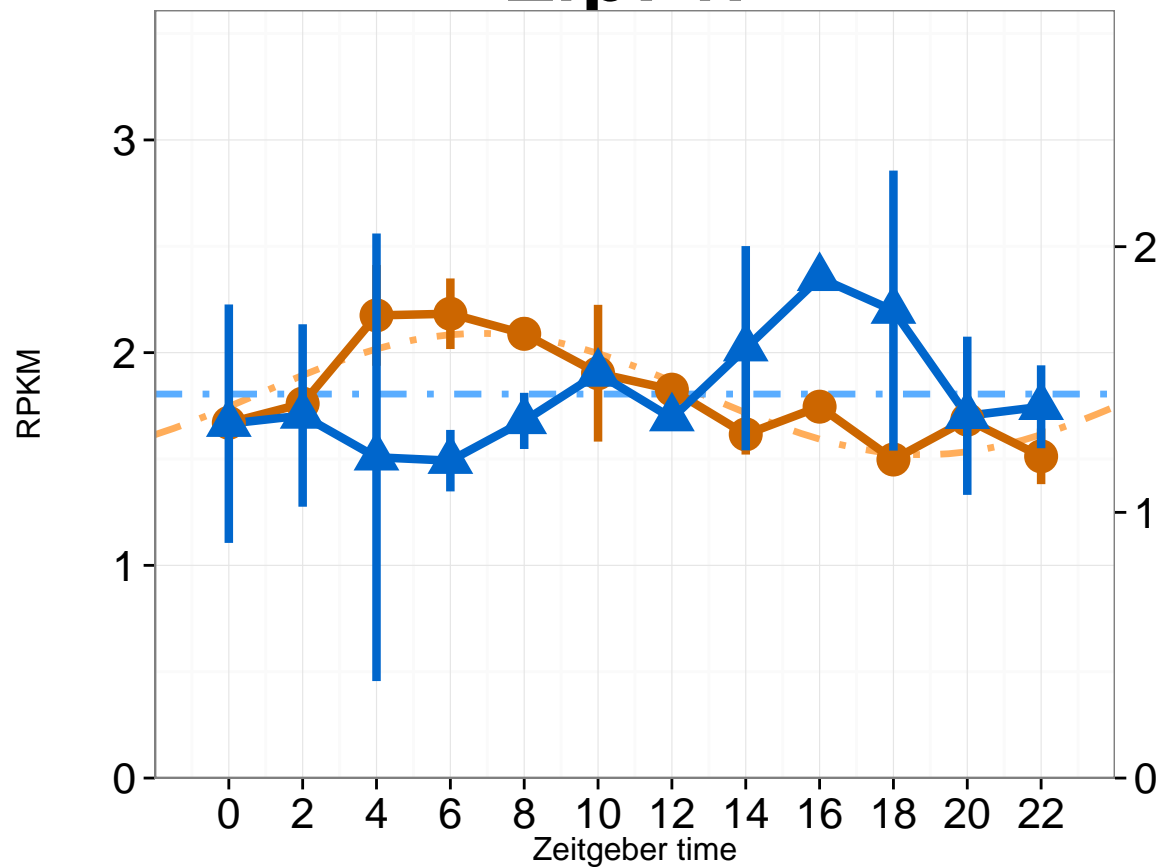

# Zfp747

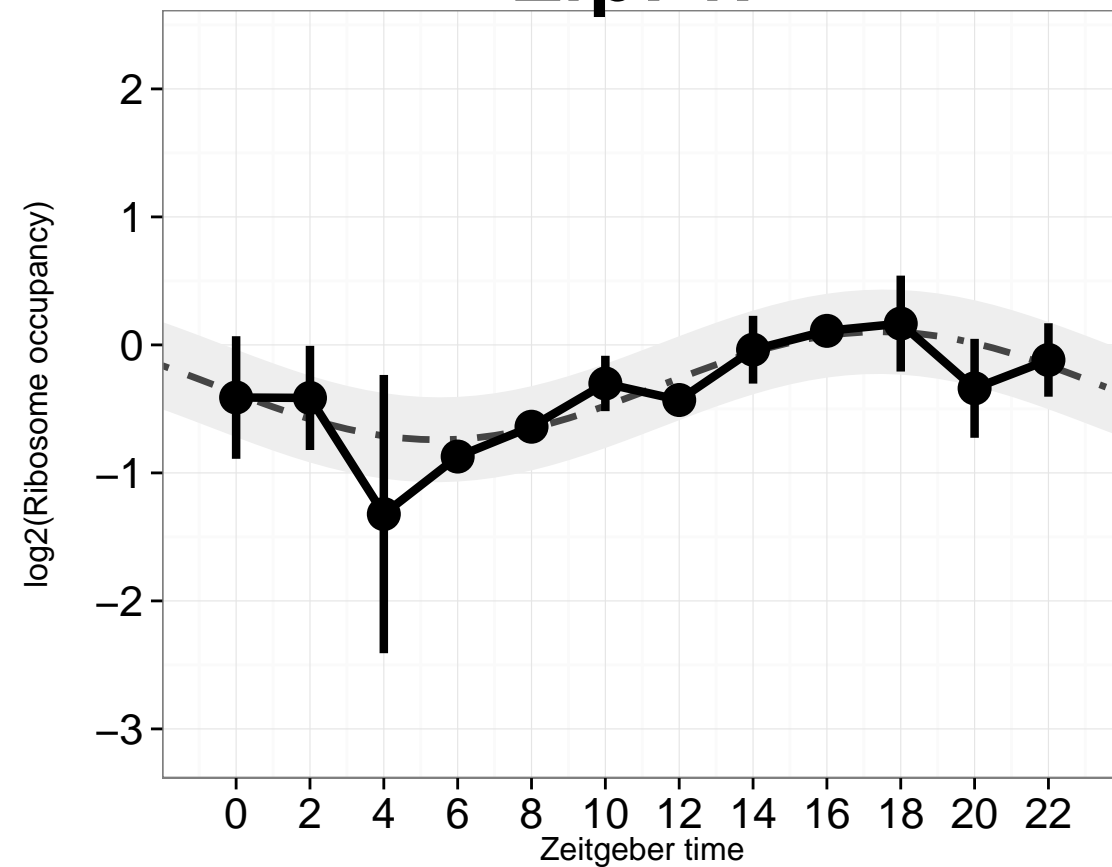

Supplement: Supplementary file 2014 [file 1]

# Pot1a

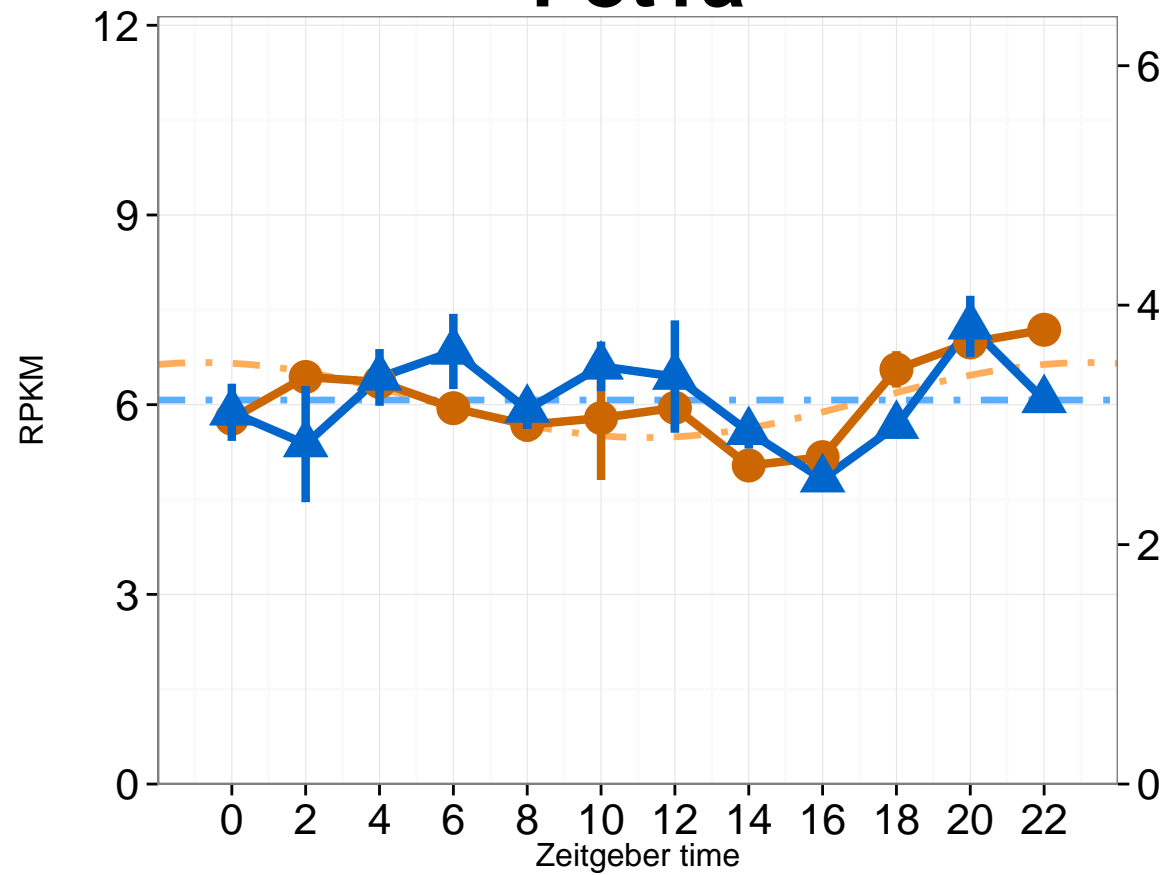

# Pot1a

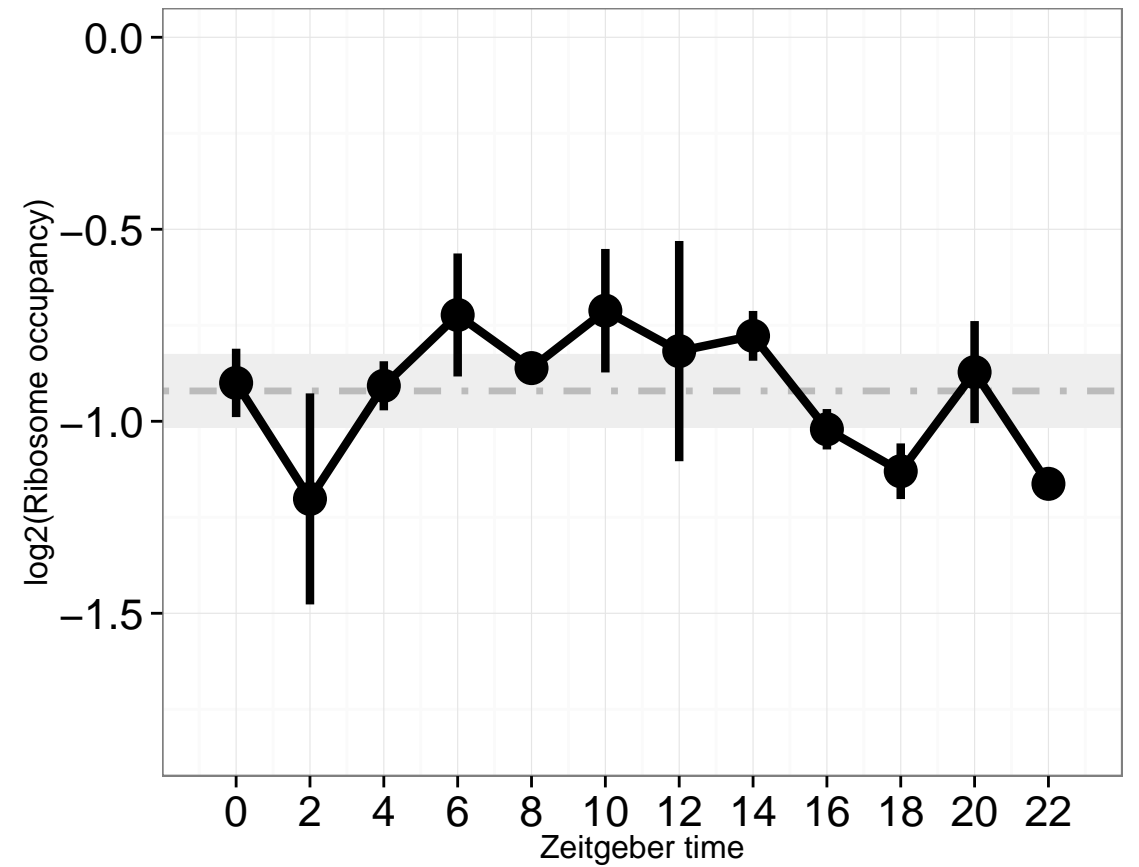

Supplement: Supplementary file 2015 [file 1]

## Icam2

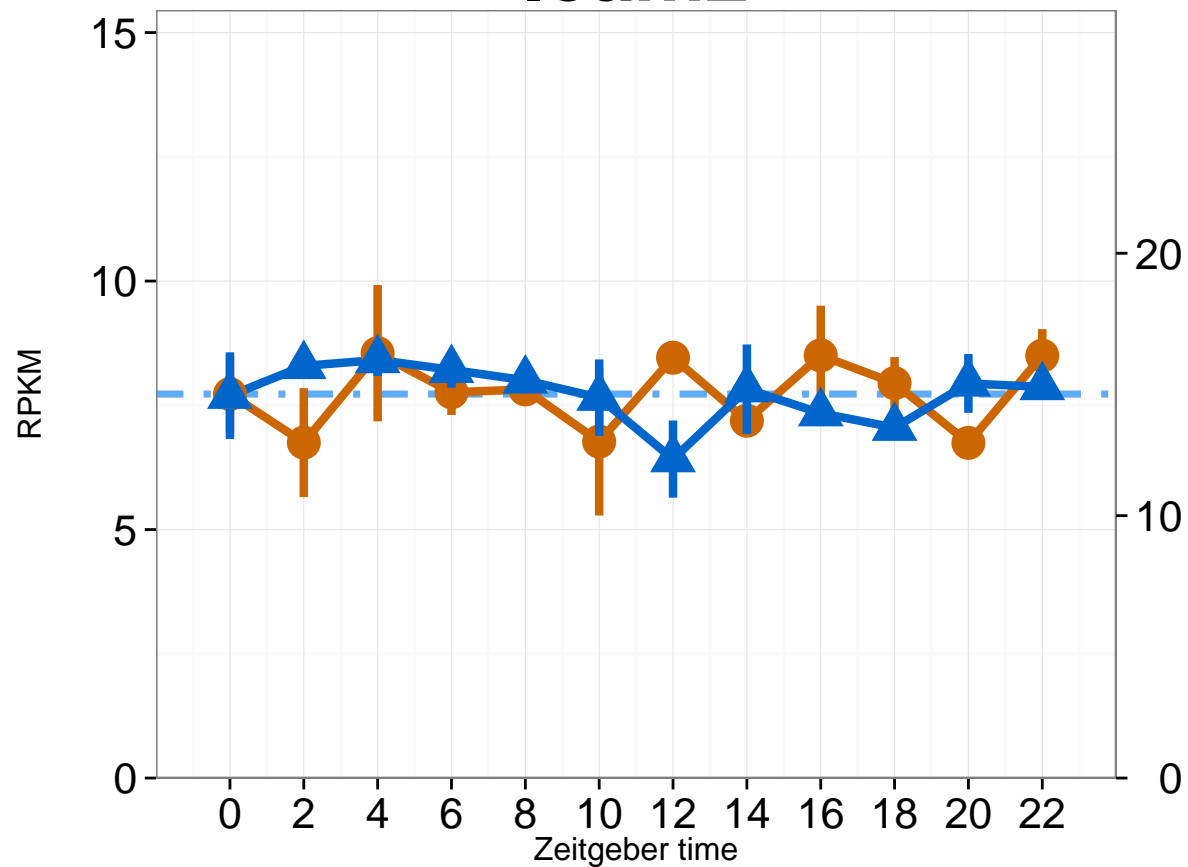

## Icam2

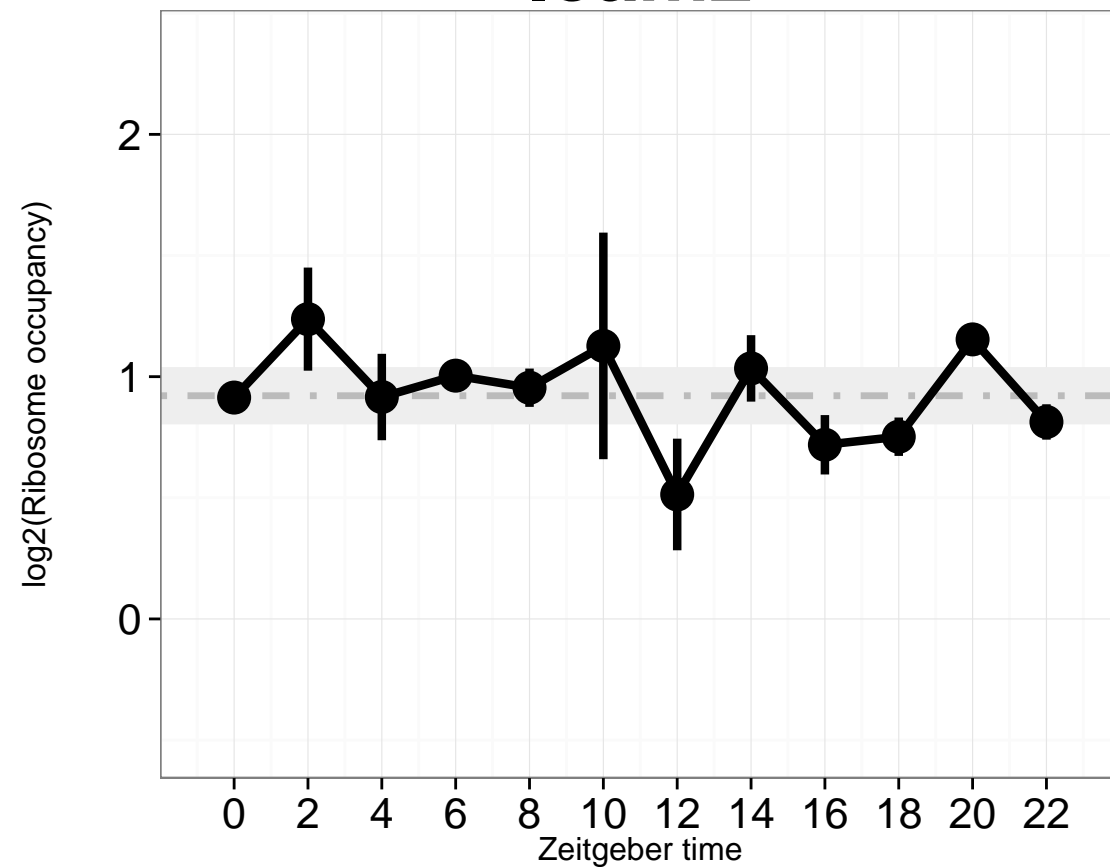

Supplement: Supplementary file 2016 [file 1]

# Pde4a

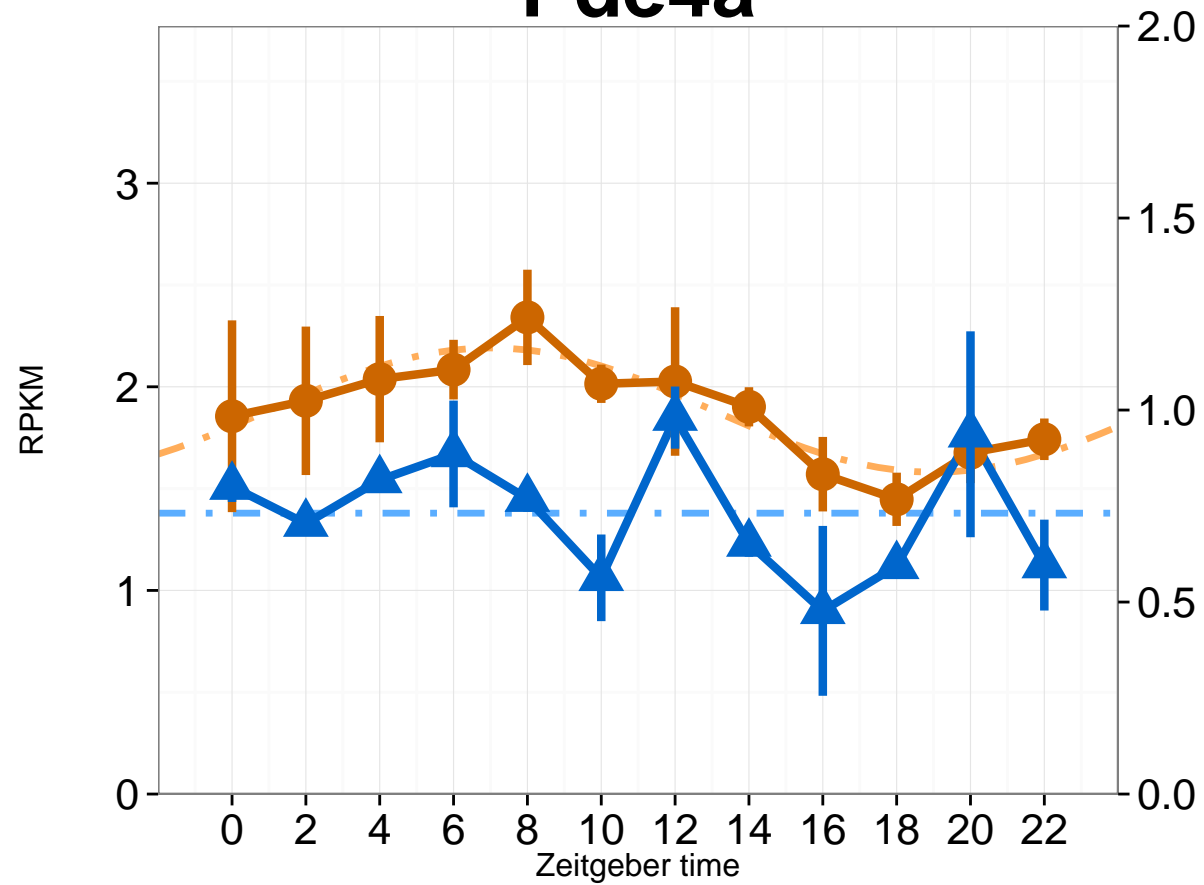

# Pde4a

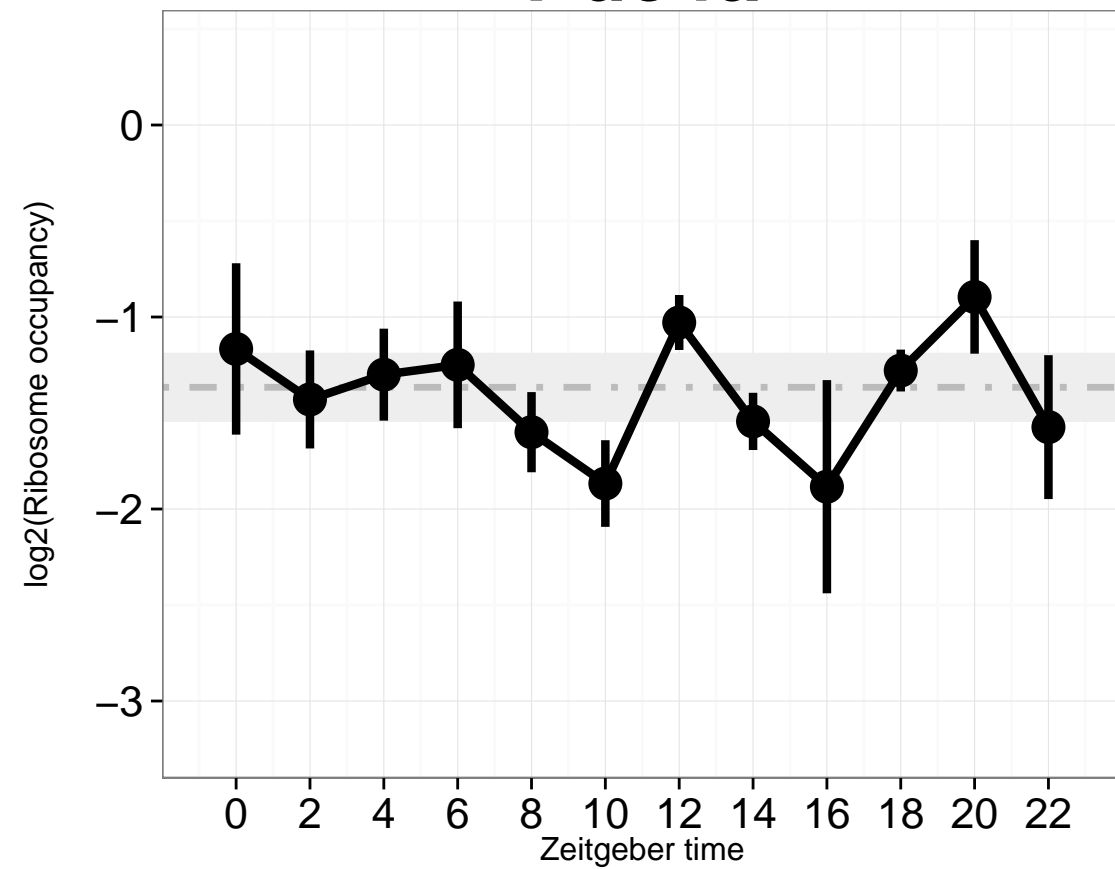

Supplement: Supplementary file 2017 [file 1]

## Asb2

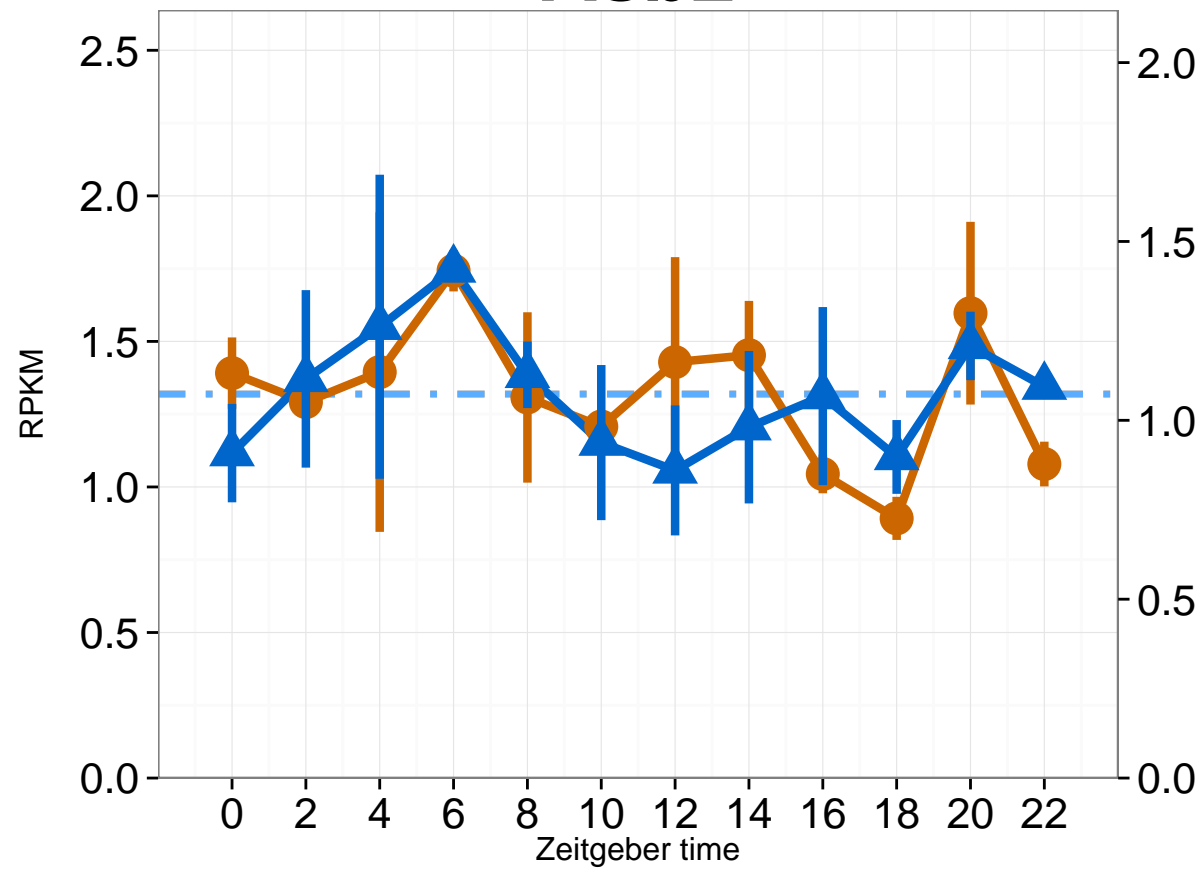

## Asb2

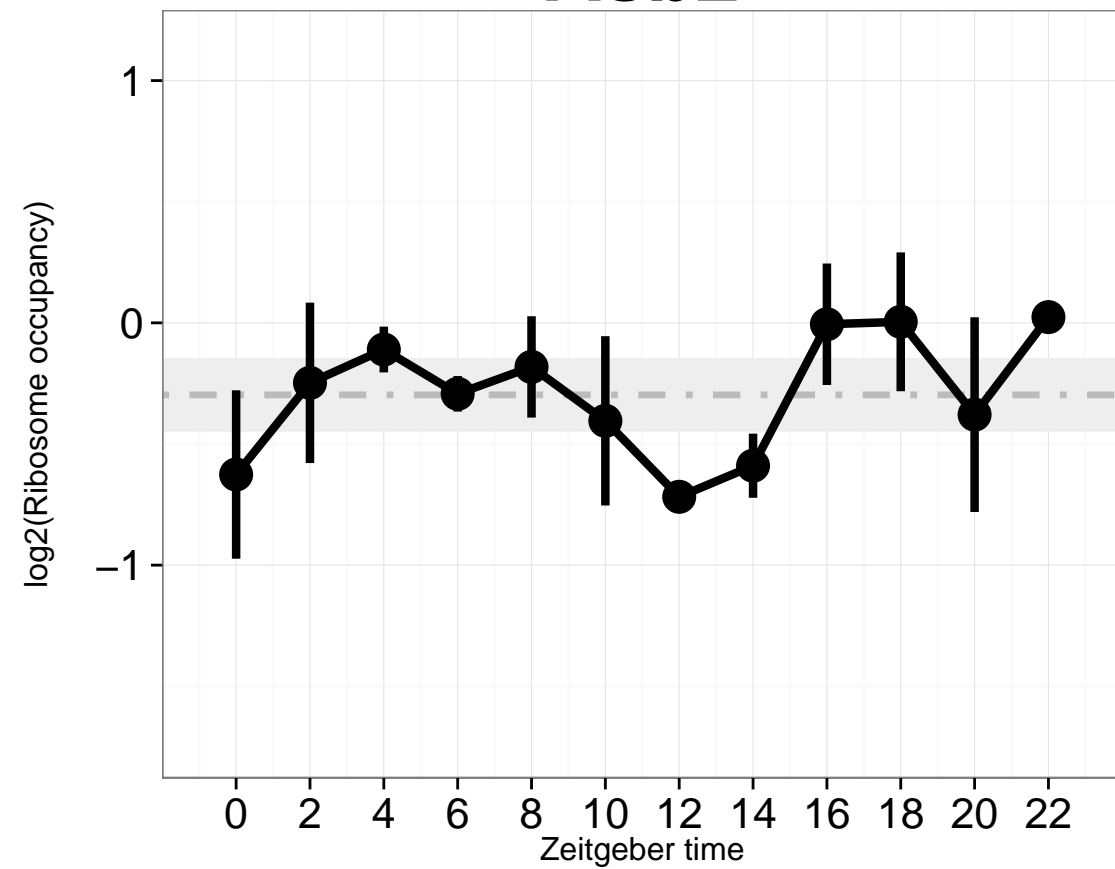

Supplement: Supplementary file 2018 [file 1]

## Farp2

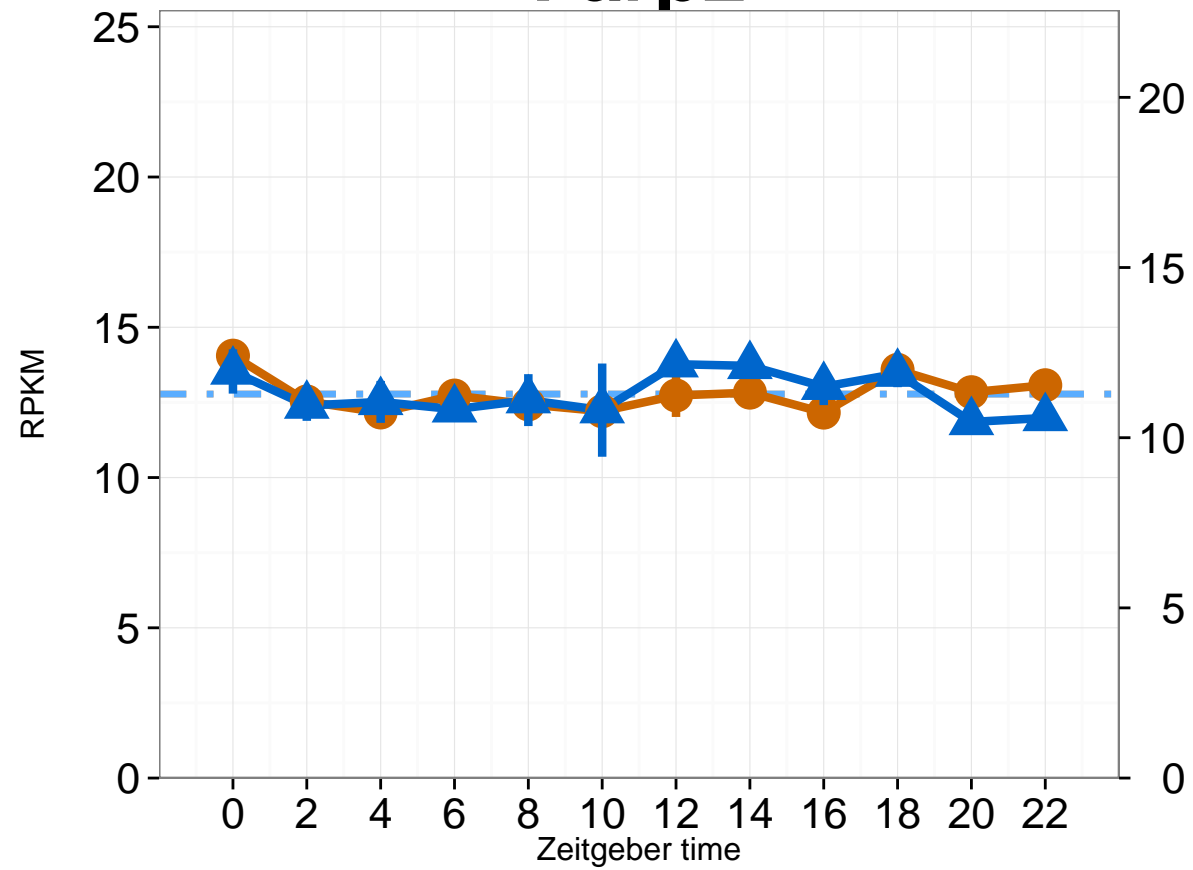

## Farp2

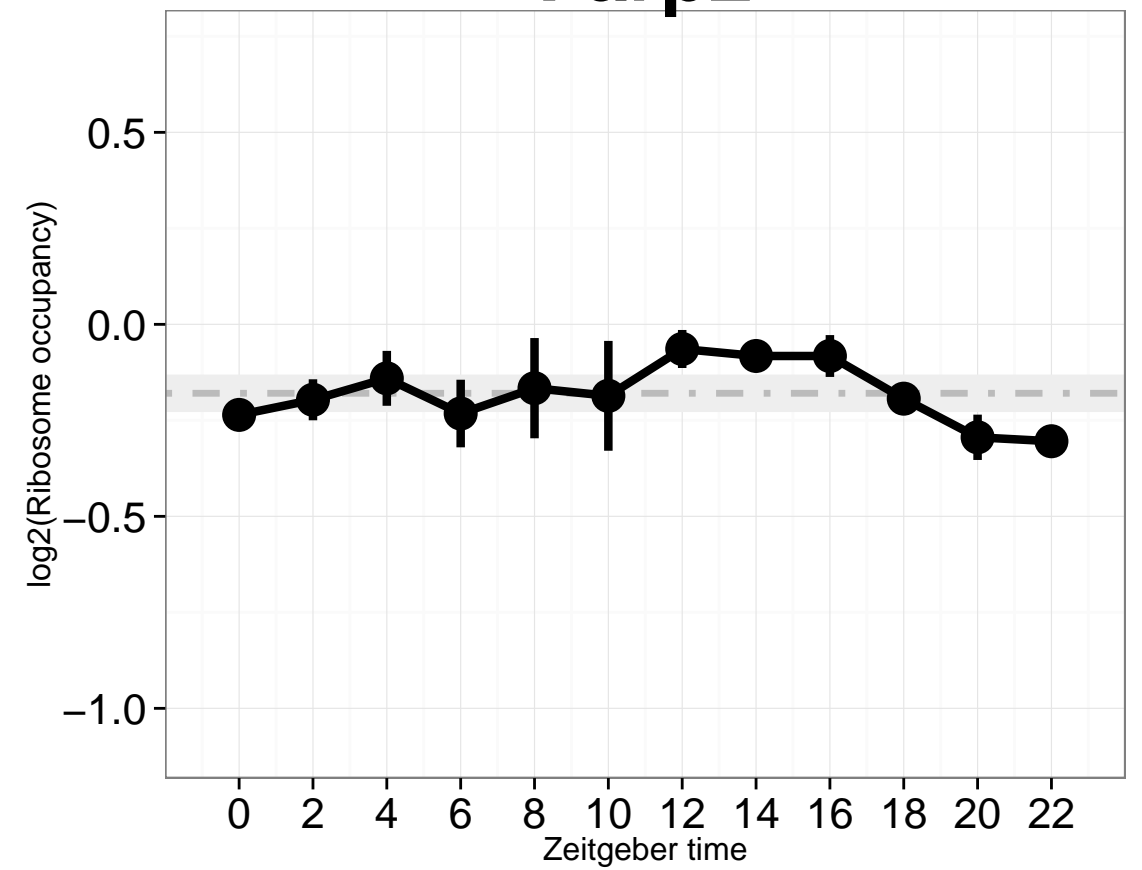

Supplement: Supplementary file 2019 [file 1]

# Zfp653

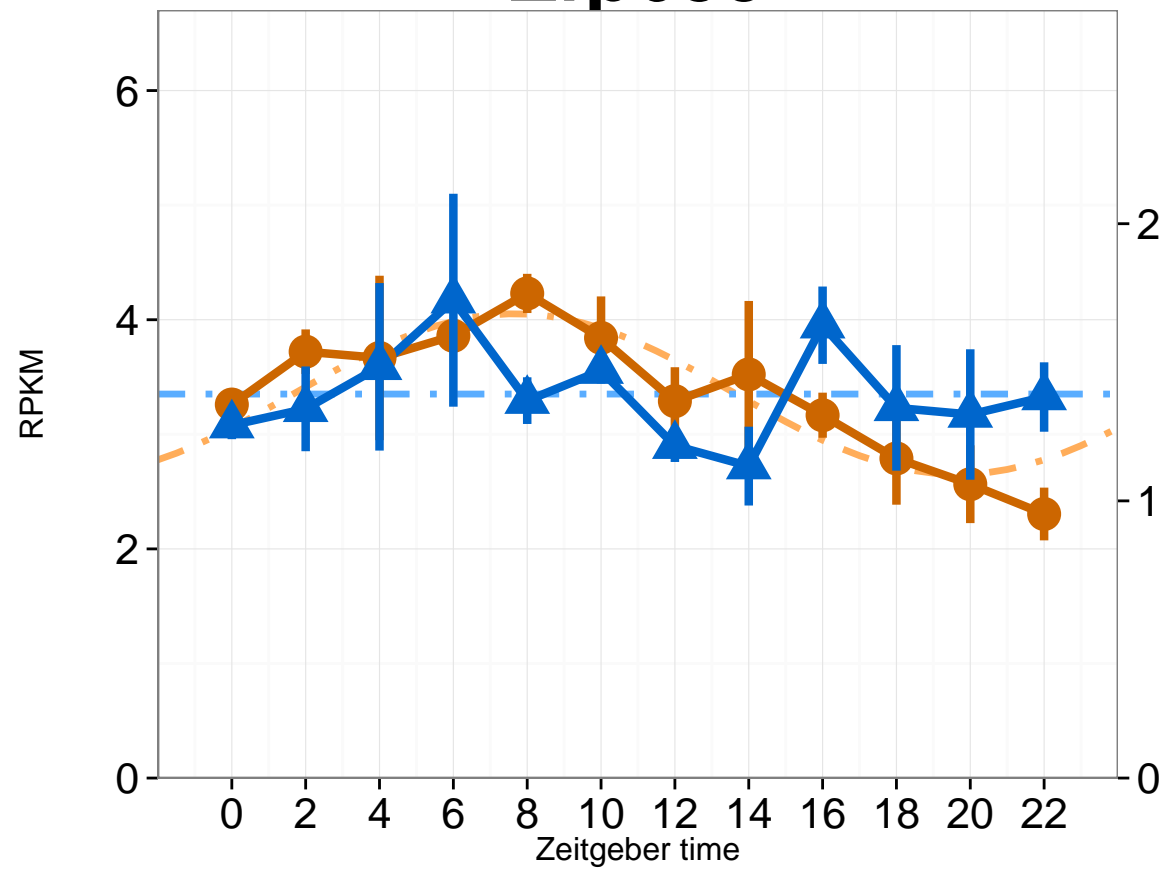

# Zfp653

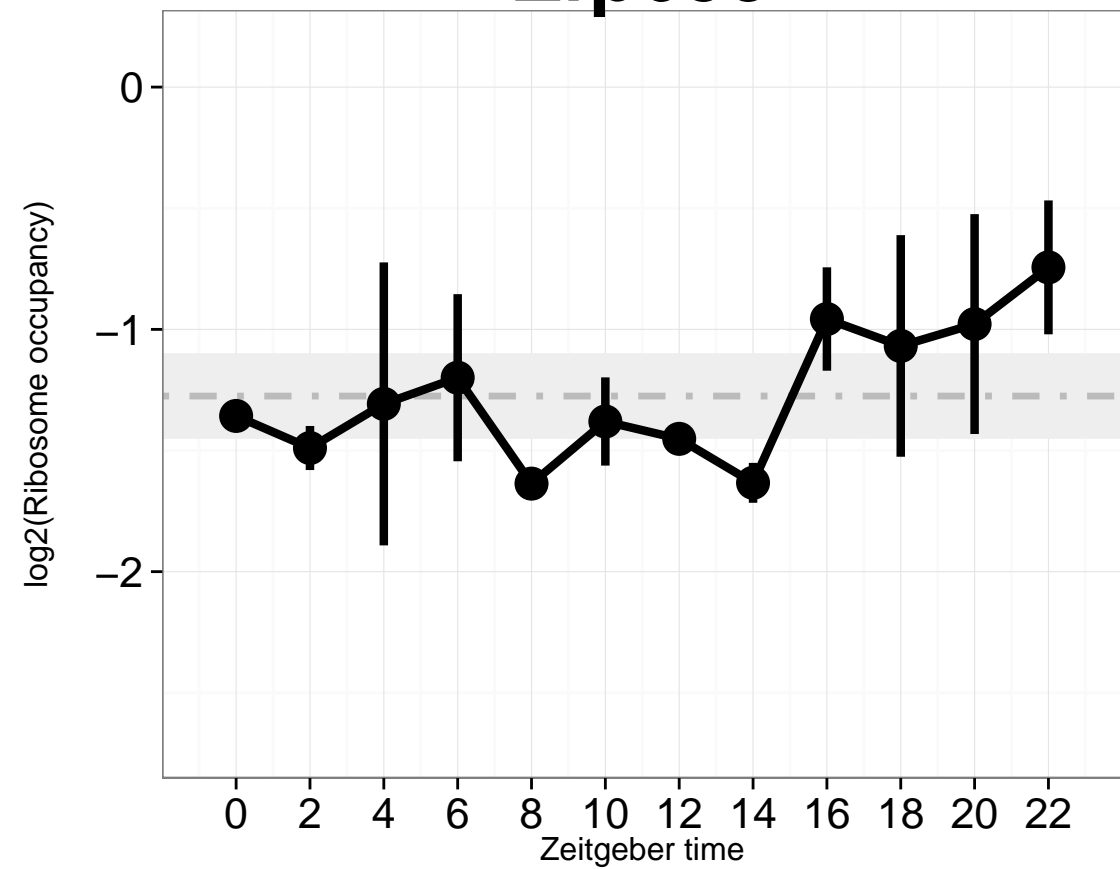

Supplement: Supplementary file 2020 [file 1]

# Pitrm1

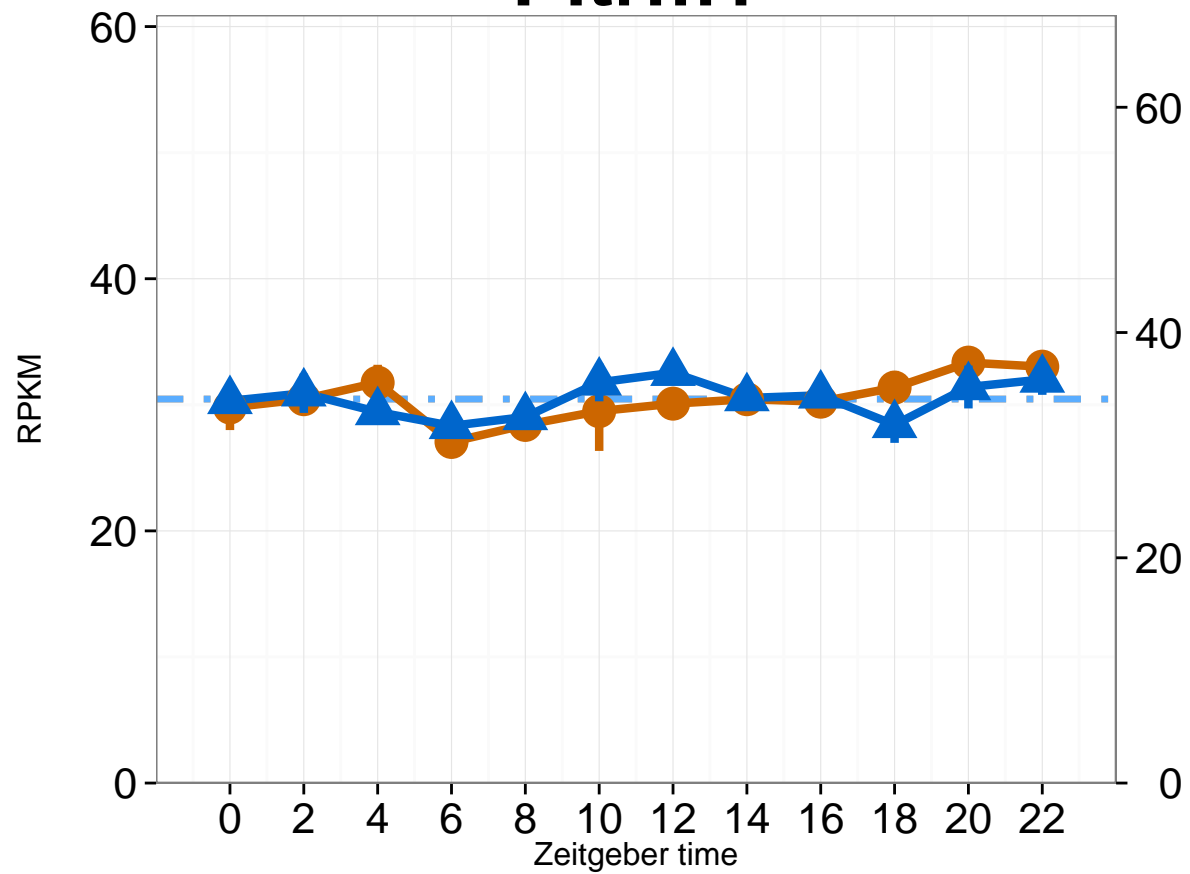

# Pitrm1

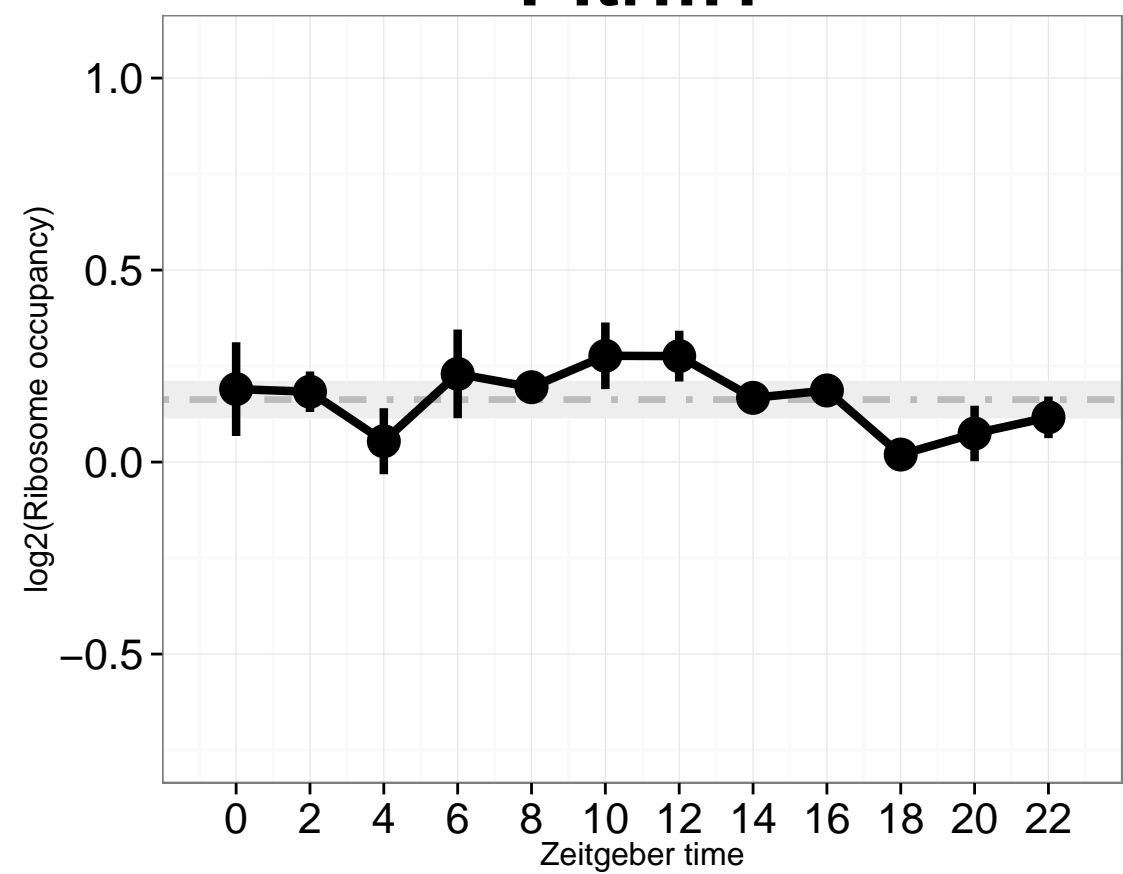

Supplement: Supplementary file 2021 [file 1]

# Rbfox1

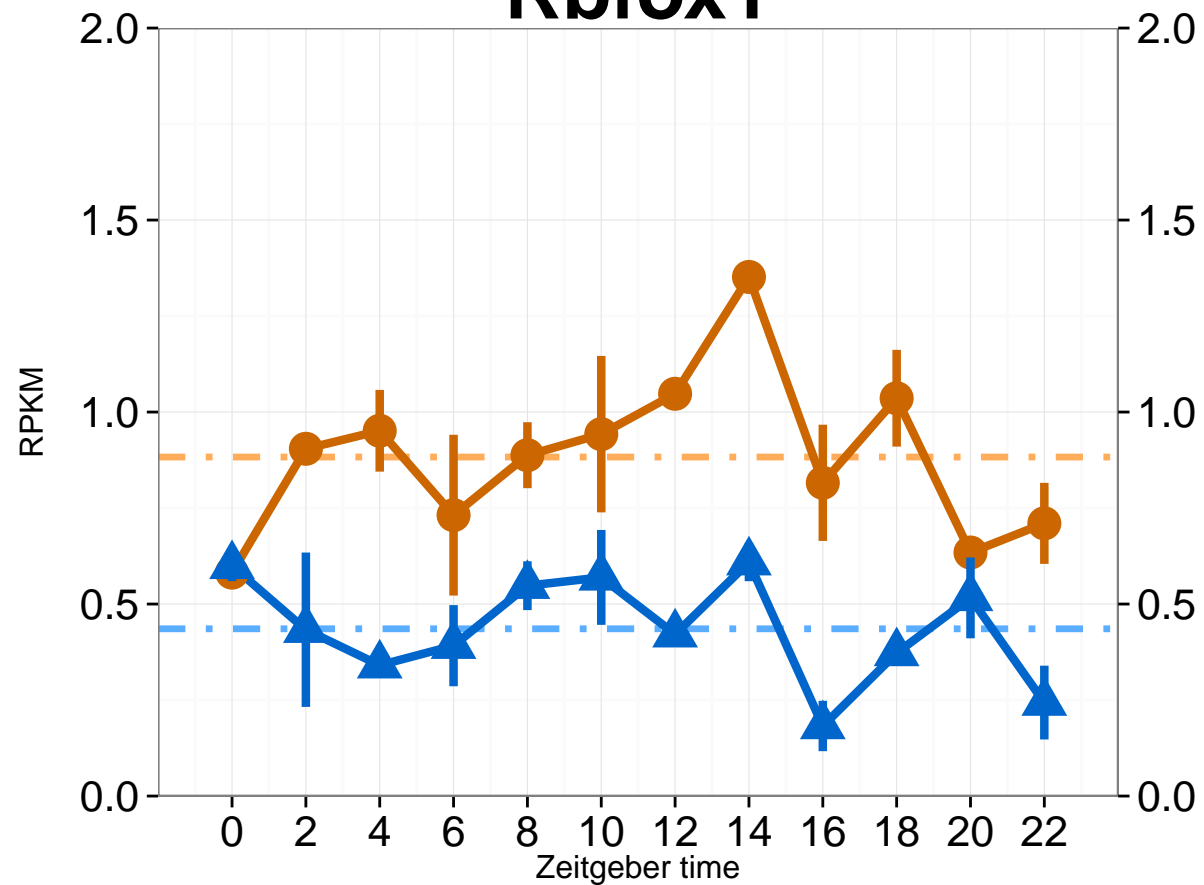

# Rbfox1

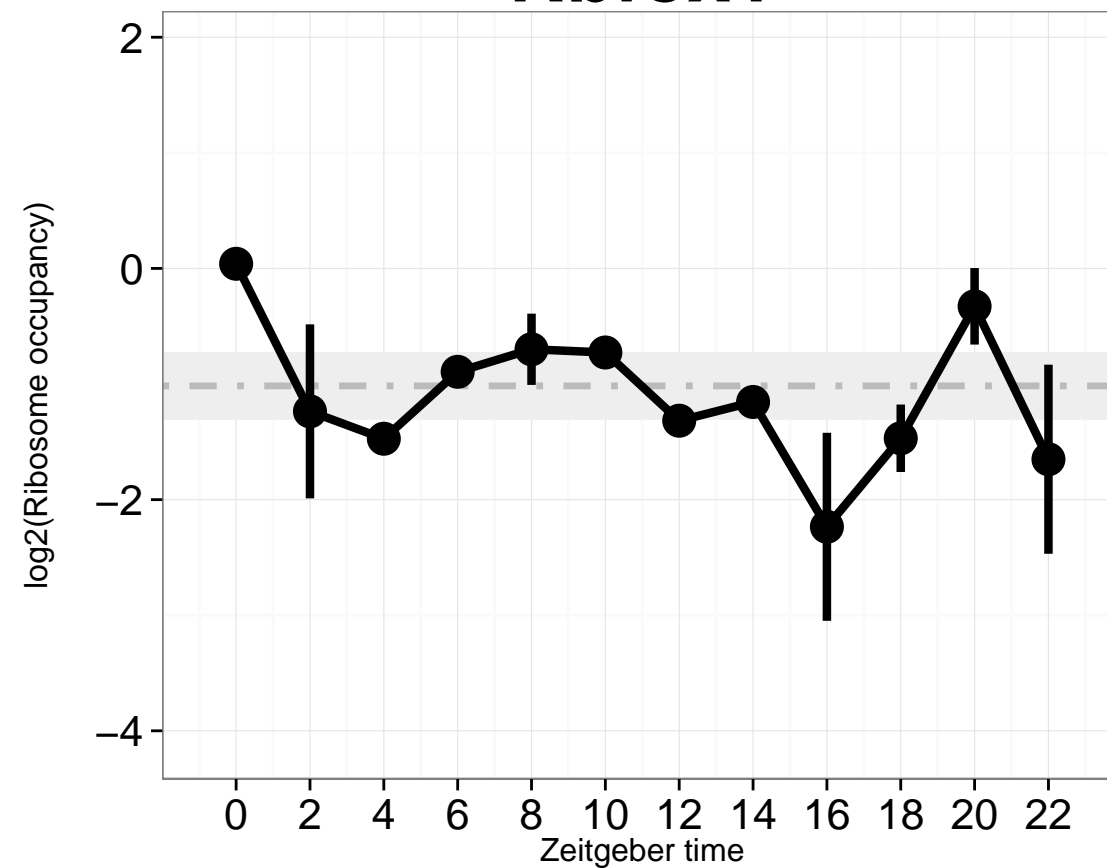

Supplement: Supplementary file 2022 [file 1]

## Polr3c

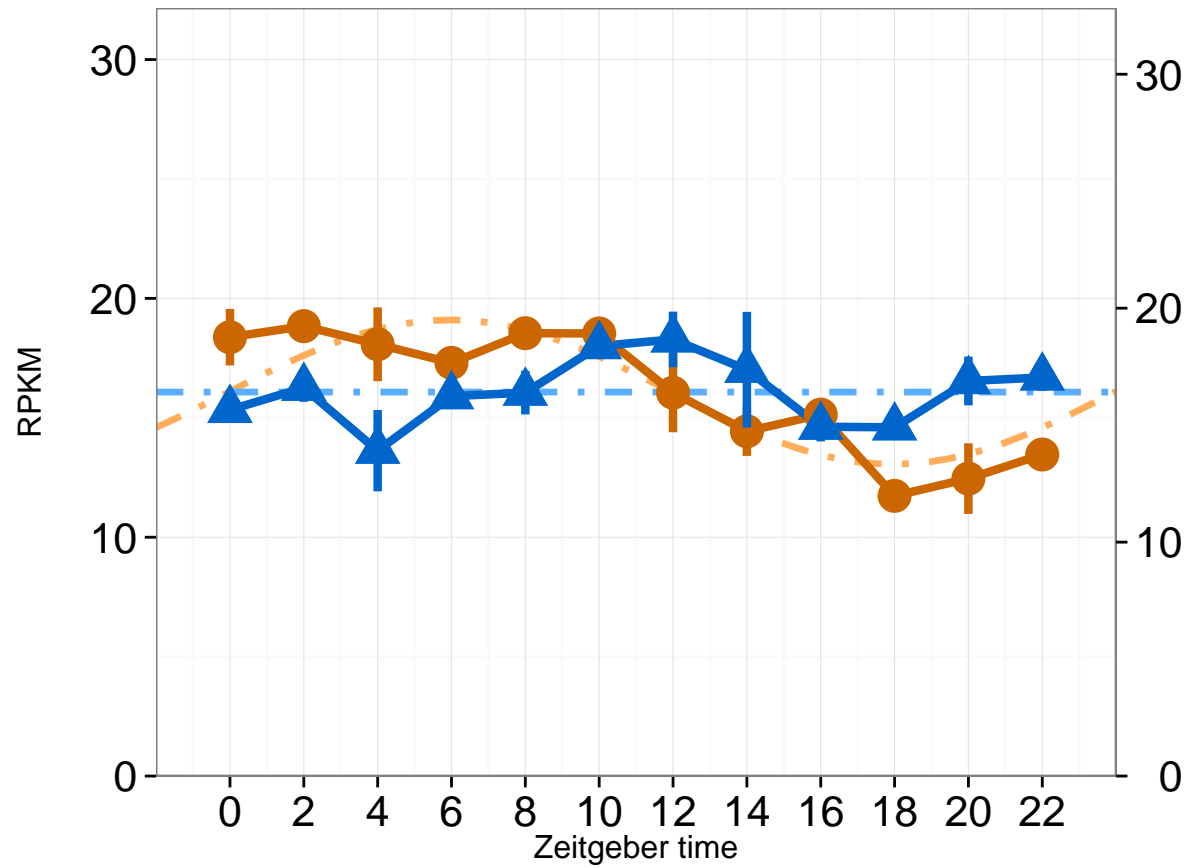

## Polr3c

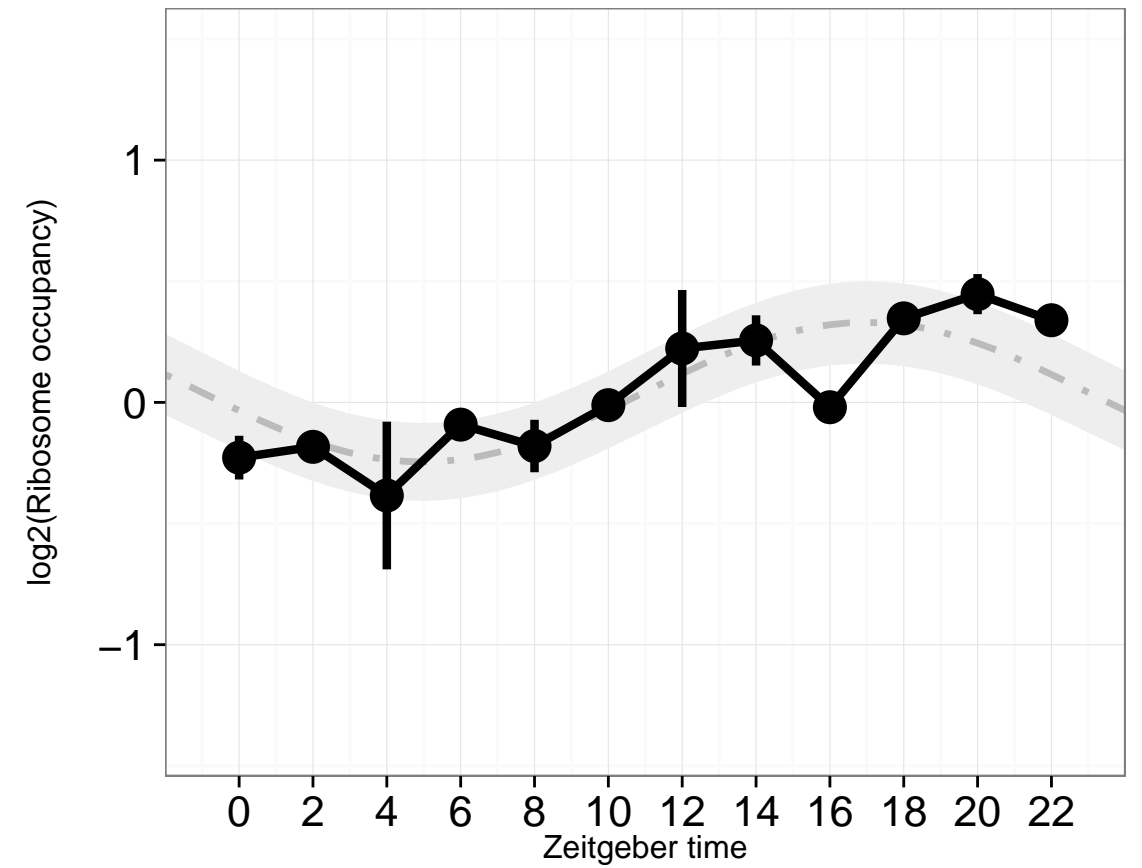

Supplement: Supplementary file 2023 [file 1]

## Rora

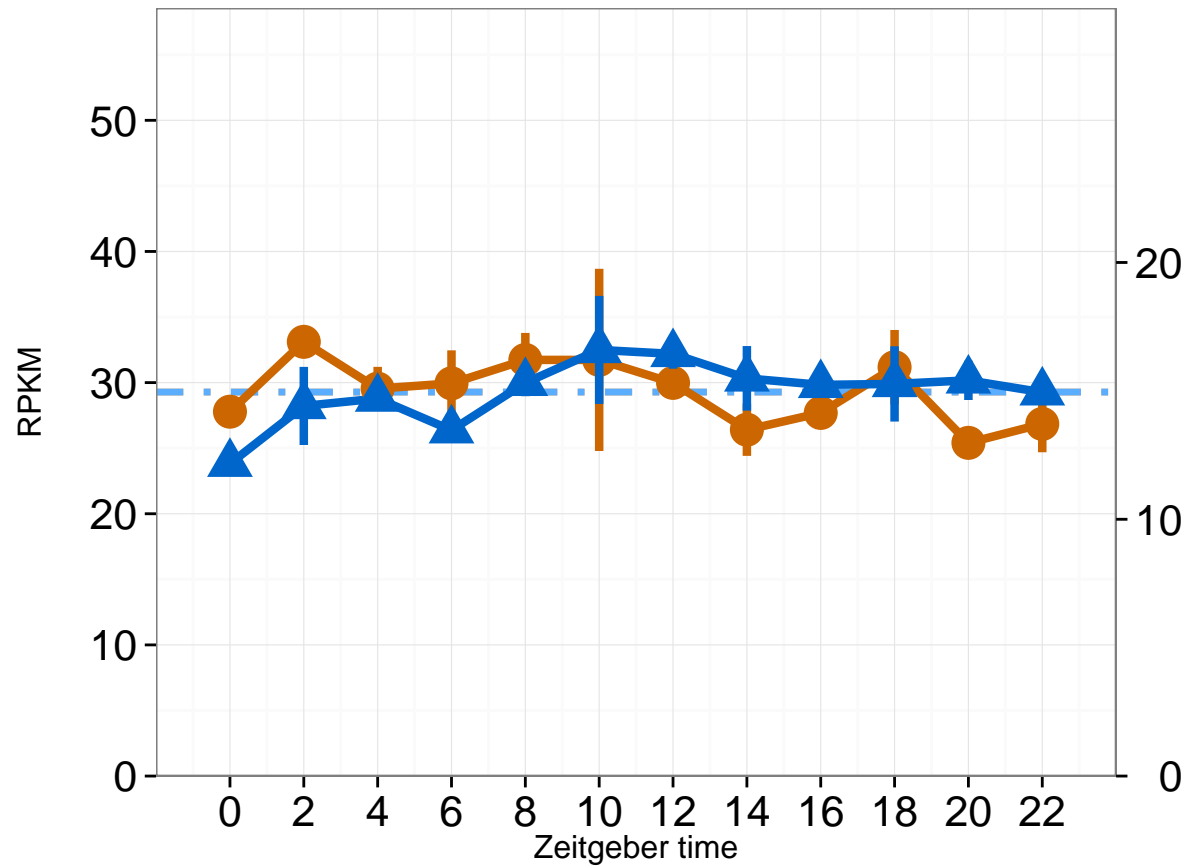

## Rora

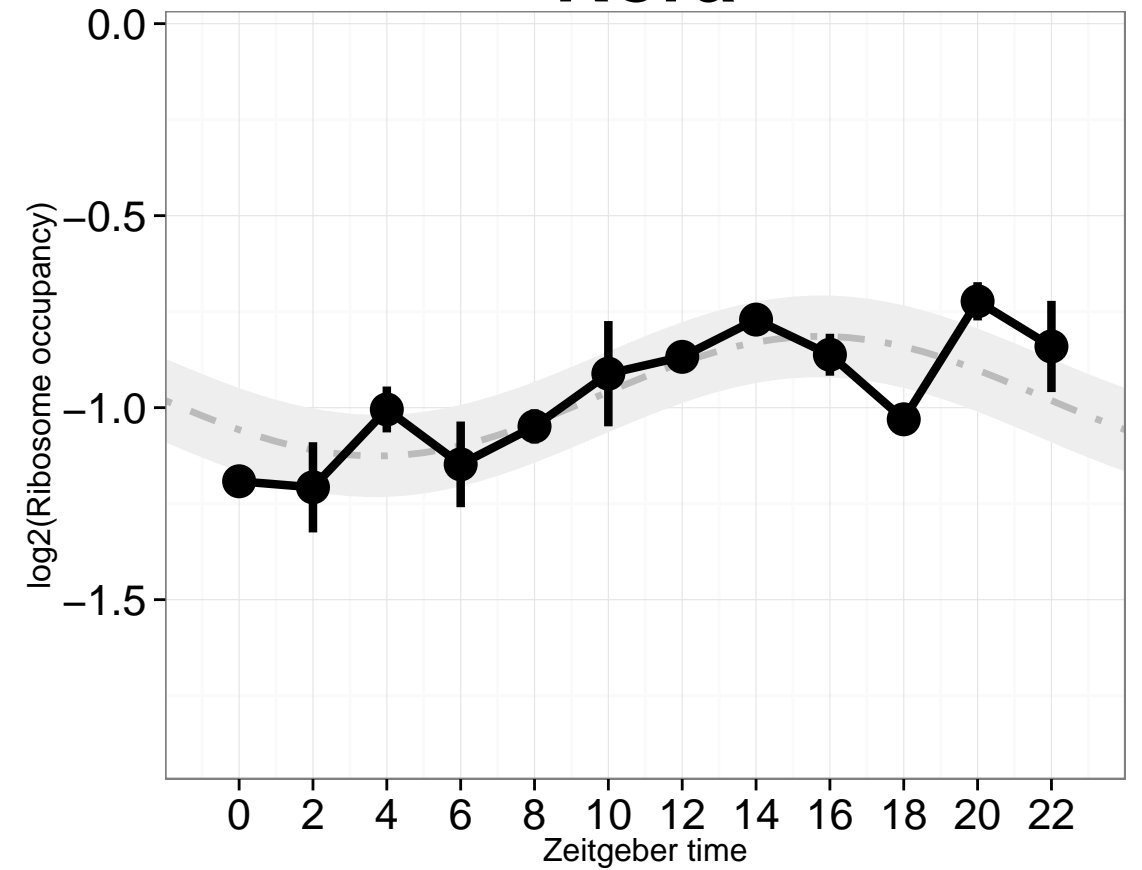

Supplement: Supplementary file 2024 [file 1]

# Rpl7a

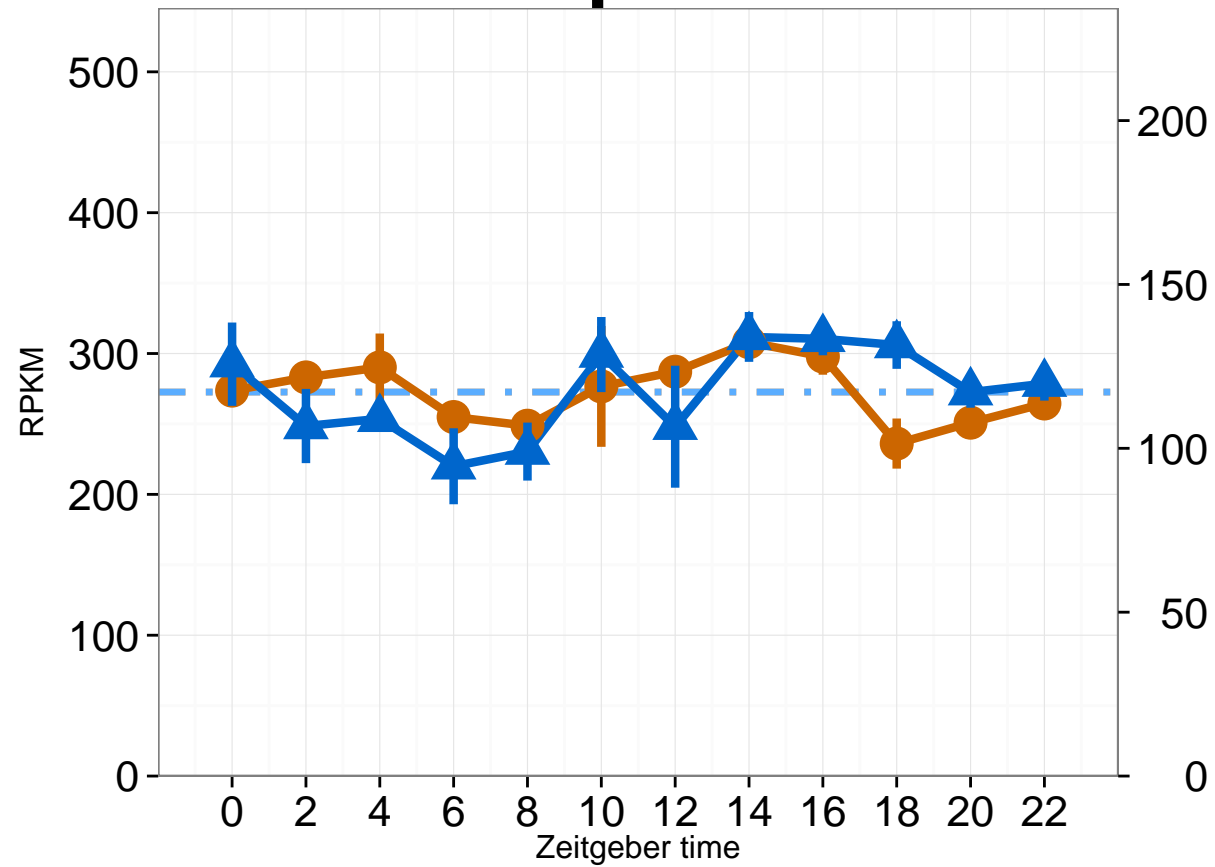

# Rpl7a

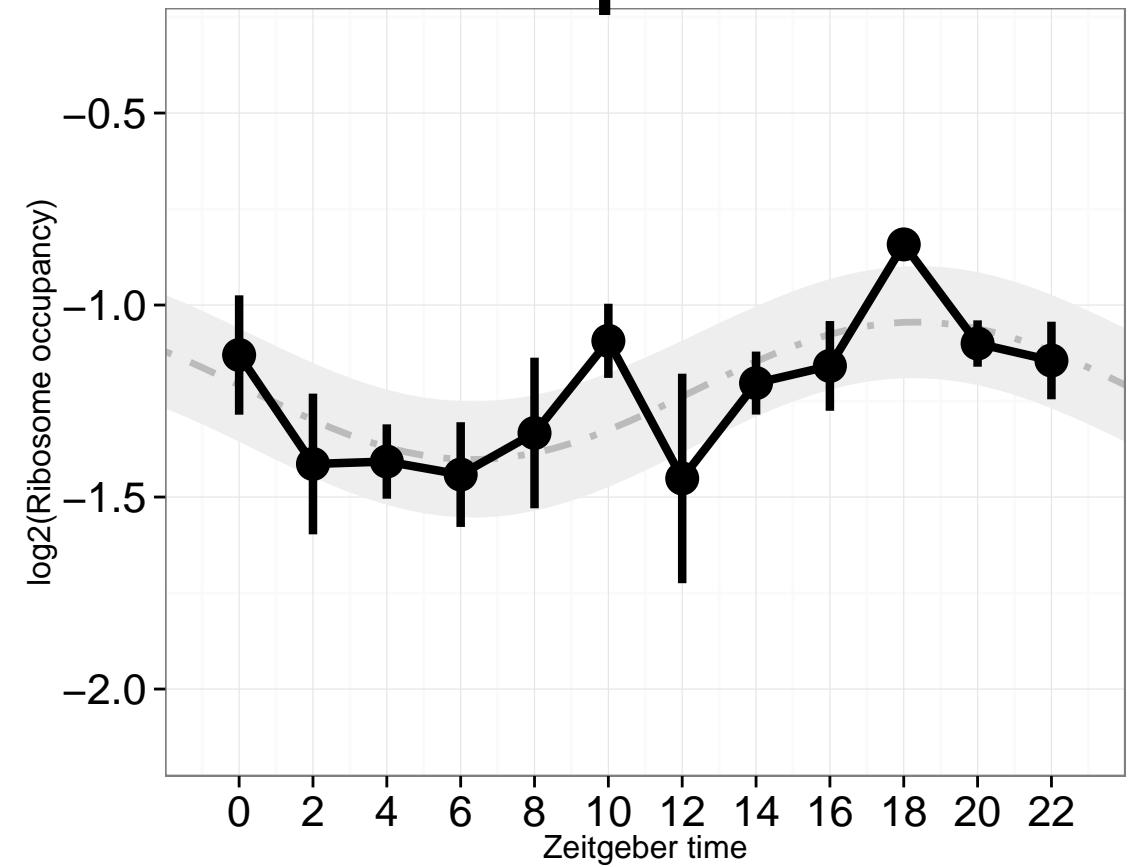

Supplement: Supplementary file 2025 [file 1]

## Mfsd4

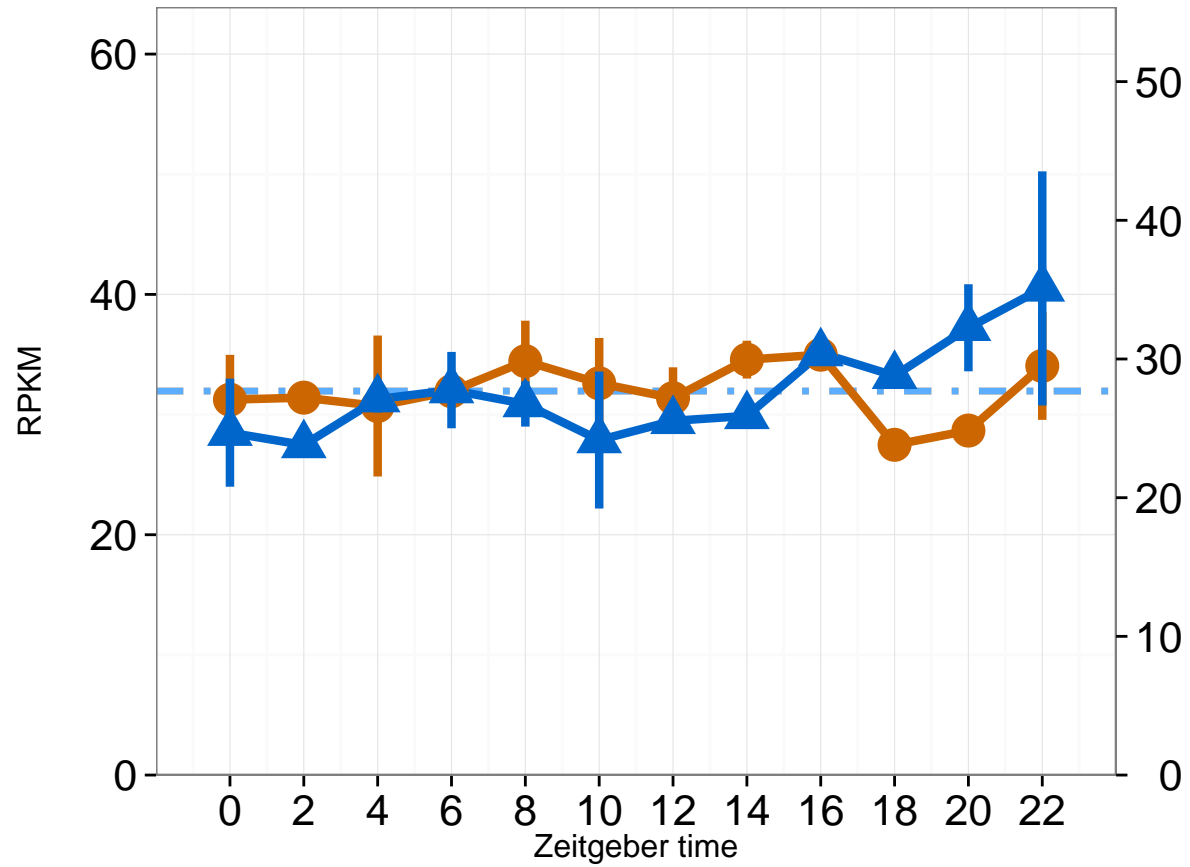

## Mfsd4

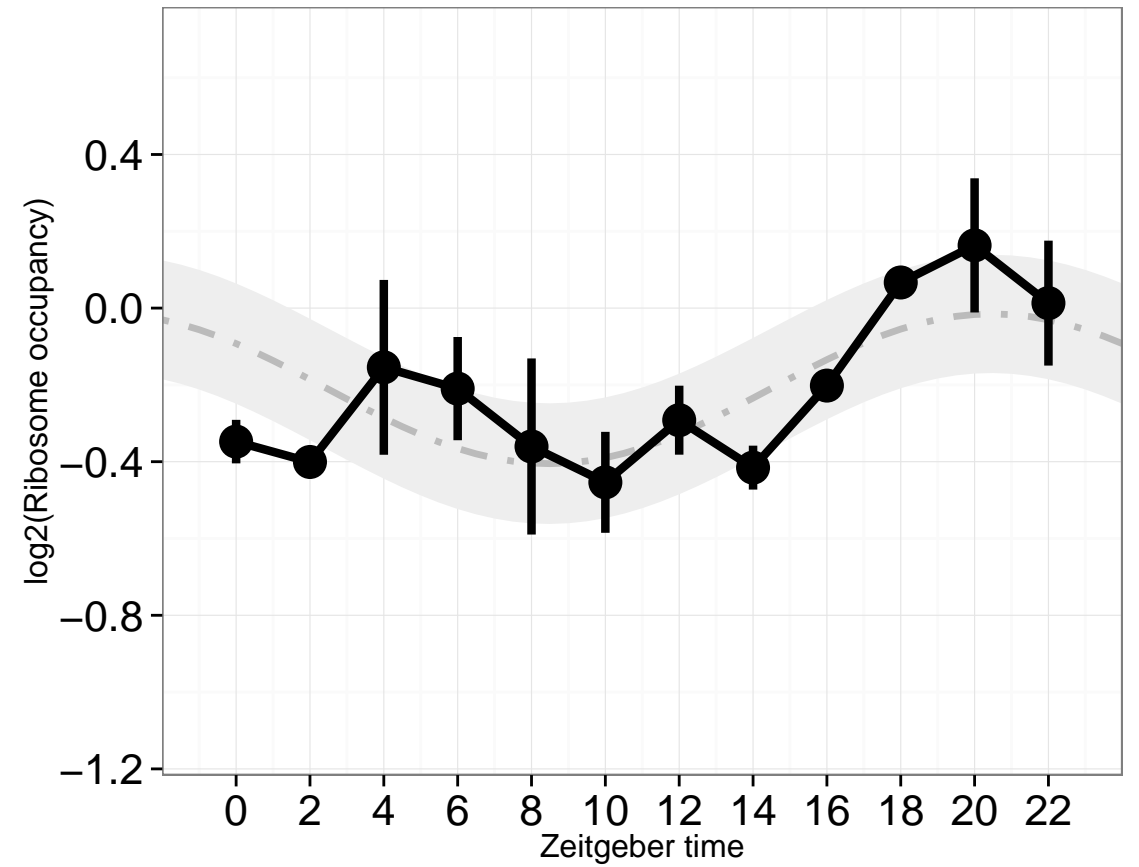

Supplement: Supplementary file 2026 [file 1]

## Terf2ip

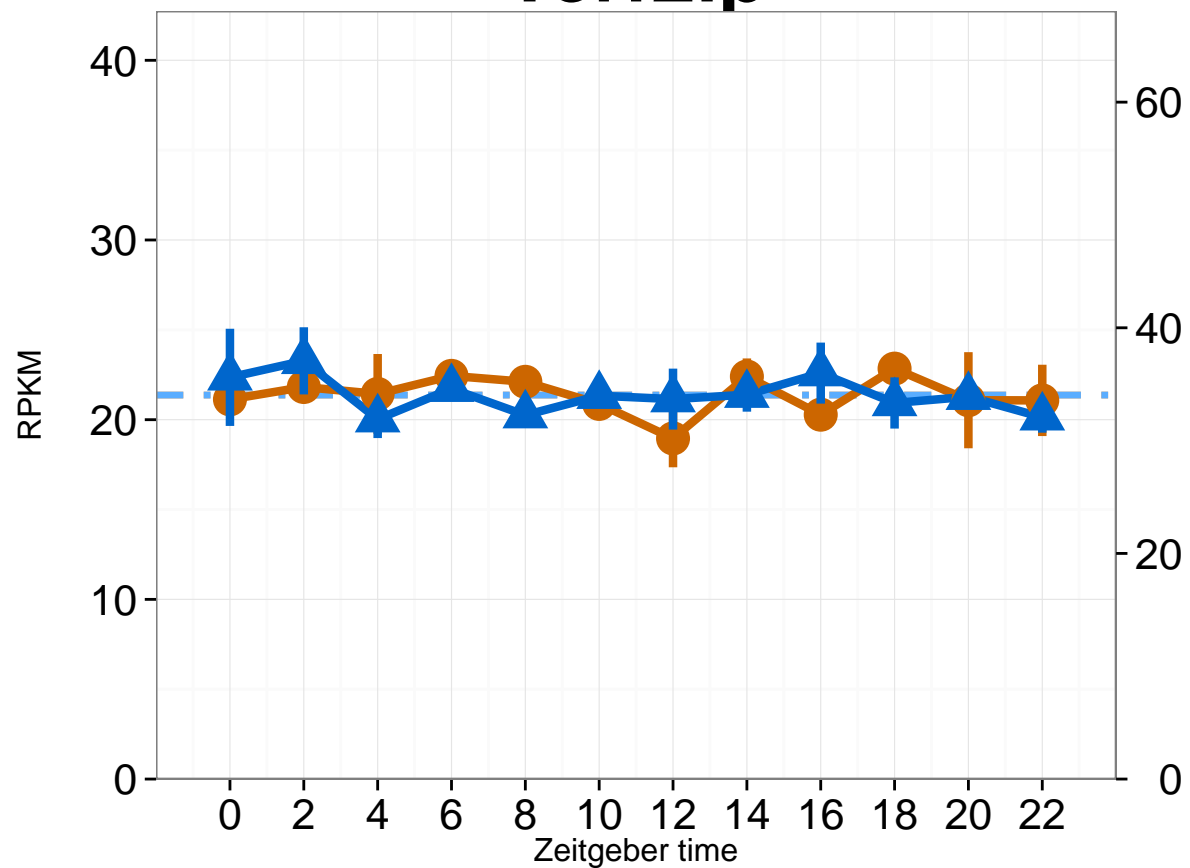

## Terf2ip

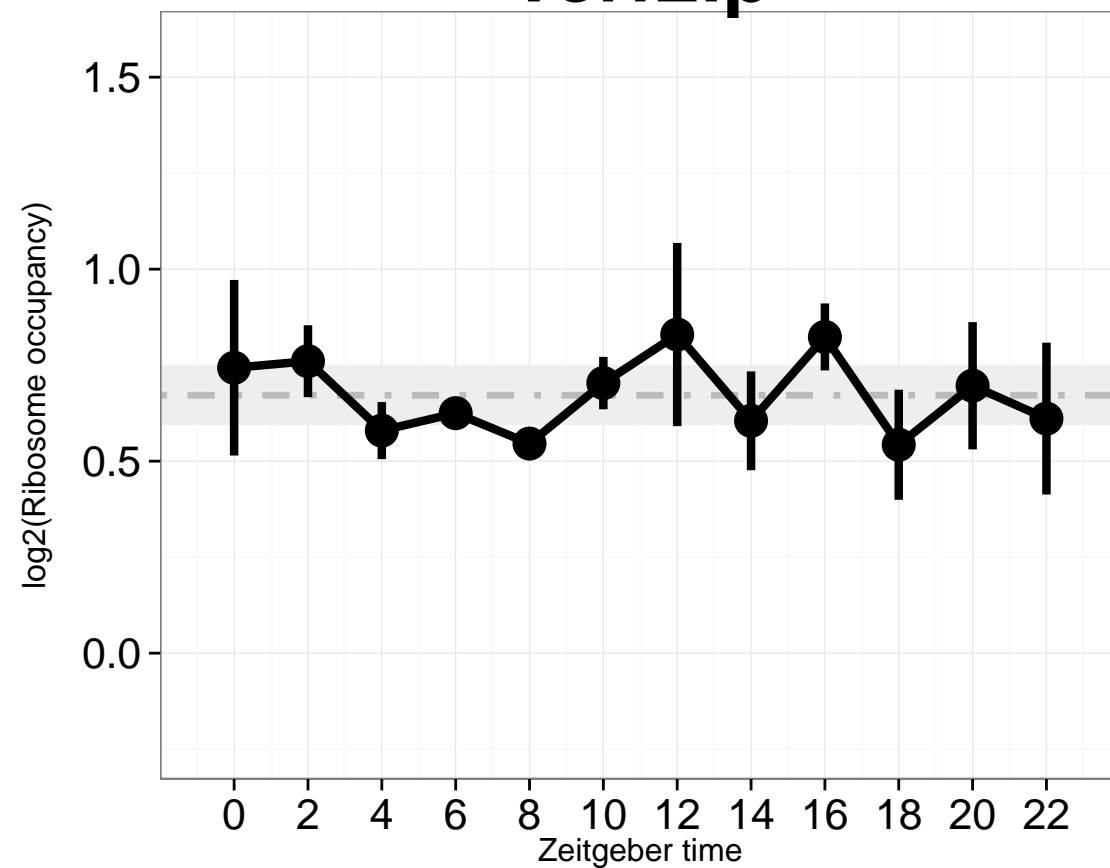

Supplement: Supplementary file 2027 [file 1]

## Ctif

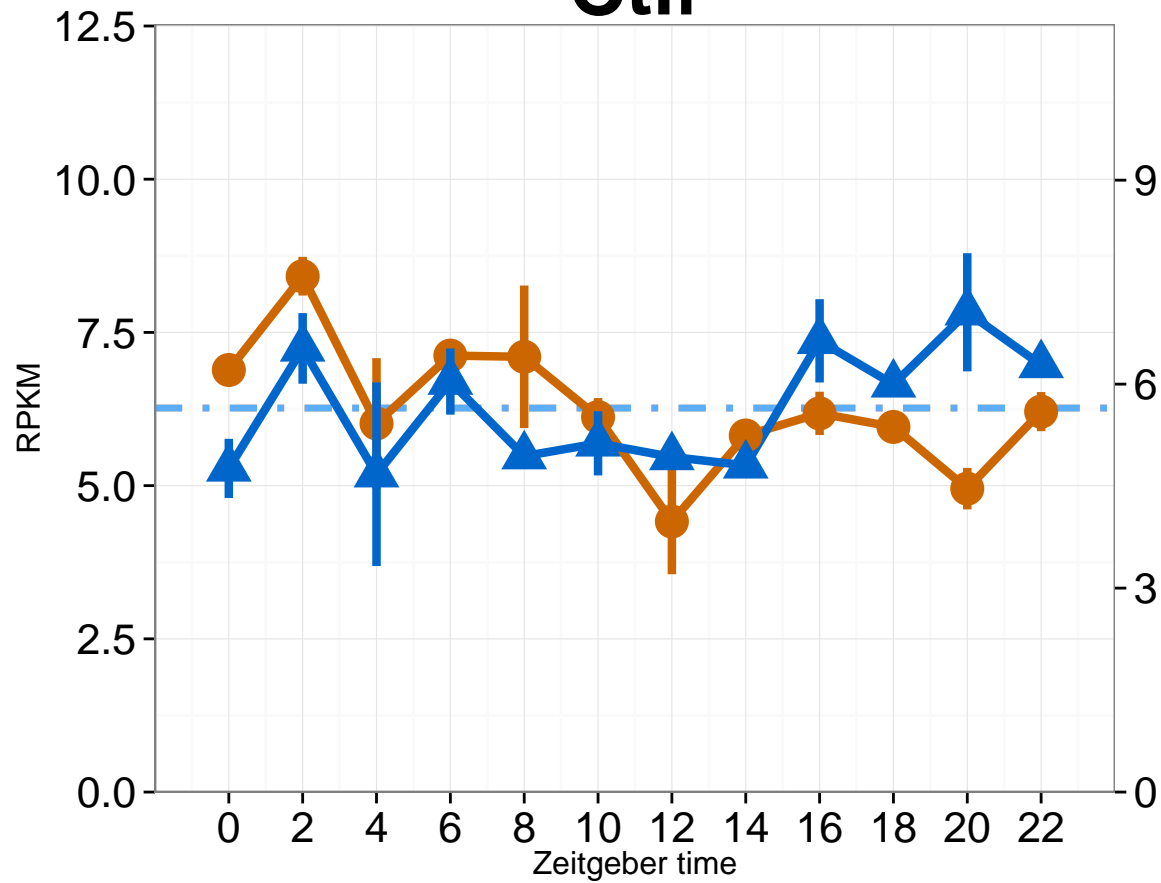

## Ctif

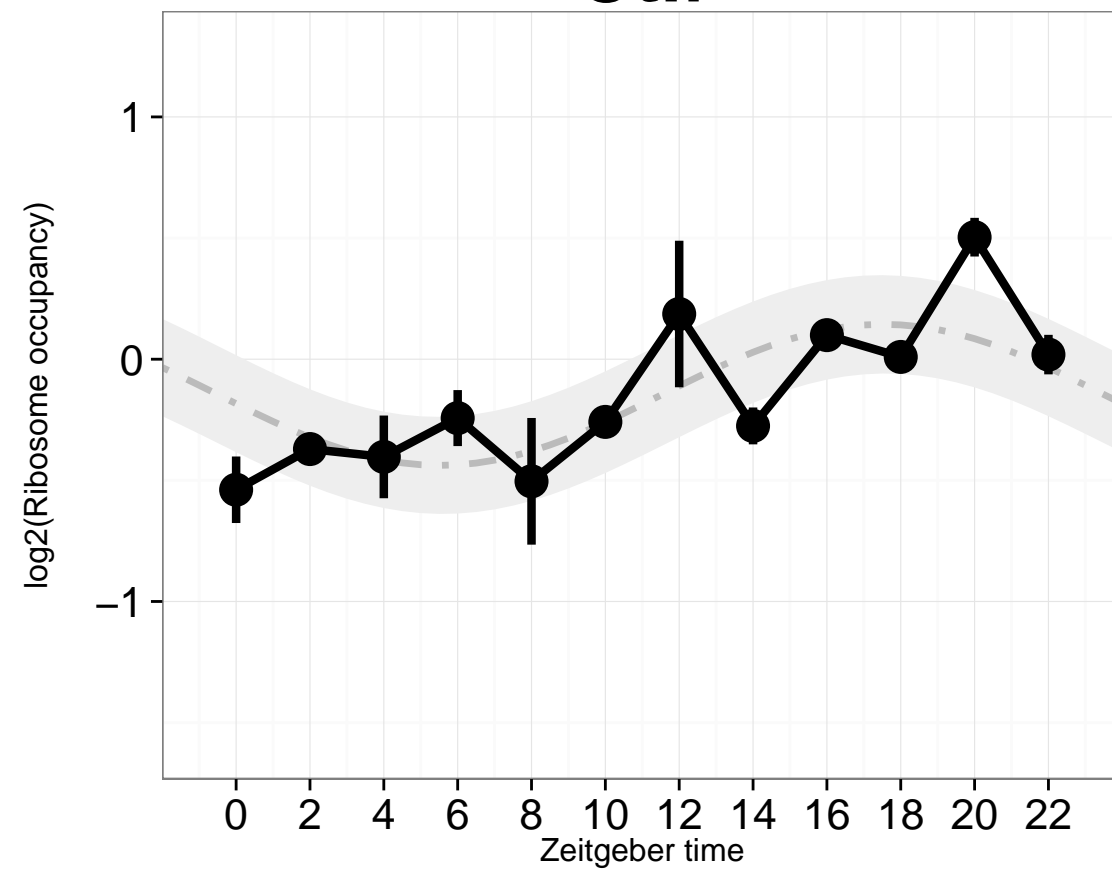

Supplement: Supplementary file 2028 [file 1]

## Phf20

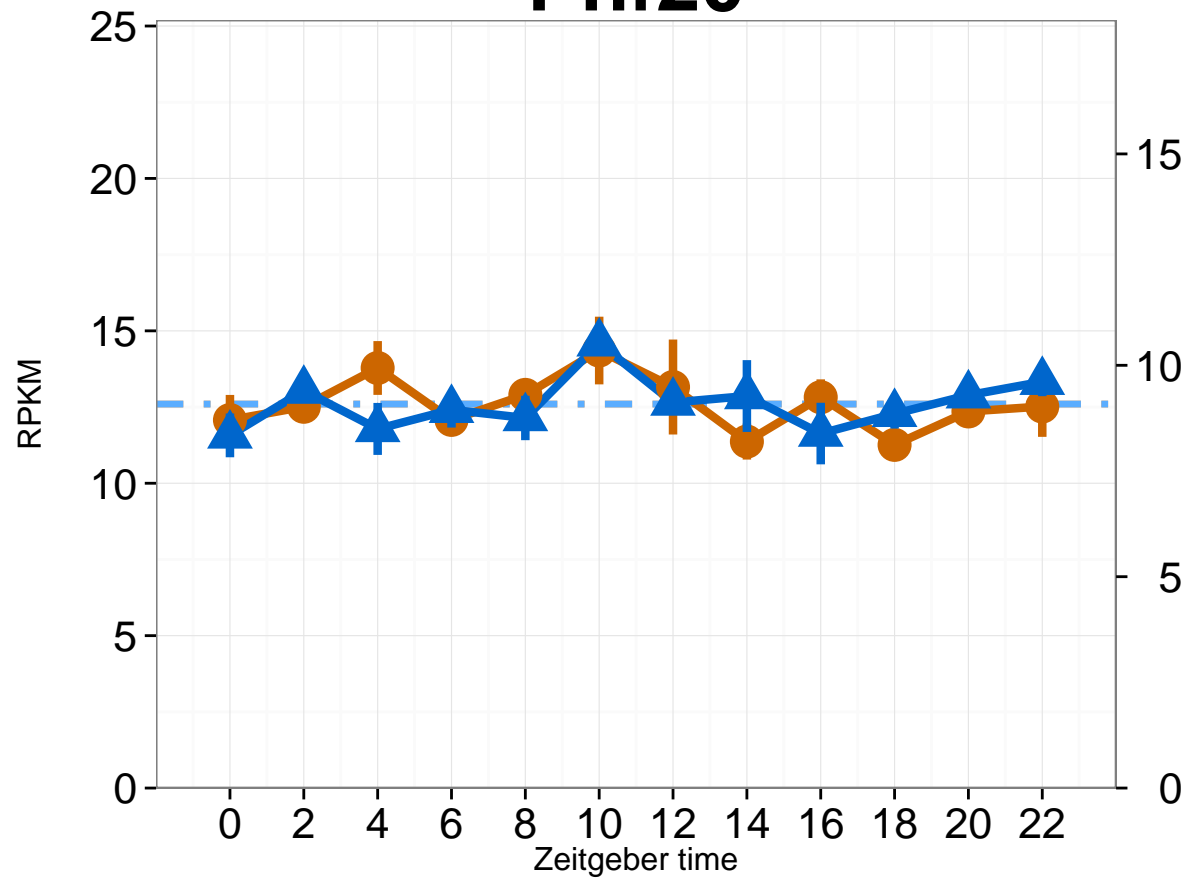

## Phf20

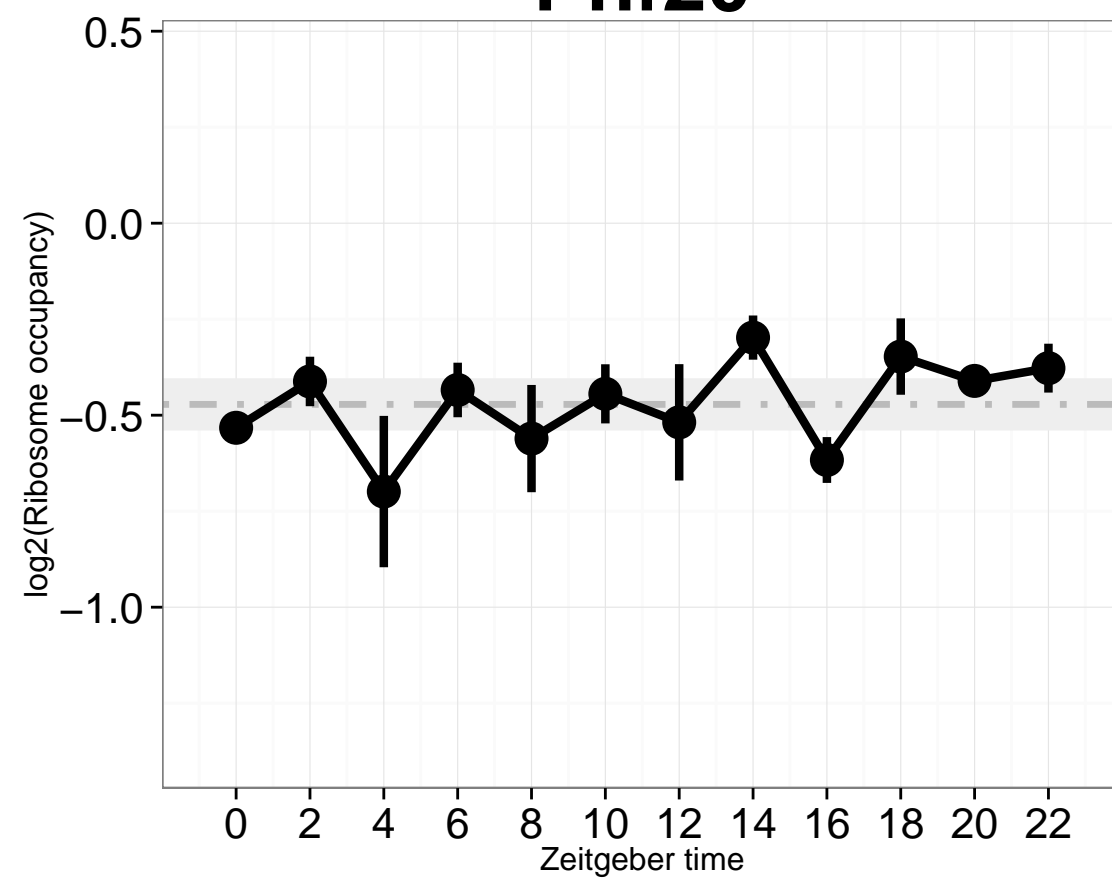

Supplement: Supplementary file 2029 [file 1]

# Frmd4b

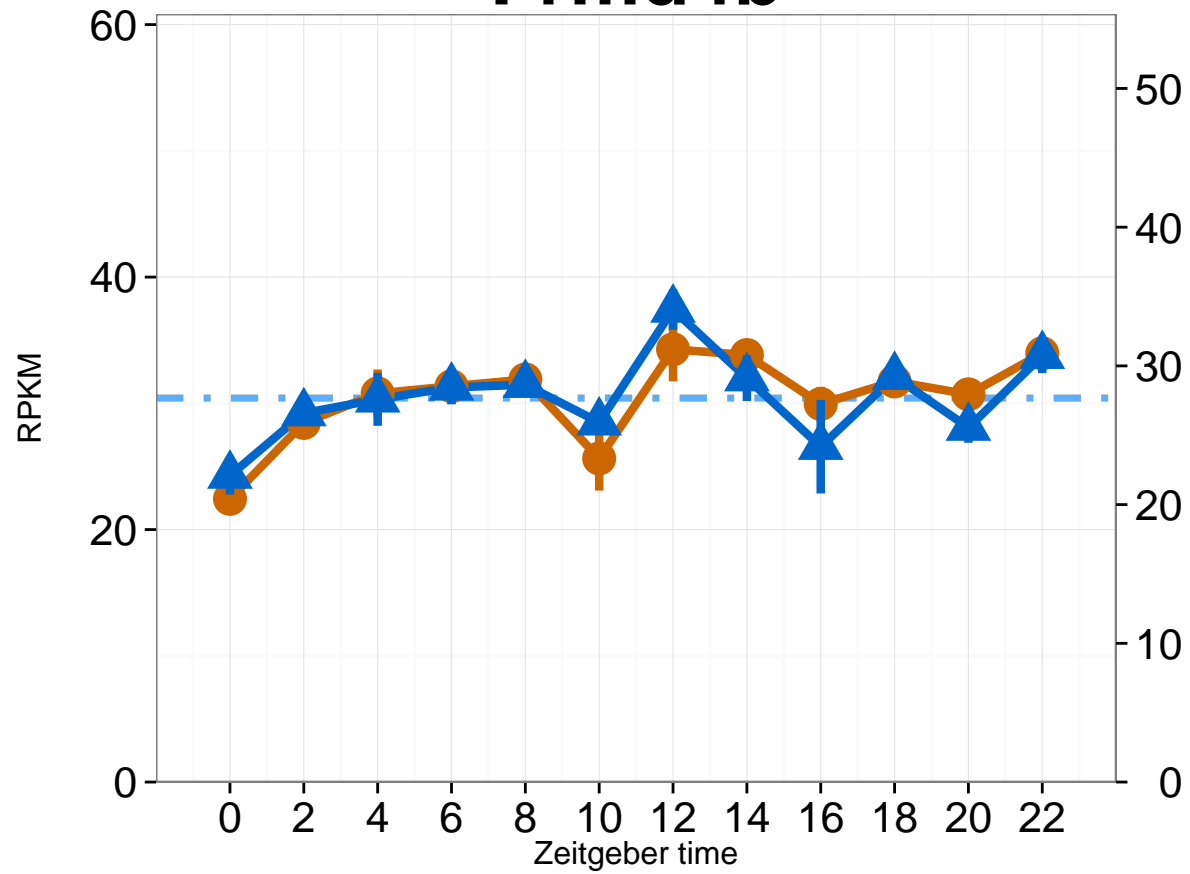

# Frmd4b

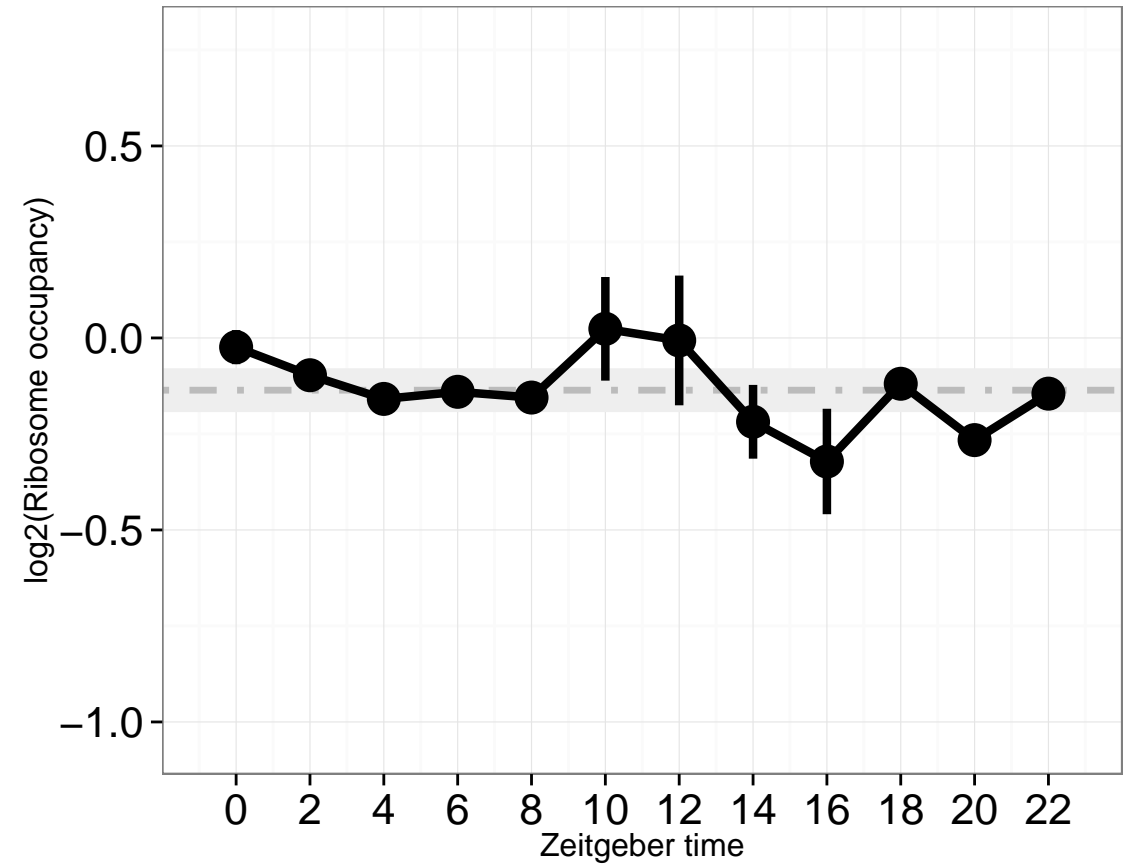

Supplement: Supplementary file 2030 [file 1]

# Zfp953

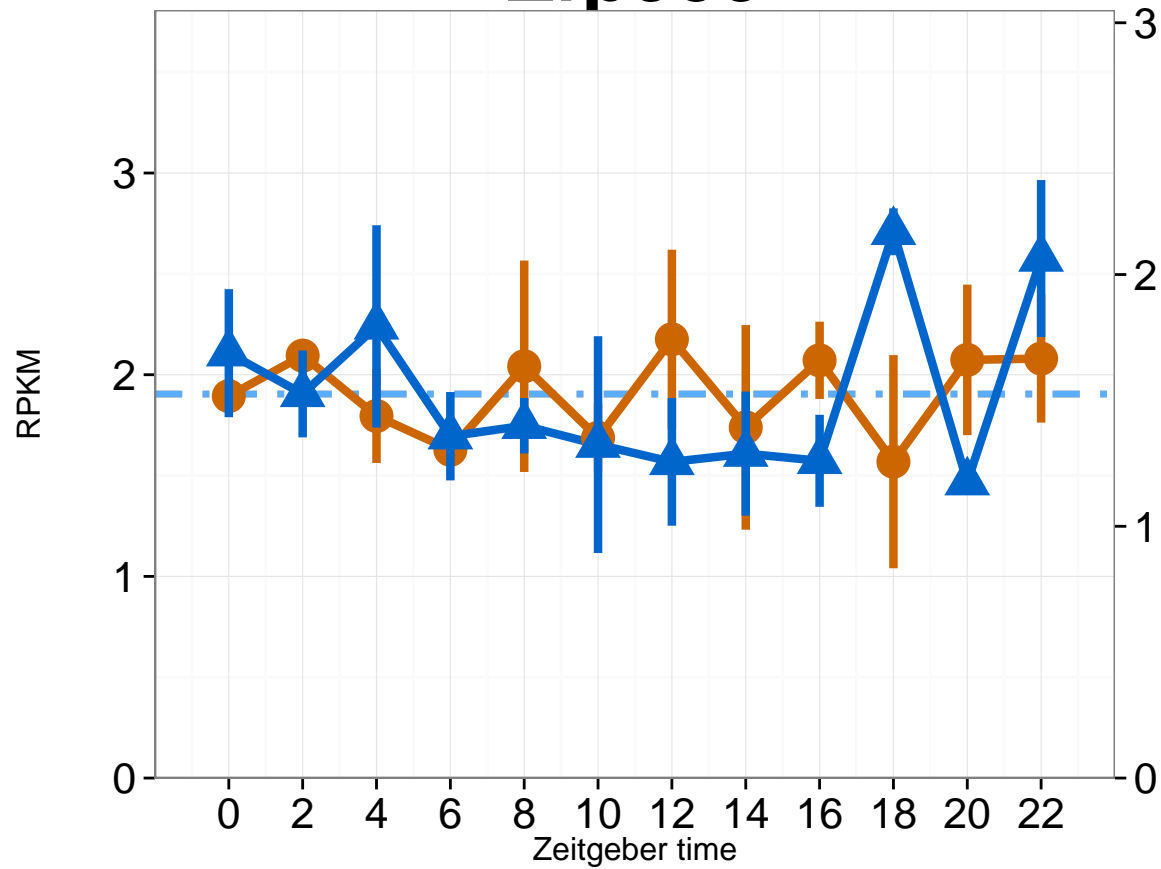

# Zfp953

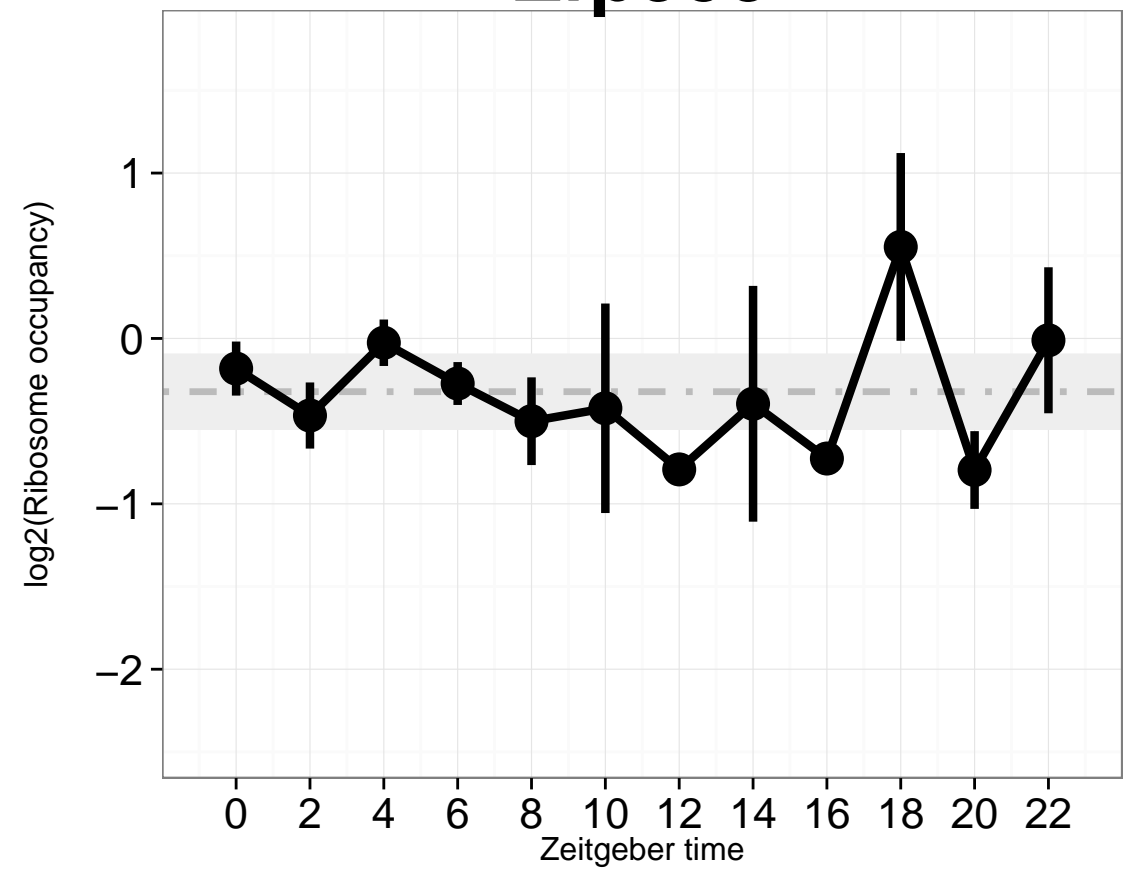

Supplement: Supplementary file 2031 [file 1]

# Hoxc5

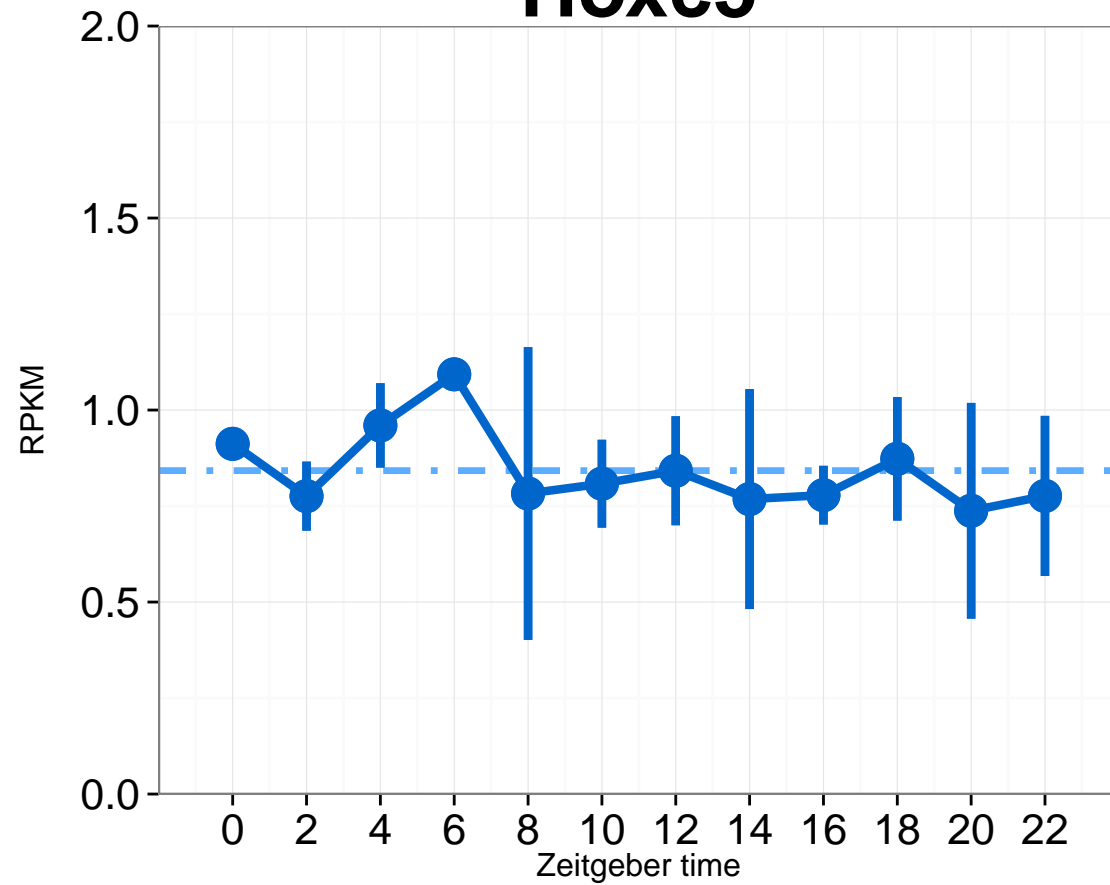

# Hoxc5 log2(Ribosome occupancy

Supplement: Supplementary file 2032 [file 1]

# Acat1

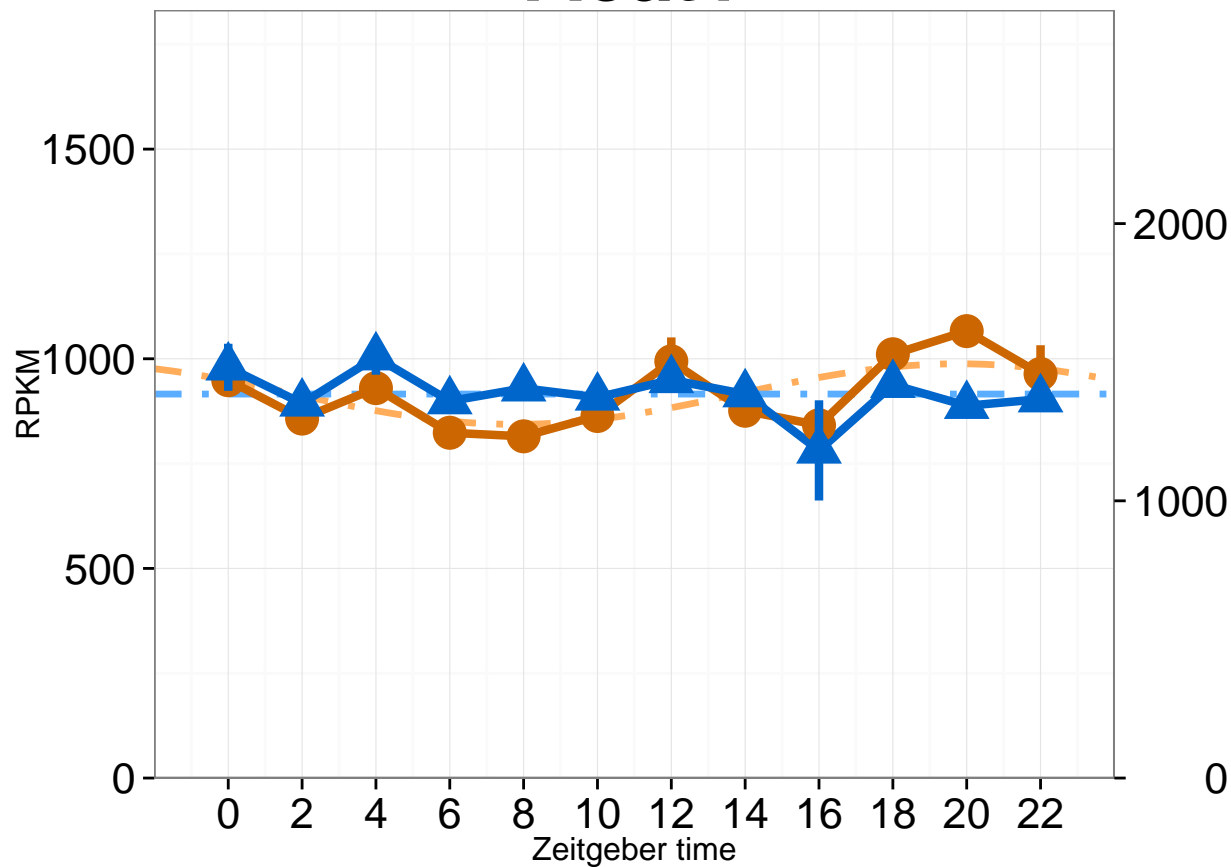

# Acat1

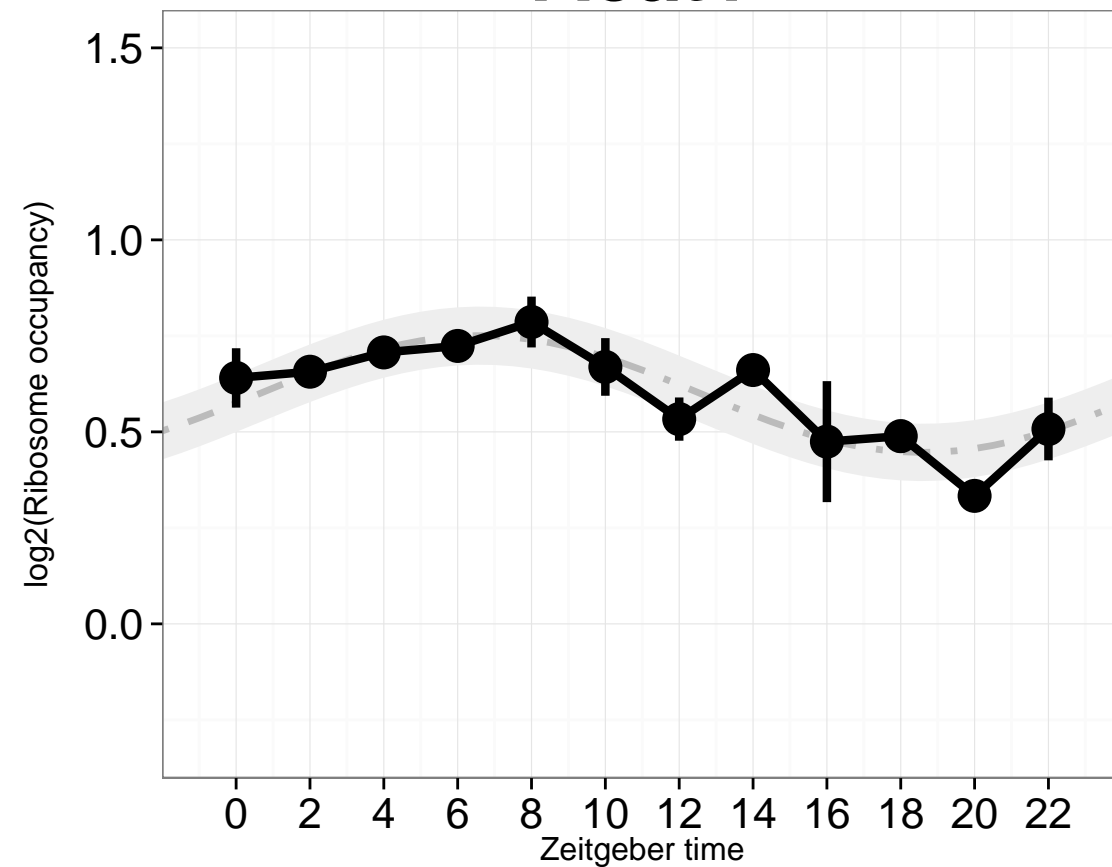

Supplement: Supplementary file 2033 [file 1]

## Alas2

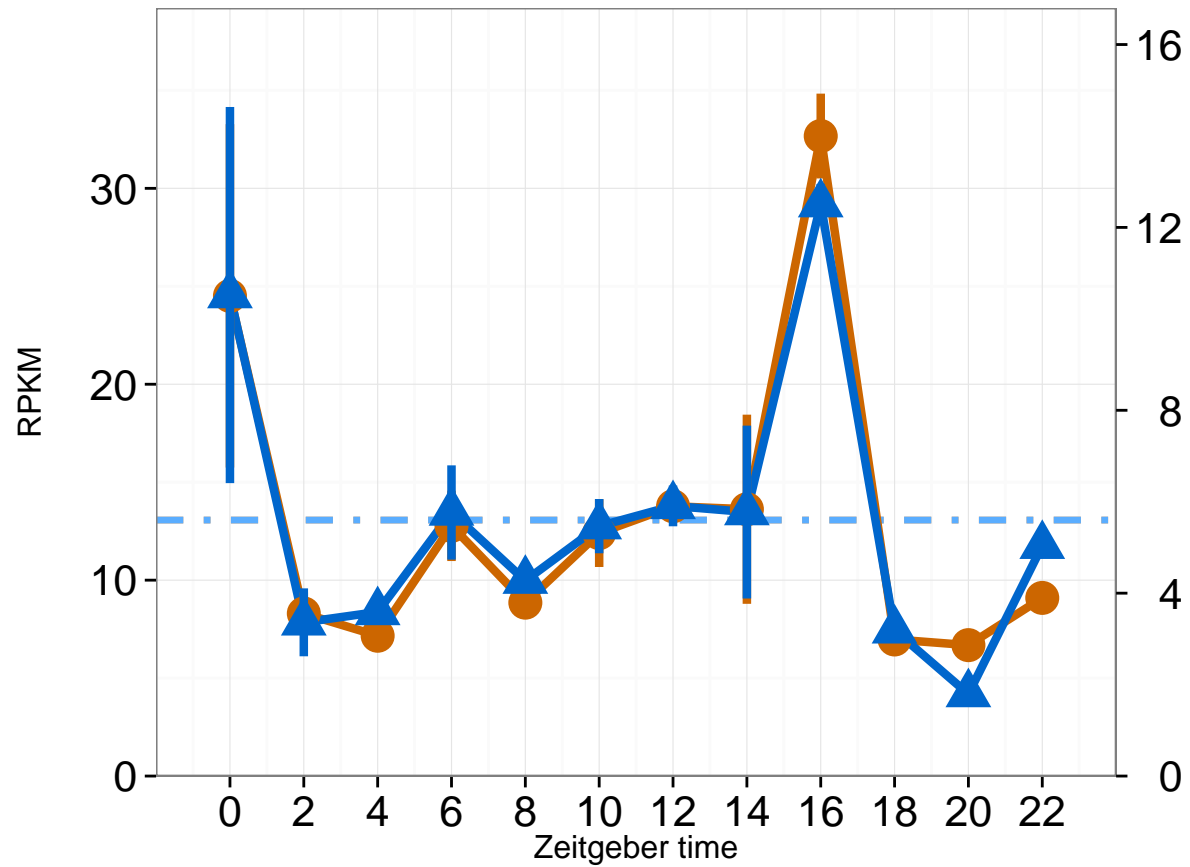

## Alas2

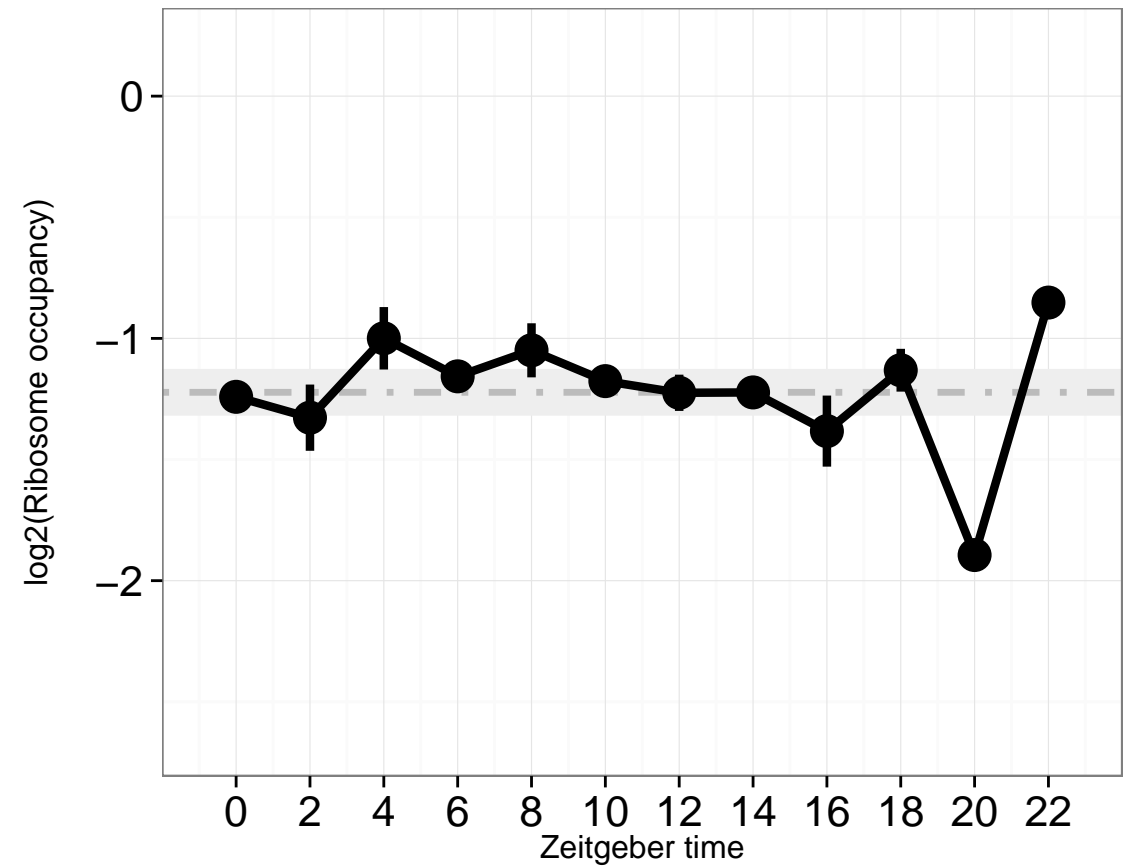

Supplement: Supplementary file 2034 [file 1]

# Erich1

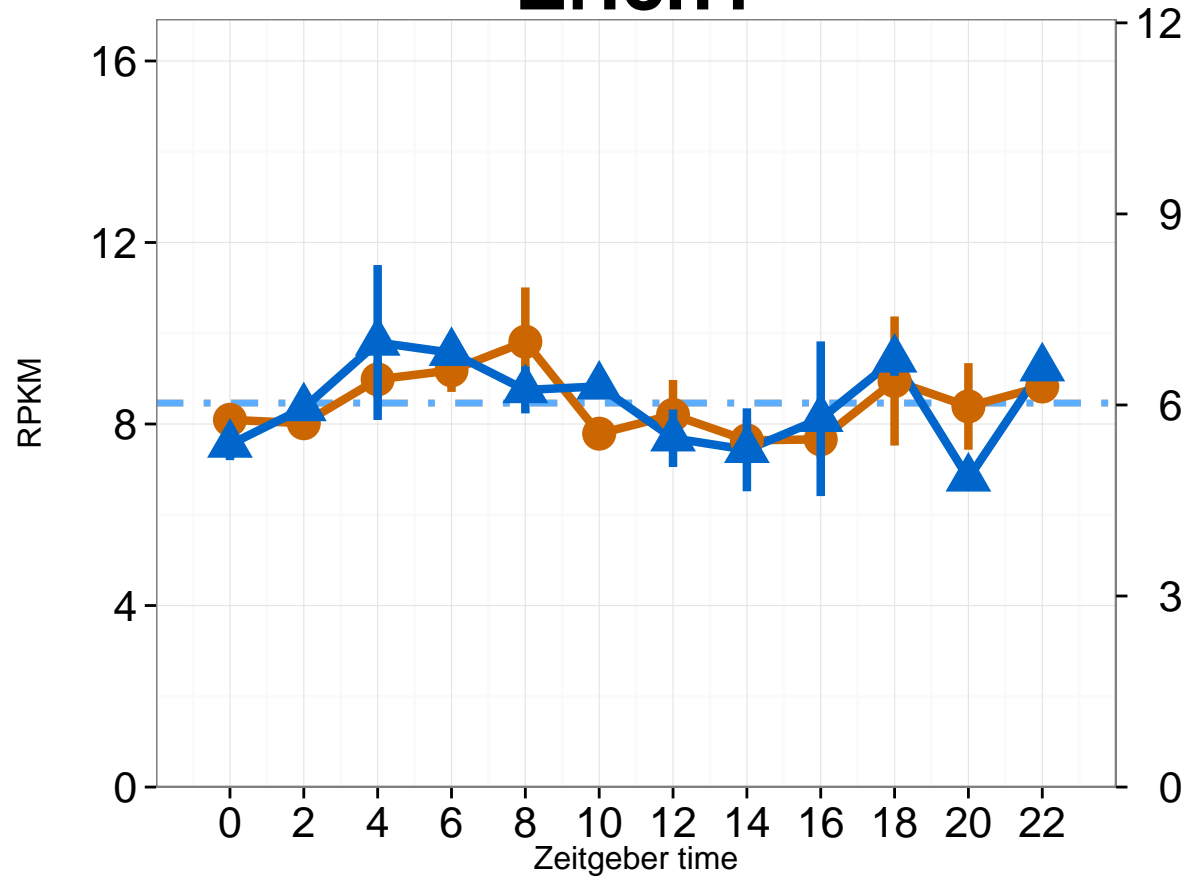

# Erich1

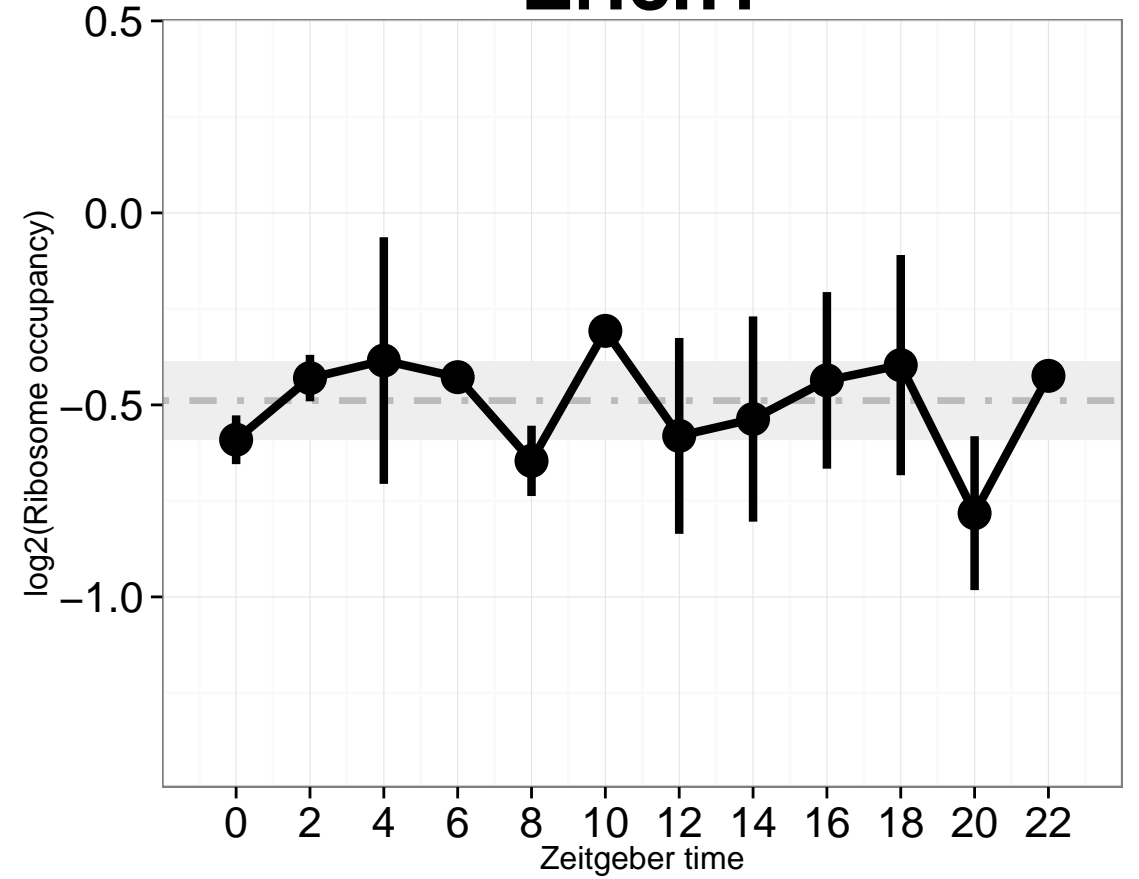

Supplement: Supplementary file 2035 [file 1]

# Fam20c

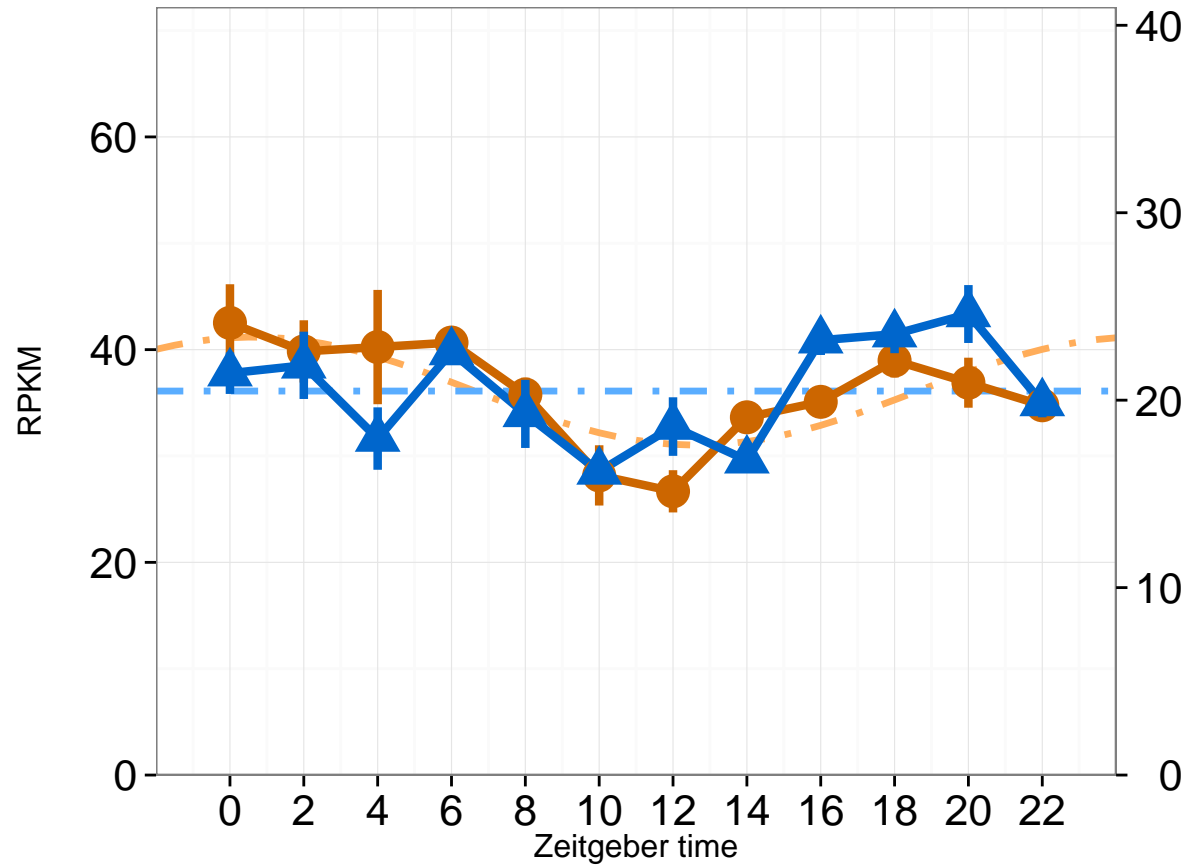

# Fam20c

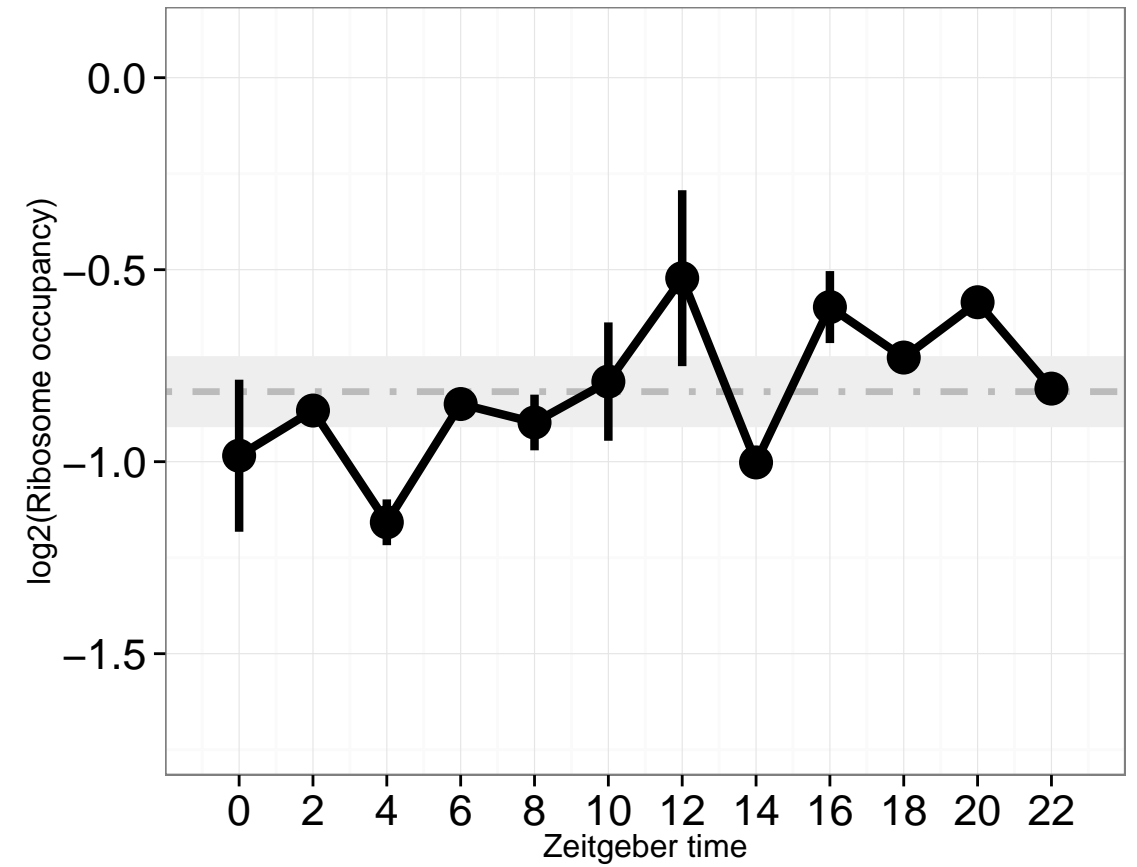

Supplement: Supplementary file 2036 [file 1]

# lca1

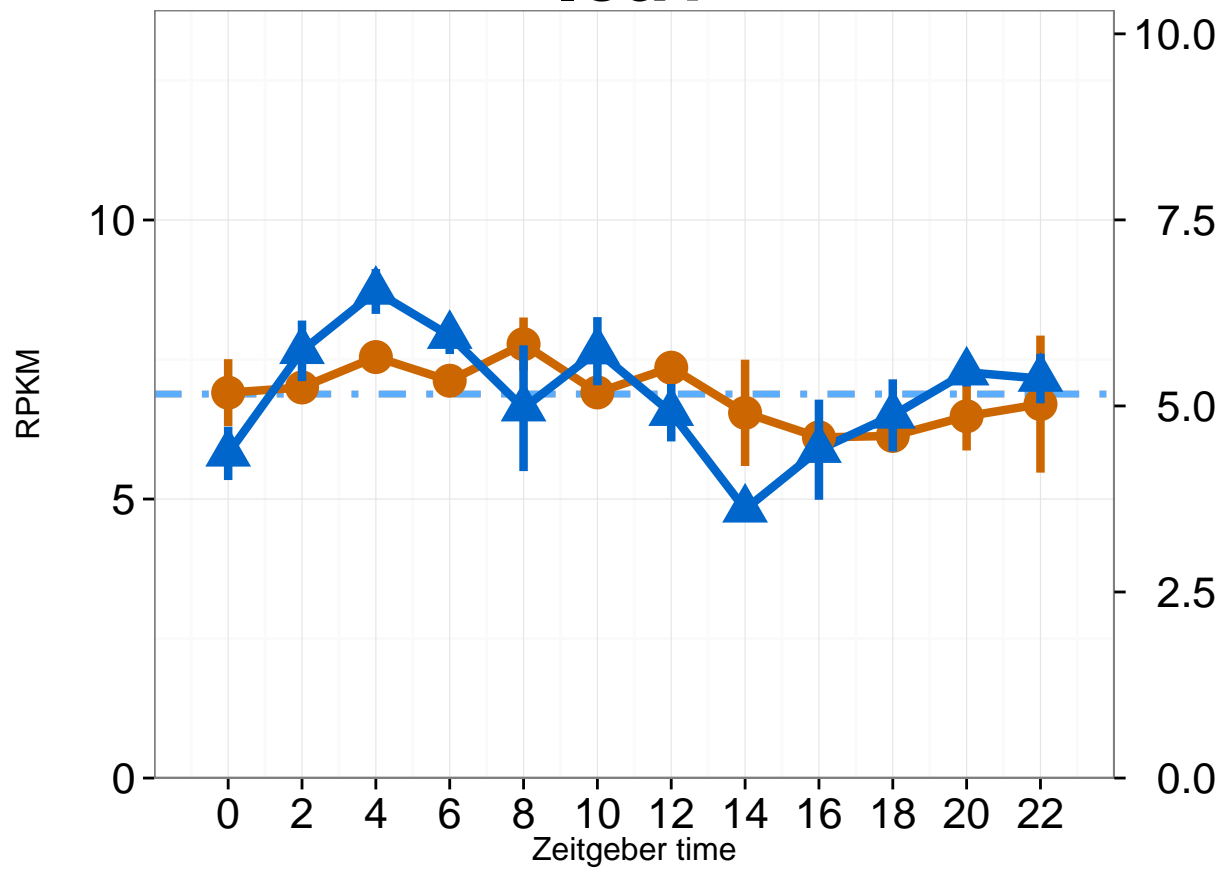

# lca1

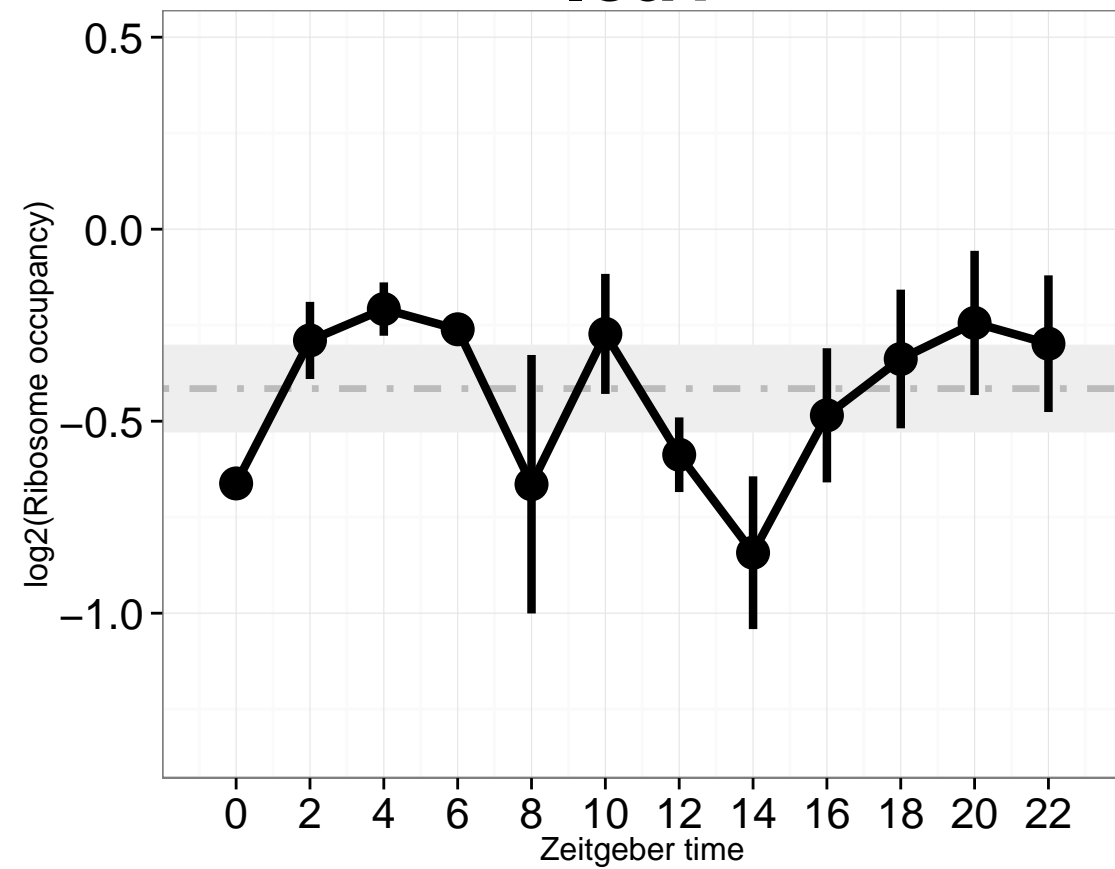

Supplement: Supplementary file 2037 [file 1]

## Kdm5a

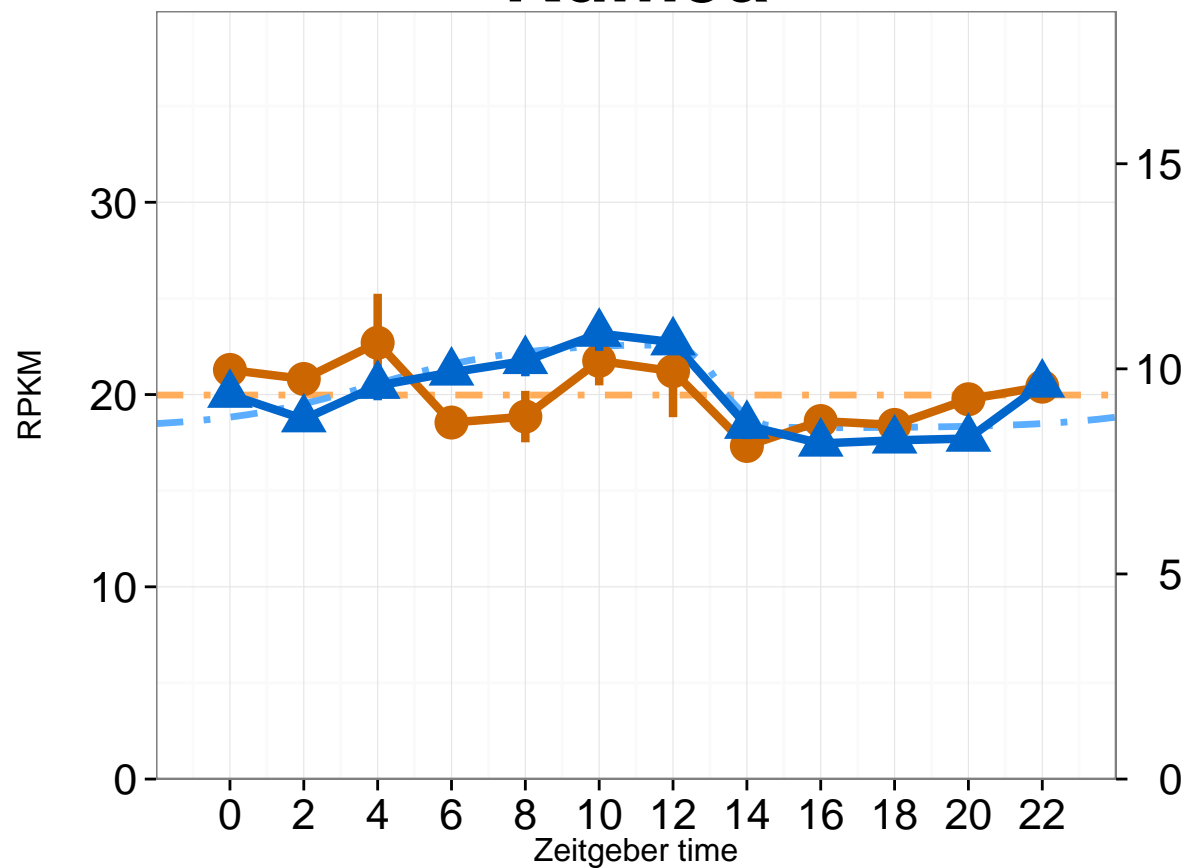

## Kdm5a

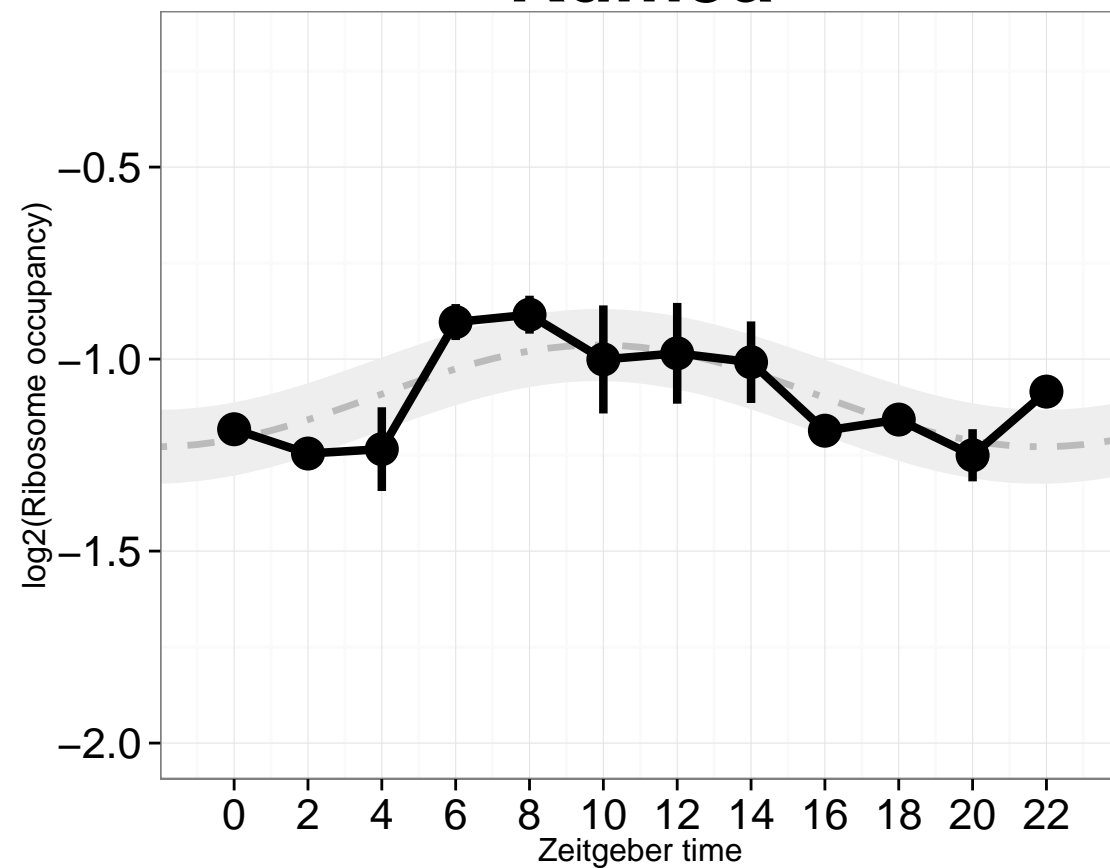

Supplement: Supplementary file 2038 [file 1]

# Cdkn2c

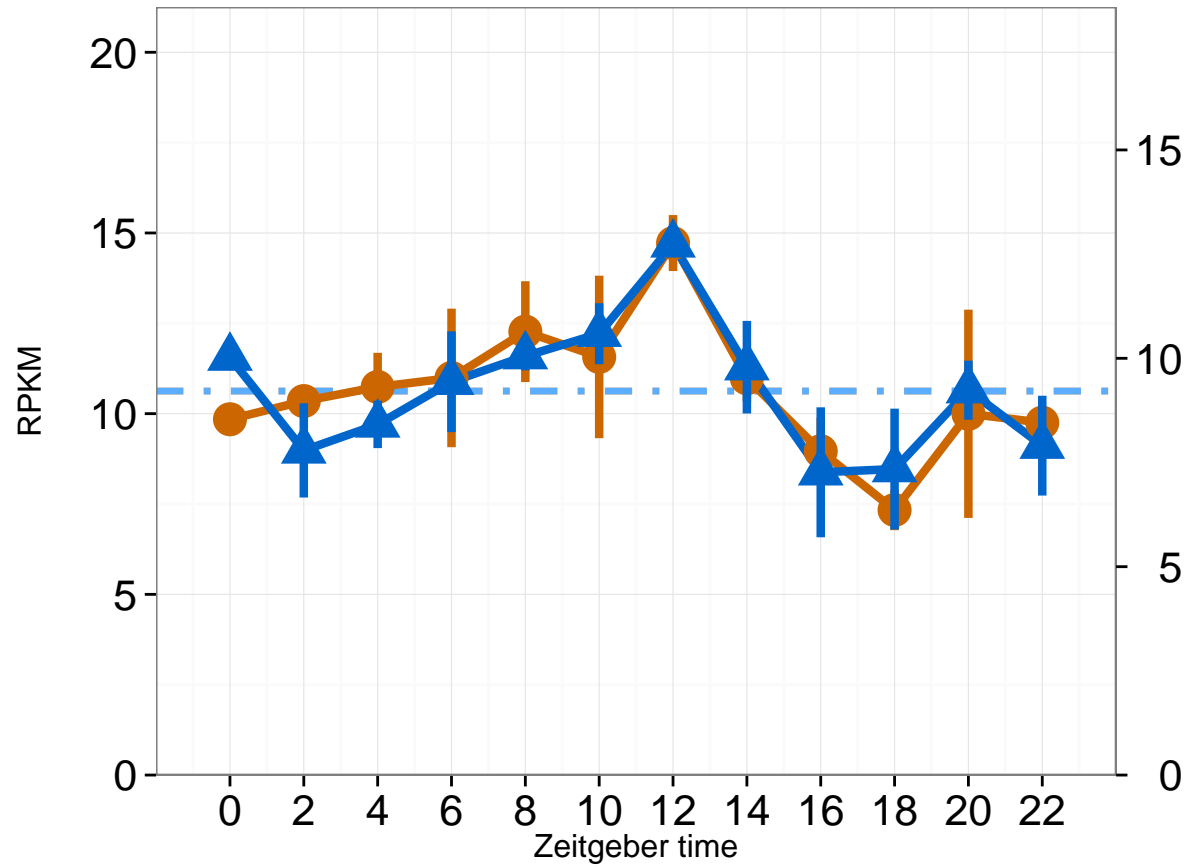

# Cdkn2c

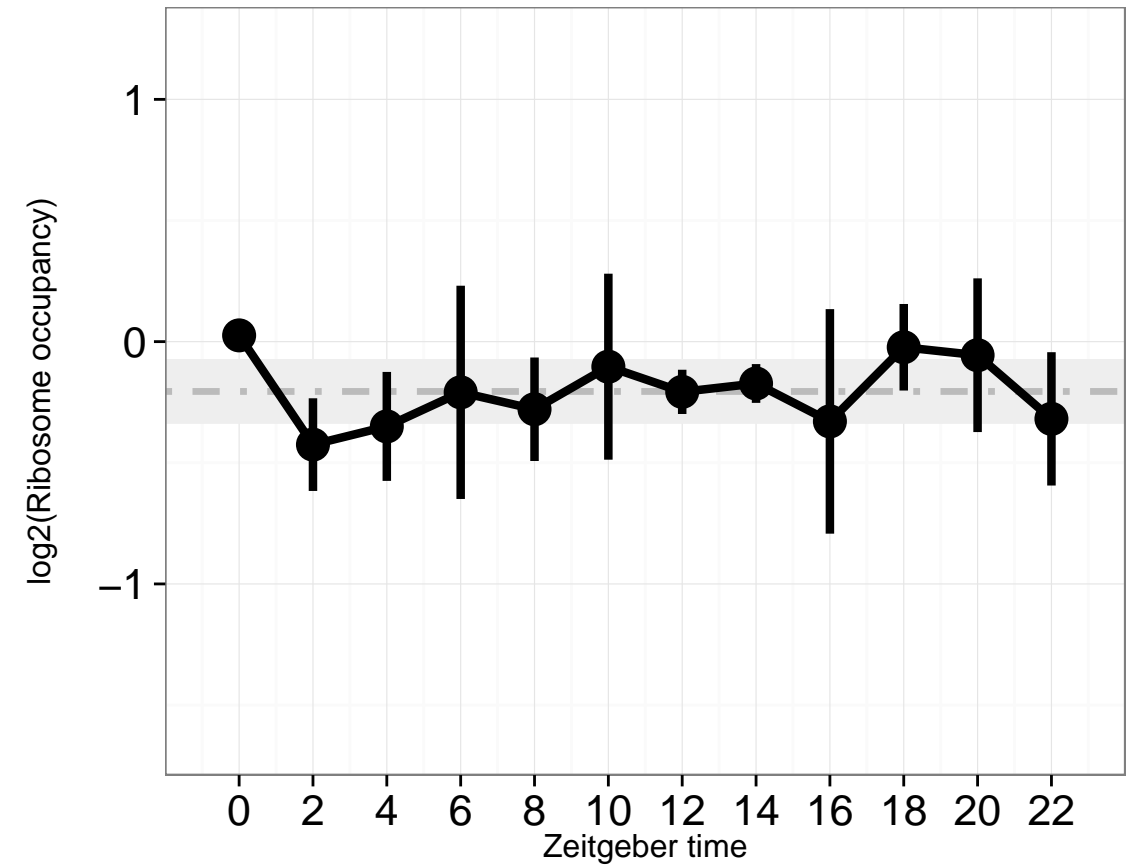

Supplement: Supplementary file 2039 [file 1]

# Dhx29

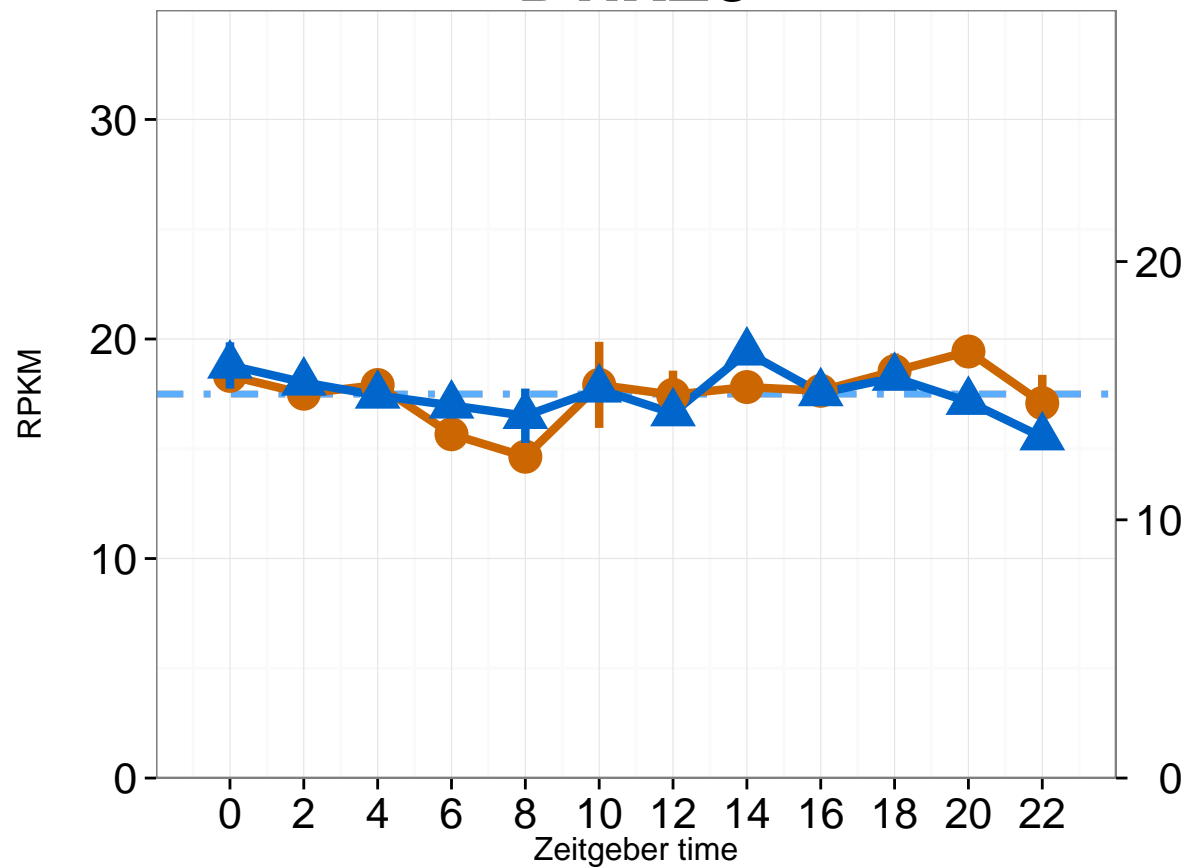

# Dhx29

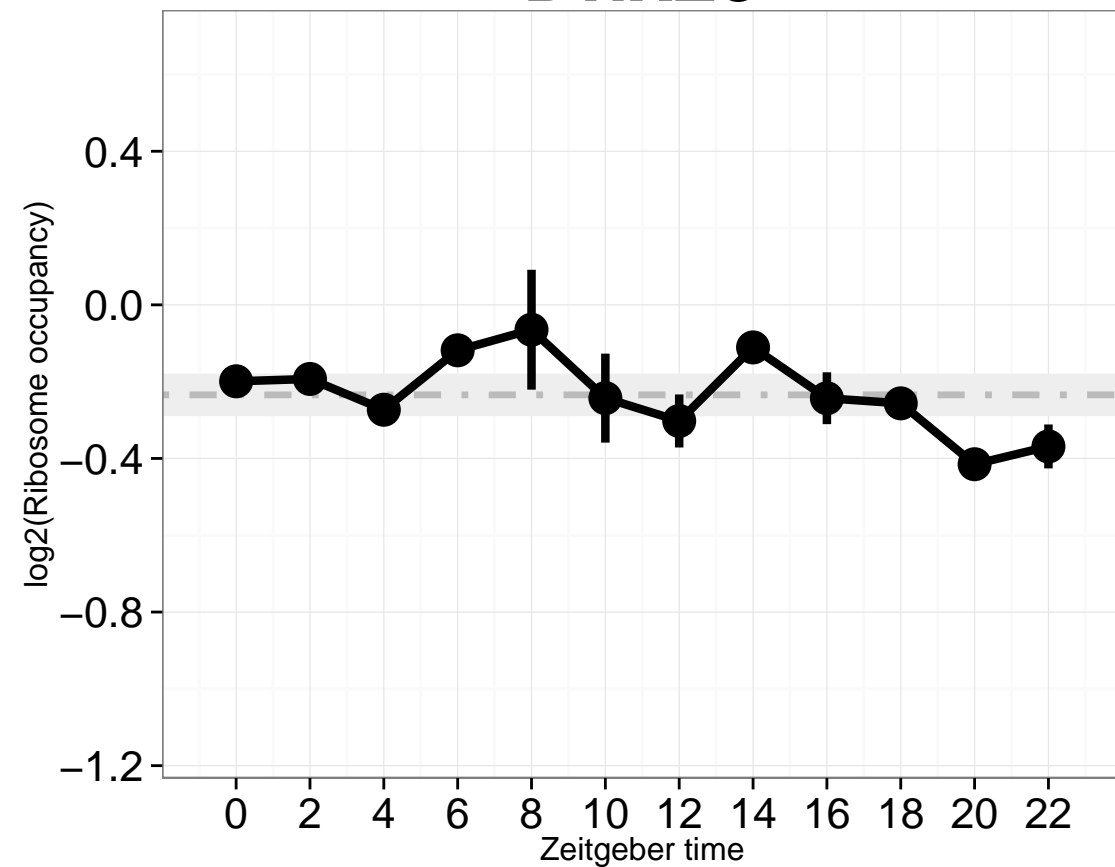

Supplement: Supplementary file 2040 [file 1]

# Dip2c

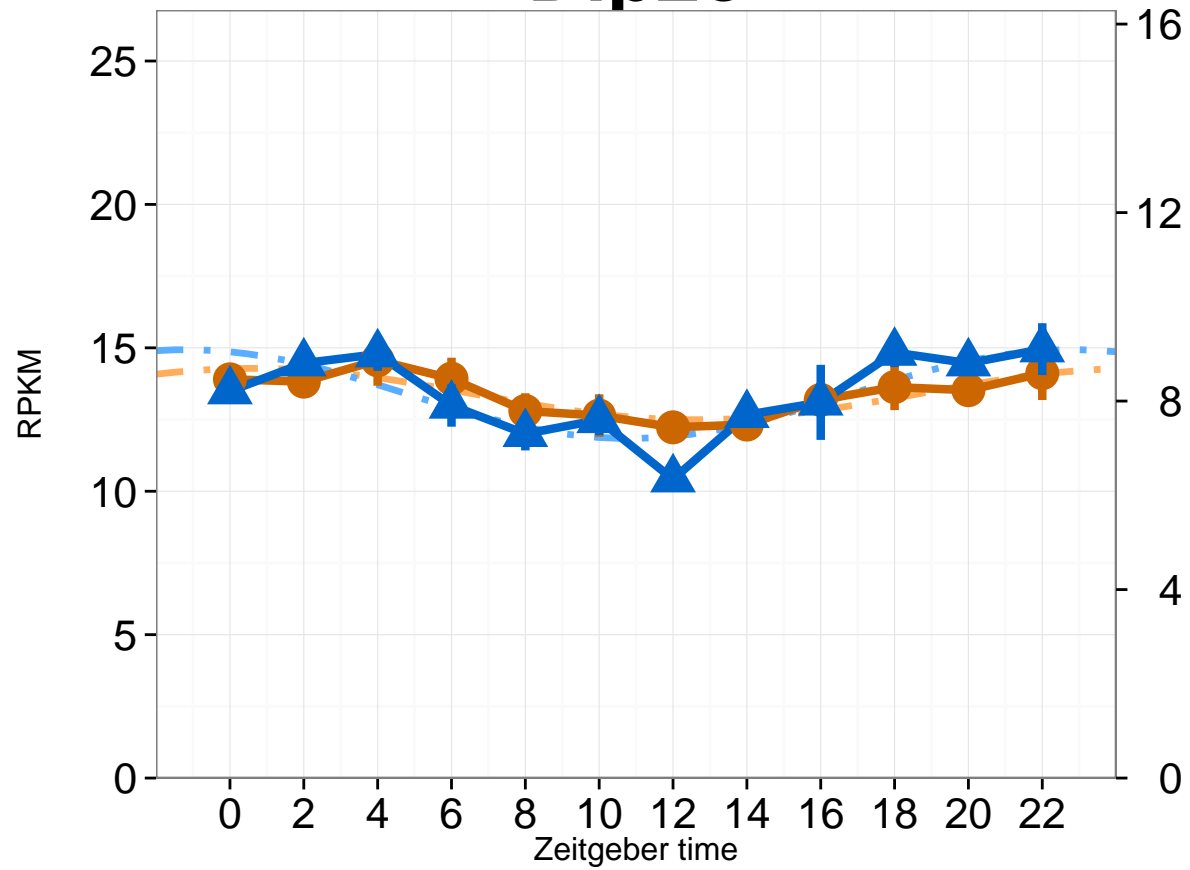

# Dip2c

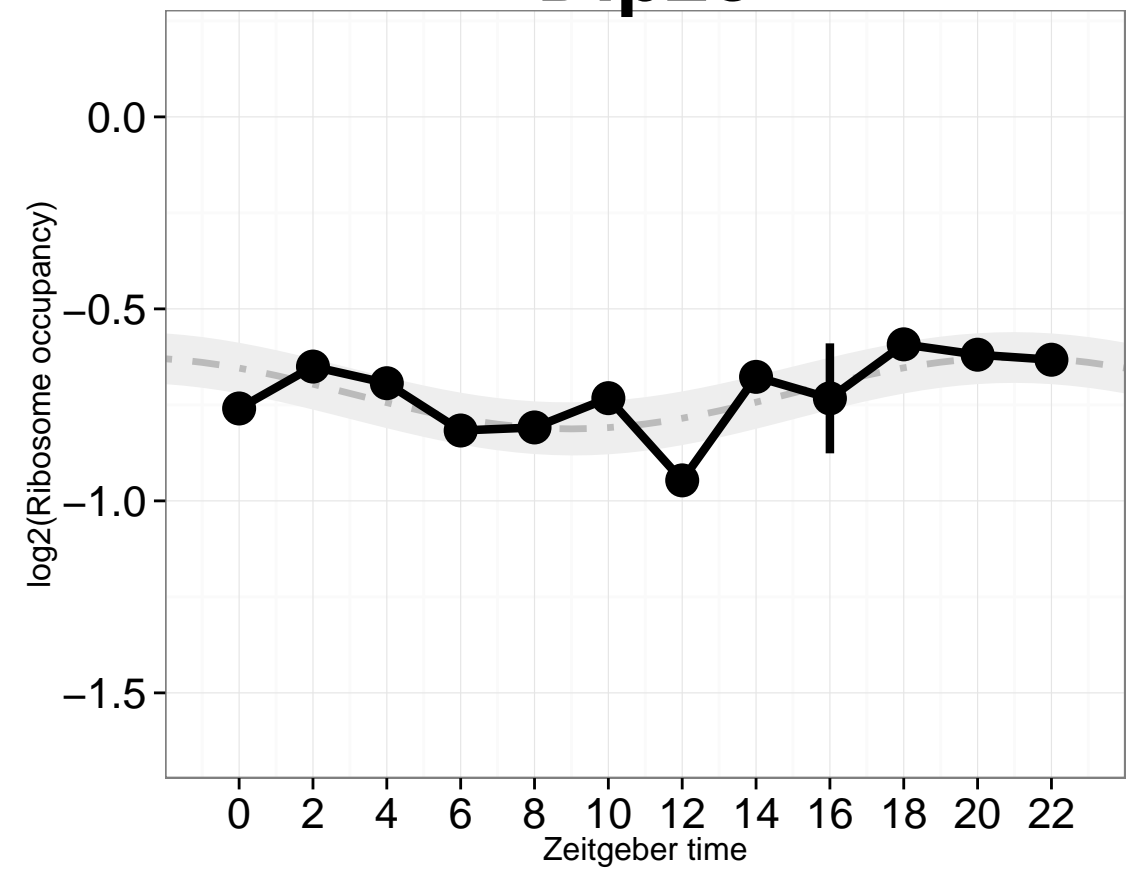

Supplement: Supplementary file 2041 [file 1]

## Acot2

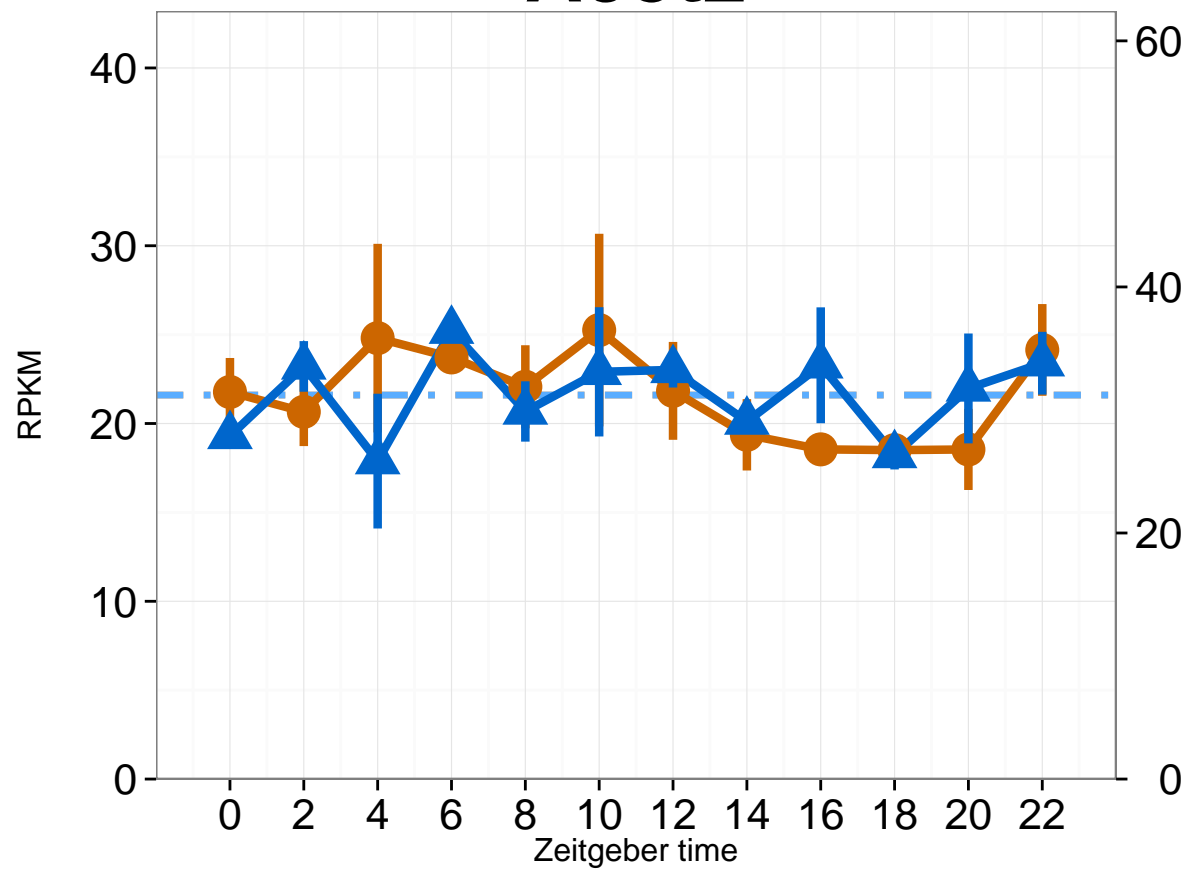

## Acot2

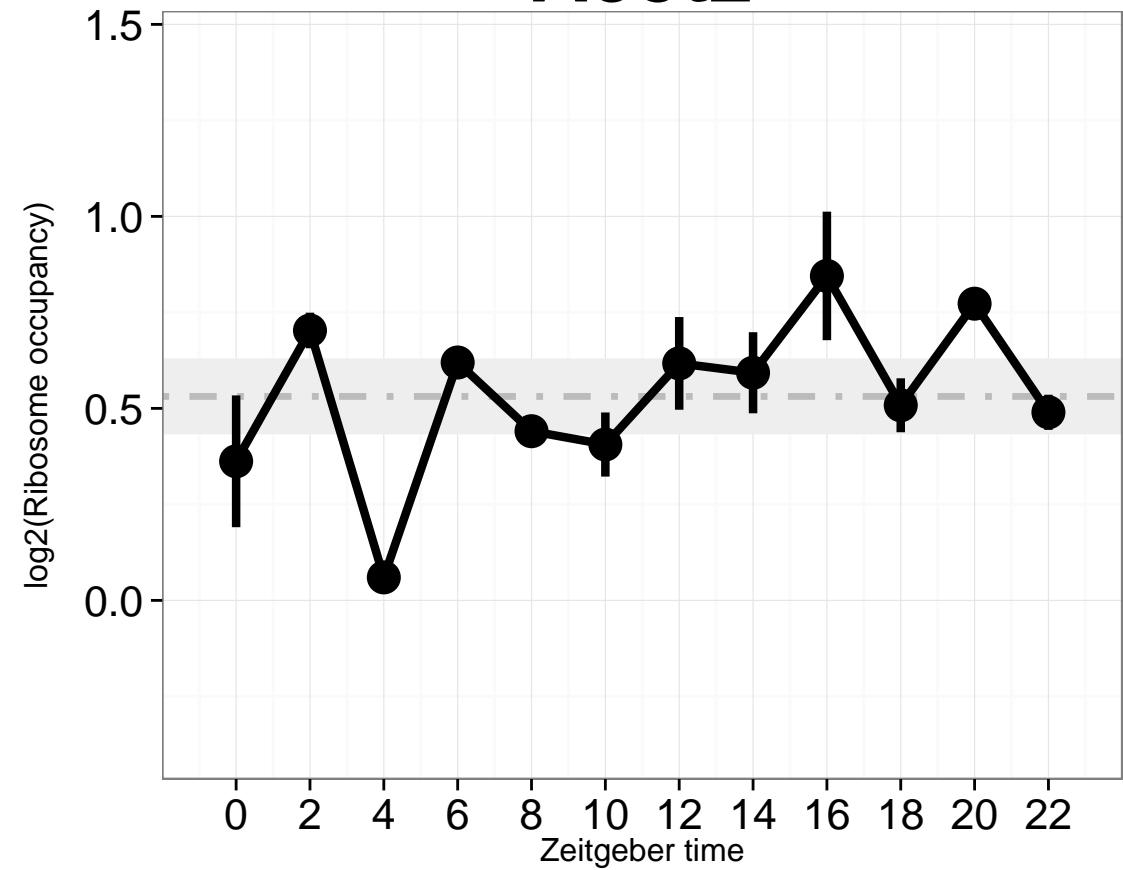

Supplement: Supplementary file 2042 [file 1]

# Arl4d

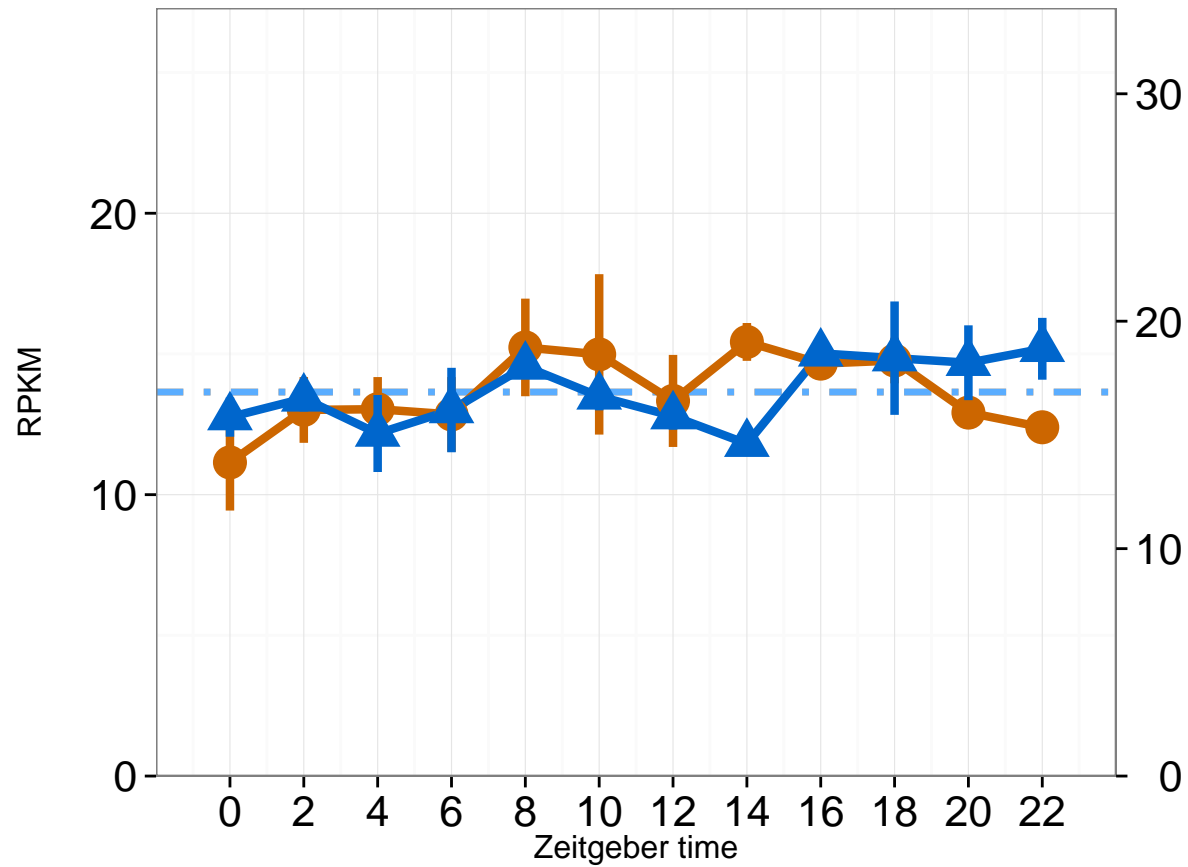

# Arl4d

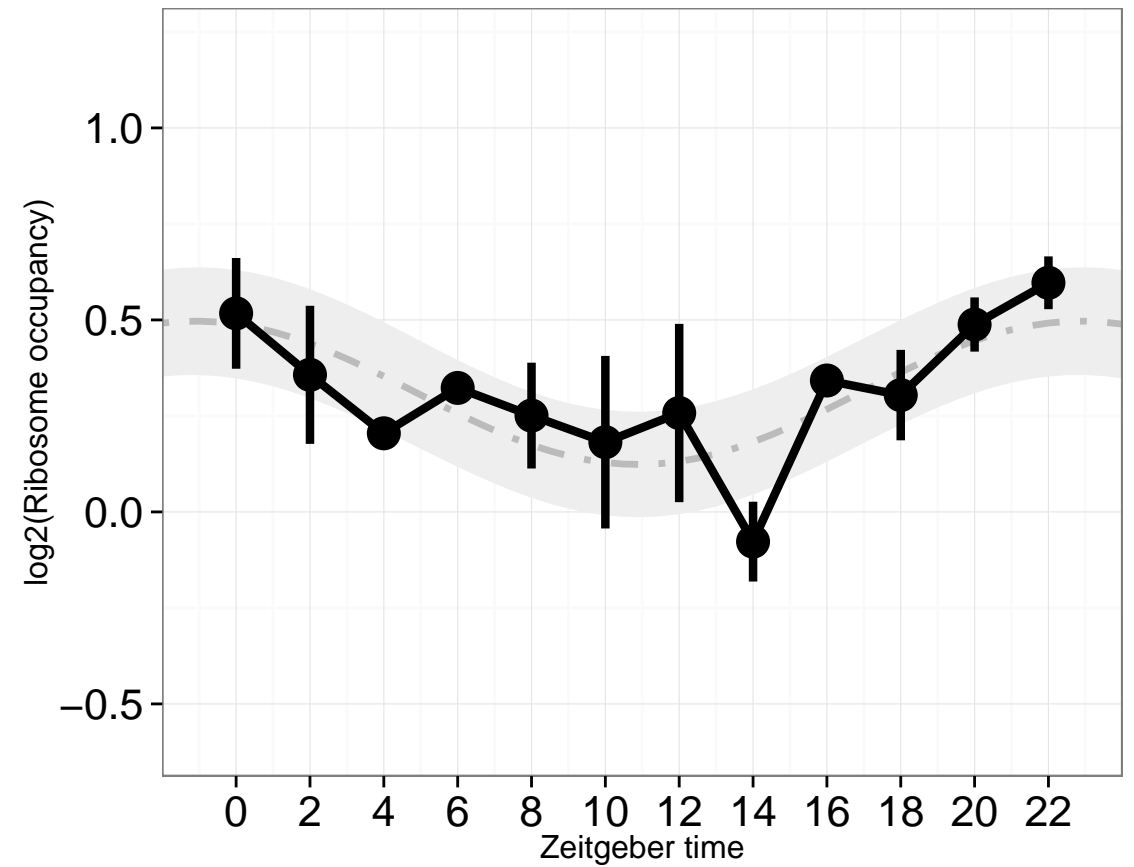

Supplement: Supplementary file 2043 [file 1]

## Brd1

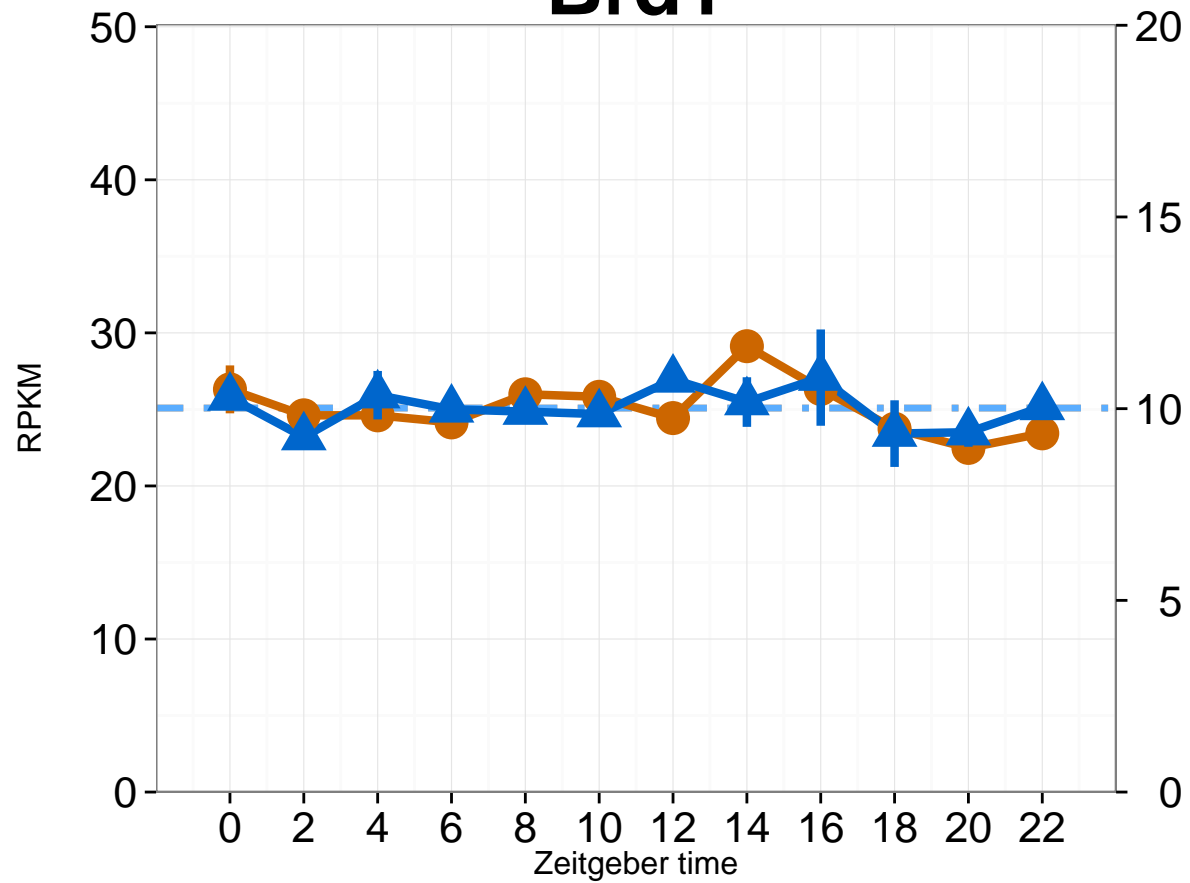

## Brd1

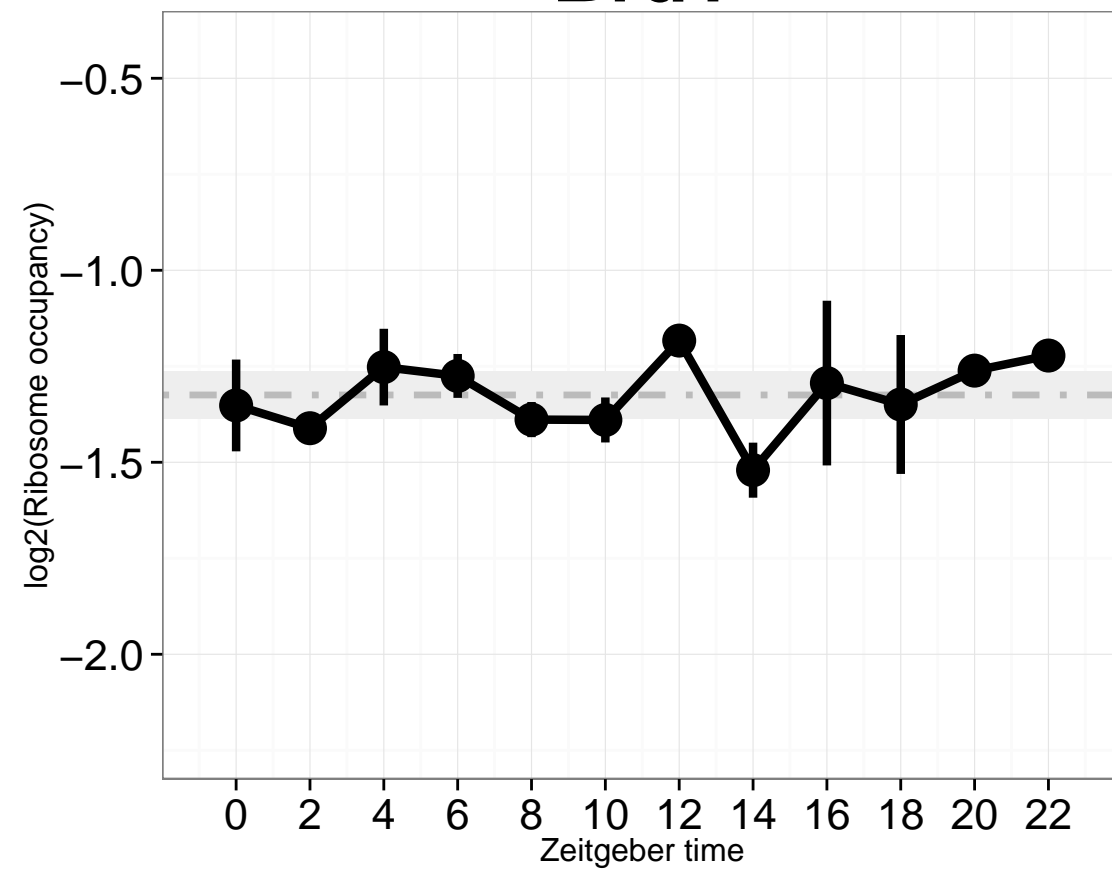

Supplement: Supplementary file 2044 [file 1]

## Msantd4

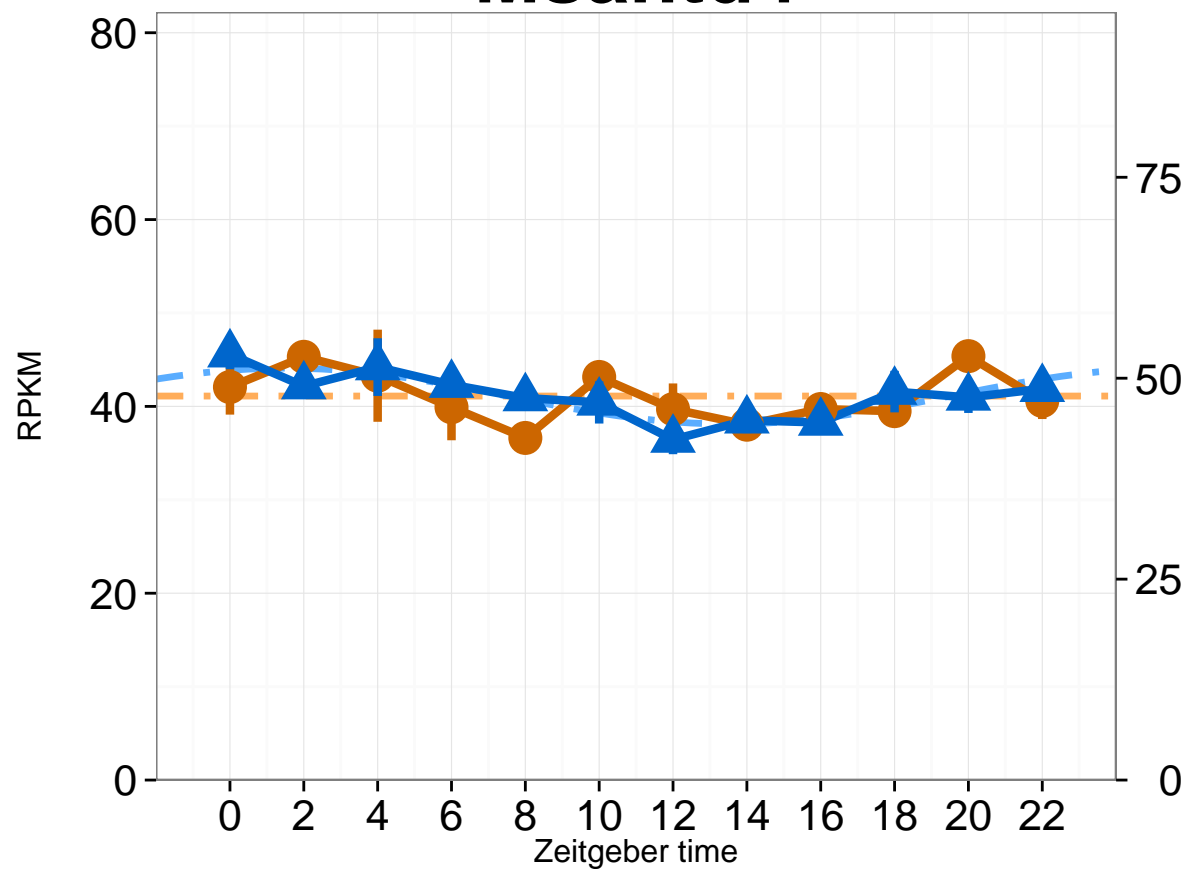

## Msantd4

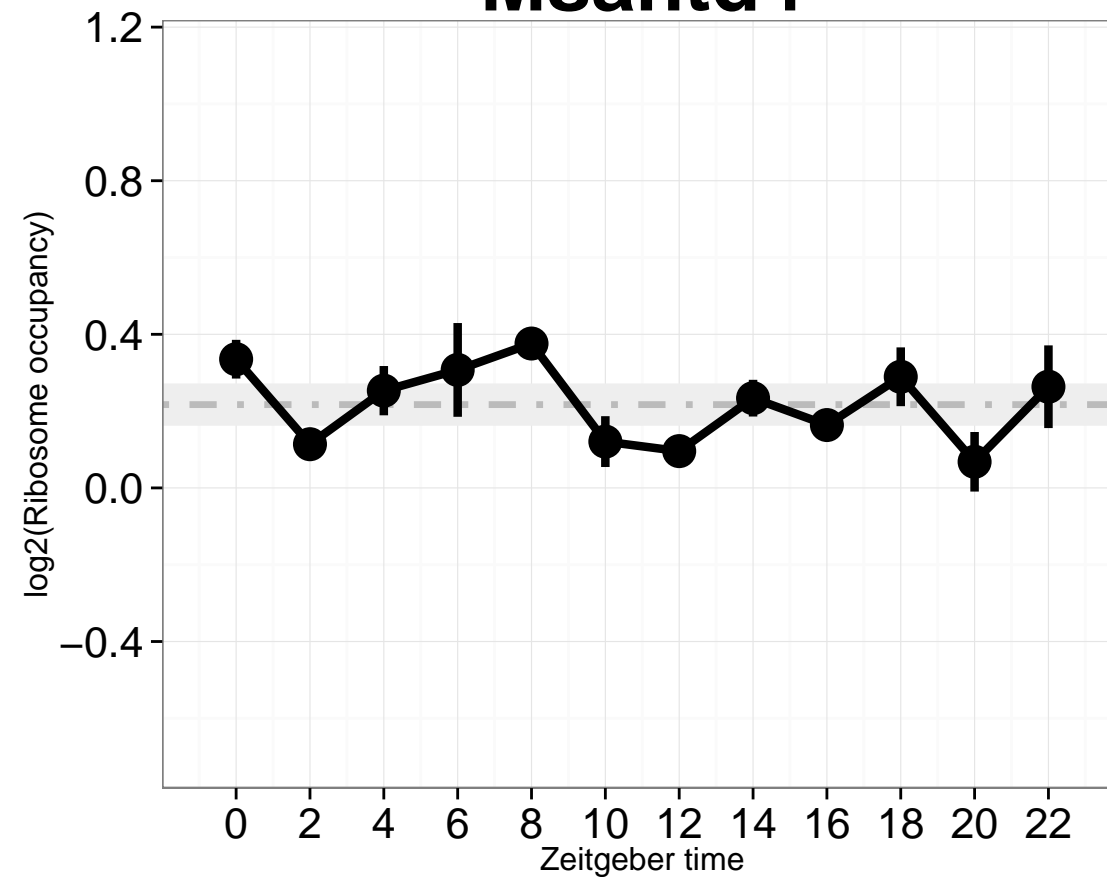

Supplement: Supplementary file 2045 [file 1]

## Gbe1

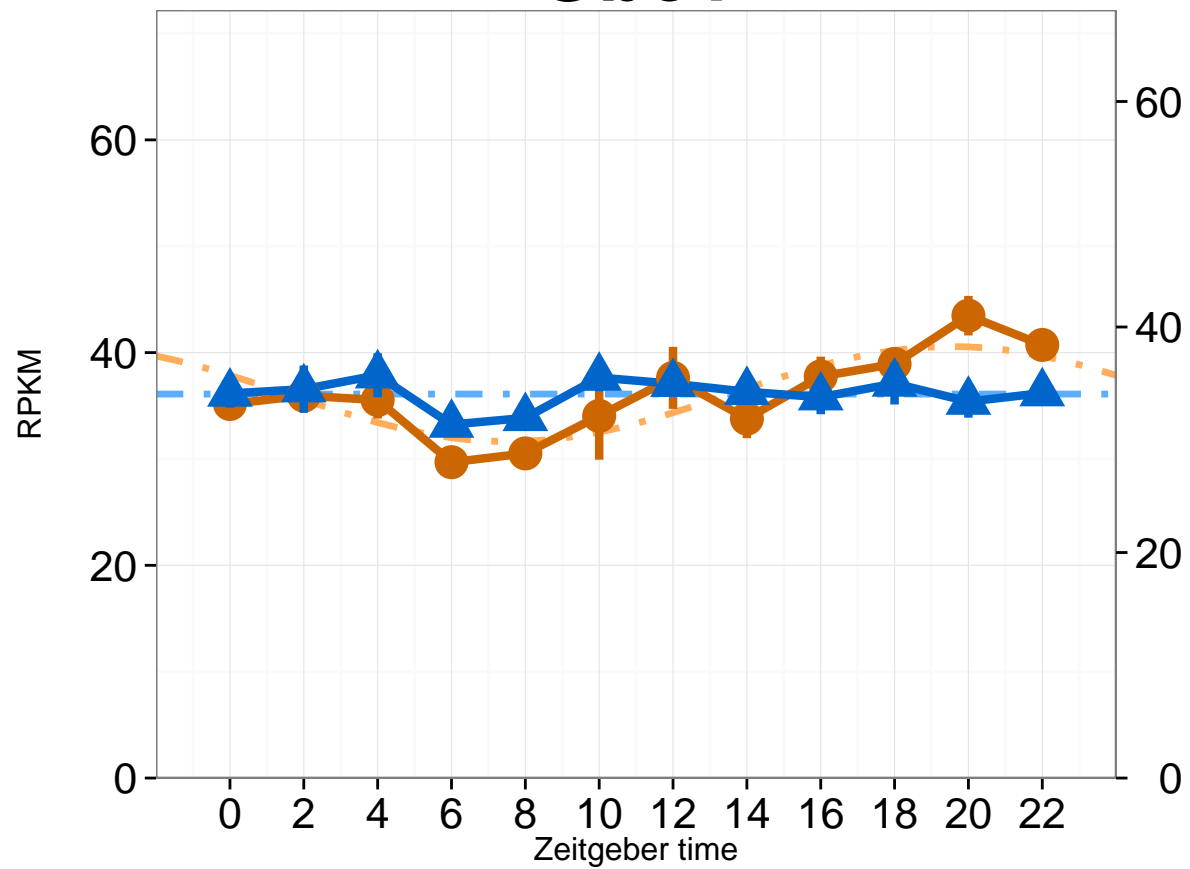

## Gbe1

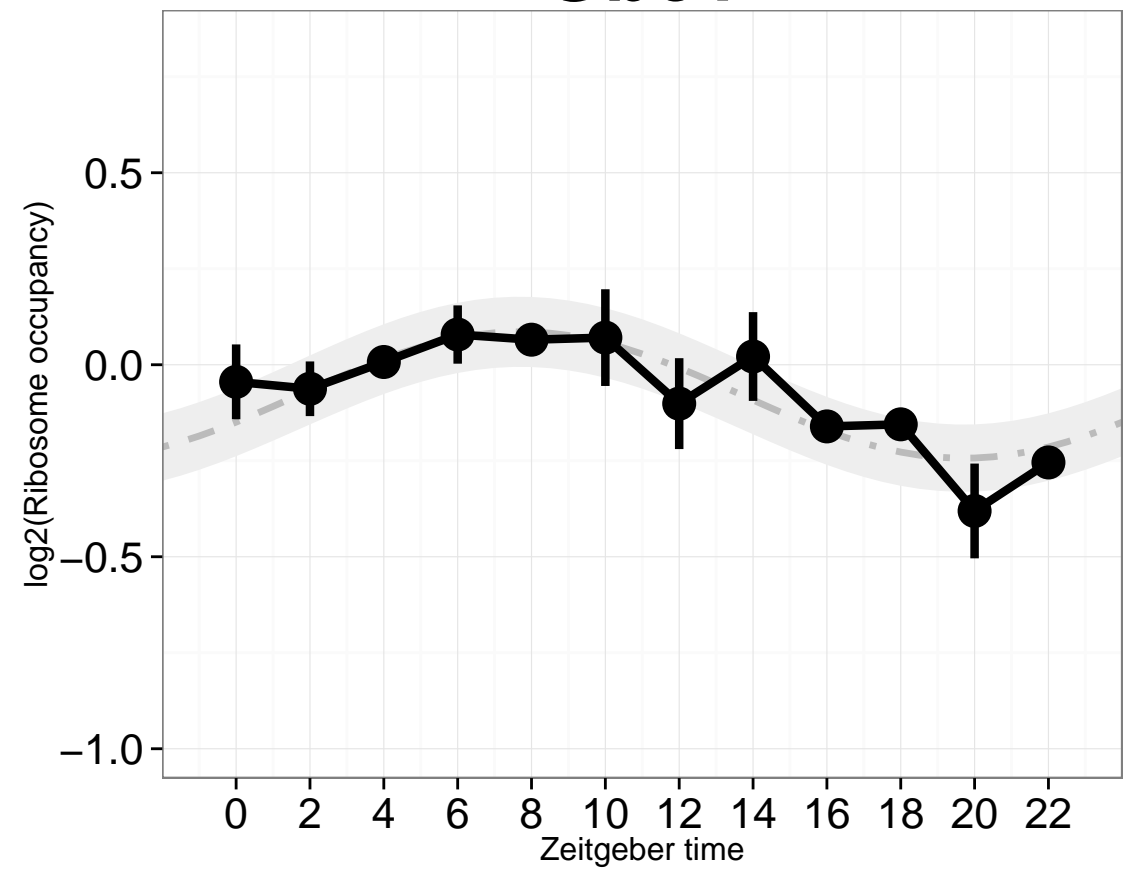

Supplement: Supplementary file 2046 [file 1]

# 3110002H16Rik

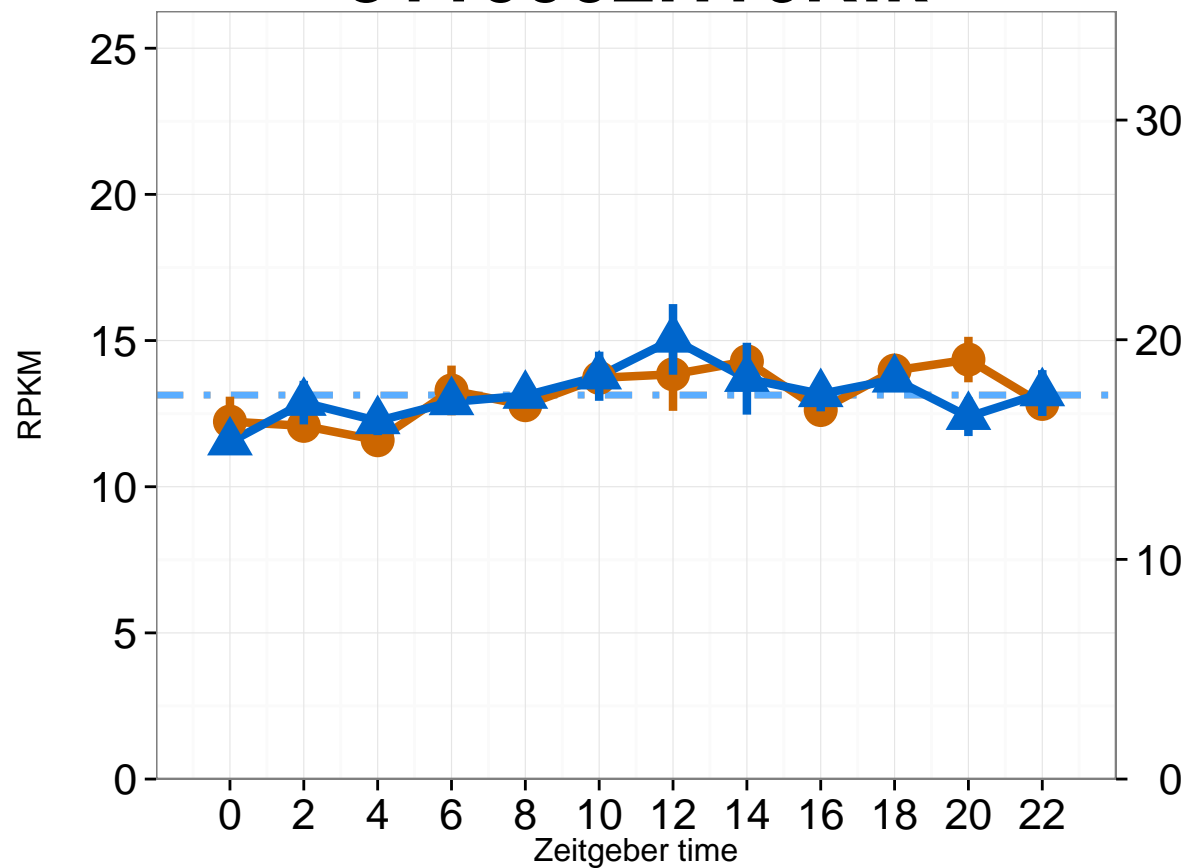

# 3110002H16Rik

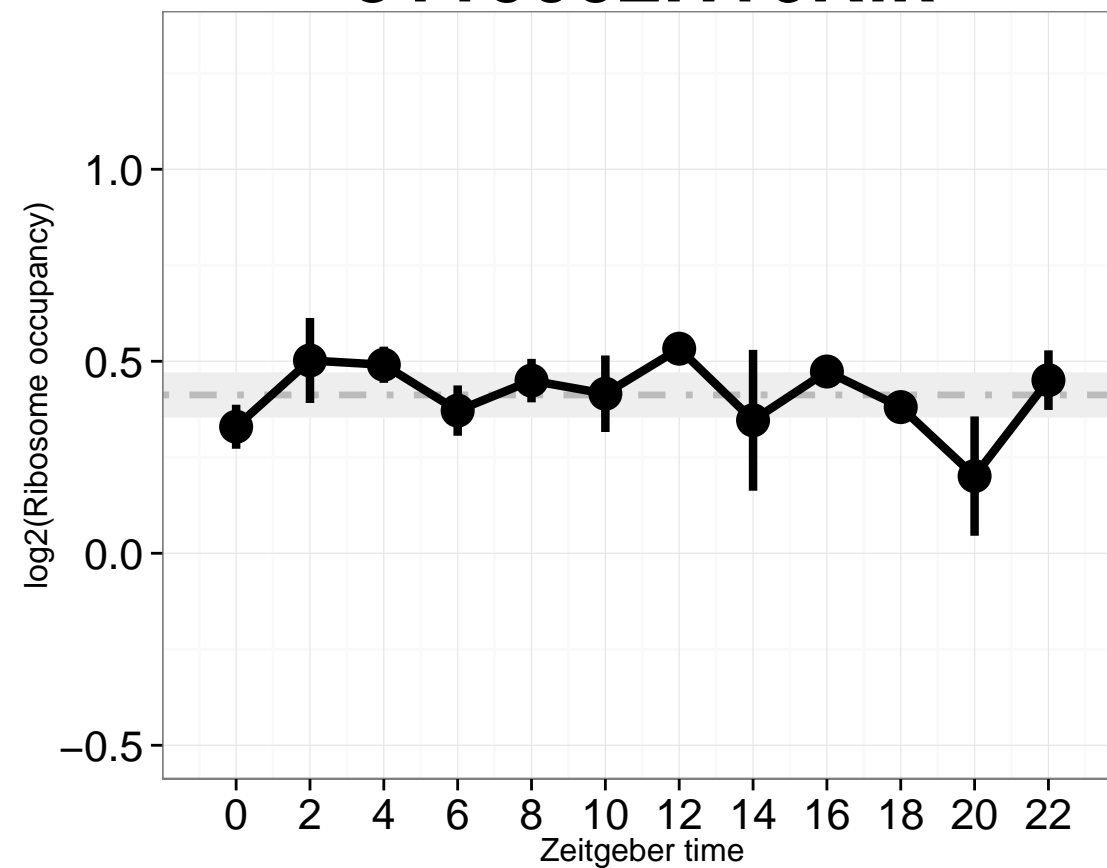

Supplement: Supplementary file 2047 [file 1]

# Tcof1

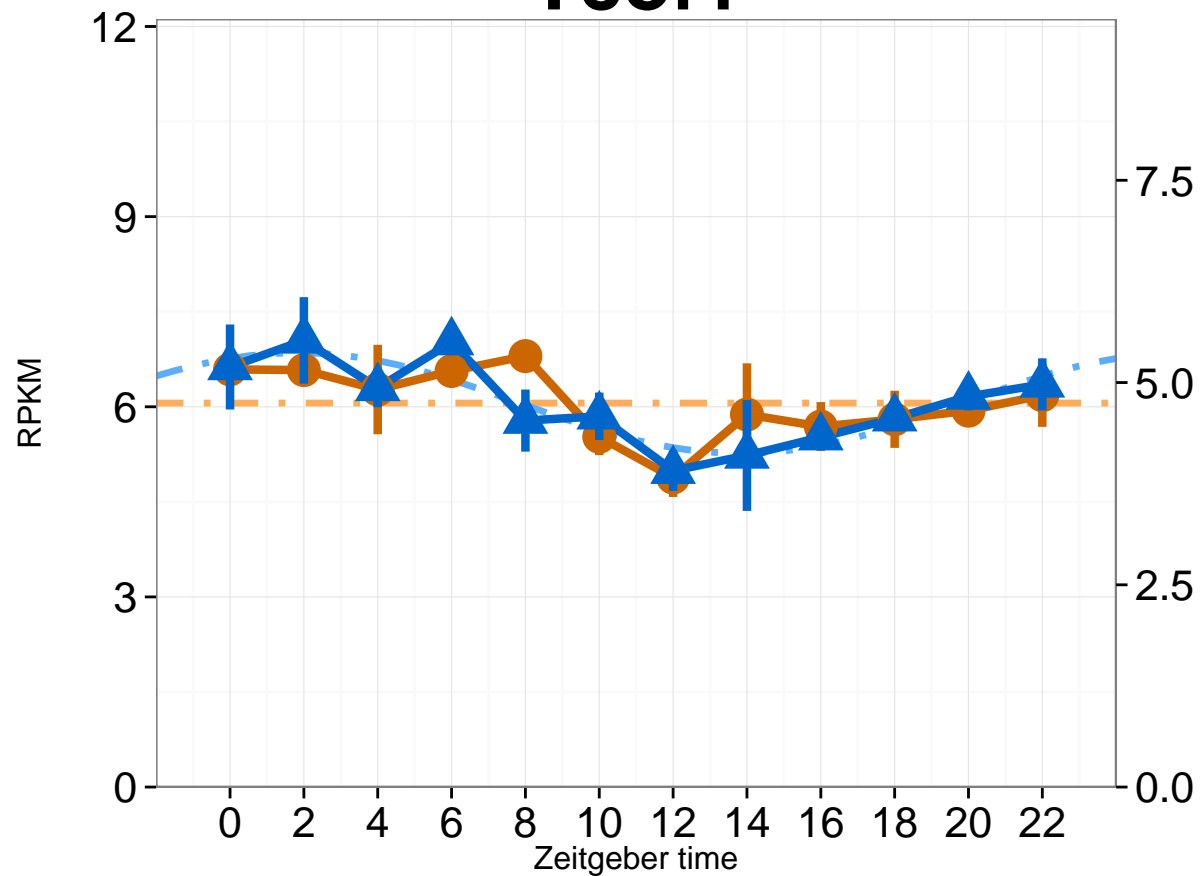

# Tcof1

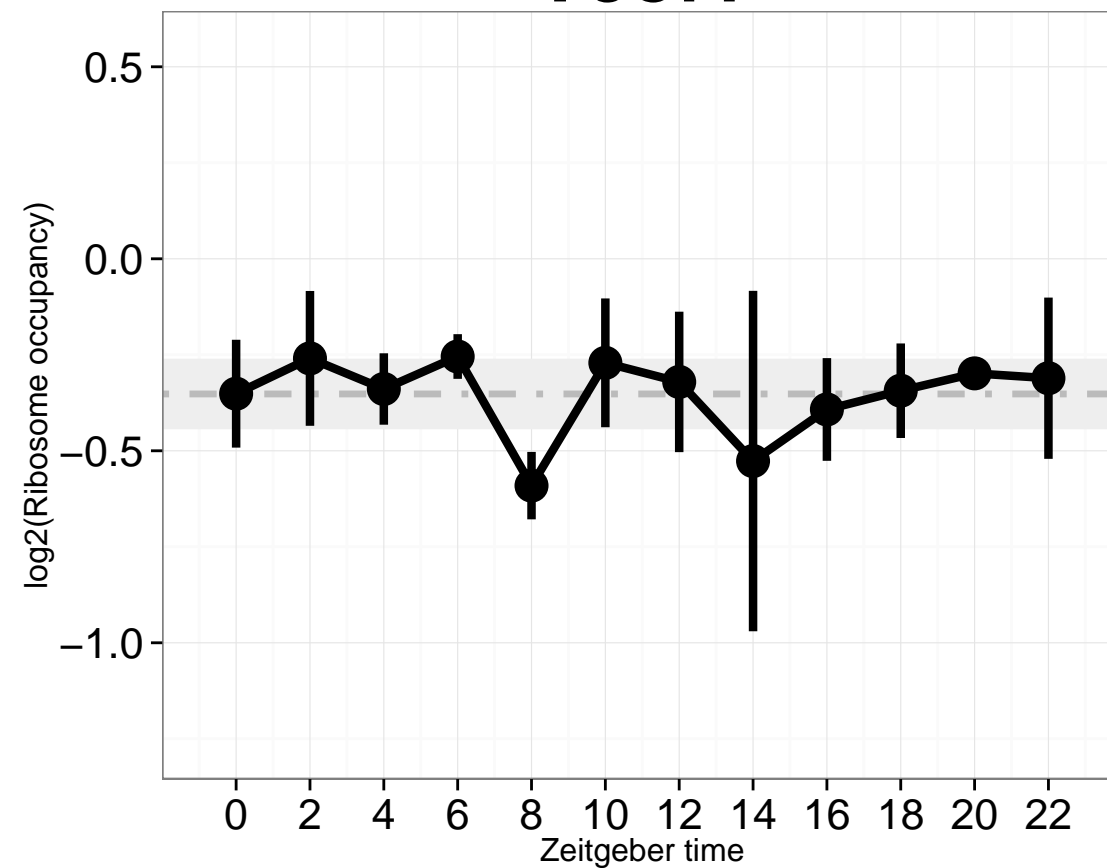

Supplement: Supplementary file 2048 [file 1]

# Arrdc3

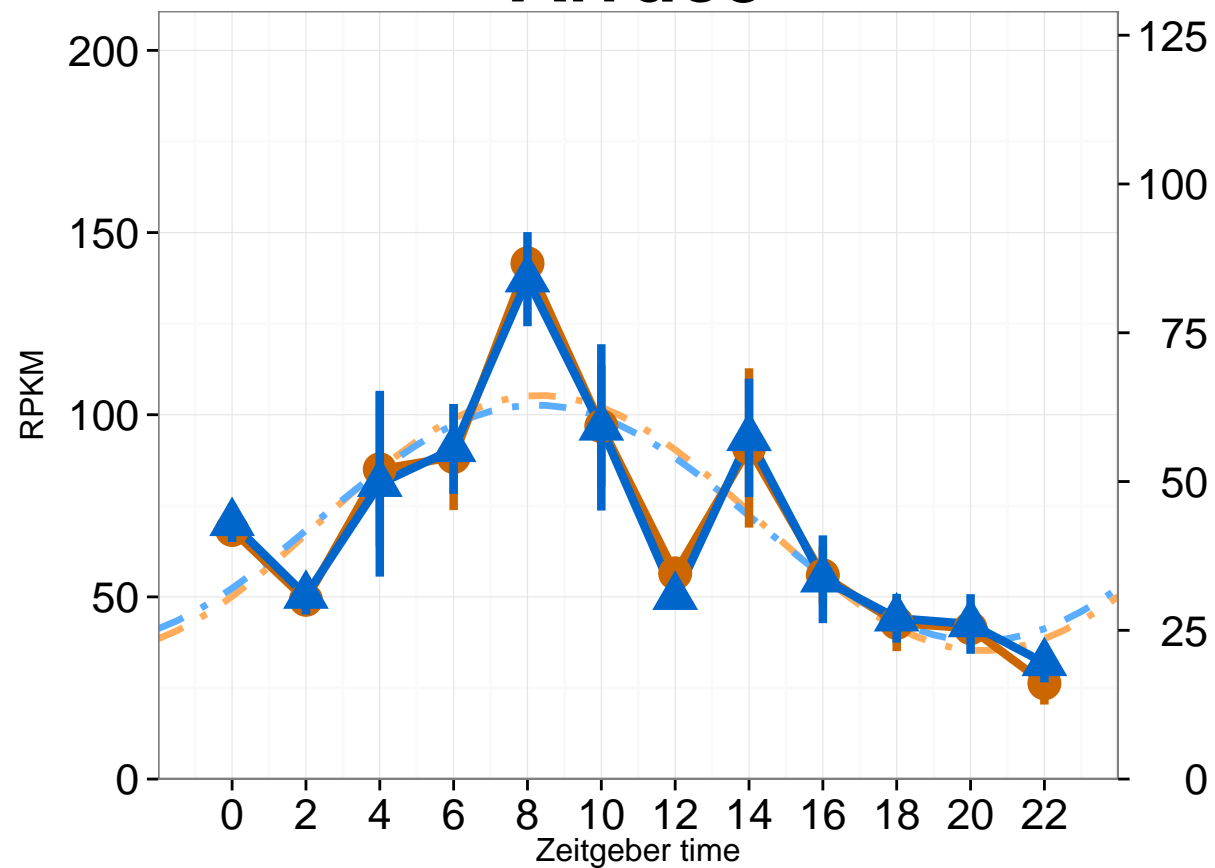

# Arrdc3

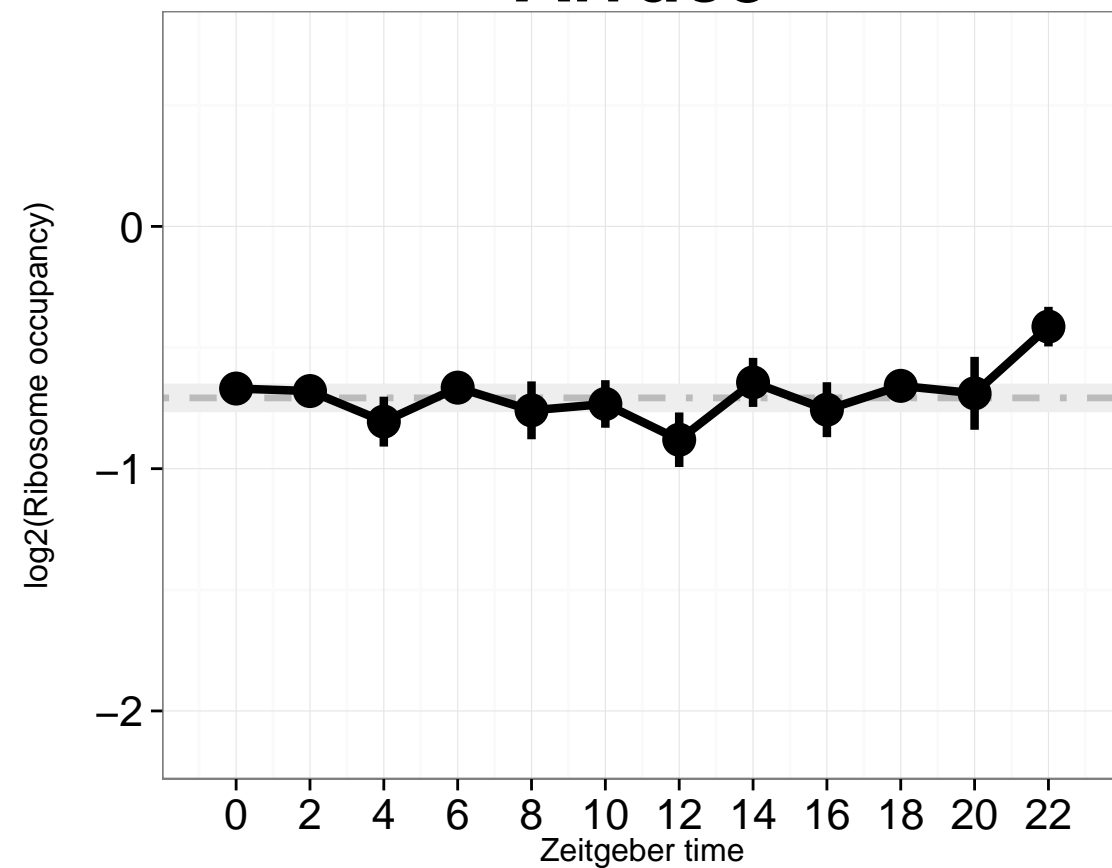

Supplement: Supplementary file 2049 [file 1]

# Cyhr1

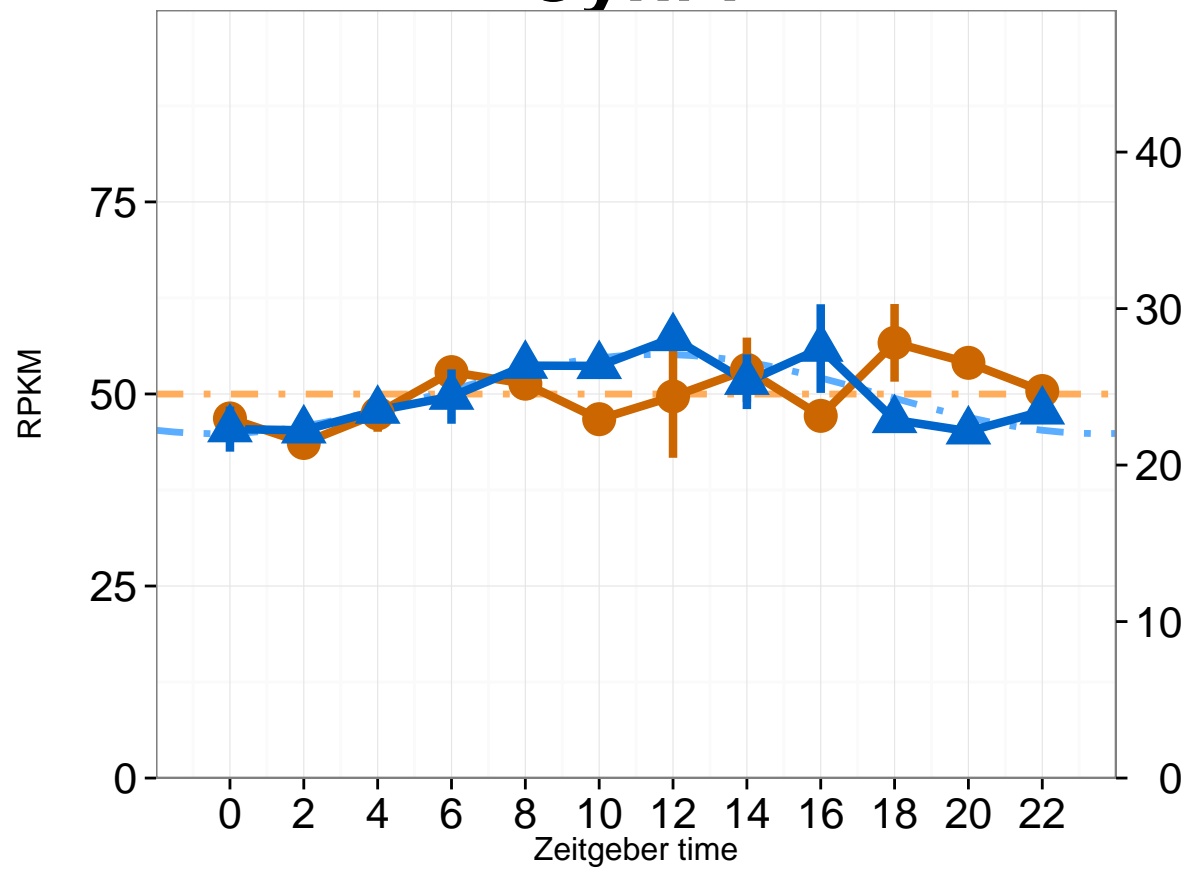

# Cyhr1

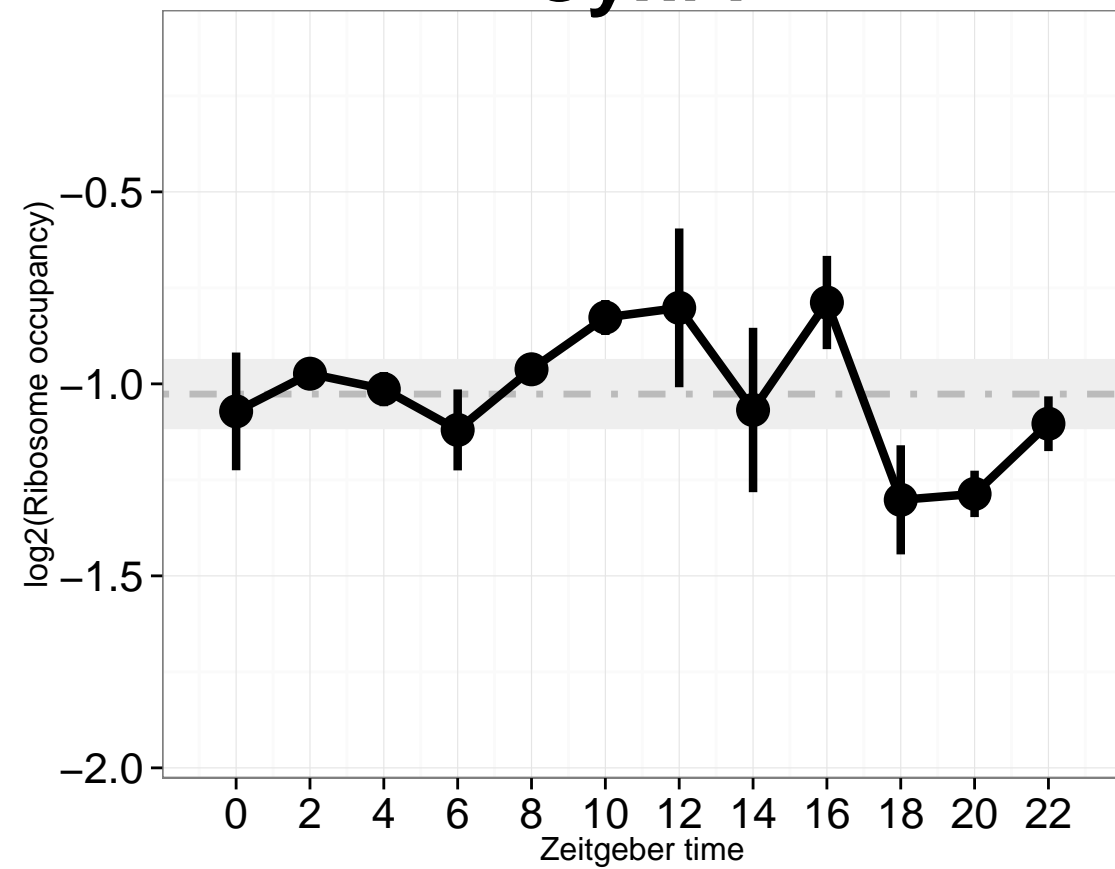

Supplement: Supplementary file 2050 [file 1]

# Zbtb39

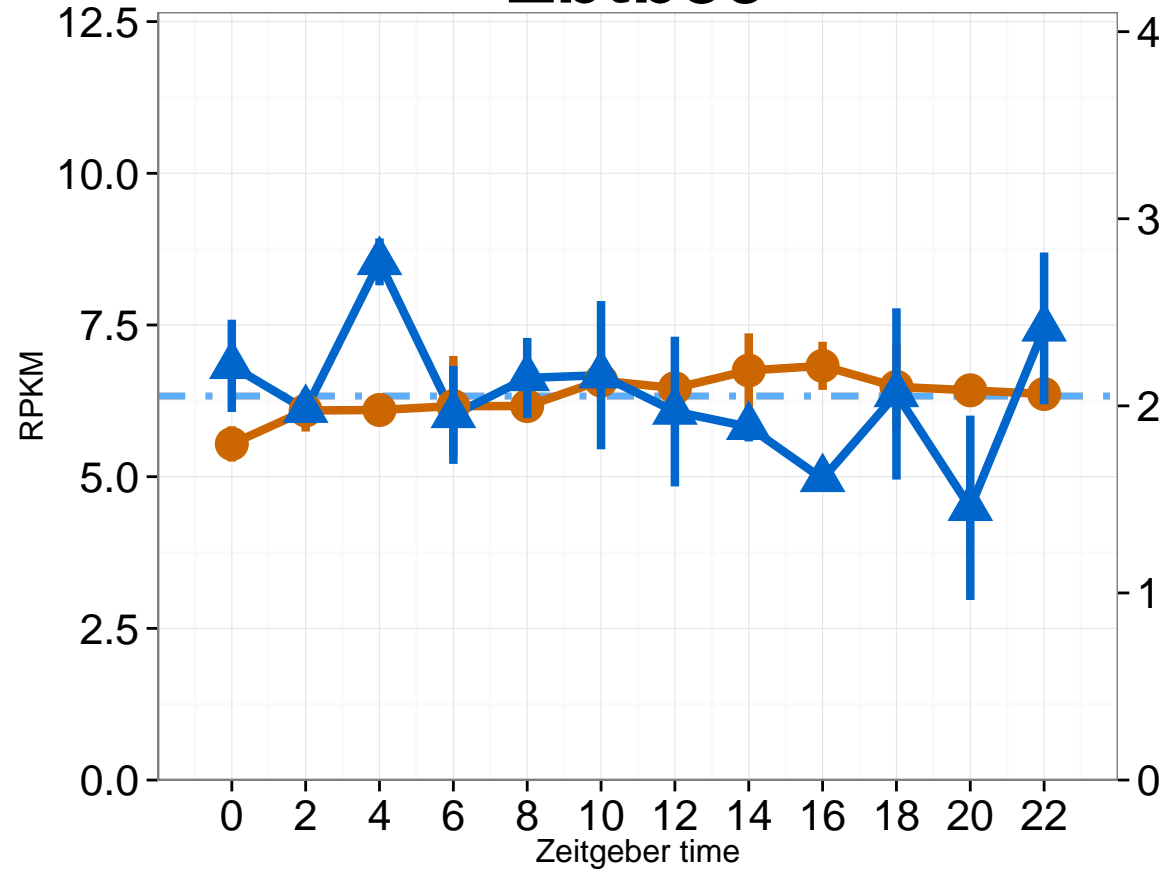

# Zbtb39

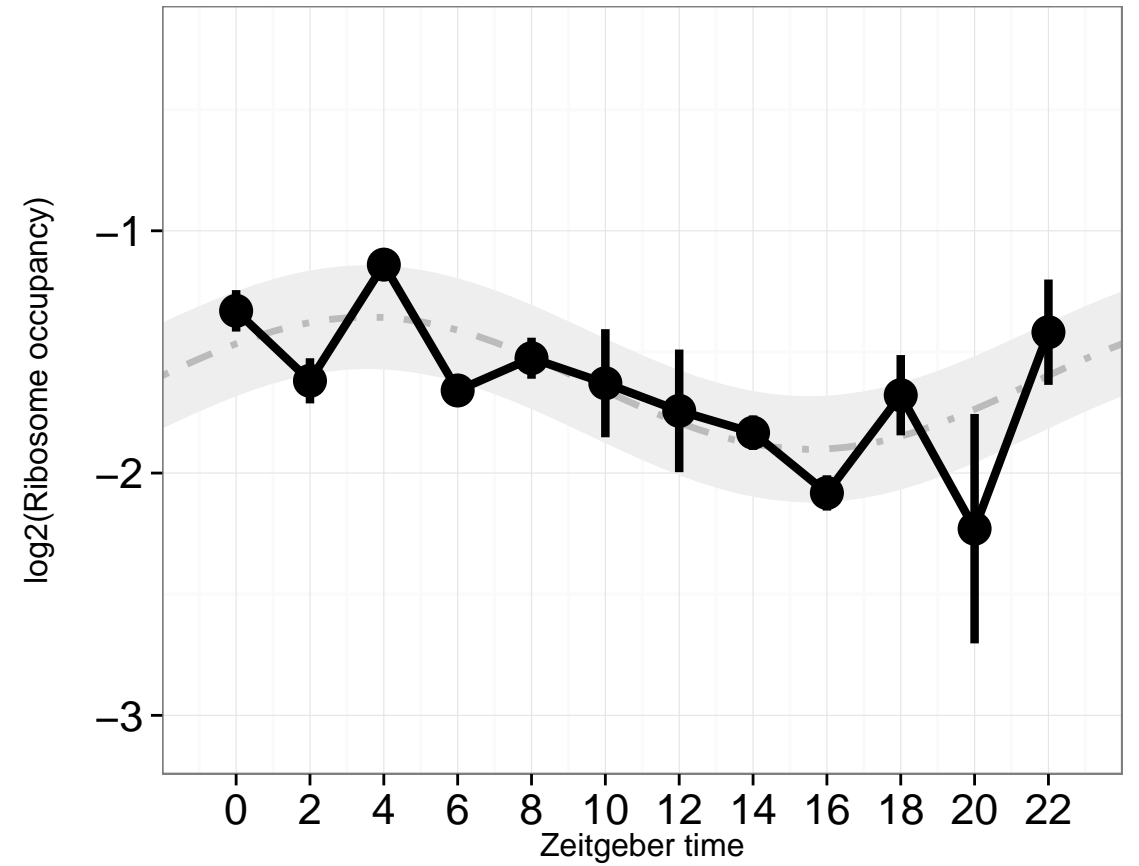

Supplement: Supplementary file 2051 [file 1]

# Rasgrp1

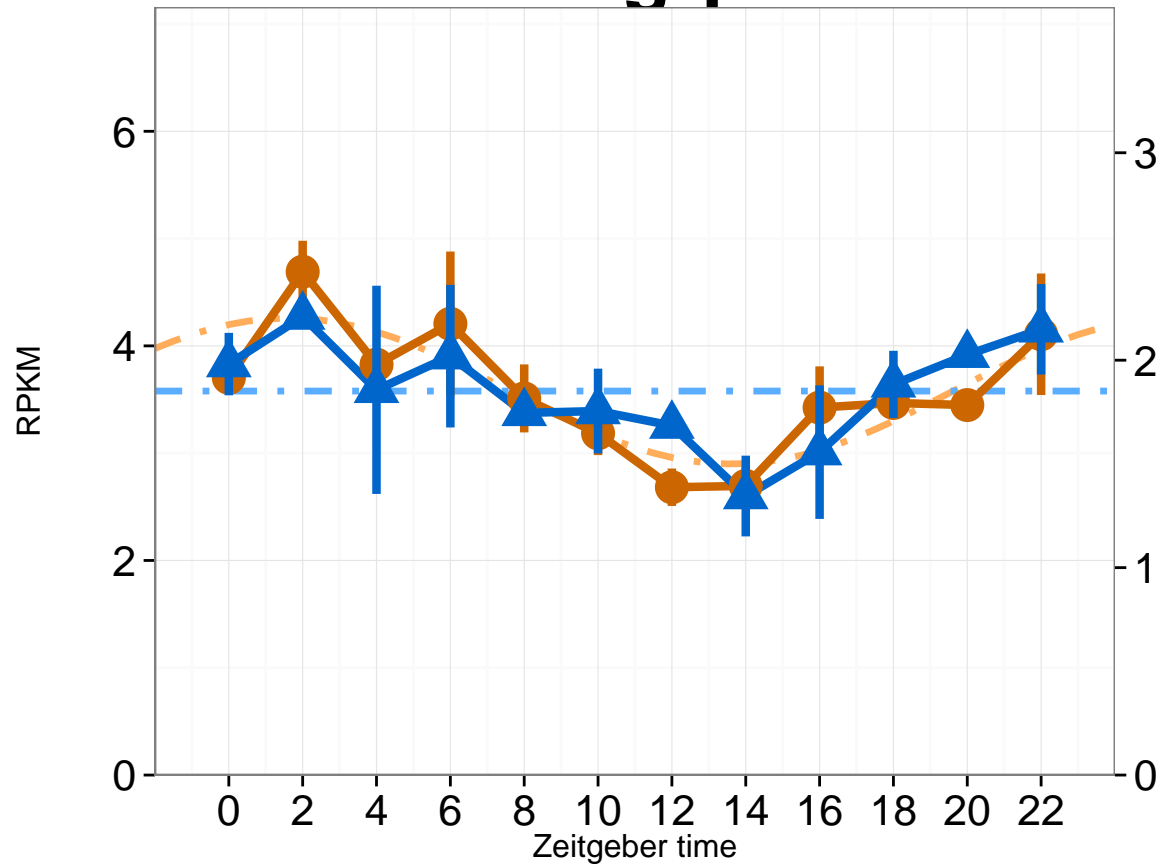

# Rasgrp1

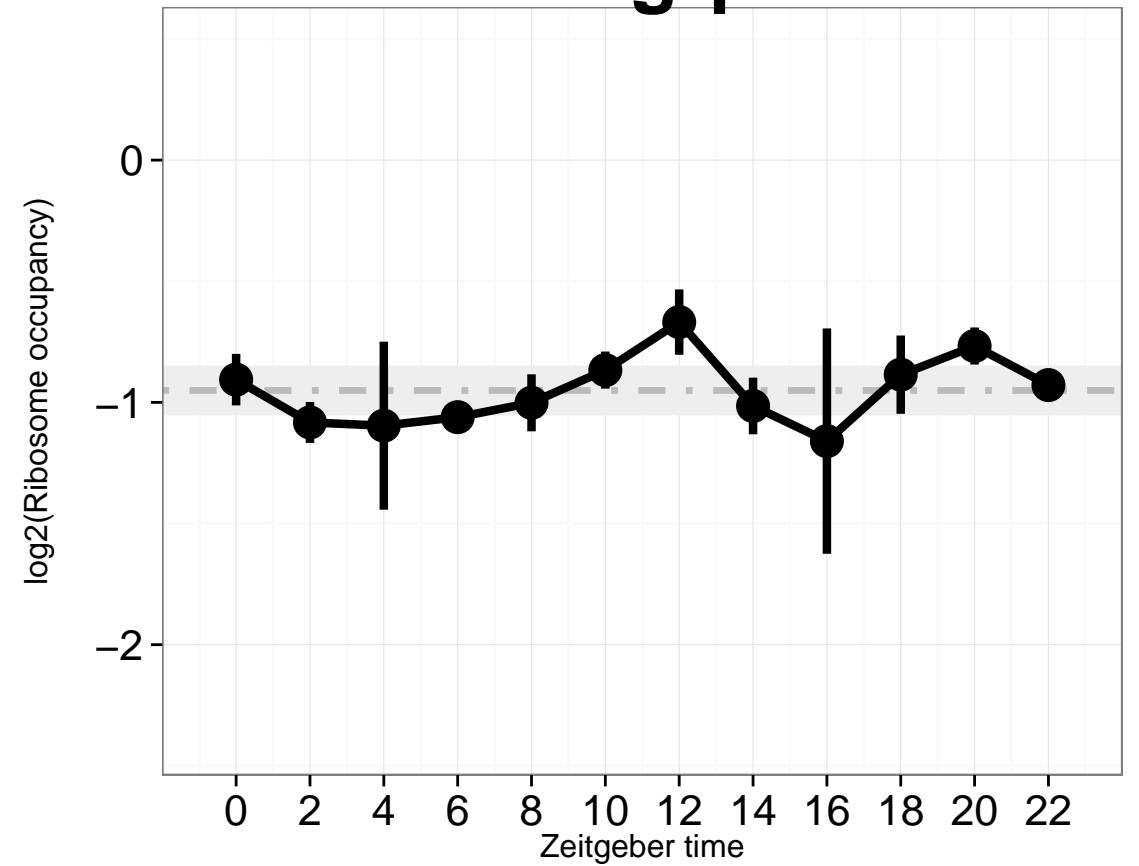

Supplement: Supplementary file 2052 [file 1]

## Cdc40

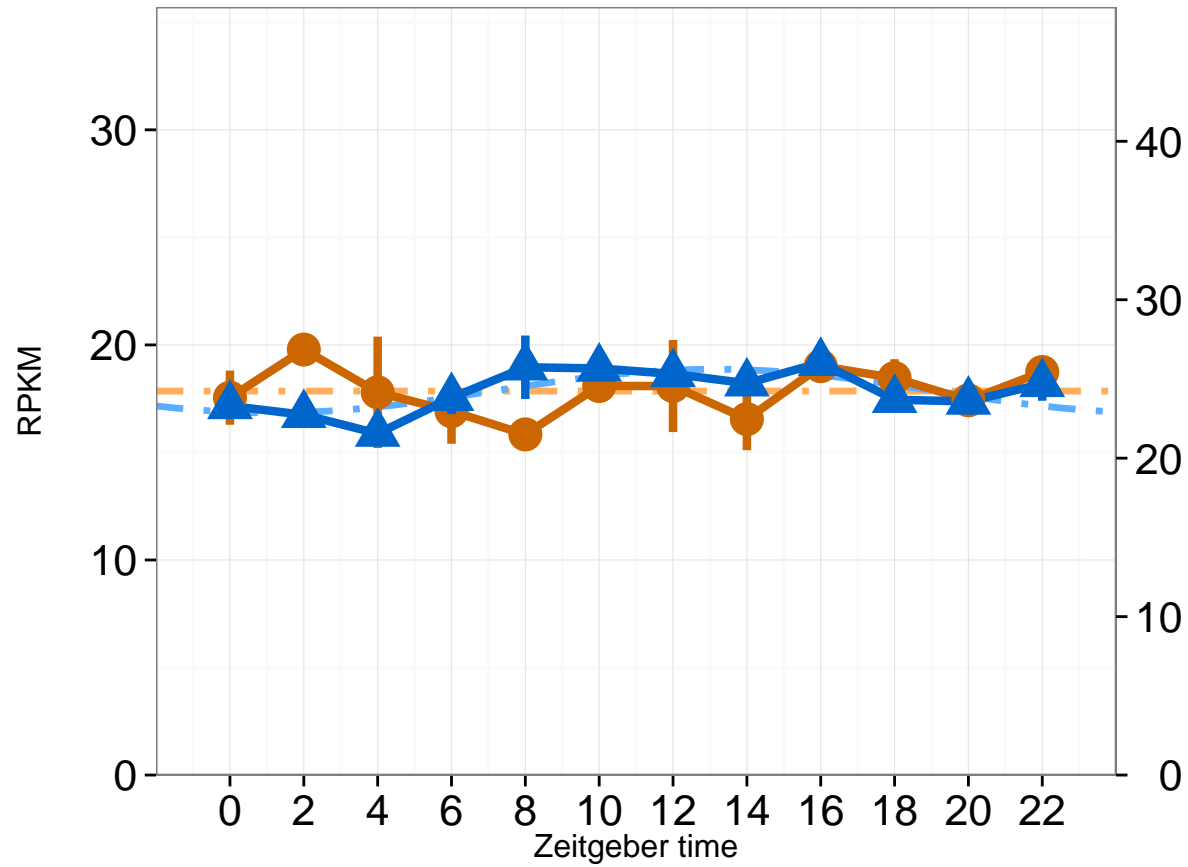

## Cdc40

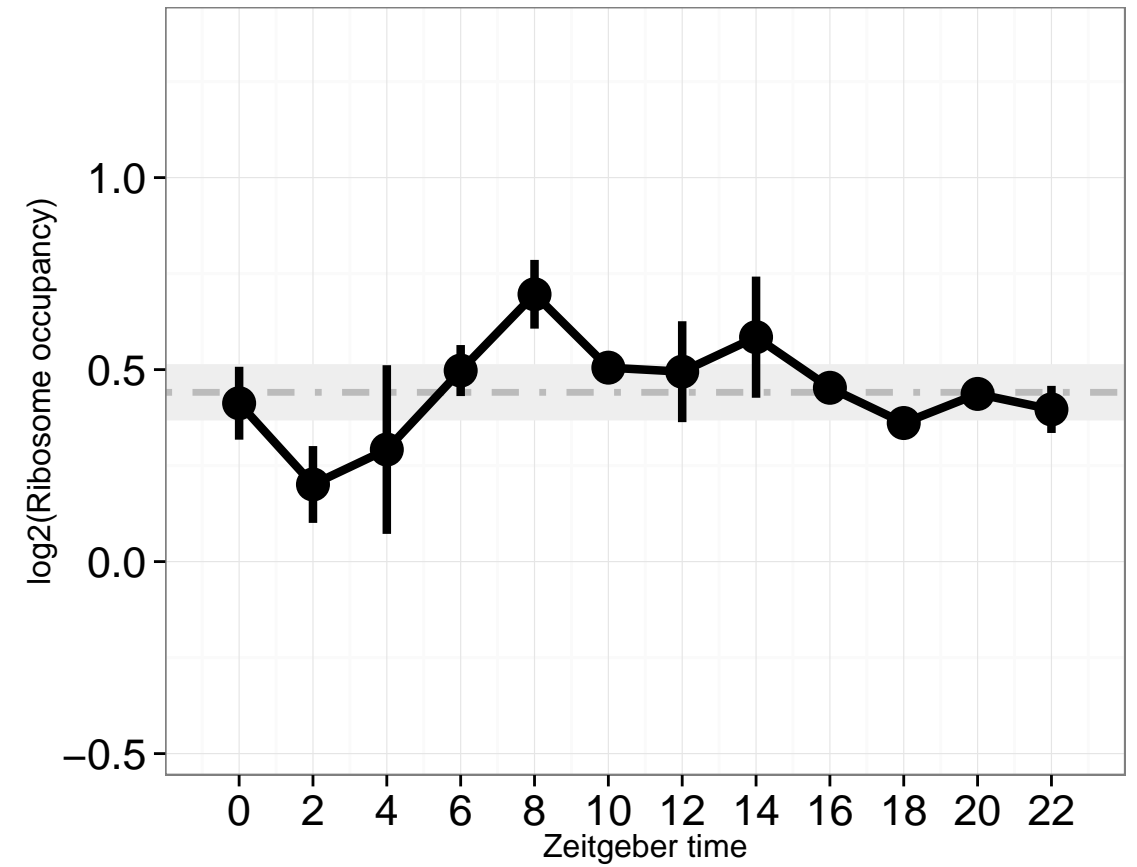

Supplement: Supplementary file 2053 [file 1]

# Krtcap2

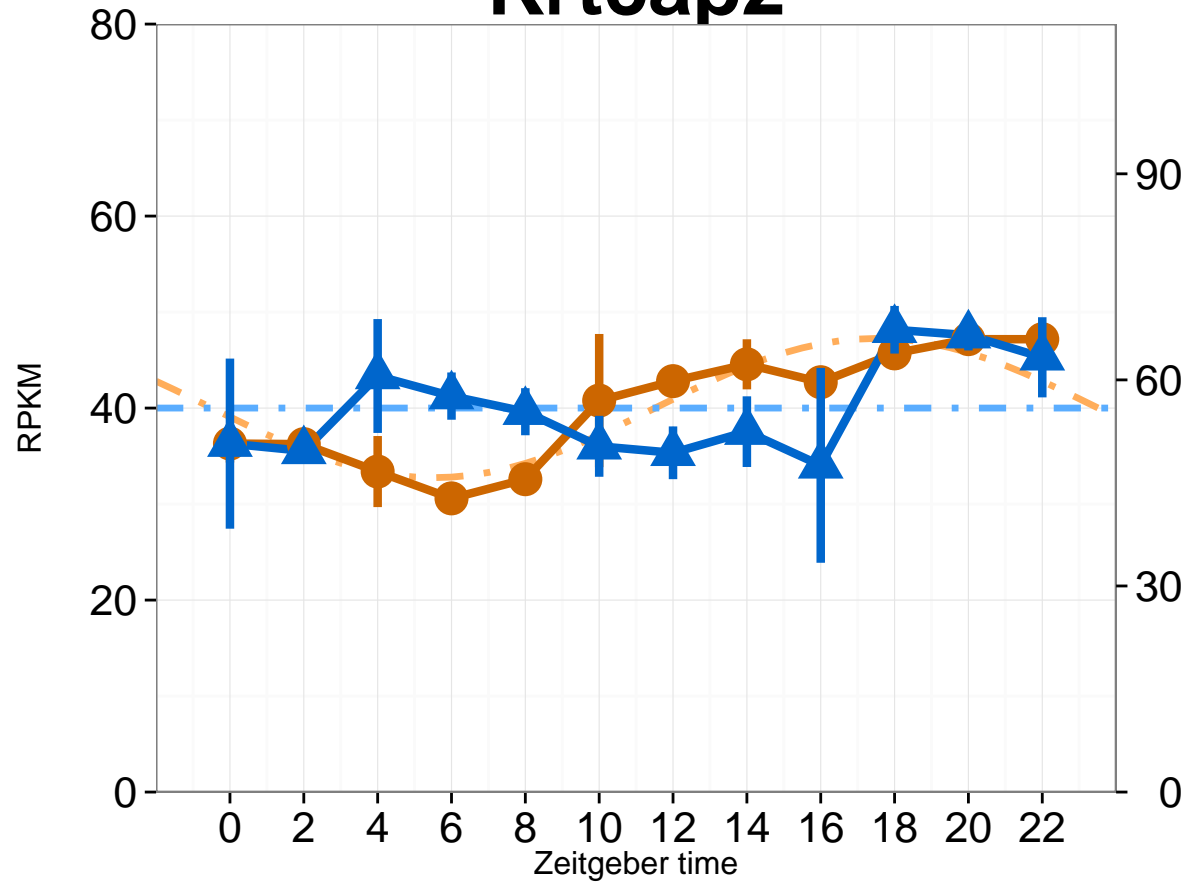

# Krtcap2

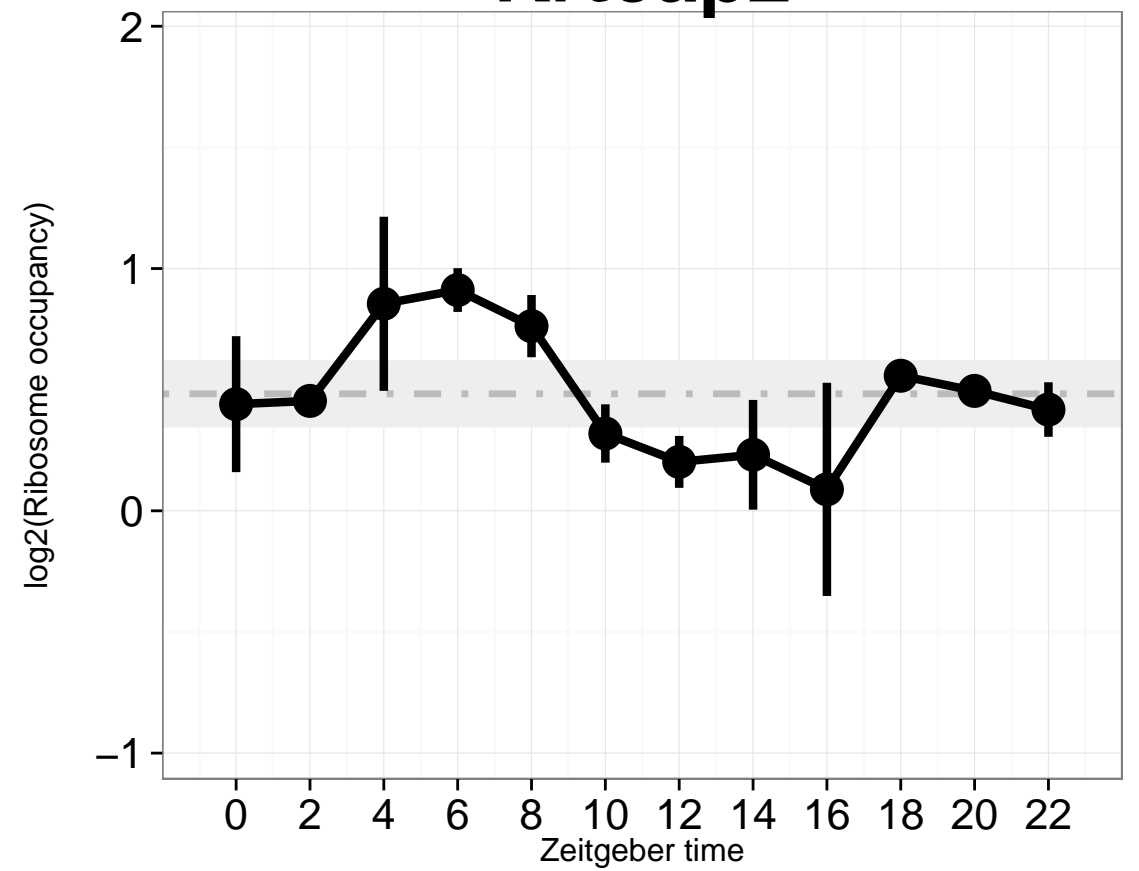

Supplement: Supplementary file 2054 [file 1]

# Cldn10

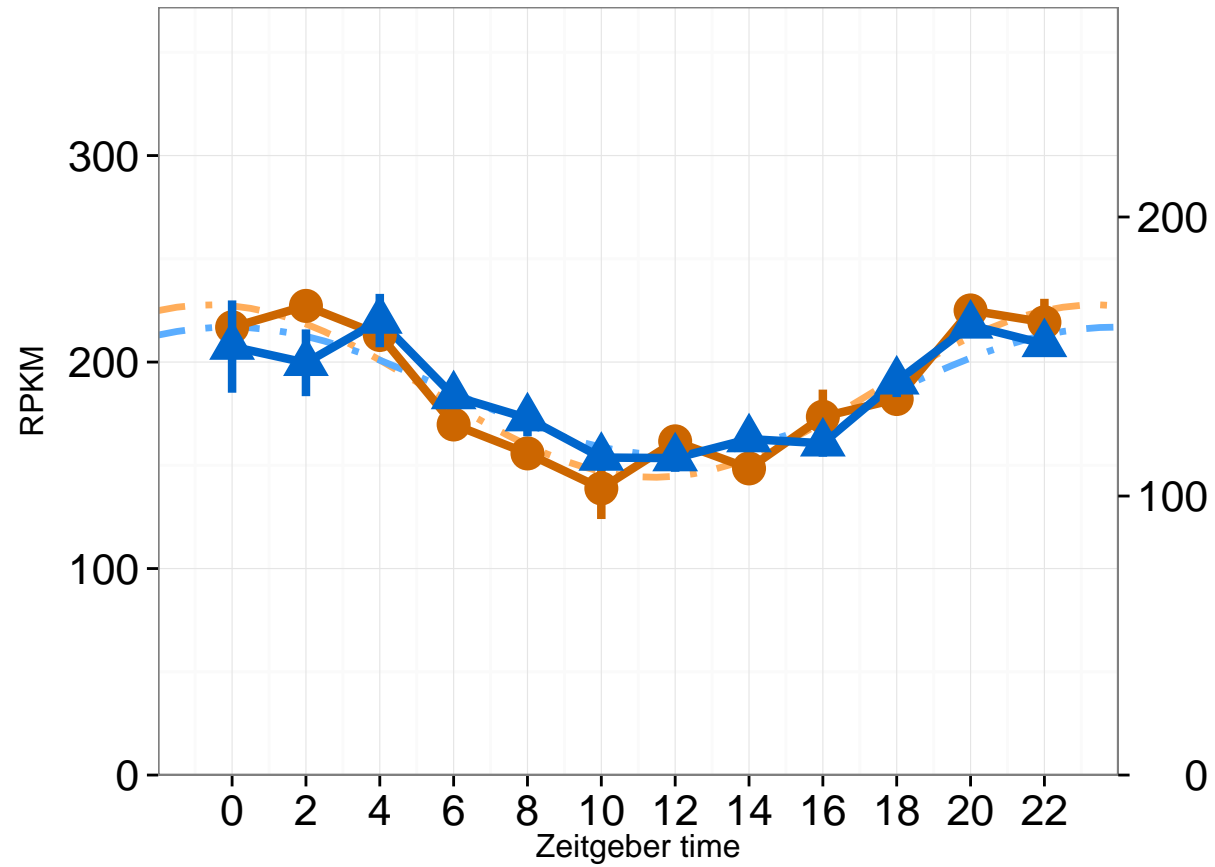

# Cldn10

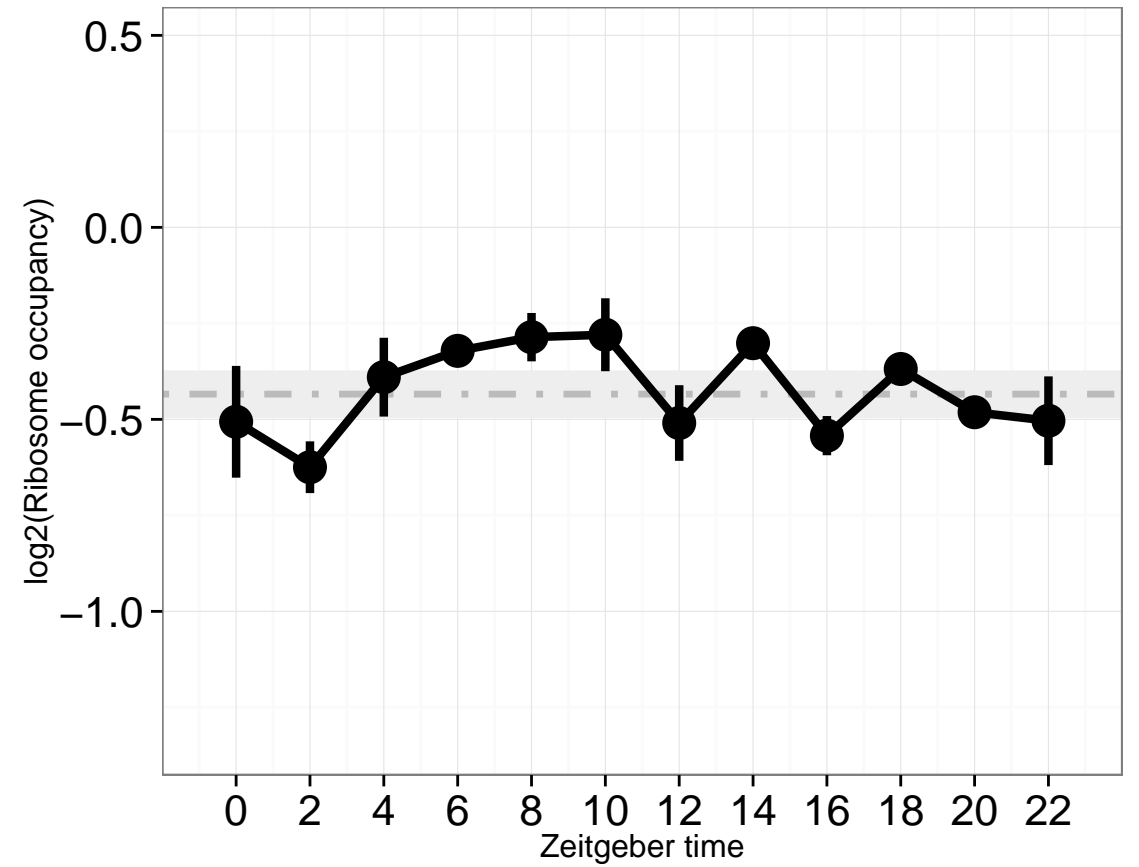

Supplement: Supplementary file 2055 [file 1]

## Nptxr

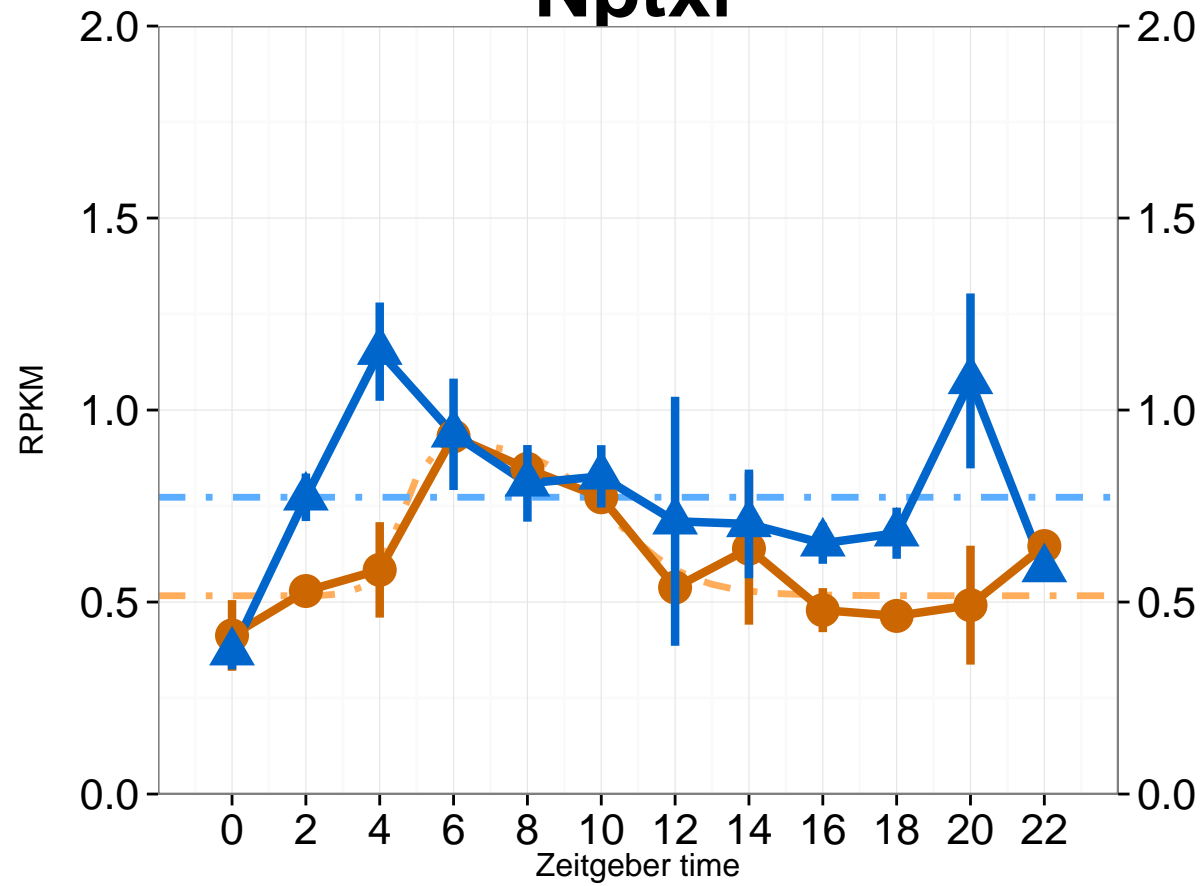

## Nptxr

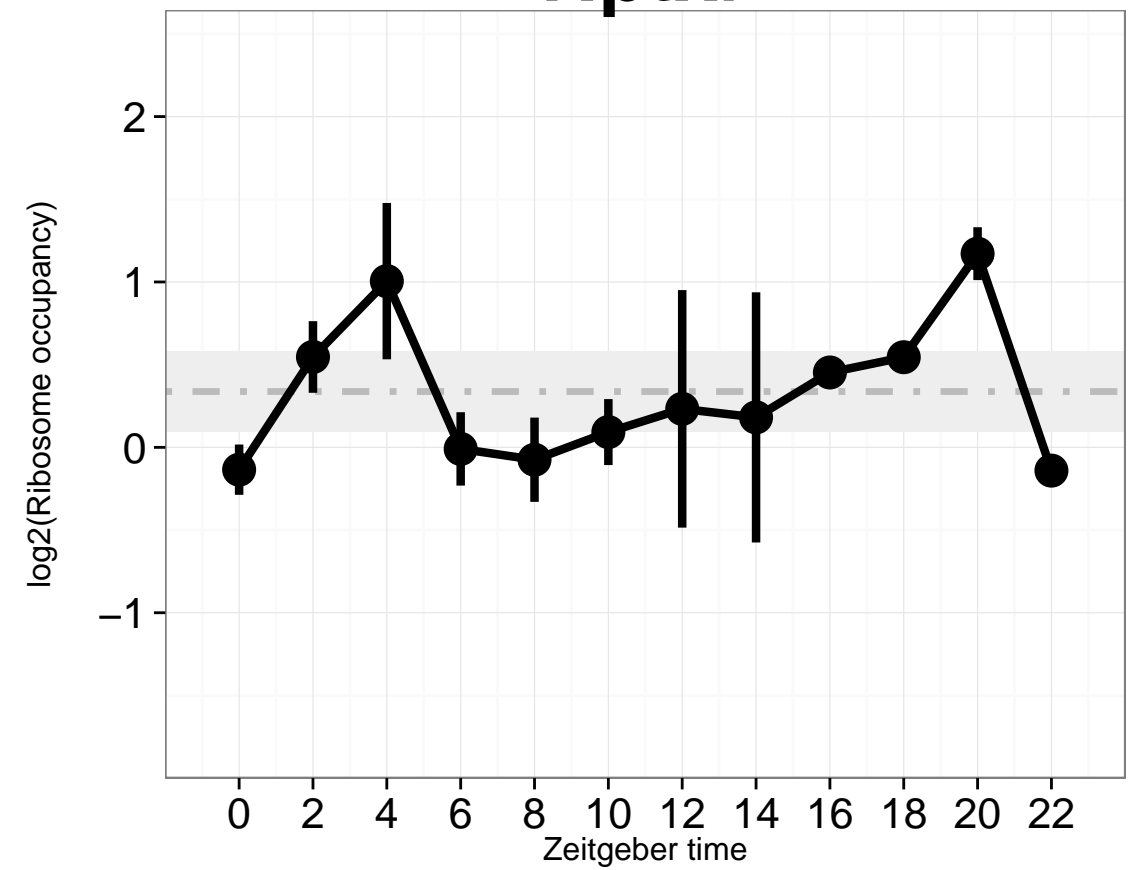

Supplement: Supplementary file 2056 [file 1]

# Tubgcp2

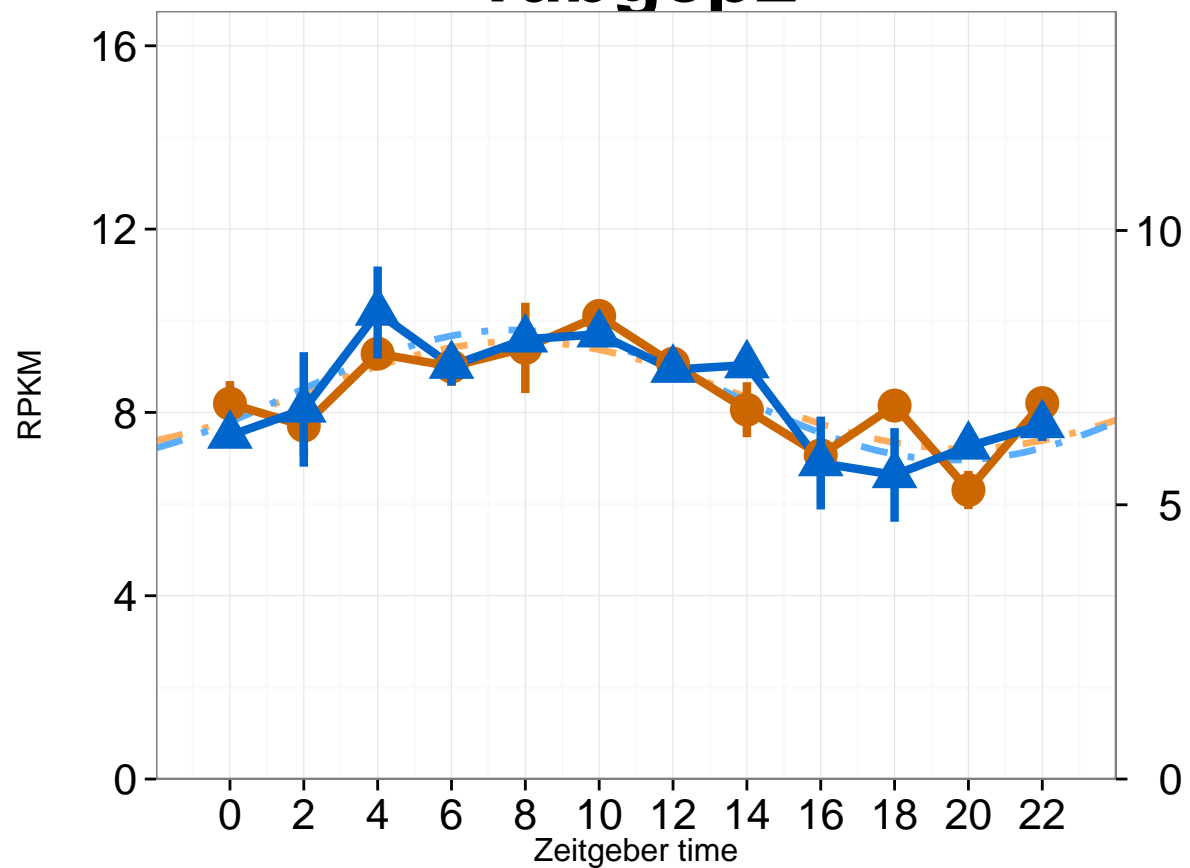

# Tubgcp2

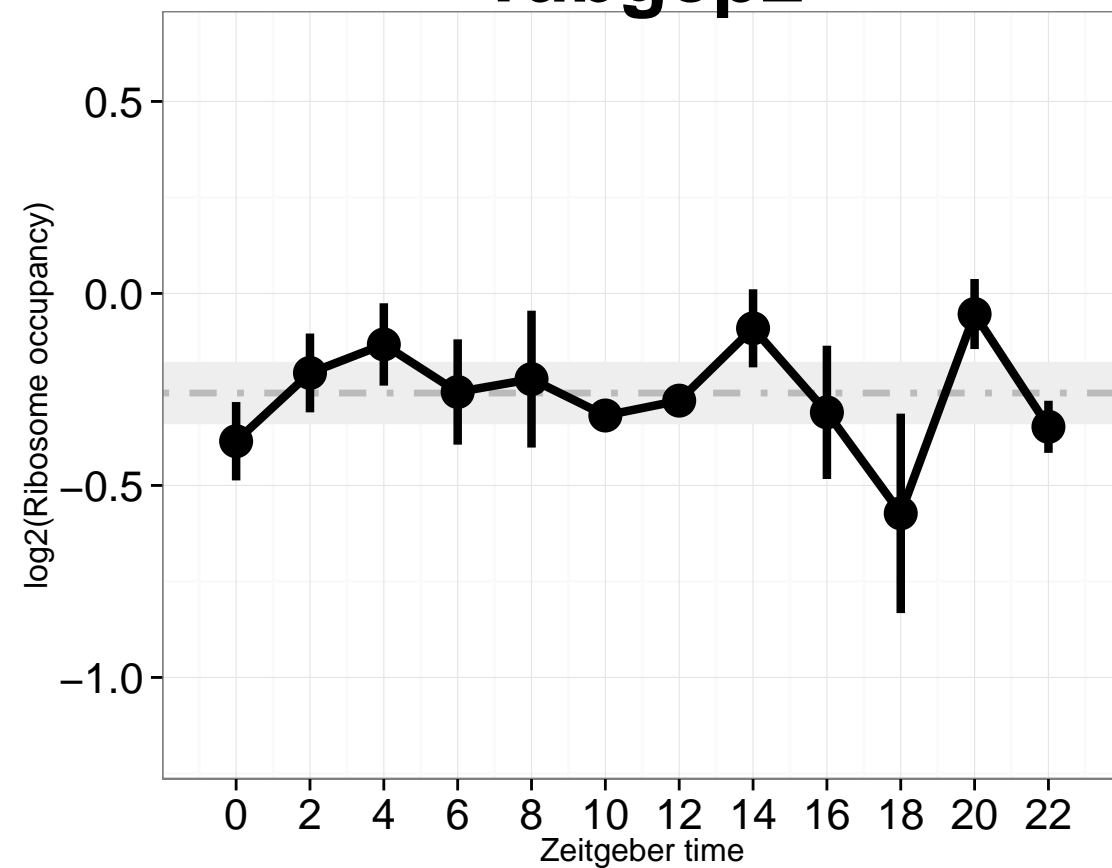

Supplement: Supplementary file 2057 [file 1]

## Plbd1

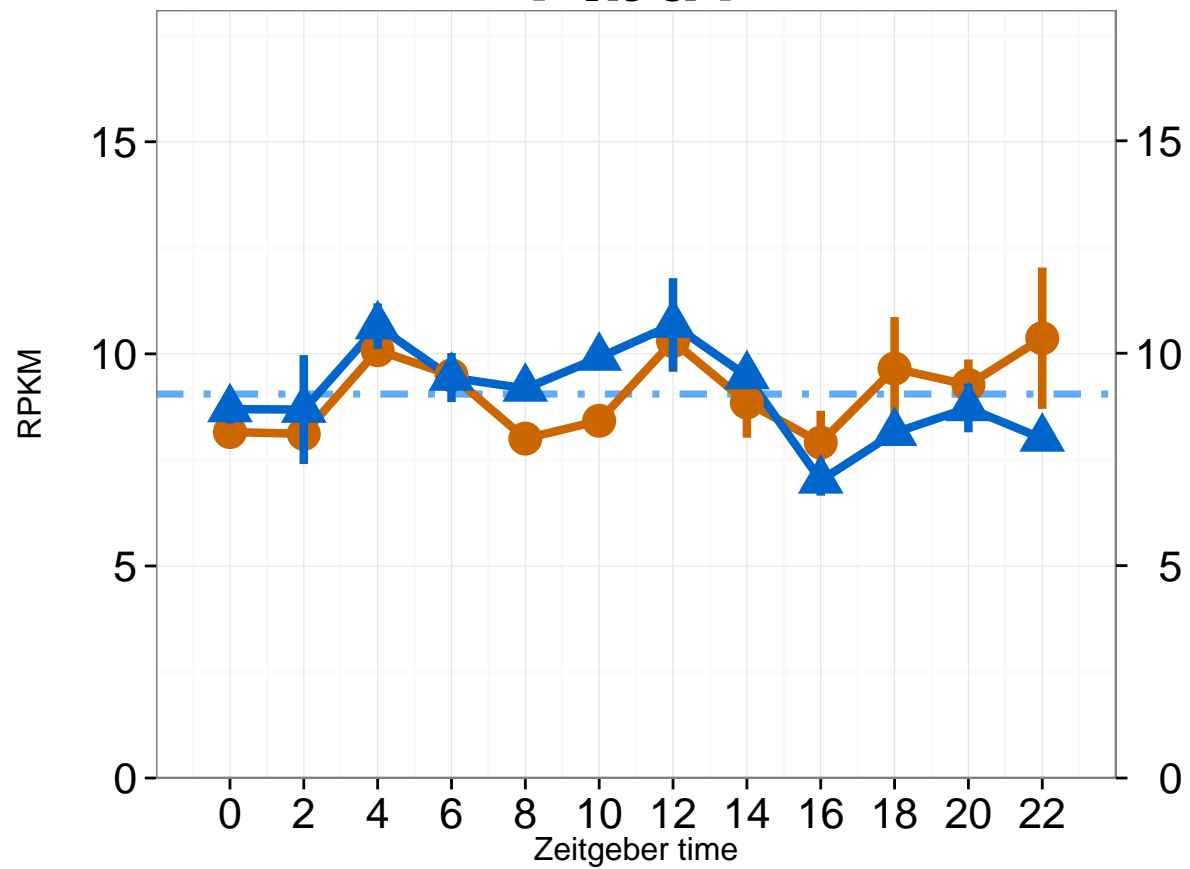

## Plbd1

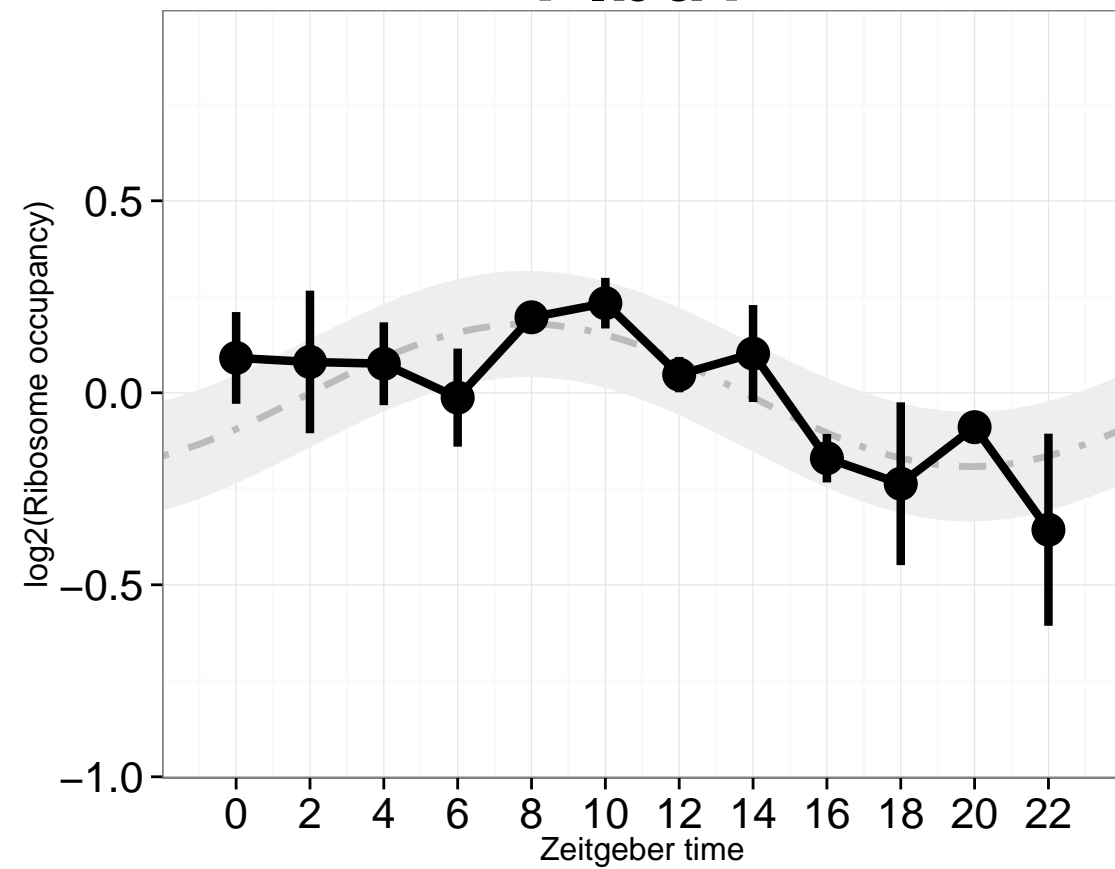

Supplement: Supplementary file 2058 [file 1]

## Marveld3

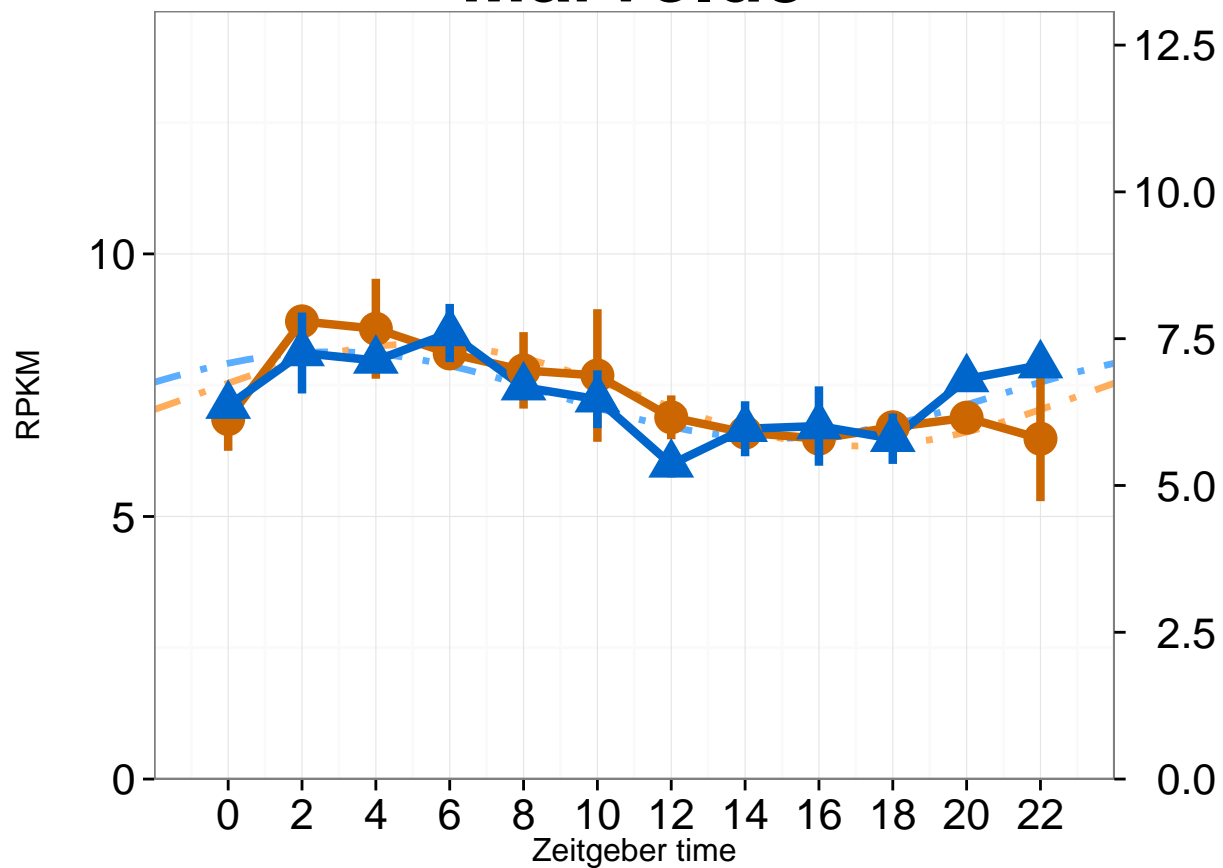

## Marveld3

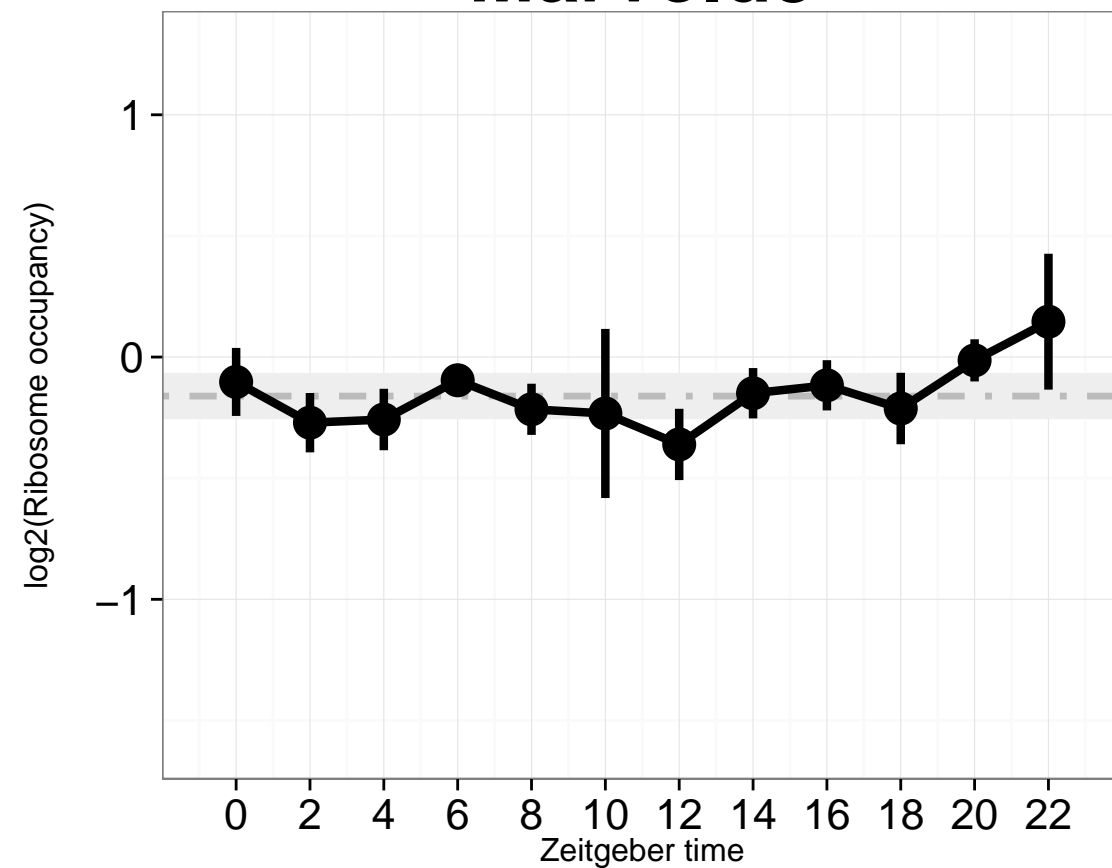

Supplement: Supplementary file 2059 [file 1]

## L3hypdh

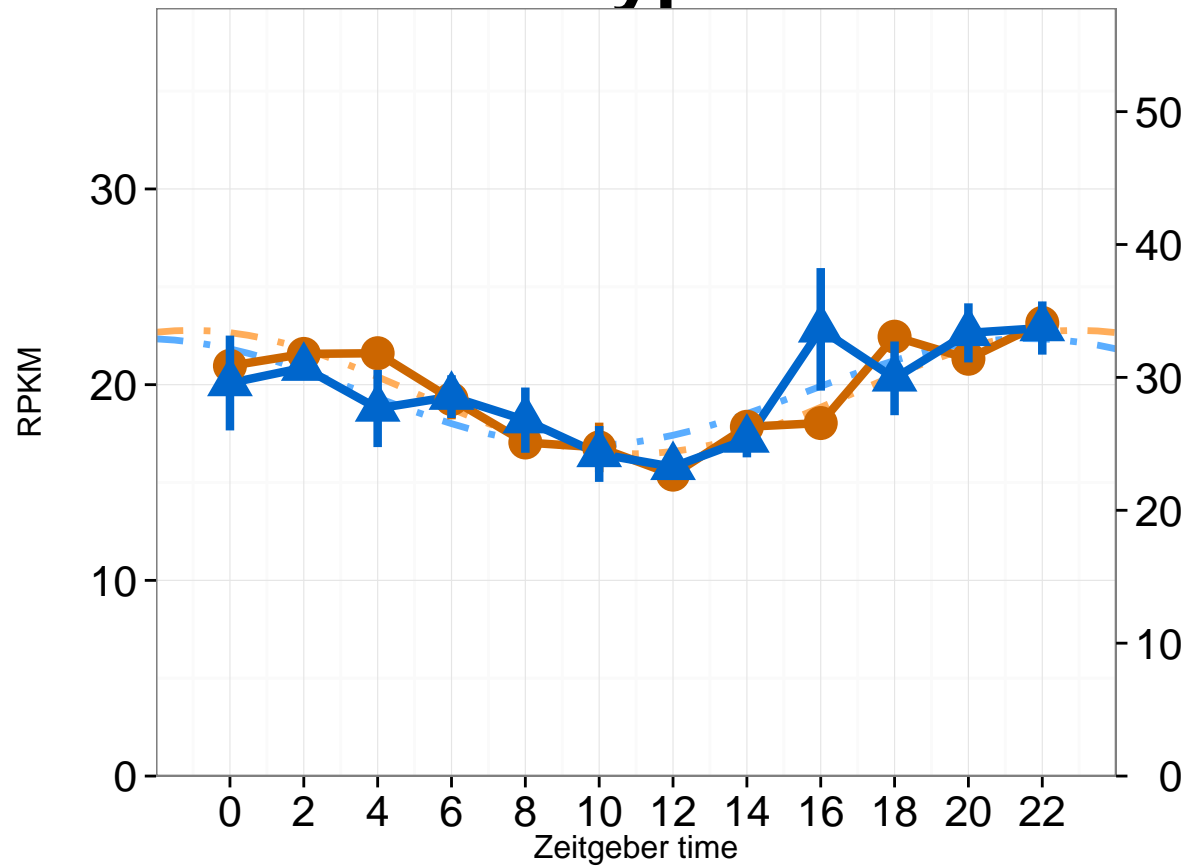

## L3hypdh

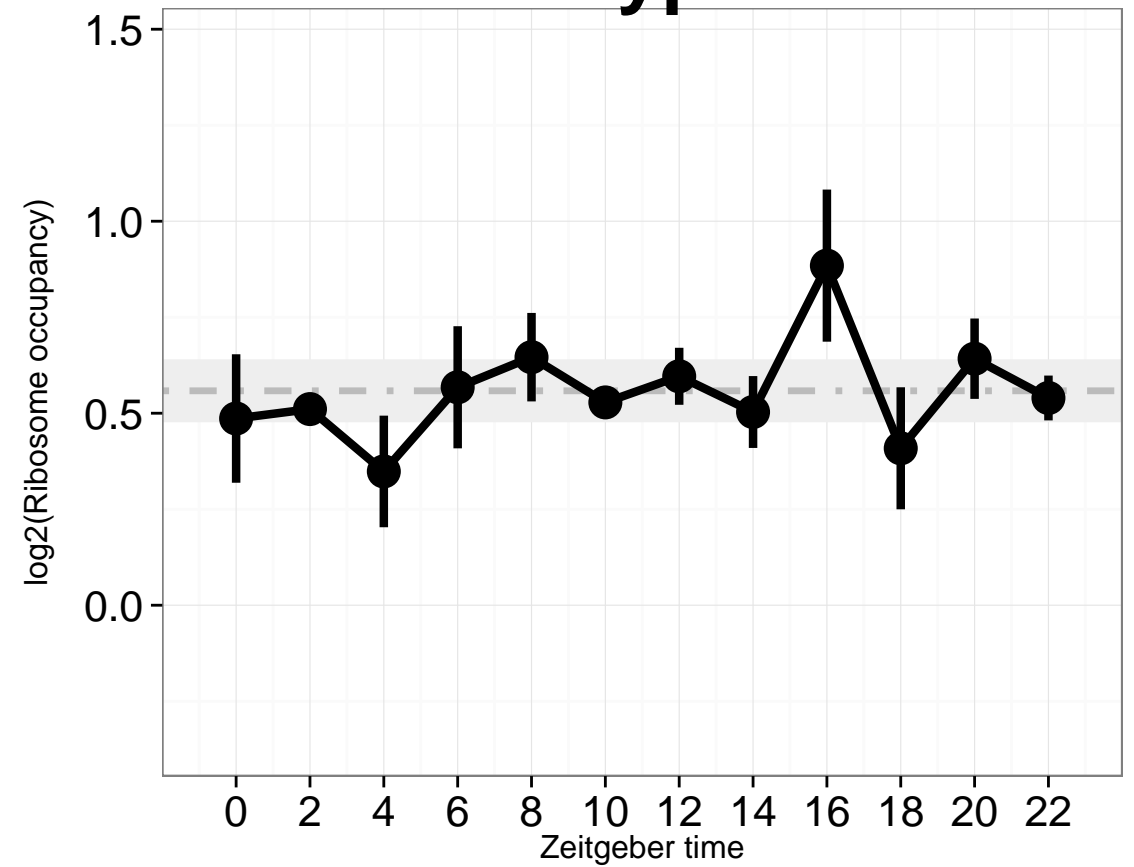

Supplement: Supplementary file 2060 [file 1]

# Man2b2

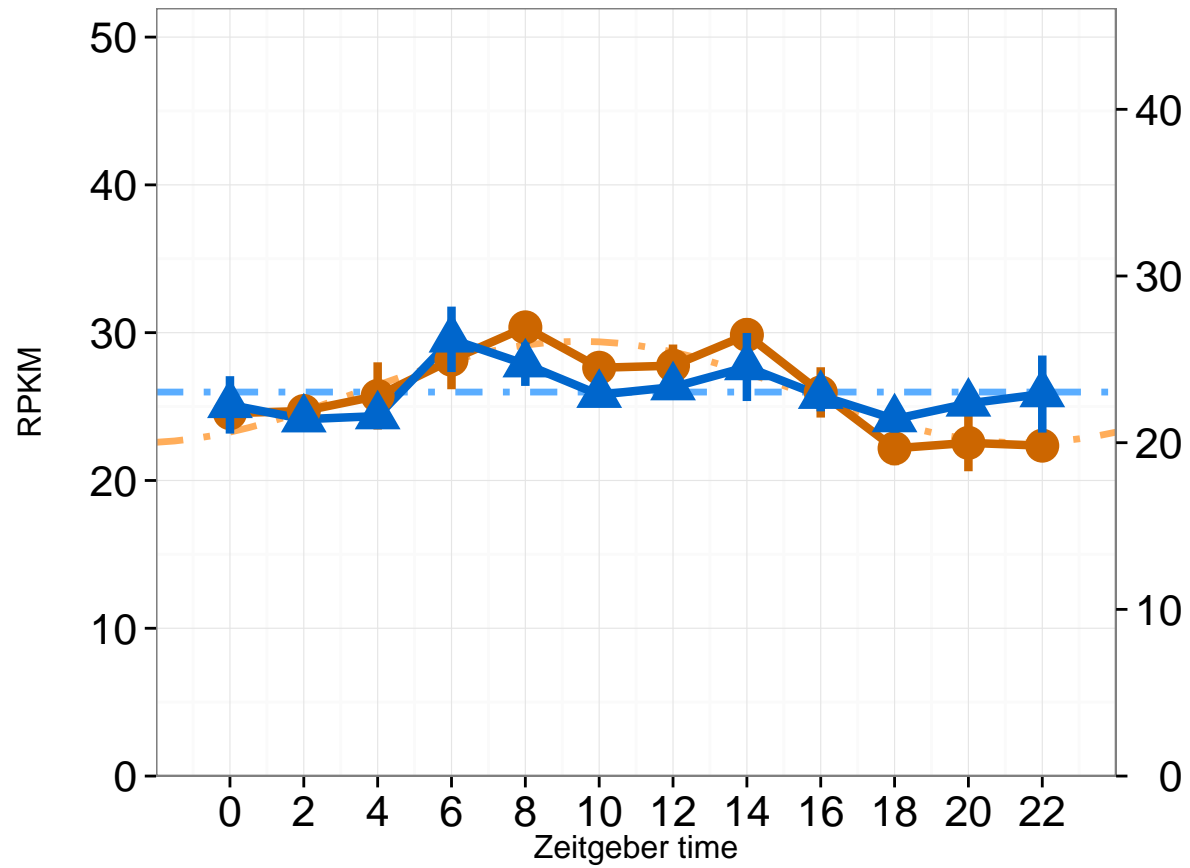

# Man2b2

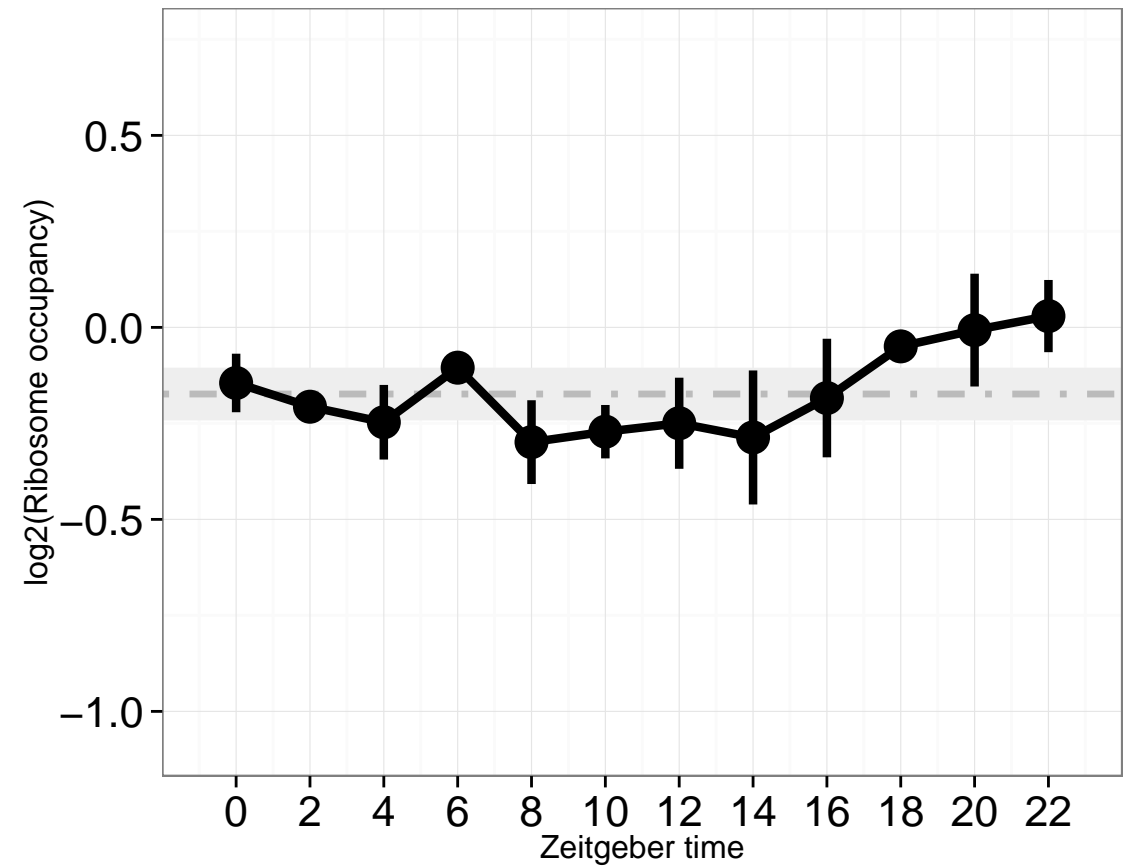

Supplement: Supplementary file 2061 [file 1]

# NIn

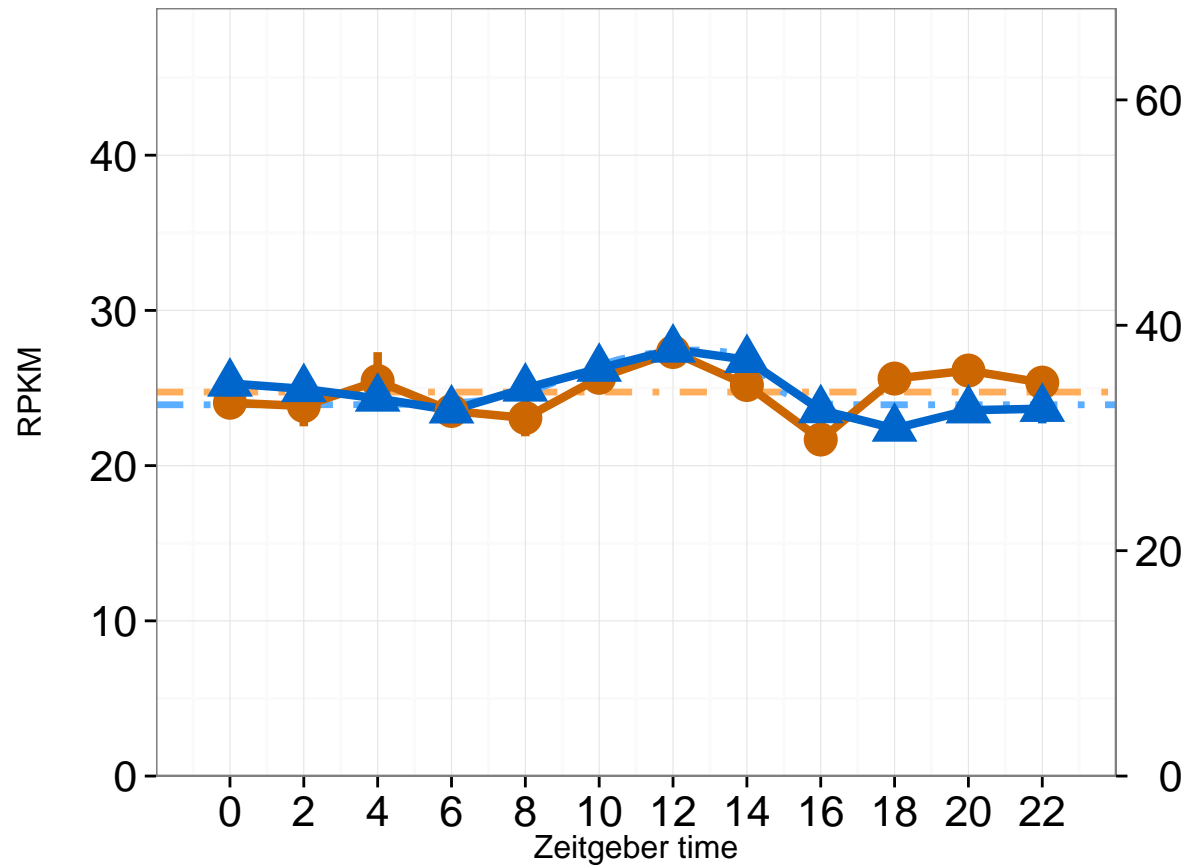

# NIn

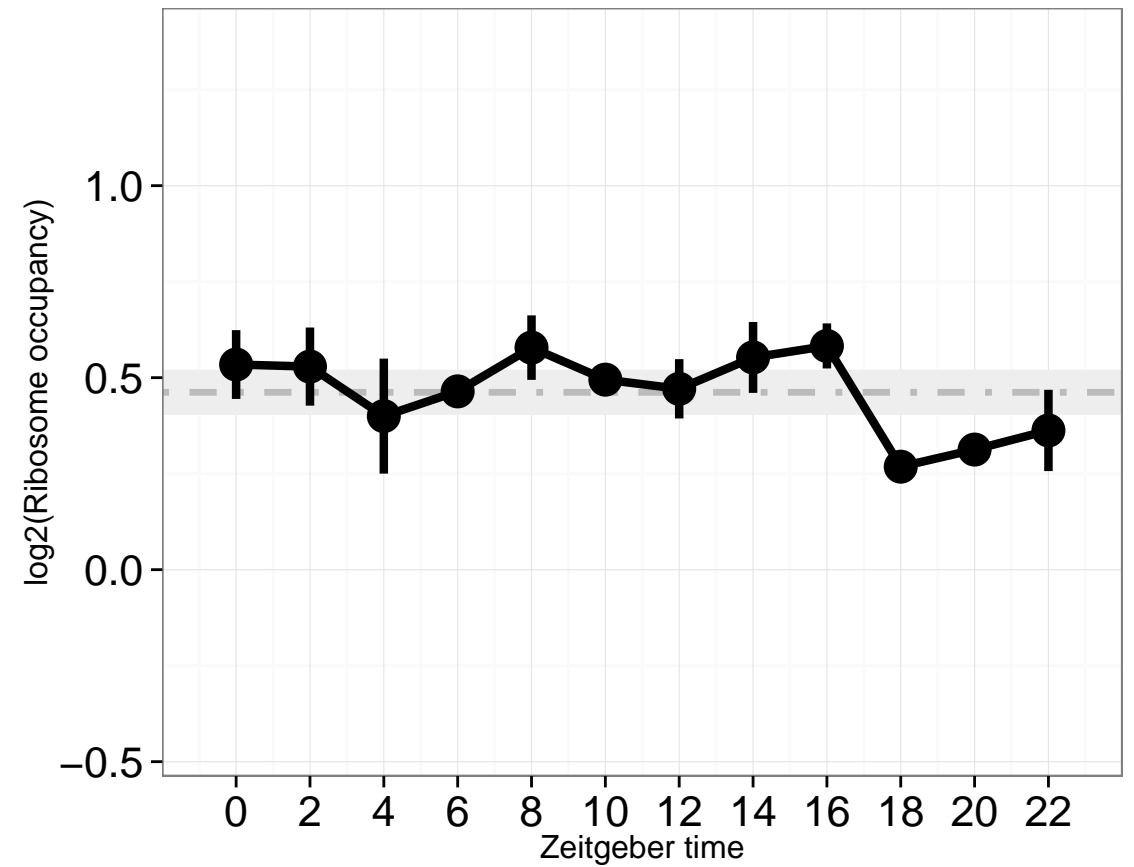

Supplement: Supplementary file 2062 [file 1]

## Dhx37

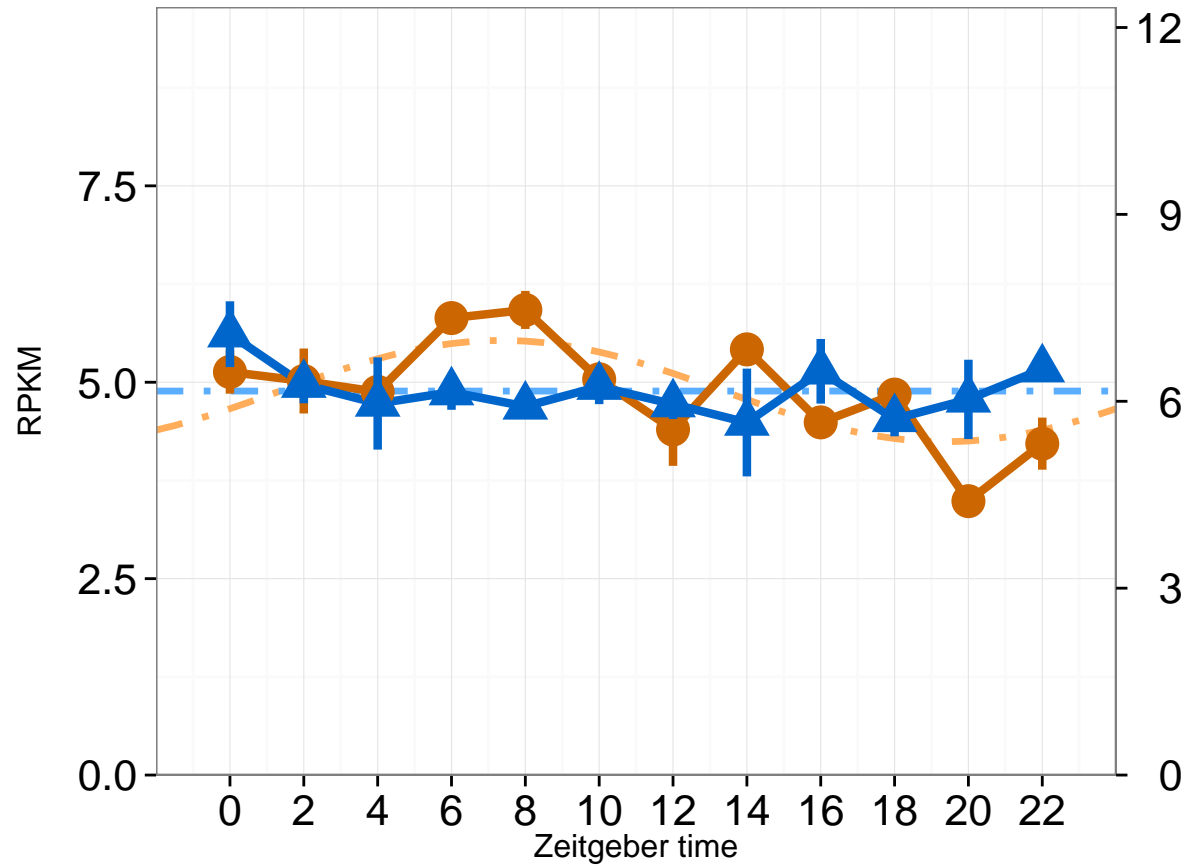

## Dhx37

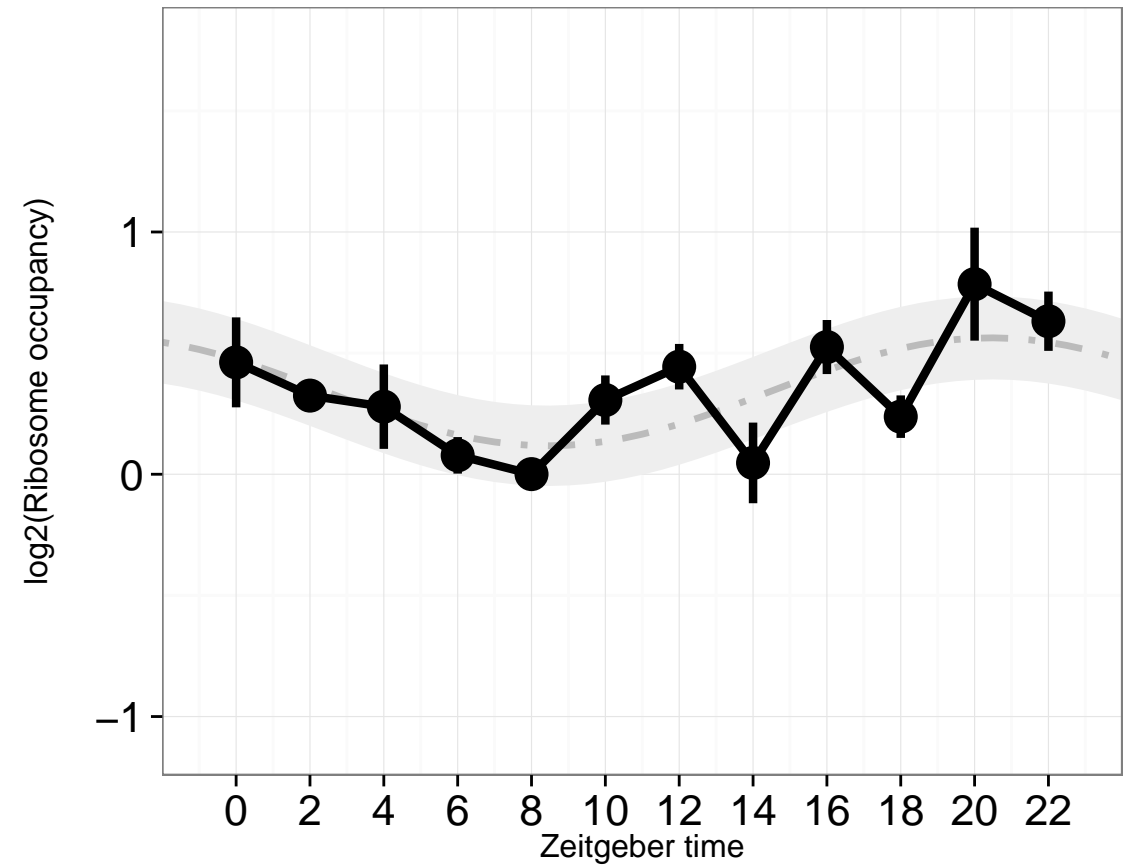

Supplement: Supplementary file 2063 [file 1]

## Slc27a3

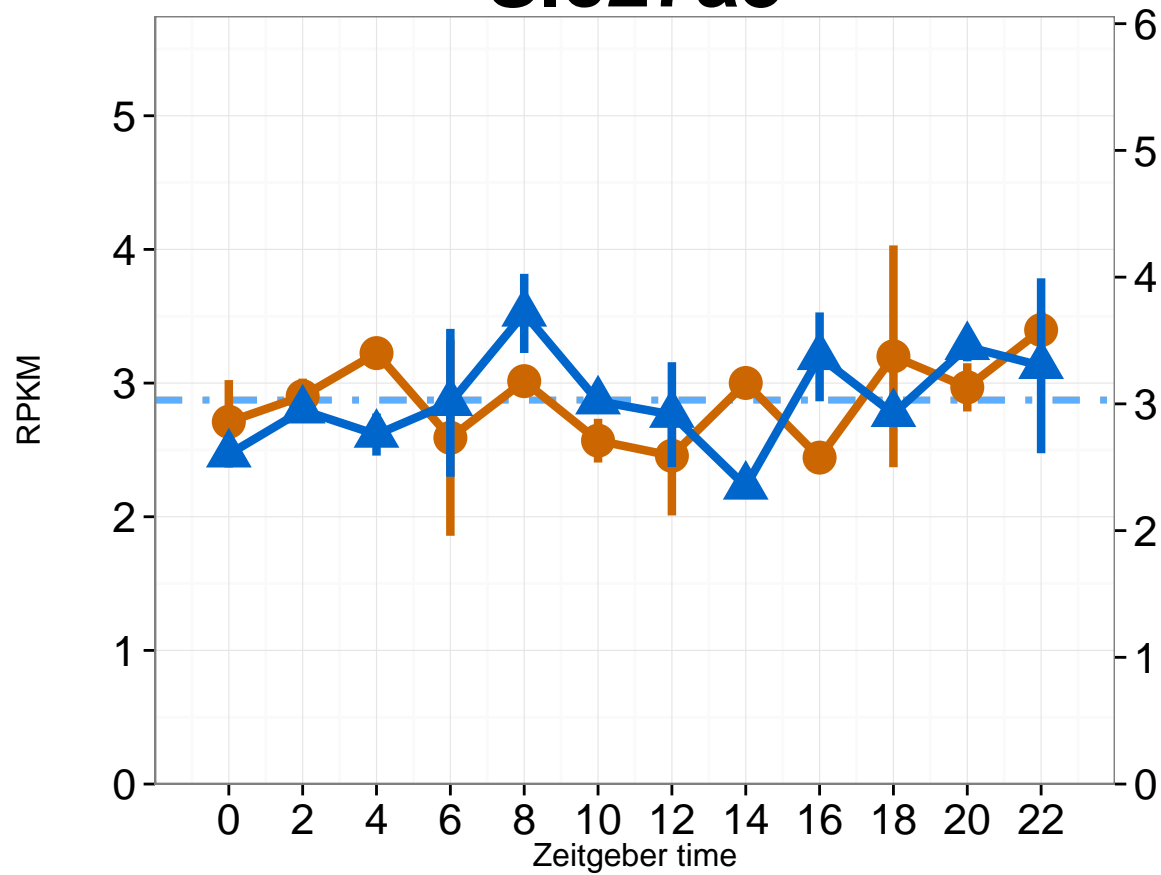

## Slc27a3

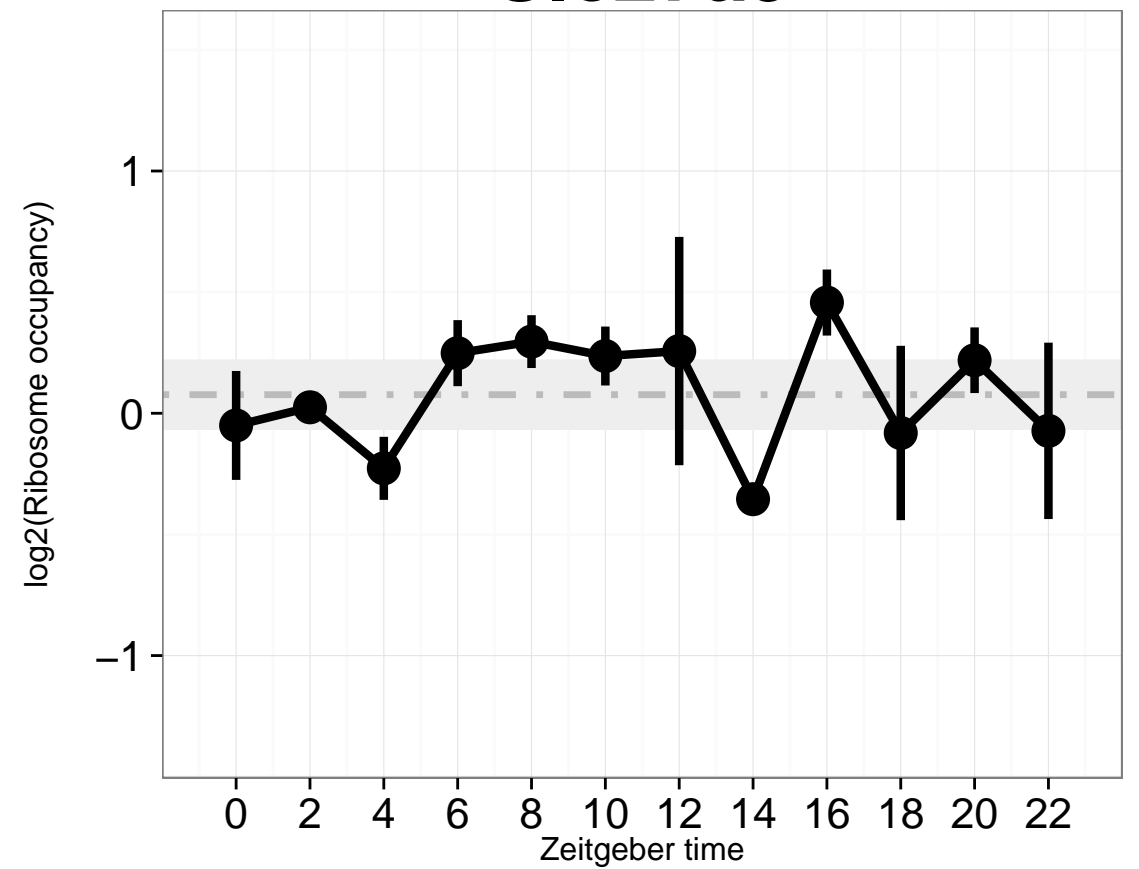

Supplement: Supplementary file 2064 [file 1]

# B4galt1

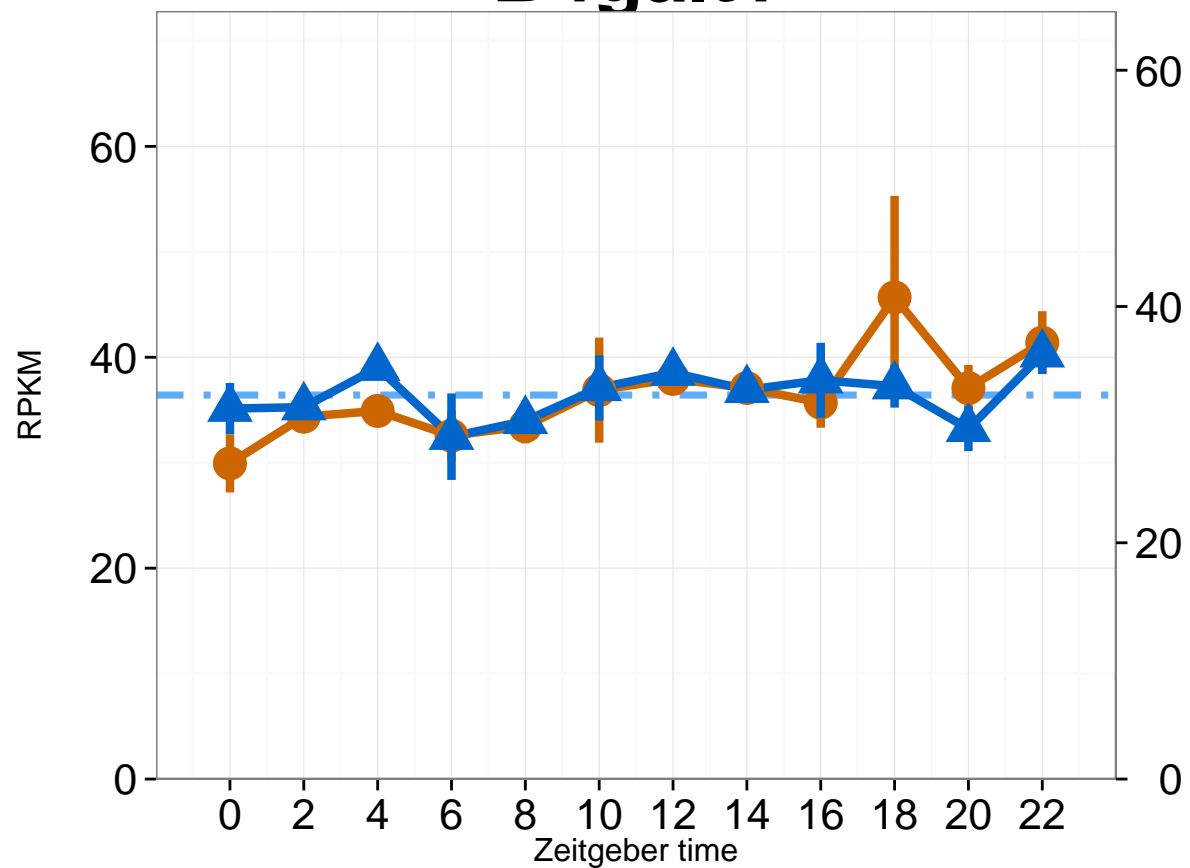

# B4galt1

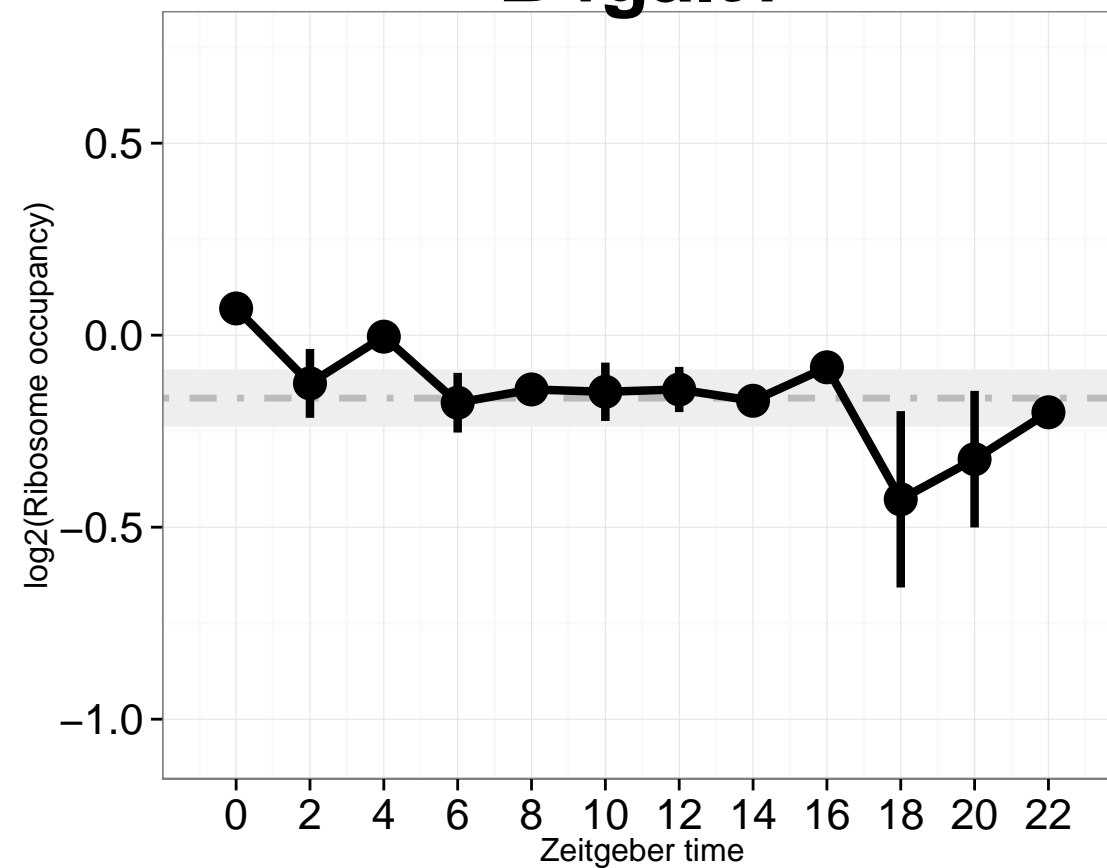

Supplement: Supplementary file 2065 [file 1]

## Ppan

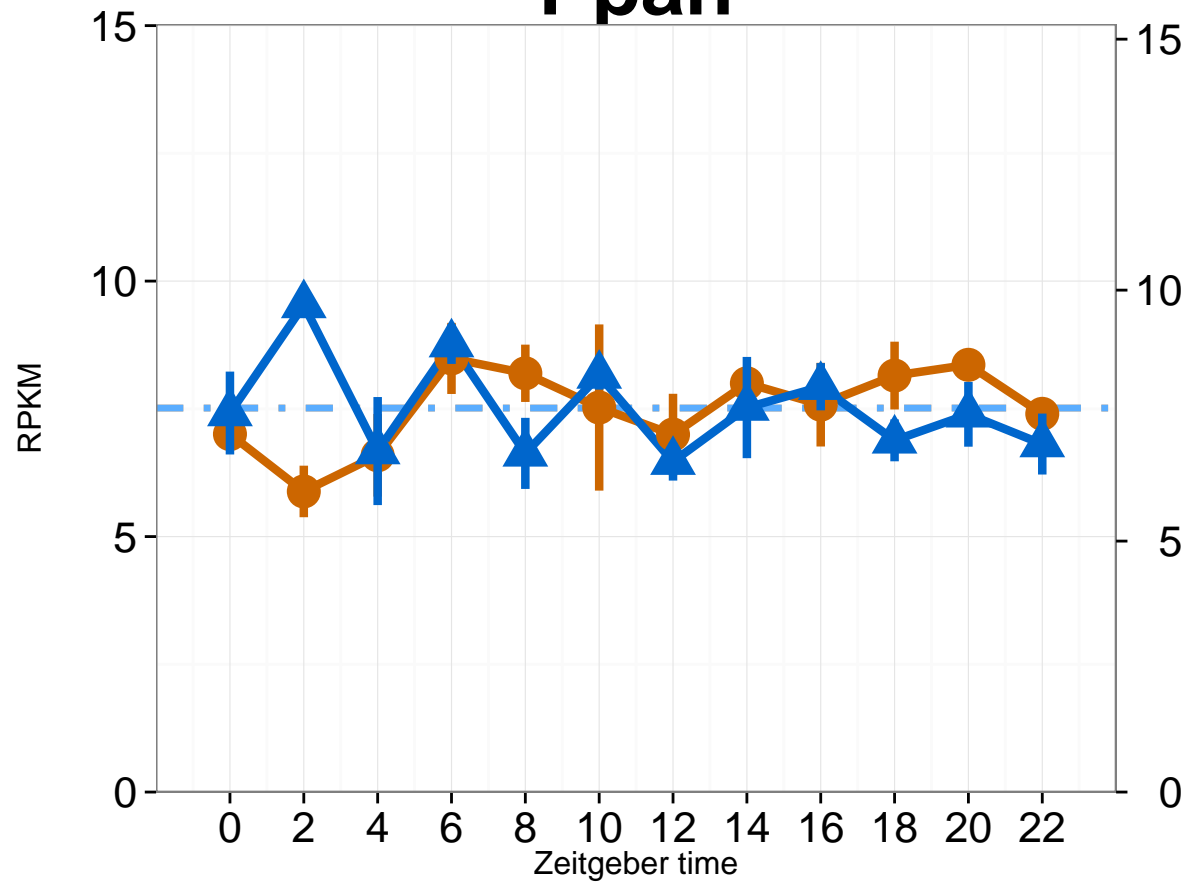

## Ppan

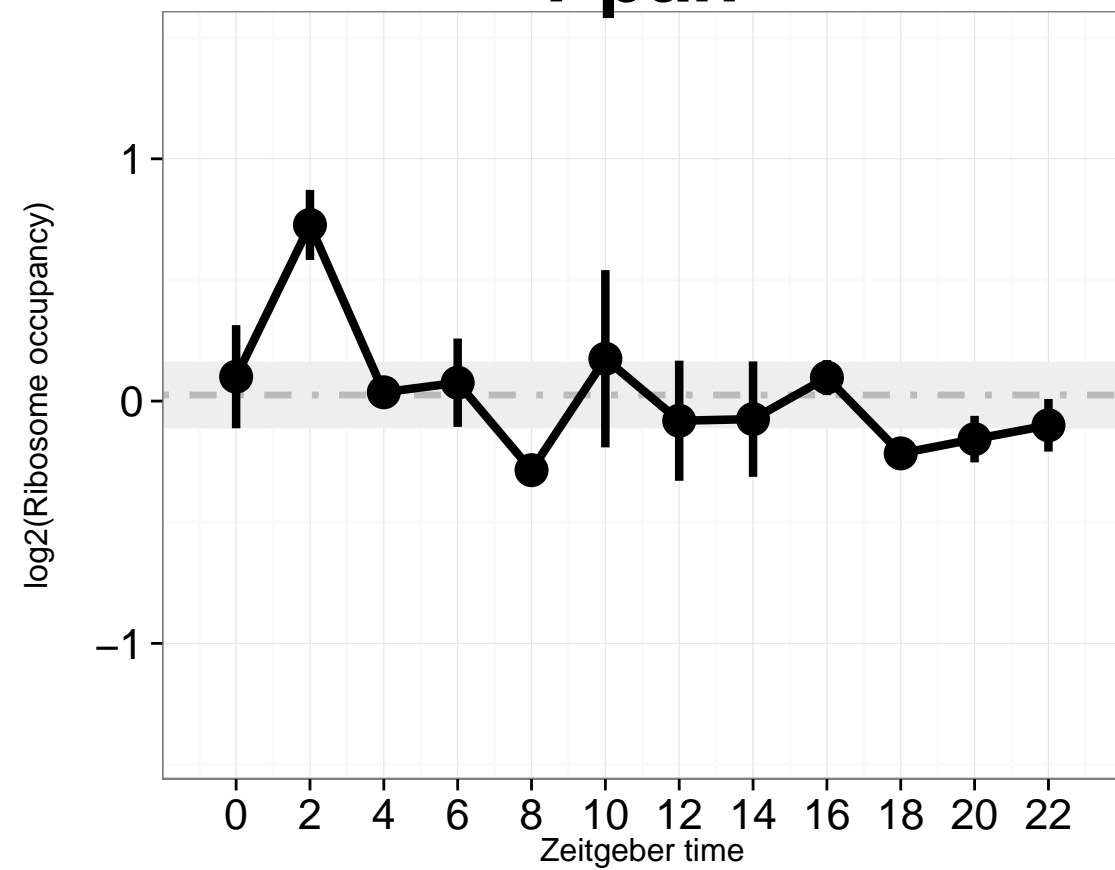

Supplement: Supplementary file 2066 [file 1]

## Mettl25

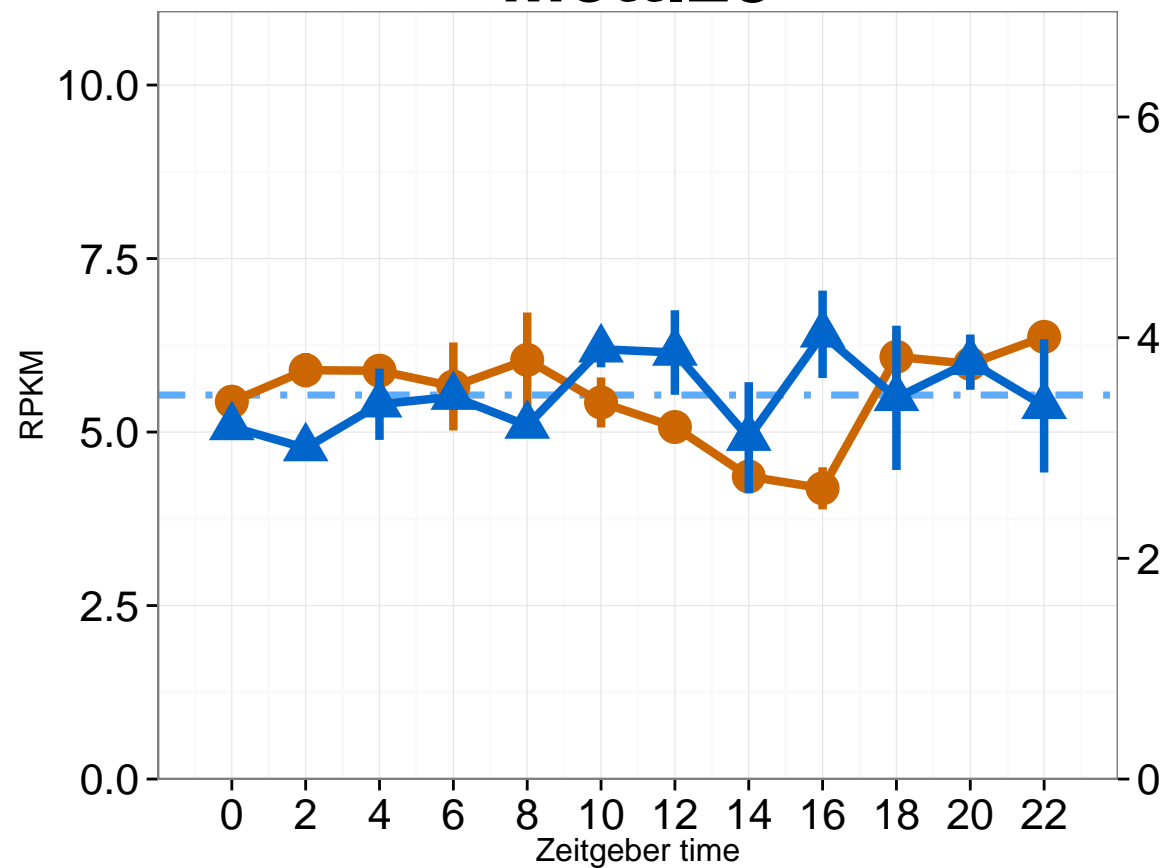

## Mettl25

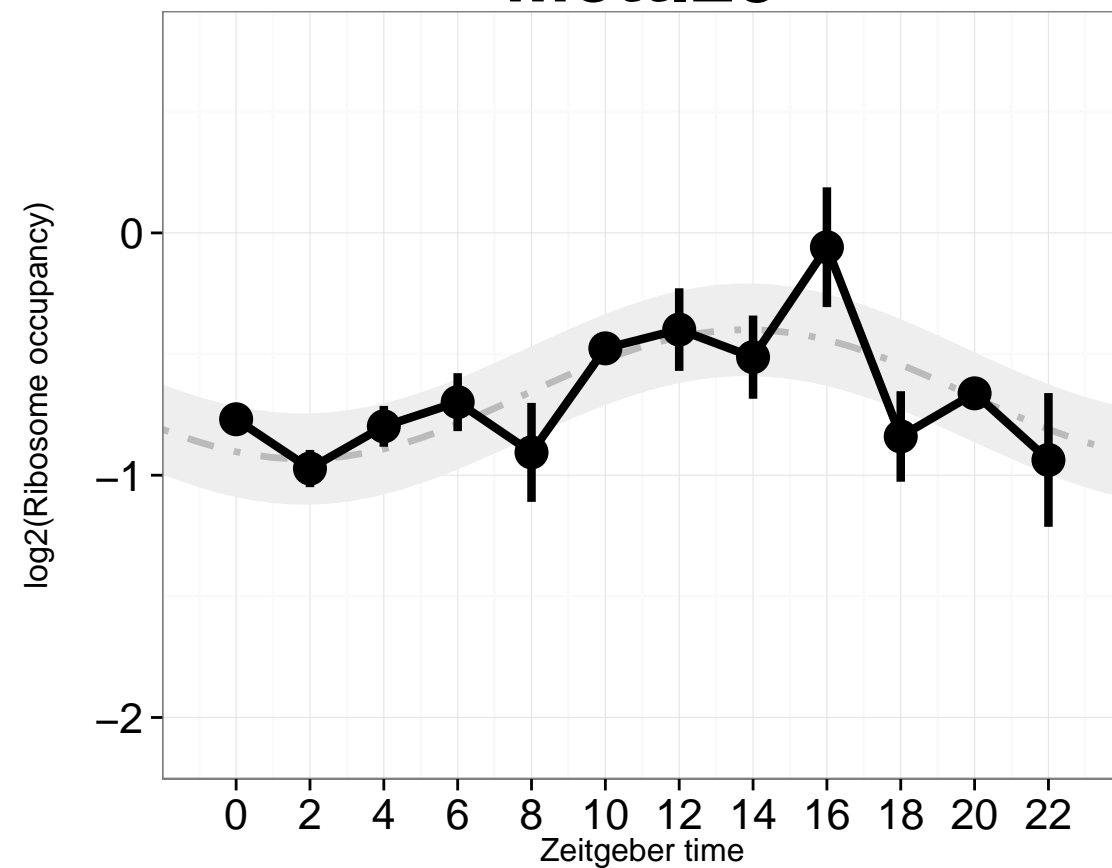

Supplement: Supplementary file 2067 [file 1]

## Adam9

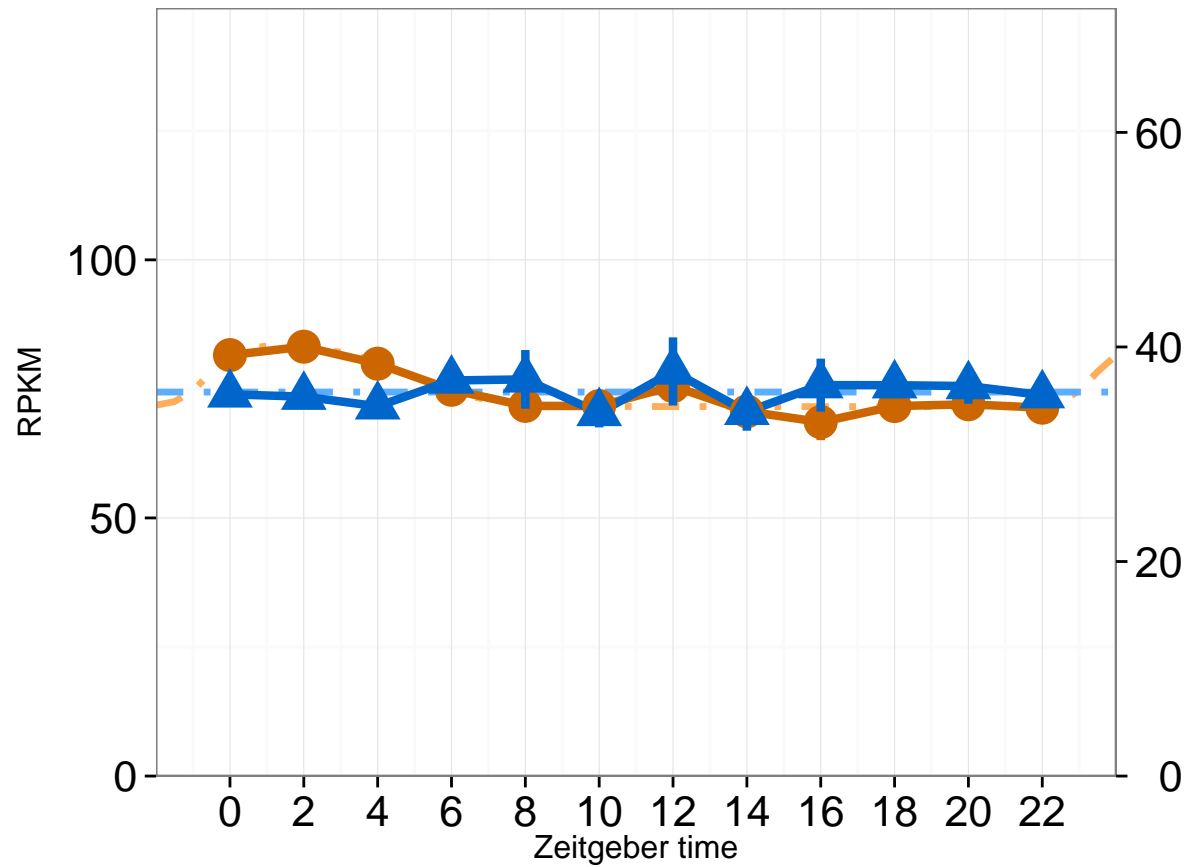

## Adam9

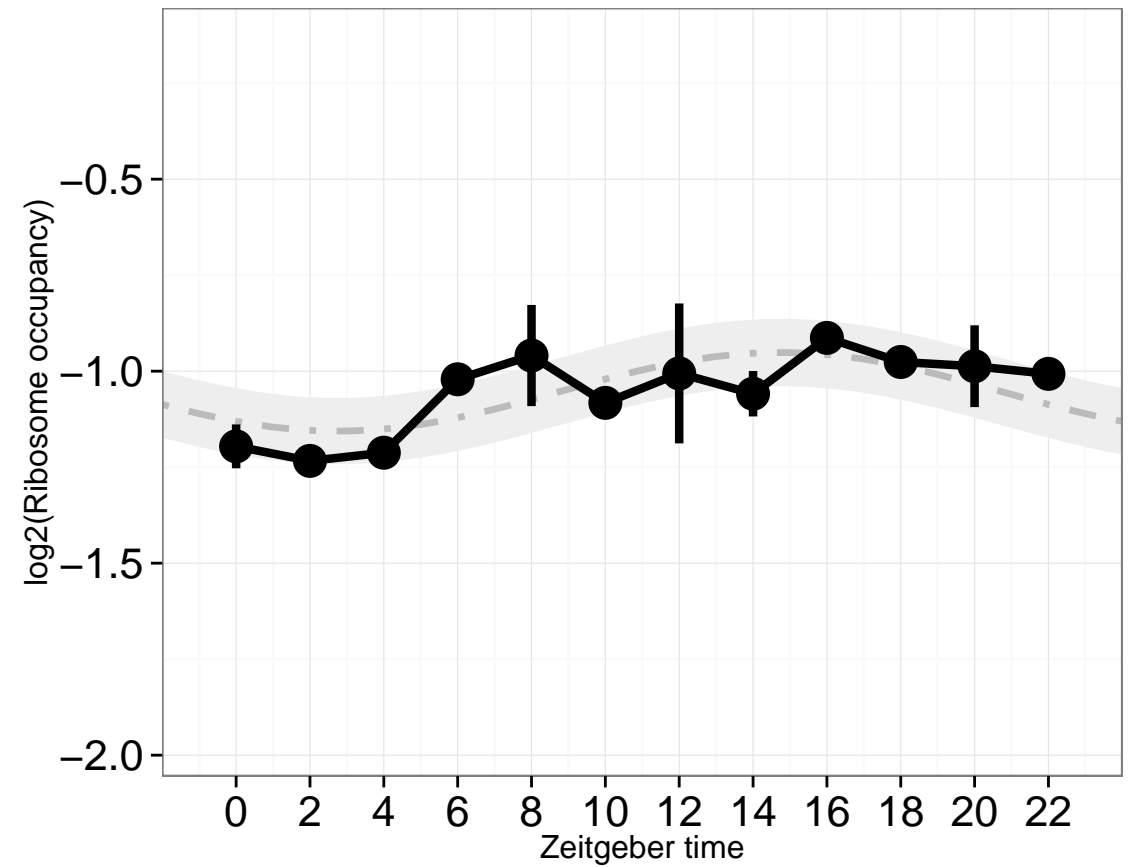

Supplement: Supplementary file 2068 [file 1]

# Tnrc6a

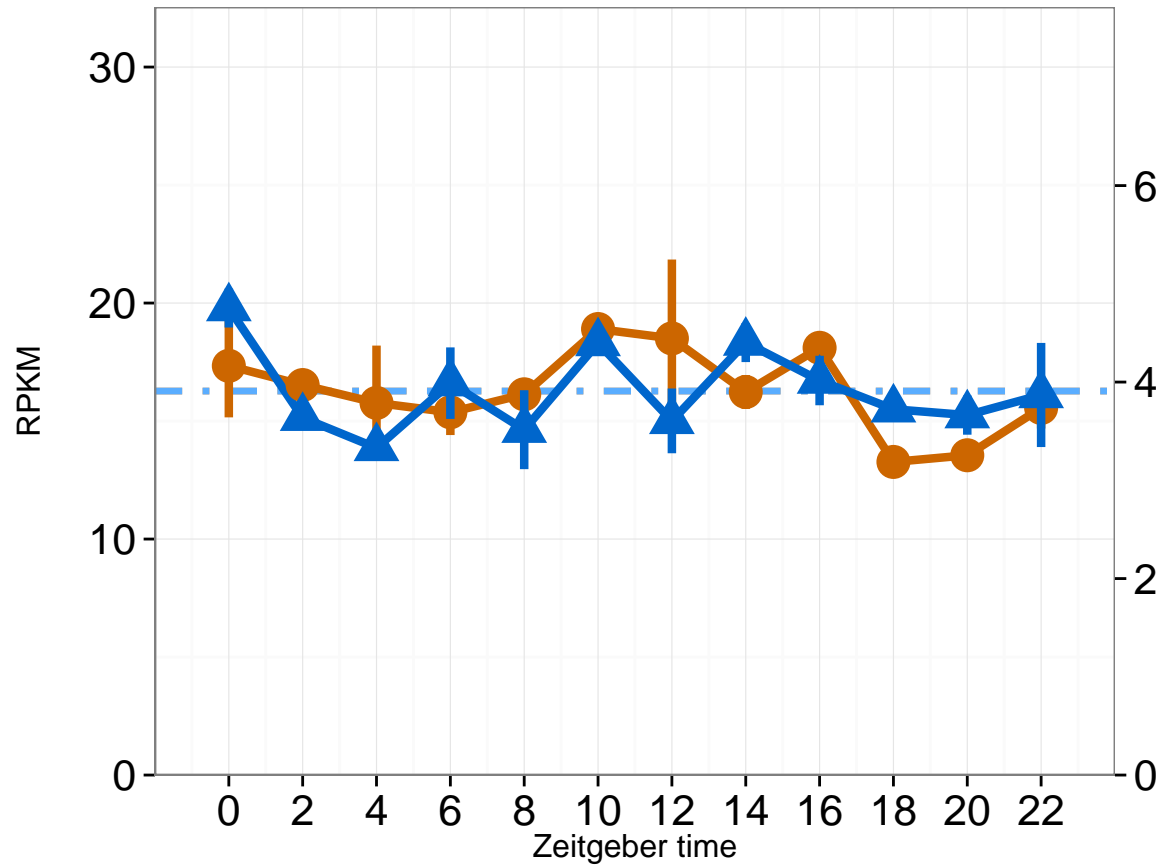

# Tnrc6a

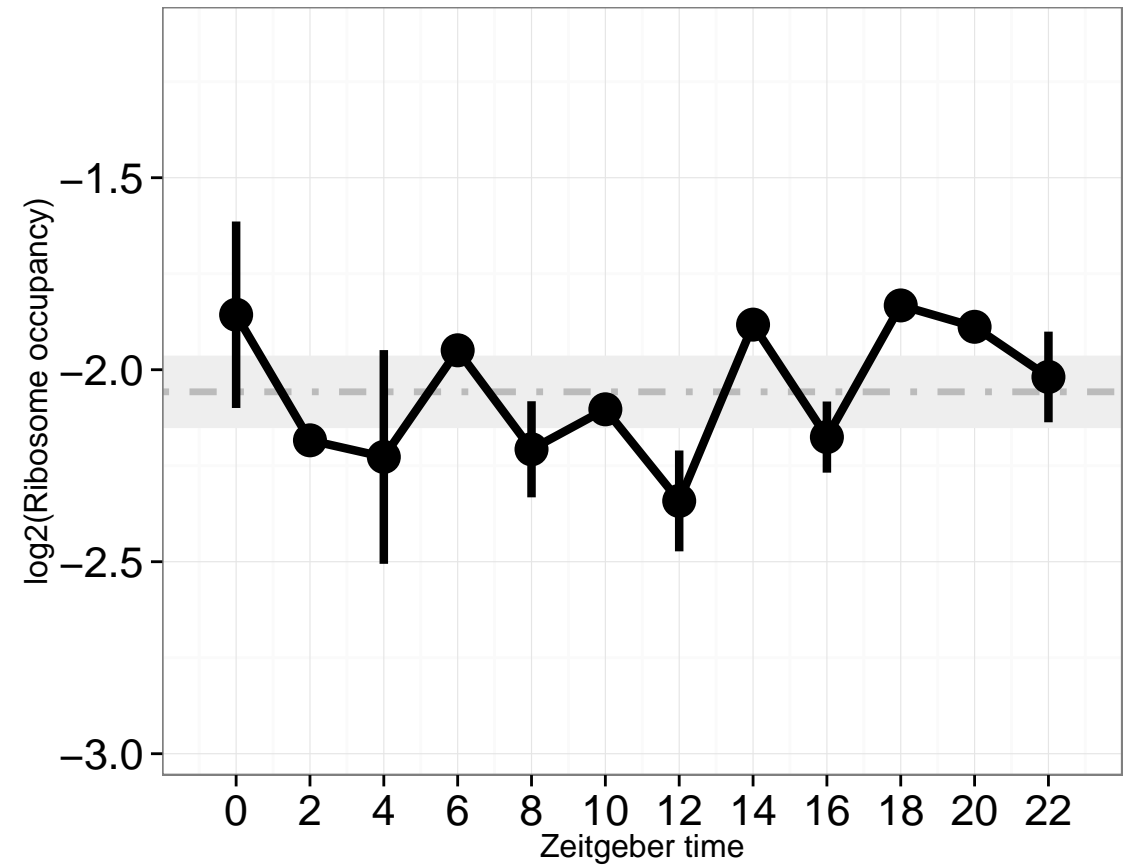

Supplement: Supplementary file 2069 [file 1]

# Fa2h

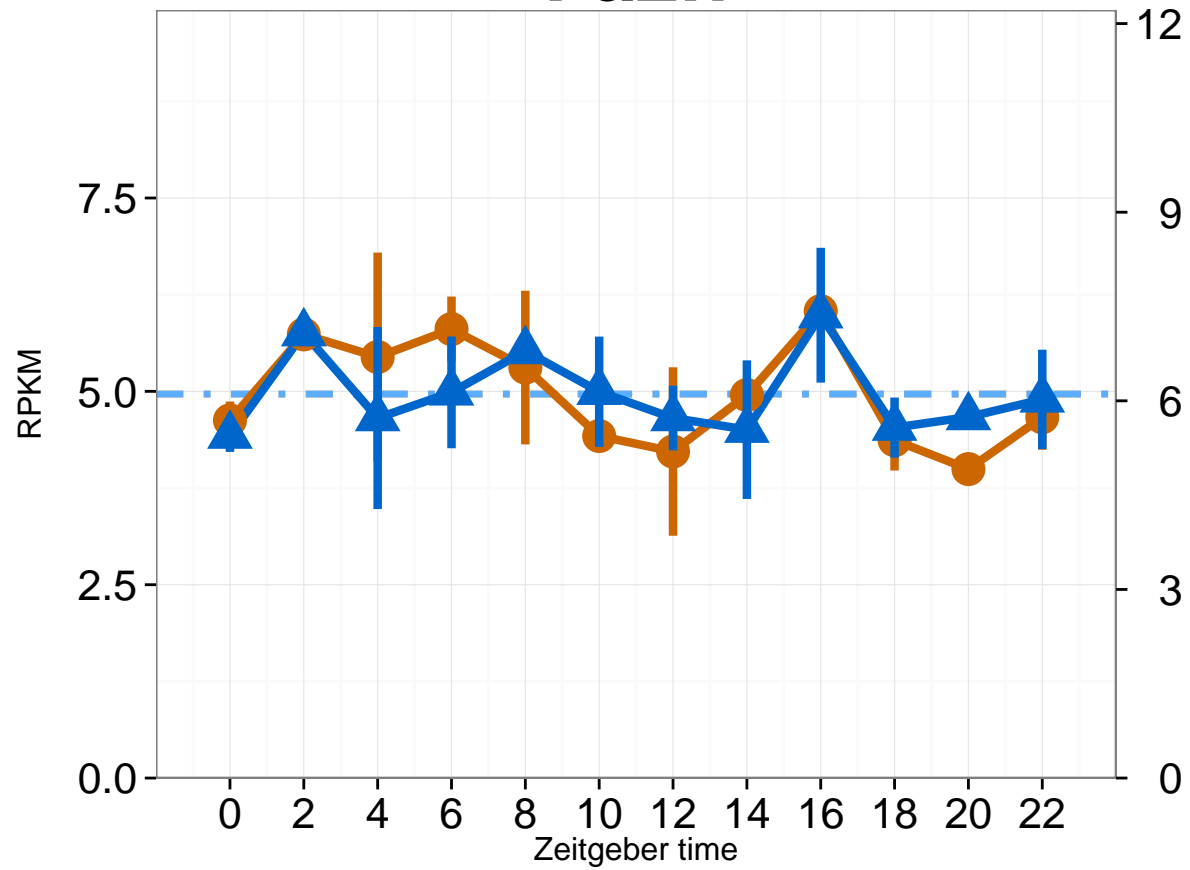

# Fa2h

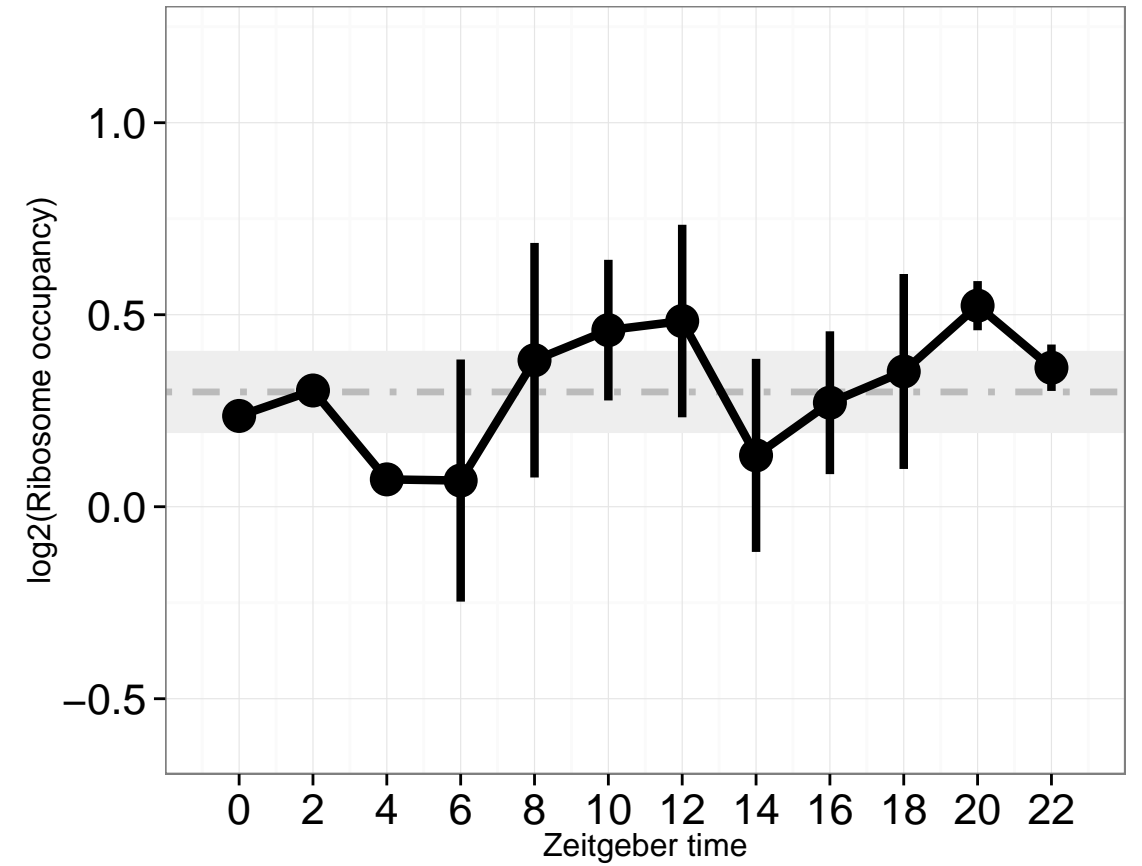

Supplement: Supplementary file 2070 [file 1]

# Cox6b1

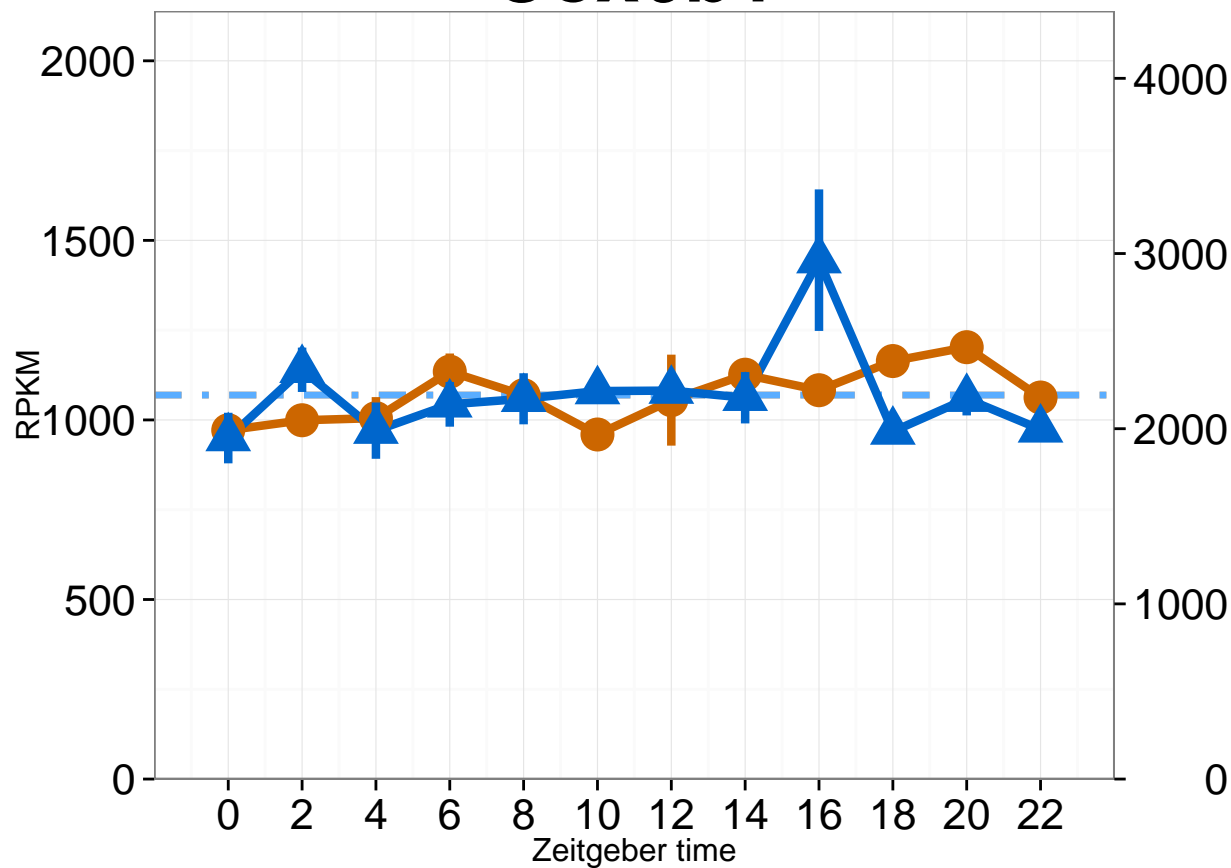

# Cox6b1

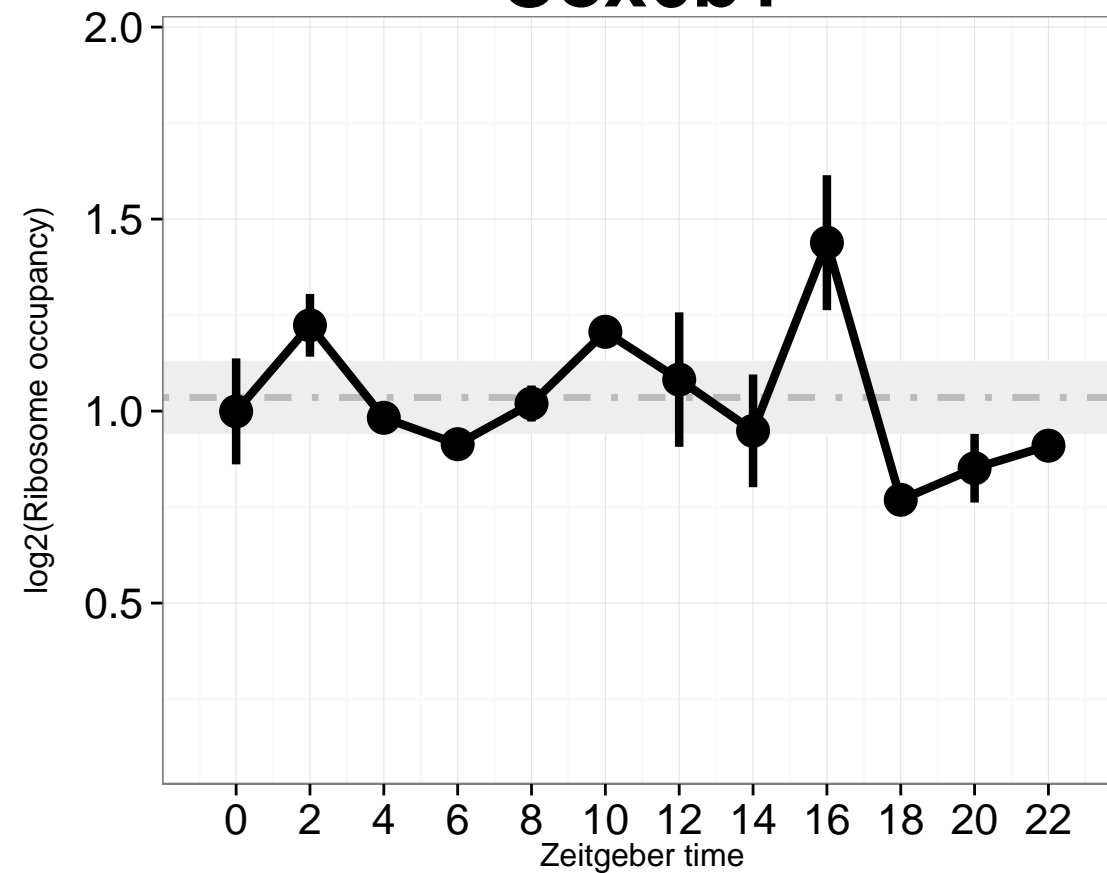

Supplement: Supplementary file 2071 [file 1]

# Sec16a

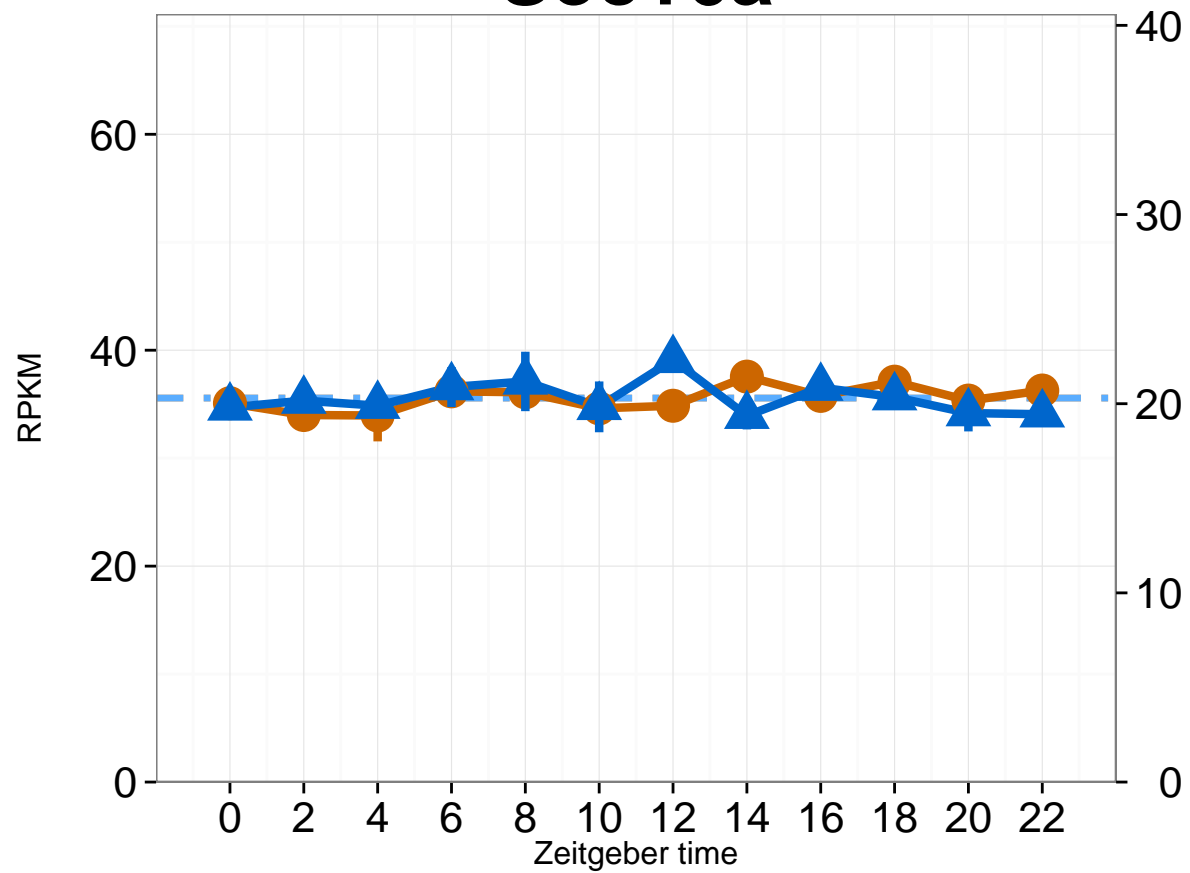

# Sec16a

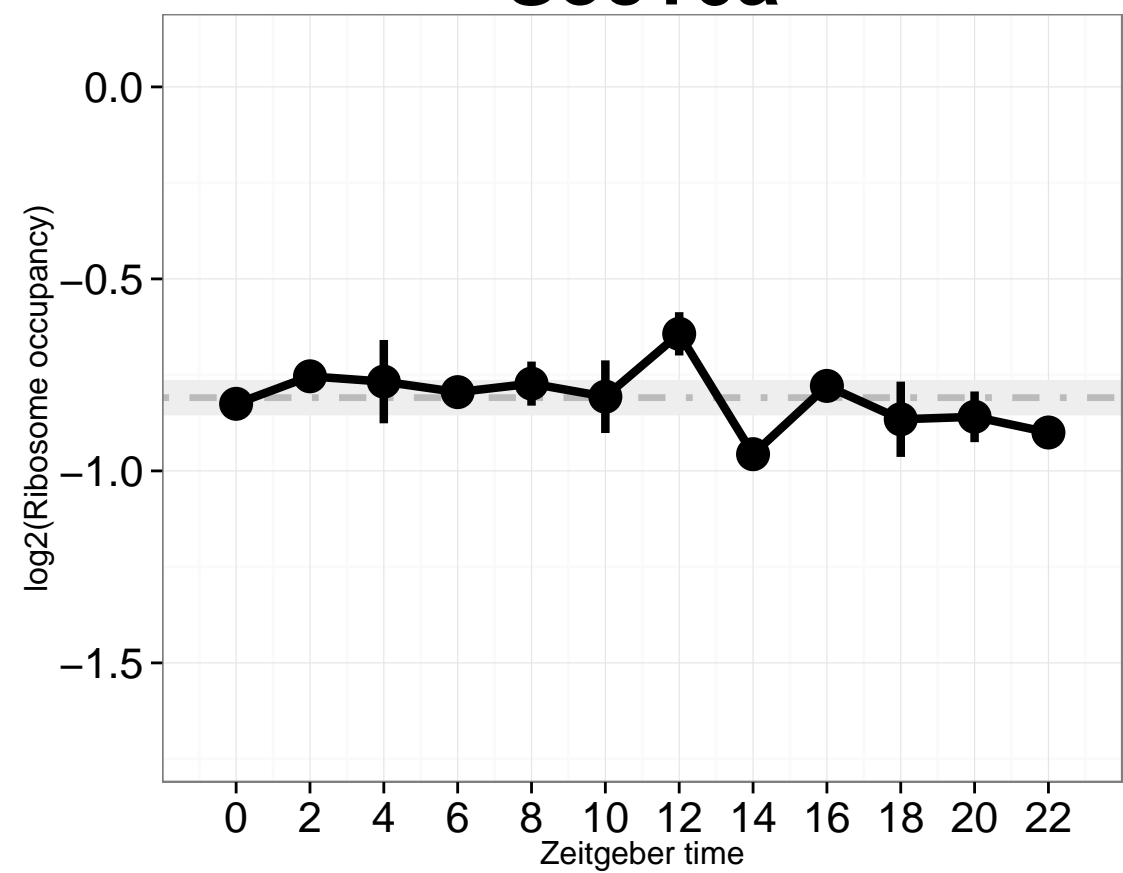

Supplement: Supplementary file 2072 [file 1]

## Aacs

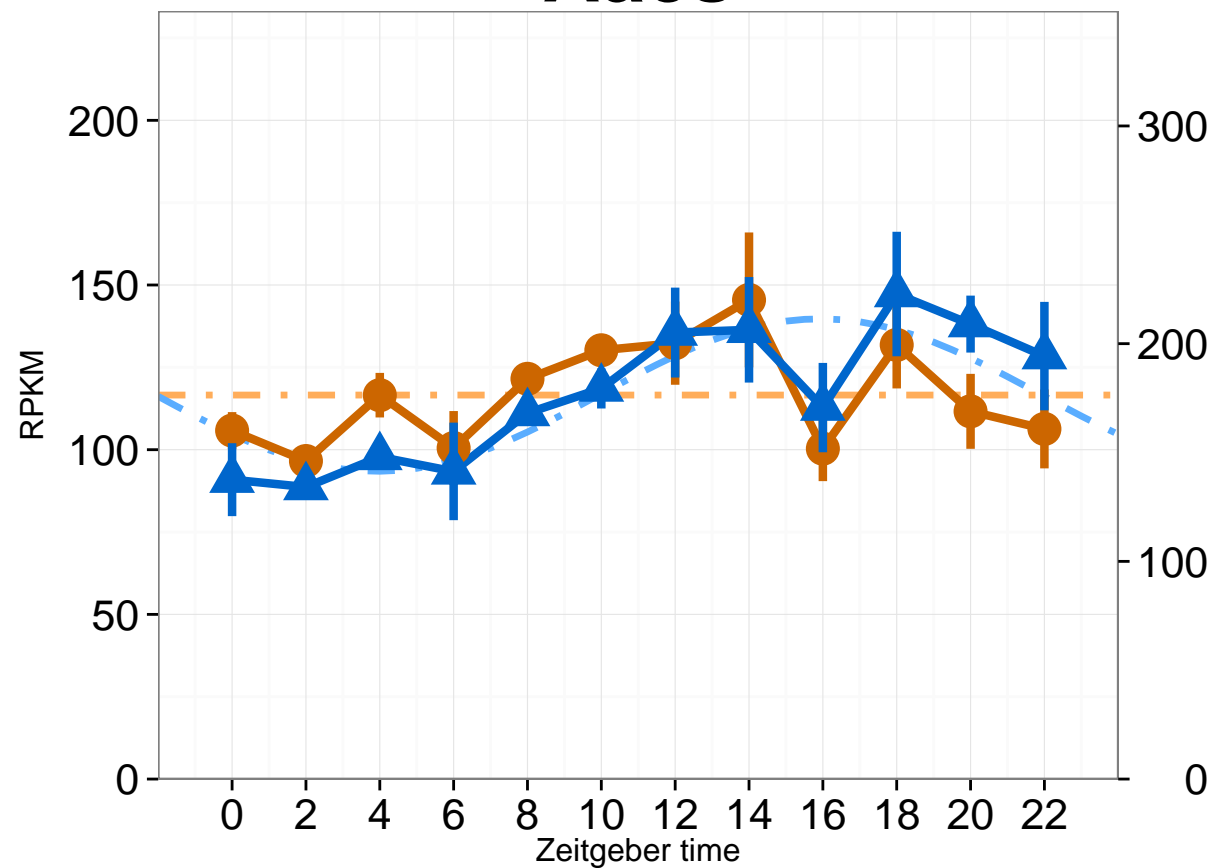

## Aacs

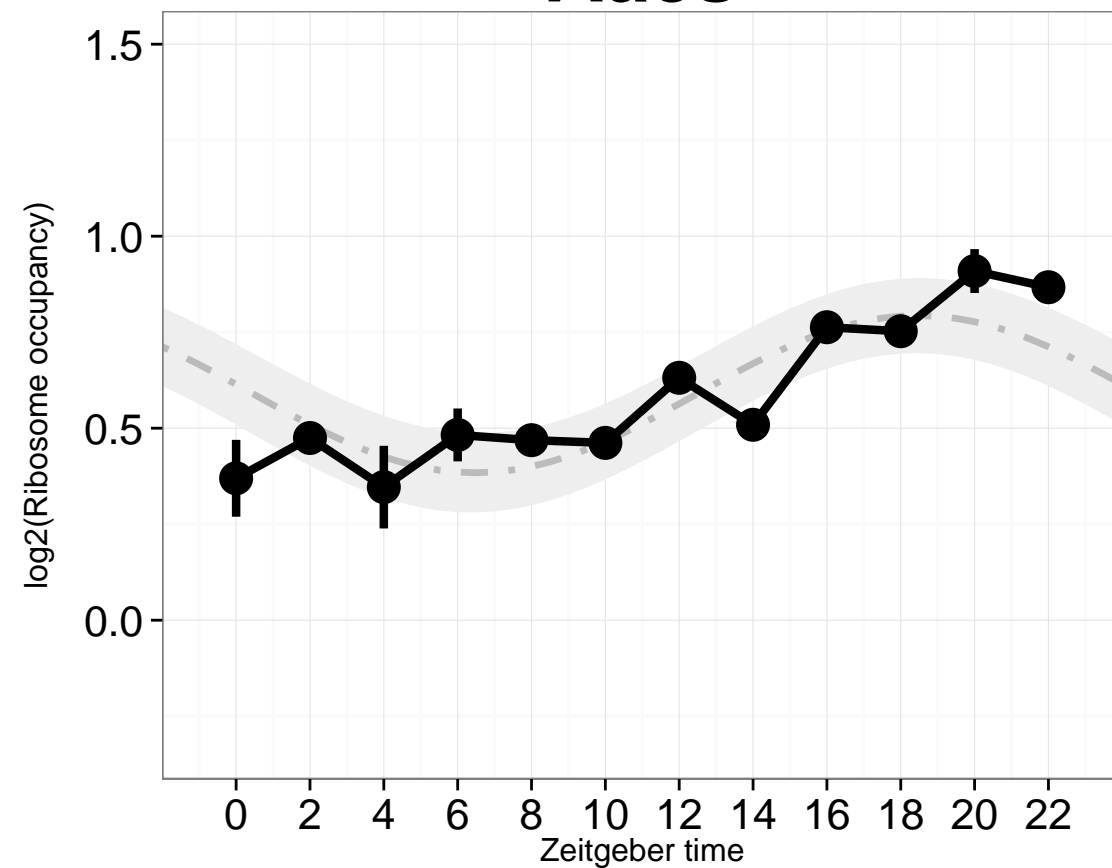

Supplement: Supplementary file 2073 [file 1]

## Slc5a12

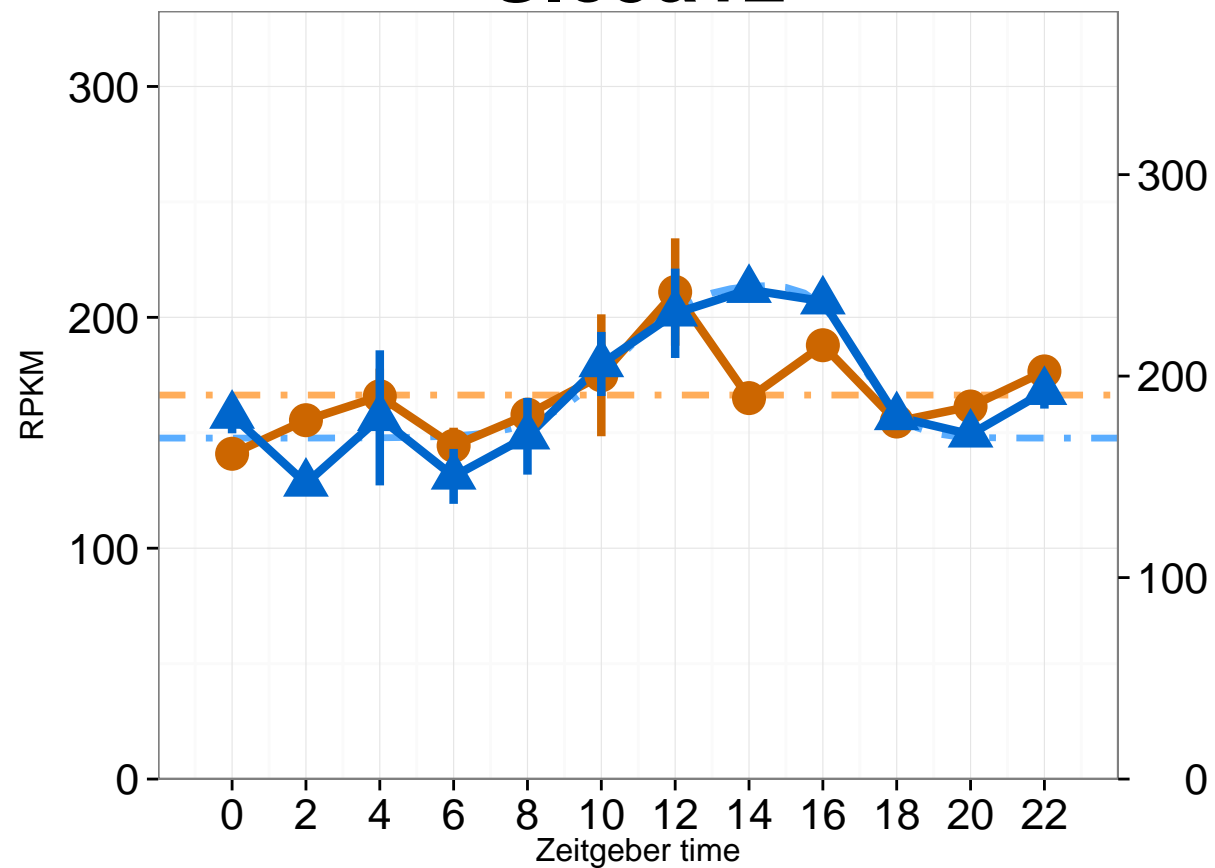

## Slc5a12

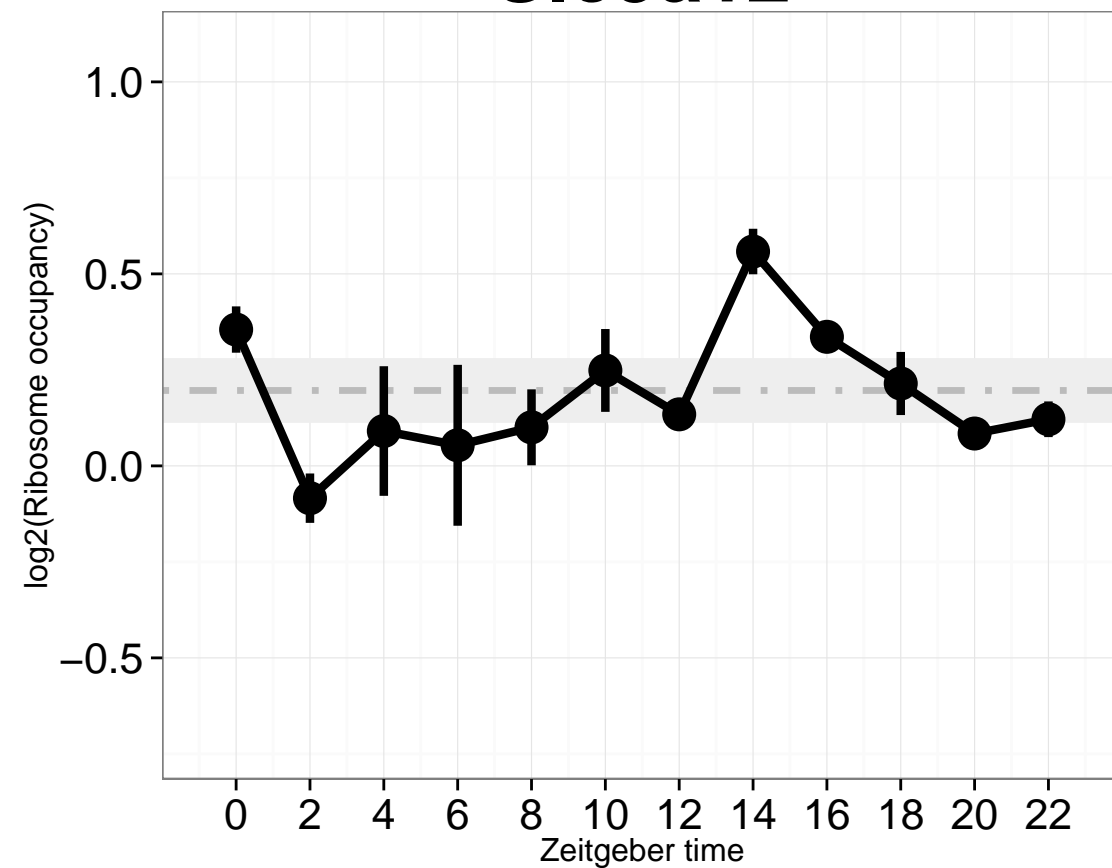

Supplement: Supplementary file 2074 [file 1]

## Zranb2

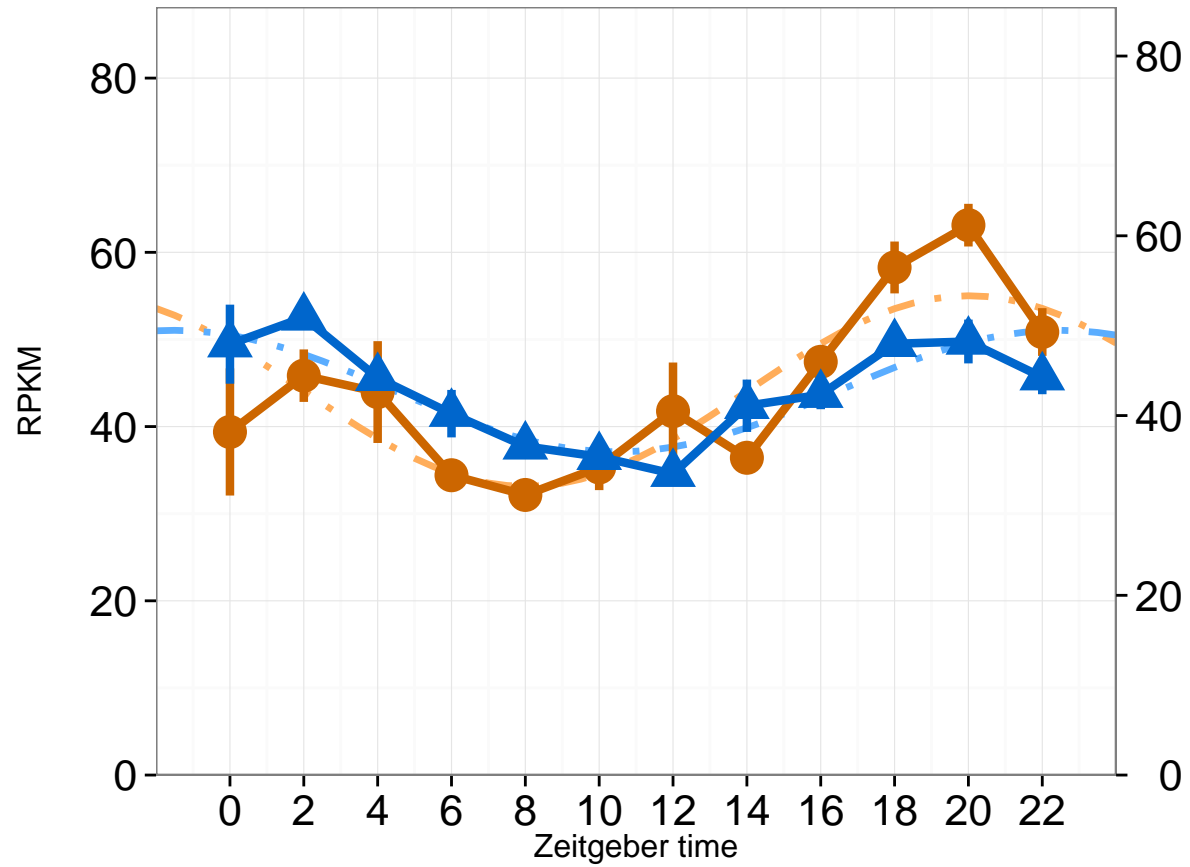

## Zranb2

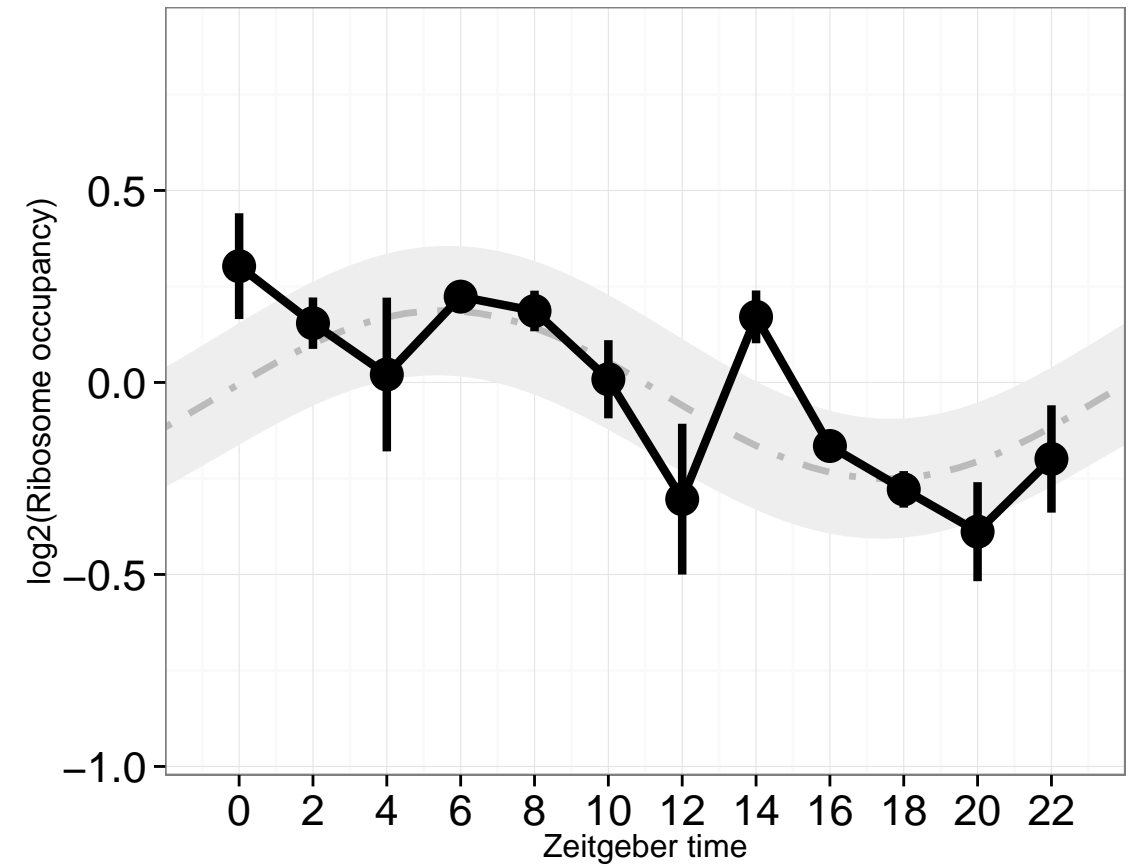

Supplement: Supplementary file 2075 [file 1]

## Dok1

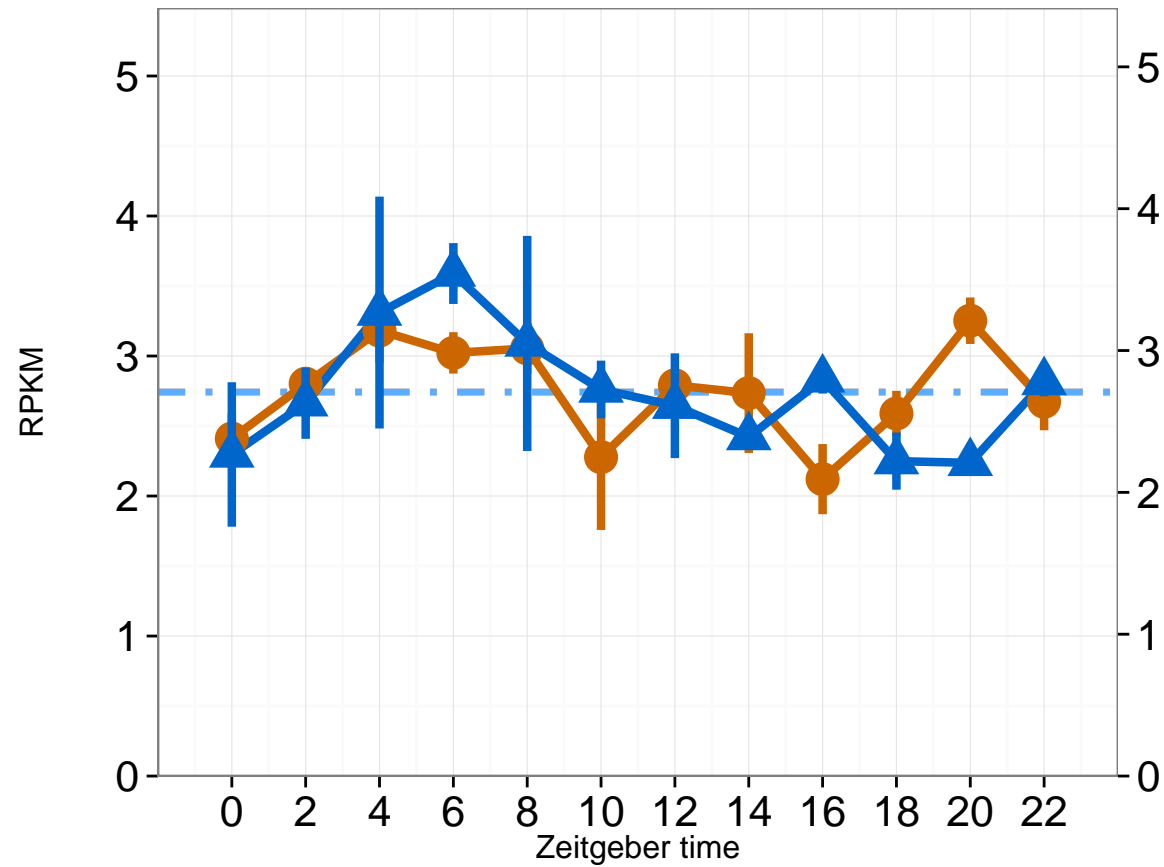

## Dok1

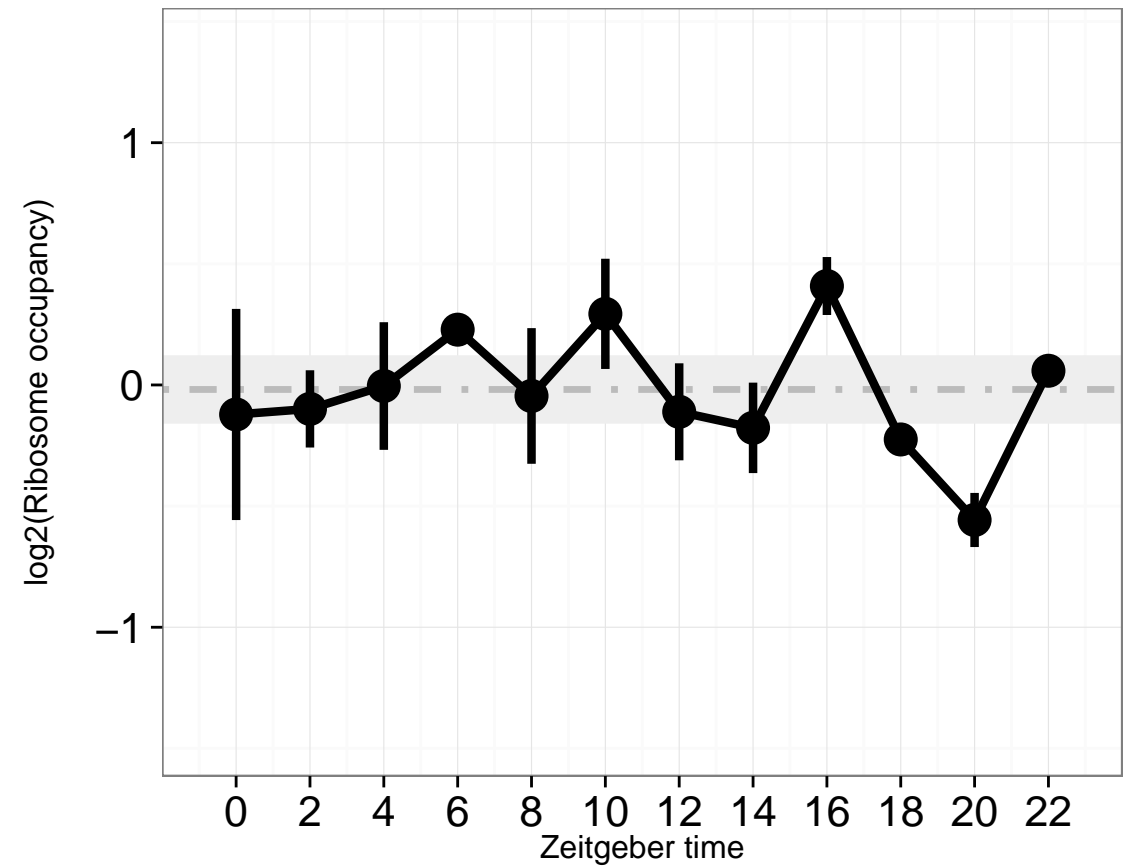

Supplement: Supplementary file 2076 [file 1]

## Alox12

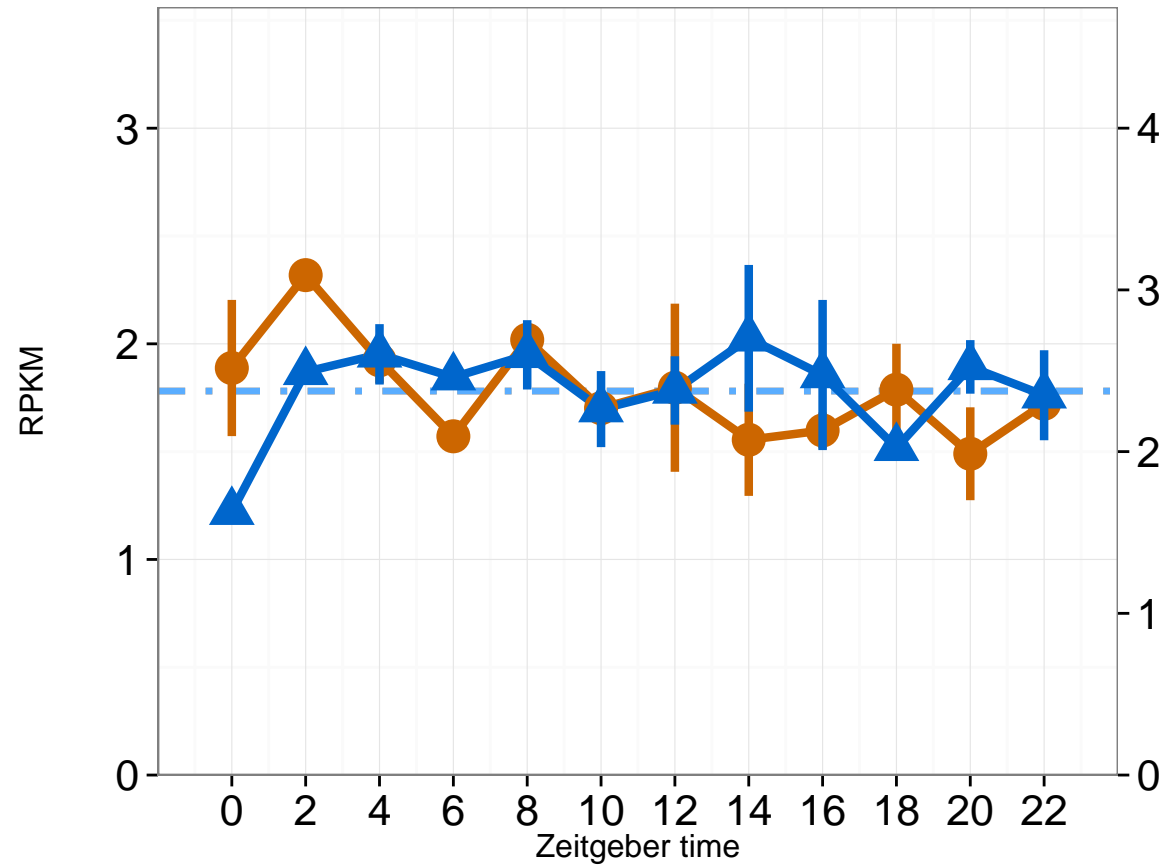

## Alox12

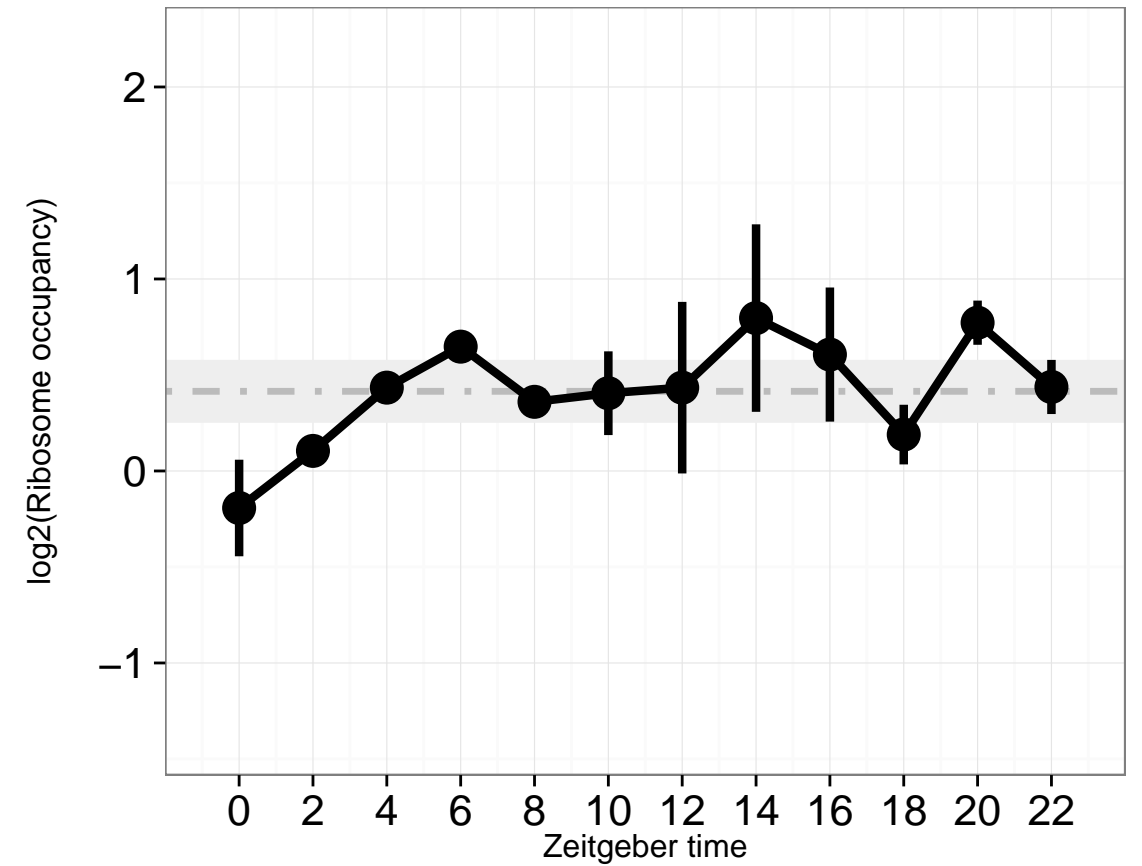

Supplement: Supplementary file 2077 [file 1]

# Csrp1

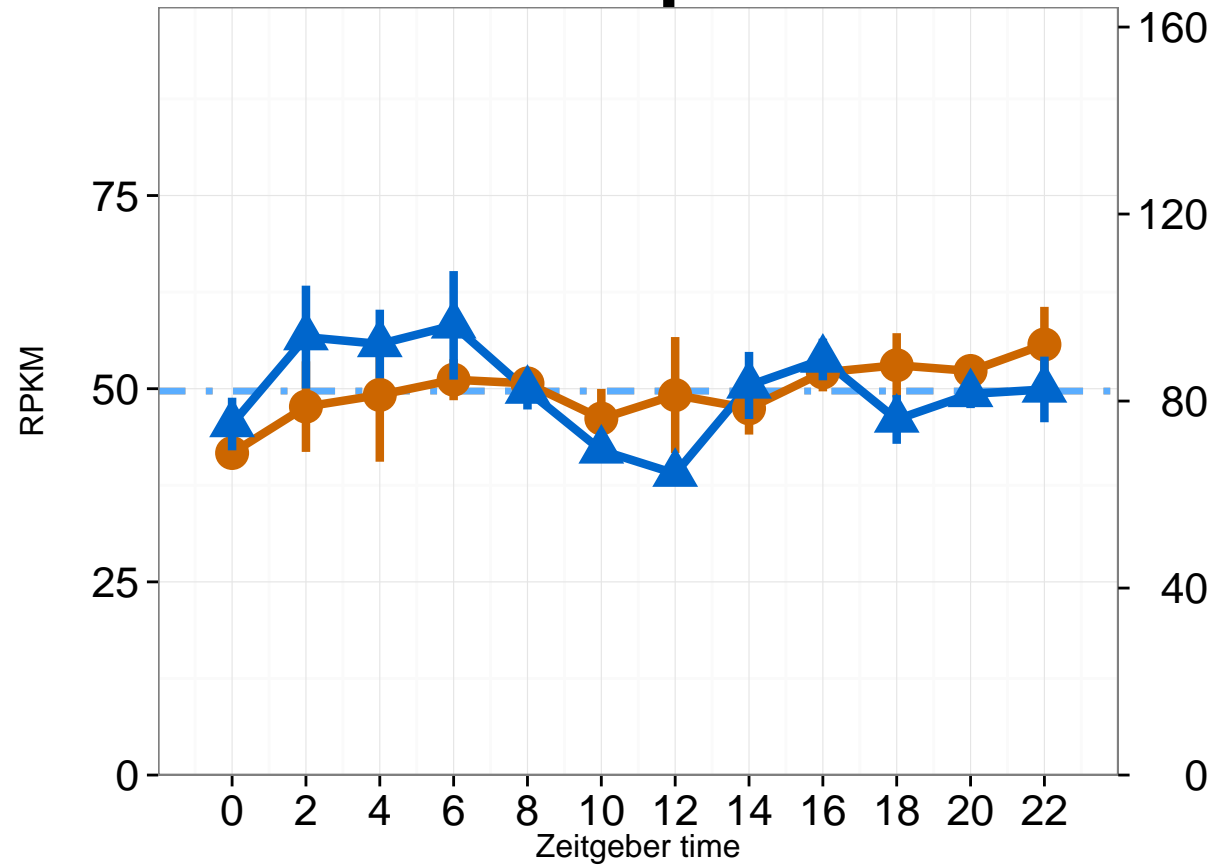

# Csrp1

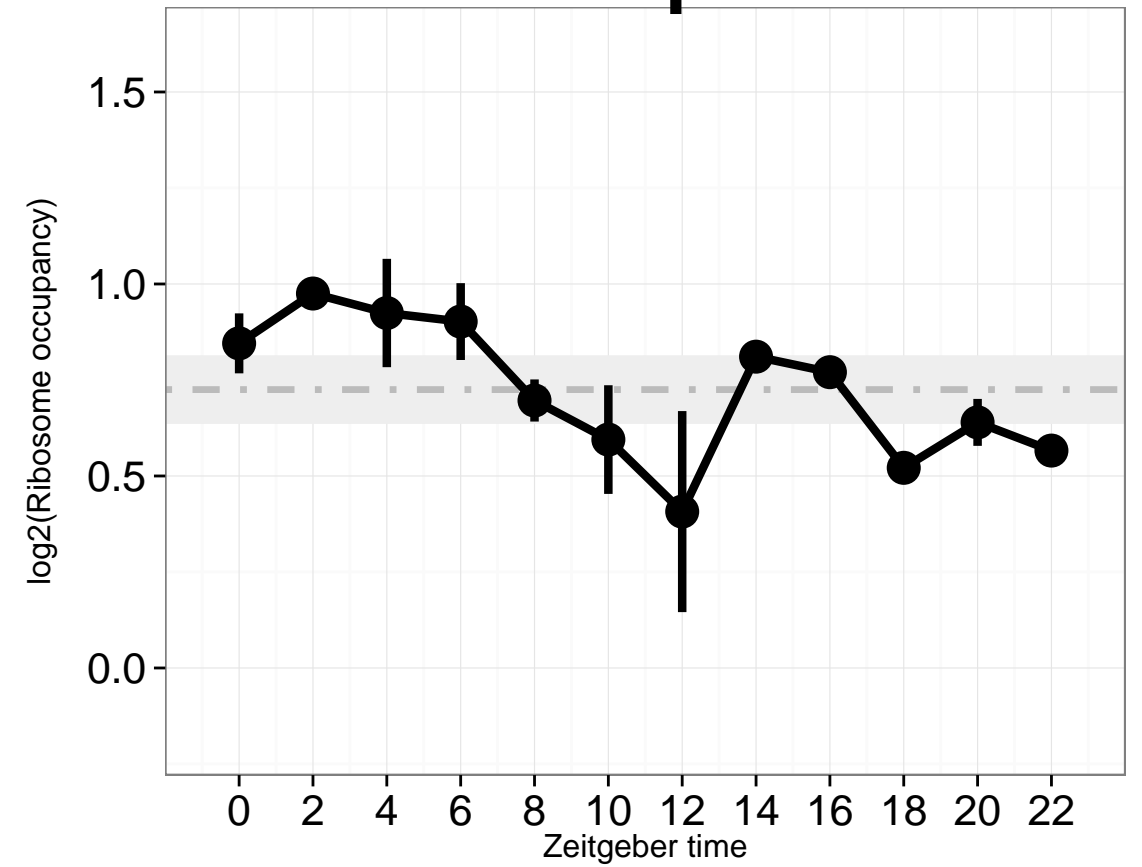

Supplement: Supplementary file 2078 [file 1]

## Kdr

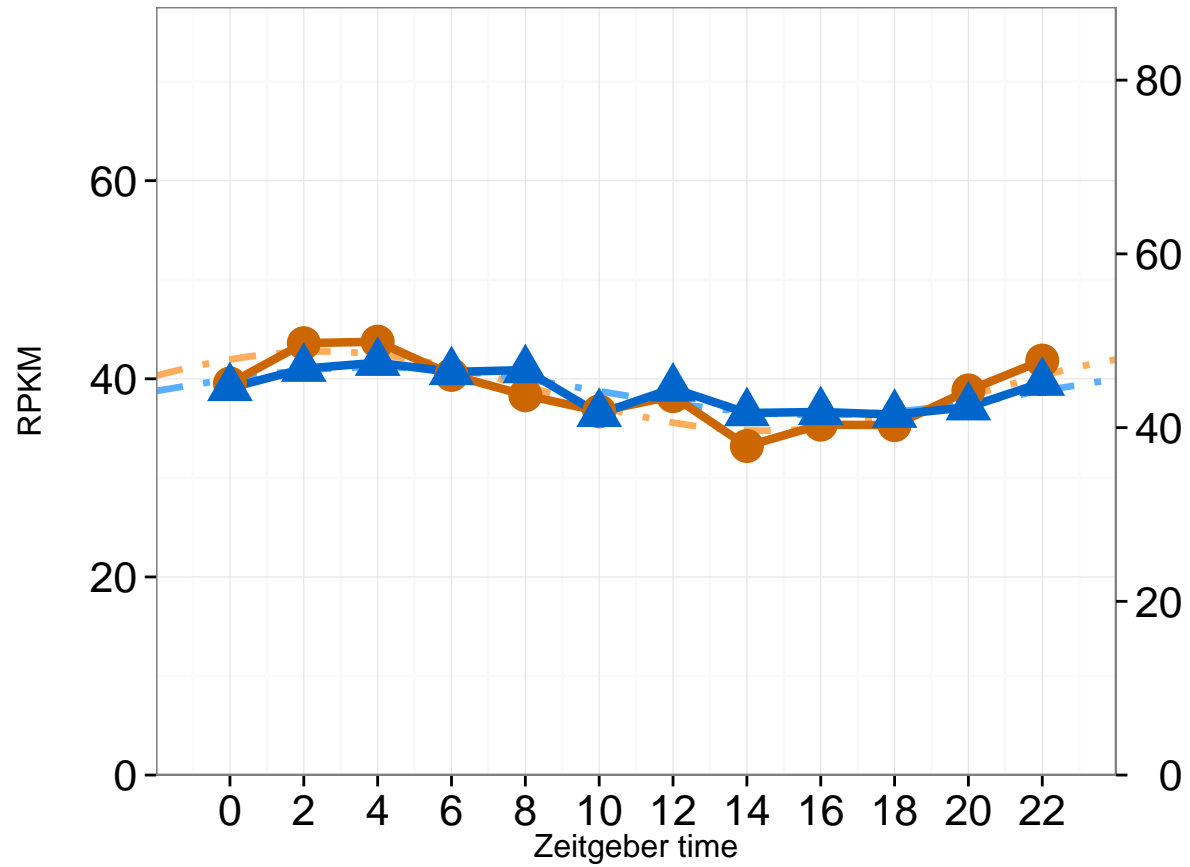

## Kdr

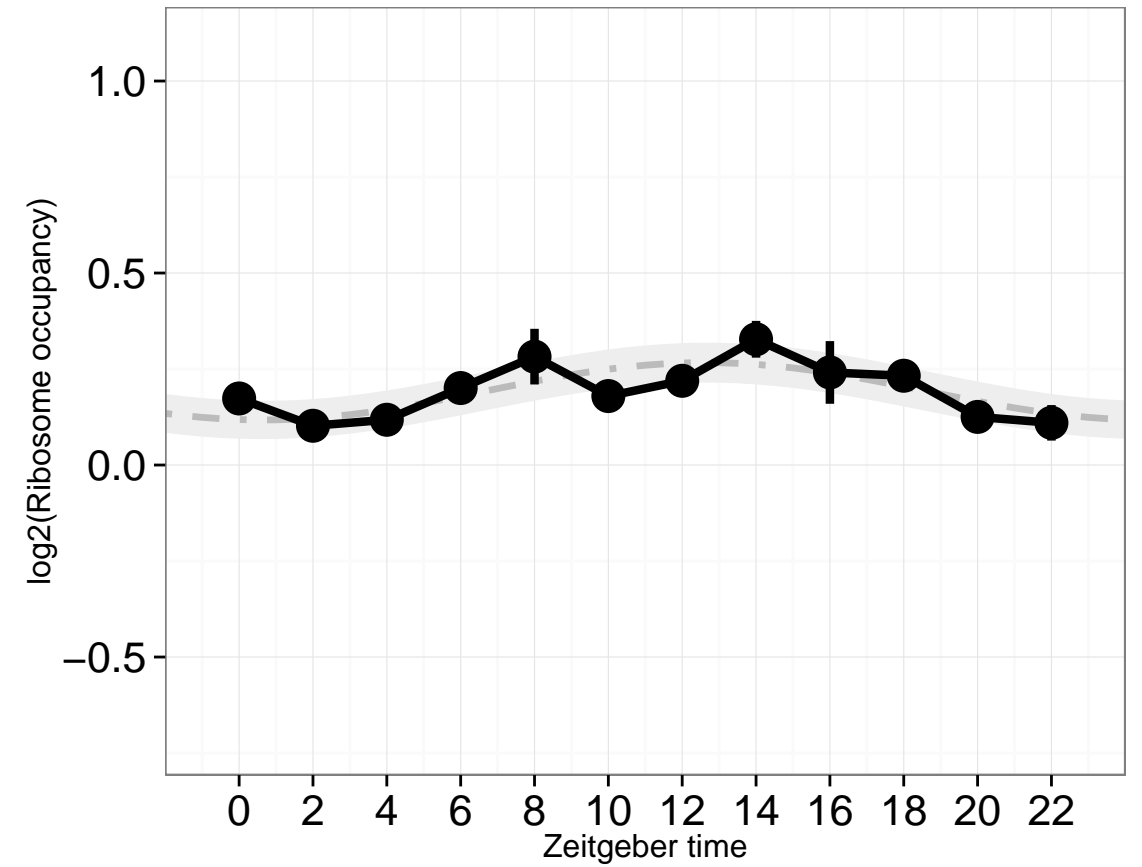

Supplement: Supplementary file 2079 [file 1]

# Ccdc28a

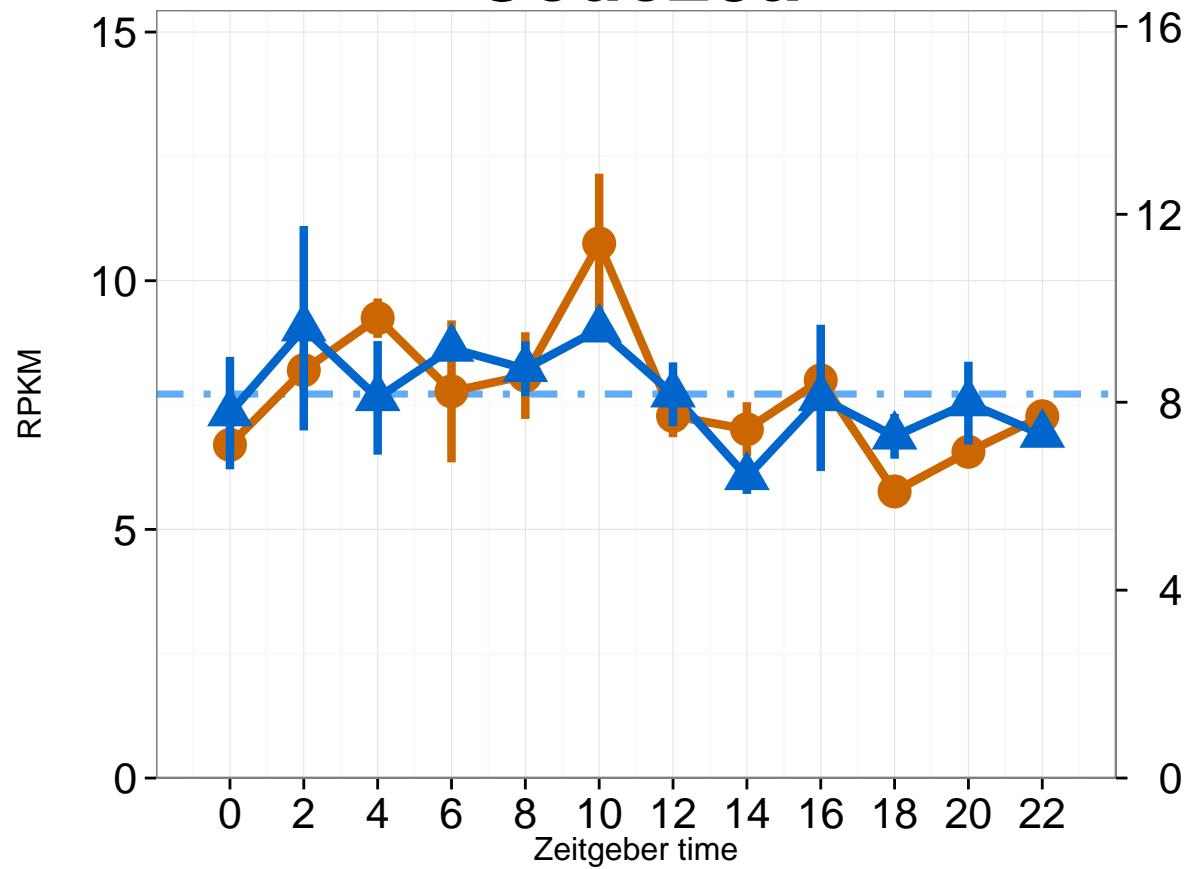

# Ccdc28a

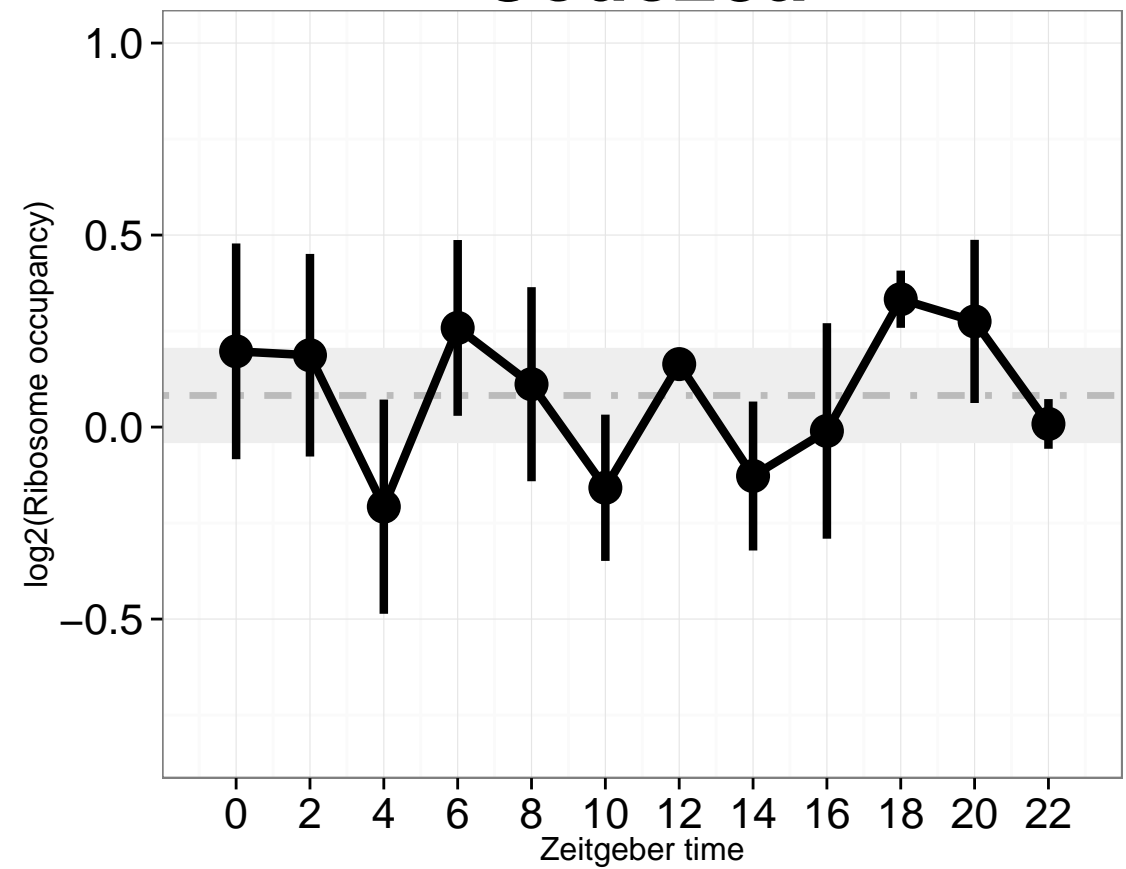

Supplement: Supplementary file 2080 [file 1]

## Dlc1

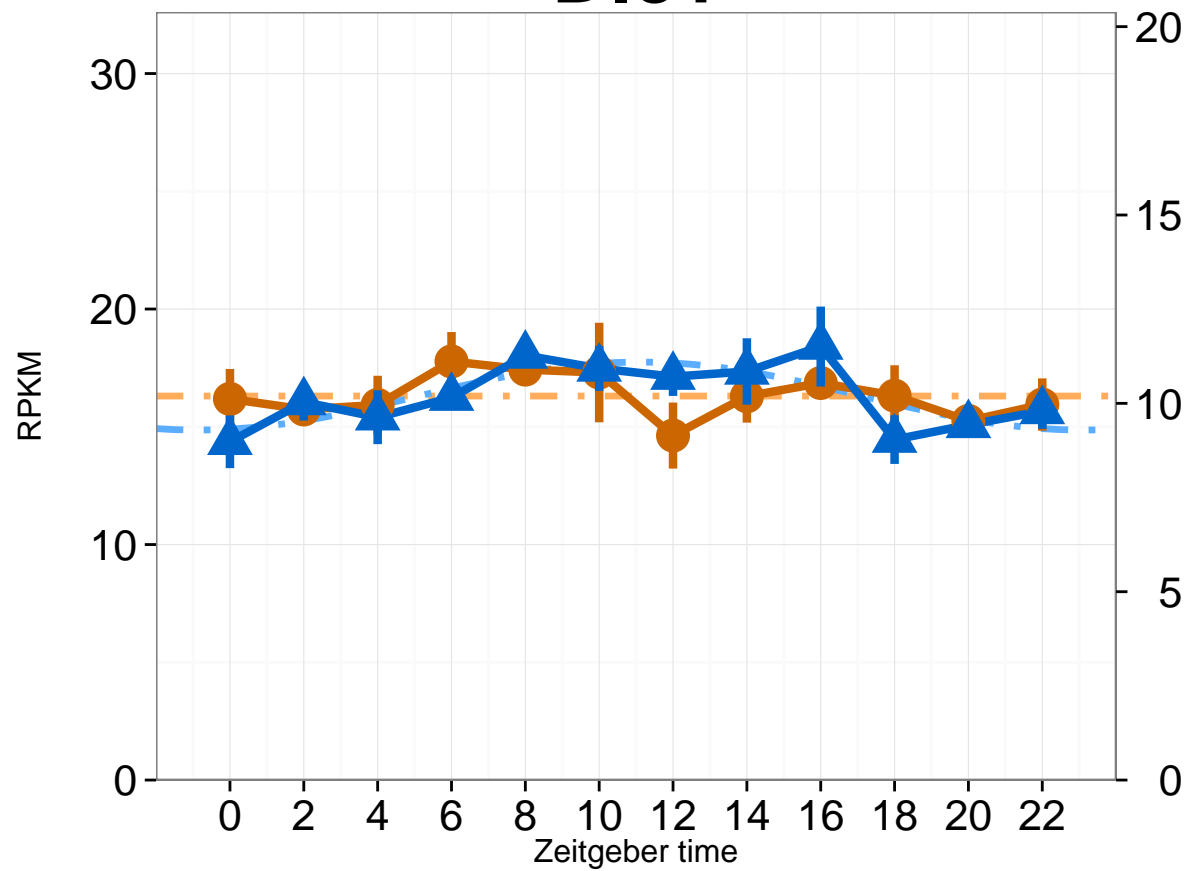

## Dlc1

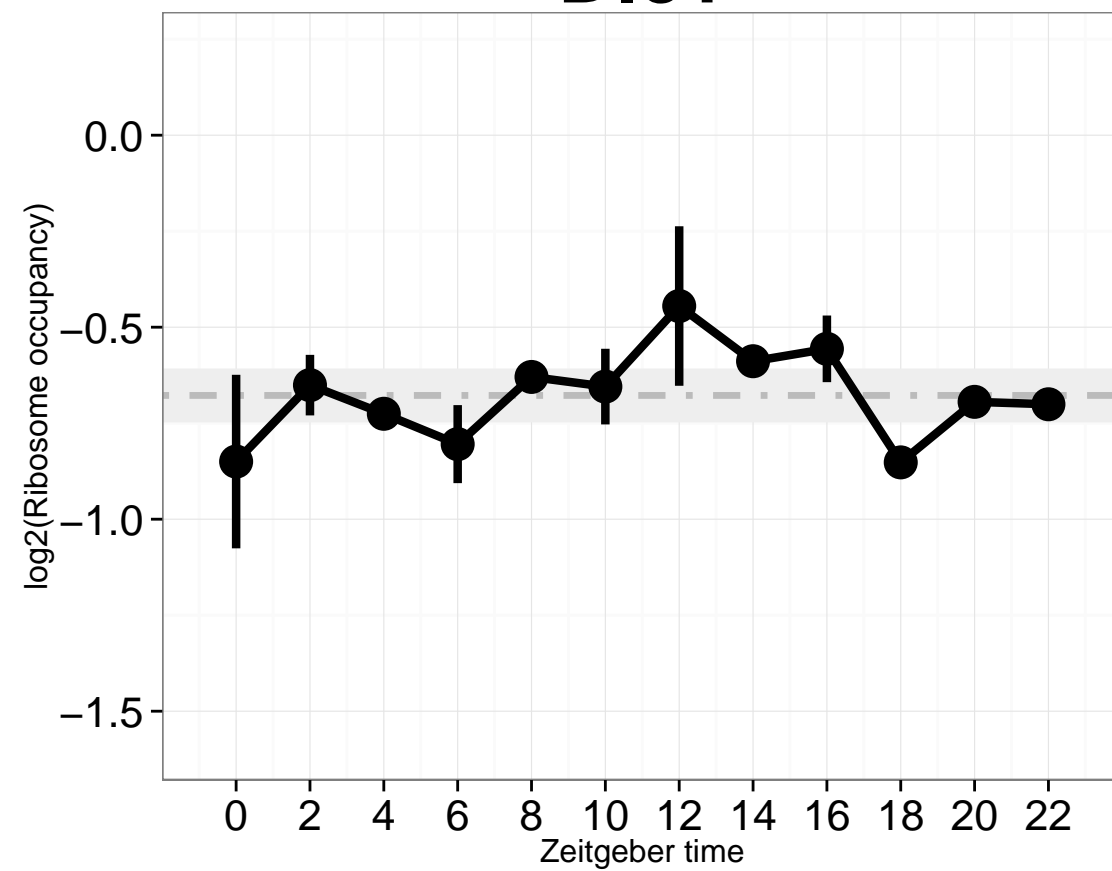

Supplement: Supplementary file 2081 [file 1]

## Zhx1

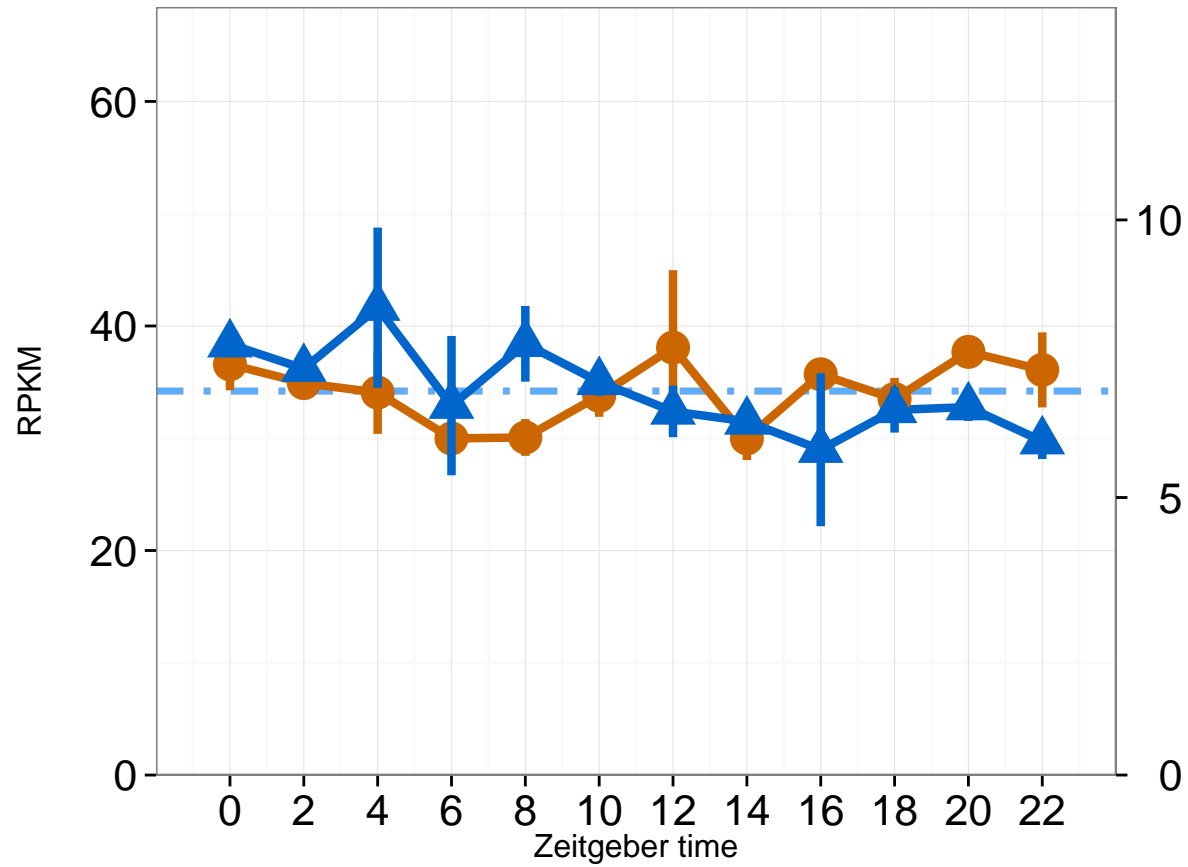

## Zhx1

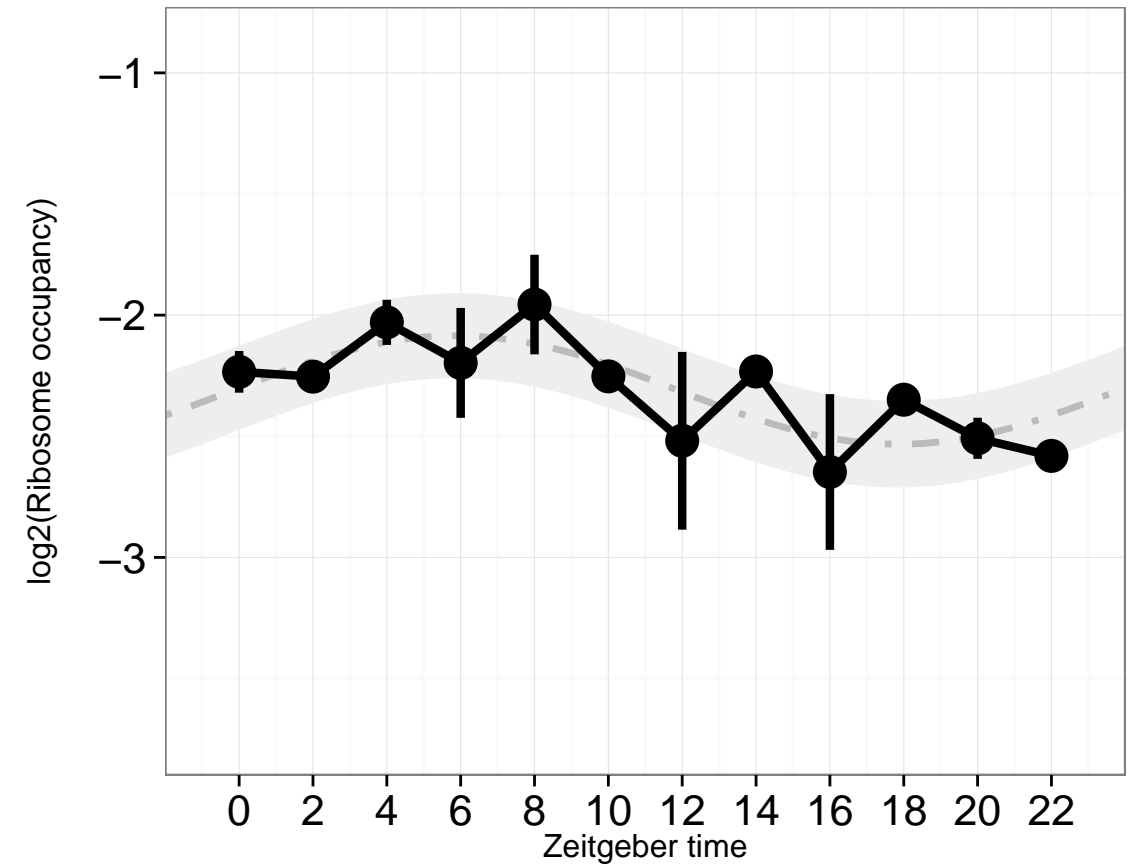

Supplement: Supplementary file 2082 [file 1]

## Slc7a8

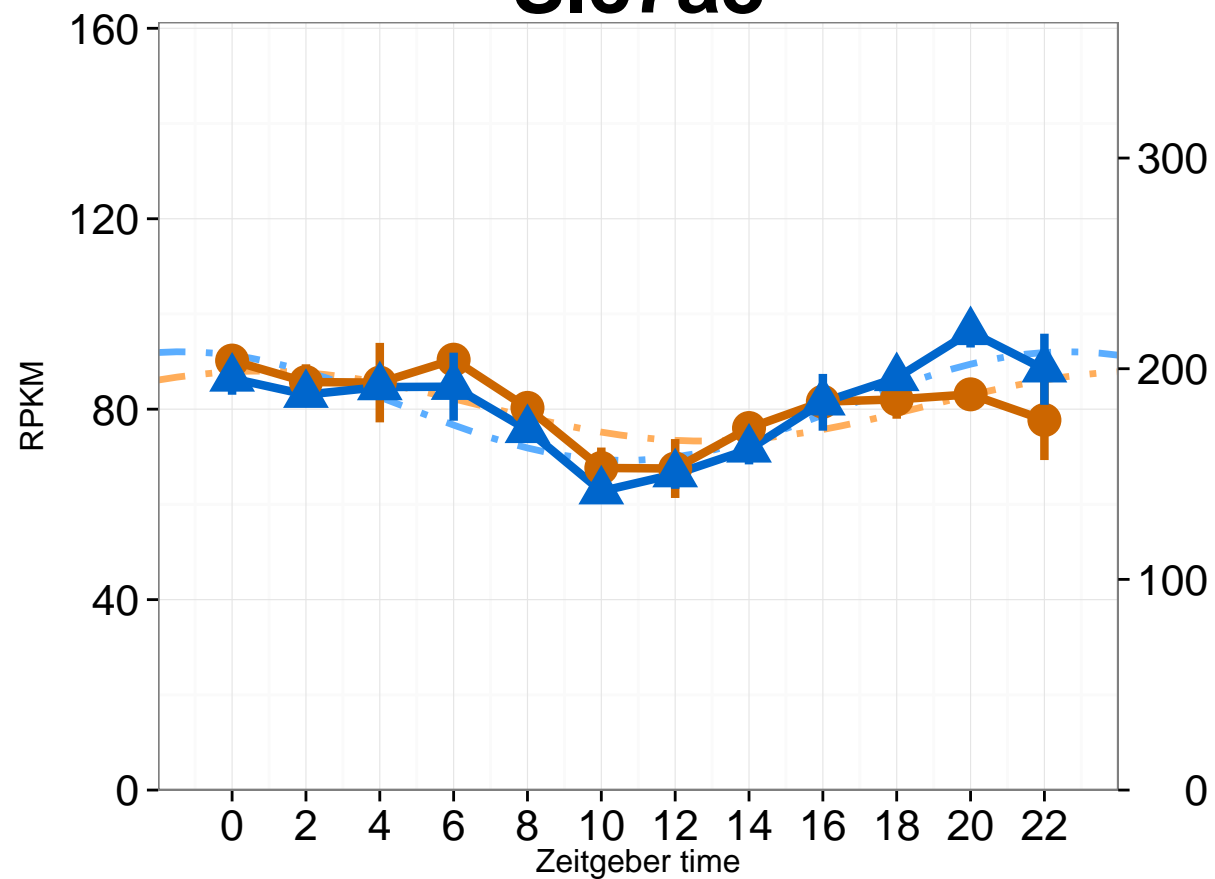

## Slc7a8

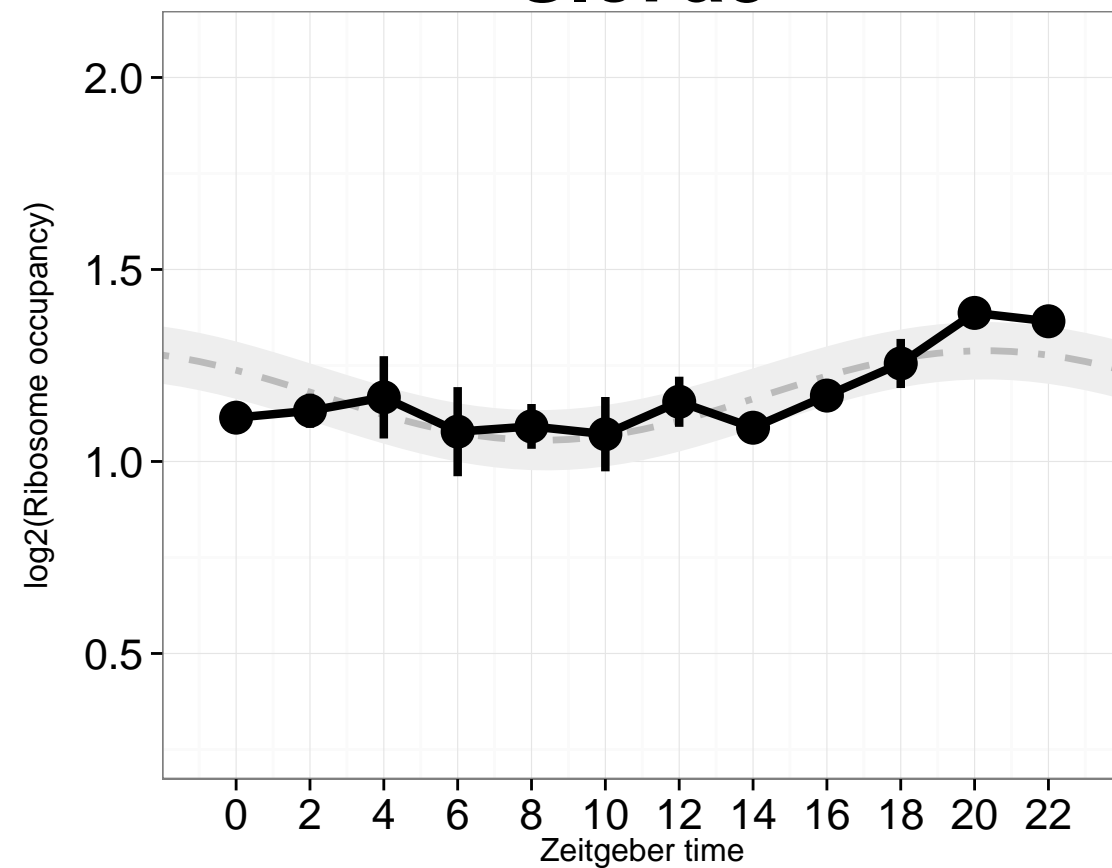

Supplement: Supplementary file 2083 [file 1]

## G3bp2

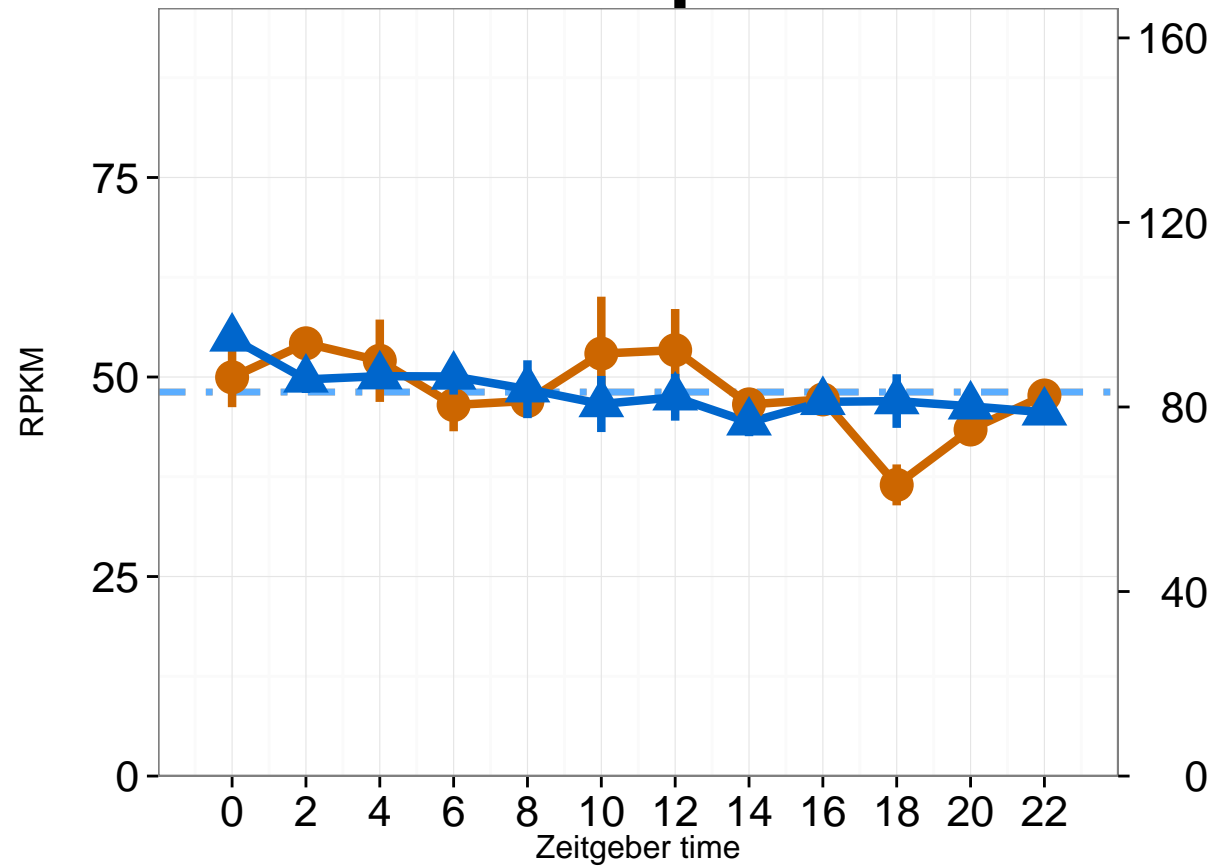

## G3bp2

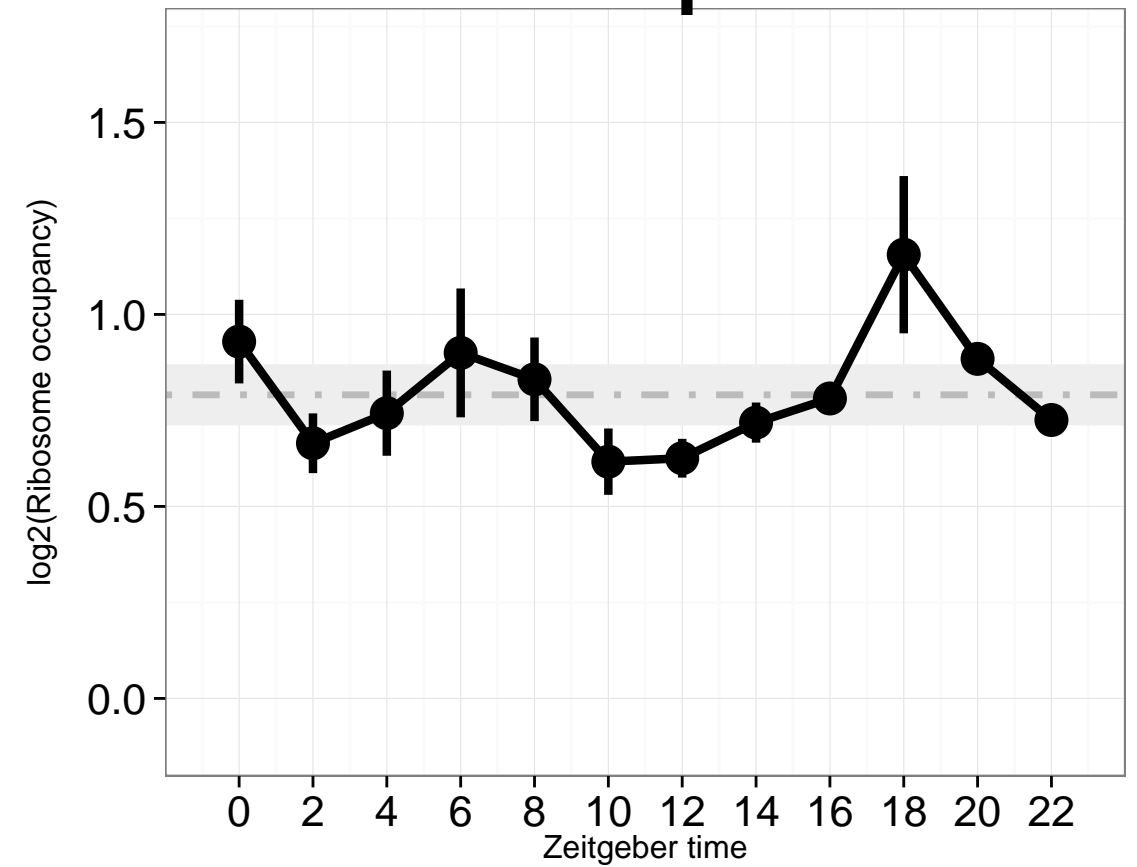

Supplement: Supplementary file 2084 [file 1]

## Npepps

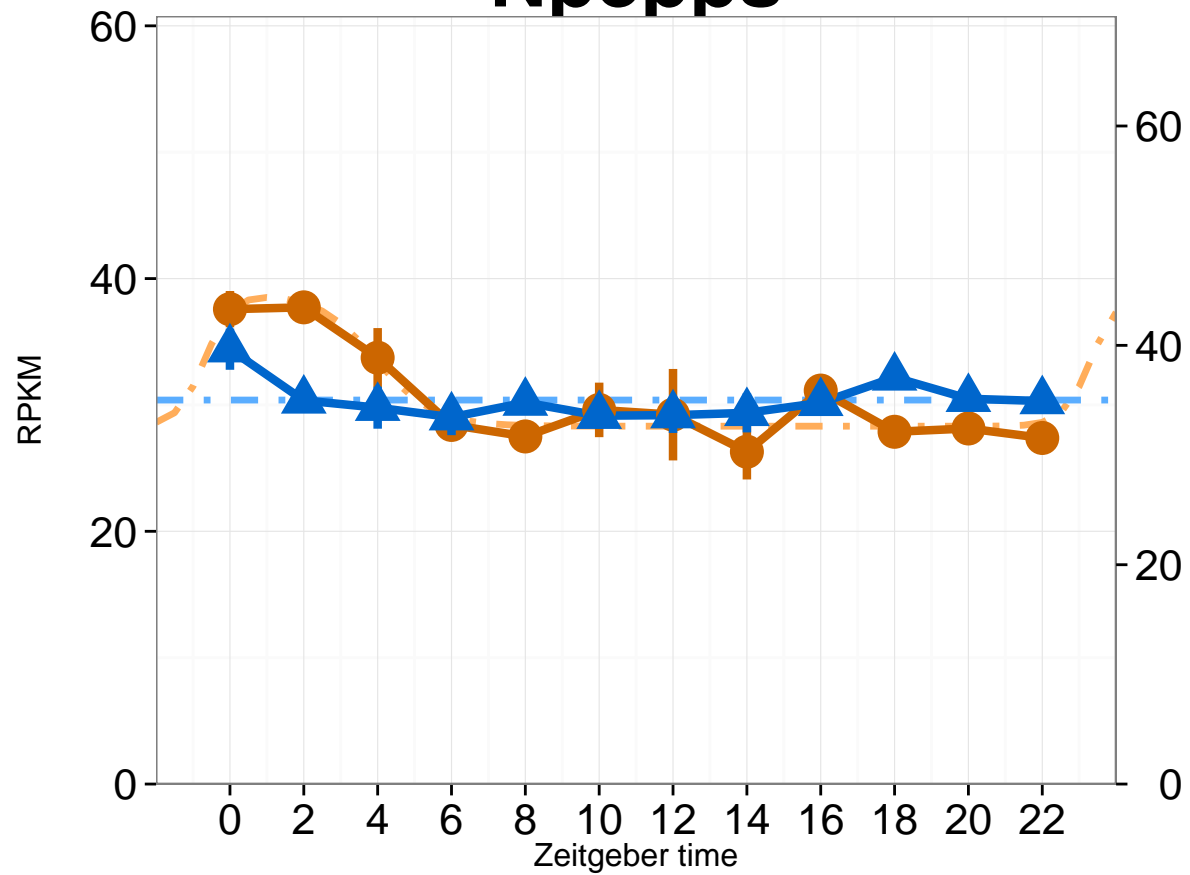

## Npepps

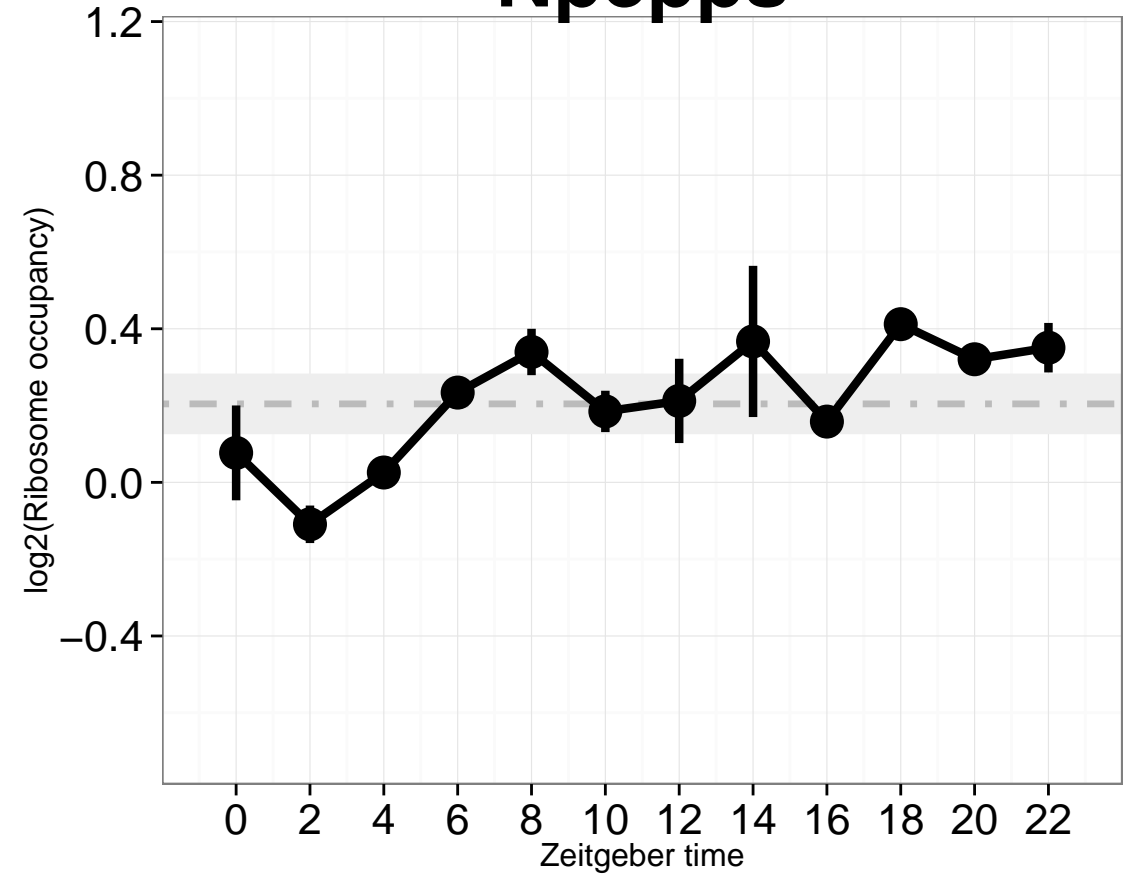

Supplement: Supplementary file 2085 [file 1]

## Bdh2

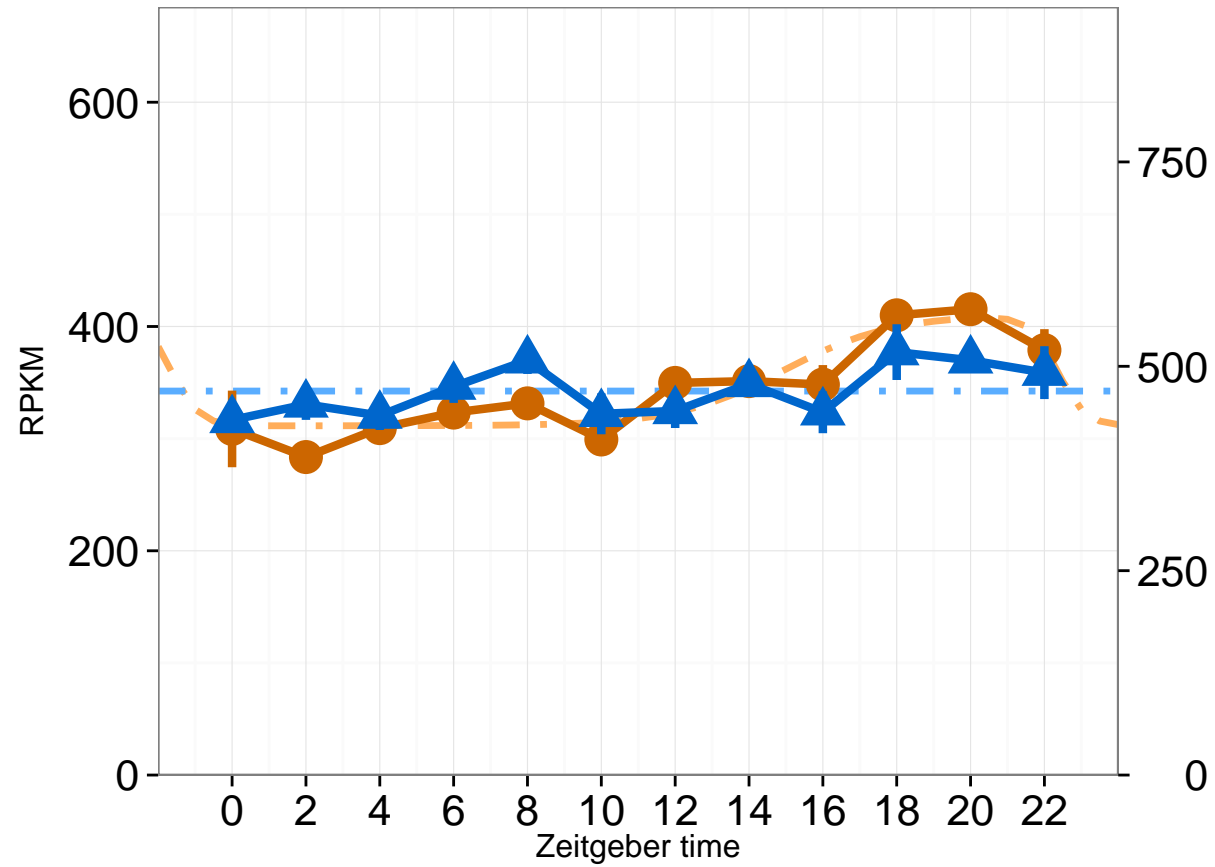

## Bdh2

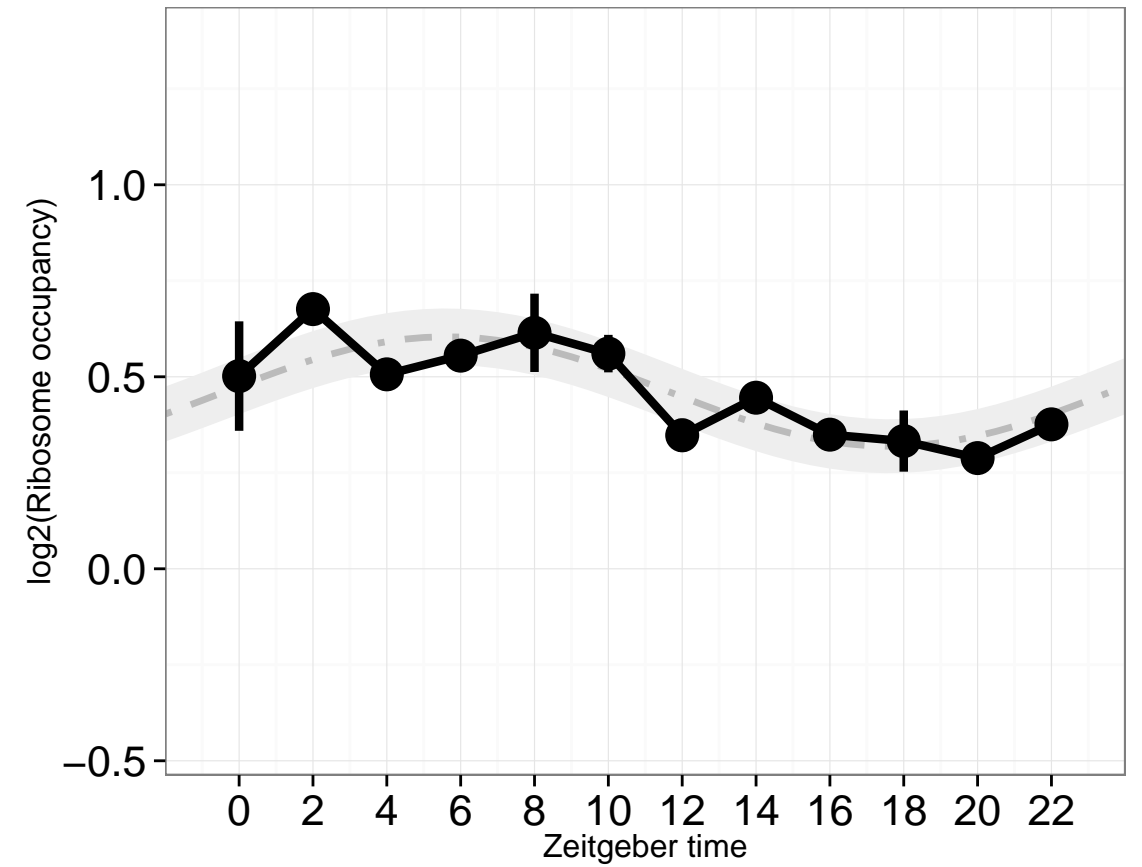

Supplement: Supplementary file 2086 [file 1]

# Veph1

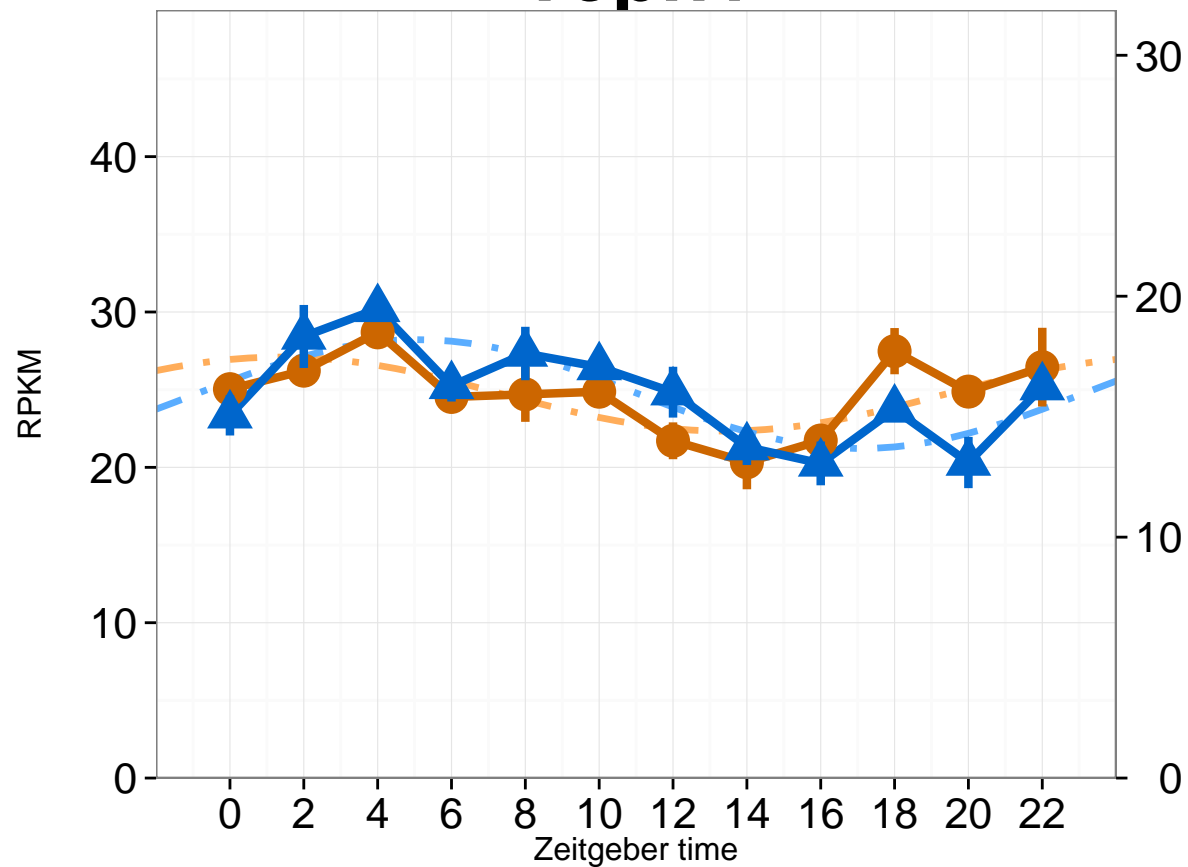

# Veph1

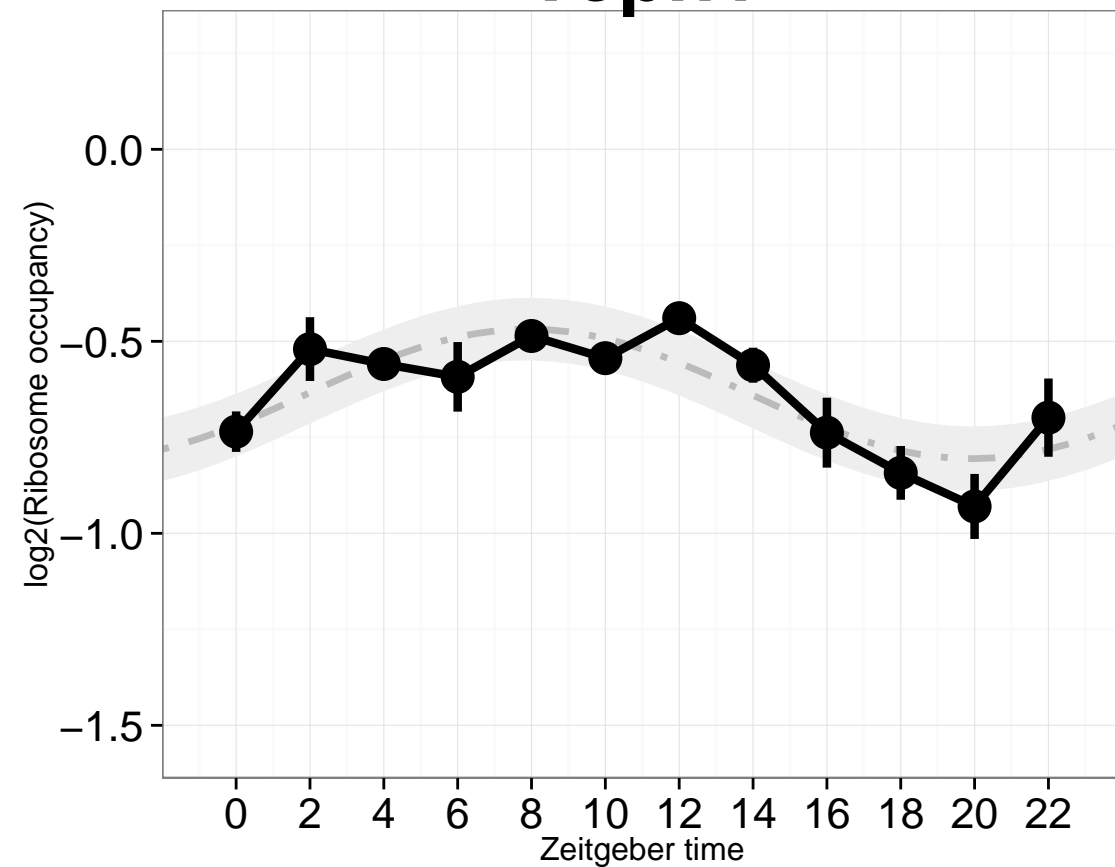

Supplement: Supplementary file 2087 [file 1]

## Pcyox1

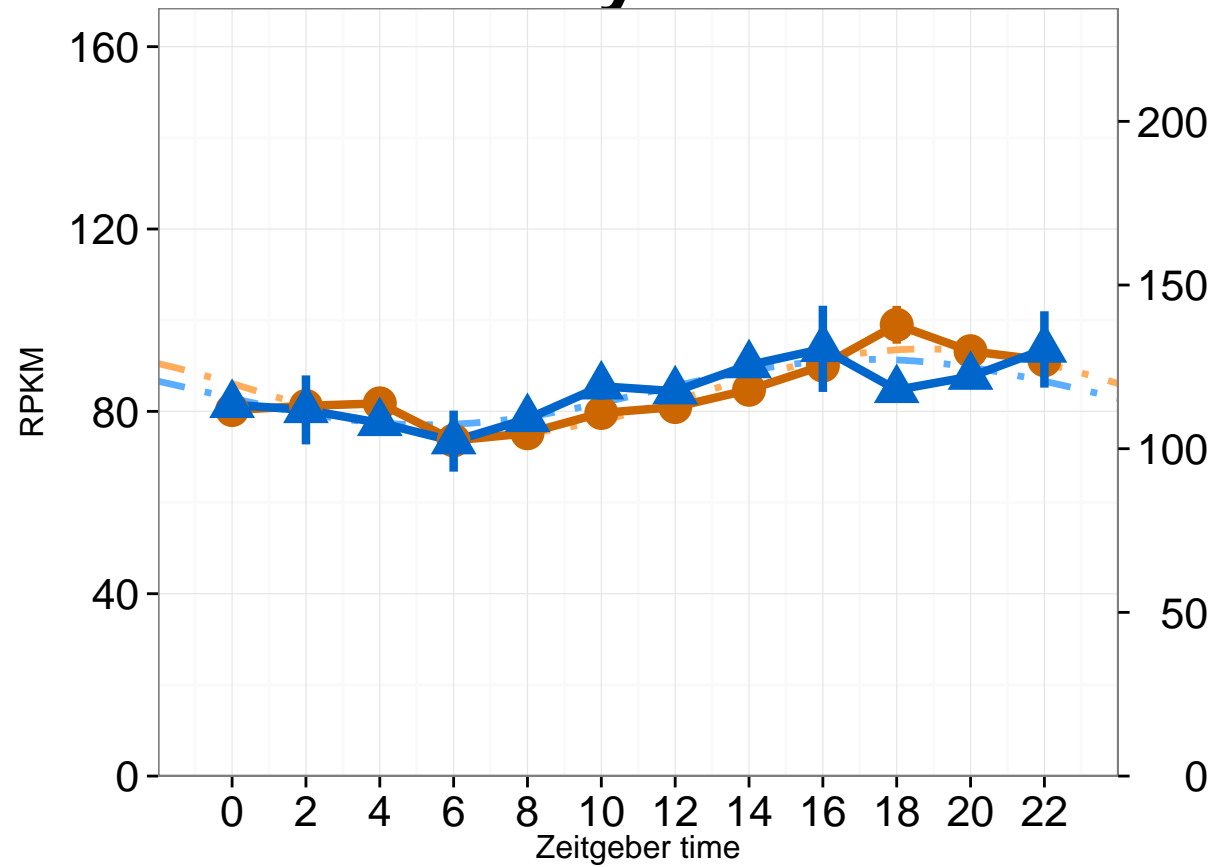

## Pcyox1

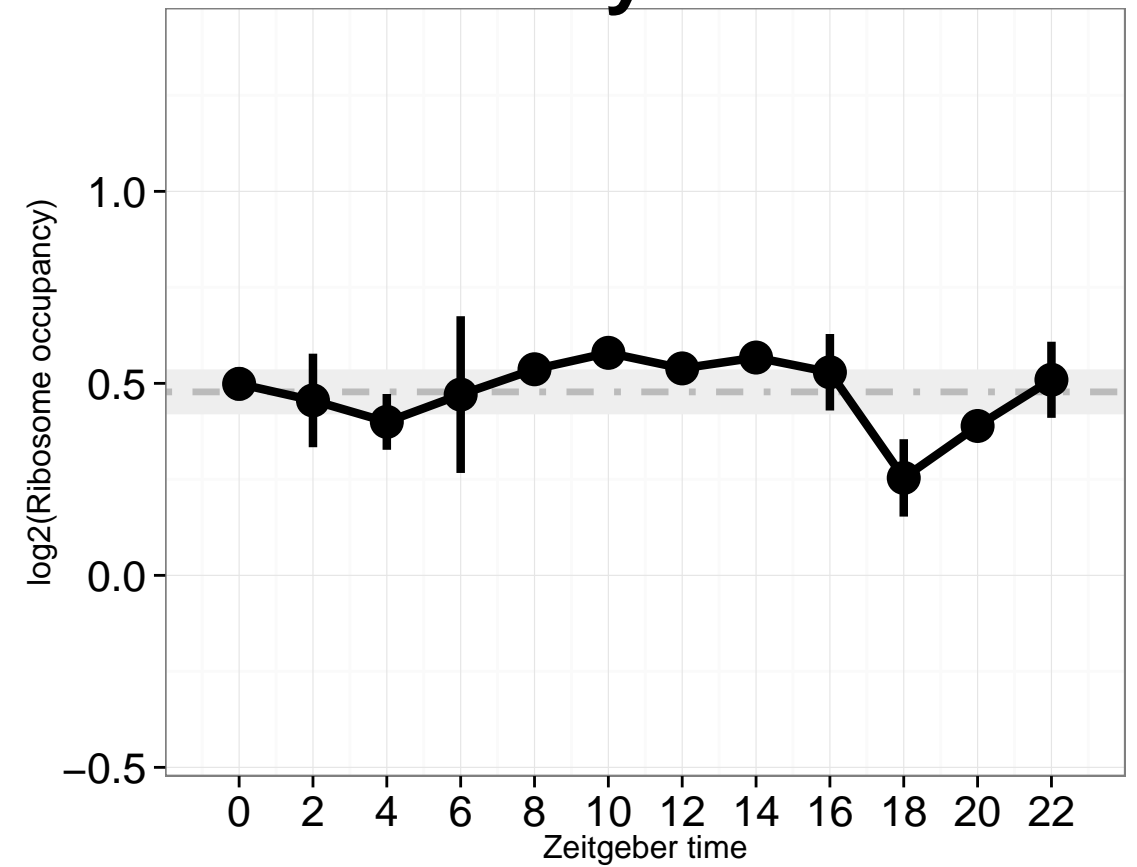

Supplement: Supplementary file 2088 [file 1]

# Herpud1

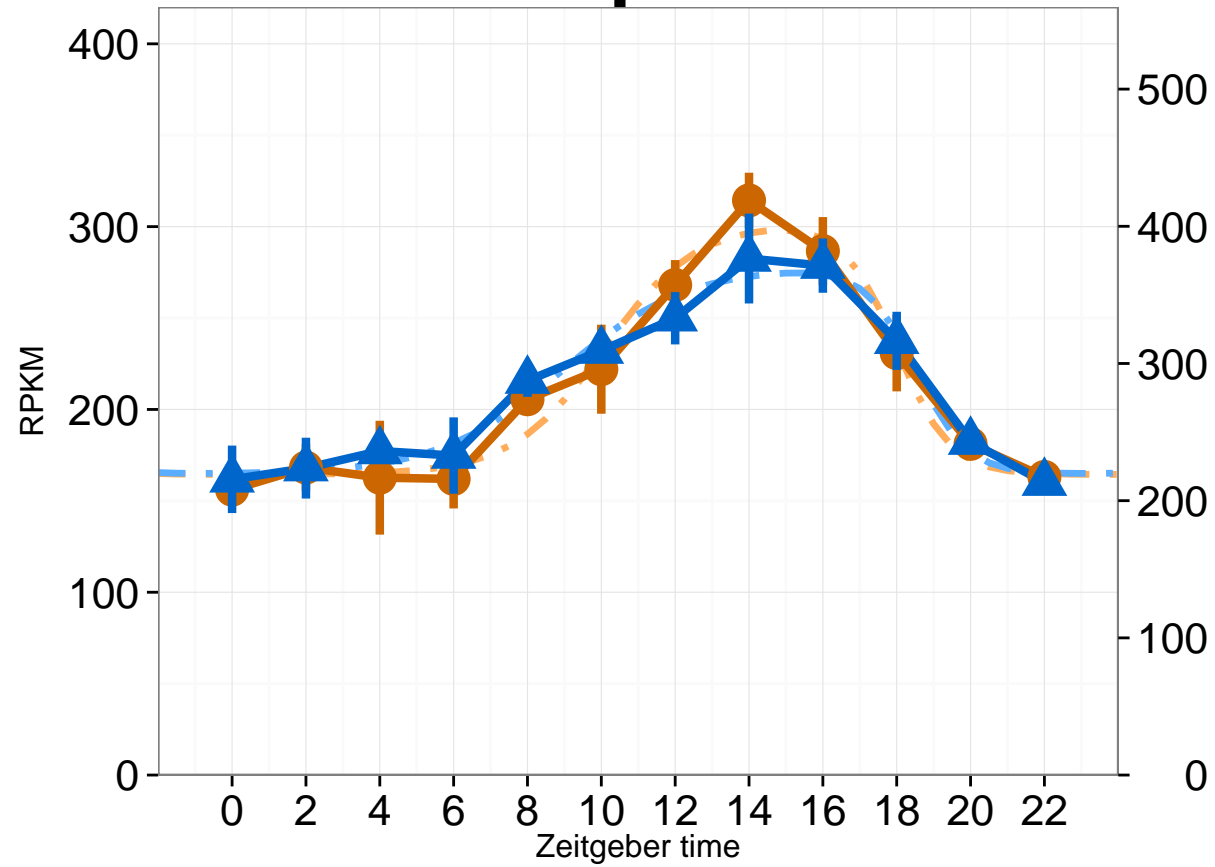

# Herpud1

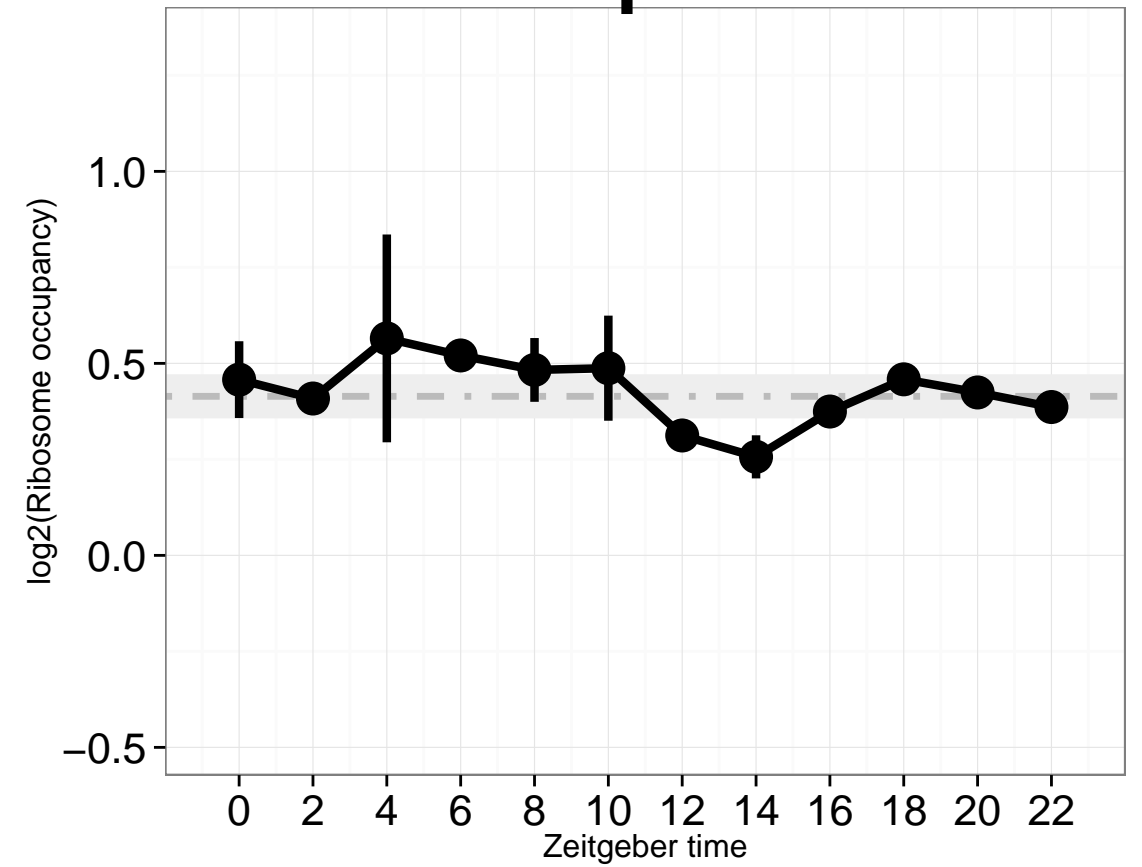

Supplement: Supplementary file 2089 [file 1]

# Lmcd1

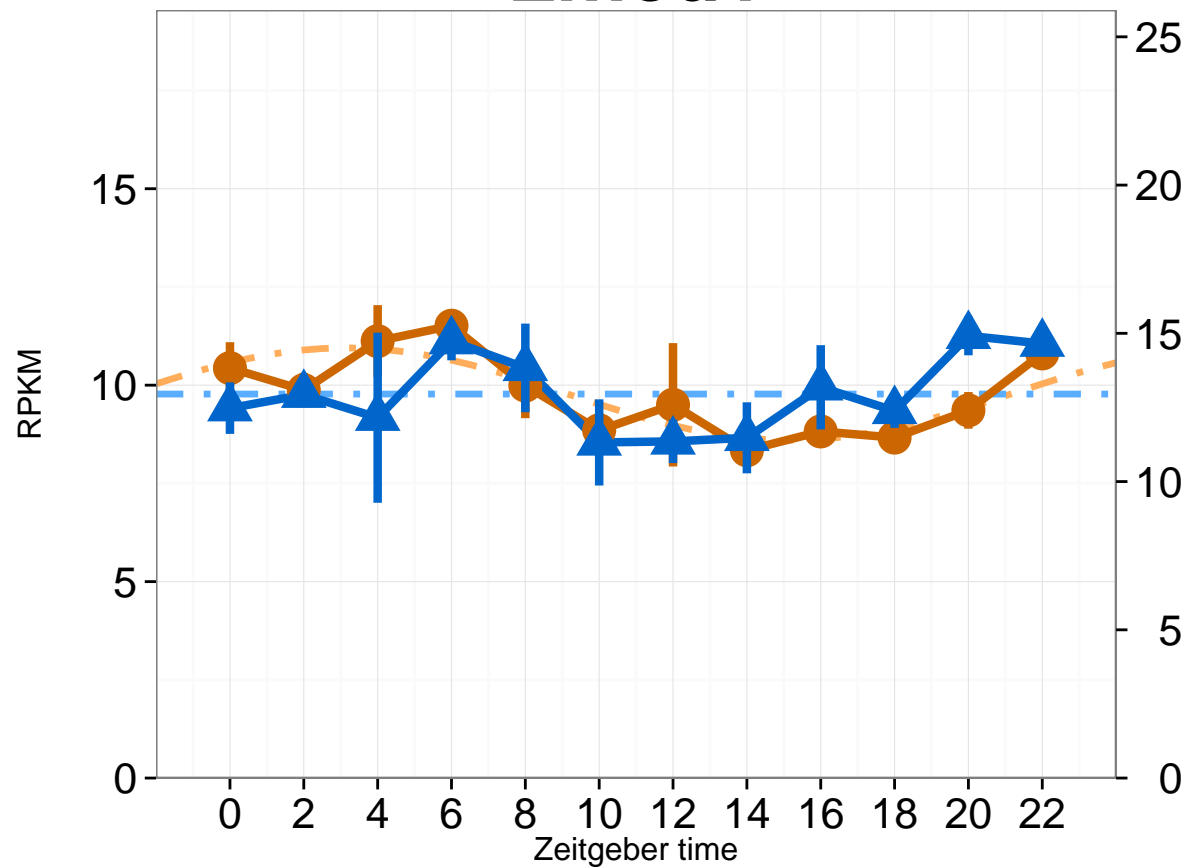

# Lmcd1

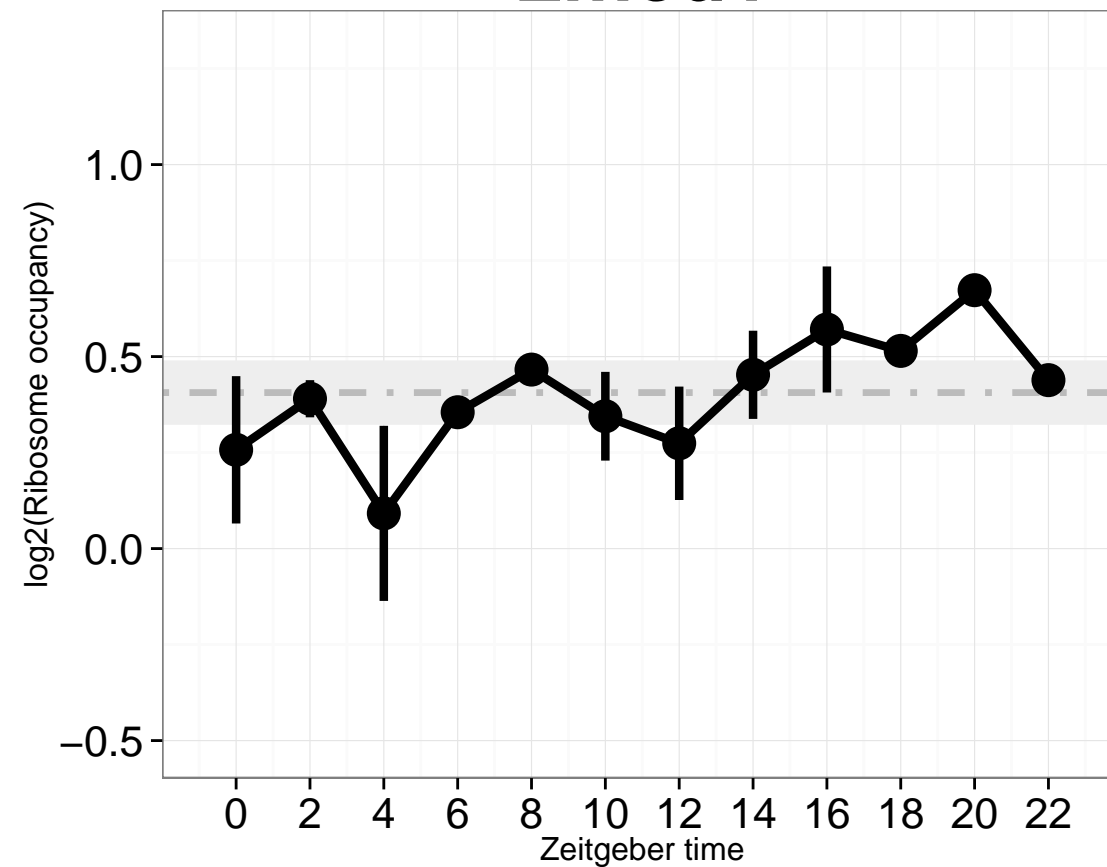

Supplement: Supplementary file 2090 [file 1]

# Tmem147

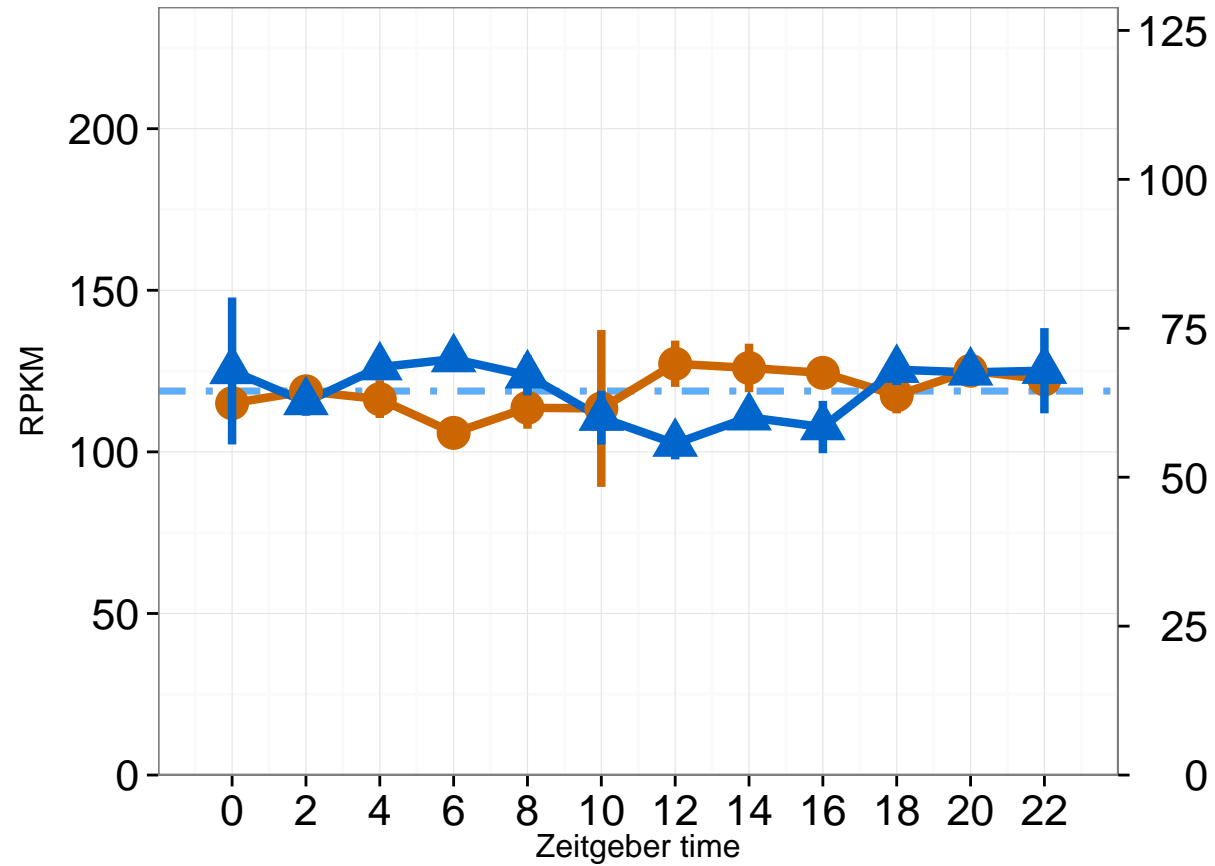

# Tmem147

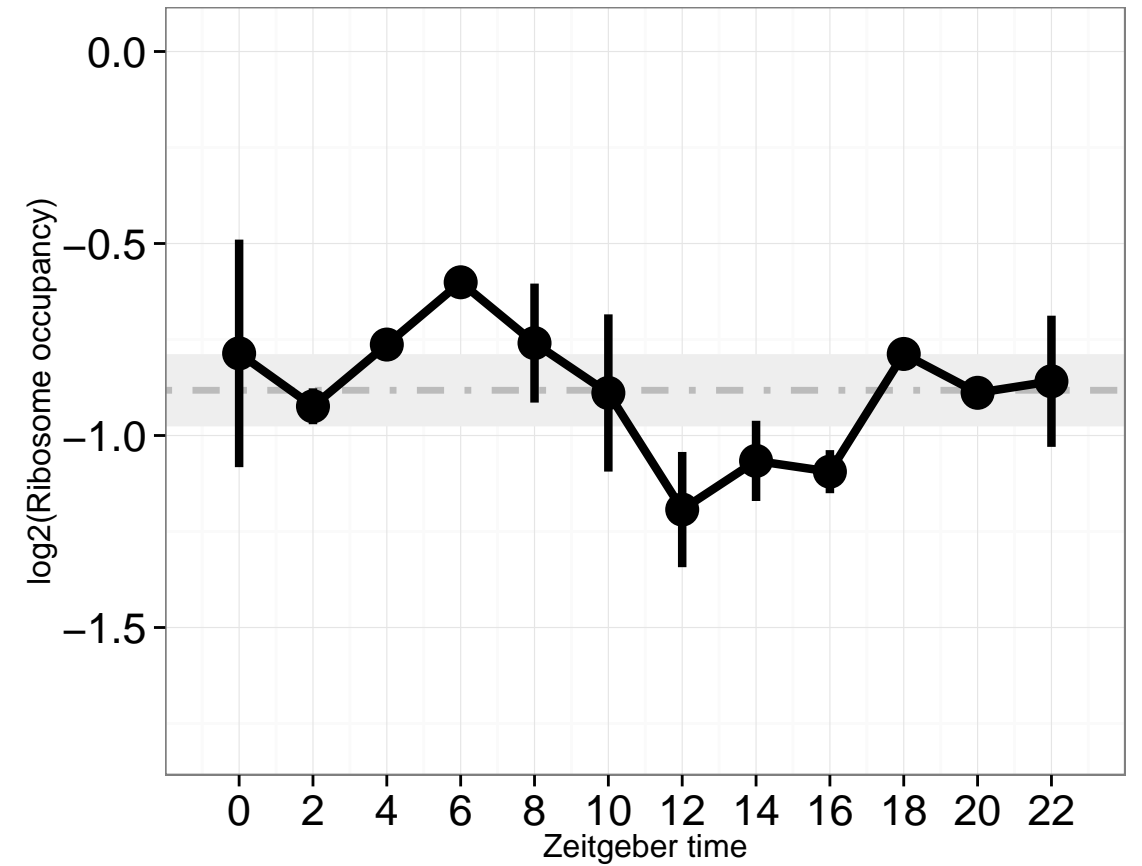

Supplement: Supplementary file 2091 [file 1]

# Fis1

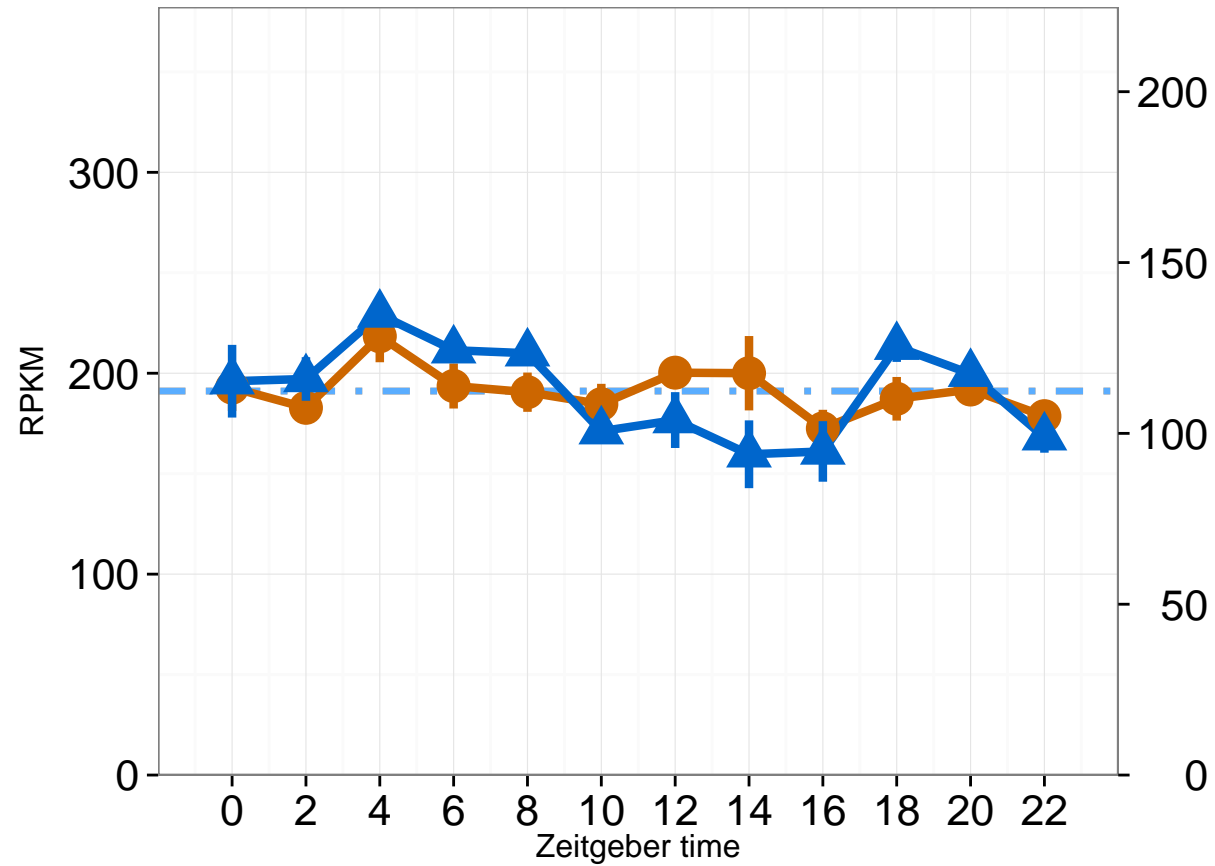

# Fis1

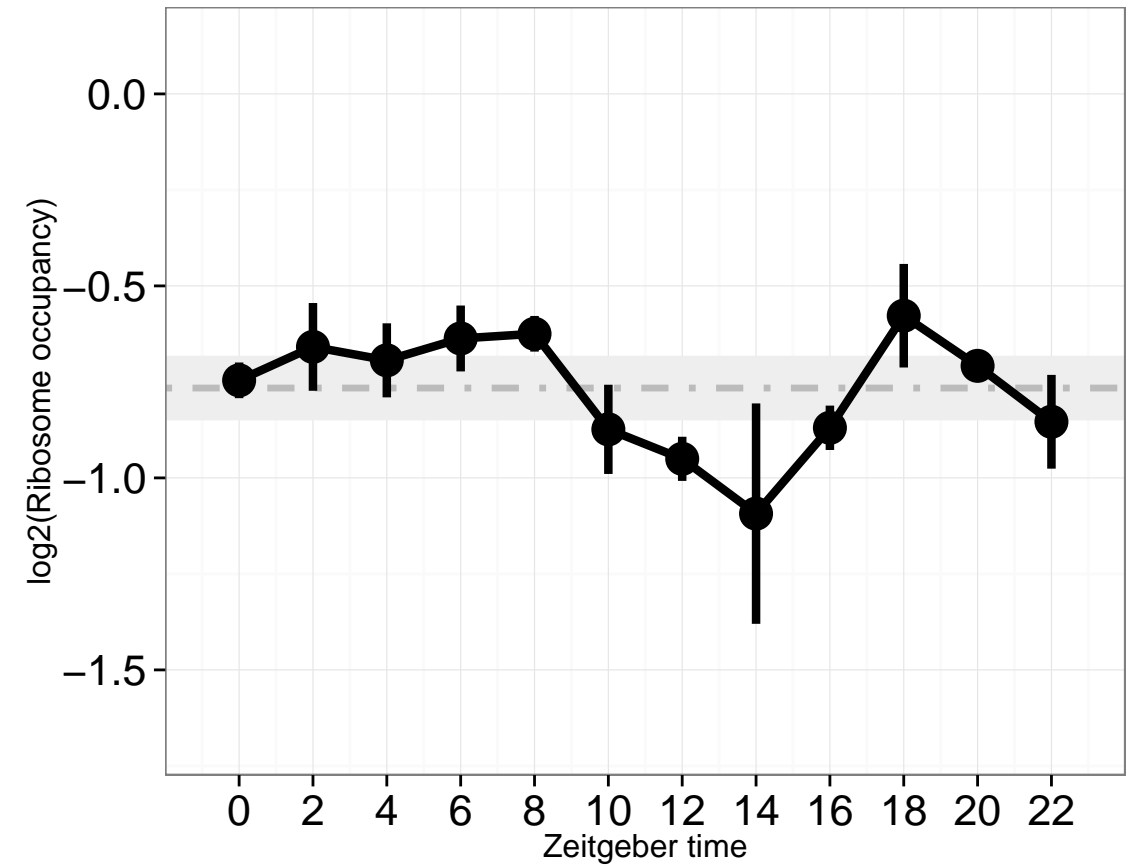

Supplement: Supplementary file 2092 [file 1]

## Spata6

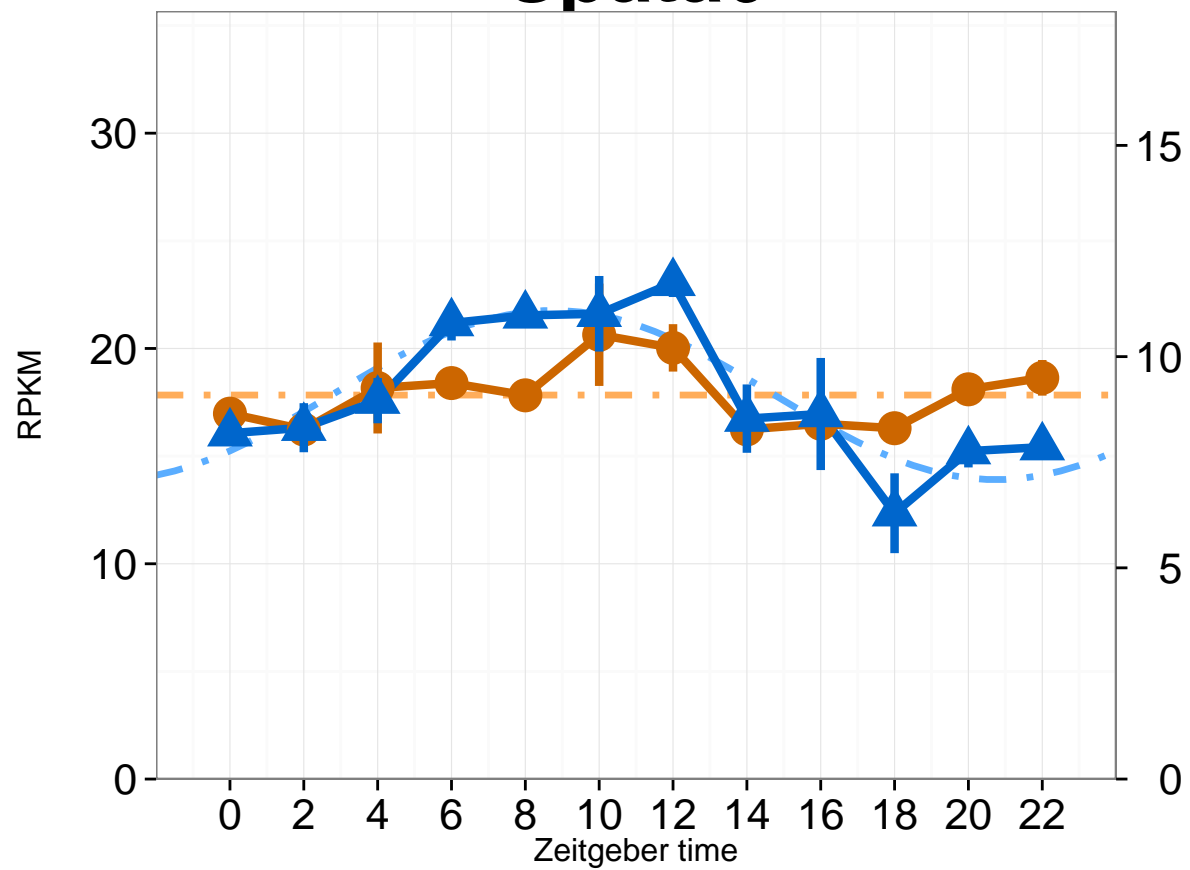

## Spata6

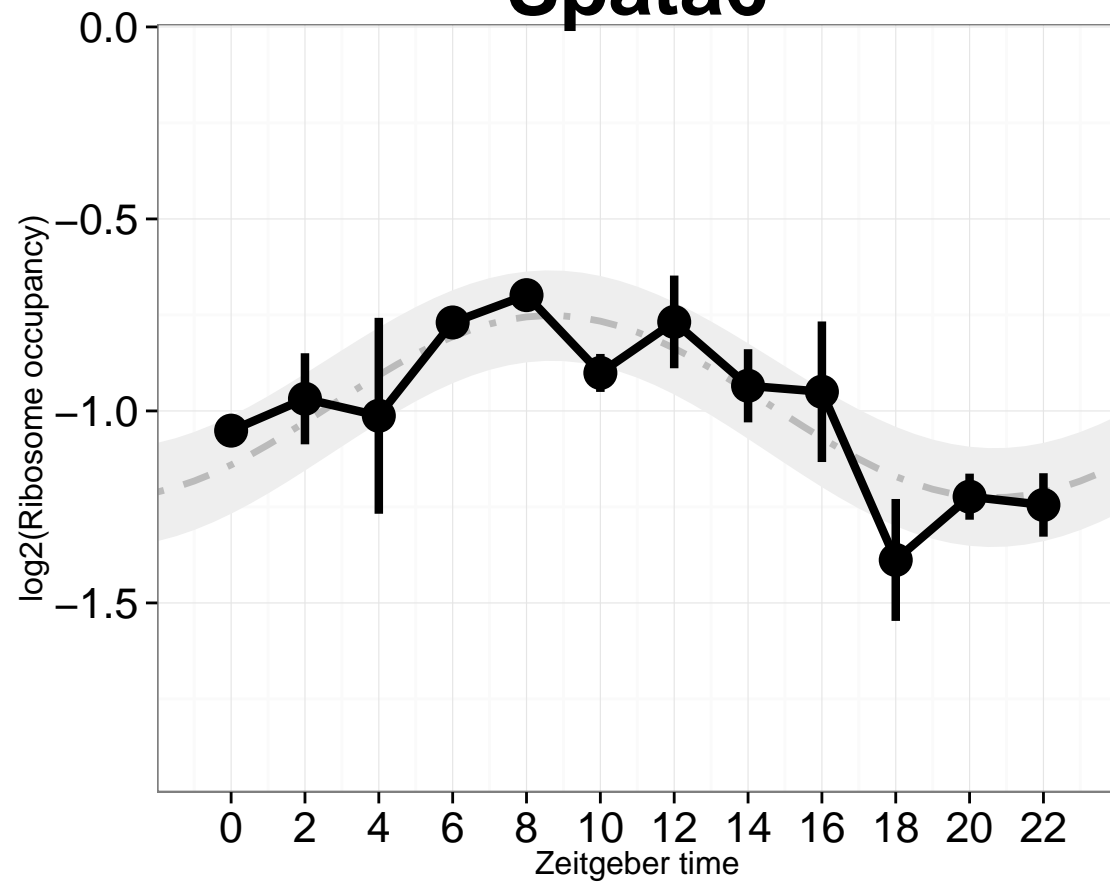

Supplement: Supplementary file 2093 [file 1]

# H2-Q2

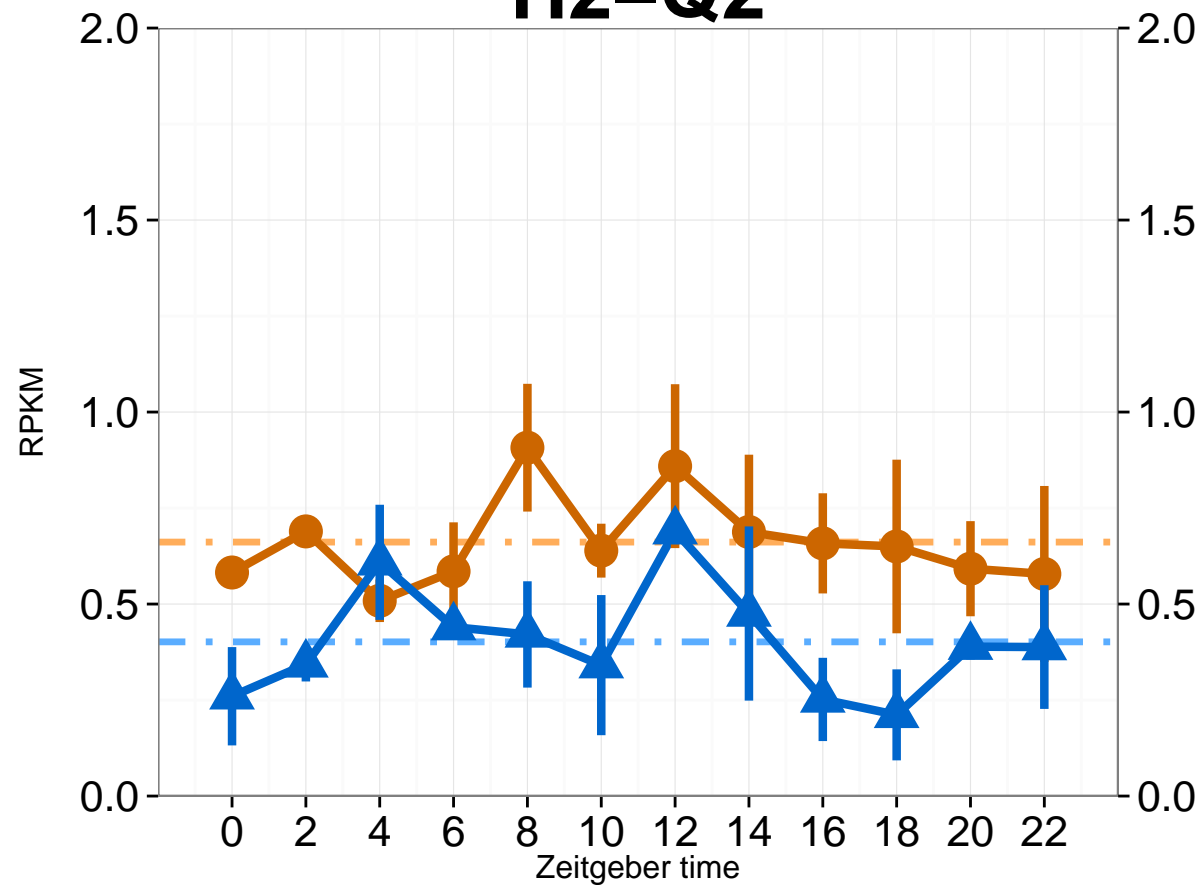

# H2-Q2

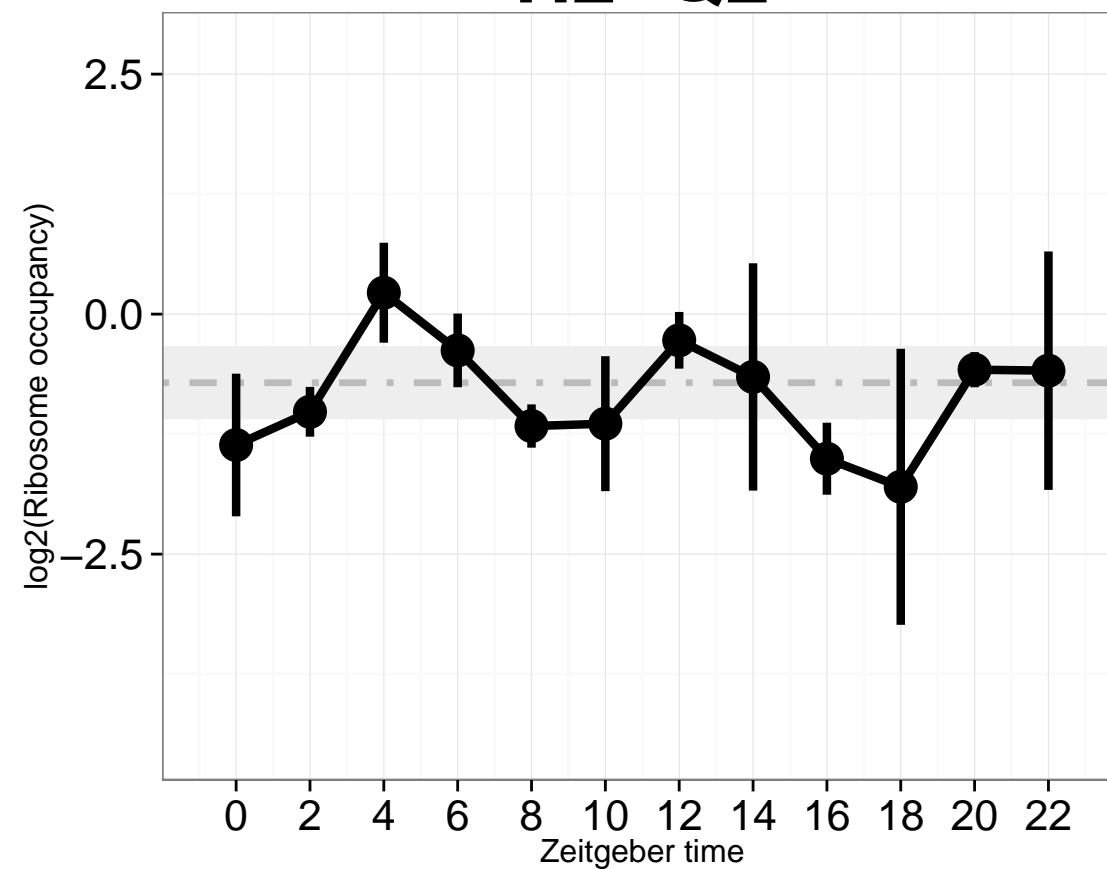

Supplement: Supplementary file 2094 [file 1]

## Dpp3

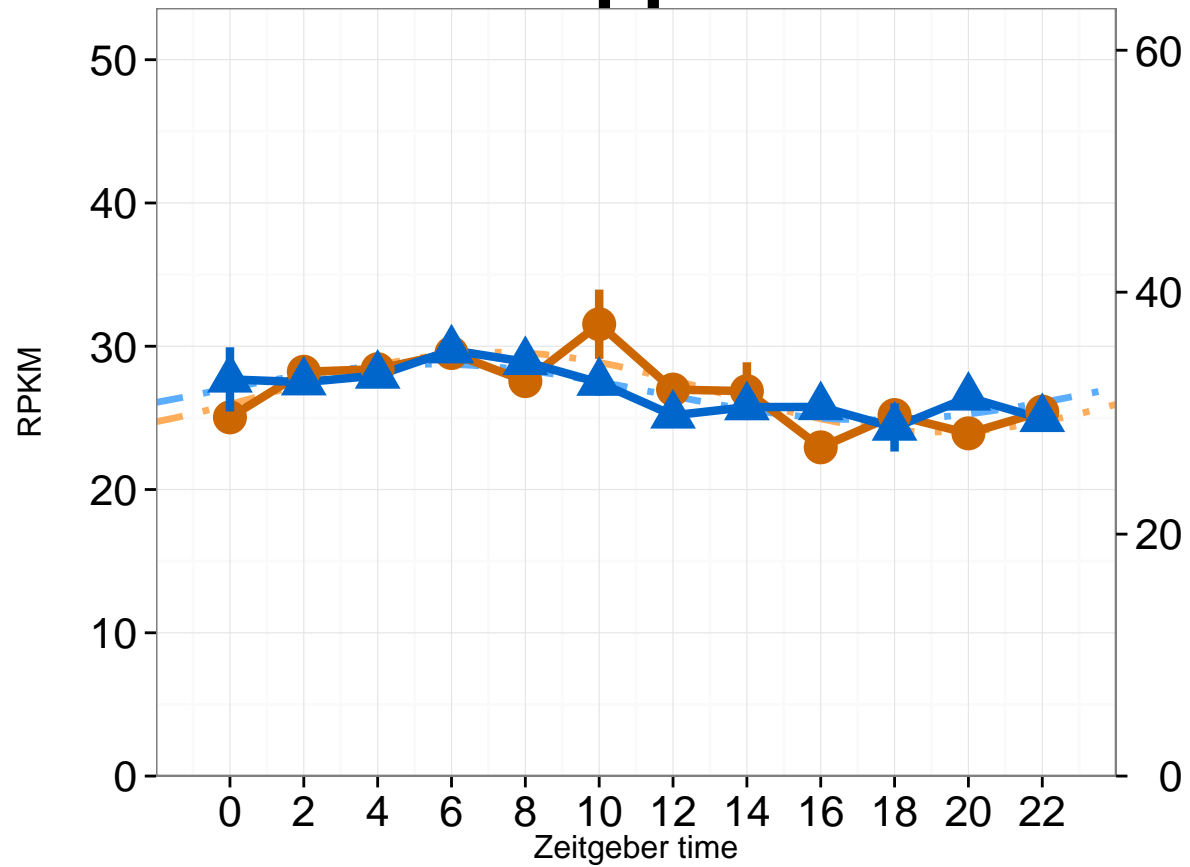

## Dpp3

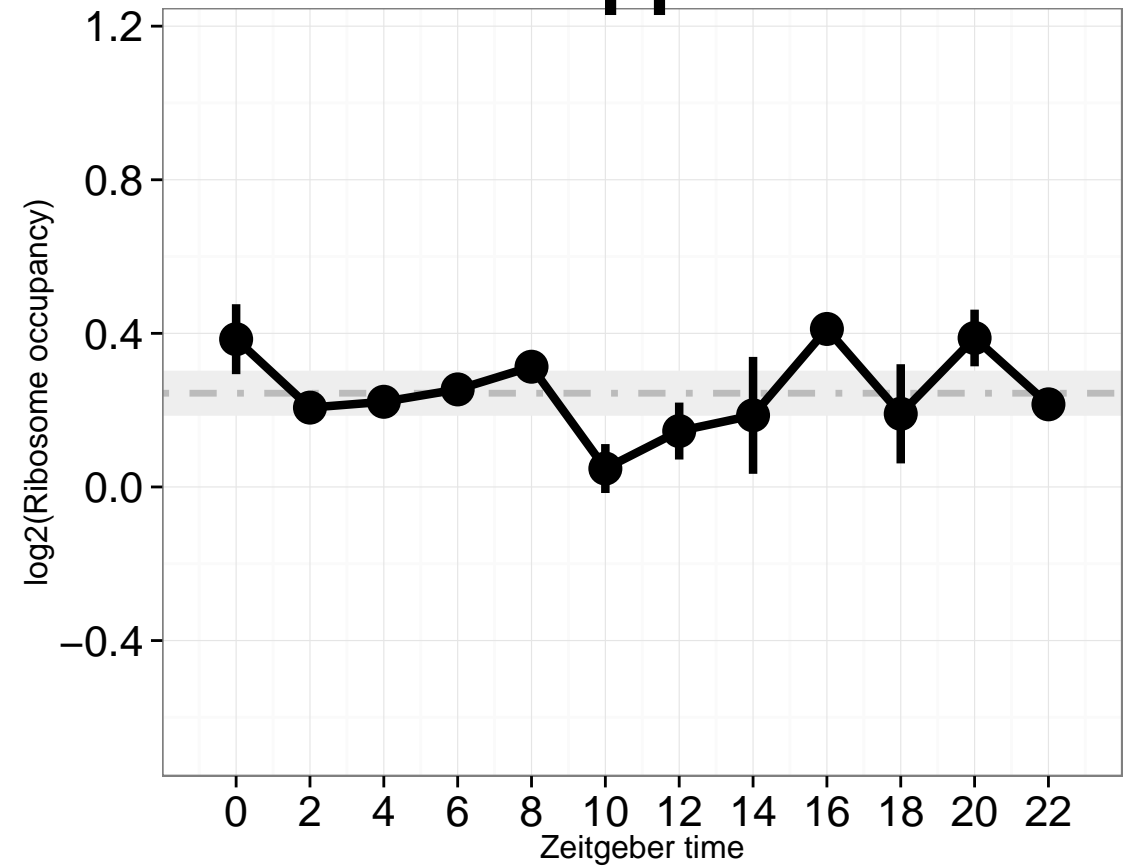

Supplement: Supplementary file 2095 [file 1]

# BC048403

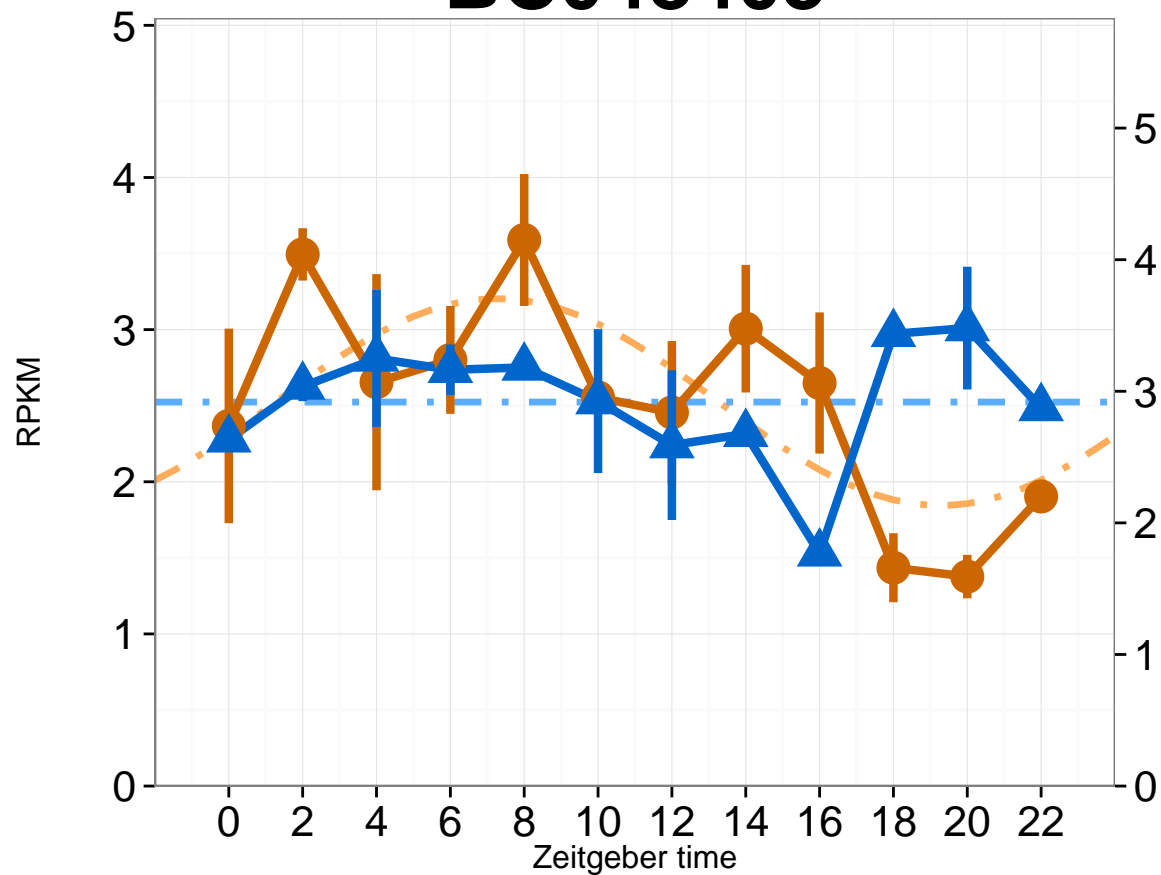

# BC048403

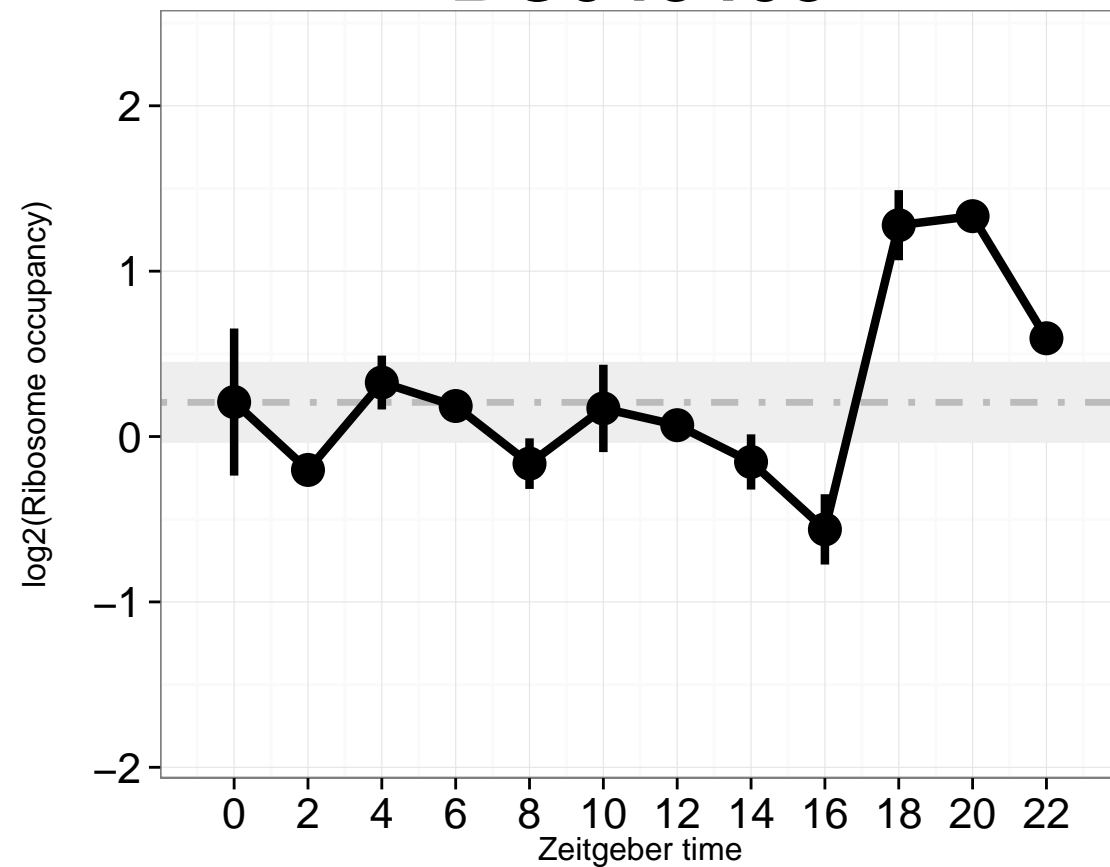

Supplement: Supplementary file 2096 [file 1]

# Rpl3l

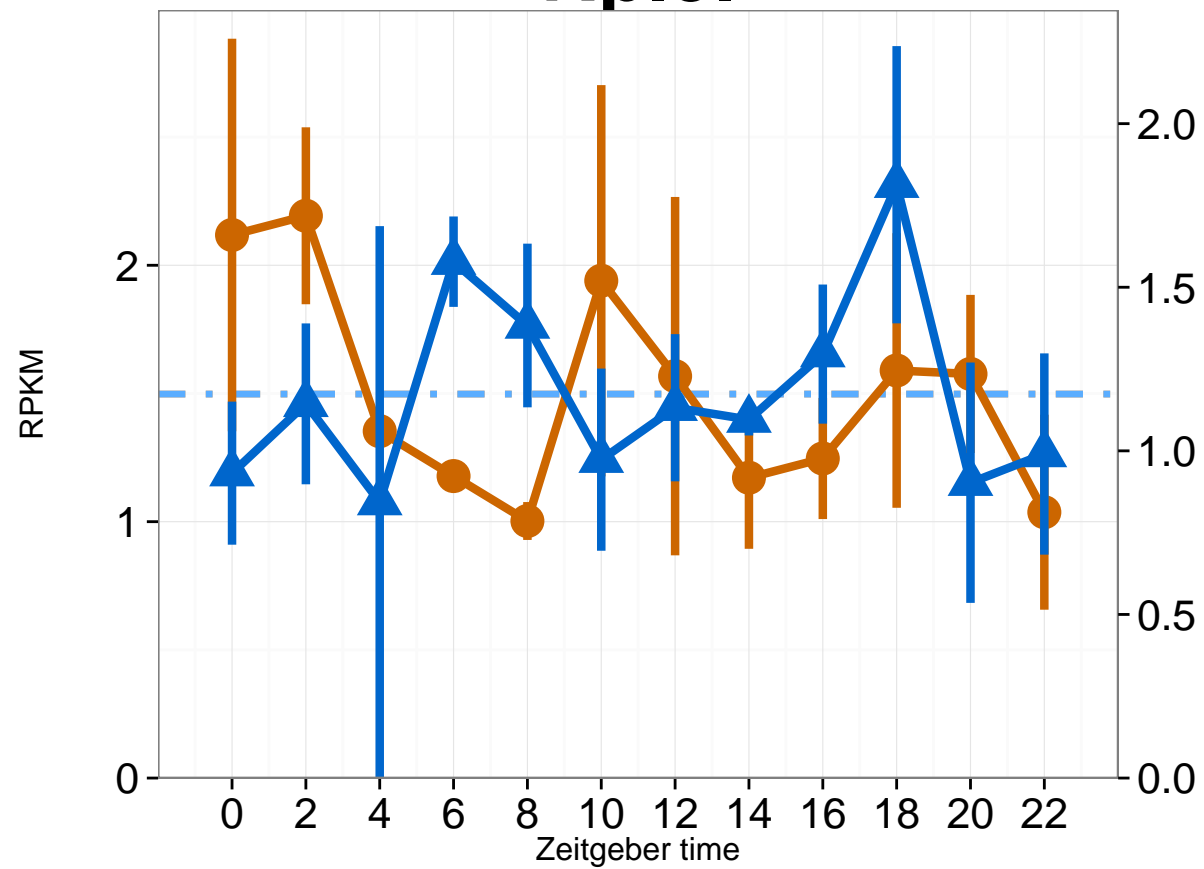

# Rpl3l

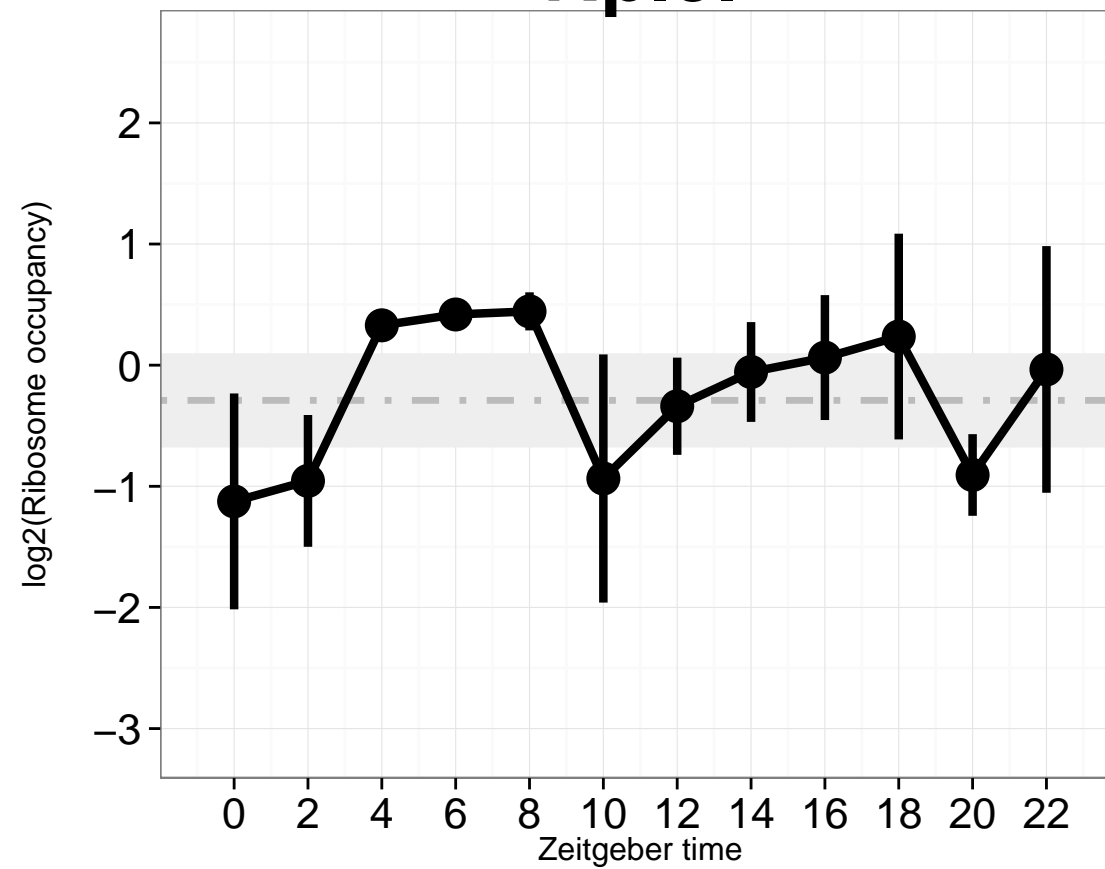

Supplement: Supplementary file 2097 [file 1]

# Zfp865

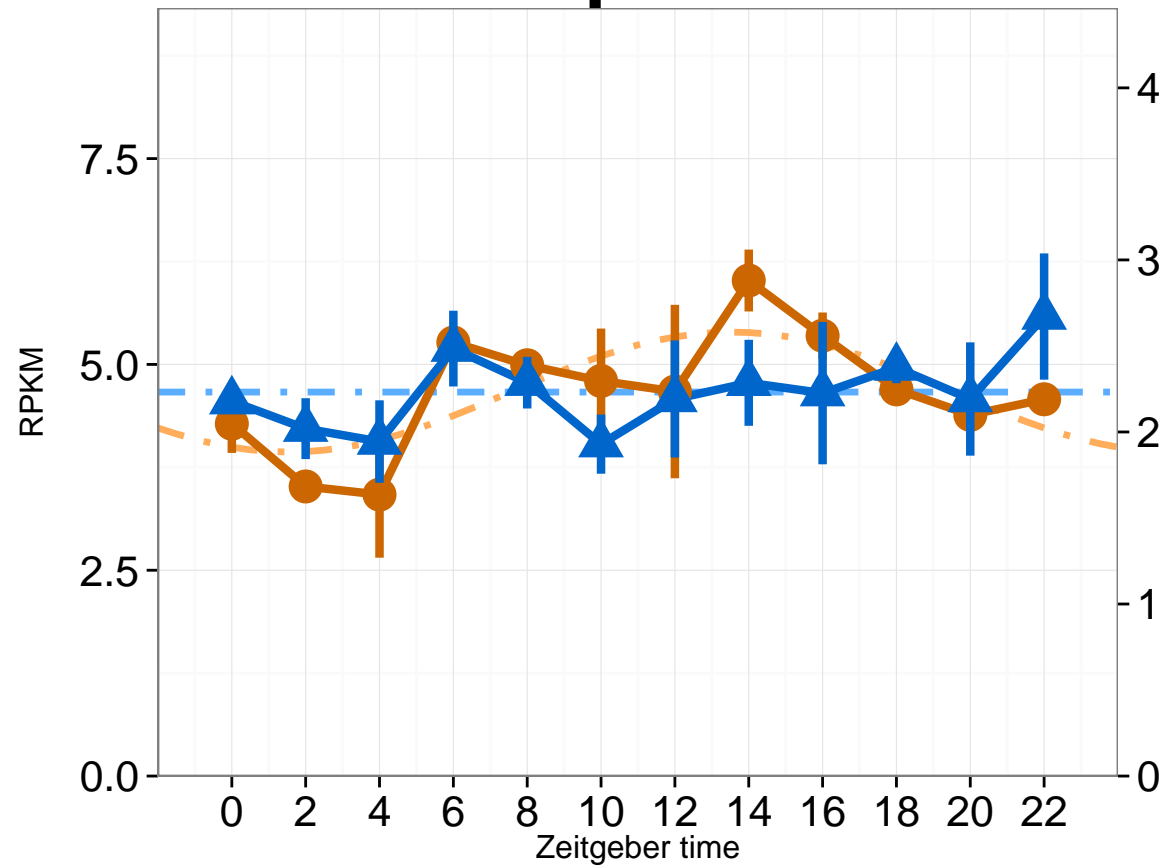

# Zfp865

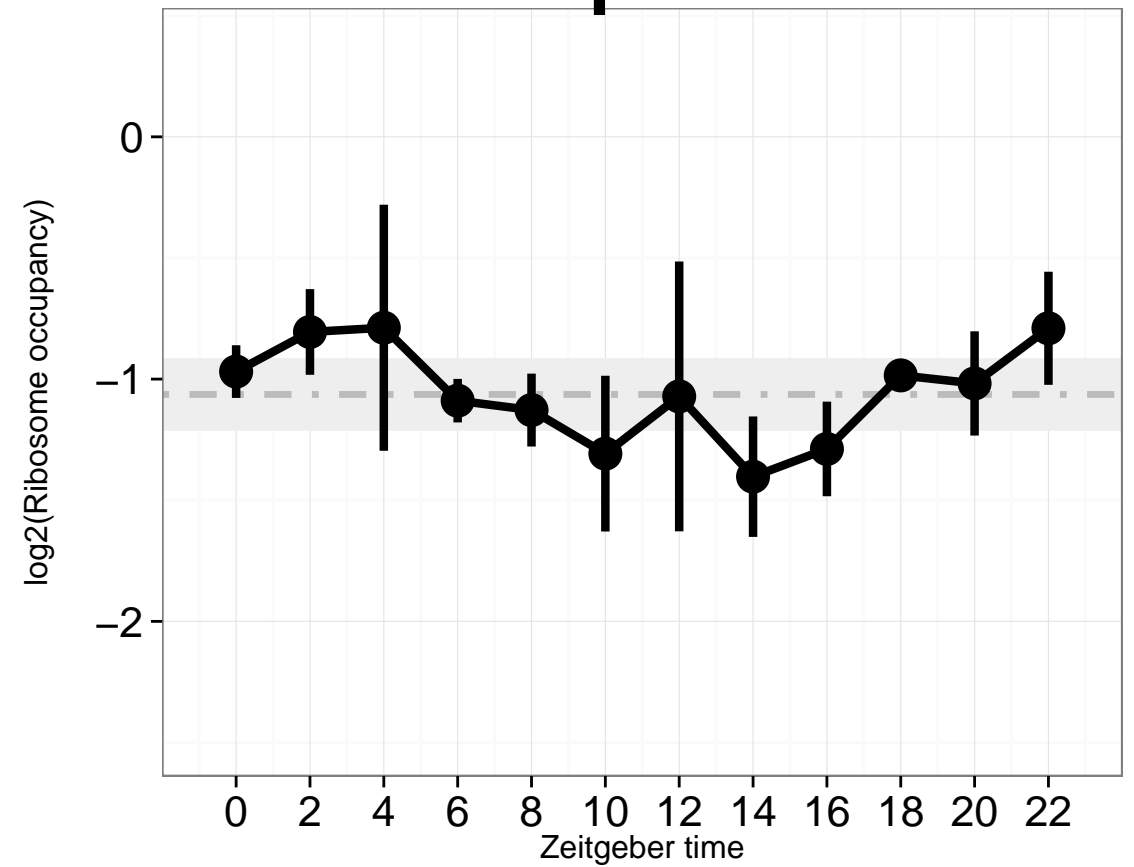

Supplement: Supplementary file 2098 [file 1]

## Nup98

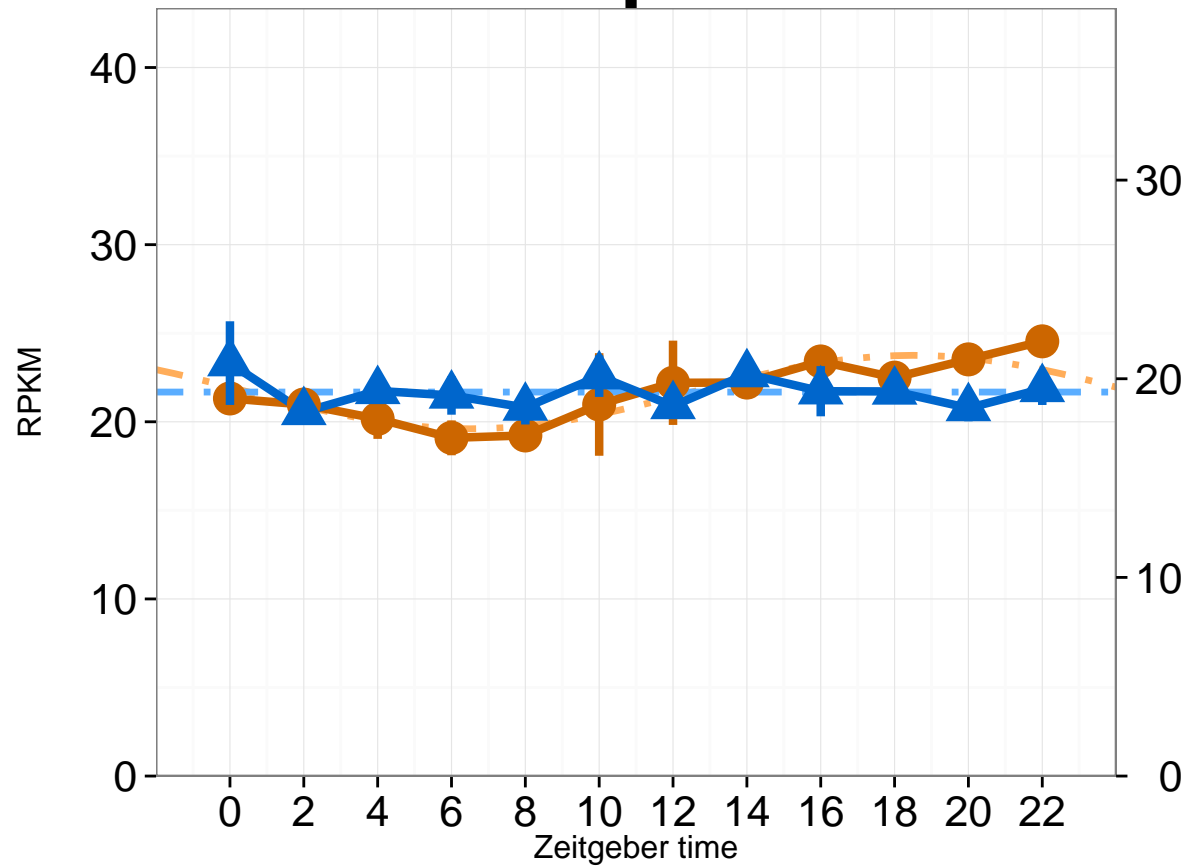

## Nup98

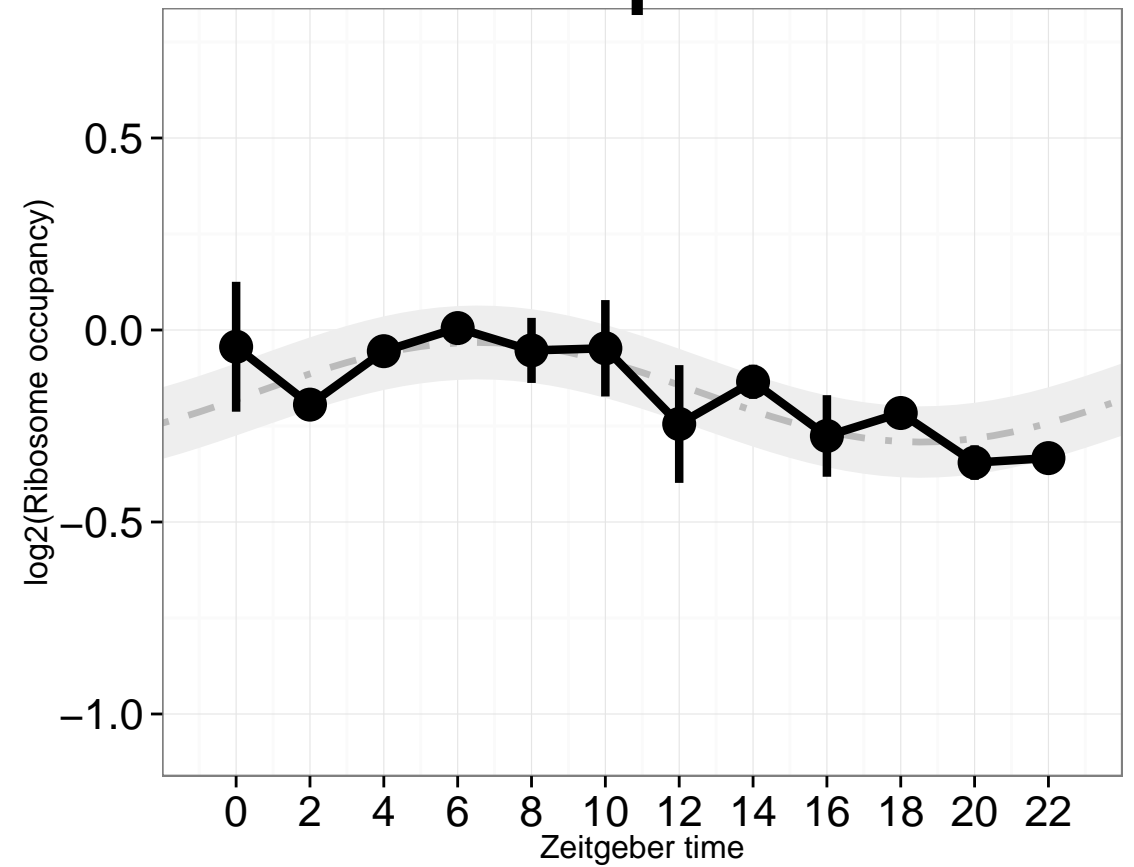

Supplement: Supplementary file 2099 [file 1]

## Pdp1

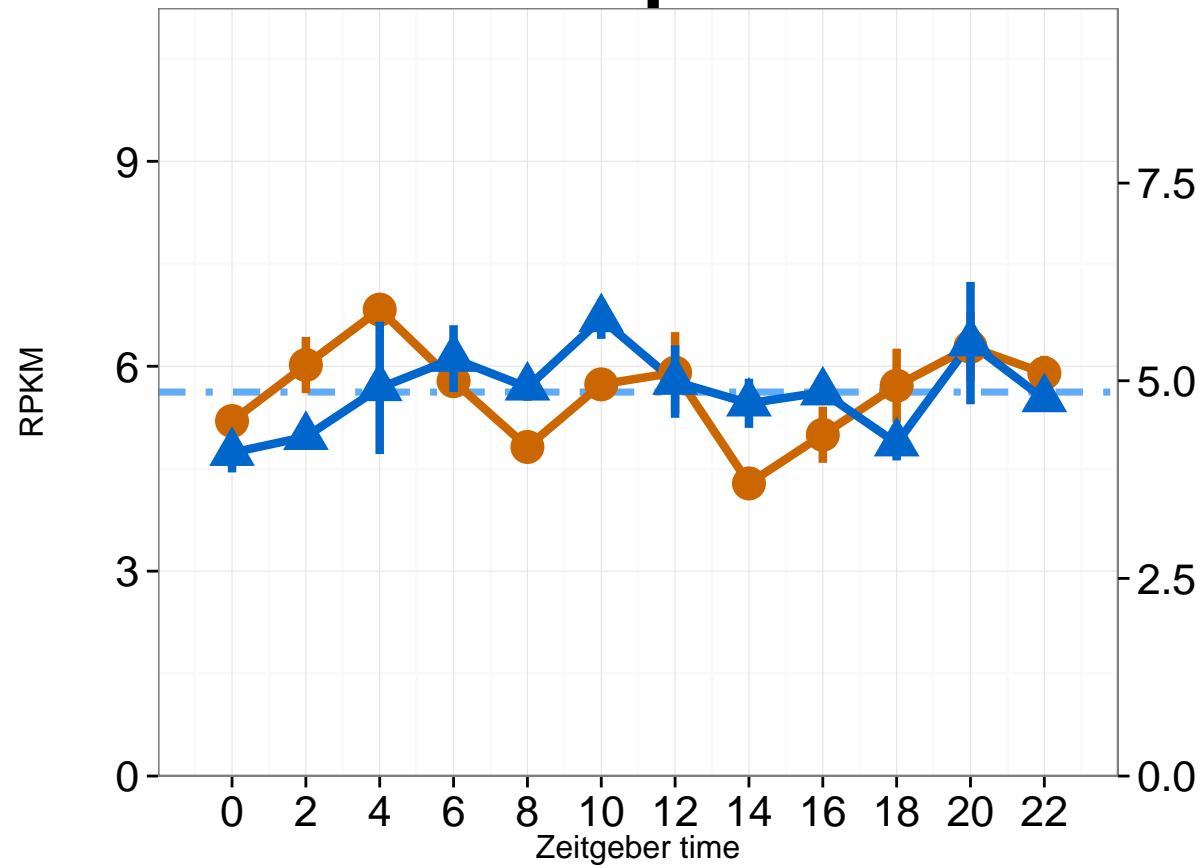

## Pdp1

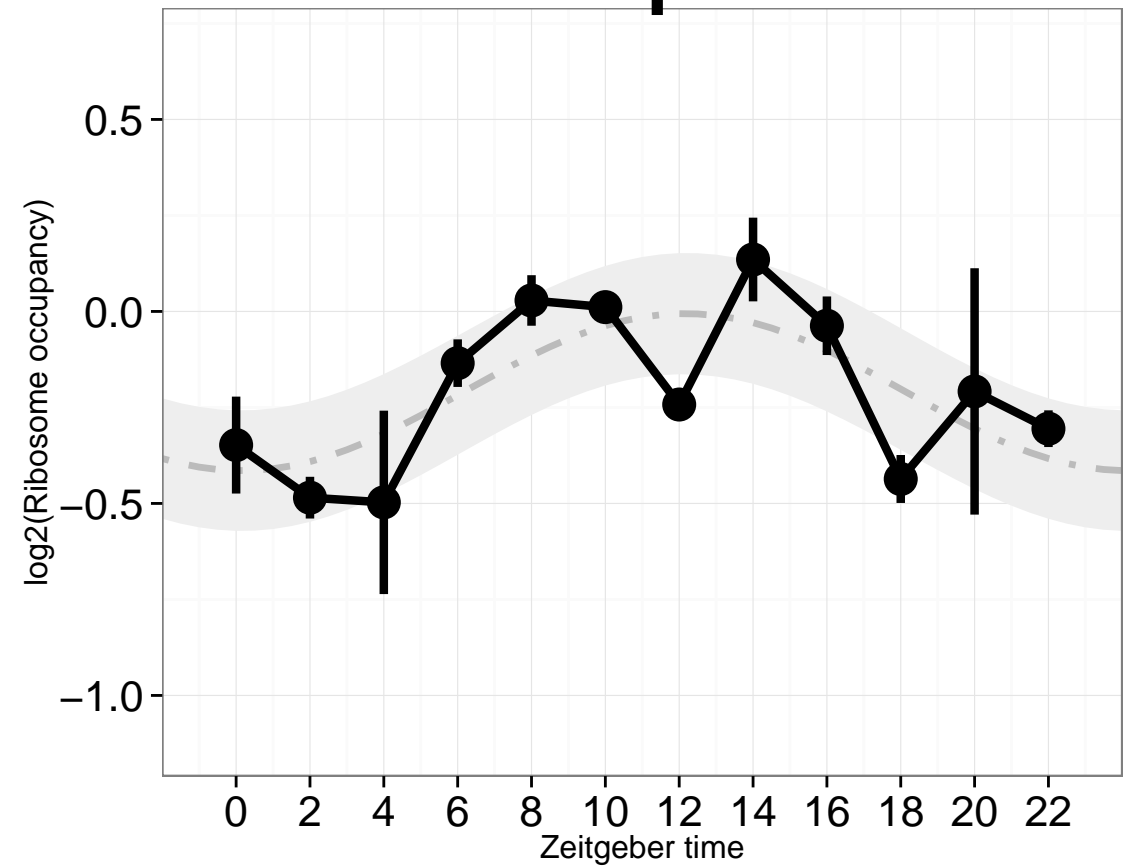

Supplement: Supplementary file 2100 [file 1]

# D17Wsu104e

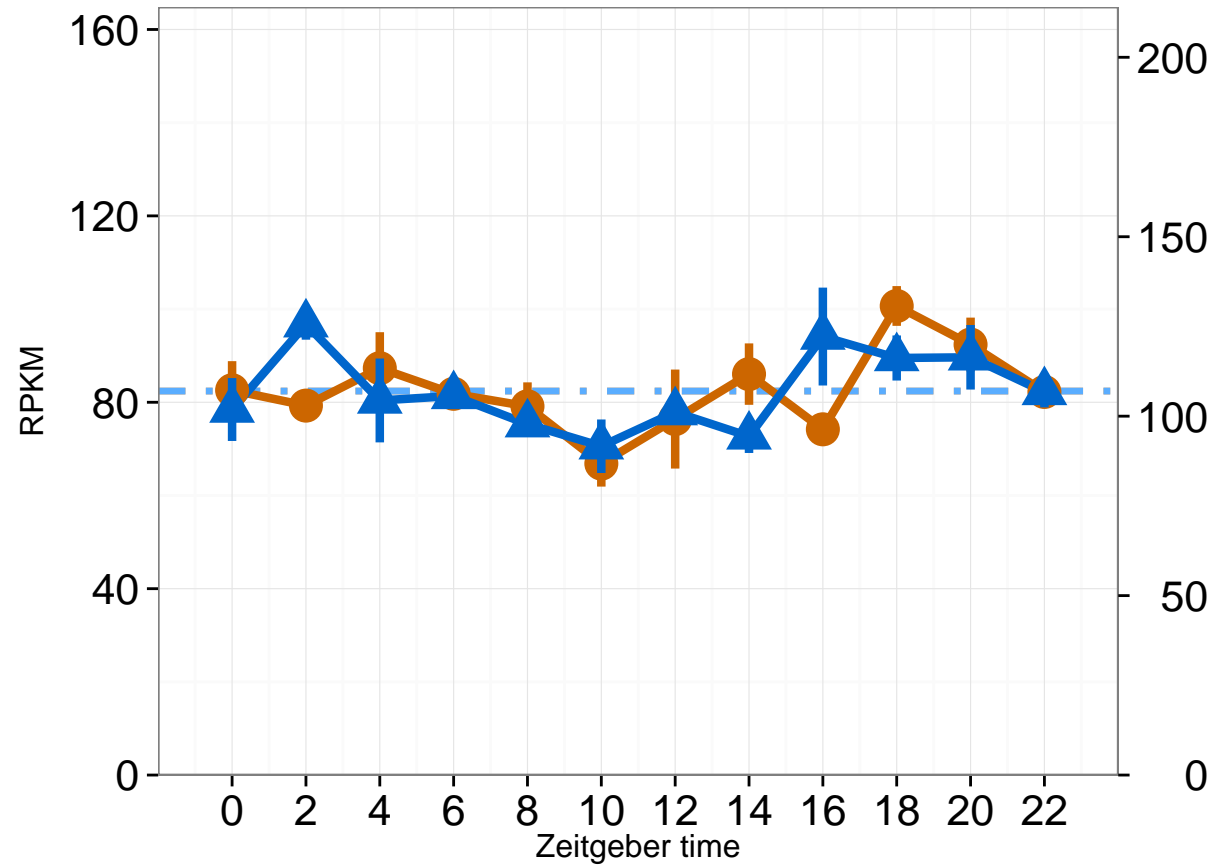

# D17Wsu104e

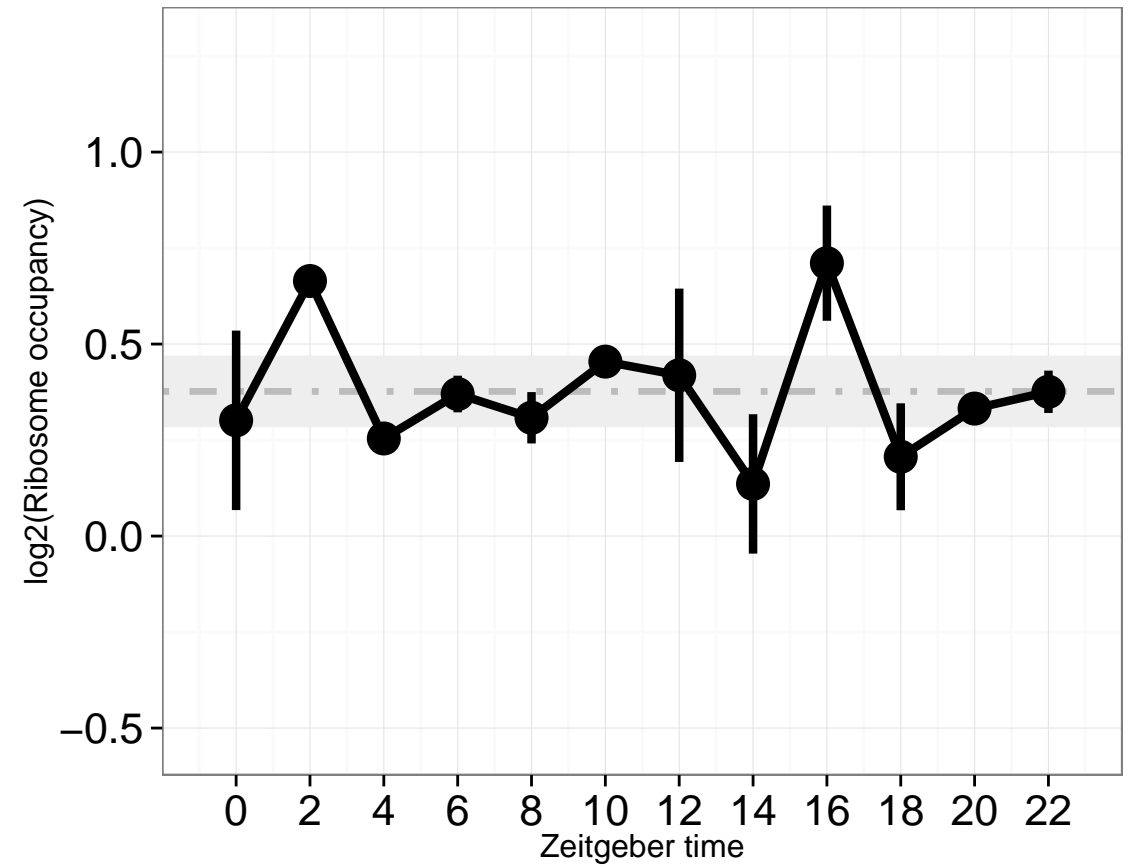

Supplement: Supplementary file 2101 [file 1]

# Bmp6

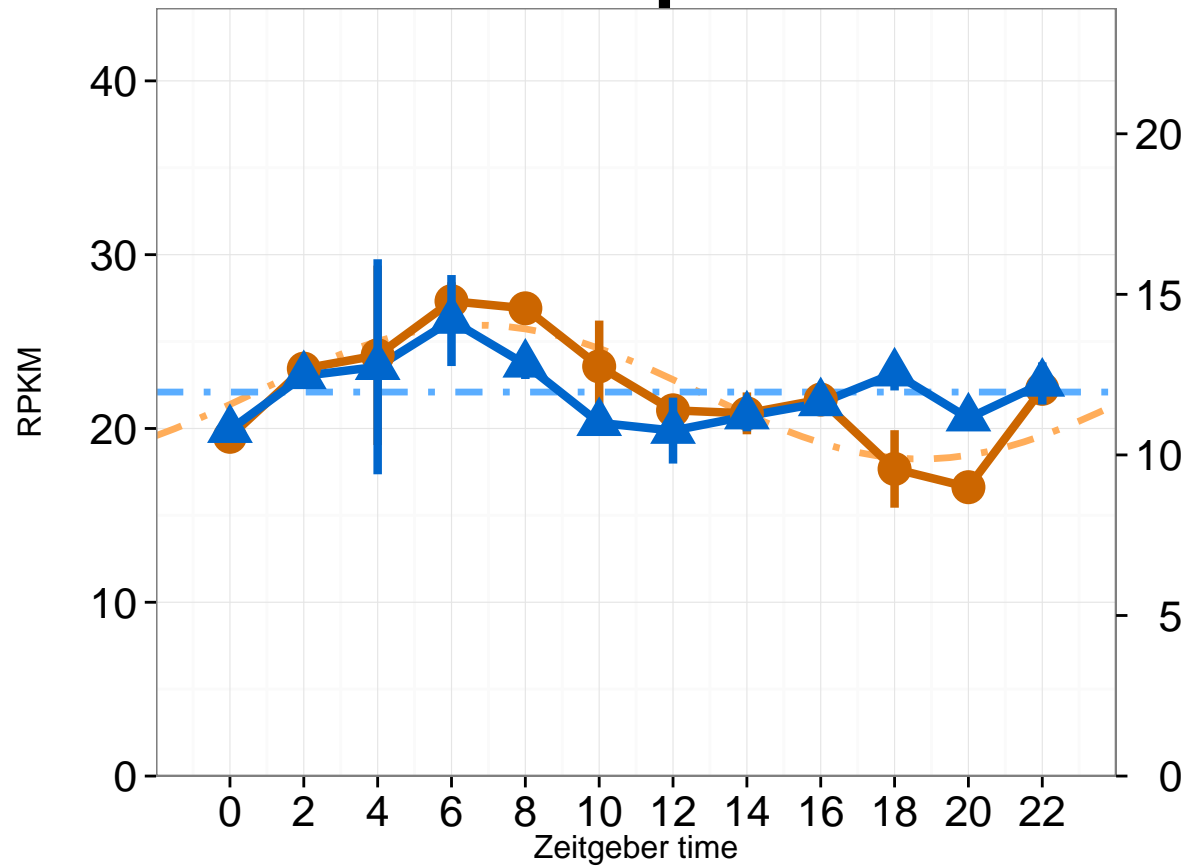

# Bmp6

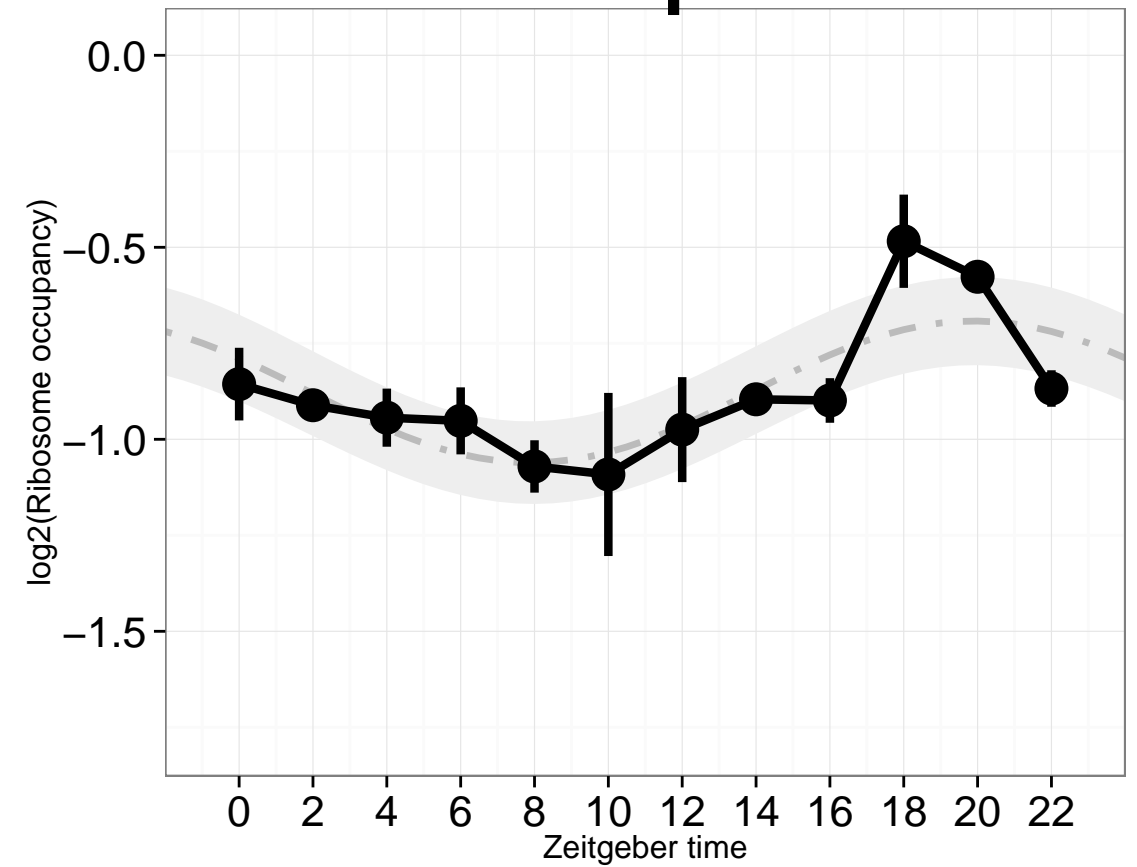

Supplement: Supplementary file 2102 [file 1]

## Ddhd1

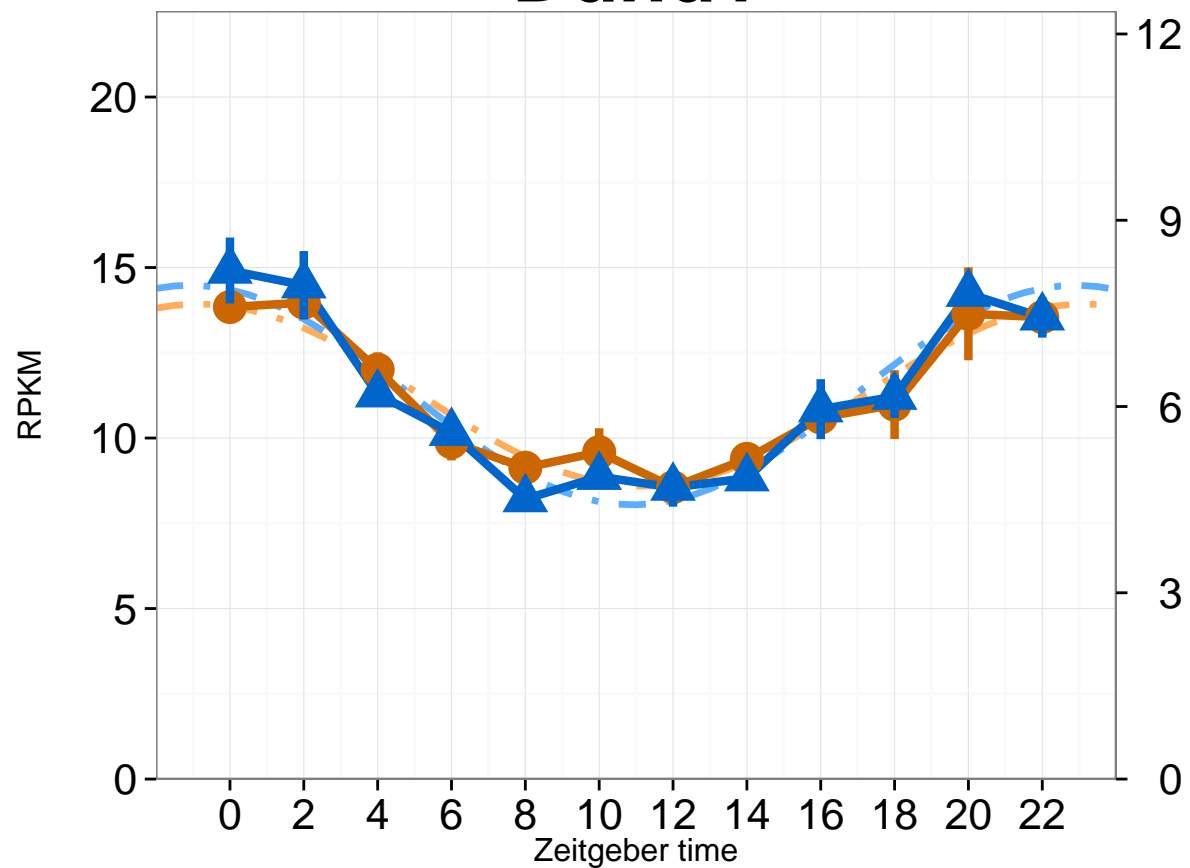

## Ddhd1

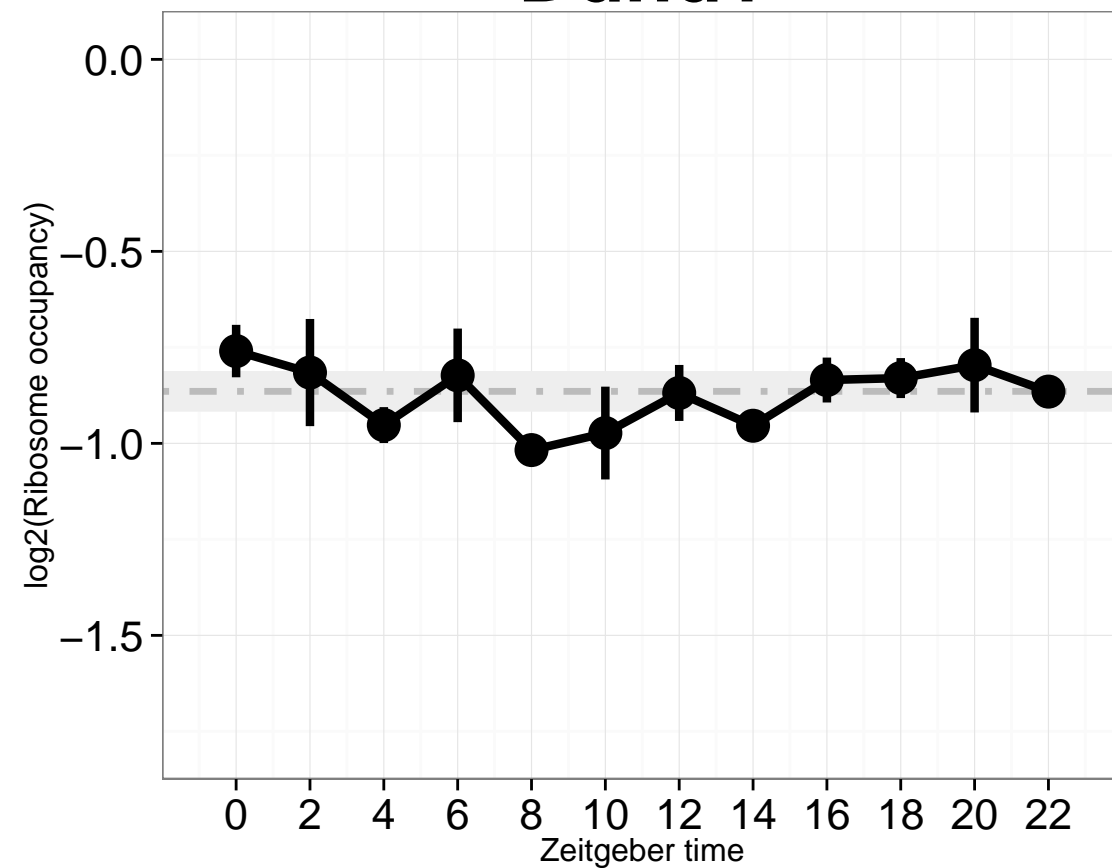

Supplement: Supplementary file 2103 [file 1]

# Smcr8

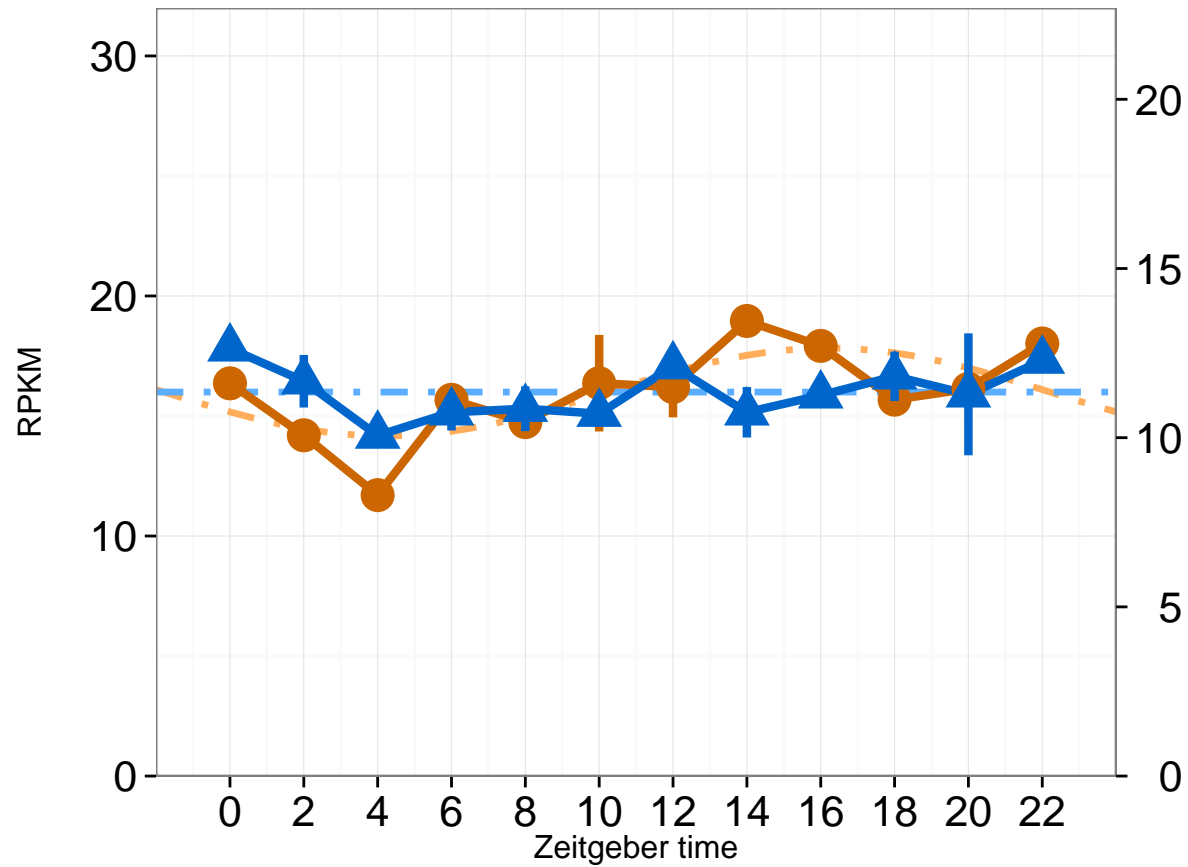

# Smcr8

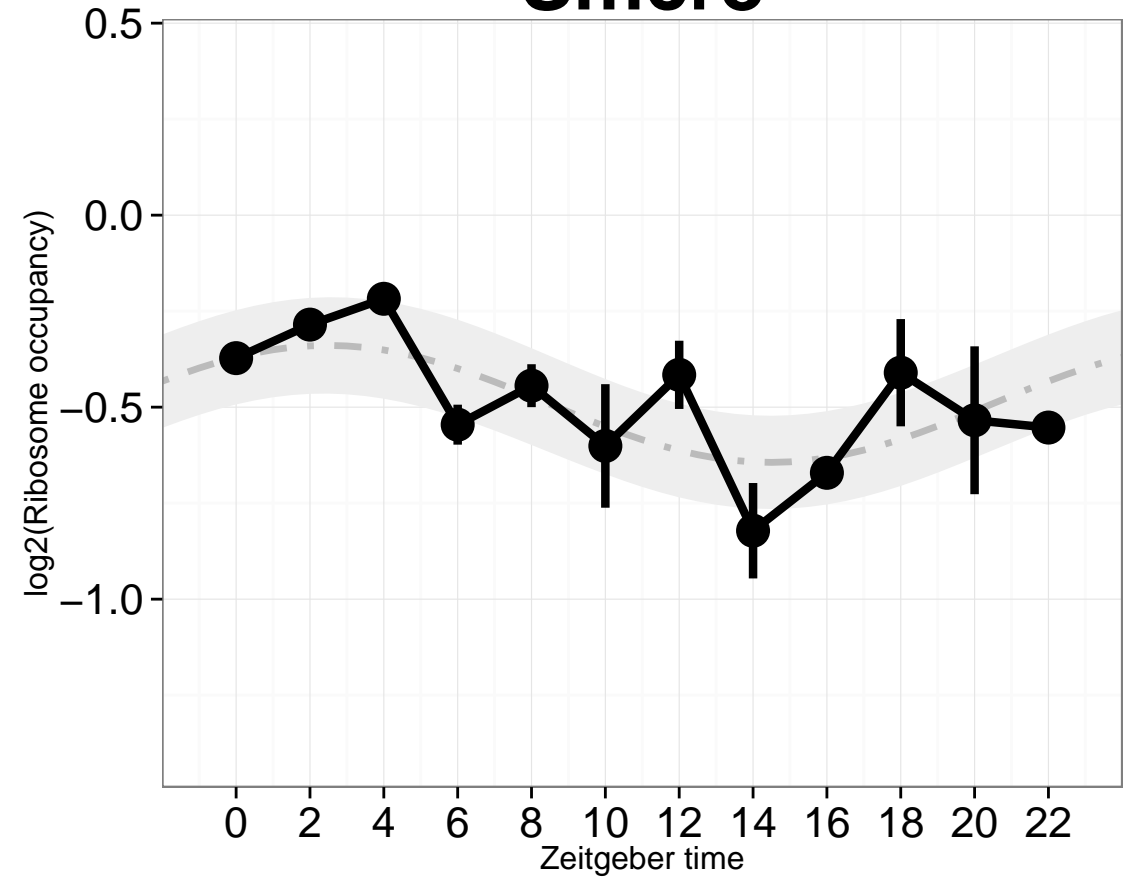

Supplement: Supplementary file 2104 [file 1]

# Dph7

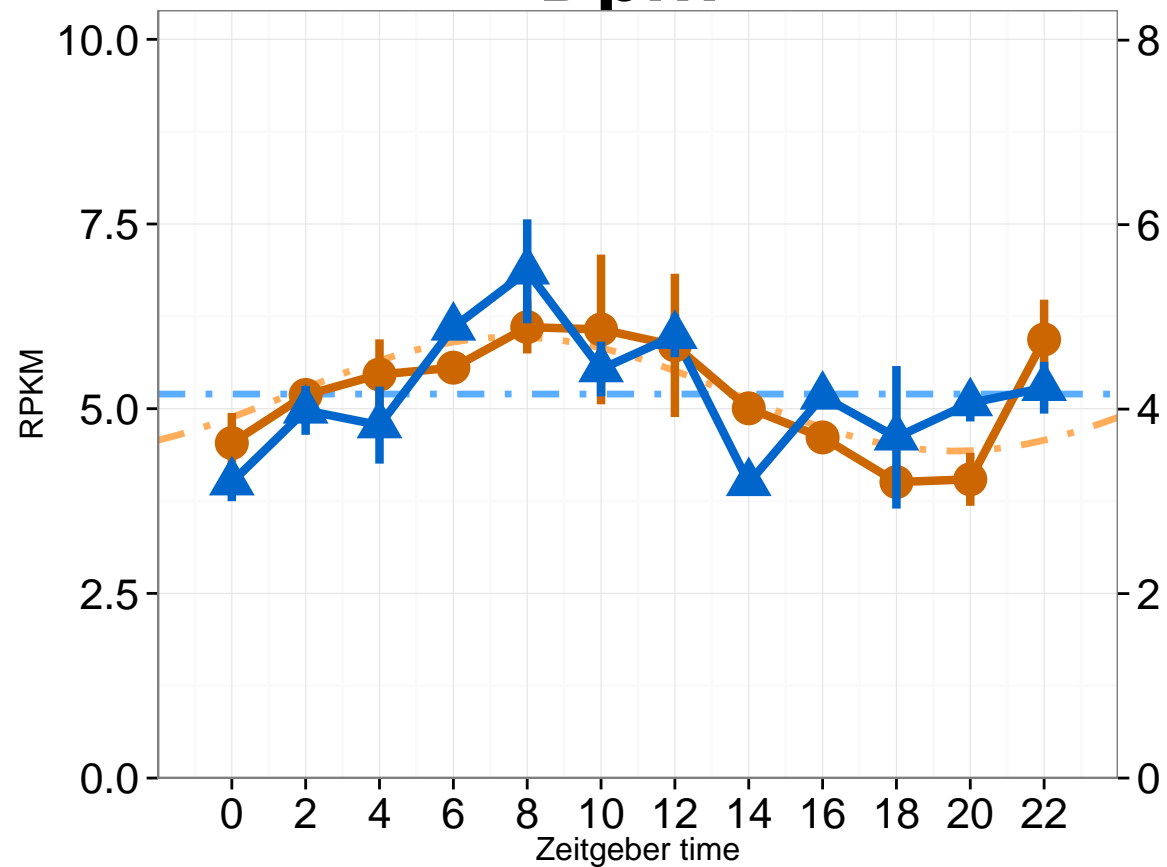

# Dph7

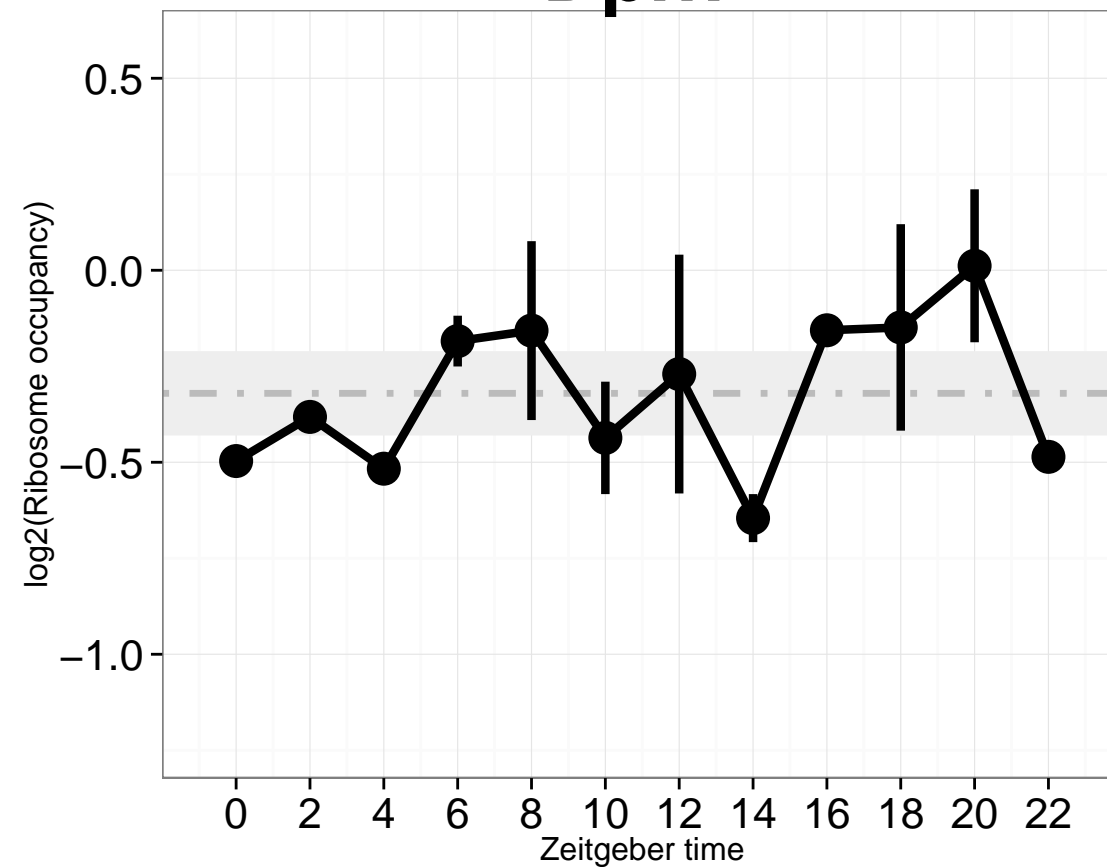

Supplement: Supplementary file 2105 [file 1]

## Neur14

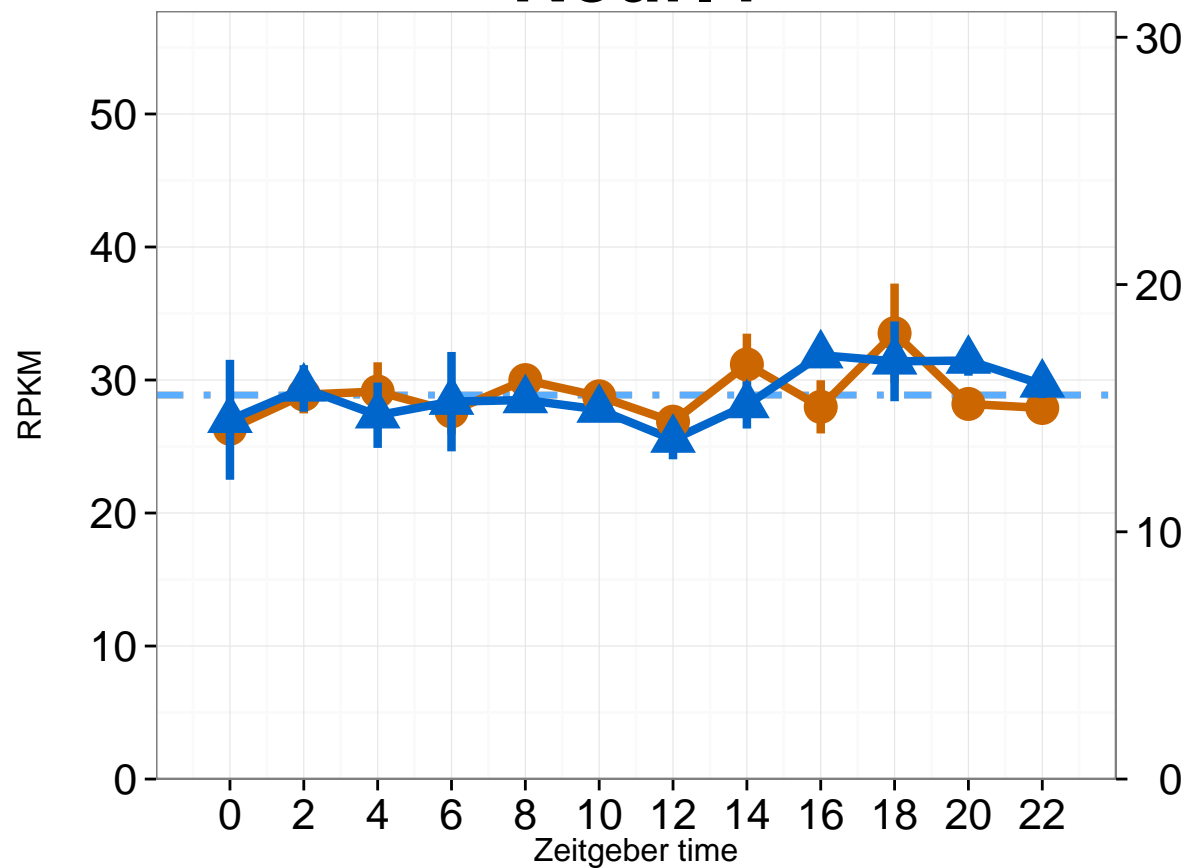

## Neur14

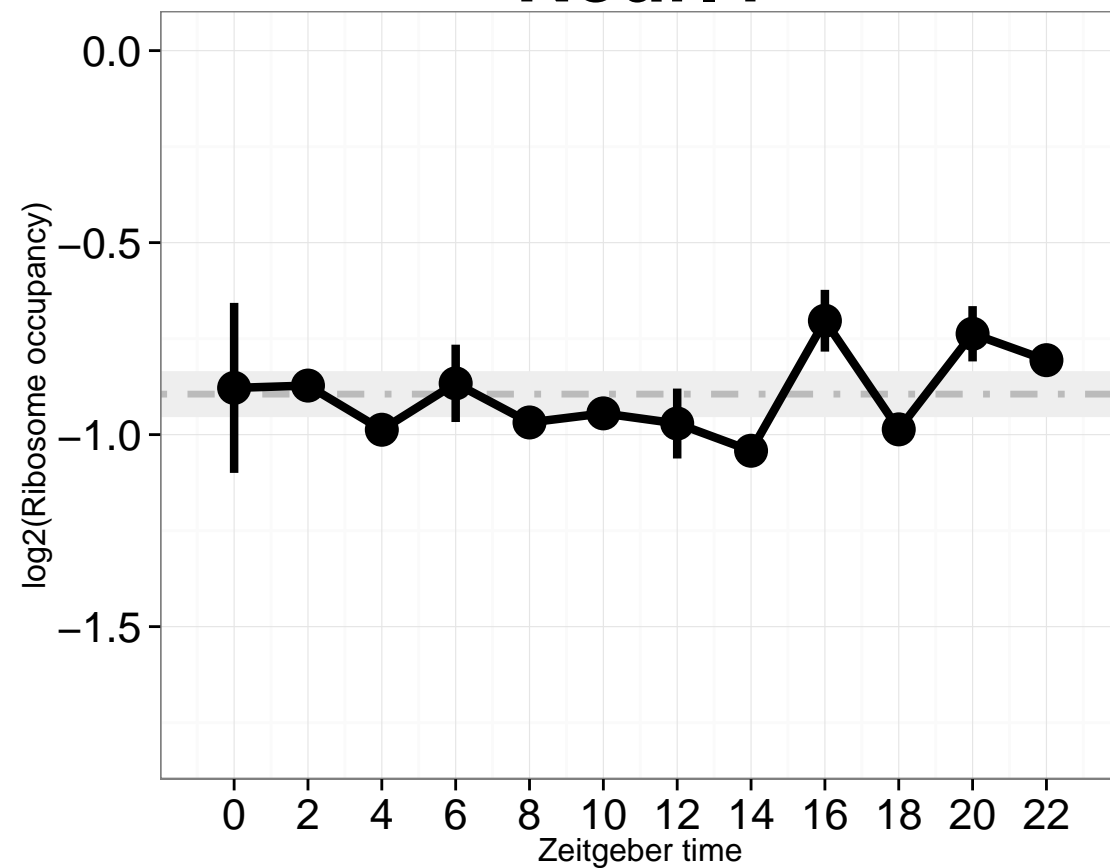

Supplement: Supplementary file 2106 [file 1]

## Tinag

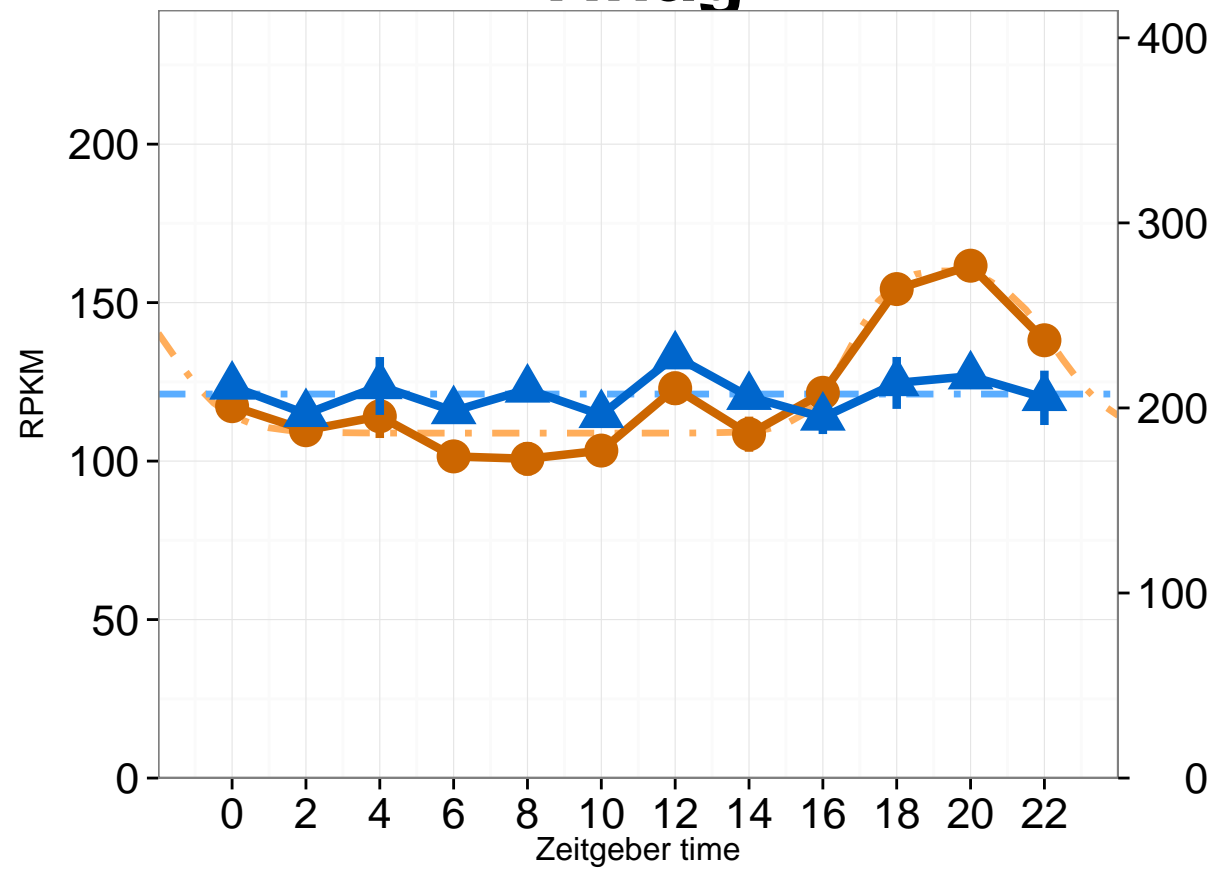

## Tinag

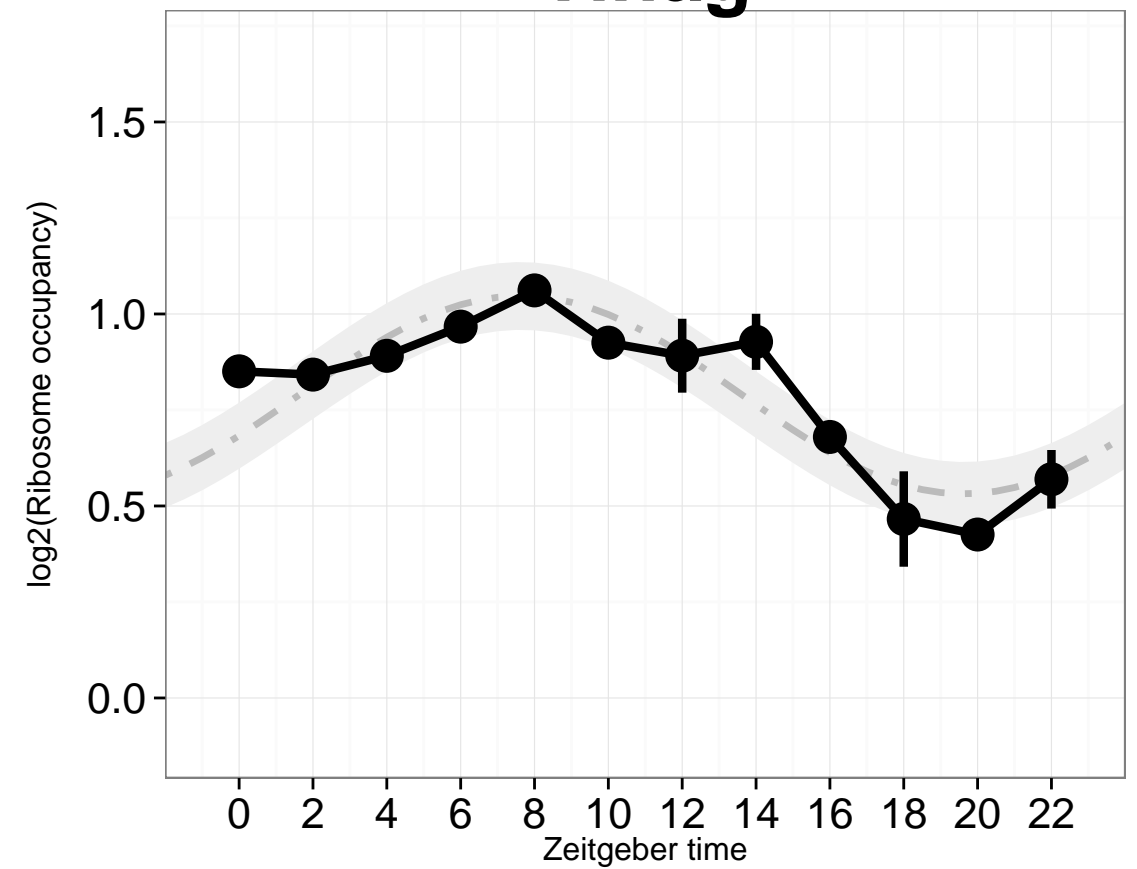

Supplement: Supplementary file 2107 [file 1]

**mt-Atp8**

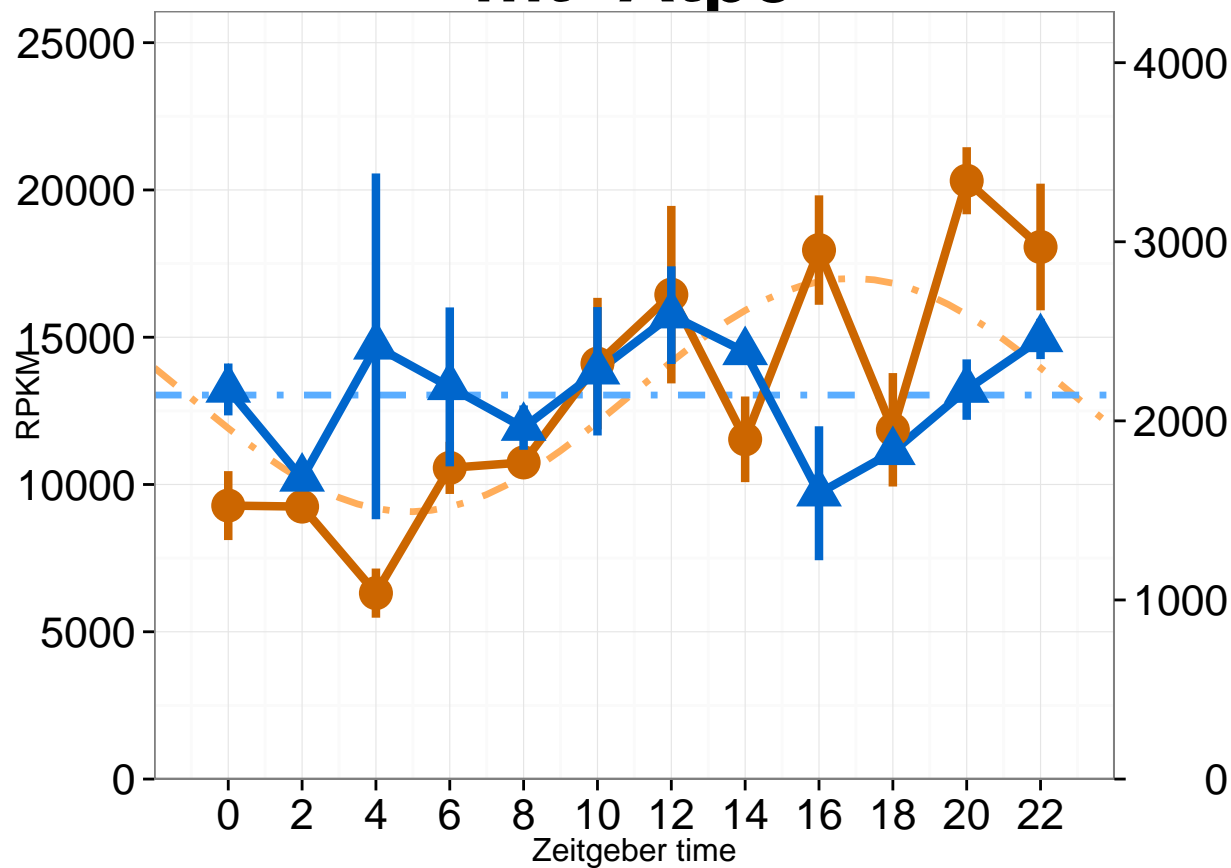

**mt-Atp8**

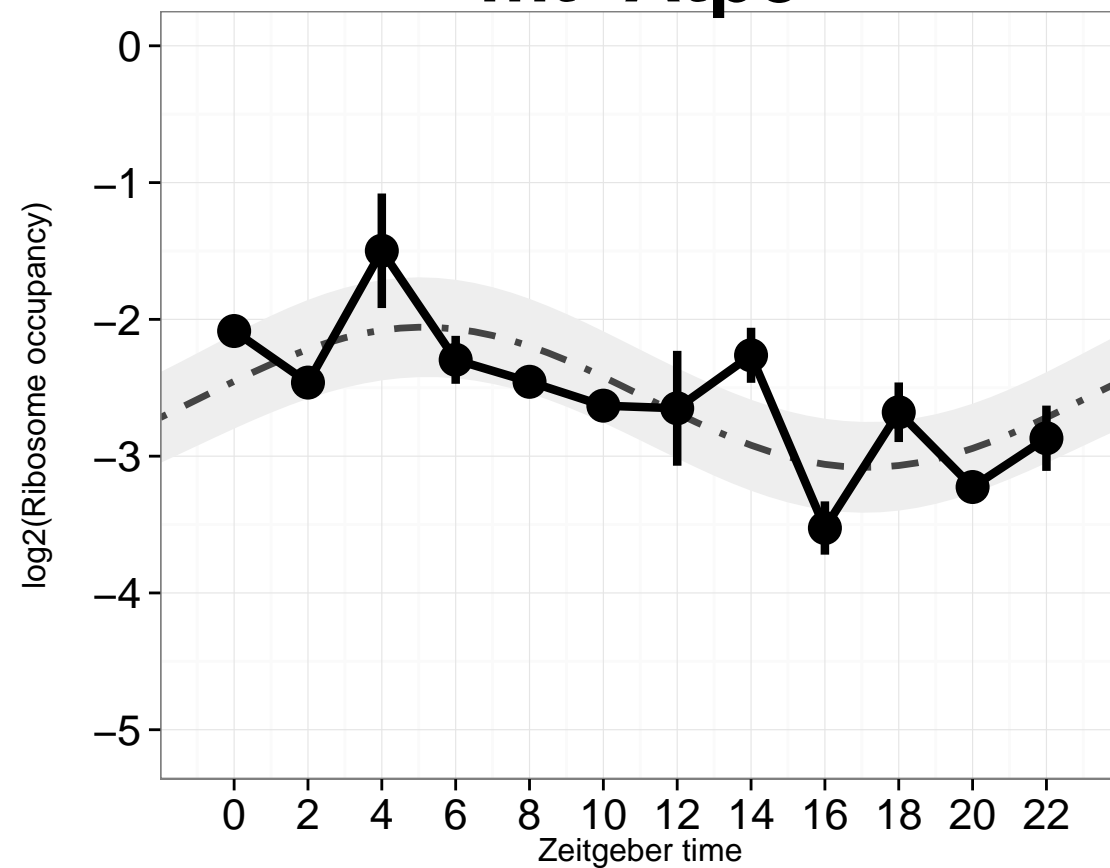

Supplement: Supplementary file 2108 [file 1]
