# Supplementary material (part 22 of 133)
Source: publisher figshare collection journal article supplement (https://springernature.figshare.com/articles/dataset/_/4903193)

# Atp2c1

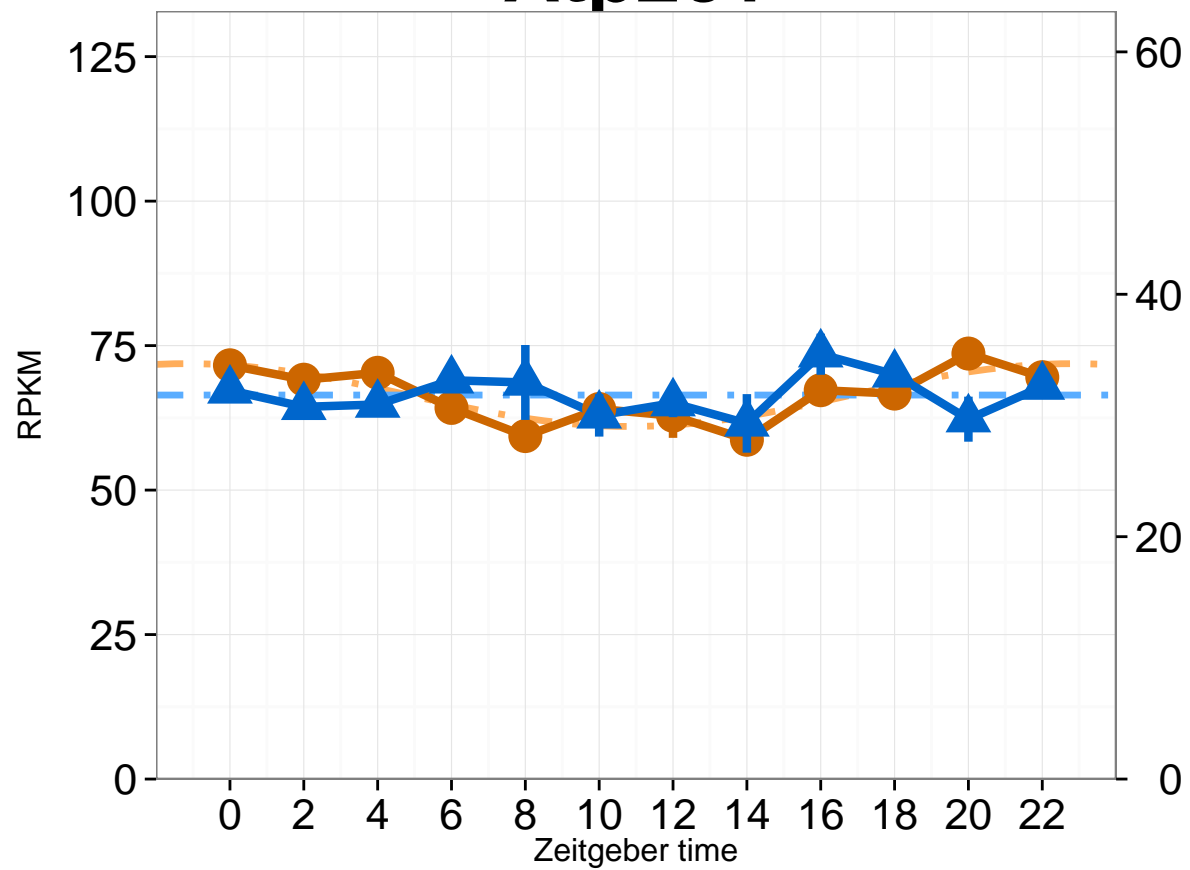

# Atp2c1

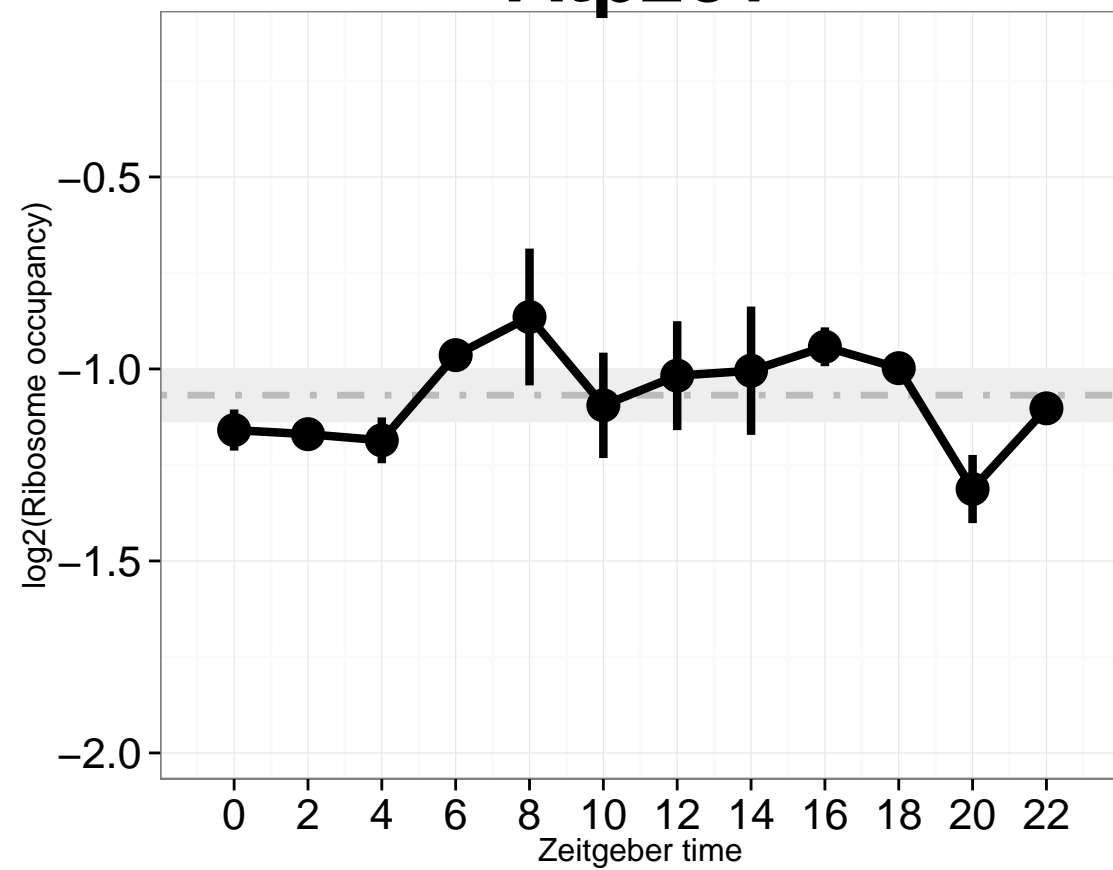

Supplement: Supplementary file 2109 [file 1]

# Aqp11

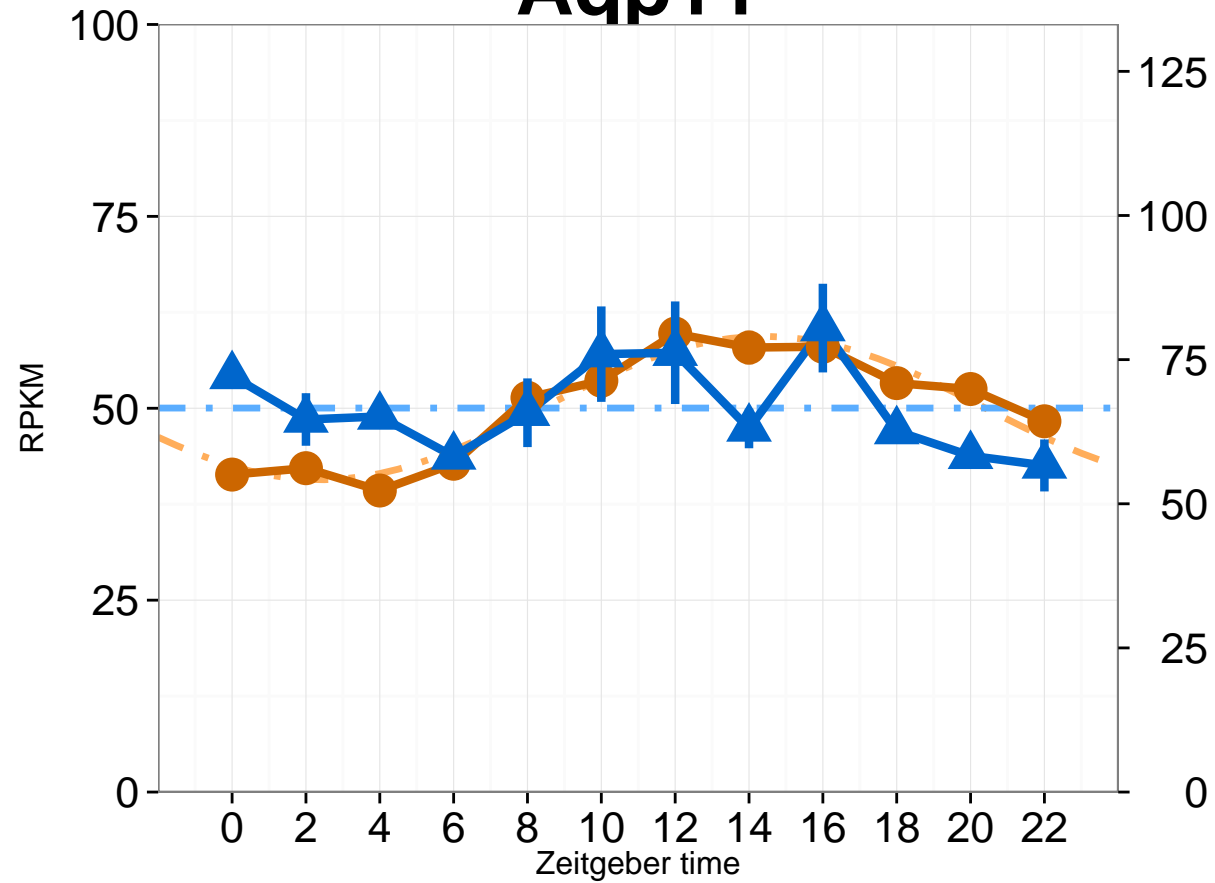

# Aqp11

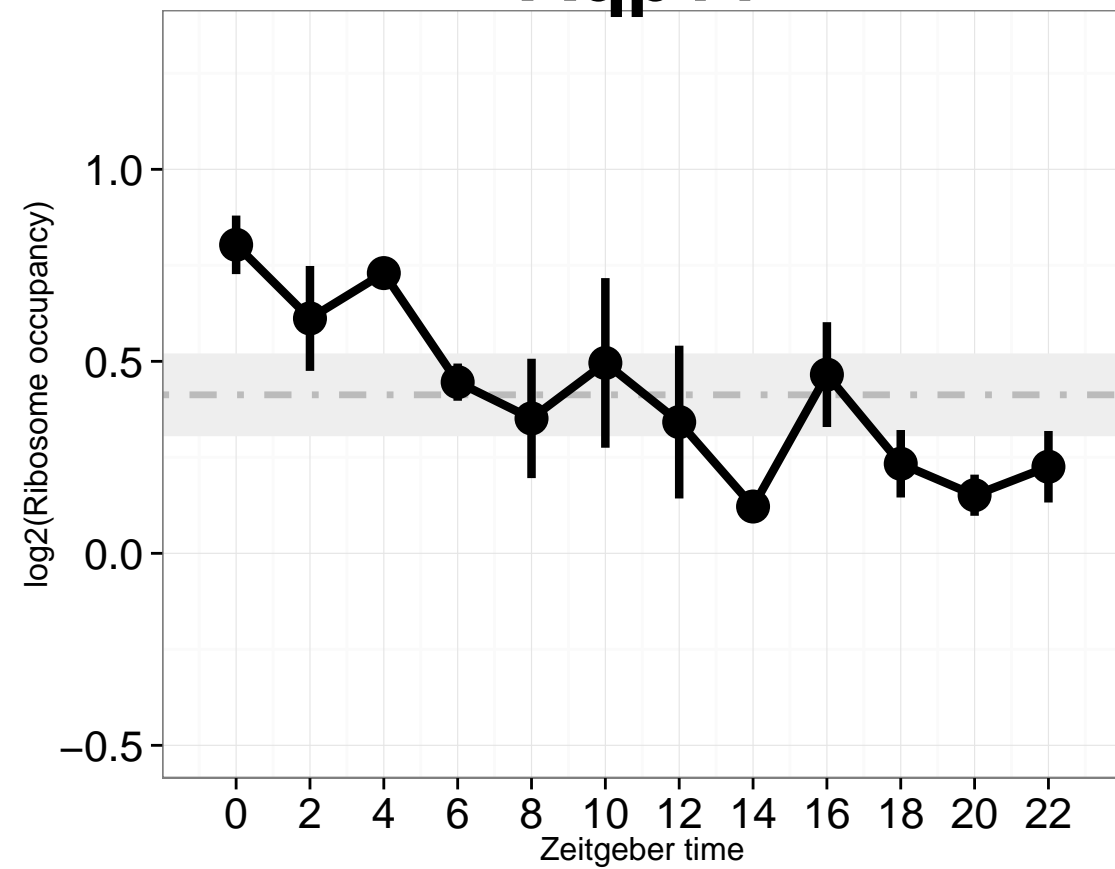

Supplement: Supplementary file 2110 [file 1]

## Ssbp3

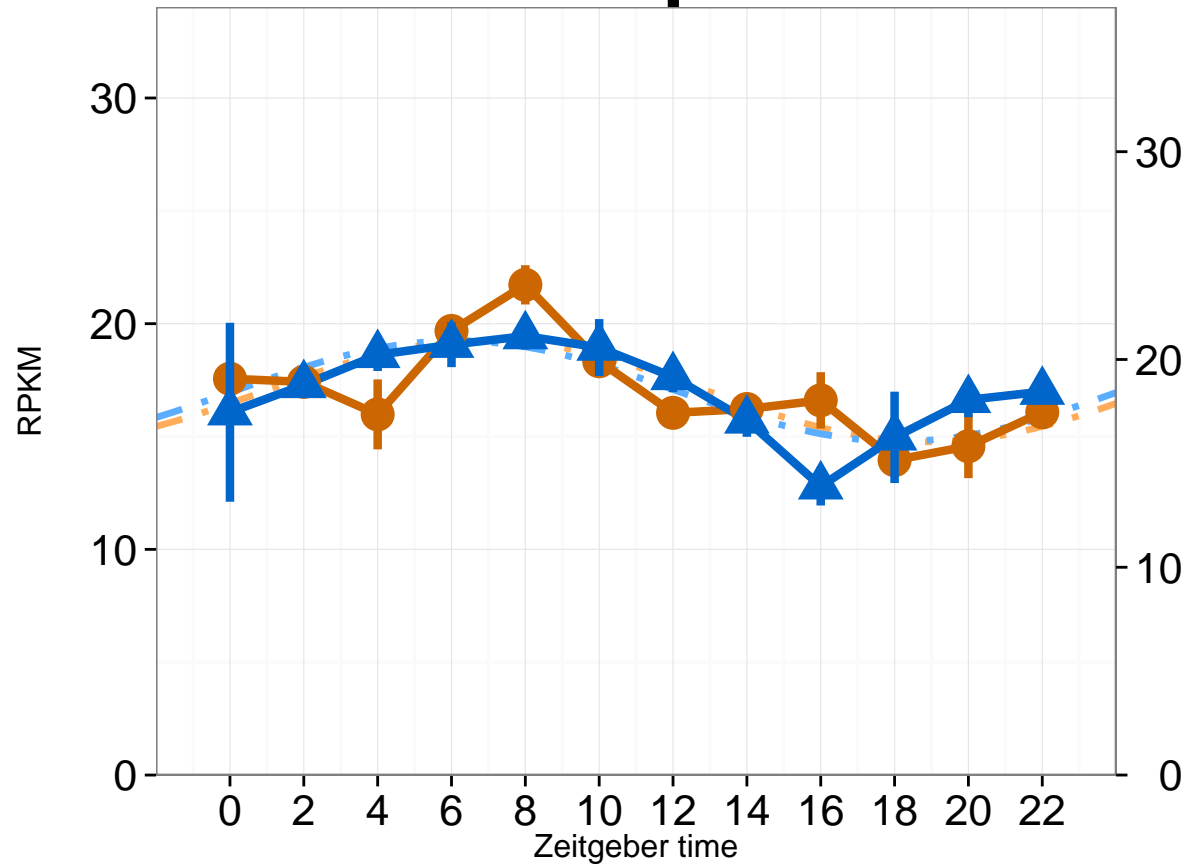

## Ssbp3

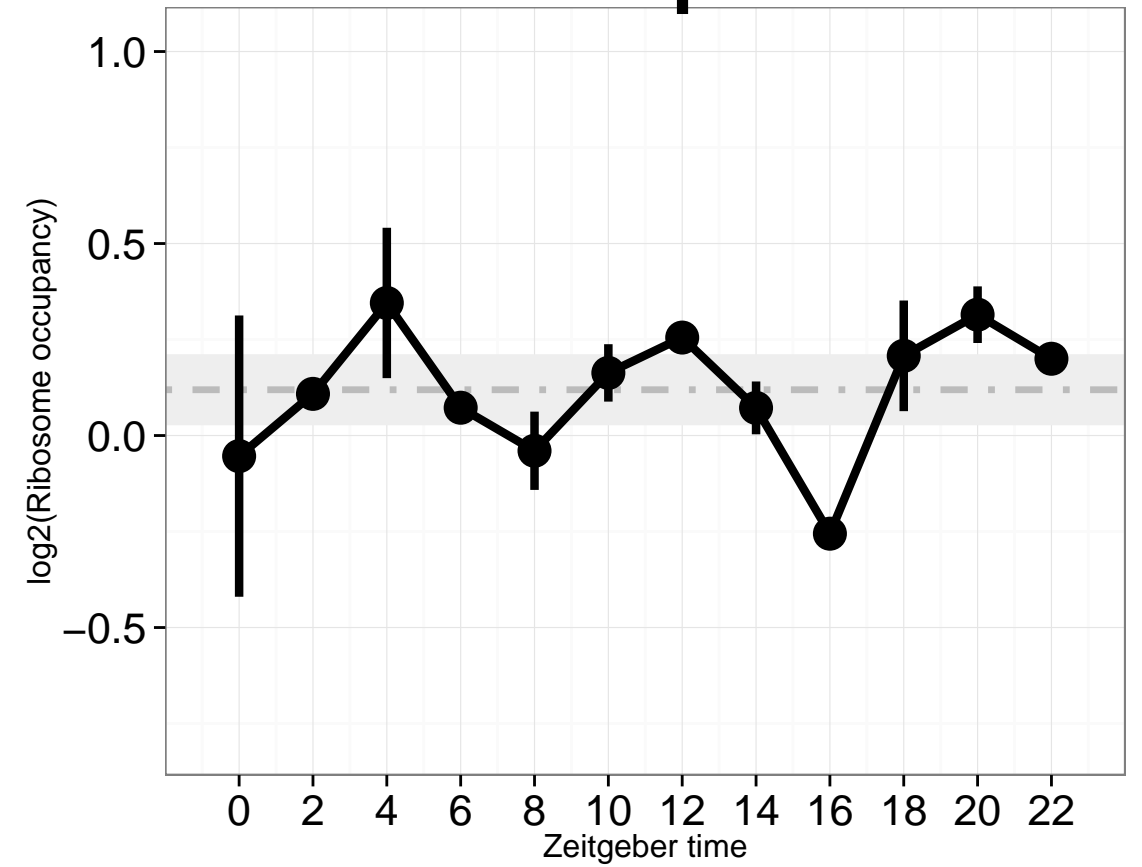

Supplement: Supplementary file 2111 [file 1]

## Egflam

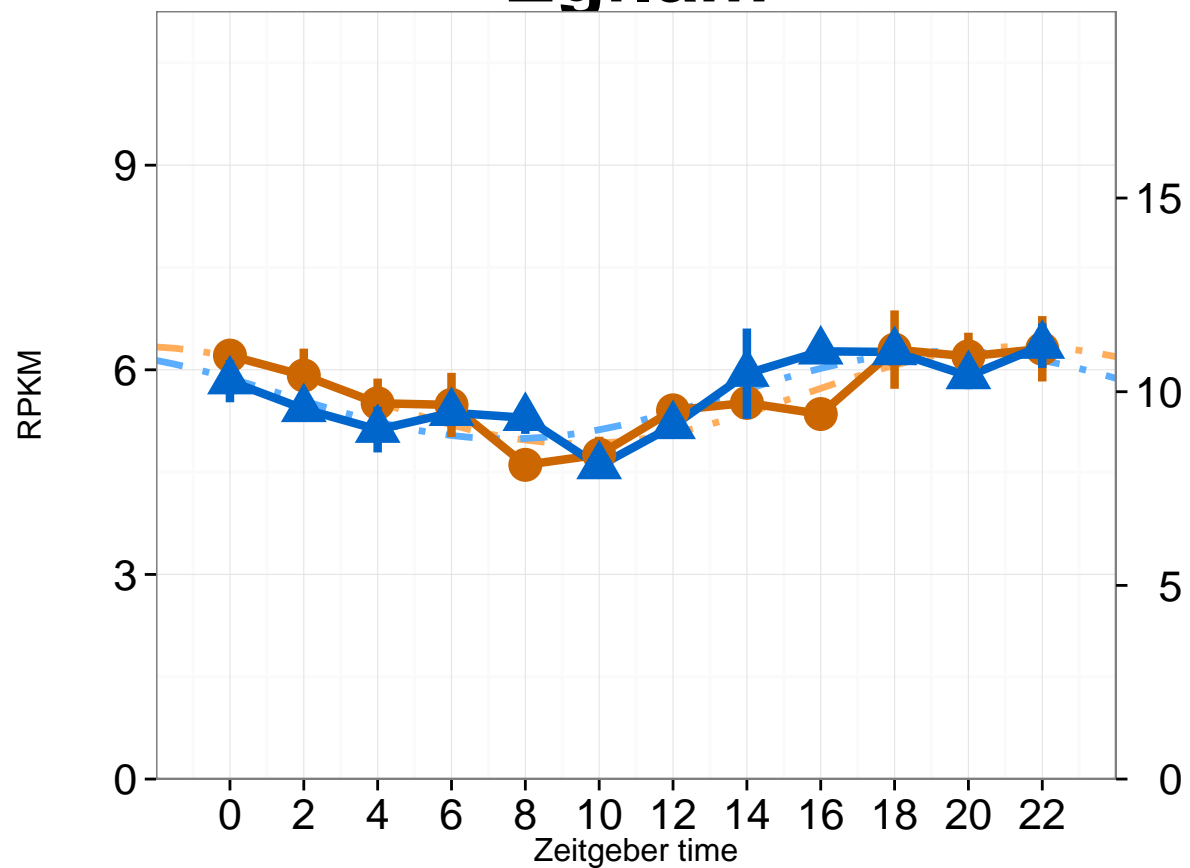

## Egflam

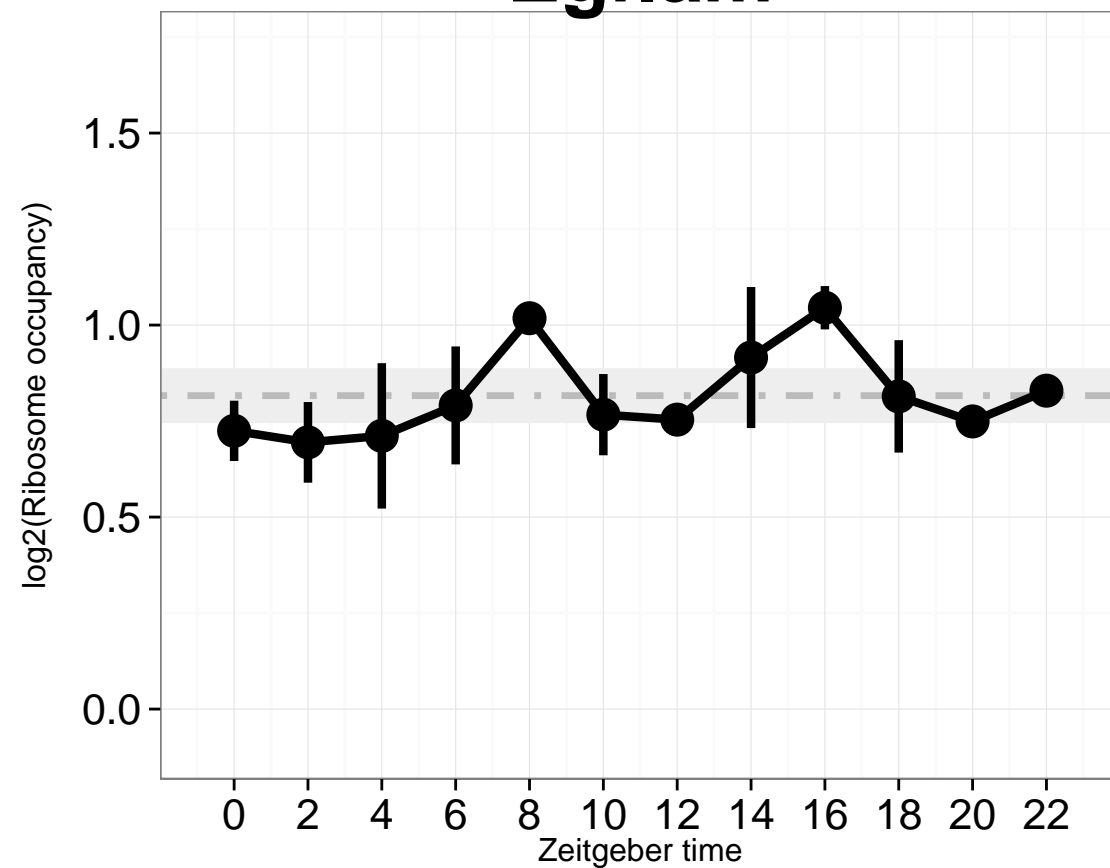

Supplement: Supplementary file 2112 [file 1]

# Mfng

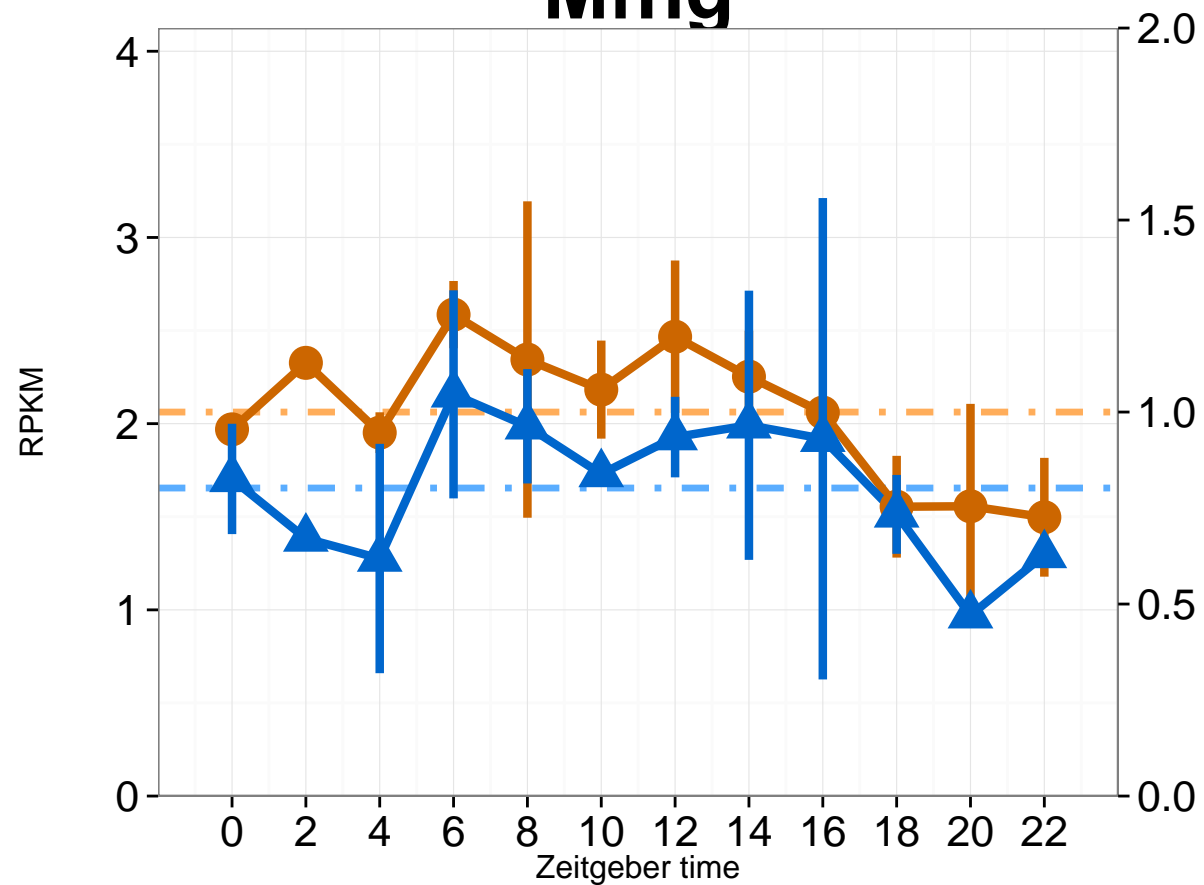

# Mfng

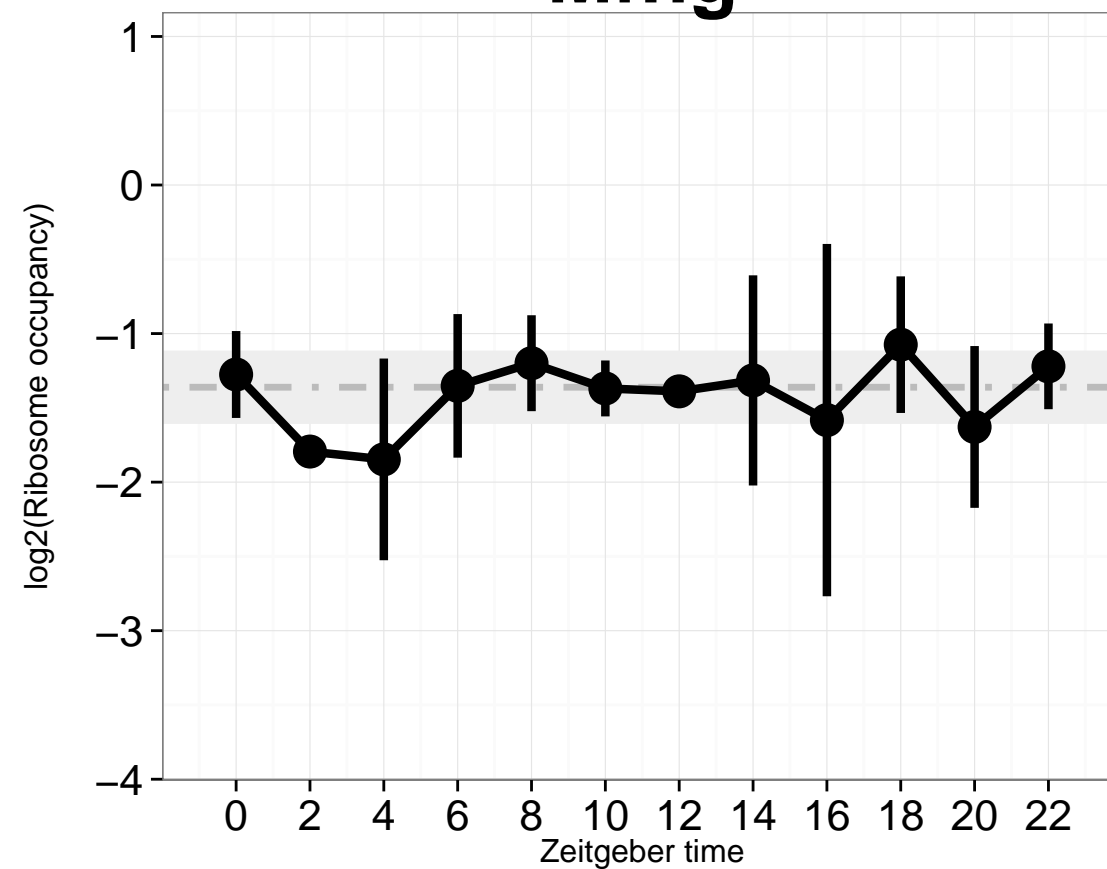

Supplement: Supplementary file 2113 [file 1]

## Prelid2

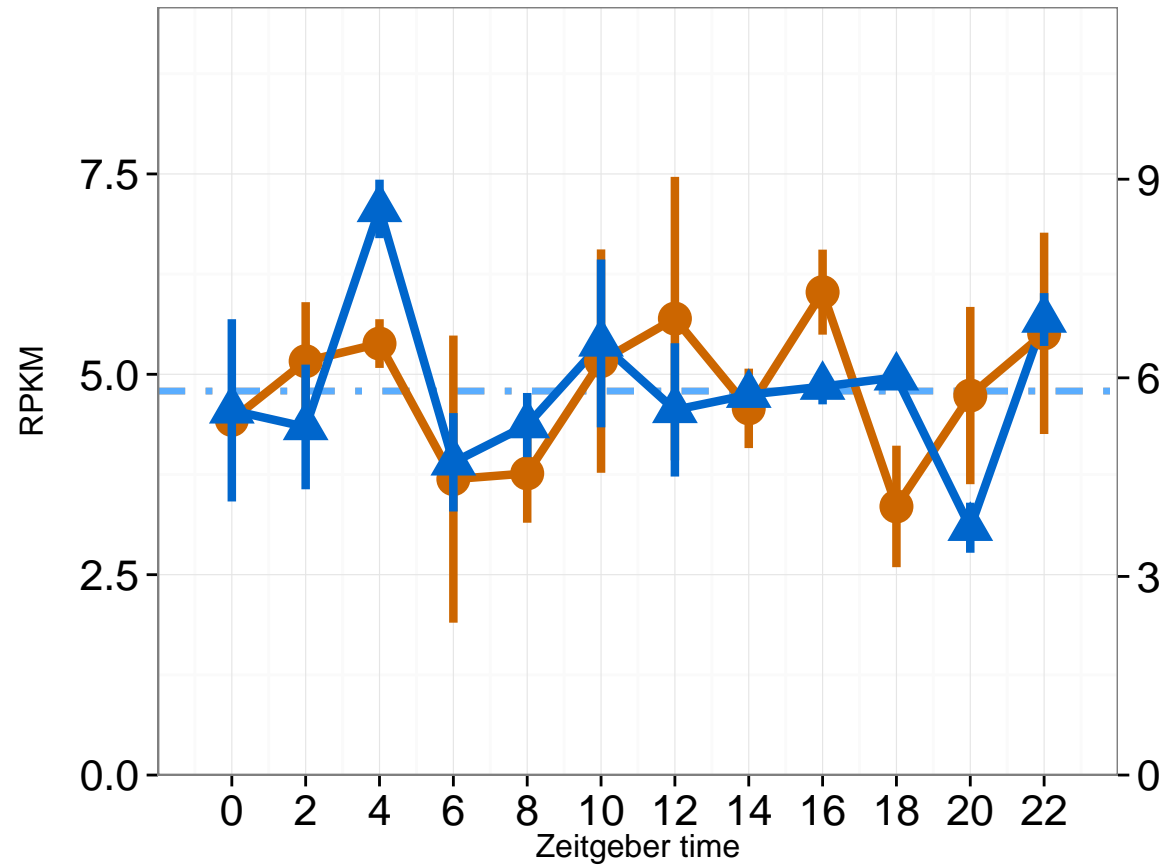

## Prelid2

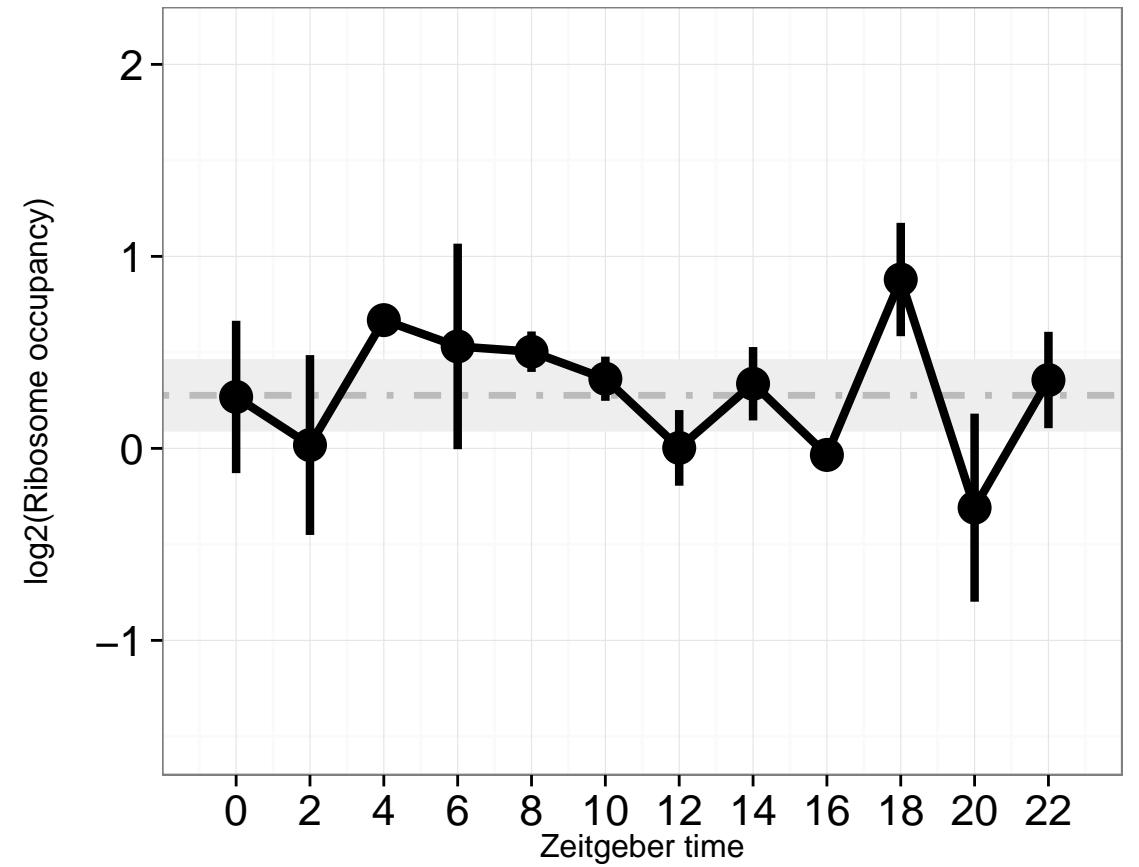

Supplement: Supplementary file 2114 [file 1]

## Dhx33

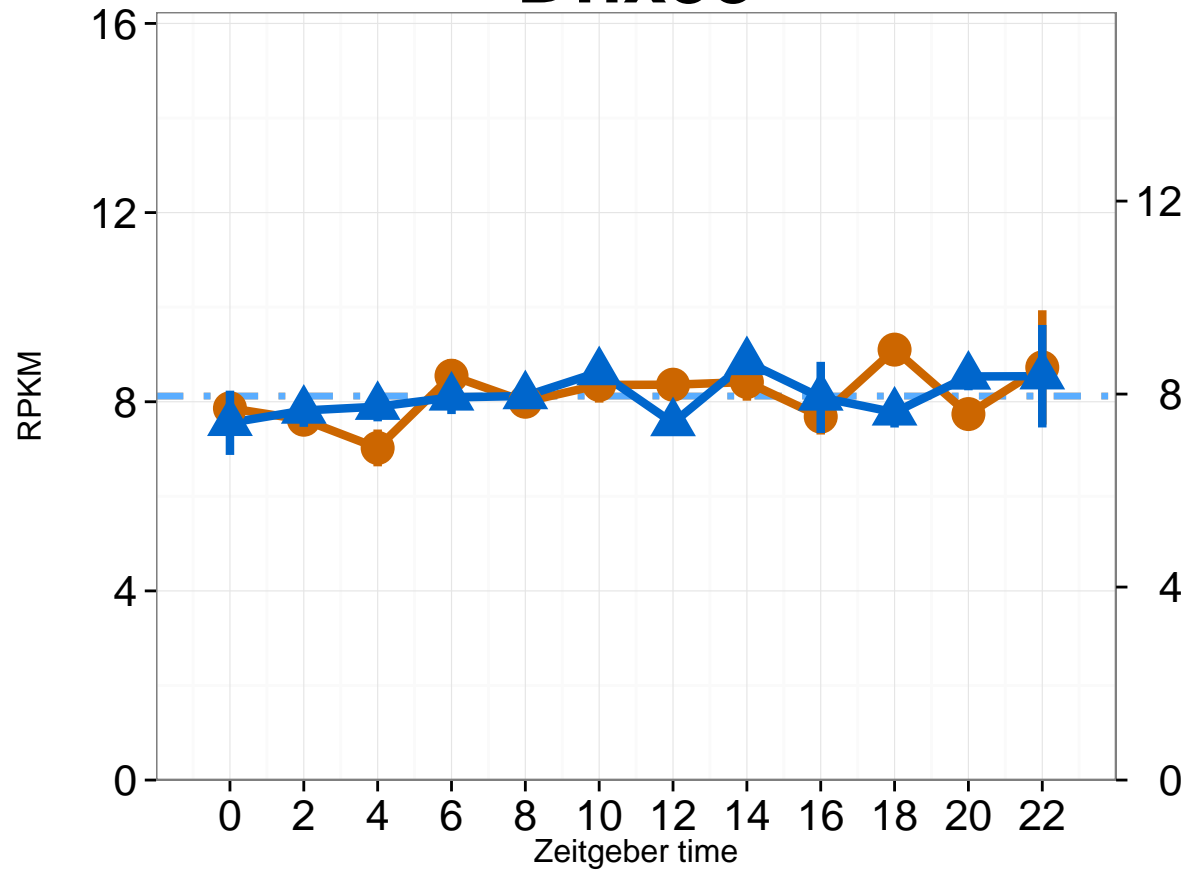

## Dhx33

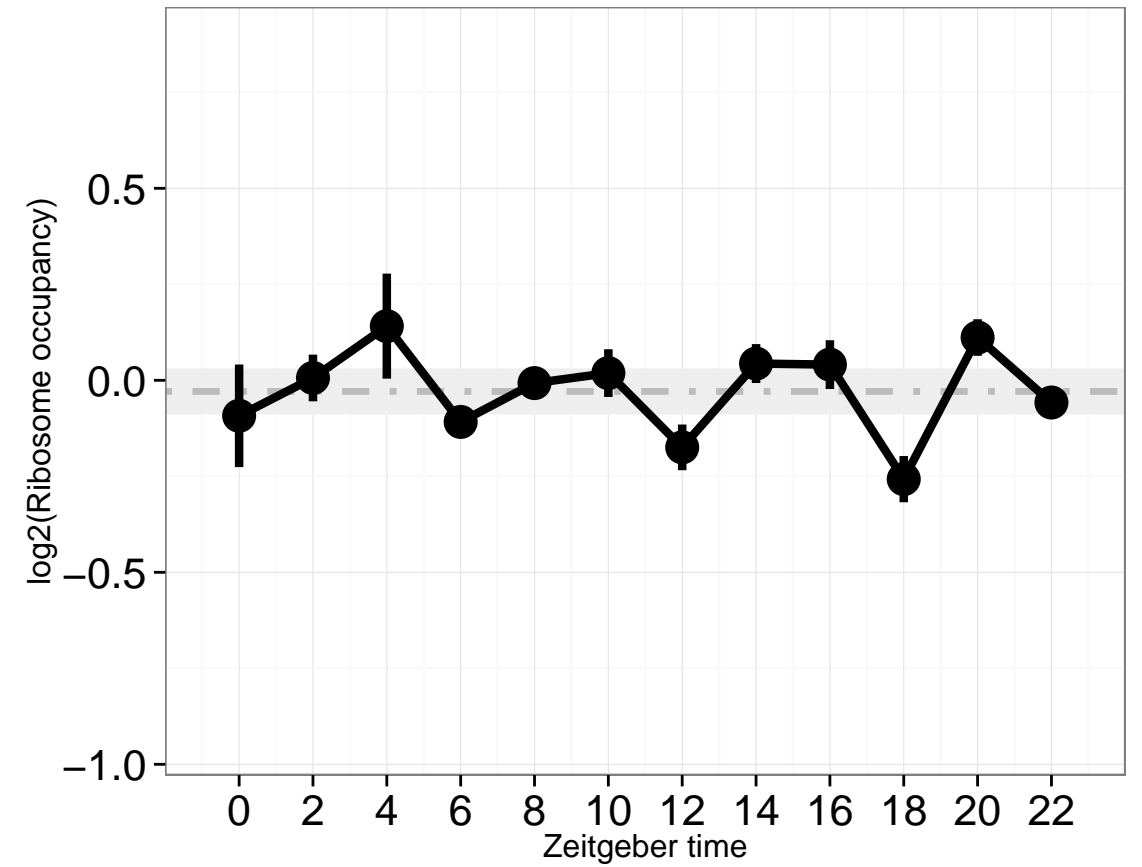

Supplement: Supplementary file 2115 [file 1]

# Fam216a

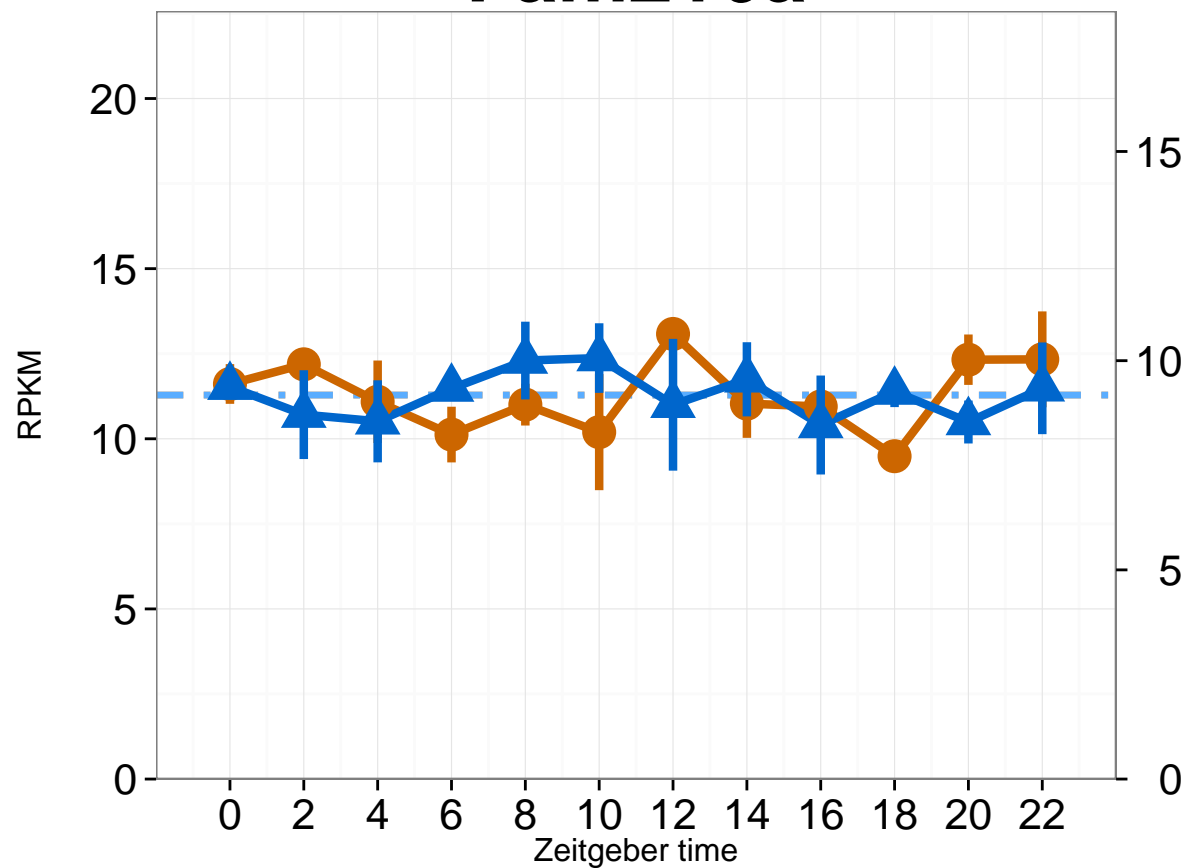

# Fam216a

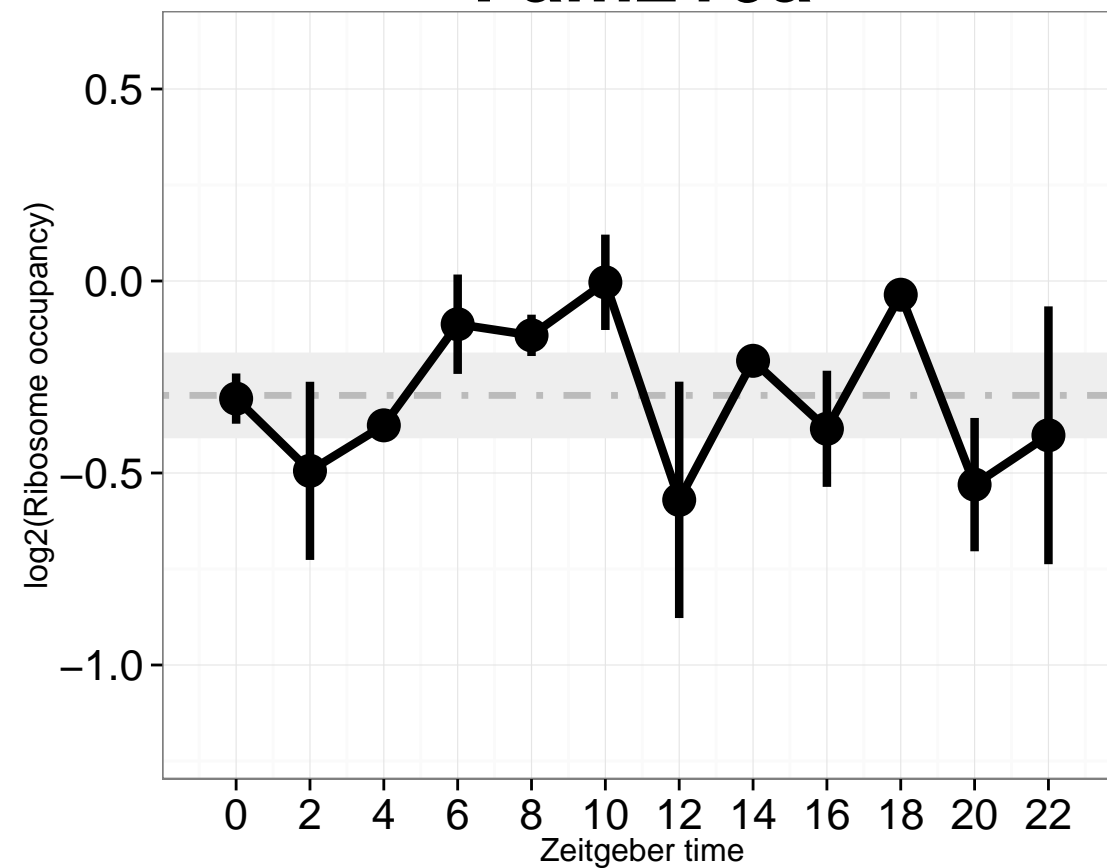

Supplement: Supplementary file 2116 [file 1]

## Ndufa10

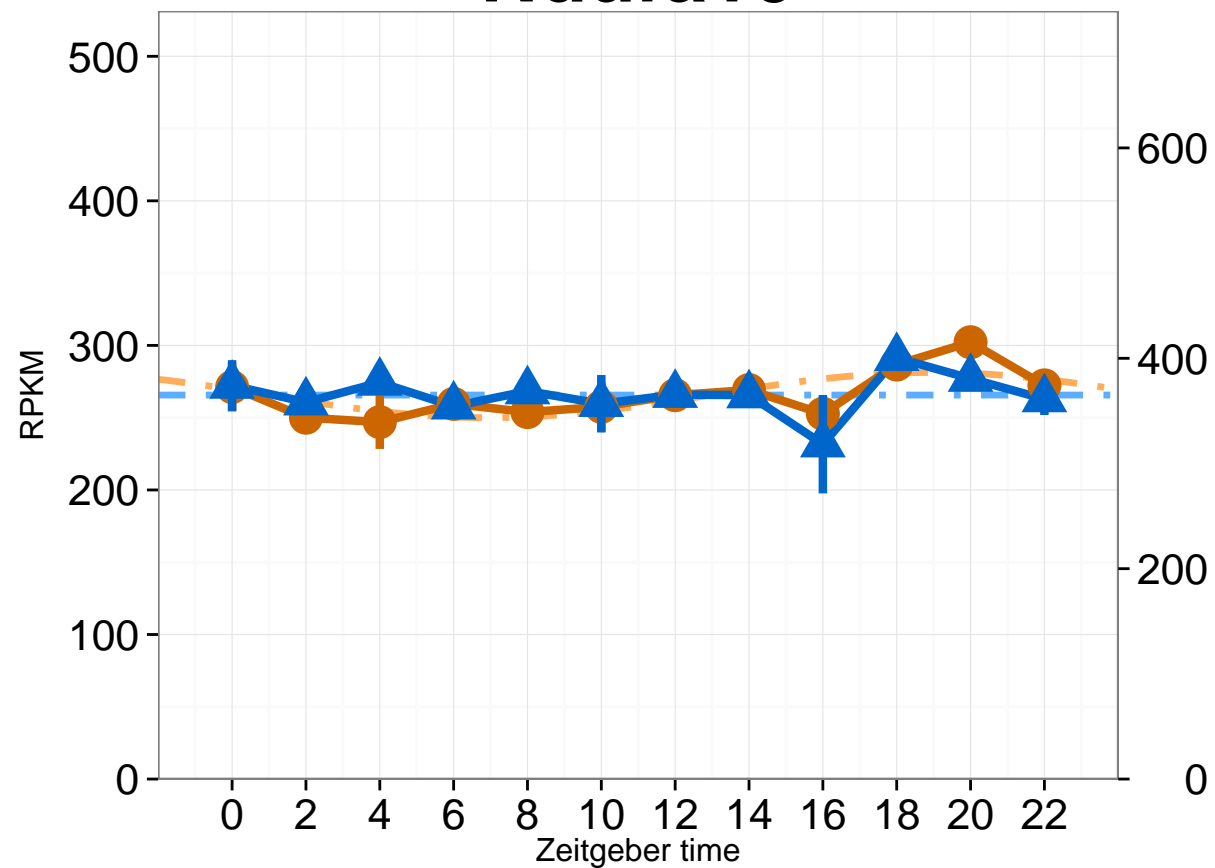

## Ndufa10

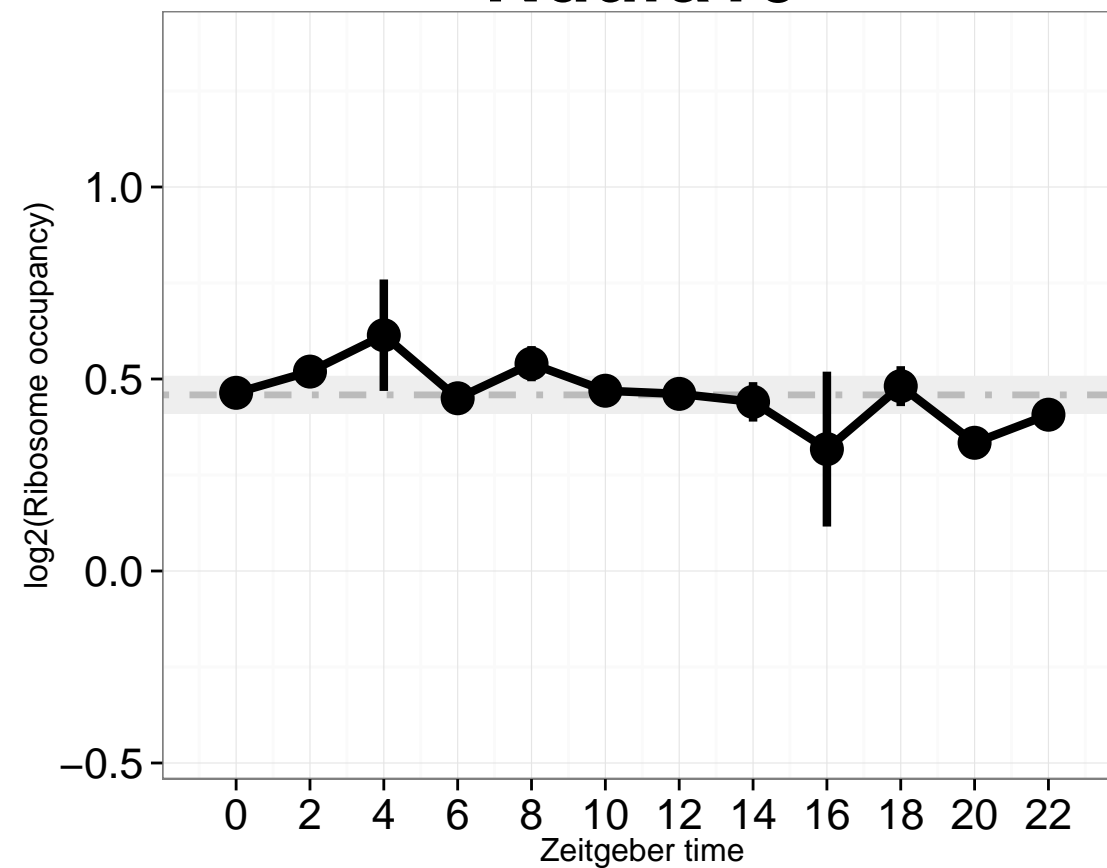

Supplement: Supplementary file 2117 [file 1]

# Suc1g1

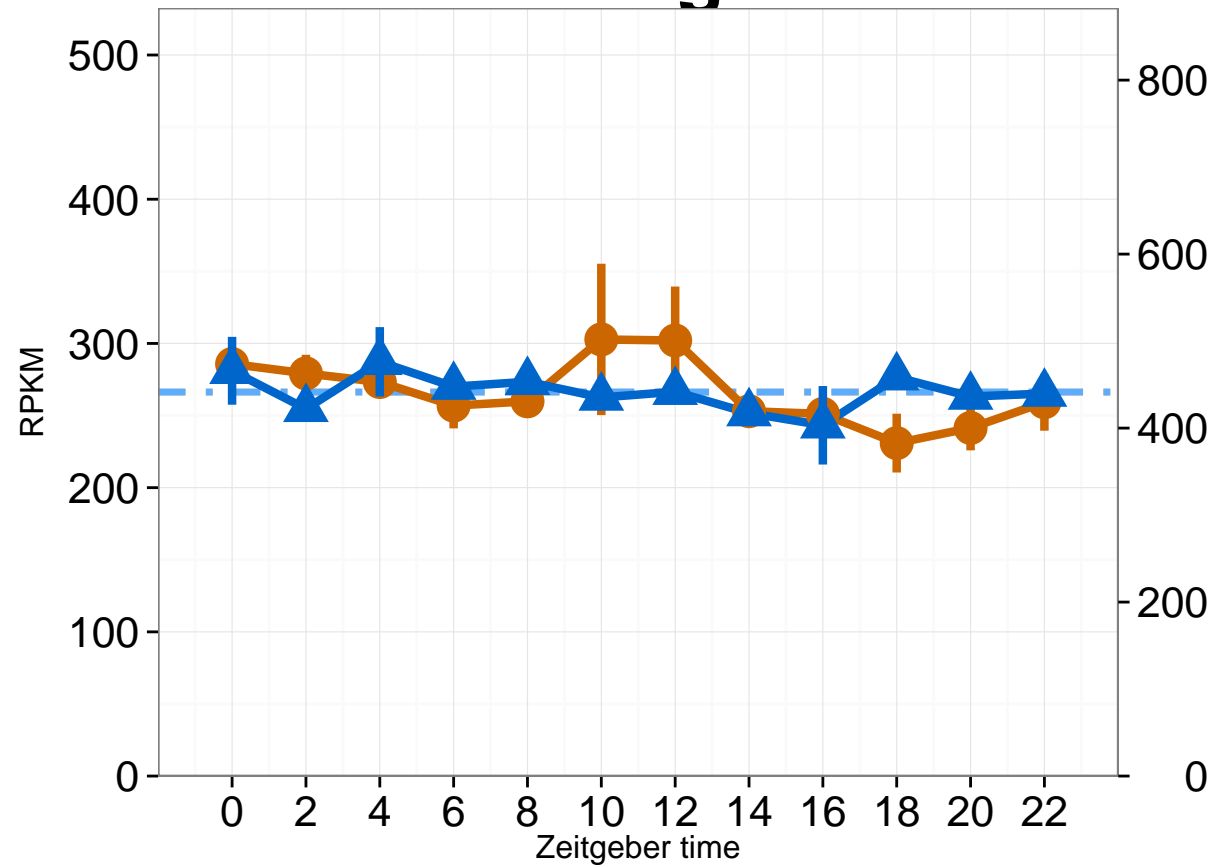

# Suc1g1

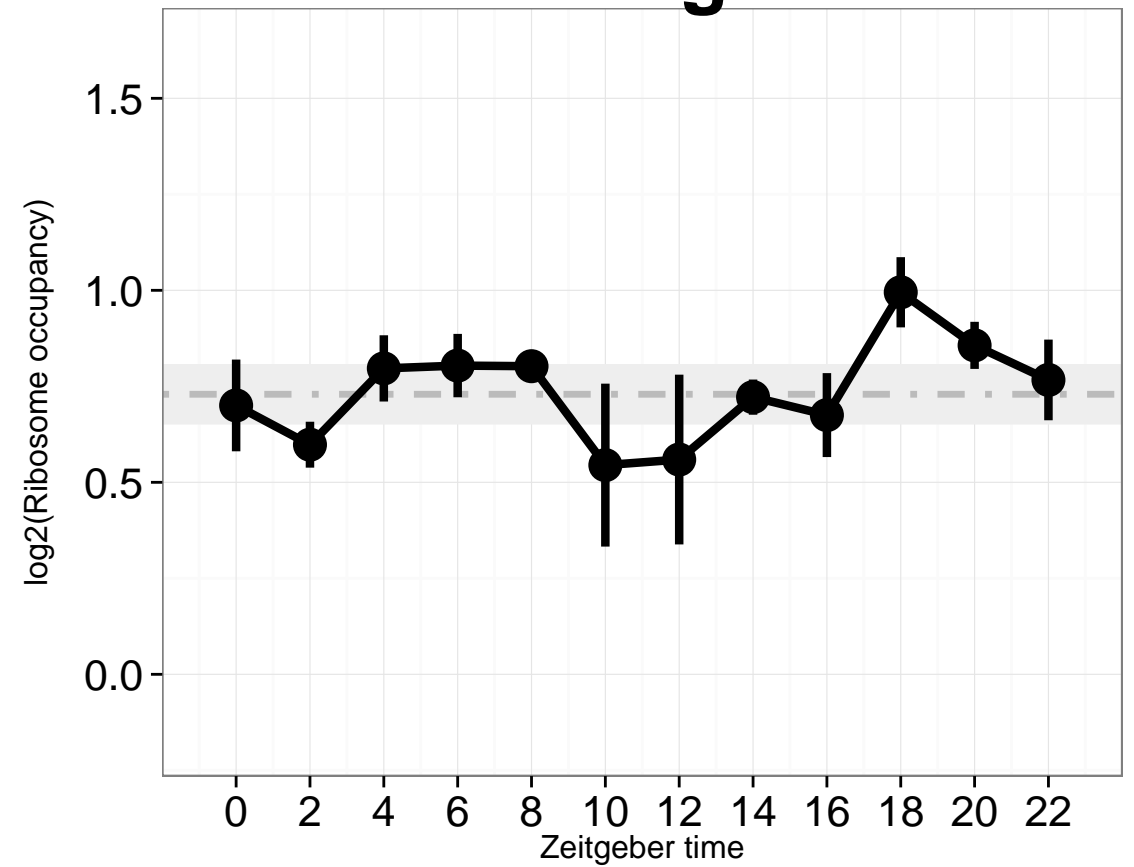

Supplement: Supplementary file 2118 [file 1]

# Tead3

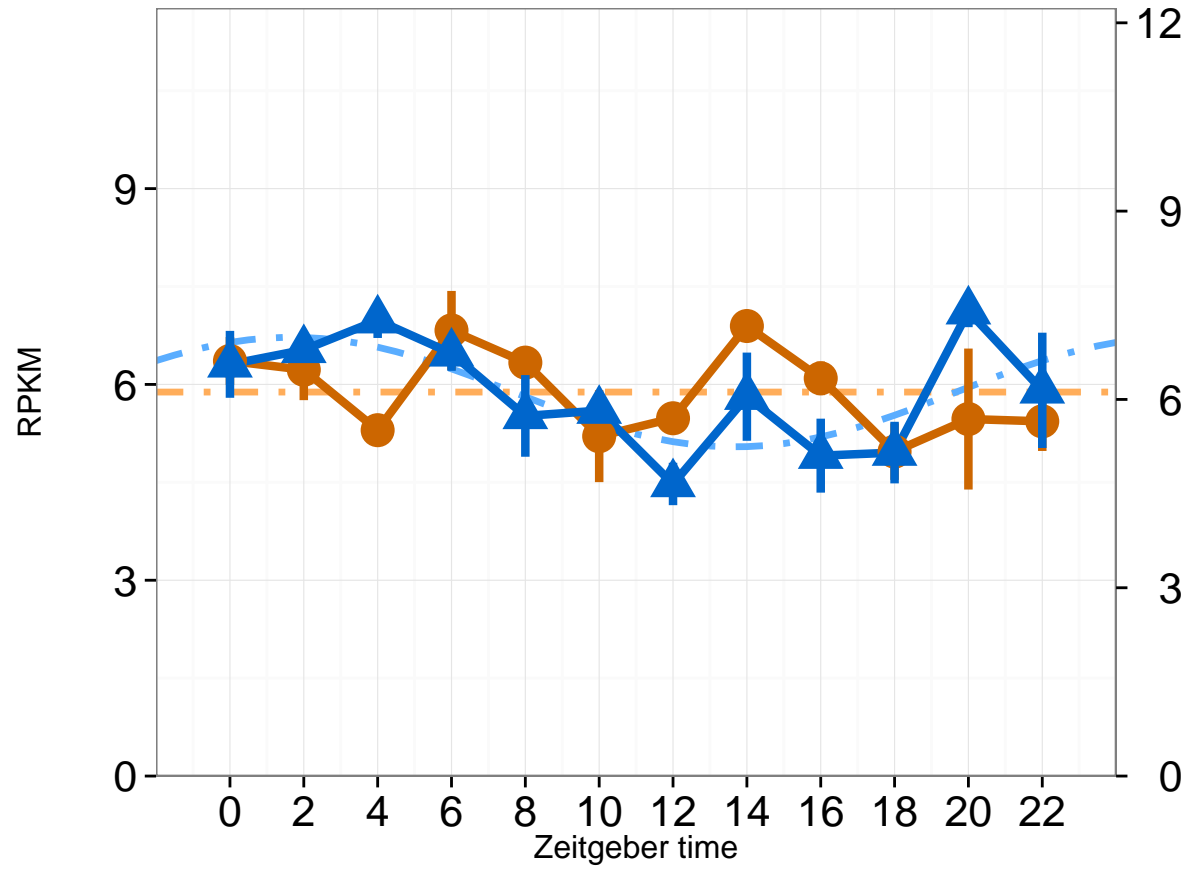

# Tead3

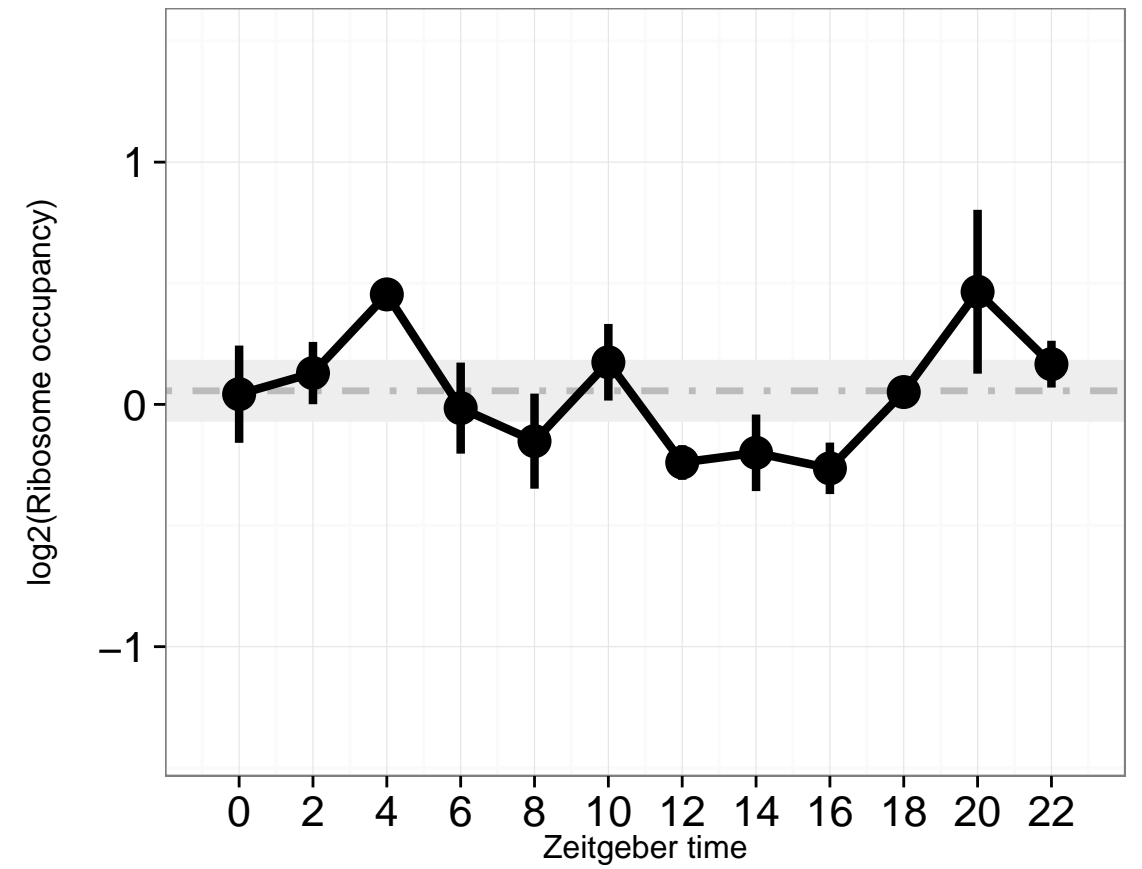

Supplement: Supplementary file 2119 [file 1]

# Ces1c

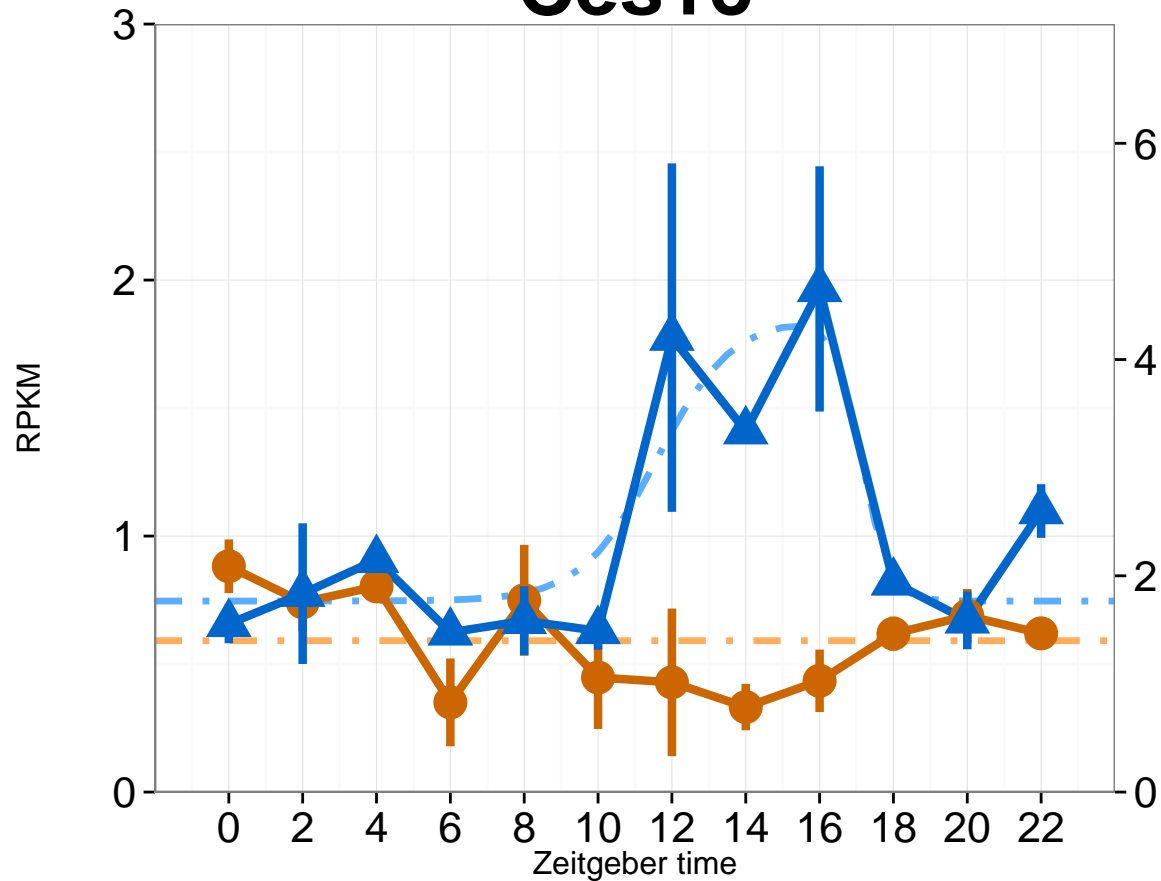

# Ces1c

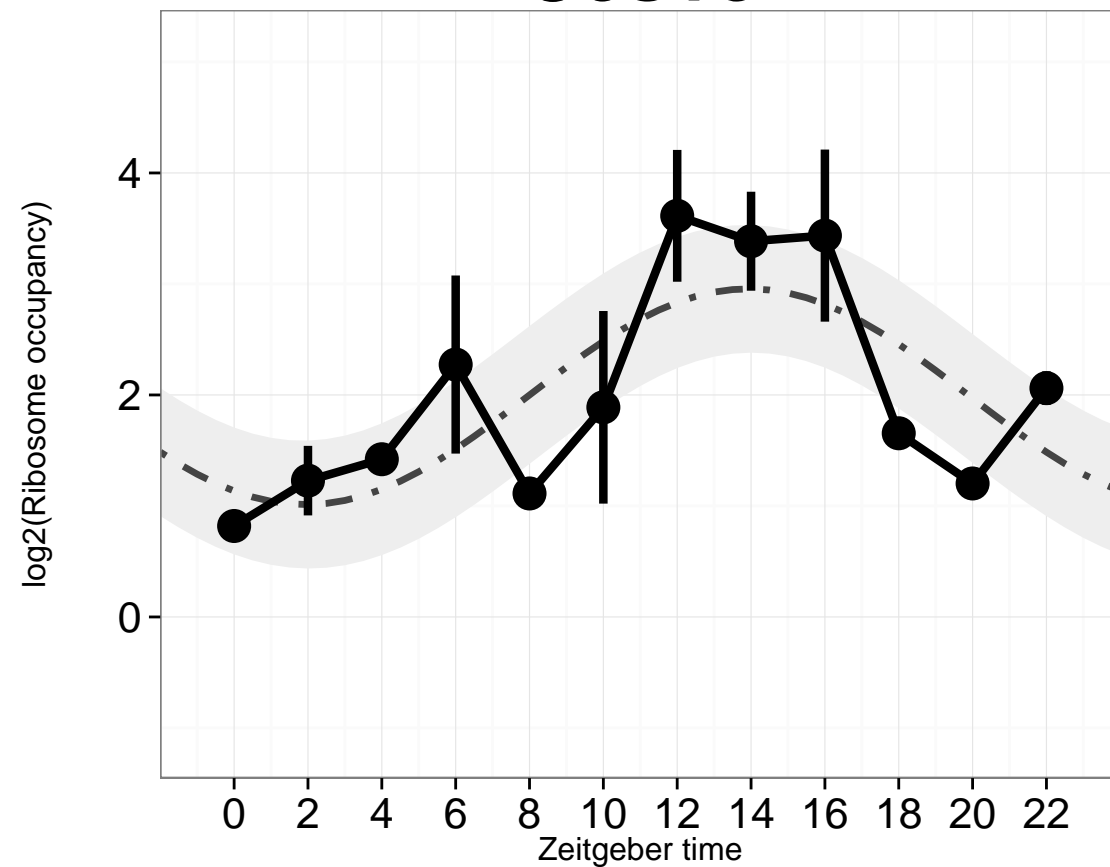

Supplement: Supplementary file 2120 [file 1]

## Plcd1

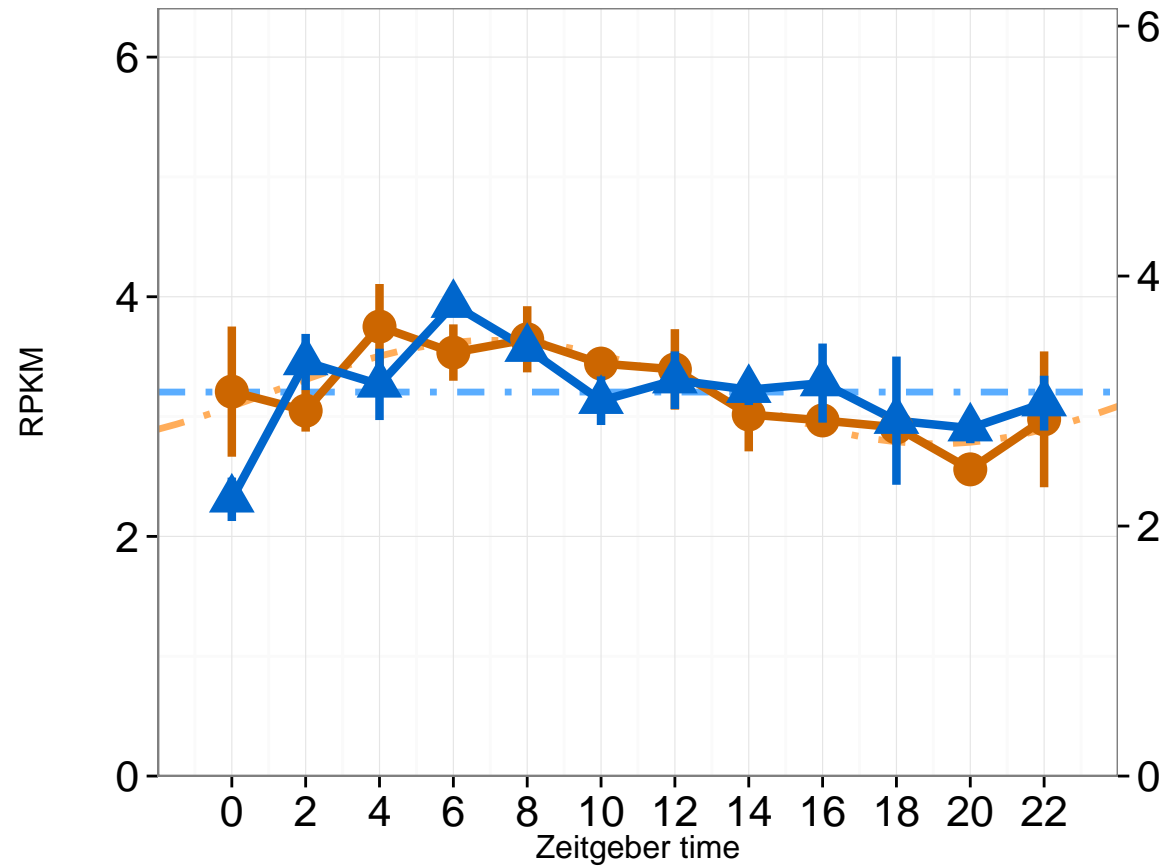

## Plcd1

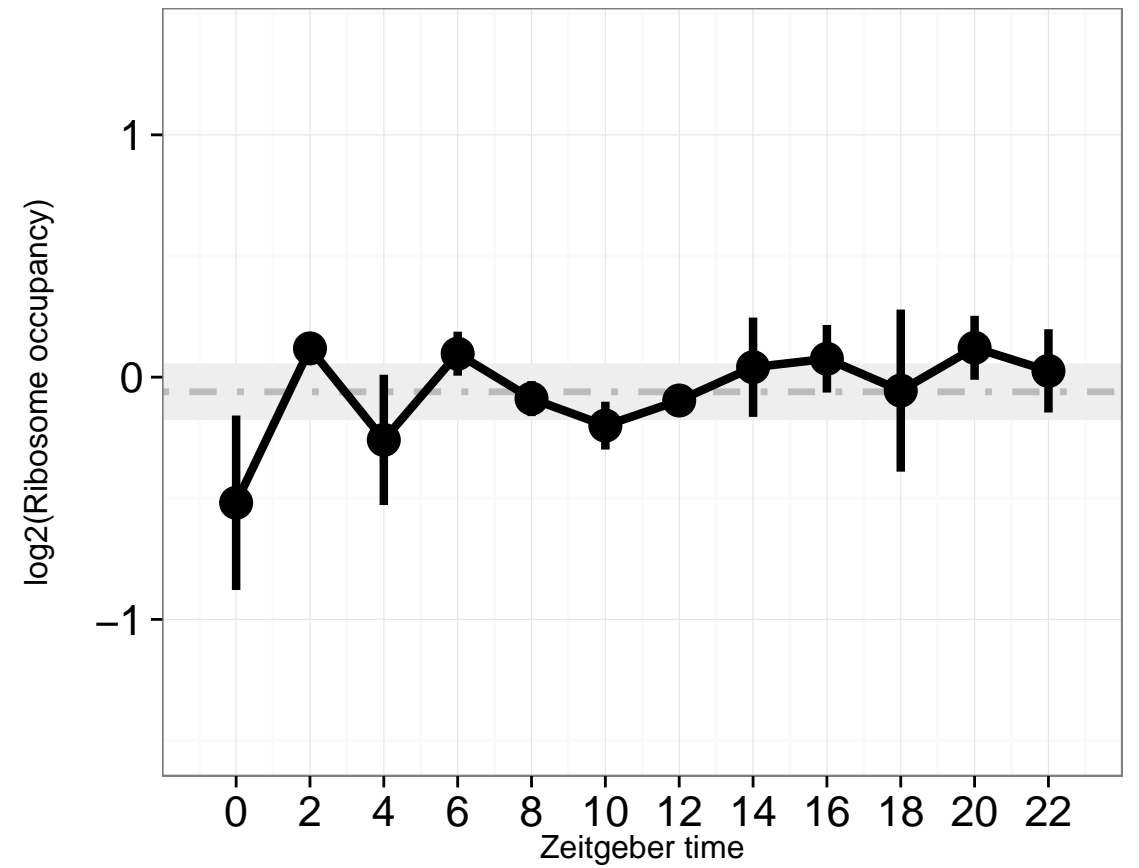

Supplement: Supplementary file 2121 [file 1]

# Atp5sl

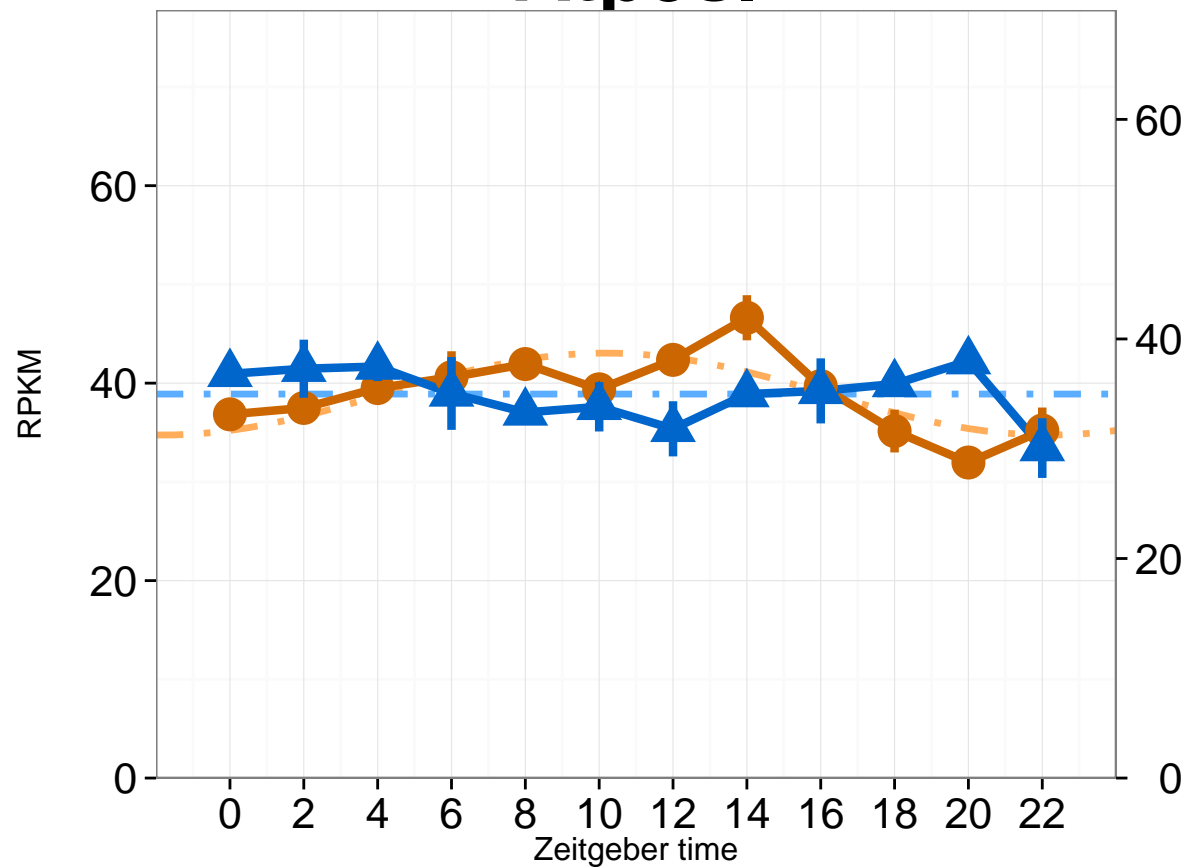

# Atp5sl

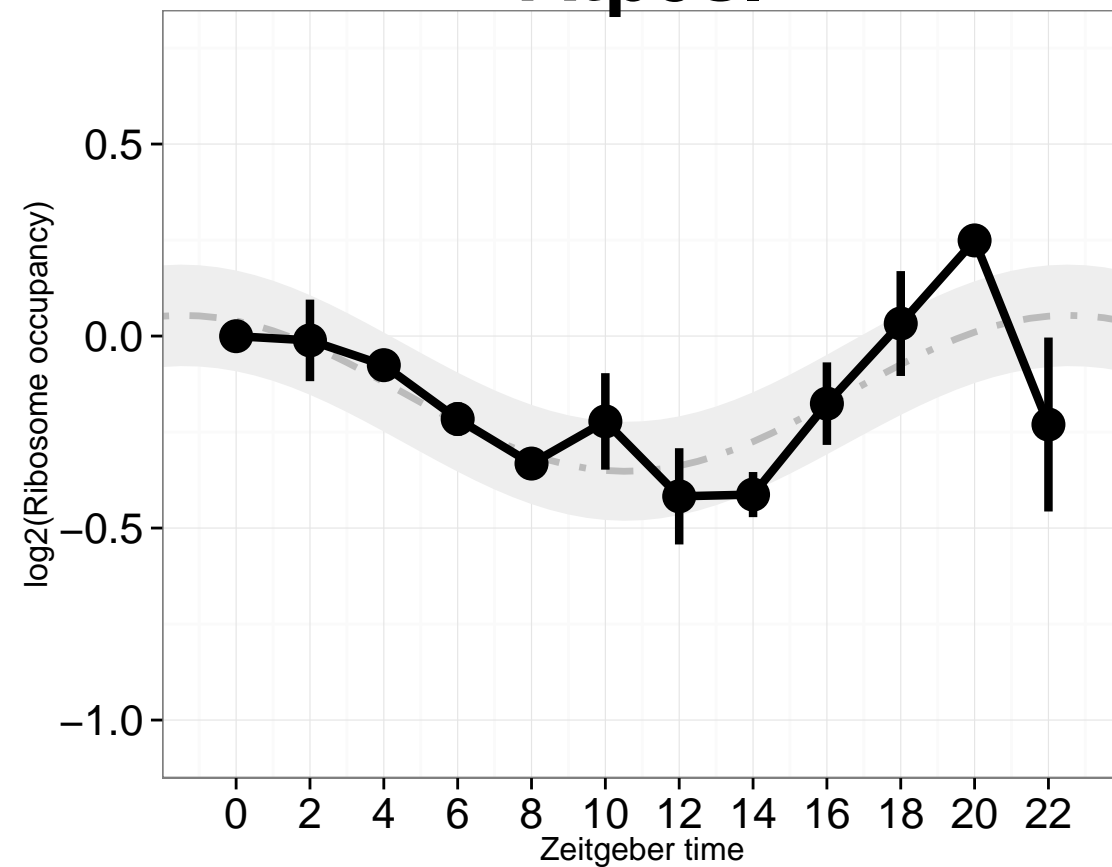

Supplement: Supplementary file 2122 [file 1]

## CbII1

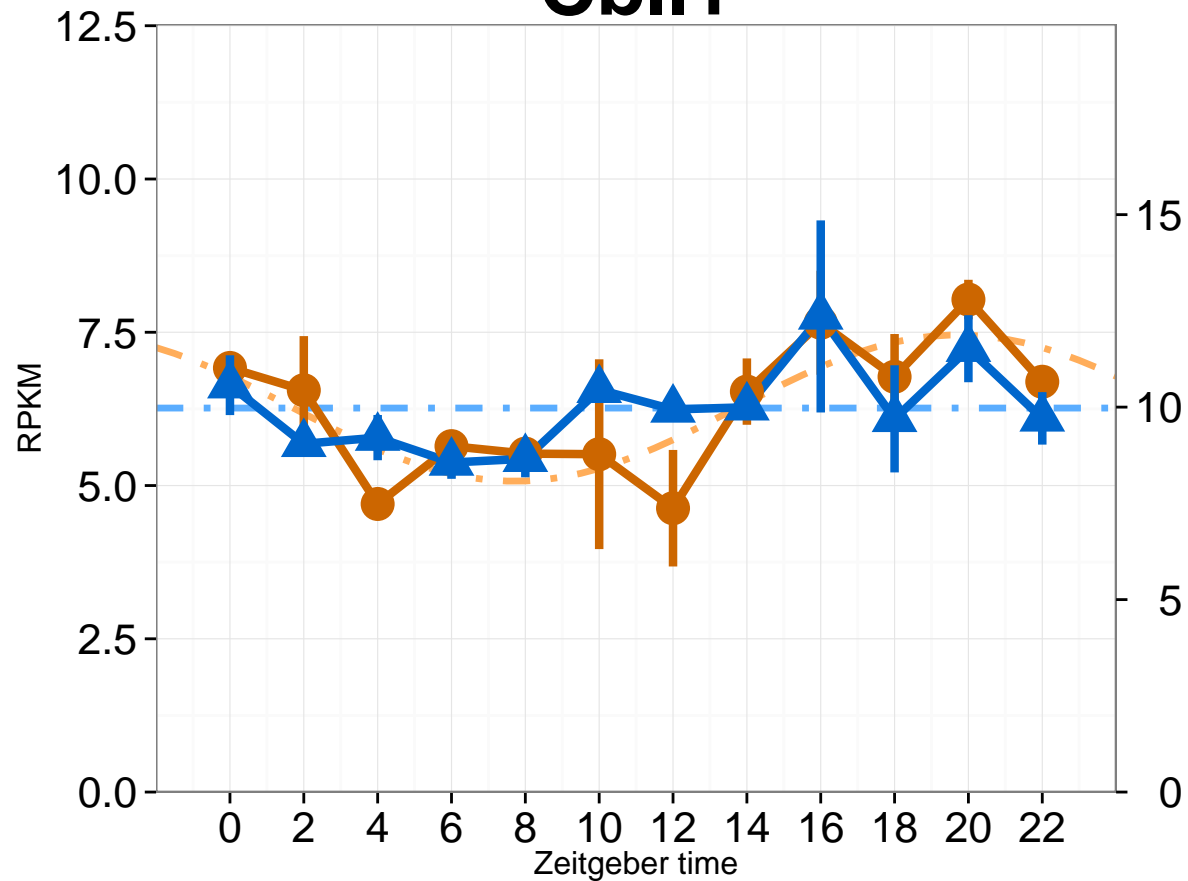

## CbII1

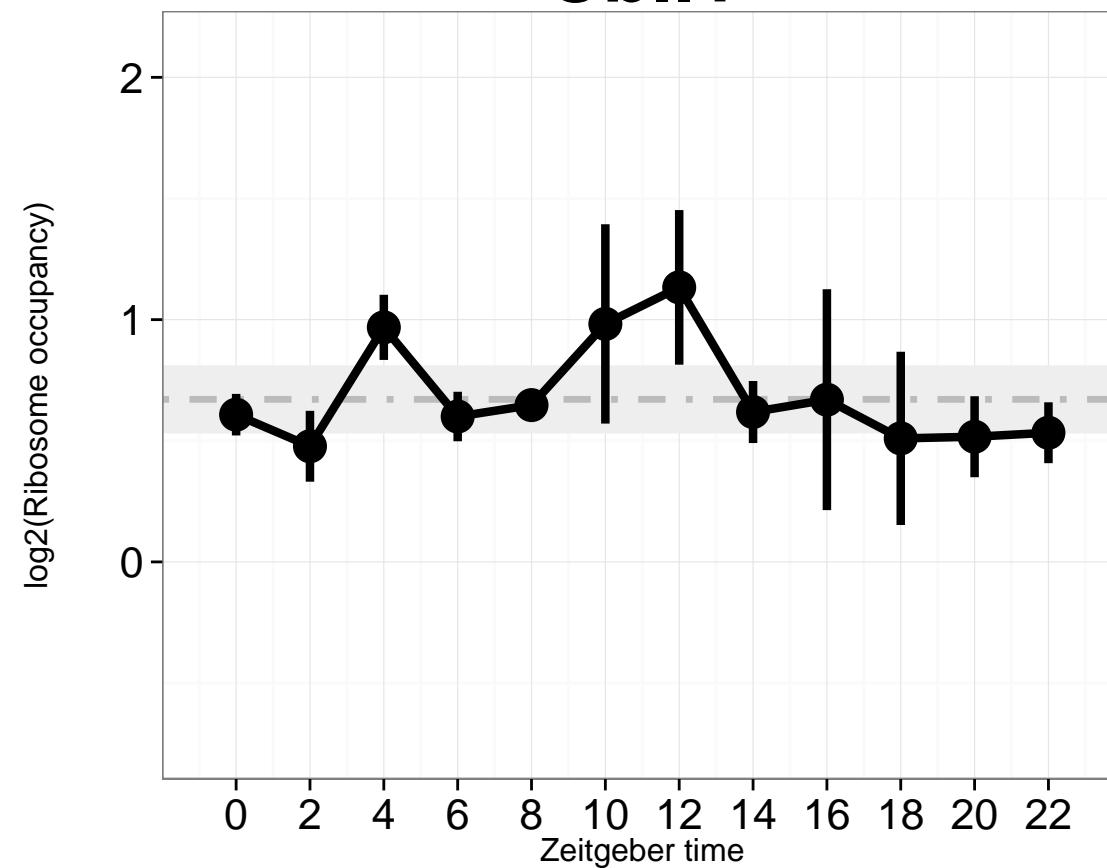

Supplement: Supplementary file 2123 [file 1]

**Tmem215 TR**

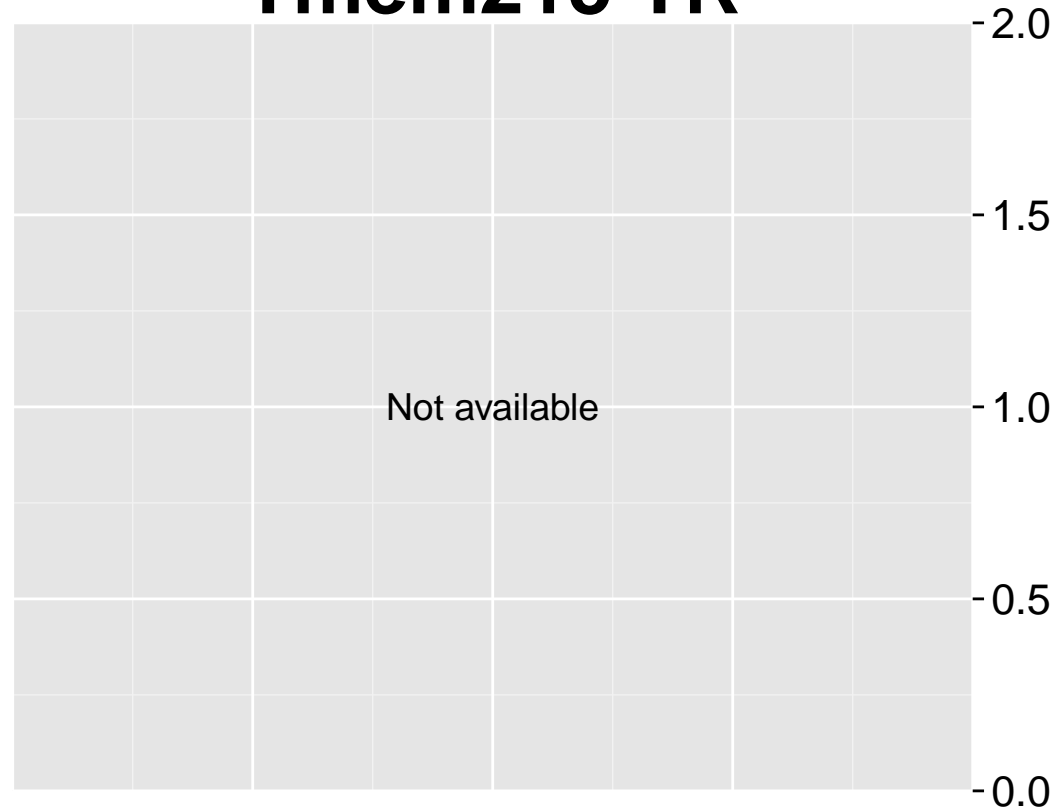

**Tmem215 log2(Ribosome occupancy)**

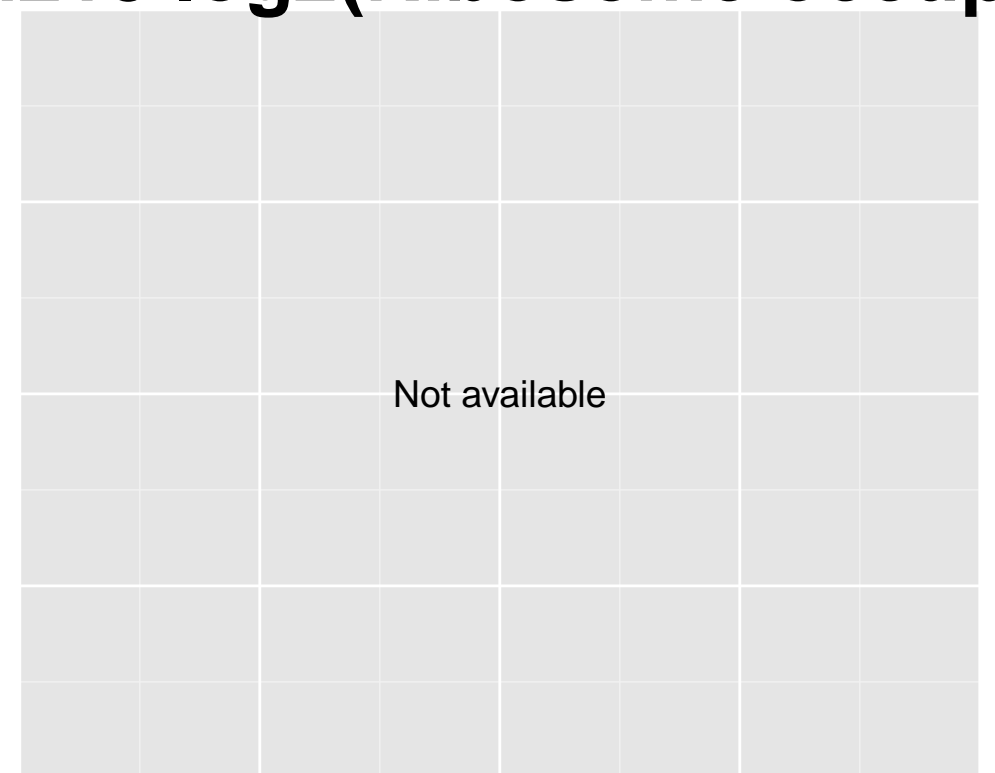

Supplement: Supplementary file 2124 [file 1]

# Idh3b

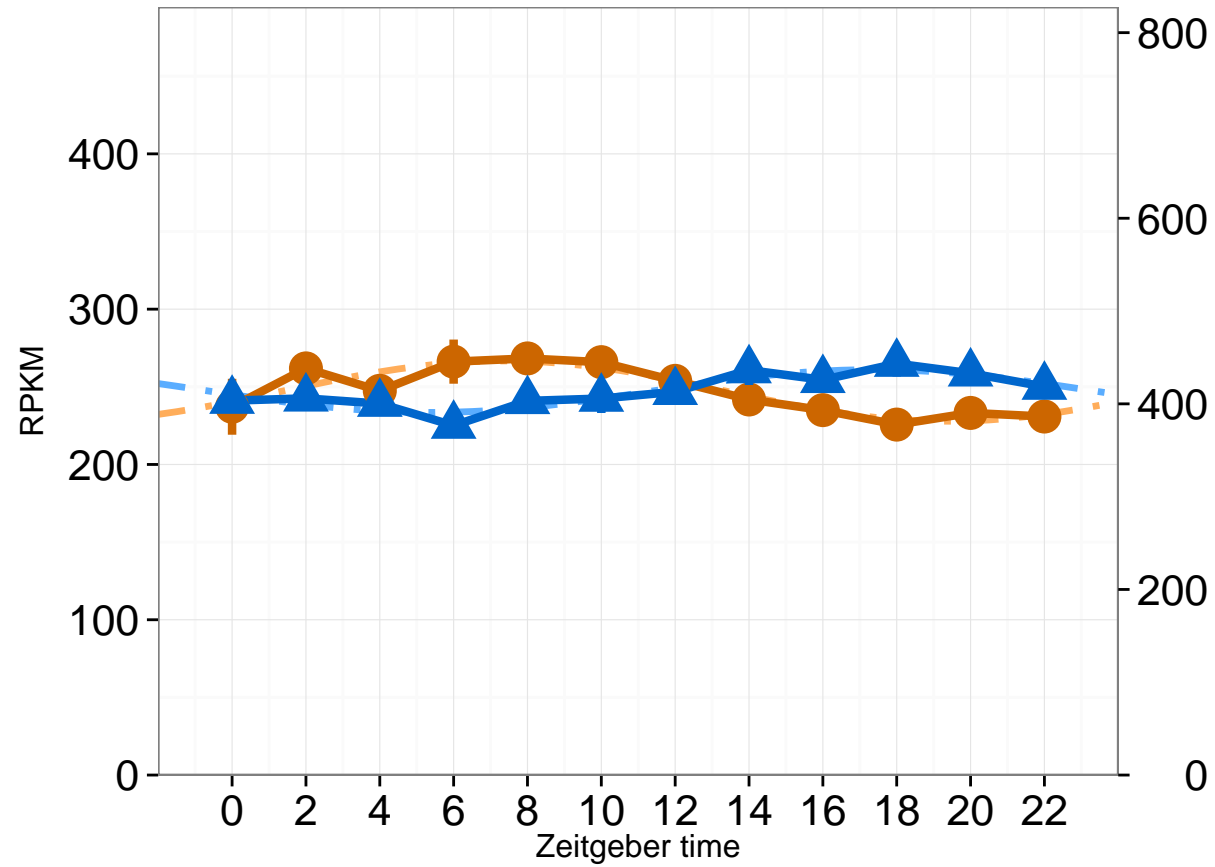

# Idh3b

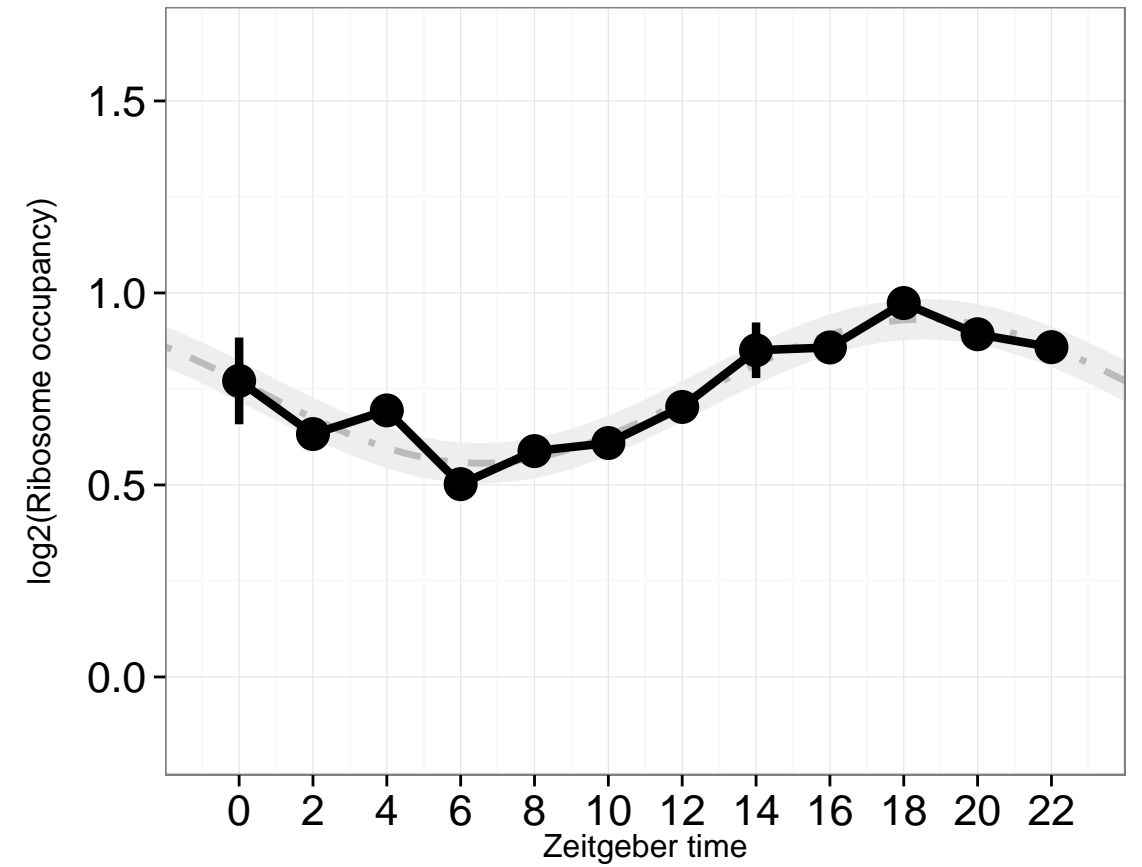

Supplement: Supplementary file 2125 [file 1]

## Dnase1I2

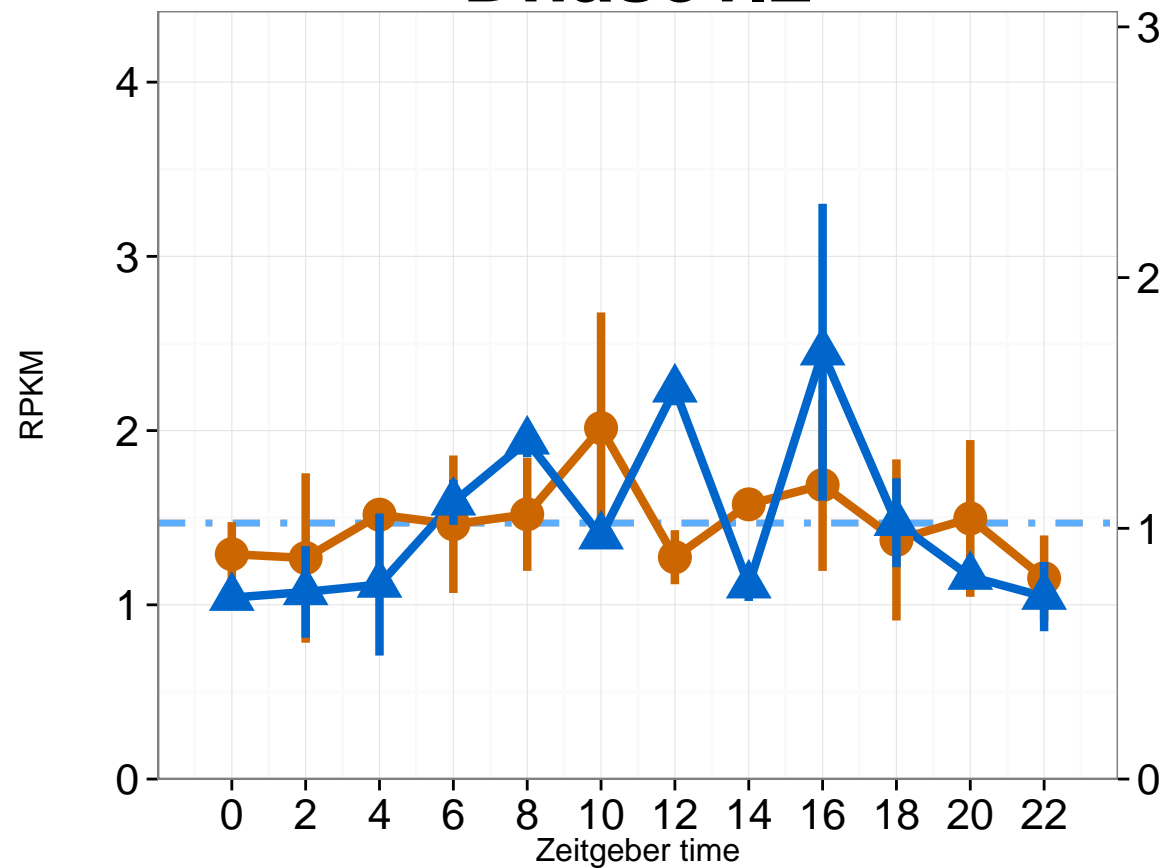

## Dnase1I2

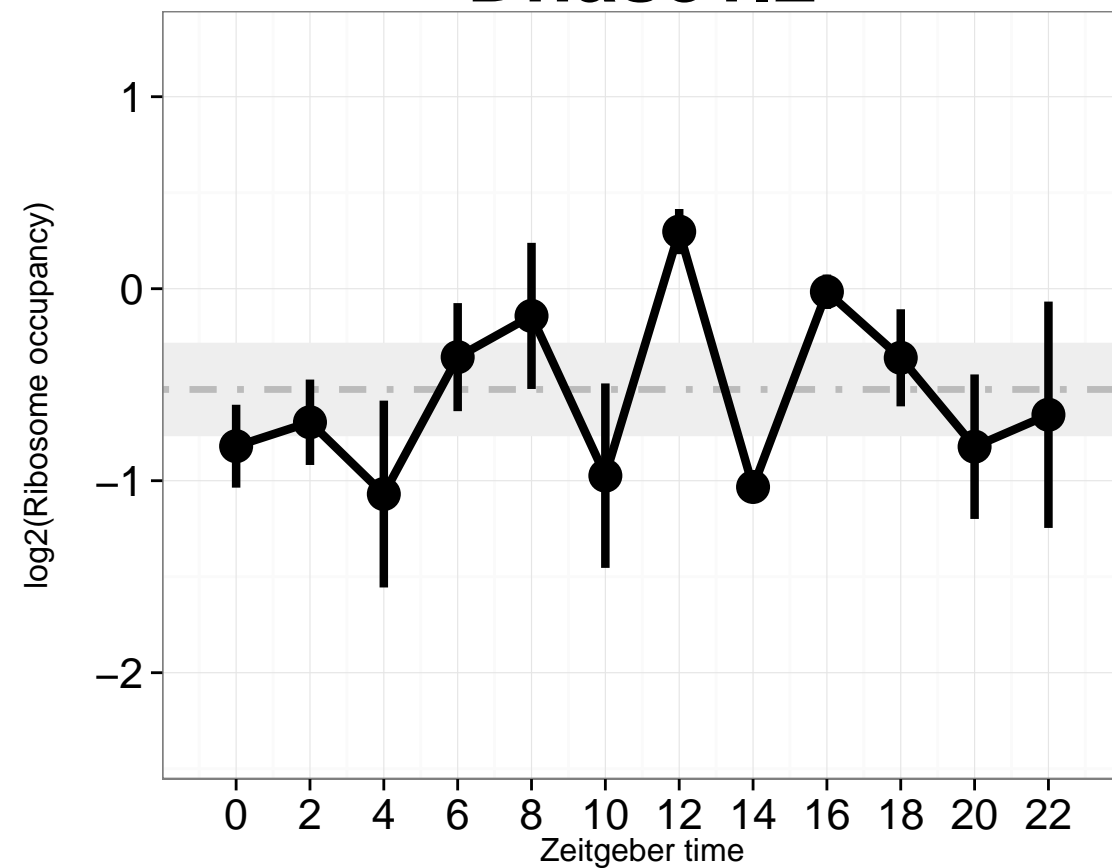

Supplement: Supplementary file 2126 [file 1]

## Slc26a2

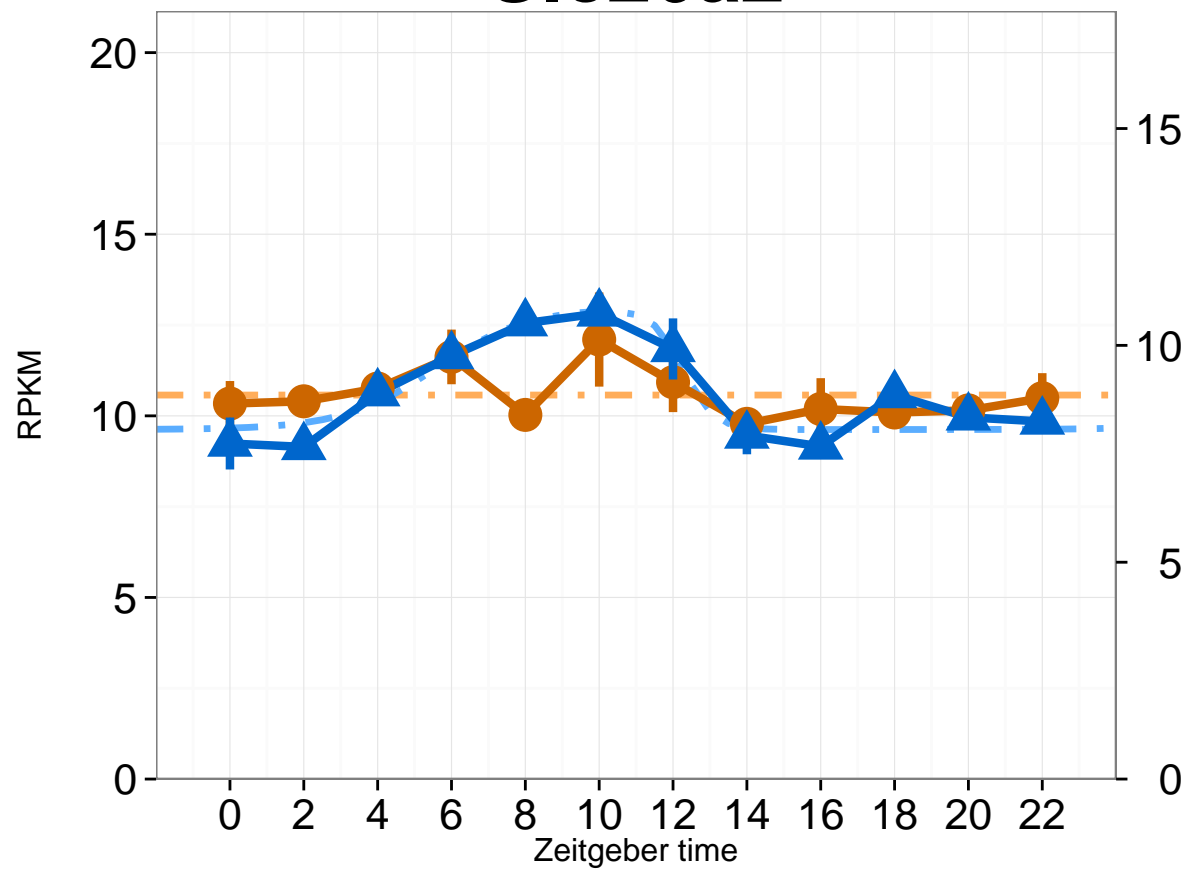

## Slc26a2

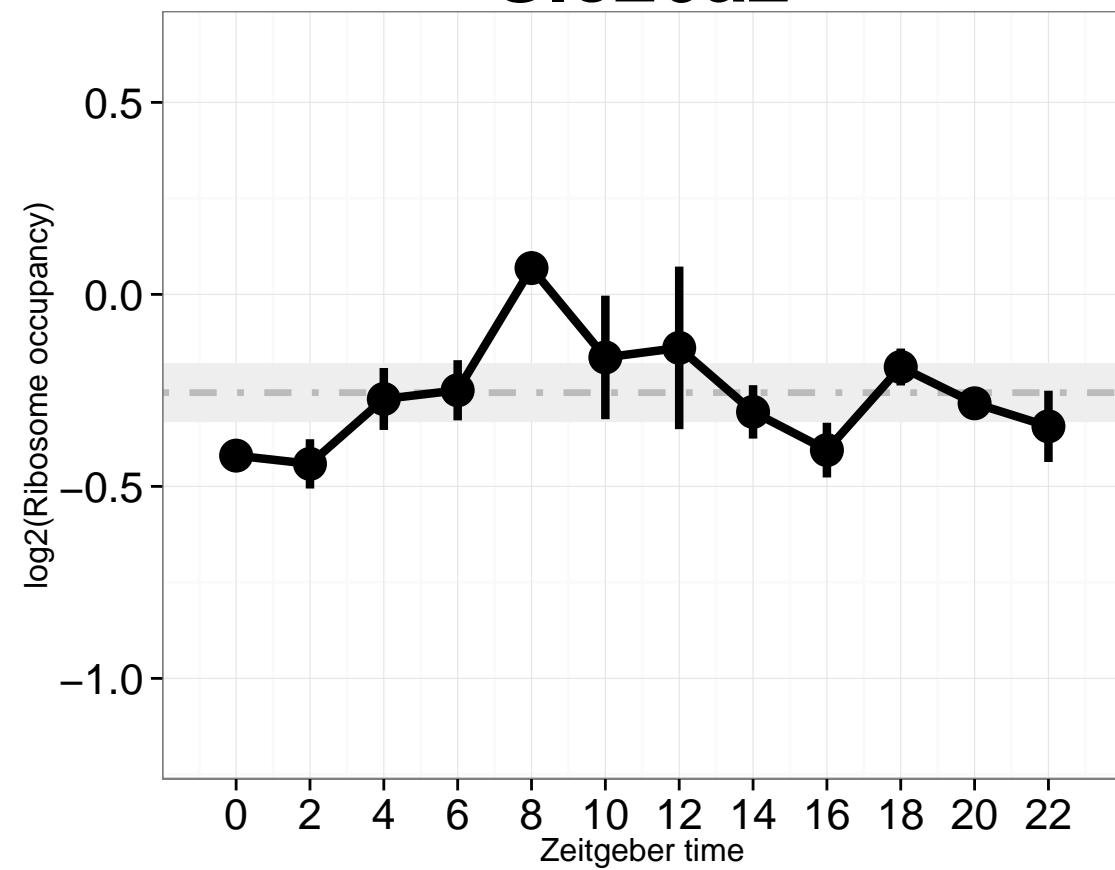

Supplement: Supplementary file 2127 [file 1]

# Cnrip1

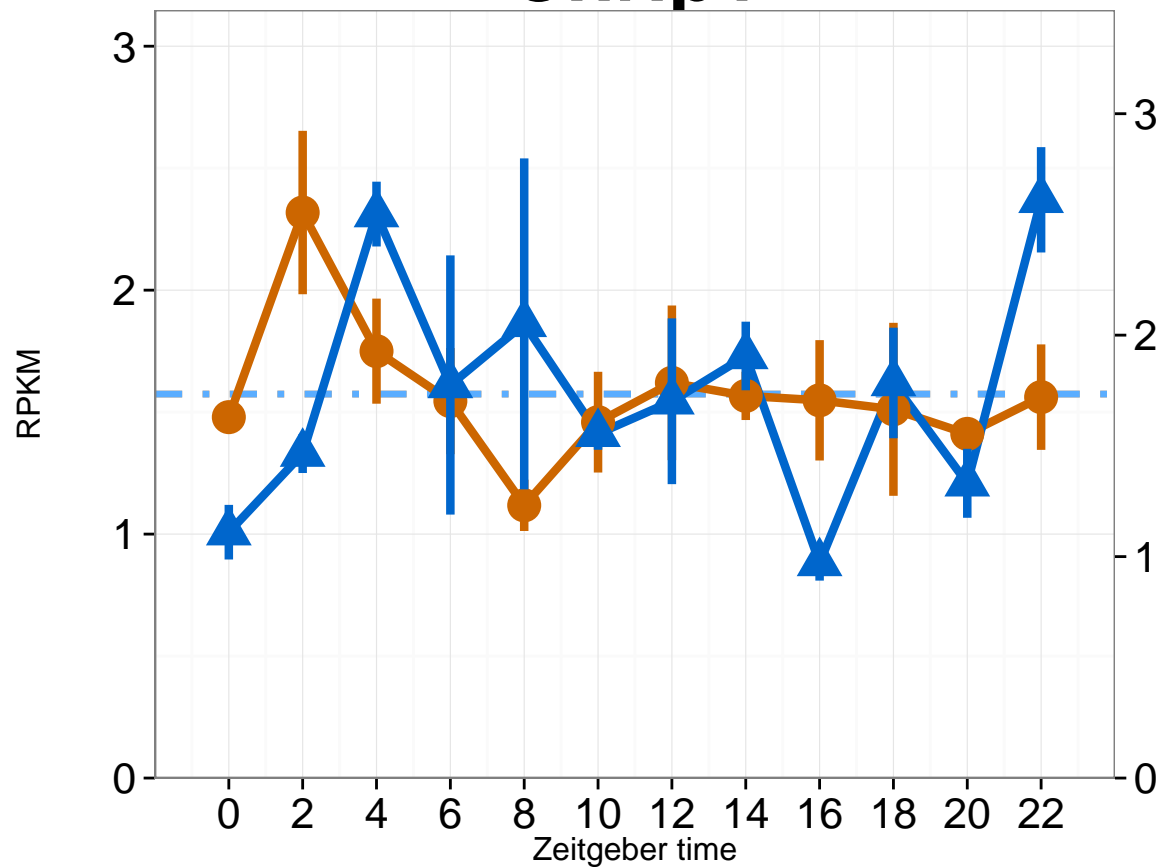

# Cnrip1

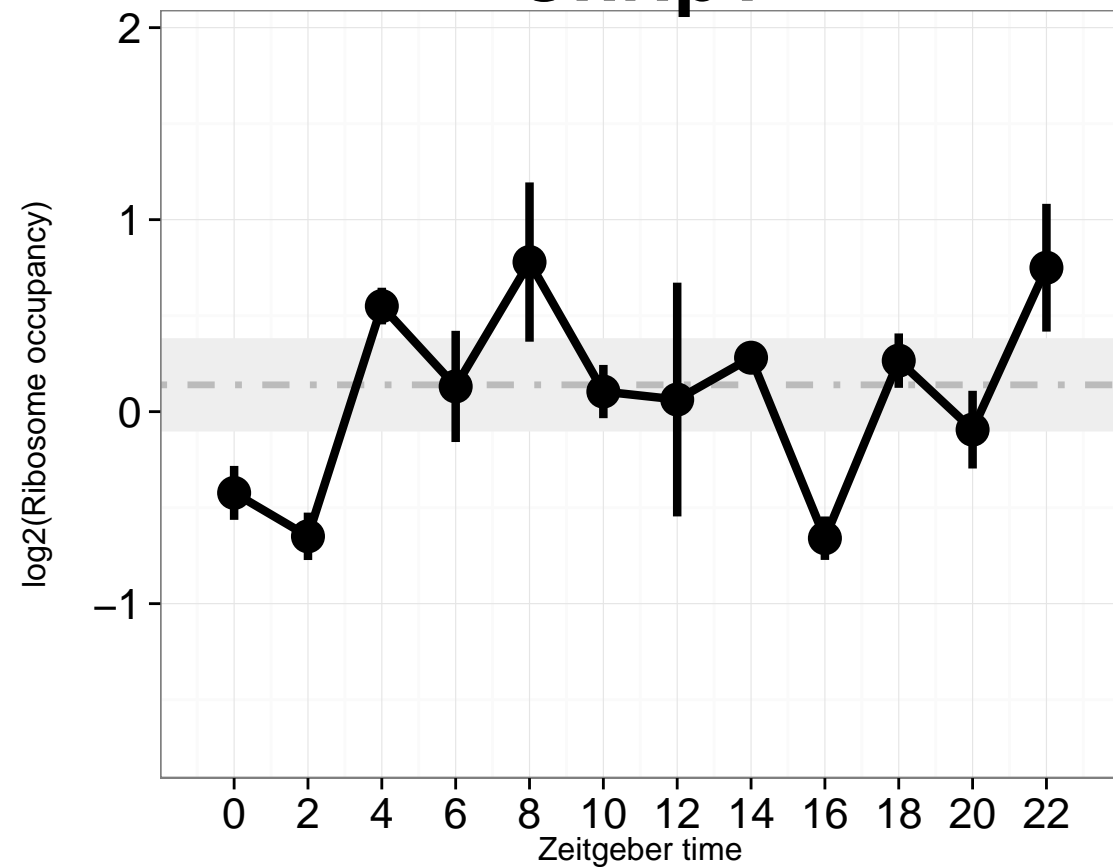

Supplement: Supplementary file 2128 [file 1]

## Snrnp40

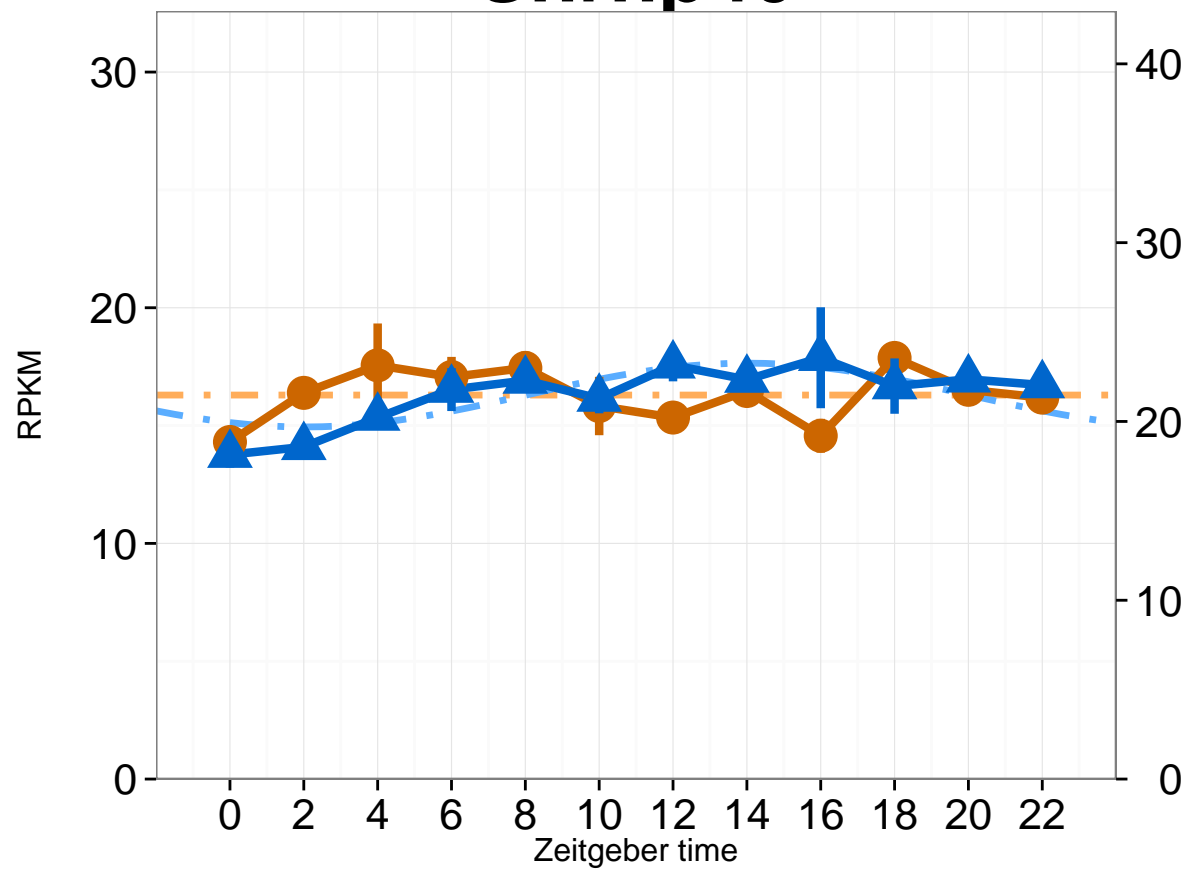

## Snrnp40

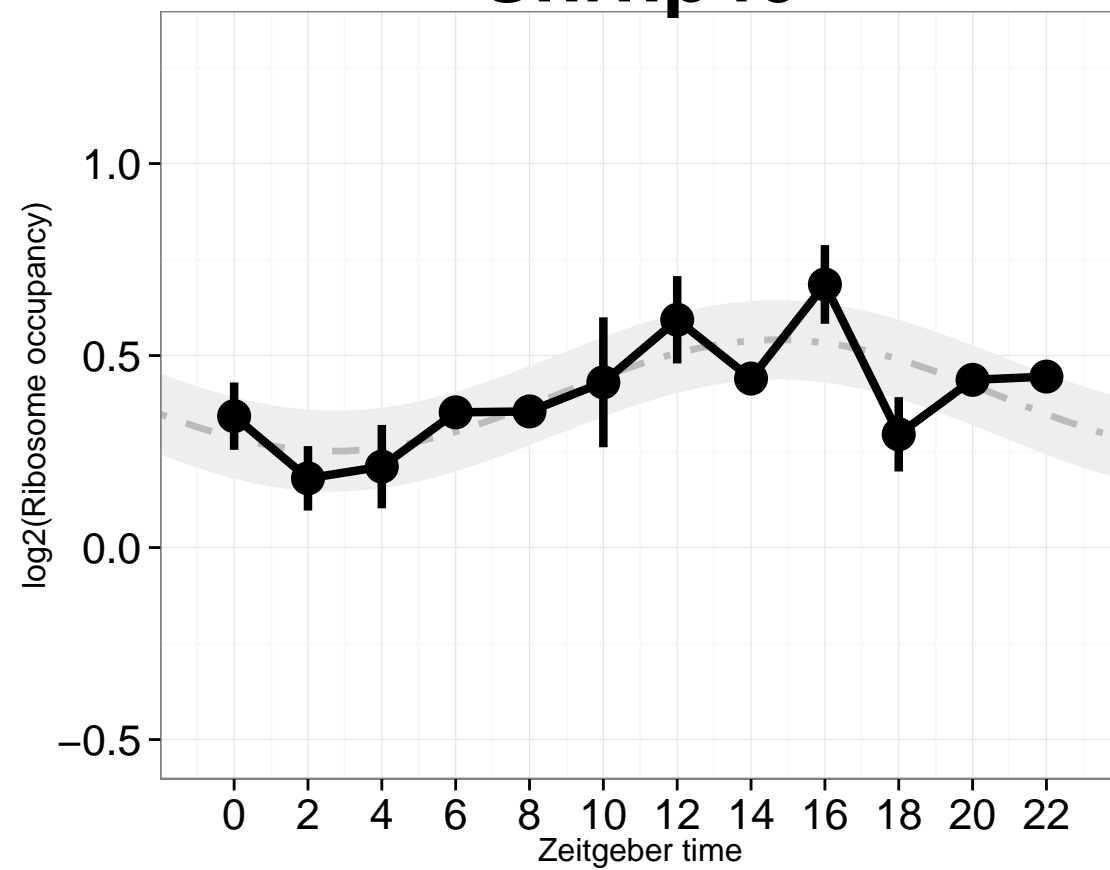

Supplement: Supplementary file 2129 [file 1]

## Cpsf1

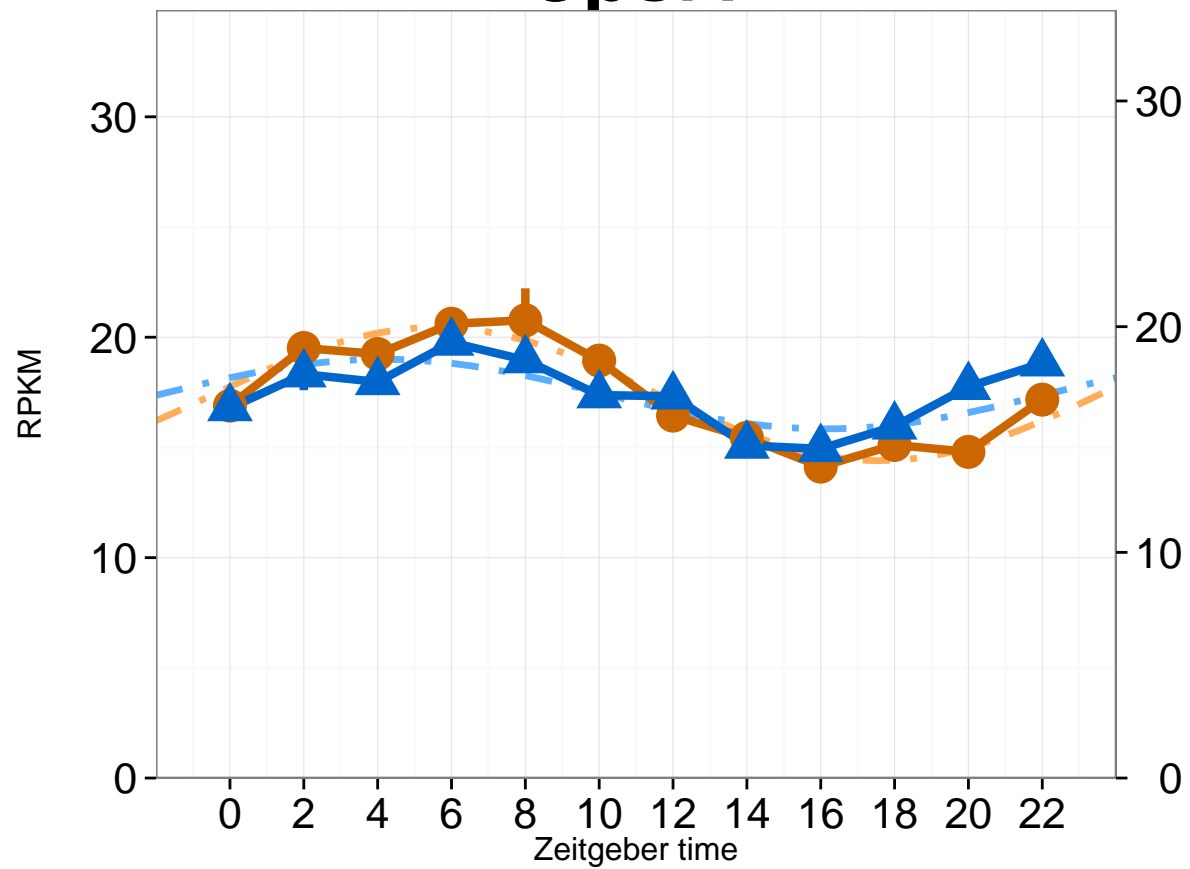

## Cpsf1

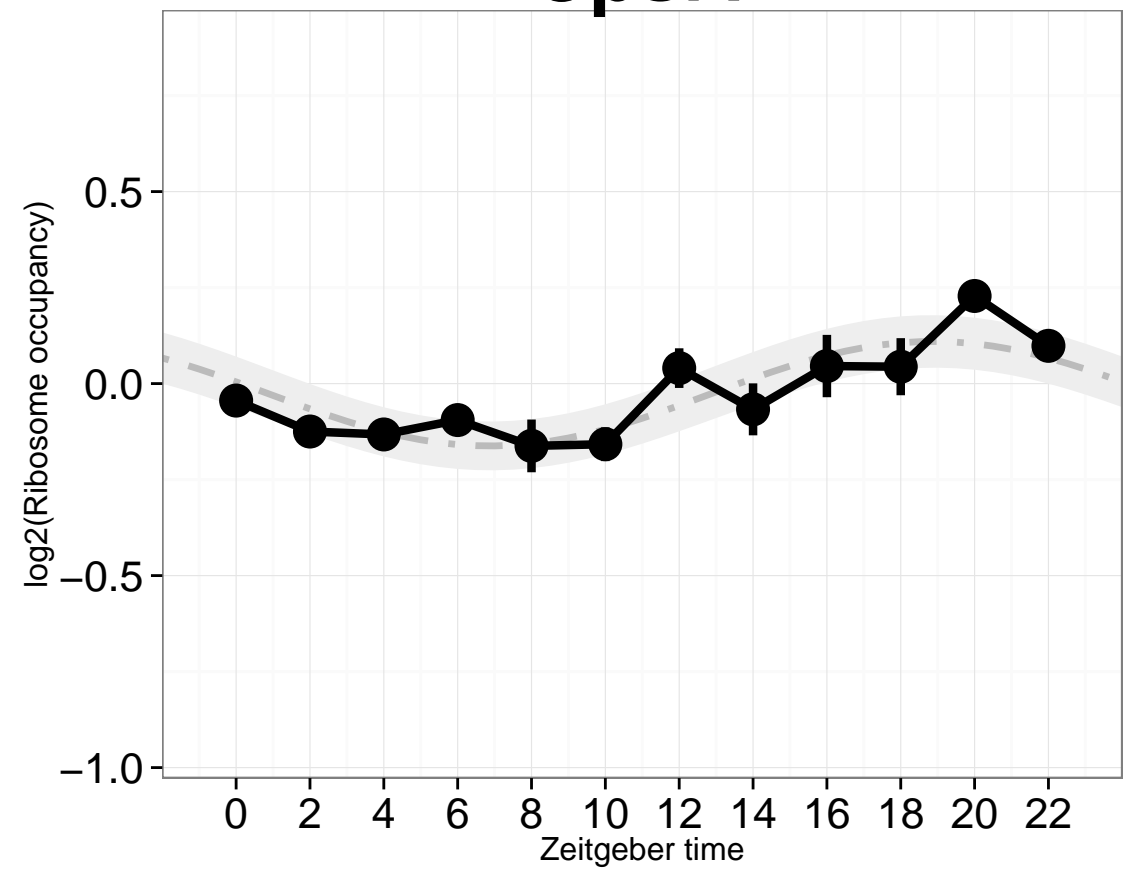

Supplement: Supplementary file 2130 [file 1]

## Gale

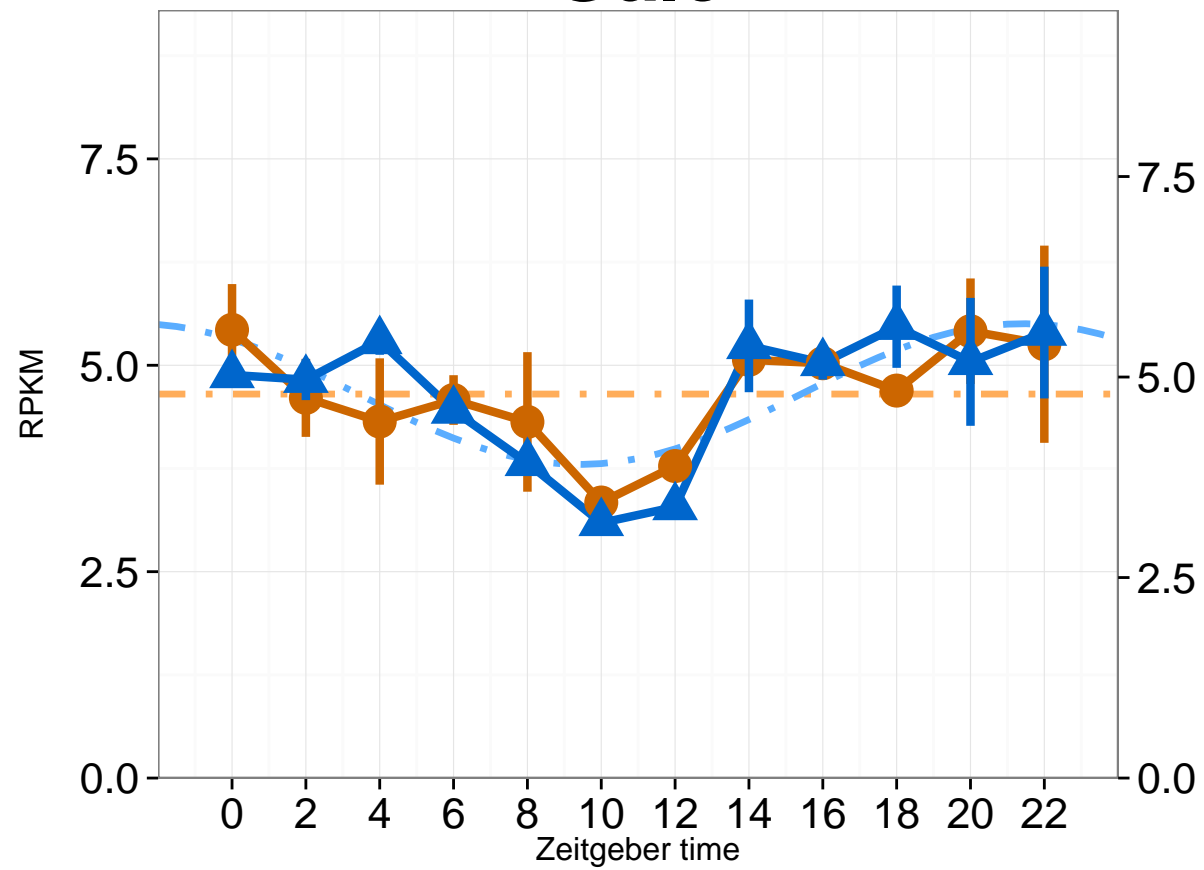

## Gale

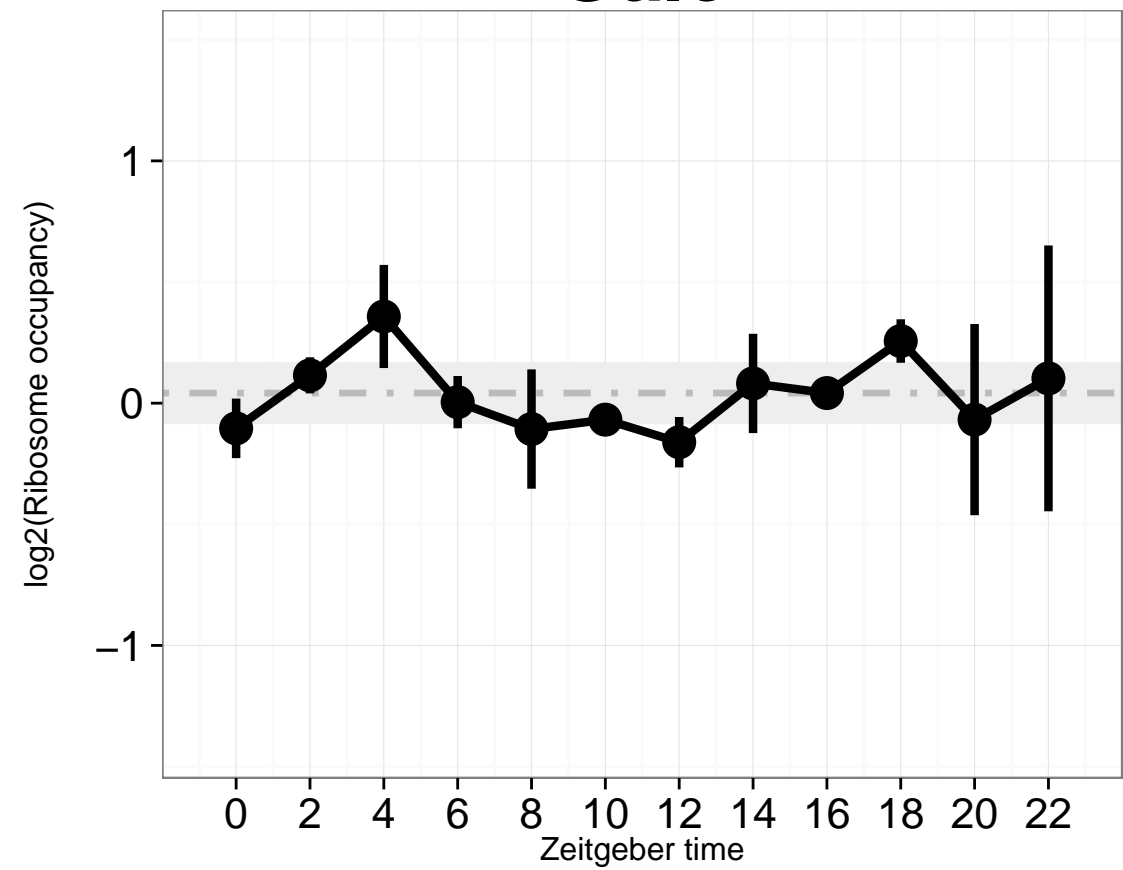

Supplement: Supplementary file 2131 [file 1]

## Vps16

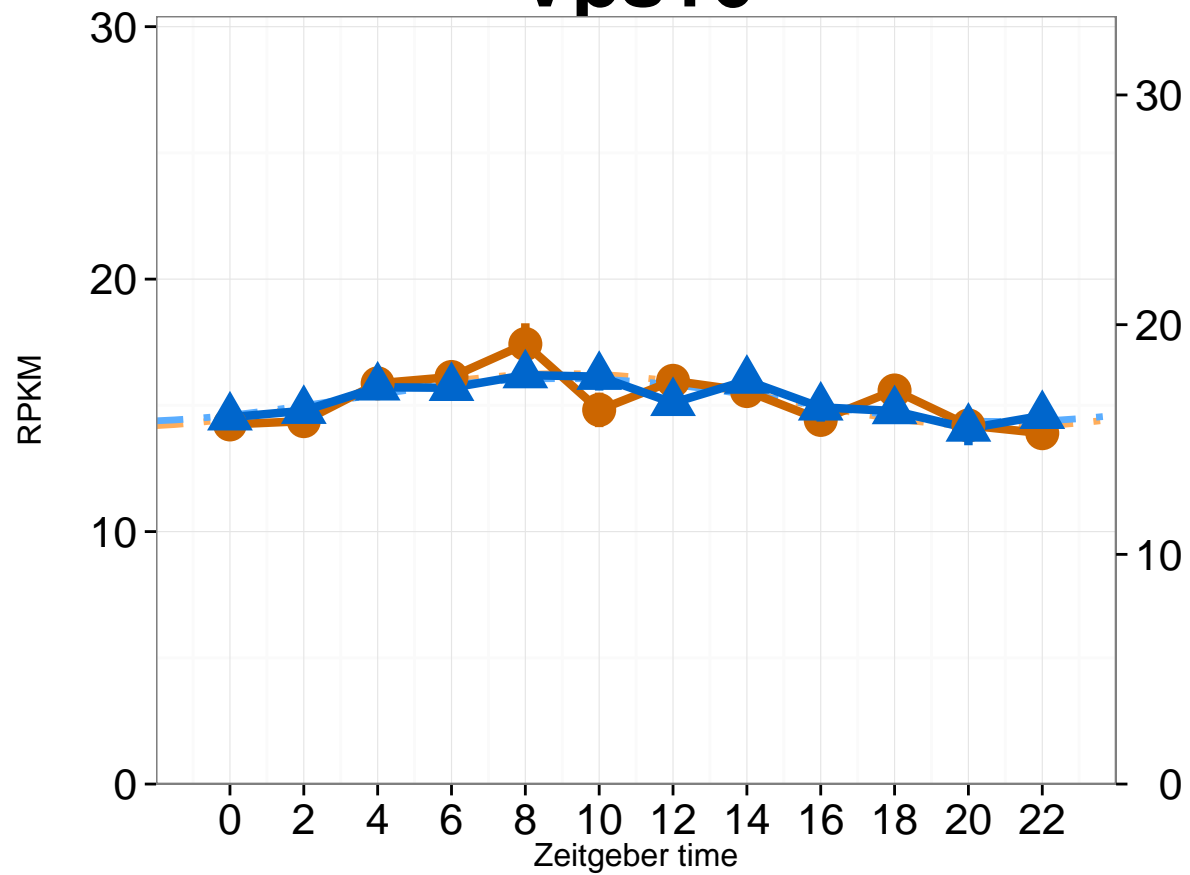

## Vps16

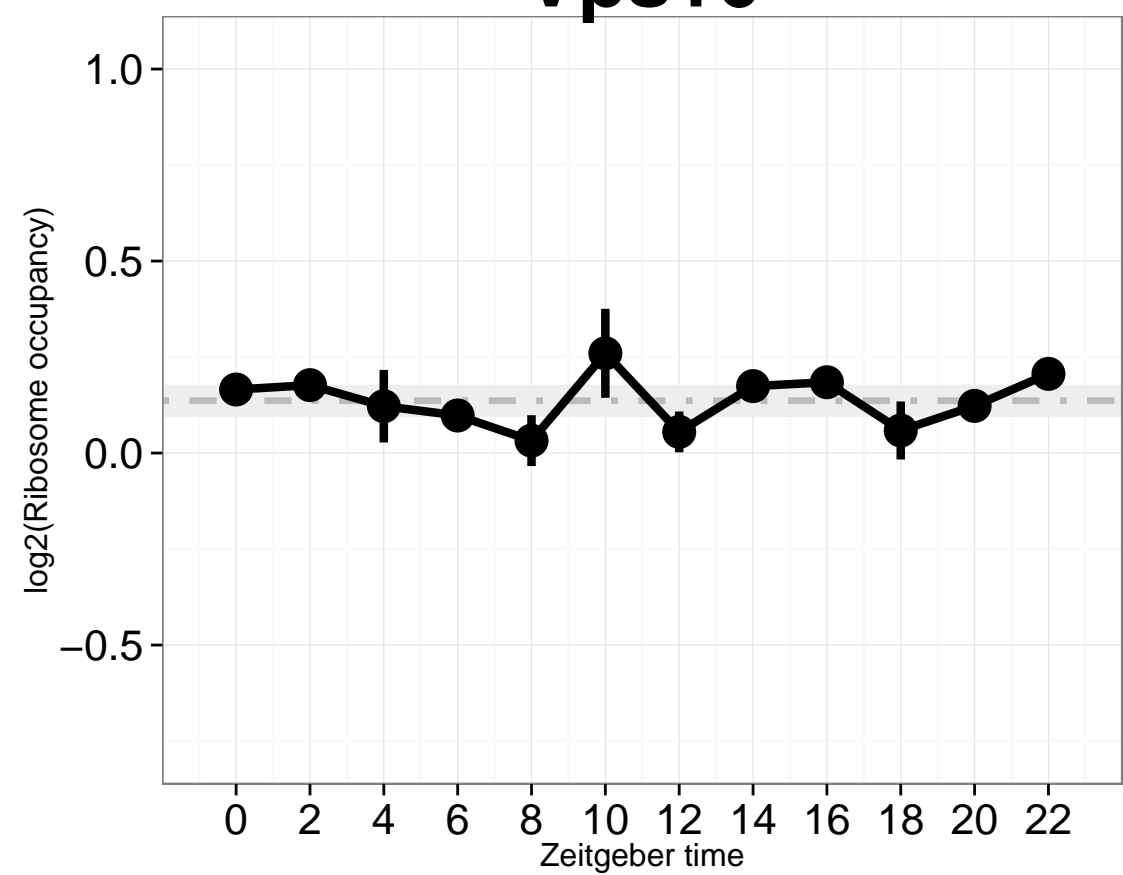

Supplement: Supplementary file 2132 [file 1]

# Zfp384

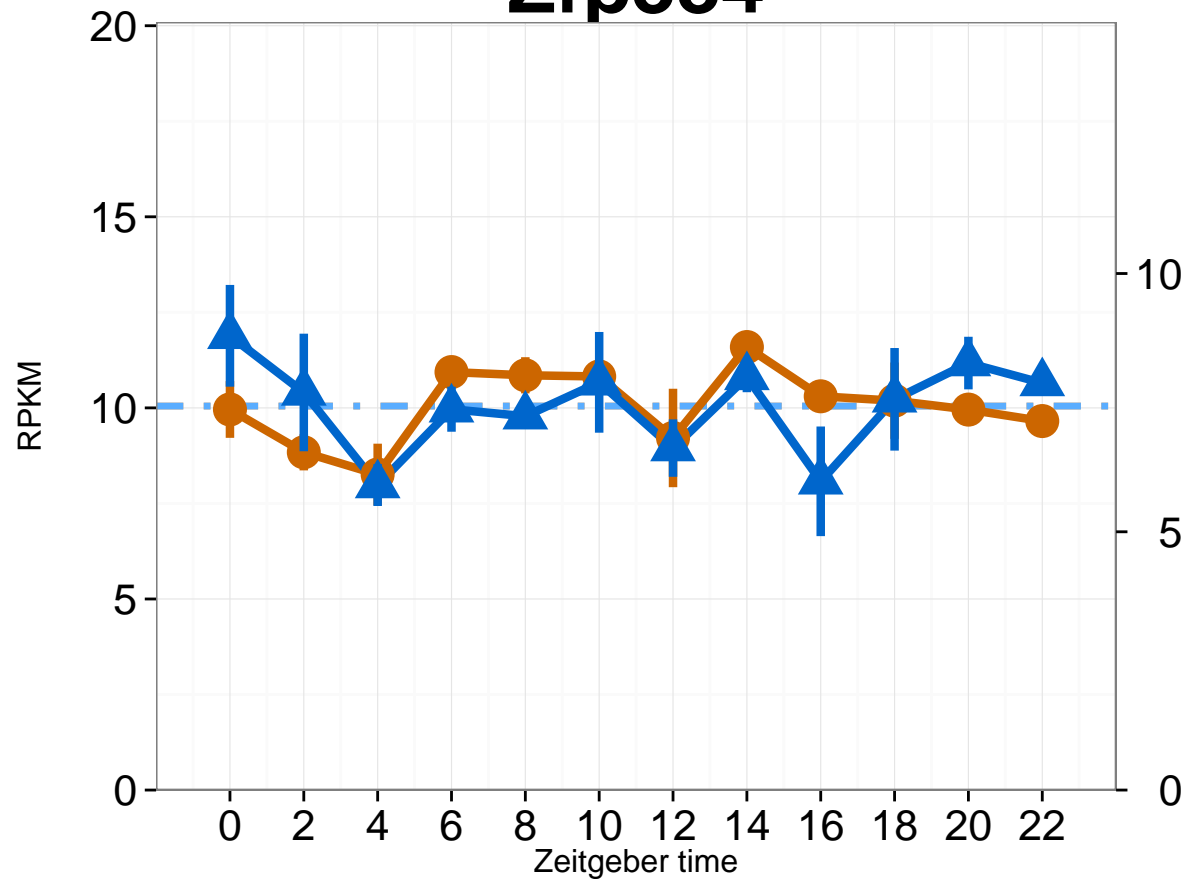

# Zfp384

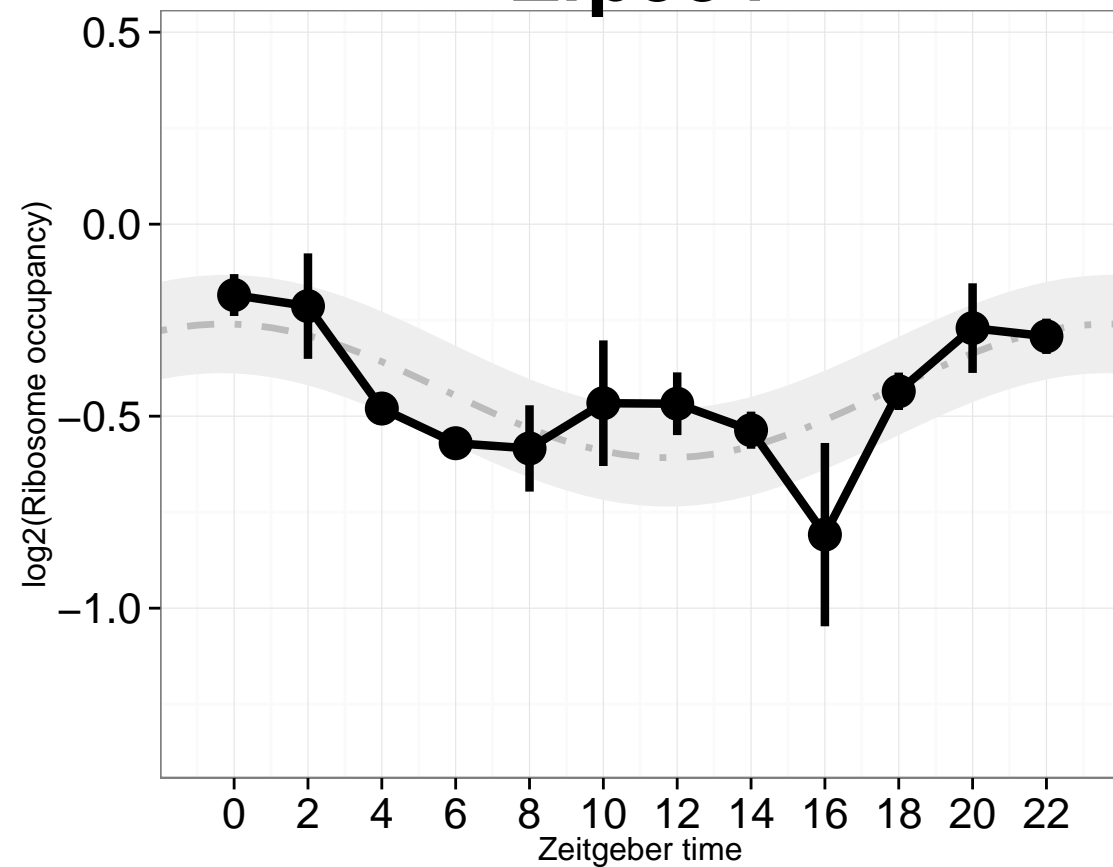

Supplement: Supplementary file 2133 [file 1]

# Trim62

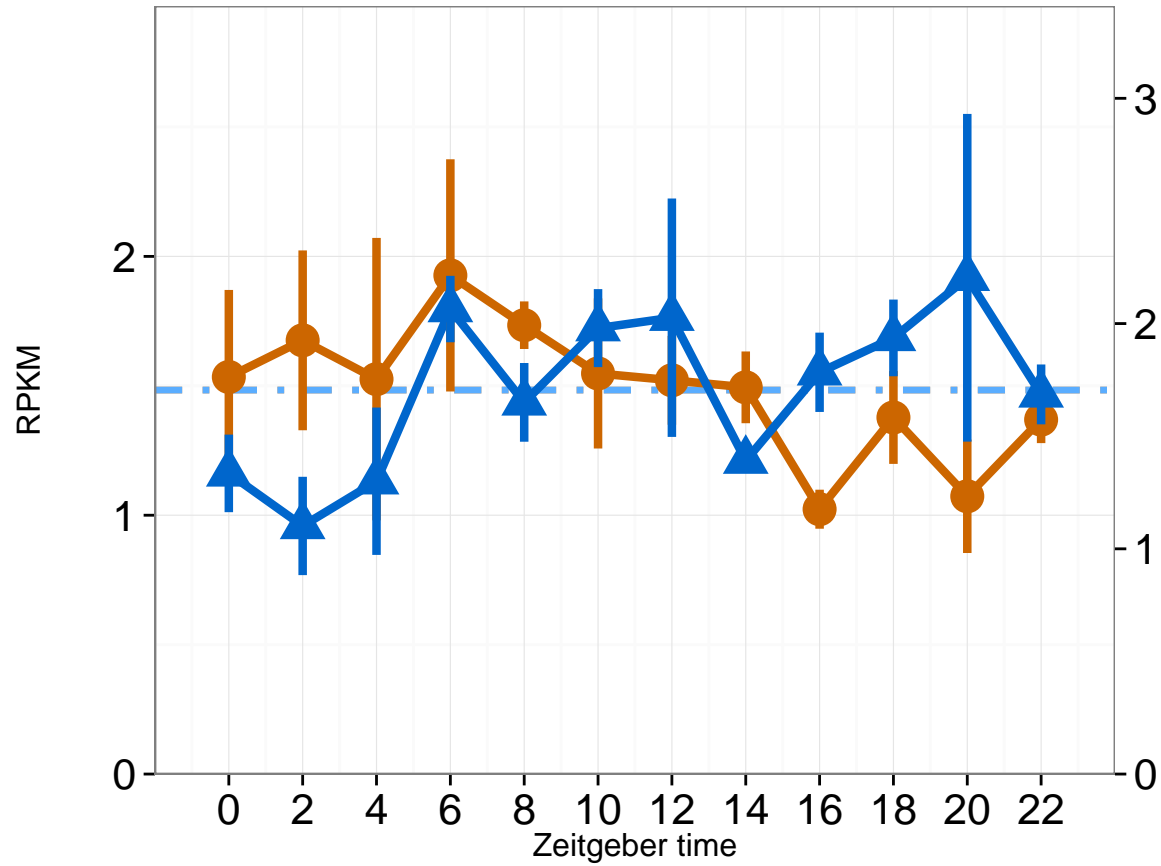

# Trim62

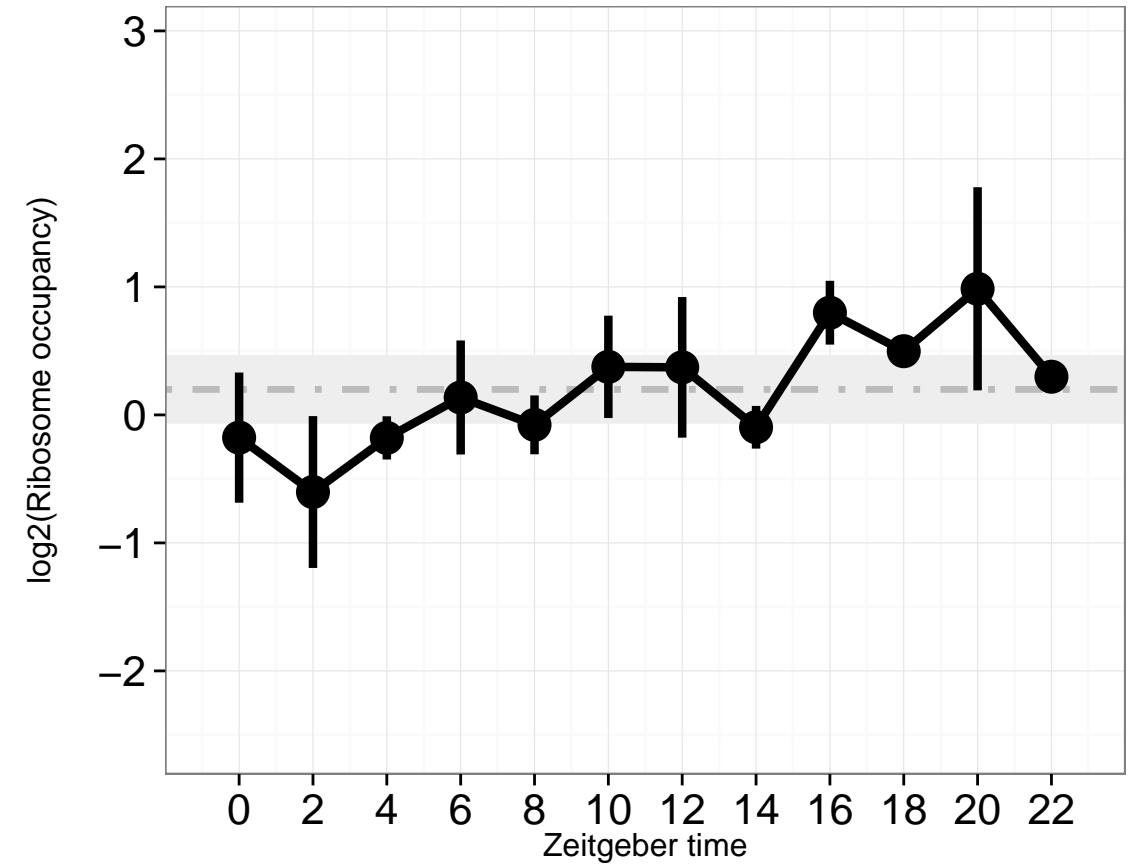

Supplement: Supplementary file 2134 [file 1]

# Il2rg

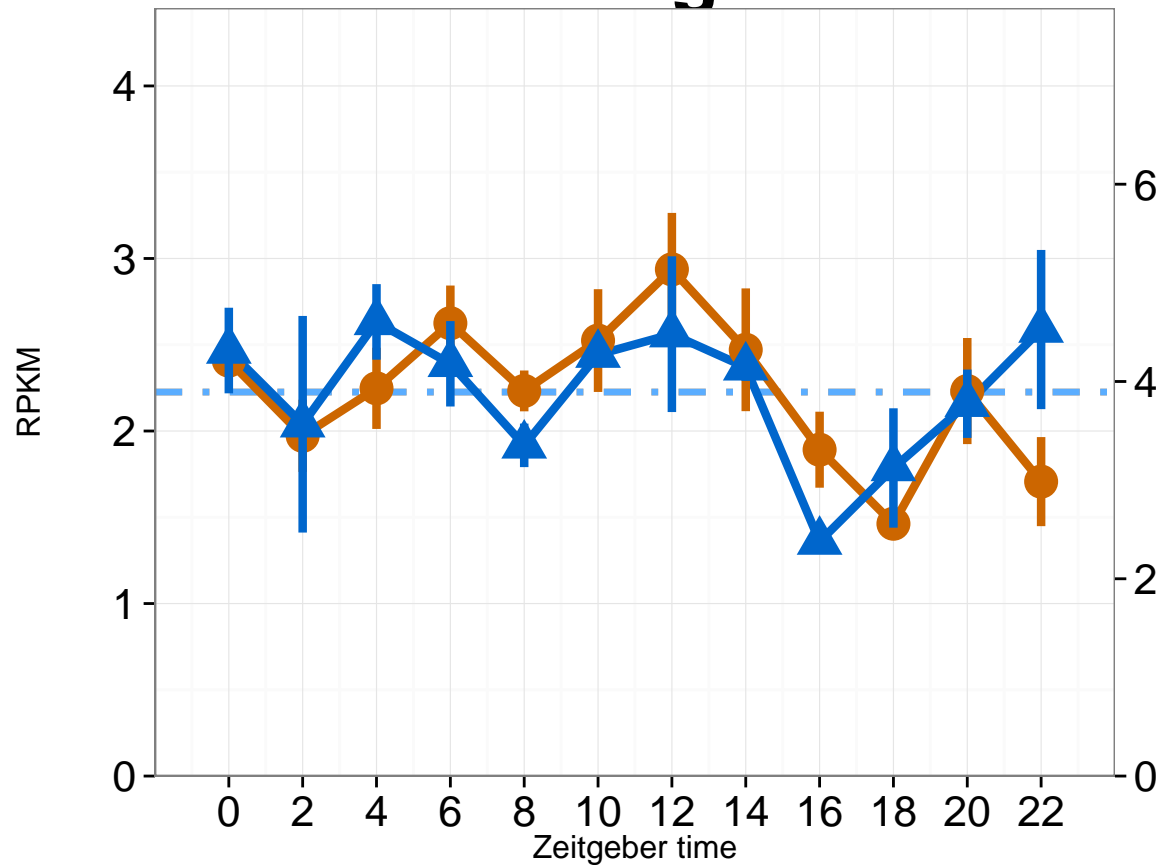

# Il2rg

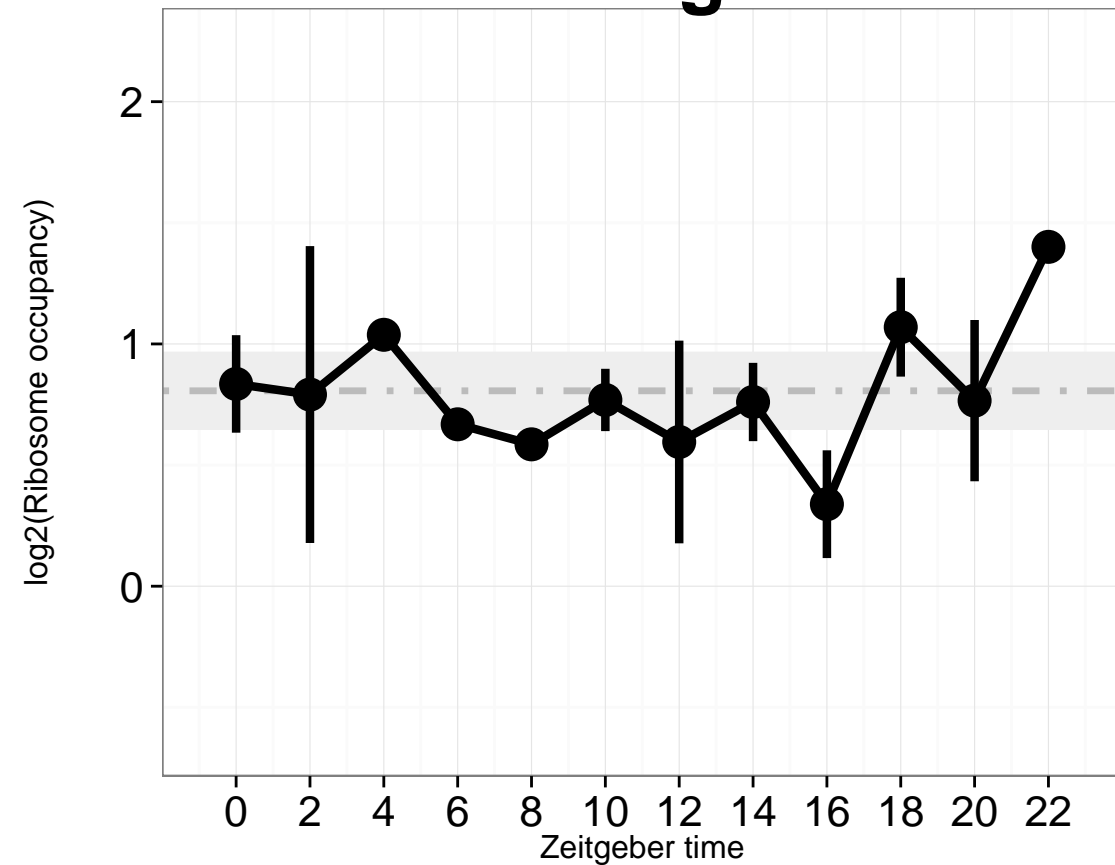

Supplement: Supplementary file 2135 [file 1]

# Thap11

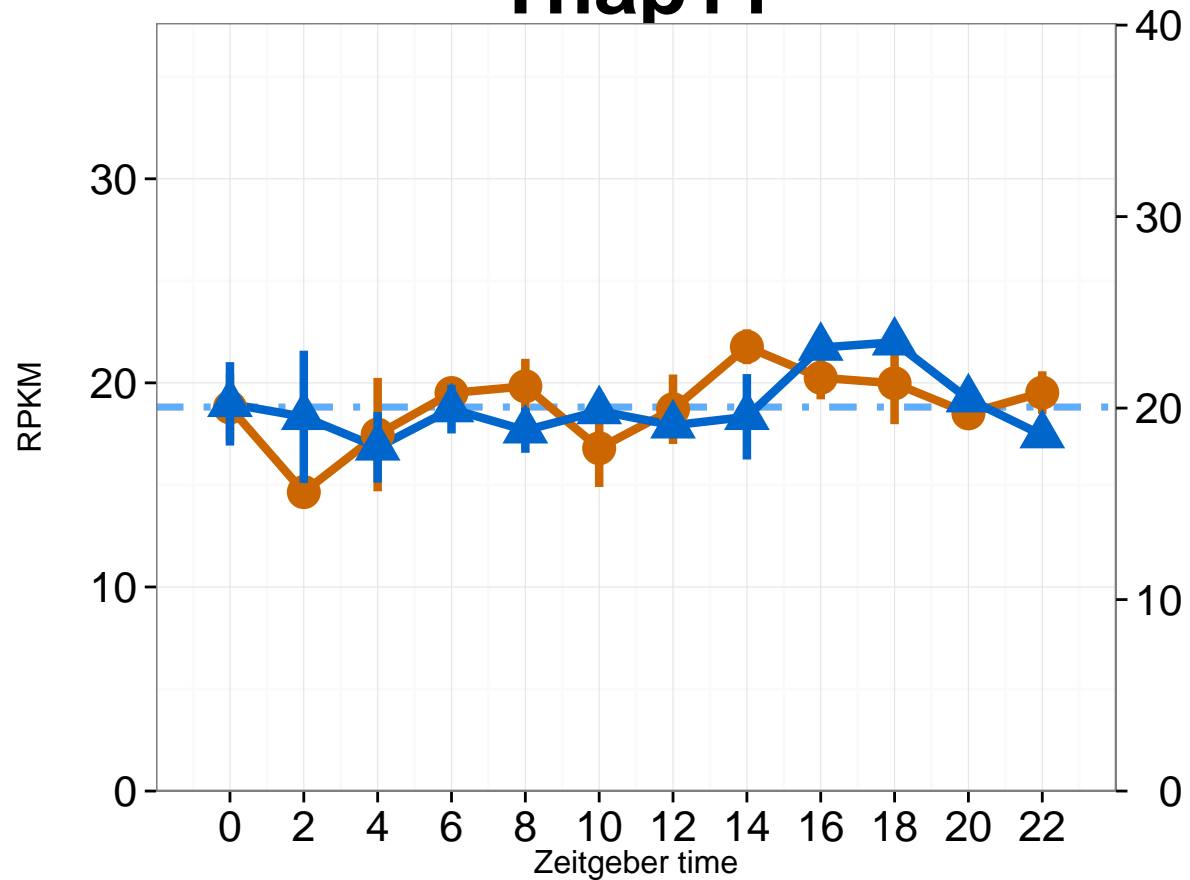

# Thap11

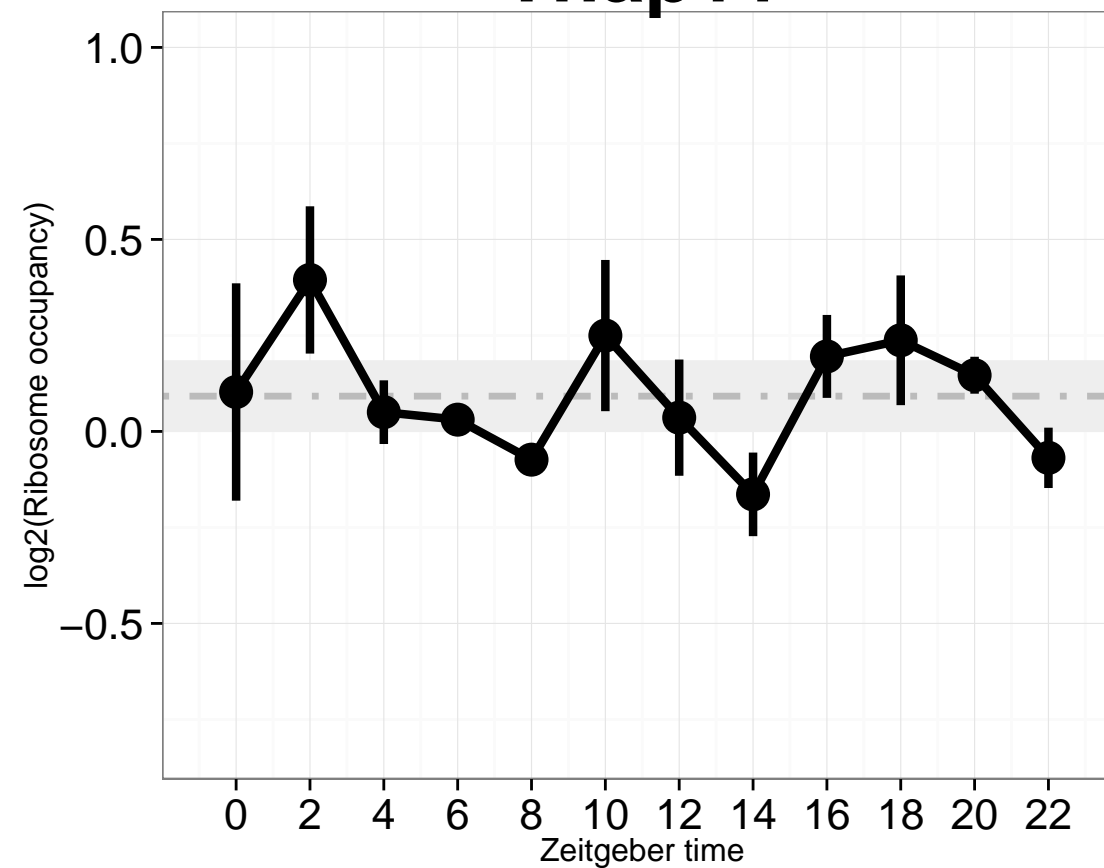

Supplement: Supplementary file 2136 [file 1]

## Als2cl

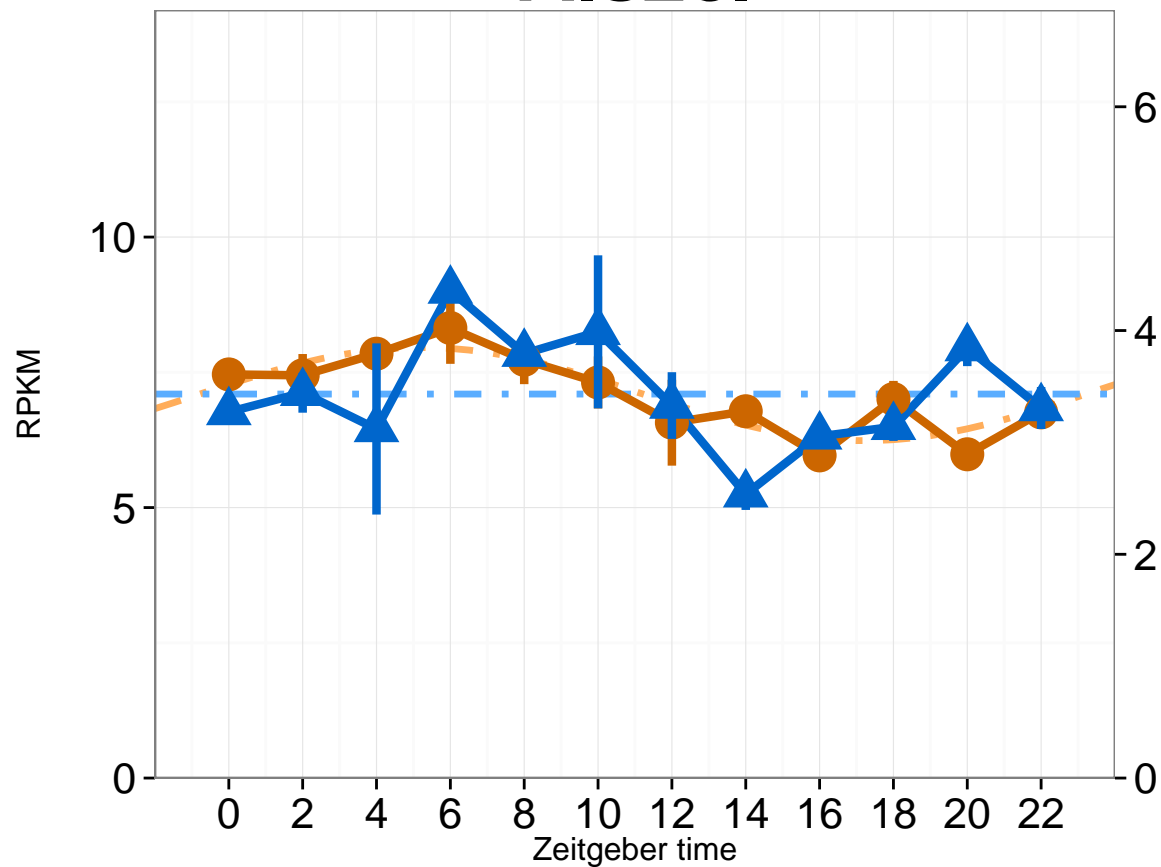

## Als2cl

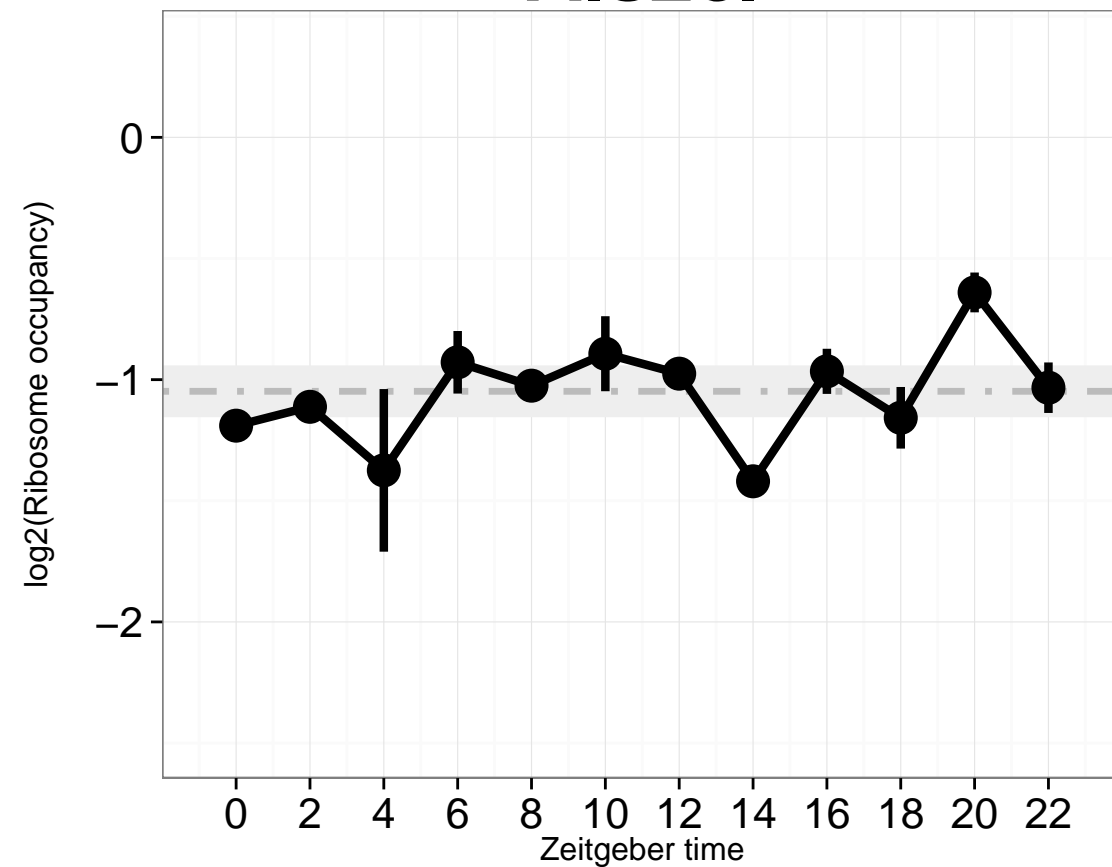

Supplement: Supplementary file 2137 [file 1]

# Helb

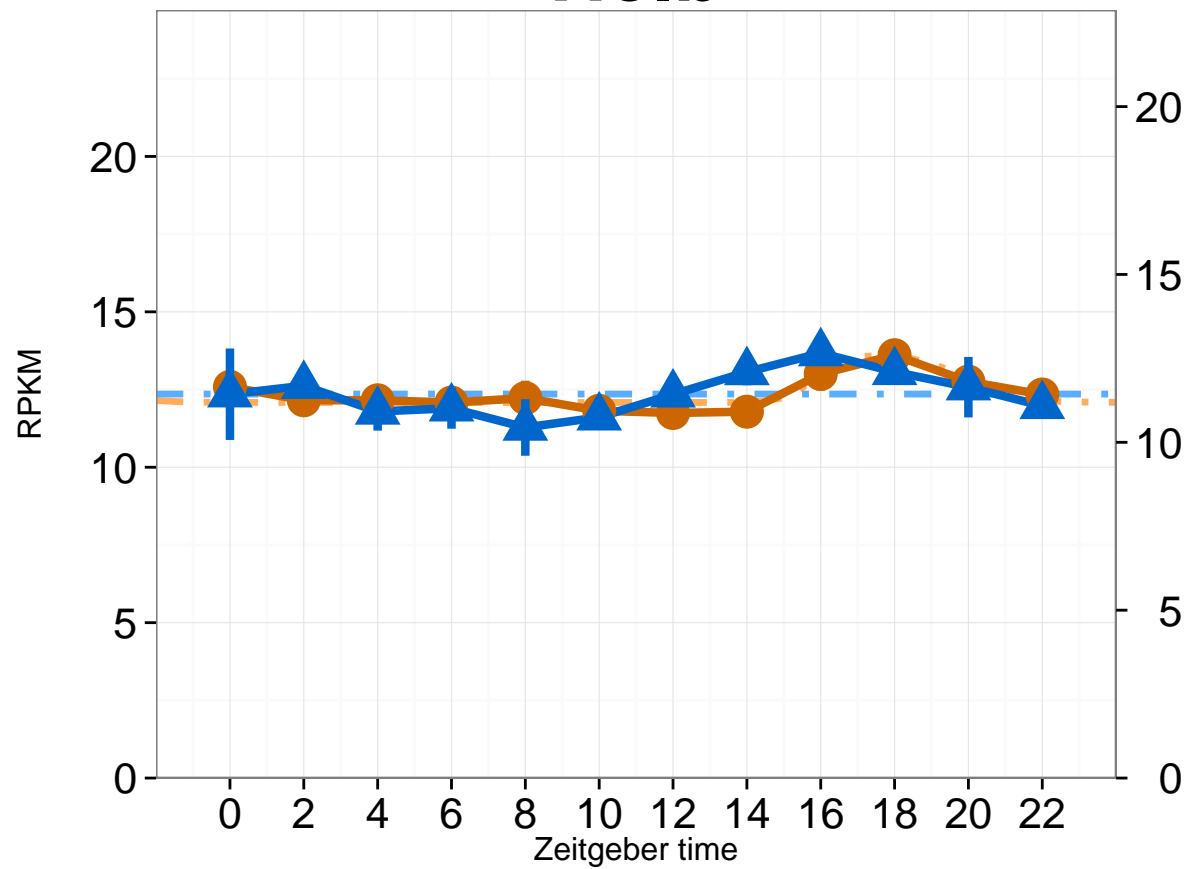

# Helb

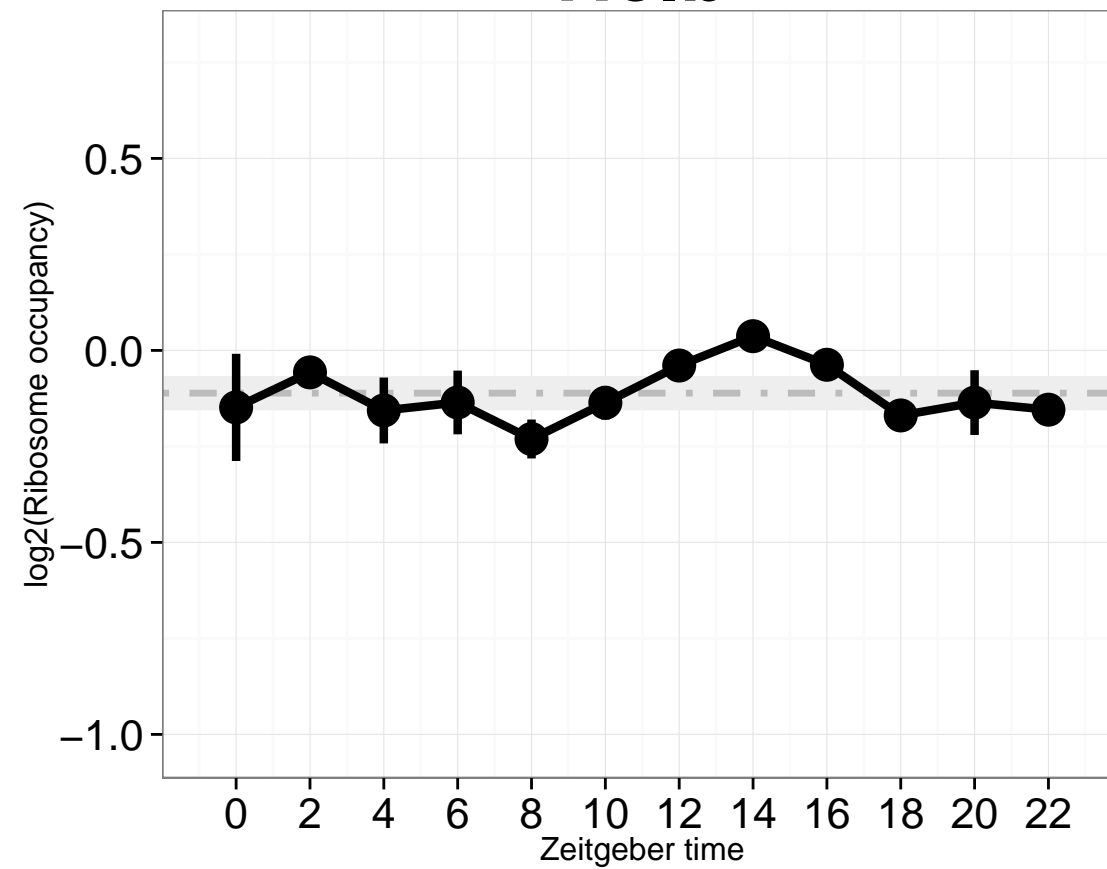

Supplement: Supplementary file 2138 [file 1]

## Snrnp200

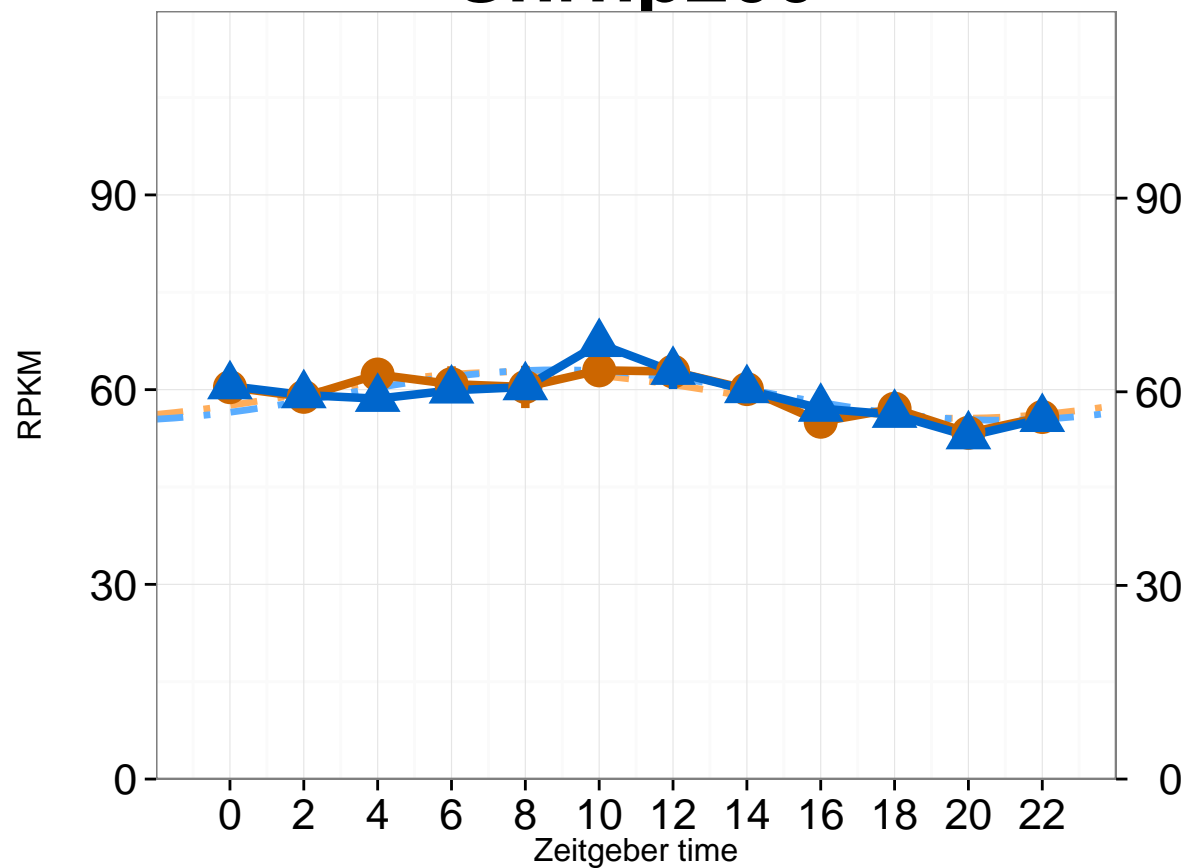

## Snrnp200

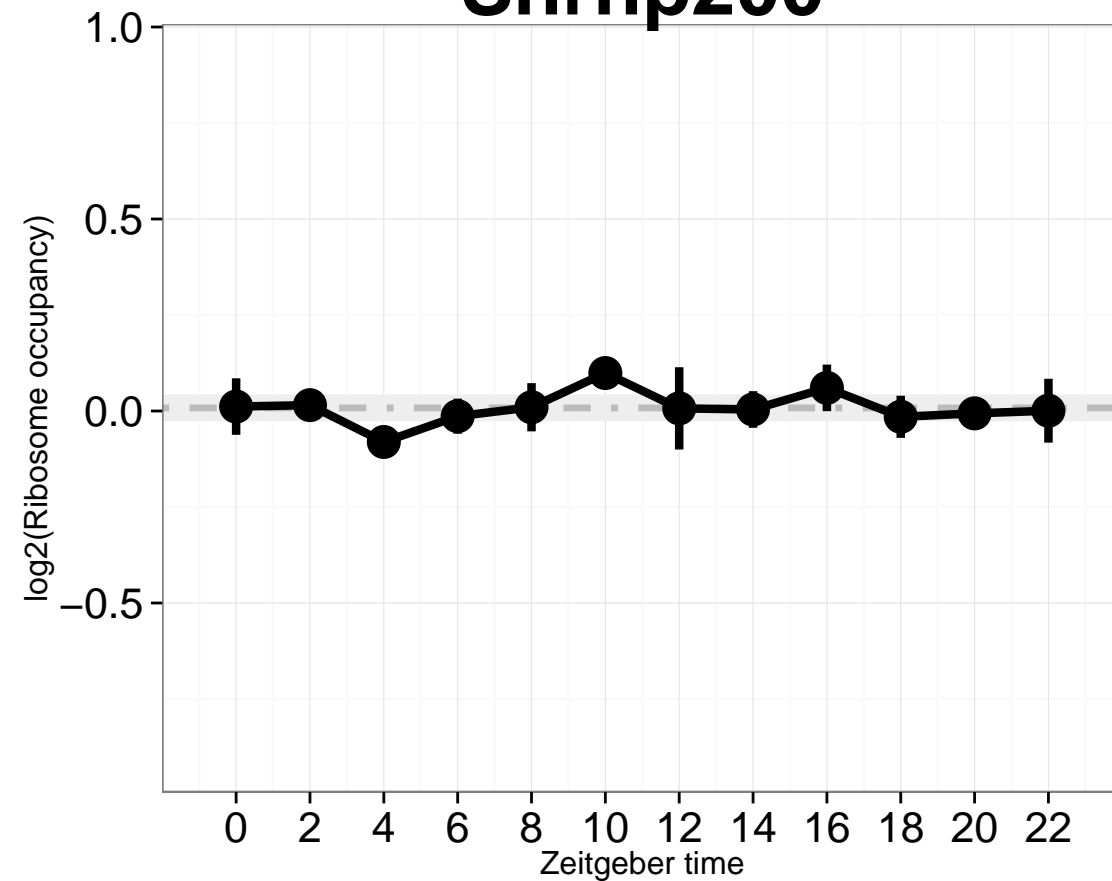

Supplement: Supplementary file 2139 [file 1]

# Sal1

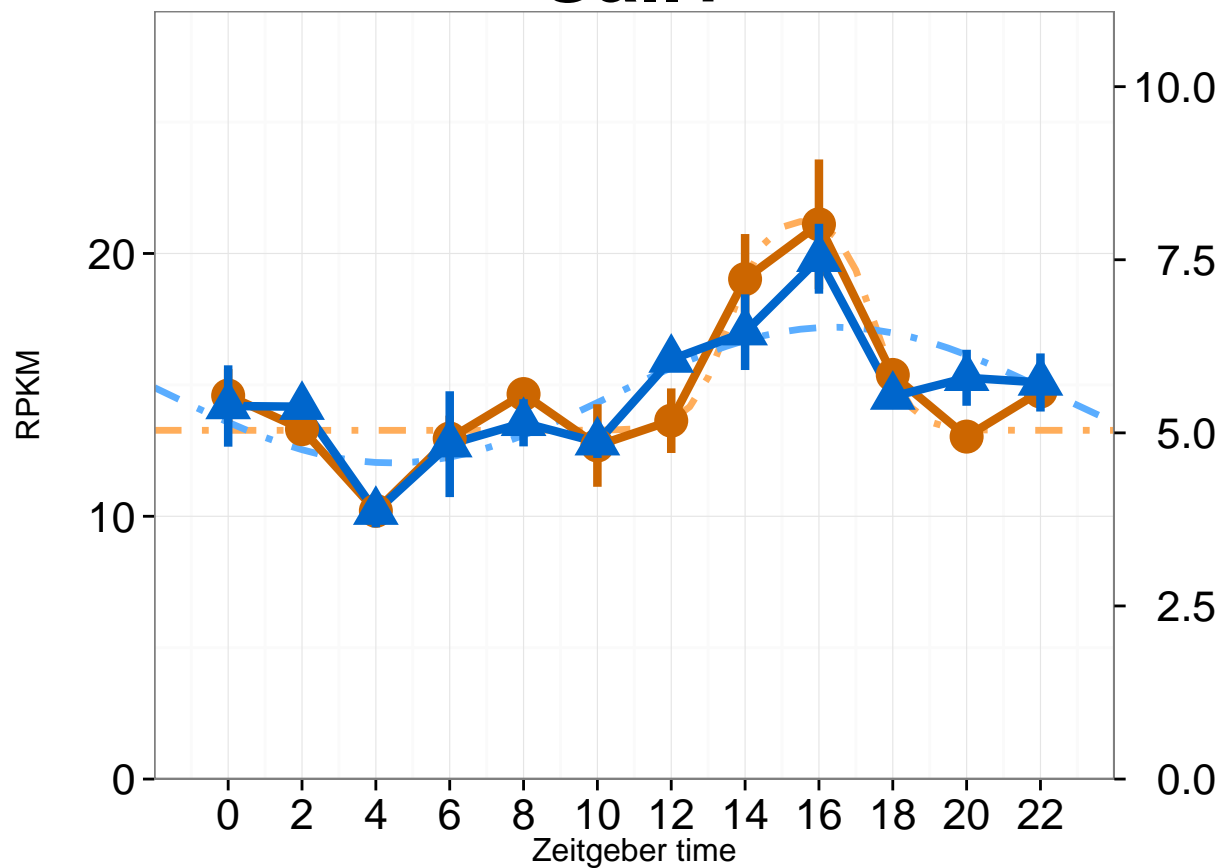

# Sal1

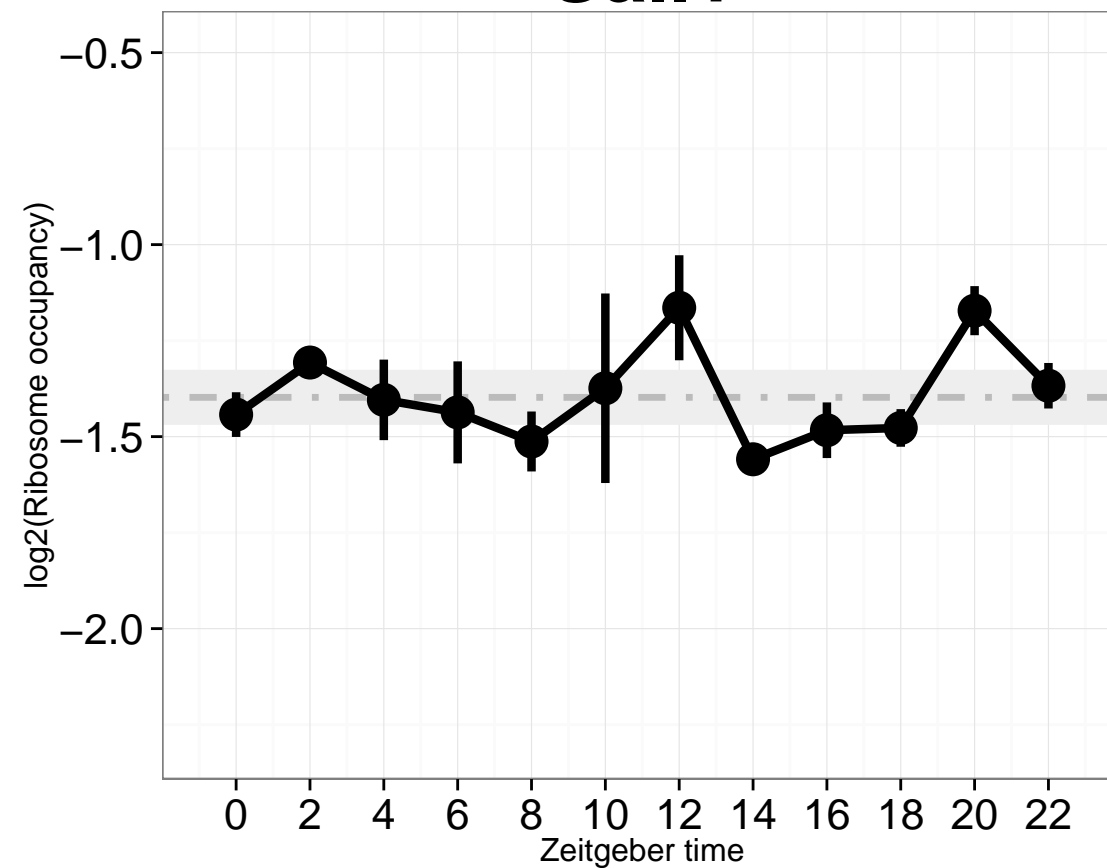

Supplement: Supplementary file 2140 [file 1]

## Zkscan3

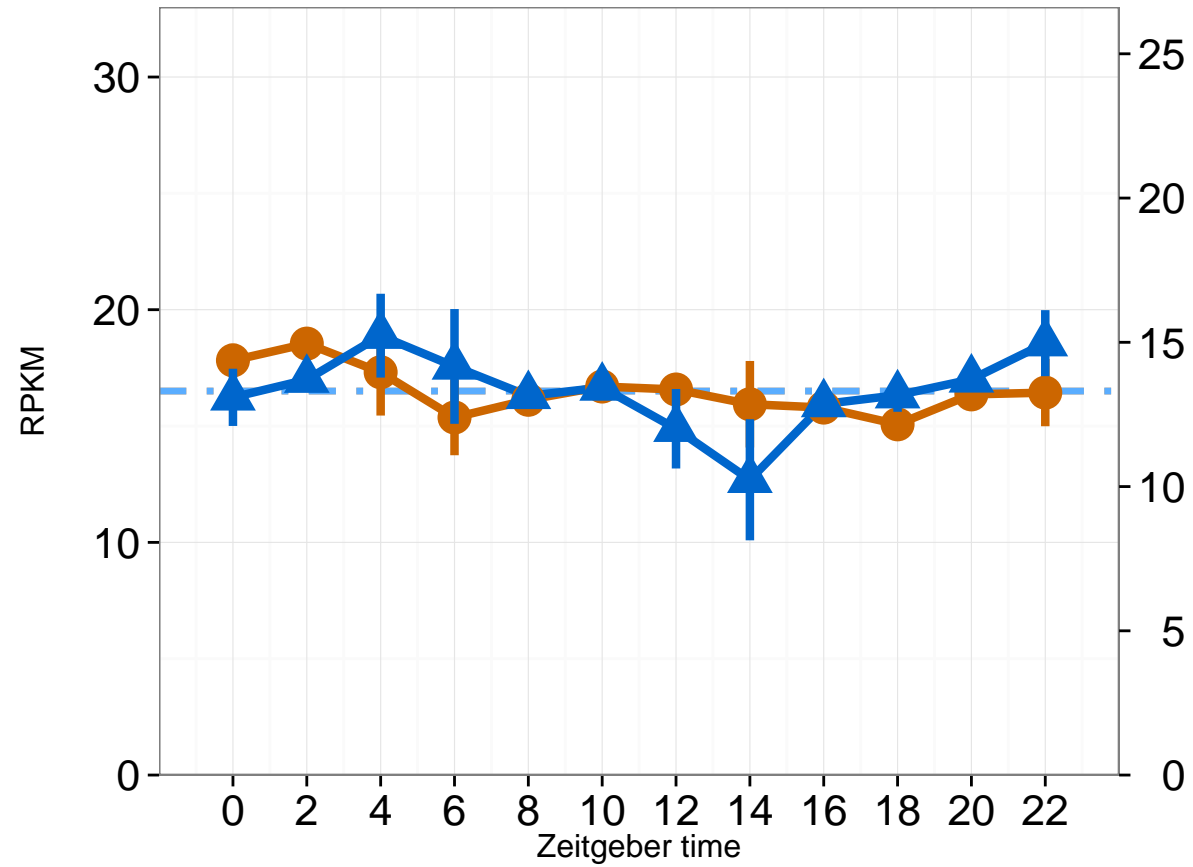

## Zkscan3

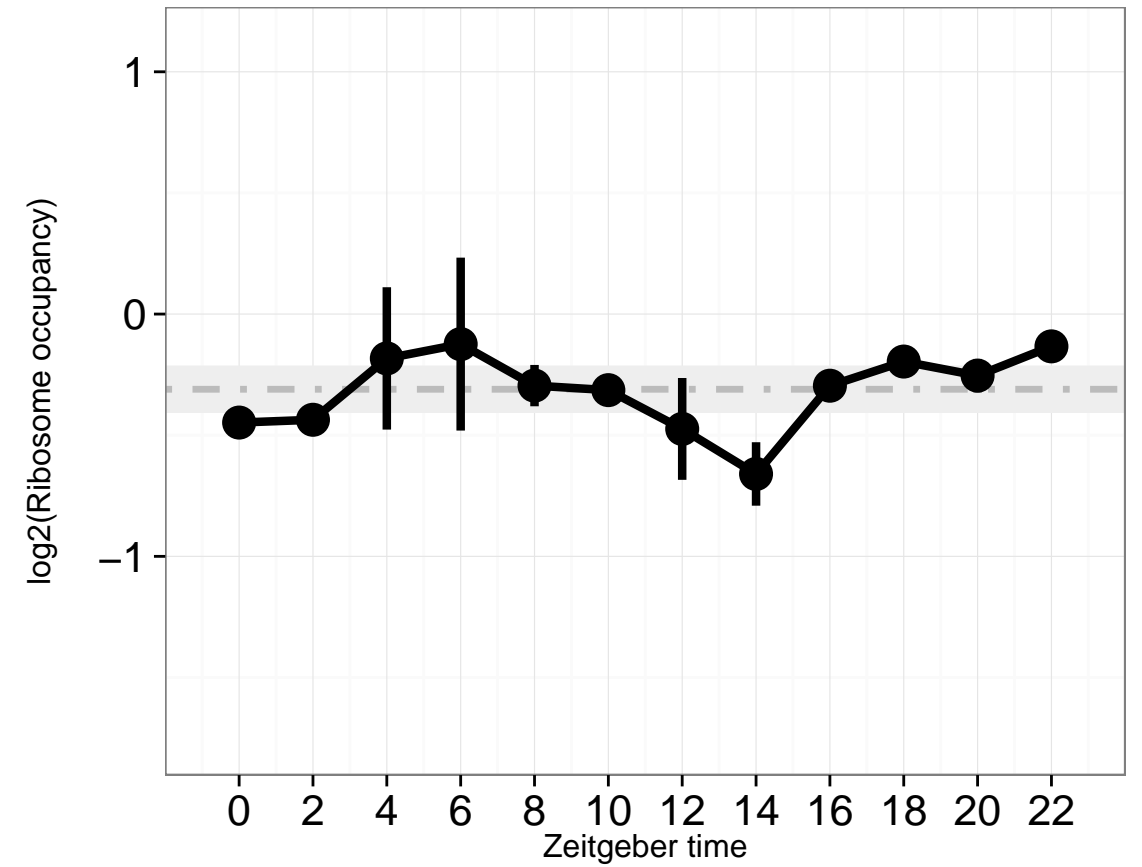

Supplement: Supplementary file 2141 [file 1]

## Dpy19l4

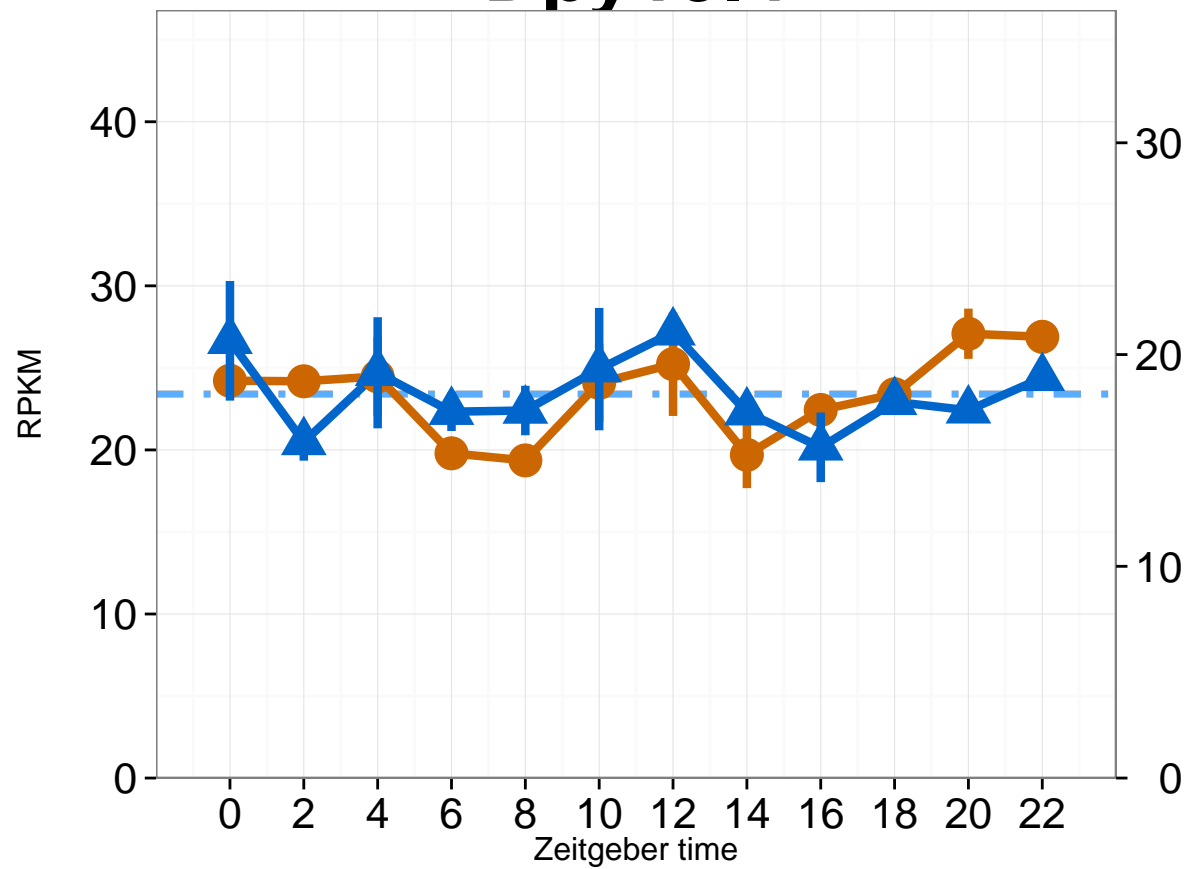

## Dpy19l4

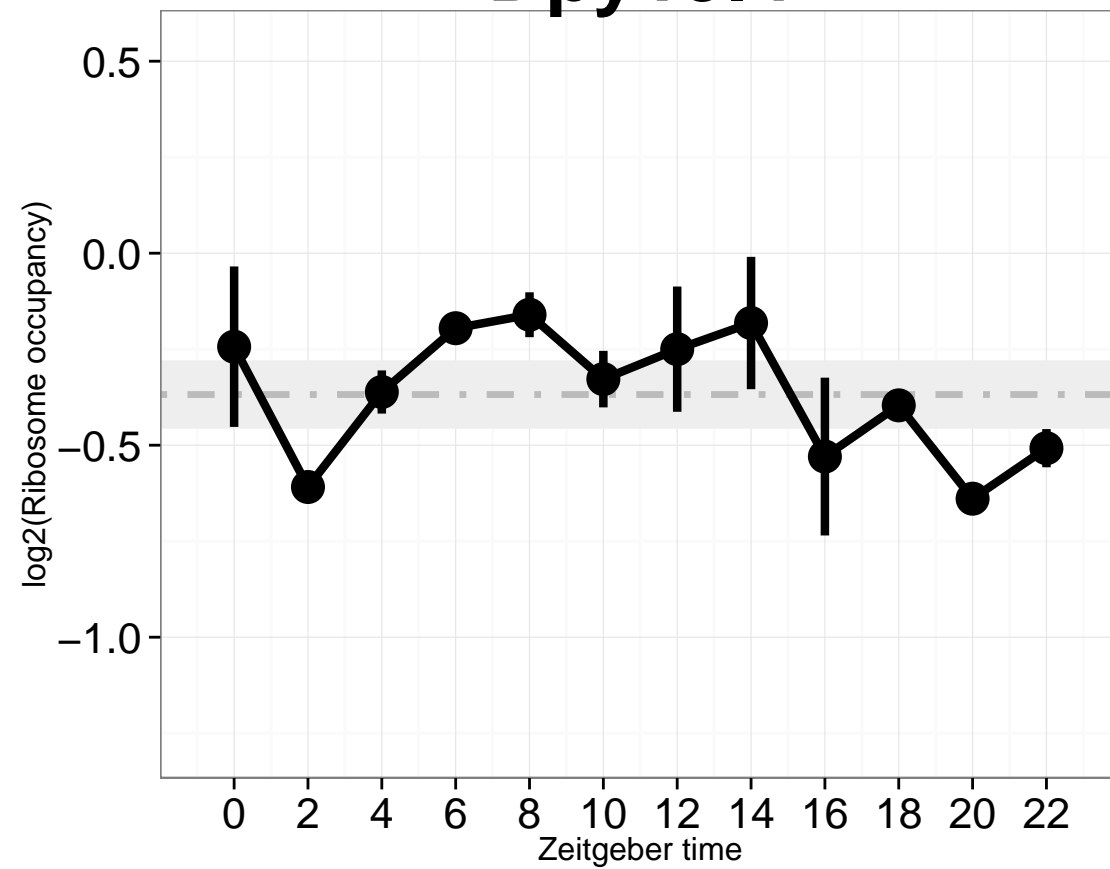

Supplement: Supplementary file 2142 [file 1]

## Plekhf2

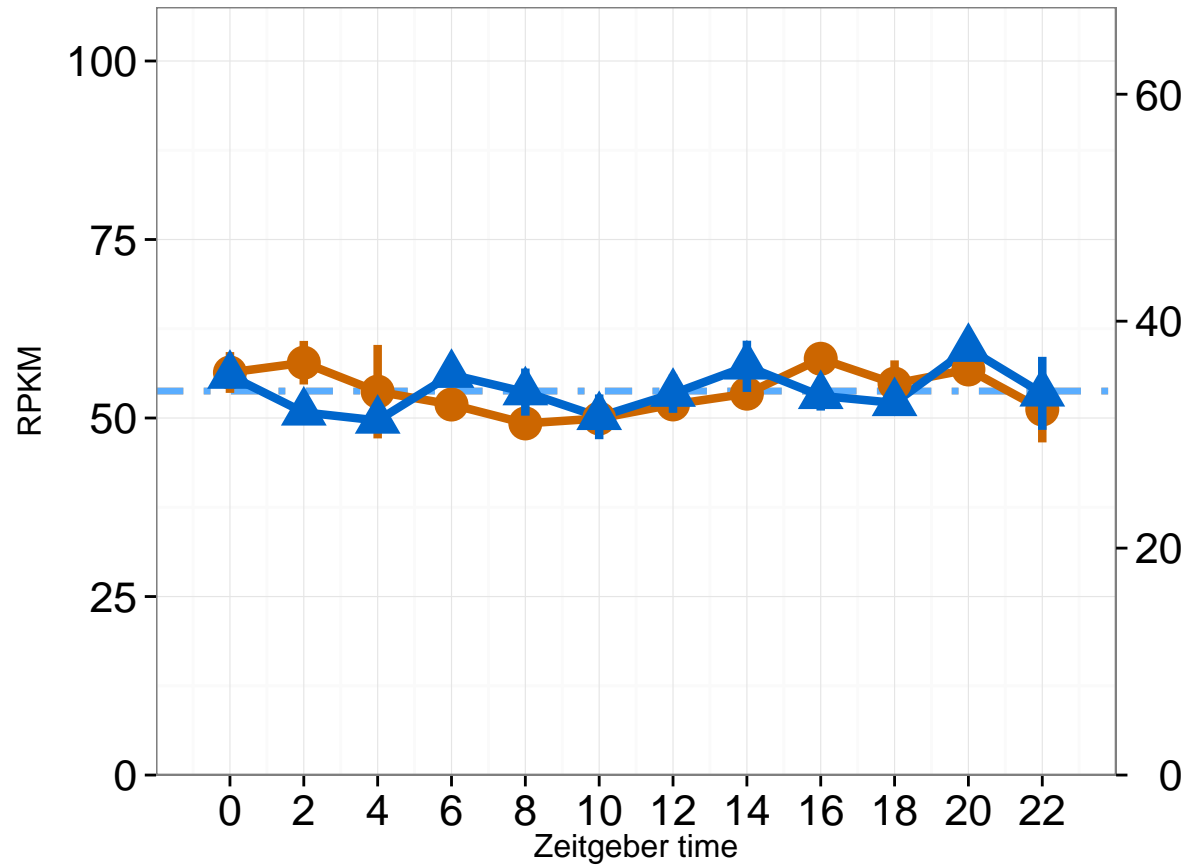

## Plekhf2

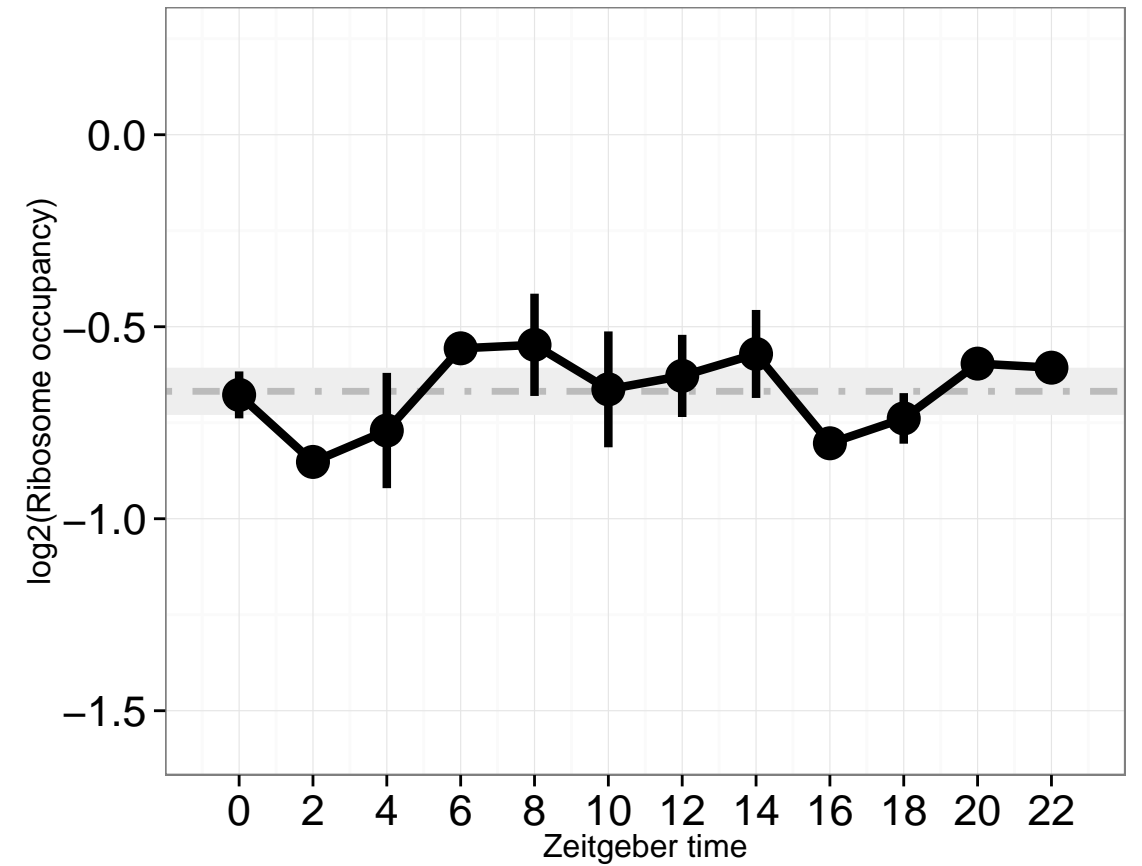

Supplement: Supplementary file 2143 [file 1]

## Atp2b4

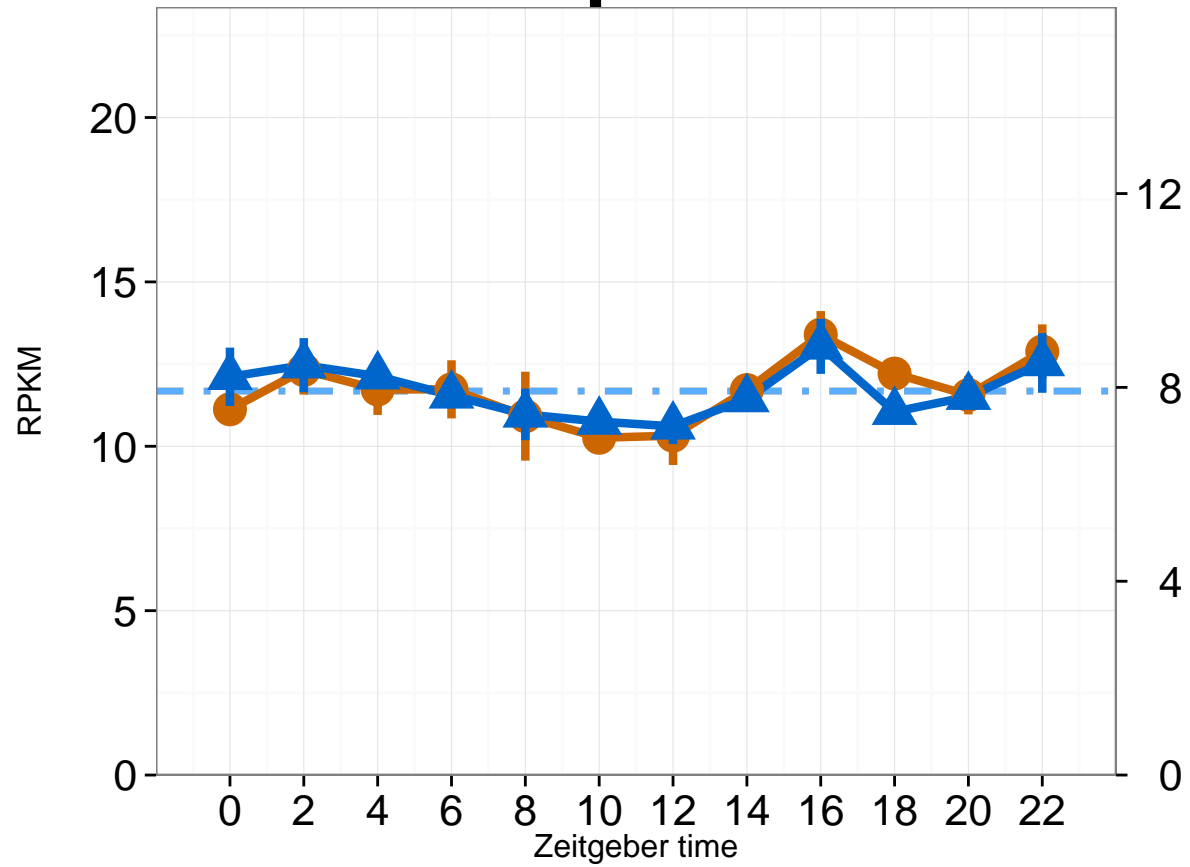

## Atp2b4

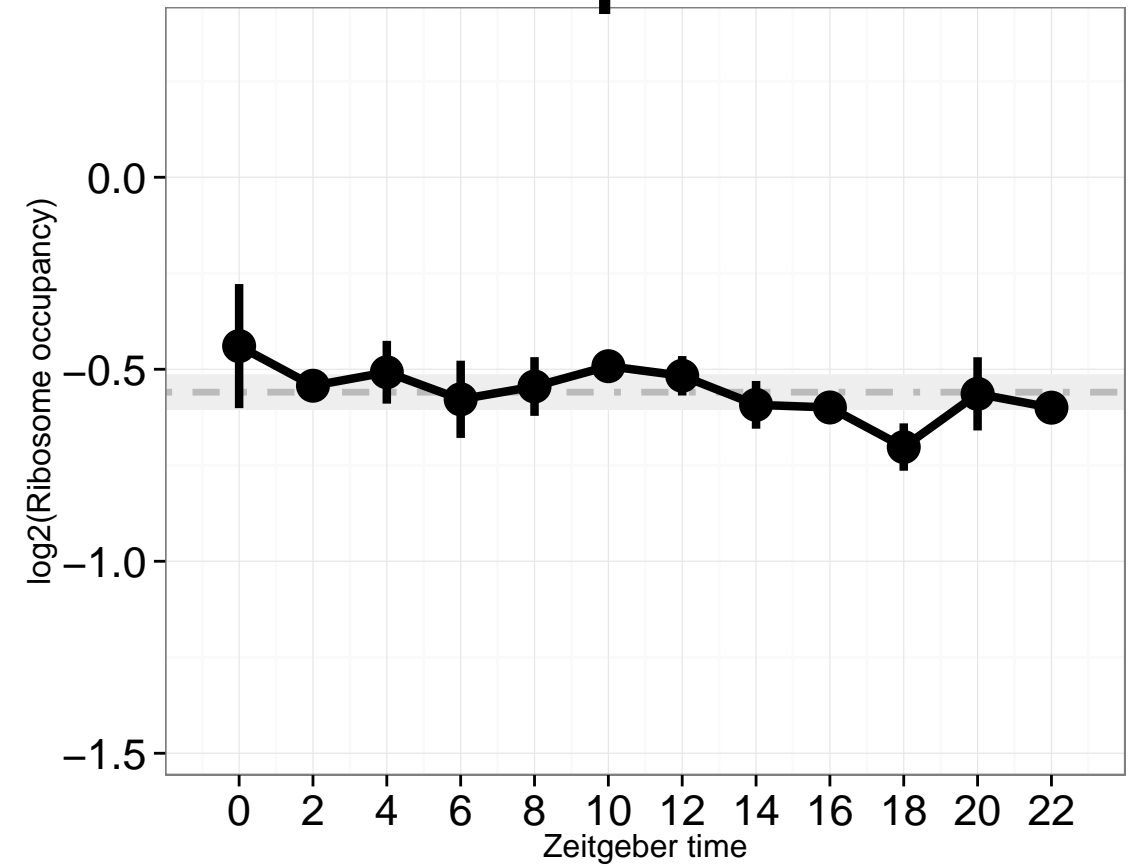

Supplement: Supplementary file 2144 [file 1]

# B4galnt4

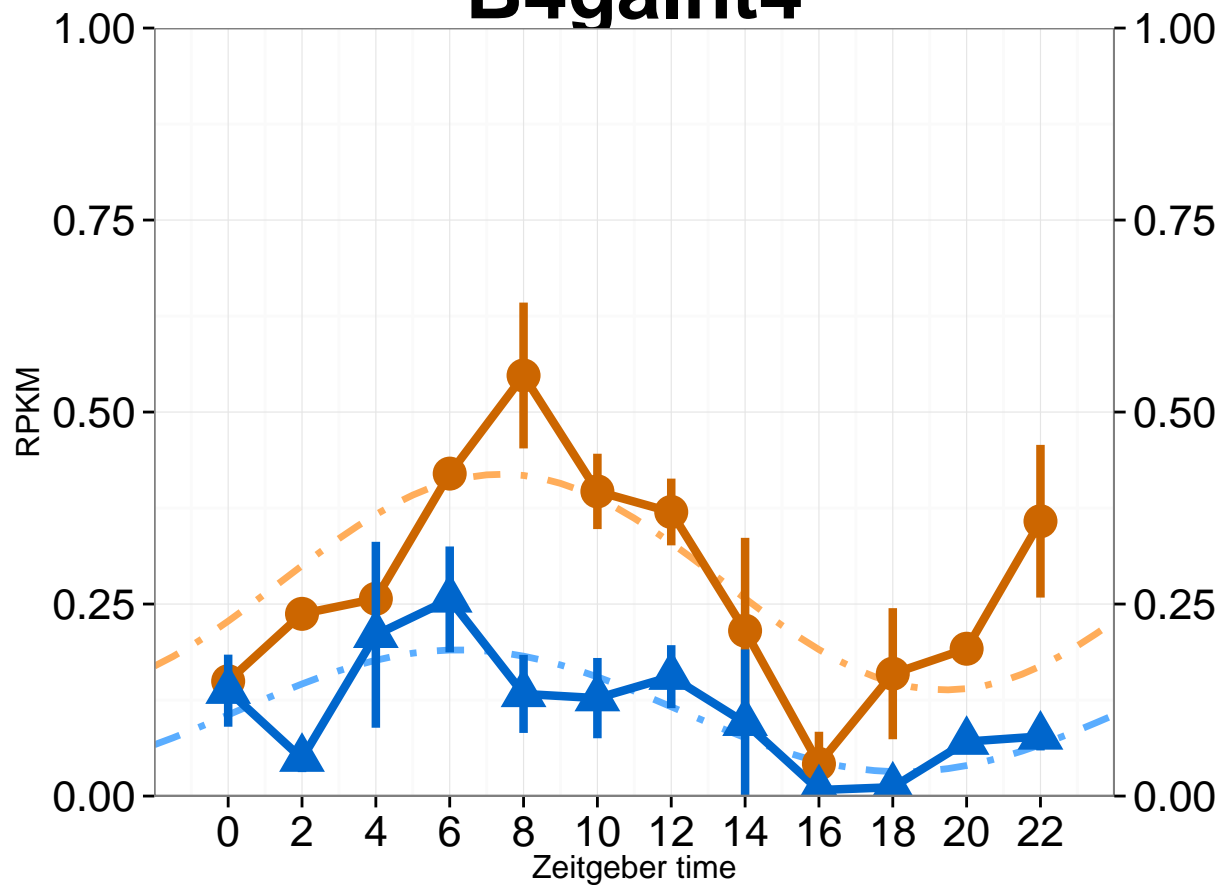

# B4galnt4

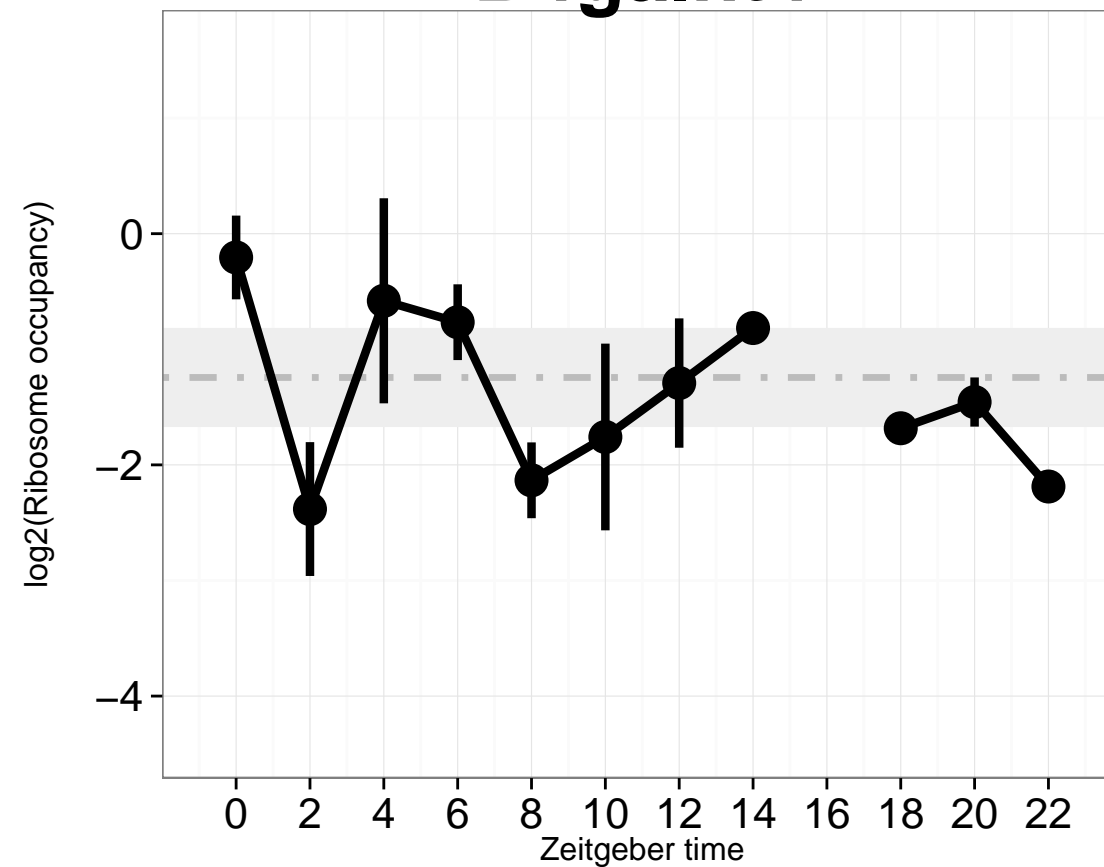

Supplement: Supplementary file 2145 [file 1]

# Stard3nl

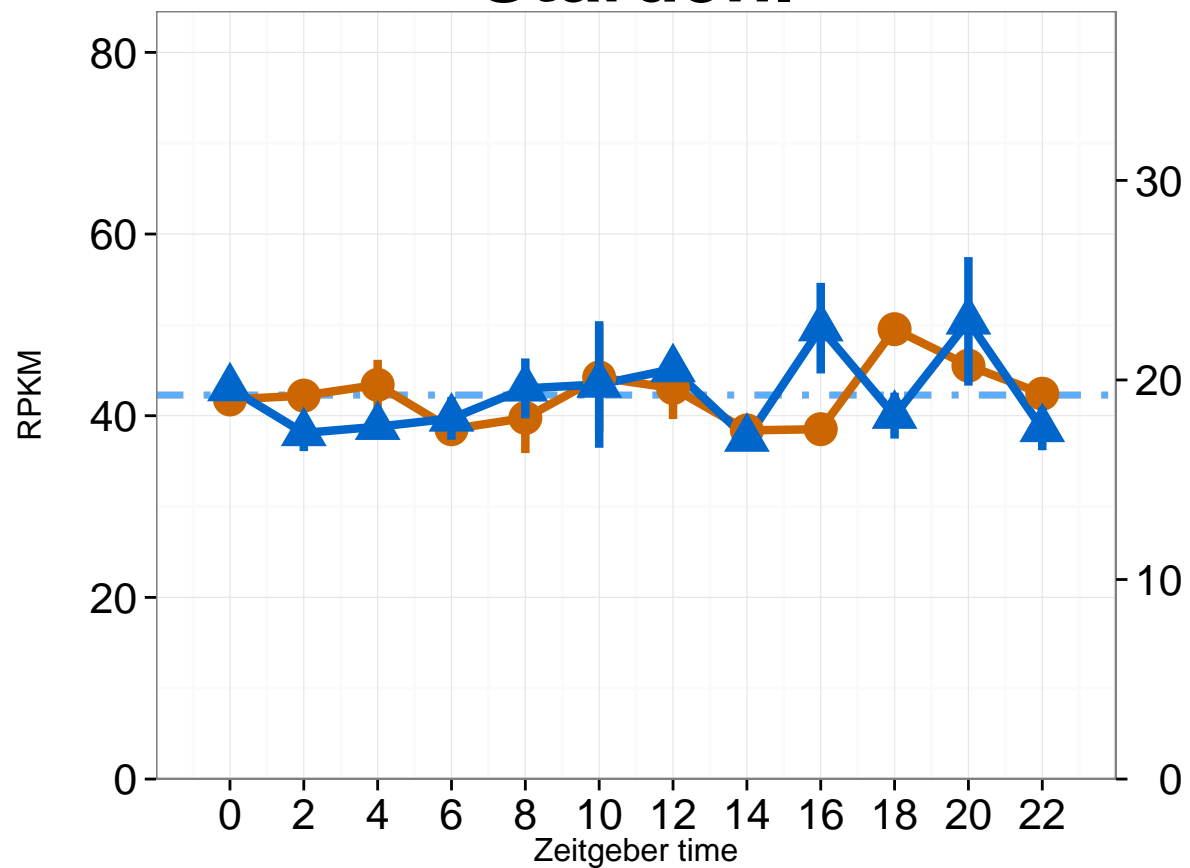

# Stard3nl

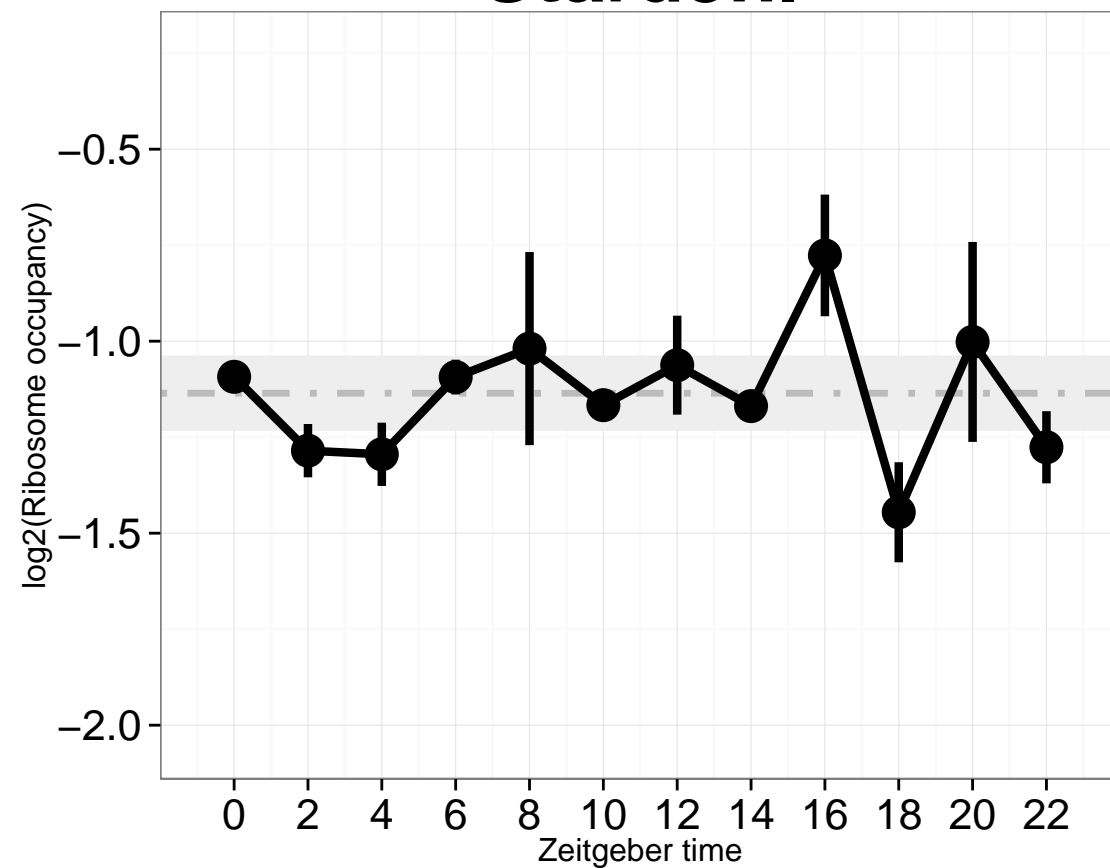

Supplement: Supplementary file 2146 [file 1]

# KIhl23

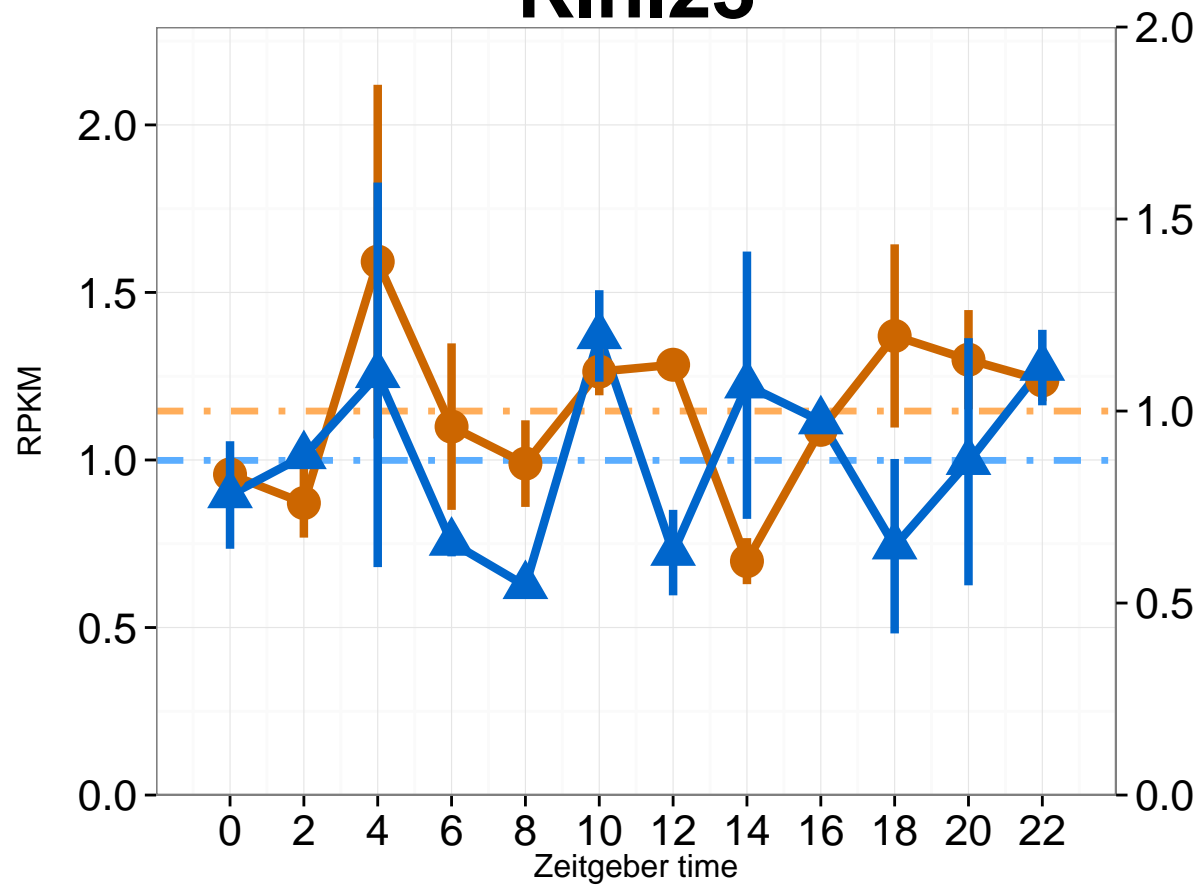

# KIhl23

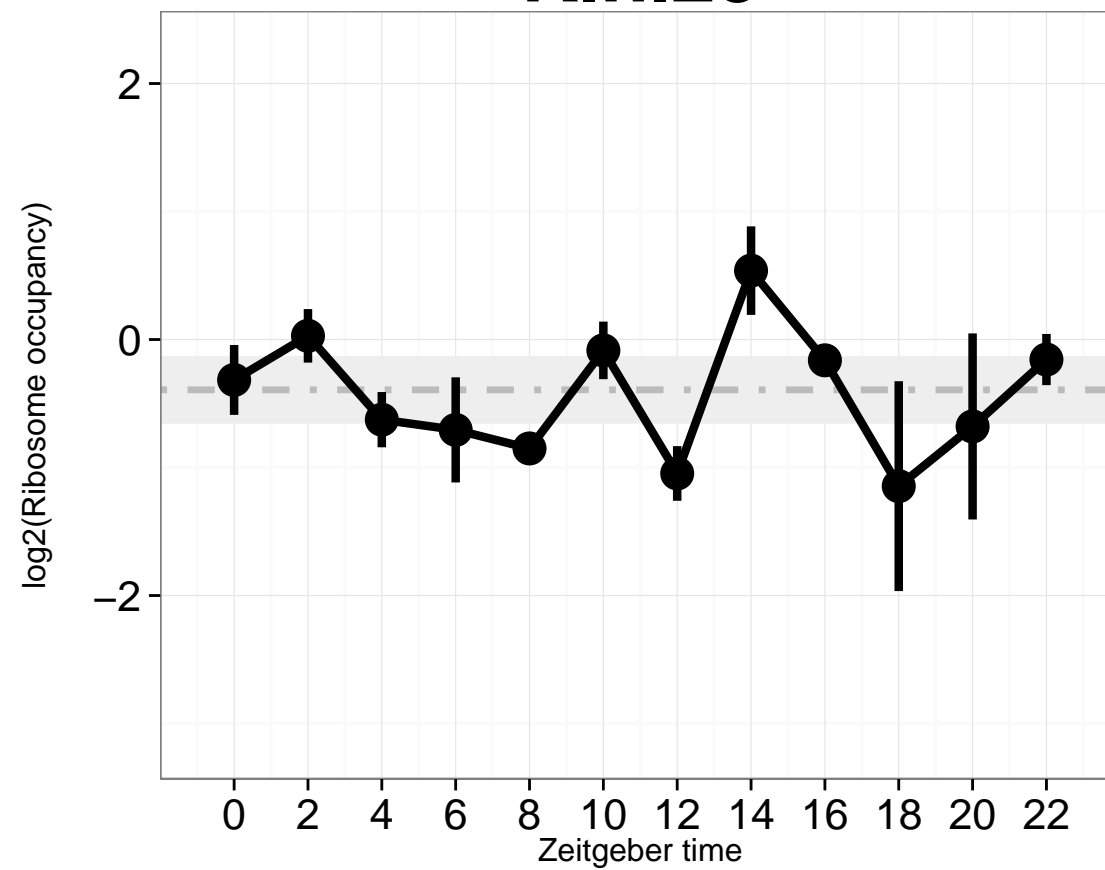

Supplement: Supplementary file 2147 [file 1]

## Sh2b1

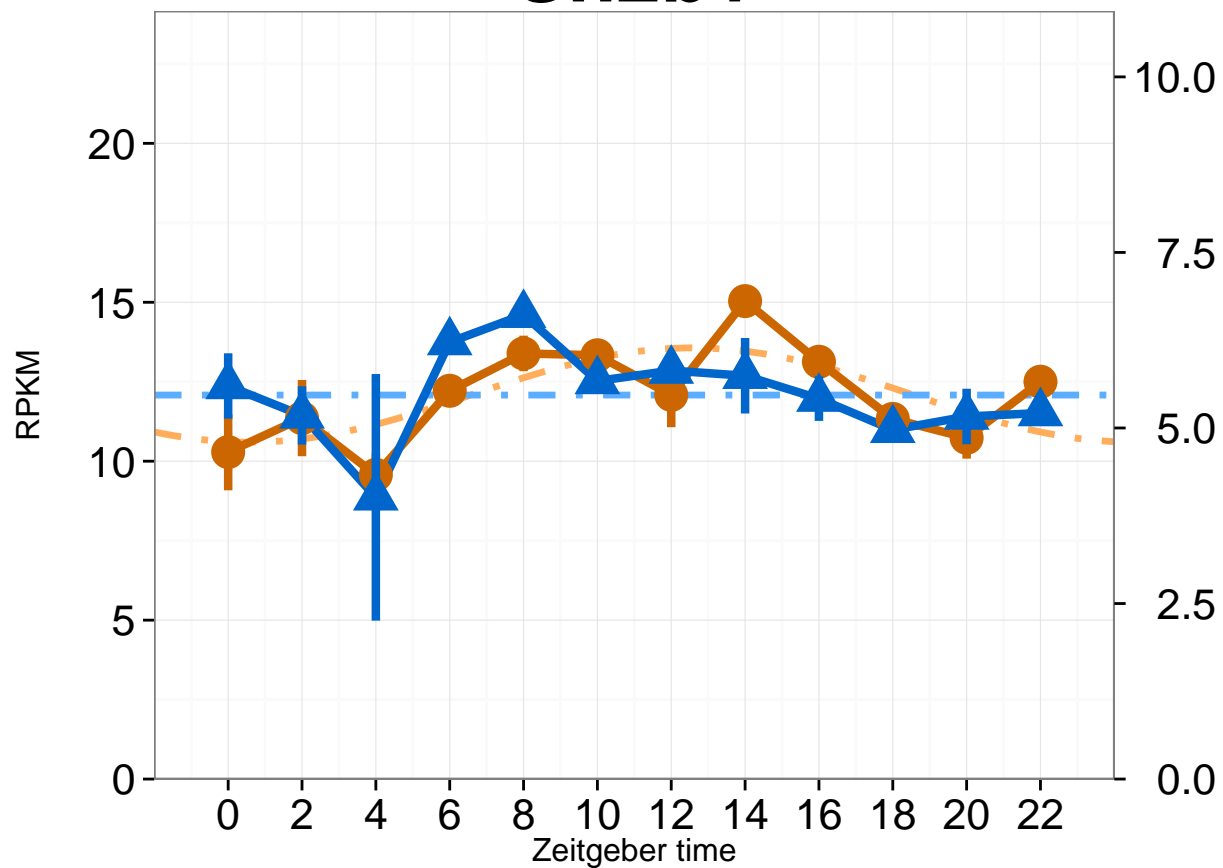

## Sh2b1

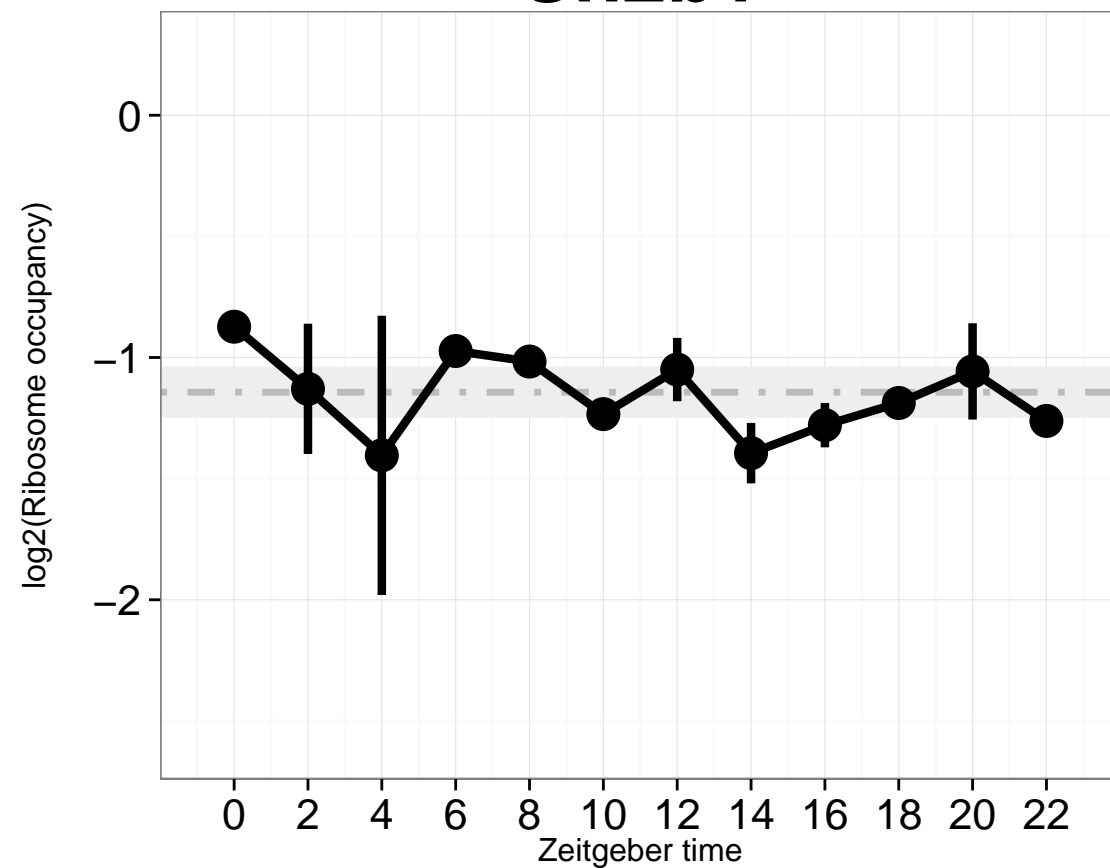

Supplement: Supplementary file 2148 [file 1]

# Copg1

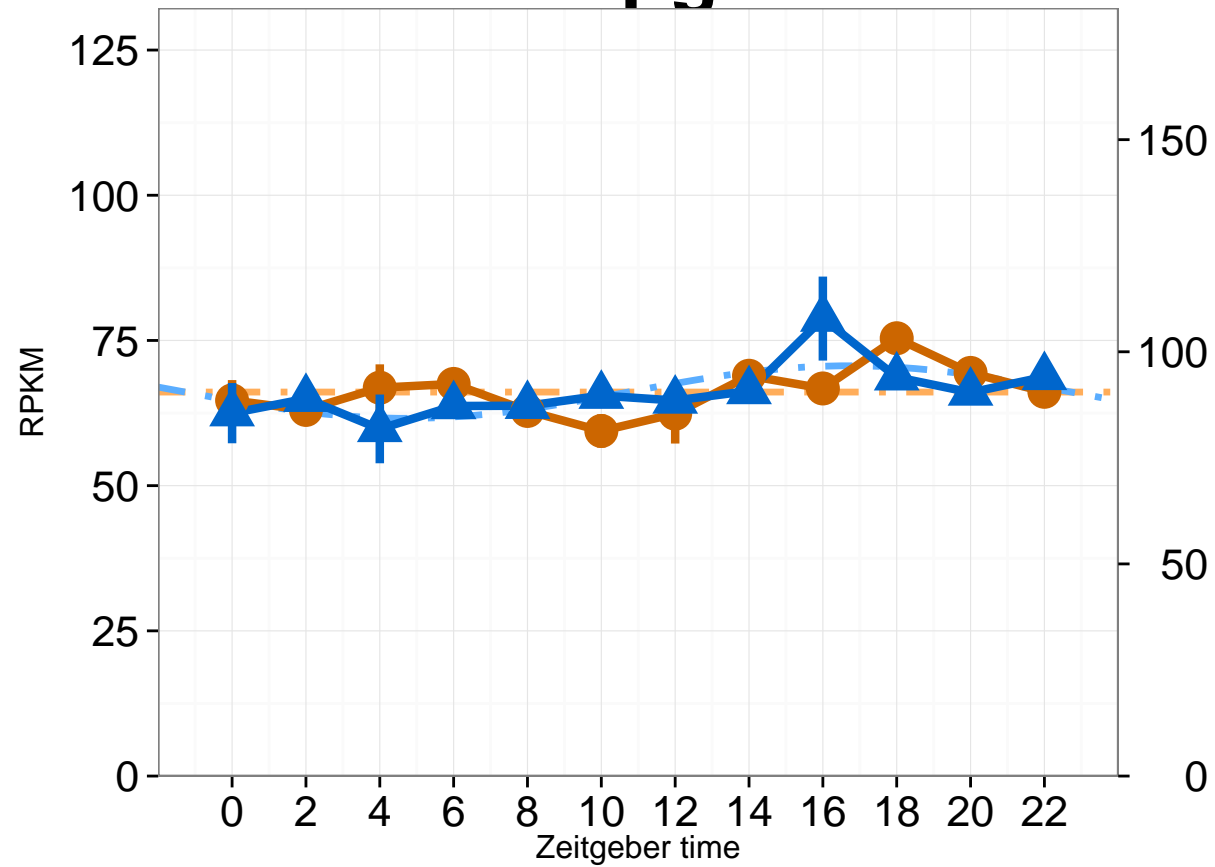

# Copg1

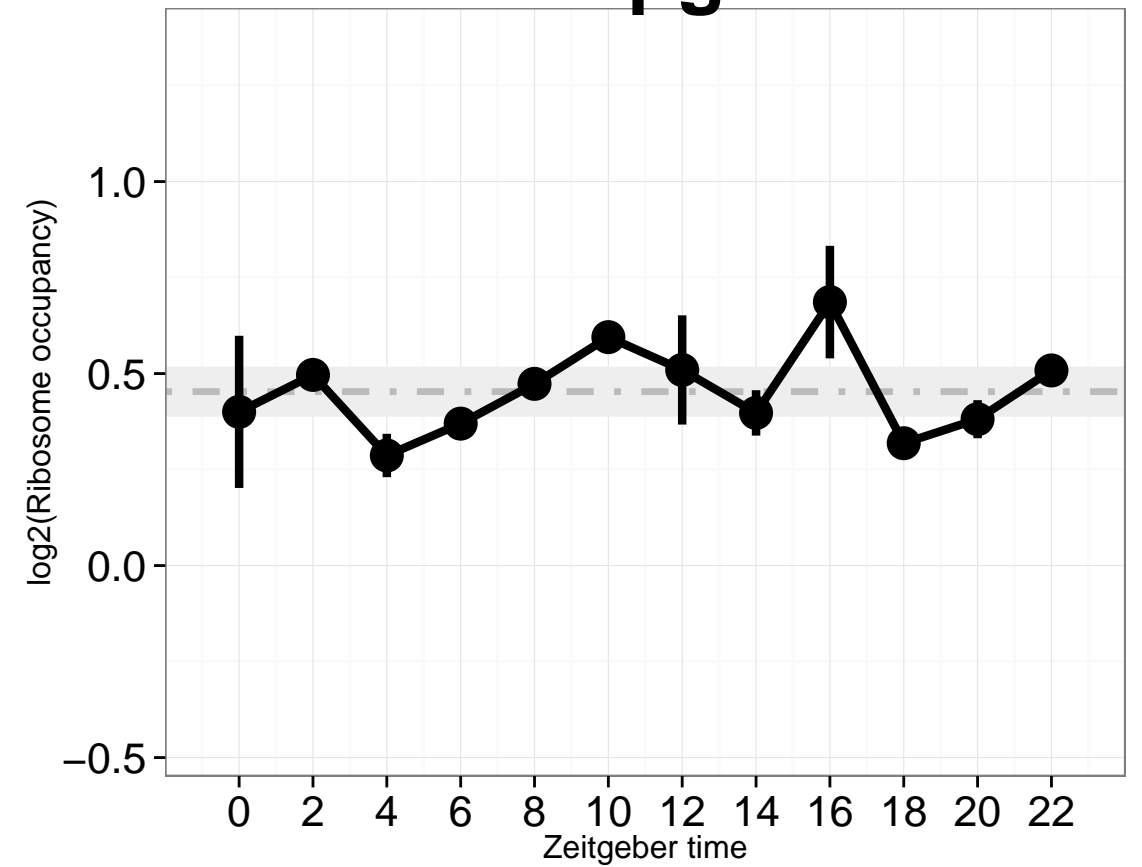

Supplement: Supplementary file 2149 [file 1]

## Elovl6

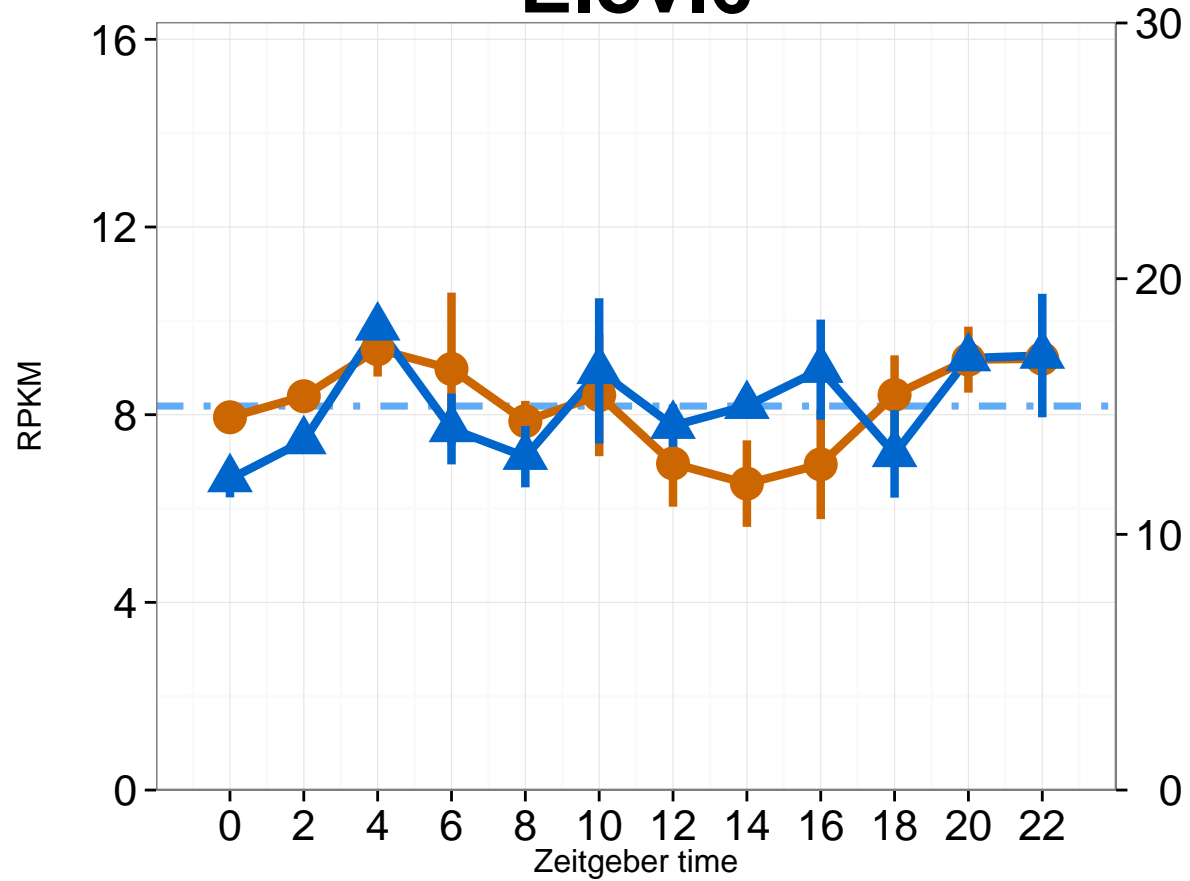

## Elovl6

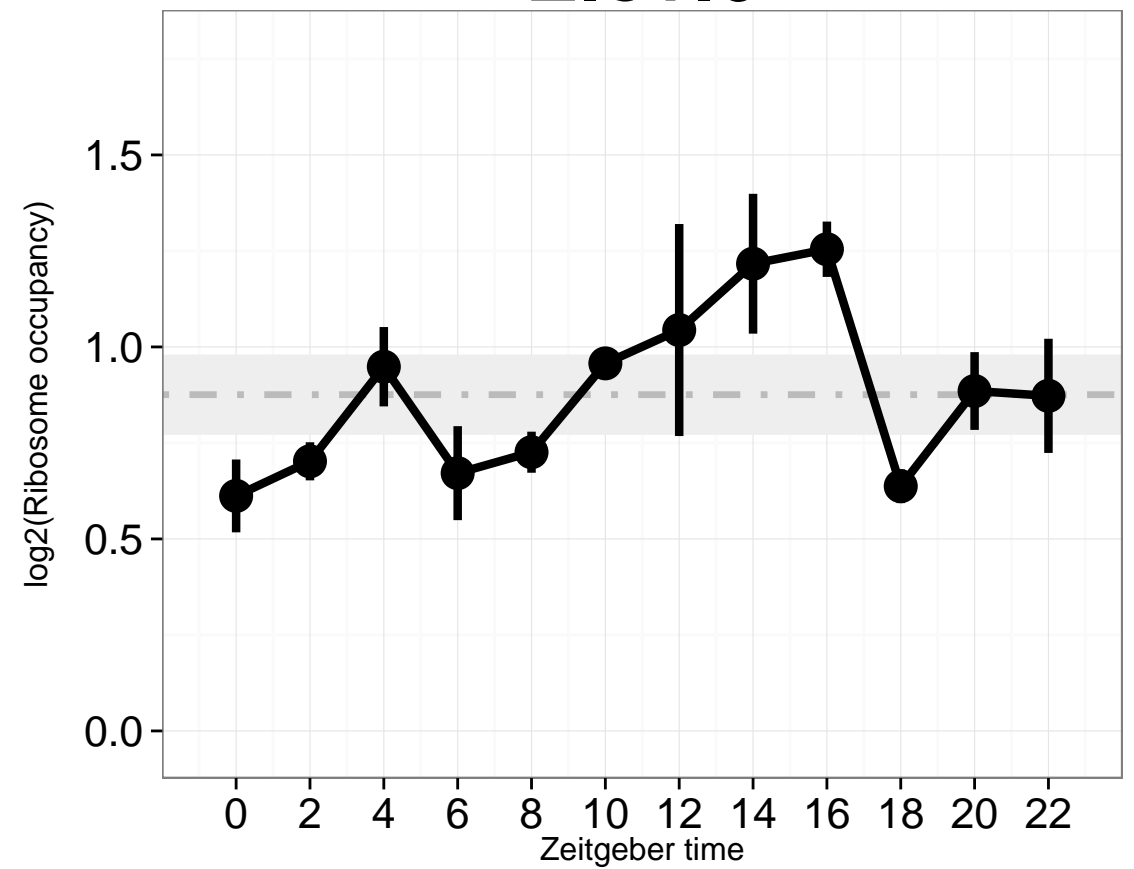

Supplement: Supplementary file 2150 [file 1]

# Mogat2

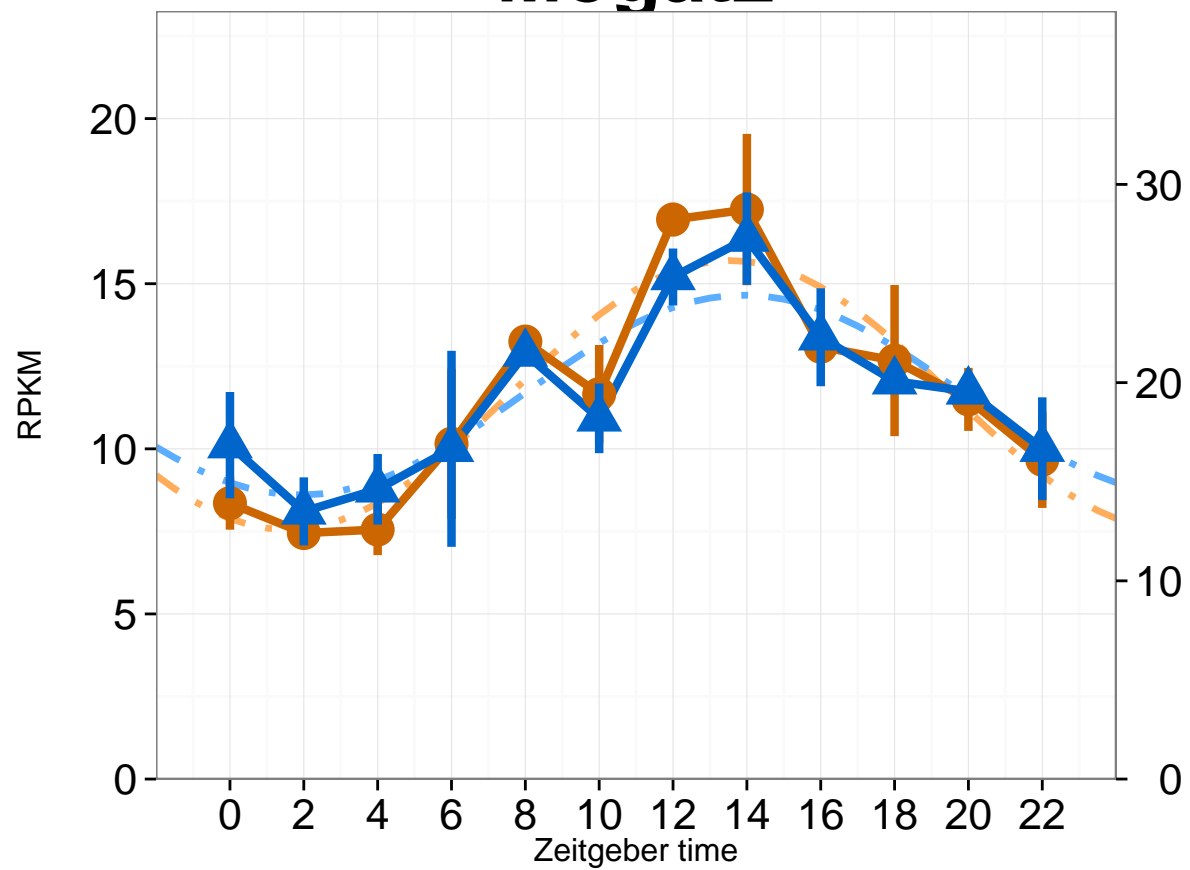

# Mogat2

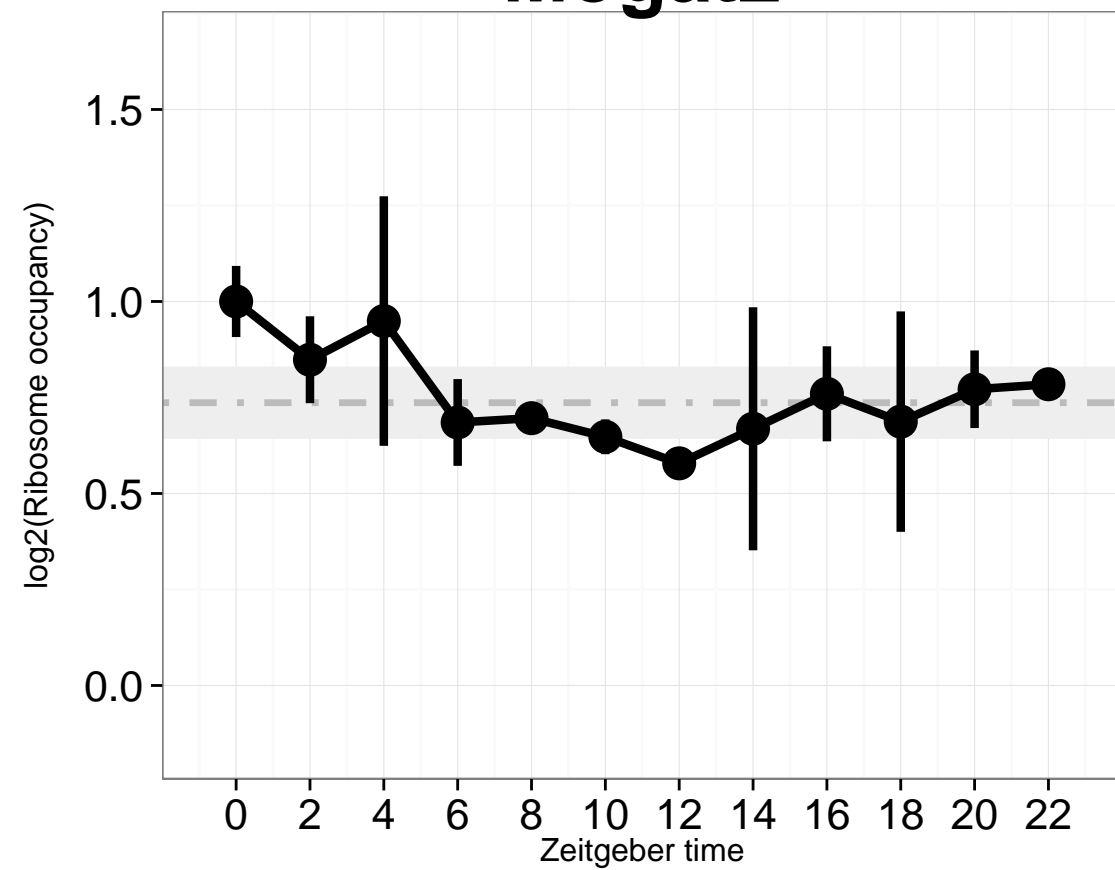

Supplement: Supplementary file 2151 [file 1]

# Gm10451

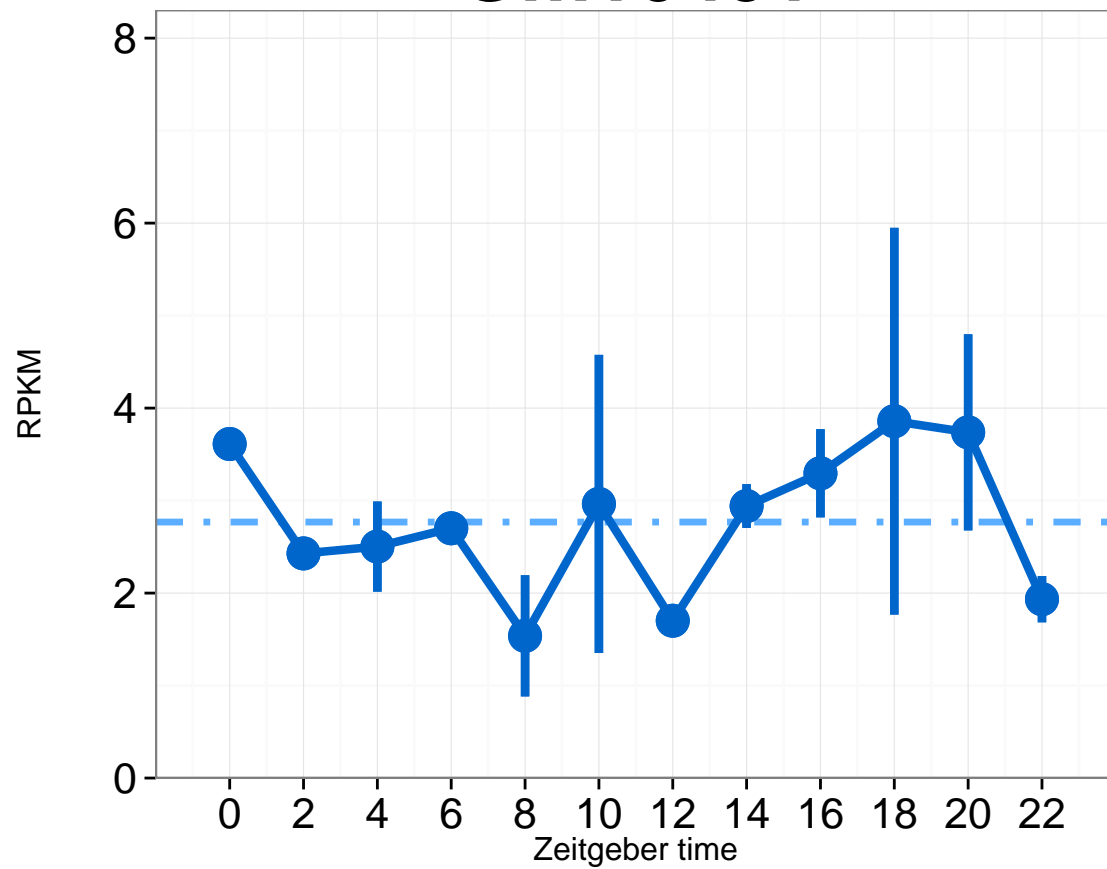

# Gm10451 log2(Ribosome occupanc

Supplement: Supplementary file 2152 [file 1]

# Man2c1

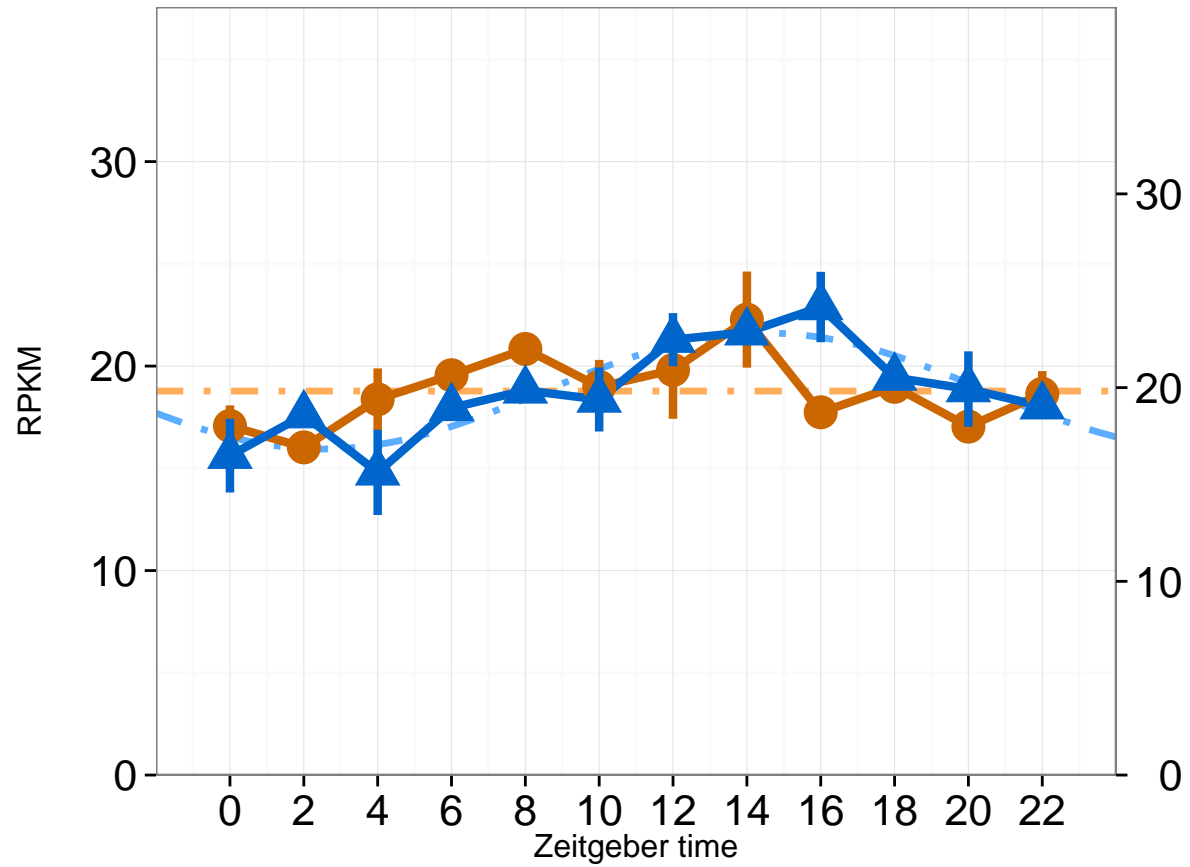

# Man2c1

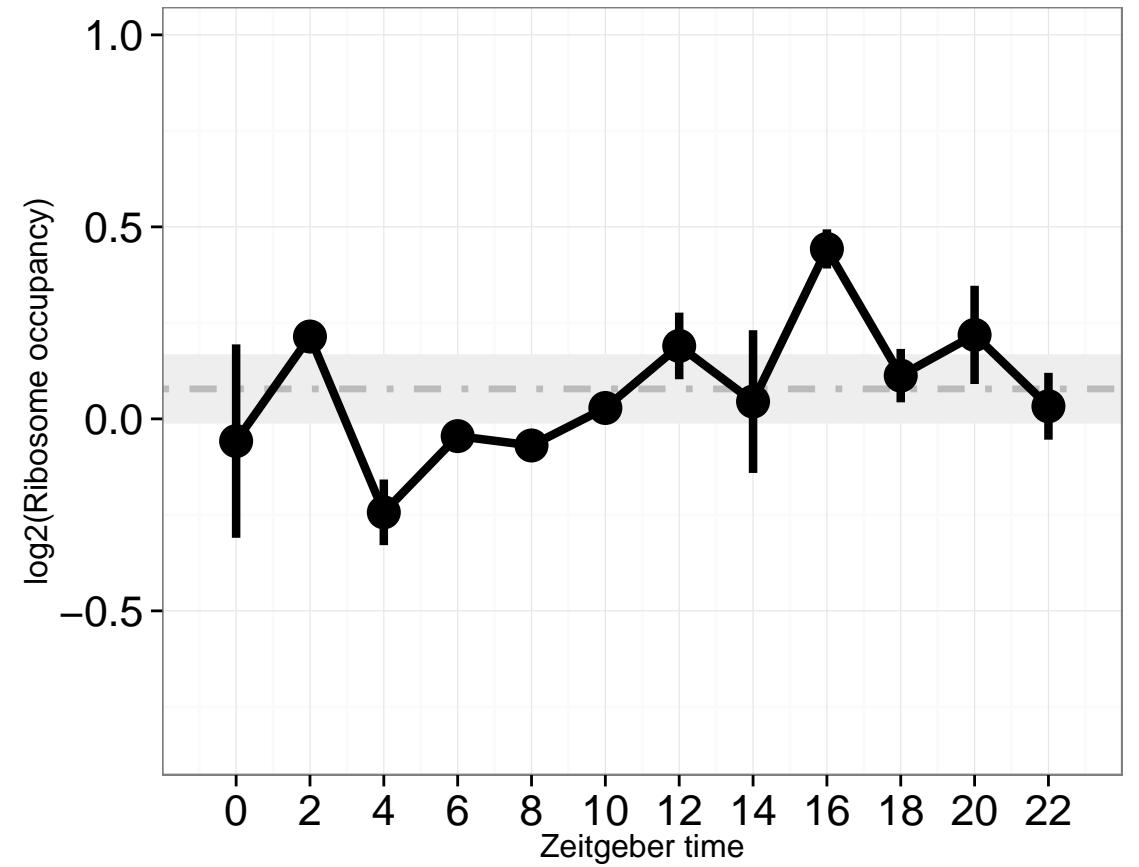

Supplement: Supplementary file 2153 [file 1]

## Hexdc

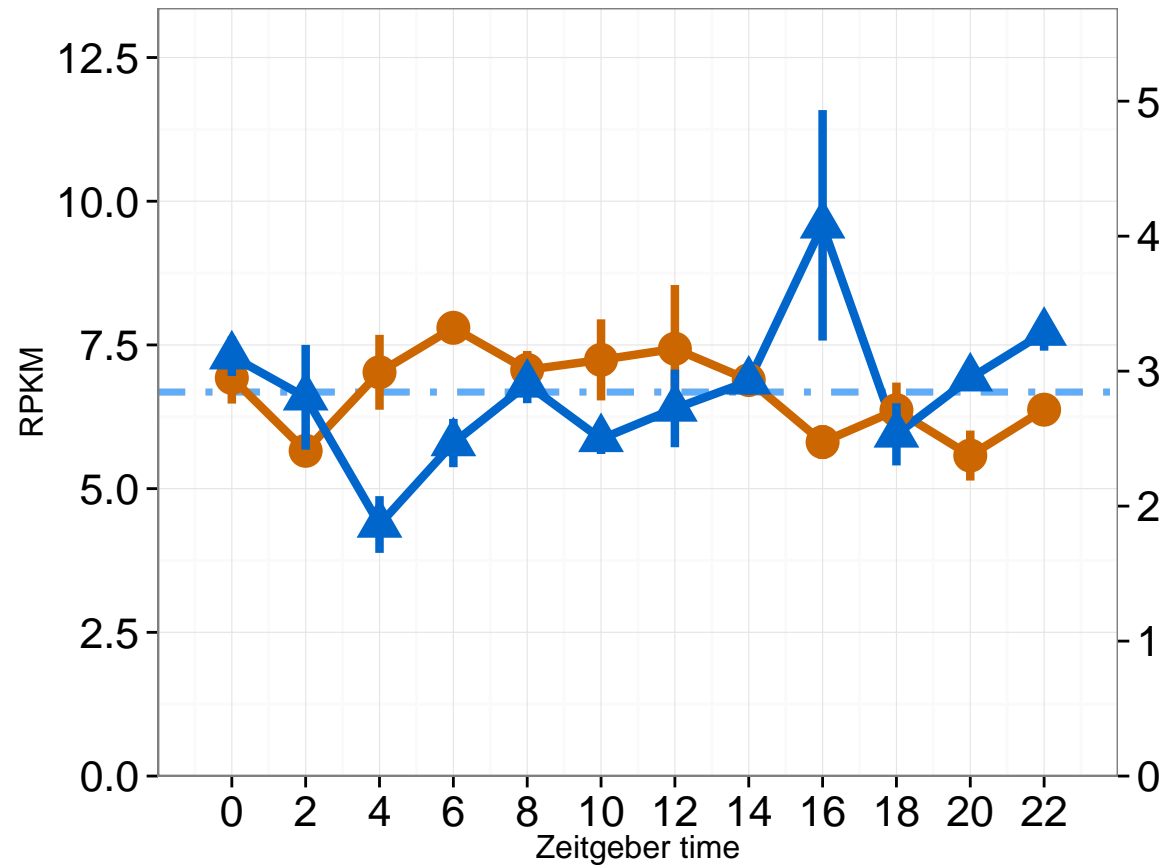

## Hexdc

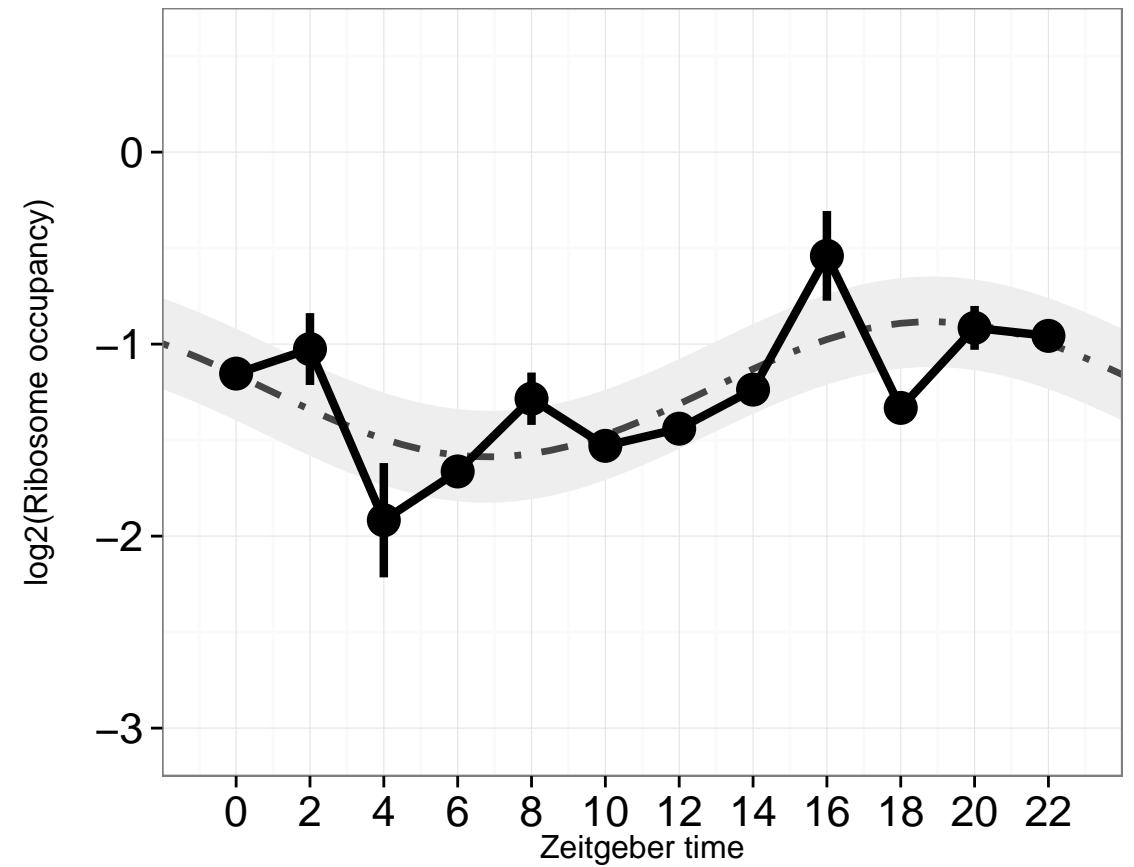

Supplement: Supplementary file 2154 [file 1]

# Lpcat4

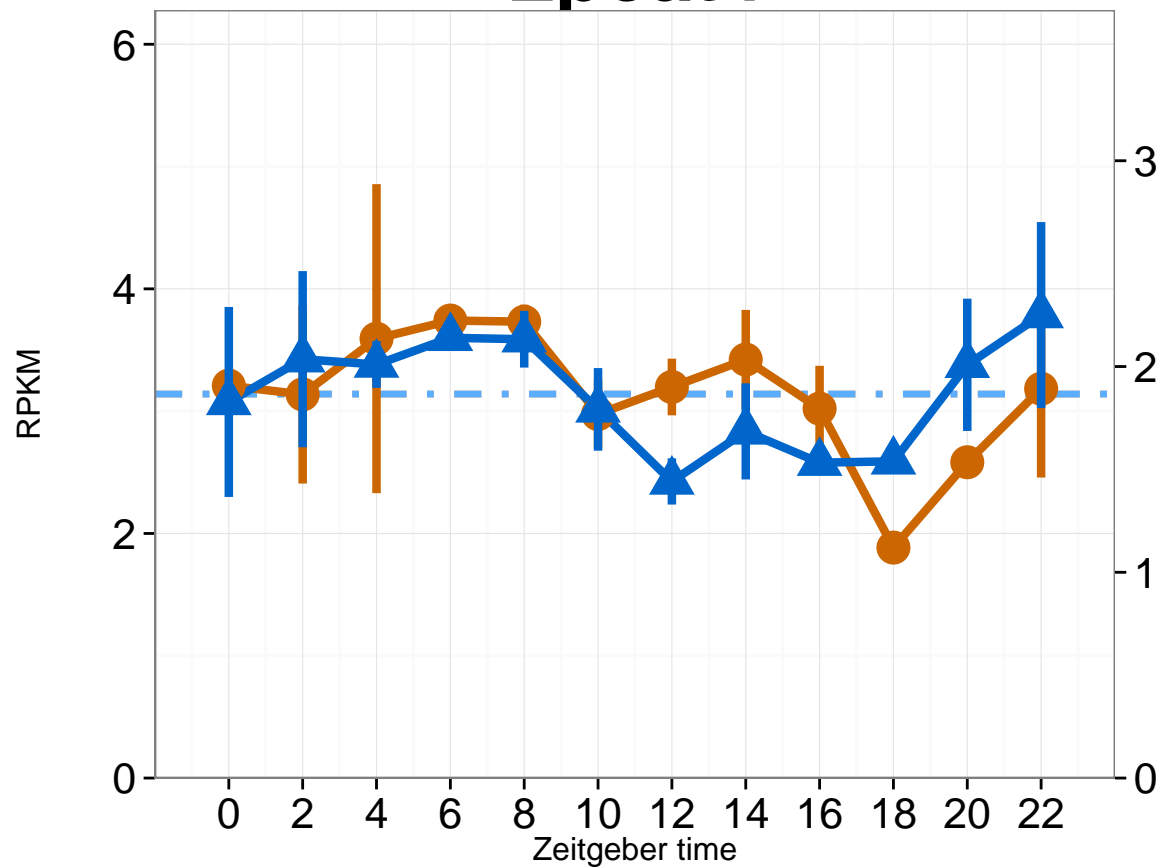

# Lpcat4

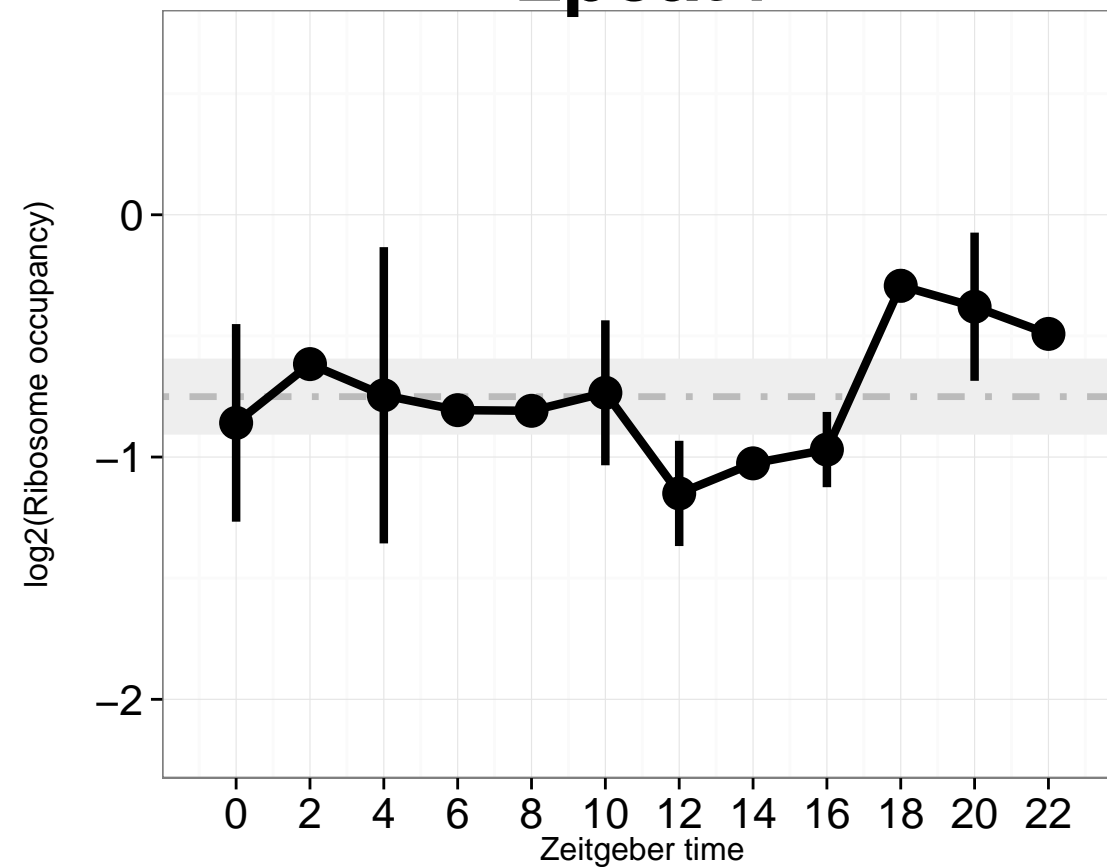

Supplement: Supplementary file 2155 [file 1]

# Ampd3

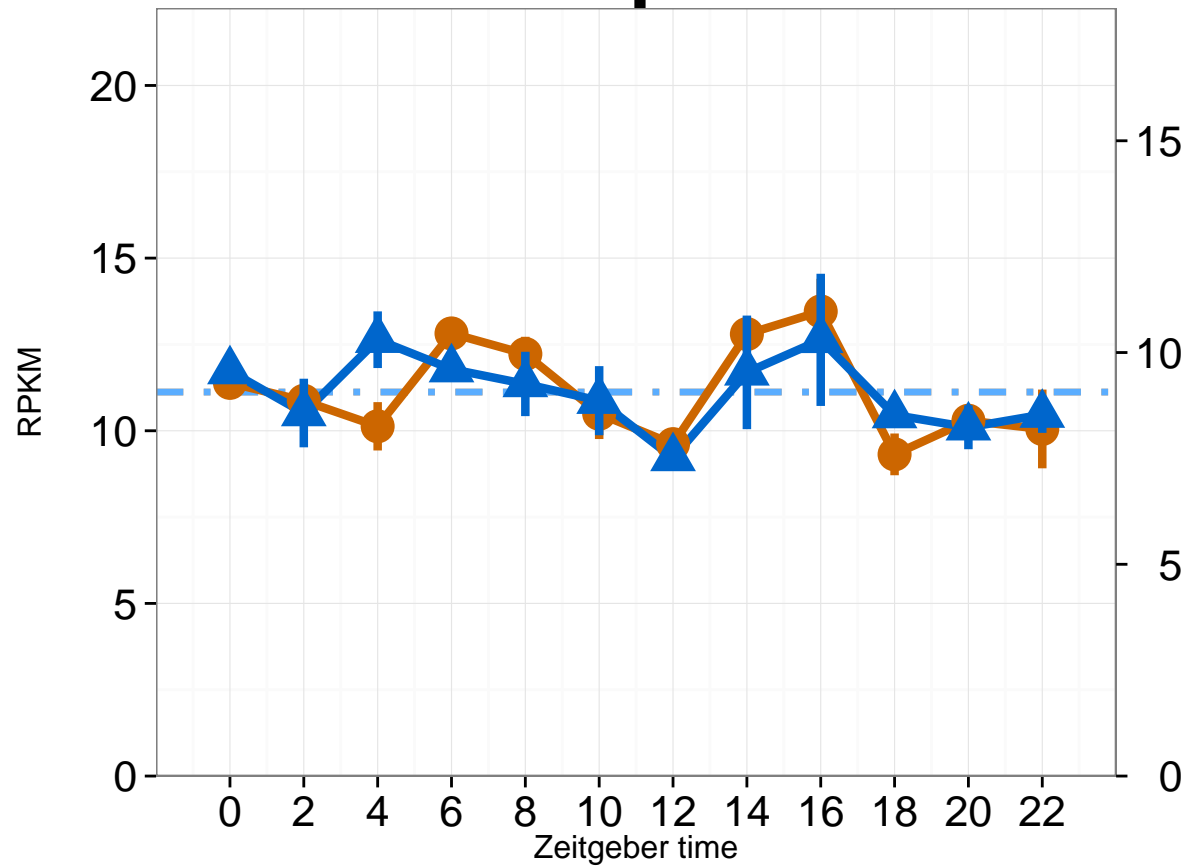

# Ampd3

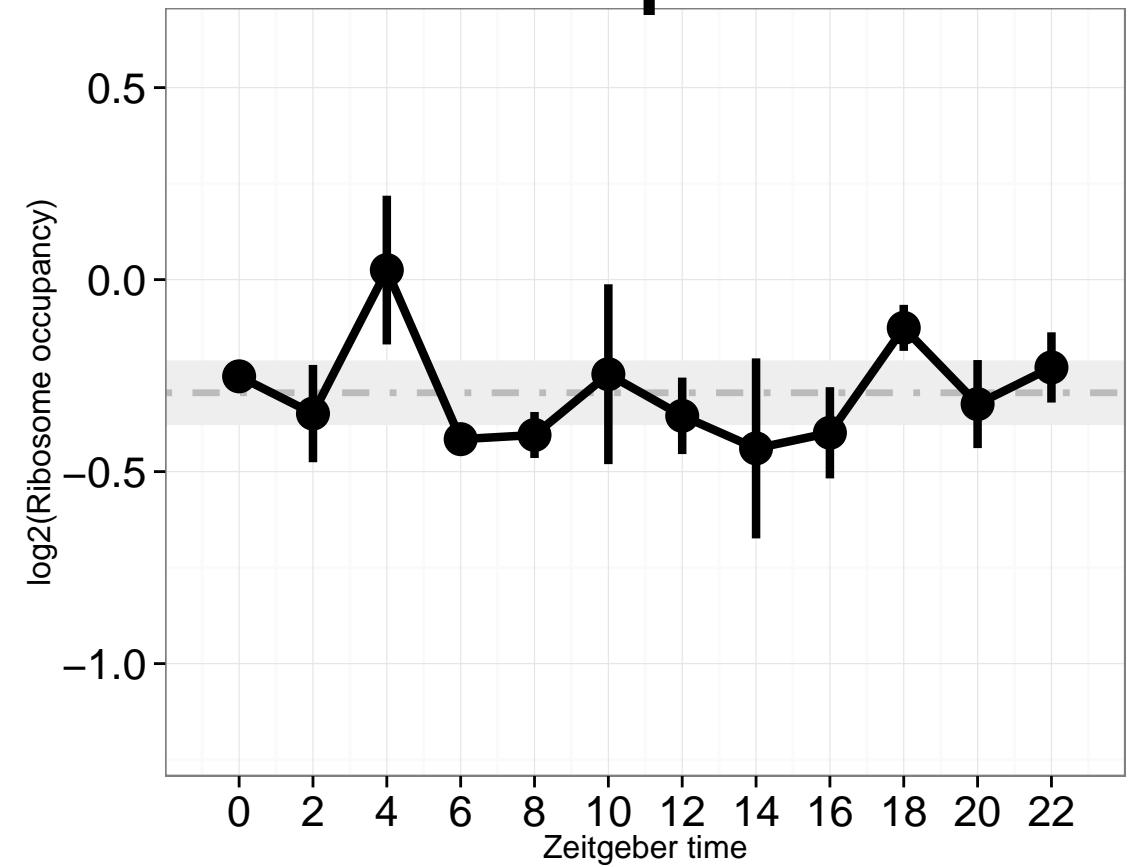

Supplement: Supplementary file 2156 [file 1]

# Ndufv3

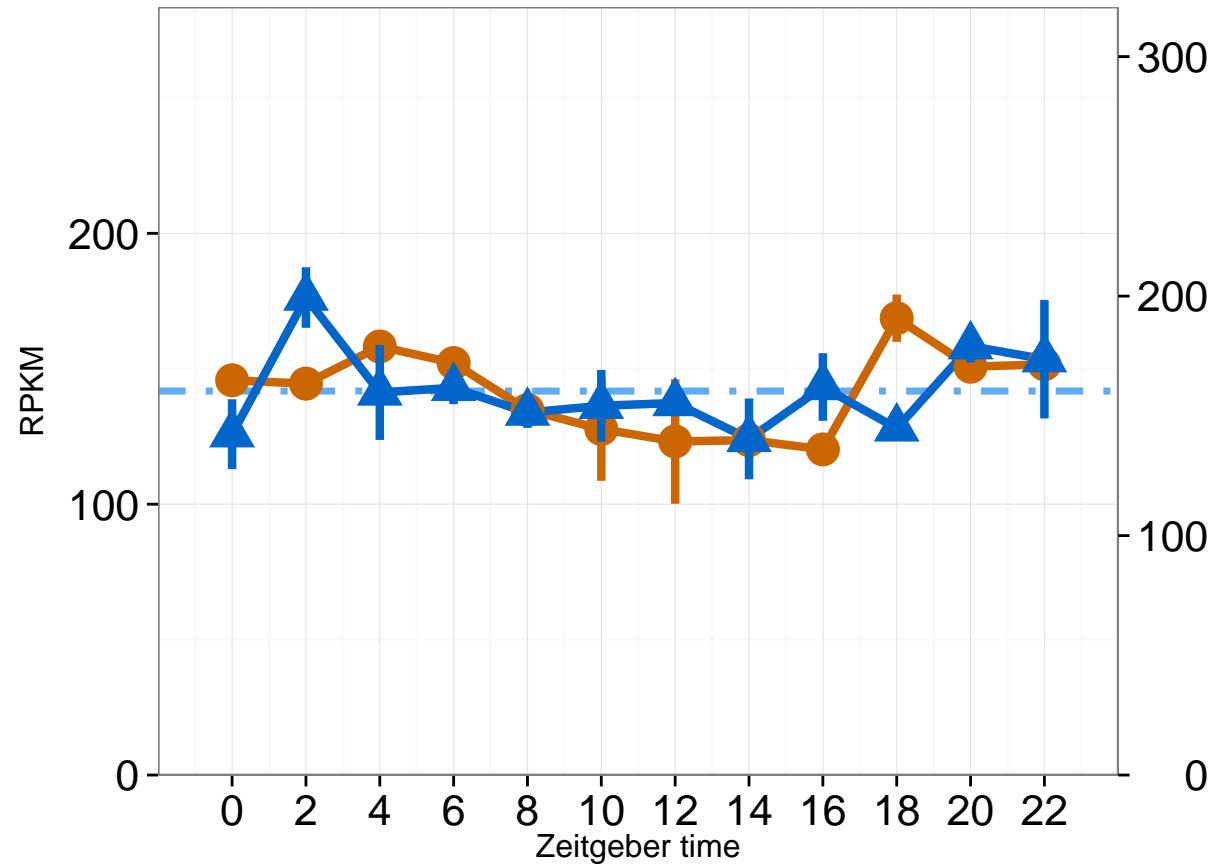

# Ndufv3

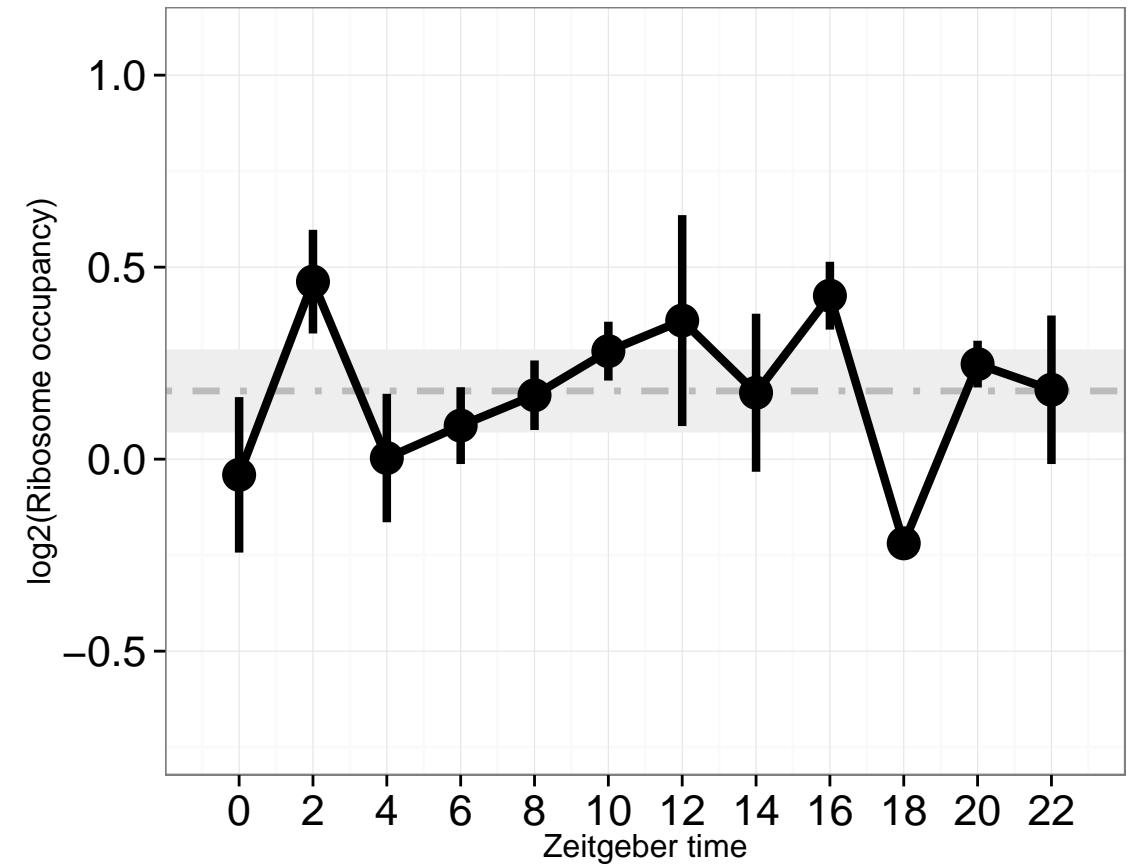

Supplement: Supplementary file 2157 [file 1]

## Coro7

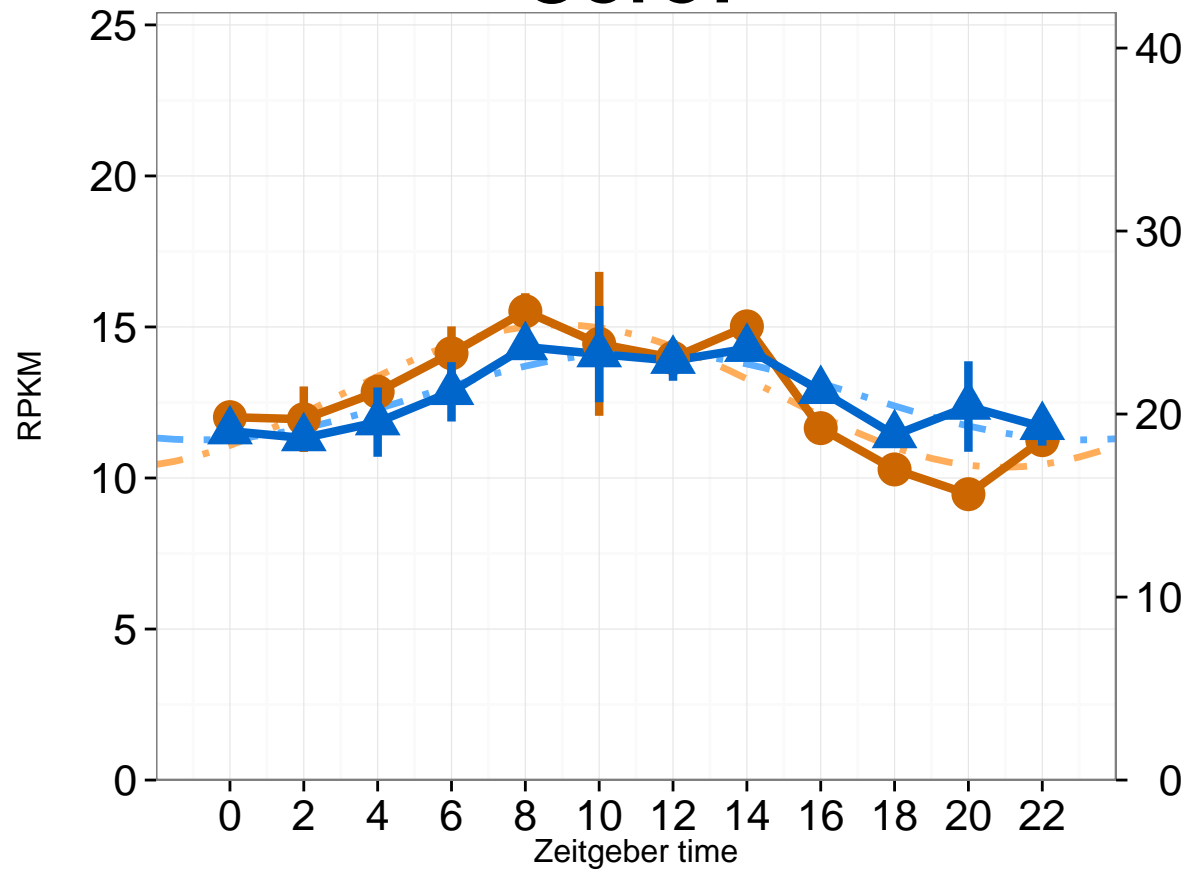

## Coro7

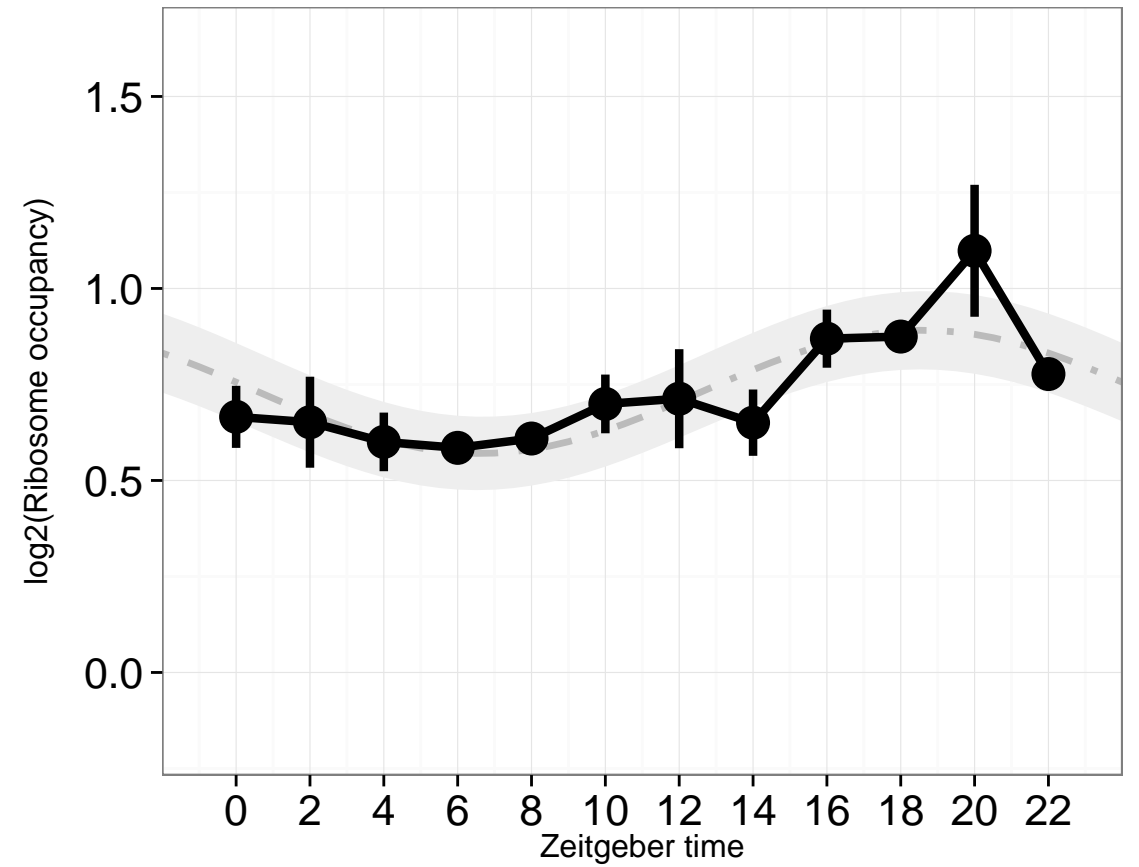

Supplement: Supplementary file 2158 [file 1]

## Blink

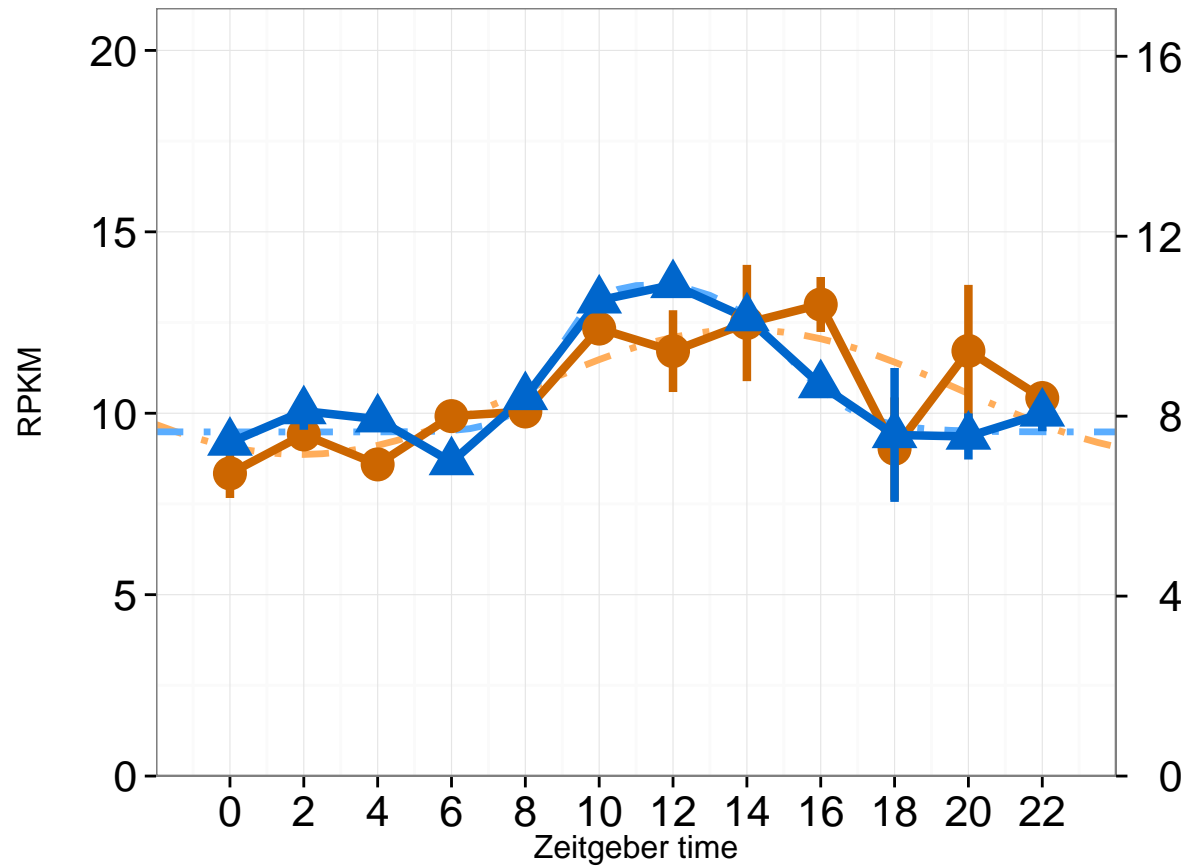

## Blink

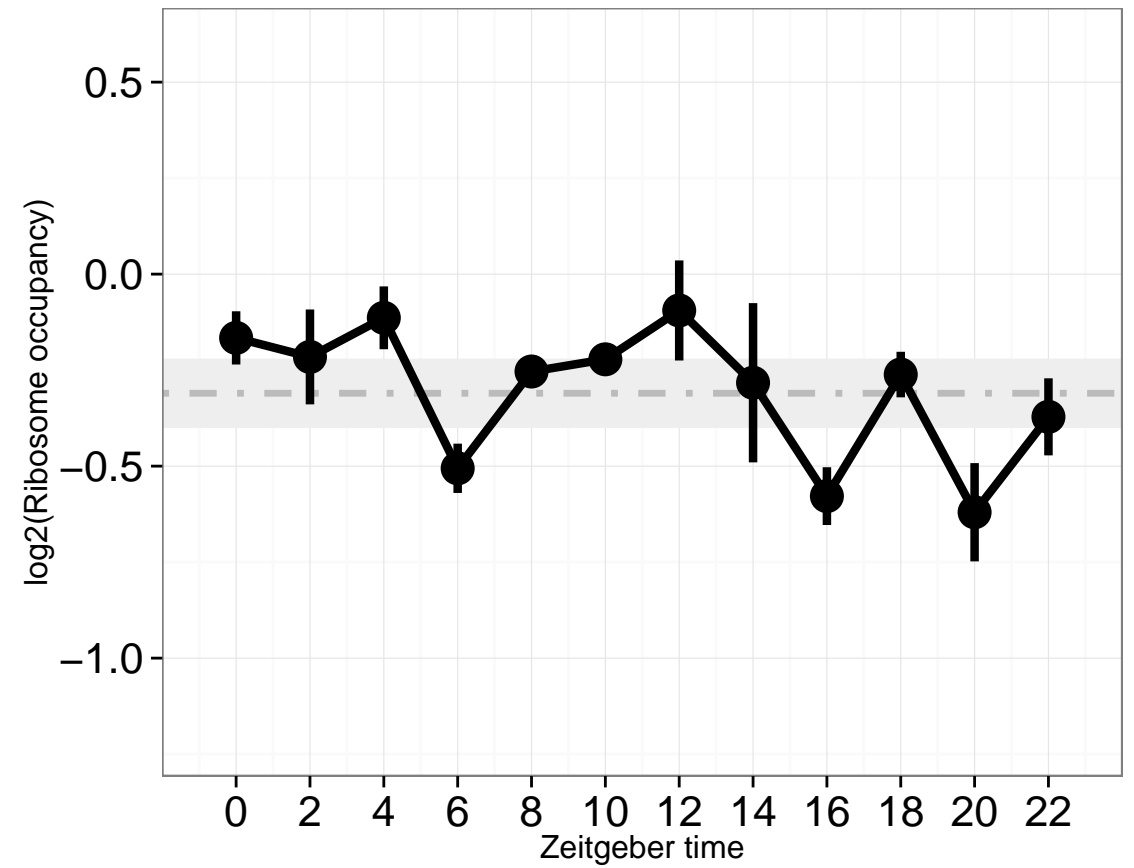

Supplement: Supplementary file 2159 [file 1]

# Ddx56

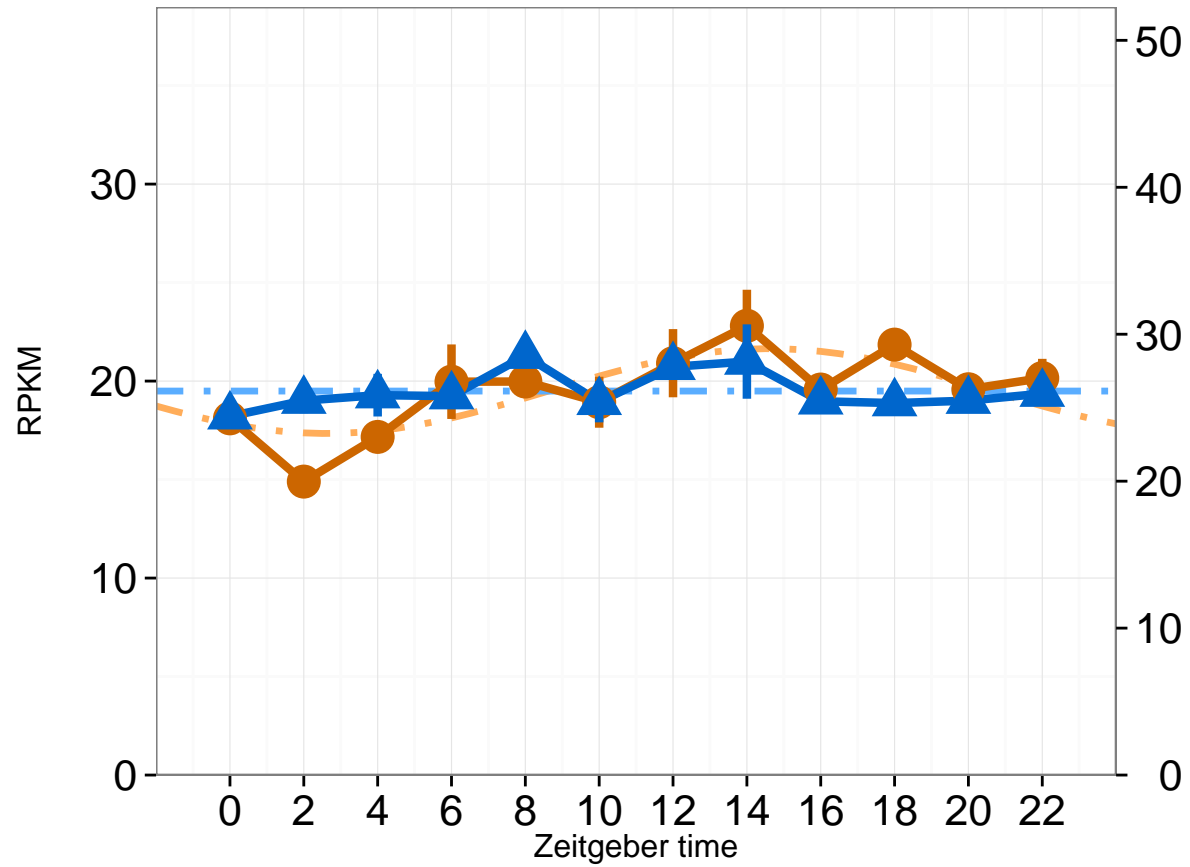

# Ddx56

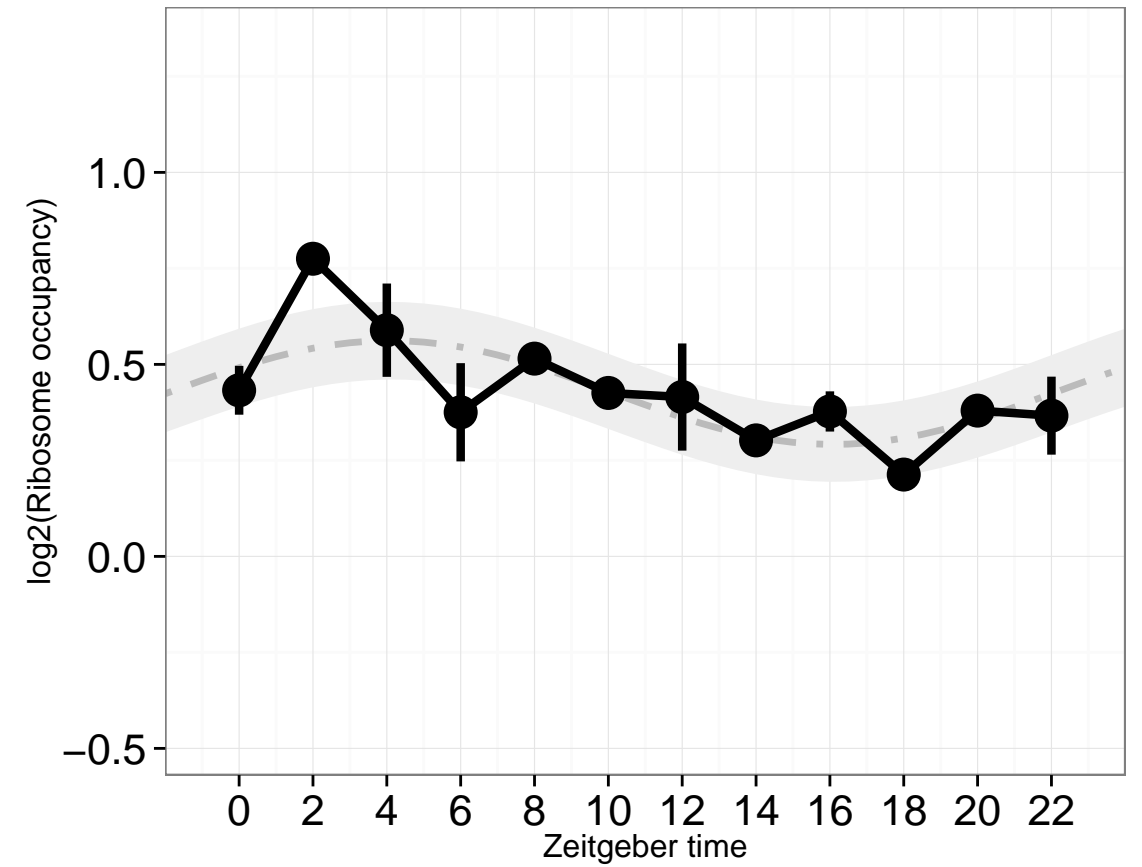

Supplement: Supplementary file 2160 [file 1]

# Card6

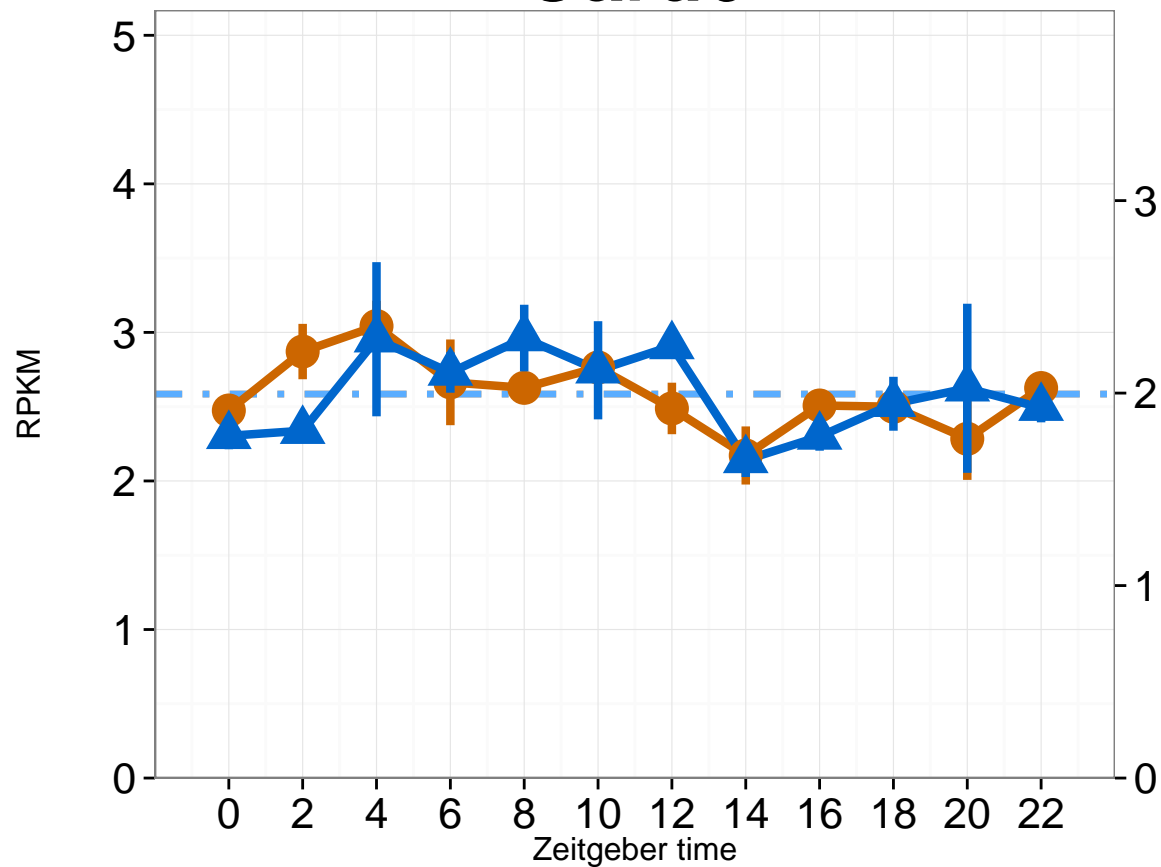

# Card6

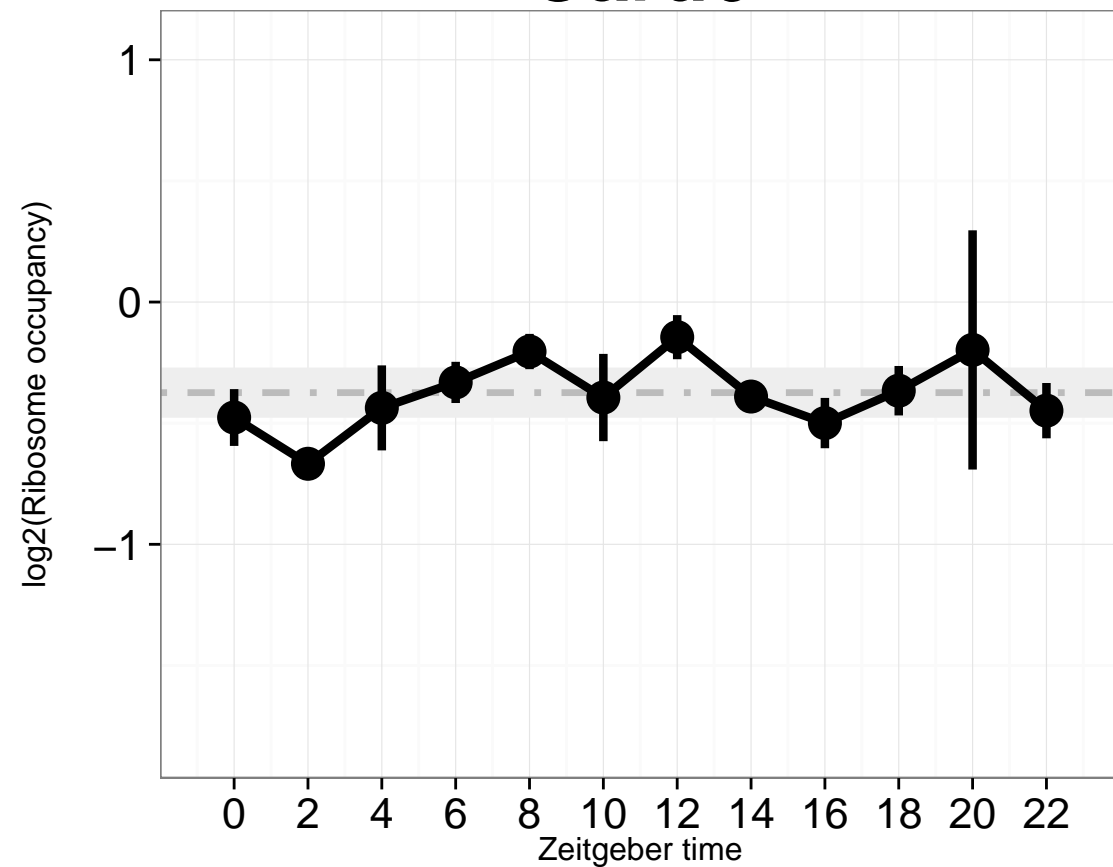

Supplement: Supplementary file 2161 [file 1]

## Vps45

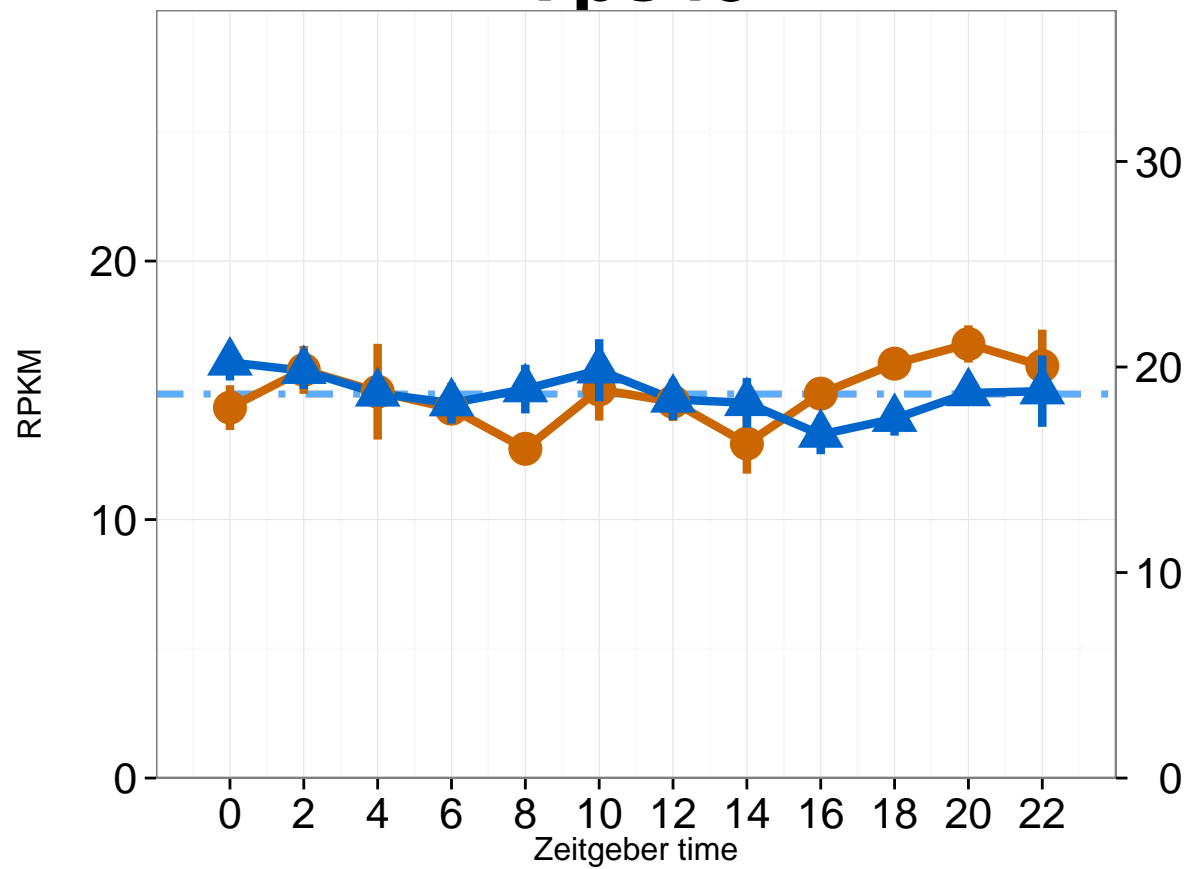

## Vps45

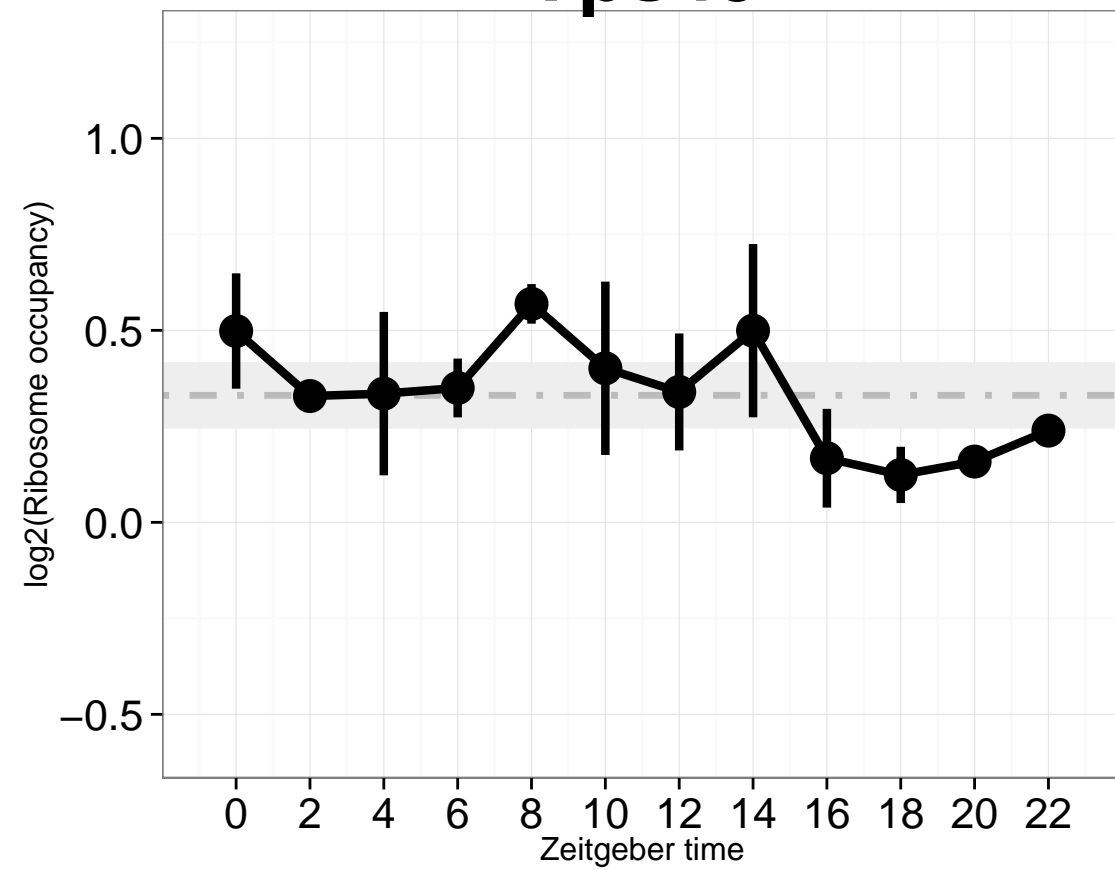

Supplement: Supplementary file 2162 [file 1]

**mt-Co3**

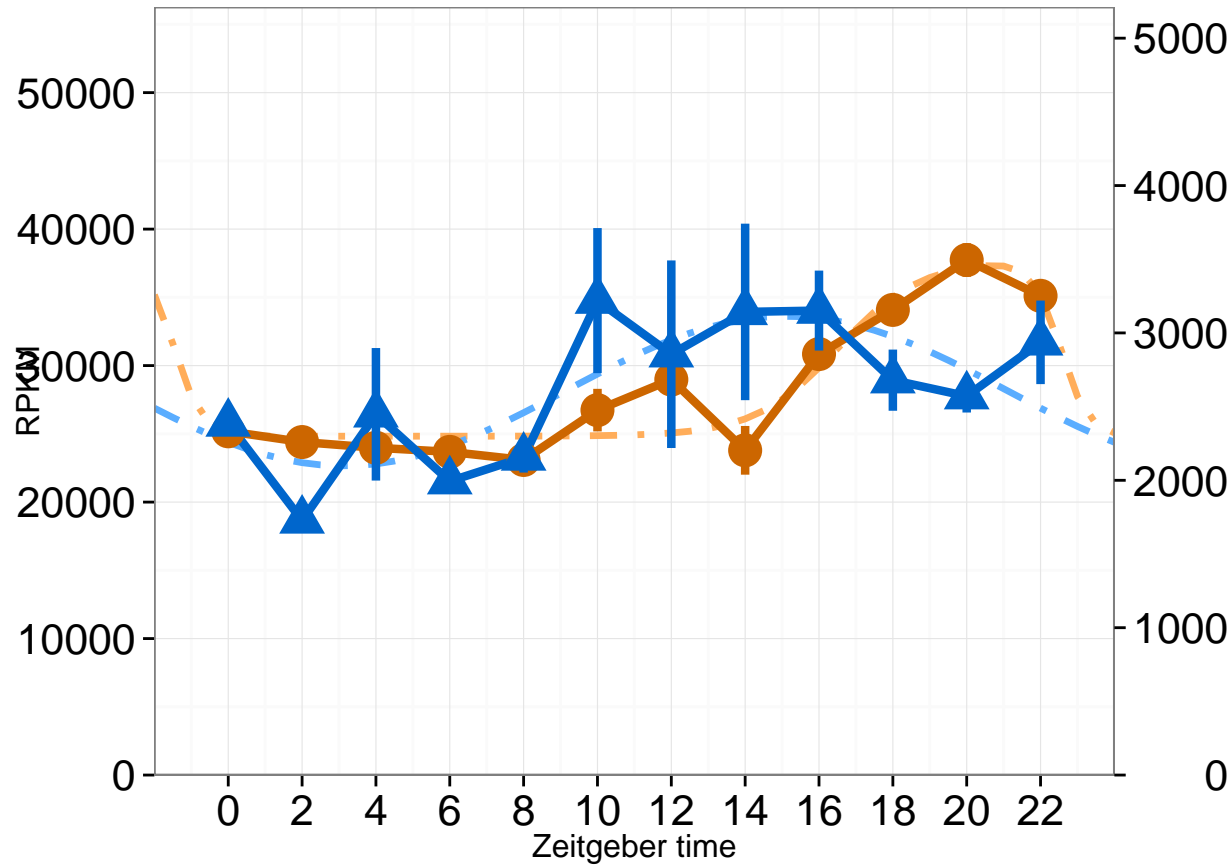

**mt-Co3**

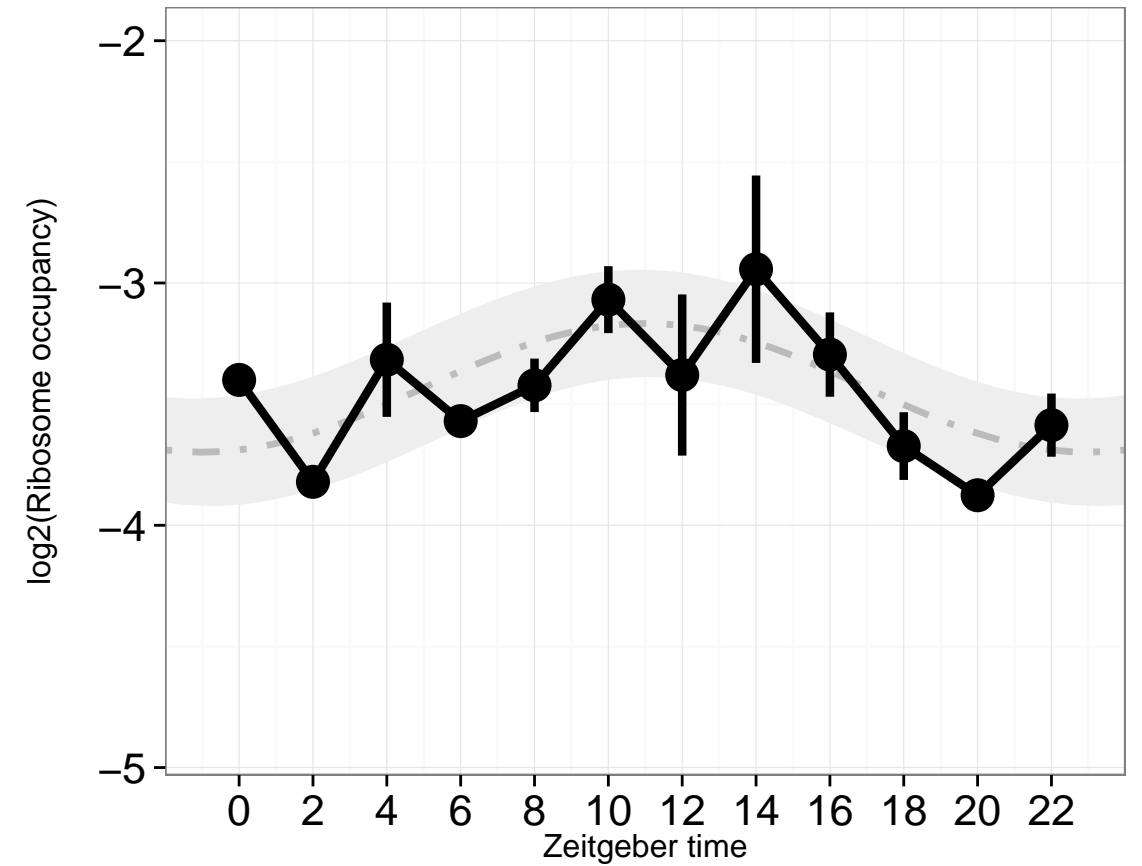

Supplement: Supplementary file 2163 [file 1]

## Sri

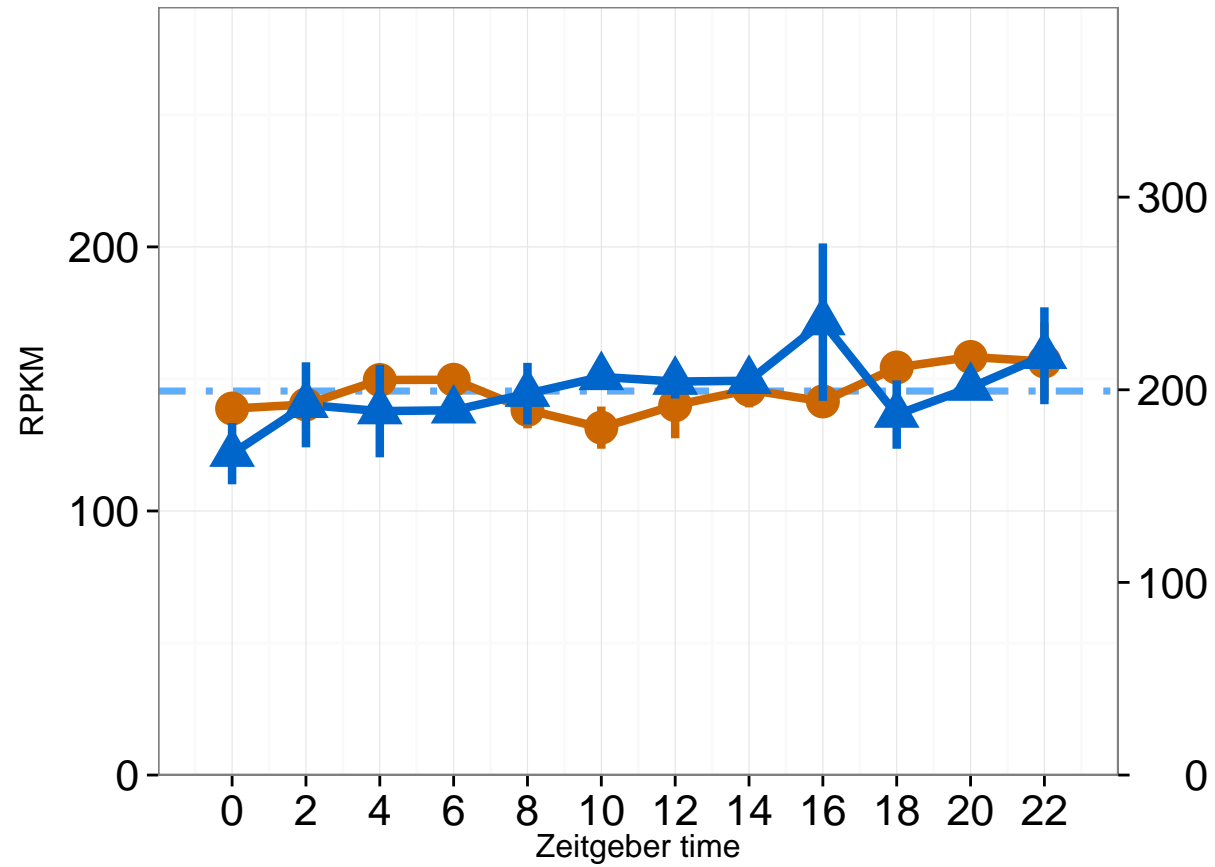

## Sri

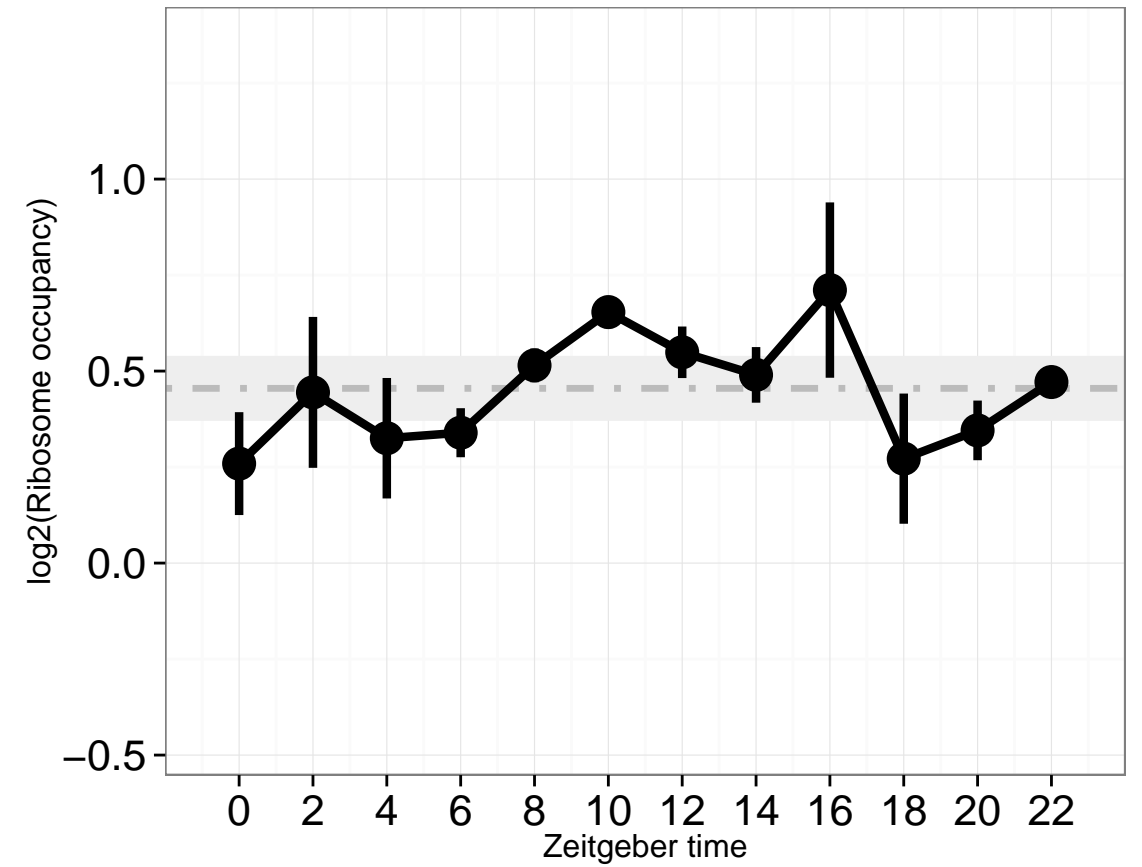

Supplement: Supplementary file 2164 [file 1]

## Glrx2

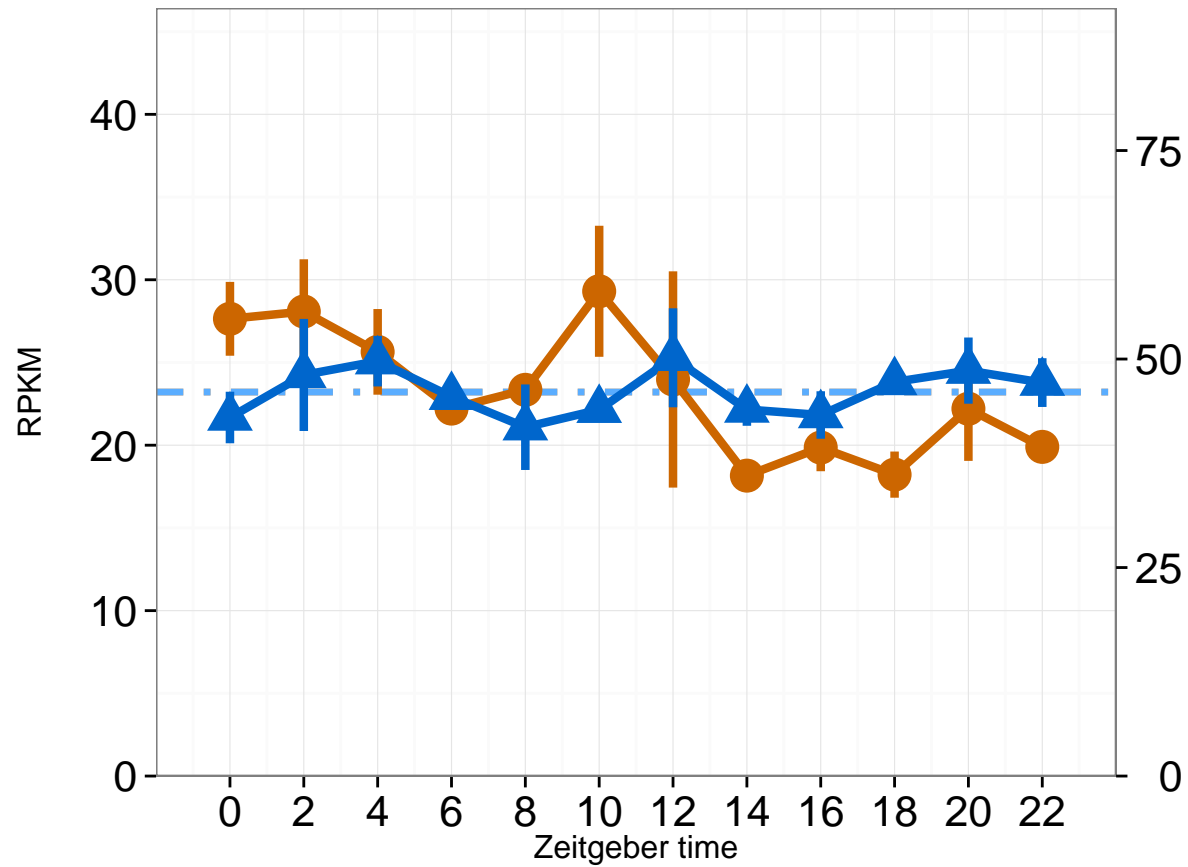

## Glrx2

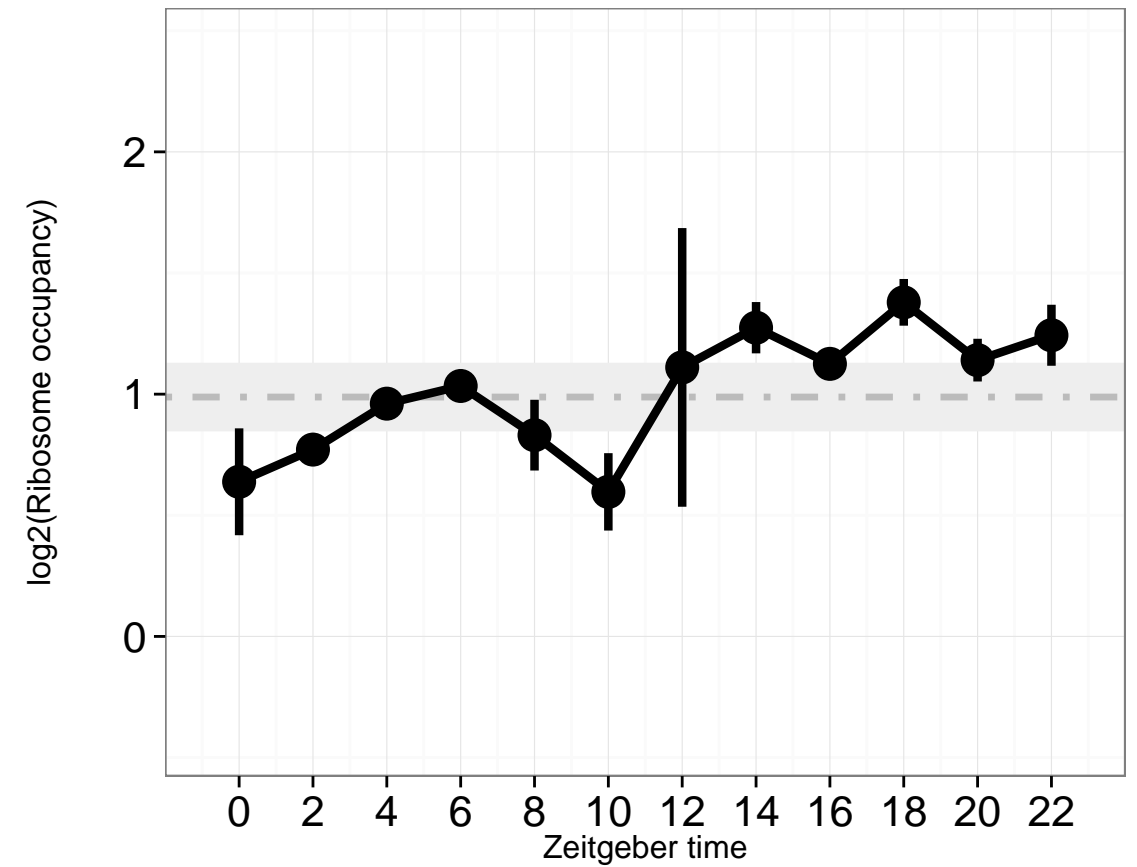

Supplement: Supplementary file 2165 [file 1]

## Cib1

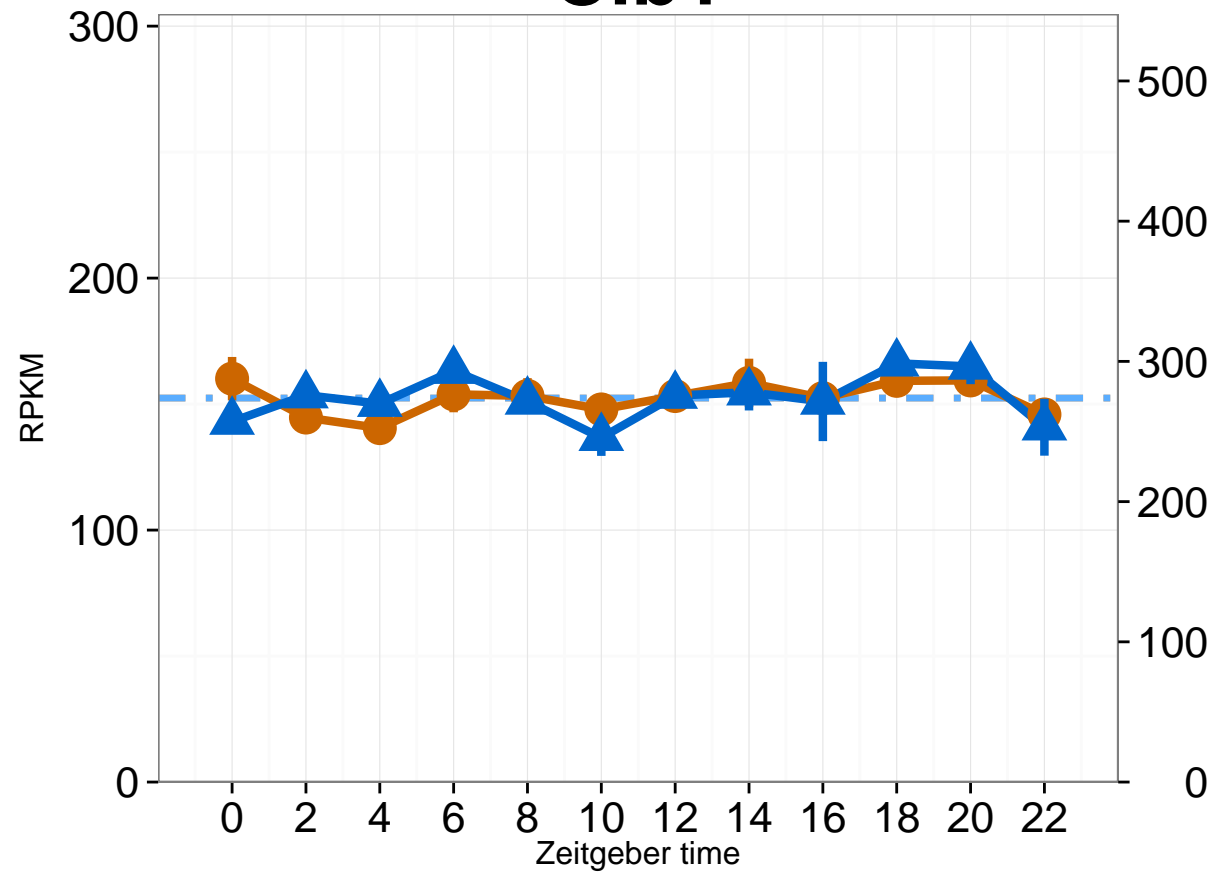

## Cib1

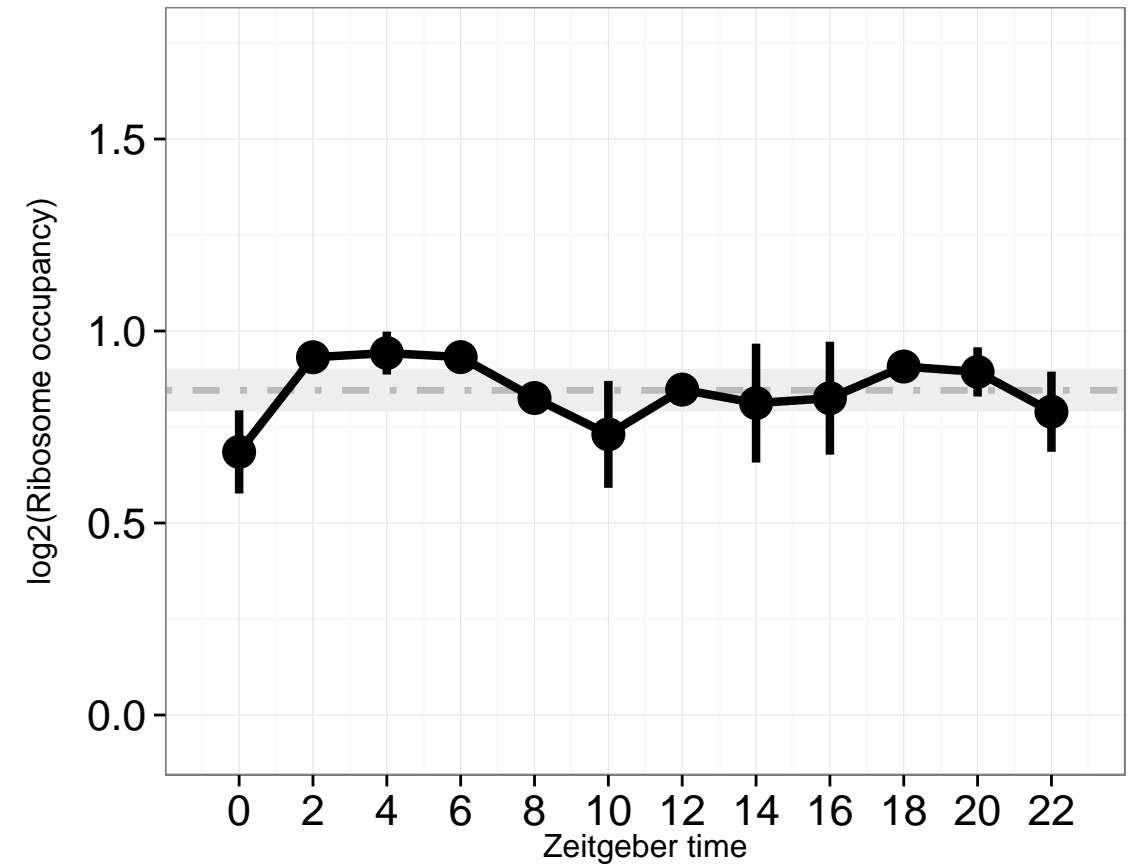

Supplement: Supplementary file 2166 [file 1]

## Wdr82

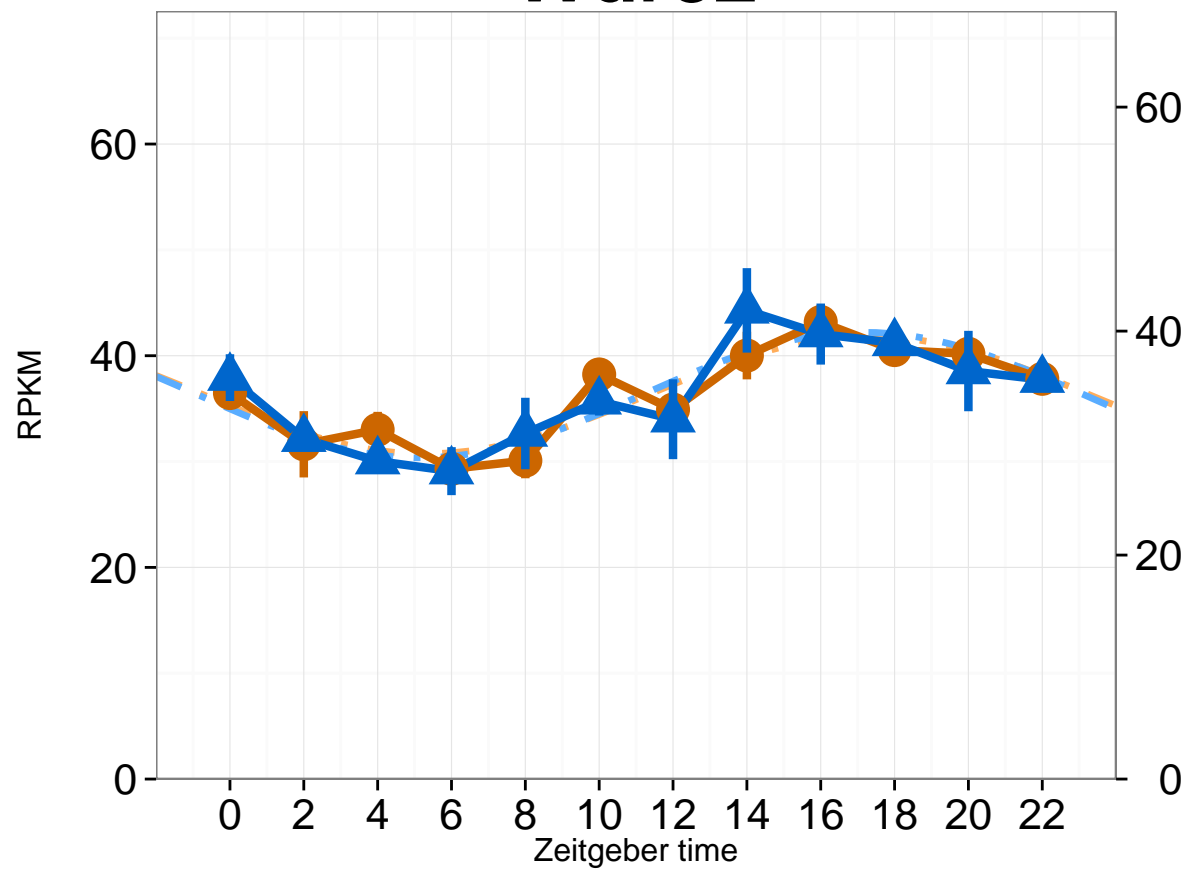

## Wdr82

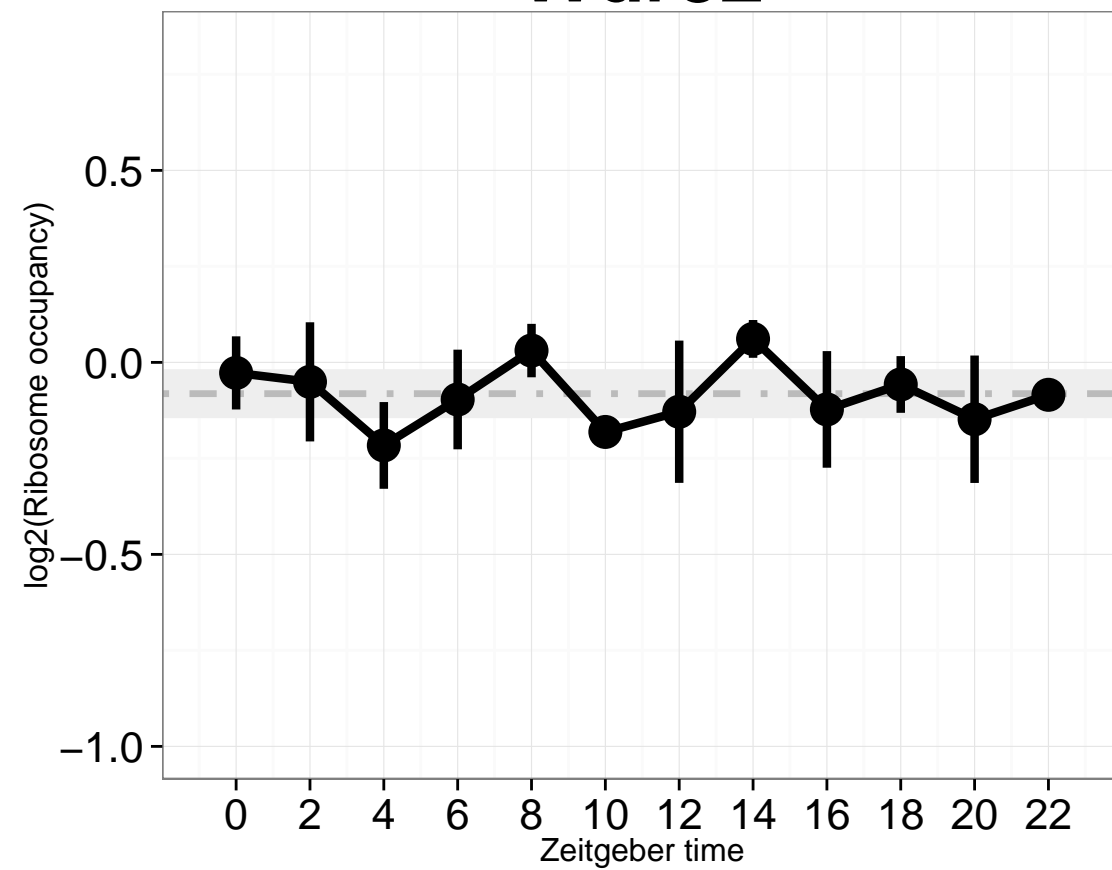

Supplement: Supplementary file 2167 [file 1]

# Ranbp17

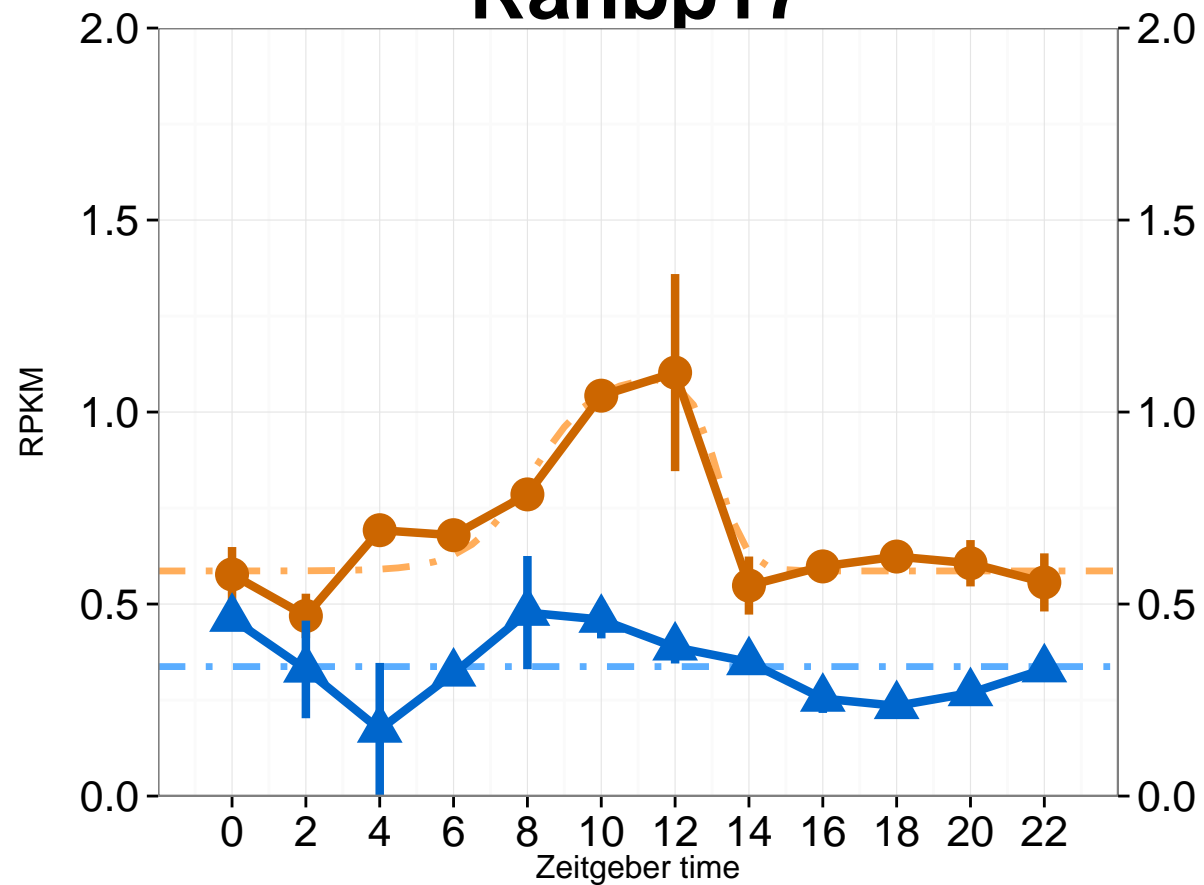

# Ranbp17

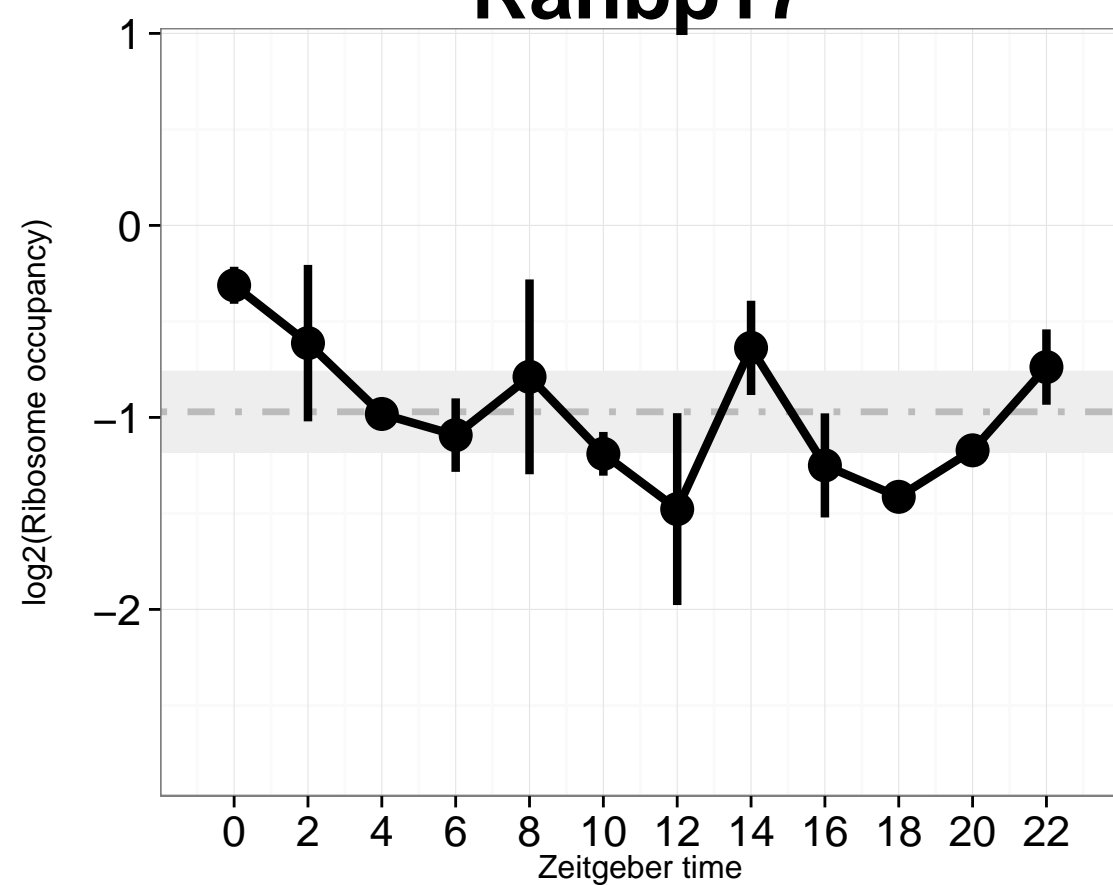

Supplement: Supplementary file 2168 [file 1]

# Nr2f6

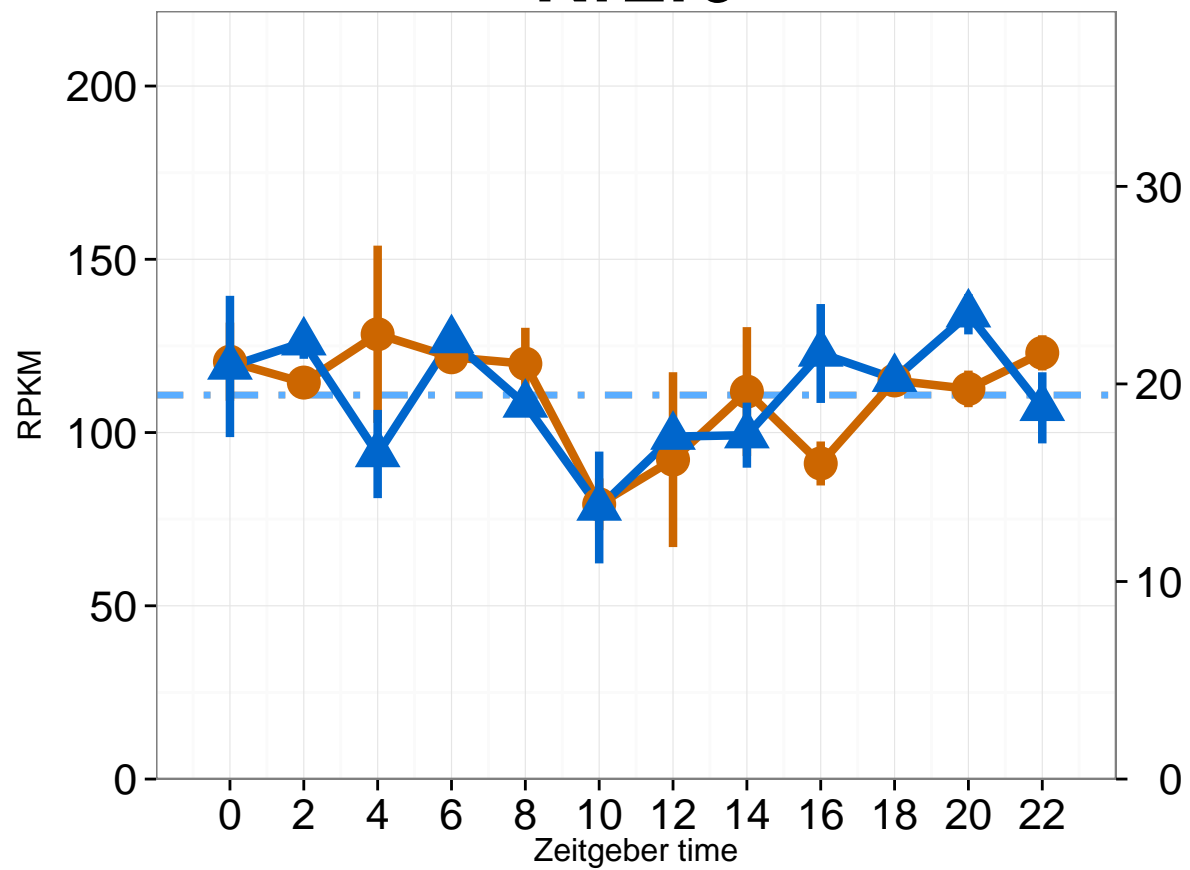

# Nr2f6

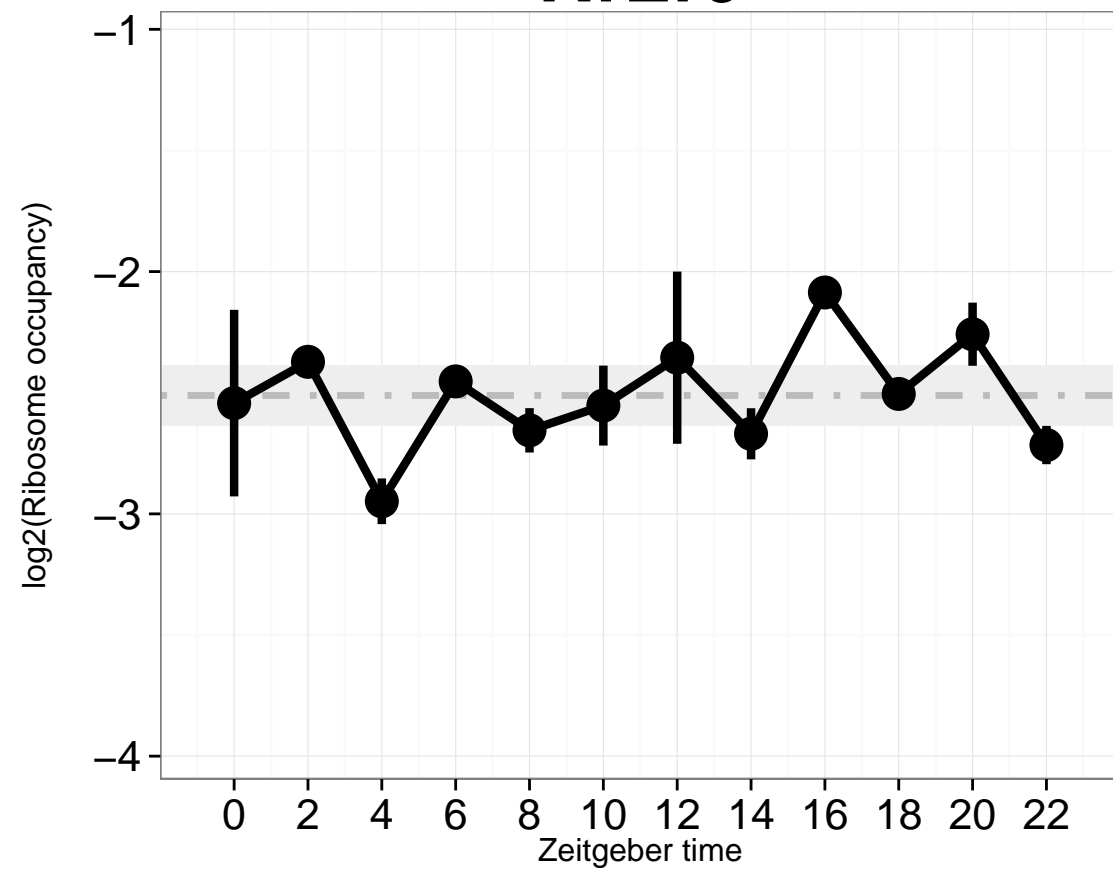

Supplement: Supplementary file 2169 [file 1]

# Bend3

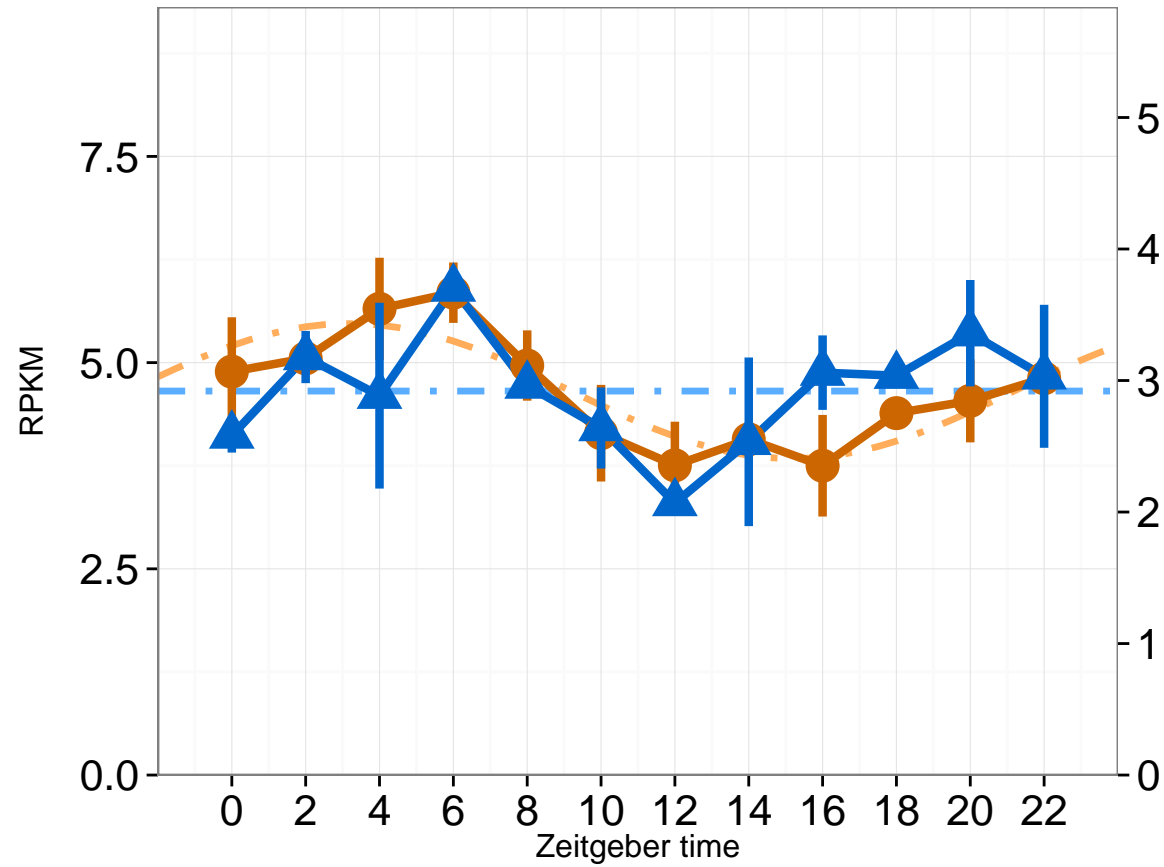

# Bend3

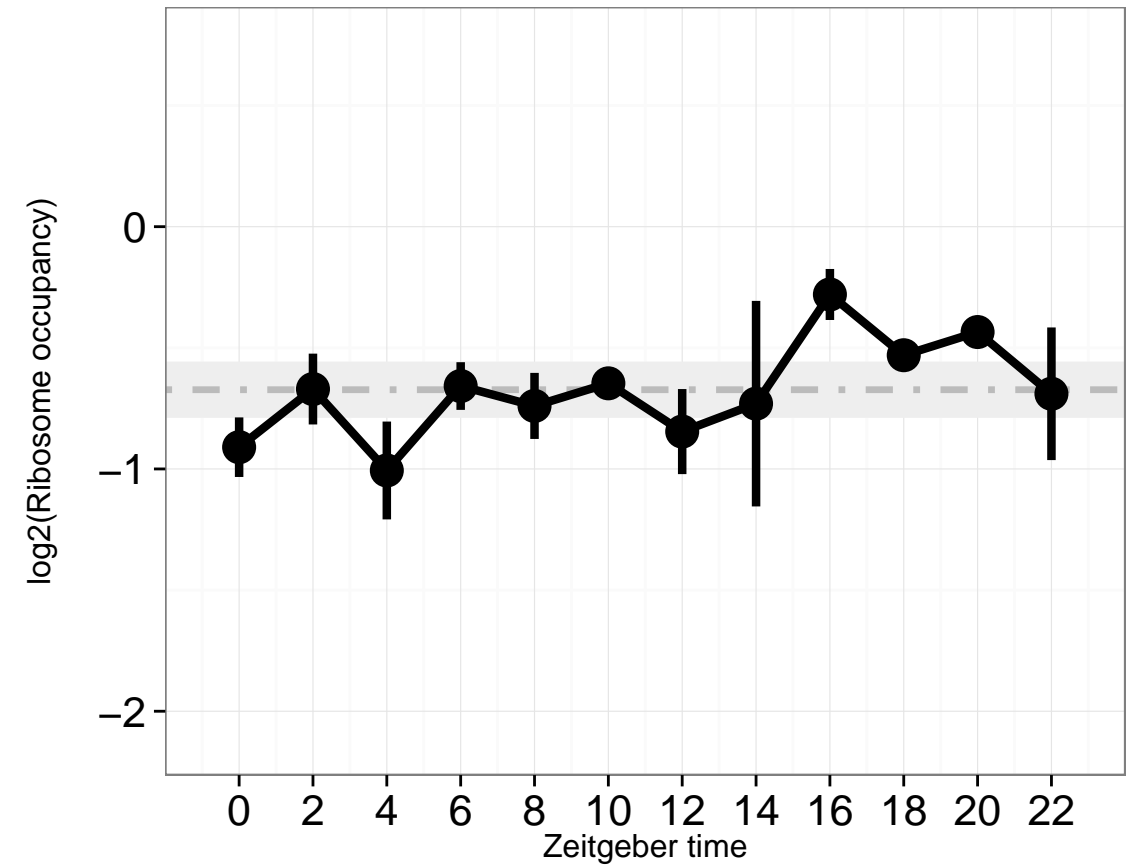

Supplement: Supplementary file 2170 [file 1]

# Ppp6r2

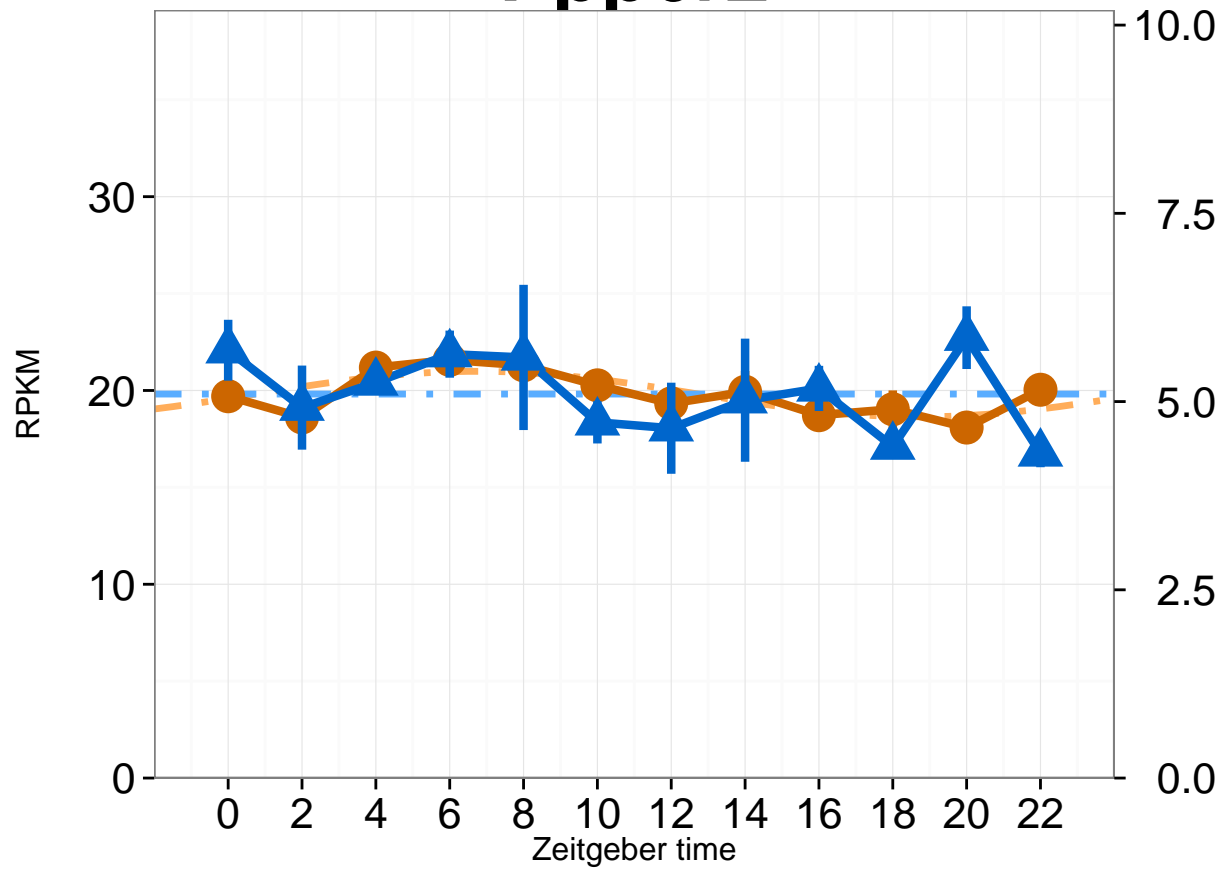

# Ppp6r2

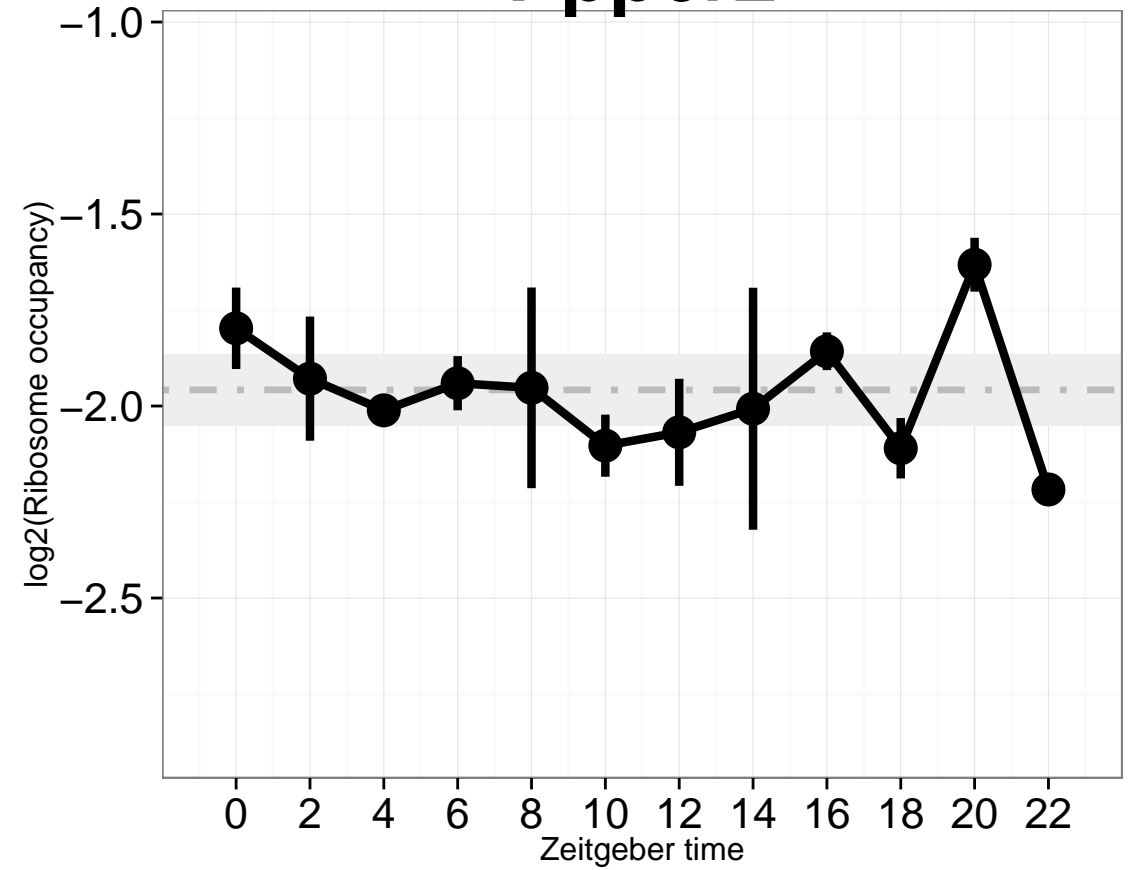

Supplement: Supplementary file 2171 [file 1]

## Gpr34

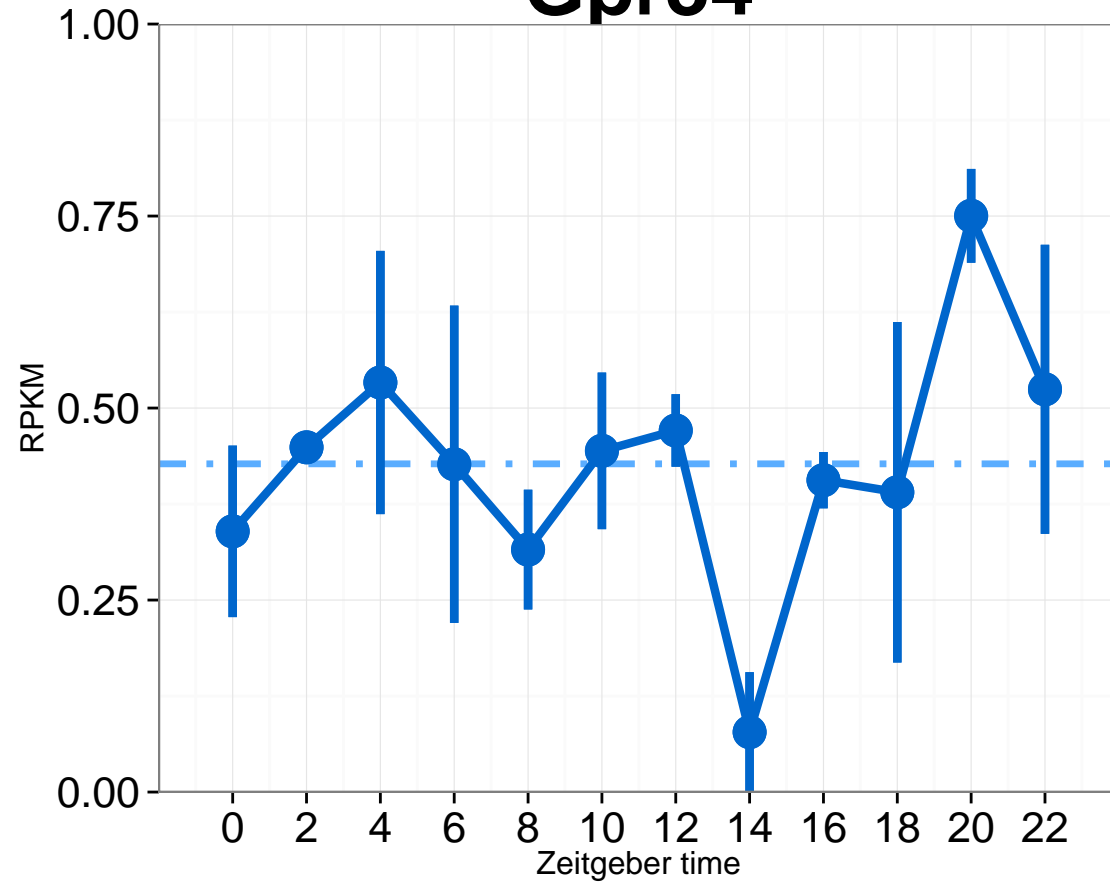

## Gpr34 log2(Ribosome occupancy

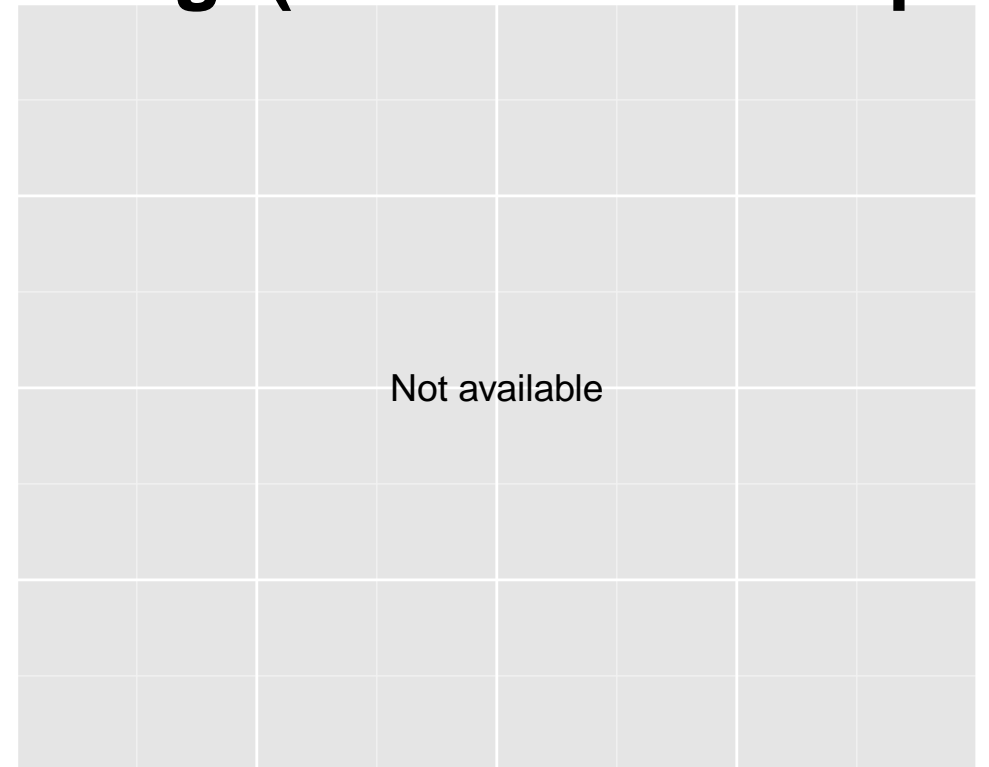

Supplement: Supplementary file 2172 [file 1]

# Upf3b

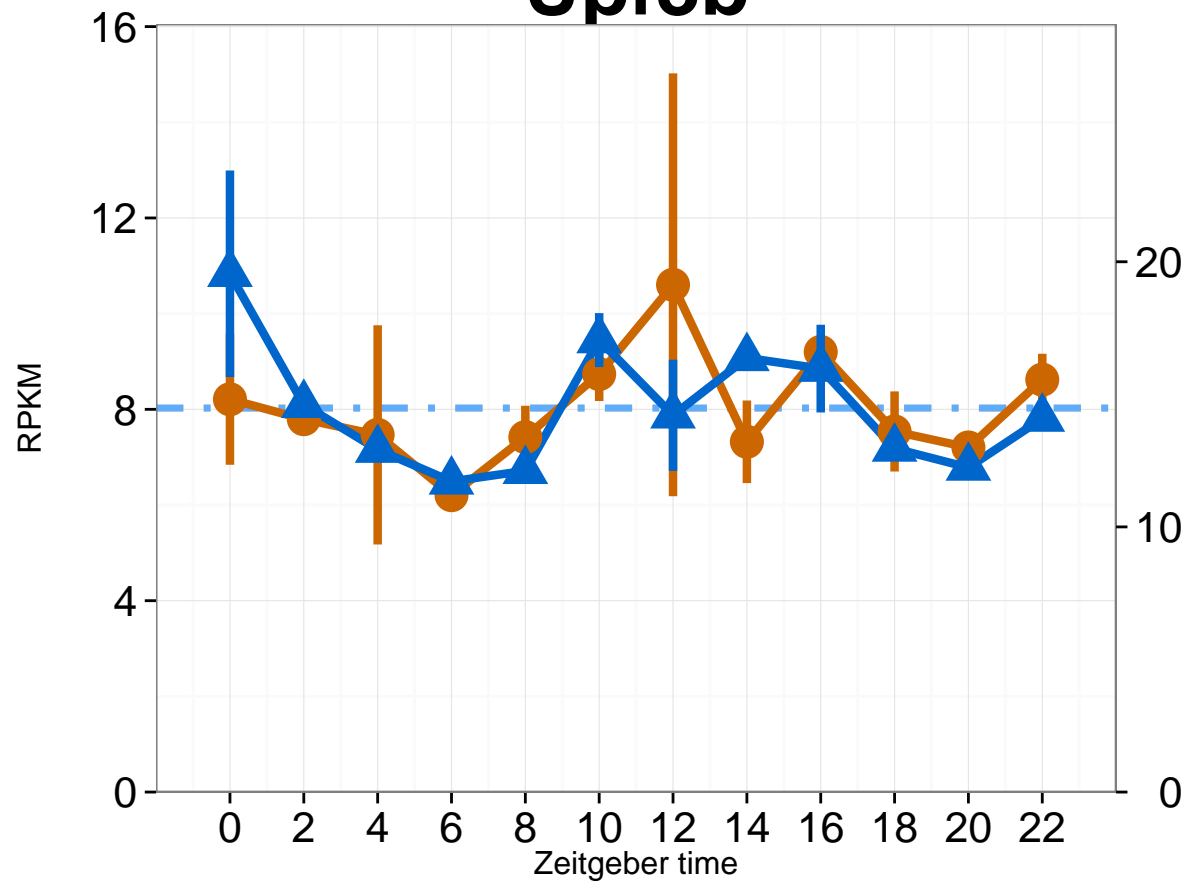

# Upf3b

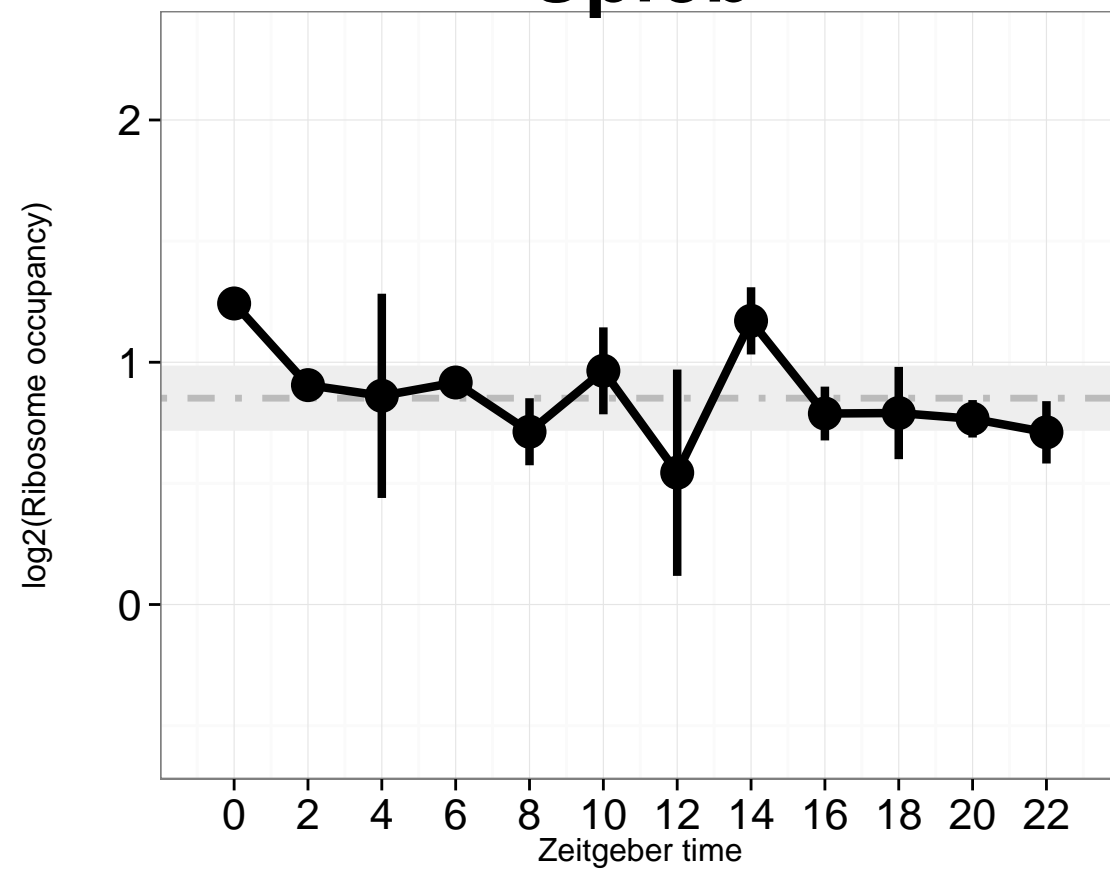

Supplement: Supplementary file 2173 [file 1]

## Cyth1

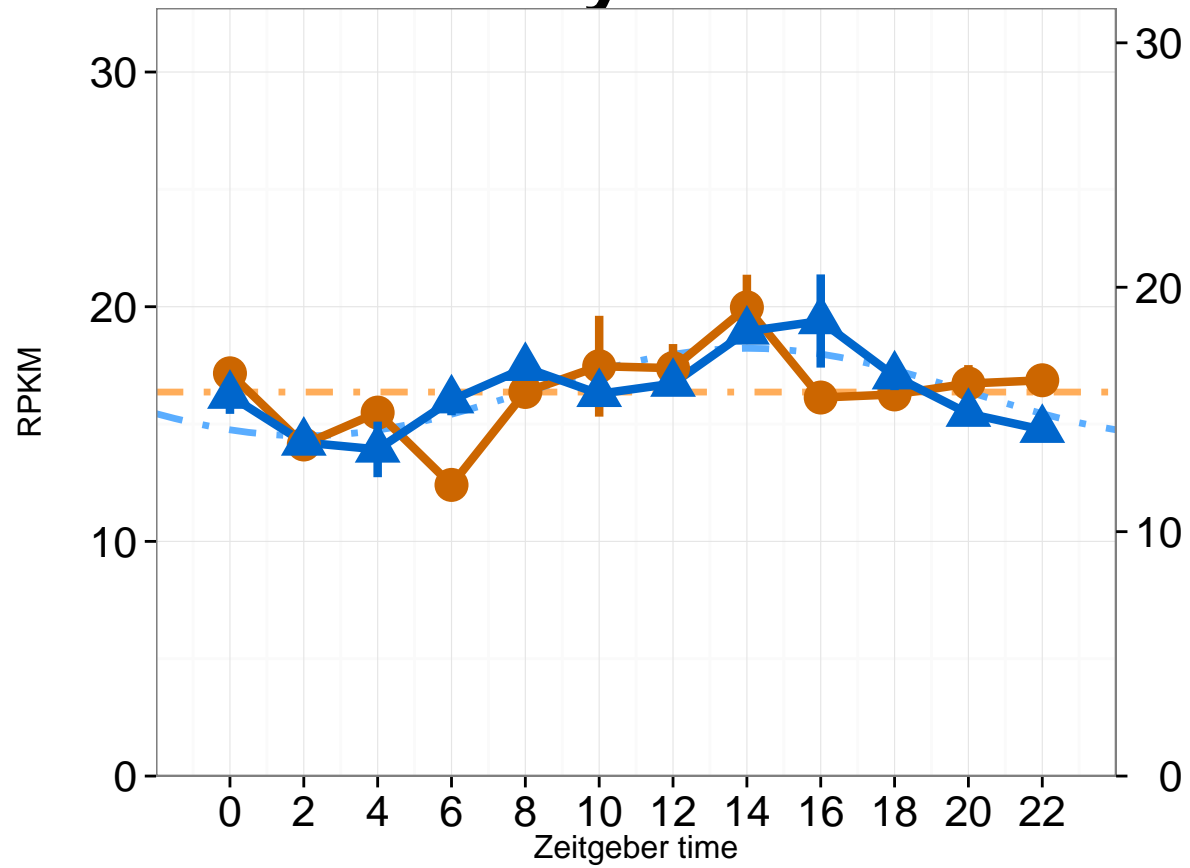

## Cyth1

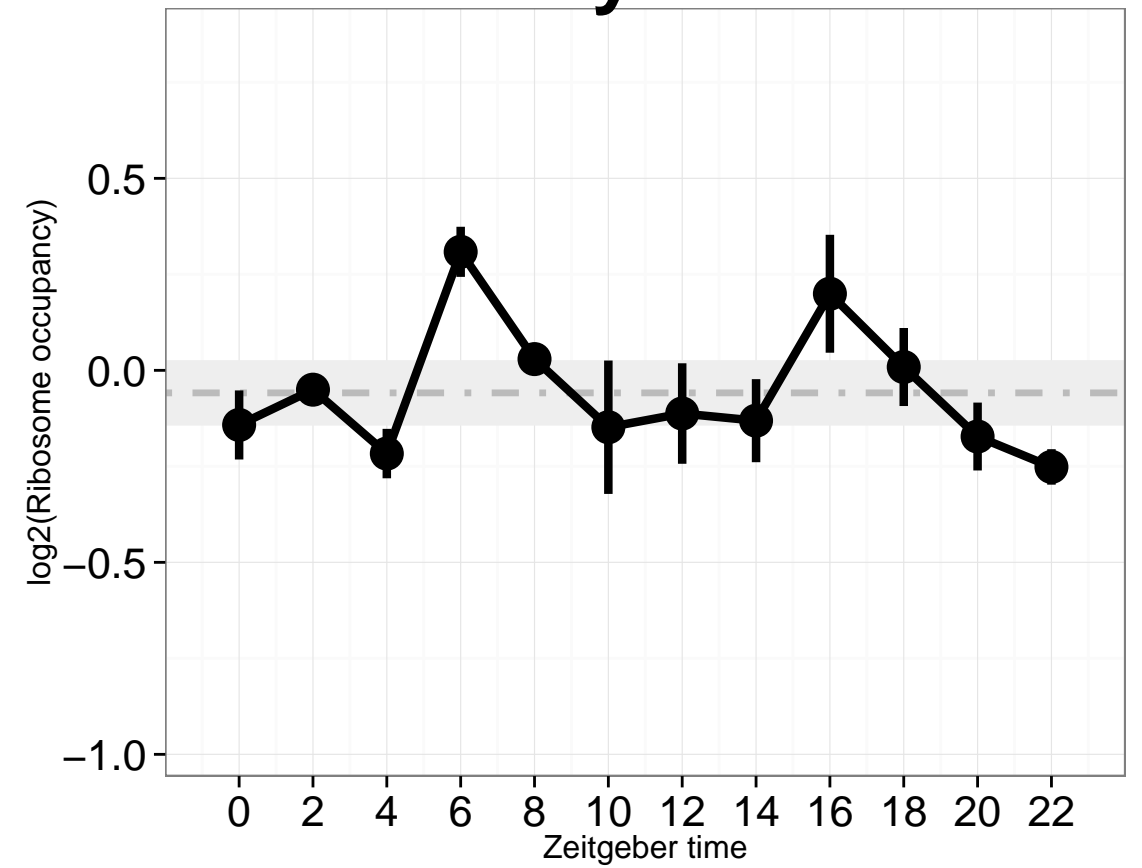

Supplement: Supplementary file 2174 [file 1]

# Fam102b

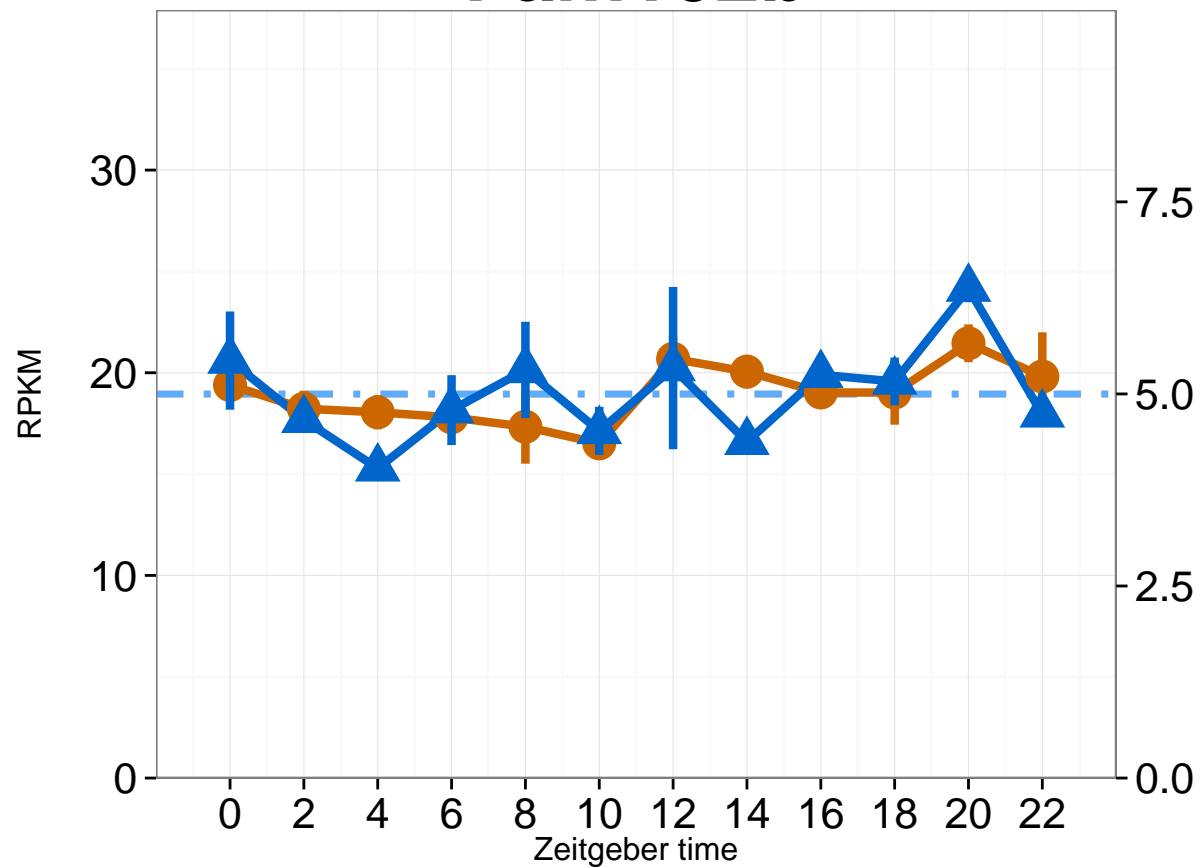

# Fam102b

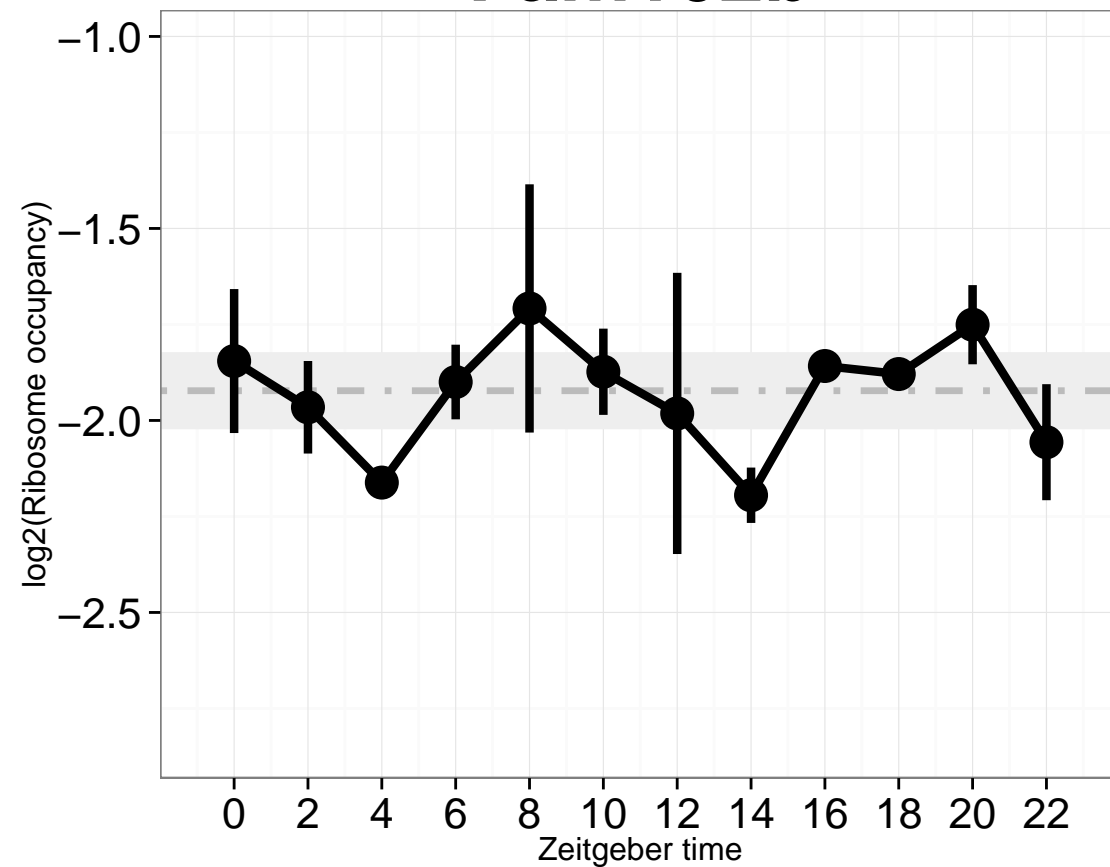

Supplement: Supplementary file 2175 [file 1]

## Dhx57

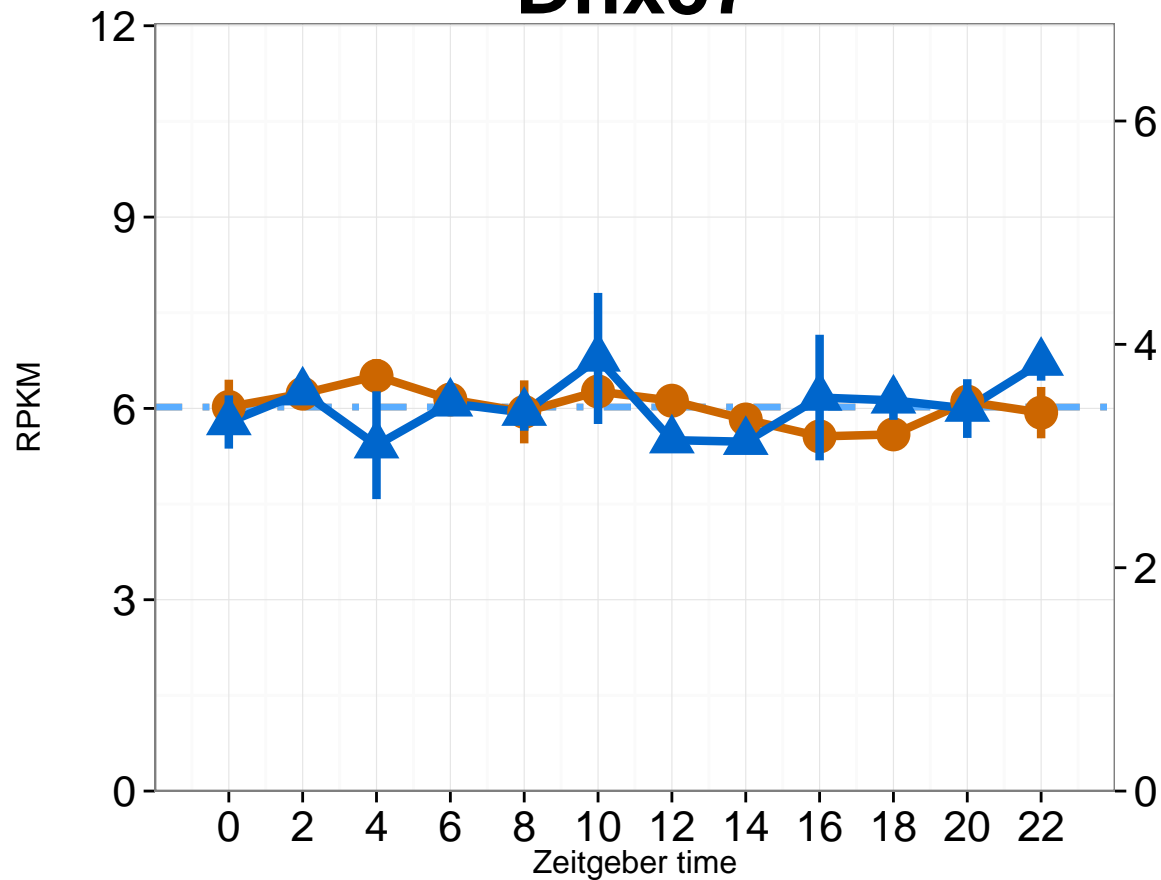

## Dhx57

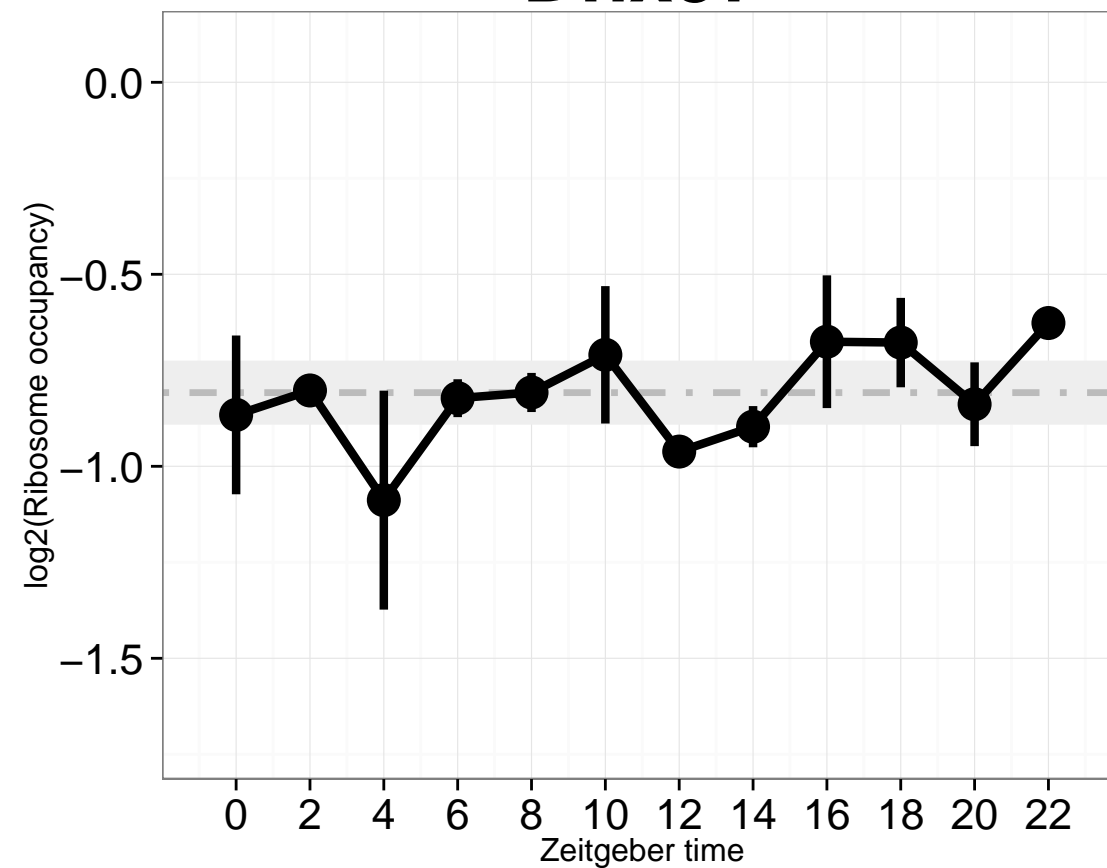

Supplement: Supplementary file 2176 [file 1]

## Wif1

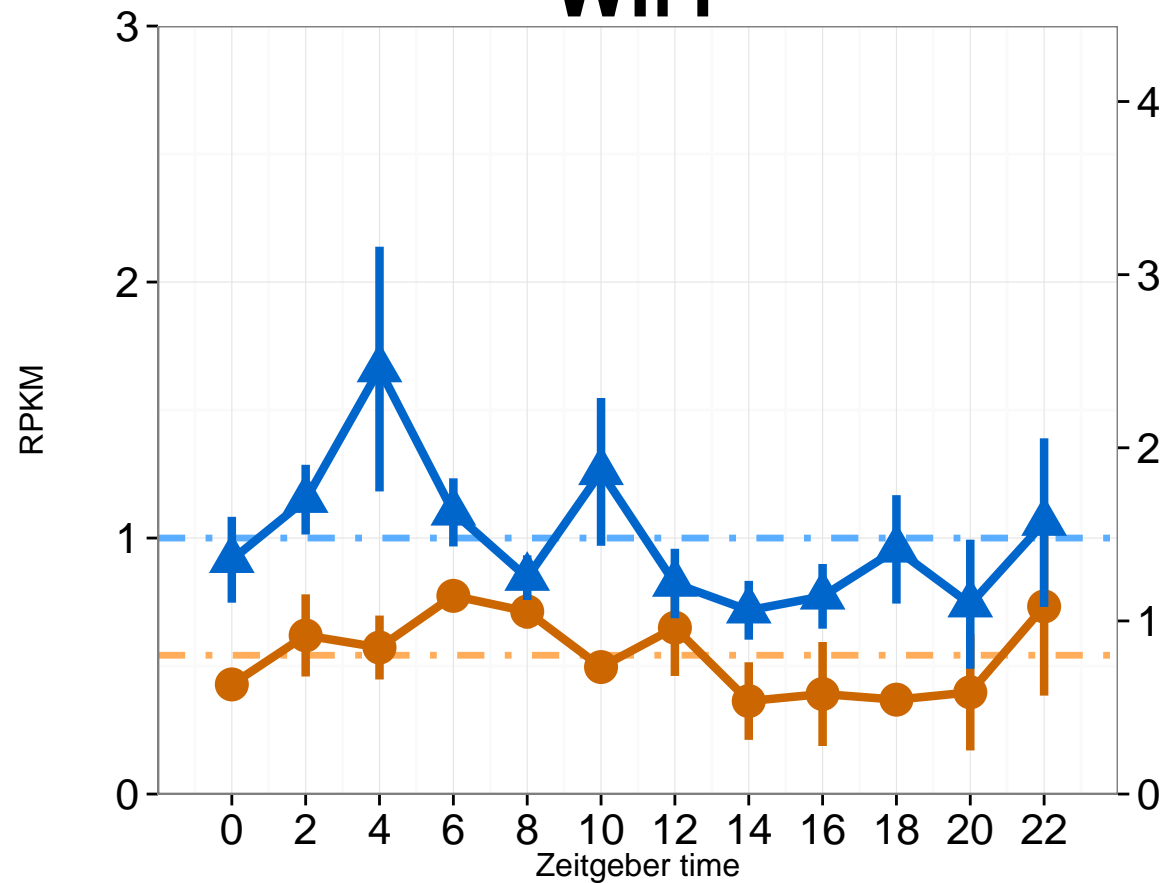

## Wif1

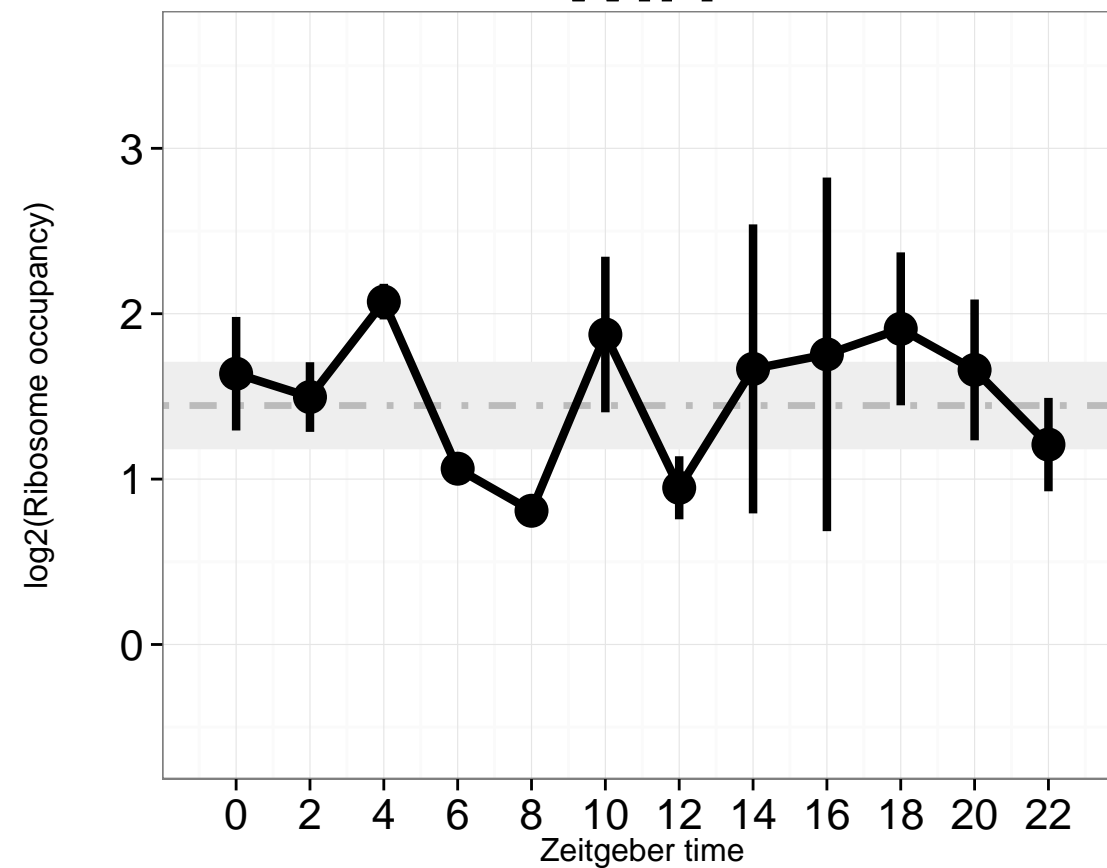

Supplement: Supplementary file 2177 [file 1]

## Phf10

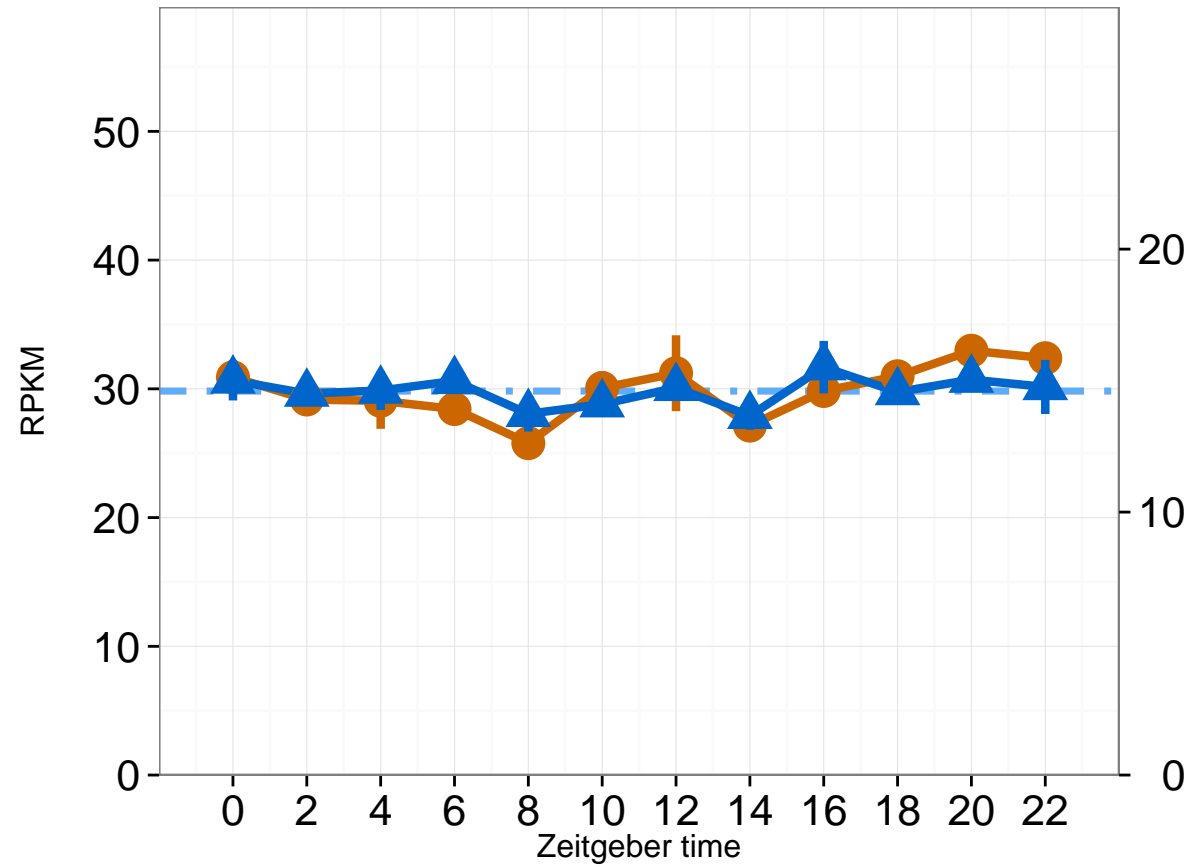

## Phf10

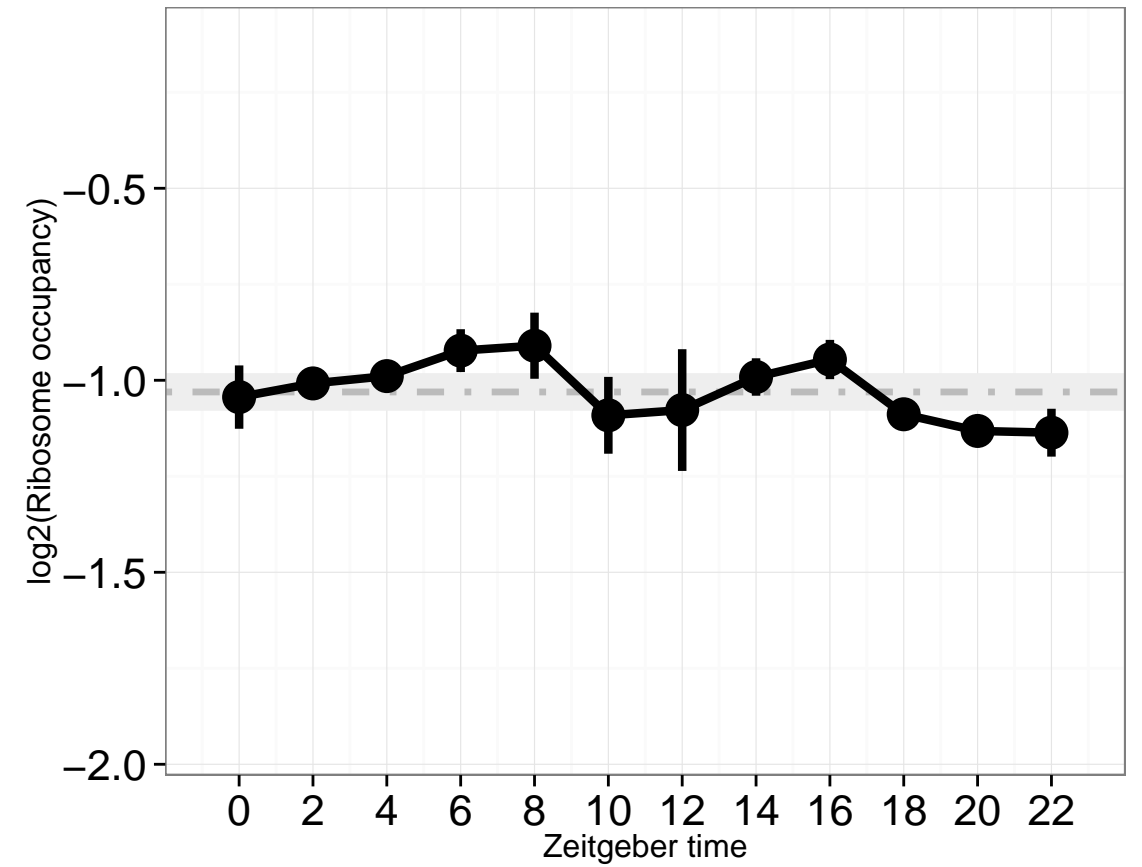

Supplement: Supplementary file 2178 [file 1]

# Me1

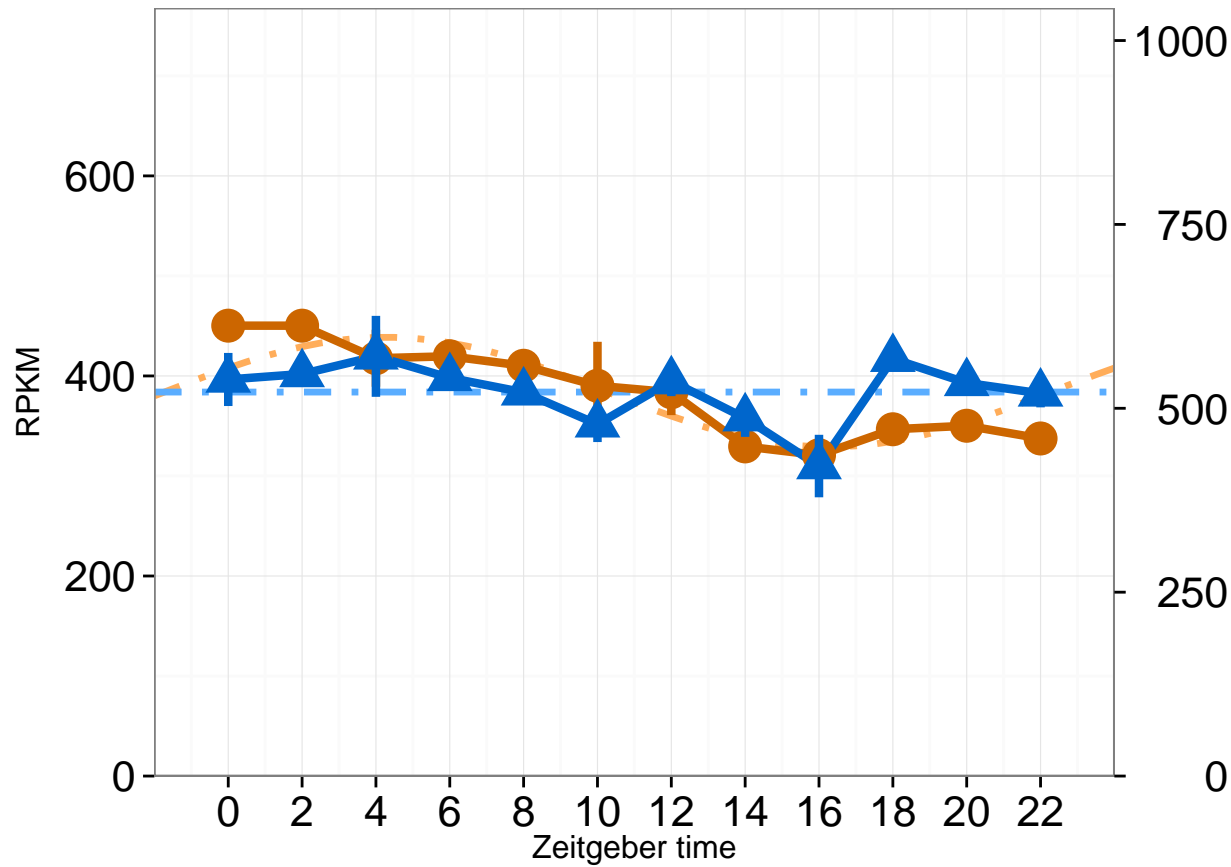

# Me1

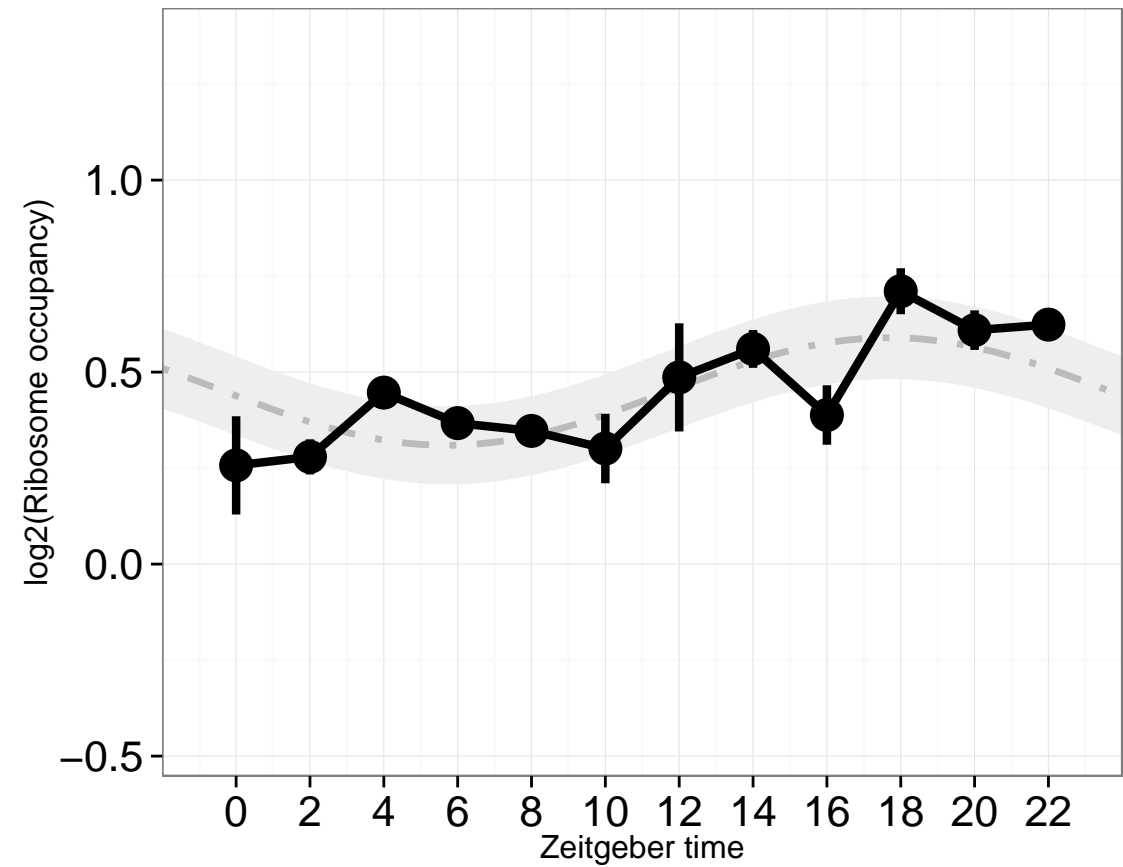

Supplement: Supplementary file 2179 [file 1]

## Coa4

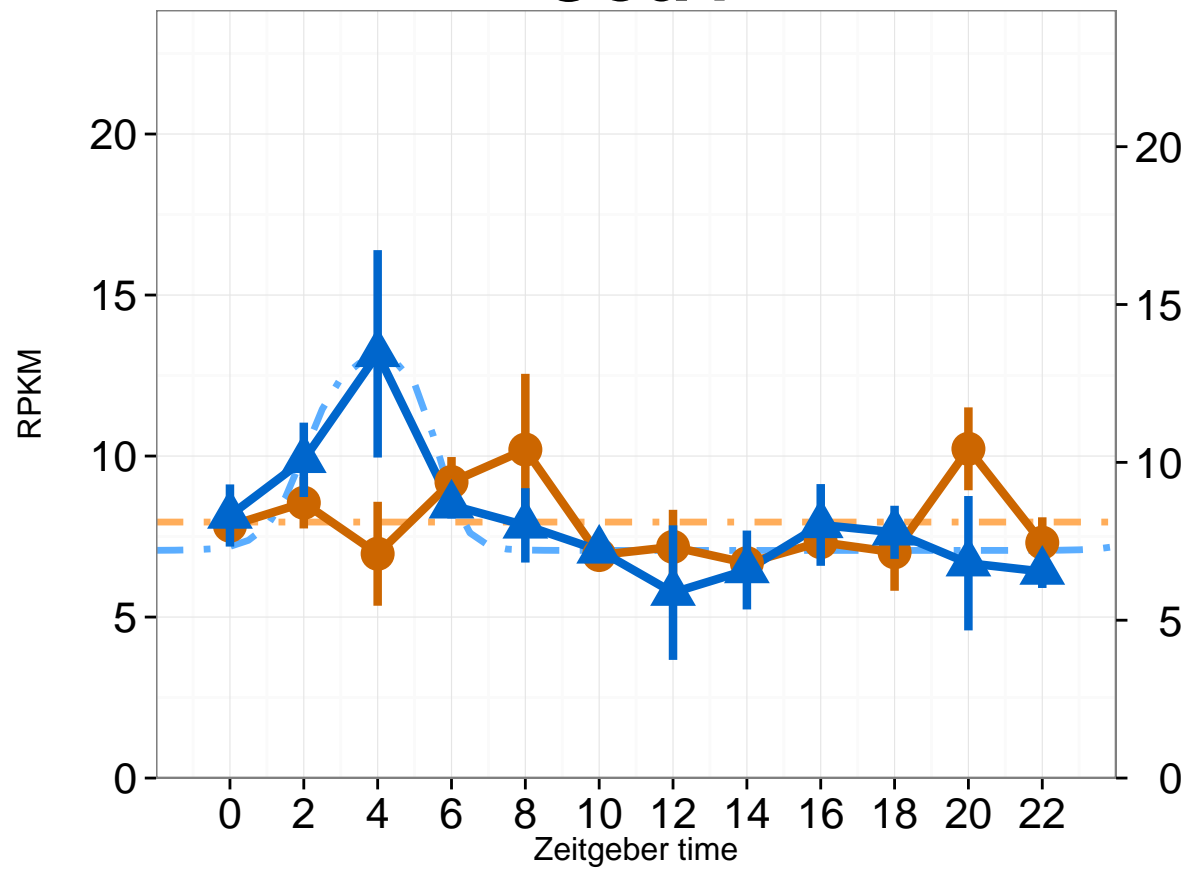

## Coa4

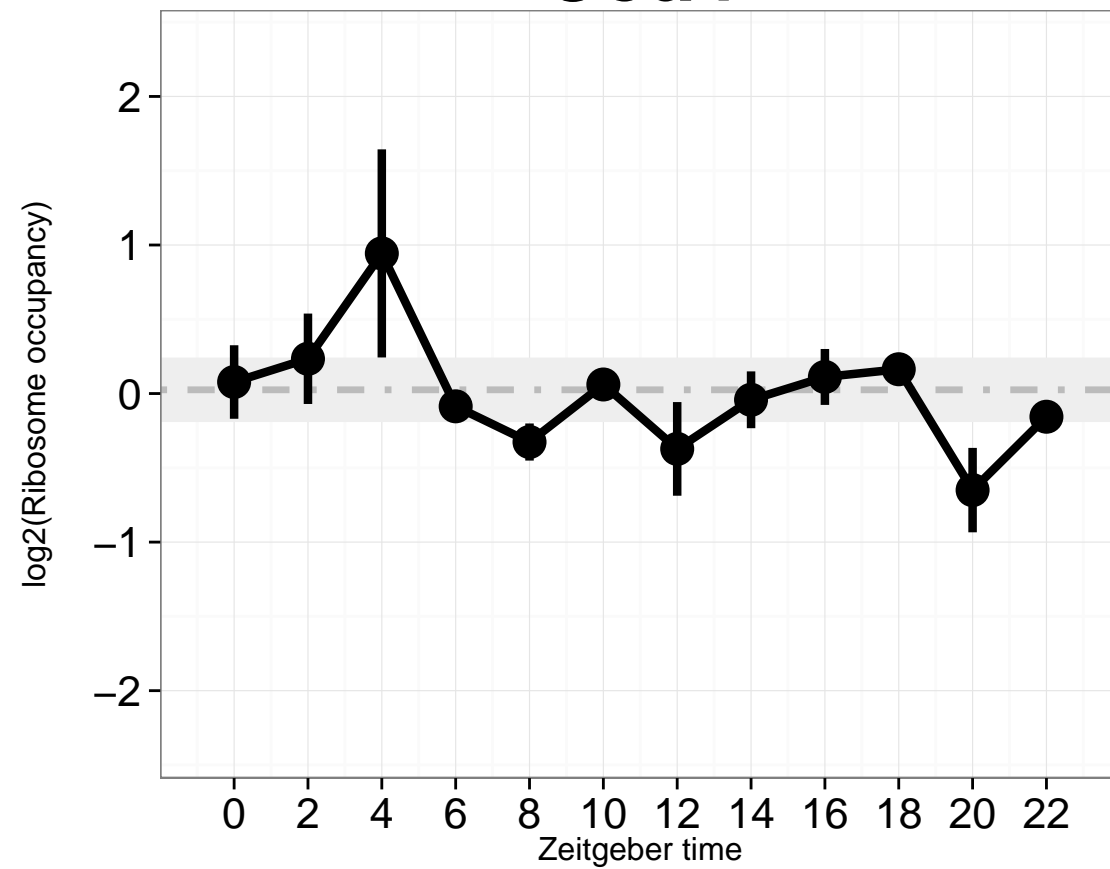

Supplement: Supplementary file 2180 [file 1]

# Mdn1

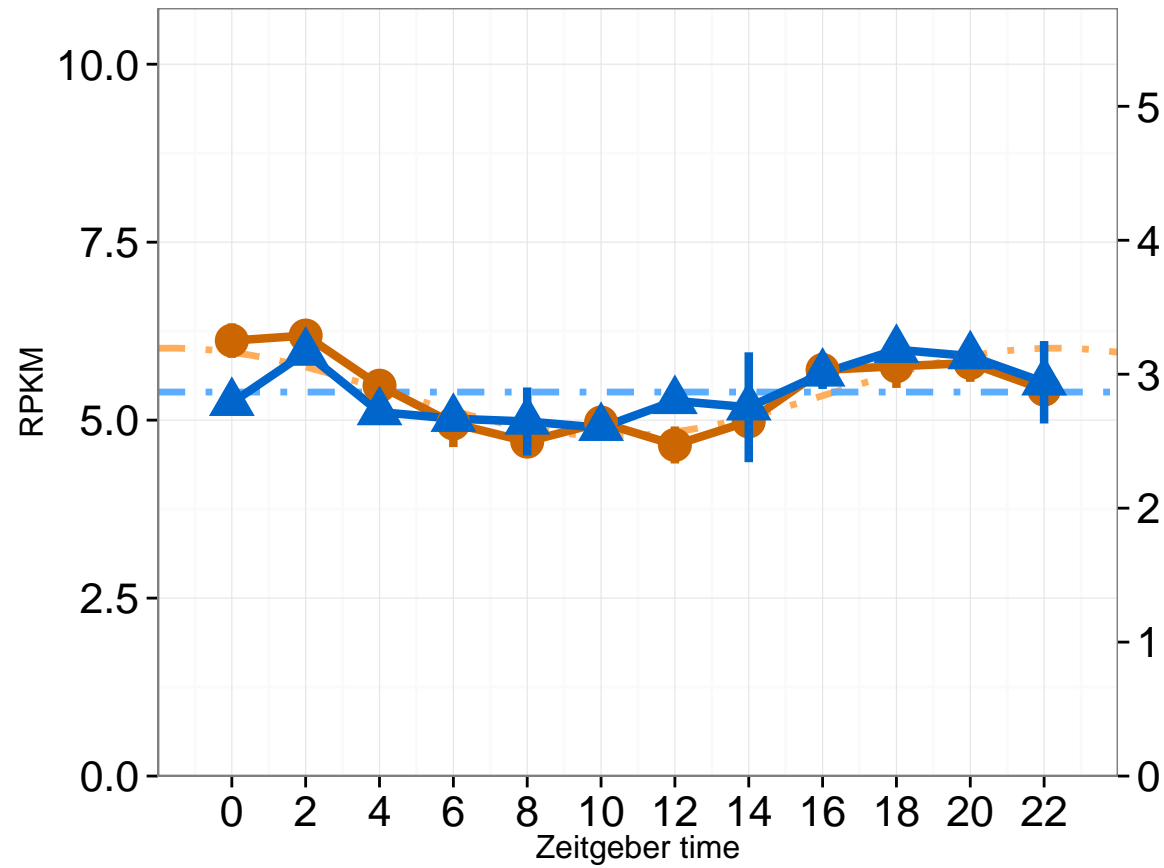

# Mdn1

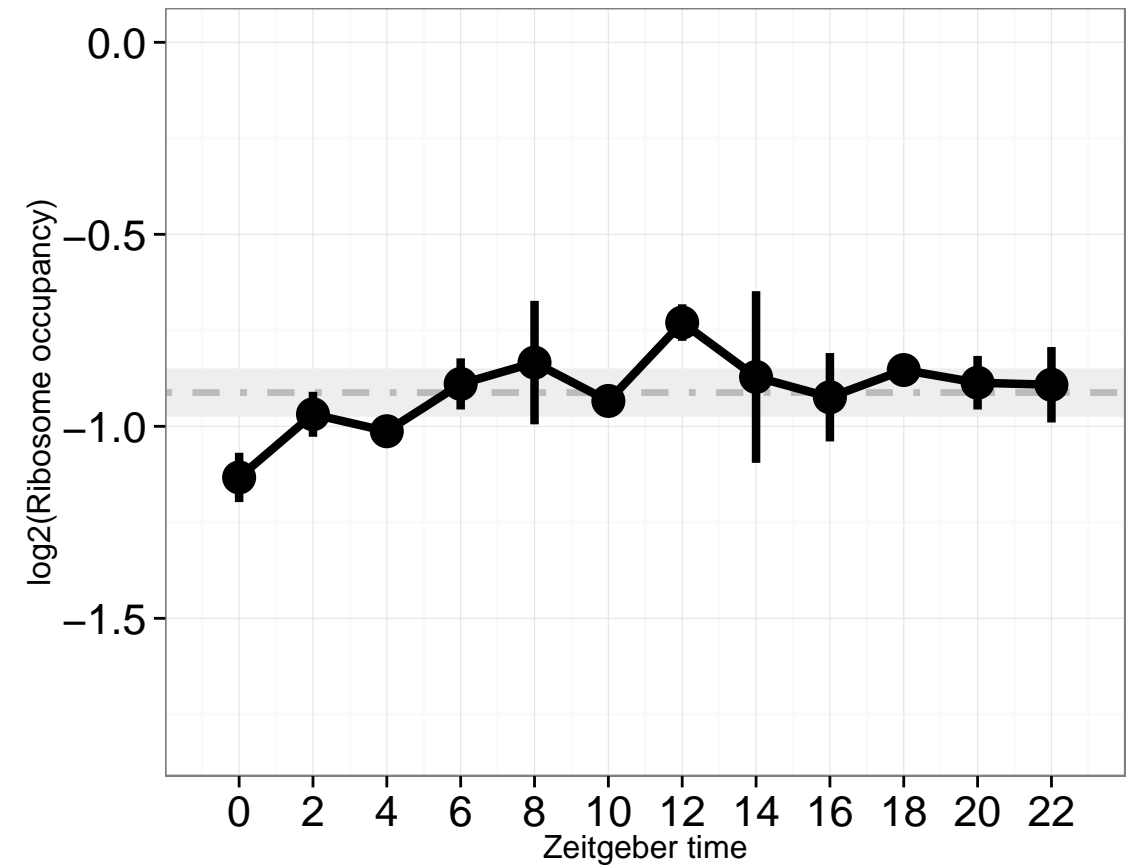

Supplement: Supplementary file 2181 [file 1]

## Trim33

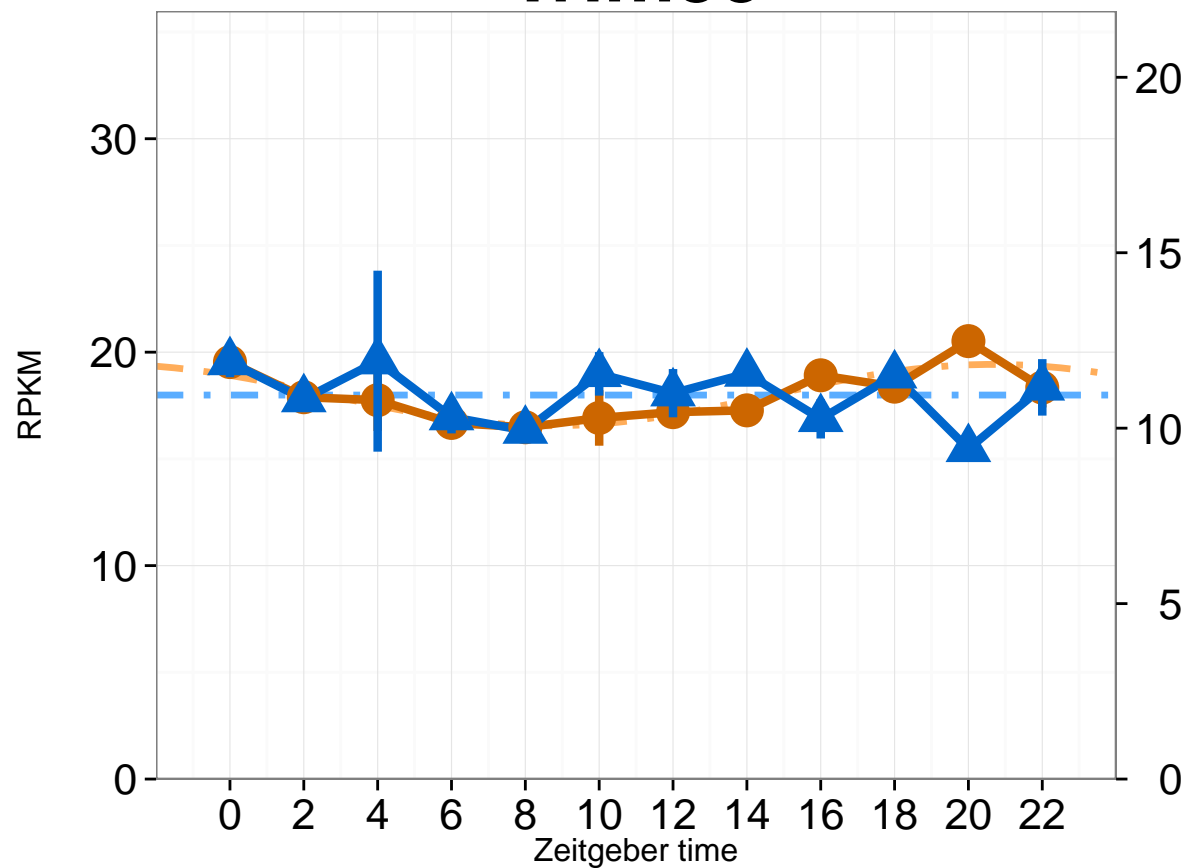

## Trim33

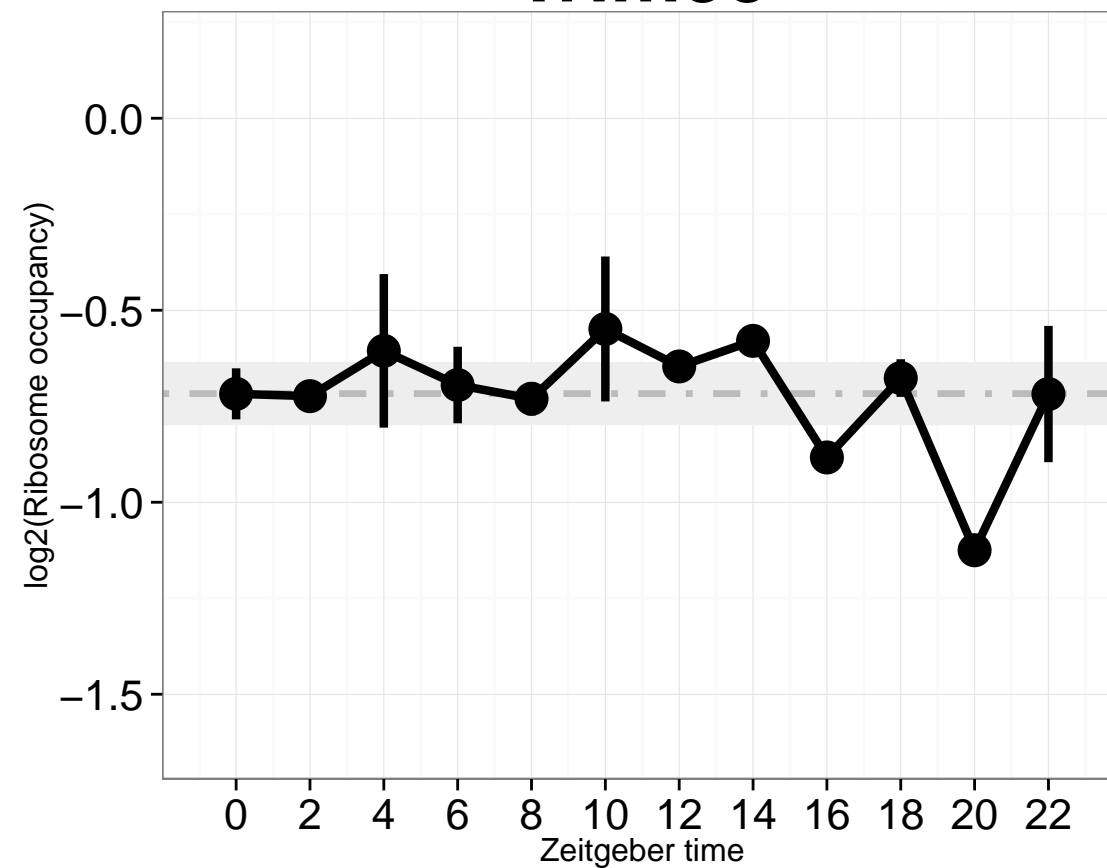

Supplement: Supplementary file 2182 [file 1]

## Abcc9

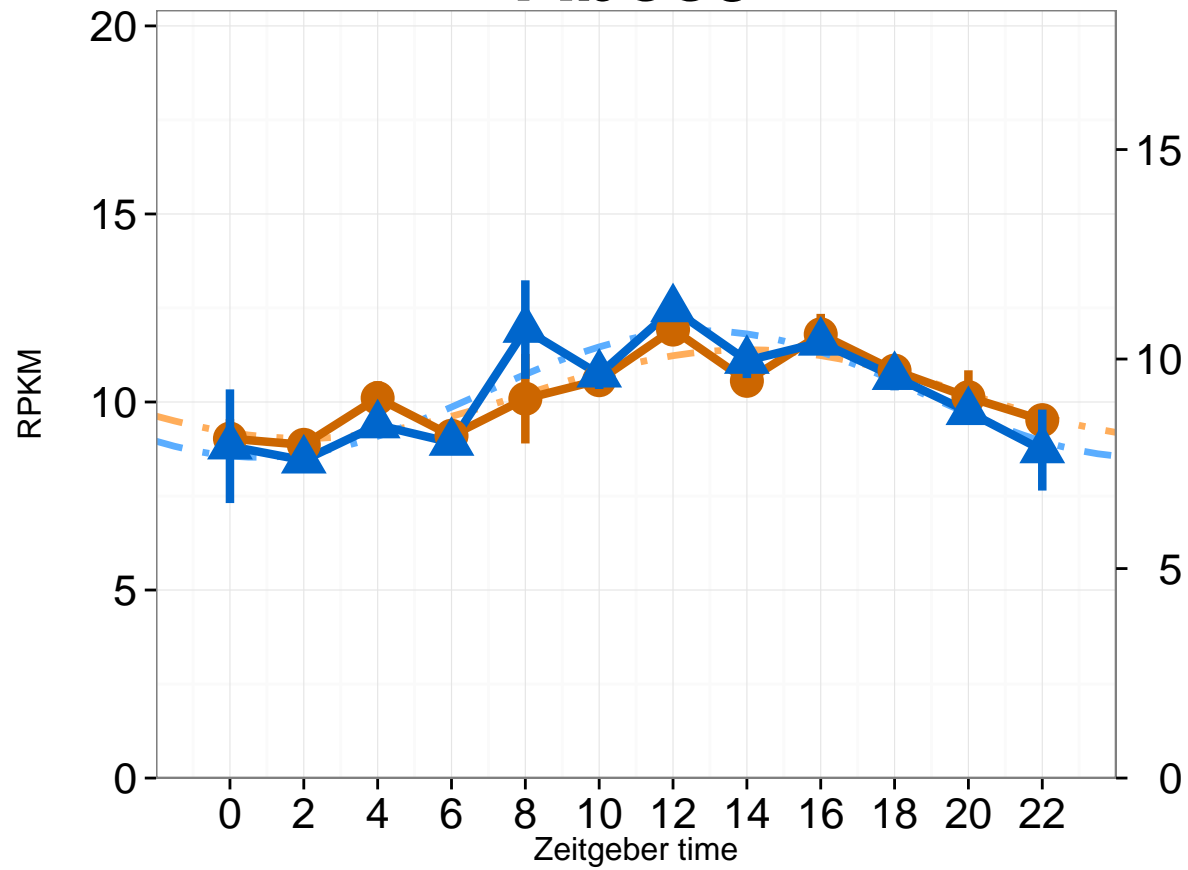

## Abcc9

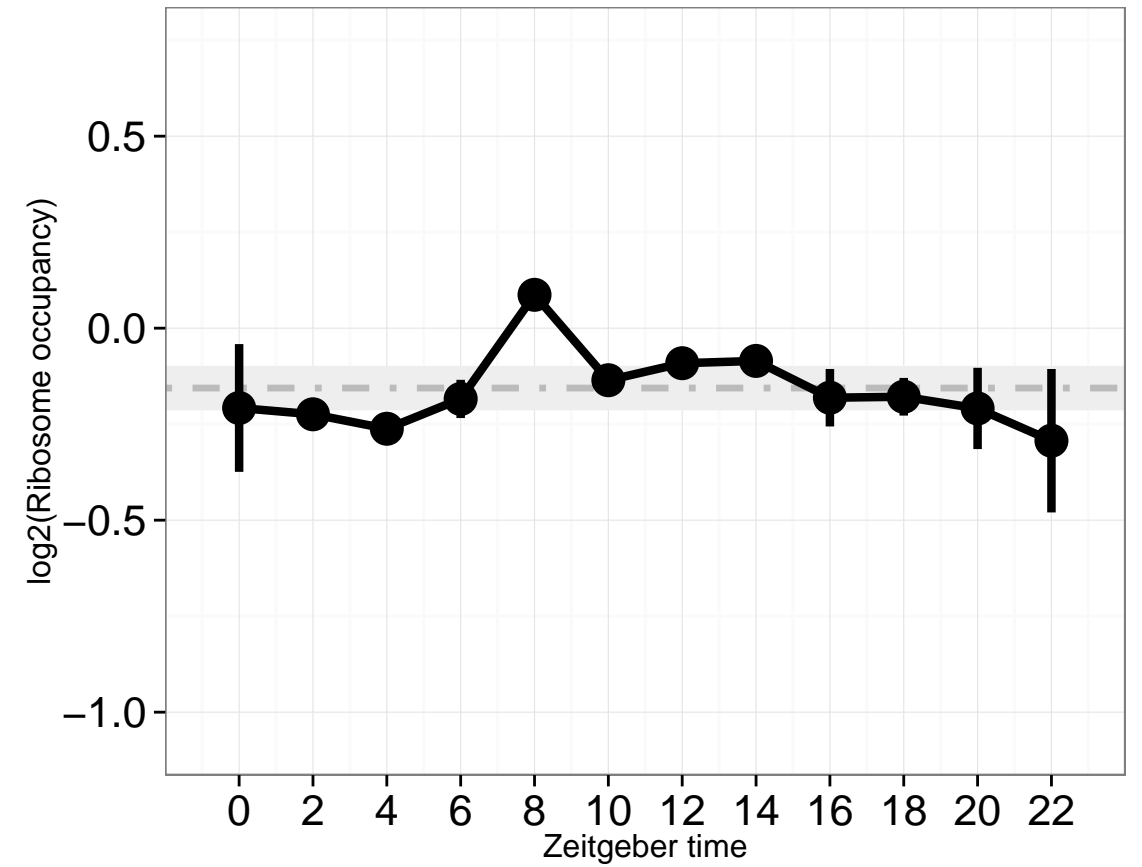

Supplement: Supplementary file 2183 [file 1]

# Gm7092

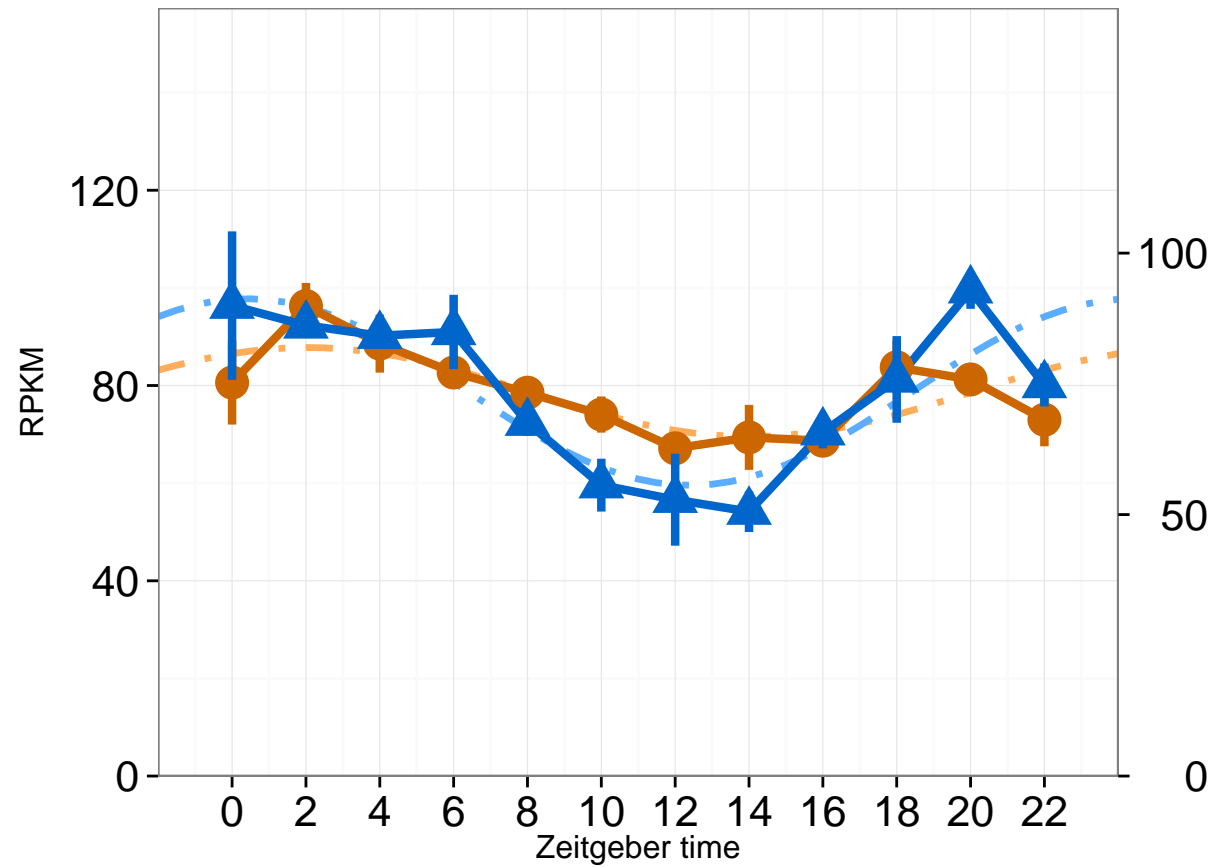

# Gm7092

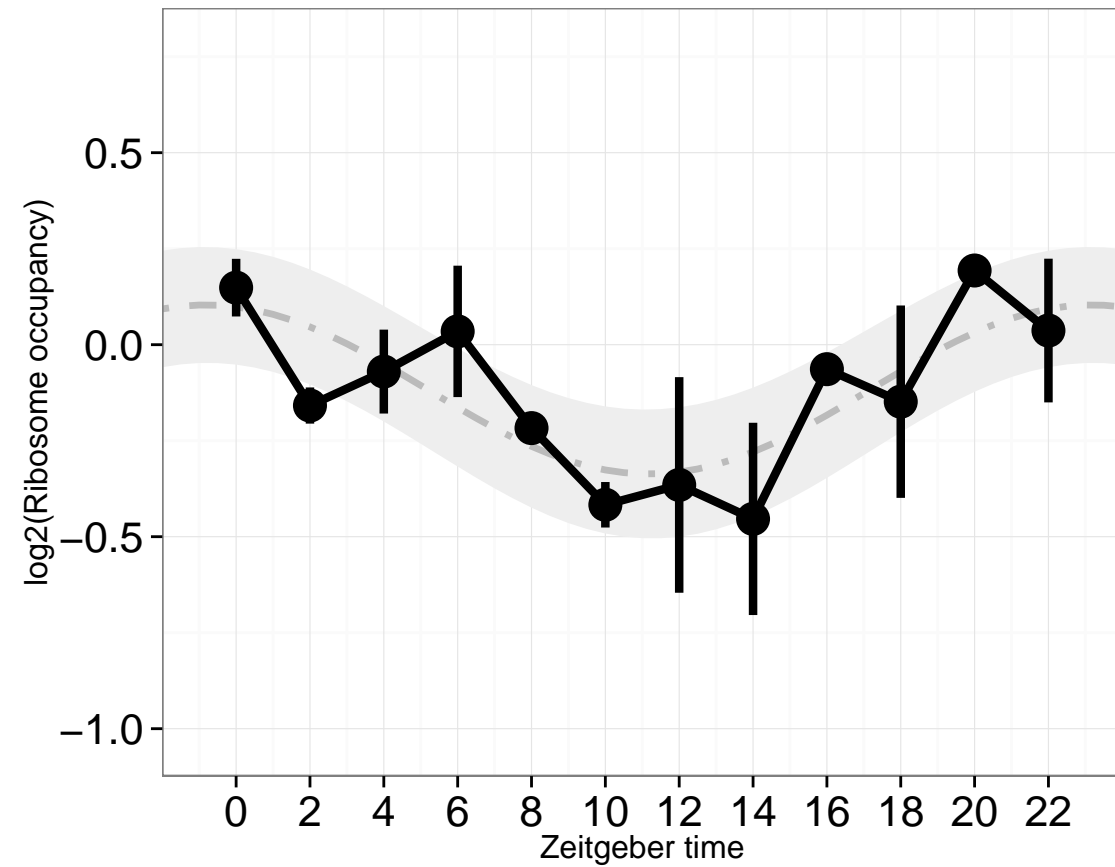

Supplement: Supplementary file 2184 [file 1]

# Micall1

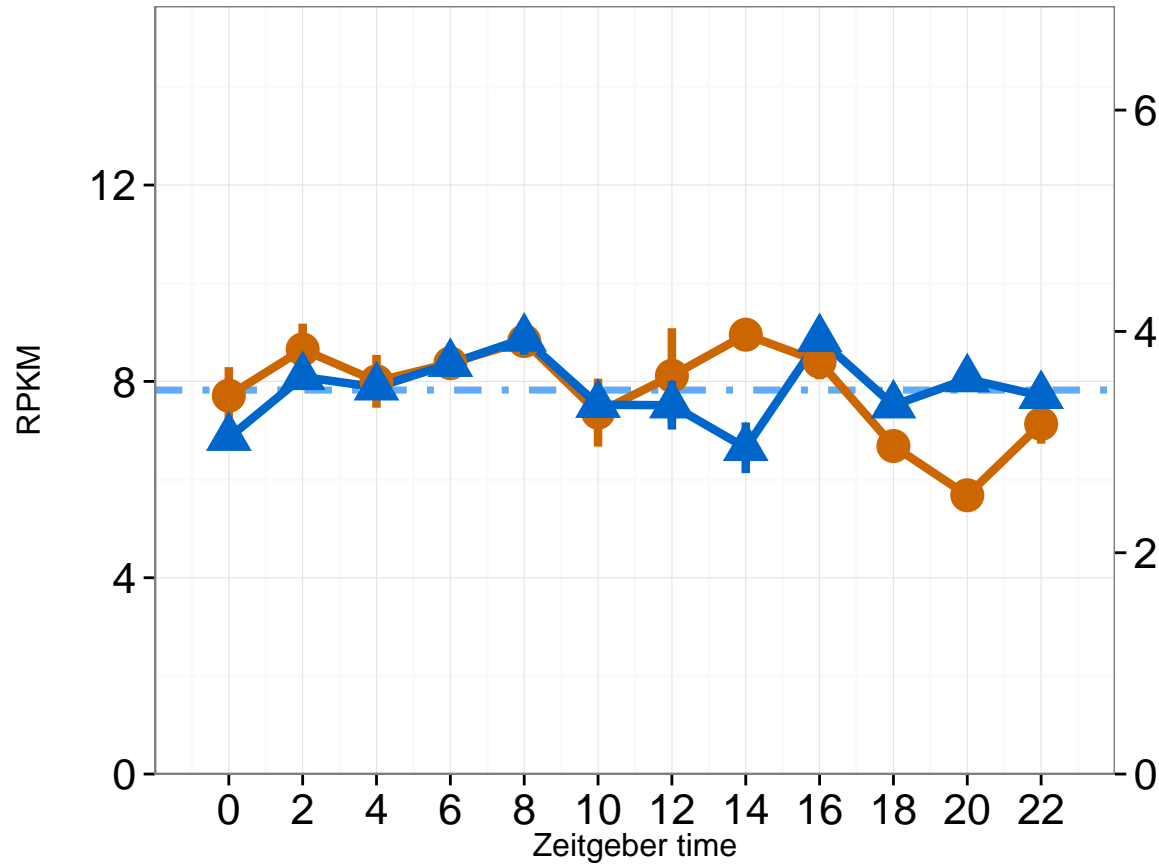

# Micall1

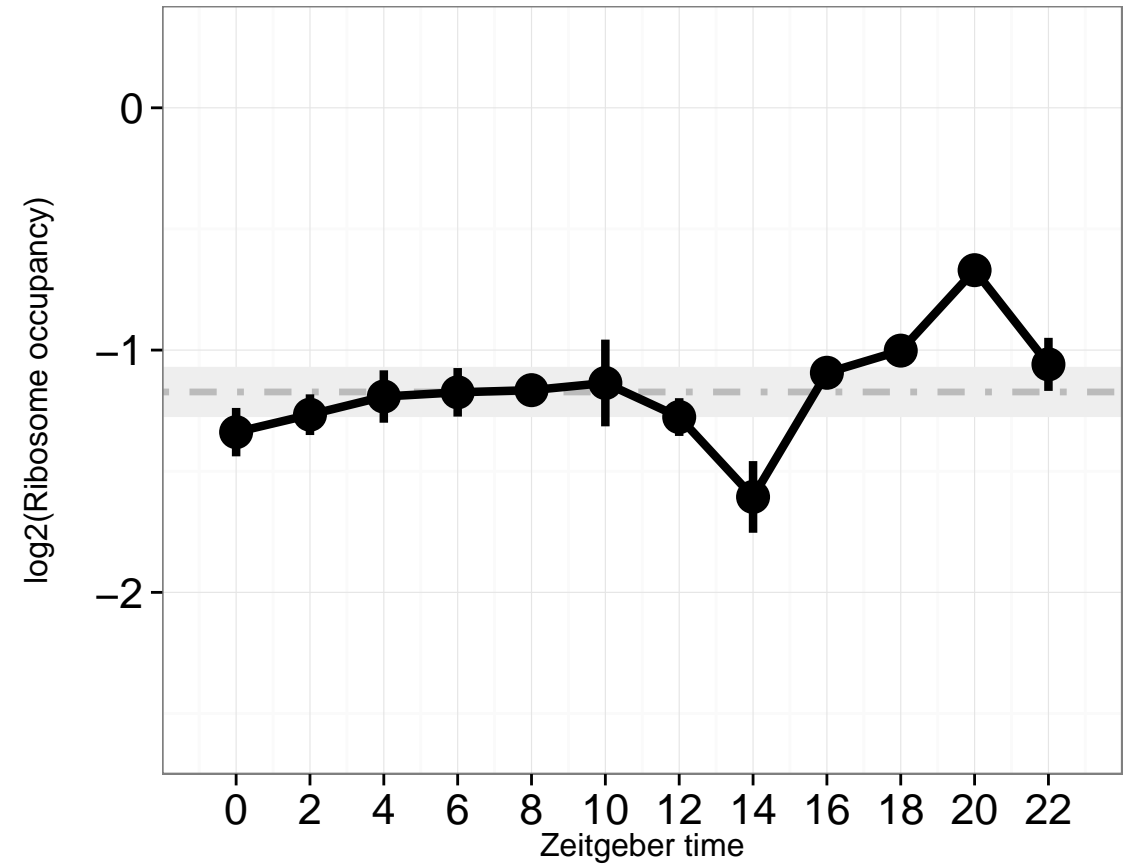

Supplement: Supplementary file 2185 [file 1]

## Aadac

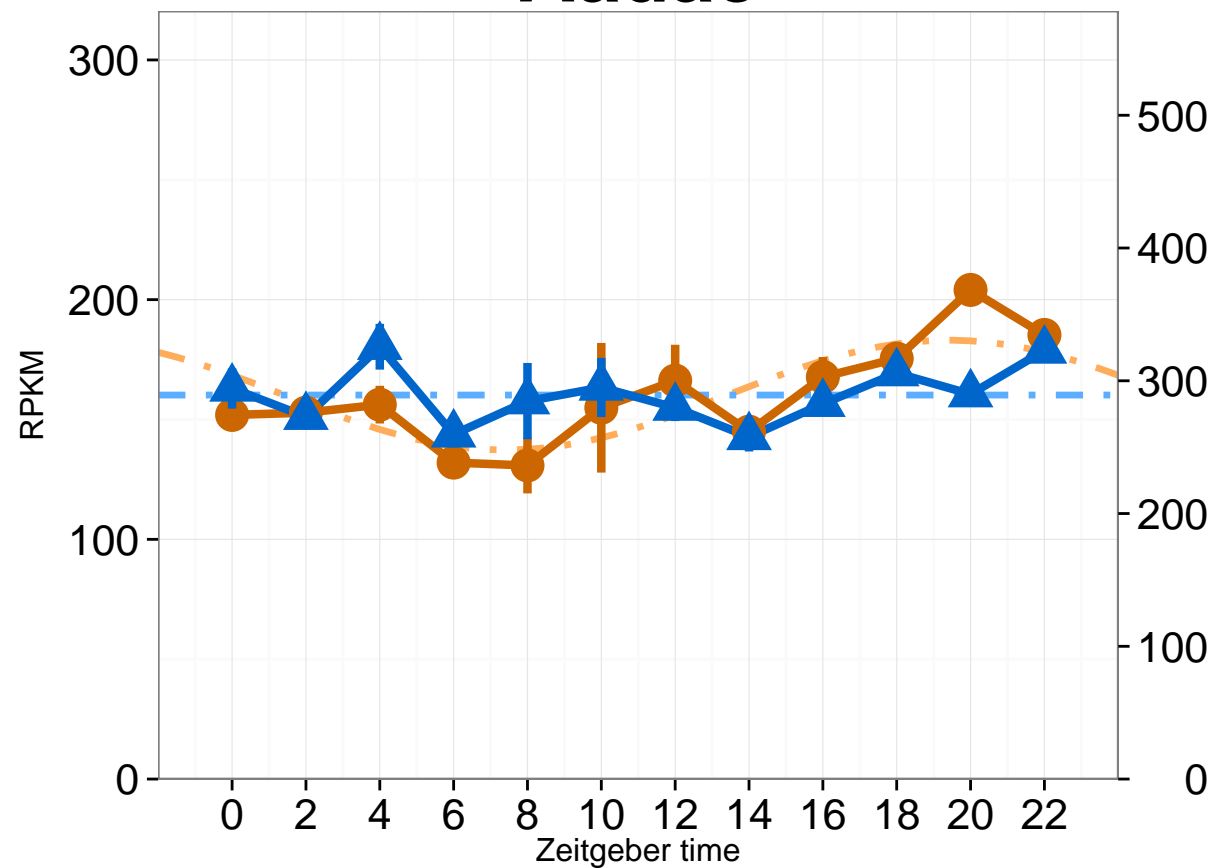

## Aadac

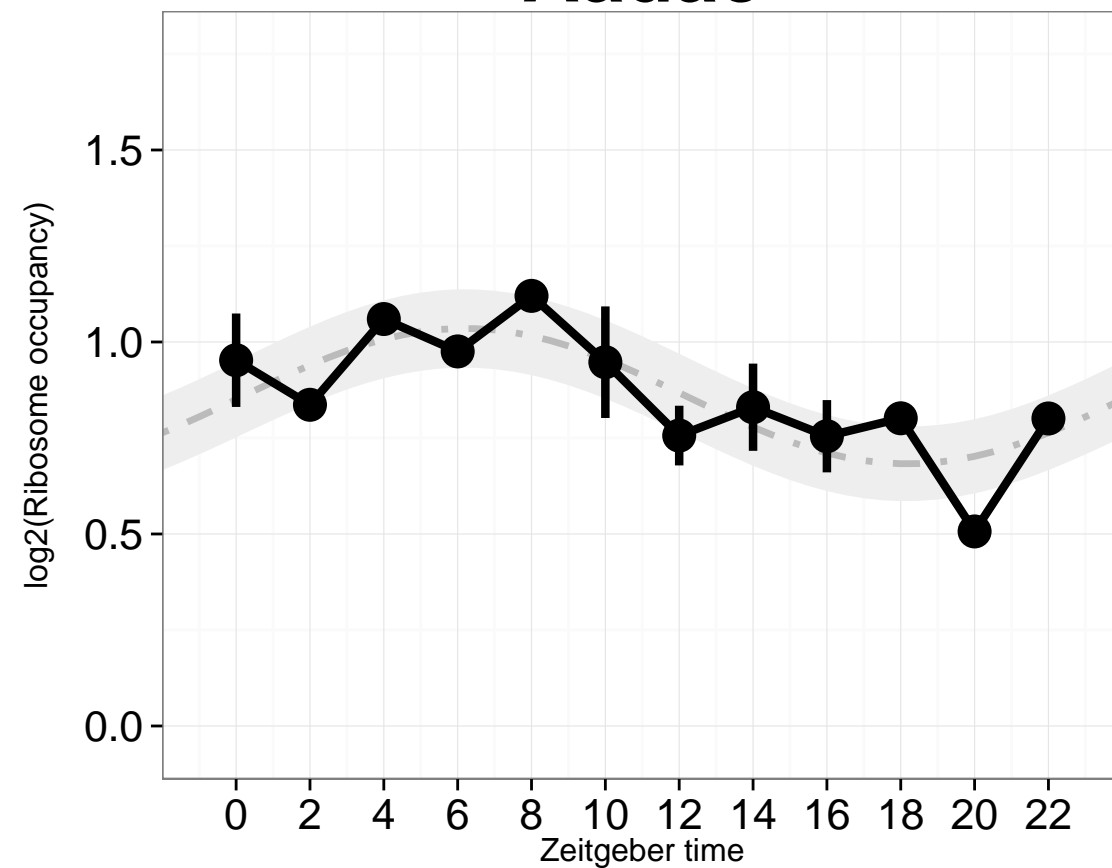

Supplement: Supplementary file 2186 [file 1]

## Dnase1

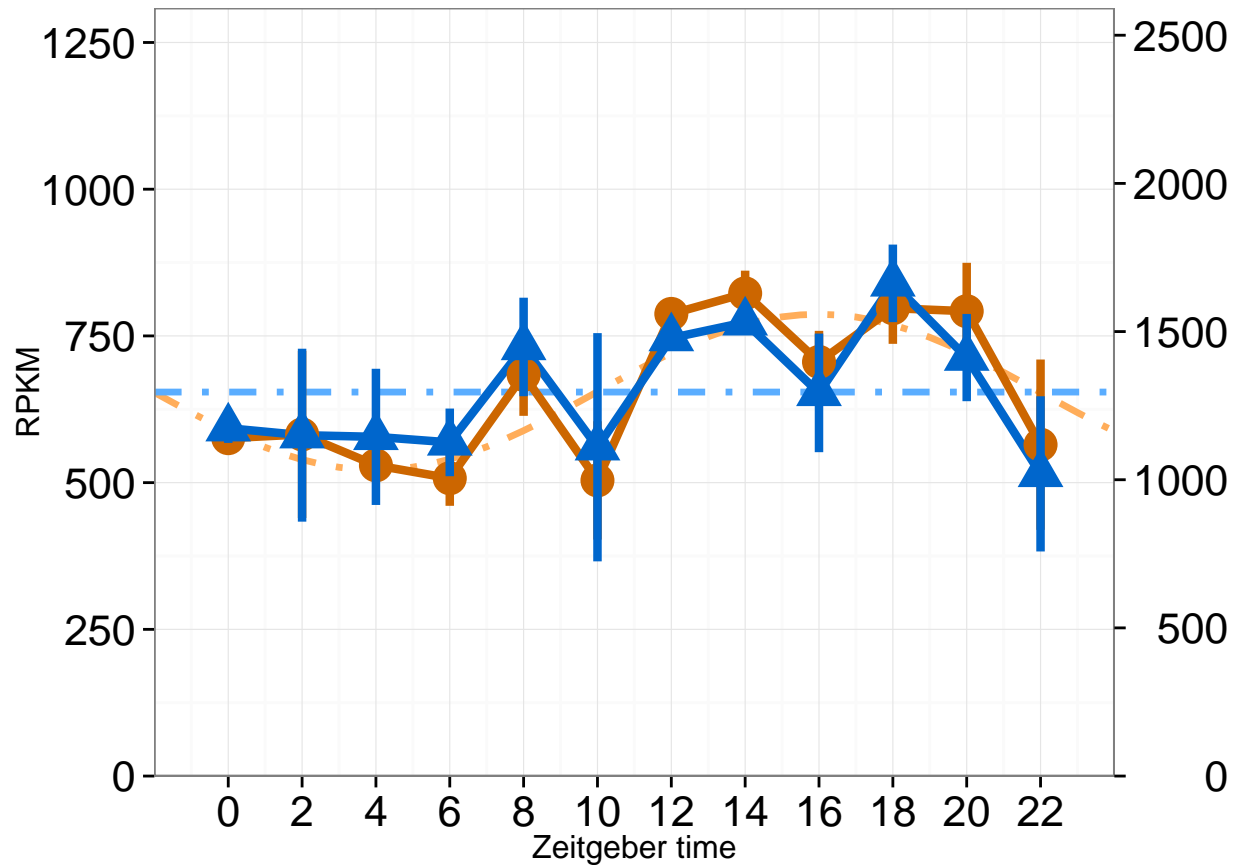

## Dnase1

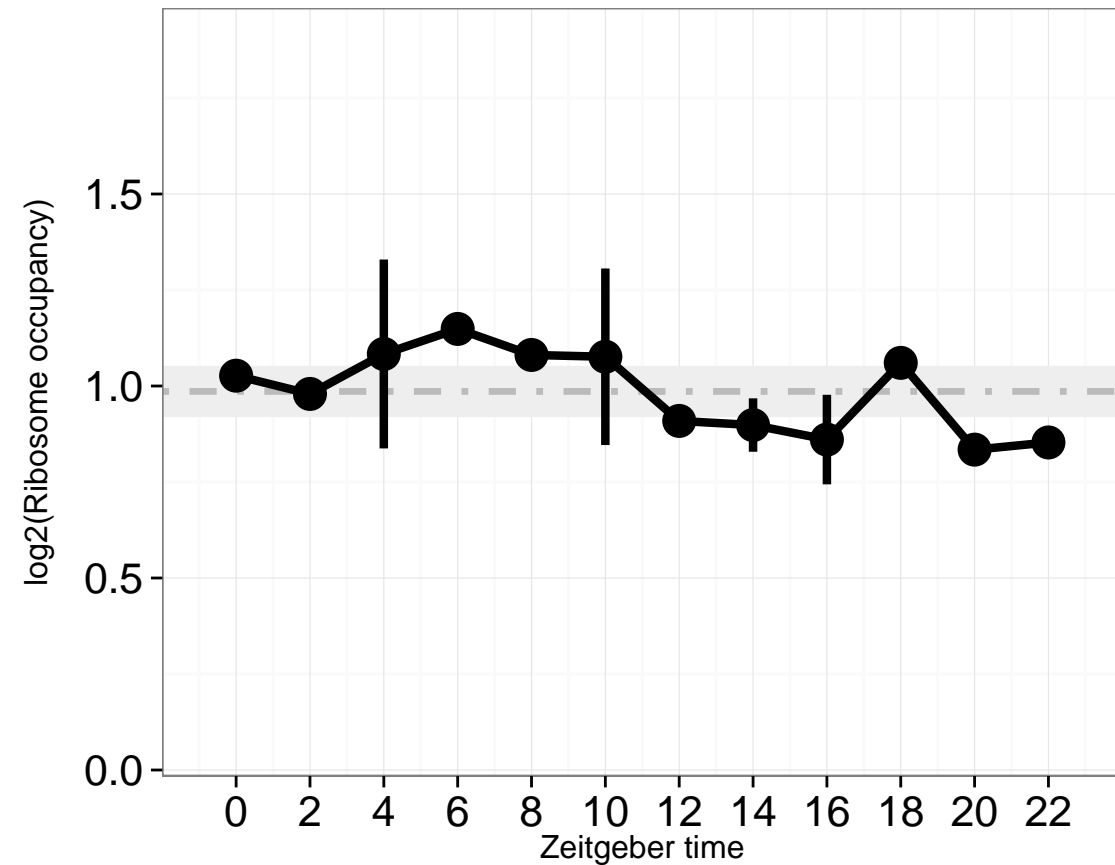

Supplement: Supplementary file 2187 [file 1]

# C77370

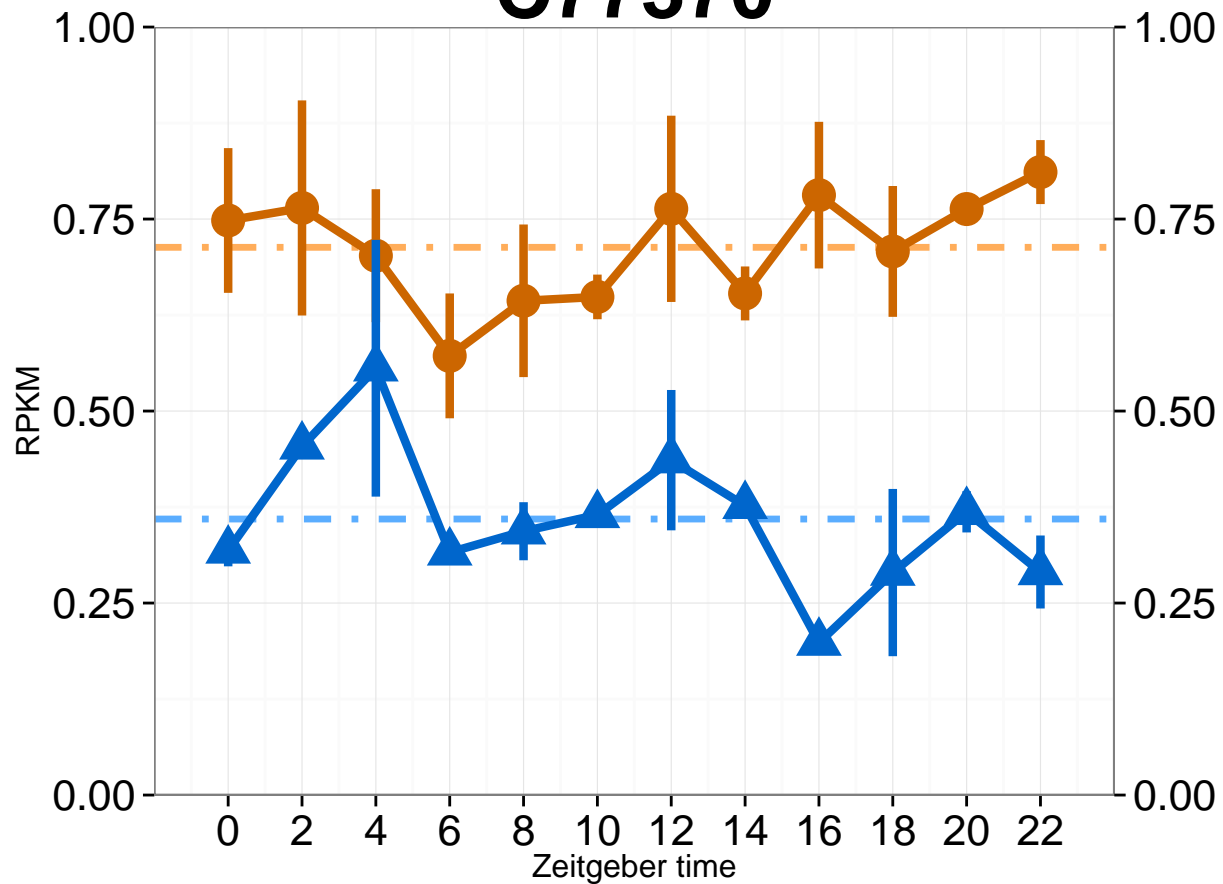

# C77370

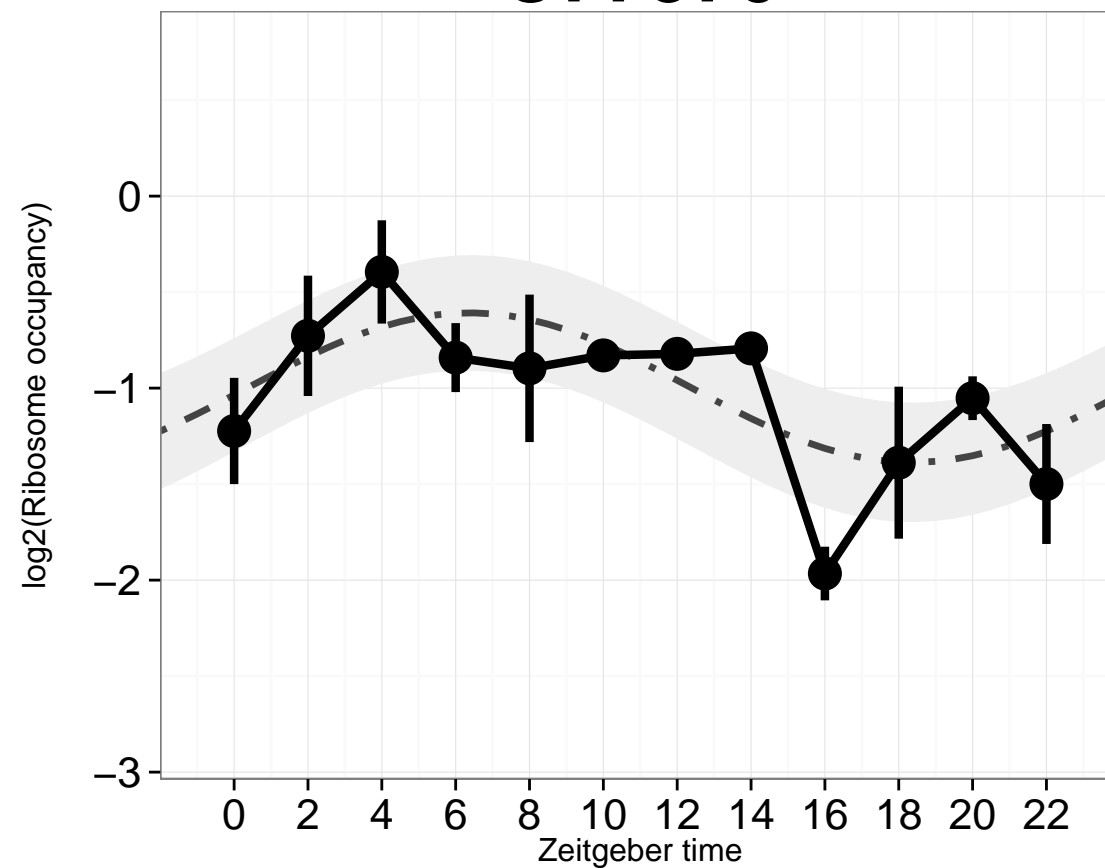

Supplement: Supplementary file 2188 [file 1]

# Trim13

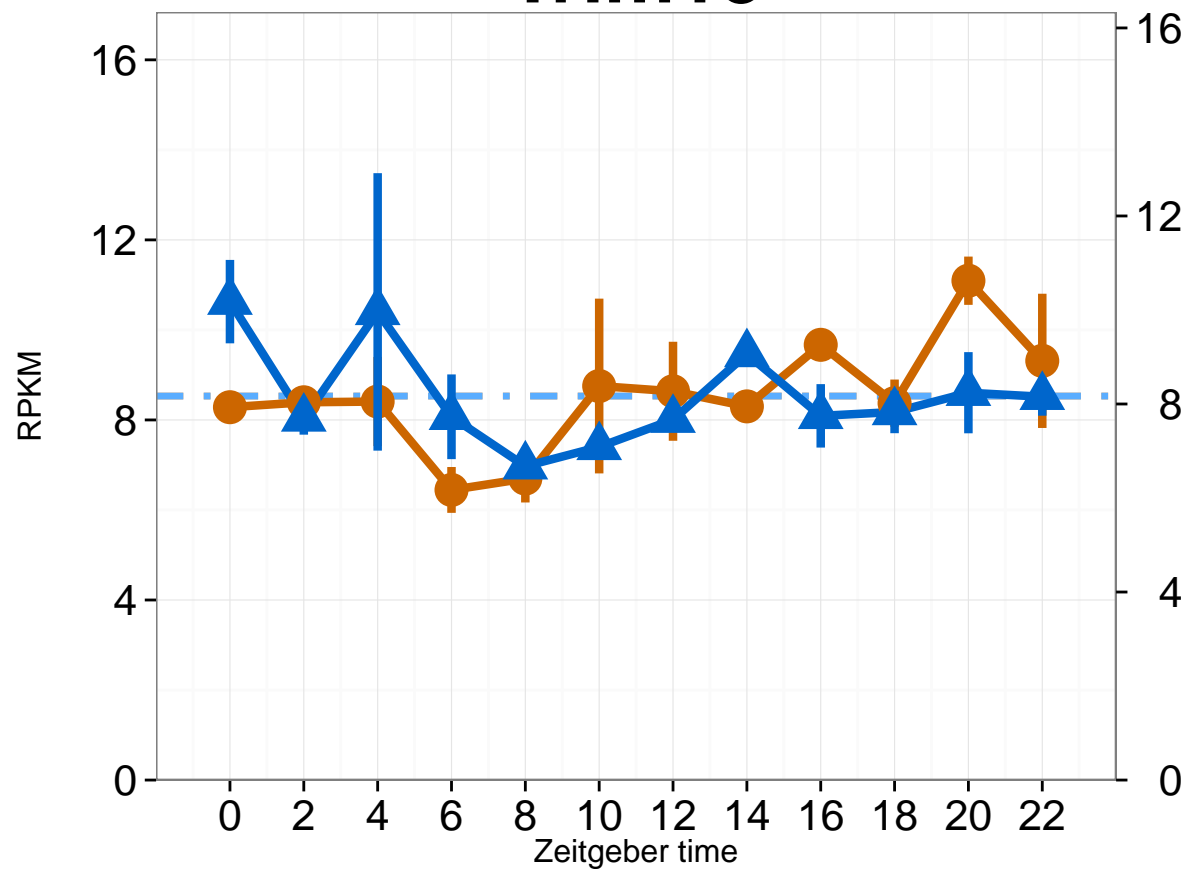

# Trim13

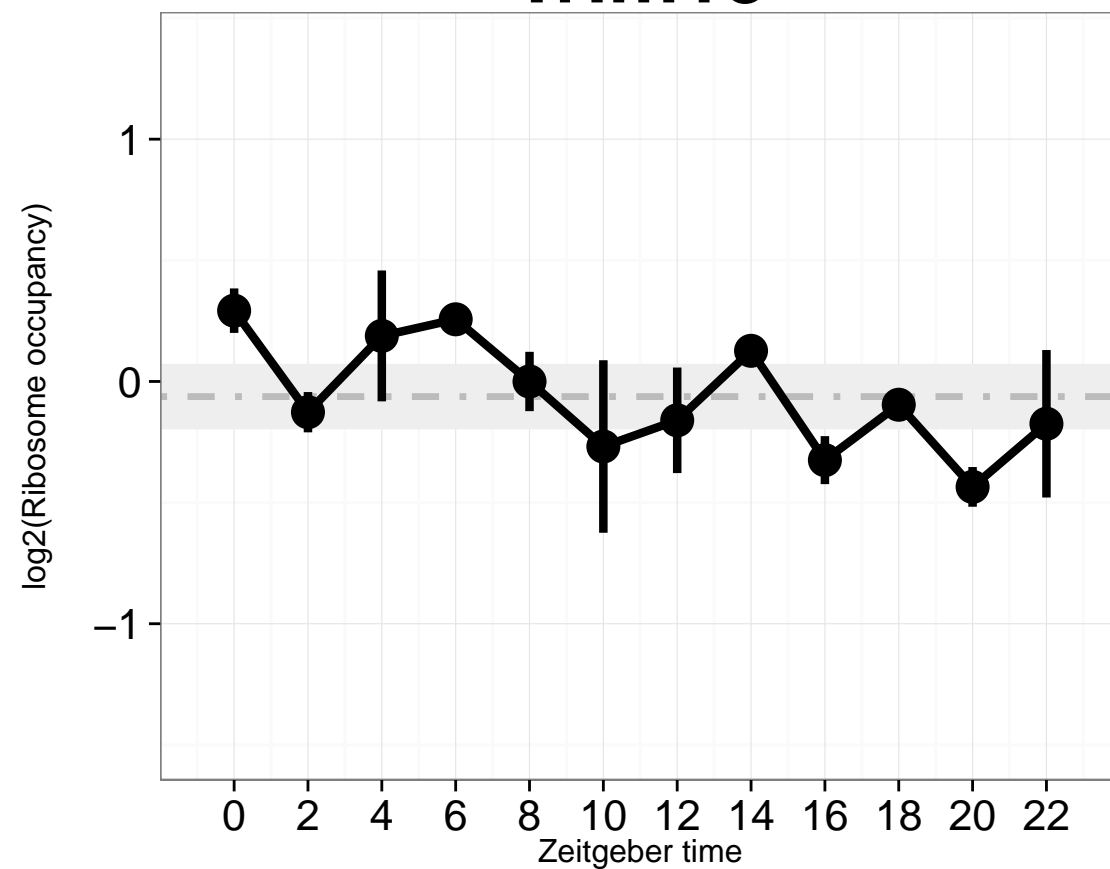

Supplement: Supplementary file 2189 [file 1]

# Fam65a

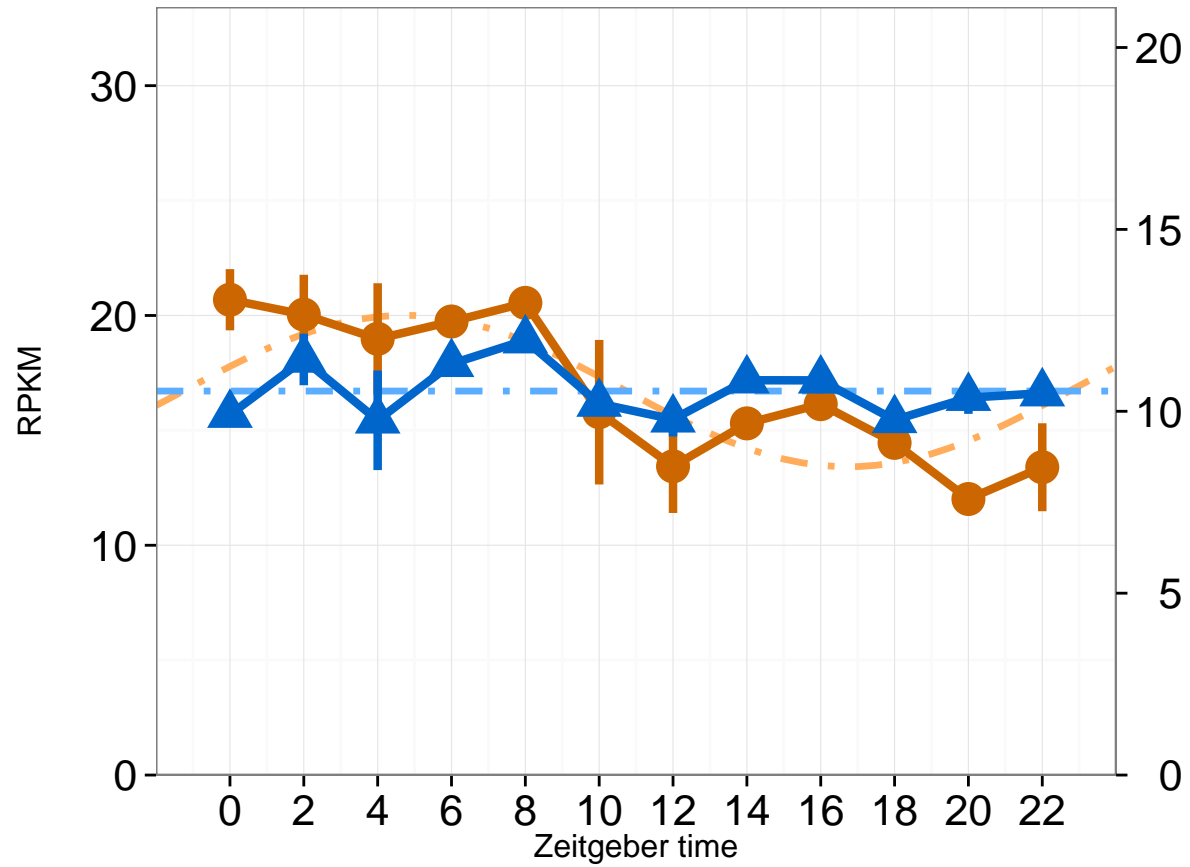

# Fam65a

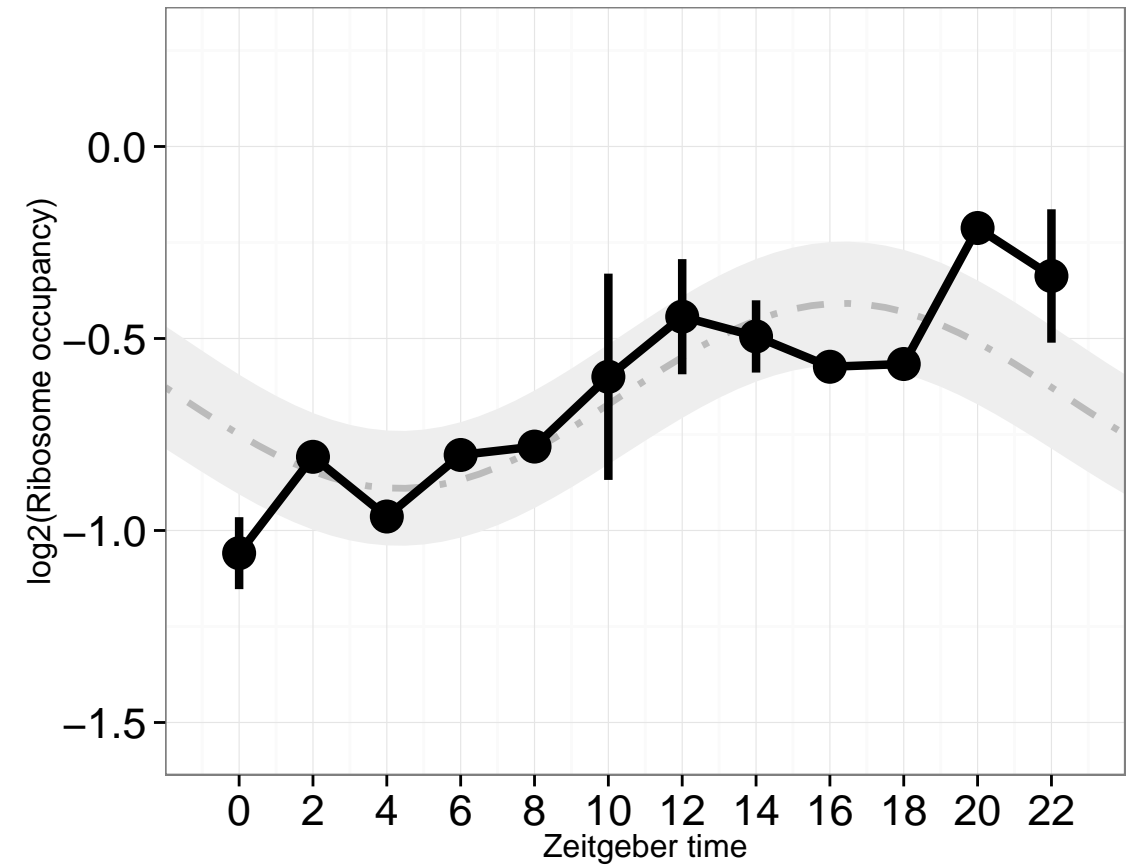

Supplement: Supplementary file 2190 [file 1]

# Rasal3

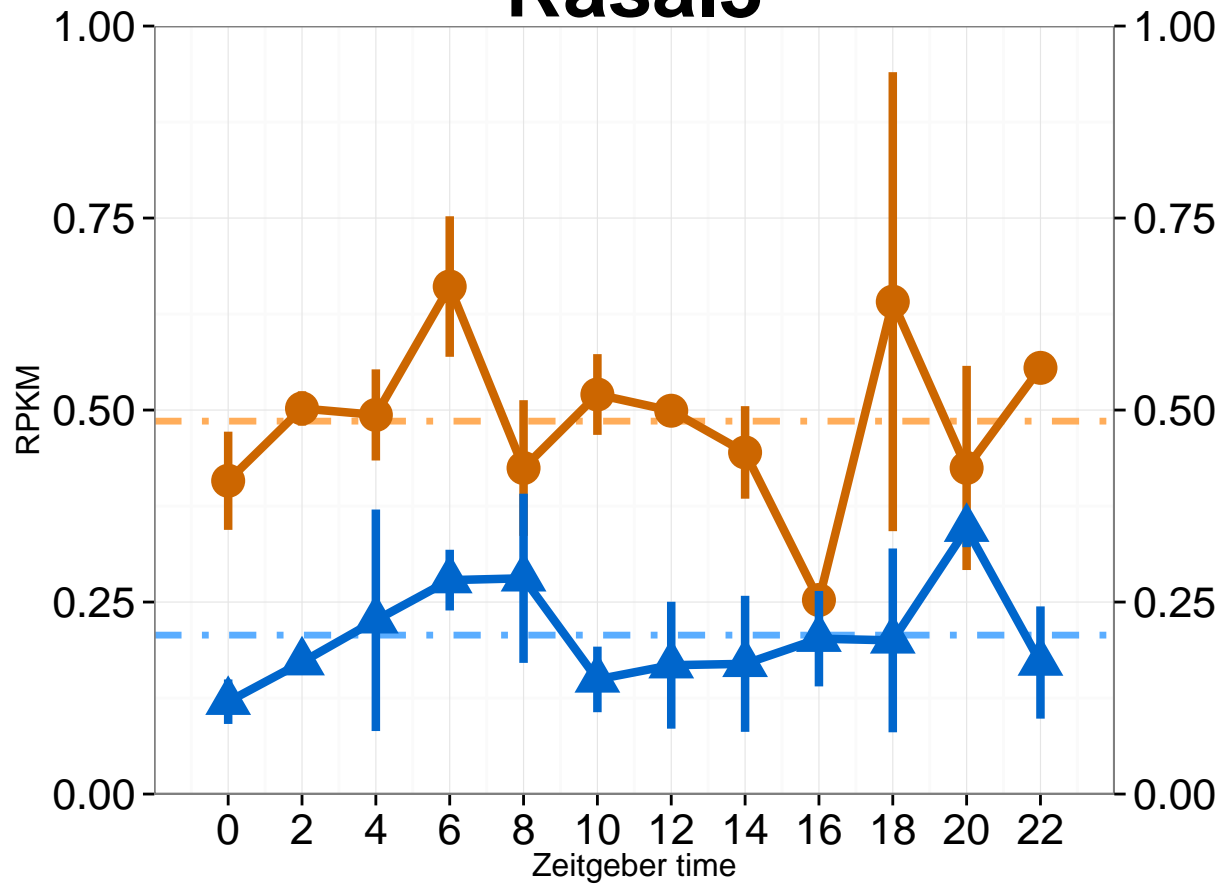

# Rasal3

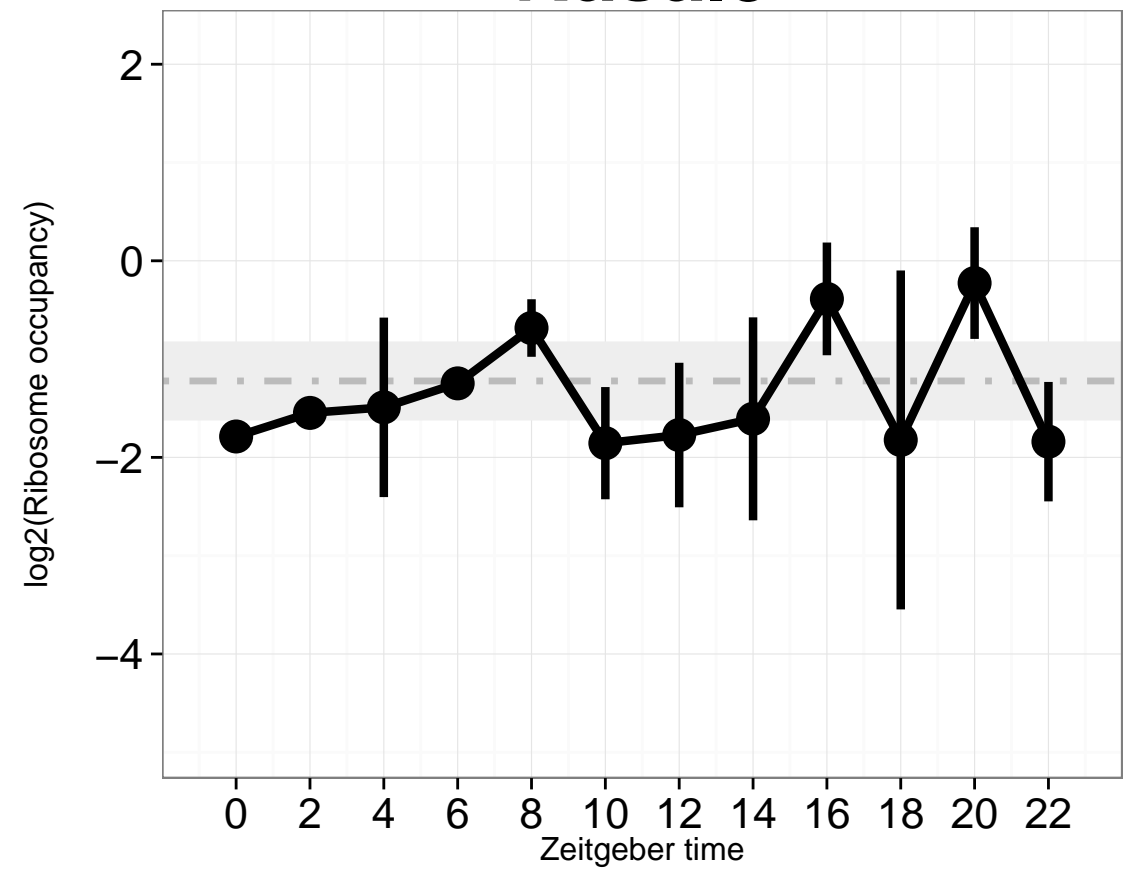

Supplement: Supplementary file 2191 [file 1]

## Ckb

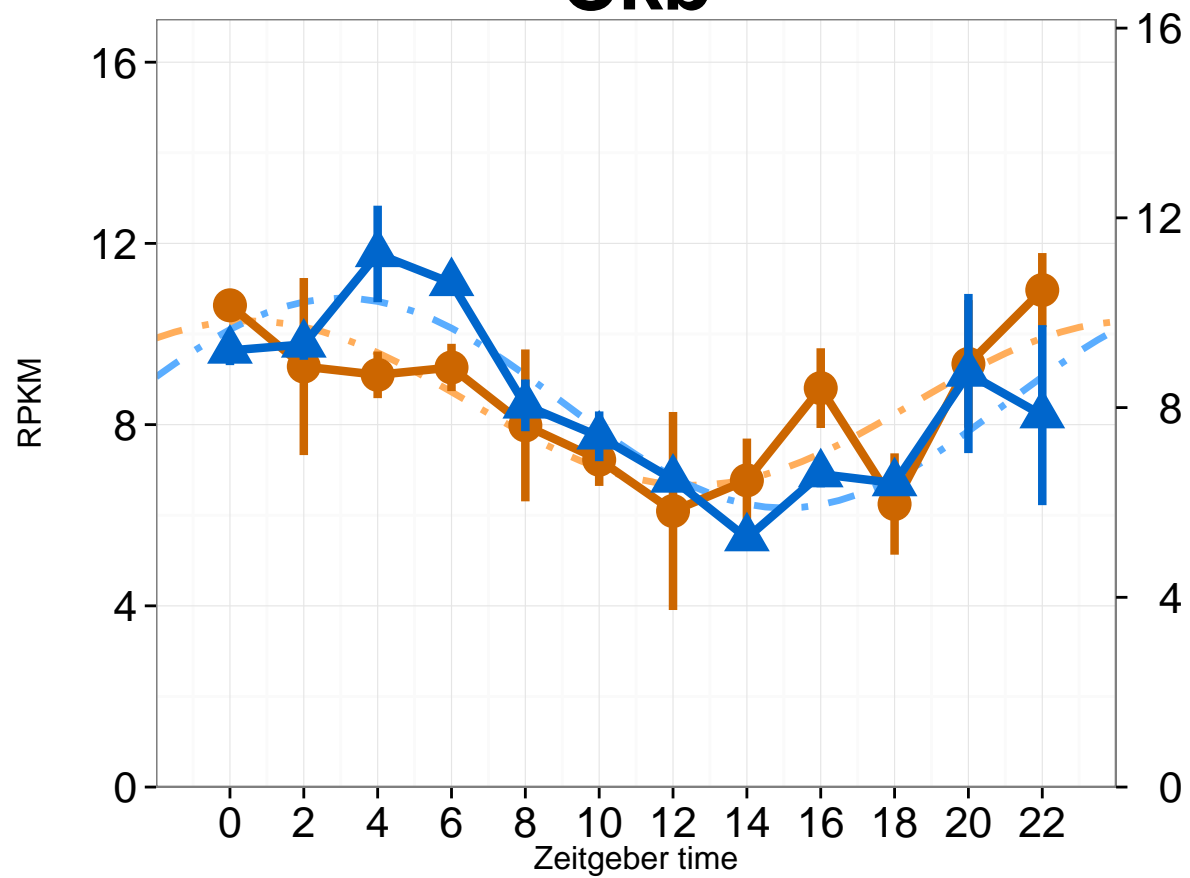

## Ckb

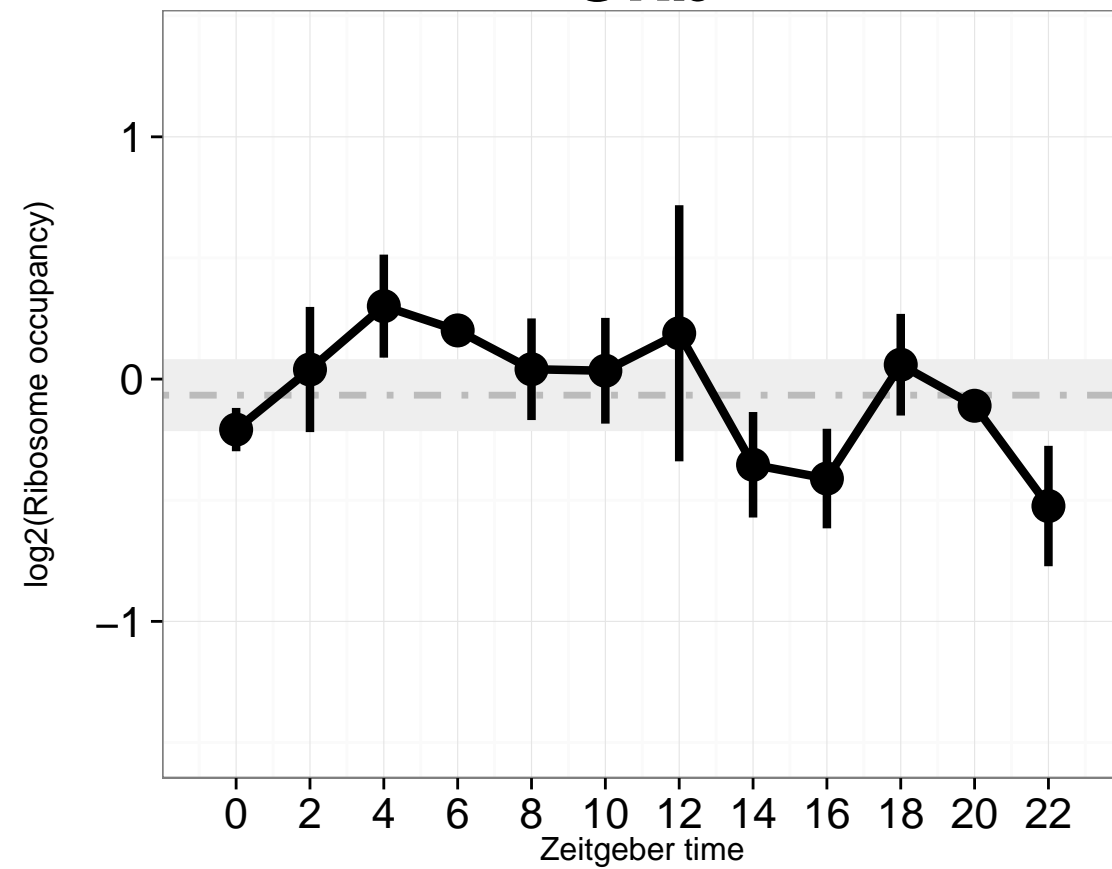

Supplement: Supplementary file 2192 [file 1]

## Brk1

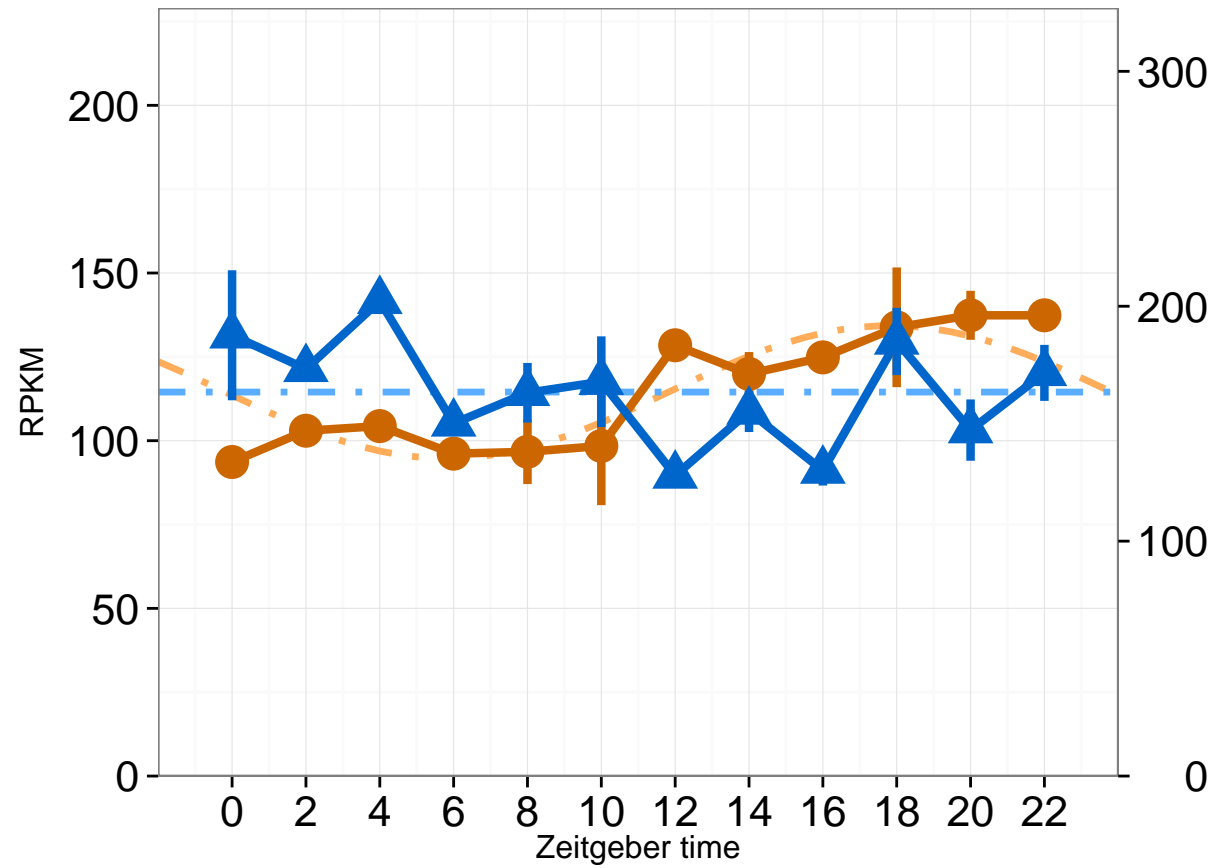

## Brk1

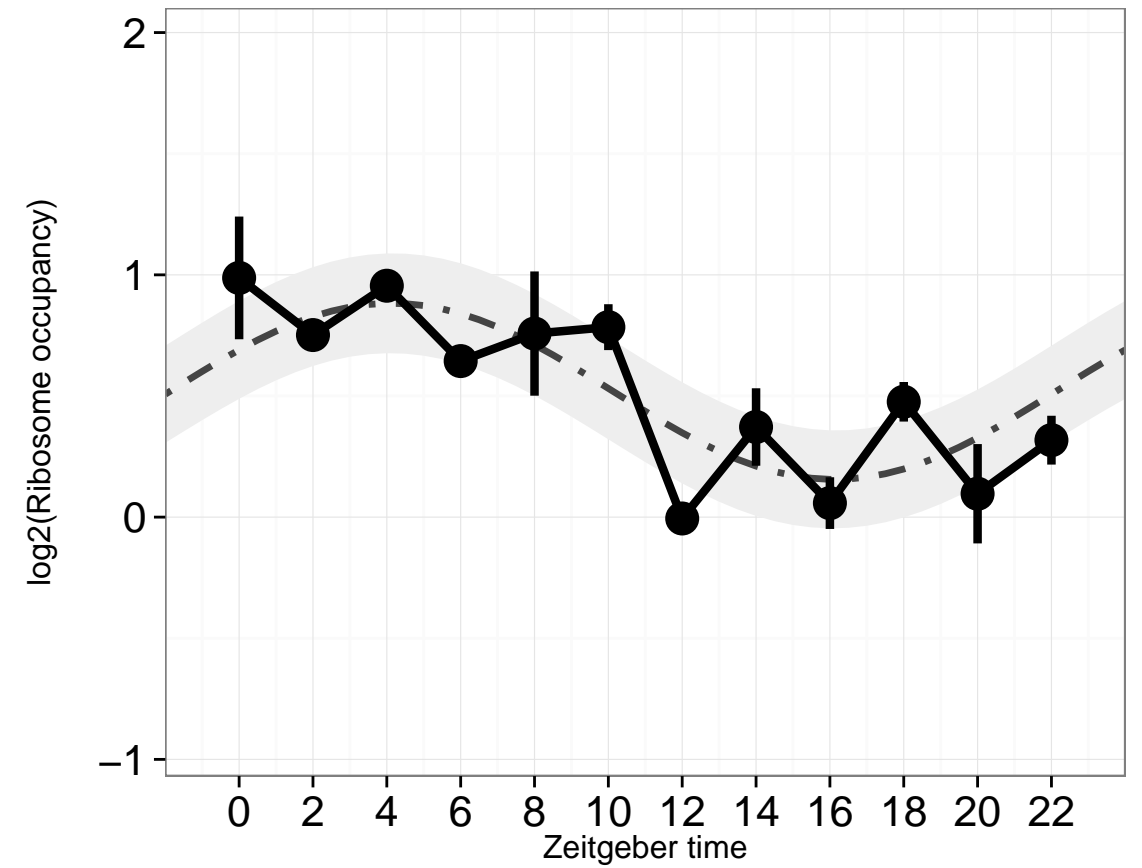

Supplement: Supplementary file 2193 [file 1]

# Syt14

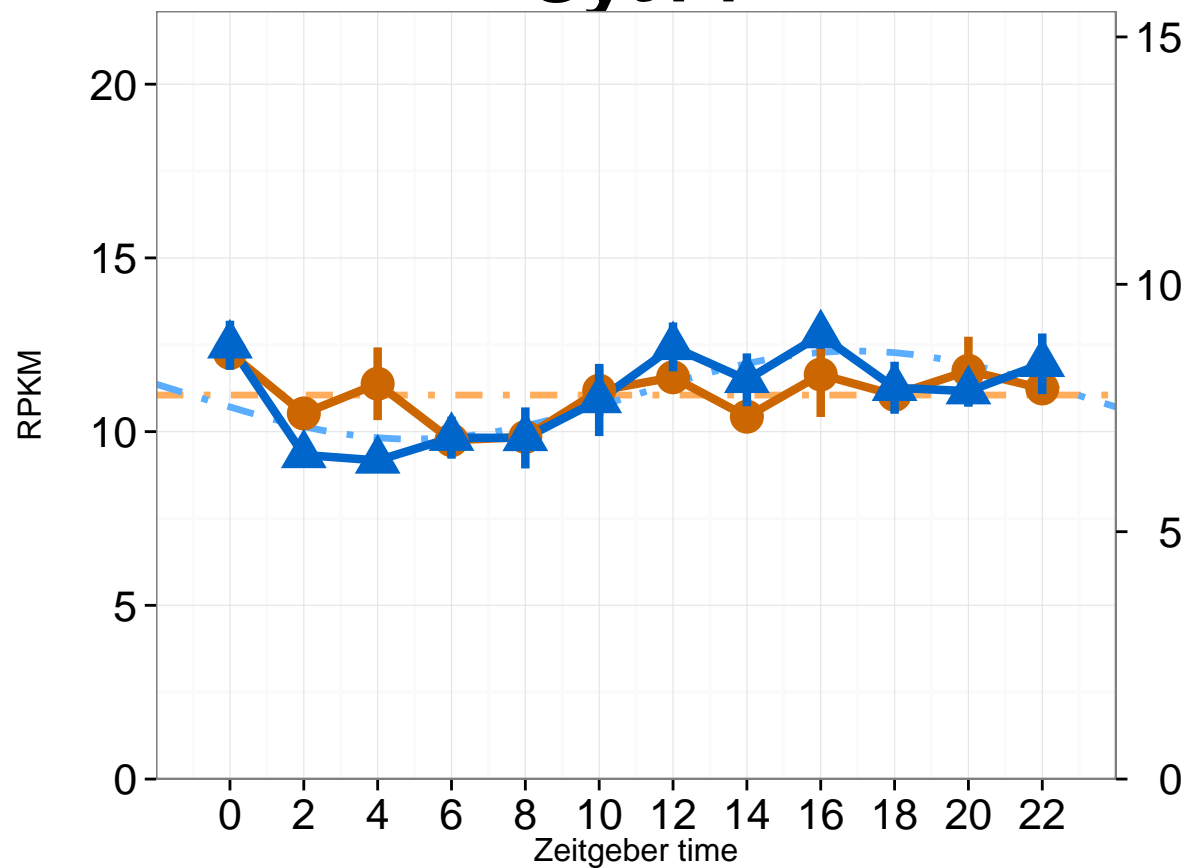

# Syt14

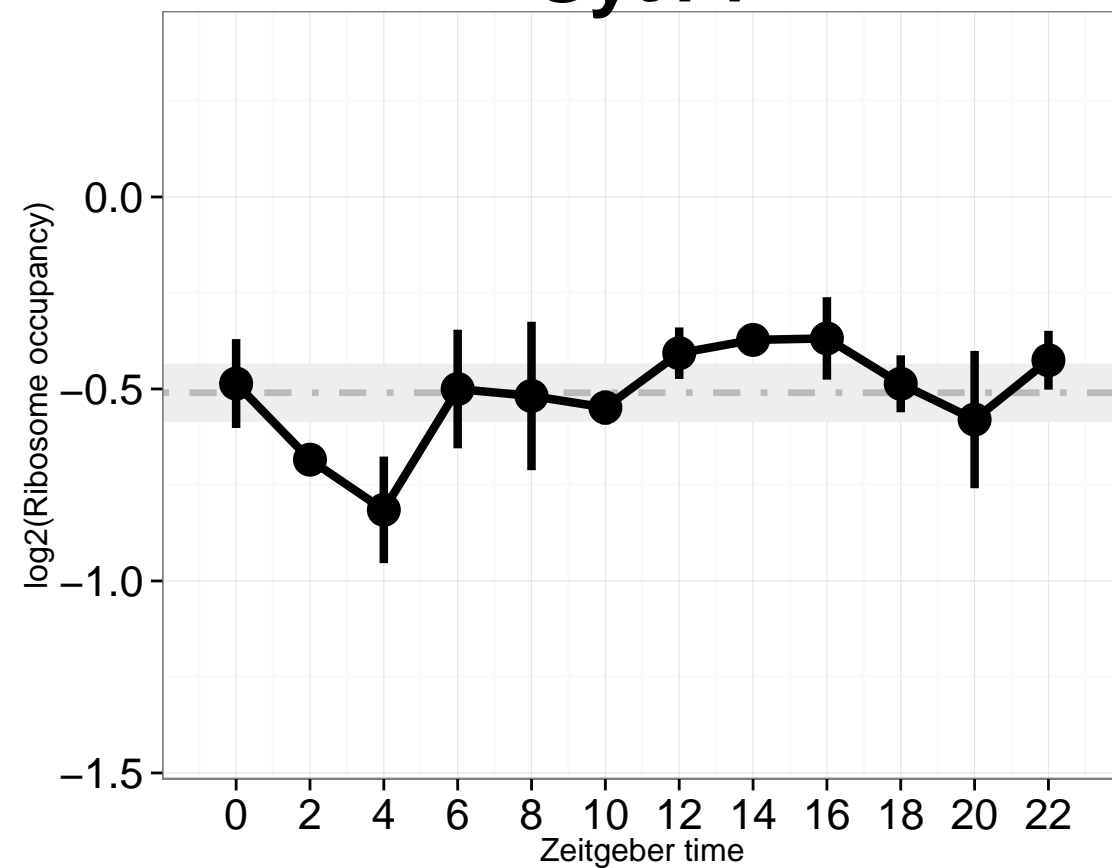

Supplement: Supplementary file 2194 [file 1]

## Nploc4

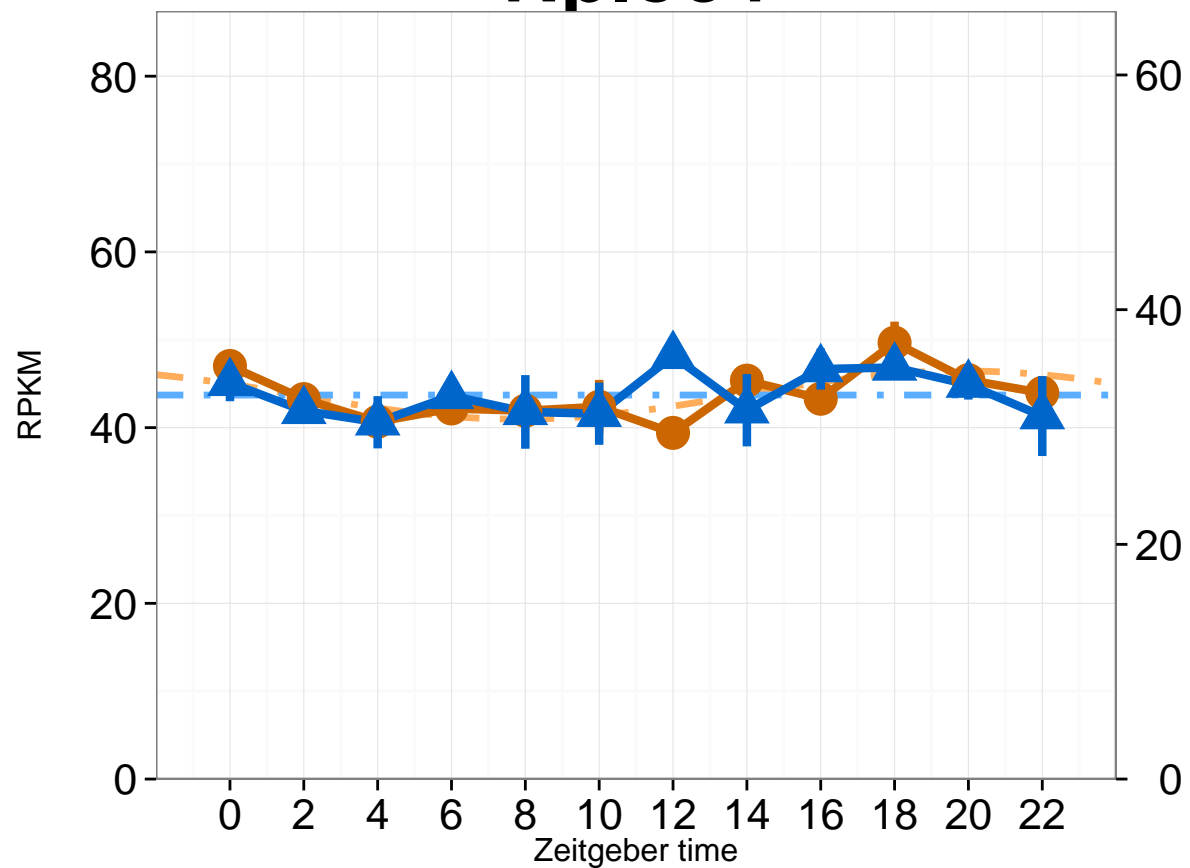

## Nploc4

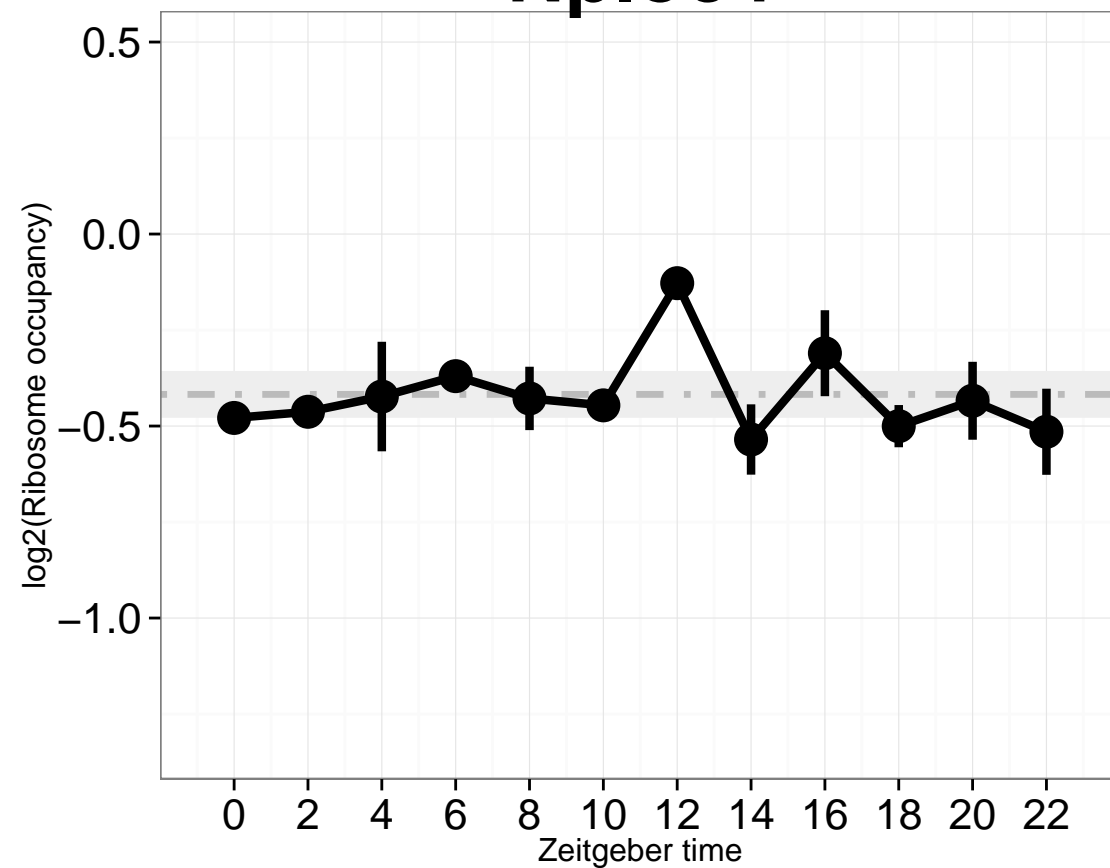

Supplement: Supplementary file 2195 [file 1]

## Edar

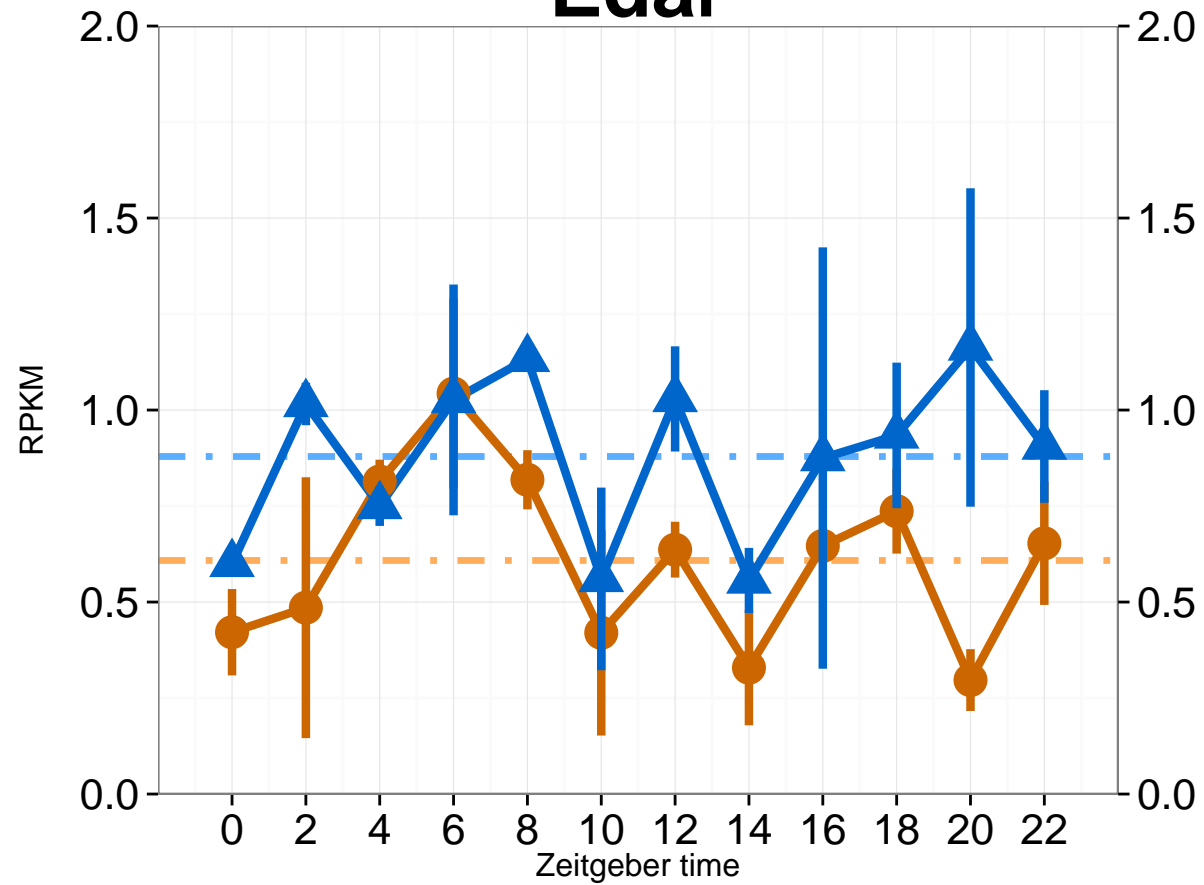

## Edar

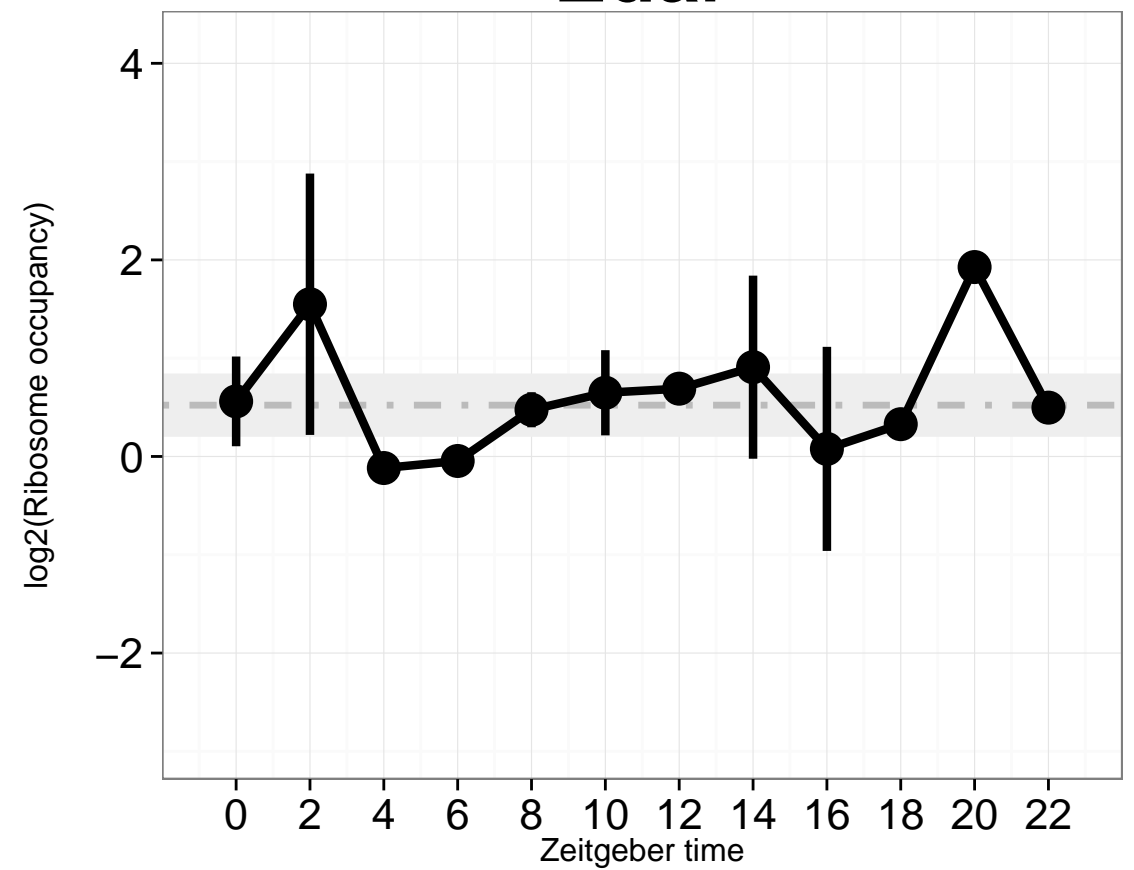

Supplement: Supplementary file 2196 [file 1]

# Adamts4

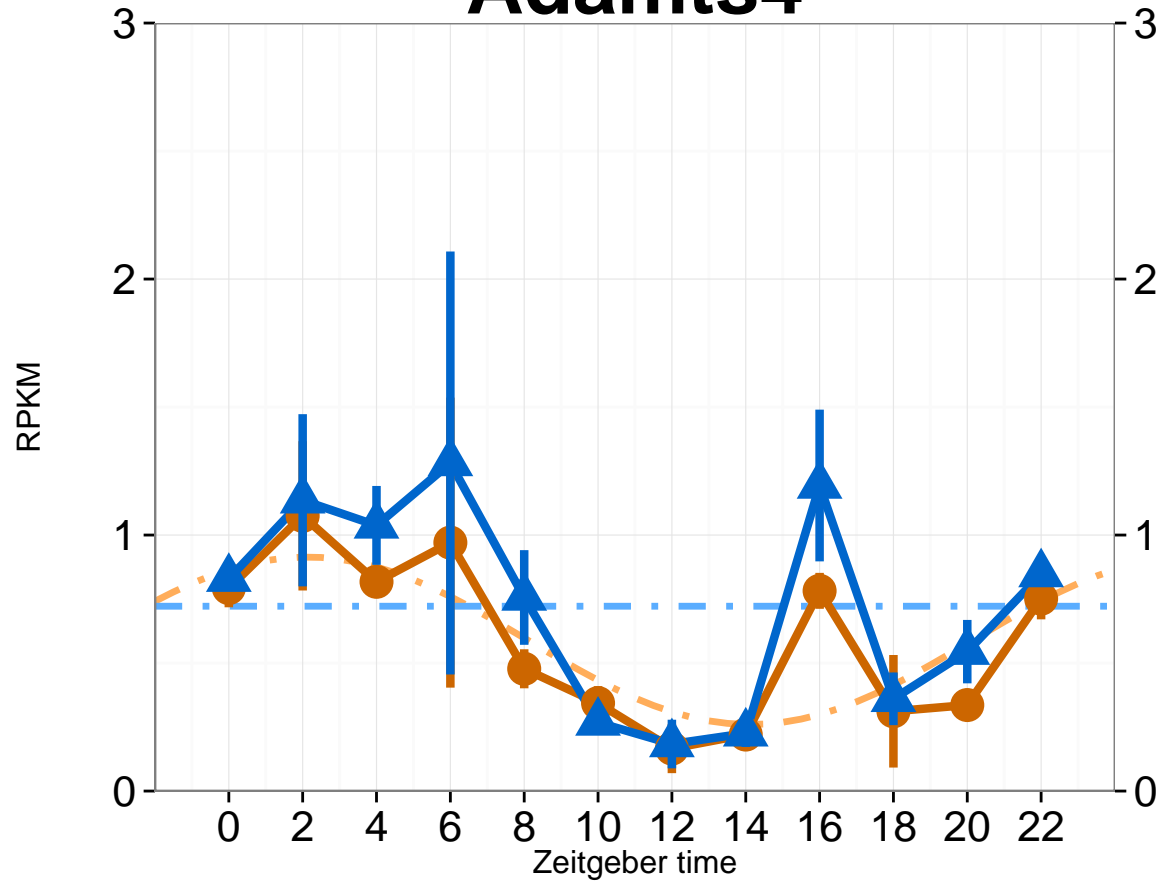

# Adamts4

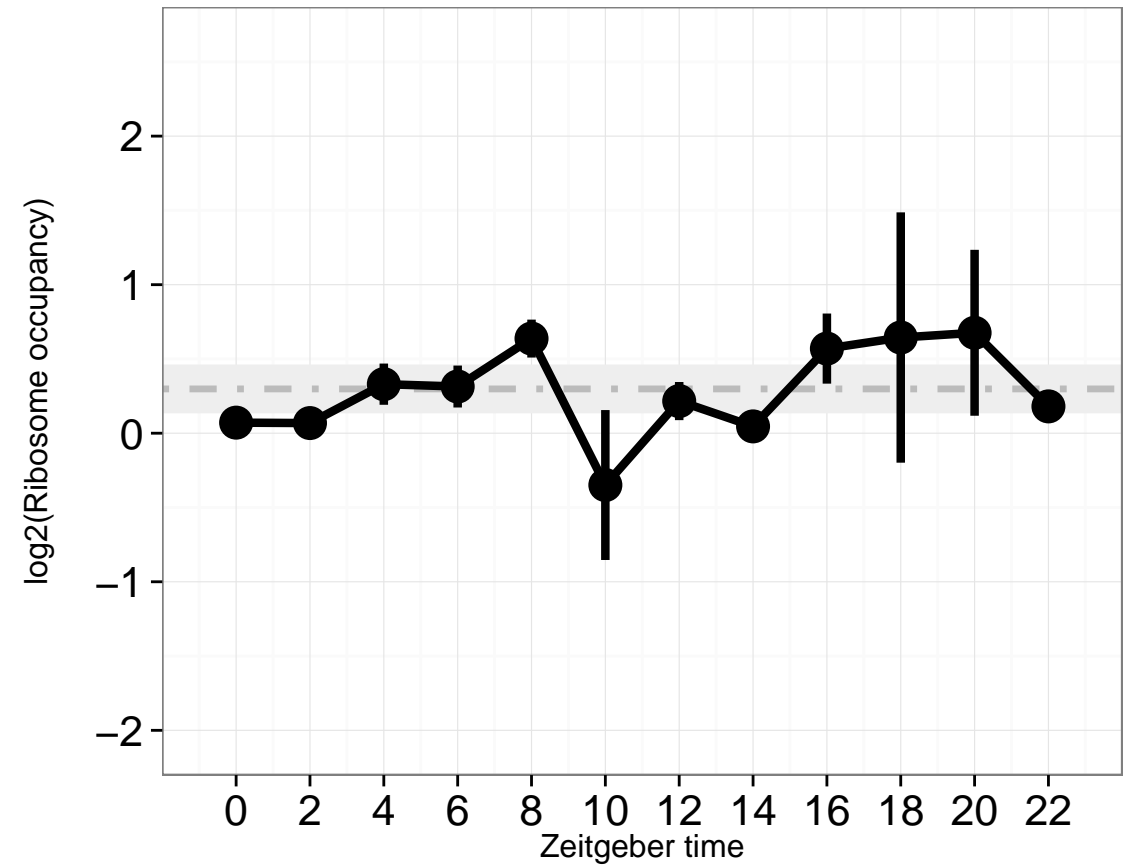

Supplement: Supplementary file 2197 [file 1]

## Pigp

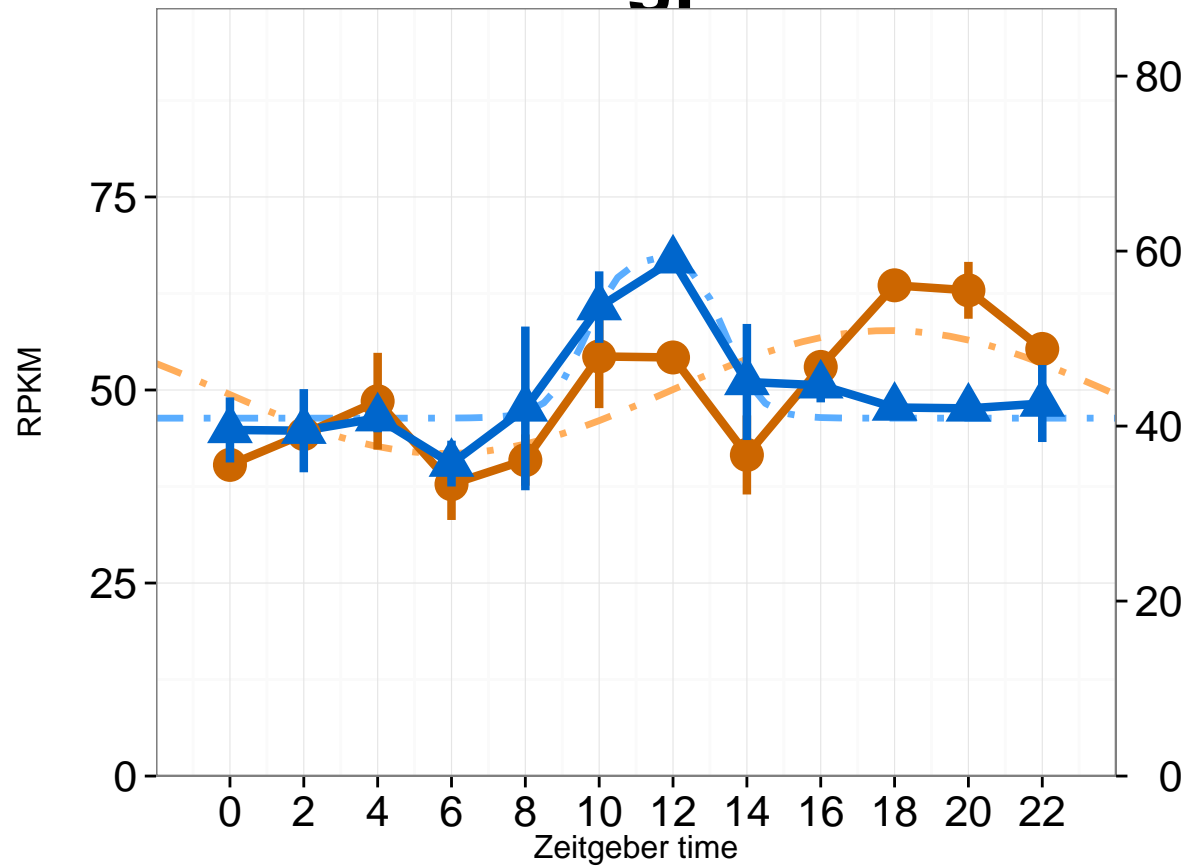

## Pigp

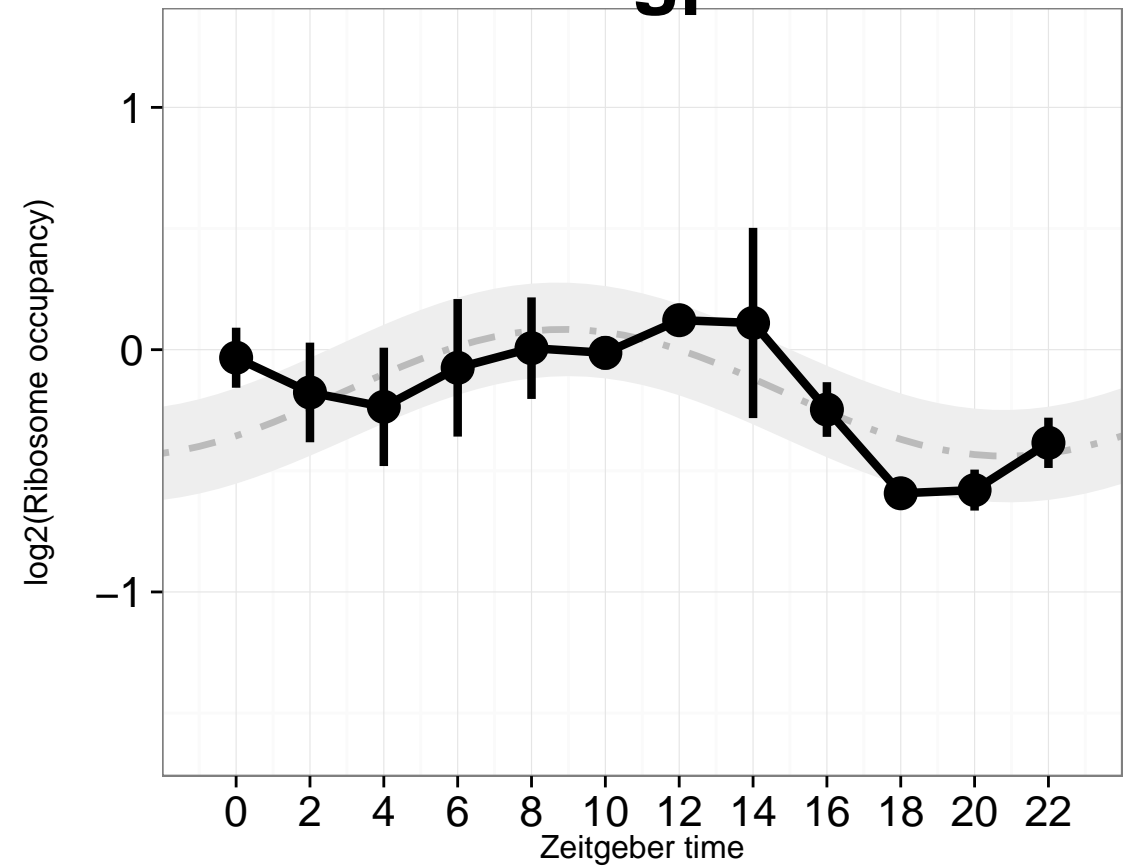

Supplement: Supplementary file 2198 [file 1]

# Rpusd1

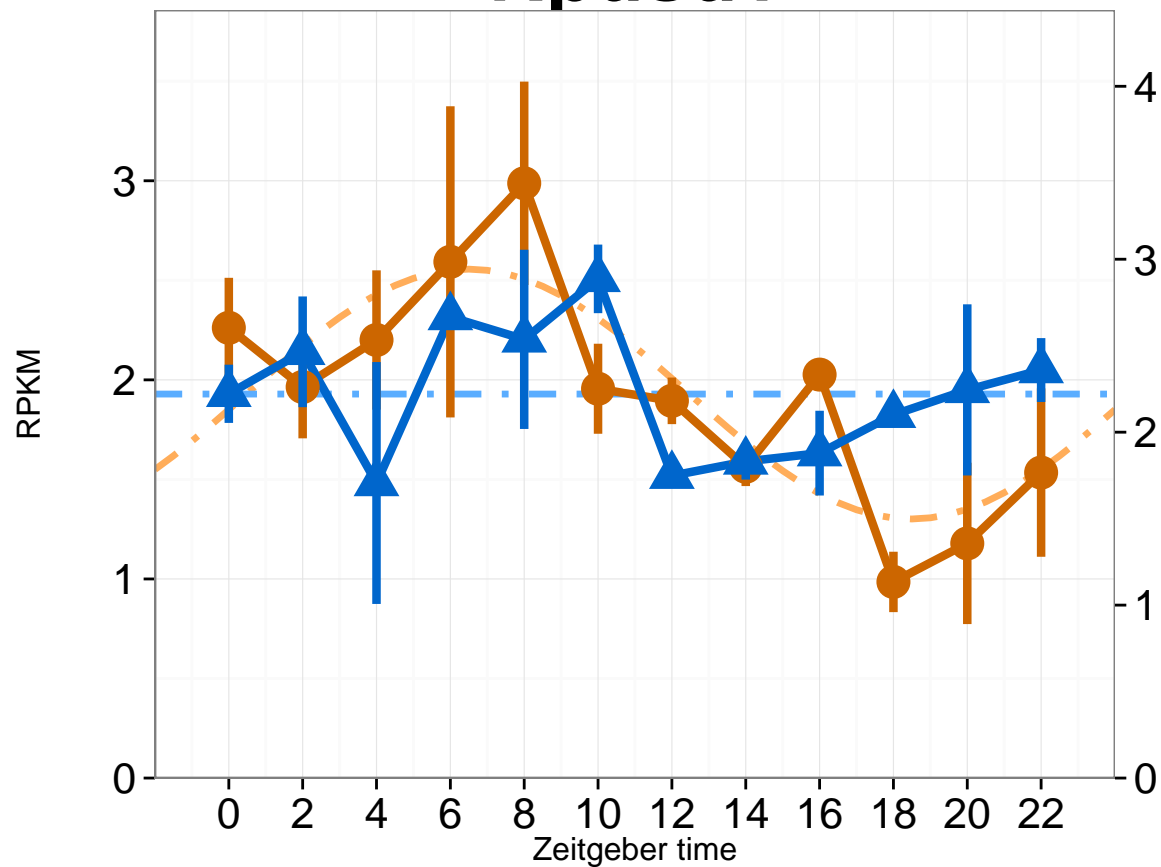

# Rpusd1

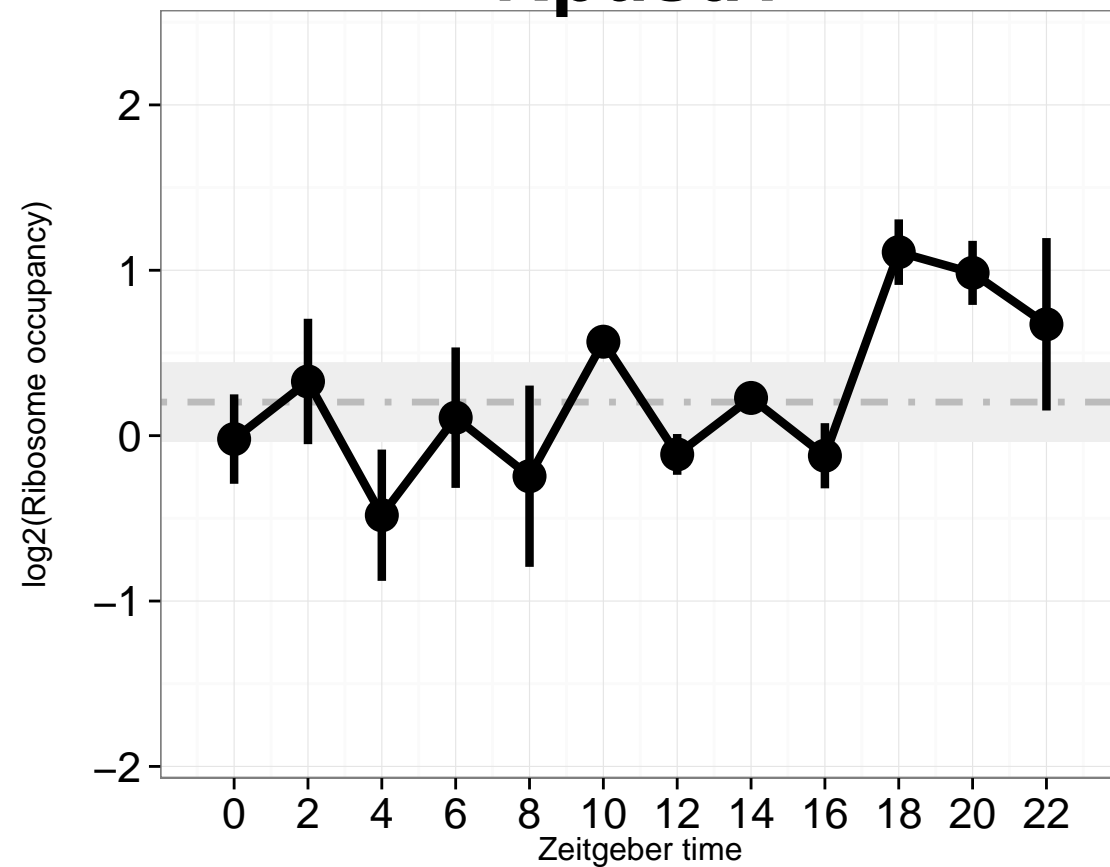

Supplement: Supplementary file 2199 [file 1]

# Dact2

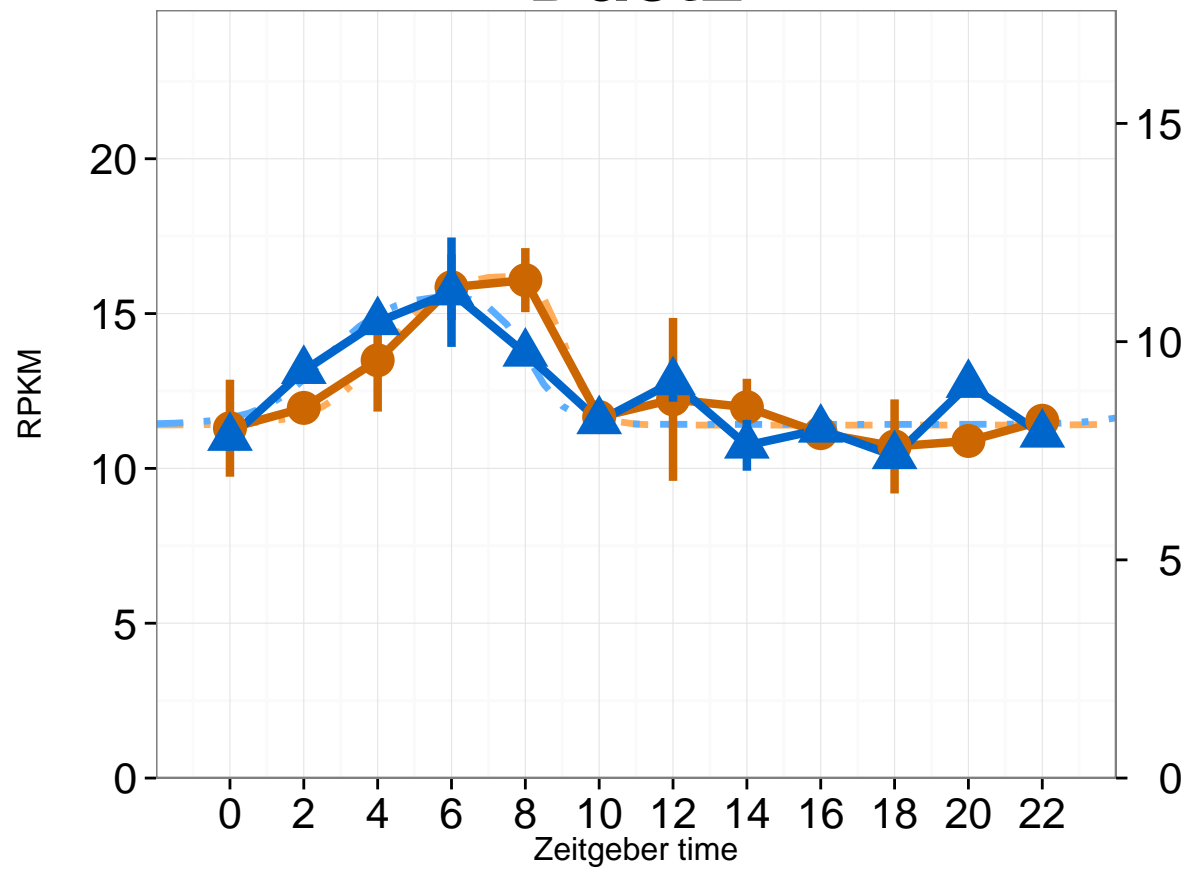

# Dact2

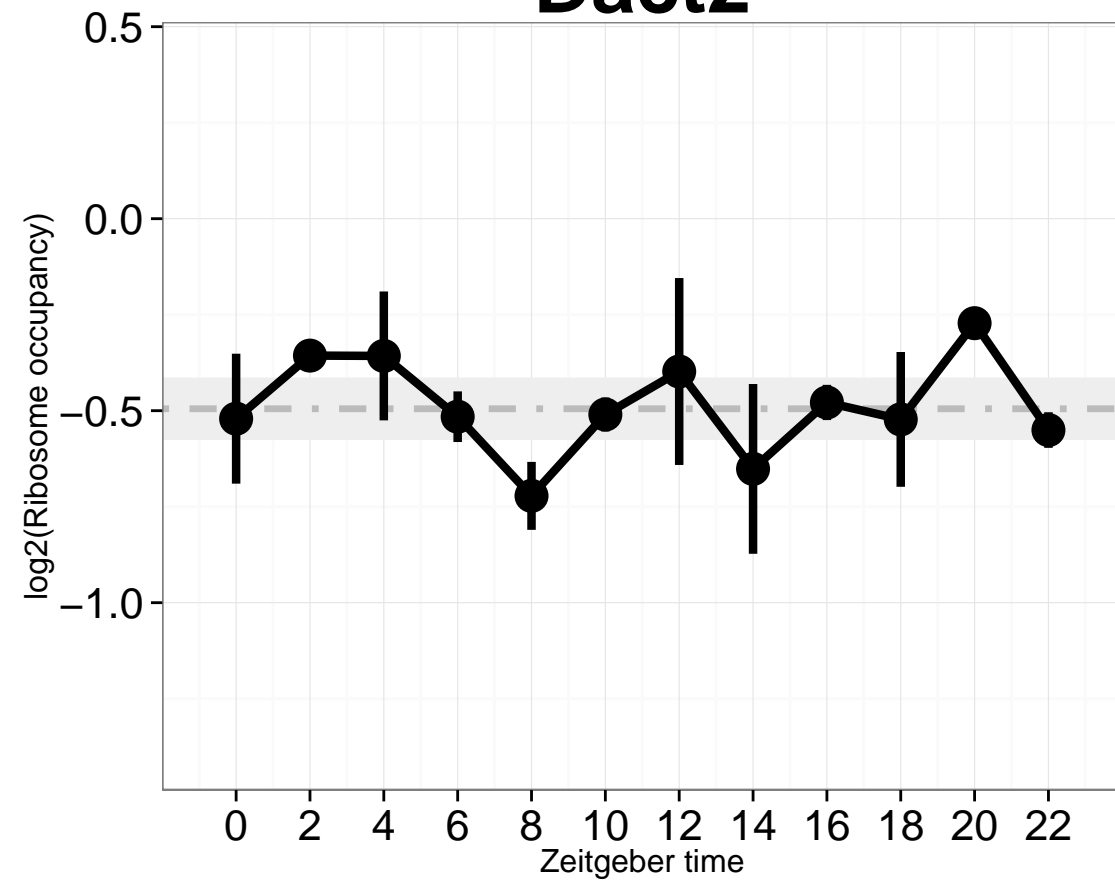

Supplement: Supplementary file 2200 [file 1]

# Stk36

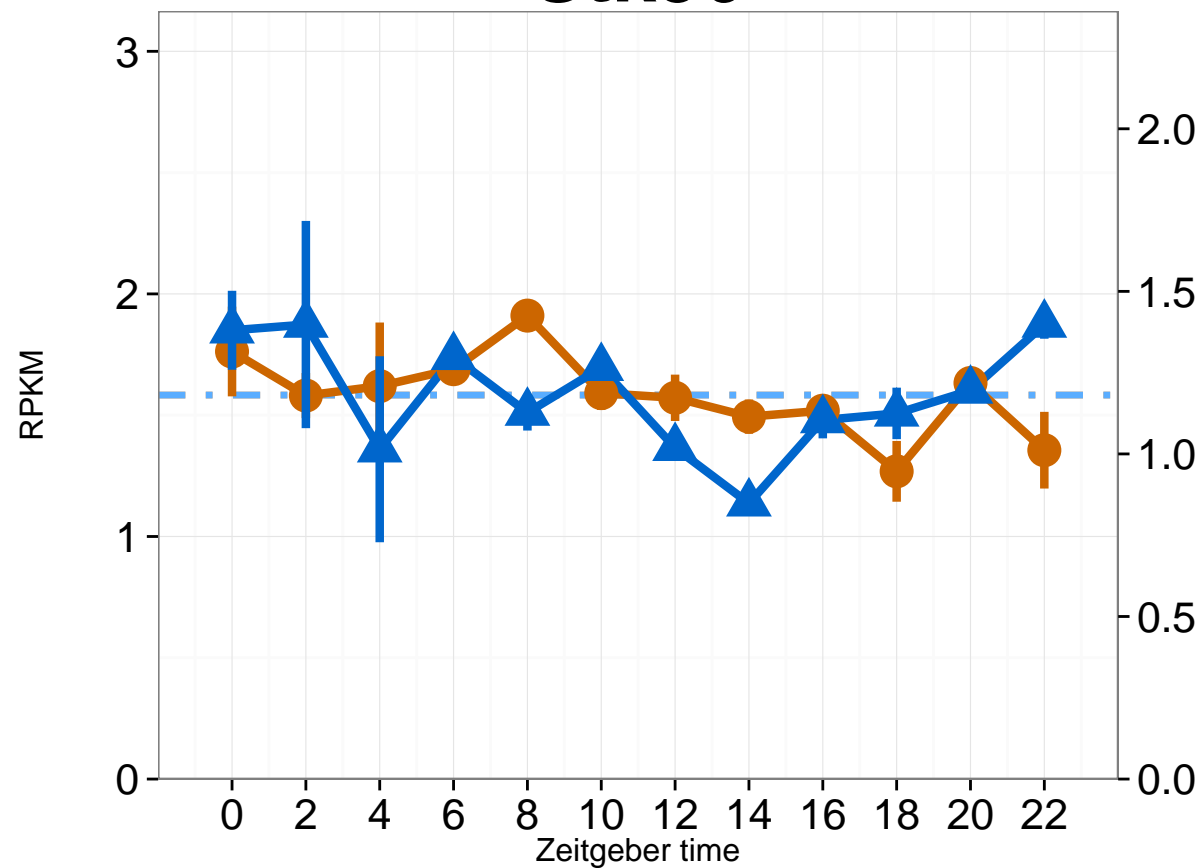

# Stk36

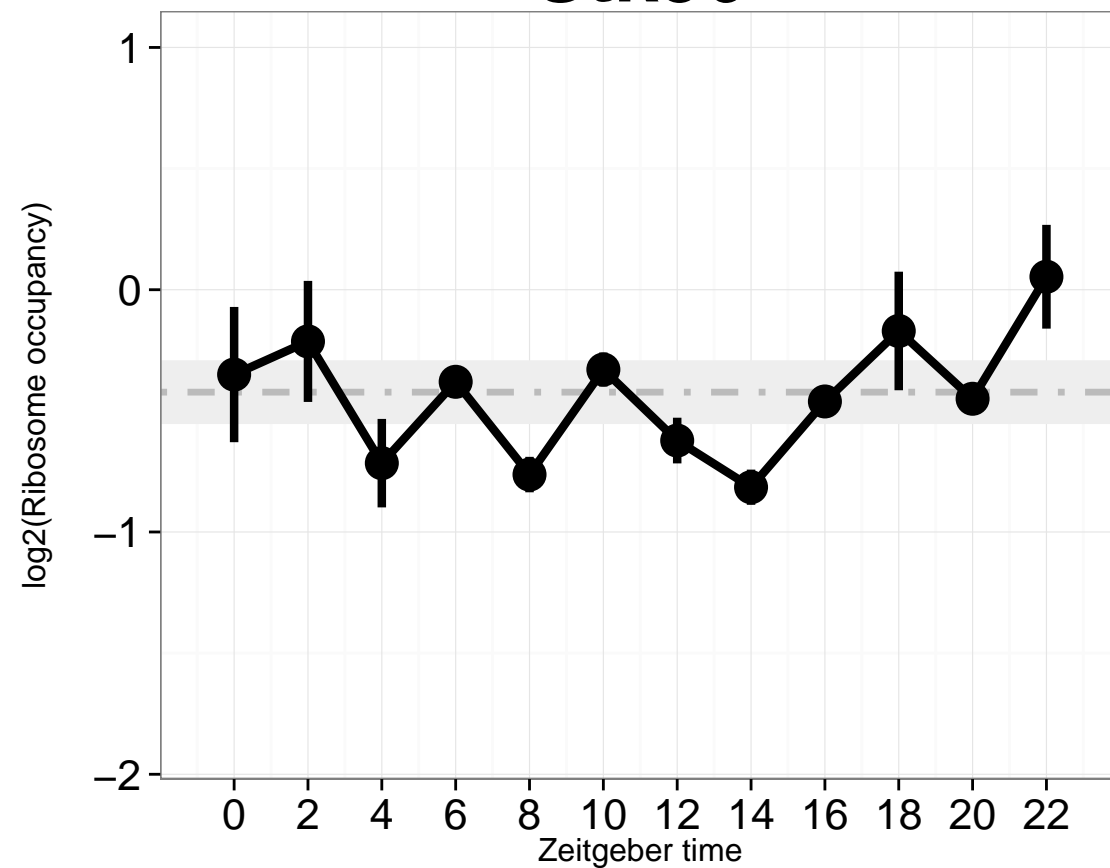

Supplement: Supplementary file 2201 [file 1]

# Hectd2

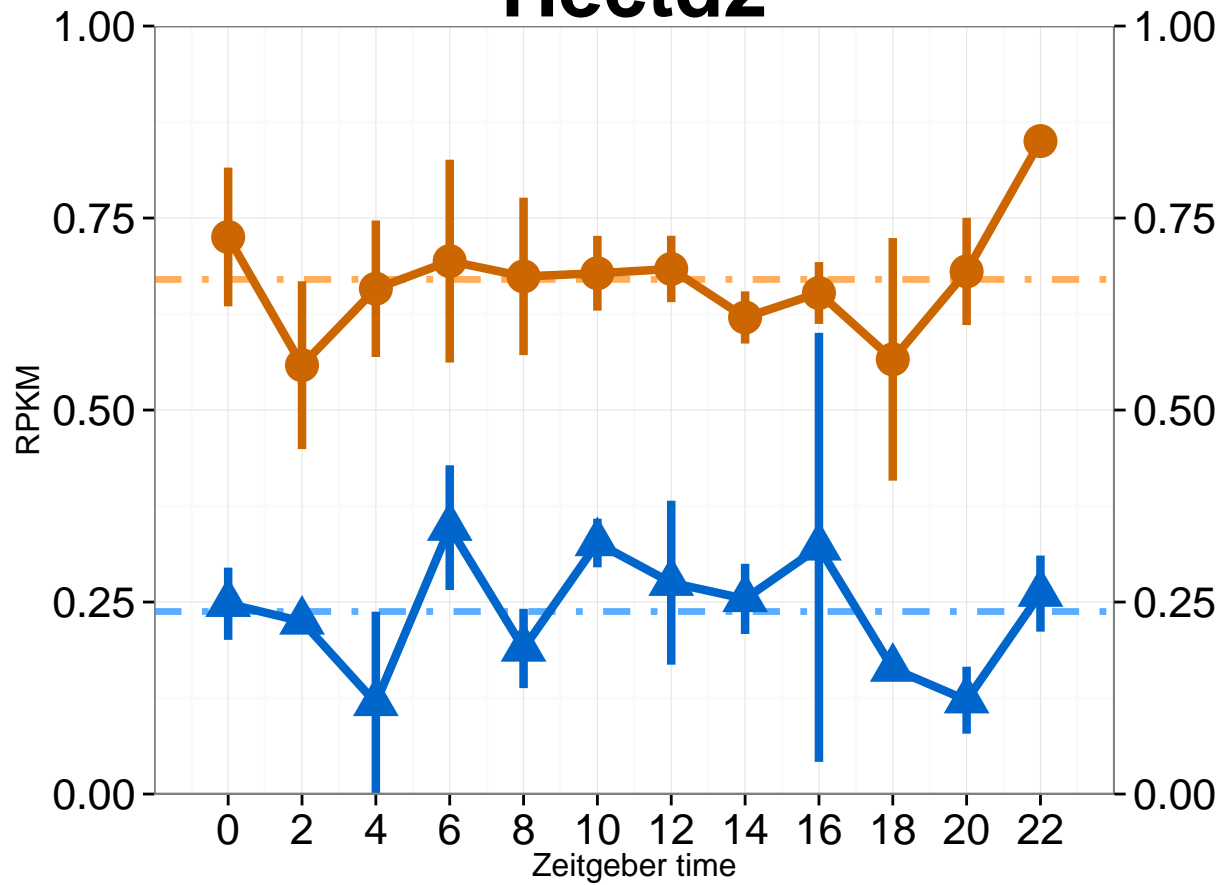

# Hectd2

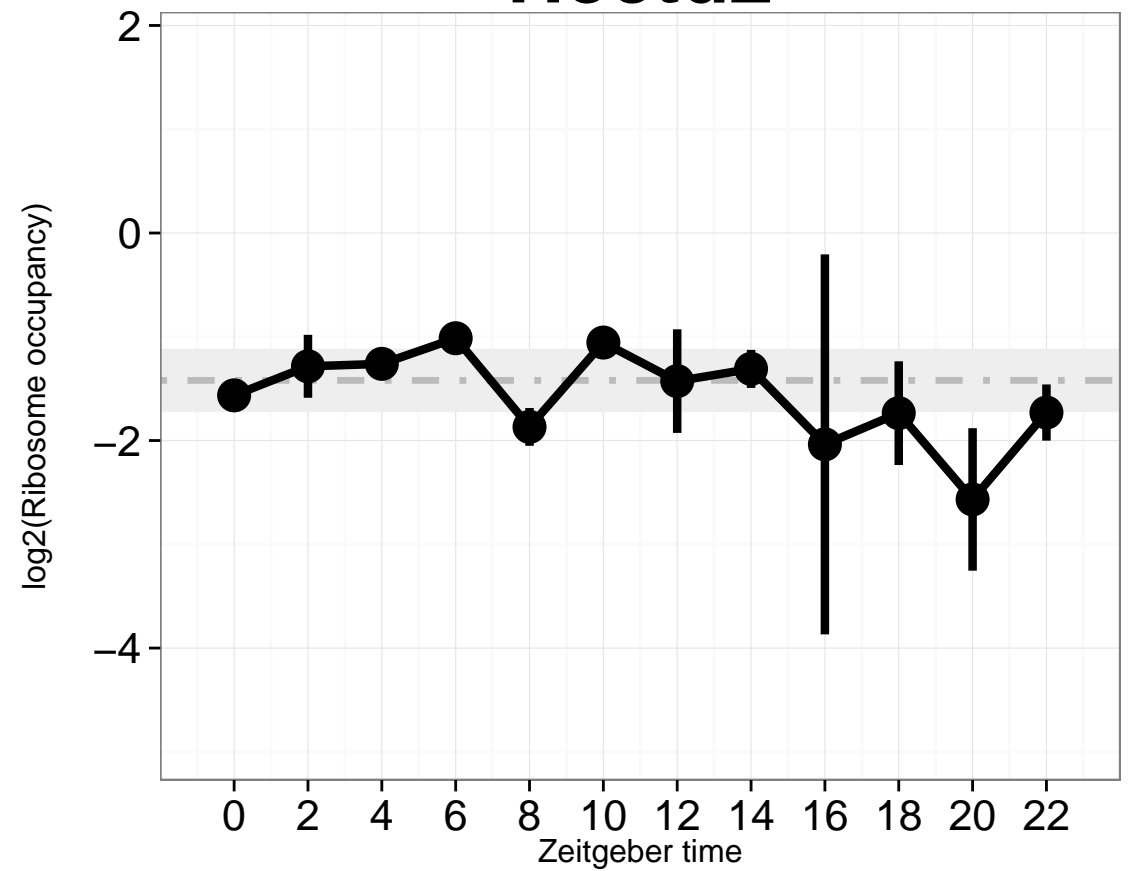

Supplement: Supplementary file 2202 [file 1]

## Lzic

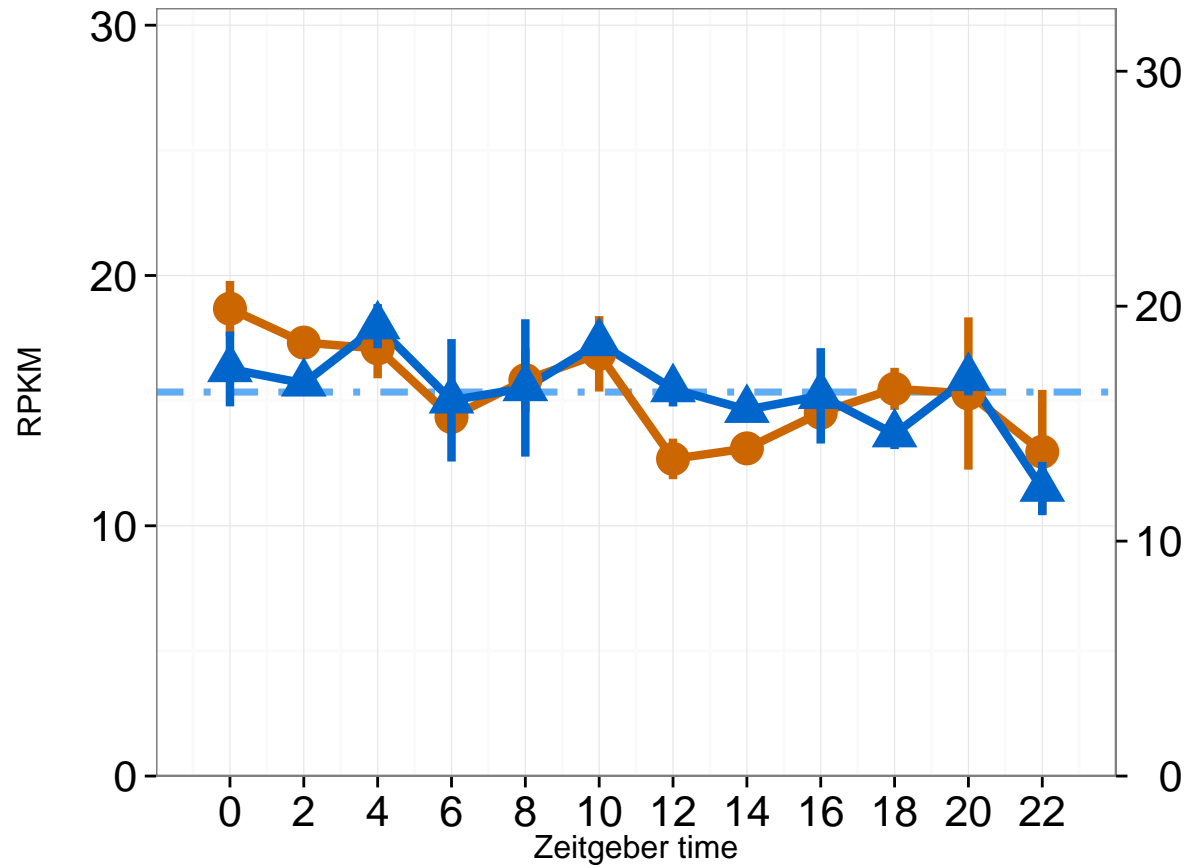

## Lzic

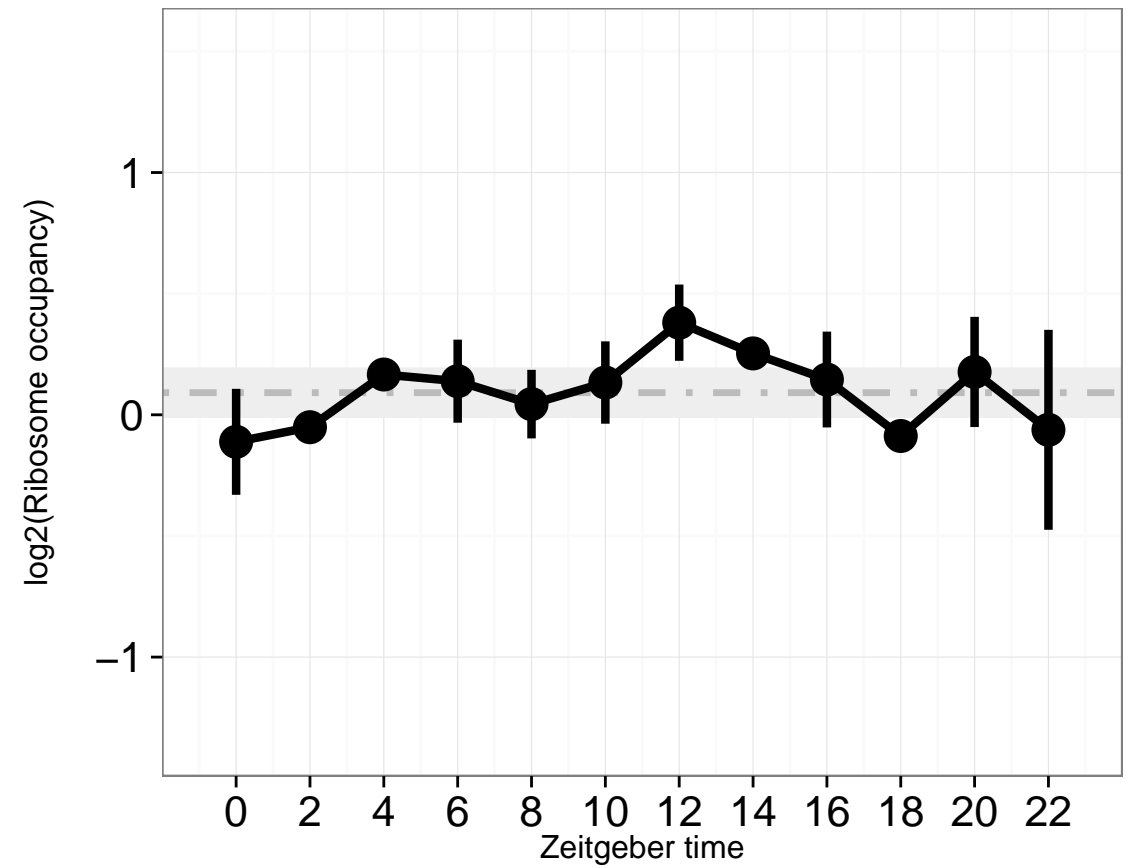

Supplement: Supplementary file 2203 [file 1]

# Hoxc4 TR

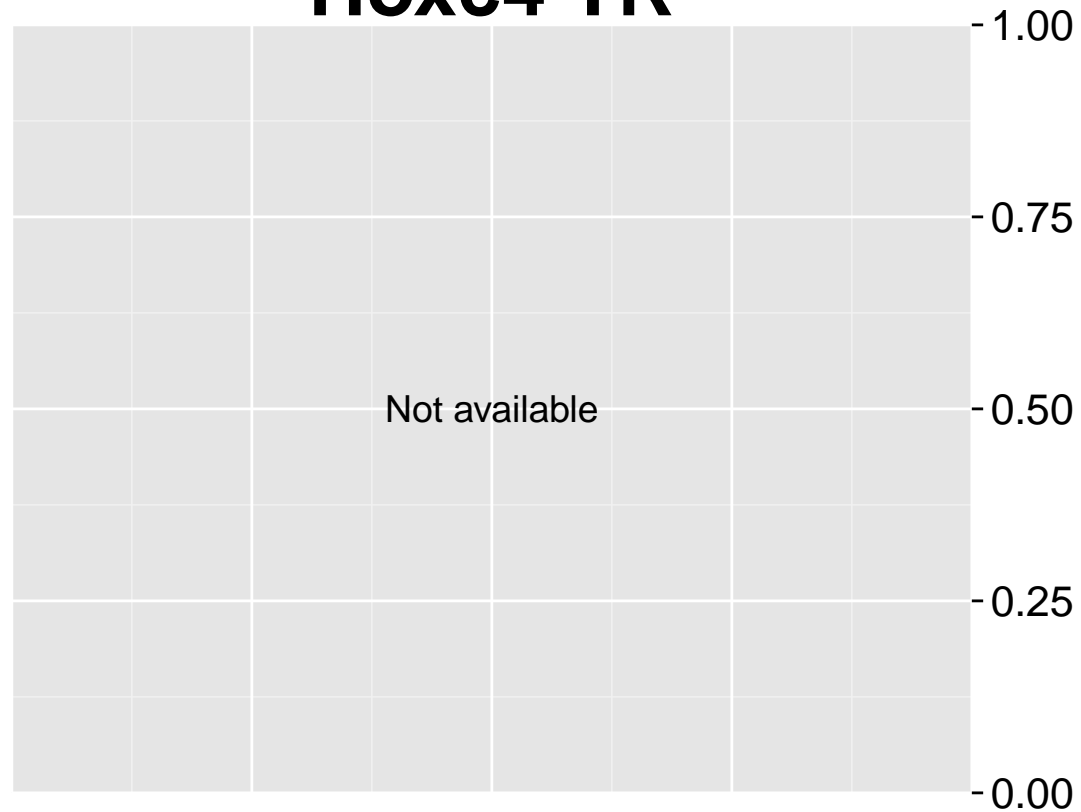

# Hoxc4 log2(Ribosome occupancy

Supplement: Supplementary file 2204 [file 1]

# Arpc3

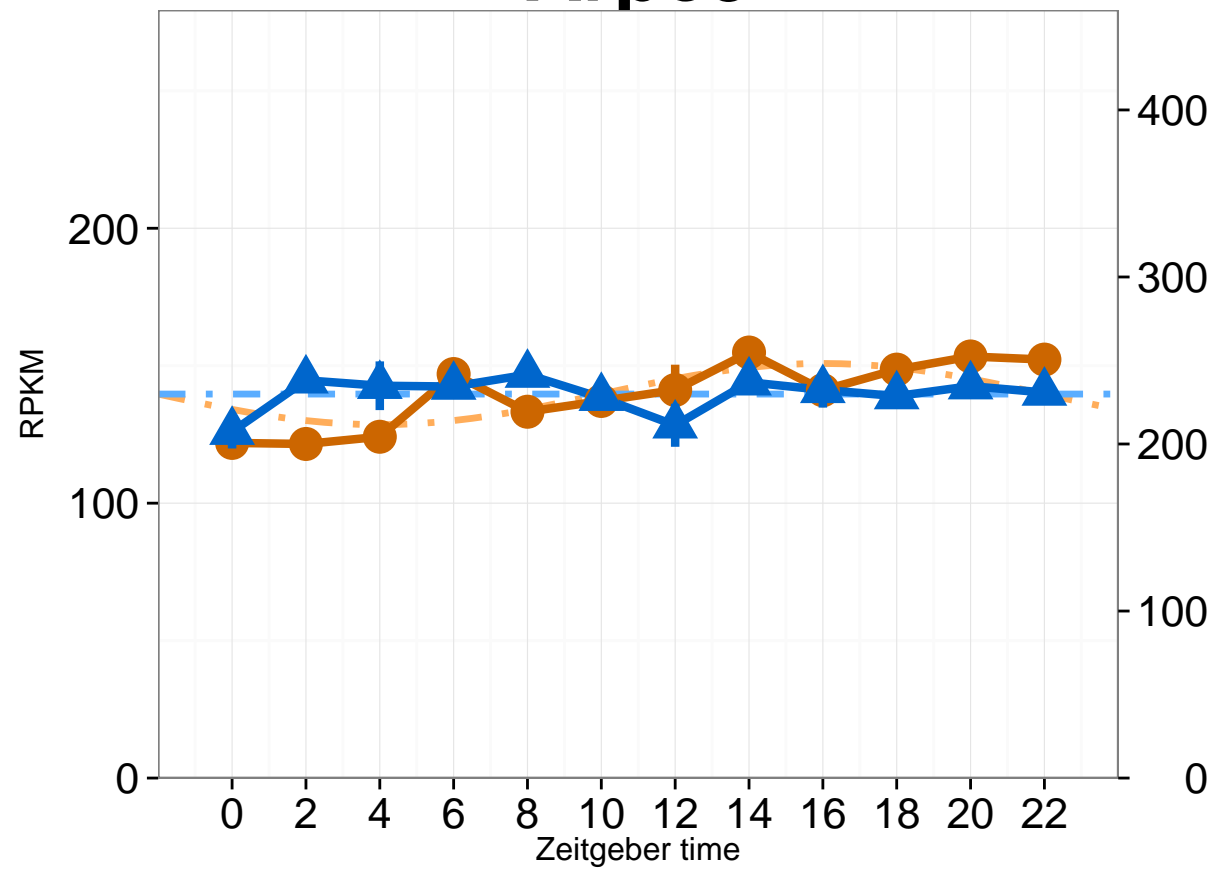

# Arpc3

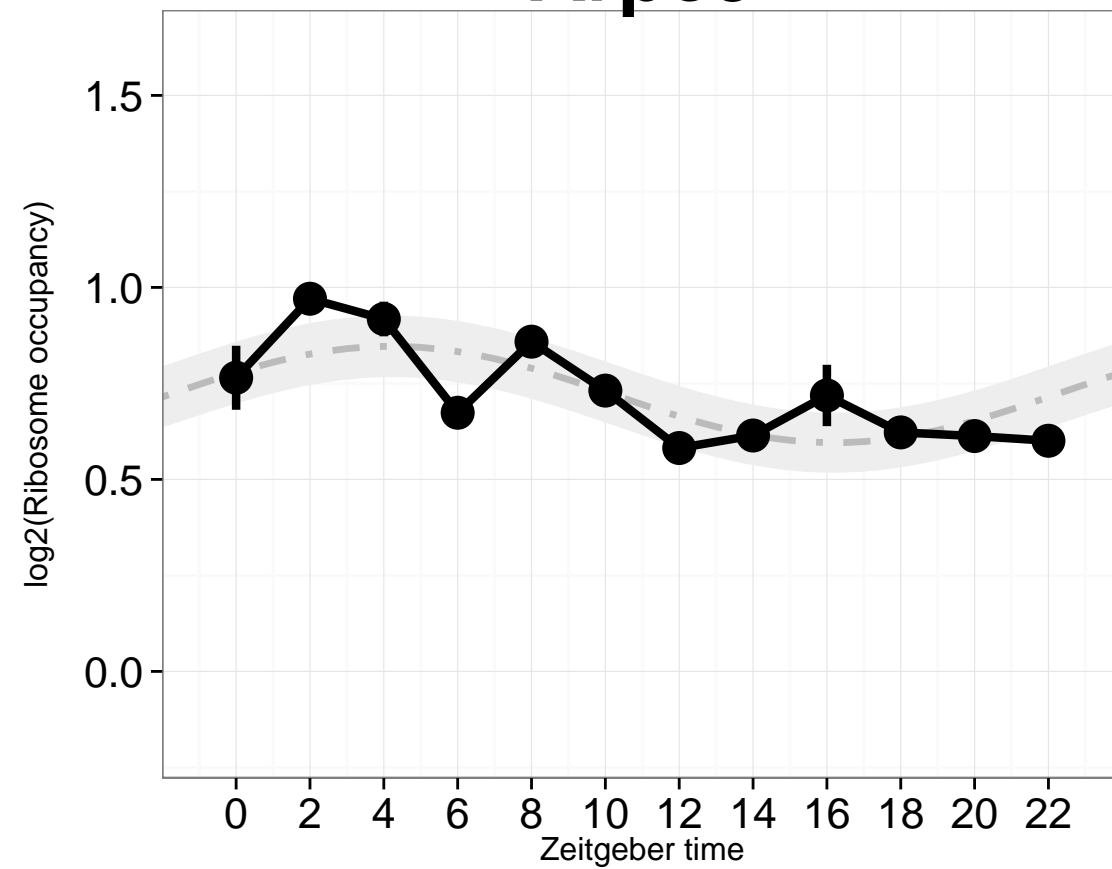

Supplement: Supplementary file 2205 [file 1]

## E130311K13Rik

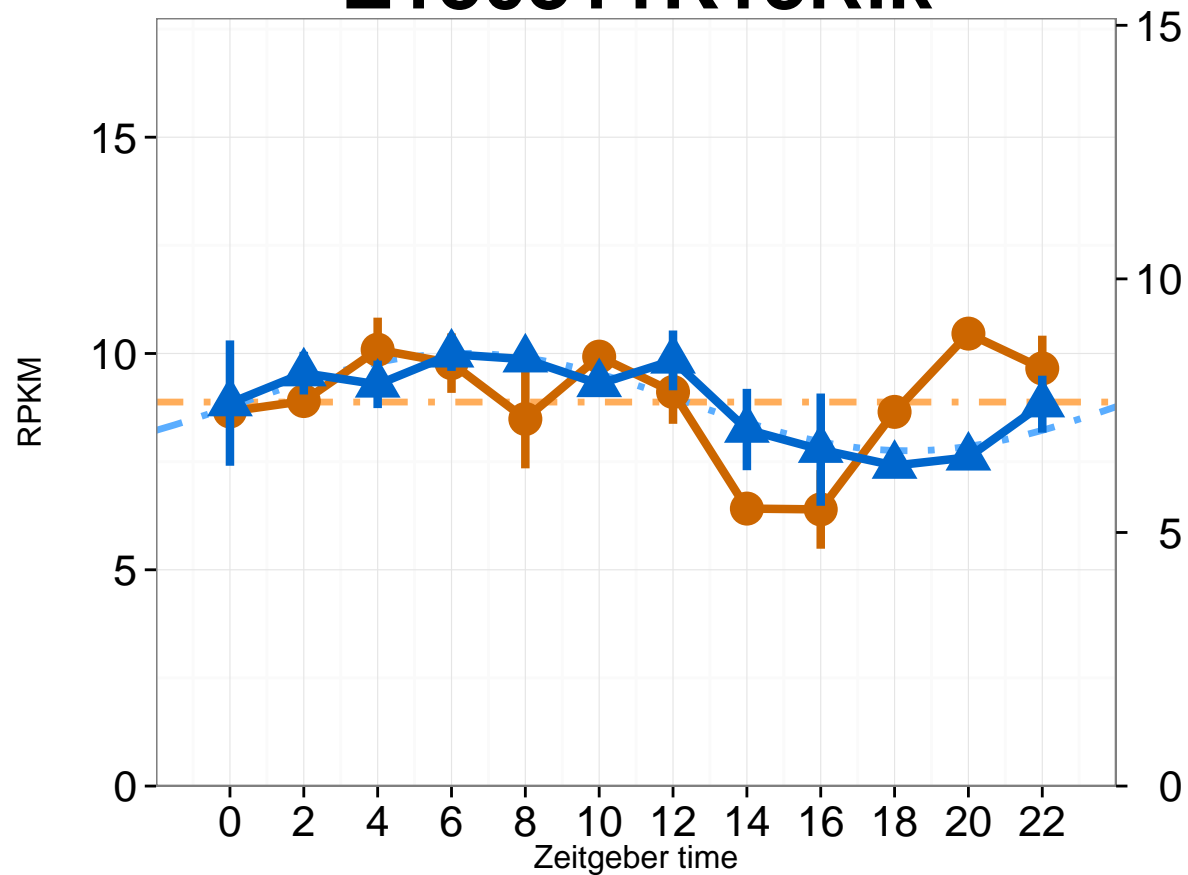

## E130311K13Rik

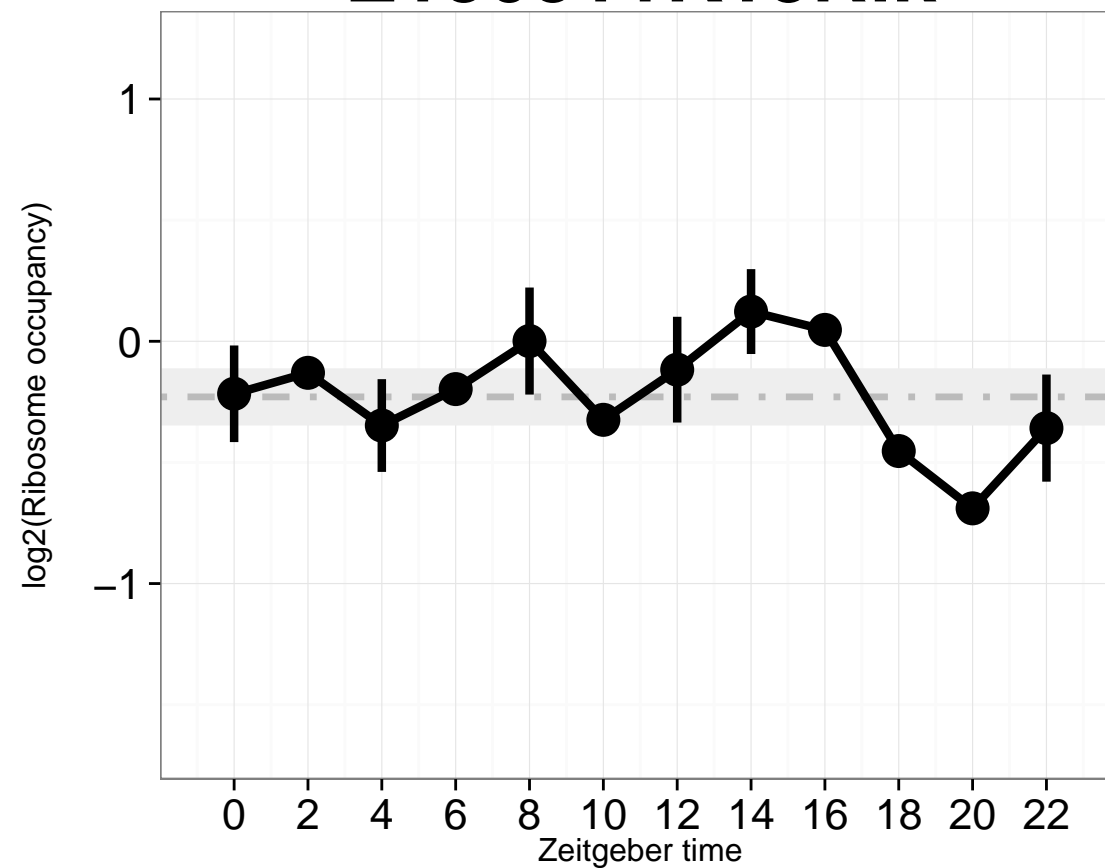

Supplement: Supplementary file 2206 [file 1]

# Gm10311

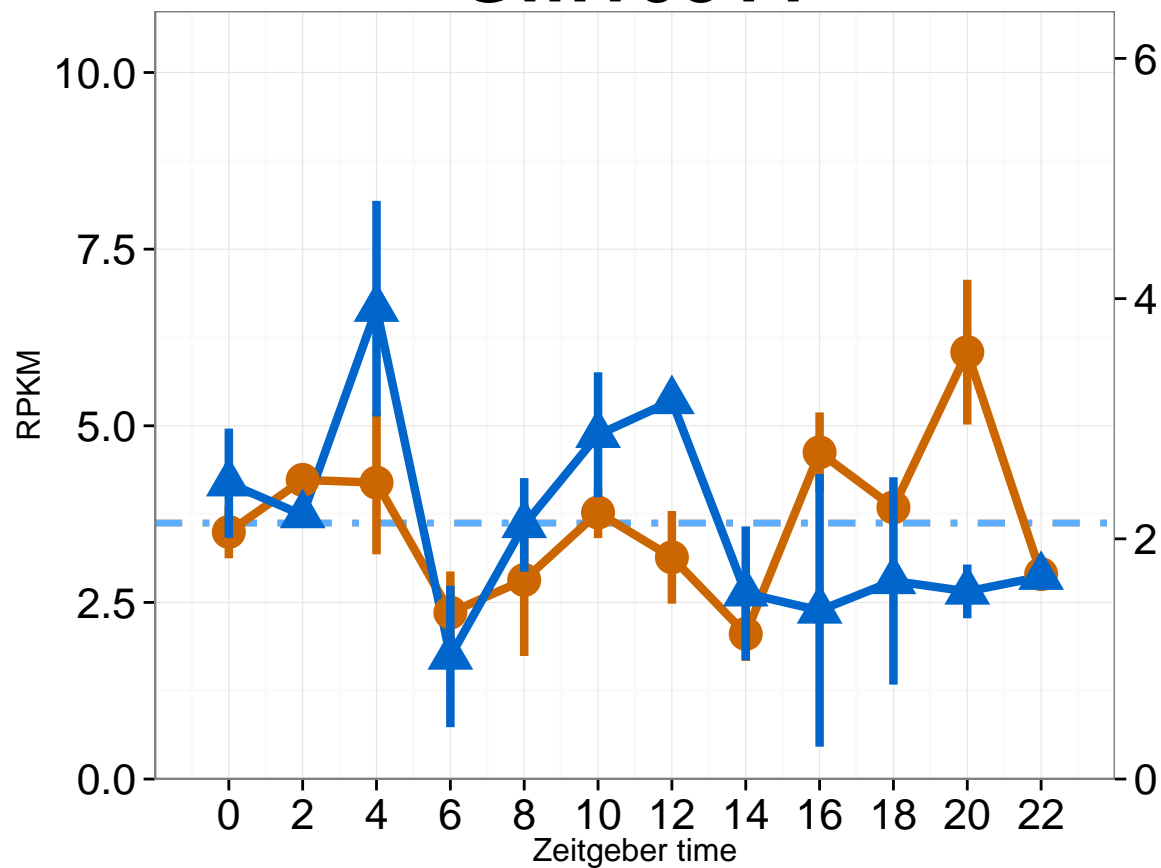

# Gm10311

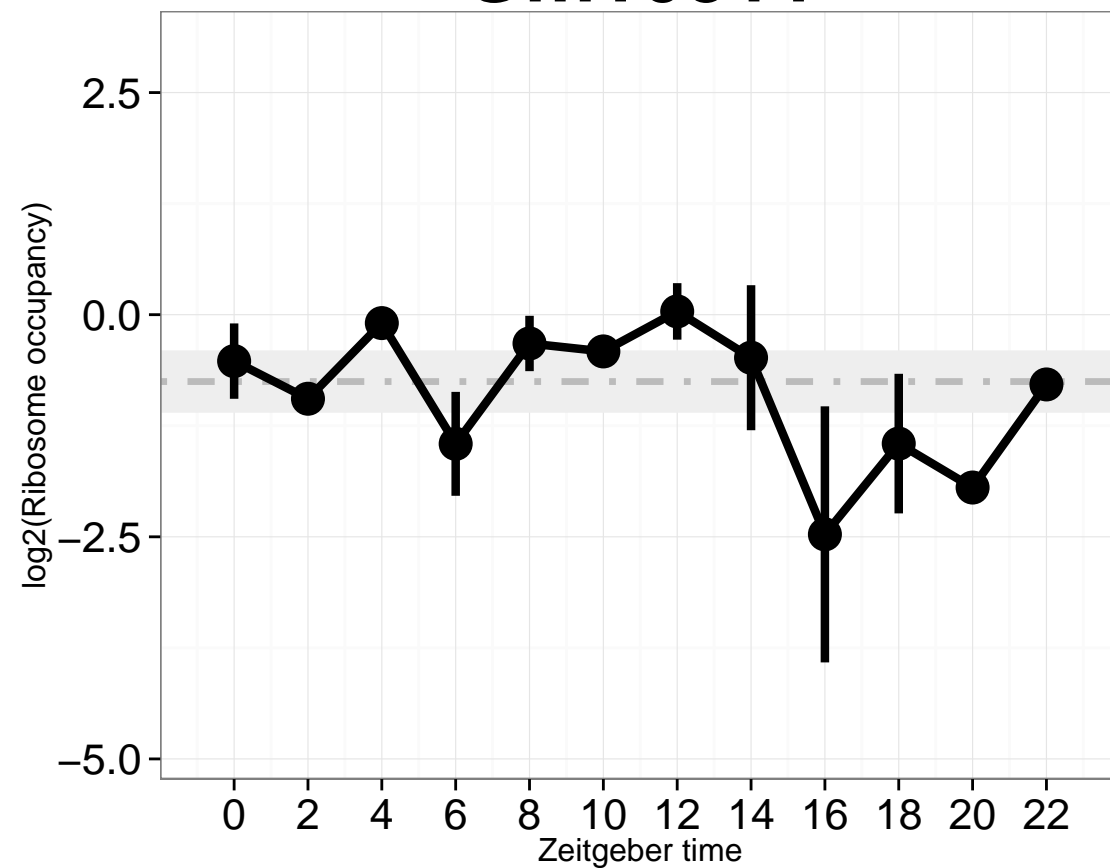

Supplement: Supplementary file 2207 [file 1]

# Tgfbrap1

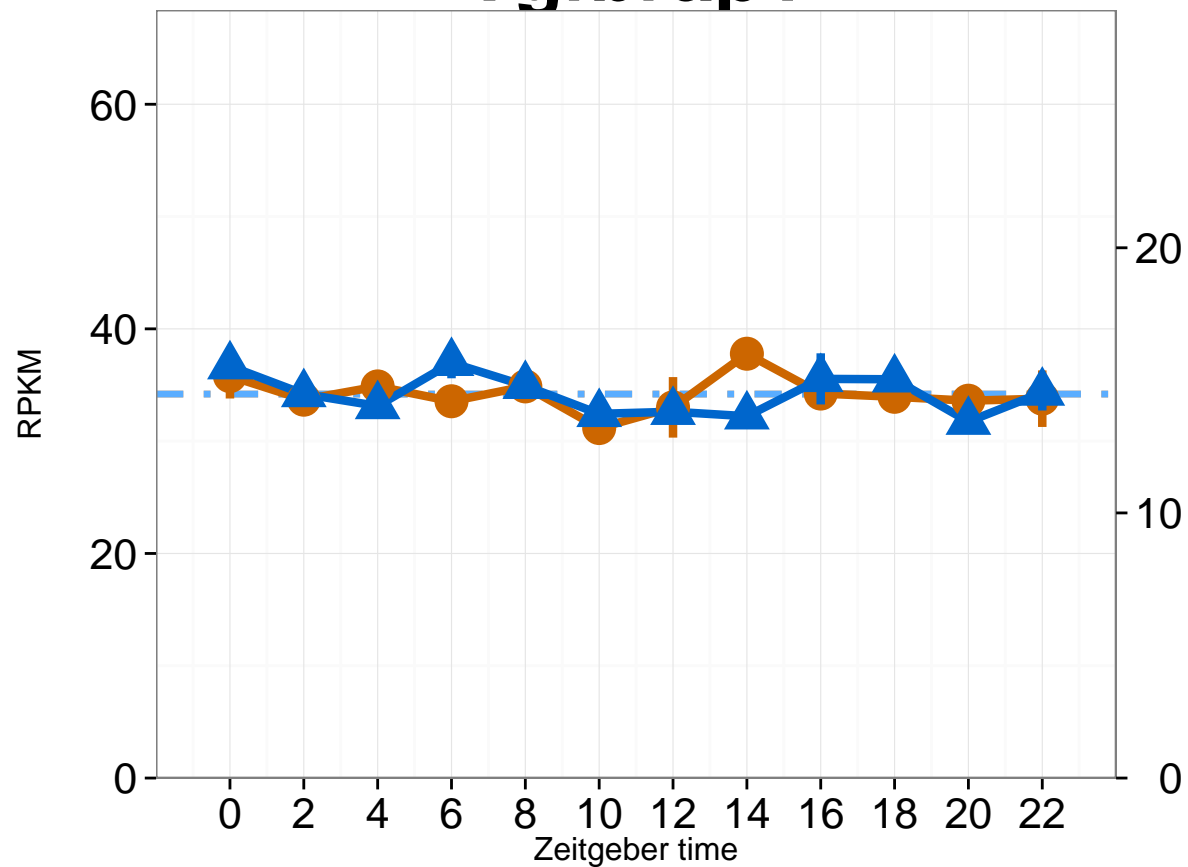

# Tgfbrap1

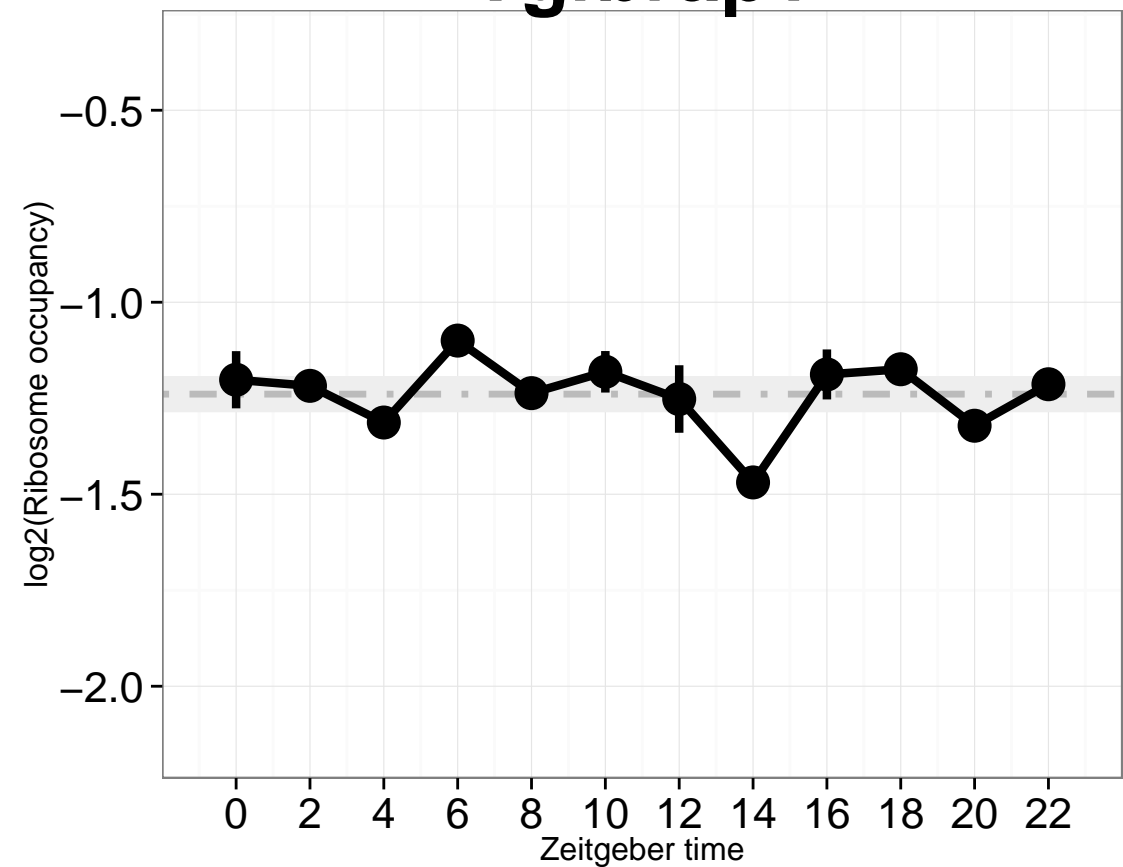

Supplement: Supplementary file 2208 [file 1]
