# Supplementary material (part 23 of 133)
Source: publisher figshare collection journal article supplement (https://springernature.figshare.com/articles/dataset/_/4903193)

## Ccdc77

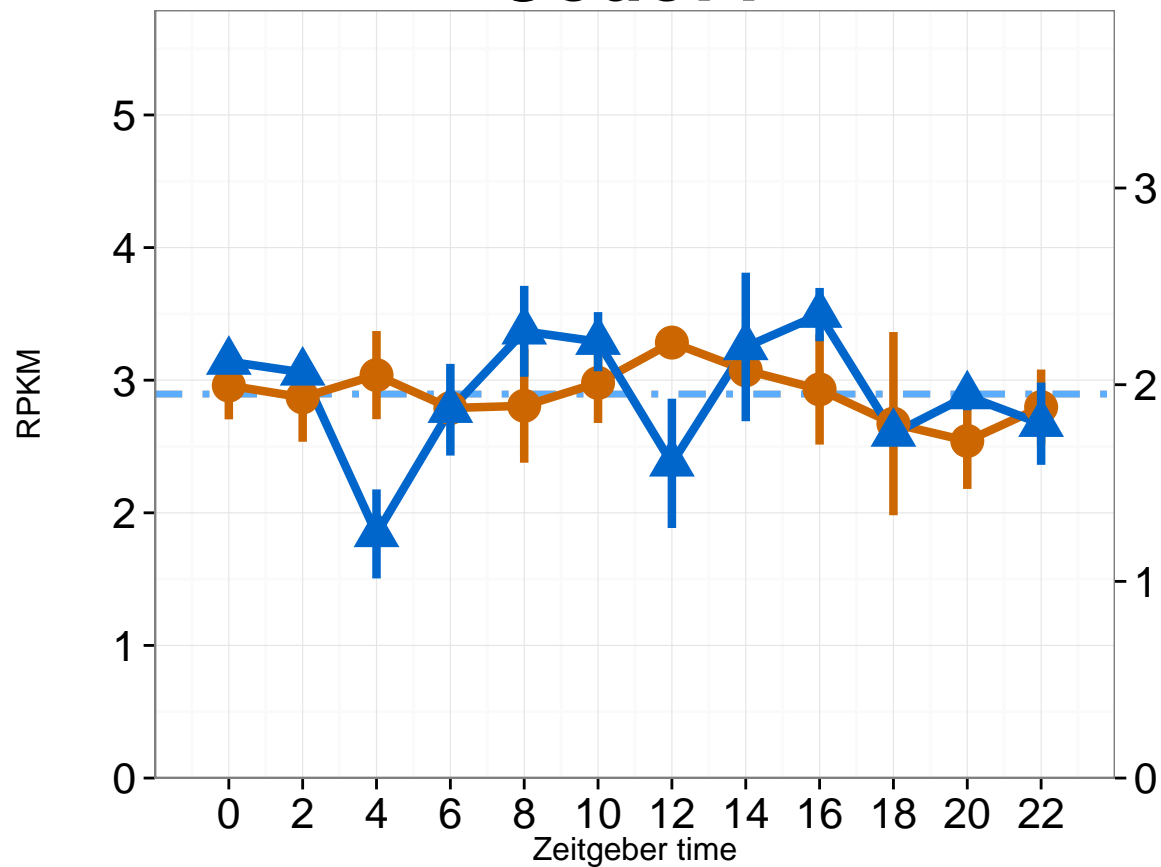

## Ccdc77

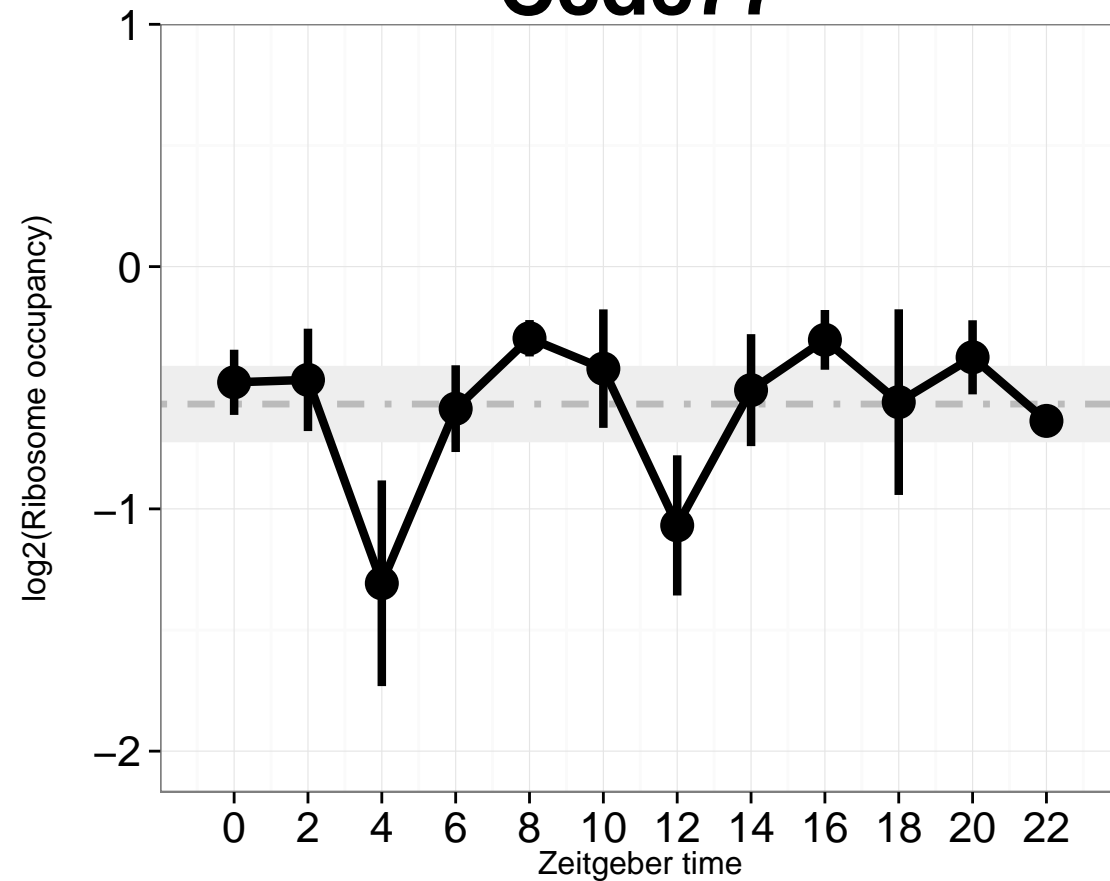

Supplement: Supplementary file 2209 [file 1]

## Wdr83

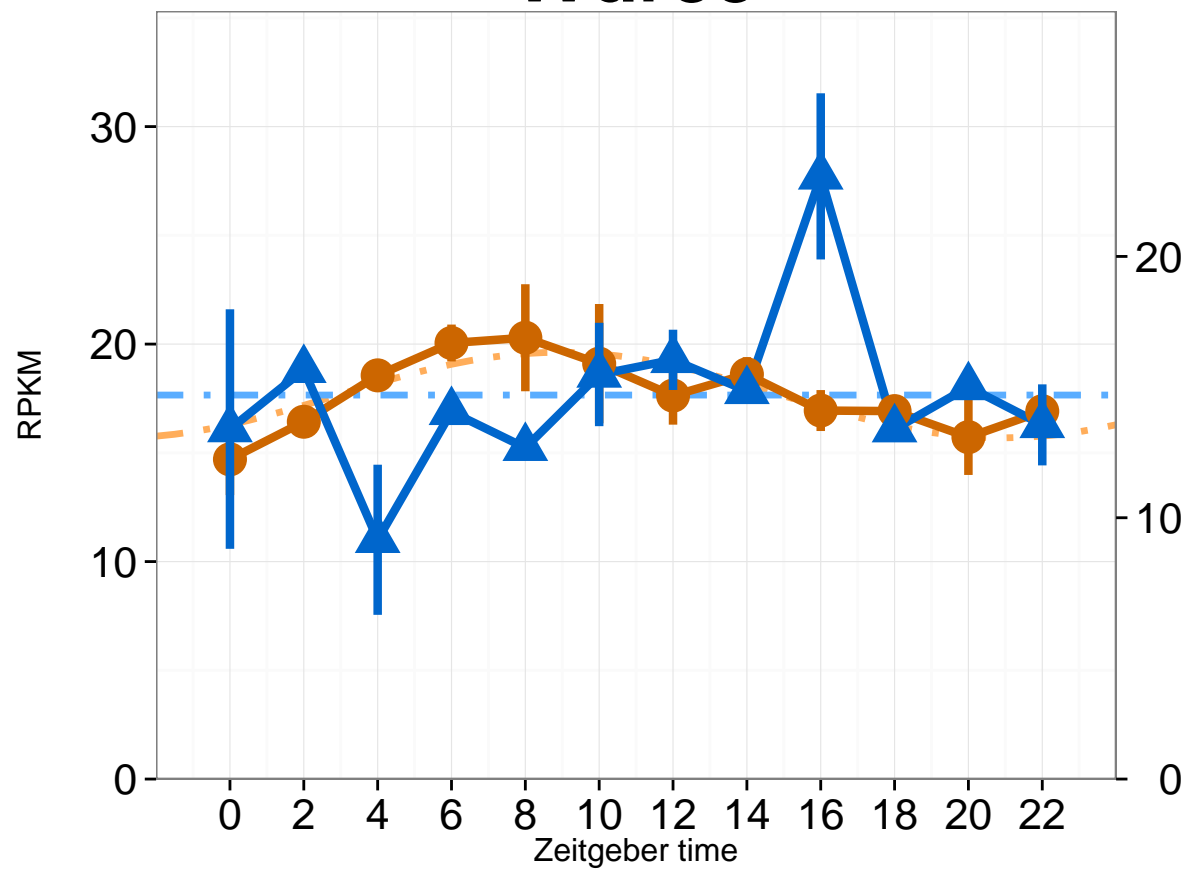

## Wdr83

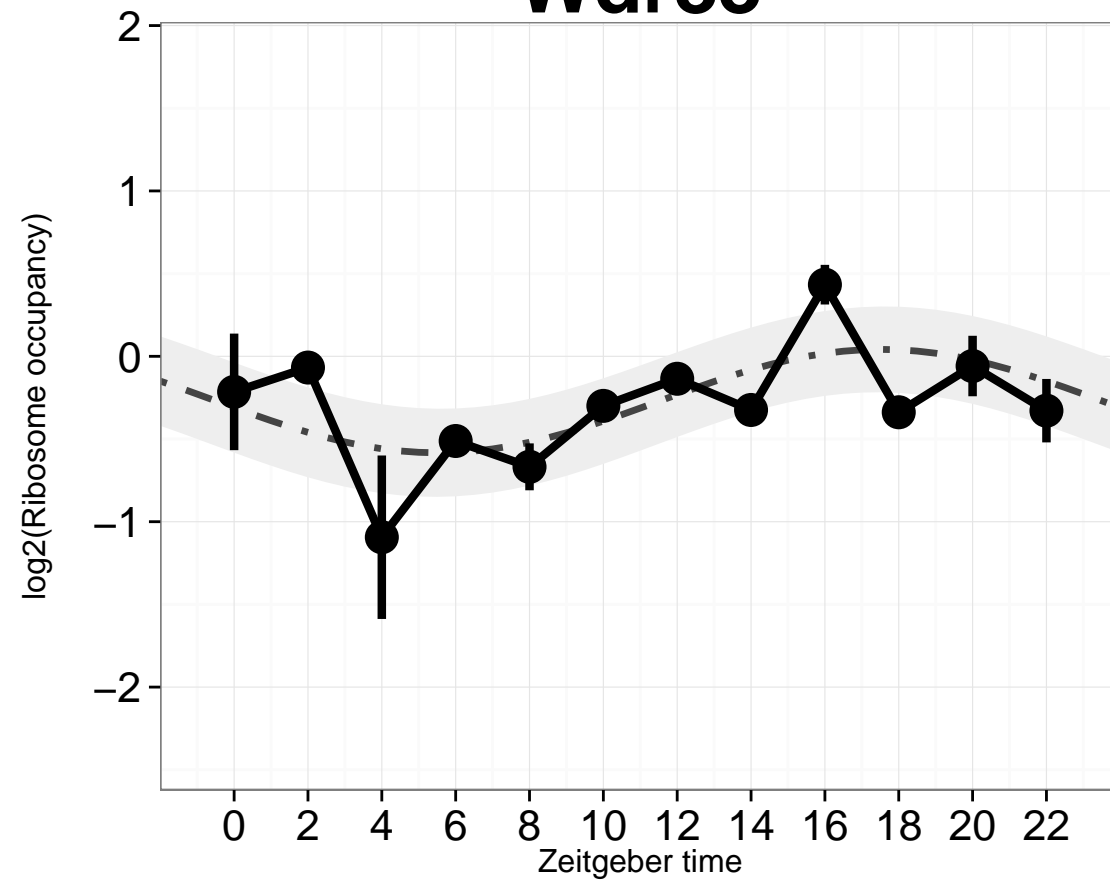

Supplement: Supplementary file 2210 [file 1]

## Oxct1

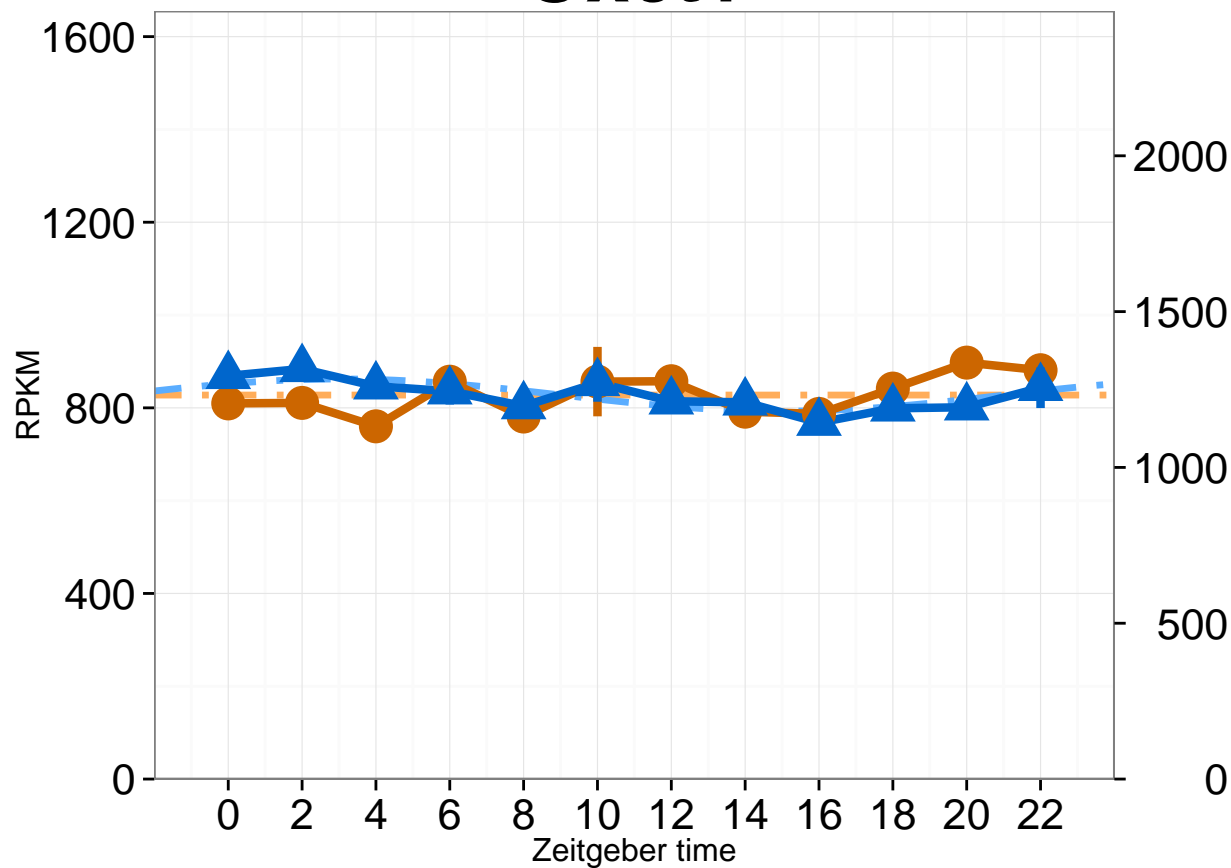

## Oxct1

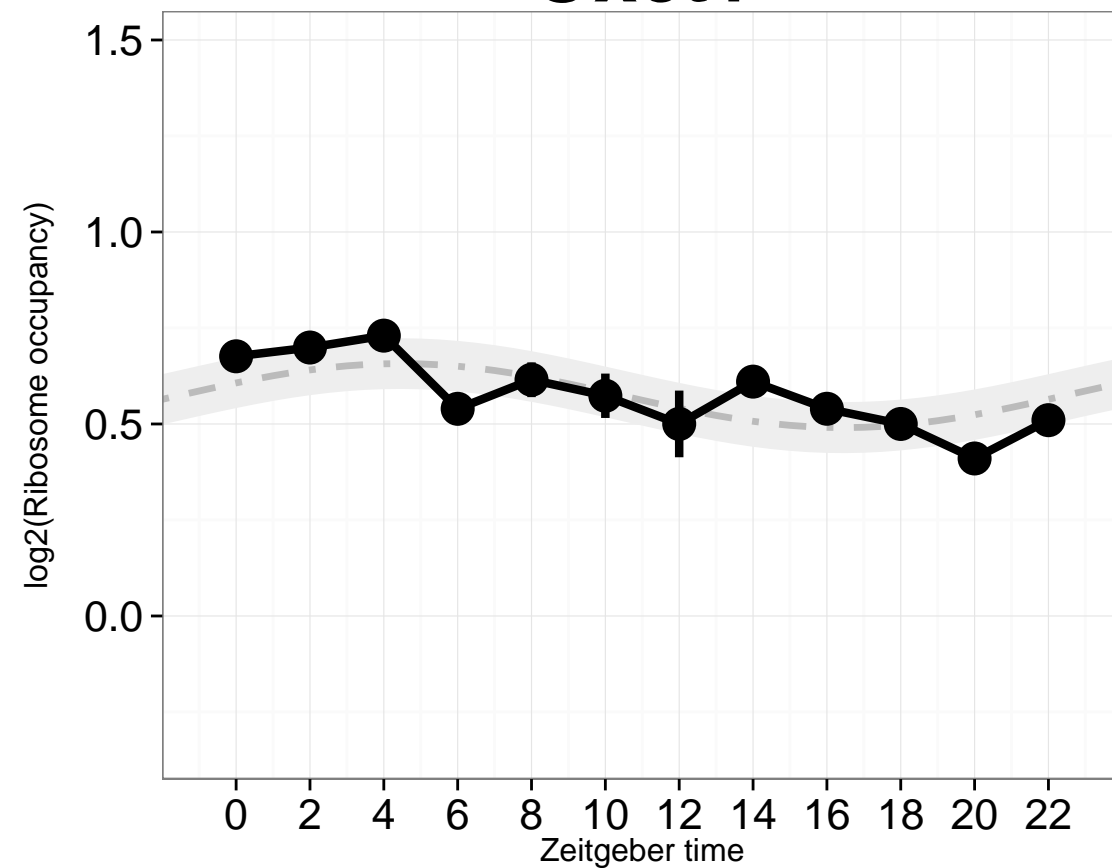

Supplement: Supplementary file 2211 [file 1]

## Zfp60

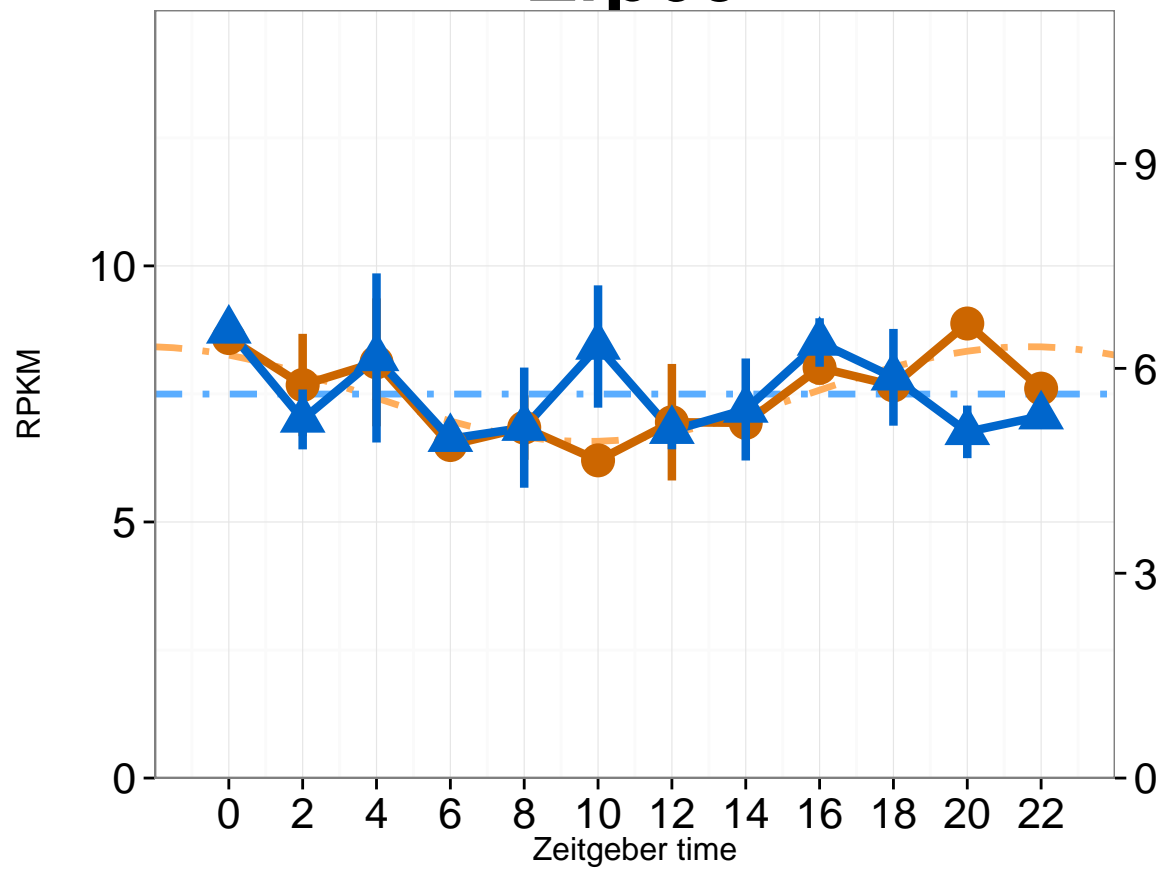

## Zfp60

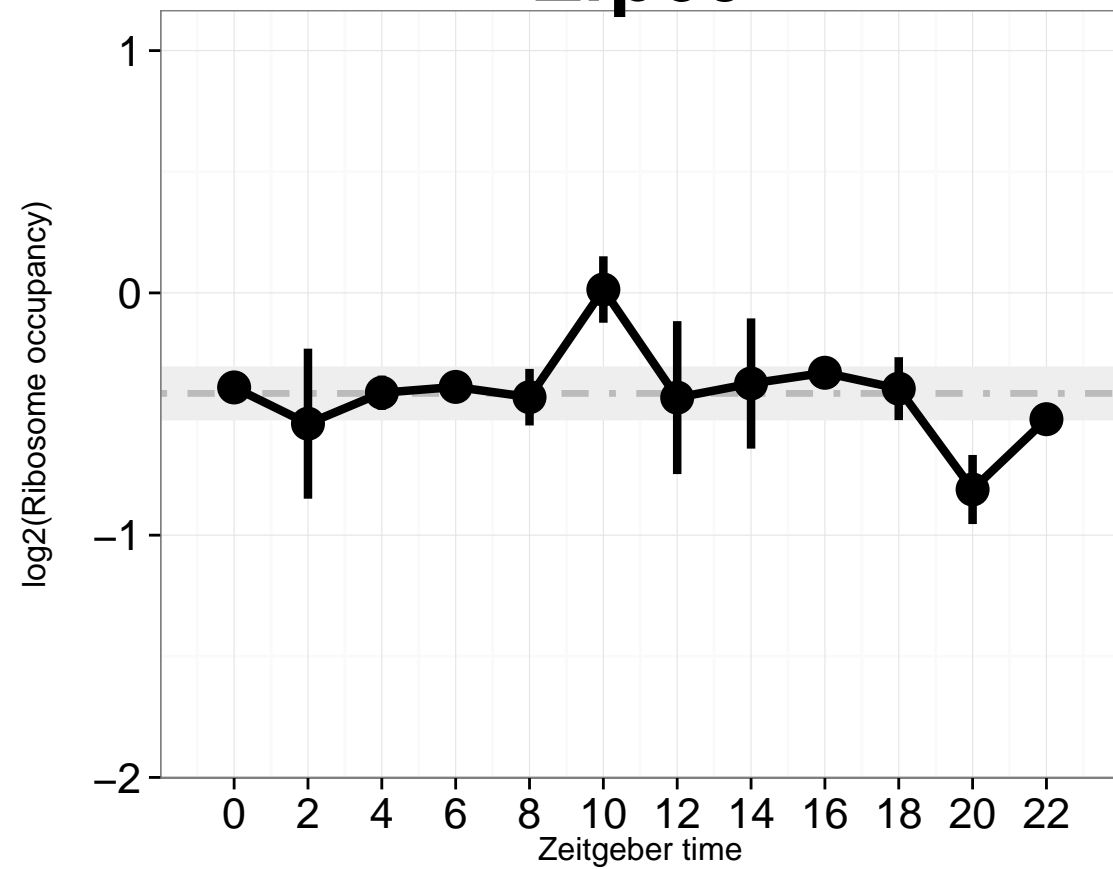

Supplement: Supplementary file 2212 [file 1]

## Nlrp1b

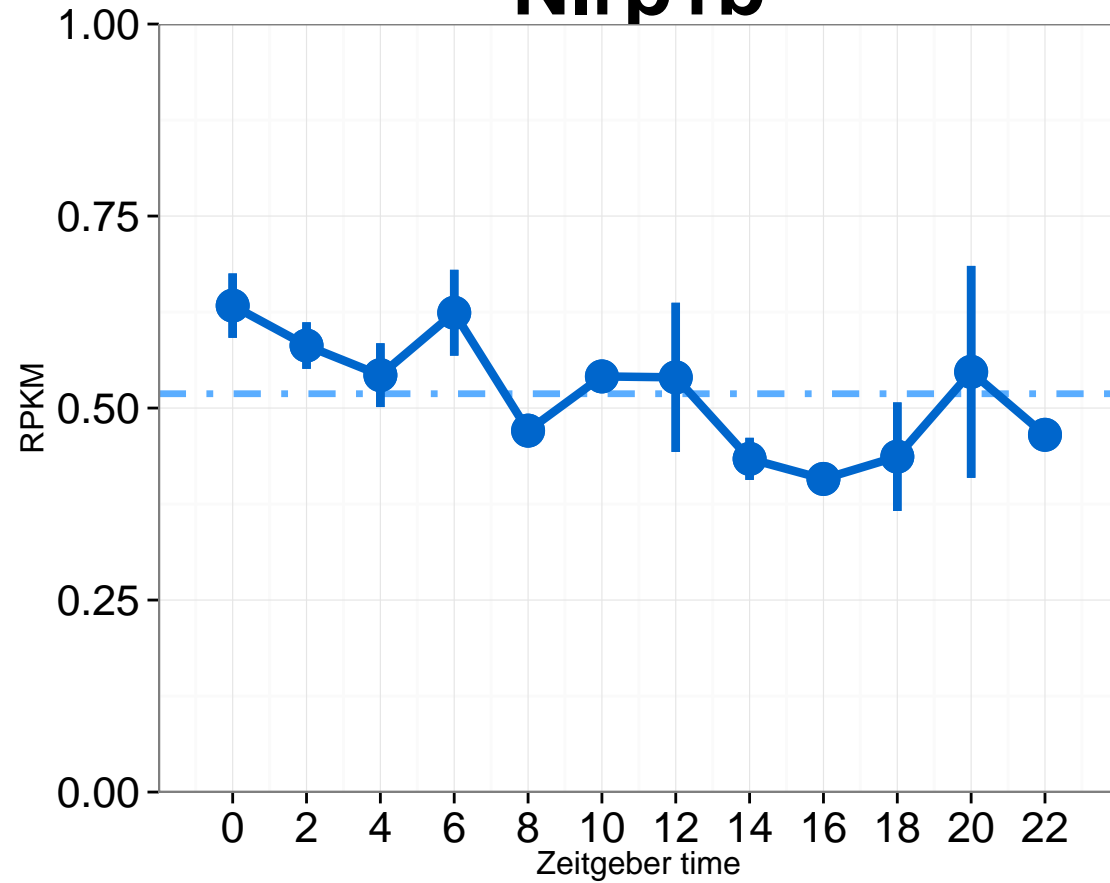

## Nlrp1b log2(Ribosome occupancy

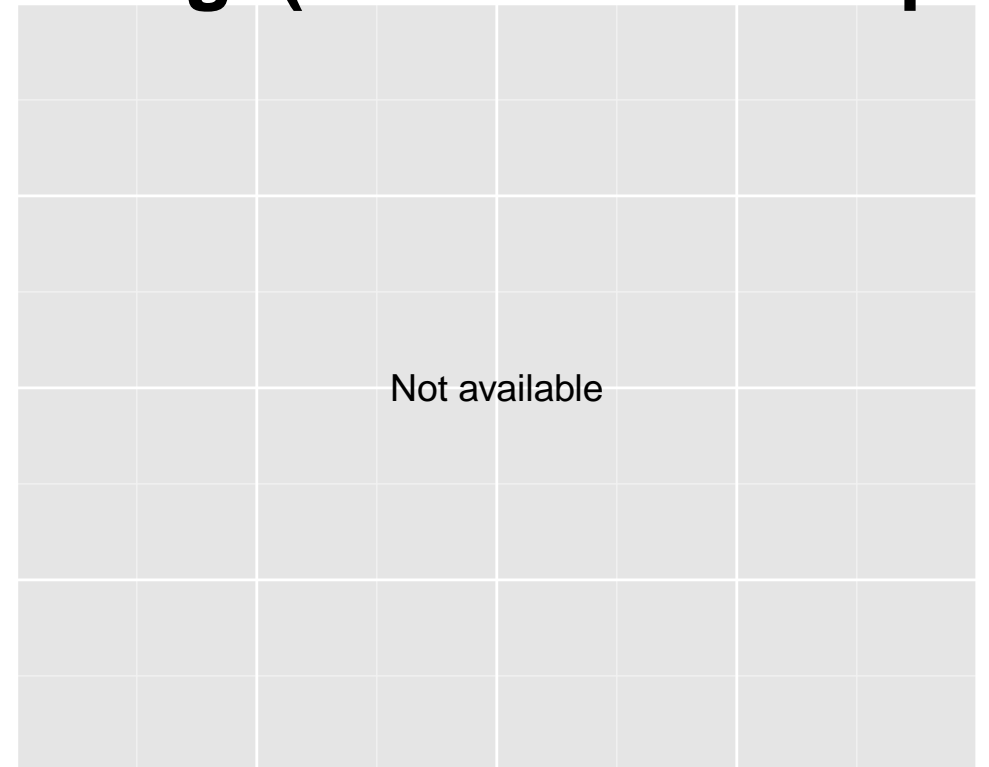

Supplement: Supplementary file 2213 [file 1]

## Atxn2l

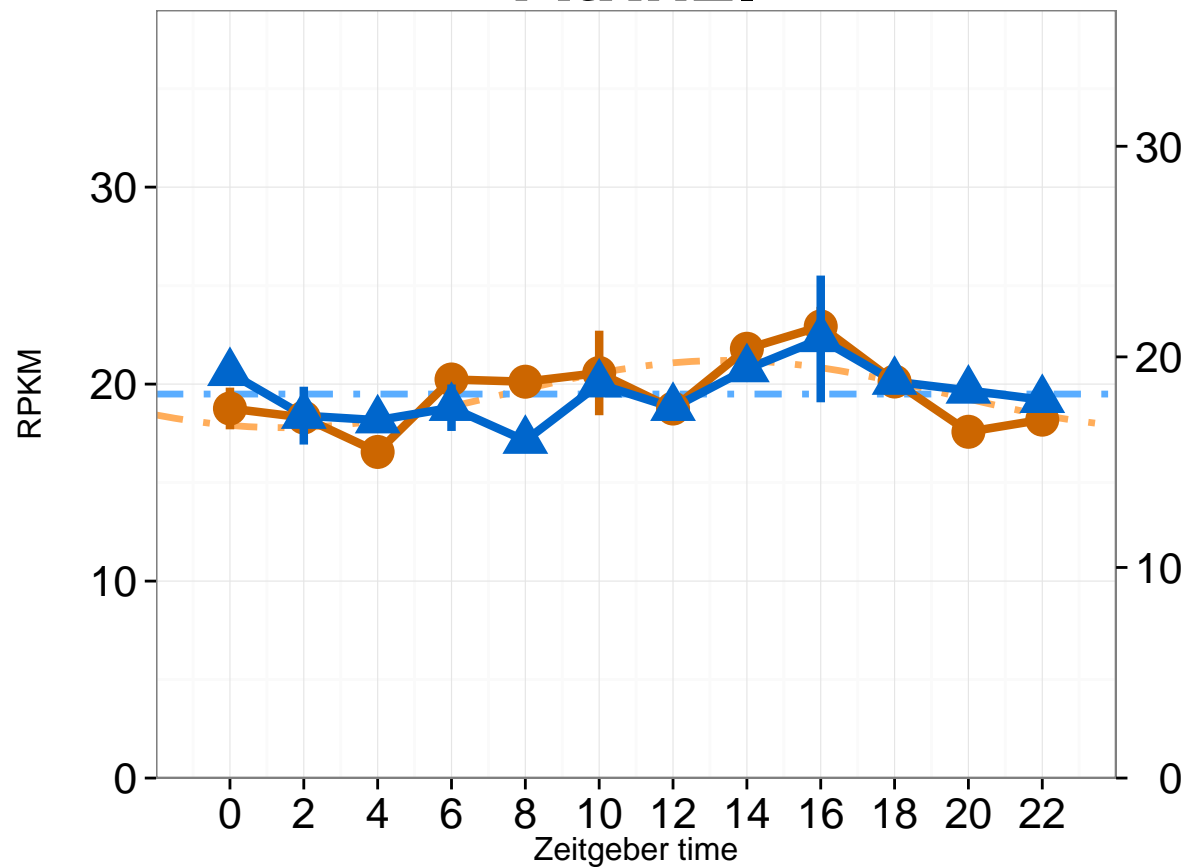

## Atxn2l

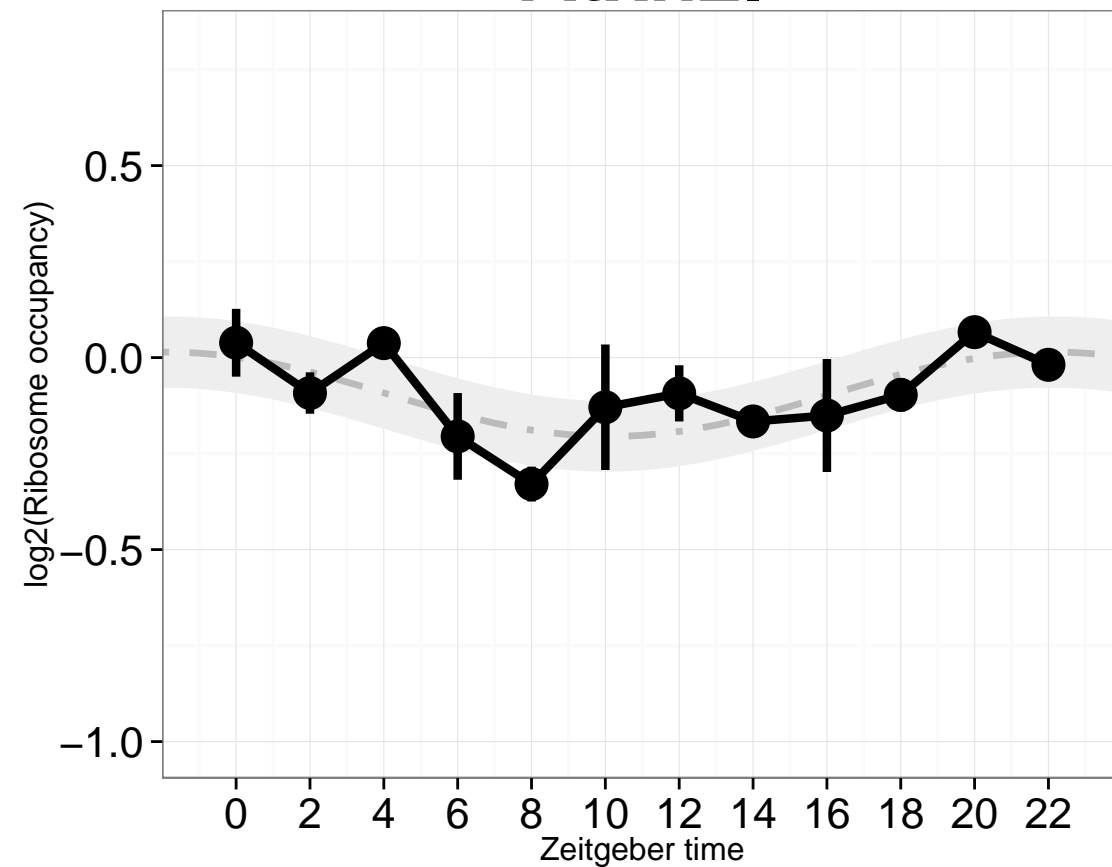

Supplement: Supplementary file 2214 [file 1]

## Foxp1

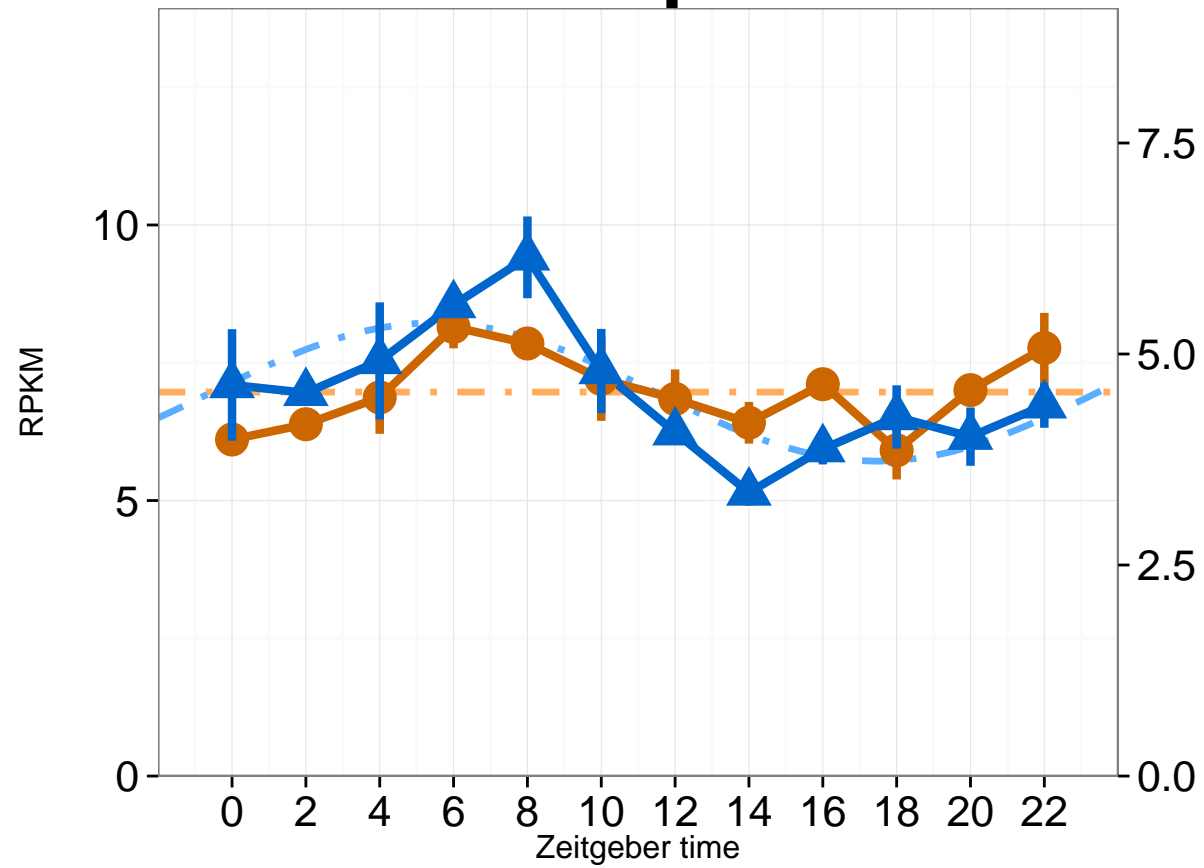

## Foxp1

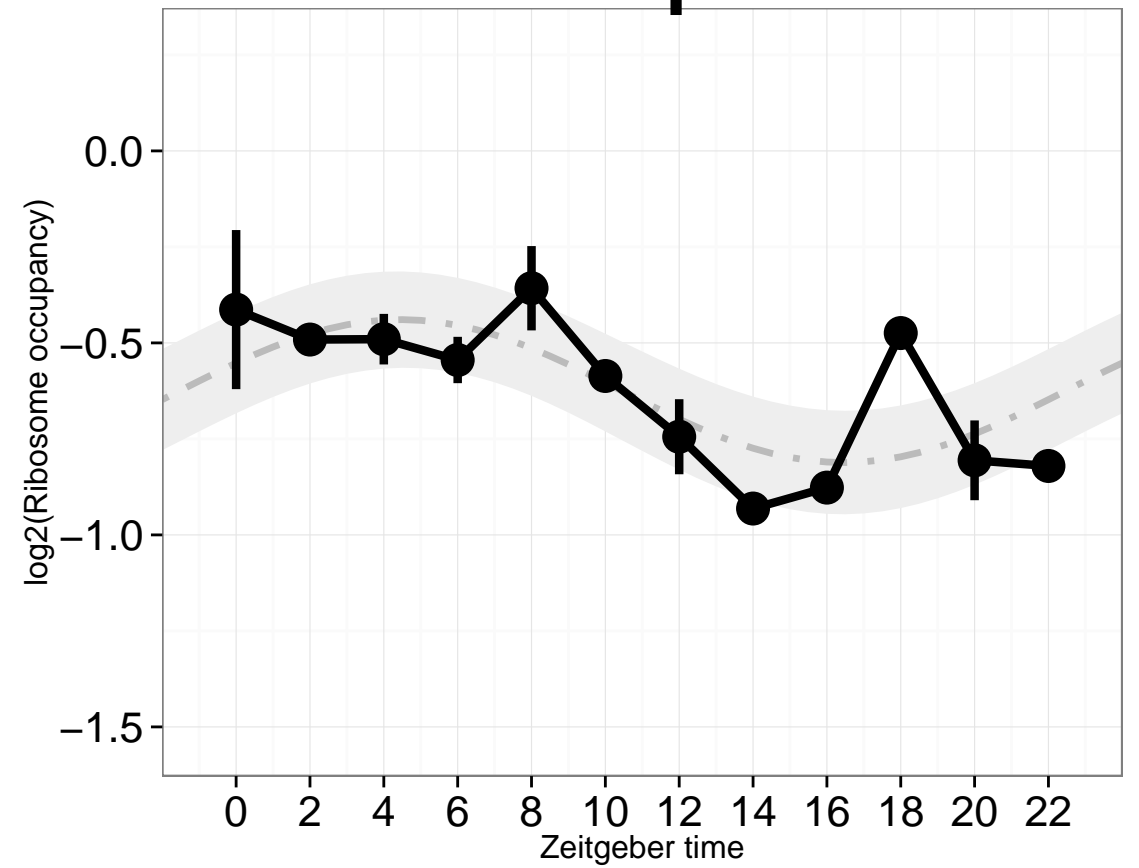

Supplement: Supplementary file 2215 [file 1]

# Fam115a

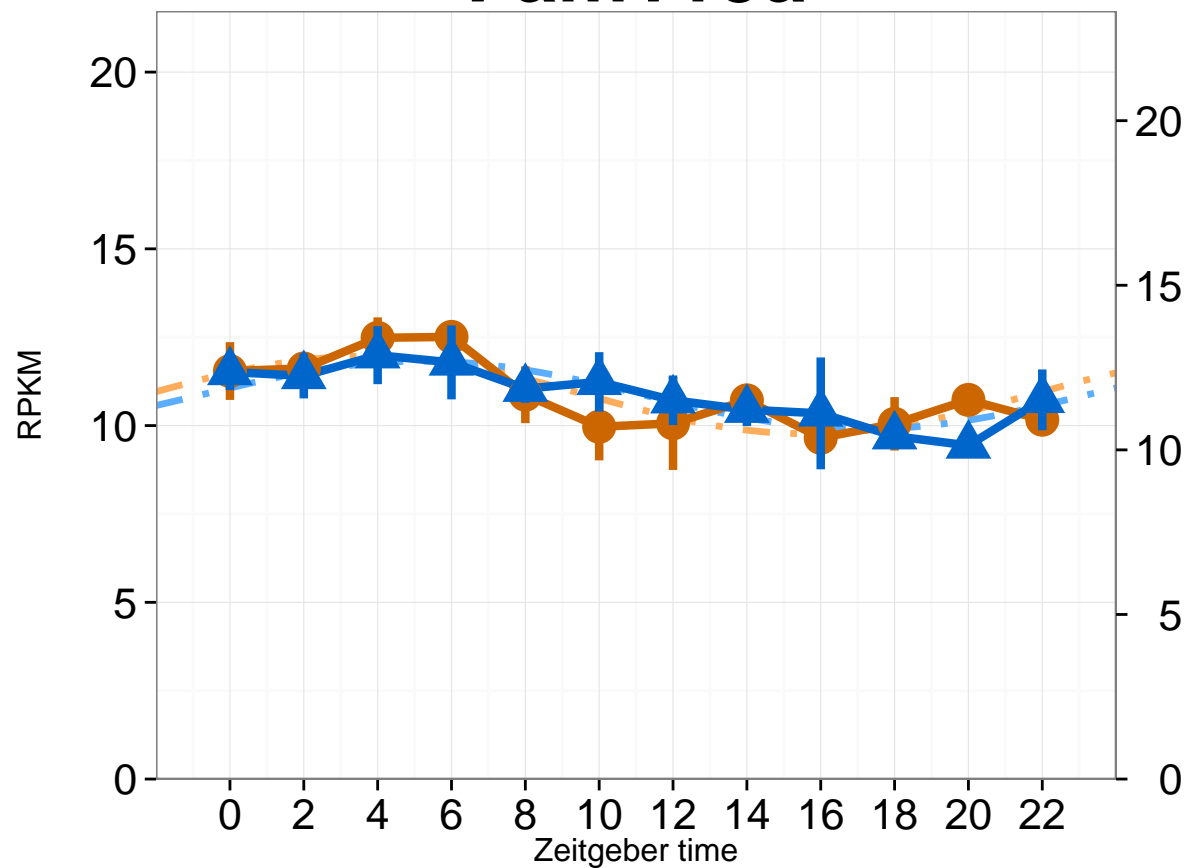

# Fam115a

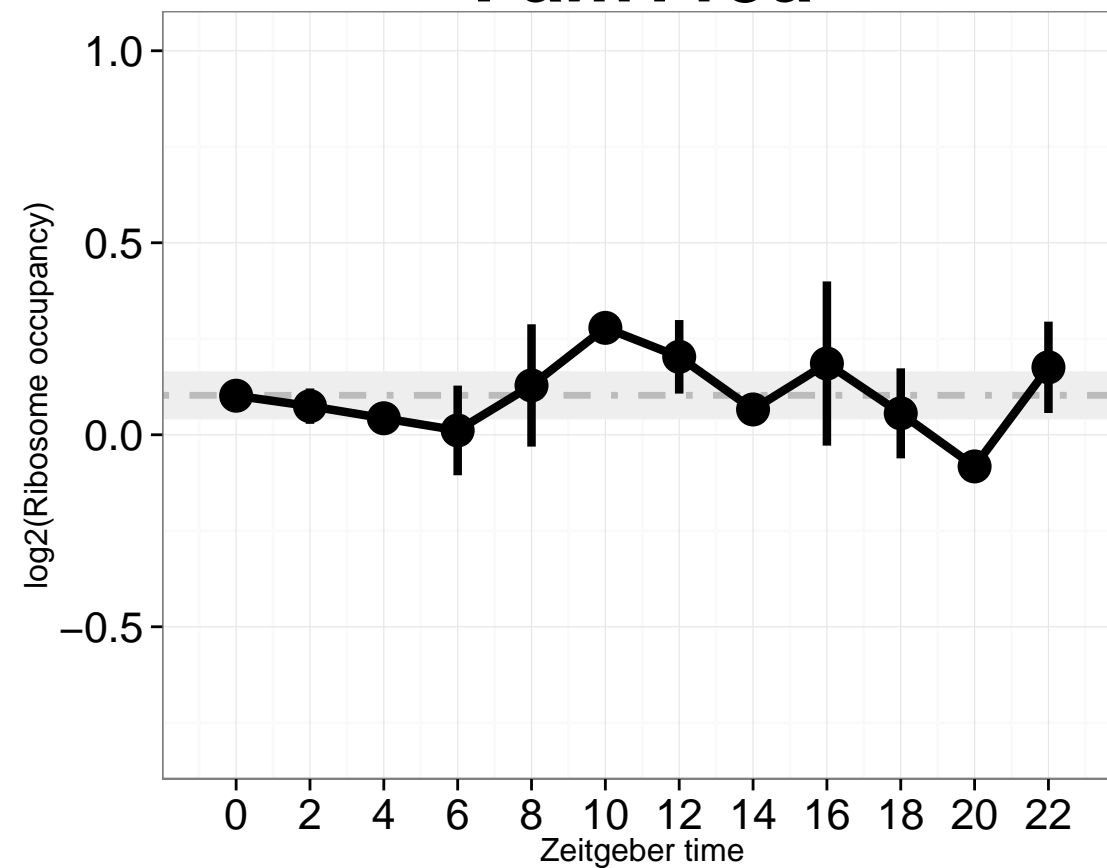

Supplement: Supplementary file 2216 [file 1]

# Tmem248

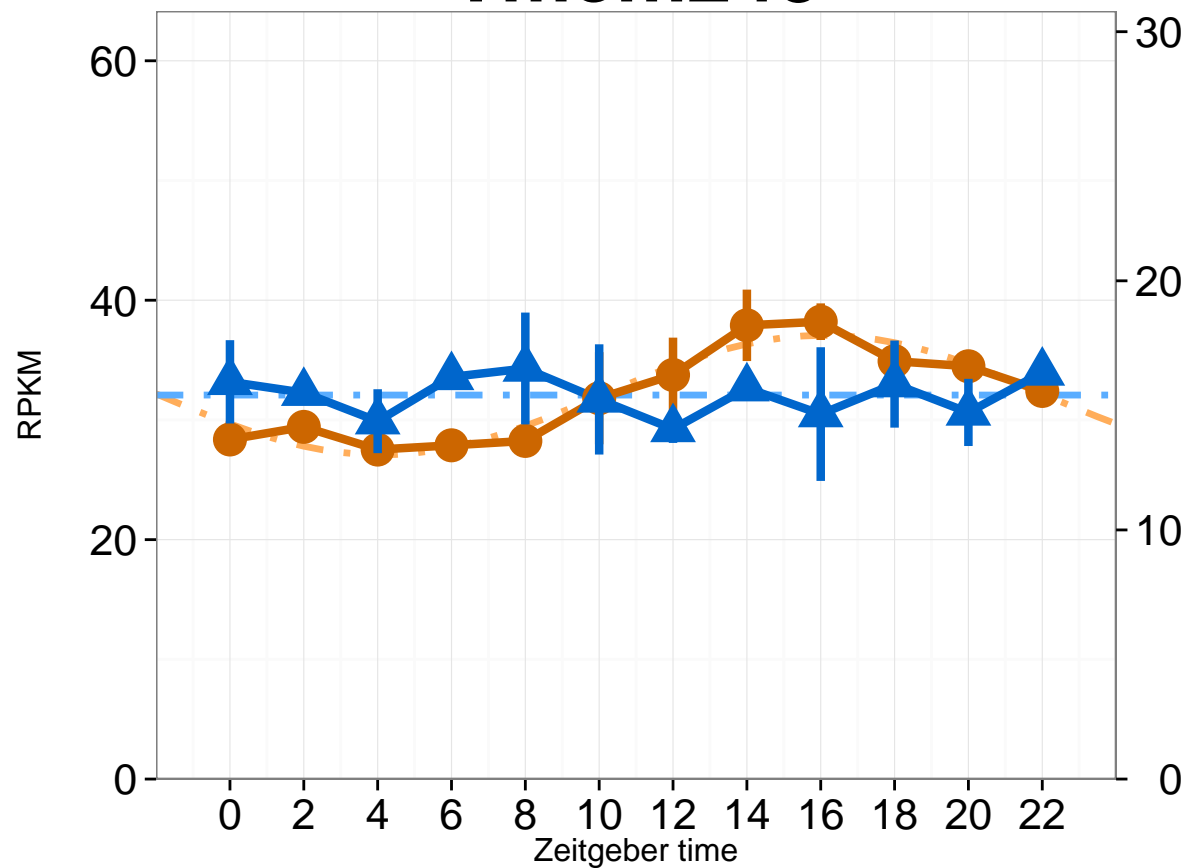

# Tmem248

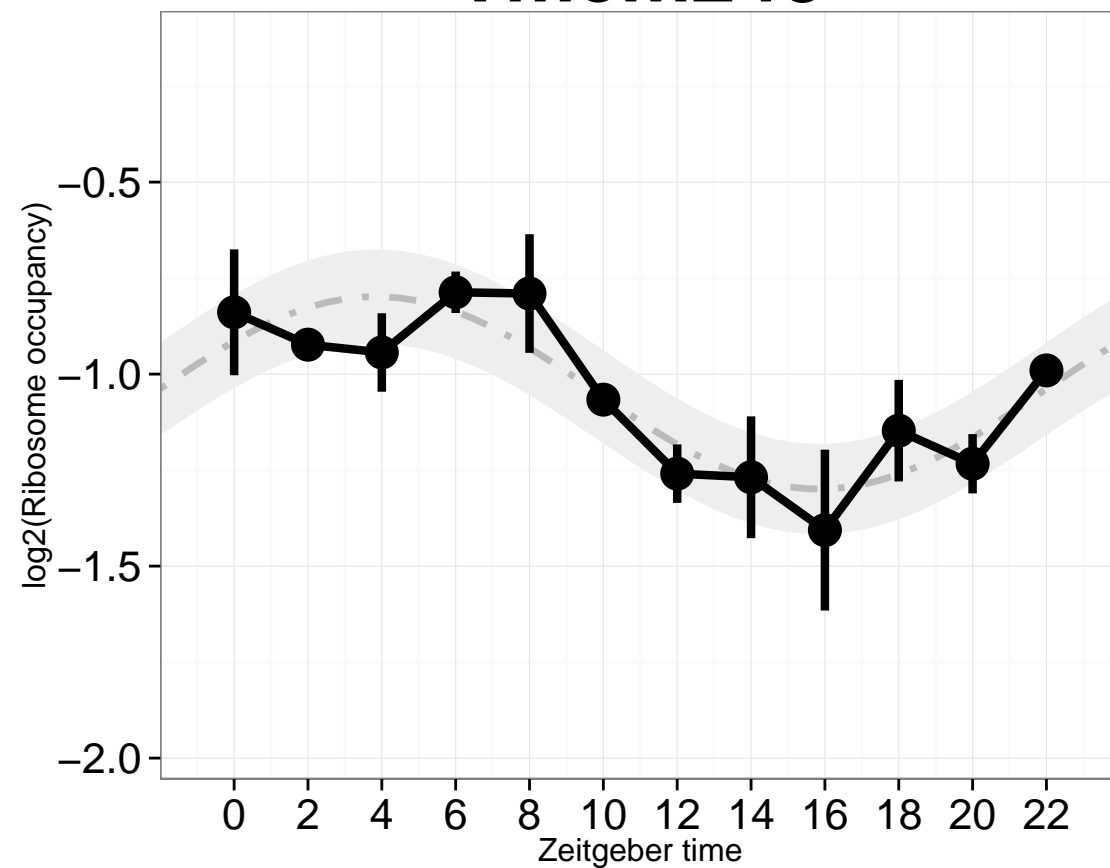

Supplement: Supplementary file 2217 [file 1]

## Sspn

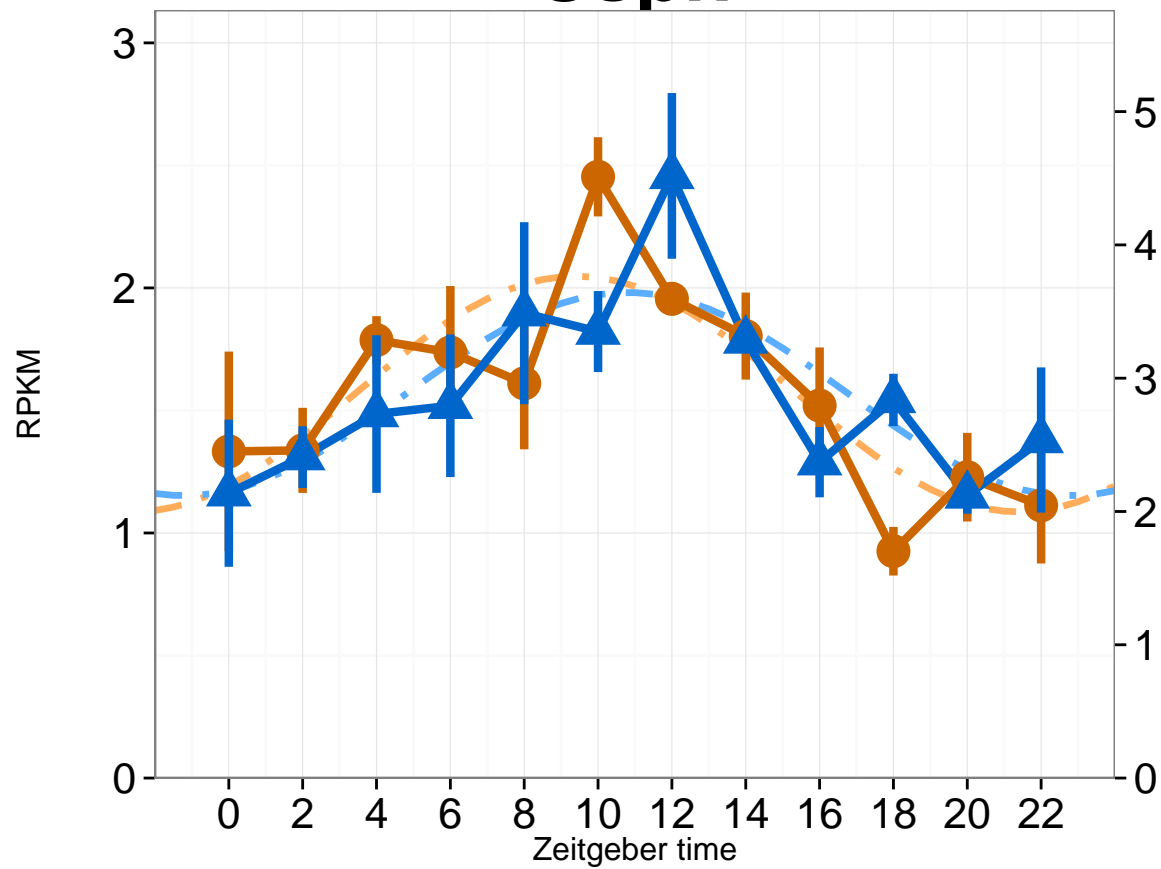

## Sspn

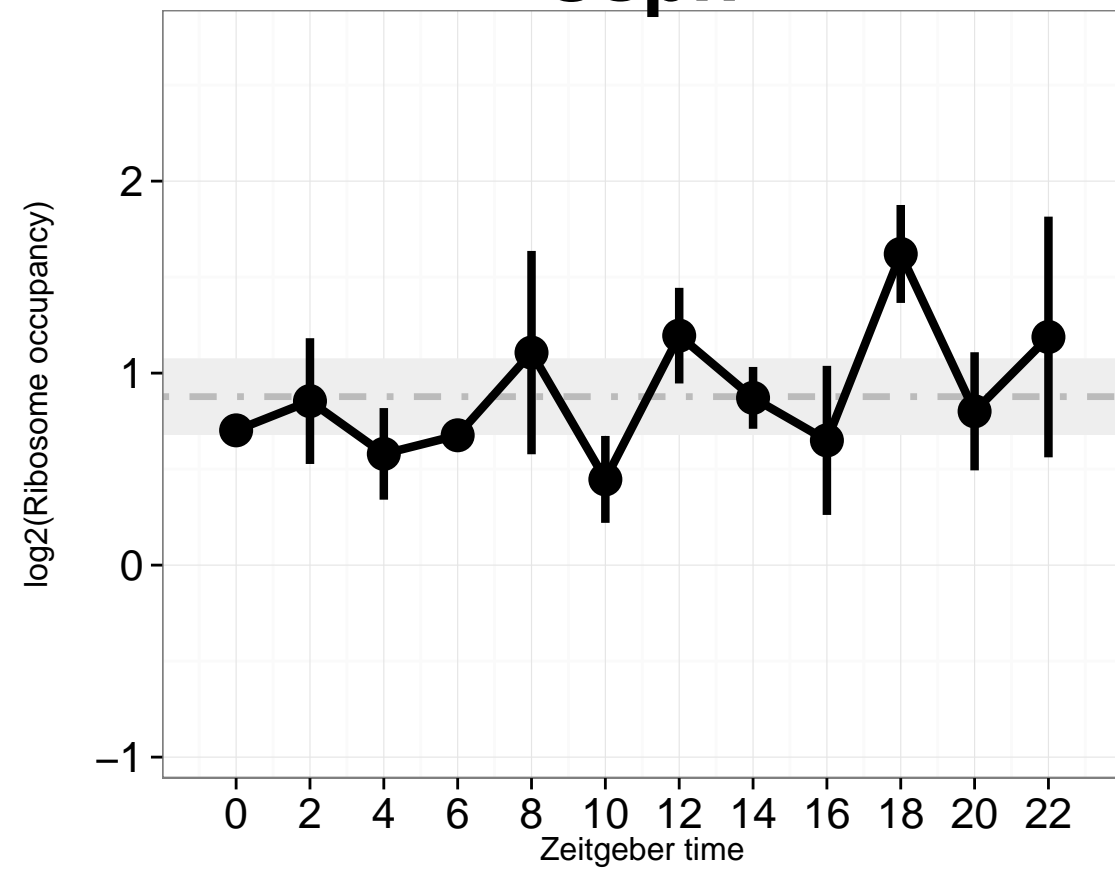

Supplement: Supplementary file 2218 [file 1]

## Cdh5

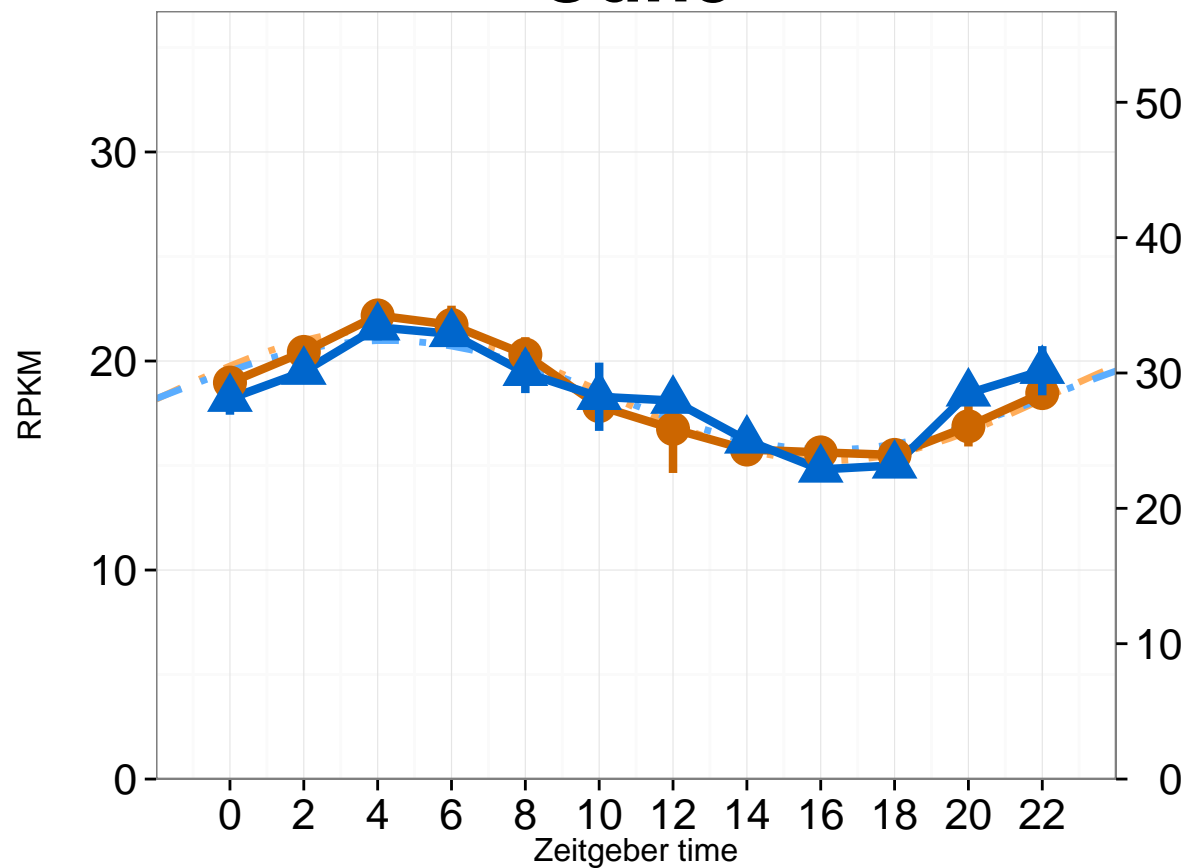

## Cdh5

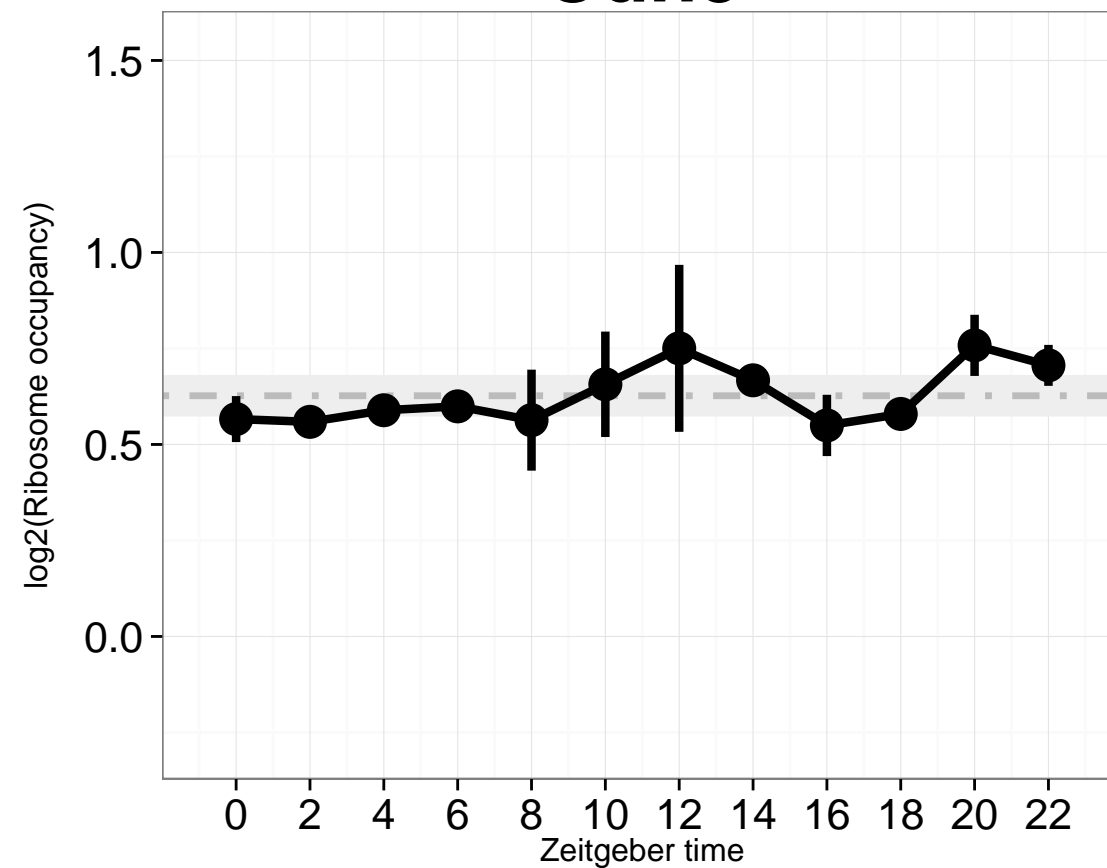

Supplement: Supplementary file 2219 [file 1]

# Stard13

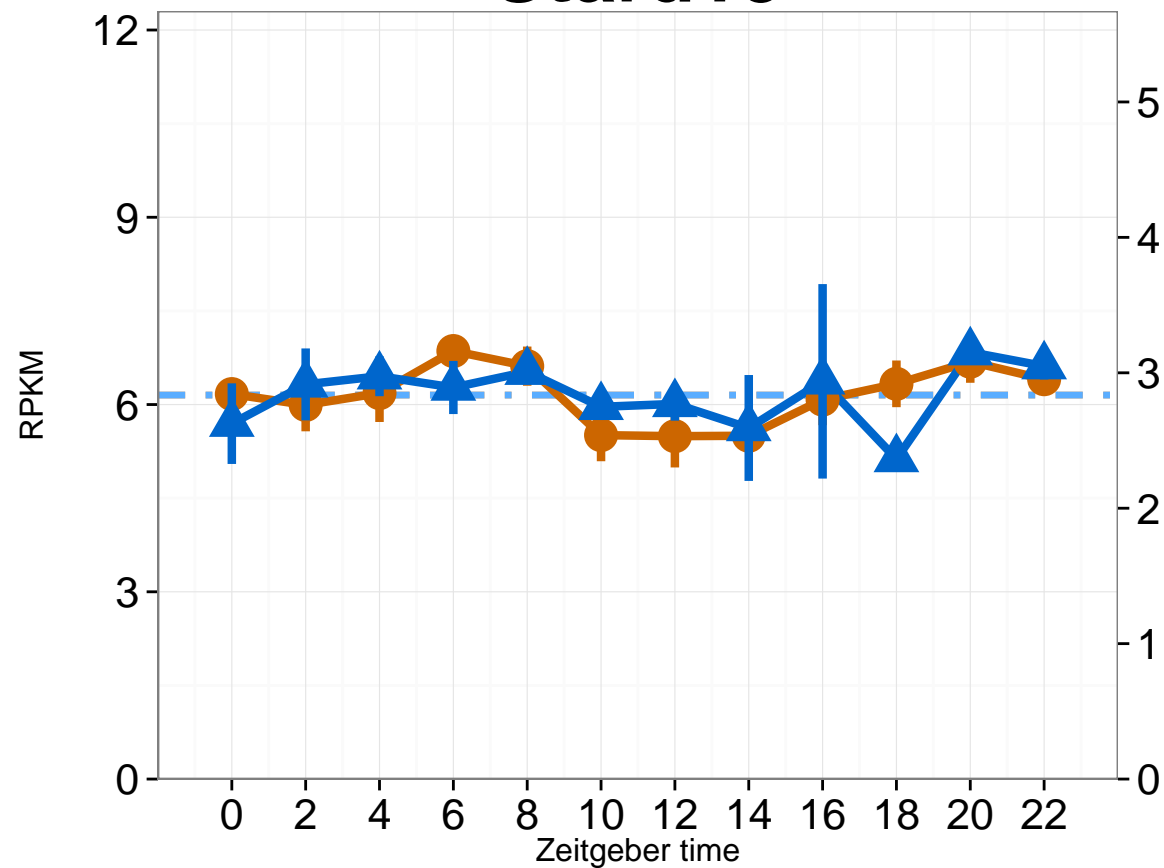

# Stard13

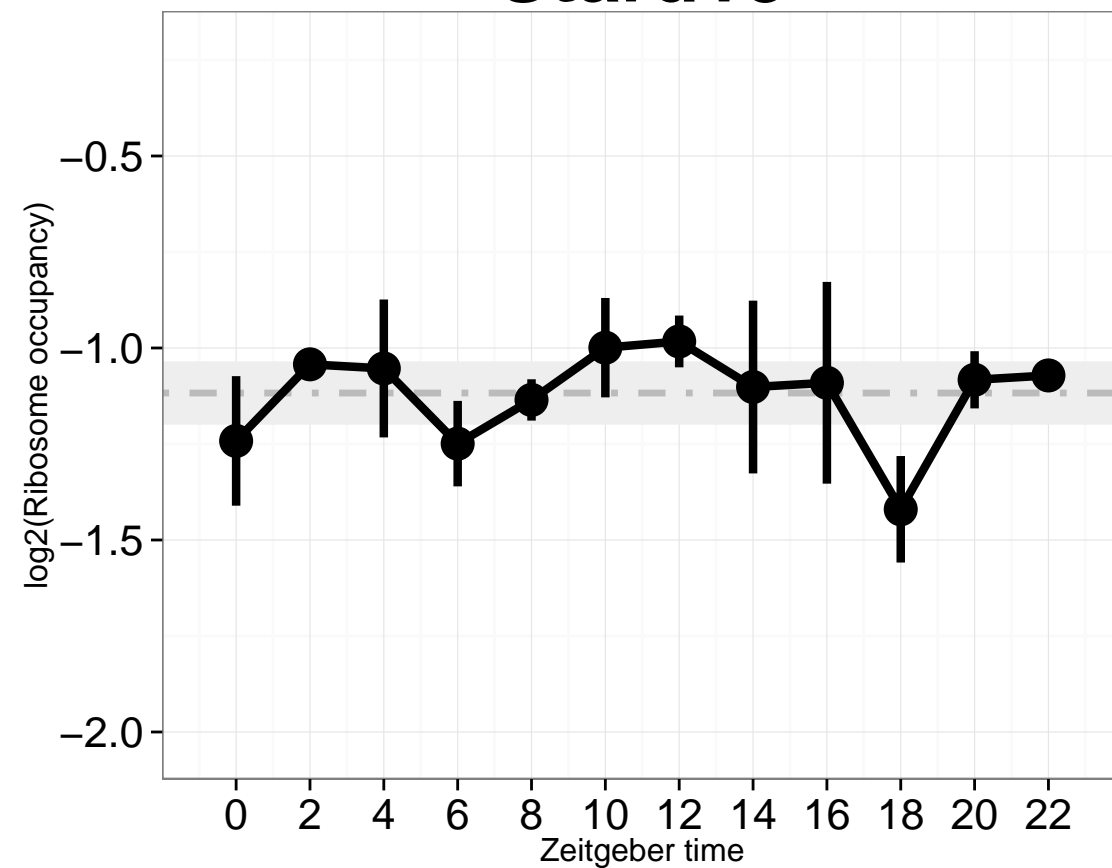

Supplement: Supplementary file 2220 [file 1]

## 9030619P08Rik

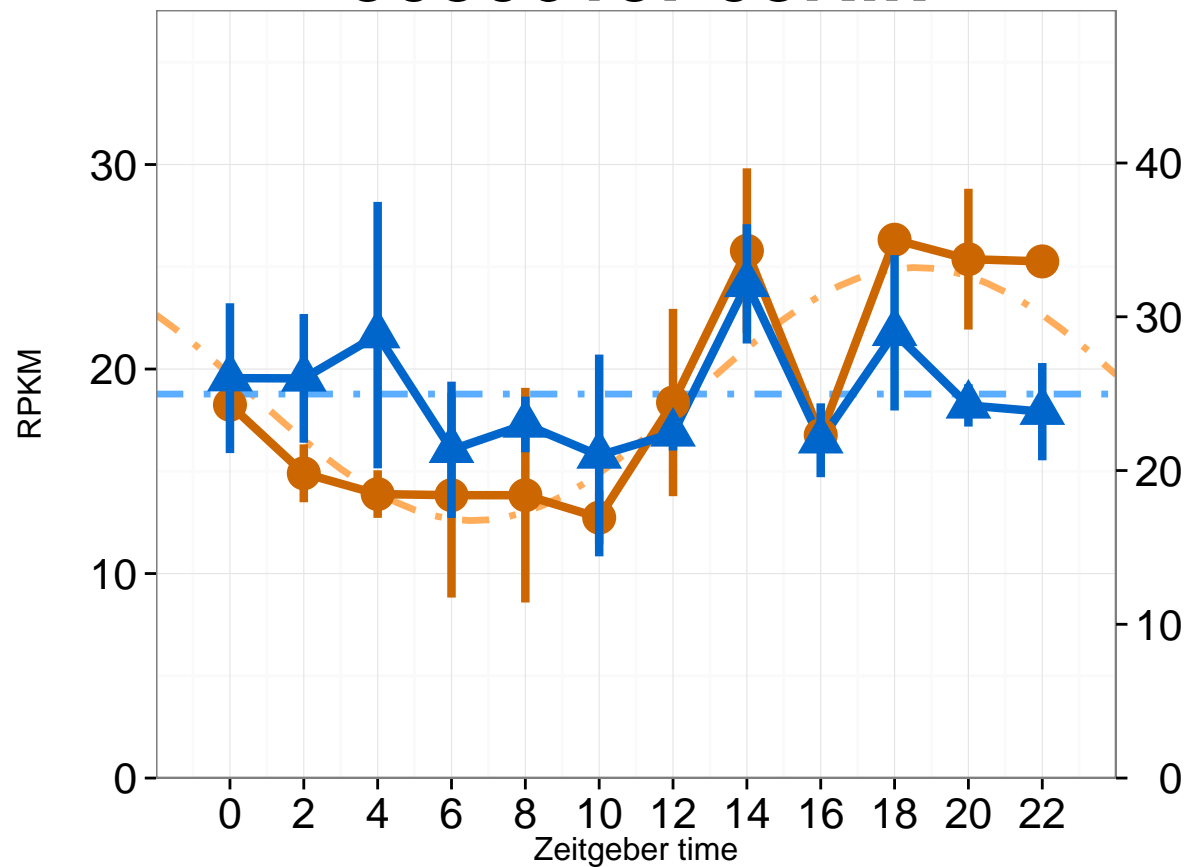

## 9030619P08Rik

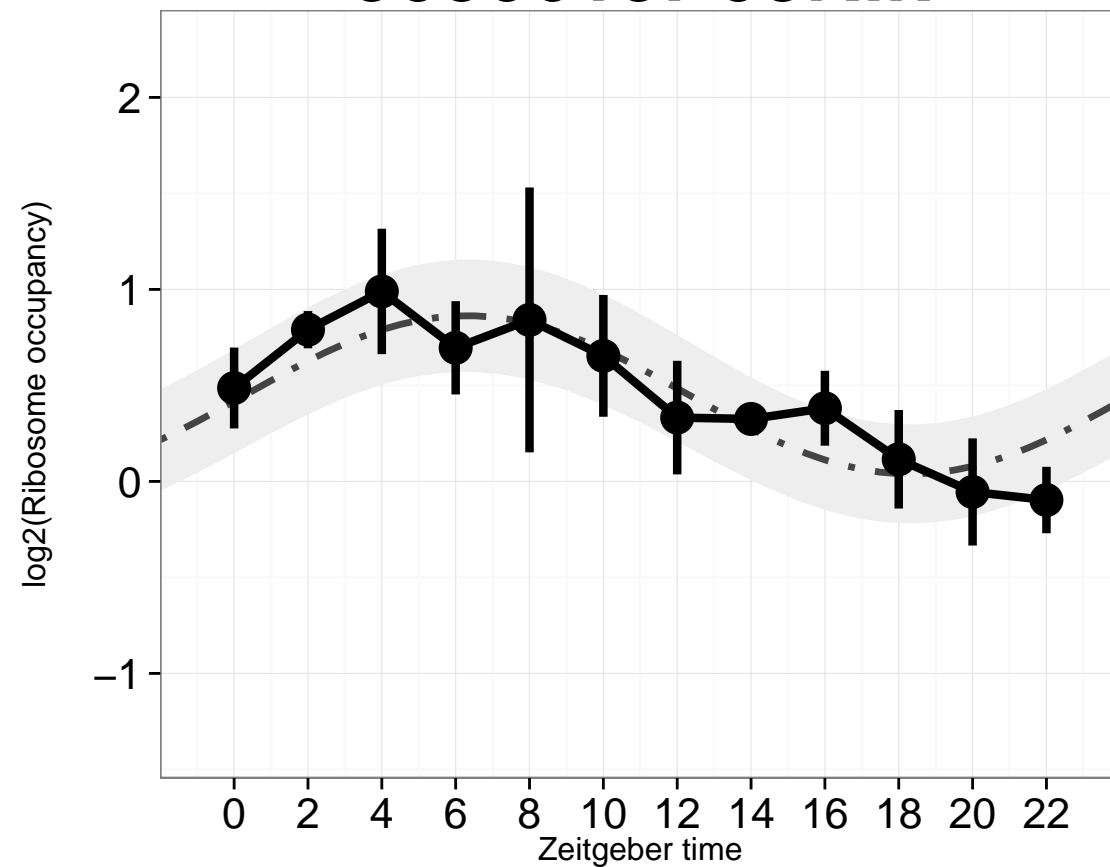

Supplement: Supplementary file 2221 [file 1]

# Cep76

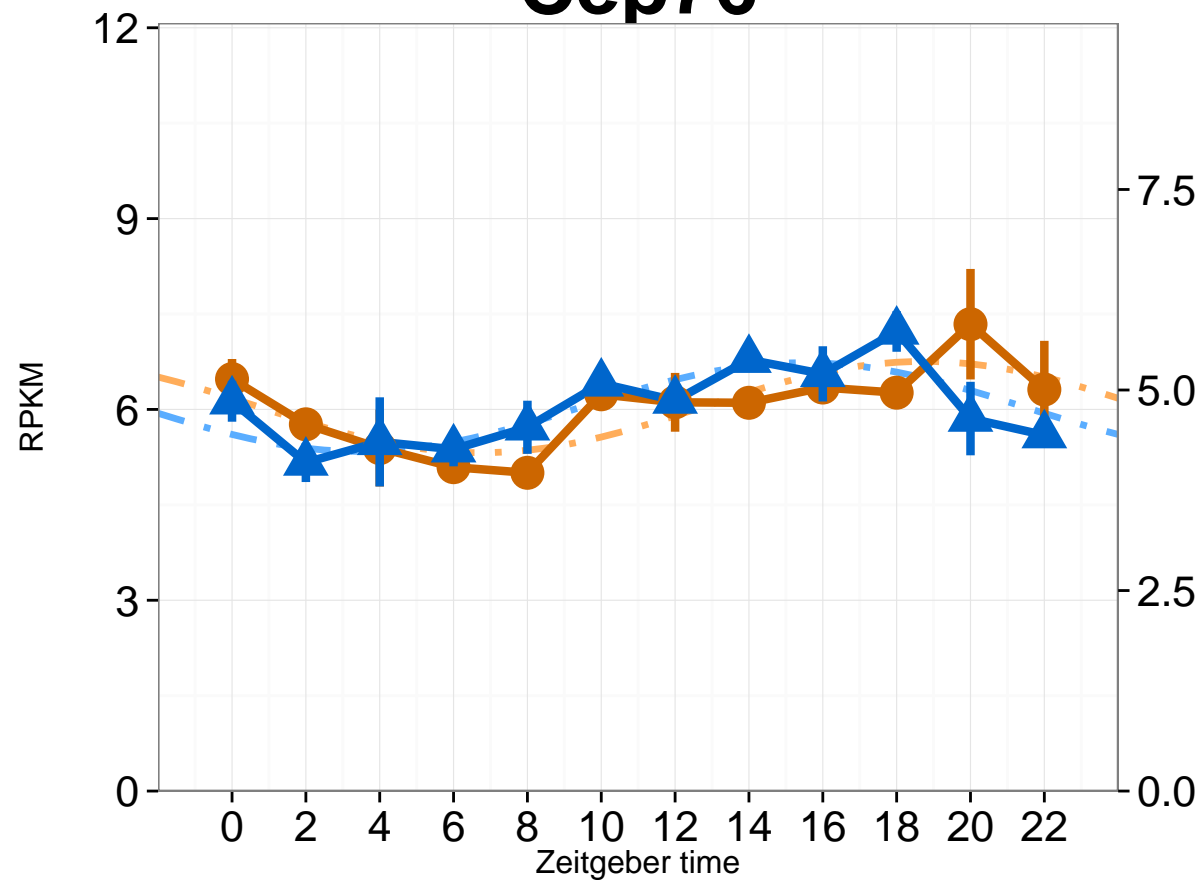

# Cep76

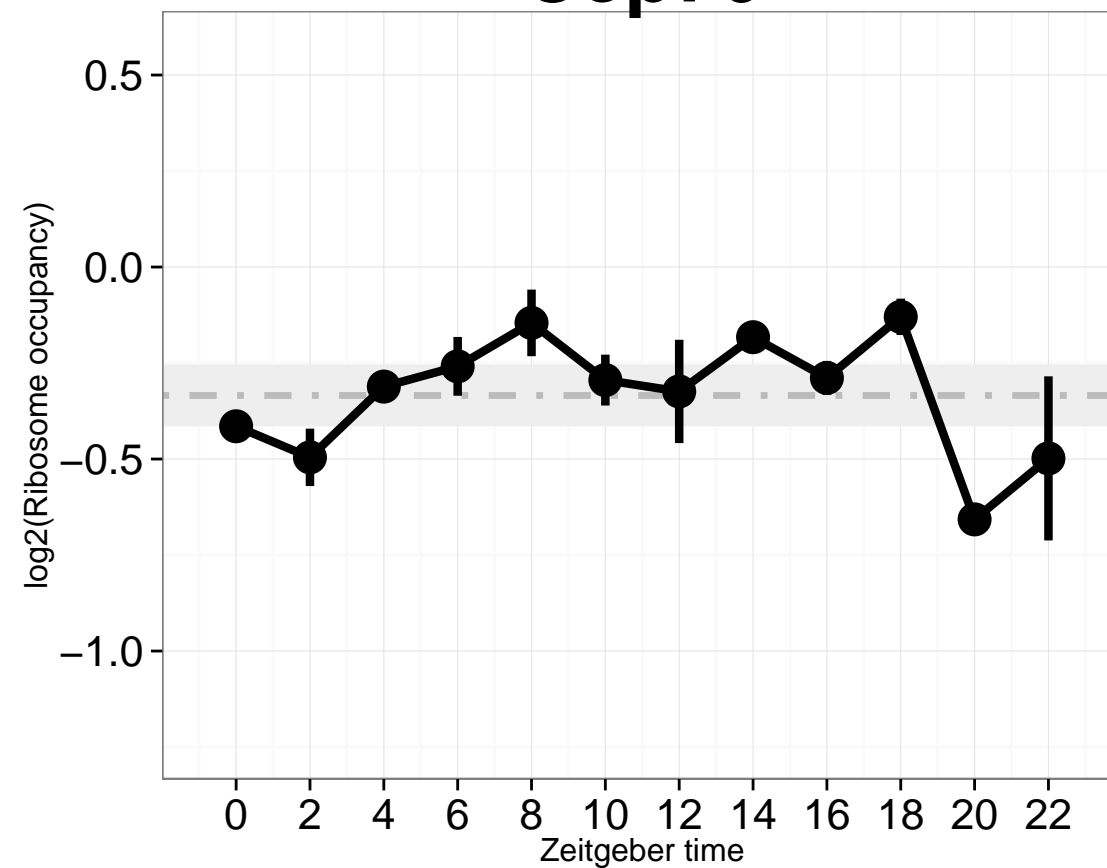

Supplement: Supplementary file 2222 [file 1]

## Nsmaf

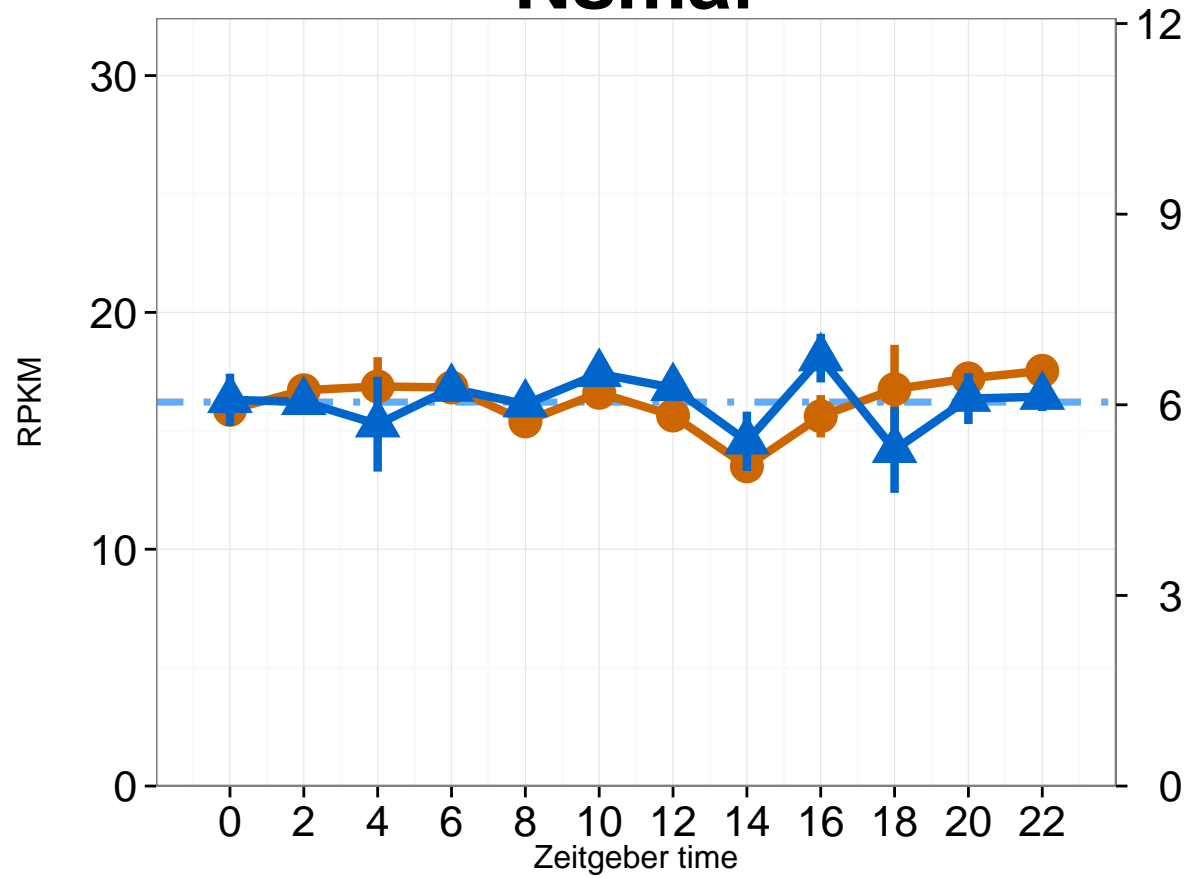

## Nsmaf

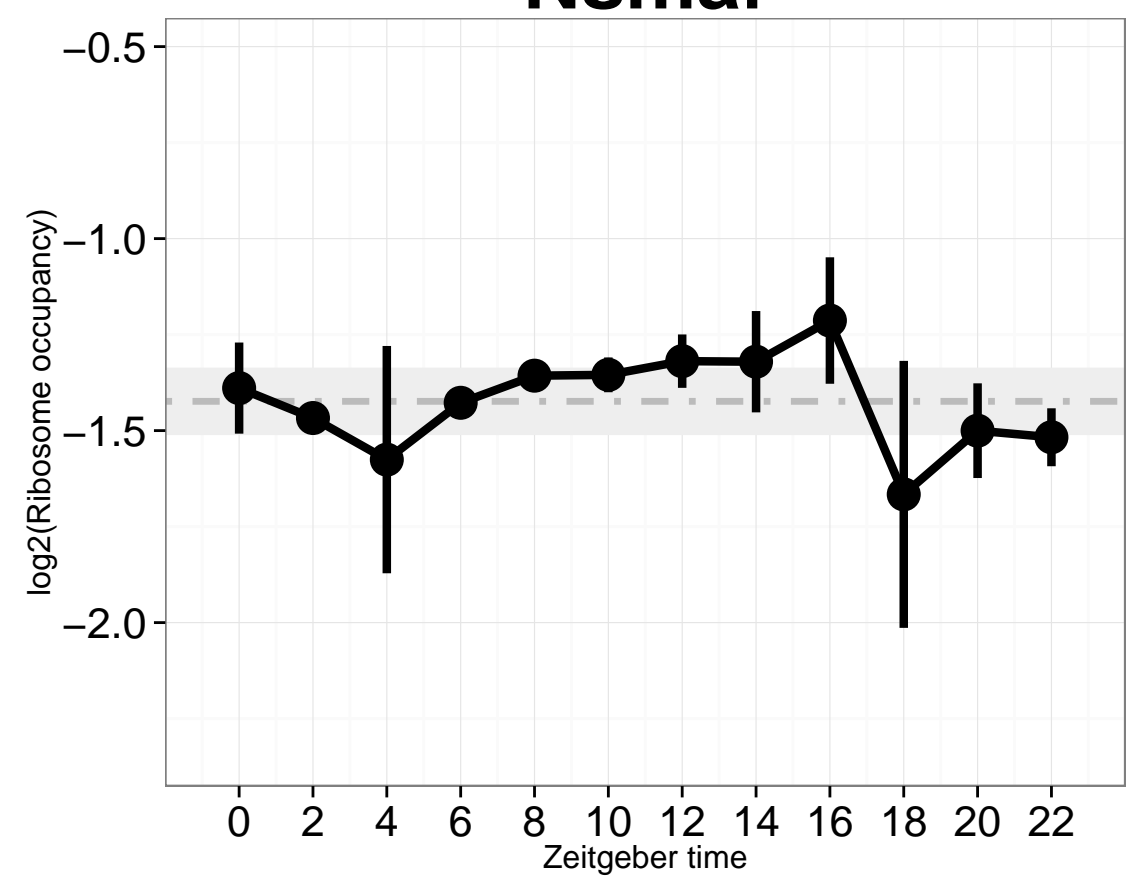

Supplement: Supplementary file 2223 [file 1]

# Fbxl16

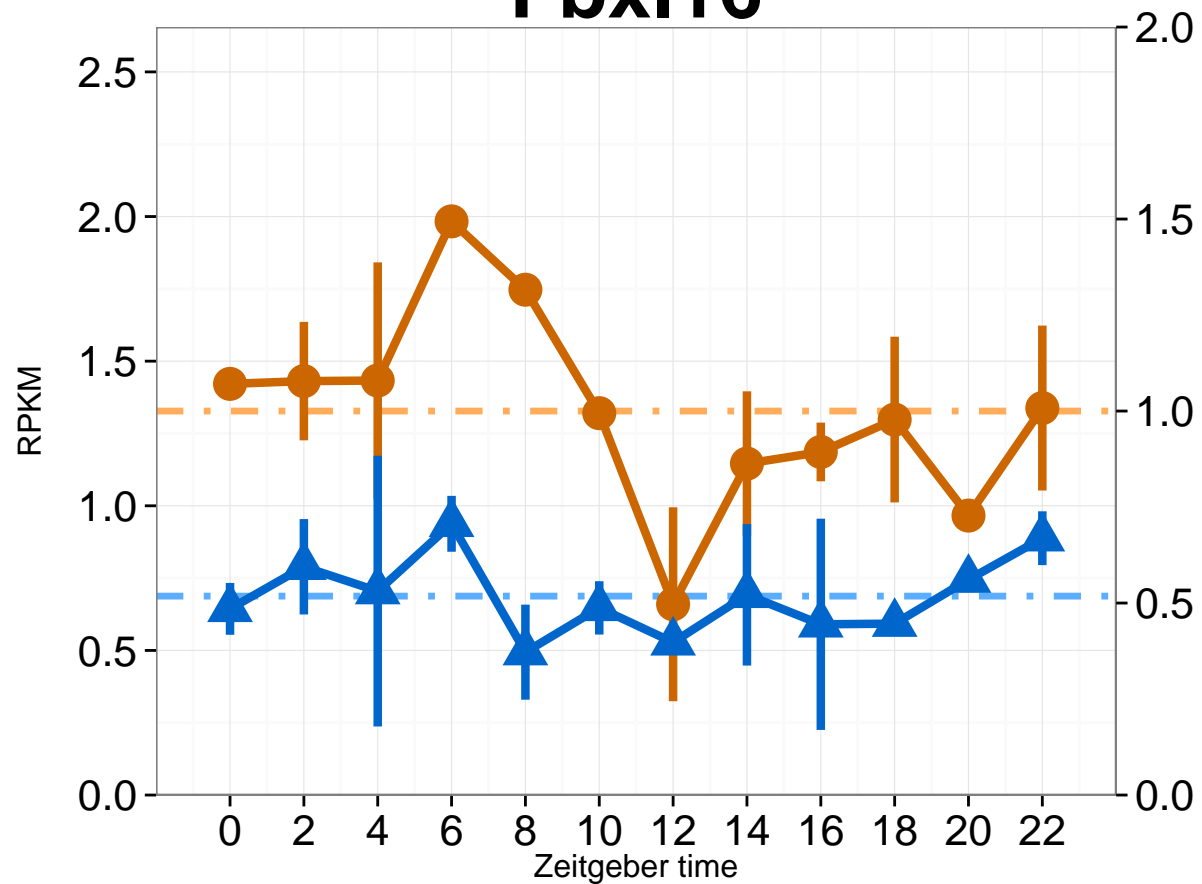

# Fbxl16

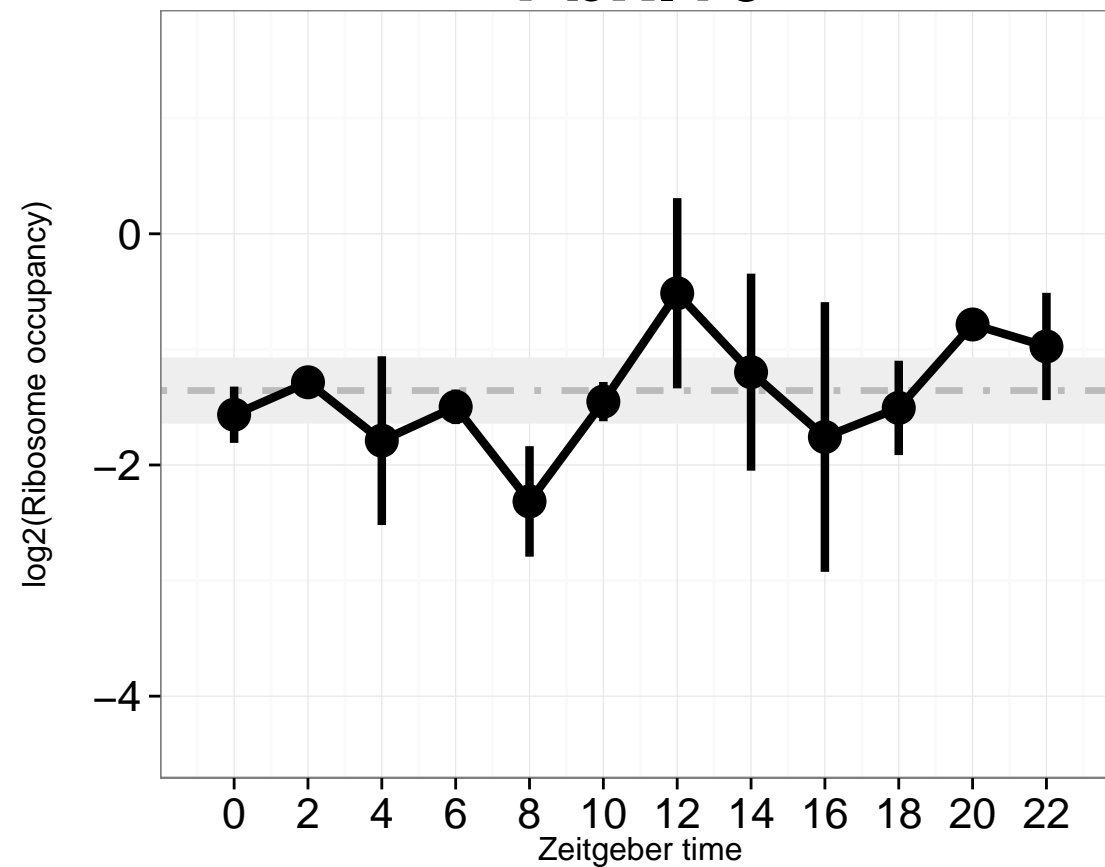

Supplement: Supplementary file 2224 [file 1]

# Drap1

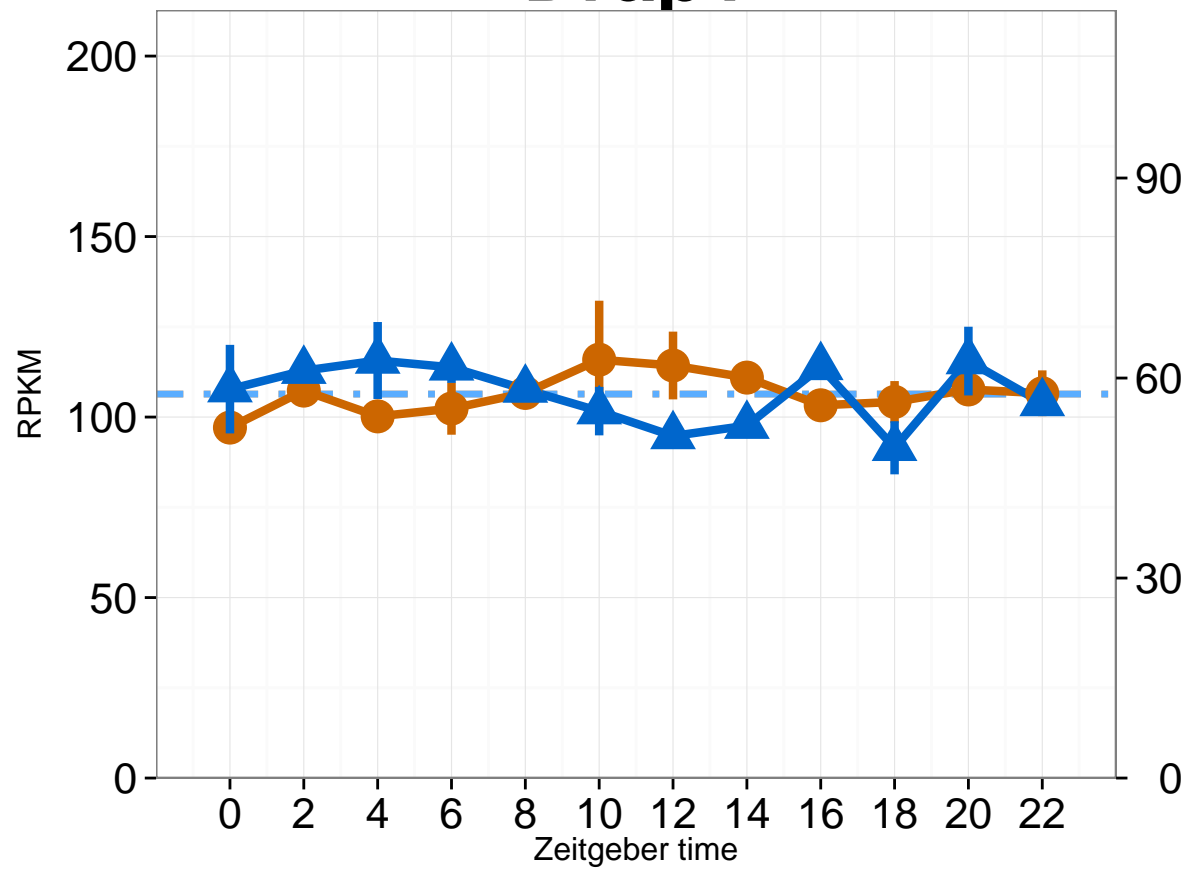

# Drap1

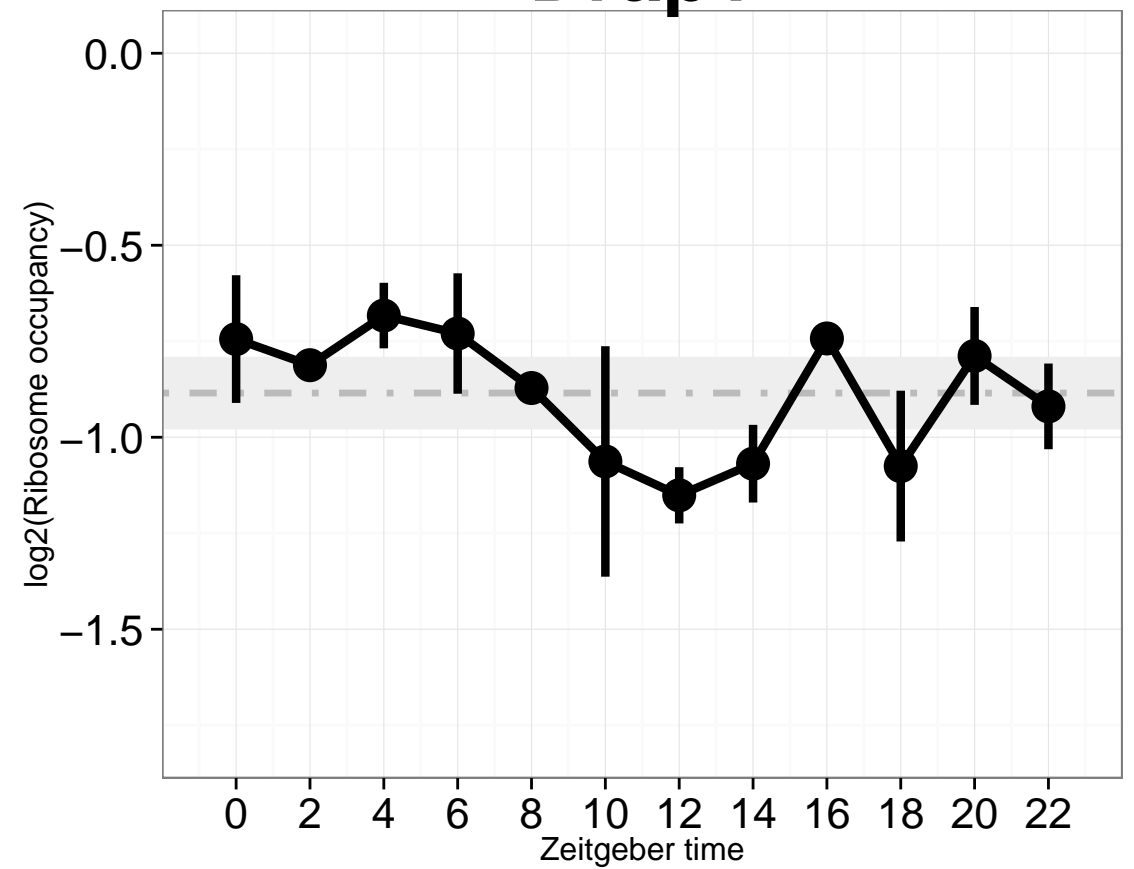

Supplement: Supplementary file 2225 [file 1]

# Trim23

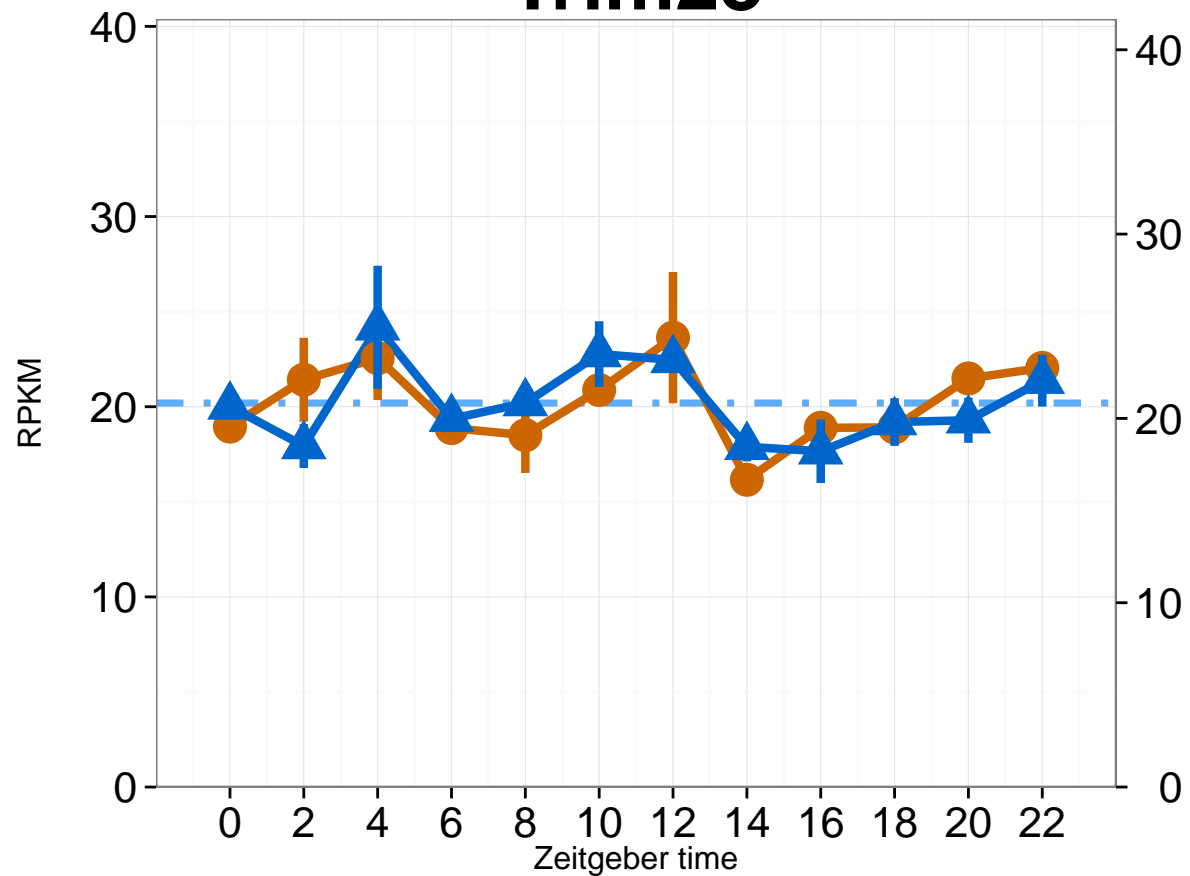

# Trim23

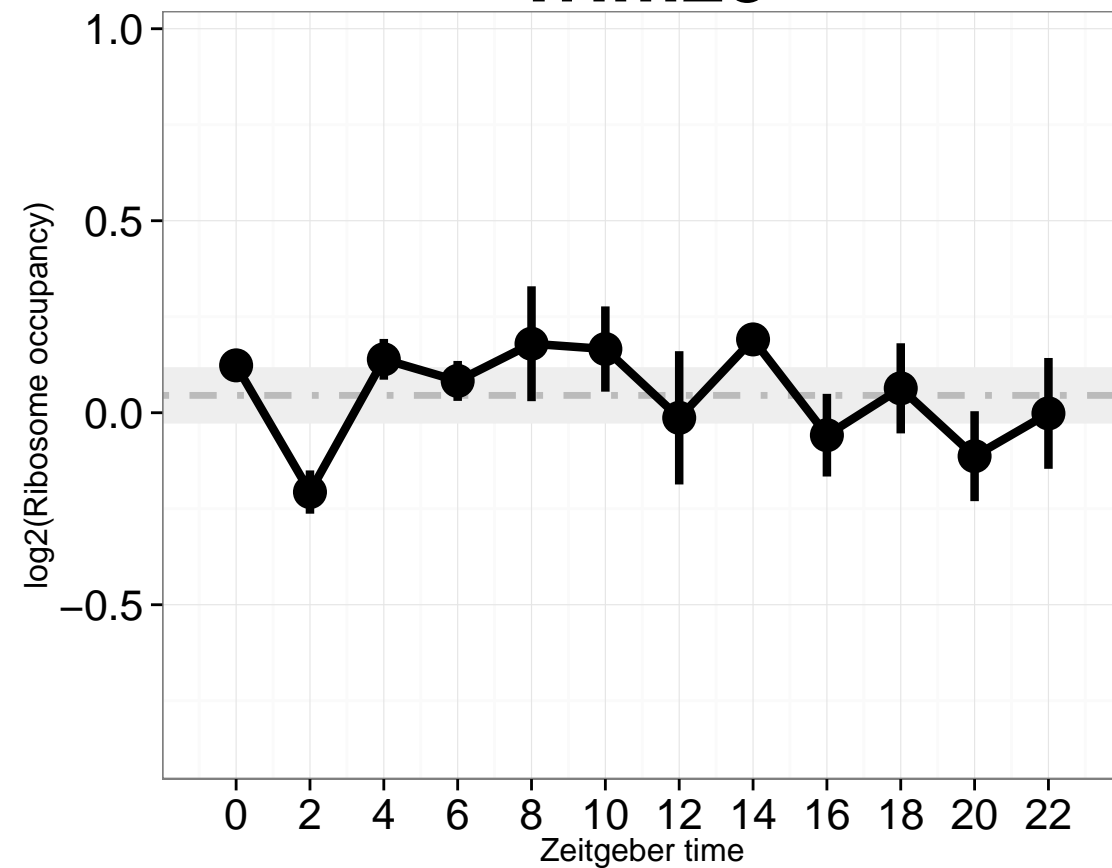

Supplement: Supplementary file 2226 [file 1]

## Arid2

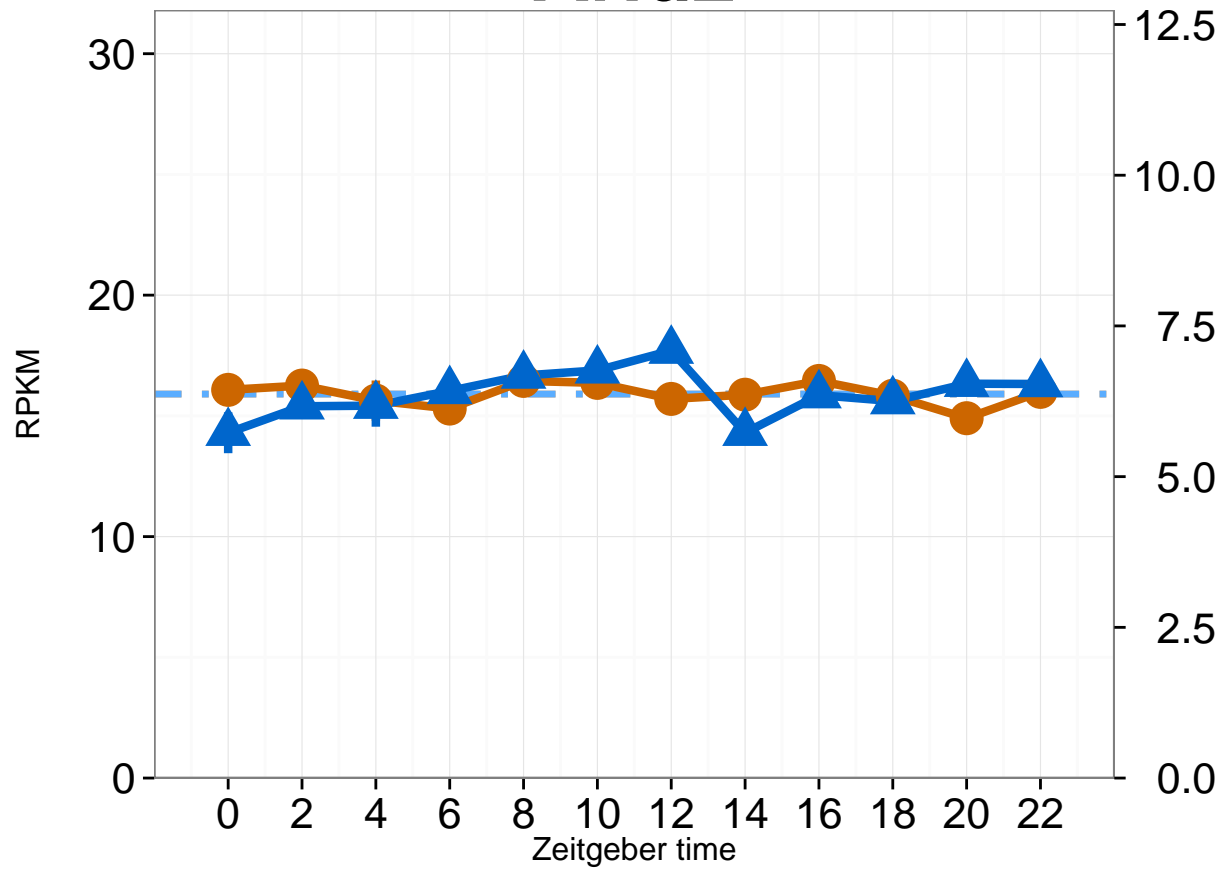

## Arid2

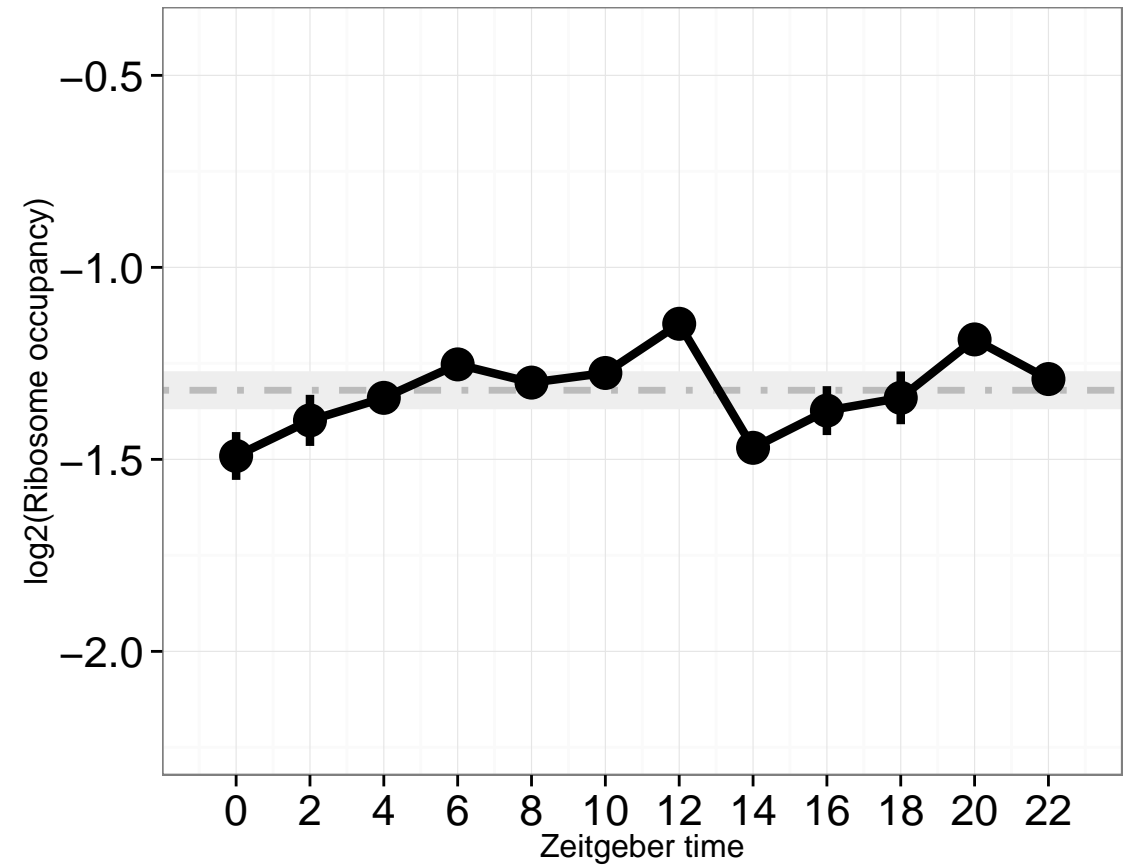

Supplement: Supplementary file 2227 [file 1]

## Ccdc94

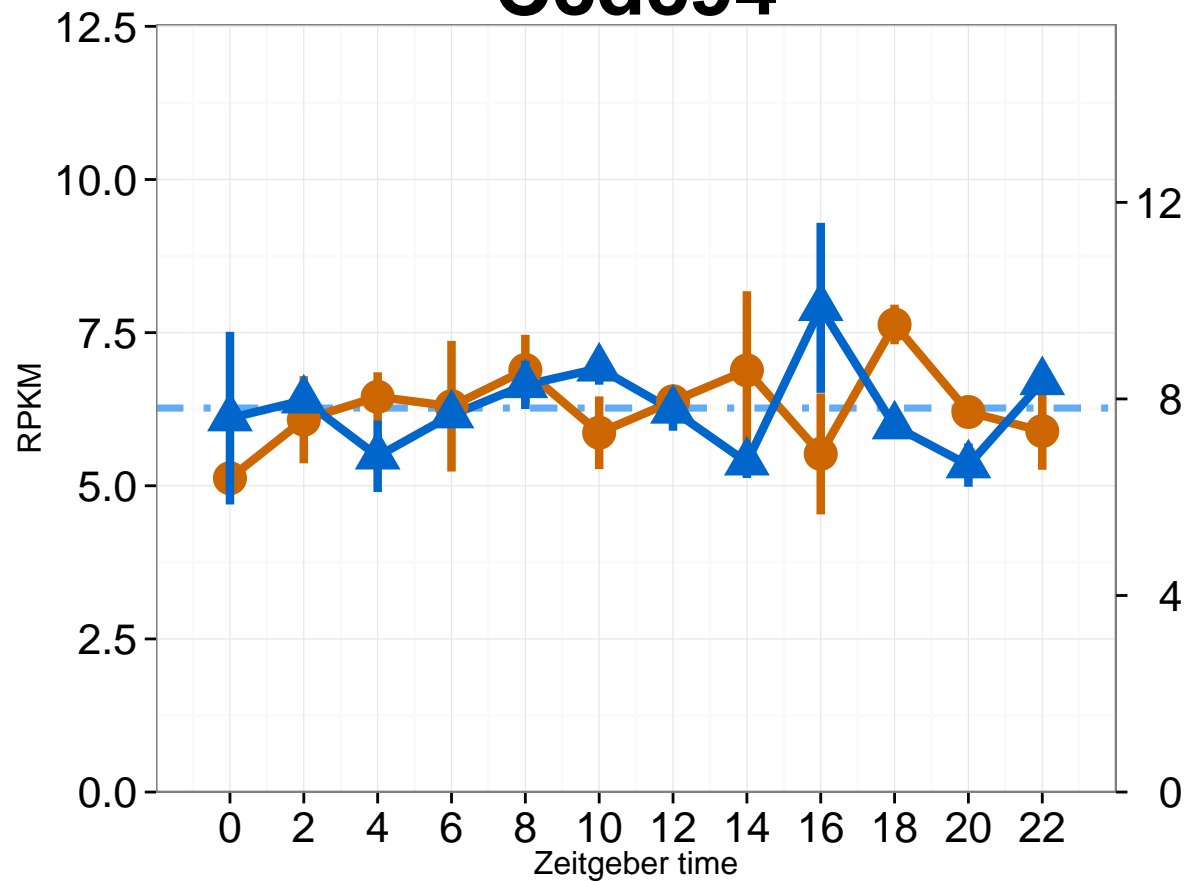

## Ccdc94

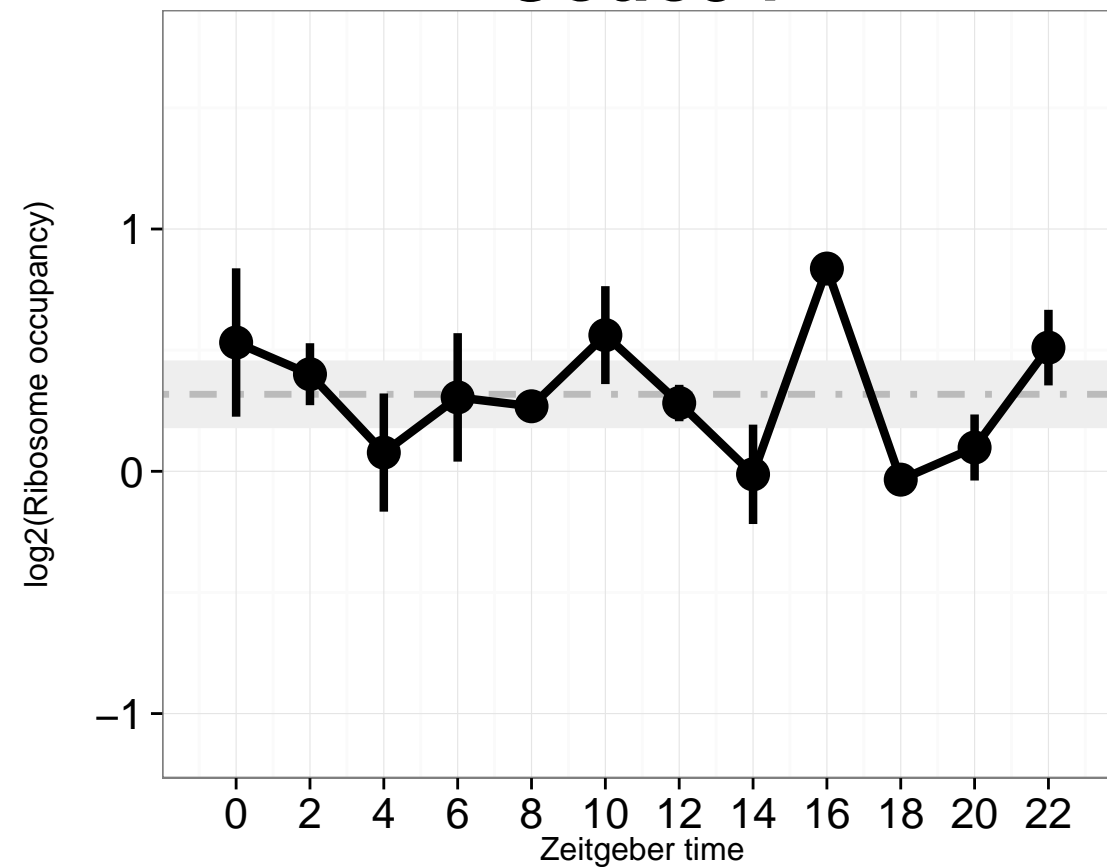

Supplement: Supplementary file 2228 [file 1]

# Zfp280b

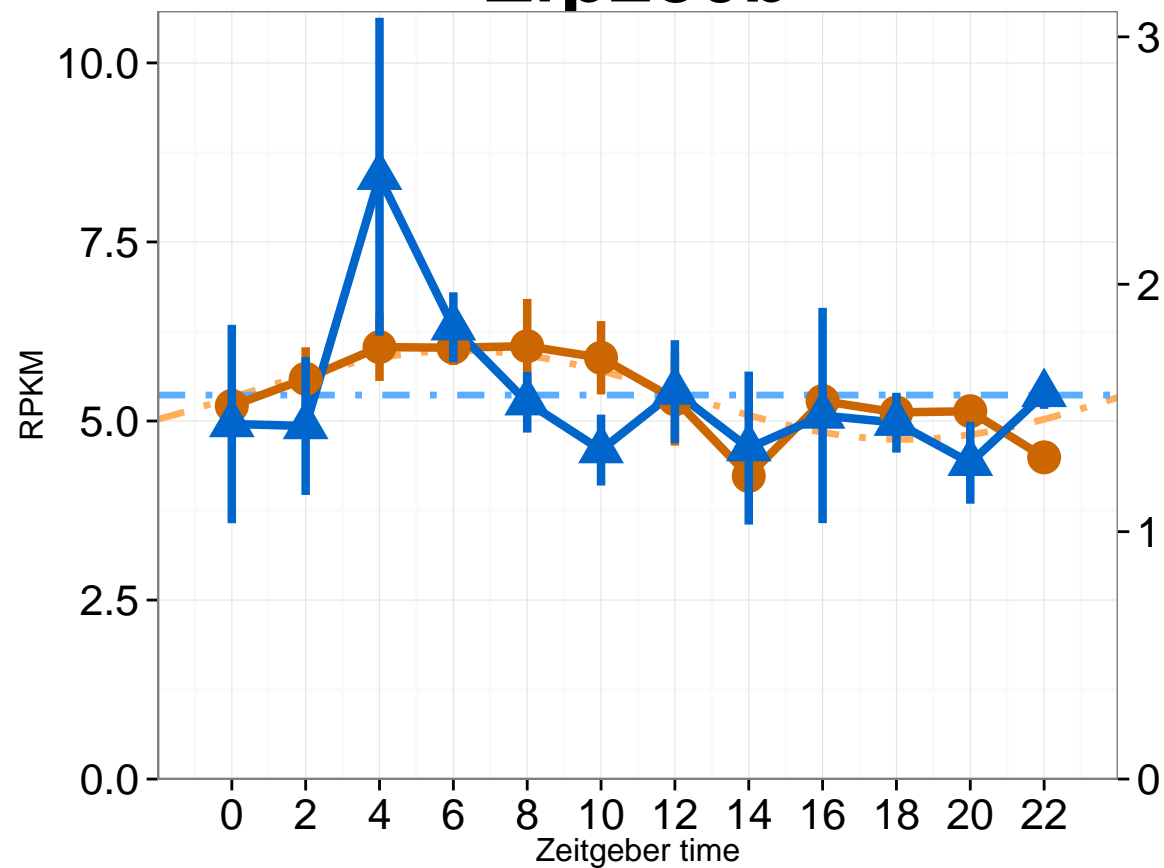

# Zfp280b

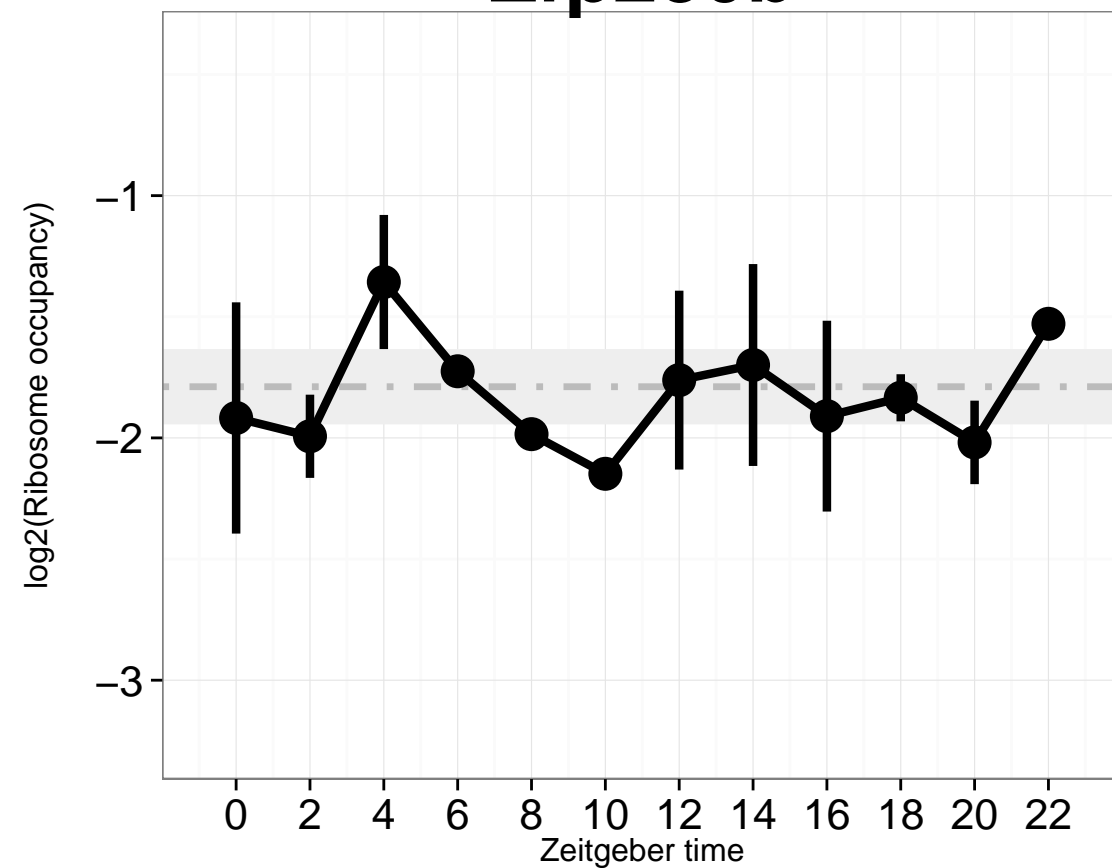

Supplement: Supplementary file 2229 [file 1]

## 1700055D18Rik

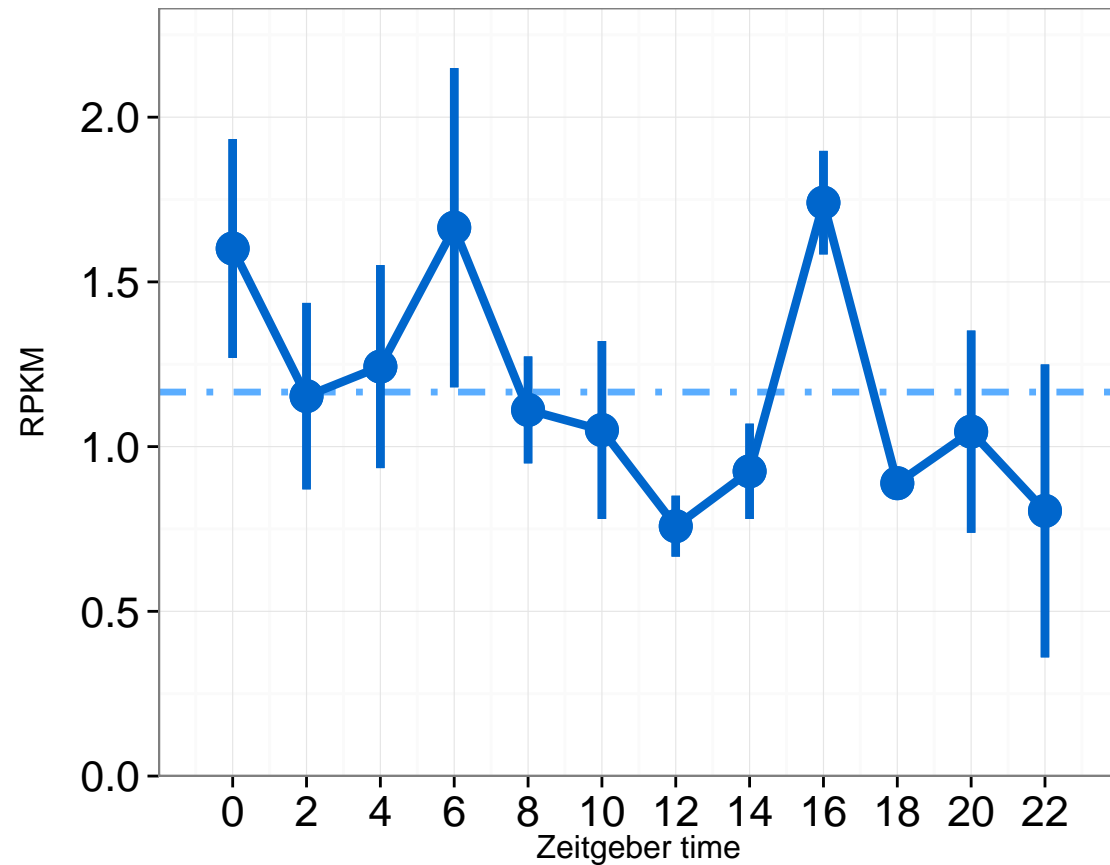

## 1700055D18Rik log2(Ribosome occup

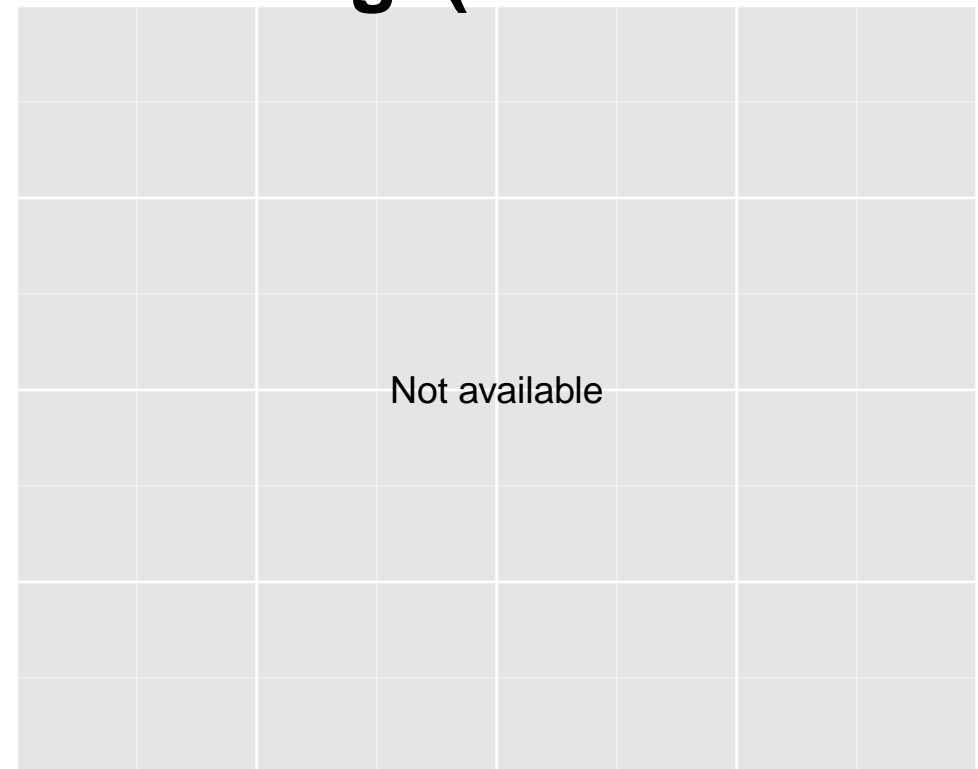

Supplement: Supplementary file 2230 [file 1]

# Tgm2

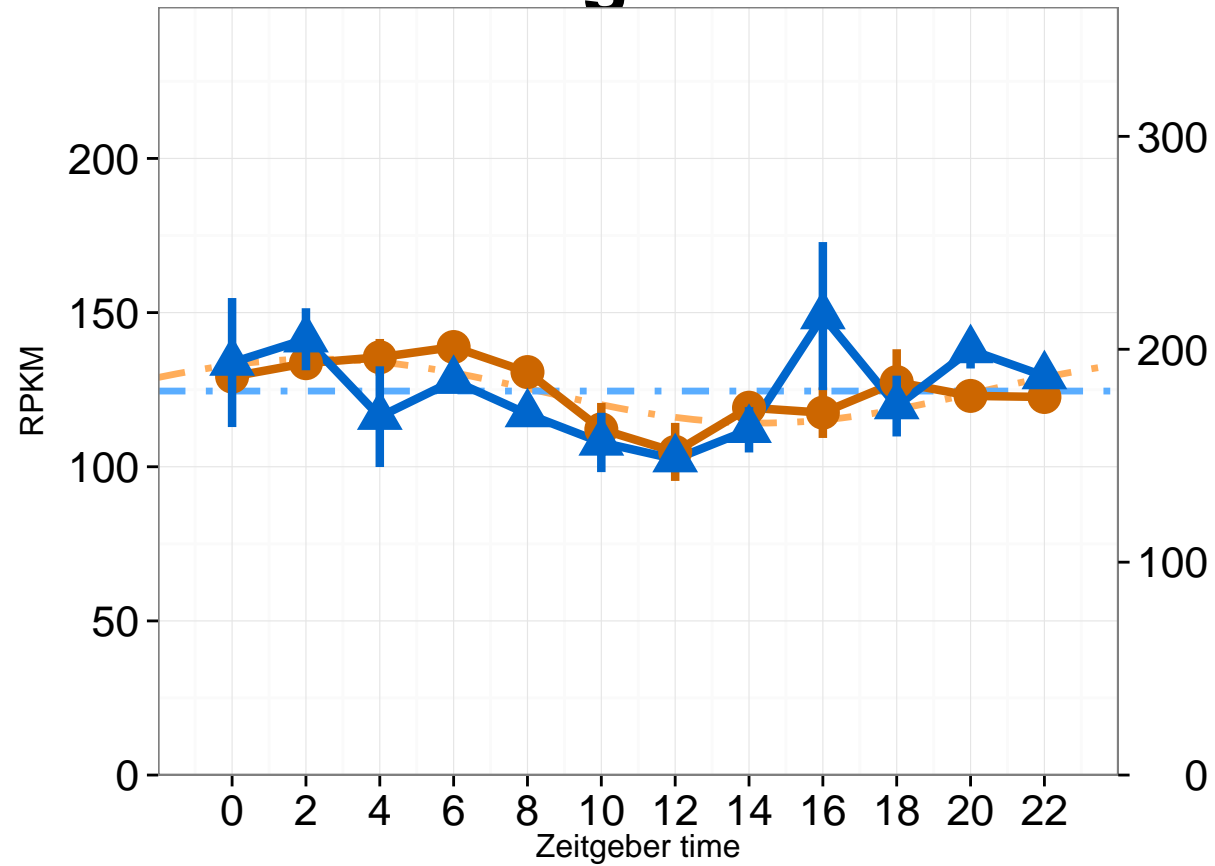

# Tgm2

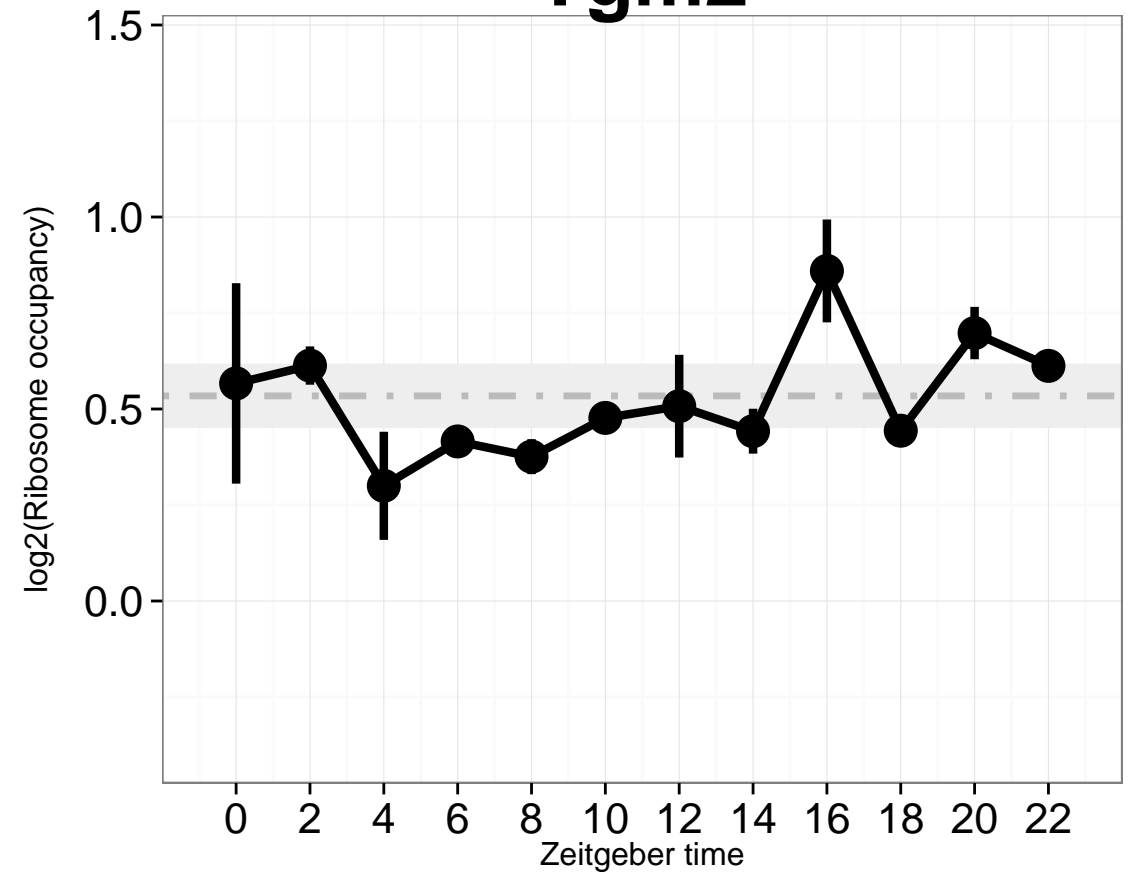

Supplement: Supplementary file 2231 [file 1]

# B3gnt9

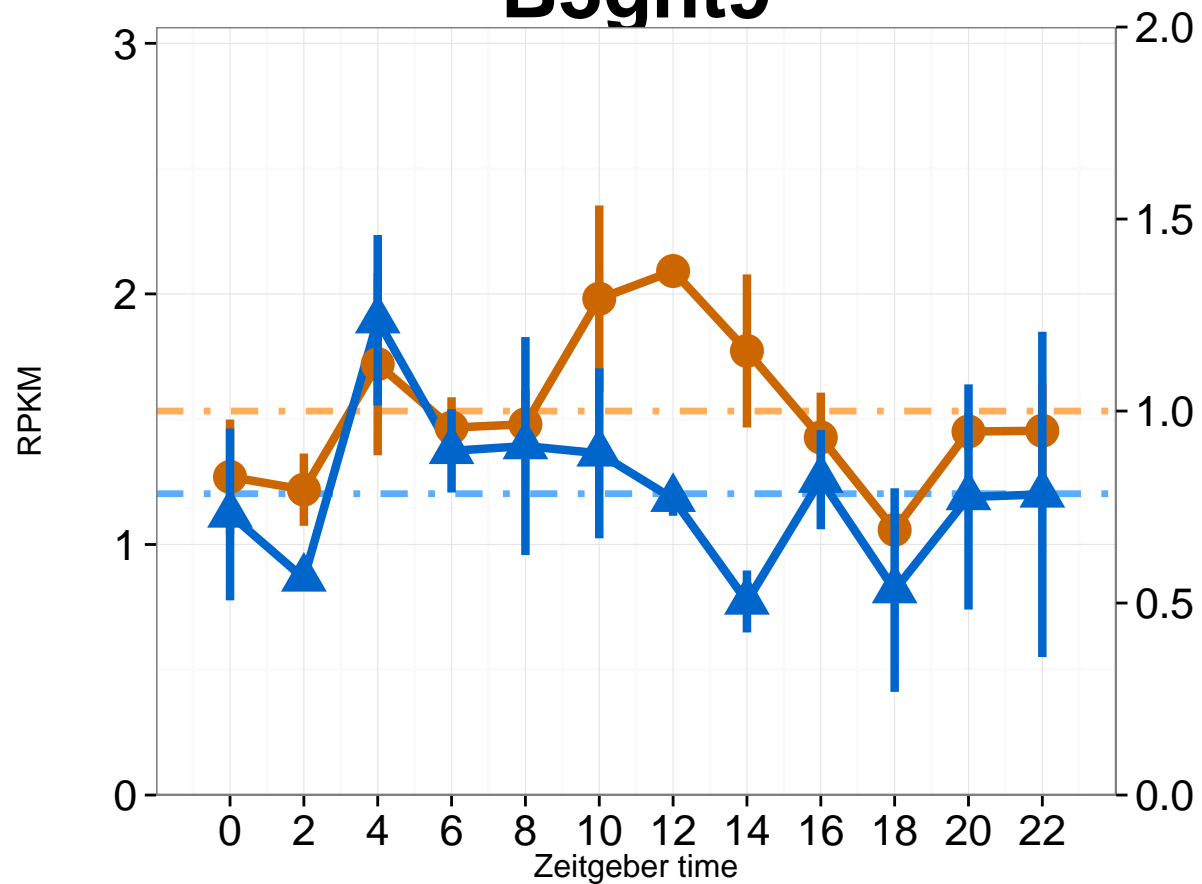

# B3gnt9

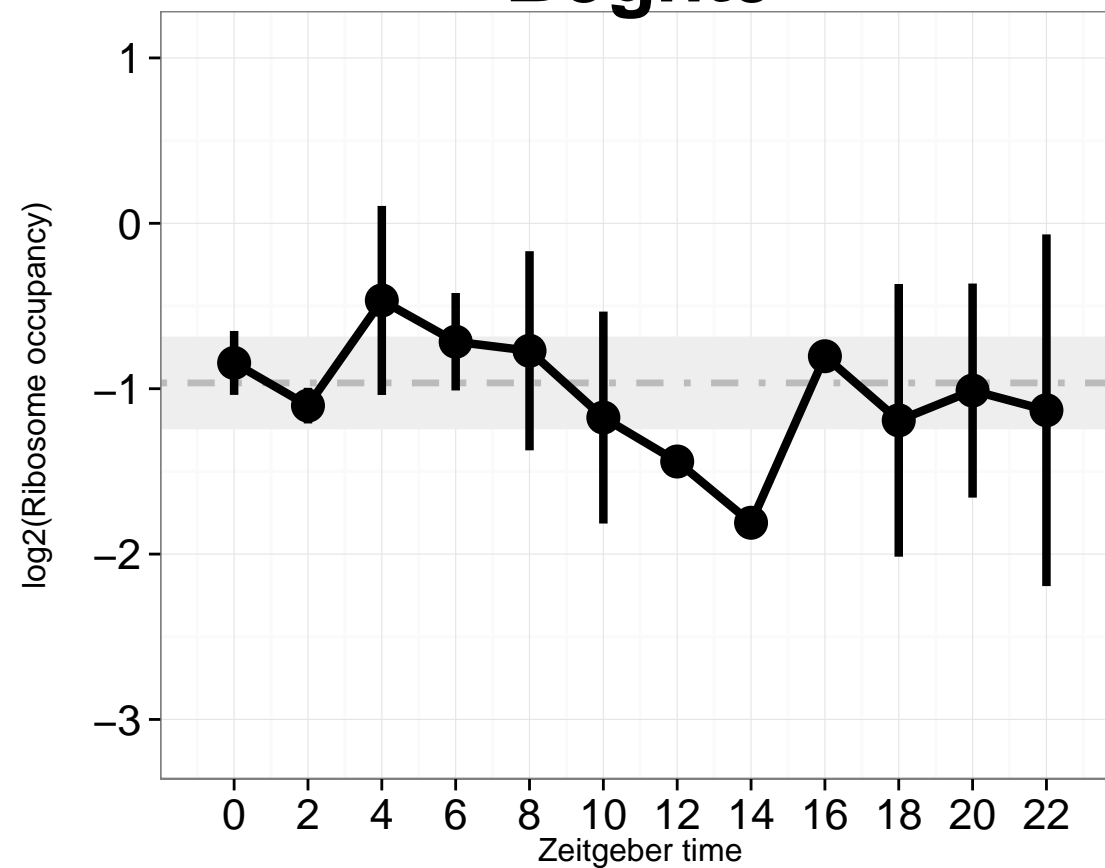

Supplement: Supplementary file 2232 [file 1]

## Lss

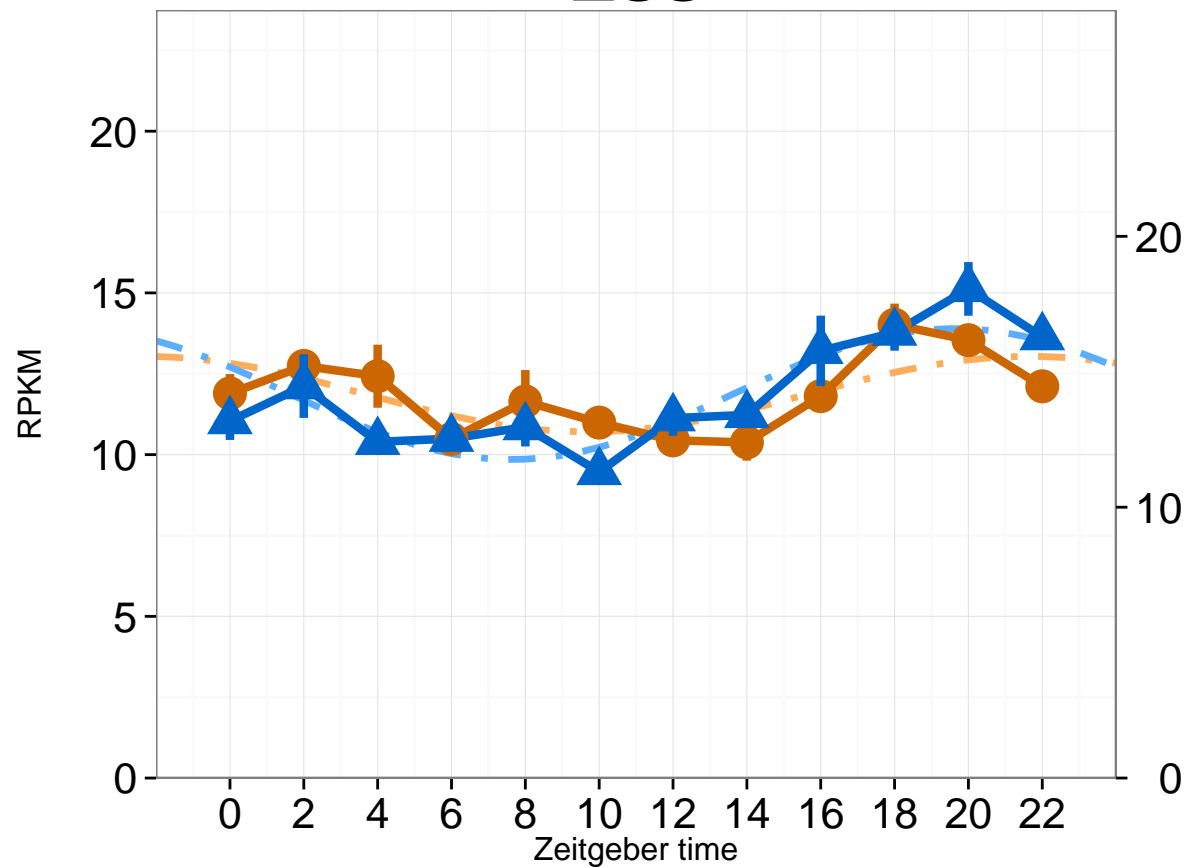

## Lss

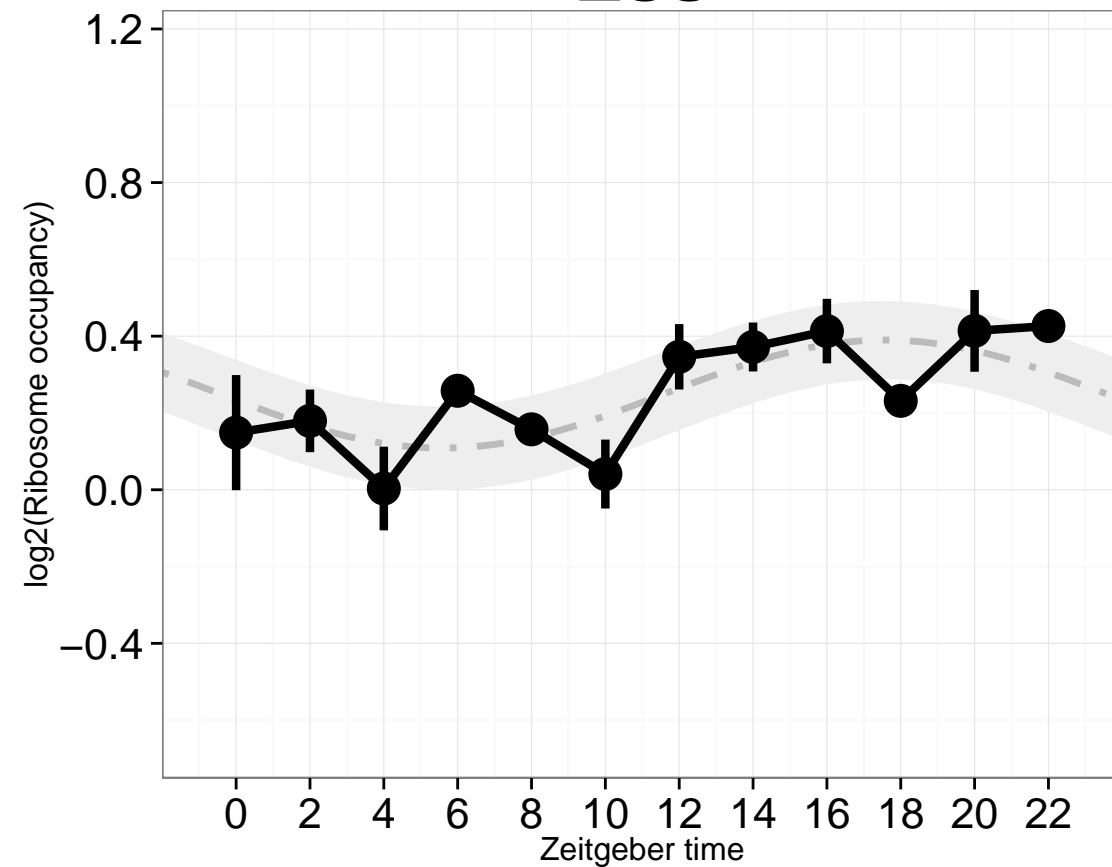

Supplement: Supplementary file 2233 [file 1]

## Lck

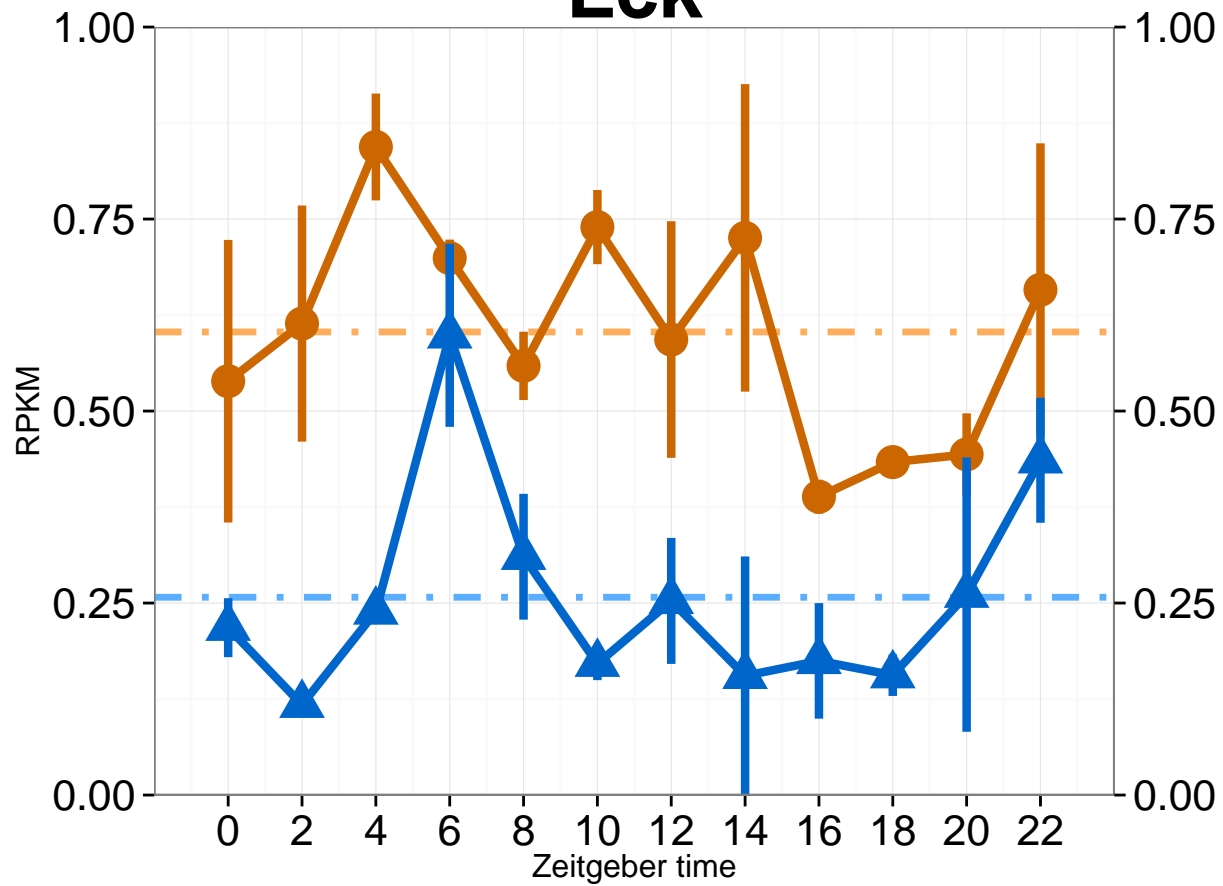

## Lck

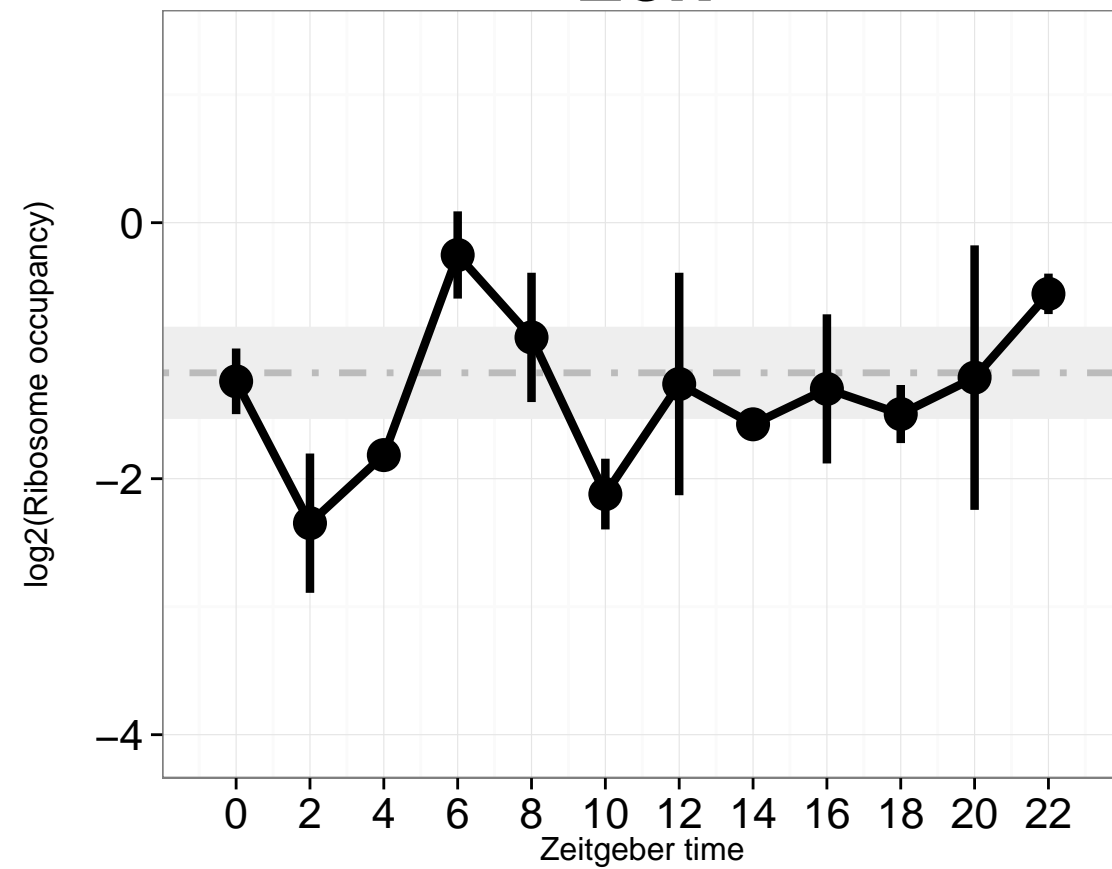

Supplement: Supplementary file 2234 [file 1]

# Rgs4

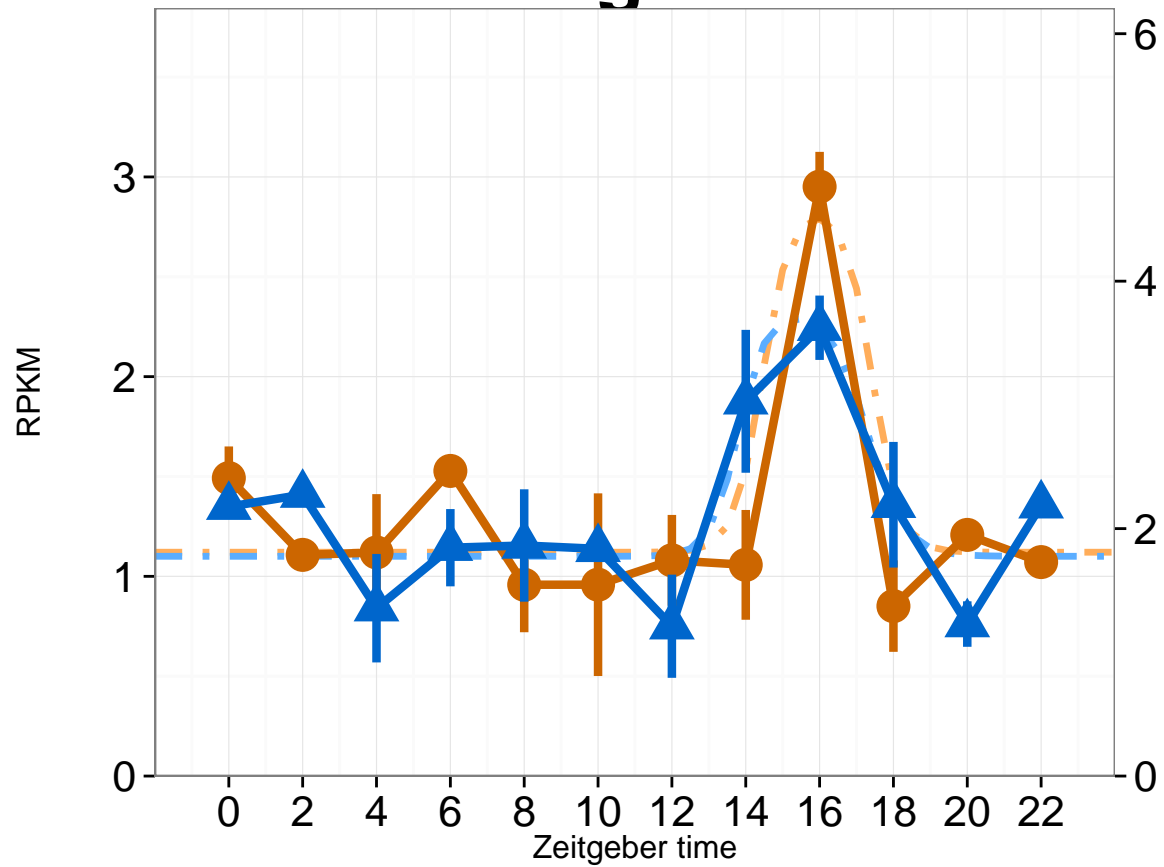

# Rgs4

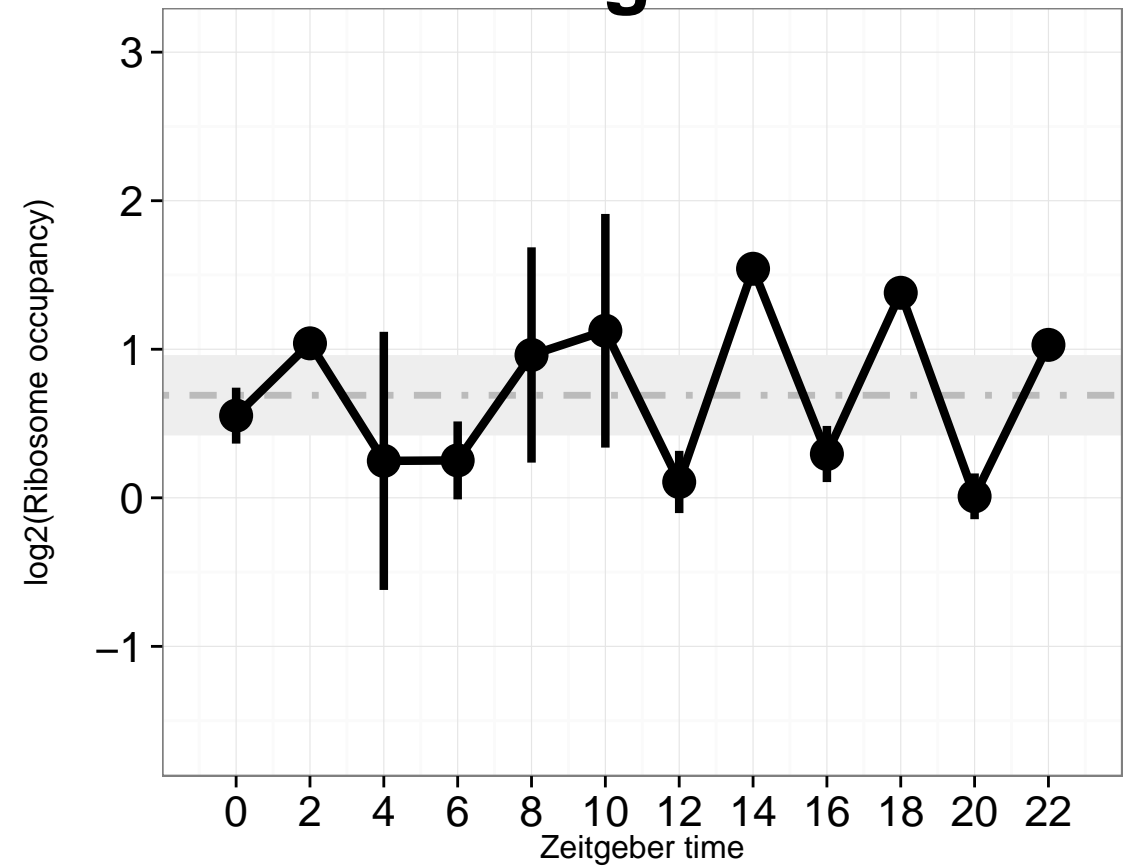

Supplement: Supplementary file 2235 [file 1]

# Slitrk6

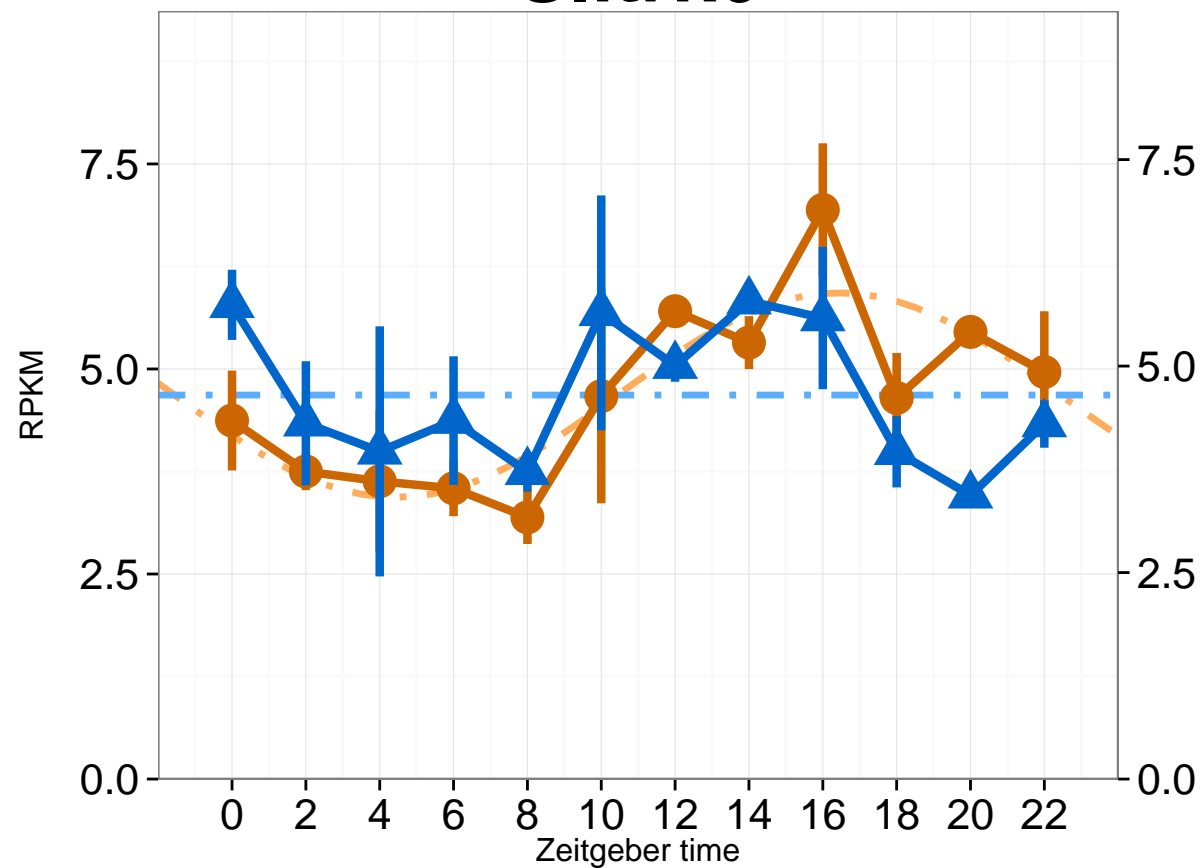

# Slitrk6

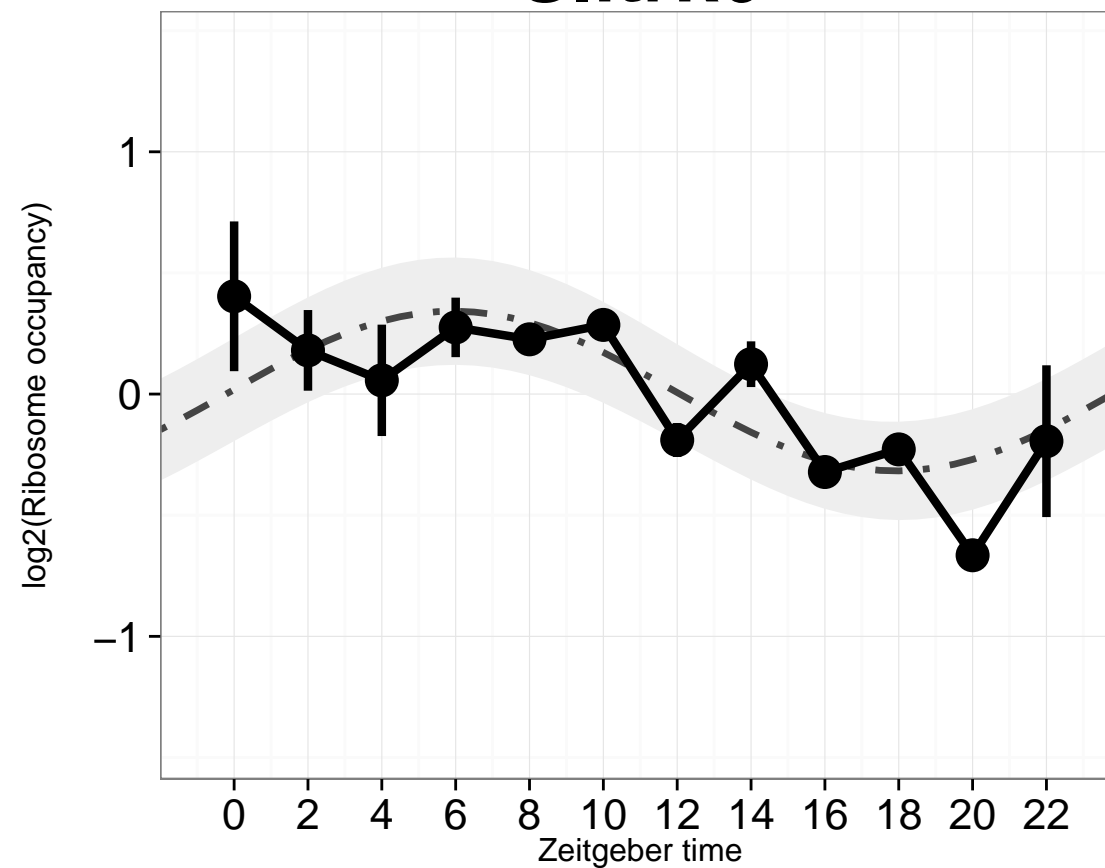

Supplement: Supplementary file 2236 [file 1]

## Poc5

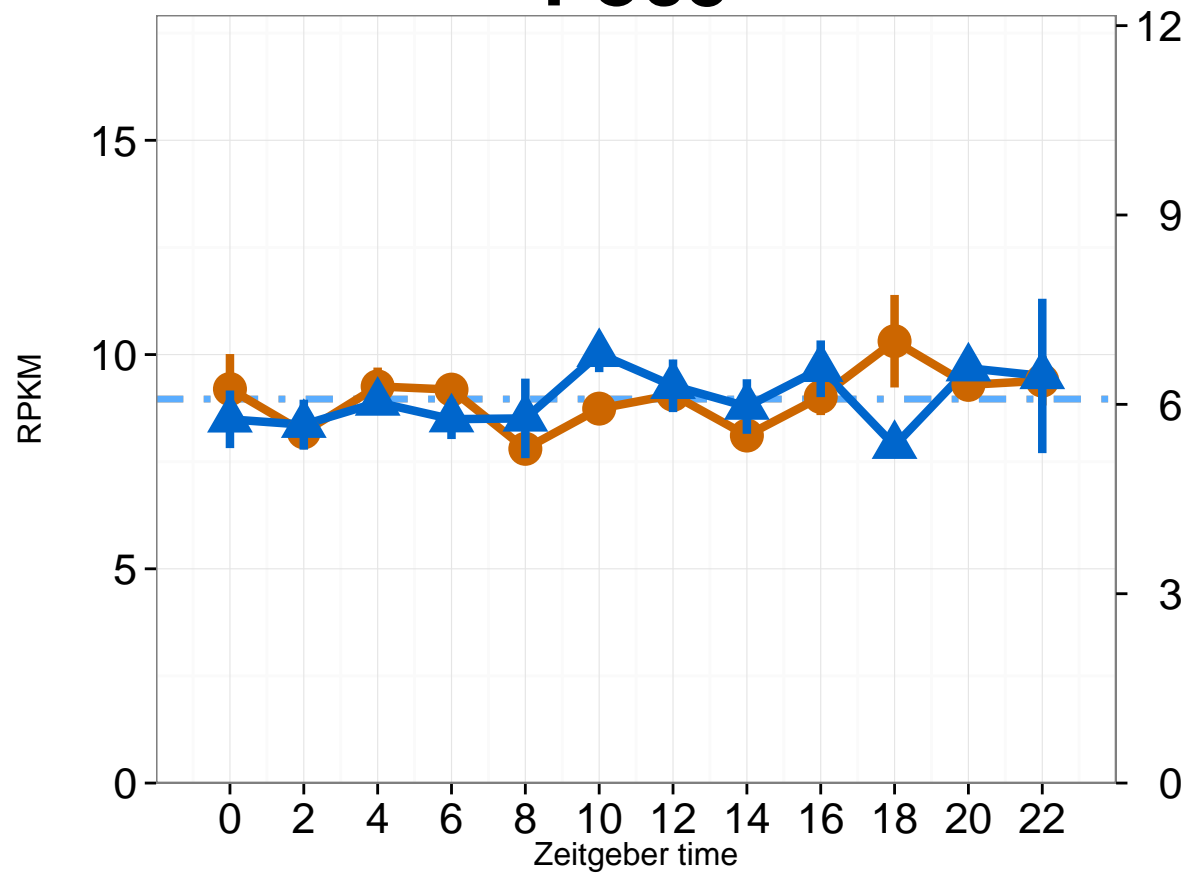

## Poc5

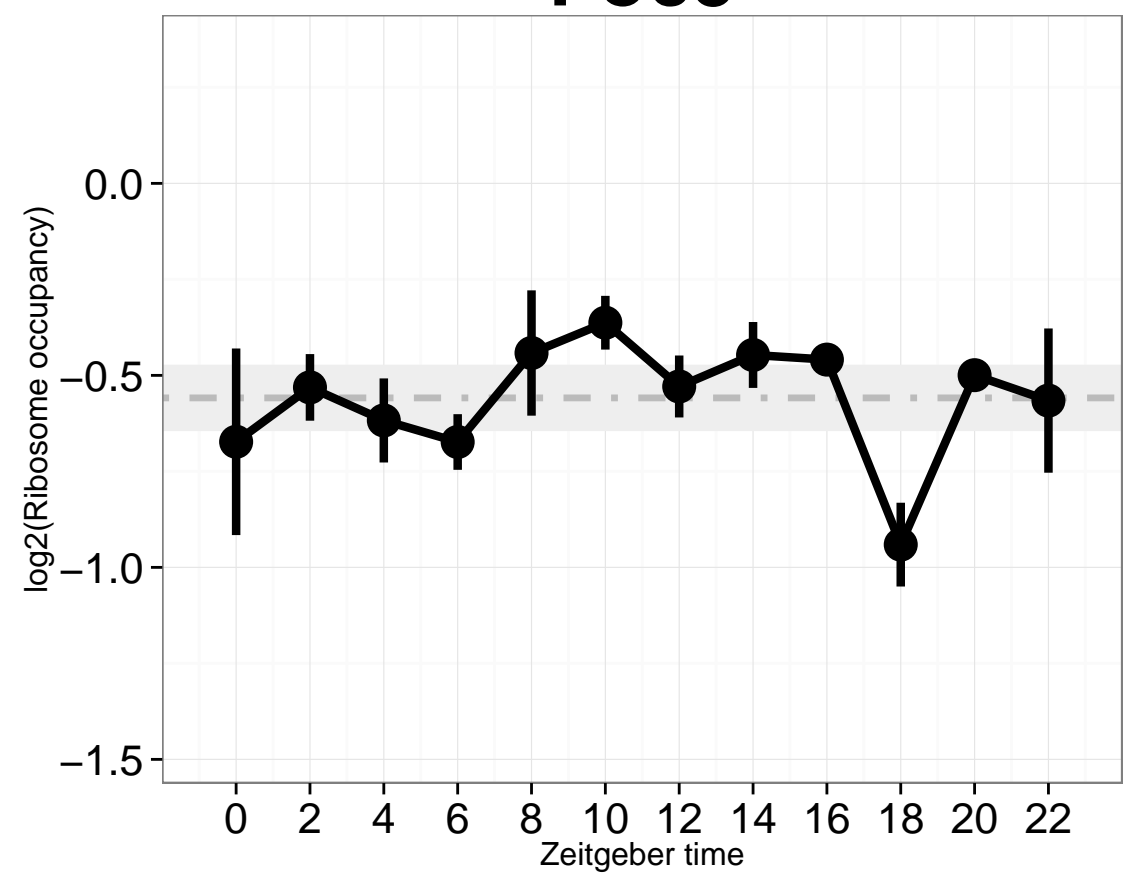

Supplement: Supplementary file 2237 [file 1]

## Mfge8

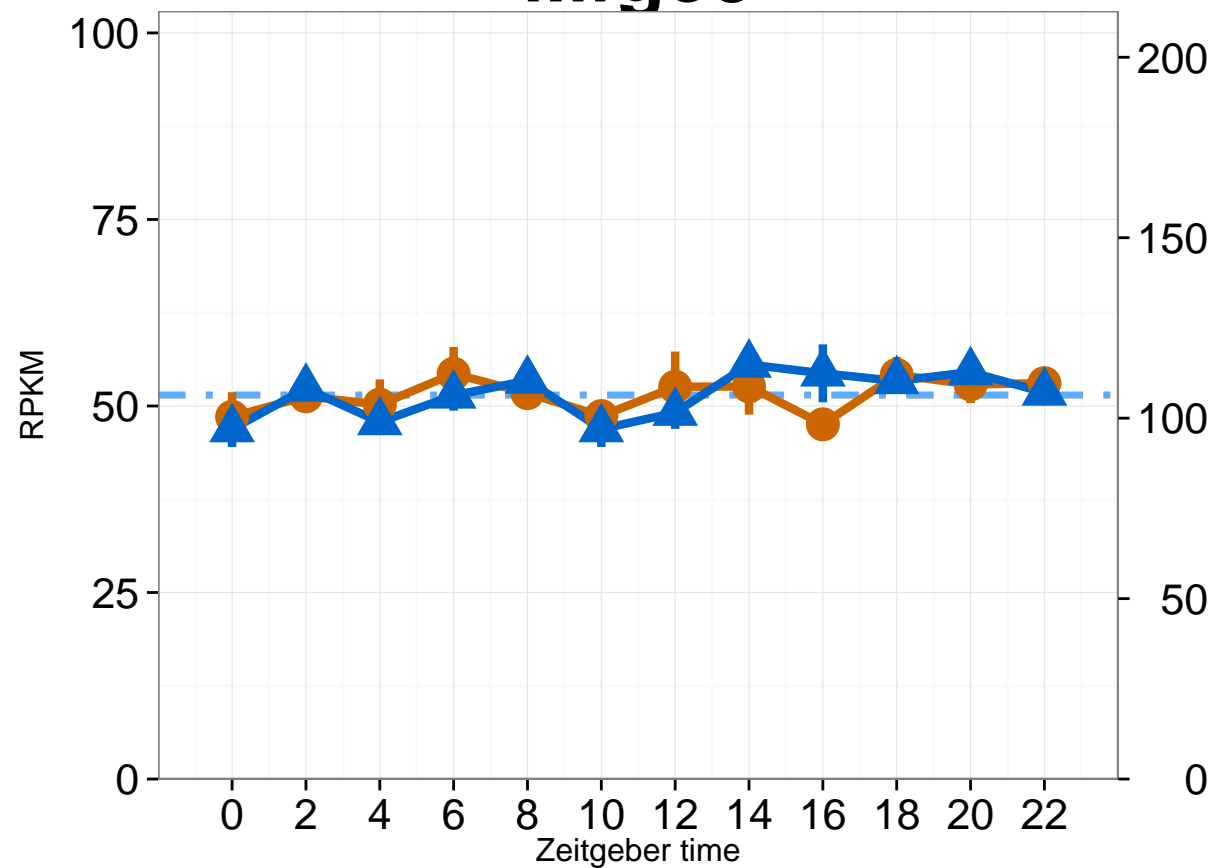

## Mfge8

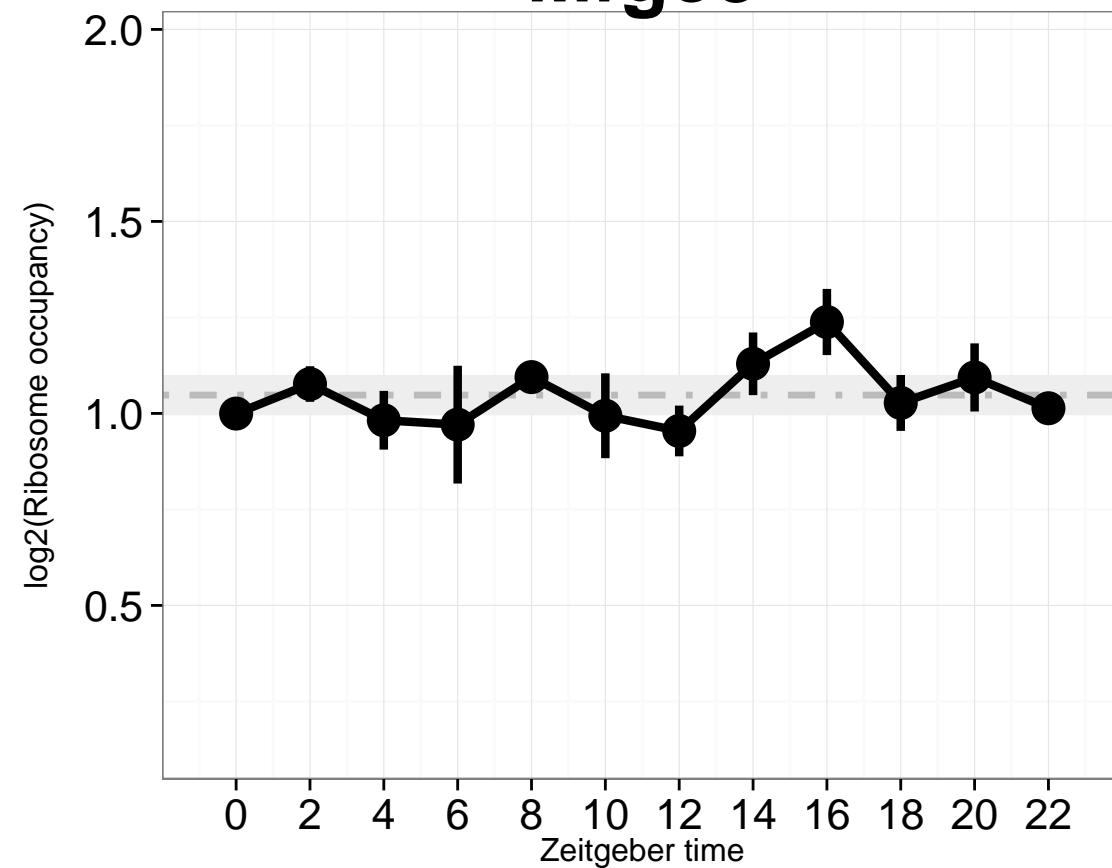

Supplement: Supplementary file 2238 [file 1]

## Snrpb

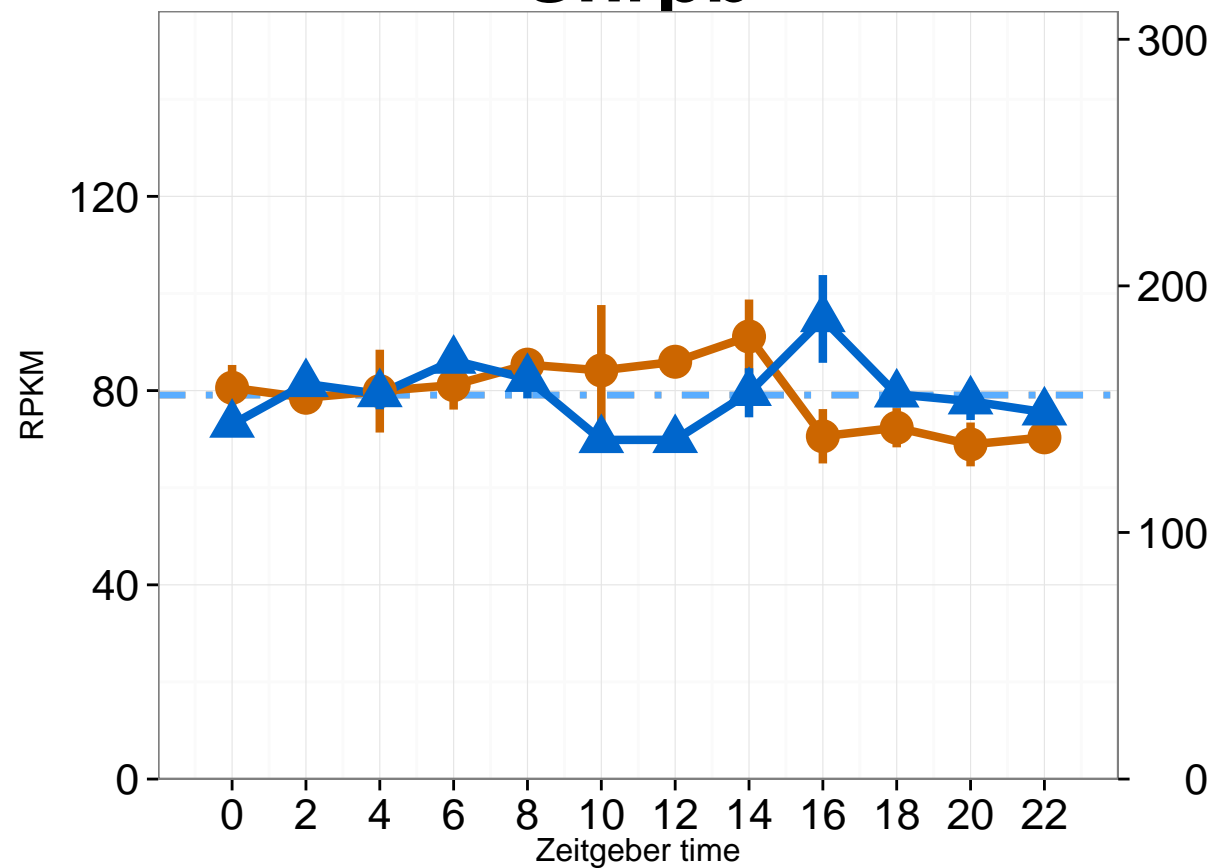

## Snrpb

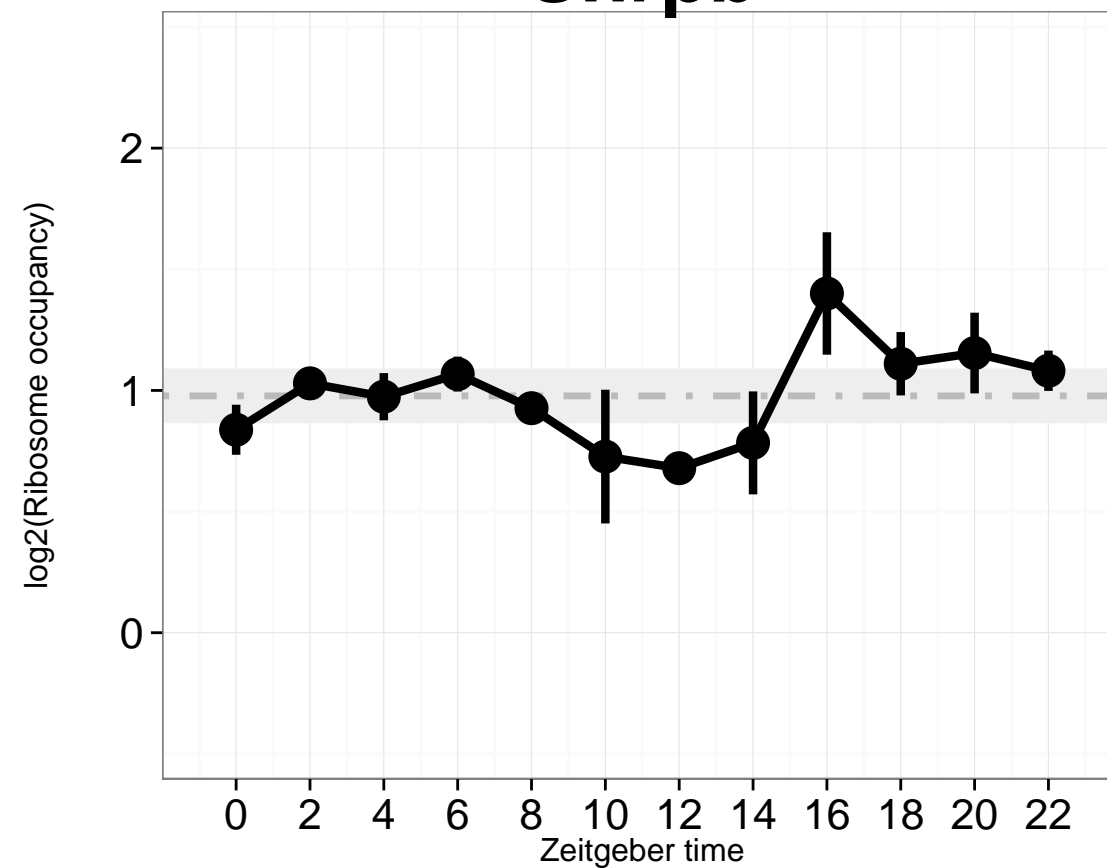

Supplement: Supplementary file 2239 [file 1]

# Lyrm5

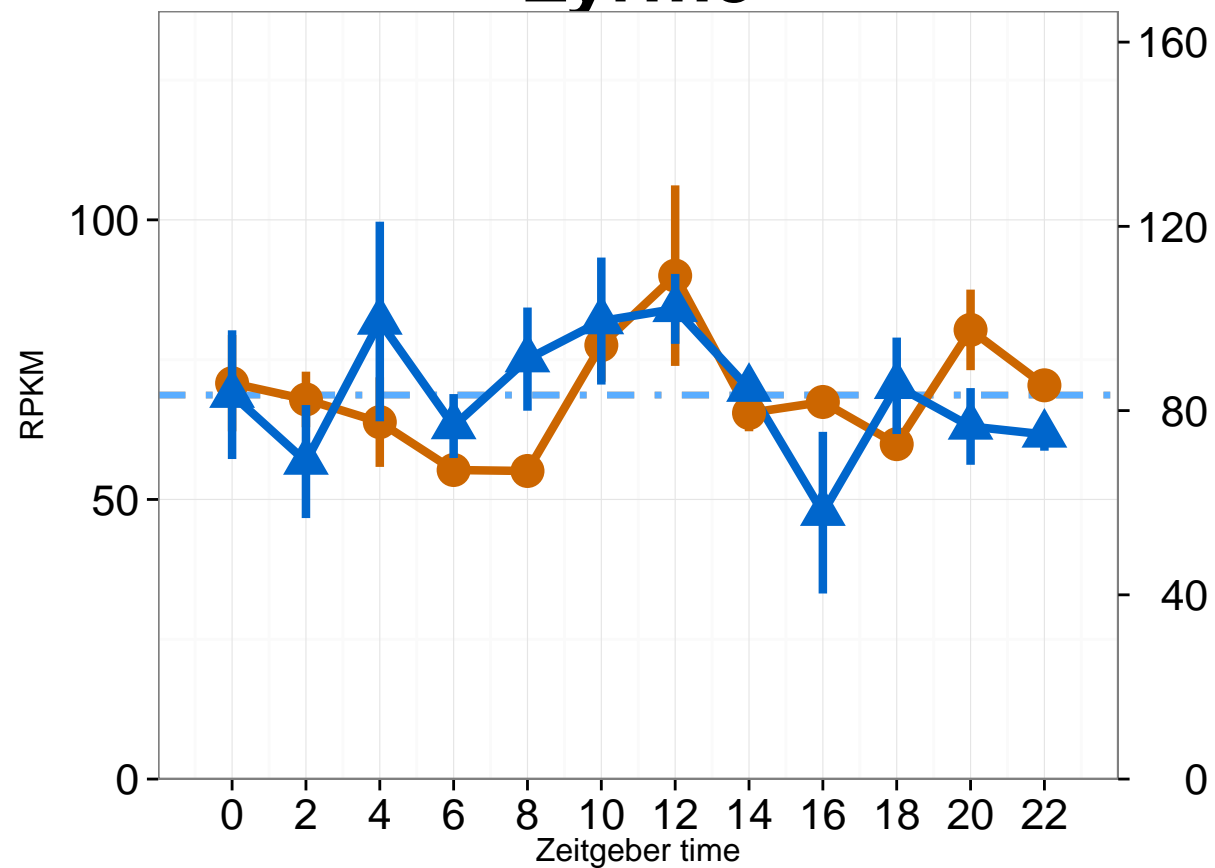

# Lyrm5

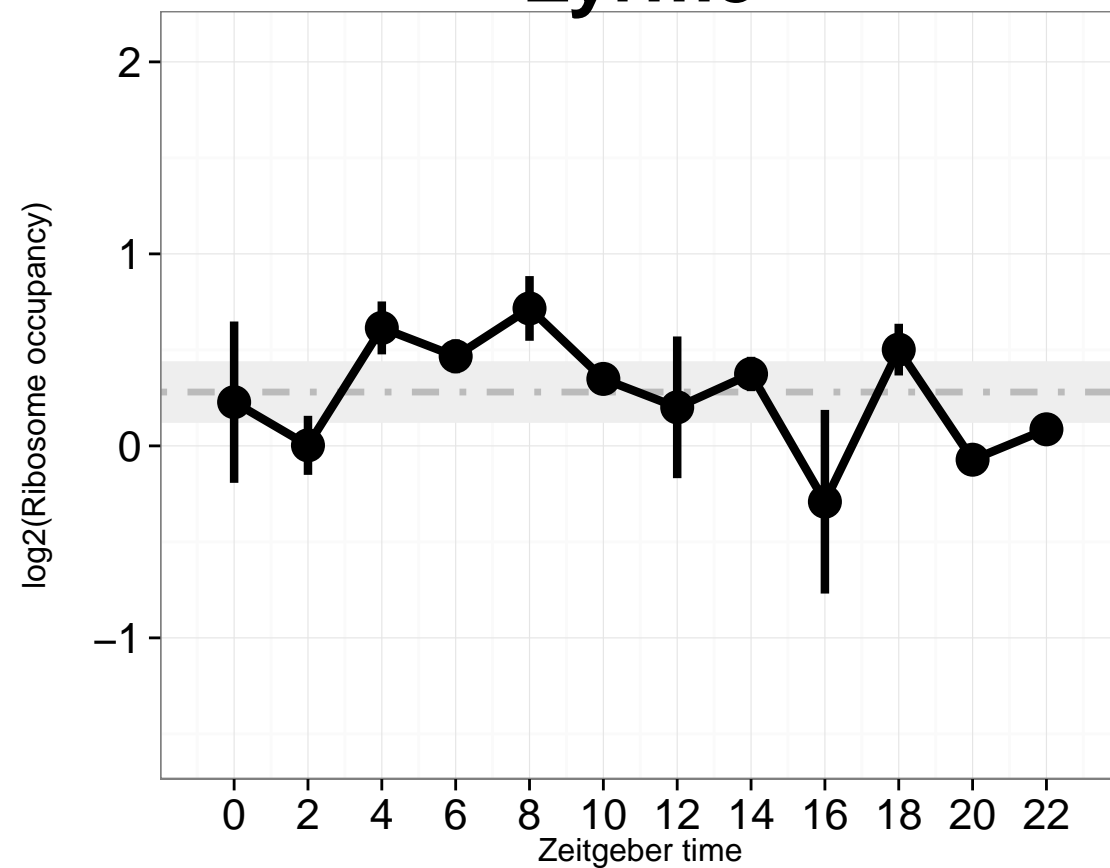

Supplement: Supplementary file 2240 [file 1]

# Fxyd1

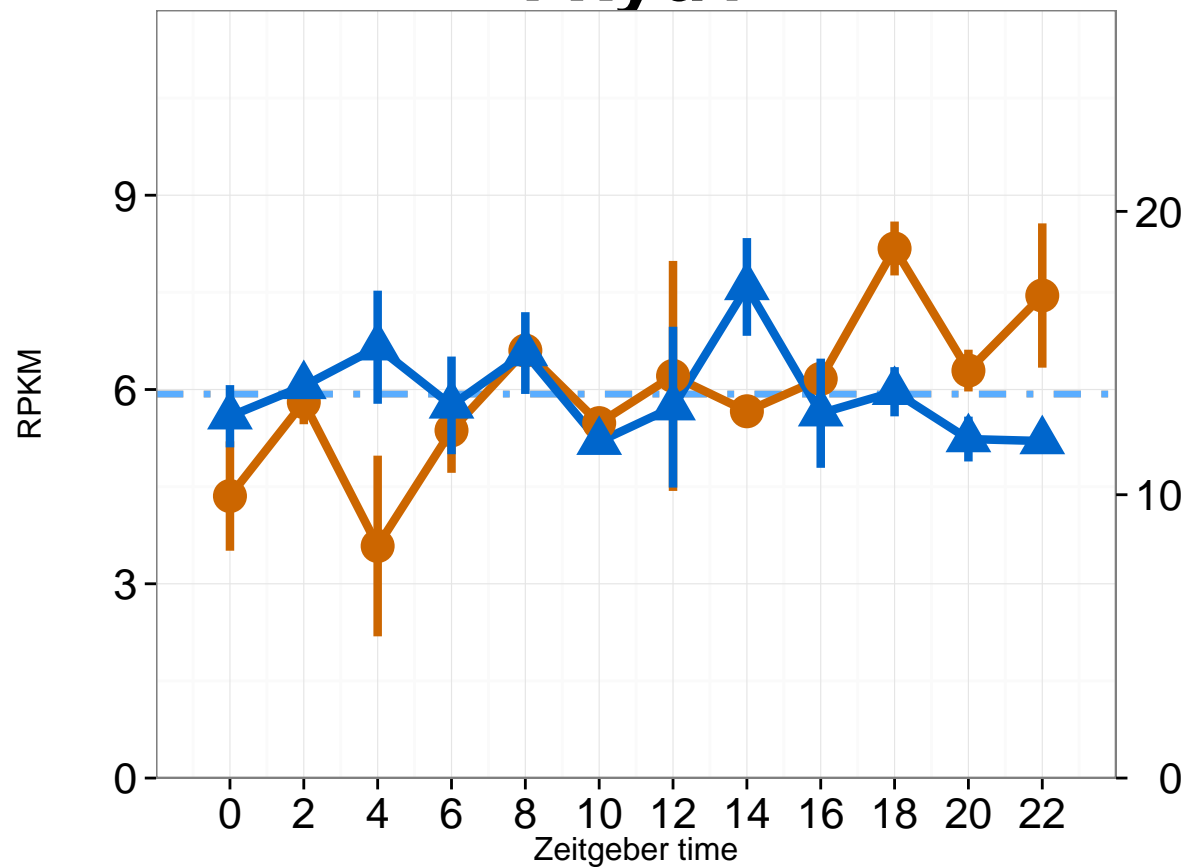

# Fxyd1

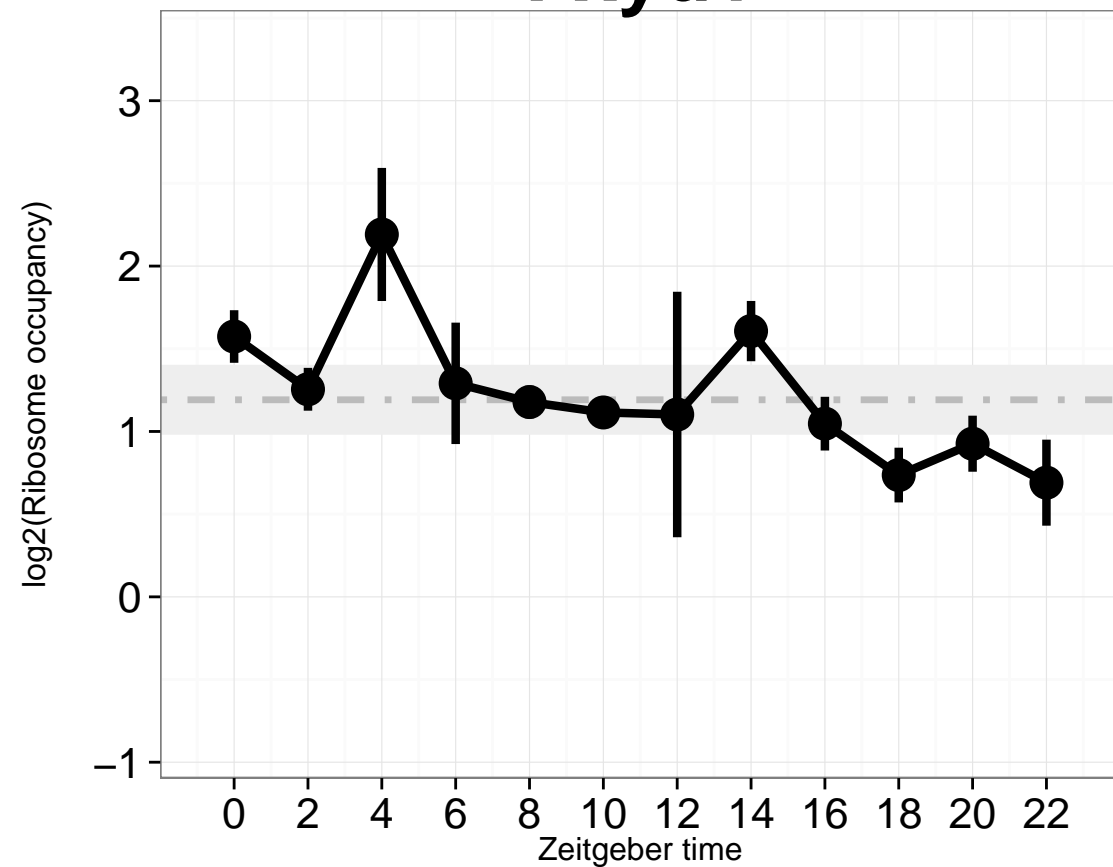

Supplement: Supplementary file 2241 [file 1]

## Socs6

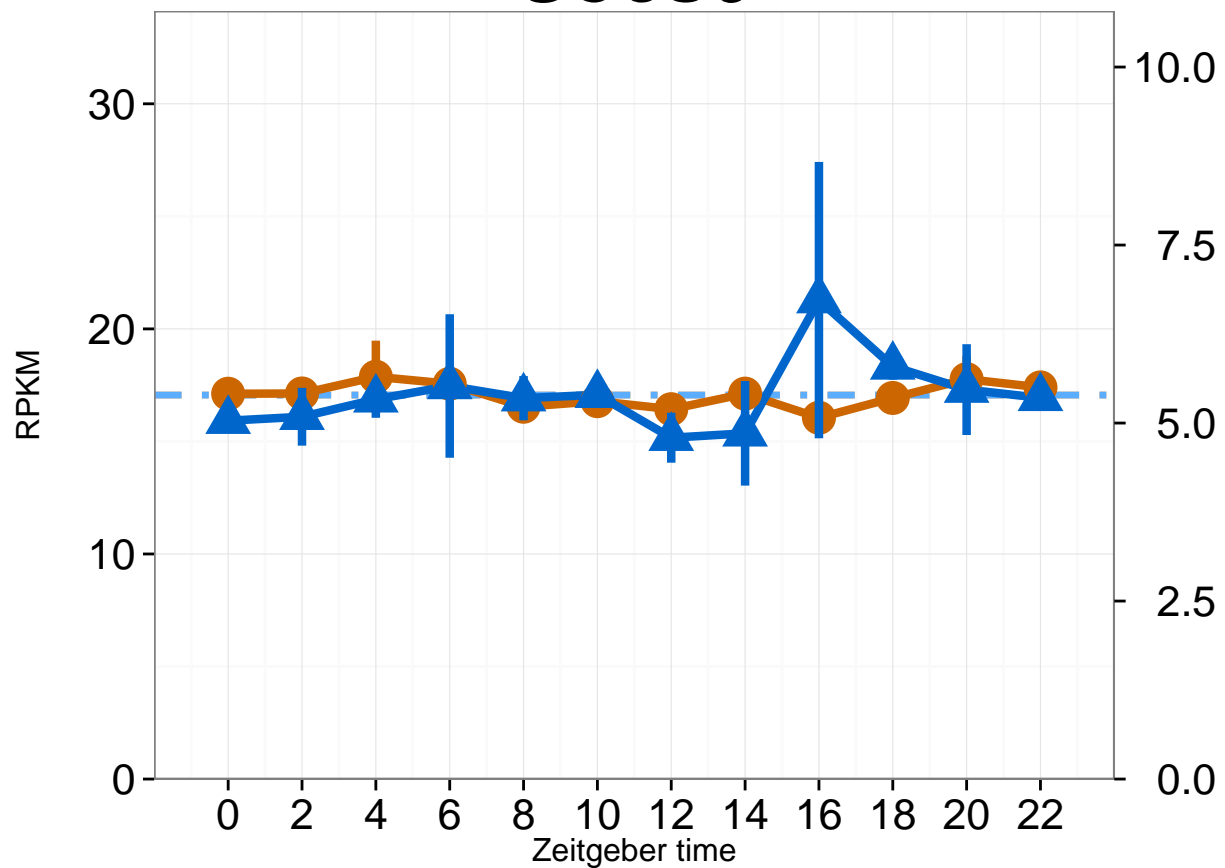

## Socs6

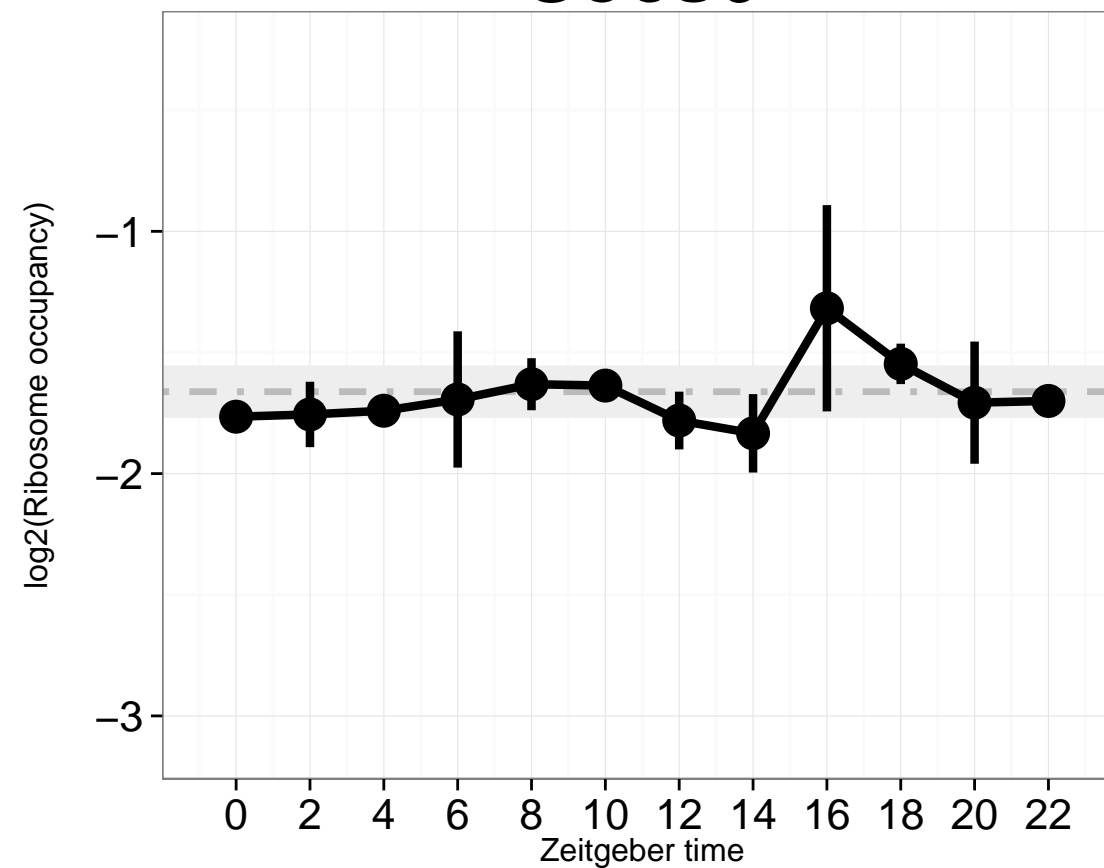

Supplement: Supplementary file 2242 [file 1]

# Atp2b2

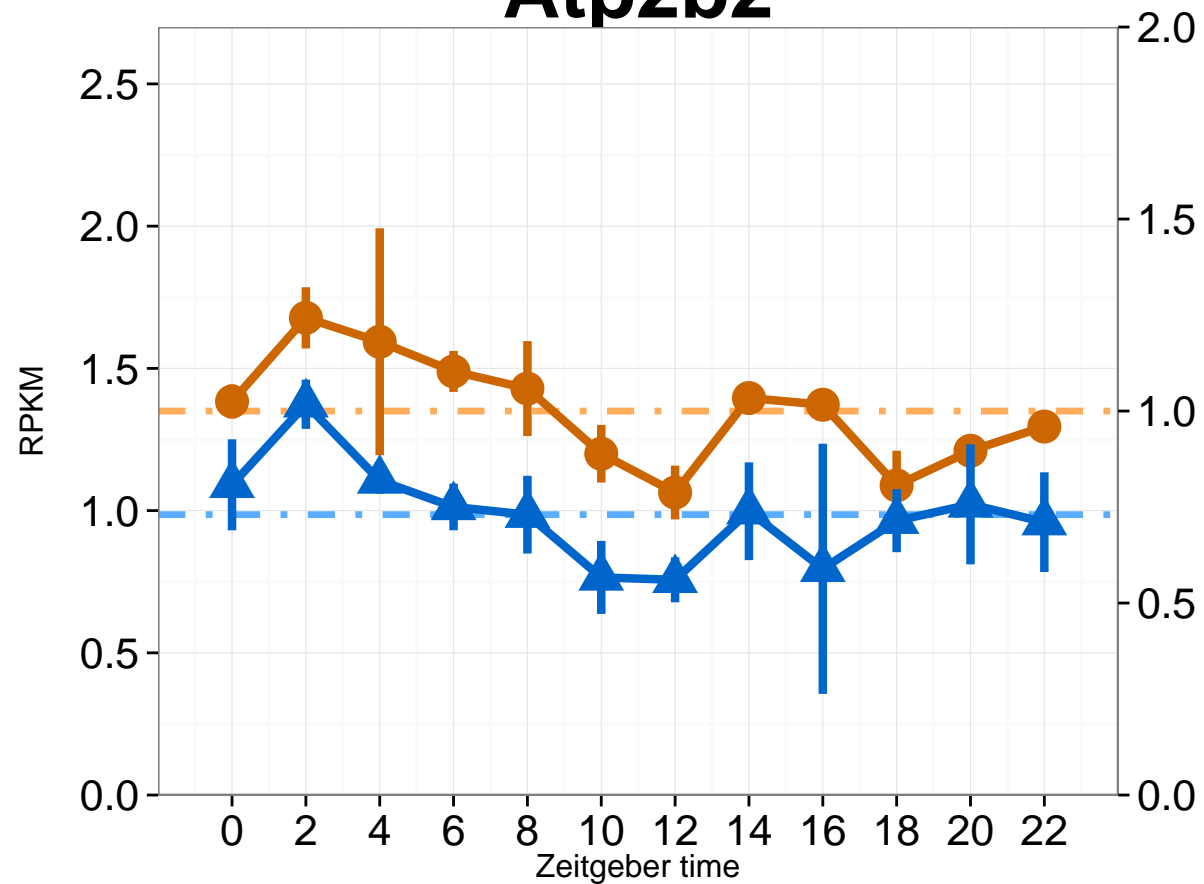

# Atp2b2

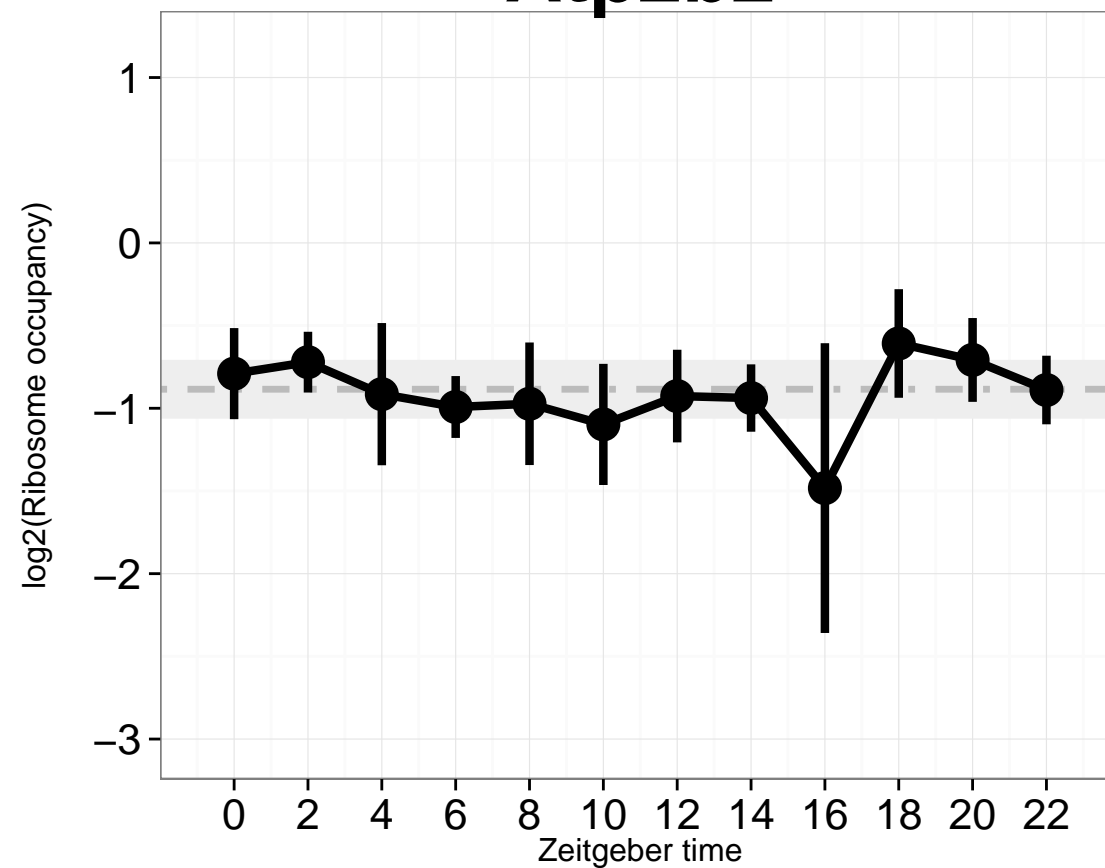

Supplement: Supplementary file 2243 [file 1]

## Sypl2

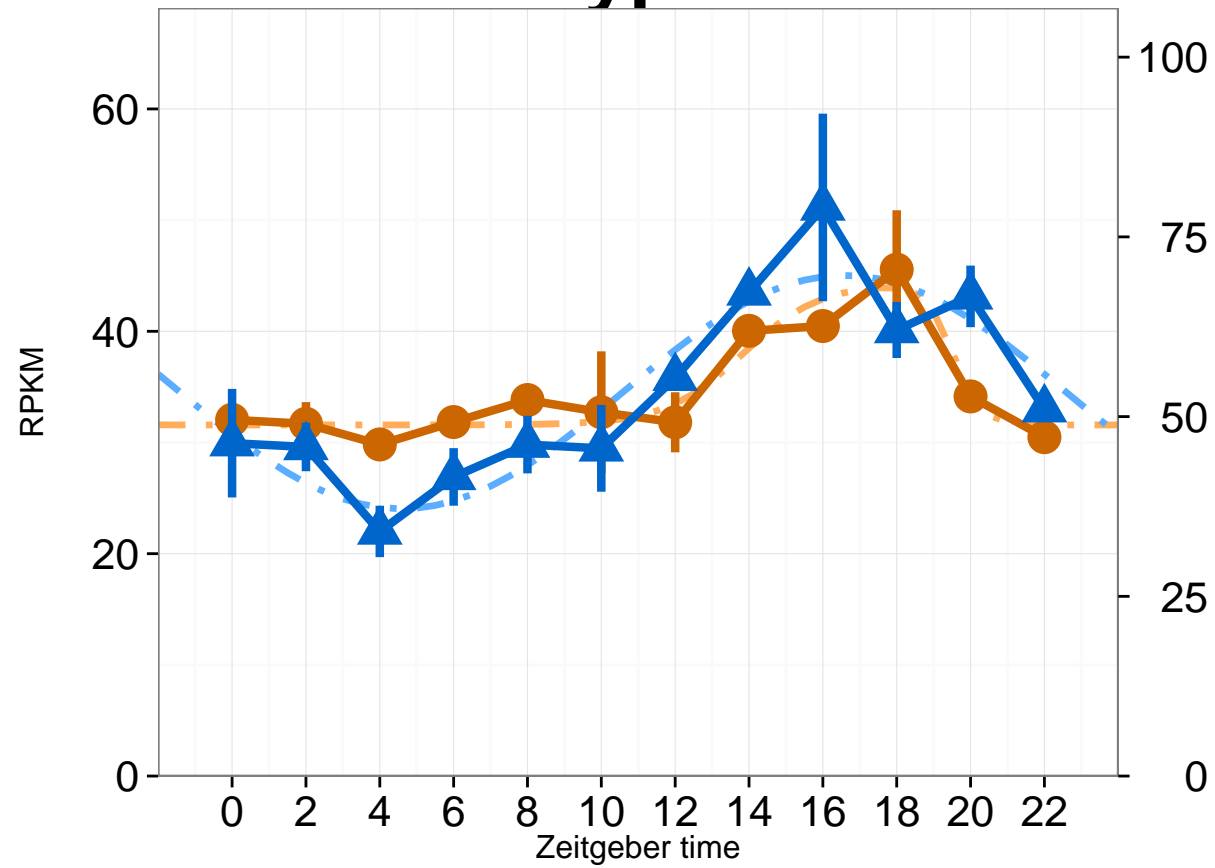

## Sypl2

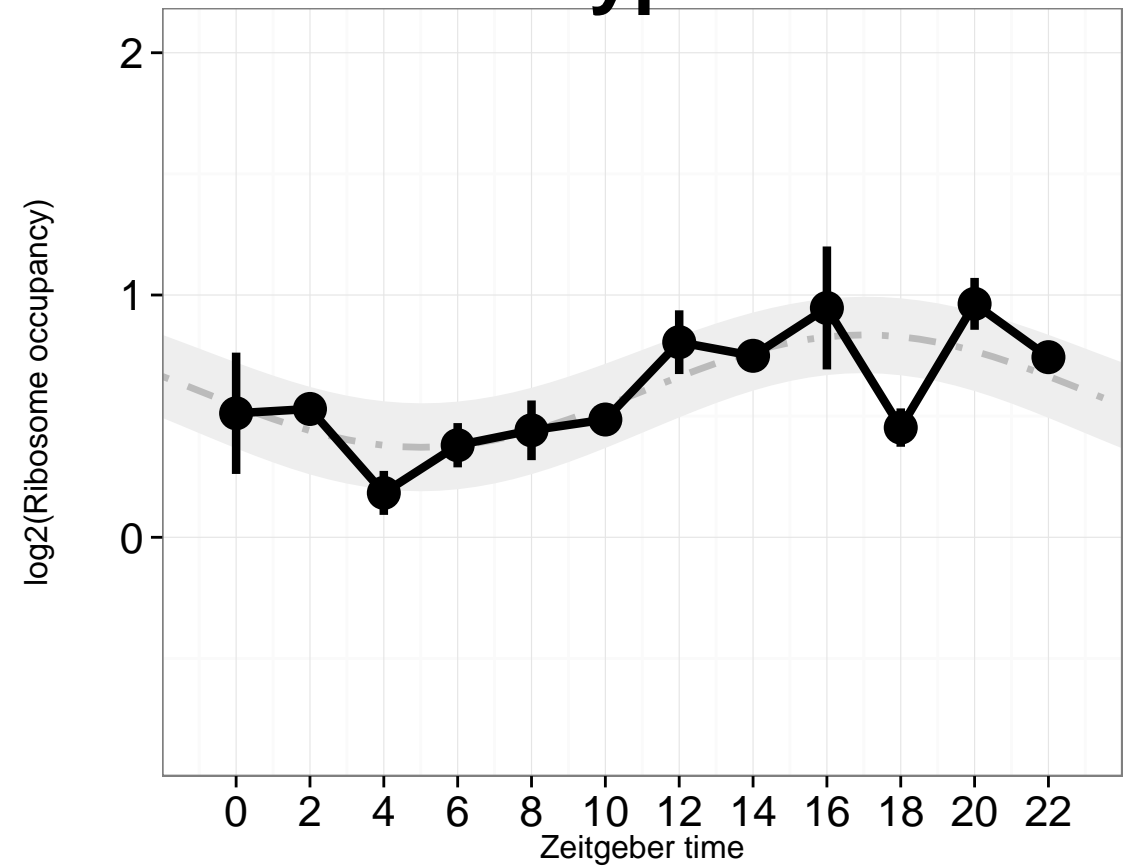

Supplement: Supplementary file 2244 [file 1]

# Atxn1

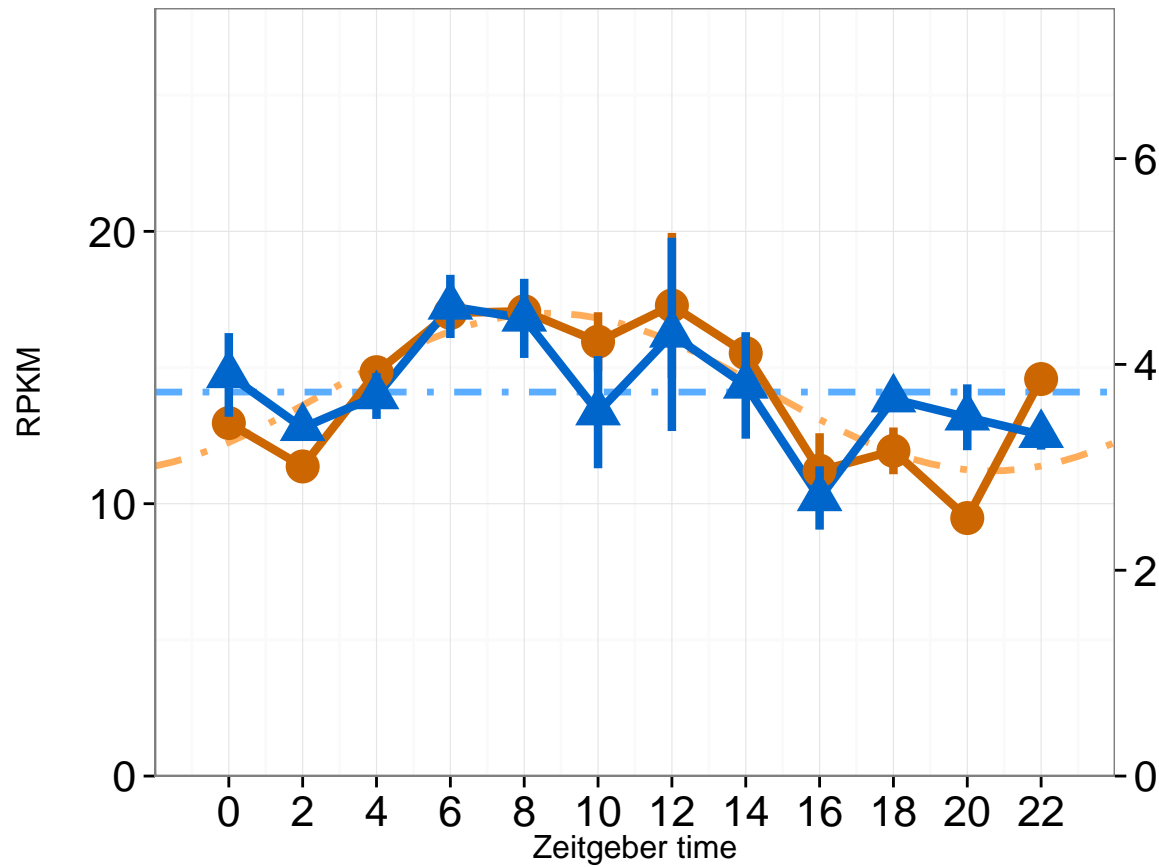

# Atxn1

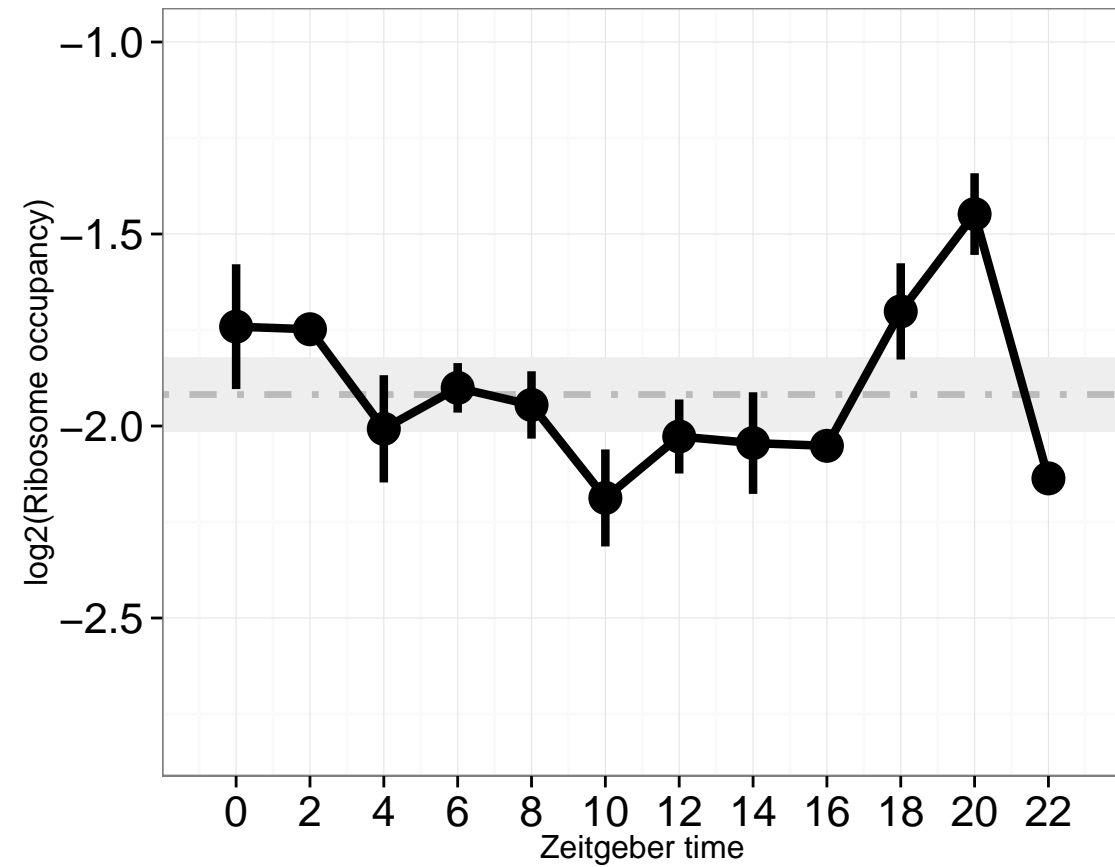

Supplement: Supplementary file 2245 [file 1]

## Eif3b

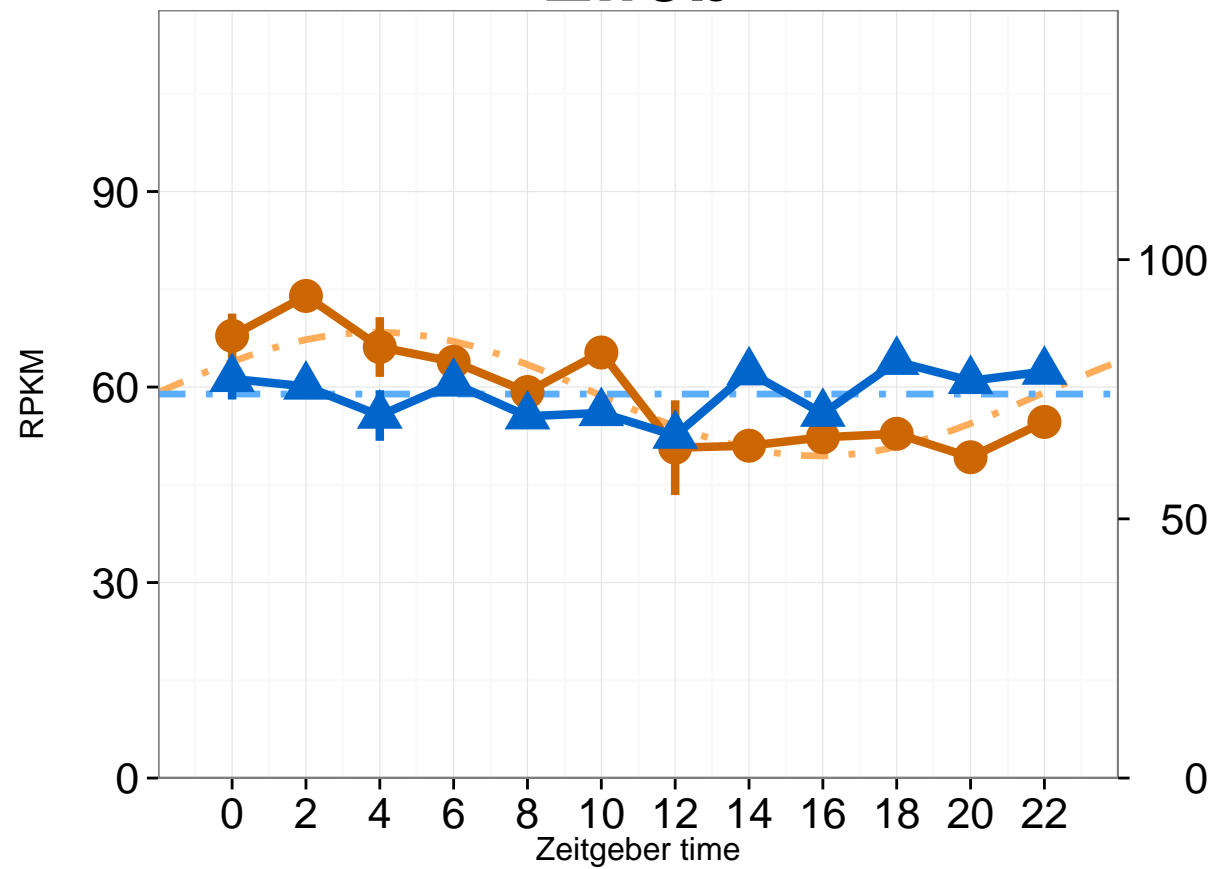

## Eif3b

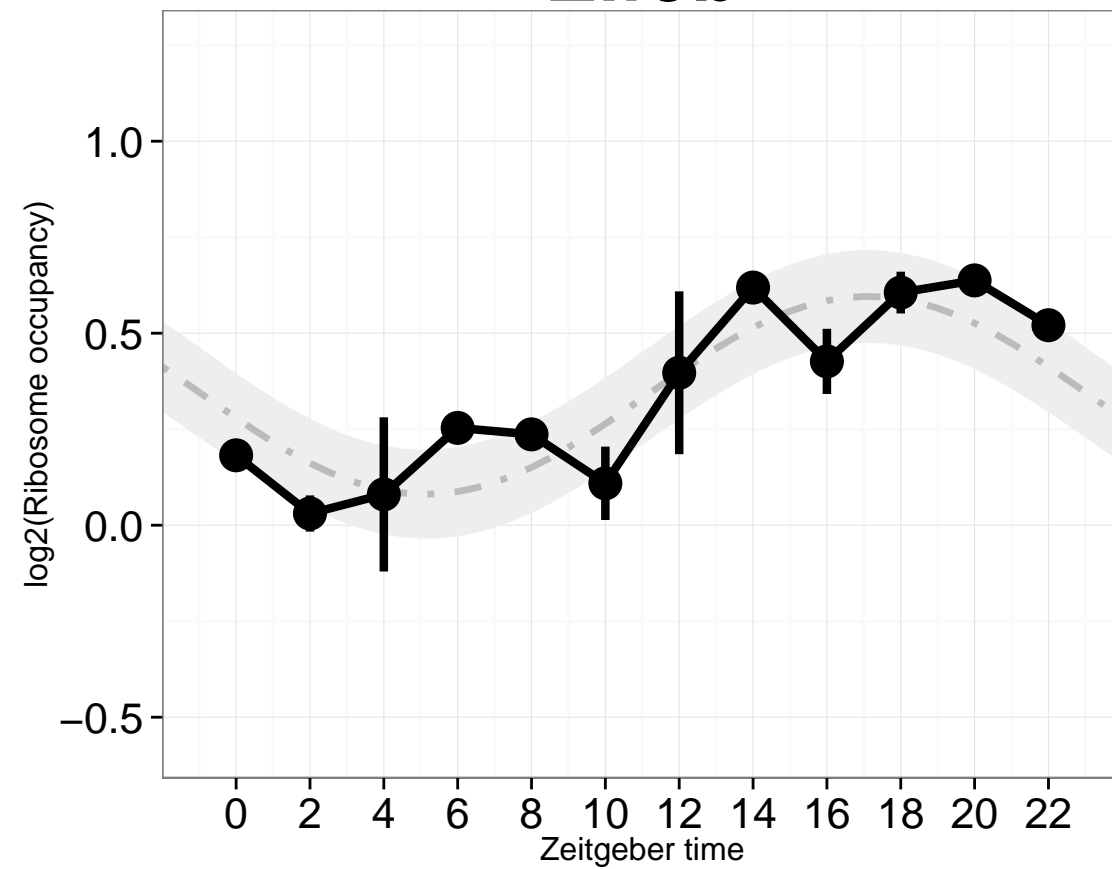

Supplement: Supplementary file 2246 [file 1]

# Rabl2

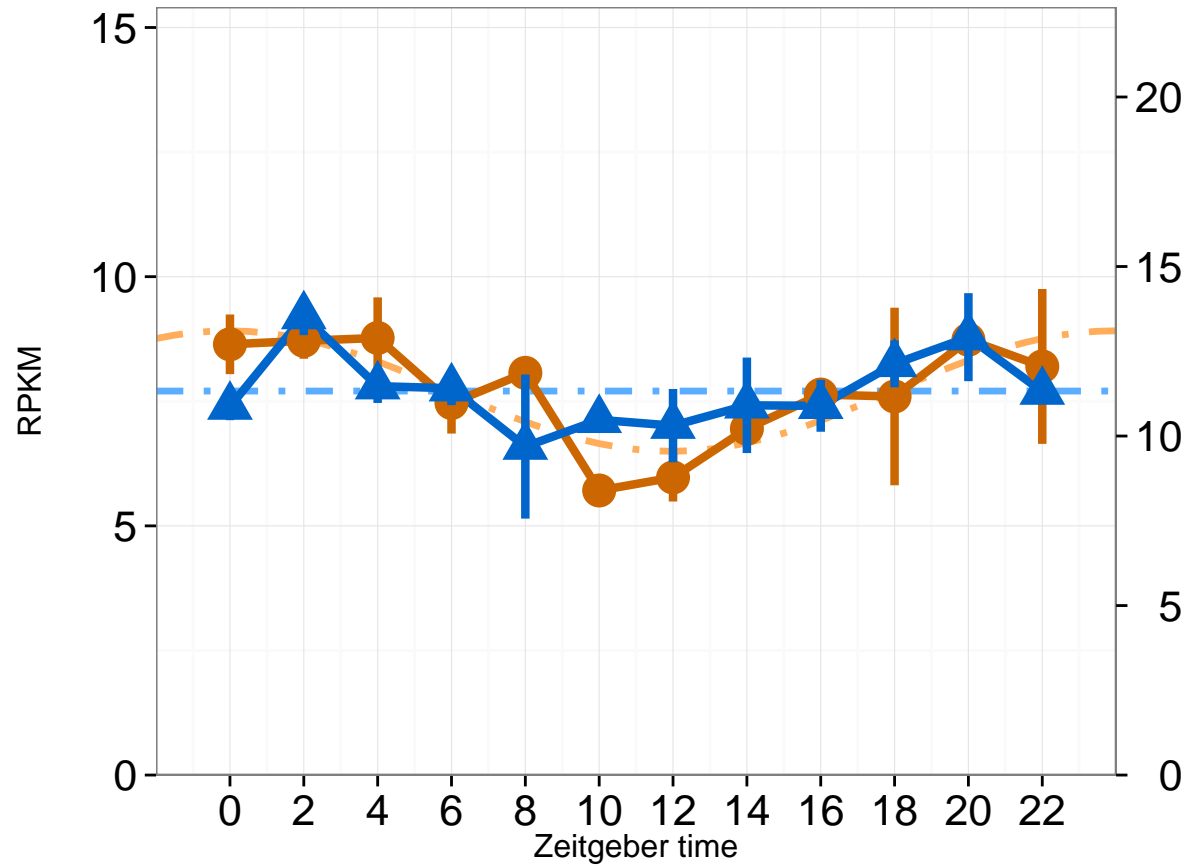

# Rabl2

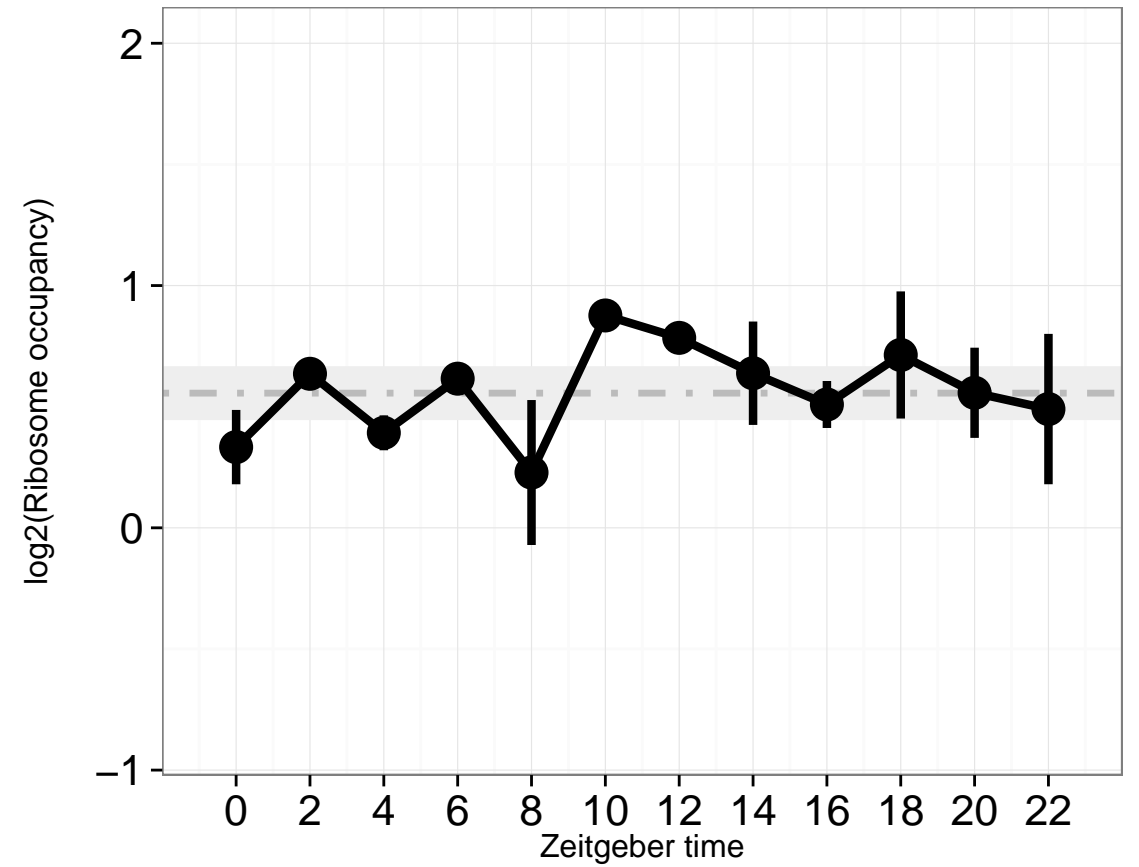

Supplement: Supplementary file 2247 [file 1]

# Gpsm1

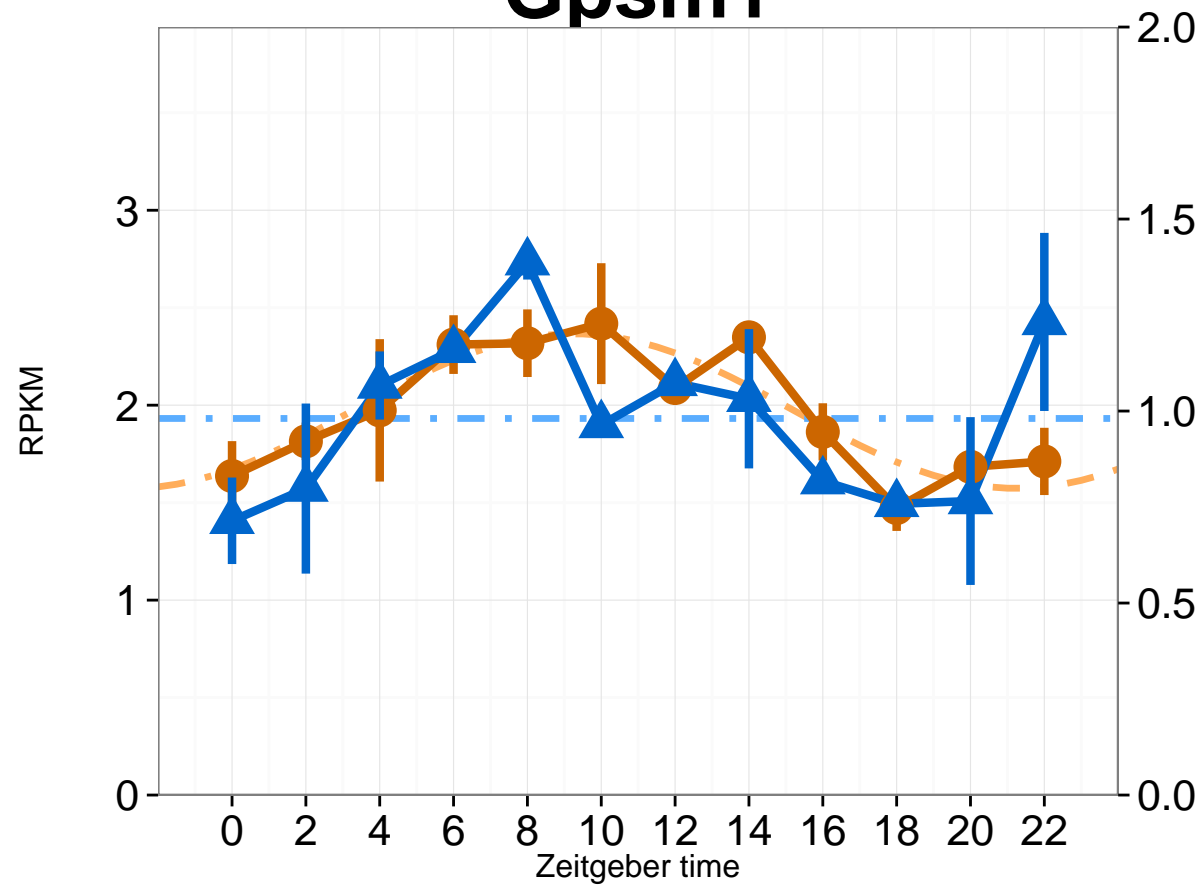

# Gpsm1

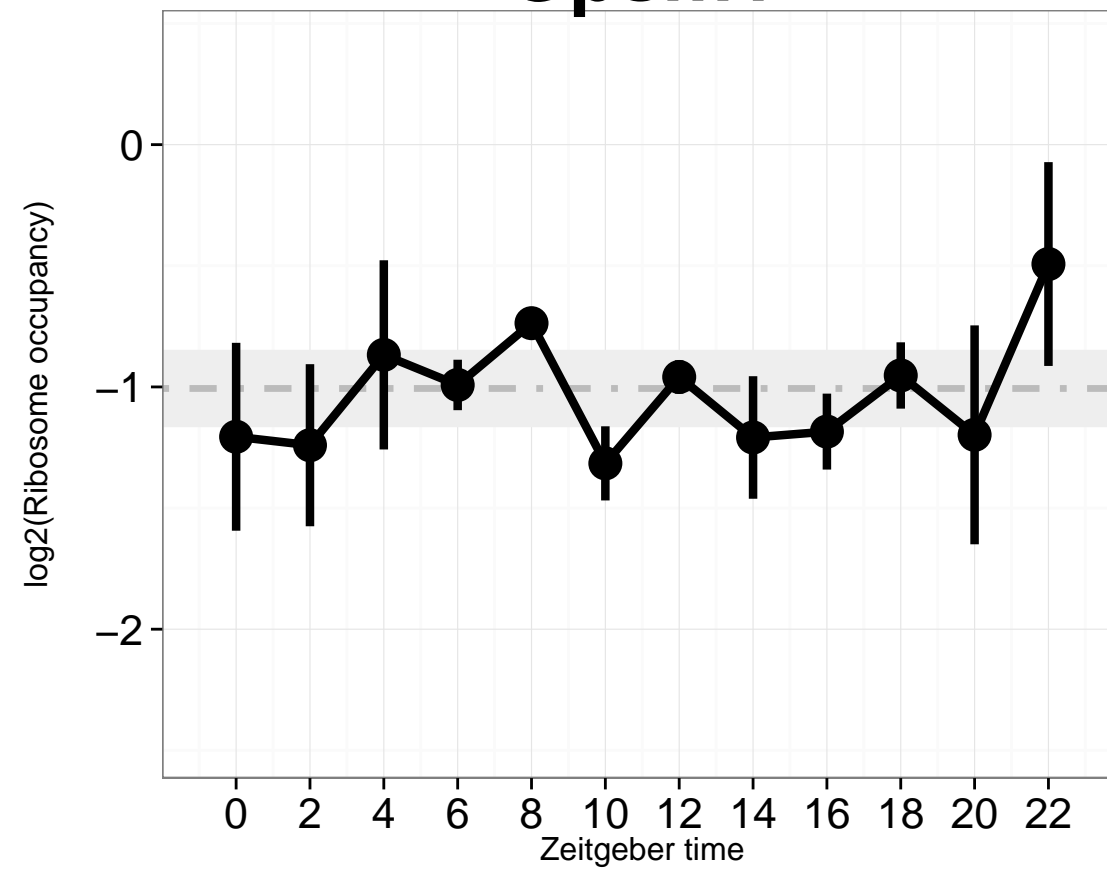

Supplement: Supplementary file 2248 [file 1]

# Creg1

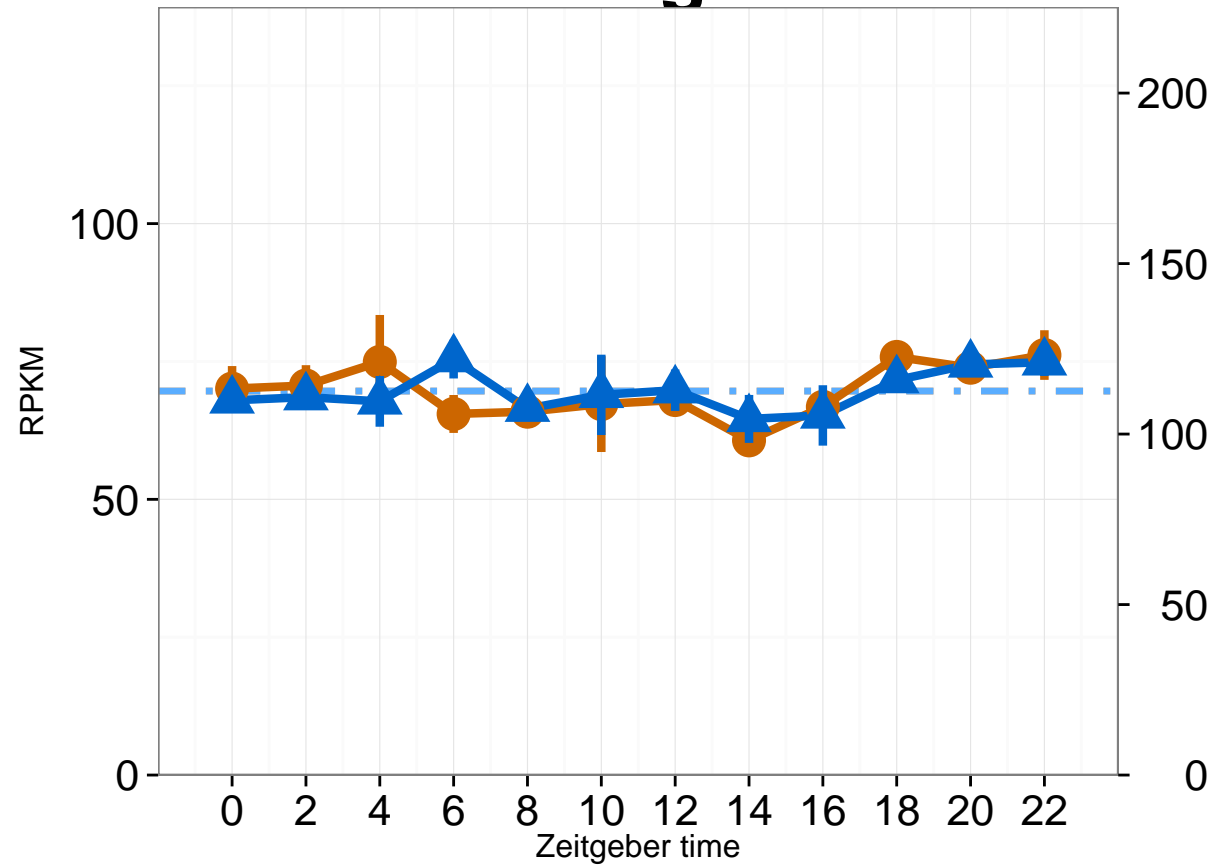

# Creg1

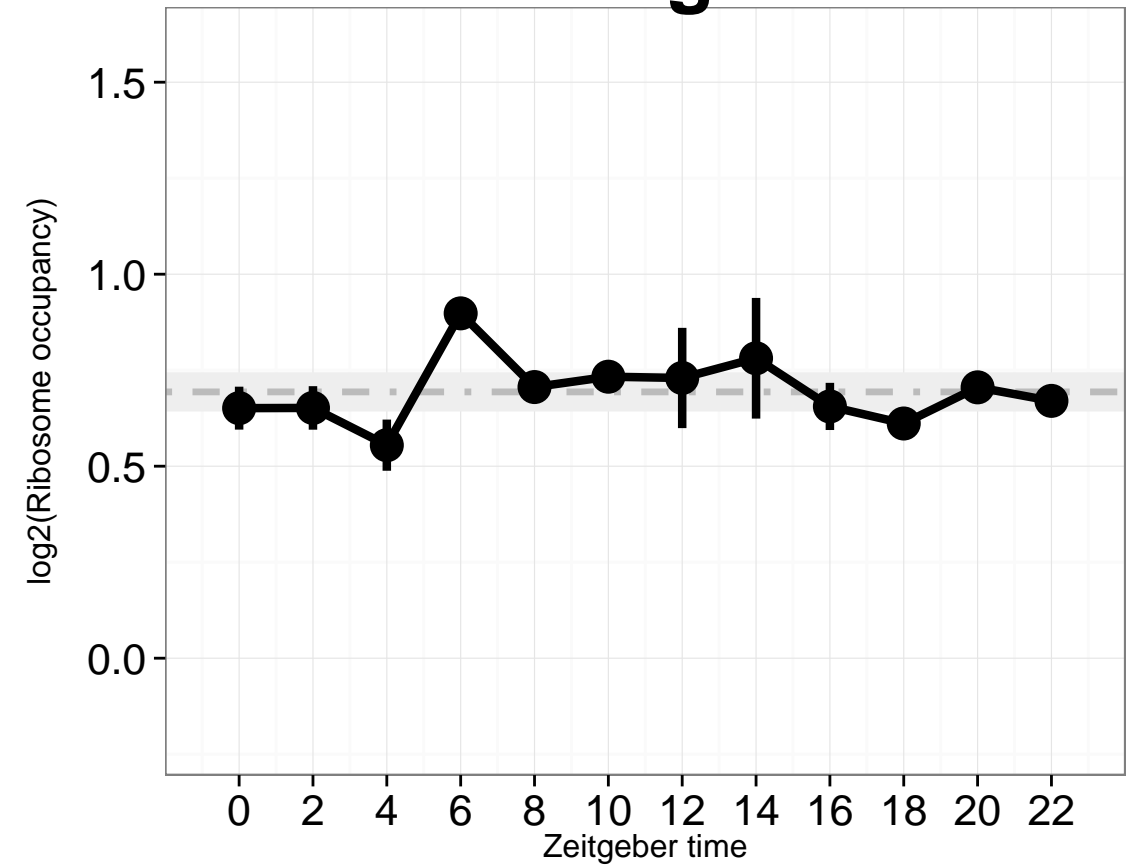

Supplement: Supplementary file 2249 [file 1]

## Il17rb

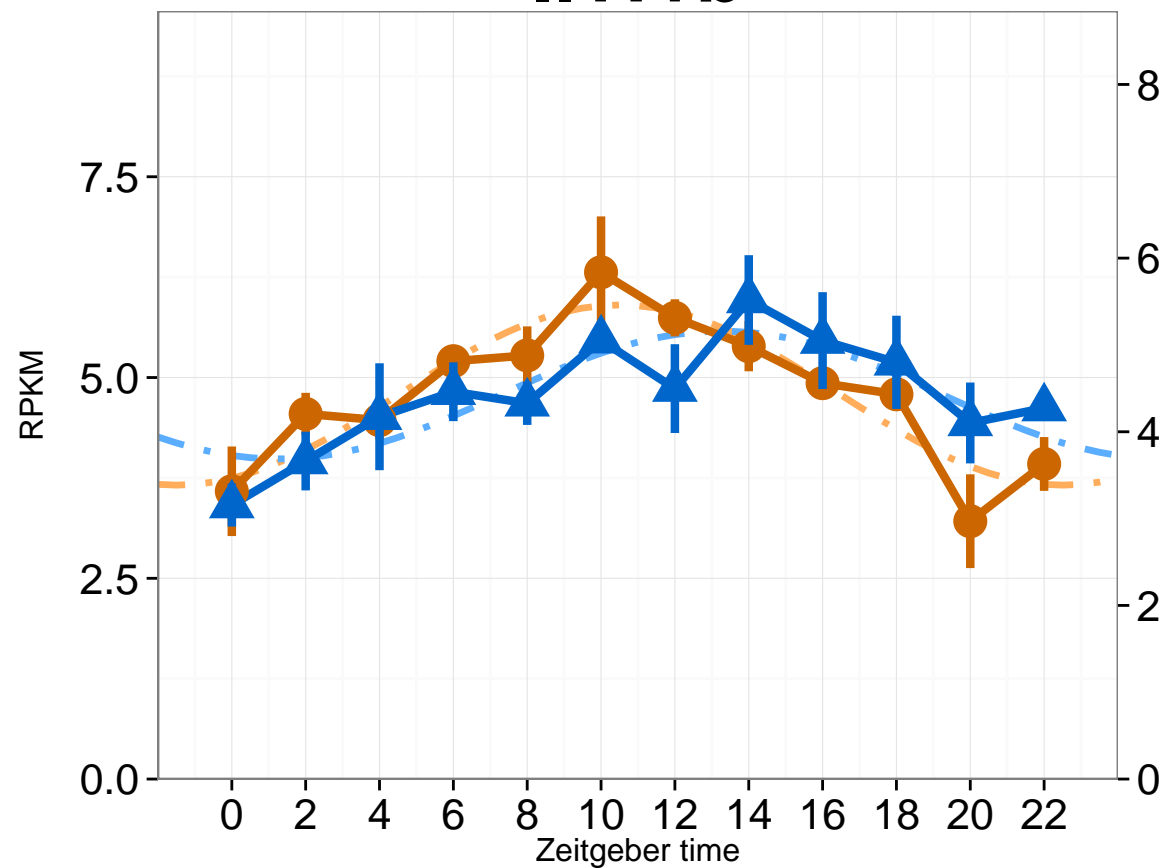

## Il17rb

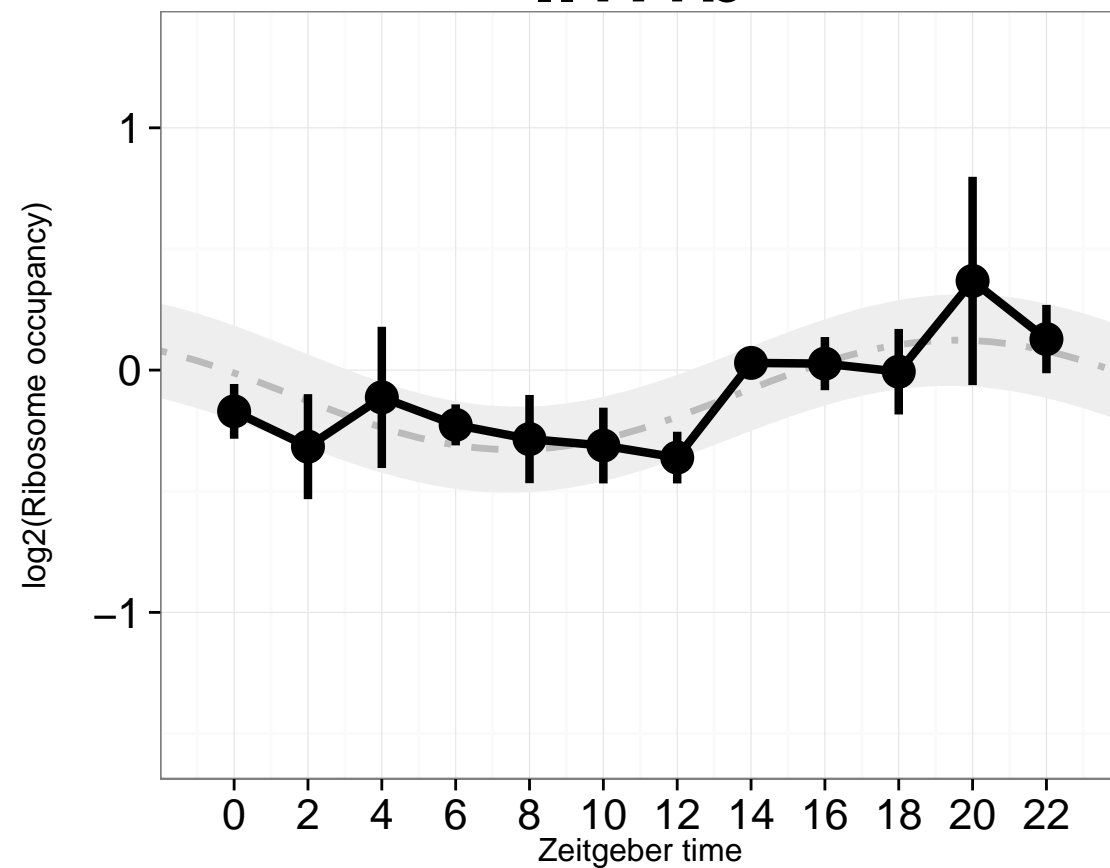

Supplement: Supplementary file 2250 [file 1]

## Mknk1

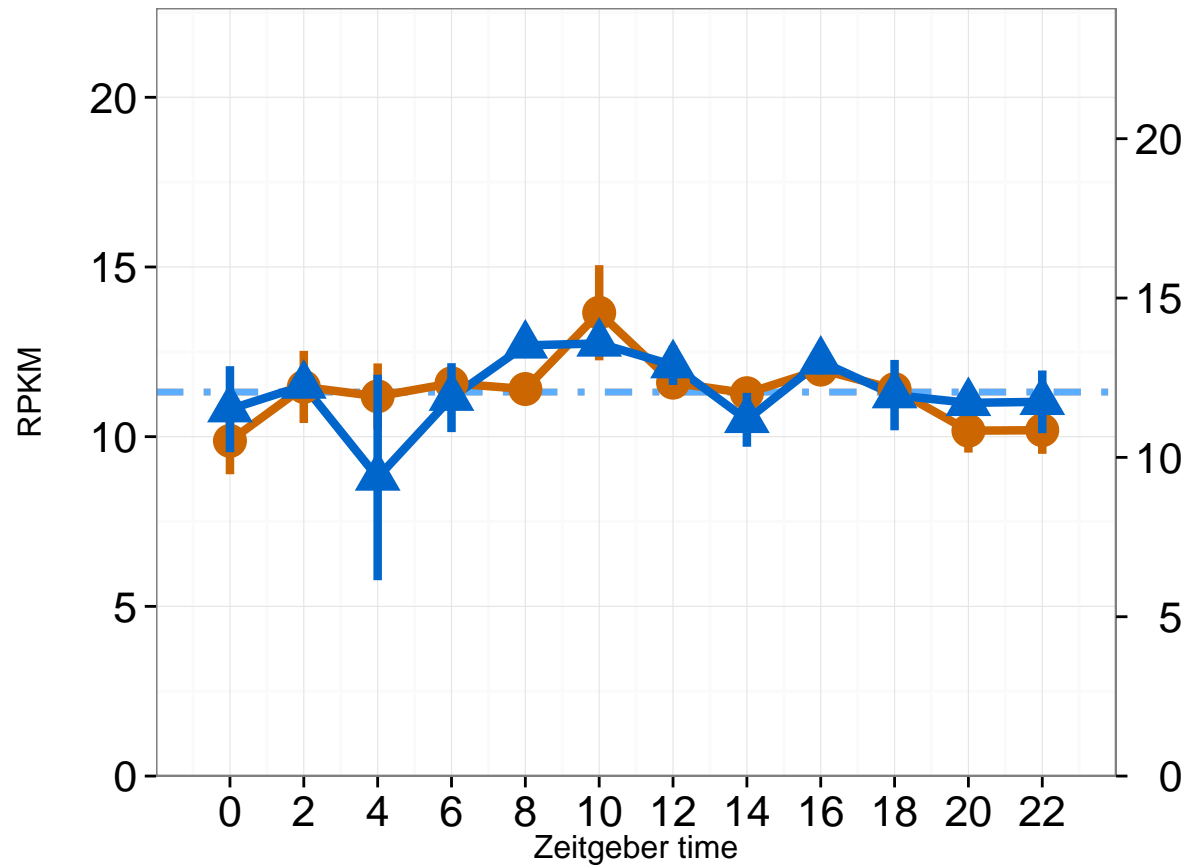

## Mknk1

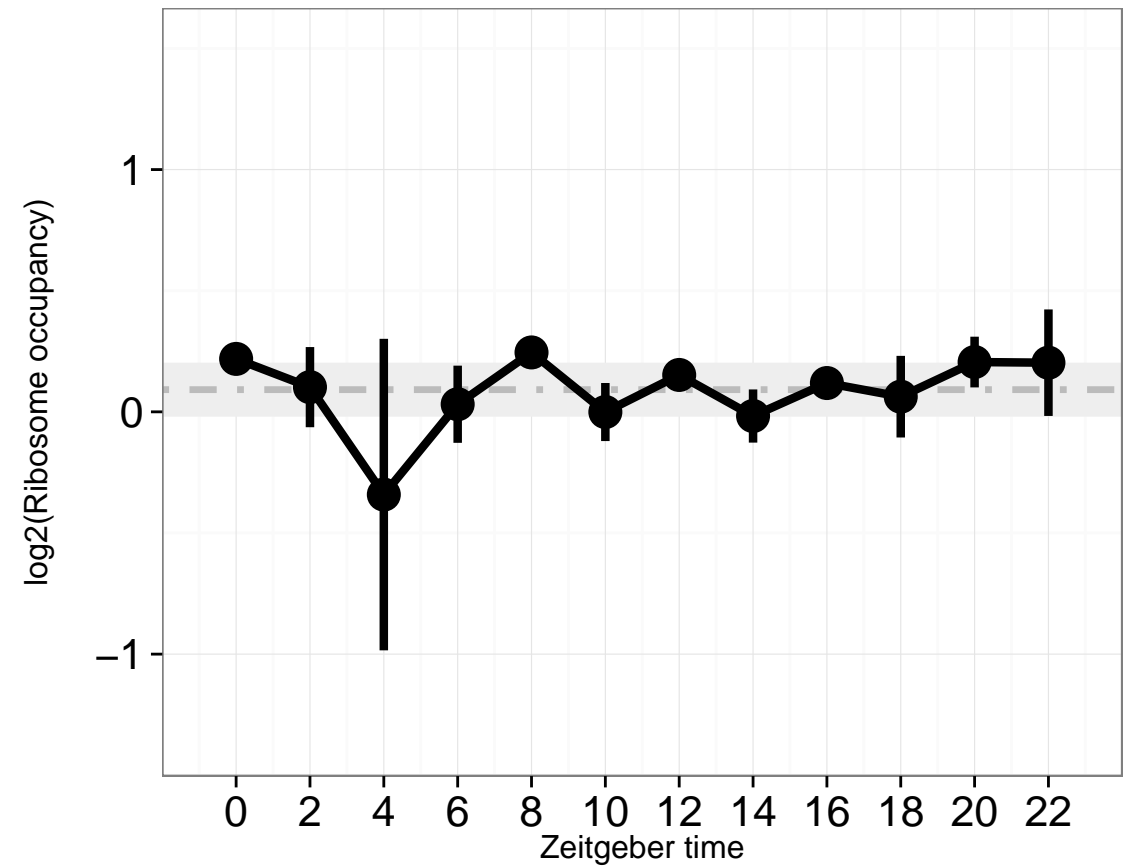

Supplement: Supplementary file 2251 [file 1]

# Cd209a

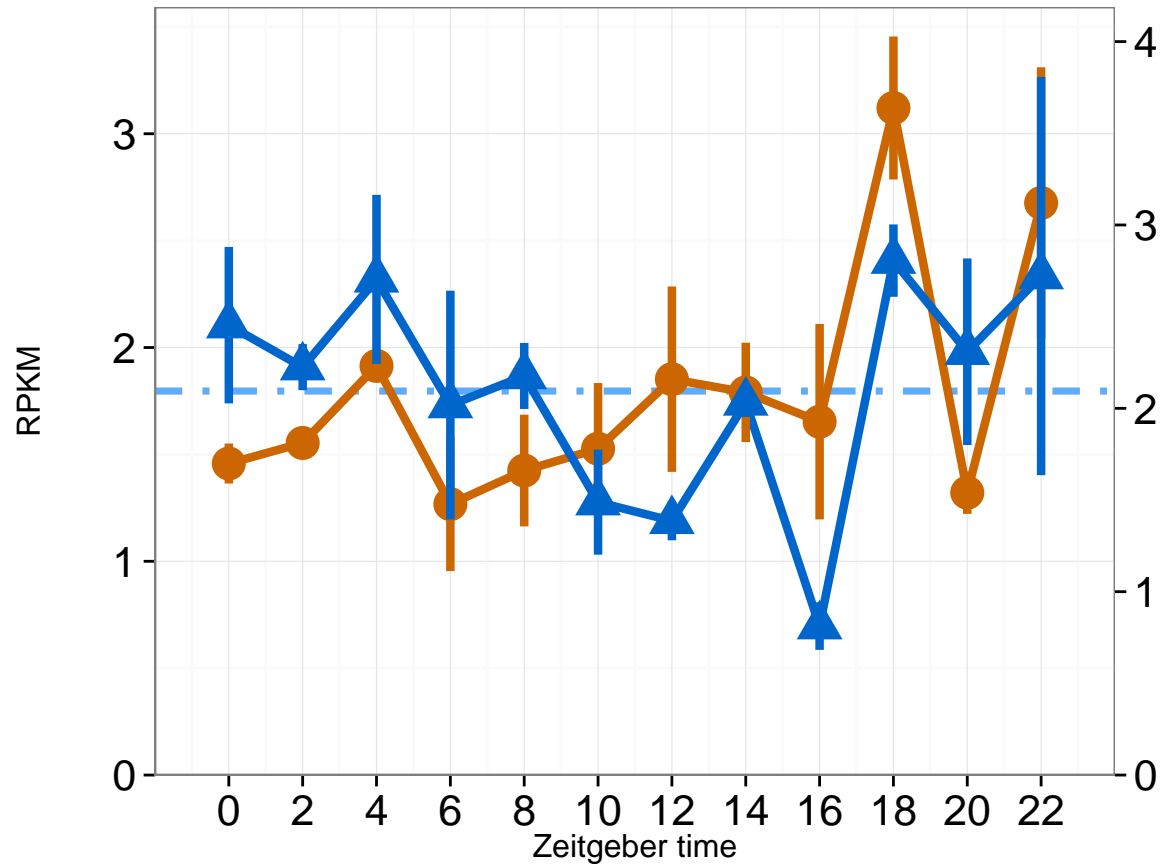

# Cd209a

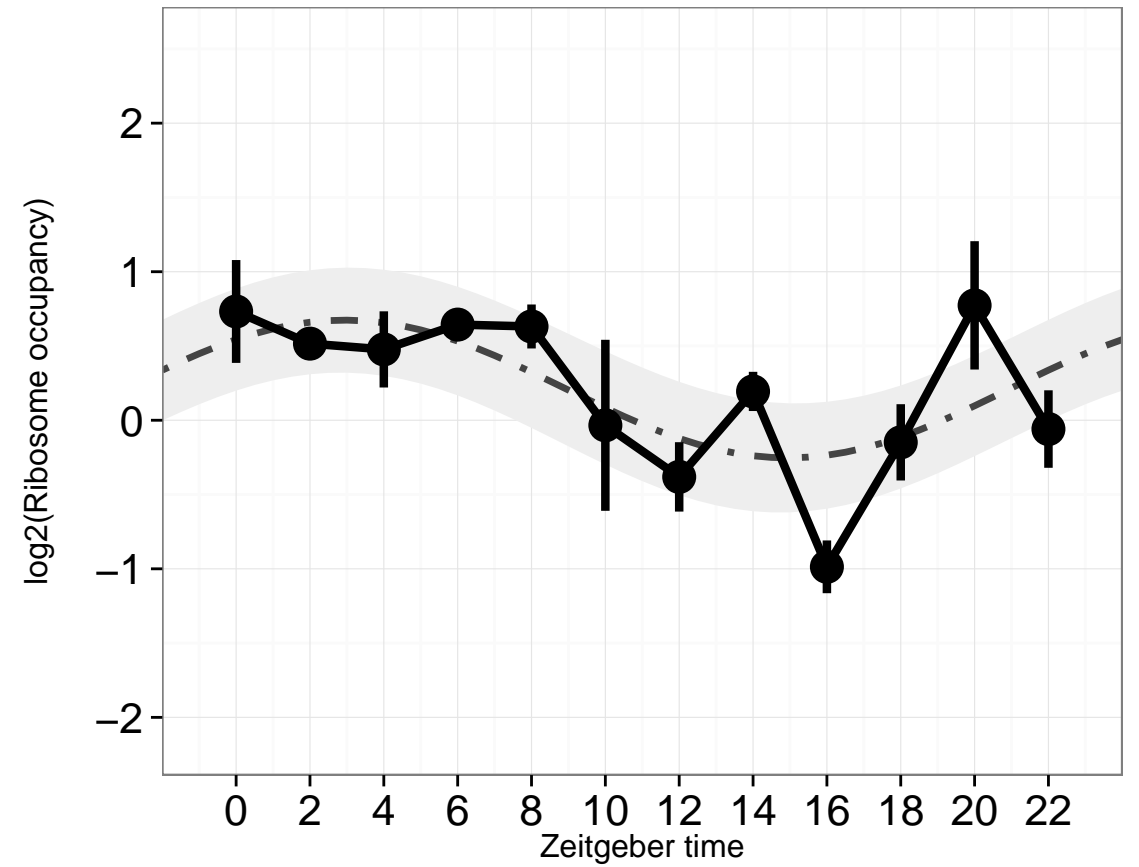

Supplement: Supplementary file 2252 [file 1]

## Ngly1

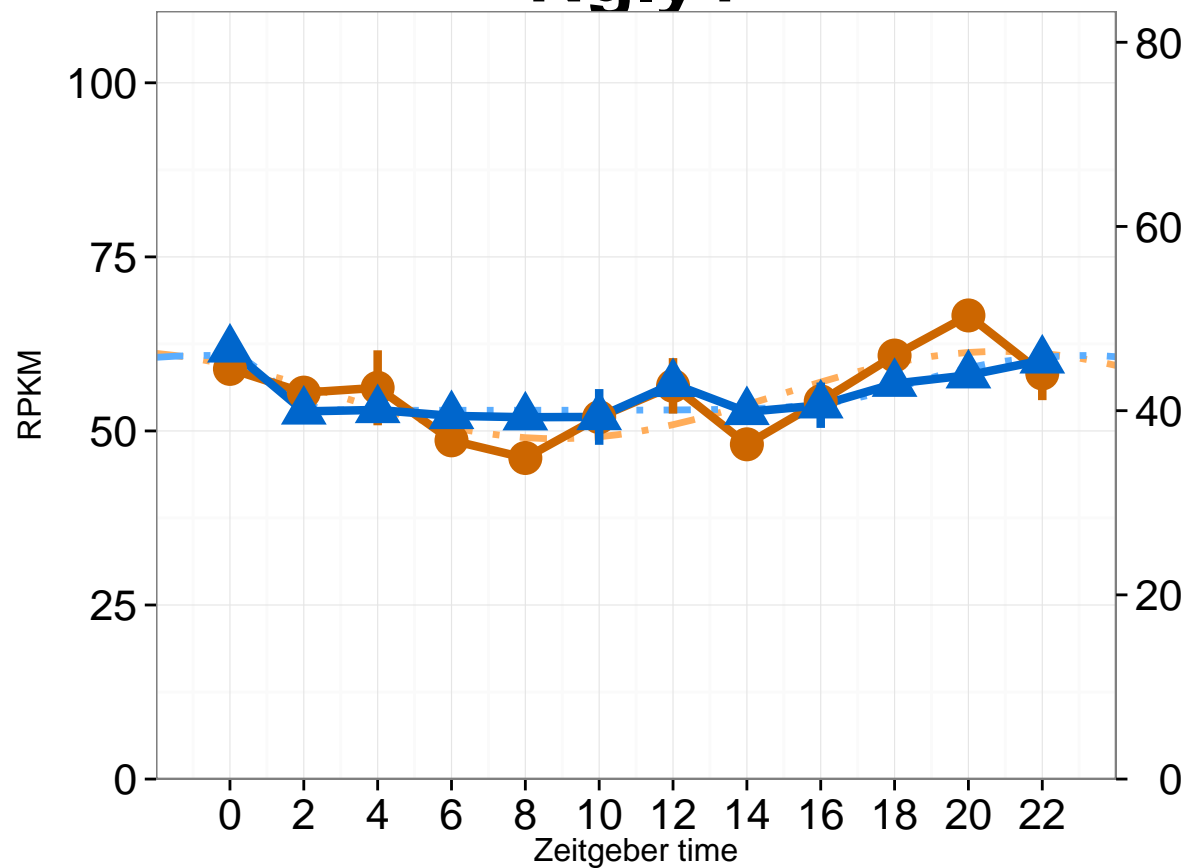

## Ngly1

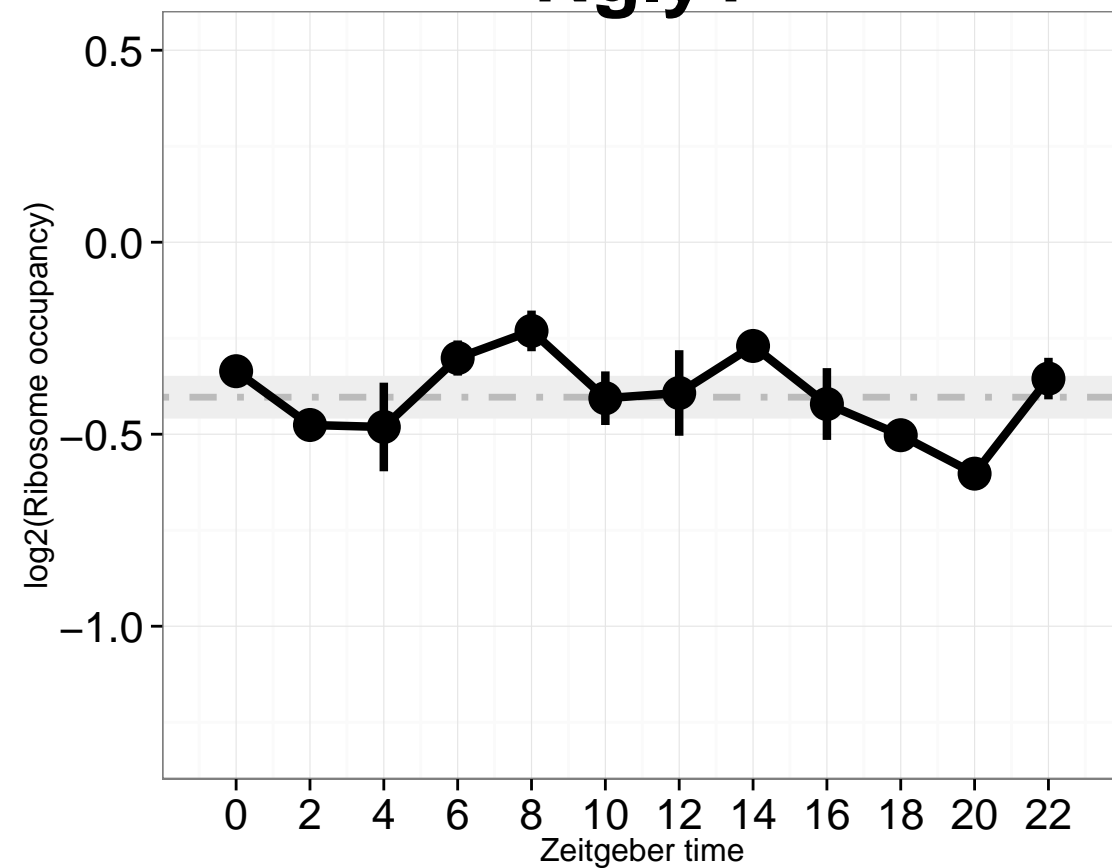

Supplement: Supplementary file 2253 [file 1]

# C1ql3

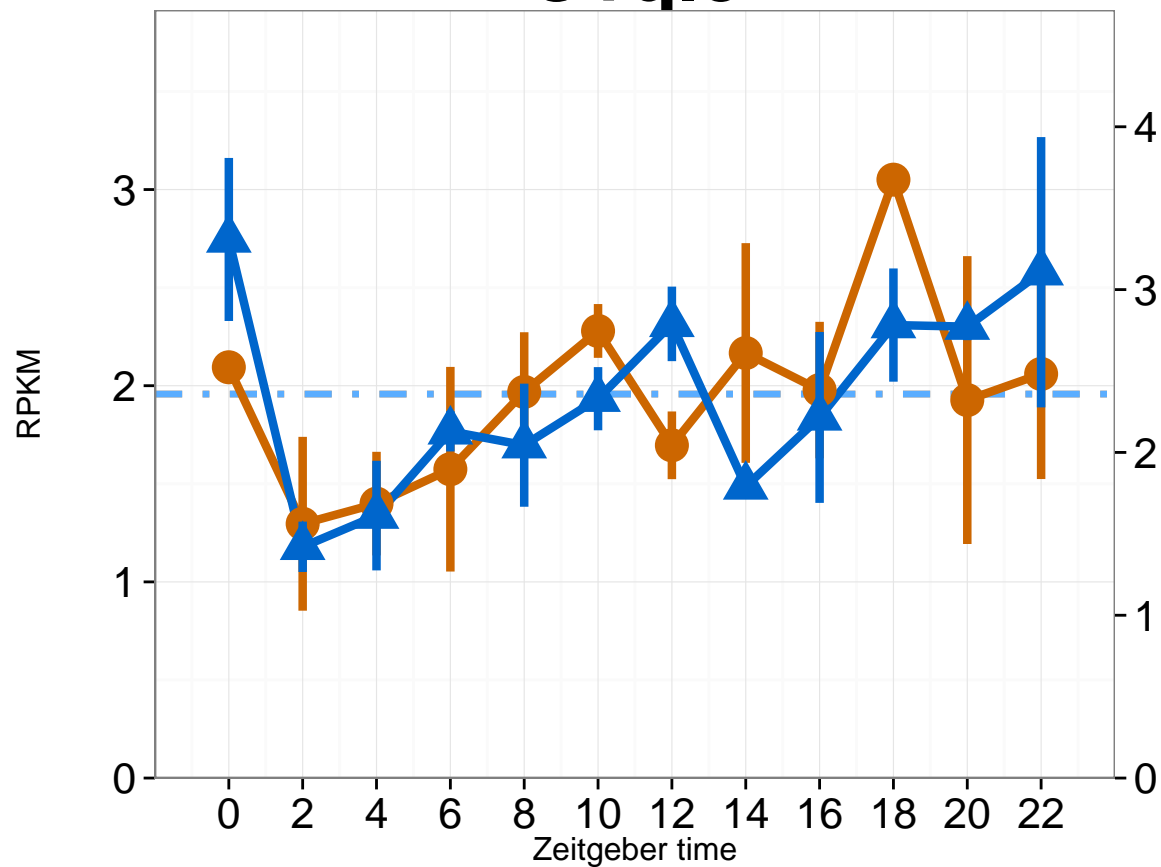

# C1ql3

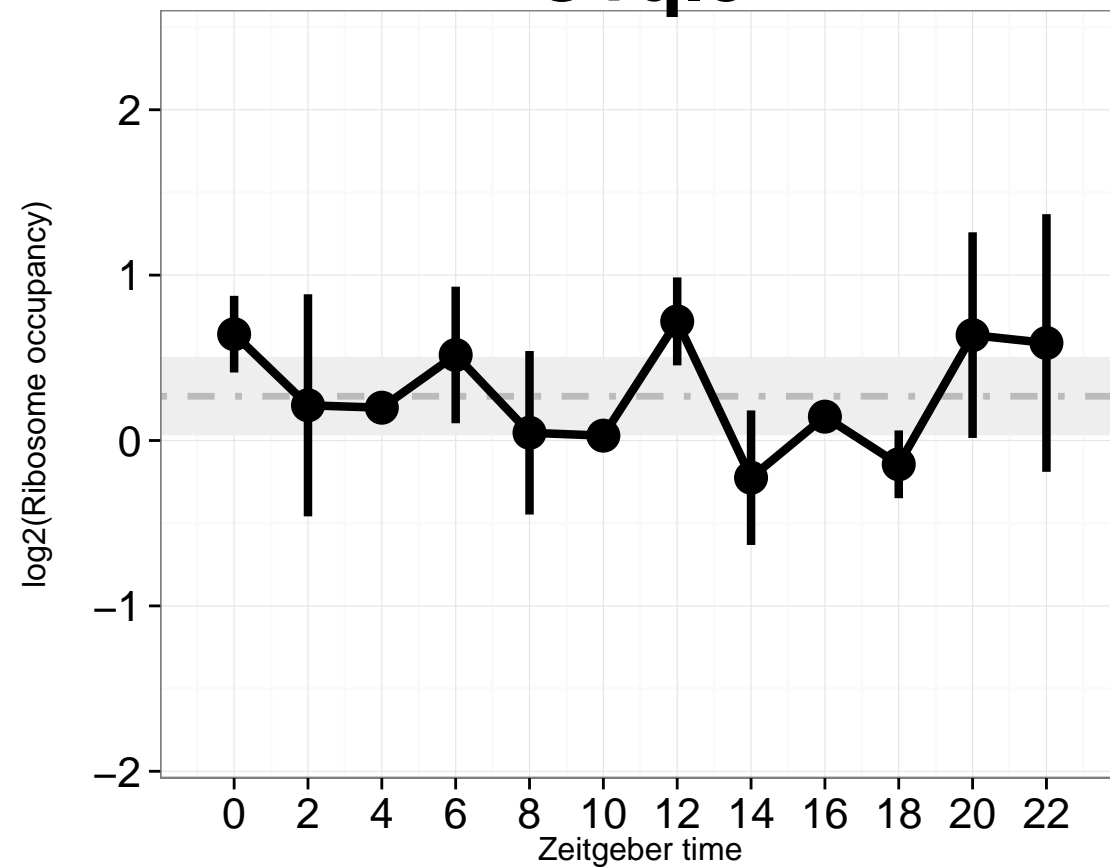

Supplement: Supplementary file 2254 [file 1]

# Zfp248

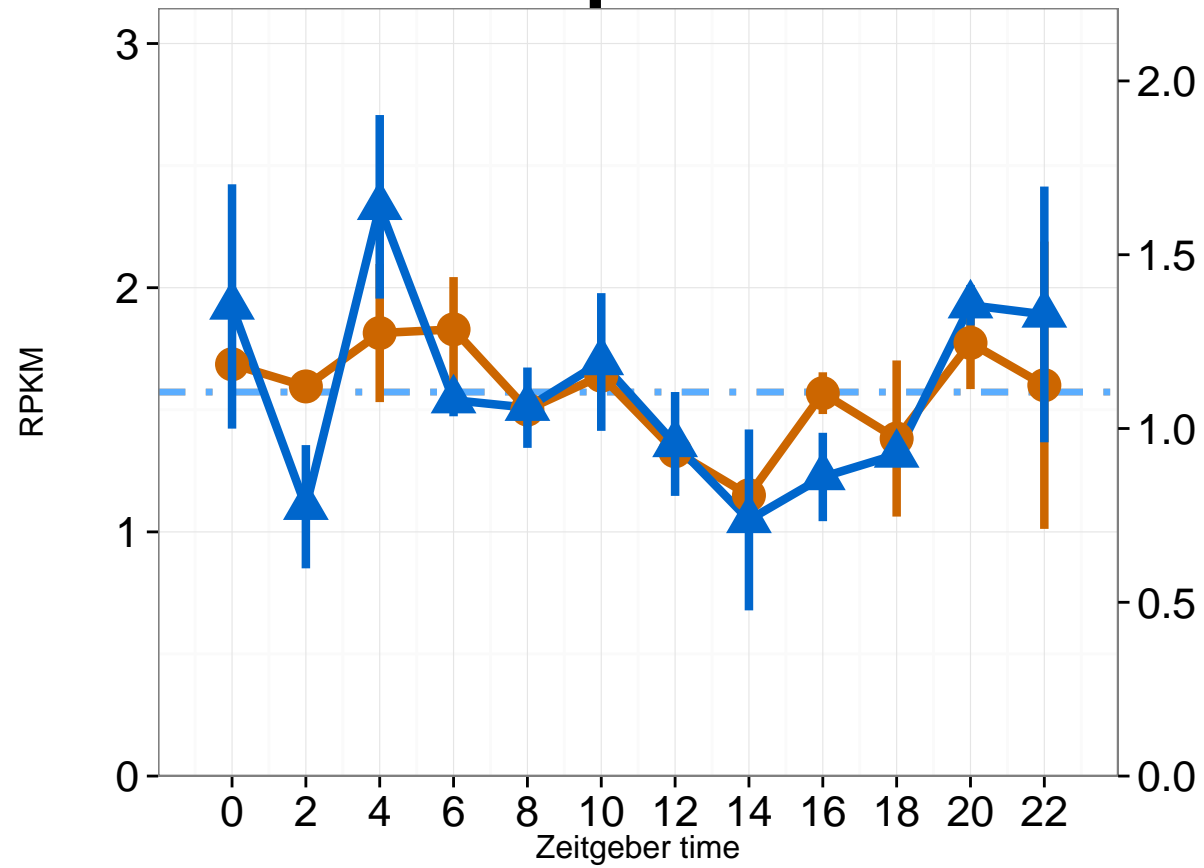

# Zfp248

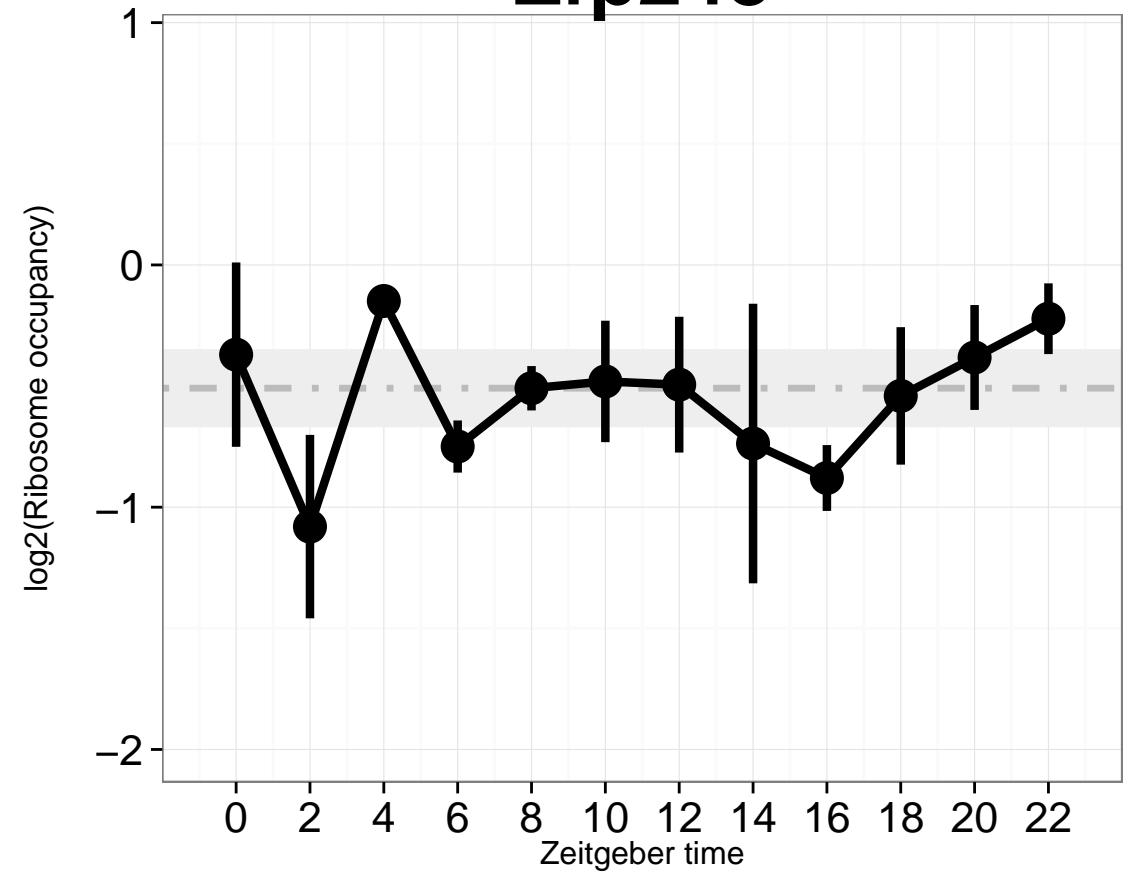

Supplement: Supplementary file 2255 [file 1]

# Zbtb34

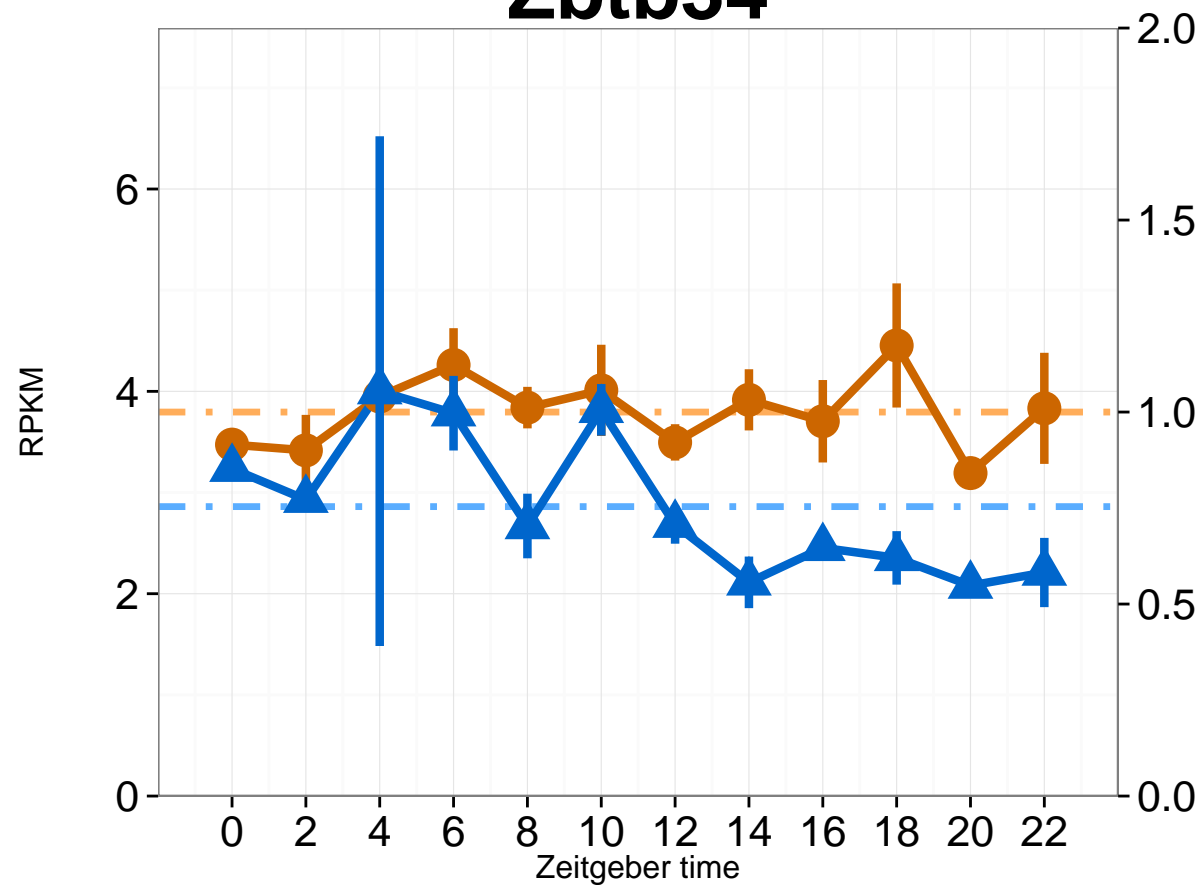

# Zbtb34

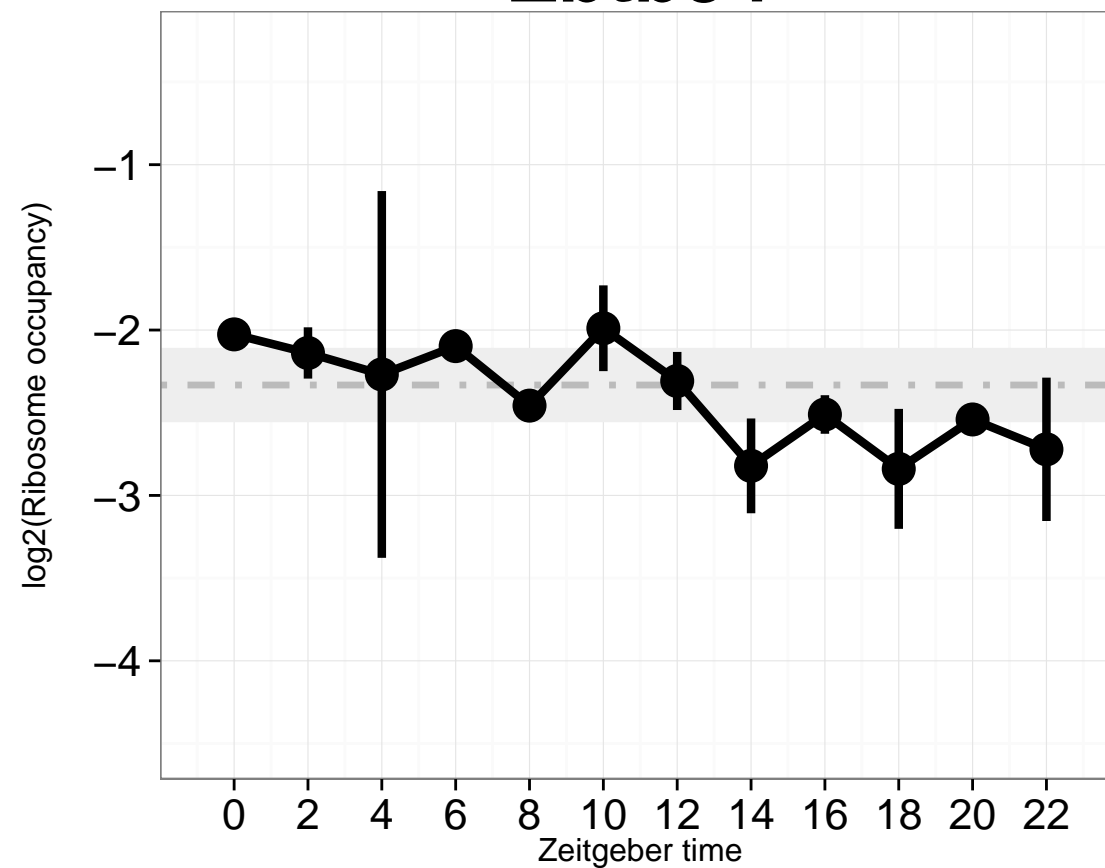

Supplement: Supplementary file 2256 [file 1]

## Ndst2

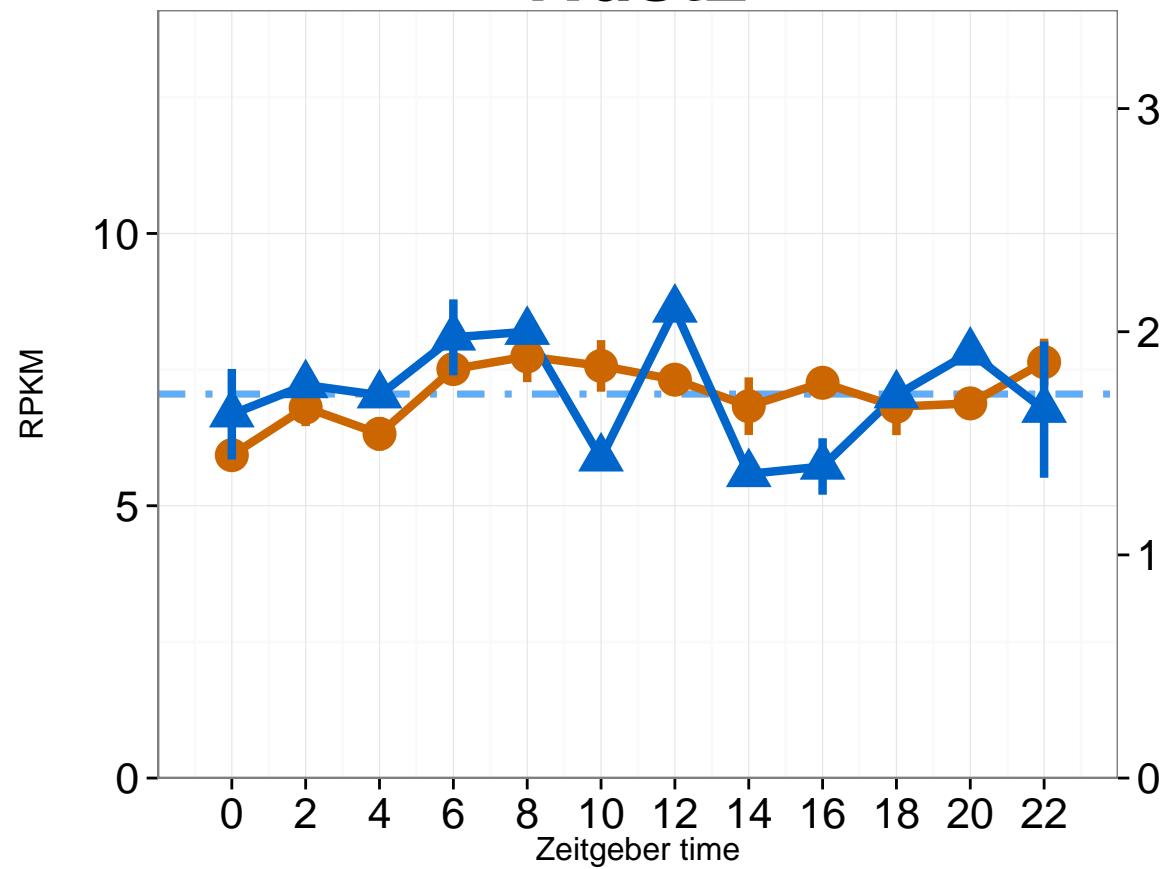

## Ndst2

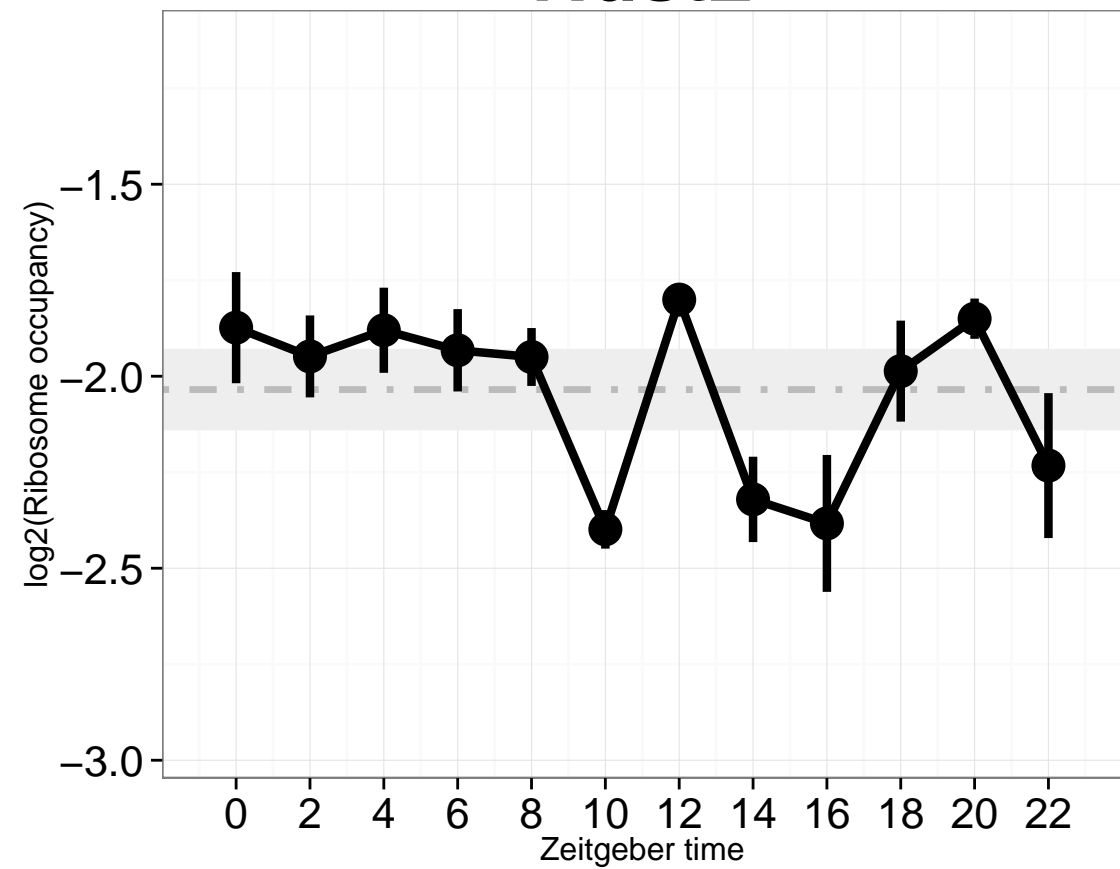

Supplement: Supplementary file 2257 [file 1]

# Plxnd1

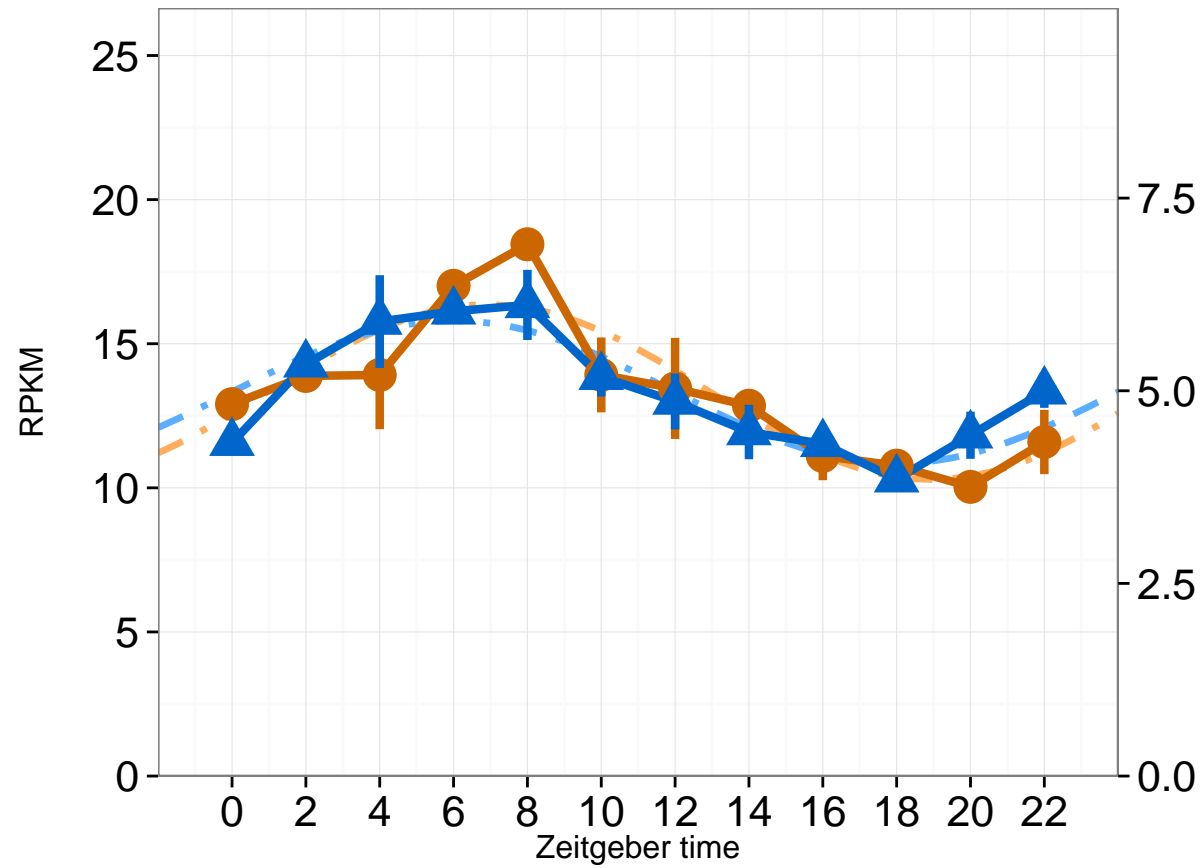

# Plxnd1

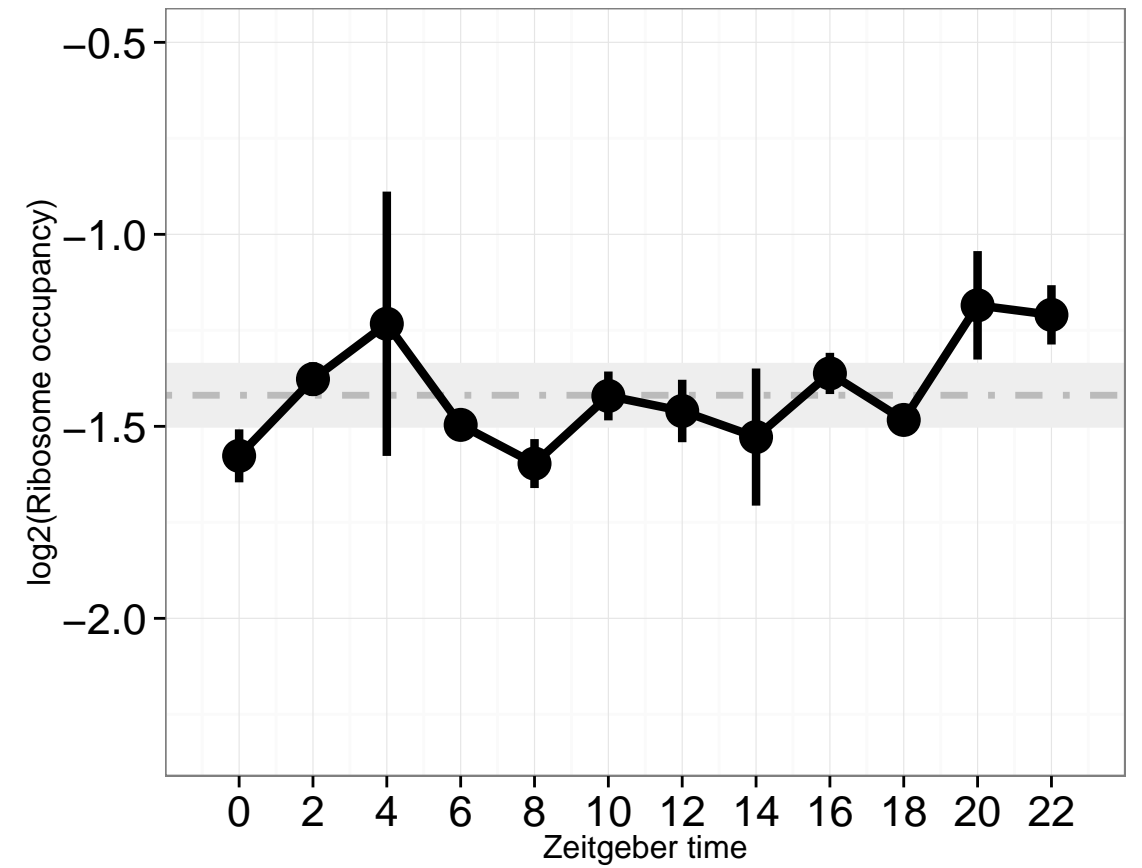

Supplement: Supplementary file 2258 [file 1]

# Ddrgk1

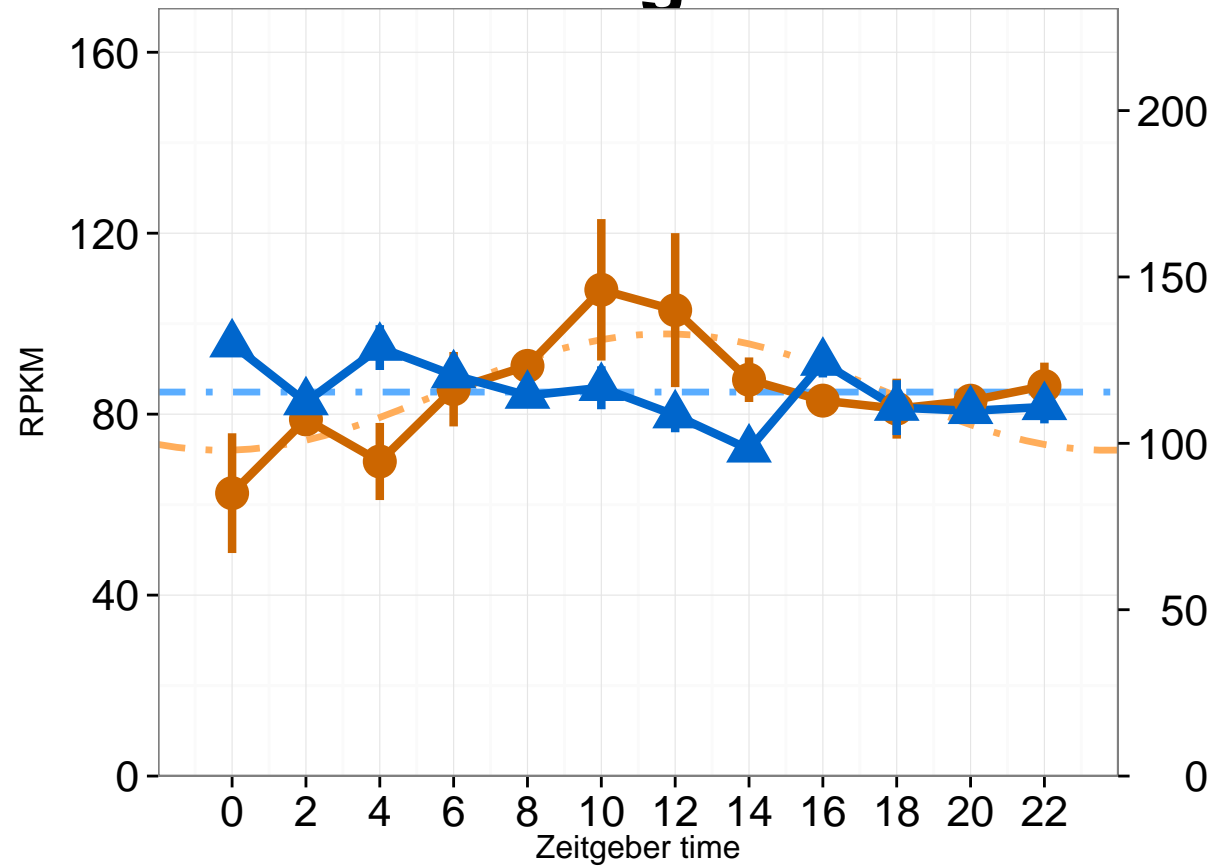

# Ddrgk1

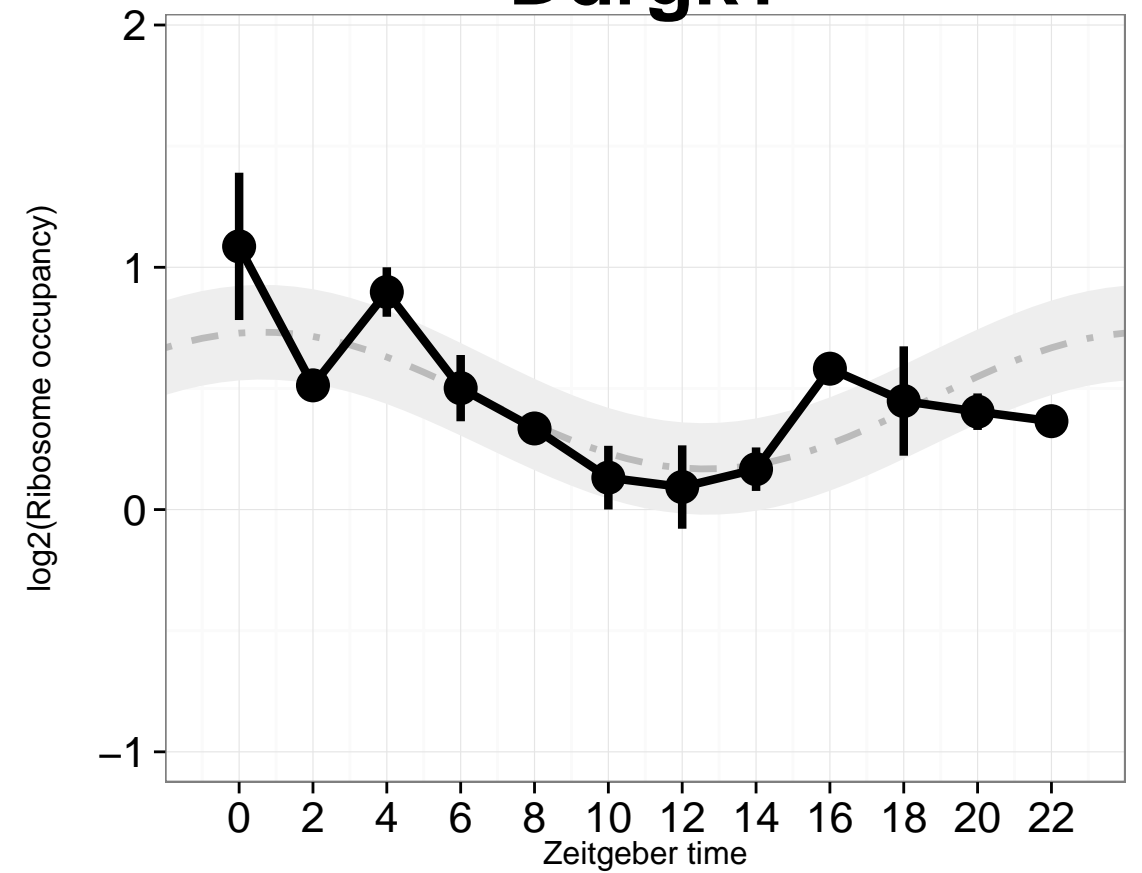

Supplement: Supplementary file 2259 [file 1]

## Pnp

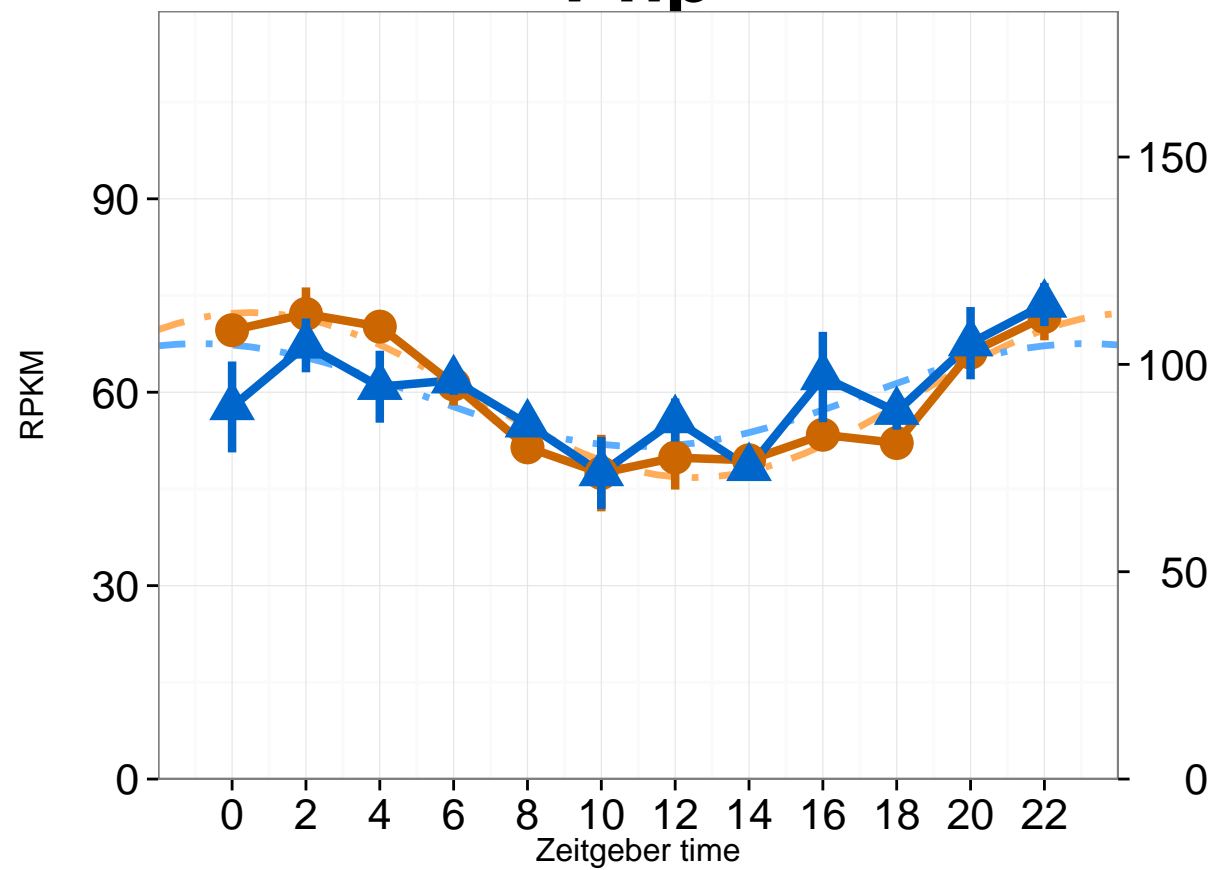

## Pnp

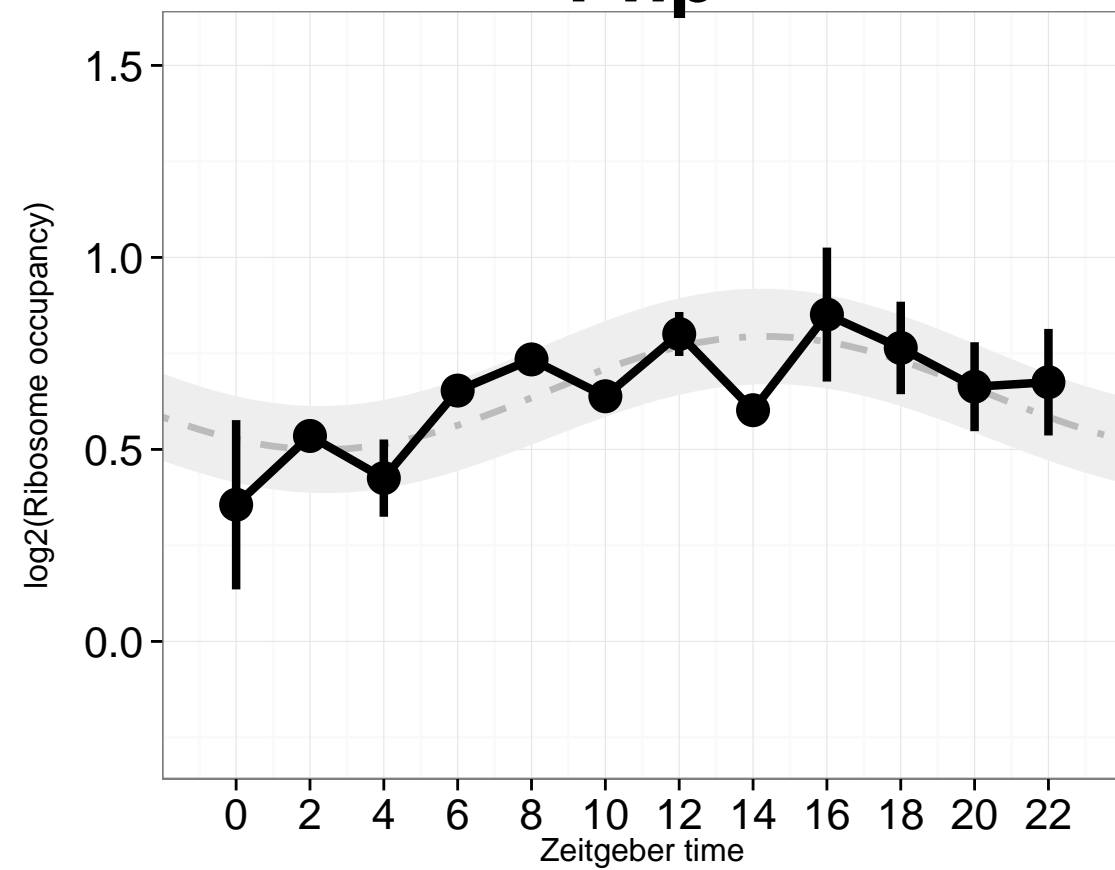

Supplement: Supplementary file 2260 [file 1]

## Usp7

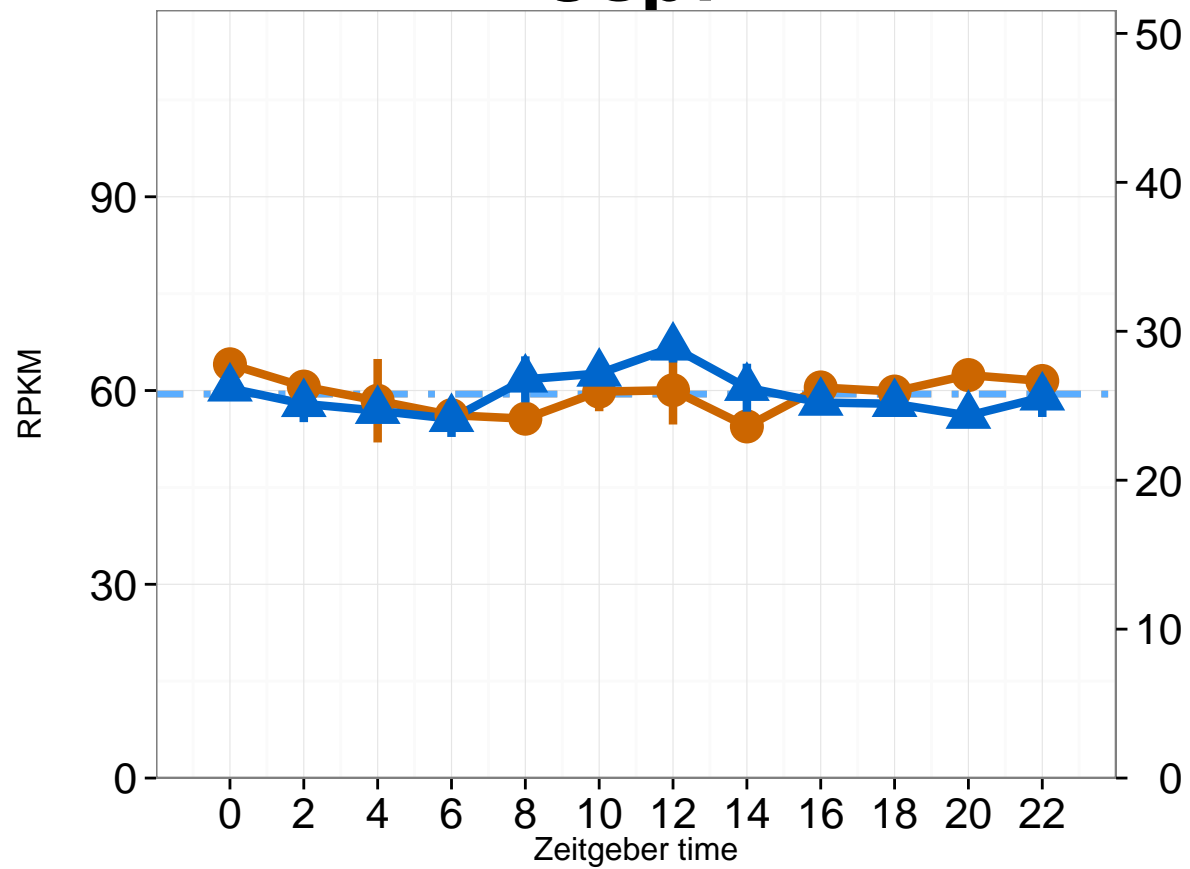

## Usp7

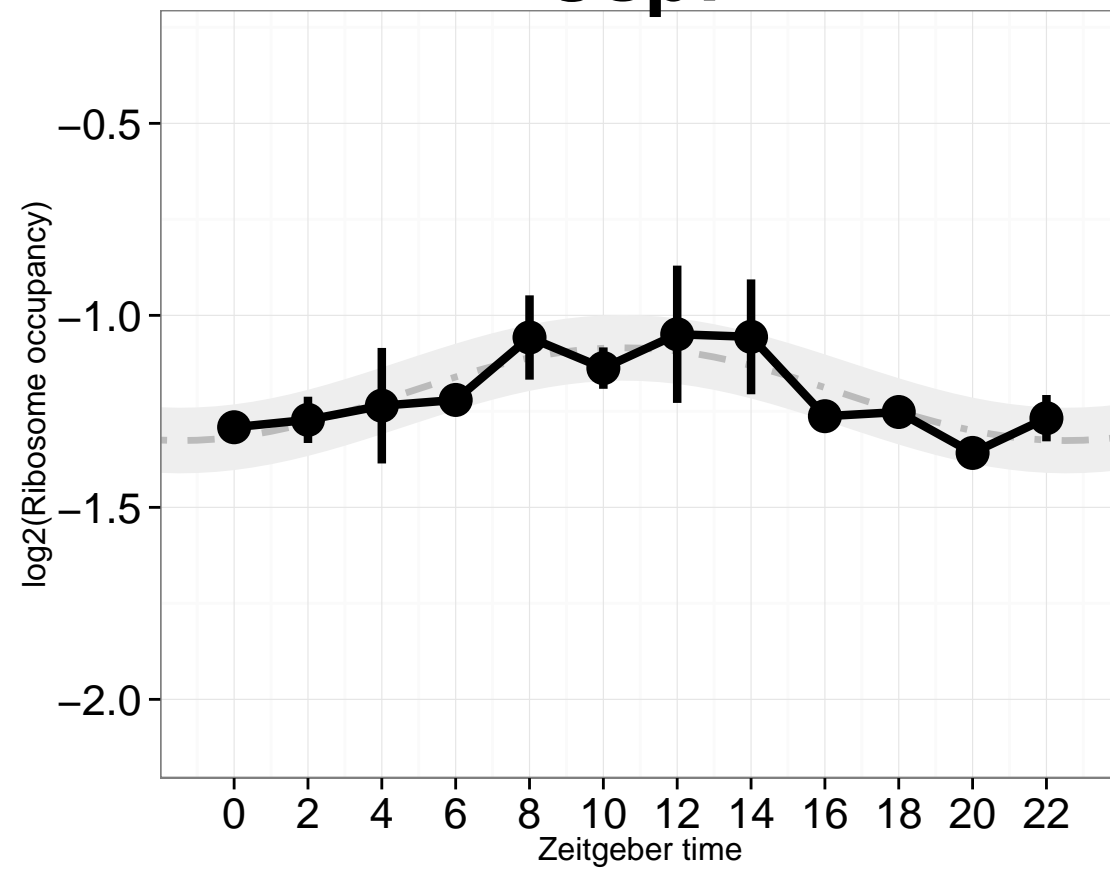

Supplement: Supplementary file 2261 [file 1]

## Crk

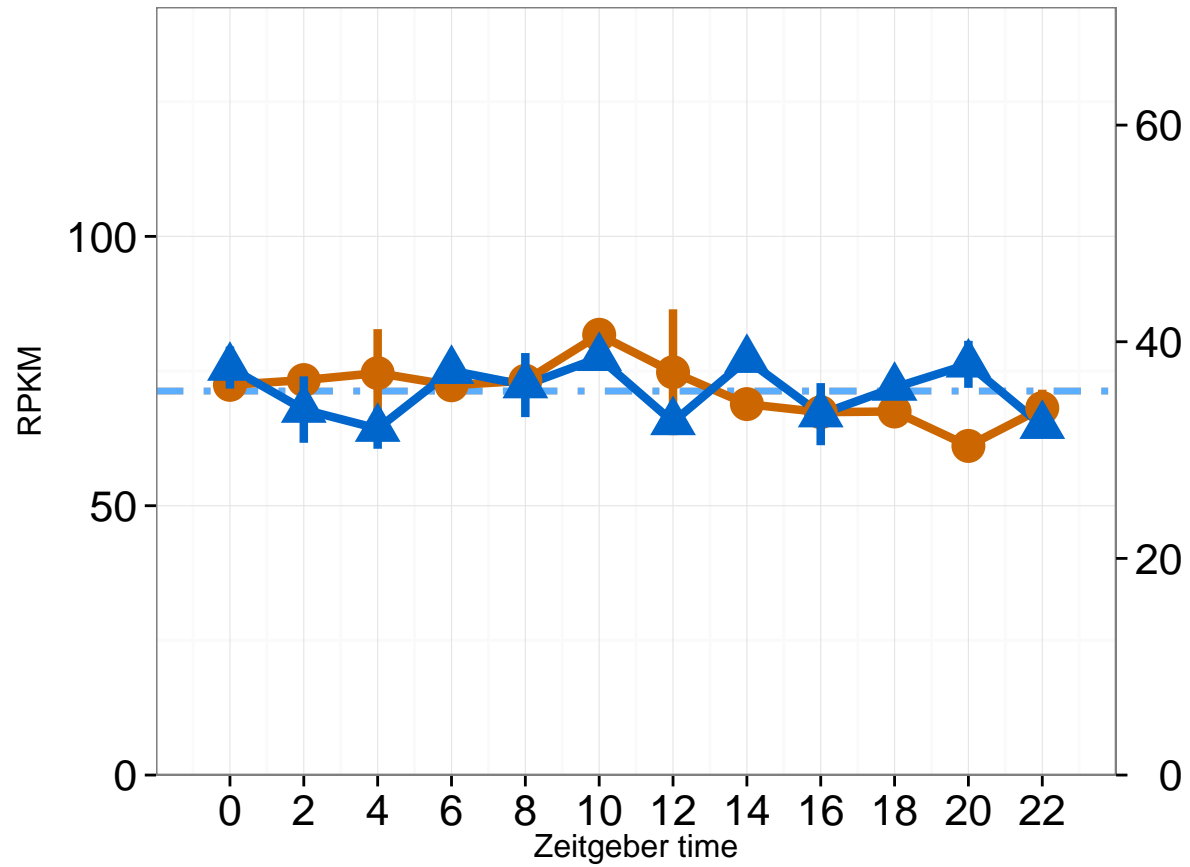

## Crk

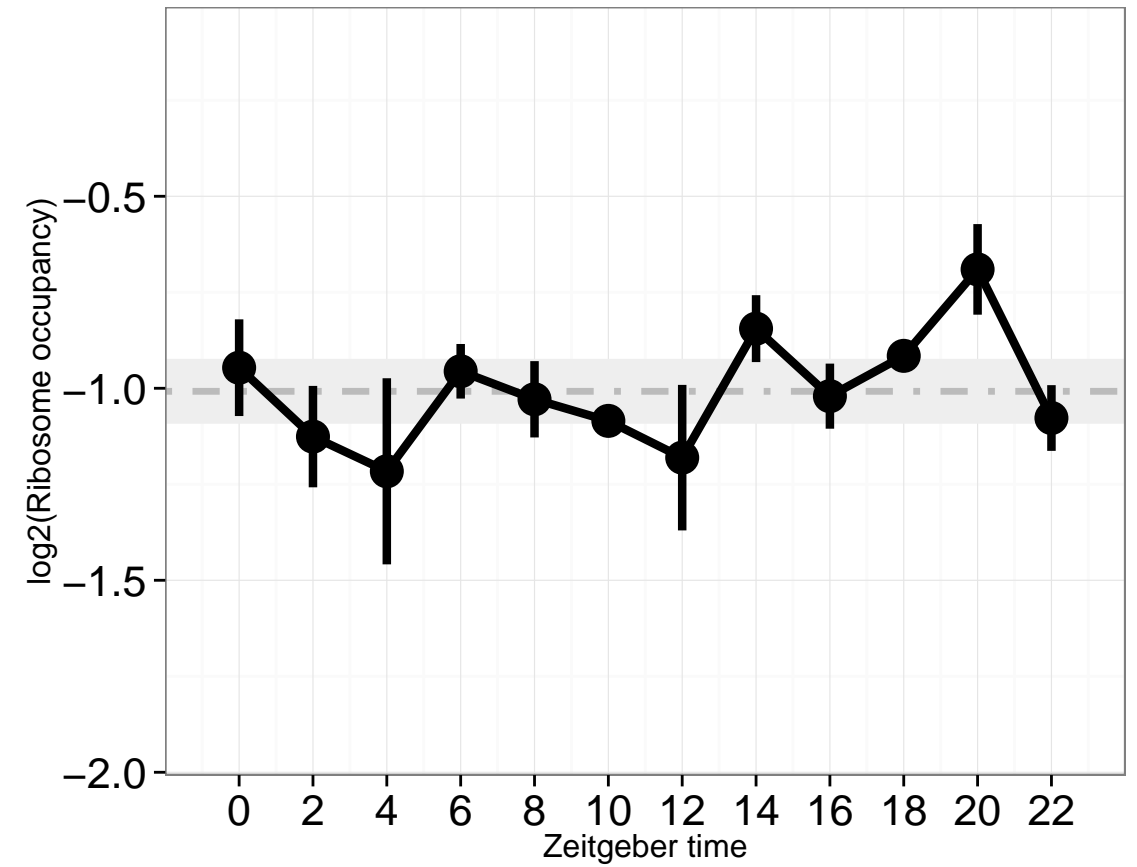

Supplement: Supplementary file 2262 [file 1]

## Acbd3

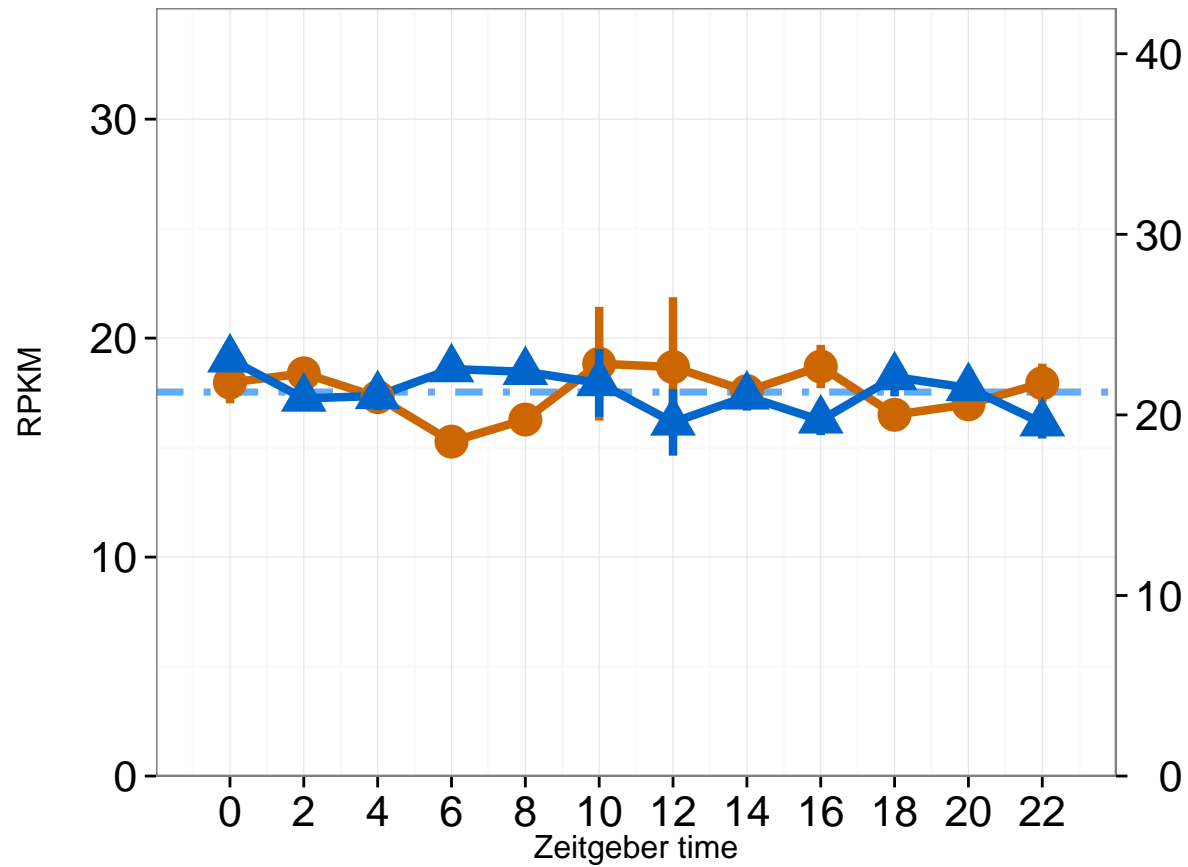

## Acbd3

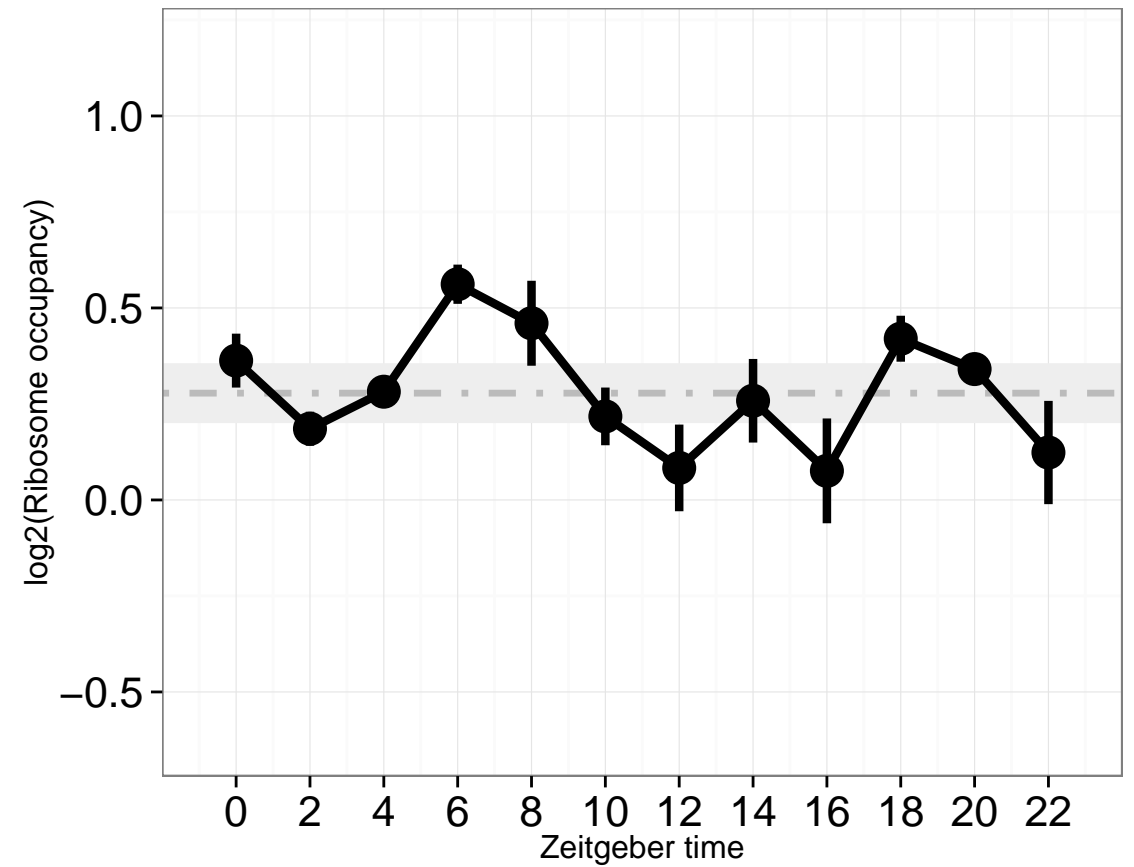

Supplement: Supplementary file 2263 [file 1]

## Sorbs3

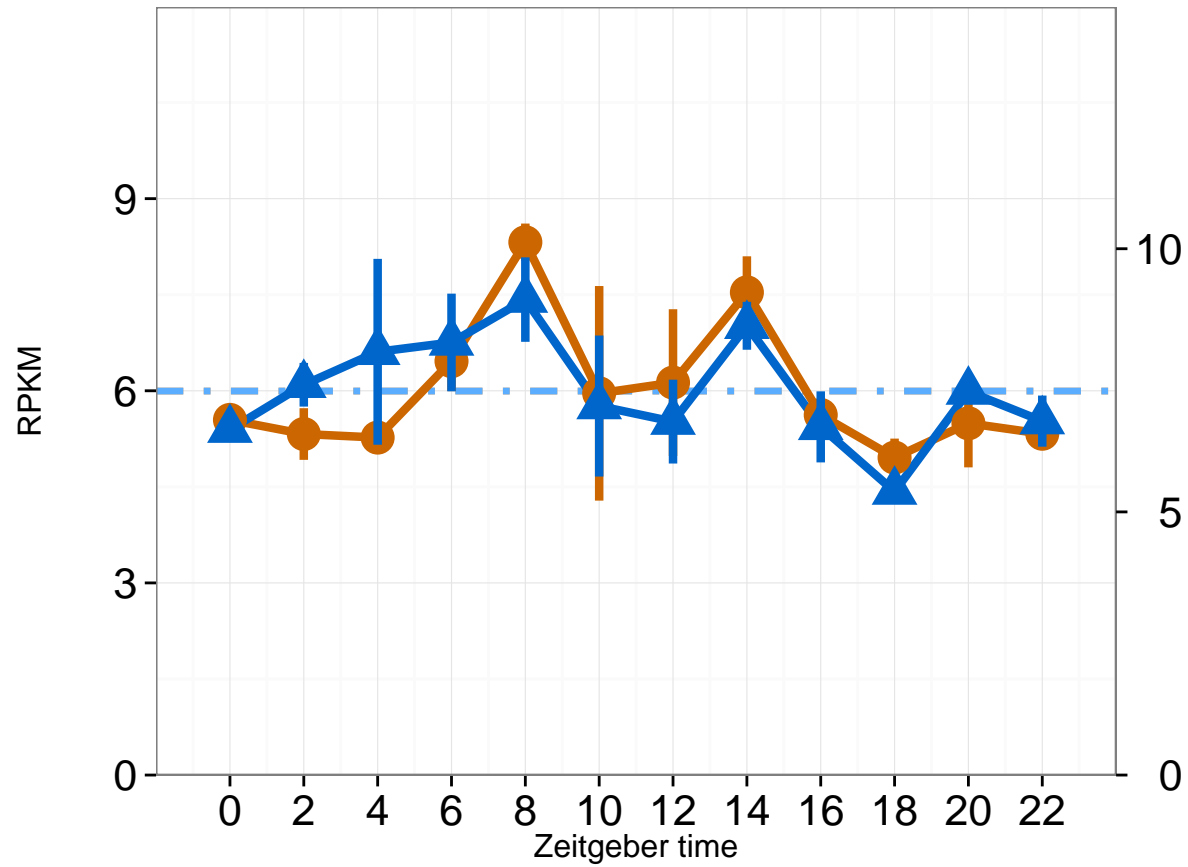

## Sorbs3

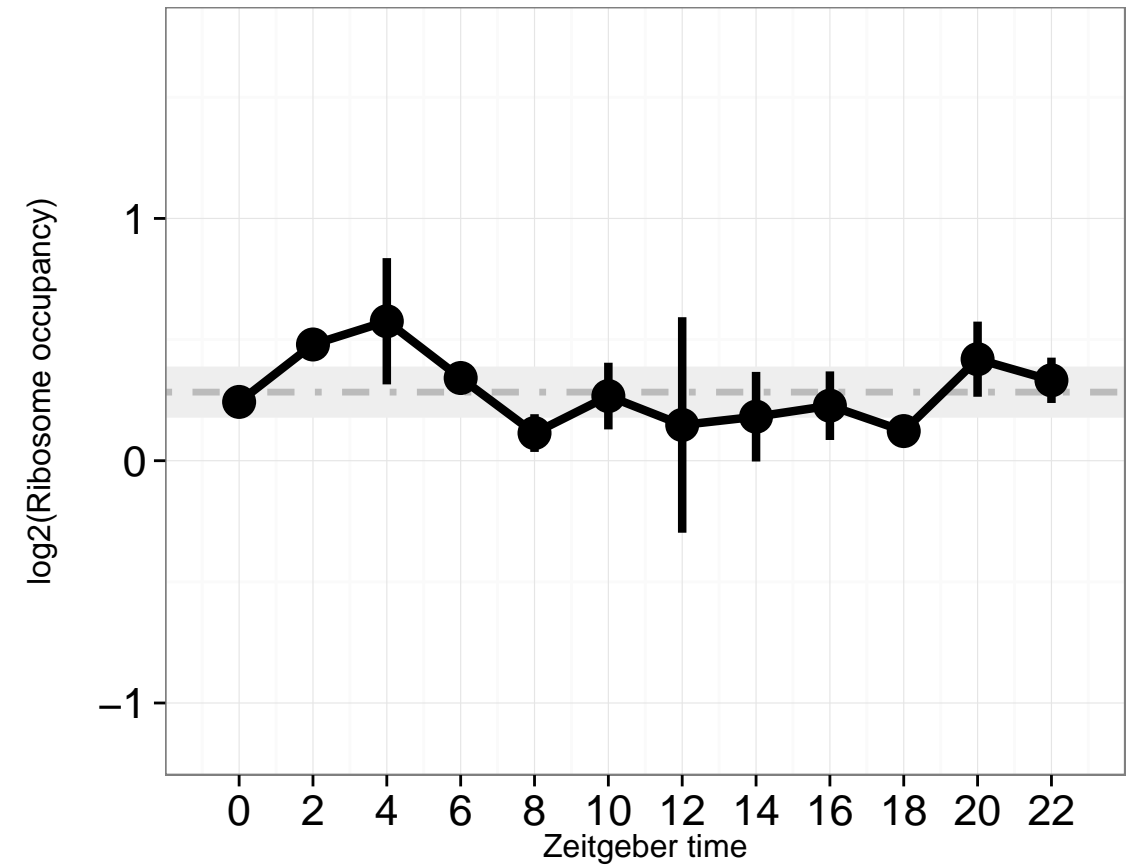

Supplement: Supplementary file 2264 [file 1]

## Naalad2

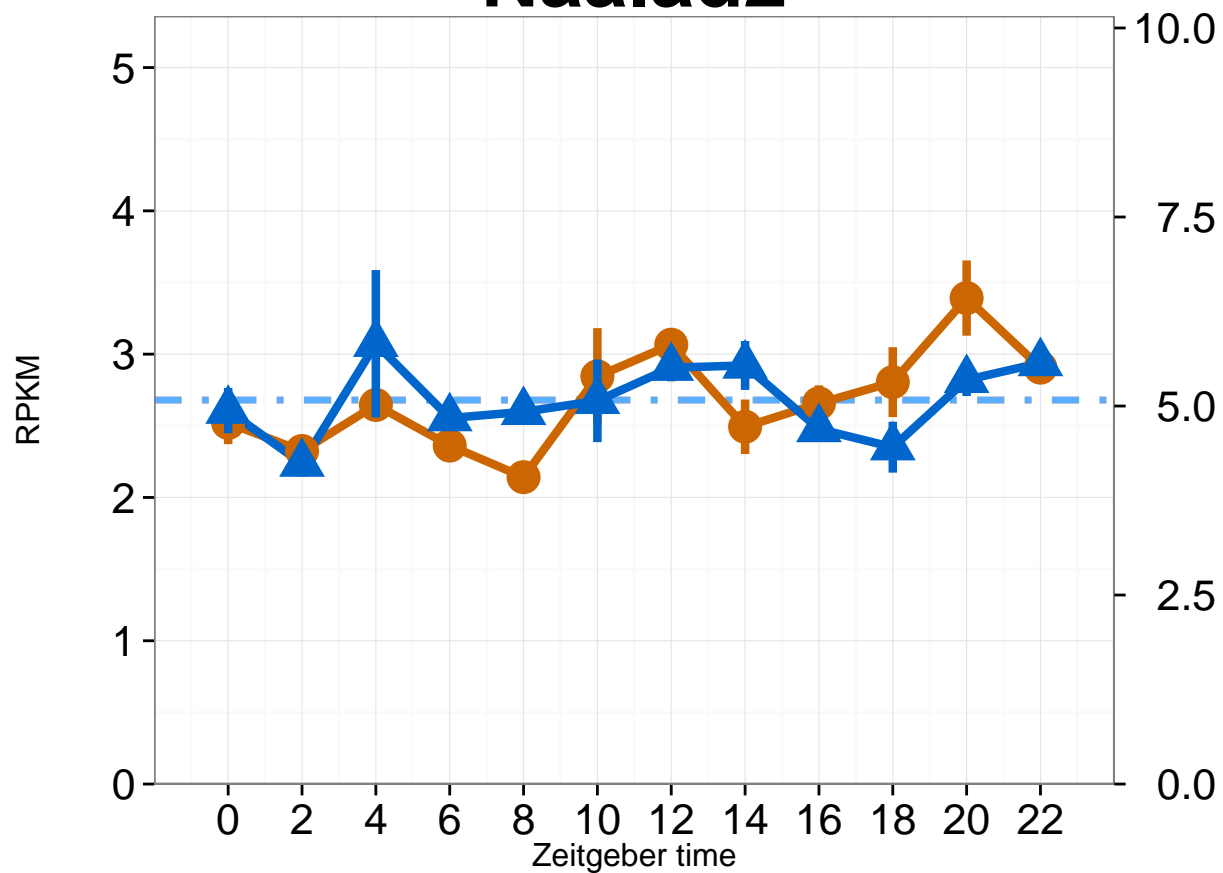

## Naalad2

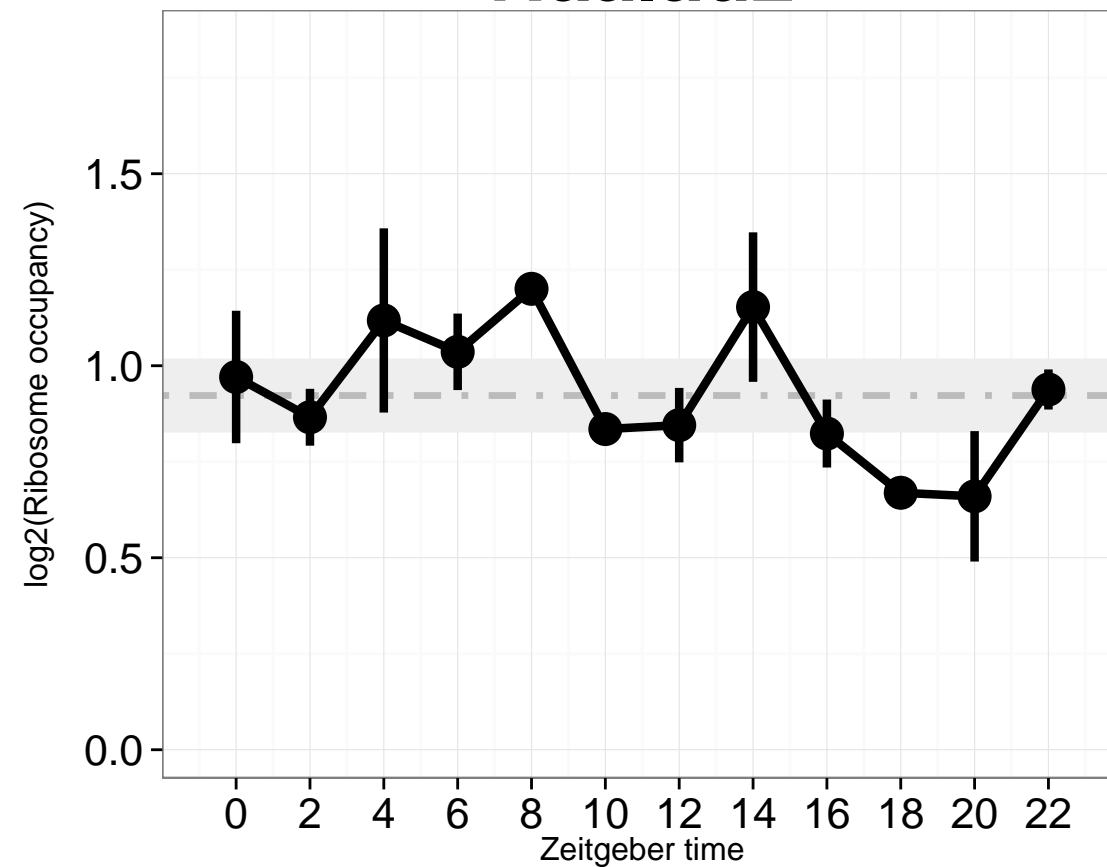

Supplement: Supplementary file 2265 [file 1]

## Pdilt

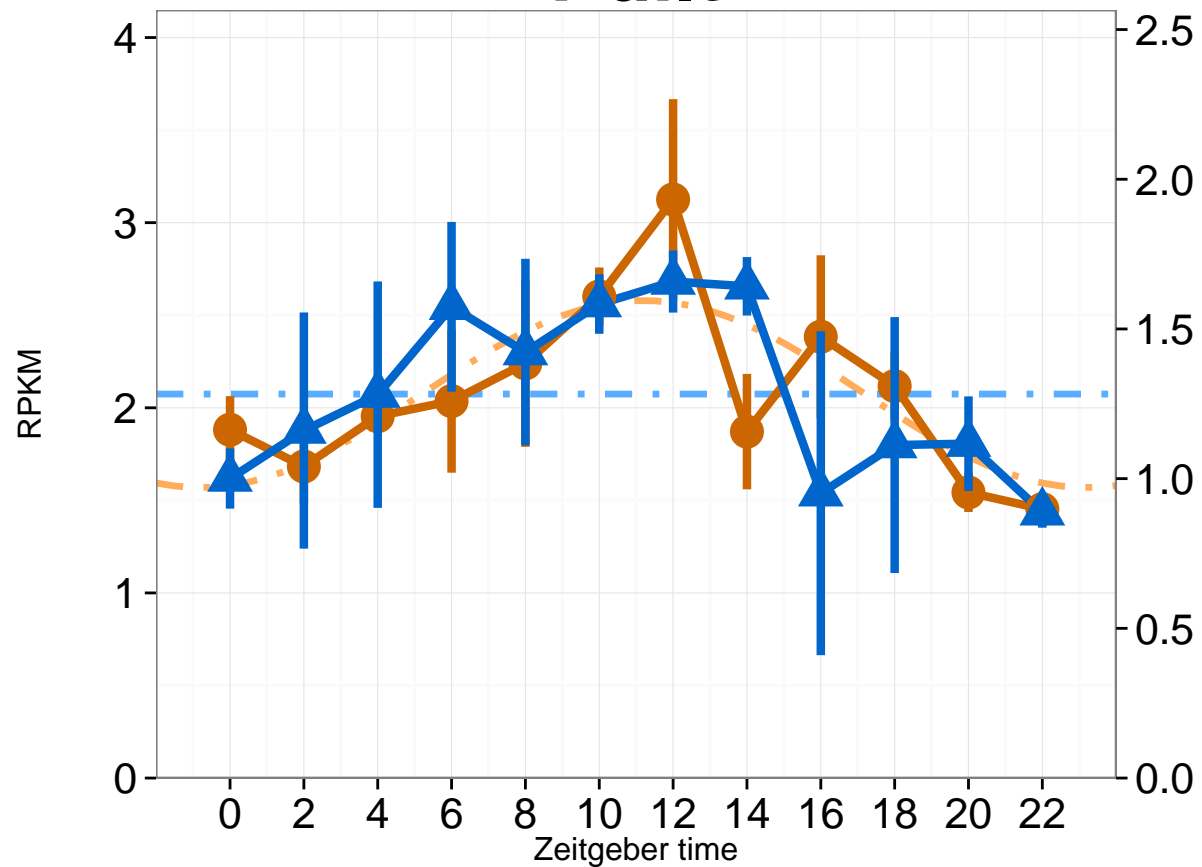

## Pdilt

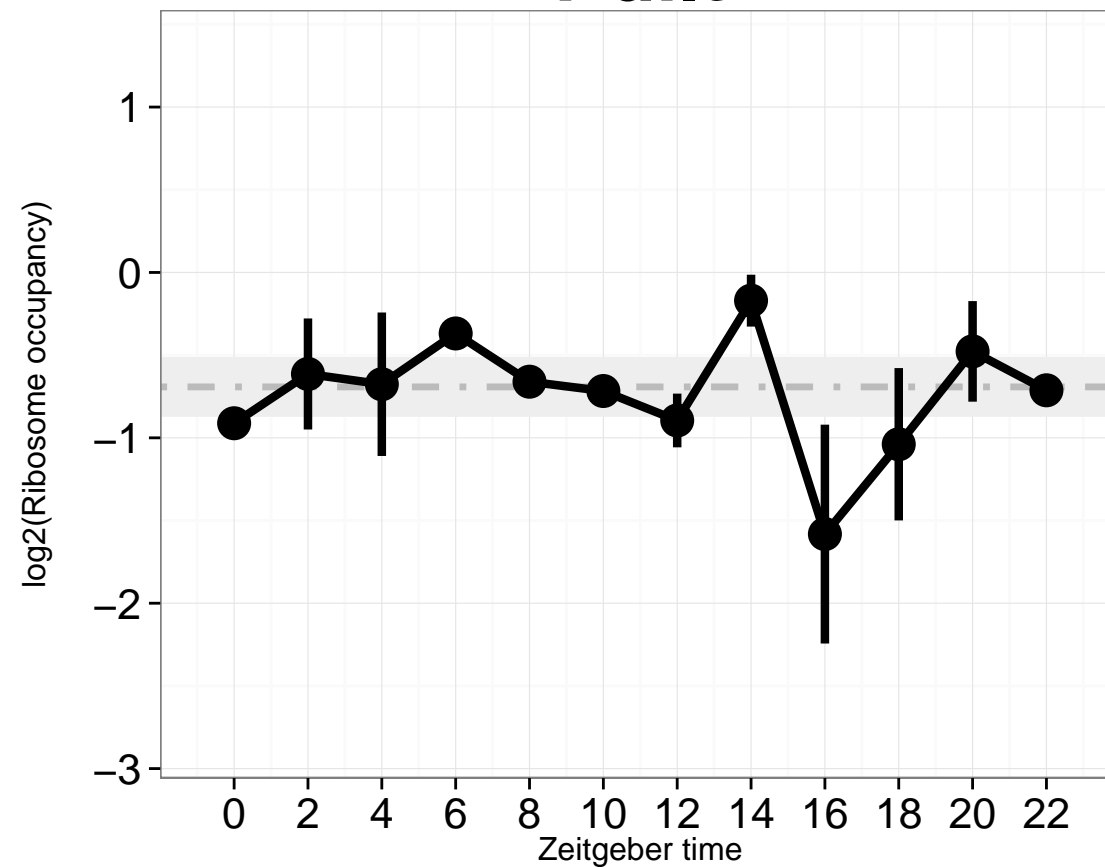

Supplement: Supplementary file 2266 [file 1]

## Cpne2

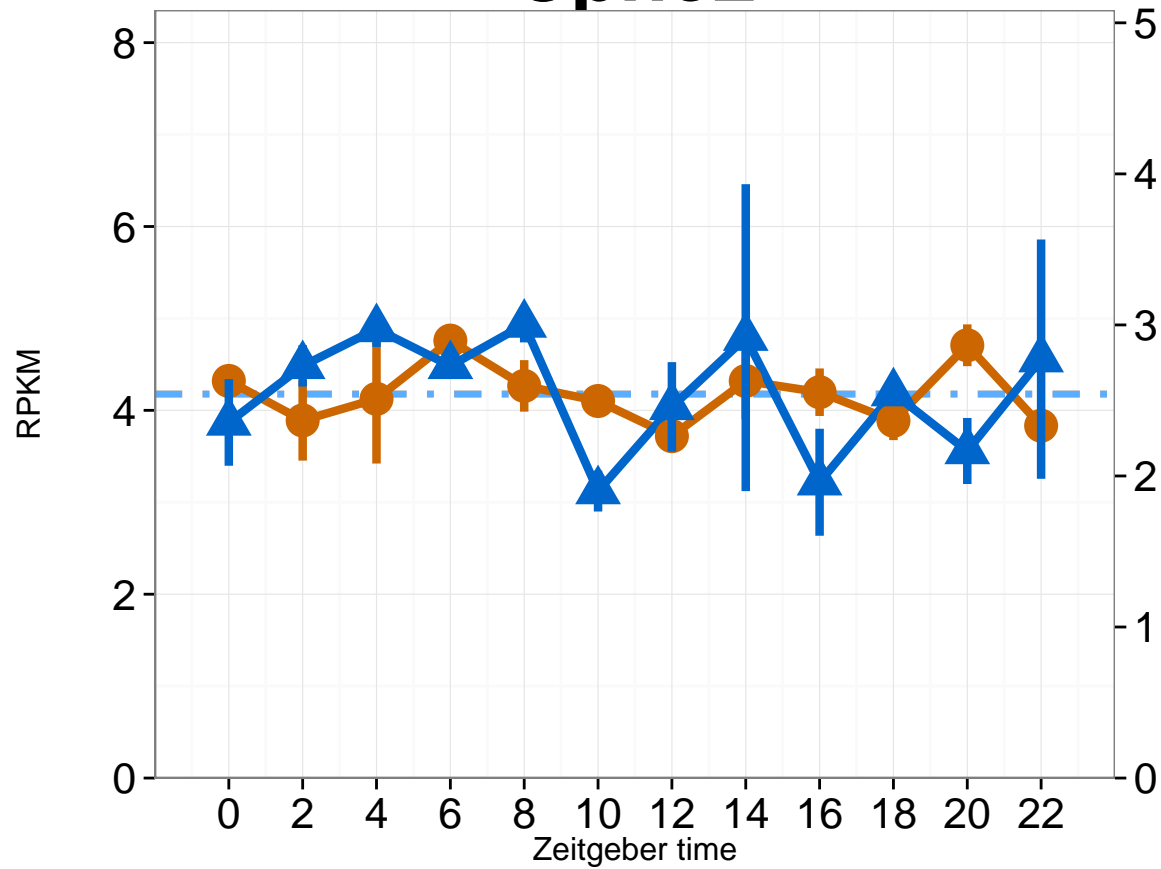

## Cpne2

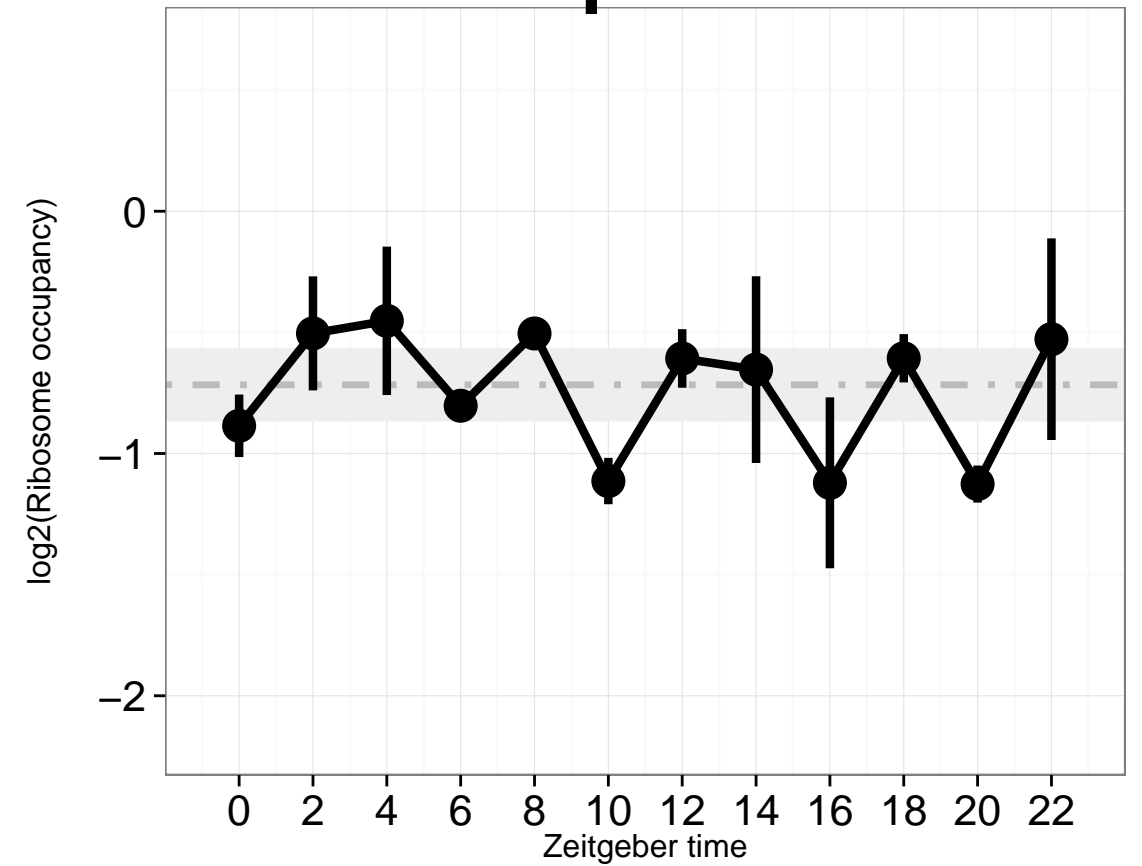

Supplement: Supplementary file 2267 [file 1]

# Trp53bp2

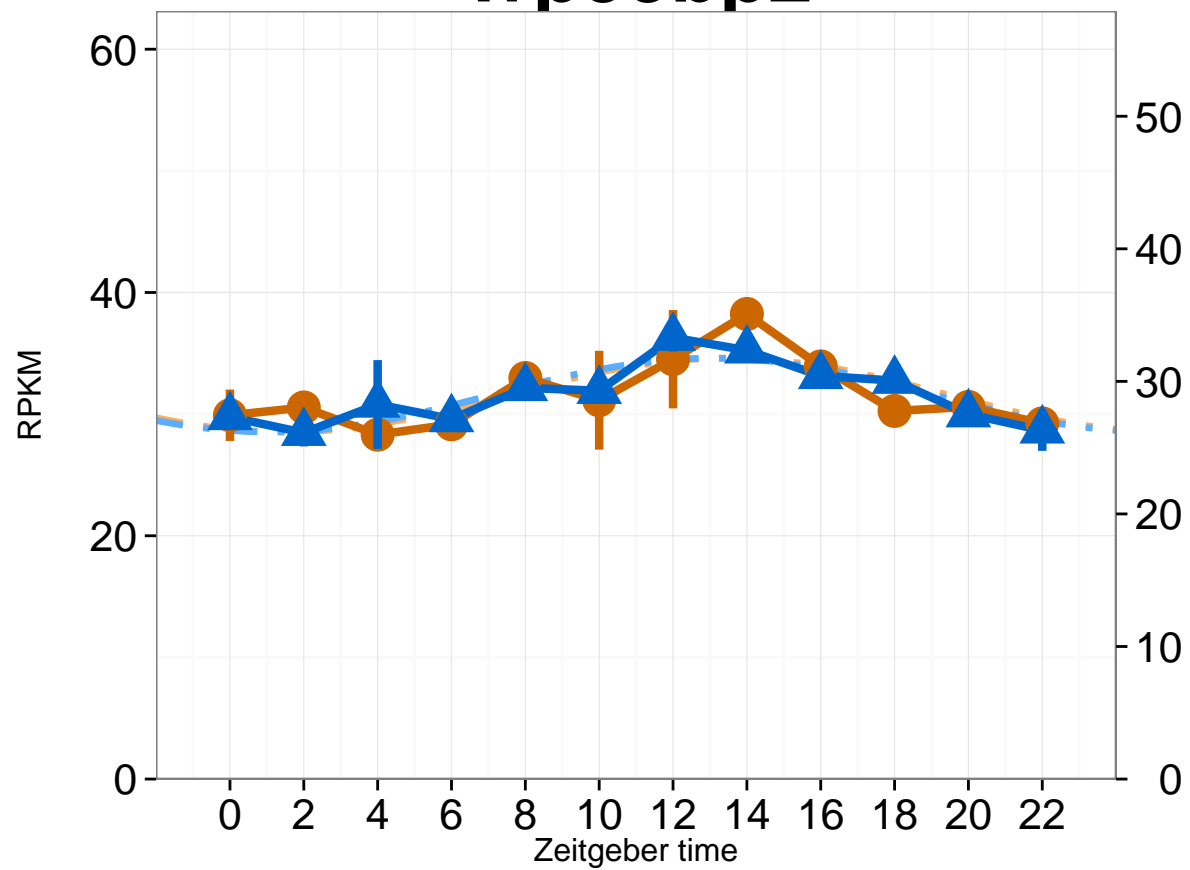

# Trp53bp2

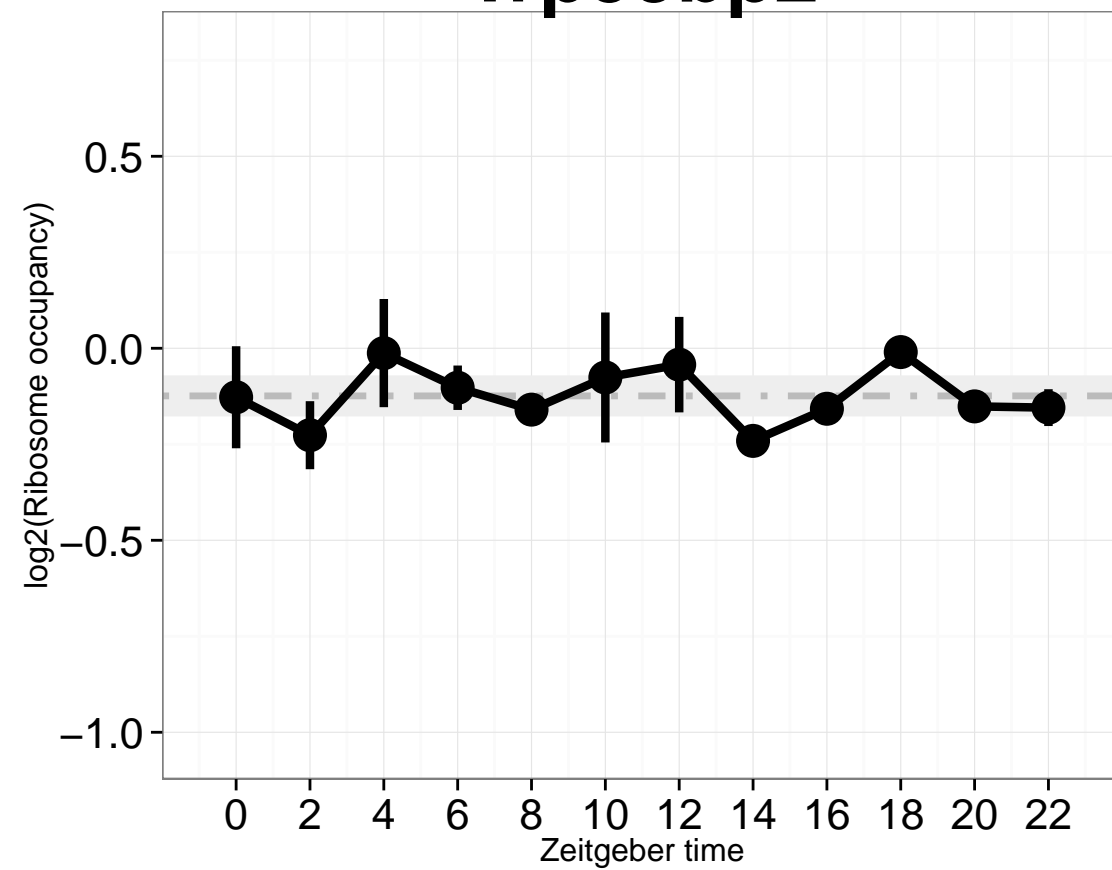

Supplement: Supplementary file 2268 [file 1]

## Cldn2

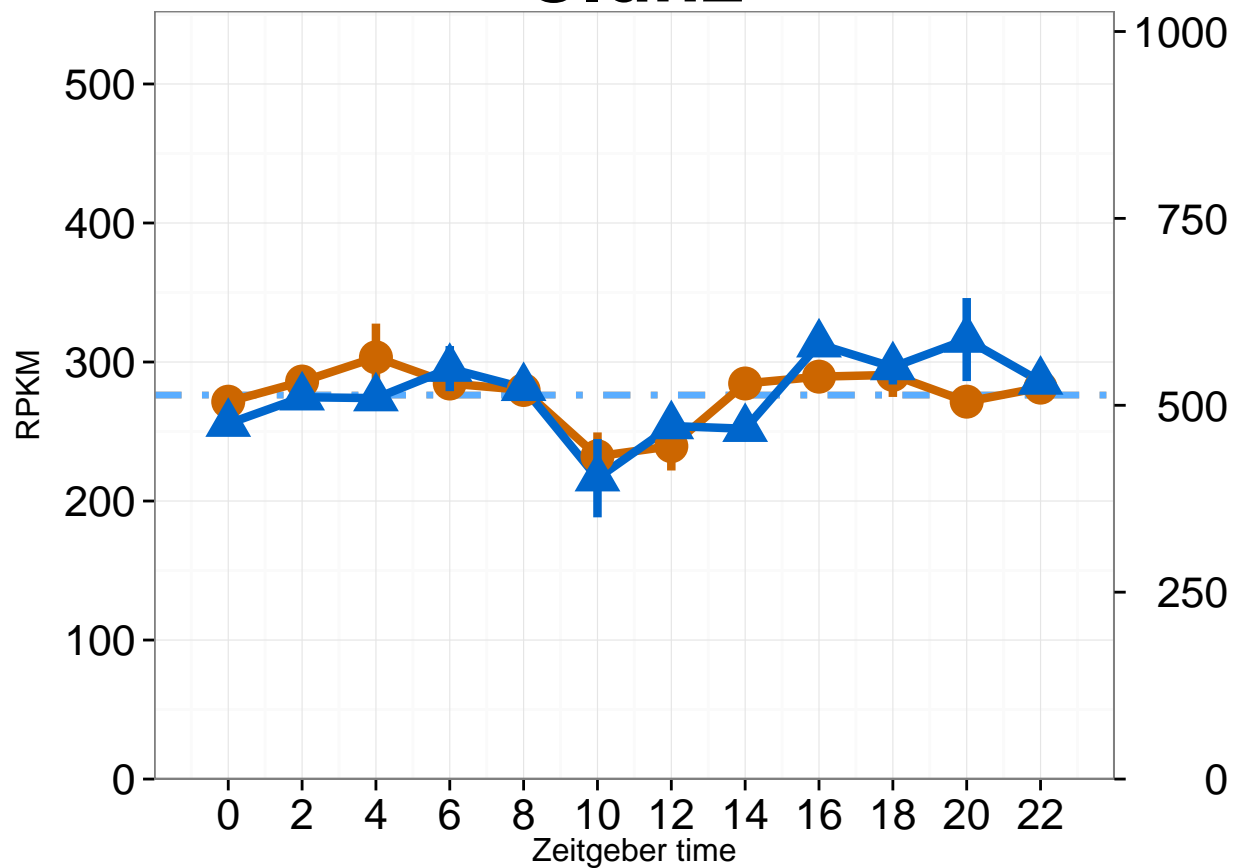

## Cldn2

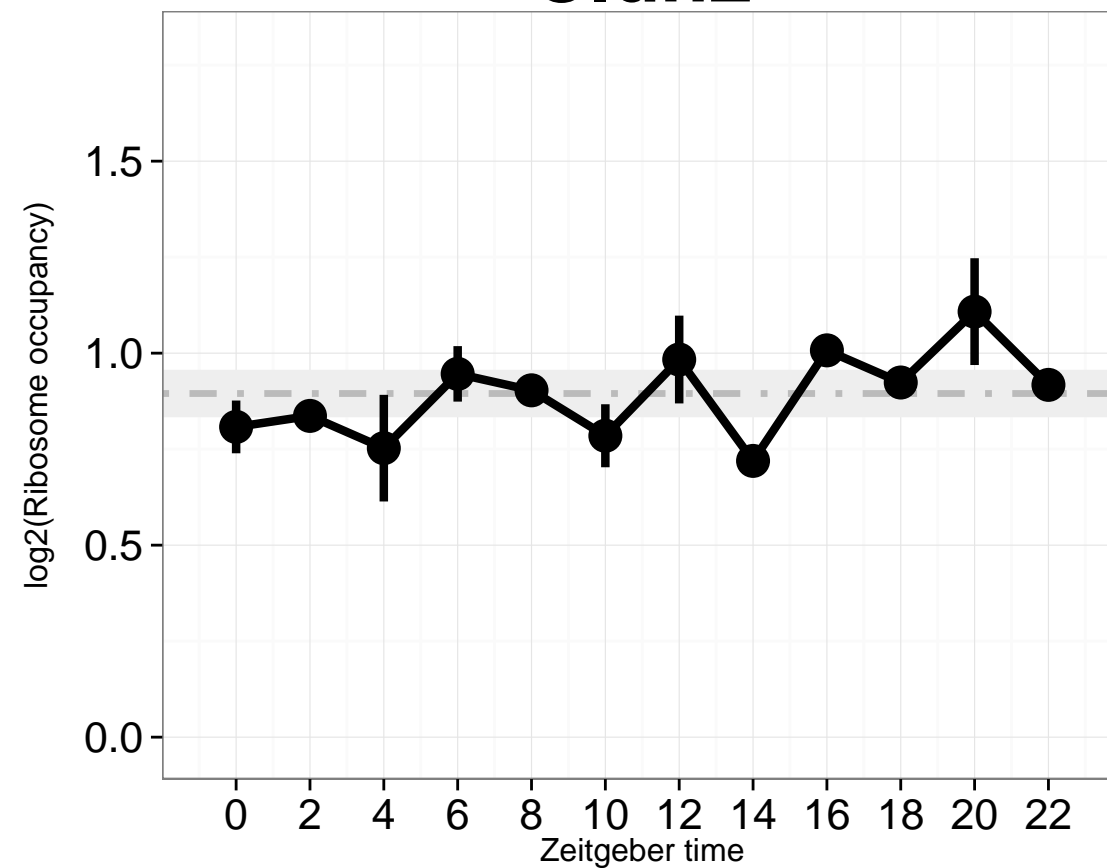

Supplement: Supplementary file 2269 [file 1]

# Vps37c

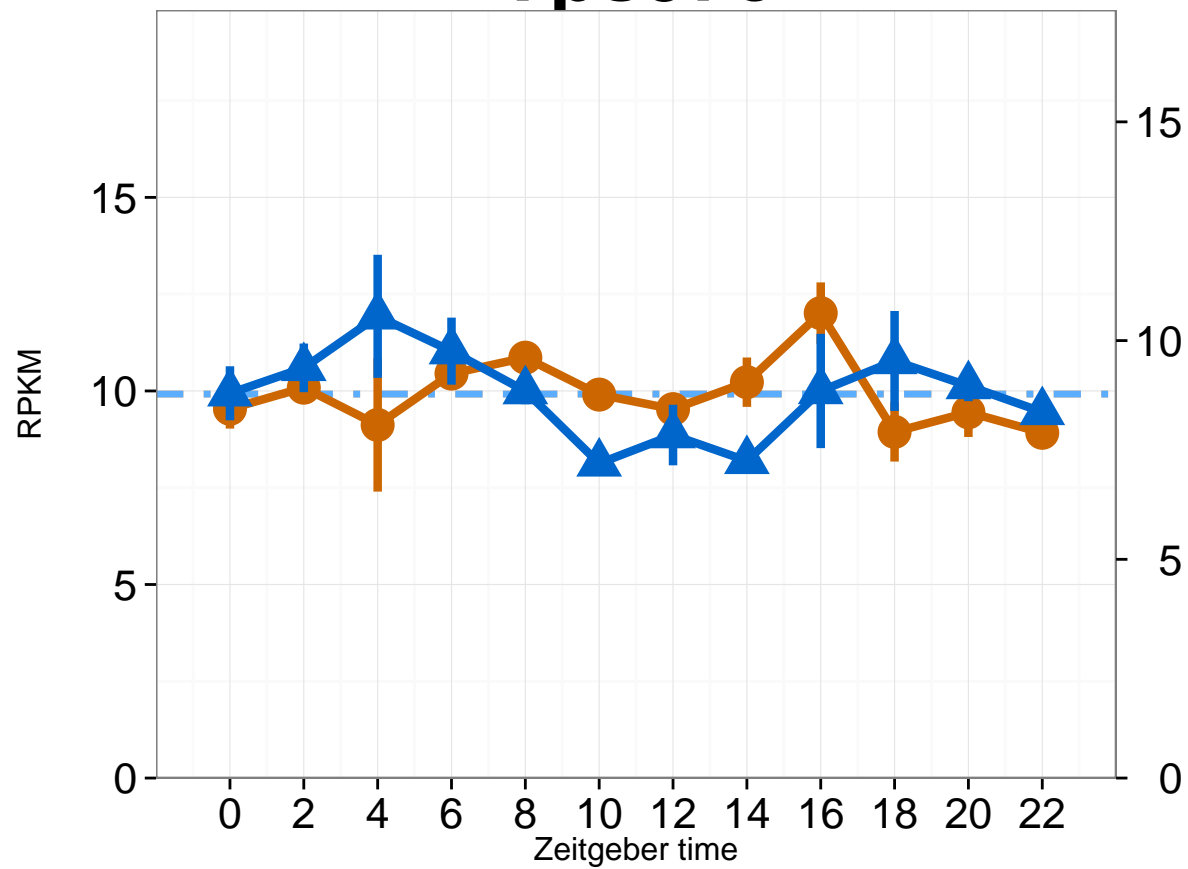

# Vps37c

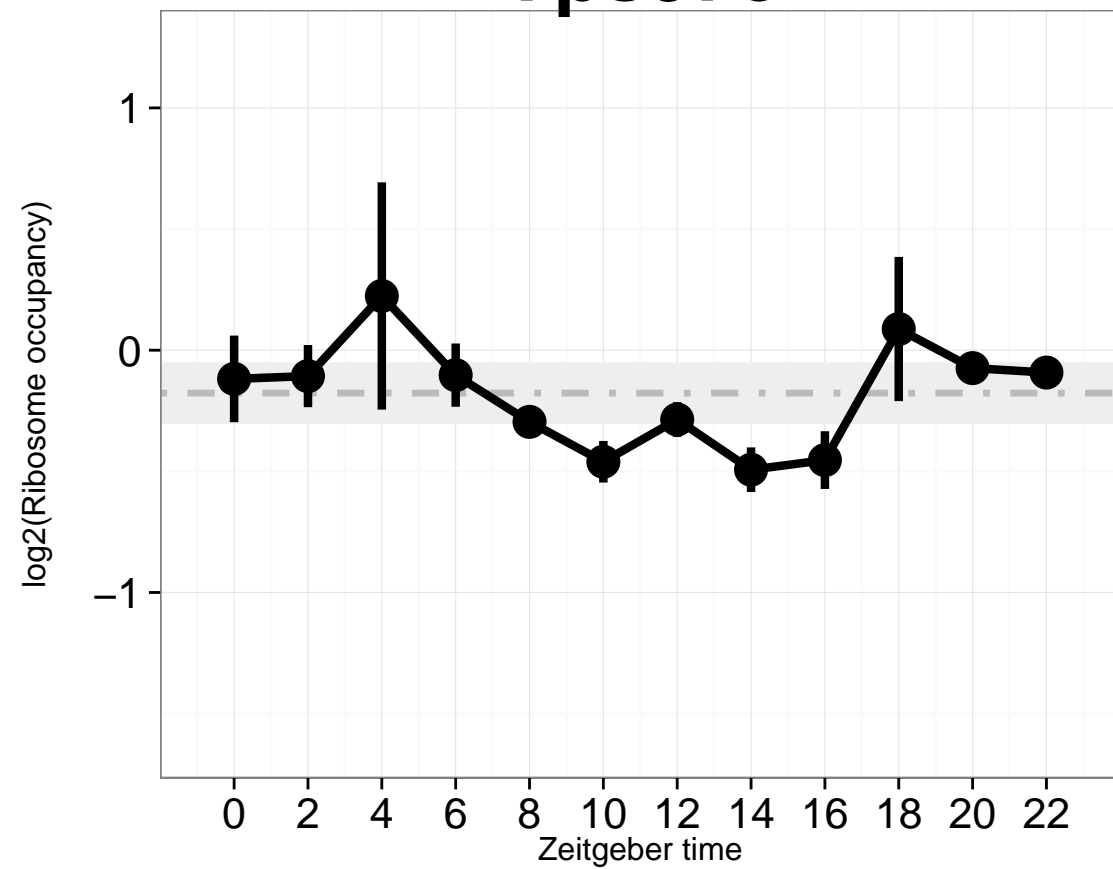

Supplement: Supplementary file 2270 [file 1]

## Lsr

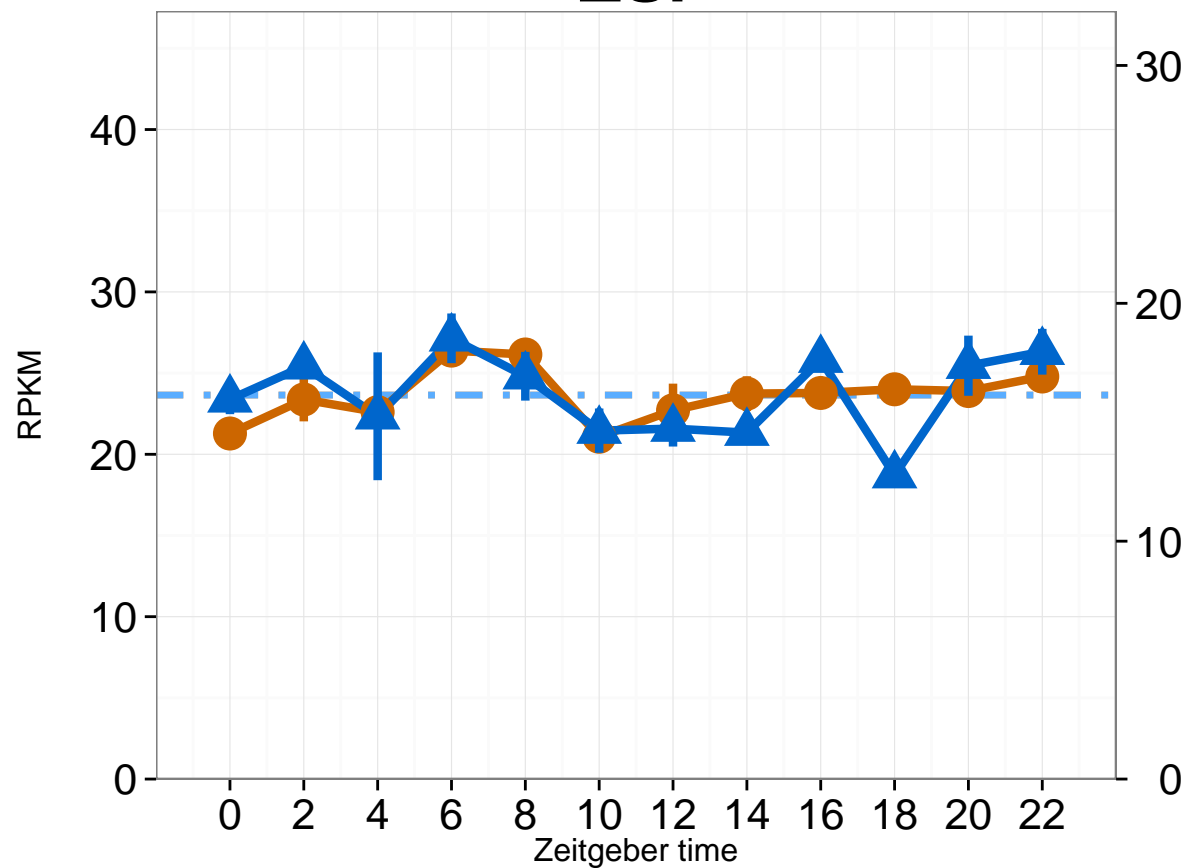

## Lsr

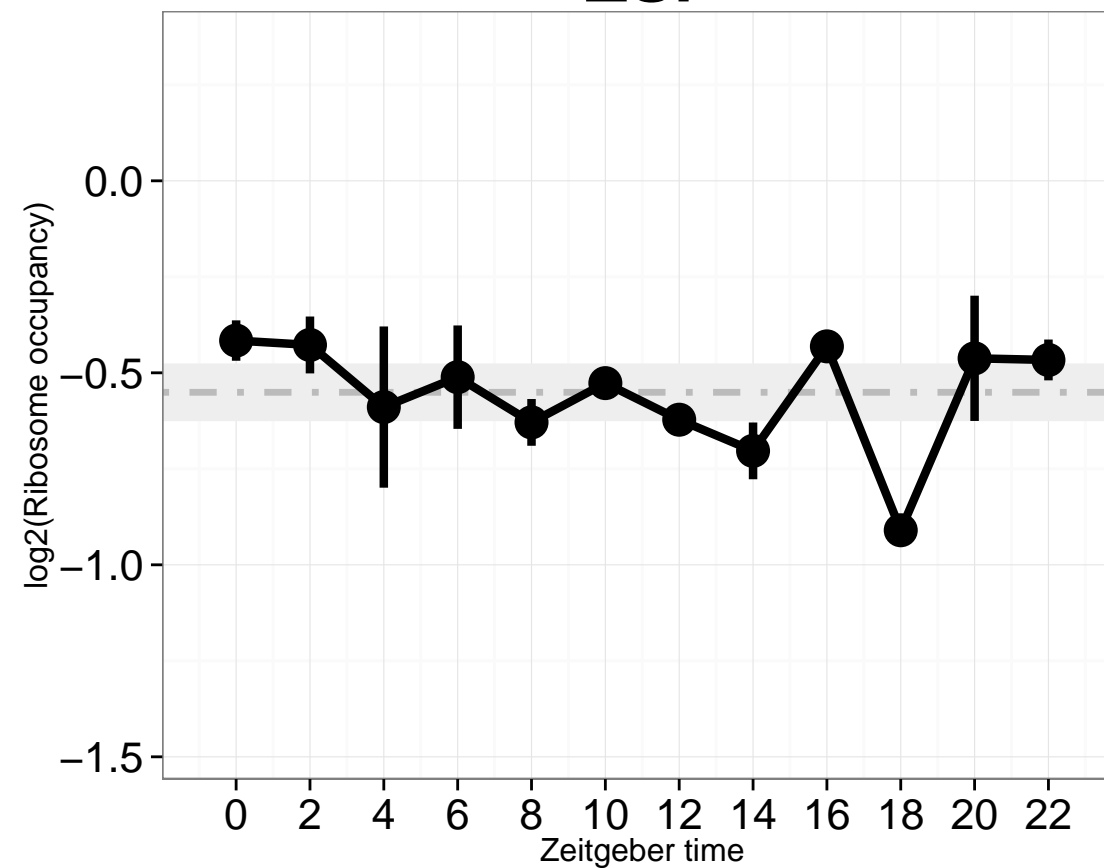

Supplement: Supplementary file 2271 [file 1]

## Hectd1

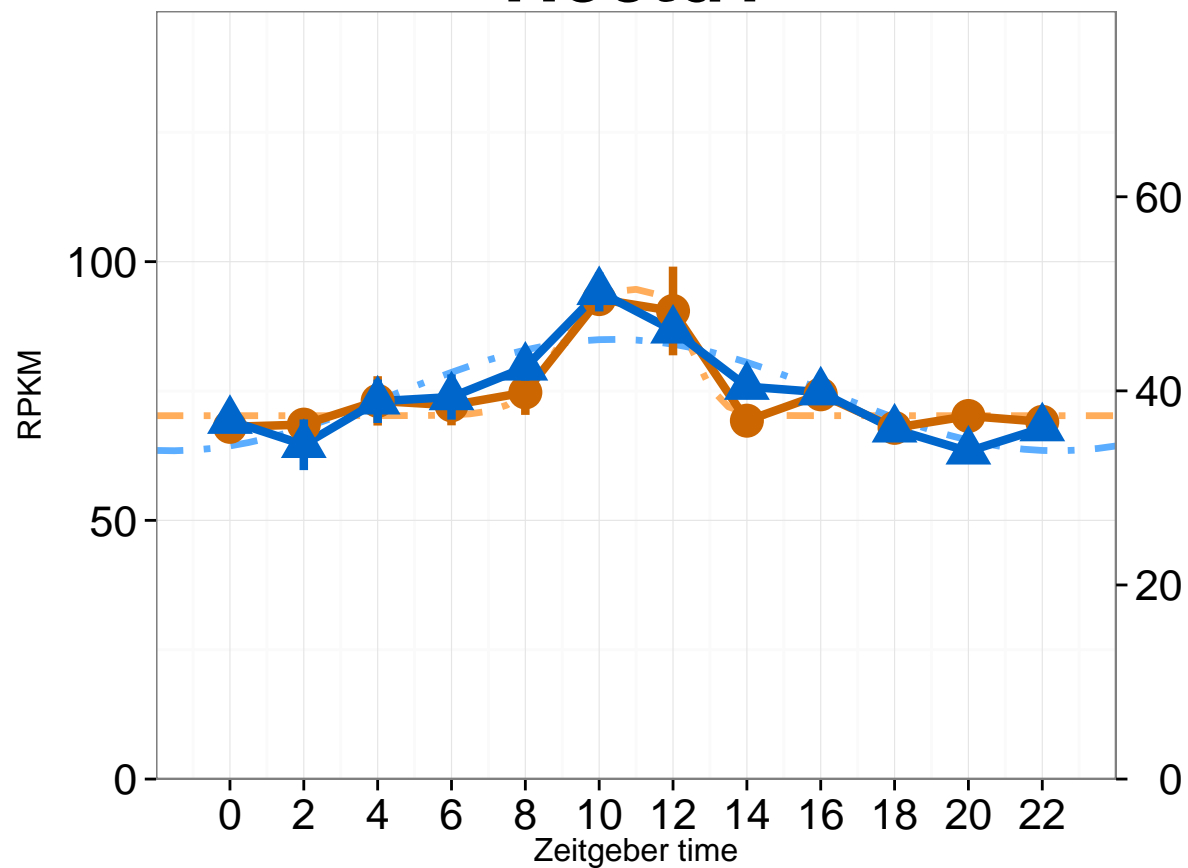

## Hectd1

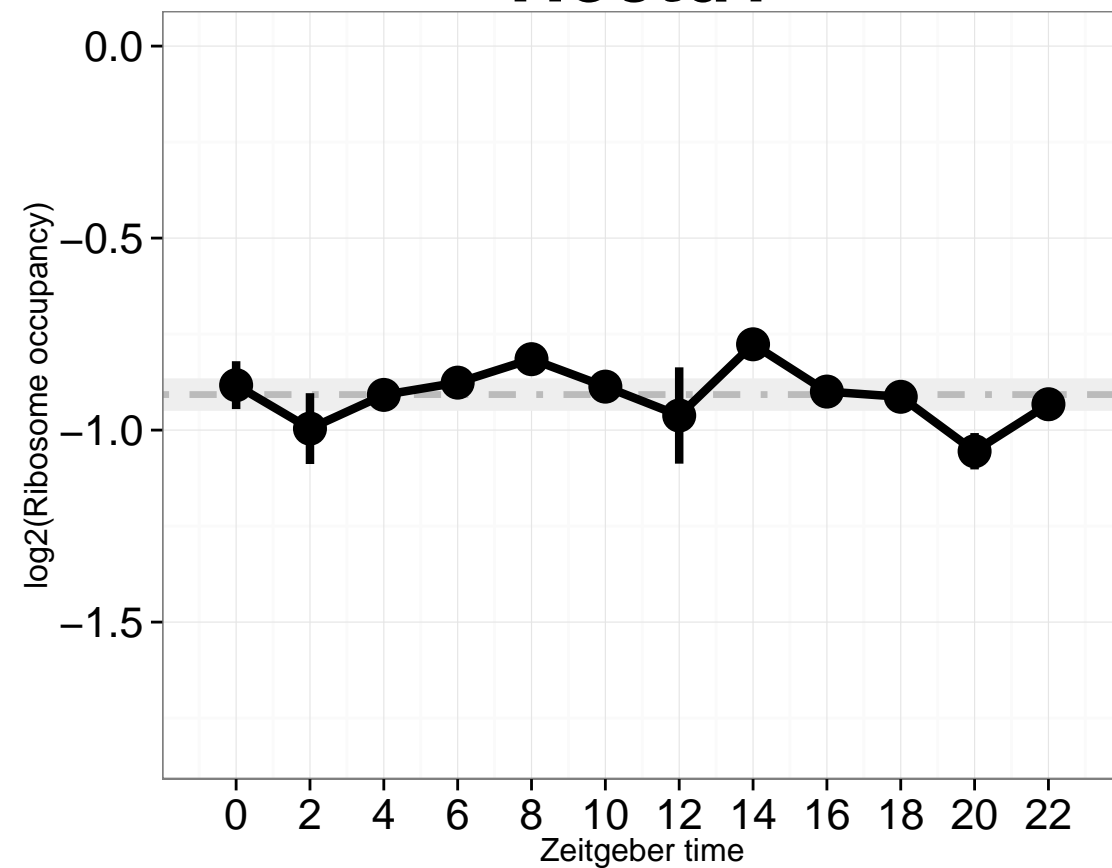

Supplement: Supplementary file 2272 [file 1]

## Slc25a21

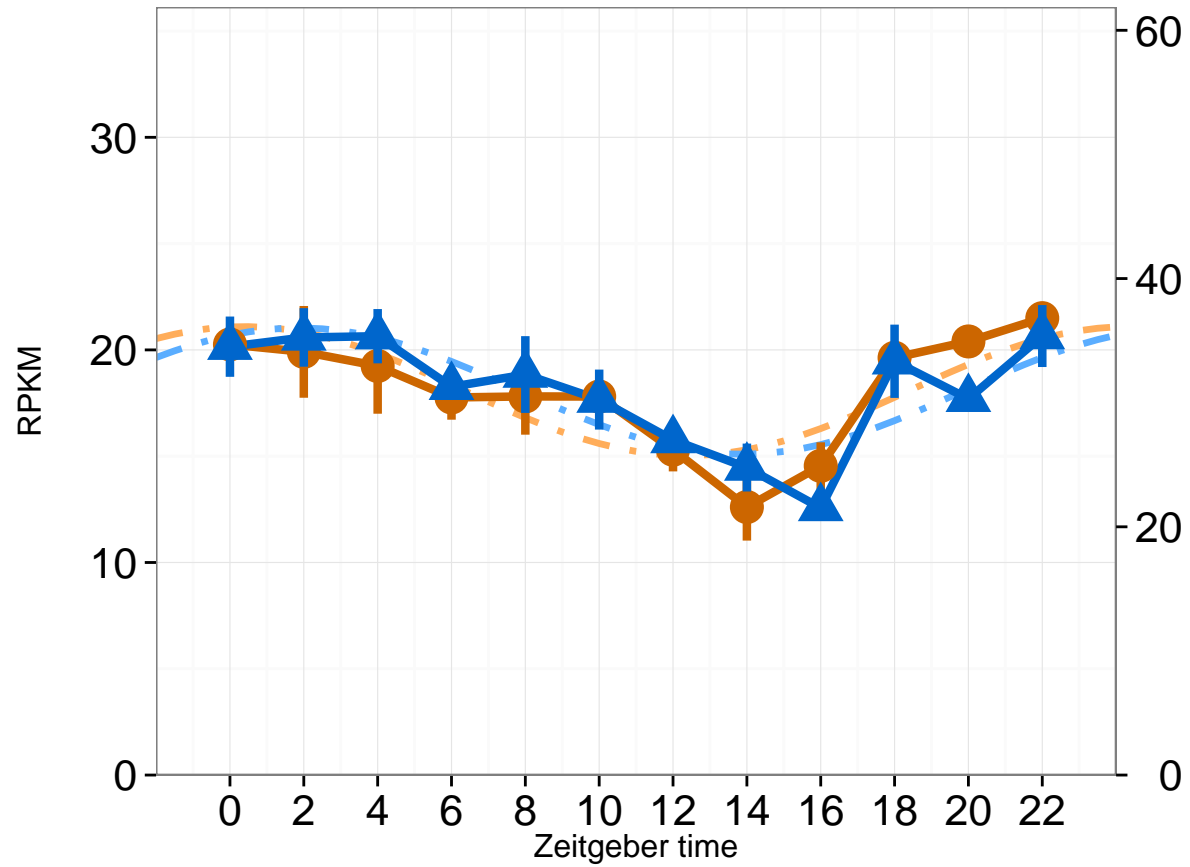

## Slc25a21

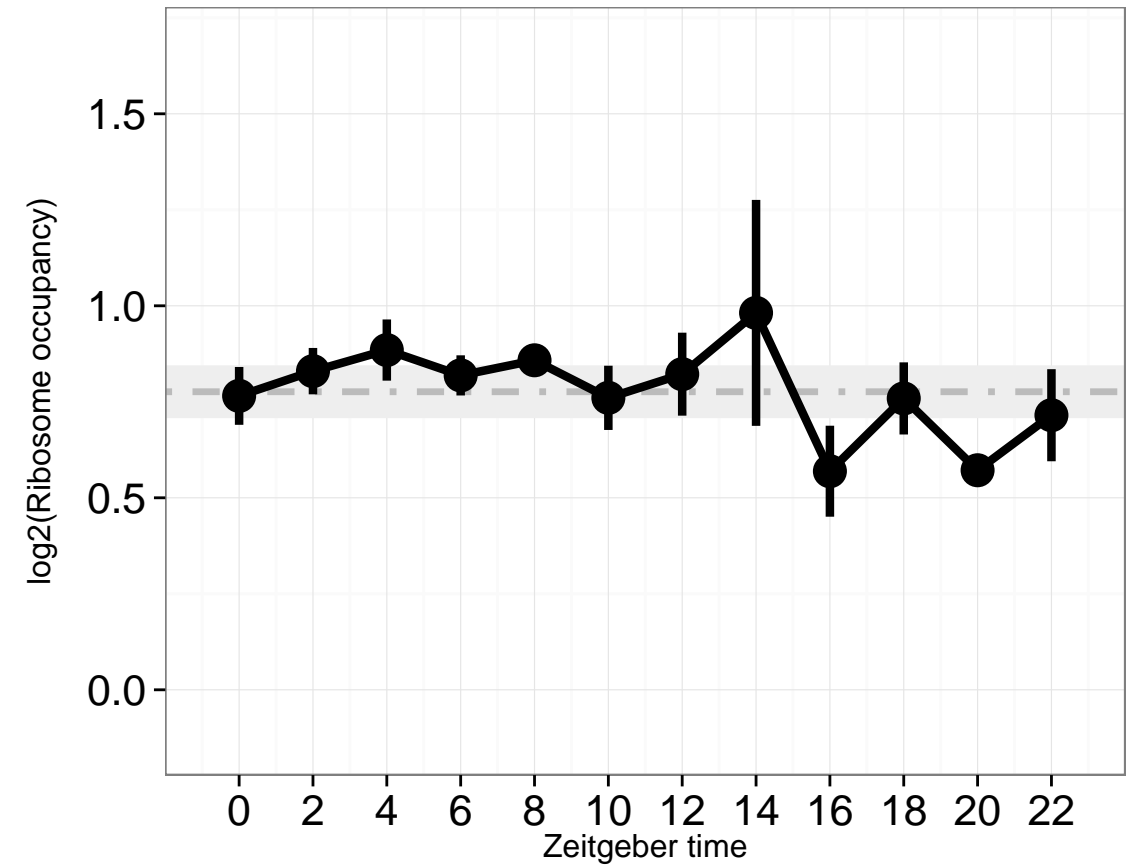

Supplement: Supplementary file 2273 [file 1]

## Cd44

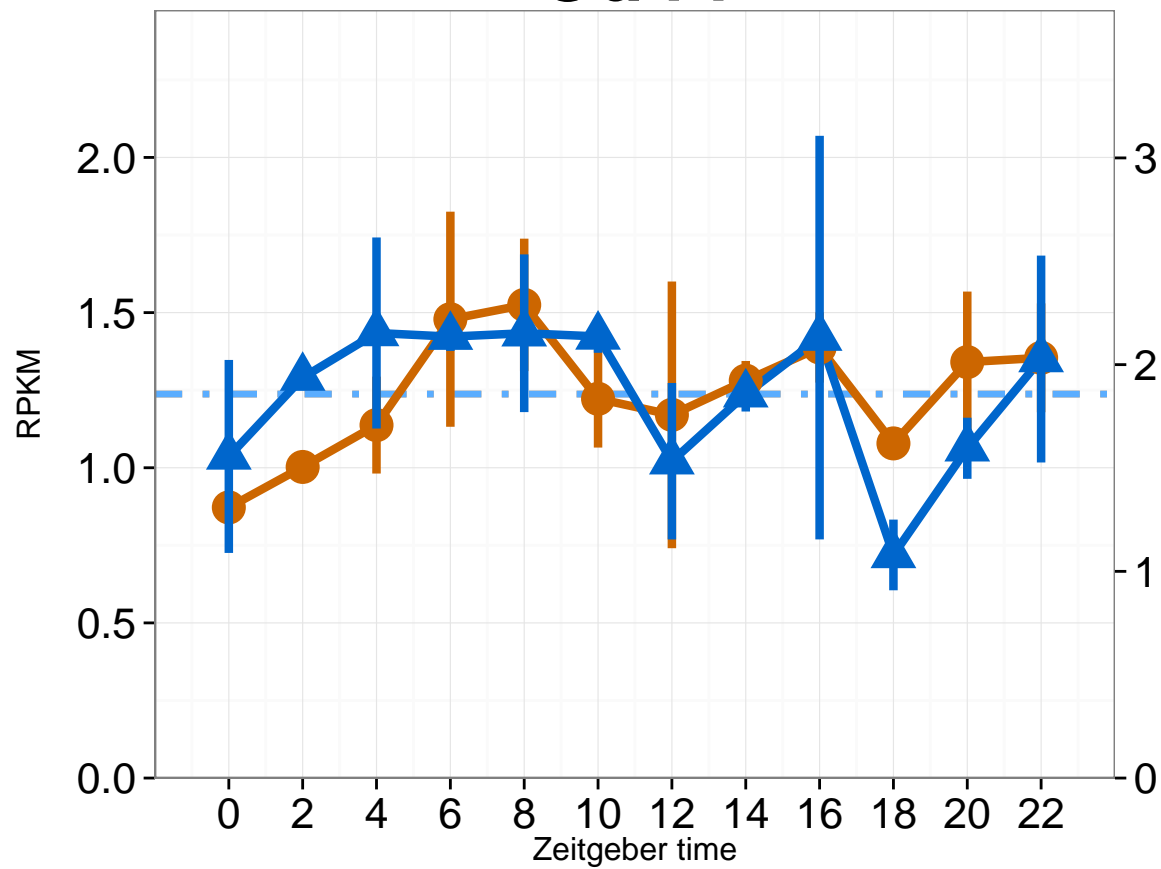

## Cd44

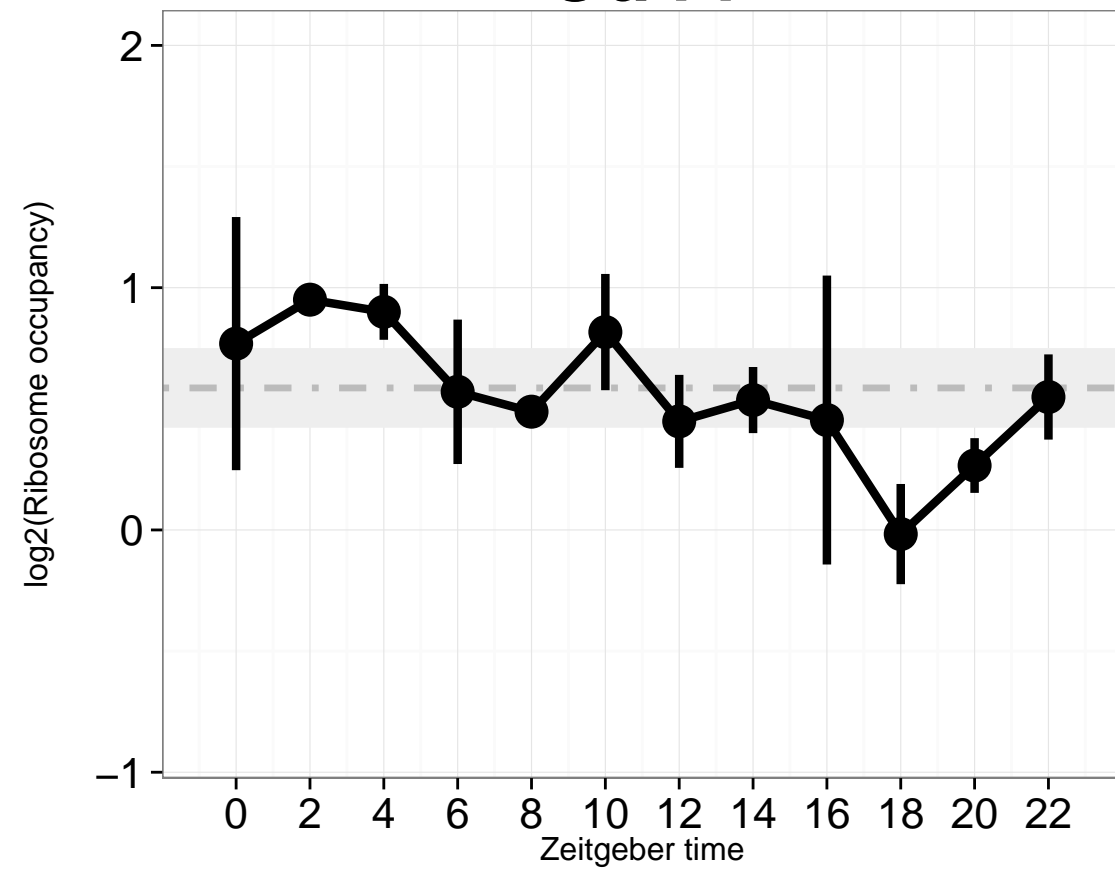

Supplement: Supplementary file 2274 [file 1]

## Psmc4

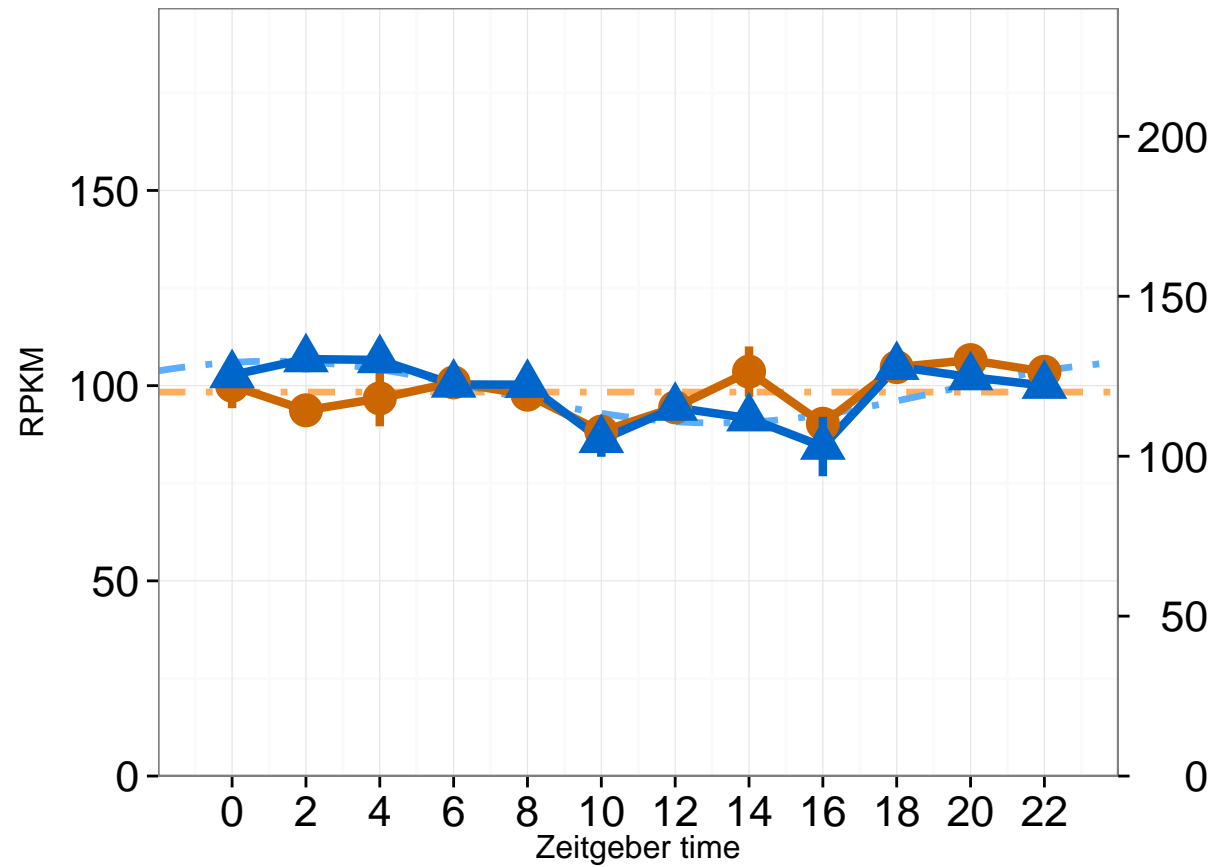

## Psmc4

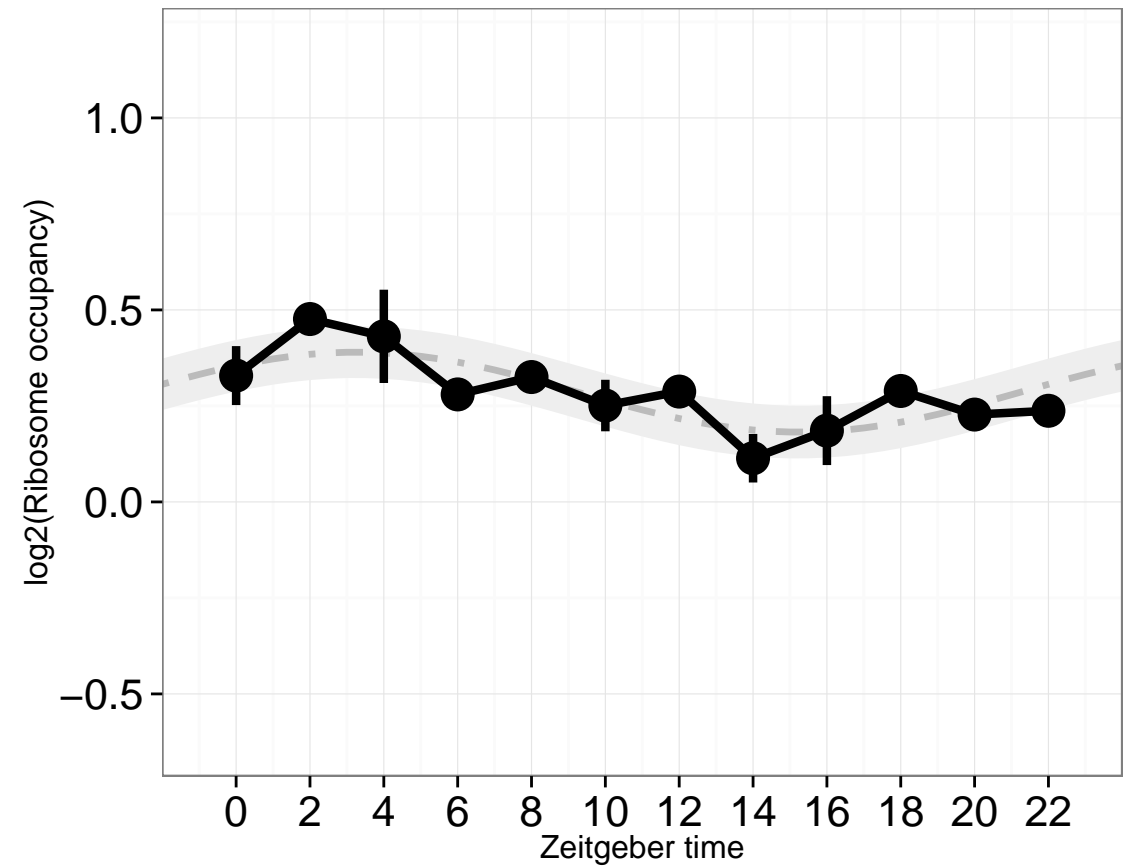

Supplement: Supplementary file 2275 [file 1]

## Epha4

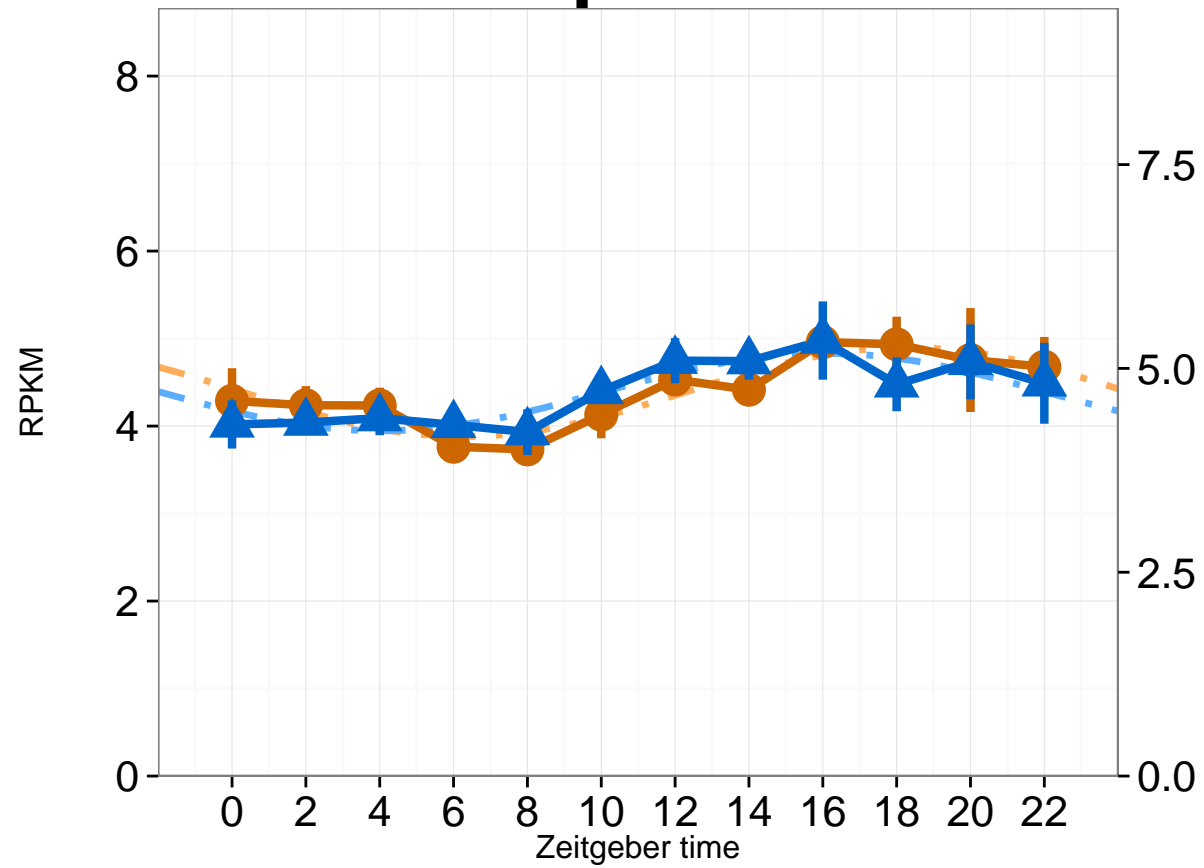

## Epha4

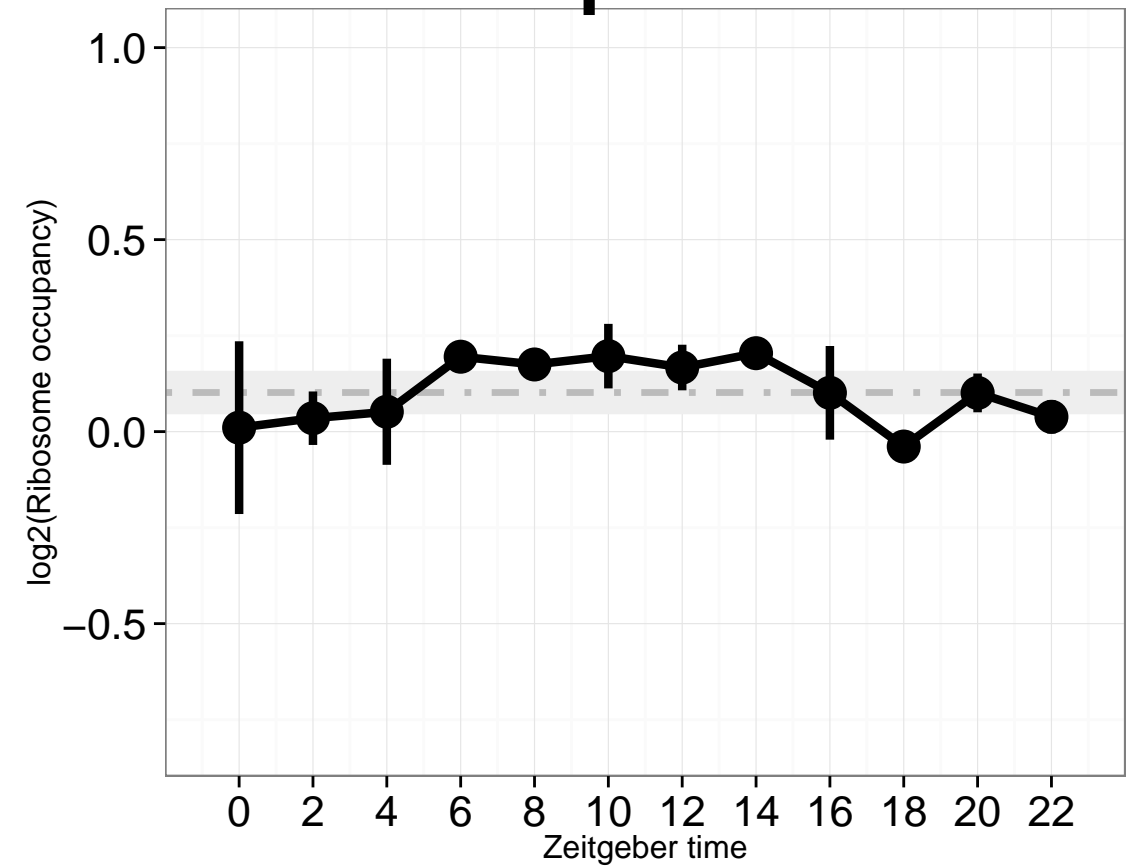

Supplement: Supplementary file 2276 [file 1]

# Col5a2

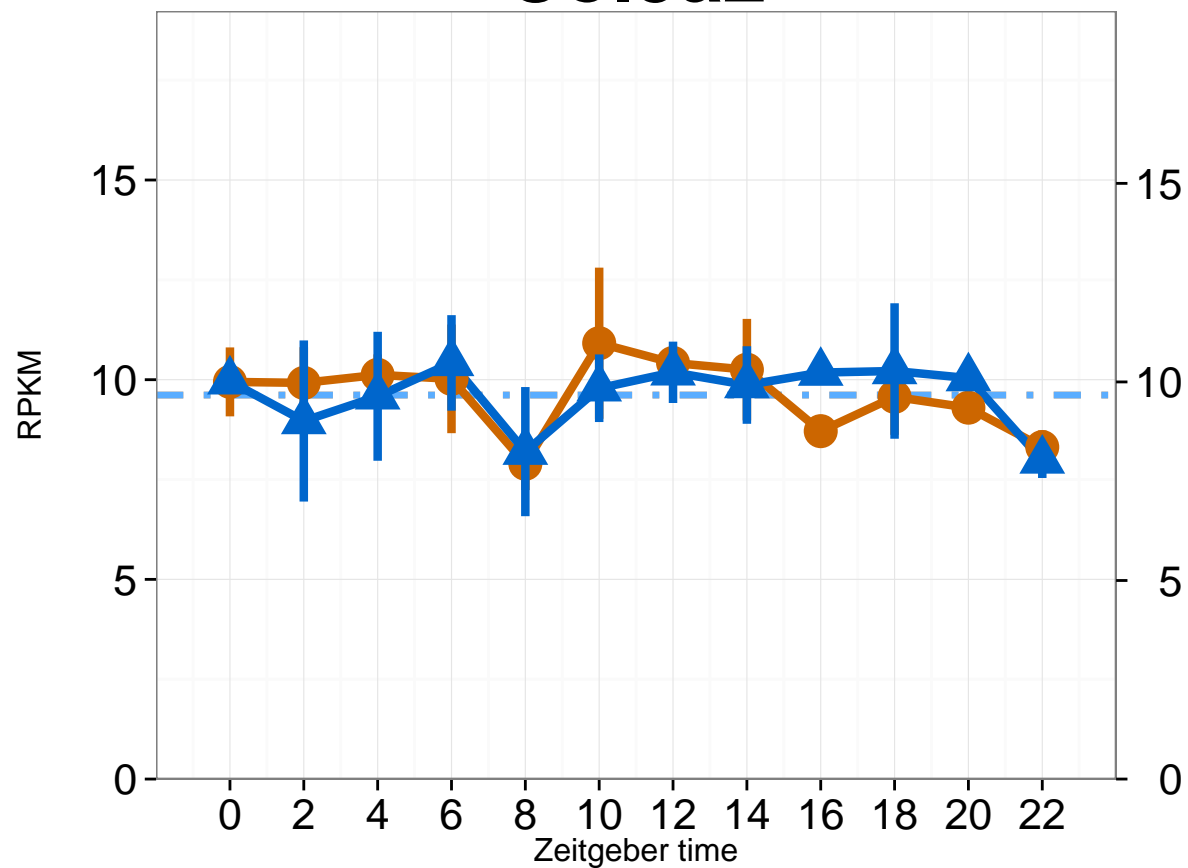

# Col5a2

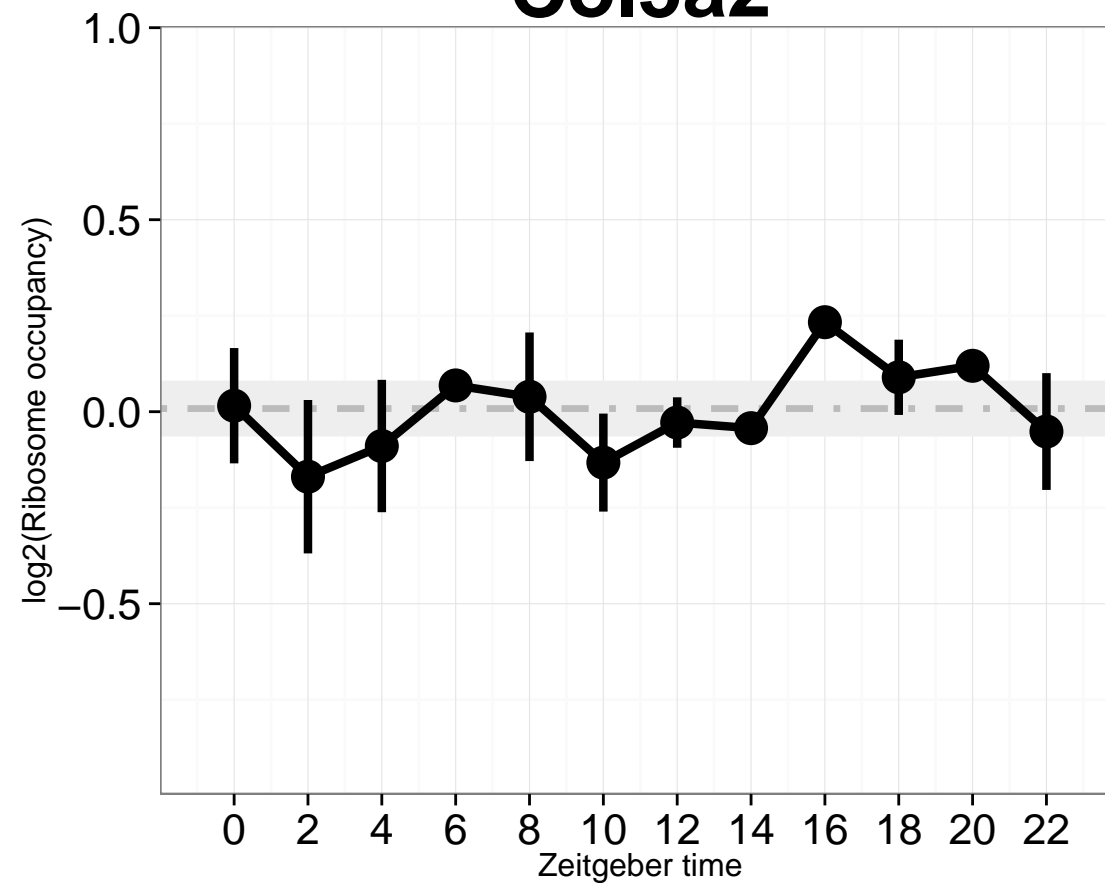

Supplement: Supplementary file 2277 [file 1]

# Mtmt3

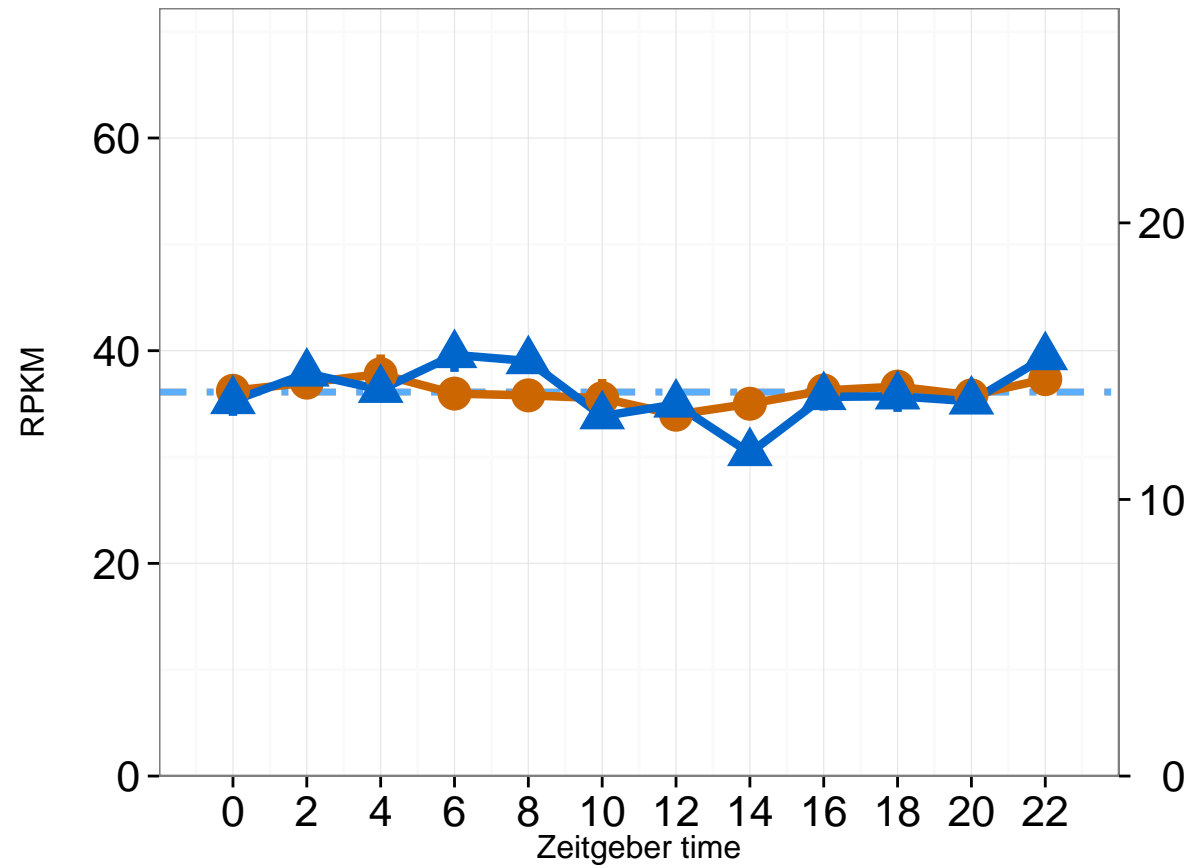

# Mtmt3

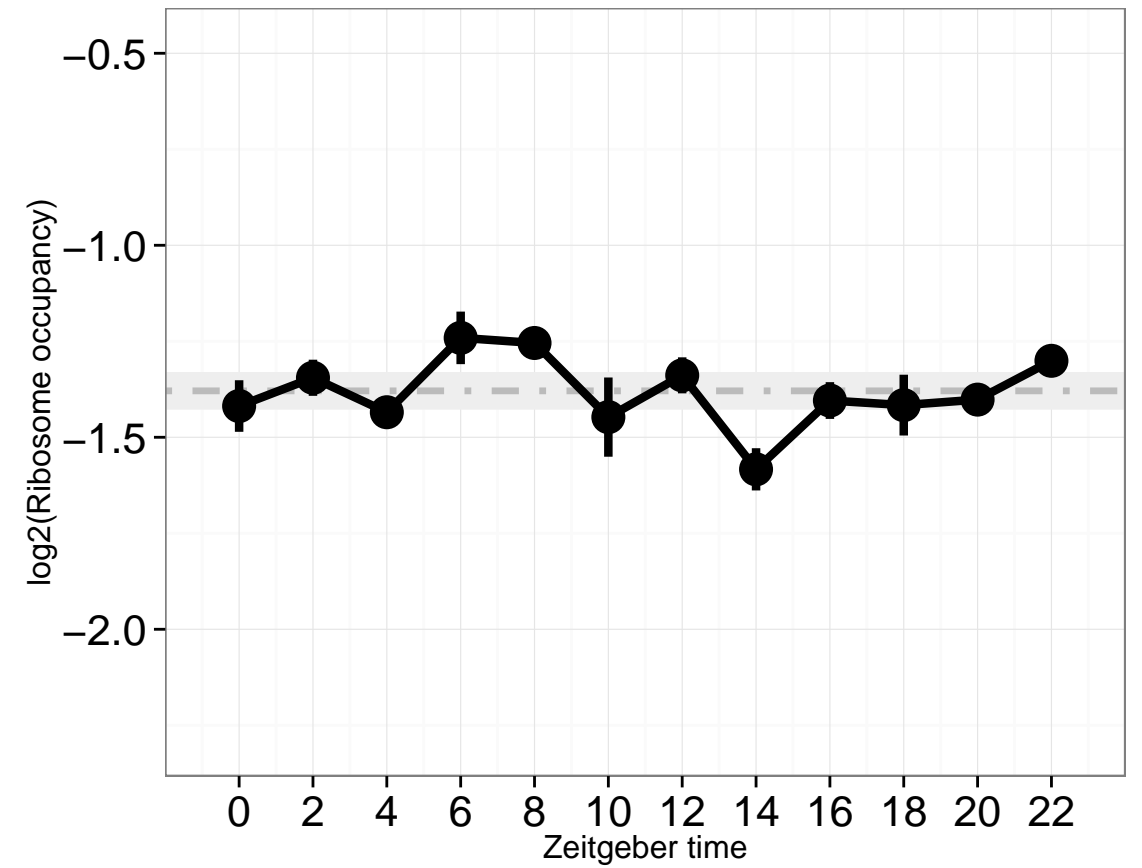

Supplement: Supplementary file 2278 [file 1]

# Cyp1b1

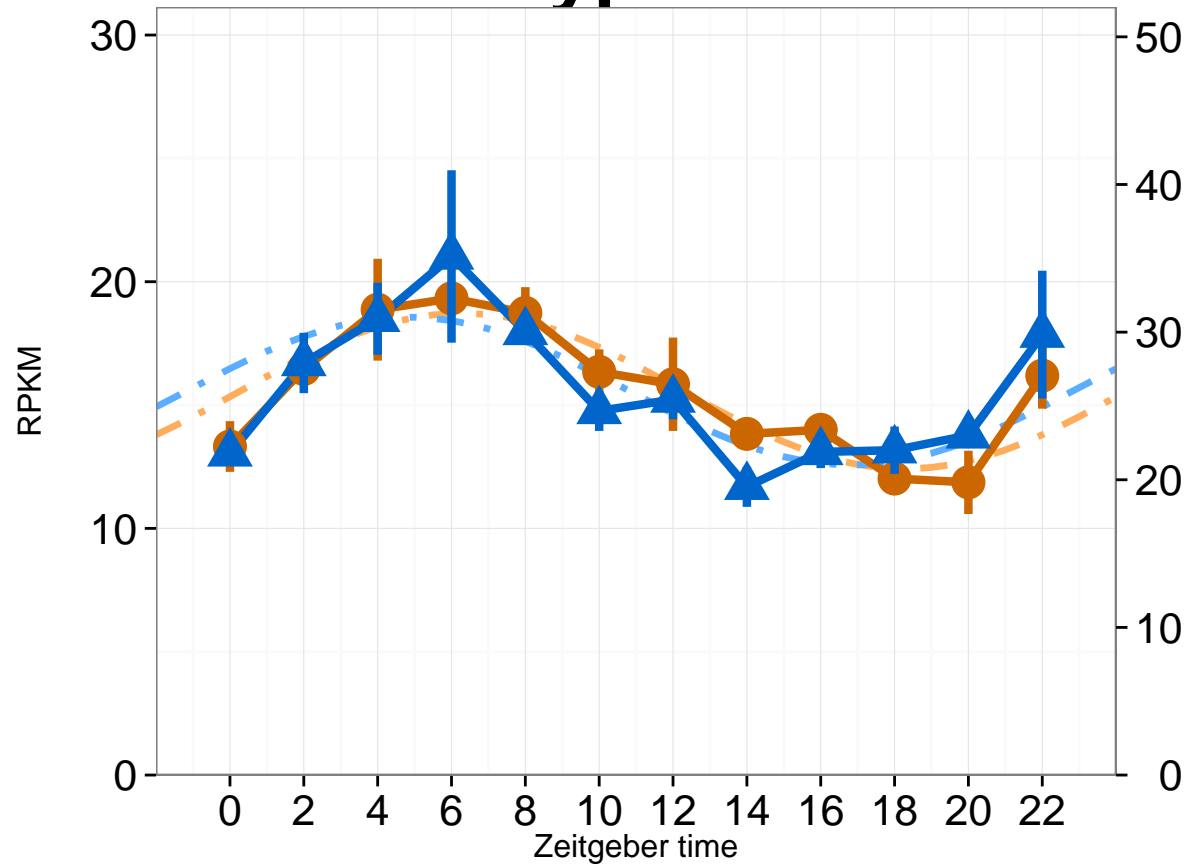

# Cyp1b1

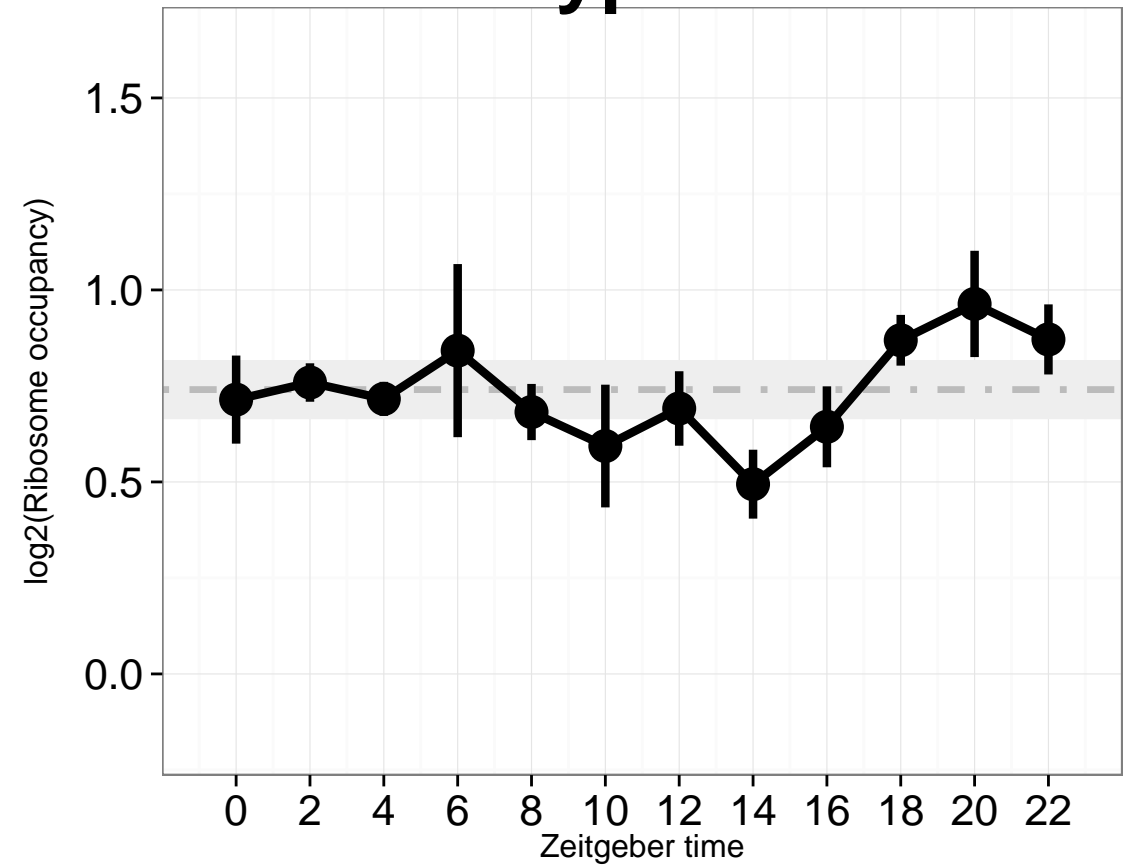

Supplement: Supplementary file 2279 [file 1]

## Bcl2l14

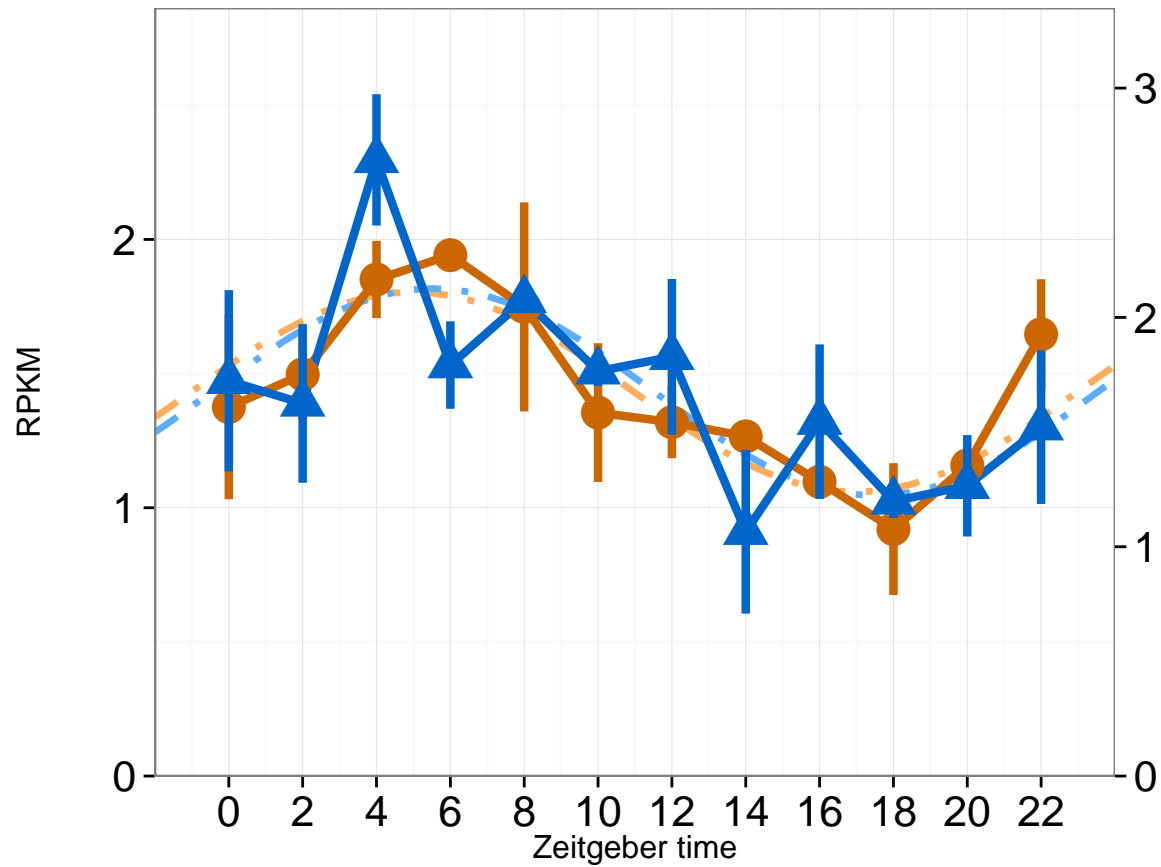

## Bcl2l14

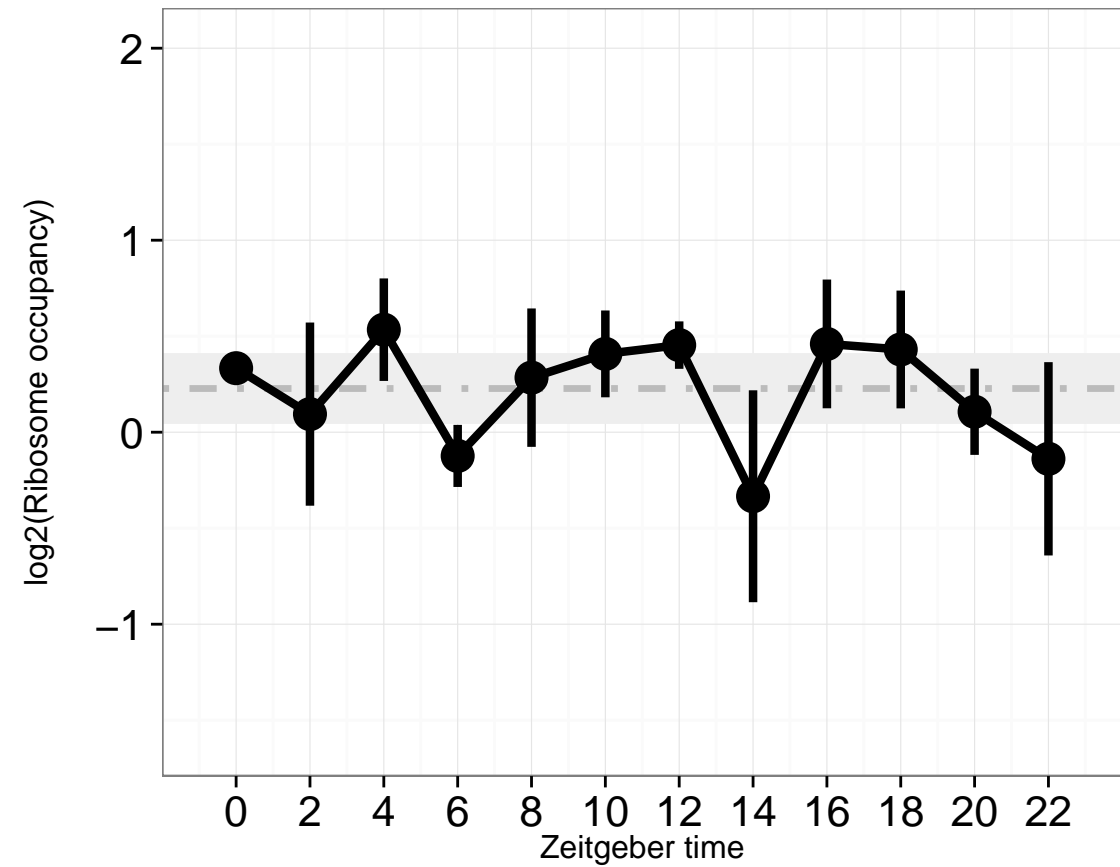

Supplement: Supplementary file 2280 [file 1]

## Cgn

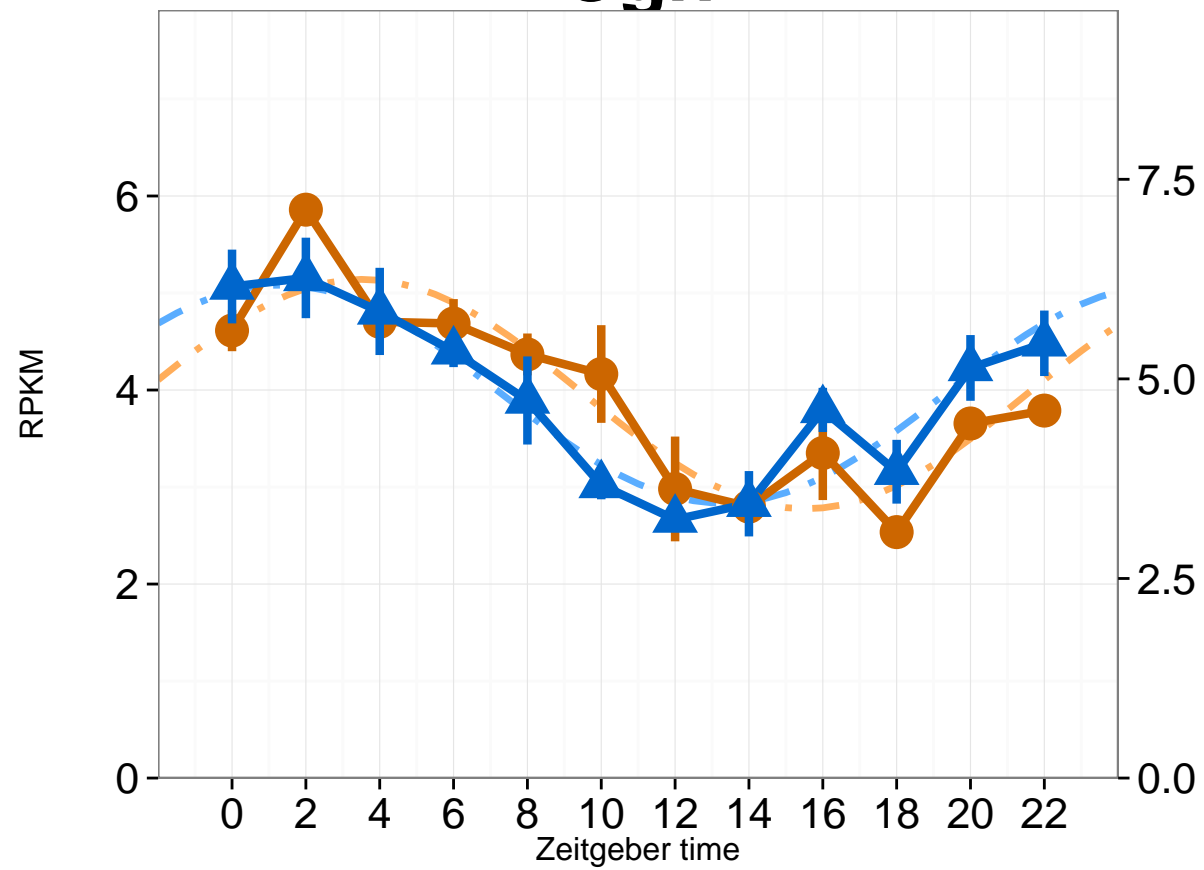

## Cgn

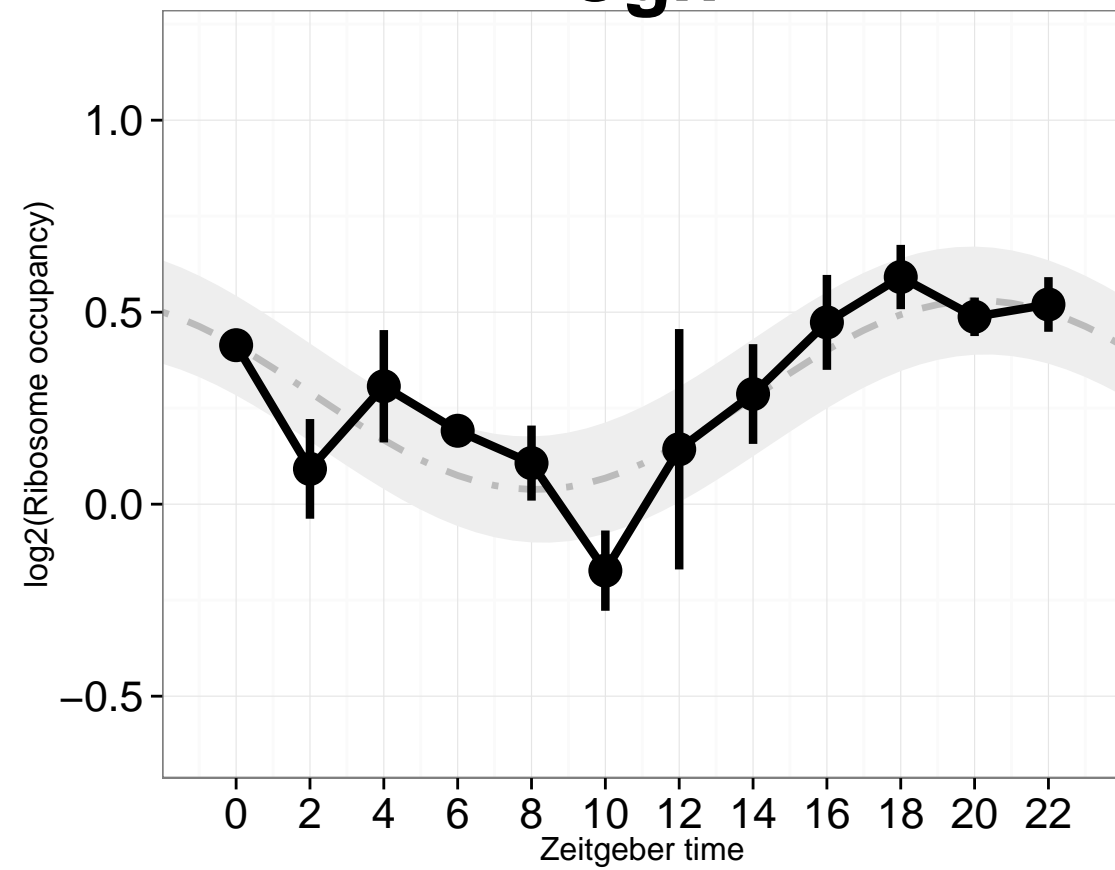

Supplement: Supplementary file 2281 [file 1]

# Sesn1

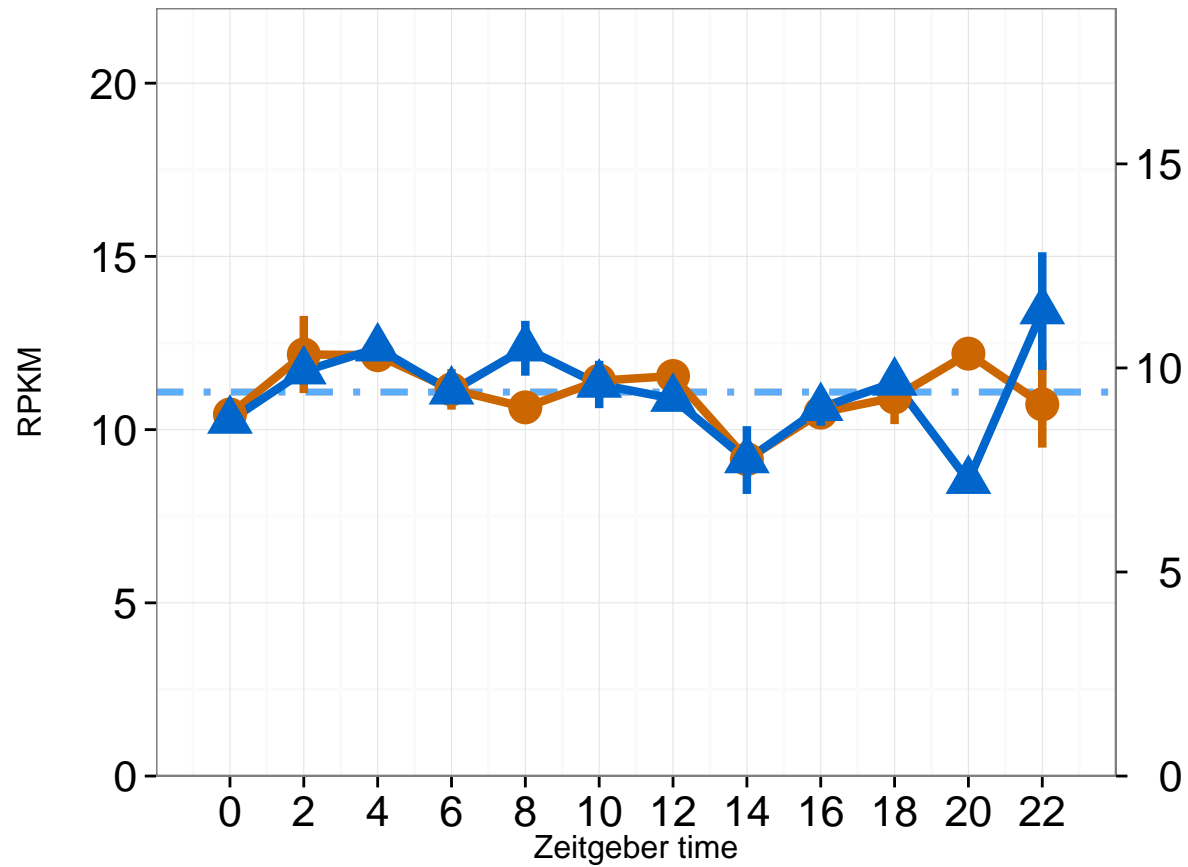

# Sesn1

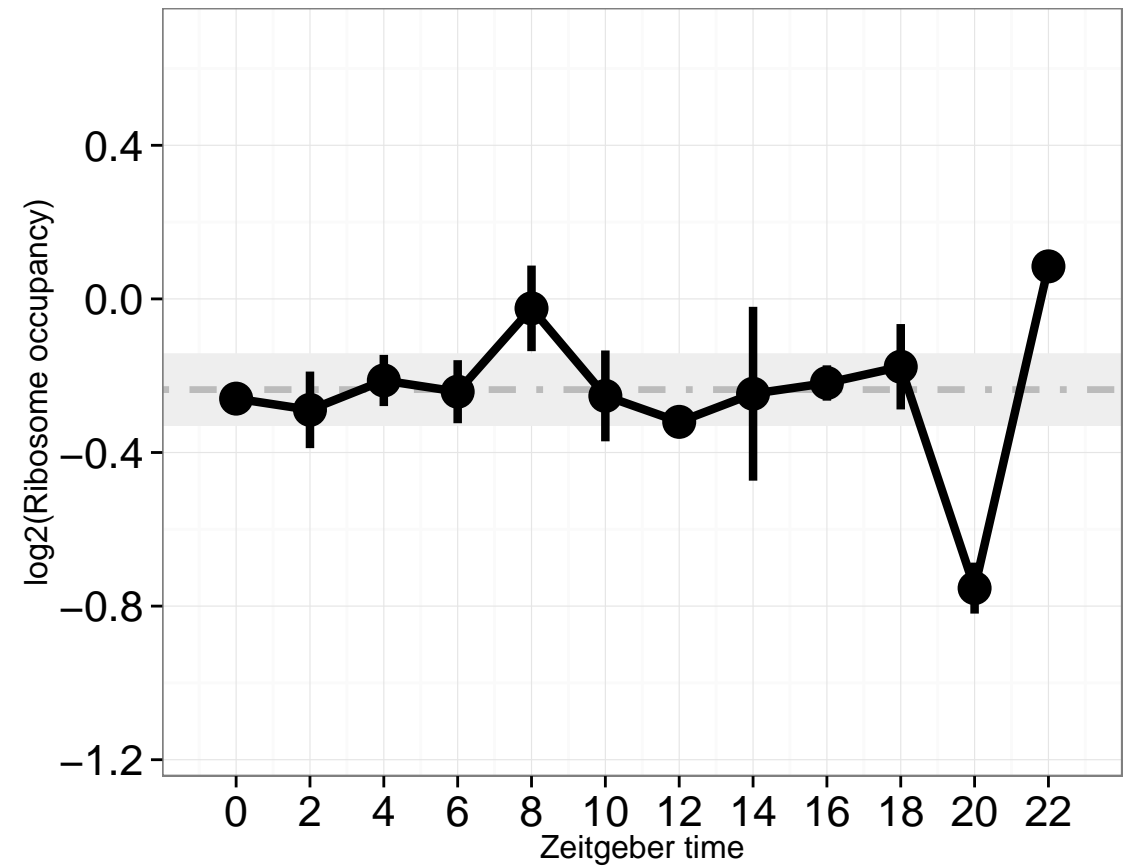

Supplement: Supplementary file 2282 [file 1]

# Rapgef6

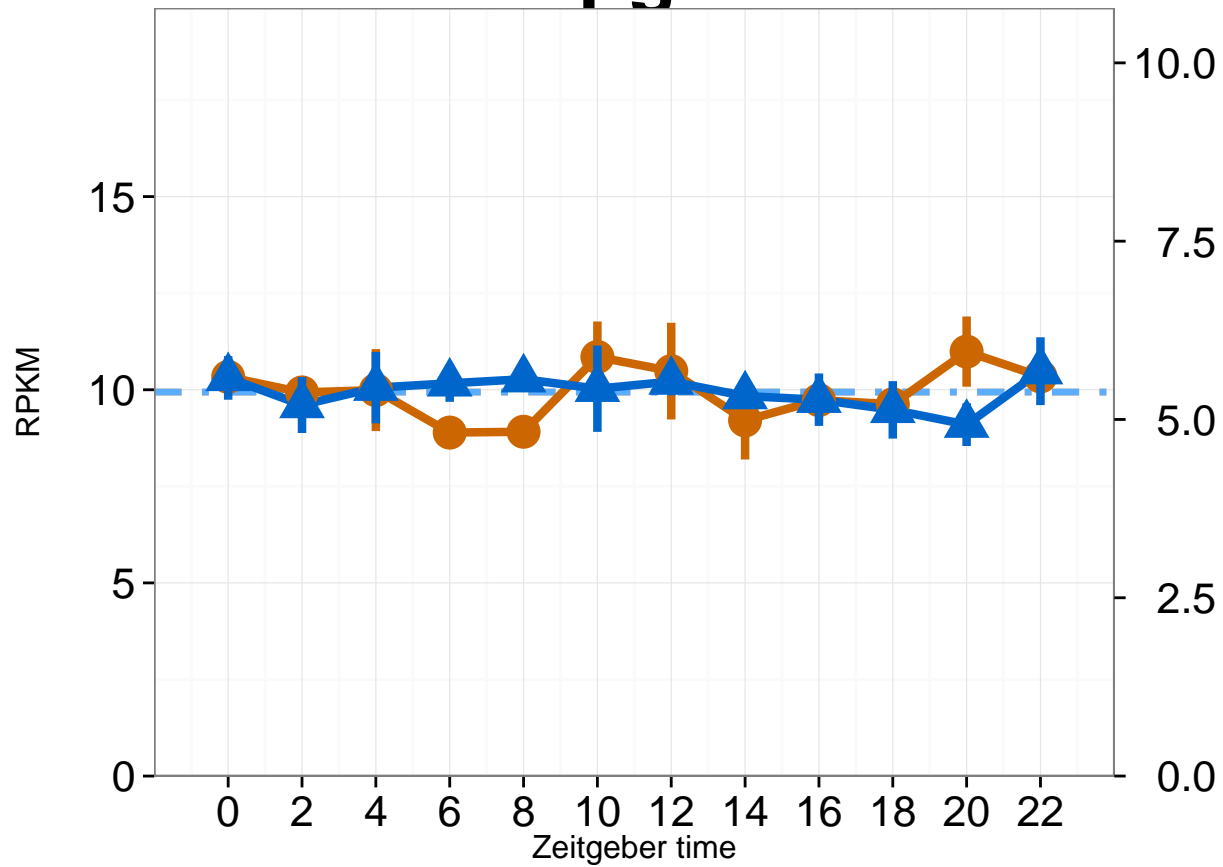

# Rapgef6

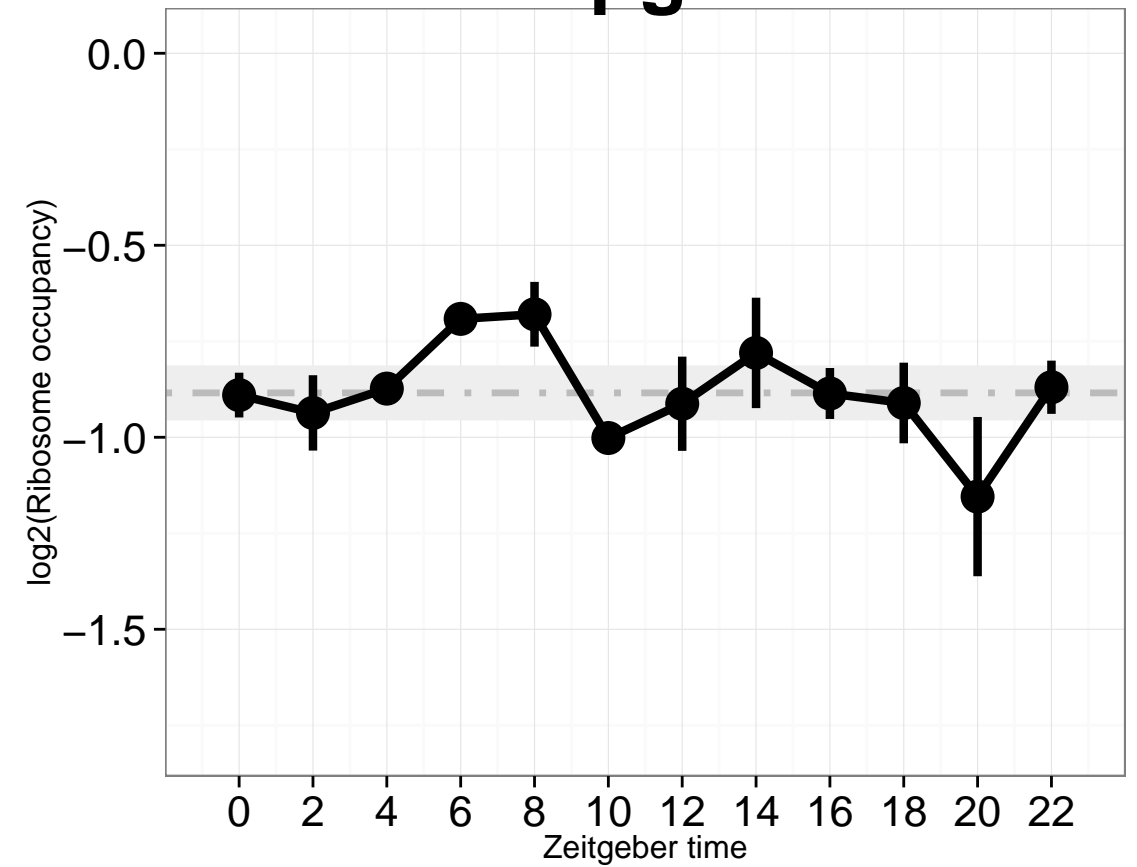

Supplement: Supplementary file 2283 [file 1]

## Repin1

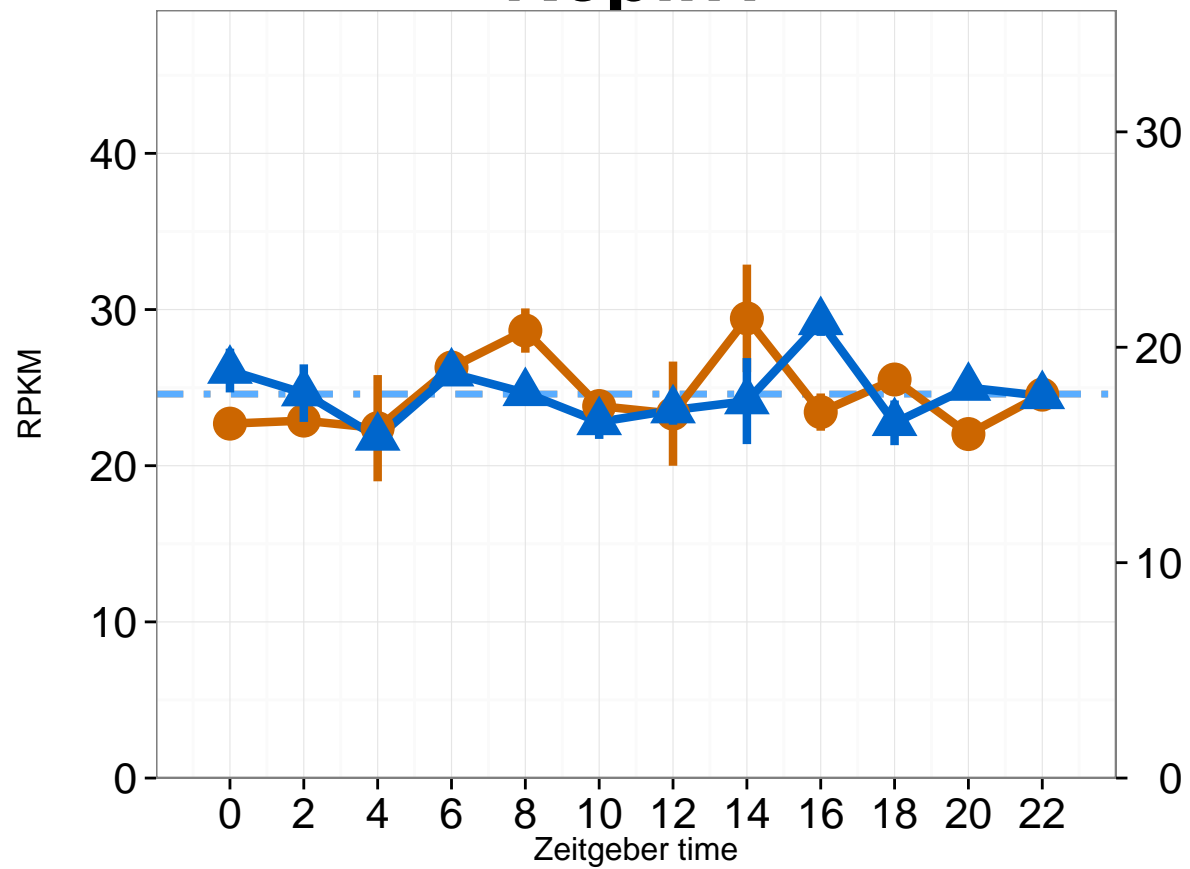

## Repin1

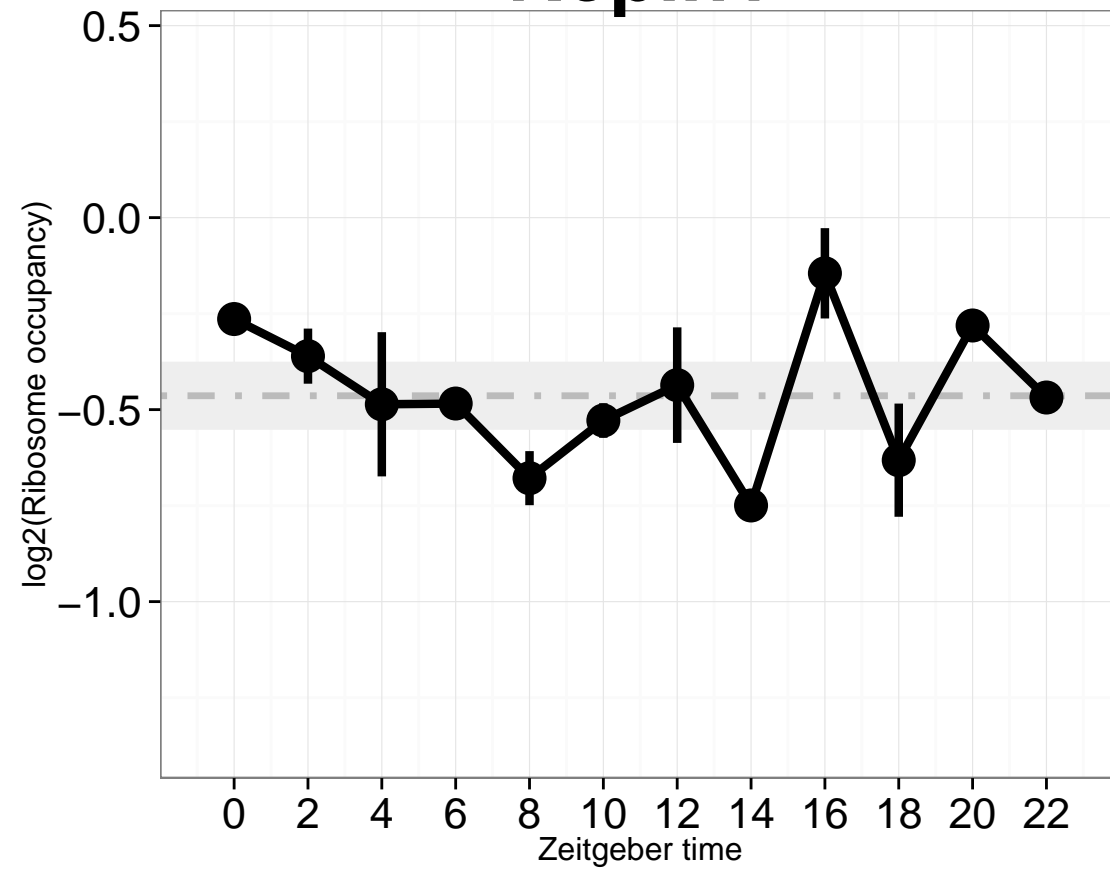

Supplement: Supplementary file 2284 [file 1]

## Arsa

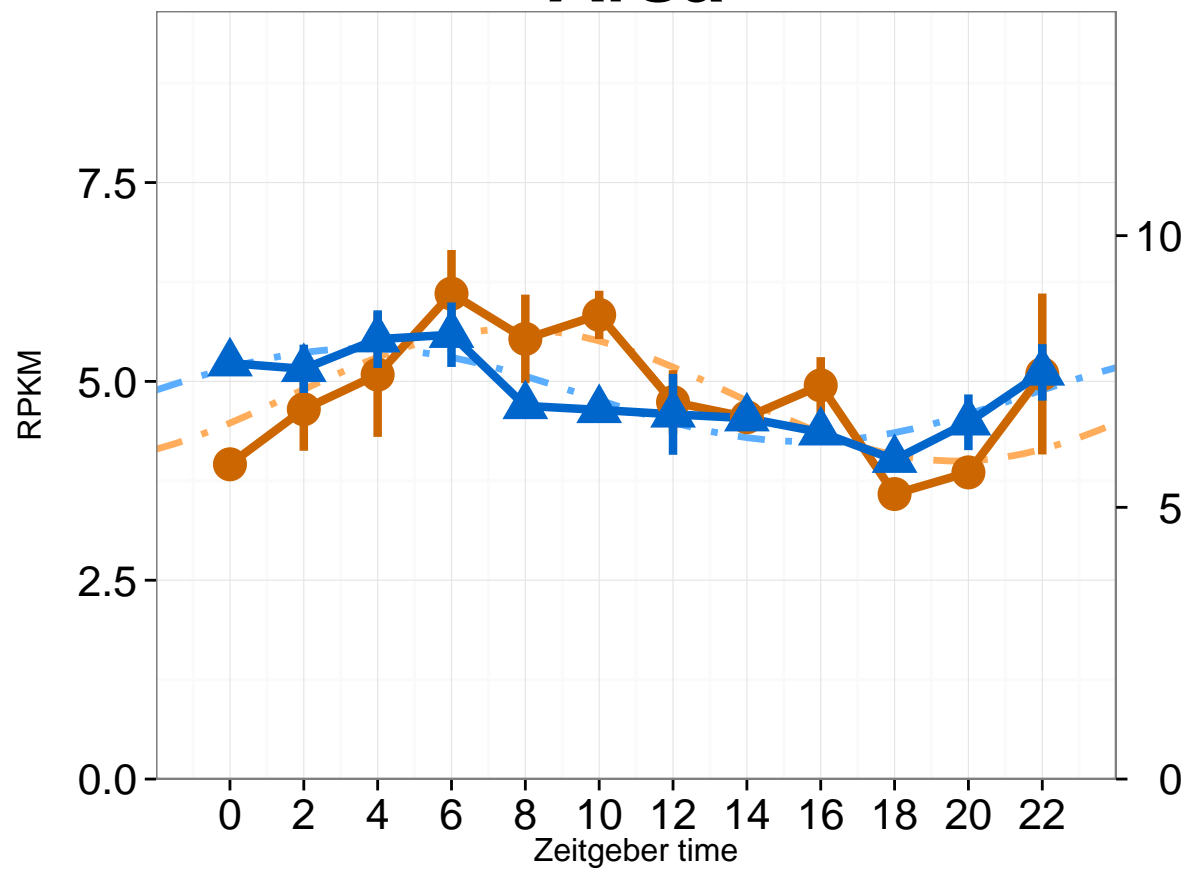

## Arsa

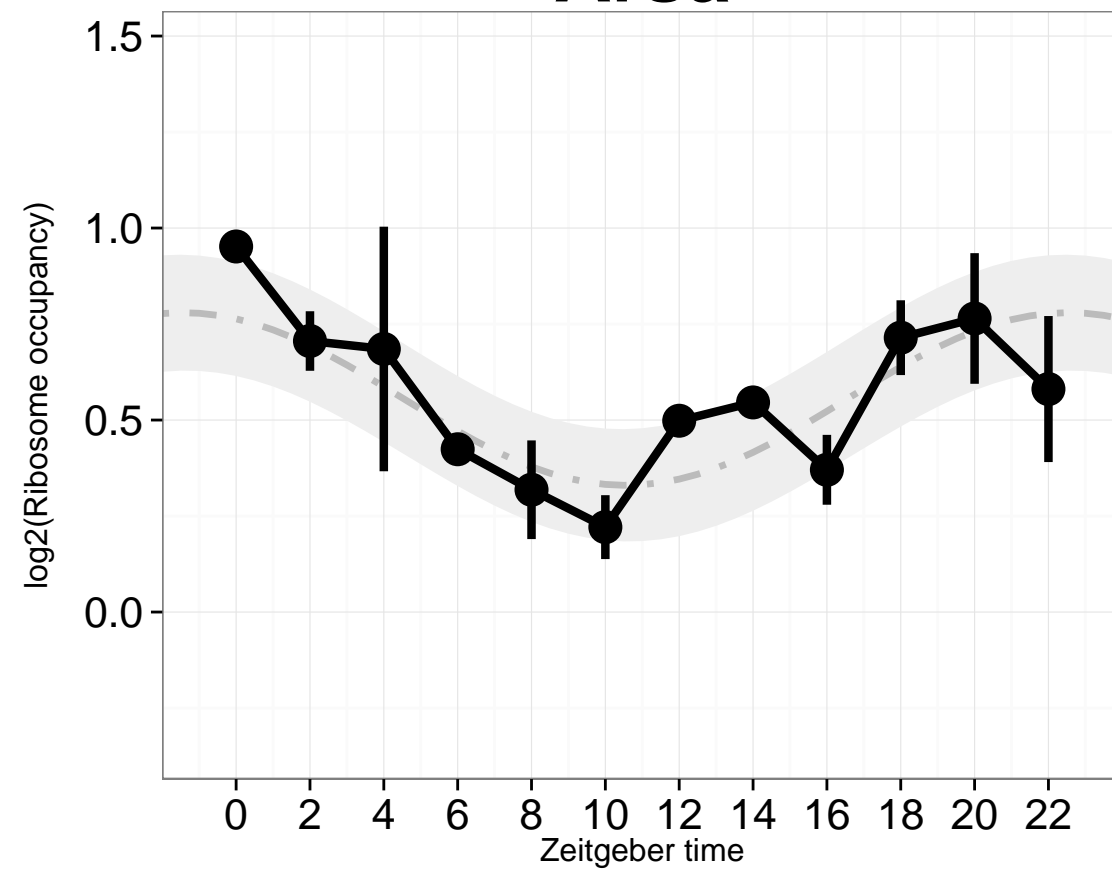

Supplement: Supplementary file 2285 [file 1]

## Sgsh

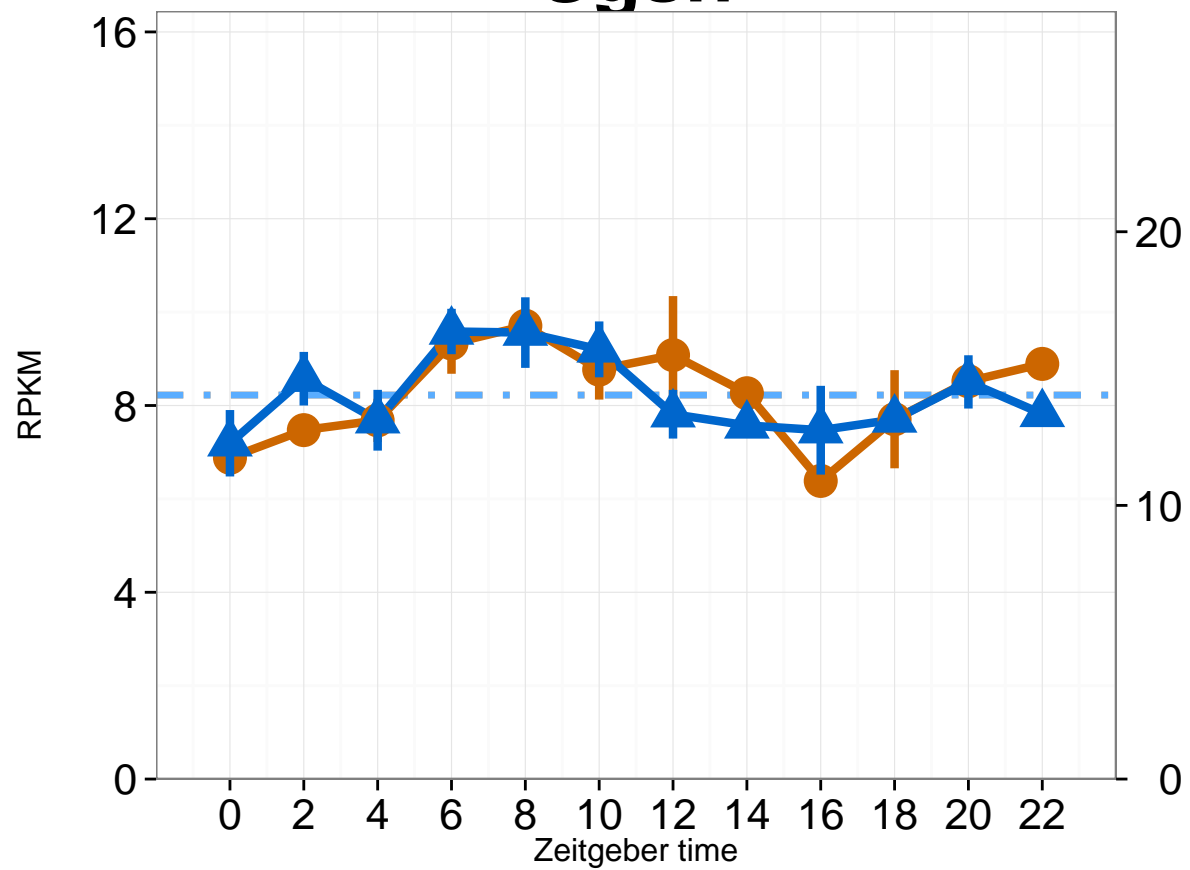

## Sgsh

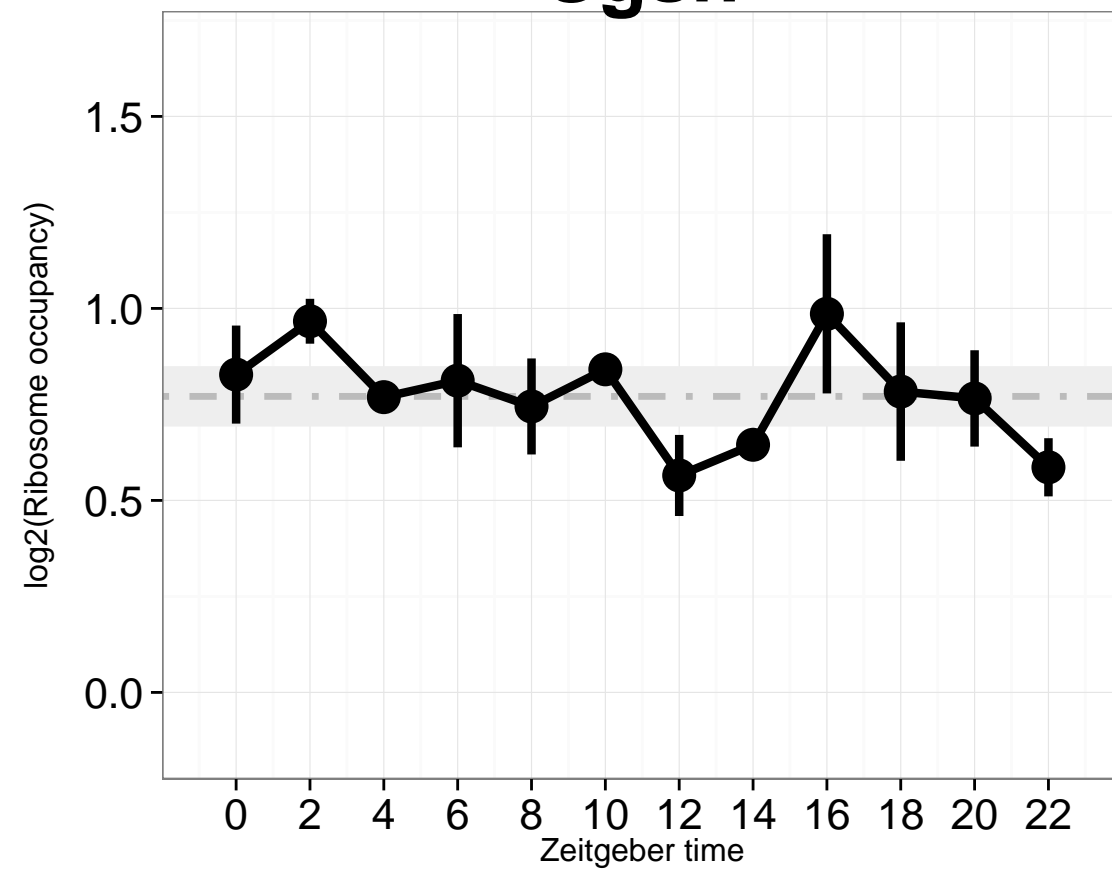

Supplement: Supplementary file 2286 [file 1]

# Glt28d2

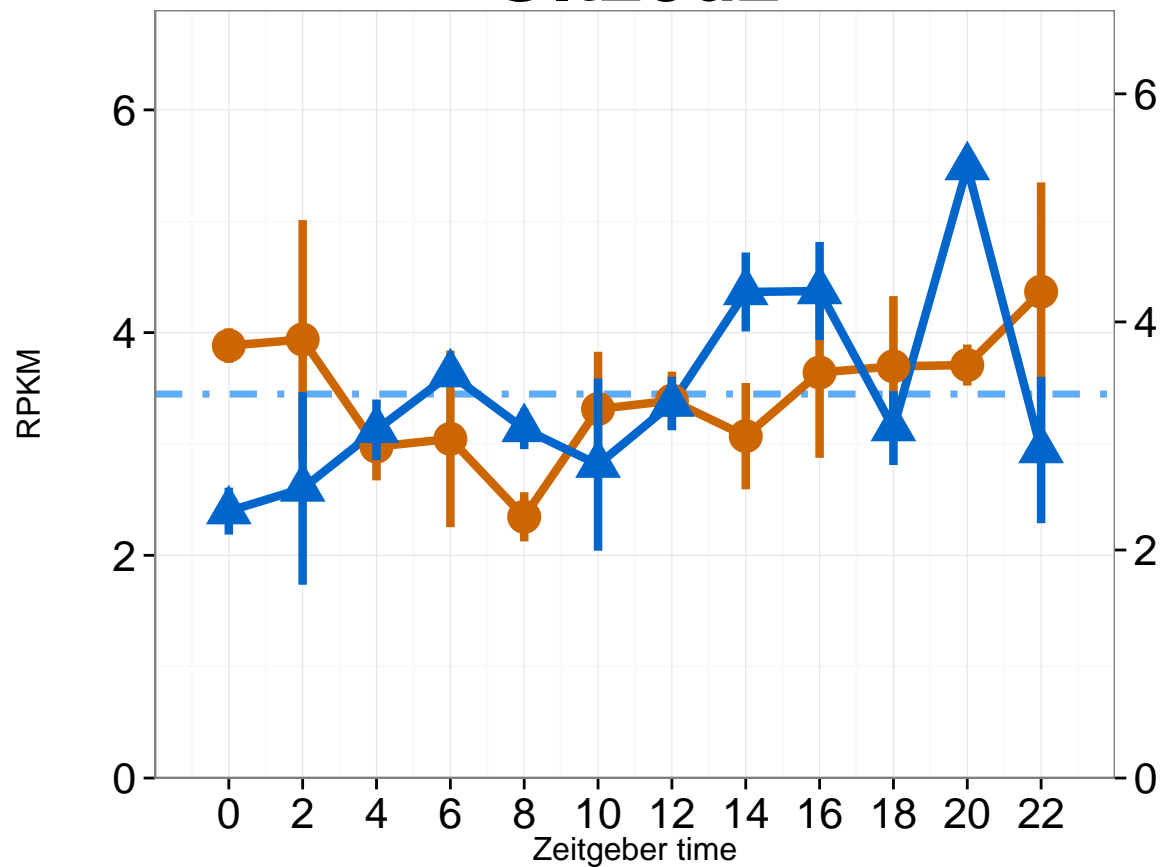

# Glt28d2

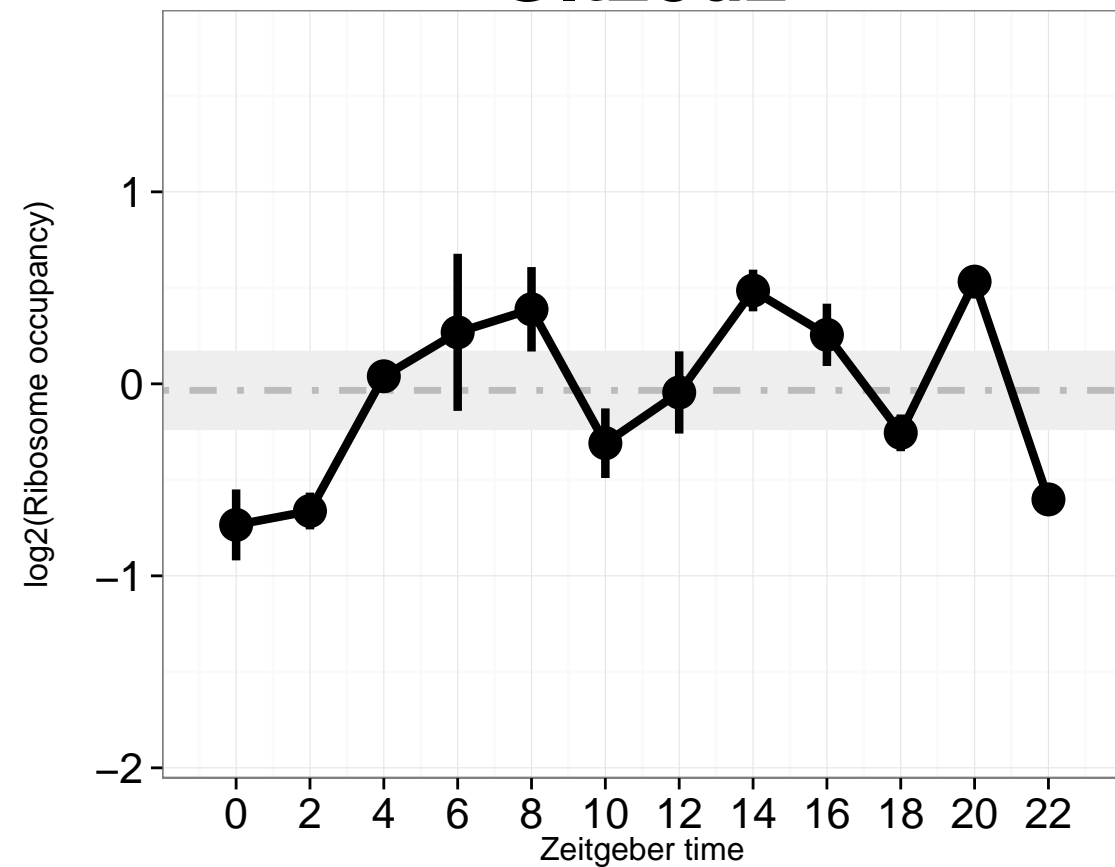

Supplement: Supplementary file 2287 [file 1]

## Dnajb14

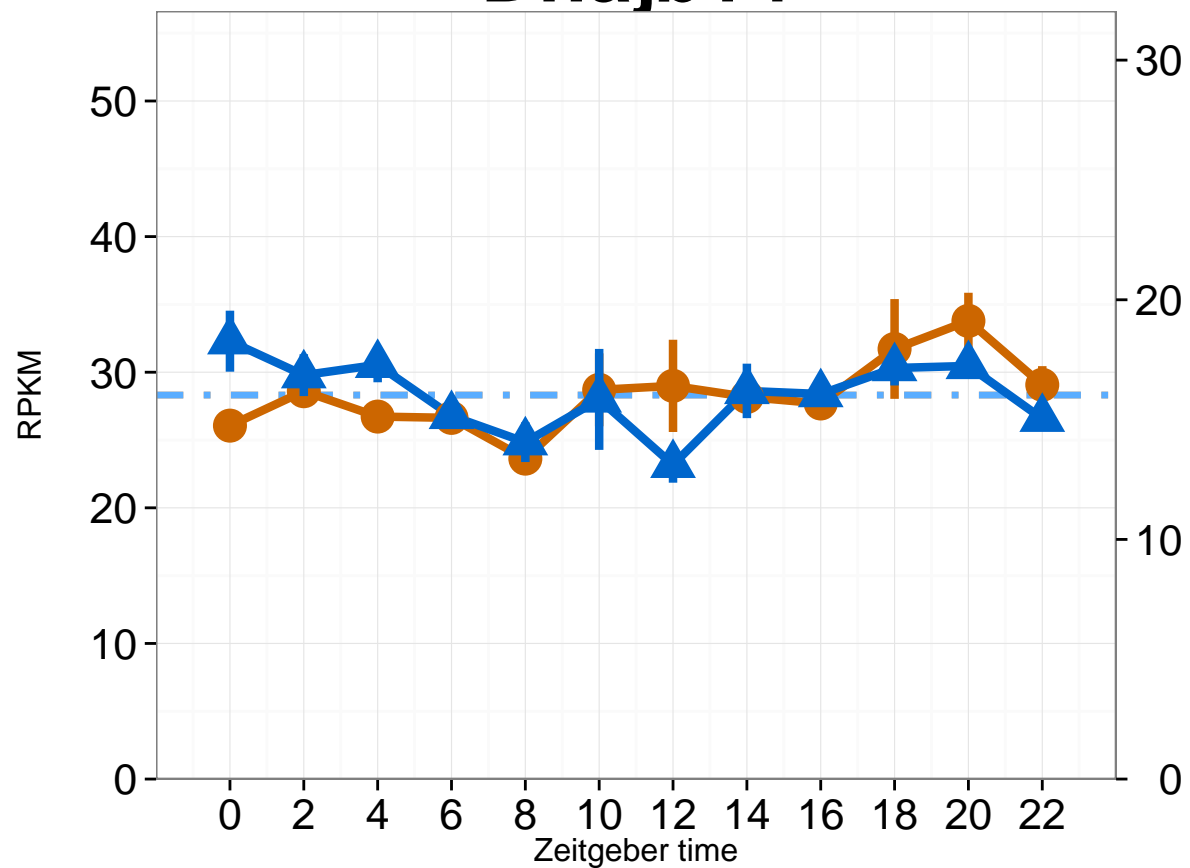

## Dnajb14

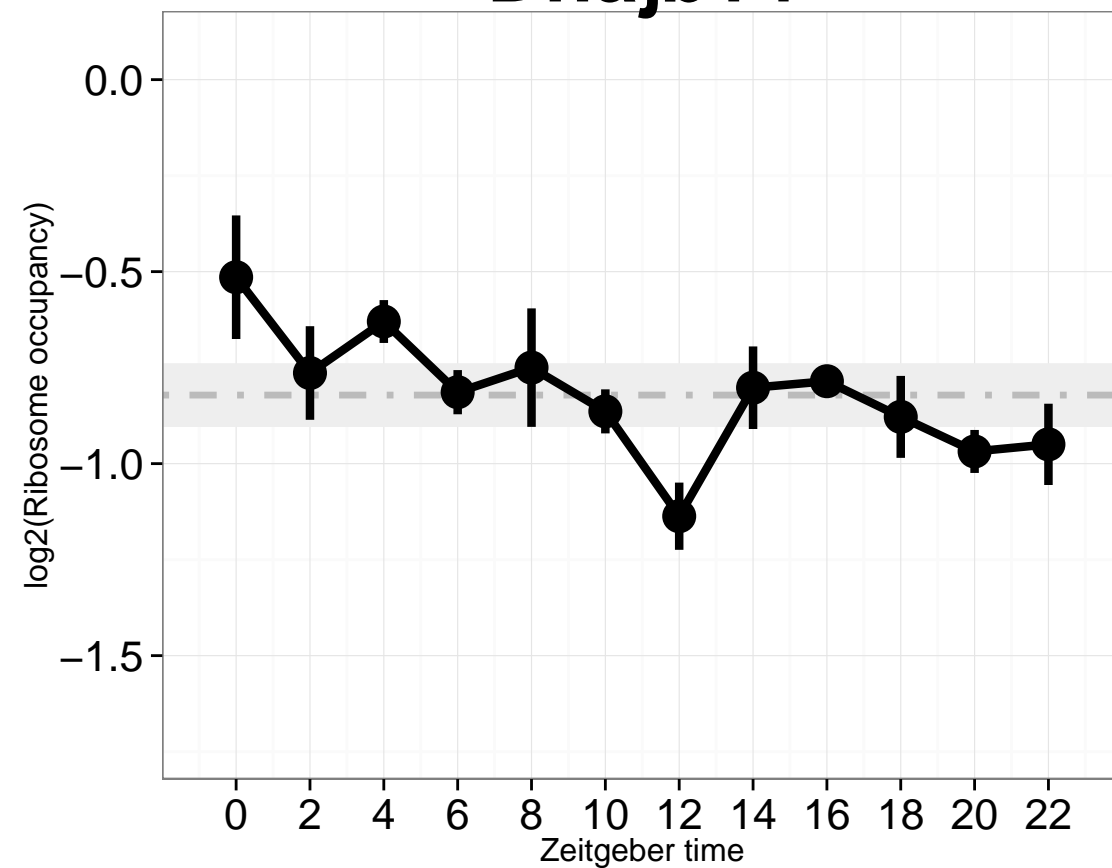

Supplement: Supplementary file 2288 [file 1]

**Elmod1 TR**

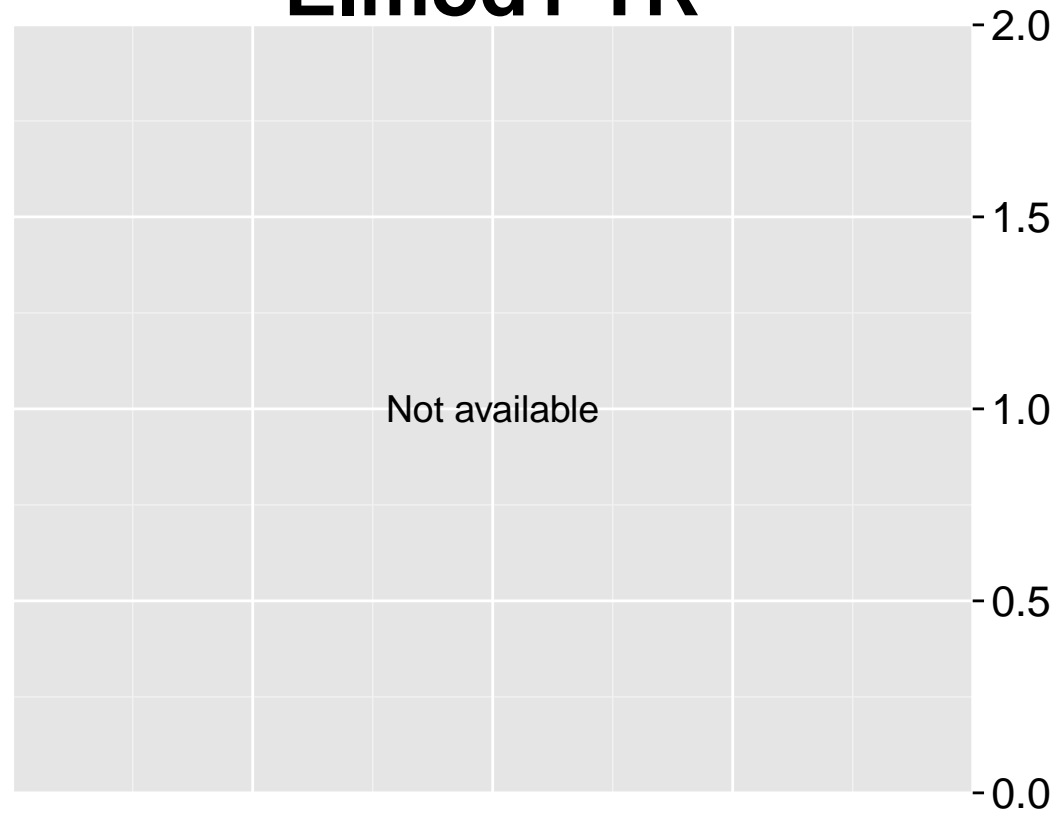

**Elmod1 log2(Ribosome occupancy**

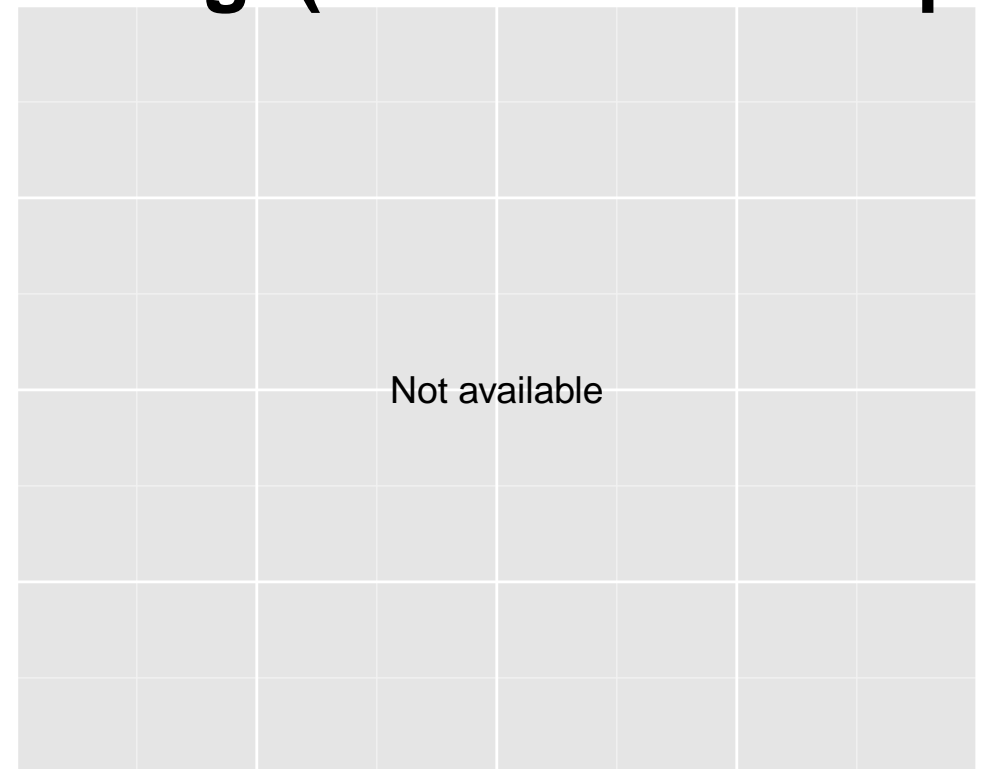

Supplement: Supplementary file 2289 [file 1]

## Fzd1

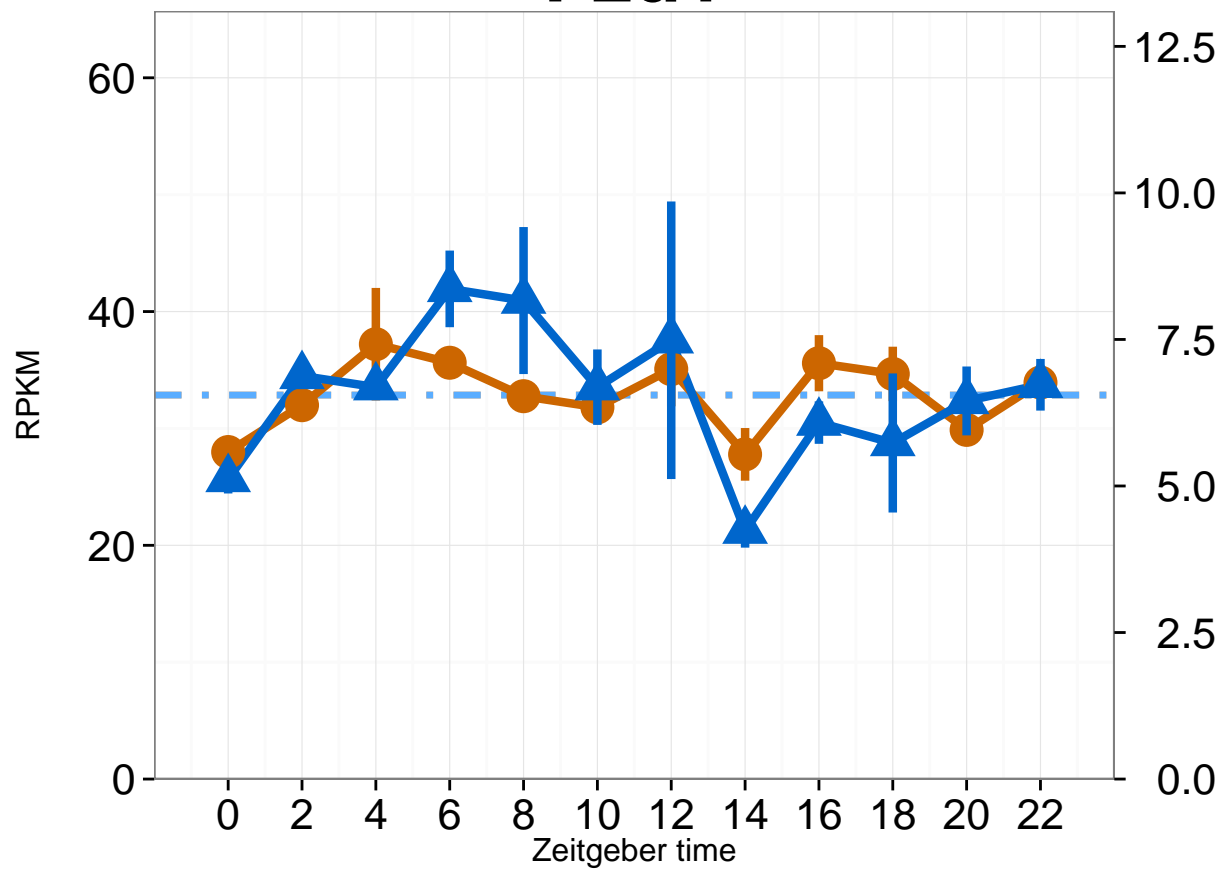

## Fzd1

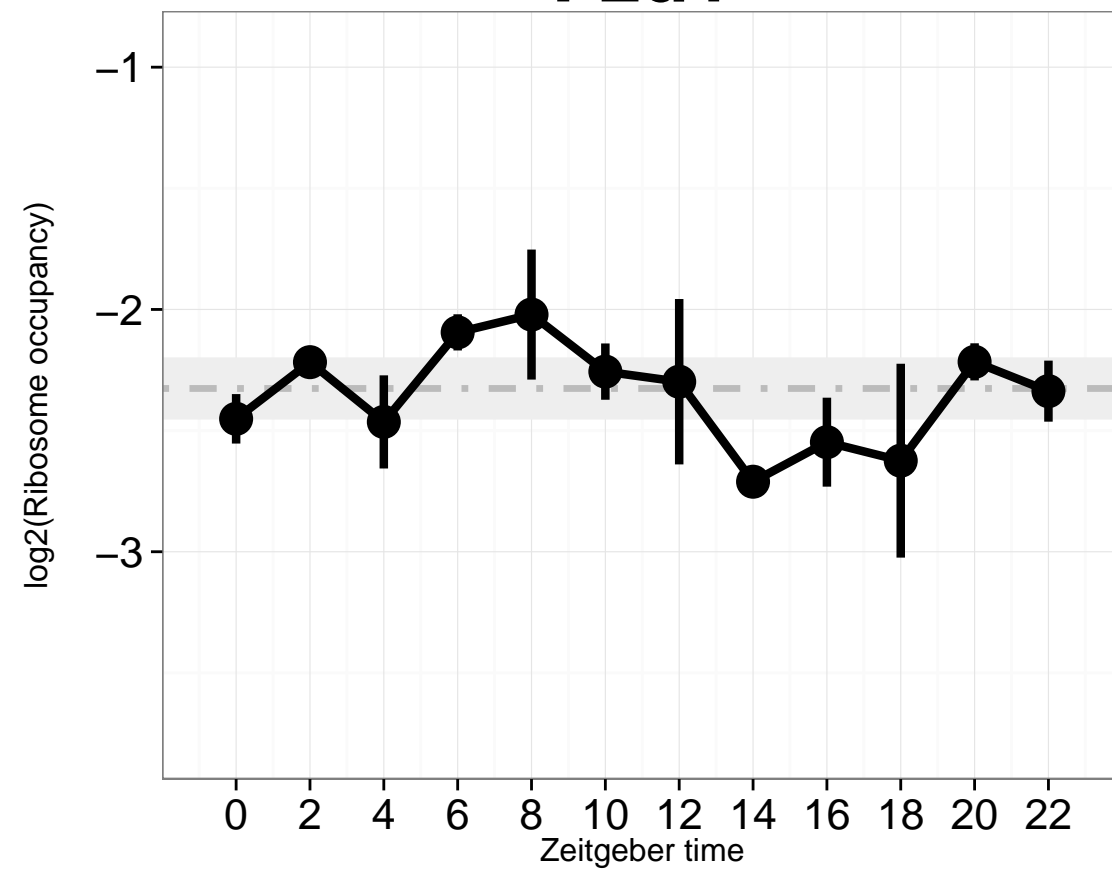

Supplement: Supplementary file 2290 [file 1]

# Rbm41

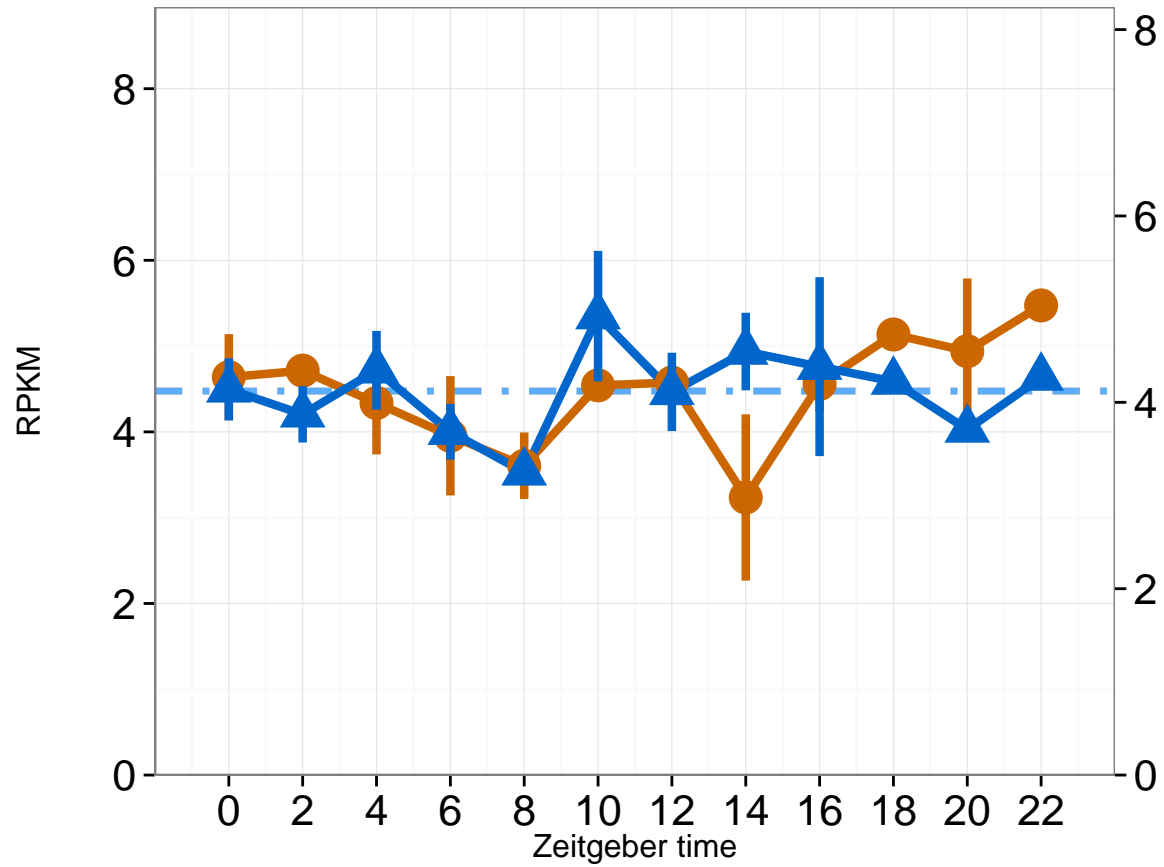

# Rbm41

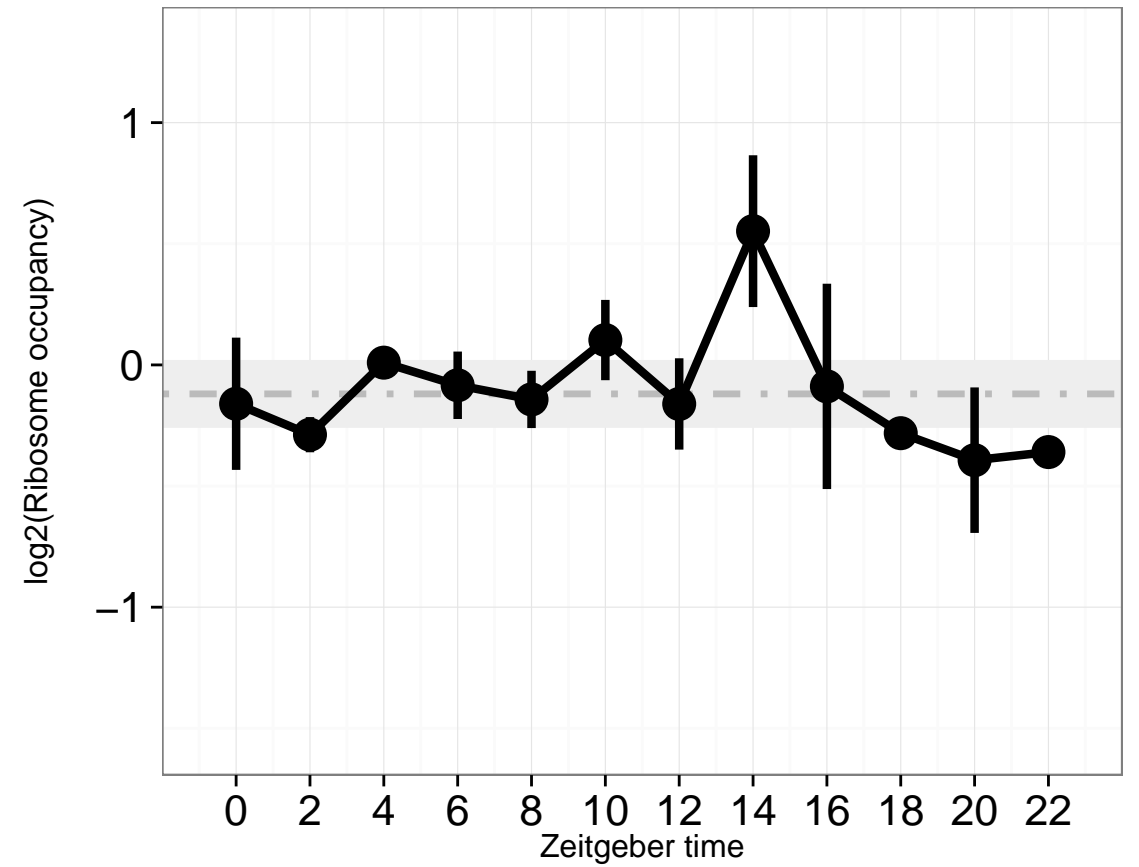

Supplement: Supplementary file 2291 [file 1]

## Vimp

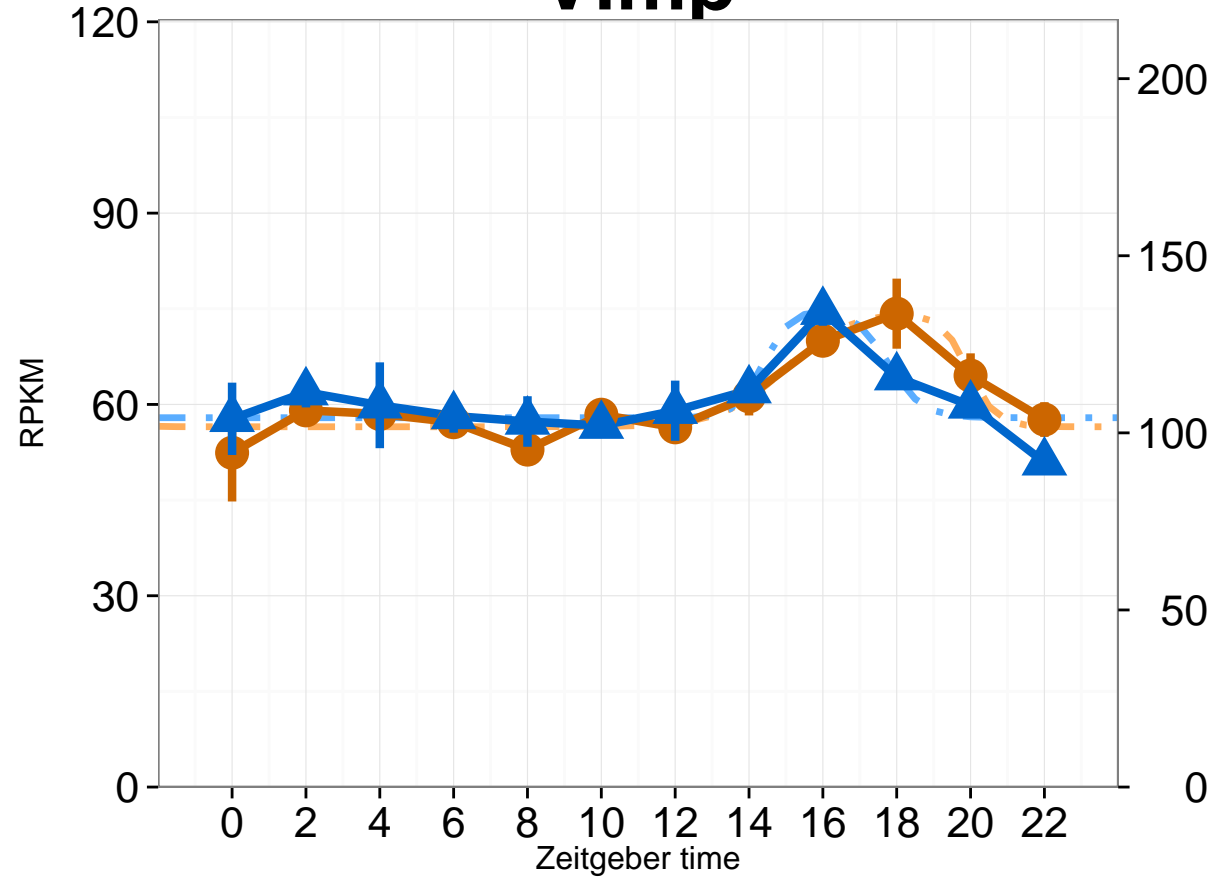

## Vimp

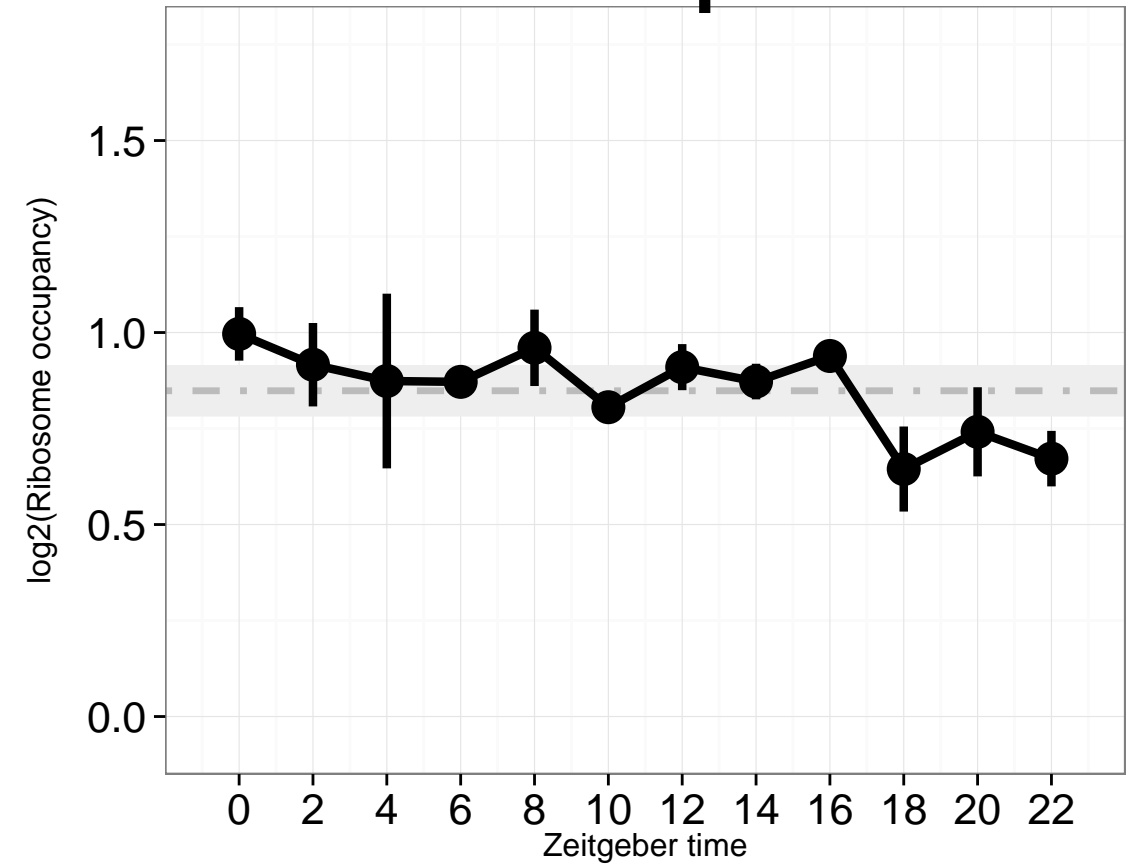

Supplement: Supplementary file 2292 [file 1]

# Syt7

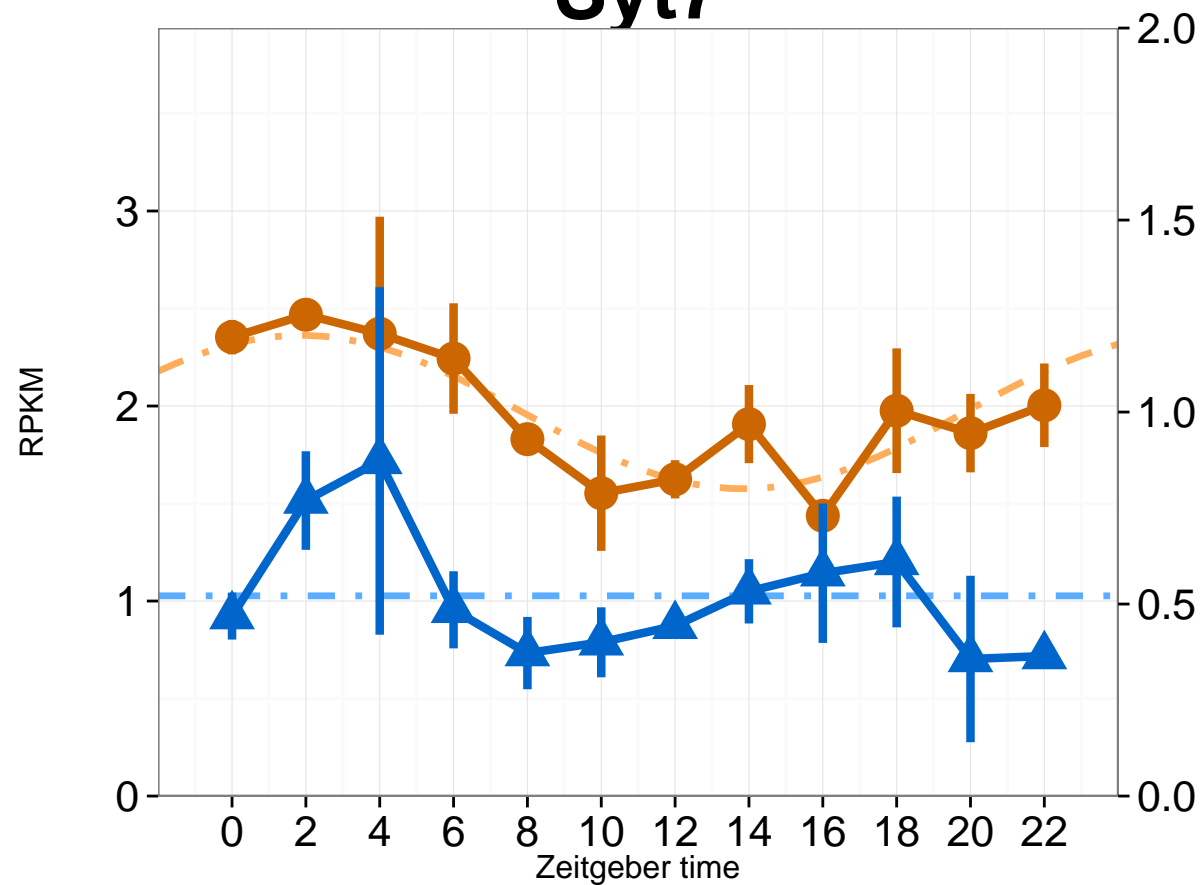

# Syt7

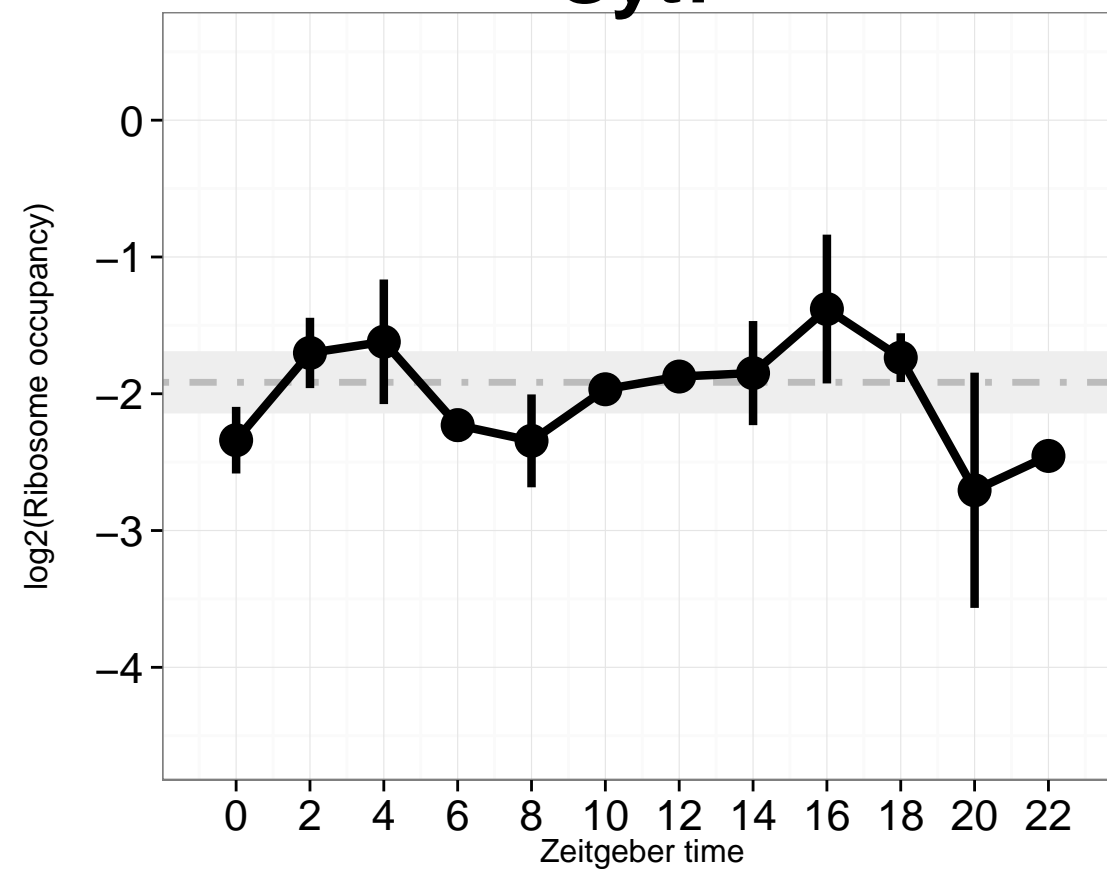

Supplement: Supplementary file 2293 [file 1]

# Gm7292

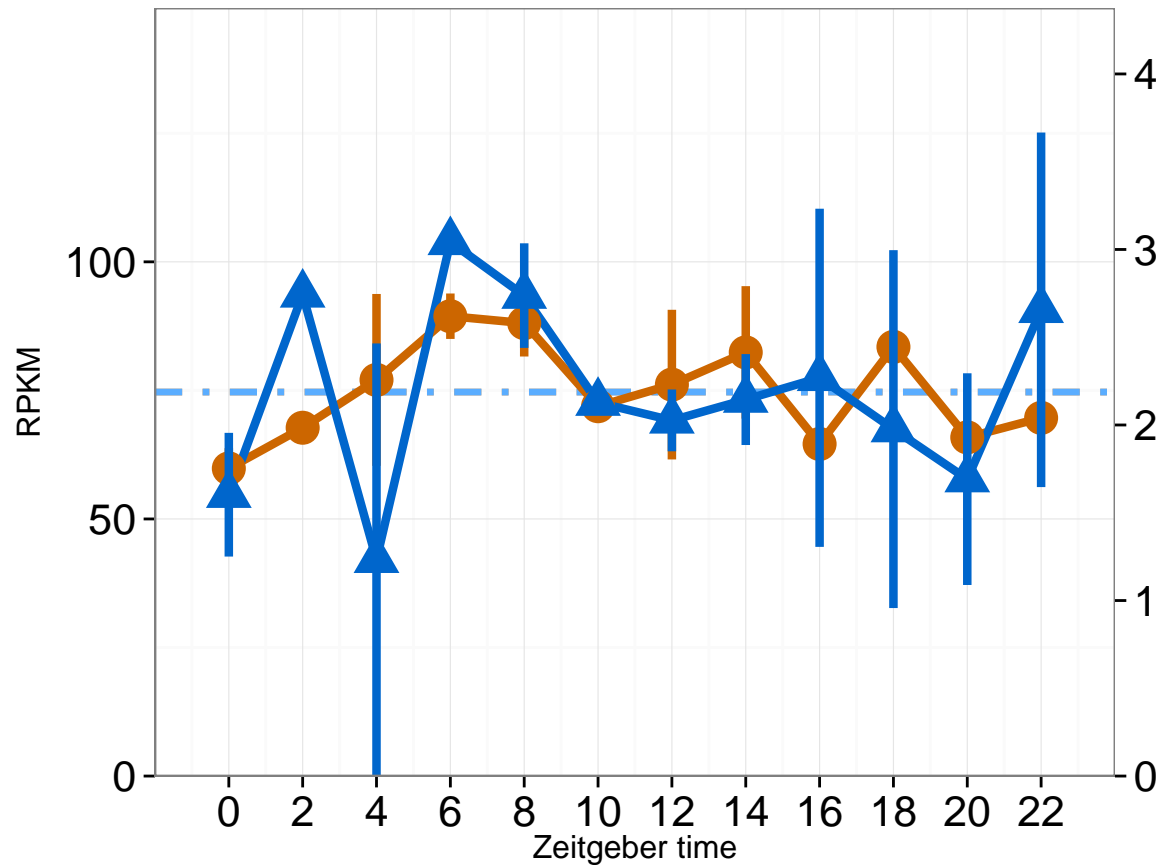

# Gm7292

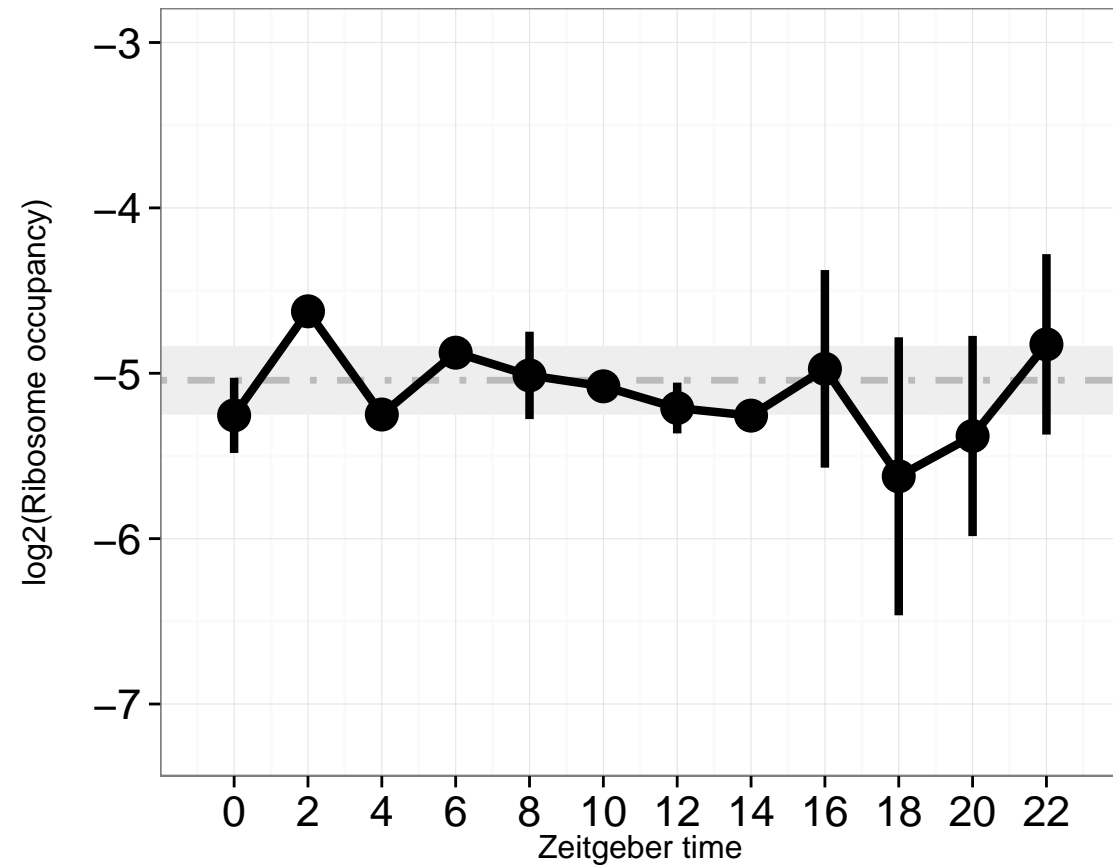

Supplement: Supplementary file 2294 [file 1]

## Kank3

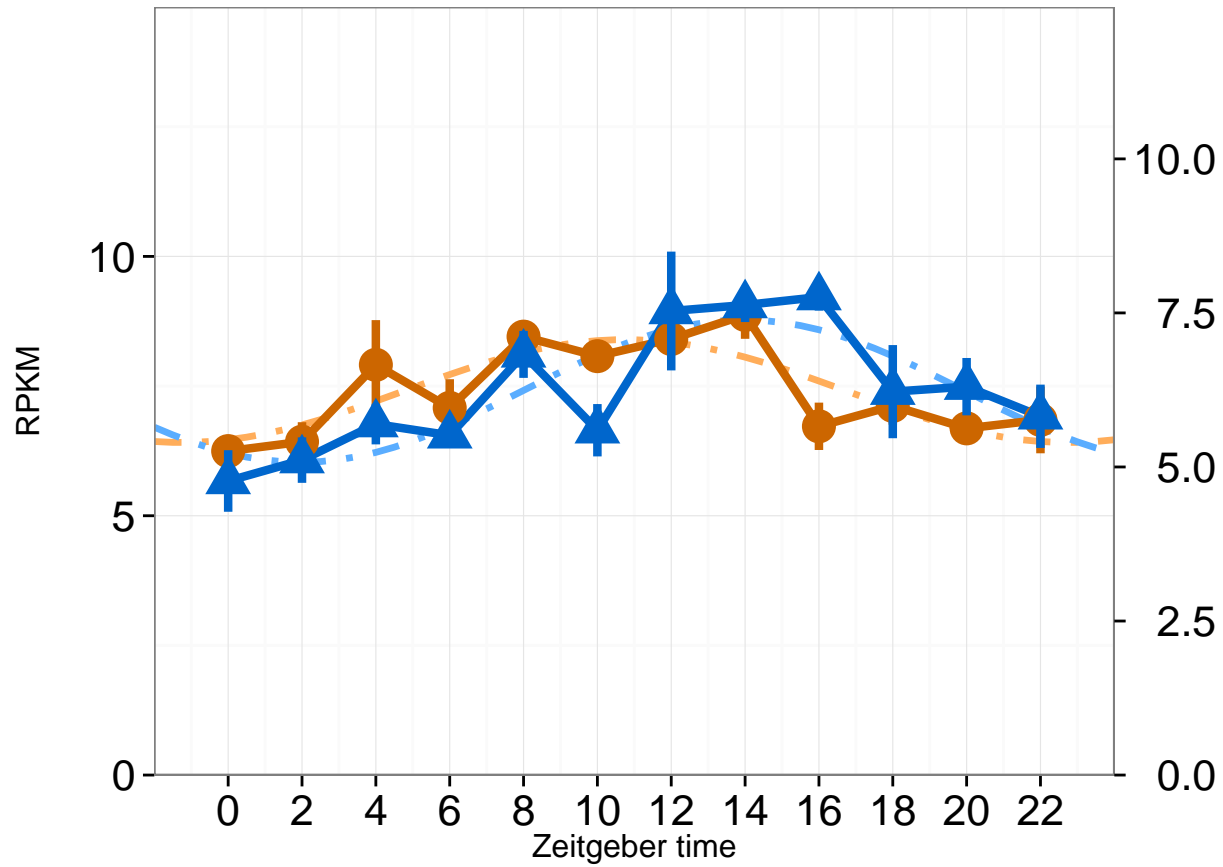

## Kank3

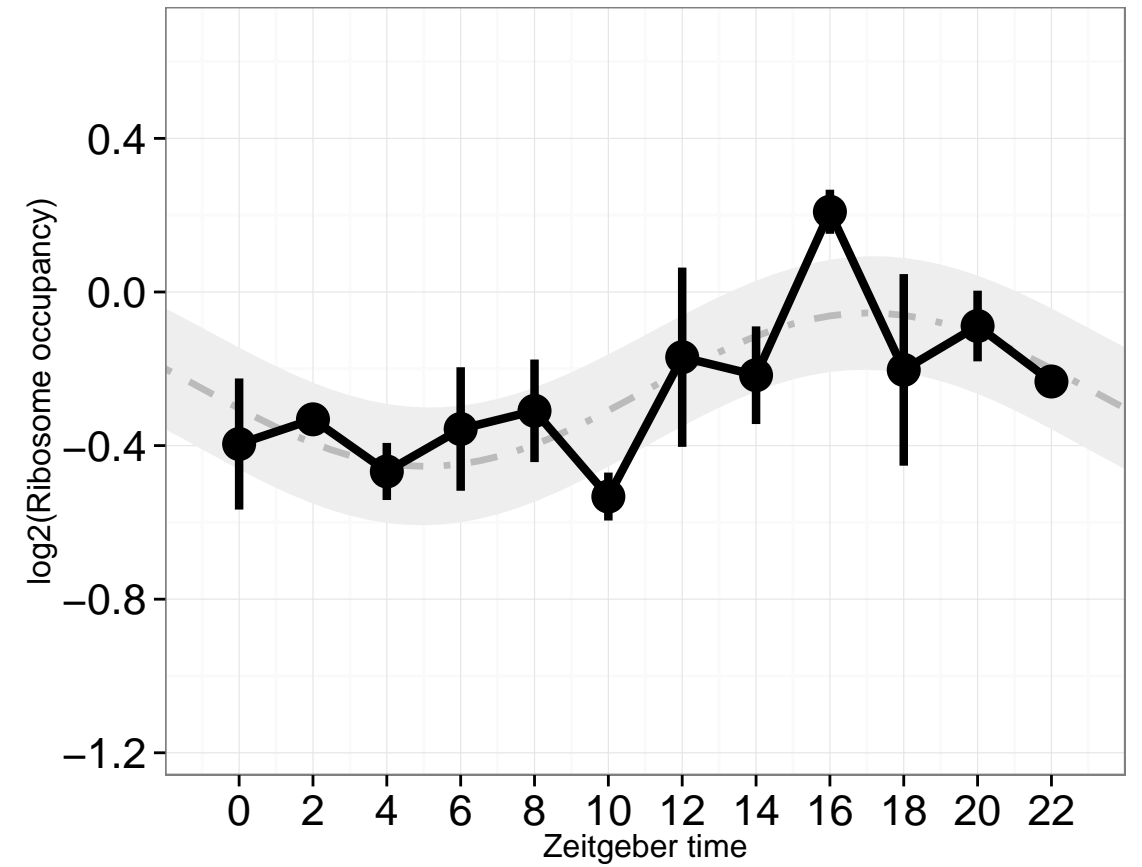

Supplement: Supplementary file 2295 [file 1]

# Kpna4

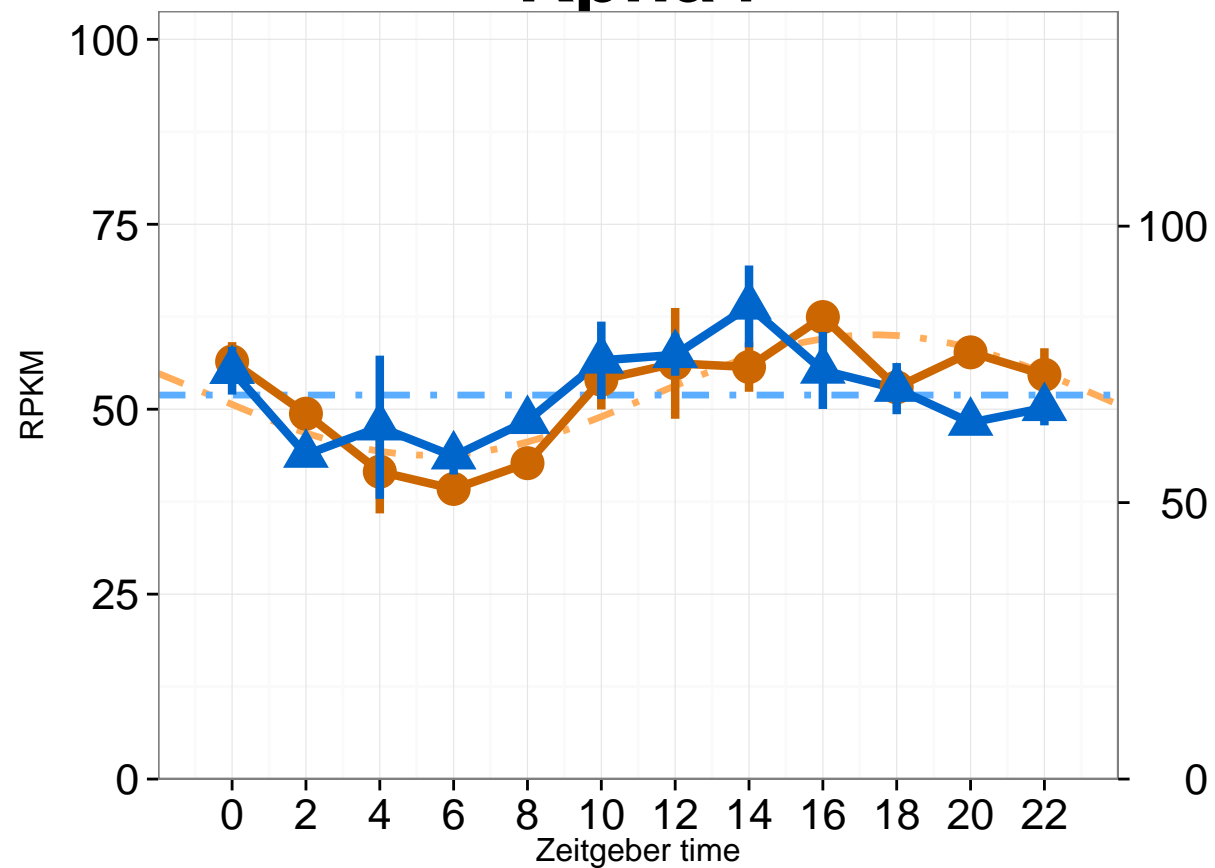

# Kpna4

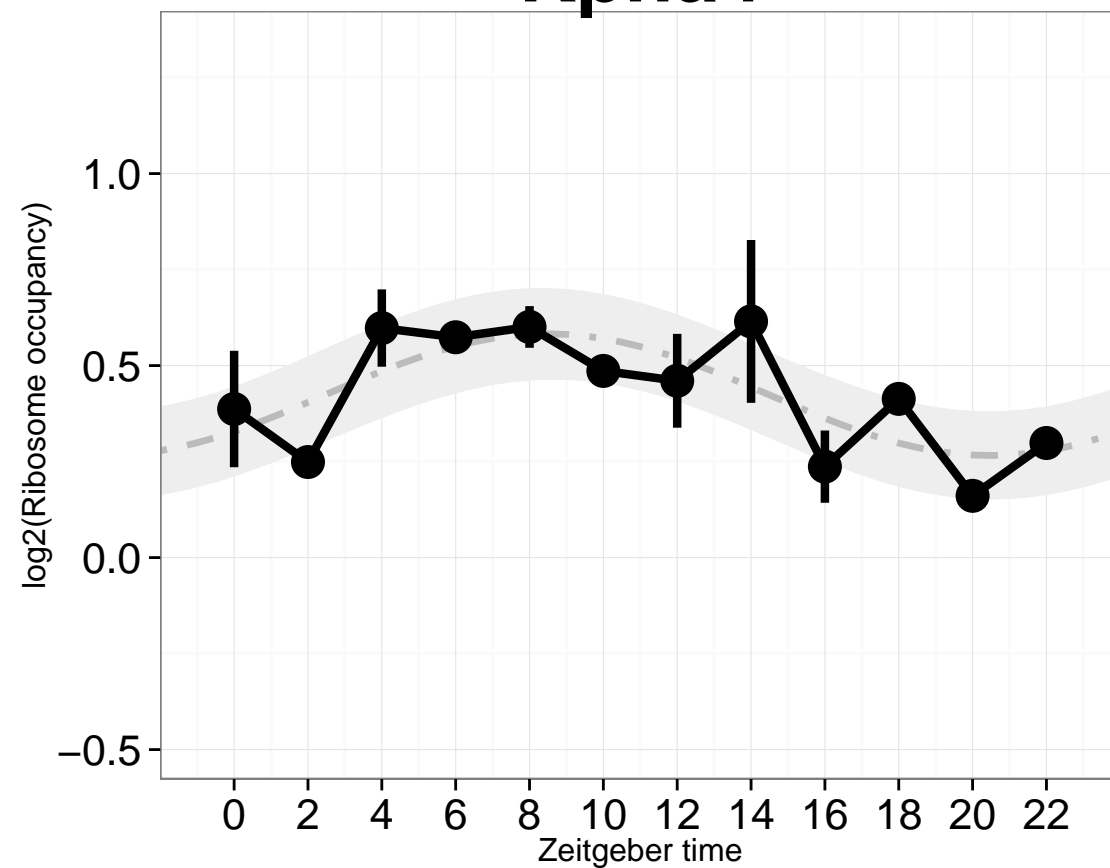

Supplement: Supplementary file 2296 [file 1]

# Lpxn

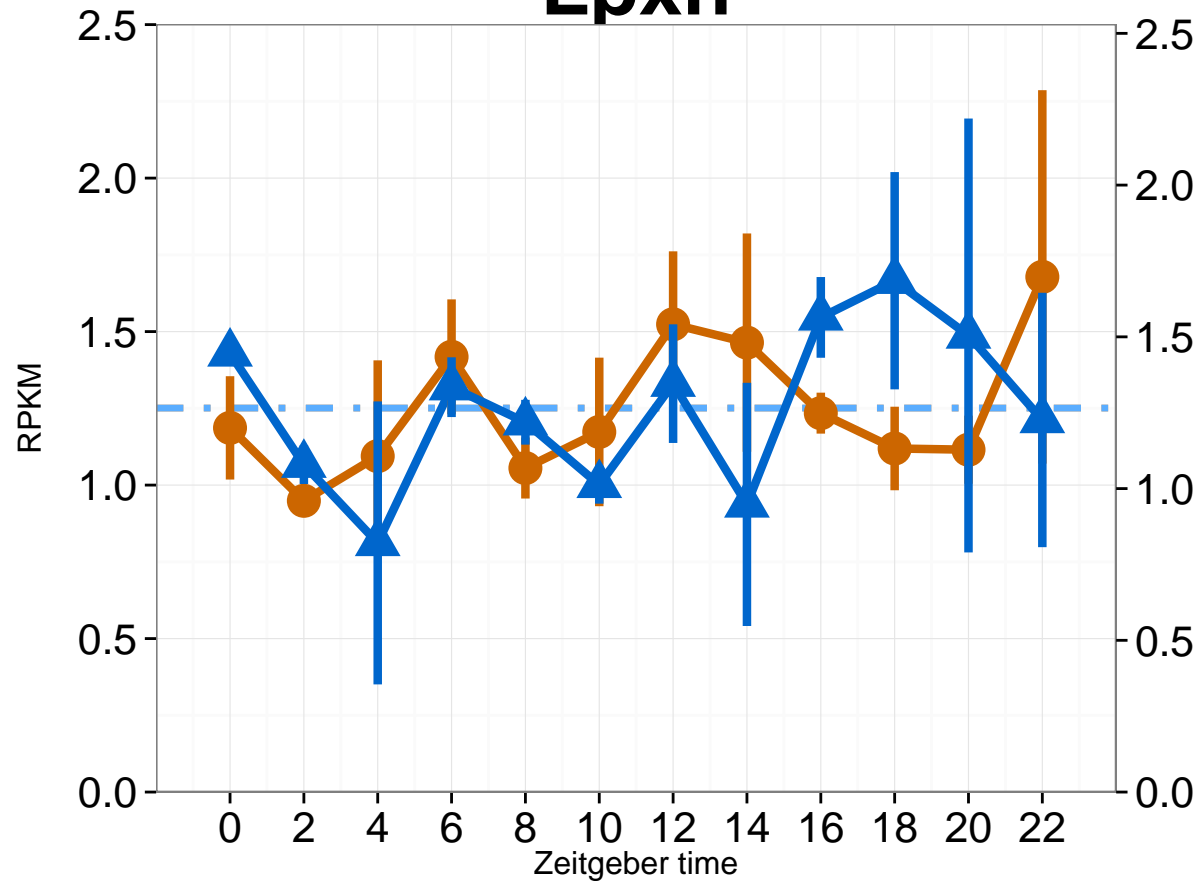

# Lpxn

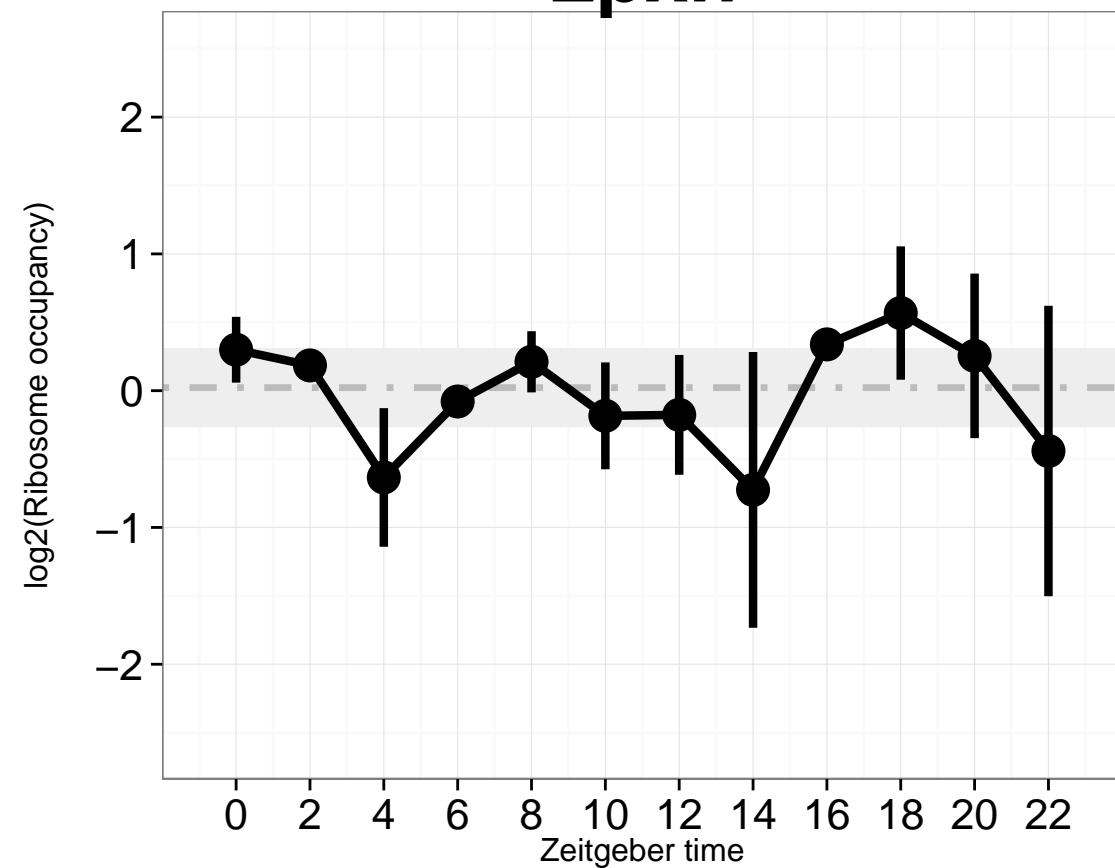

Supplement: Supplementary file 2297 [file 1]

# Itga4

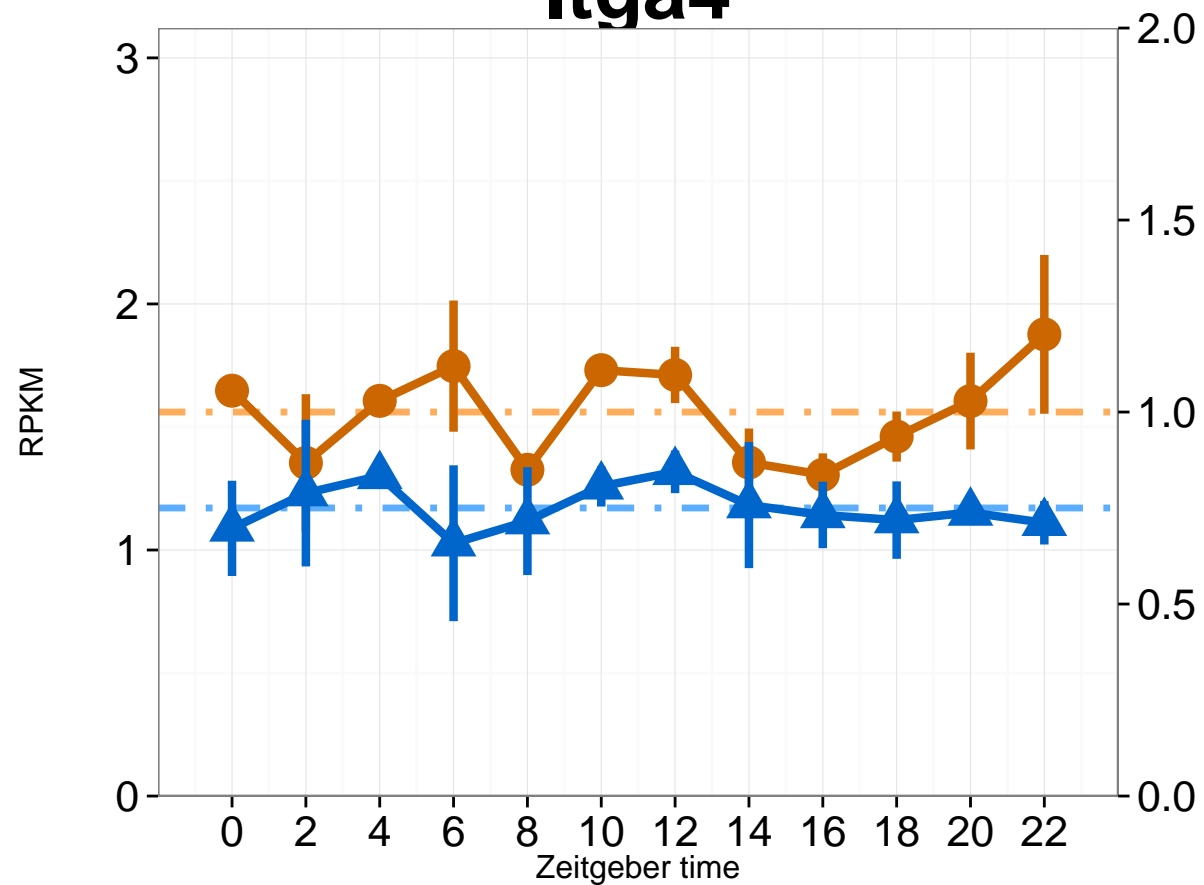

# Itga4

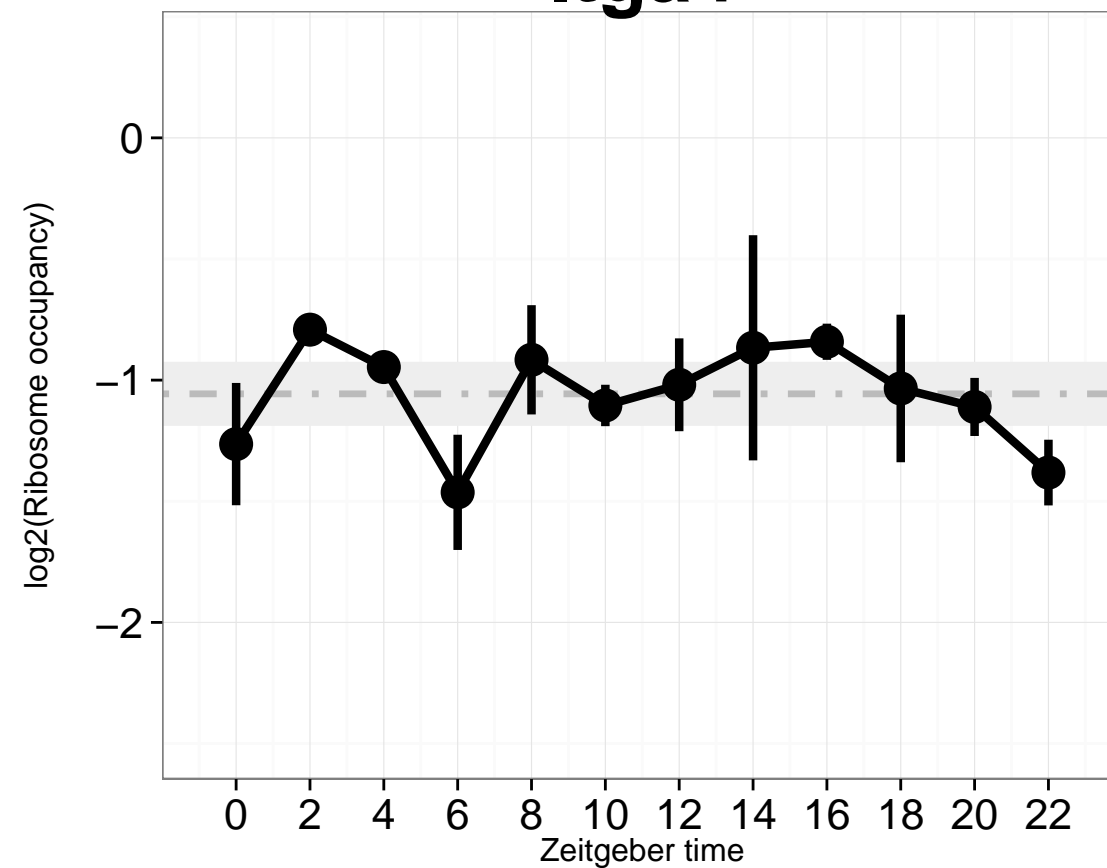

Supplement: Supplementary file 2298 [file 1]

# Fig11

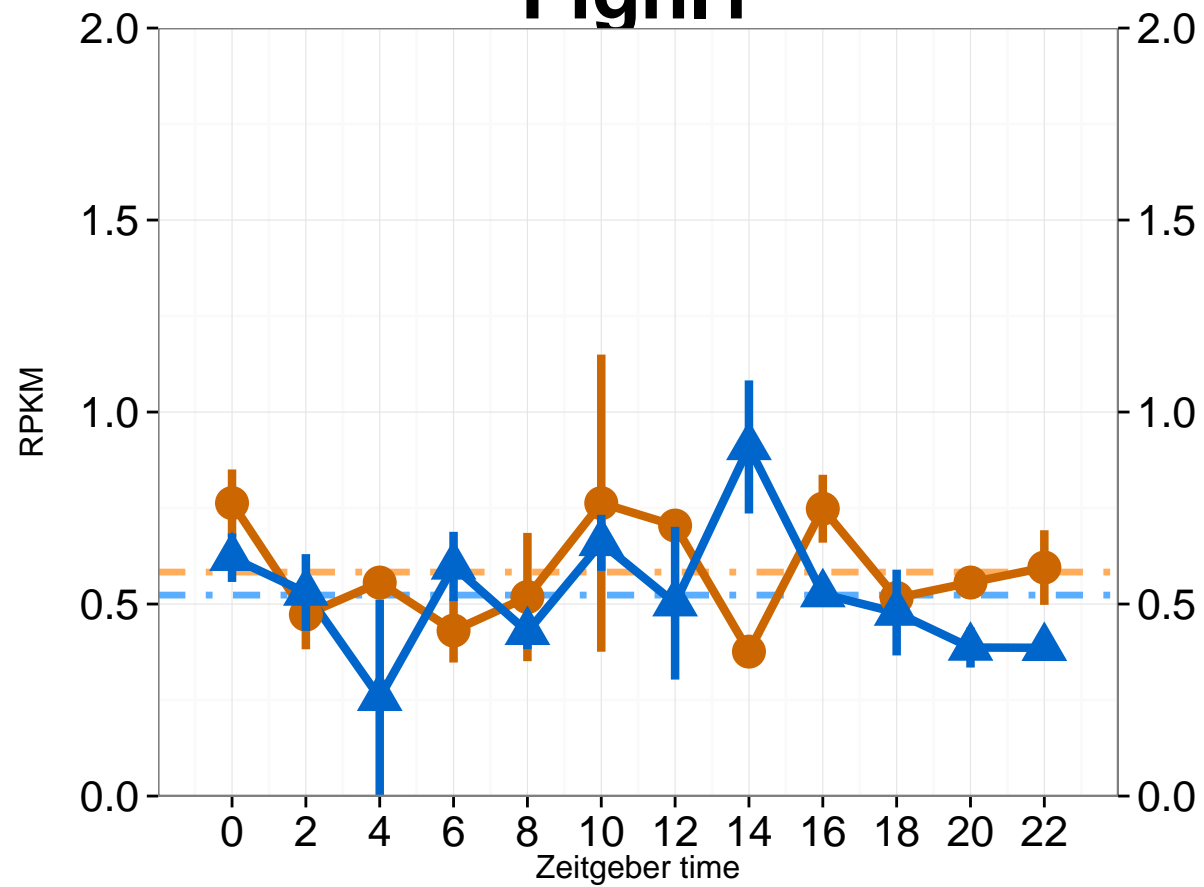

# Fig11

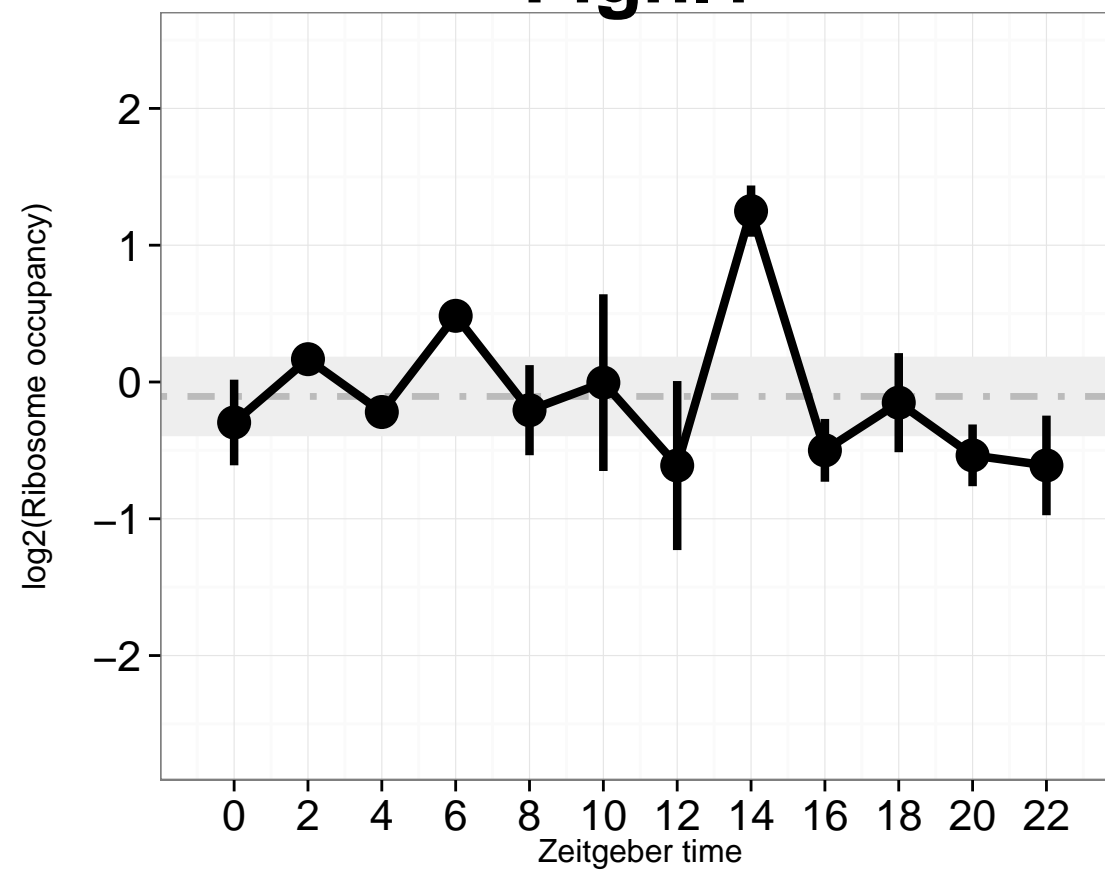

Supplement: Supplementary file 2299 [file 1]

## Plcb4

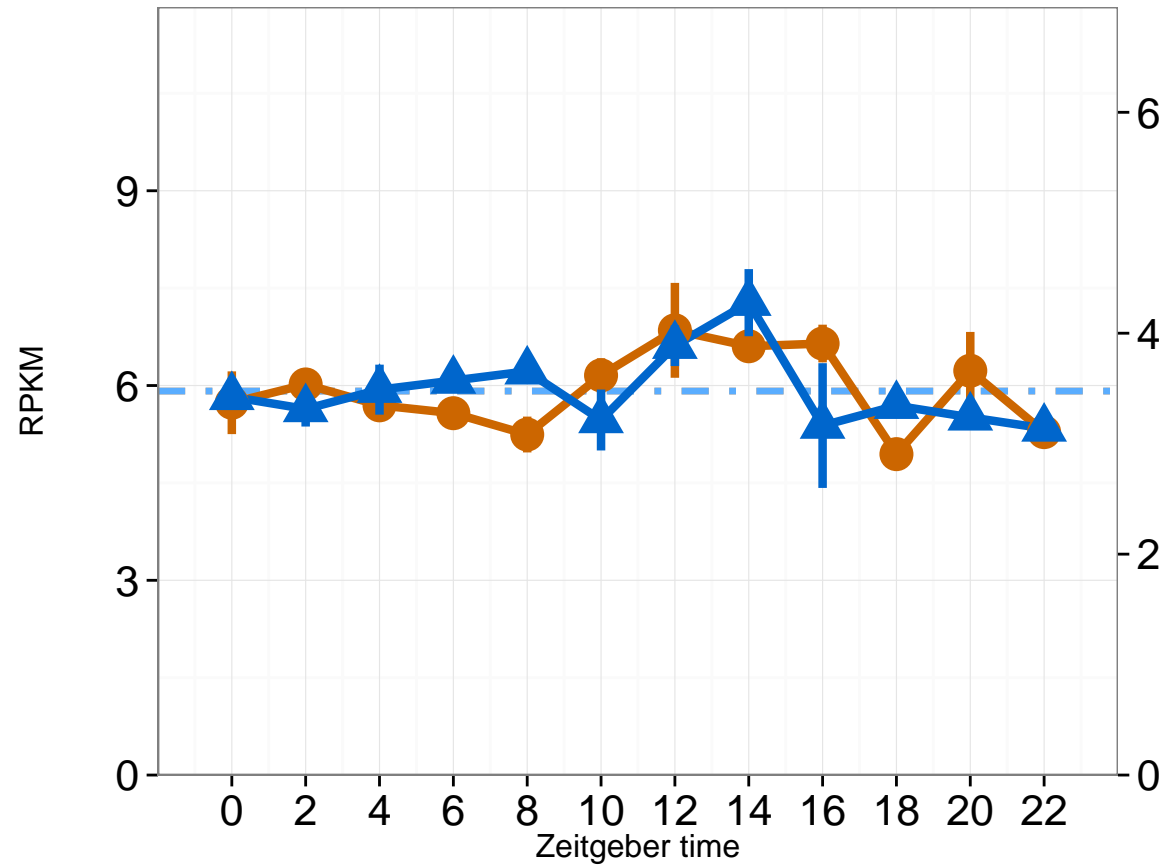

## Plcb4

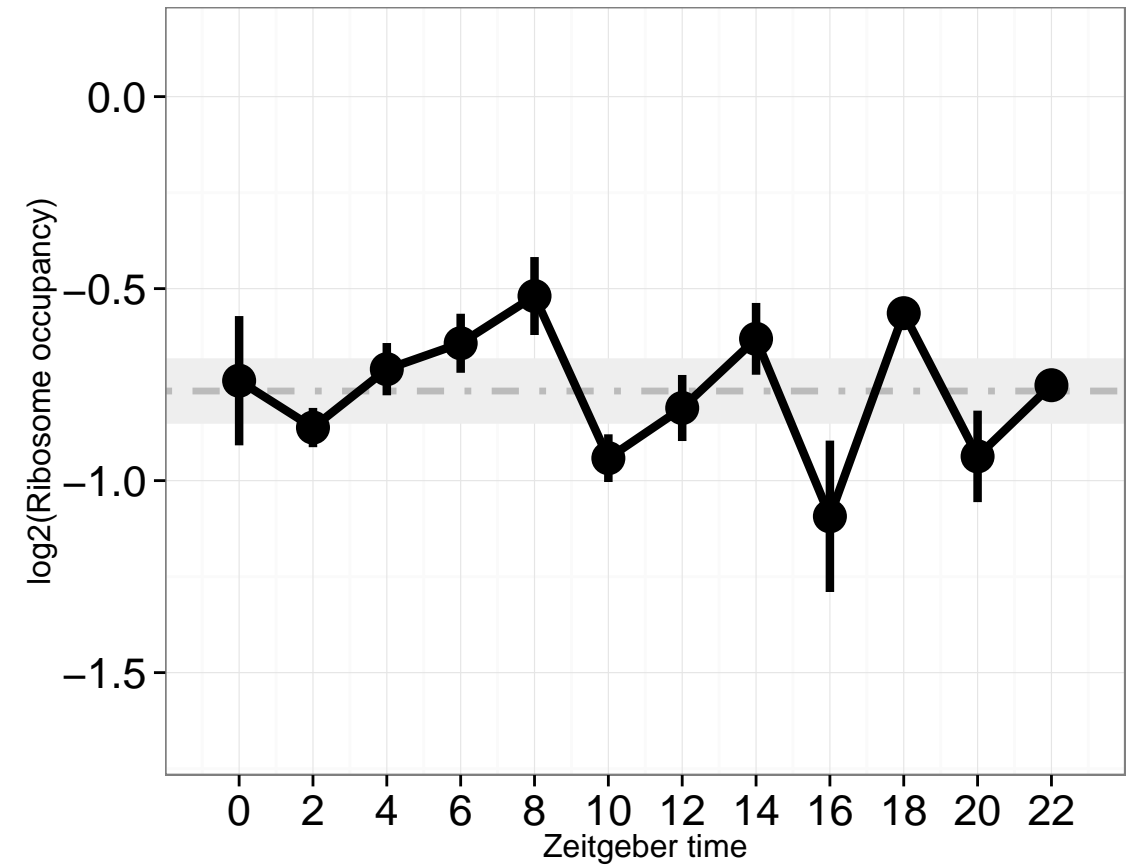

Supplement: Supplementary file 2300 [file 1]

# Mapkapk3

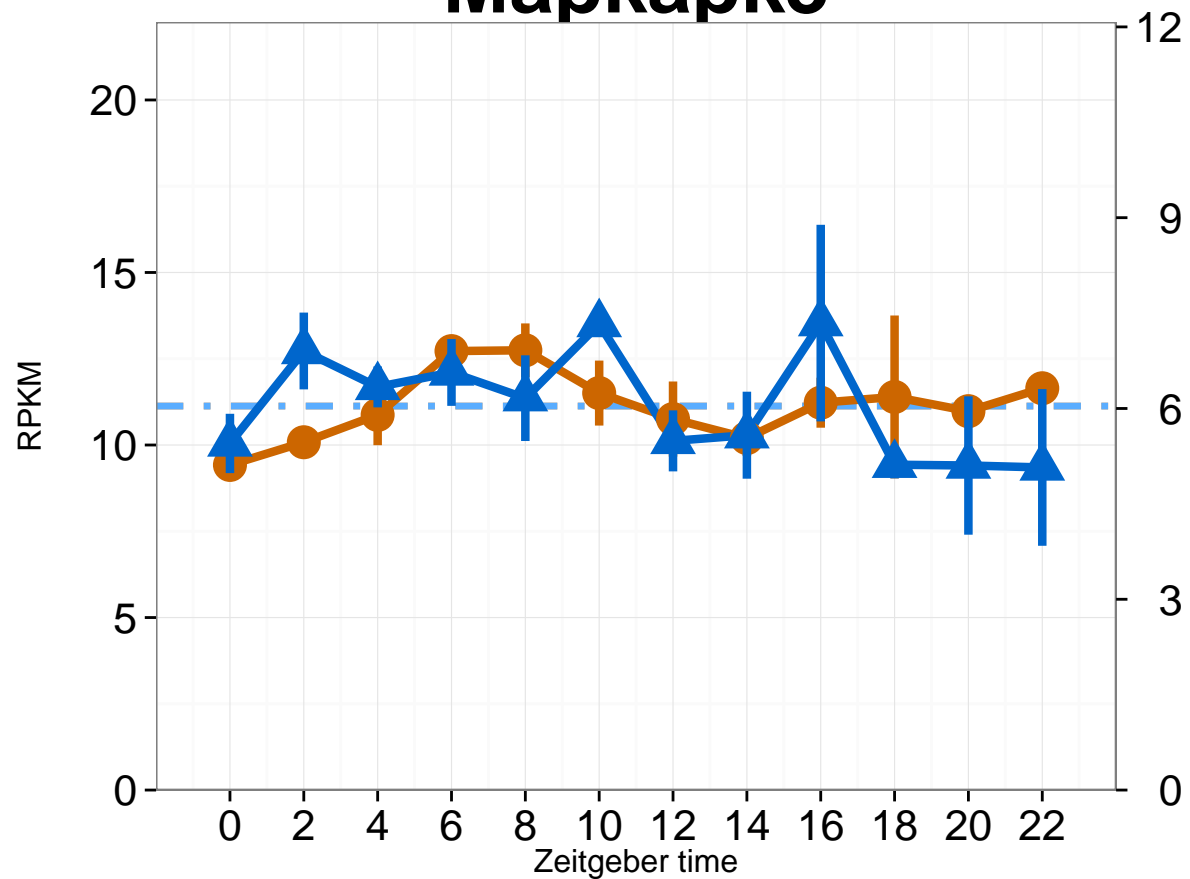

# Mapkapk3

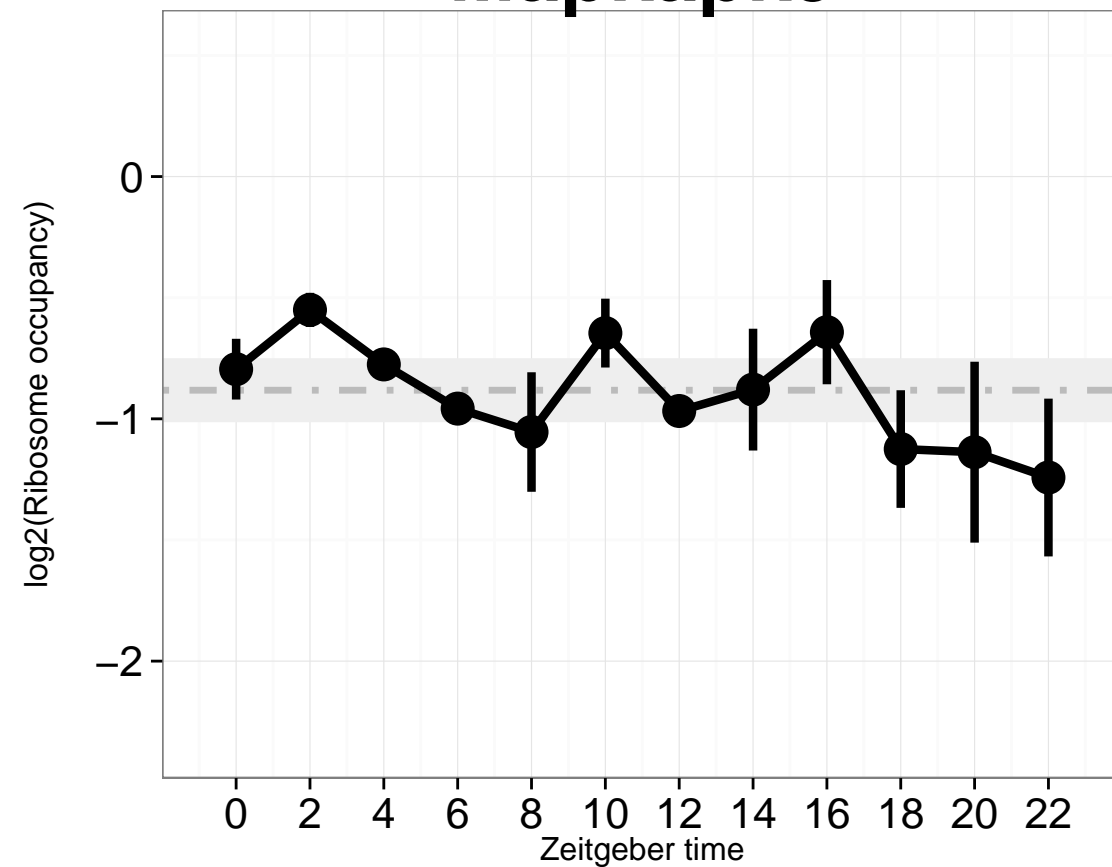

Supplement: Supplementary file 2301 [file 1]

## Pak4

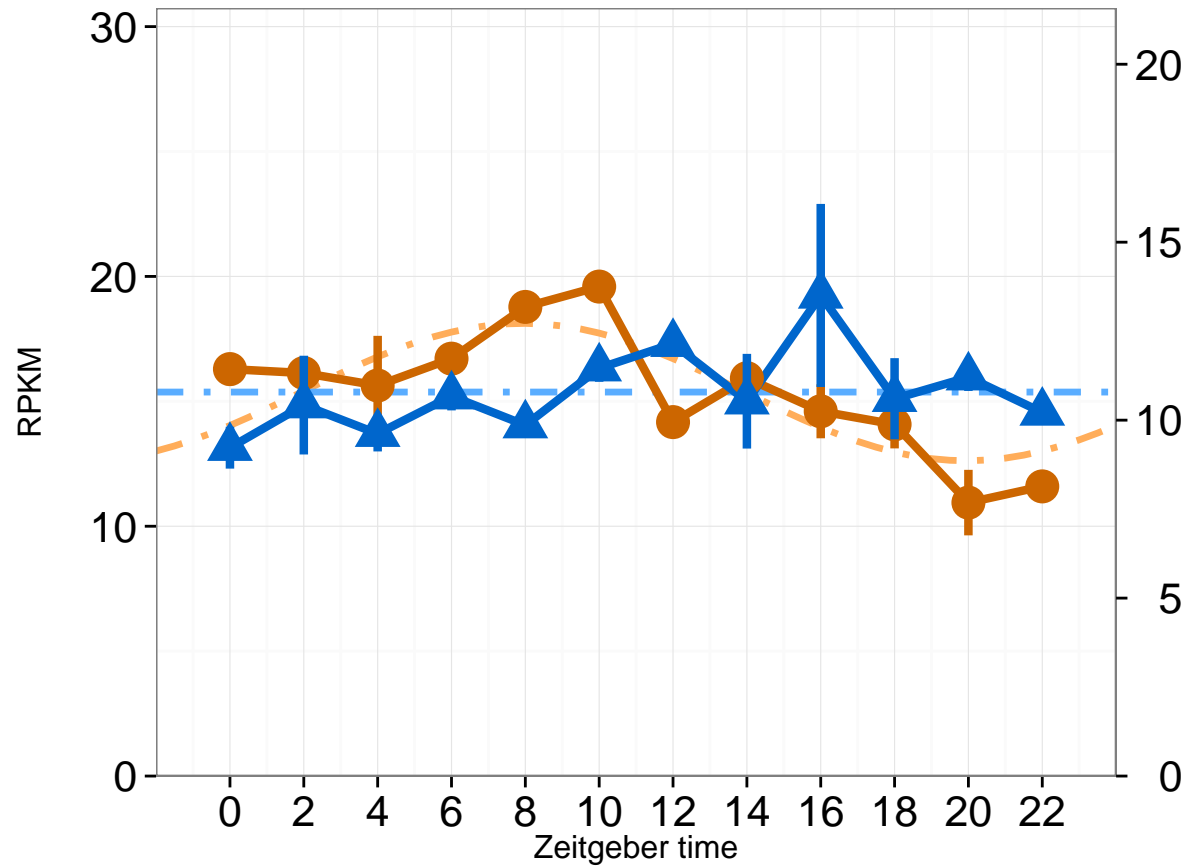

## Pak4

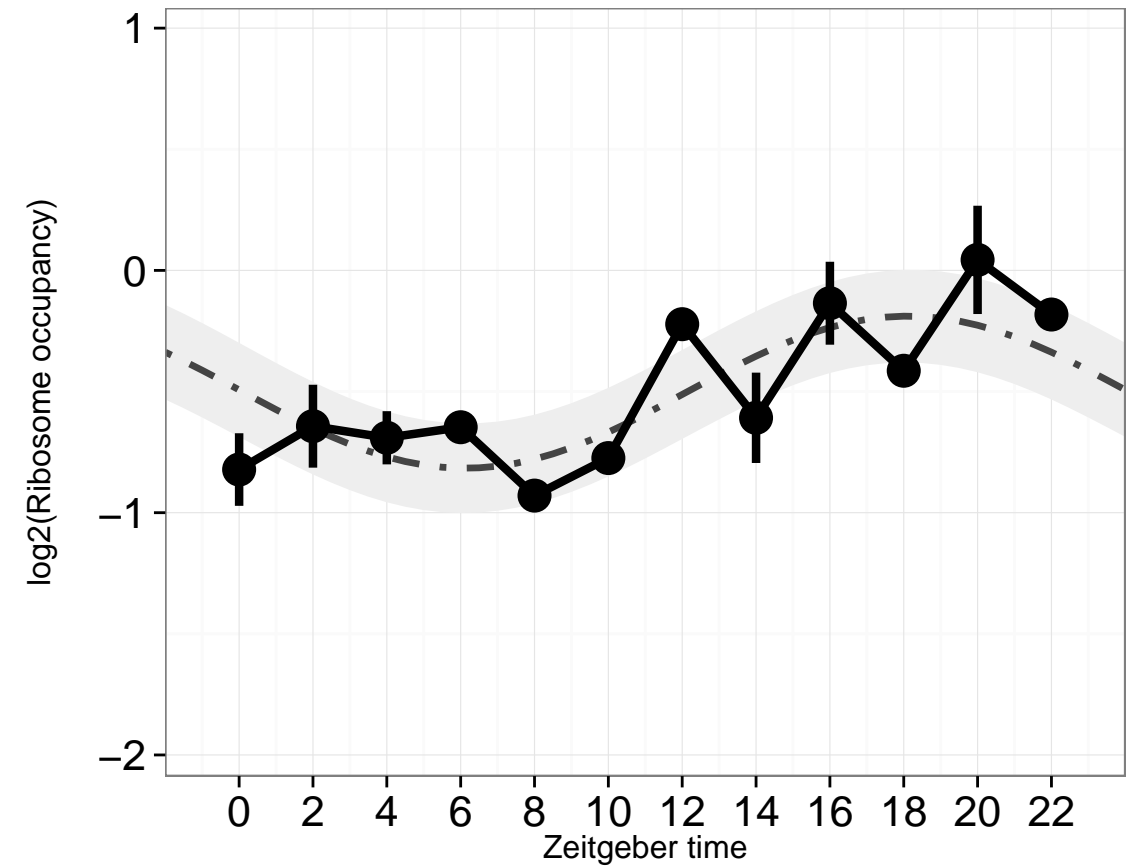

Supplement: Supplementary file 2302 [file 1]

# Rps6ka4

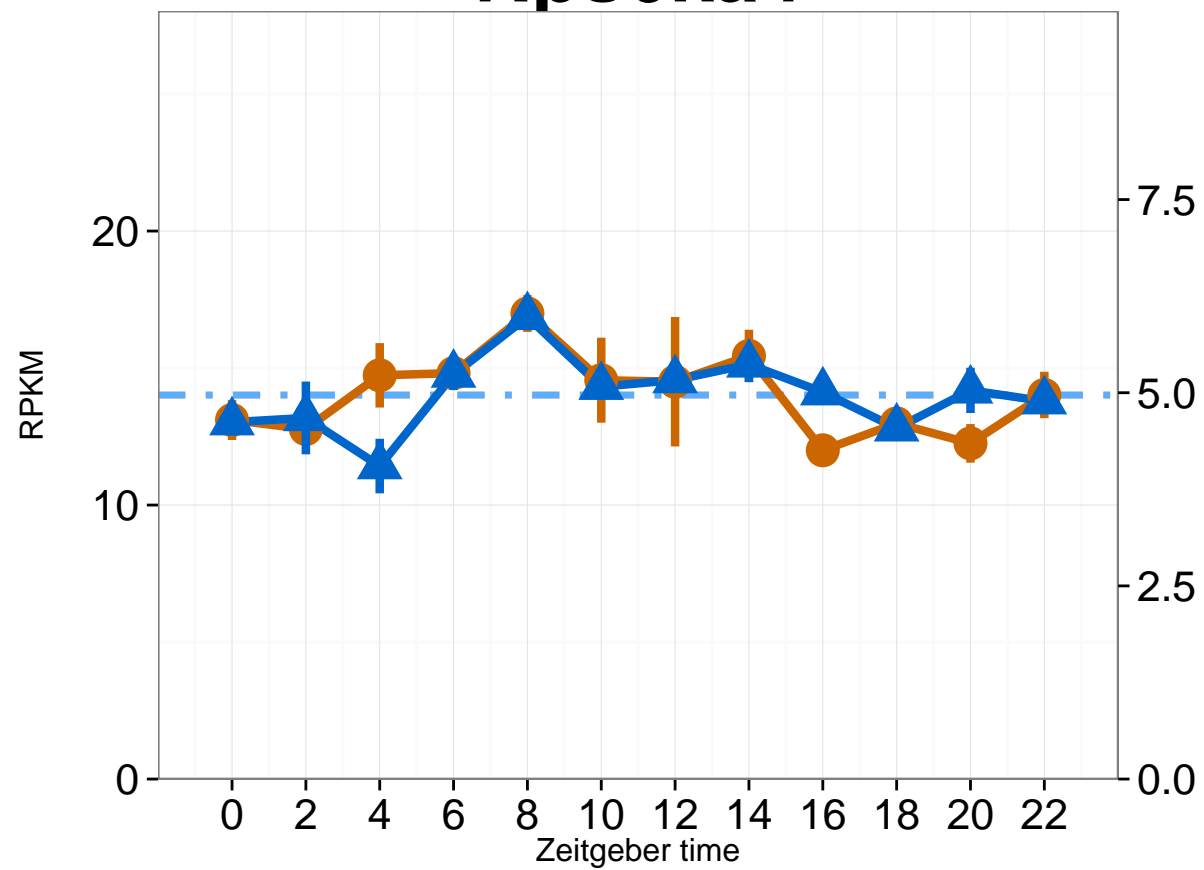

# Rps6ka4

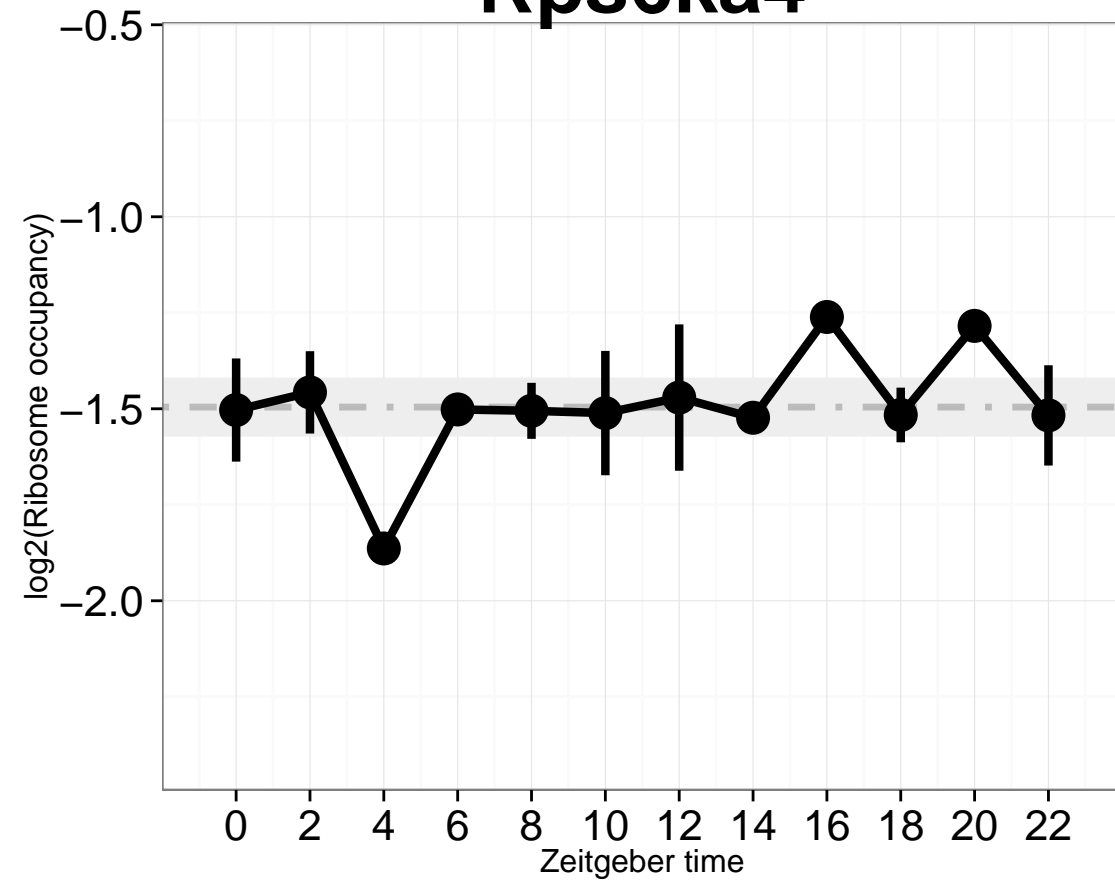

Supplement: Supplementary file 2303 [file 1]

## Naa15

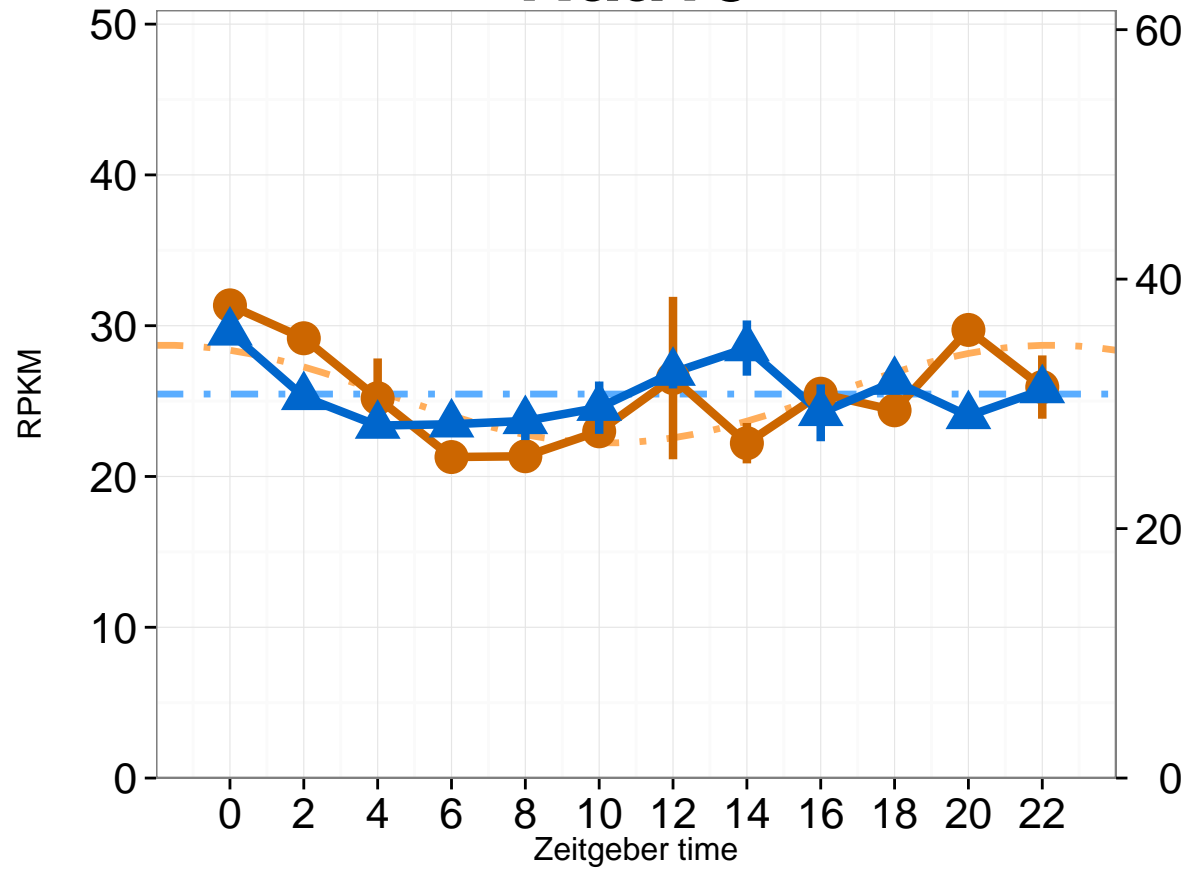

## Naa15

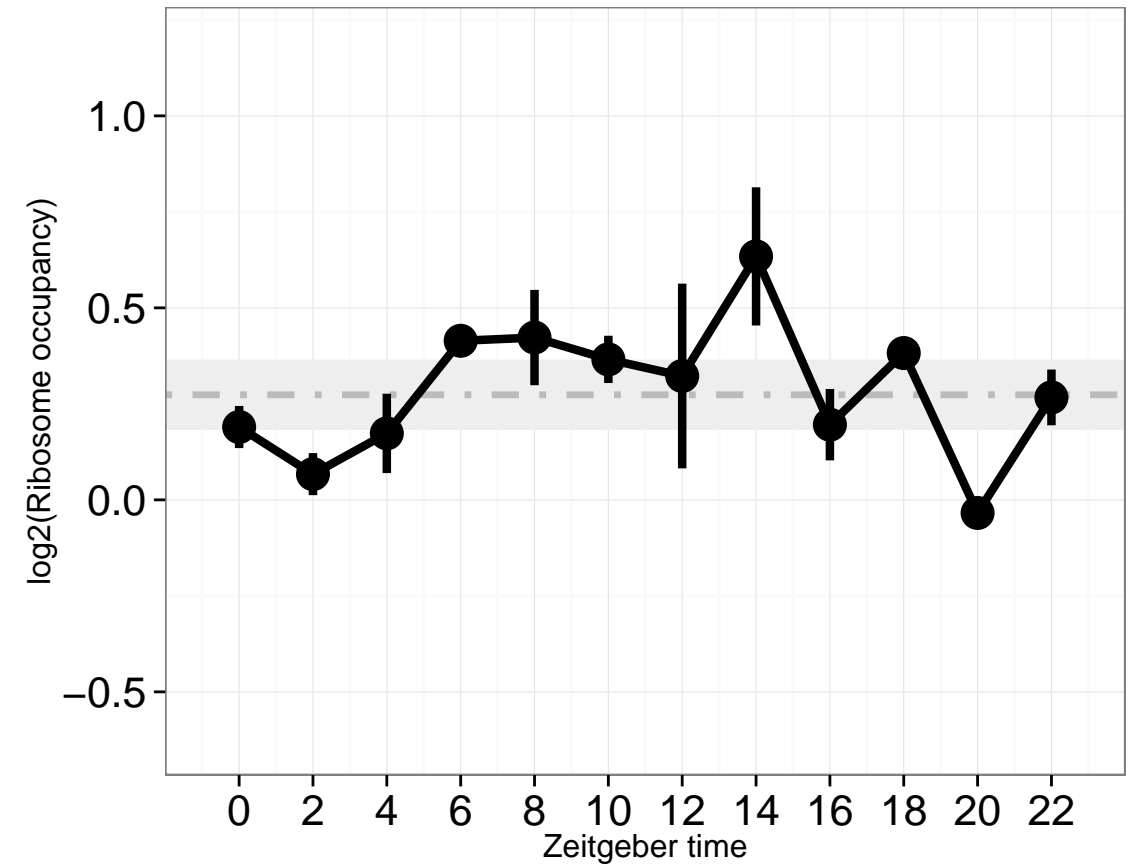

Supplement: Supplementary file 2304 [file 1]

## Tssc4

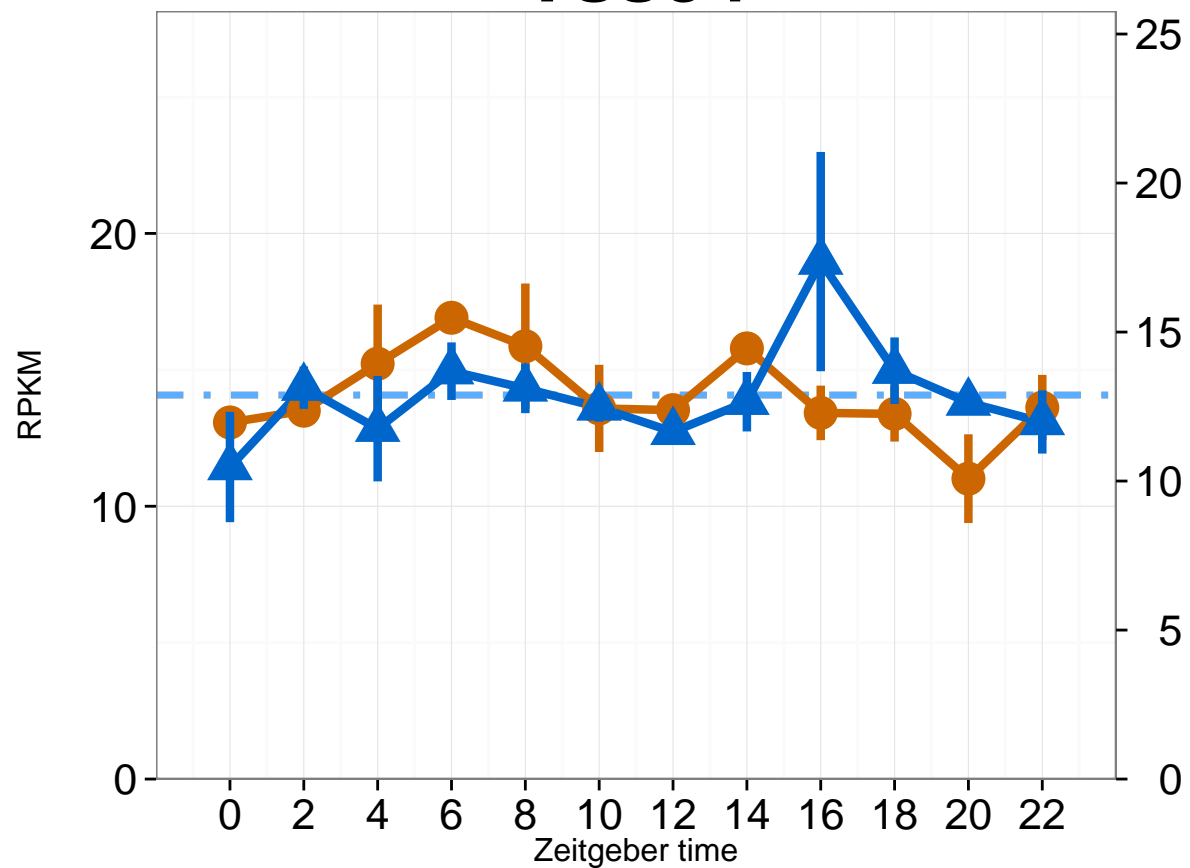

## Tssc4

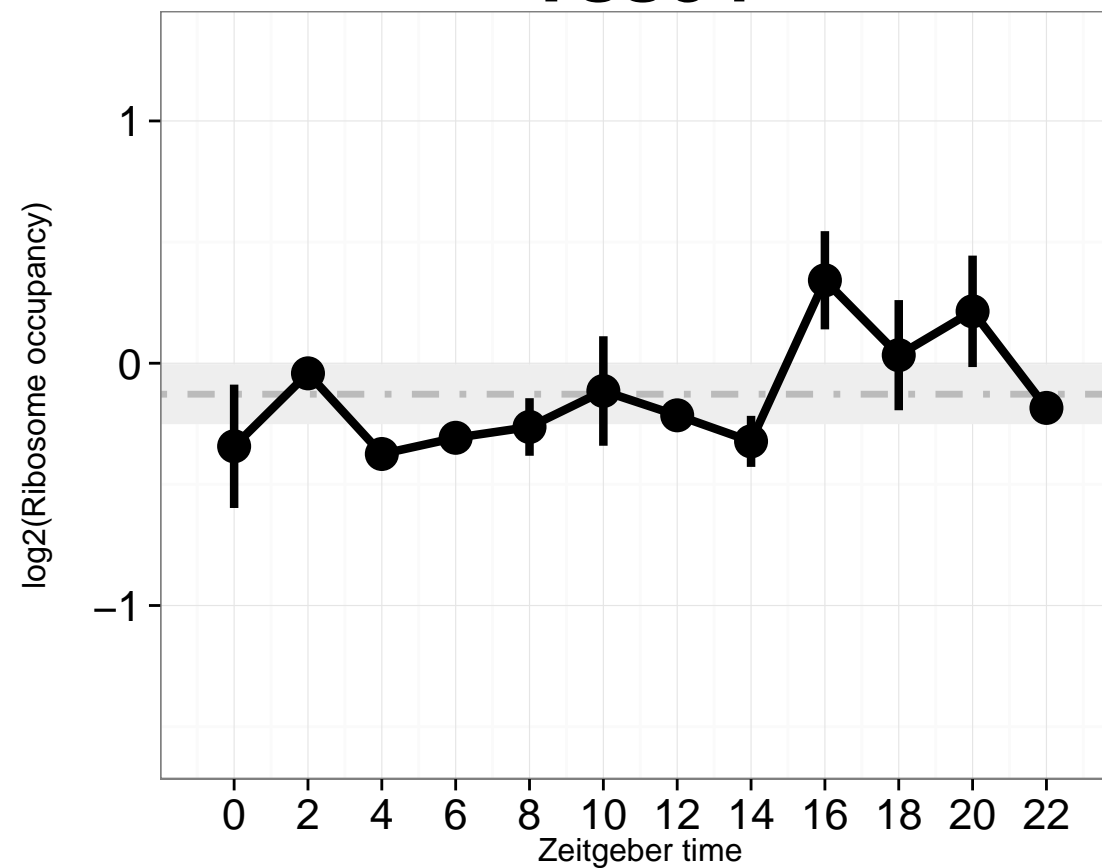

Supplement: Supplementary file 2305 [file 1]

# Syce2

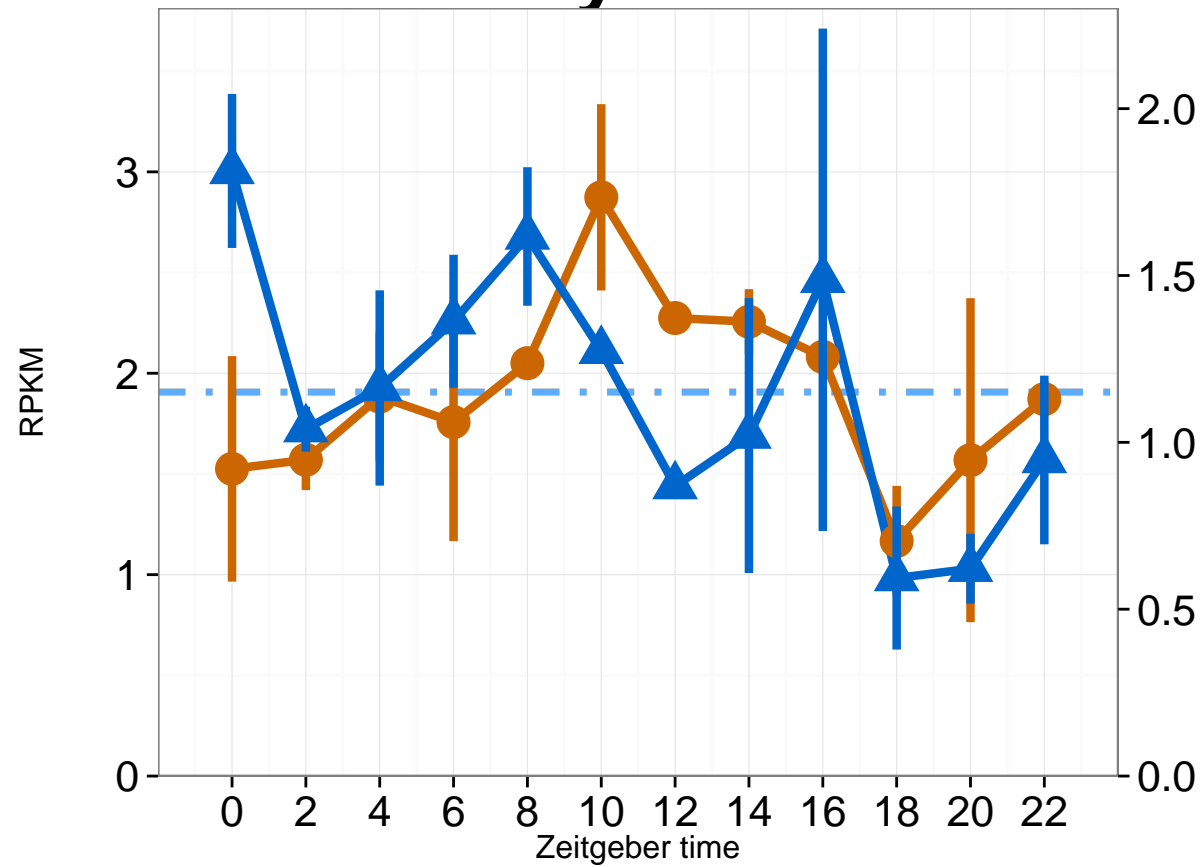

# Syce2

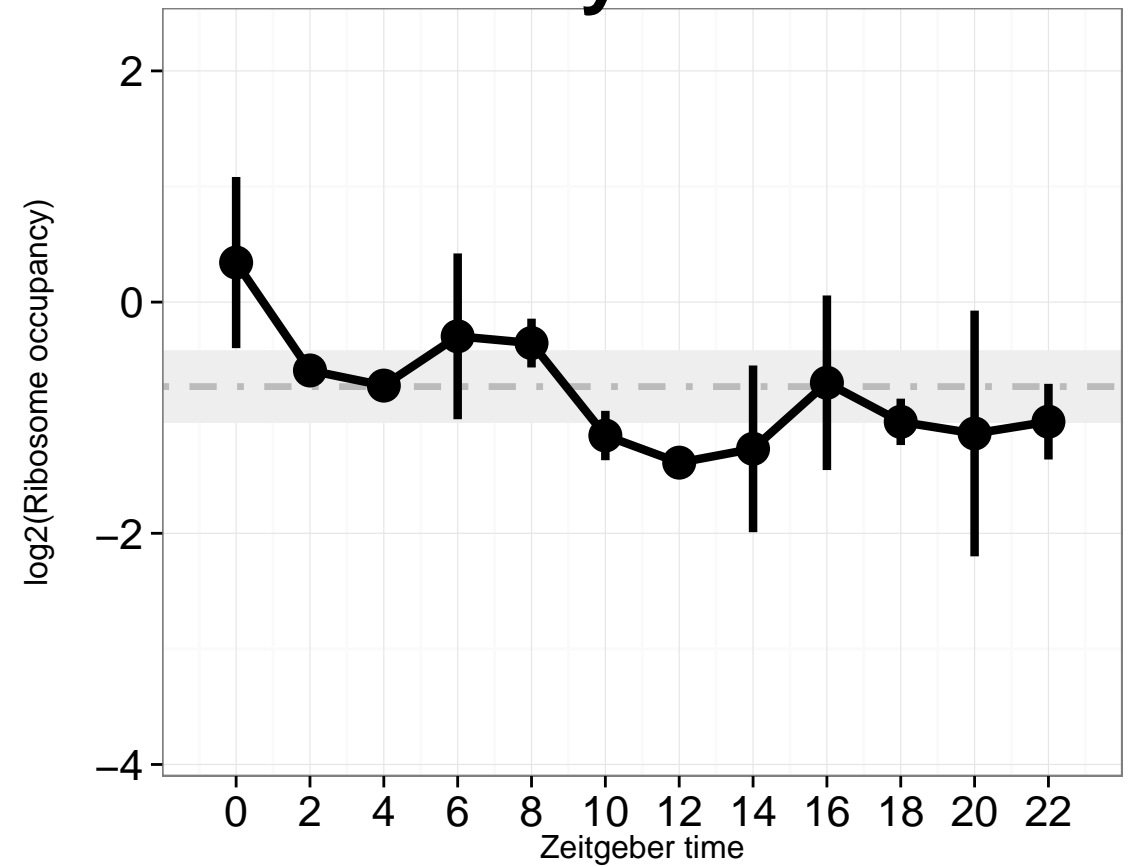

Supplement: Supplementary file 2306 [file 1]

# Hnf1a

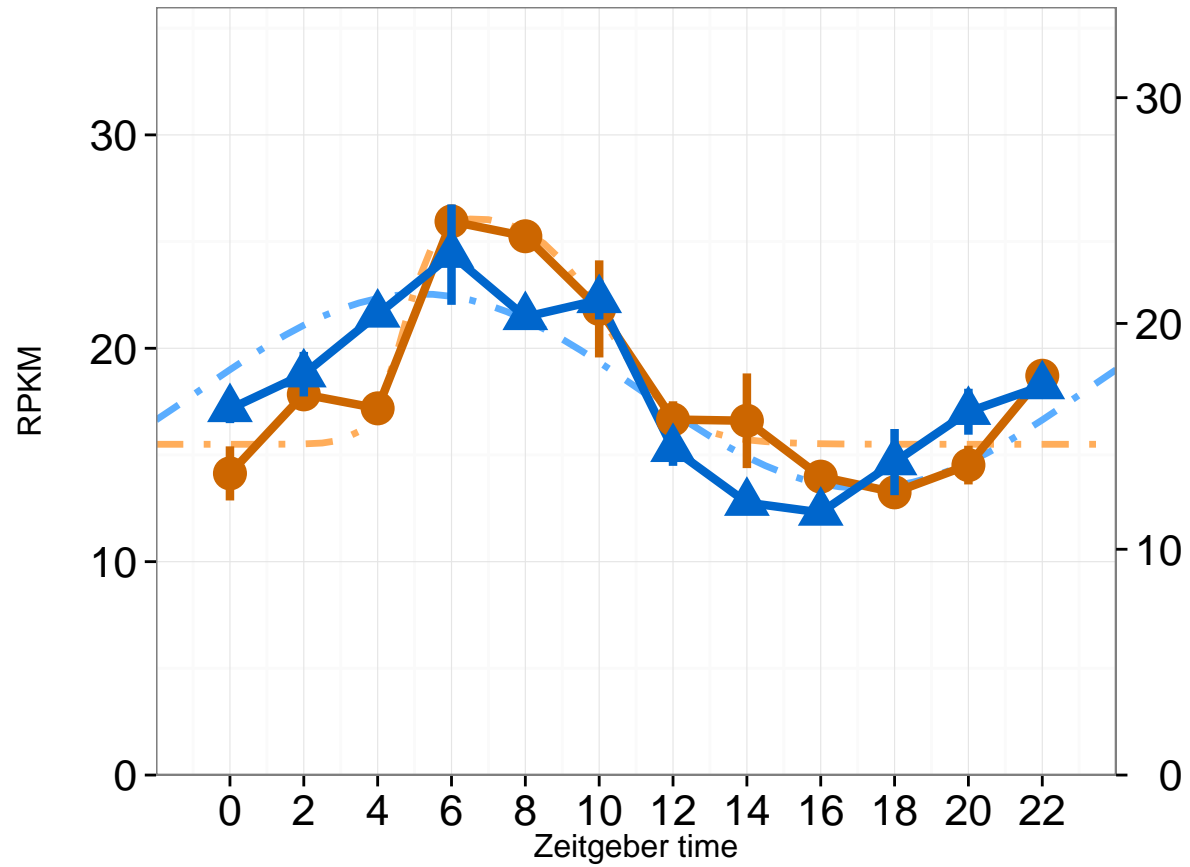

# Hnf1a

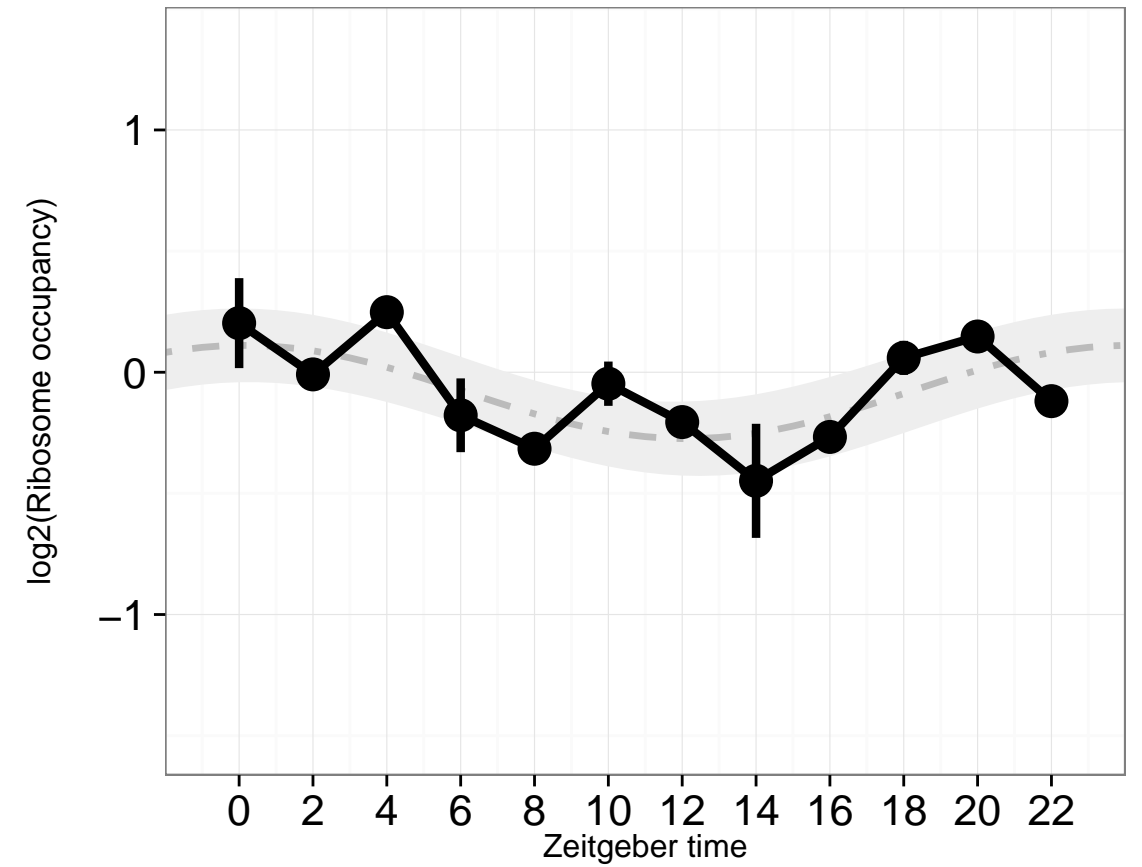

Supplement: Supplementary file 2307 [file 1]

# Ctbp1

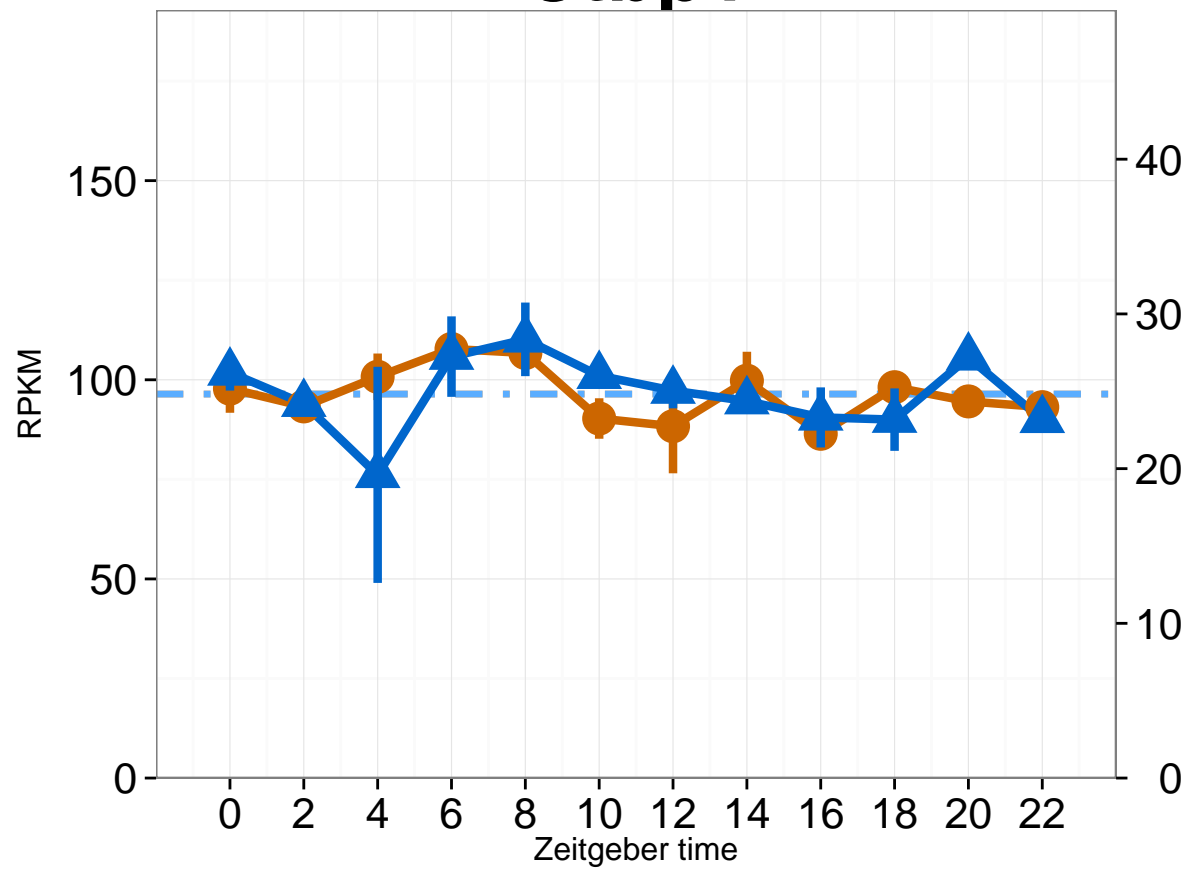

# Ctbp1

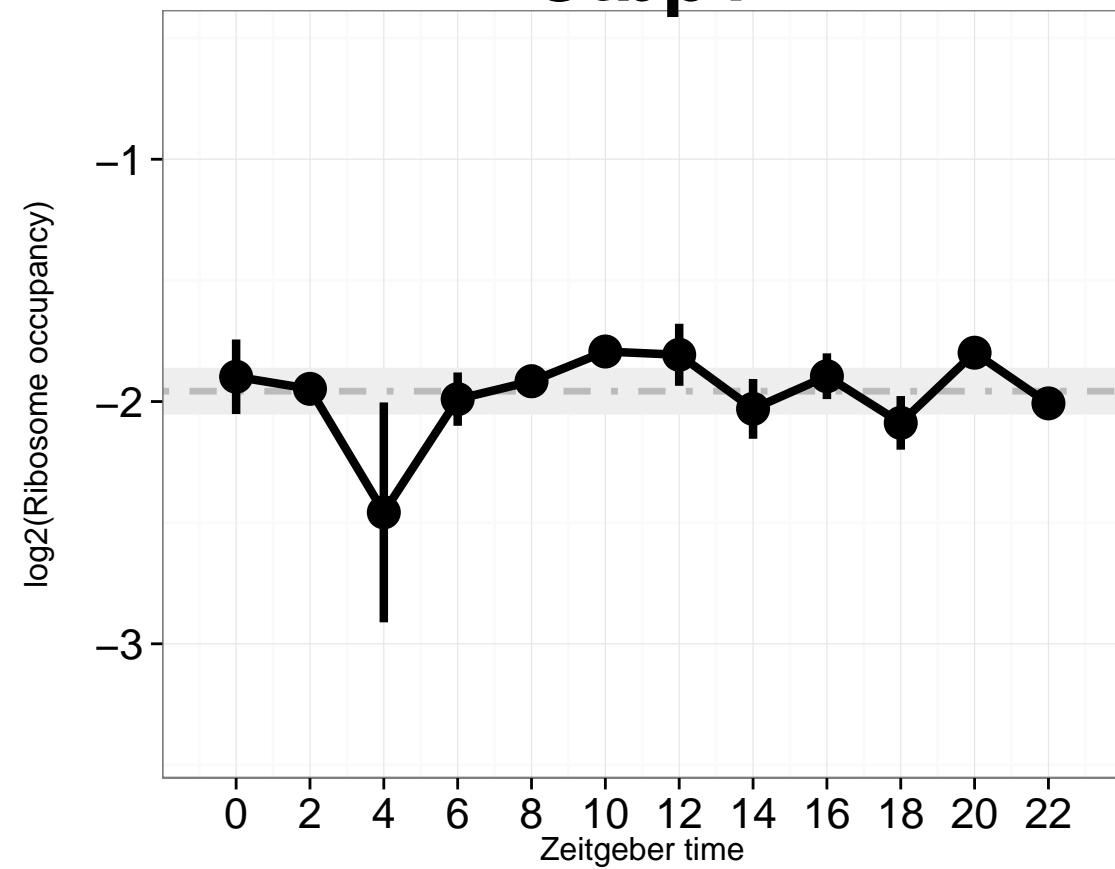

Supplement: Supplementary file 2308 [file 1]
