# Supplementary material (part 24 of 133)
Source: publisher figshare collection journal article supplement (https://springernature.figshare.com/articles/dataset/_/4903193)

# Igf1

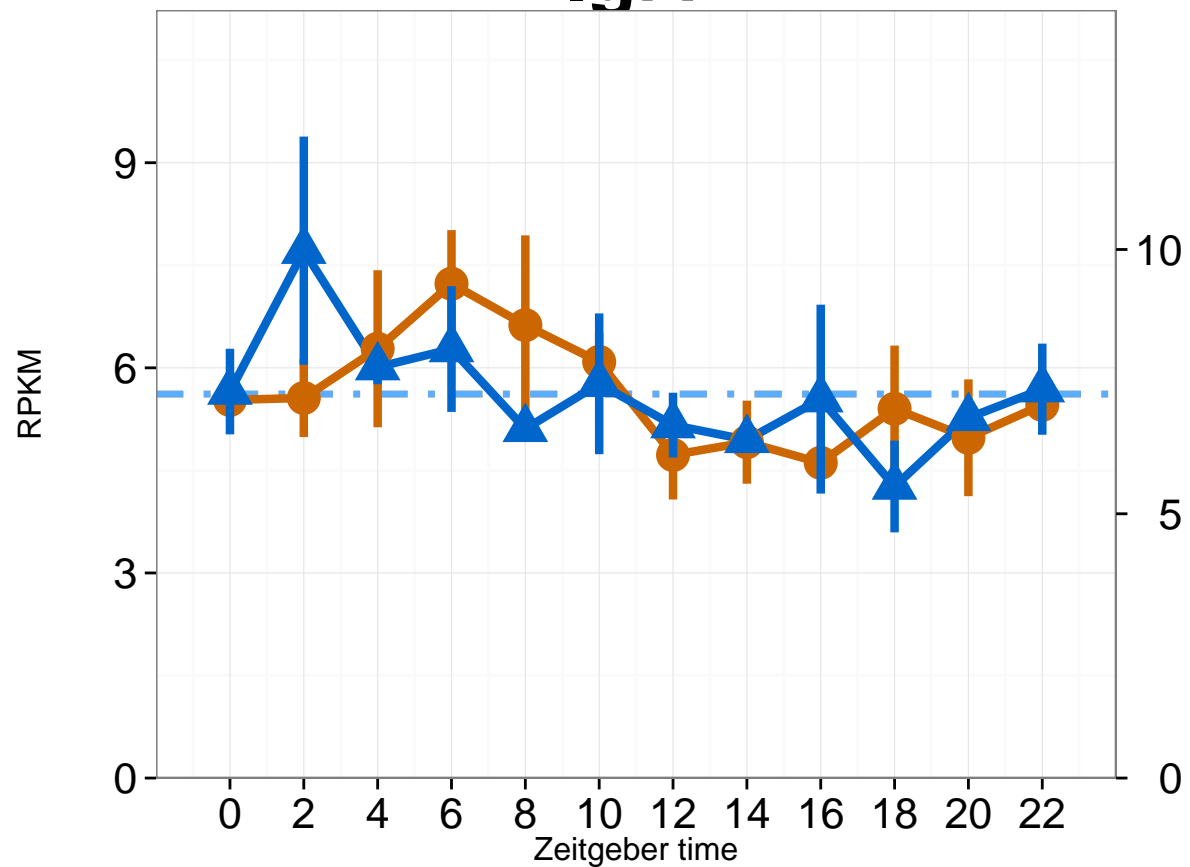

# Igf1

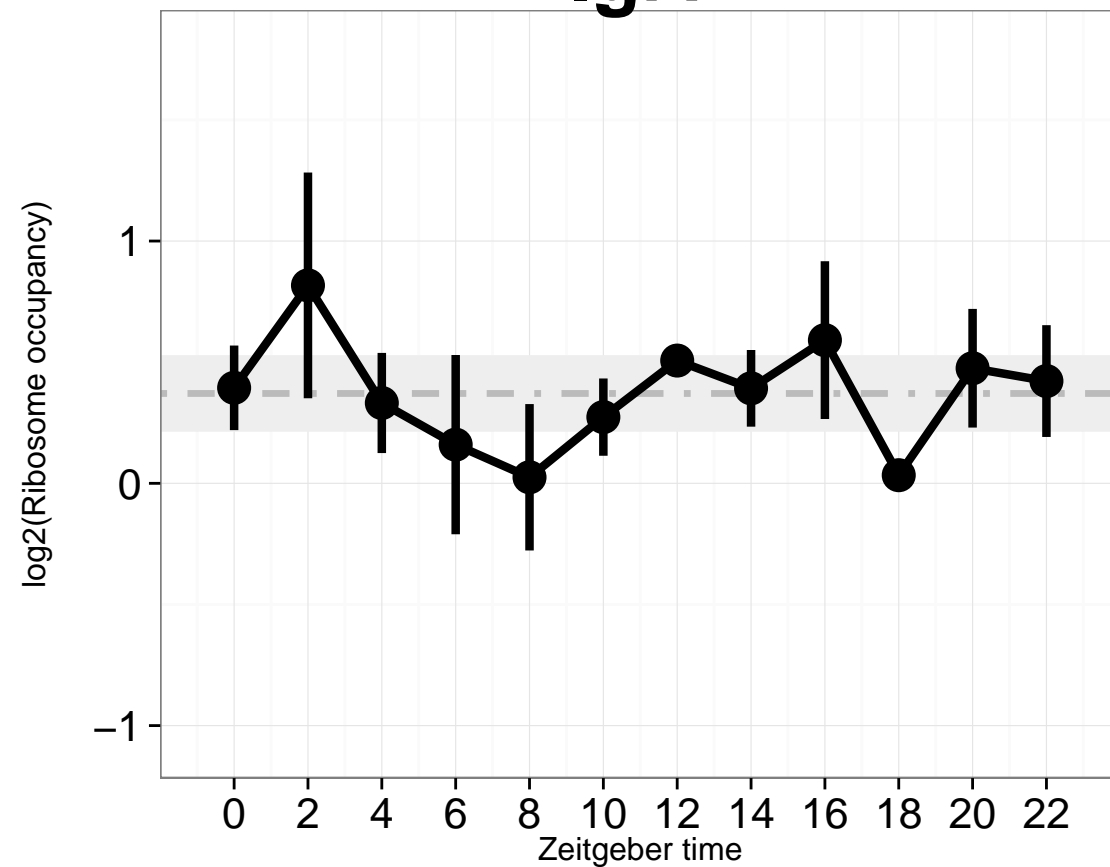

Supplement: Supplementary file 2309 [file 1]

## Naaa

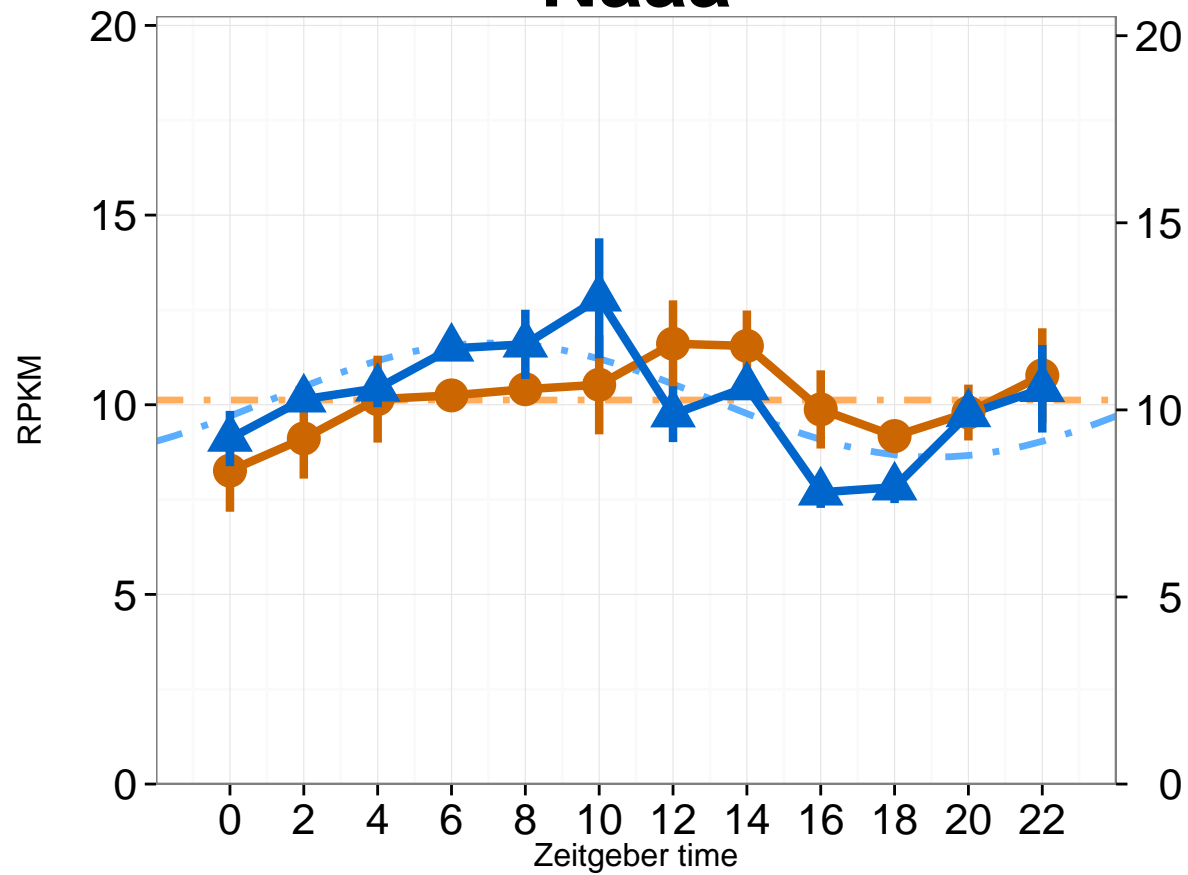

## Naaa

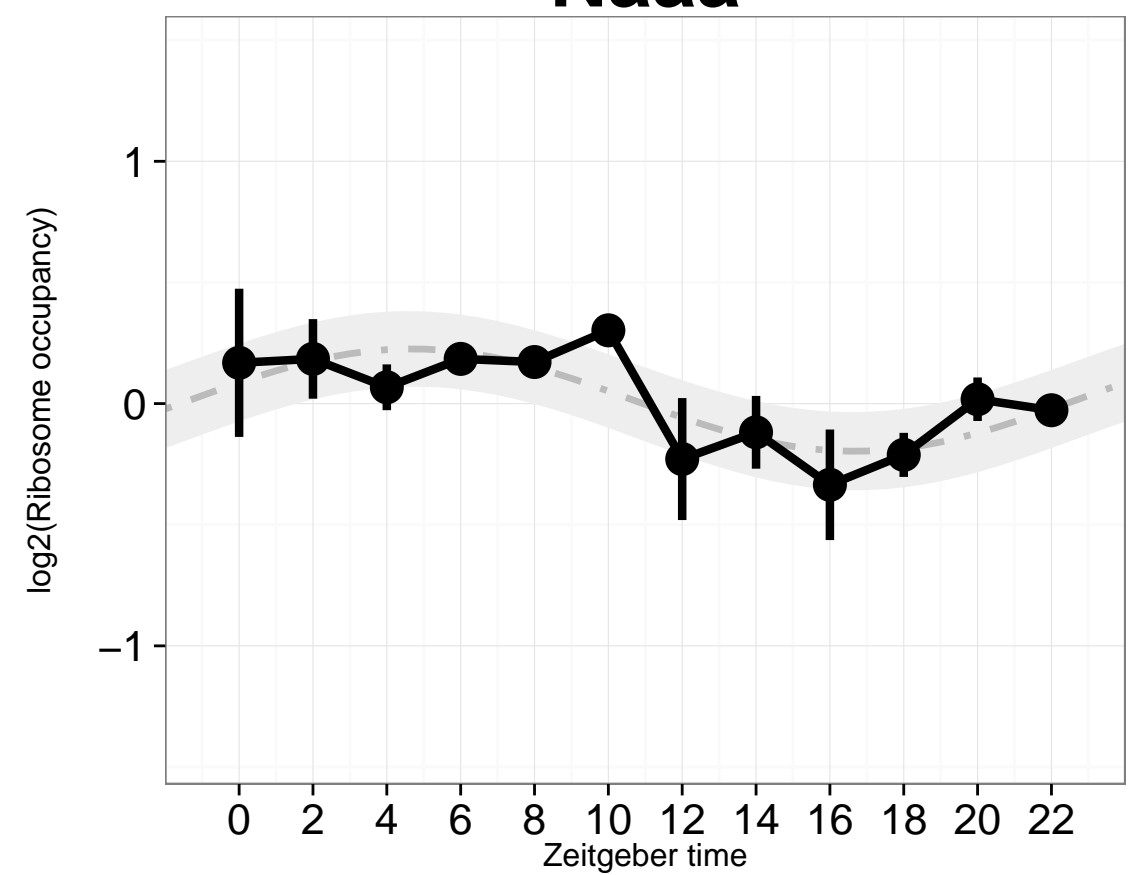

Supplement: Supplementary file 2310 [file 1]

# Atg4c

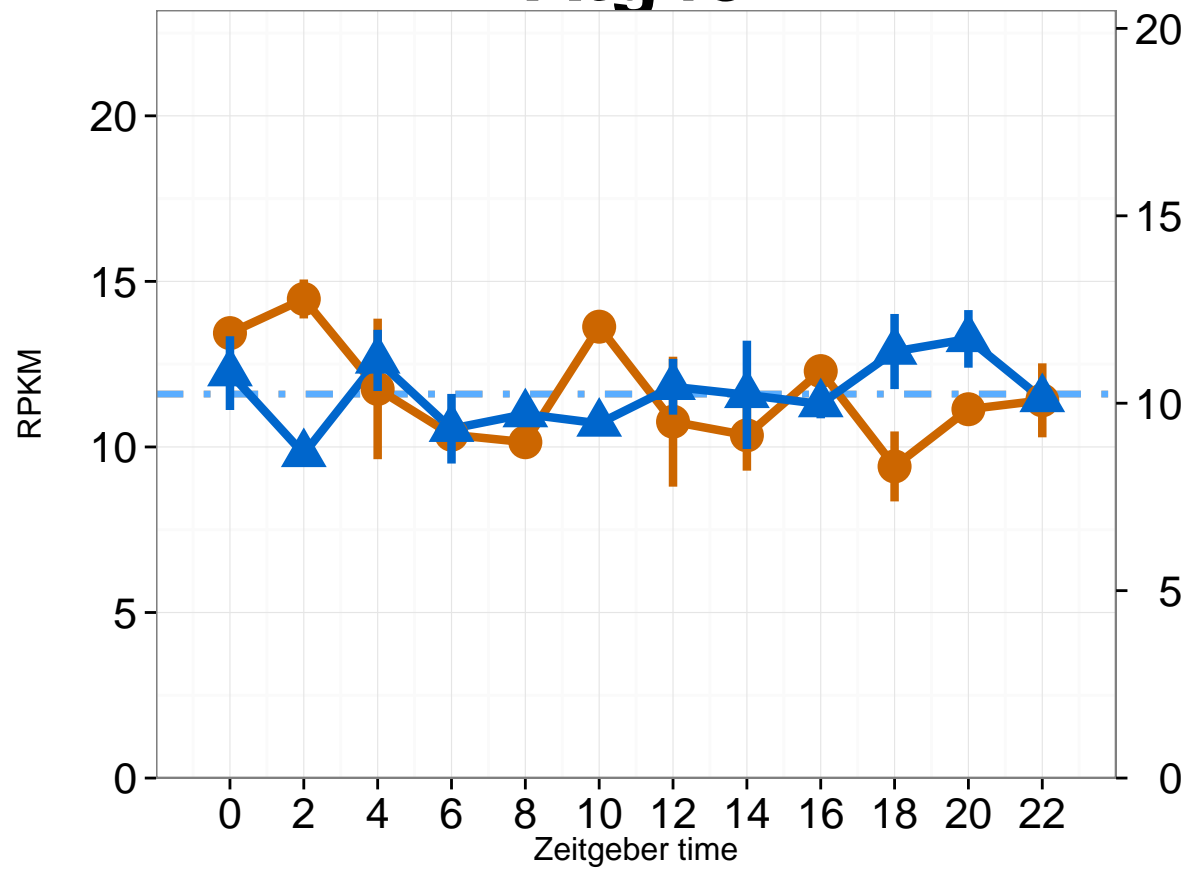

# Atg4c

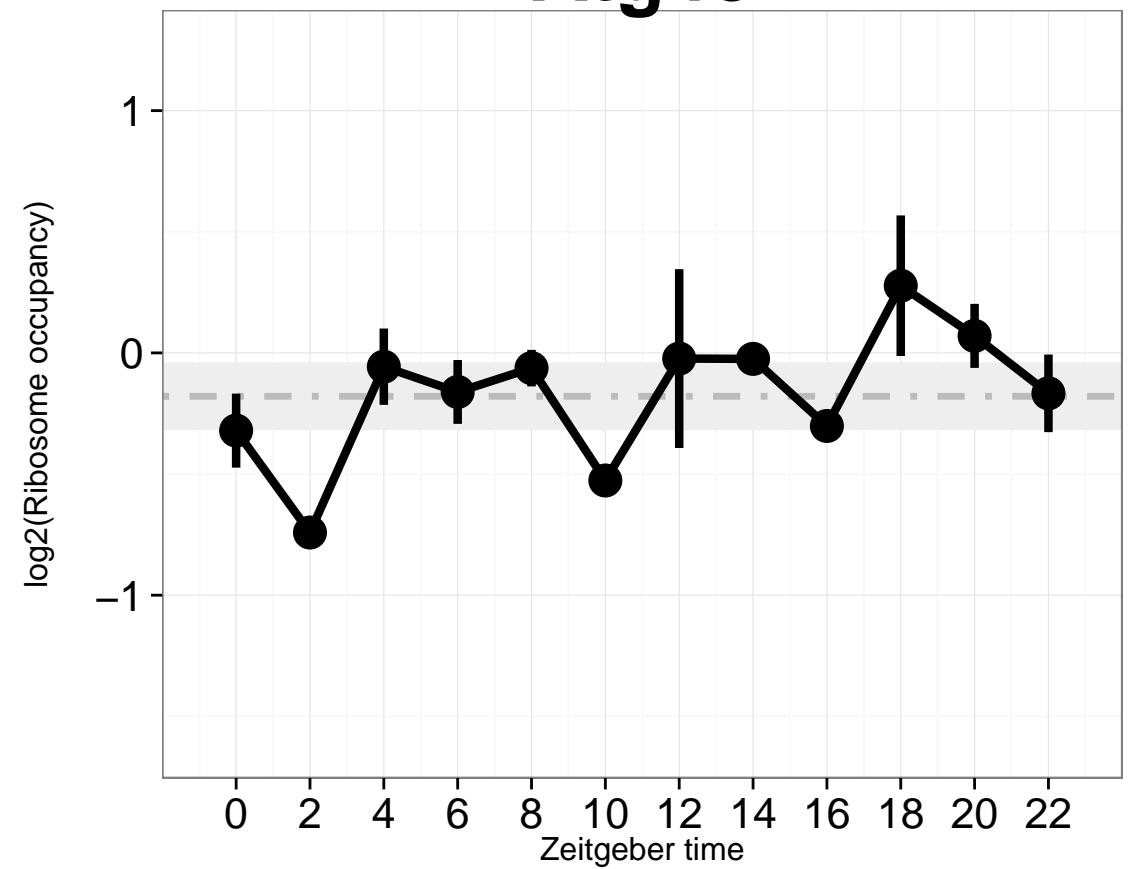

Supplement: Supplementary file 2311 [file 1]

# 1110008L16Rik

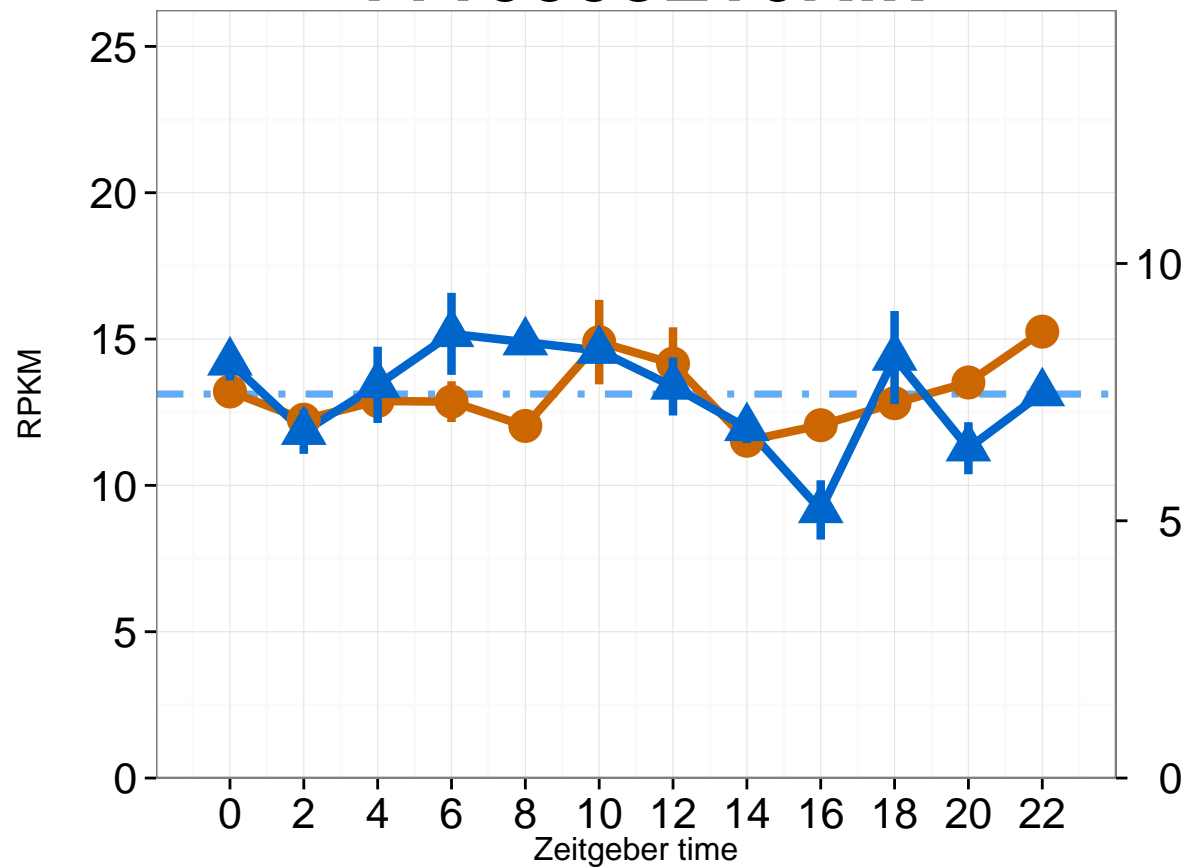

# 1110008L16Rik

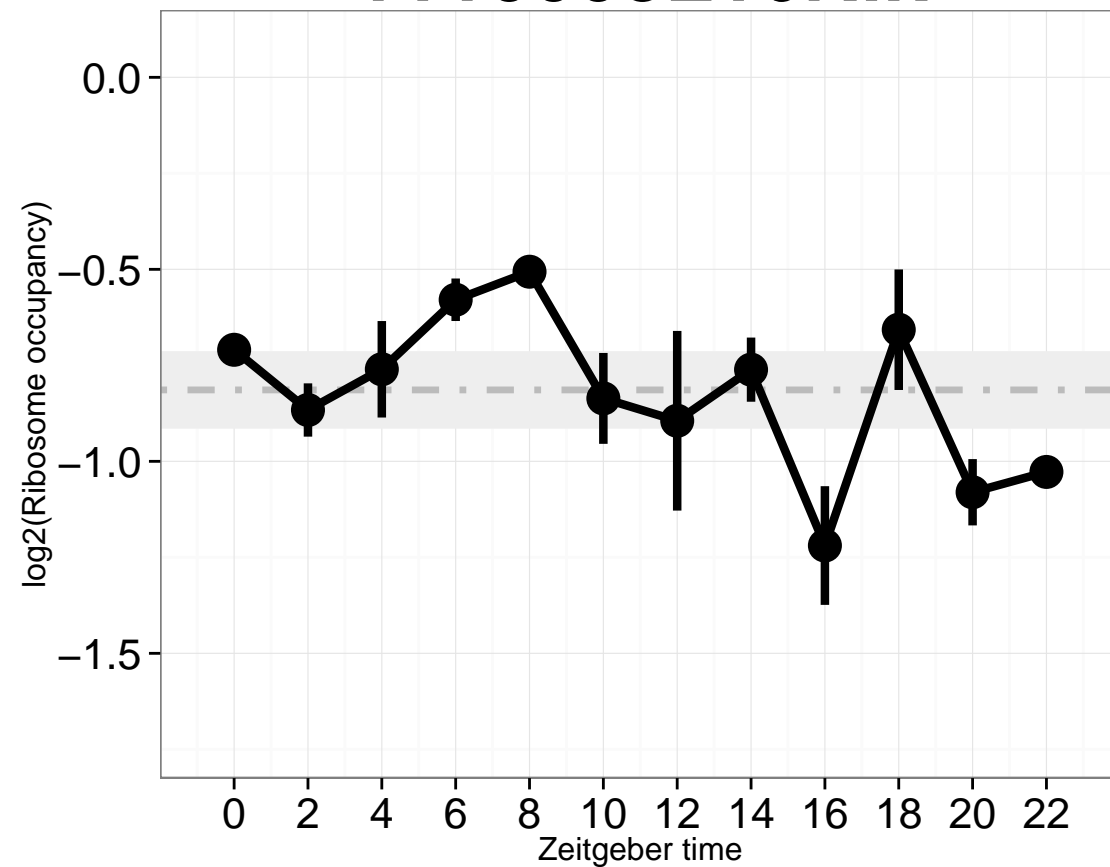

Supplement: Supplementary file 2312 [file 1]

## Frzb

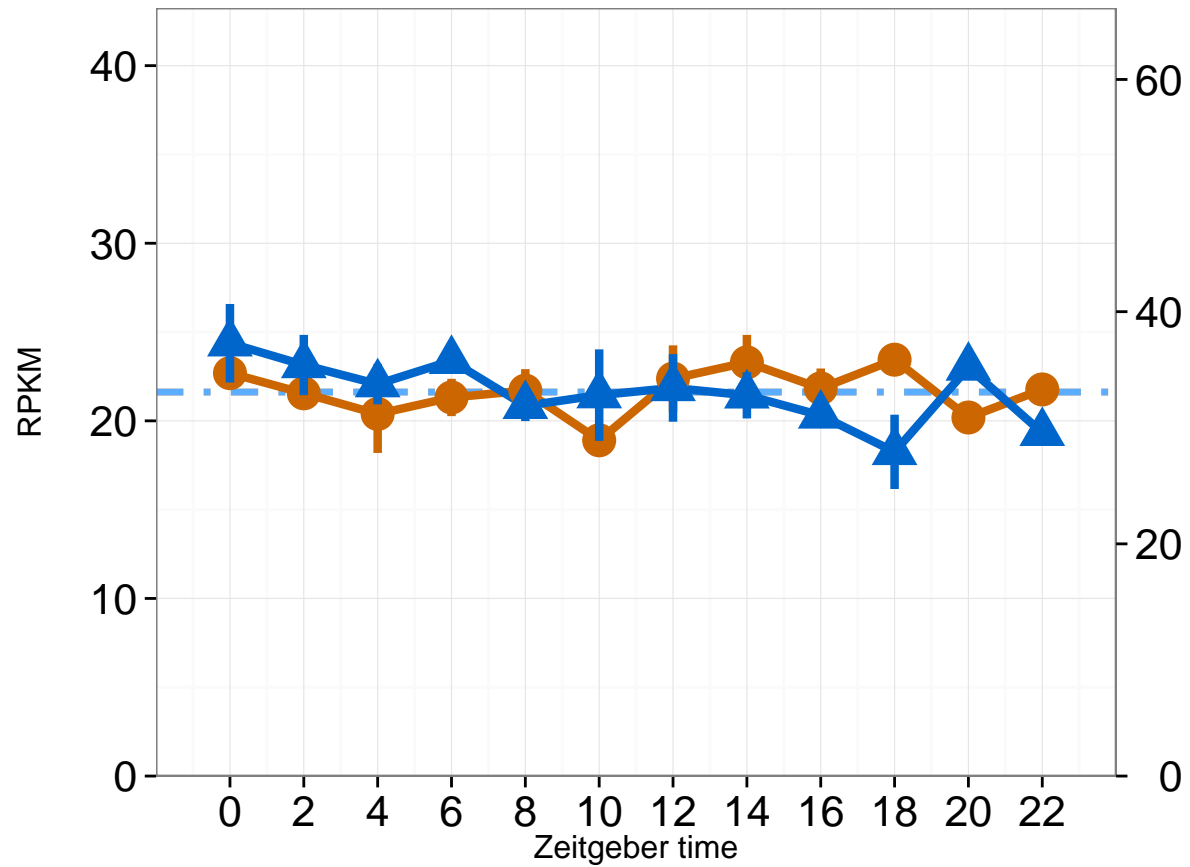

## Frzb

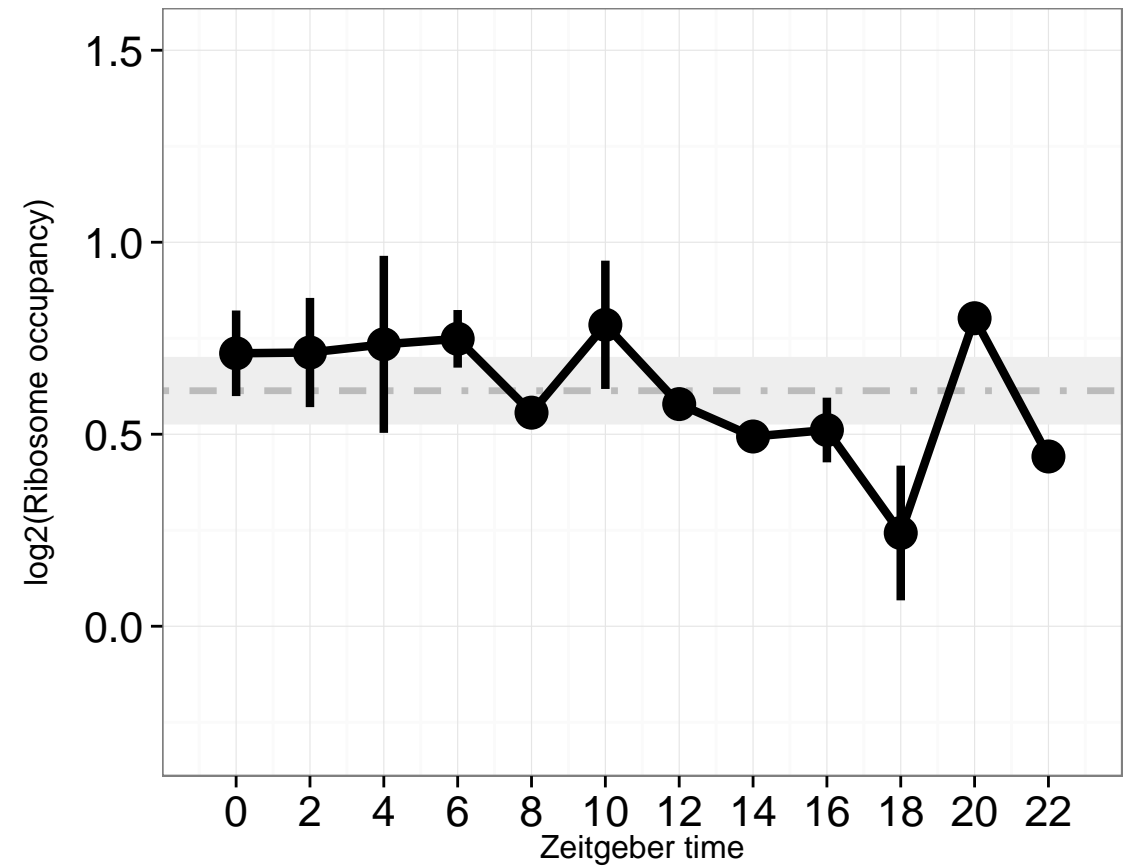

Supplement: Supplementary file 2313 [file 1]

# Pgm2l1

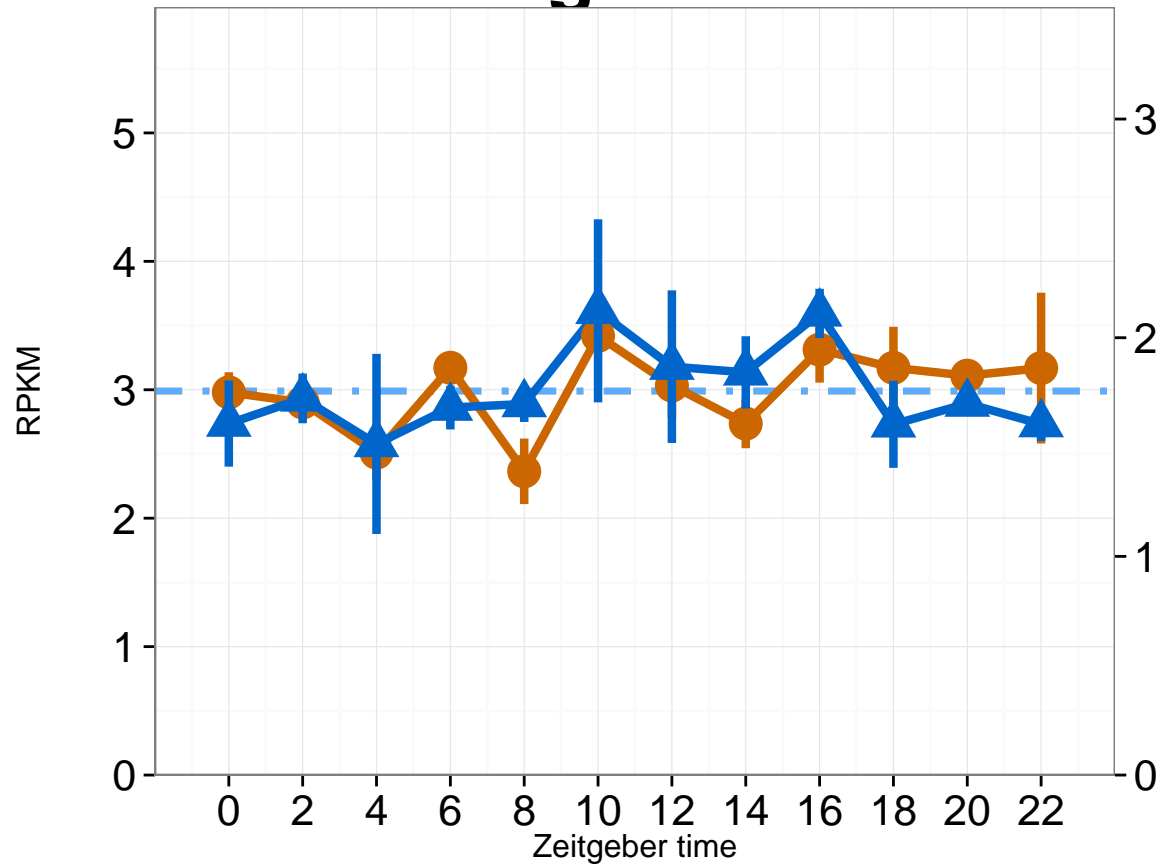

# Pgm2l1

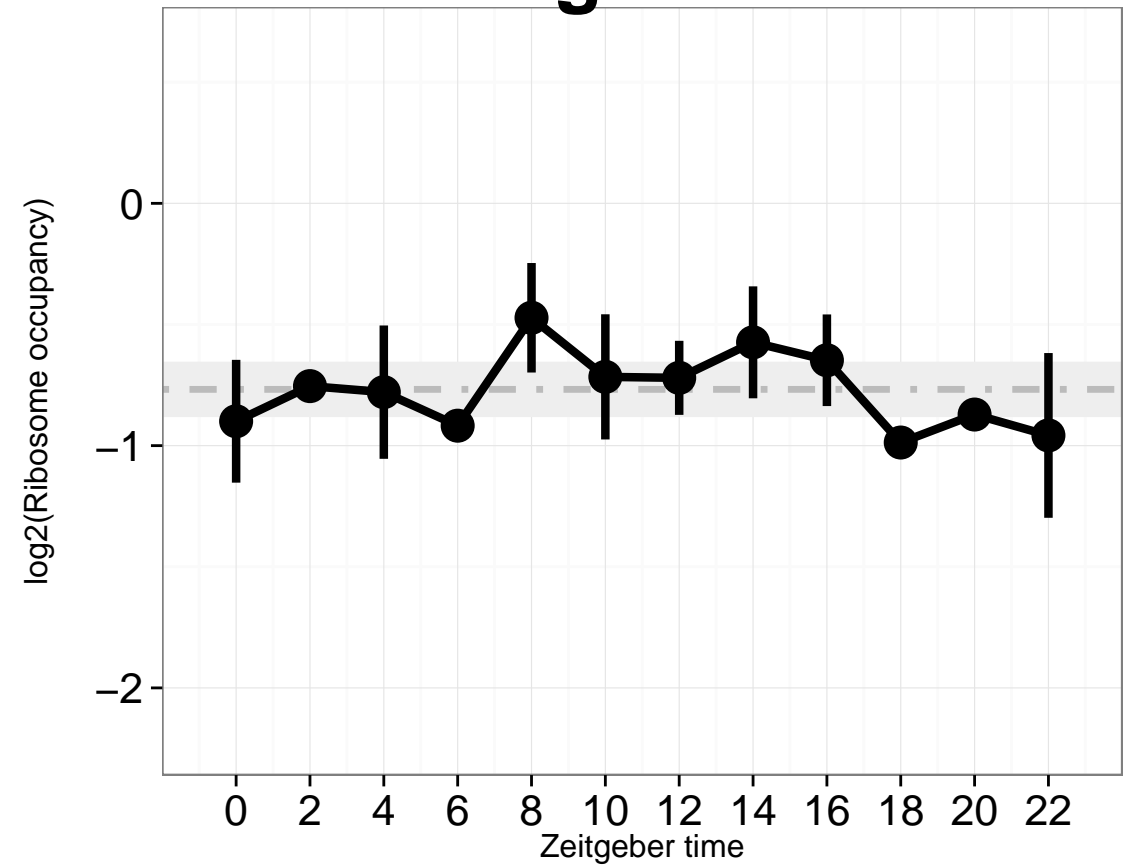

Supplement: Supplementary file 2314 [file 1]

## Cd52

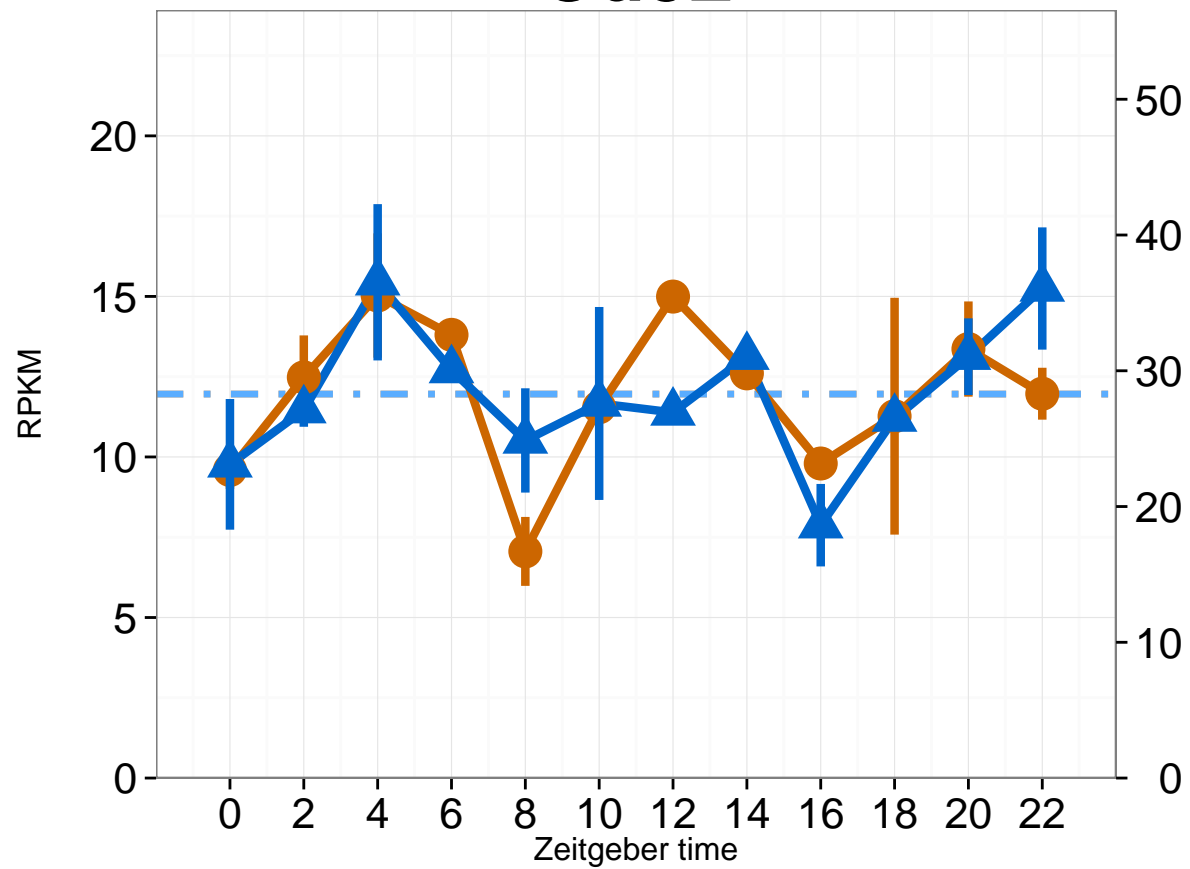

## Cd52

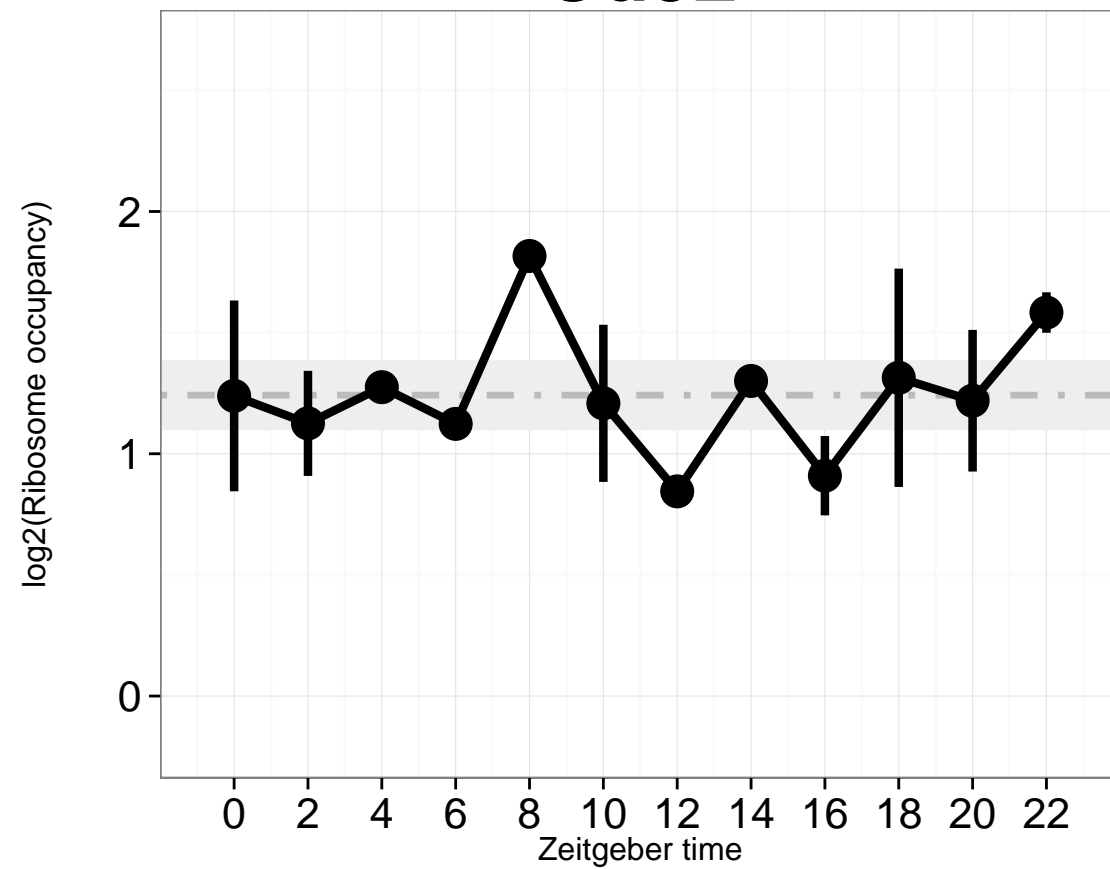

Supplement: Supplementary file 2315 [file 1]

## Fsip1

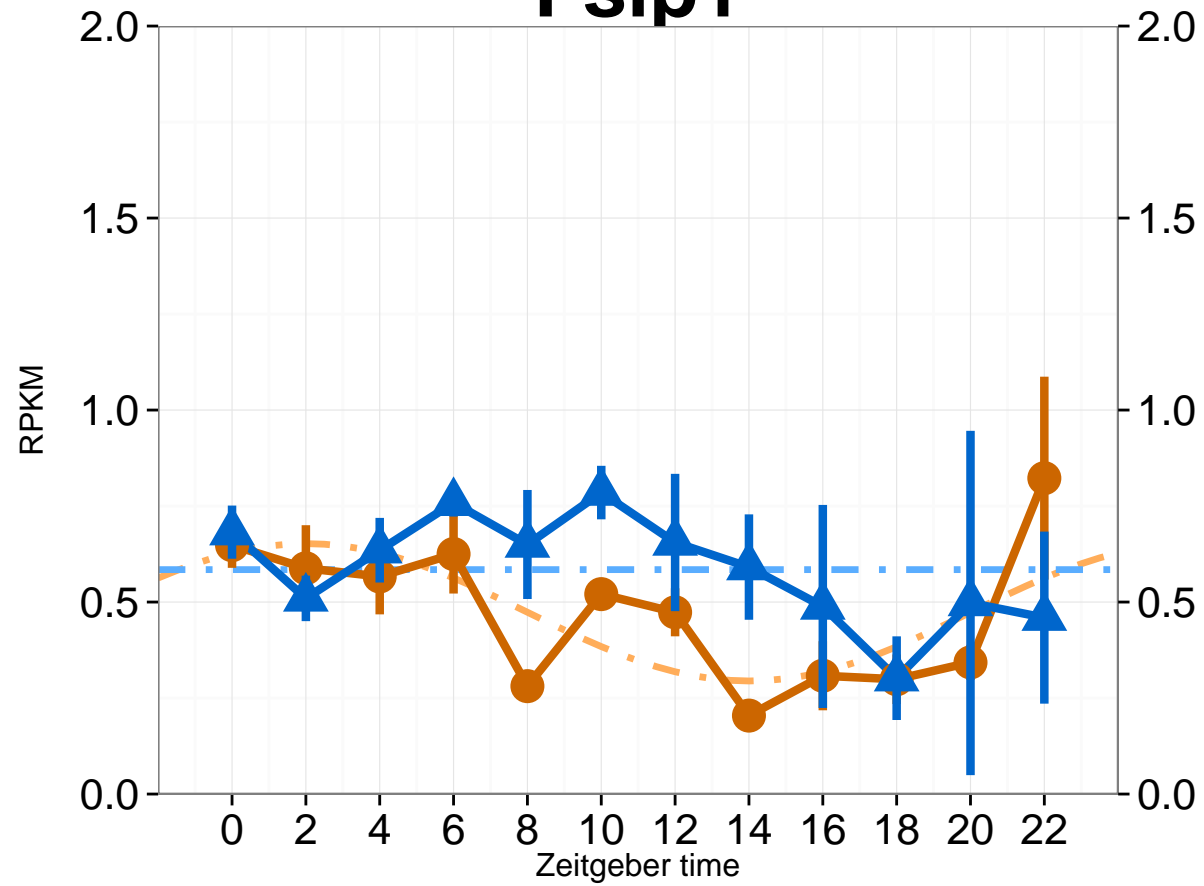

## Fsip1

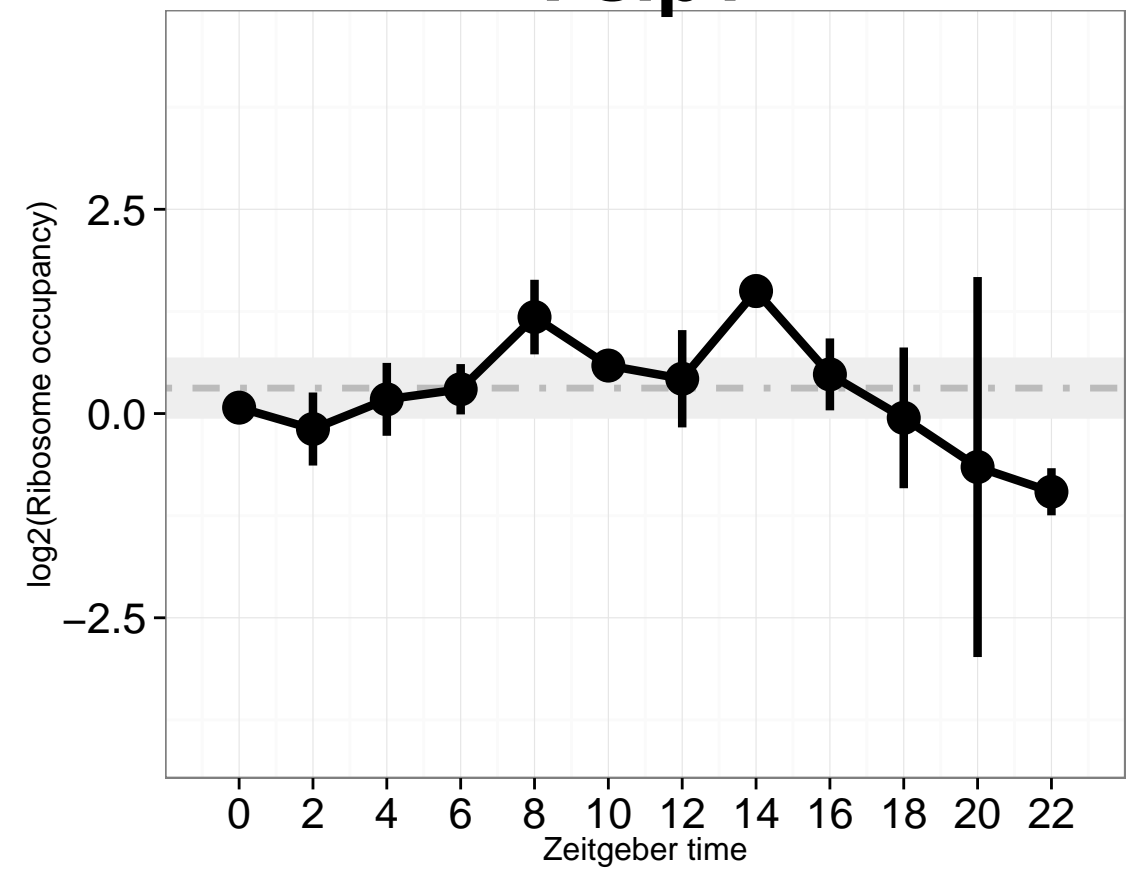

Supplement: Supplementary file 2316 [file 1]

## Wipf2

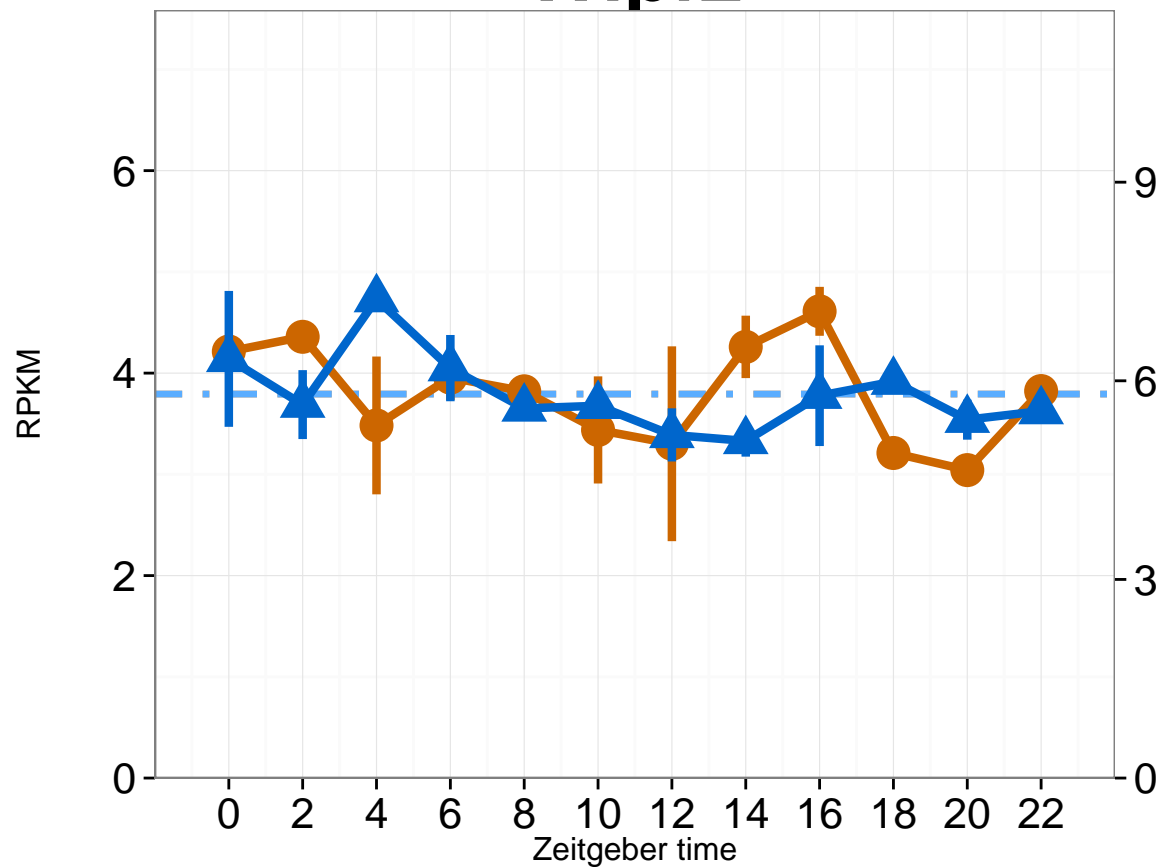

## Wipf2

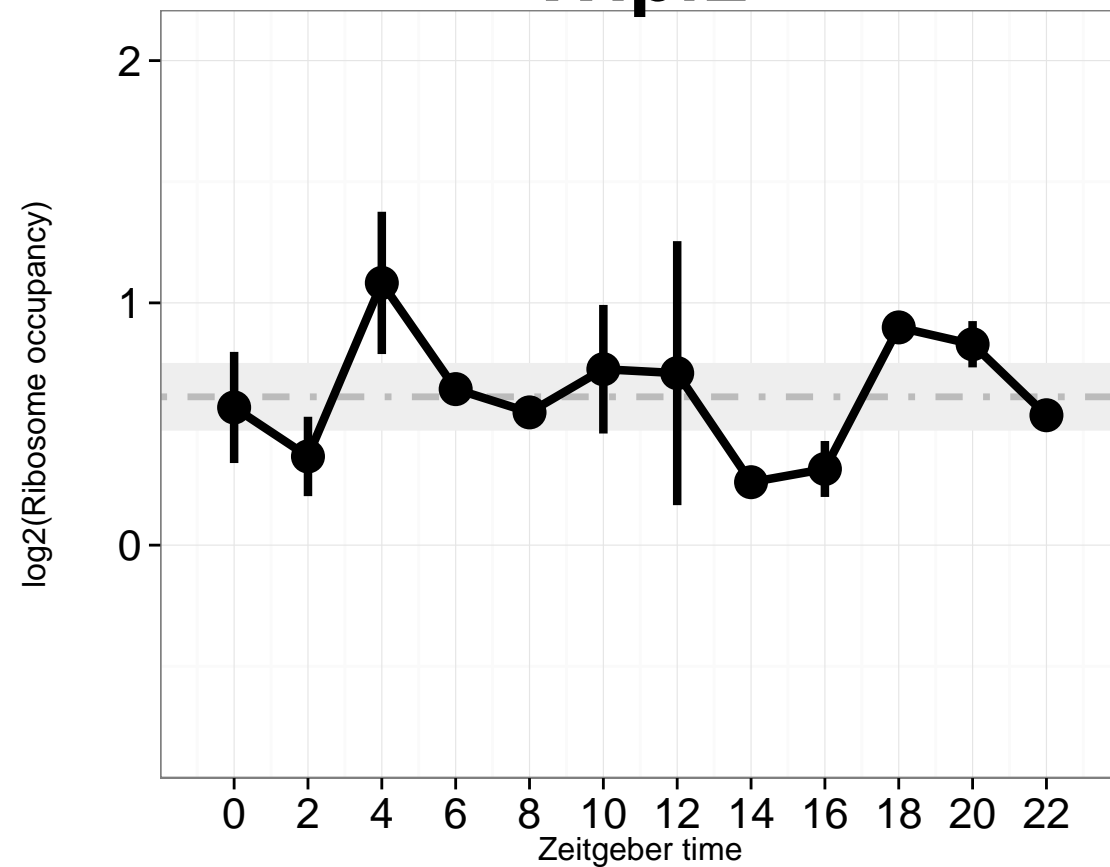

Supplement: Supplementary file 2317 [file 1]

# Creb3l4

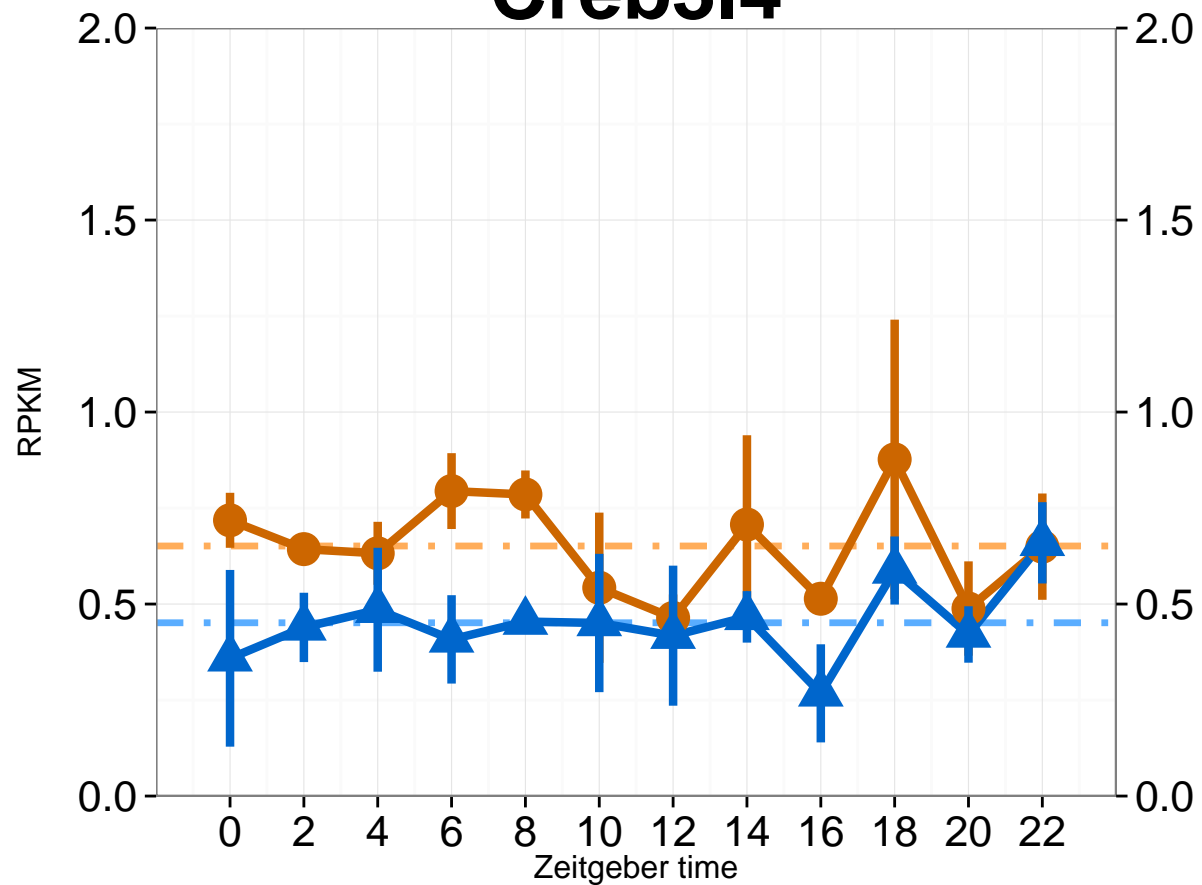

# Creb3l4

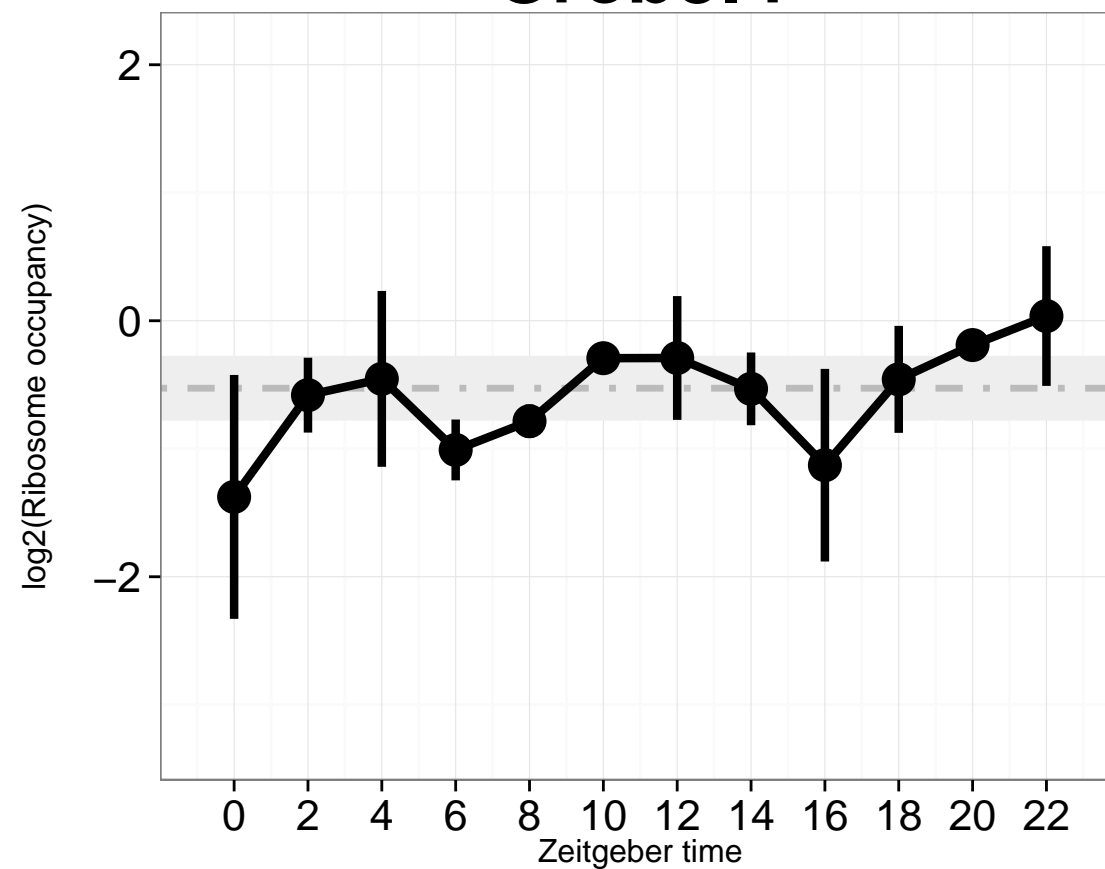

Supplement: Supplementary file 2318 [file 1]

## Cask

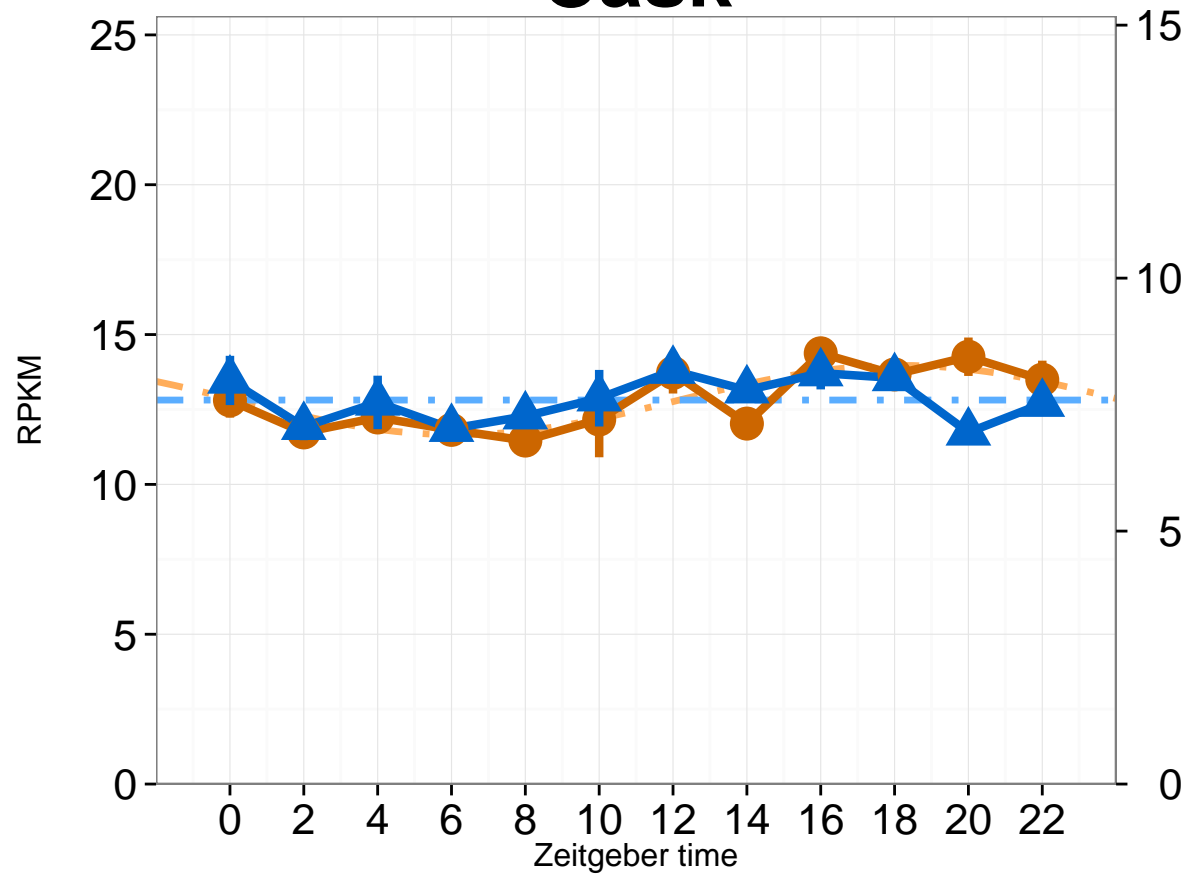

## Cask

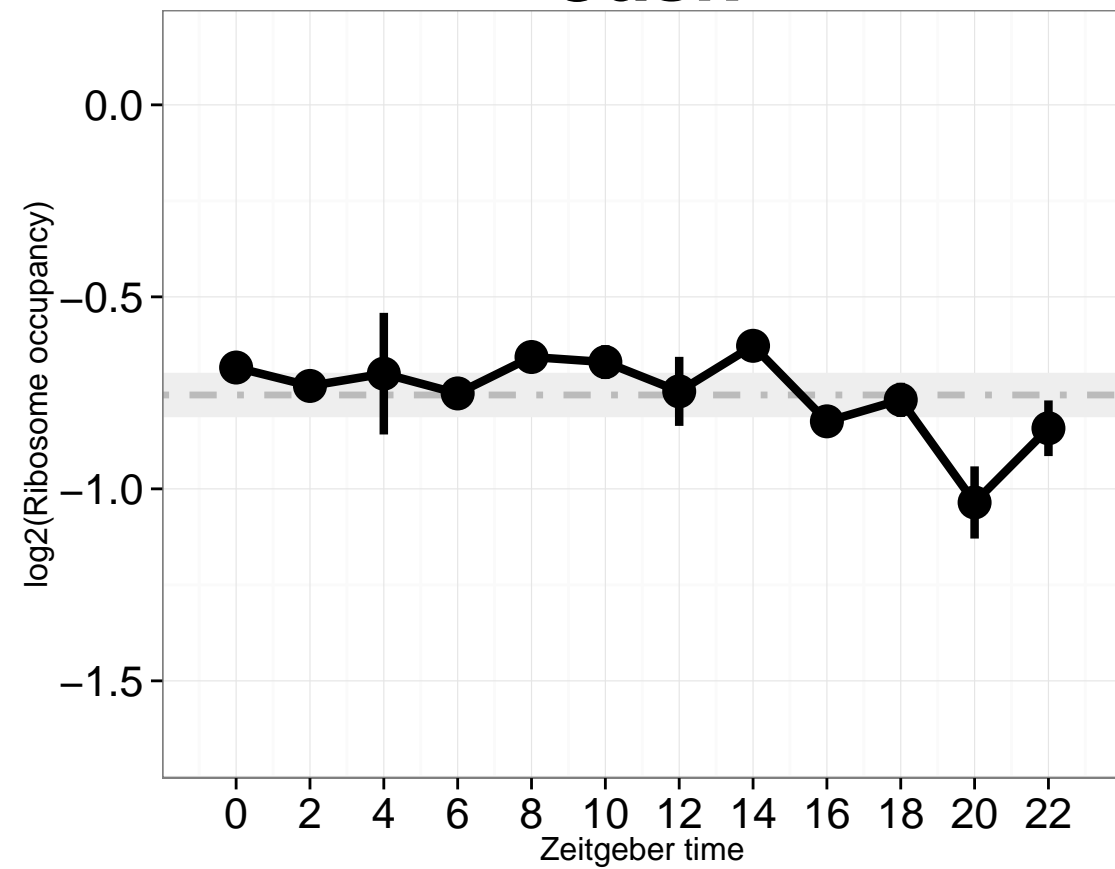

Supplement: Supplementary file 2319 [file 1]

## Xpnpep3

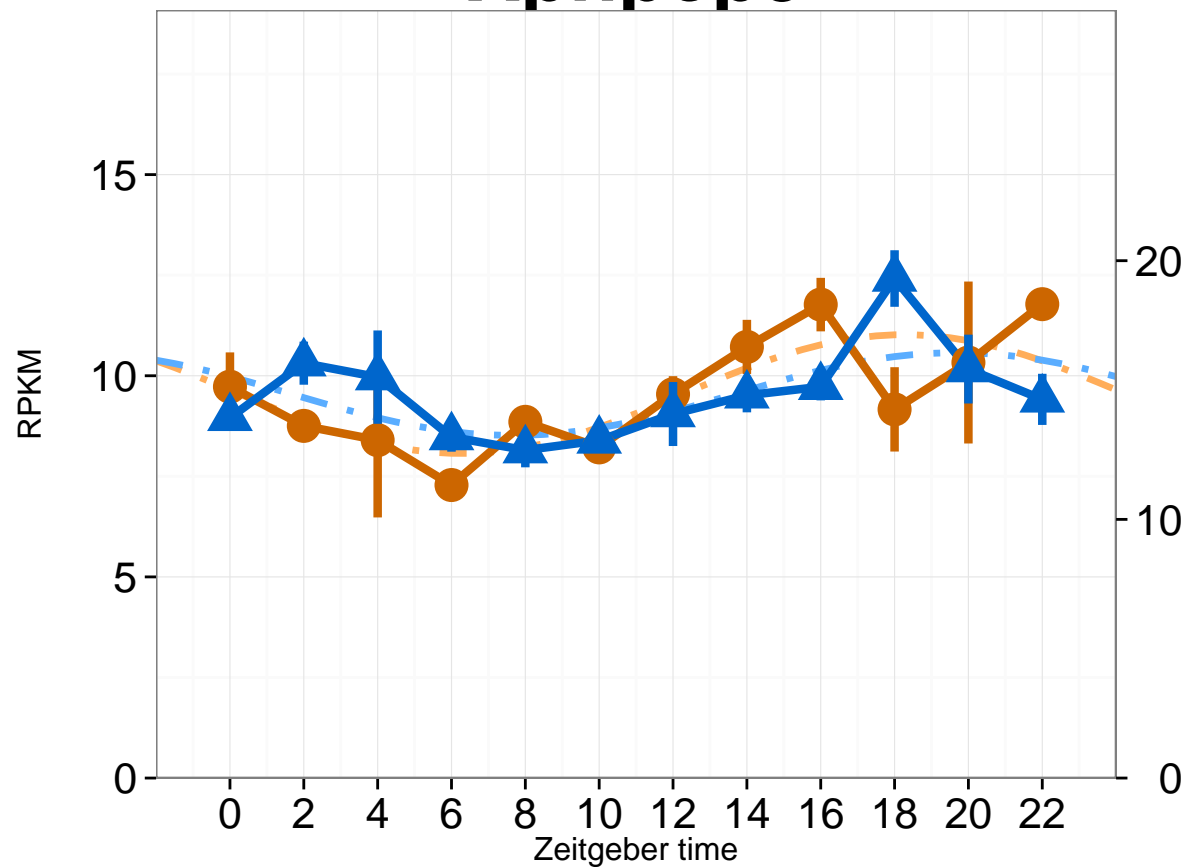

## Xpnpep3

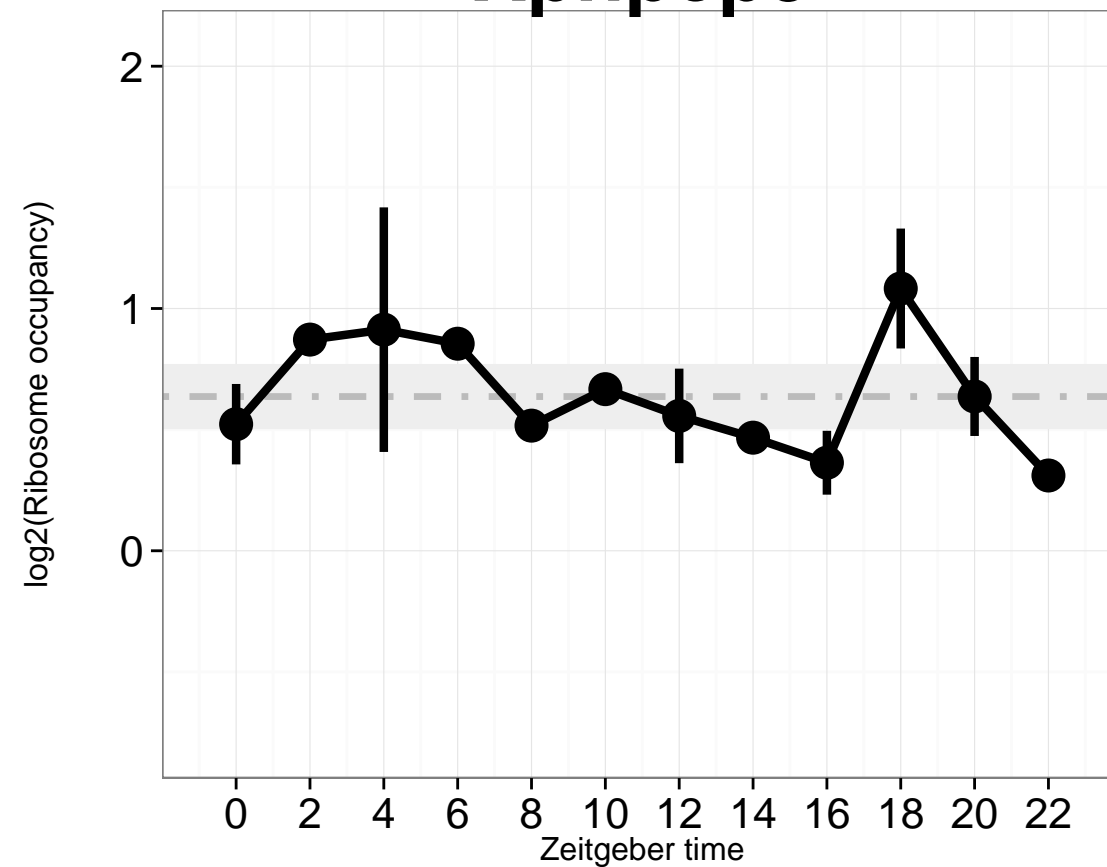

Supplement: Supplementary file 2320 [file 1]

# Sucnr1

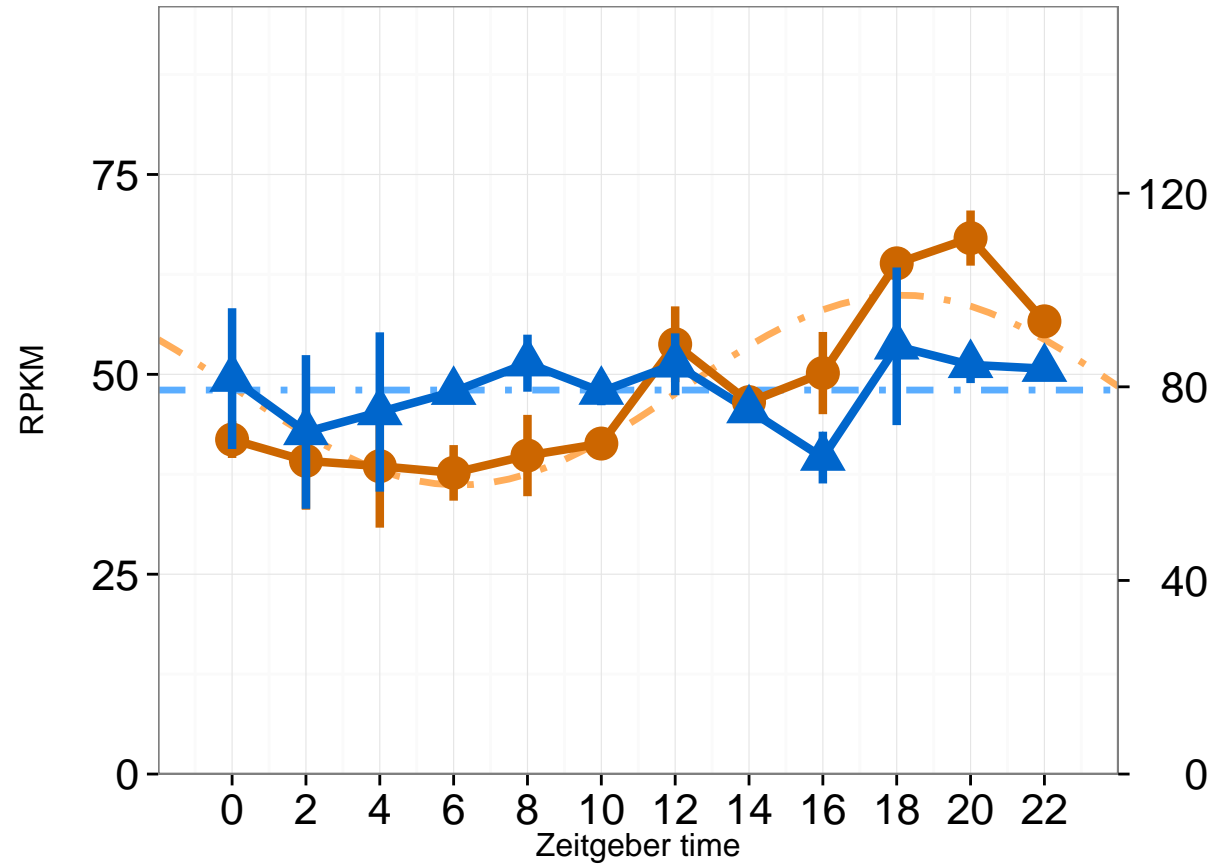

# Sucnr1

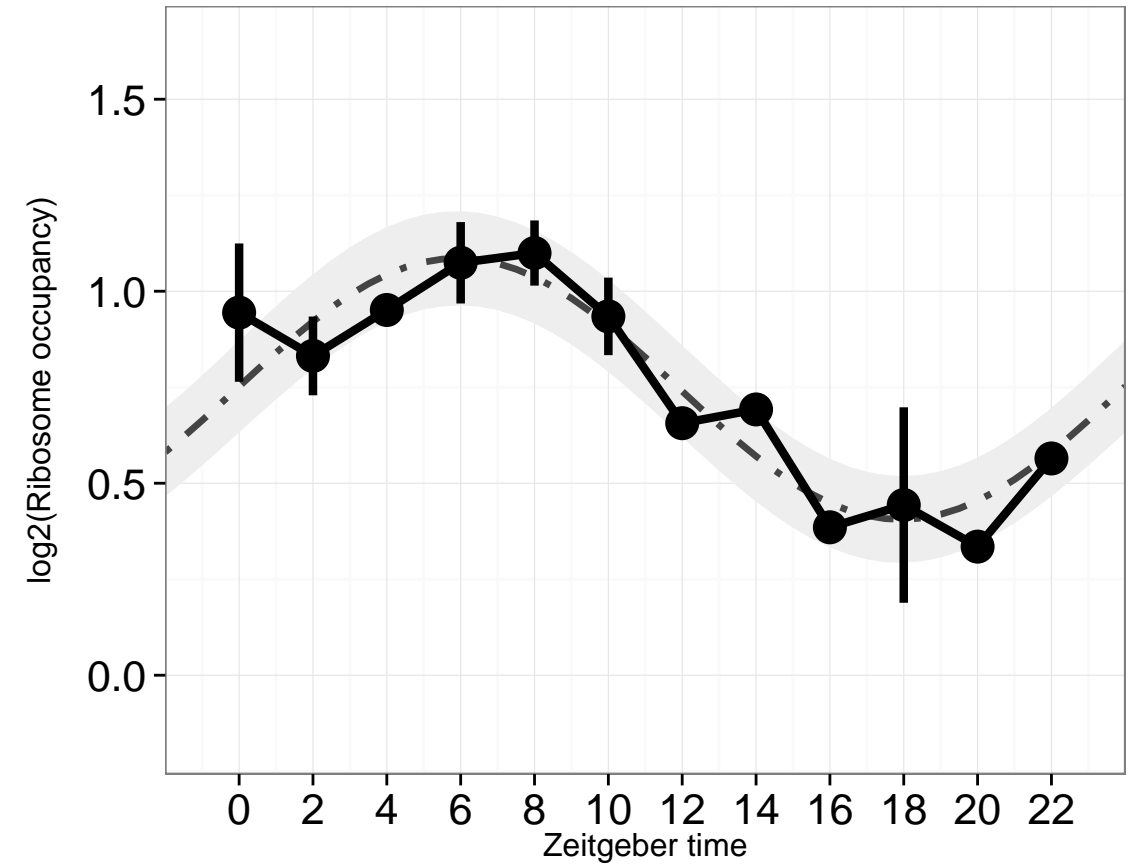

Supplement: Supplementary file 2321 [file 1]

## Pigm

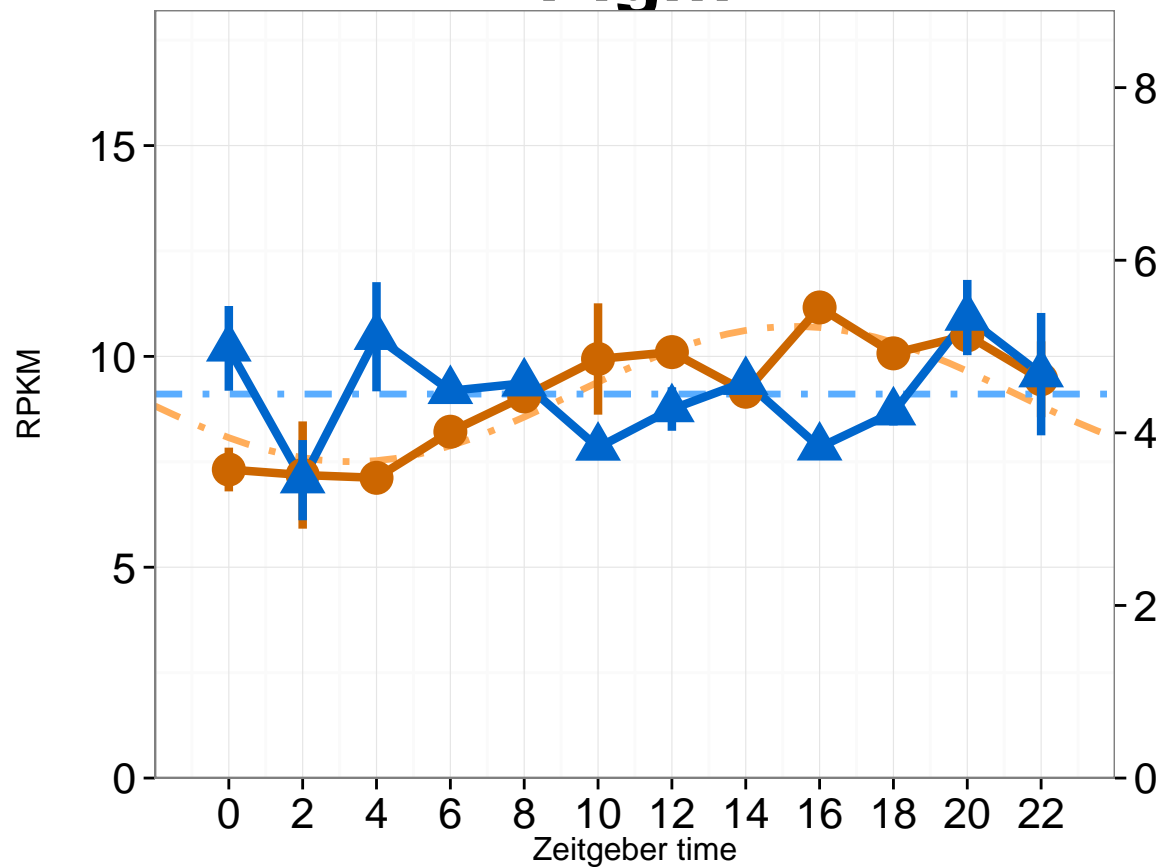

## Pigm

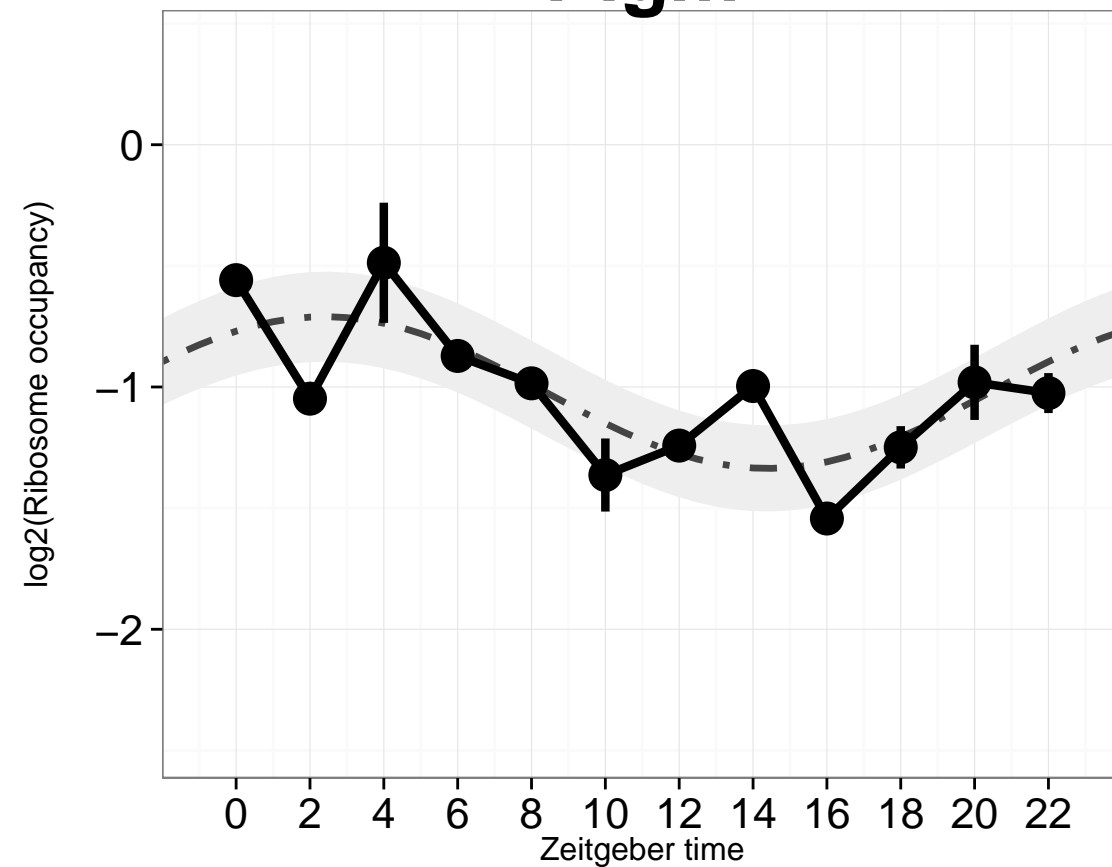

Supplement: Supplementary file 2322 [file 1]

## Nos3

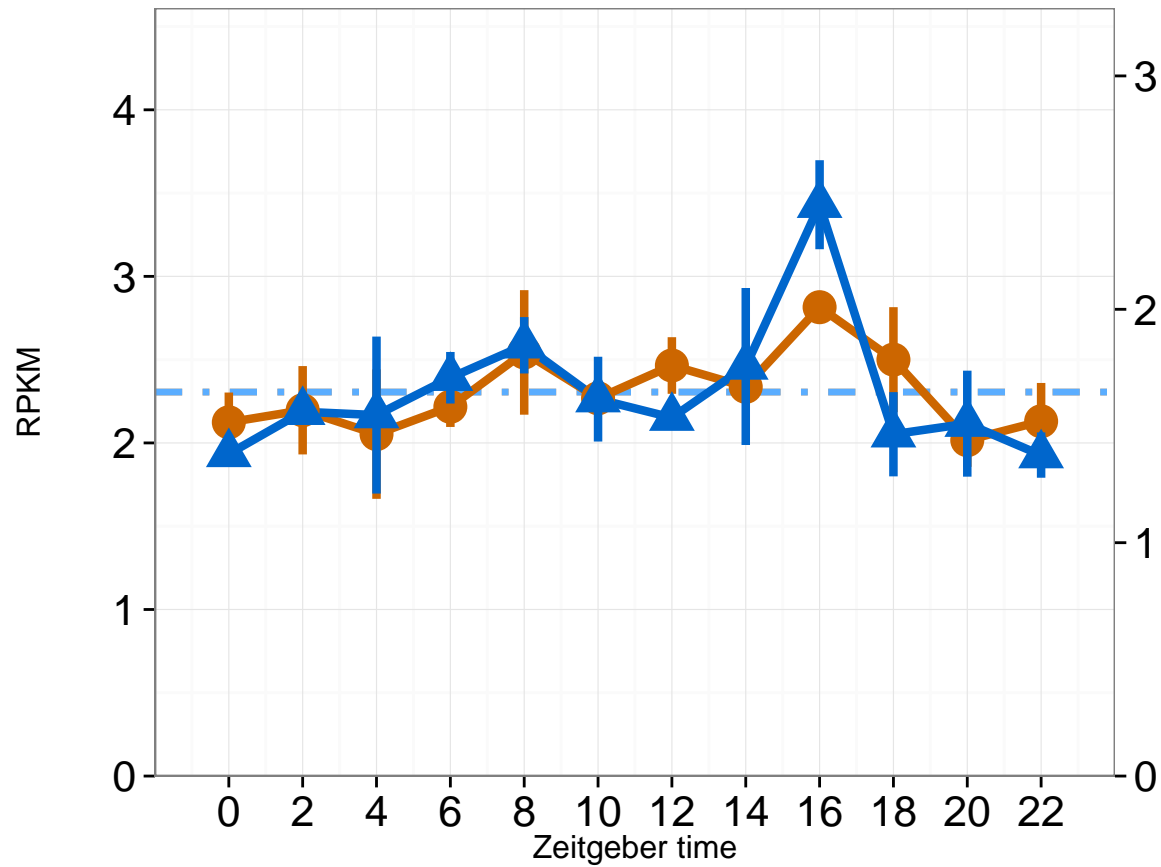

## Nos3

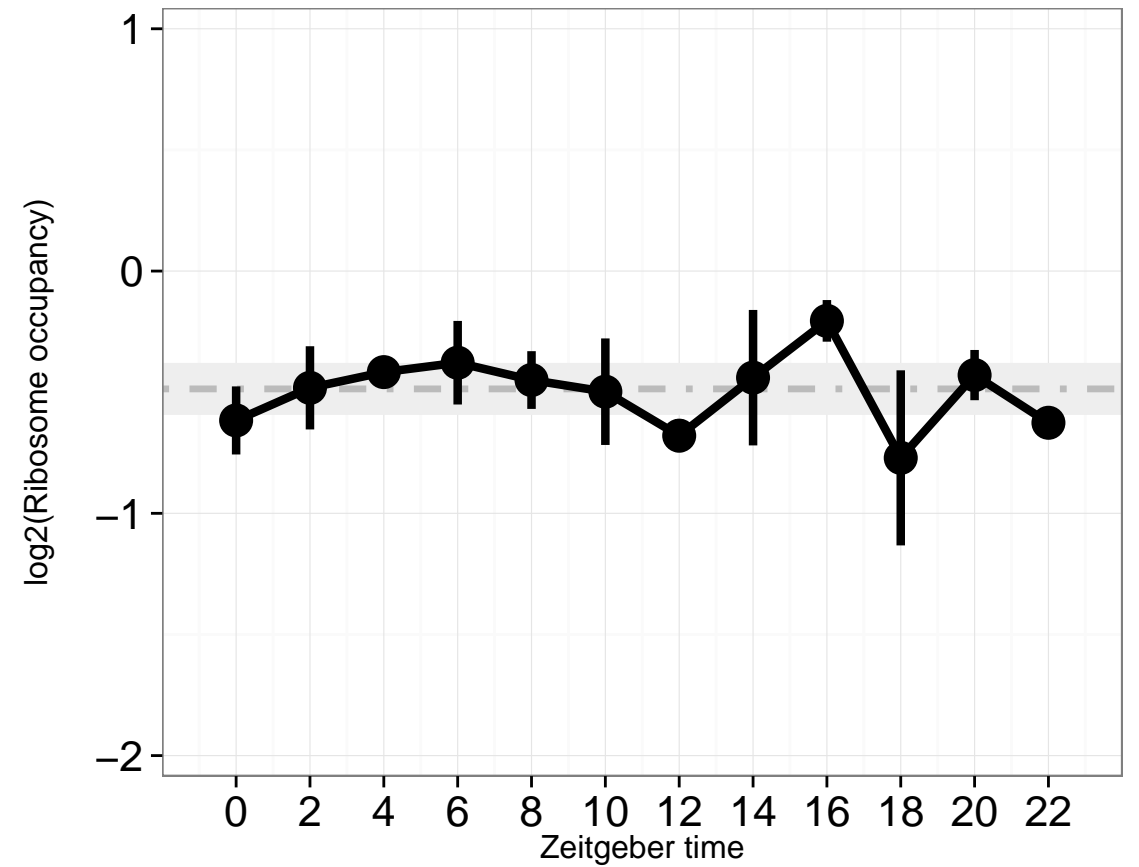

Supplement: Supplementary file 2323 [file 1]

## lah1

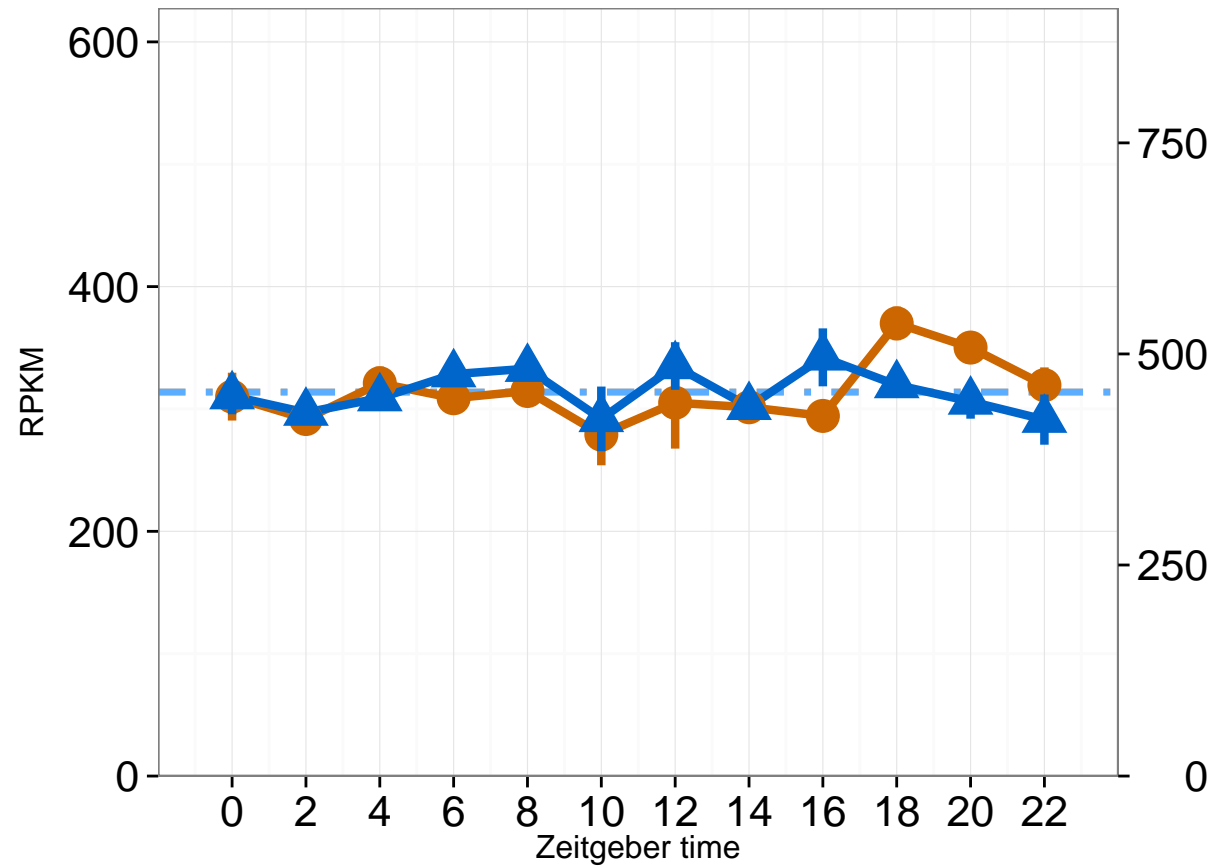

## lah1

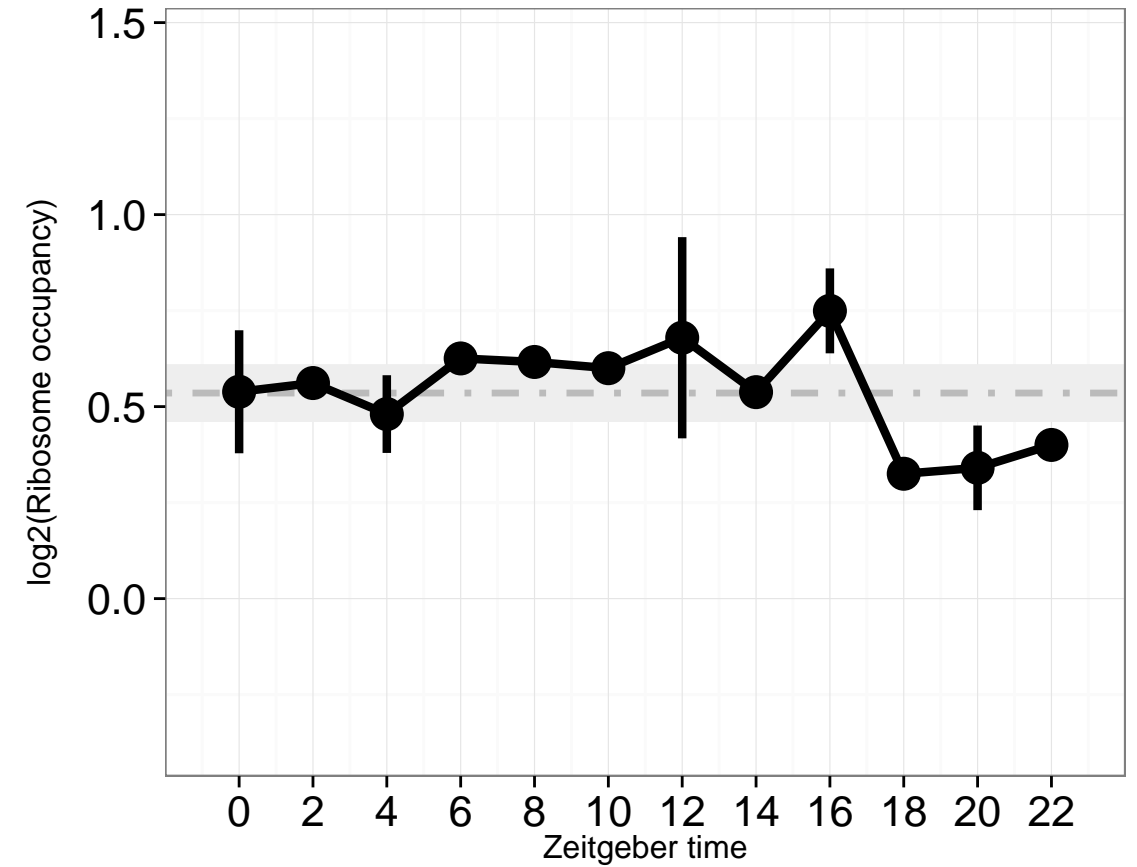

Supplement: Supplementary file 2324 [file 1]

## Pla2g6

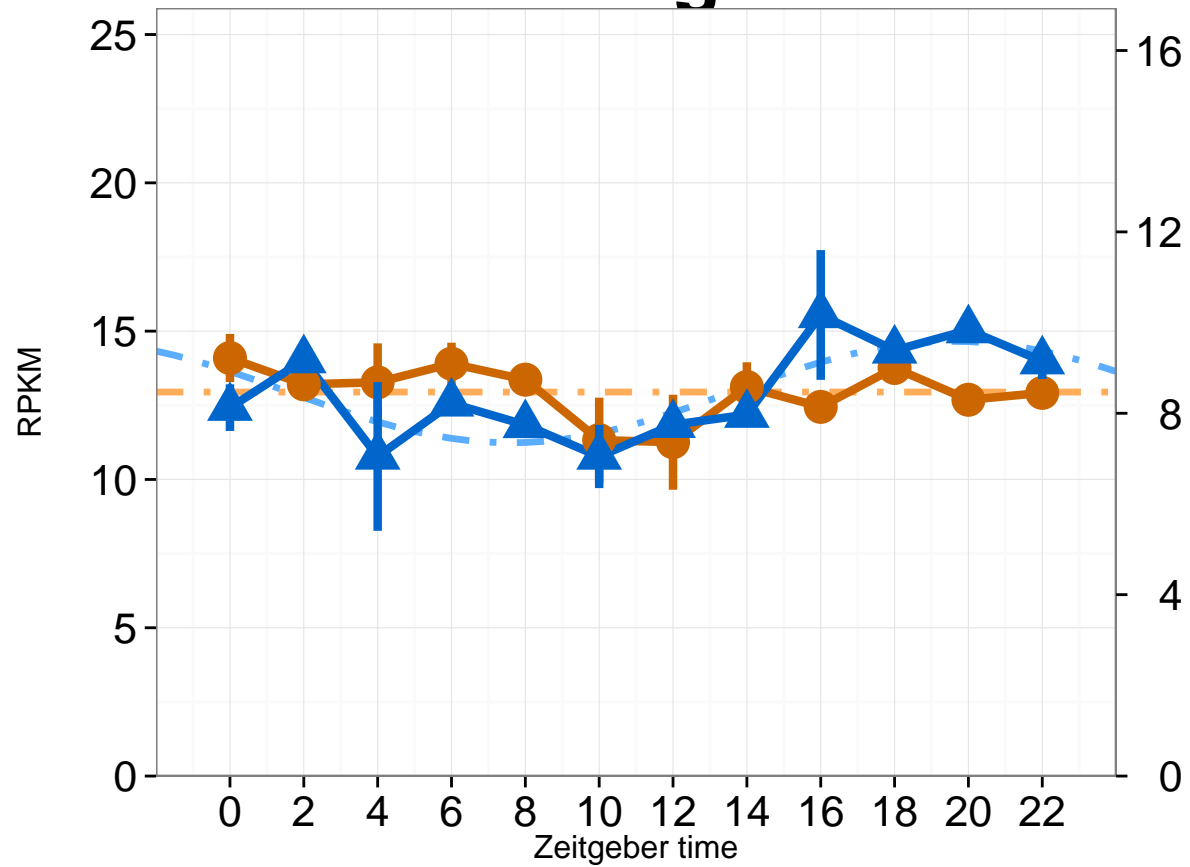

## Pla2g6

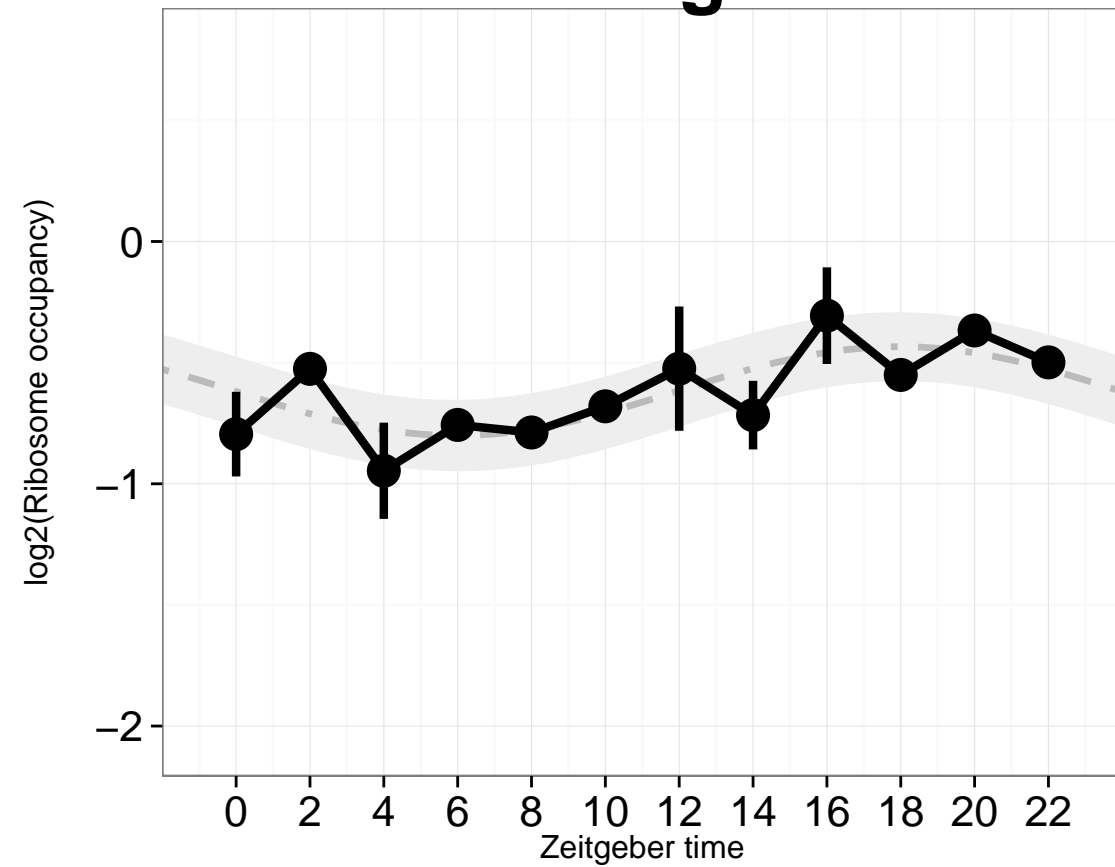

Supplement: Supplementary file 2325 [file 1]

# Srpk2

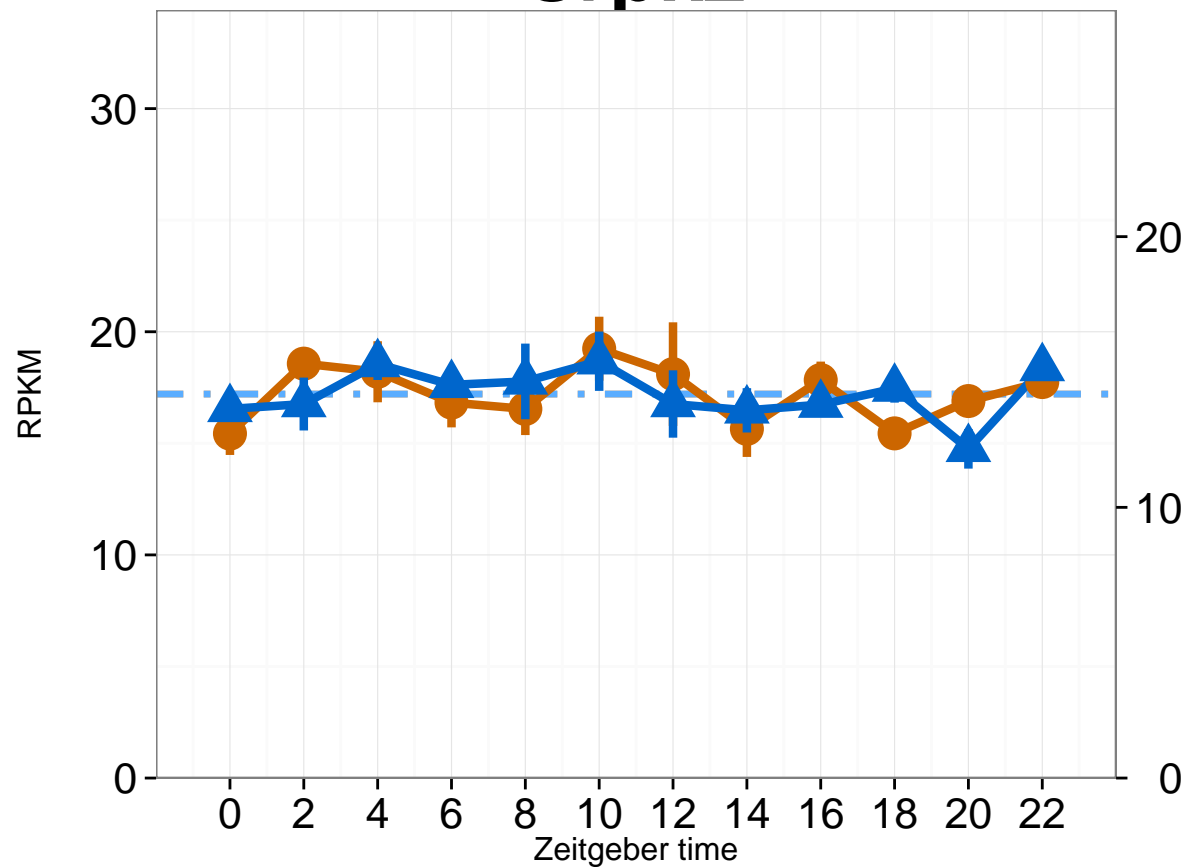

# Srpk2

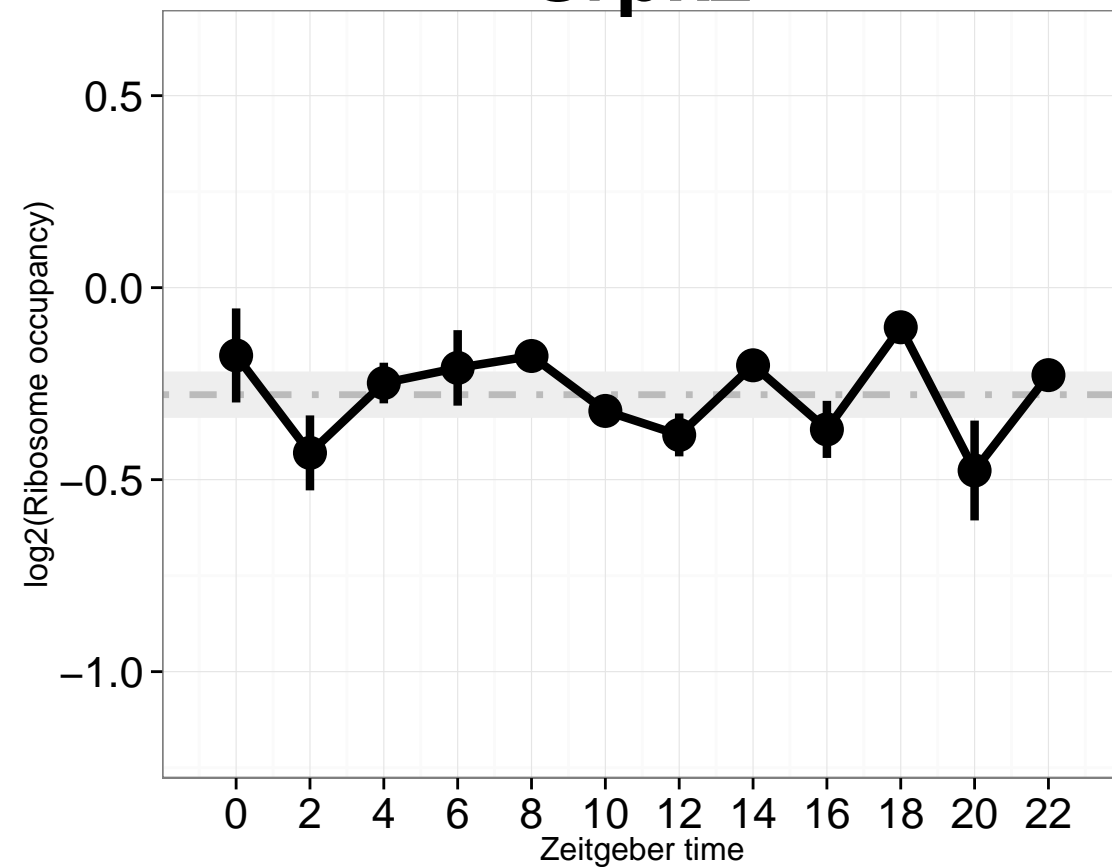

Supplement: Supplementary file 2326 [file 1]

## Dkc1

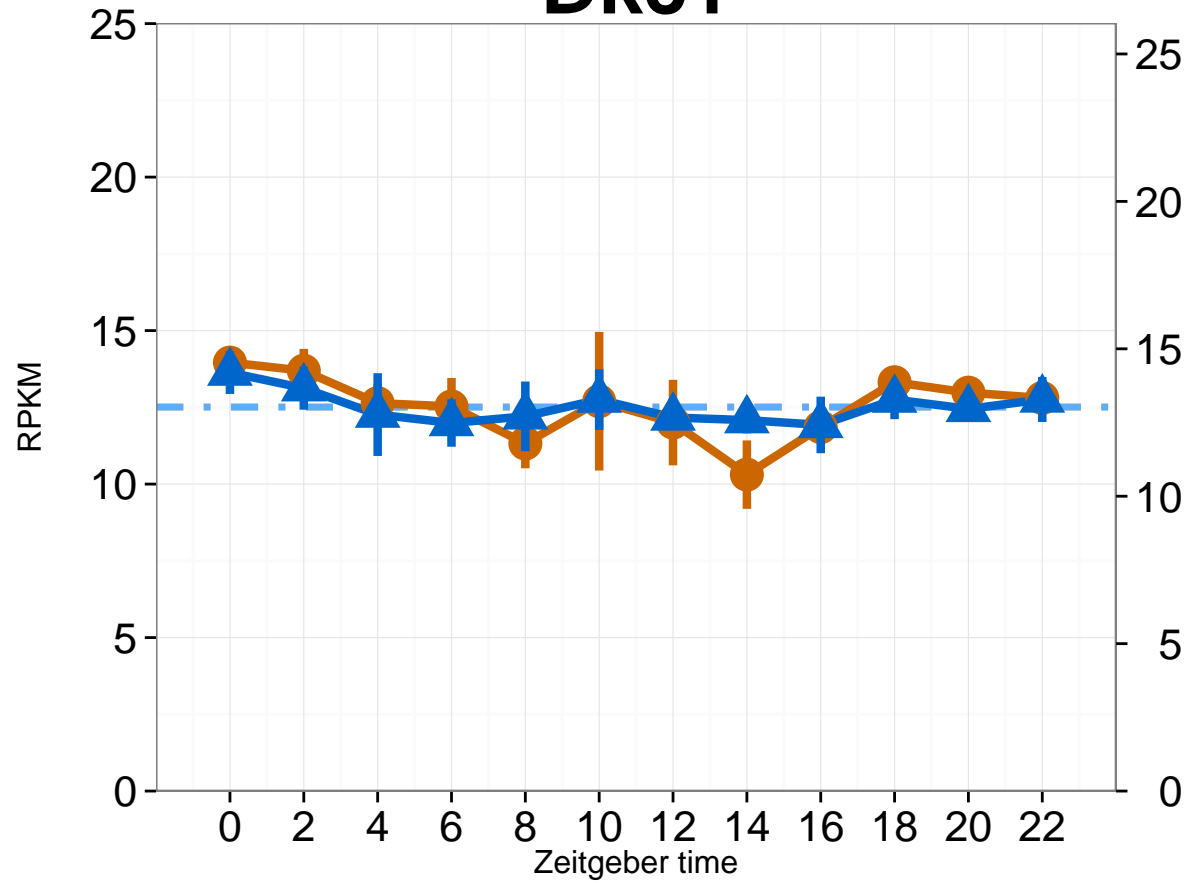

## Dkc1

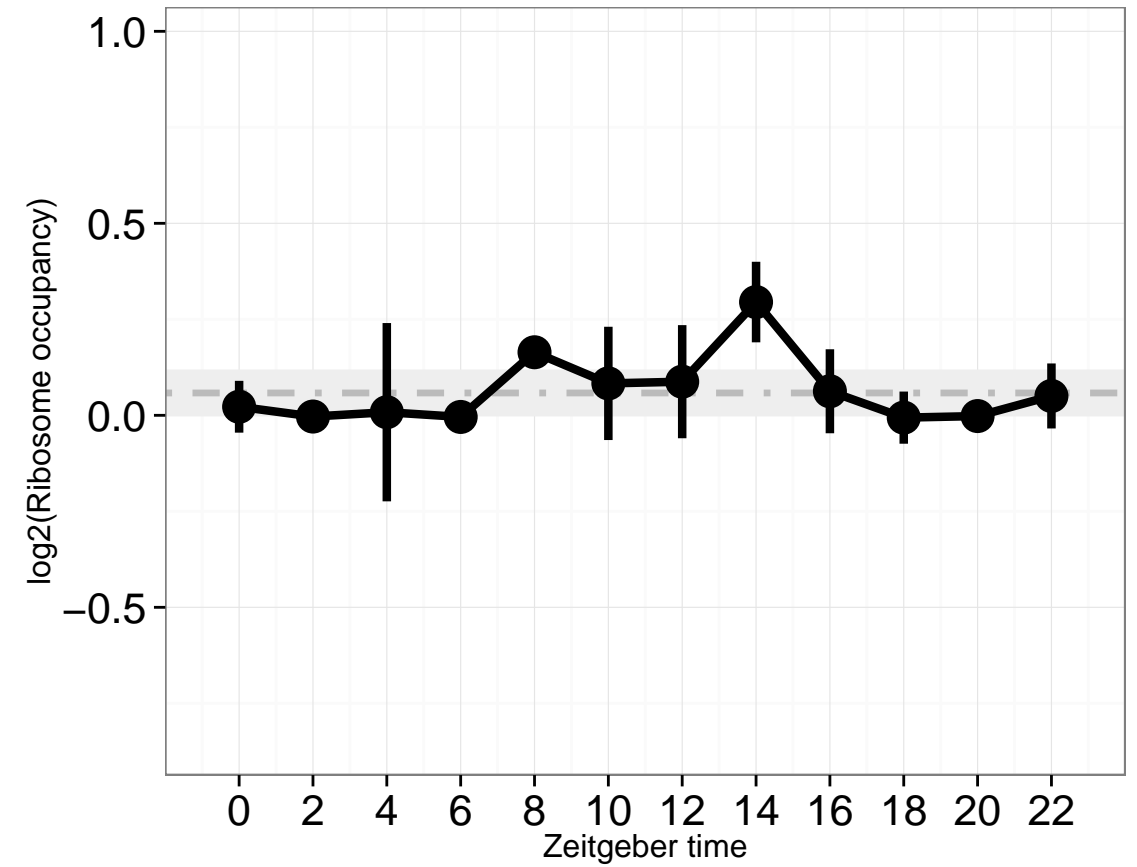

Supplement: Supplementary file 2327 [file 1]

## Lypla2

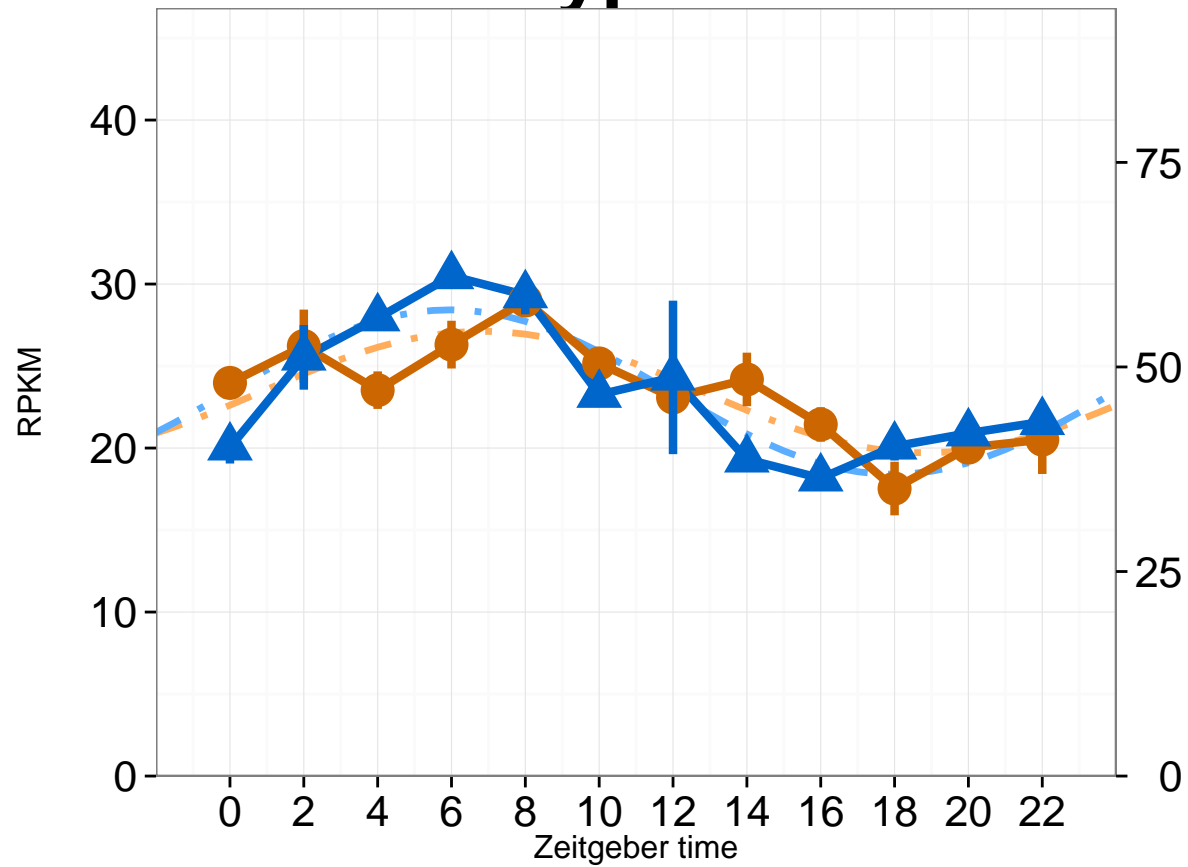

## Lypla2

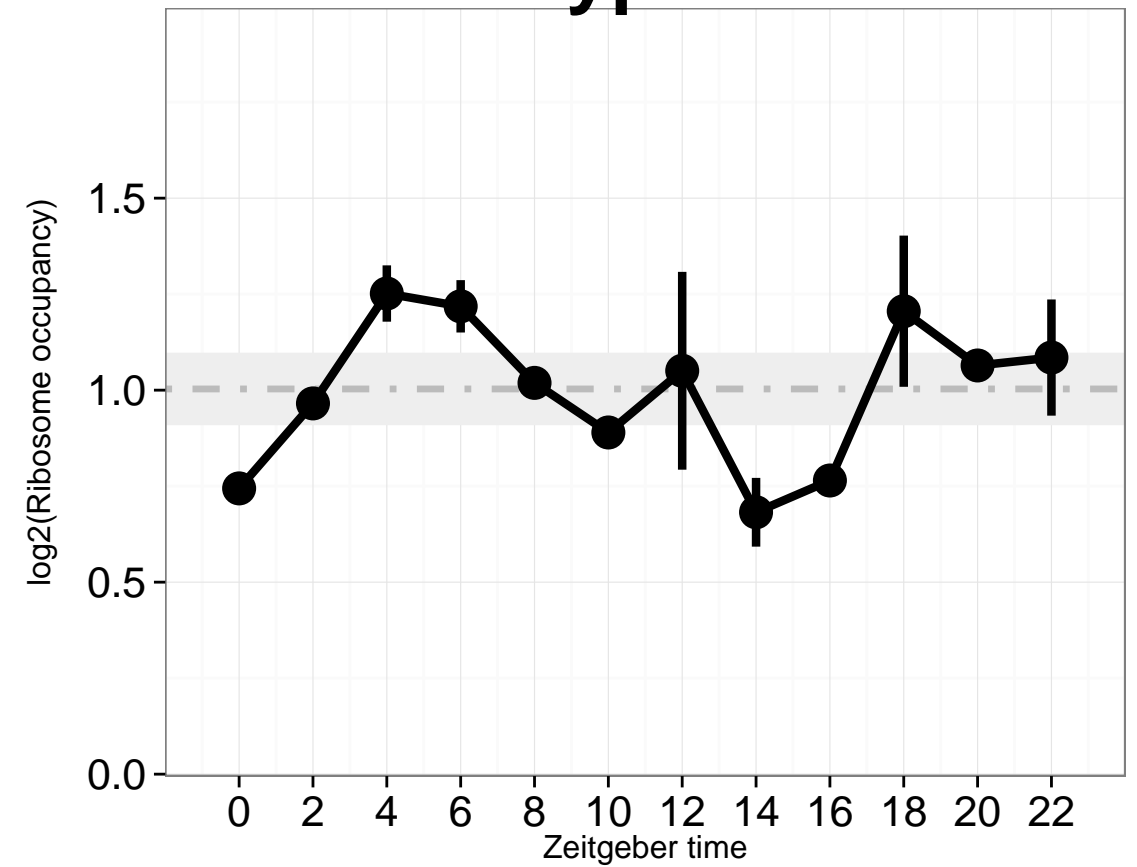

Supplement: Supplementary file 2328 [file 1]

## Dnhd1

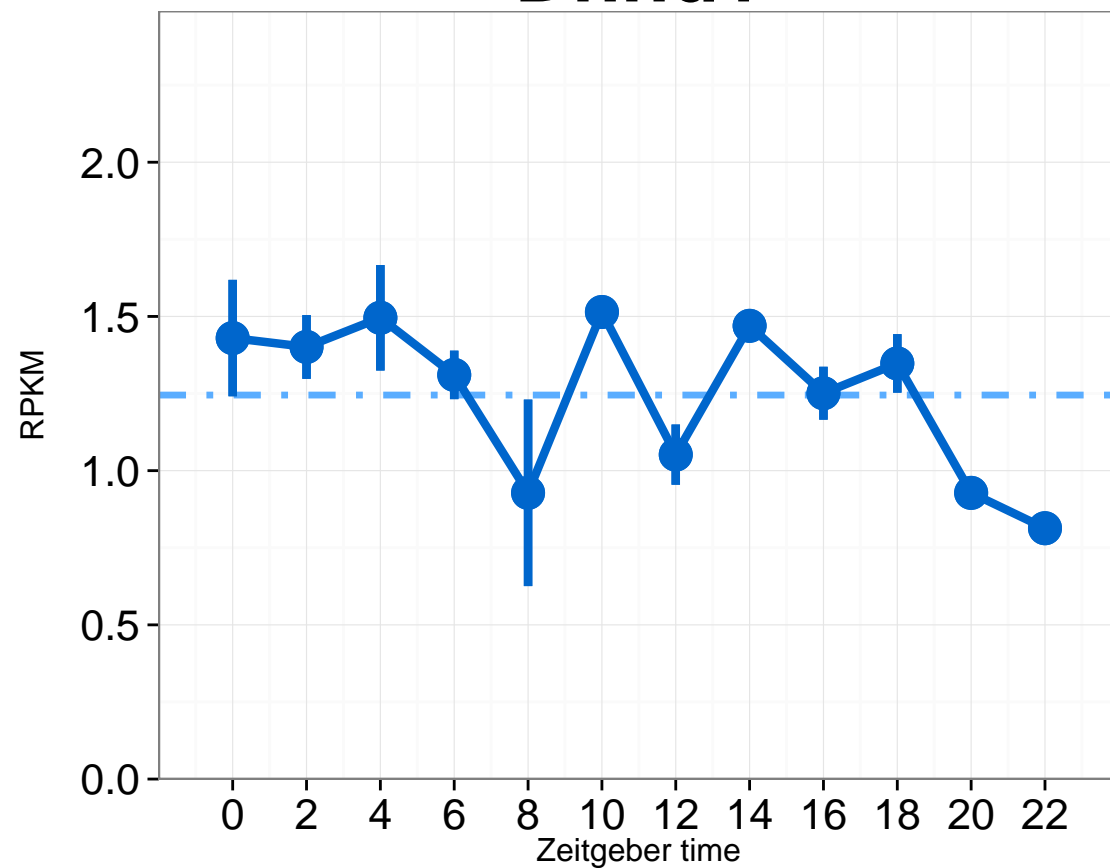

## Dnhd1 log2(Ribosome occupancy

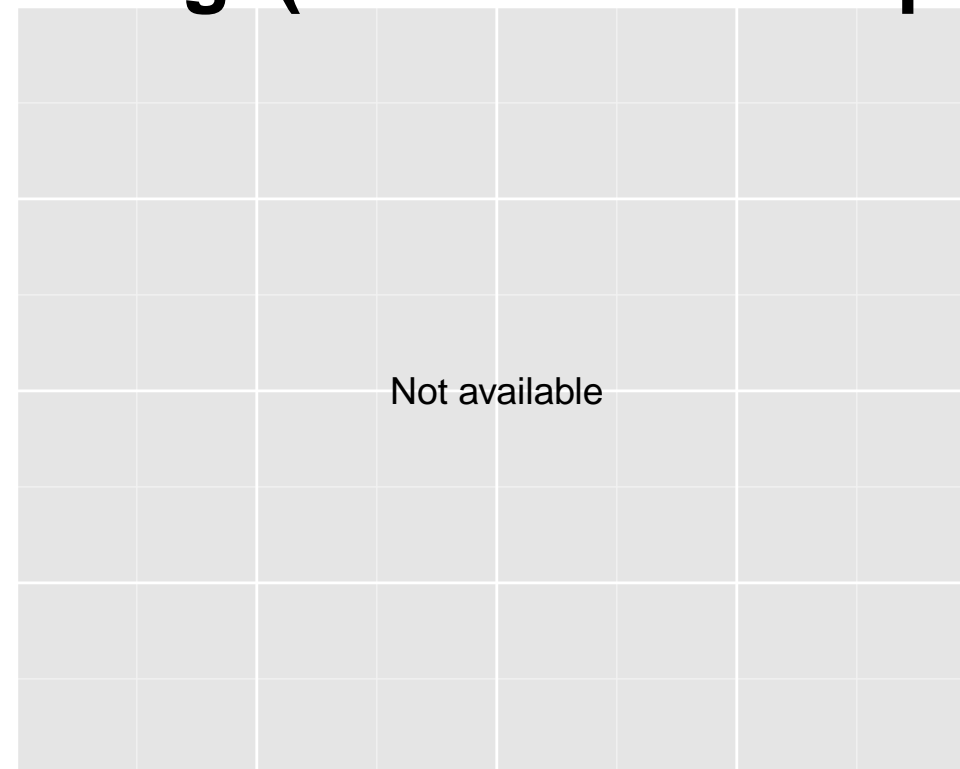

Supplement: Supplementary file 2329 [file 1]

## Zdhhc24

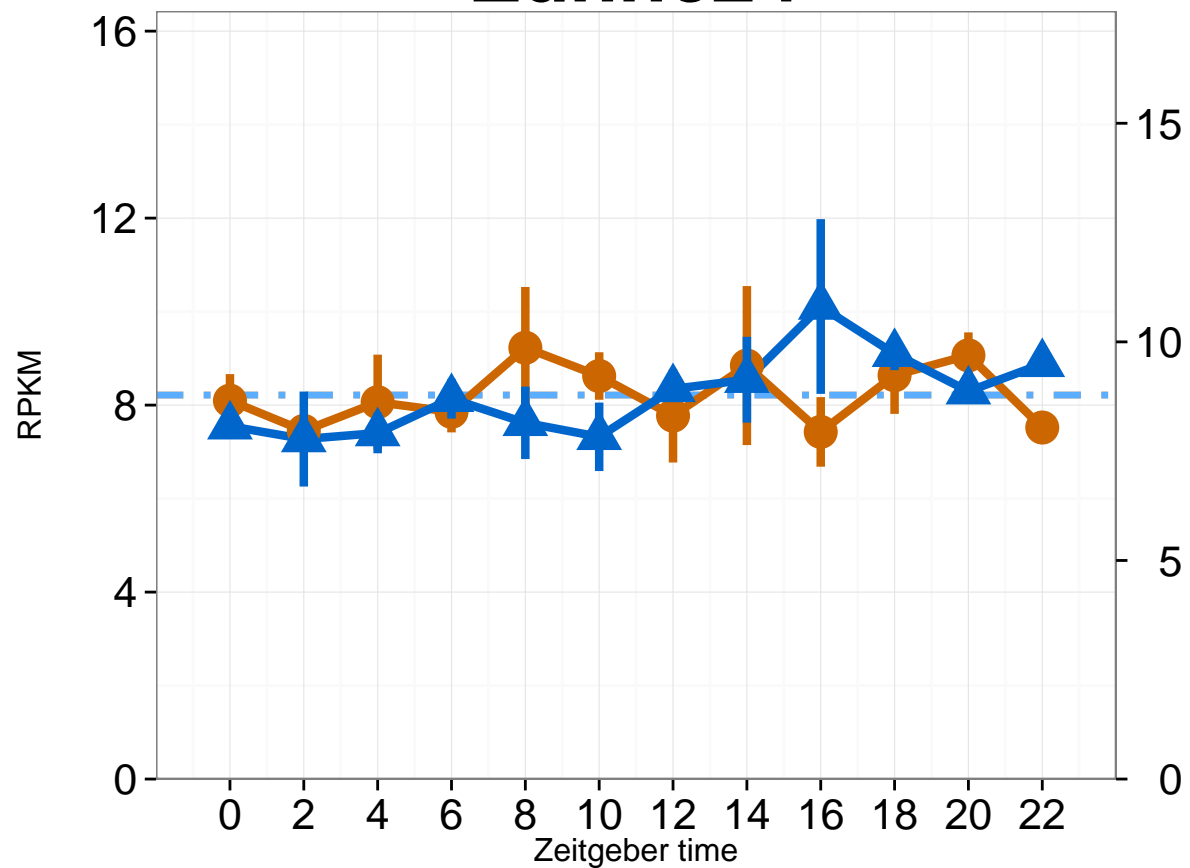

## Zdhhc24

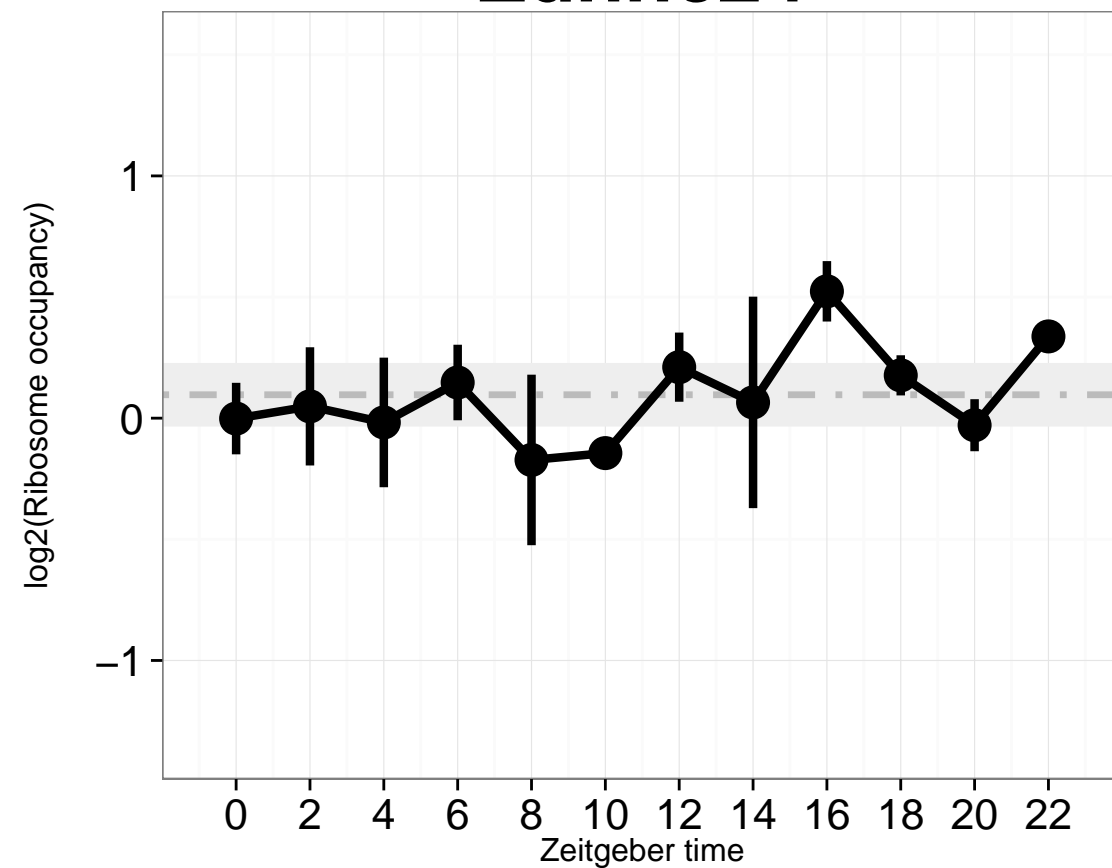

Supplement: Supplementary file 2330 [file 1]

## Shprh

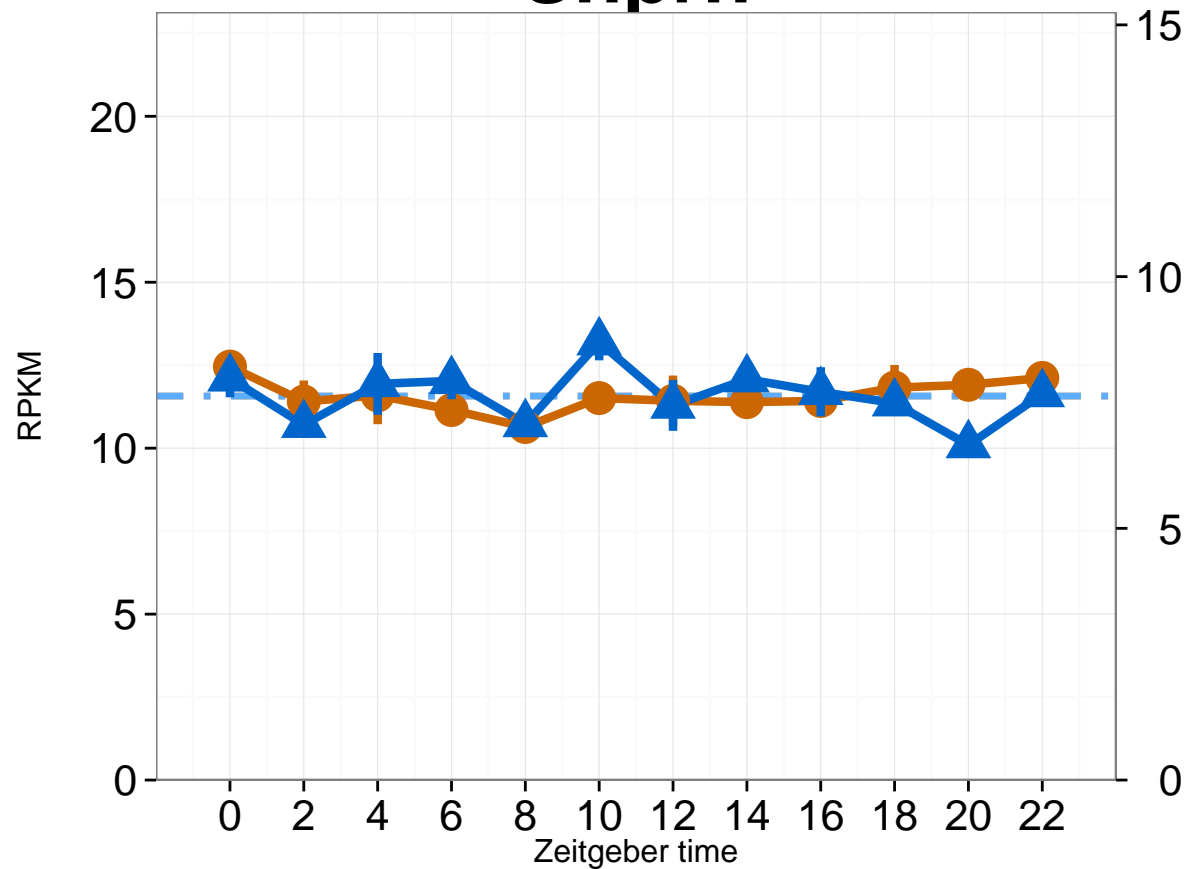

## Shprh

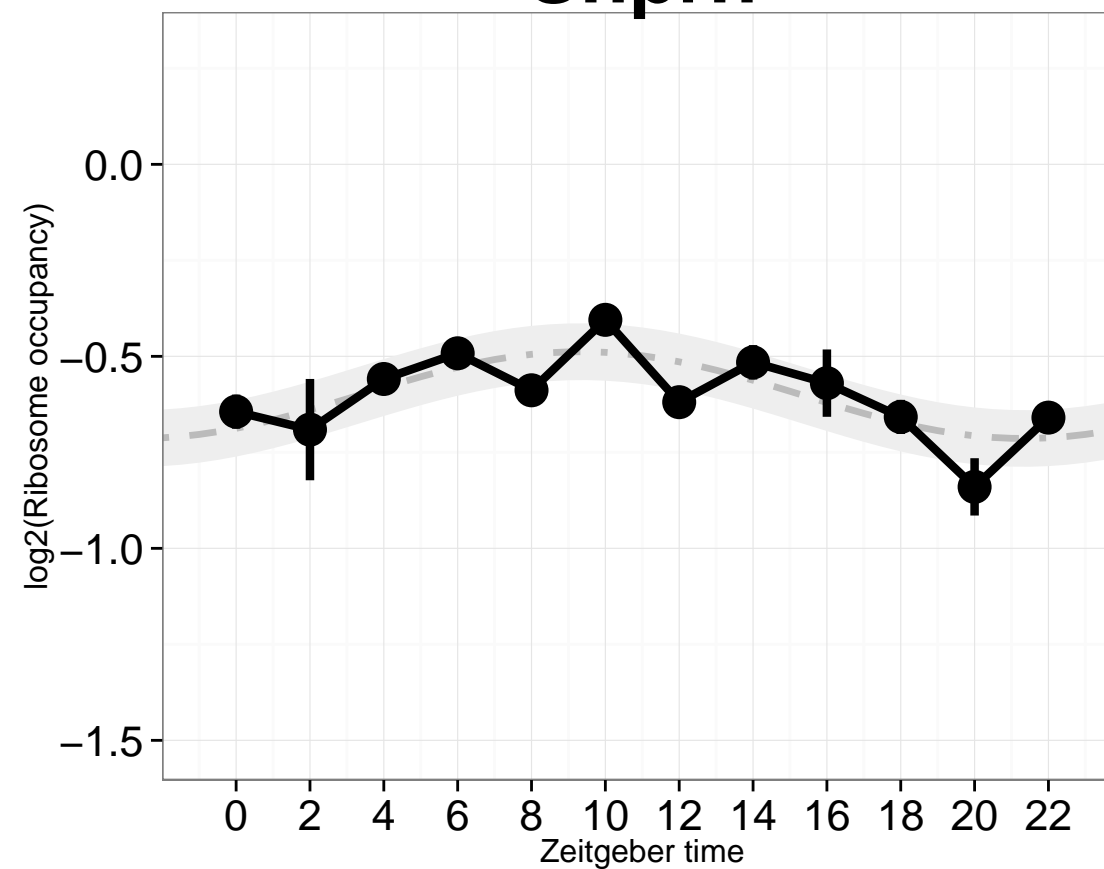

Supplement: Supplementary file 2331 [file 1]

# Cyp27b1

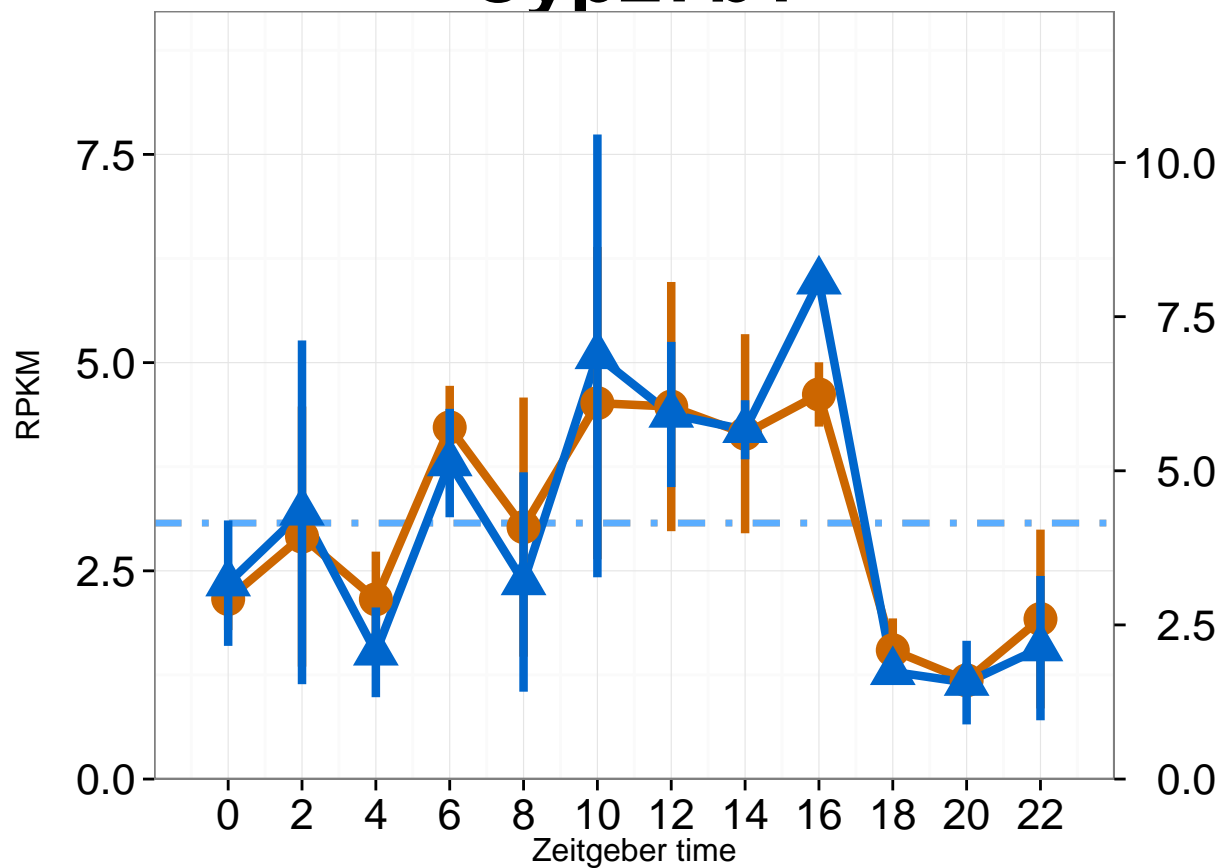

# Cyp27b1

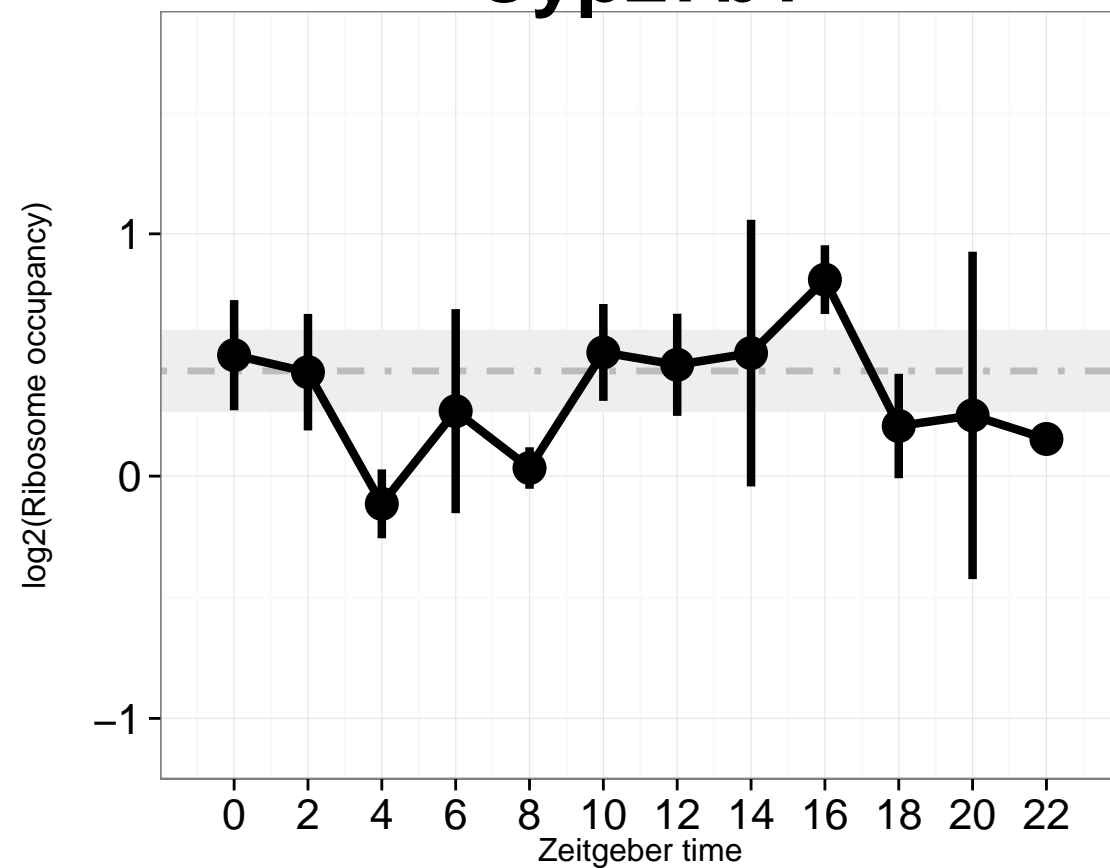

Supplement: Supplementary file 2332 [file 1]

## Stx3

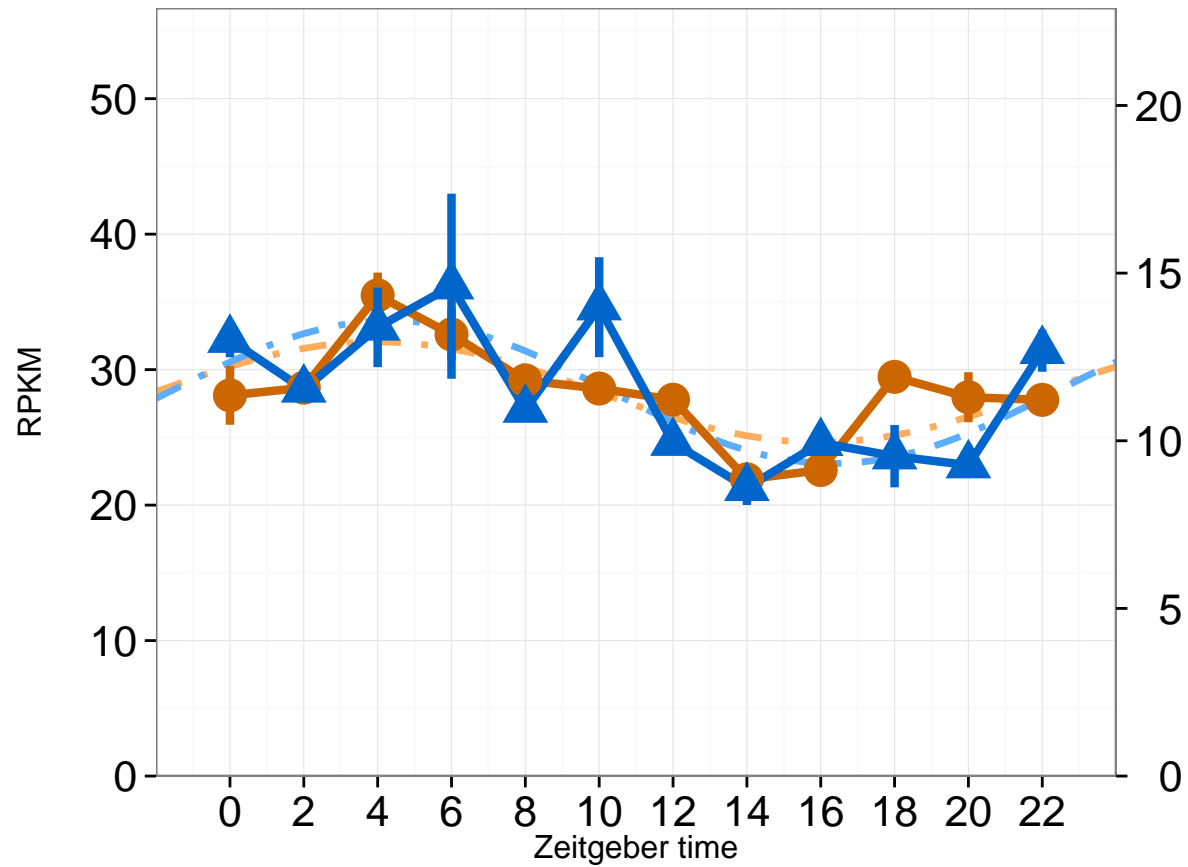

## Stx3

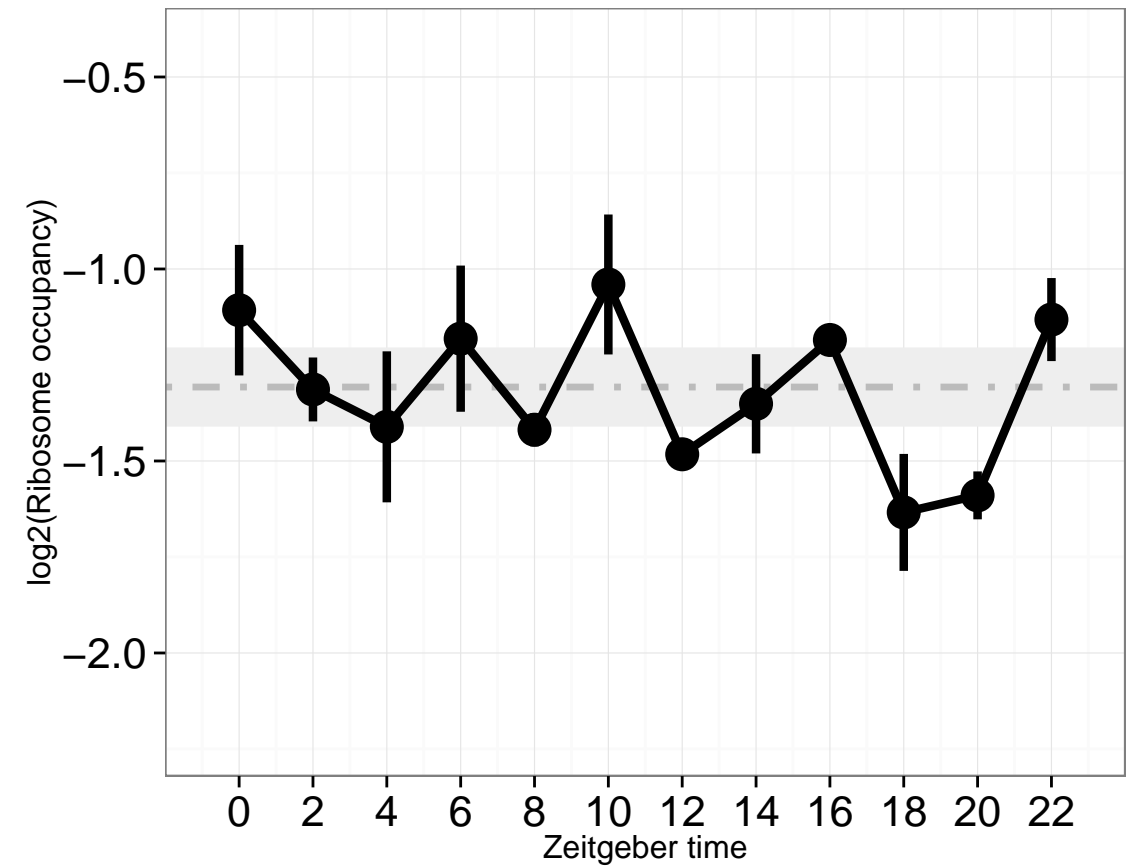

Supplement: Supplementary file 2333 [file 1]

# **Stra13**

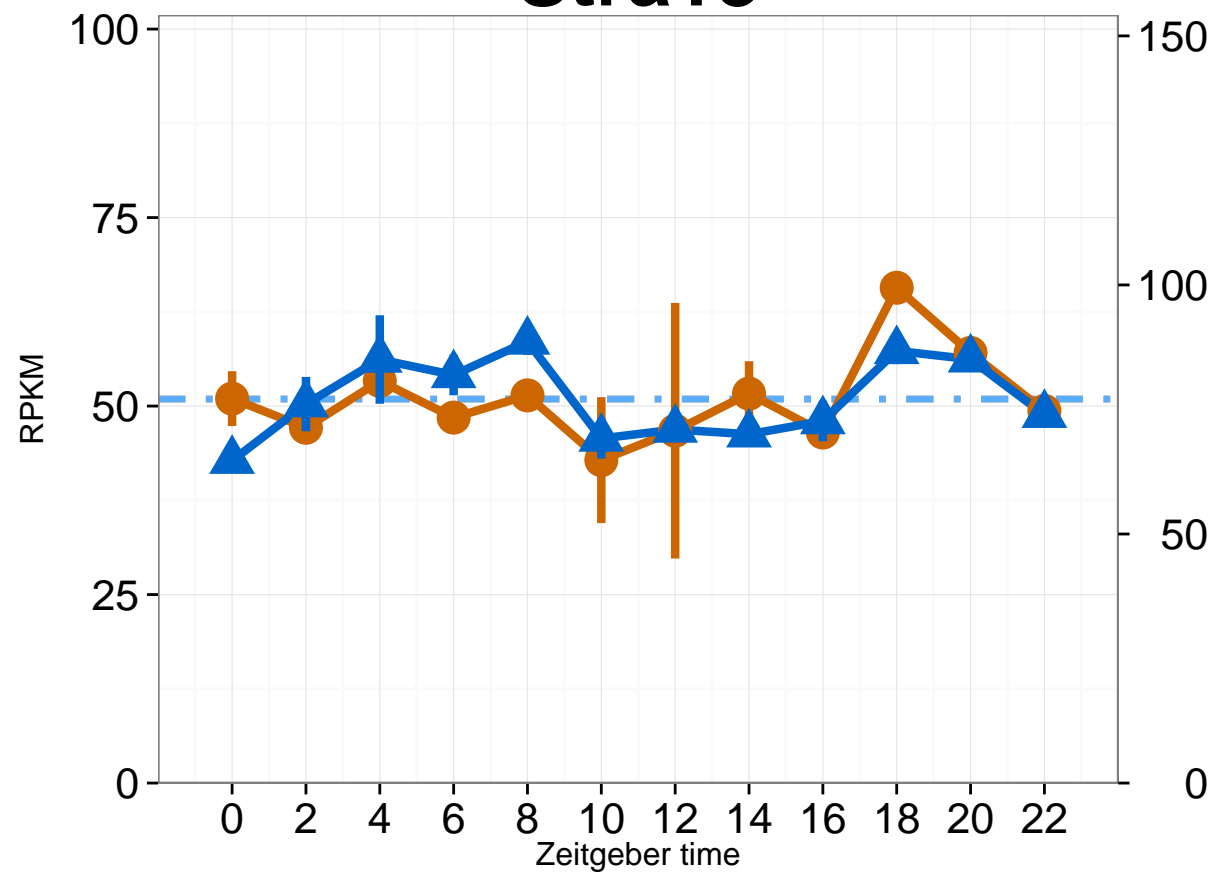

# **Stra13**

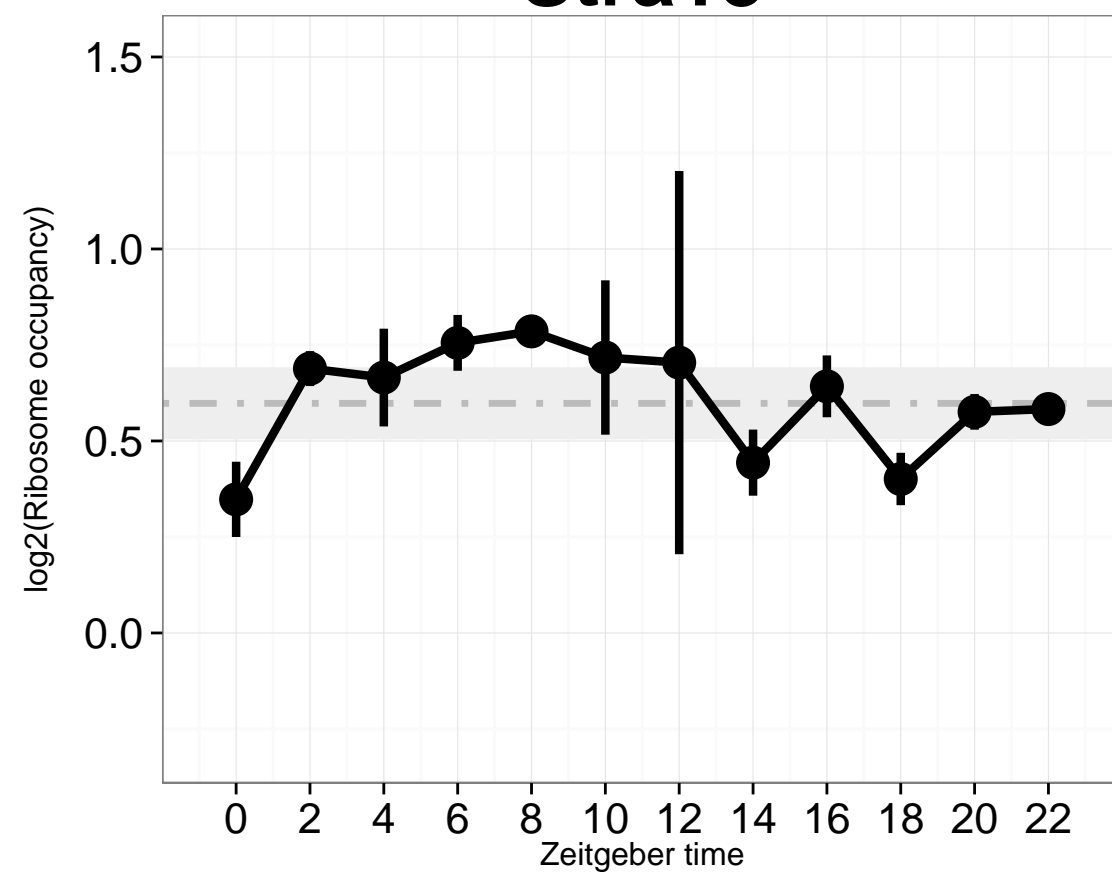

Supplement: Supplementary file 2334 [file 1]

## Gabrb3

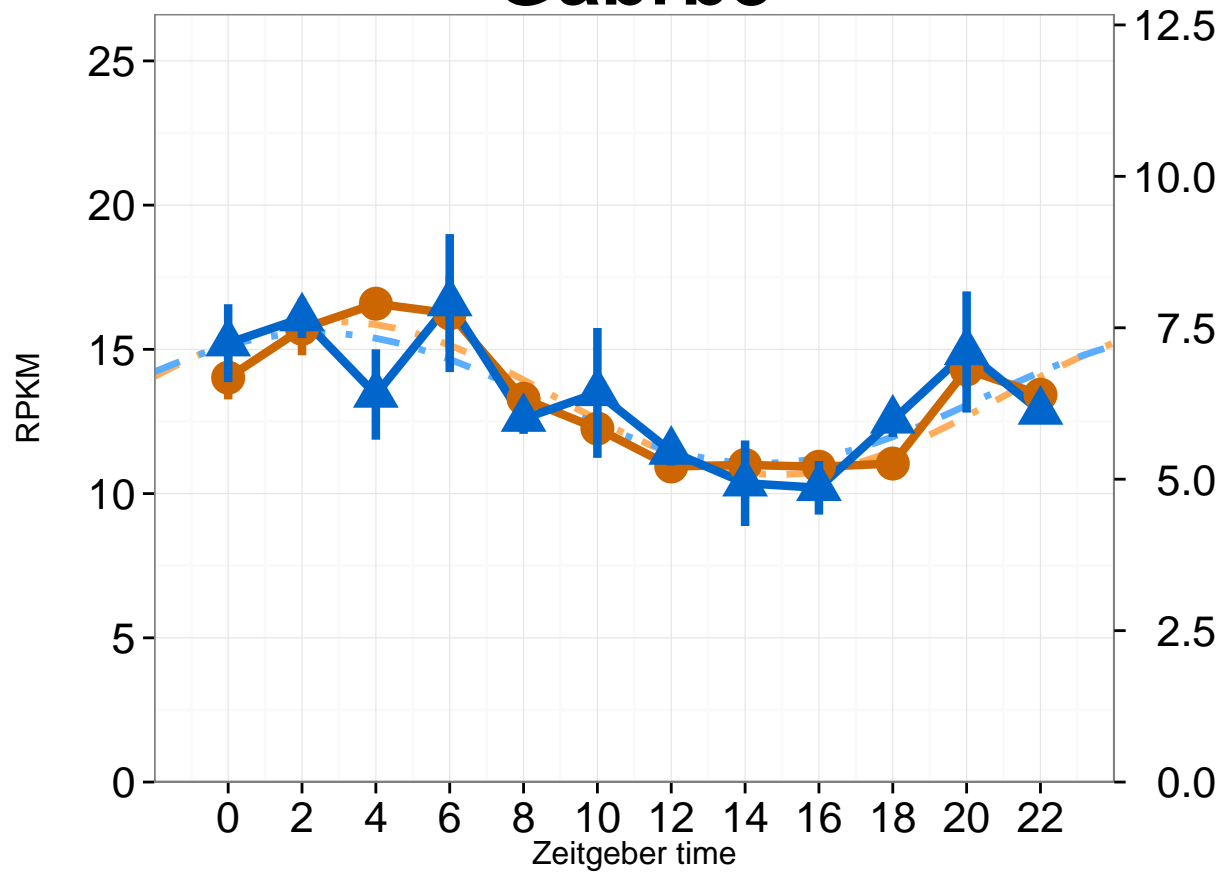

## Gabrb3

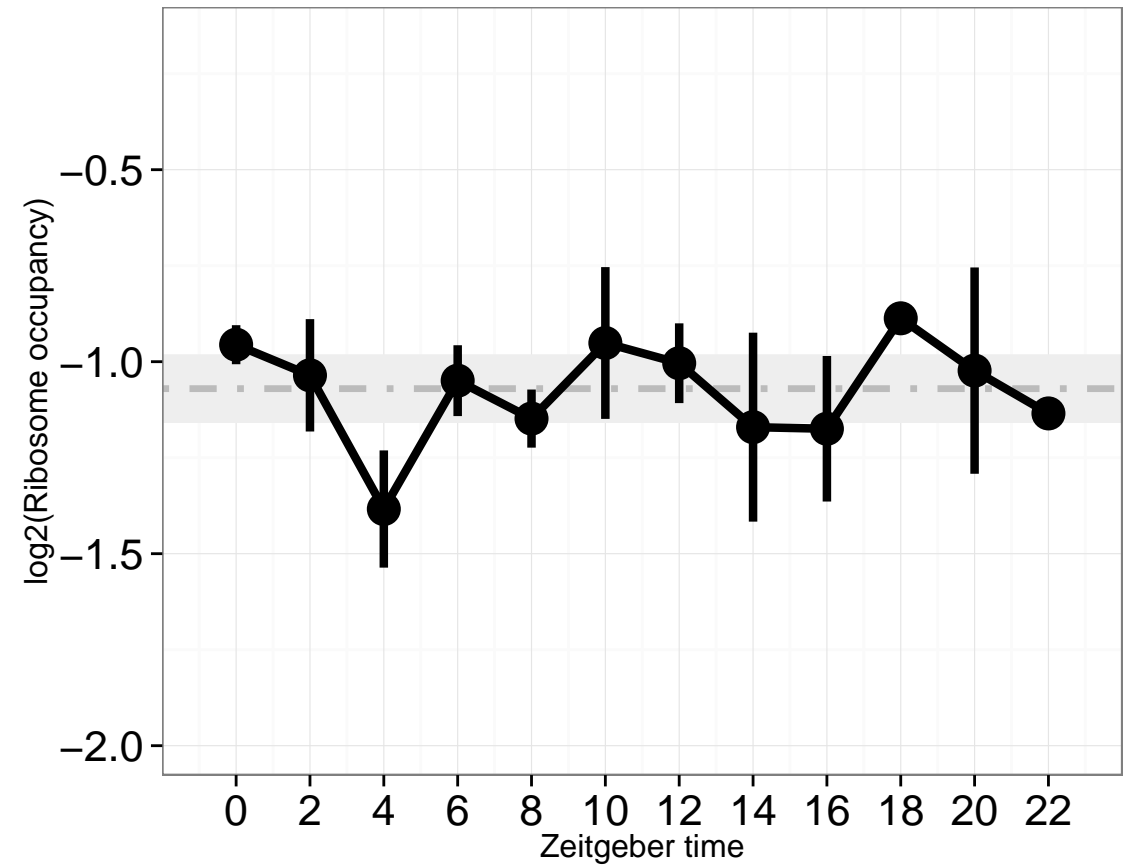

Supplement: Supplementary file 2335 [file 1]

## Lins

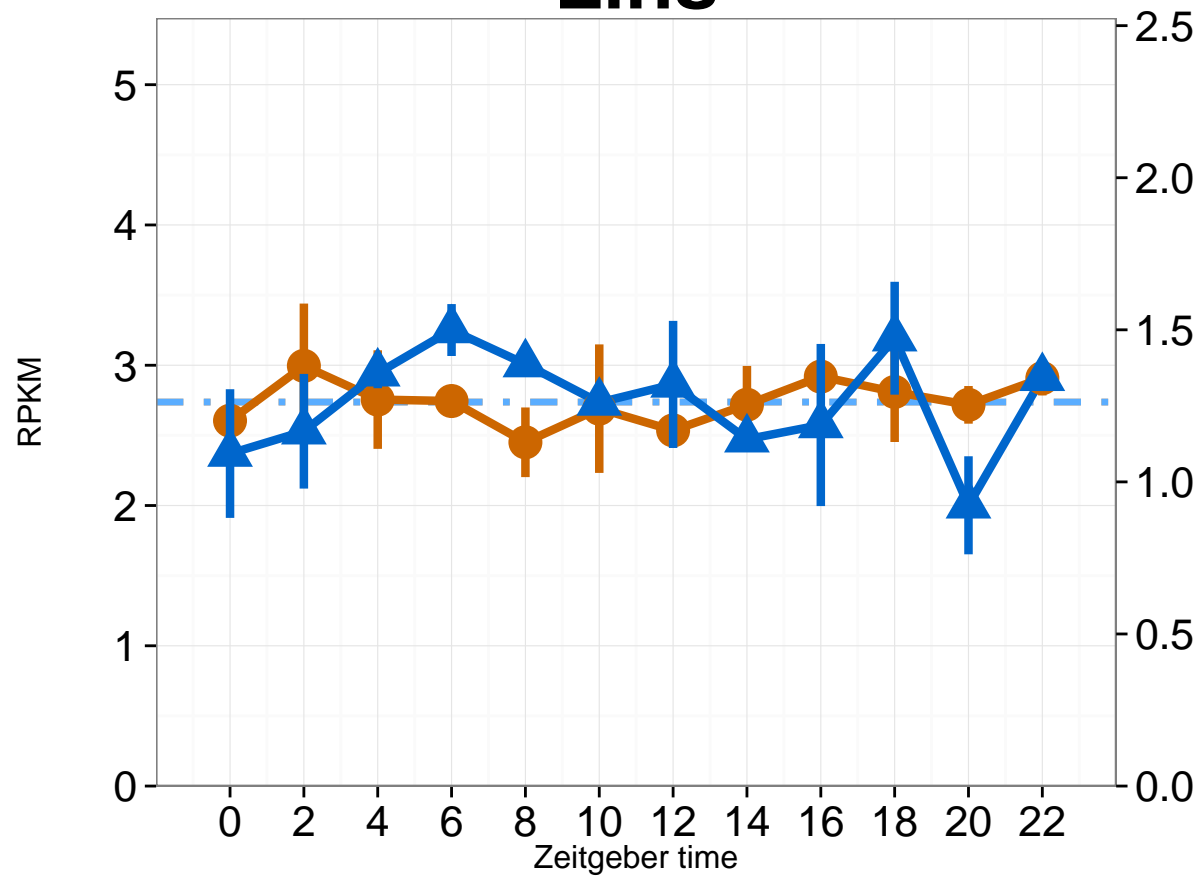

## Lins

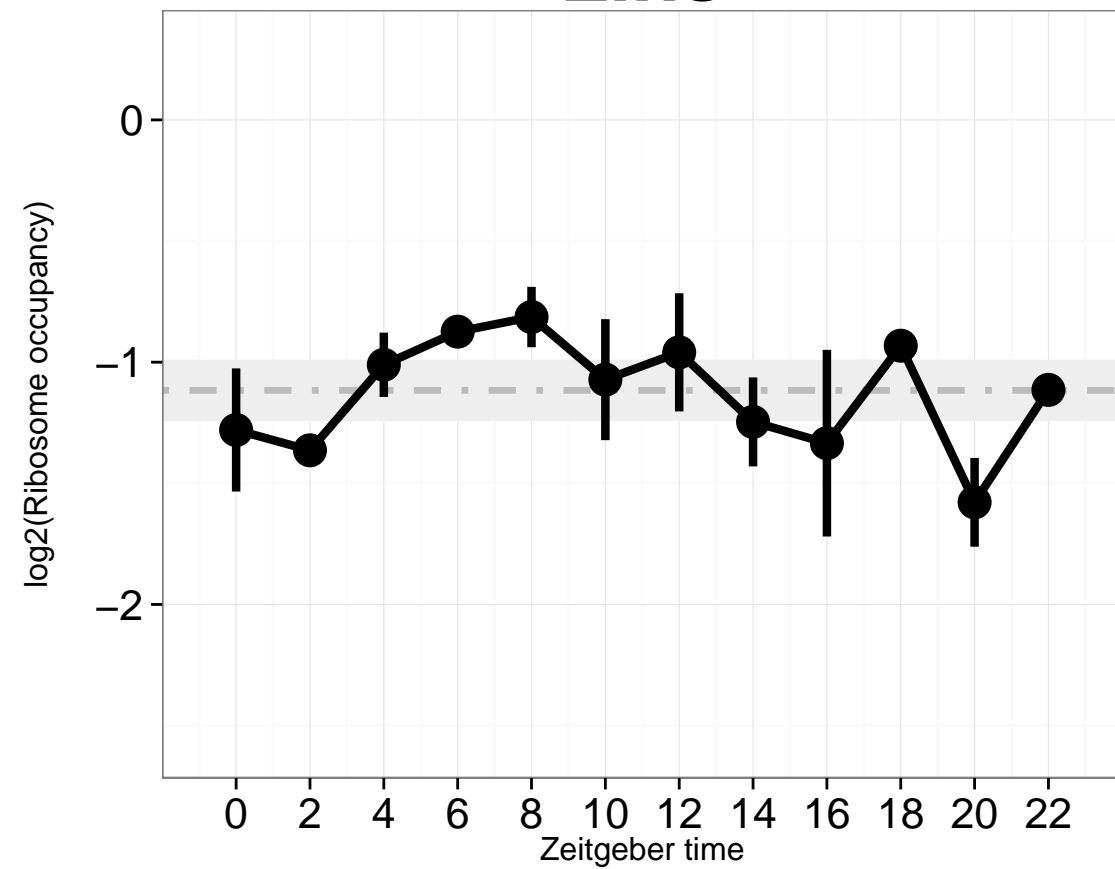

Supplement: Supplementary file 2336 [file 1]

## Gpr81

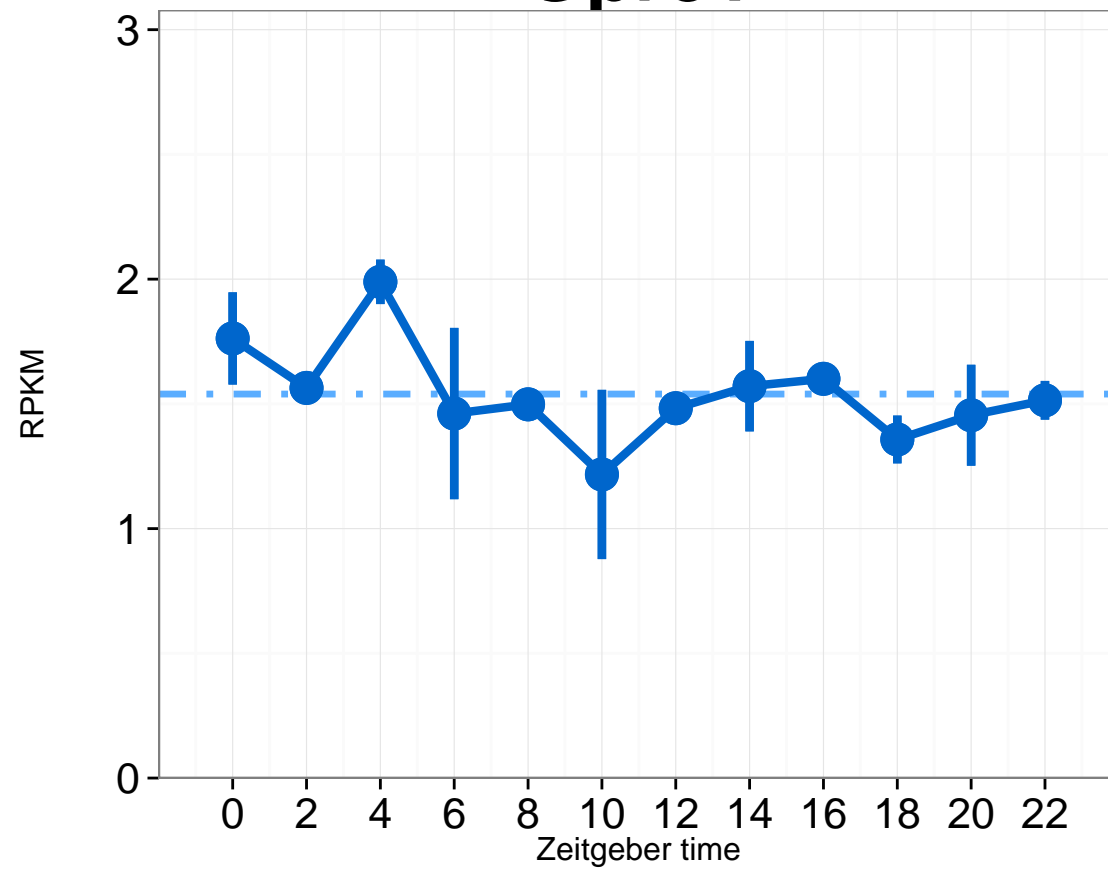

## Gpr81 log2(Ribosome occupancy

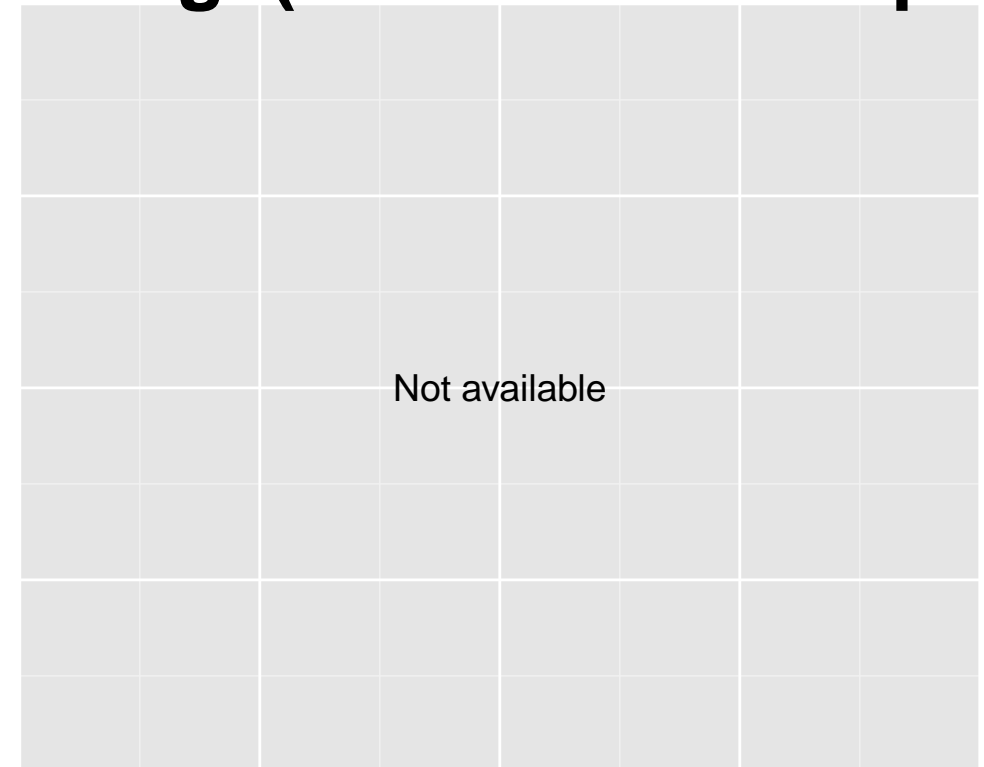

Supplement: Supplementary file 2337 [file 1]

## Polr2j

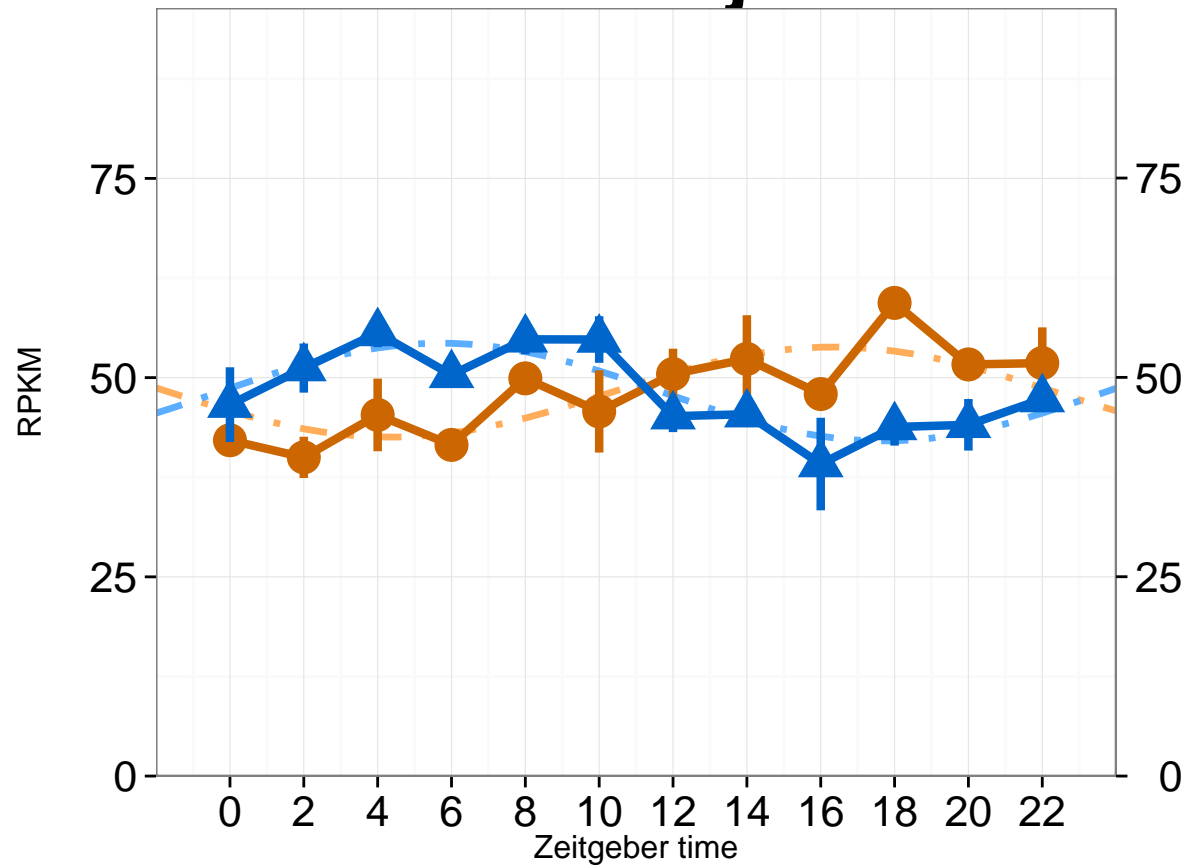

## Polr2j

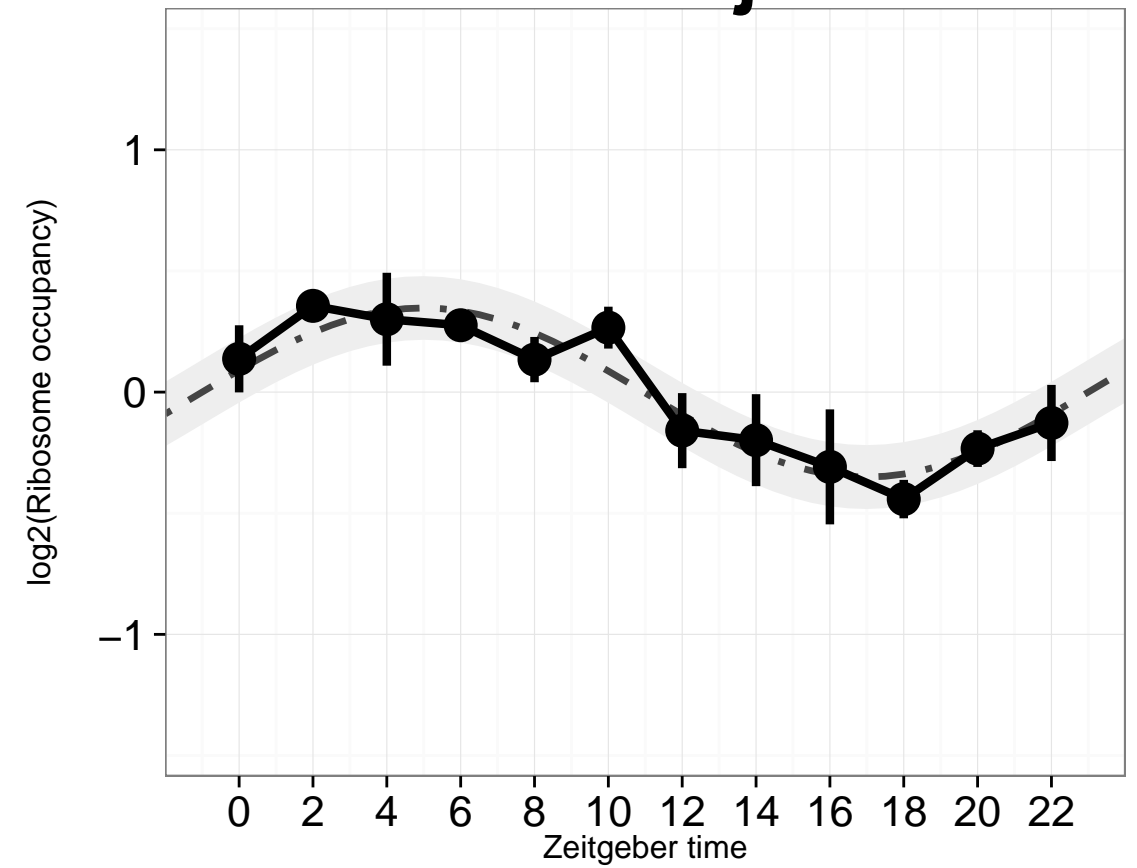

Supplement: Supplementary file 2338 [file 1]

## Mbd5

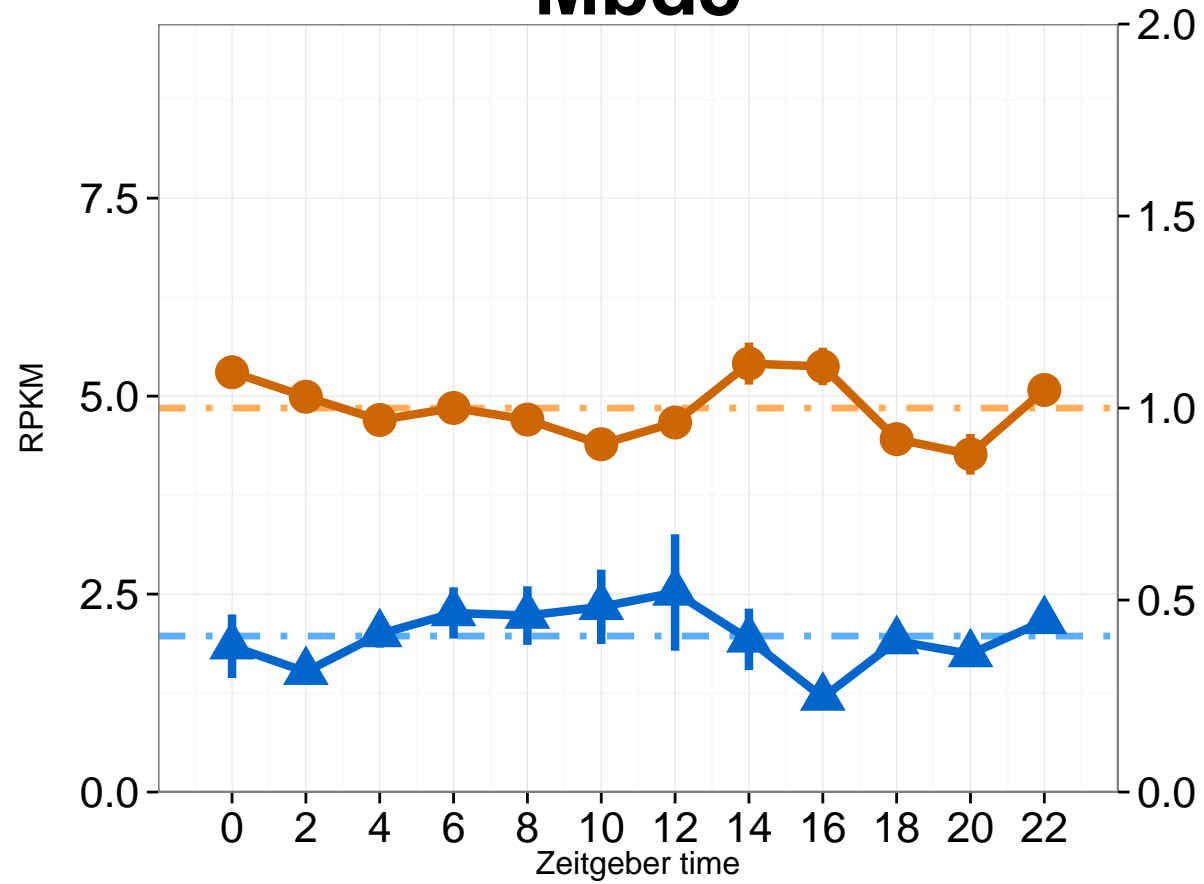

## Mbd5

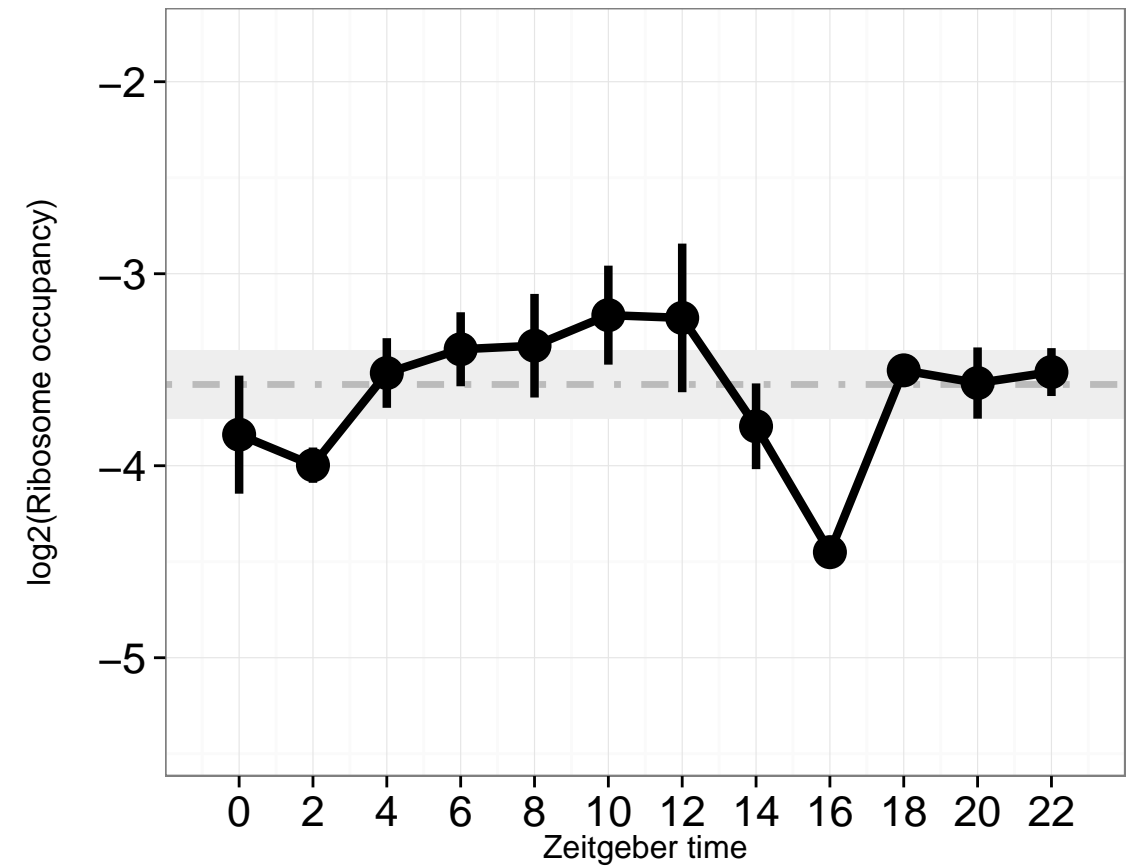

Supplement: Supplementary file 2339 [file 1]

## B3galt6

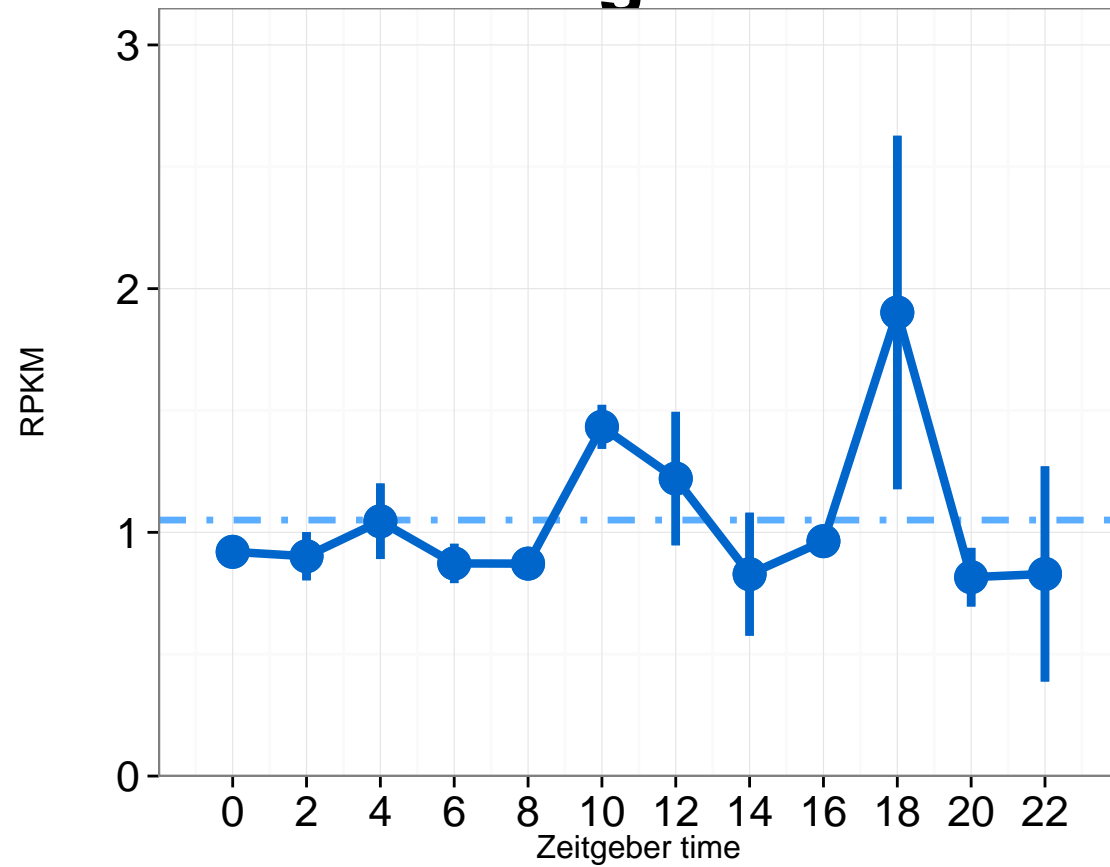

## B3galt6 log2(Ribosome occupancy)

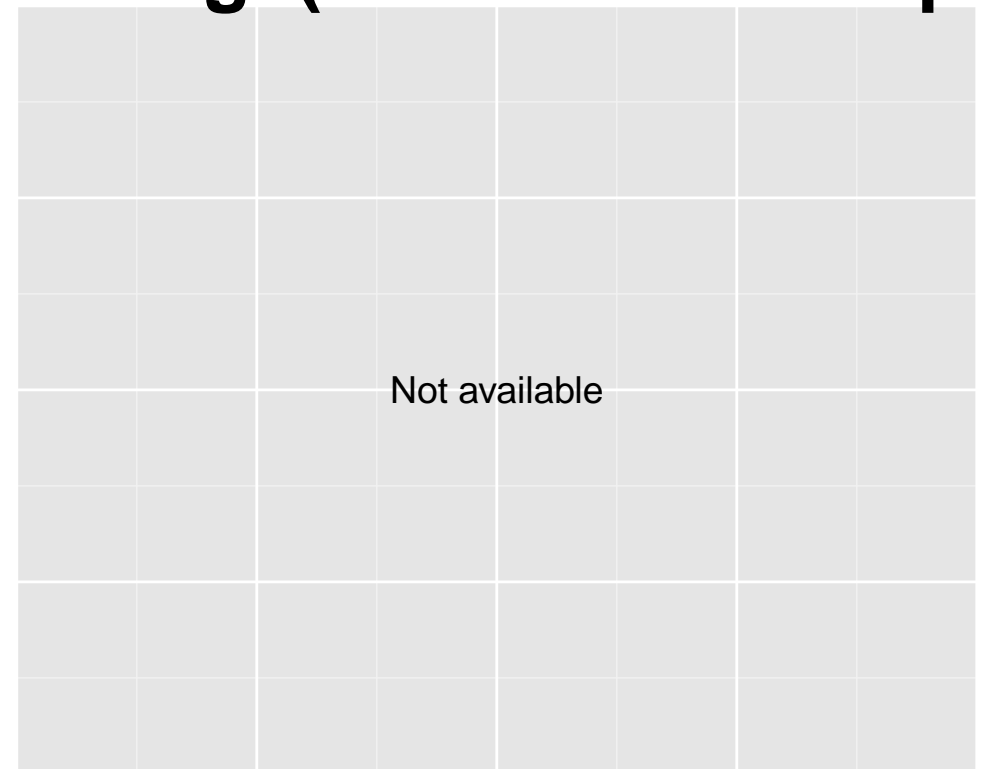

Supplement: Supplementary file 2340 [file 1]

# Mrpl32

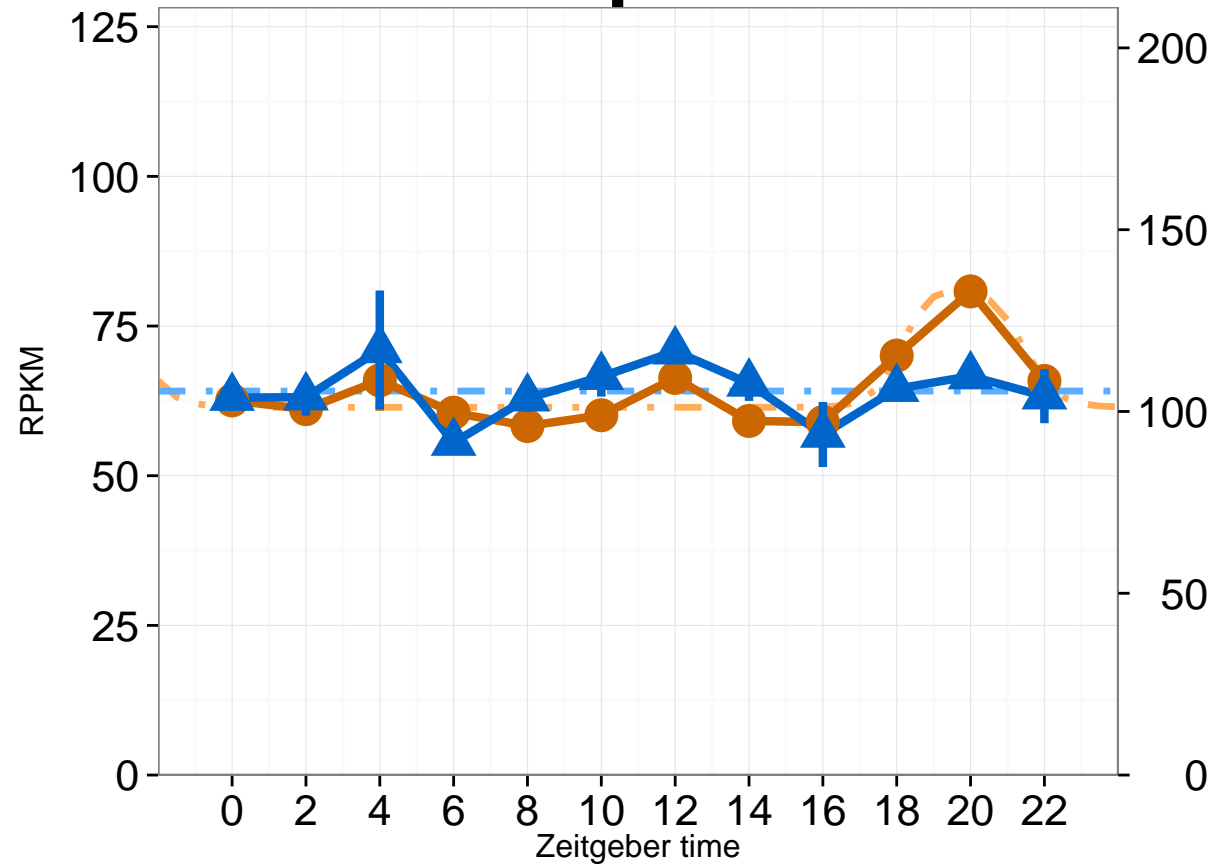

# Mrpl32

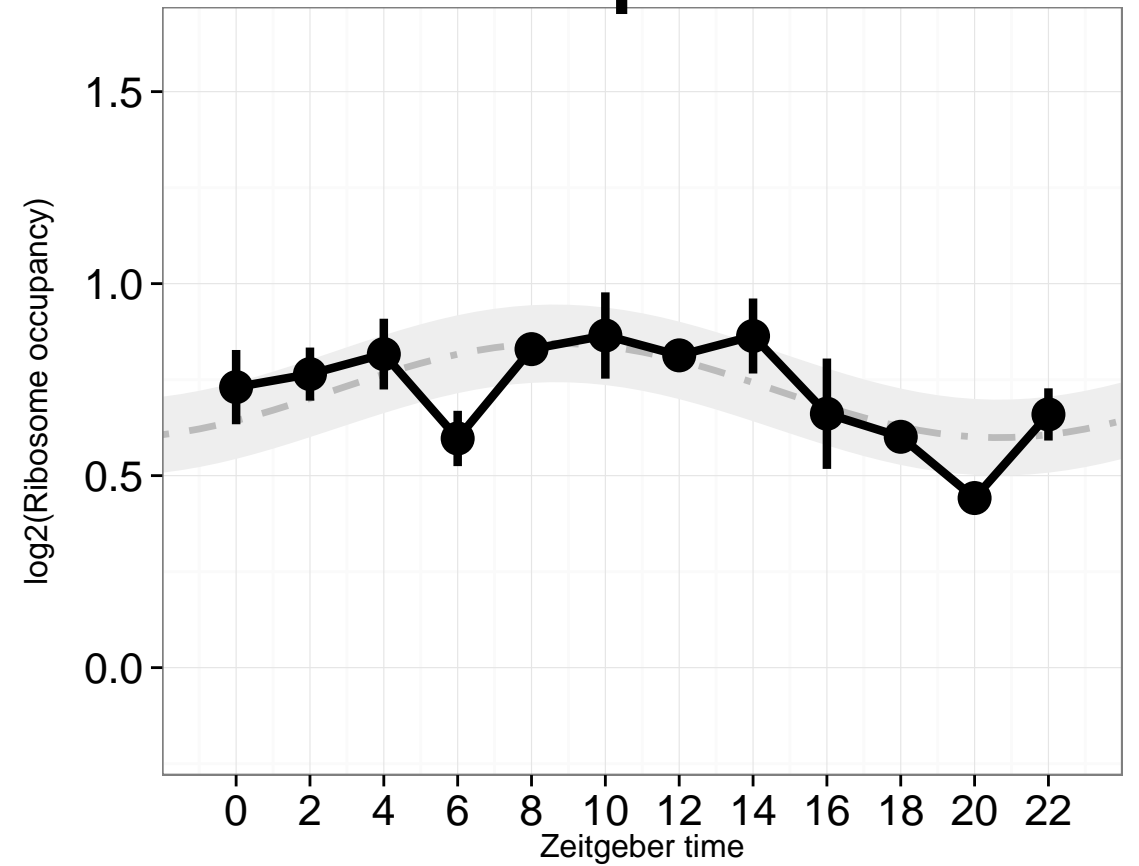

Supplement: Supplementary file 2341 [file 1]

# Tmem63a

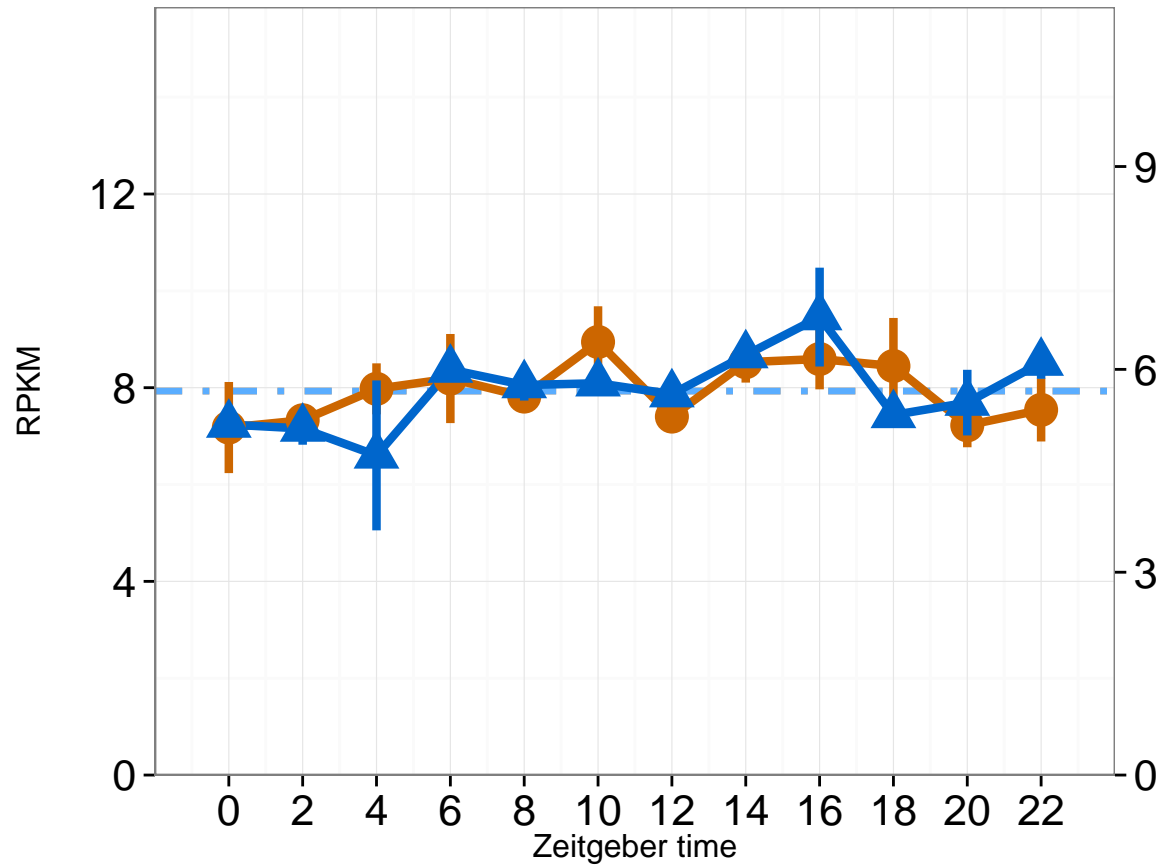

# Tmem63a

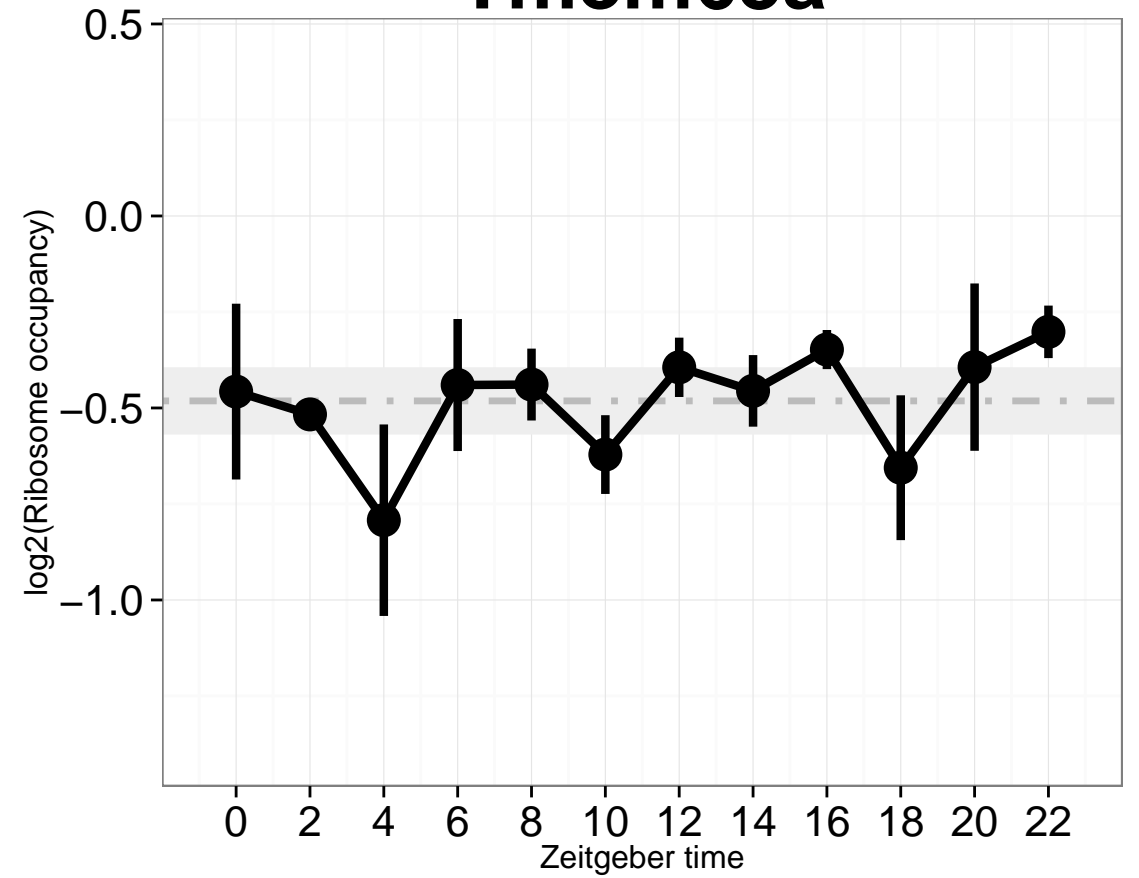

Supplement: Supplementary file 2342 [file 1]

## Tirap

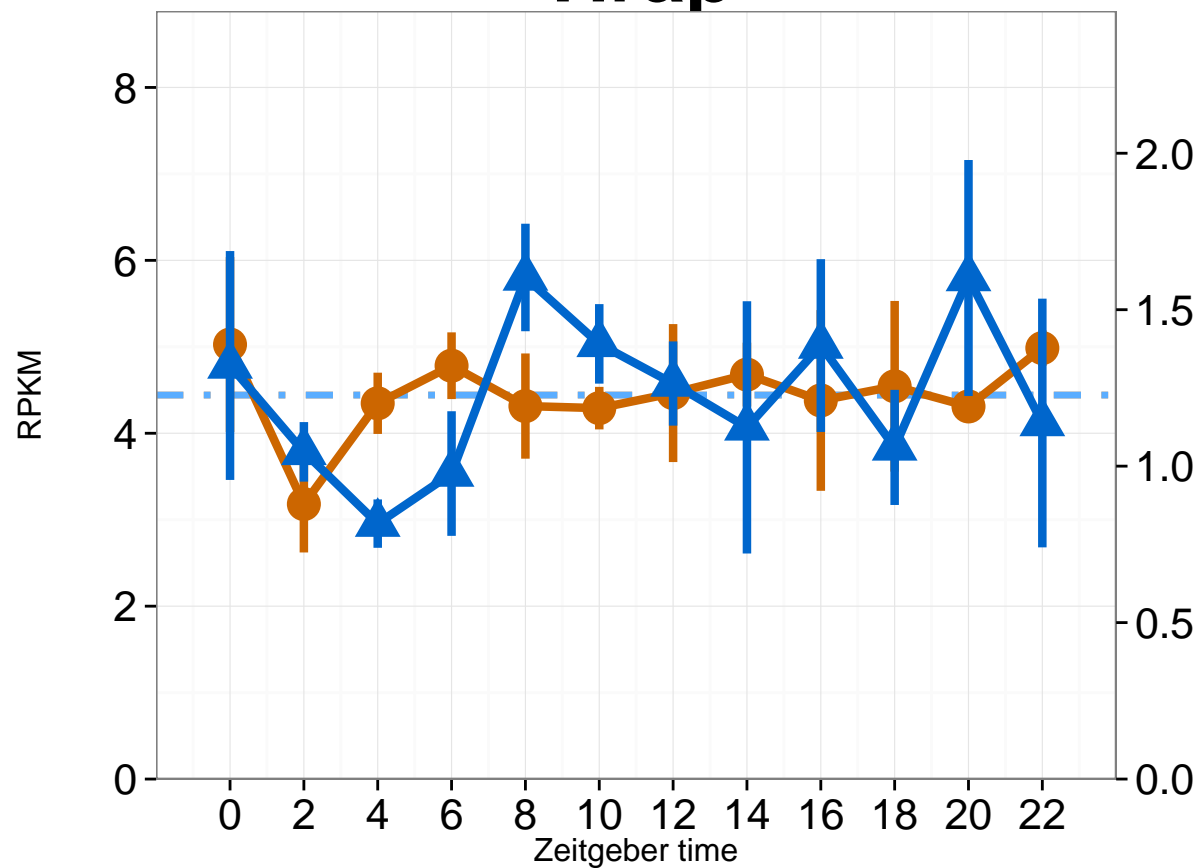

## Tirap

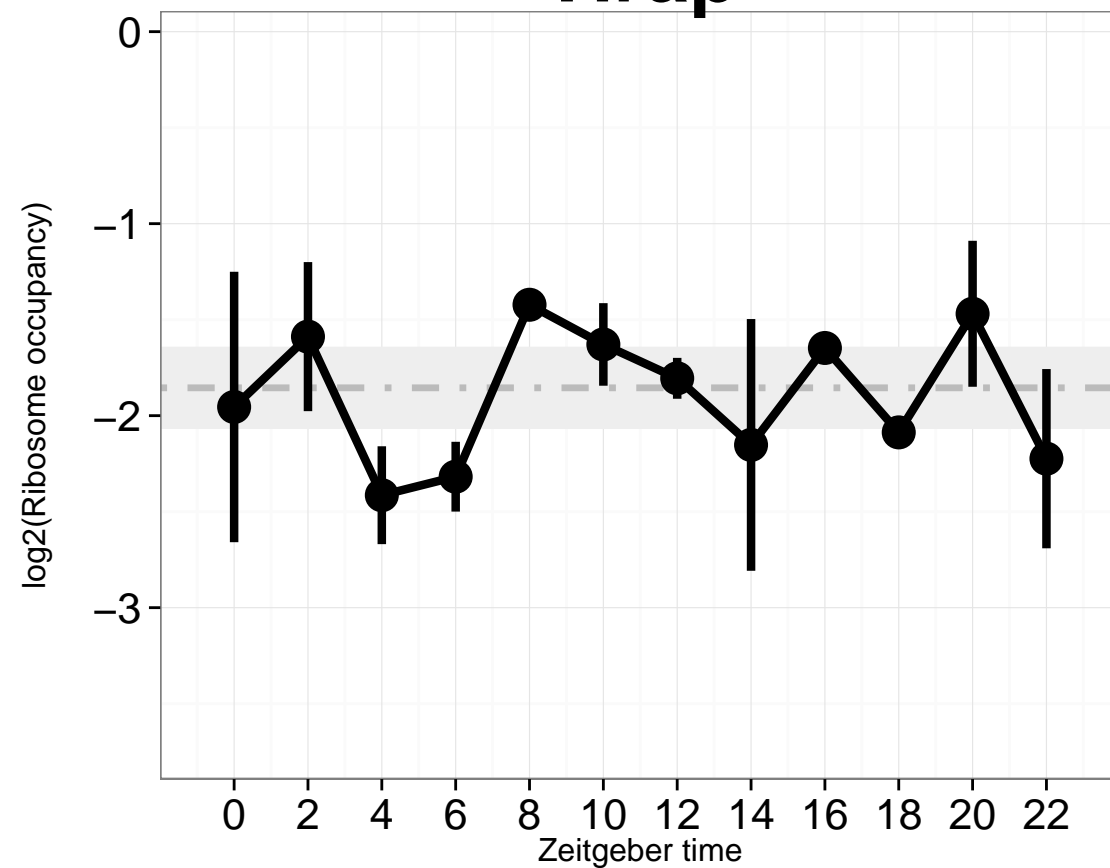

Supplement: Supplementary file 2343 [file 1]

**Gm4841 TR**

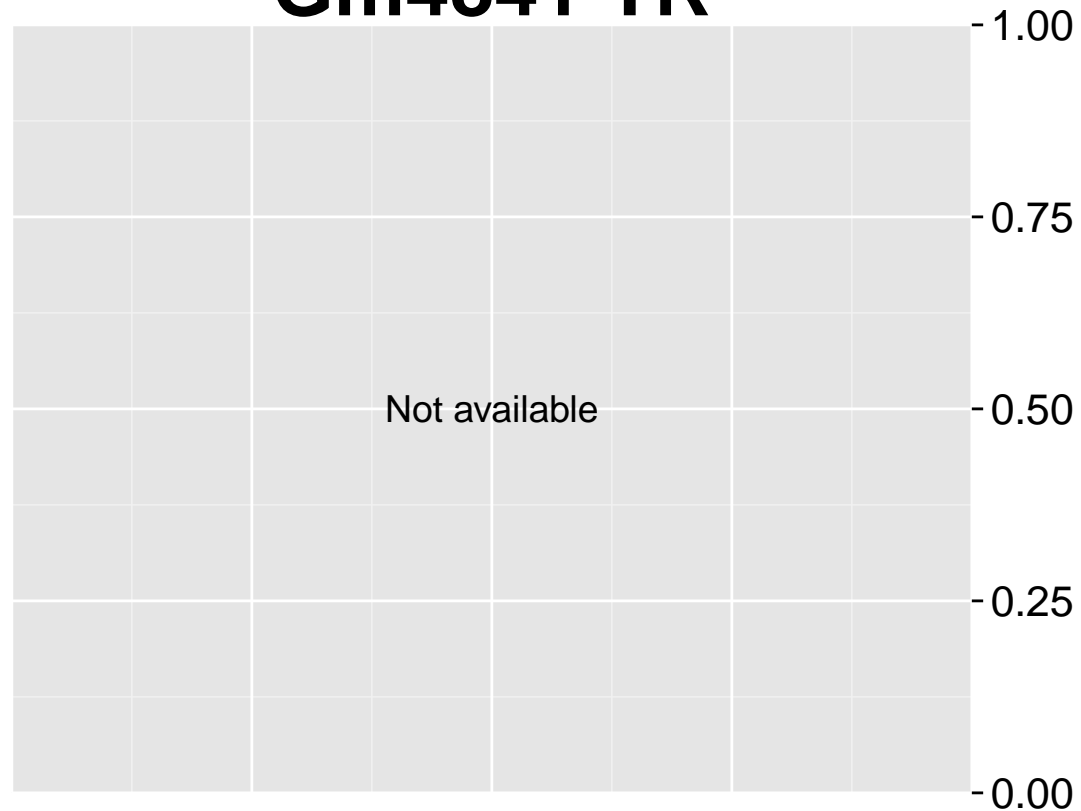

**Gm4841 log2(Ribosome occupanc**

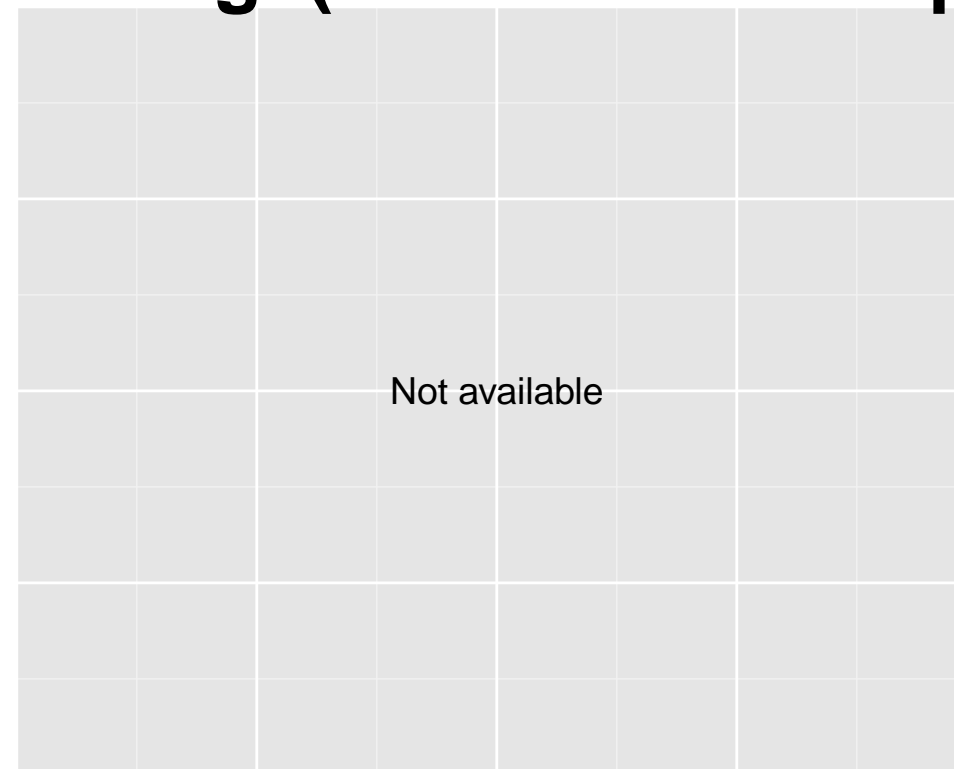

Supplement: Supplementary file 2344 [file 1]

# Tprgl

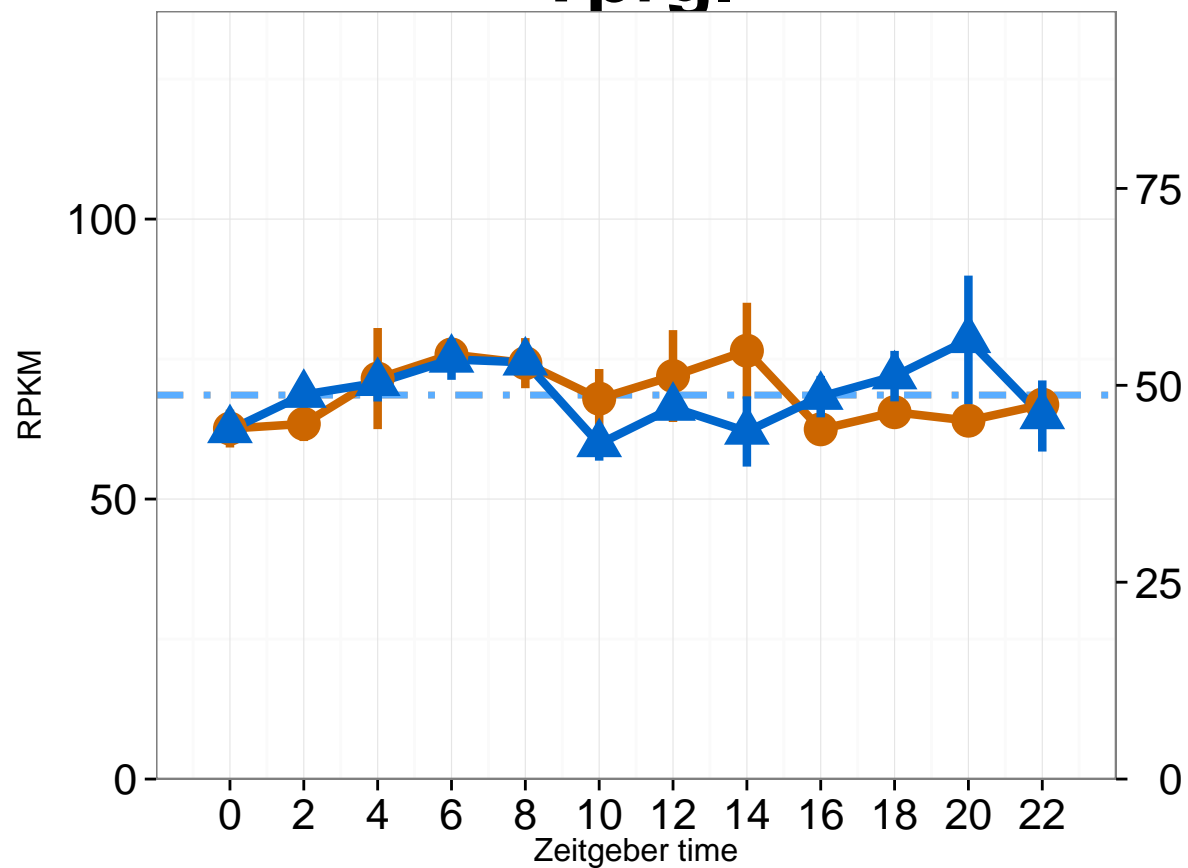

# Tprgl

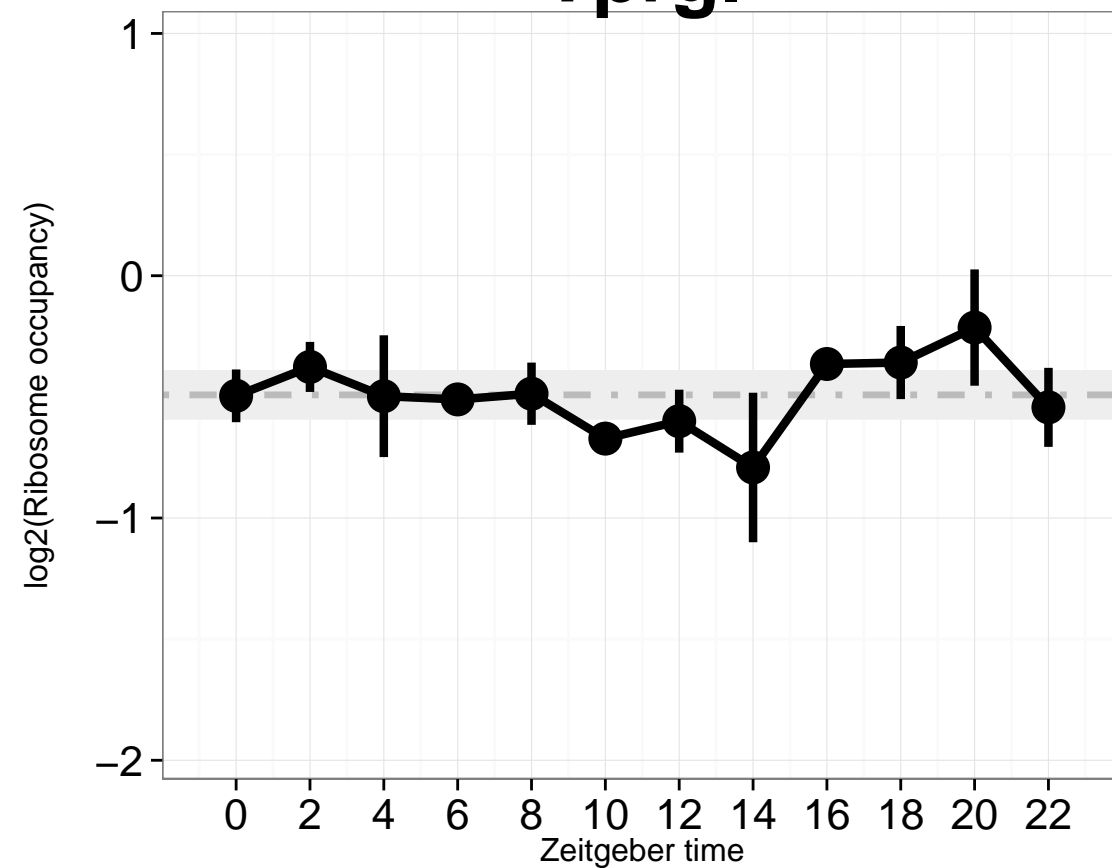

Supplement: Supplementary file 2345 [file 1]

## Mpv17

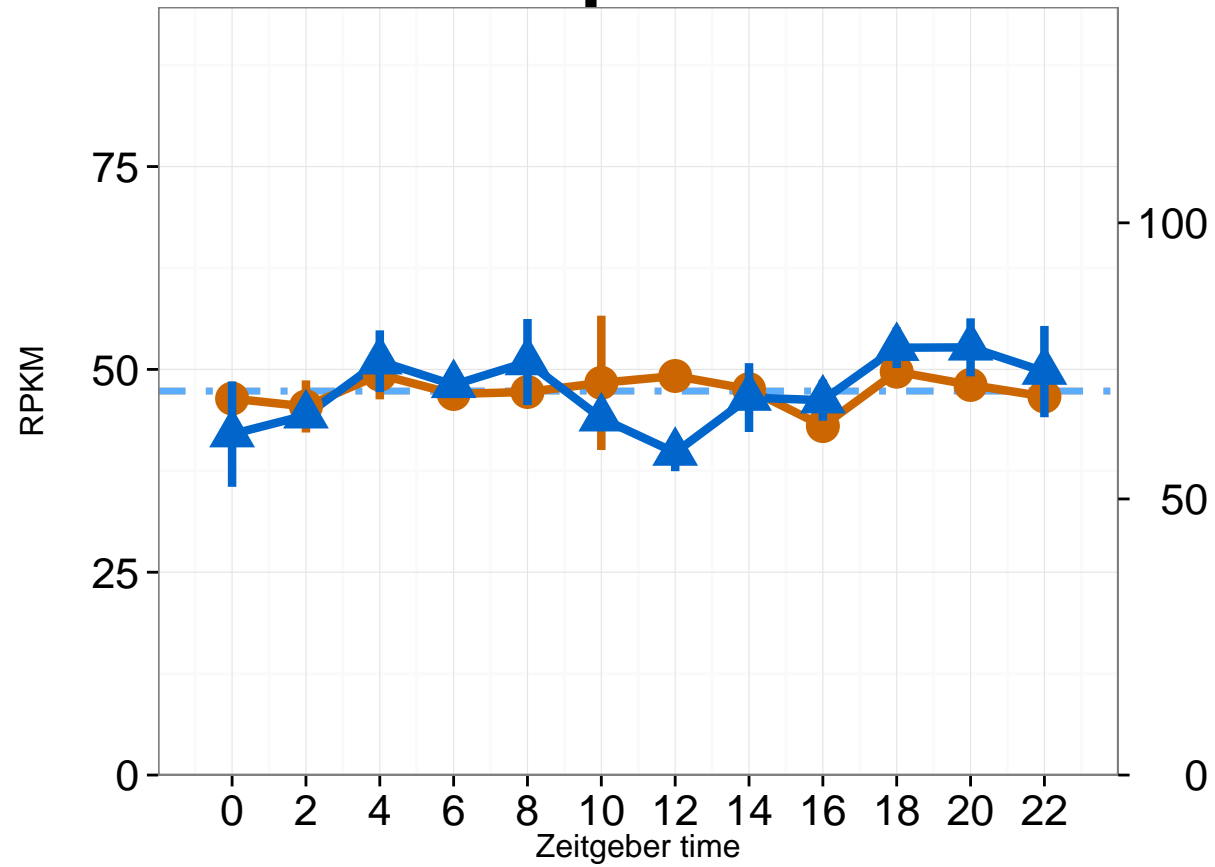

## Mpv17

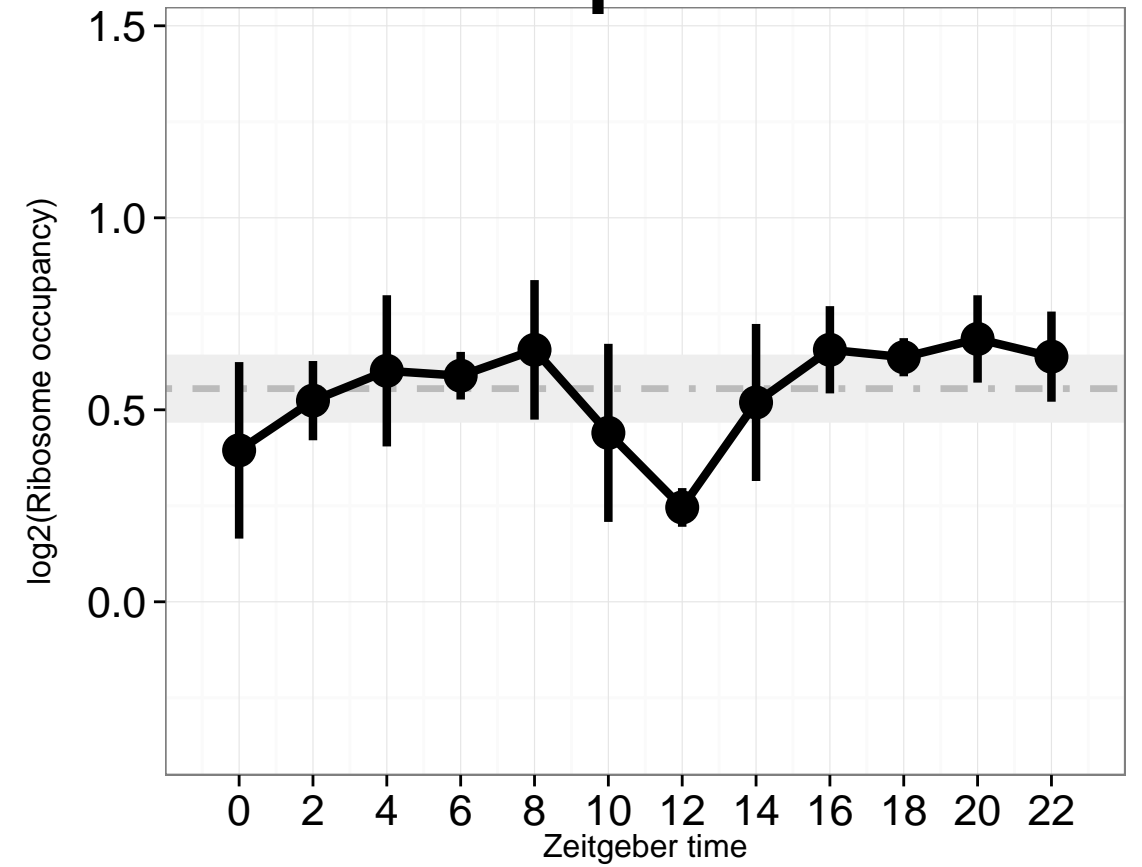

Supplement: Supplementary file 2346 [file 1]

## Phf21b

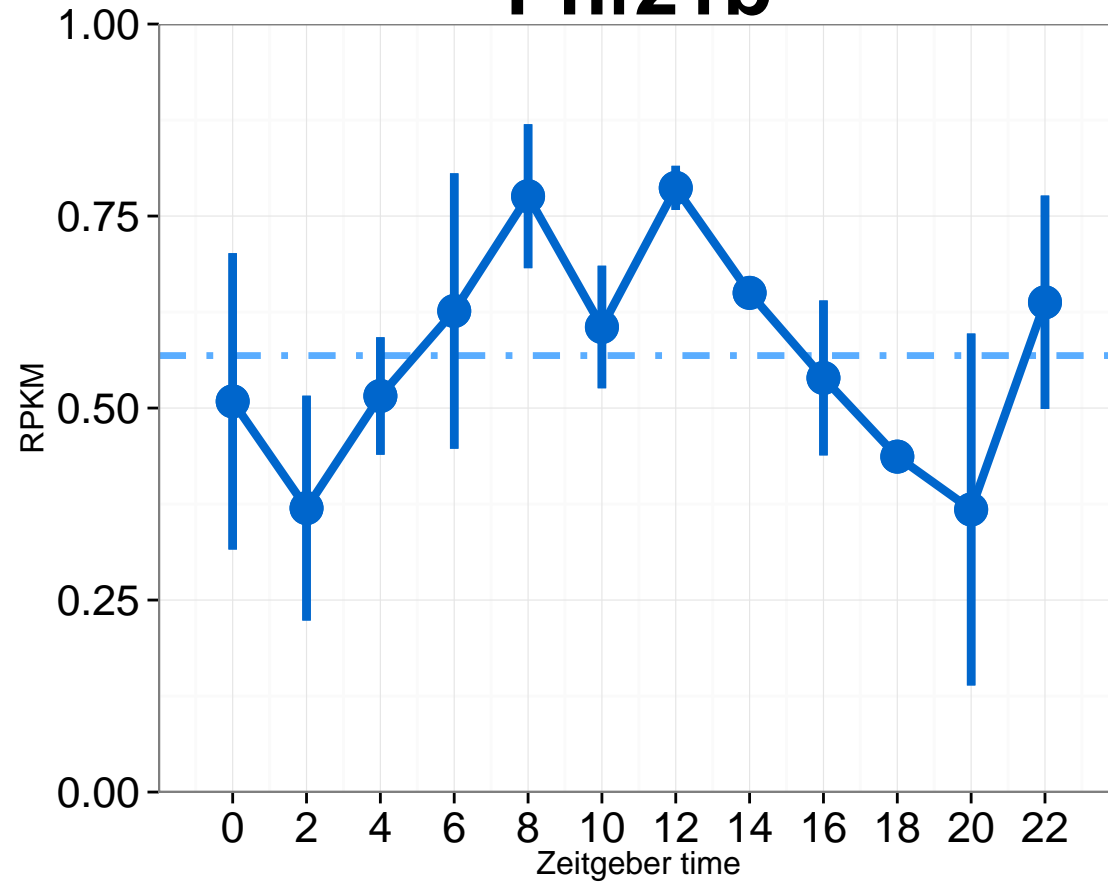

## Phf21b log2(Ribosome occupancy

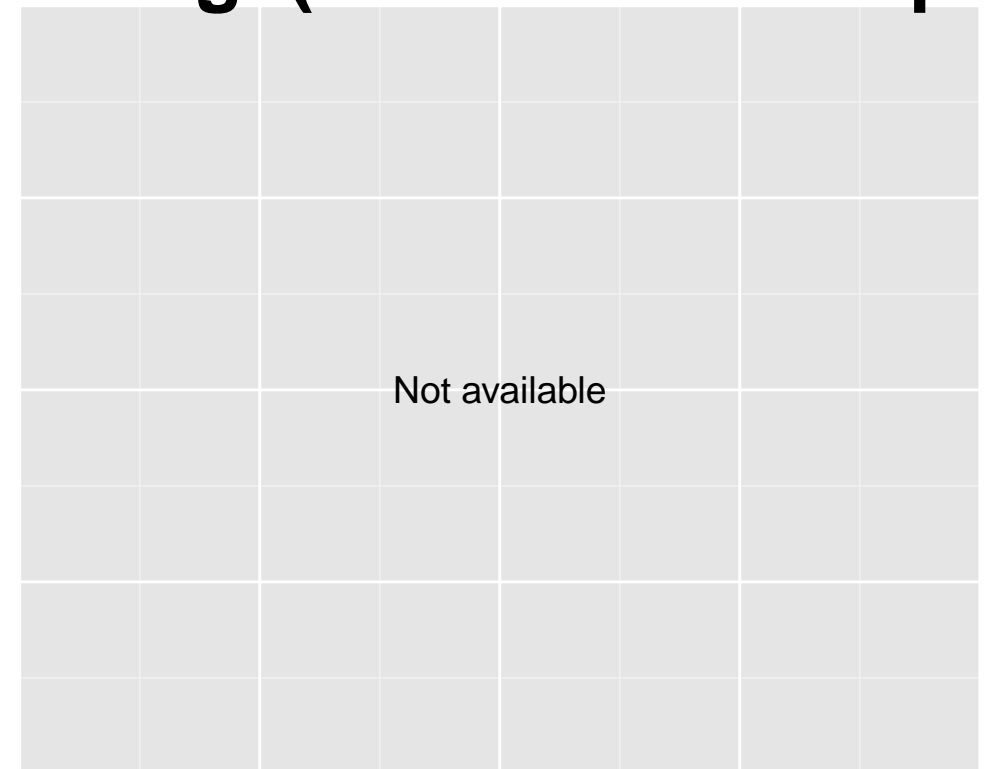

Supplement: Supplementary file 2347 [file 1]

# Rangrf

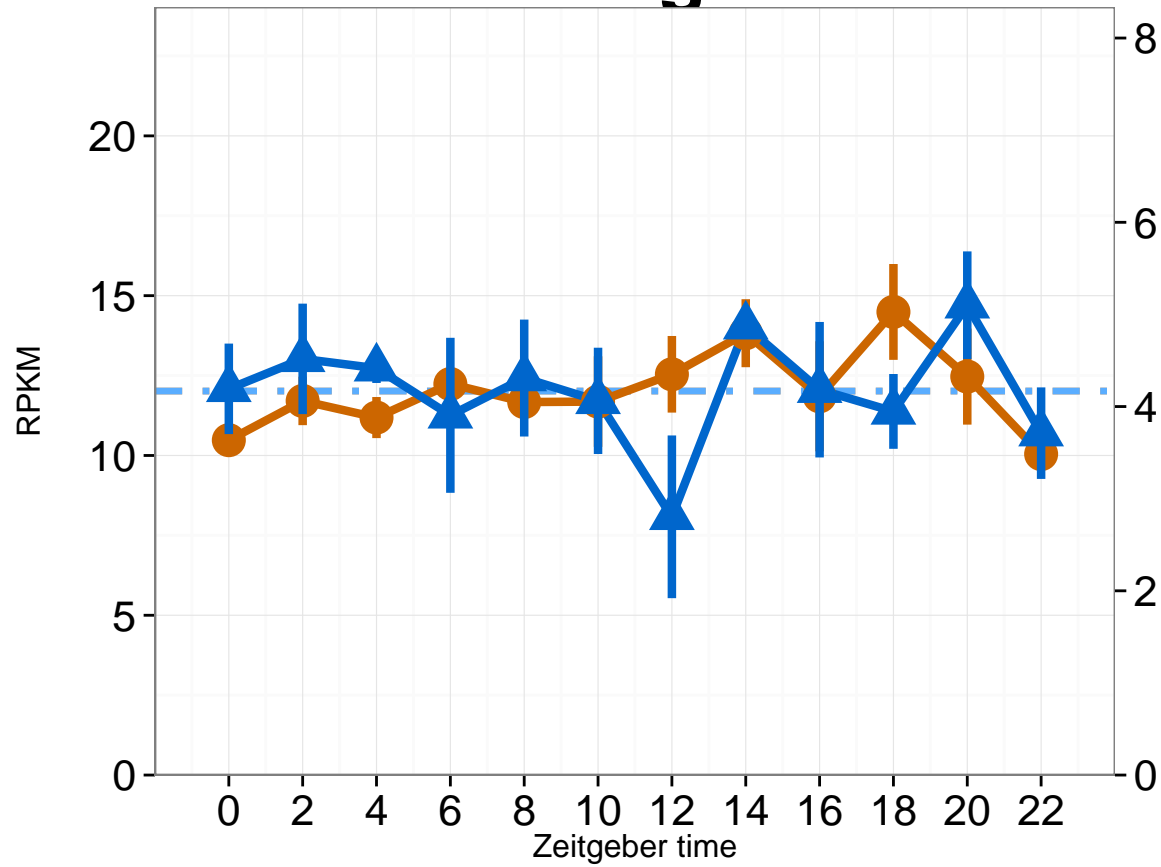

# Rangrf

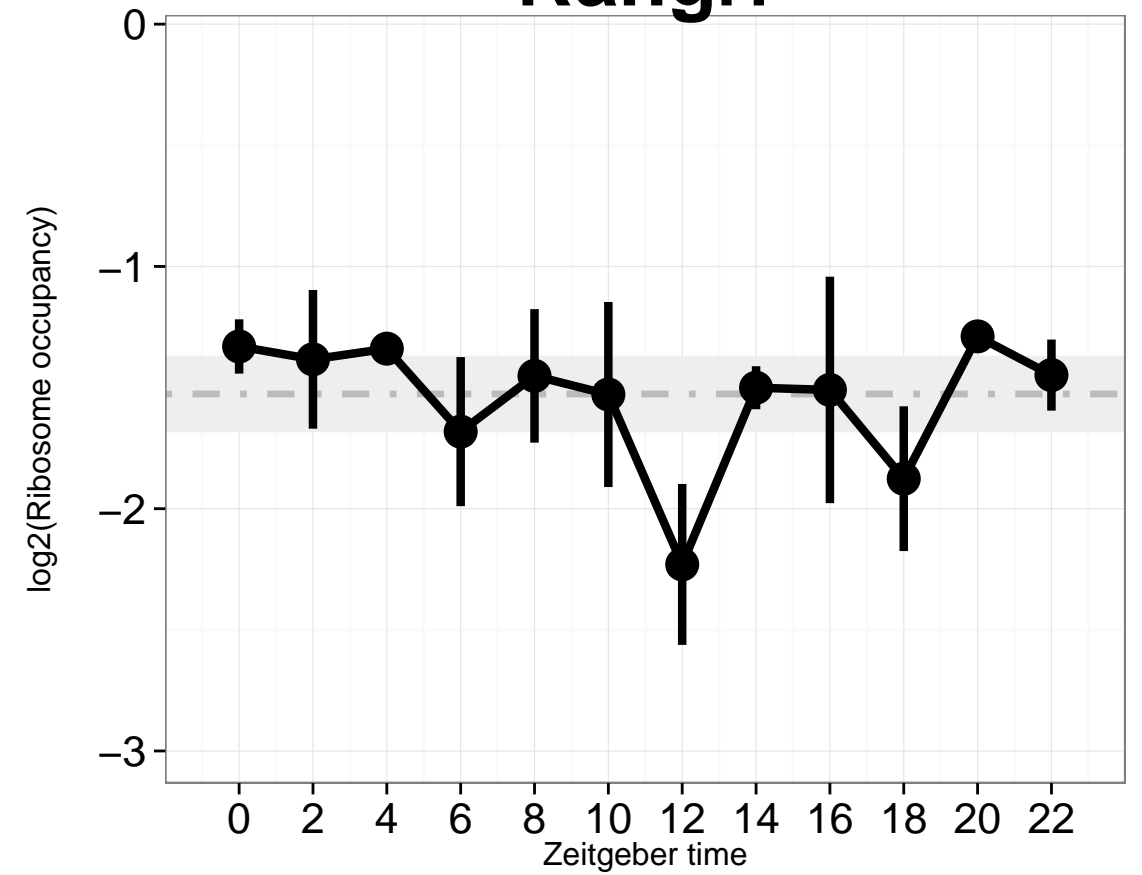

Supplement: Supplementary file 2348 [file 1]

# Thumpd3

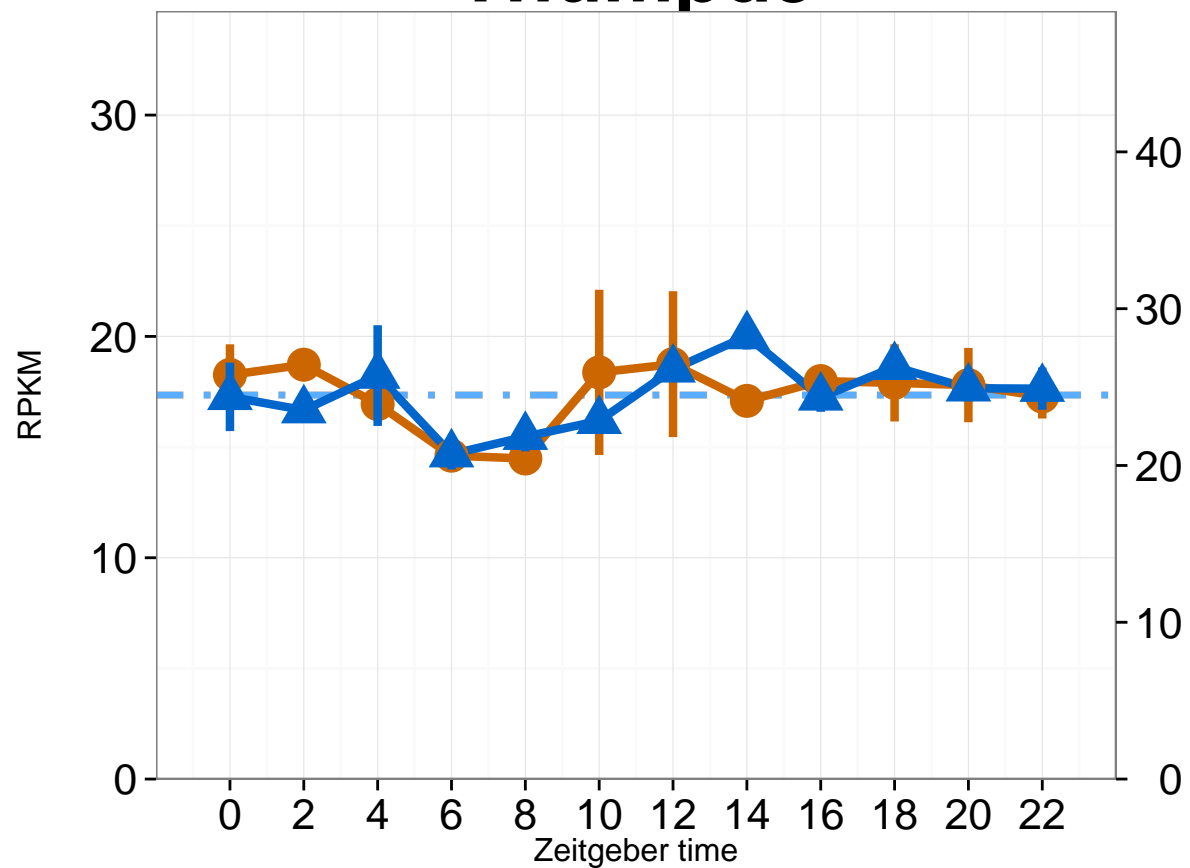

# Thumpd3

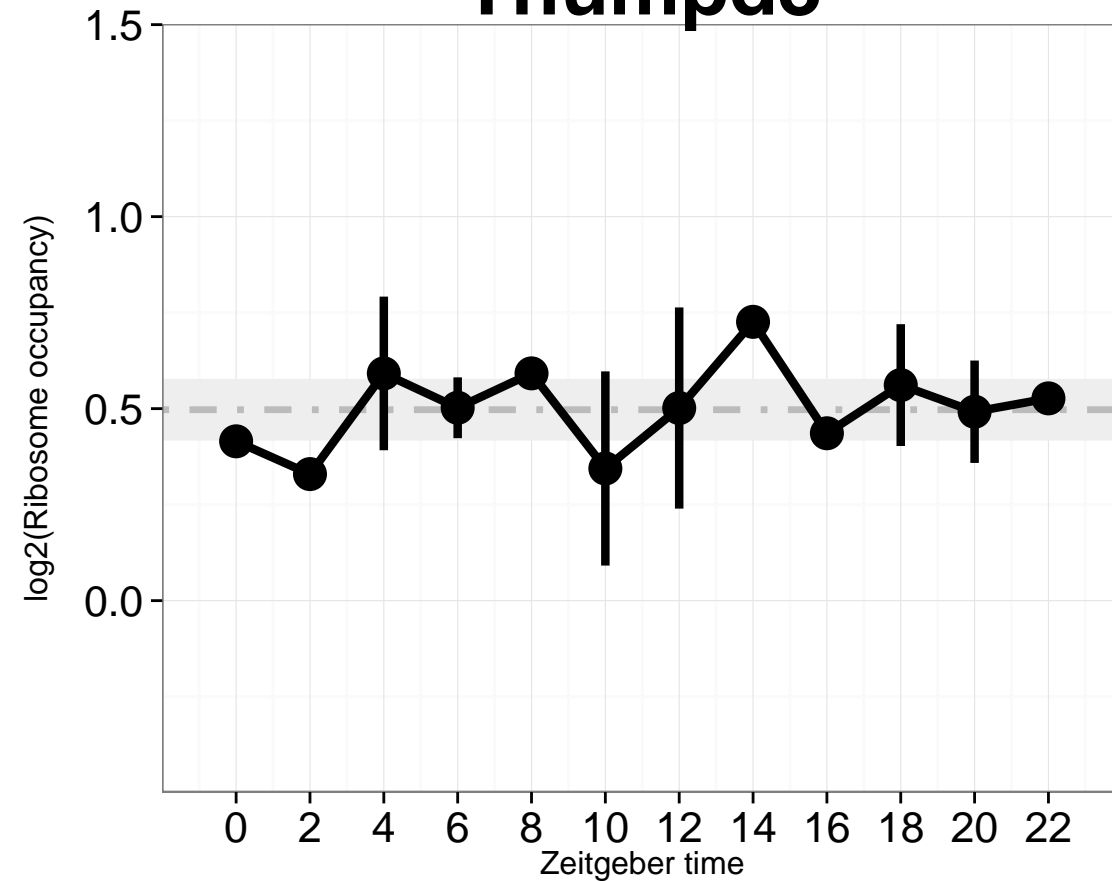

Supplement: Supplementary file 2349 [file 1]

## Ngdn

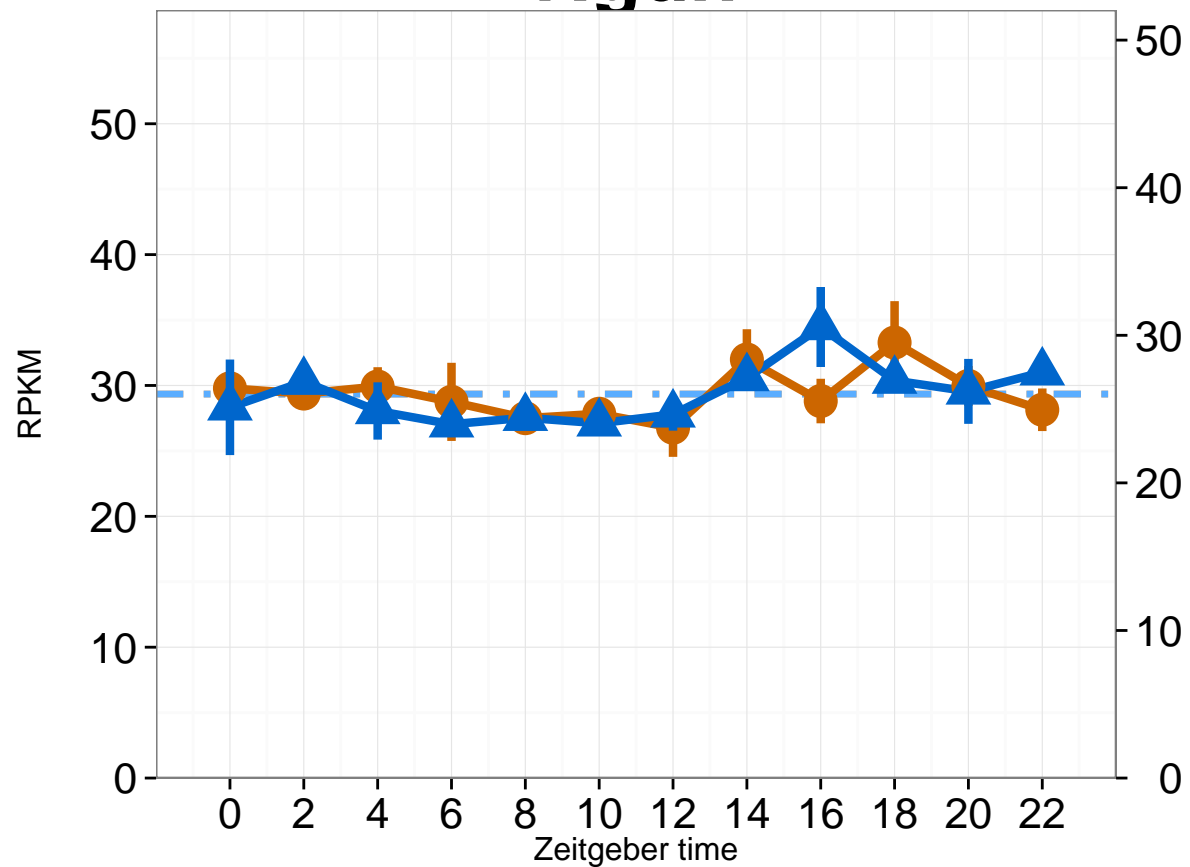

## Ngdn

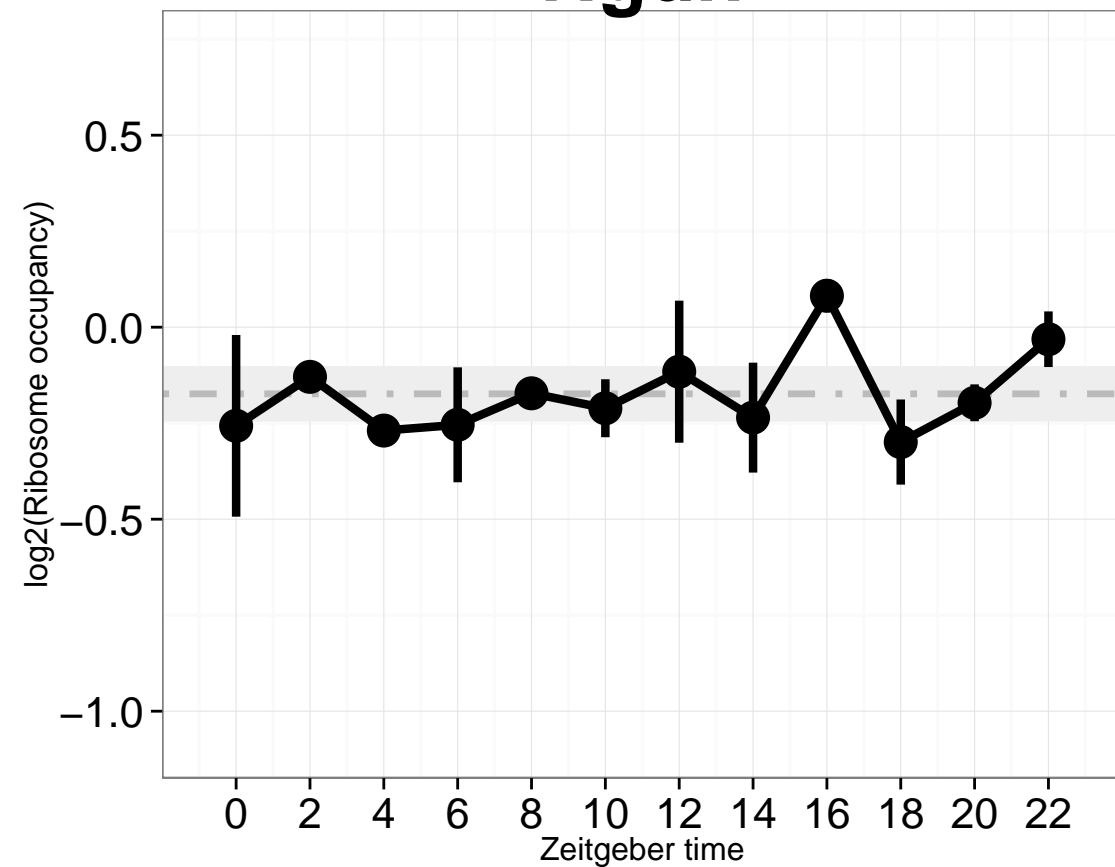

Supplement: Supplementary file 2350 [file 1]

## Fyb

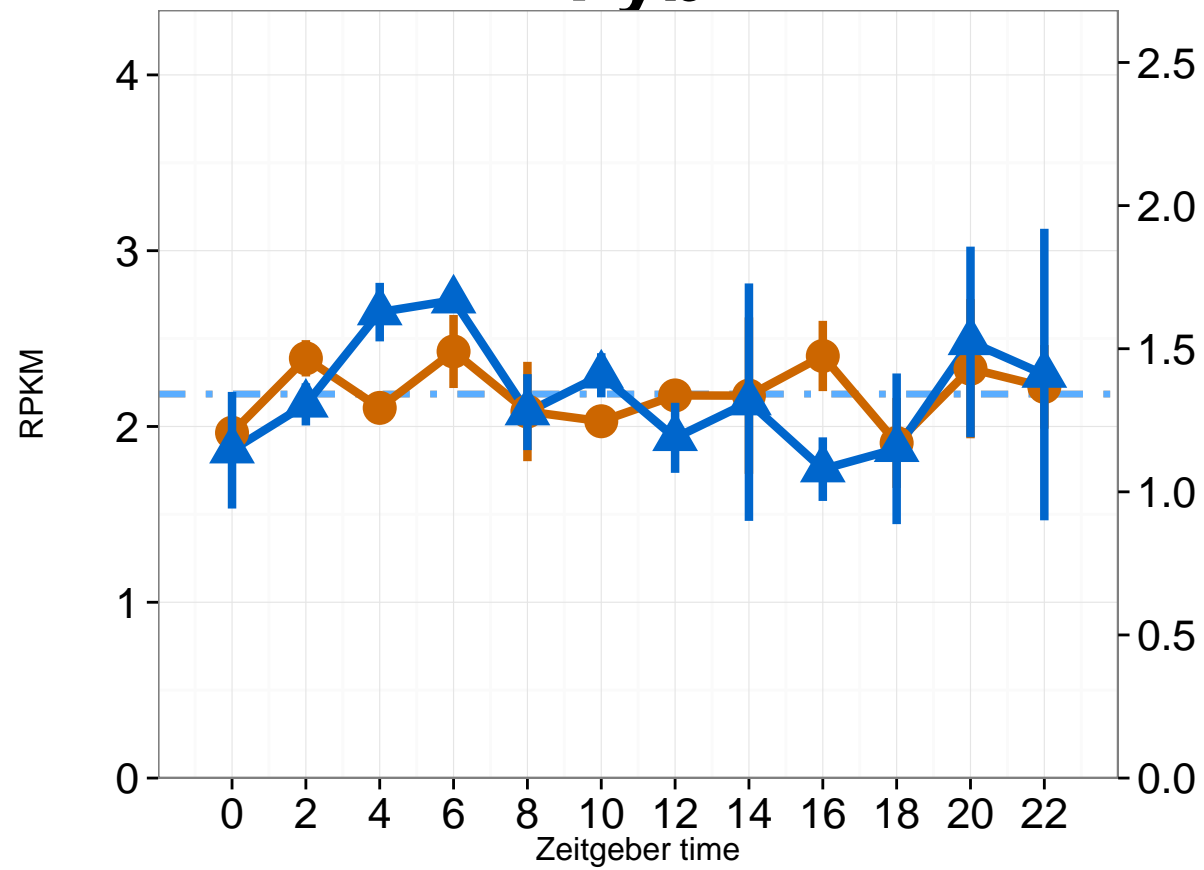

## Fyb

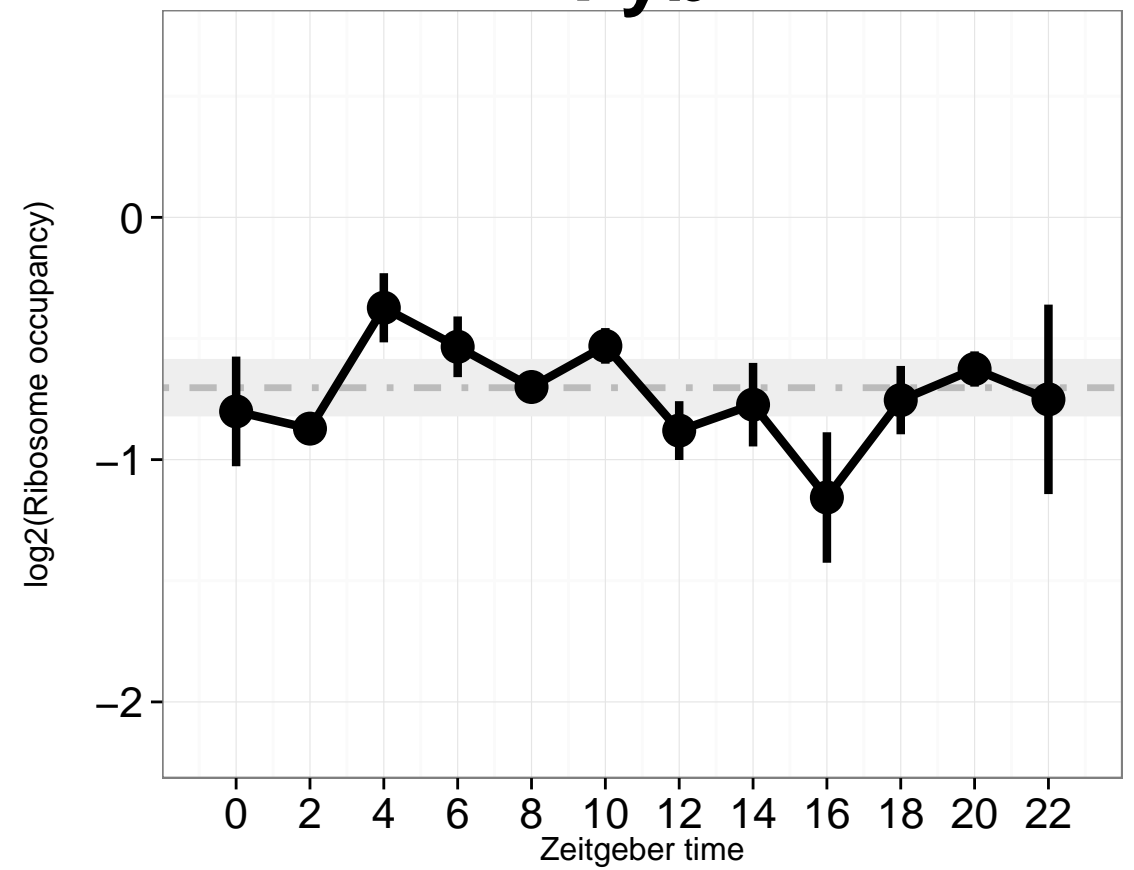

Supplement: Supplementary file 2351 [file 1]

# Fzd7

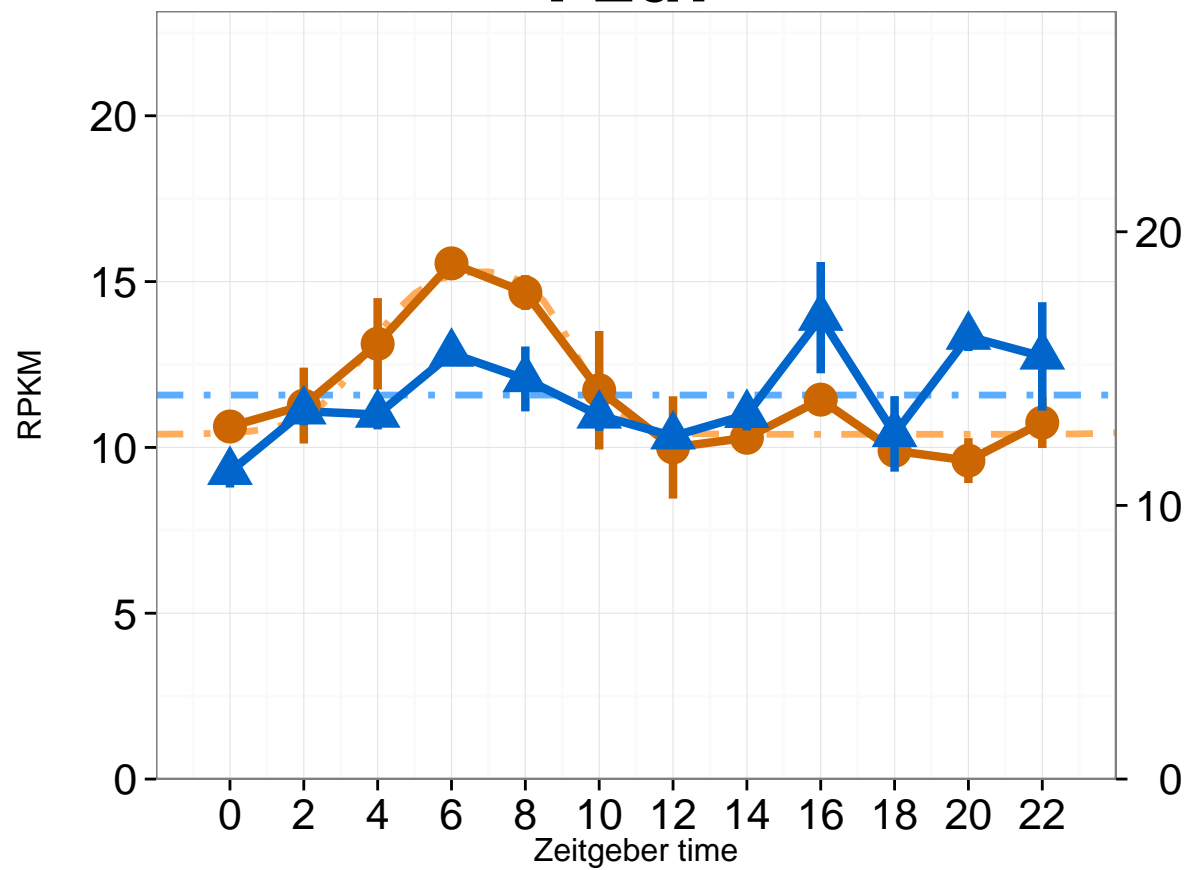

# Fzd7

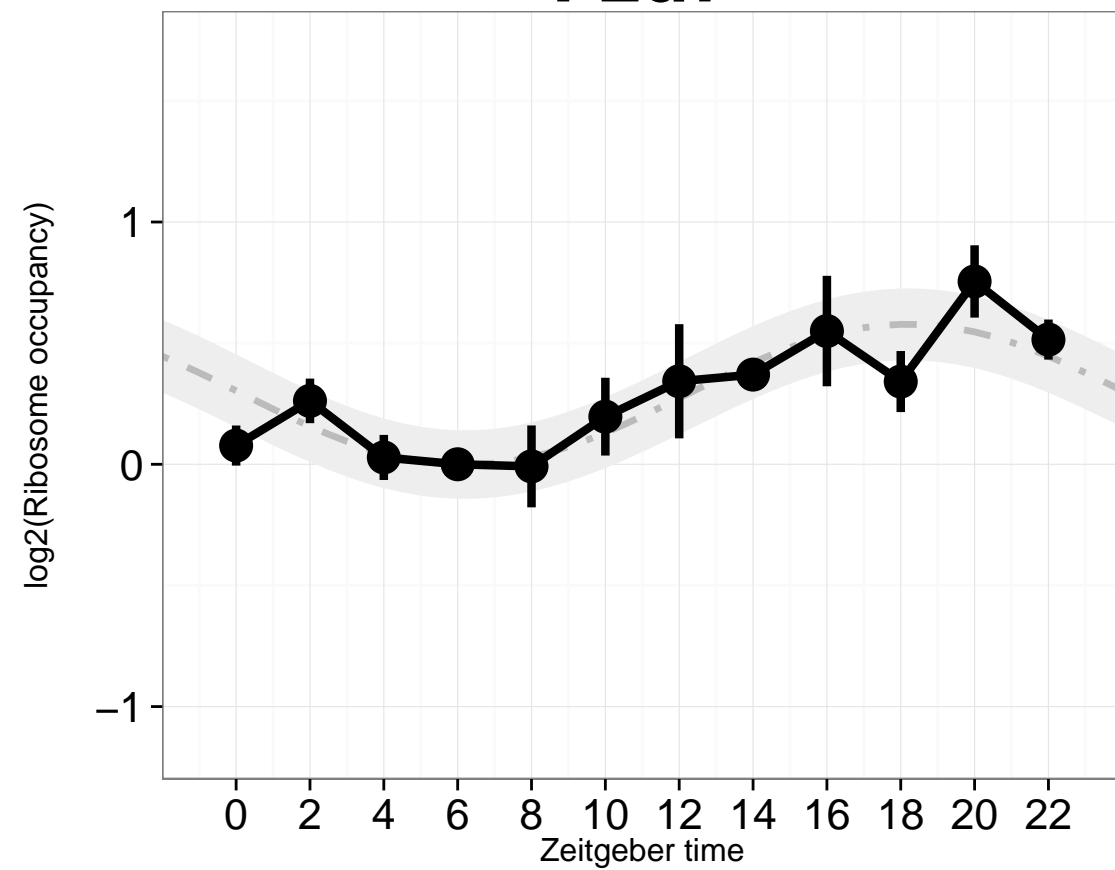

Supplement: Supplementary file 2352 [file 1]

# Crtap

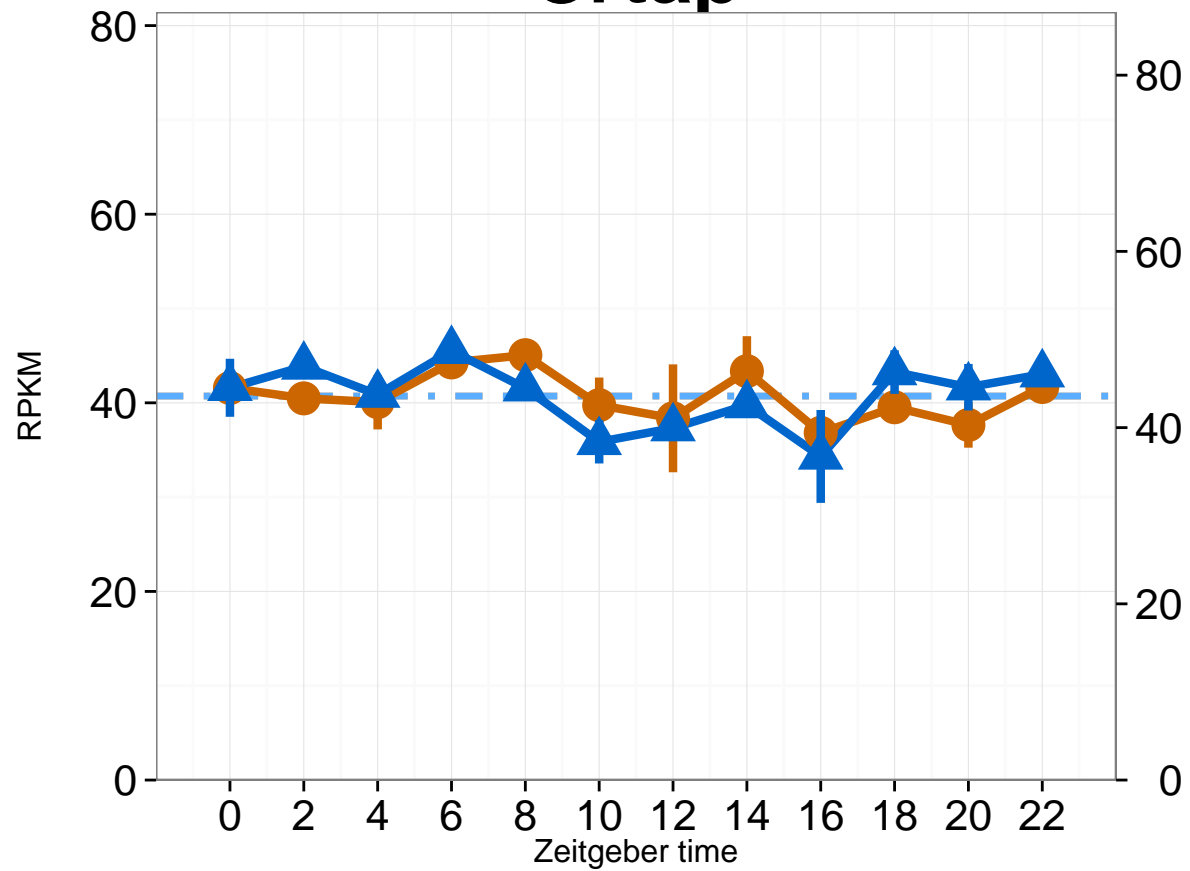

# Crtap

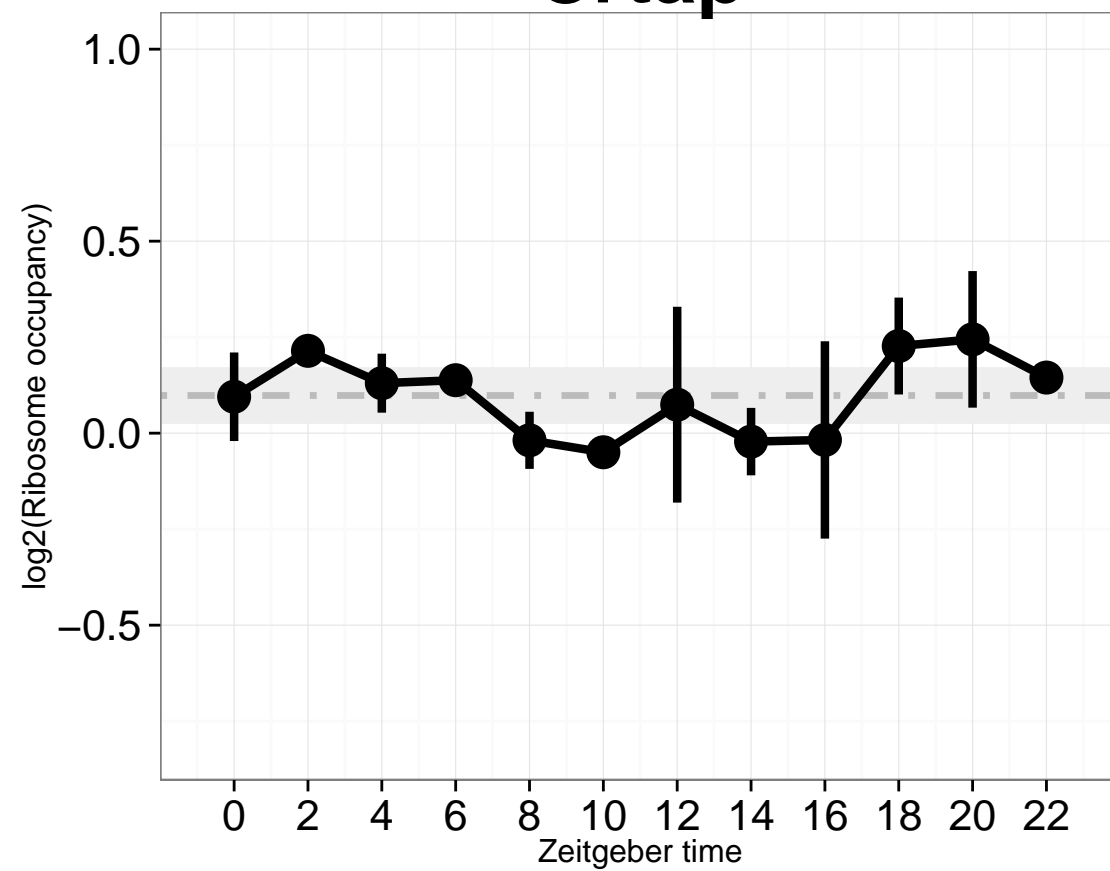

Supplement: Supplementary file 2353 [file 1]

## Adsl

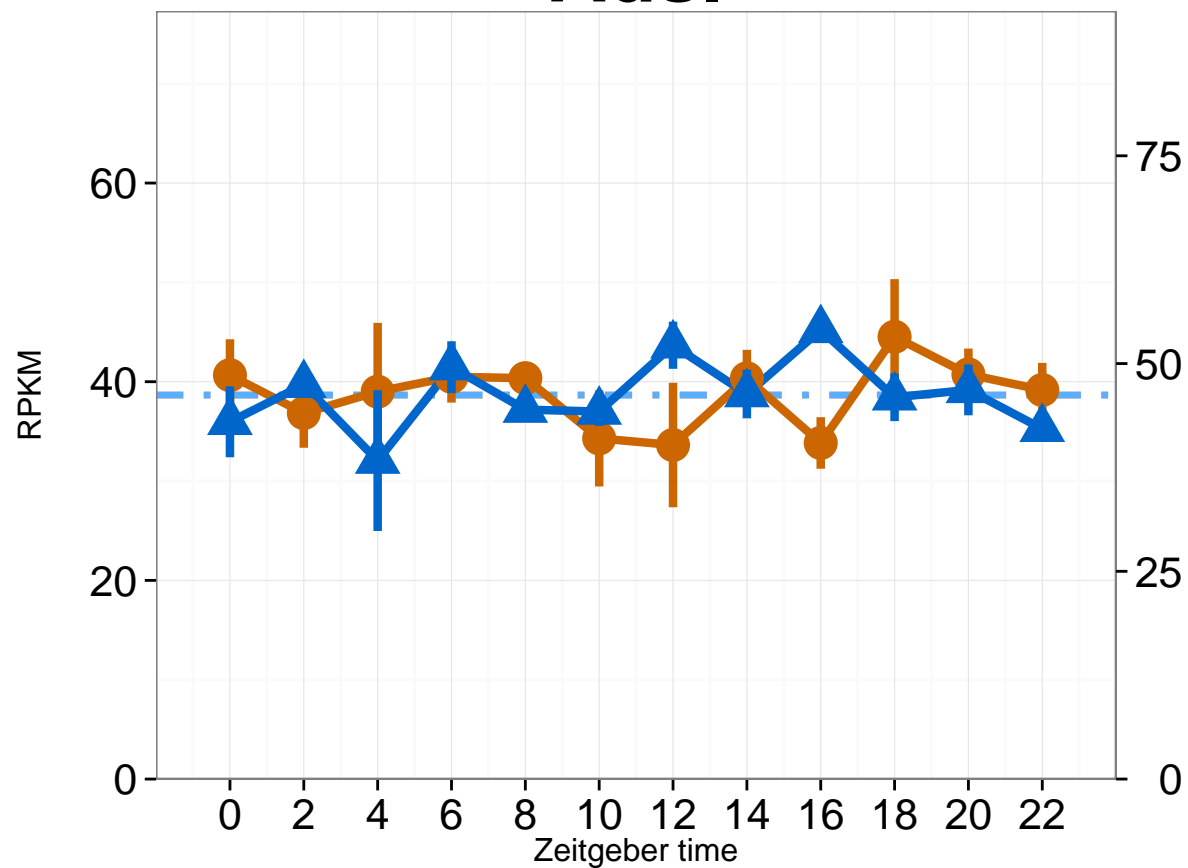

## Adsl

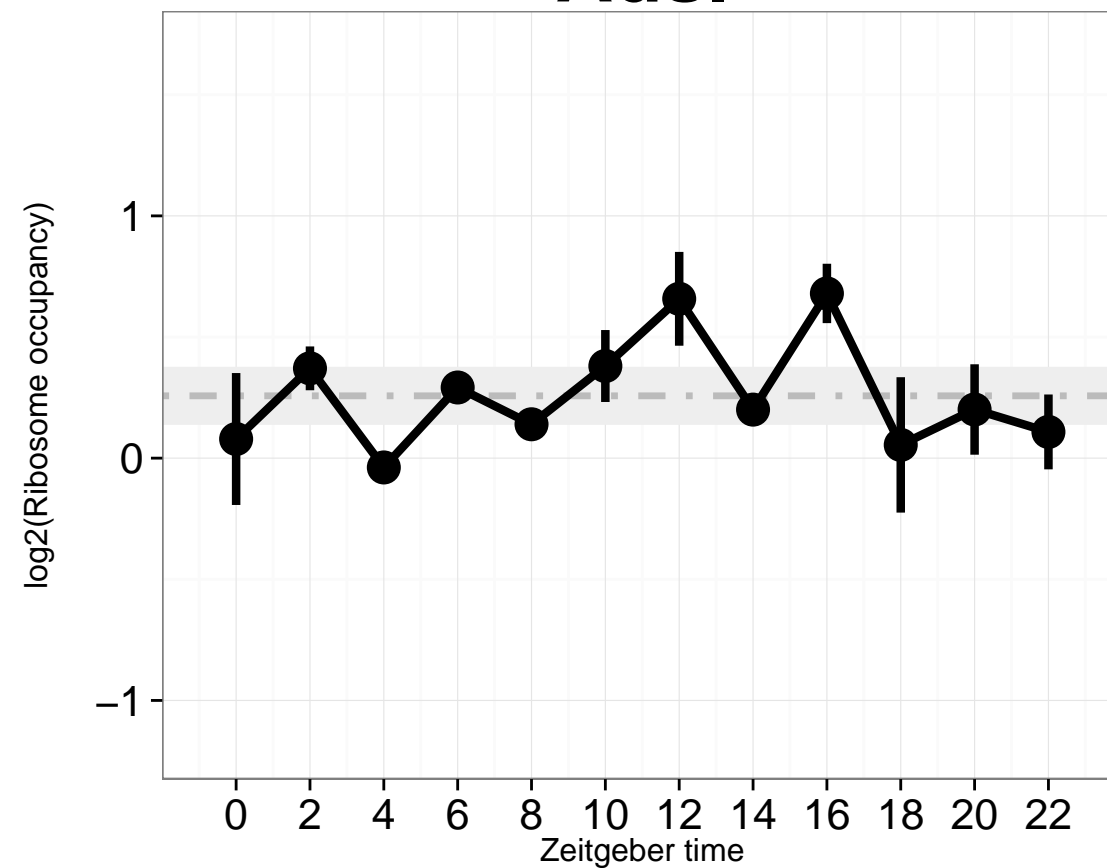

Supplement: Supplementary file 2355 [file 1]

# Strip1

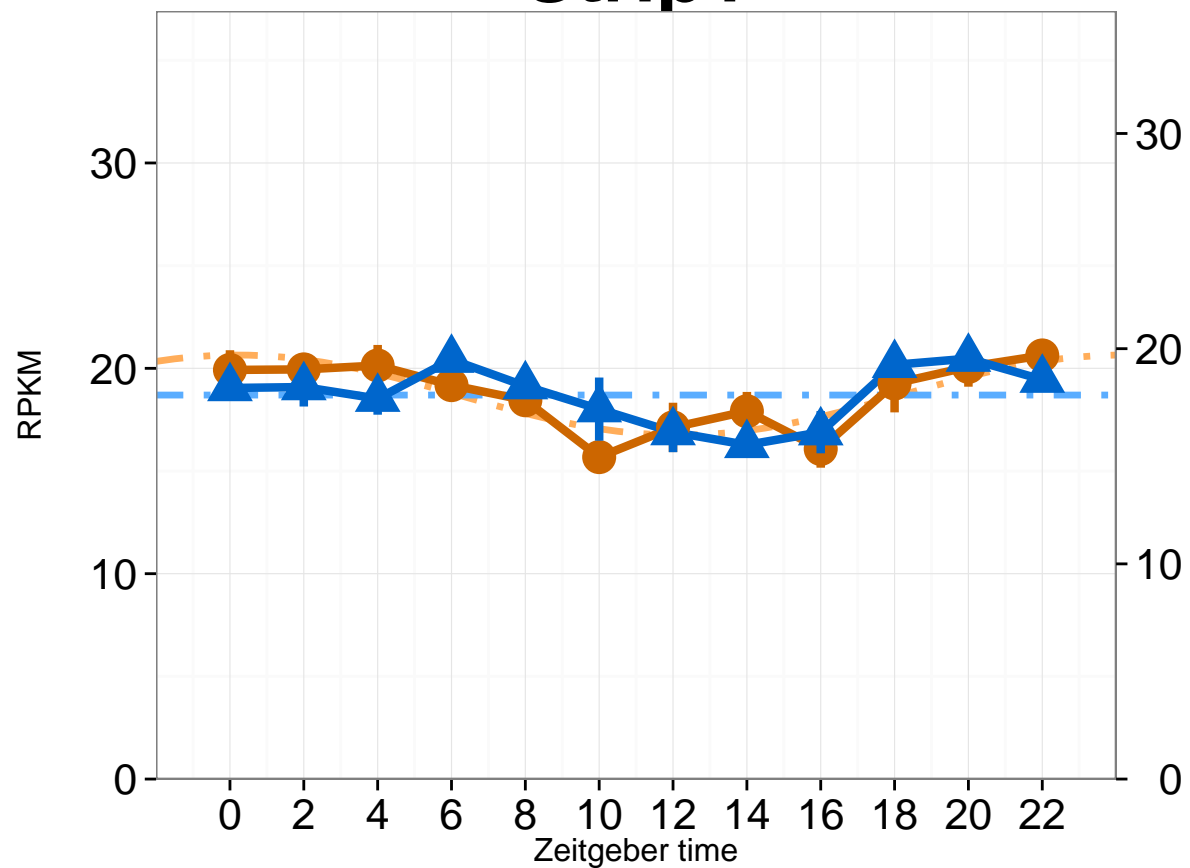

# Strip1

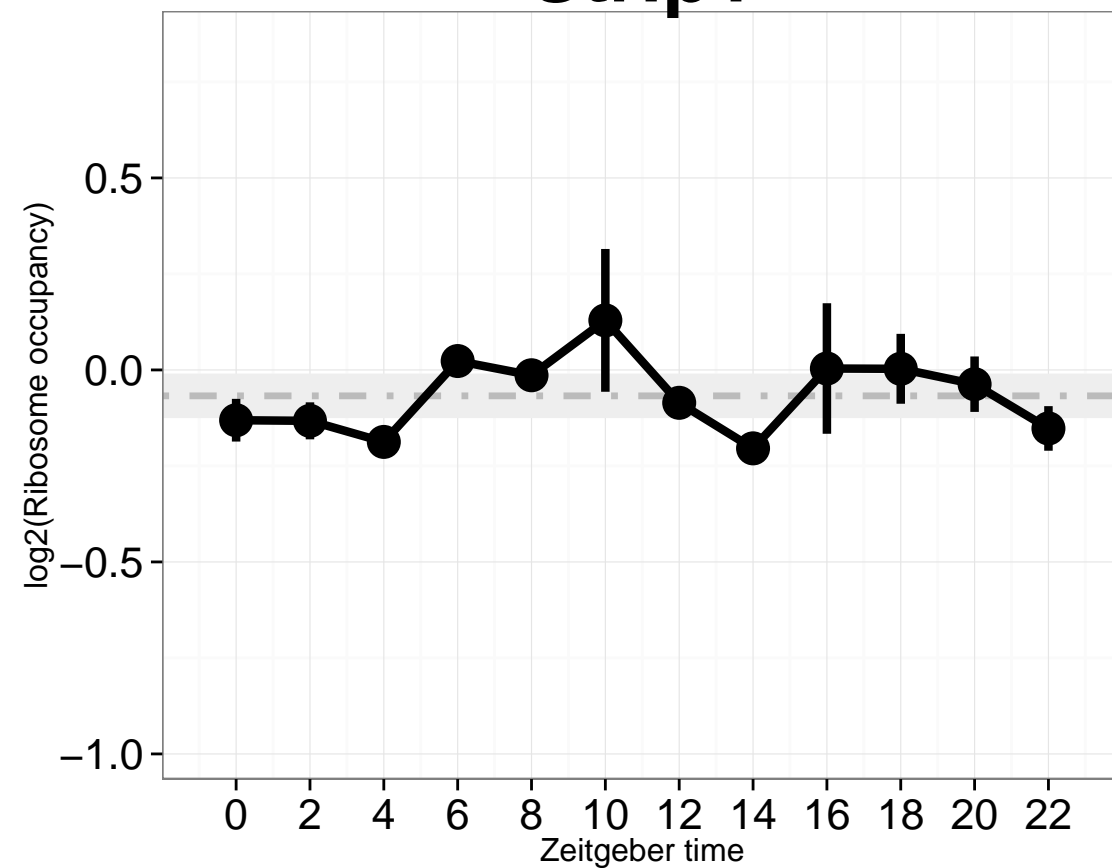

Supplement: Supplementary file 2356 [file 1]

## Rgl3

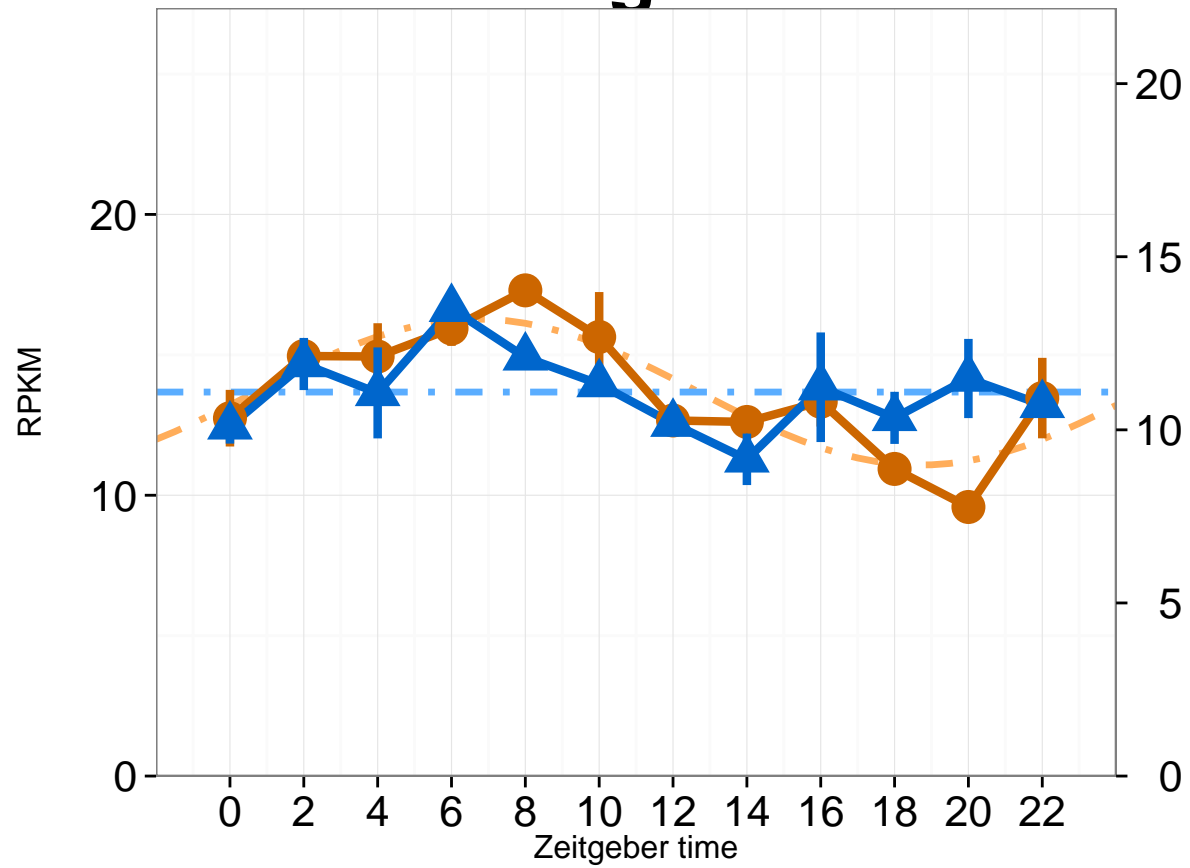

## Rgl3

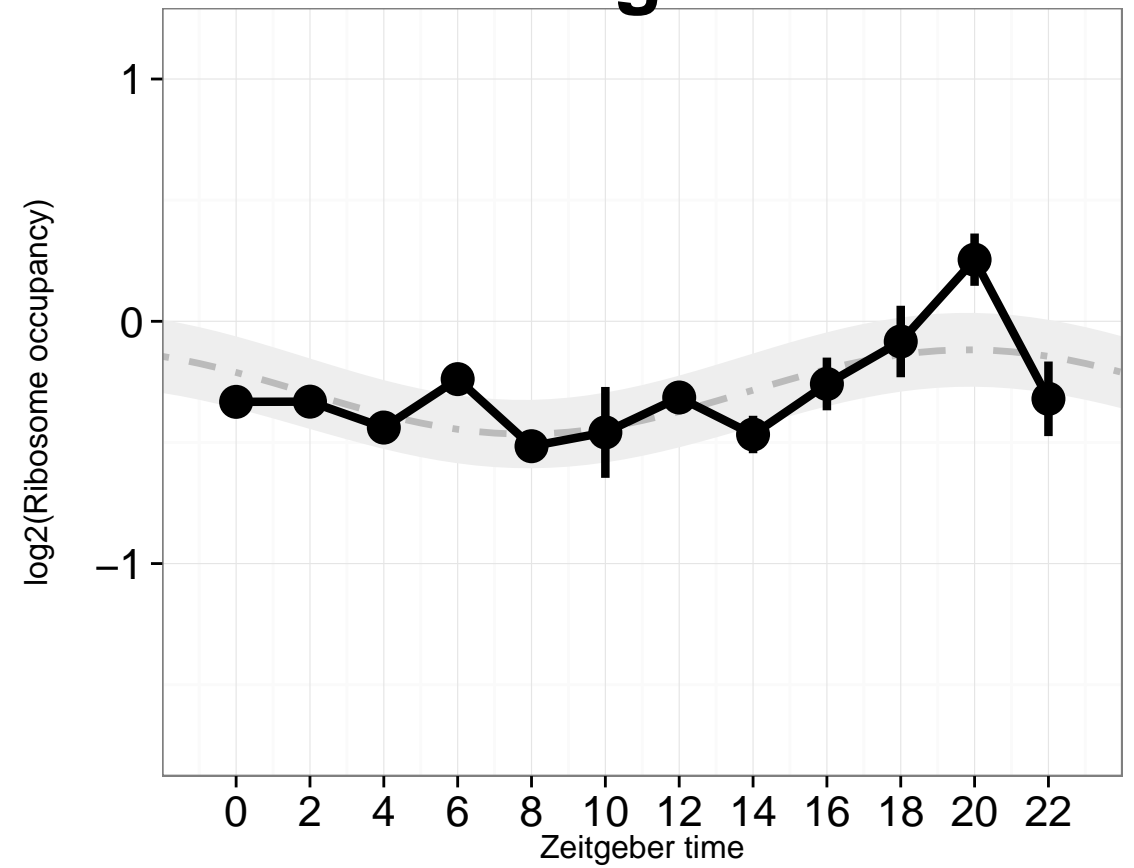

Supplement: Supplementary file 2357 [file 1]

# Fam65b

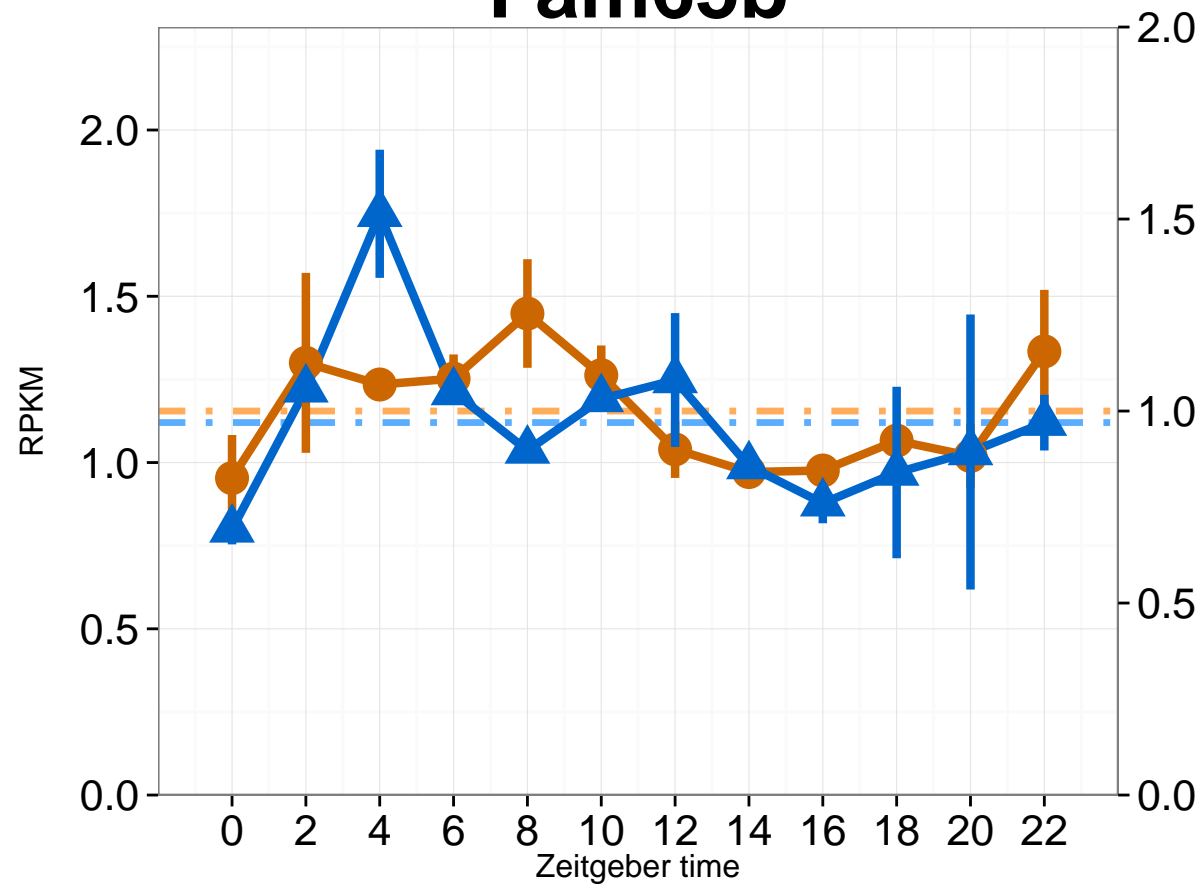

# Fam65b

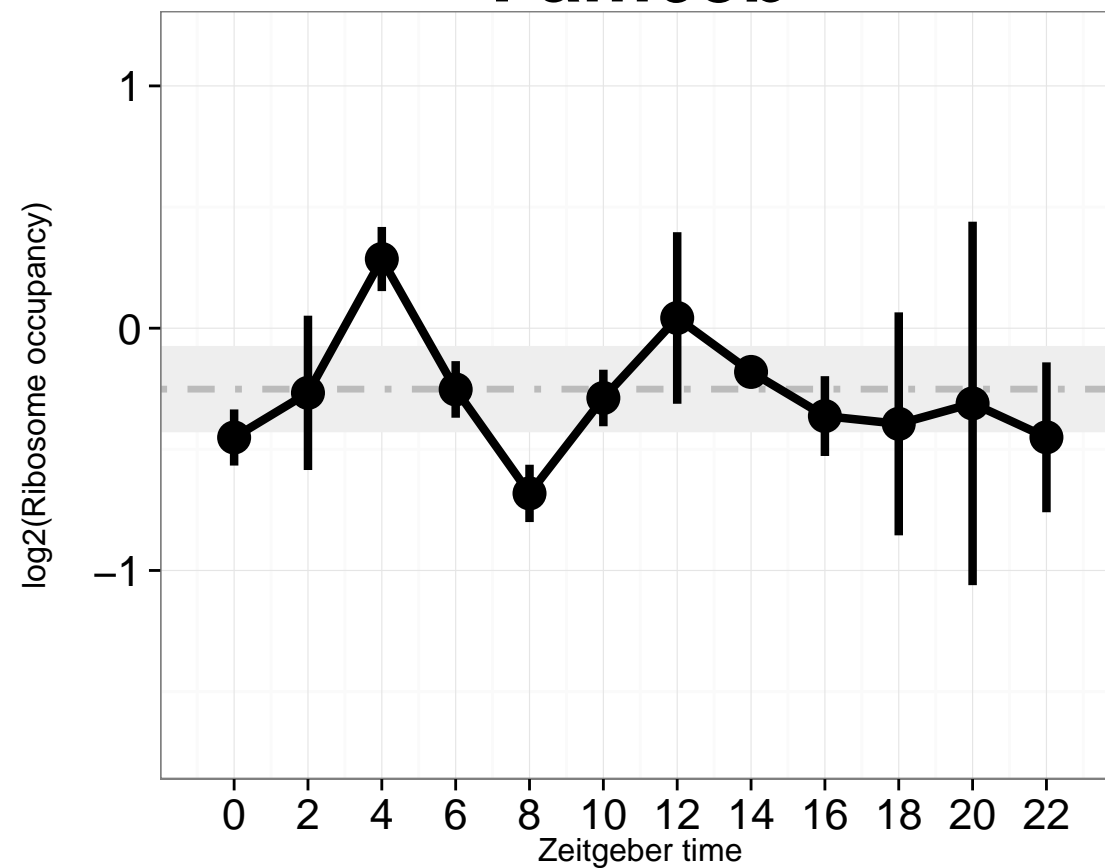

Supplement: Supplementary file 2358 [file 1]

# Taok1

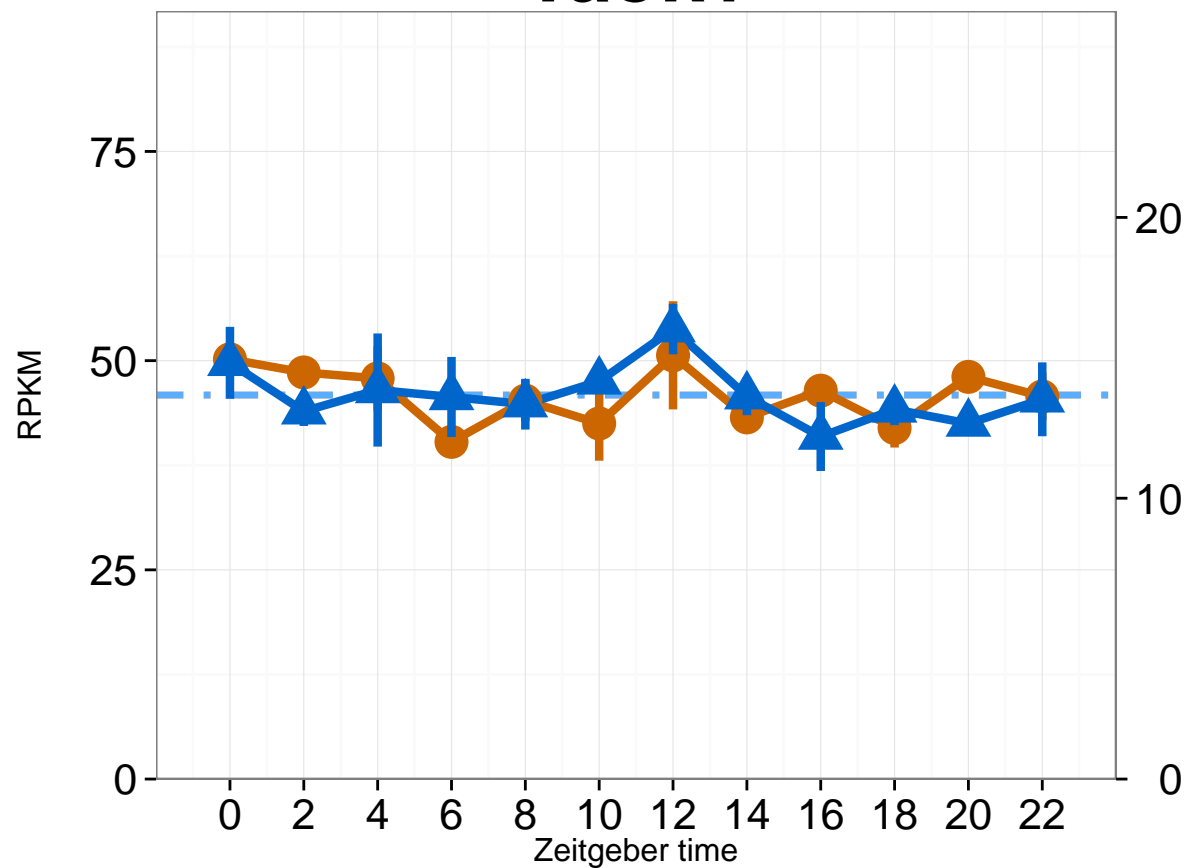

# Taok1

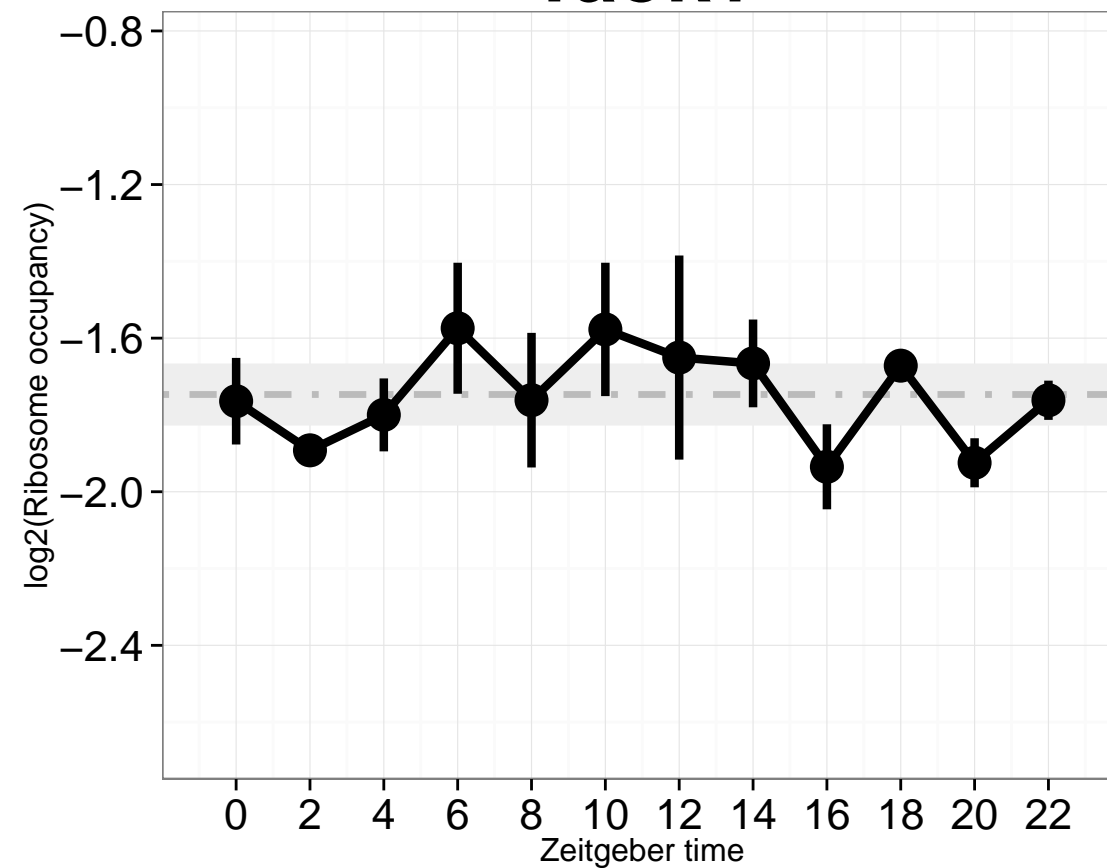

Supplement: Supplementary file 2359 [file 1]

# Map2

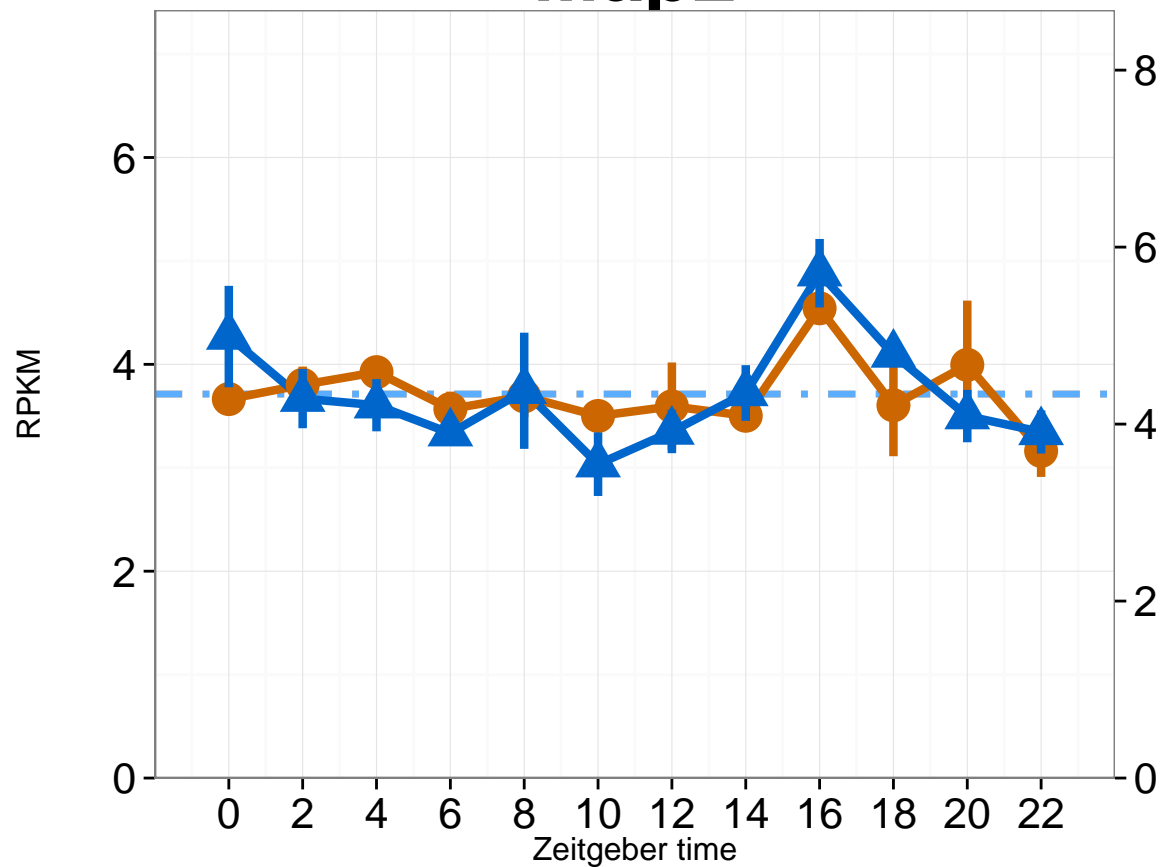

# Map2

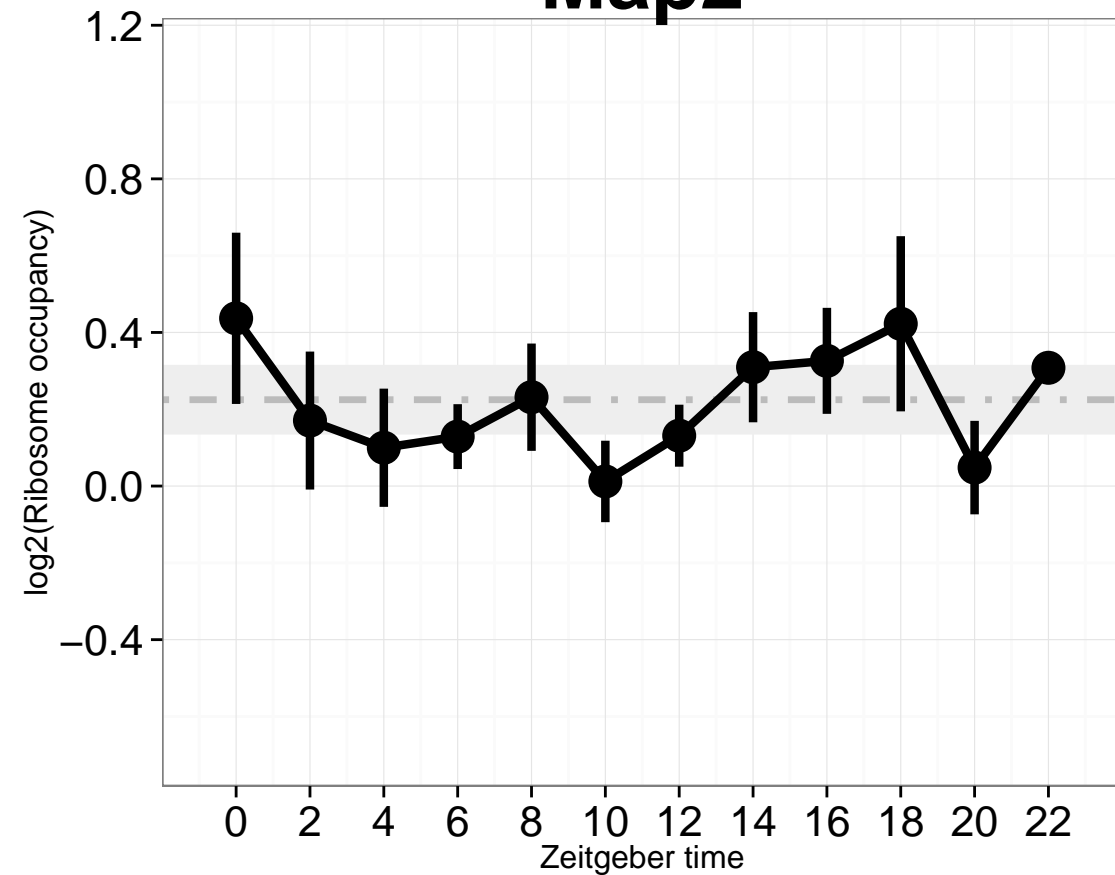

Supplement: Supplementary file 2360 [file 1]

## Gria4

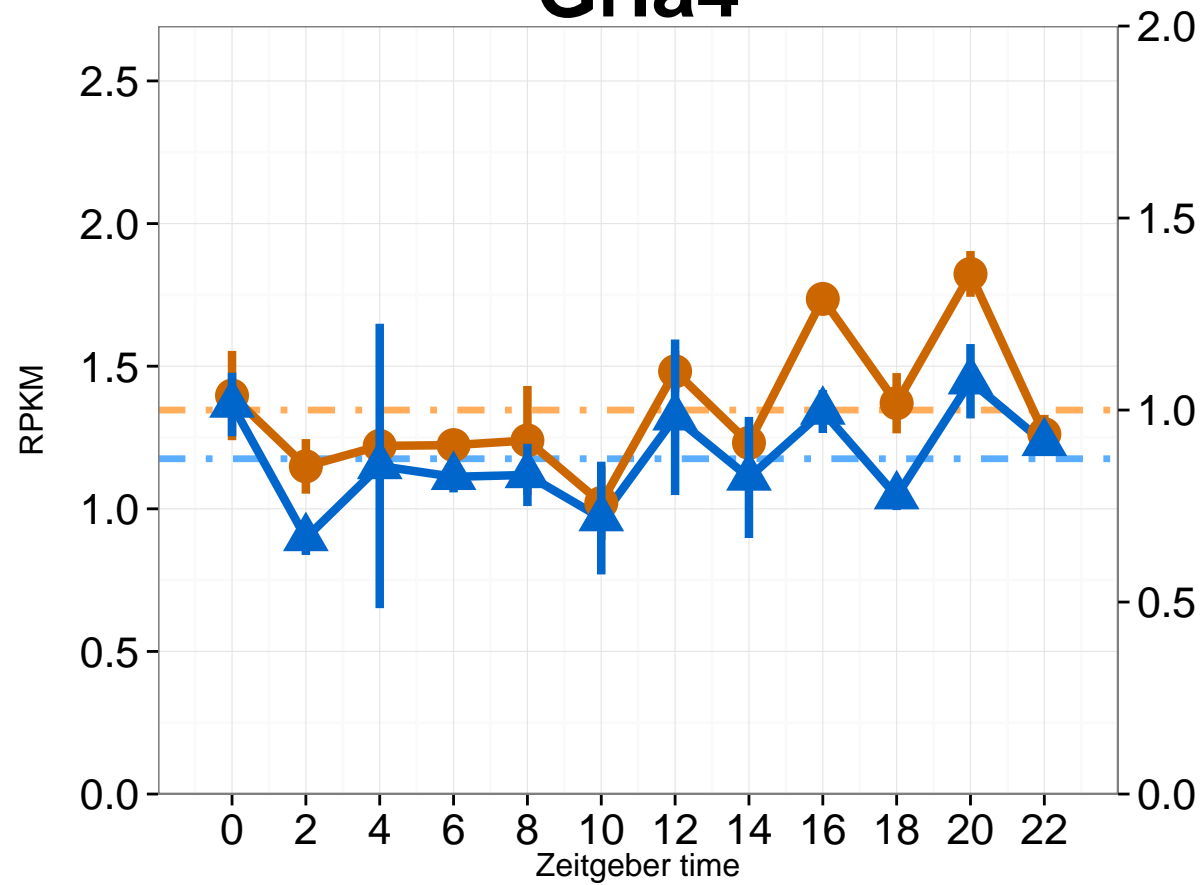

## Gria4

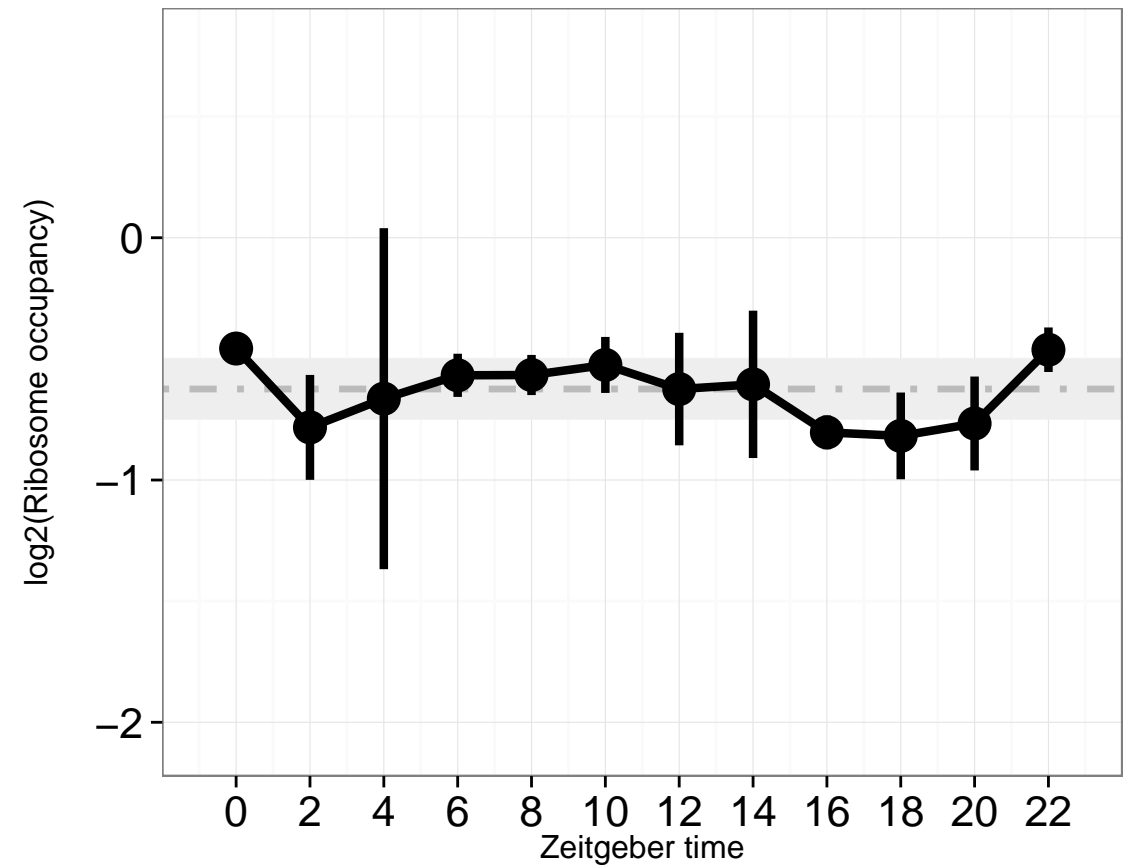

Supplement: Supplementary file 2361 [file 1]

# Fam192a

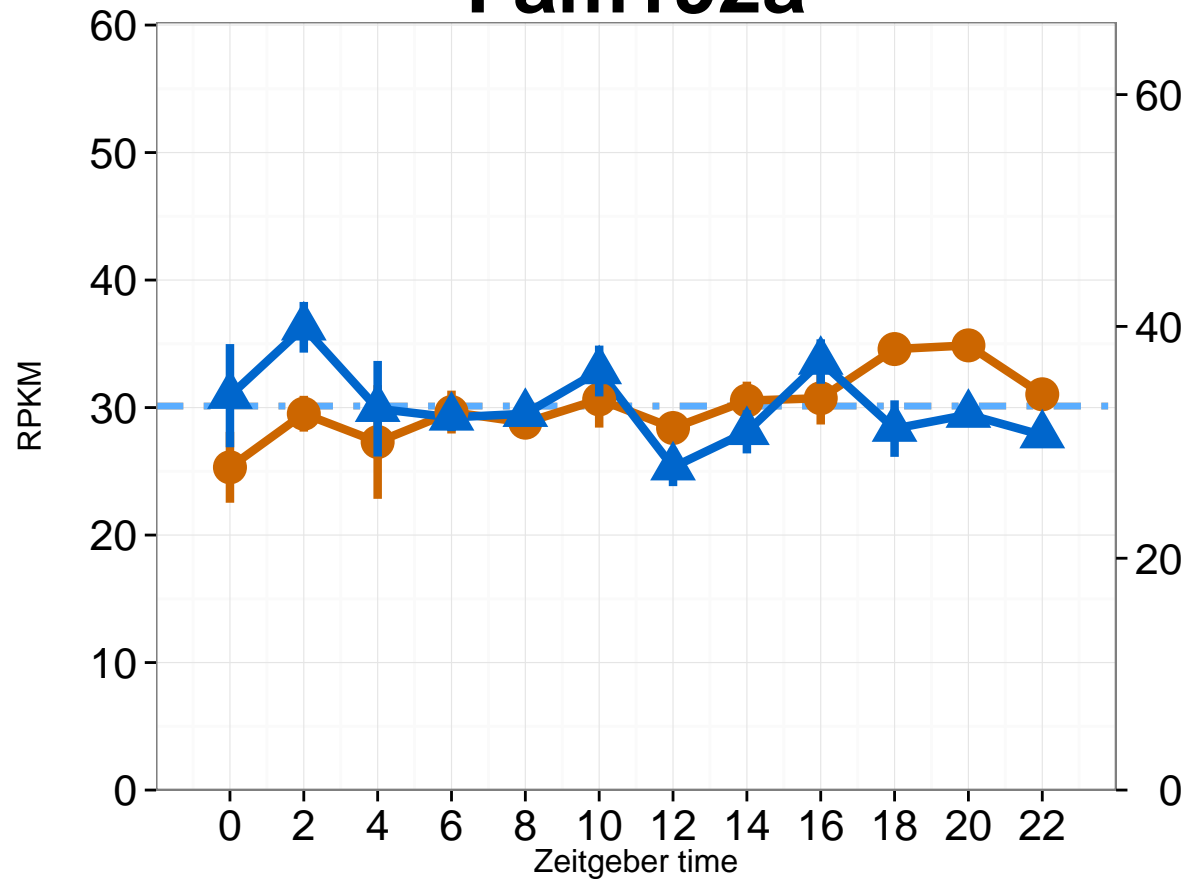

# Fam192a

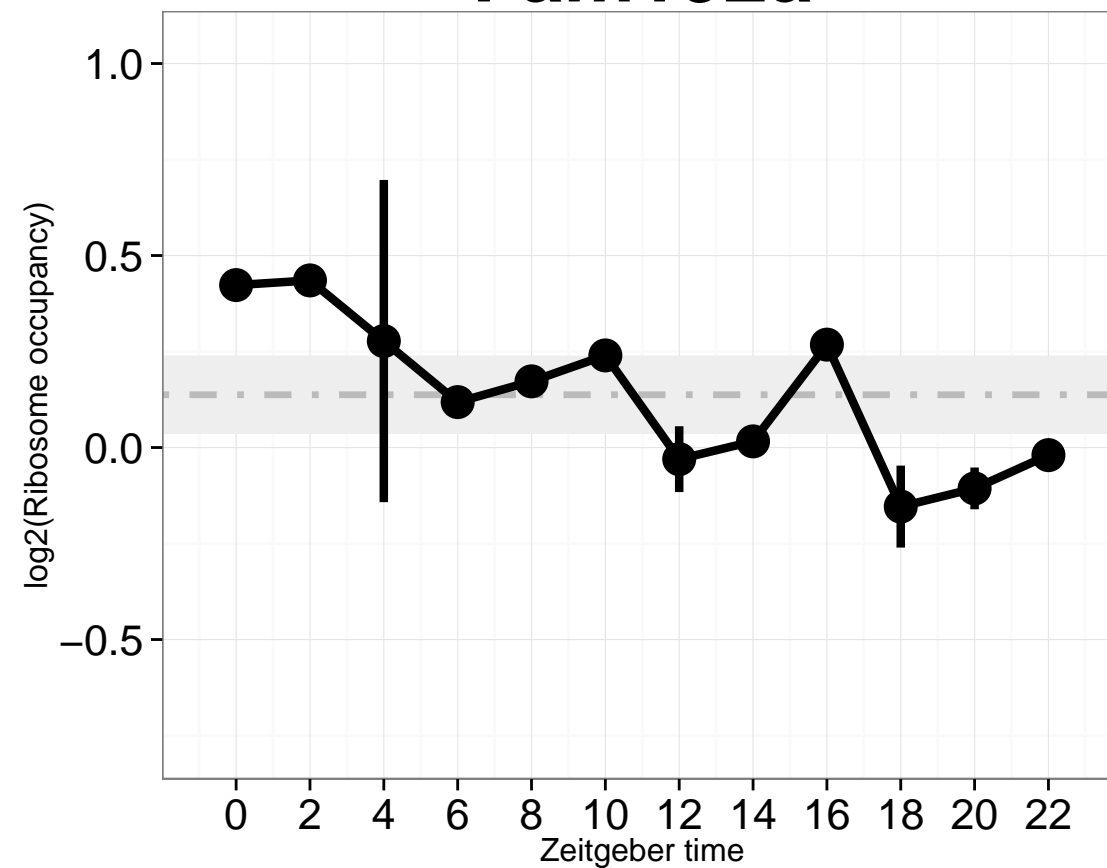

Supplement: Supplementary file 2362 [file 1]

## Lrrfip1

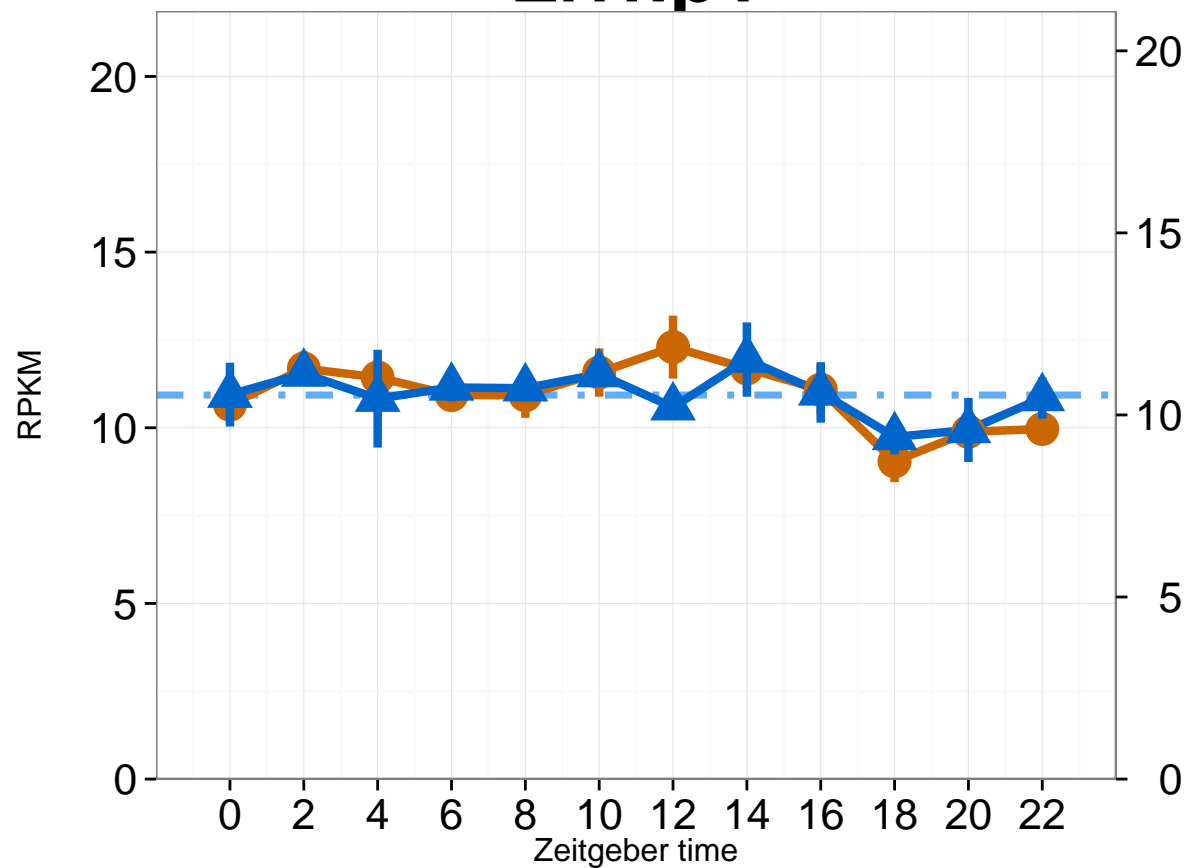

## Lrrfip1

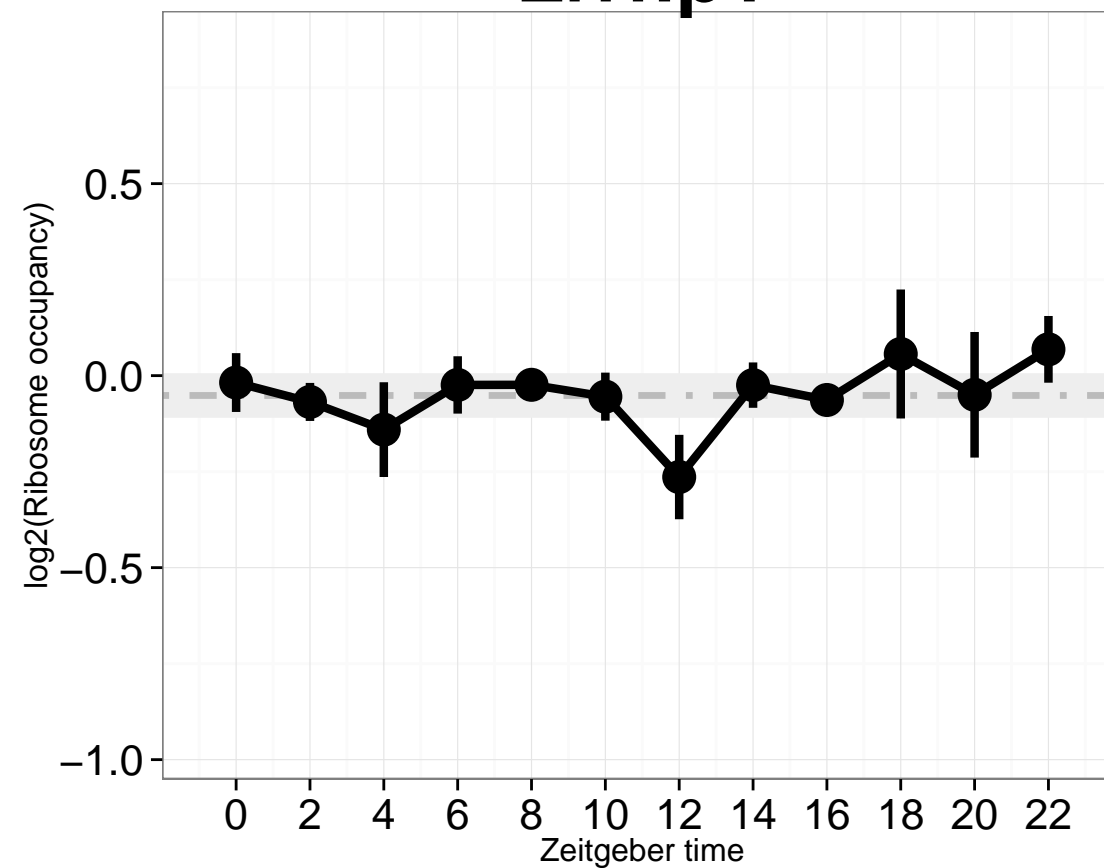

Supplement: Supplementary file 2363 [file 1]

Cyp2b10

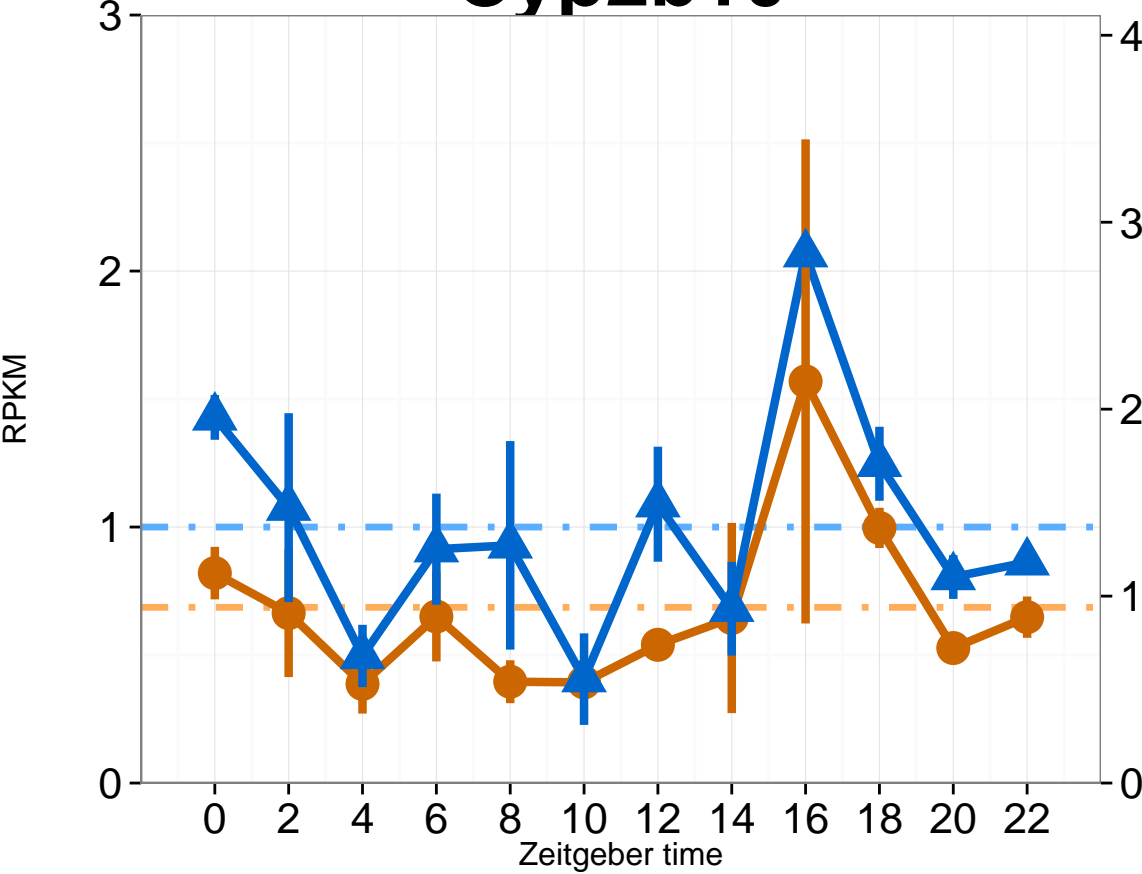

Cyp2b10

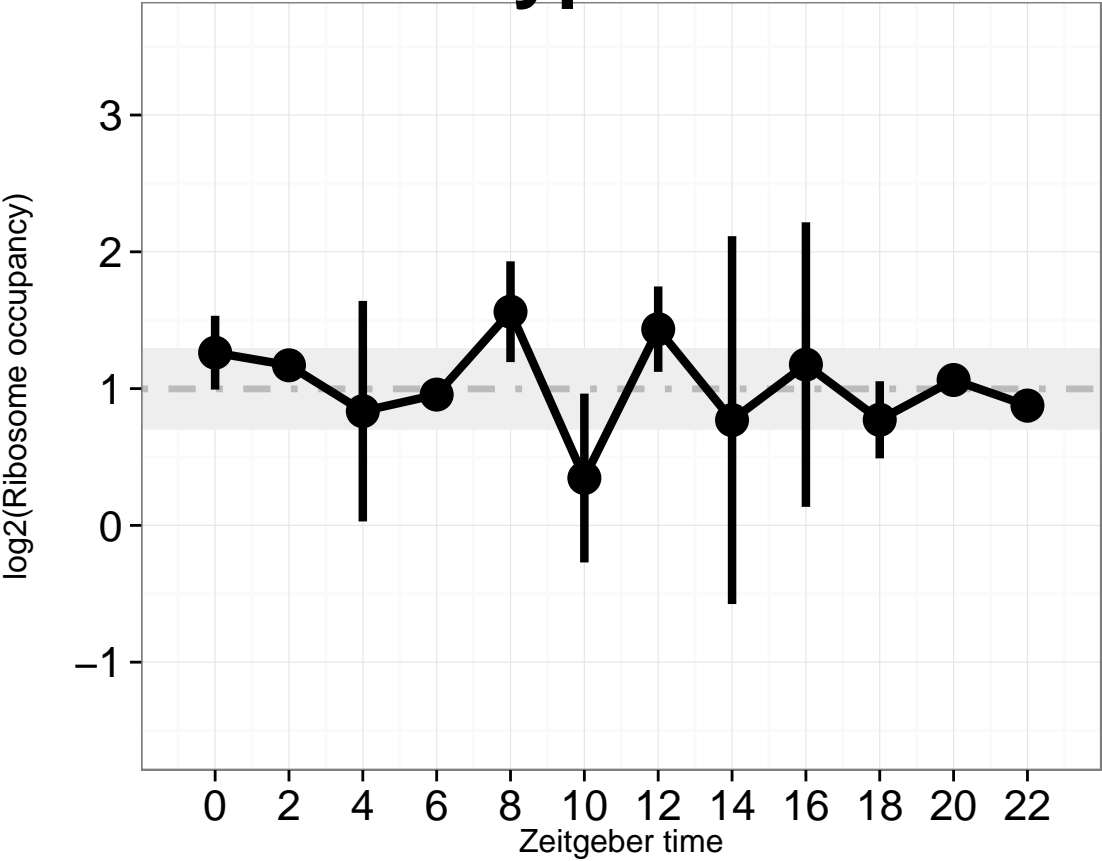

Supplement: Supplementary file 2364 [file 1]

# 3110062M04Rik

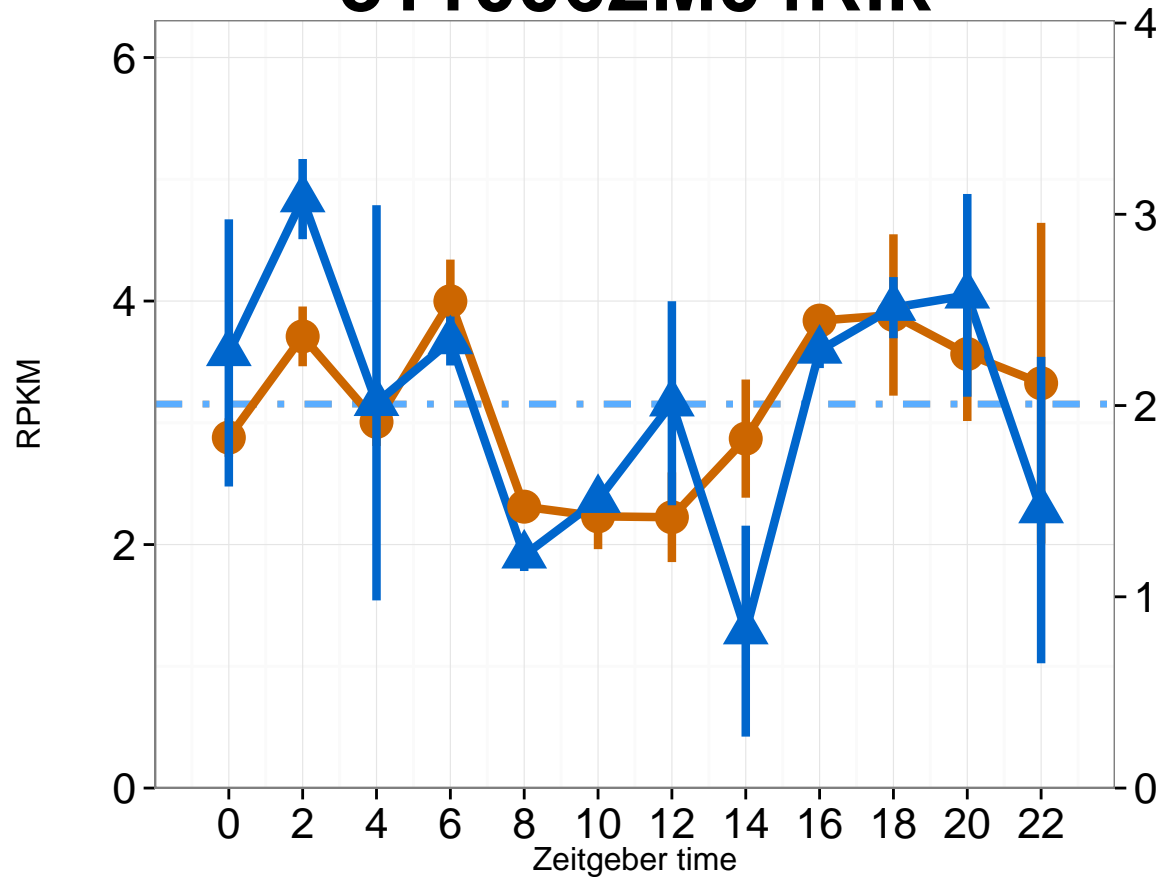

# 3110062M04Rik

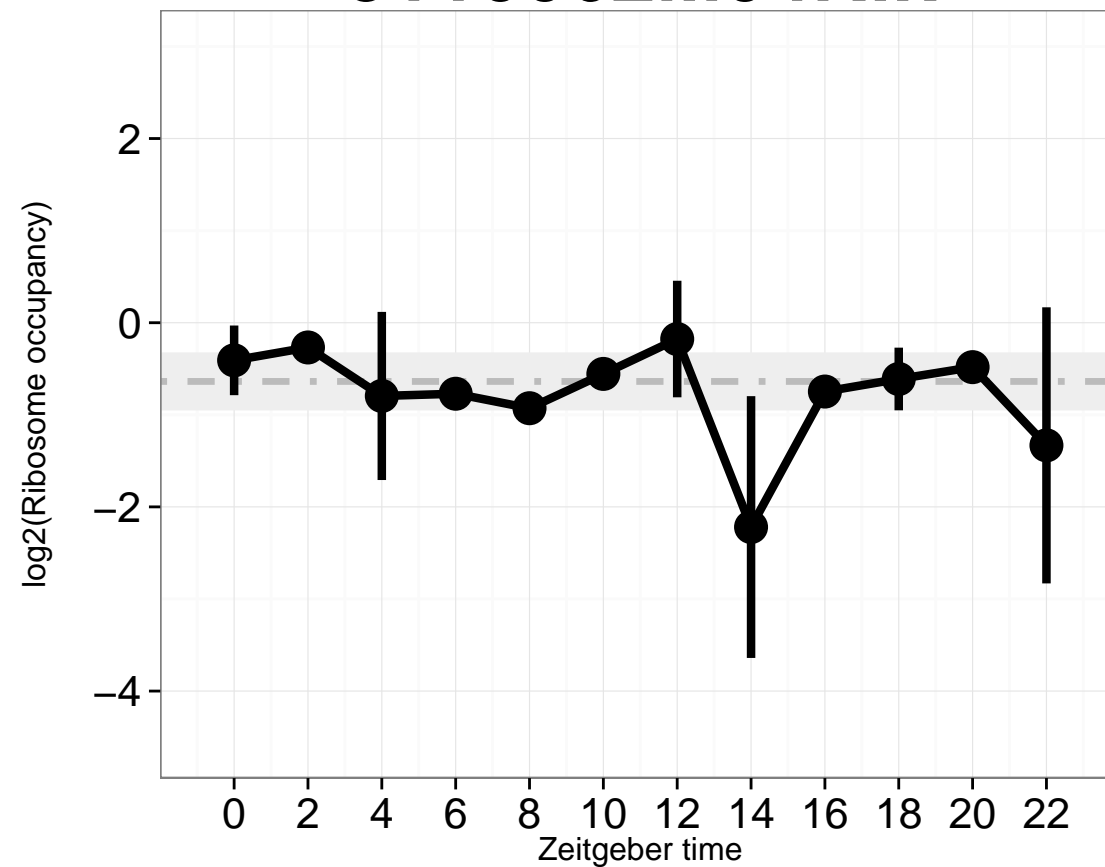

Supplement: Supplementary file 2365 [file 1]

## 2700097O09Rik

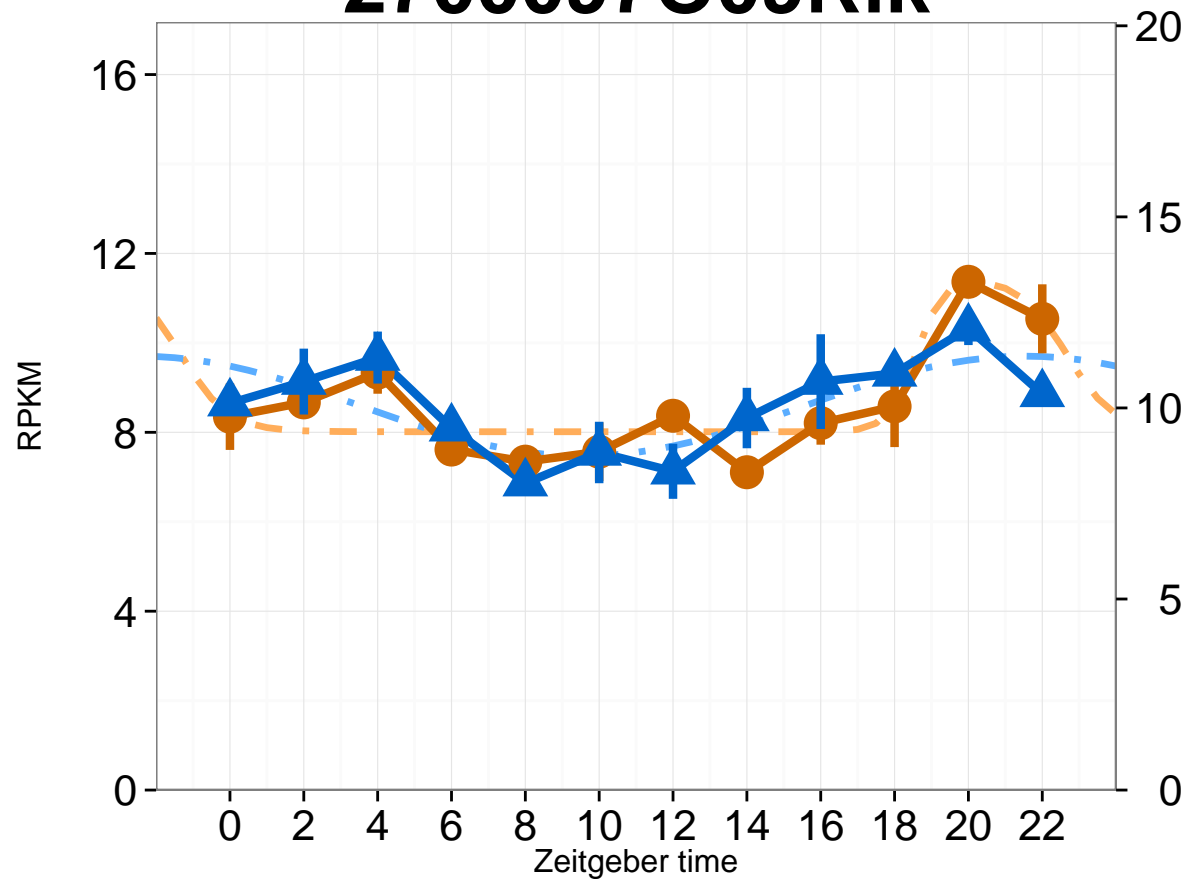

## 2700097O09Rik

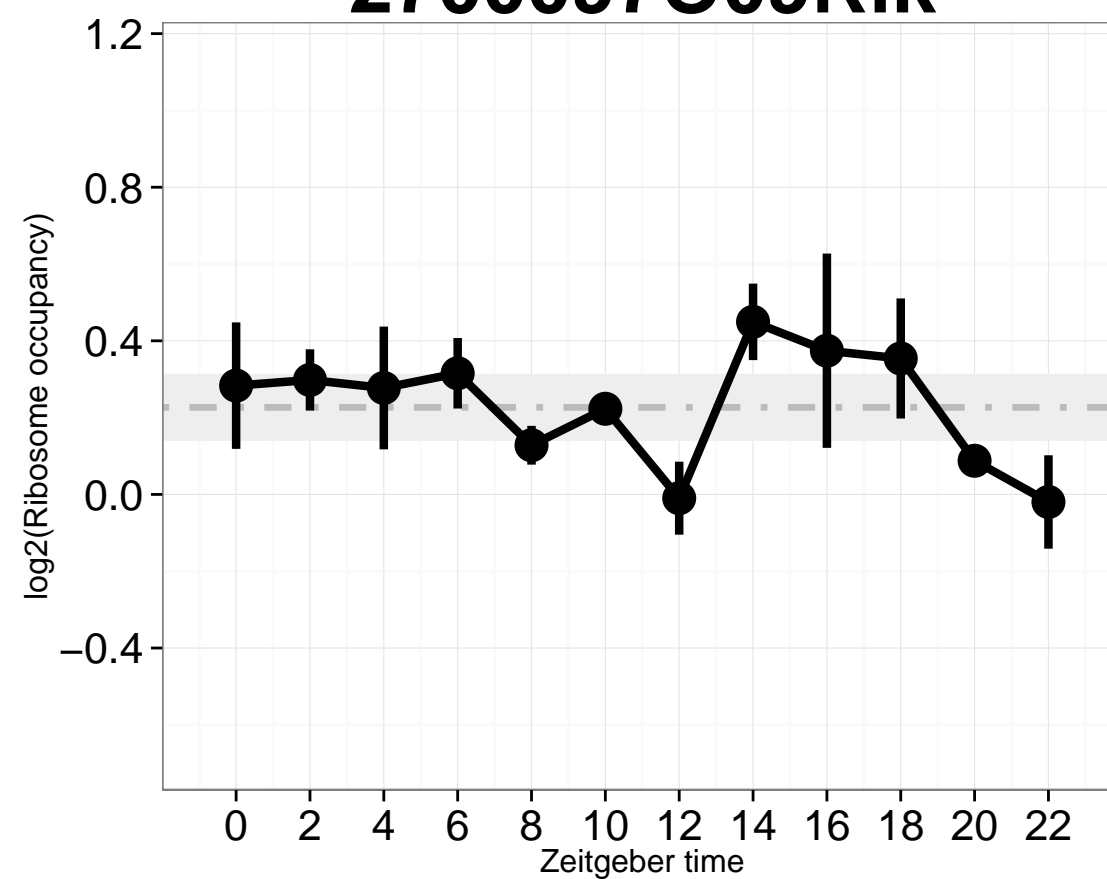

Supplement: Supplementary file 2366 [file 1]

# Mb21d2

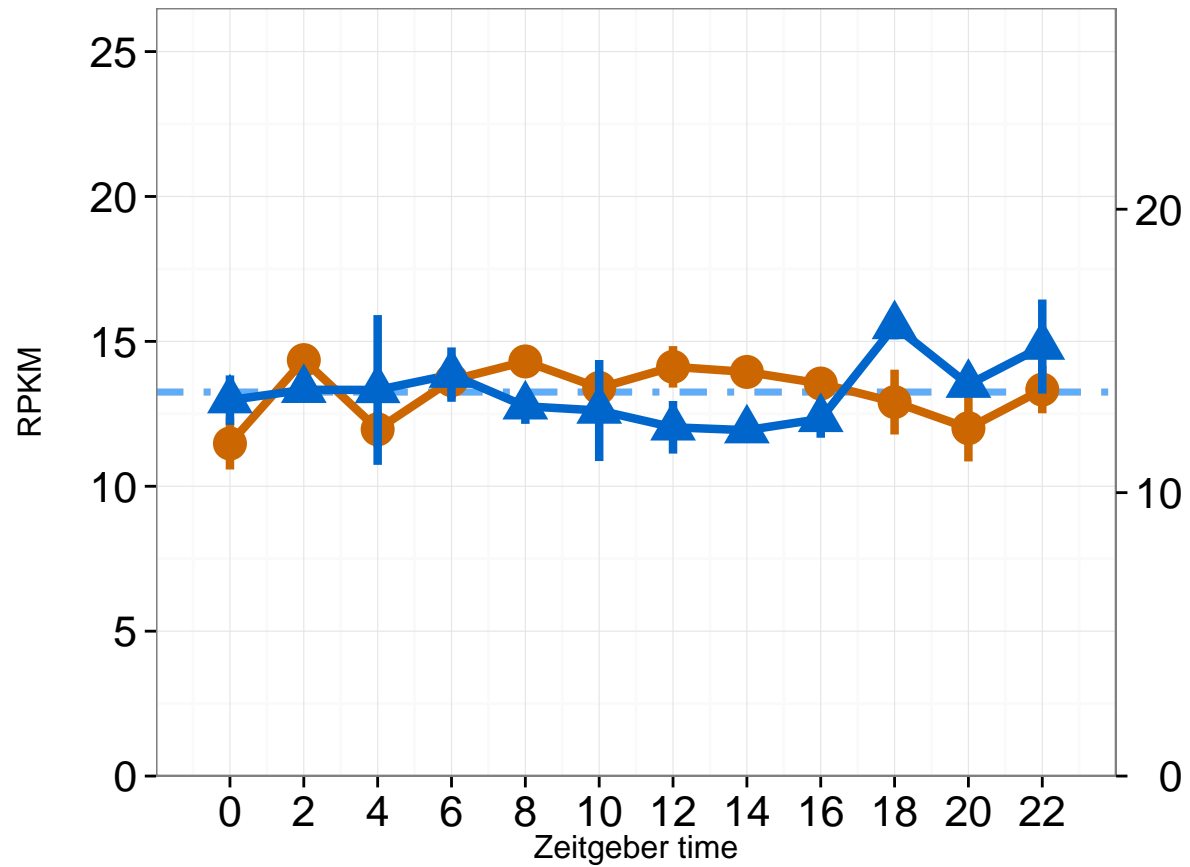

# Mb21d2

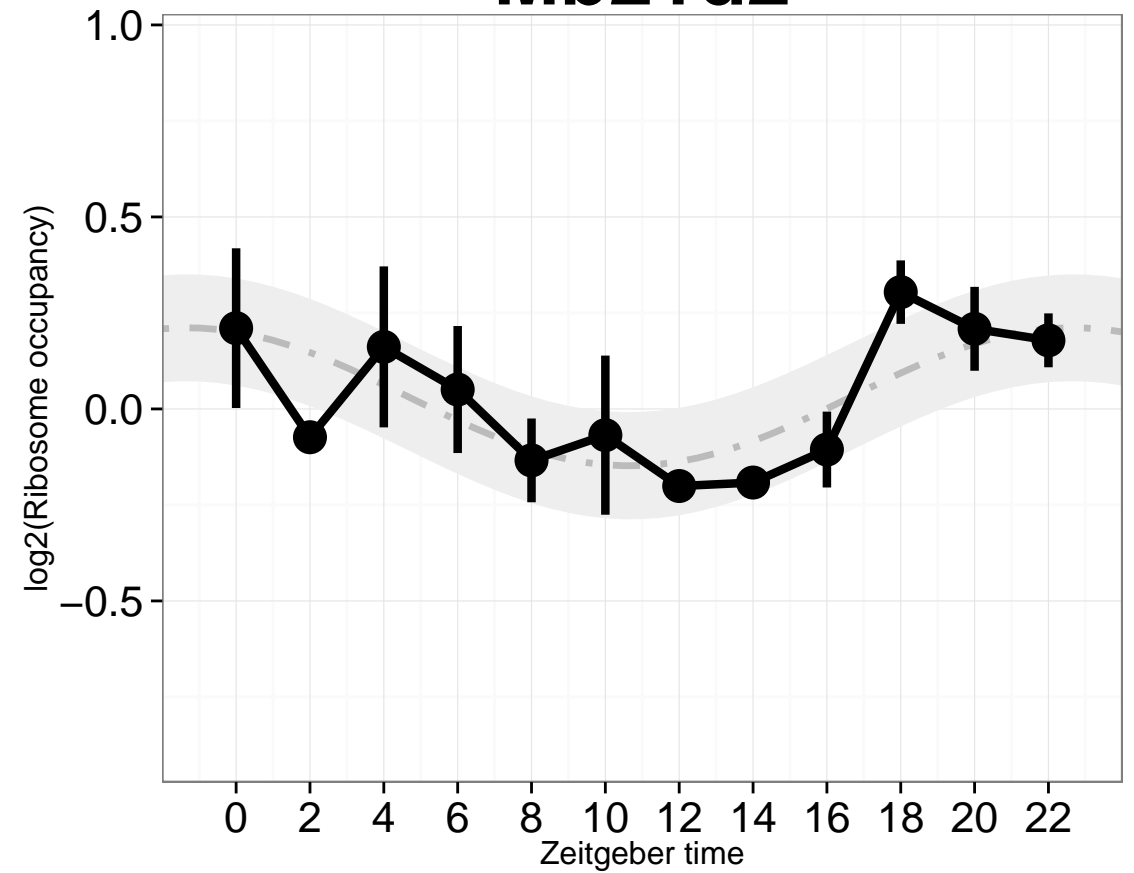

Supplement: Supplementary file 2367 [file 1]

## Camk2d

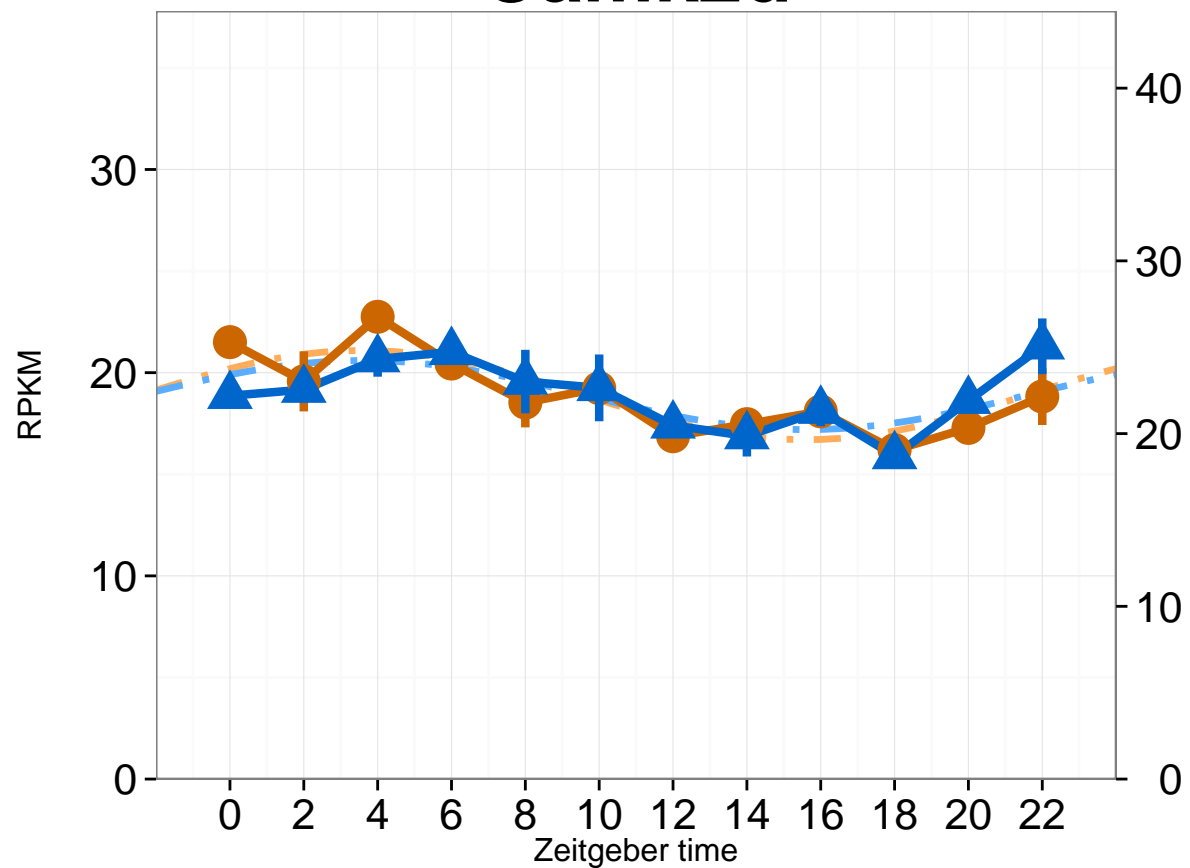

## Camk2d

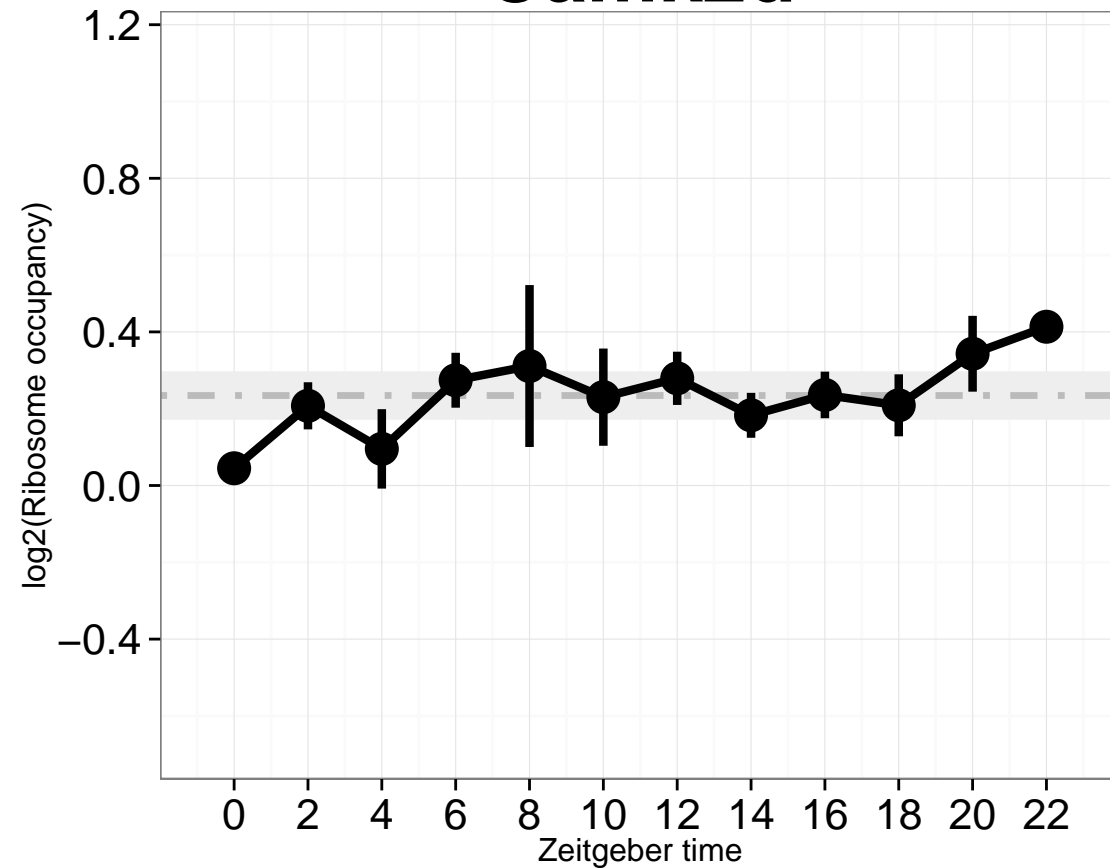

Supplement: Supplementary file 2368 [file 1]

# Slc6a8

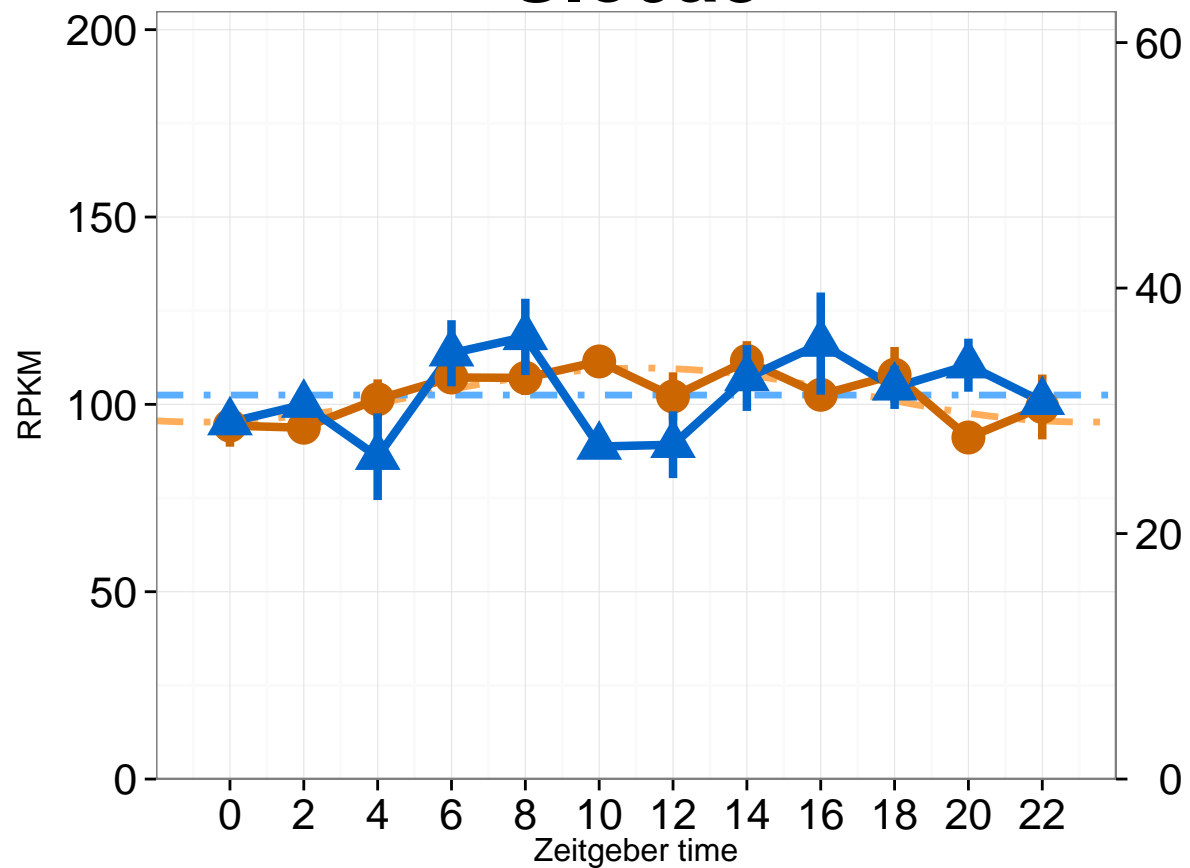

# Slc6a8

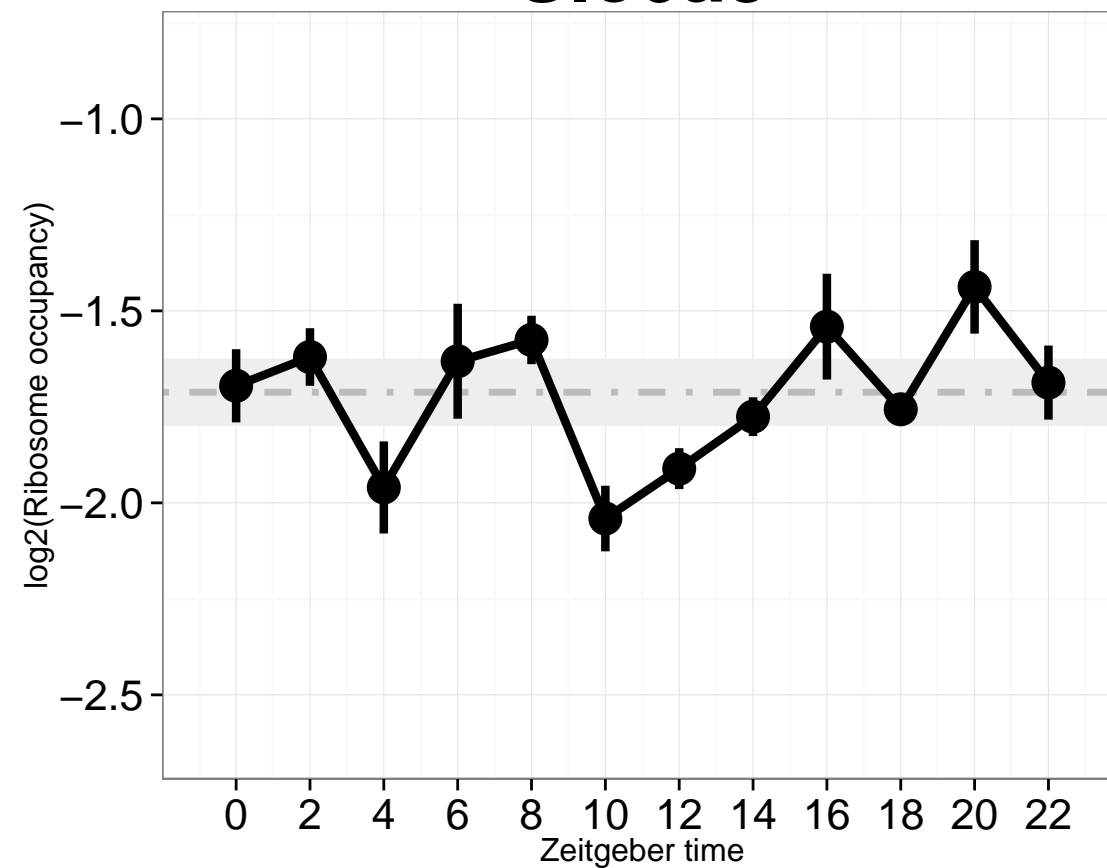

Supplement: Supplementary file 2369 [file 1]

## Acss2

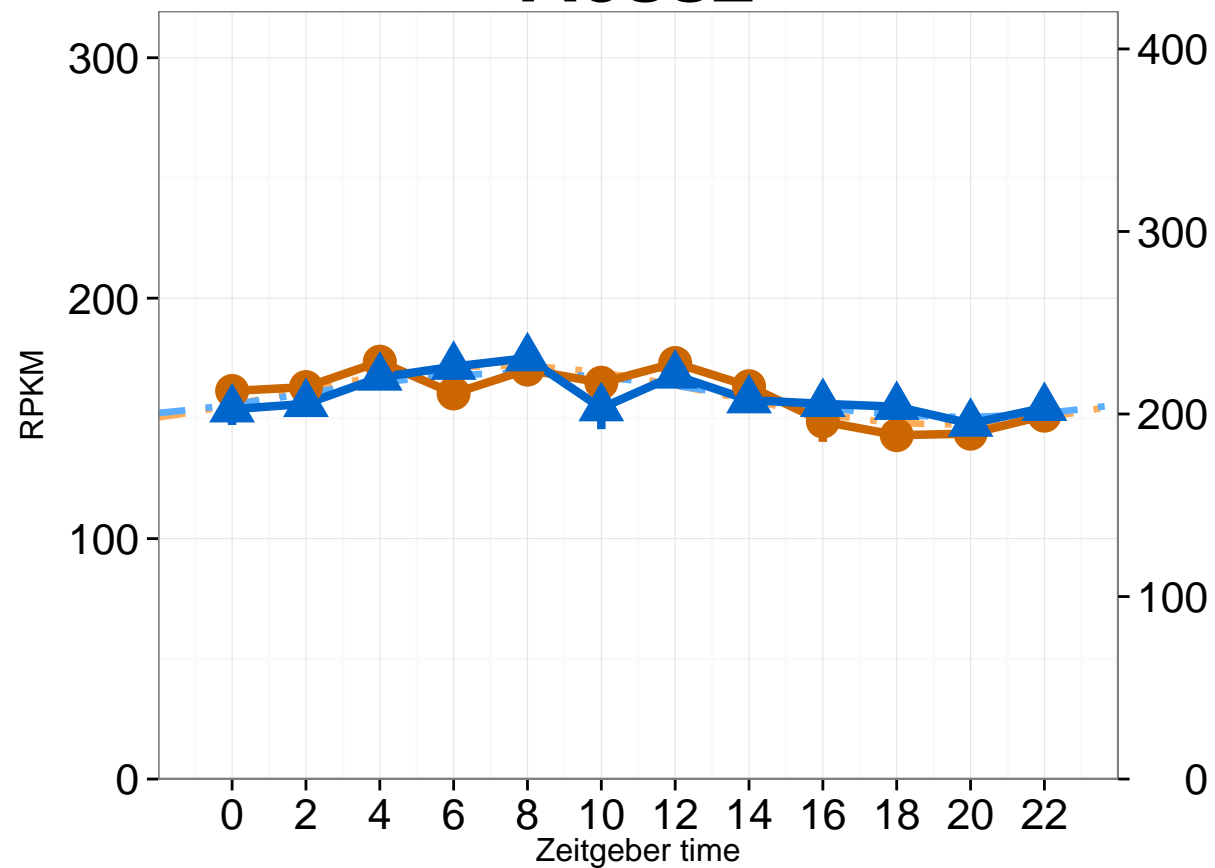

## Acss2

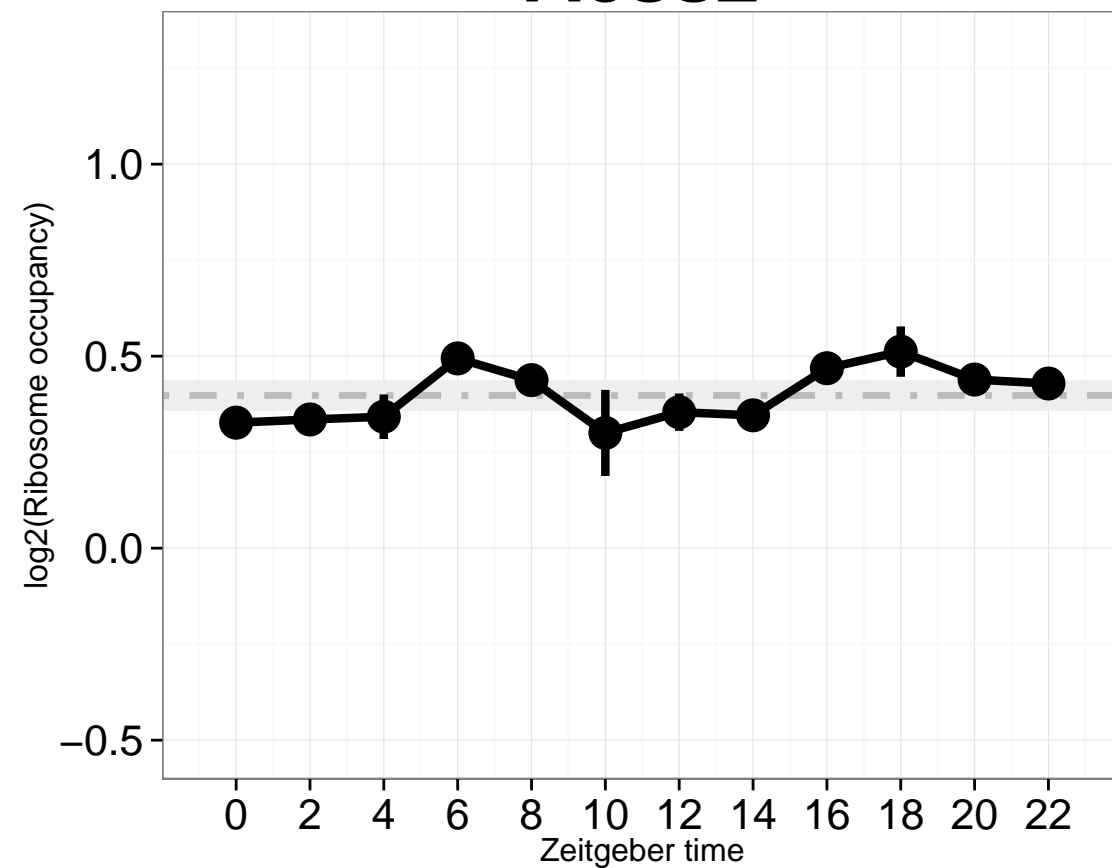

Supplement: Supplementary file 2370 [file 1]

# Trappc12

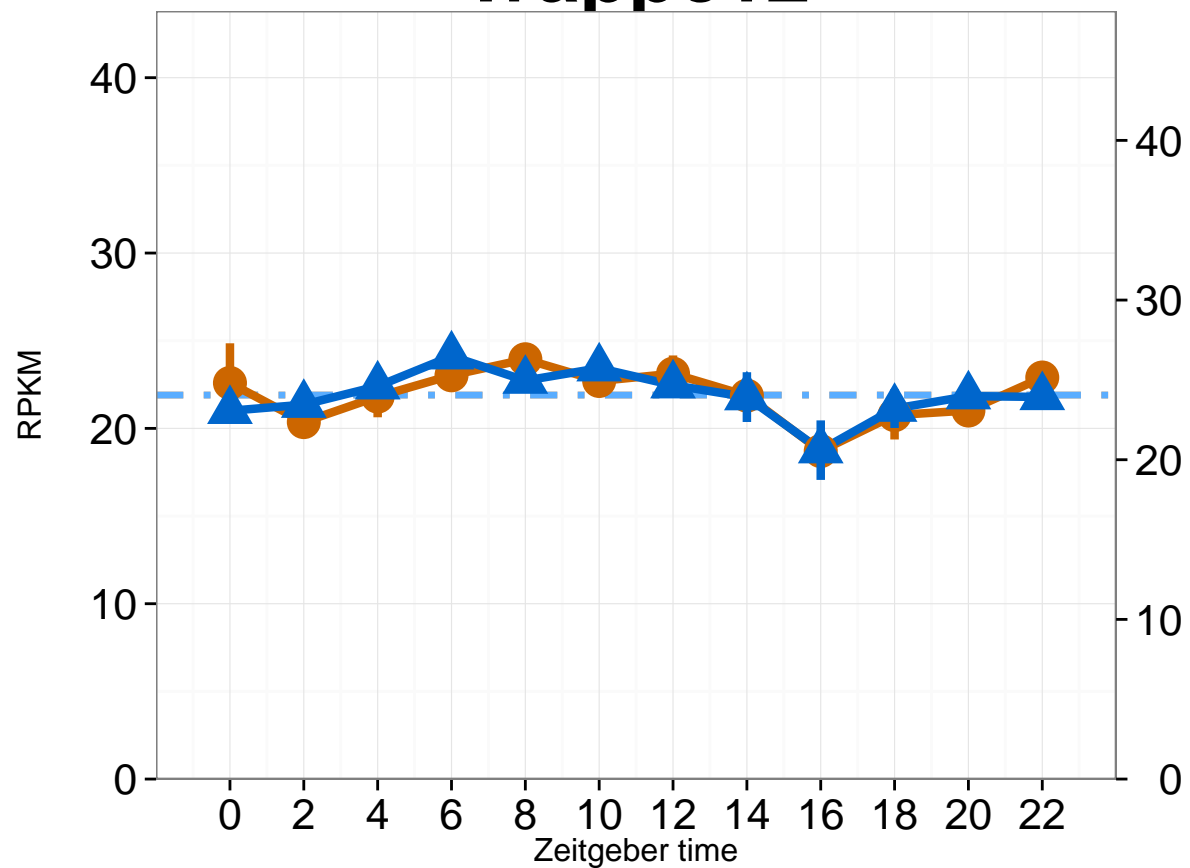

# Trappc12

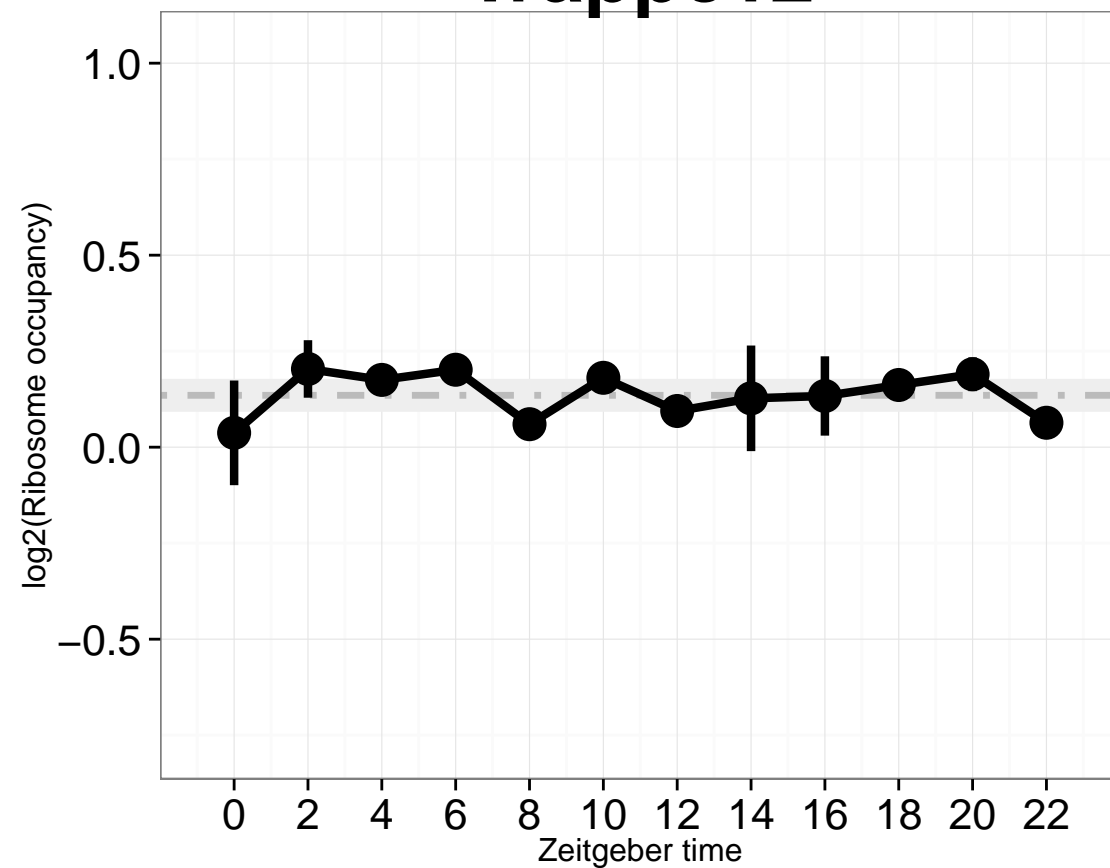

Supplement: Supplementary file 2371 [file 1]

## Slc26a1

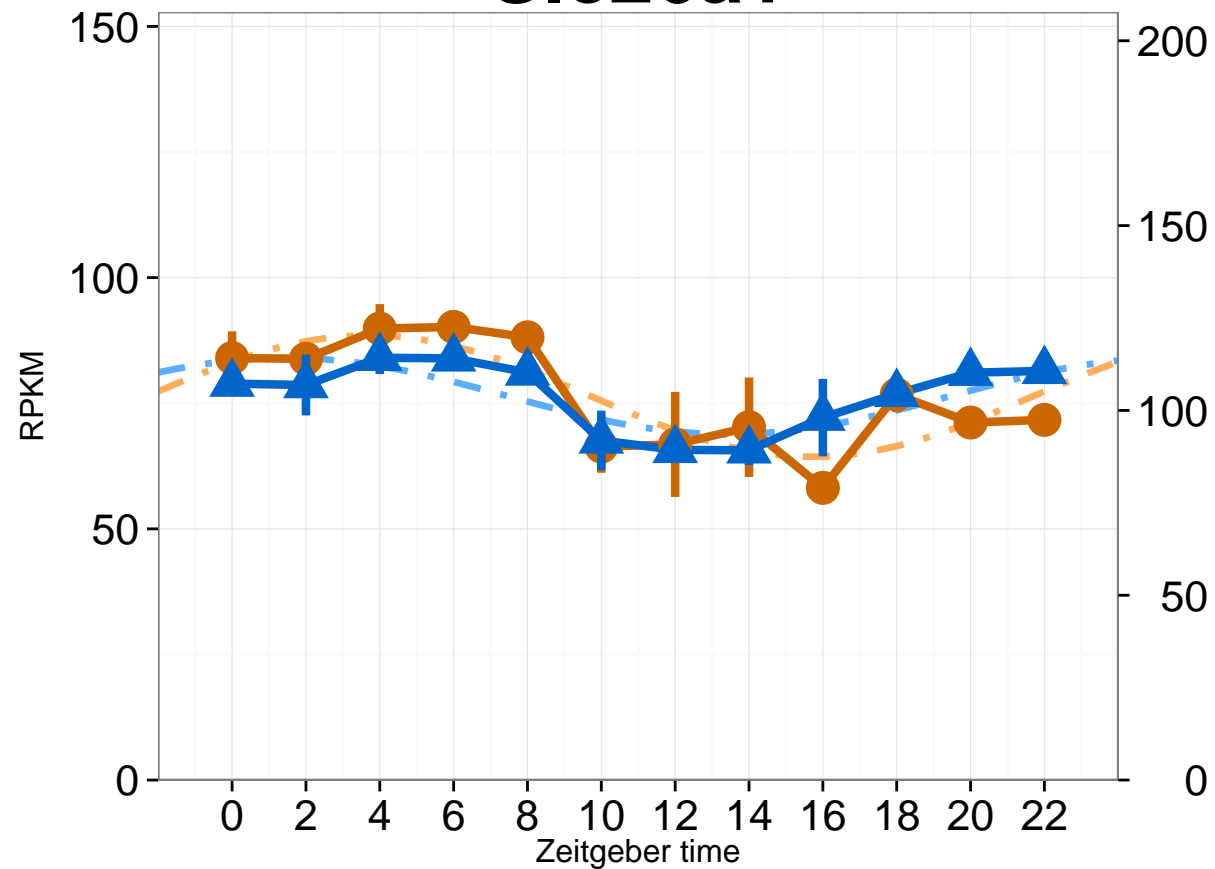

## Slc26a1

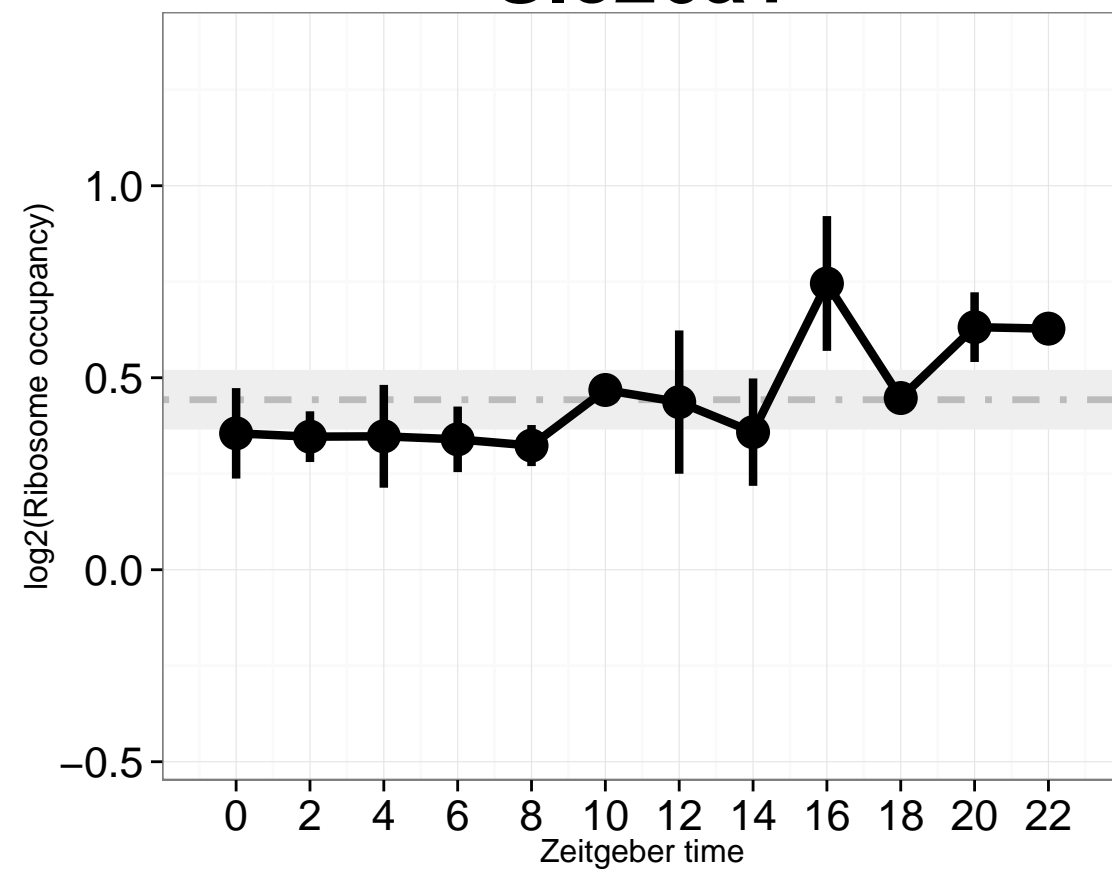

Supplement: Supplementary file 2372 [file 1]

# Hvcn1

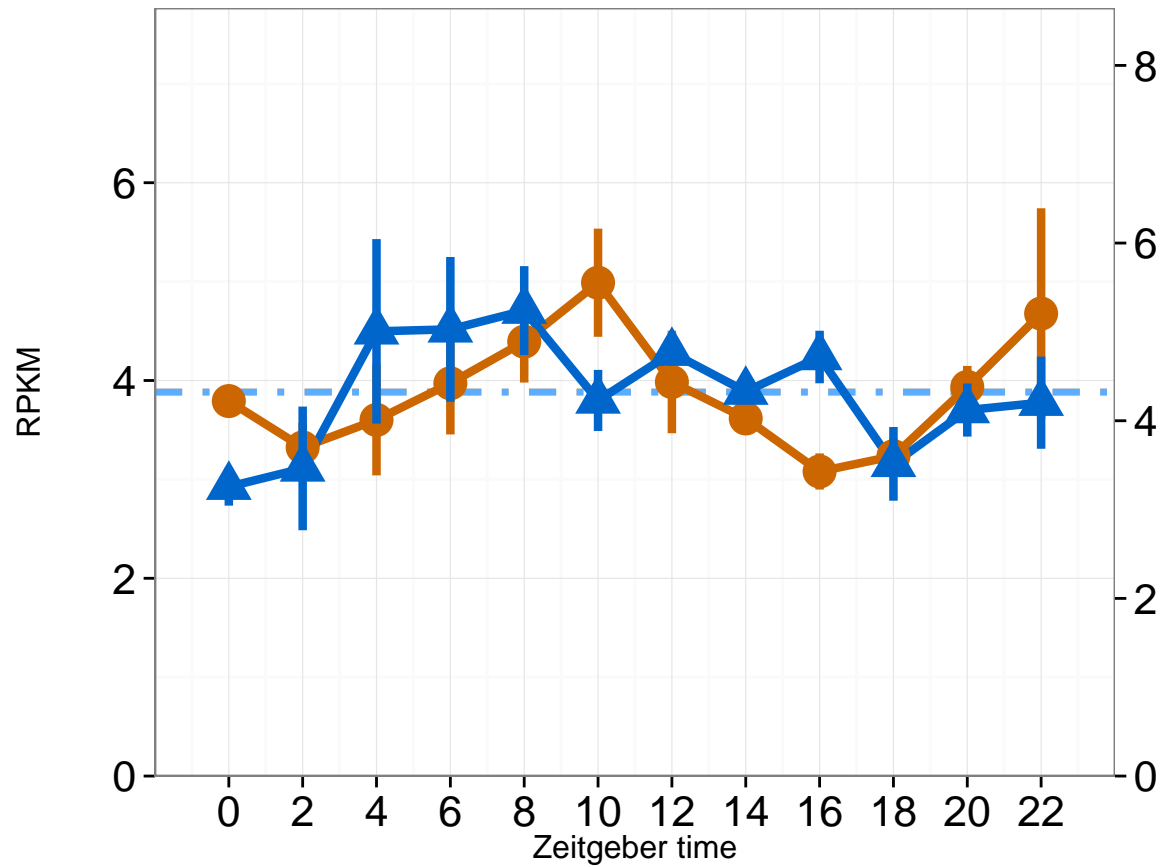

# Hvcn1

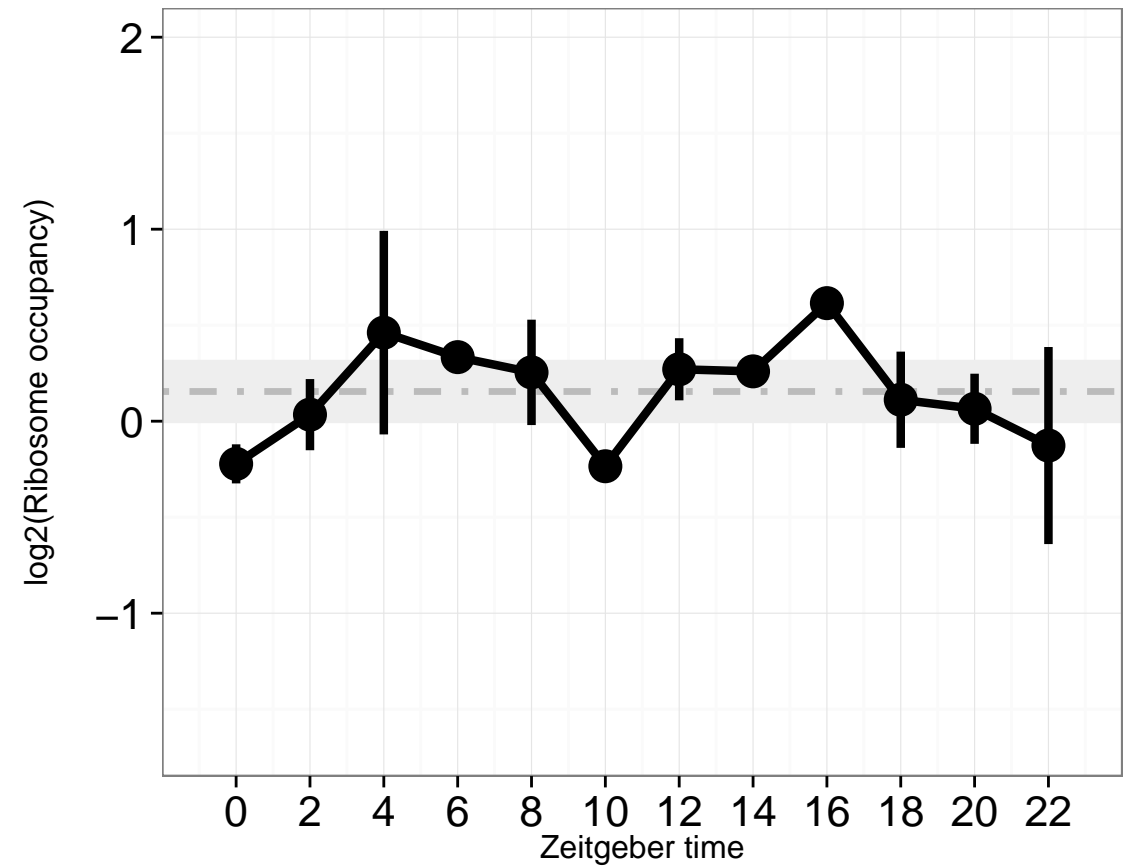

Supplement: Supplementary file 2373 [file 1]

# Them4

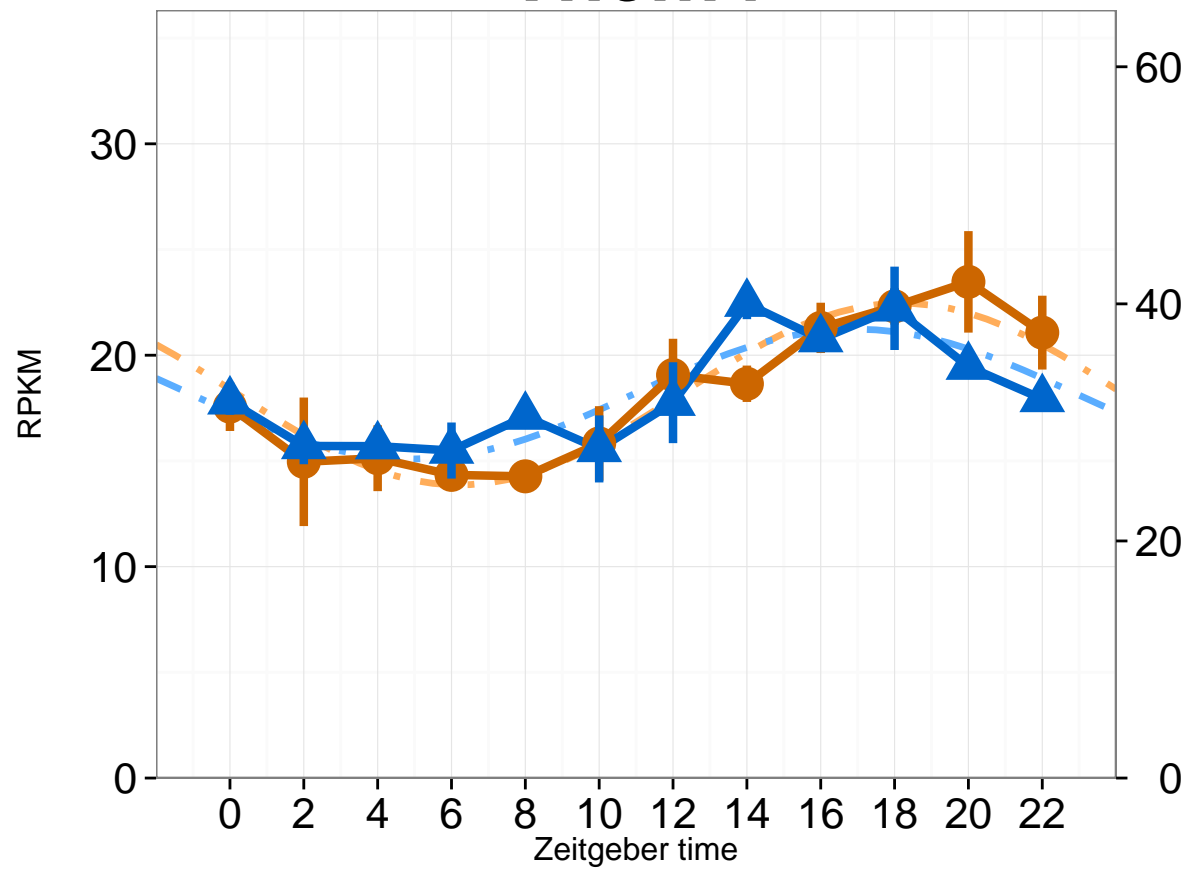

# Them4

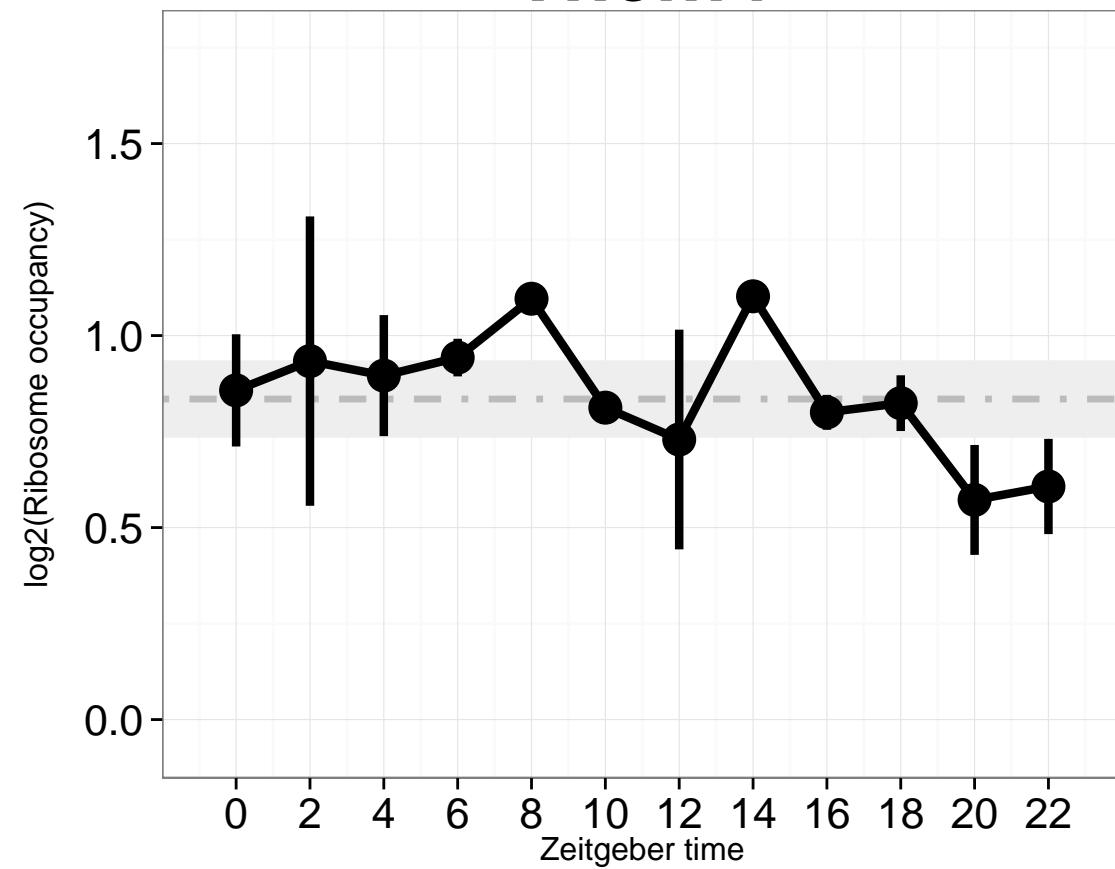

Supplement: Supplementary file 2374 [file 1]

# Lilrb4

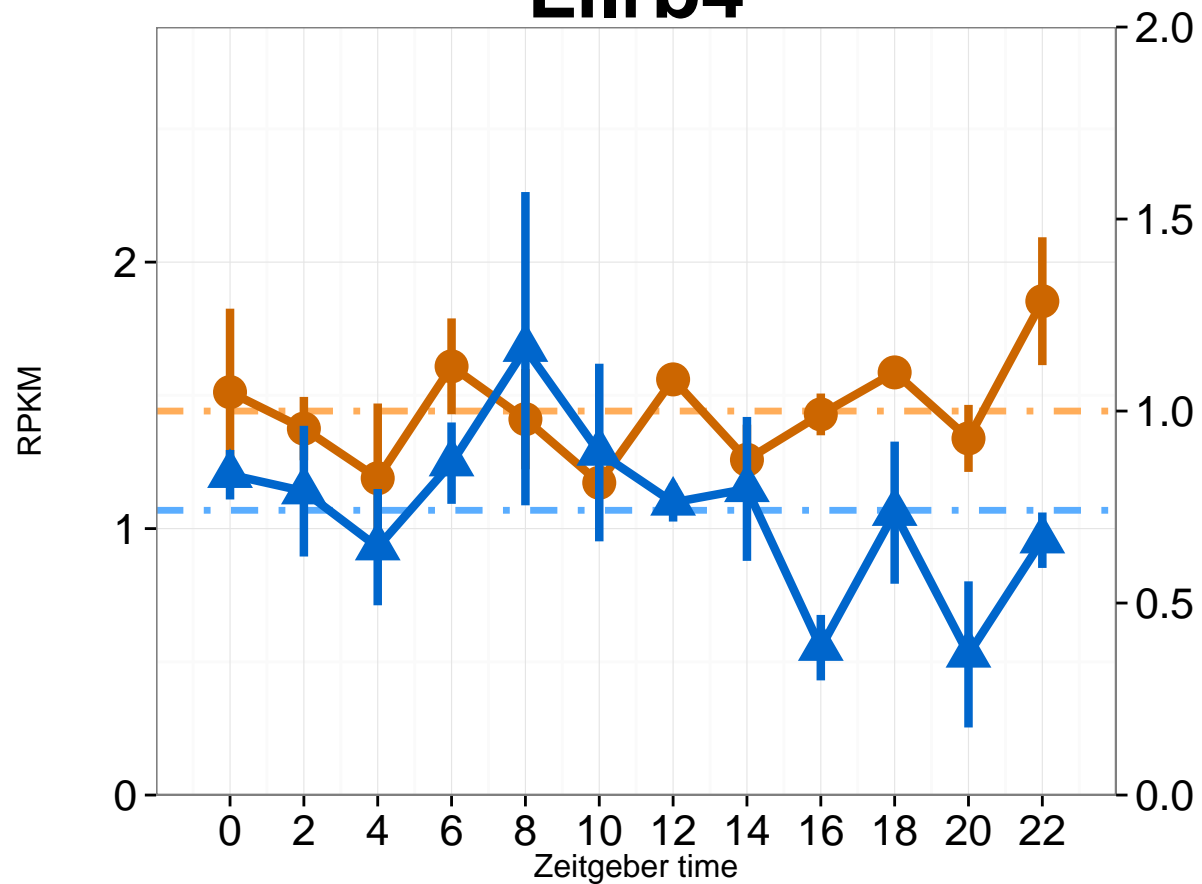

# Lilrb4

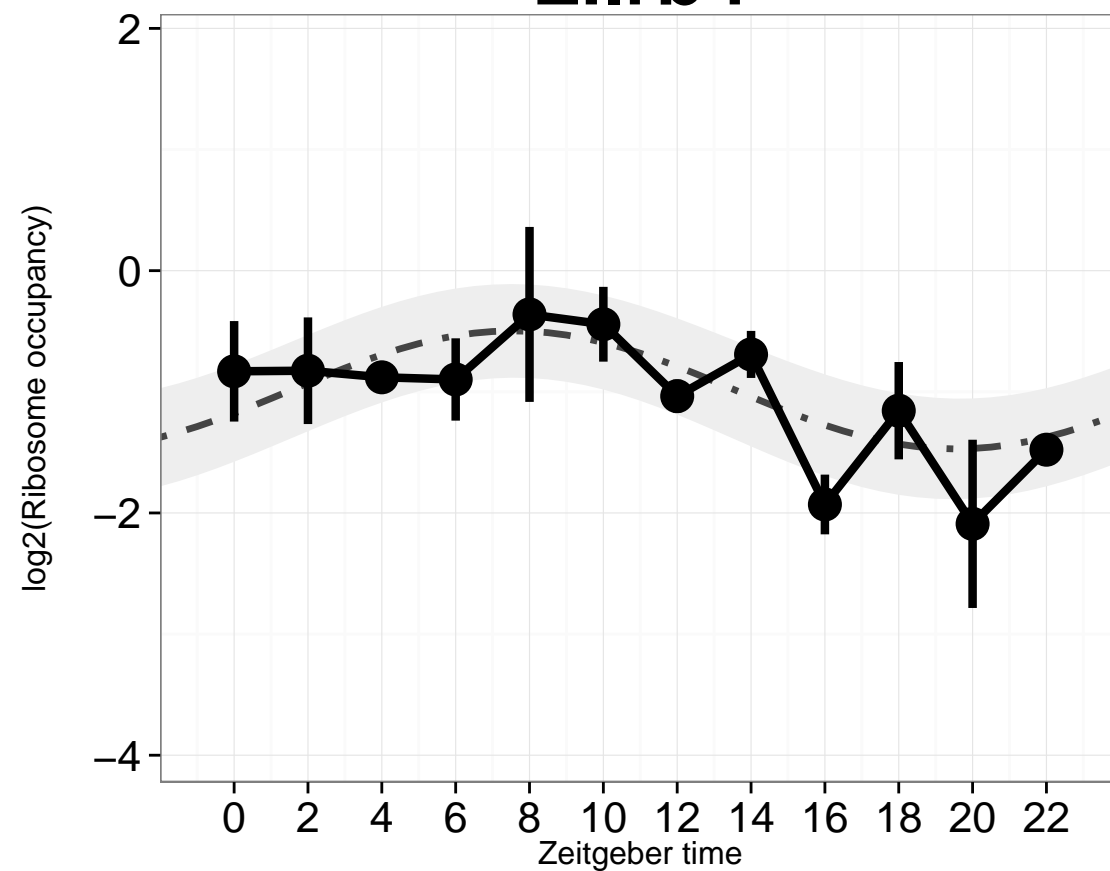

Supplement: Supplementary file 2375 [file 1]

# Uimc1

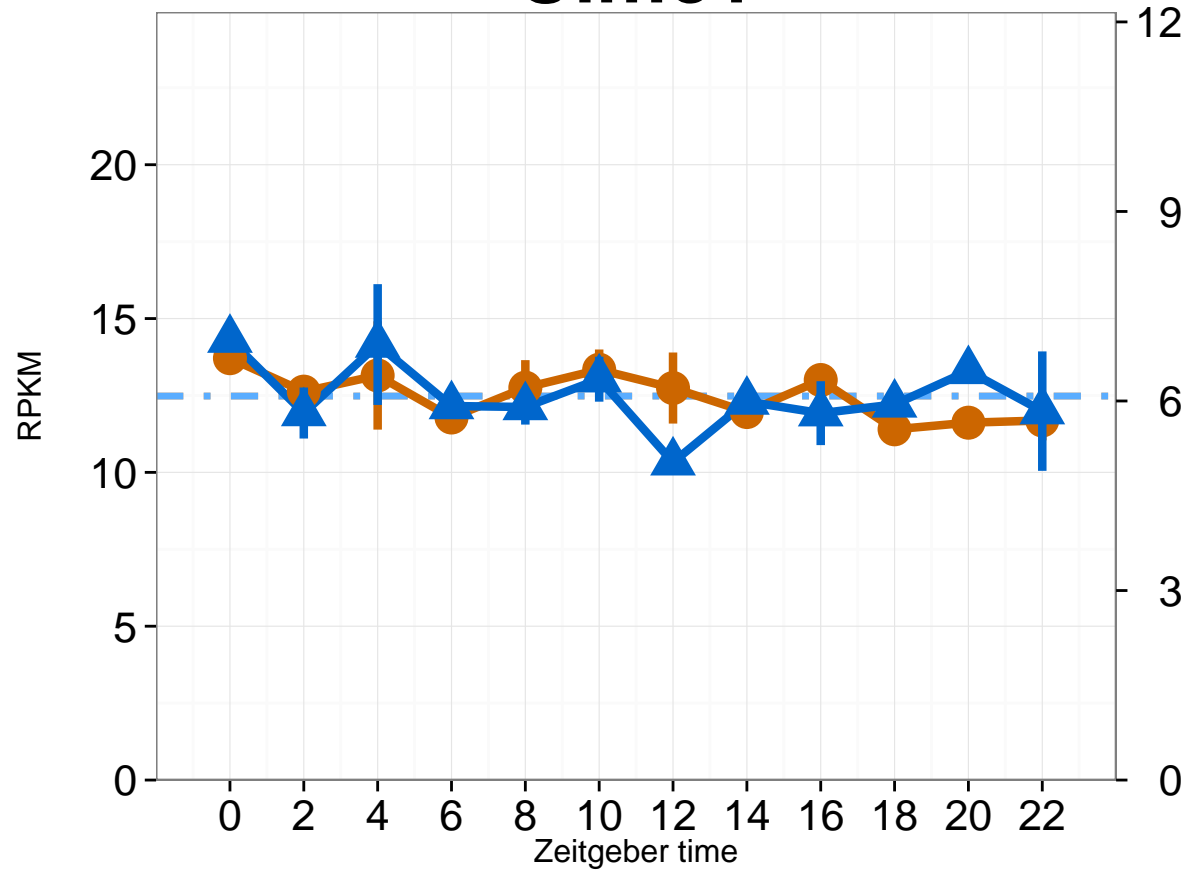

# Uimc1

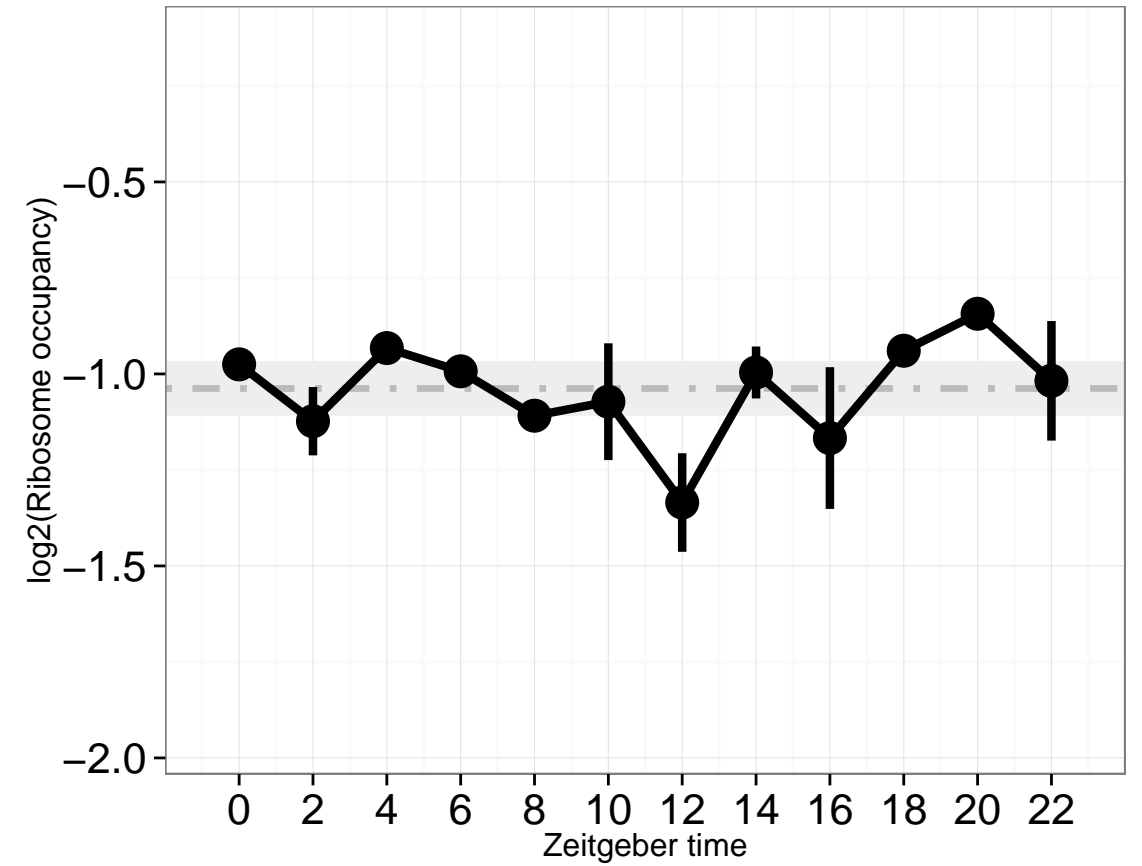

Supplement: Supplementary file 2376 [file 1]

**Slc24a3**

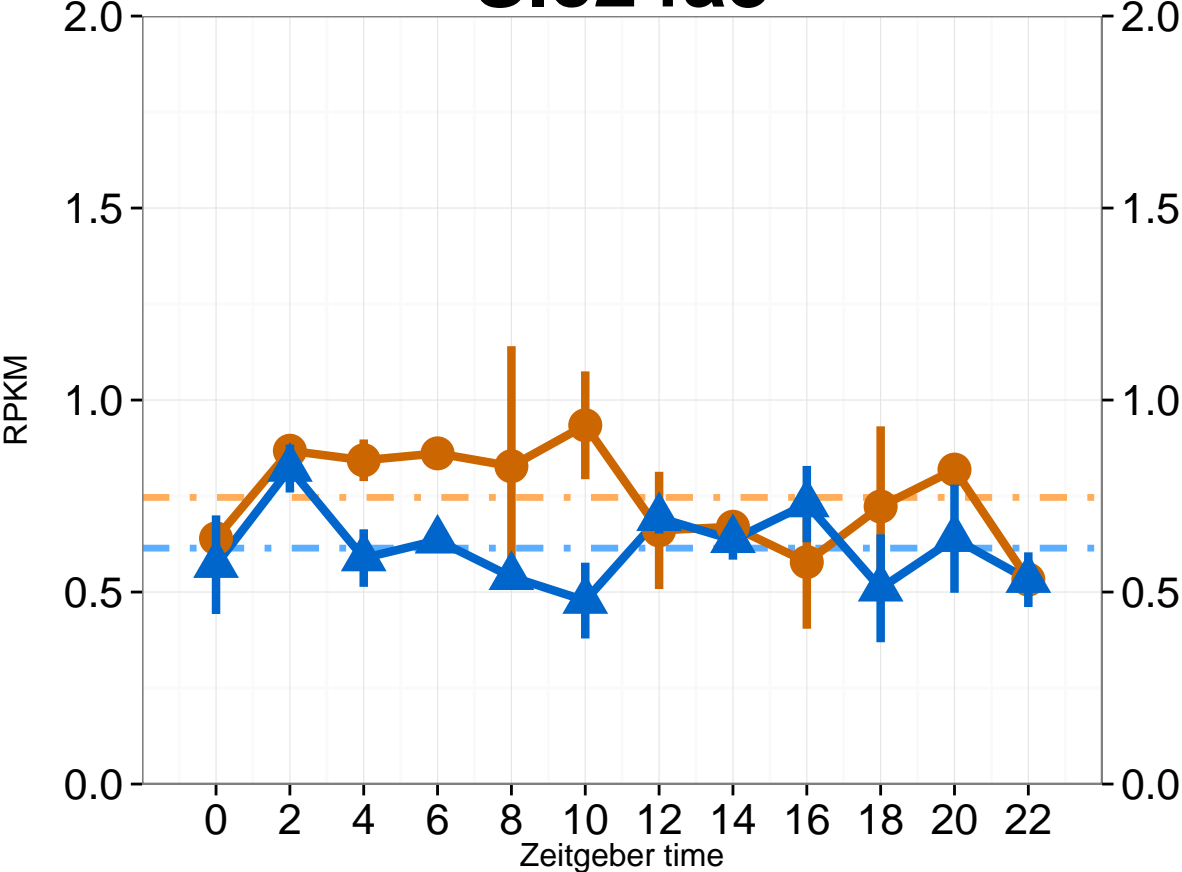

**Slc24a3**

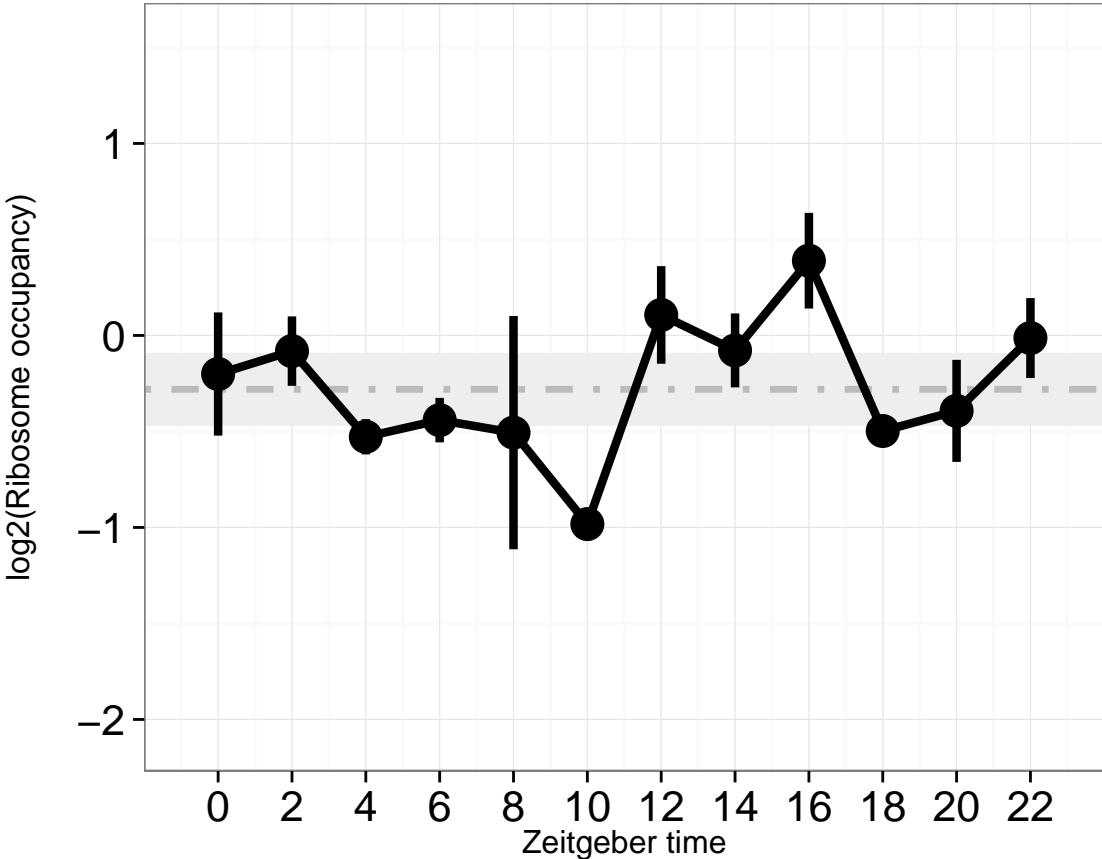

Supplement: Supplementary file 2377 [file 1]

# A4gnt

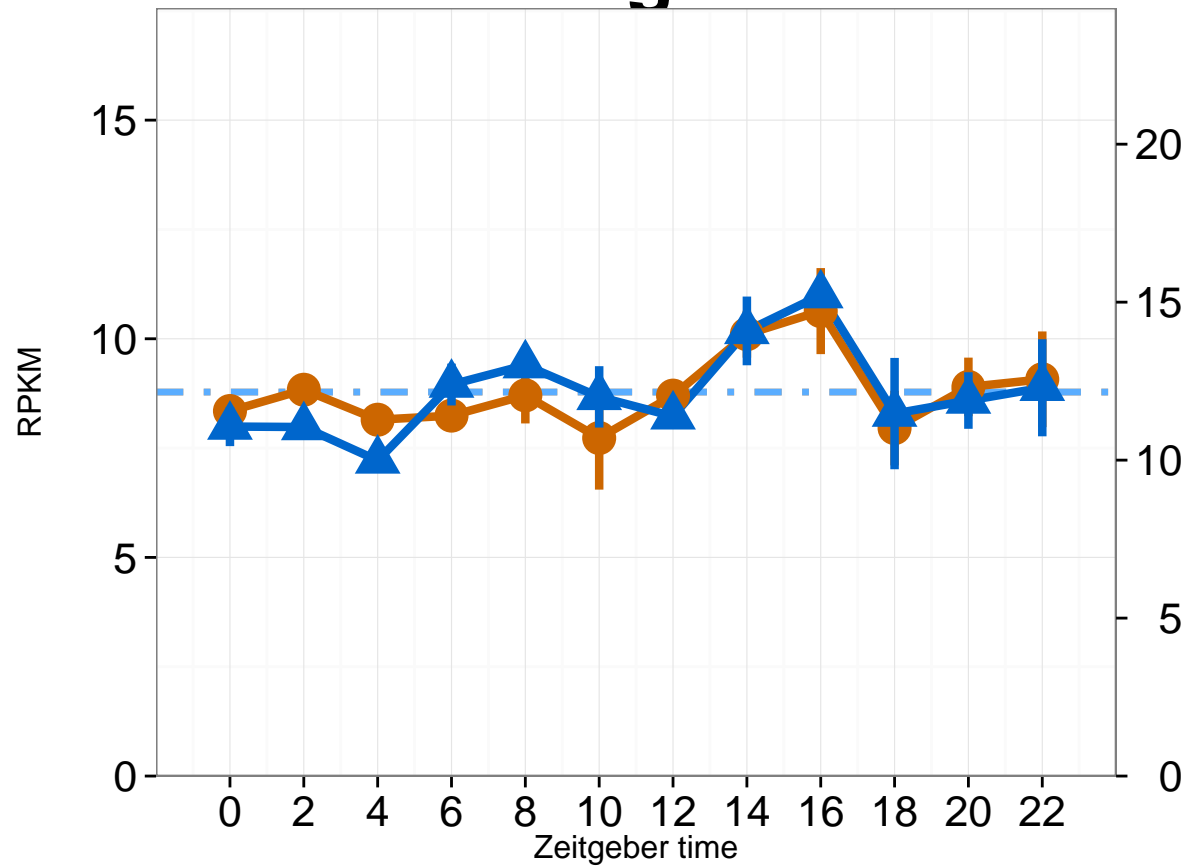

# A4gnt

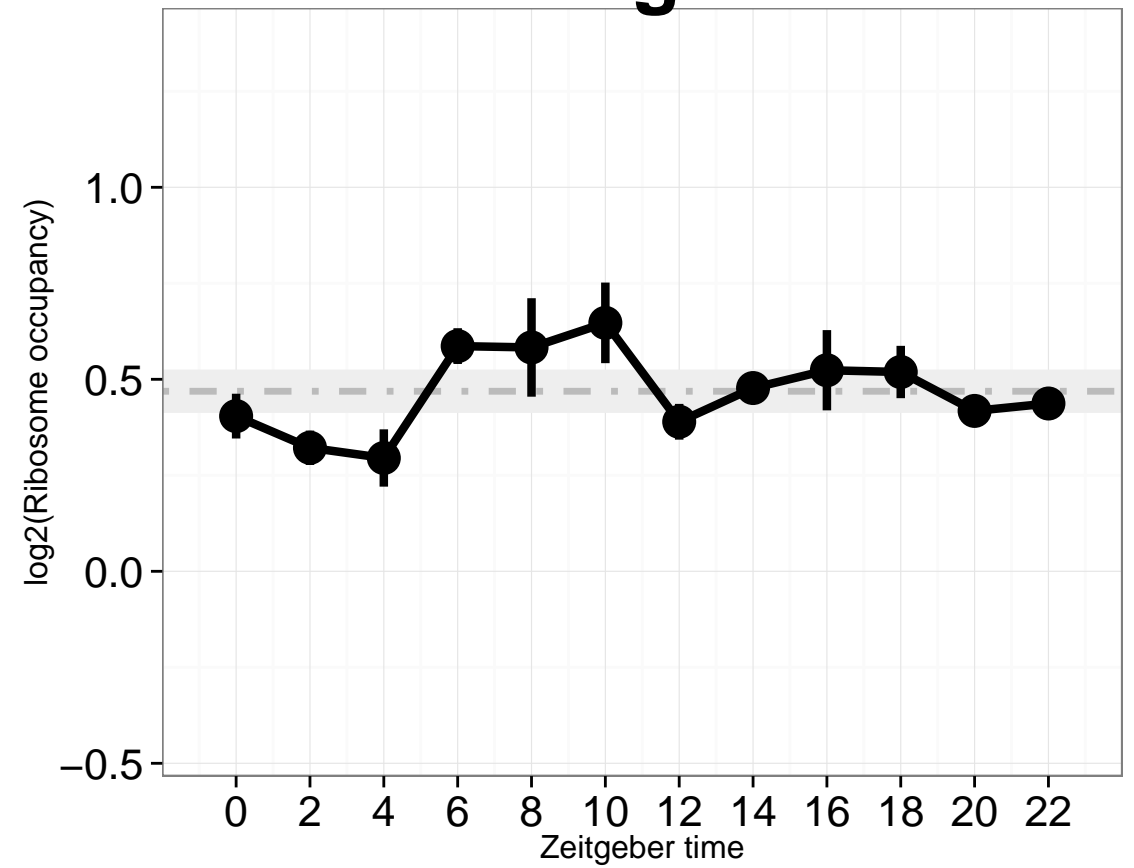

Supplement: Supplementary file 2378 [file 1]

## Exoc3l4

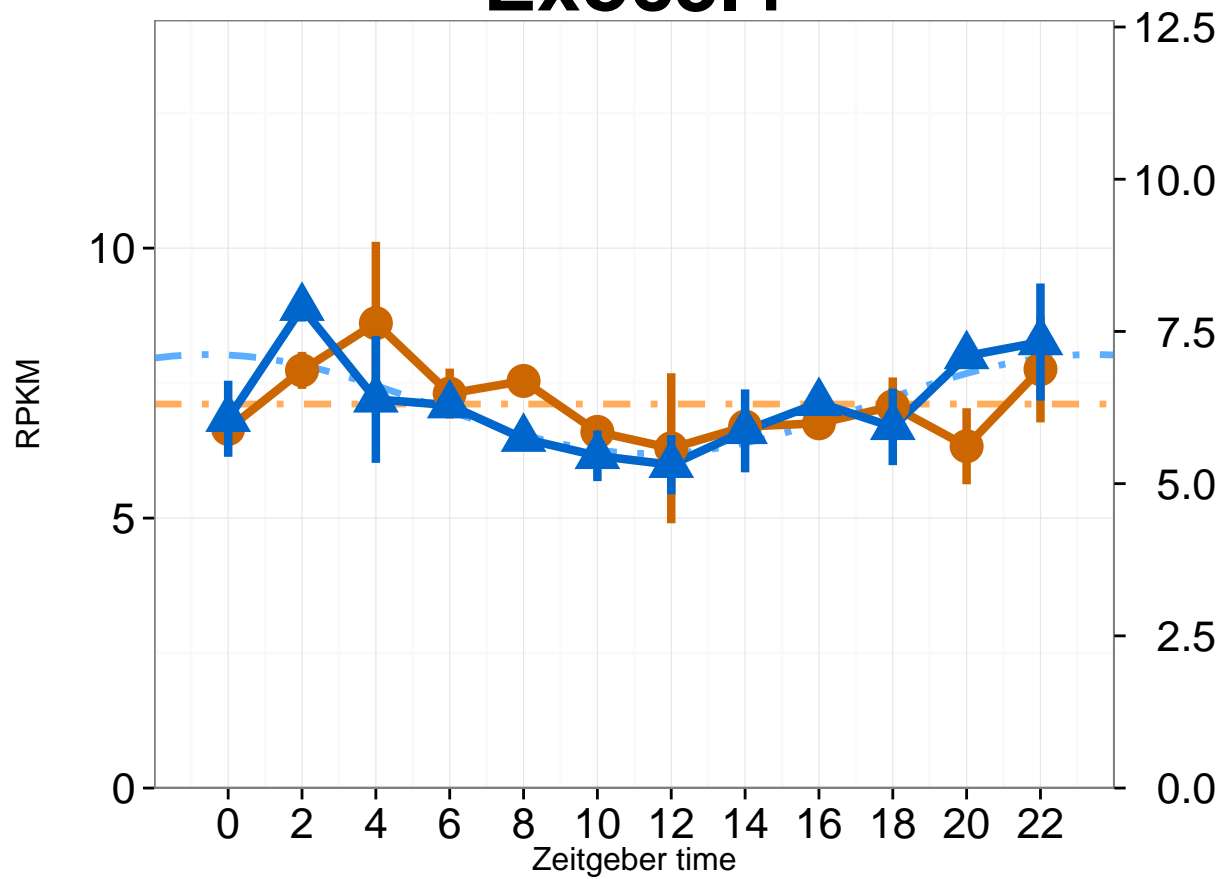

## Exoc3l4

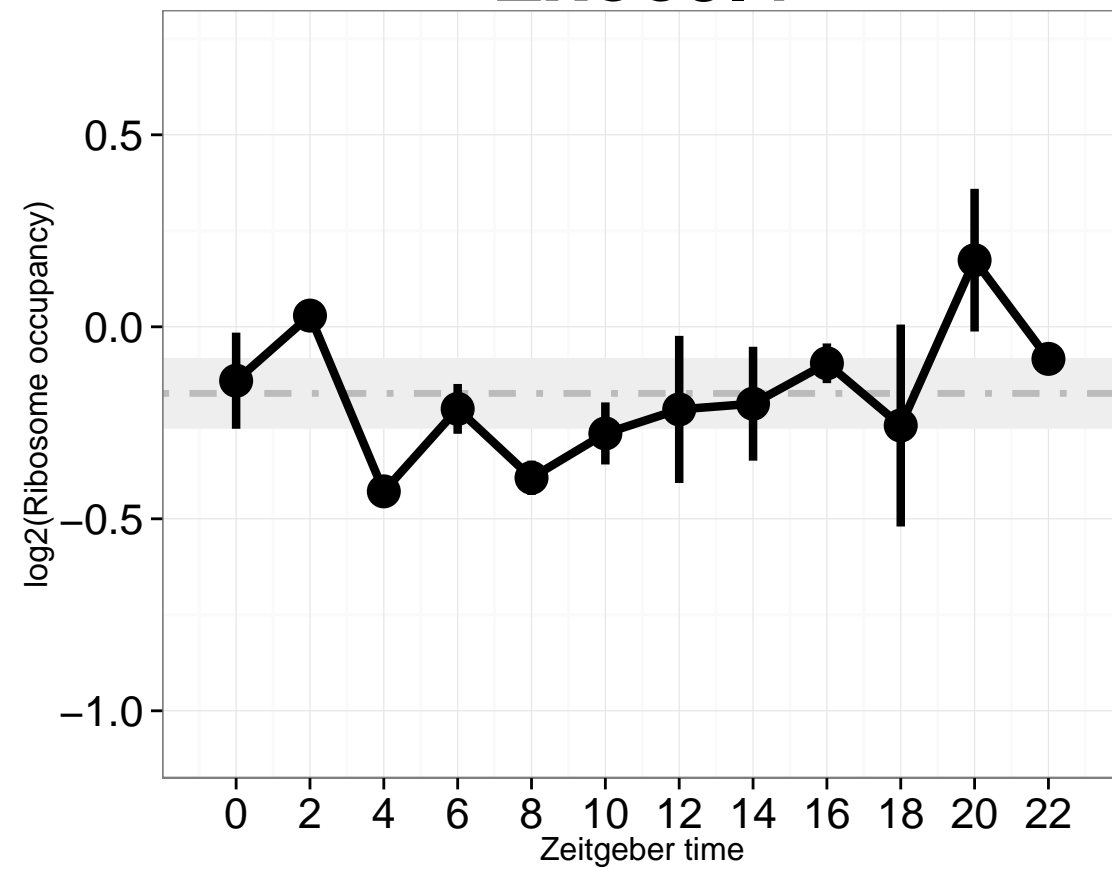

Supplement: Supplementary file 2379 [file 1]

# Mfsd6l

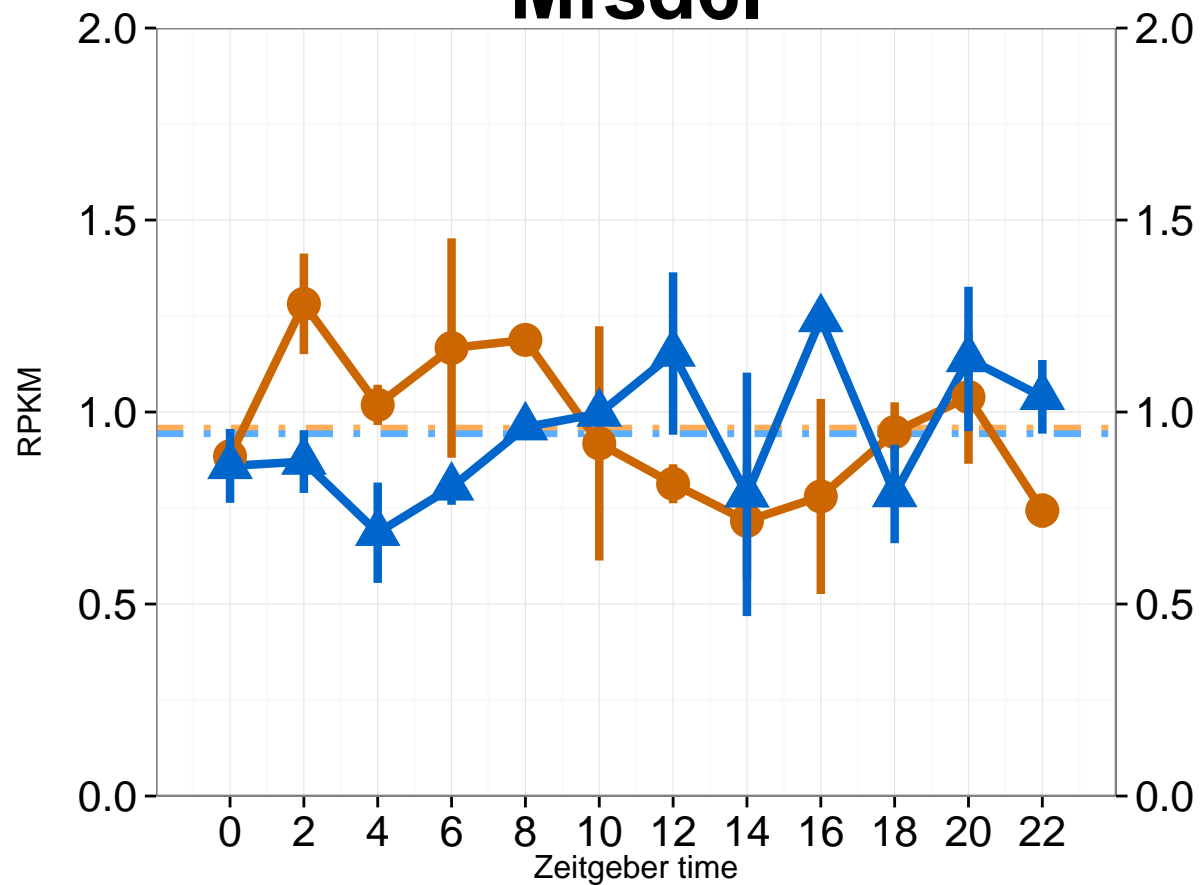

# Mfsd6l

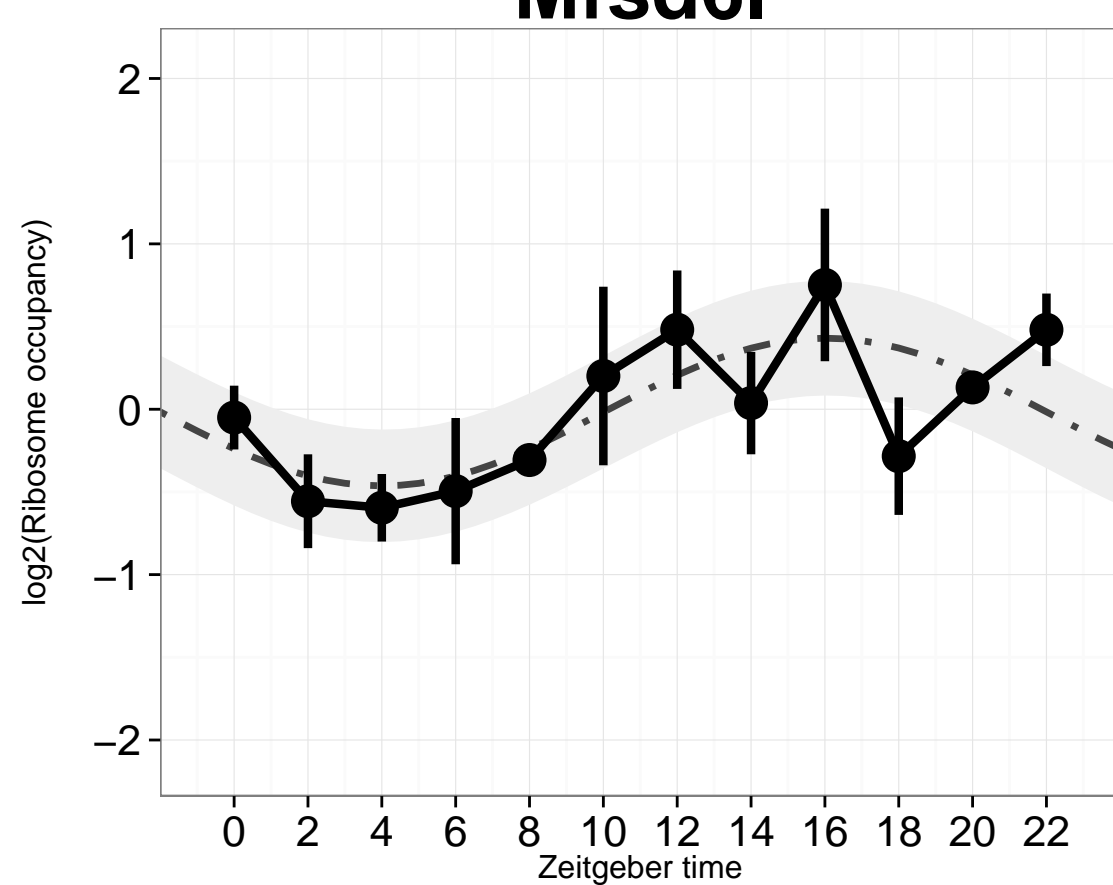

Supplement: Supplementary file 2380 [file 1]

# Zdhhc15

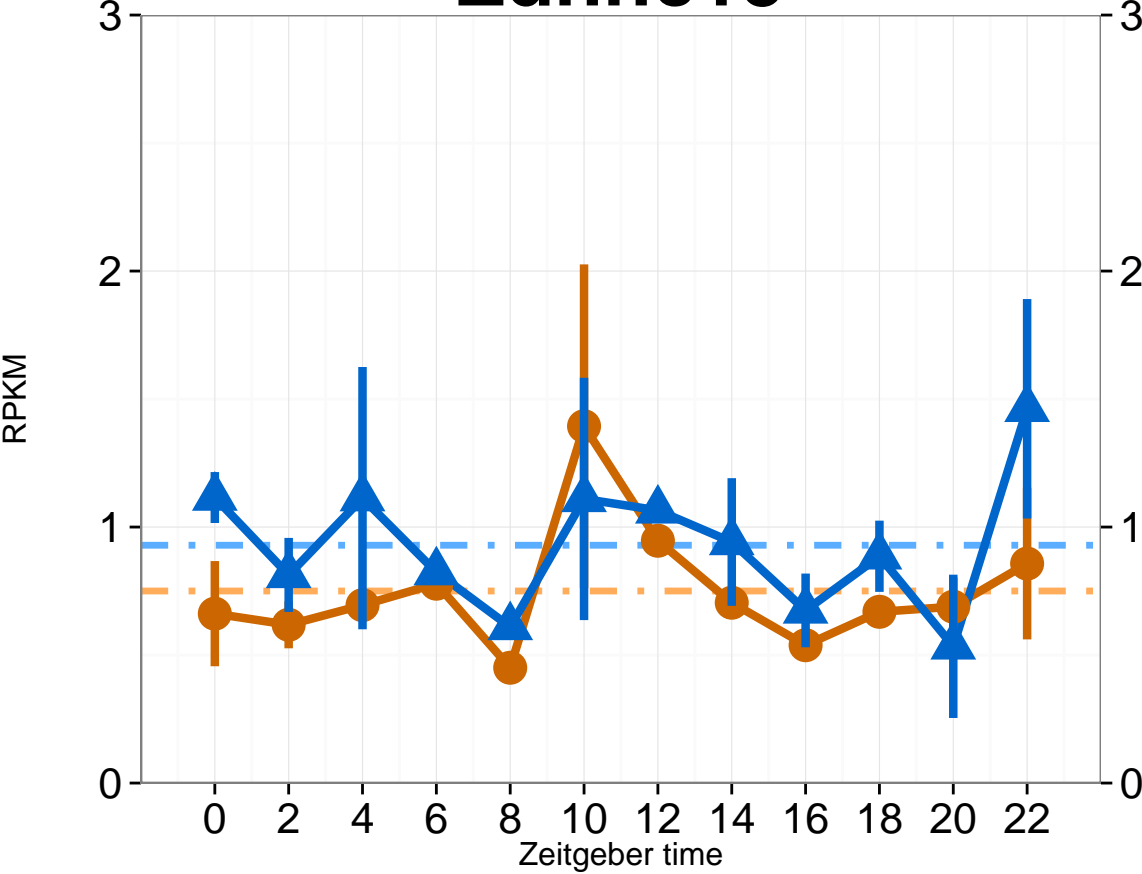

# Zdhhc15

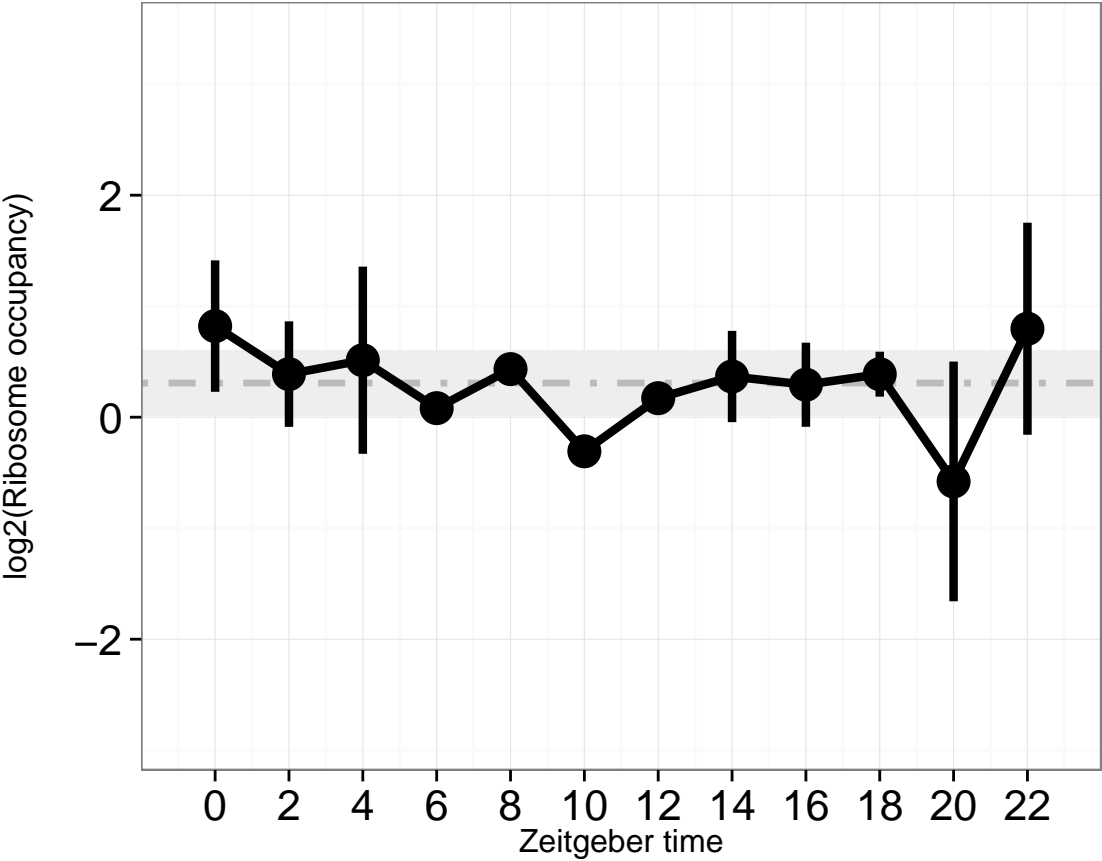

Supplement: Supplementary file 2381 [file 1]

## Sms

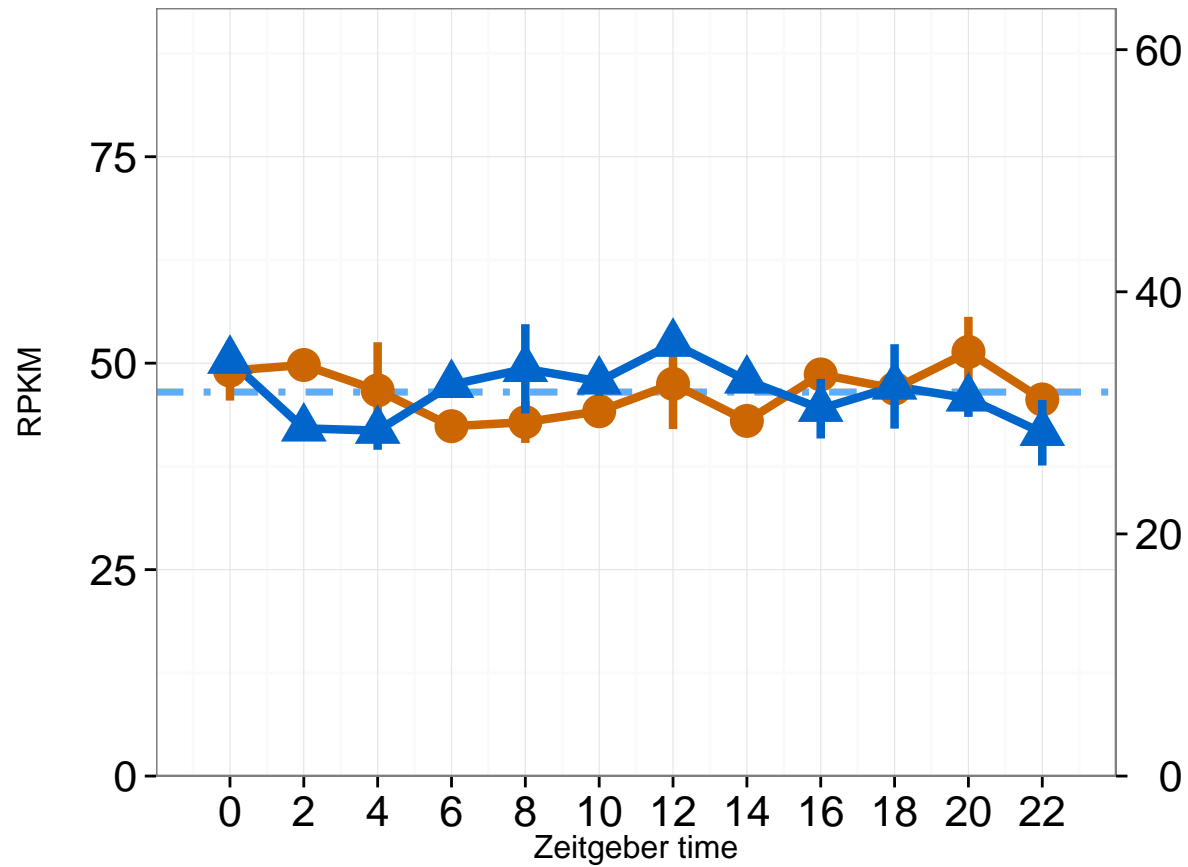

## Sms

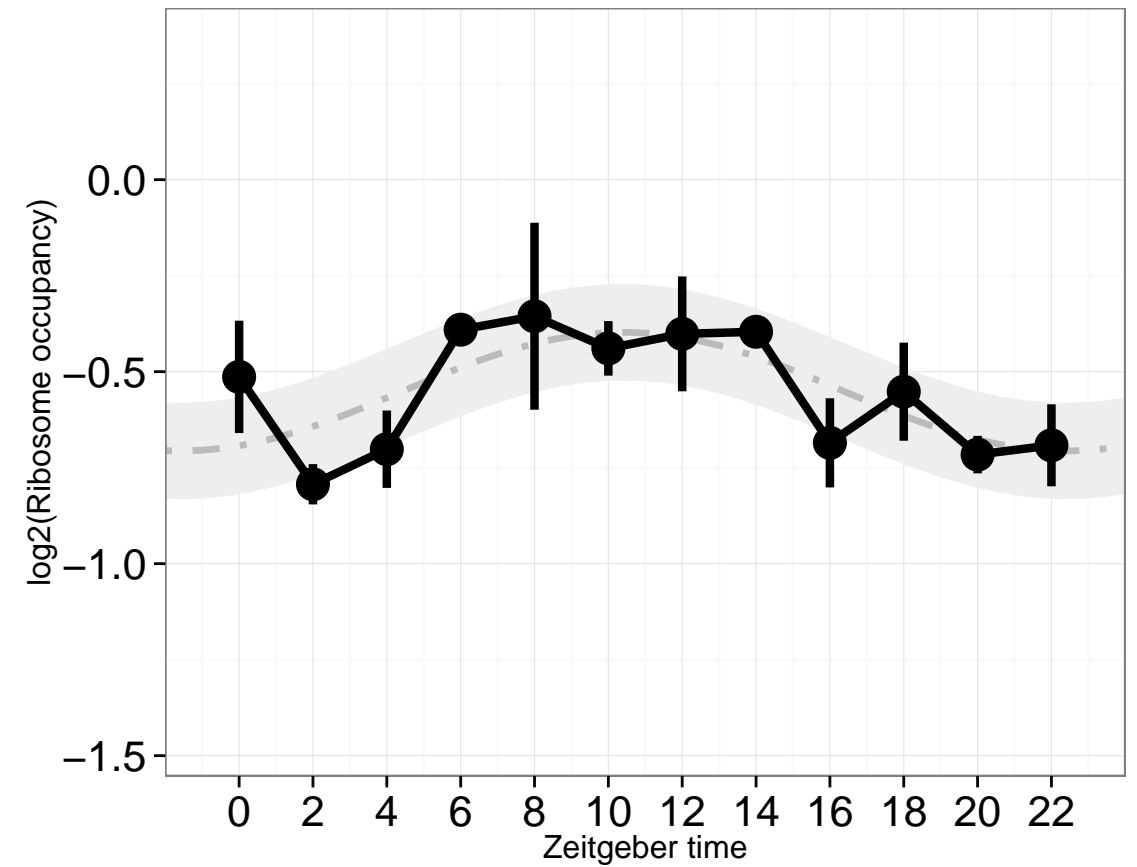

Supplement: Supplementary file 2382 [file 1]

## Pax2

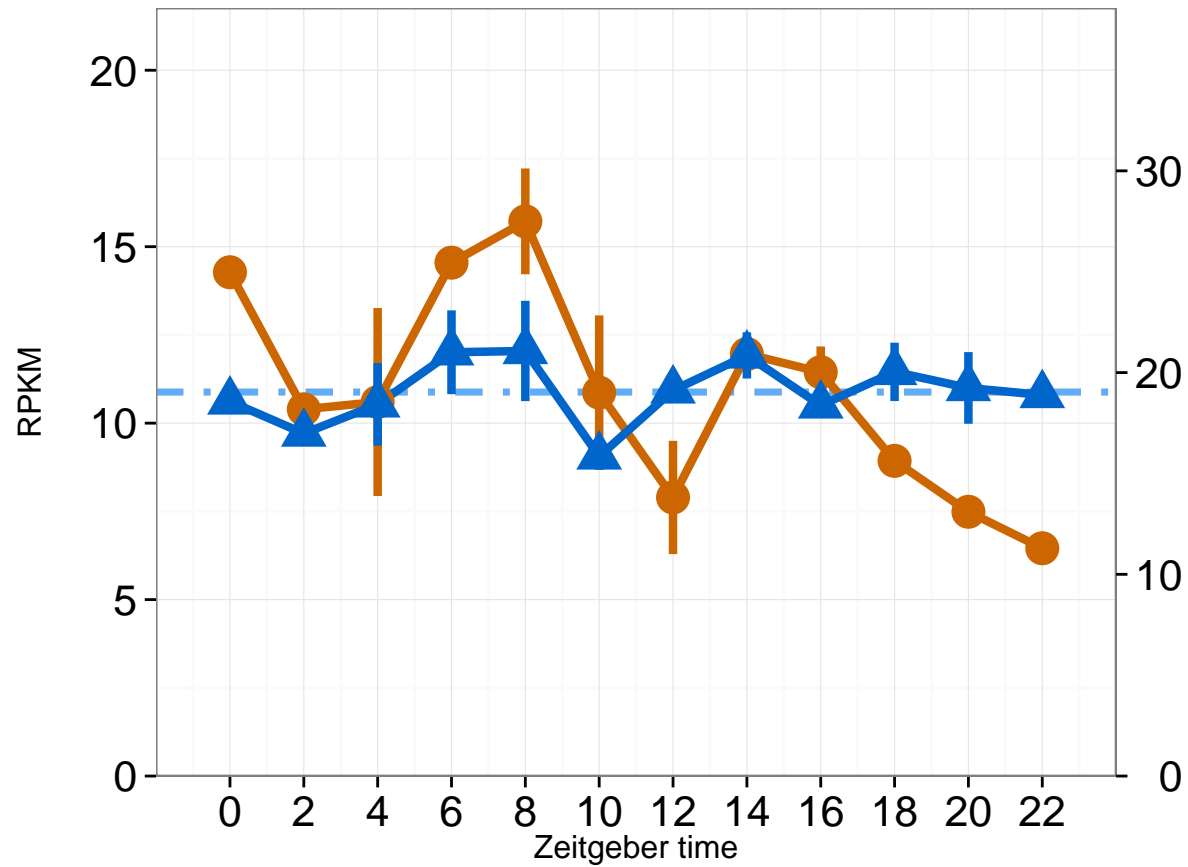

## Pax2

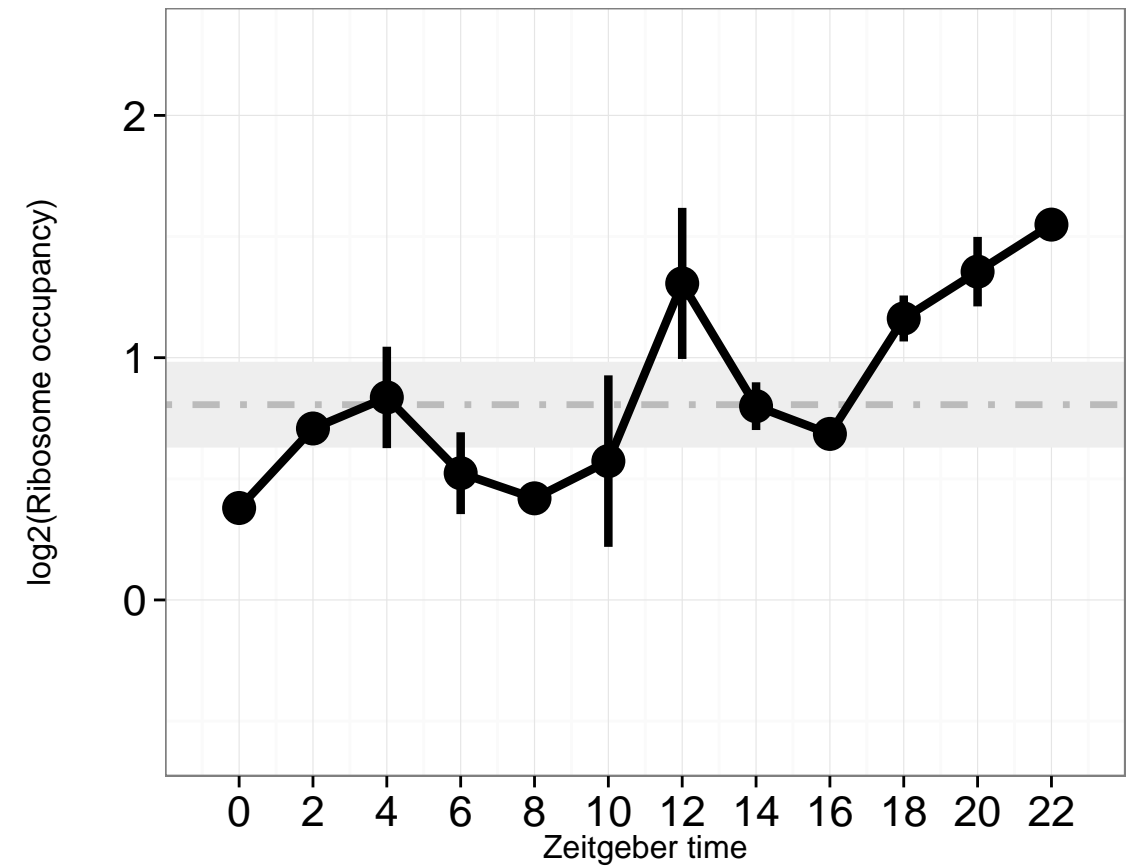

Supplement: Supplementary file 2383 [file 1]

## Rpl35

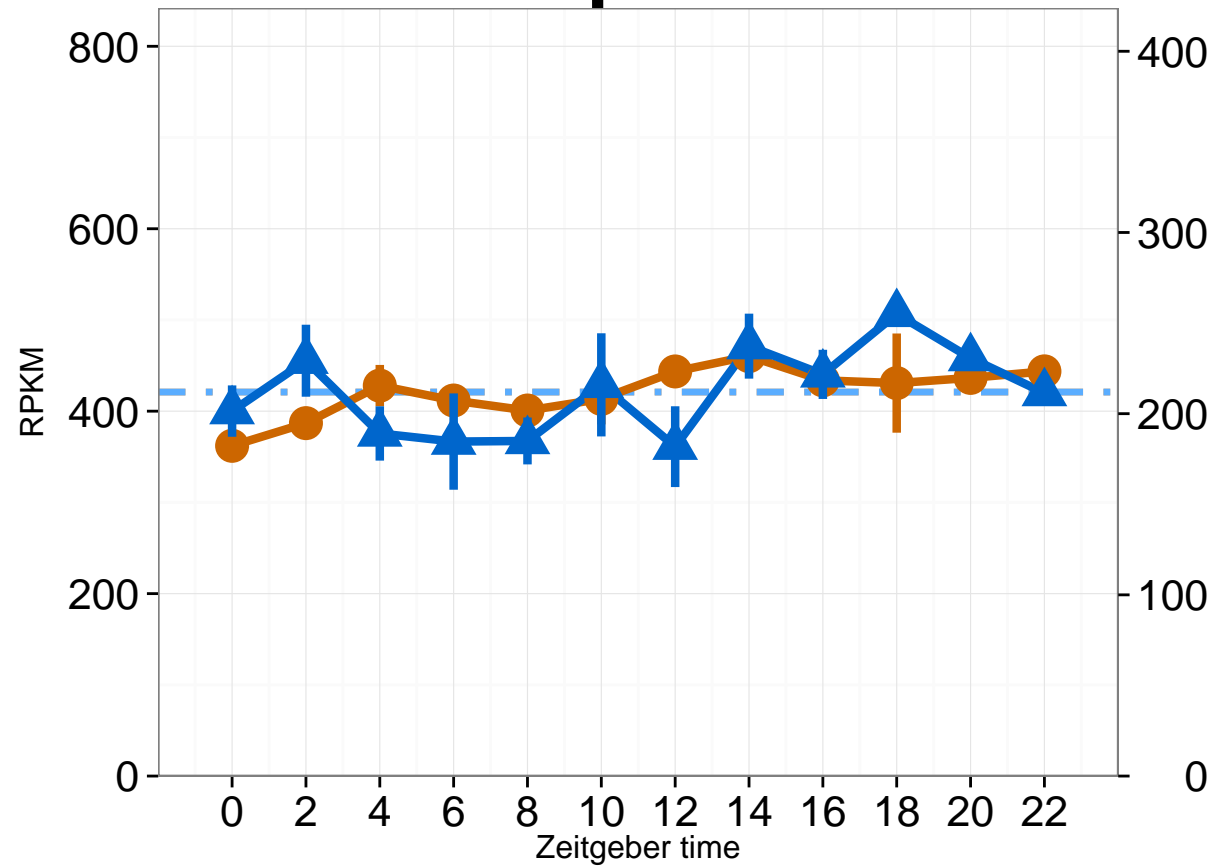

## Rpl35

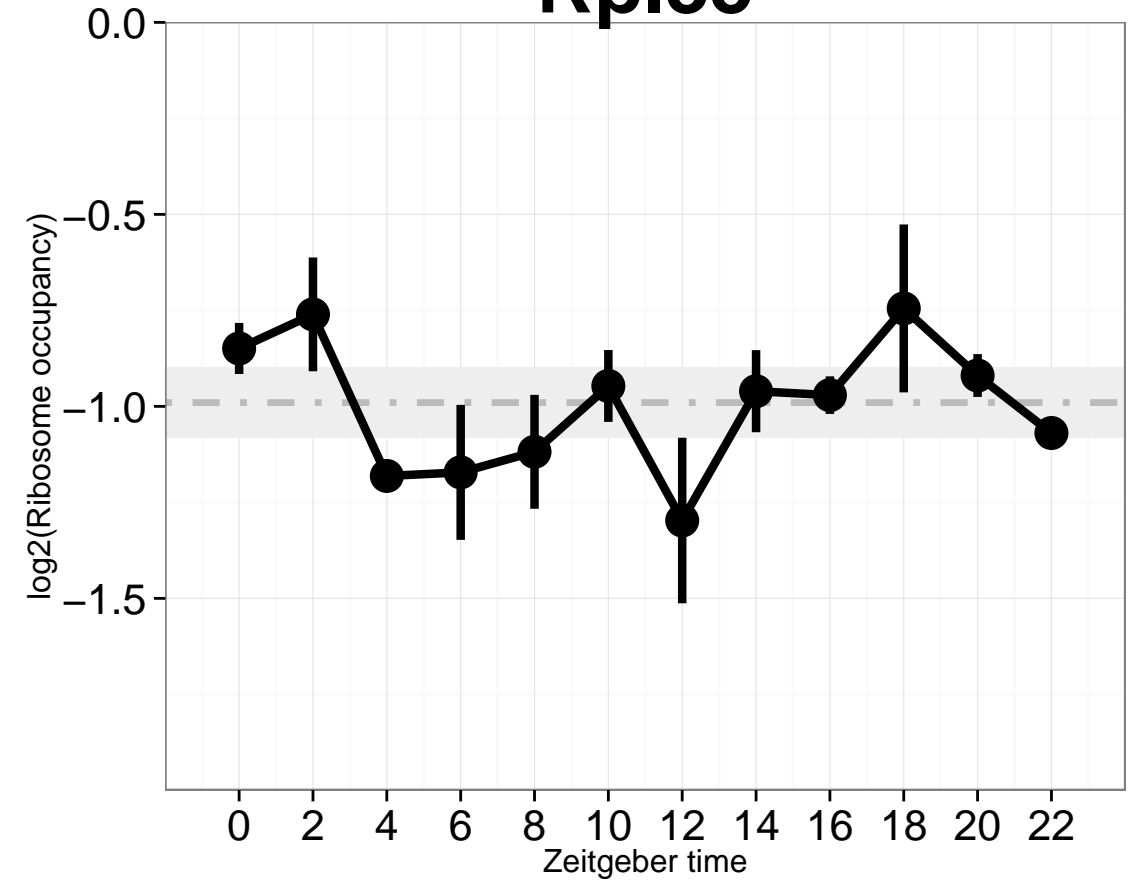

Supplement: Supplementary file 2384 [file 1]

# Txn1

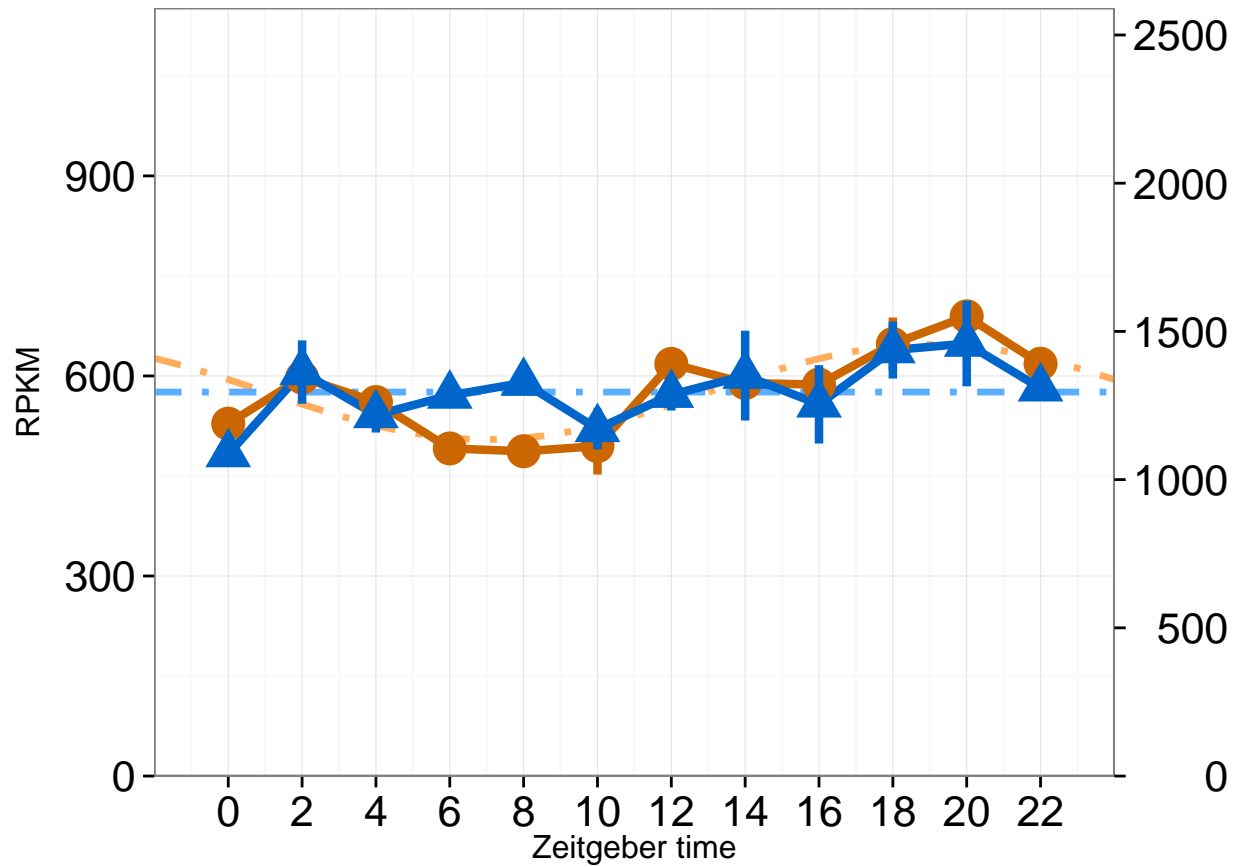

# Txn1

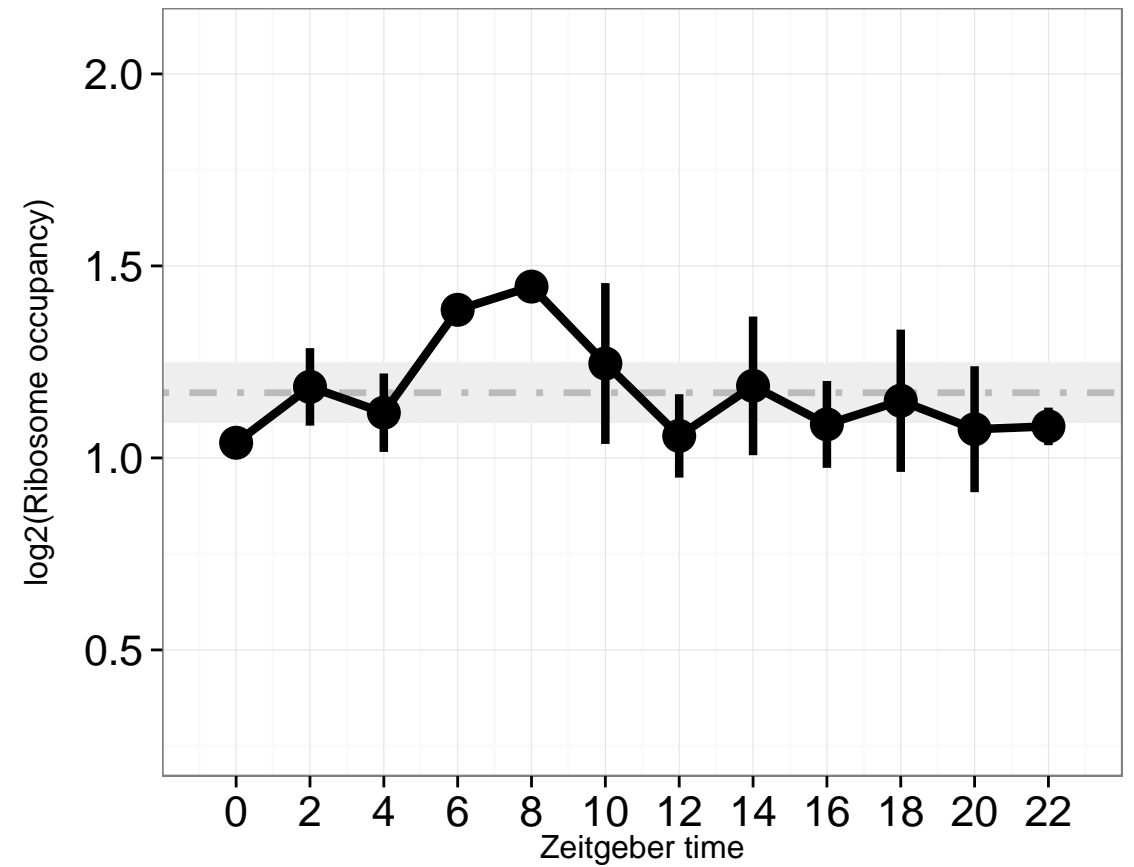

Supplement: Supplementary file 2385 [file 1]

## Mill2

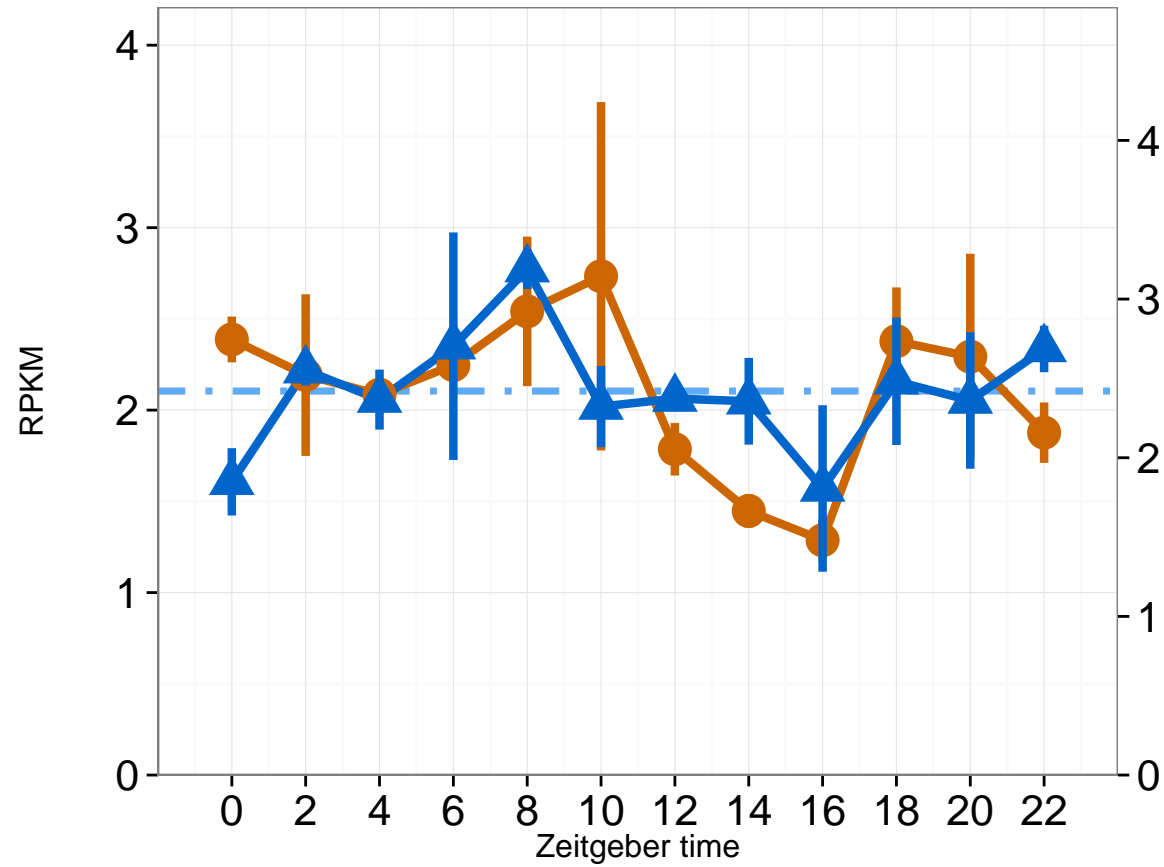

## Mill2

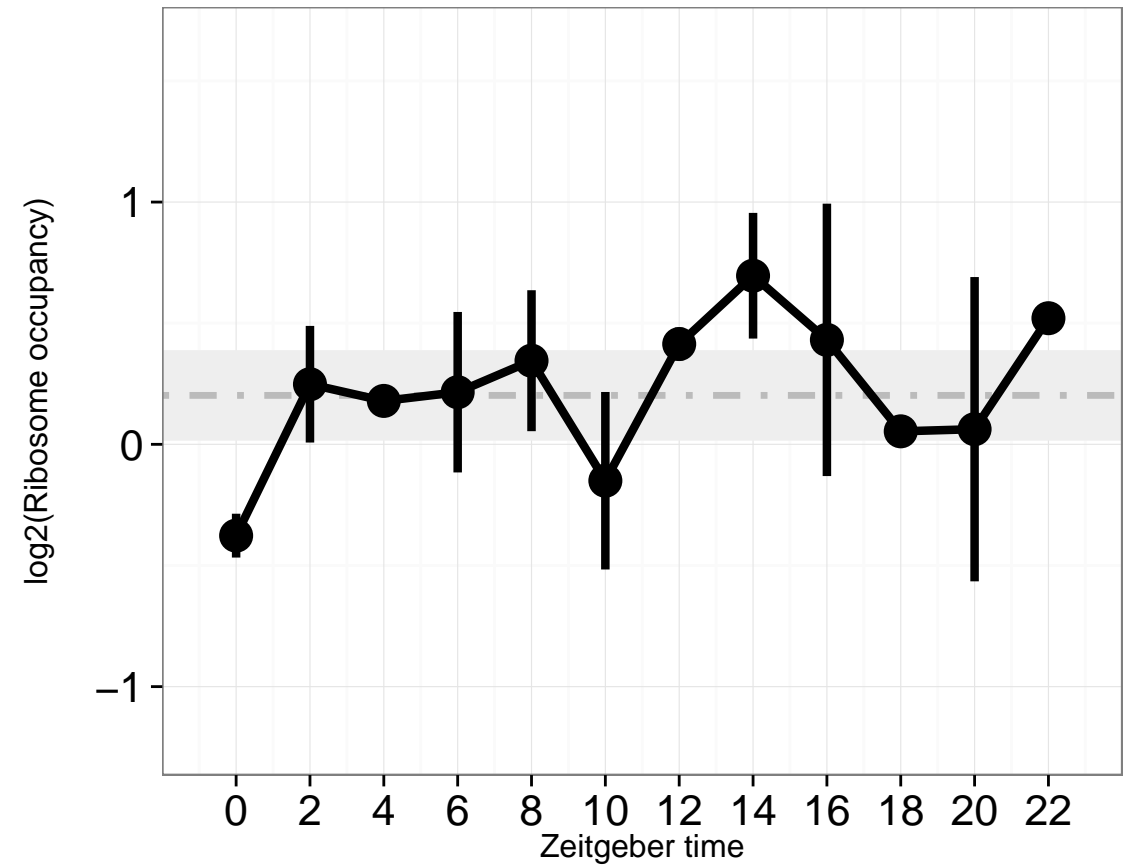

Supplement: Supplementary file 2386 [file 1]

## Plag1

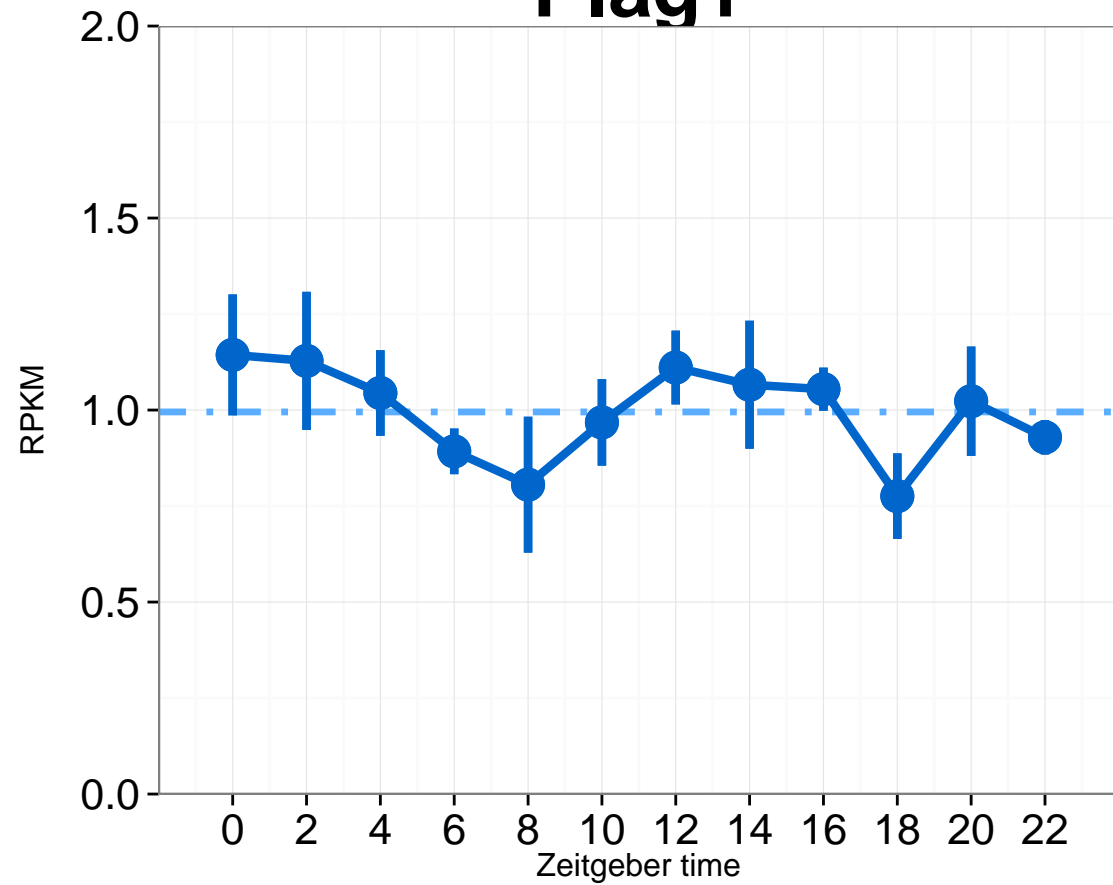

## Plag1 log2(Ribosome occupancy)

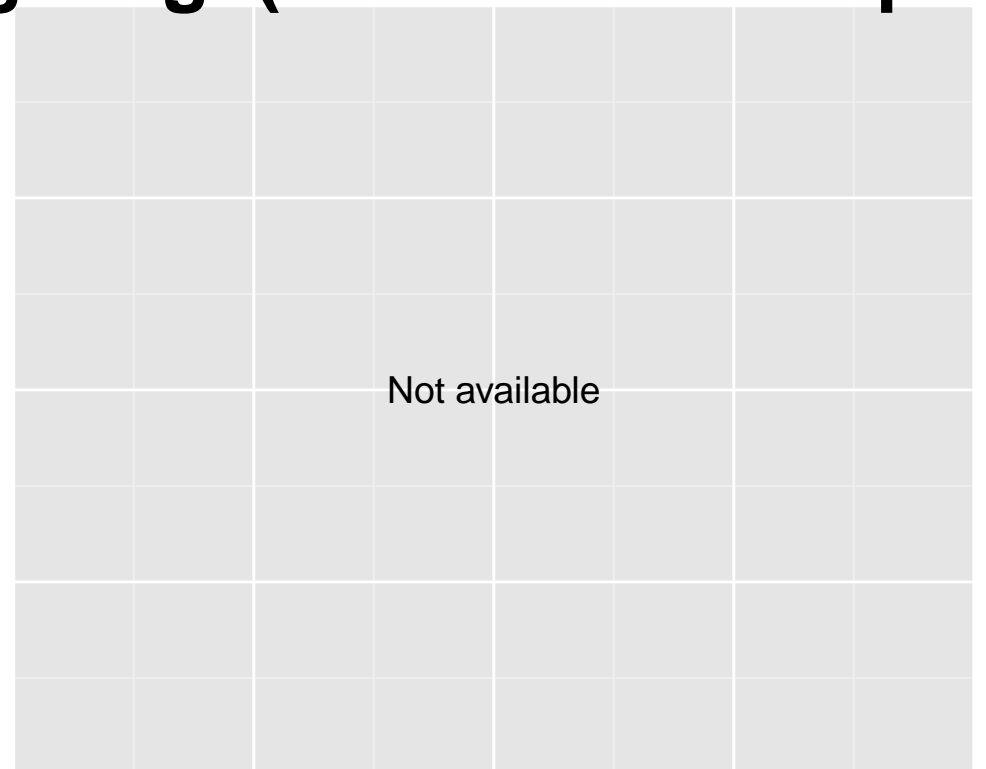

Supplement: Supplementary file 2387 [file 1]

## Cryab

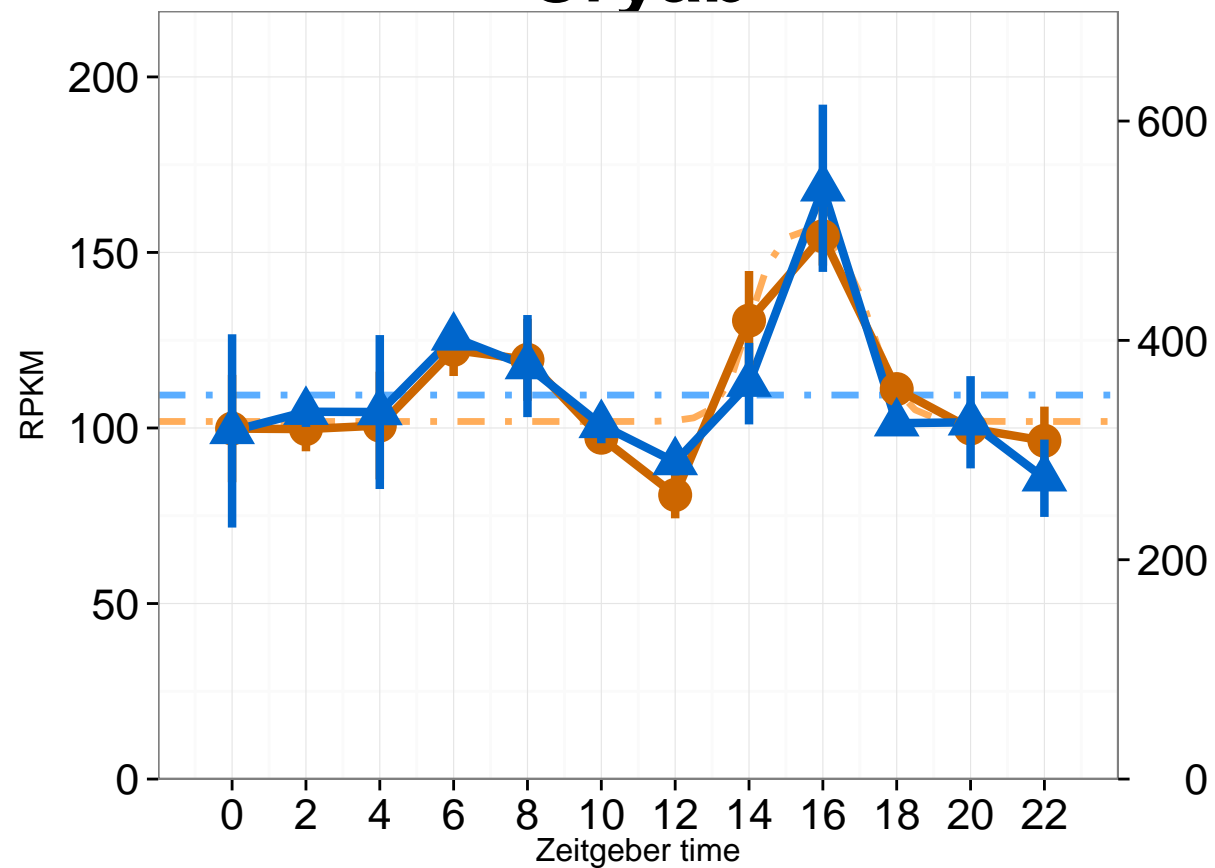

## Cryab

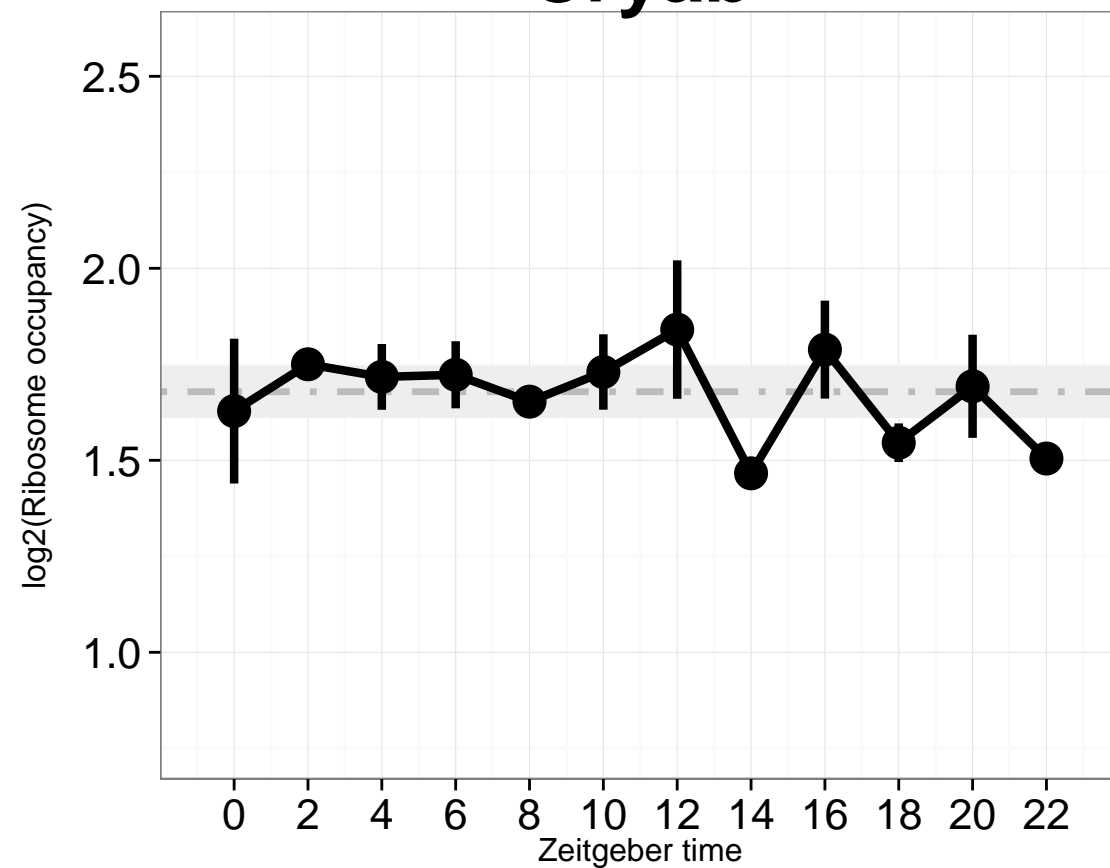

Supplement: Supplementary file 2388 [file 1]

# Card14

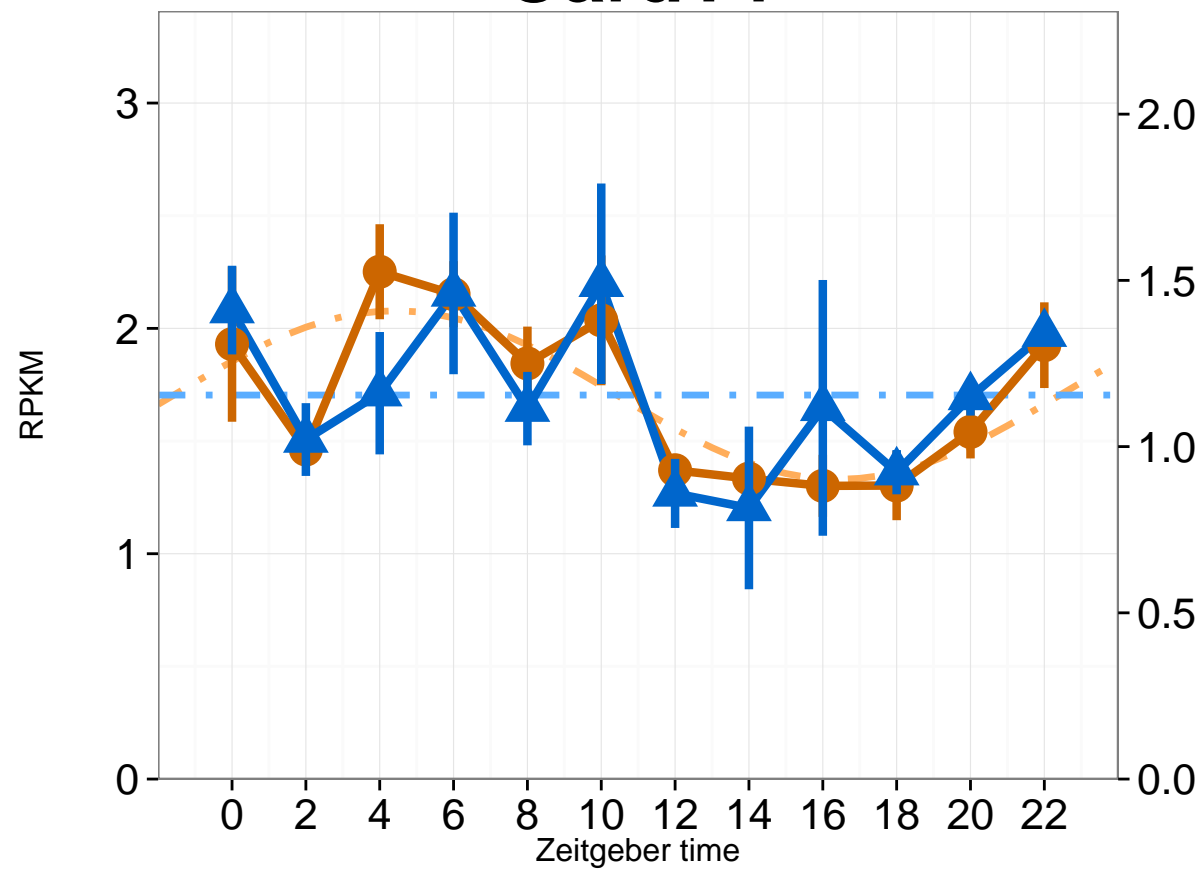

# Card14

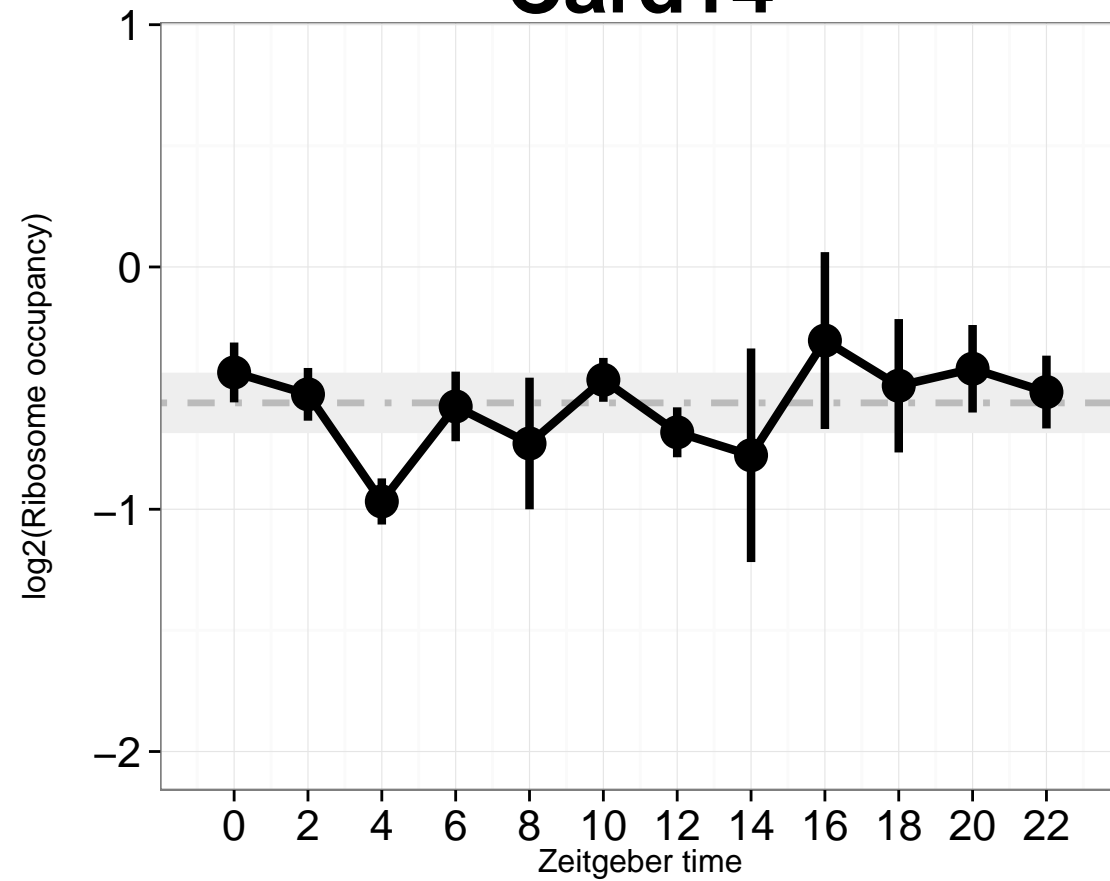

Supplement: Supplementary file 2389 [file 1]

## Armc10

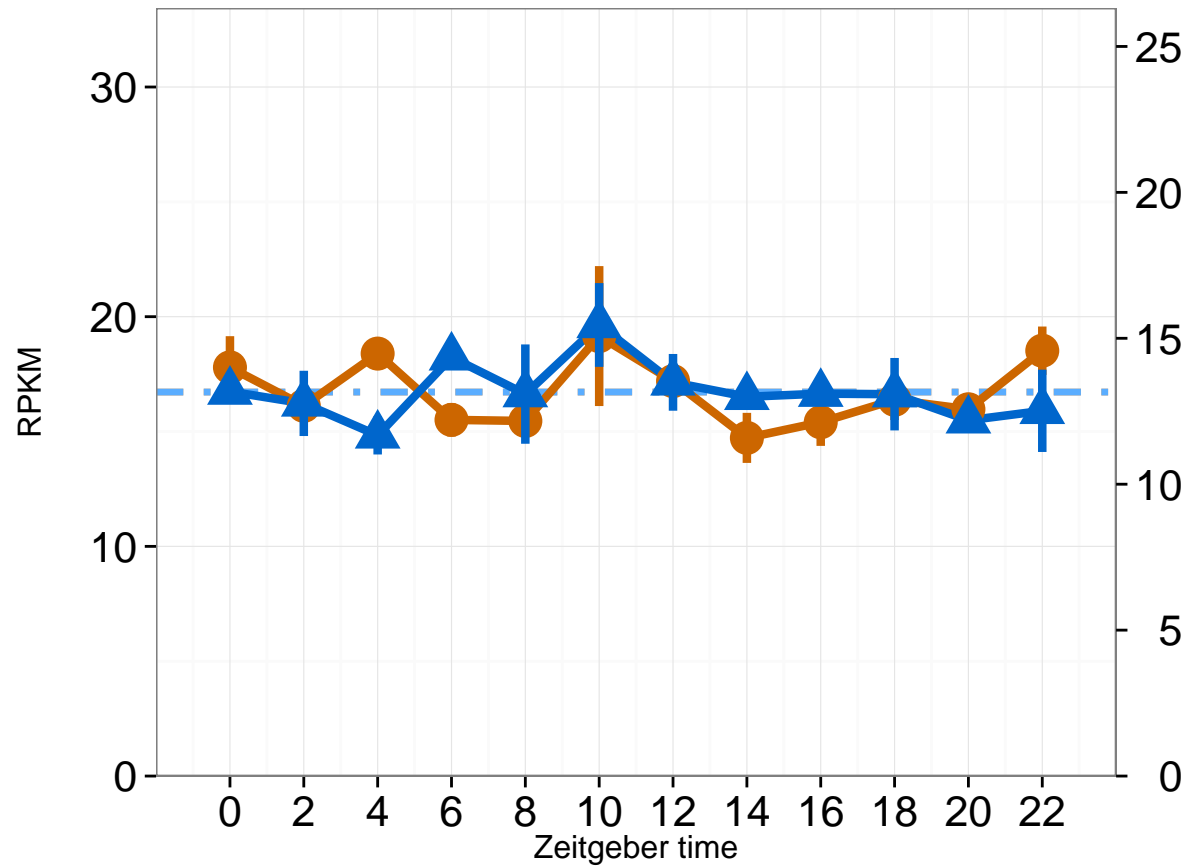

## Armc10

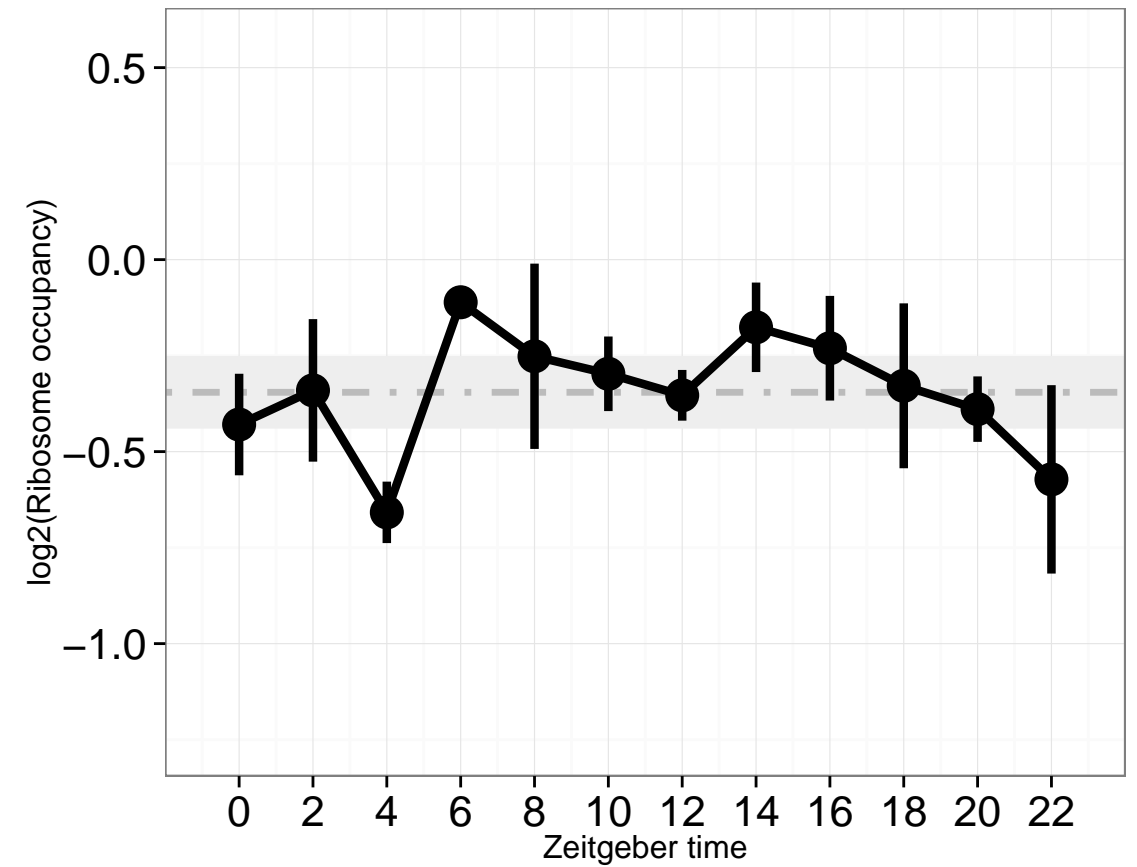

Supplement: Supplementary file 2390 [file 1]

# Slc25a11

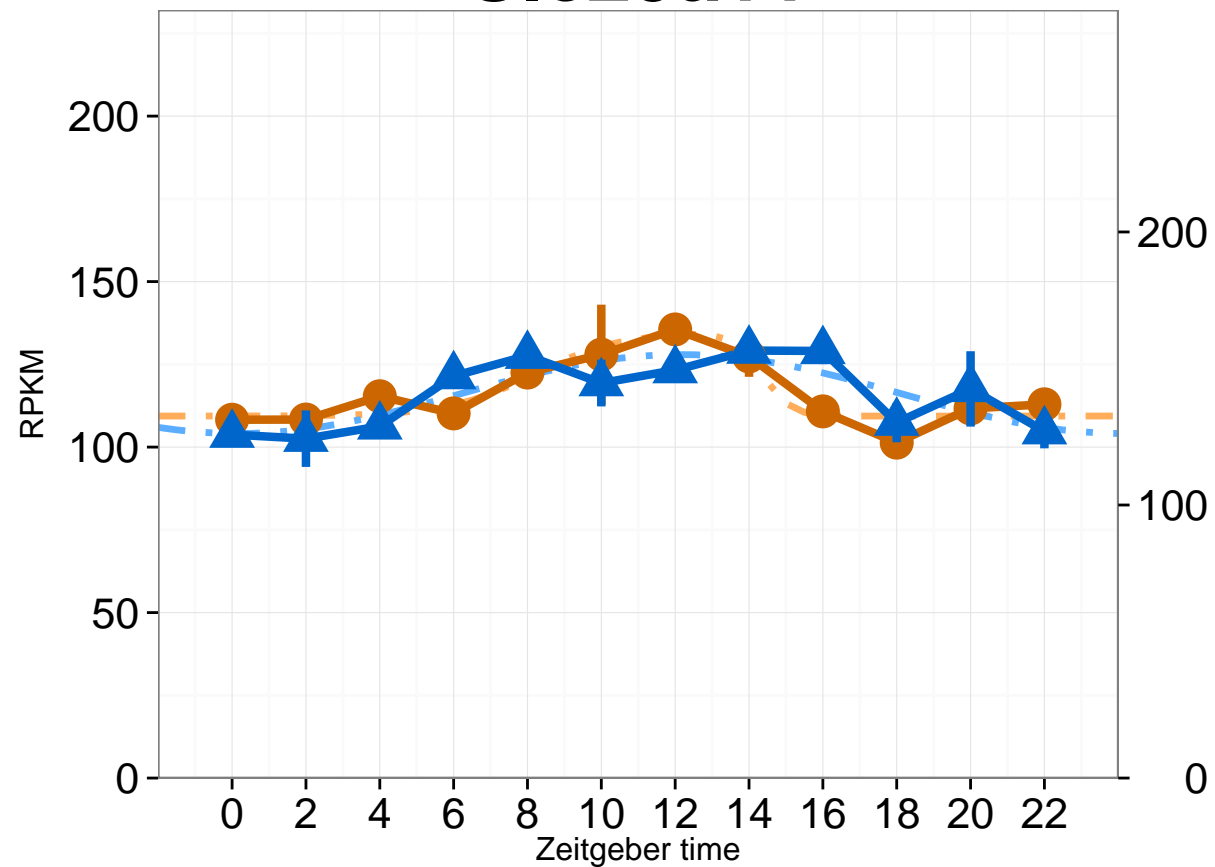

# Slc25a11

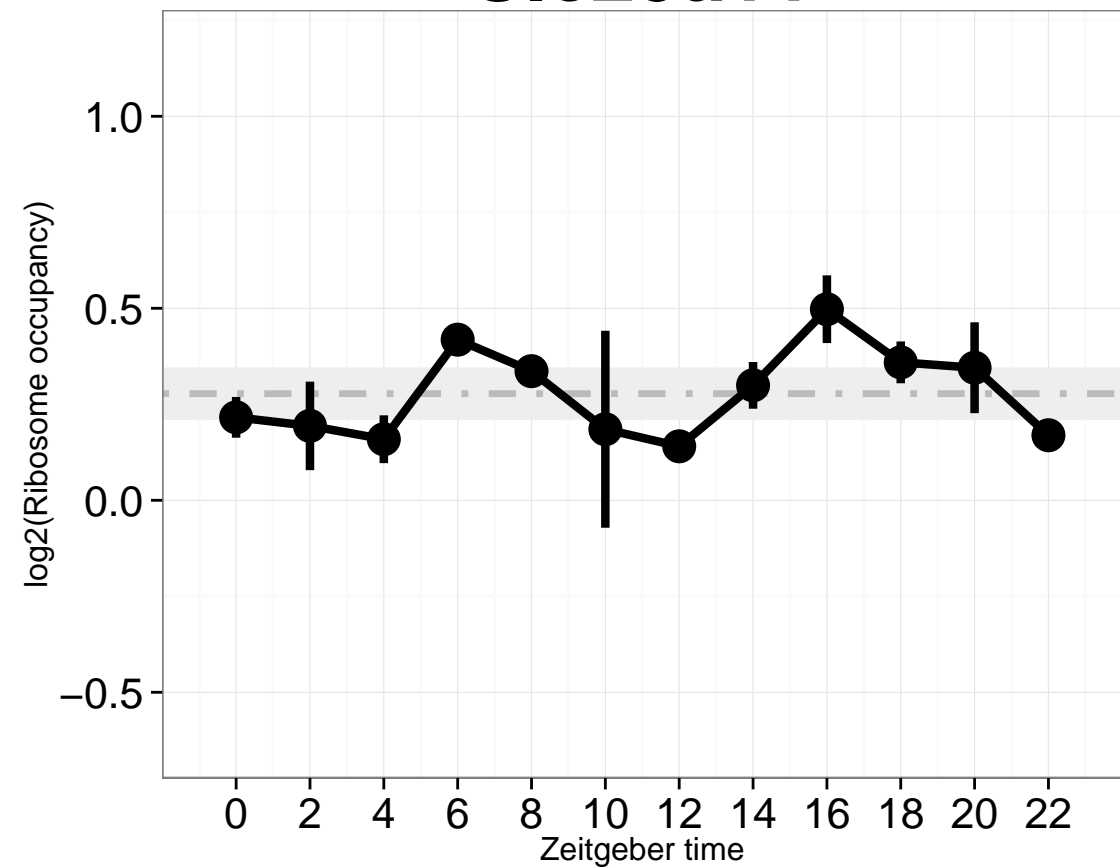

Supplement: Supplementary file 2391 [file 1]

## Exoc8

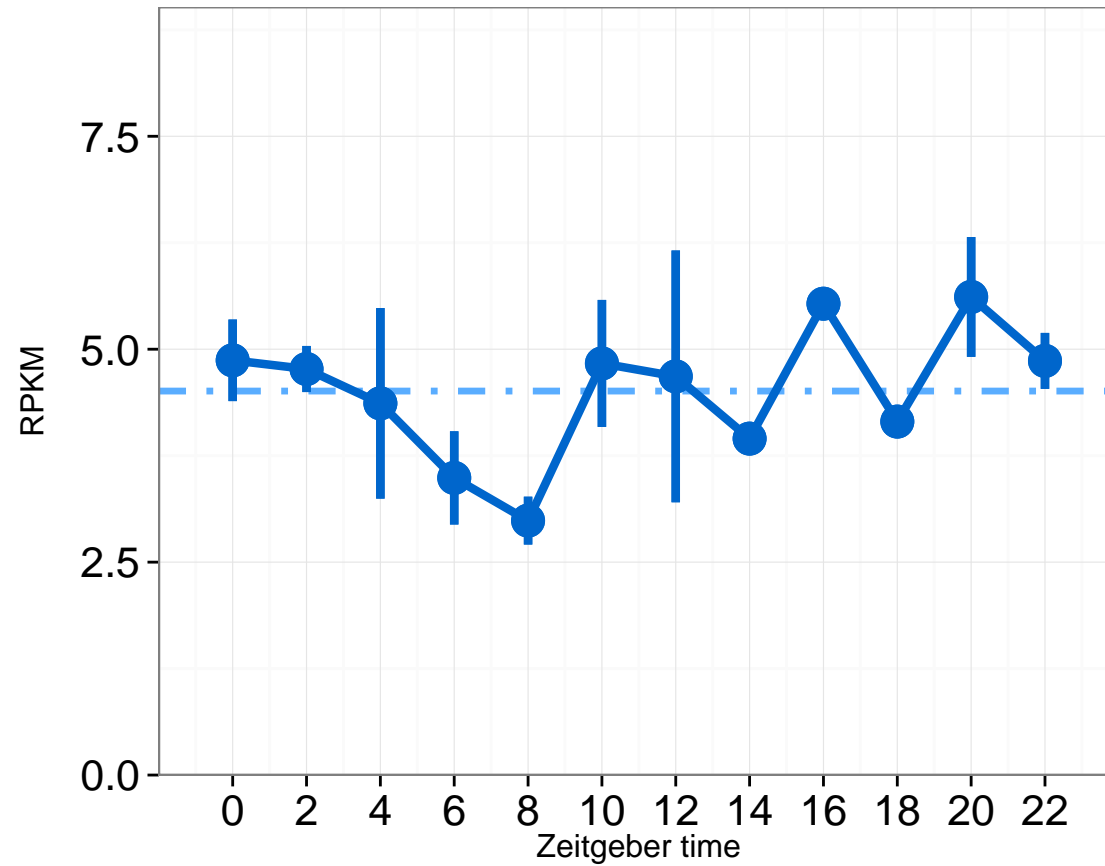

## Exoc8 log2(Ribosome occupancy

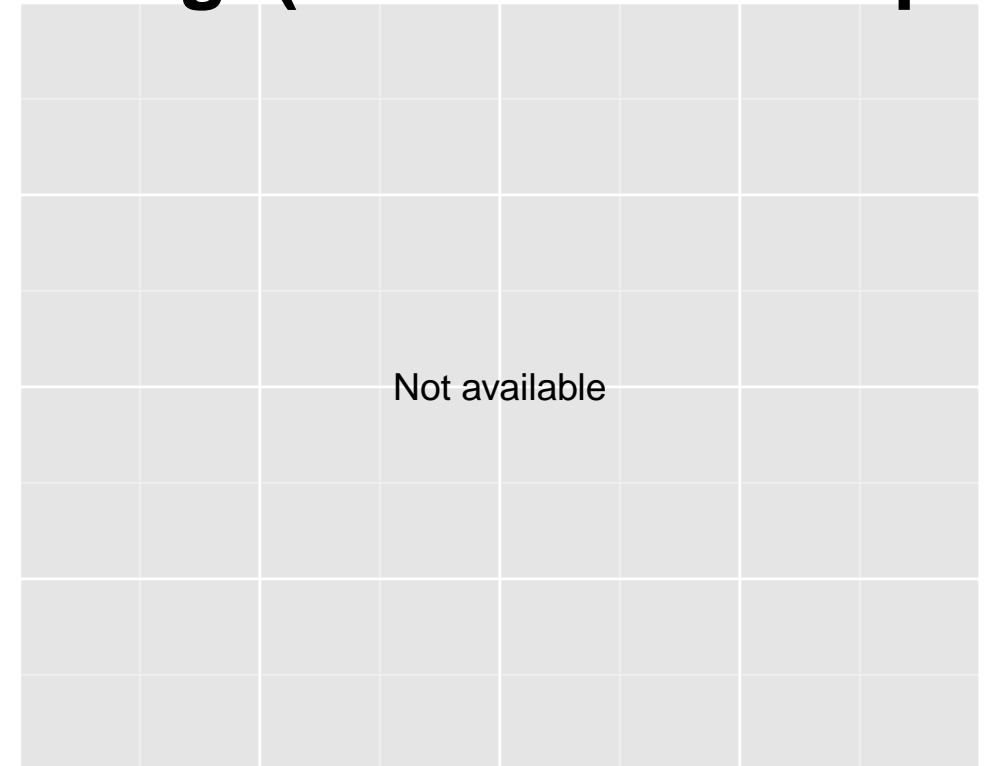

Supplement: Supplementary file 2392 [file 1]

# Rprd1a

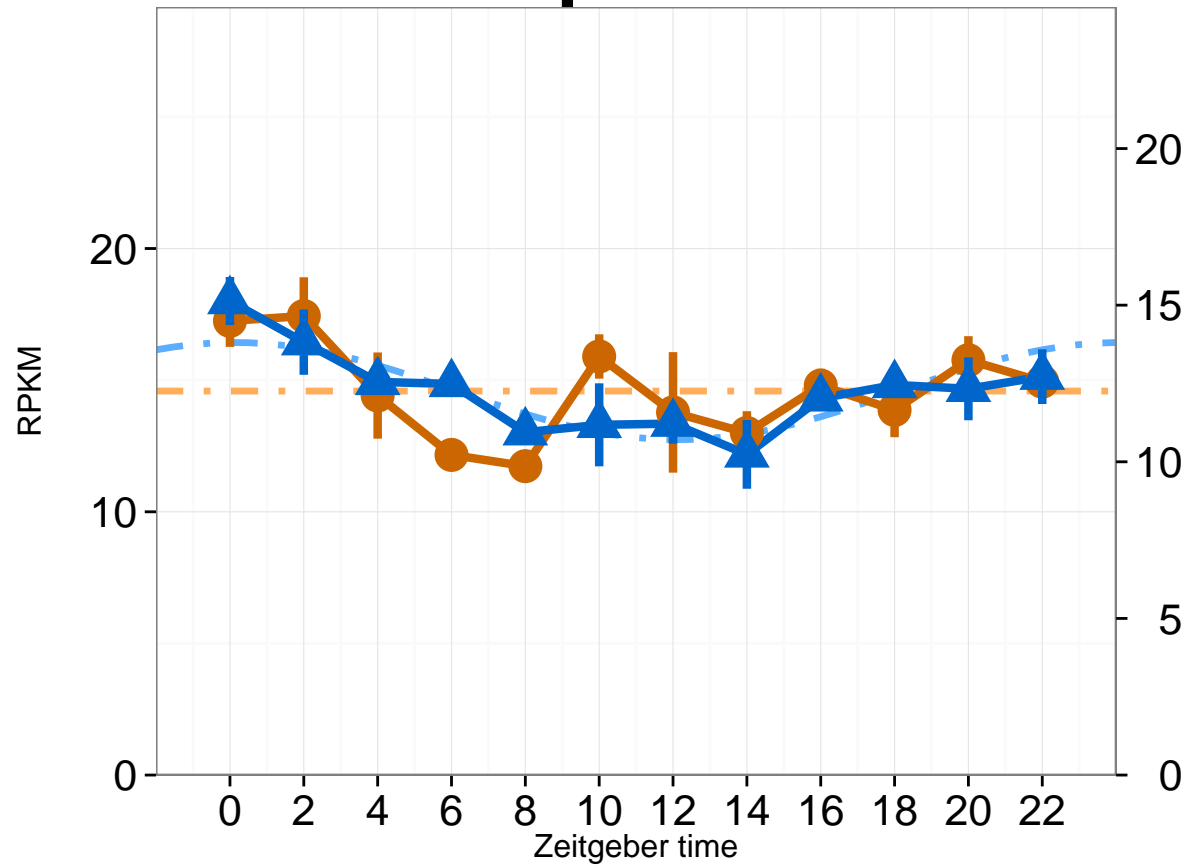

# Rprd1a

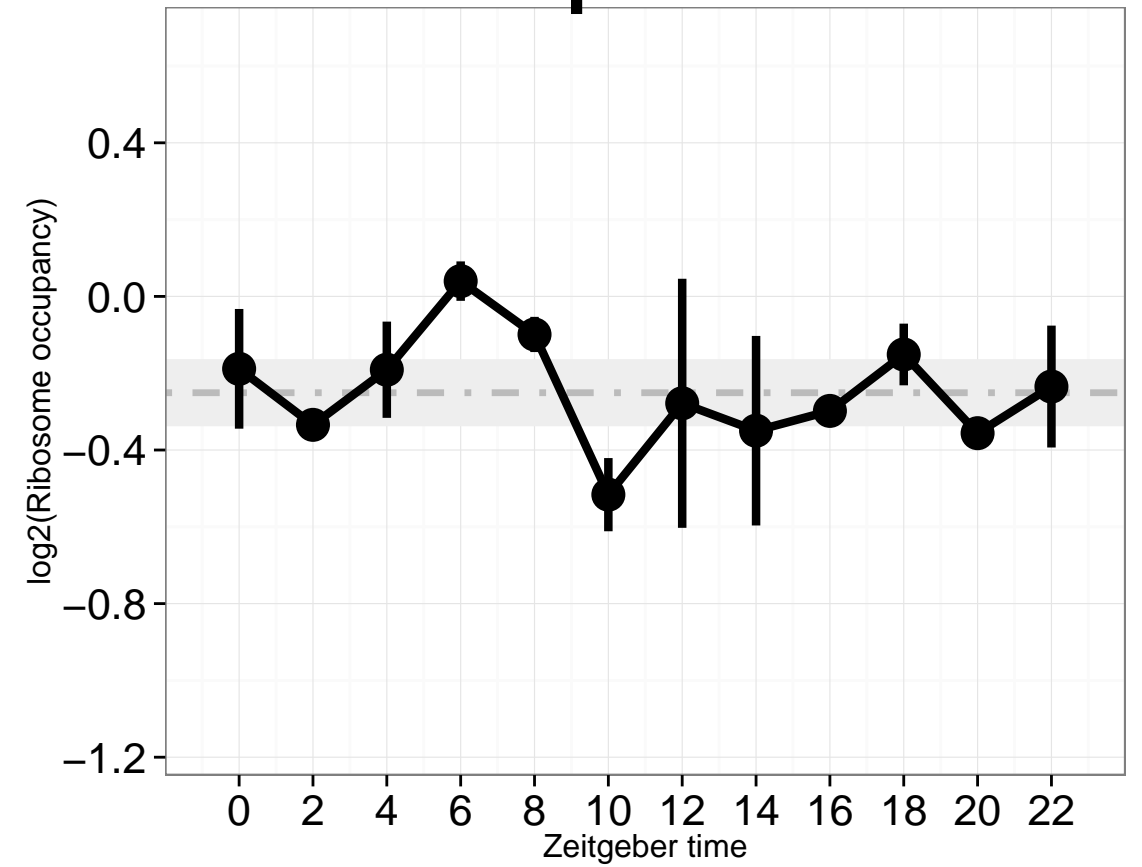

Supplement: Supplementary file 2393 [file 1]

# Zfp68

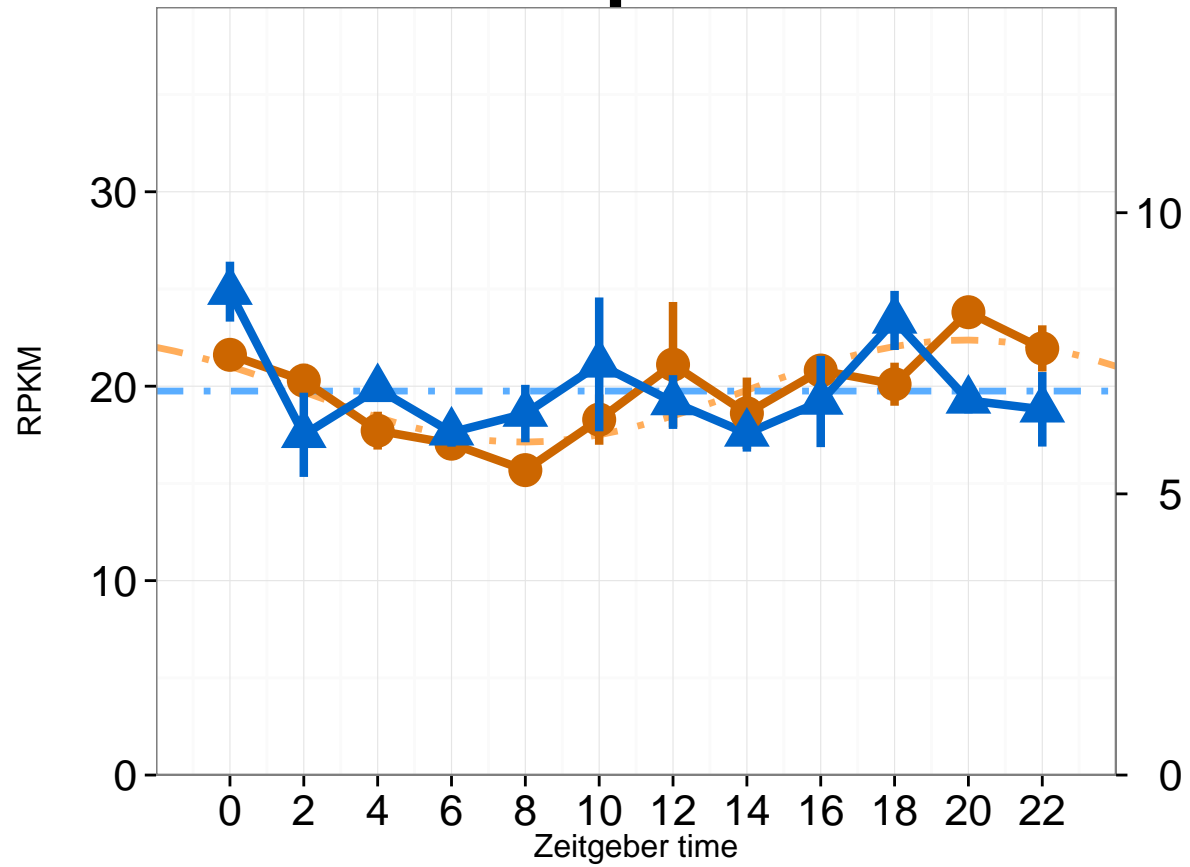

# Zfp68

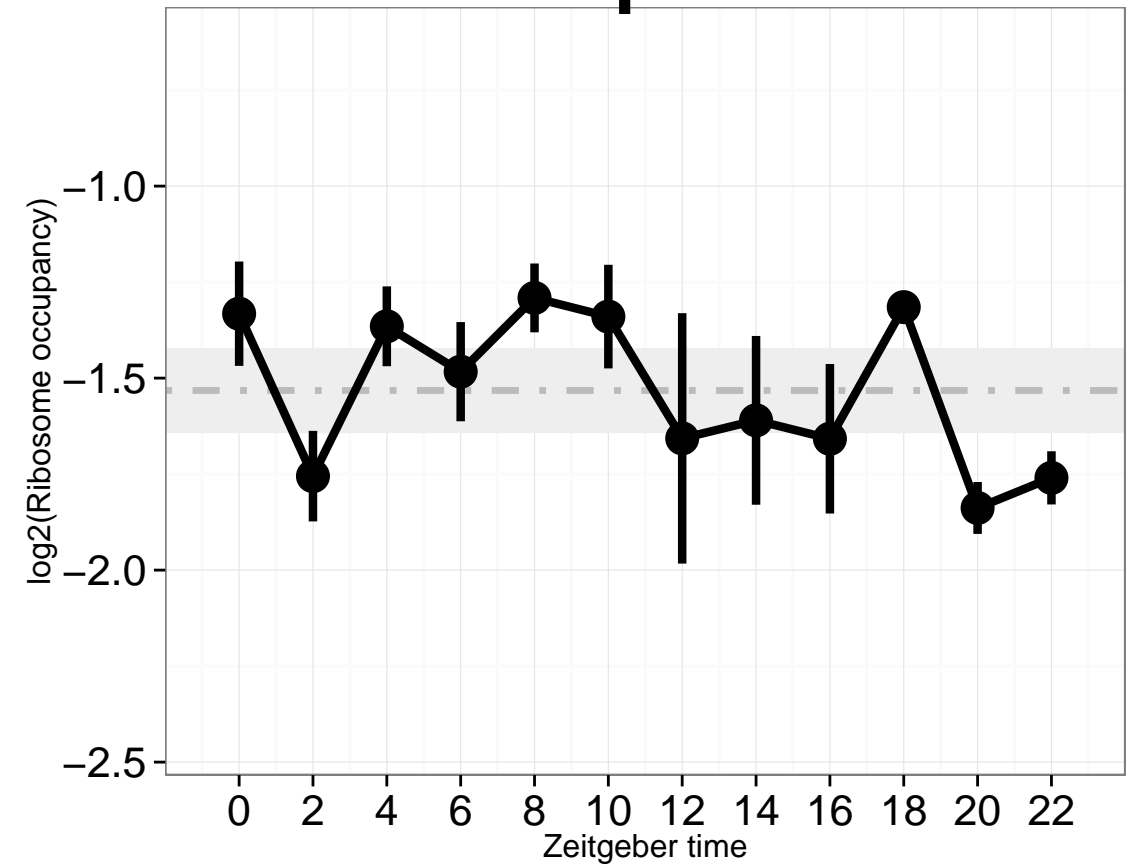

Supplement: Supplementary file 2394 [file 1]

# Sipa1l1

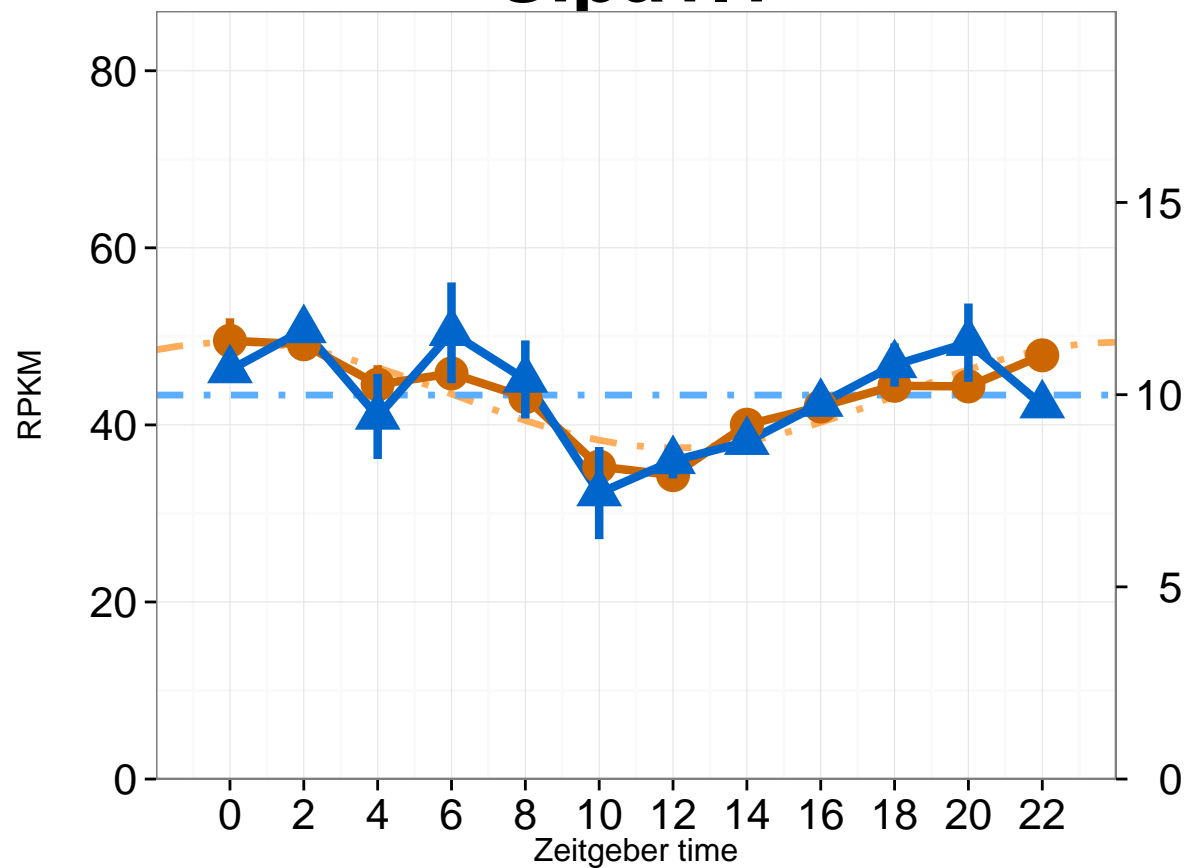

# Sipa1l1

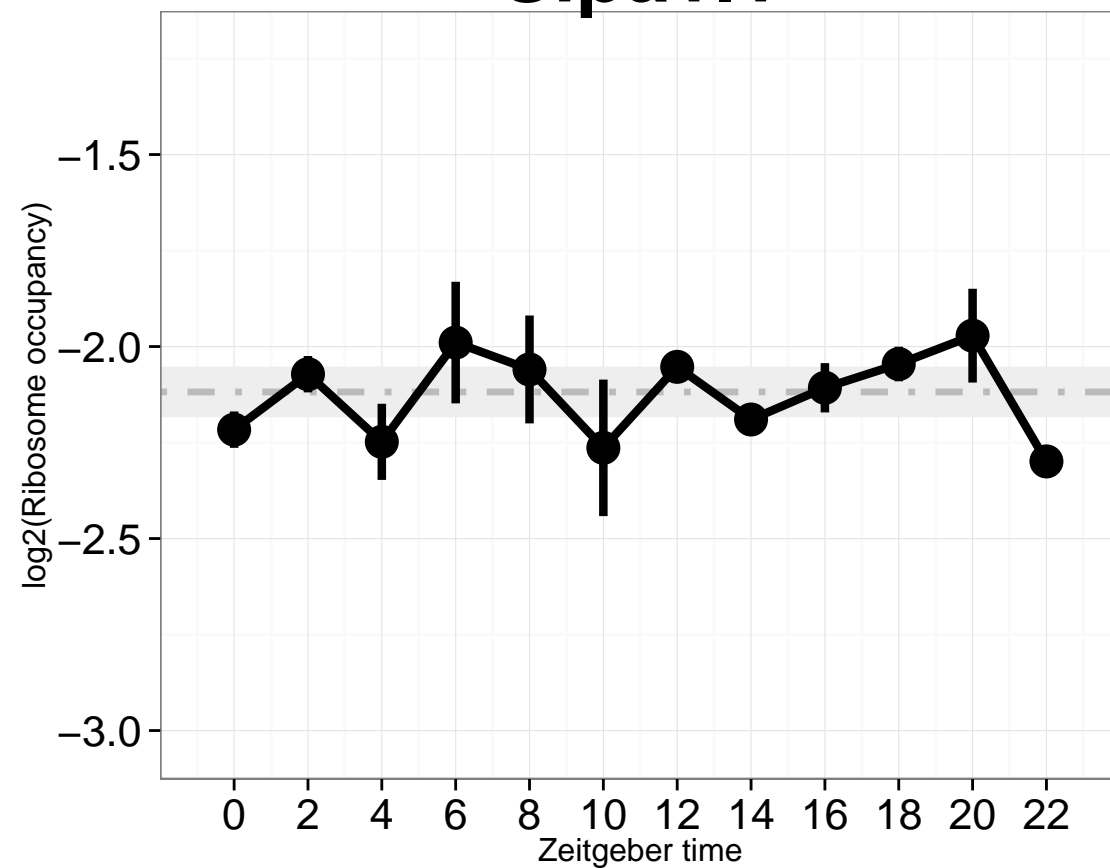

Supplement: Supplementary file 2395 [file 1]

## Anks1

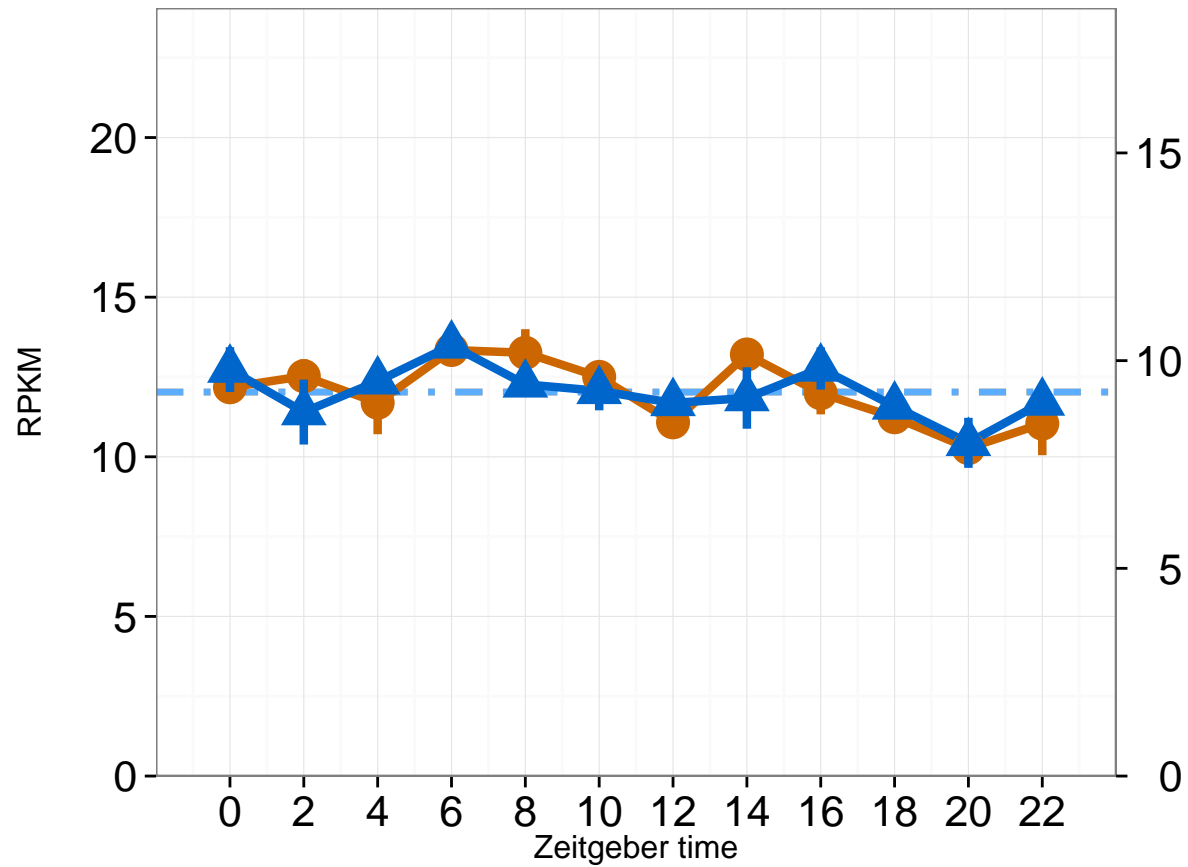

## Anks1

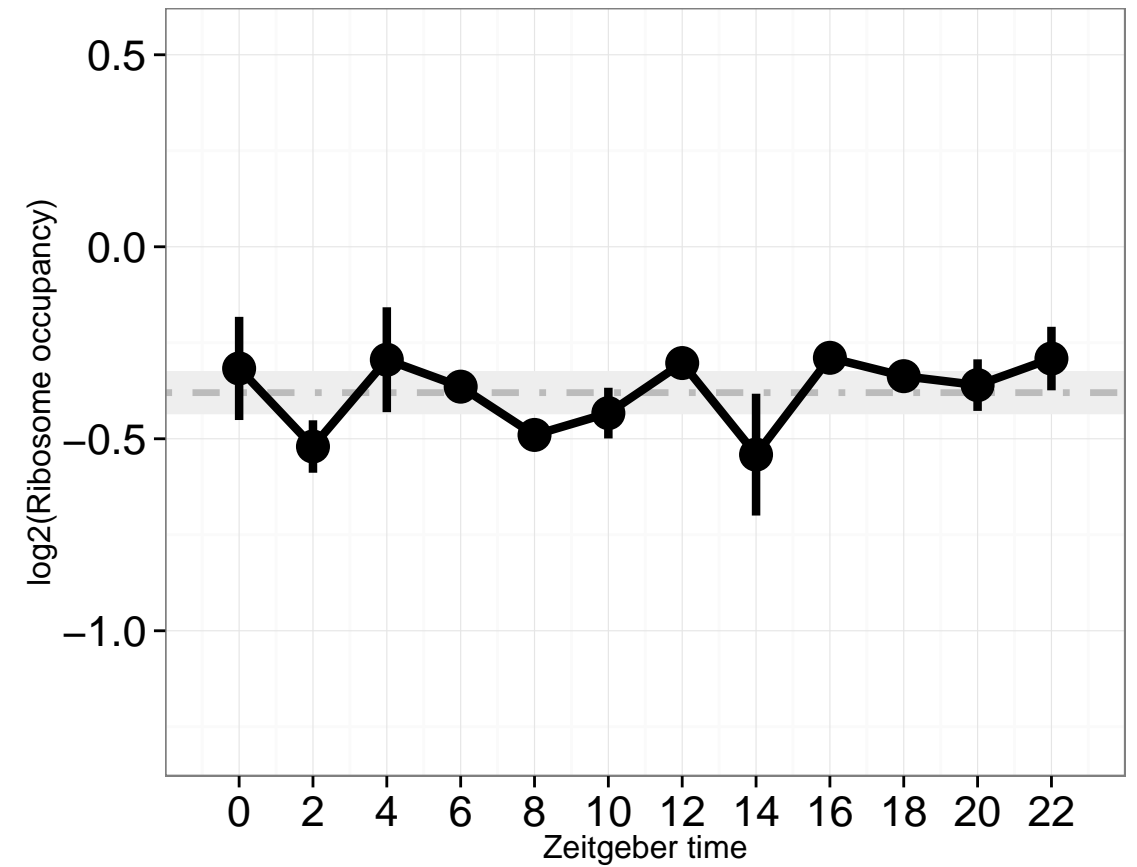

Supplement: Supplementary file 2396 [file 1]

# Il17re

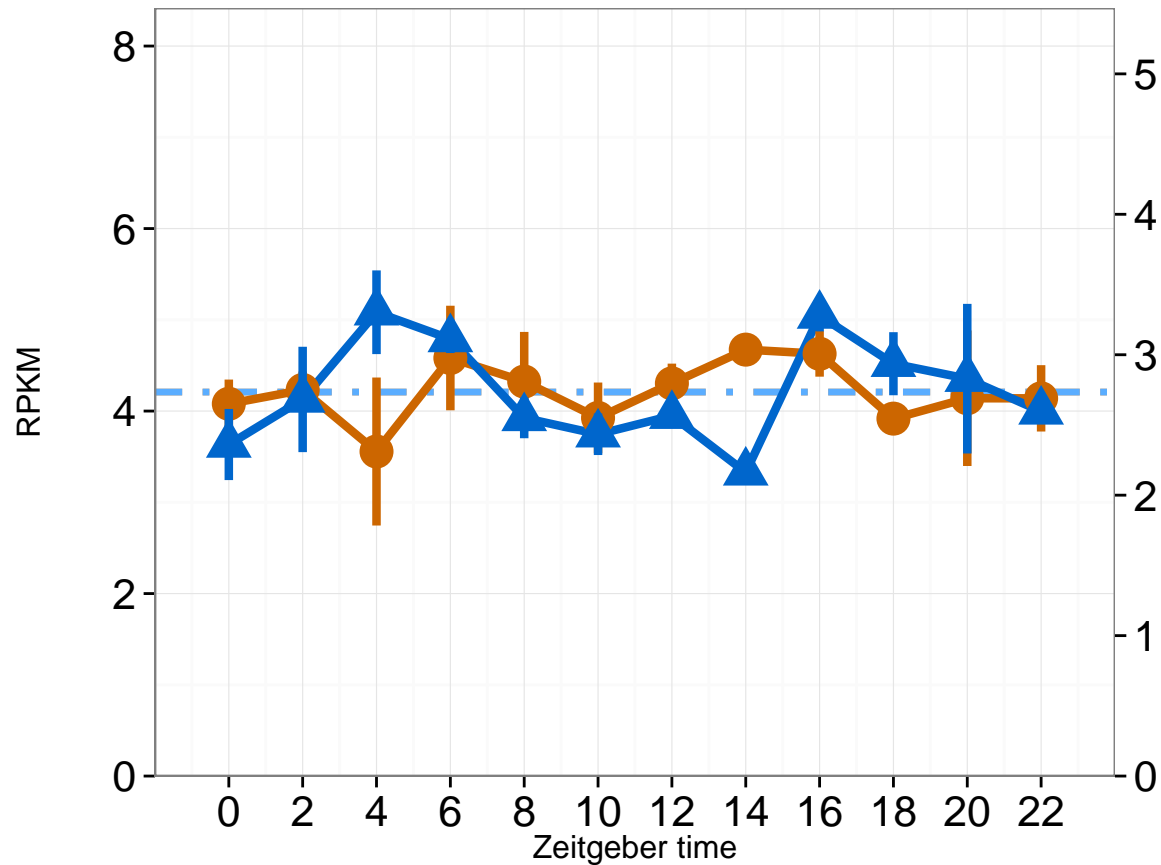

# Il17re

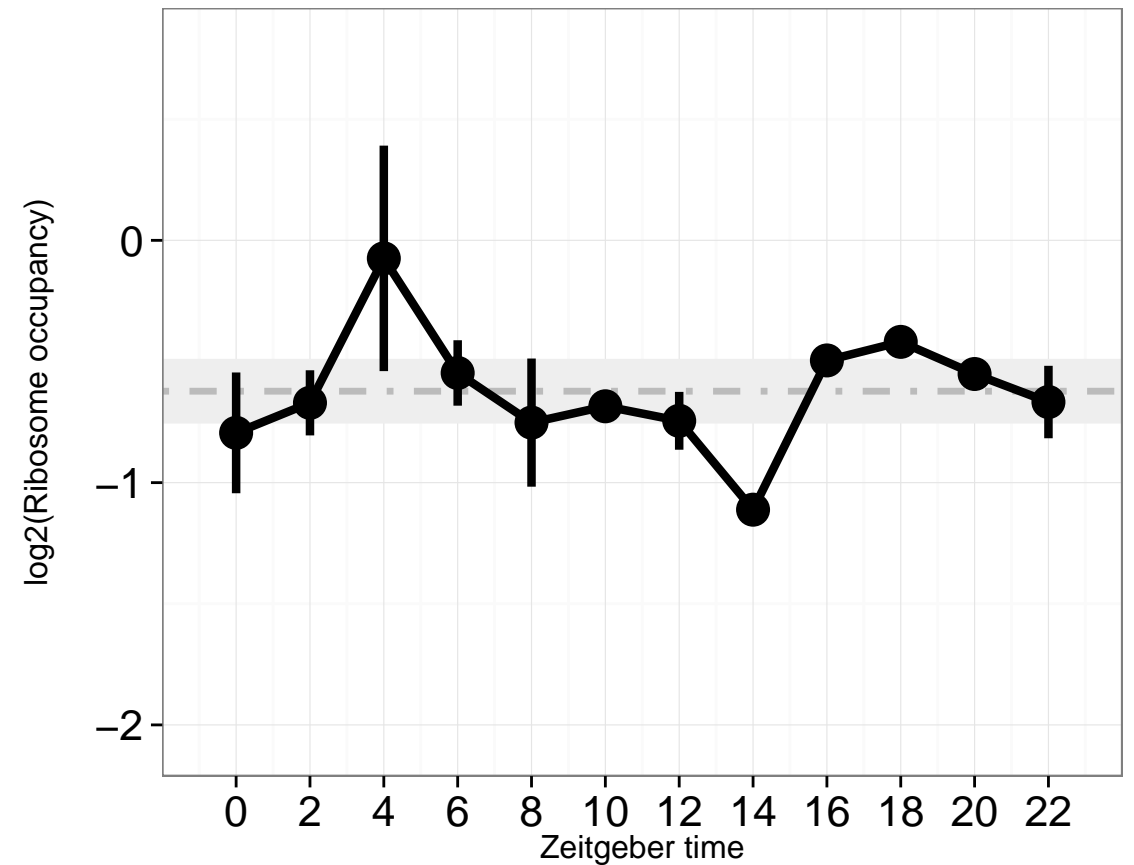

Supplement: Supplementary file 2397 [file 1]

# Ctnna1

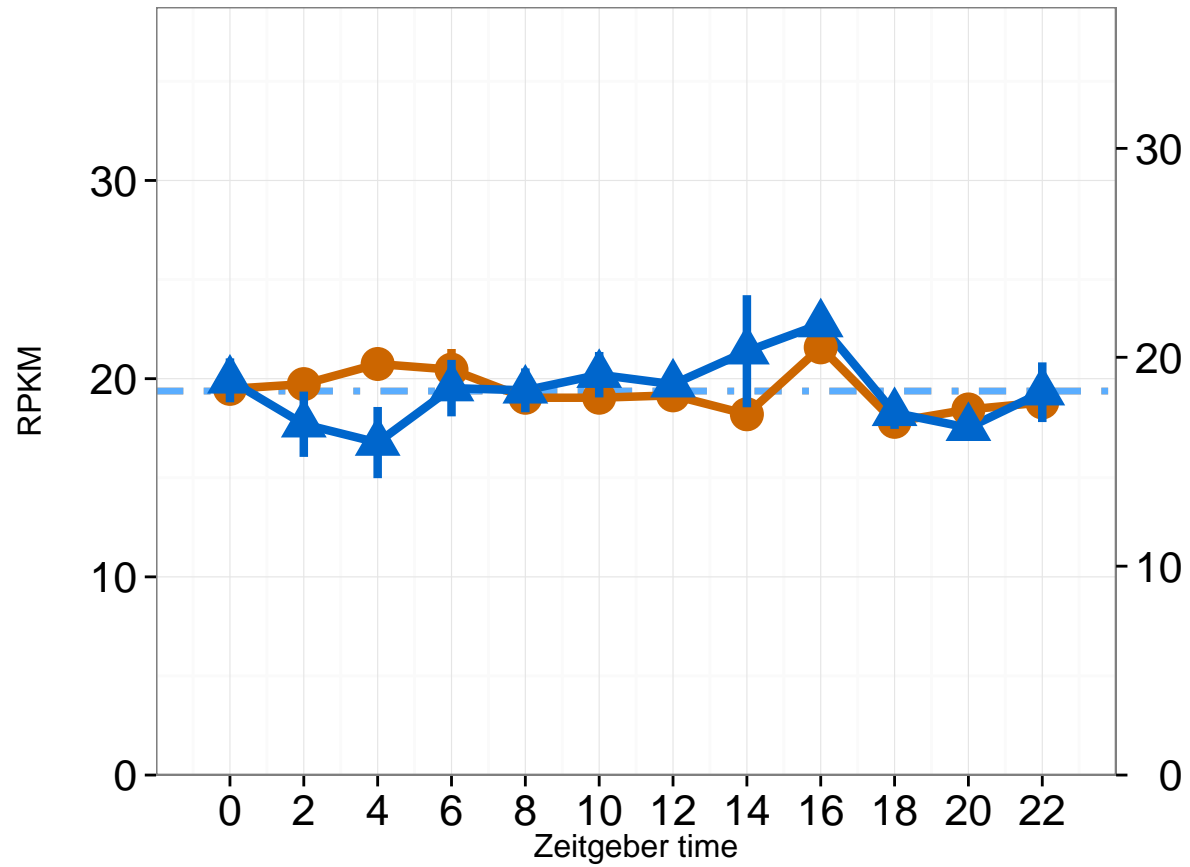

# Ctnna1

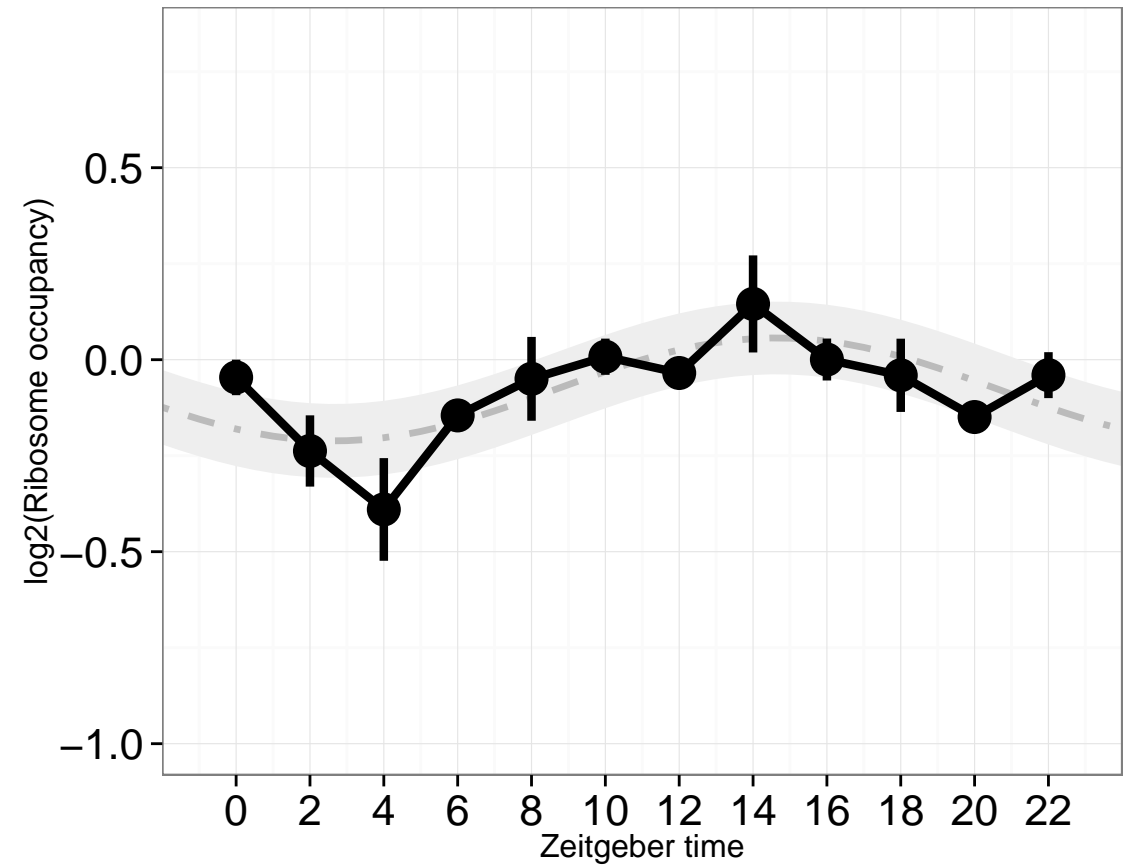

Supplement: Supplementary file 2398 [file 1]

## Abcc3

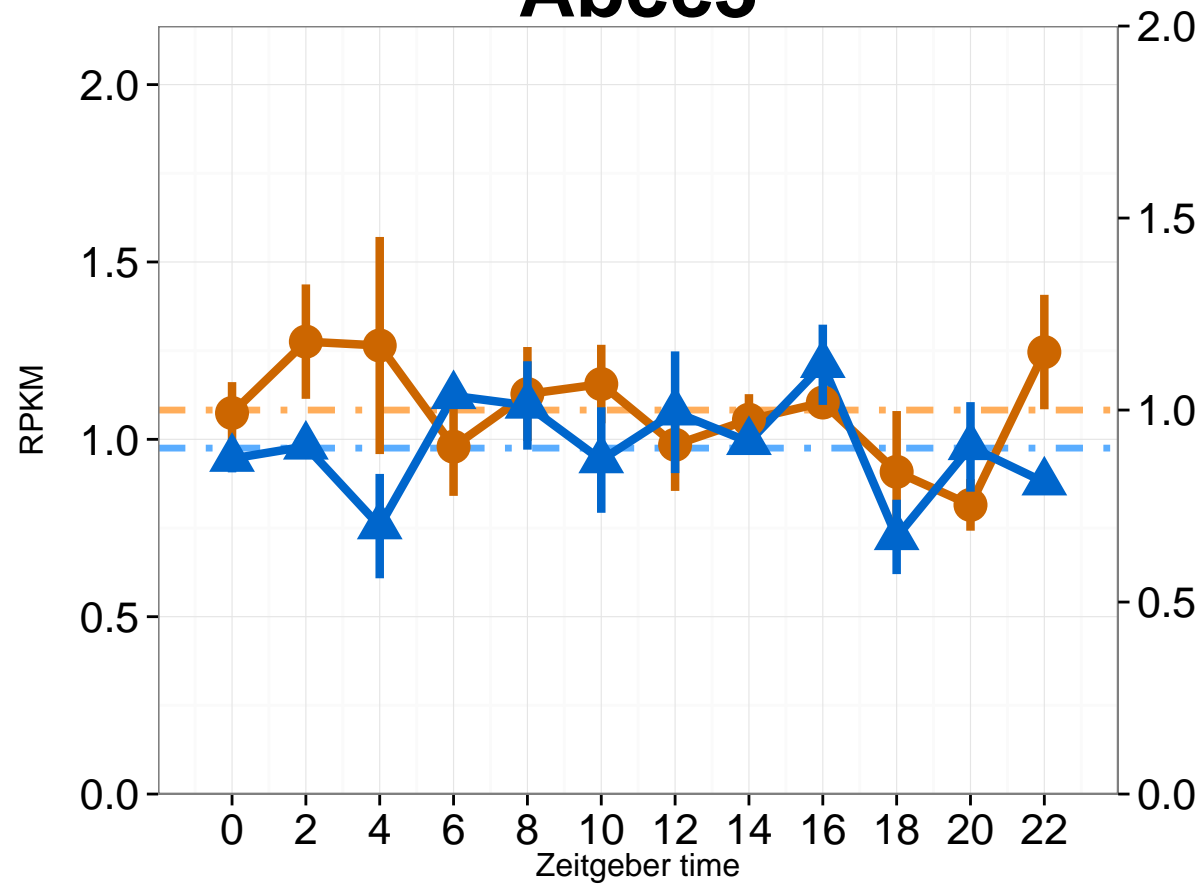

## Abcc3

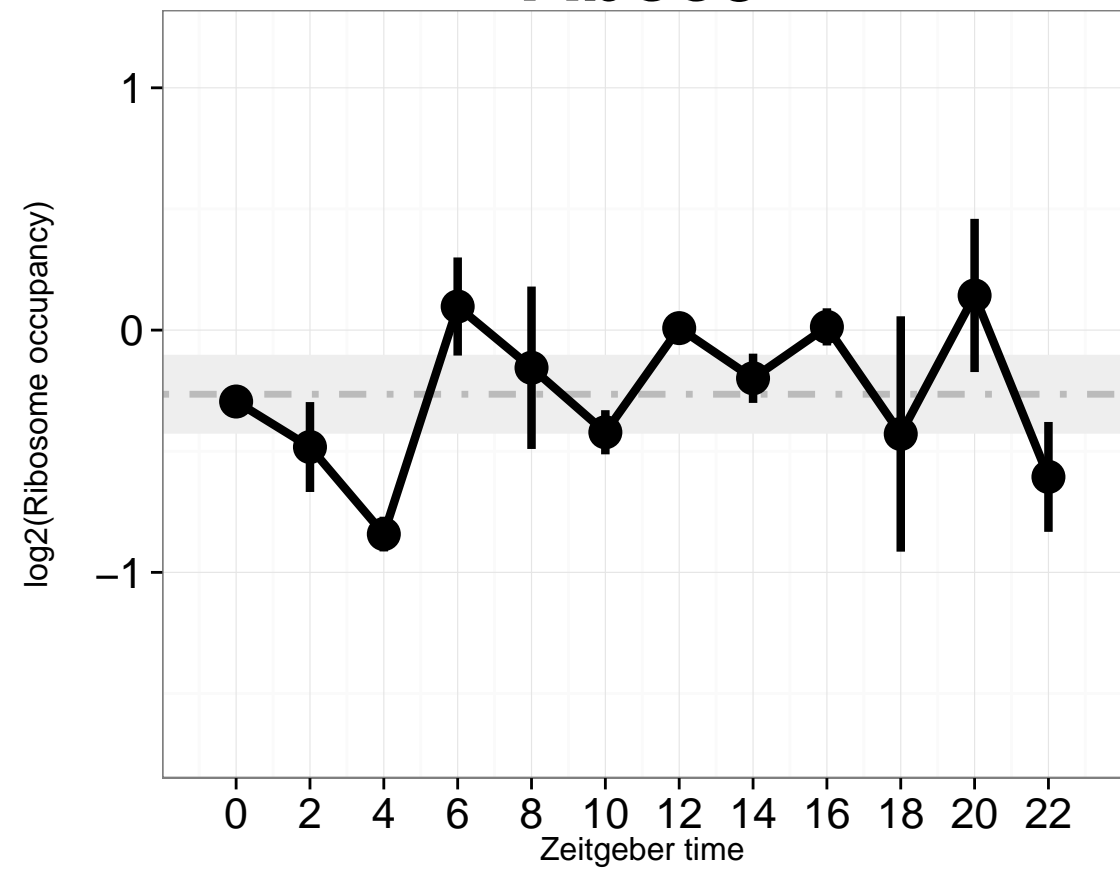

Supplement: Supplementary file 2399 [file 1]

# Tmem87b

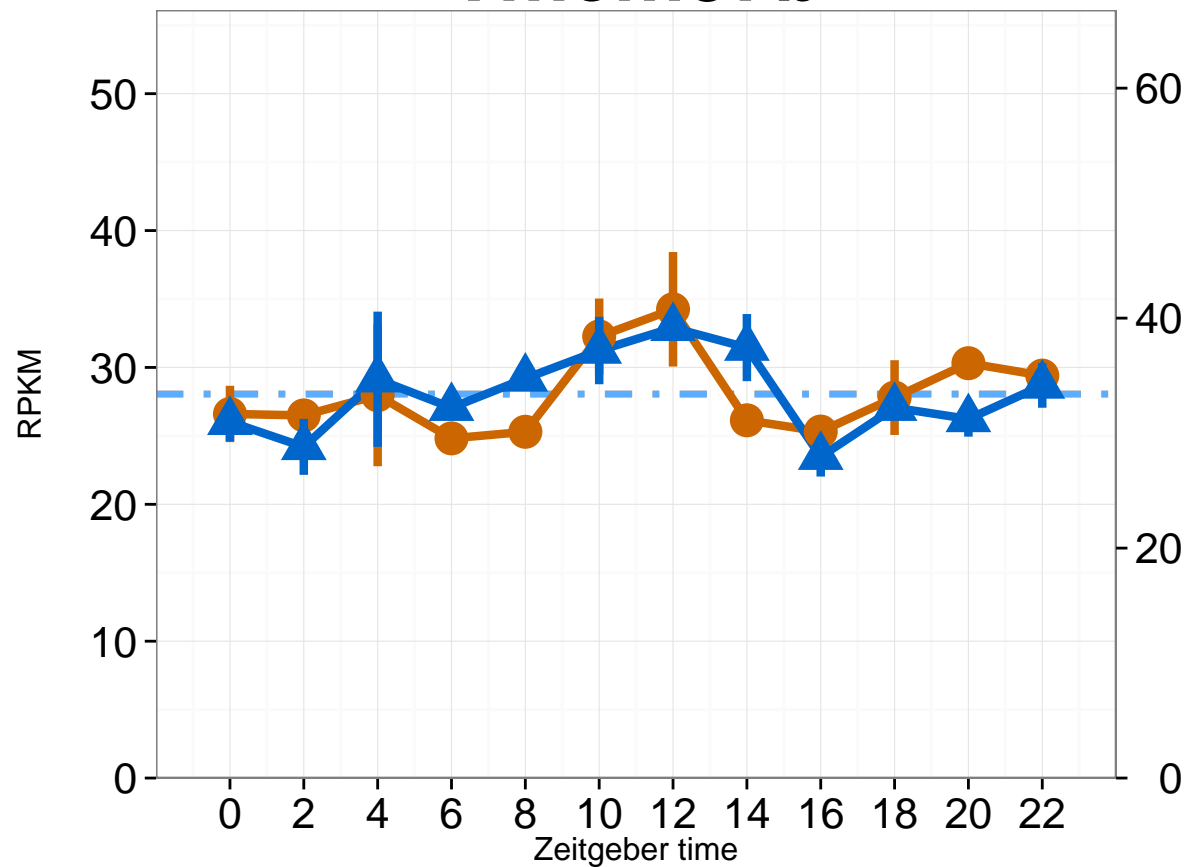

# Tmem87b

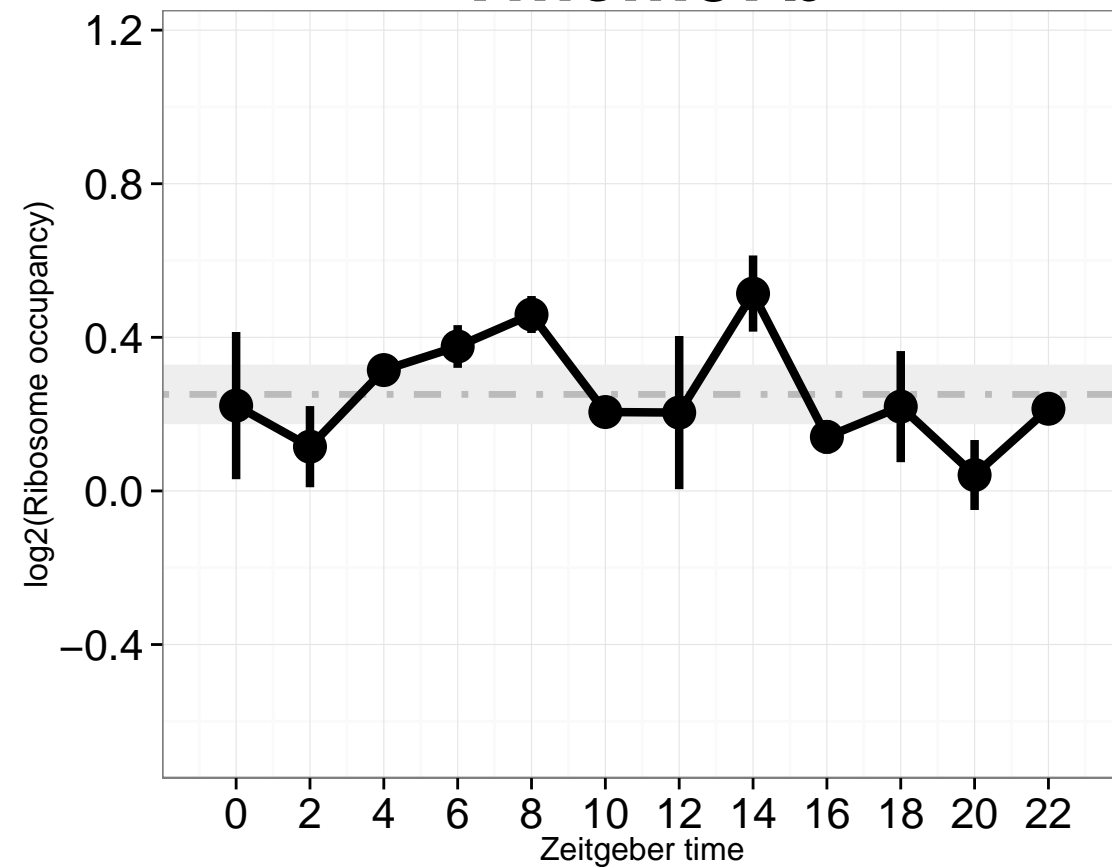

Supplement: Supplementary file 2400 [file 1]

# C2cd2l

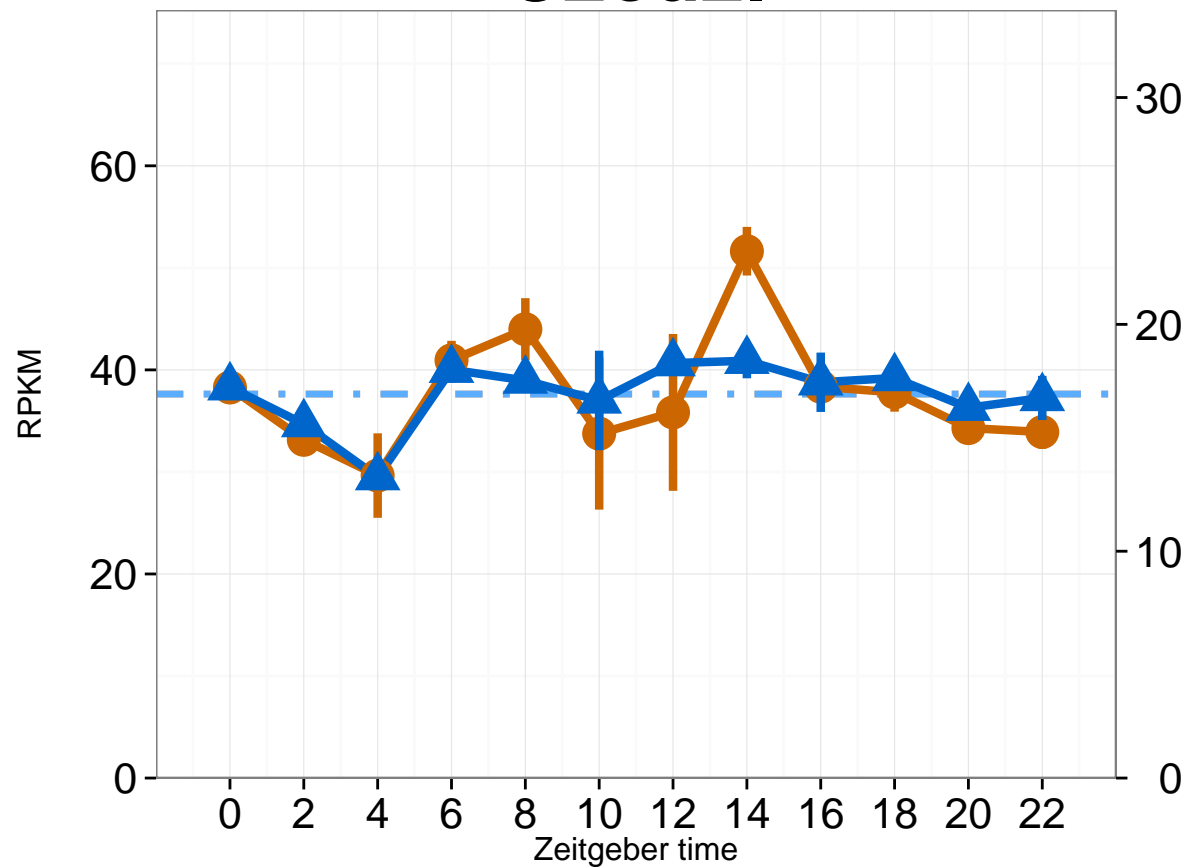

# C2cd2l

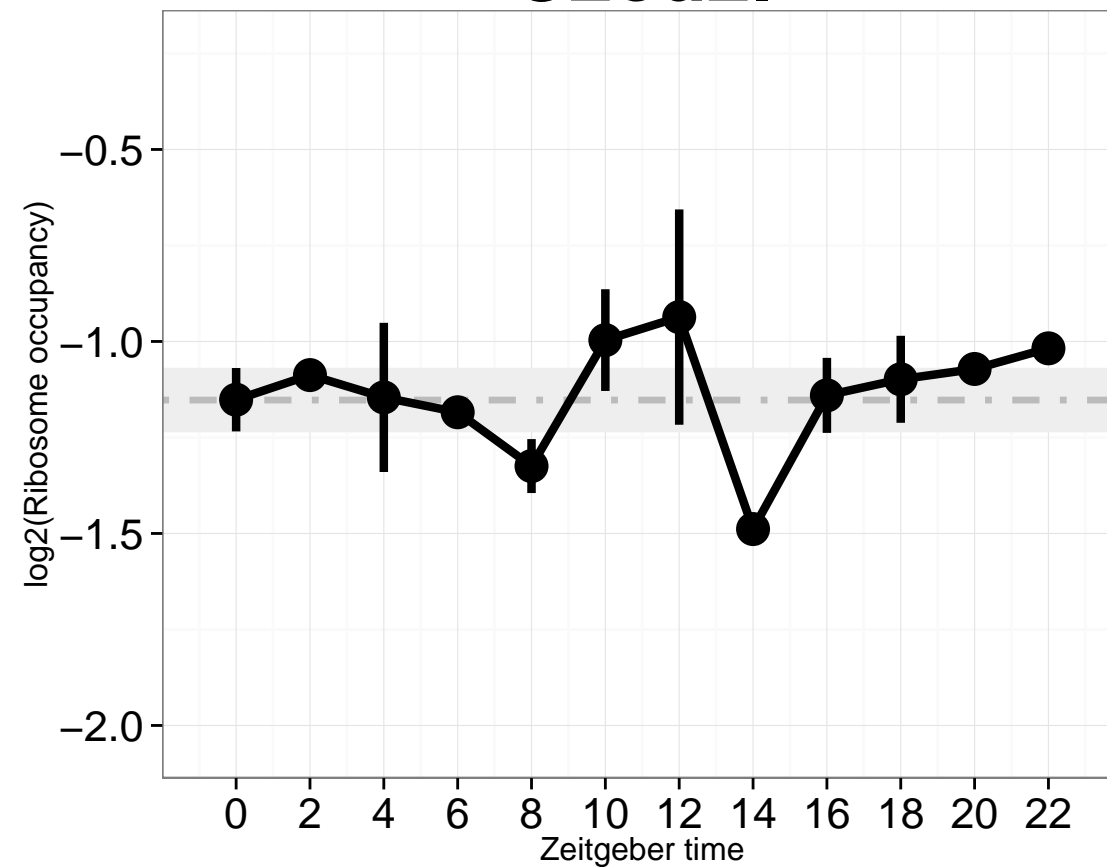

Supplement: Supplementary file 2401 [file 1]

# Aox1

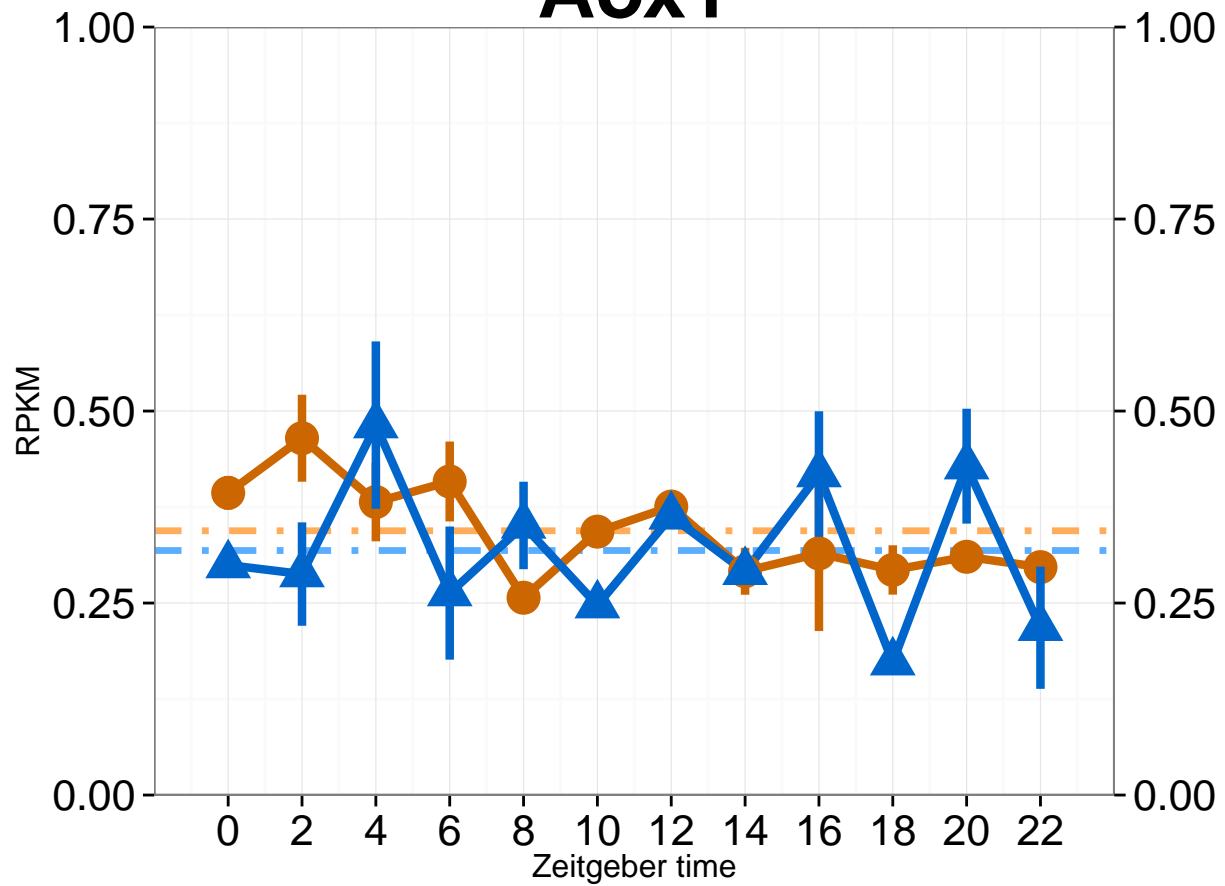

# Aox1

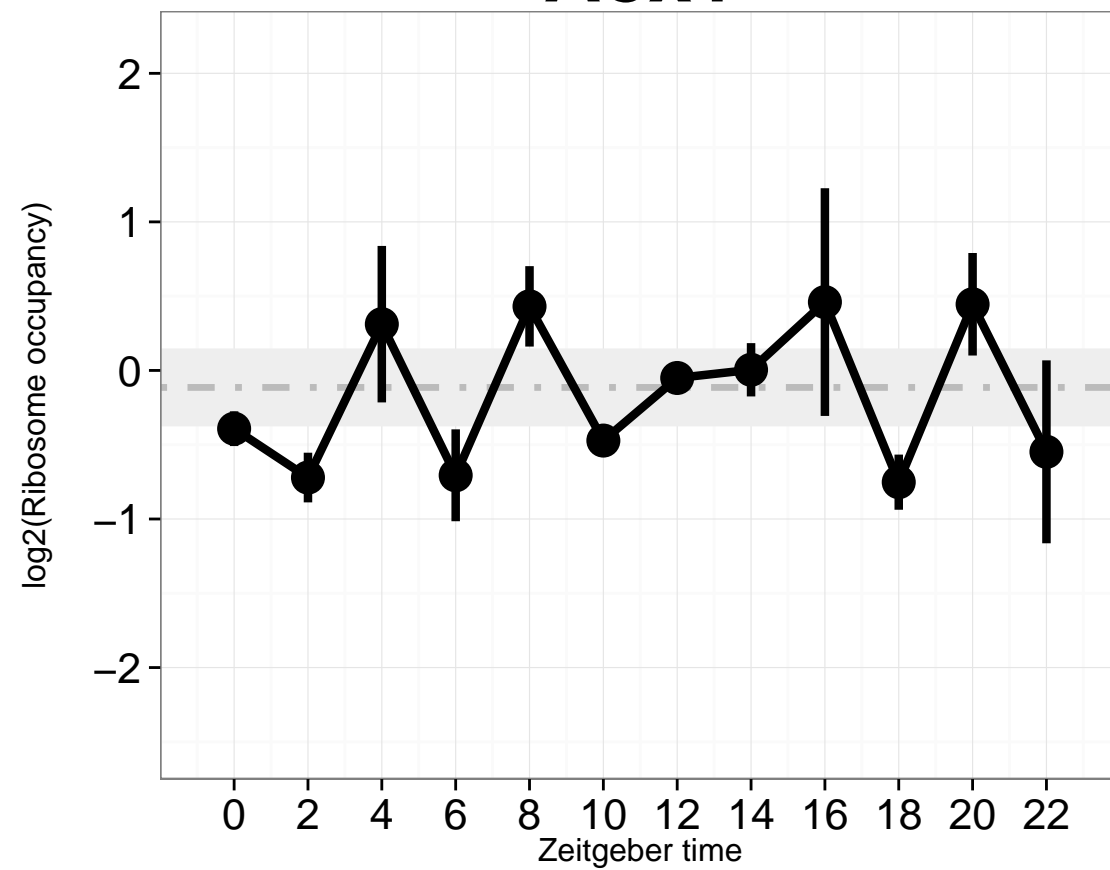

Supplement: Supplementary file 2402 [file 1]

# Cetn2

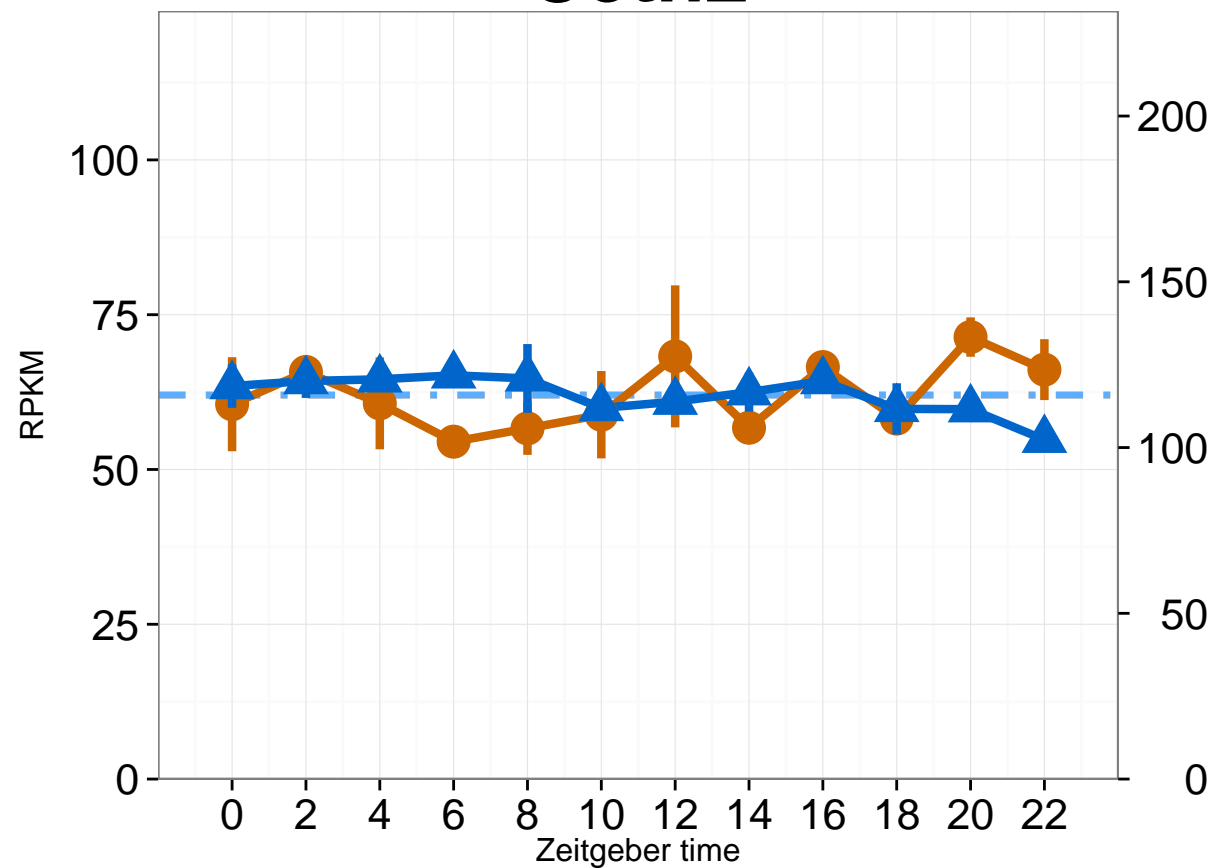

# Cetn2

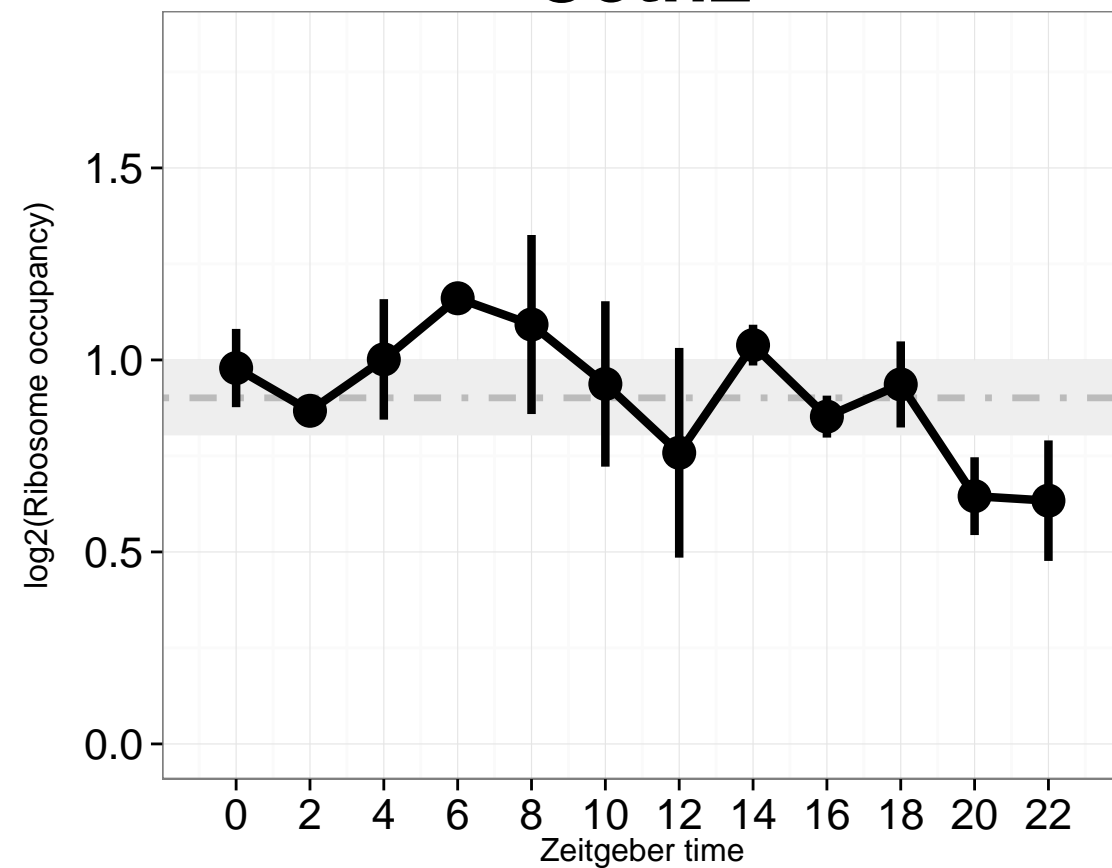

Supplement: Supplementary file 2403 [file 1]

# Trim24

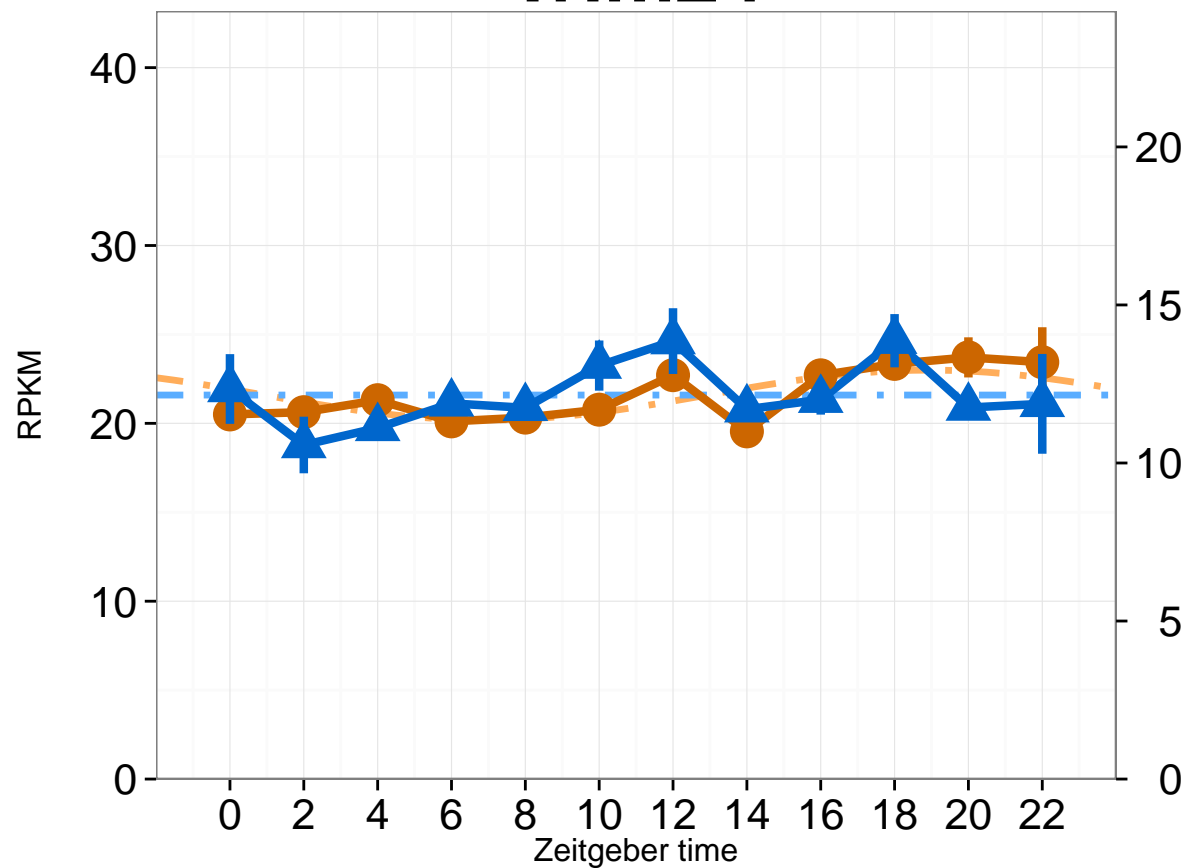

# Trim24

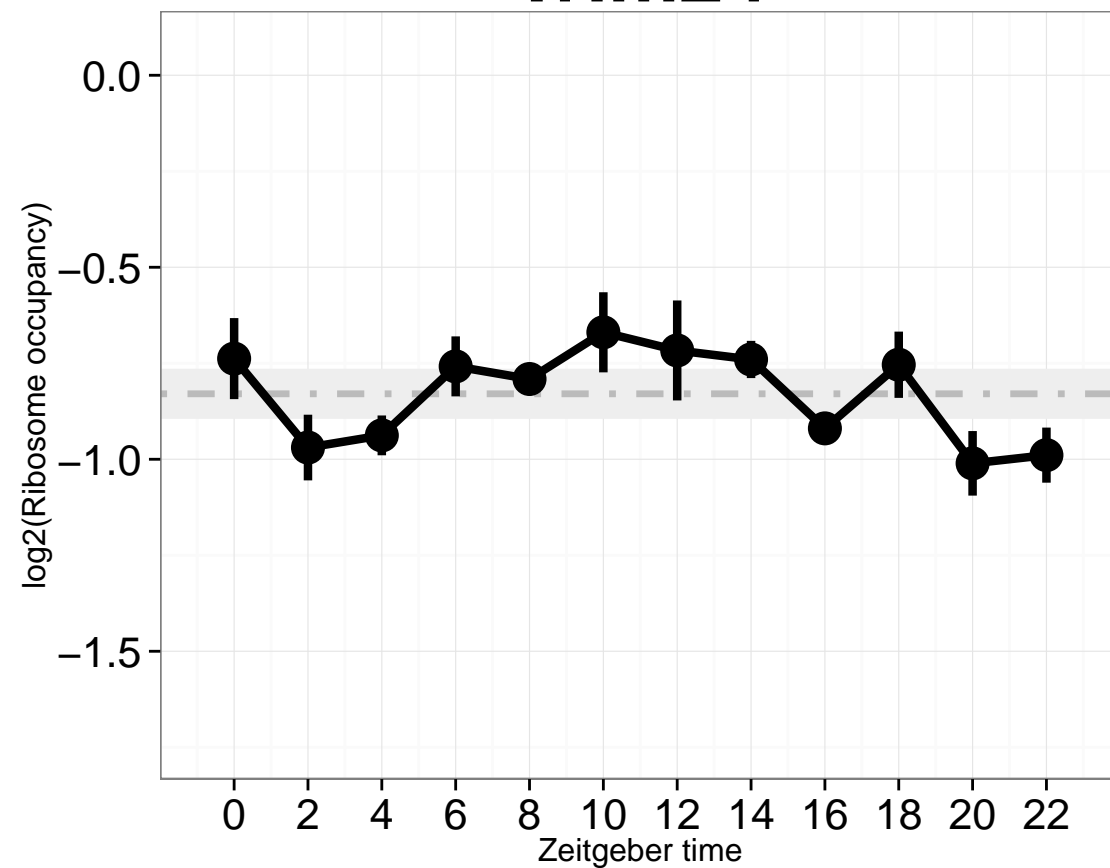

Supplement: Supplementary file 2404 [file 1]

## Edc4

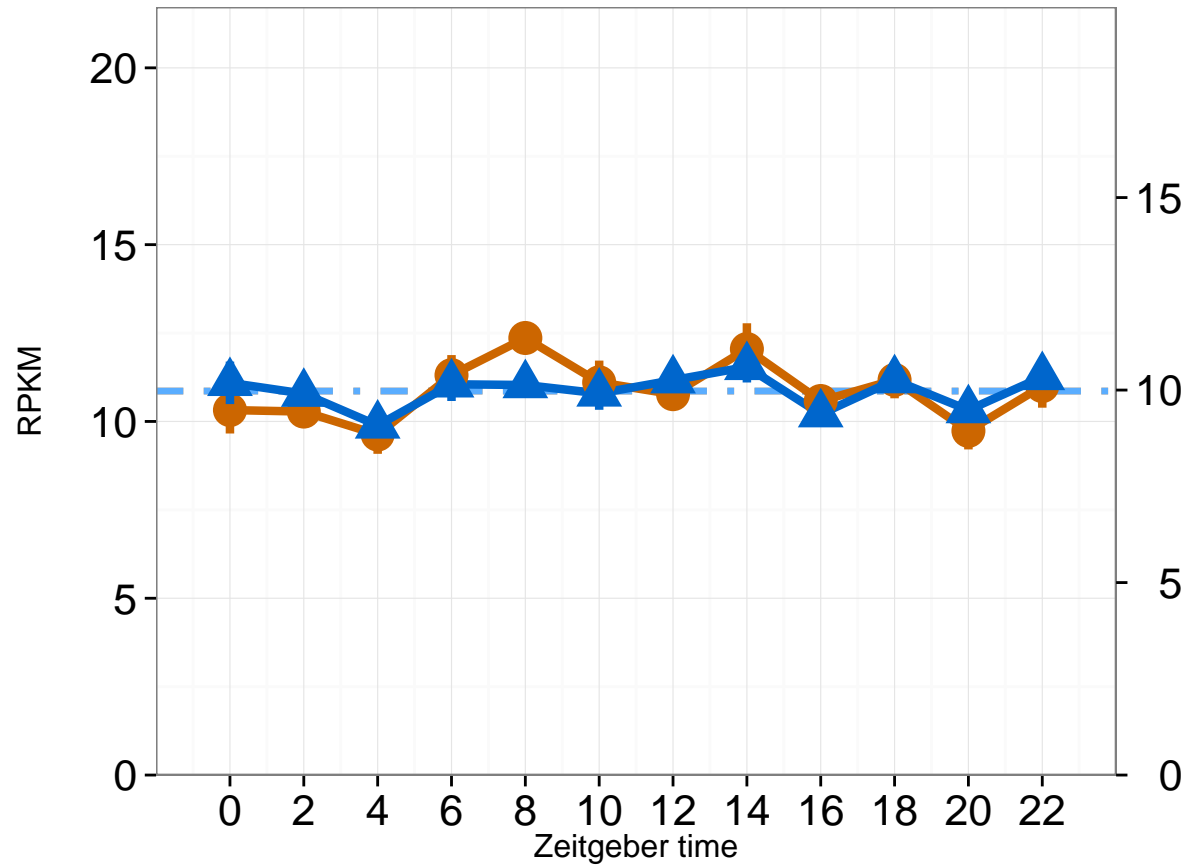

## Edc4

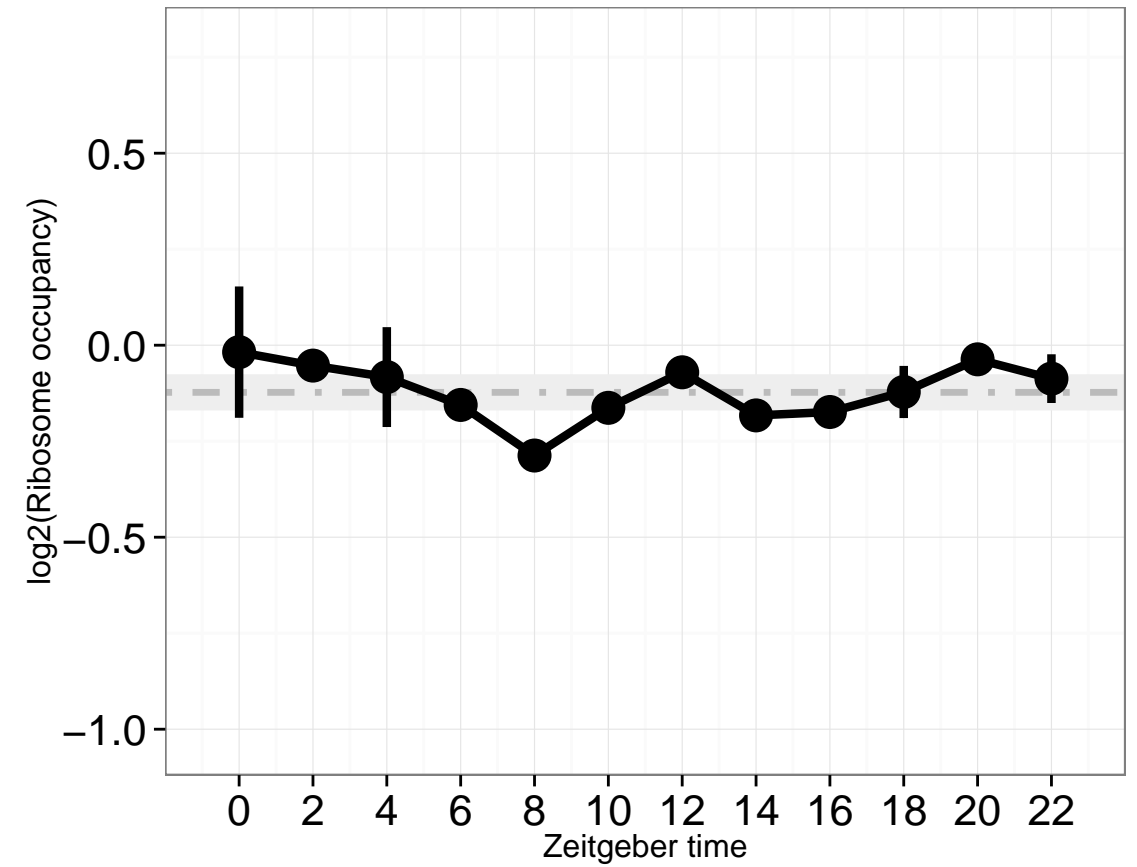

Supplement: Supplementary file 2405 [file 1]

## Nagpa

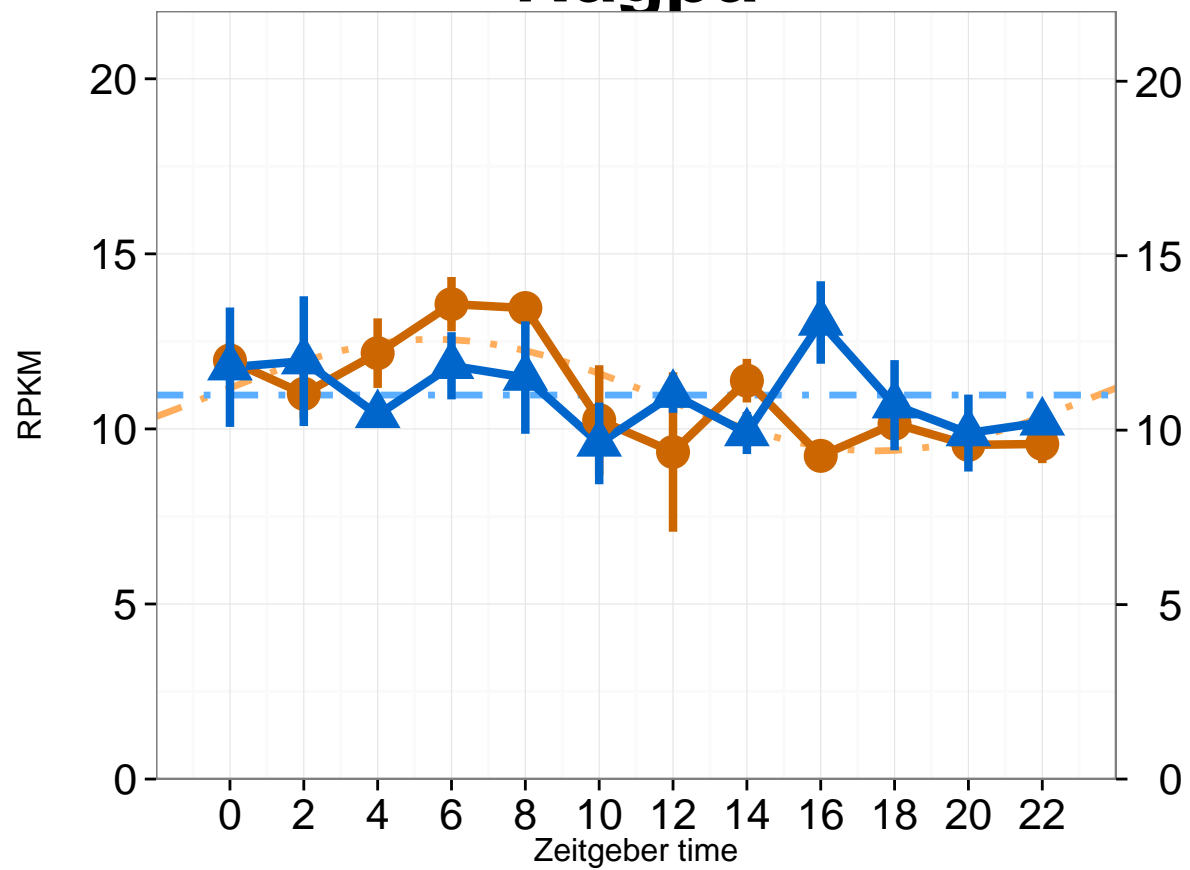

## Nagpa

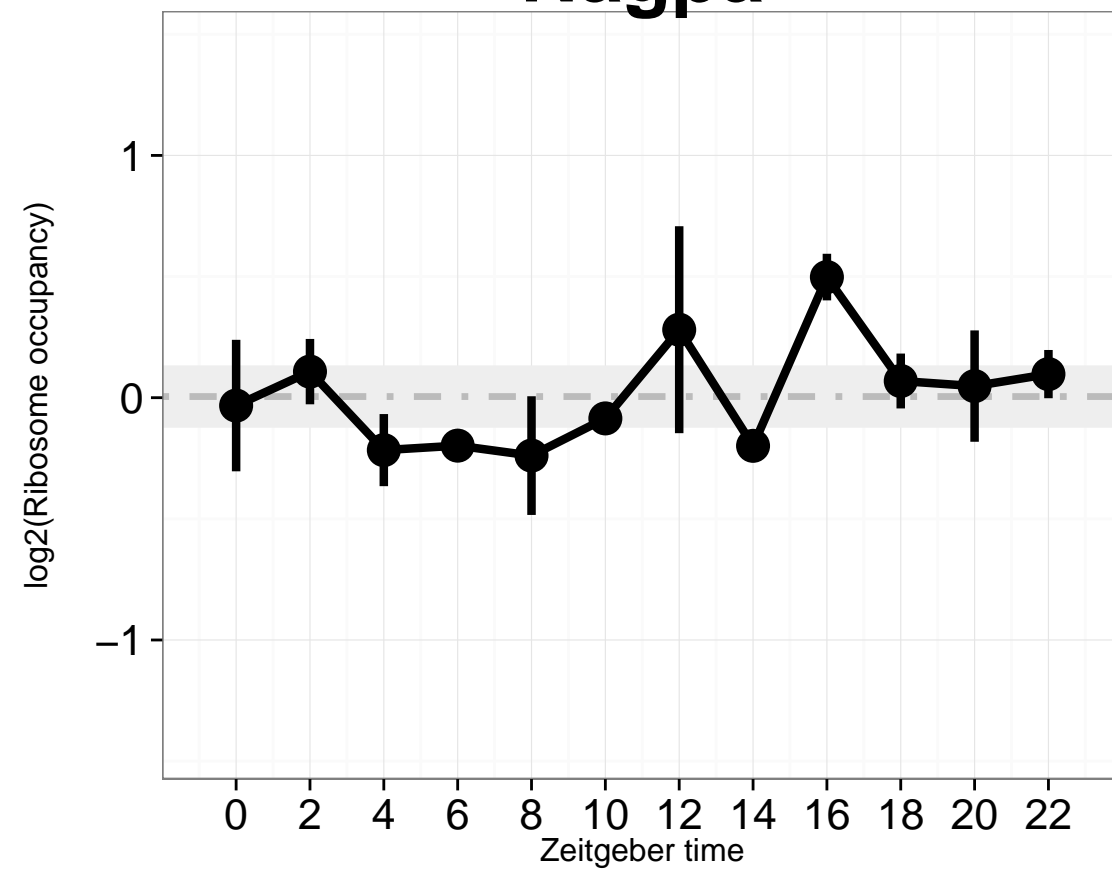

Supplement: Supplementary file 2406 [file 1]

# Tpcn2

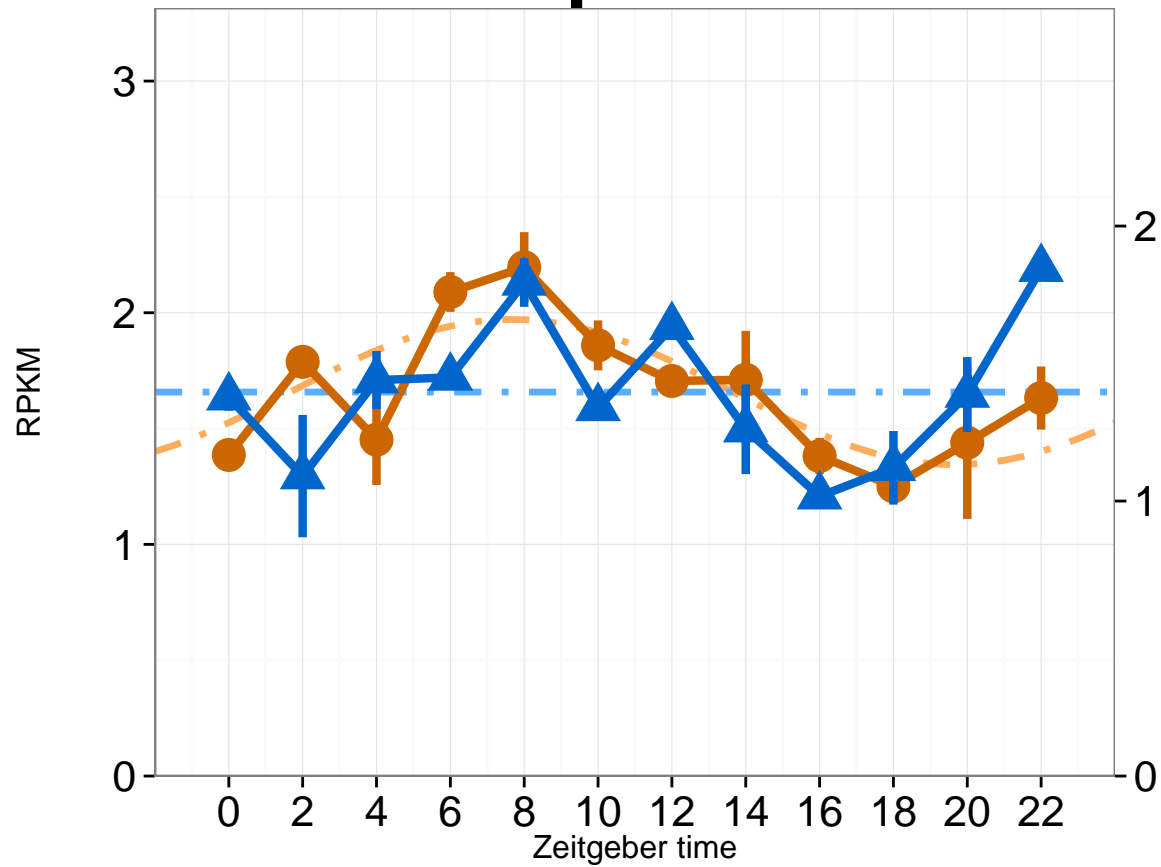

# Tpcn2

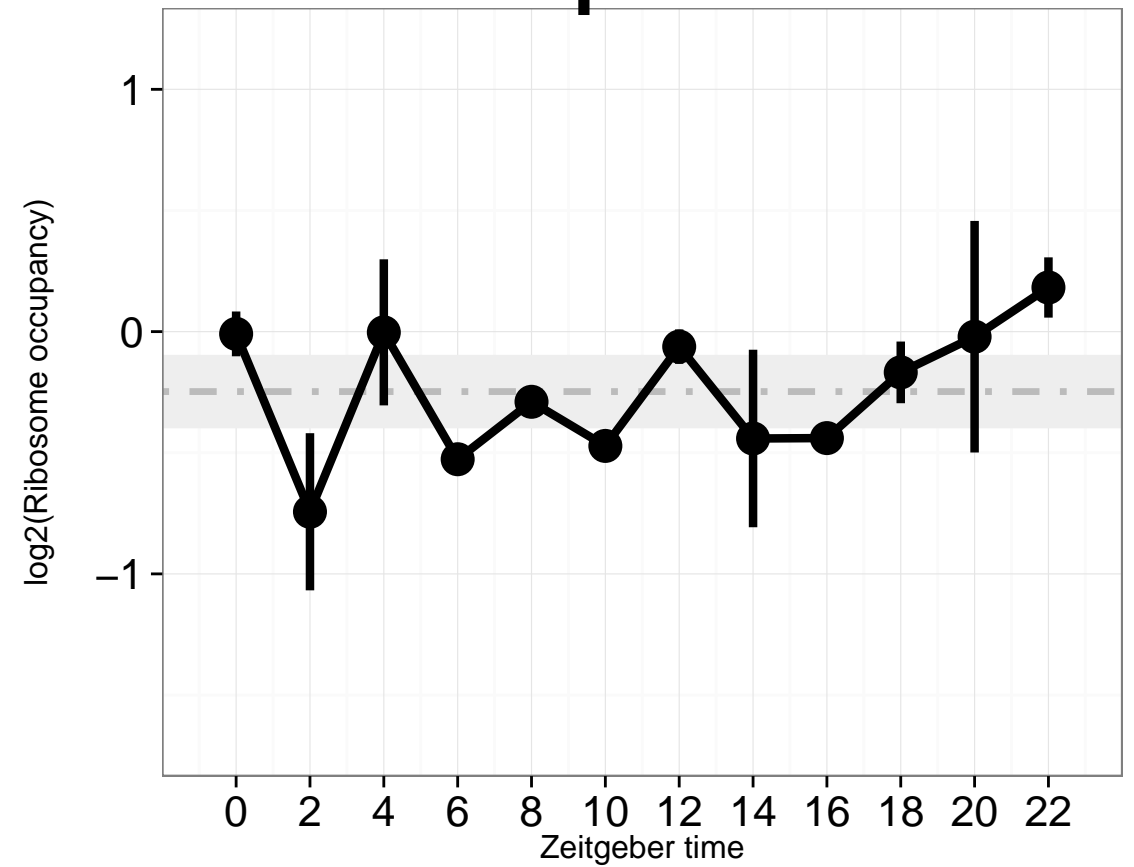

Supplement: Supplementary file 2407 [file 1]

## Slc46a3

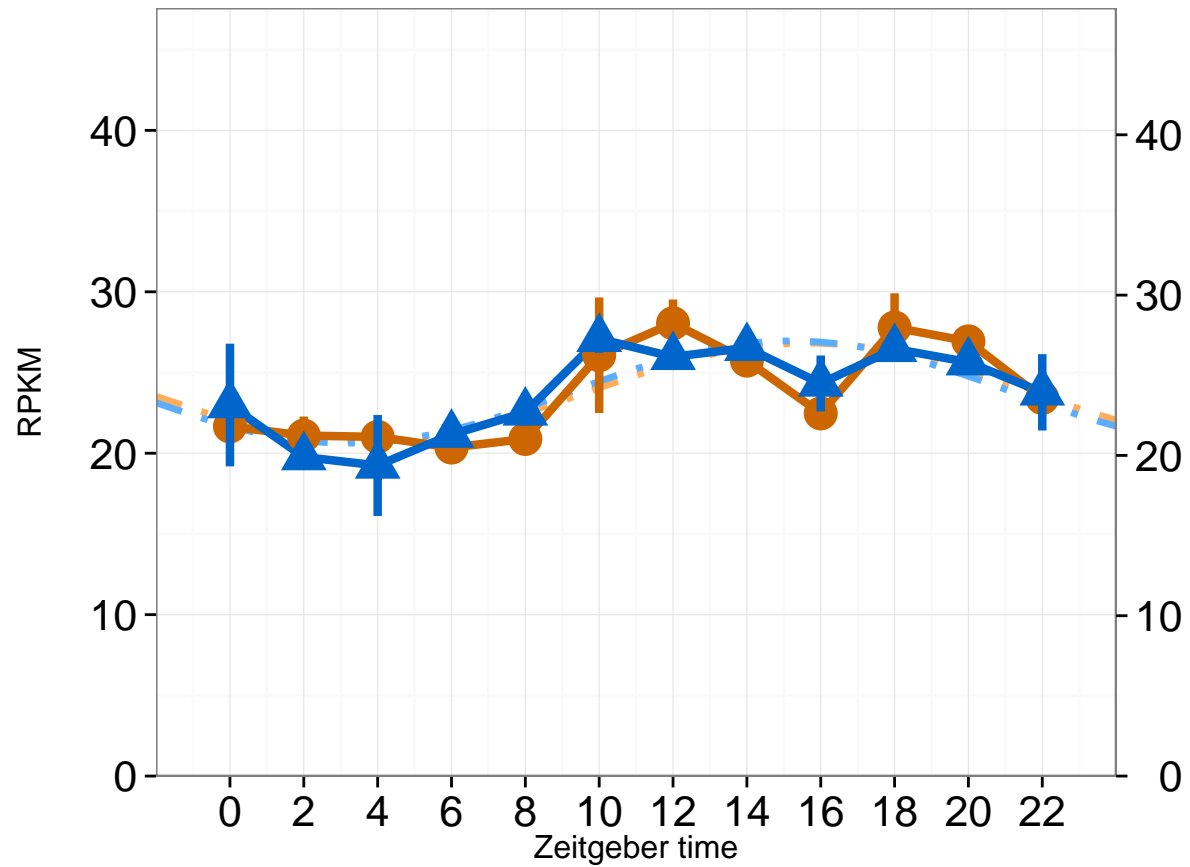

## Slc46a3

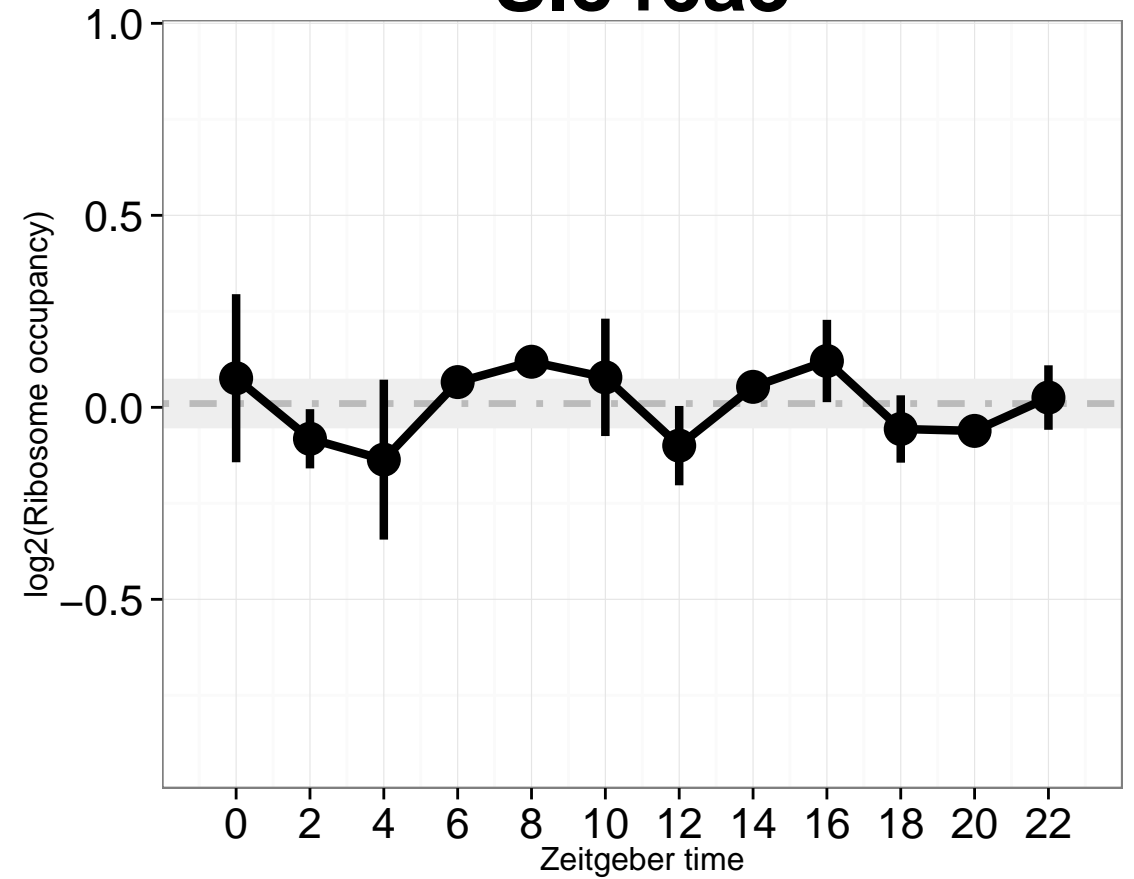

Supplement: Supplementary file 2408 [file 1]

# Igfbp4

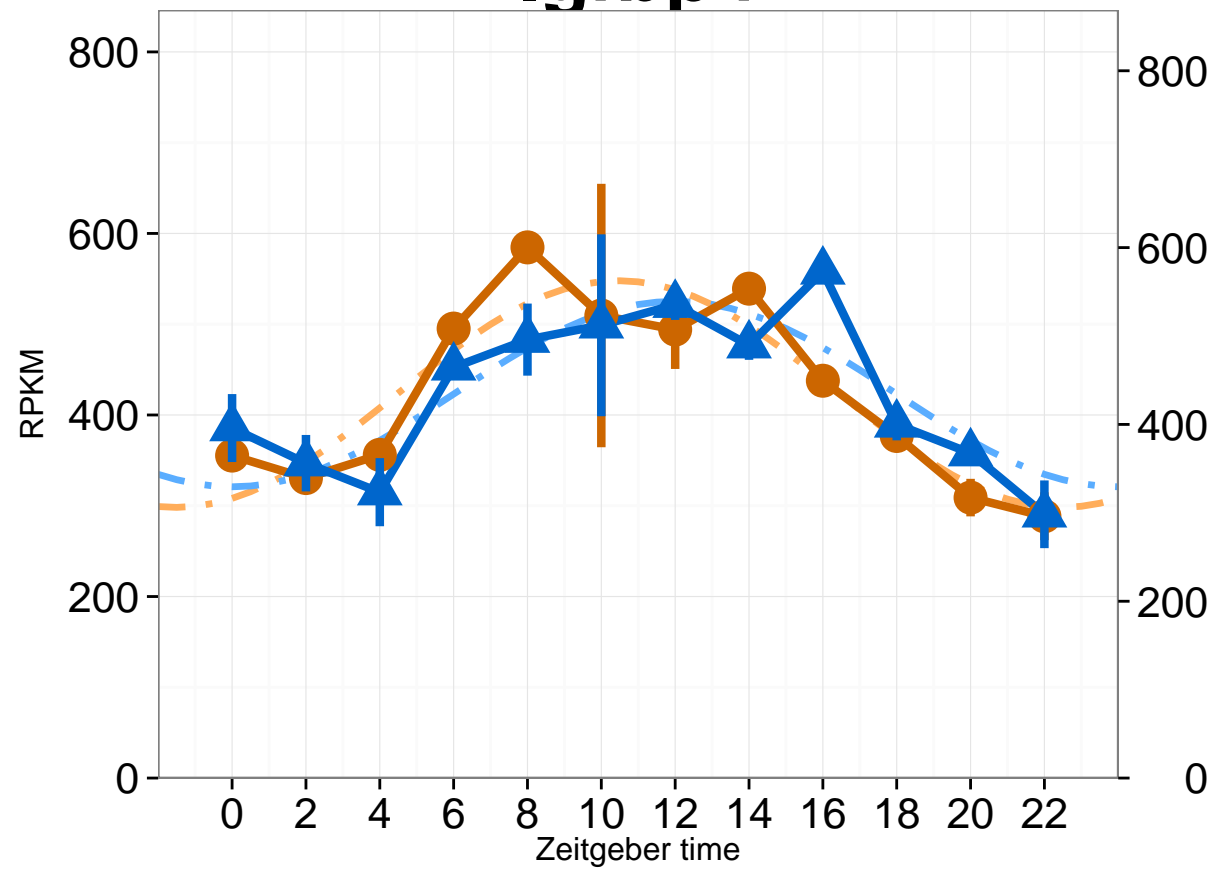

# Igfbp4

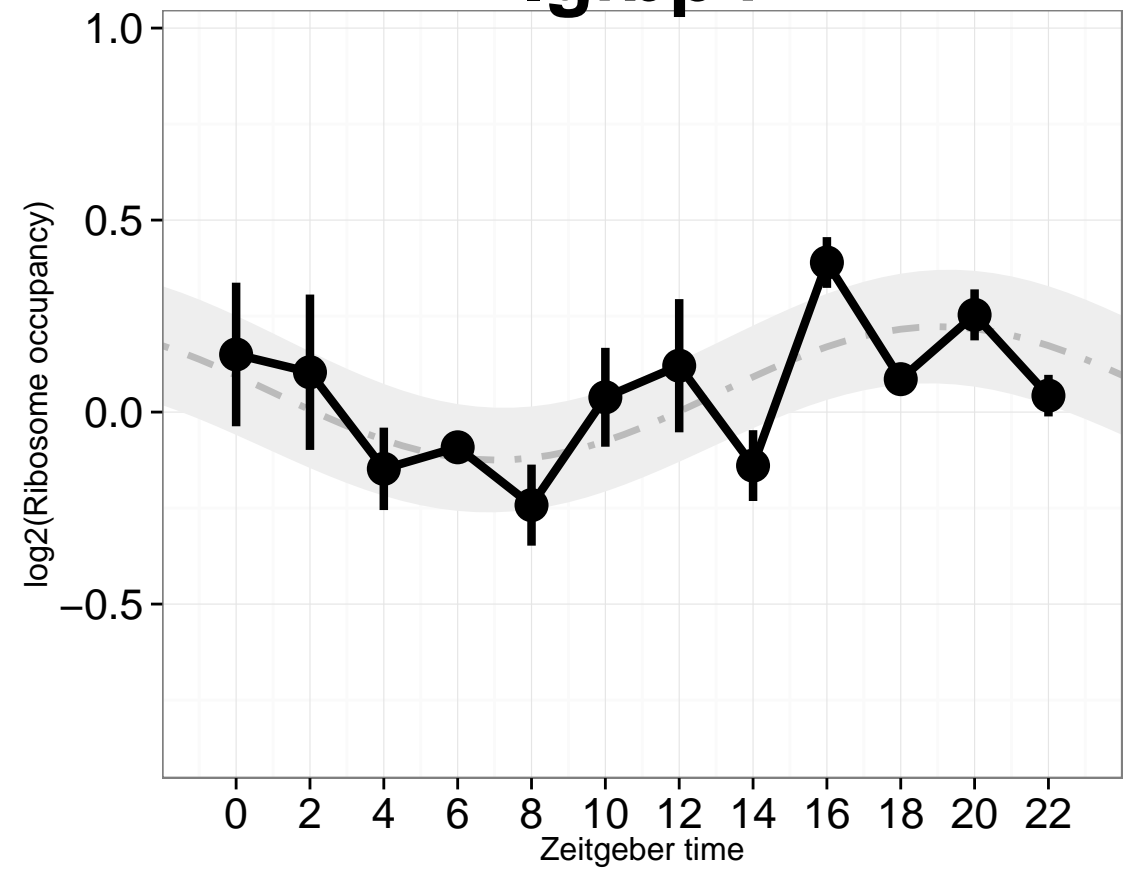

Supplement: Supplementary file 2409 [file 1]
