# Supplementary material (part 25 of 133)
Source: publisher figshare collection journal article supplement (https://springernature.figshare.com/articles/dataset/_/4903193)

## Wnt16

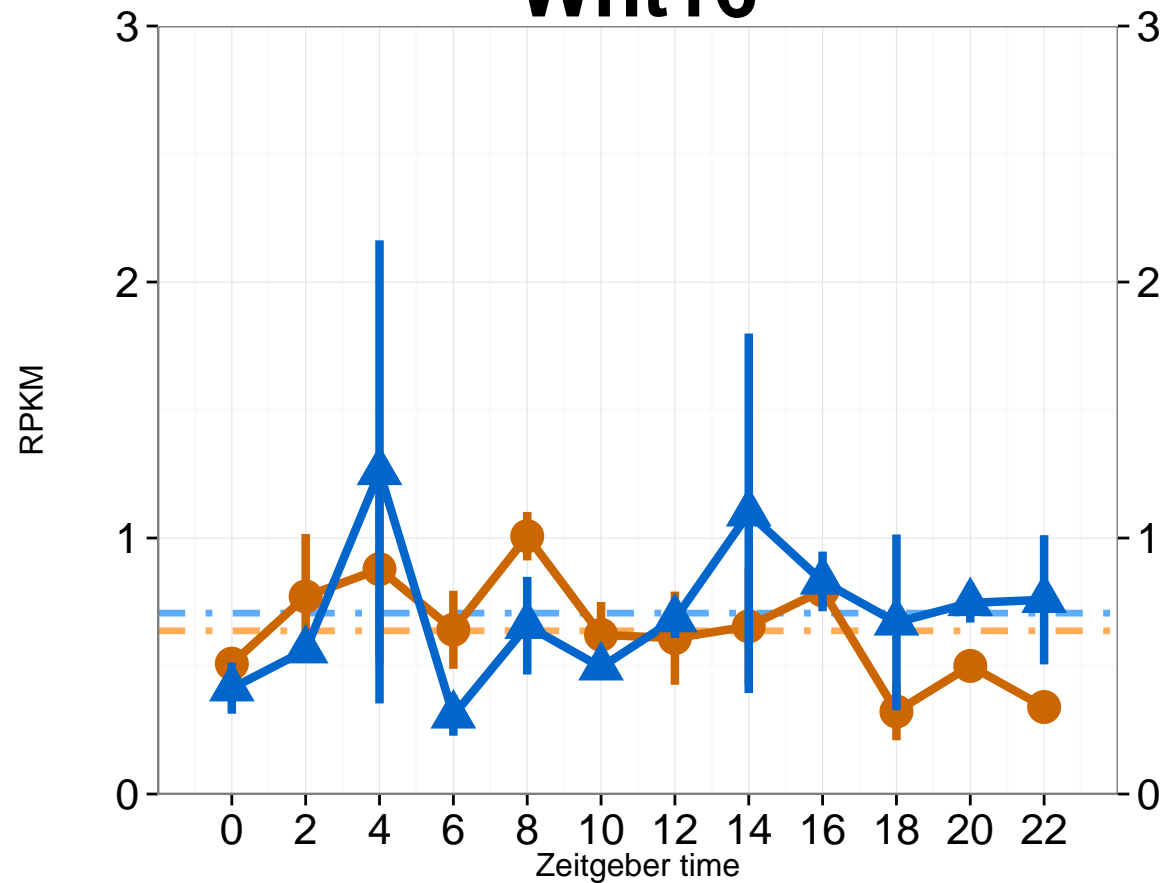

## Wnt16

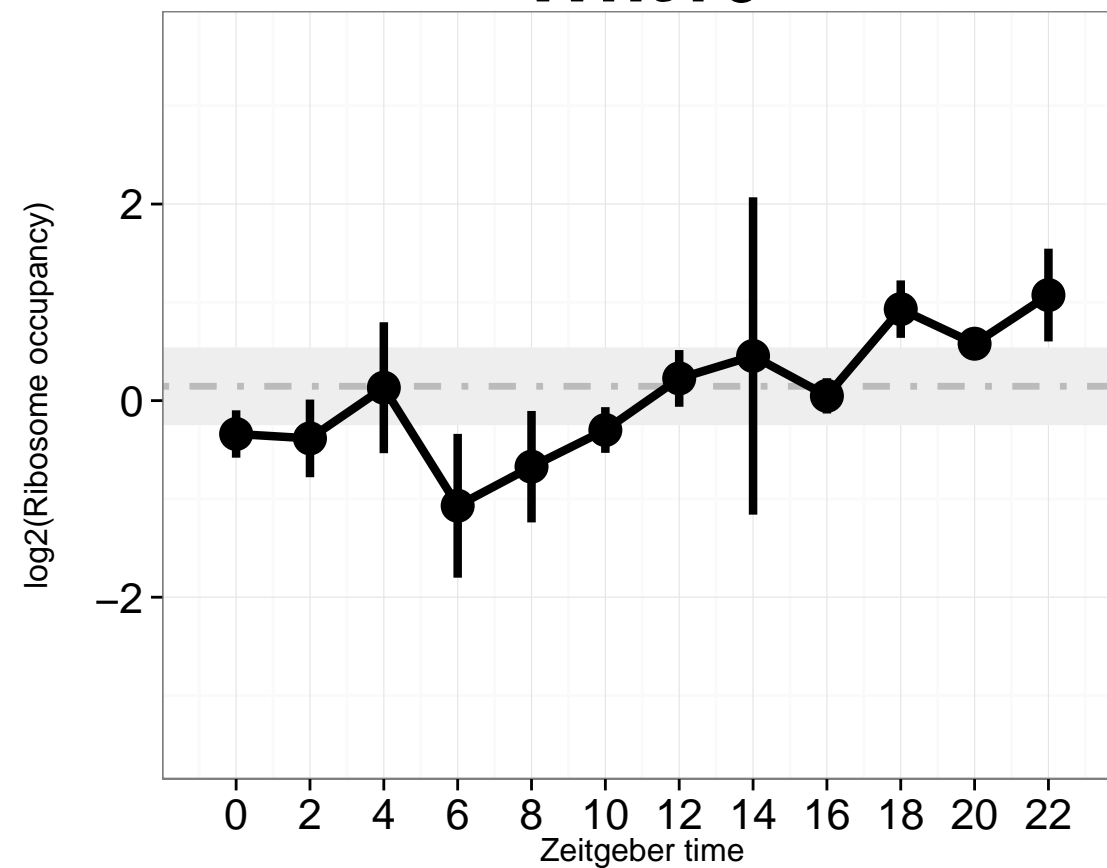

Supplement: Supplementary file 2410 [file 1]

## Nup155

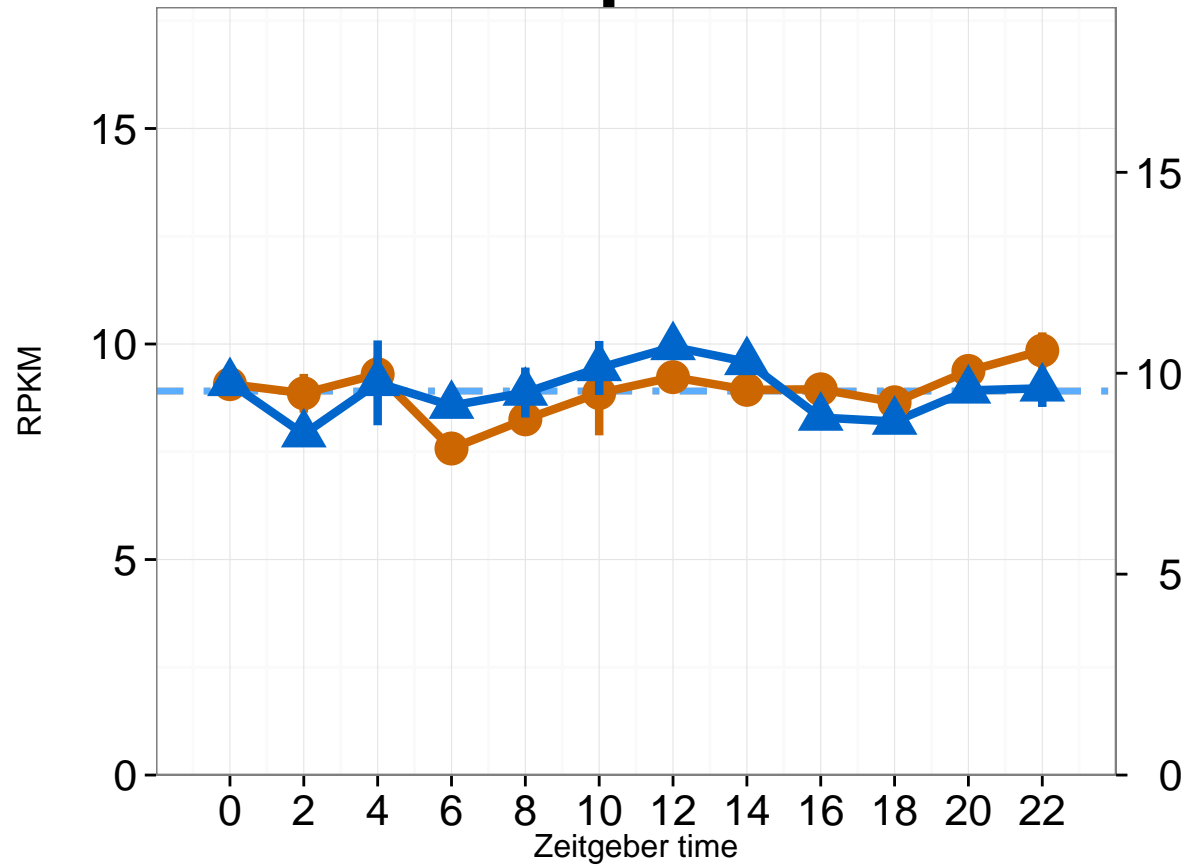

## Nup155

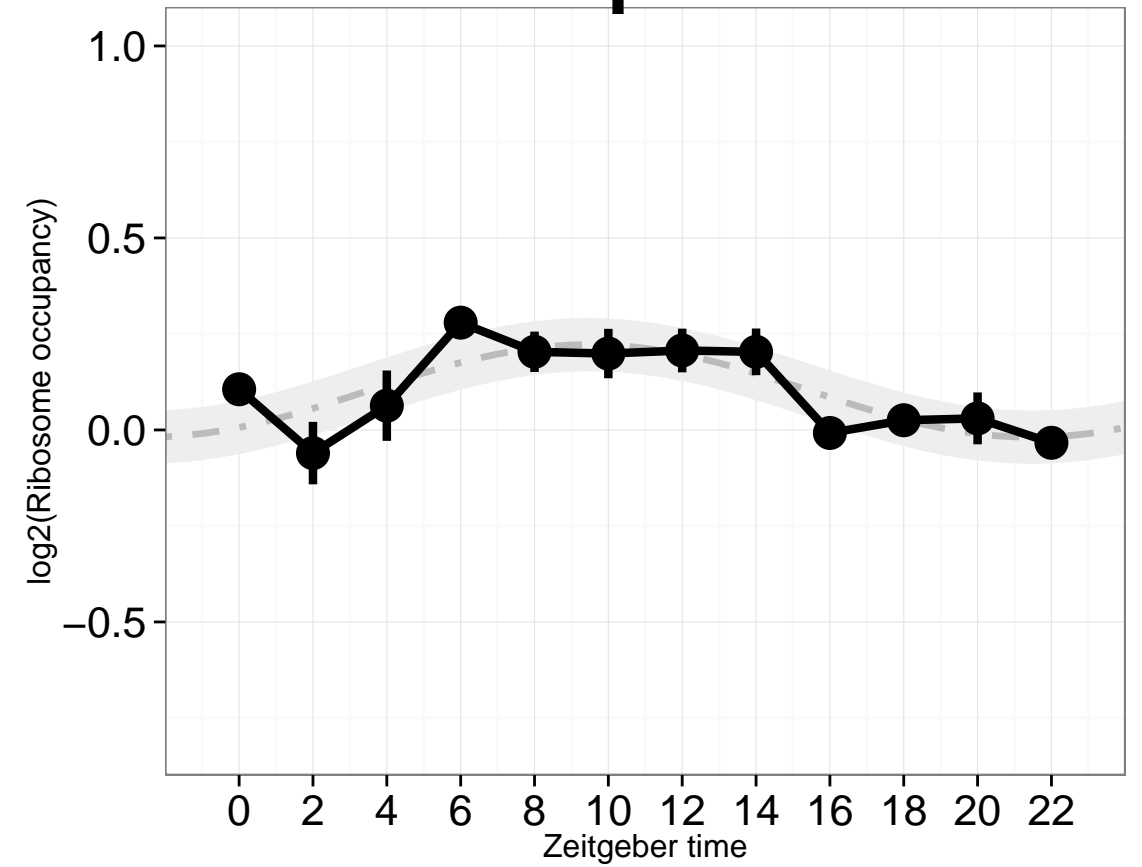

Supplement: Supplementary file 2411 [file 1]

## Mxra7

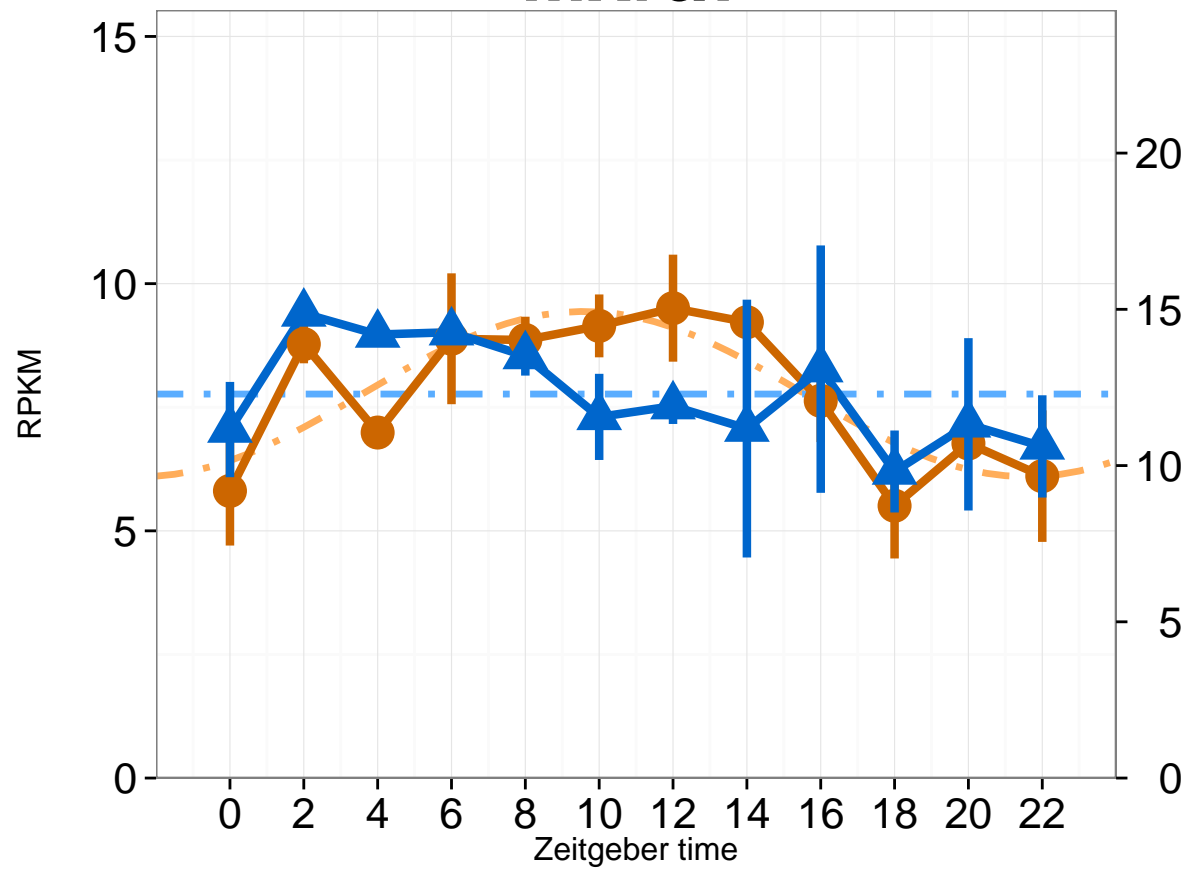

## Mxra7

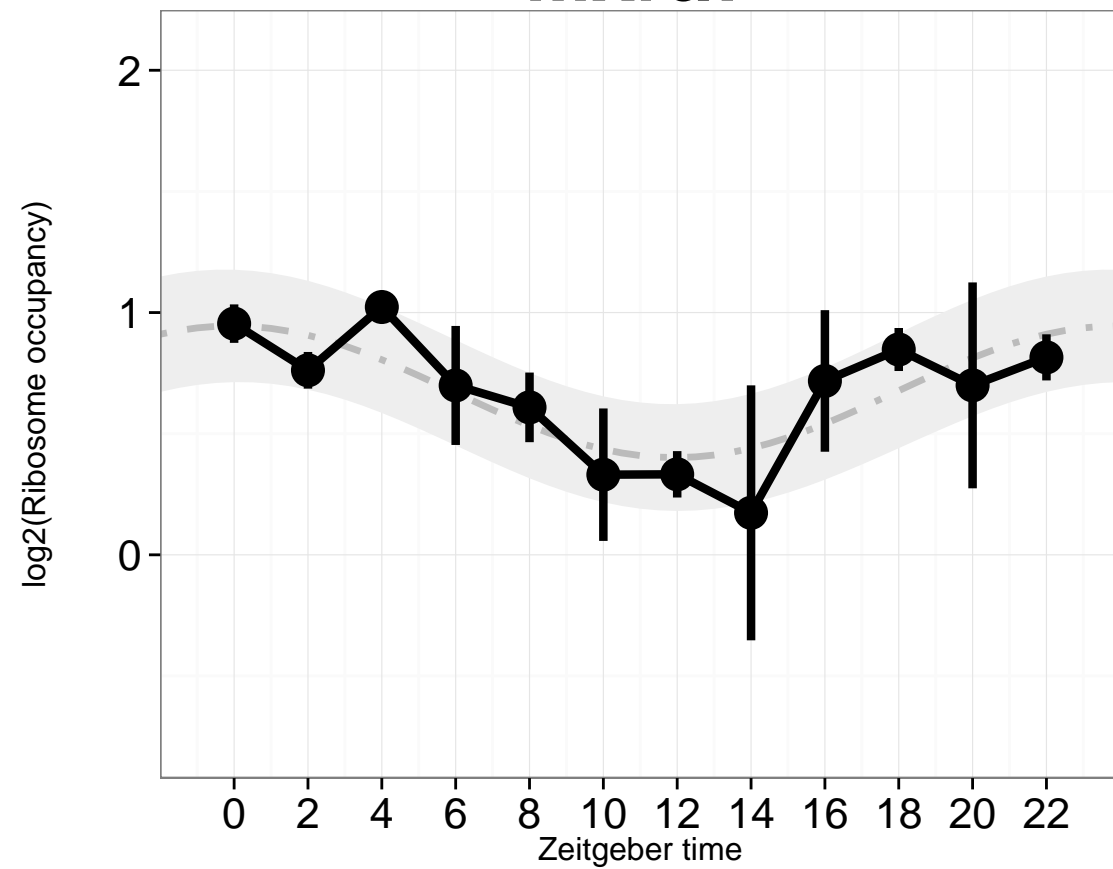

Supplement: Supplementary file 2412 [file 1]

# Gm21897

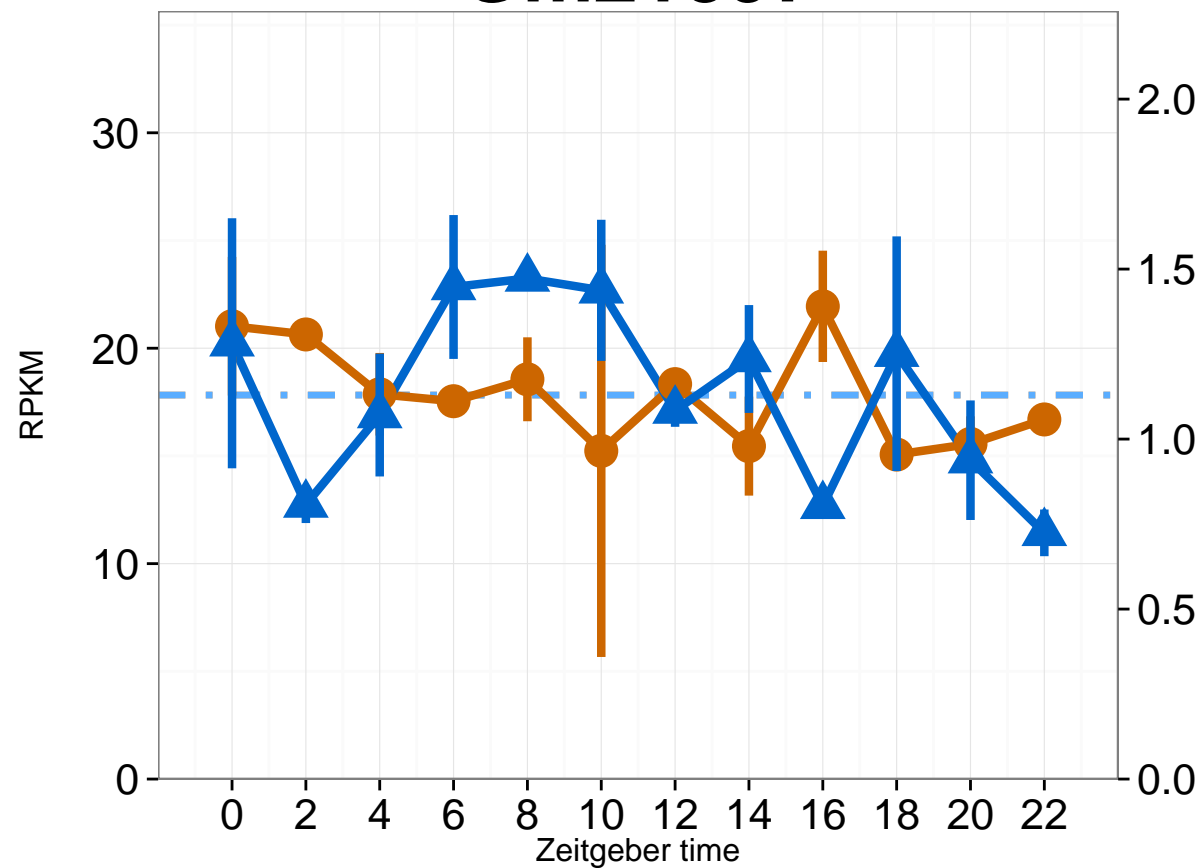

# Gm21897

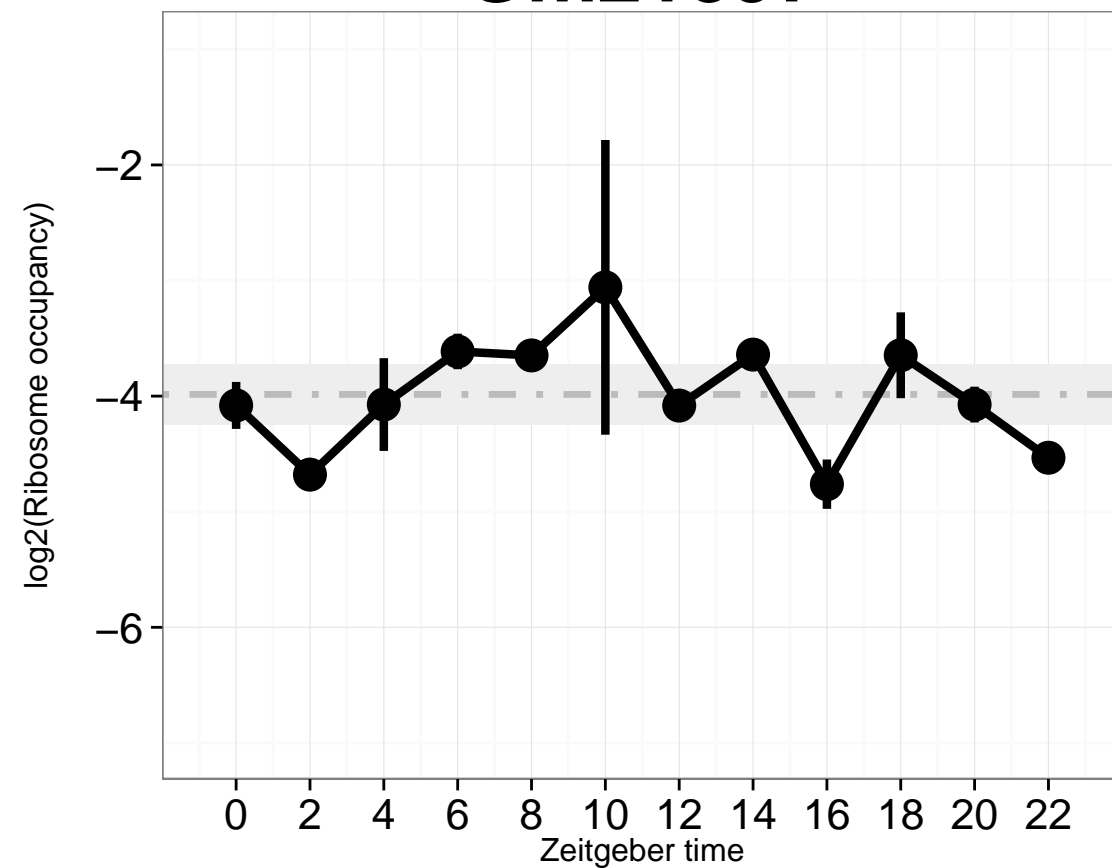

Supplement: Supplementary file 2413 [file 1]

## Slc43a3

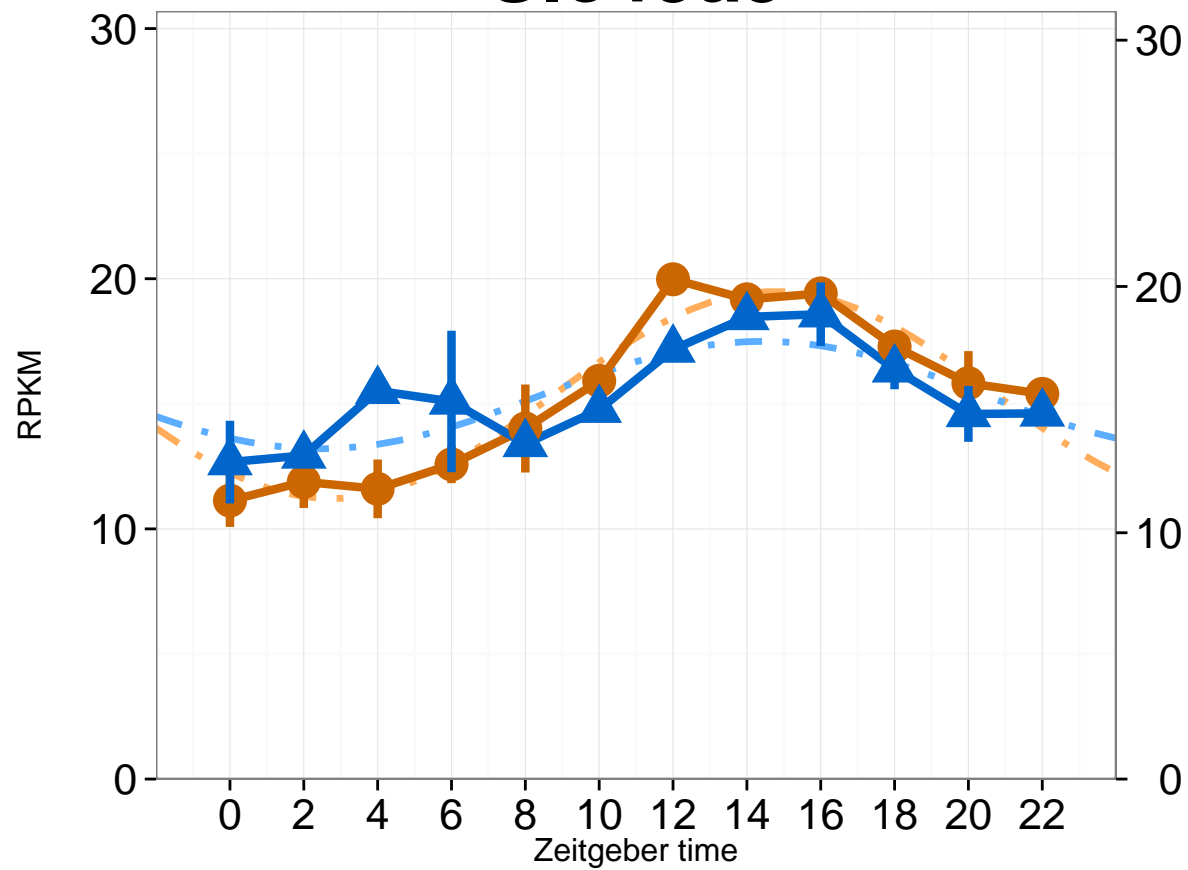

## Slc43a3

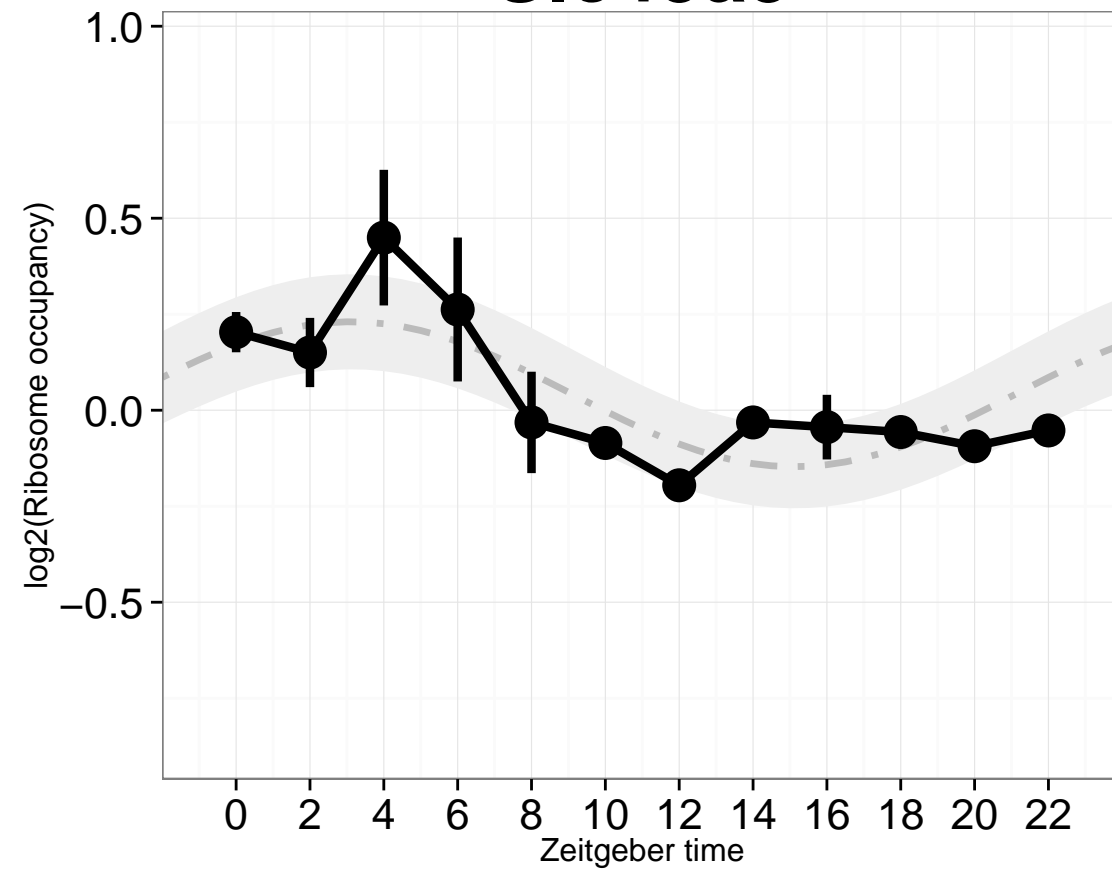

Supplement: Supplementary file 2414 [file 1]

# Becn1

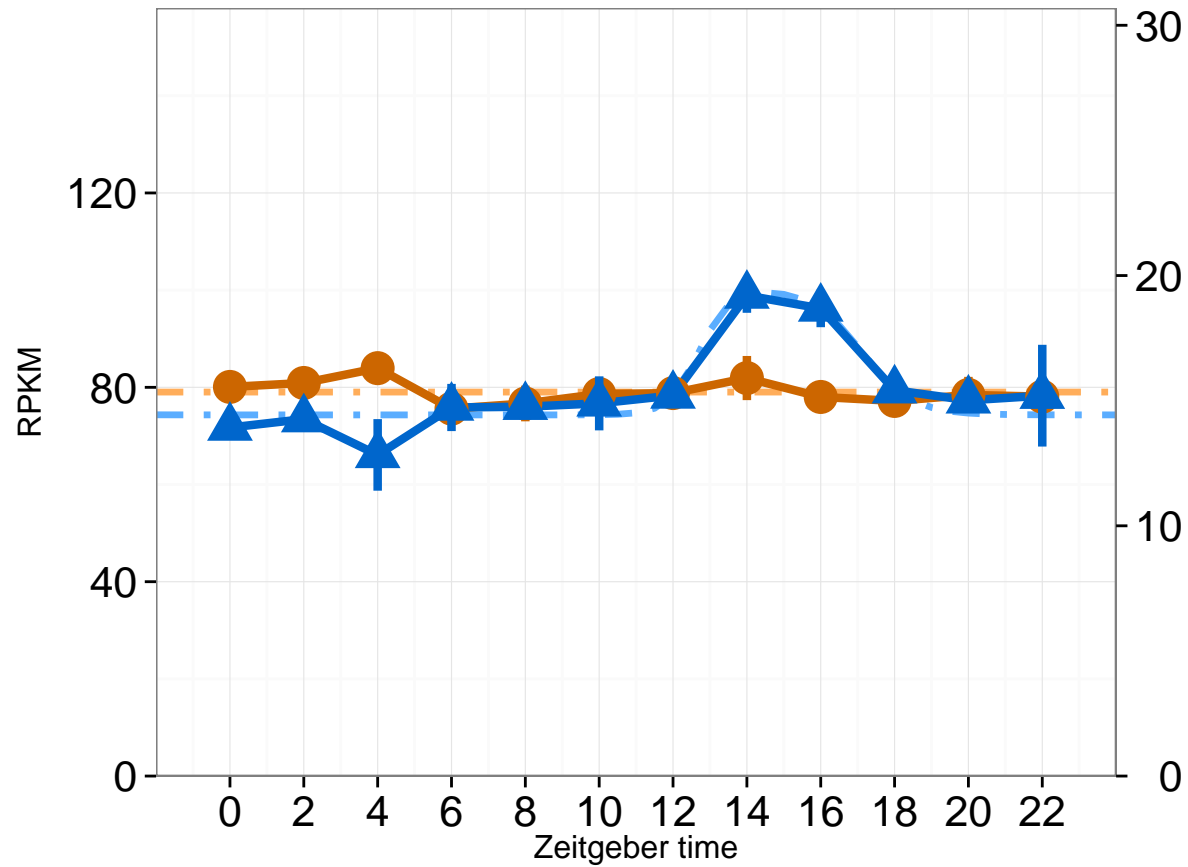

# Becn1

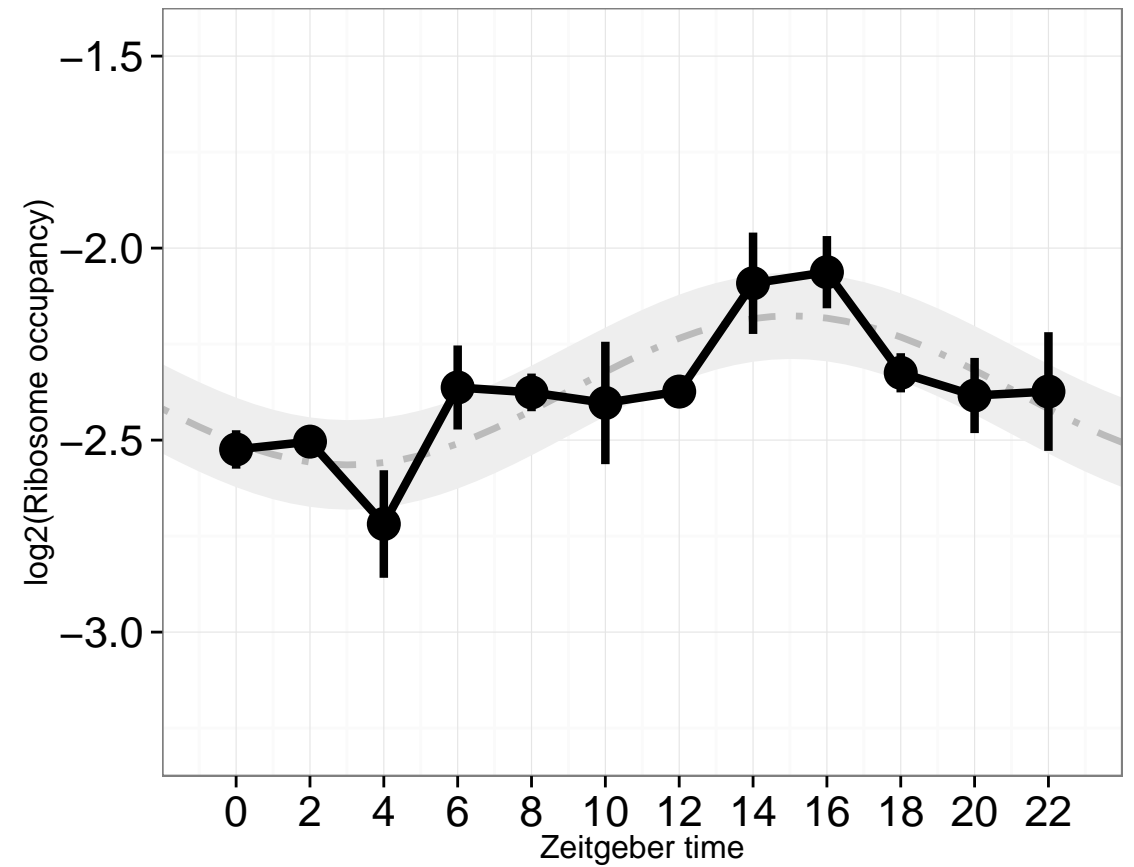

Supplement: Supplementary file 2415 [file 1]

# Tmem203

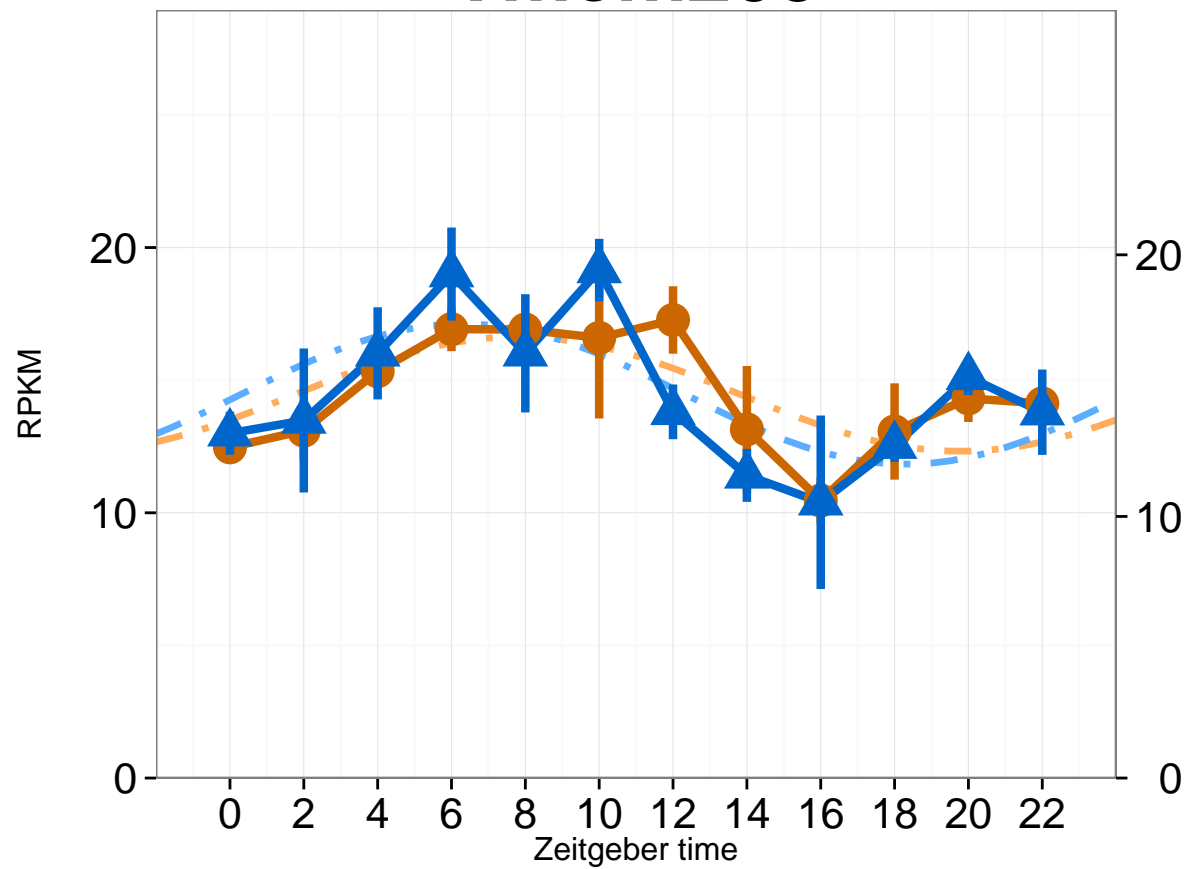

# Tmem203

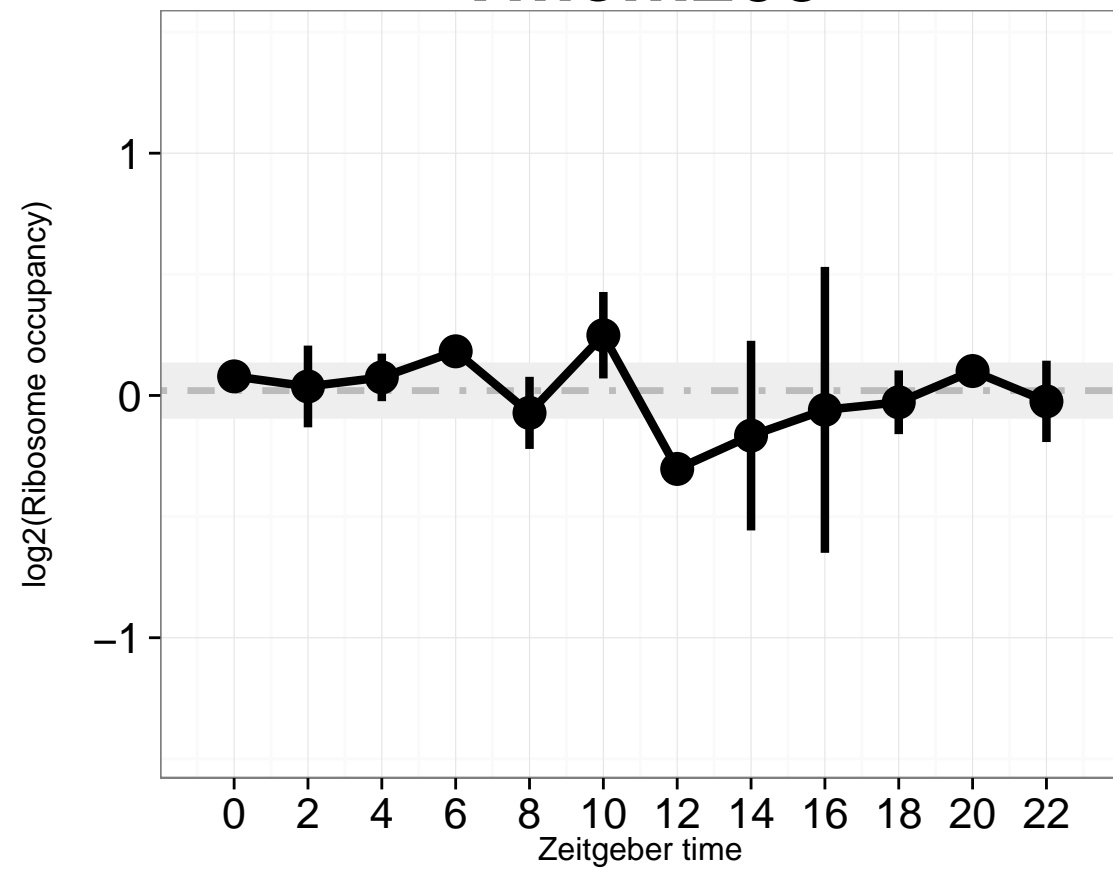

Supplement: Supplementary file 2416 [file 1]

## Rfwd2

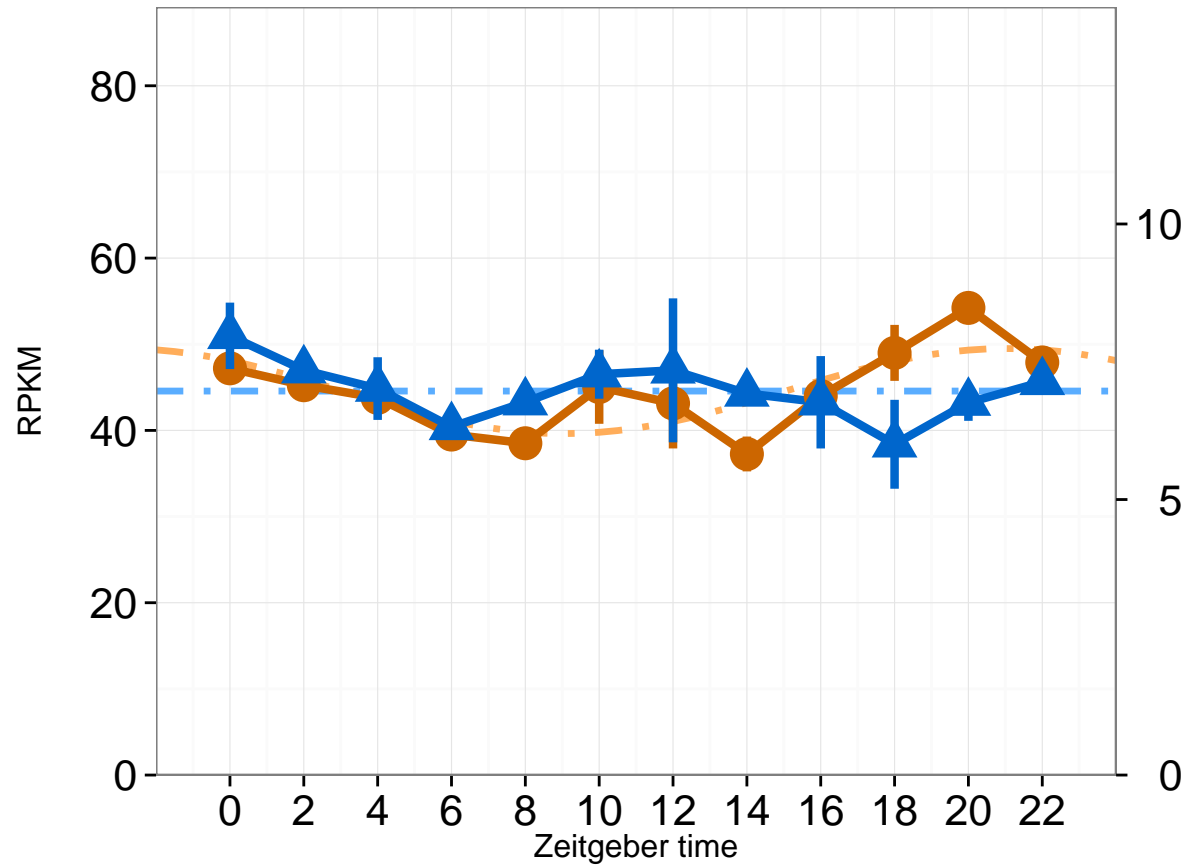

## Rfwd2

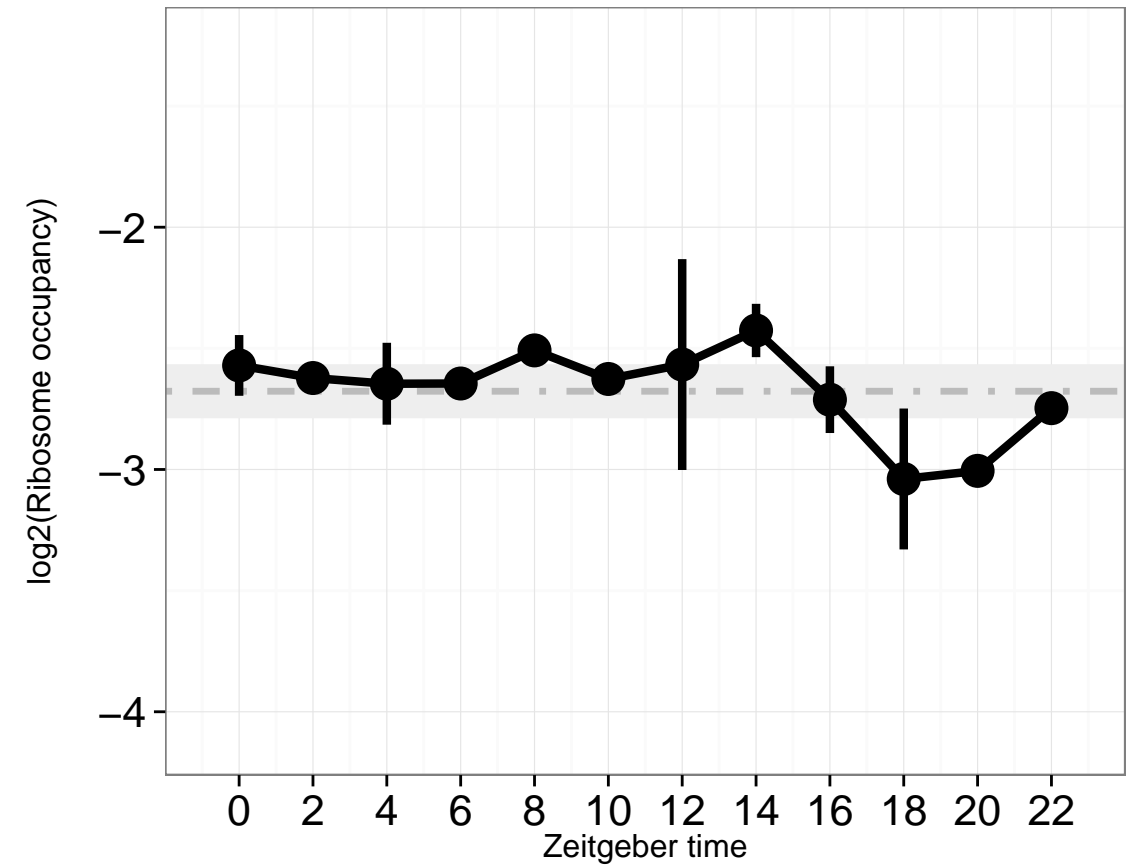

Supplement: Supplementary file 2417 [file 1]

## PIk5

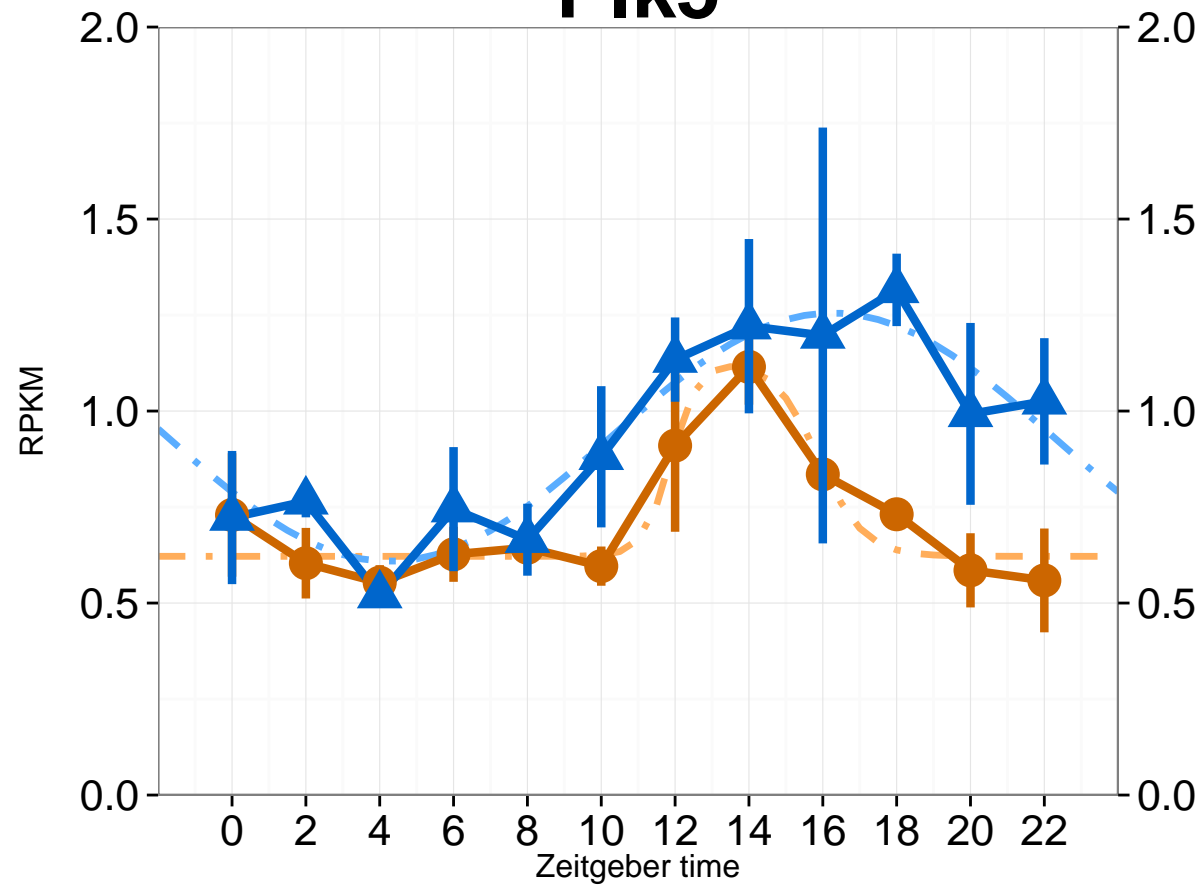

## PIk5

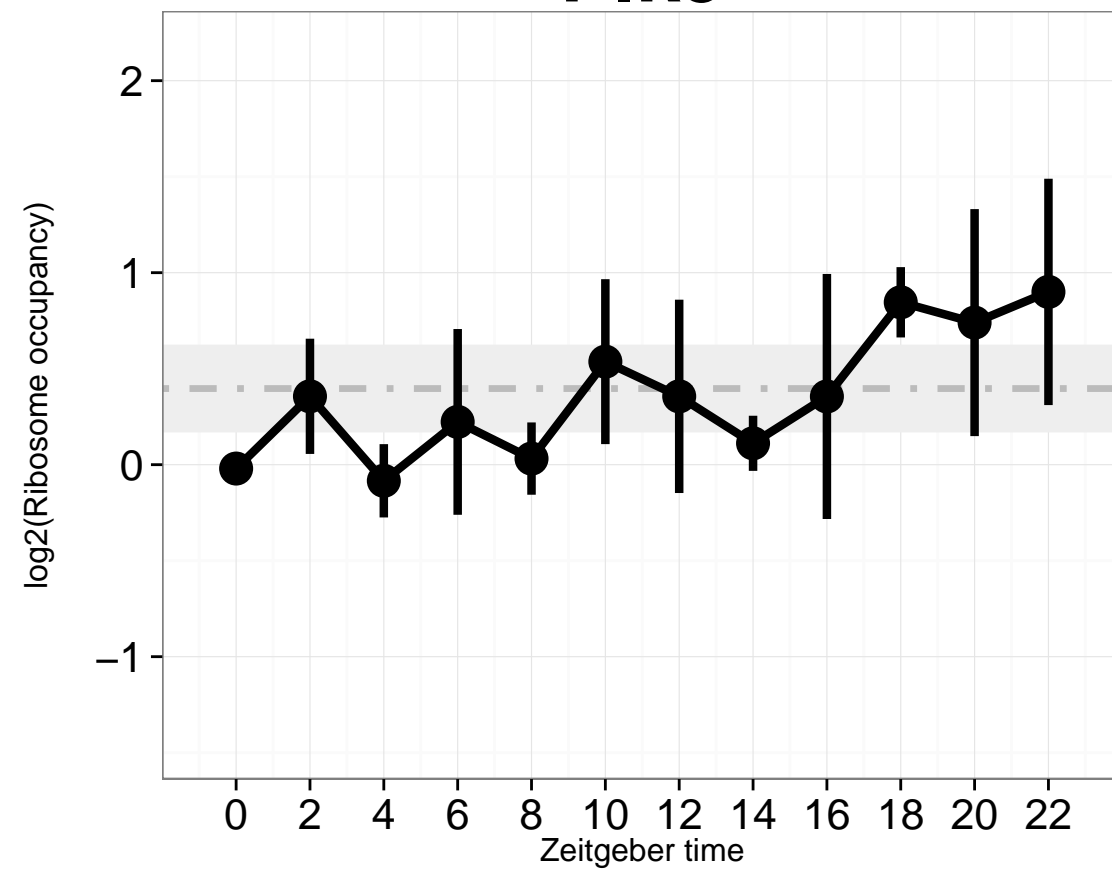

Supplement: Supplementary file 2418 [file 1]

# Lig1

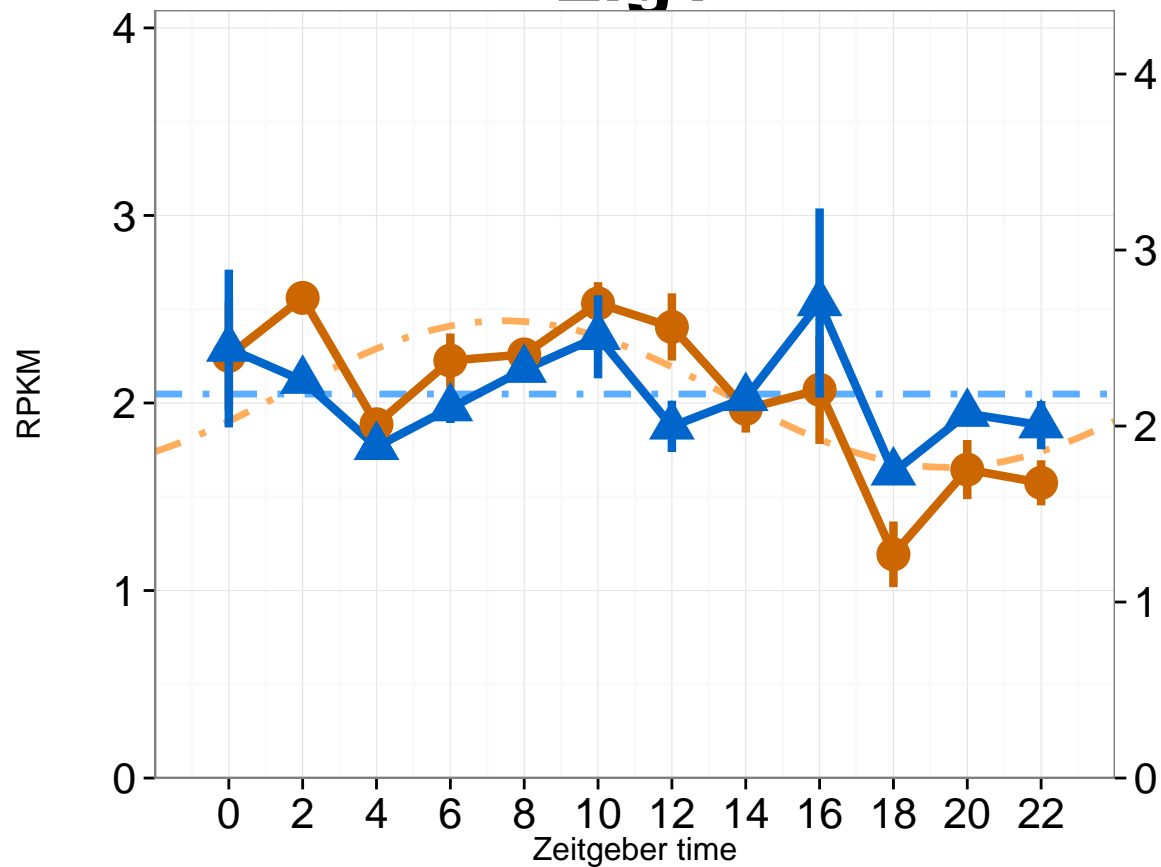

# Lig1

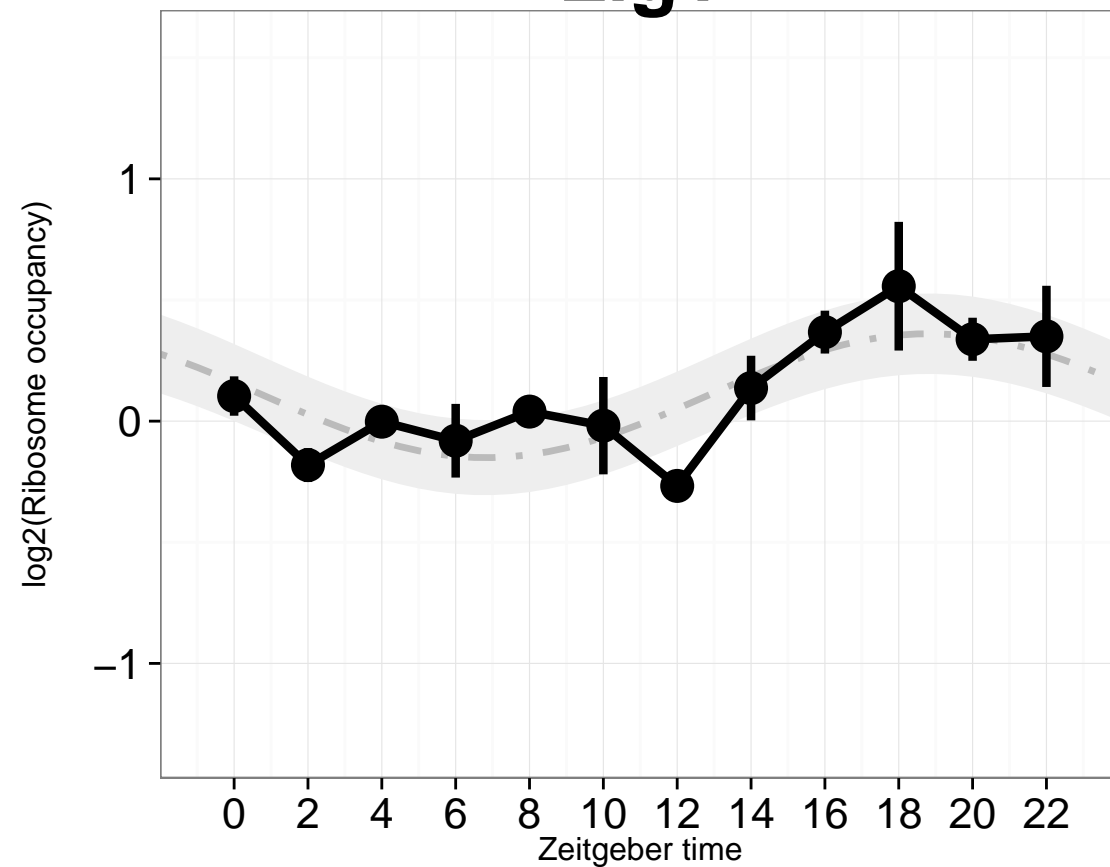

Supplement: Supplementary file 2419 [file 1]

## Erich2

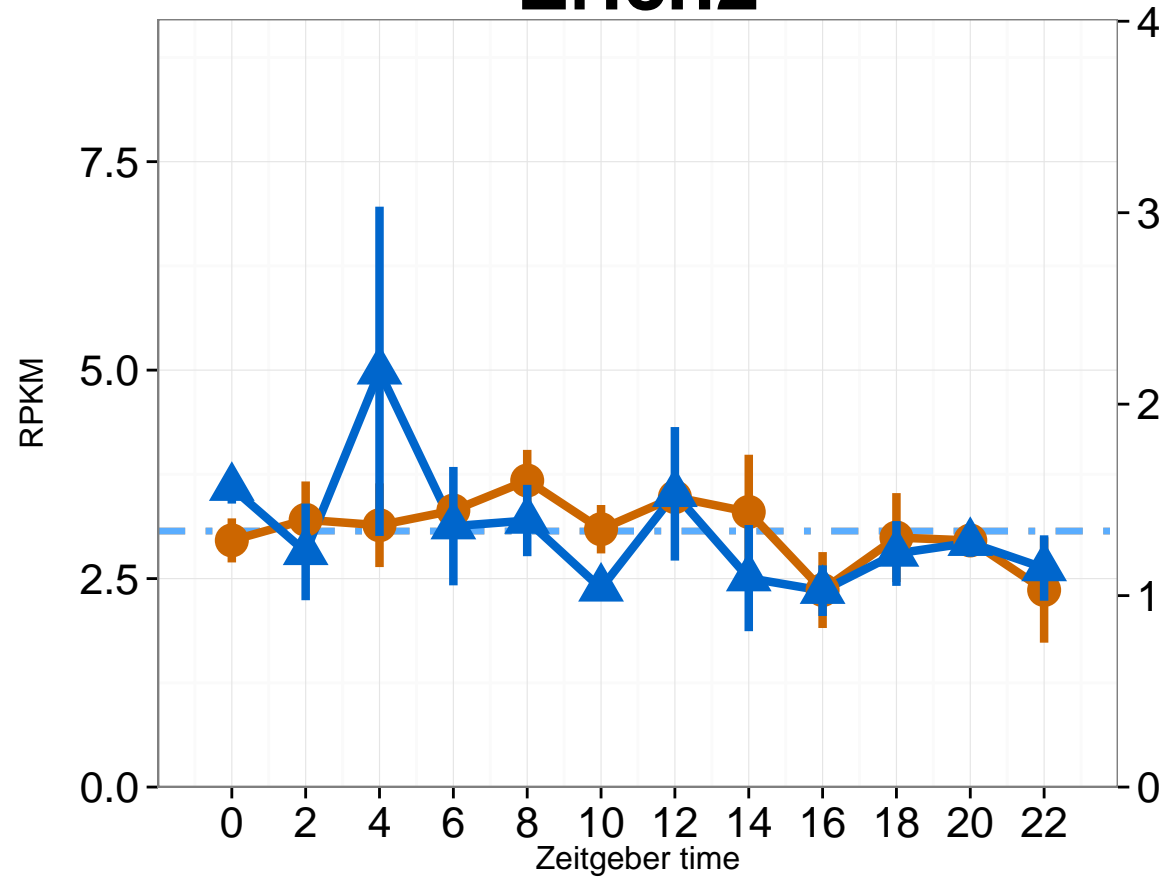

## Erich2

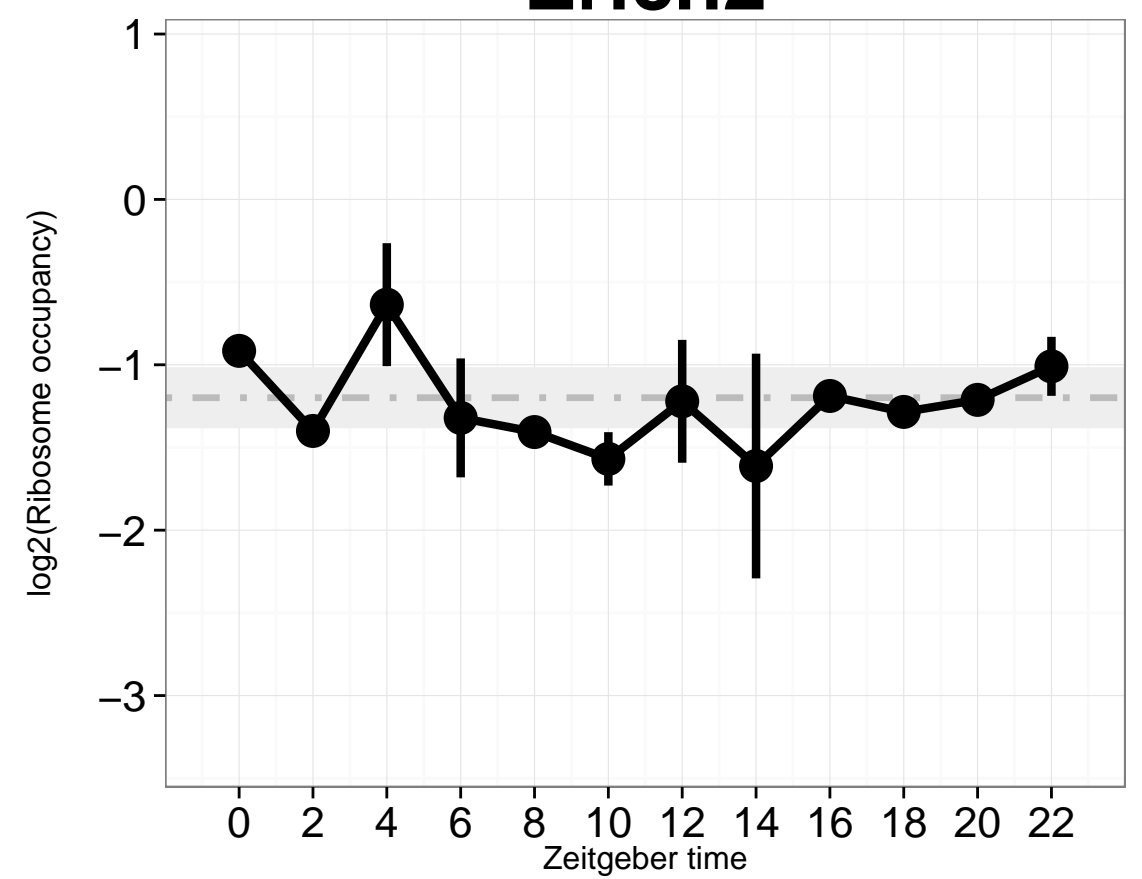

Supplement: Supplementary file 2420 [file 1]

# Actr5

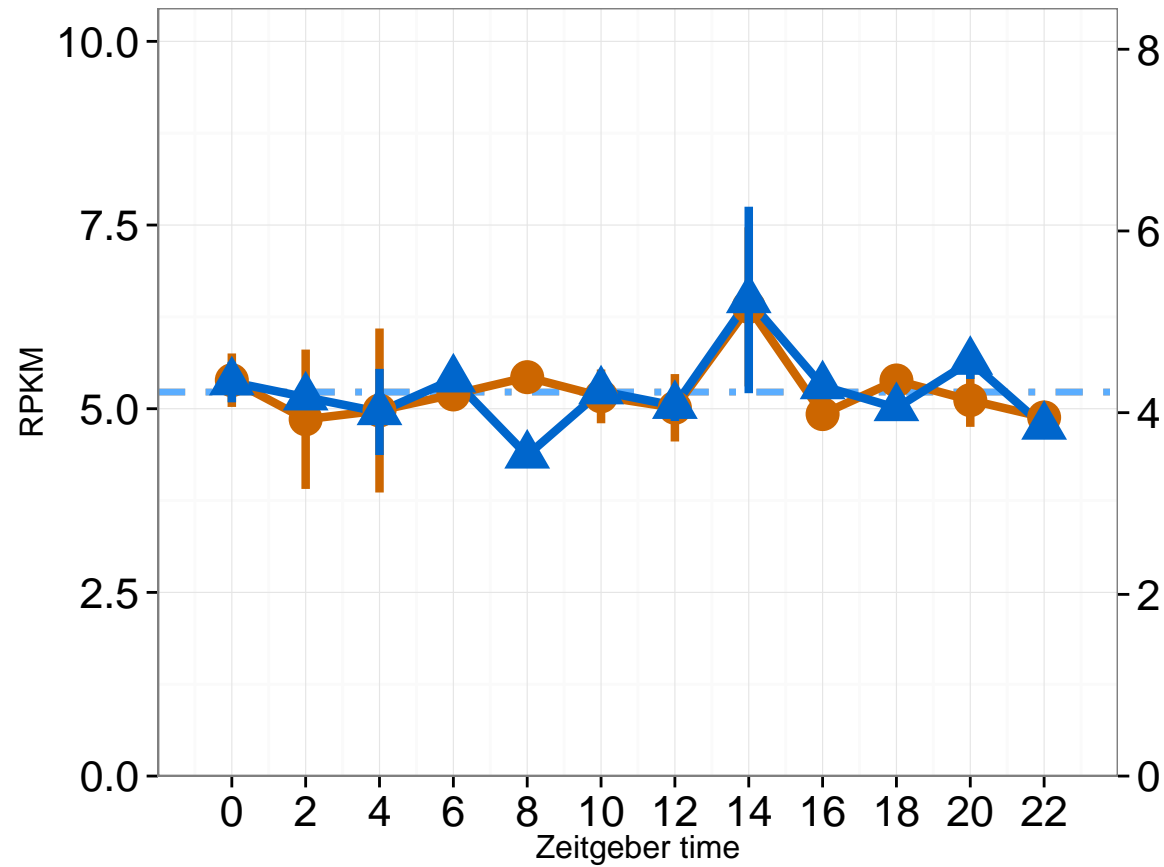

# Actr5

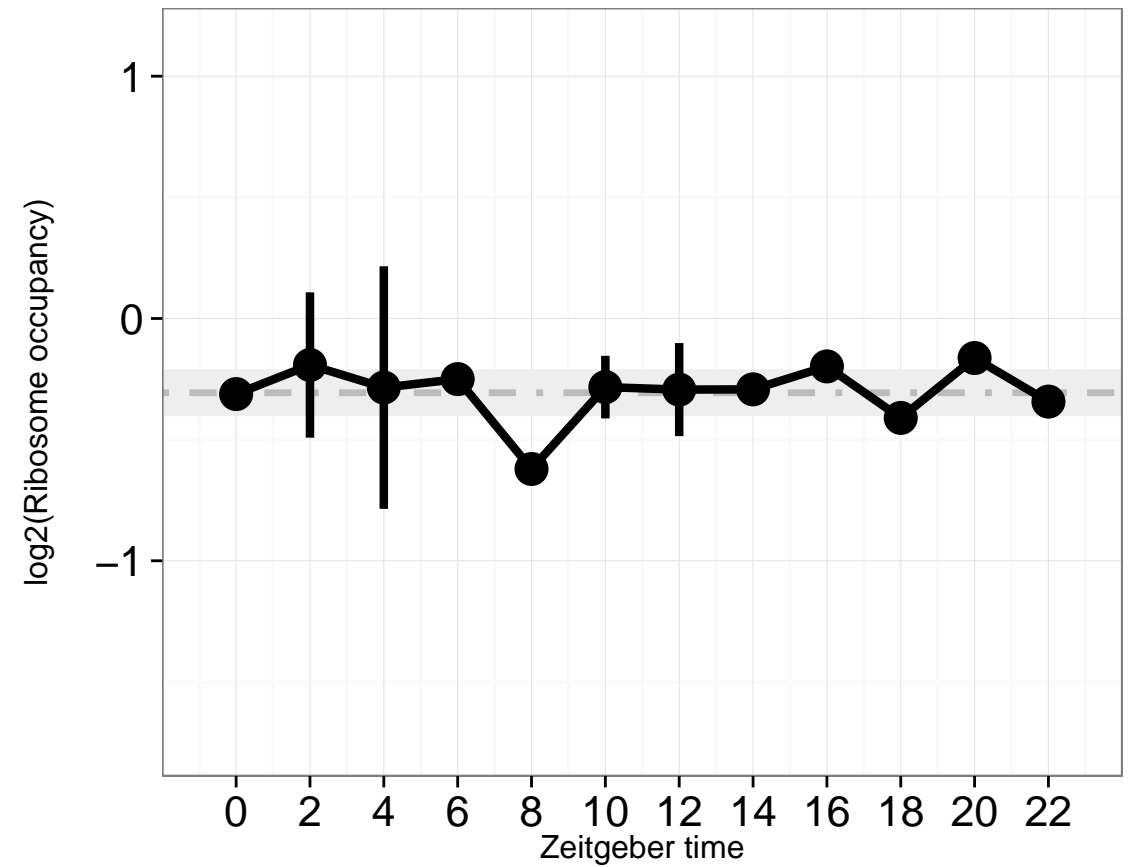

Supplement: Supplementary file 2421 [file 1]

**Tmsb15b1 TR**

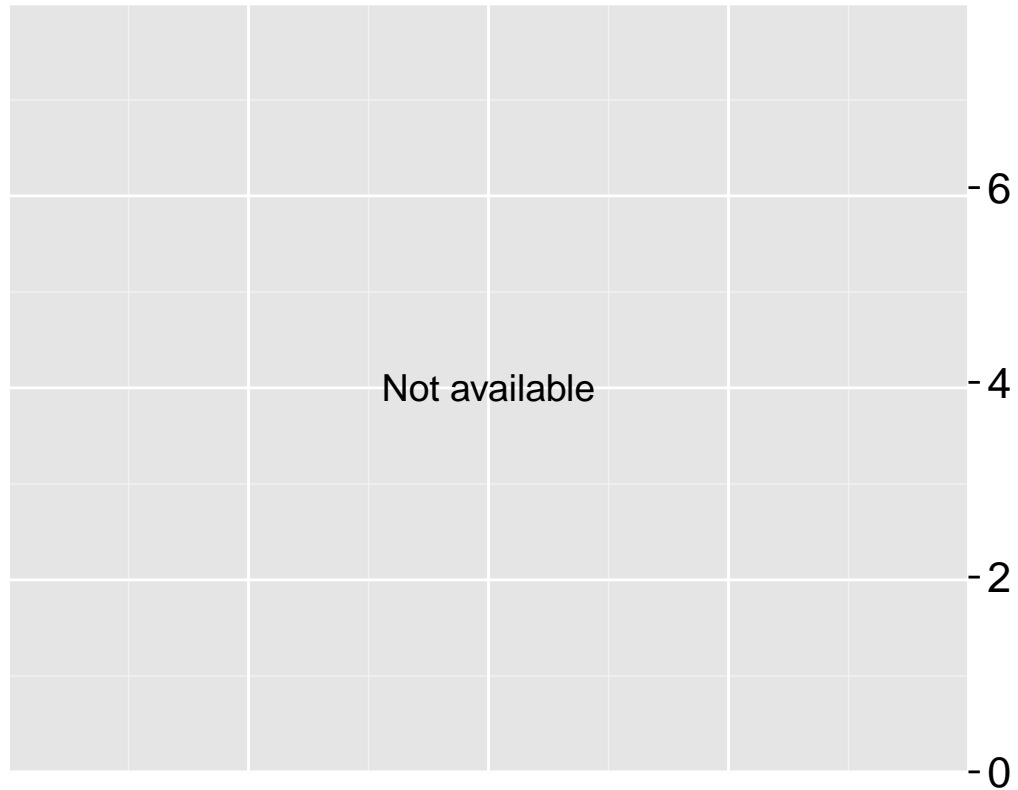

**Tmsb15b1 log2(Ribosome occupan**

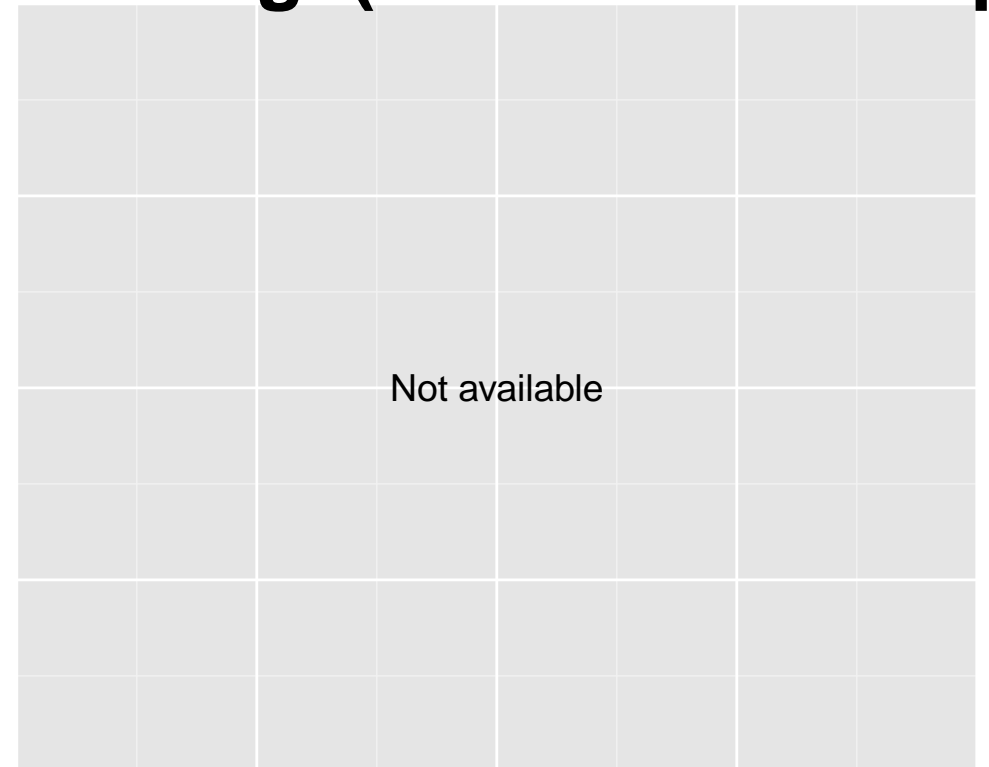

Supplement: Supplementary file 2422 [file 1]

# 4930431F12Rik

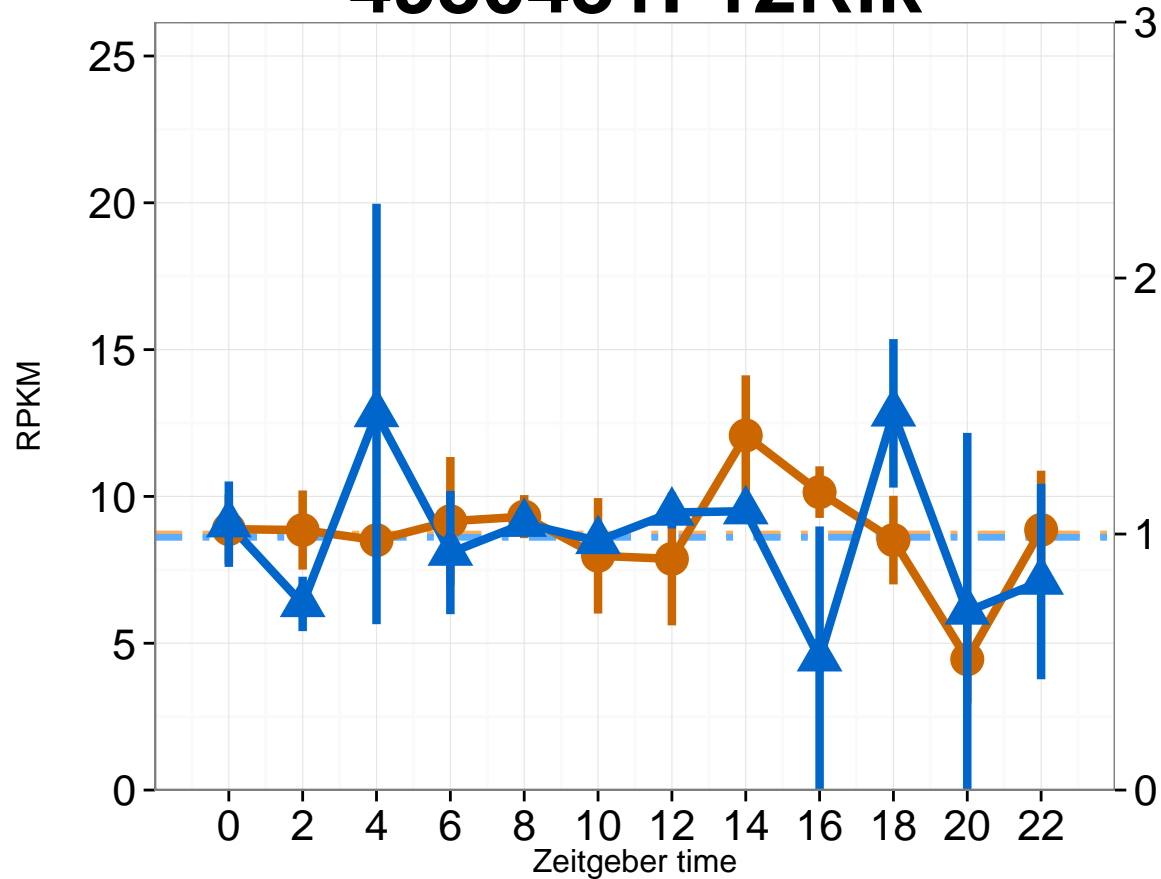

# 4930431F12Rik

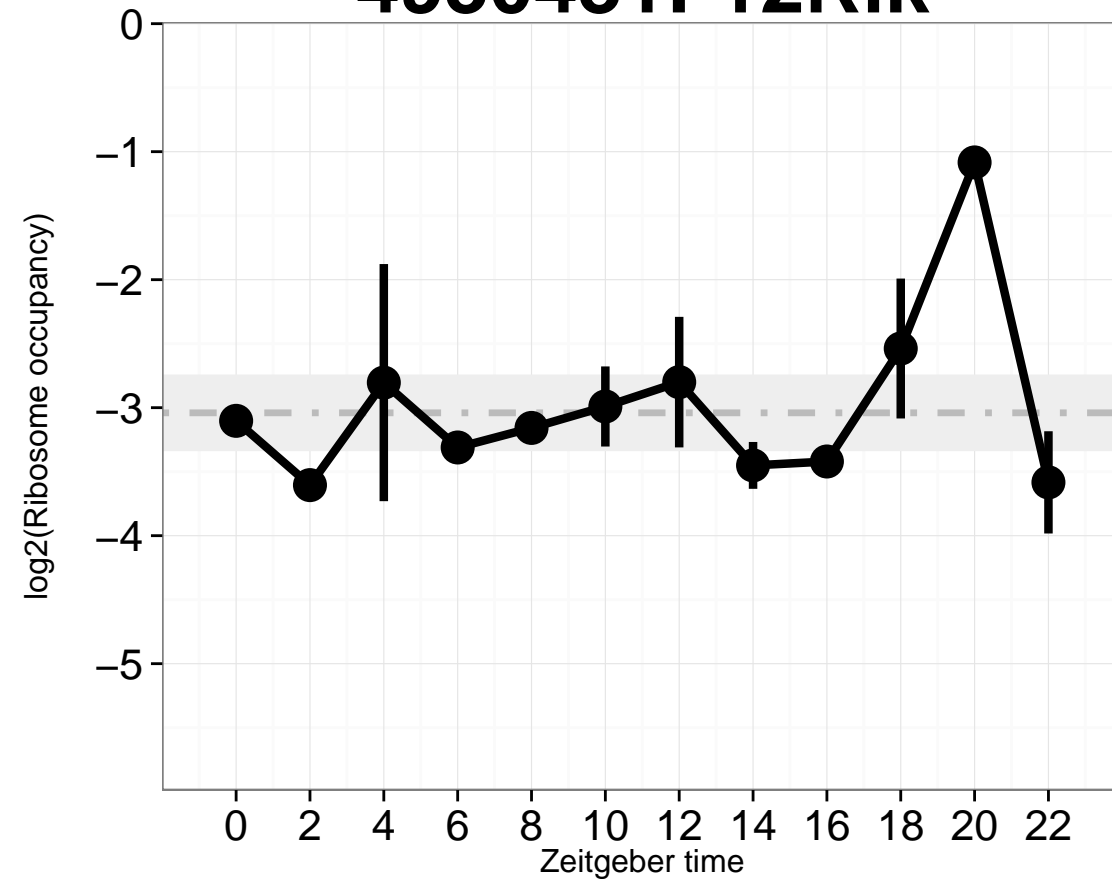

Supplement: Supplementary file 2423 [file 1]

## 2610008E11Rik

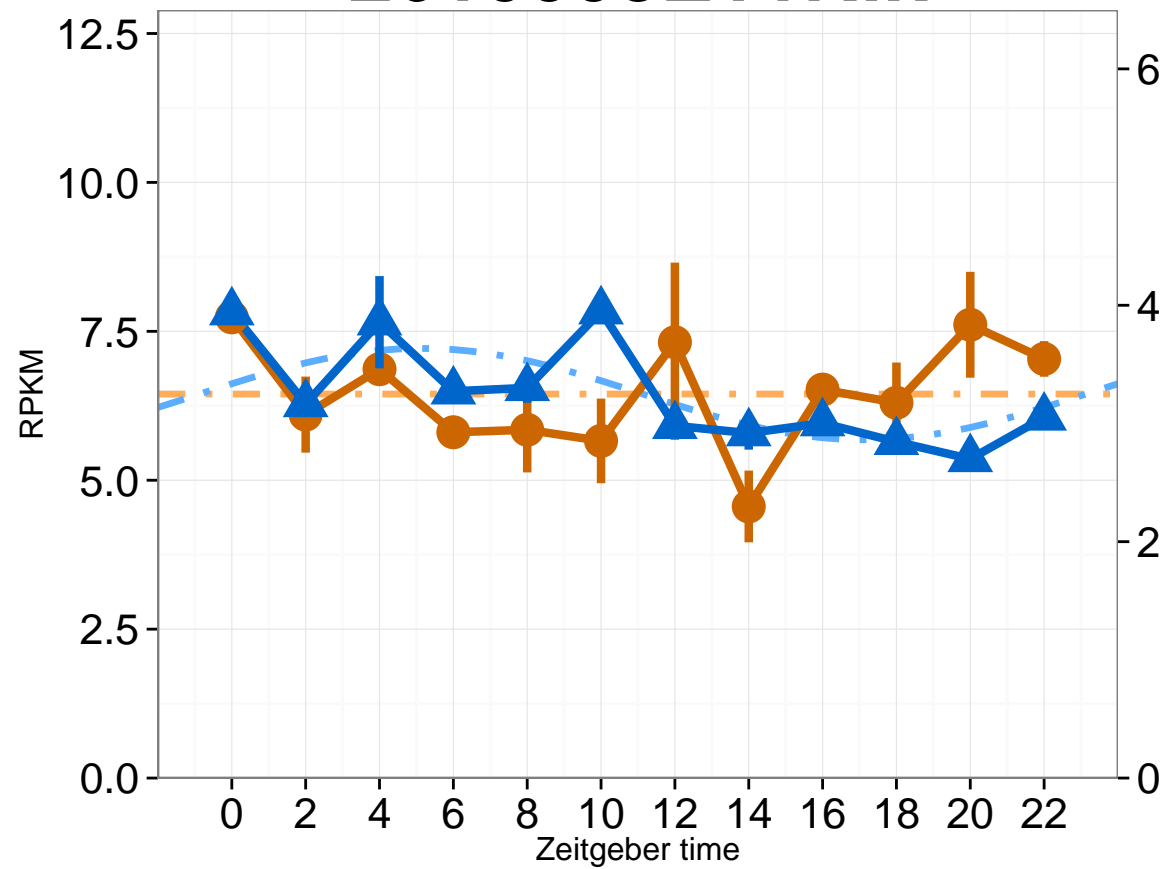

## 2610008E11Rik

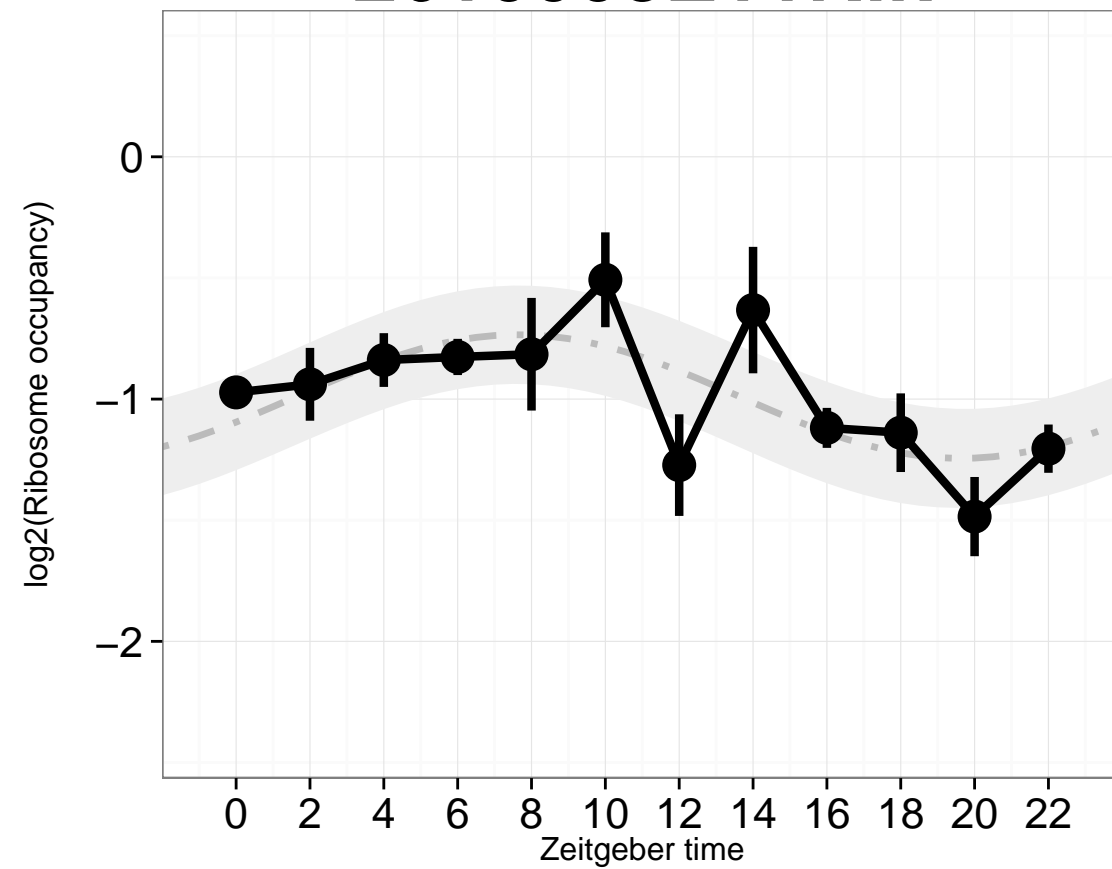

Supplement: Supplementary file 2424 [file 1]

## Sod1

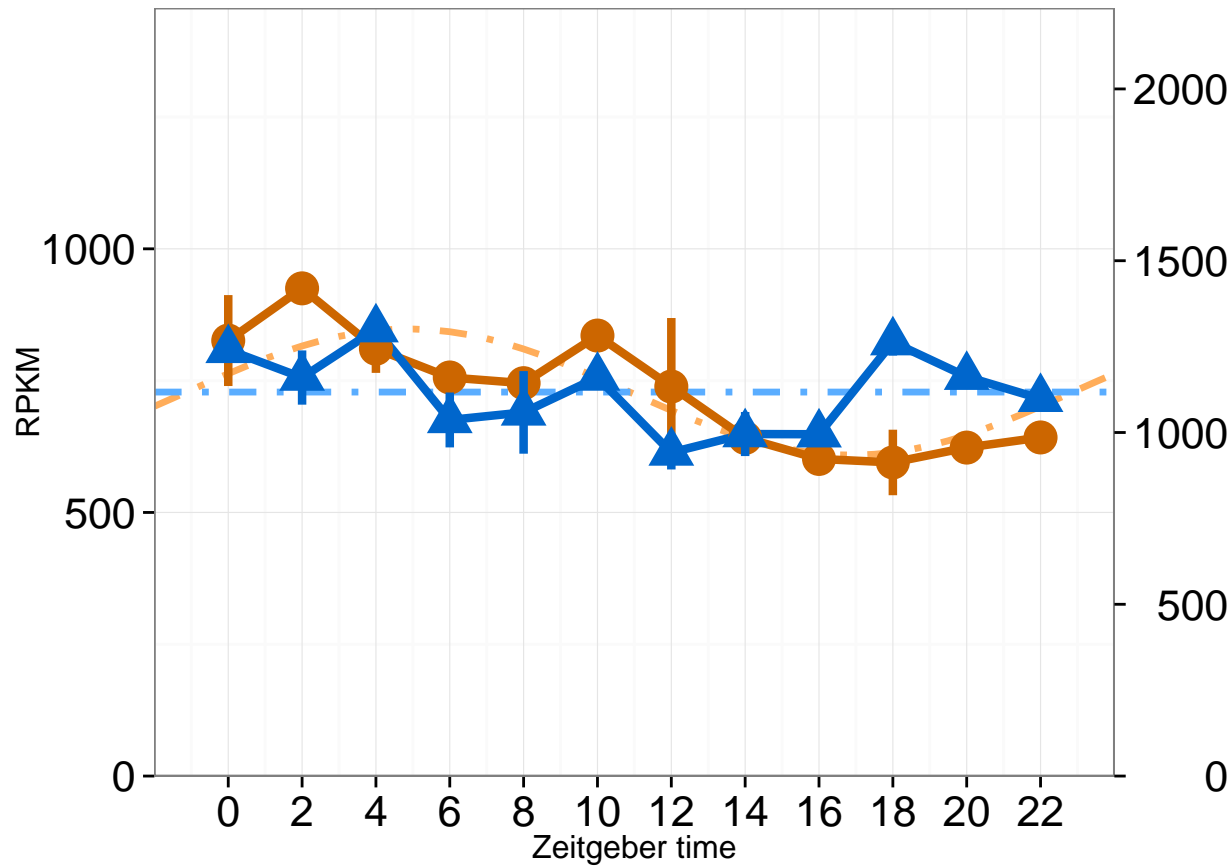

## Sod1

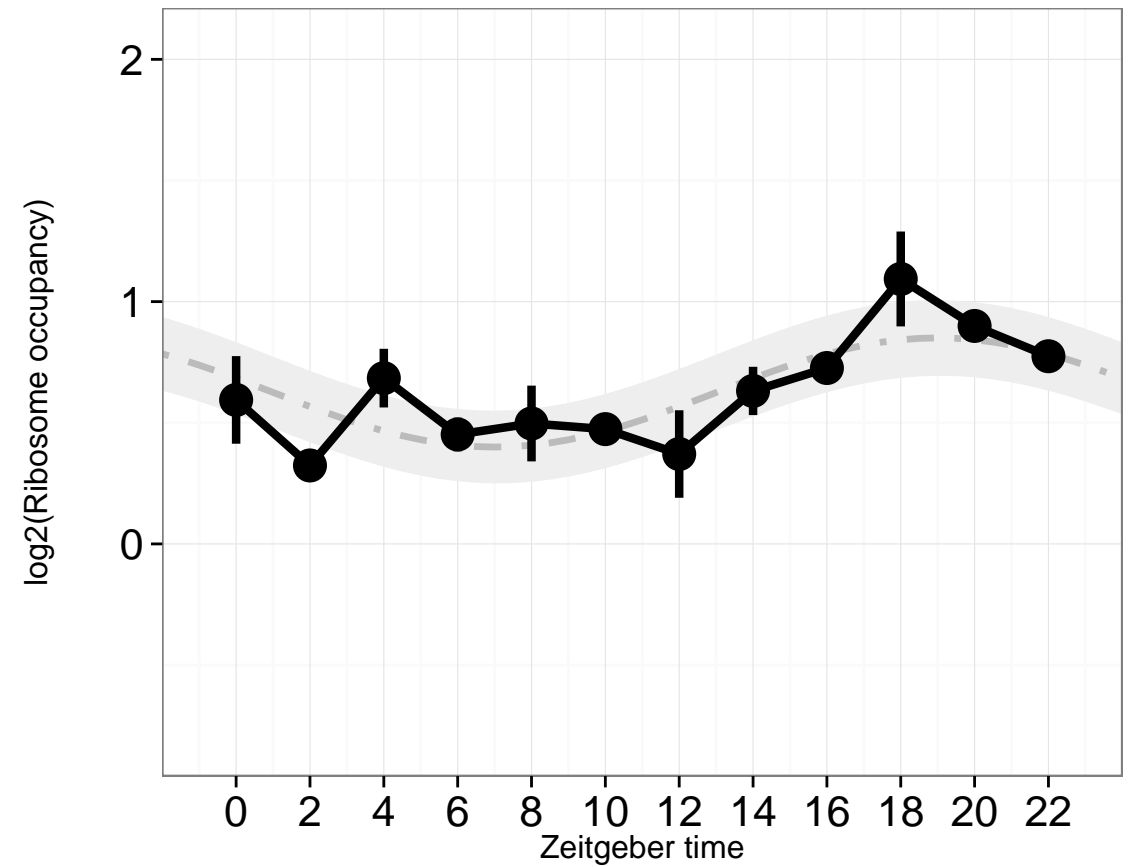

Supplement: Supplementary file 2425 [file 1]

## Dtd1

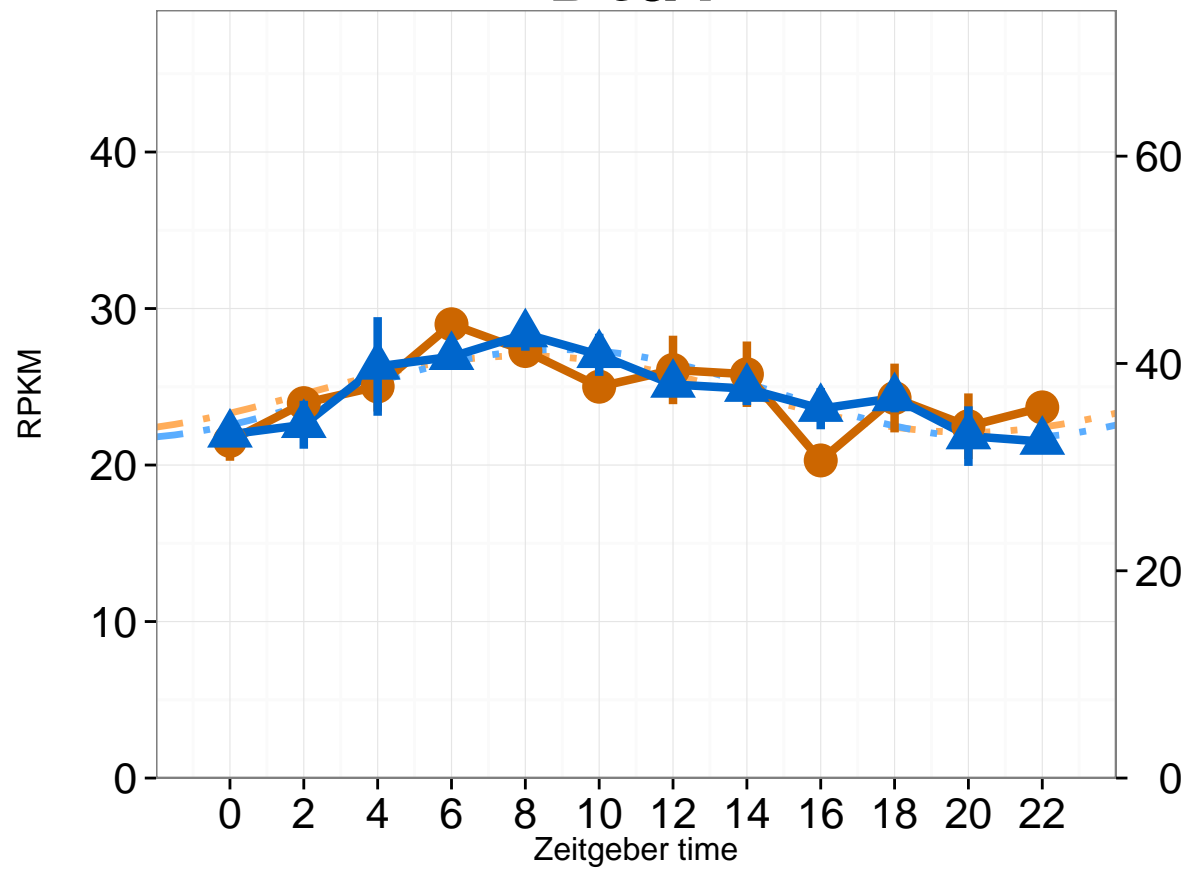

## Dtd1

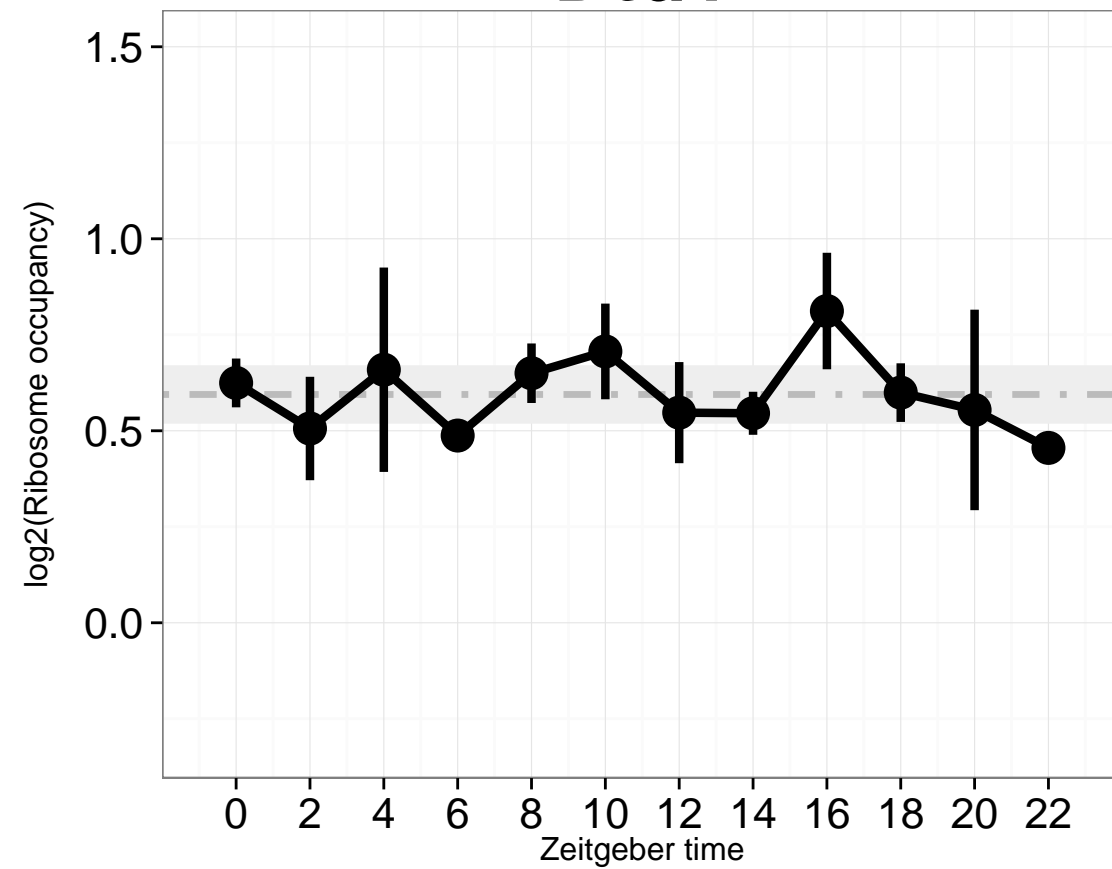

Supplement: Supplementary file 2426 [file 1]

## Stoml2

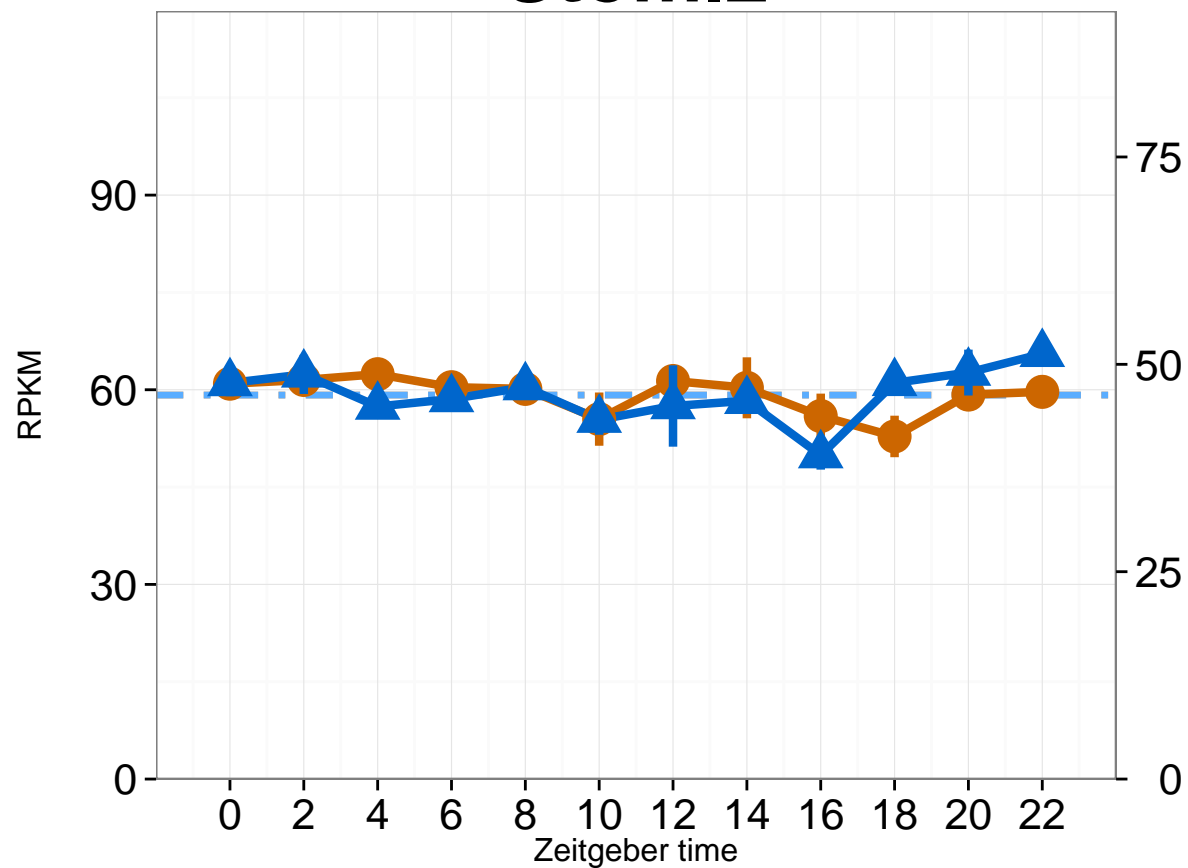

## Stoml2

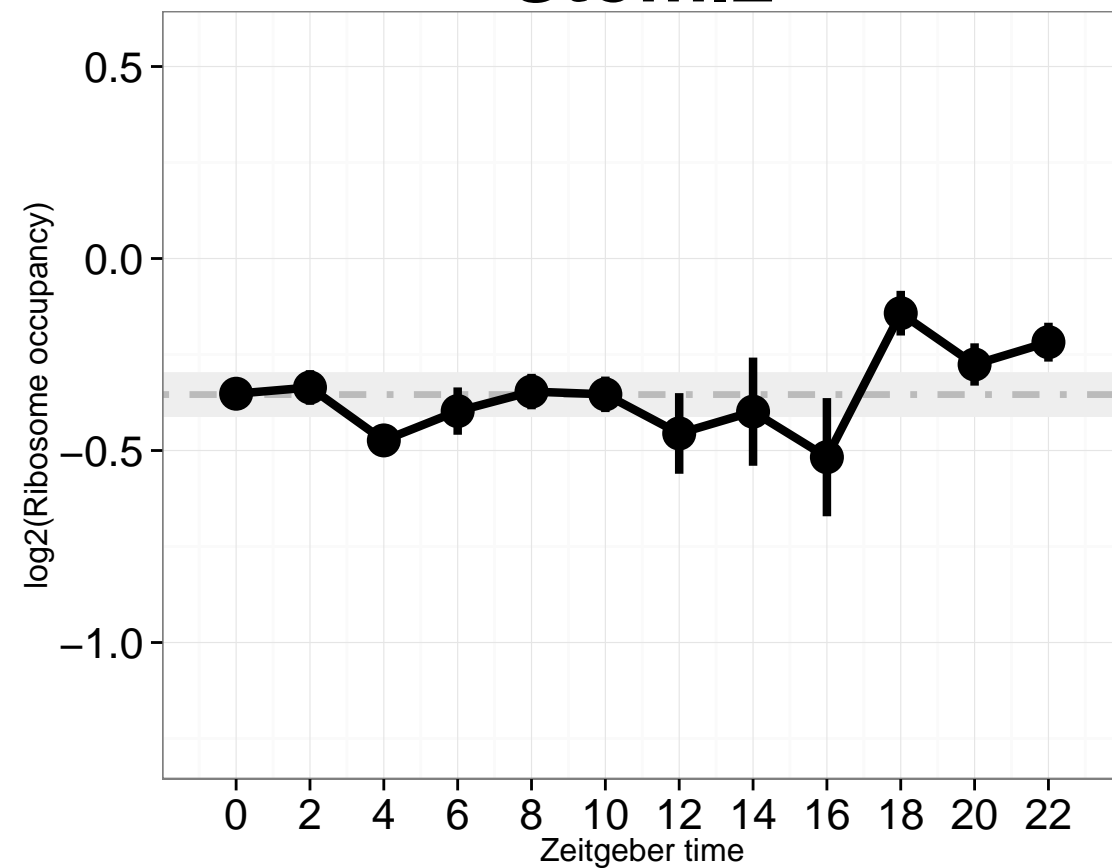

Supplement: Supplementary file 2427 [file 1]

## Cep89

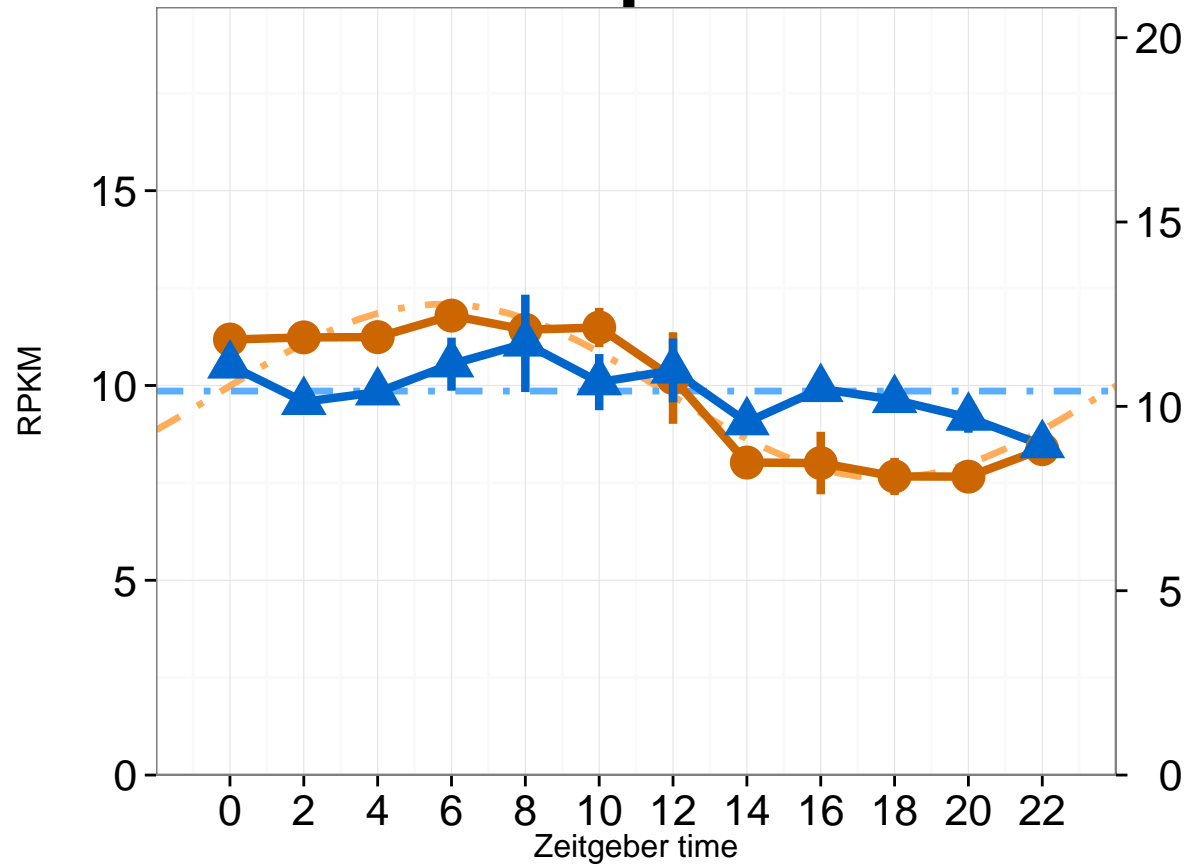

## Cep89

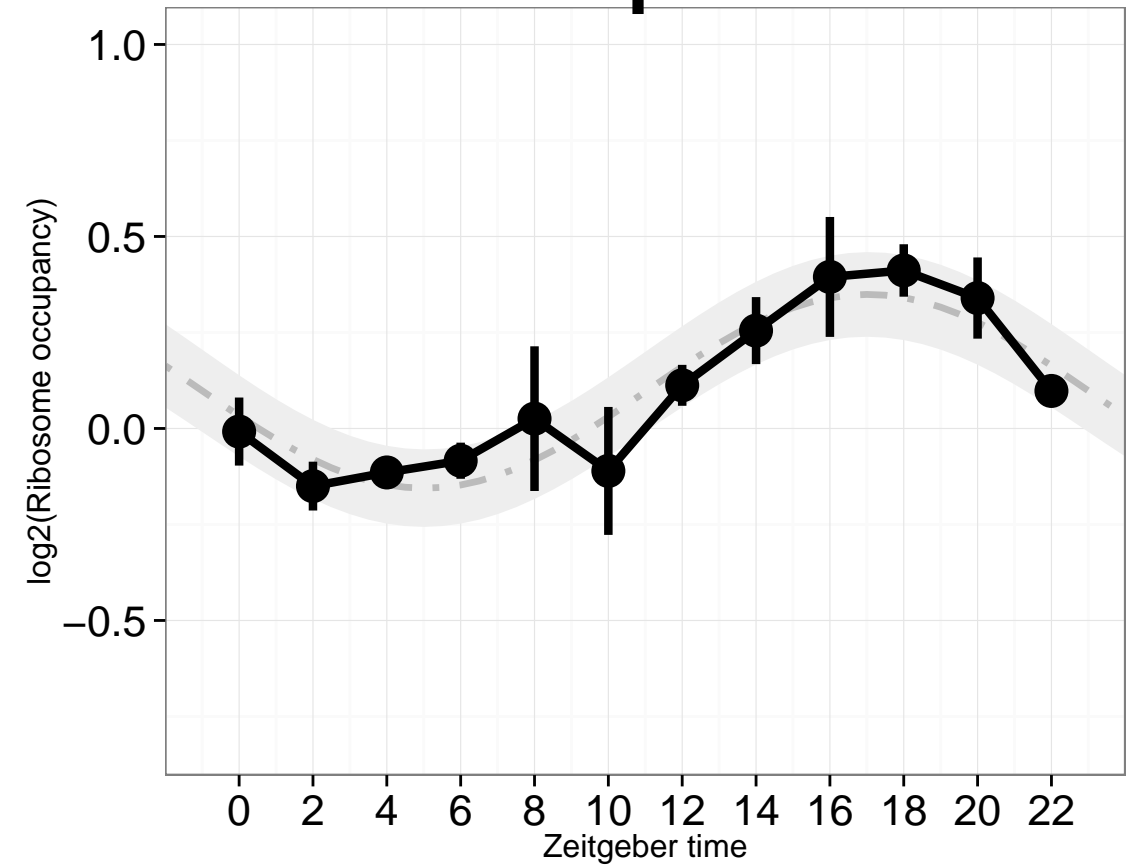

Supplement: Supplementary file 2428 [file 1]

# Atp6v0b

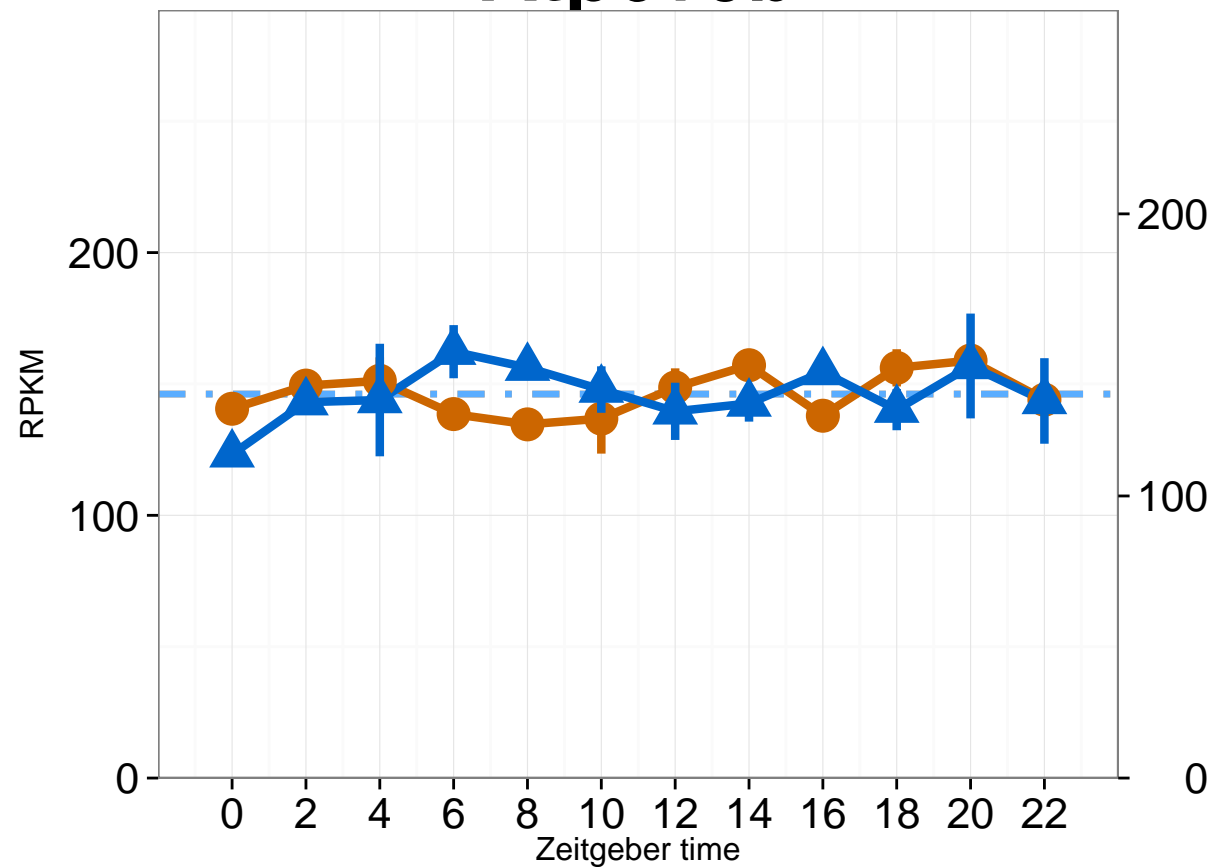

# Atp6v0b

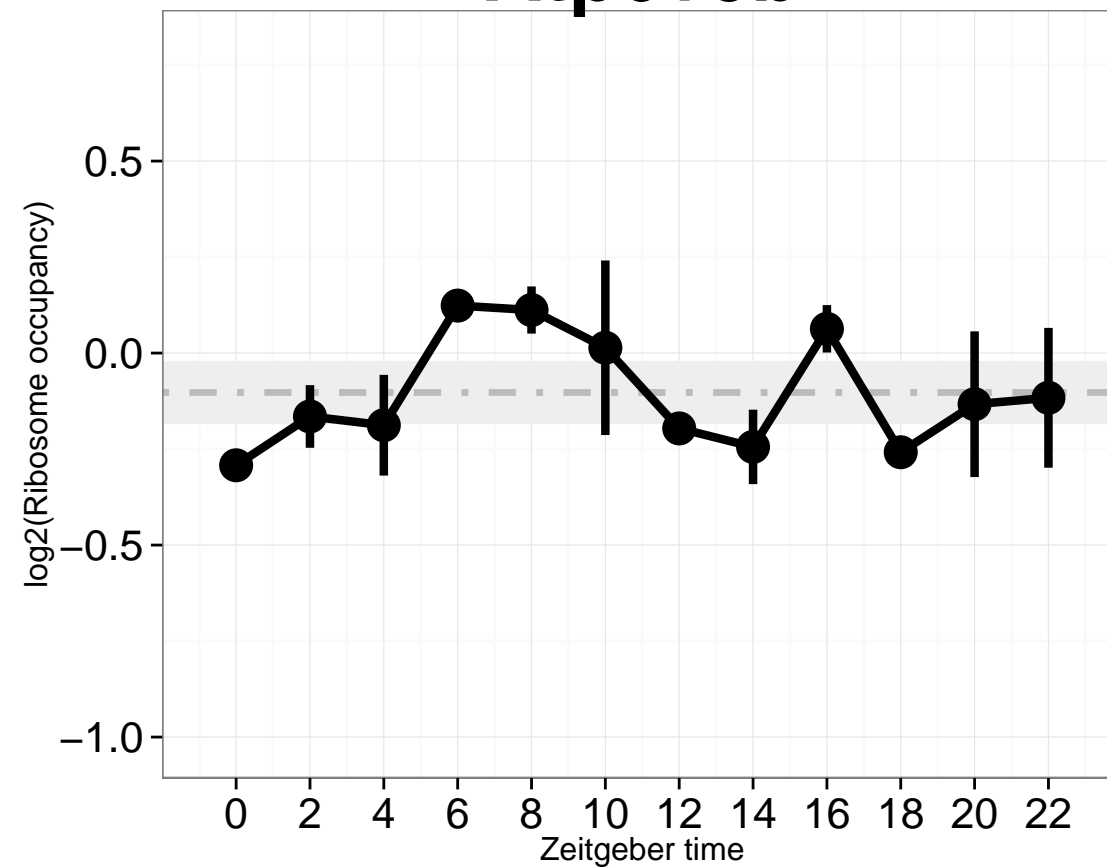

Supplement: Supplementary file 2429 [file 1]

# Inpp4a

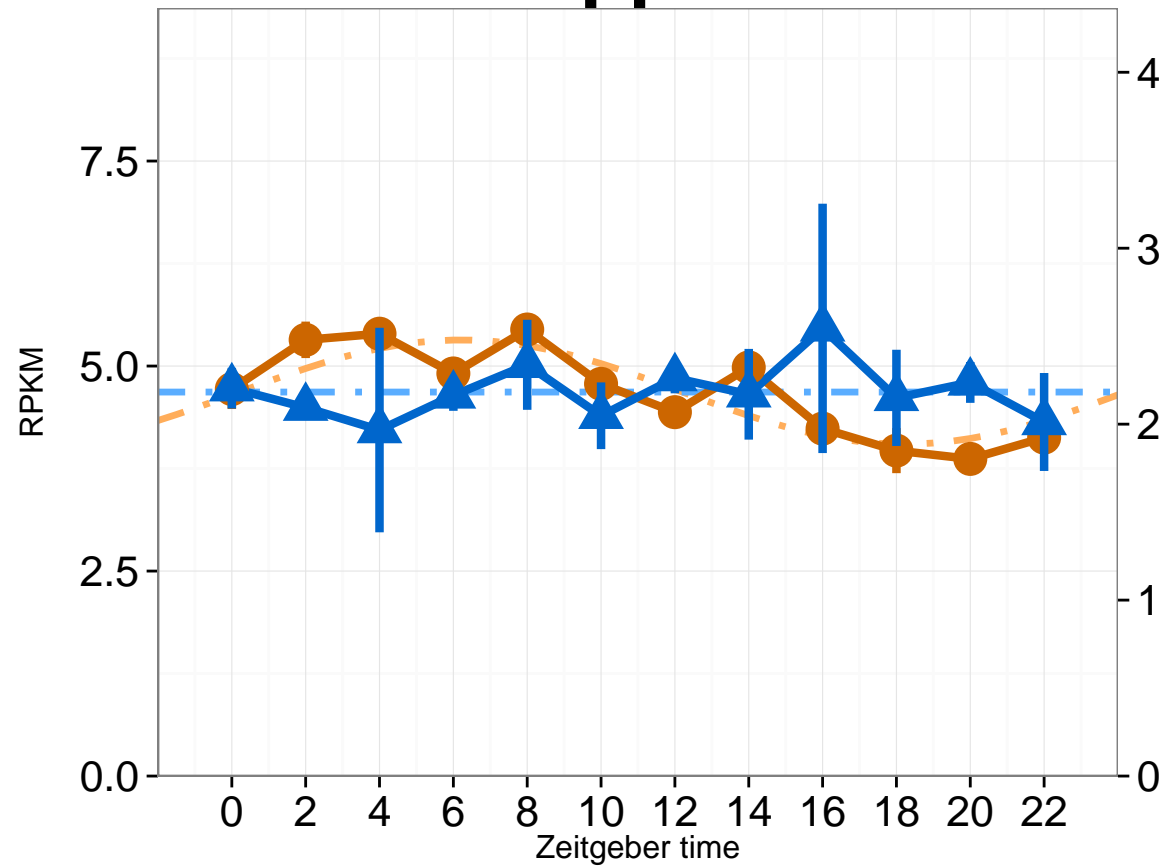

# Inpp4a

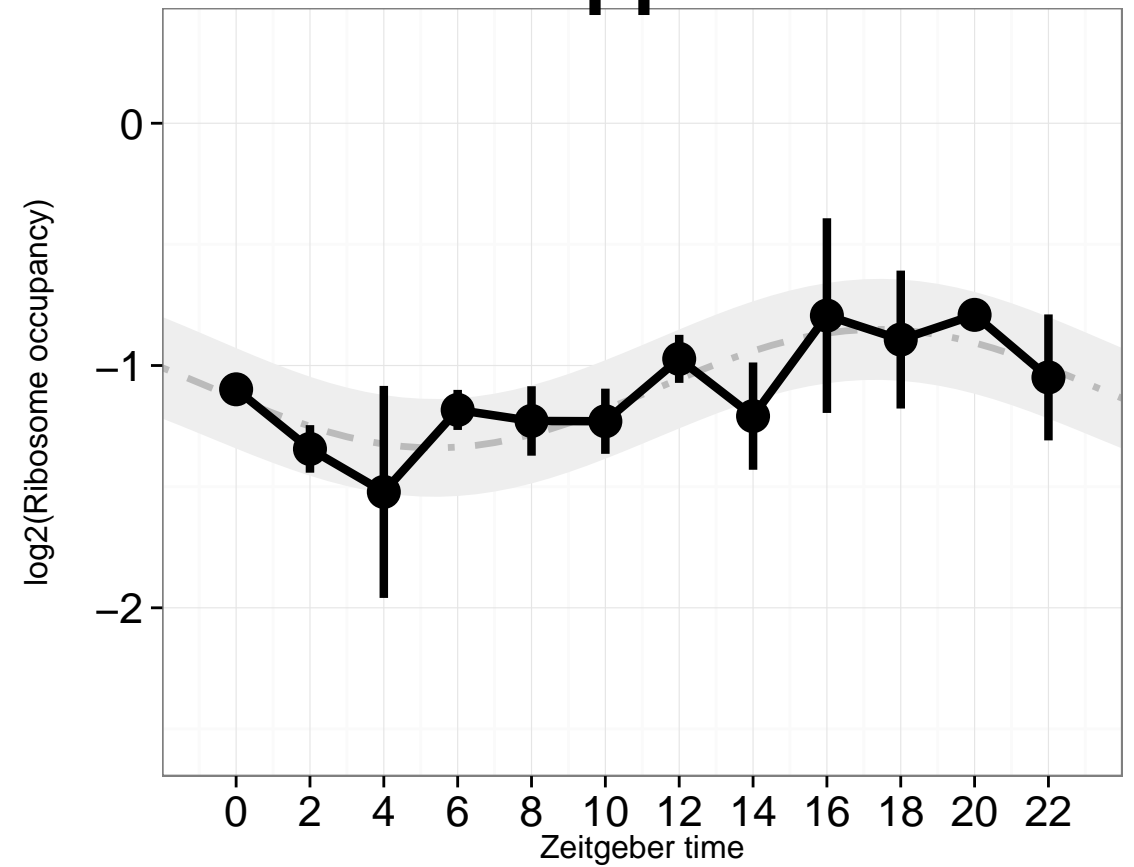

Supplement: Supplementary file 2430 [file 1]

## Heca

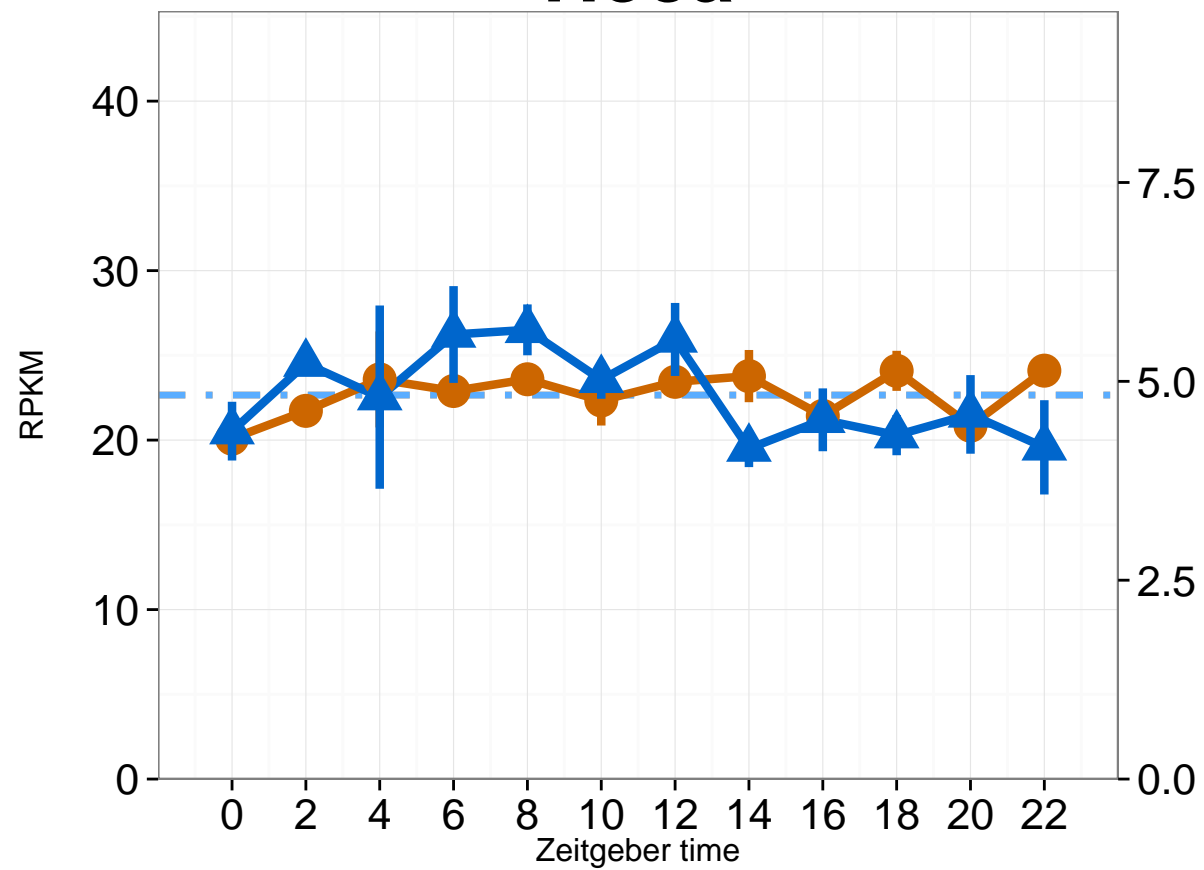

## Heca

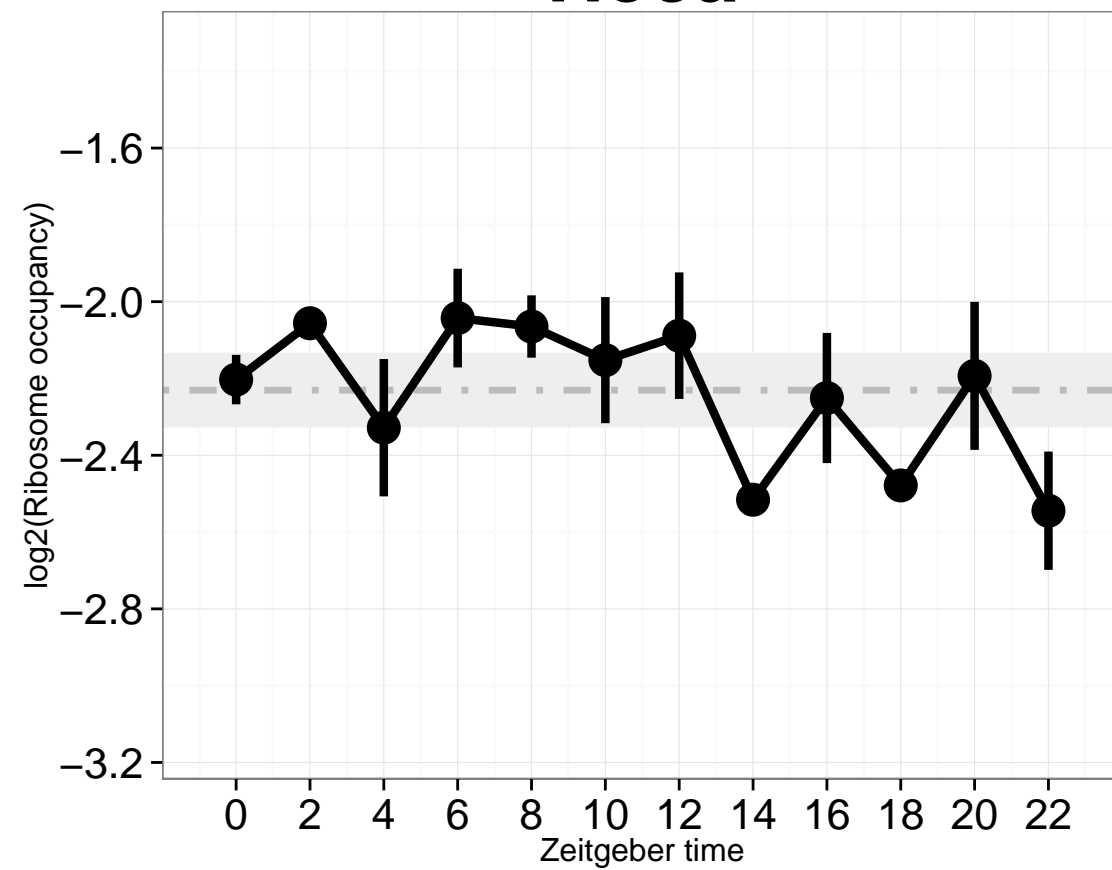

Supplement: Supplementary file 2431 [file 1]

# Arrb1

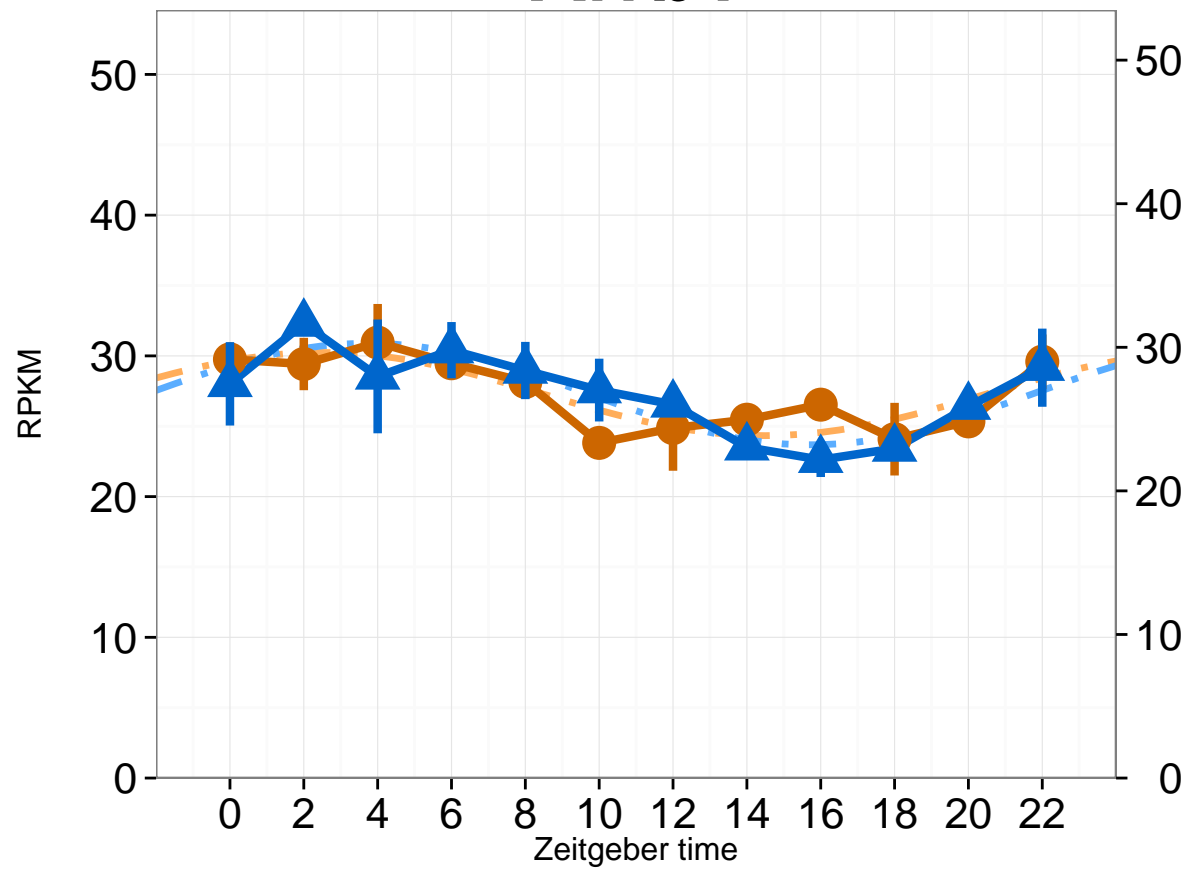

# Arrb1

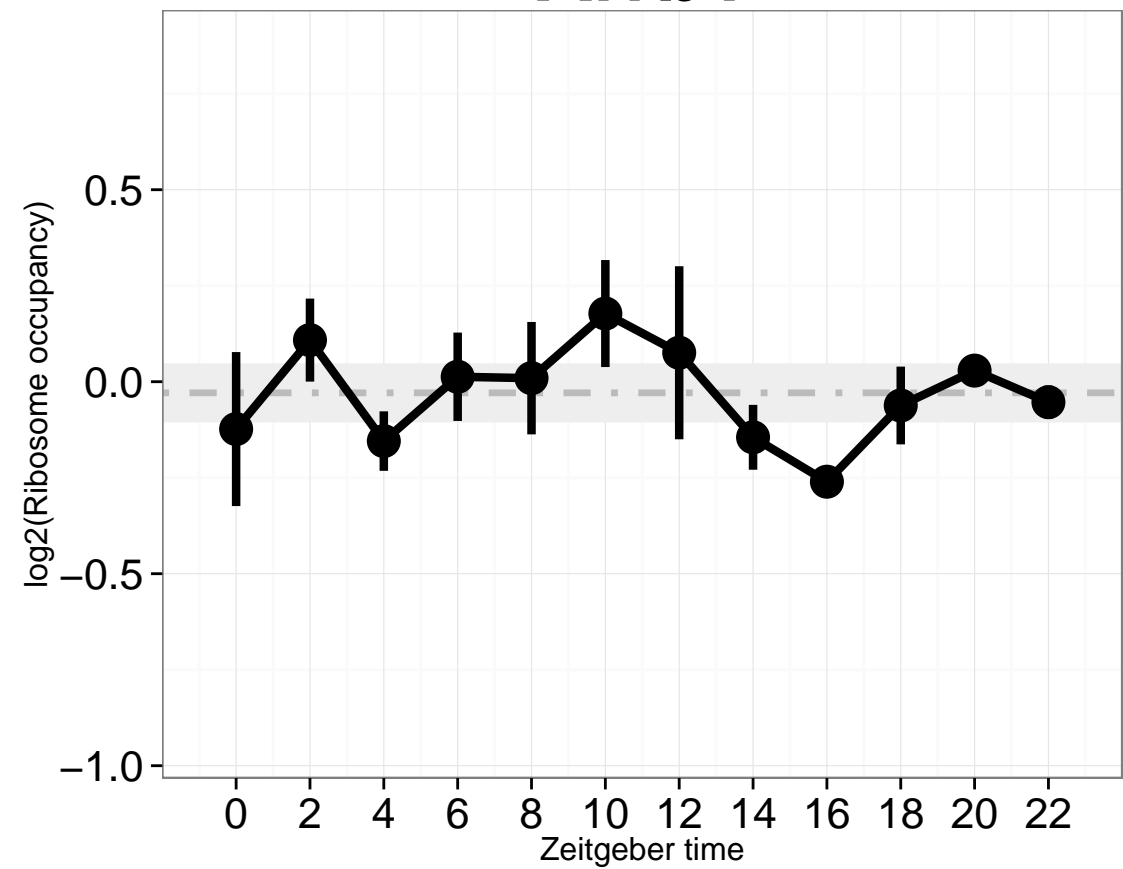

Supplement: Supplementary file 2432 [file 1]

## Ddx17

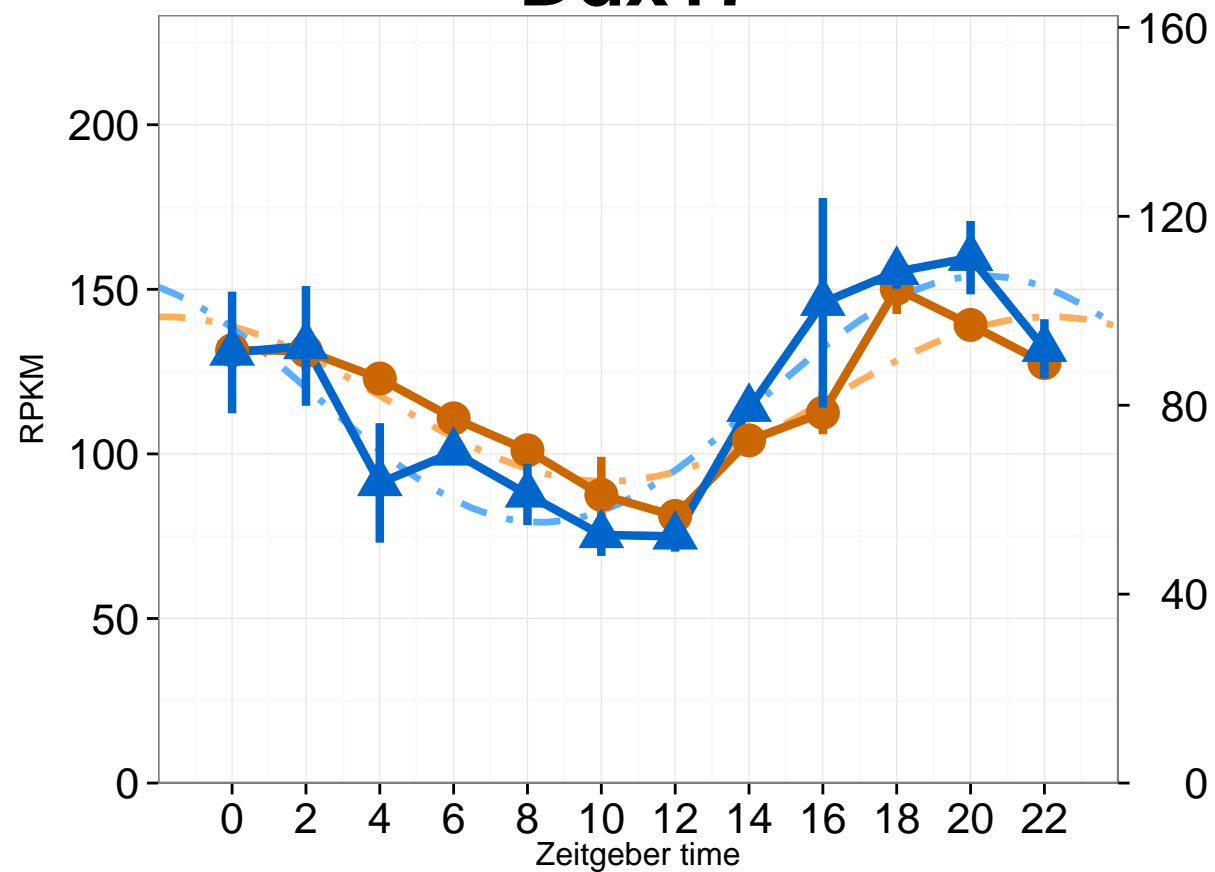

## Ddx17

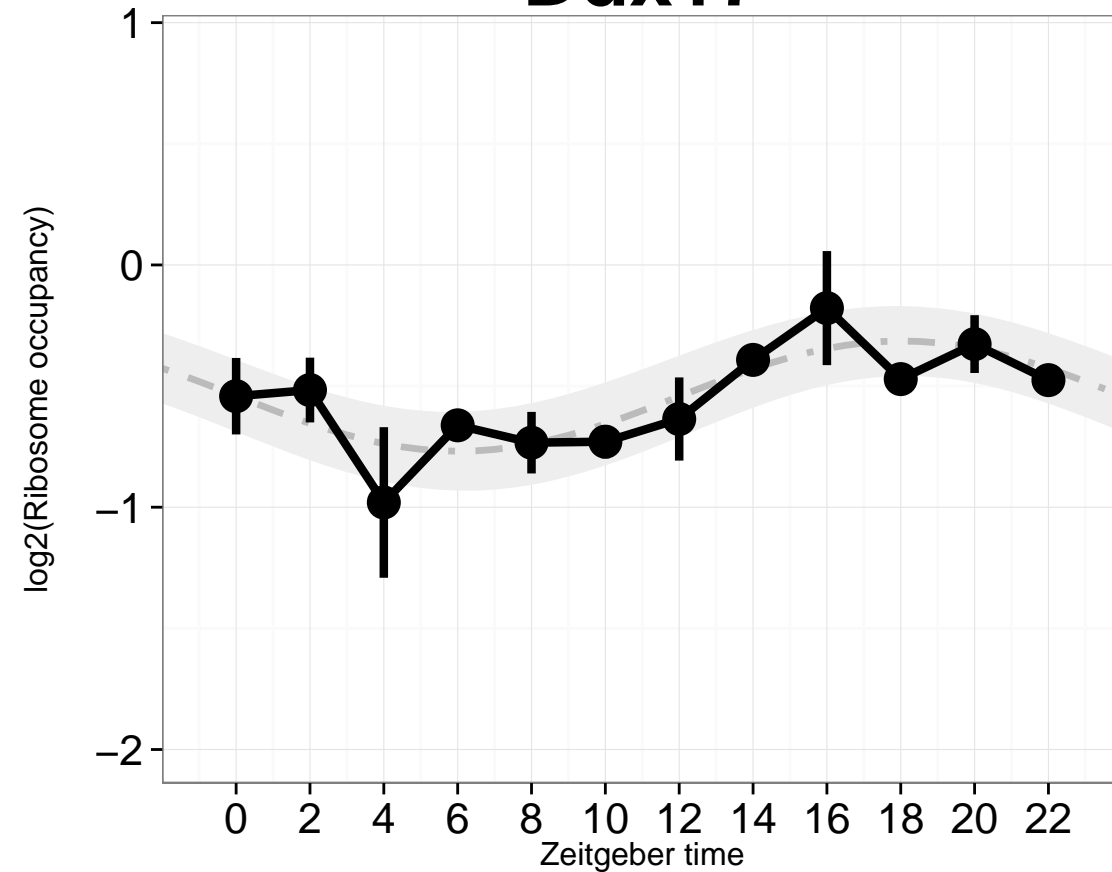

Supplement: Supplementary file 2433 [file 1]

## AI462493

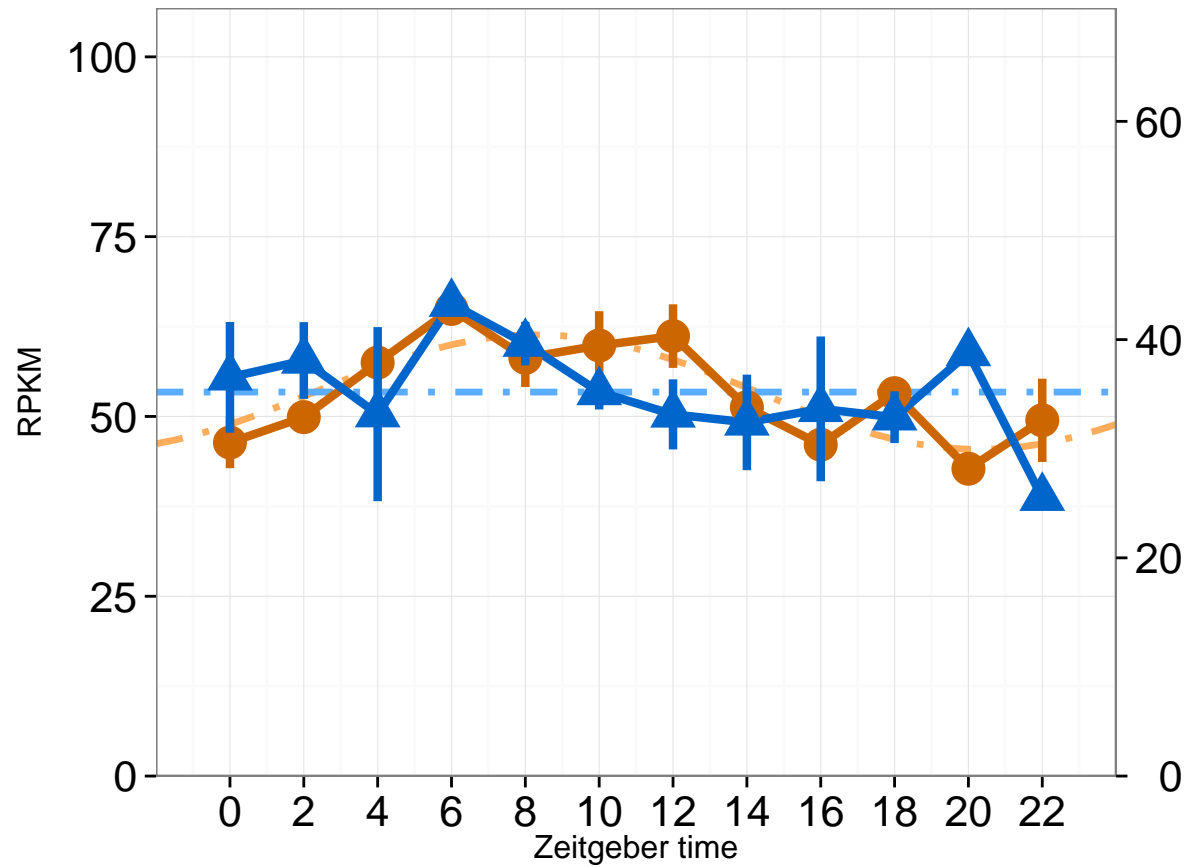

## AI462493

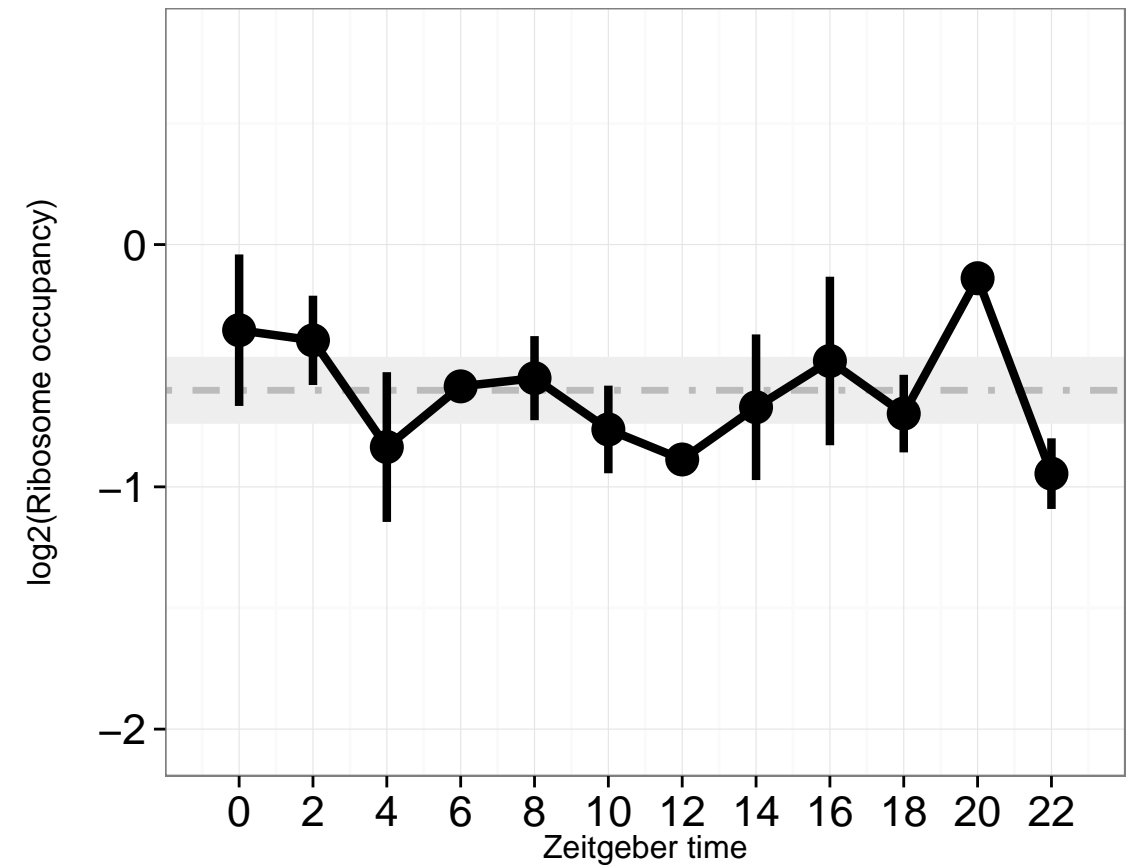

Supplement: Supplementary file 2434 [file 1]

## Stbd1

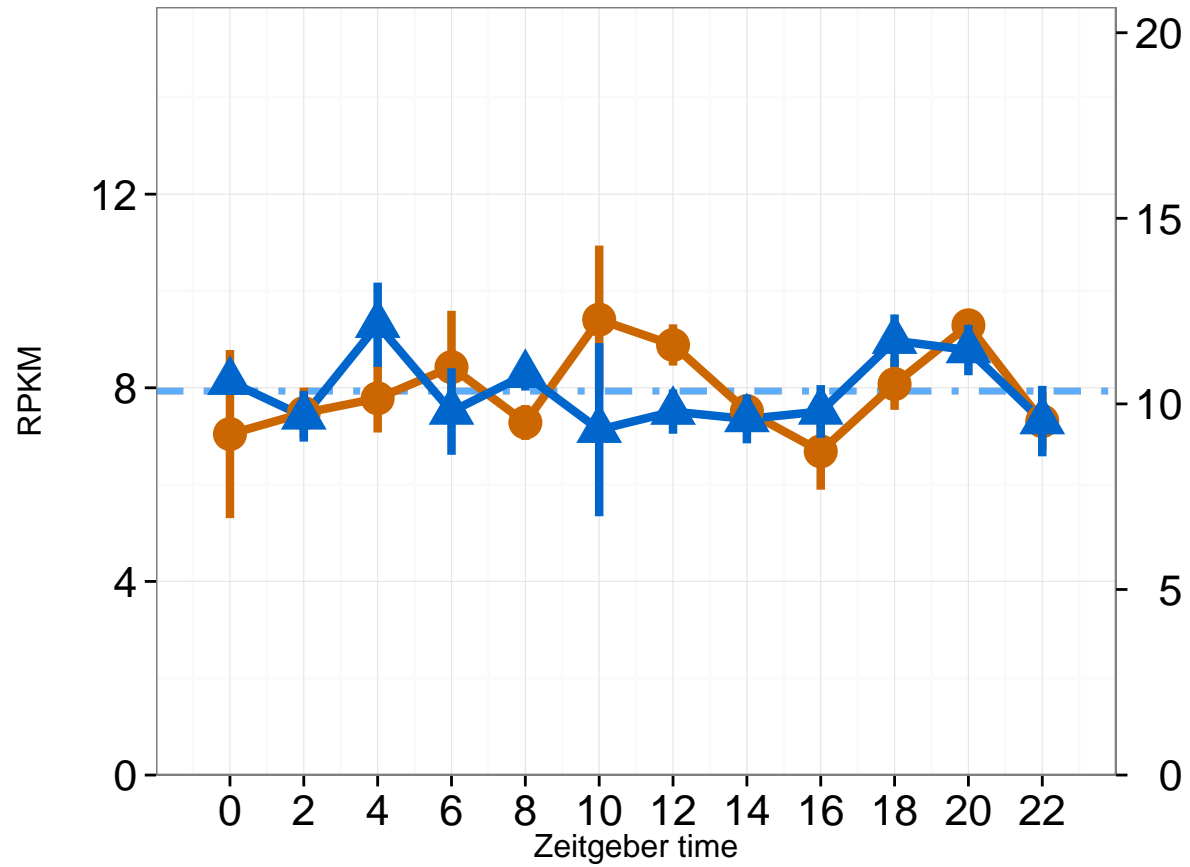

## Stbd1

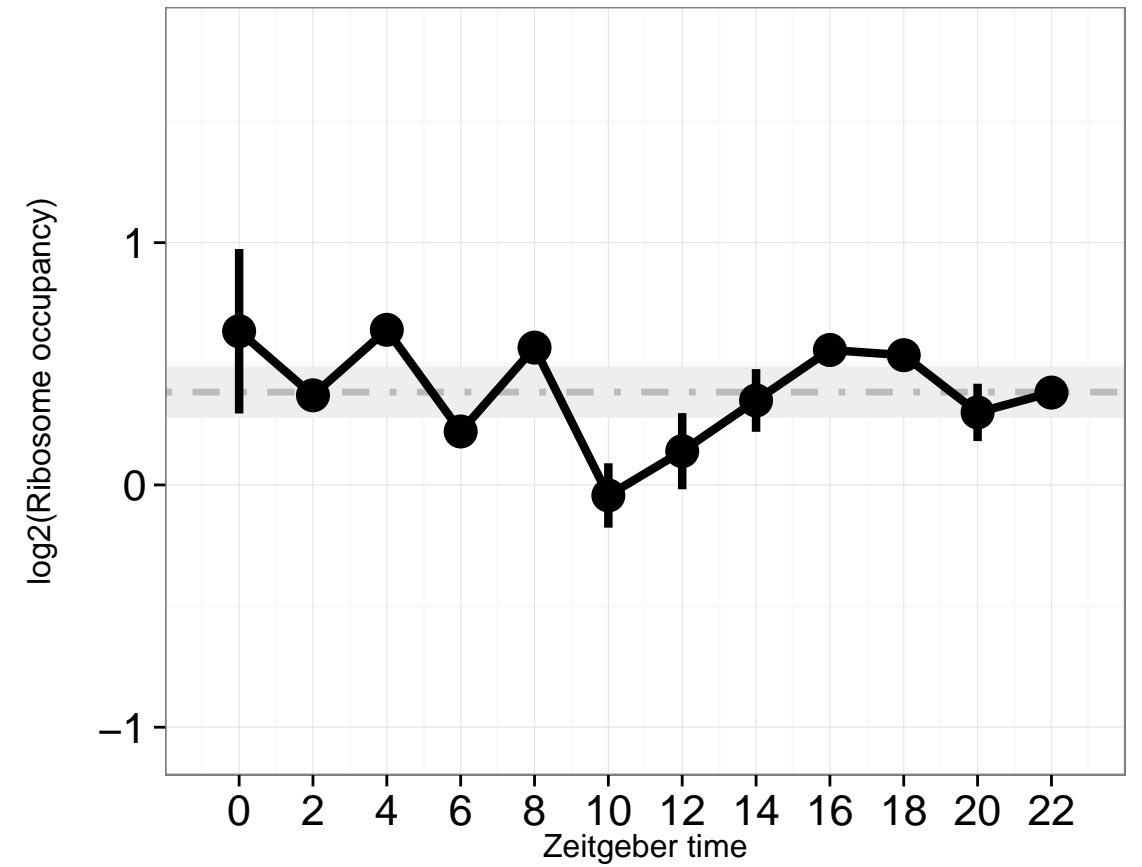

Supplement: Supplementary file 2435 [file 1]

## Spats2

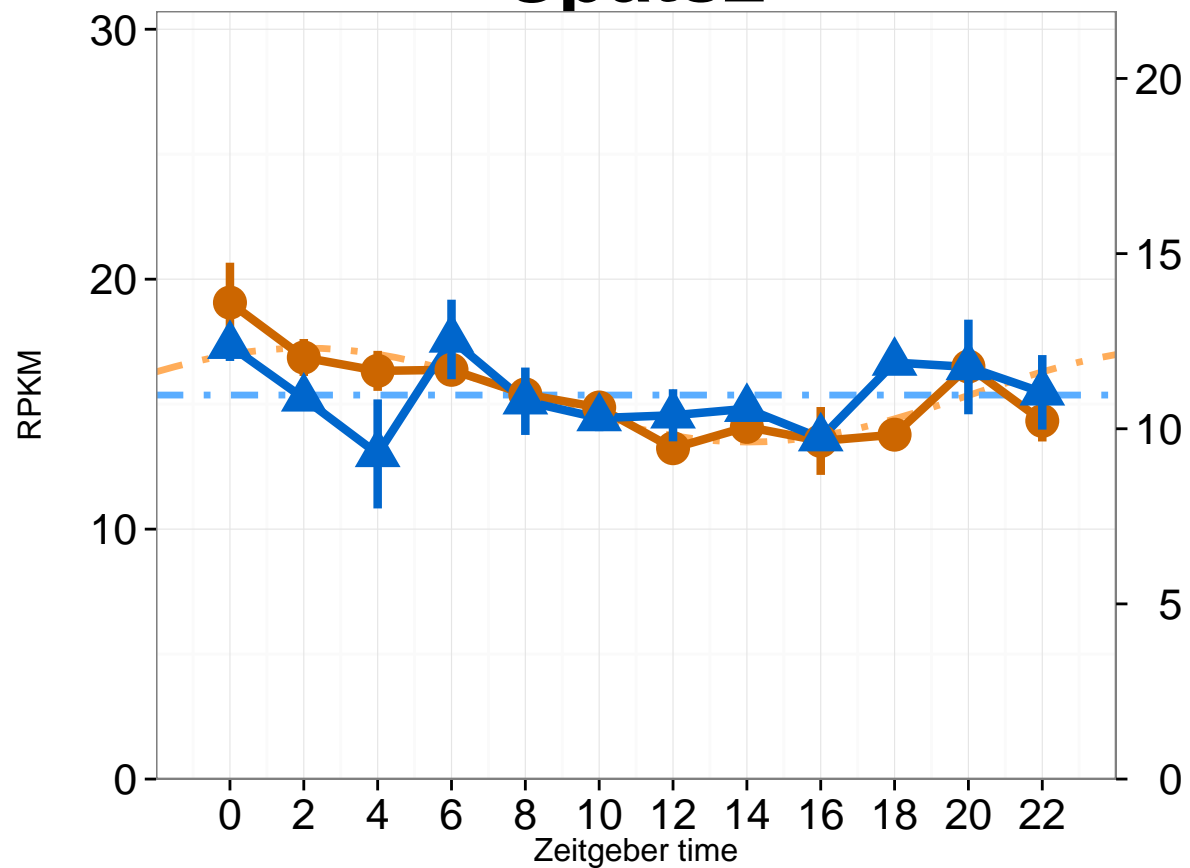

## Spats2

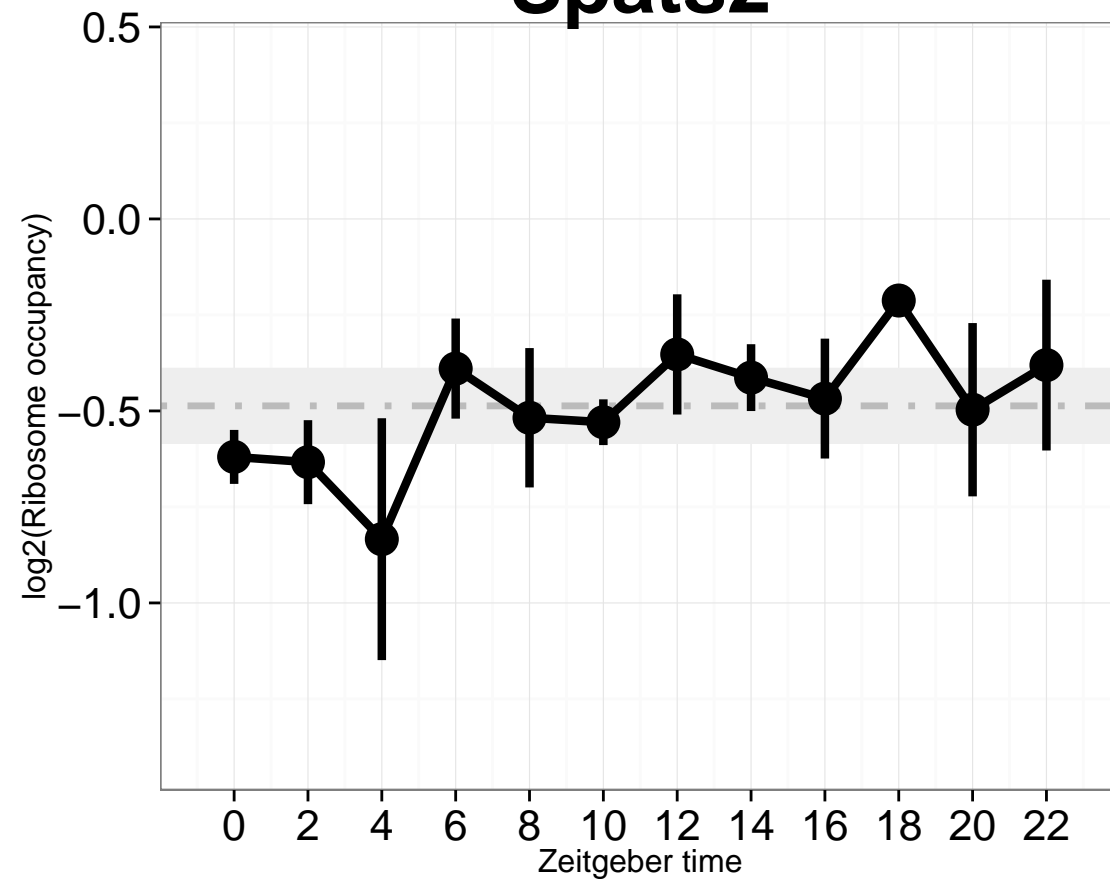

Supplement: Supplementary file 2436 [file 1]

## N6amt2

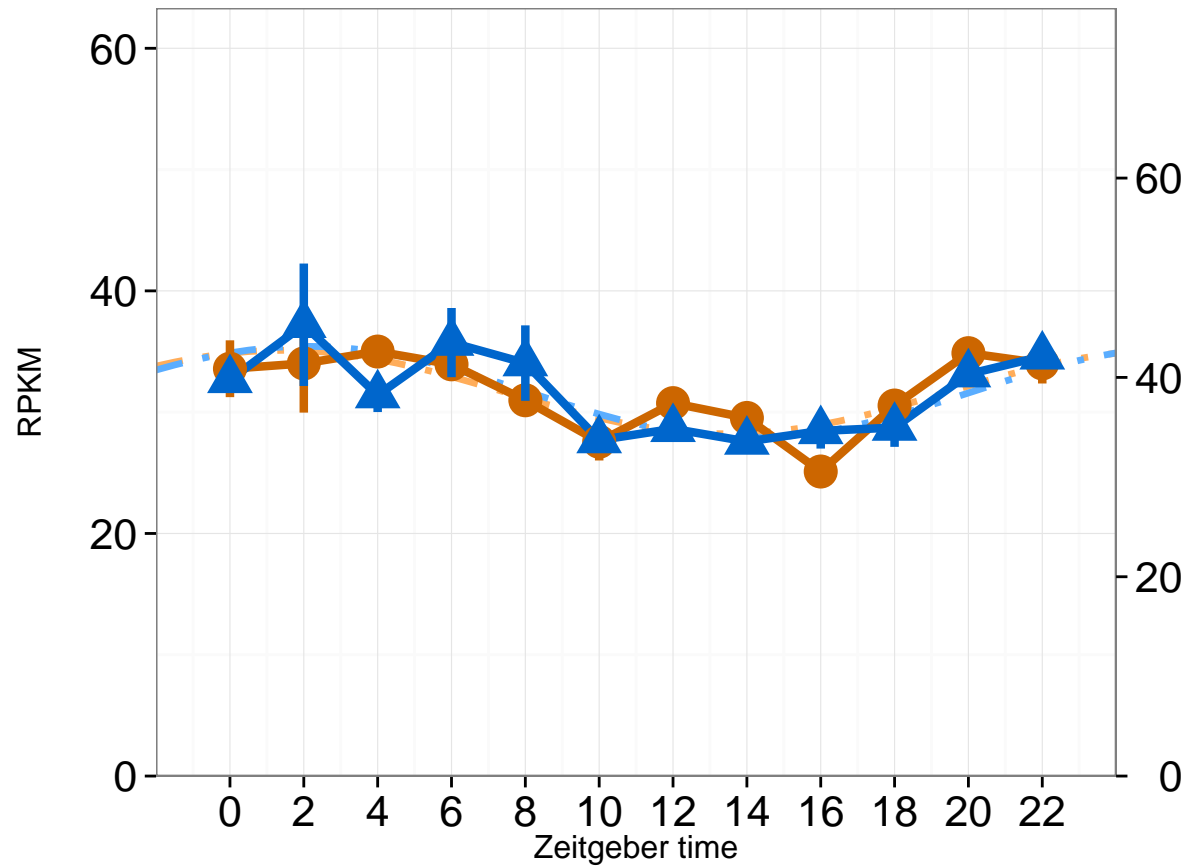

## N6amt2

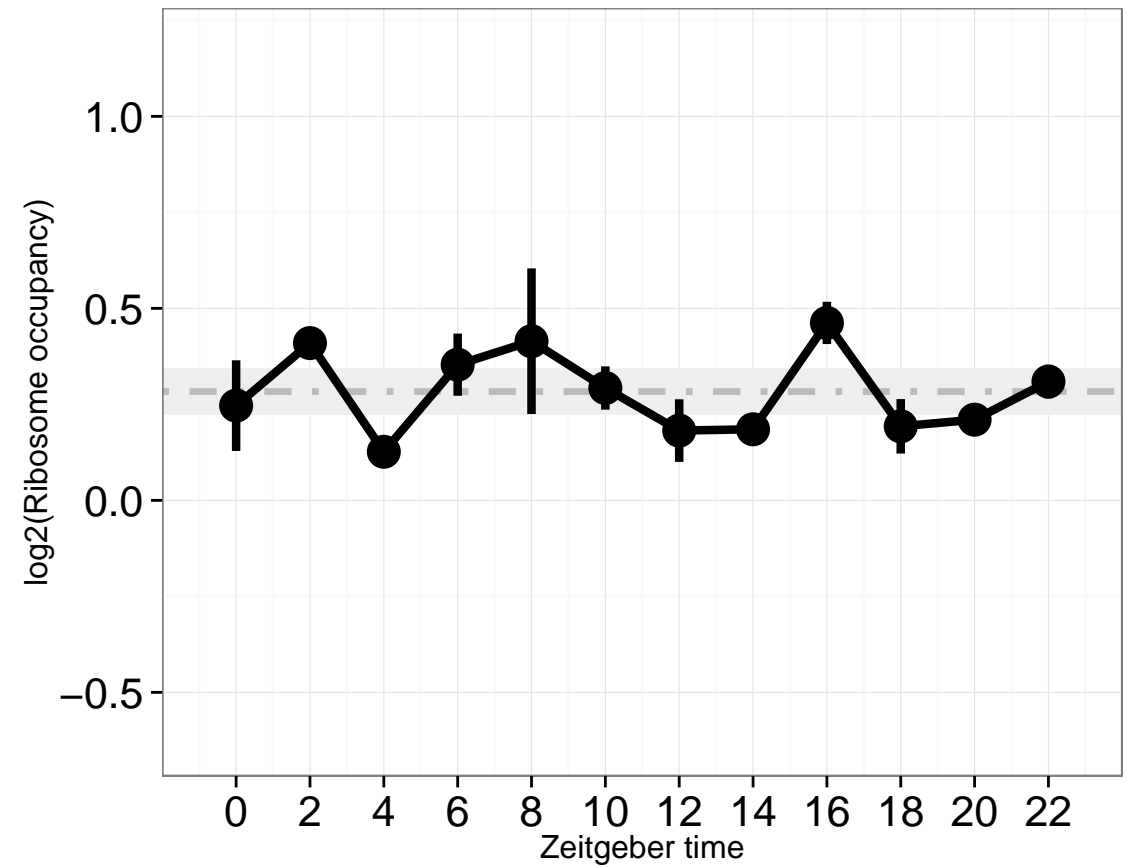

Supplement: Supplementary file 2437 [file 1]

## Gsr

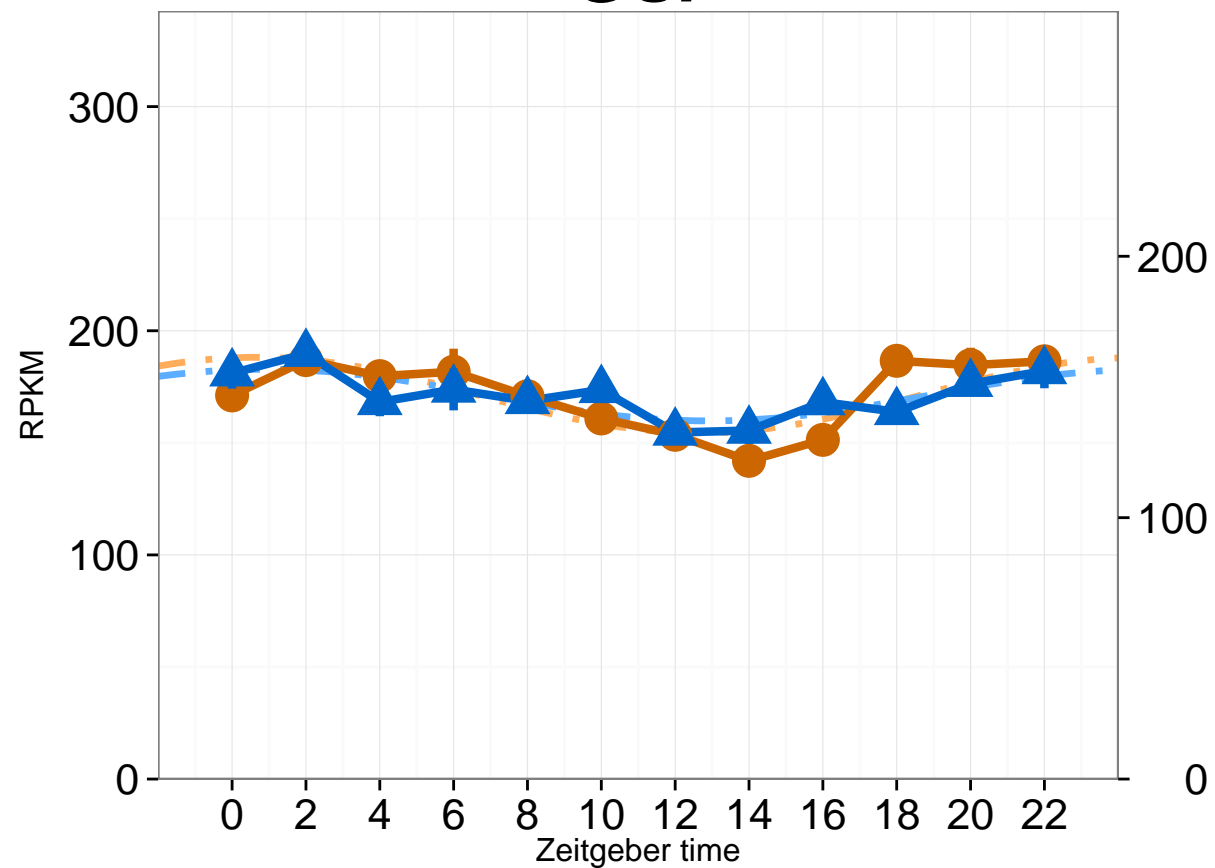

## Gsr

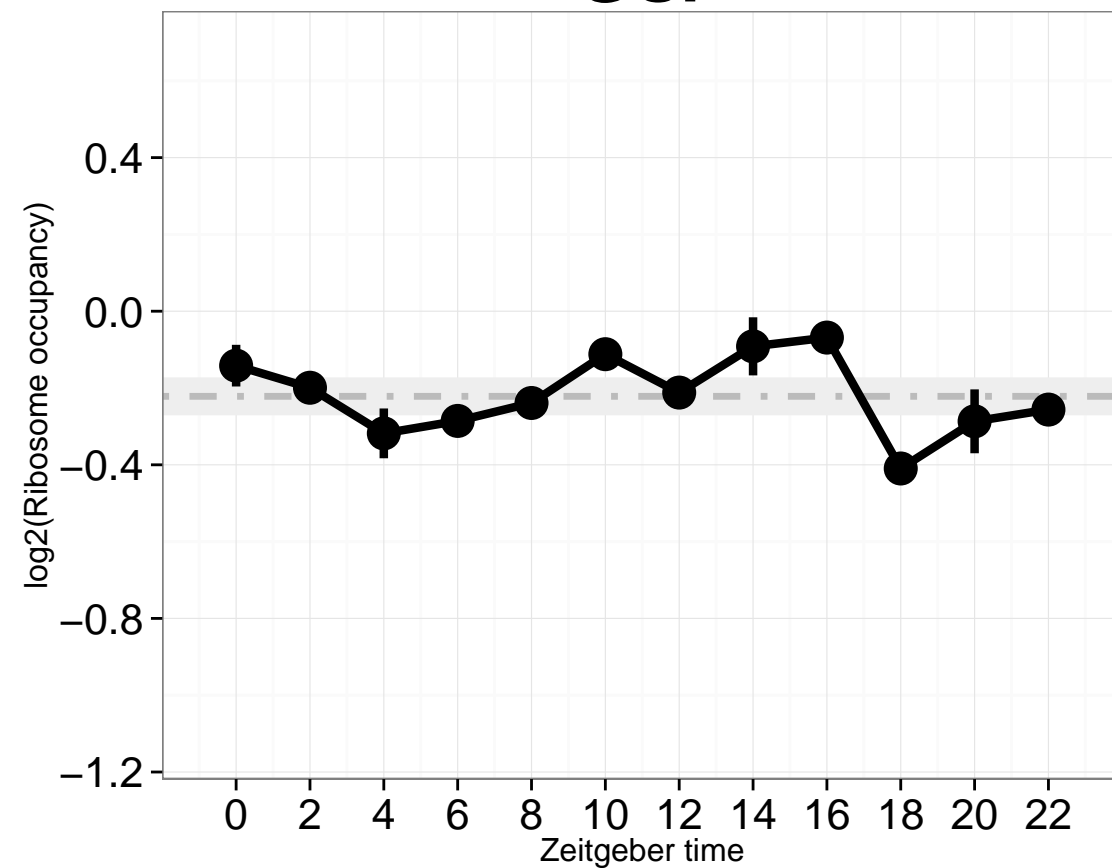

Supplement: Supplementary file 2438 [file 1]

# Mid1ip1

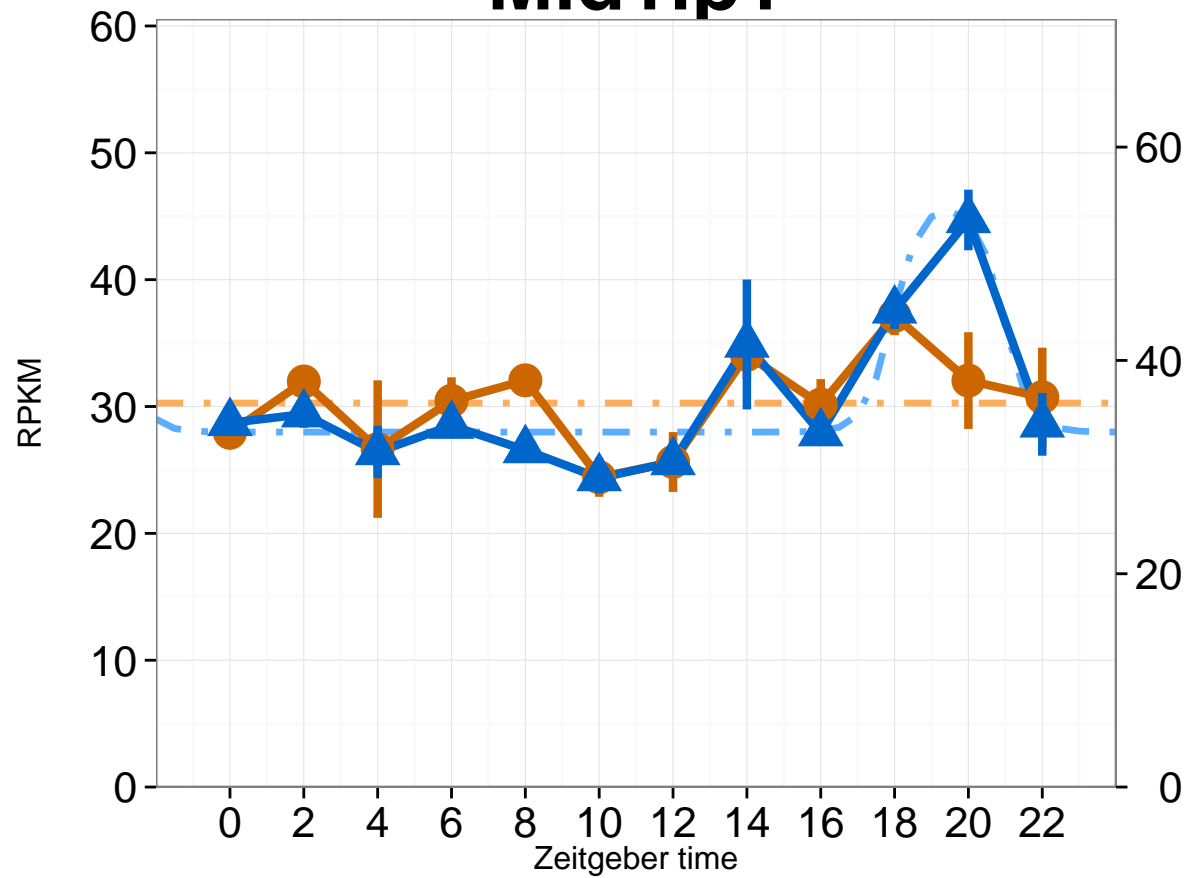

# Mid1ip1

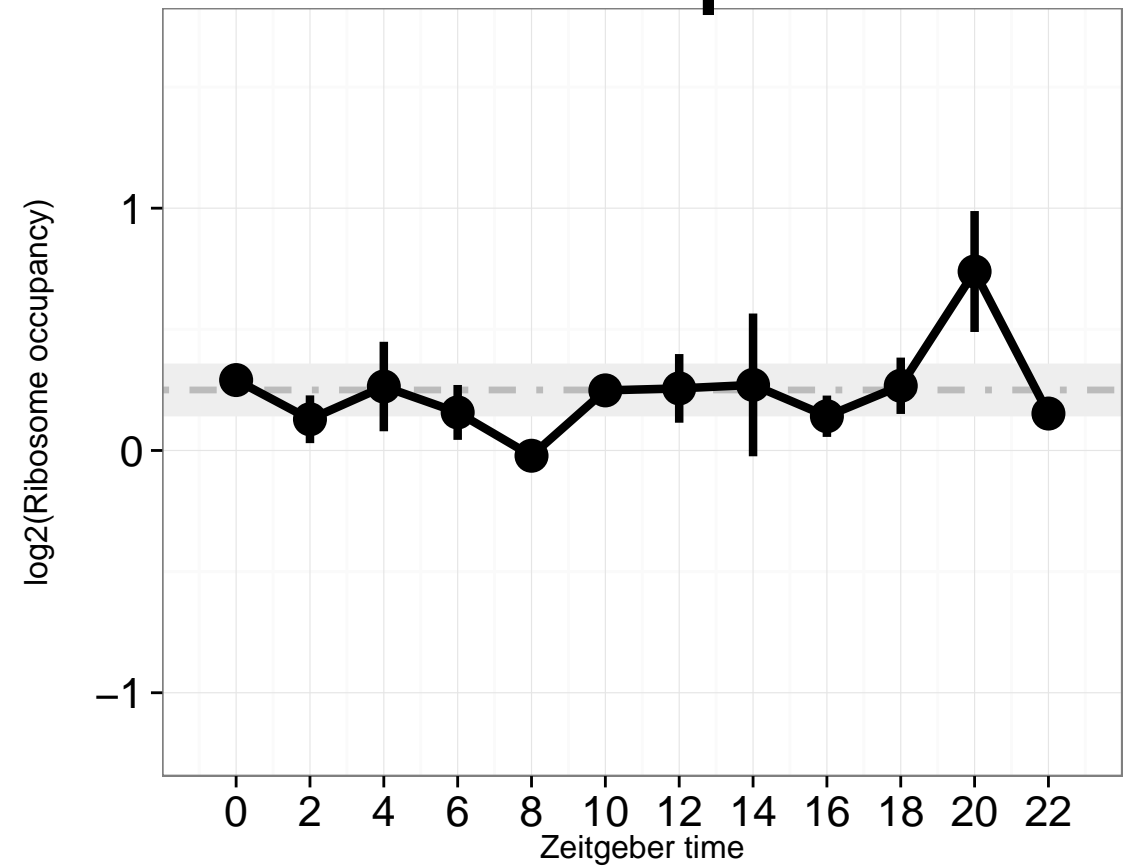

Supplement: Supplementary file 2439 [file 1]

## Cb1c

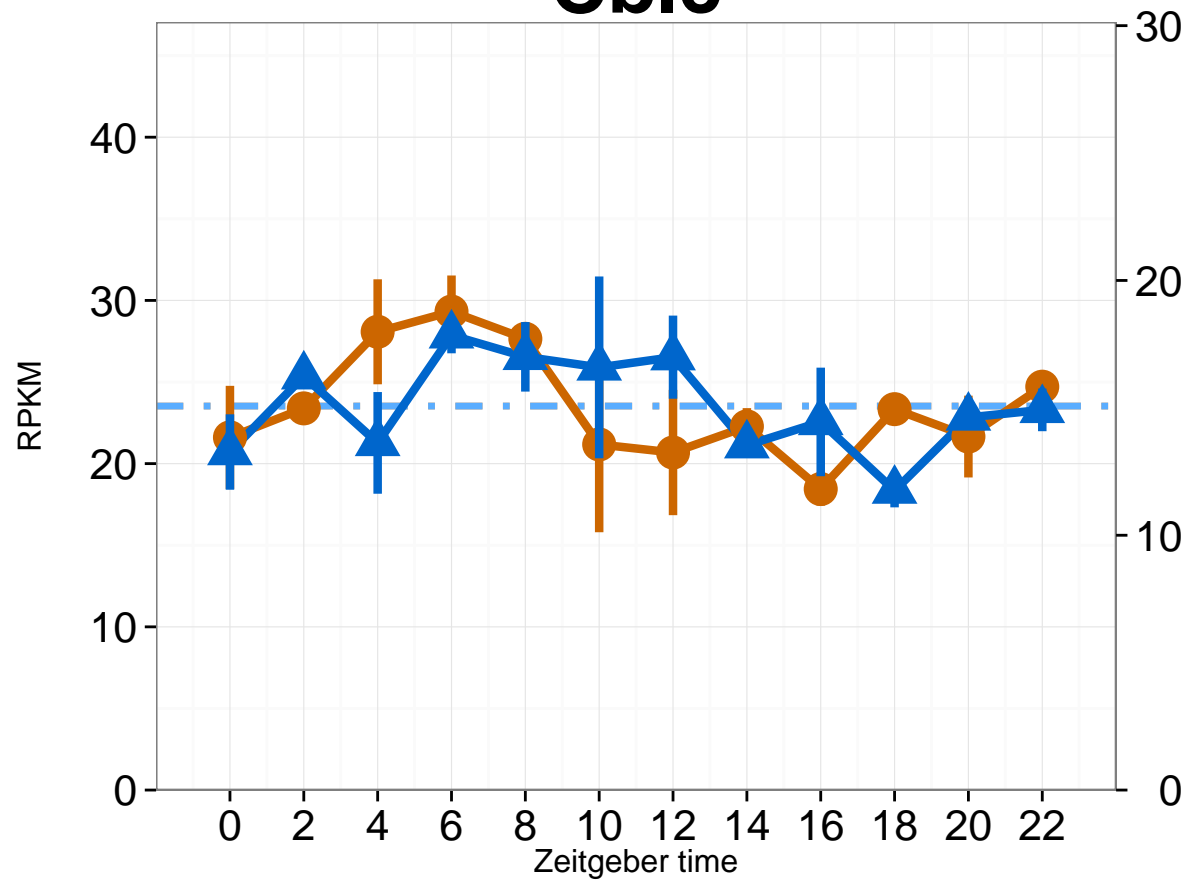

## Cb1c

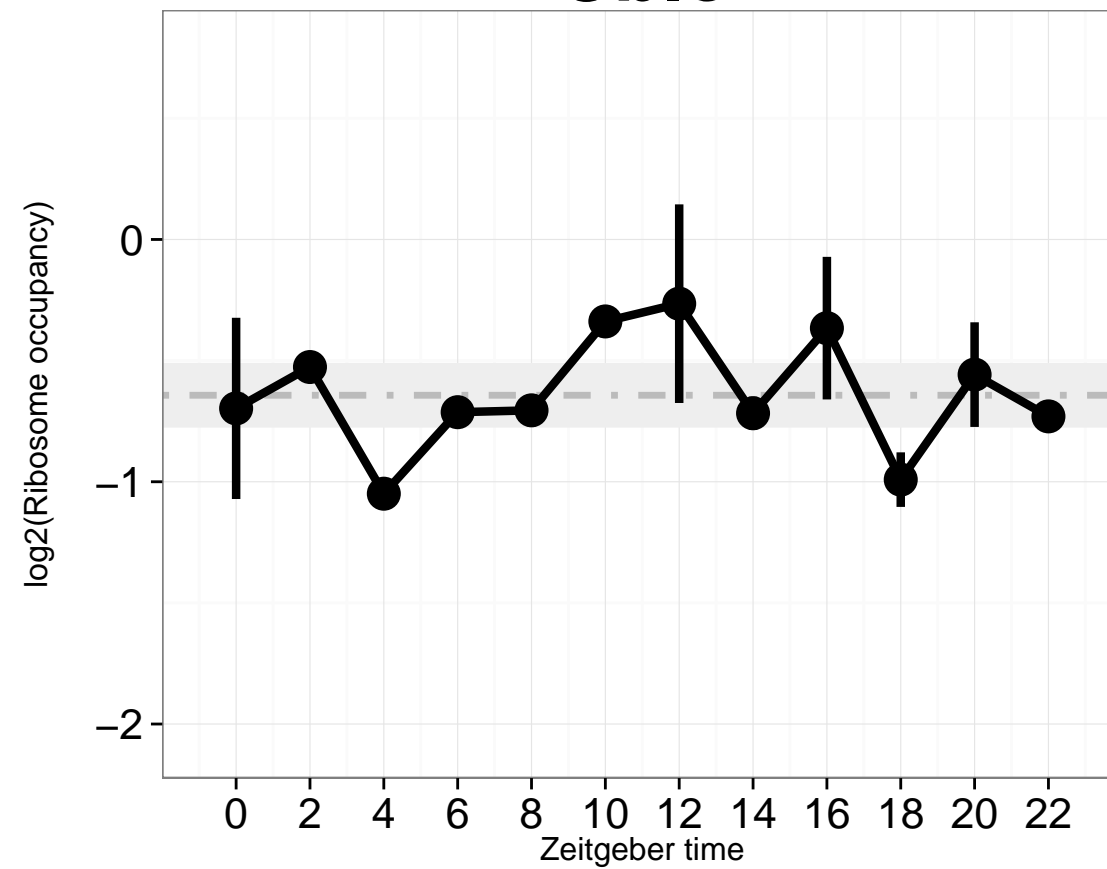

Supplement: Supplementary file 2440 [file 1]

## Sorcs3

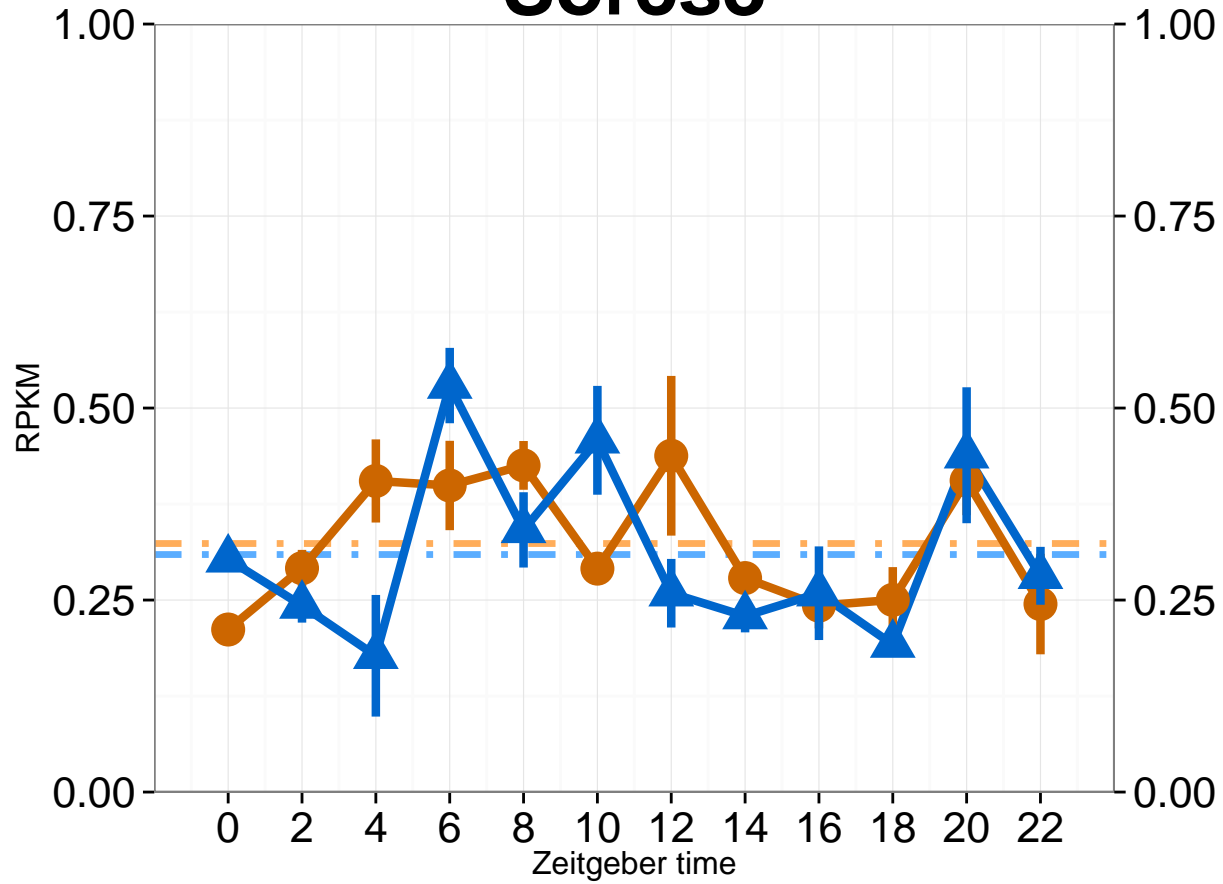

## Sorcs3

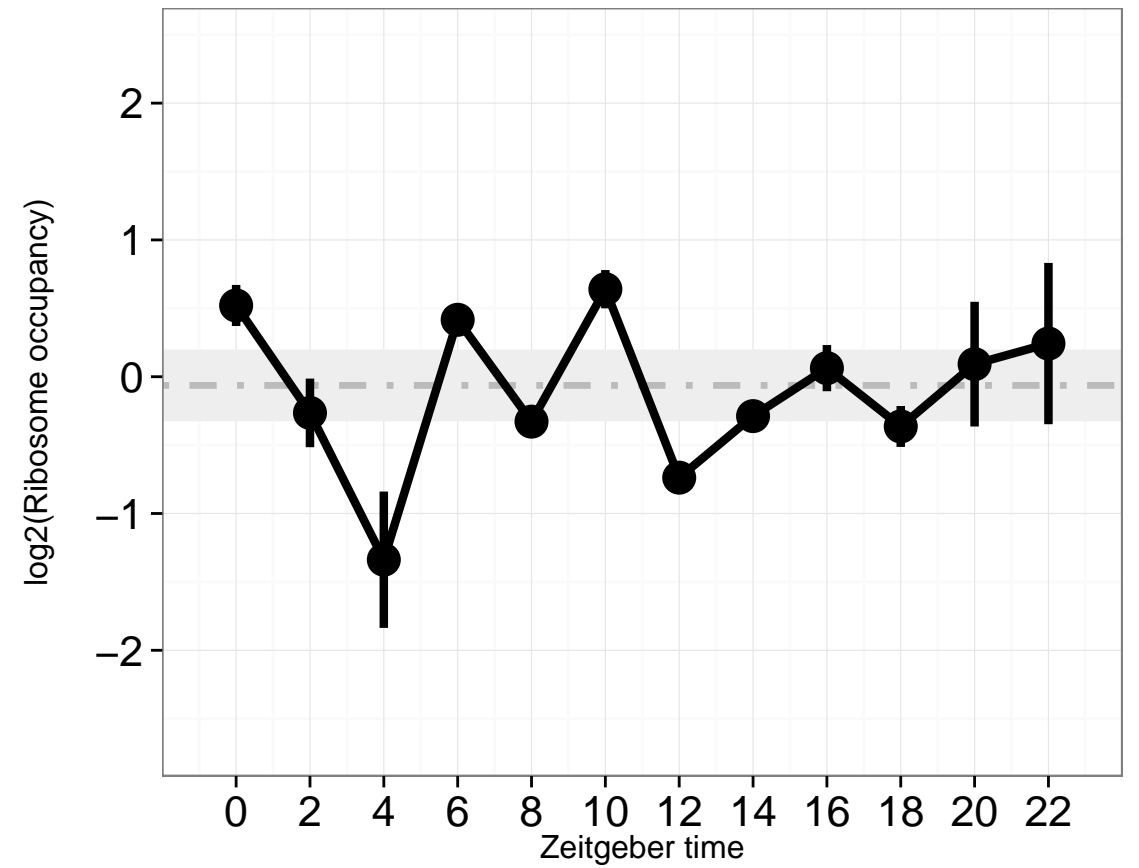

Supplement: Supplementary file 2441 [file 1]

# Rpl23

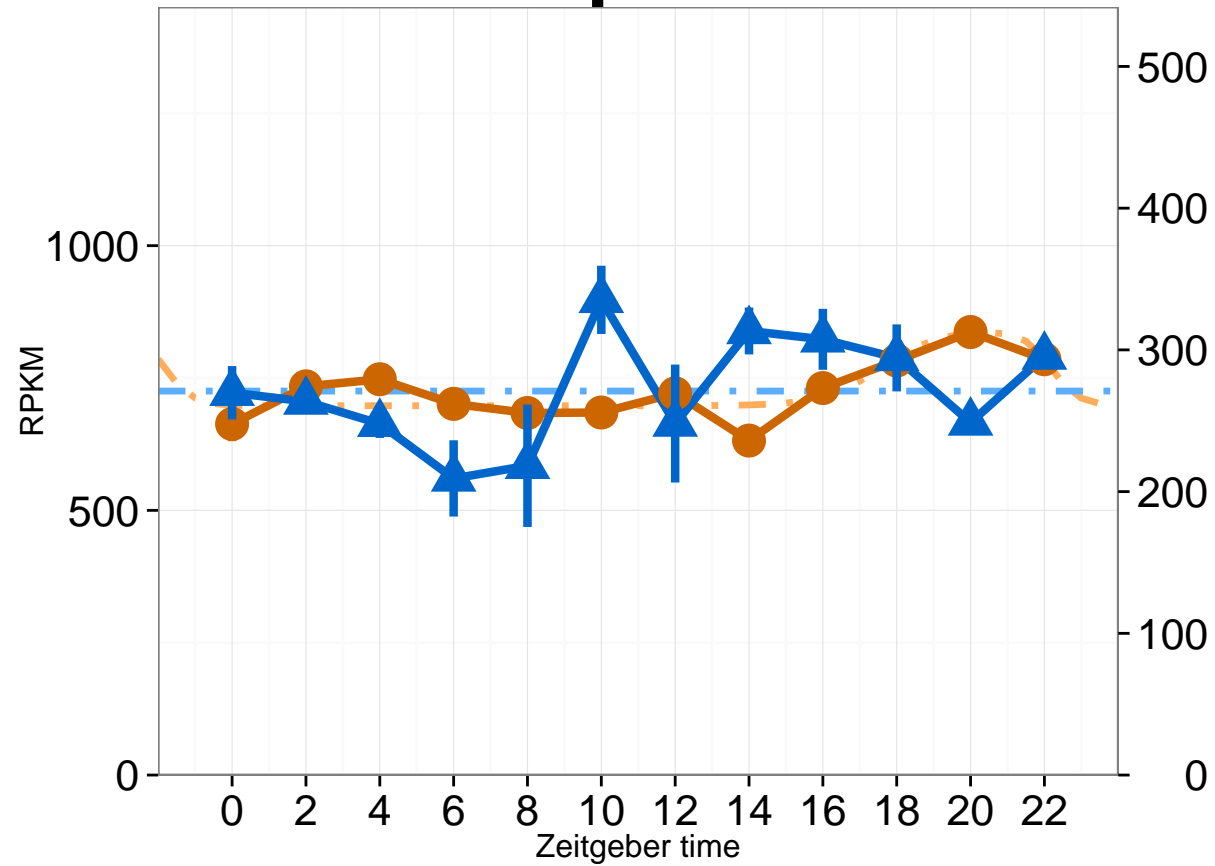

# Rpl23

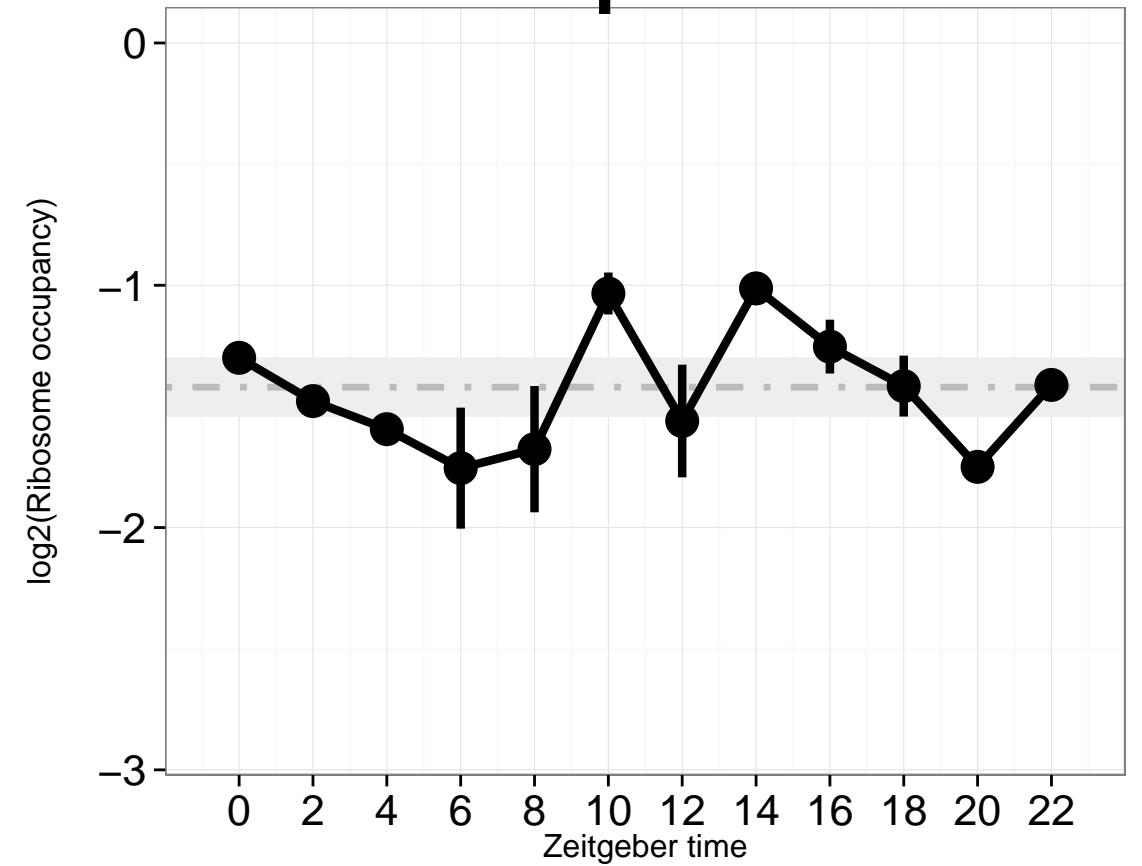

Supplement: Supplementary file 2442 [file 1]

# Lurap1l

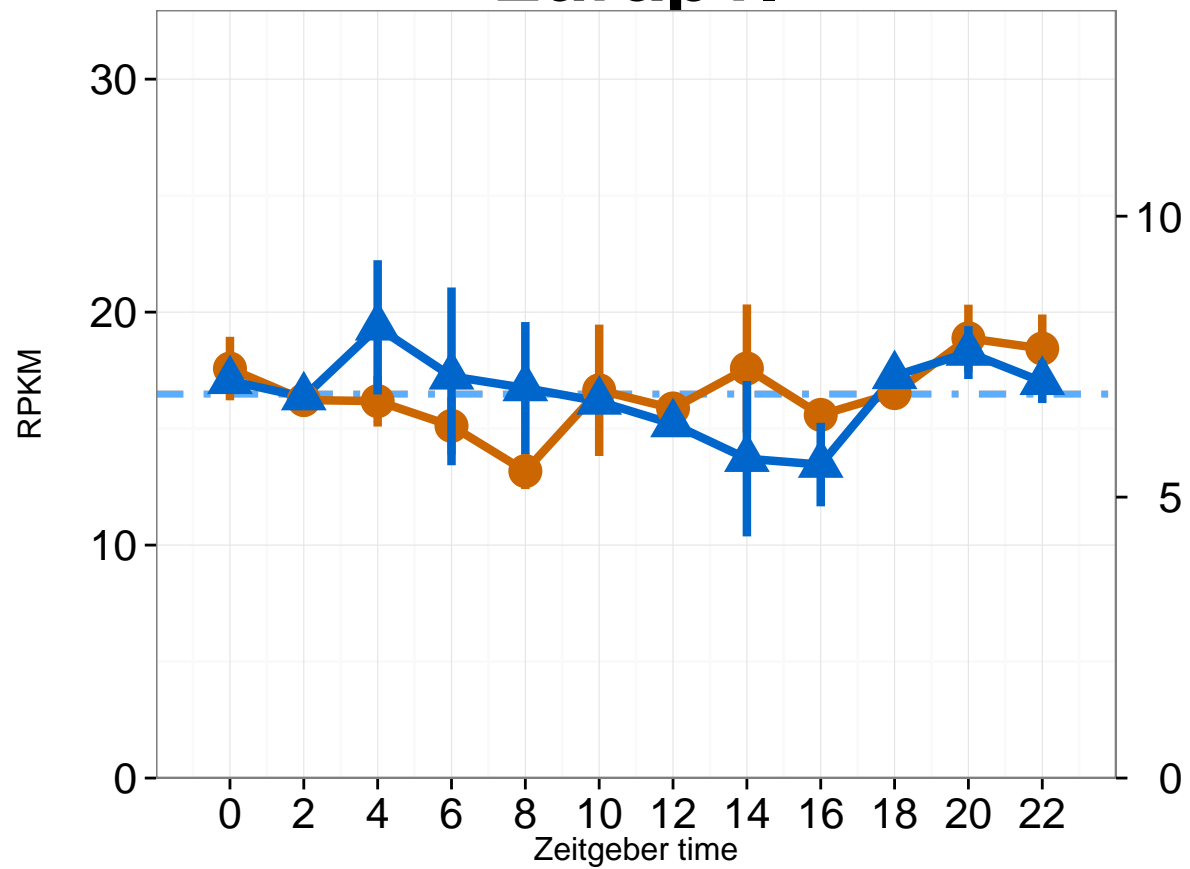

# Lurap1l

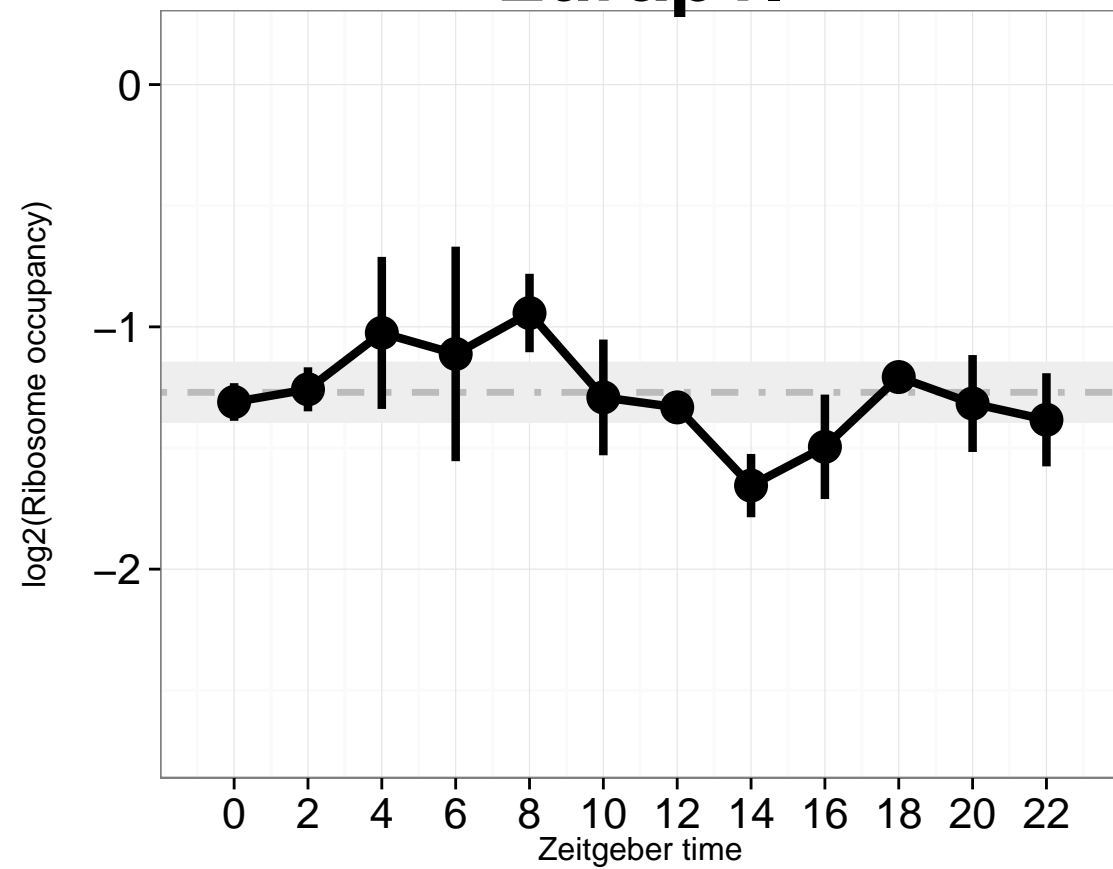

Supplement: Supplementary file 2443 [file 1]

## Pgam2

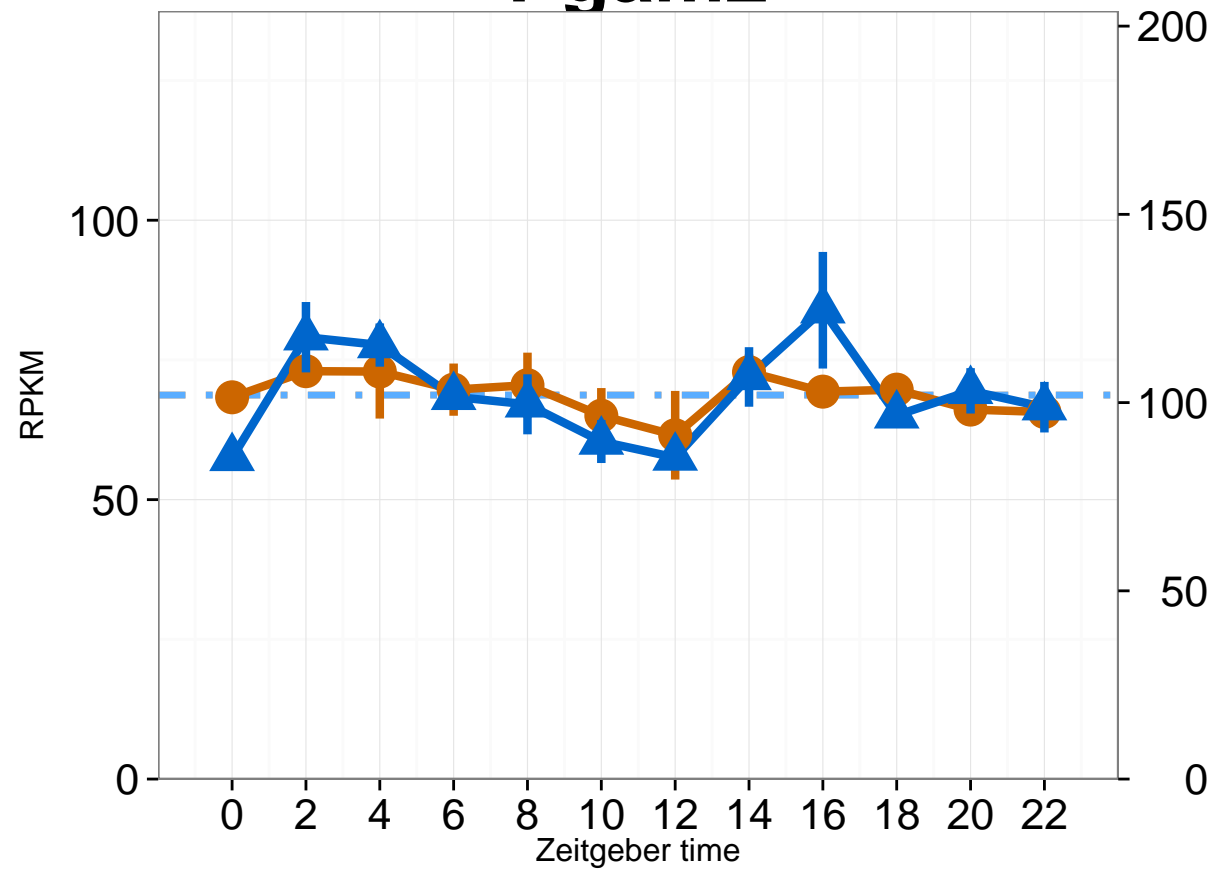

## Pgam2

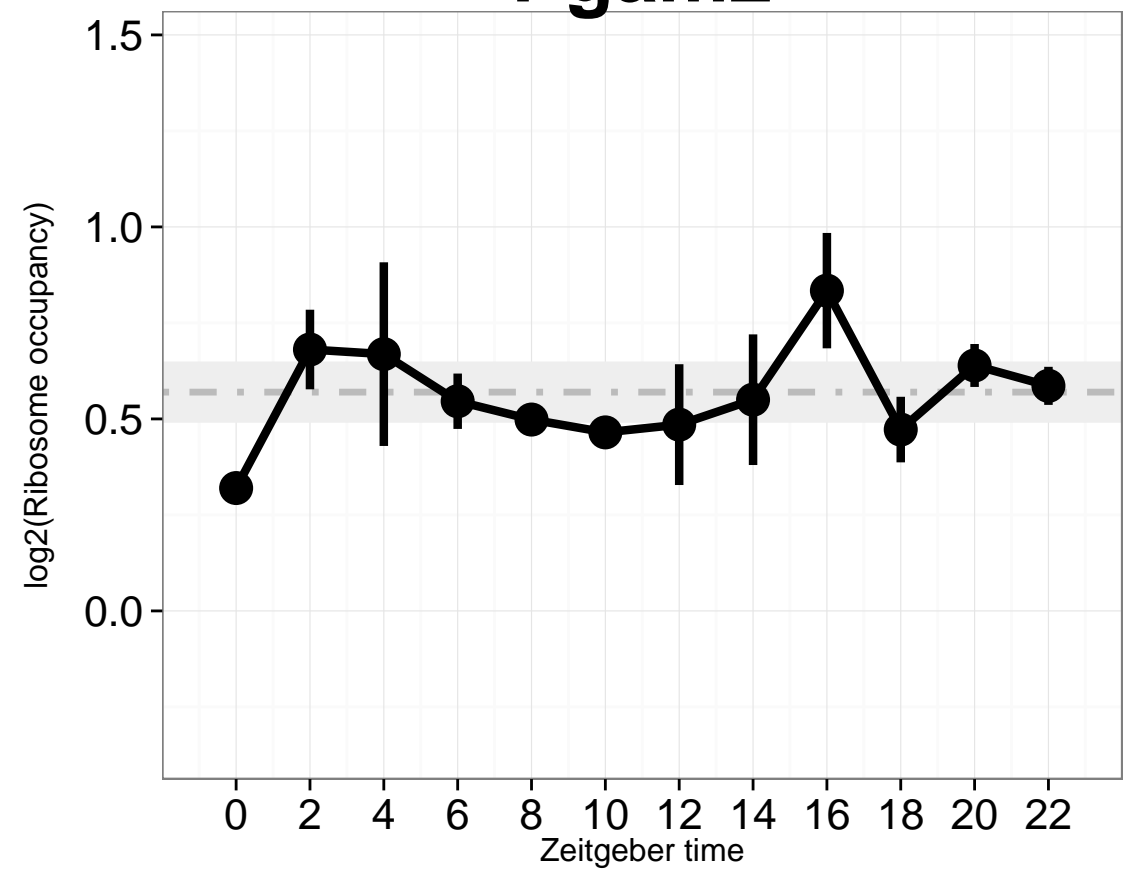

Supplement: Supplementary file 2444 [file 1]

## Tspan8

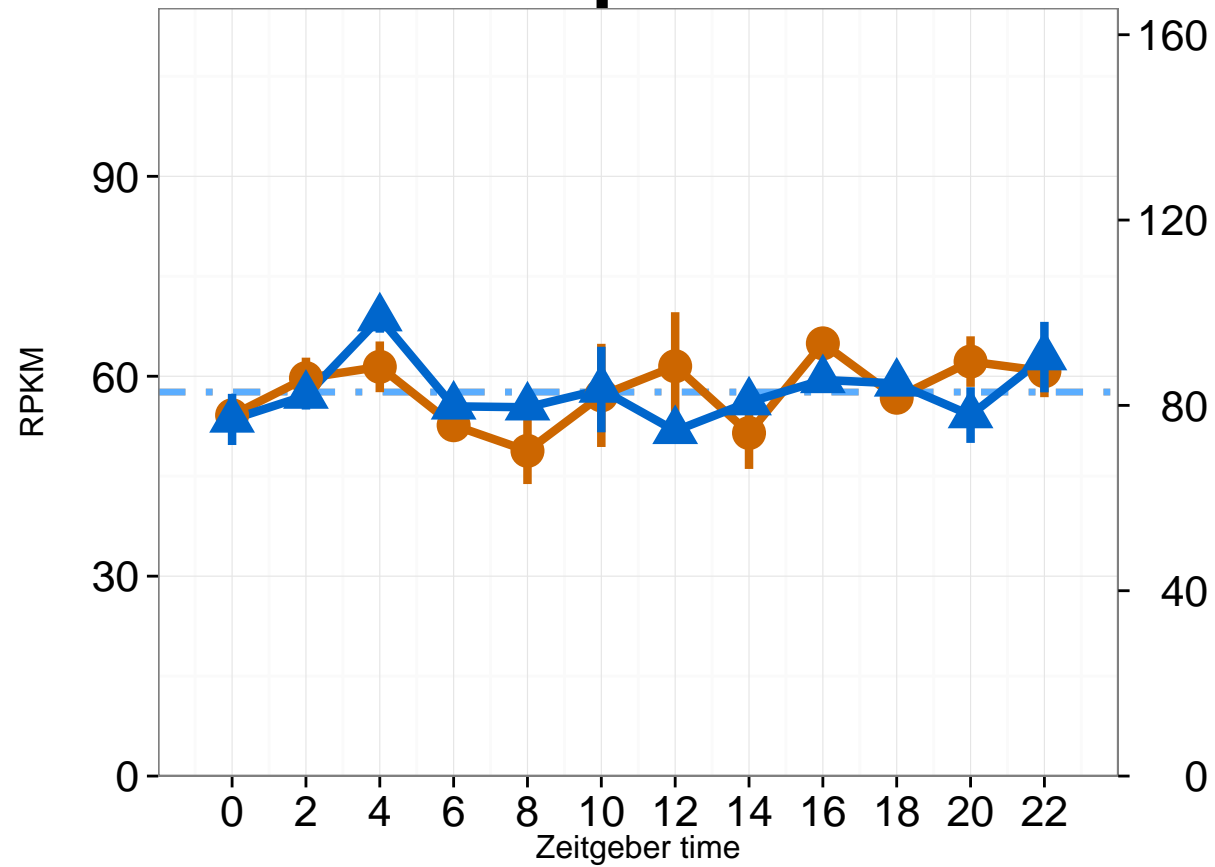

## Tspan8

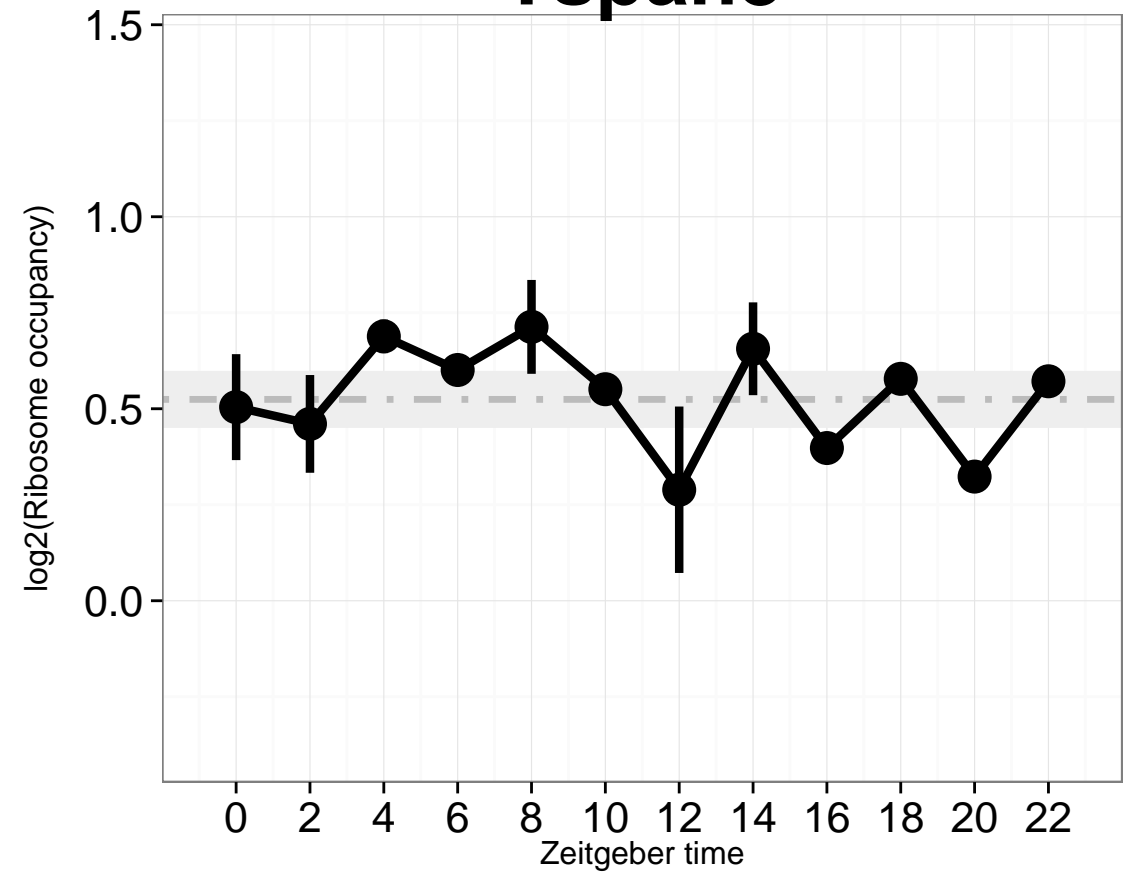

Supplement: Supplementary file 2445 [file 1]

## Dennd5b

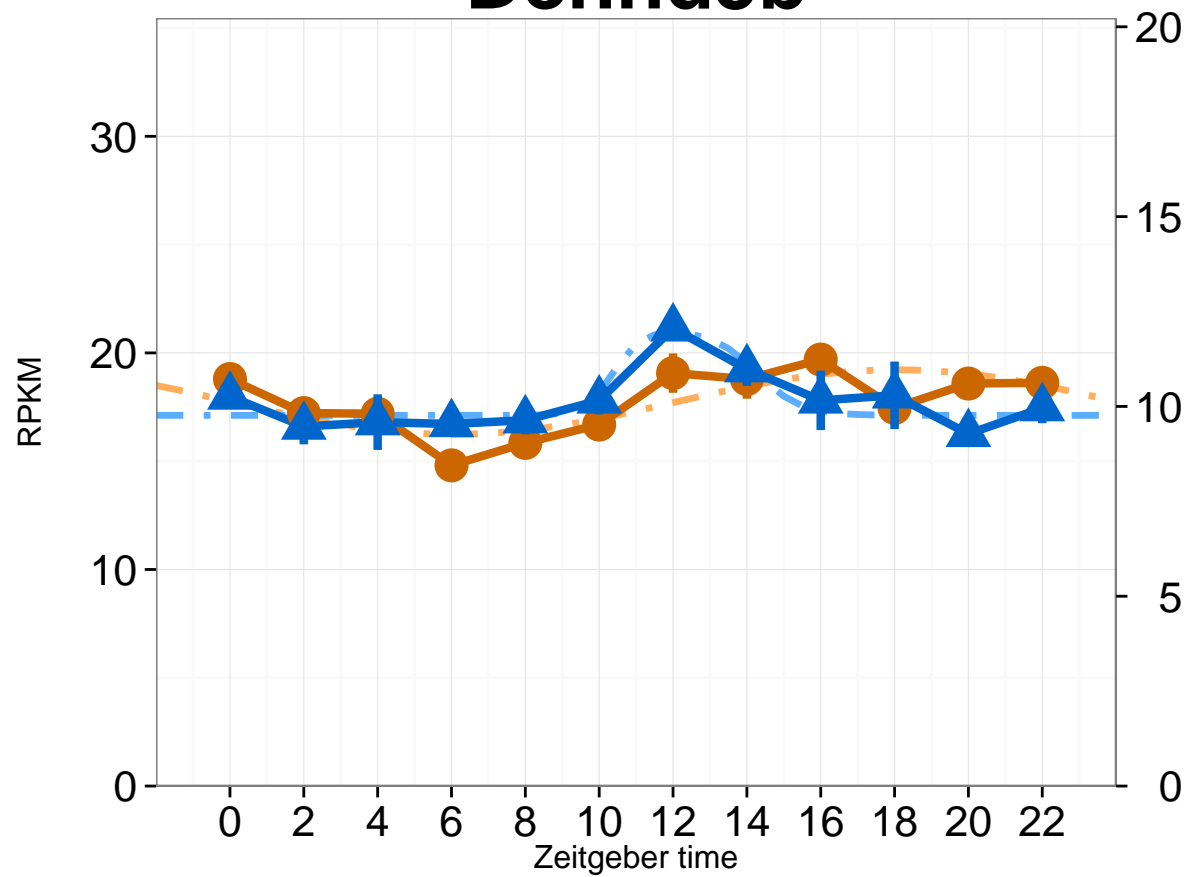

## Dennd5b

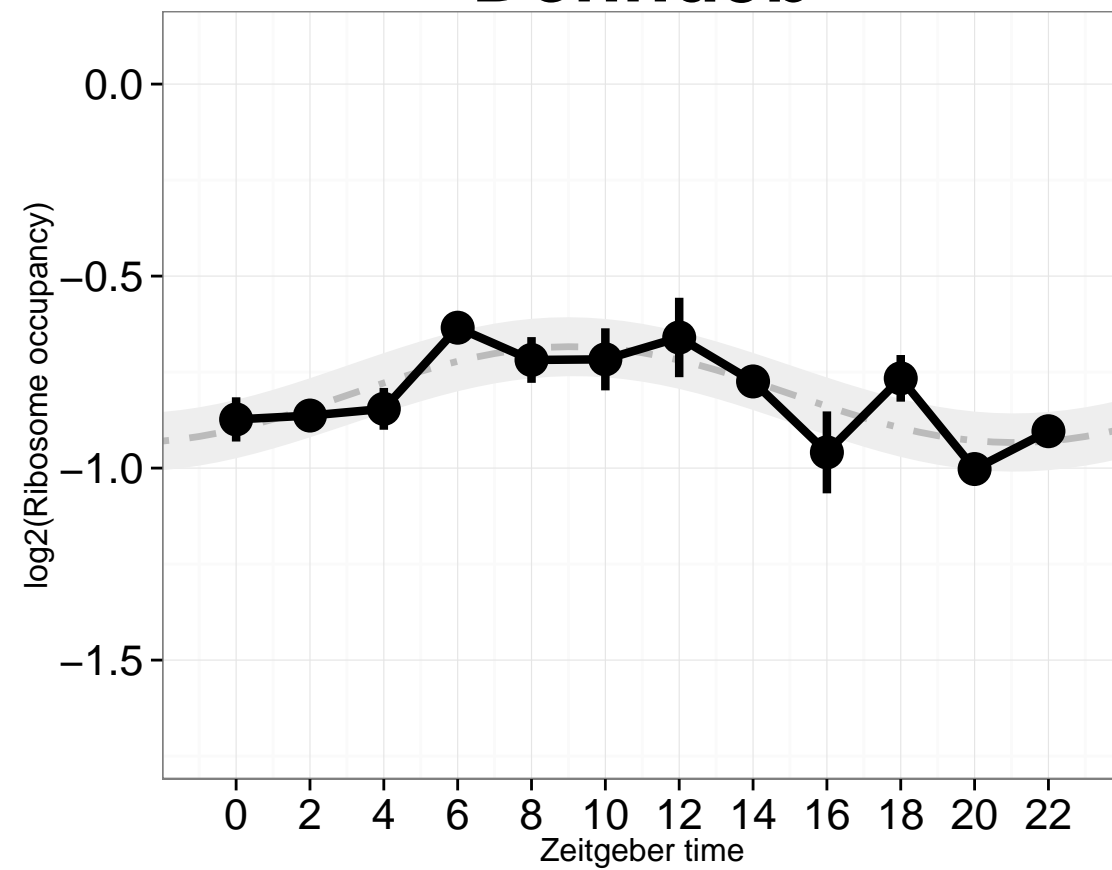

Supplement: Supplementary file 2446 [file 1]

**Ly6f TR**

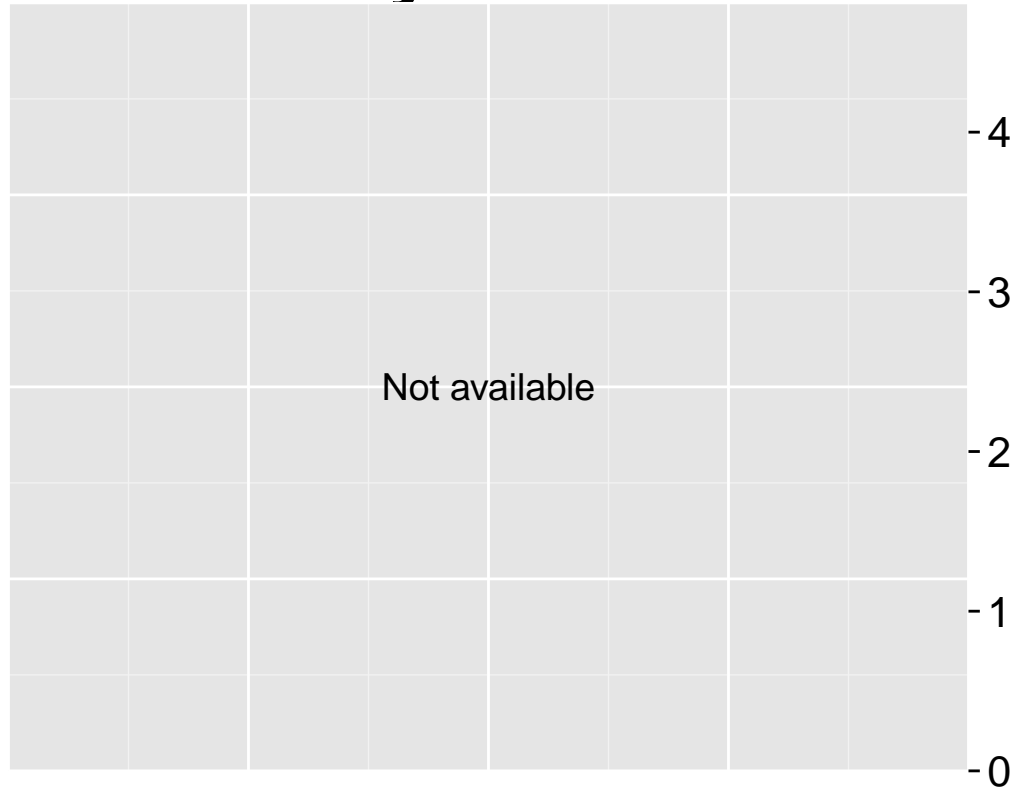

**Ly6f log2(Ribosome occupancy)**

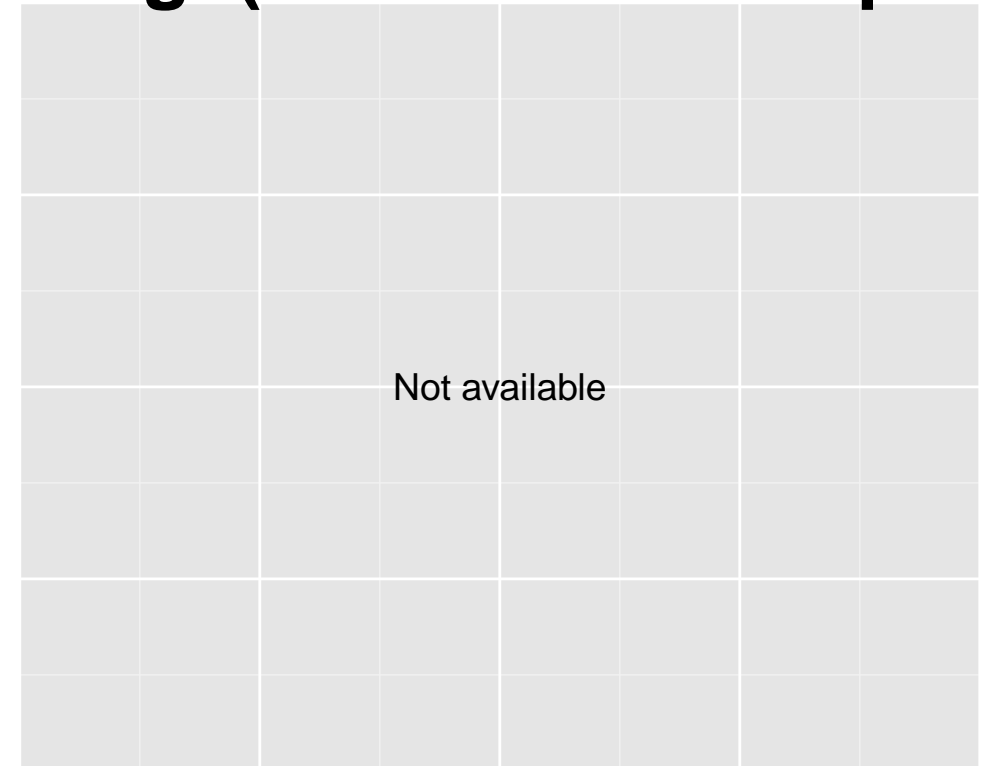

Supplement: Supplementary file 2447 [file 1]

# Proser2

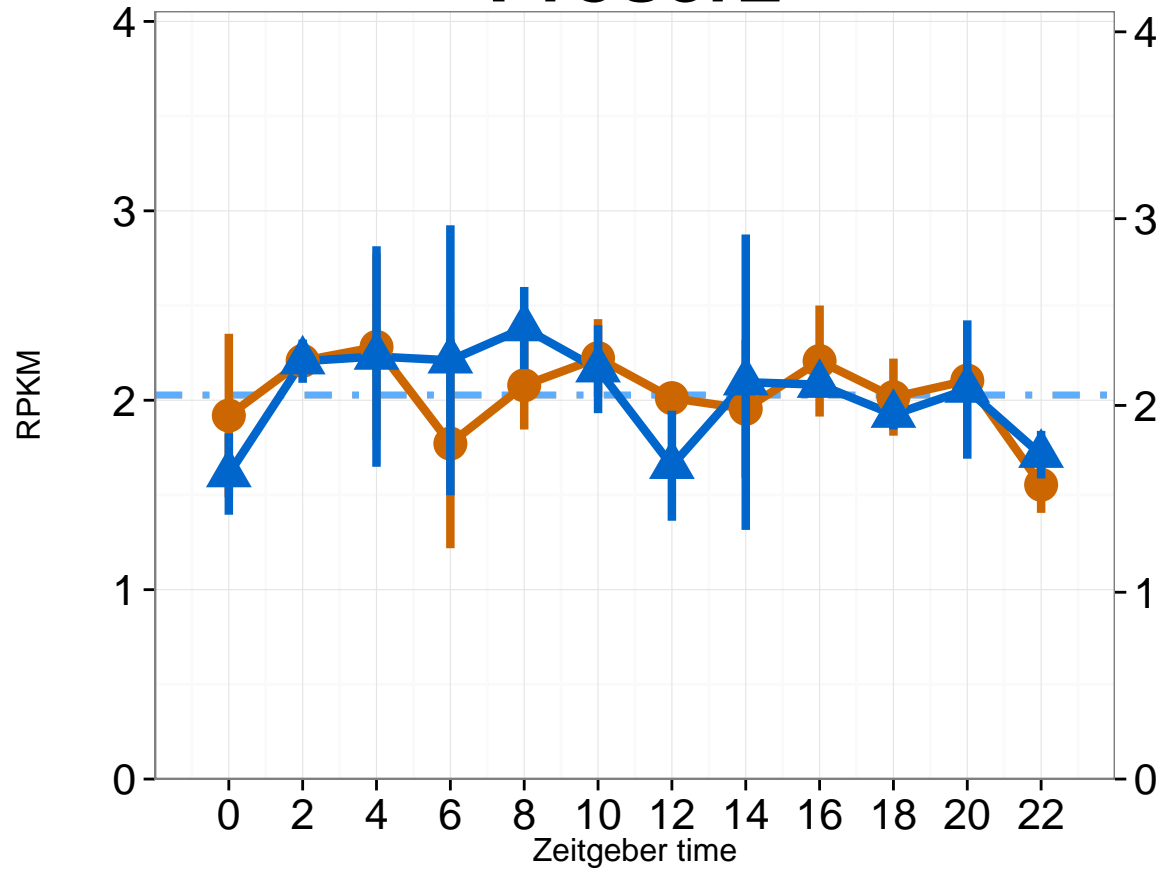

# Proser2

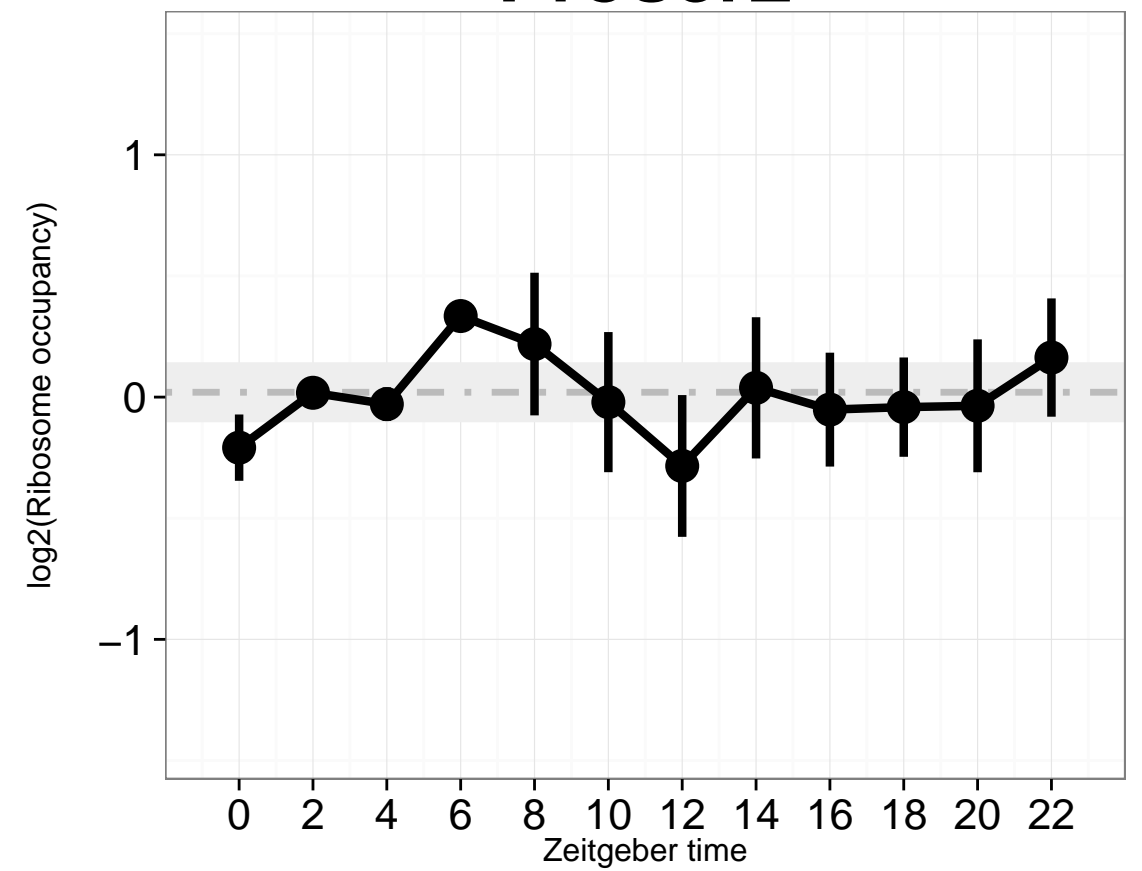

Supplement: Supplementary file 2448 [file 1]

## Ccdc101

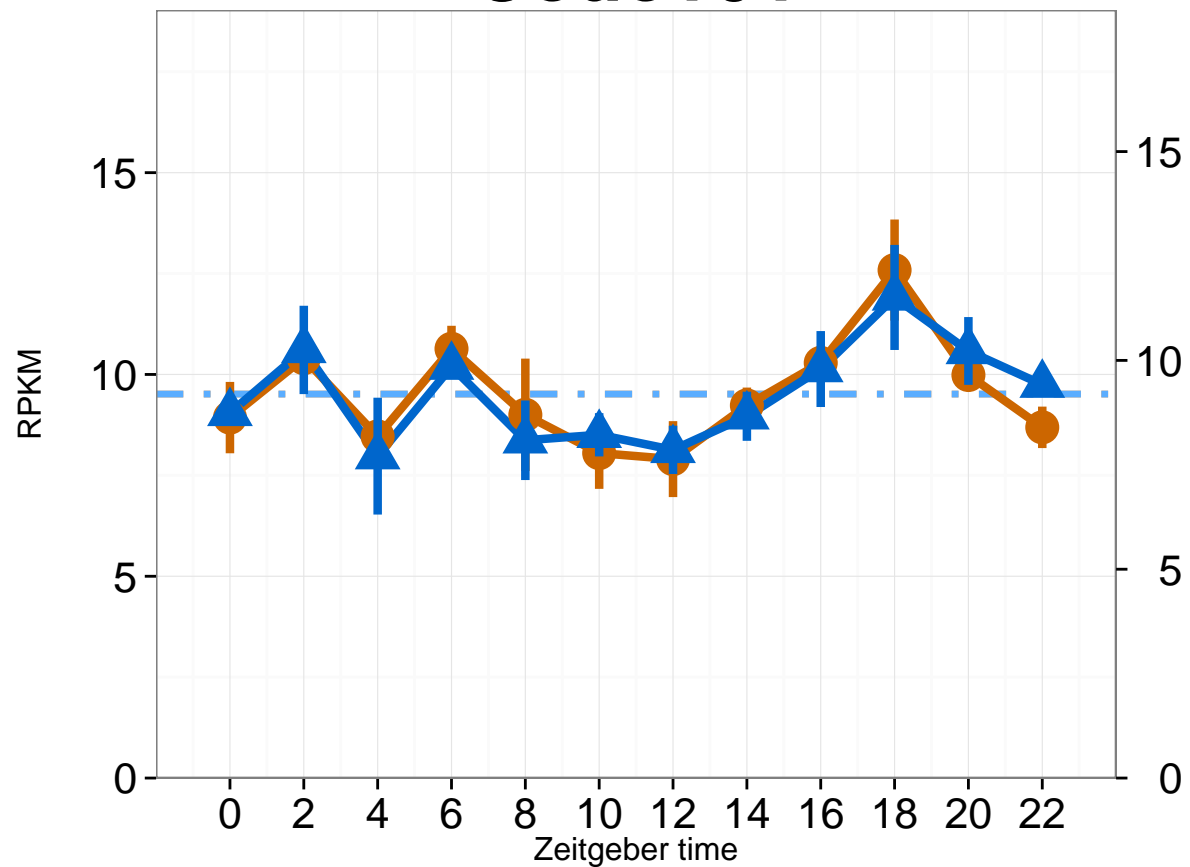

## Ccdc101

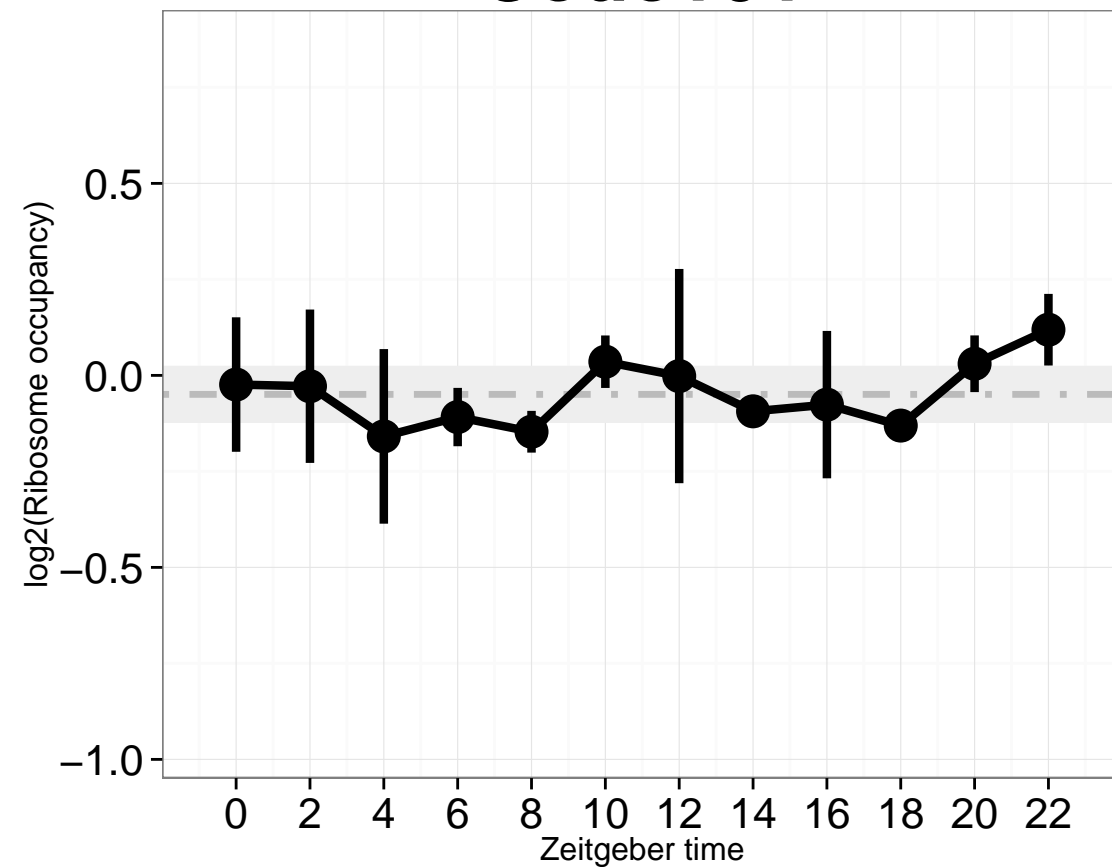

Supplement: Supplementary file 2449 [file 1]

## Elf4

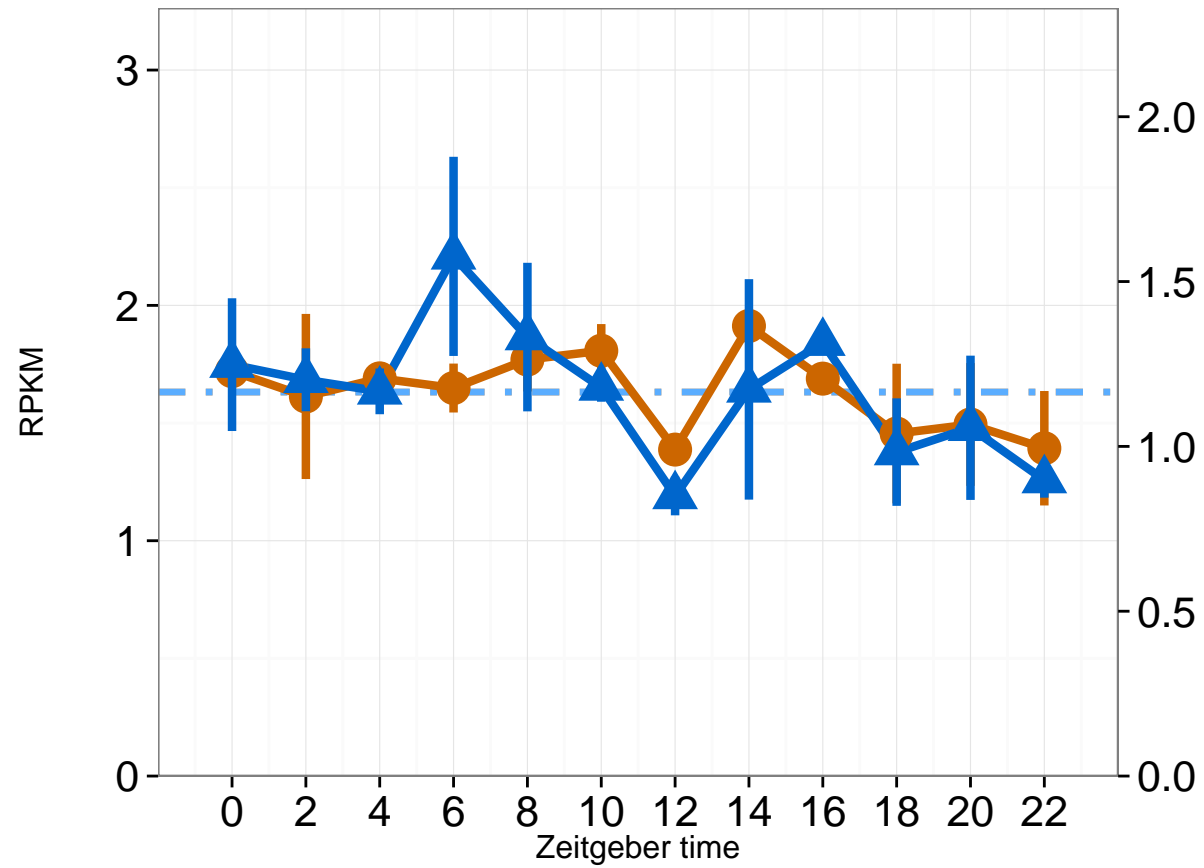

## Elf4

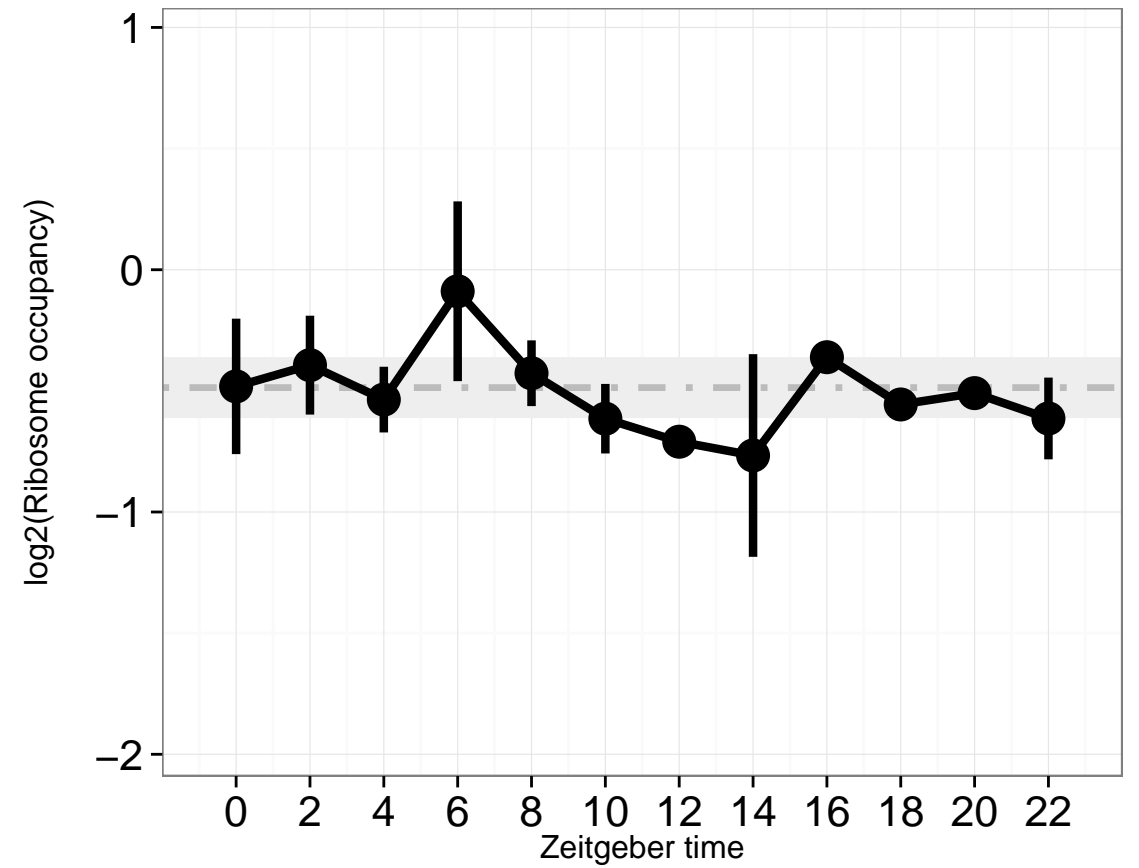

Supplement: Supplementary file 2450 [file 1]

# Pq1c1

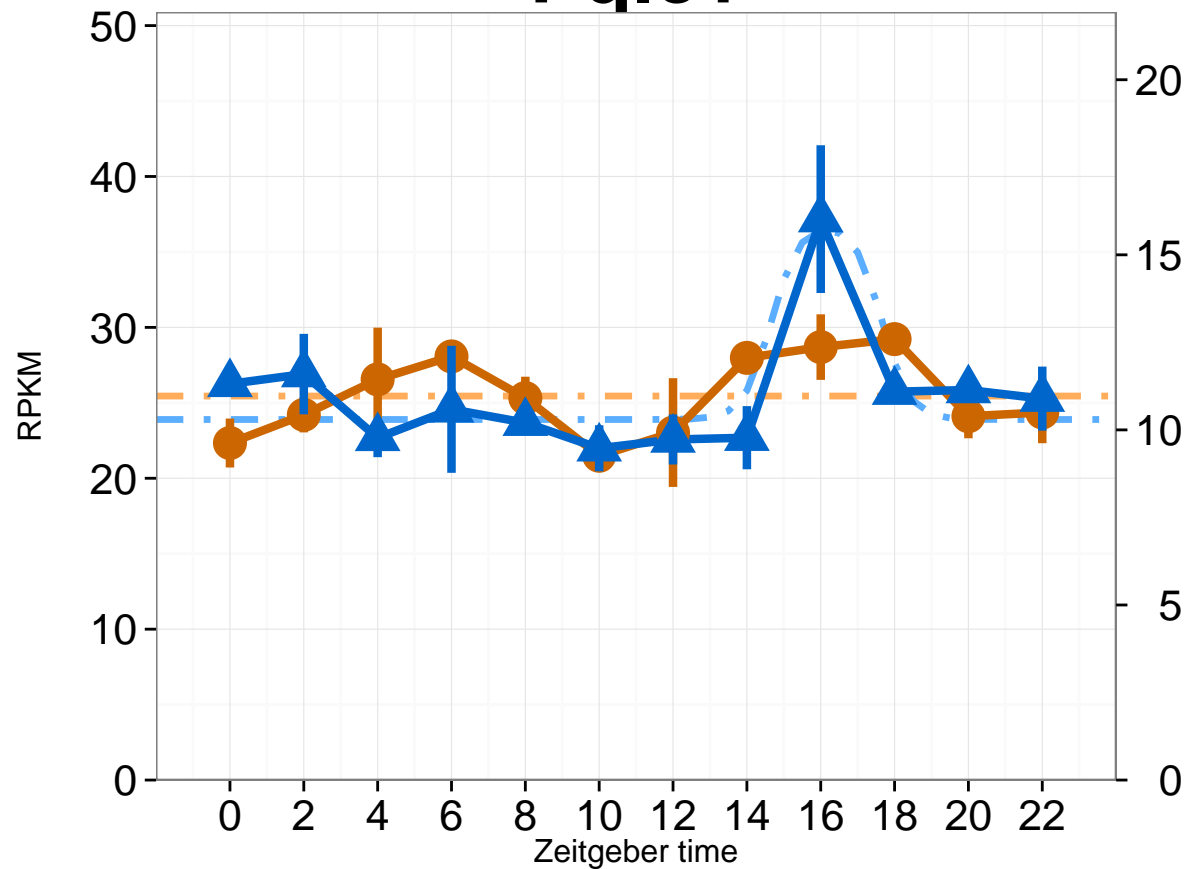

# Pq1c1

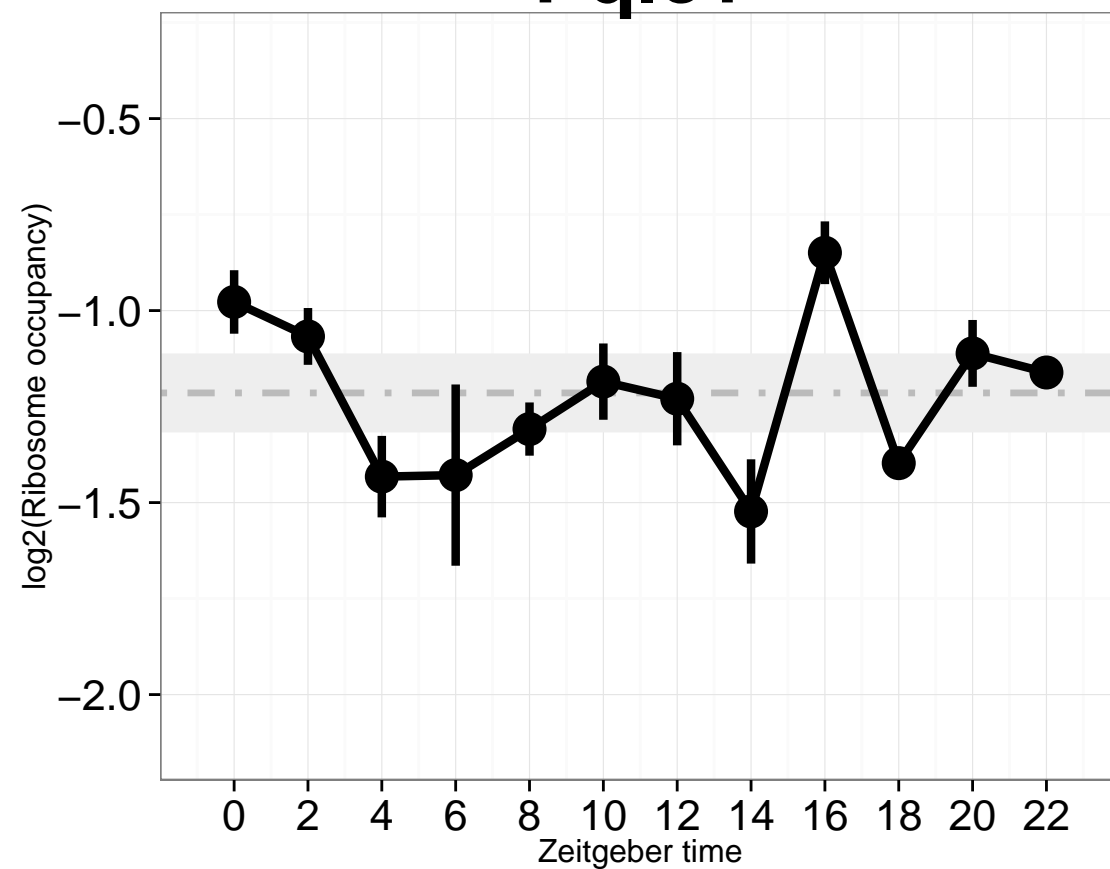

Supplement: Supplementary file 2451 [file 1]

## Rcor3

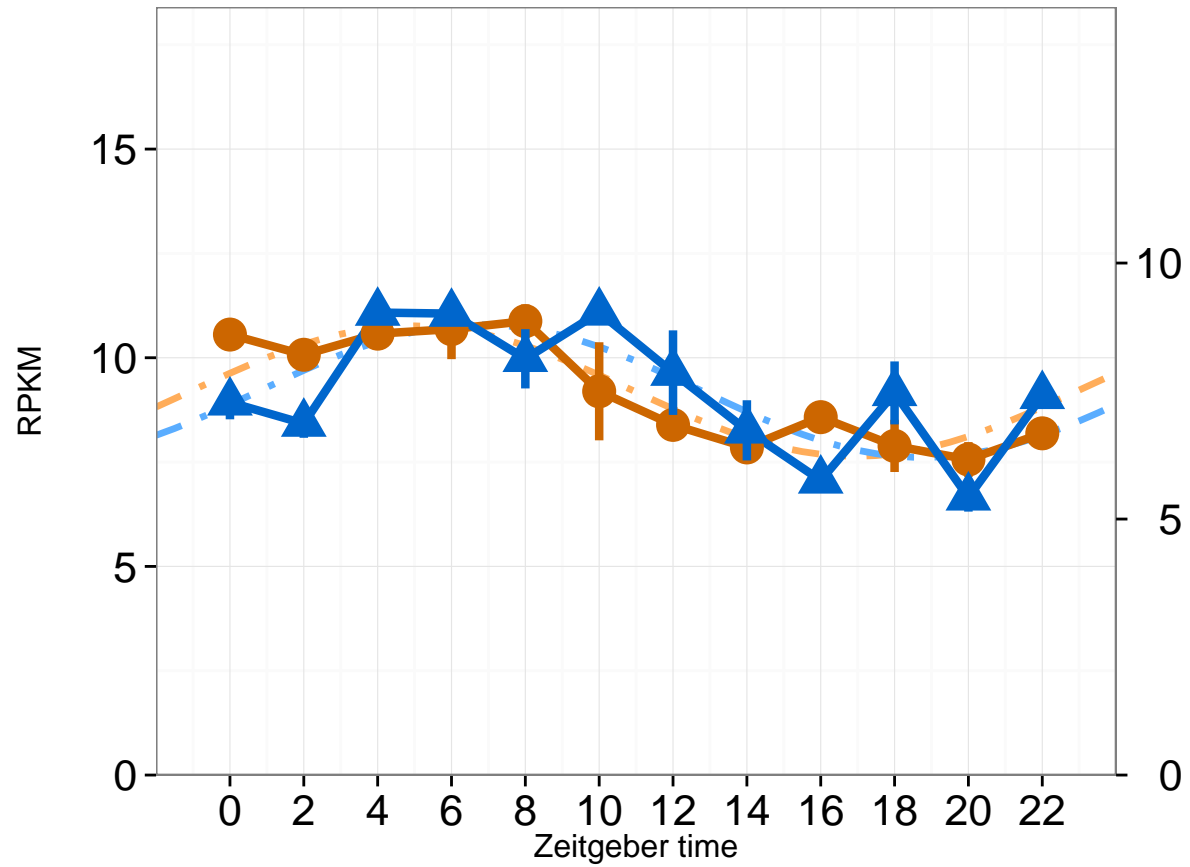

## Rcor3

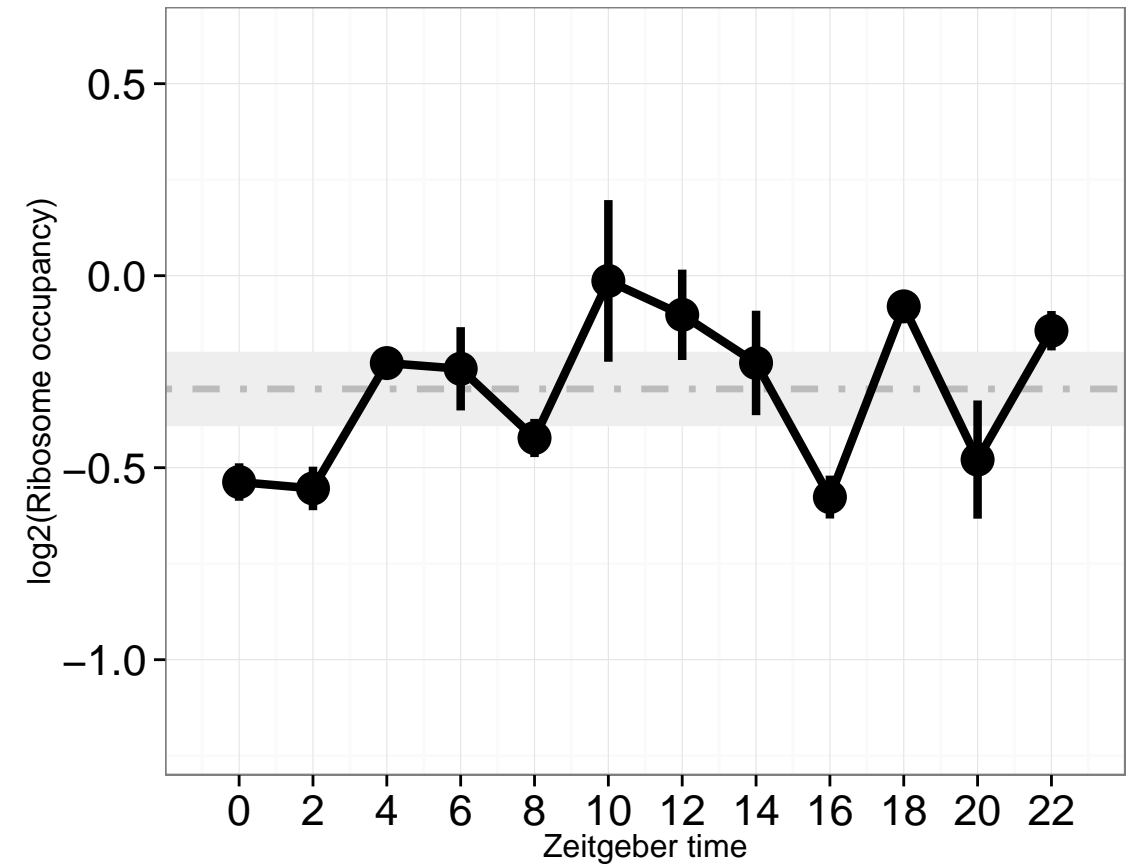

Supplement: Supplementary file 2452 [file 1]

## Adam15

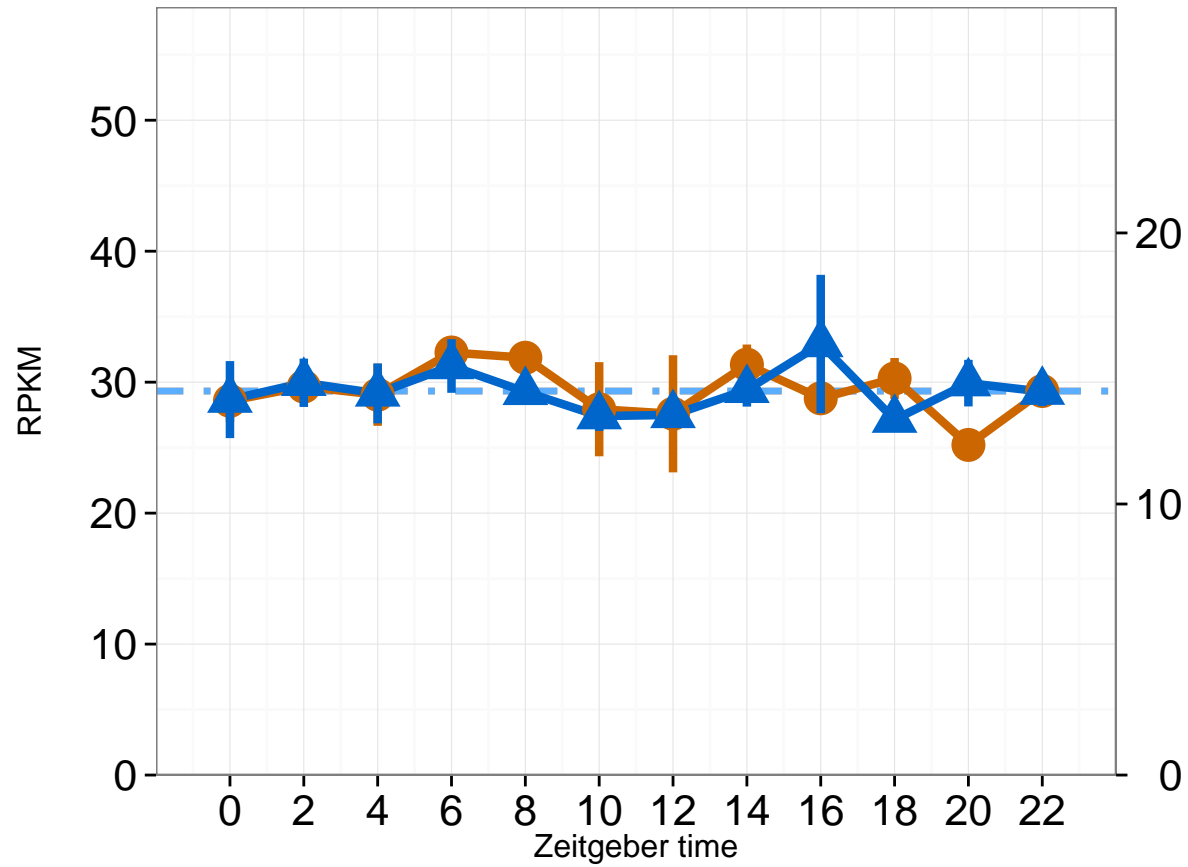

## Adam15

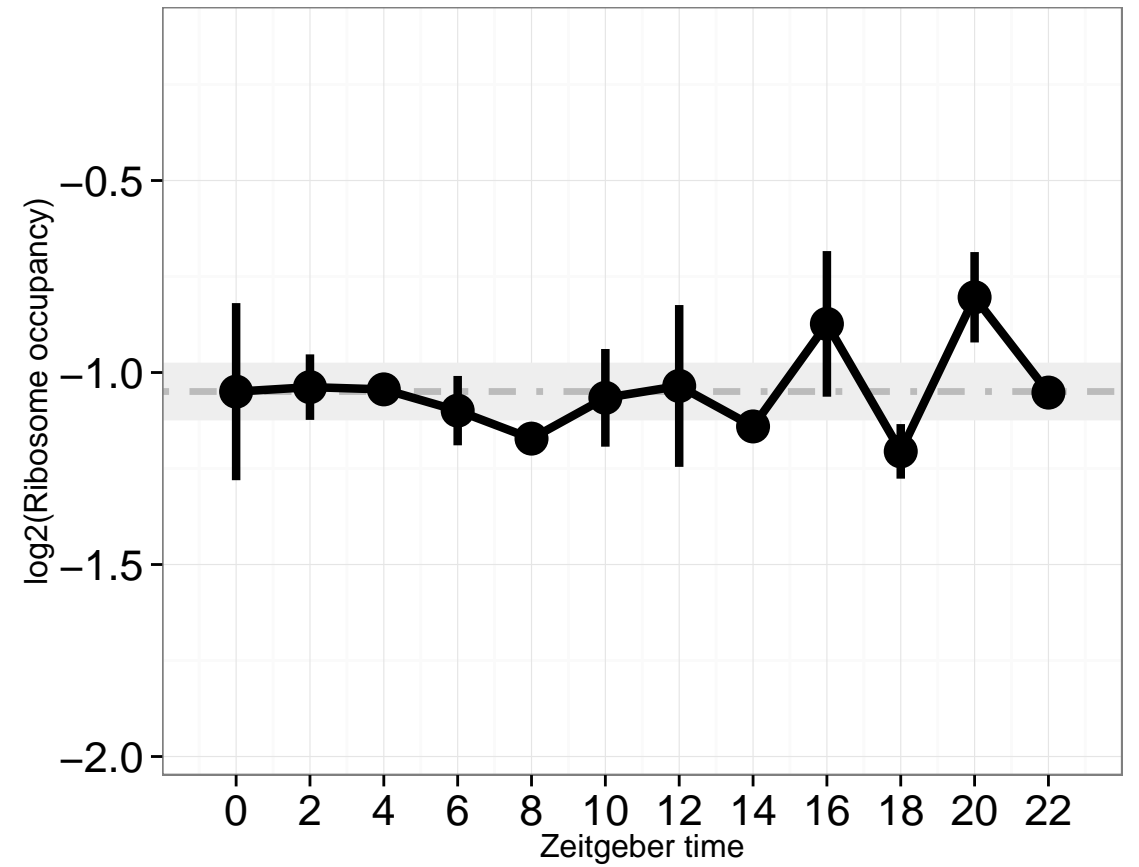

Supplement: Supplementary file 2453 [file 1]

# 1110032A03Rik

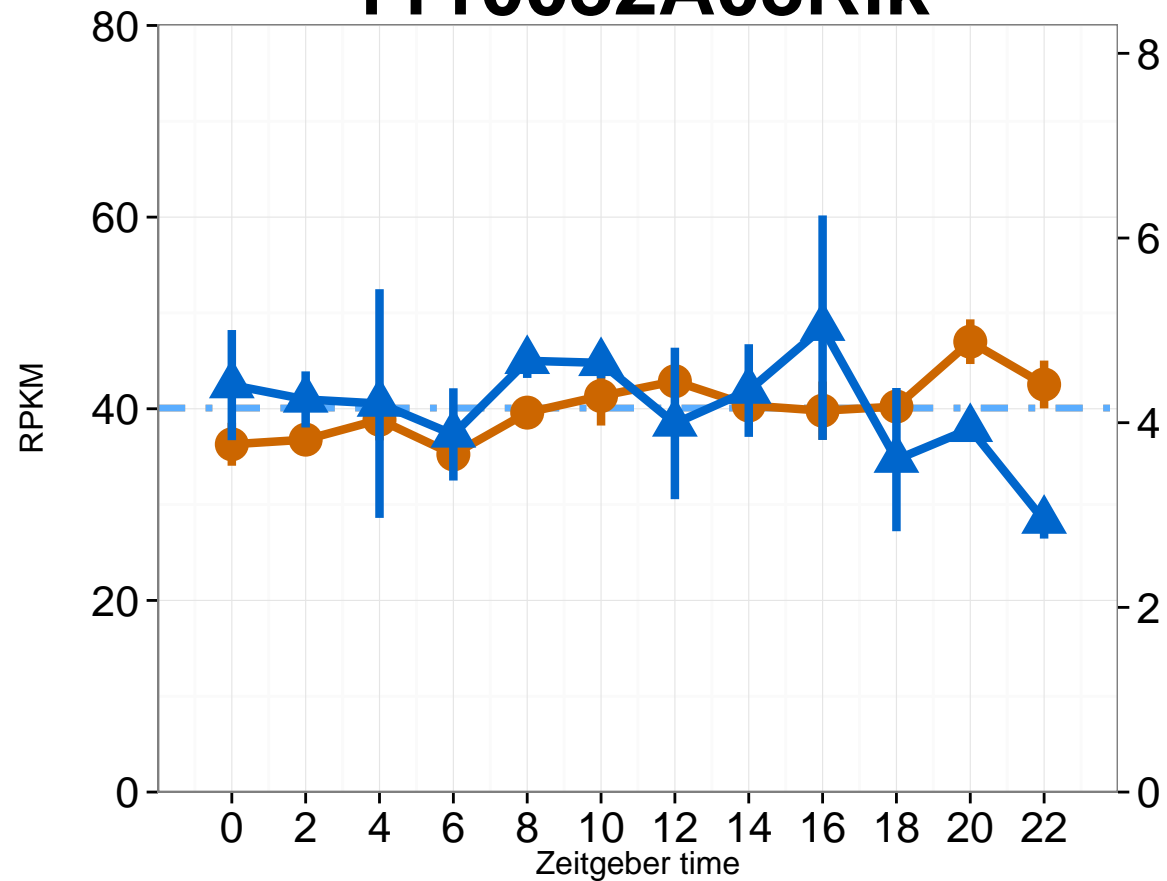

# 1110032A03Rik

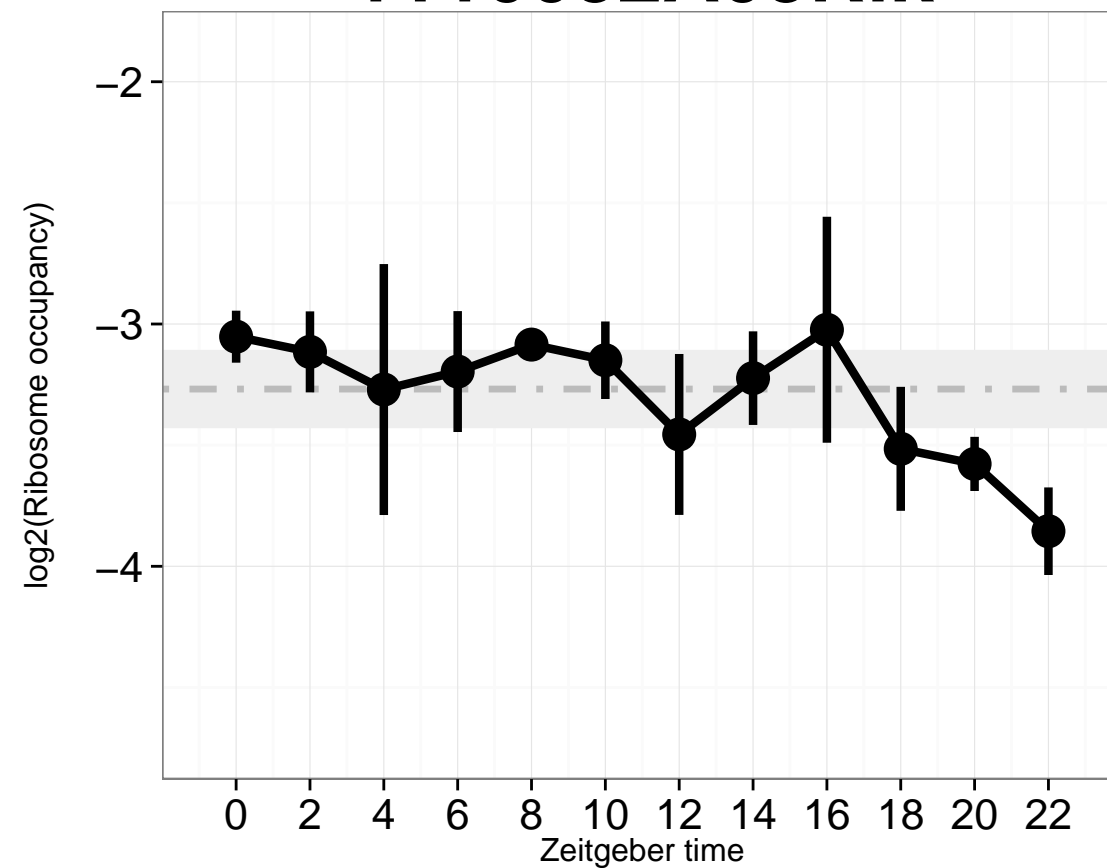

Supplement: Supplementary file 2454 [file 1]

## Bicd2

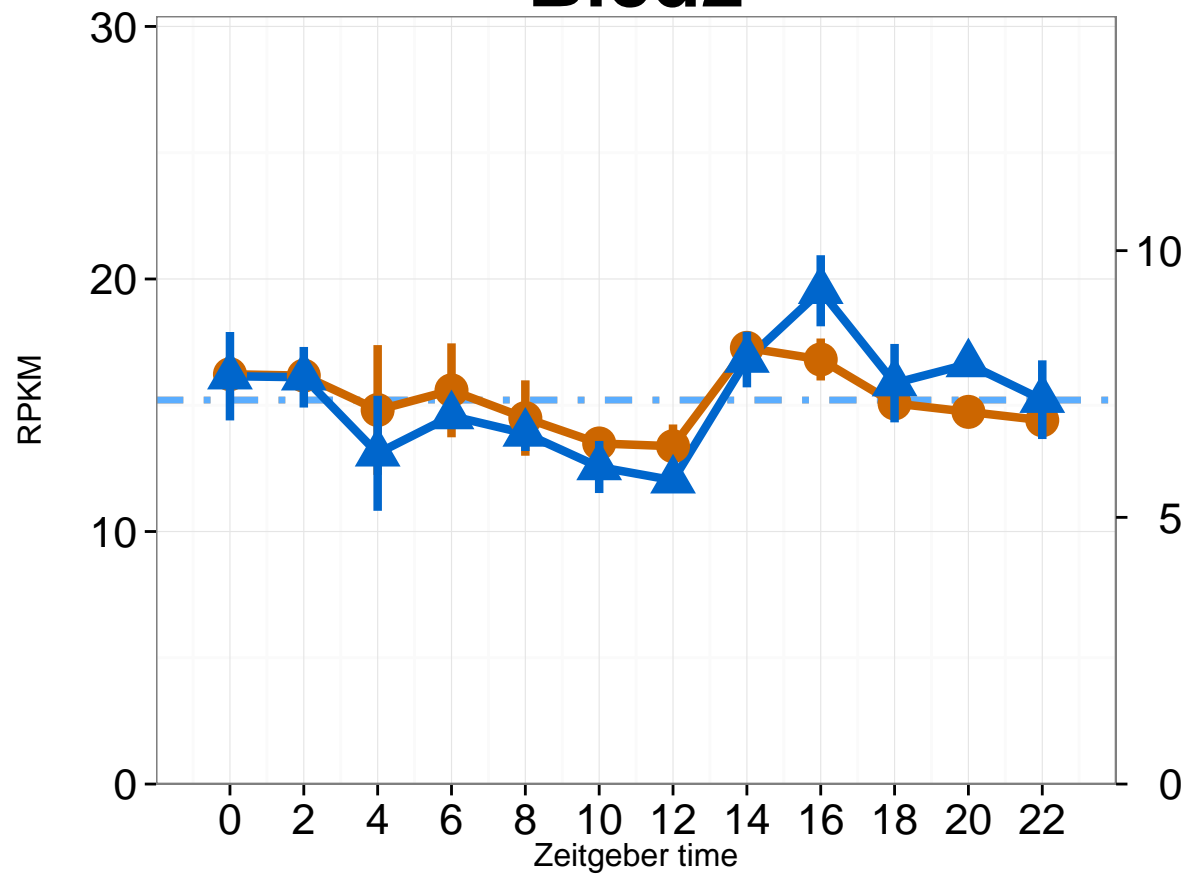

## Bicd2

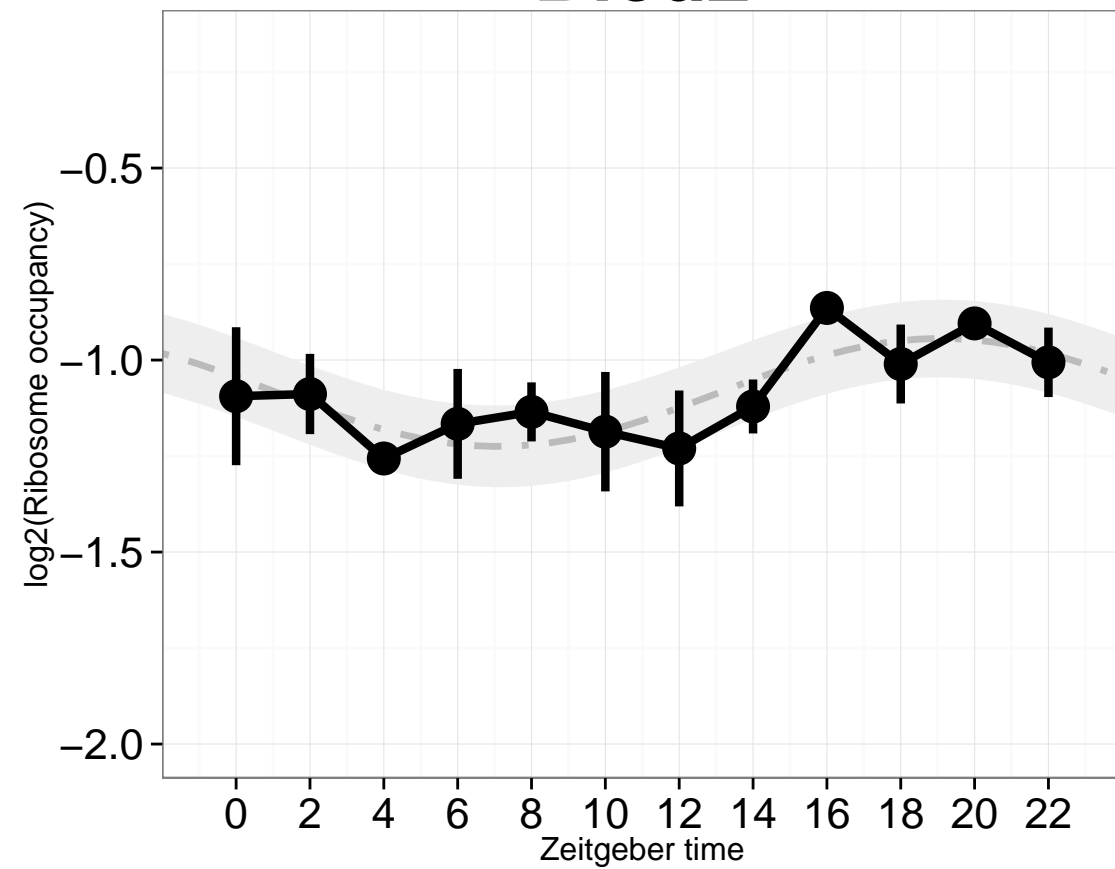

Supplement: Supplementary file 2455 [file 1]

## Nos1

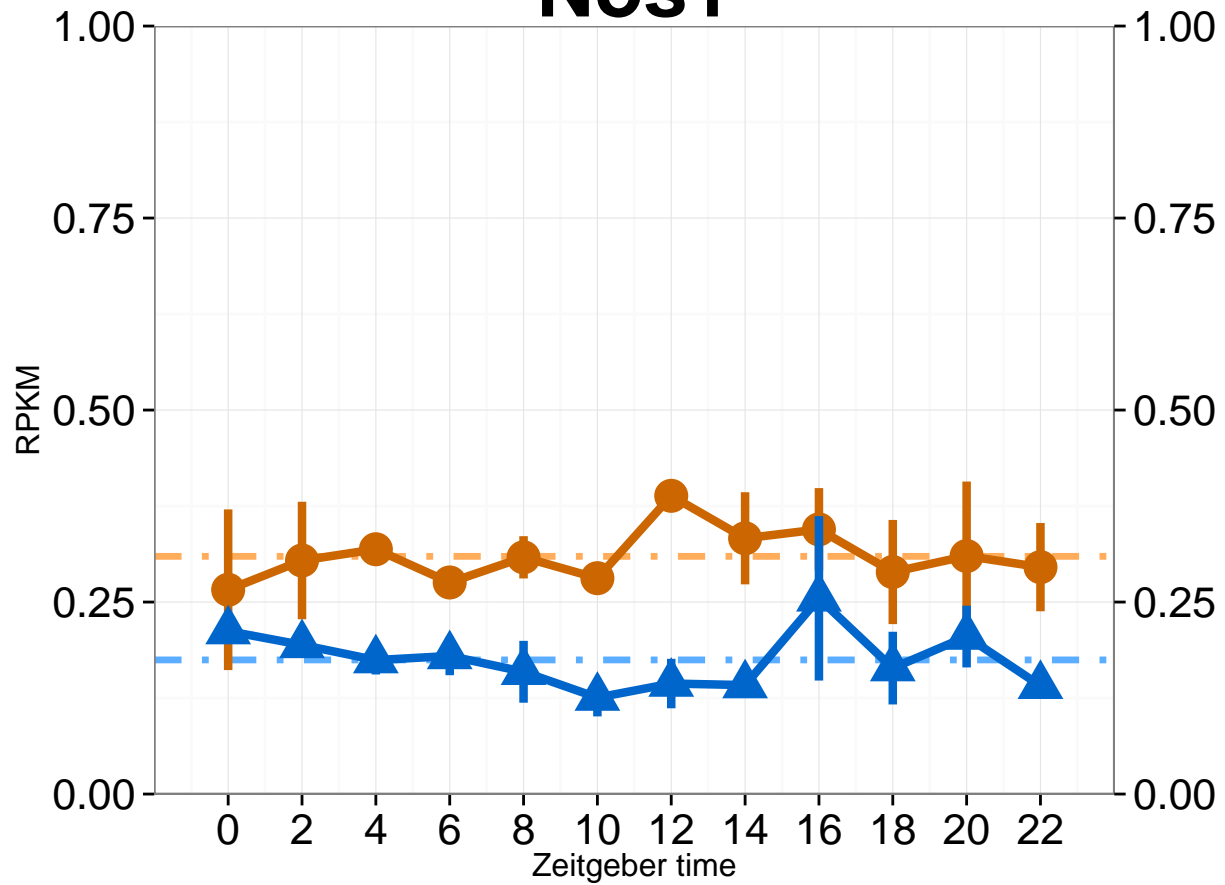

## Nos1

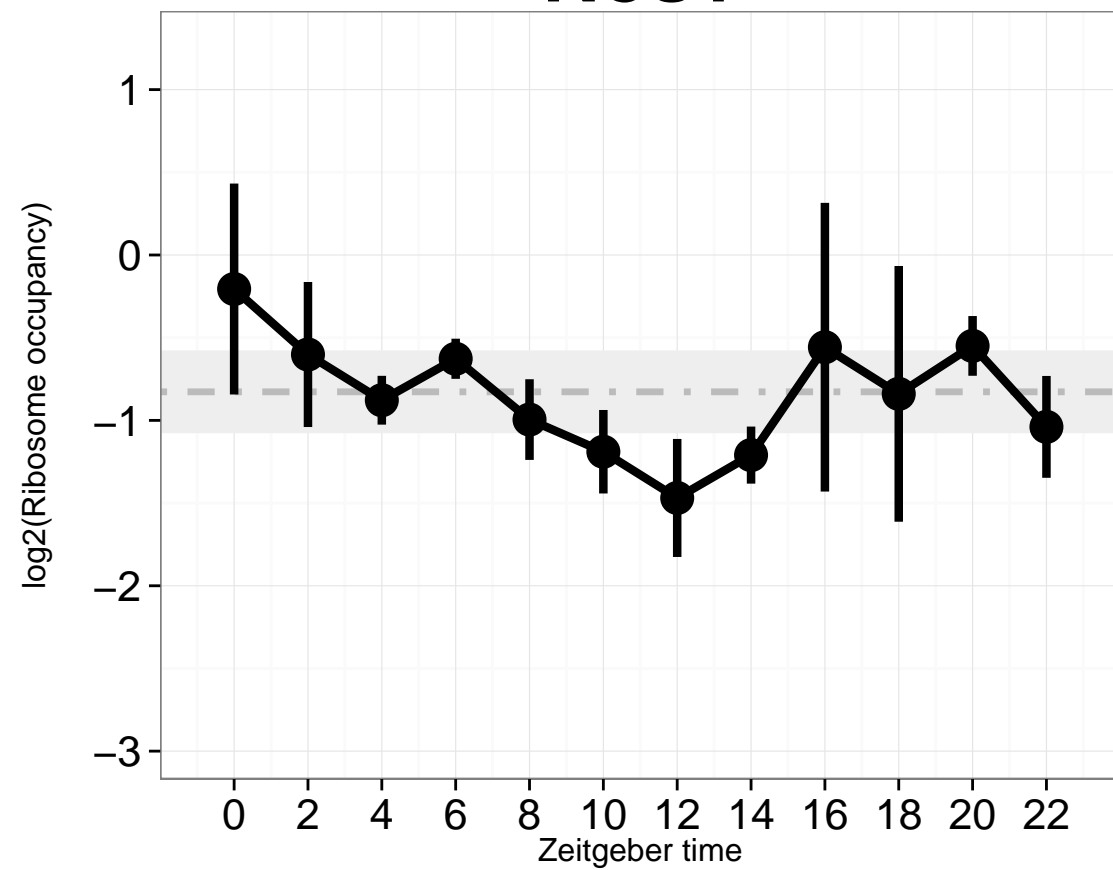

Supplement: Supplementary file 2456 [file 1]

# Lcn2

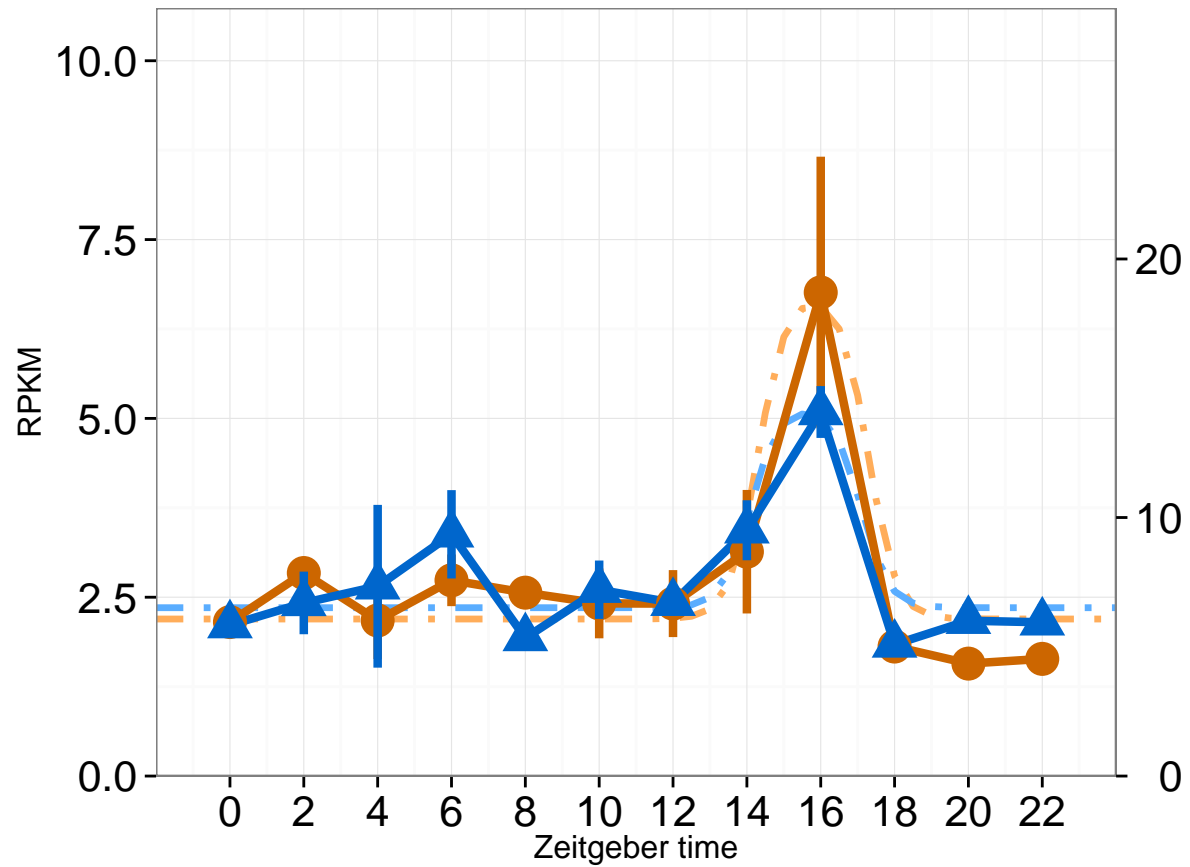

# Lcn2

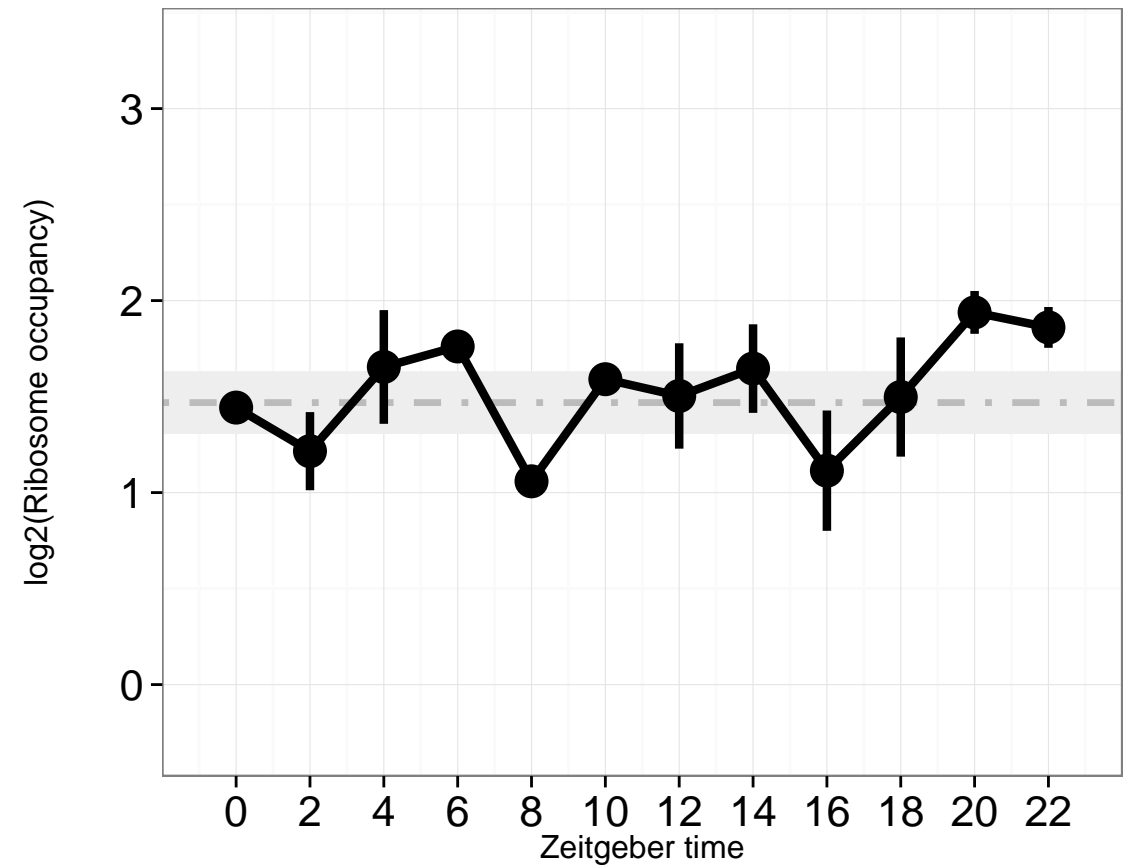

Supplement: Supplementary file 2457 [file 1]

## Hps3

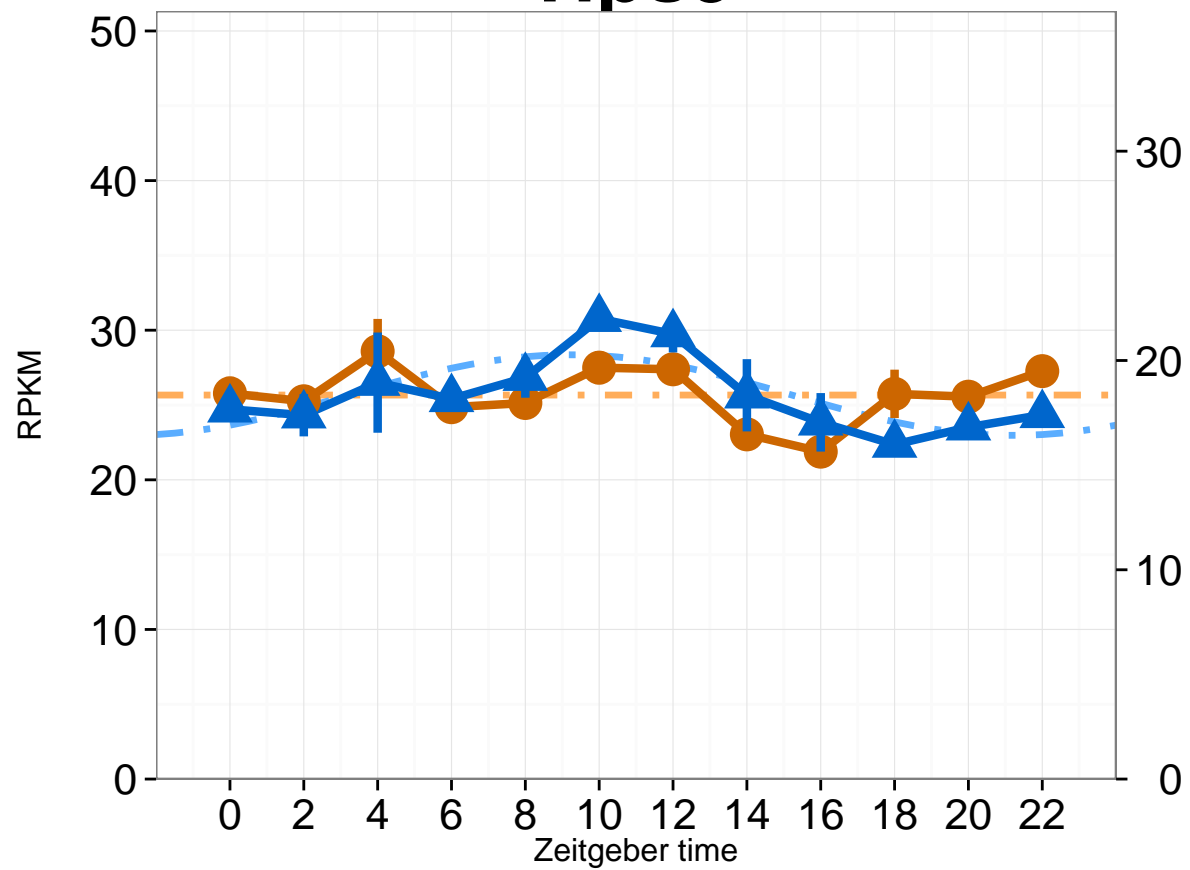

## Hps3

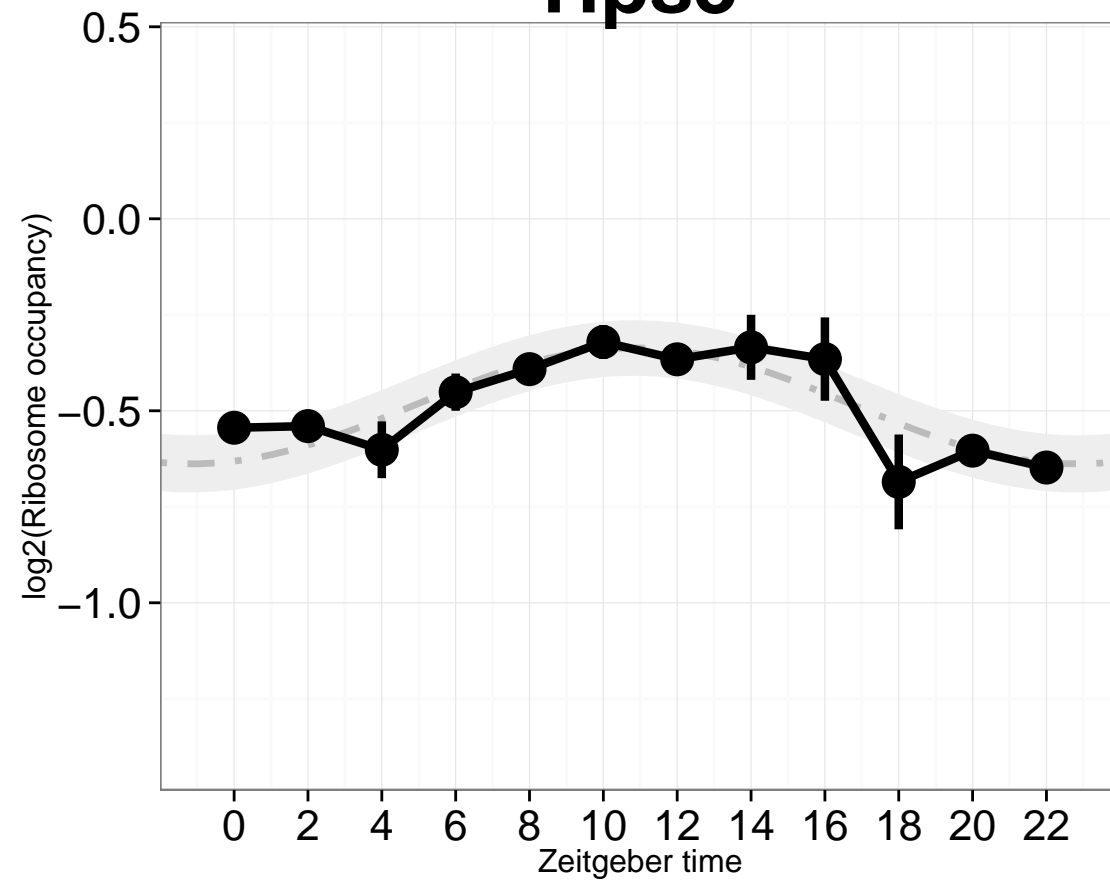

Supplement: Supplementary file 2458 [file 1]

## Alkbh6

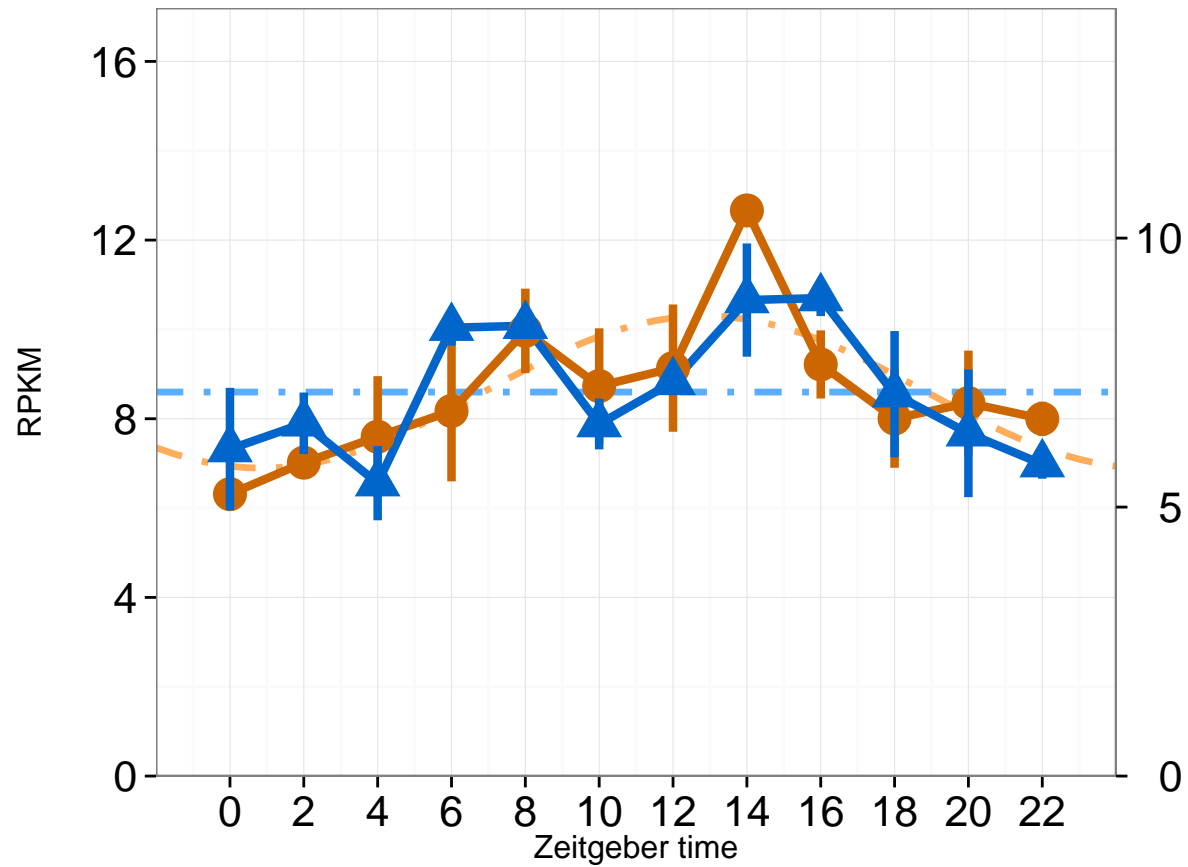

## Alkbh6

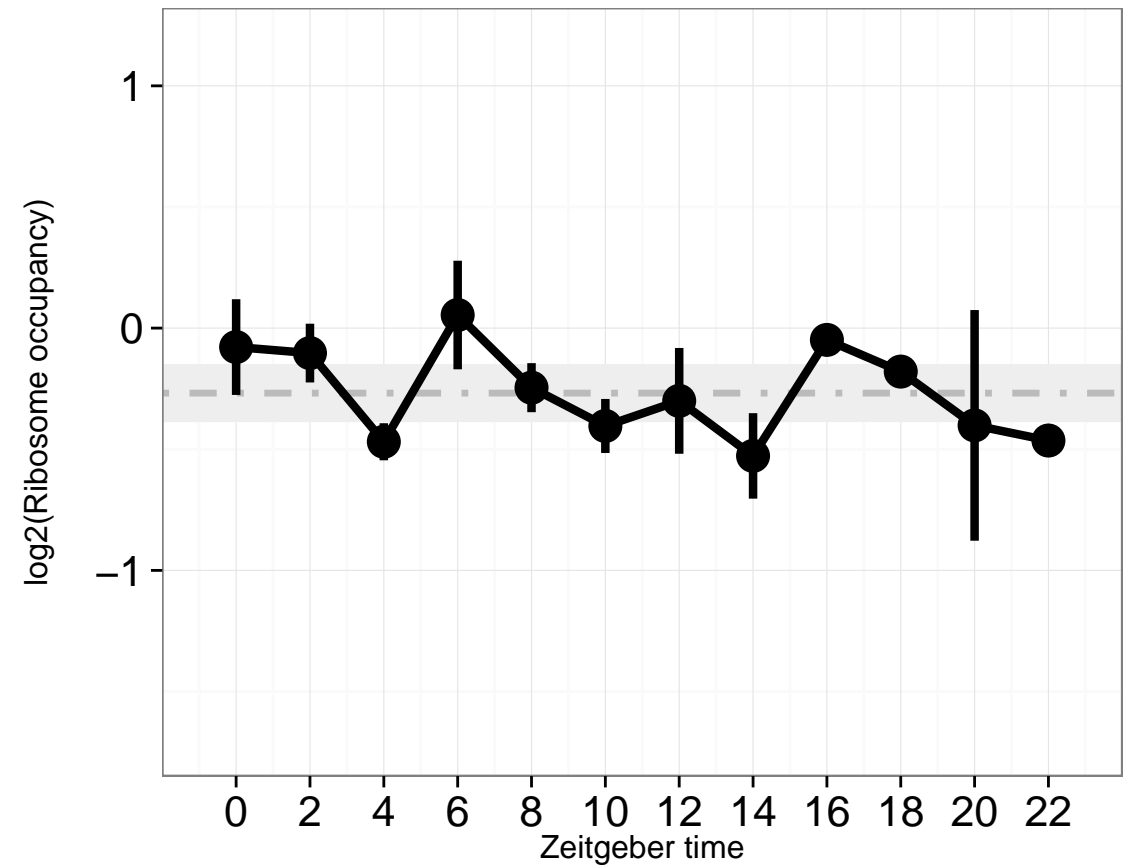

Supplement: Supplementary file 2459 [file 1]

# Mogat1

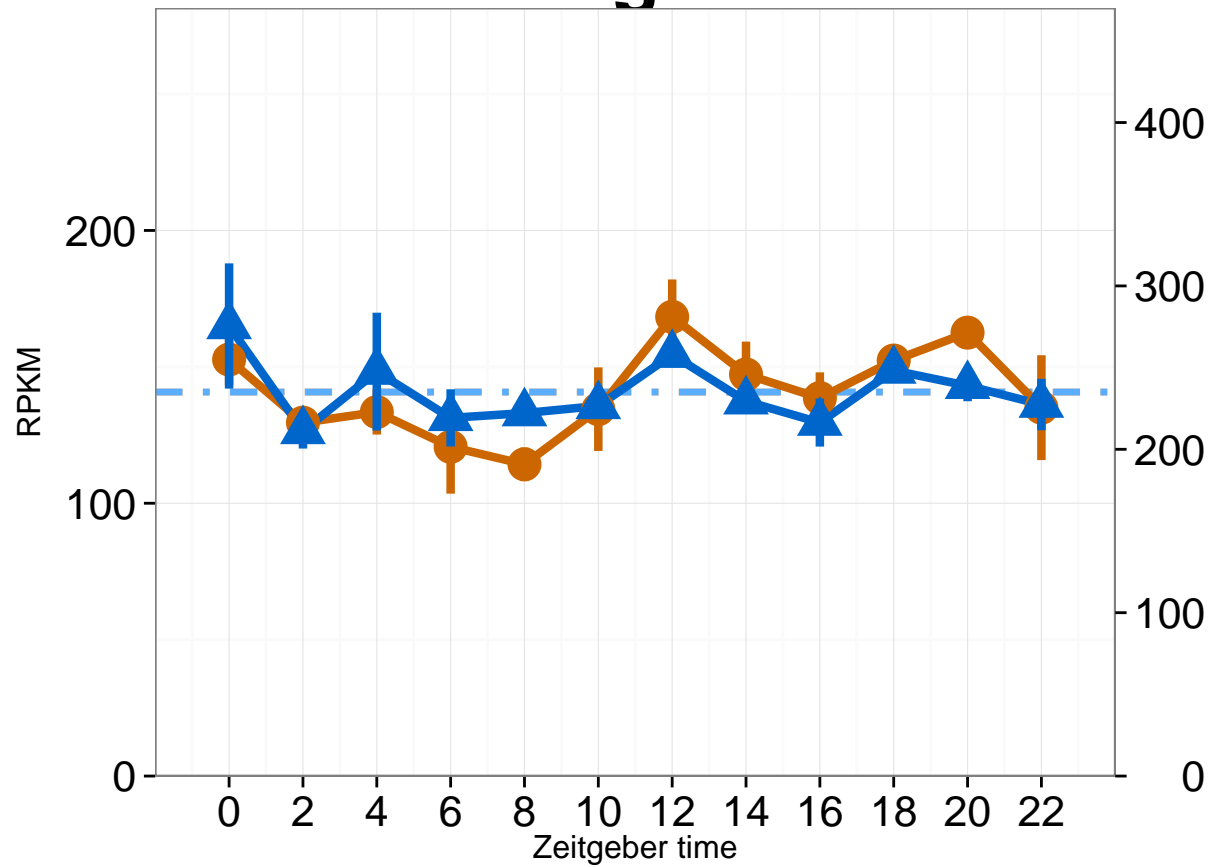

# Mogat1

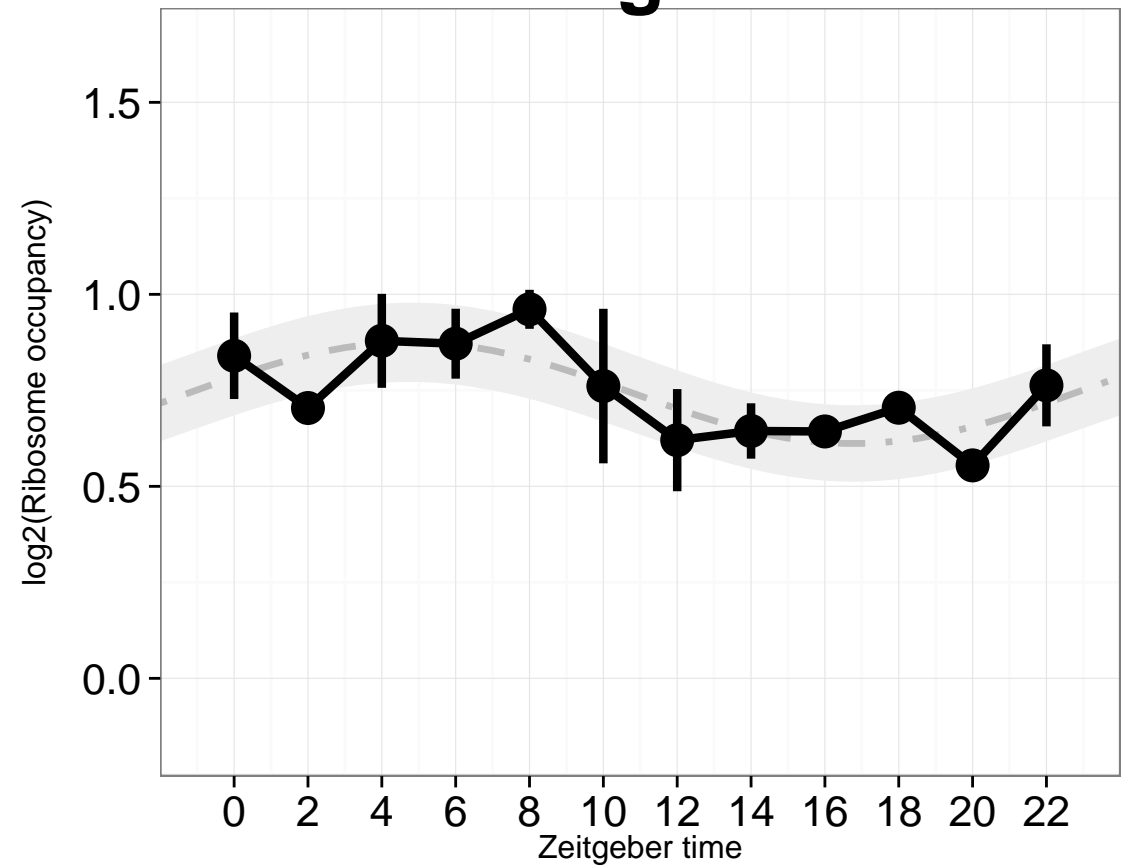

Supplement: Supplementary file 2460 [file 1]

# Arl6ip1

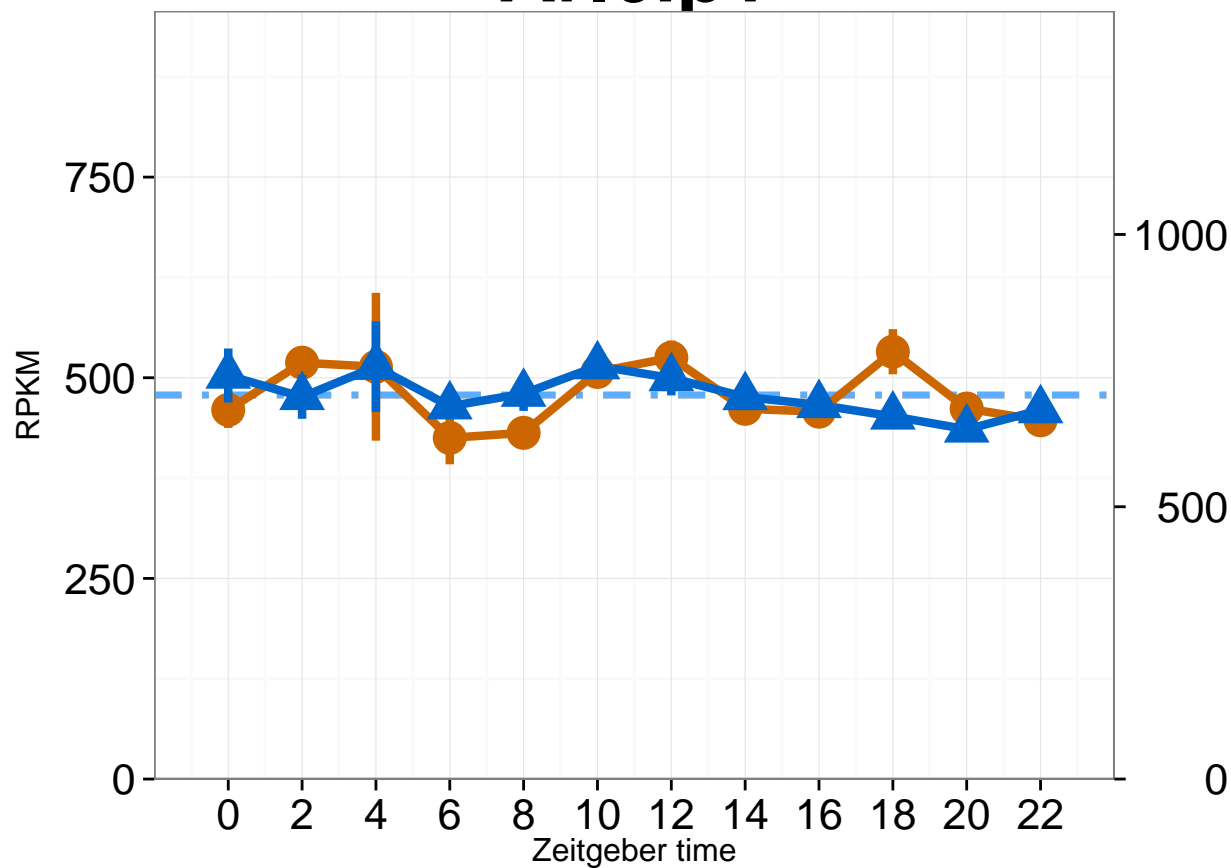

# Arl6ip1

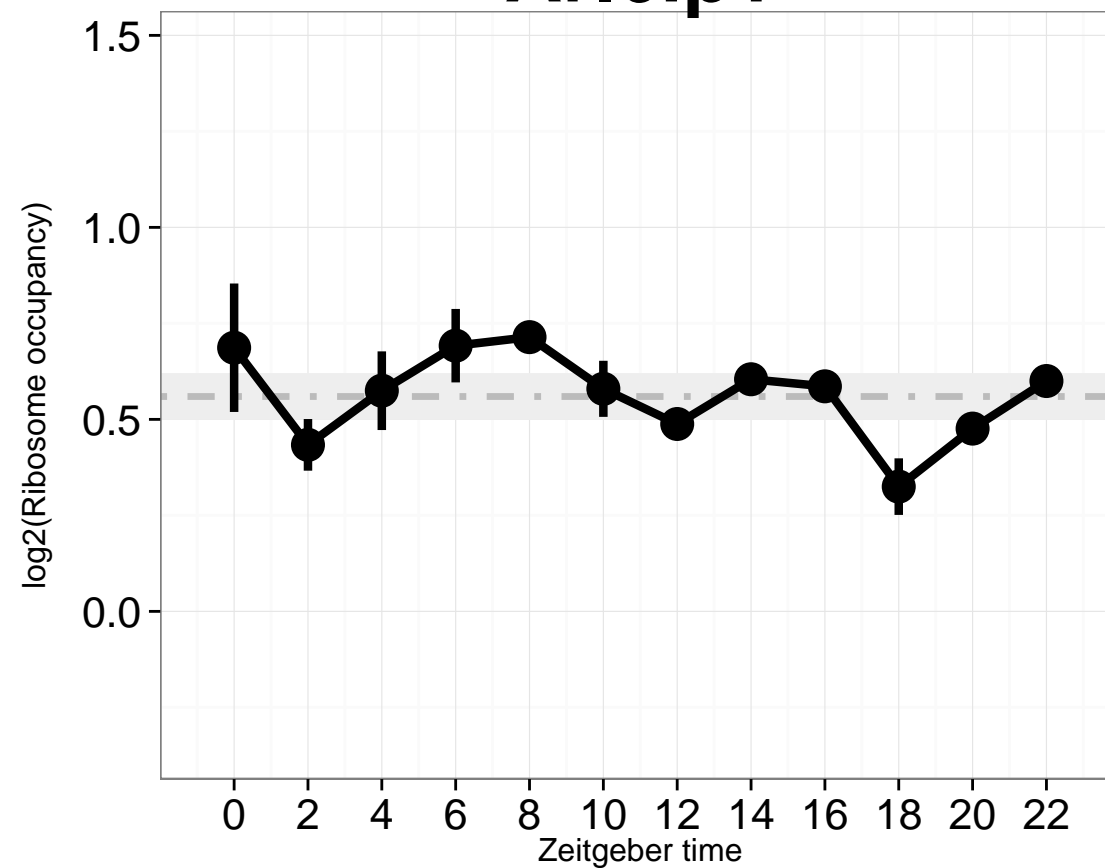

Supplement: Supplementary file 2461 [file 1]

## Med9

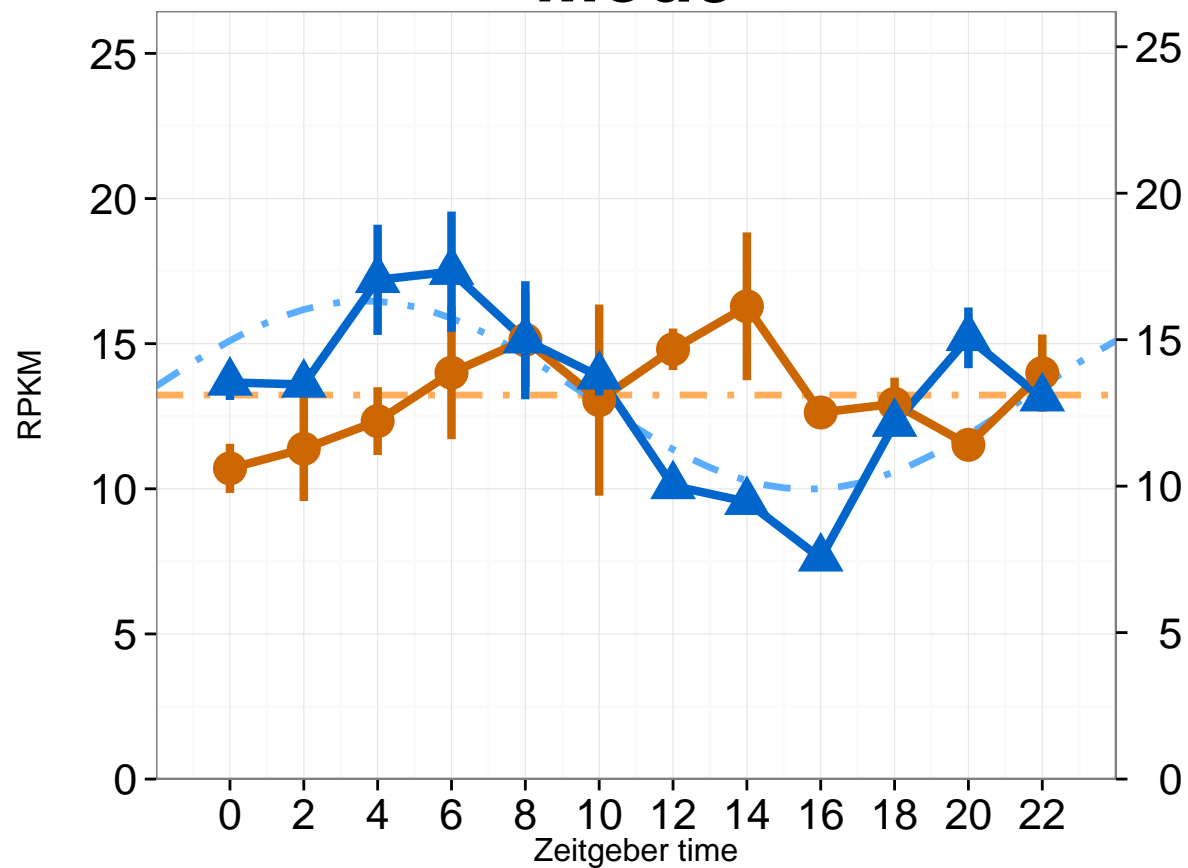

## Med9

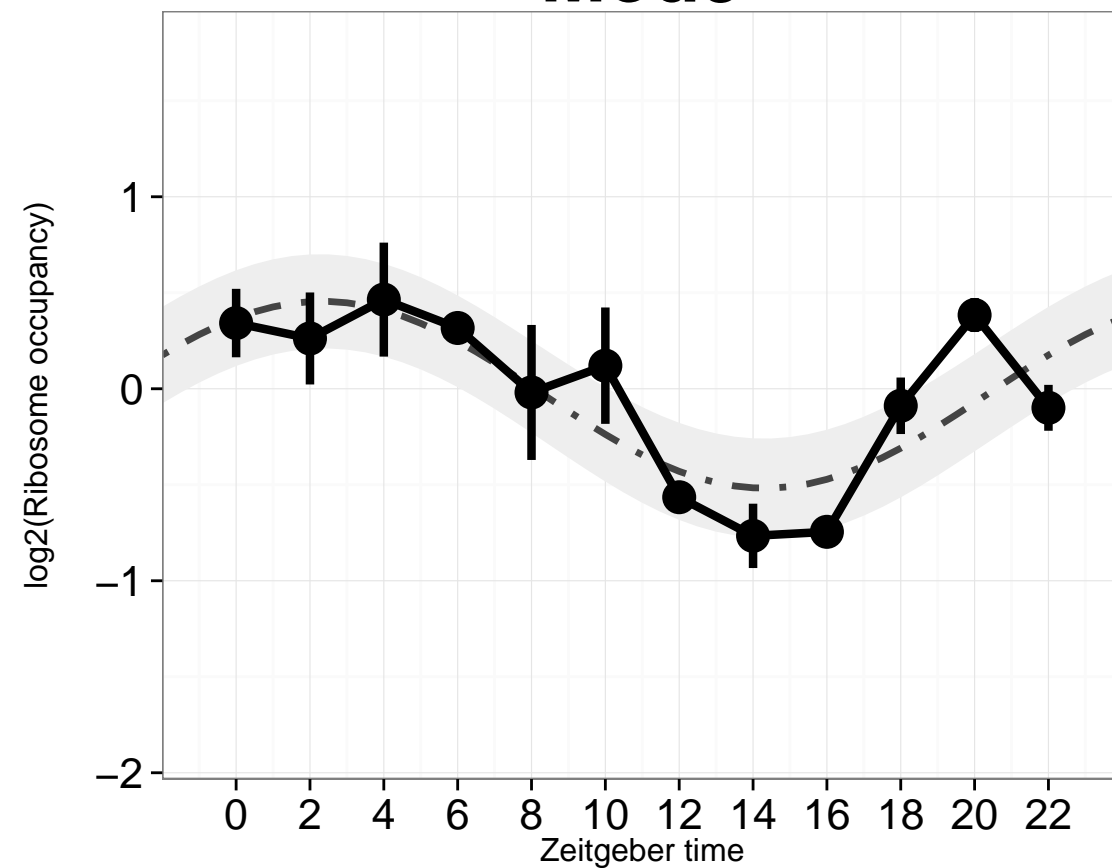

Supplement: Supplementary file 2462 [file 1]

# Hspa13

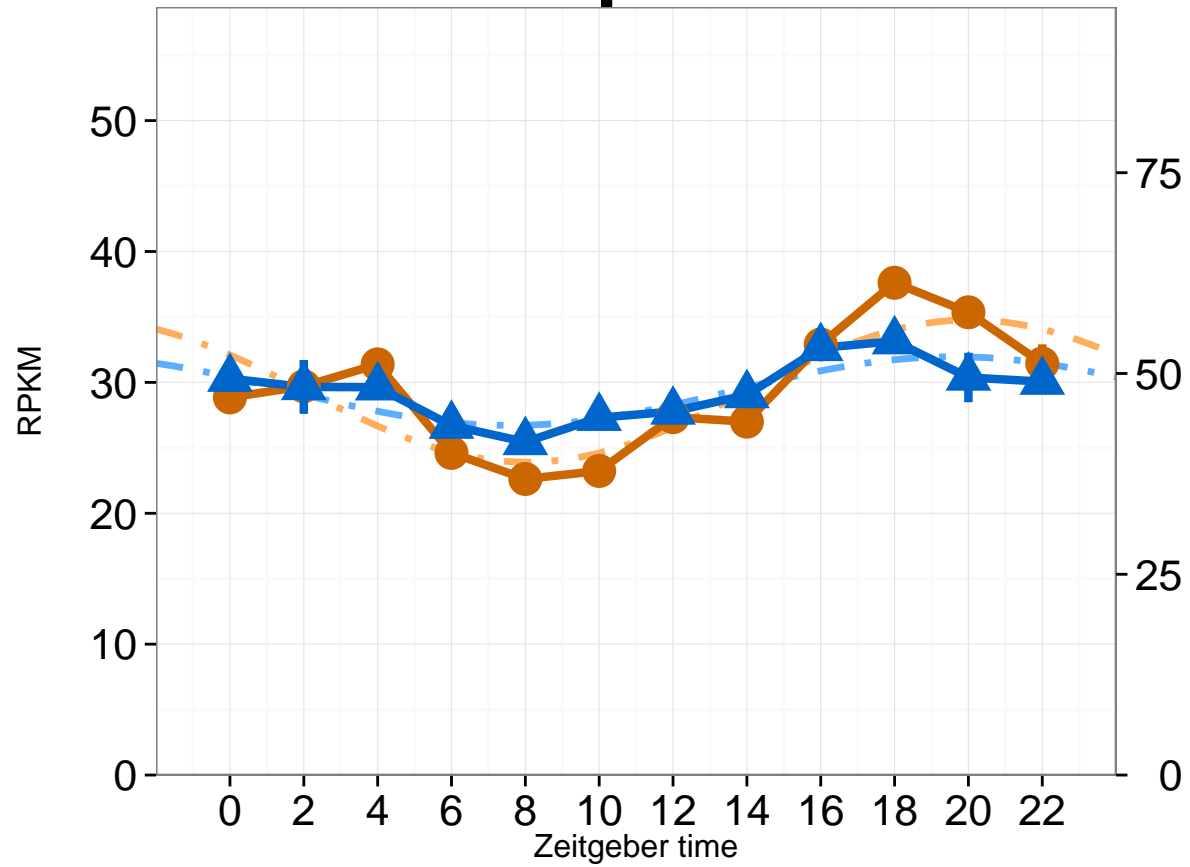

# Hspa13

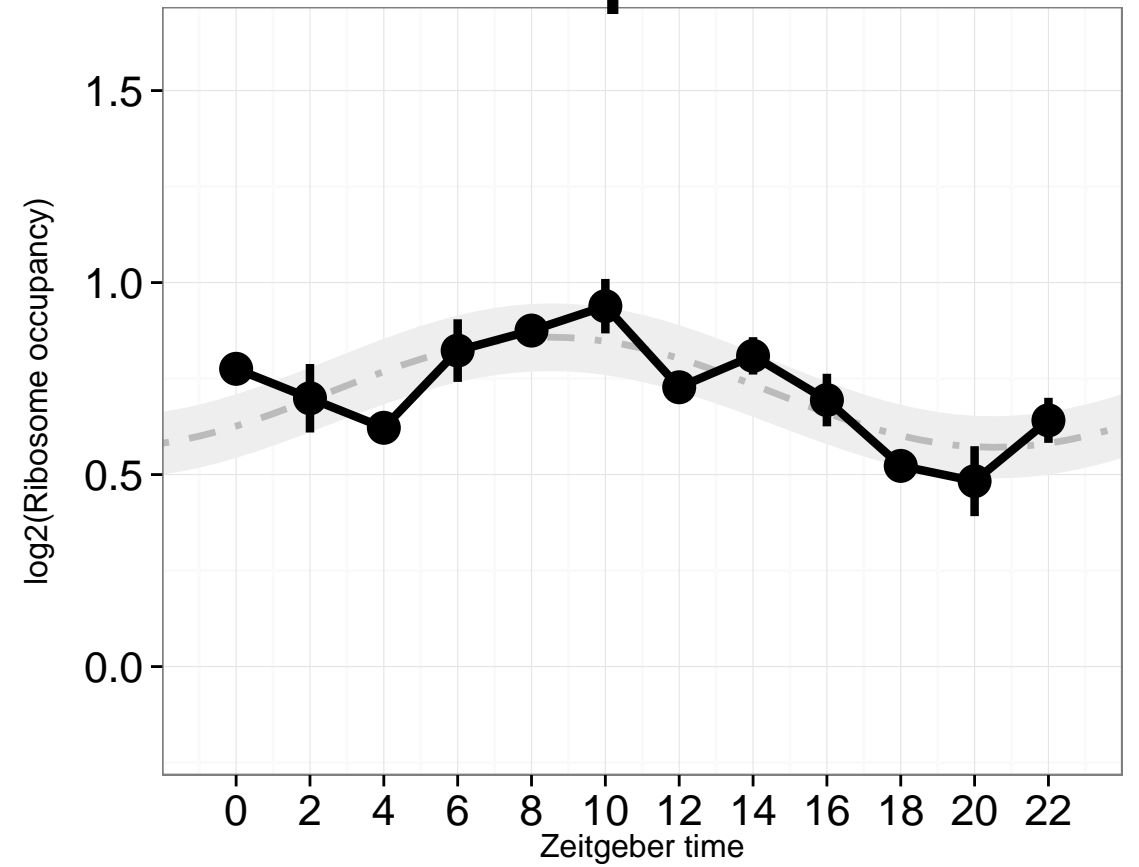

Supplement: Supplementary file 2463 [file 1]

# Alg14

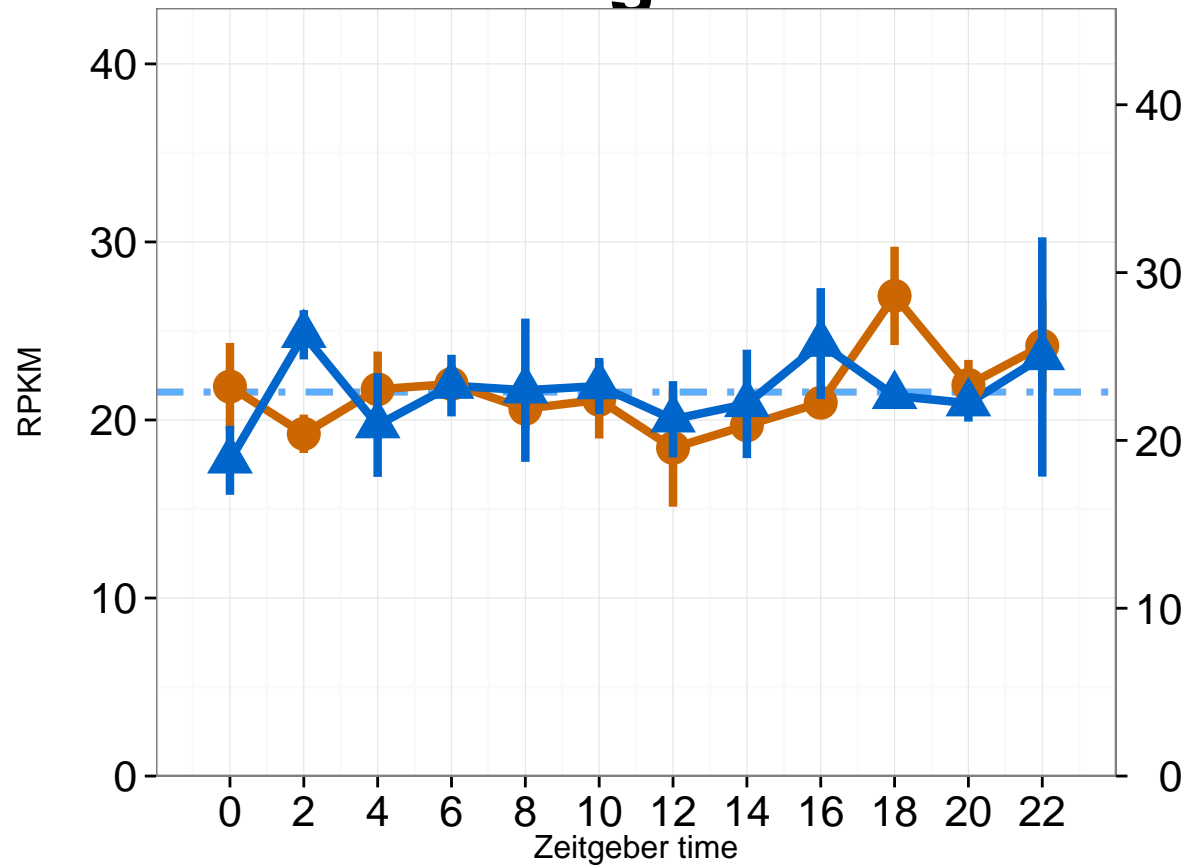

# Alg14

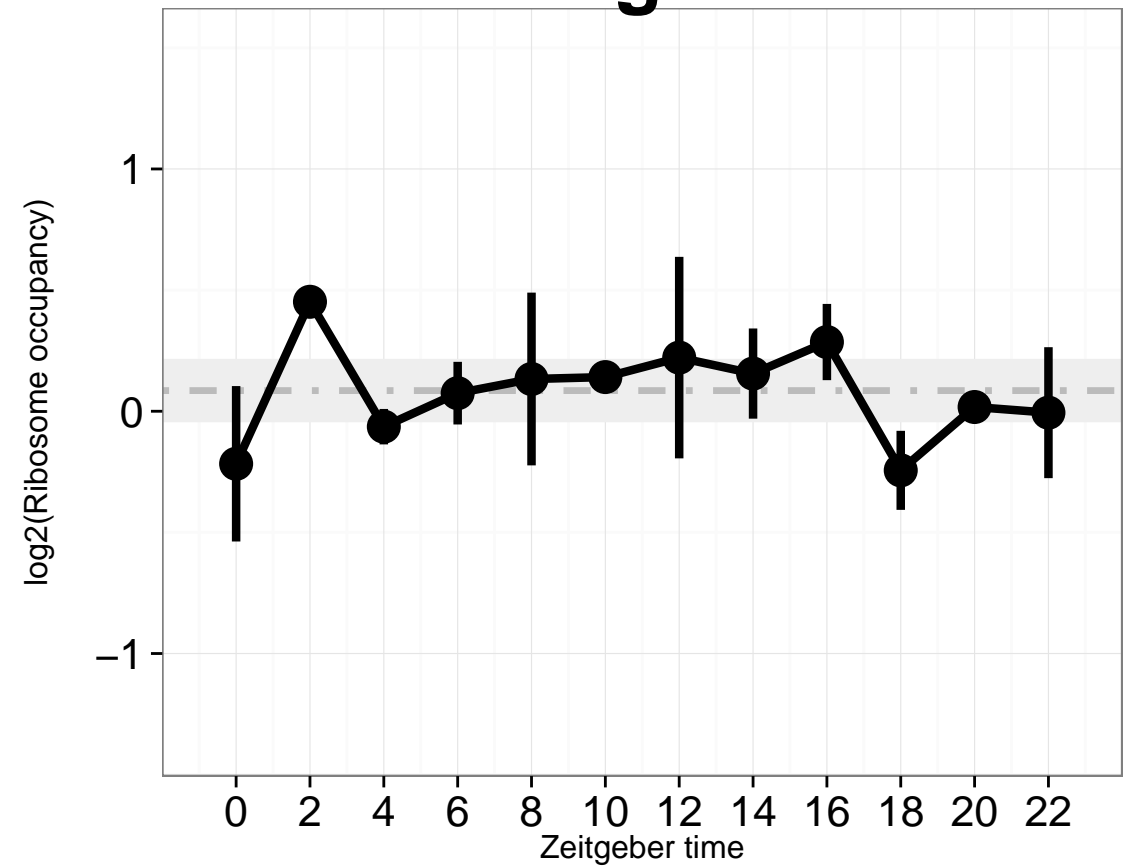

Supplement: Supplementary file 2464 [file 1]

# Otud7b

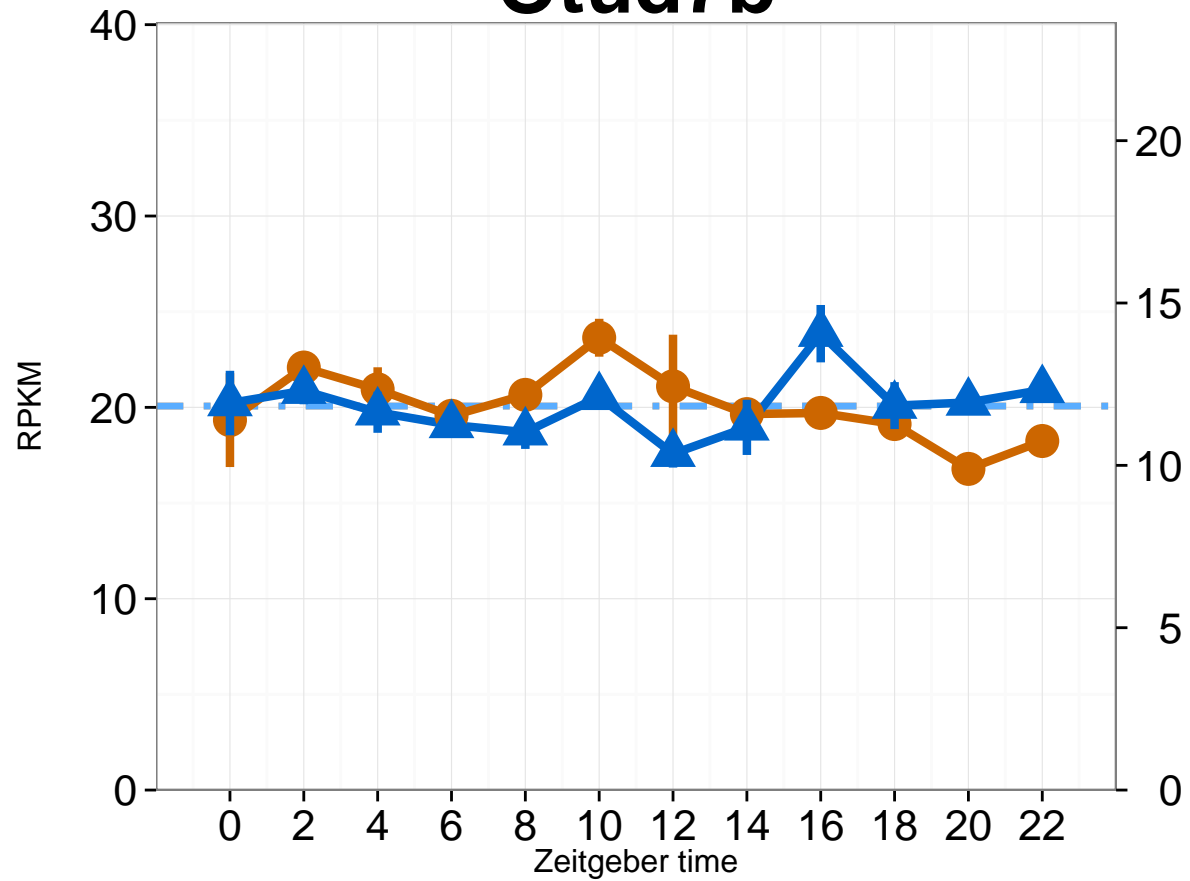

# Otud7b

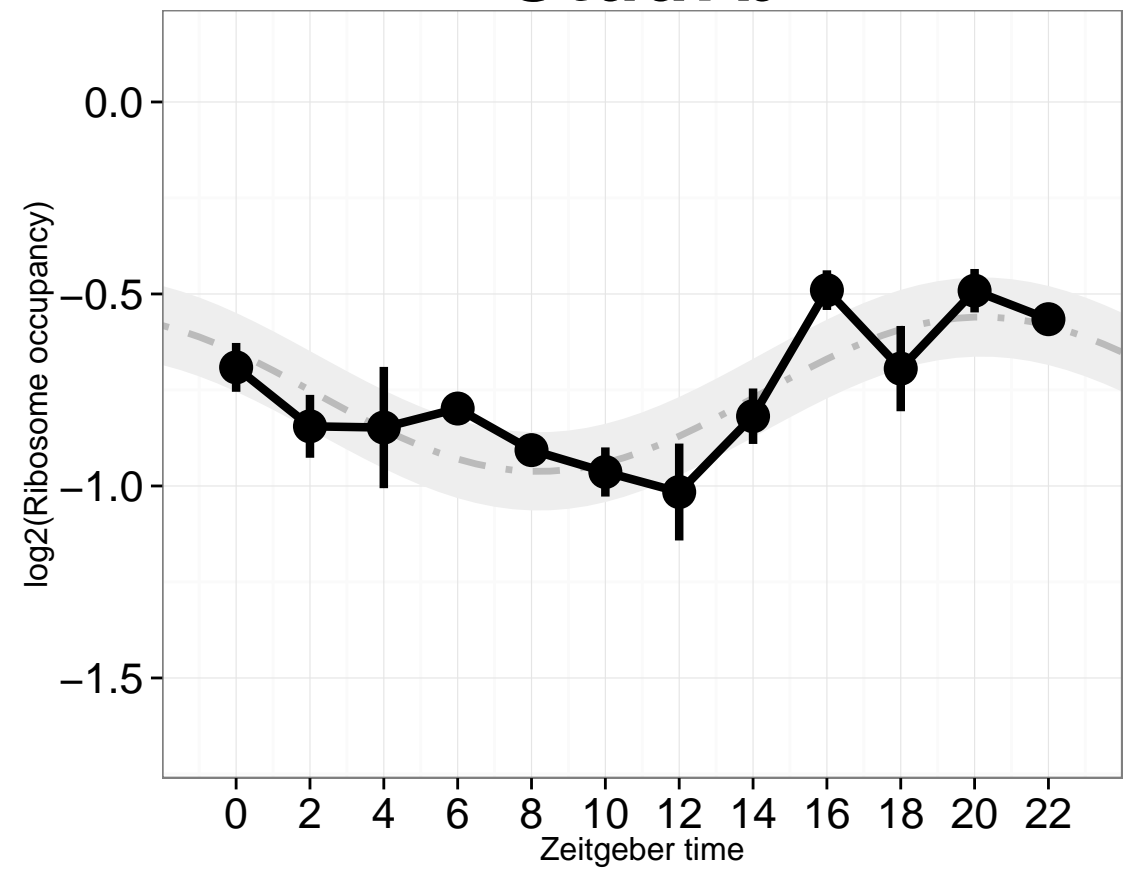

Supplement: Supplementary file 2465 [file 1]

# Wbscr22

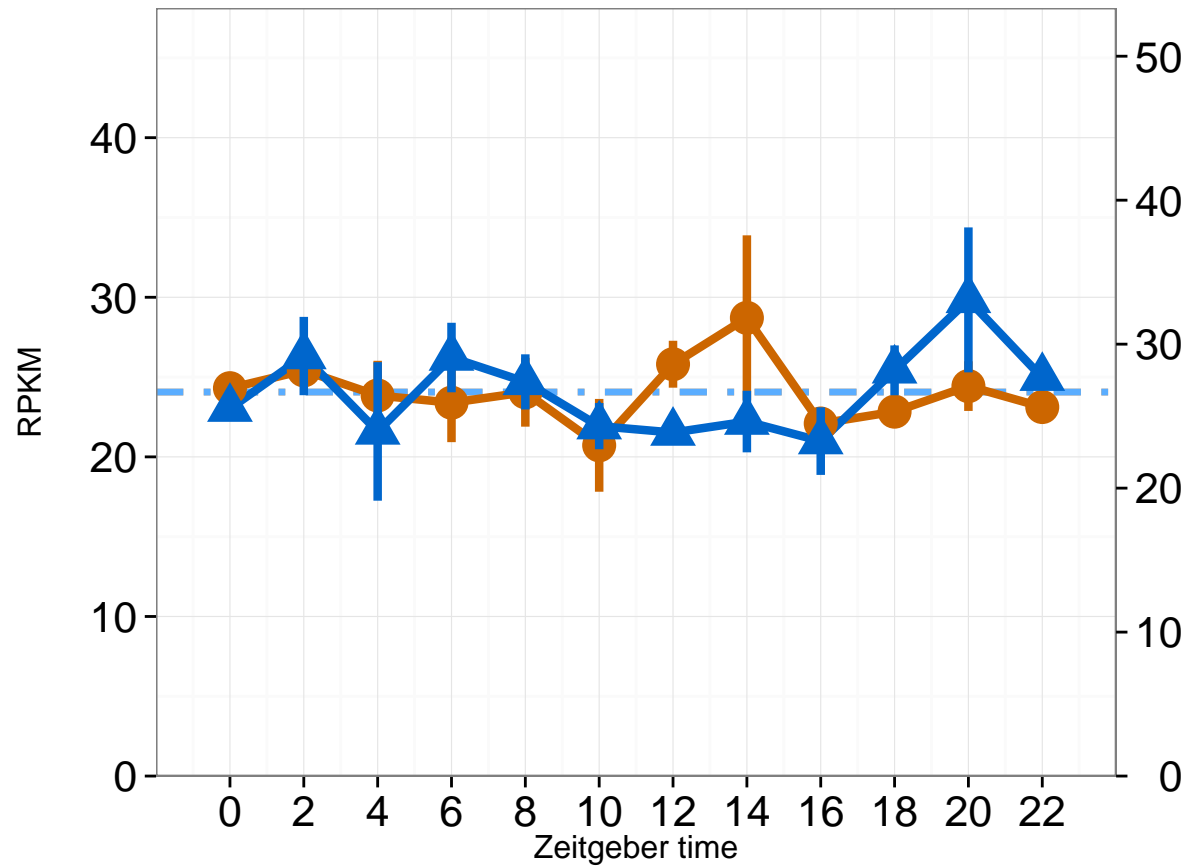

# Wbscr22

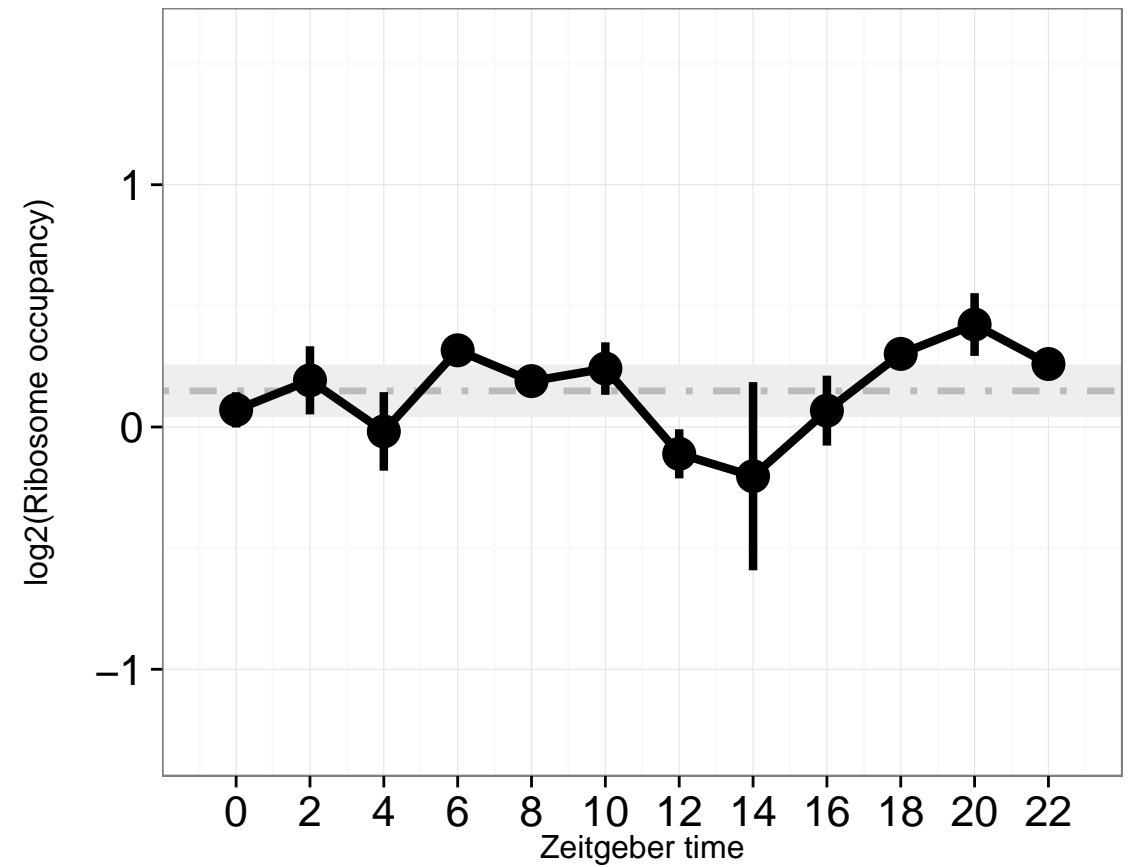

Supplement: Supplementary file 2466 [file 1]

## Sgcd

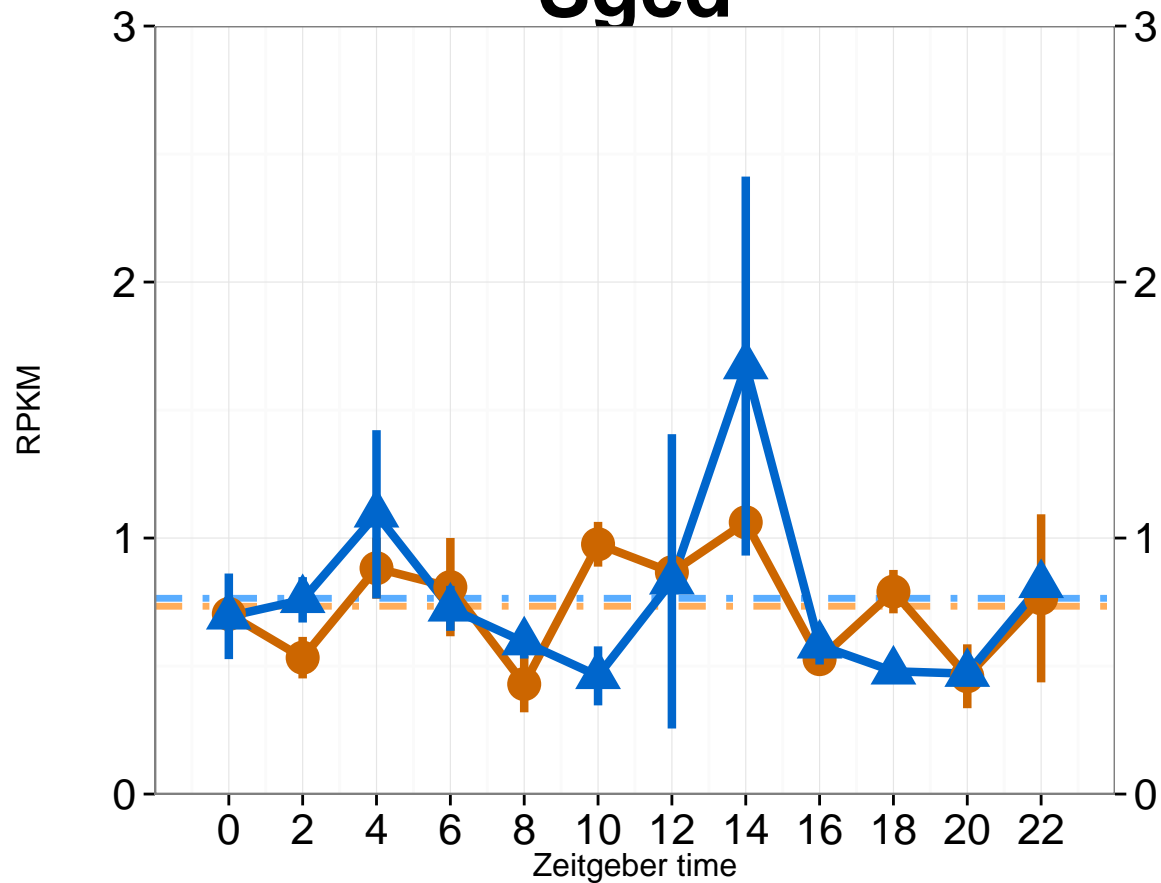

## Sgcd

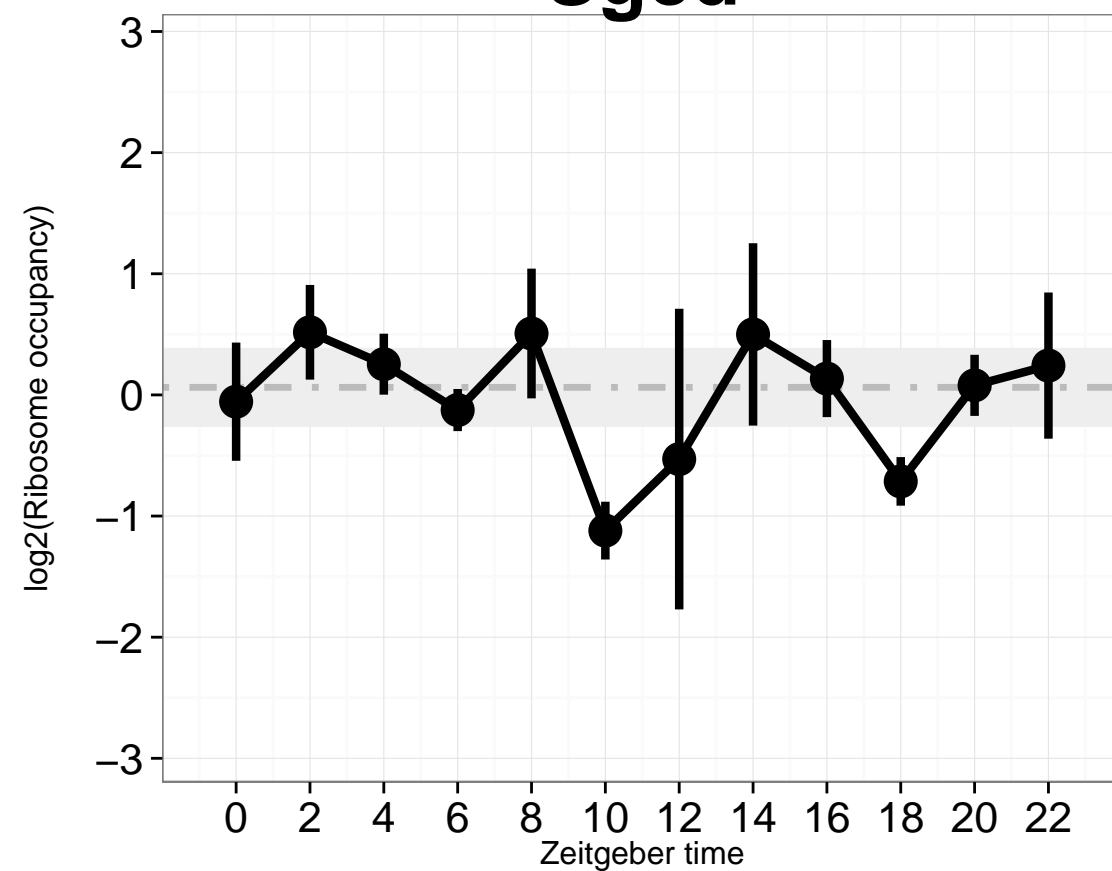

Supplement: Supplementary file 2467 [file 1]

# Zc2hc1c

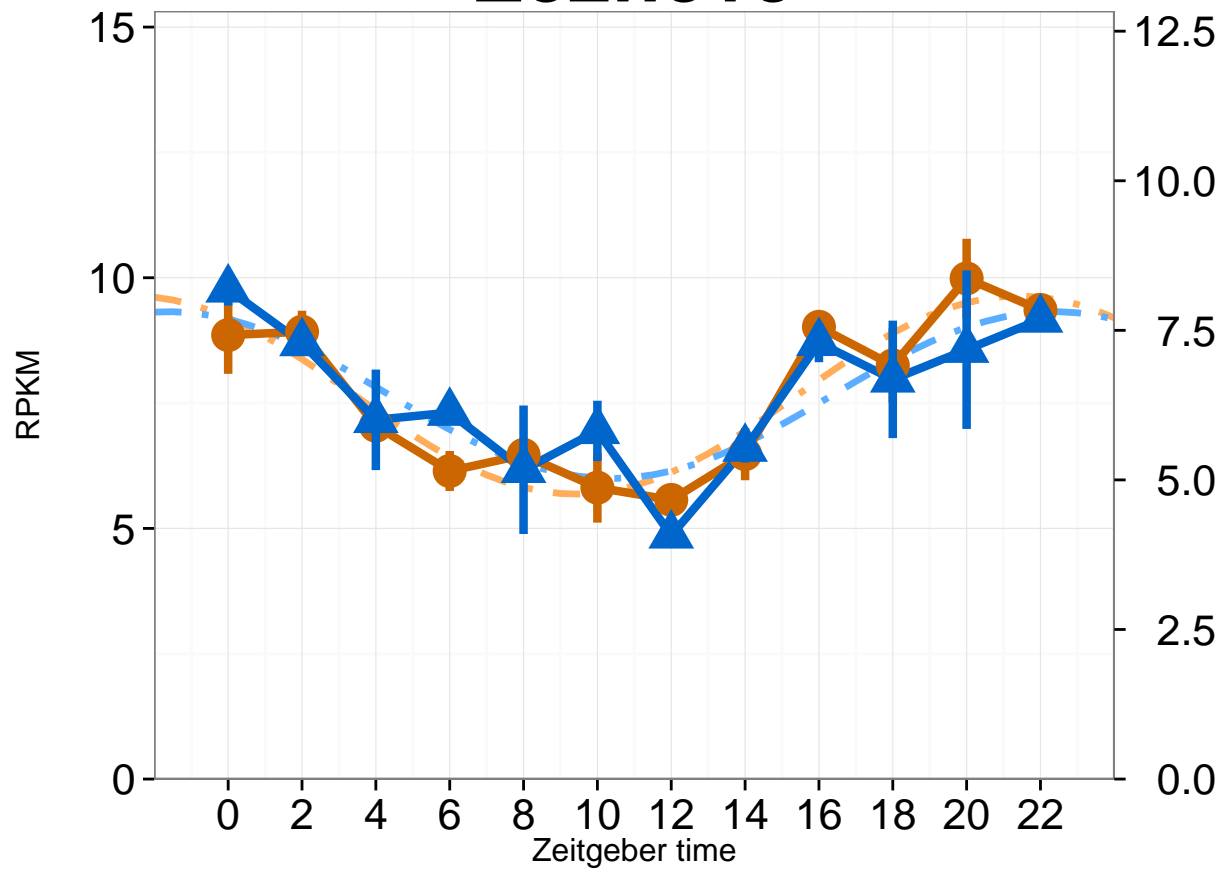

# Zc2hc1c

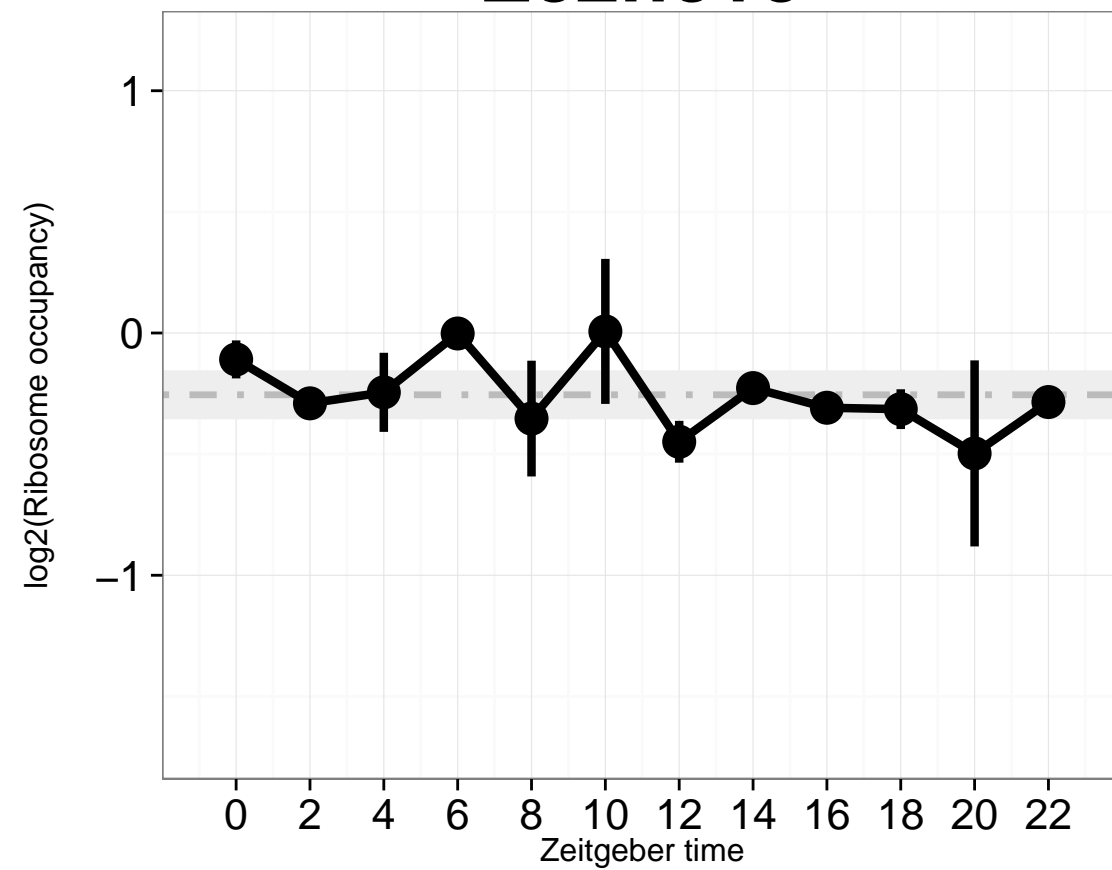

Supplement: Supplementary file 2468 [file 1]

# 2310042D19Rik

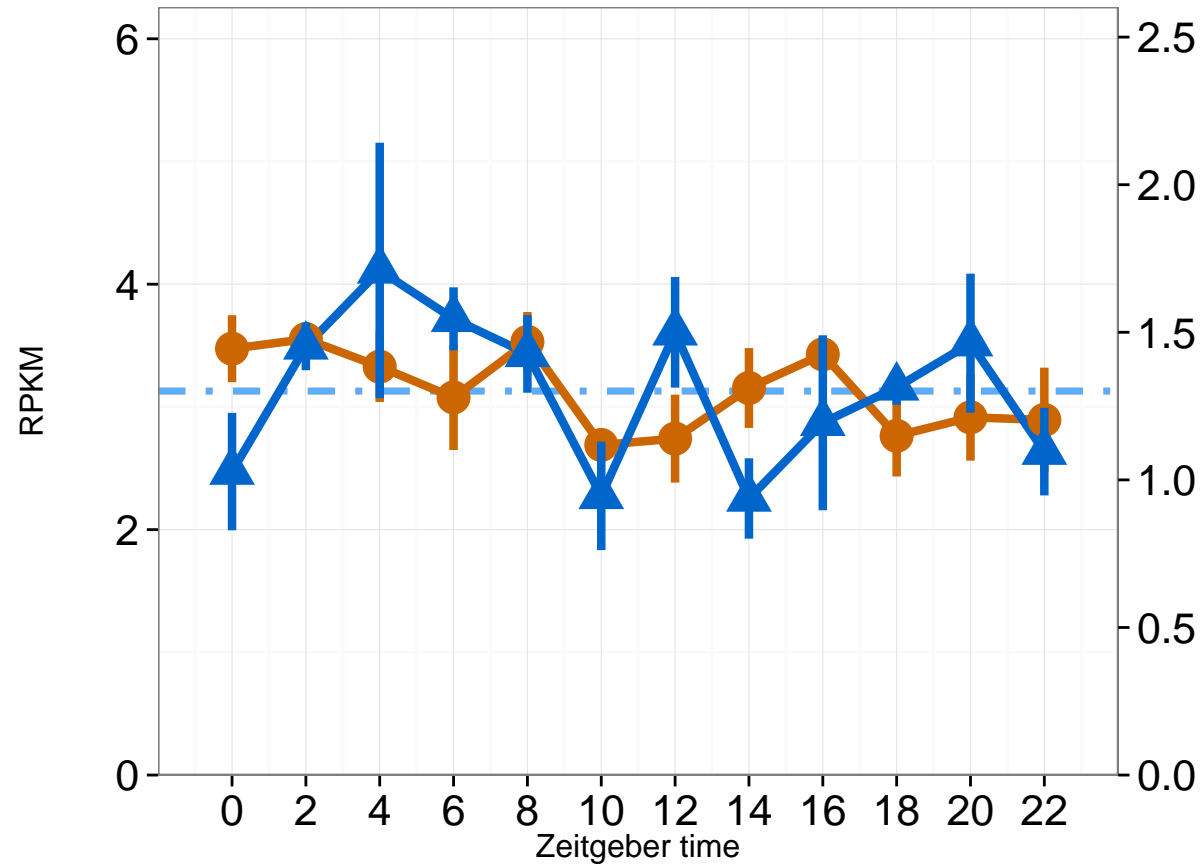

# 2310042D19Rik

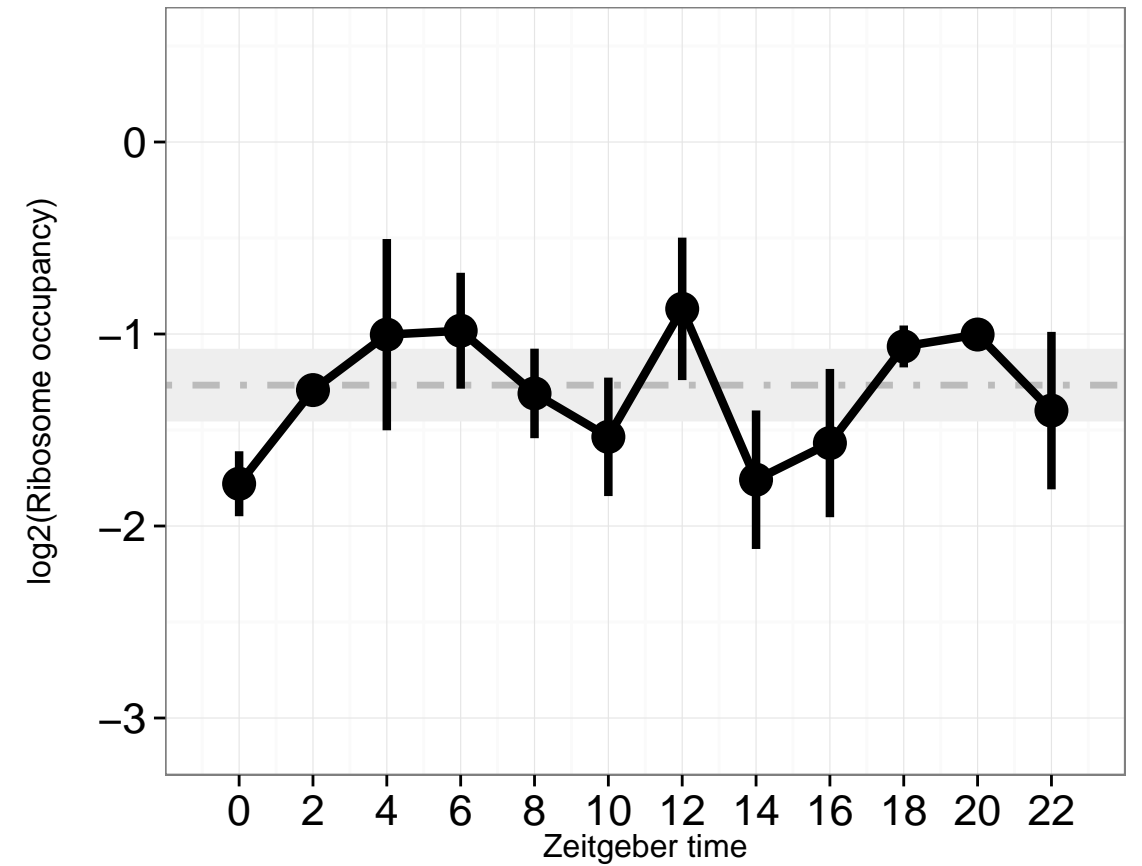

Supplement: Supplementary file 2469 [file 1]

## Terf2

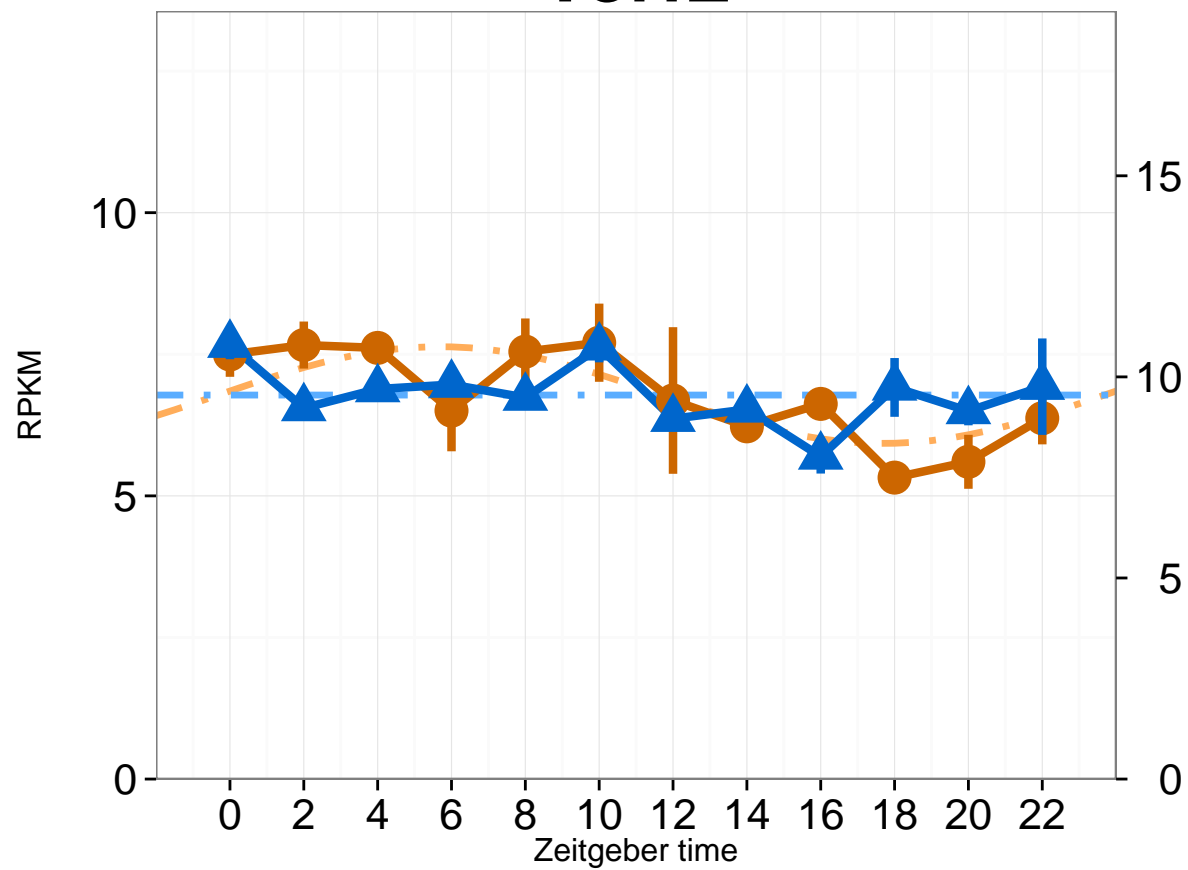

## Terf2

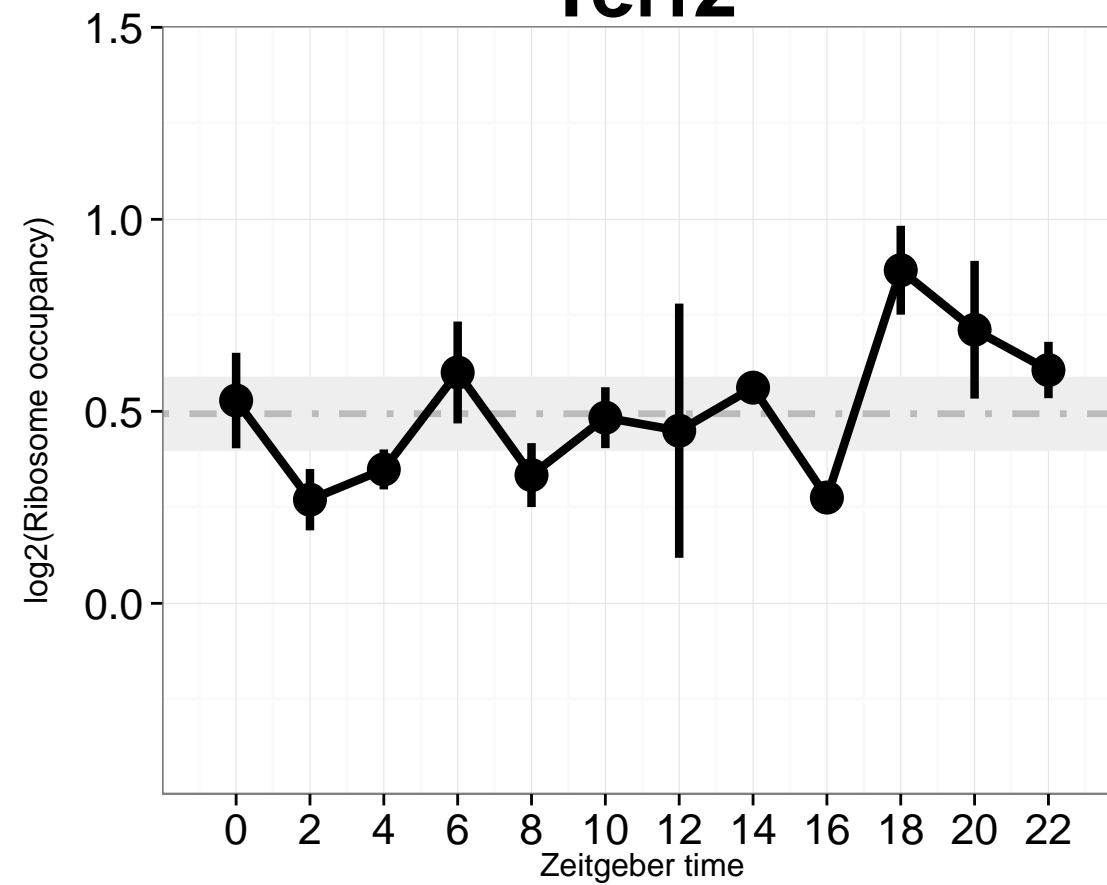

Supplement: Supplementary file 2470 [file 1]

# Slc9a3r2

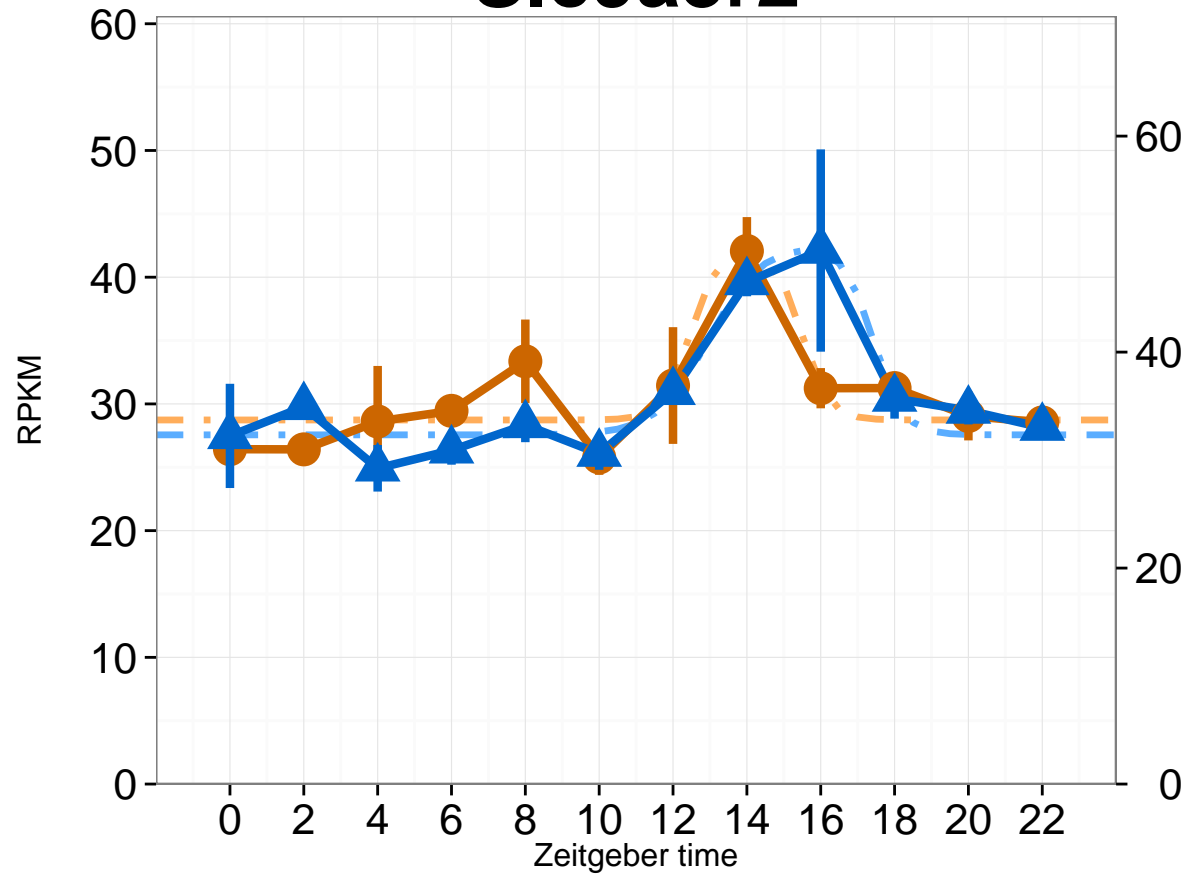

# Slc9a3r2

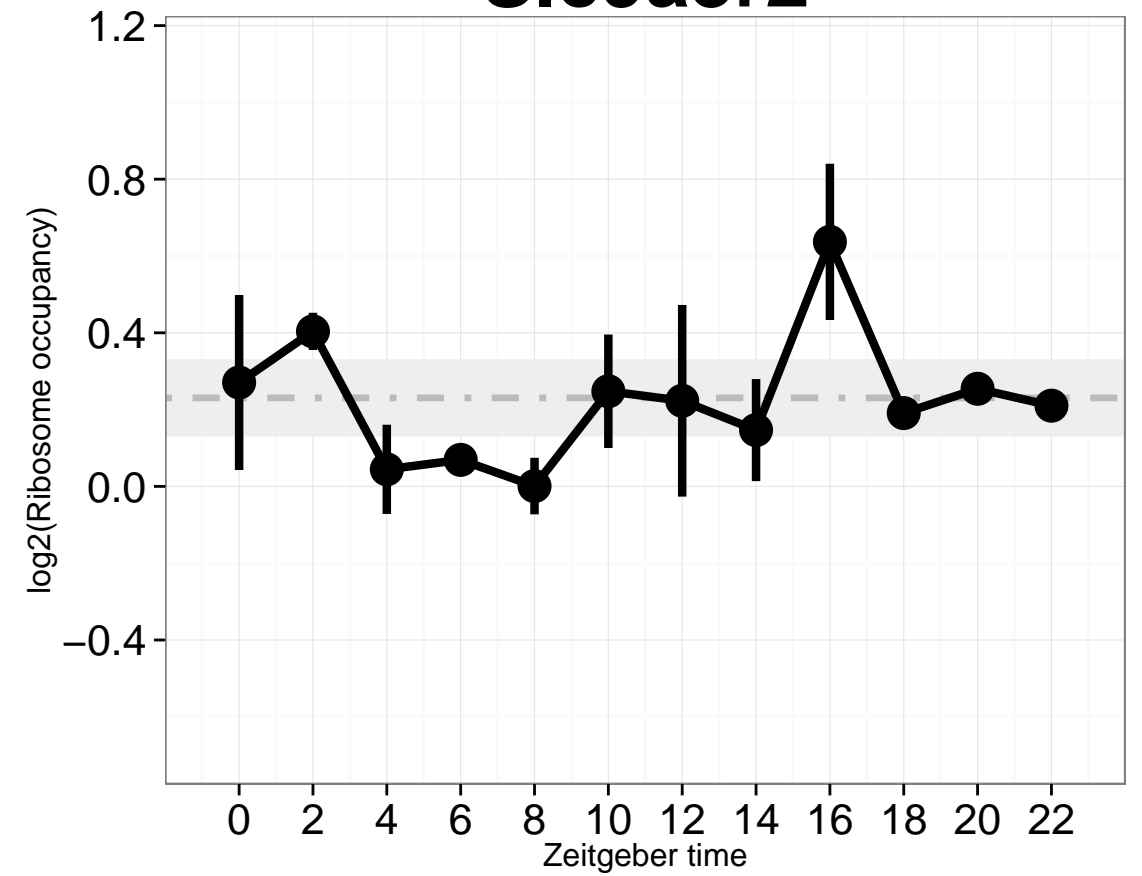

Supplement: Supplementary file 2471 [file 1]

## Rcor2

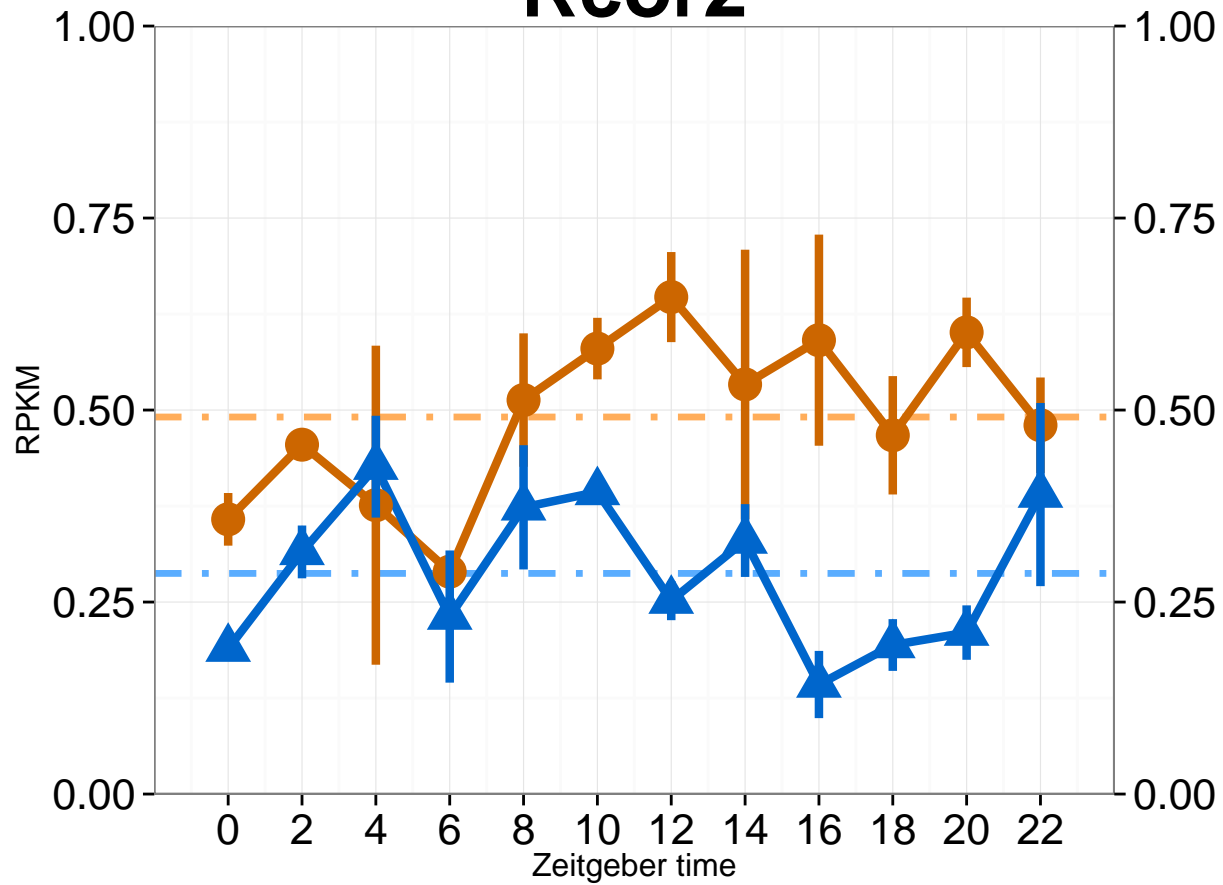

## Rcor2

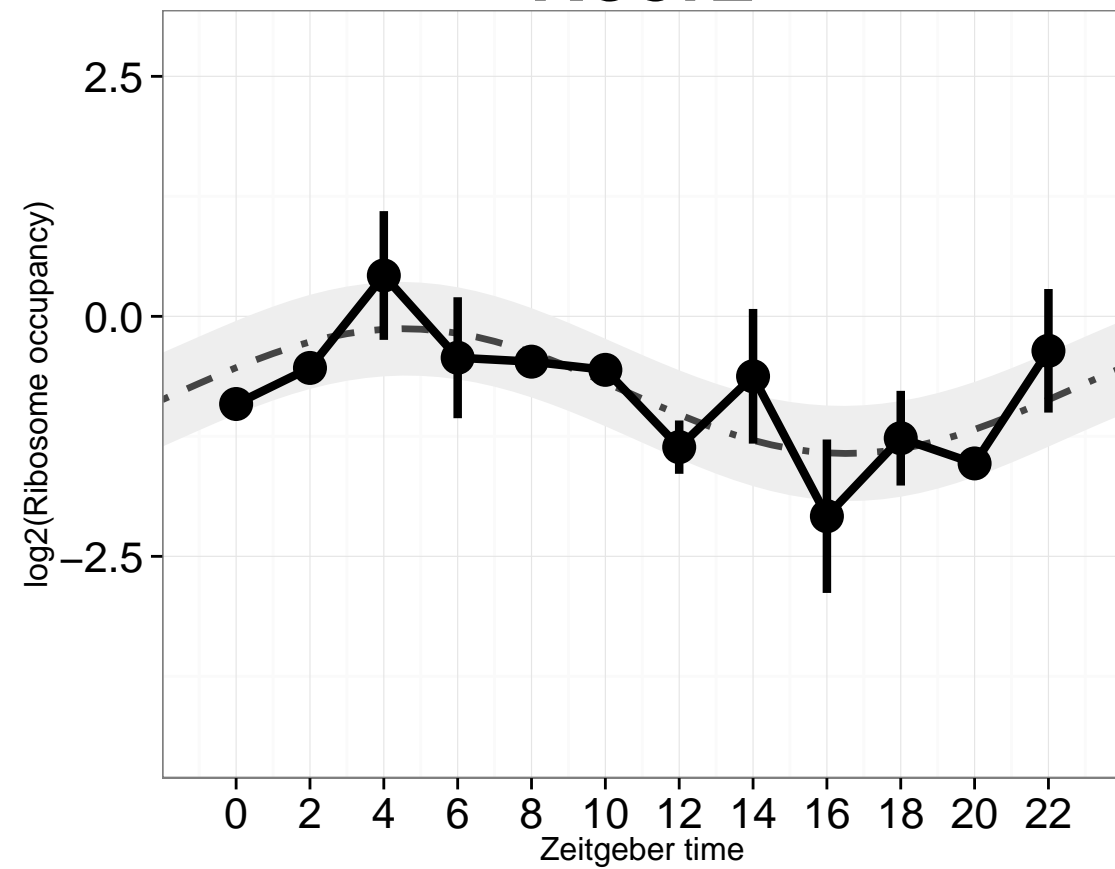

Supplement: Supplementary file 2472 [file 1]

# 2410066E13Rik

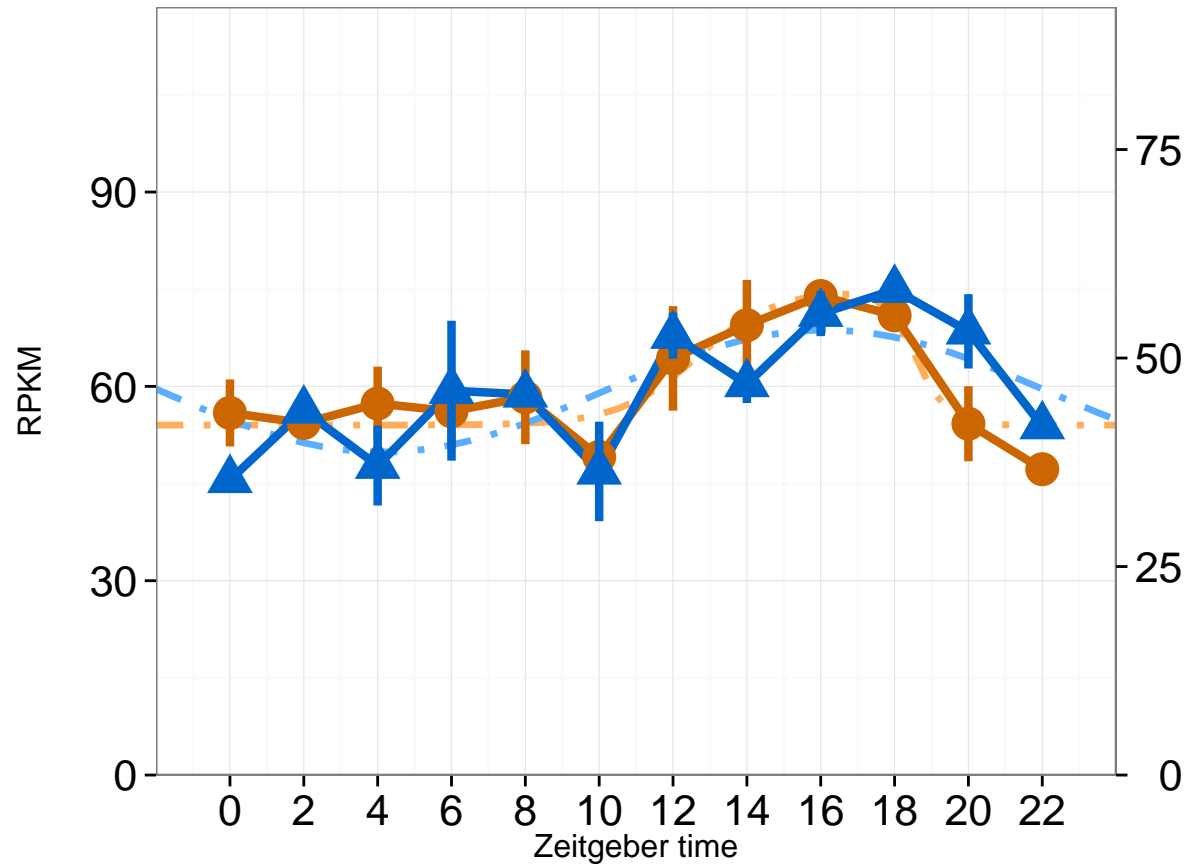

# 2410066E13Rik

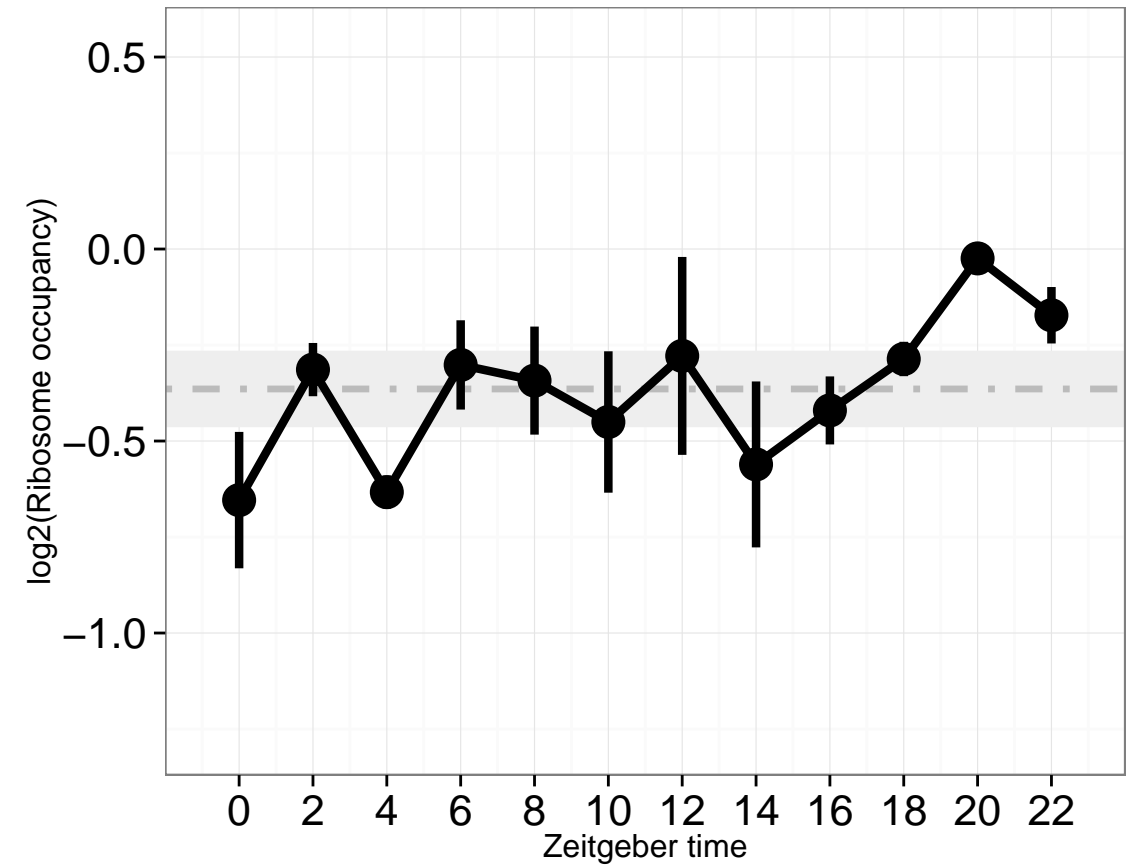

Supplement: Supplementary file 2473 [file 1]

# Ppp1r16b

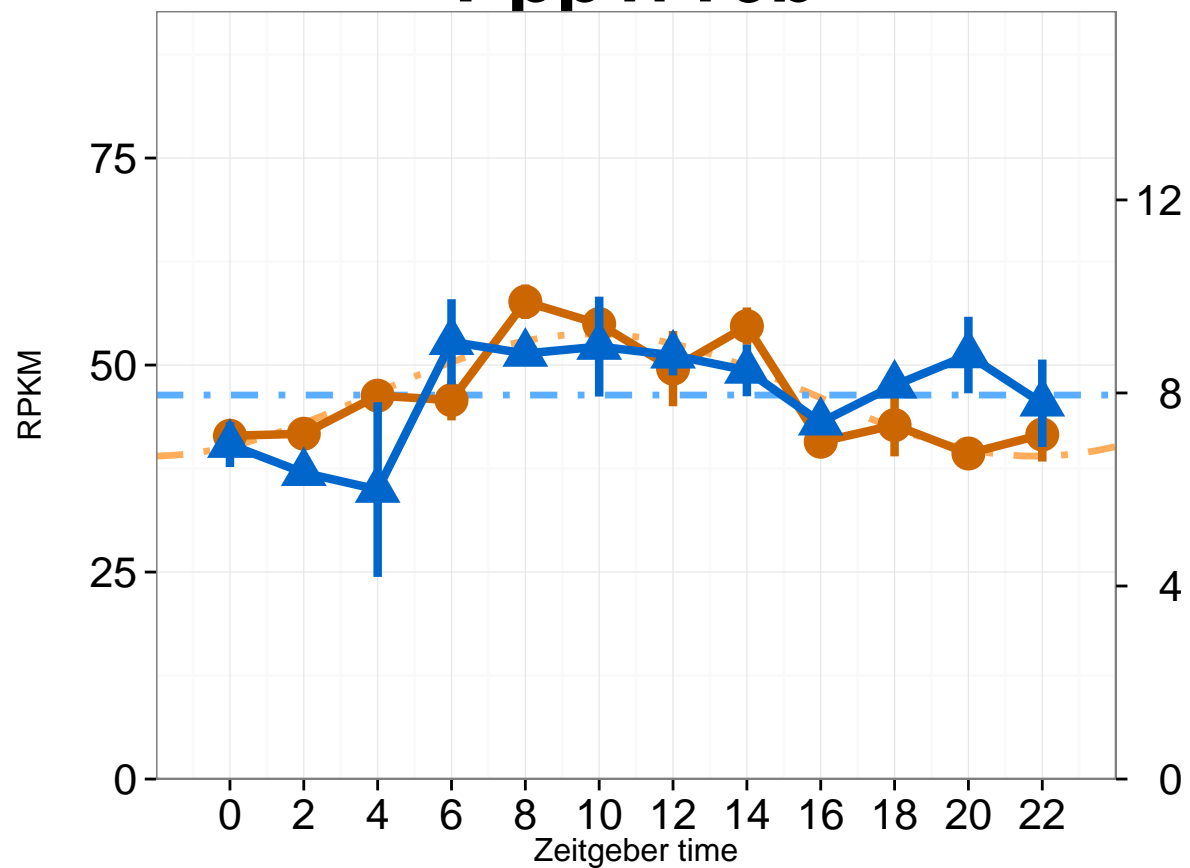

# Ppp1r16b

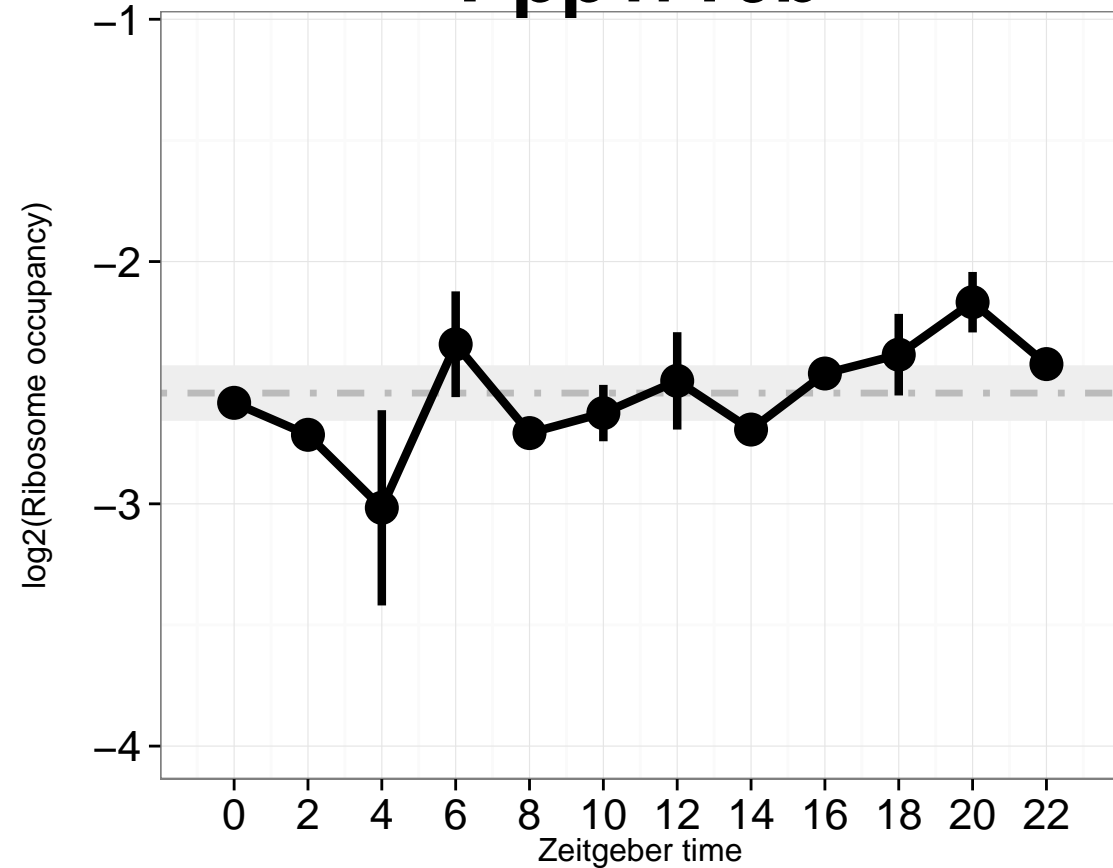

Supplement: Supplementary file 2474 [file 1]

# Zfp964

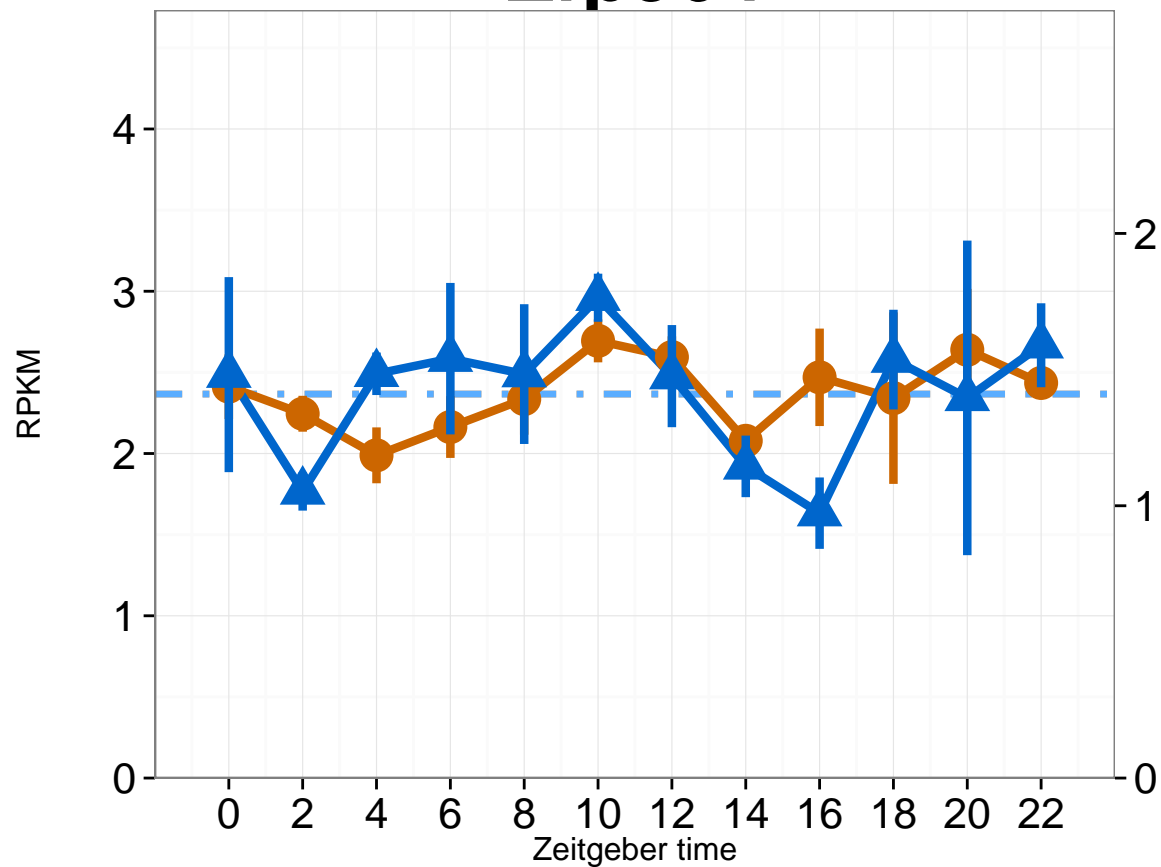

# Zfp964

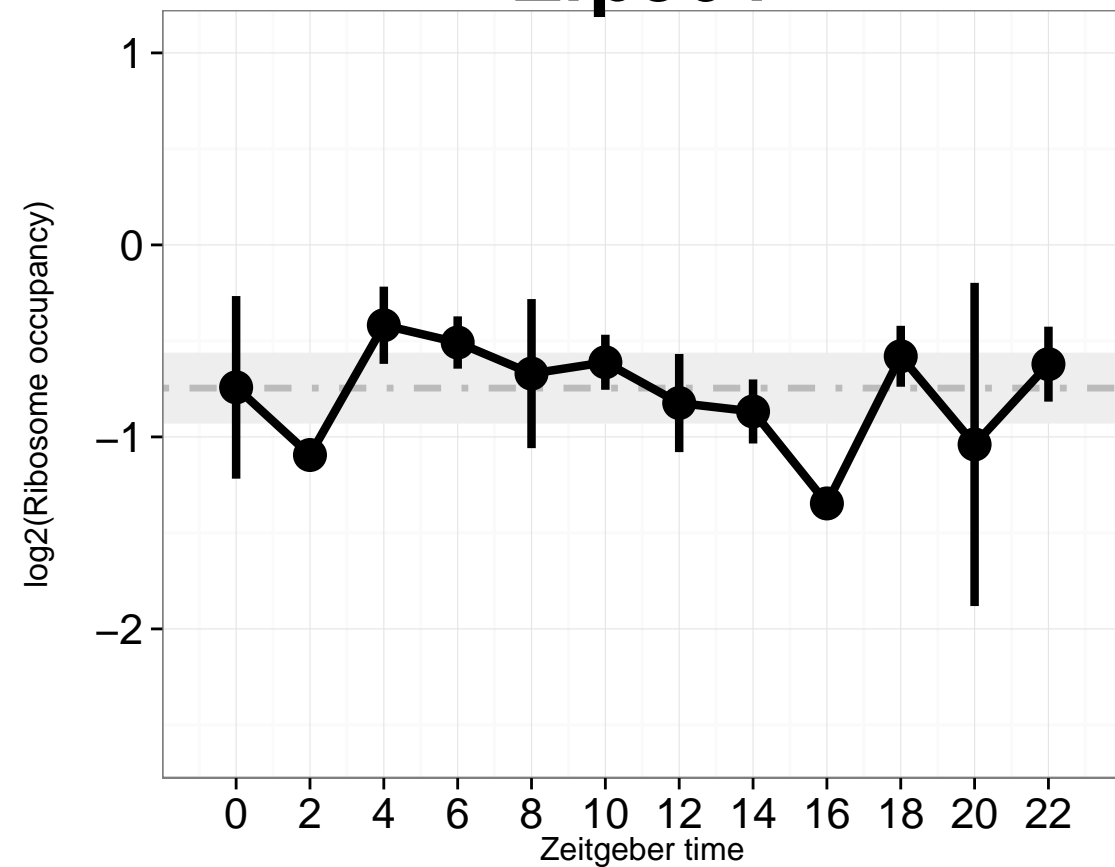

Supplement: Supplementary file 2475 [file 1]

# Prrg1

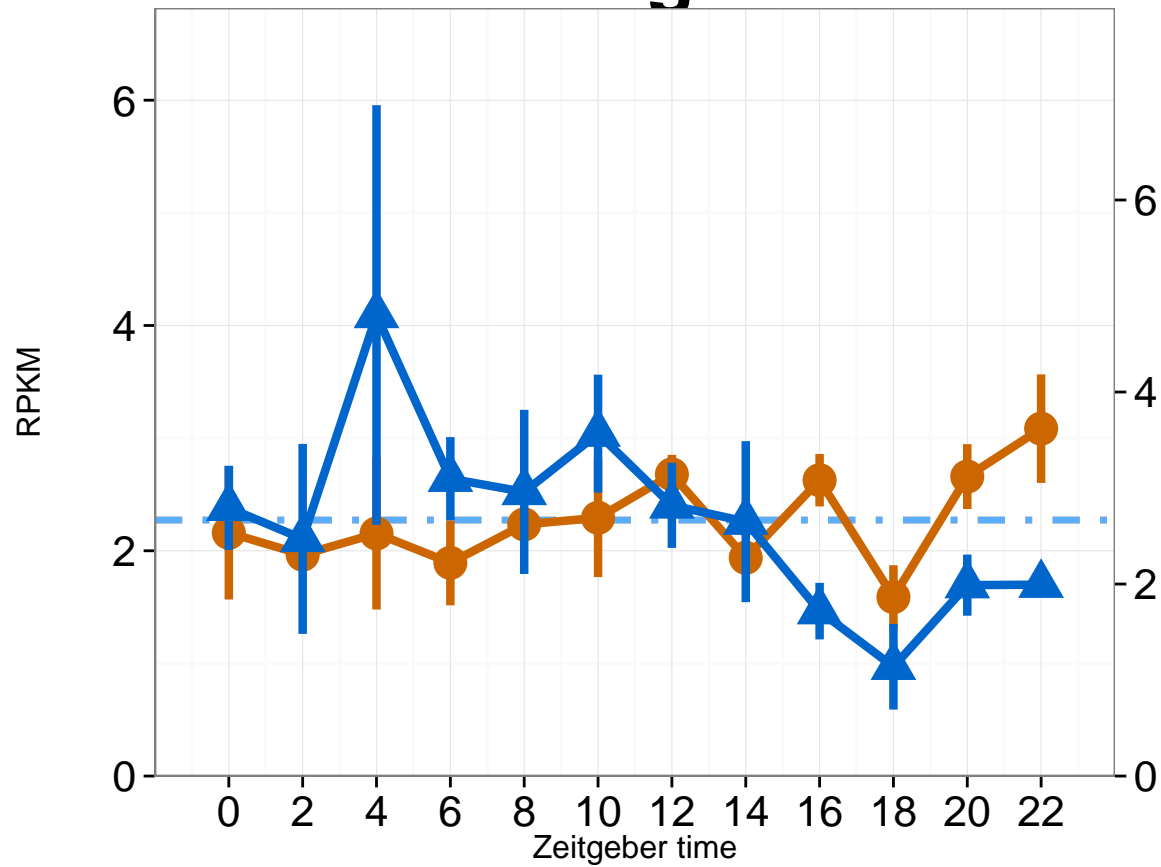

# Prrg1

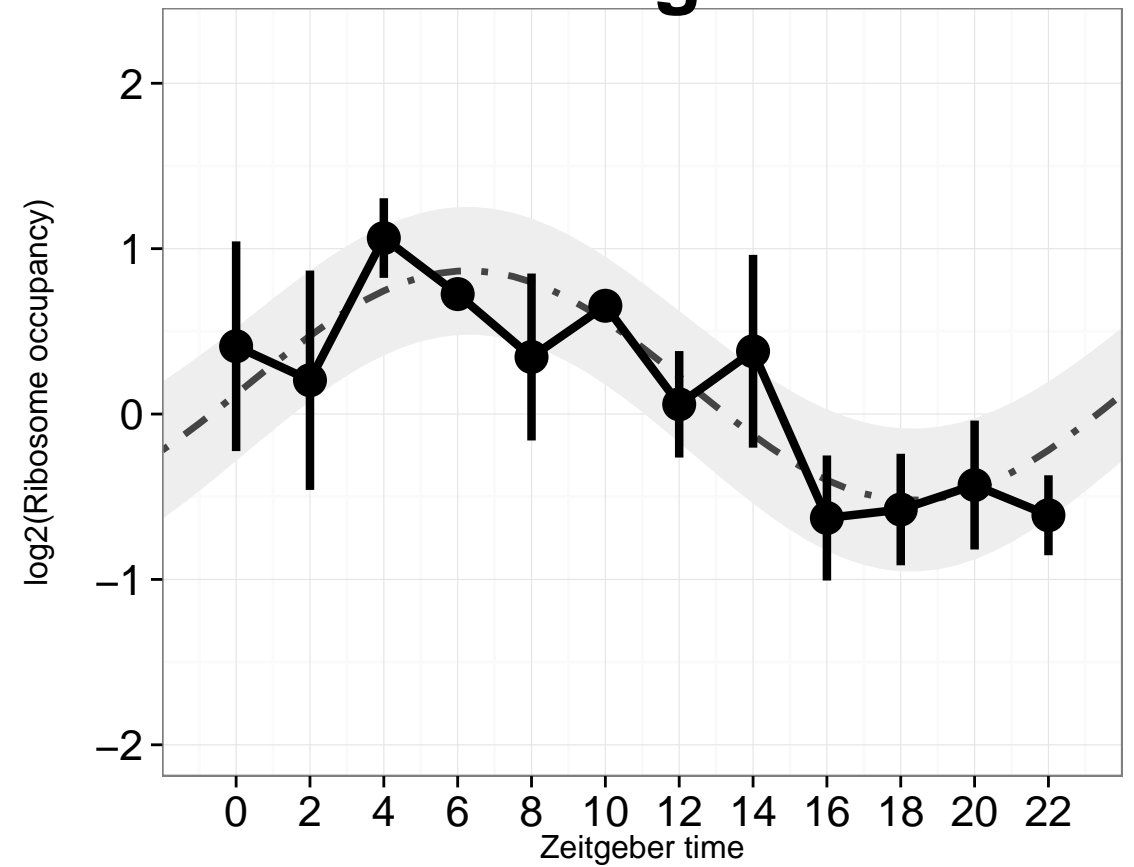

Supplement: Supplementary file 2476 [file 1]

# 2810021J22Rik

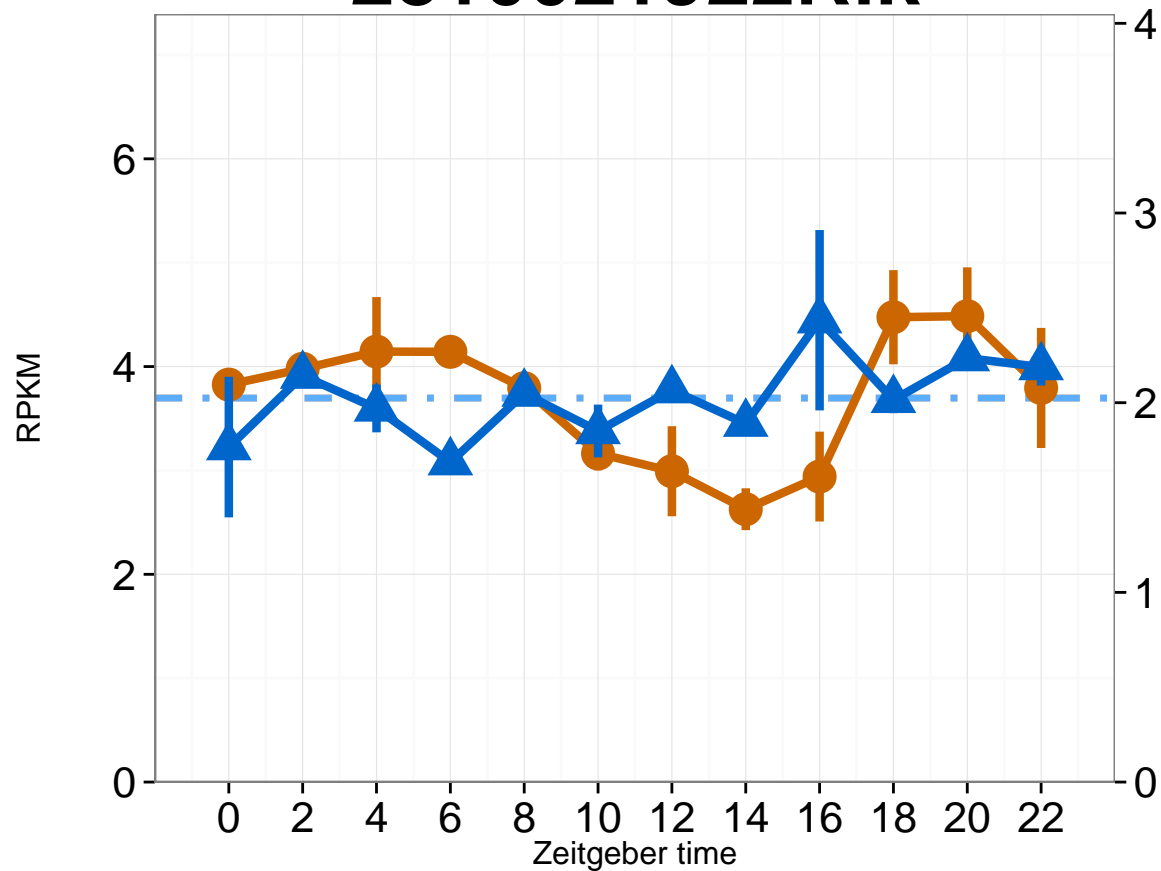

# 2810021J22Rik

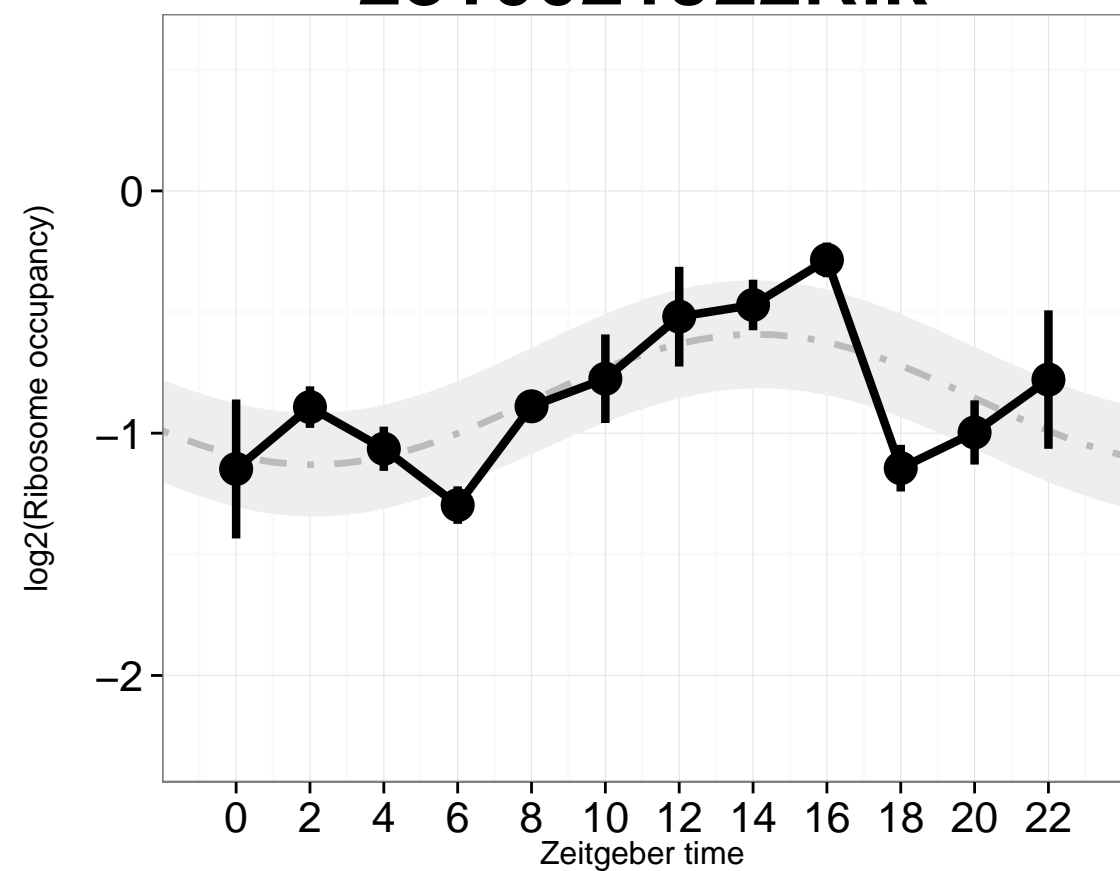

Supplement: Supplementary file 2477 [file 1]

# Klf1

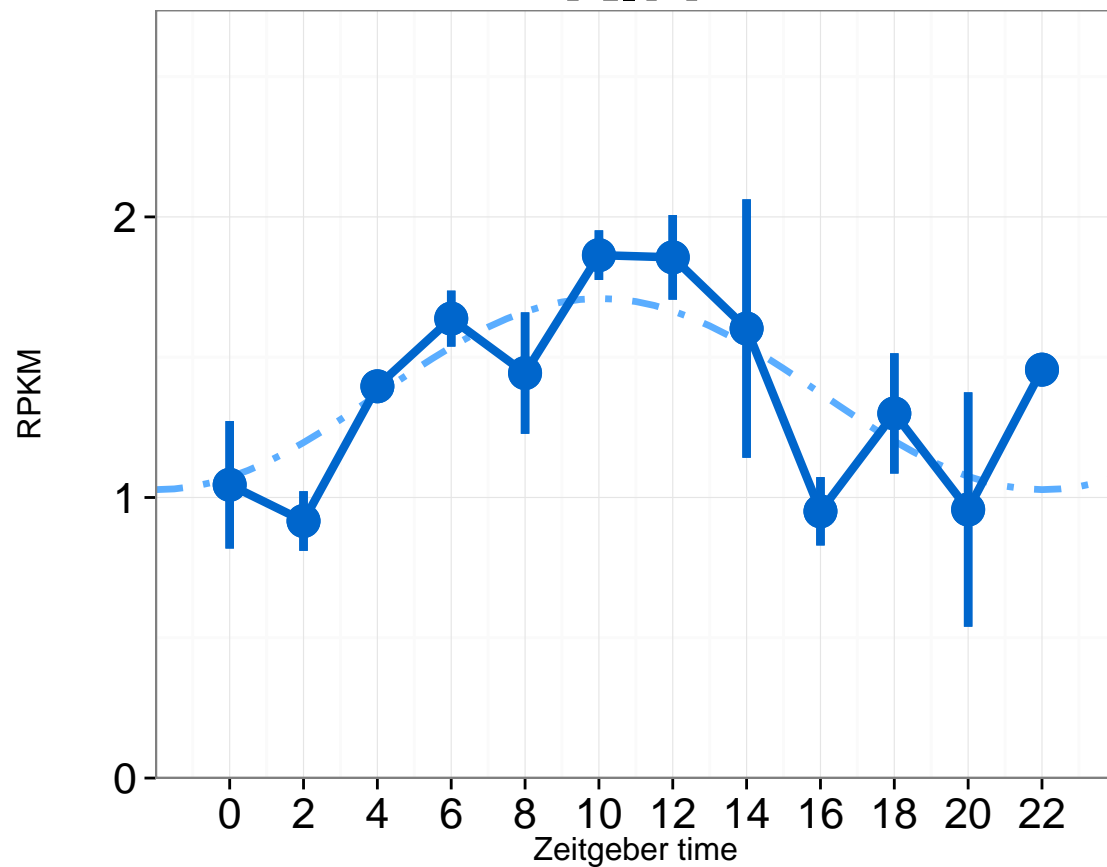

# Klf1 log2(Ribosome occupancy)

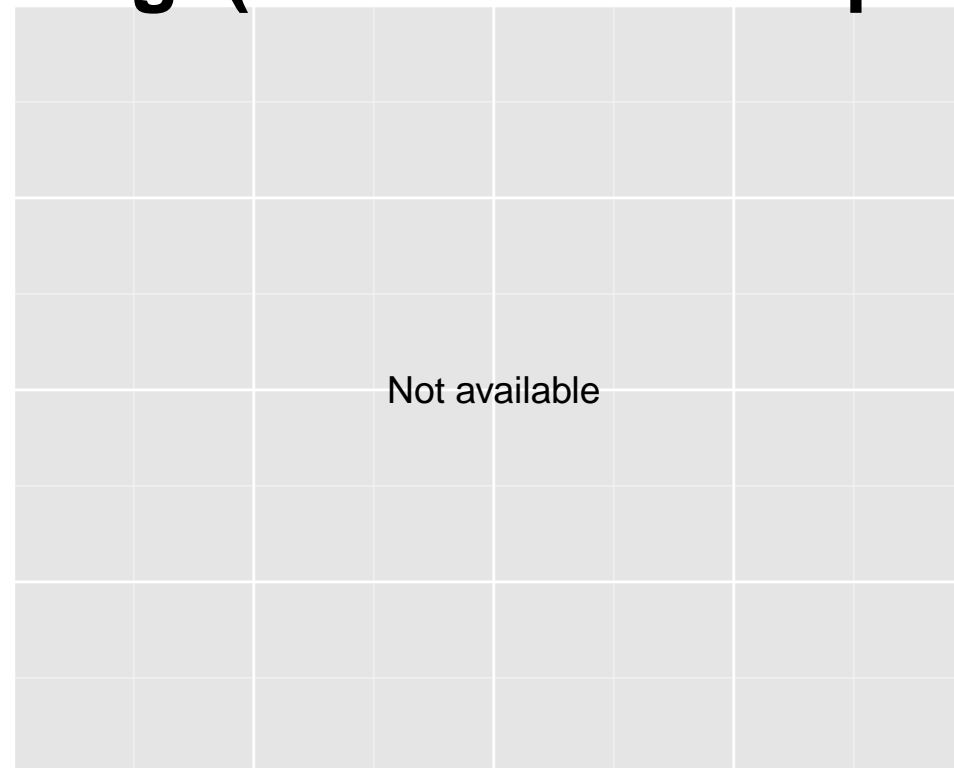

Supplement: Supplementary file 2478 [file 1]

## Arntl

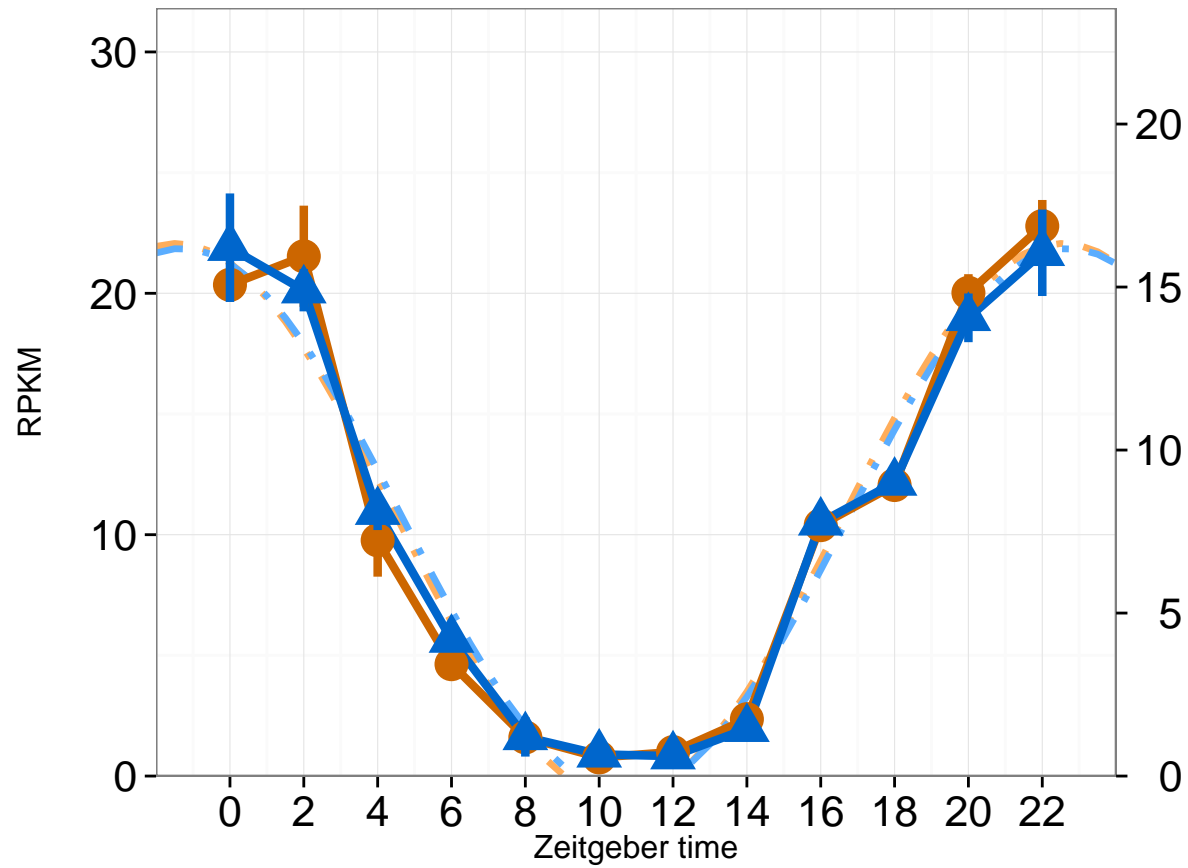

## Arntl

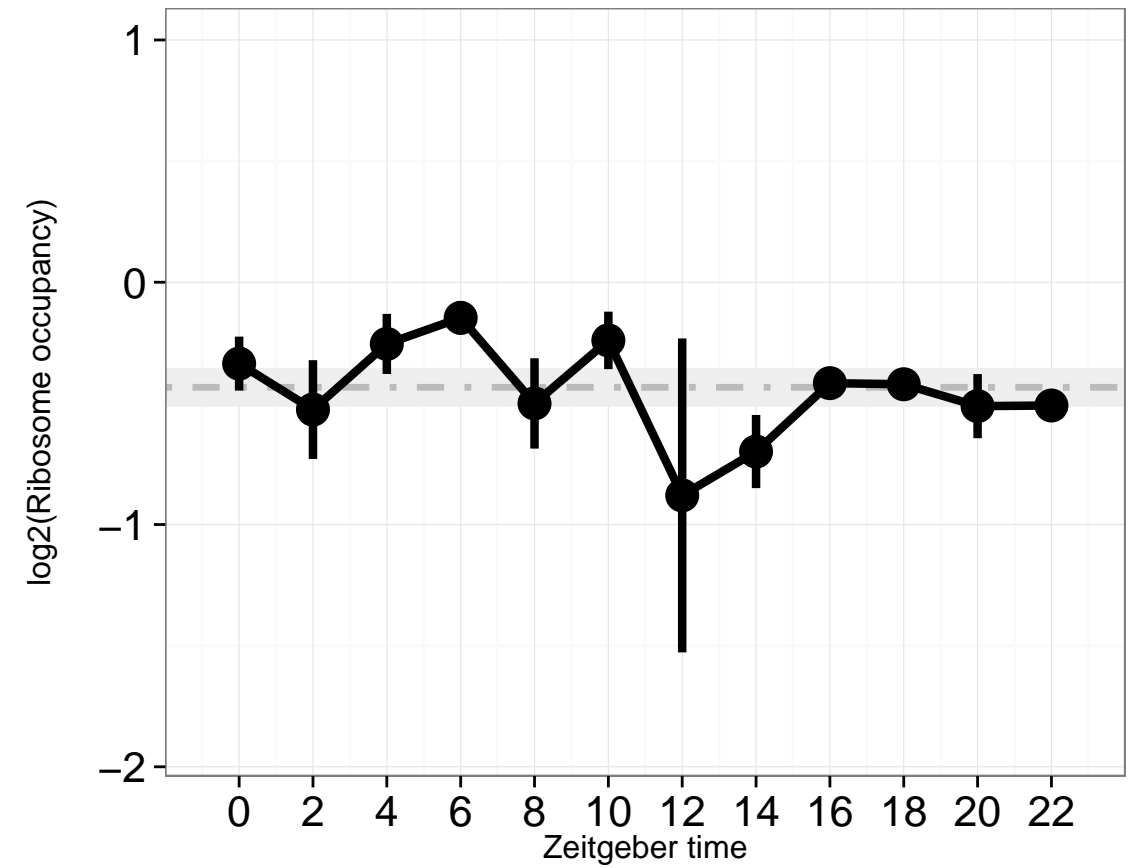

Supplement: Supplementary file 2479 [file 1]

# Tmem198b

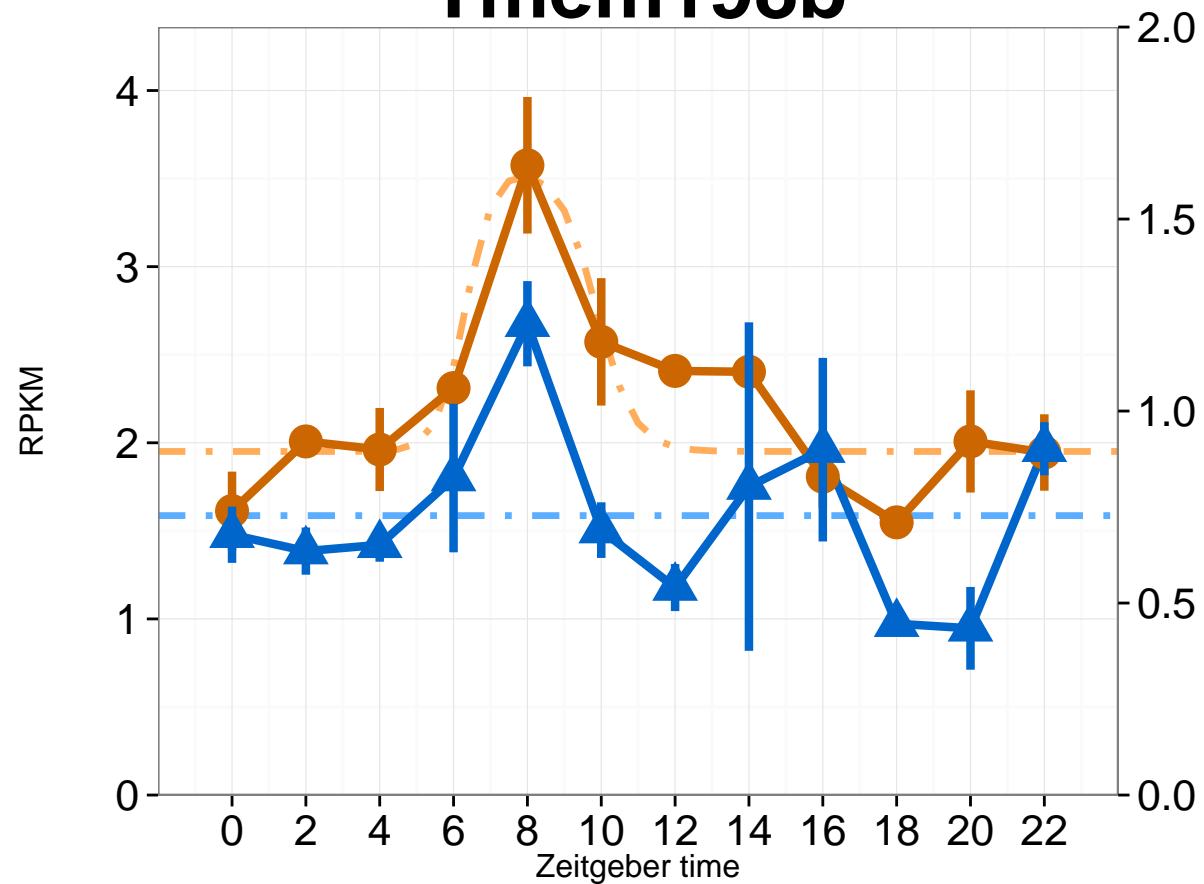

# Tmem198b

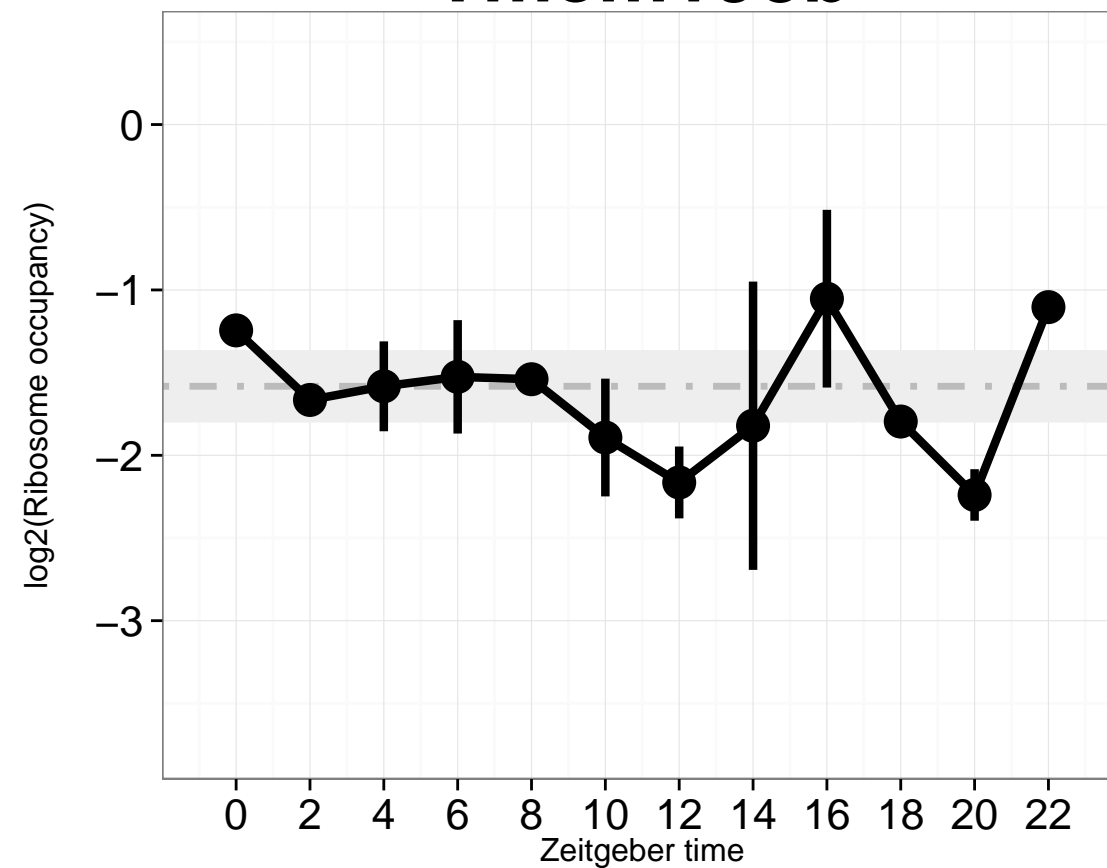

Supplement: Supplementary file 2480 [file 1]

## Galc

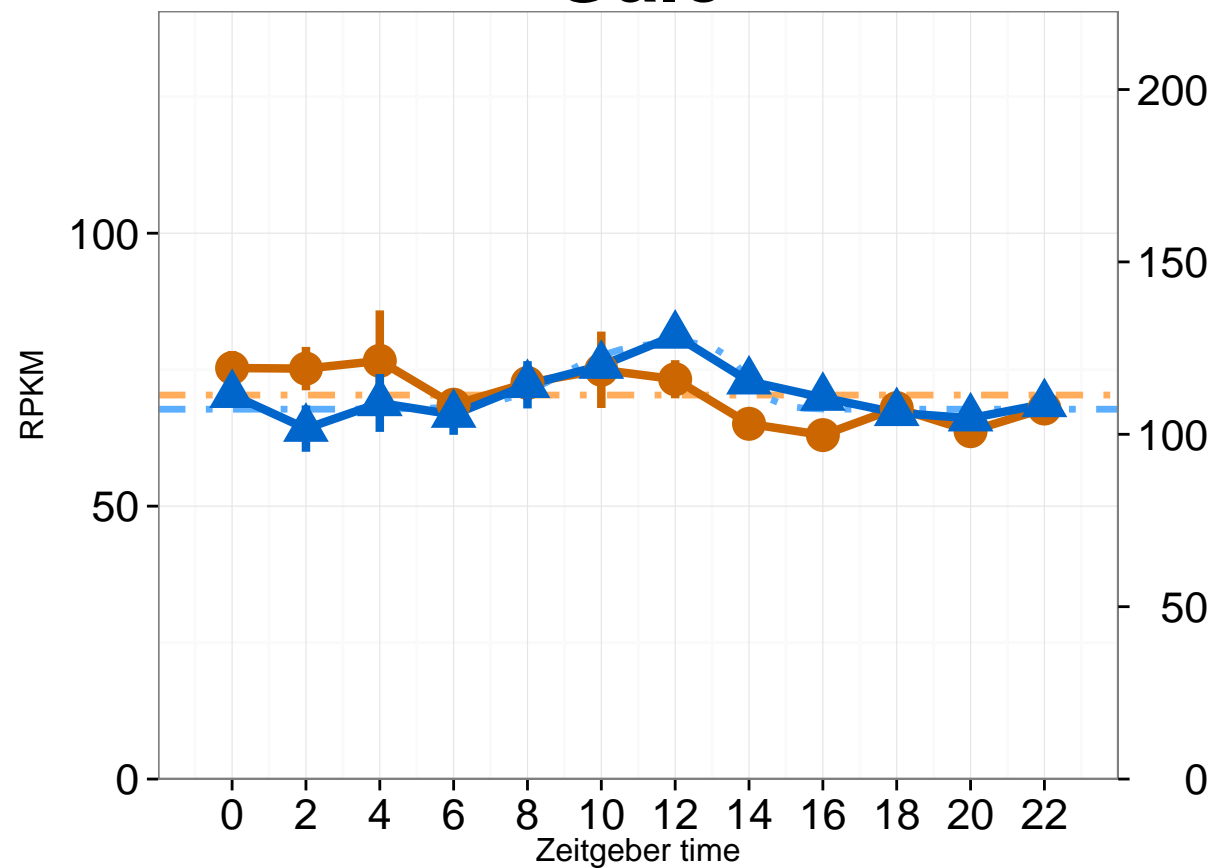

## Galc

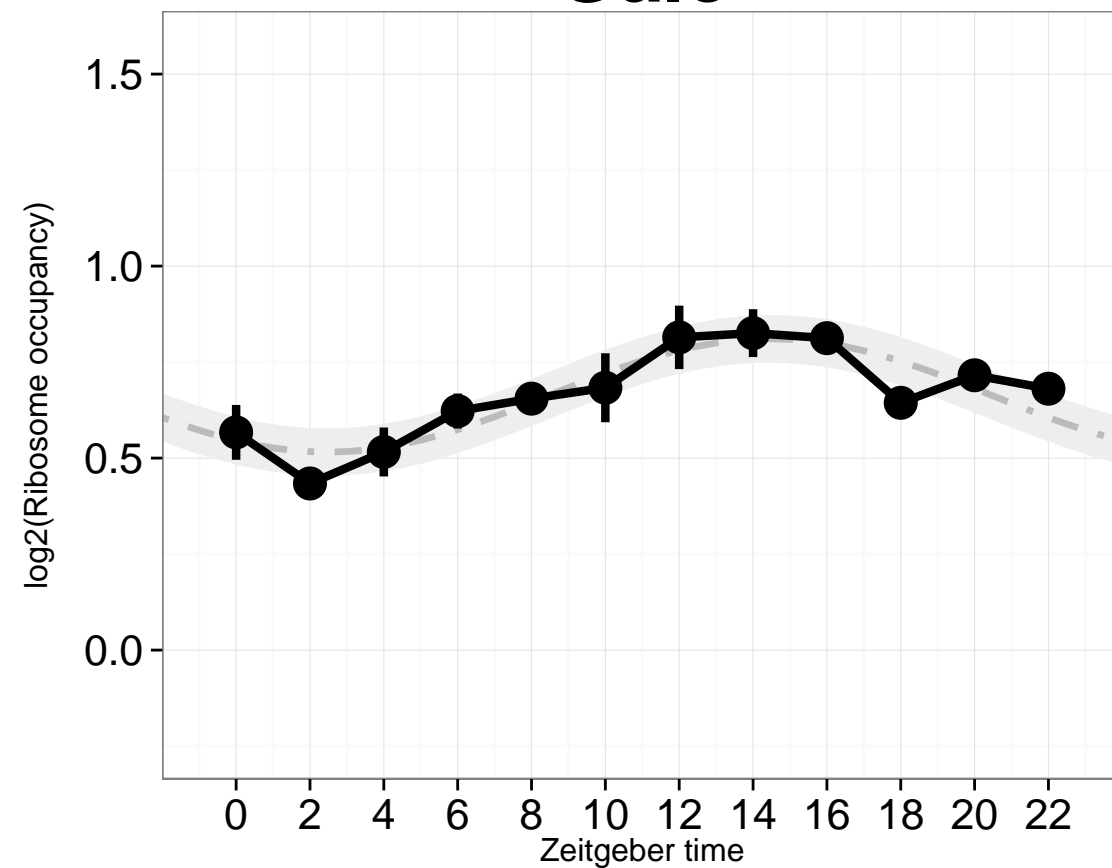

Supplement: Supplementary file 2481 [file 1]

## Abi2

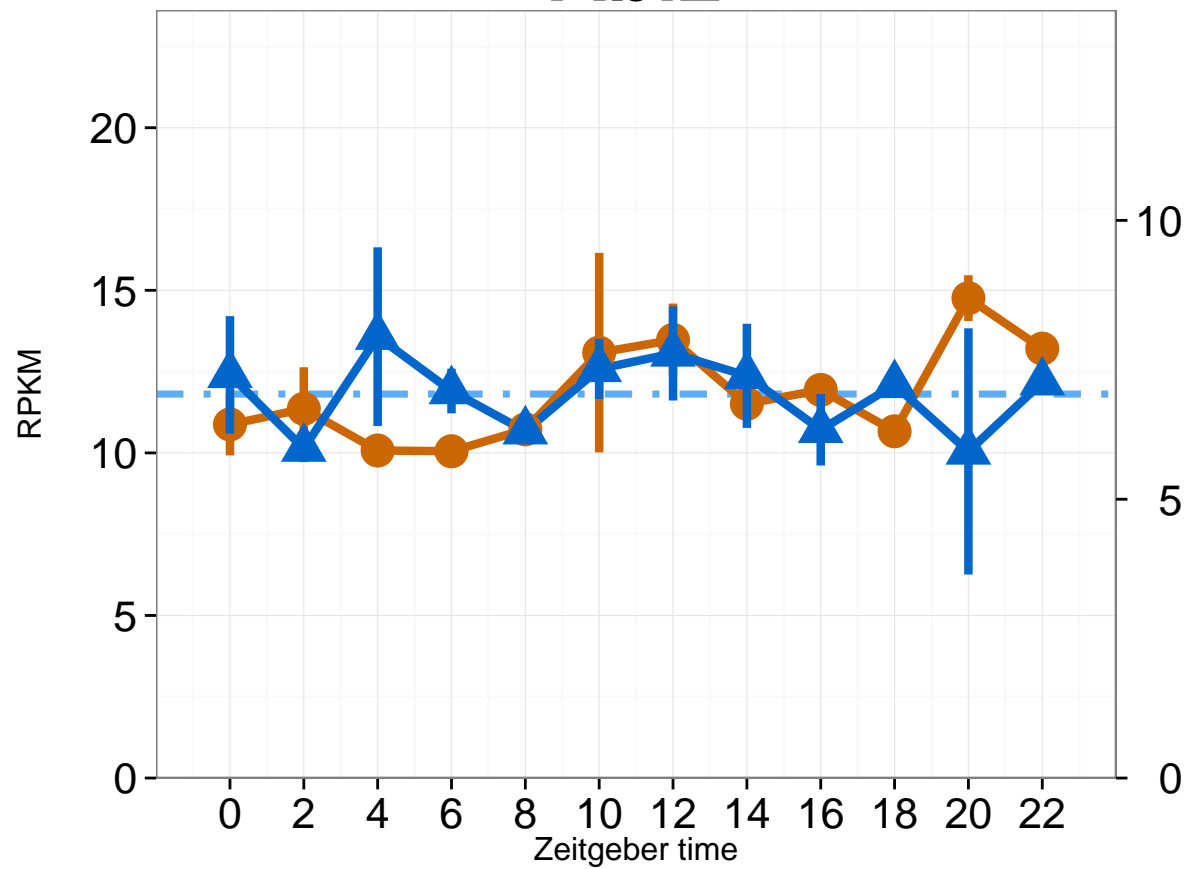

## Abi2

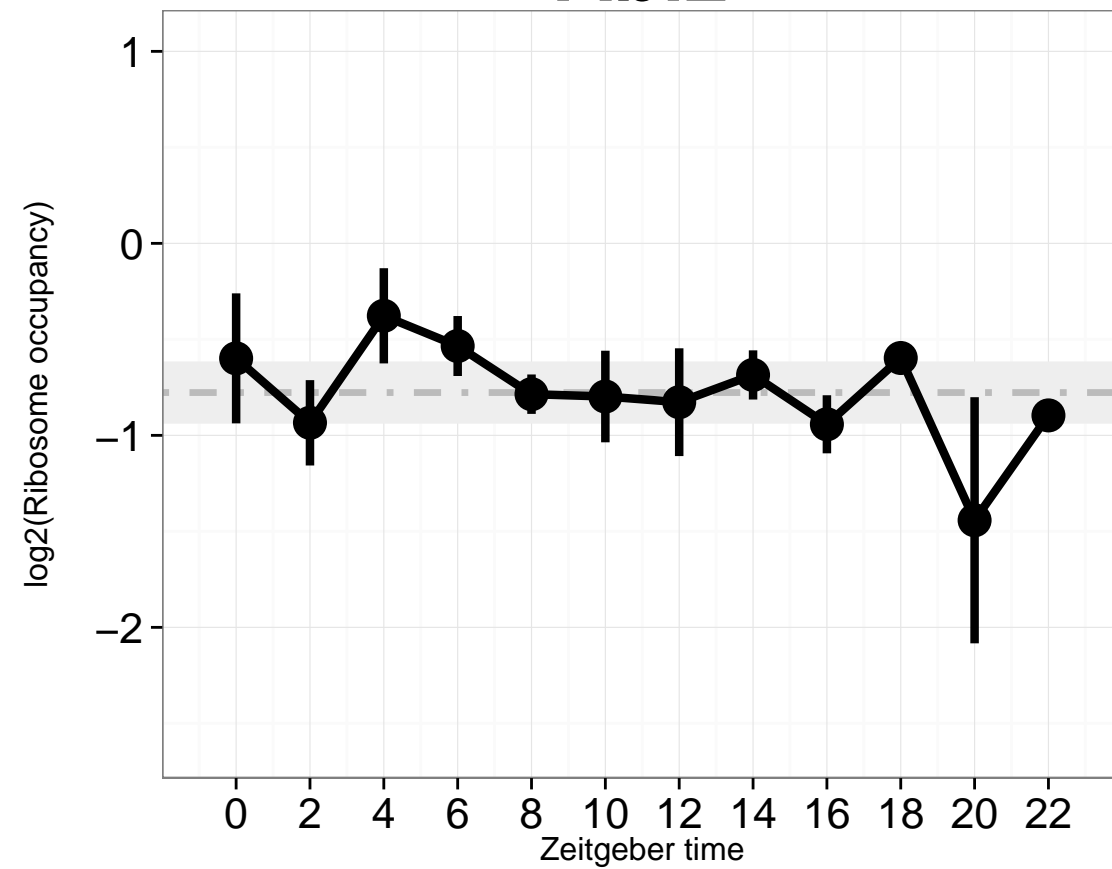

Supplement: Supplementary file 2482 [file 1]

# Laptm4b

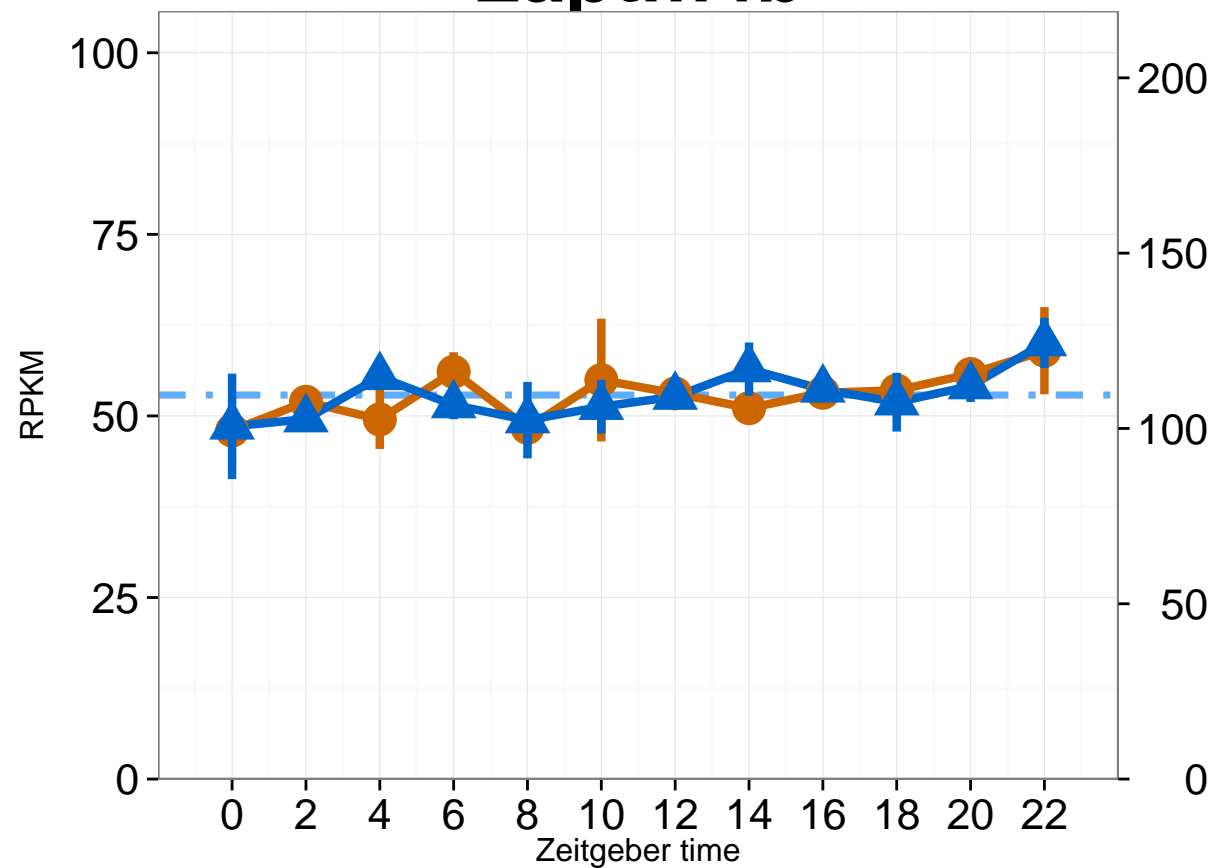

# Laptm4b

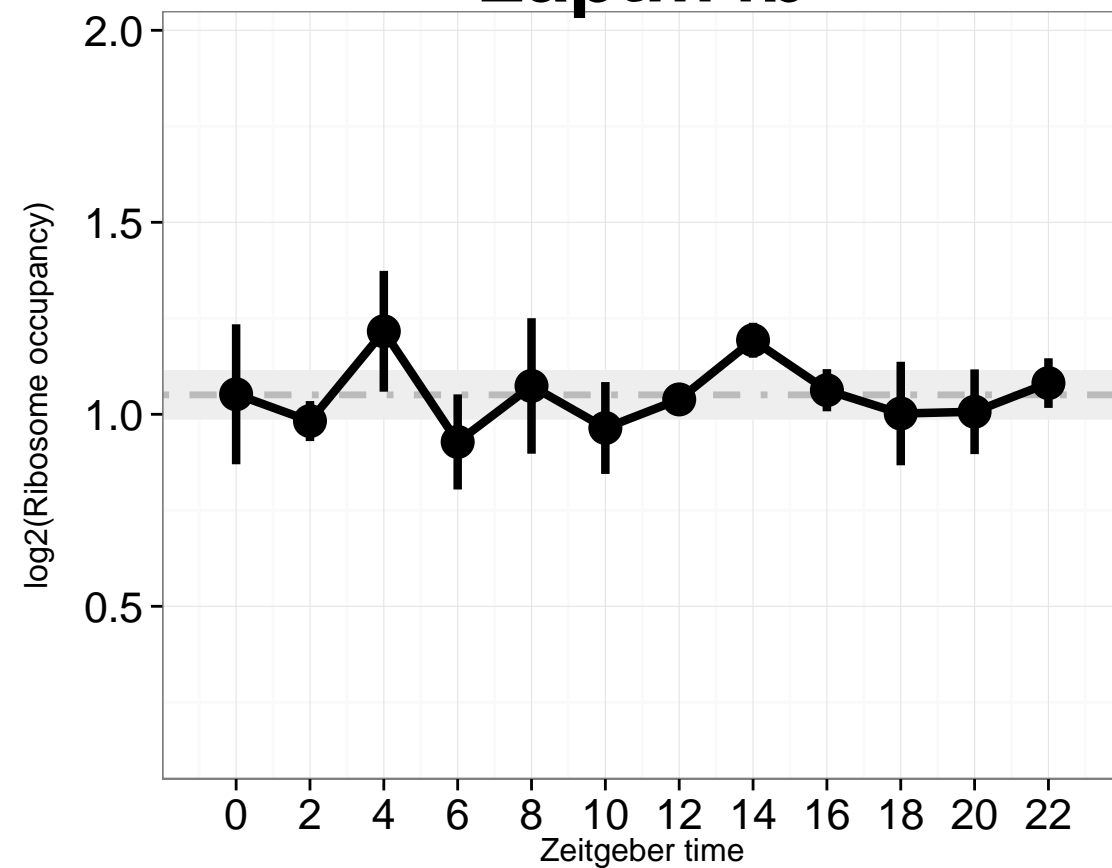

Supplement: Supplementary file 2483 [file 1]

## Rab25

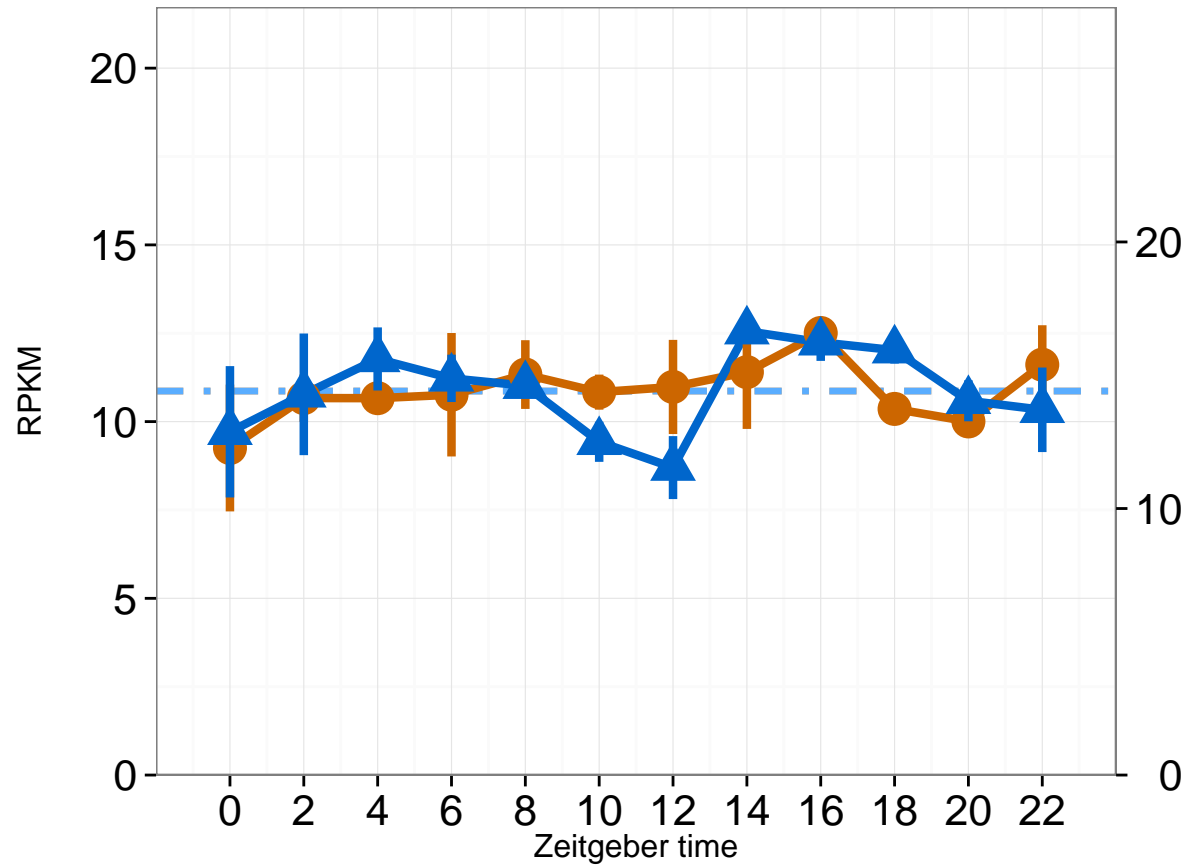

## Rab25

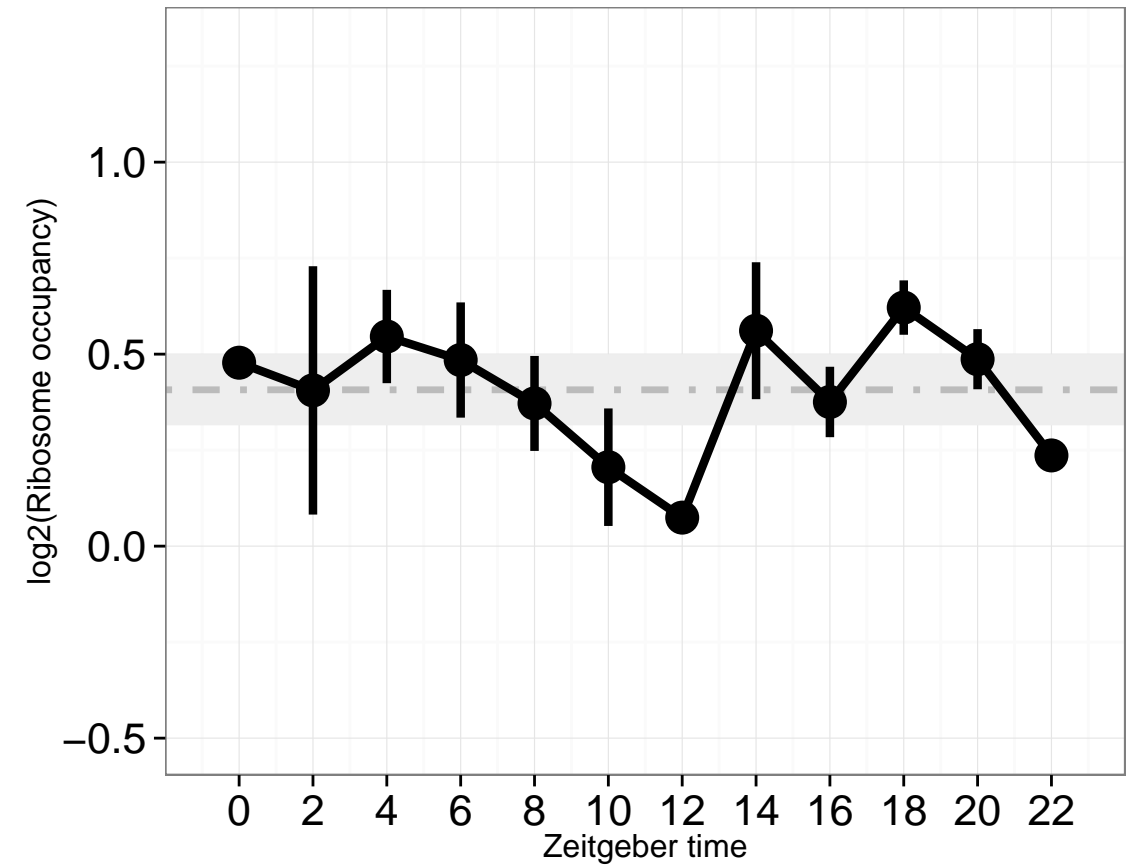

Supplement: Supplementary file 2484 [file 1]

# Tma16

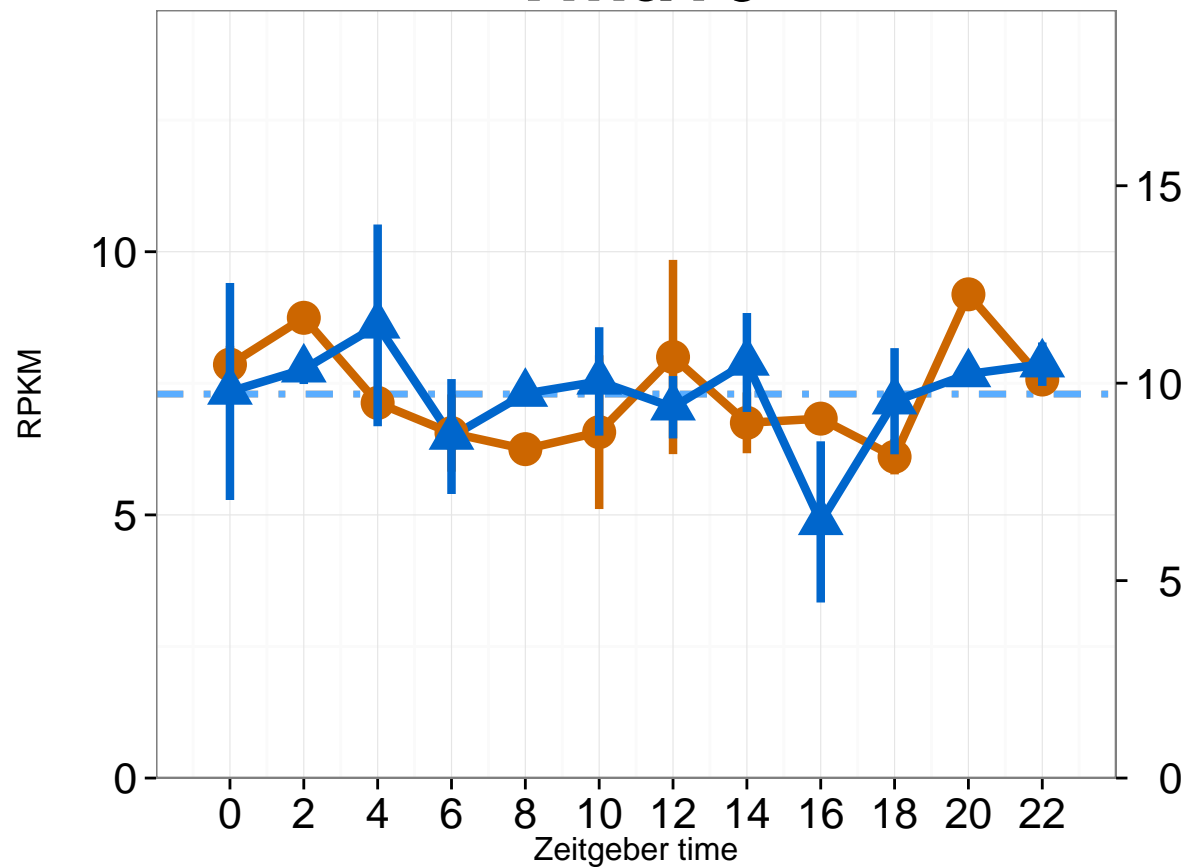

# Tma16

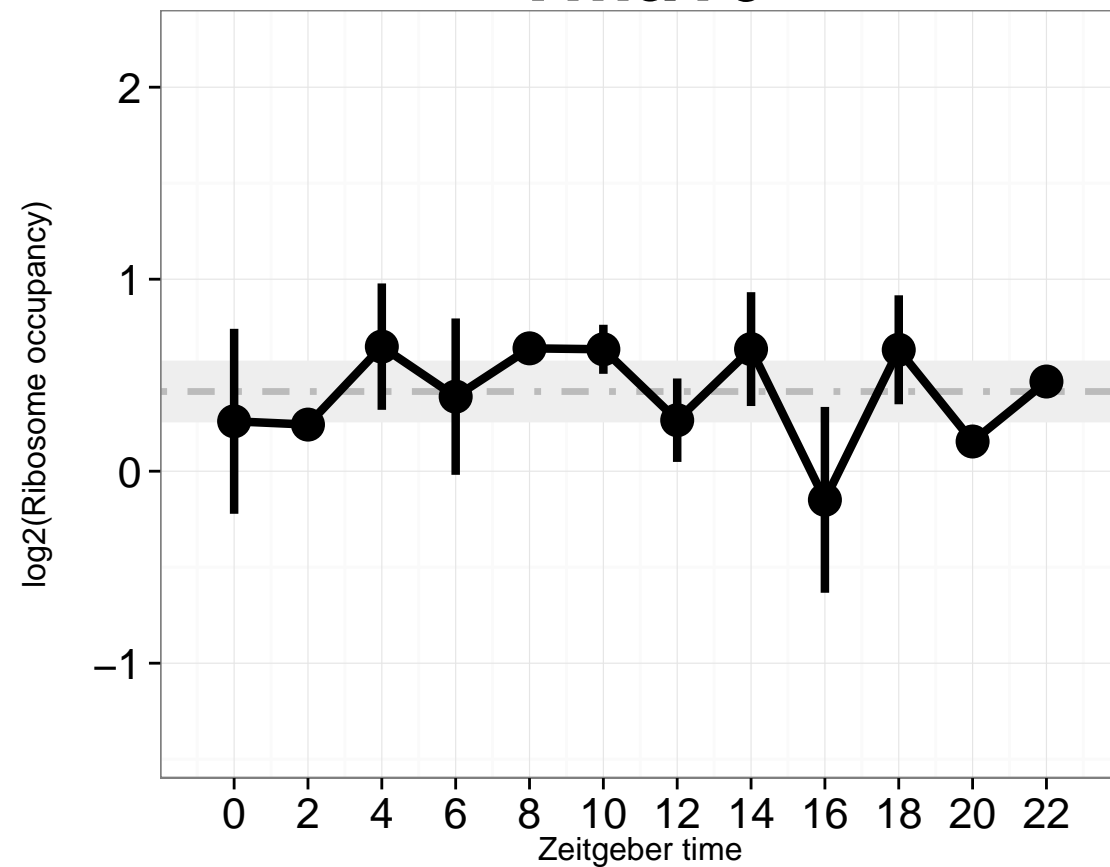

Supplement: Supplementary file 2485 [file 1]

## Bsg

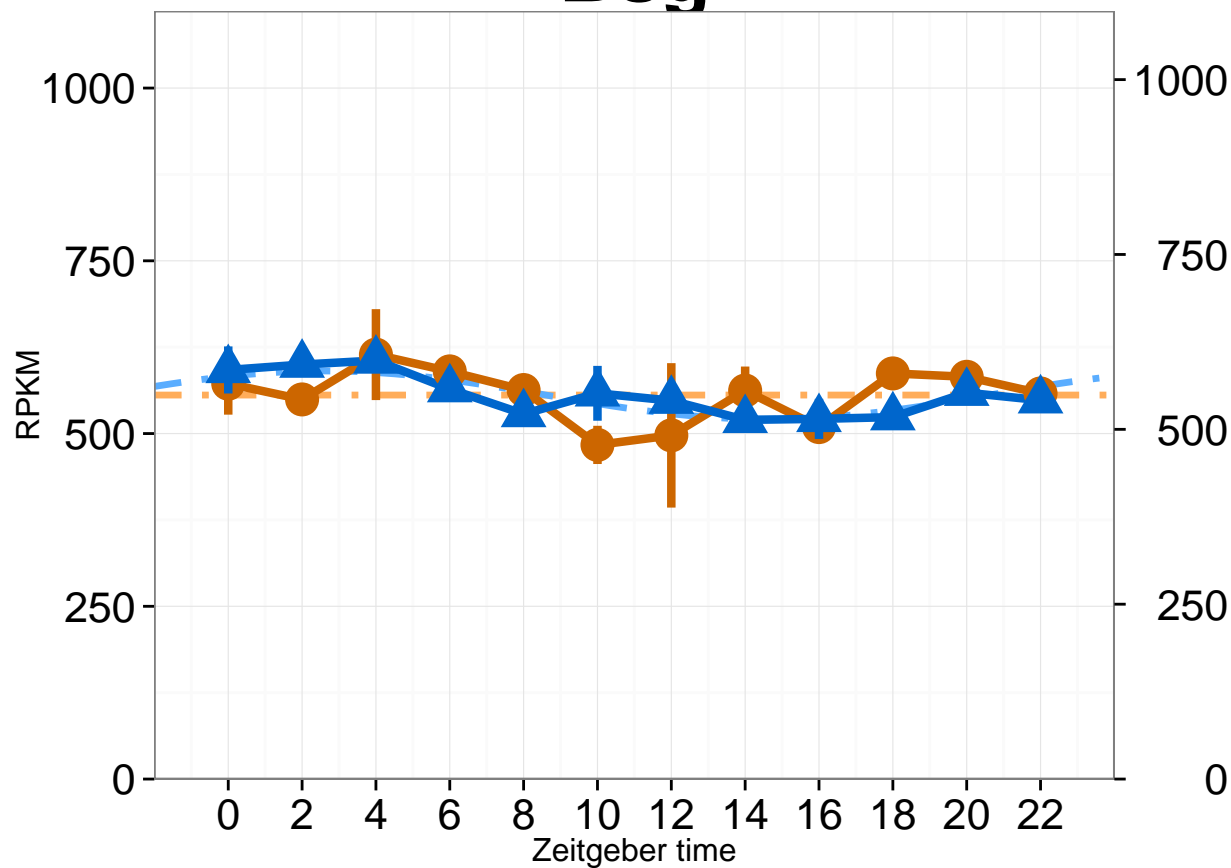

## Bsg

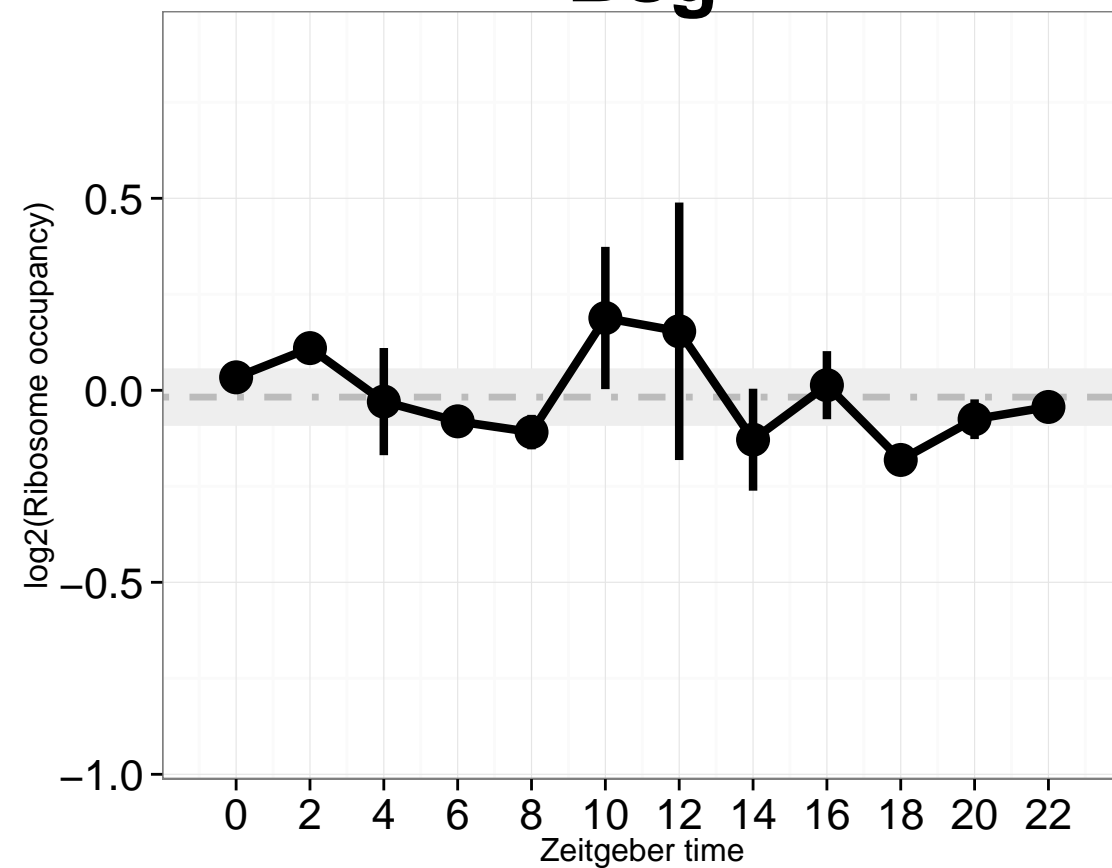

Supplement: Supplementary file 2486 [file 1]

## Rom1

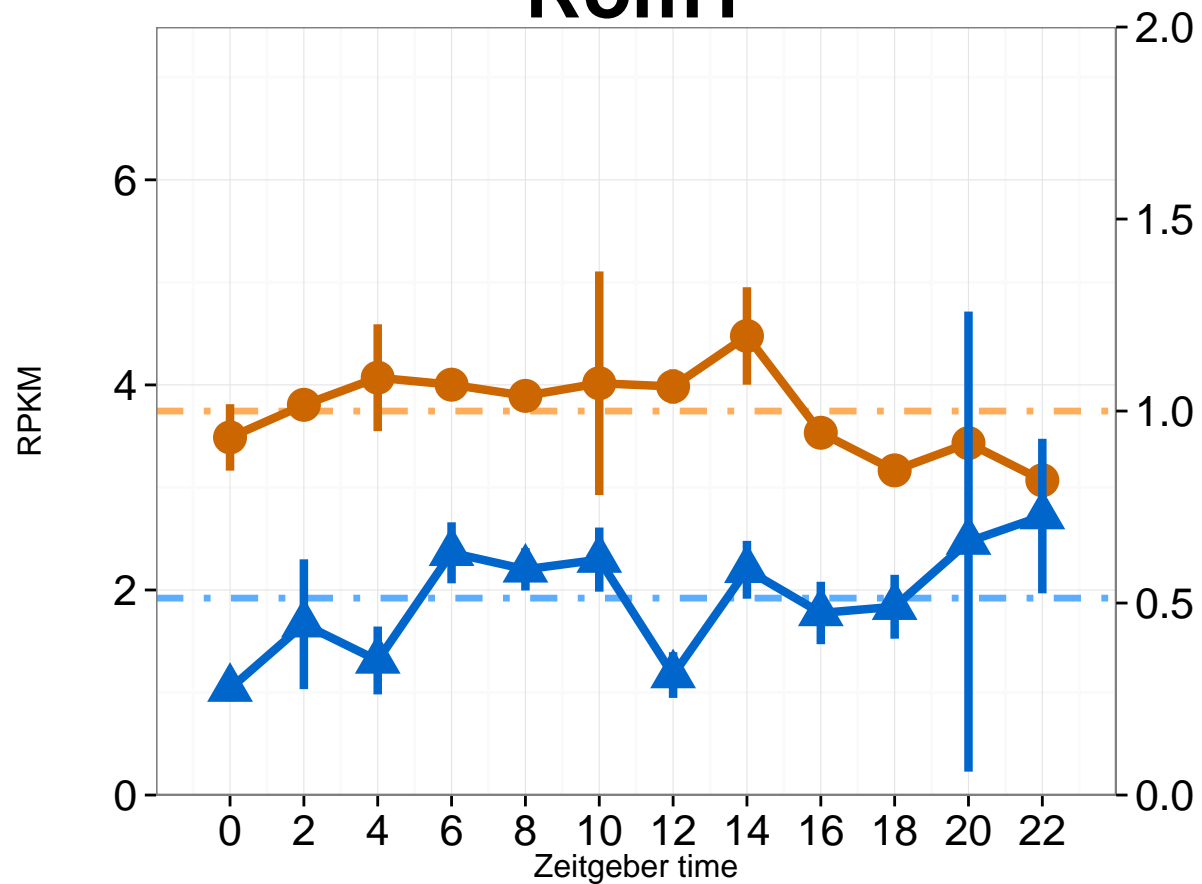

## Rom1

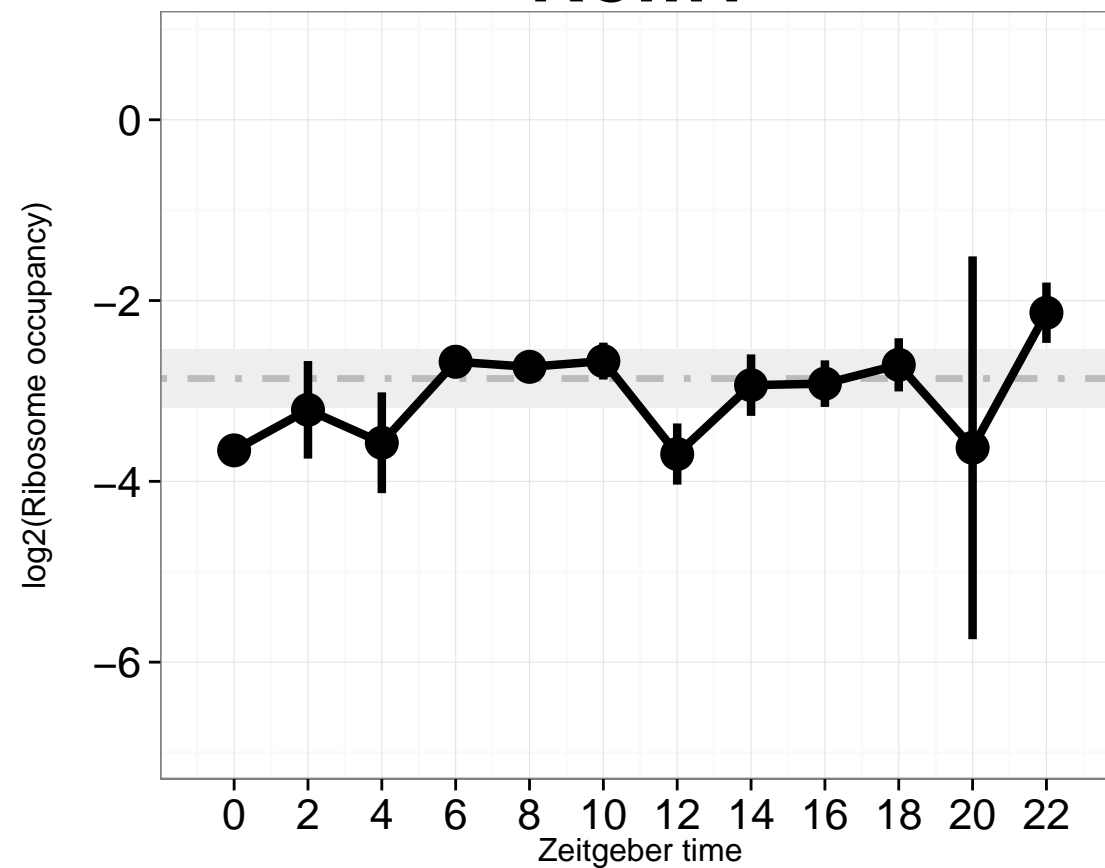

Supplement: Supplementary file 2487 [file 1]

## Polr3d

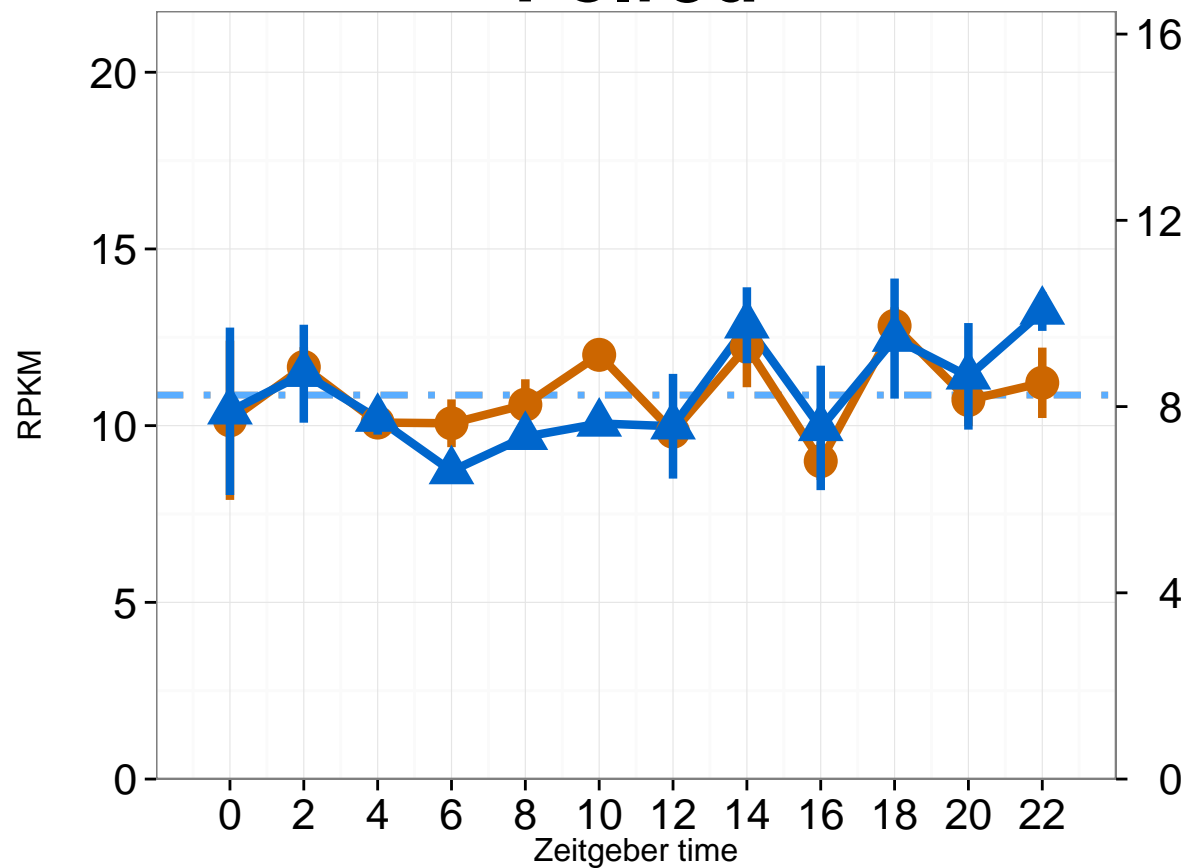

## Polr3d

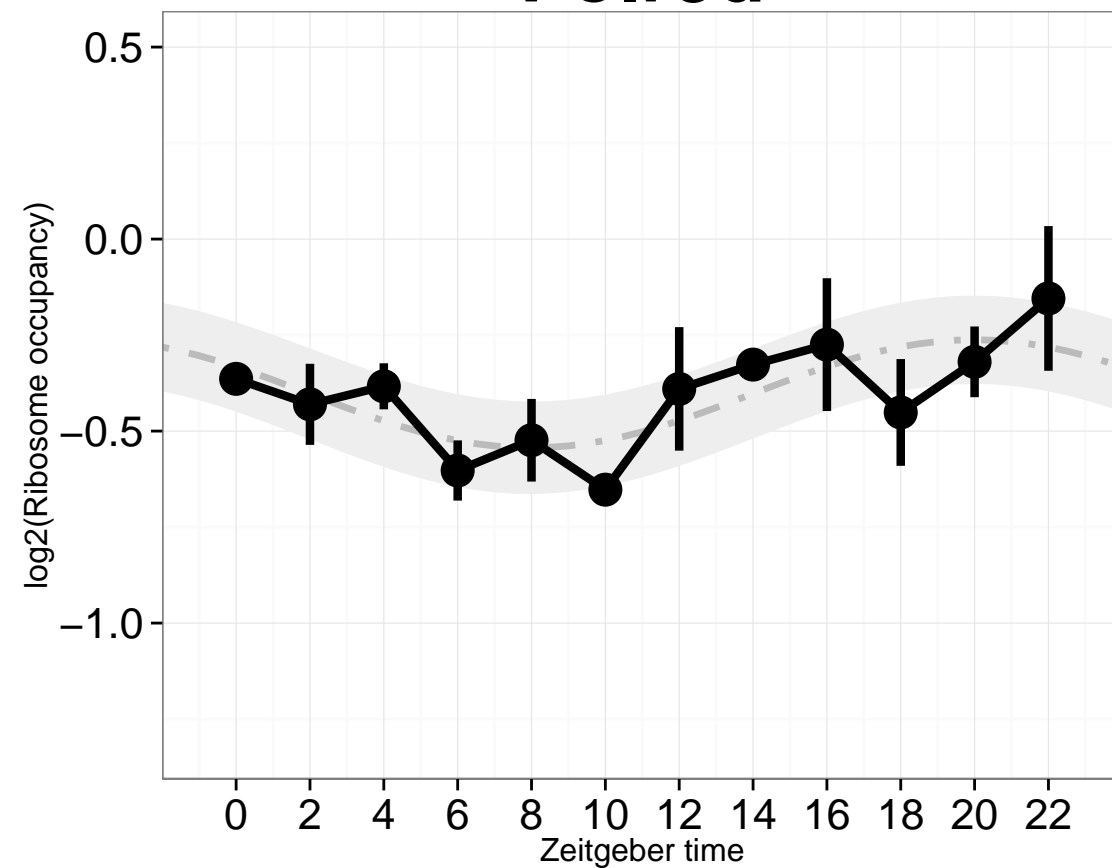

Supplement: Supplementary file 2488 [file 1]

# H2-Ab1

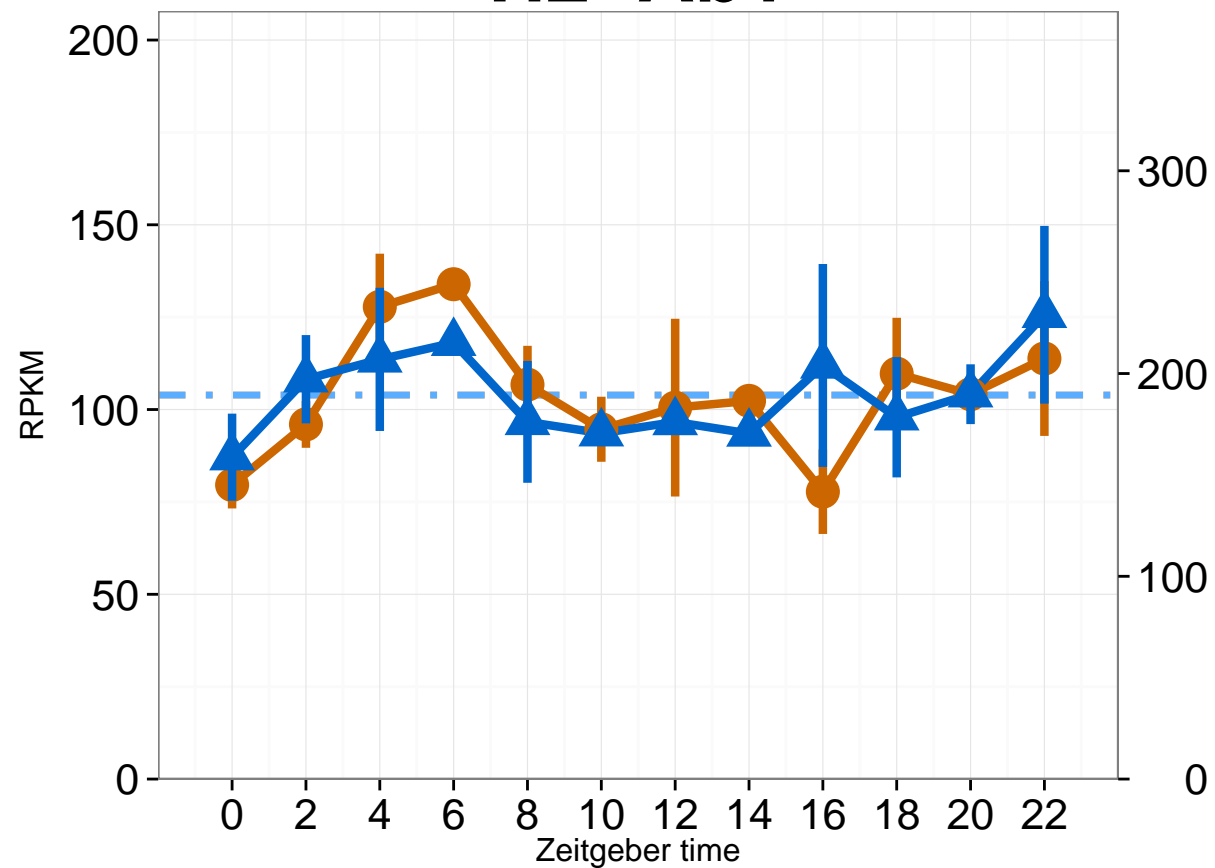

# H2-Ab1

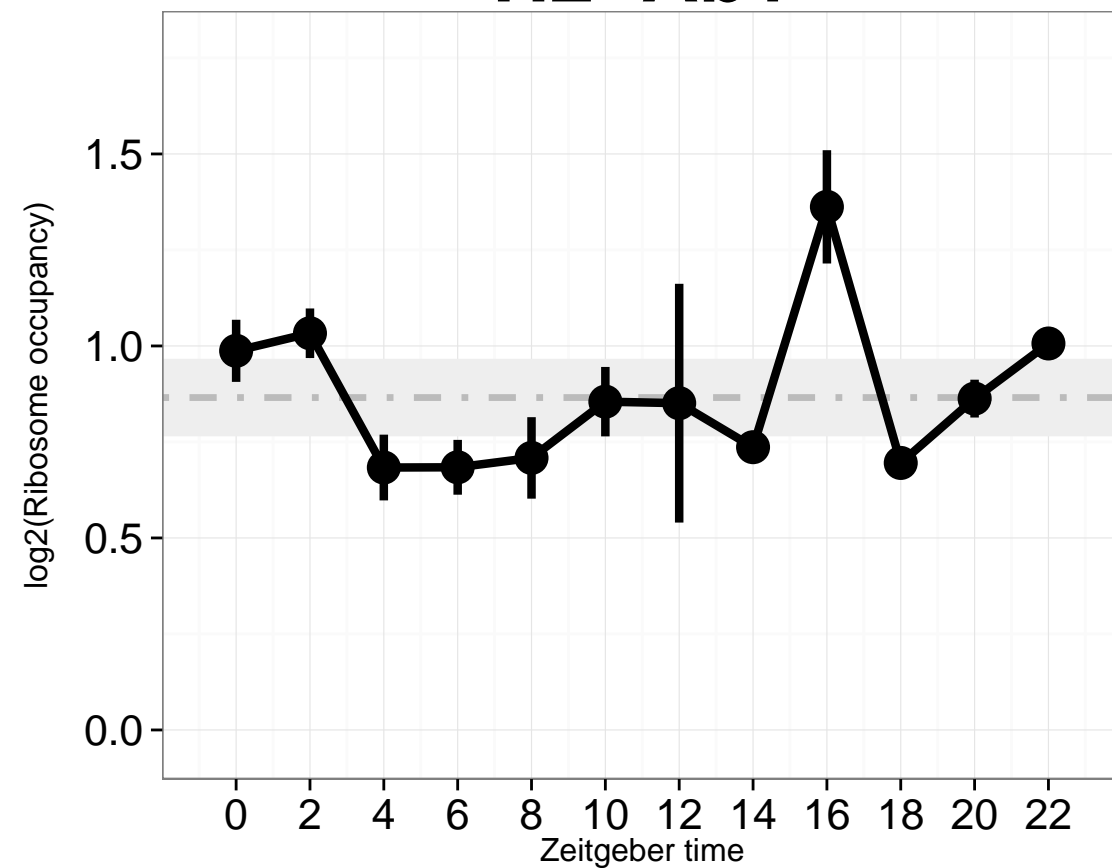

Supplement: Supplementary file 2489 [file 1]

## Derl1

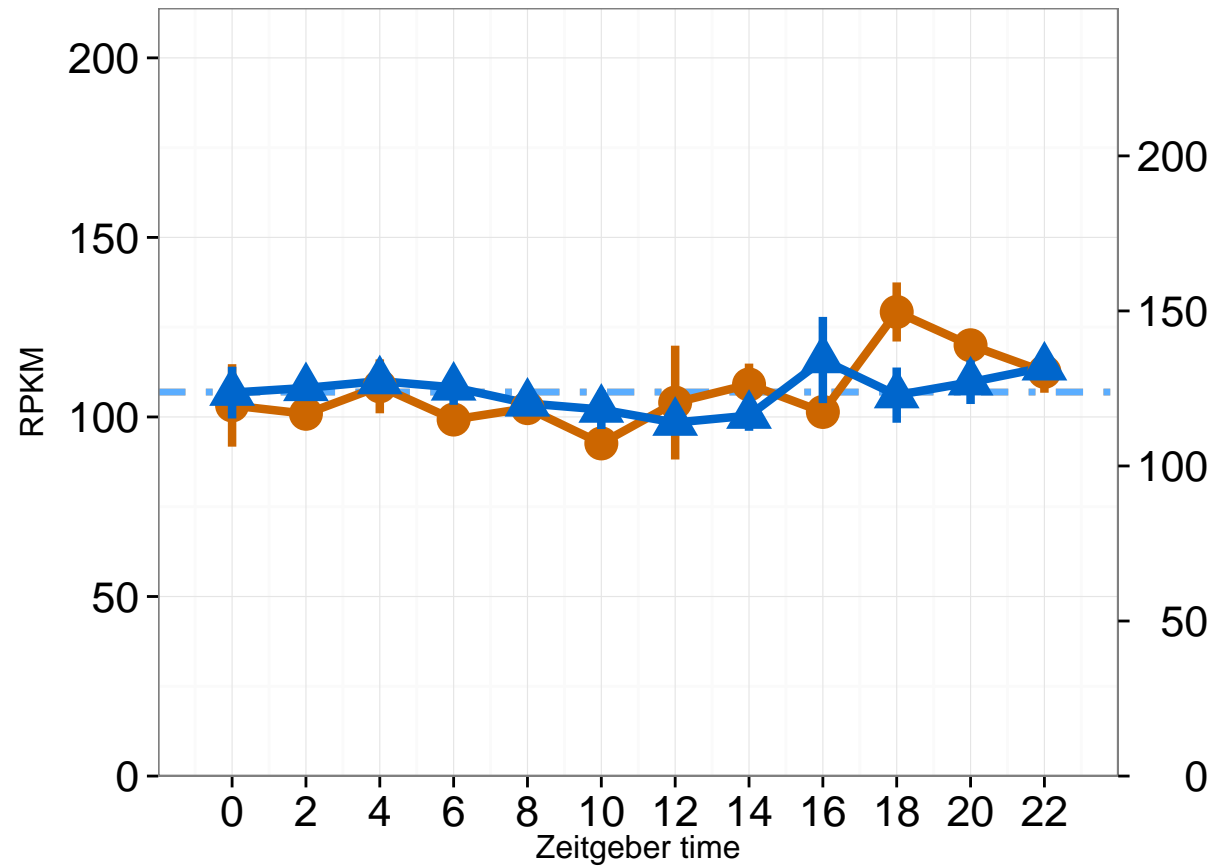

## Derl1

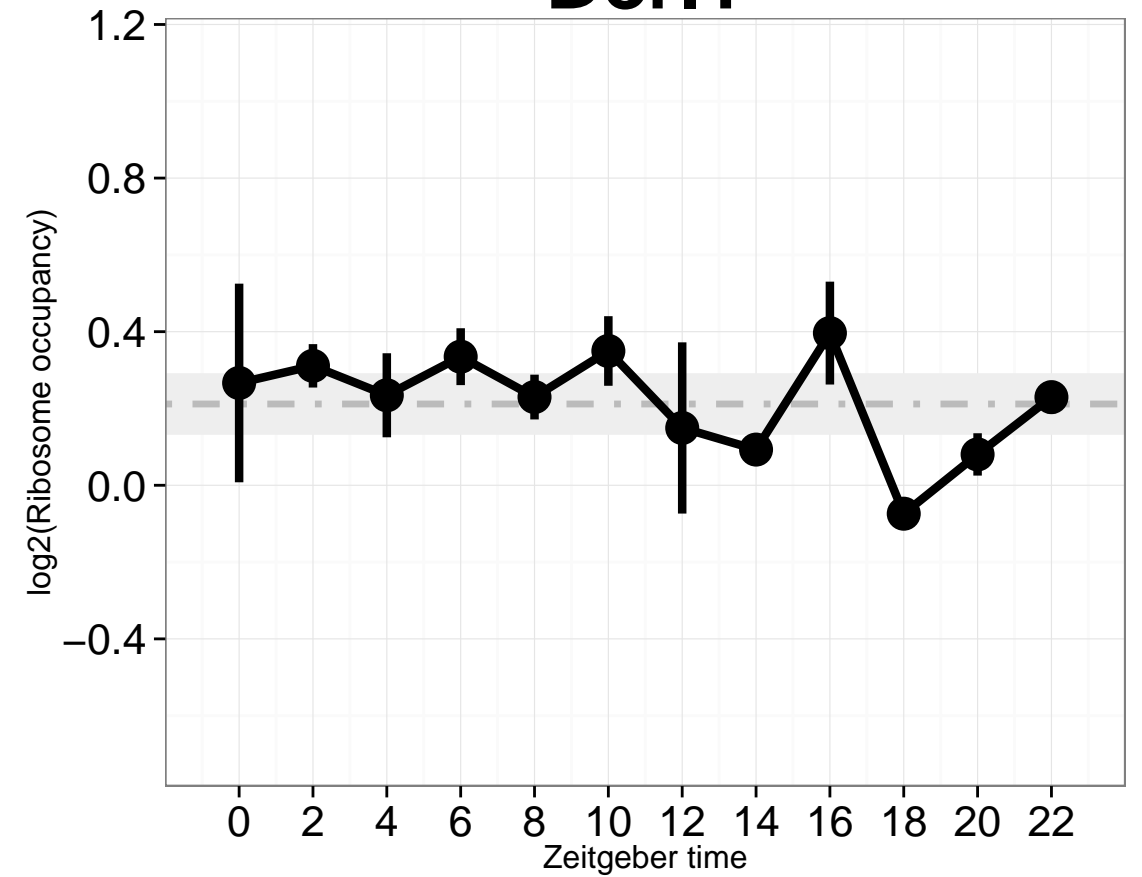

Supplement: Supplementary file 2490 [file 1]

## Lcn2

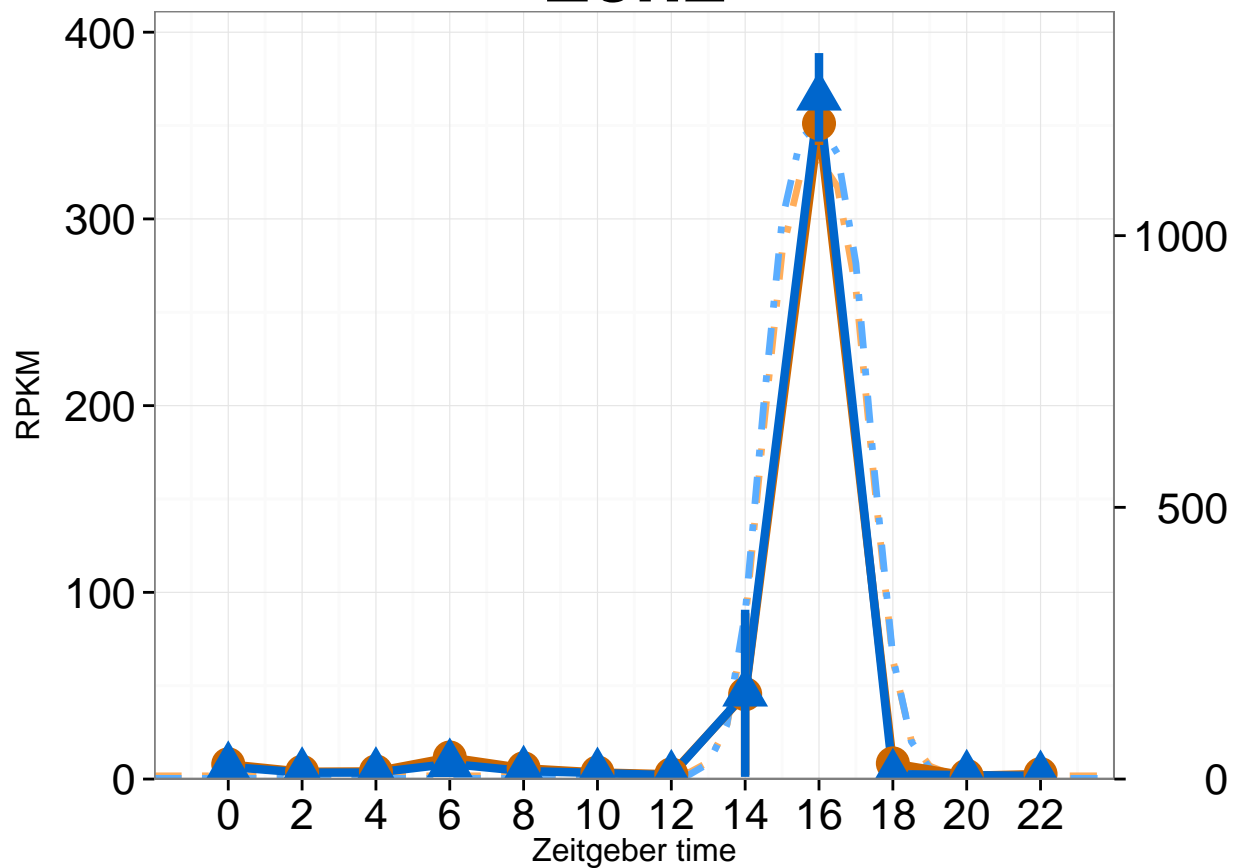

## Lcn2

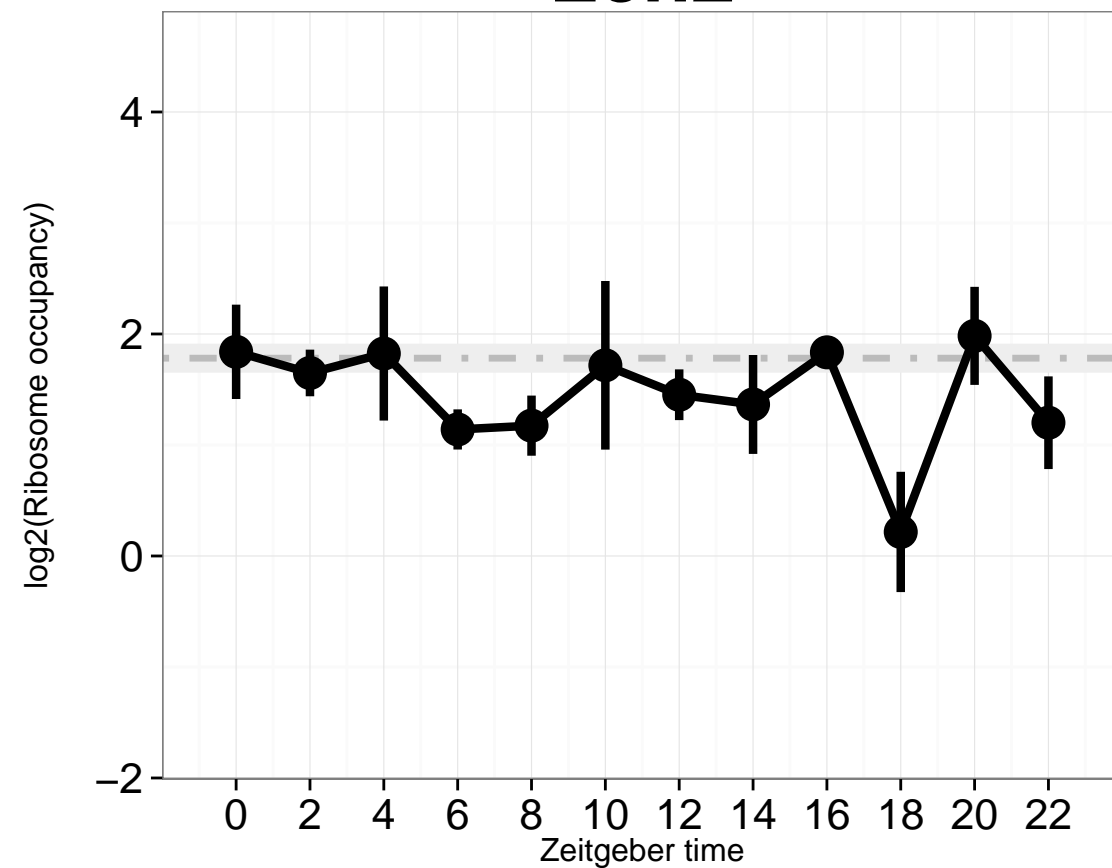

Supplement: Supplementary file 2491 [file 1]

## Mtpap

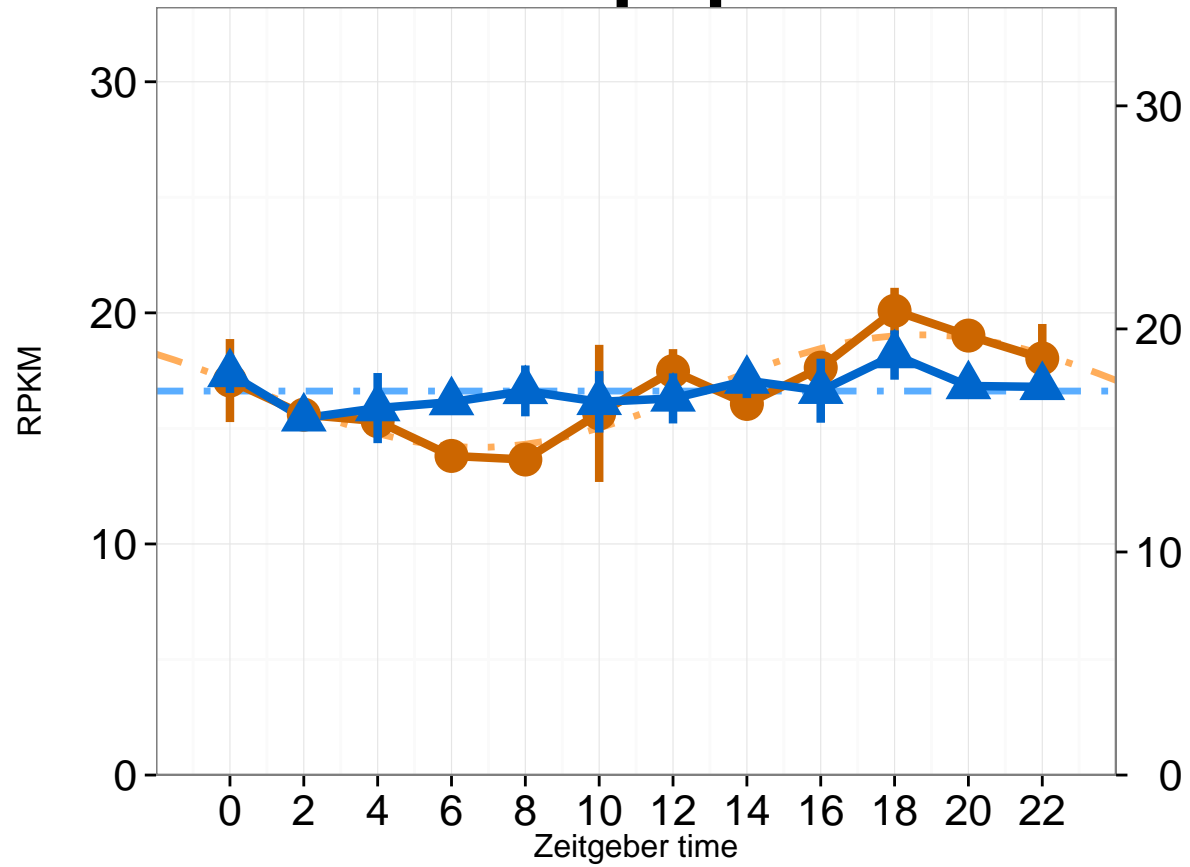

## Mtpap

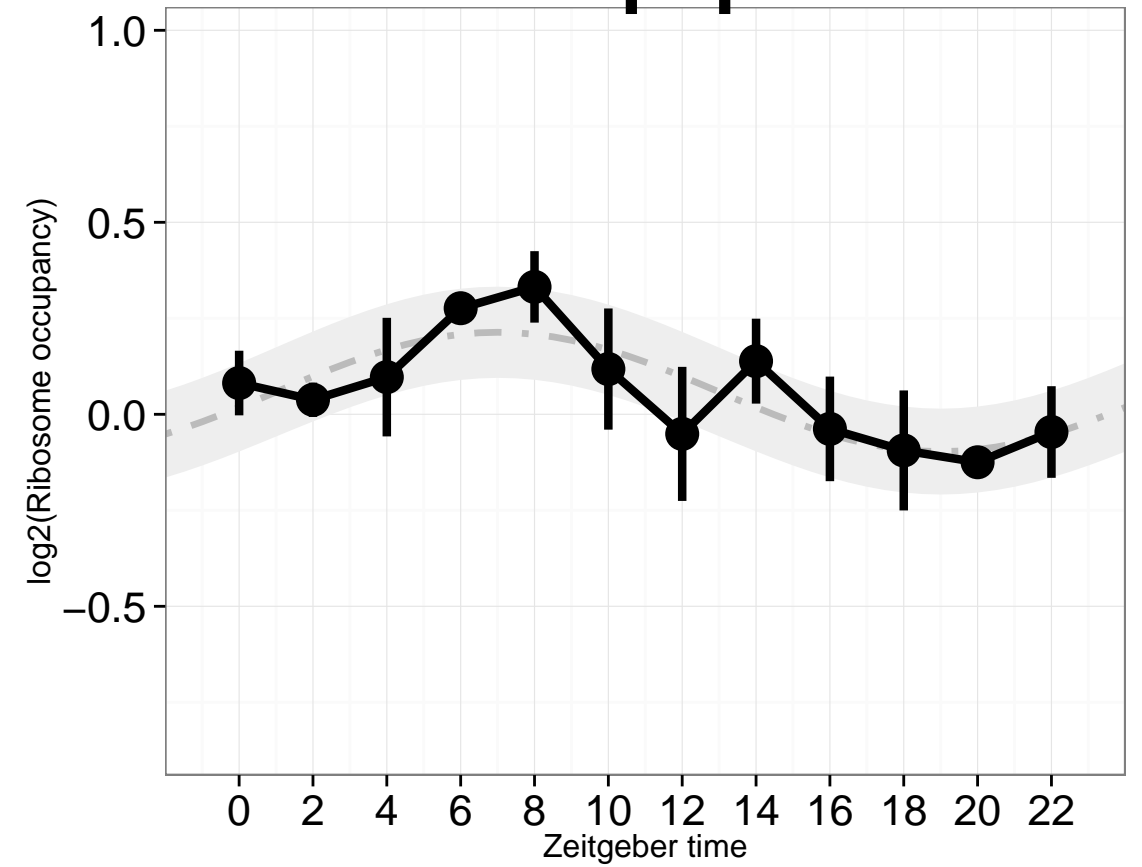

Supplement: Supplementary file 2492 [file 1]

## Cyr61

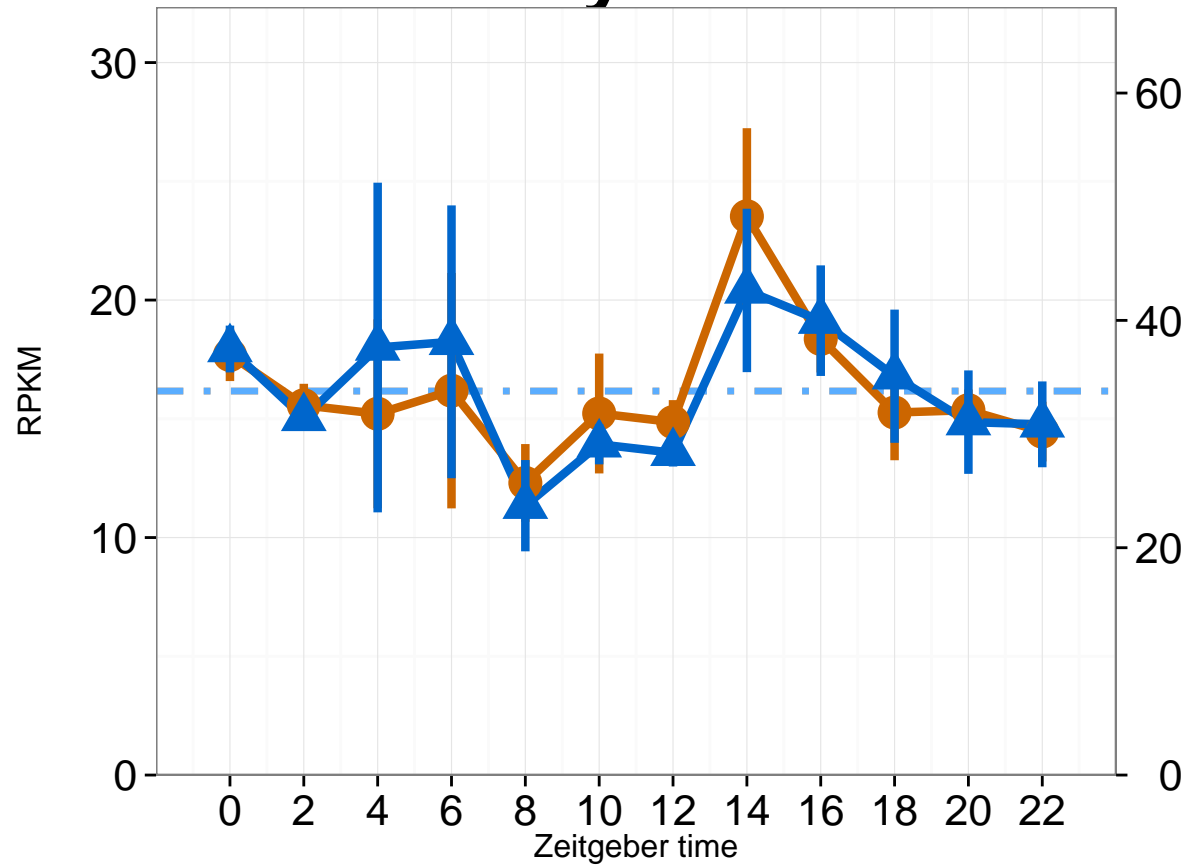

## Cyr61

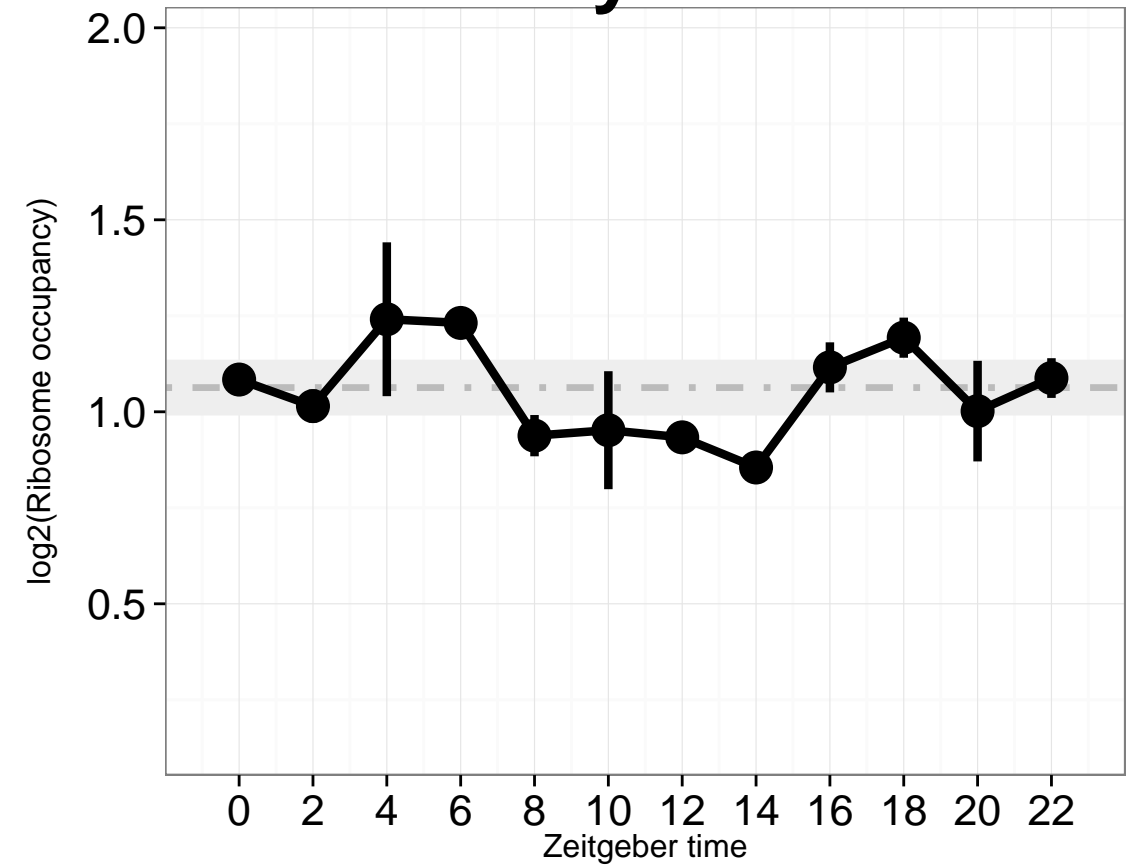

Supplement: Supplementary file 2493 [file 1]

# lfrd1

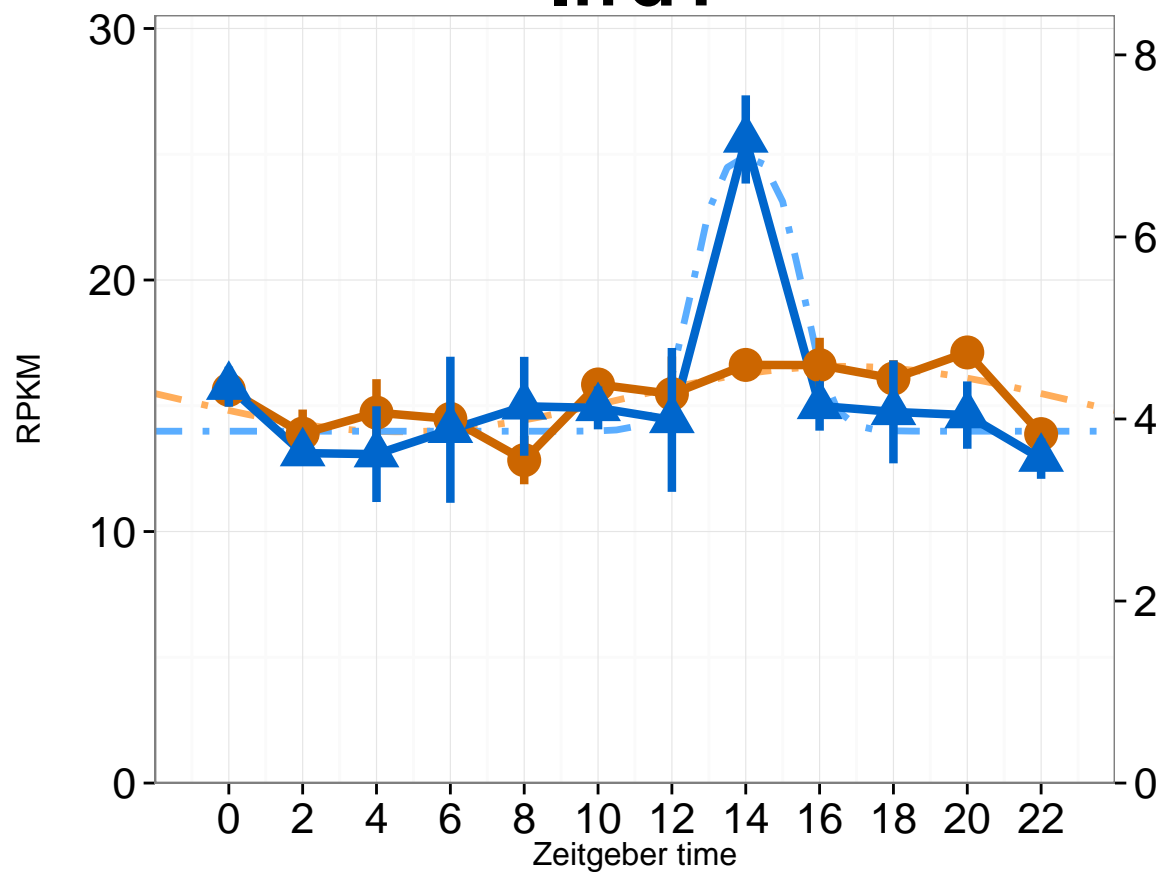

# lfrd1

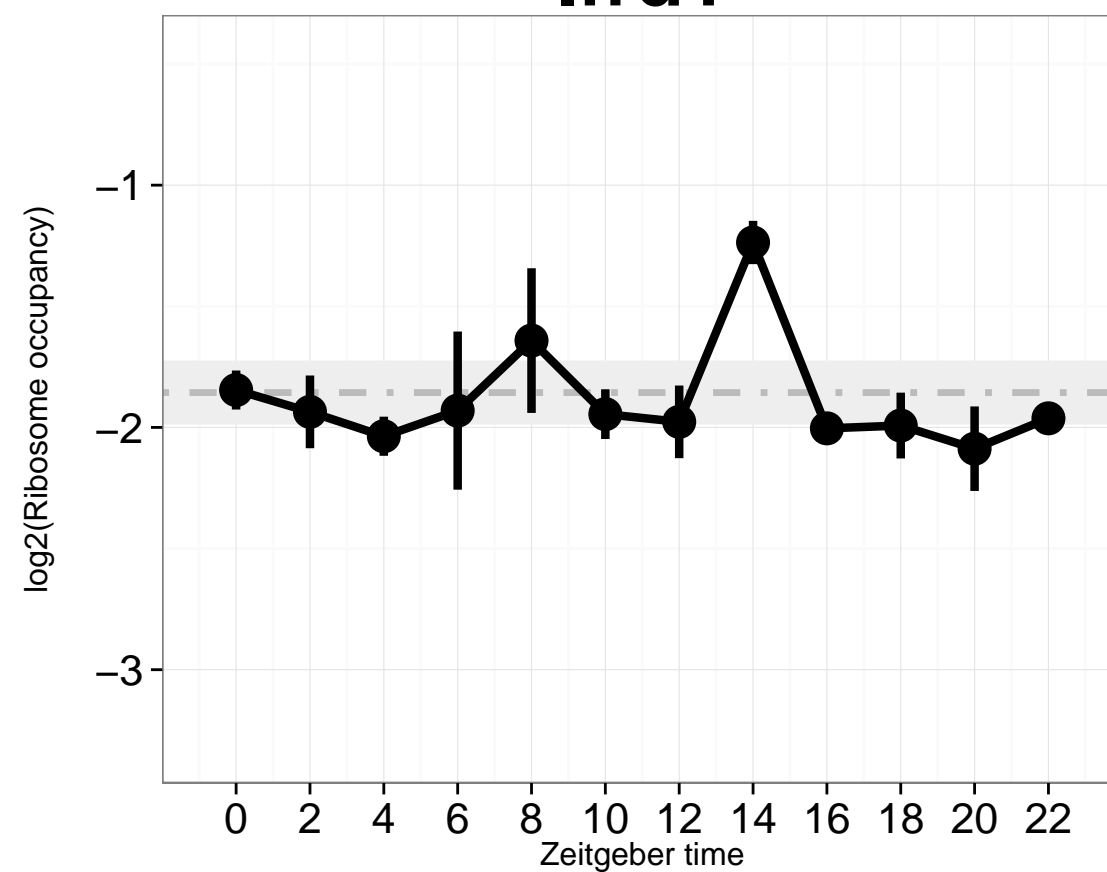

Supplement: Supplementary file 2494 [file 1]

# Tor1aip1

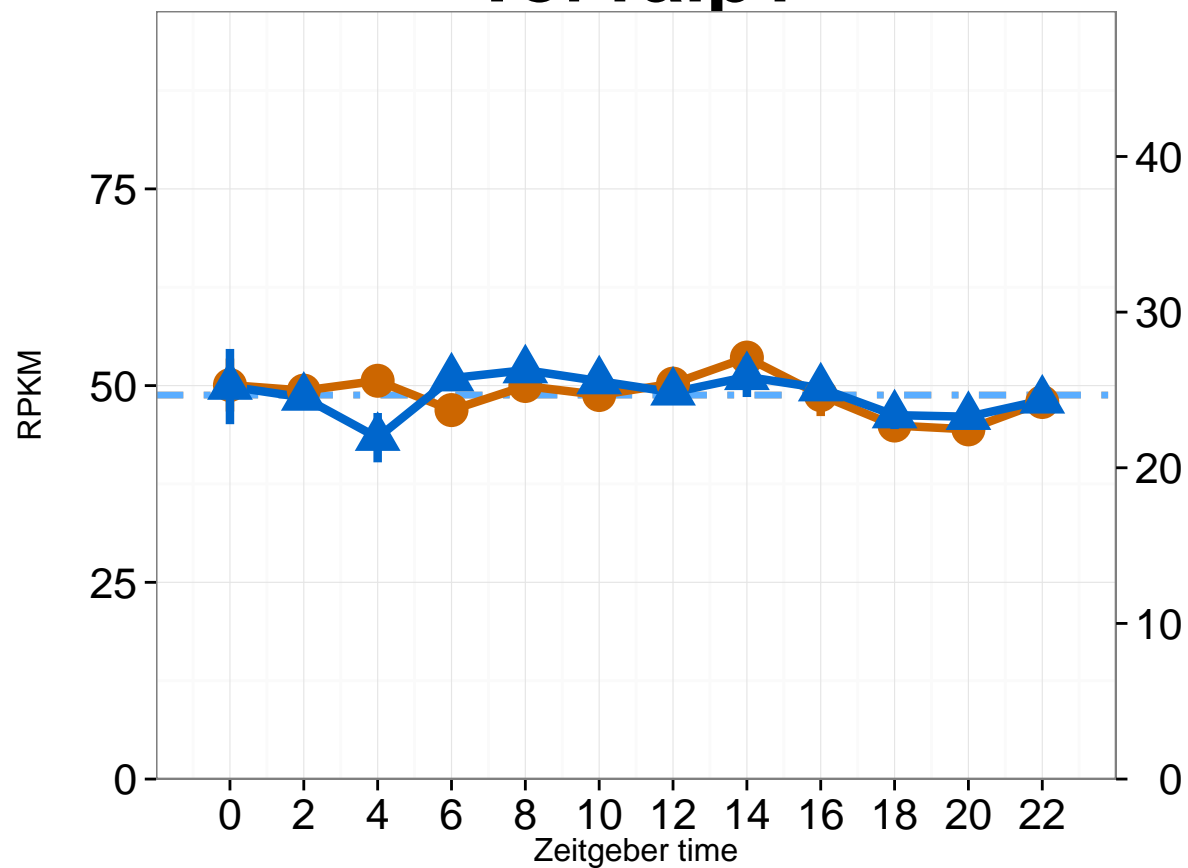

# Tor1aip1

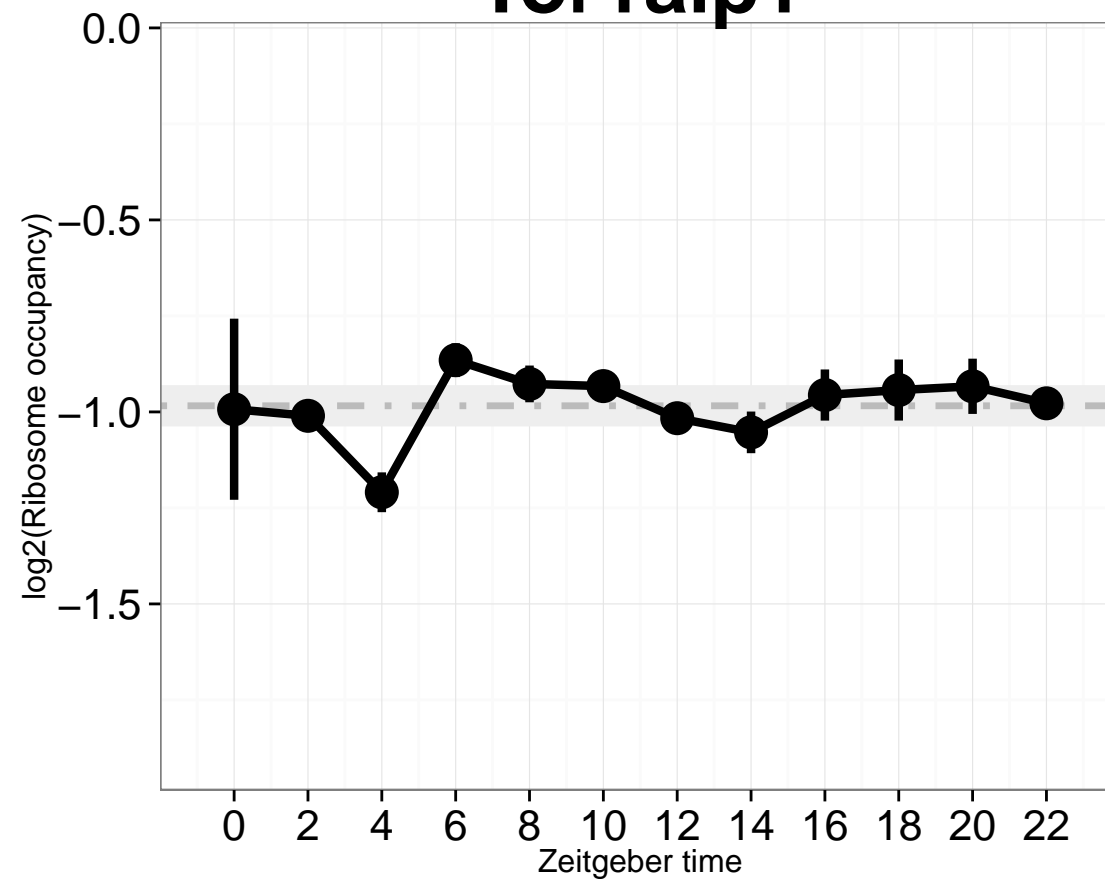

Supplement: Supplementary file 2495 [file 1]

## Ubc

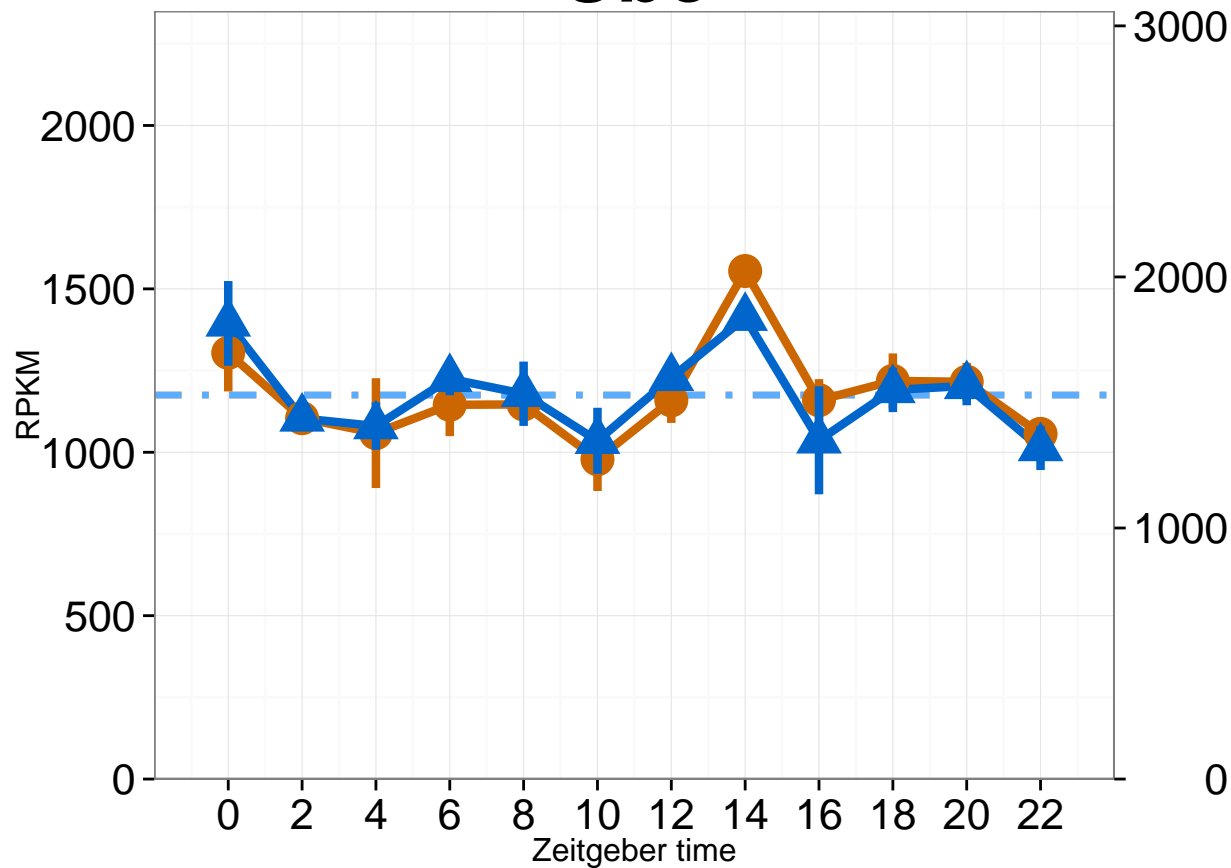

## Ubc

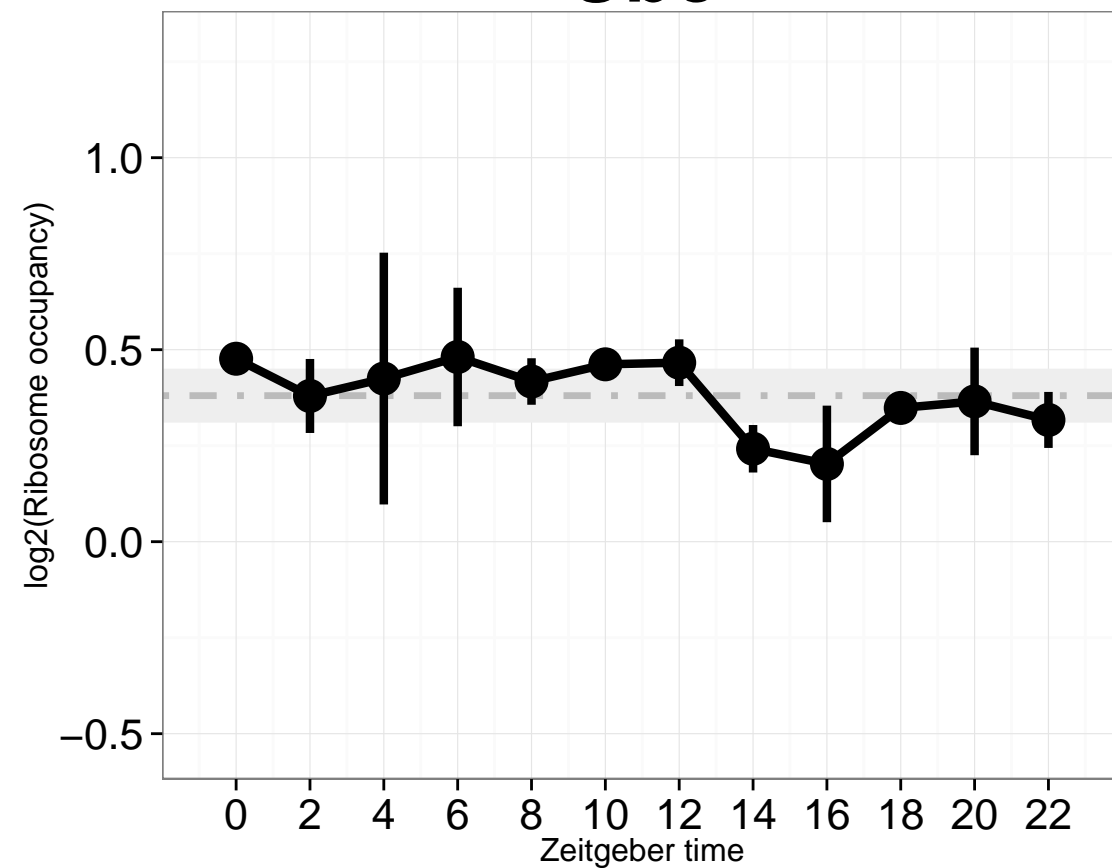

Supplement: Supplementary file 2496 [file 1]

## Rab32

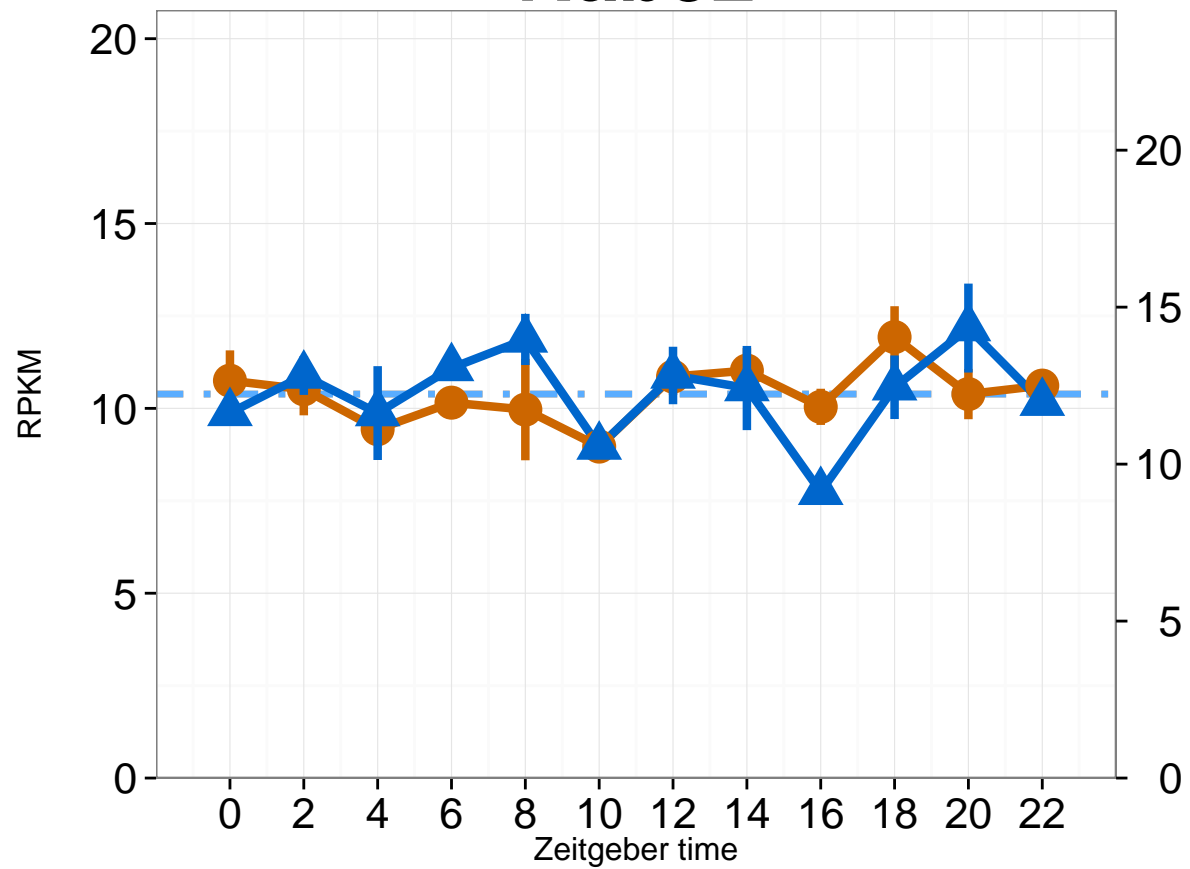

## Rab32

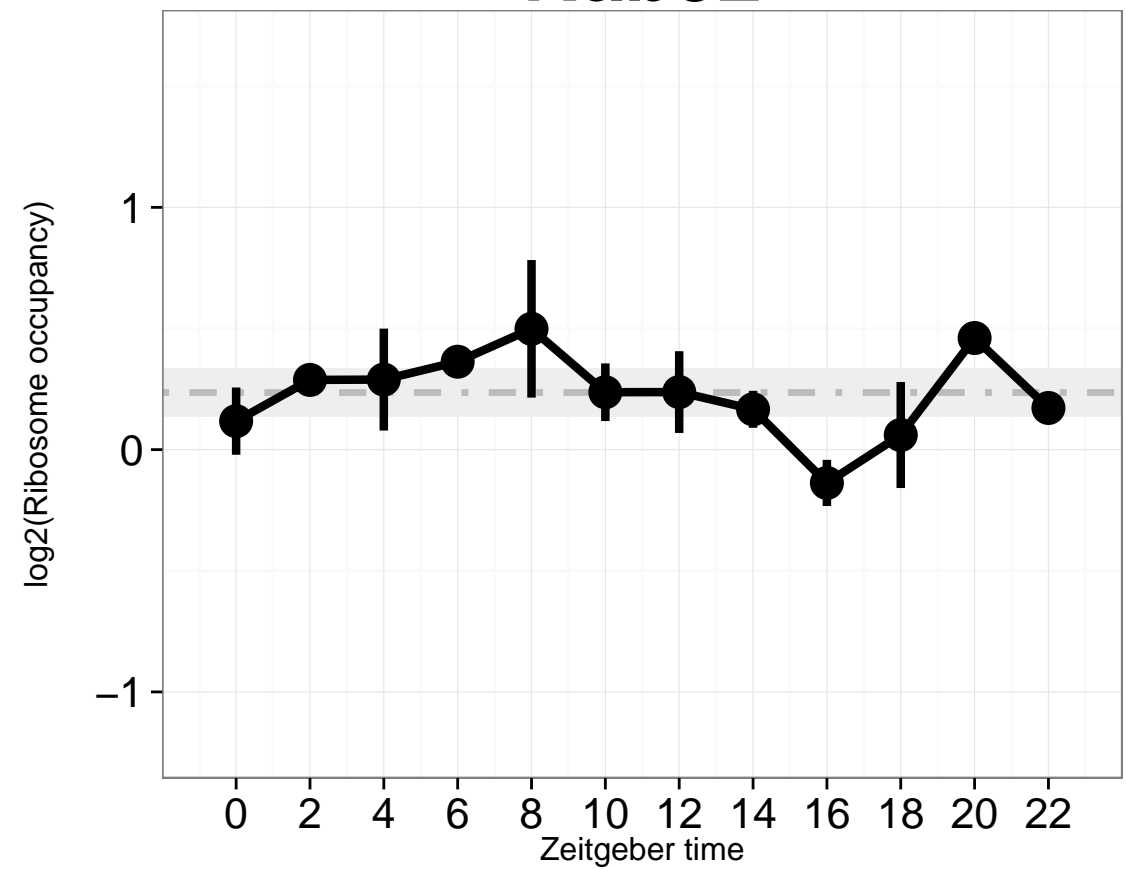

Supplement: Supplementary file 2497 [file 1]

## Kctd1

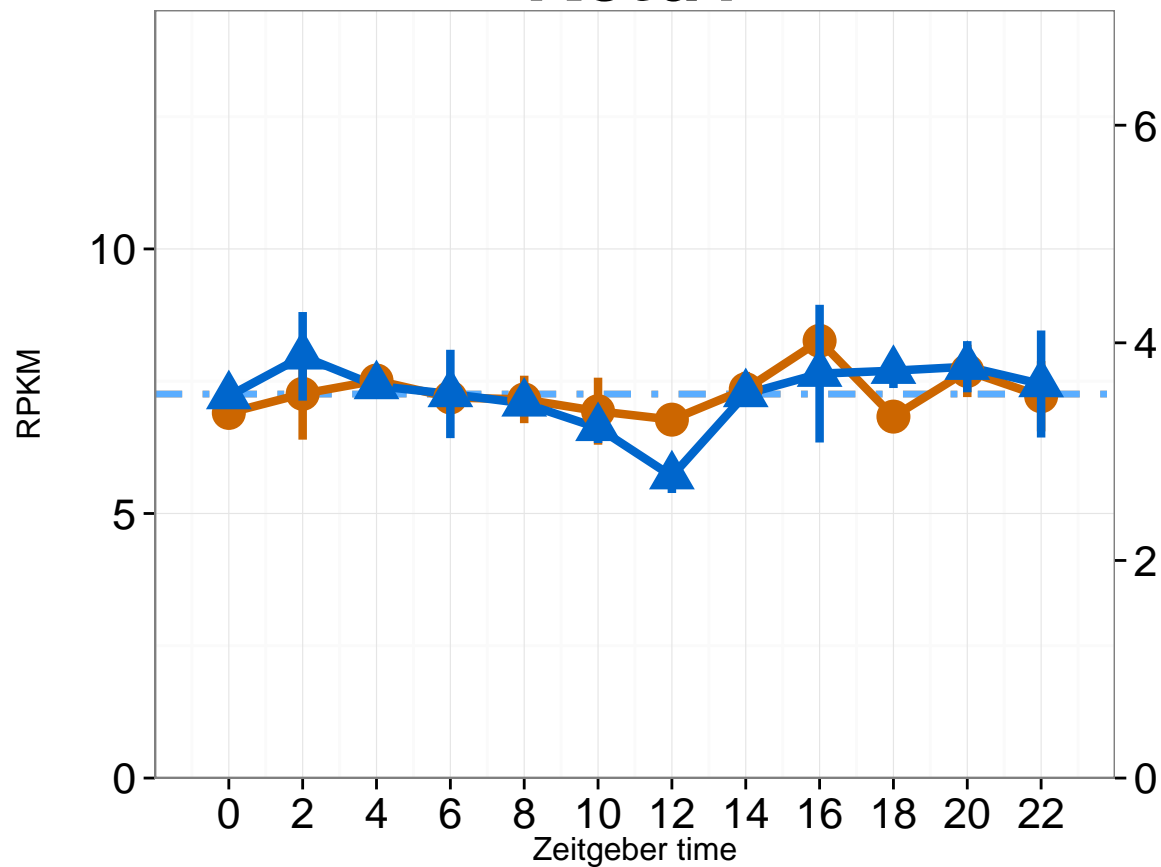

## Kctd1

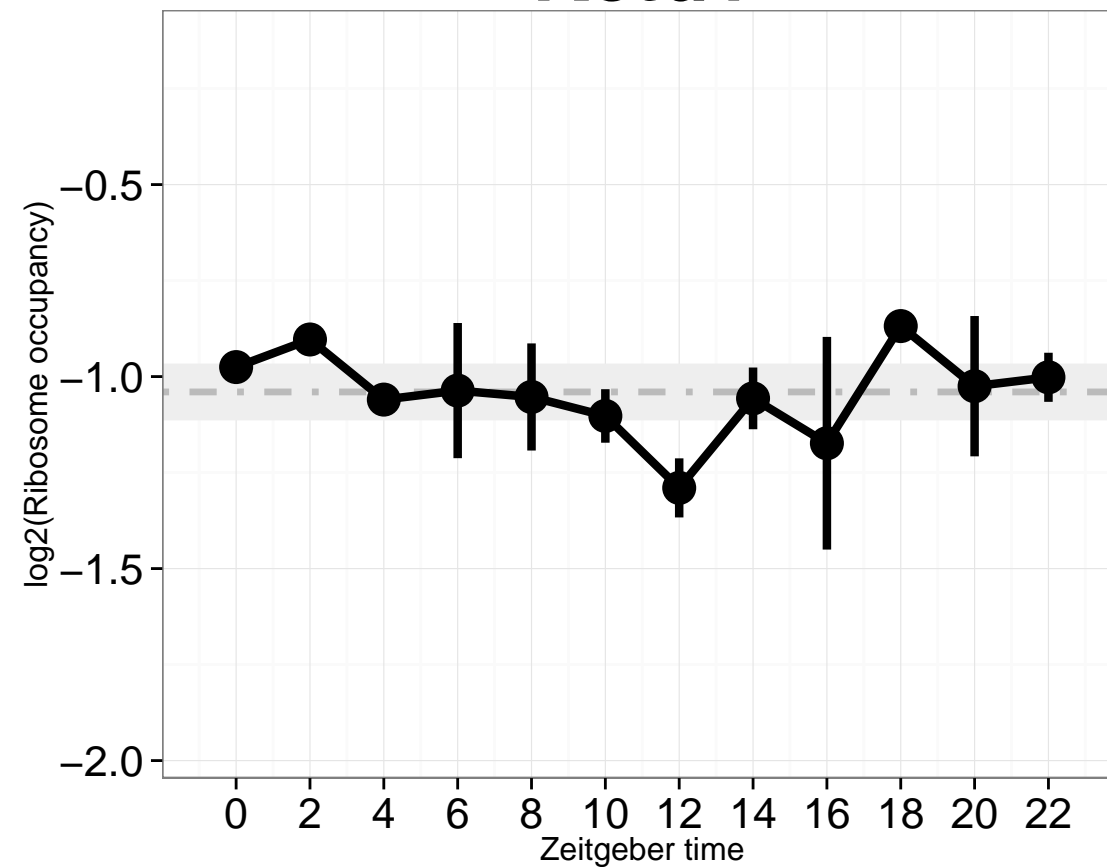

Supplement: Supplementary file 2498 [file 1]

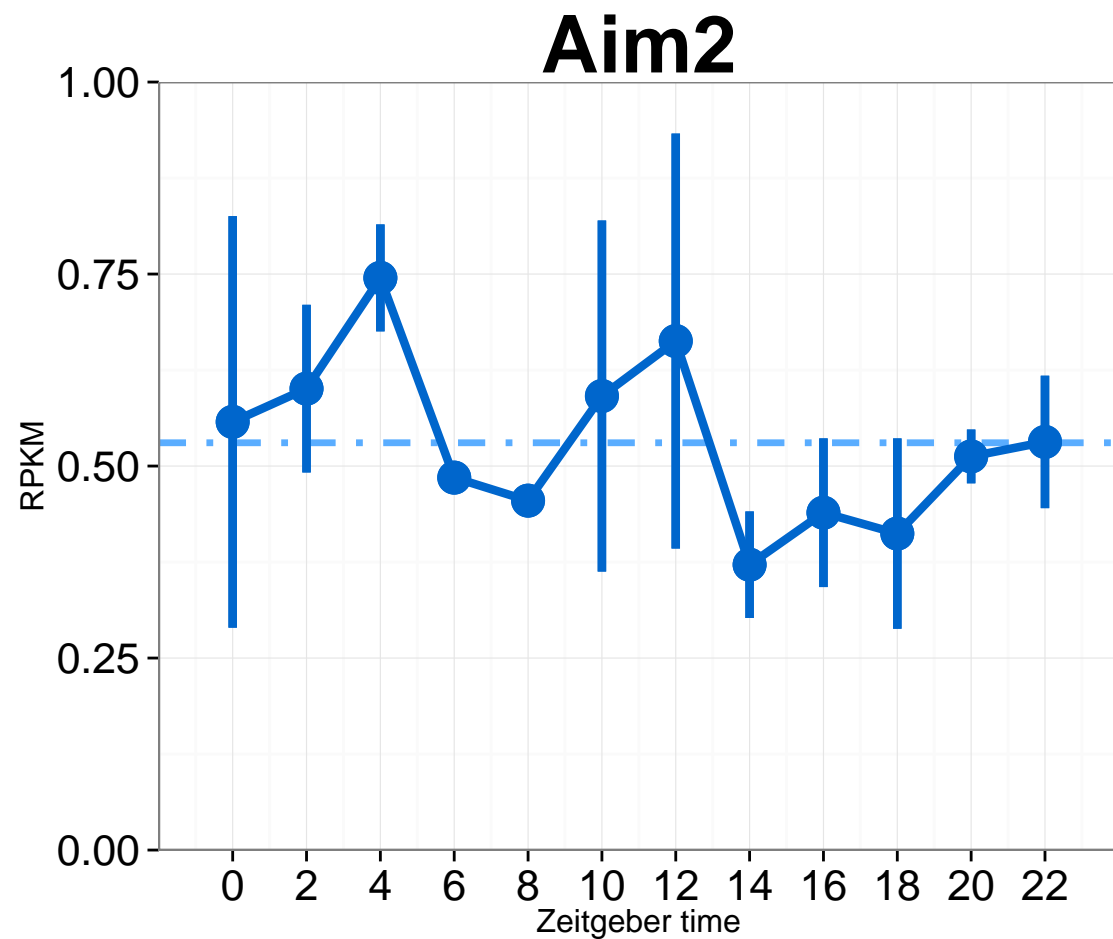

### Aim2 log2(Ribosome occupancy)

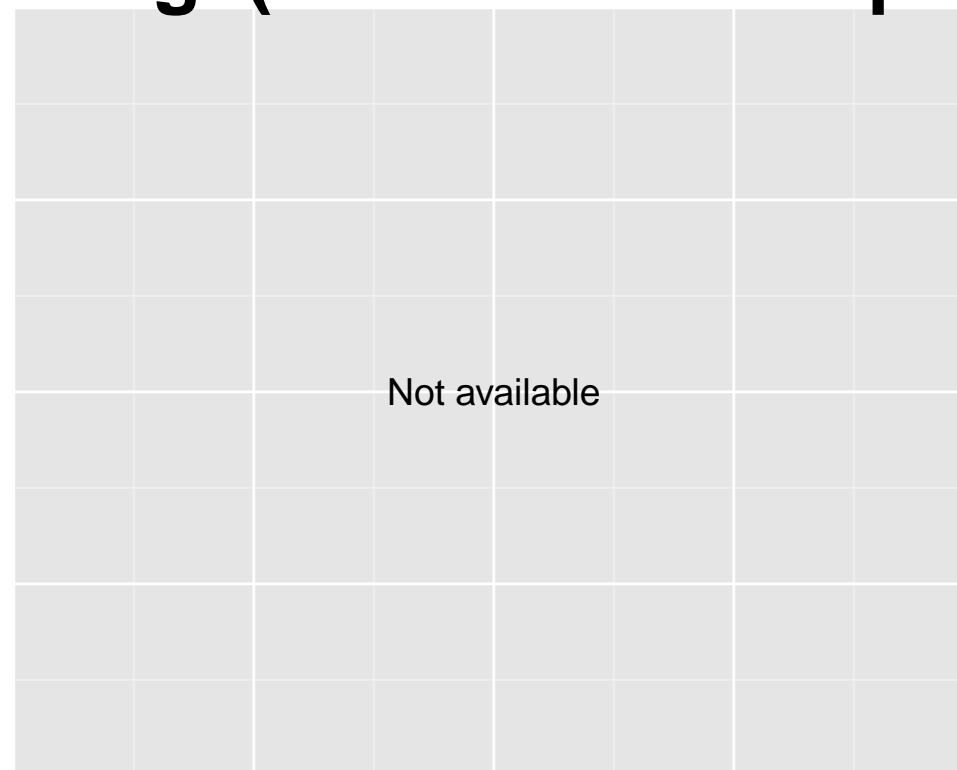

Supplement: Supplementary file 2499 [file 1]

## Tmem62

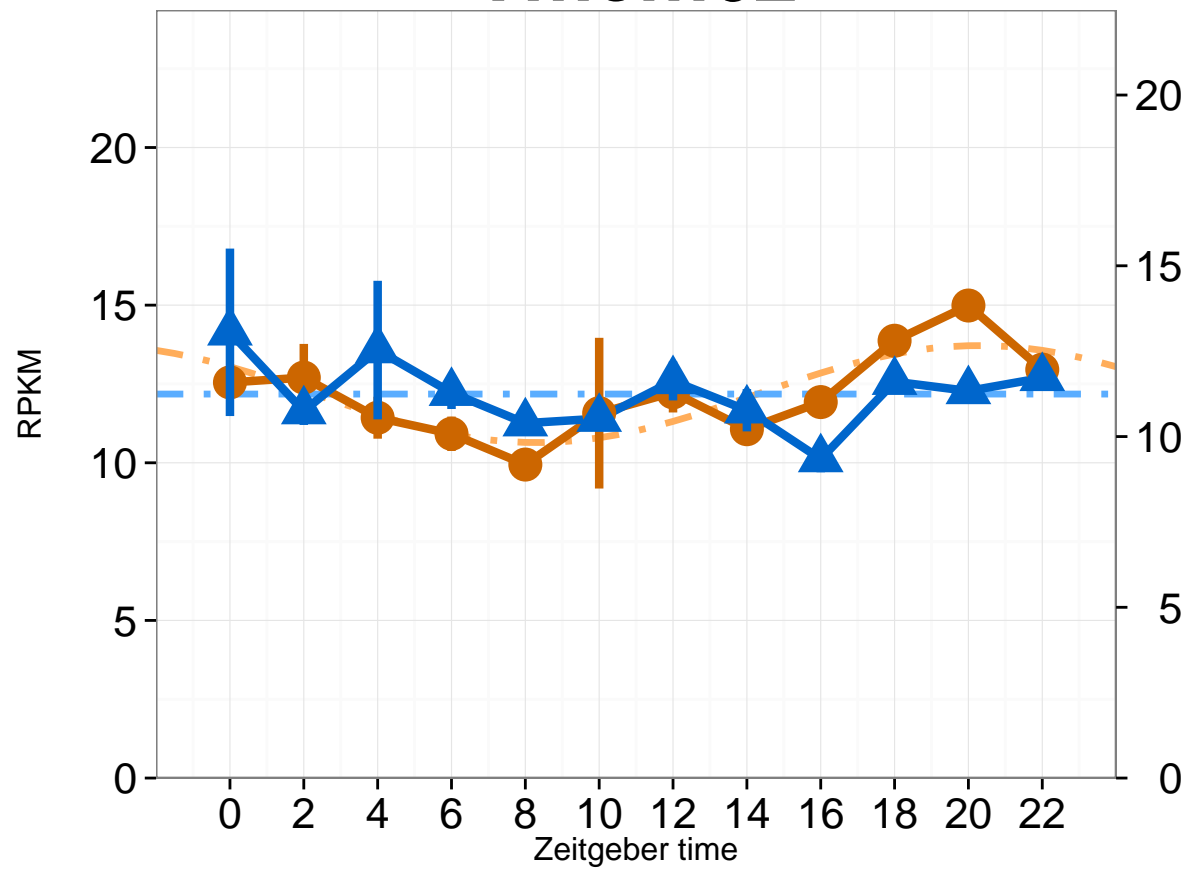

## Tmem62

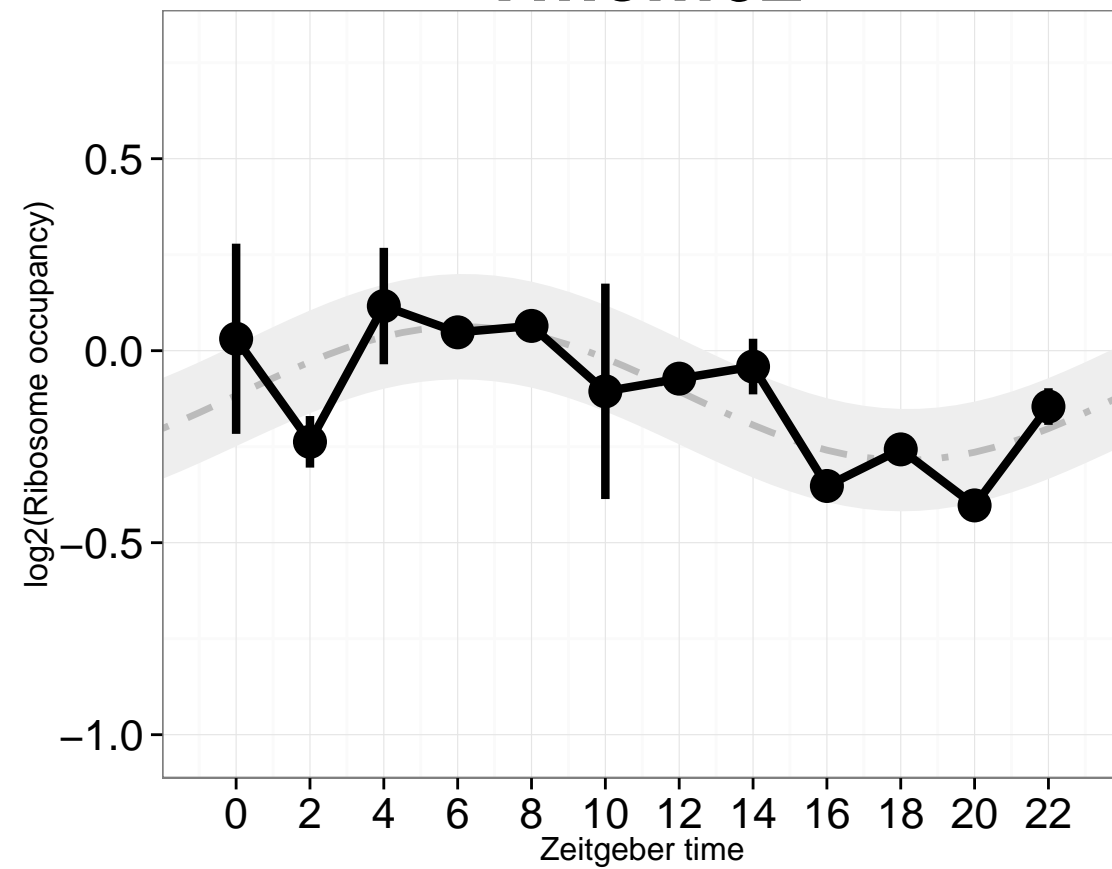

Supplement: Supplementary file 2500 [file 1]

## Rasgrp3

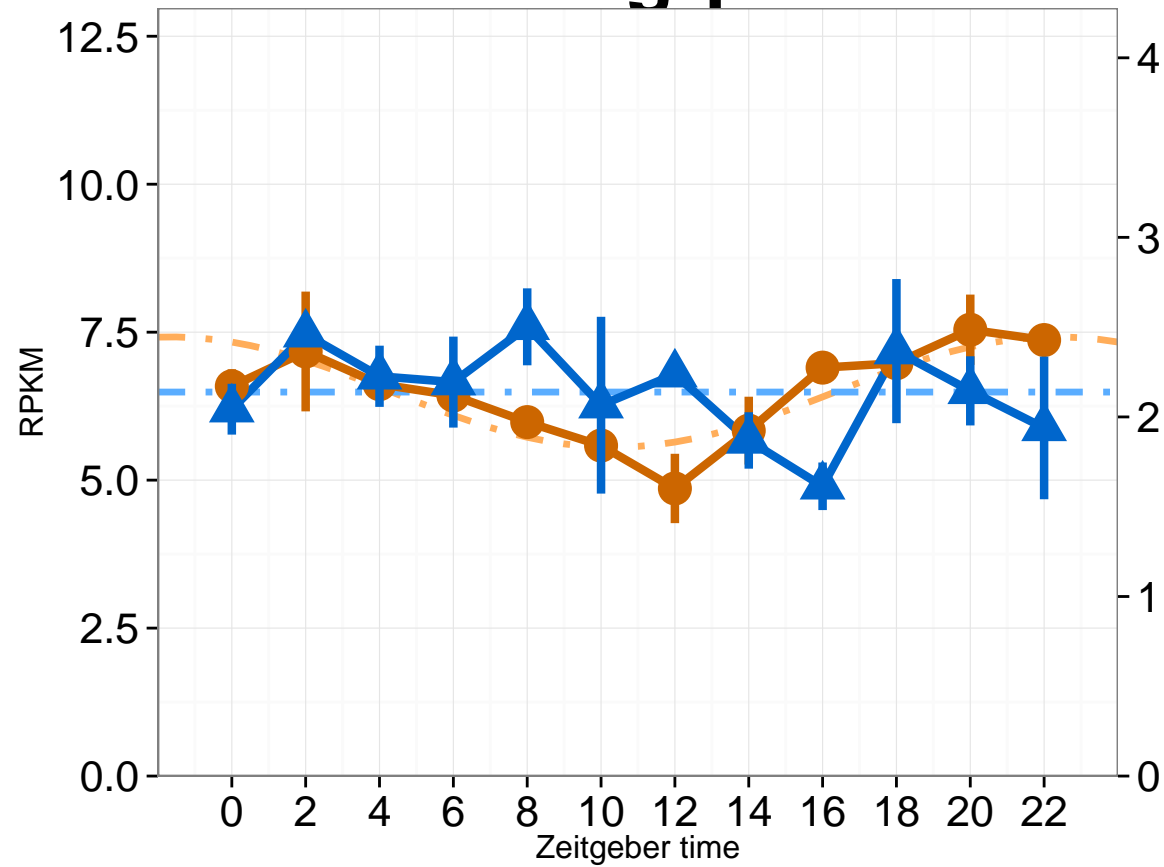

## Rasgrp3

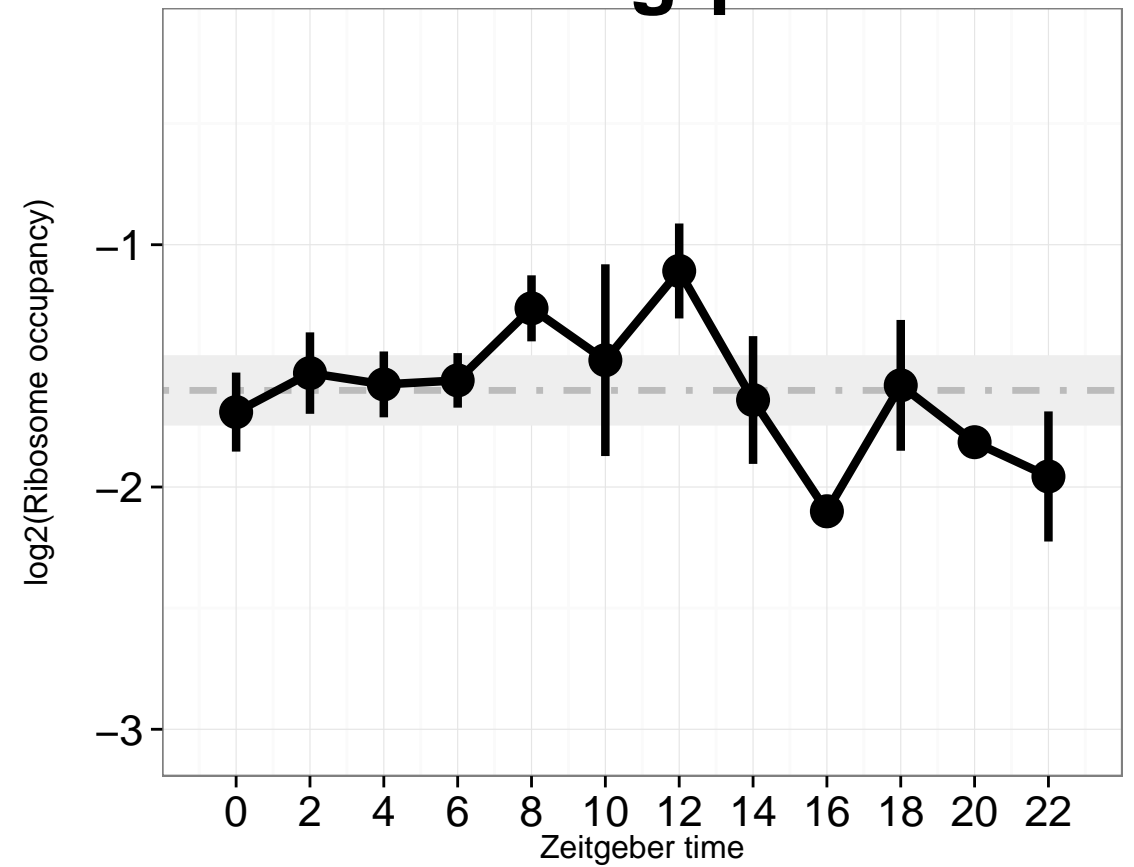

Supplement: Supplementary file 2501 [file 1]

# Usp2

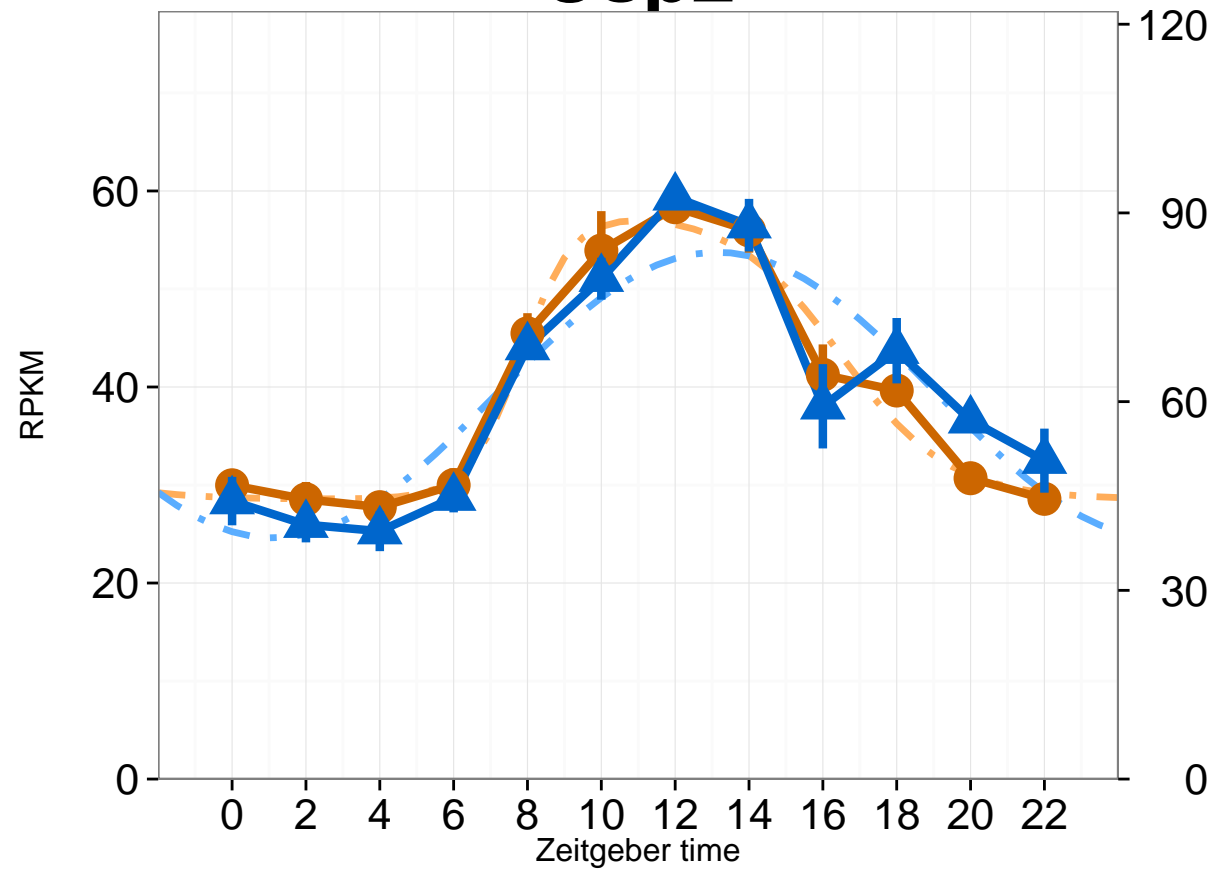

# Usp2

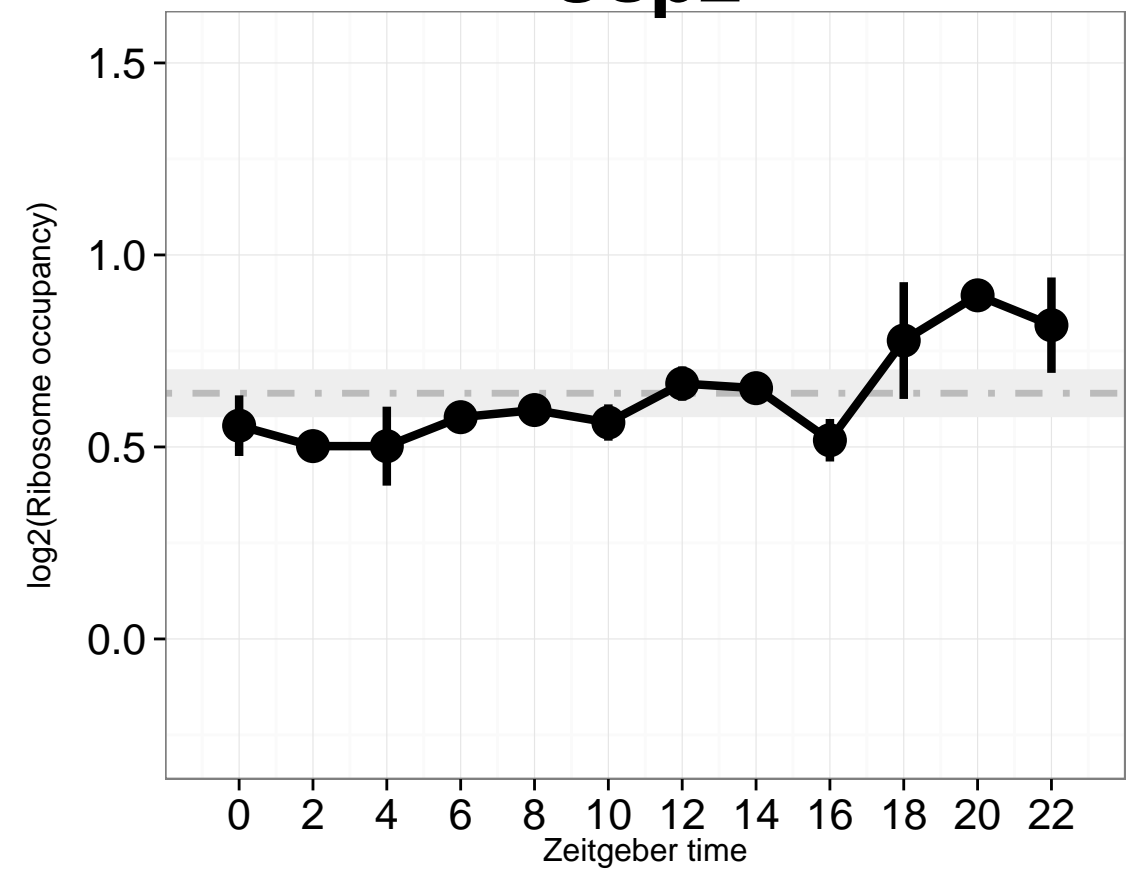

Supplement: Supplementary file 2502 [file 1]

## Sepsecs

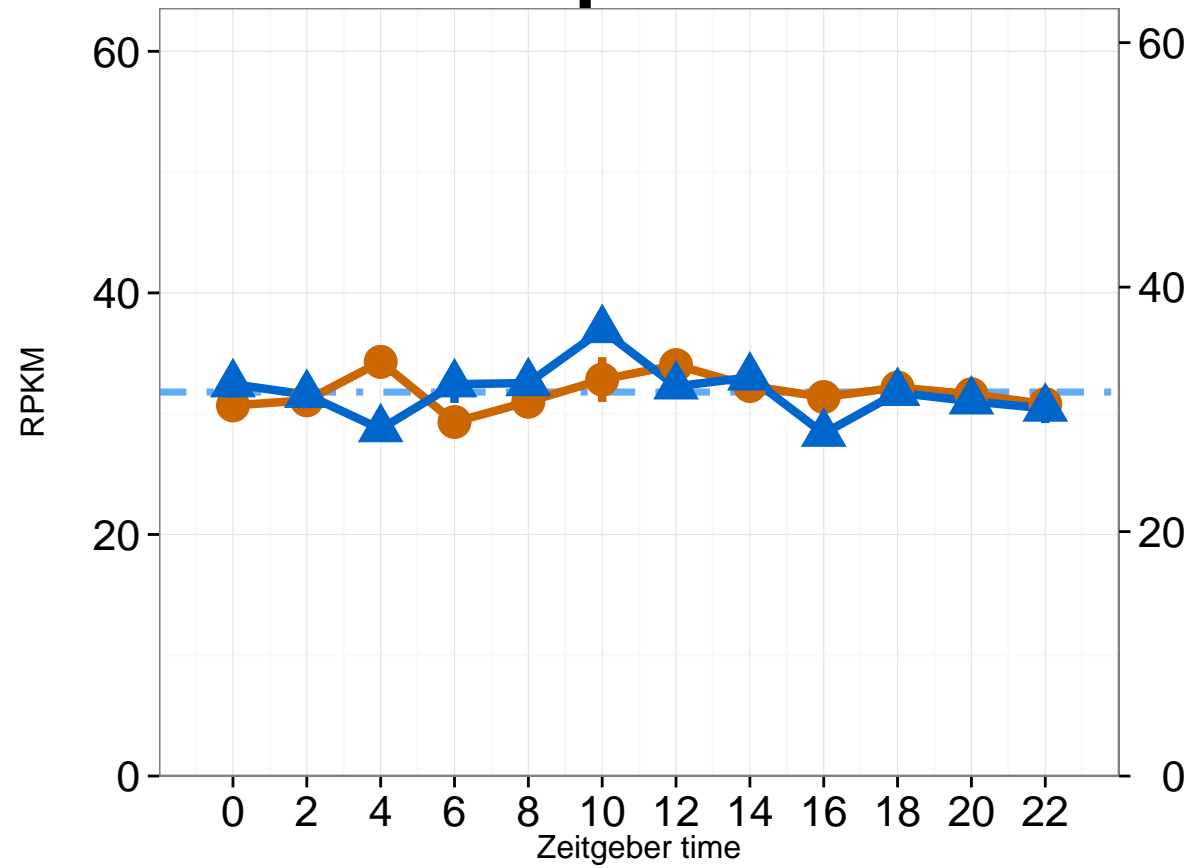

## Sepsecs

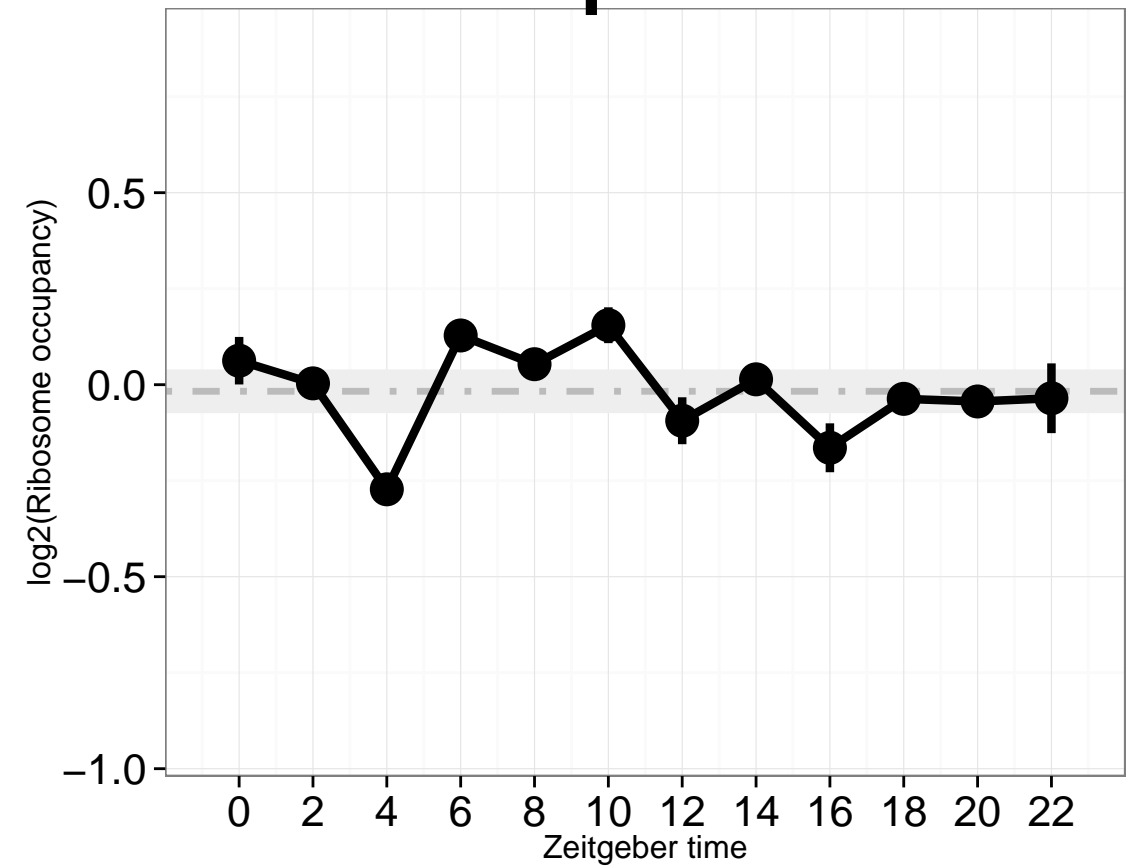

Supplement: Supplementary file 2503 [file 1]

# Agap3

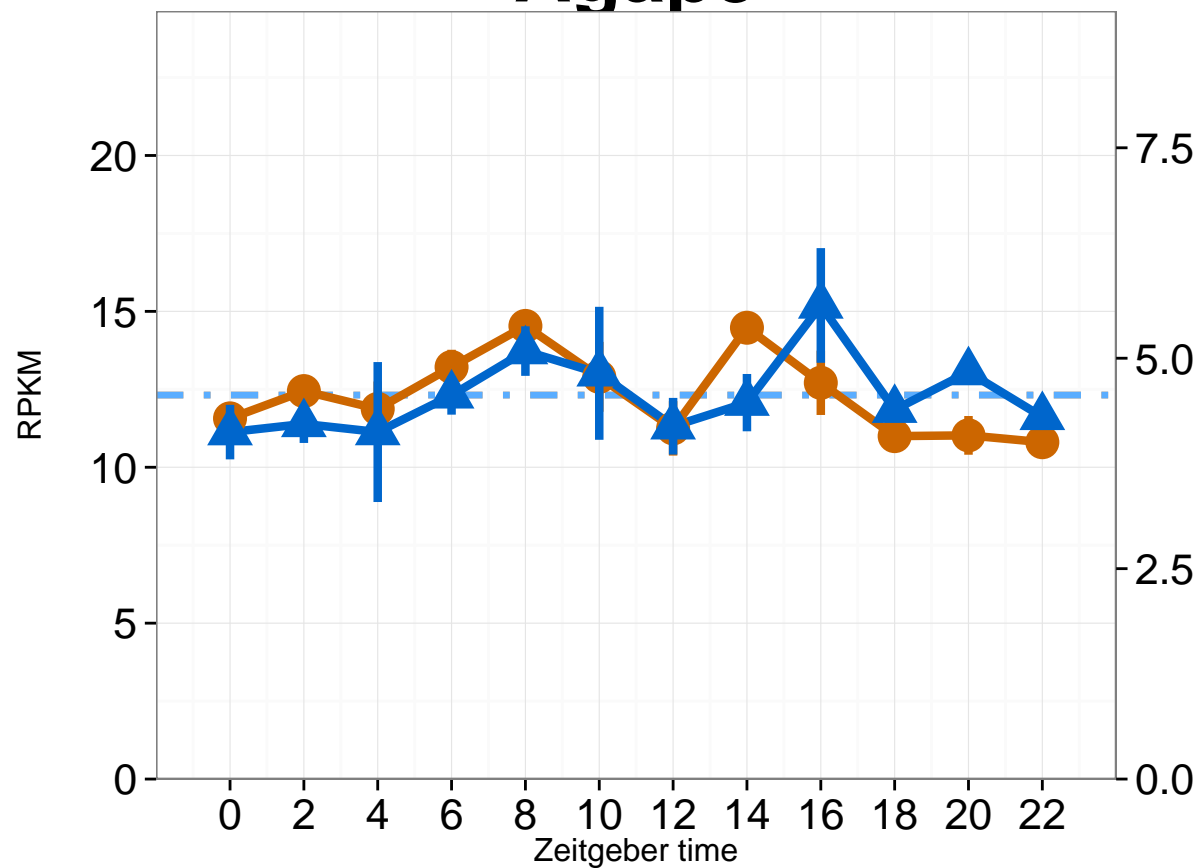

# Agap3

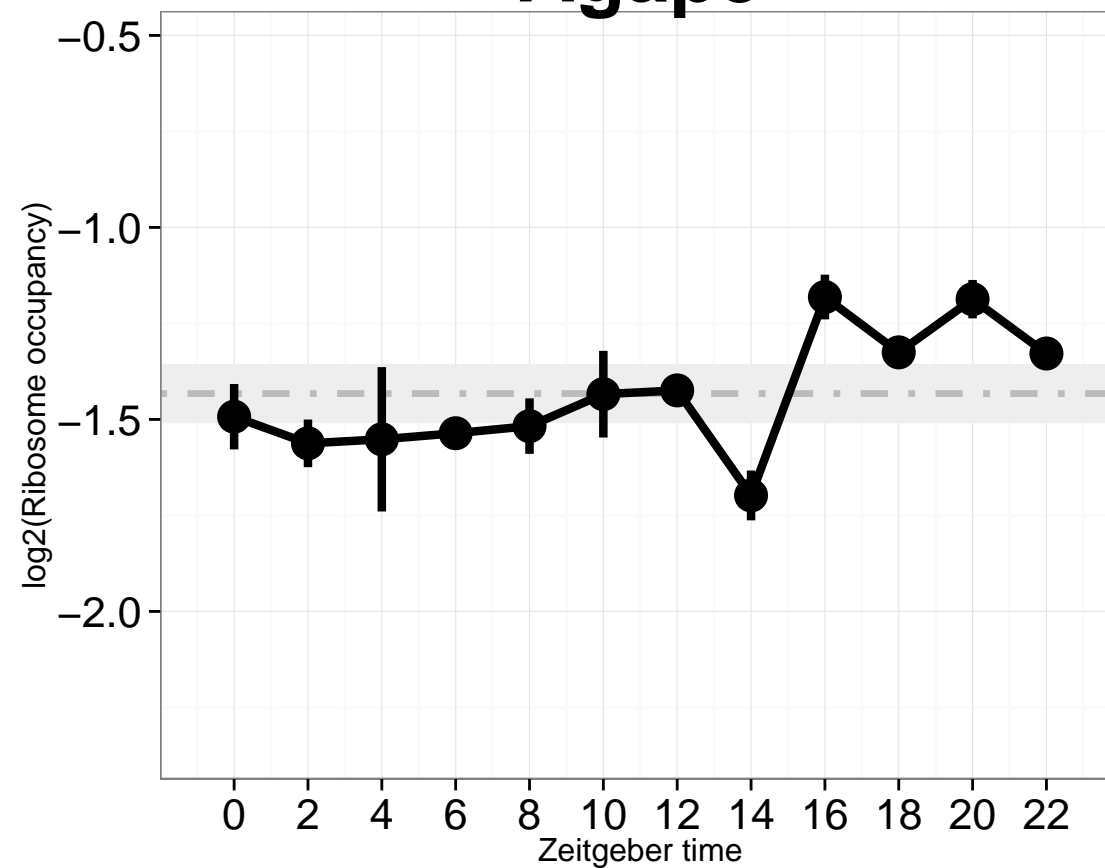

Supplement: Supplementary file 2504 [file 1]

## Cbx6

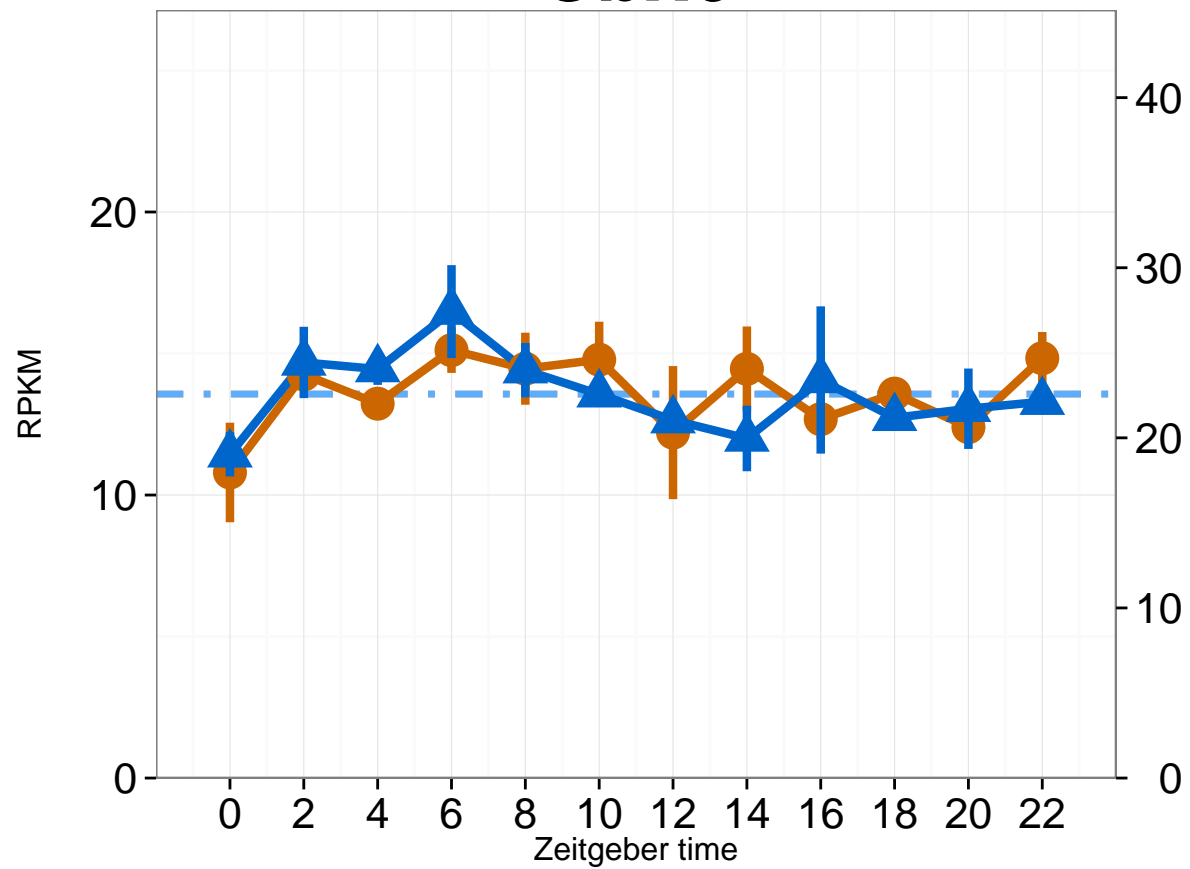

## Cbx6

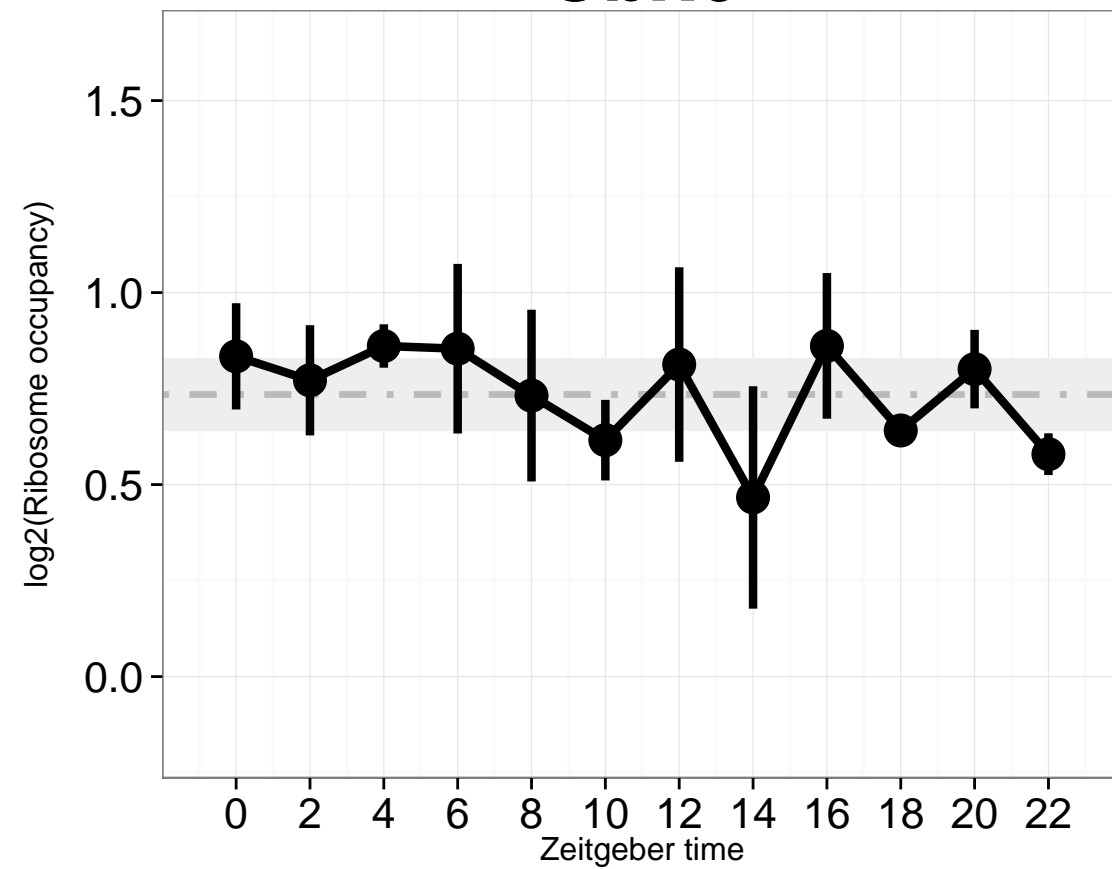

Supplement: Supplementary file 2505 [file 1]

# Supt6

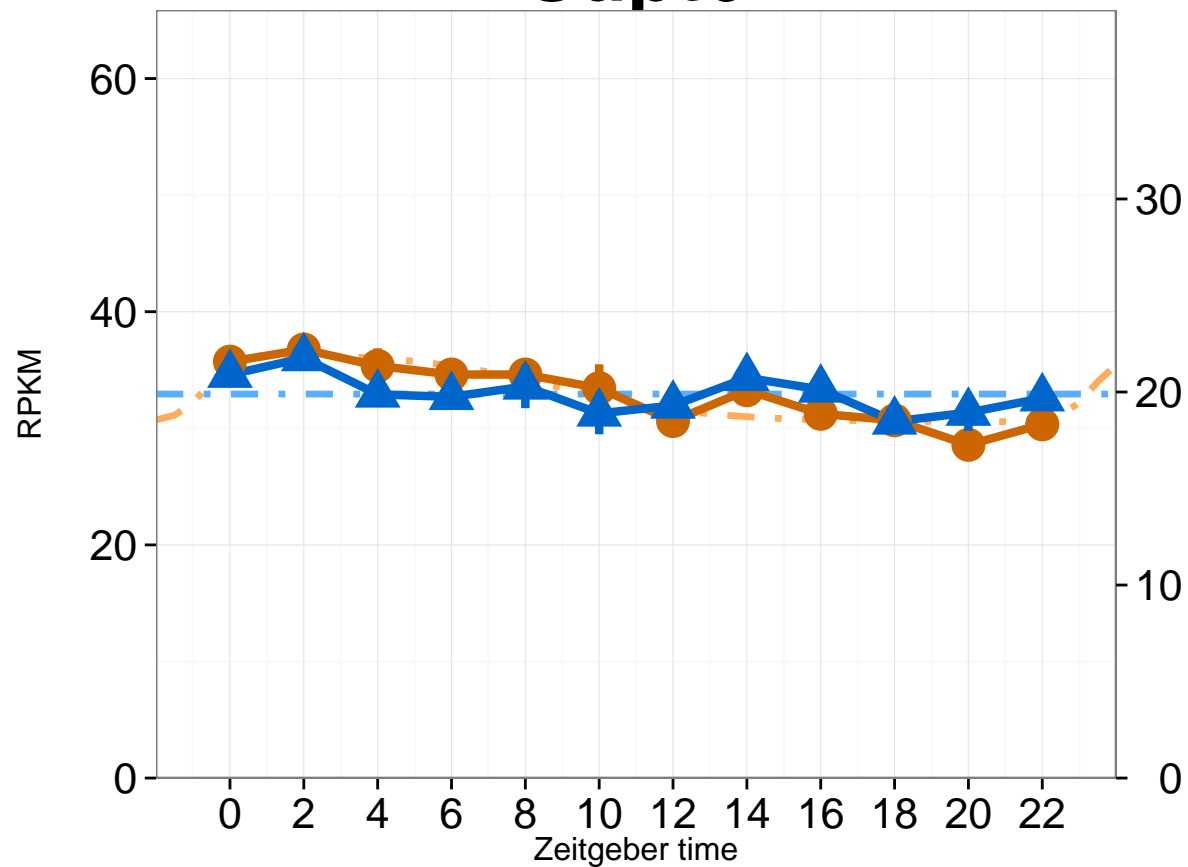

# Supt6

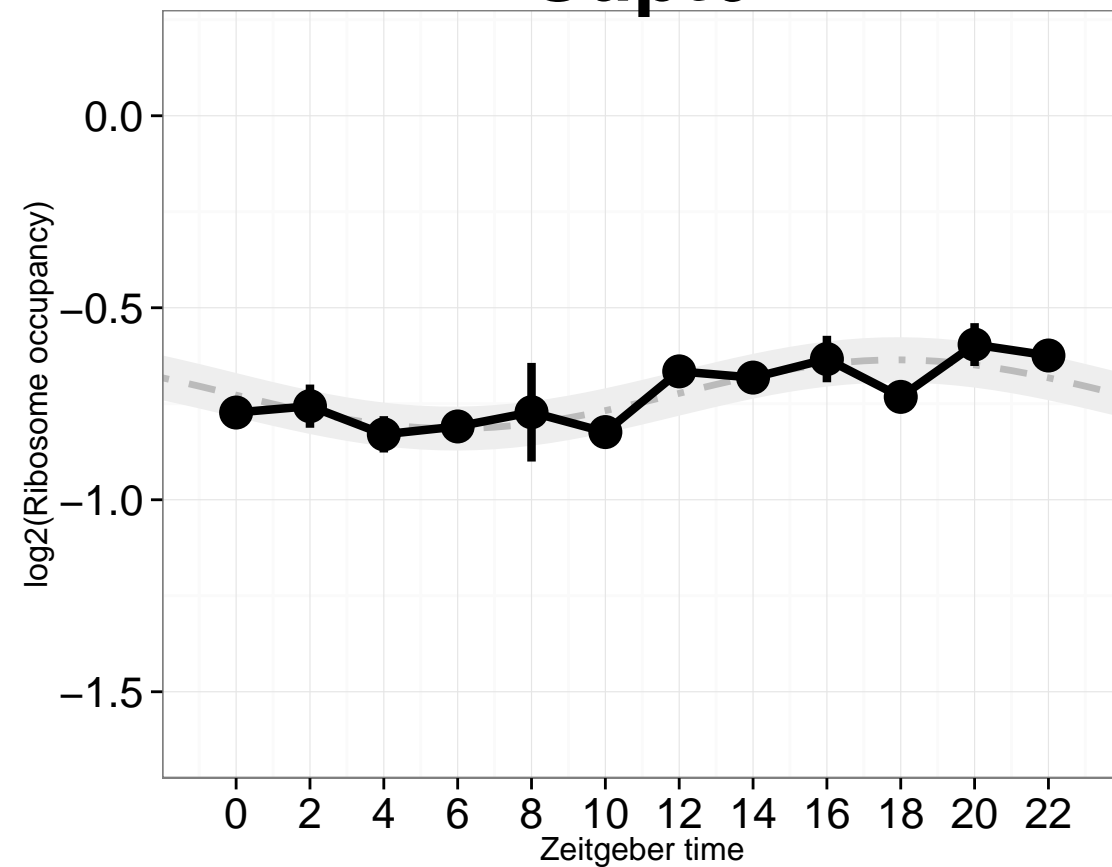

Supplement: Supplementary file 2506 [file 1]

## Pbdc1

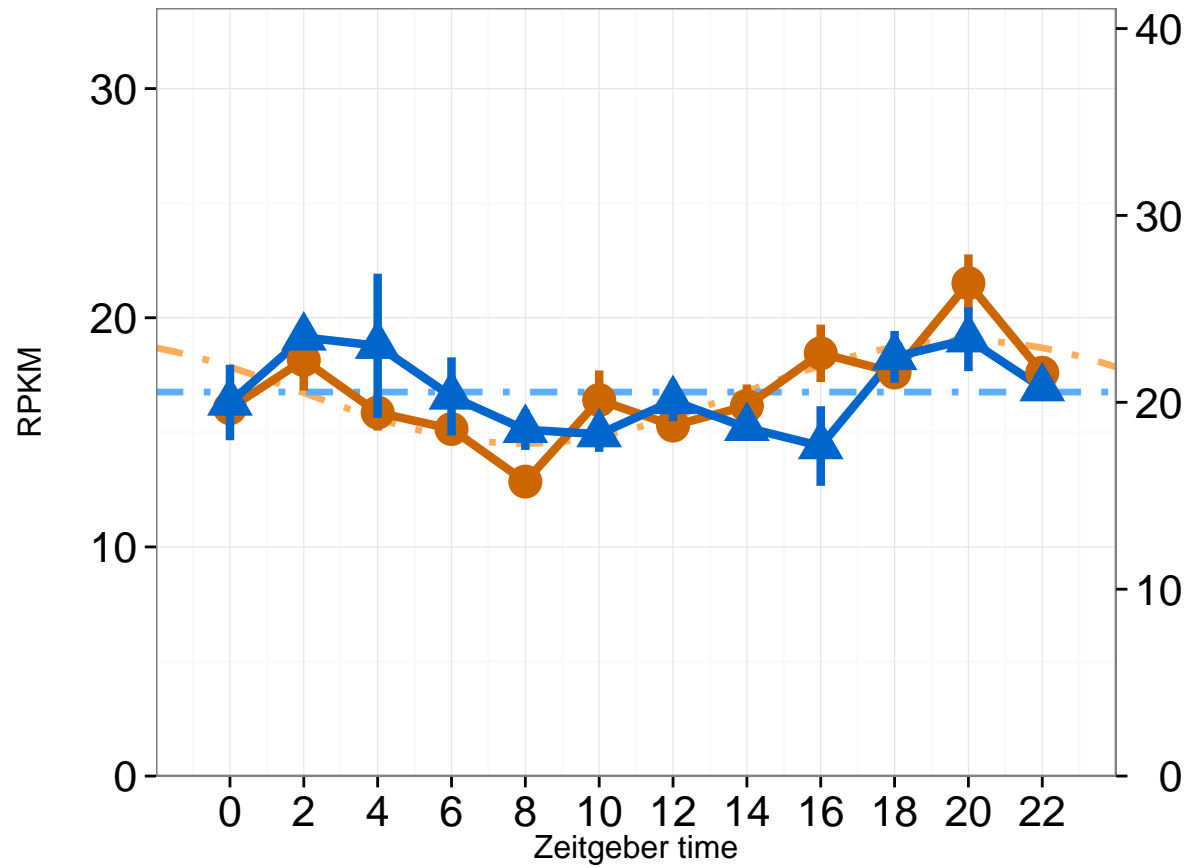

## Pbdc1

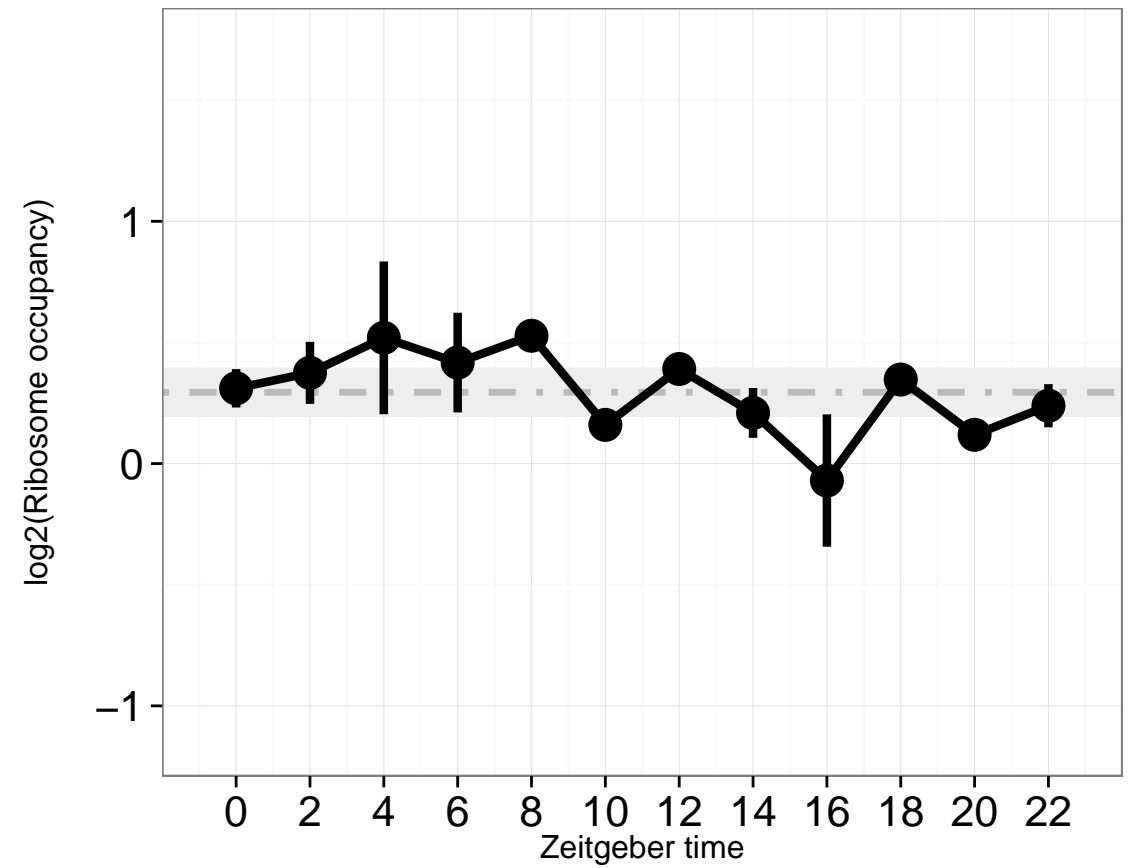

Supplement: Supplementary file 2507 [file 1]

## Naa20

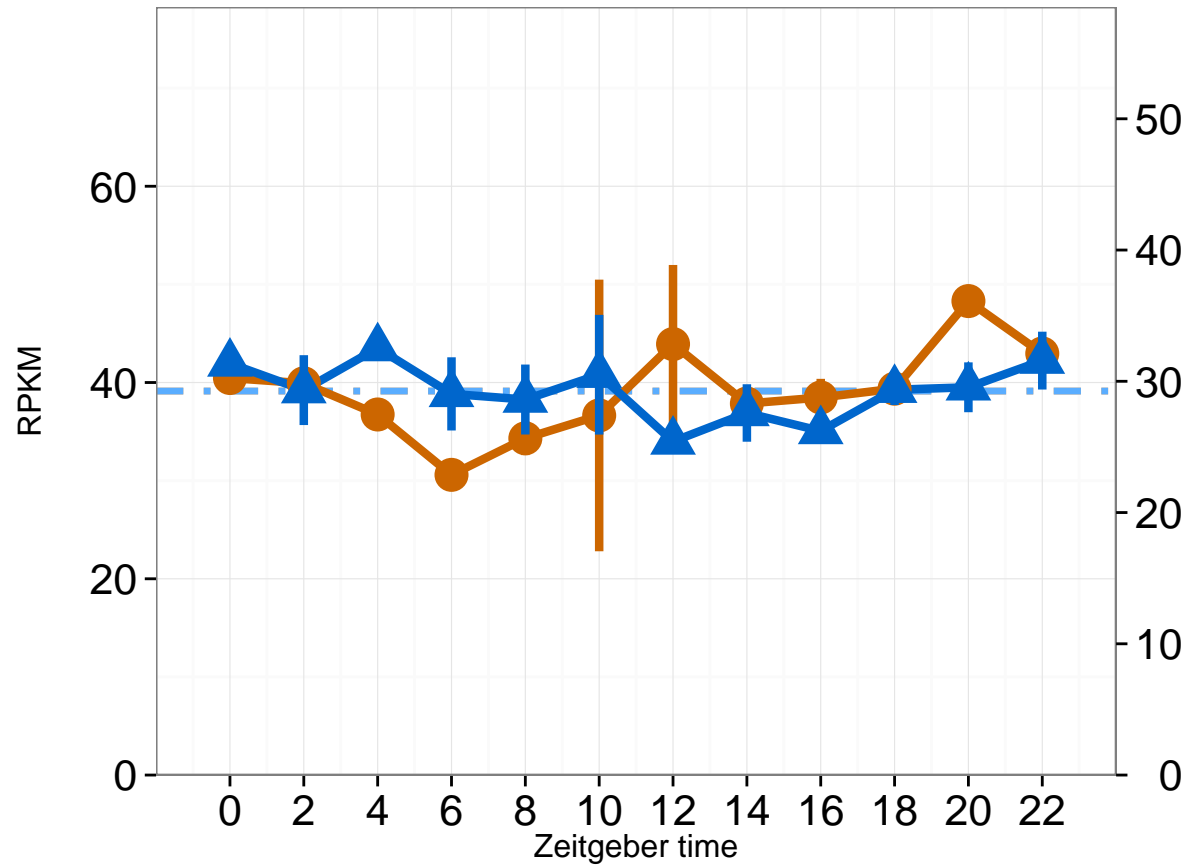

## Naa20

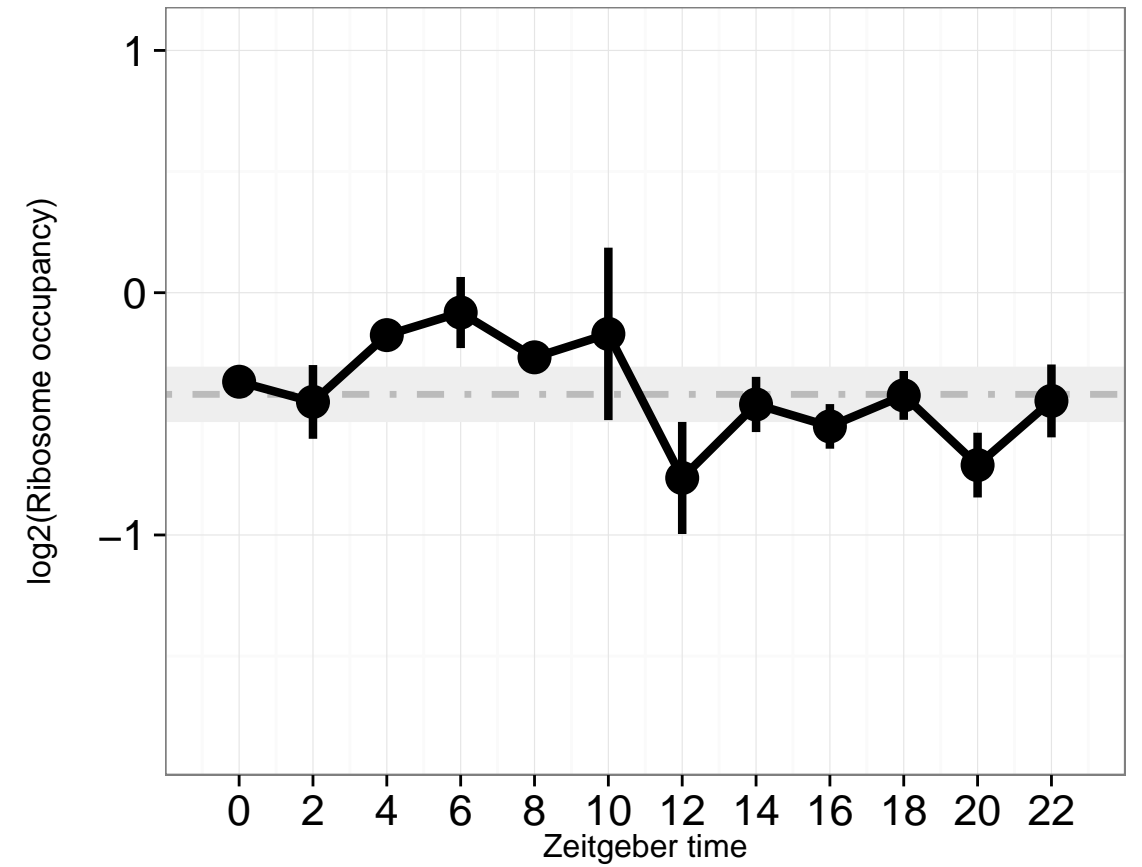

Supplement: Supplementary file 2508 [file 1]

# Cdk17

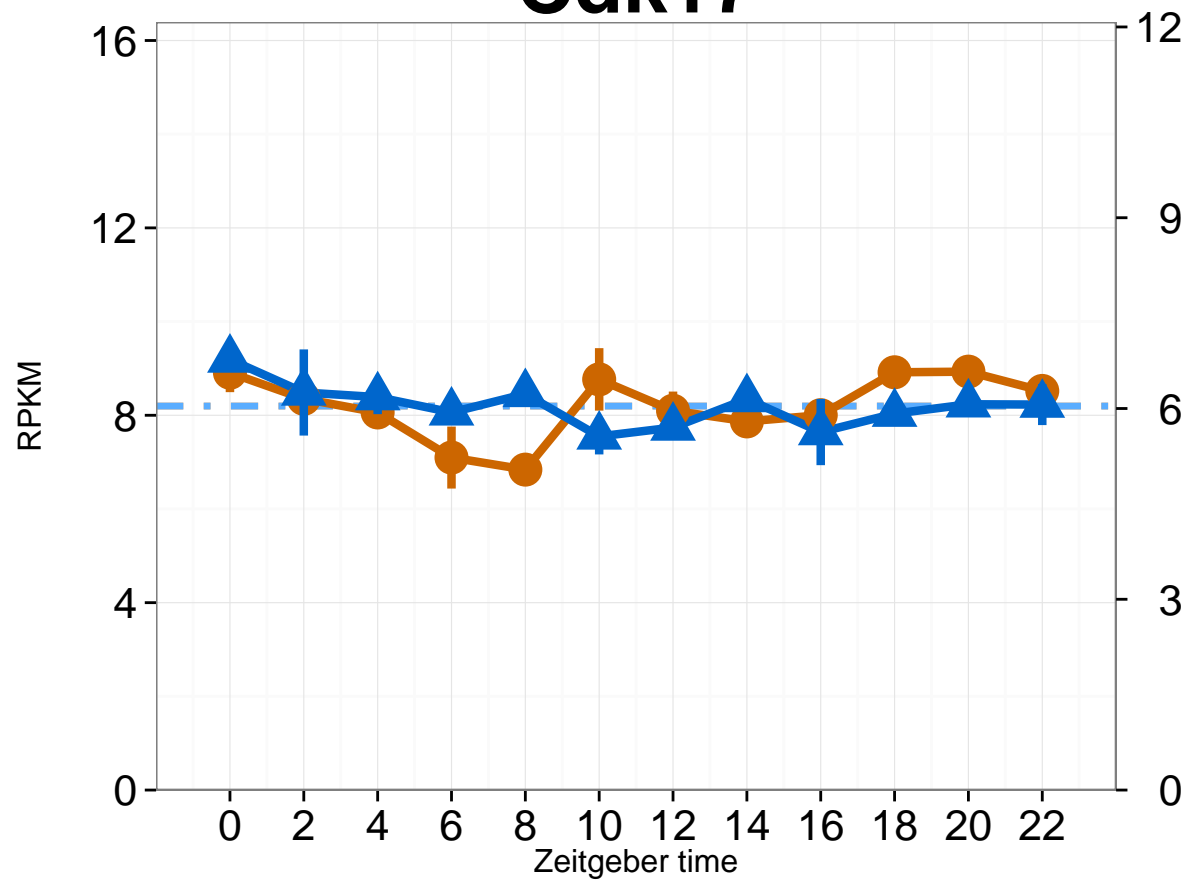

# Cdk17

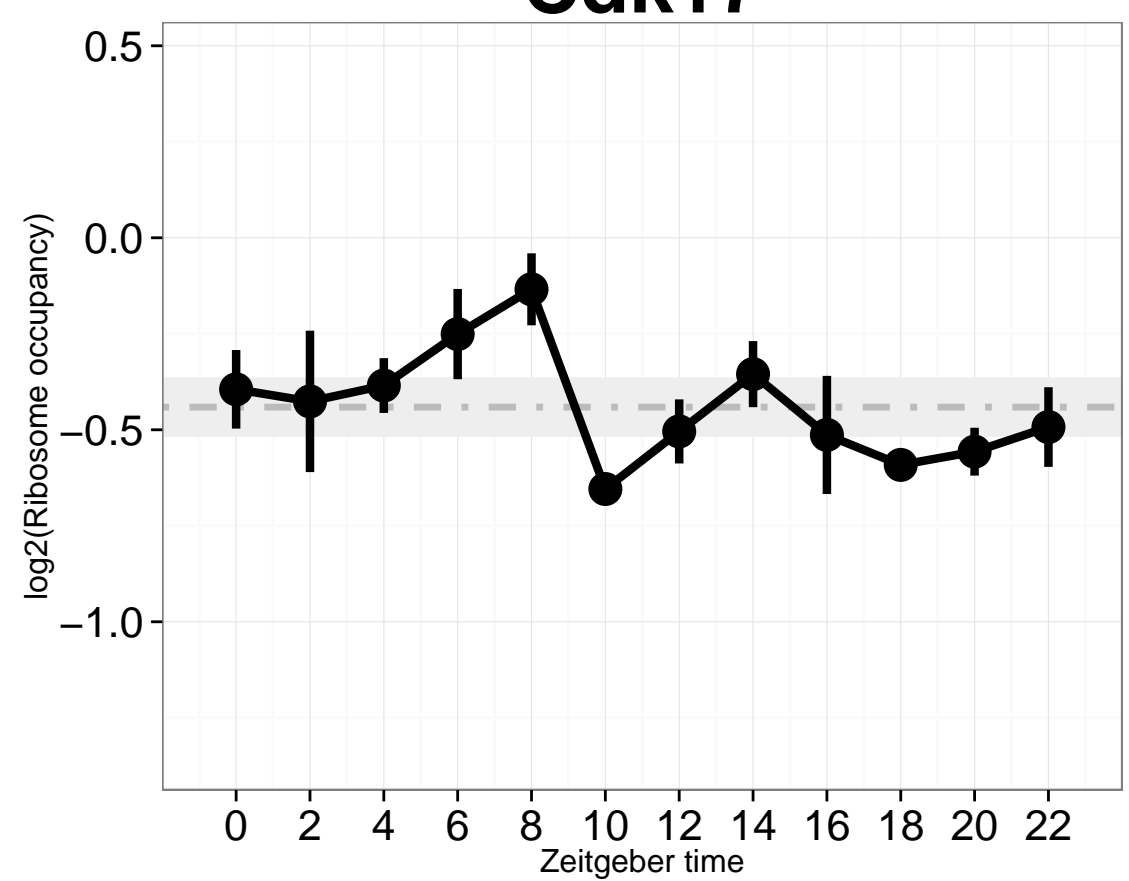

Supplement: Supplementary file 2509 [file 1]
