# Supplementary material (part 26 of 133)
Source: publisher figshare collection journal article supplement (https://springernature.figshare.com/articles/dataset/_/4903193)

# Rbpms2

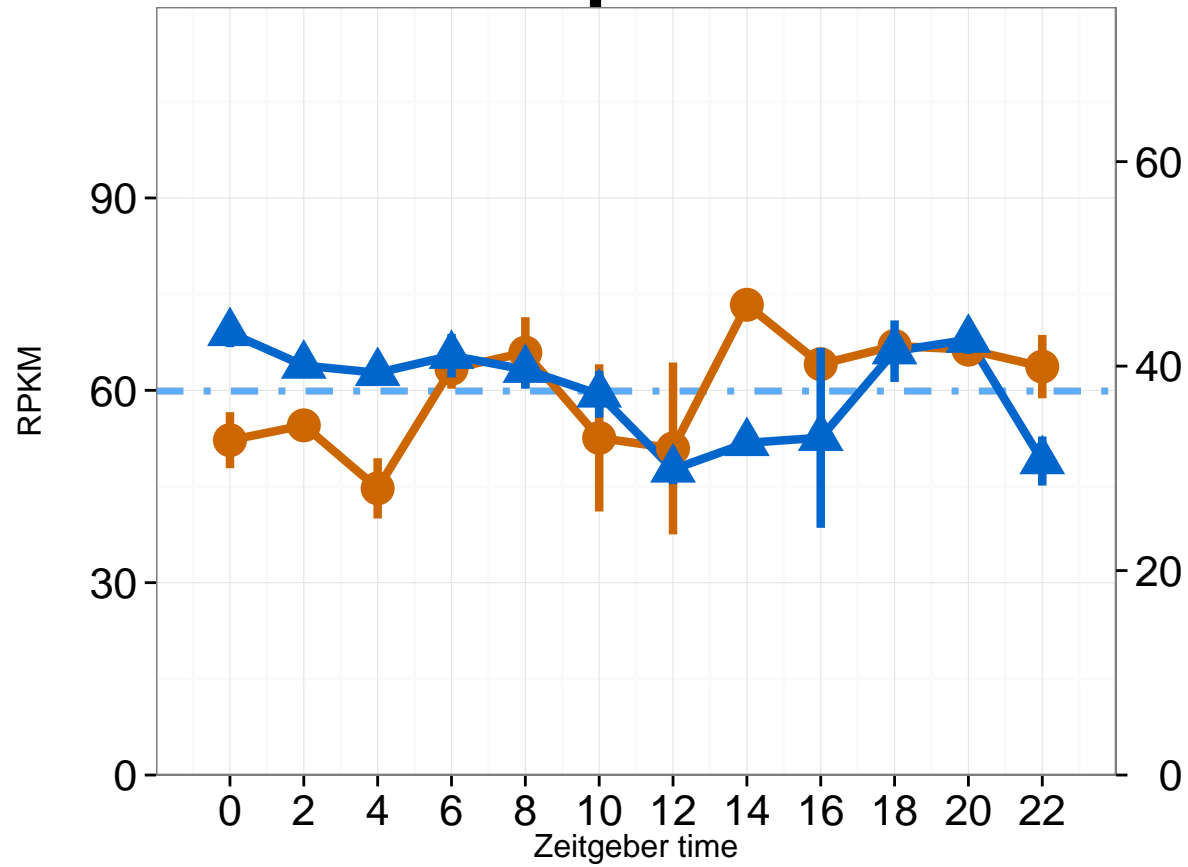

# Rbpms2

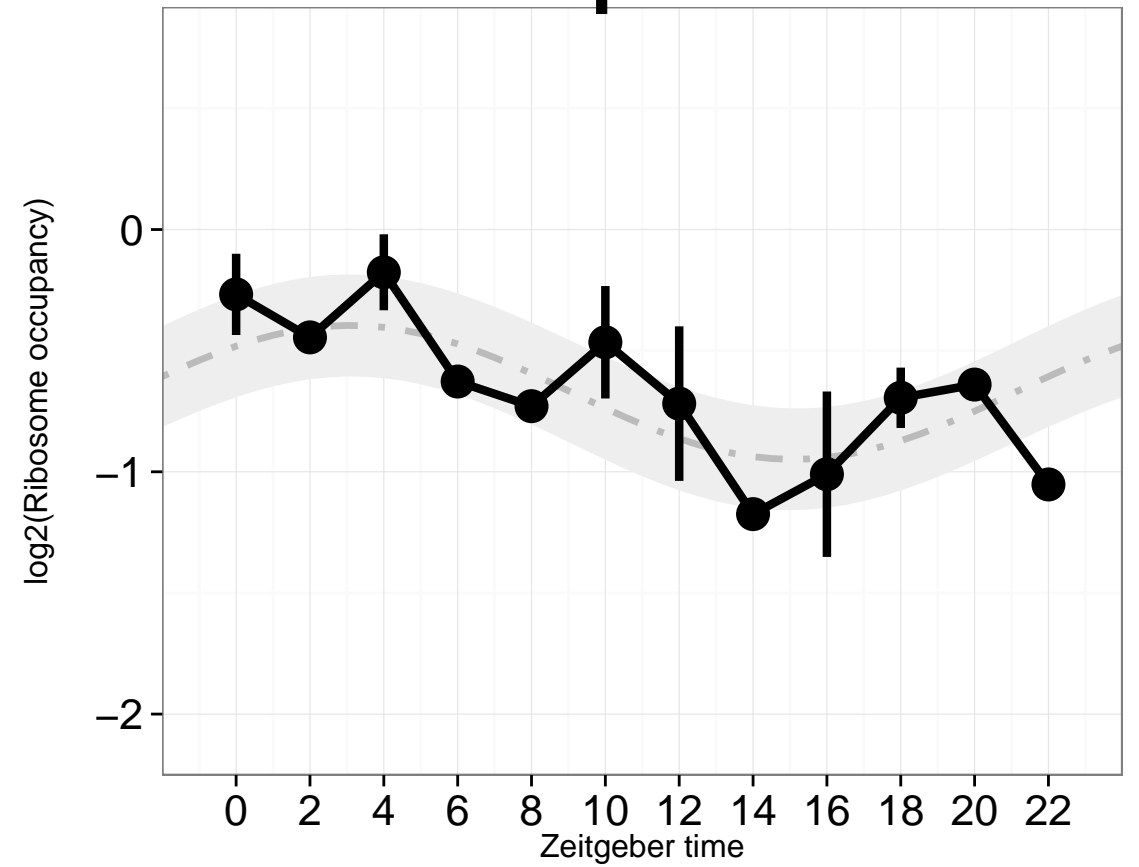

Supplement: Supplementary file 2510 [file 1]

# Gng12

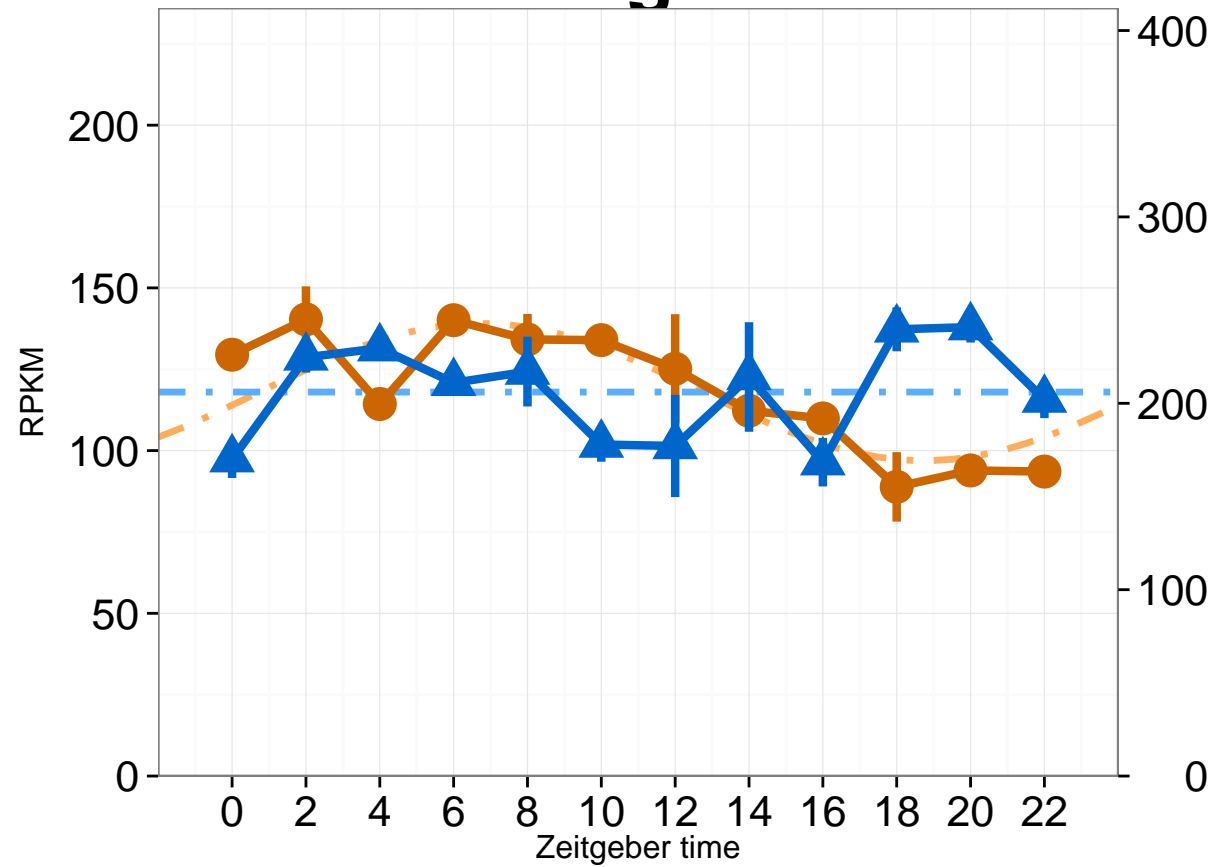

# Gng12

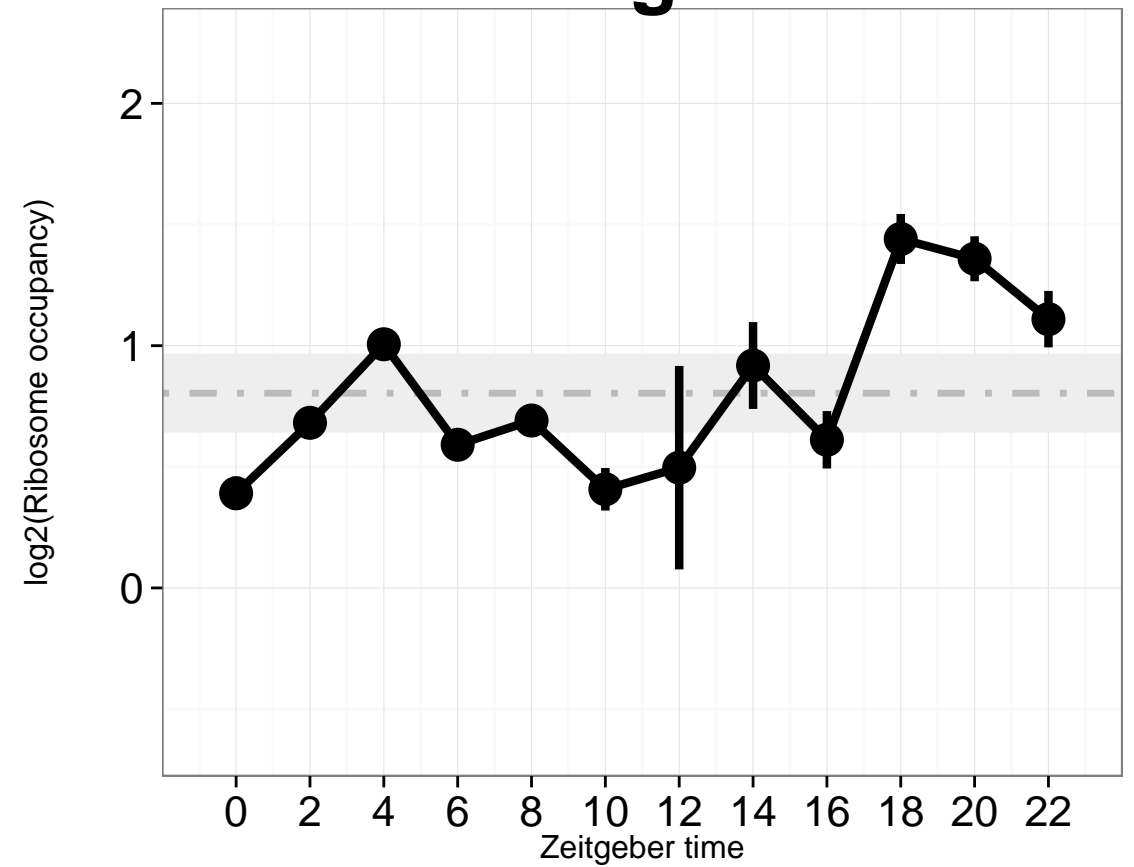

Supplement: Supplementary file 2511 [file 1]

## Klhl2

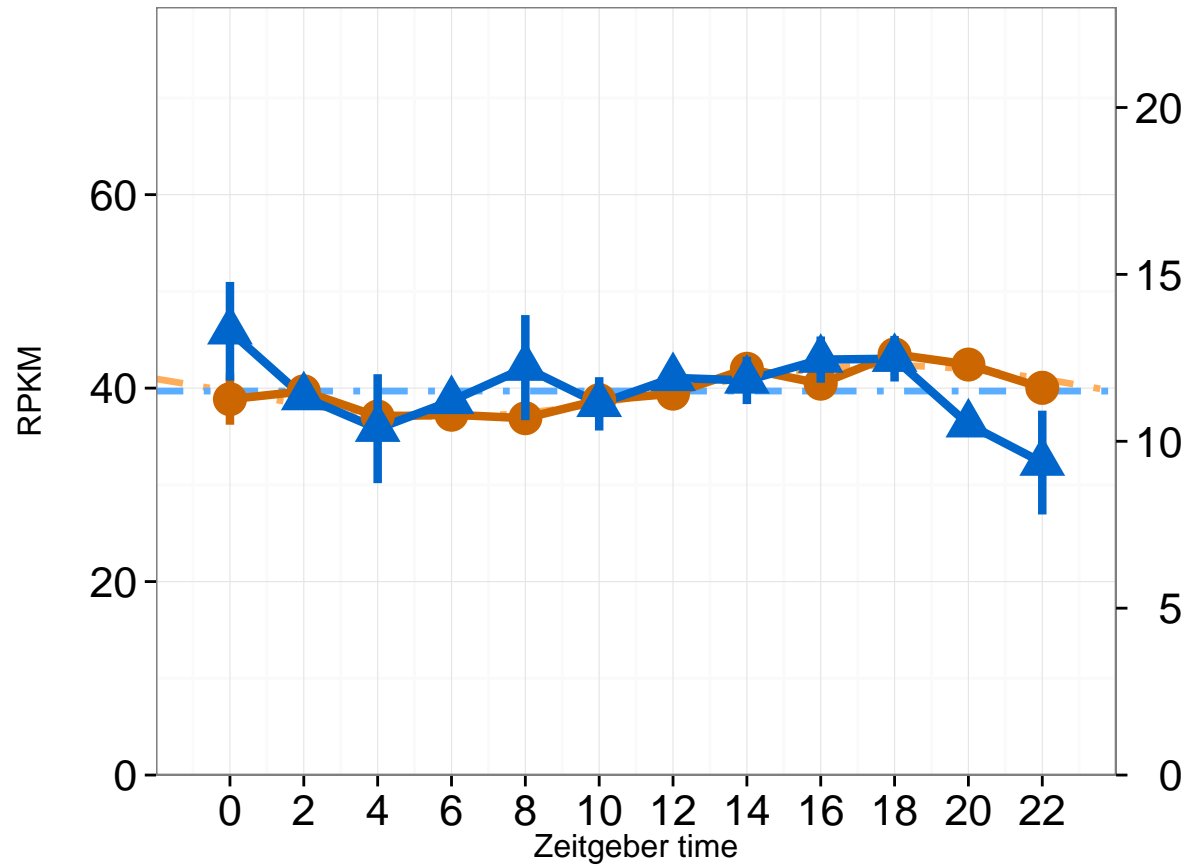

## Klhl2

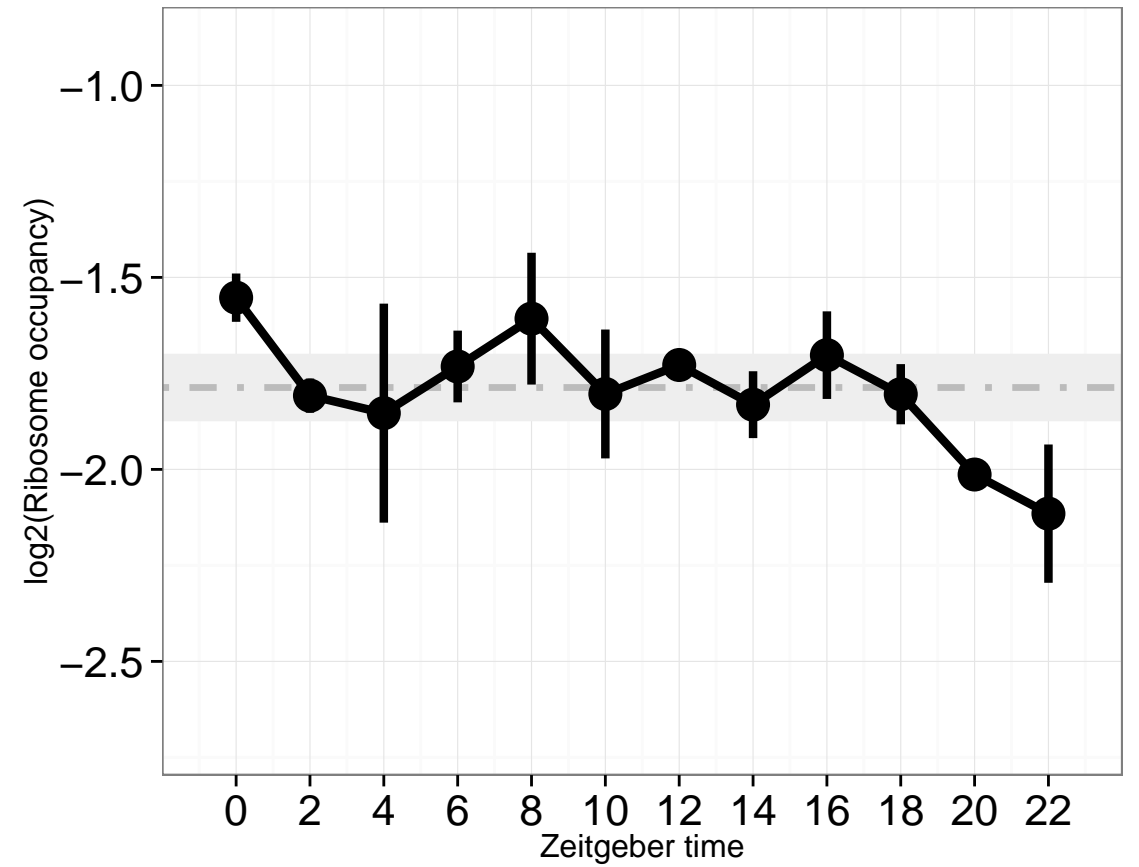

Supplement: Supplementary file 2512 [file 1]

**Hist1h2ap TR**

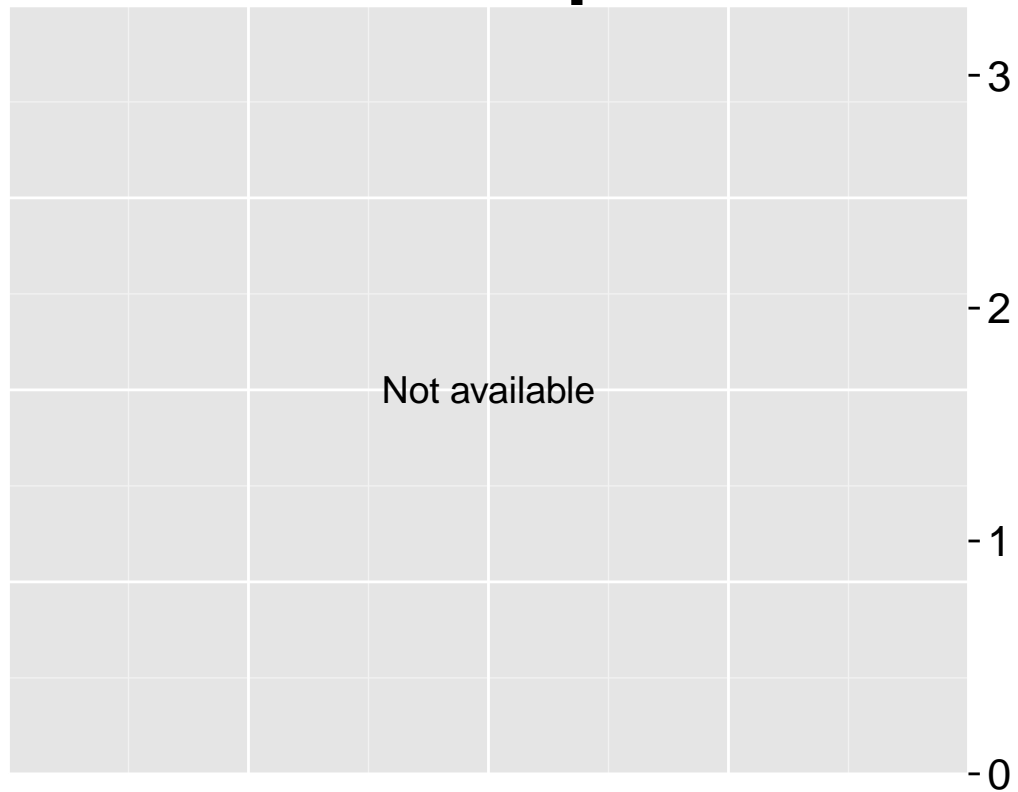

**Hist1h2ap log2(Ribosome occupanc**

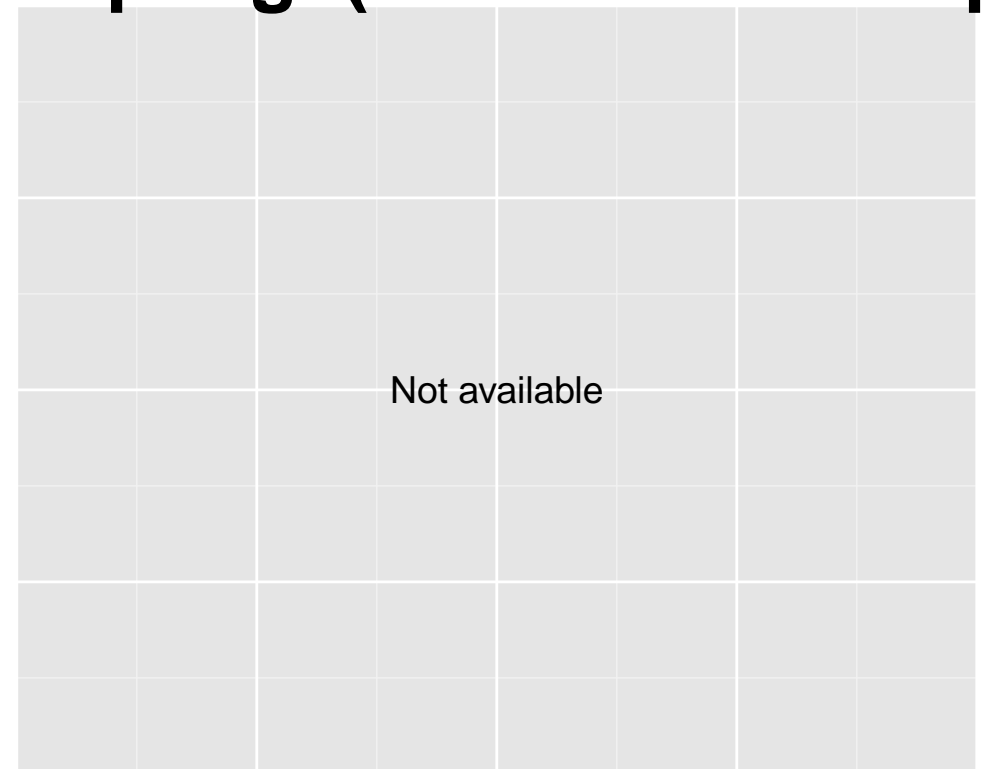

Supplement: Supplementary file 2513 [file 1]

## Ubald2

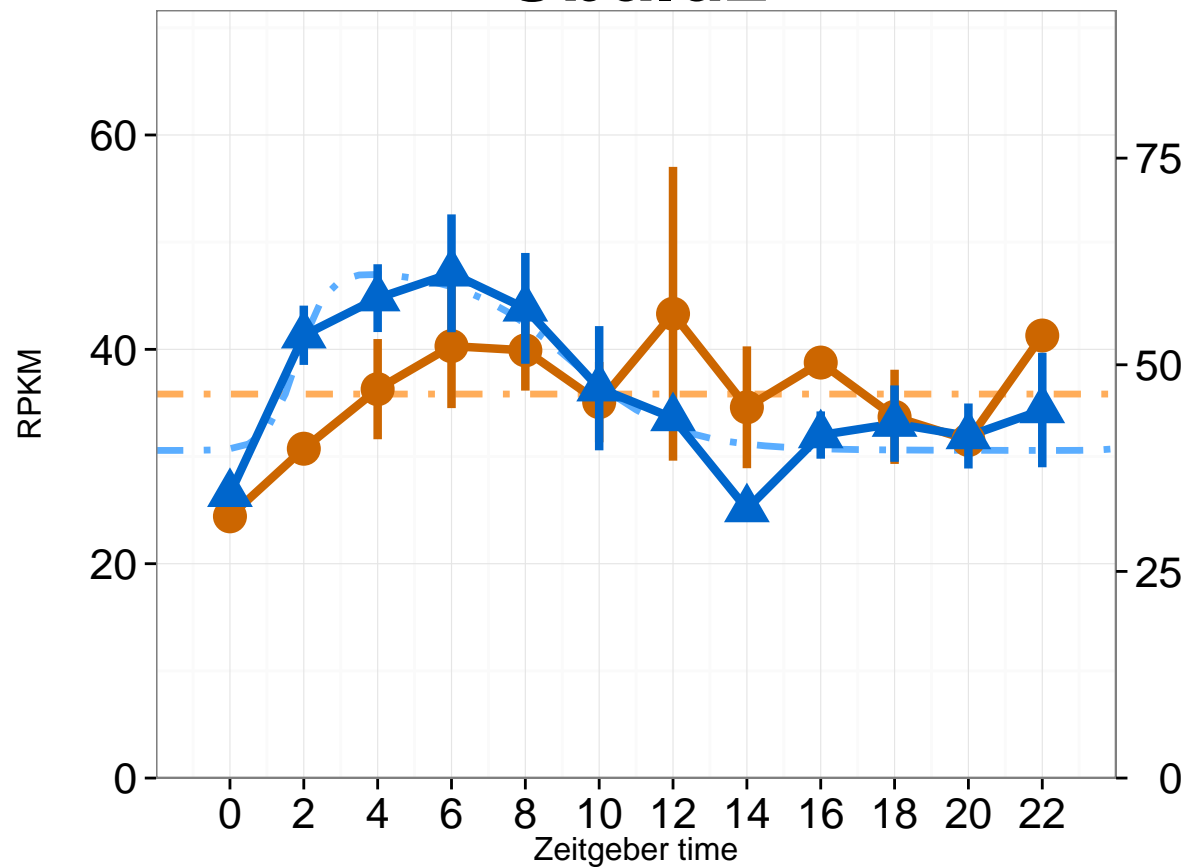

## Ubald2

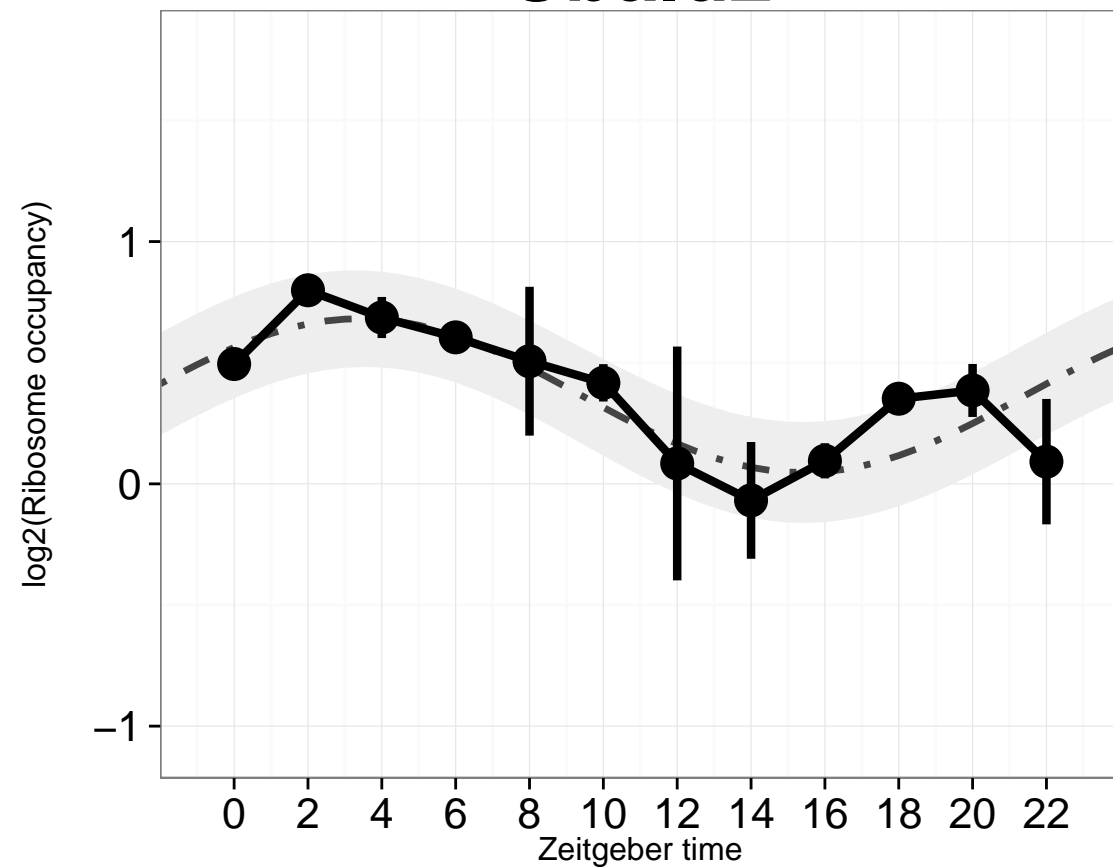

Supplement: Supplementary file 2514 [file 1]

# Hbs1l

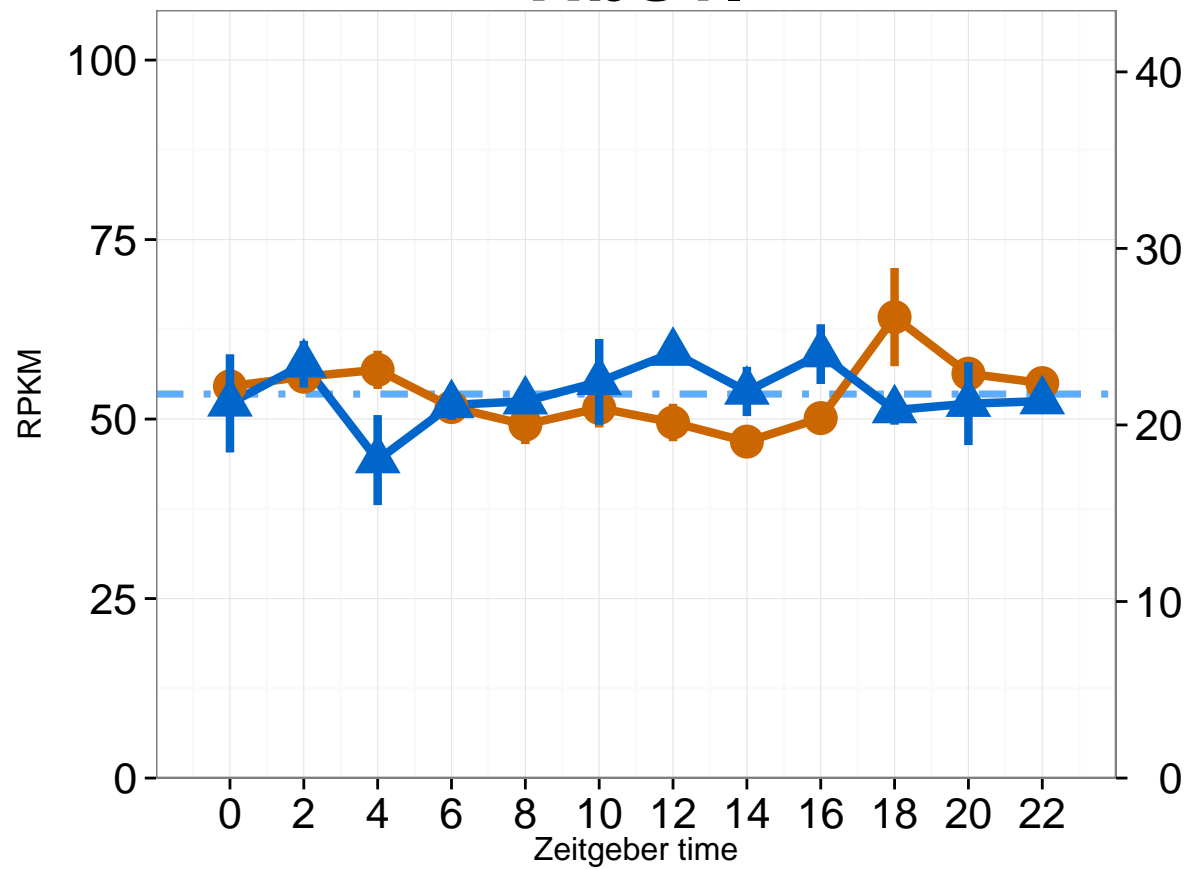

# Hbs1l

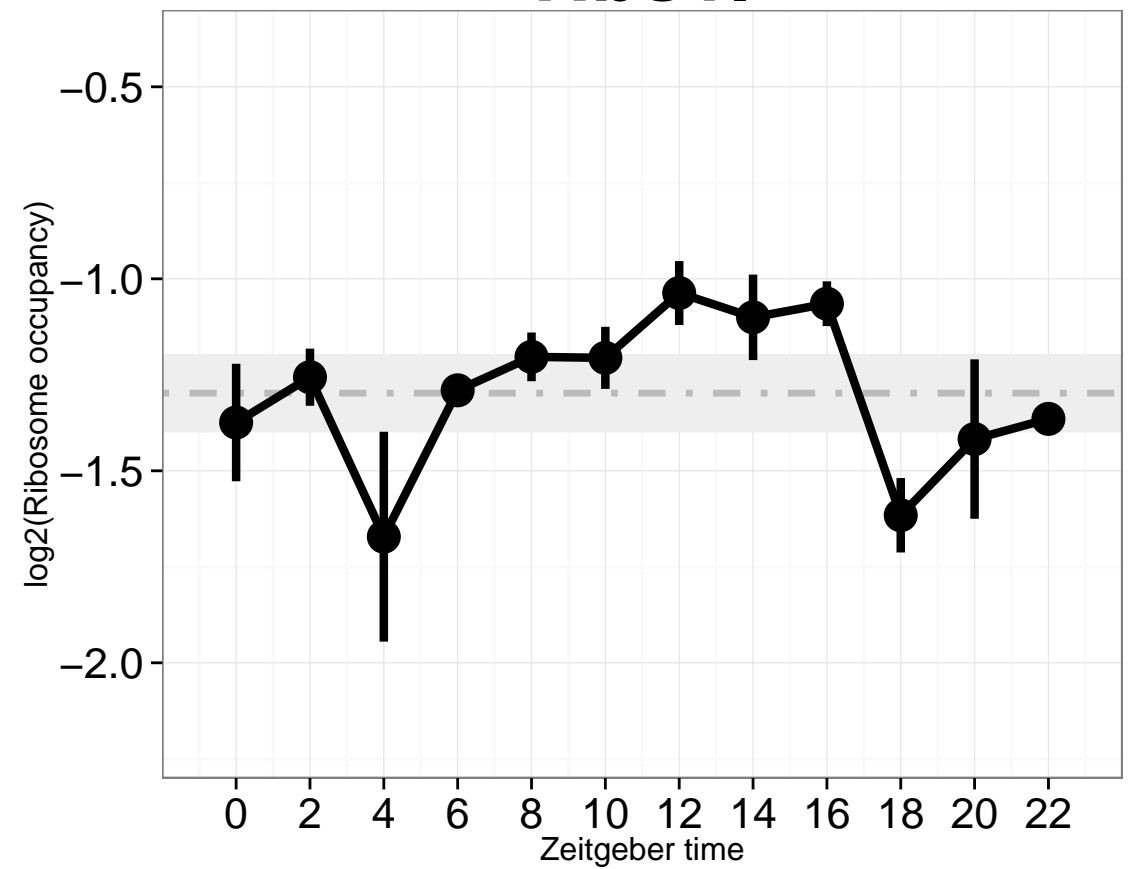

Supplement: Supplementary file 2515 [file 1]

# Ift88

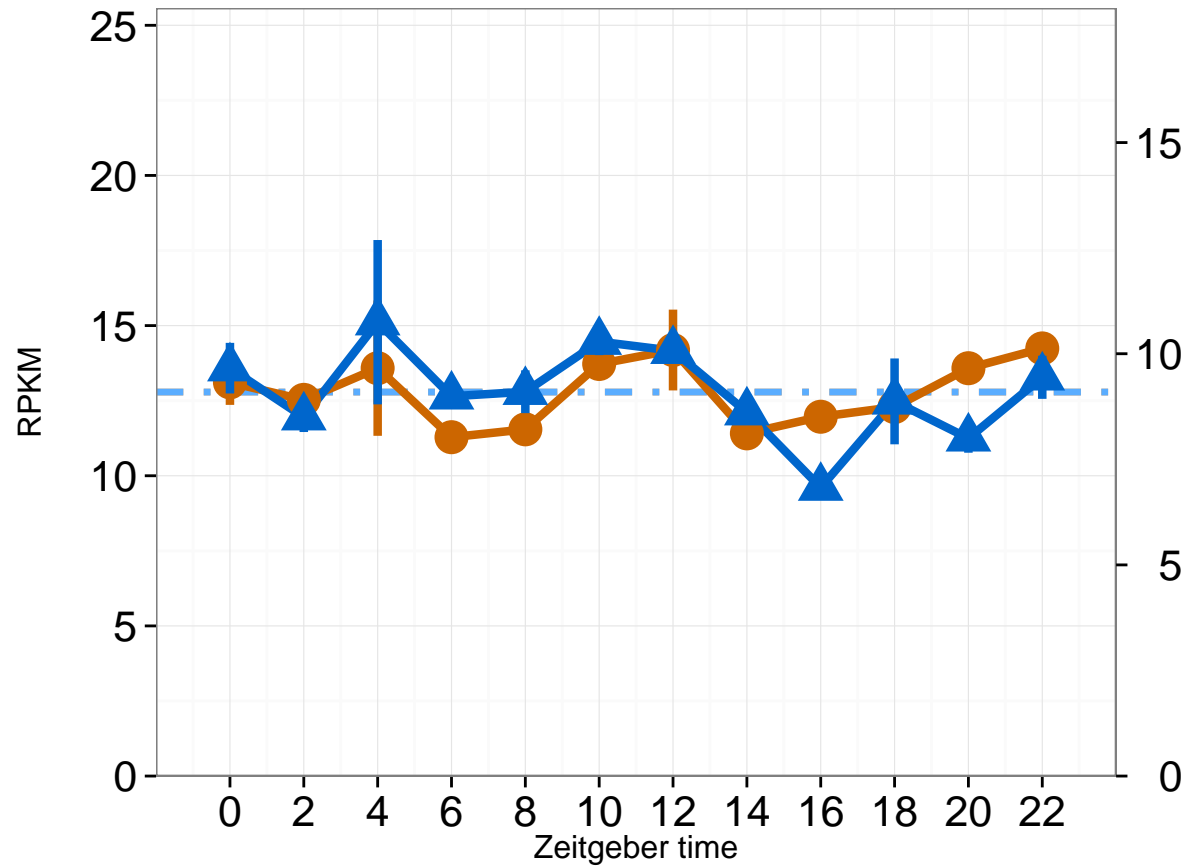

# Ift88

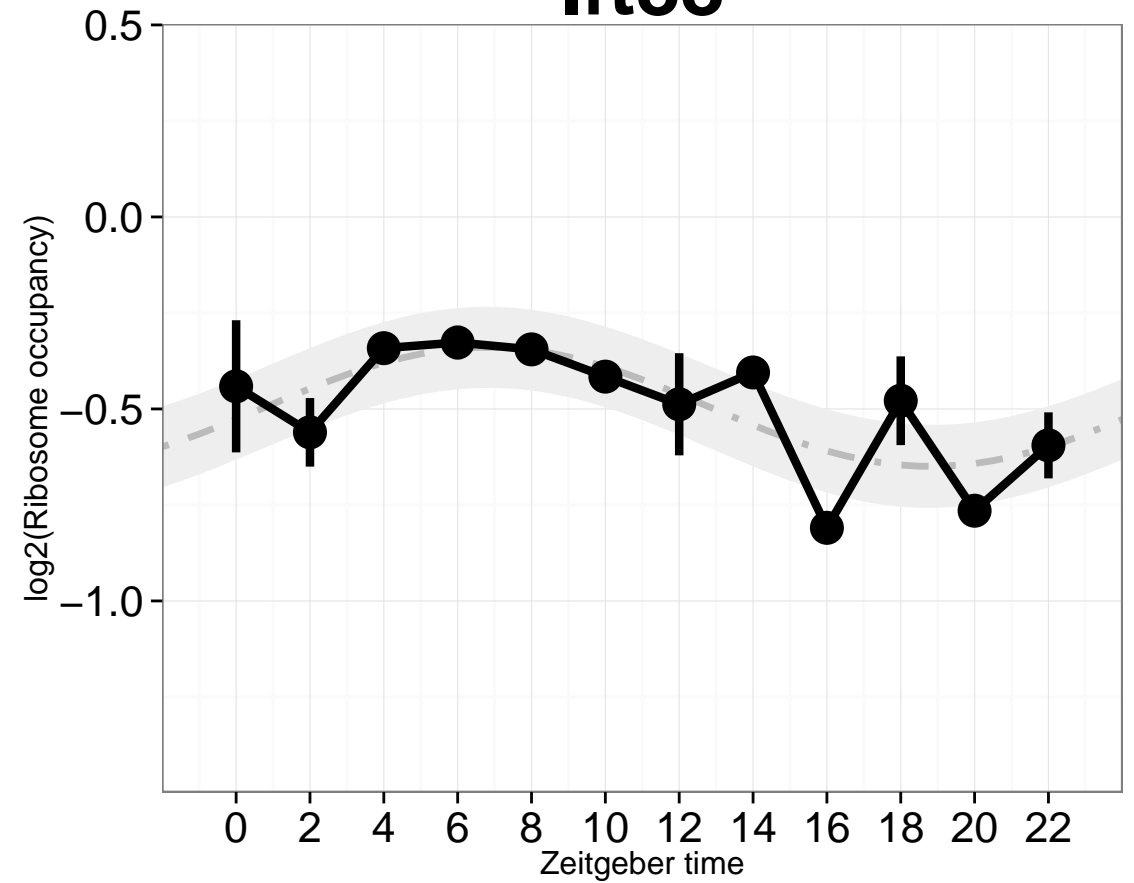

Supplement: Supplementary file 2516 [file 1]

# Fgfr1op

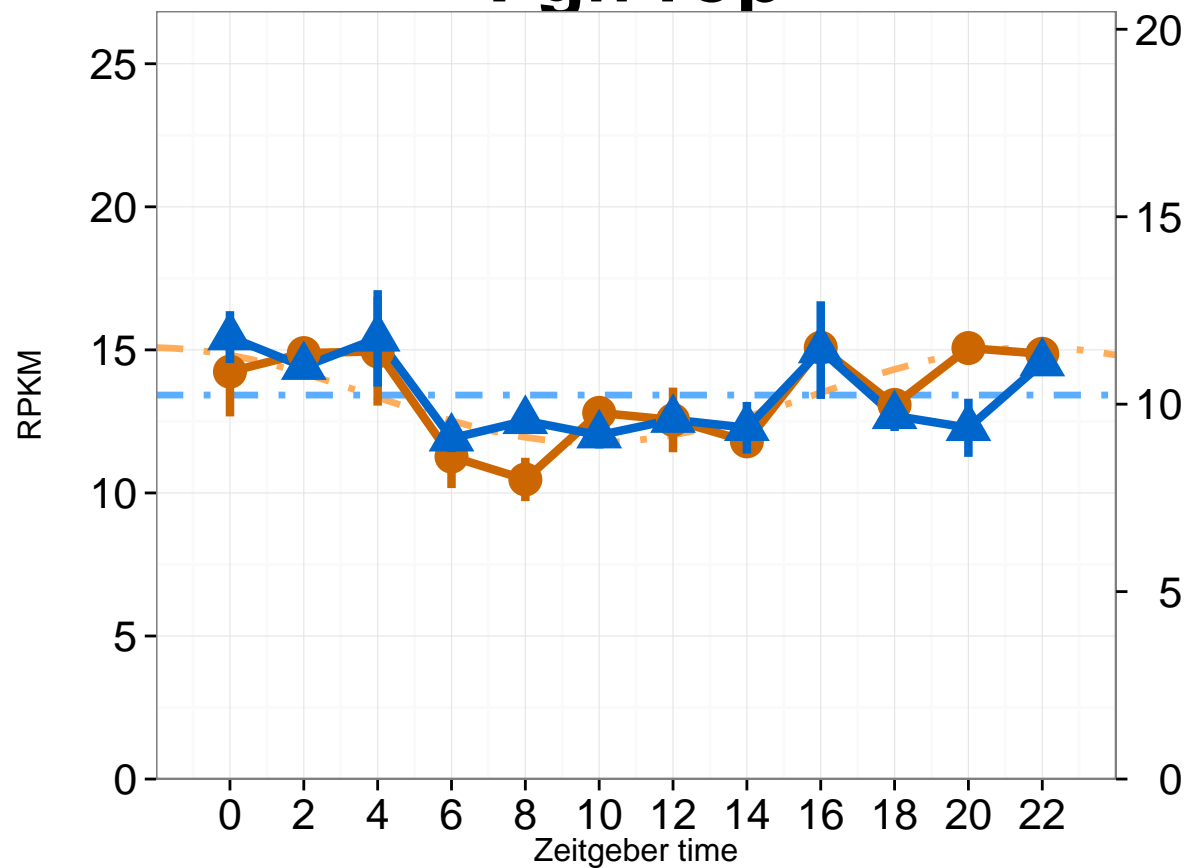

# Fgfr1op

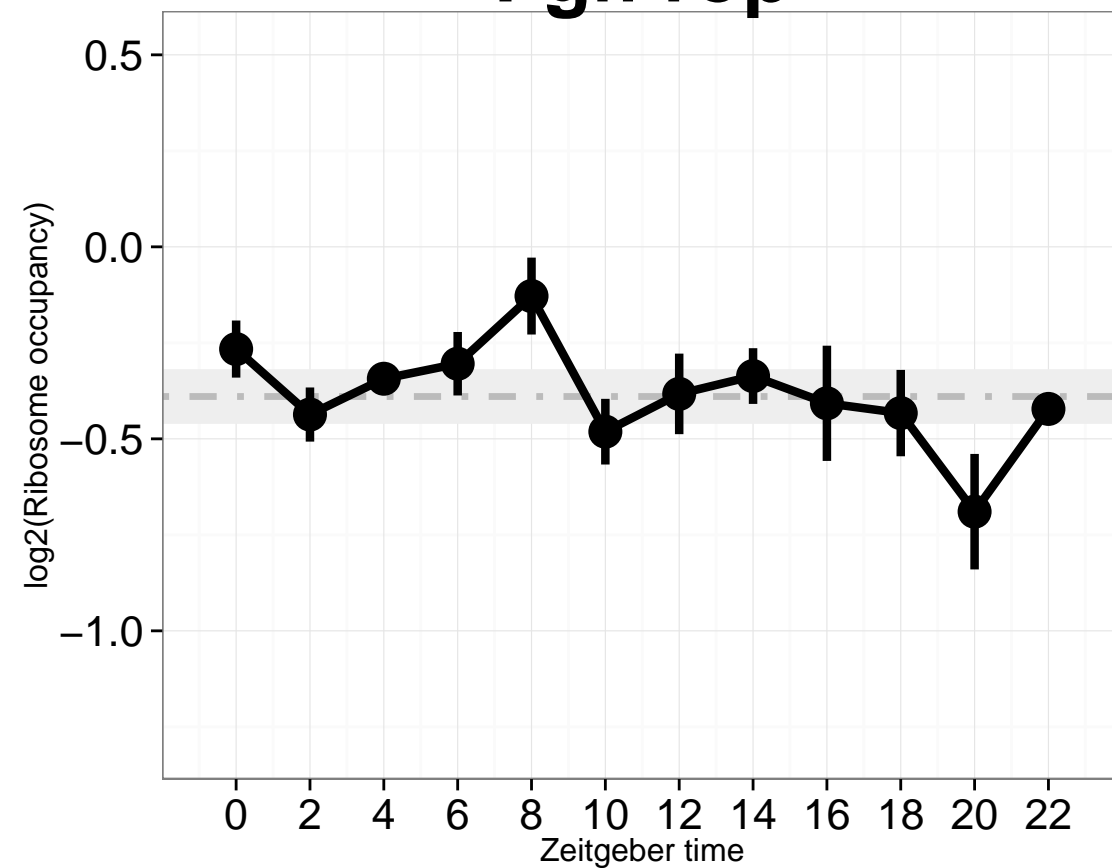

Supplement: Supplementary file 2517 [file 1]

# Def6

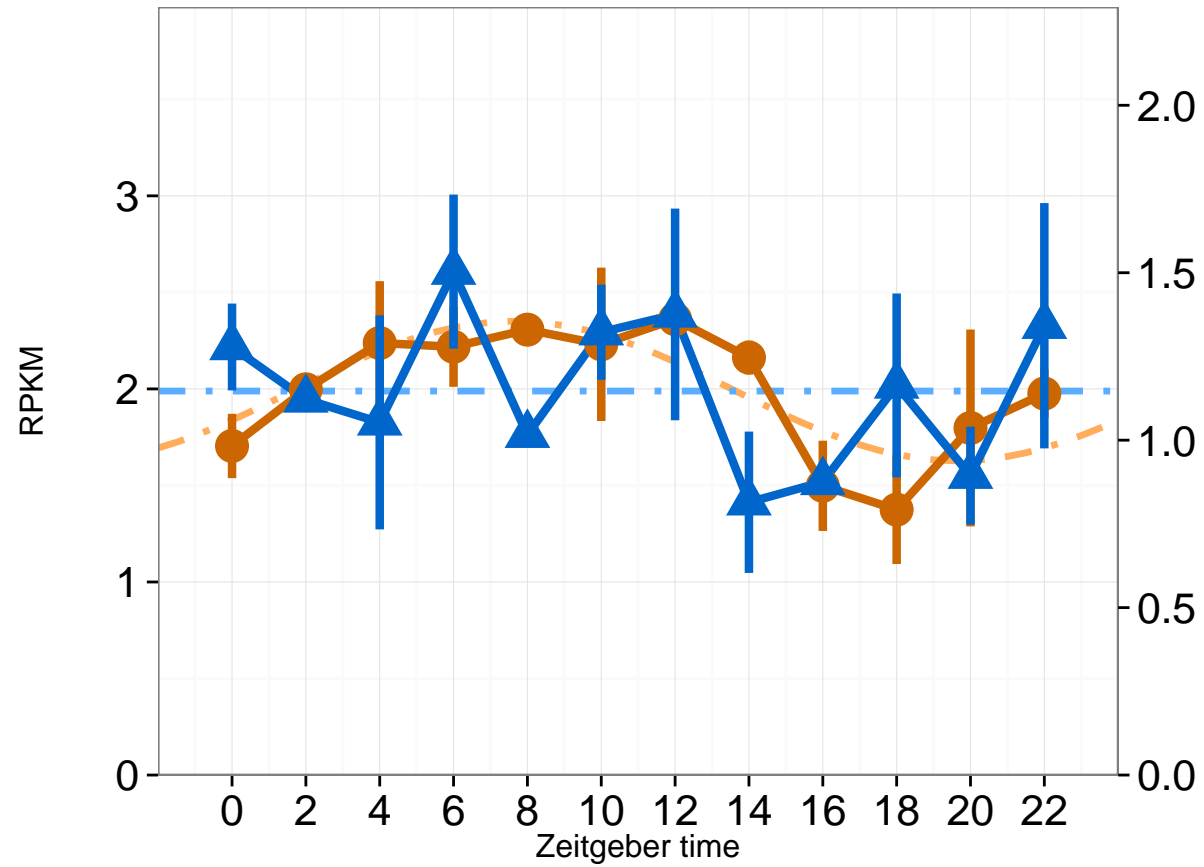

# Def6

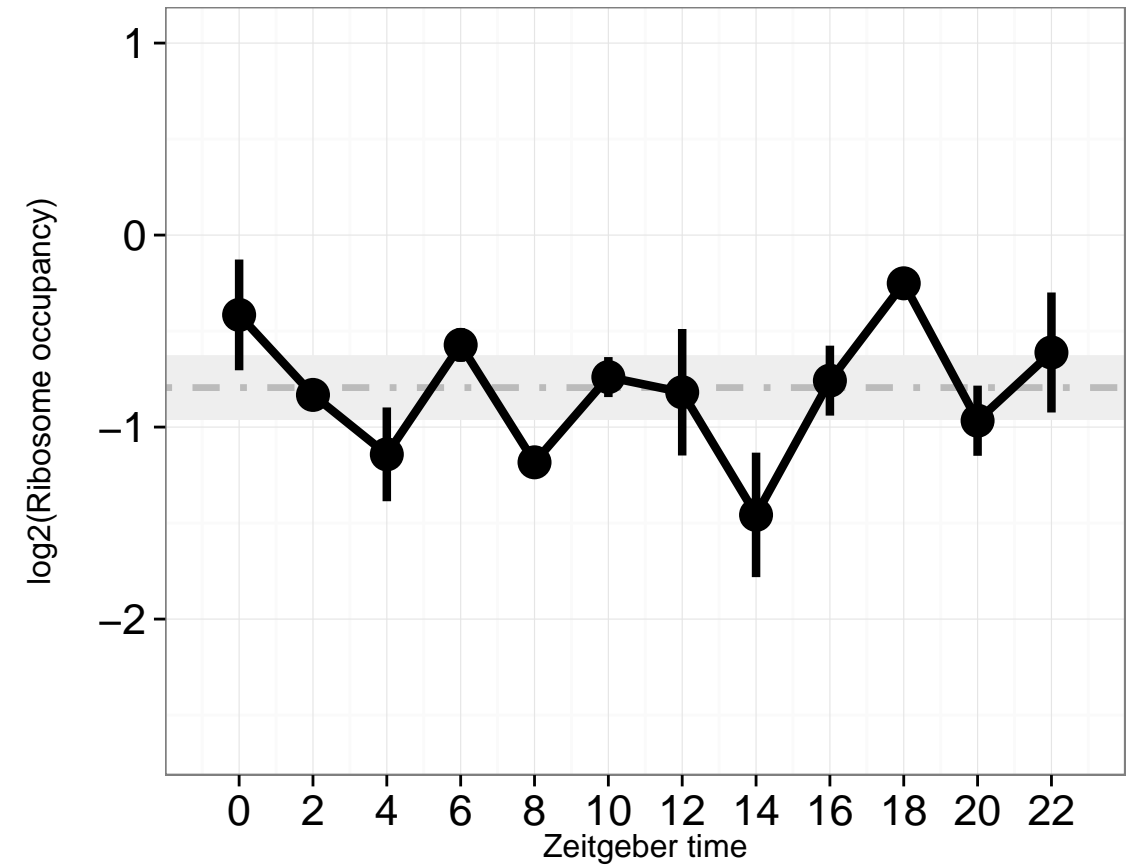

Supplement: Supplementary file 2518 [file 1]

## Tcaim

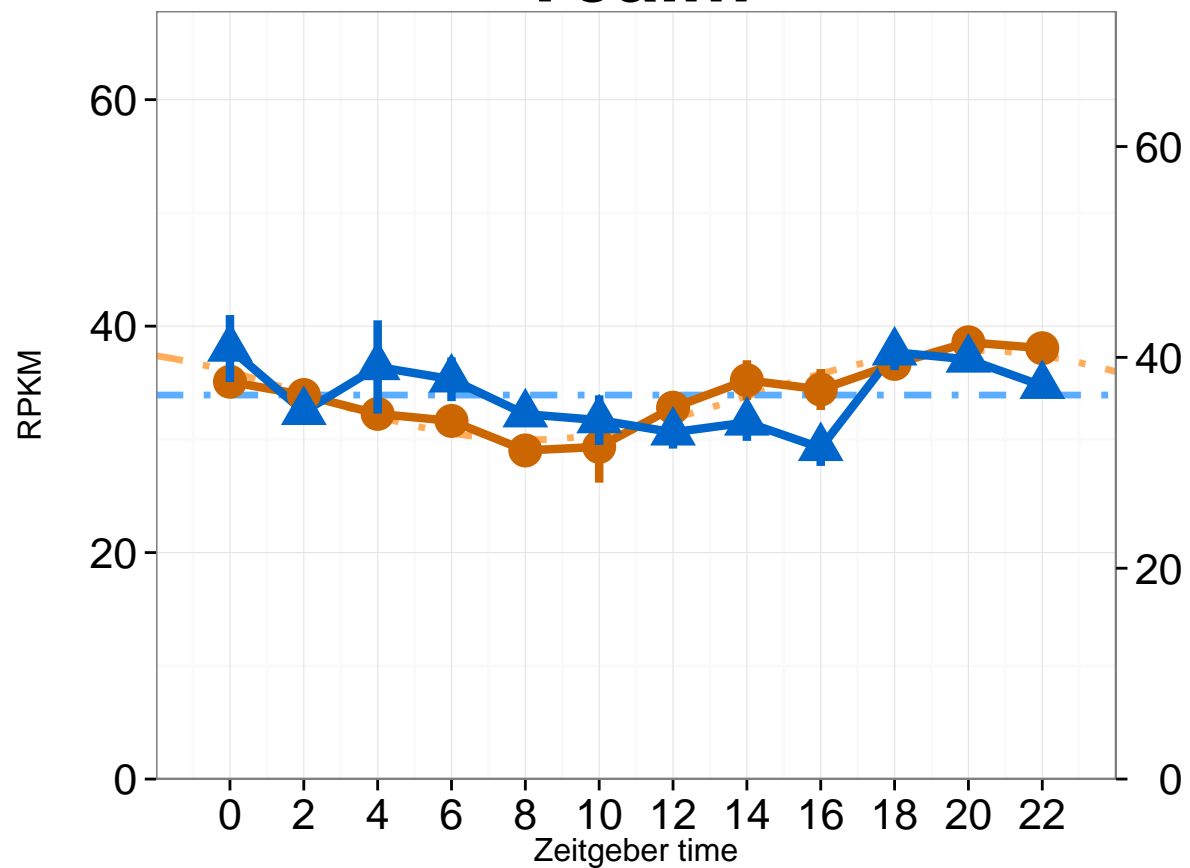

## Tcaim

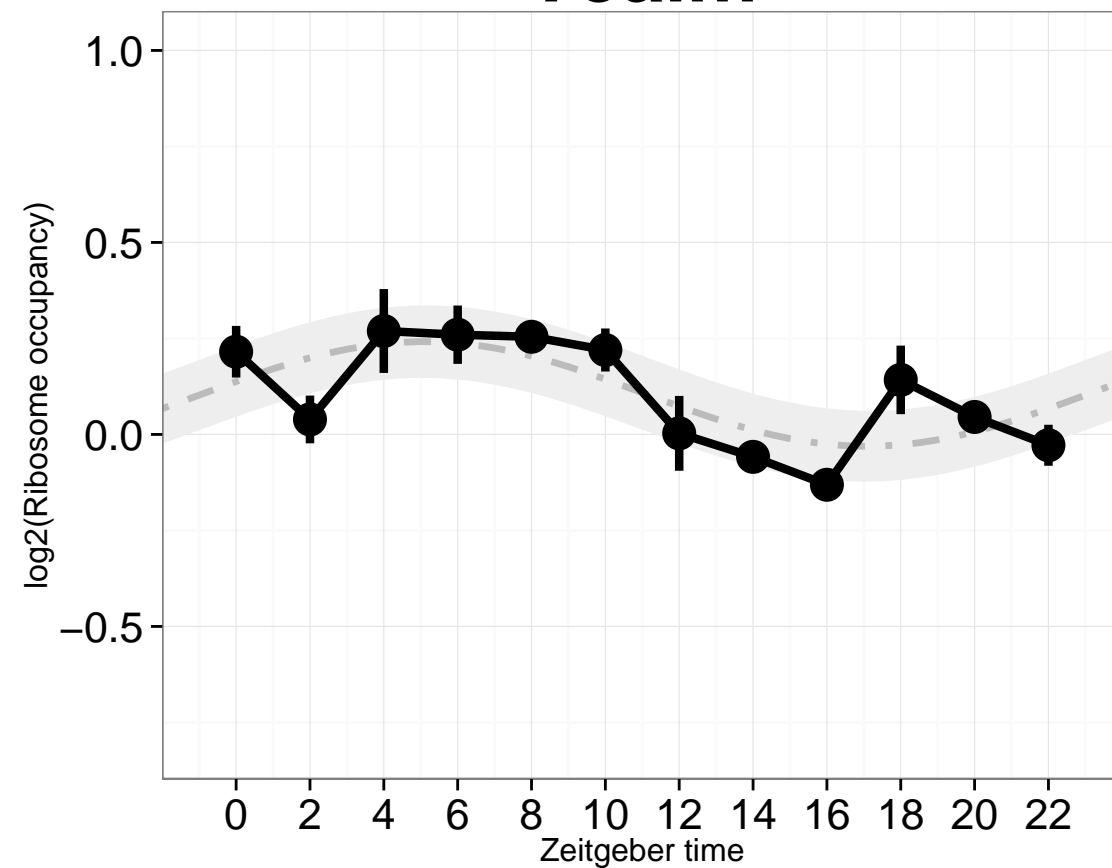

Supplement: Supplementary file 2519 [file 1]

## Sidt2

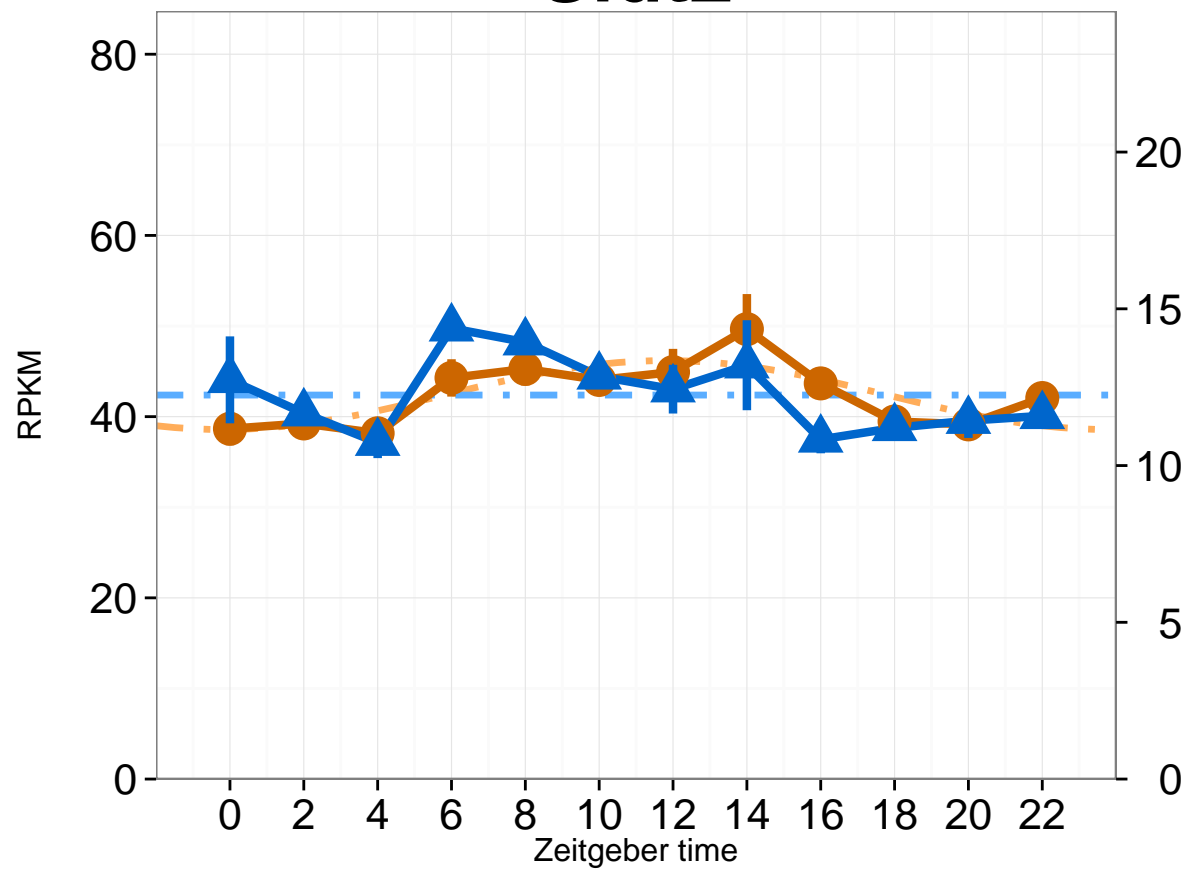

## Sidt2

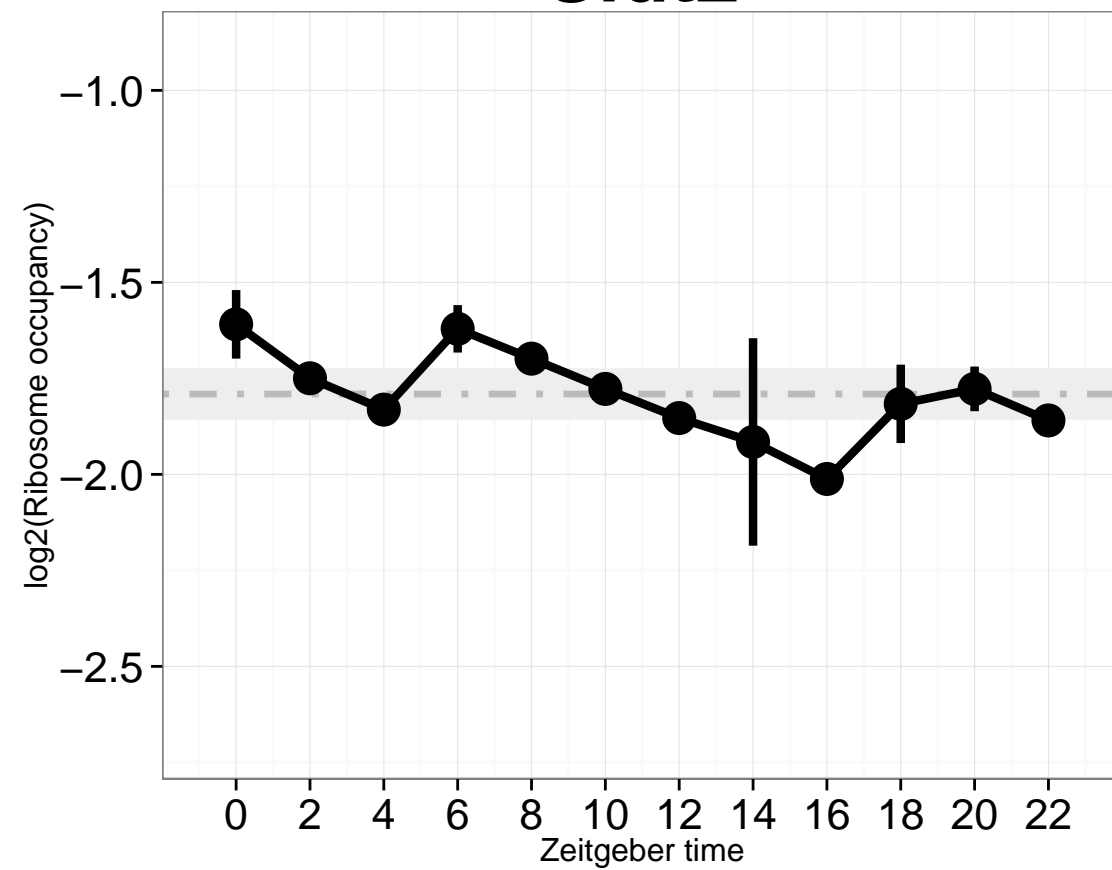

Supplement: Supplementary file 2520 [file 1]

# Gnpnat1

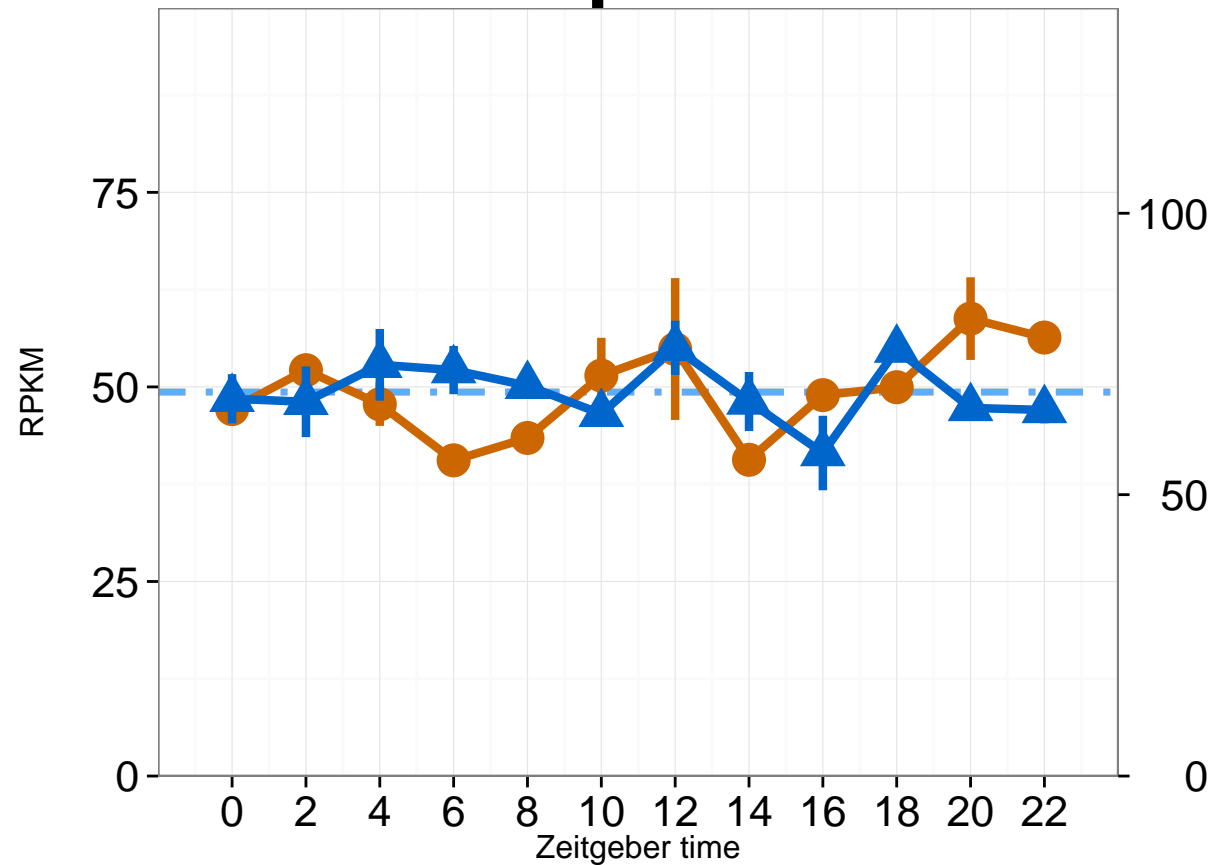

# Gnpnat1

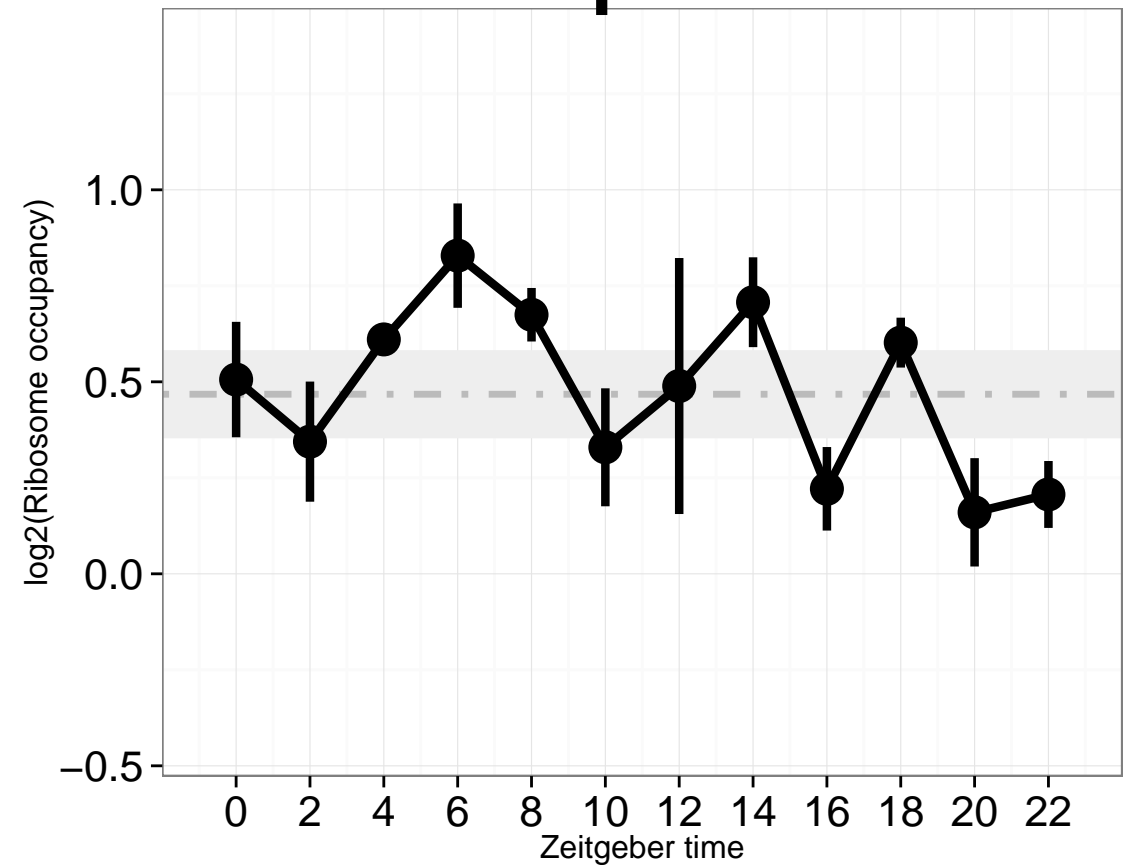

Supplement: Supplementary file 2521 [file 1]

# Romo1

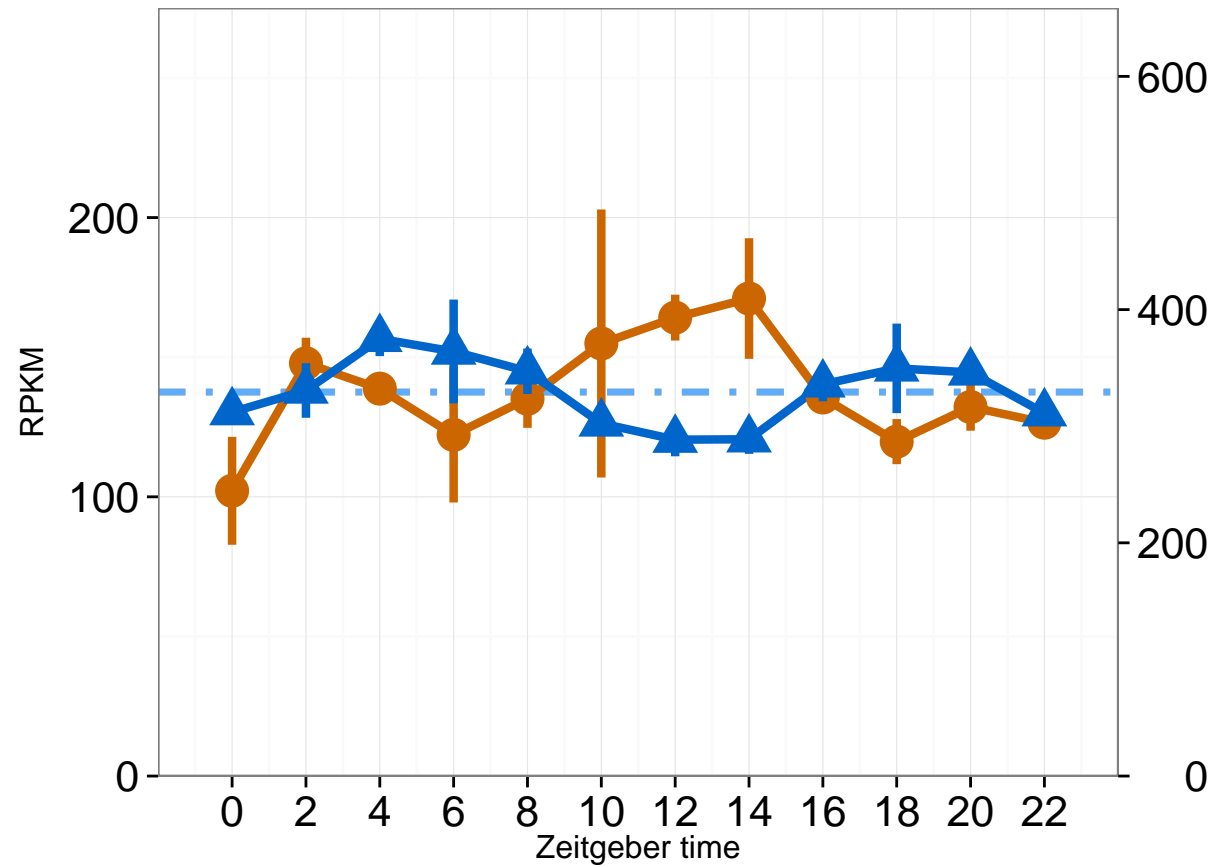

# Romo1

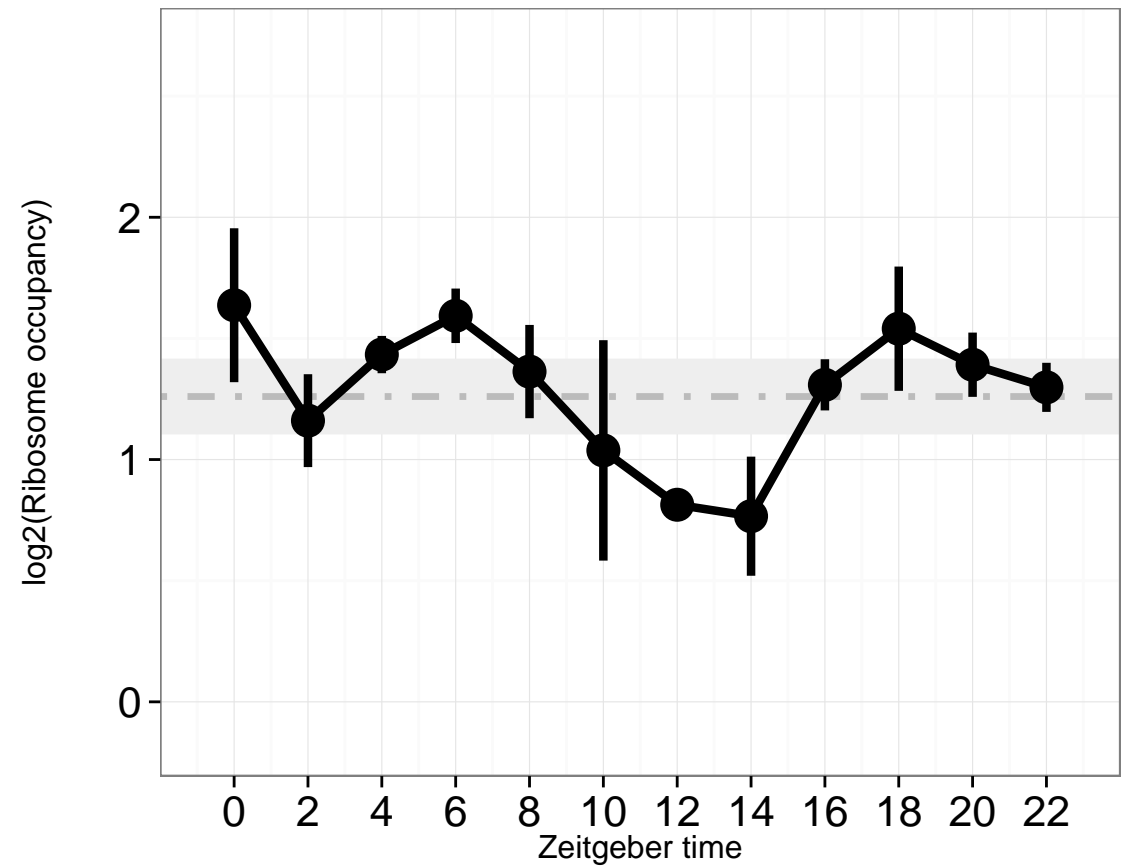

Supplement: Supplementary file 2522 [file 1]

## Pdk4

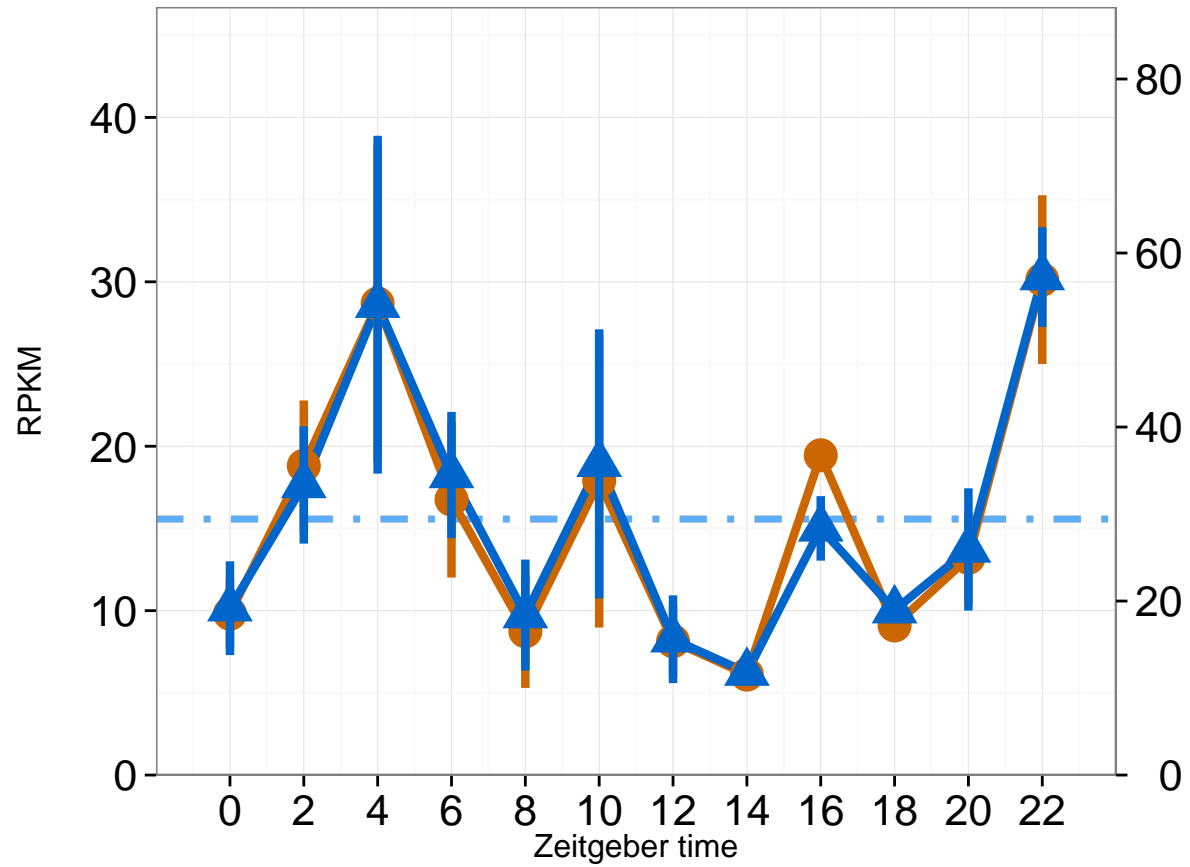

## Pdk4

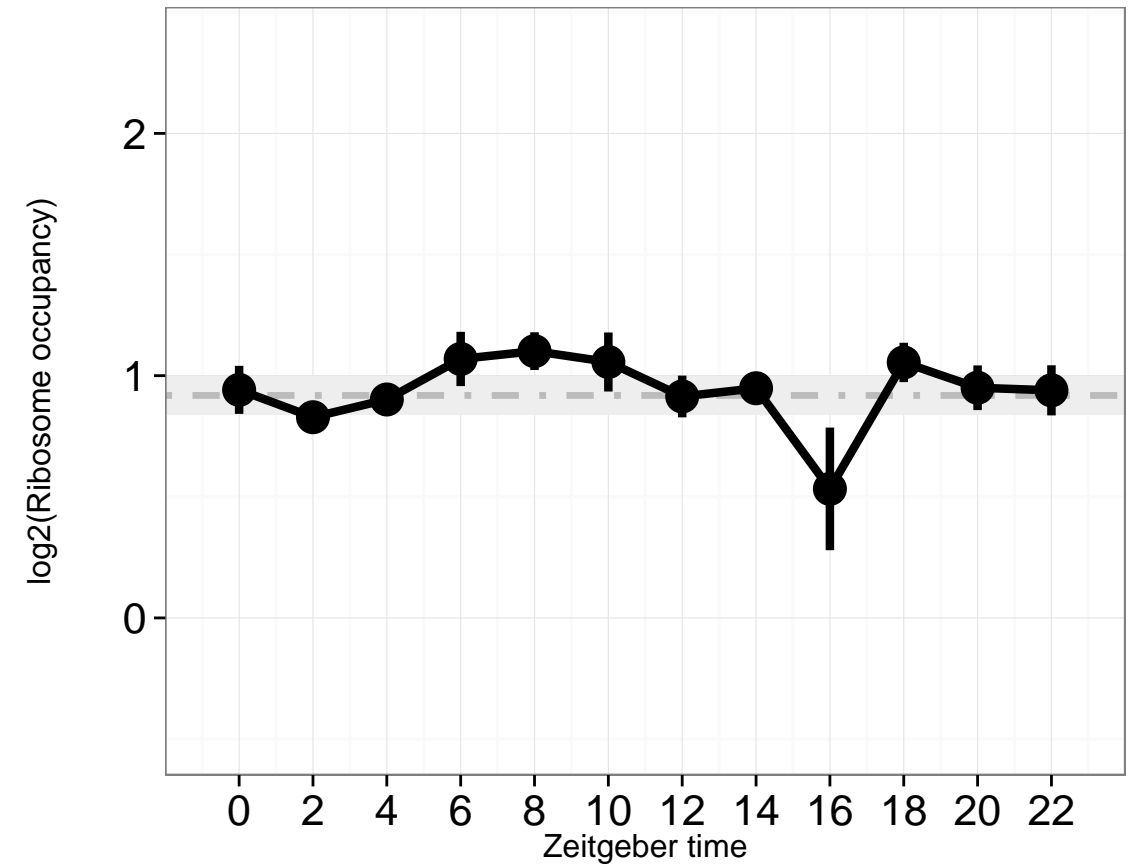

Supplement: Supplementary file 2523 [file 1]

## Slc22a12

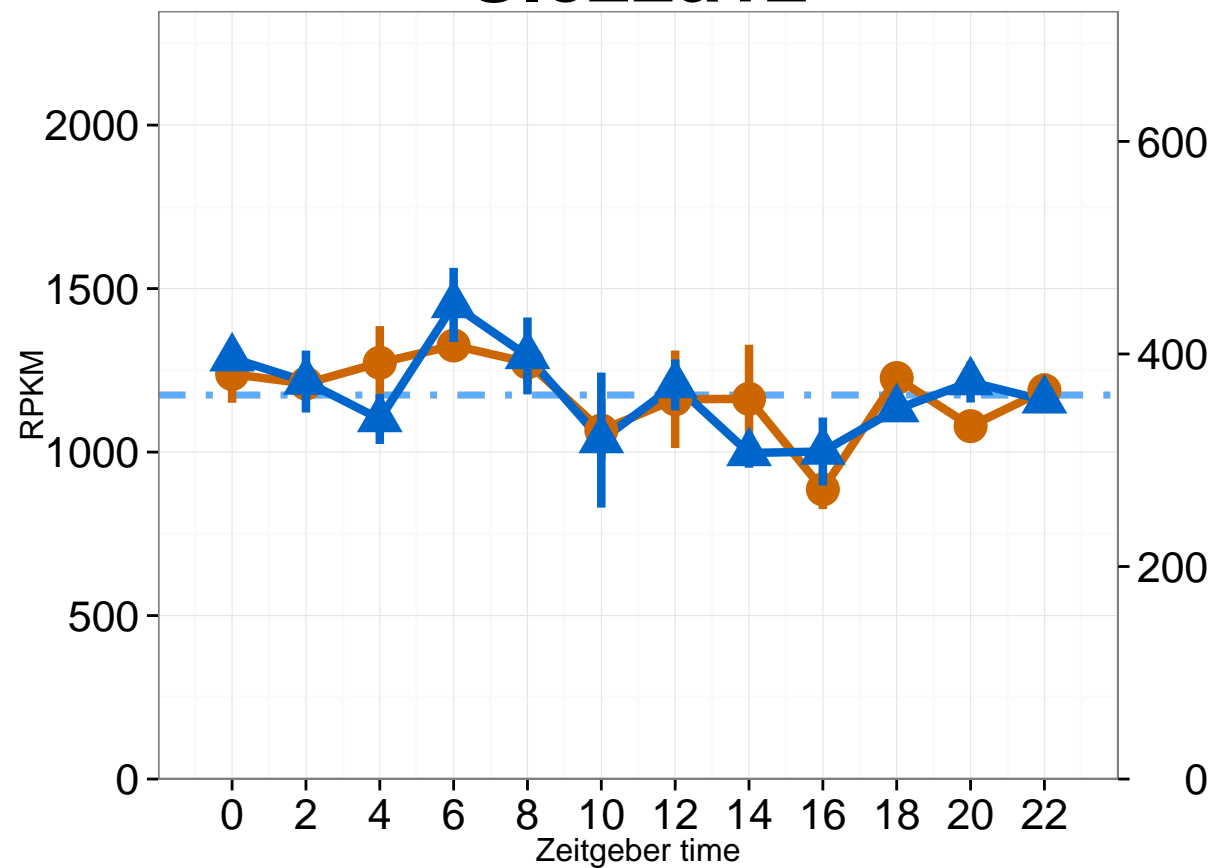

## Slc22a12

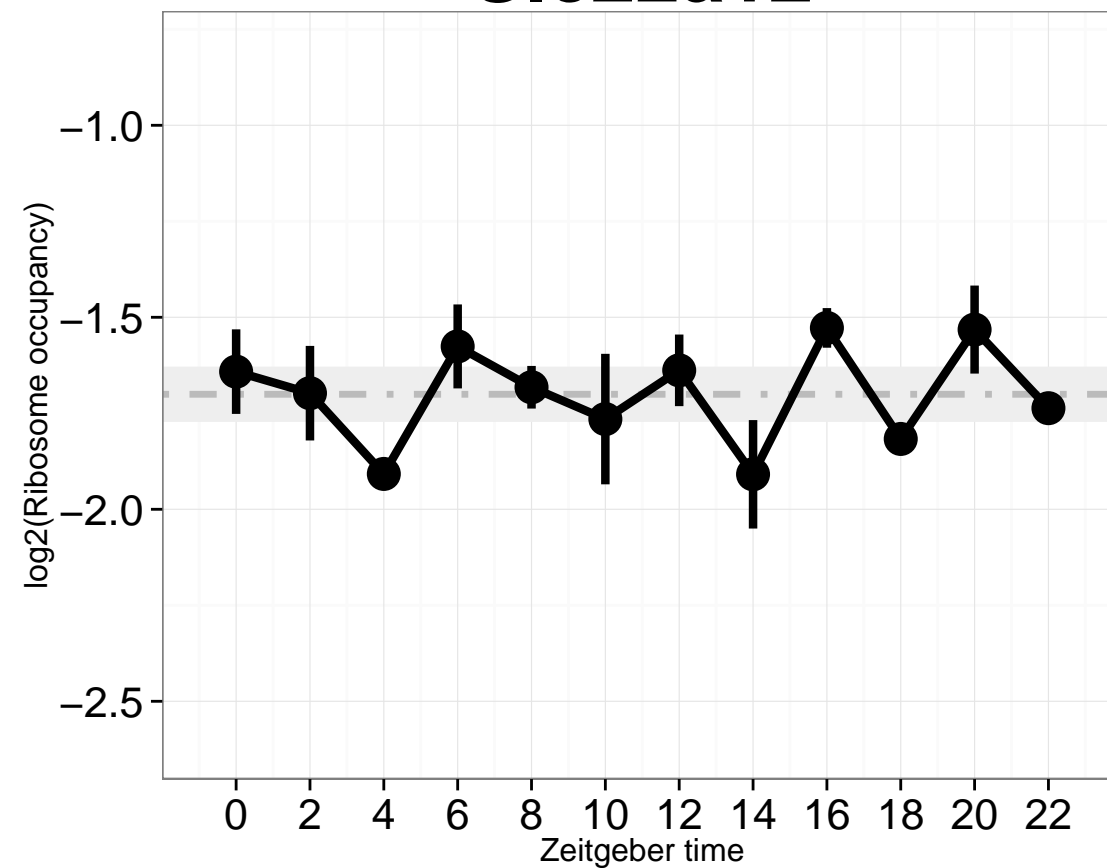

Supplement: Supplementary file 2525 [file 1]

# Dhx9

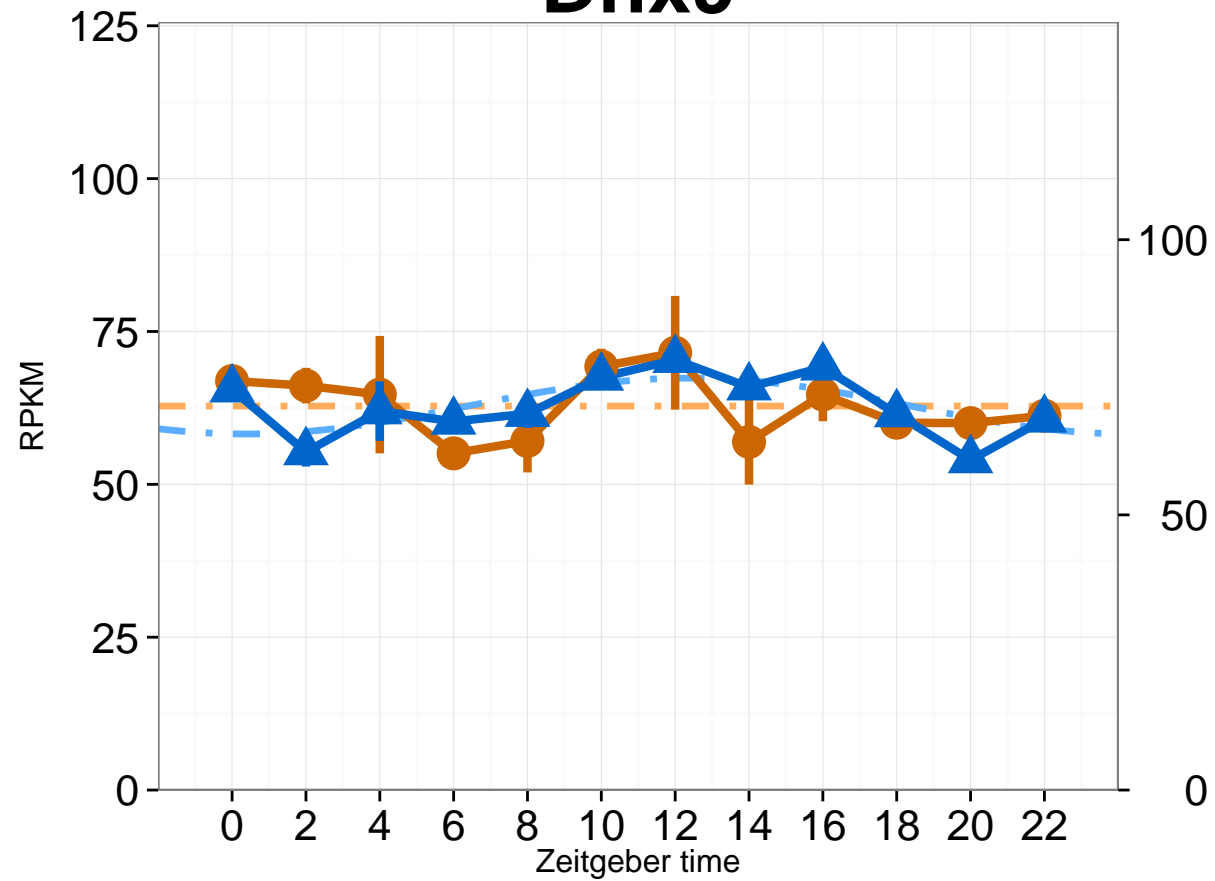

# Dhx9

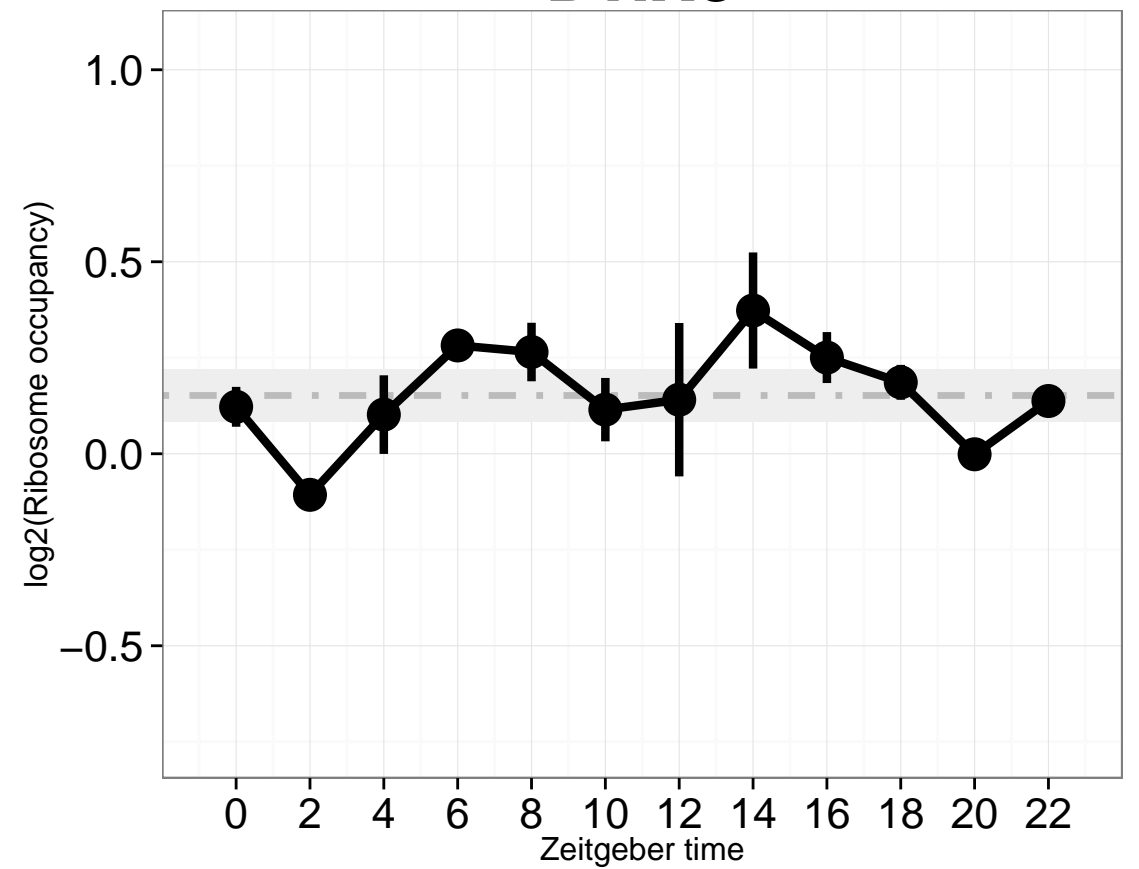

Supplement: Supplementary file 2526 [file 1]

# Coq5

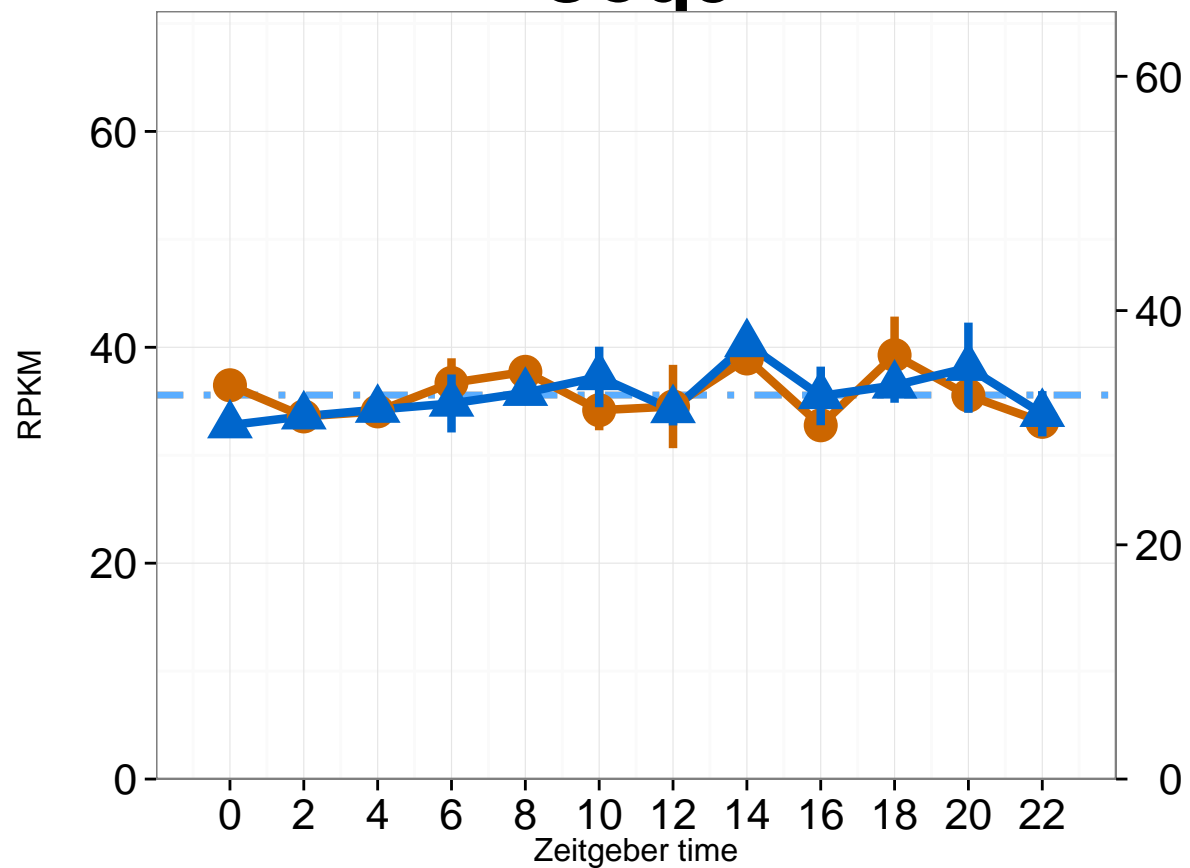

# Coq5

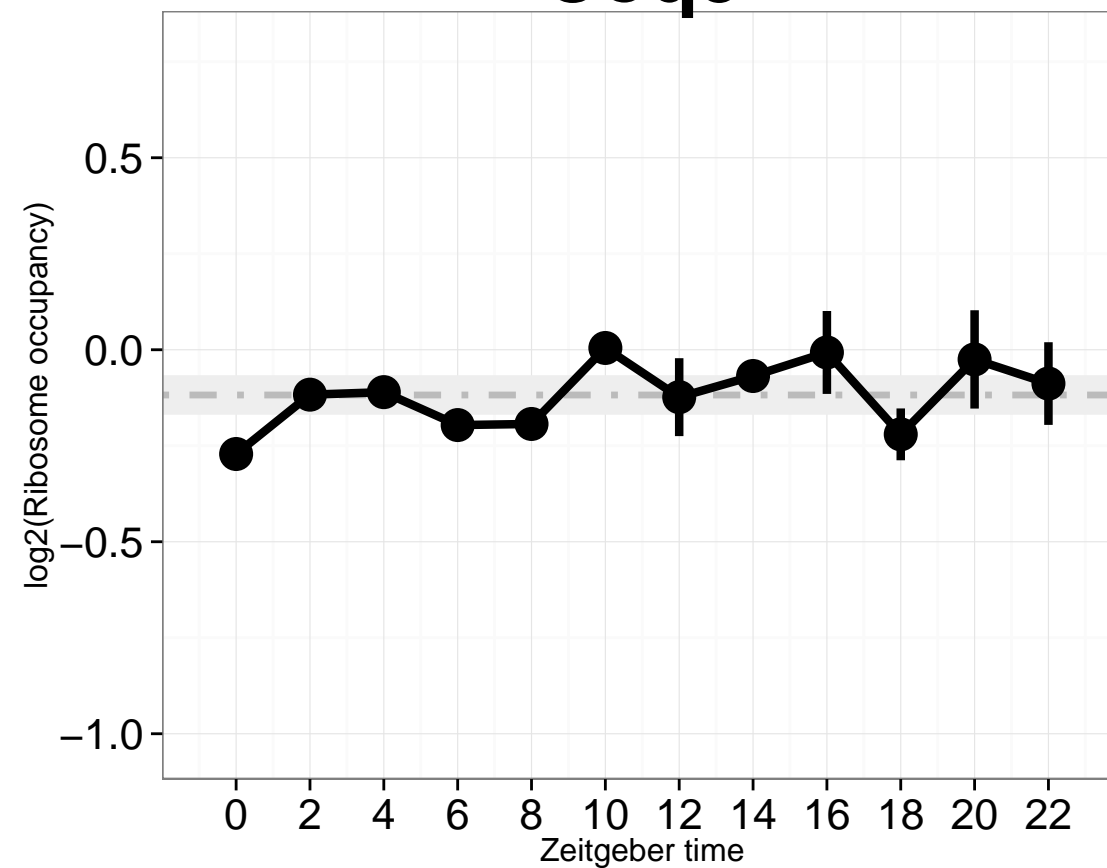

Supplement: Supplementary file 2527 [file 1]

# Rps6ka2

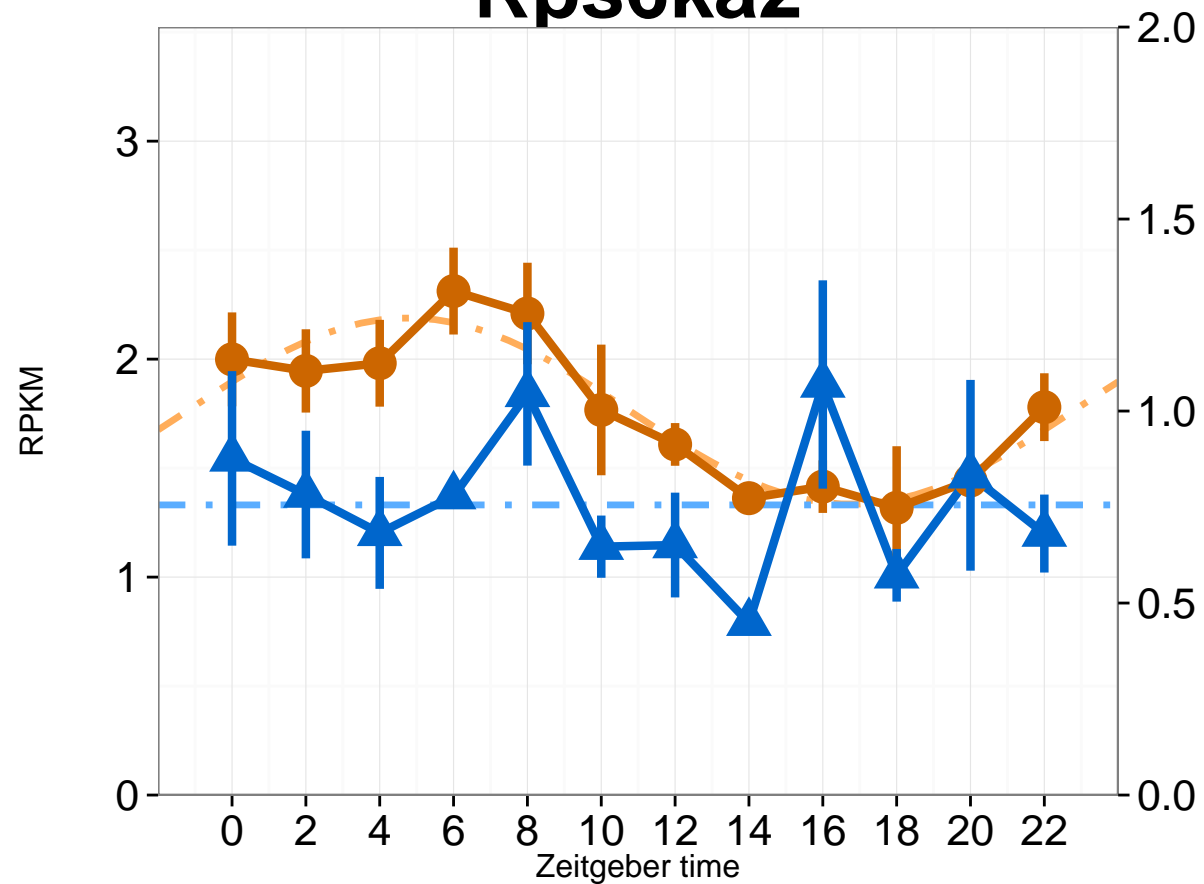

# Rps6ka2

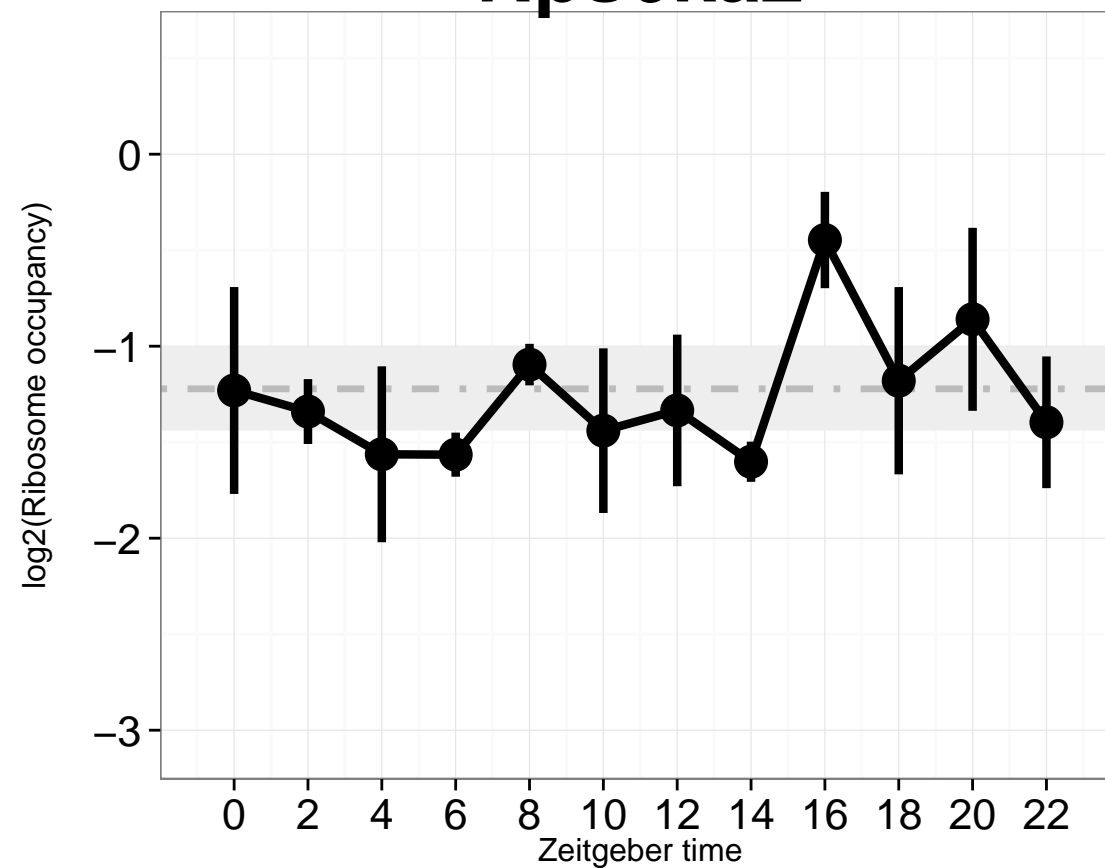

Supplement: Supplementary file 2528 [file 1]

# Nudt17

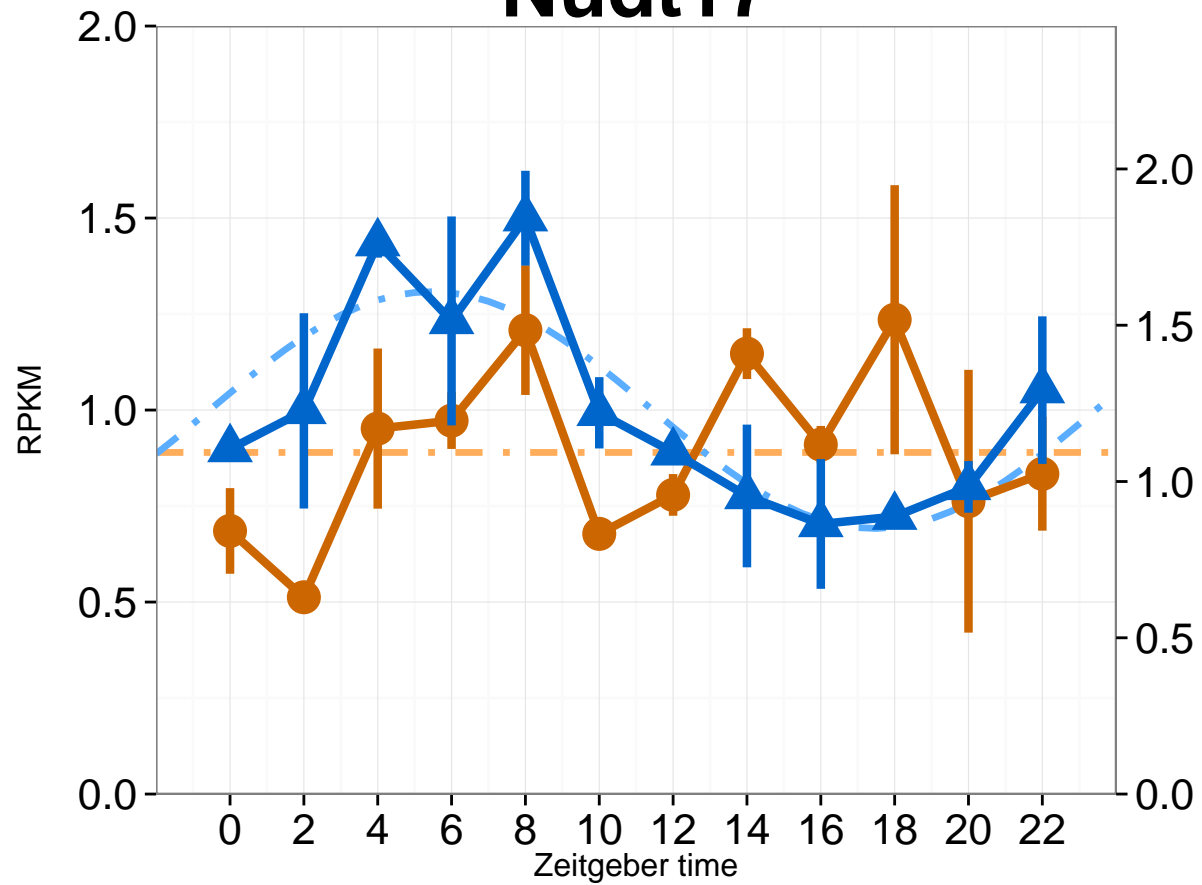

# Nudt17

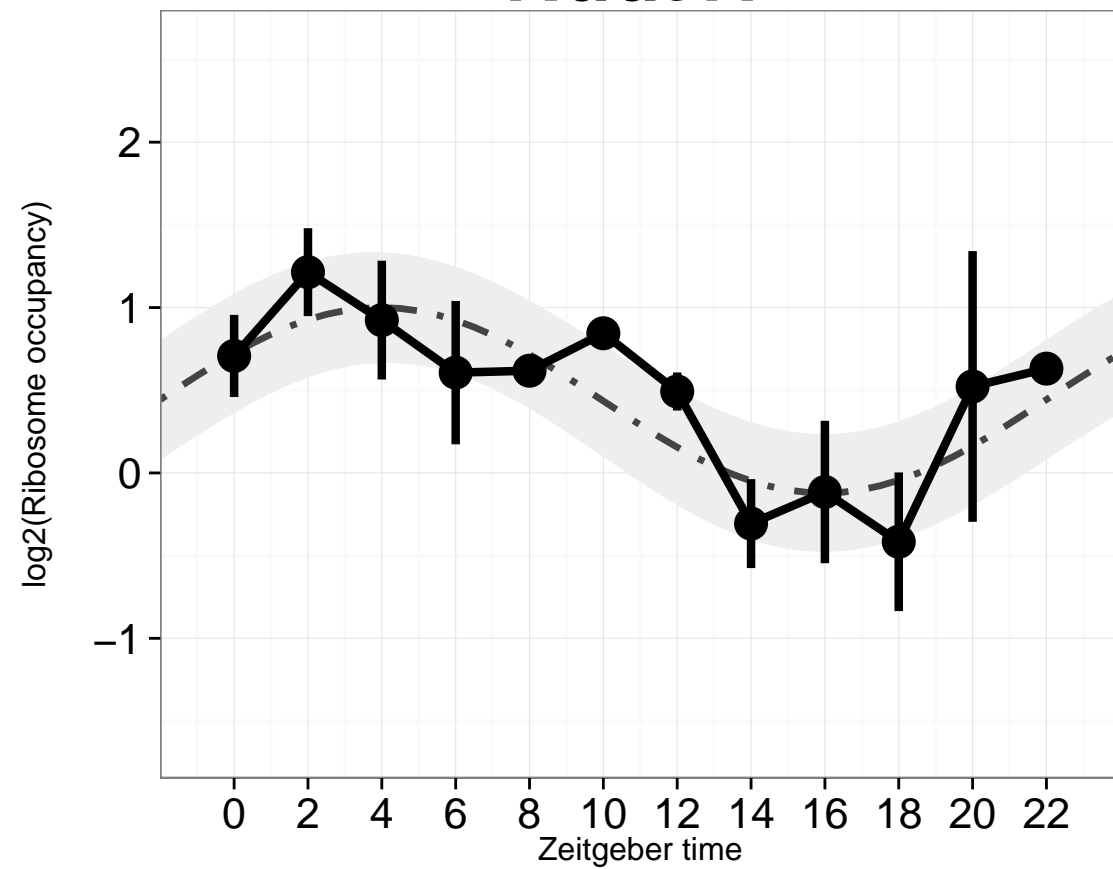

Supplement: Supplementary file 2529 [file 1]

## Rassf4

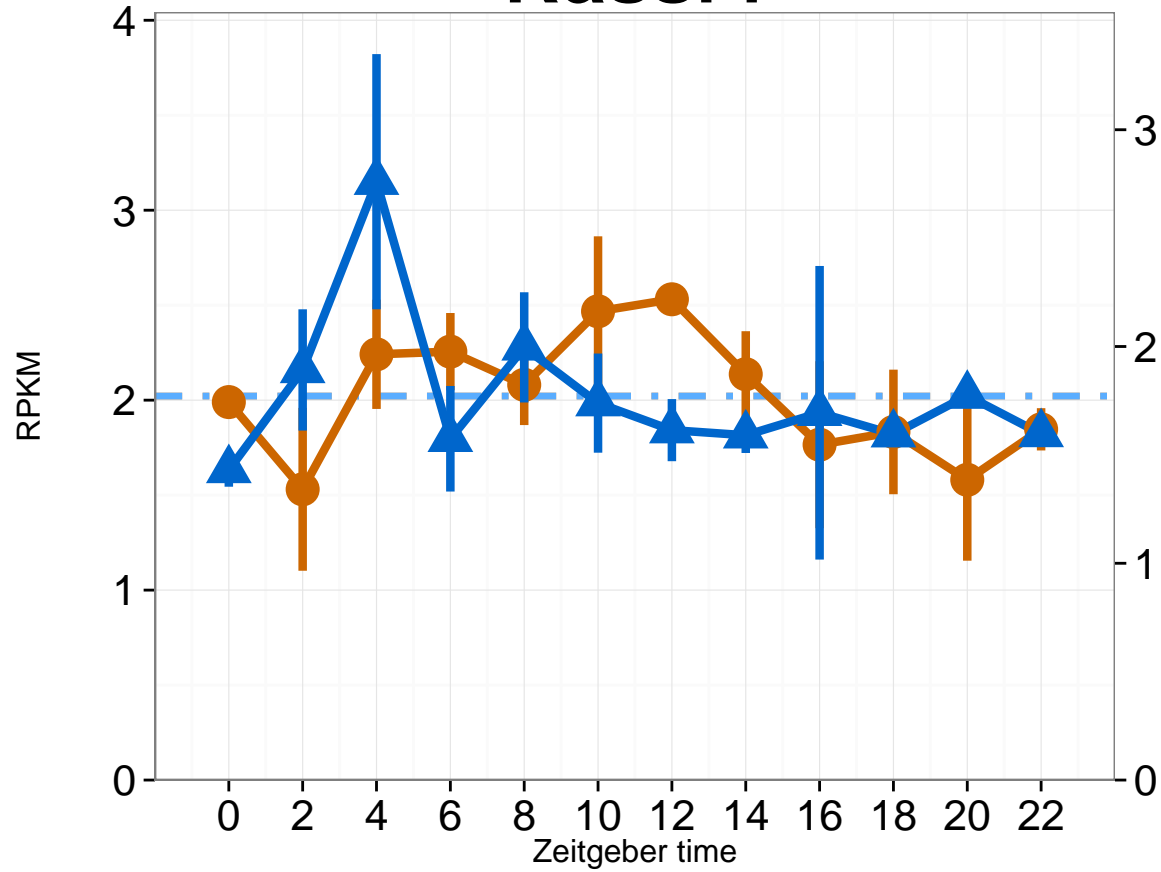

## Rassf4

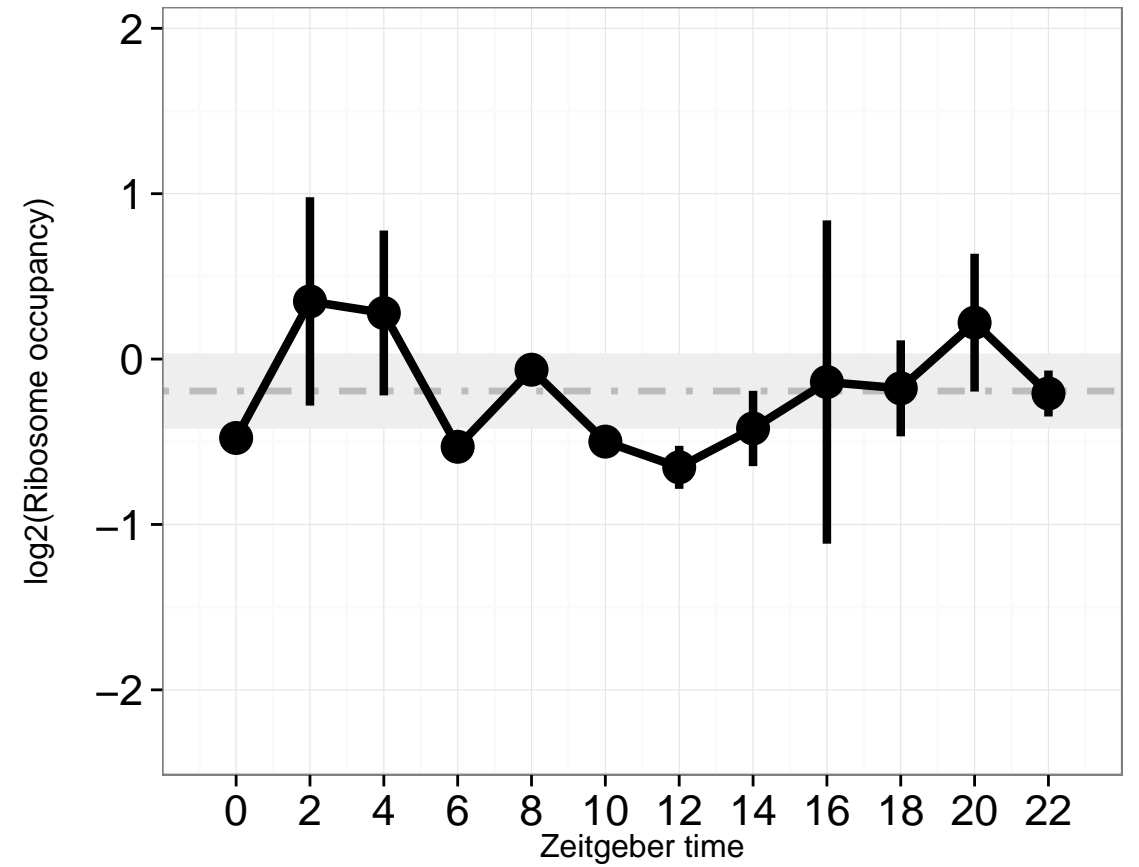

Supplement: Supplementary file 2530 [file 1]

# Bmp2k

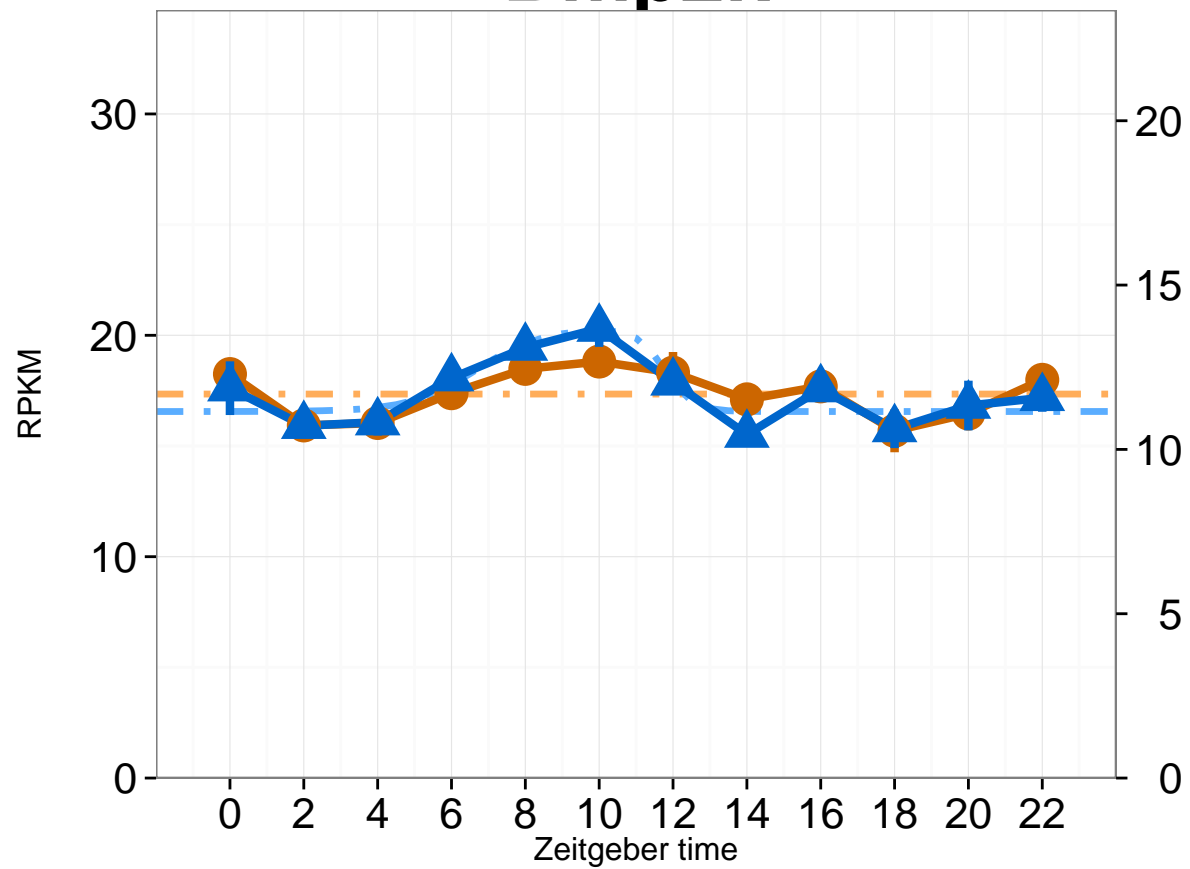

# Bmp2k

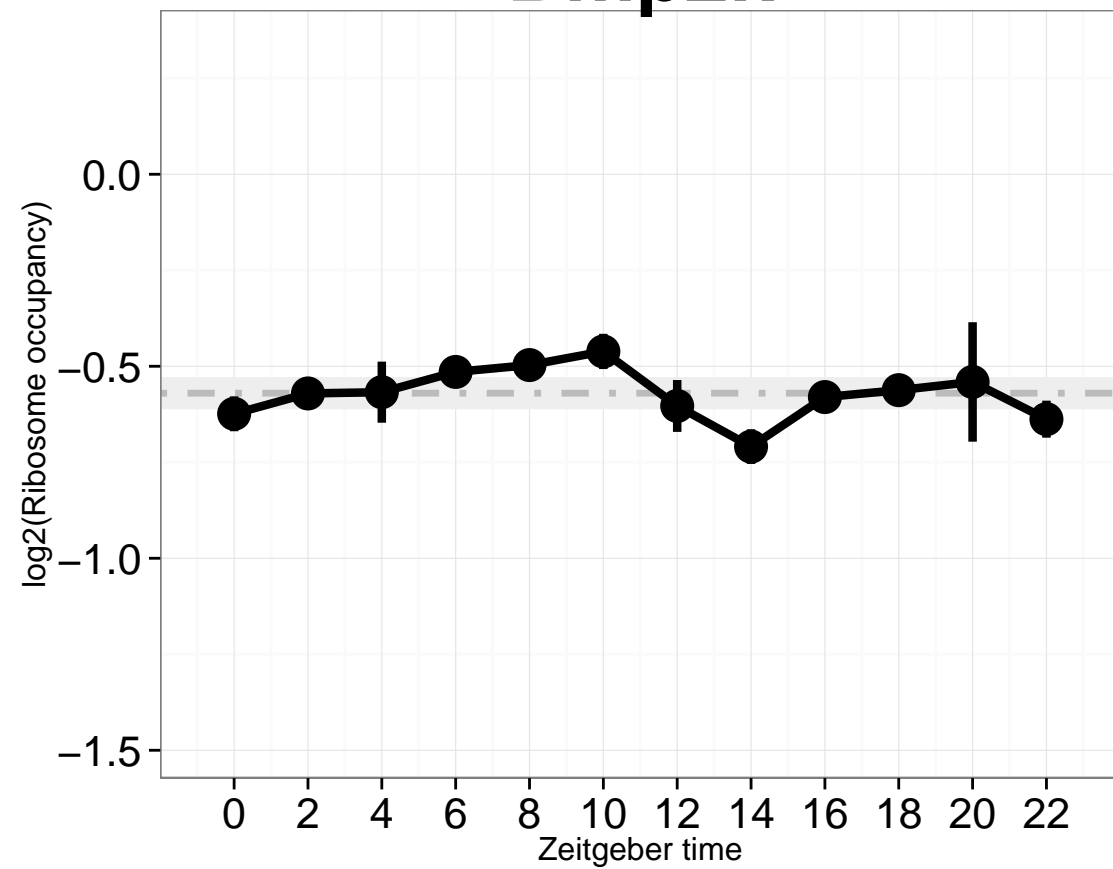

Supplement: Supplementary file 2531 [file 1]

## Gca

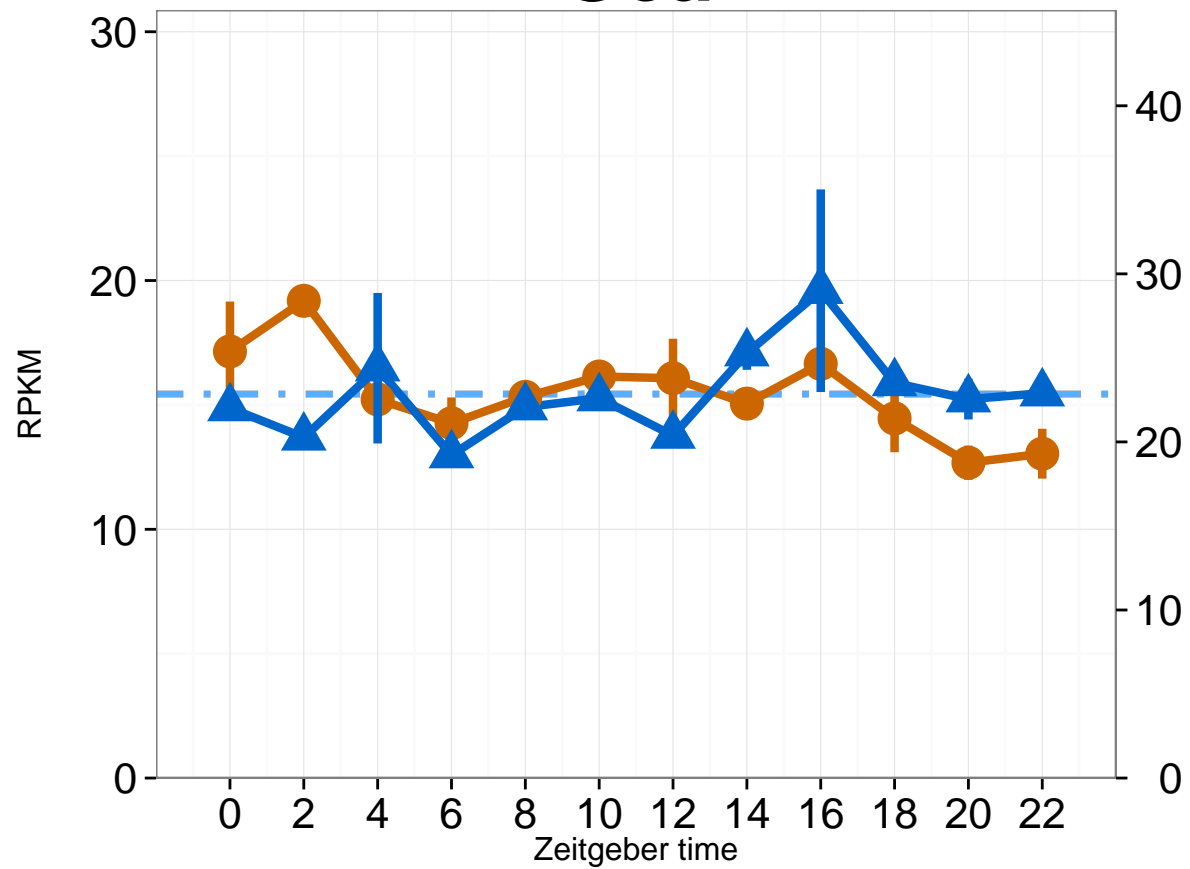

## Gca

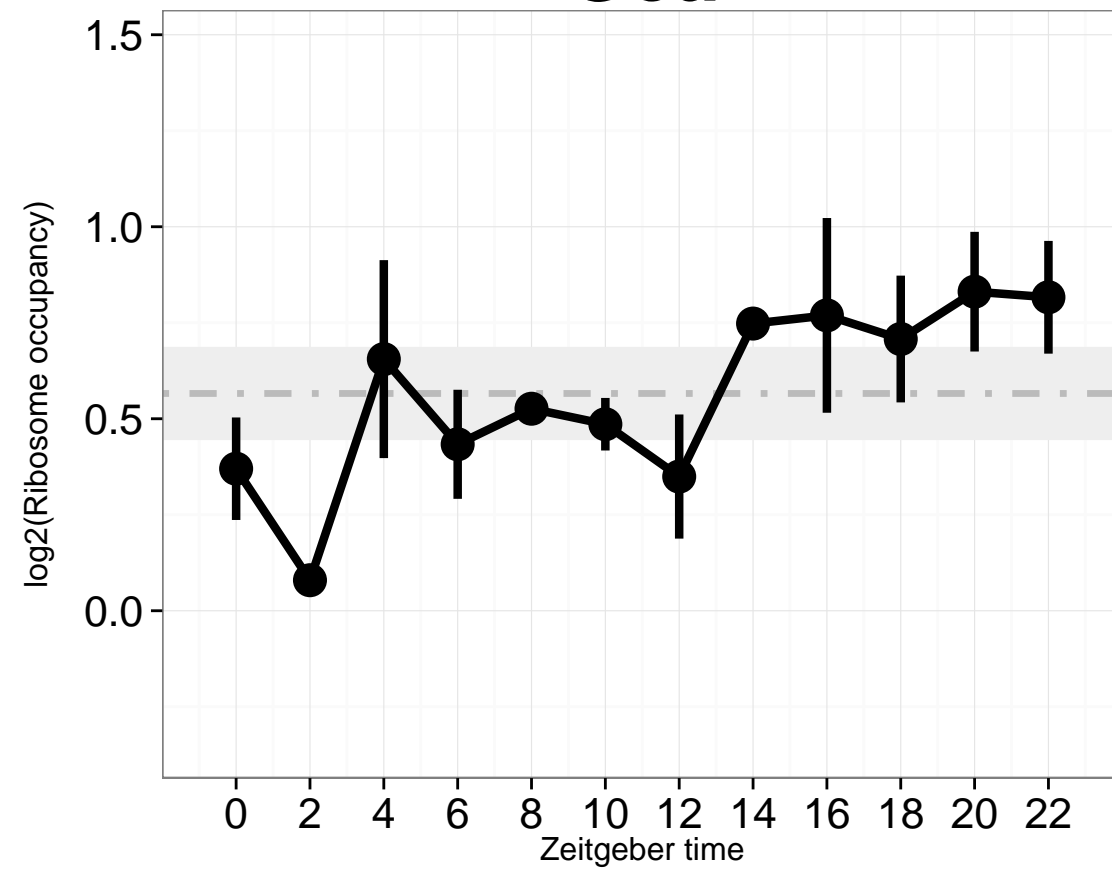

Supplement: Supplementary file 2532 [file 1]

# 5033430I15Rik

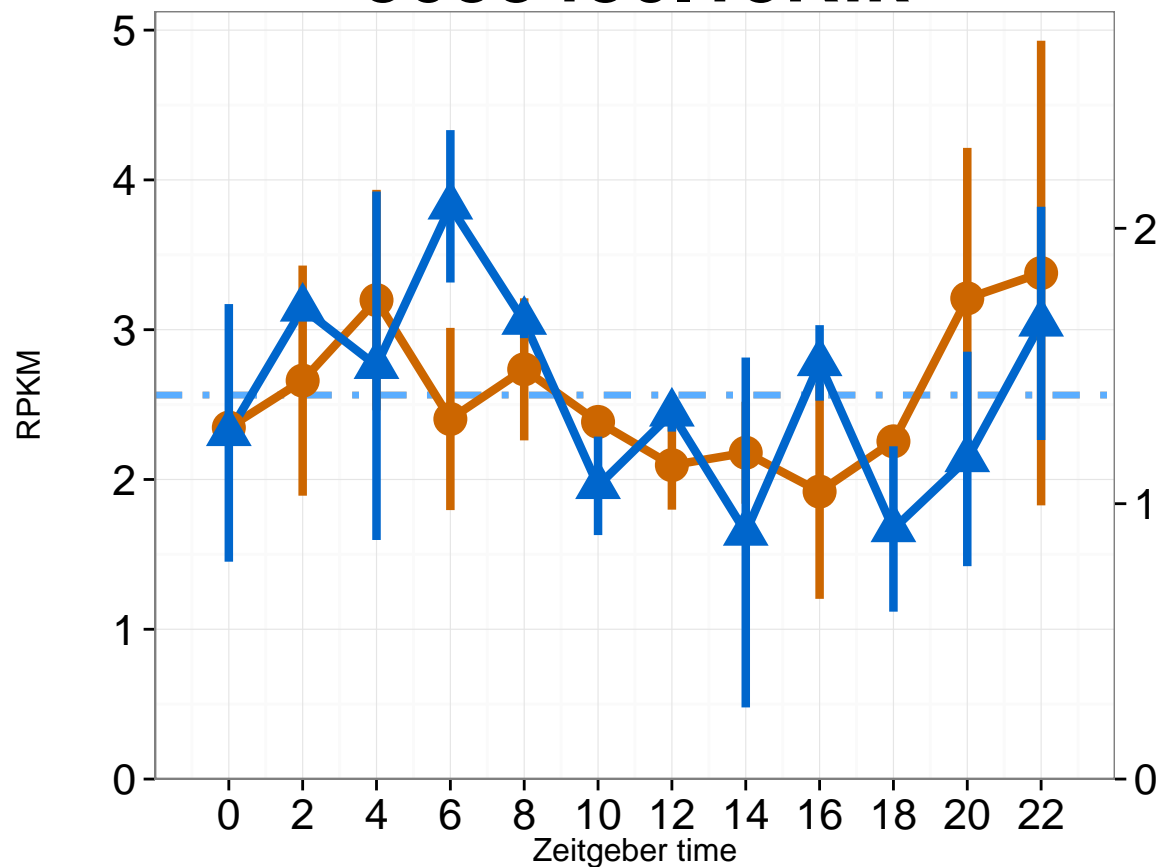

# 5033430I15Rik

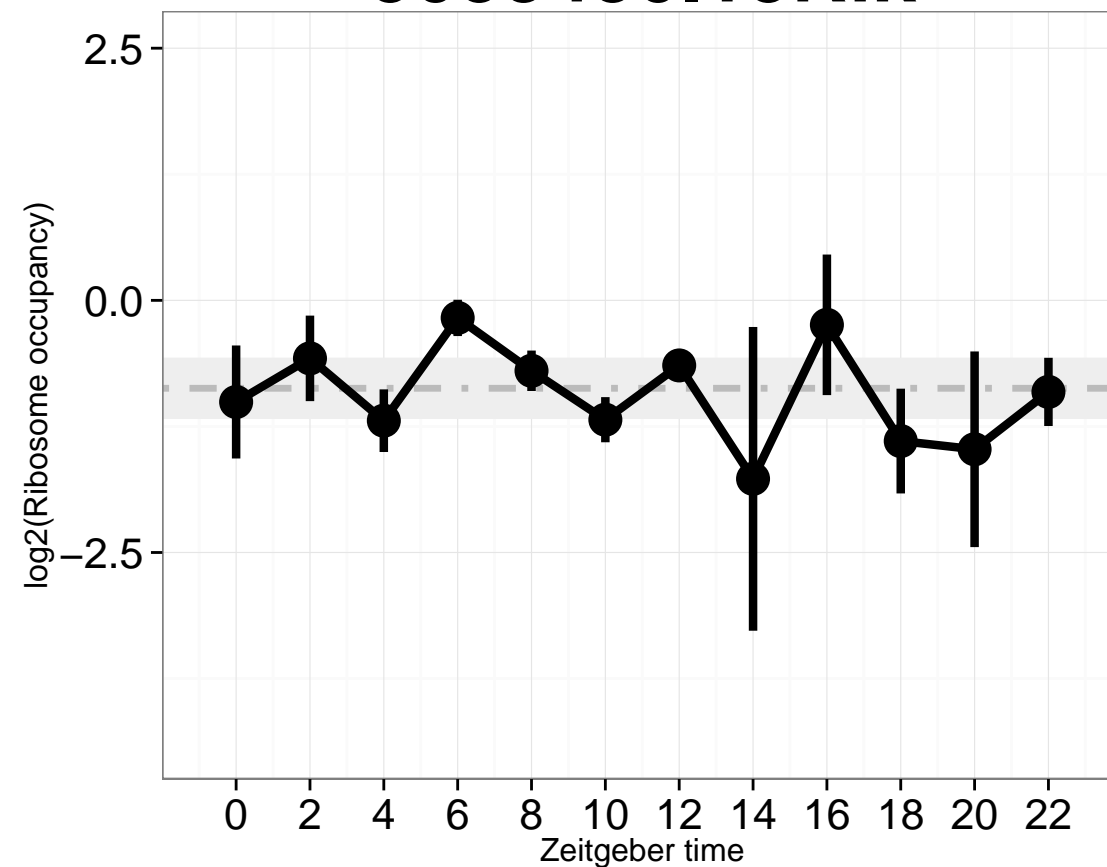

Supplement: Supplementary file 2533 [file 1]

## Bbs7

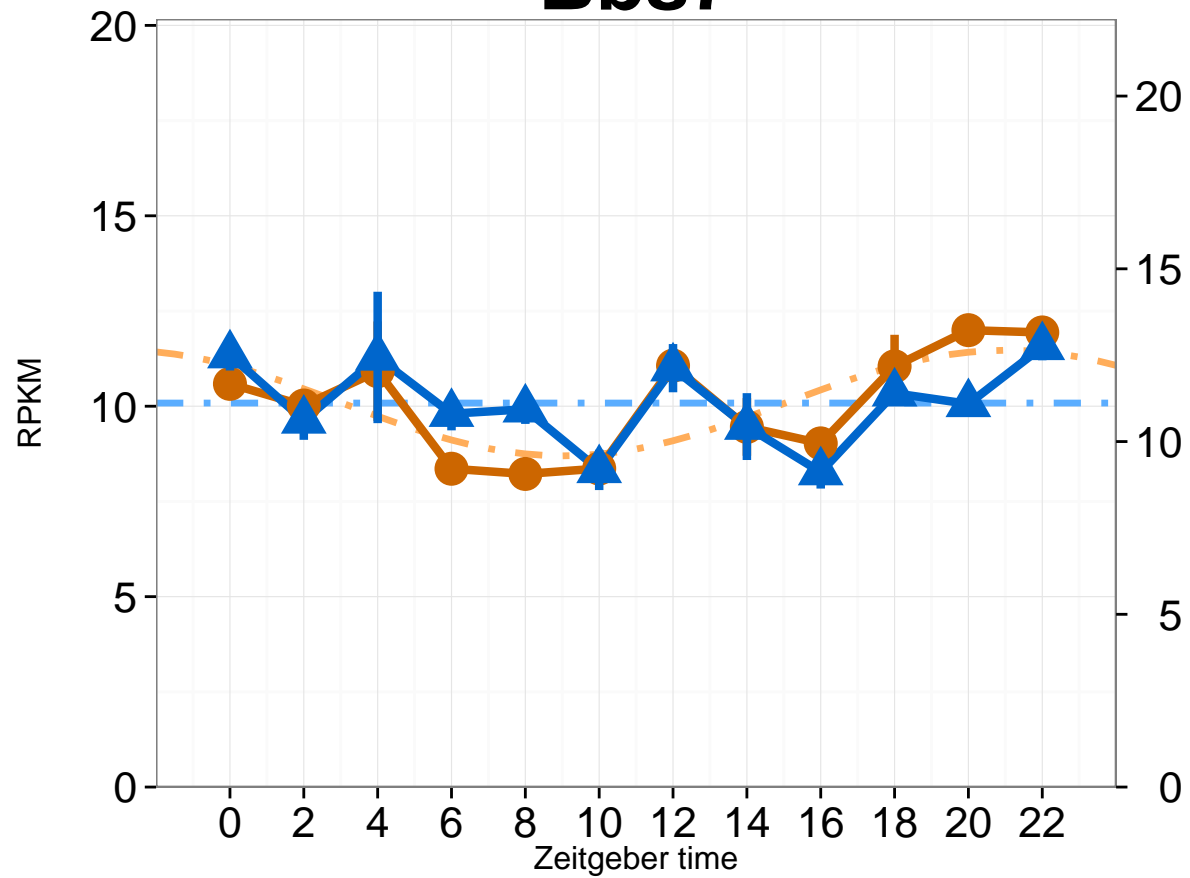

## Bbs7

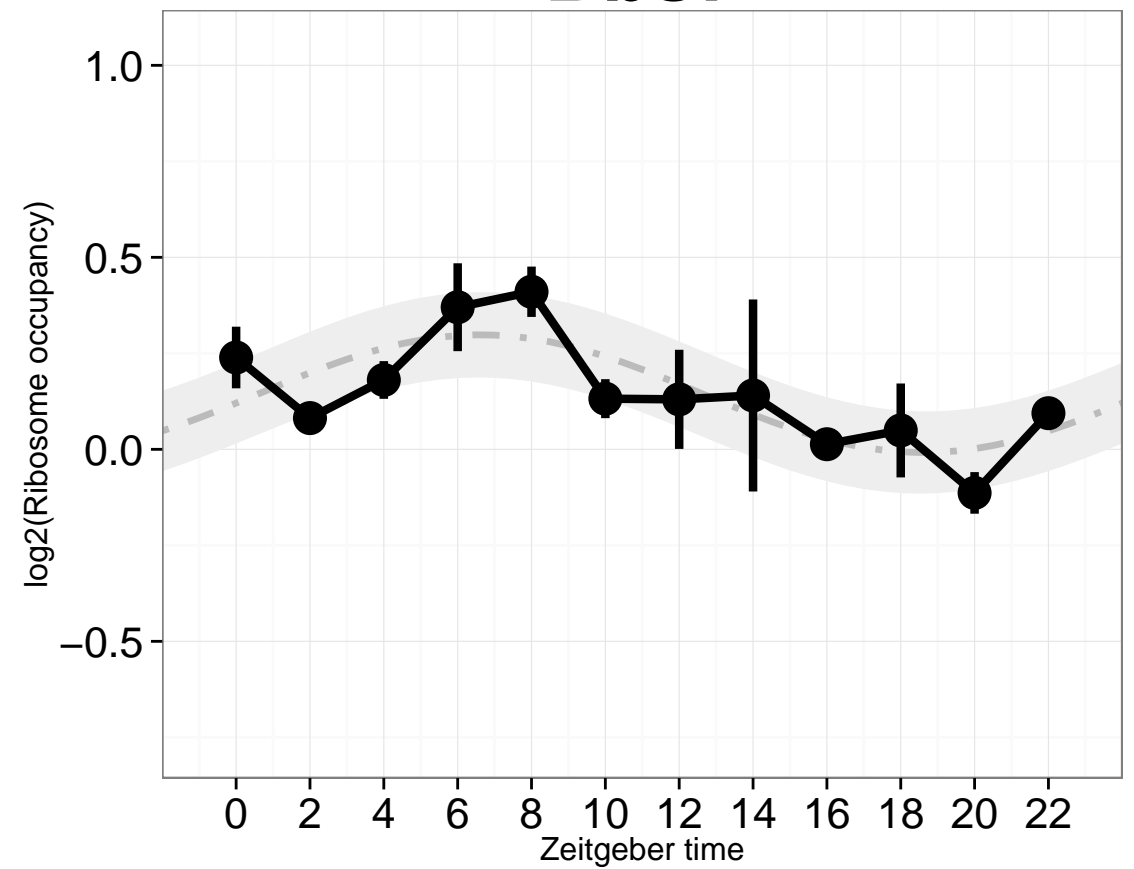

Supplement: Supplementary file 2534 [file 1]

# Nudt9

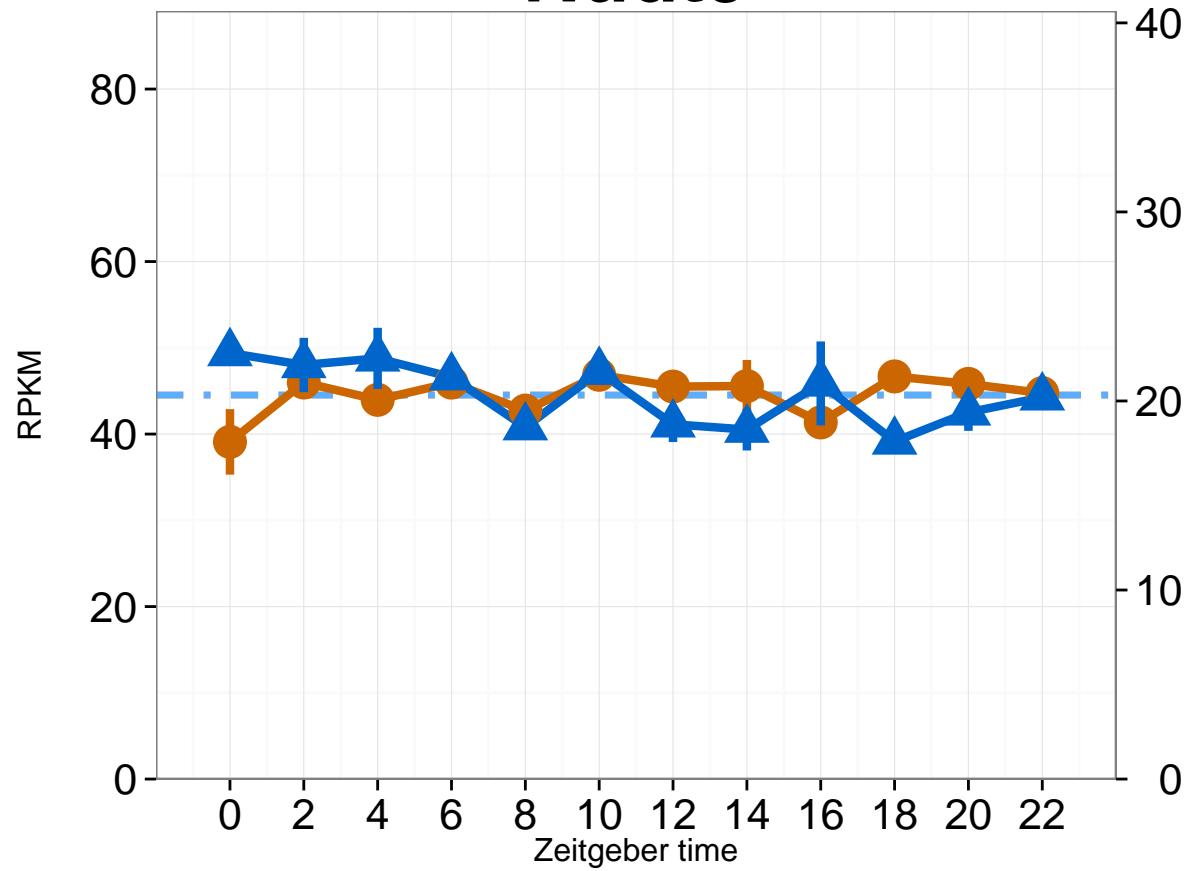

# Nudt9

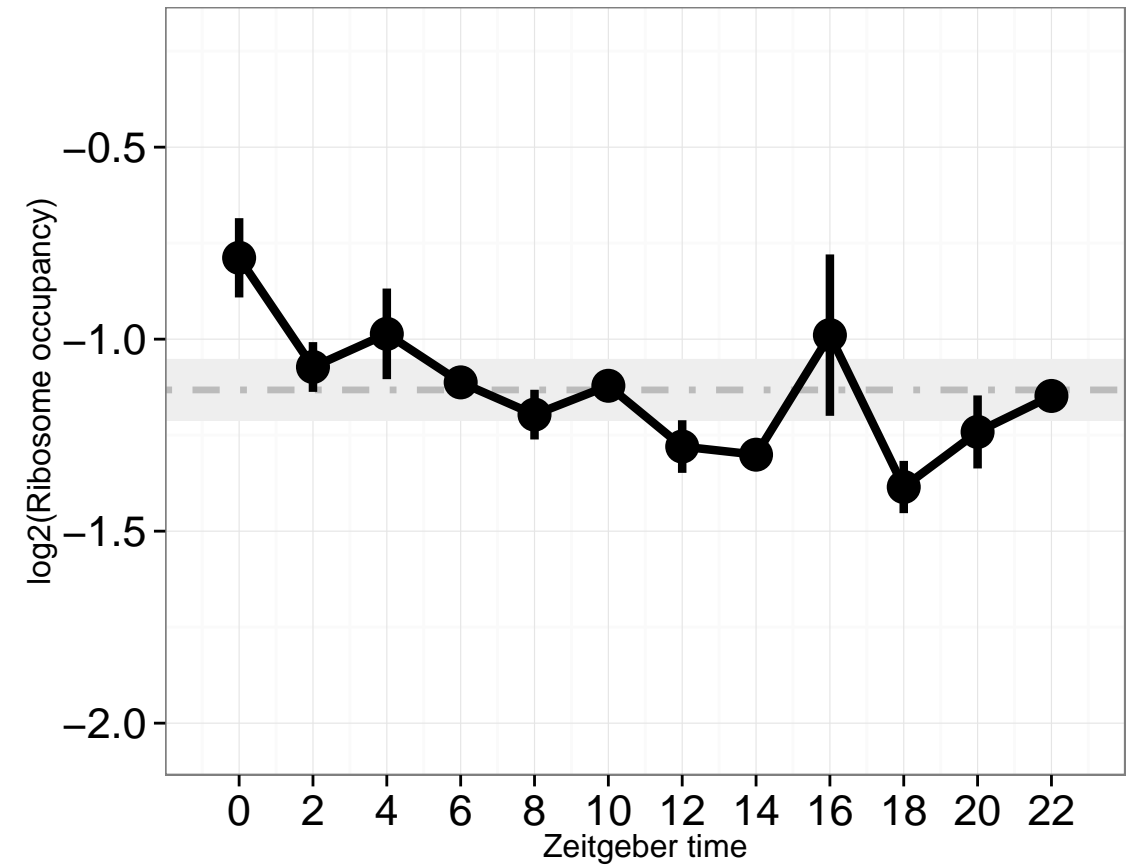

Supplement: Supplementary file 2535 [file 1]

# Dr1

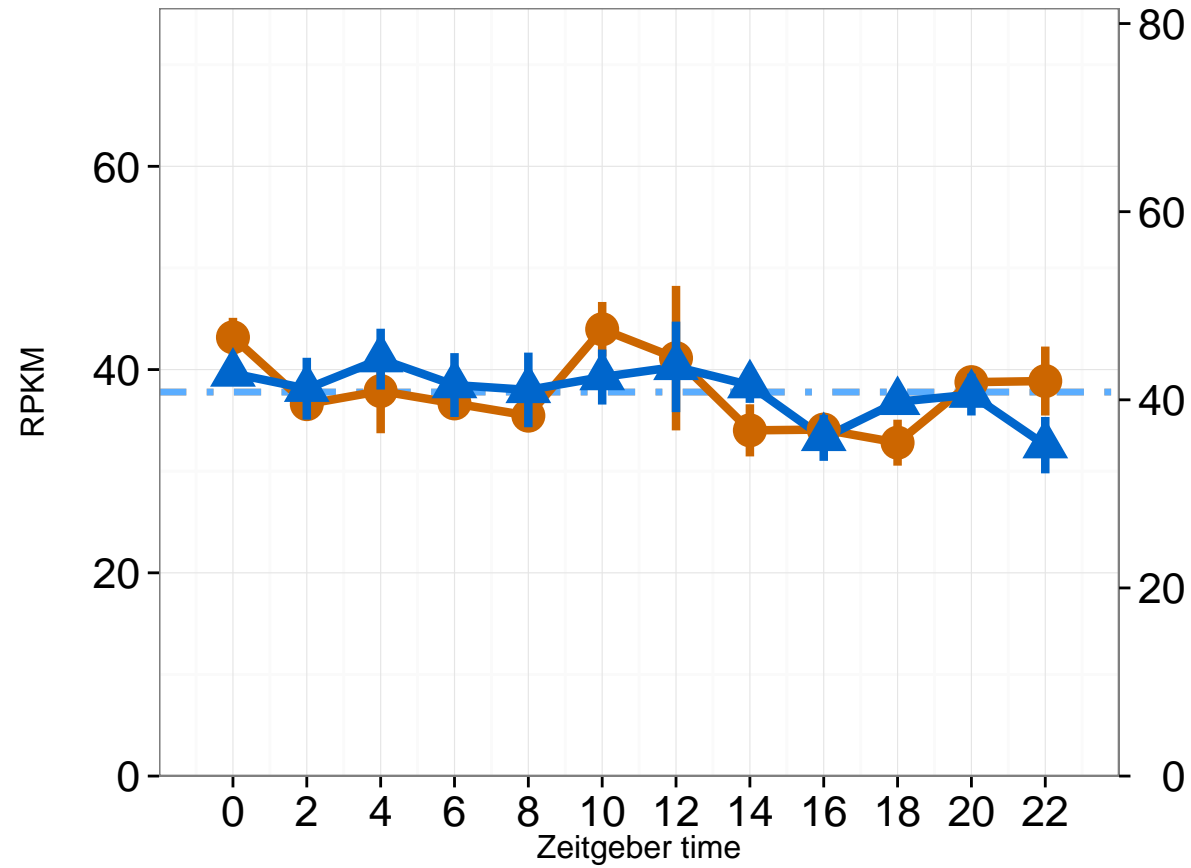

# Dr1

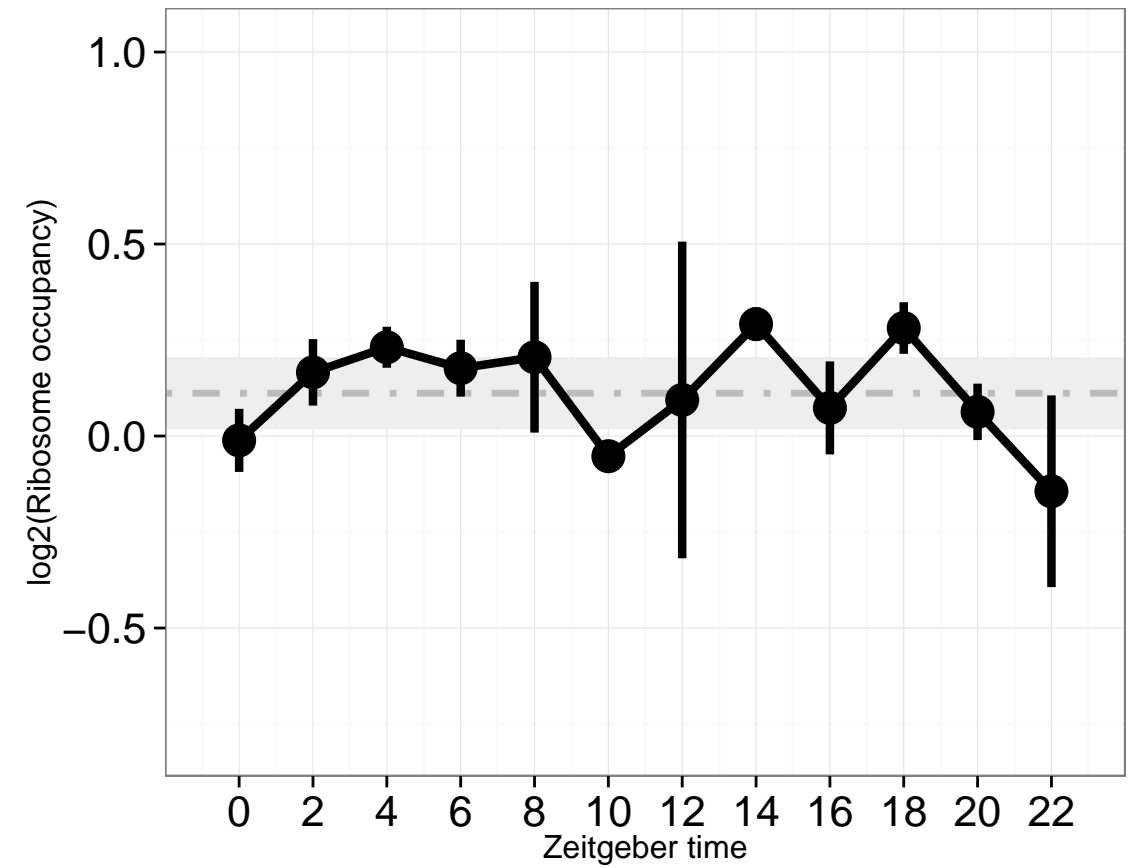

Supplement: Supplementary file 2536 [file 1]

# Zfp174

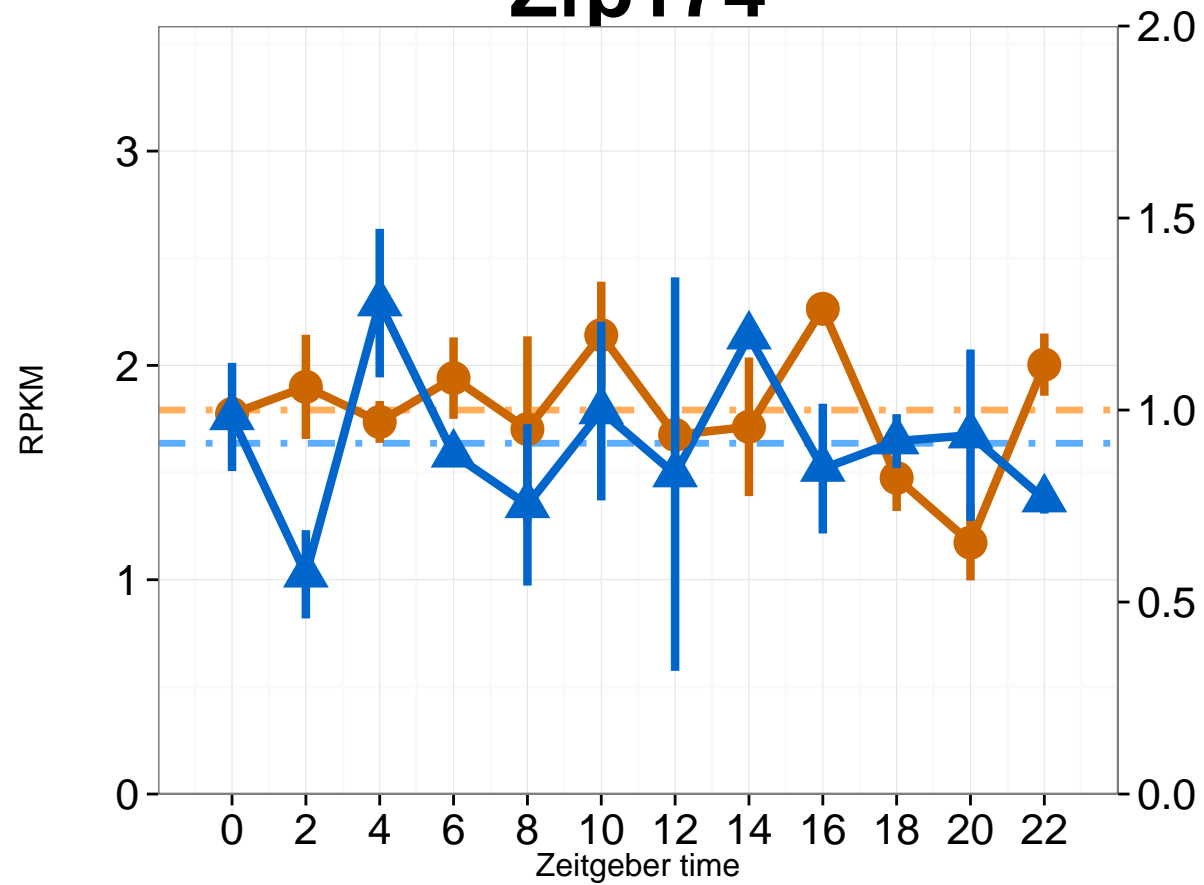

# Zfp174

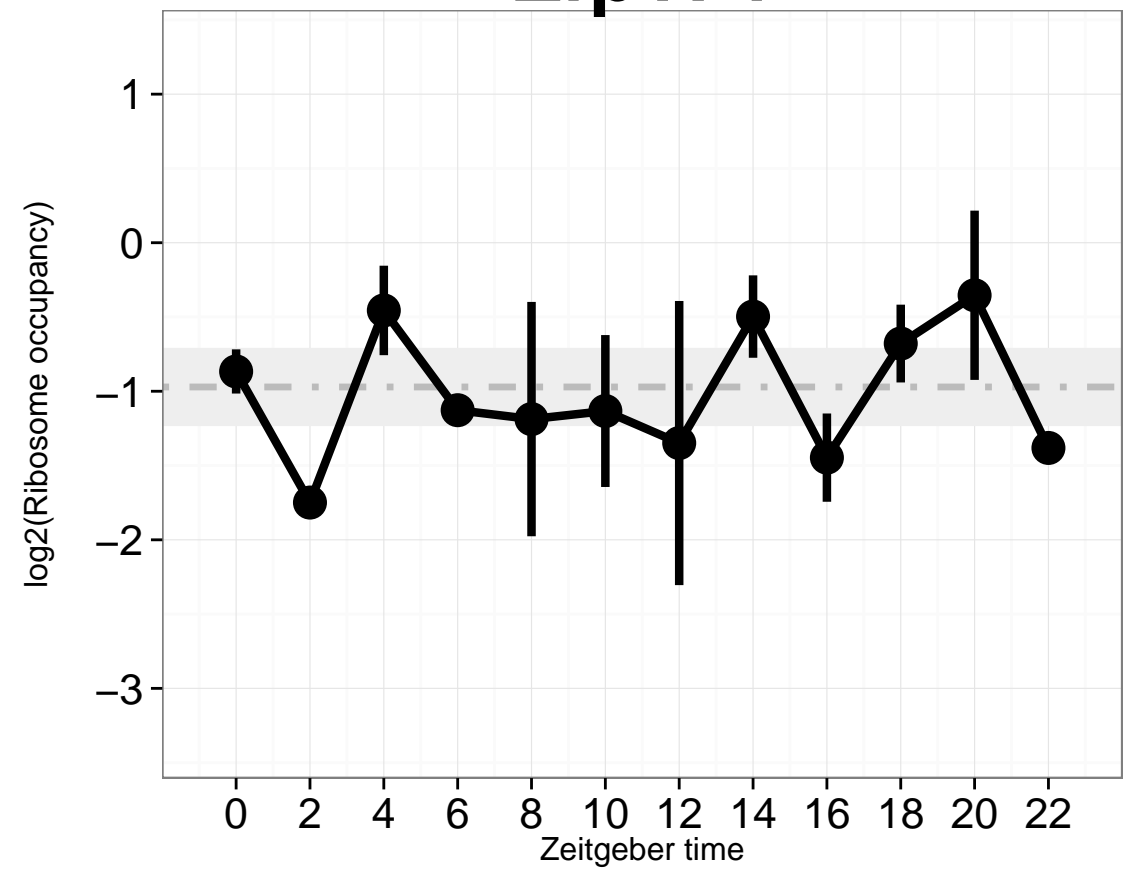

Supplement: Supplementary file 2537 [file 1]

## Vrk1

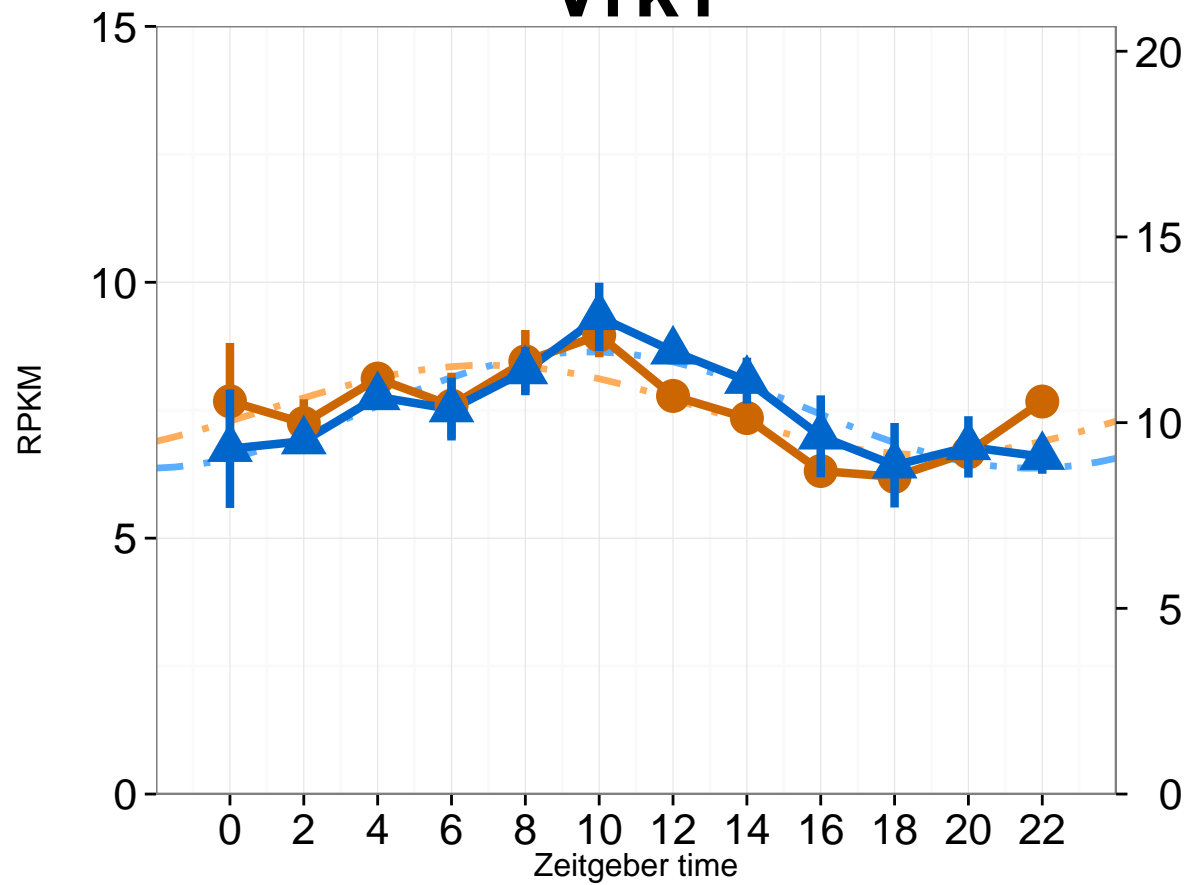

## Vrk1

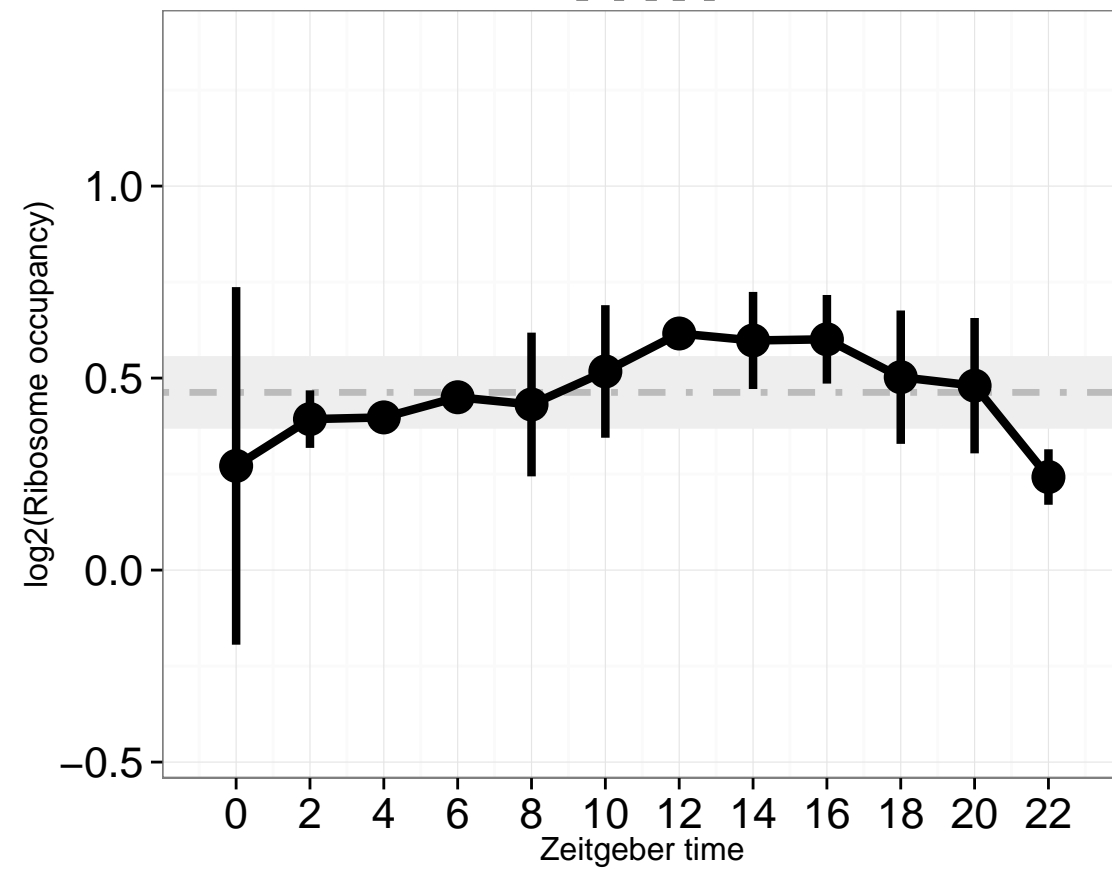

Supplement: Supplementary file 2538 [file 1]

# Cxx1c

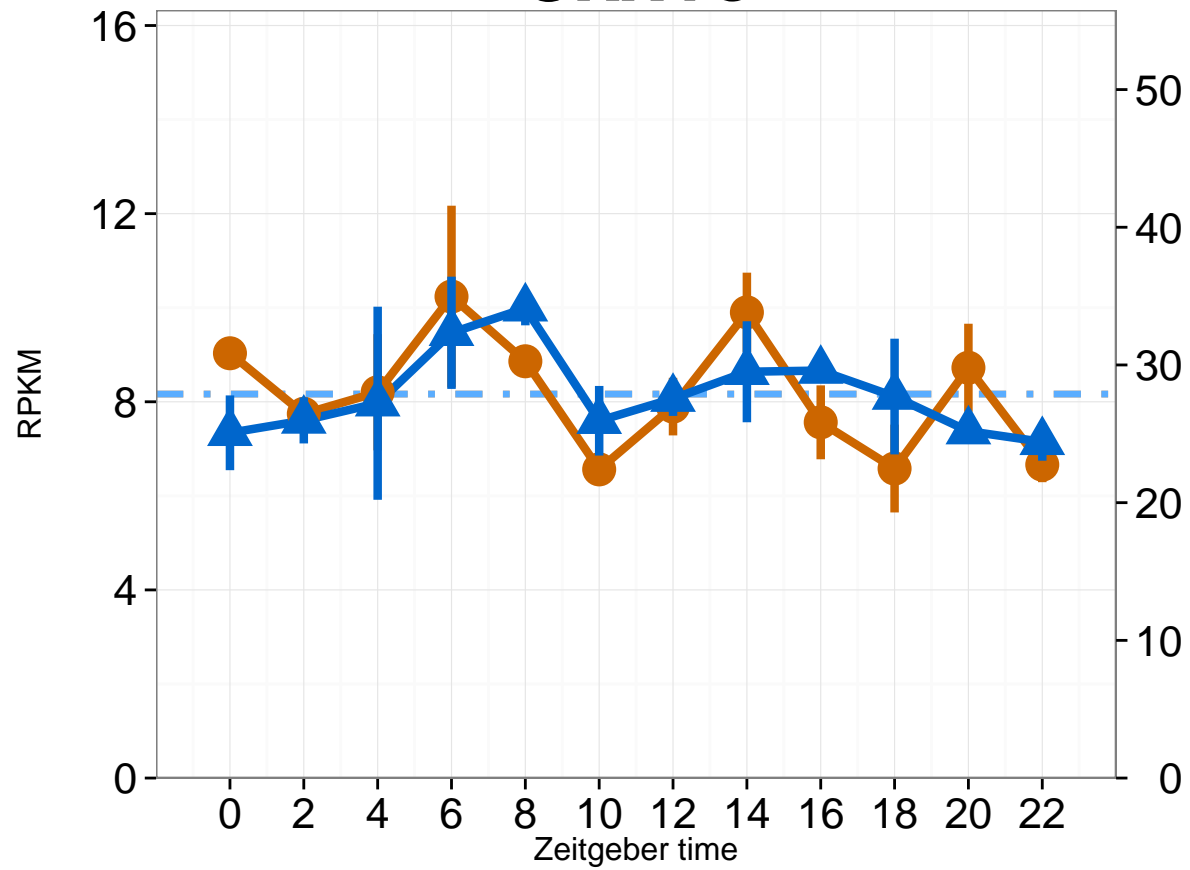

# Cxx1c

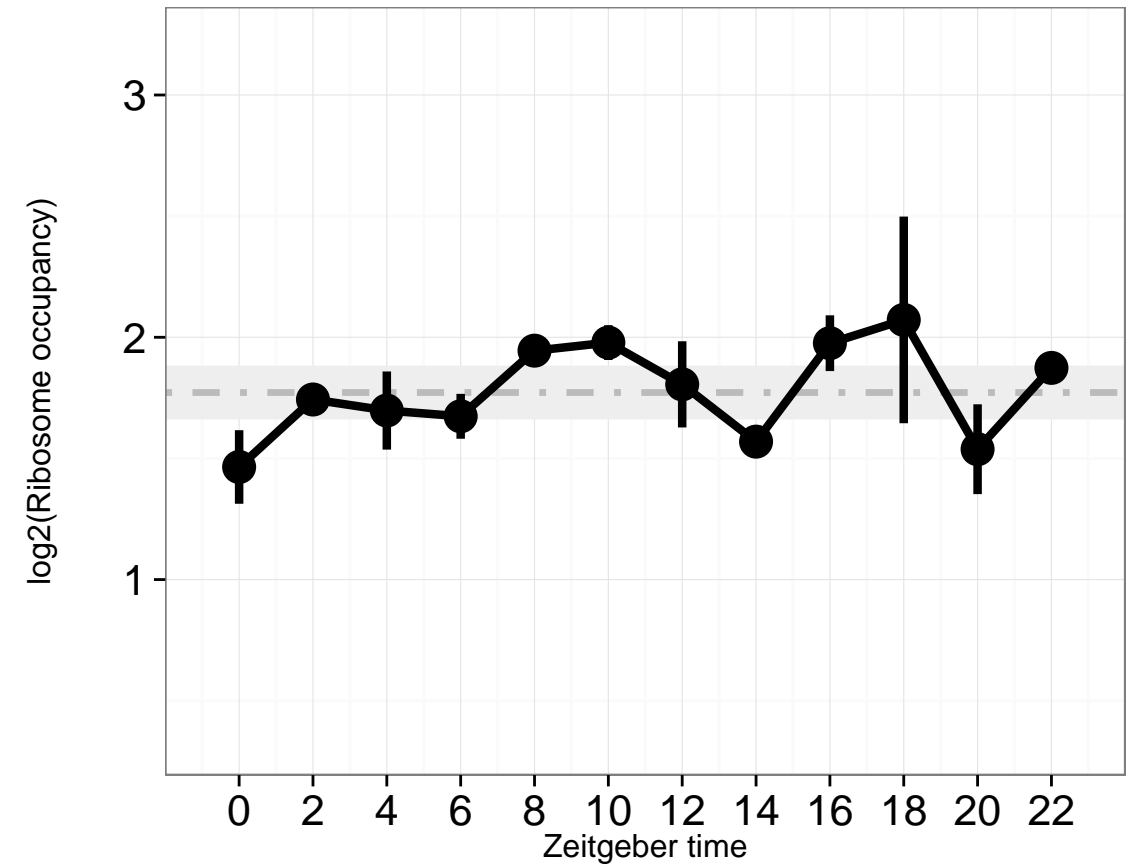

Supplement: Supplementary file 2539 [file 1]

# Mrgprf

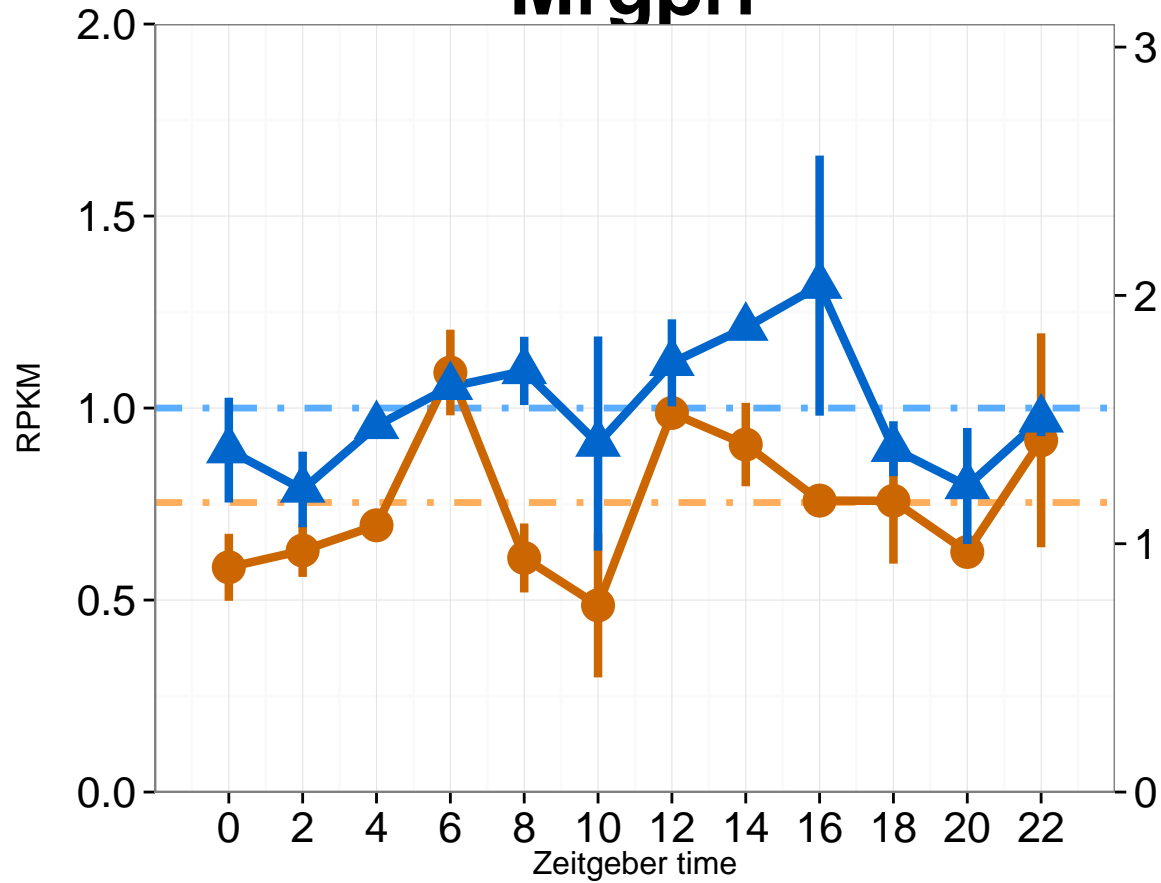

# Mrgprf

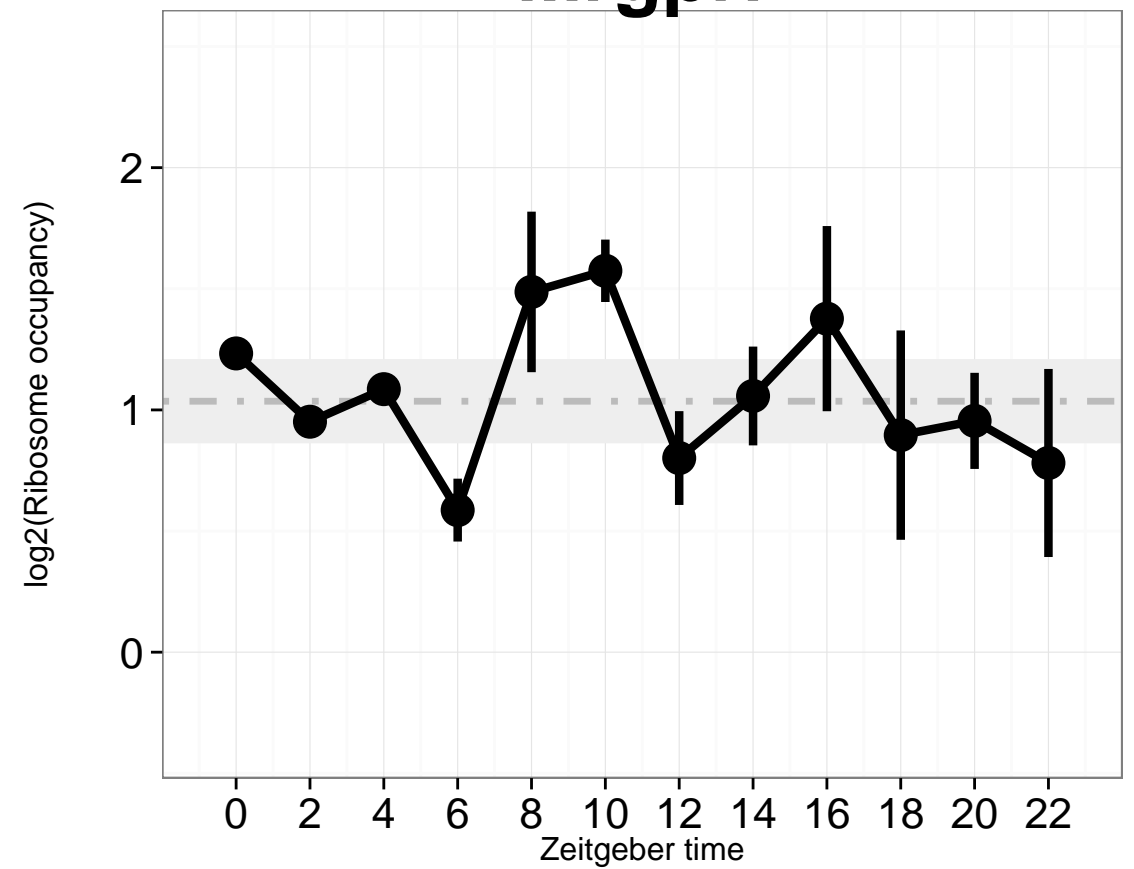

Supplement: Supplementary file 2540 [file 1]

## Tmc5

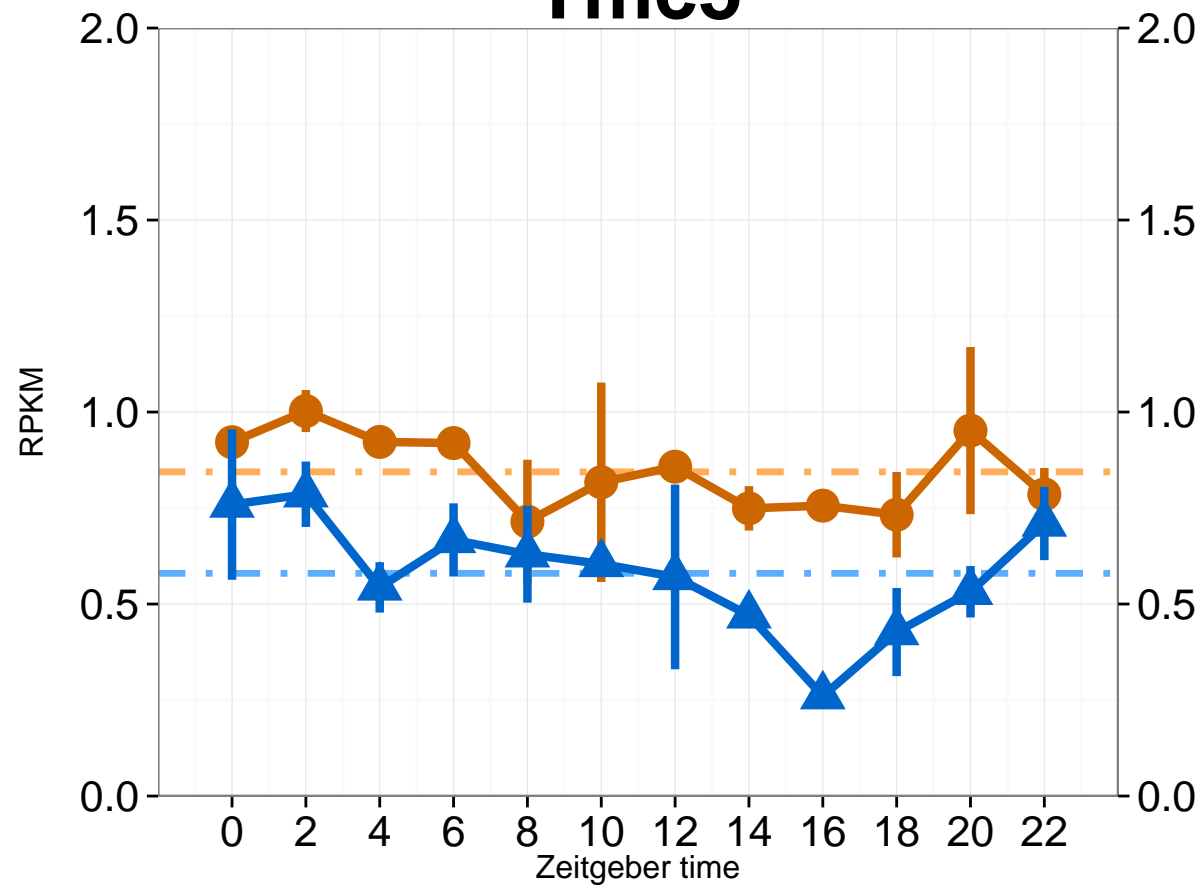

## Tmc5

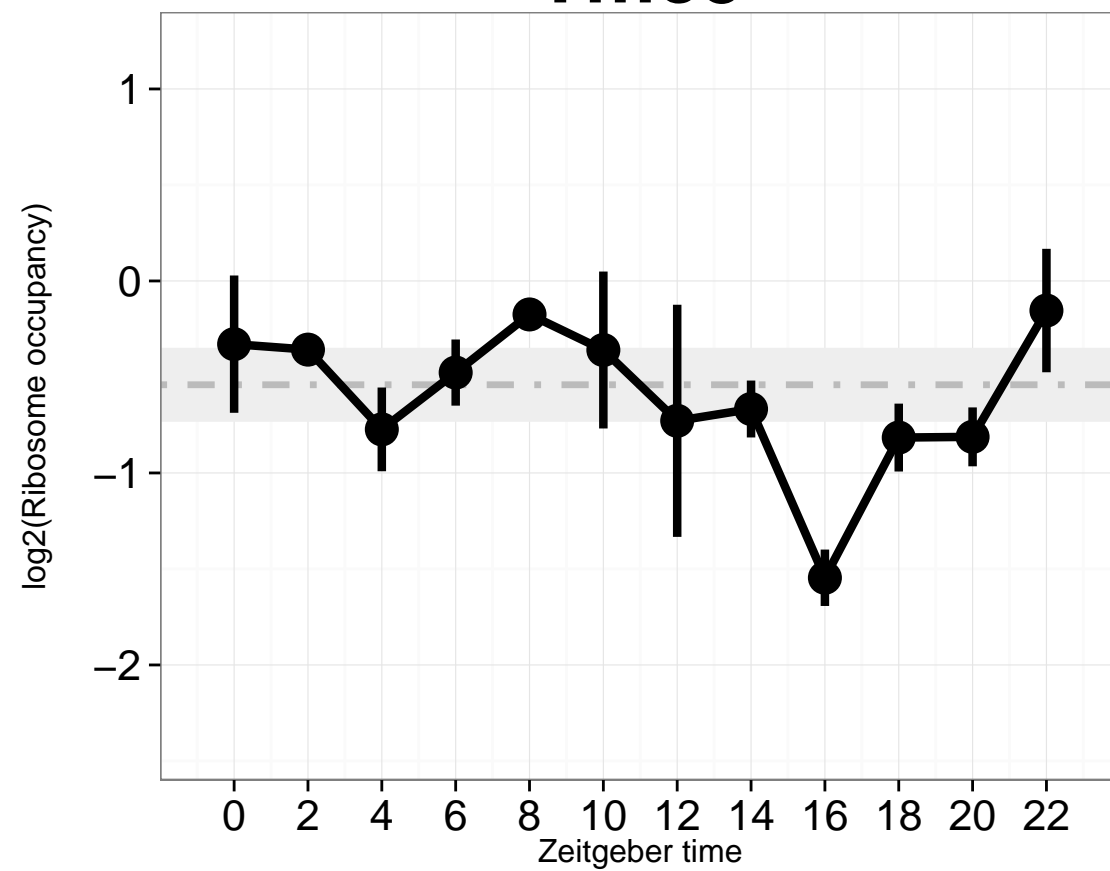

Supplement: Supplementary file 2541 [file 1]

## Phkg2

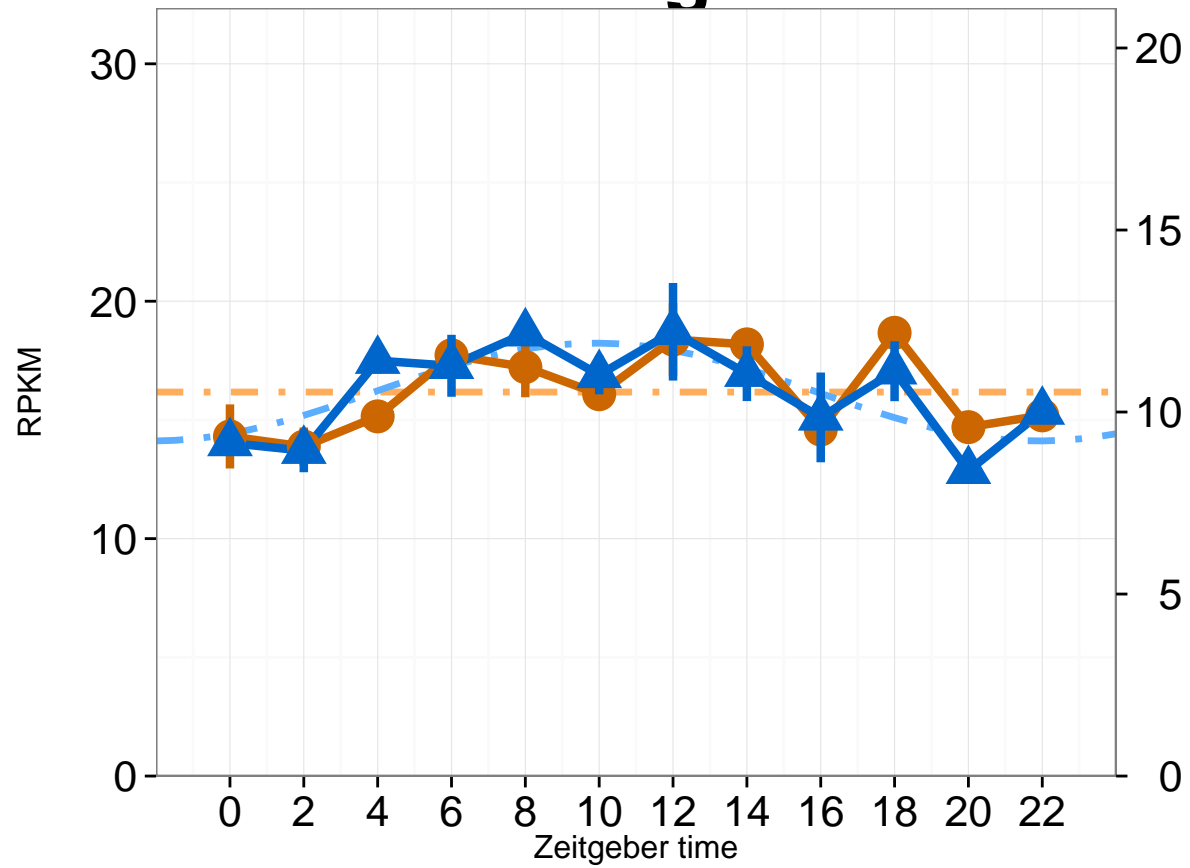

## Phkg2

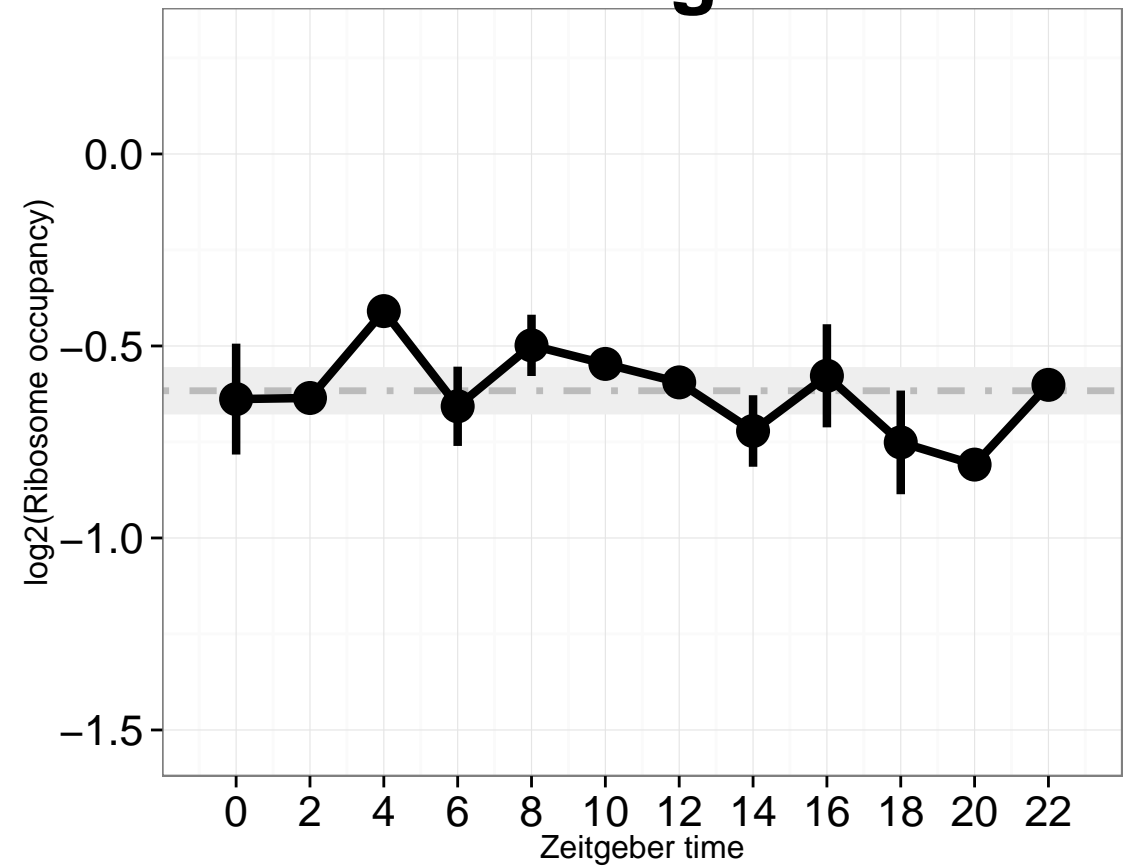

Supplement: Supplementary file 2542 [file 1]

## Eif2b4

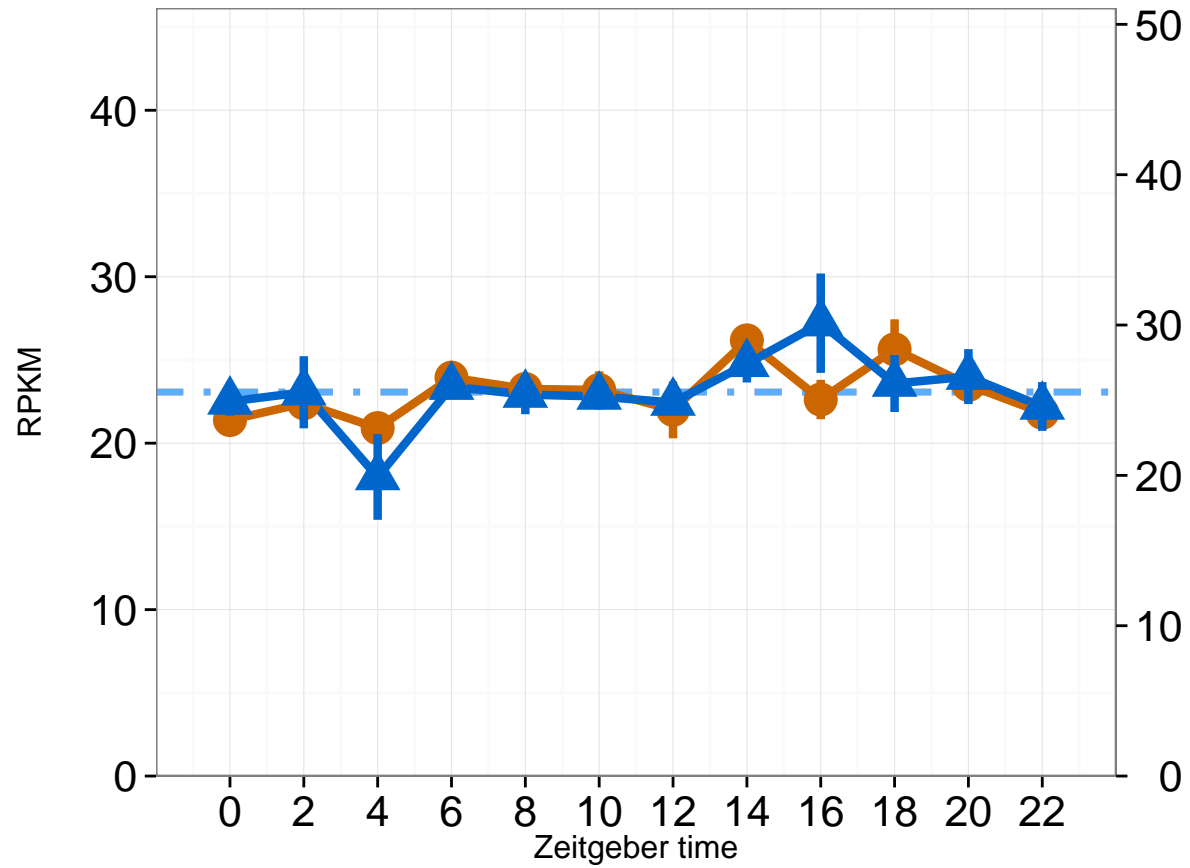

## Eif2b4

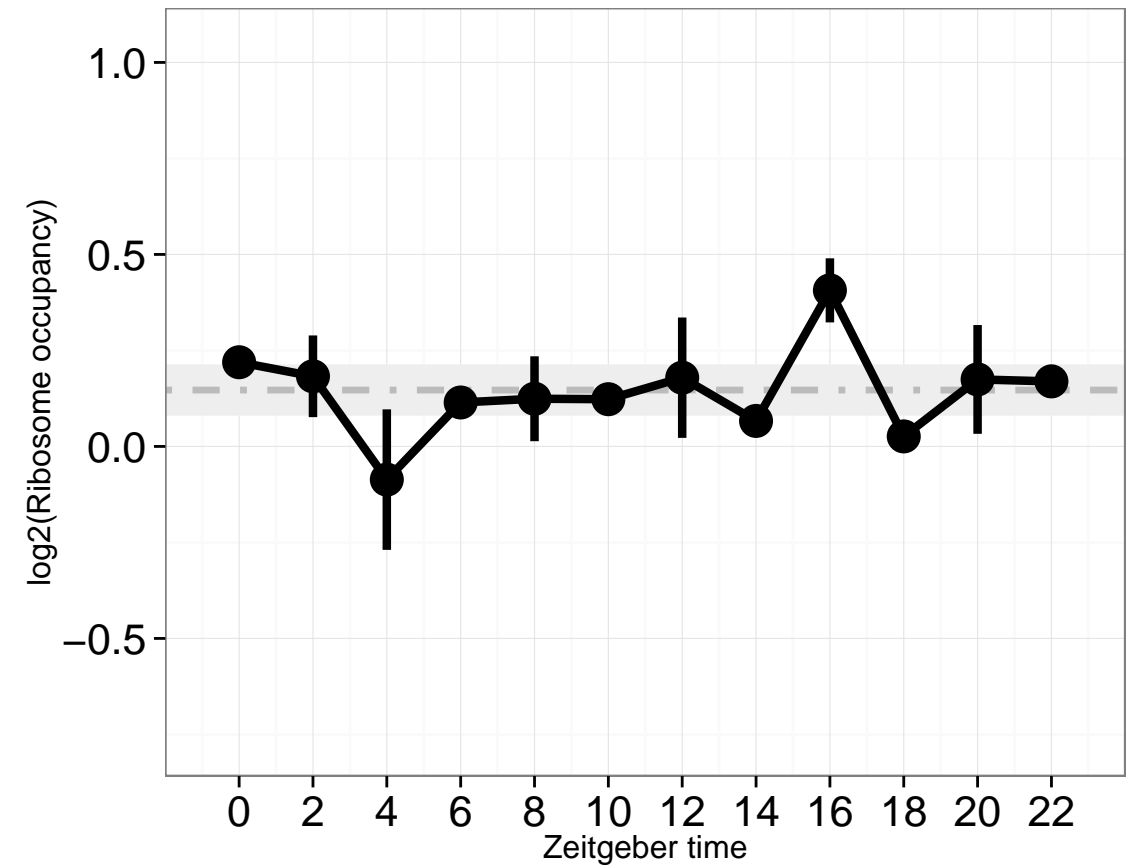

Supplement: Supplementary file 2543 [file 1]

# Trip4

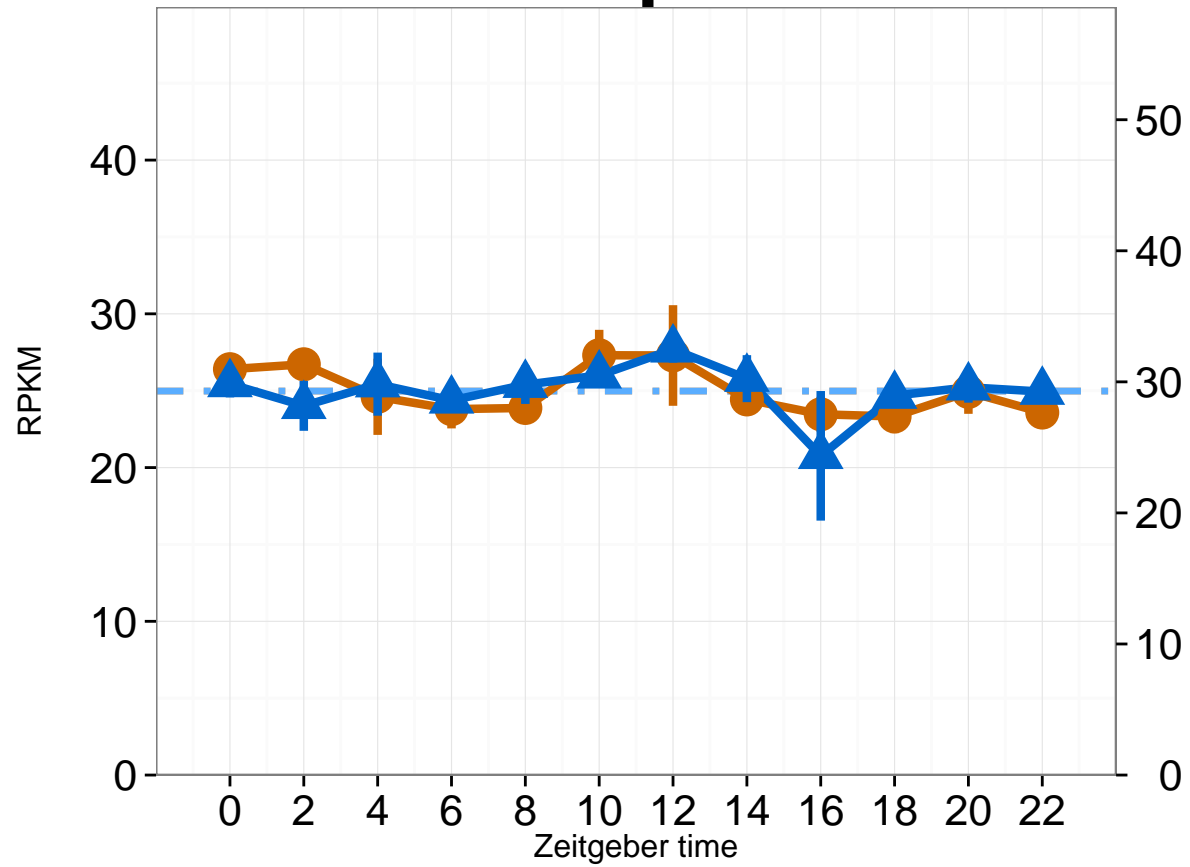

# Trip4

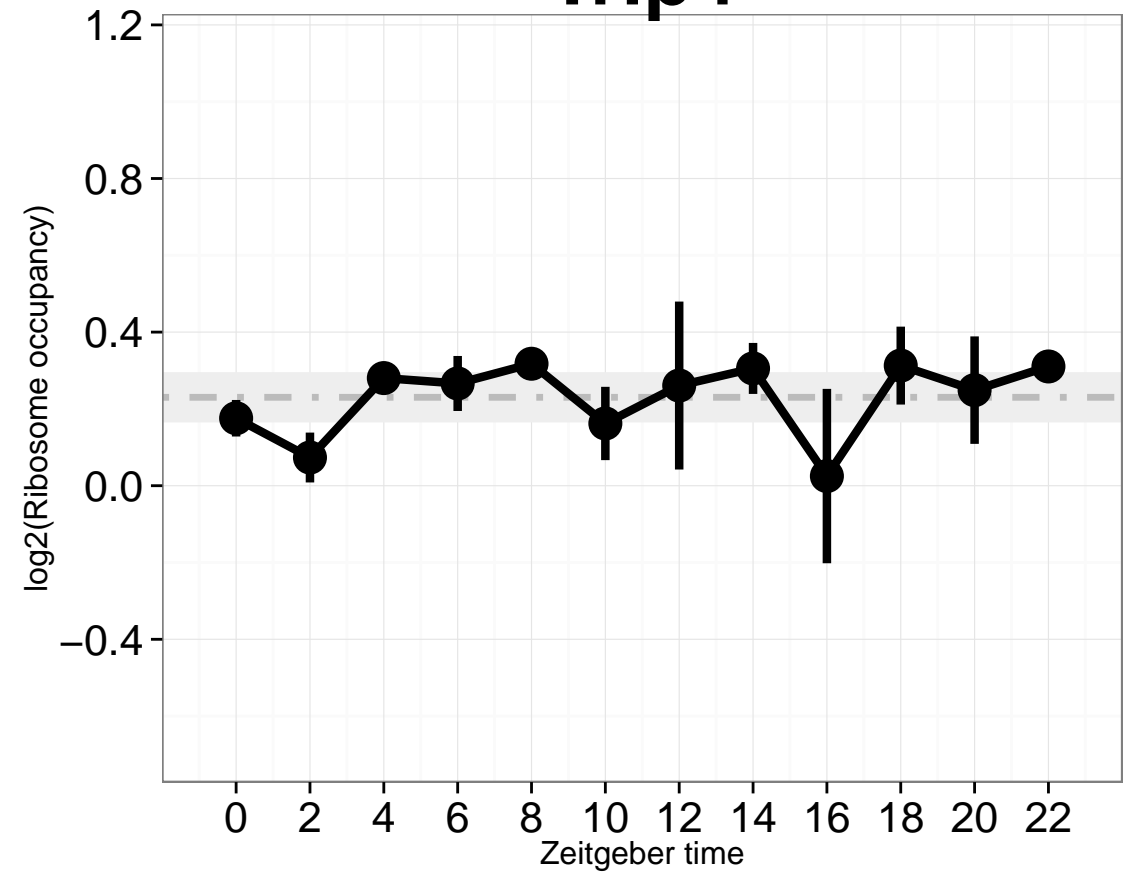

Supplement: Supplementary file 2544 [file 1]

## Ankrd17

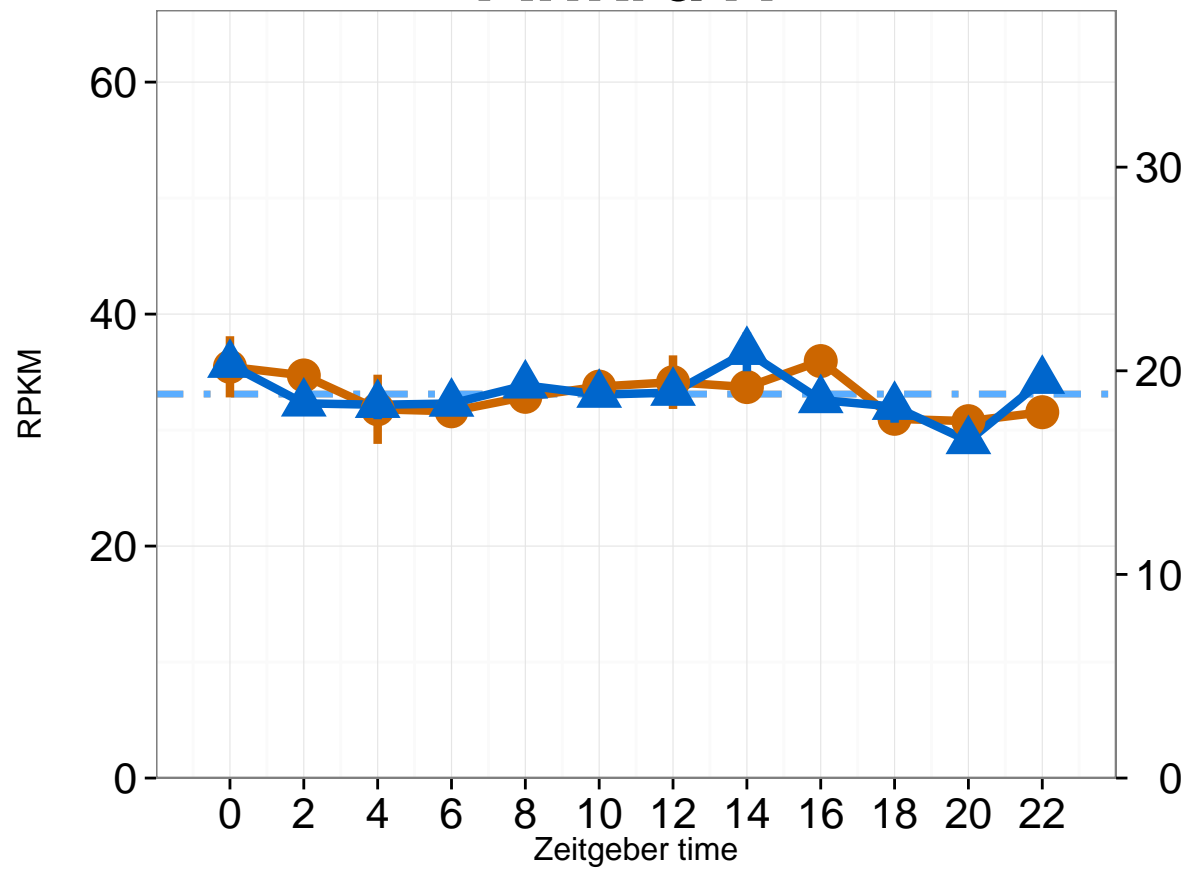

## Ankrd17

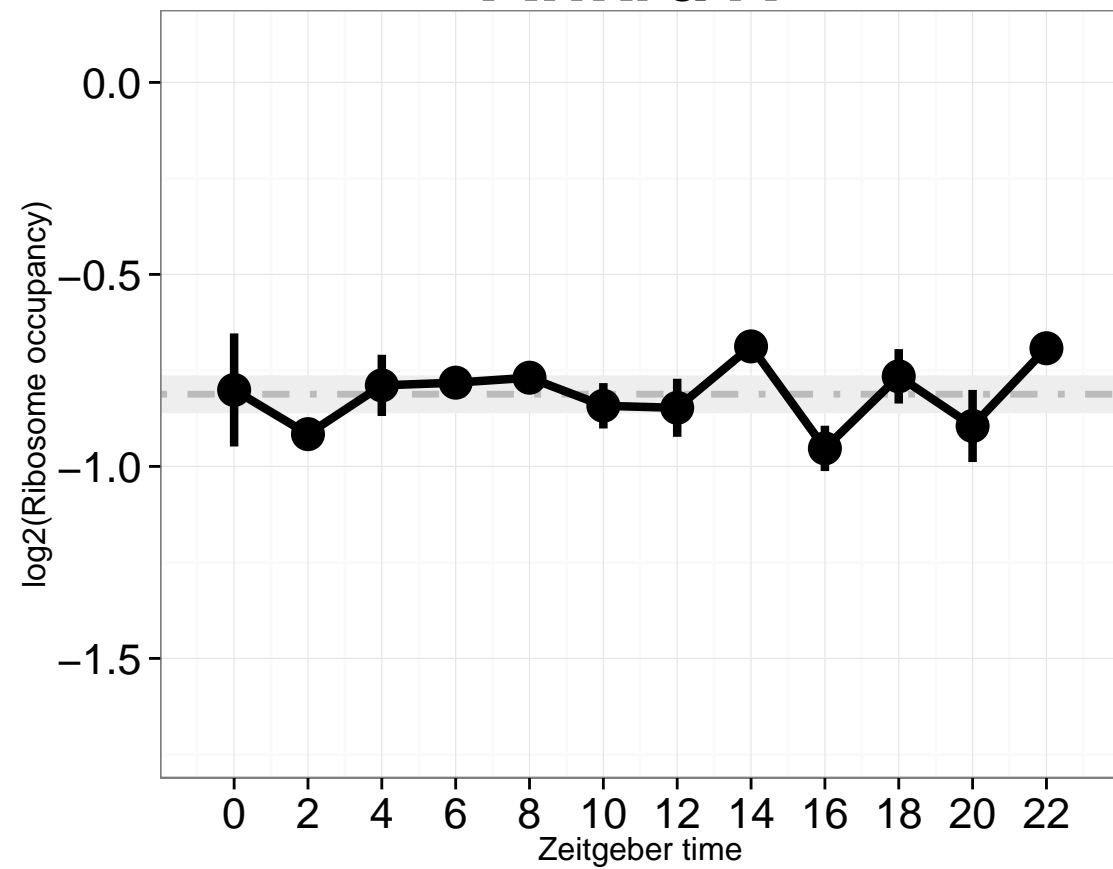

Supplement: Supplementary file 2545 [file 1]

# Fxyd2

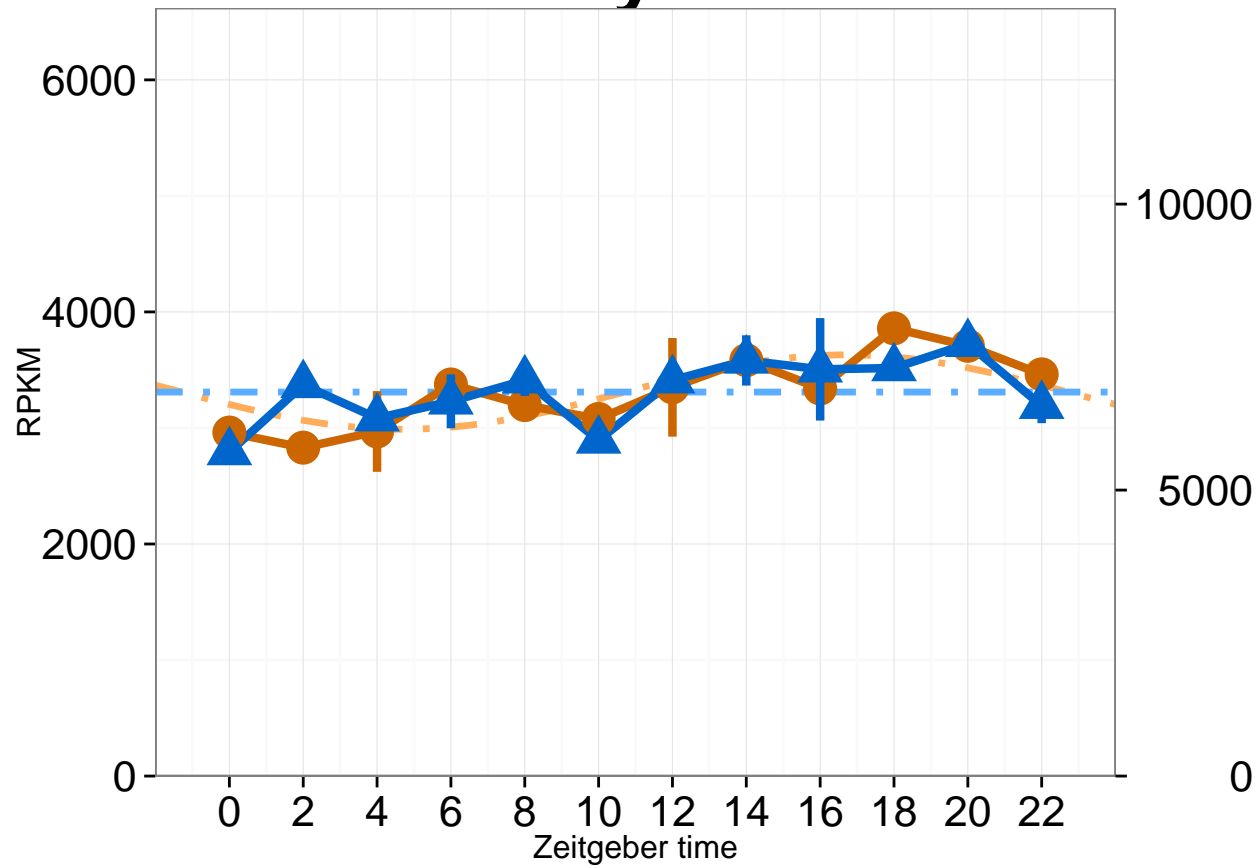

# Fxyd2

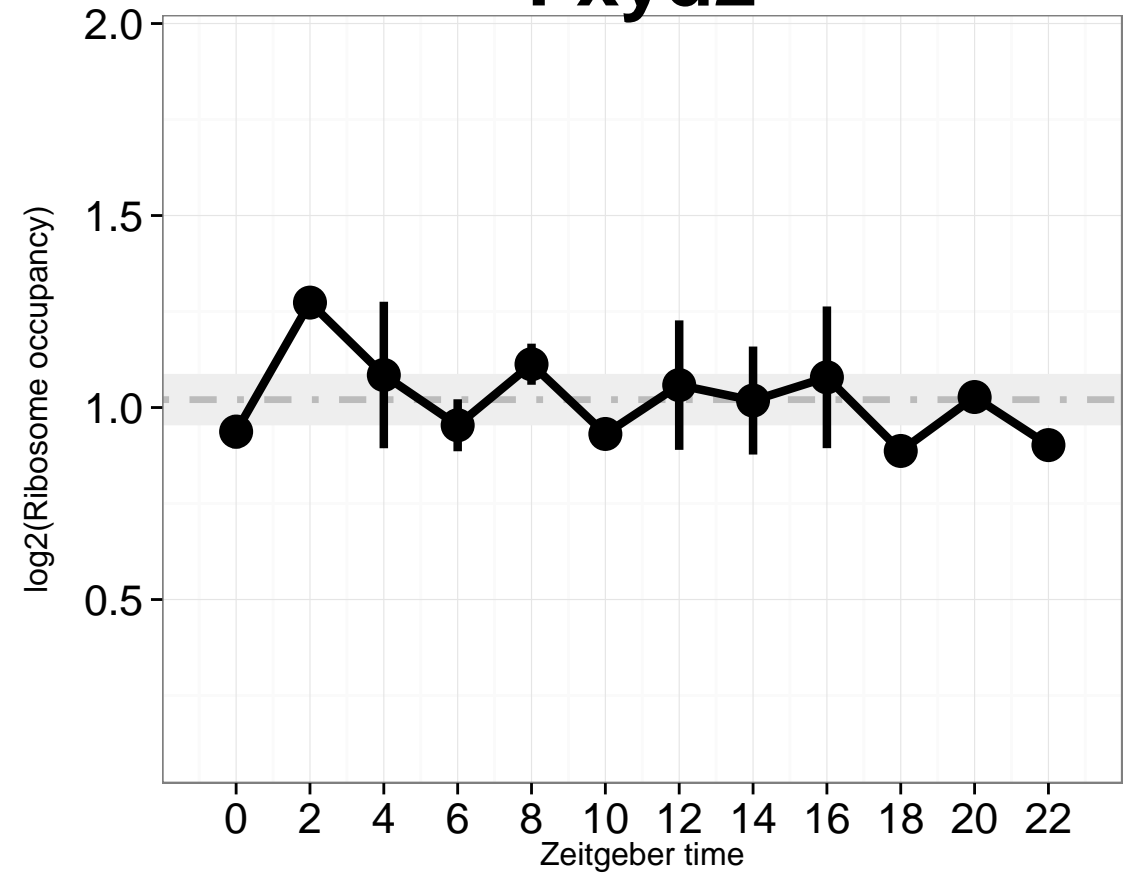

Supplement: Supplementary file 2546 [file 1]

# Ndufc2

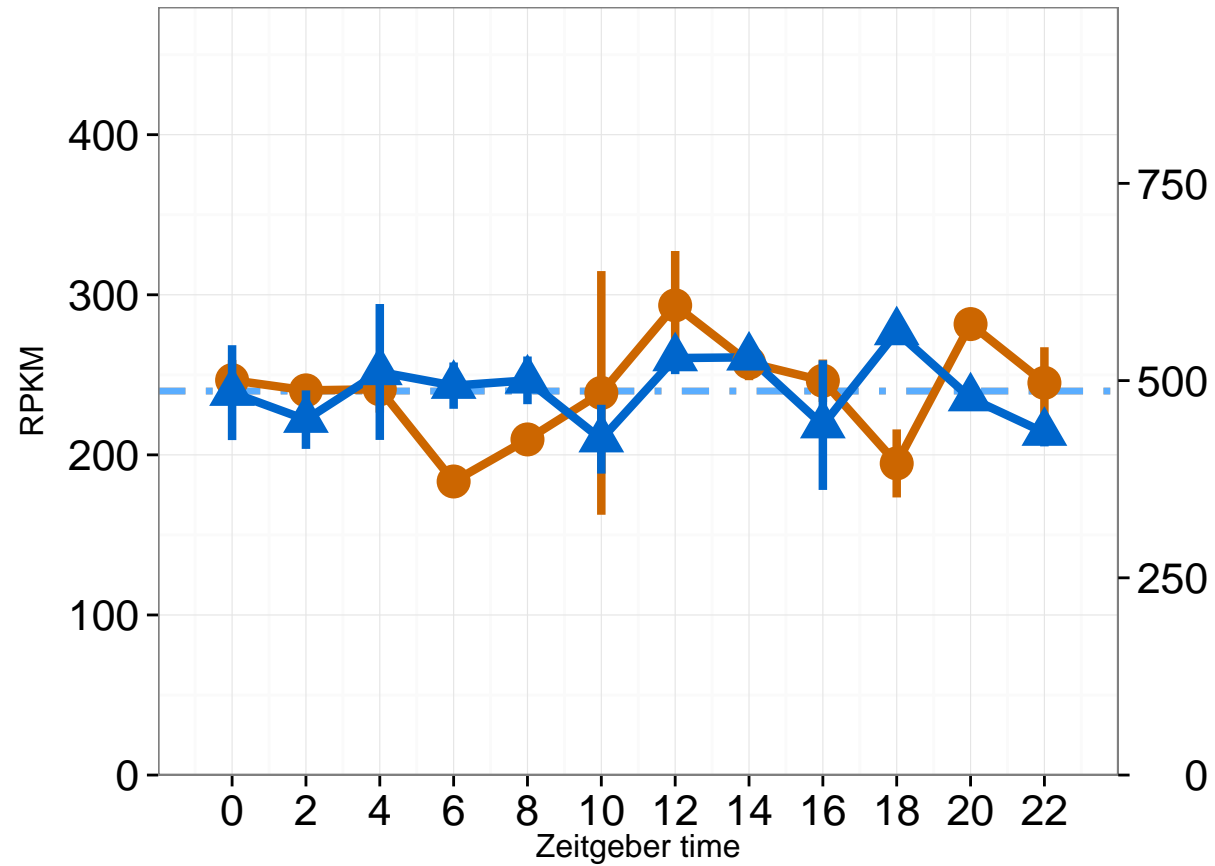

# Ndufc2

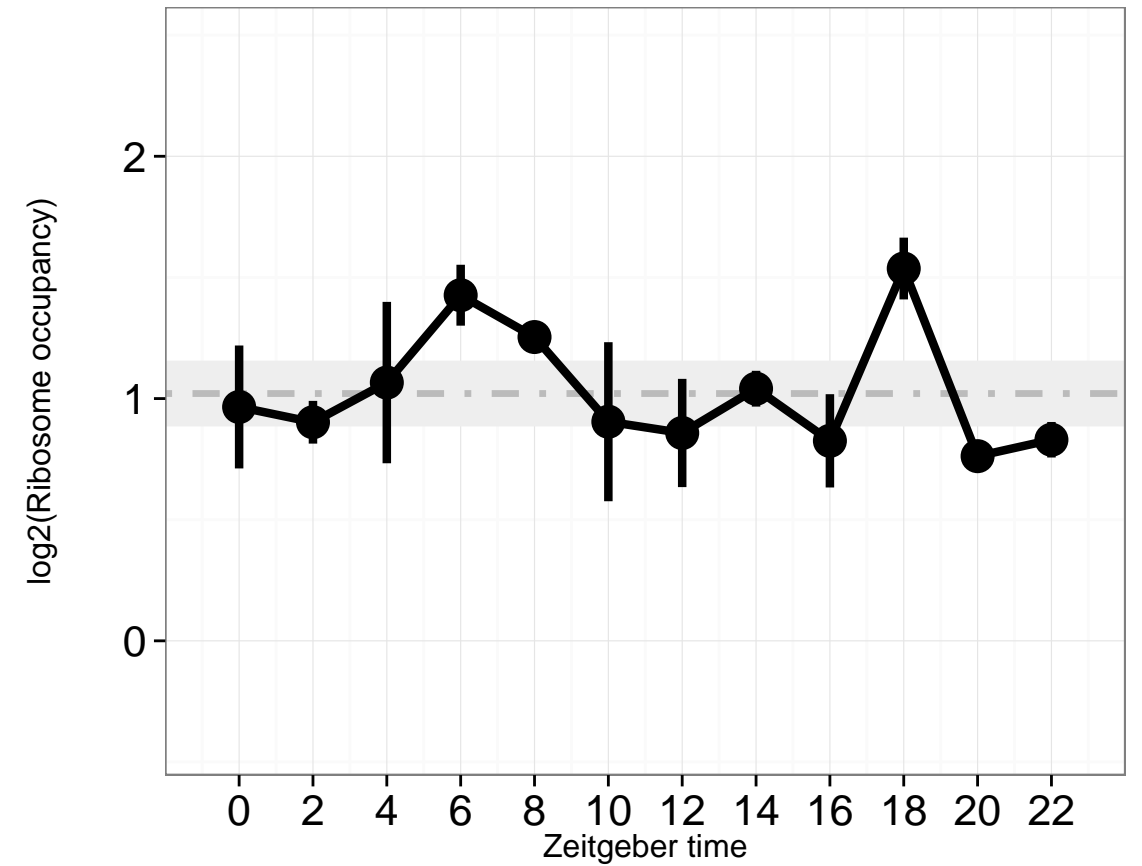

Supplement: Supplementary file 2547 [file 1]

# Tpr

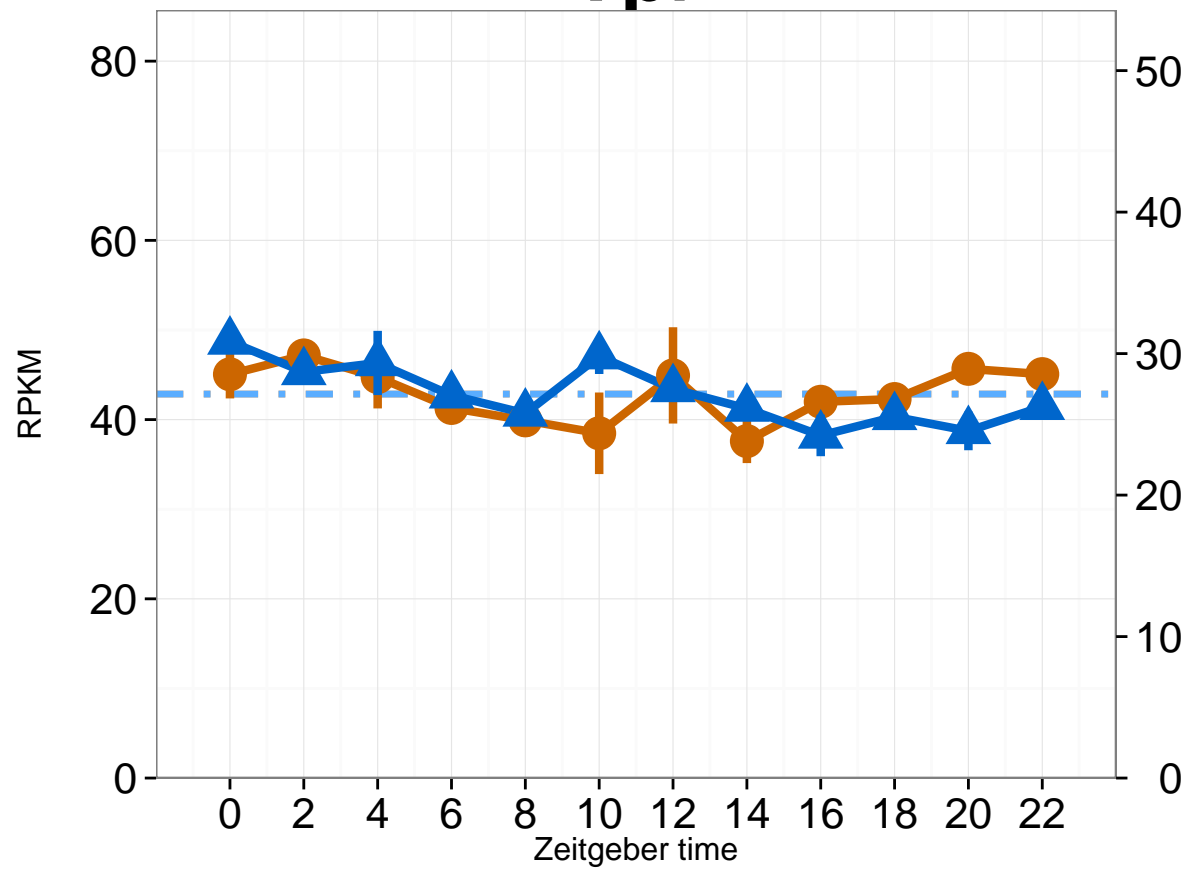

# Tpr

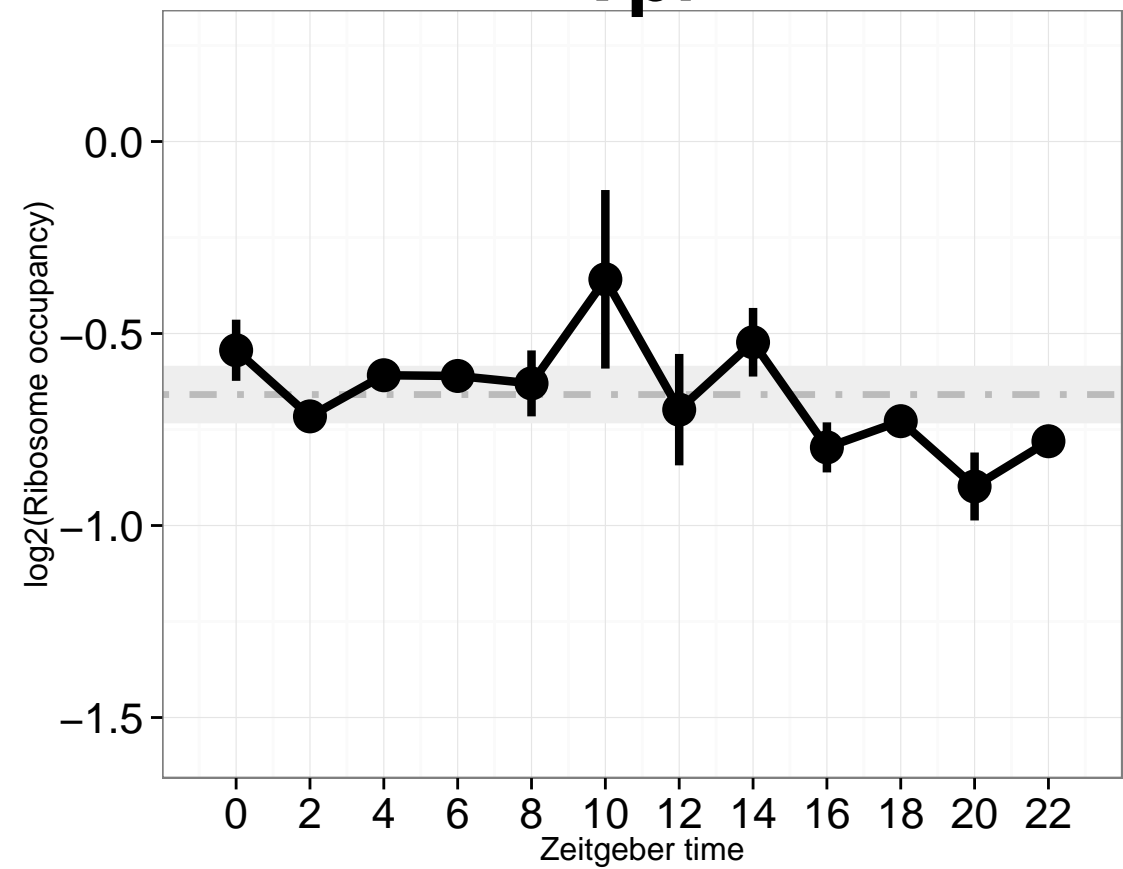

Supplement: Supplementary file 2548 [file 1]

# Ppp3r1

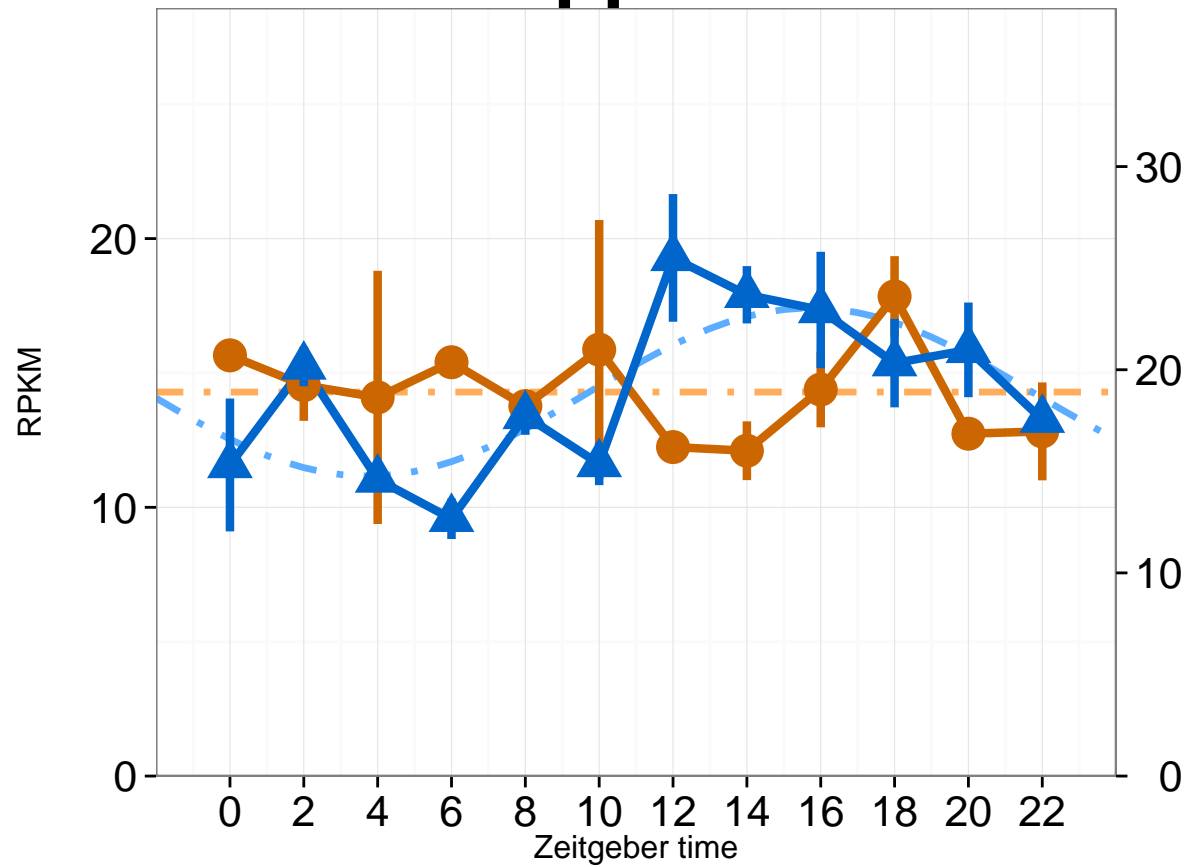

# Ppp3r1

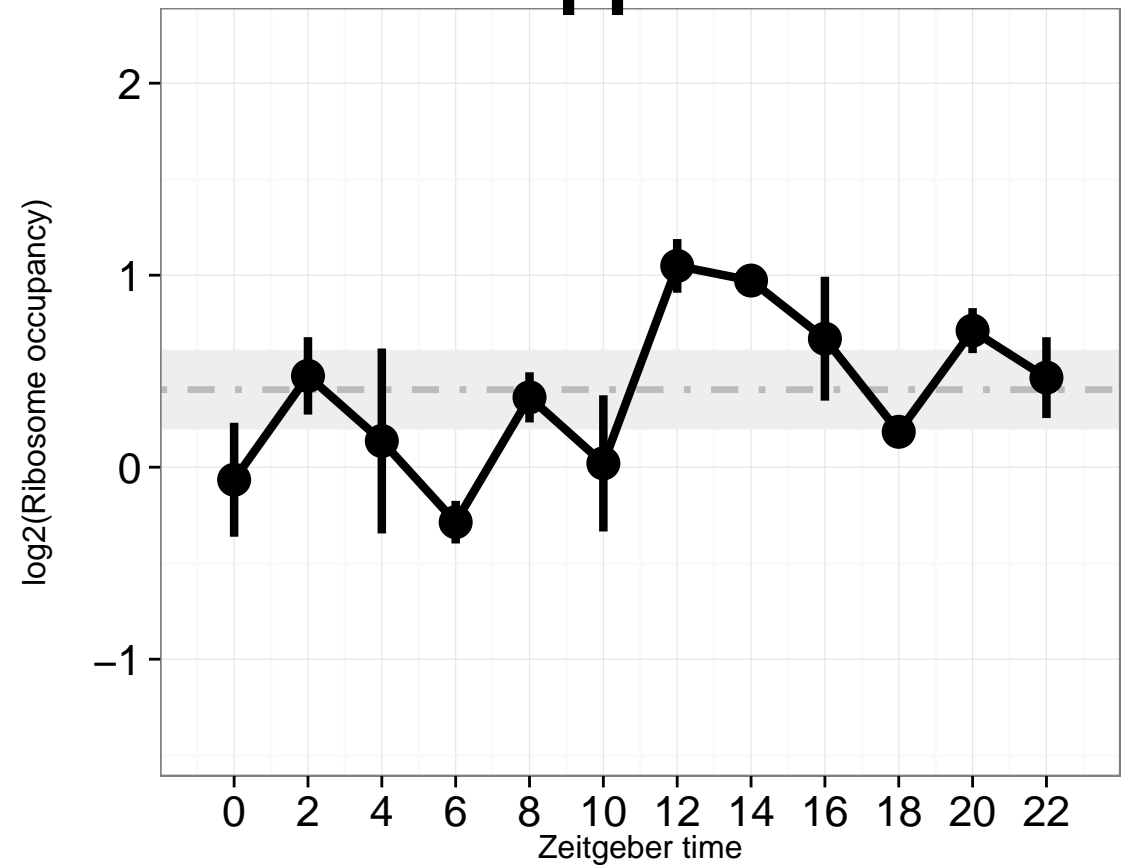

Supplement: Supplementary file 2549 [file 1]

# Csnk1g1

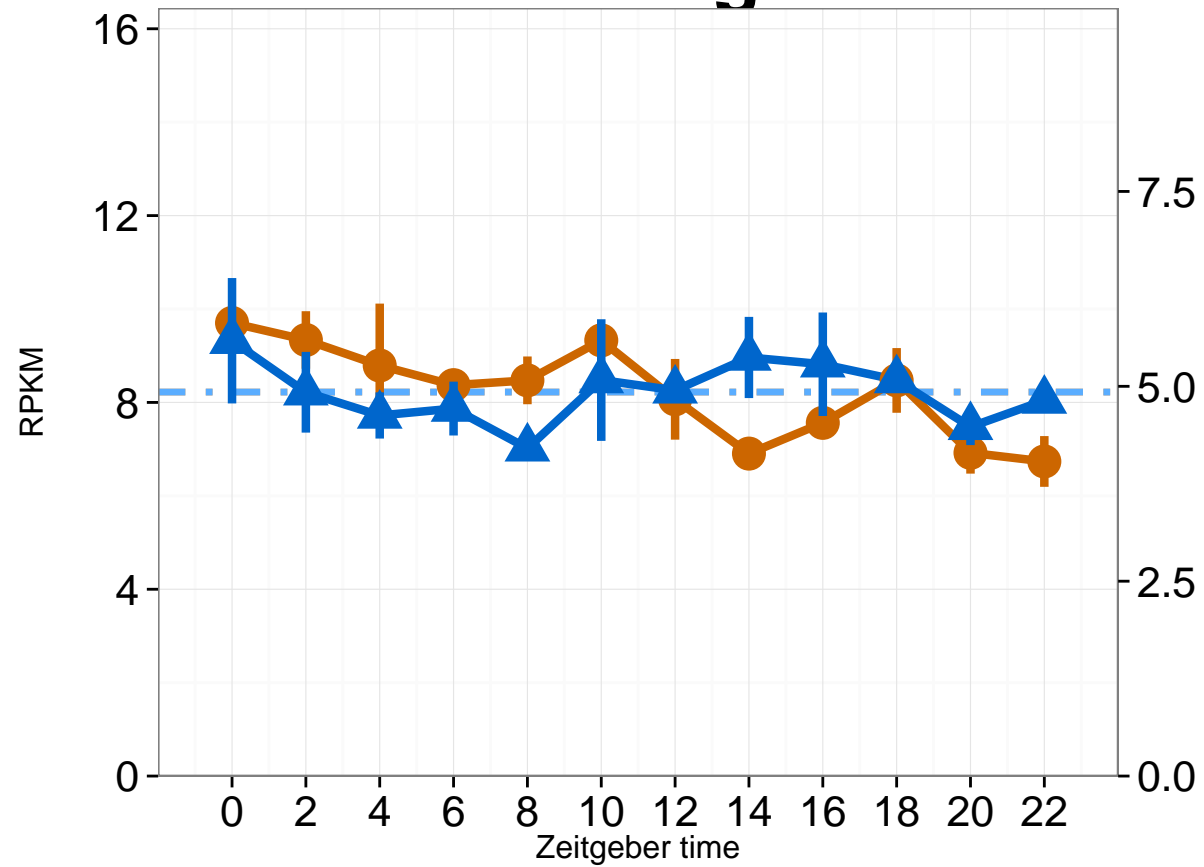

# Csnk1g1

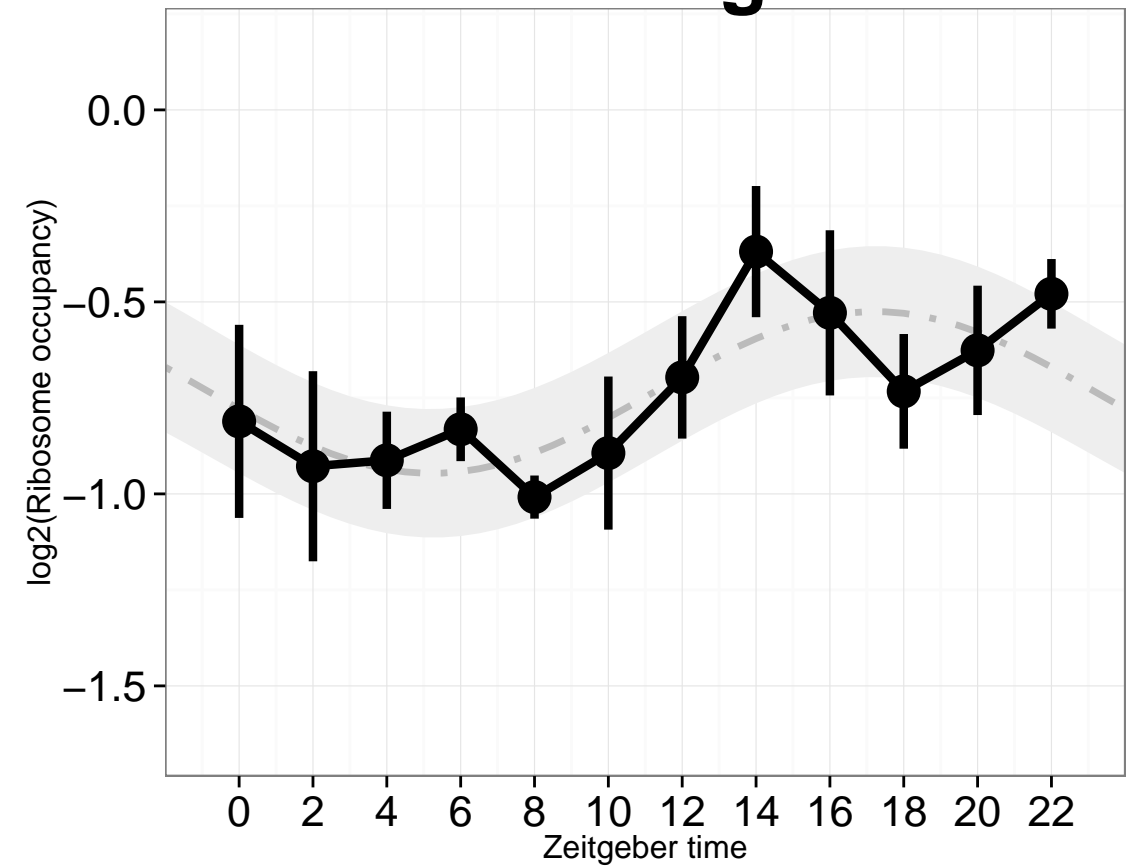

Supplement: Supplementary file 2550 [file 1]

## Sccpdh

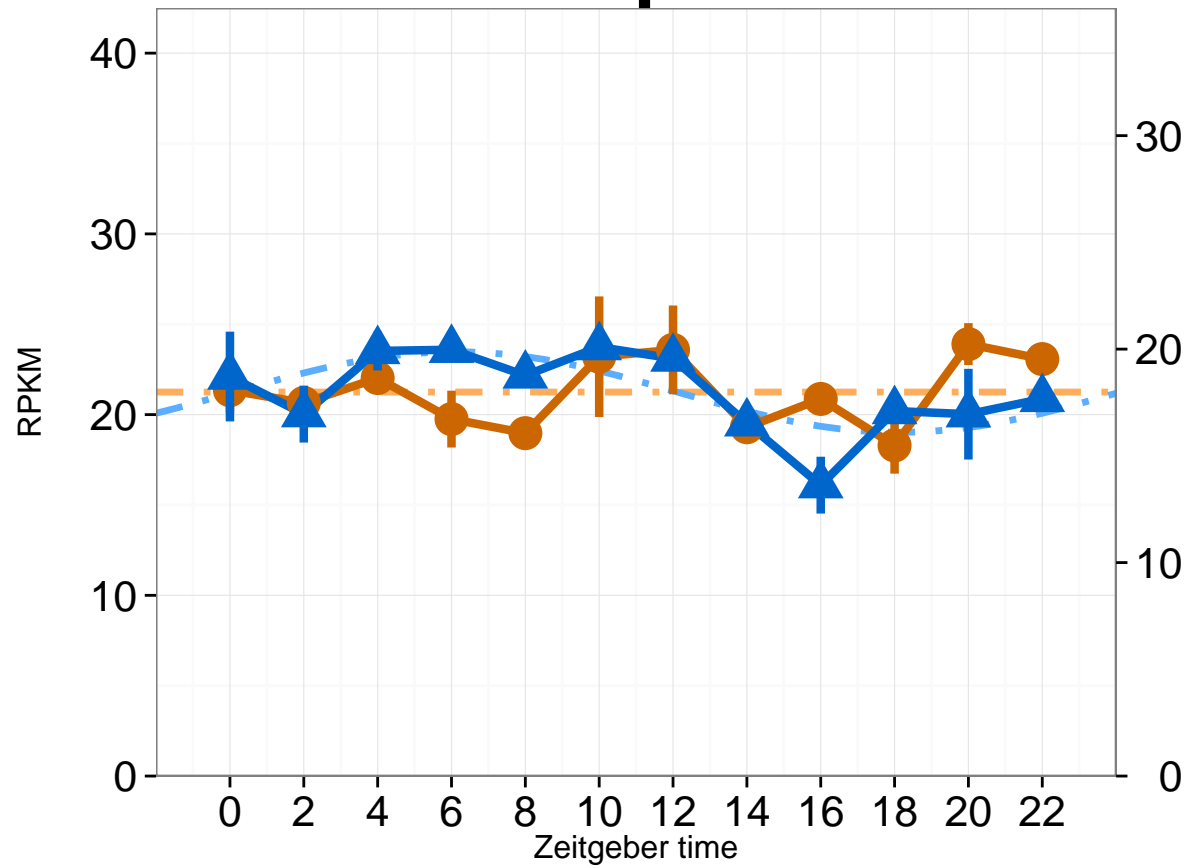

## Sccpdh

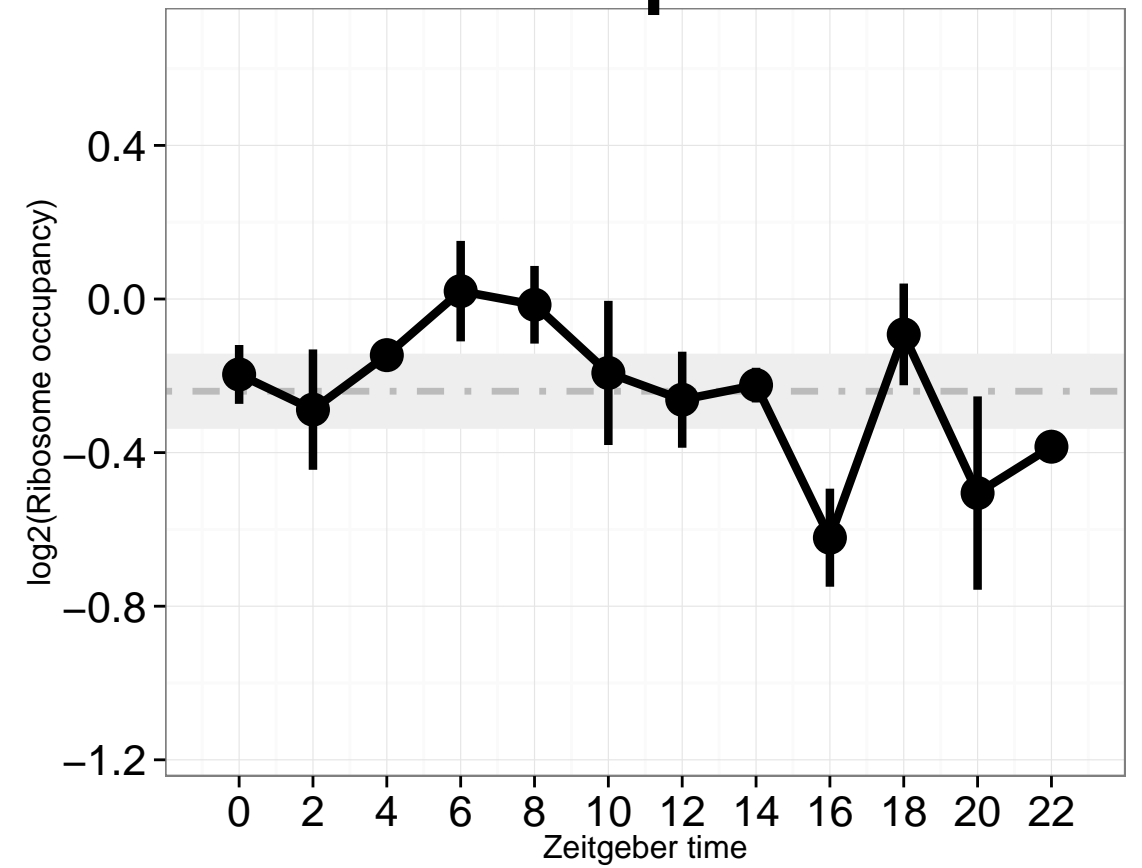

Supplement: Supplementary file 2551 [file 1]

## Nid1

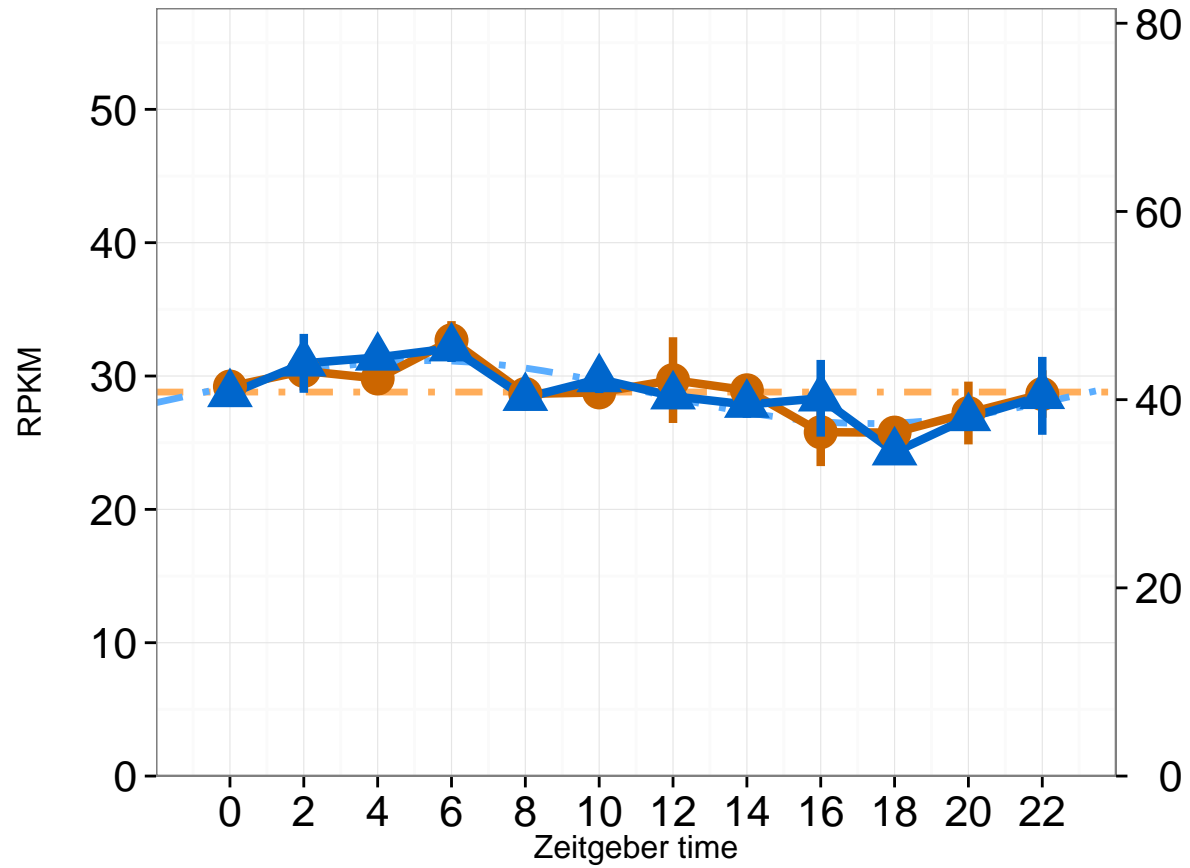

## Nid1

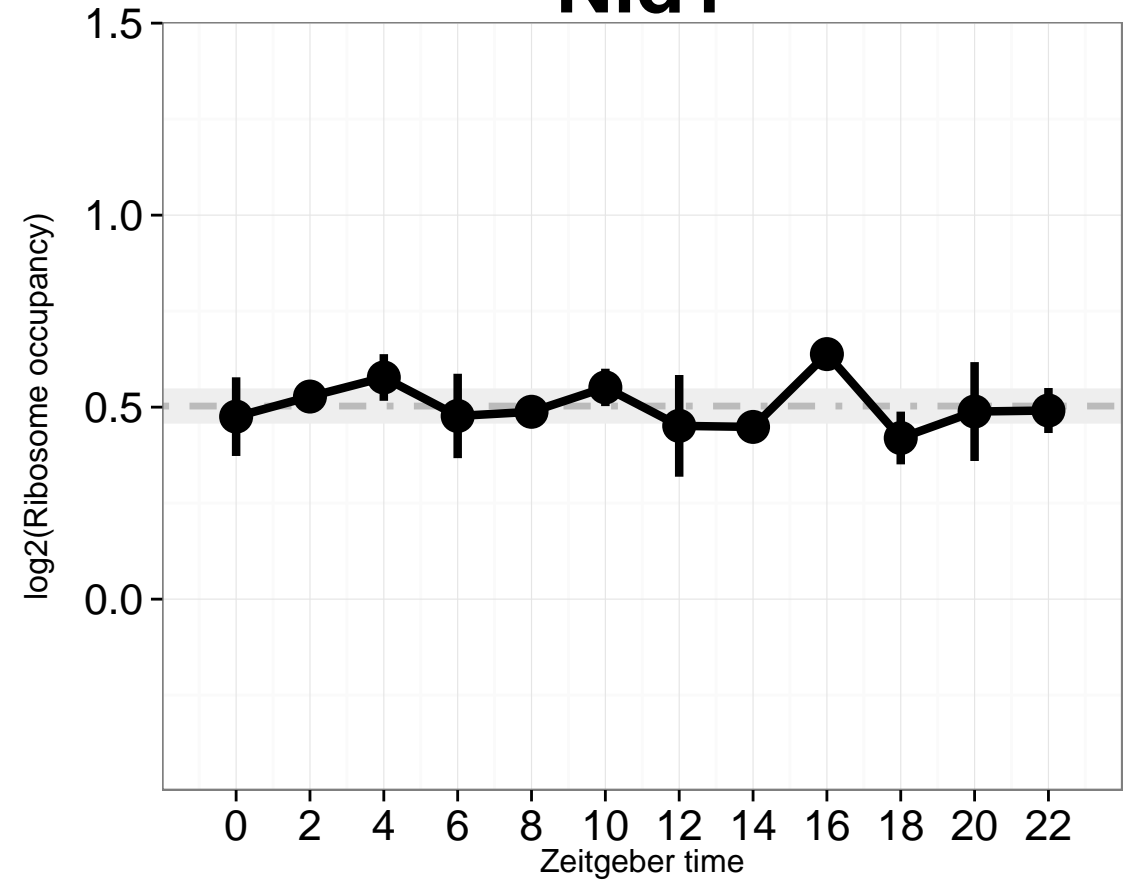

Supplement: Supplementary file 2552 [file 1]

# Gbp10

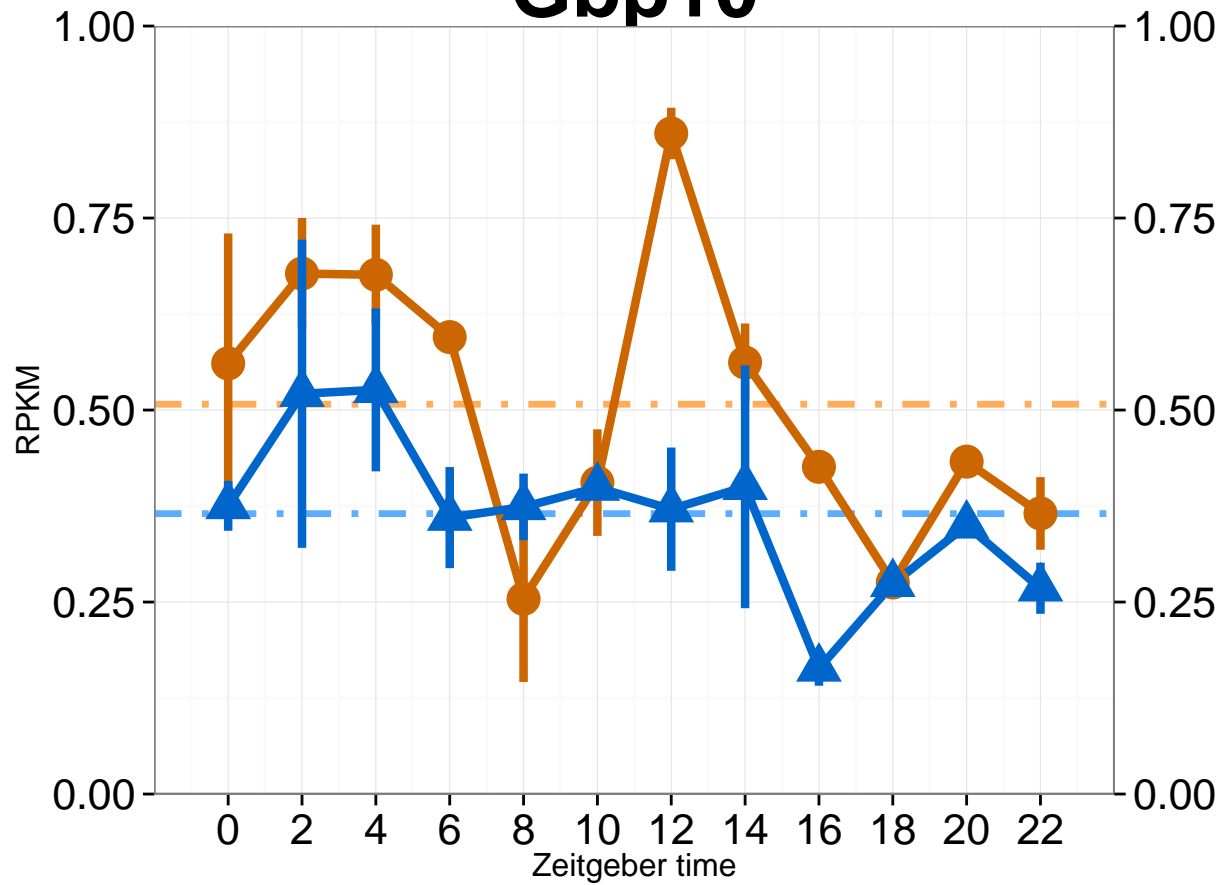

# Gbp10

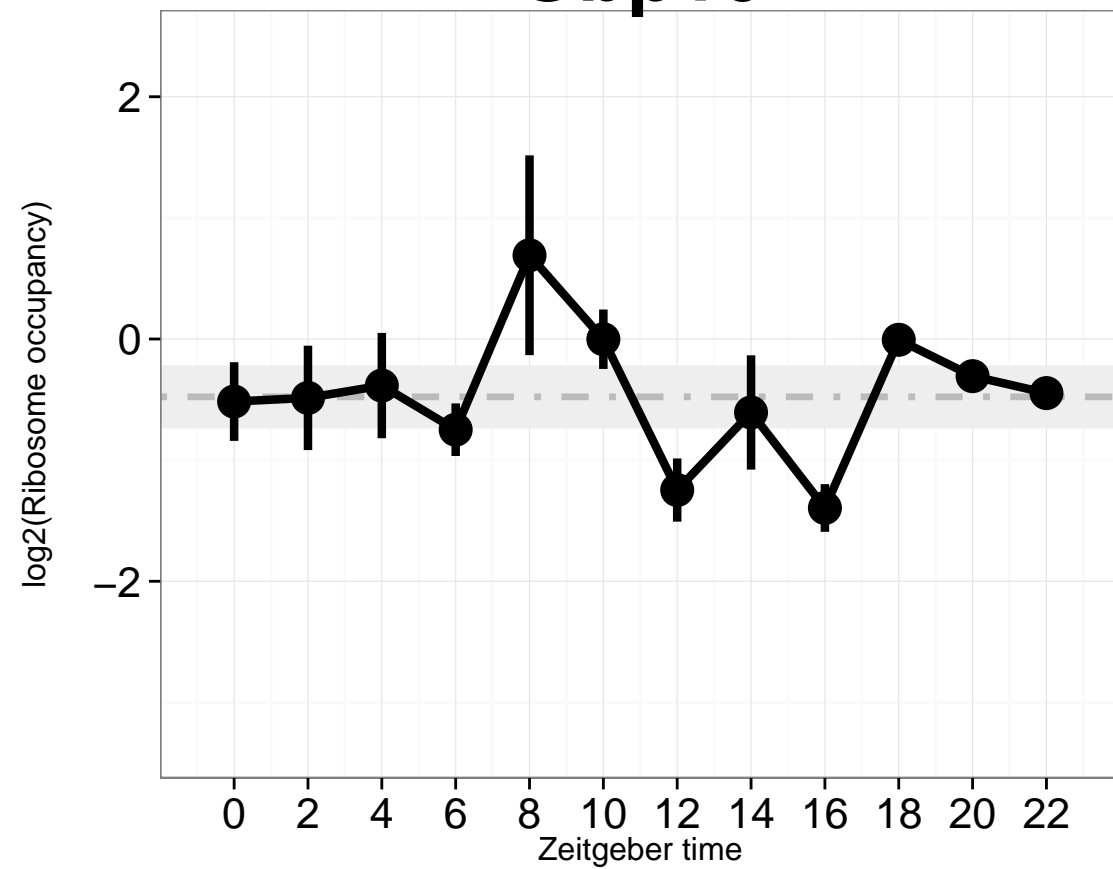

Supplement: Supplementary file 2553 [file 1]

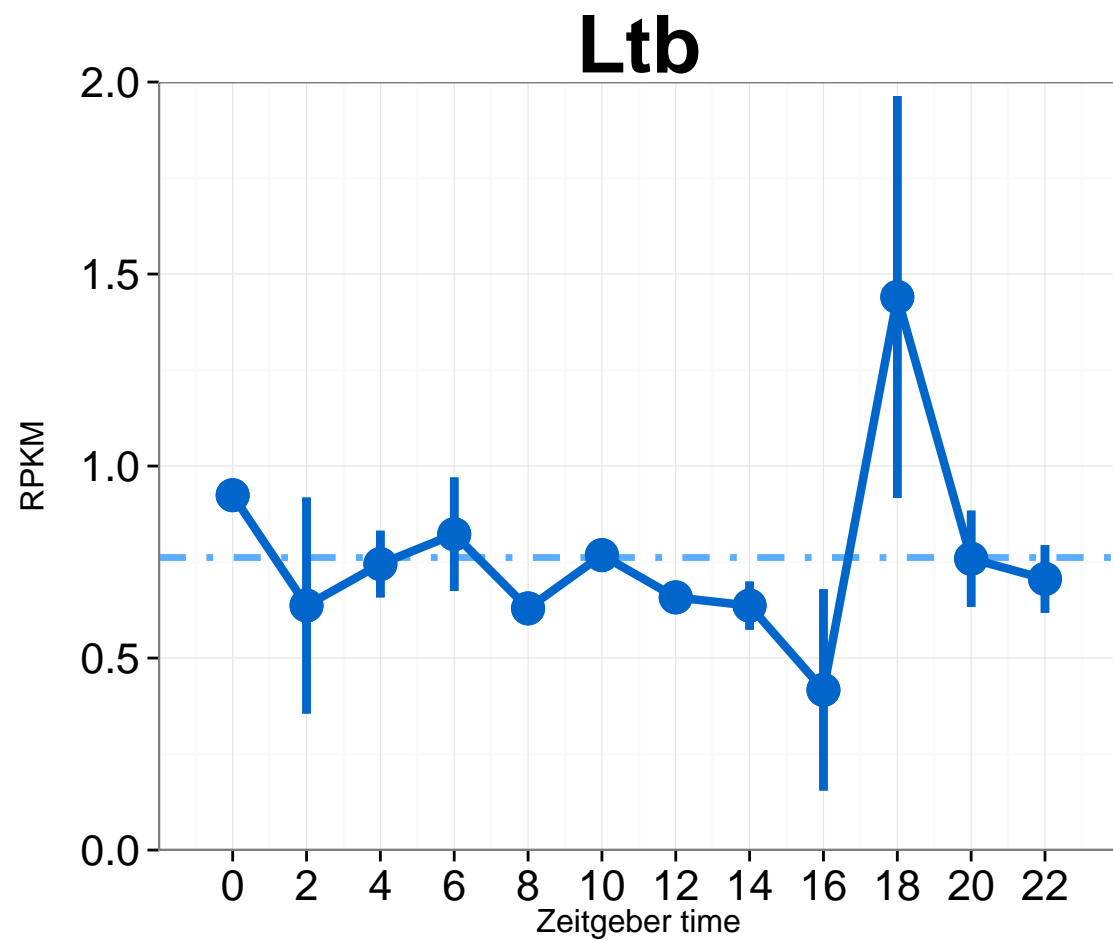

### Ltb log2(Ribosome occupancy)

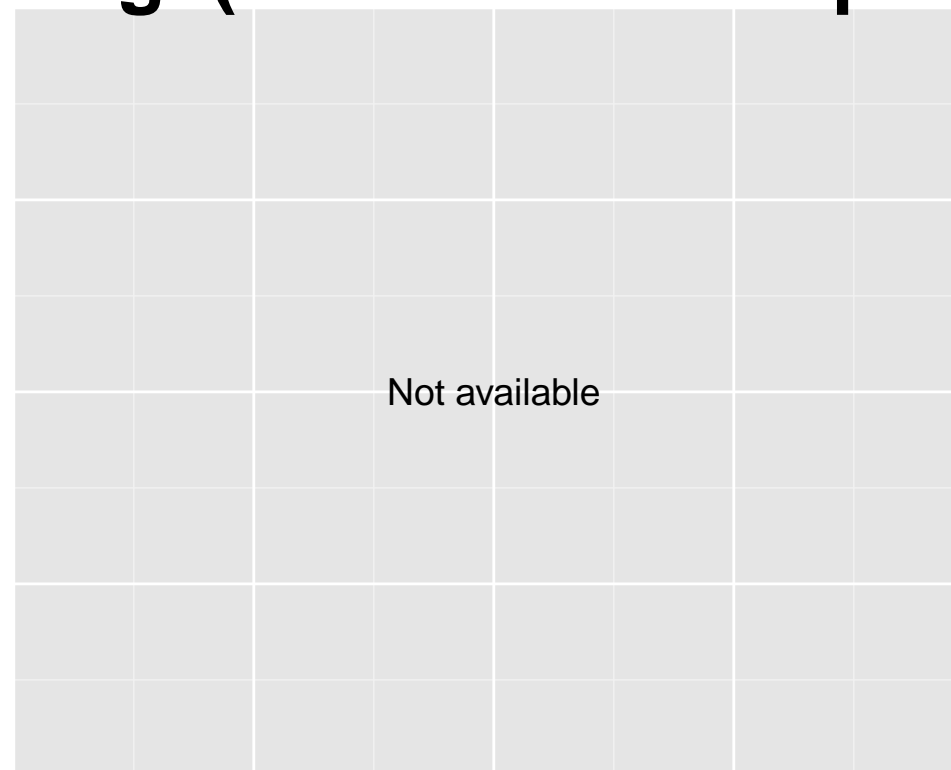

Supplement: Supplementary file 2554 [file 1]

# Bms1

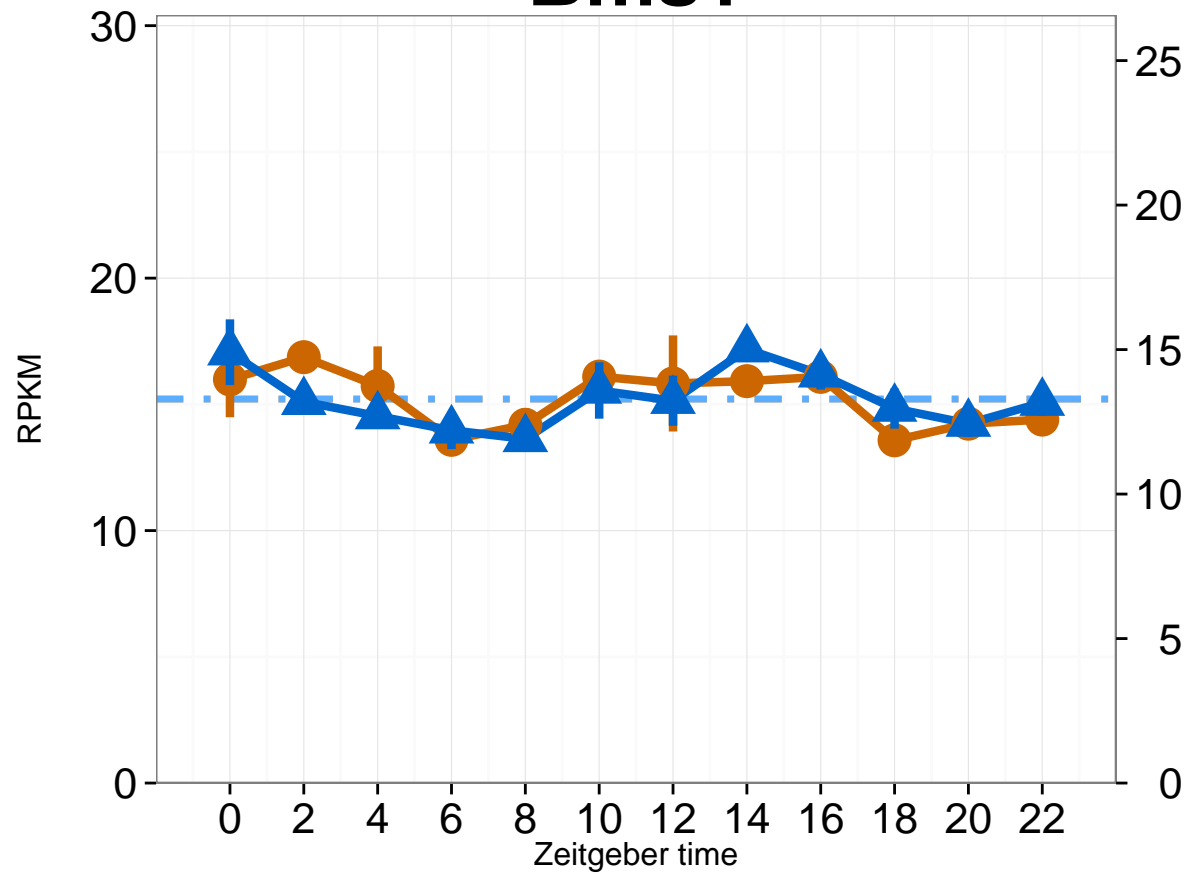

# Bms1

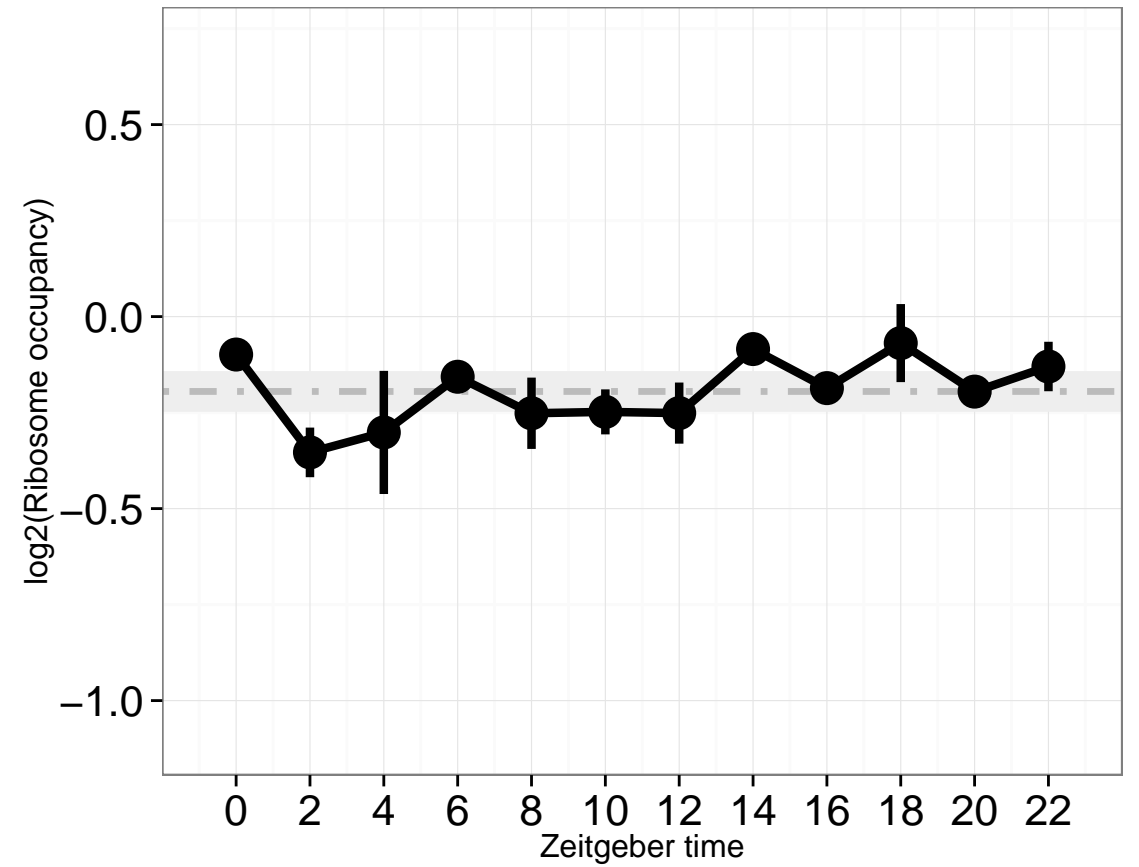

Supplement: Supplementary file 2555 [file 1]

# Efna3

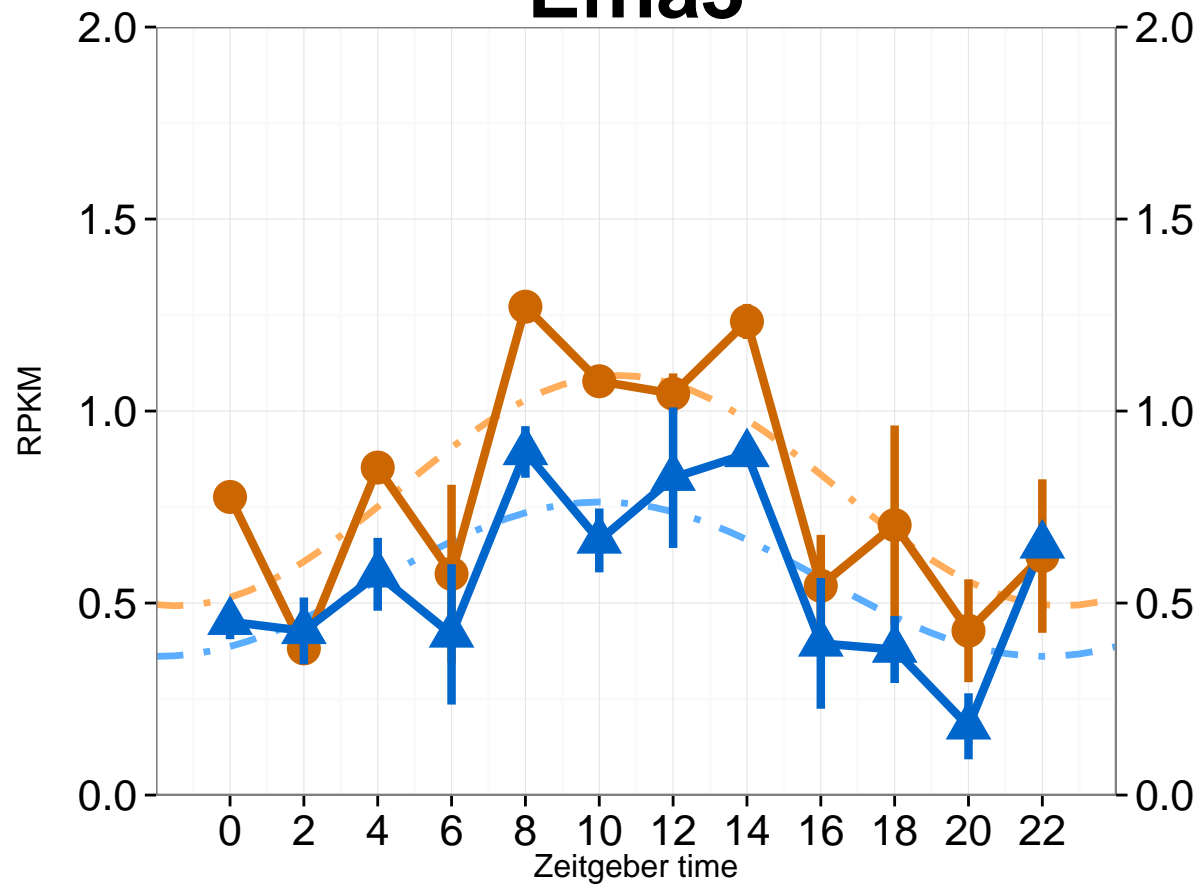

# Efna3

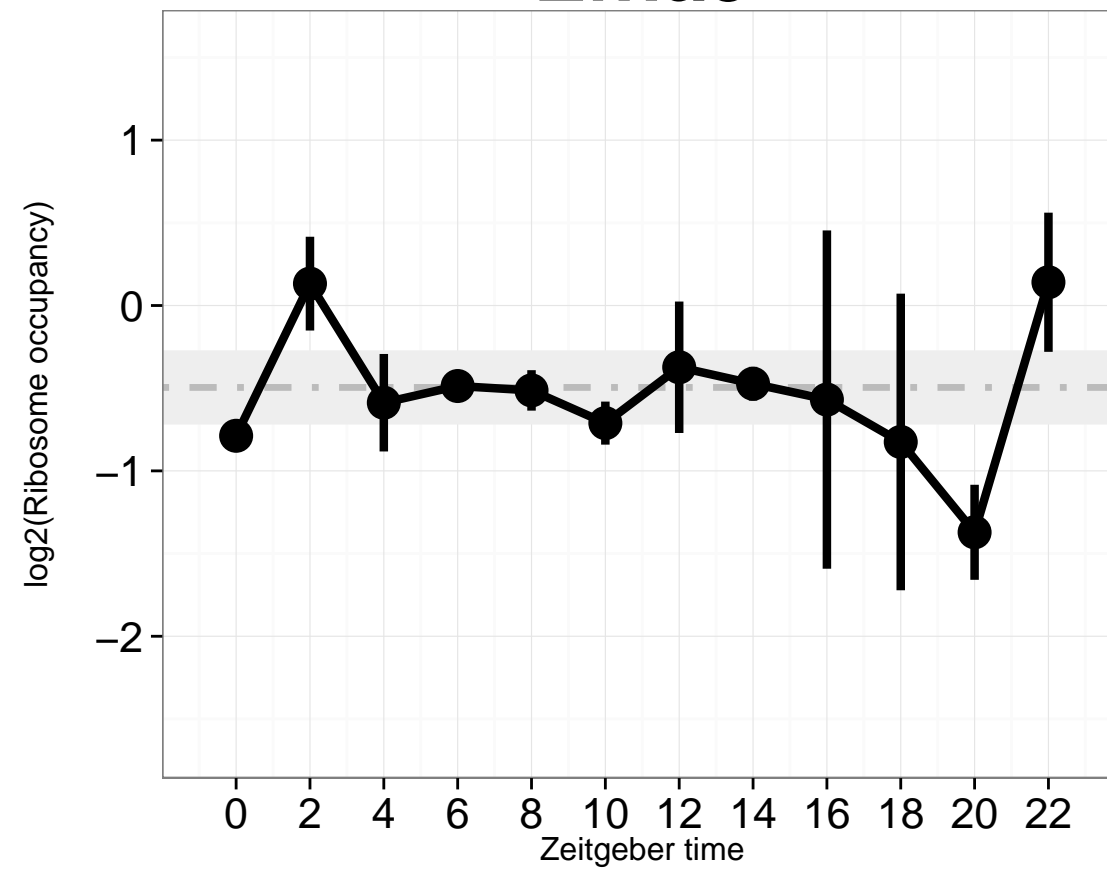

Supplement: Supplementary file 2556 [file 1]

## Hcls1

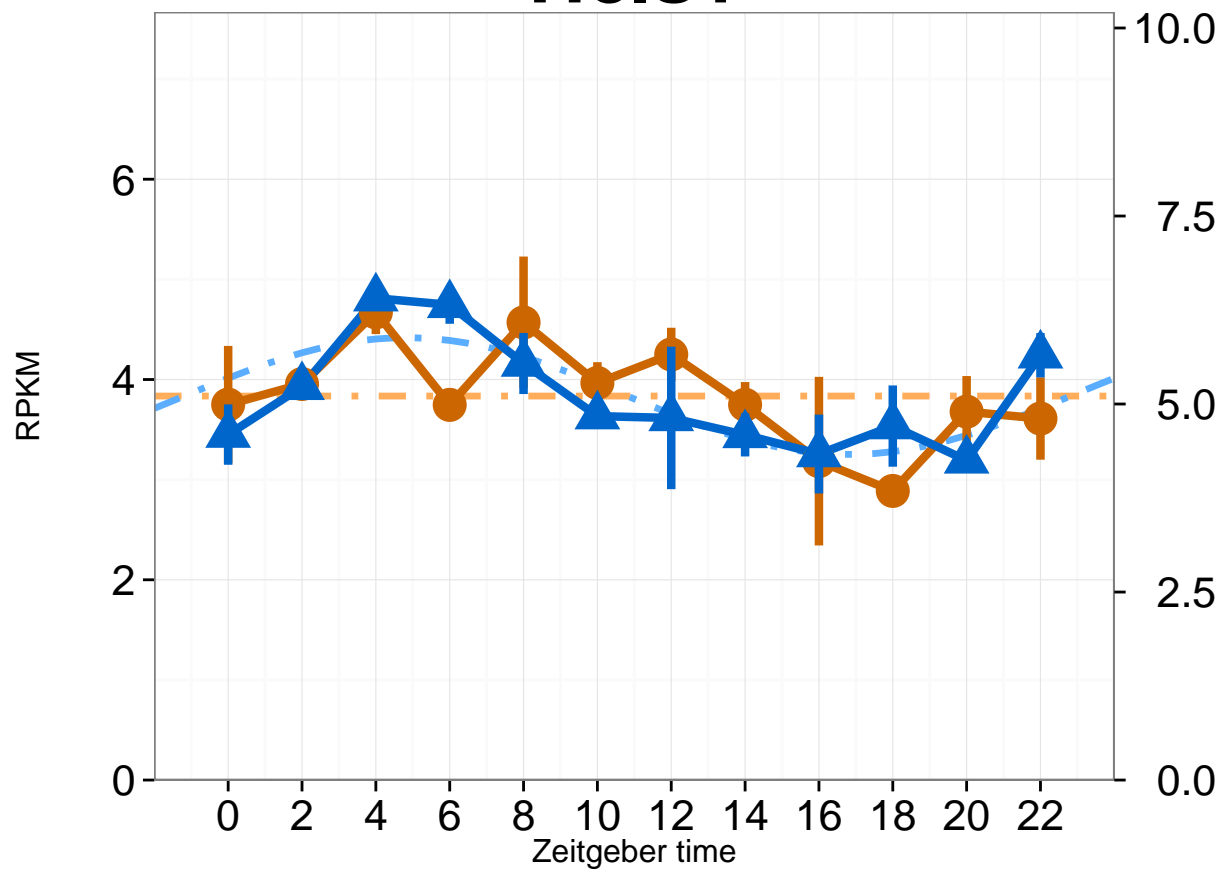

## Hcls1

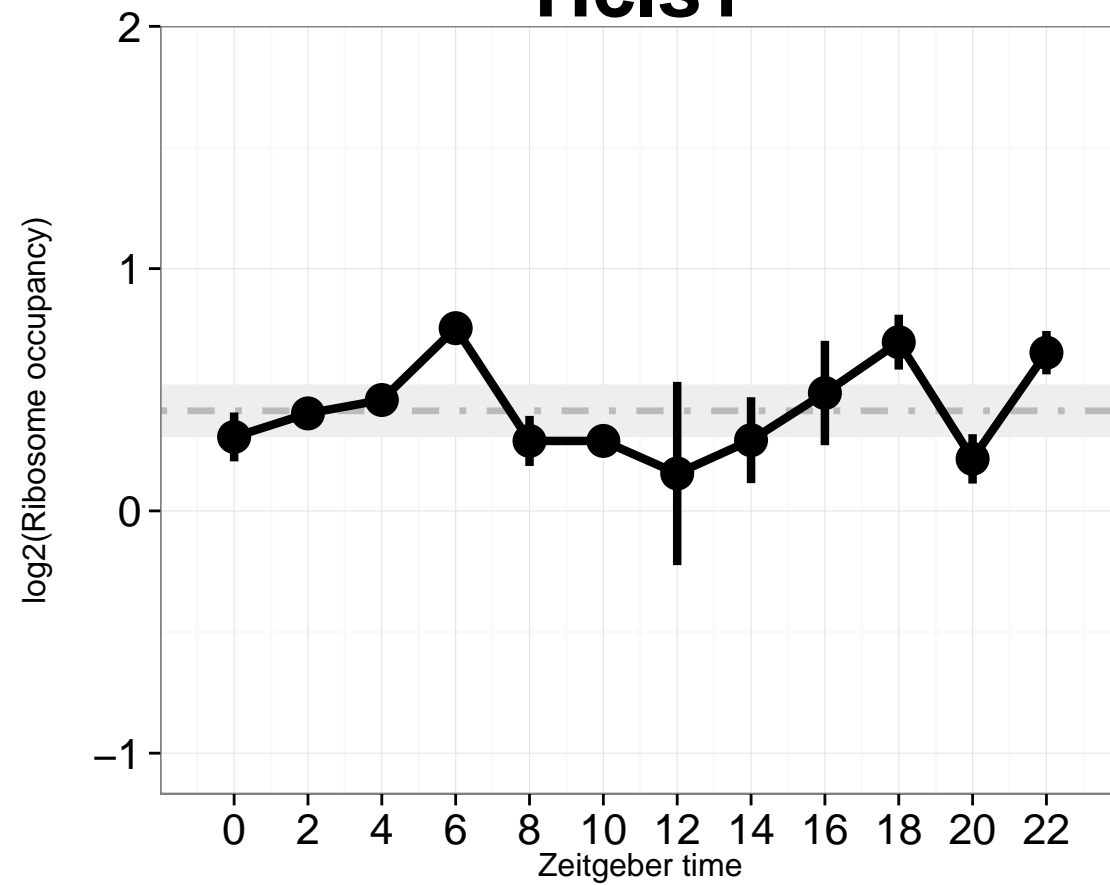

Supplement: Supplementary file 2557 [file 1]

## Elavl1

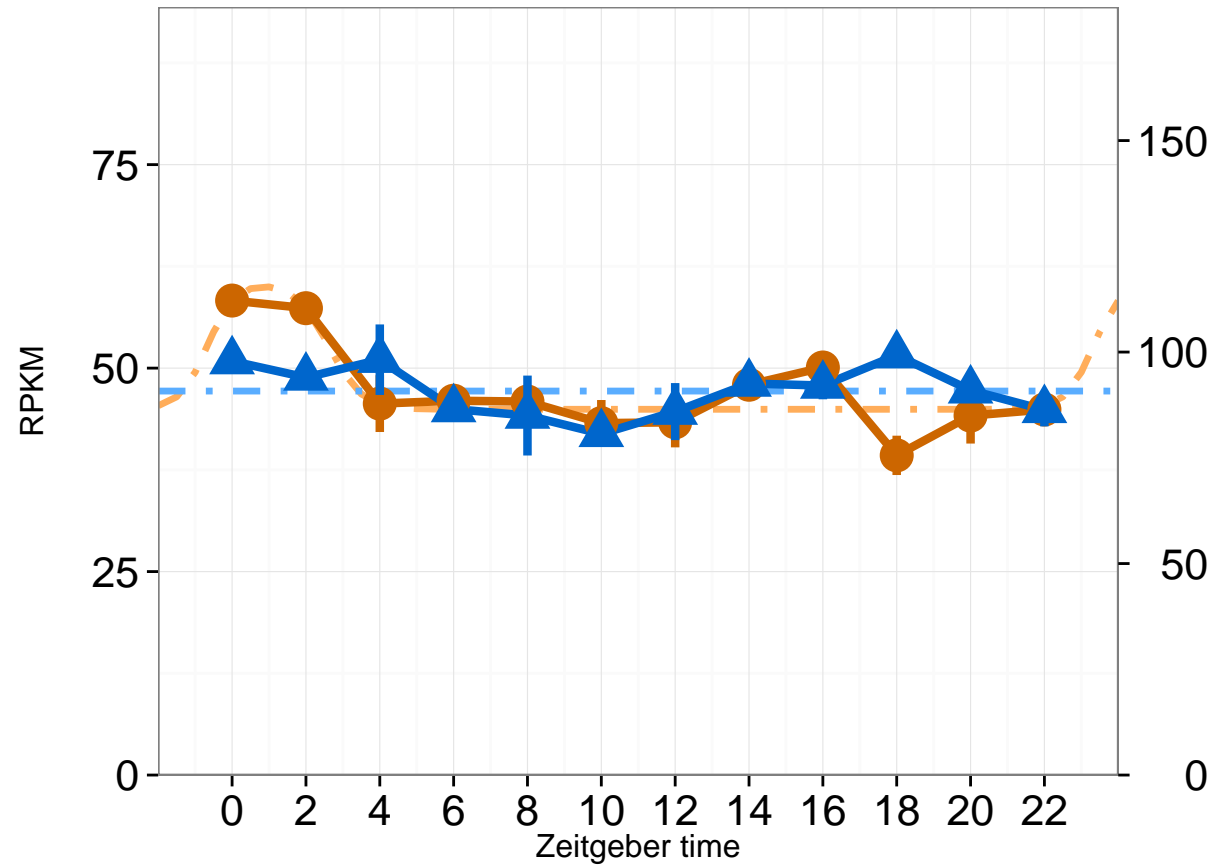

## Elavl1

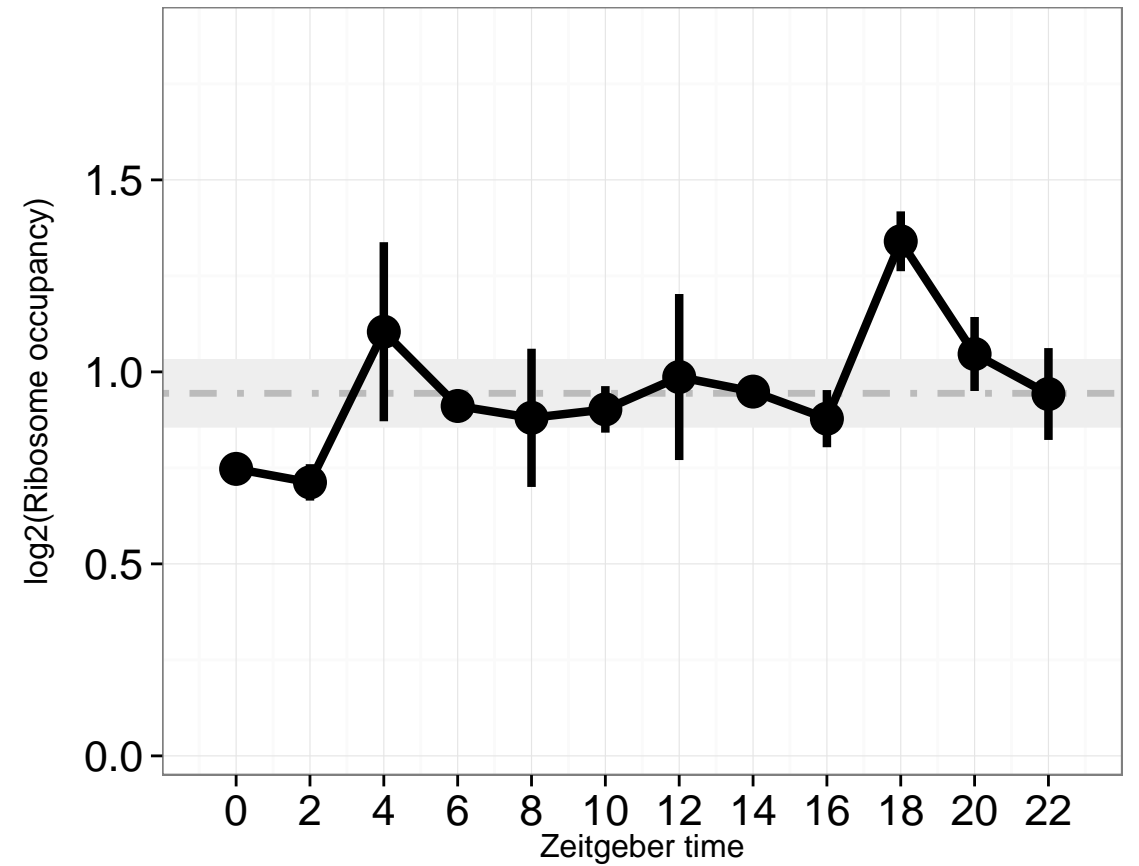

Supplement: Supplementary file 2558 [file 1]

# Uap1

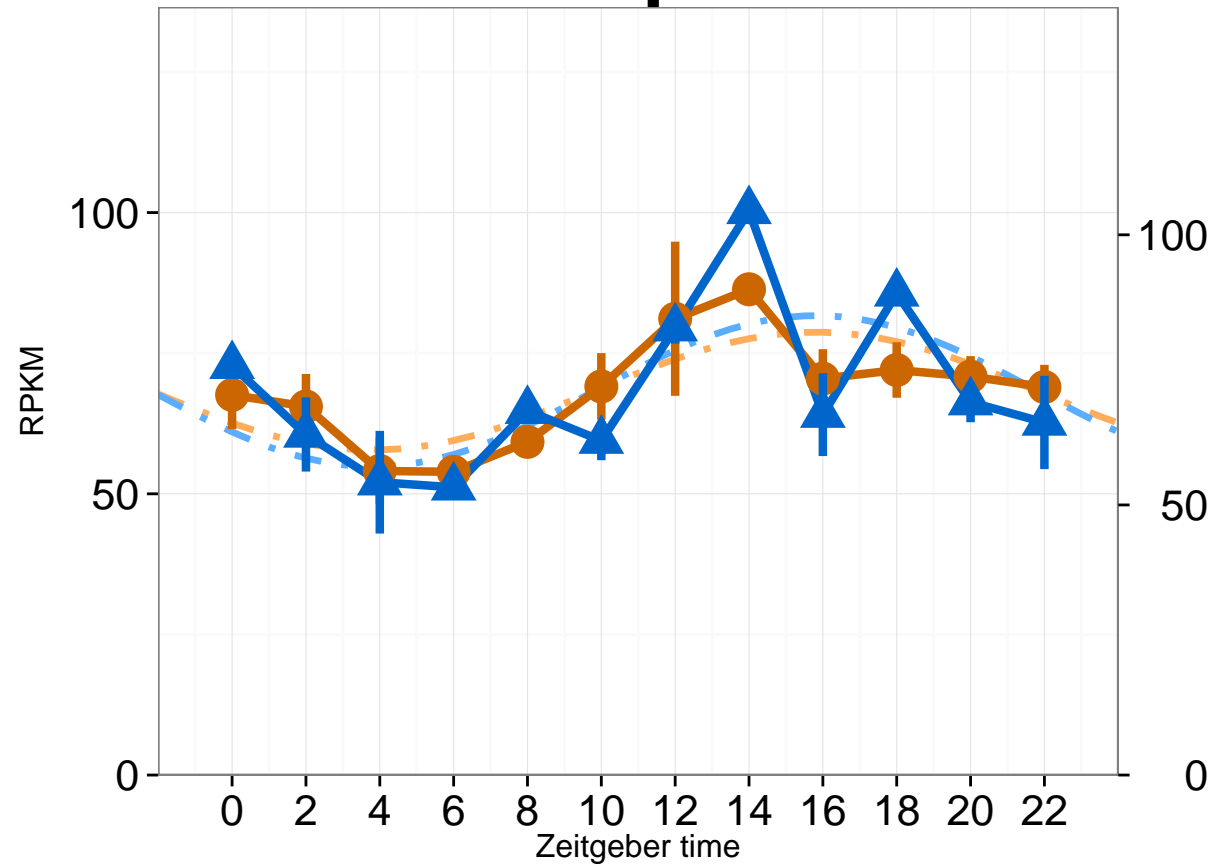

# Uap1

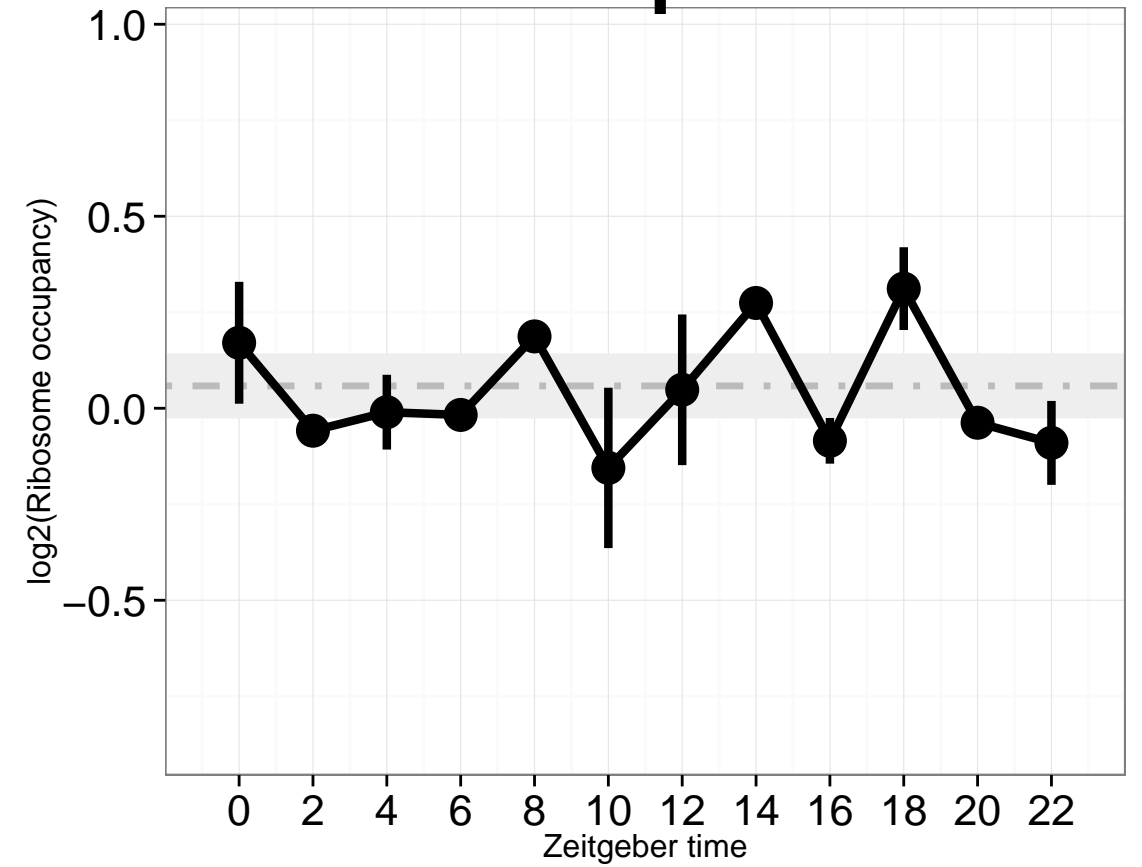

Supplement: Supplementary file 2559 [file 1]

# Cpt1a

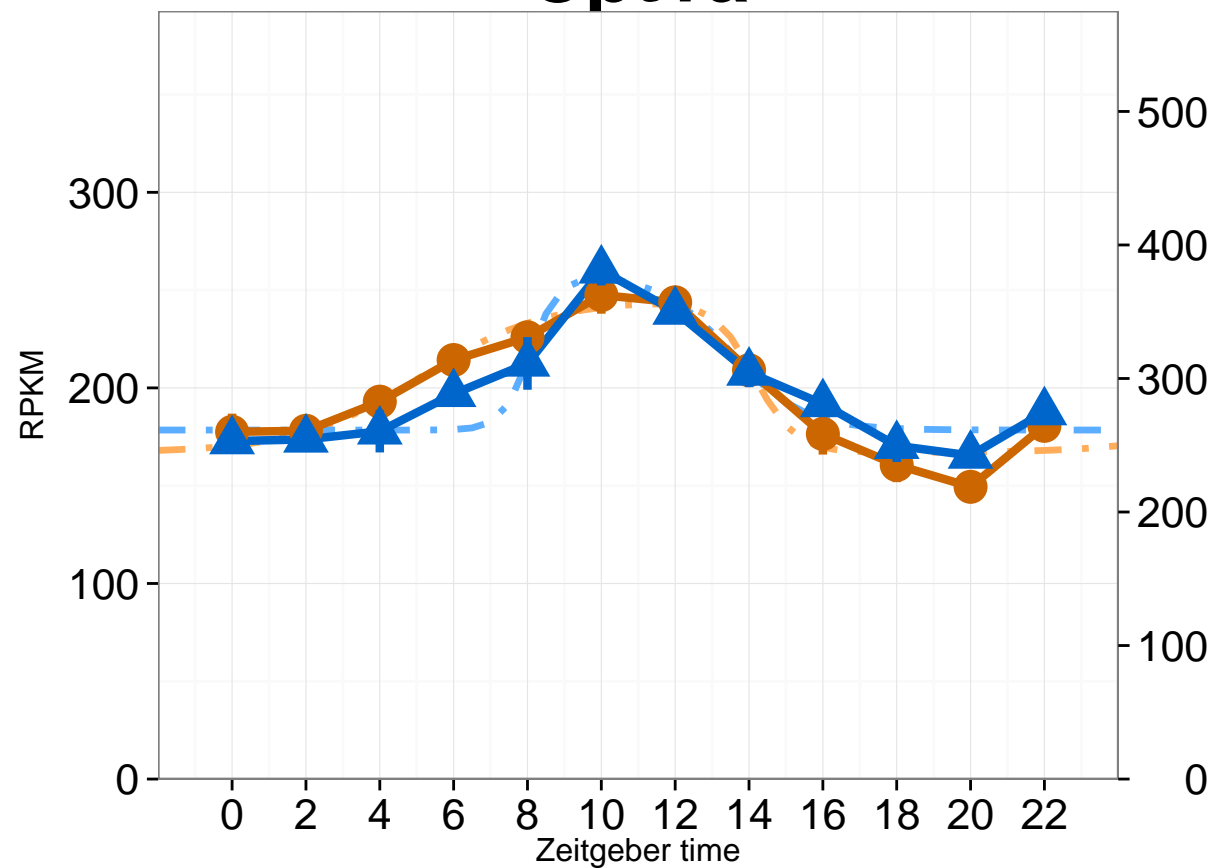

# Cpt1a

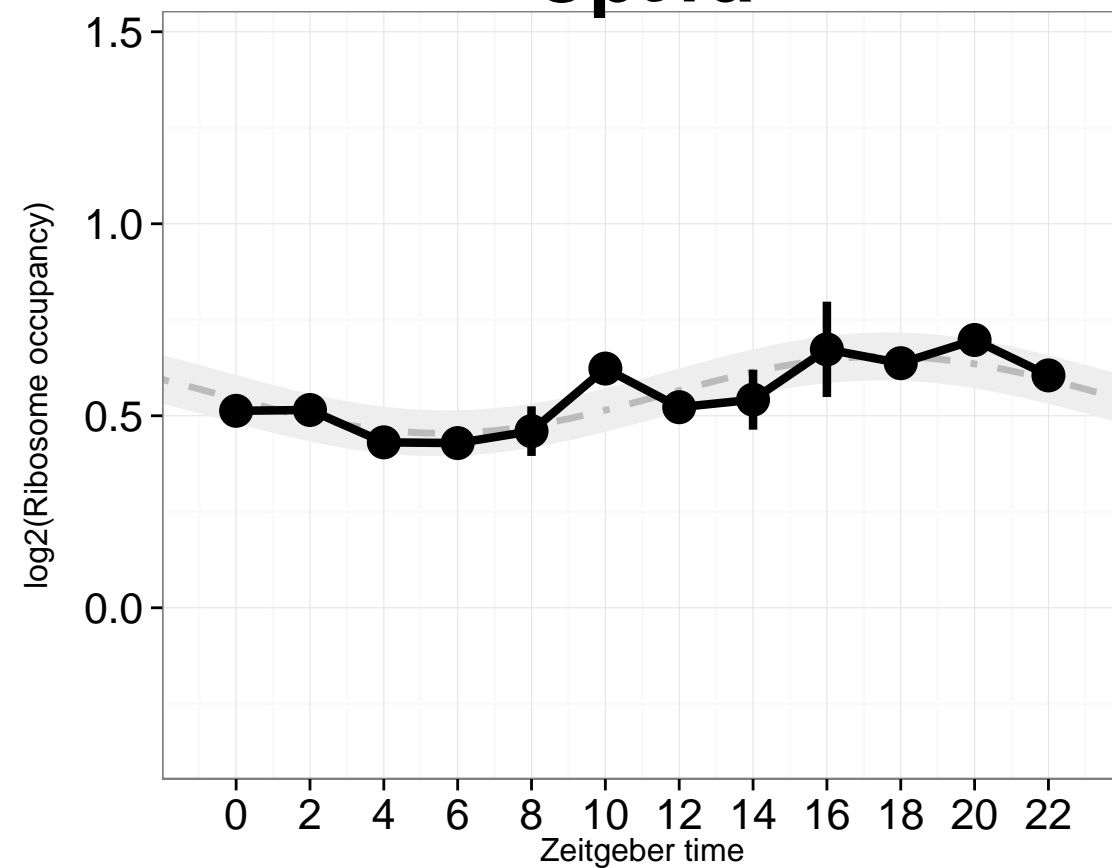

Supplement: Supplementary file 2560 [file 1]

## Abhd5

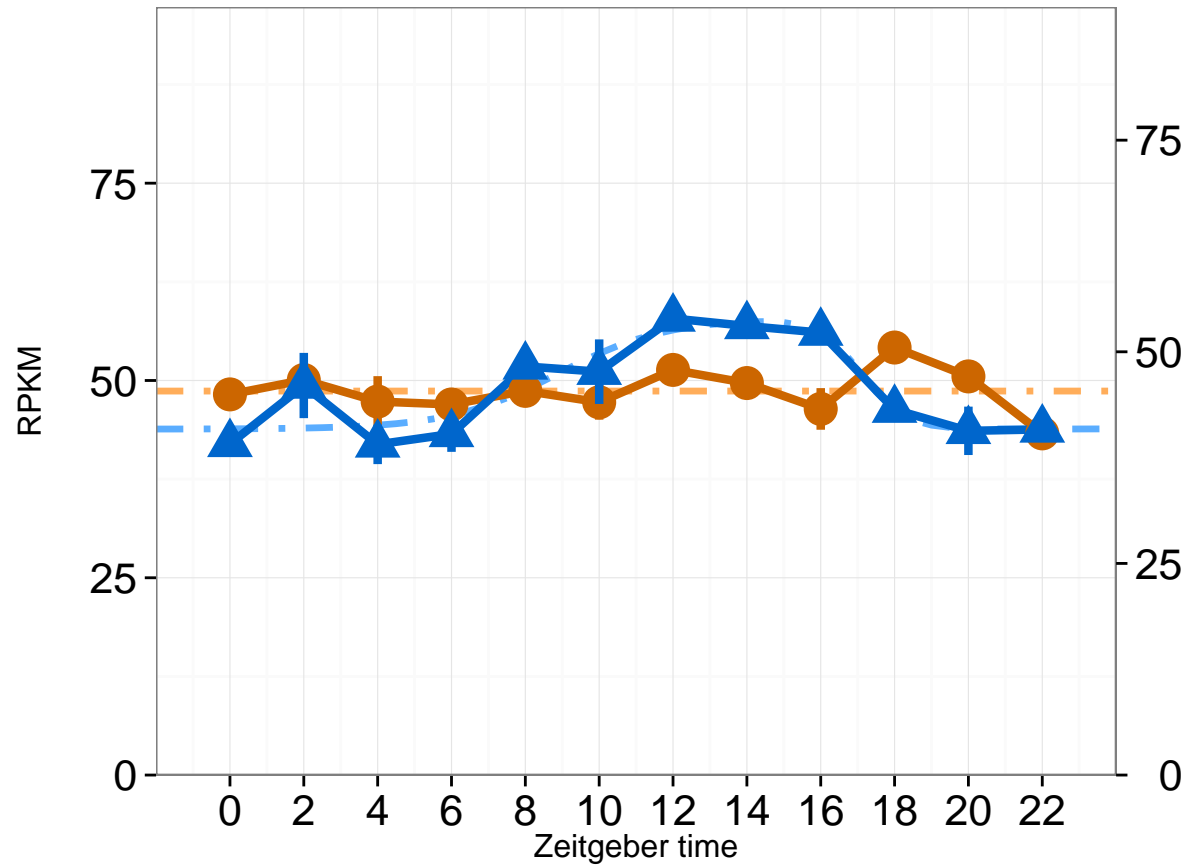

## Abhd5

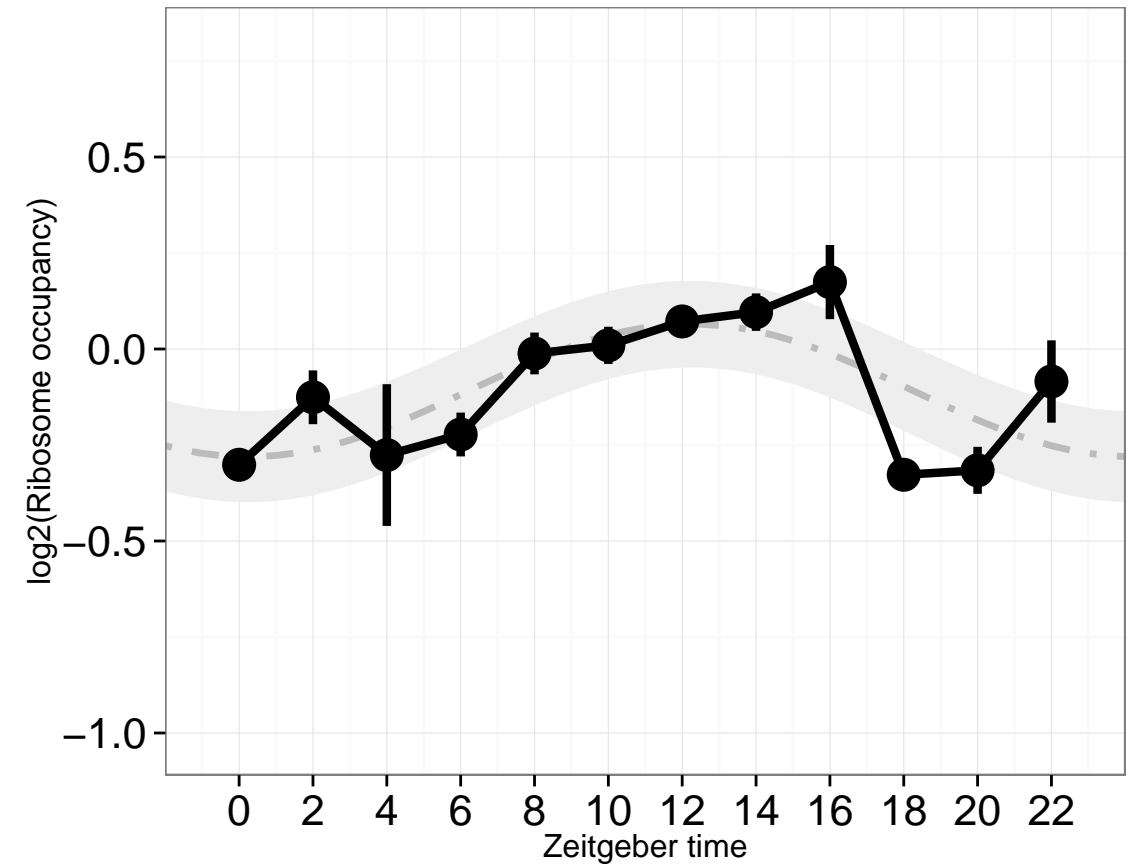

Supplement: Supplementary file 2561 [file 1]

## Mocos

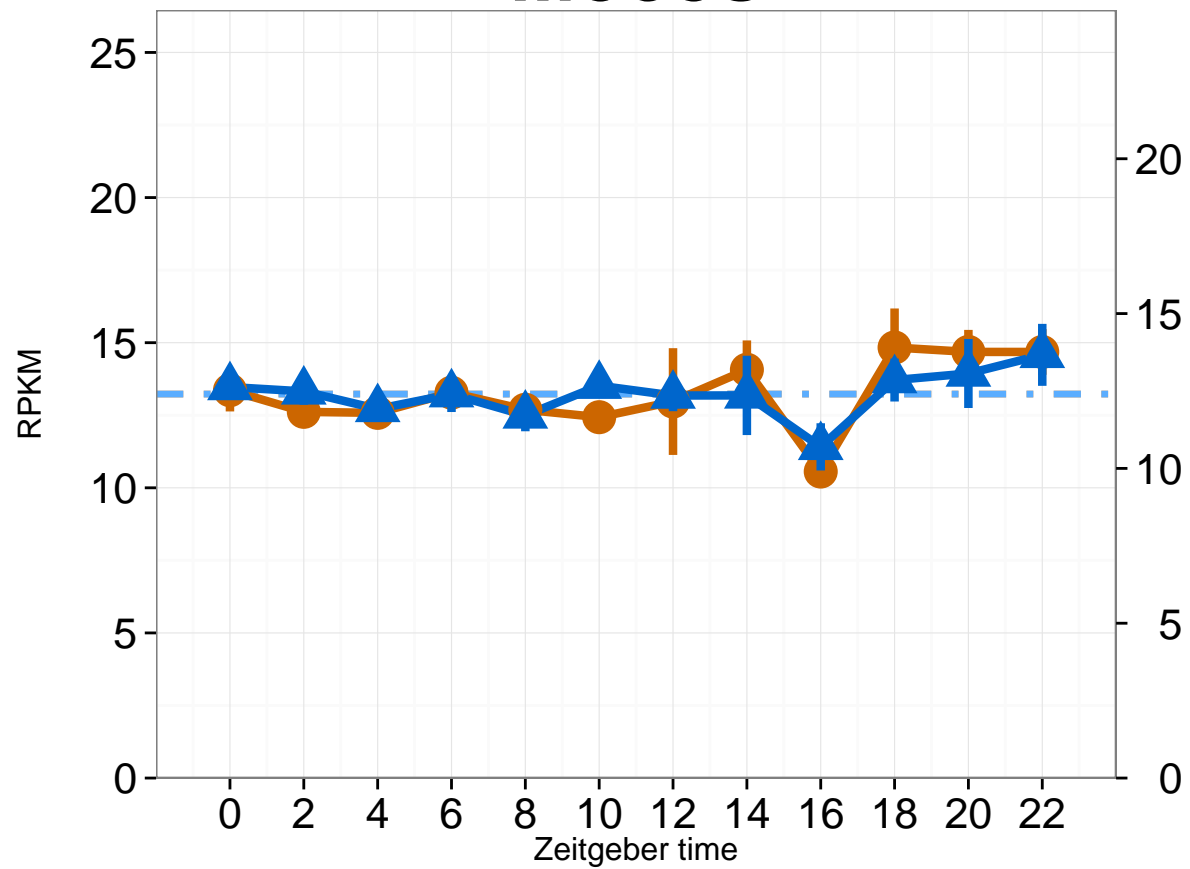

## Mocos

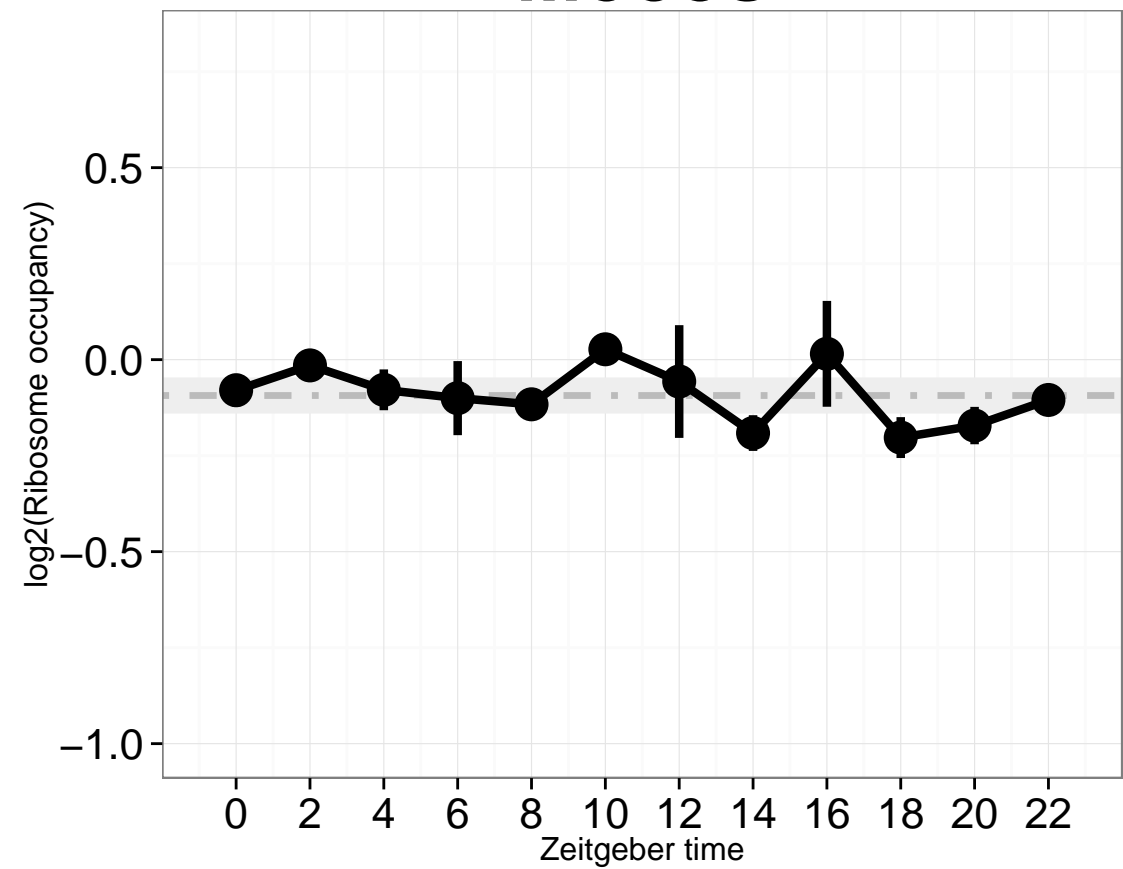

Supplement: Supplementary file 2562 [file 1]

## Cir1

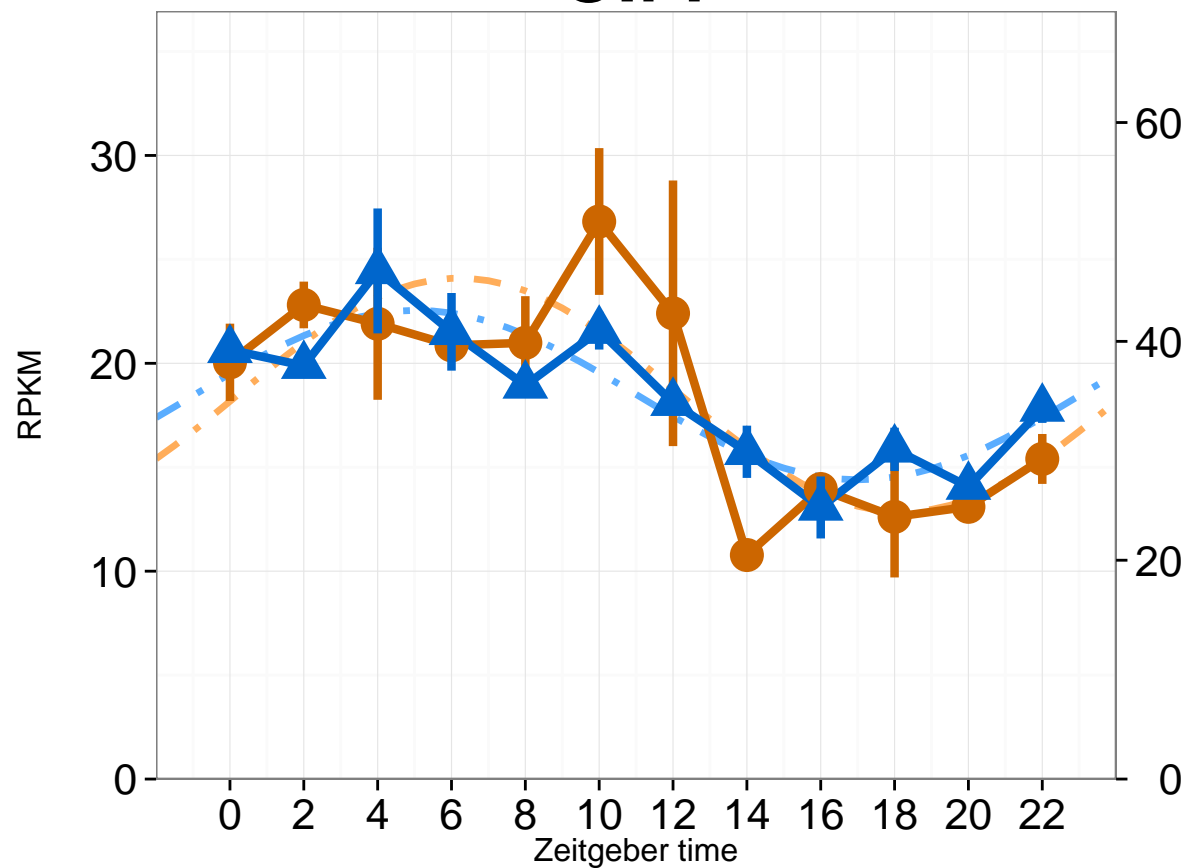

## Cir1

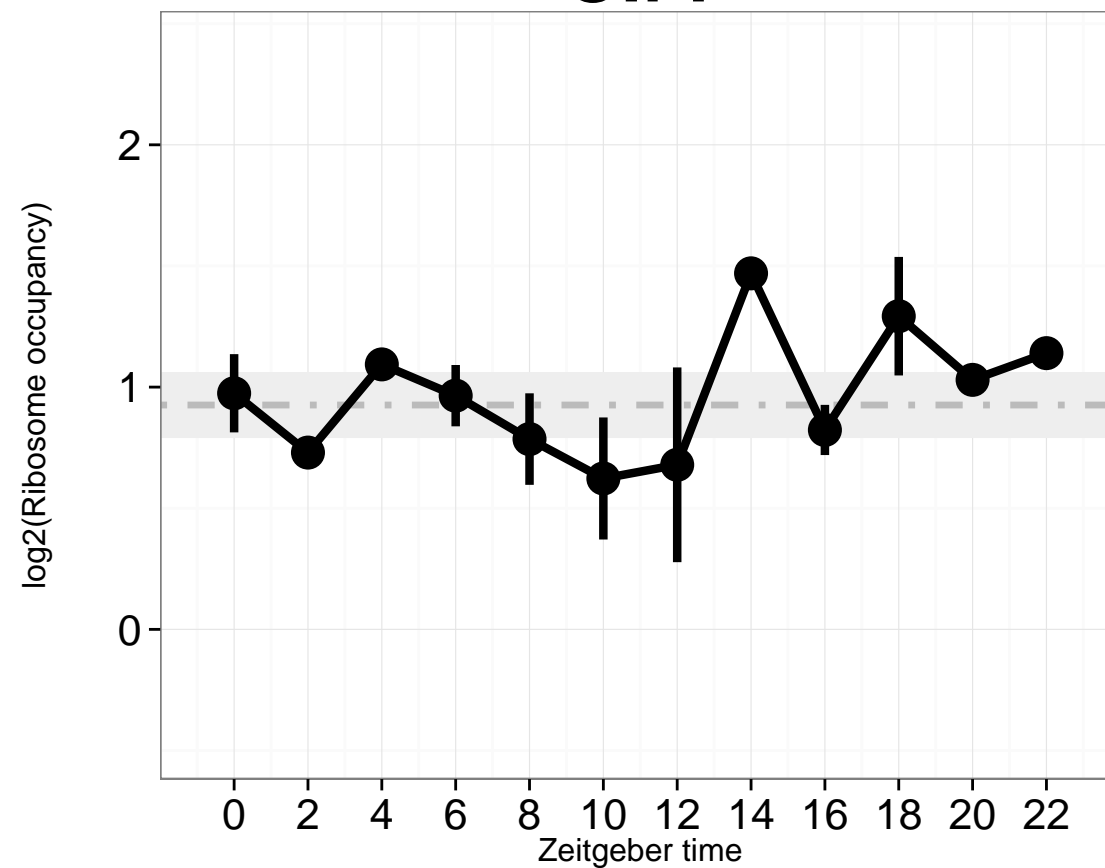

Supplement: Supplementary file 2563 [file 1]

## Lpar3

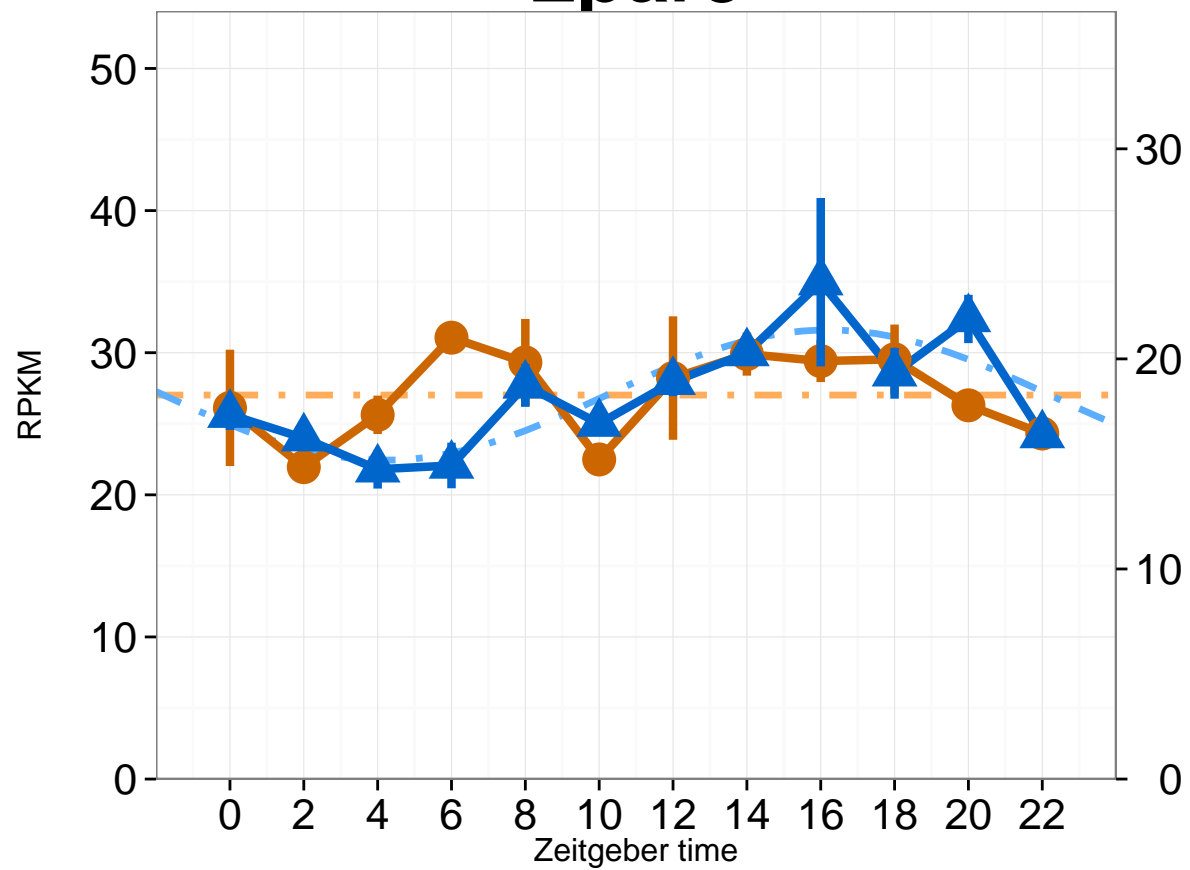

## Lpar3

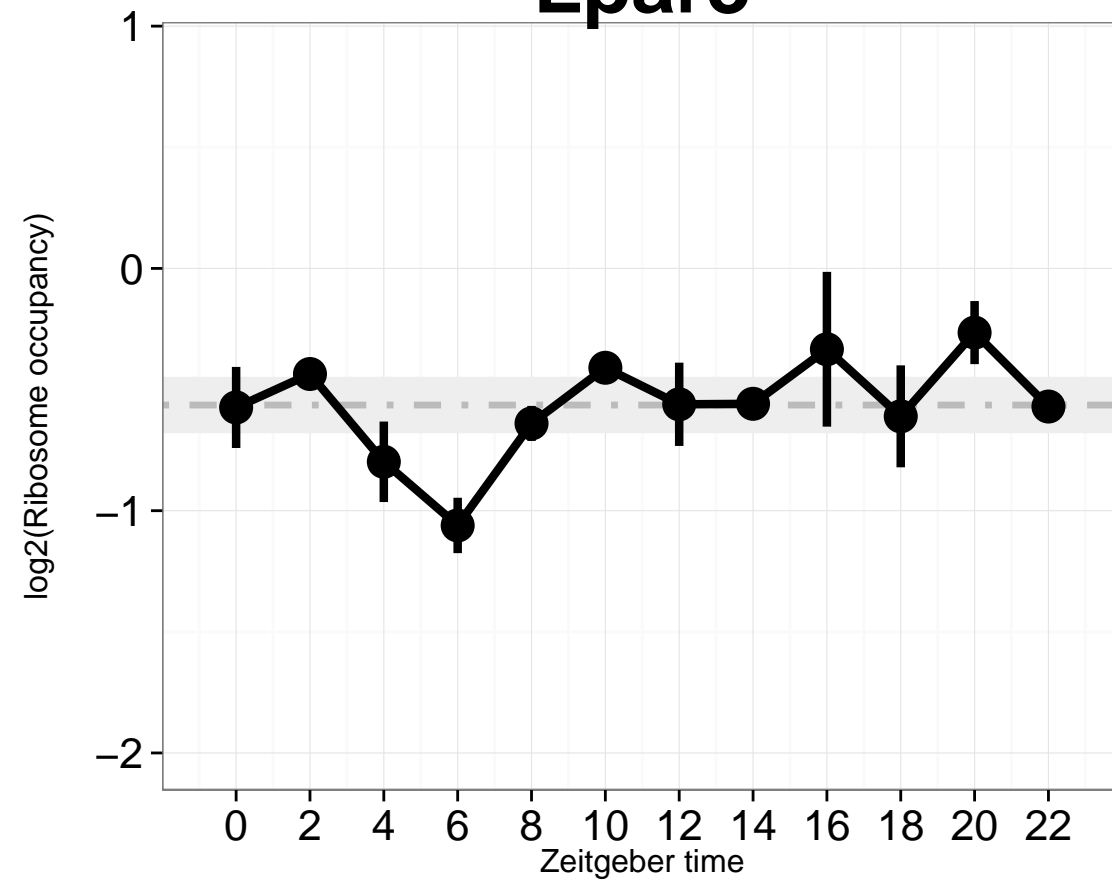

Supplement: Supplementary file 2564 [file 1]

# Rpl41

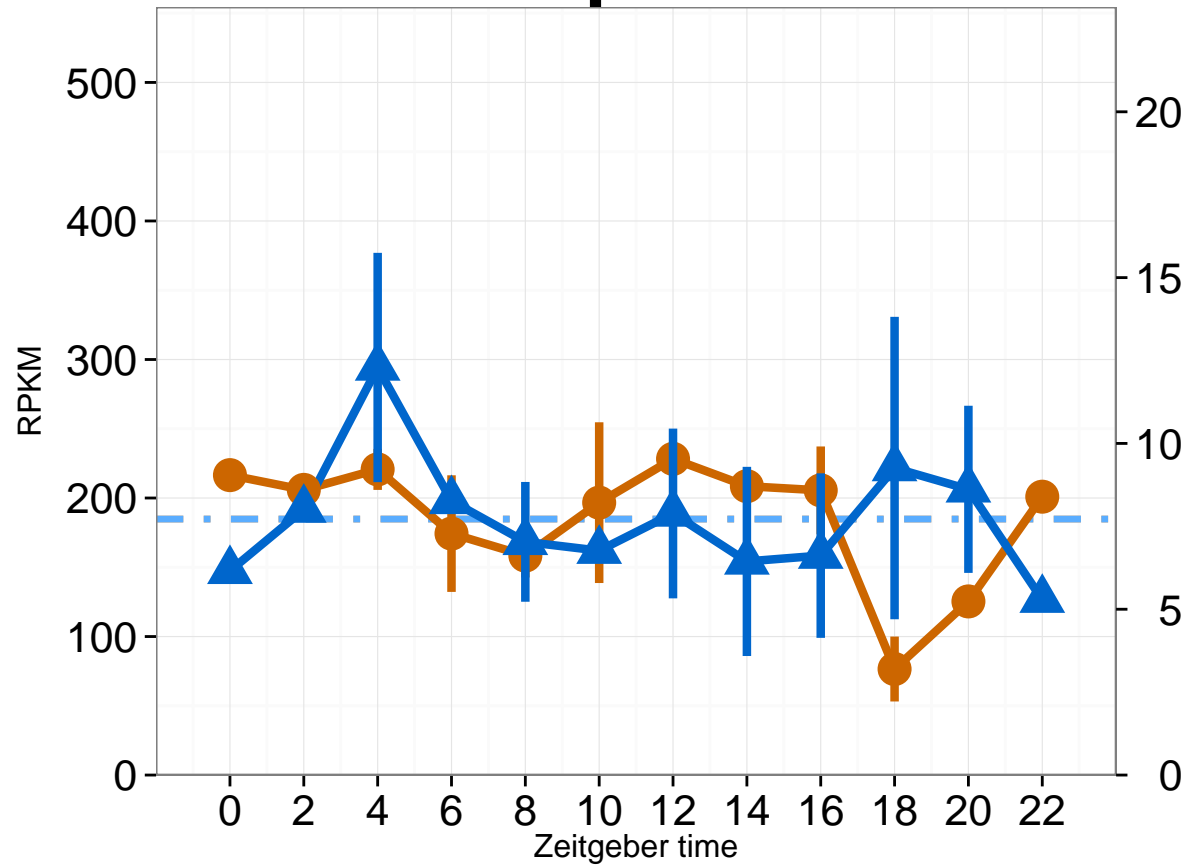

# Rpl41

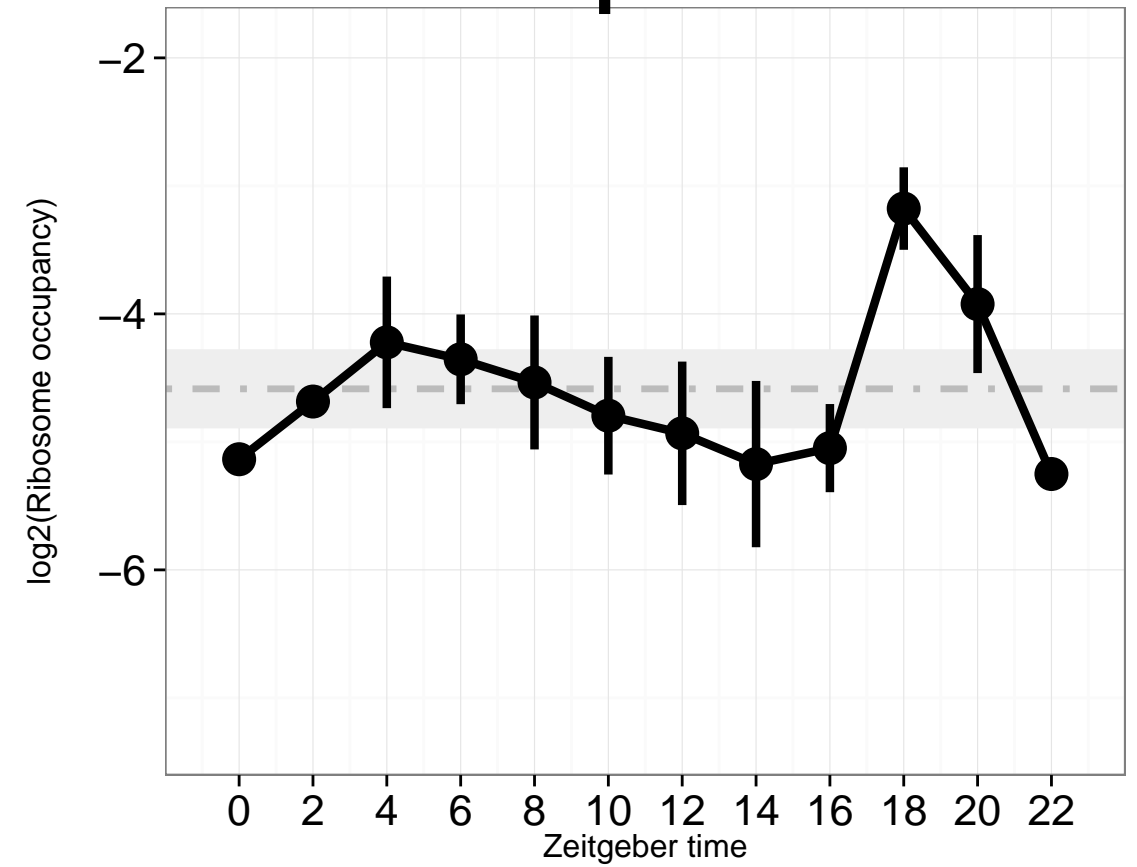

Supplement: Supplementary file 2565 [file 1]

## Unc119b

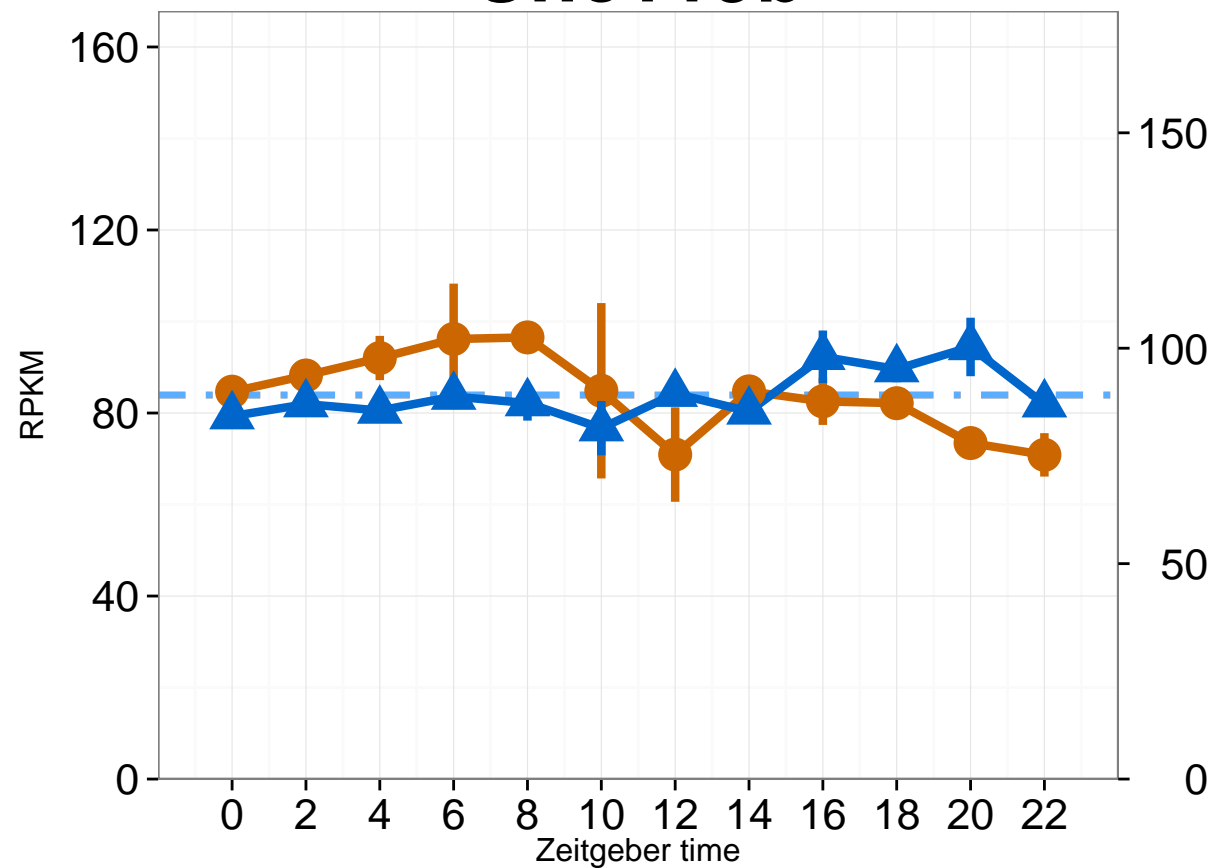

## Unc119b

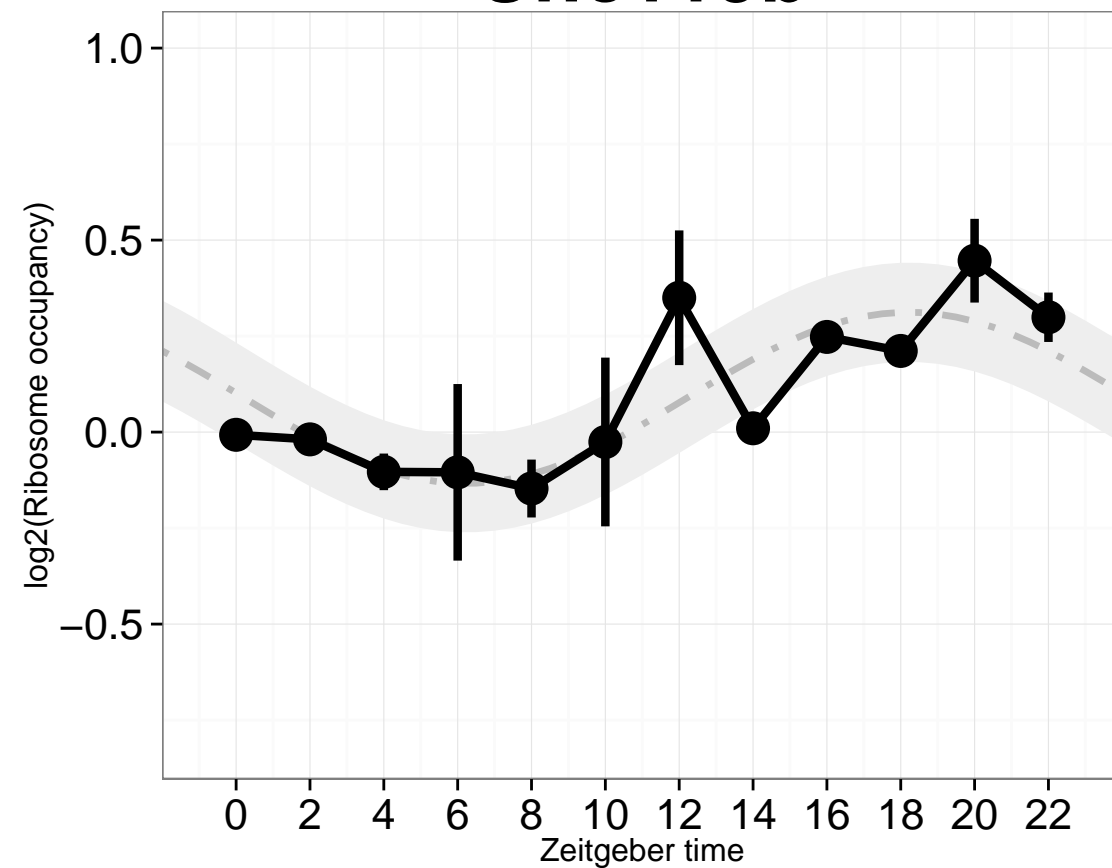

Supplement: Supplementary file 2566 [file 1]

# Per1

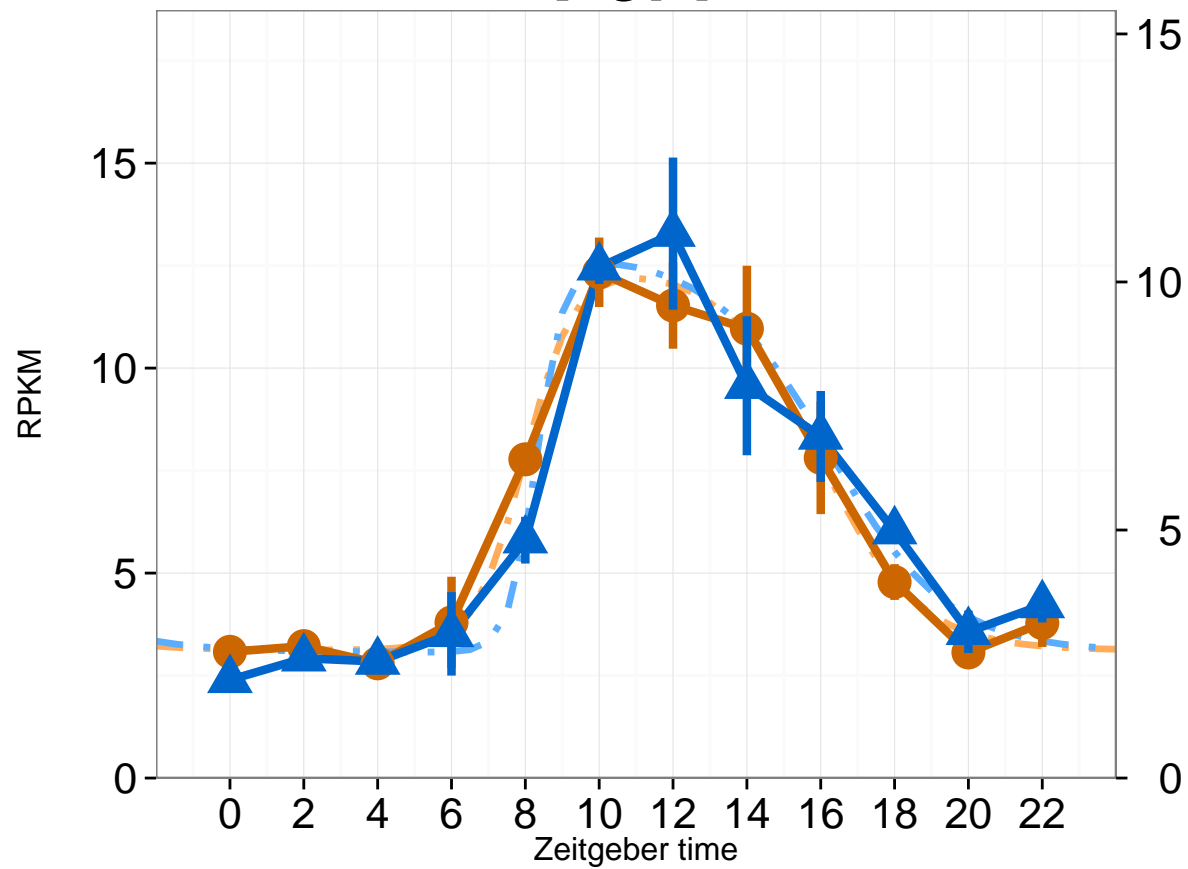

# Per1

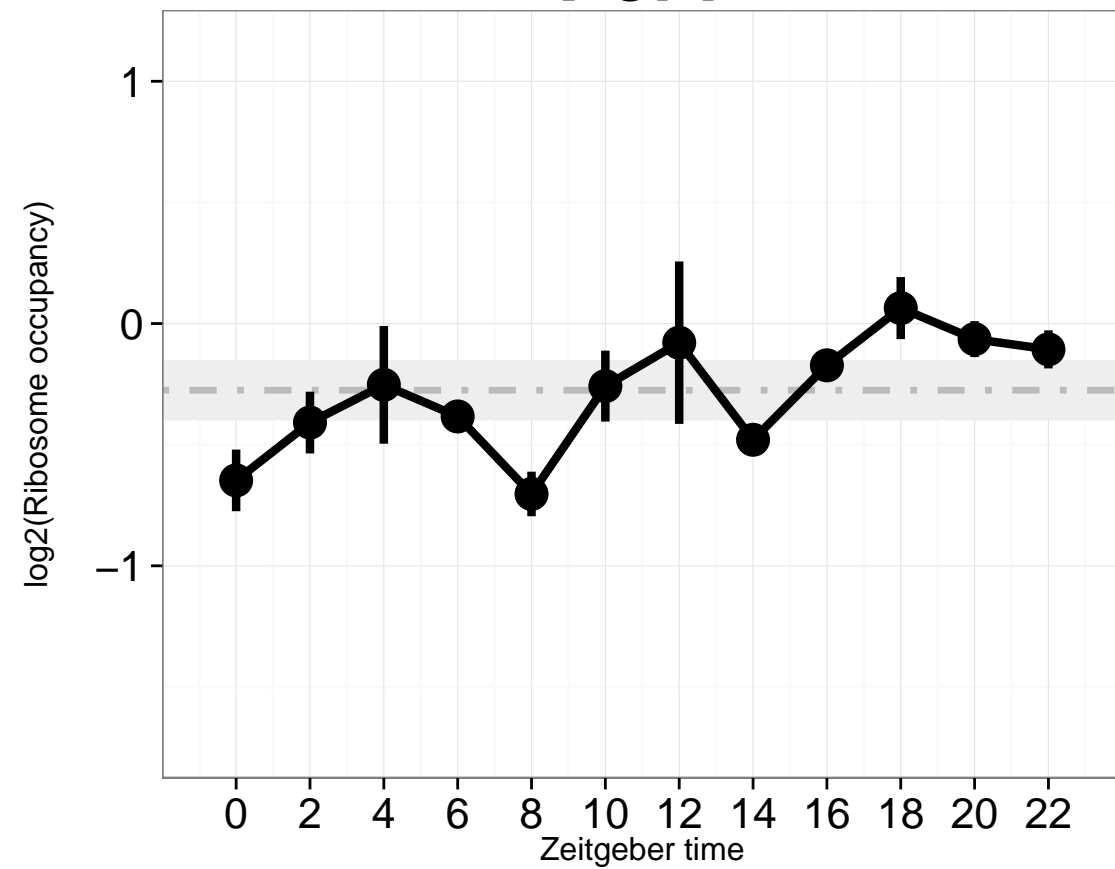

Supplement: Supplementary file 2567 [file 1]

# Tmem14c

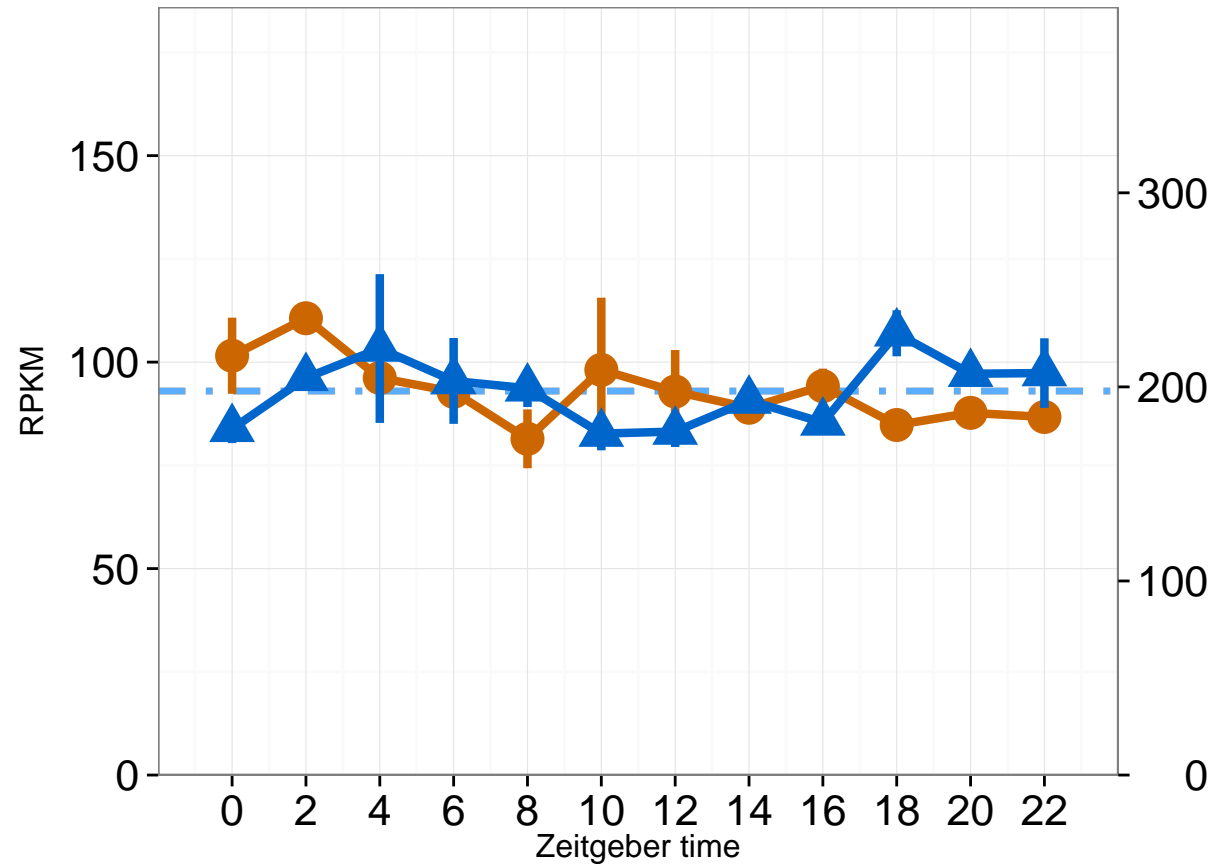

# Tmem14c

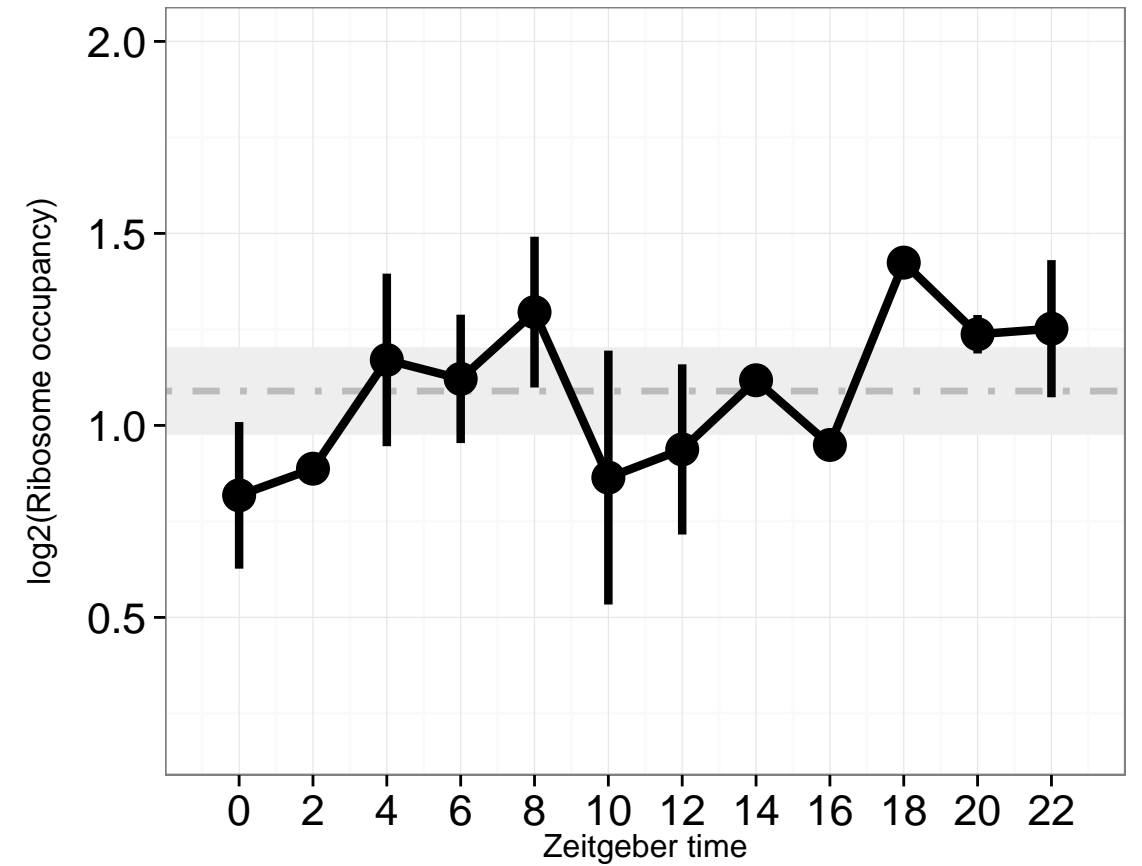

Supplement: Supplementary file 2568 [file 1]

# Rtn2

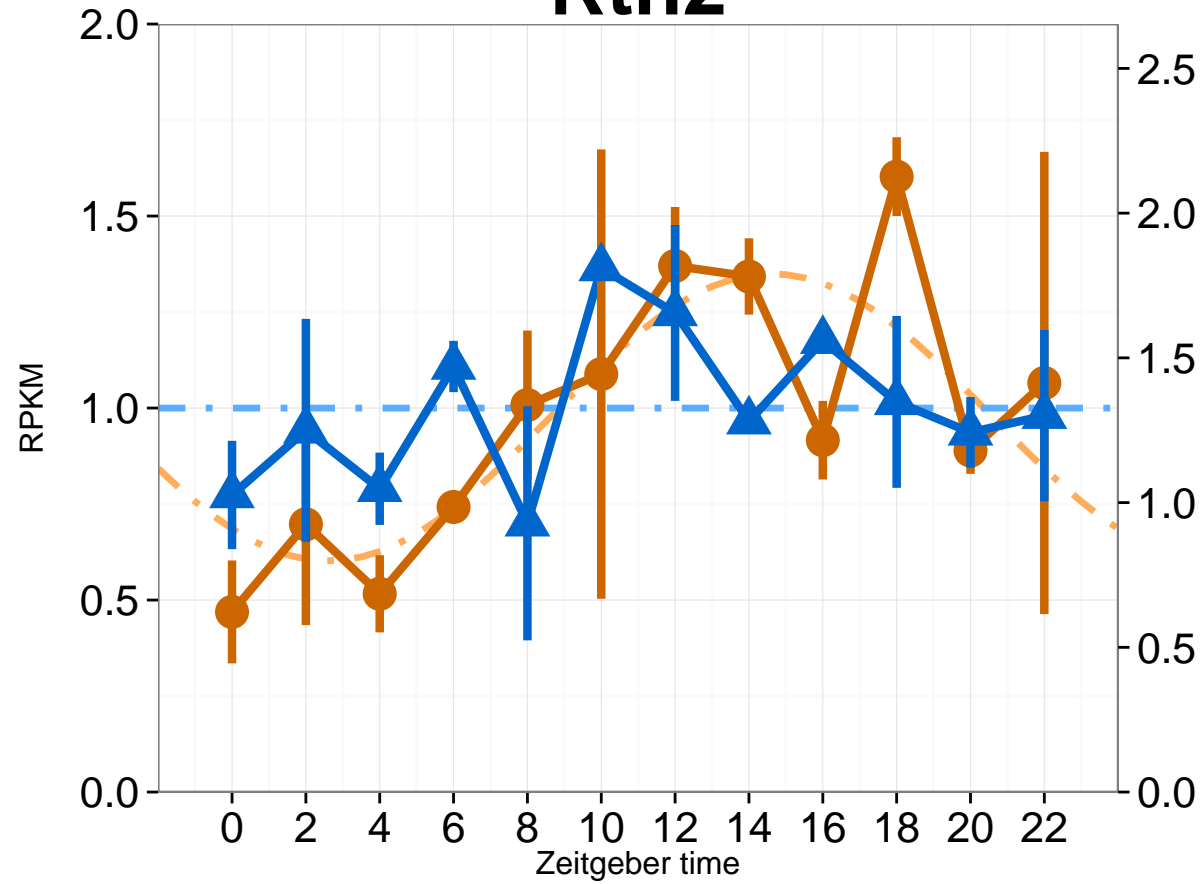

# Rtn2

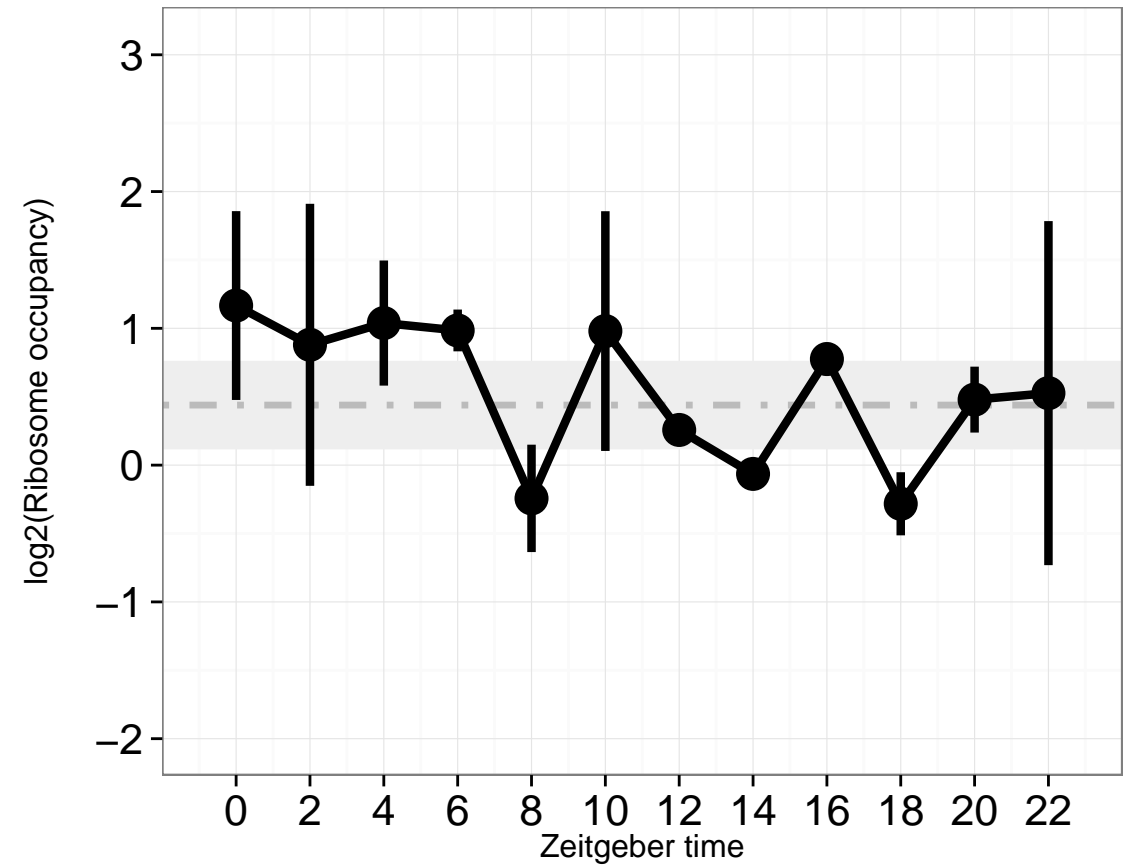

Supplement: Supplementary file 2569 [file 1]

## Mcoln3

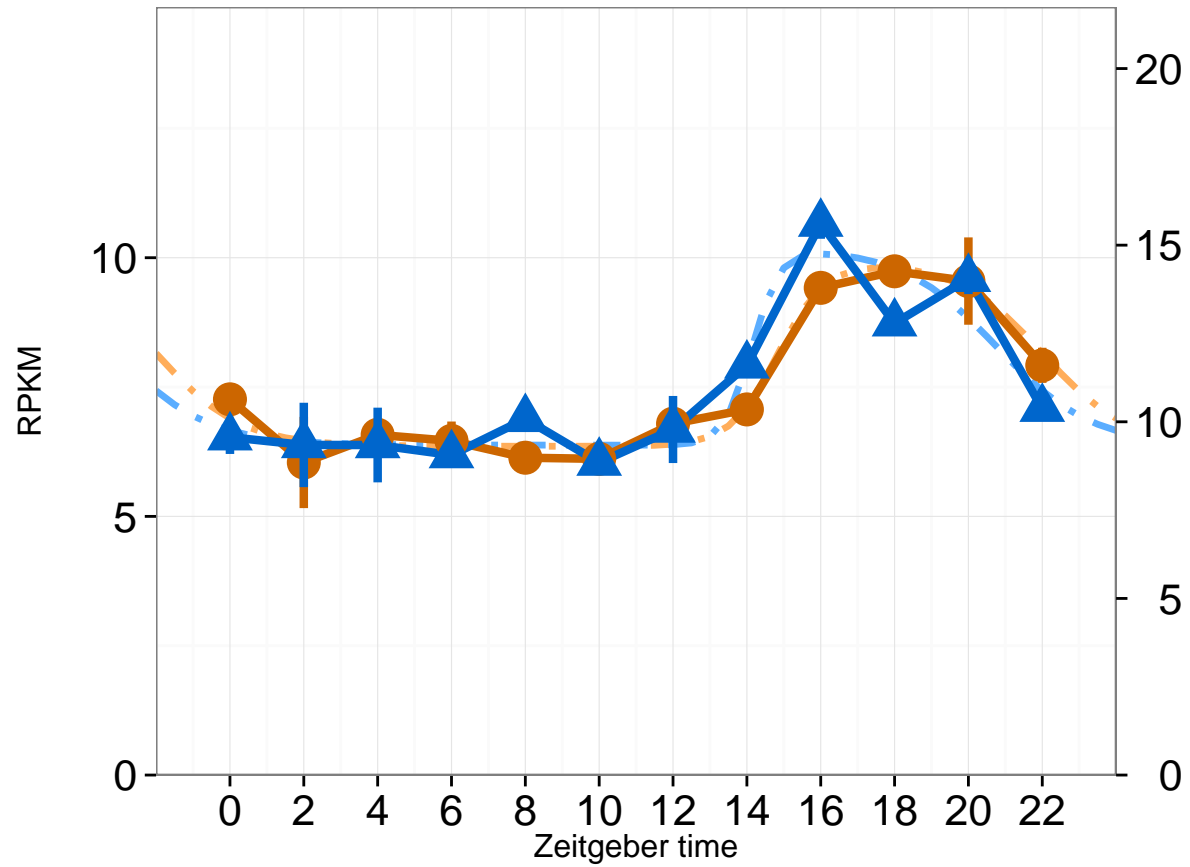

## Mcoln3

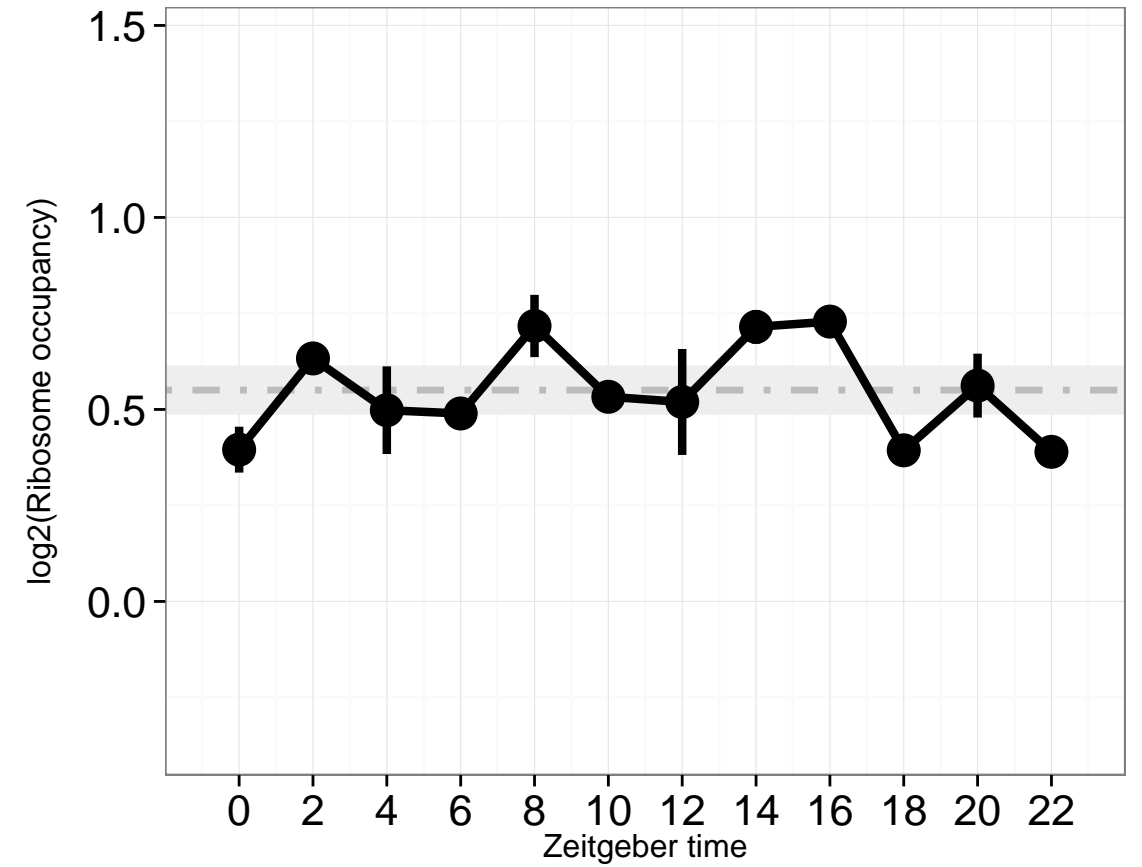

Supplement: Supplementary file 2570 [file 1]

## Bid

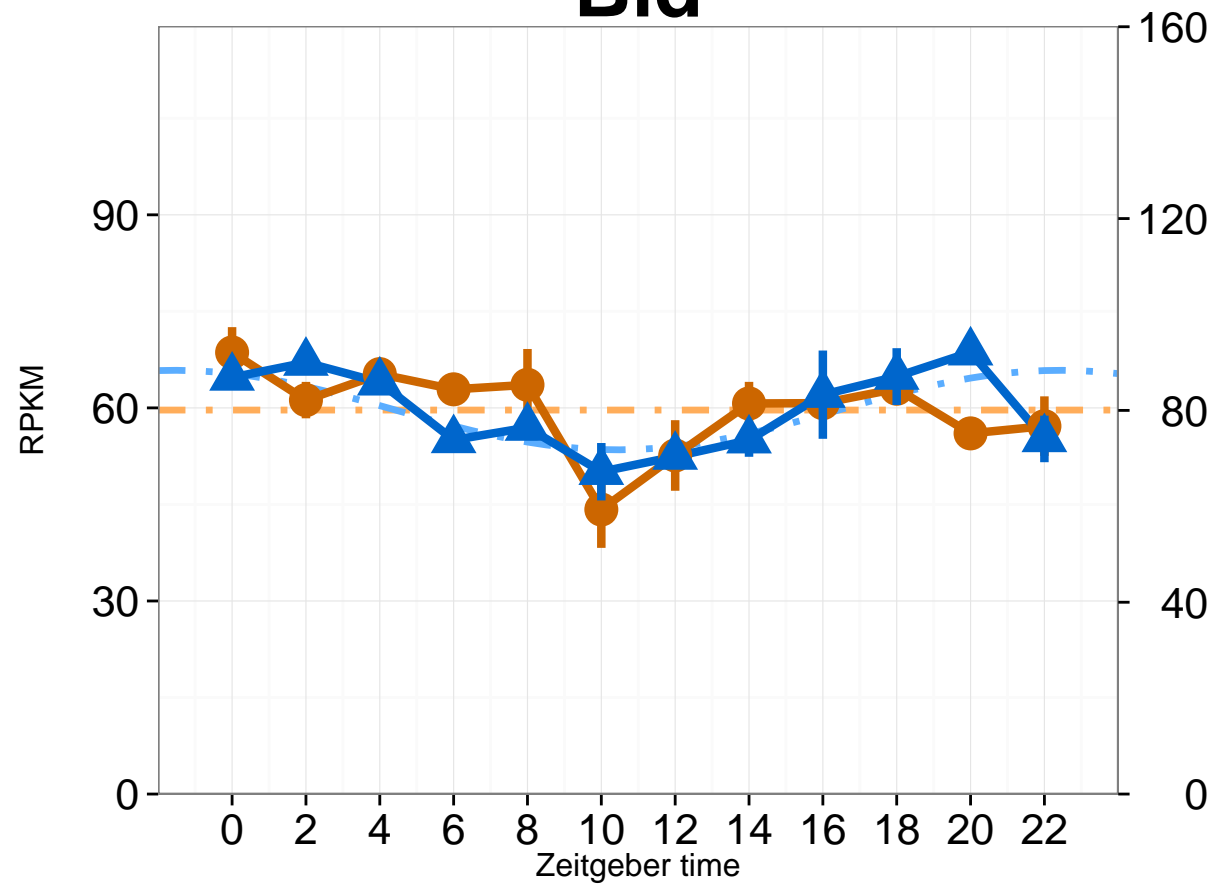

## Bid

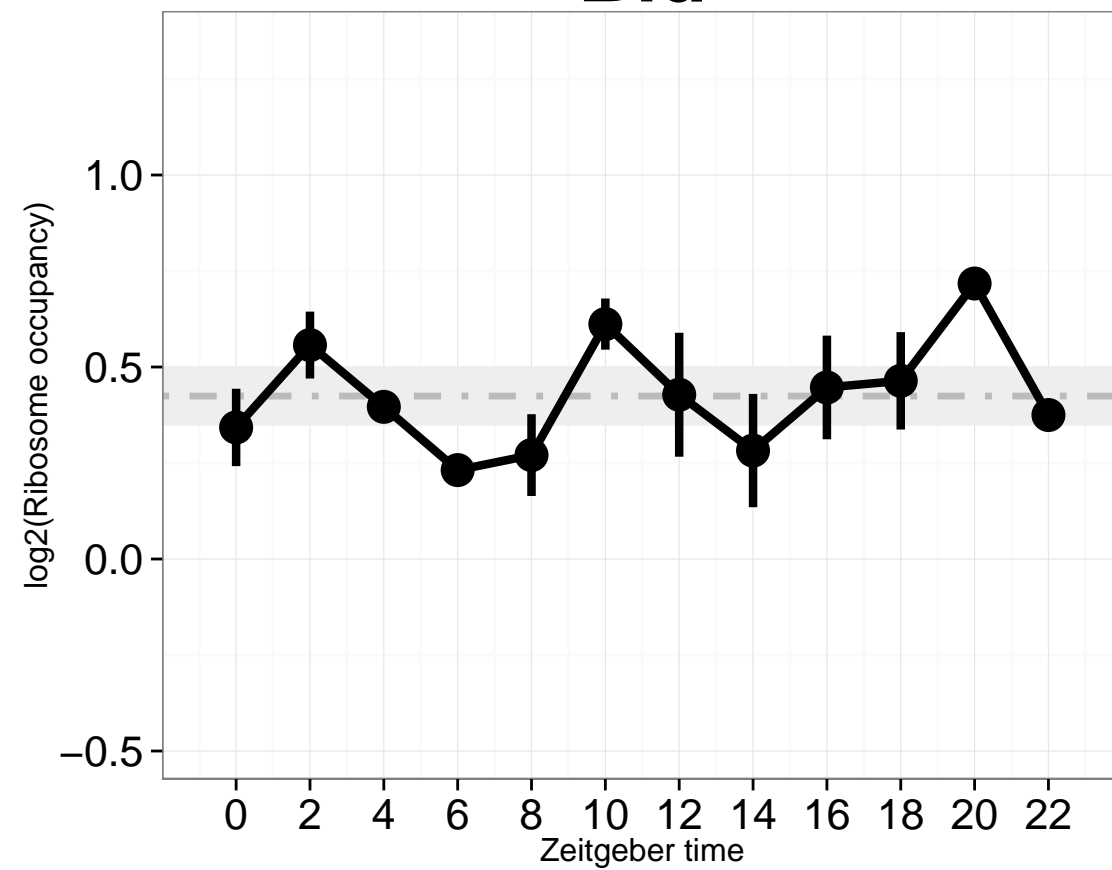

Supplement: Supplementary file 2571 [file 1]

## Hnmt

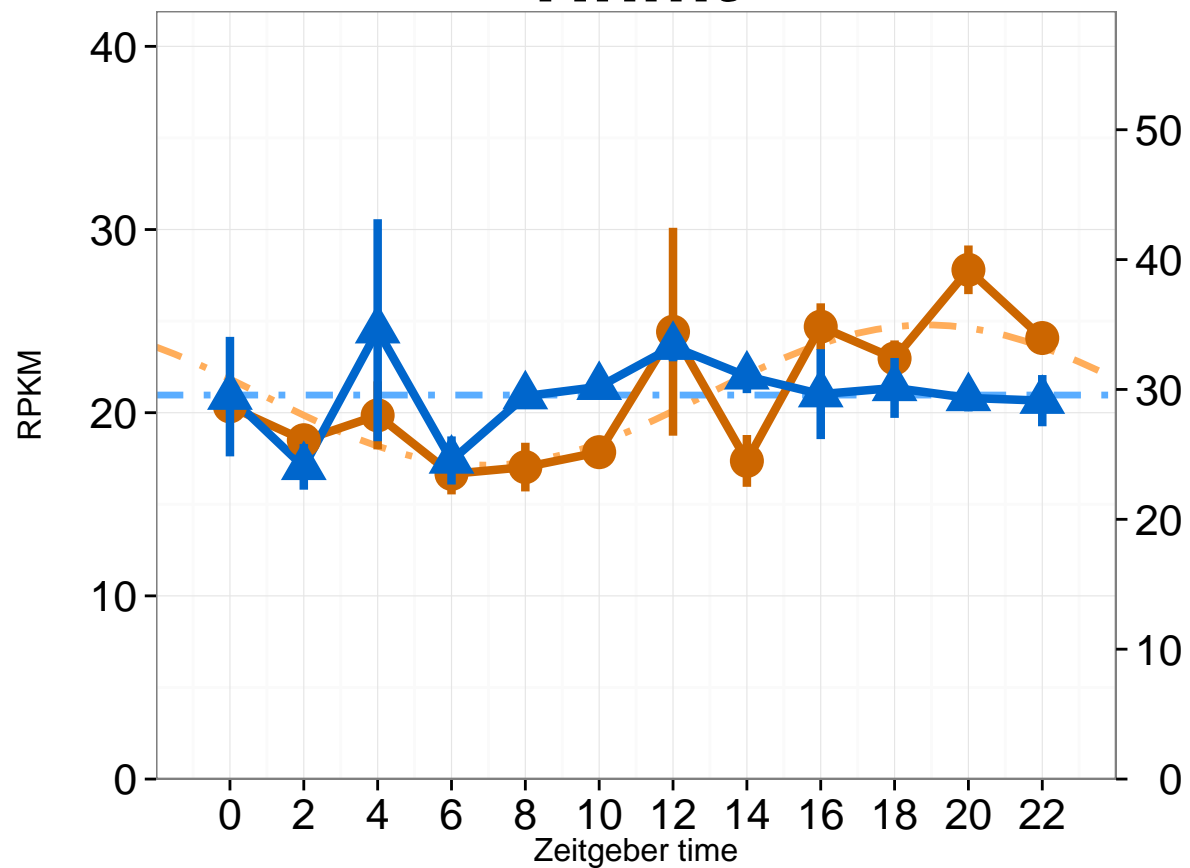

## Hnmt

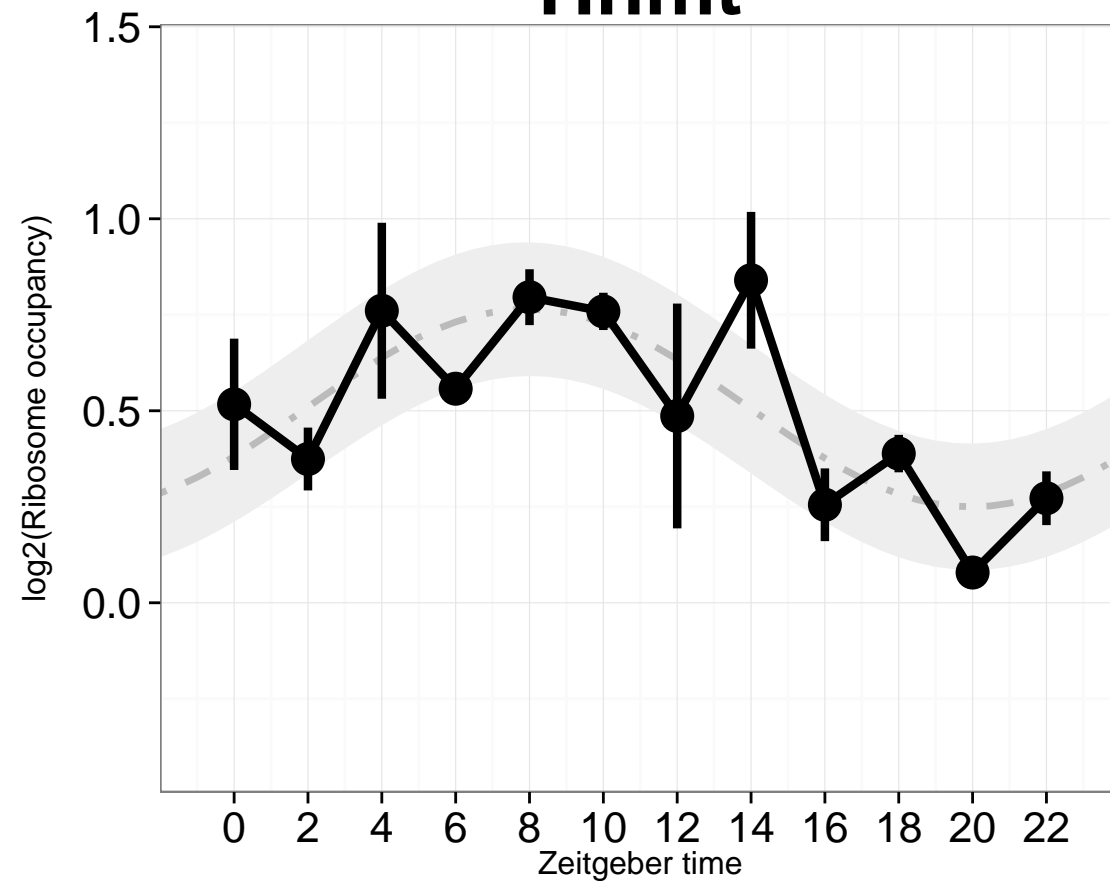

Supplement: Supplementary file 2572 [file 1]

**Olfcr558 TR**

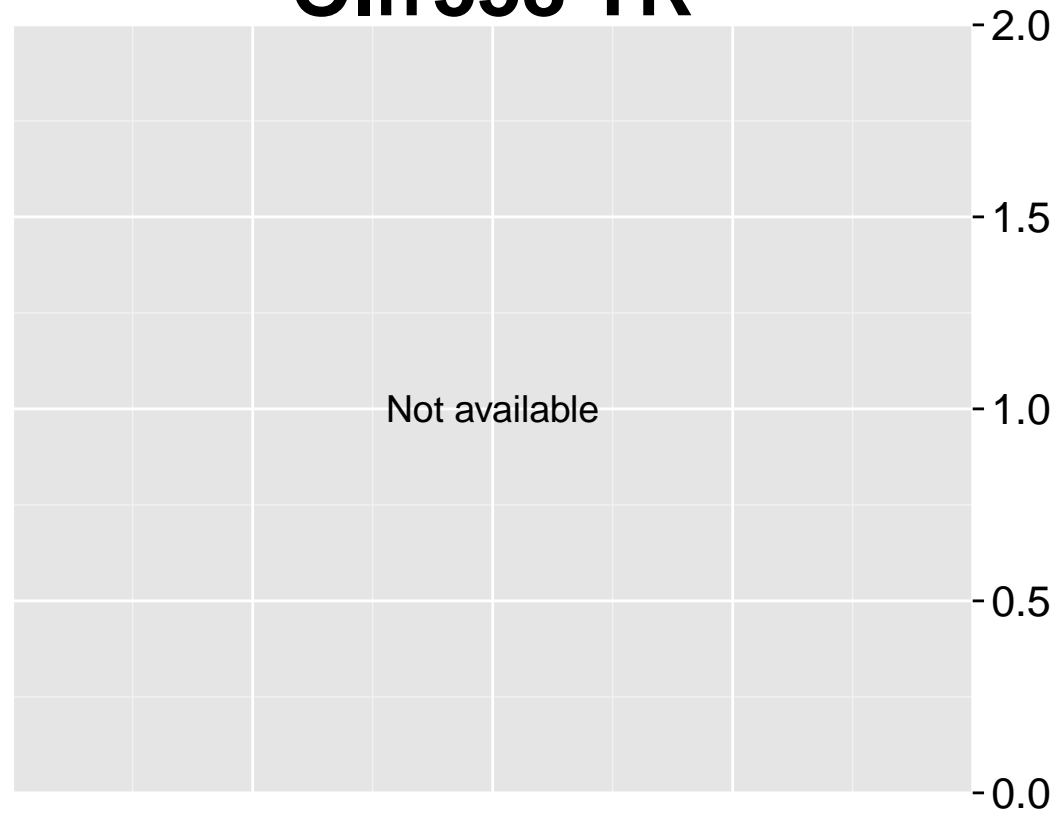

**Olfcr558 log2(Ribosome occupancy**

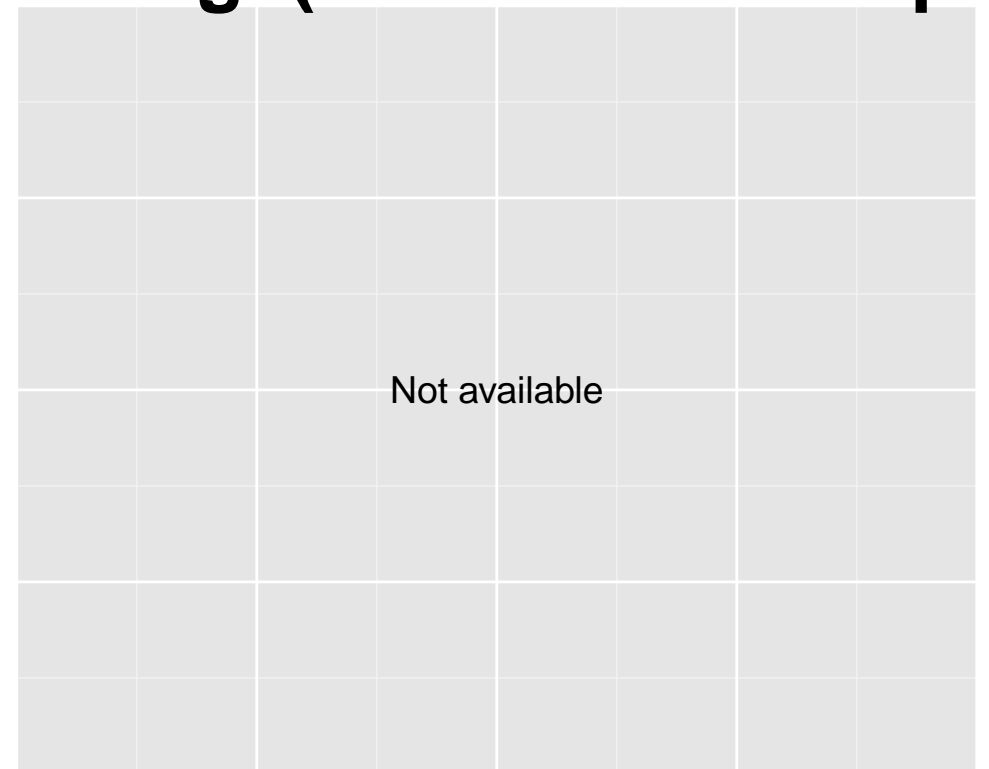

Supplement: Supplementary file 2573 [file 1]

## Pbxip1

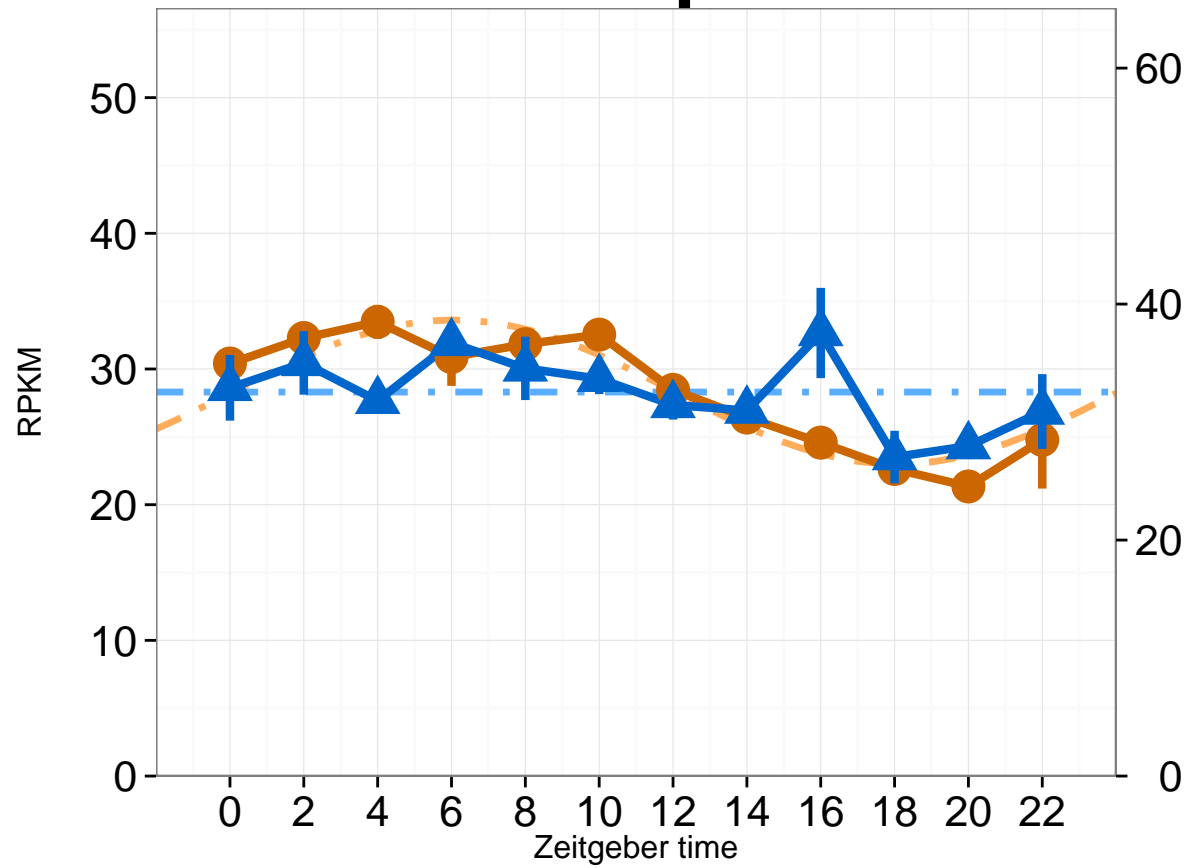

## Pbxip1

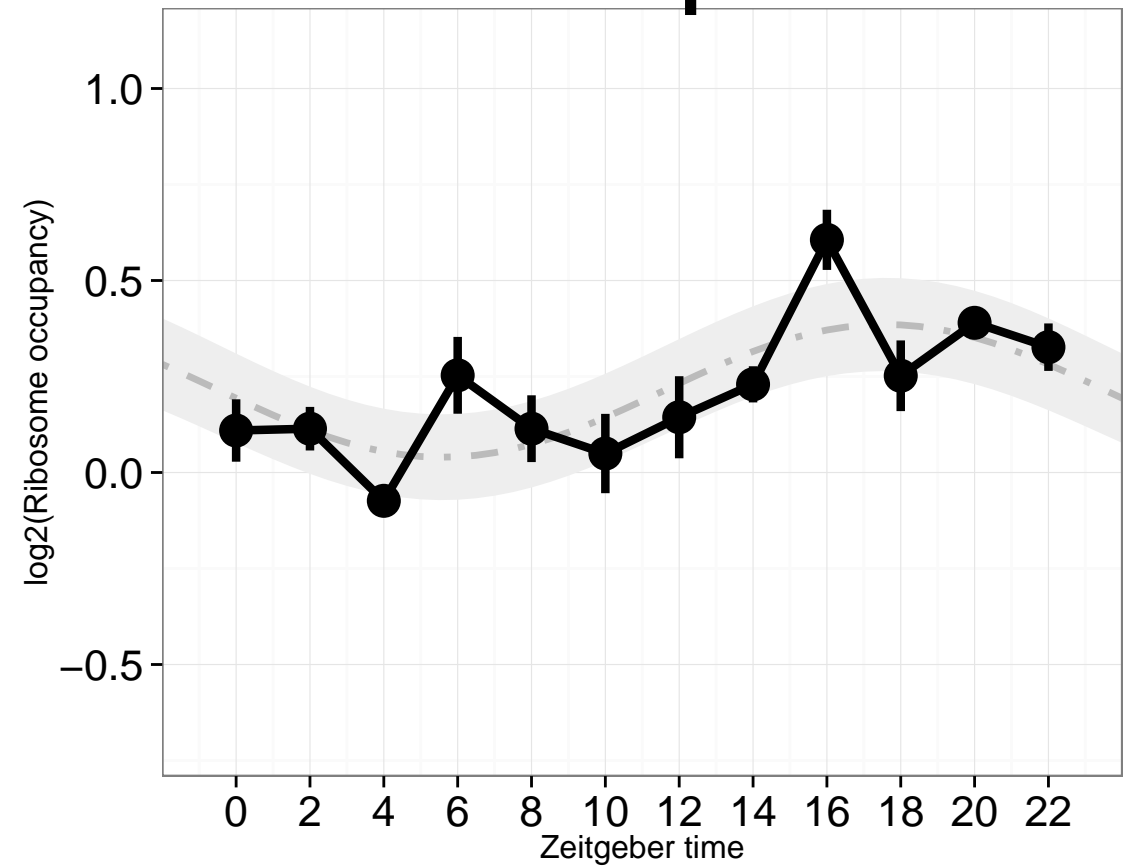

Supplement: Supplementary file 2574 [file 1]

# Lonrf1

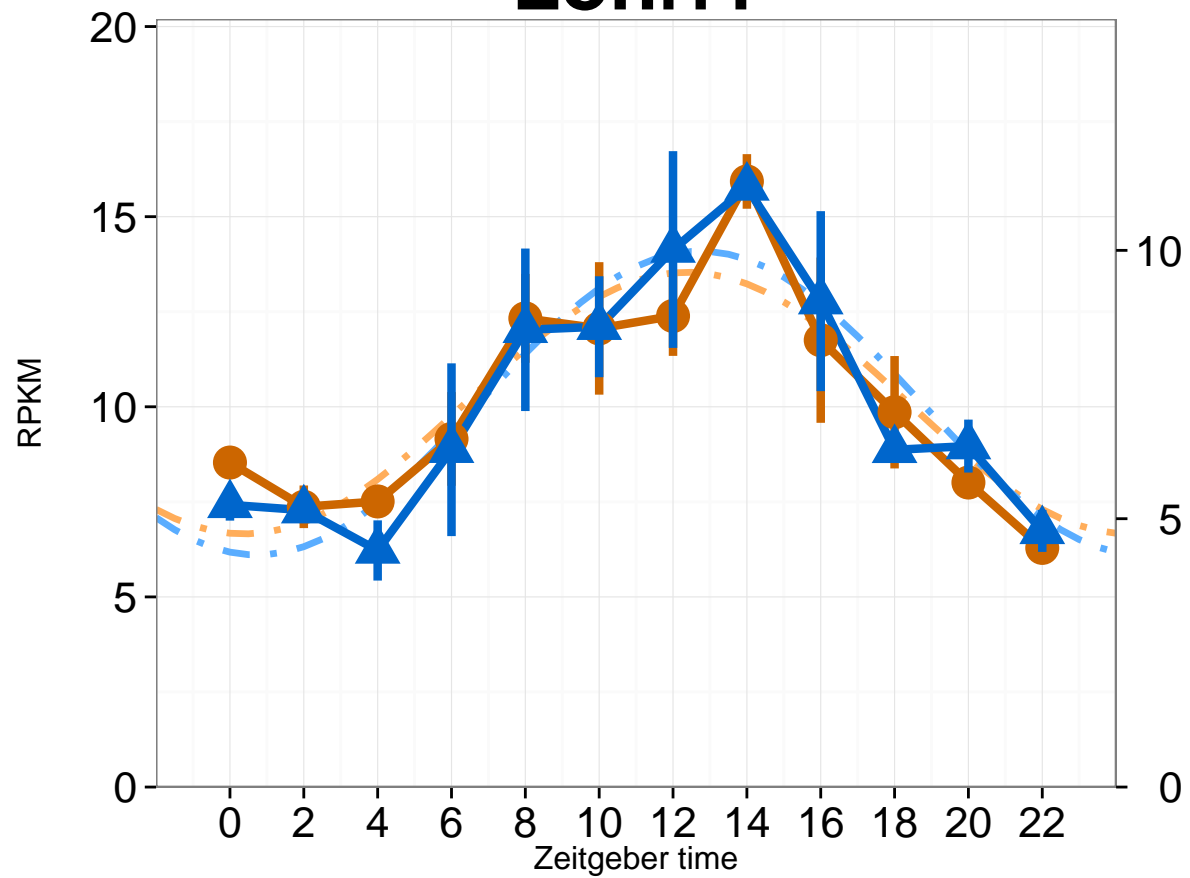

# Lonrf1

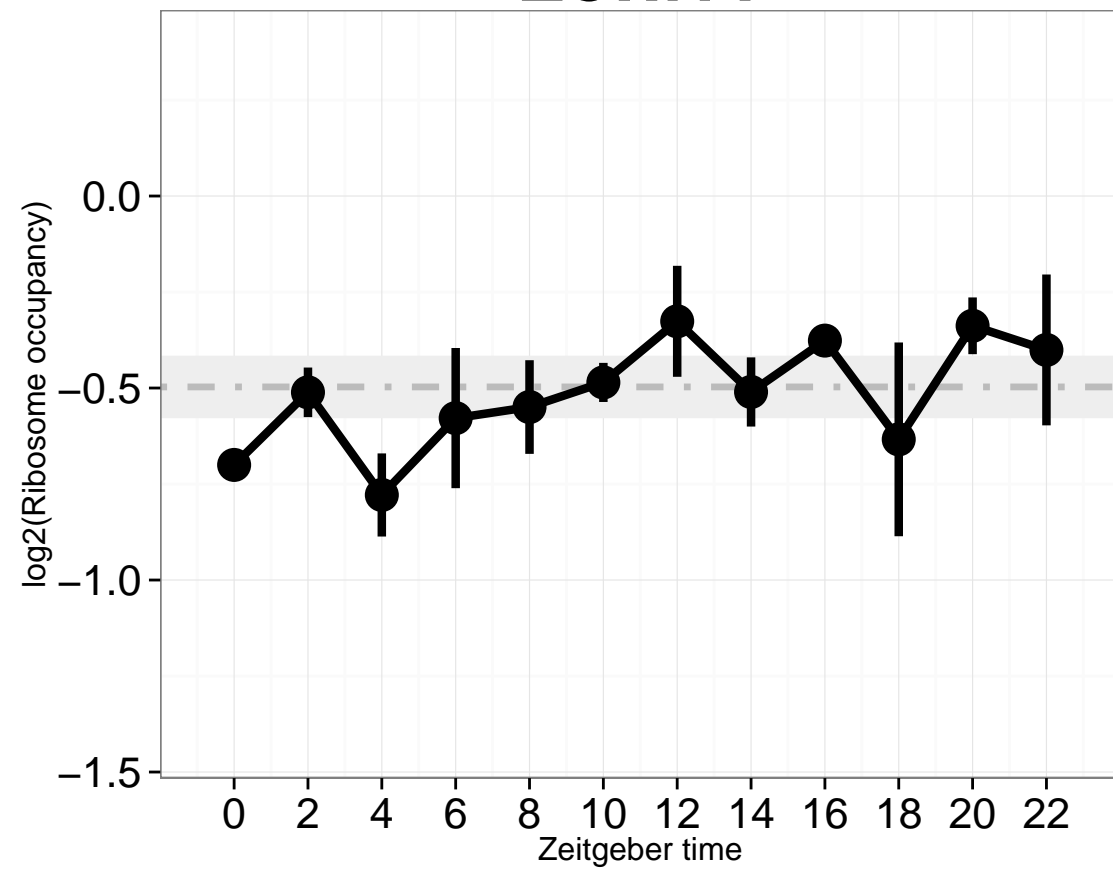

Supplement: Supplementary file 2575 [file 1]

## Cntf

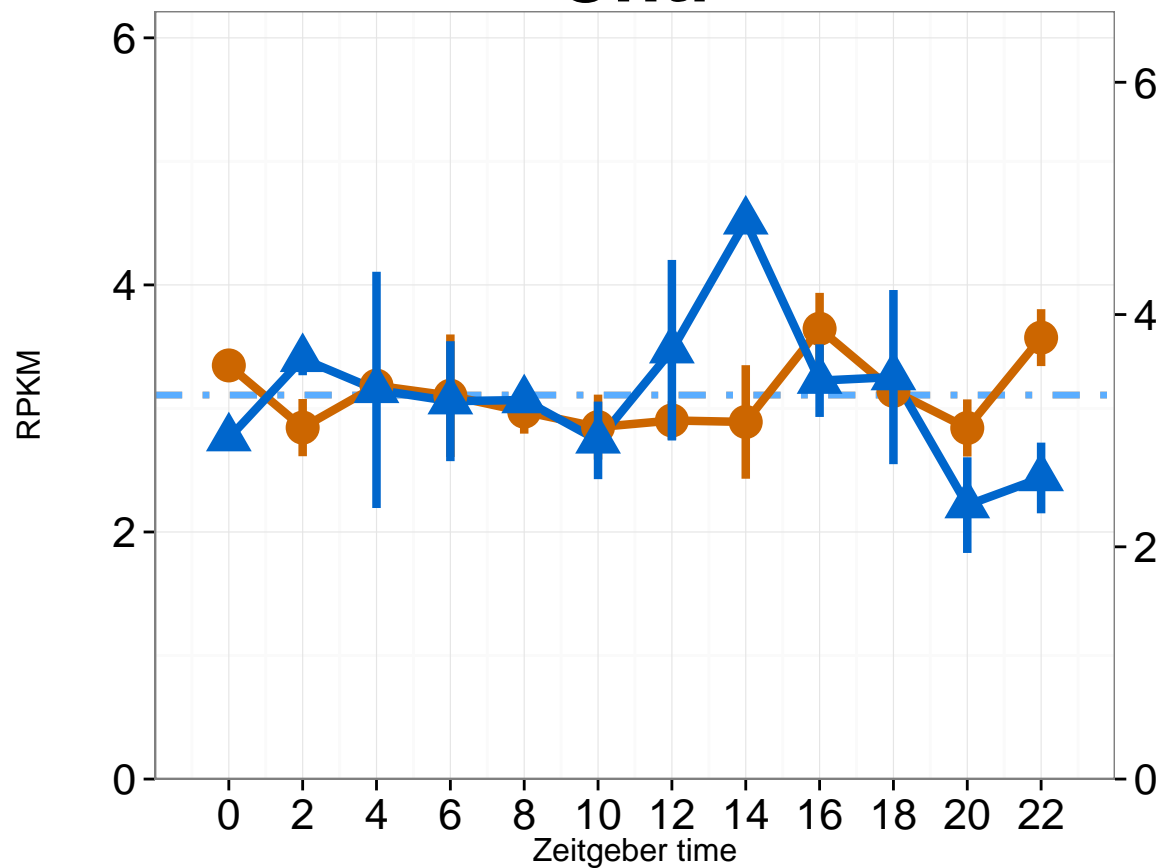

## Cntf

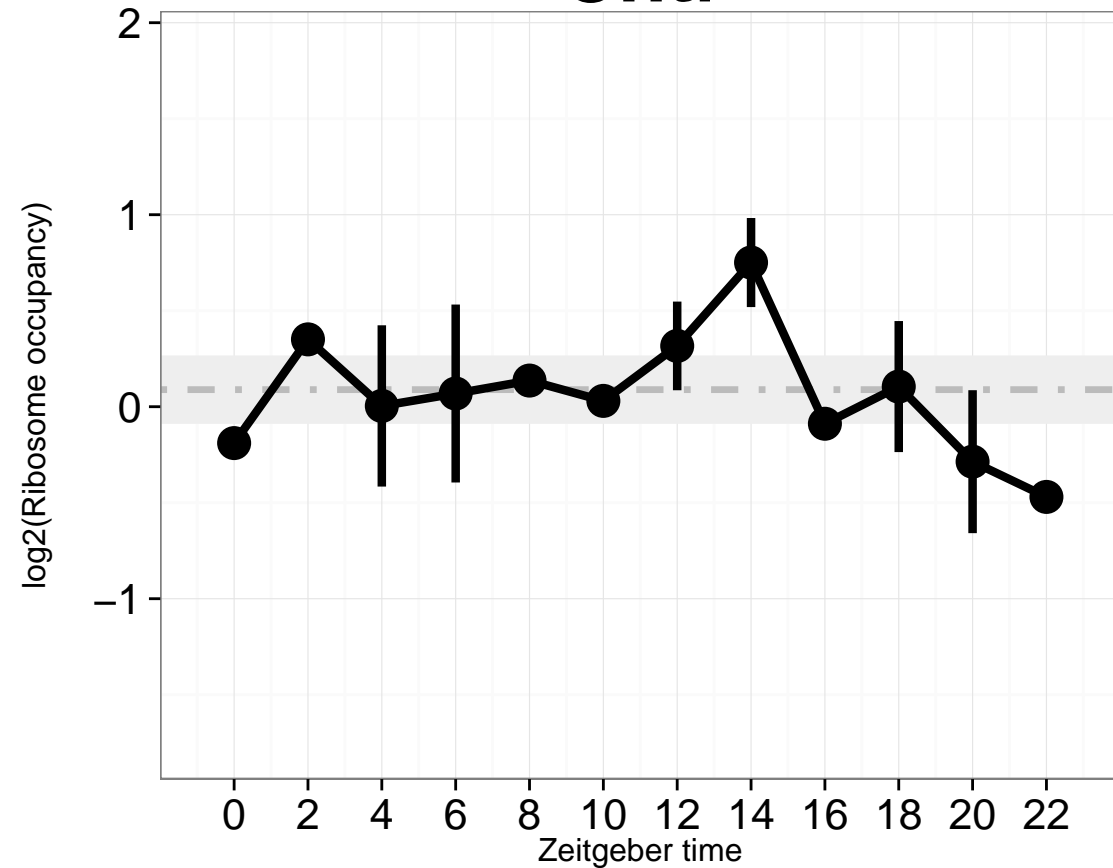

Supplement: Supplementary file 2576 [file 1]

## Pde12

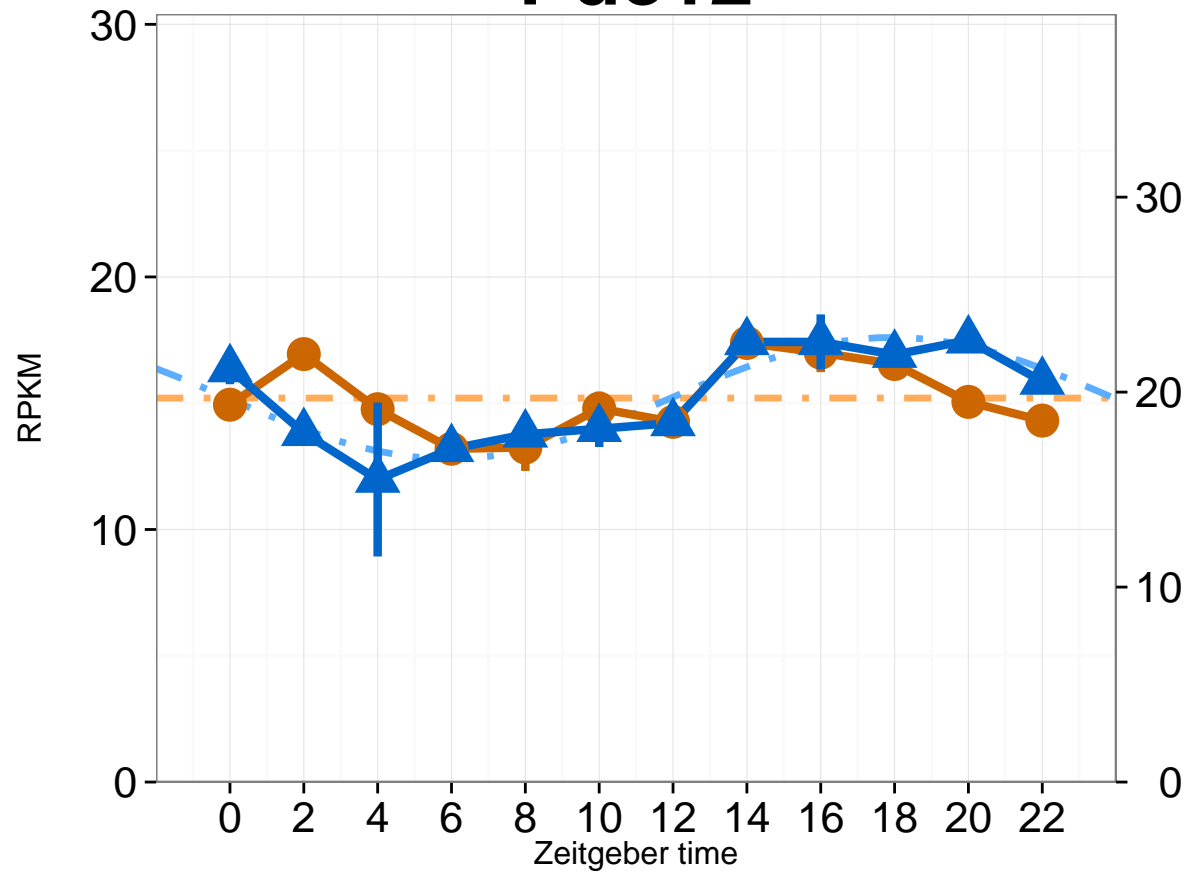

## Pde12

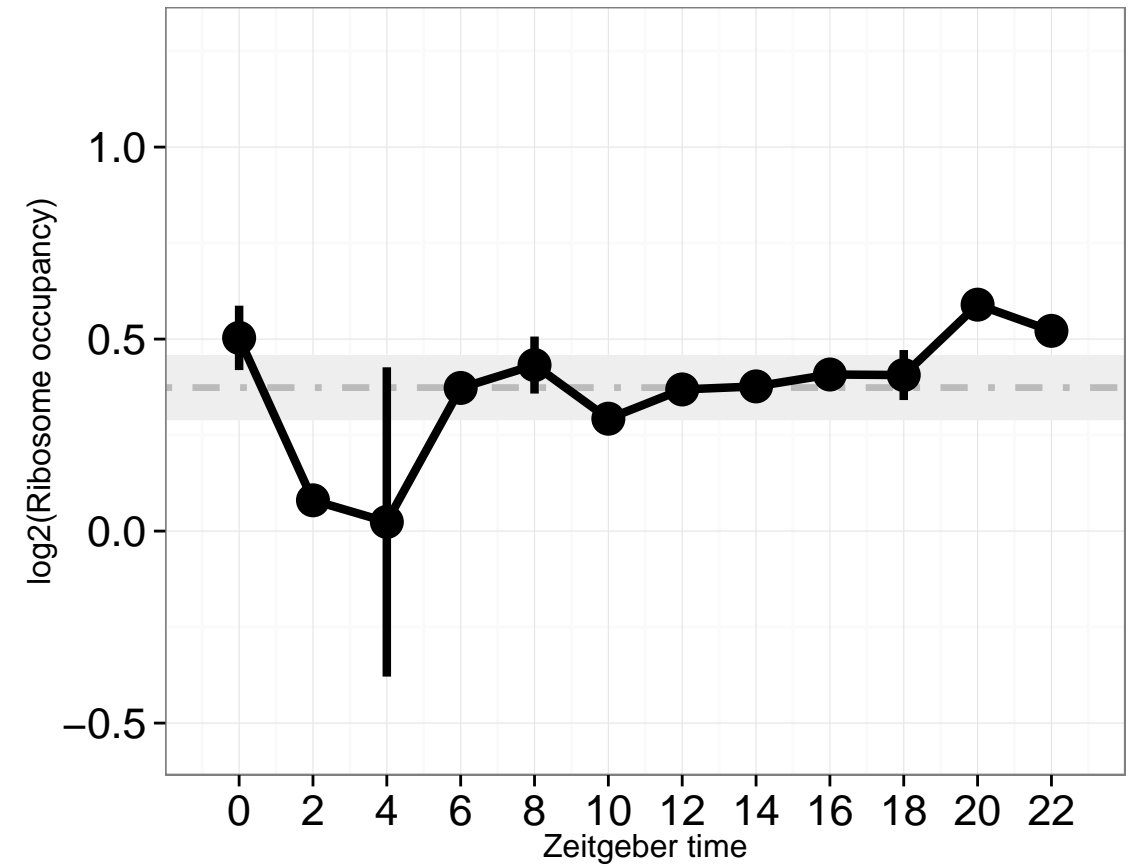

Supplement: Supplementary file 2577 [file 1]

## Tlr2

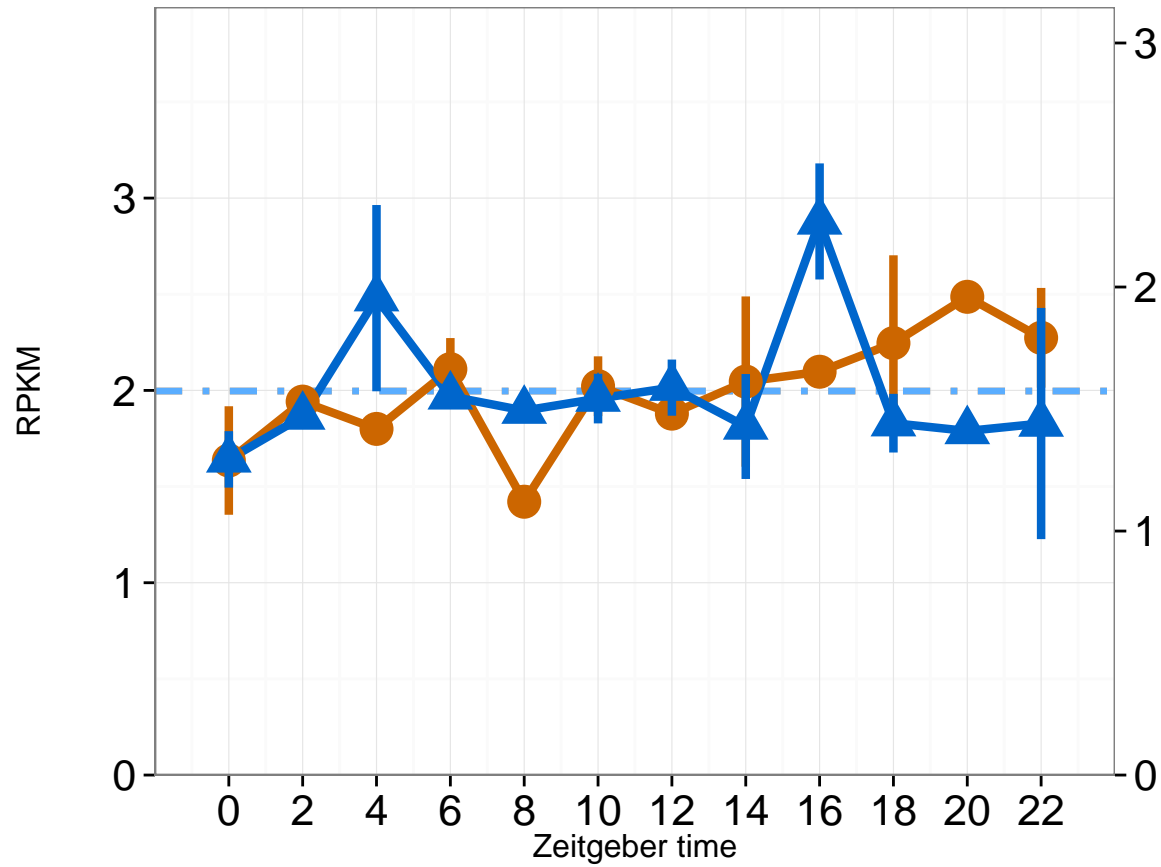

## Tlr2

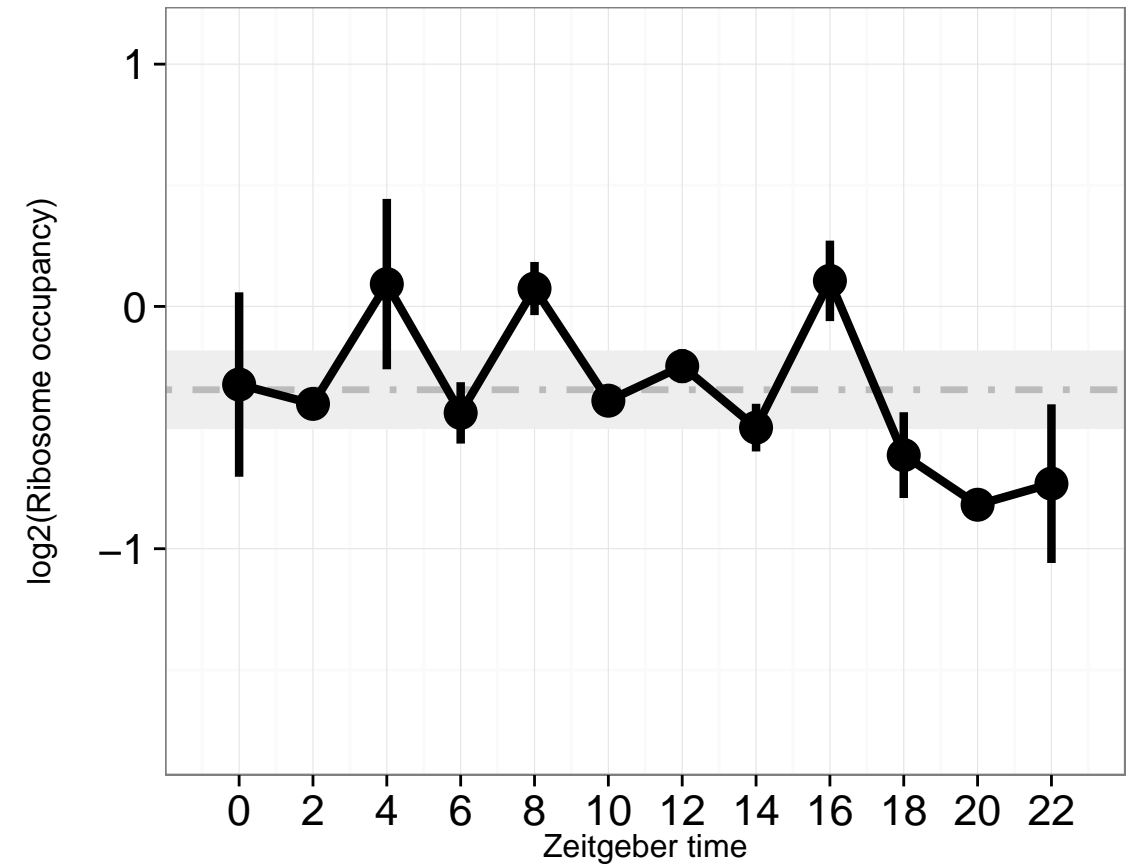

Supplement: Supplementary file 2578 [file 1]

# Rpl5

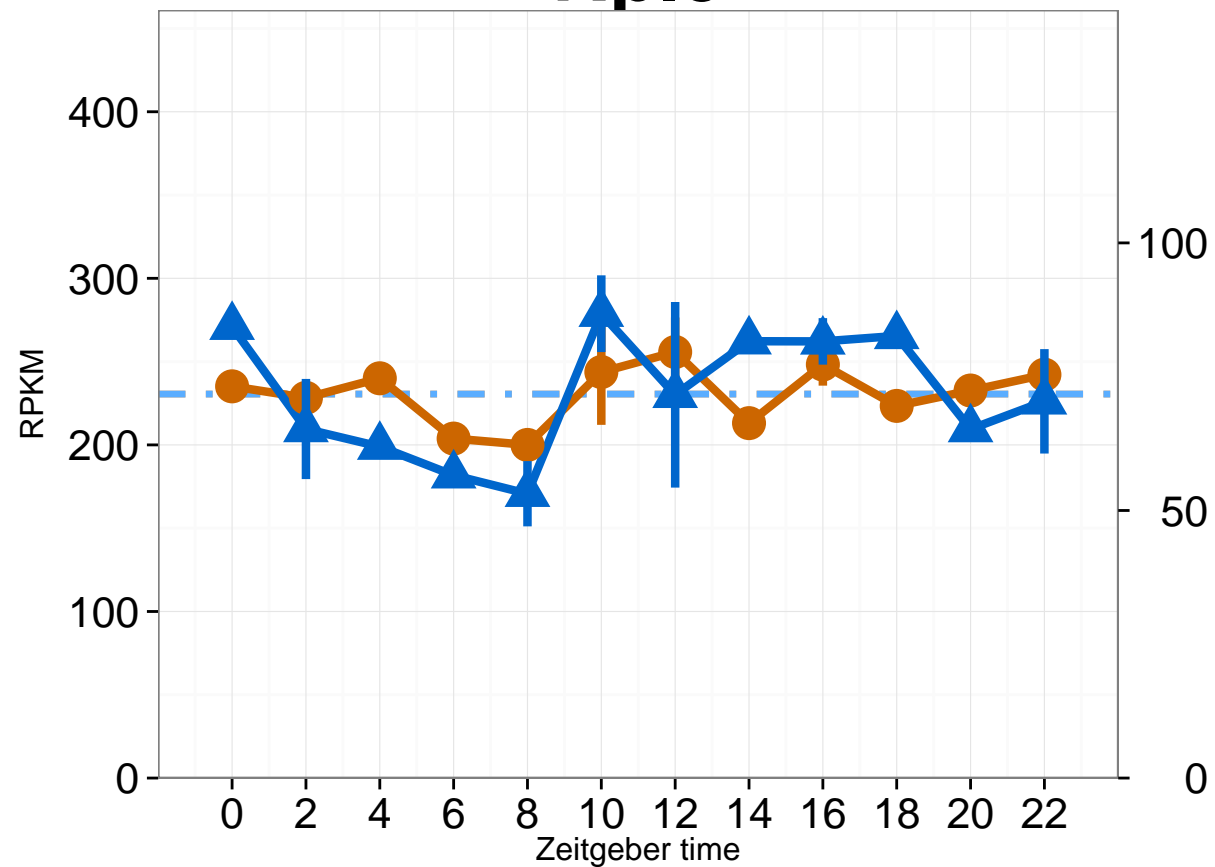

# Rpl5

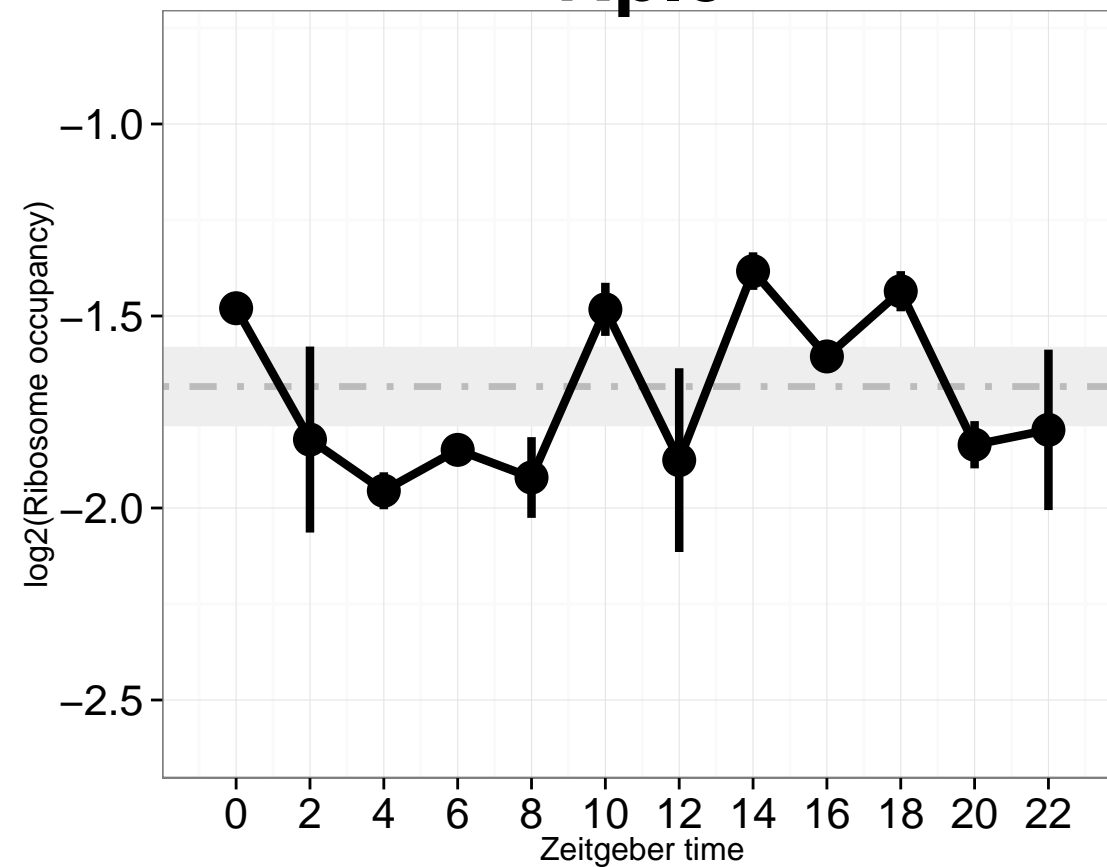

Supplement: Supplementary file 2579 [file 1]

## Dhx35

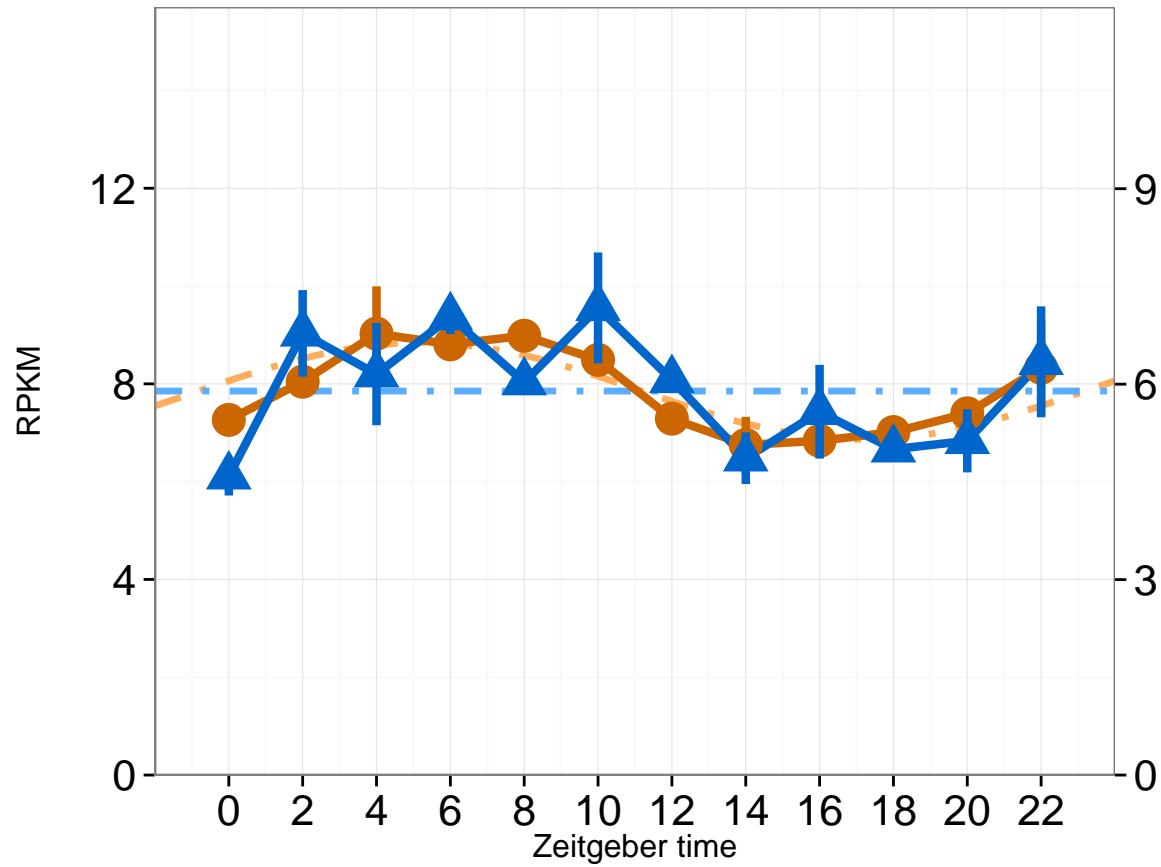

## Dhx35

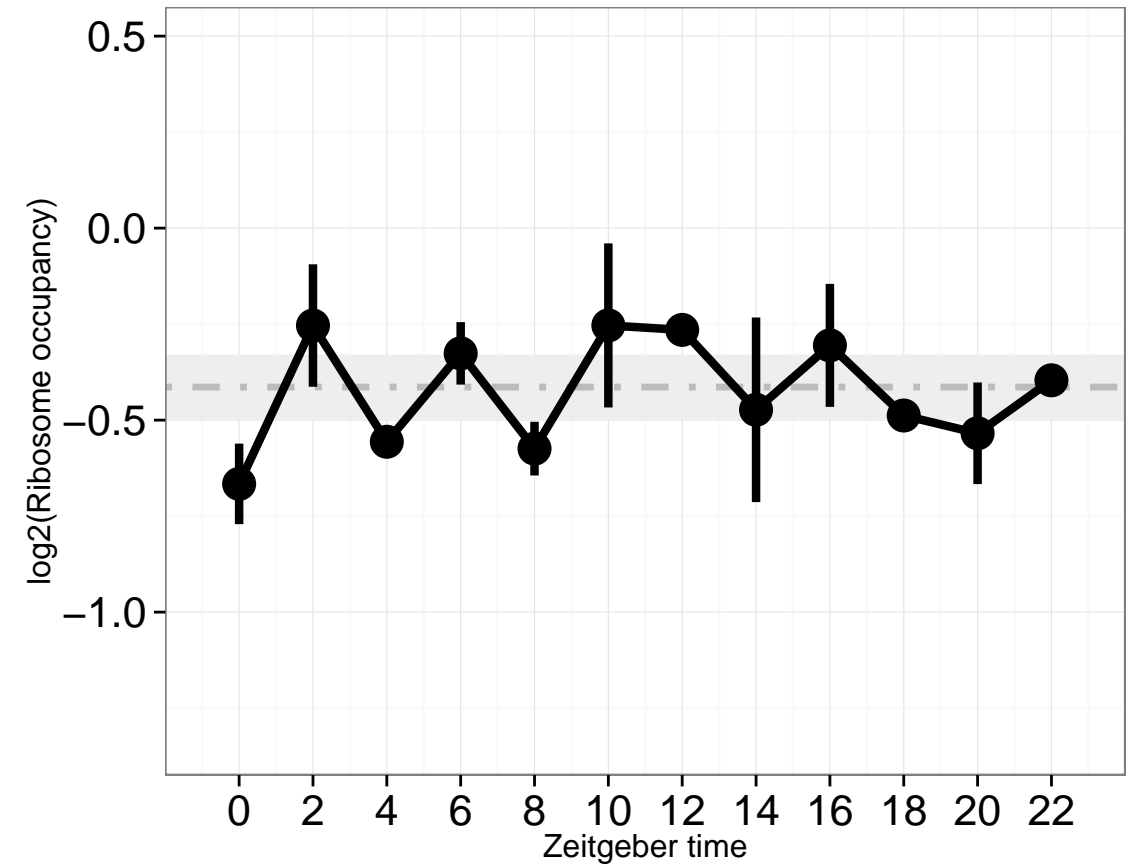

Supplement: Supplementary file 2580 [file 1]

## Dgcr2

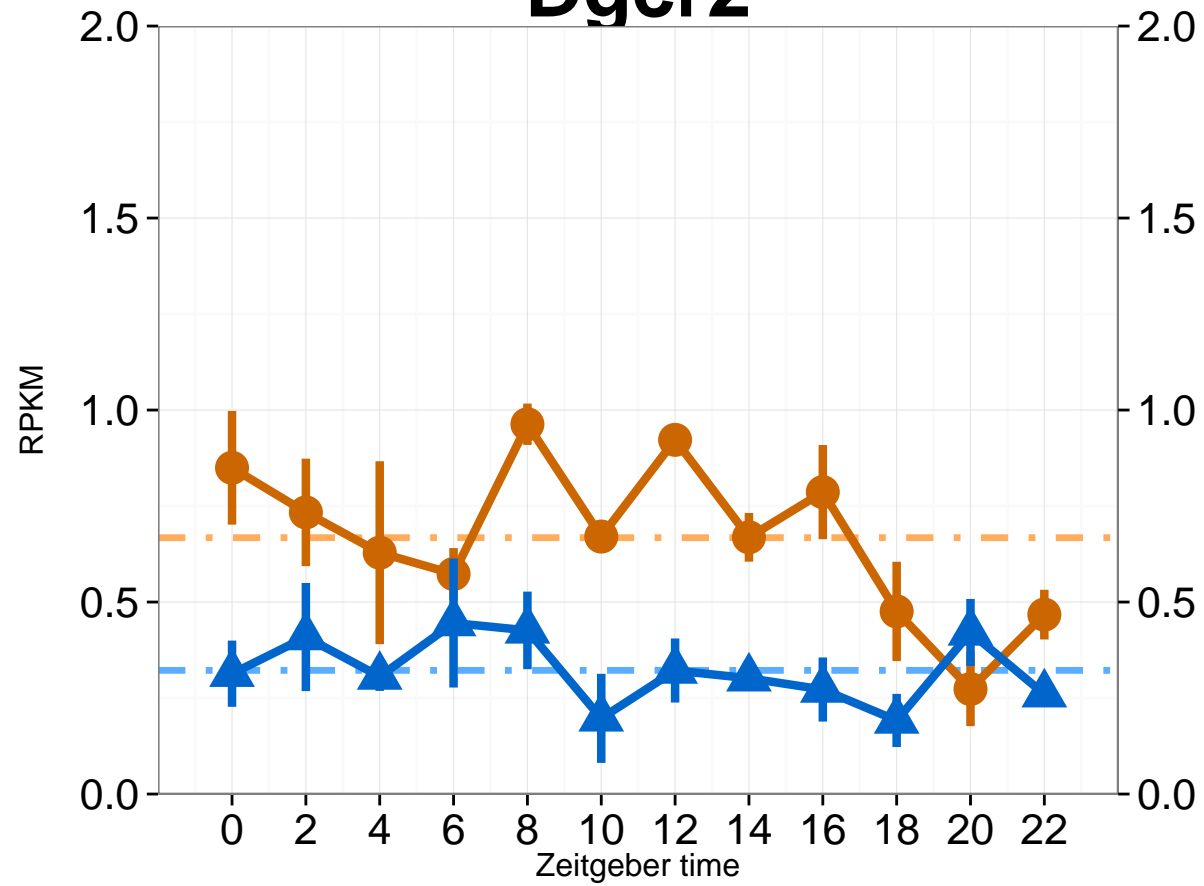

## Dgcr2

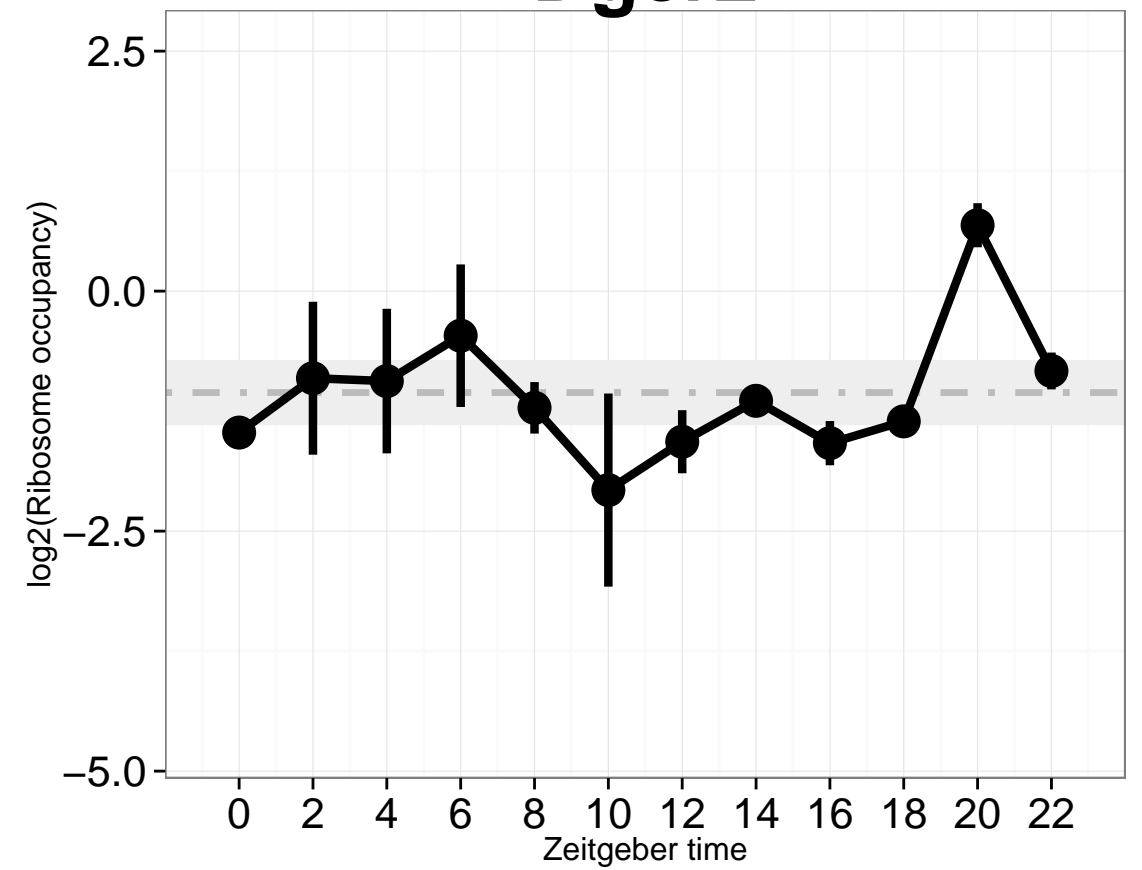

Supplement: Supplementary file 2581 [file 1]

## Shf

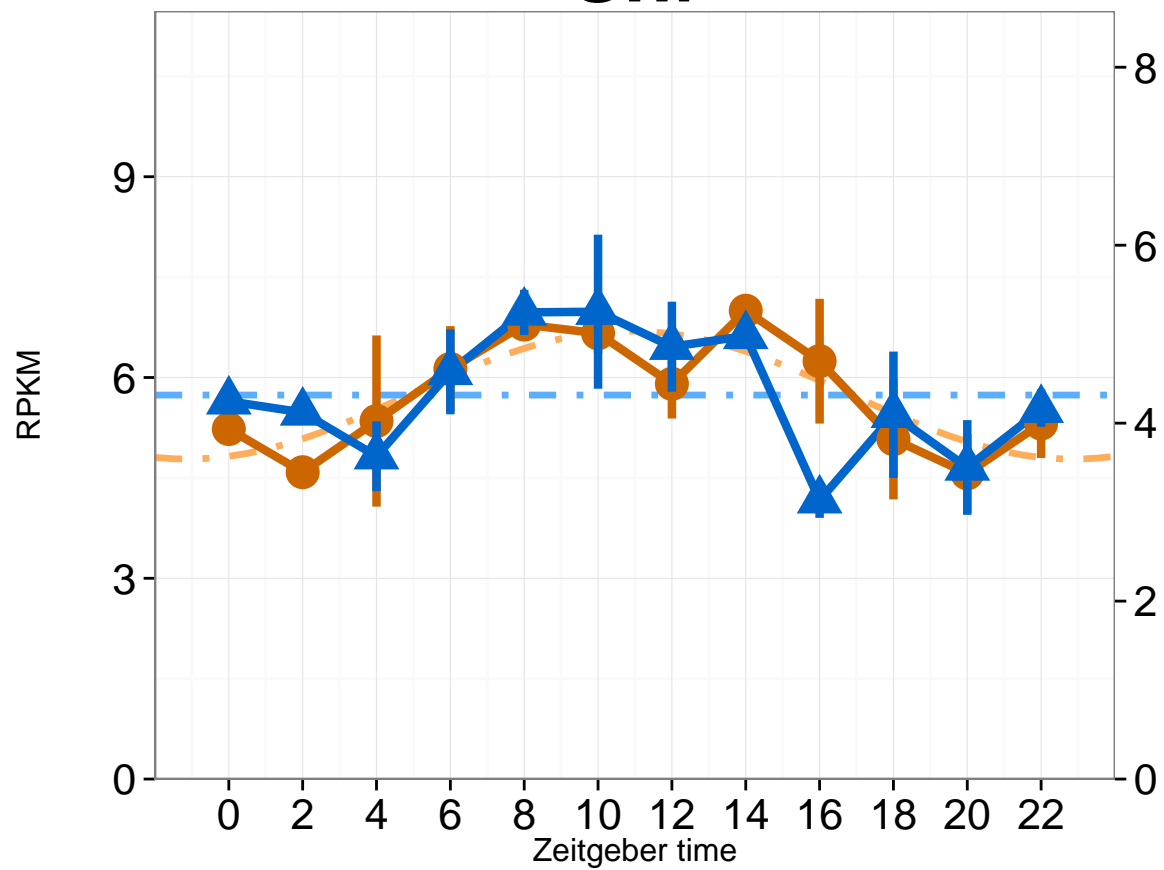

## Shf

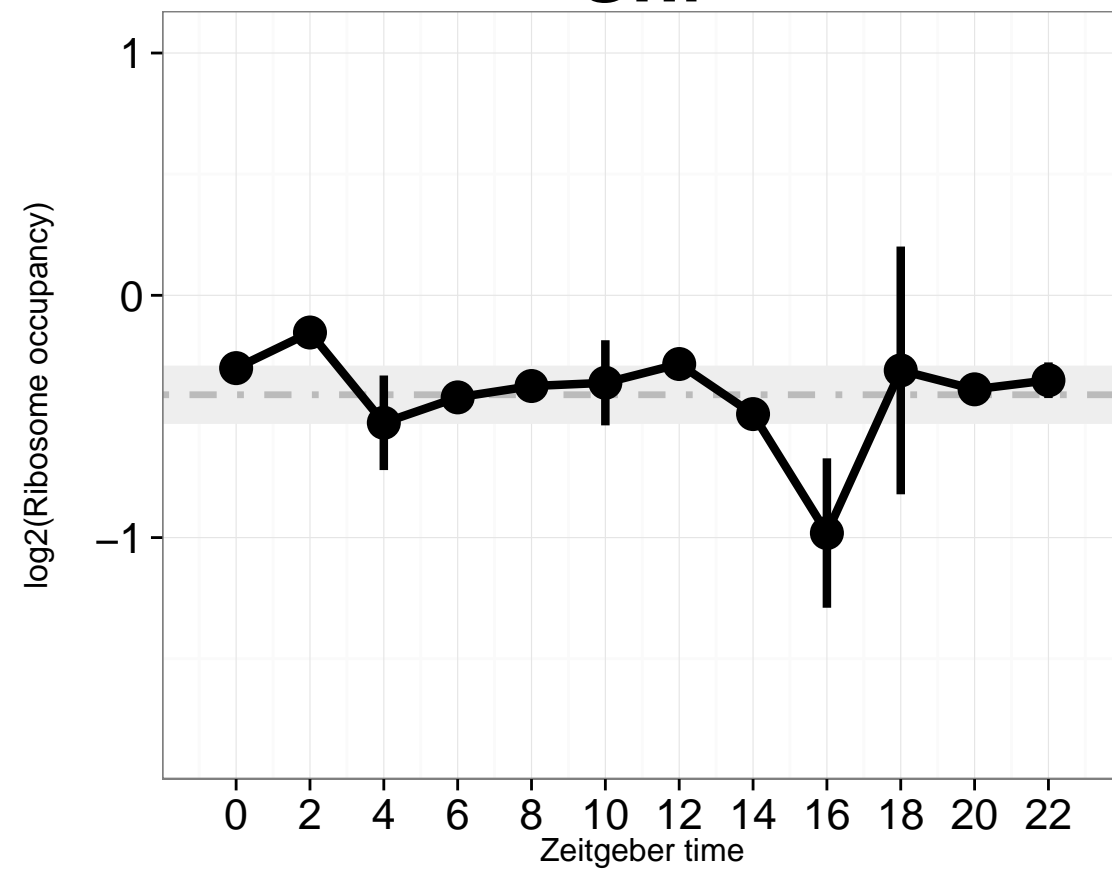

Supplement: Supplementary file 2582 [file 1]

# Itga8

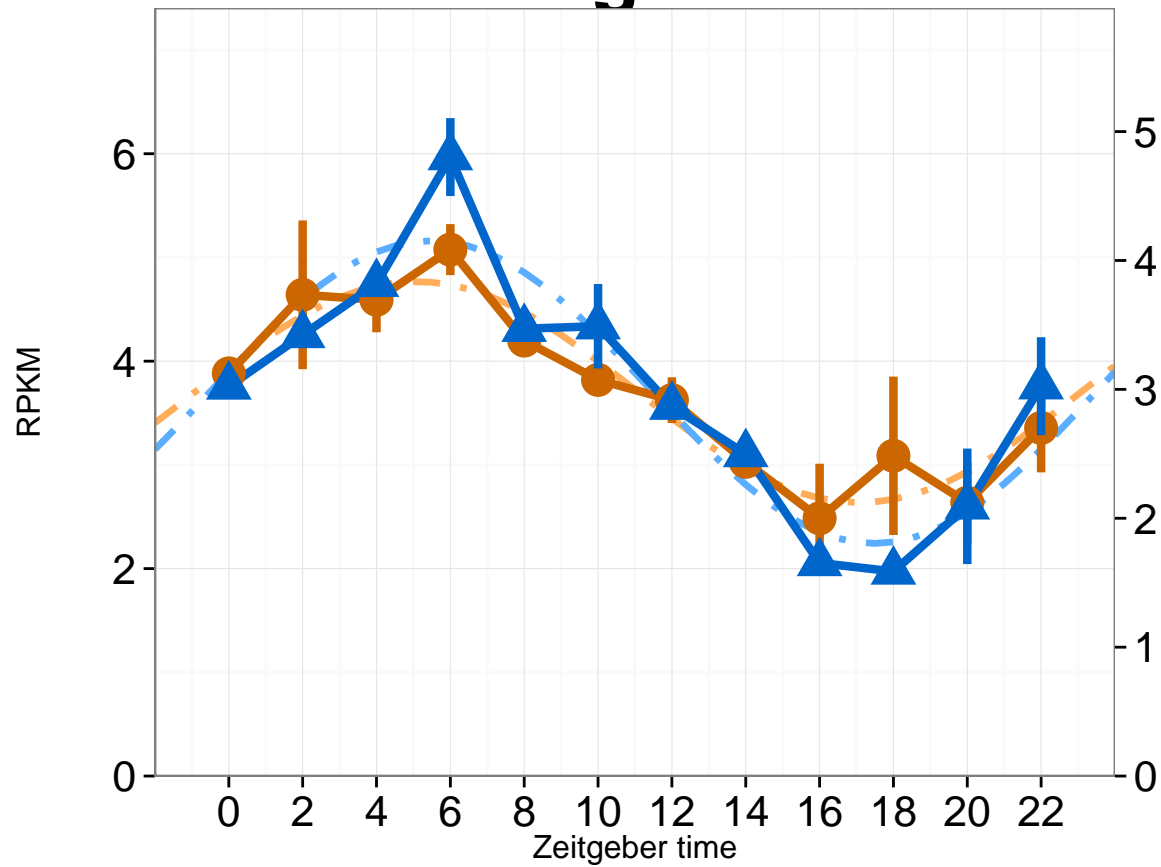

# Itga8

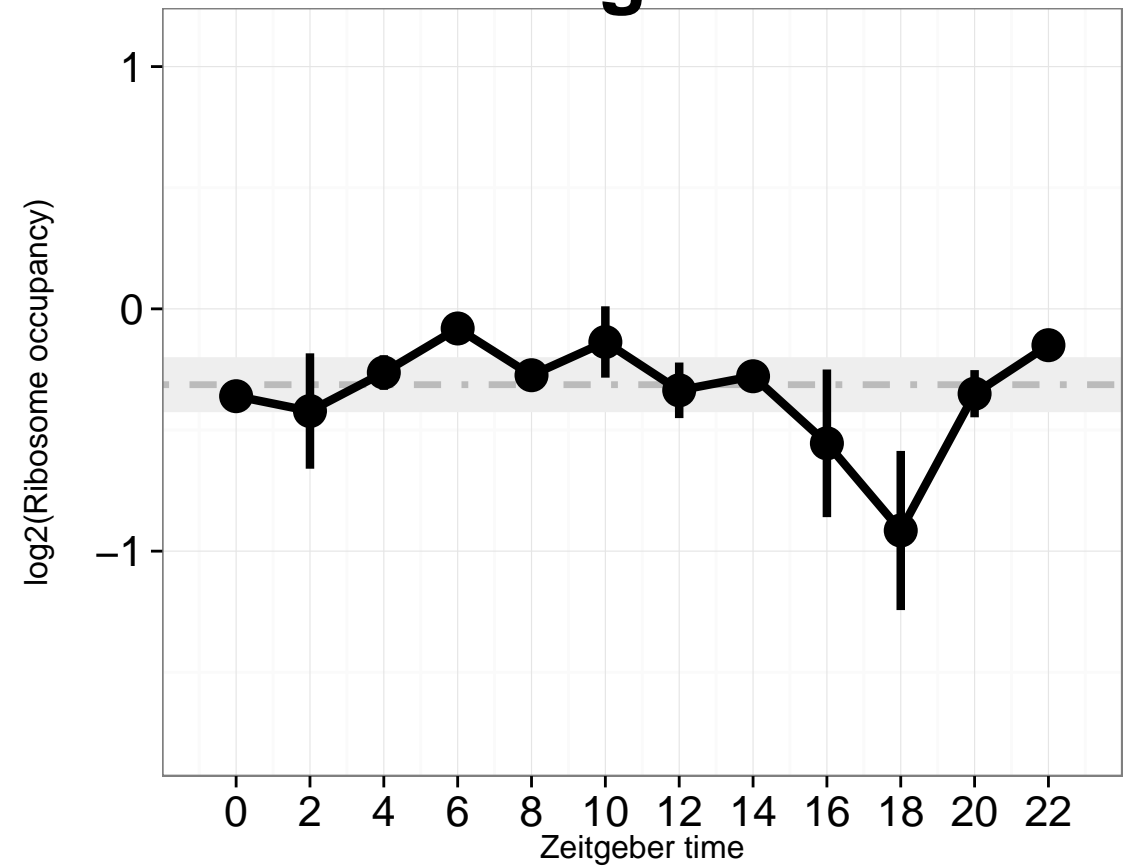

Supplement: Supplementary file 2583 [file 1]

# Tlcd1

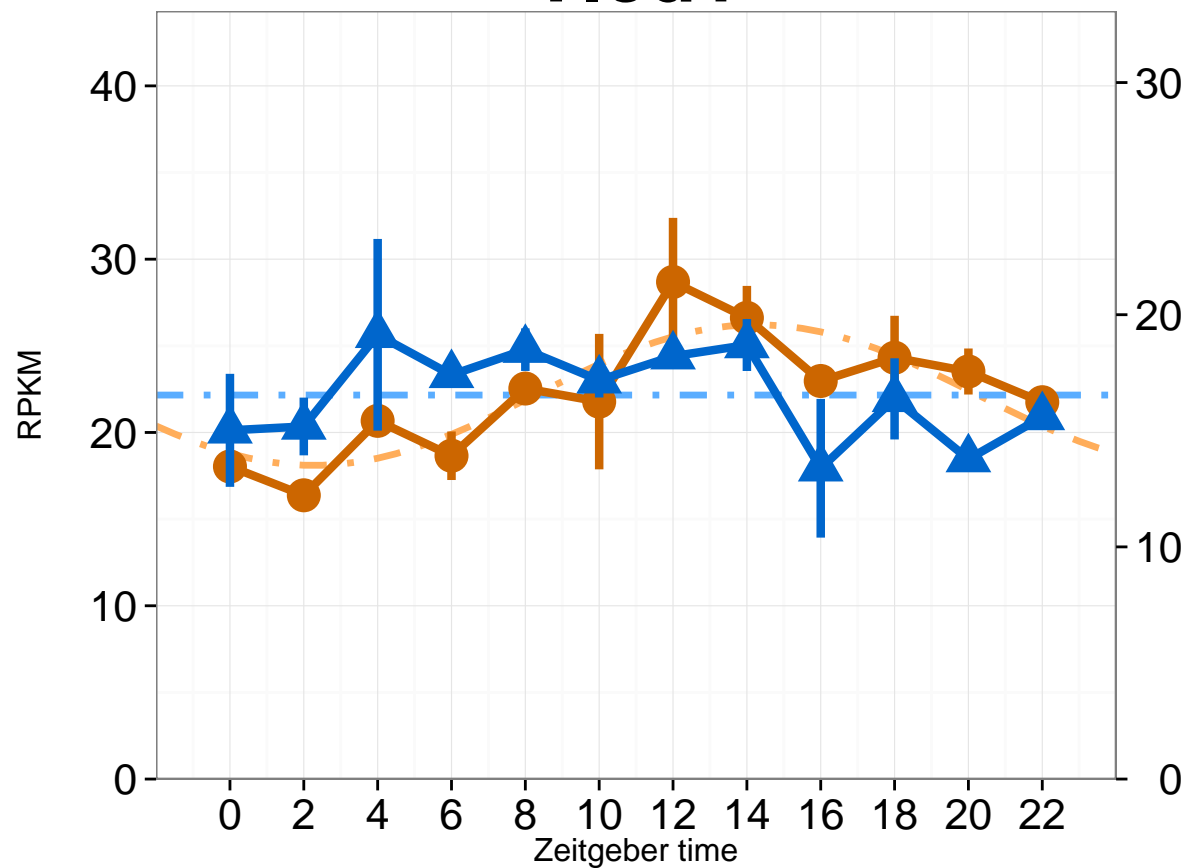

# Tlcd1

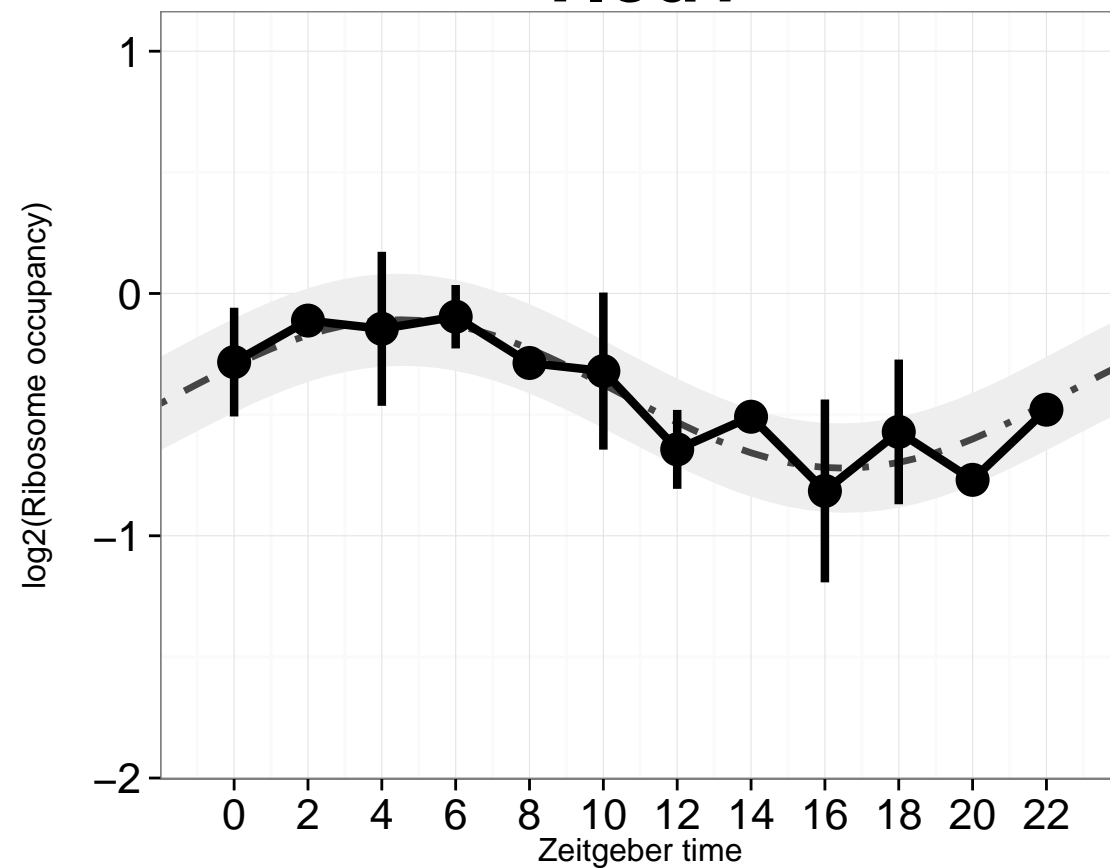

Supplement: Supplementary file 2584 [file 1]

## Brix1

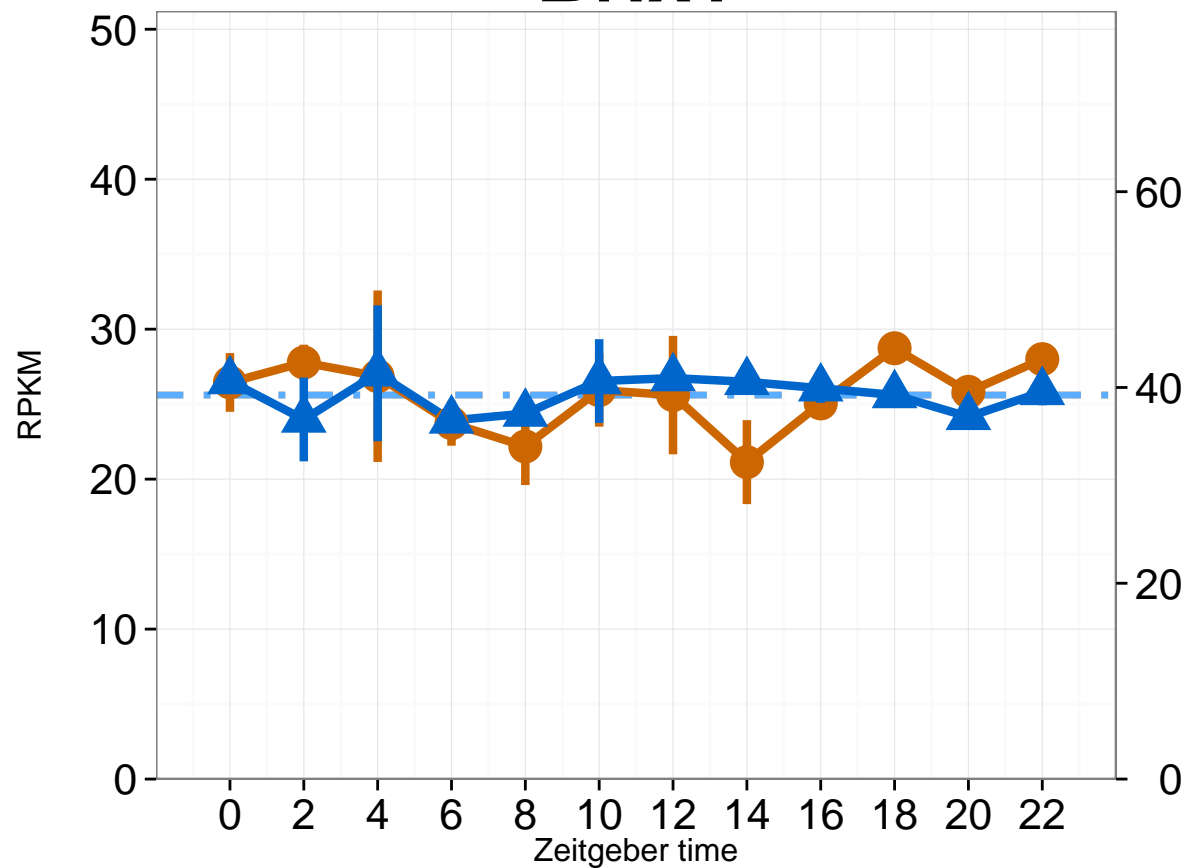

## Brix1

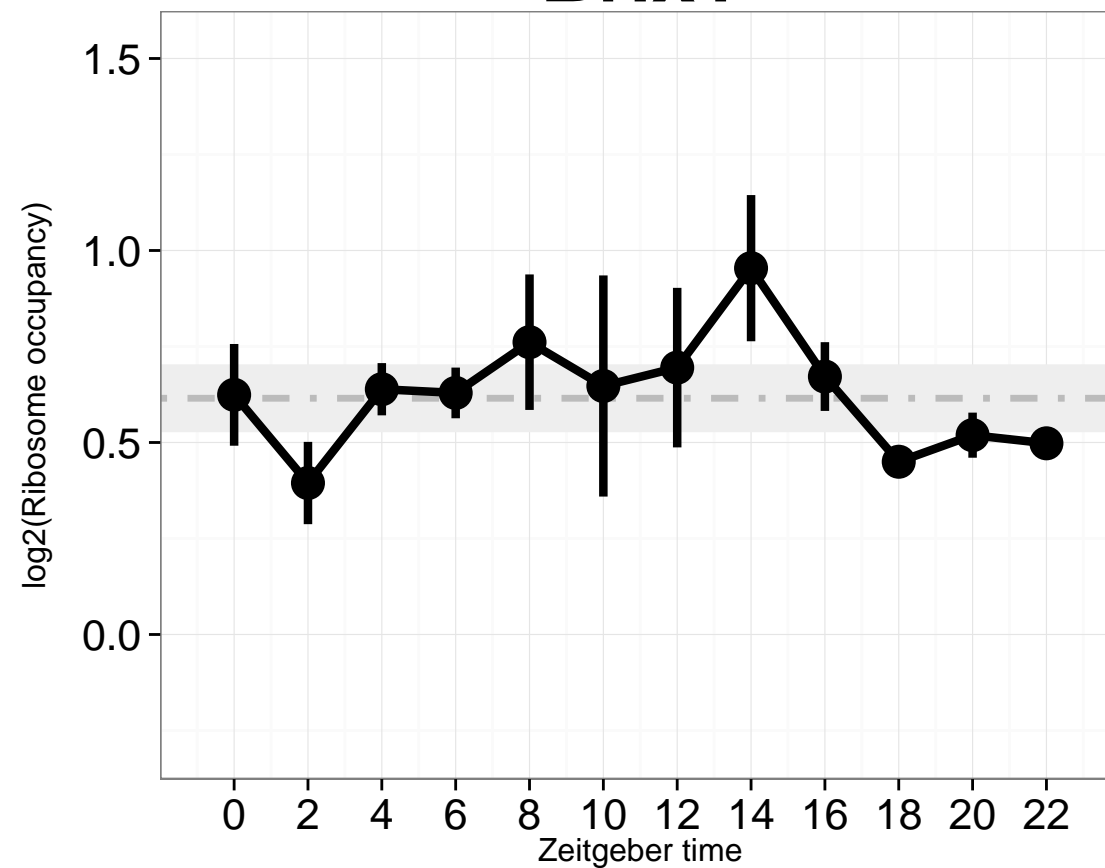

Supplement: Supplementary file 2585 [file 1]

# Zfp27

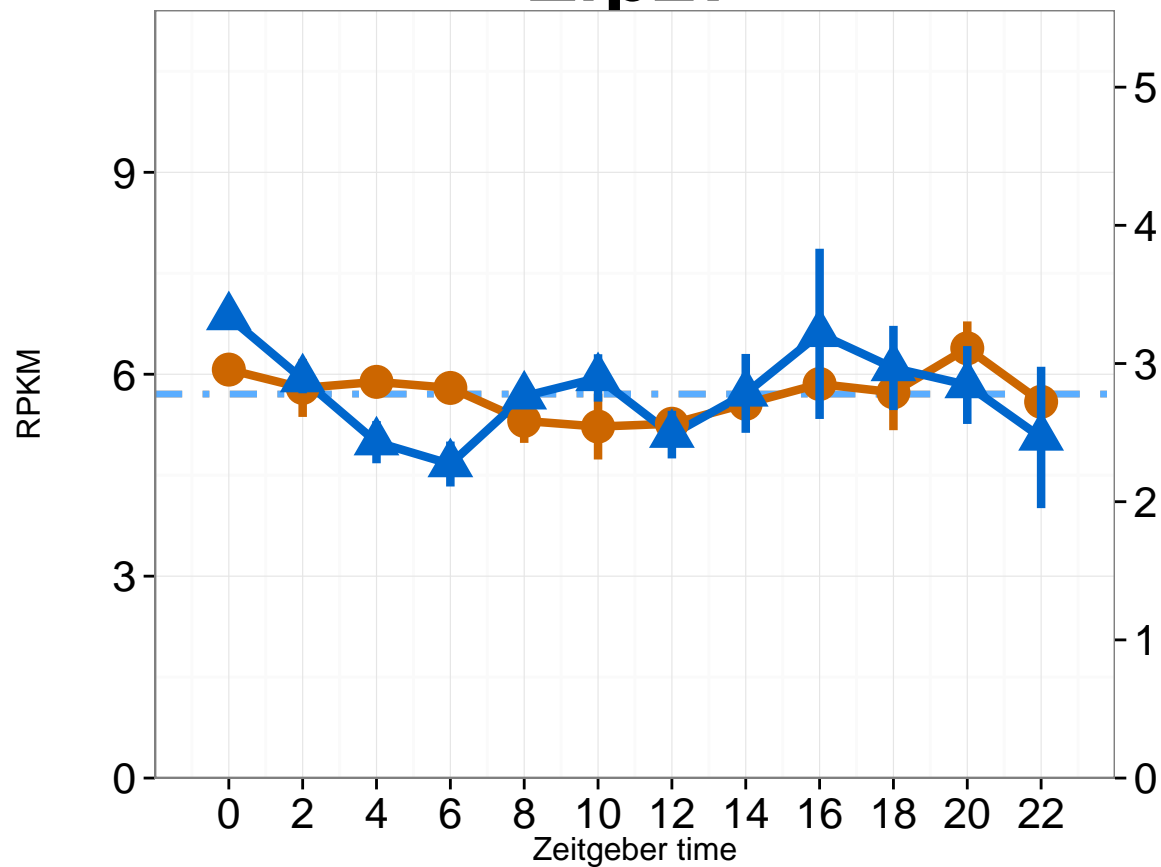

# Zfp27

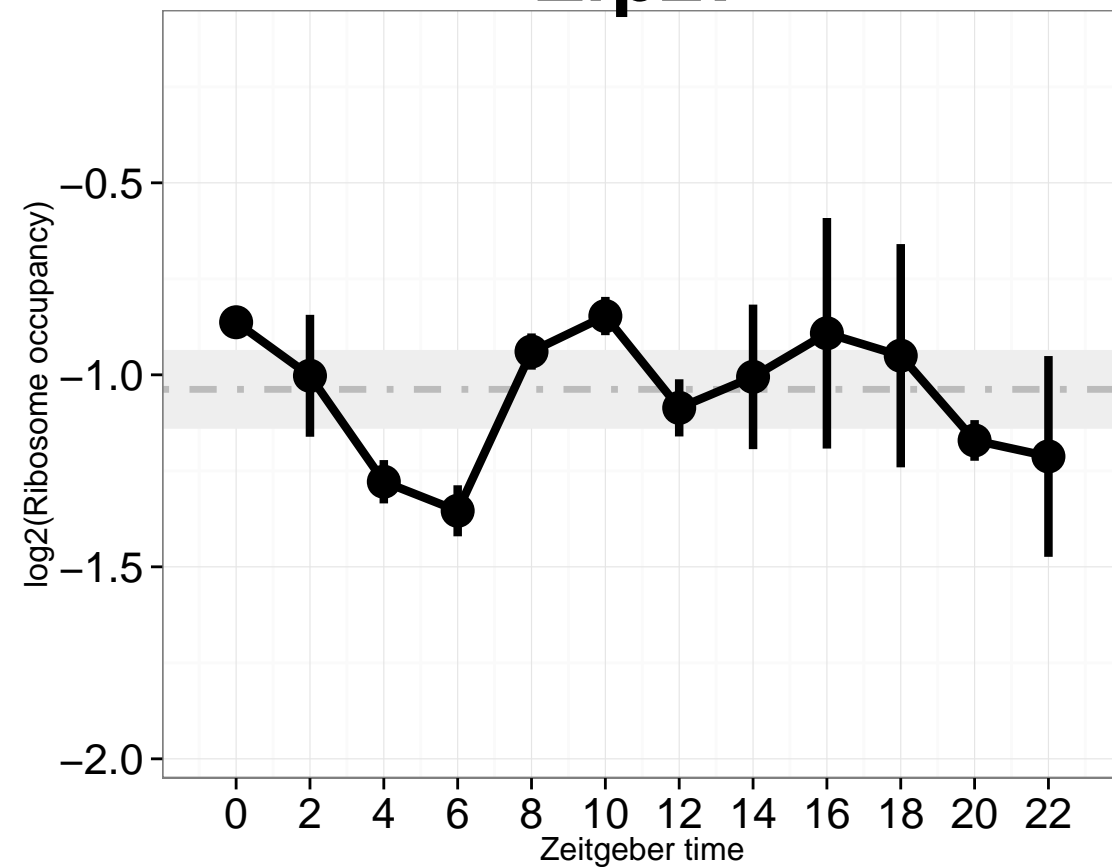

Supplement: Supplementary file 2586 [file 1]

# Cep85l

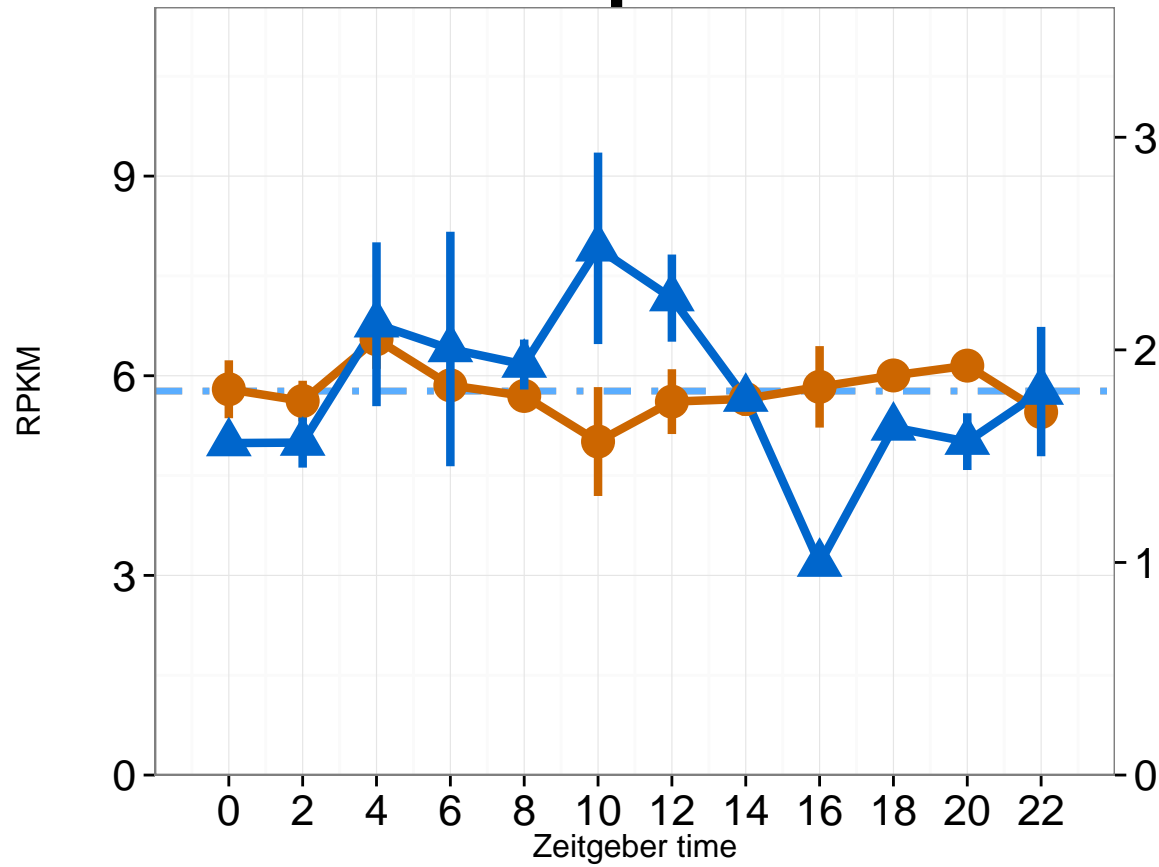

# Cep85l

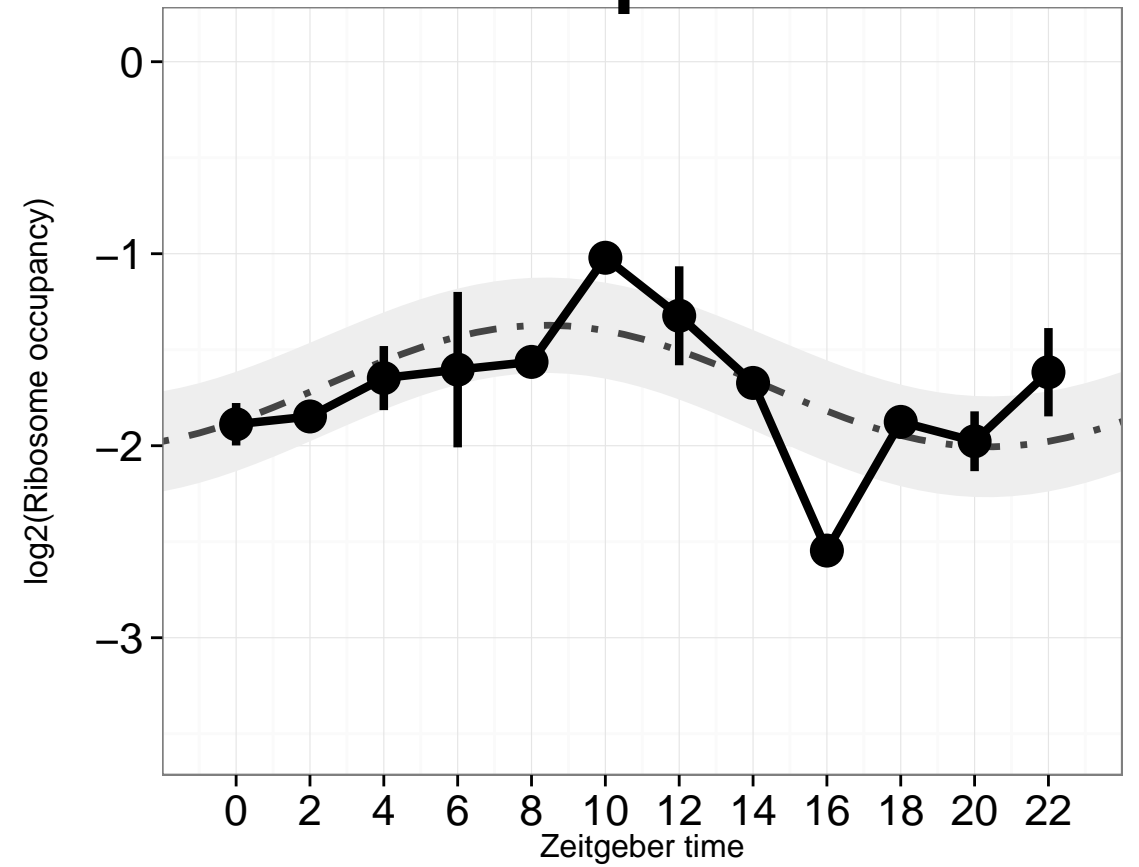

Supplement: Supplementary file 2587 [file 1]

## Selpg

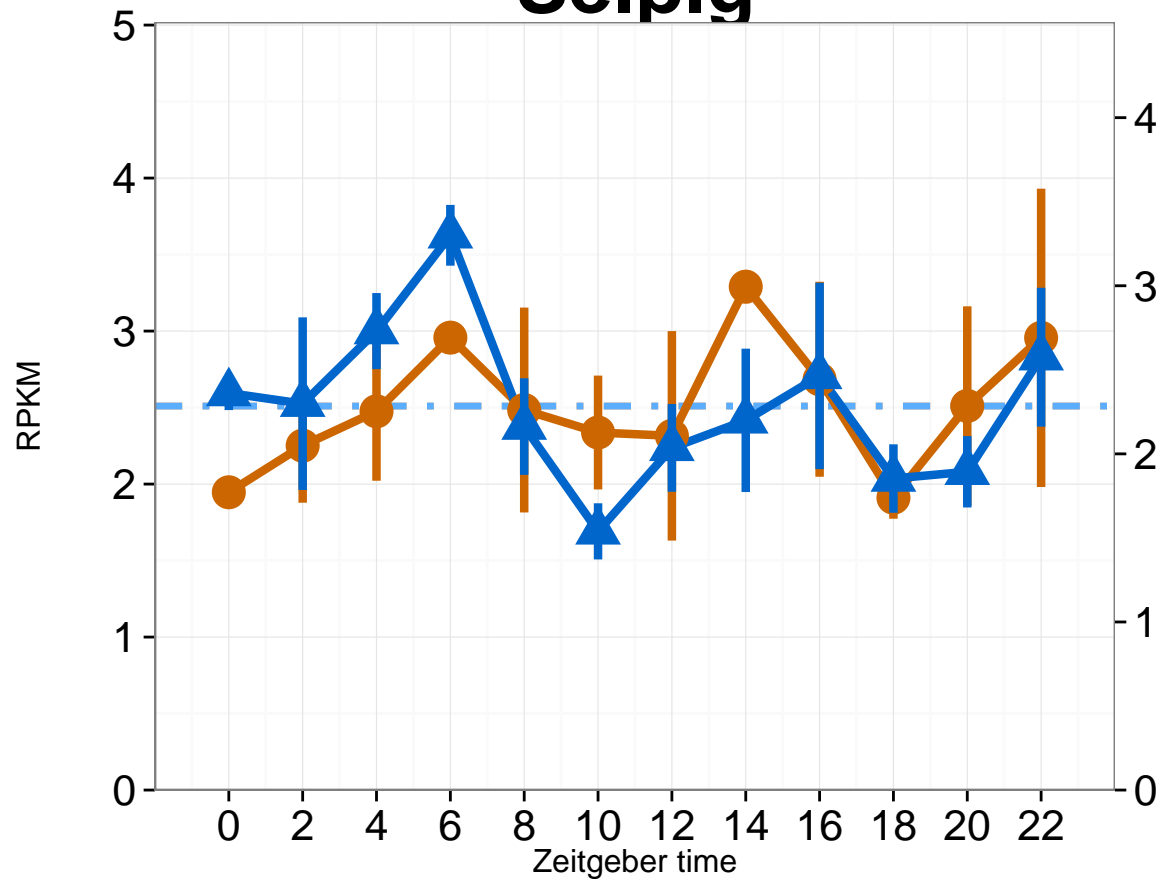

## Selpg

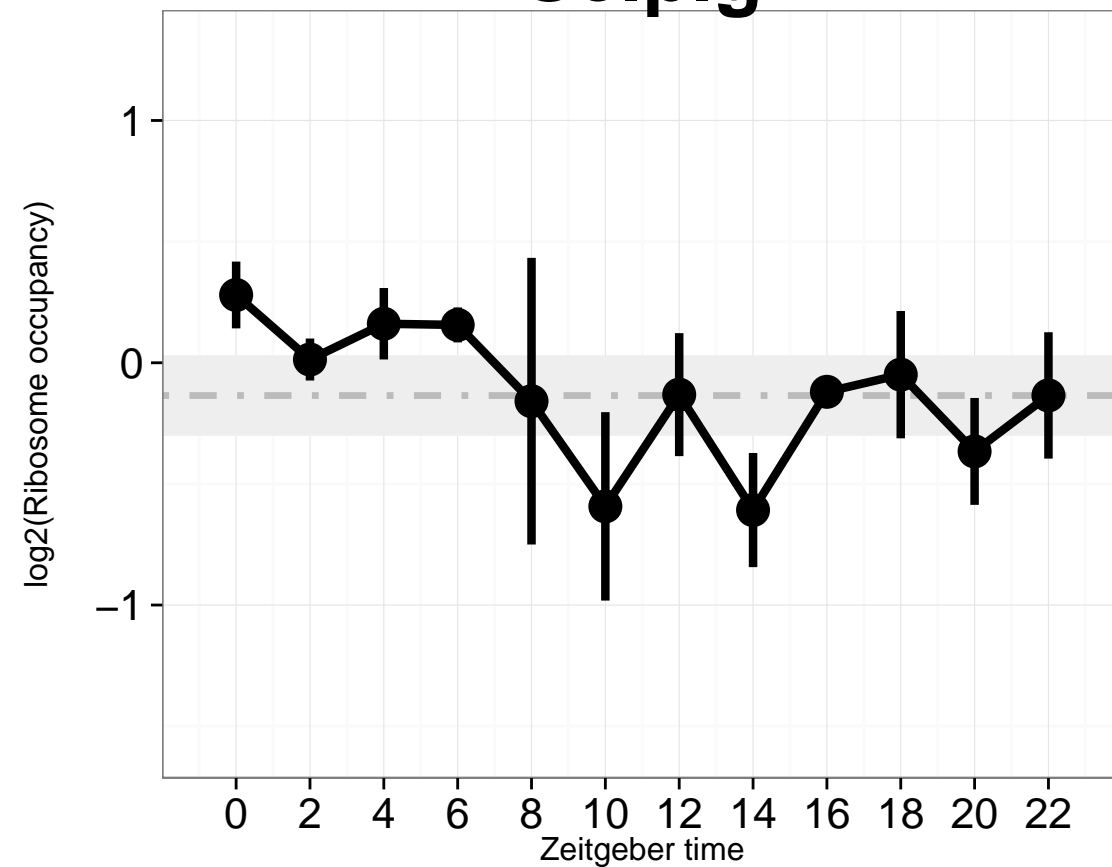

Supplement: Supplementary file 2588 [file 1]

# Ccng1

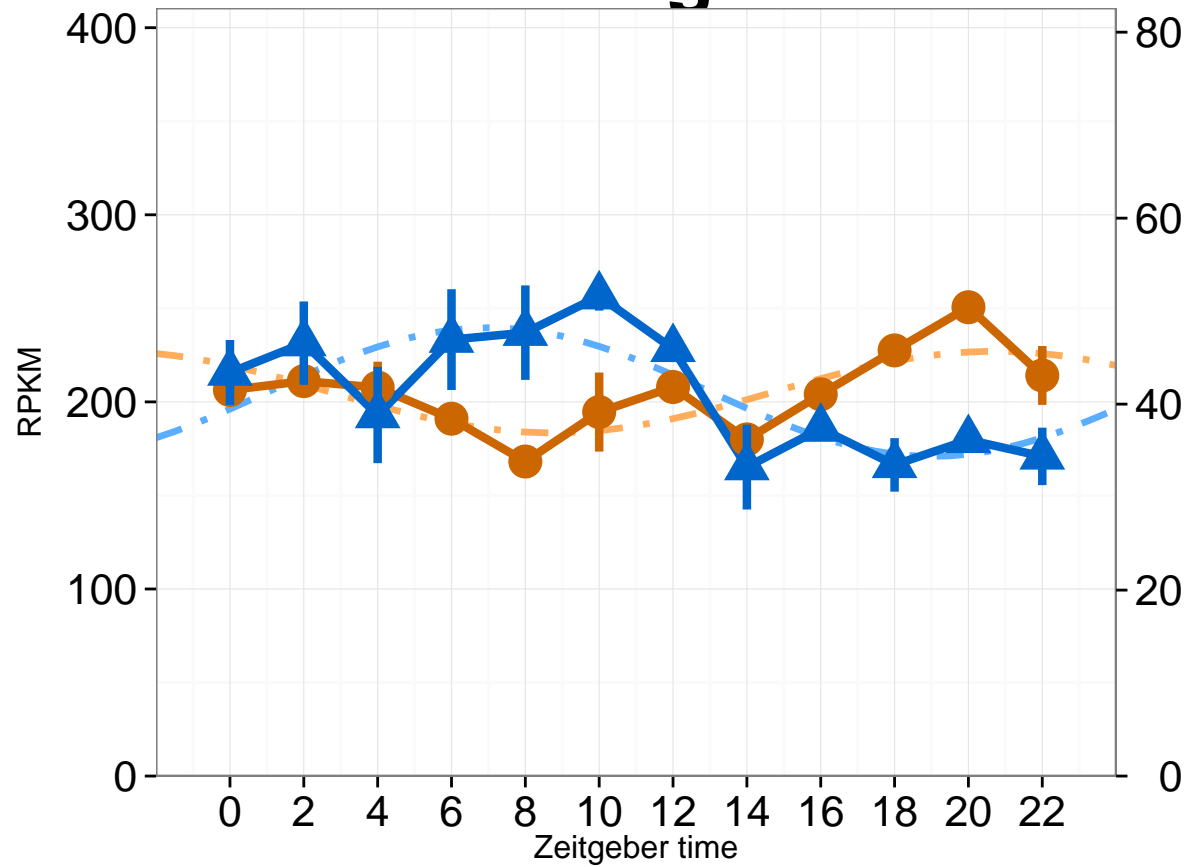

# Ccng1

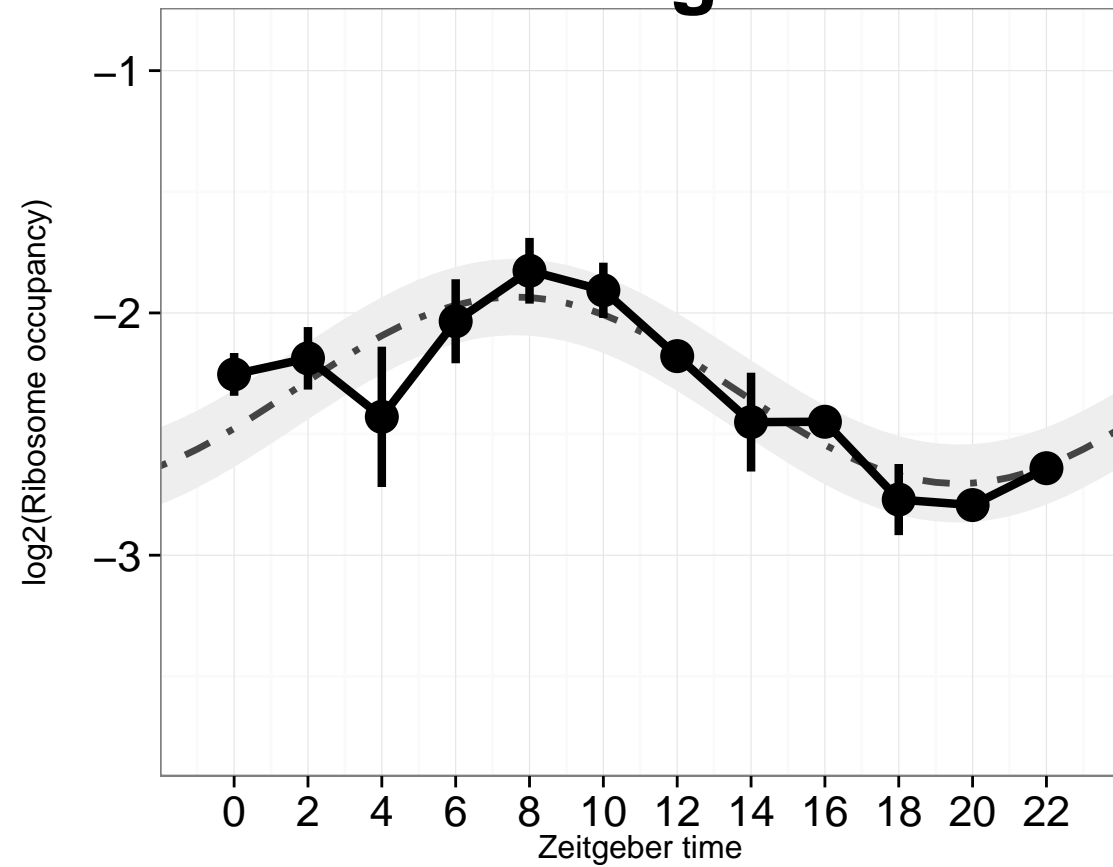

Supplement: Supplementary file 2589 [file 1]

## Slfn8

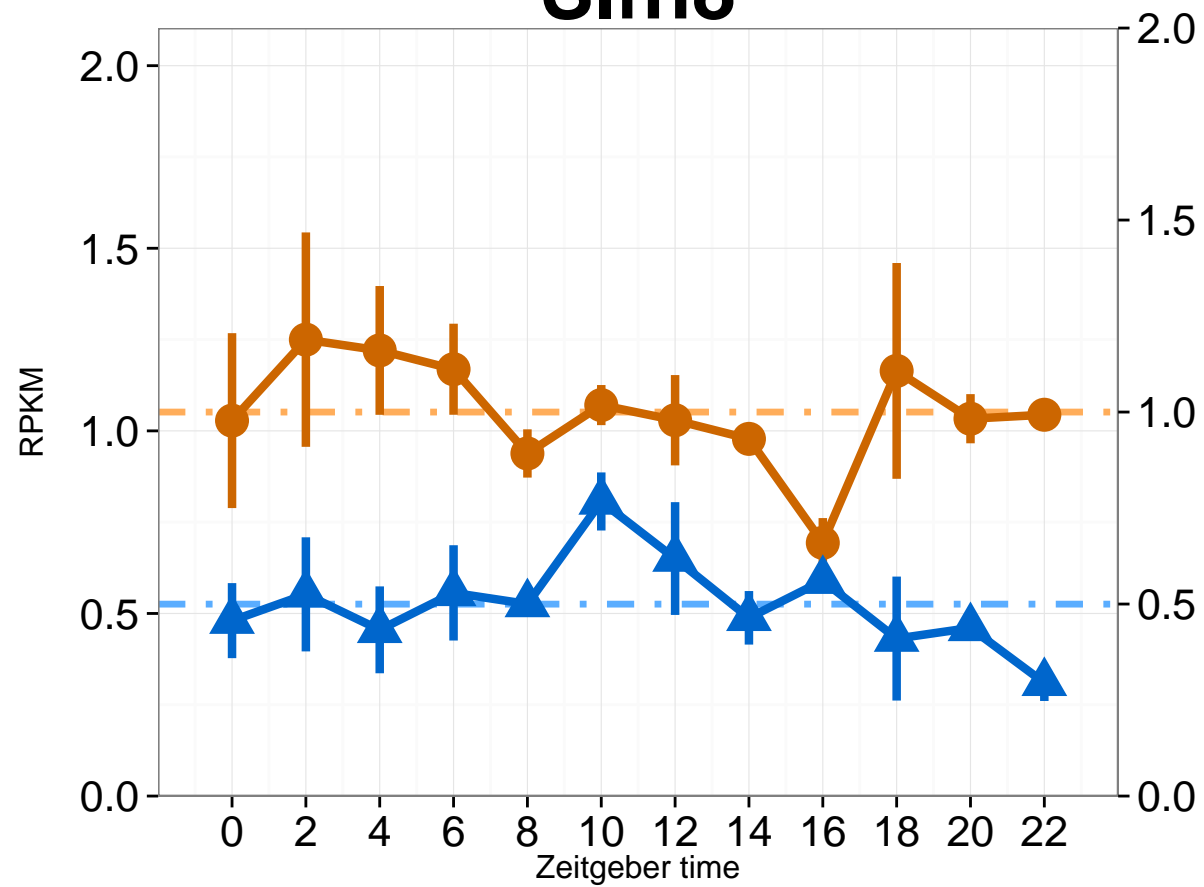

## Slfn8

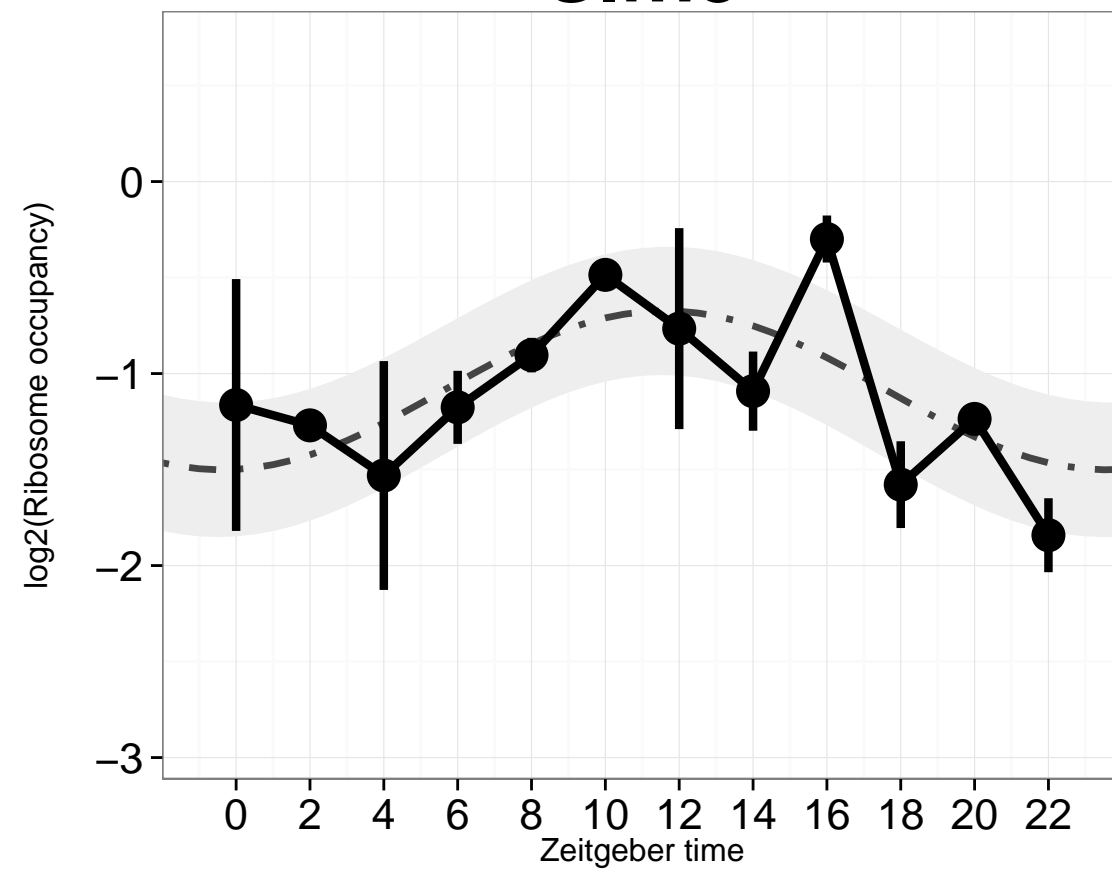

Supplement: Supplementary file 2590 [file 1]

# Arhgef12

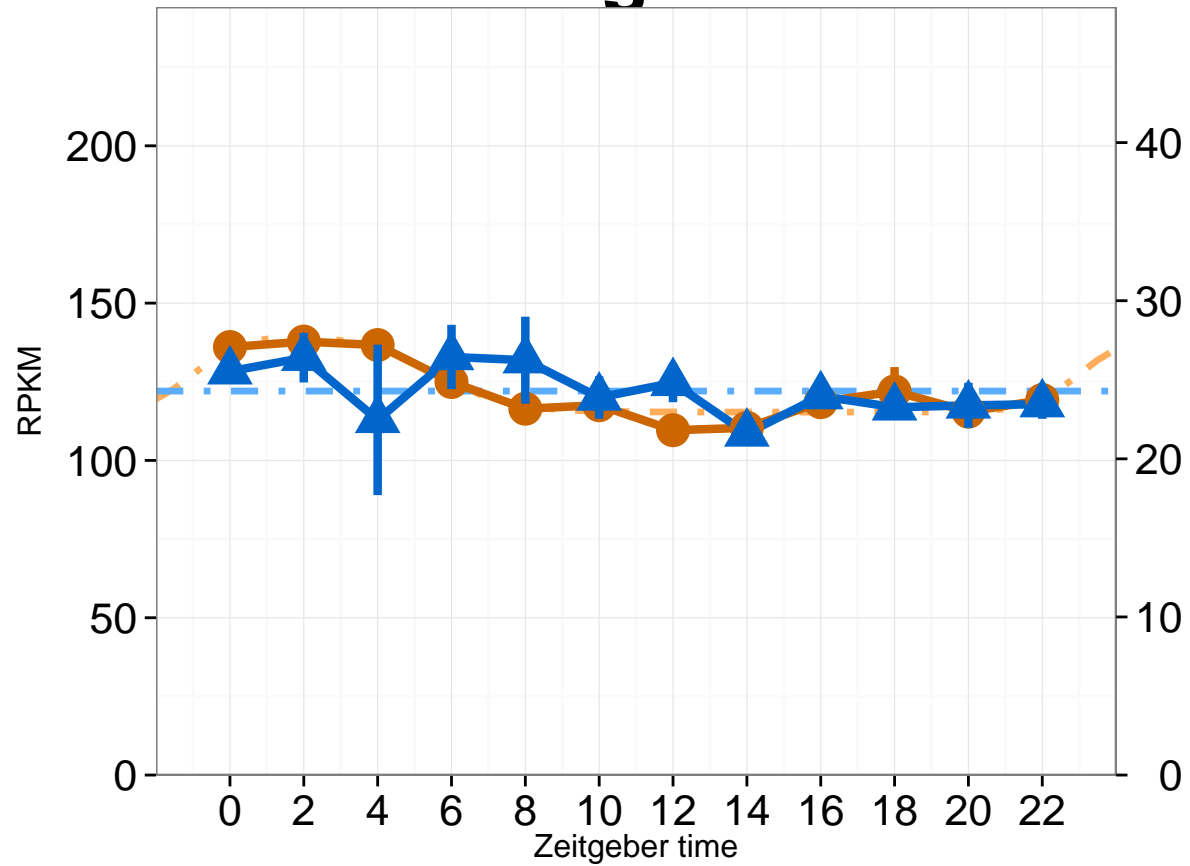

# Arhgef12

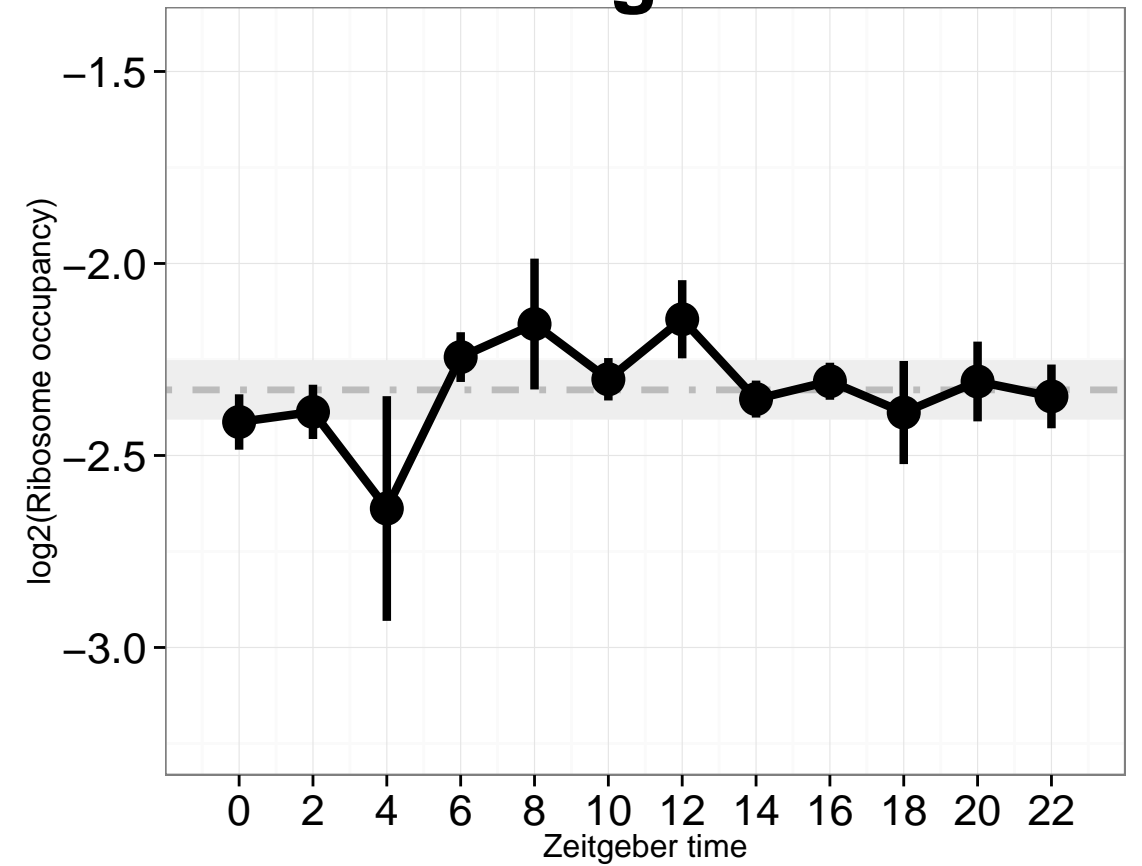

Supplement: Supplementary file 2591 [file 1]

## Serf2

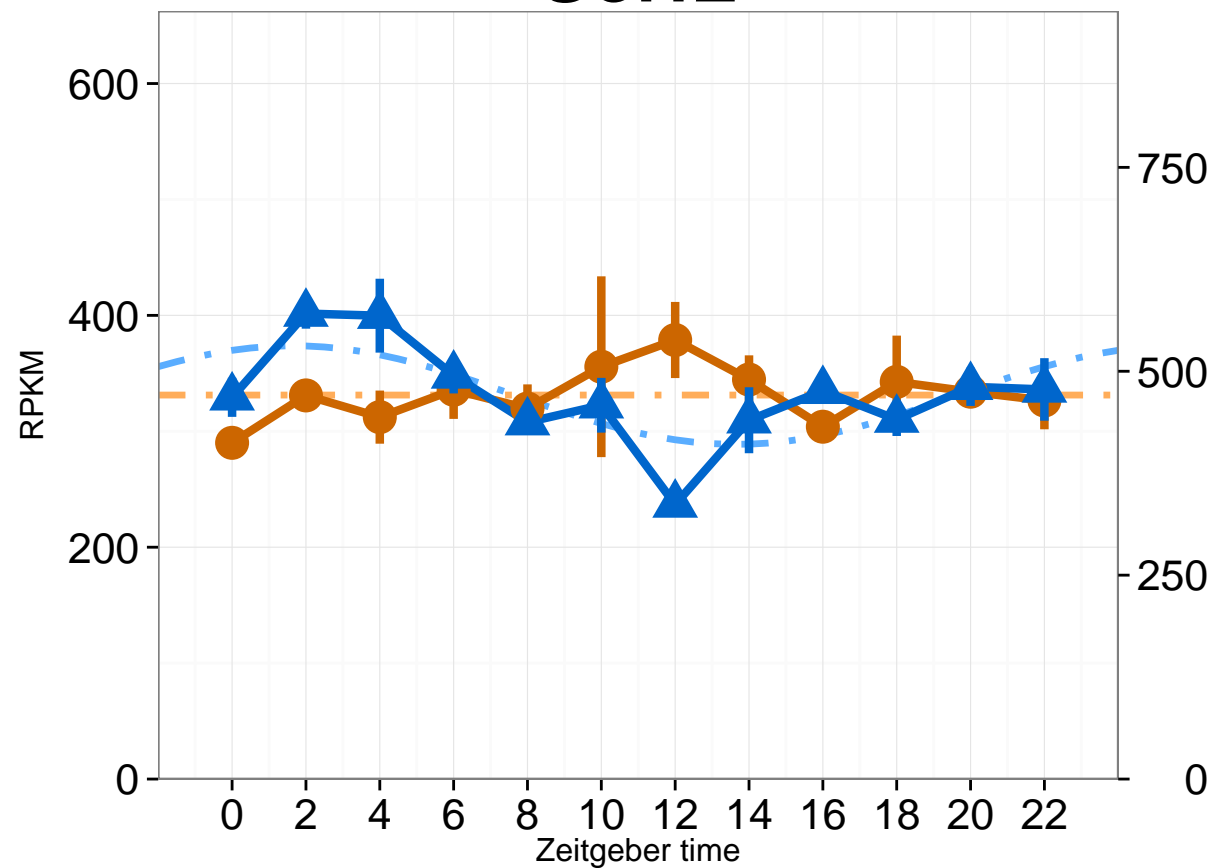

## Serf2

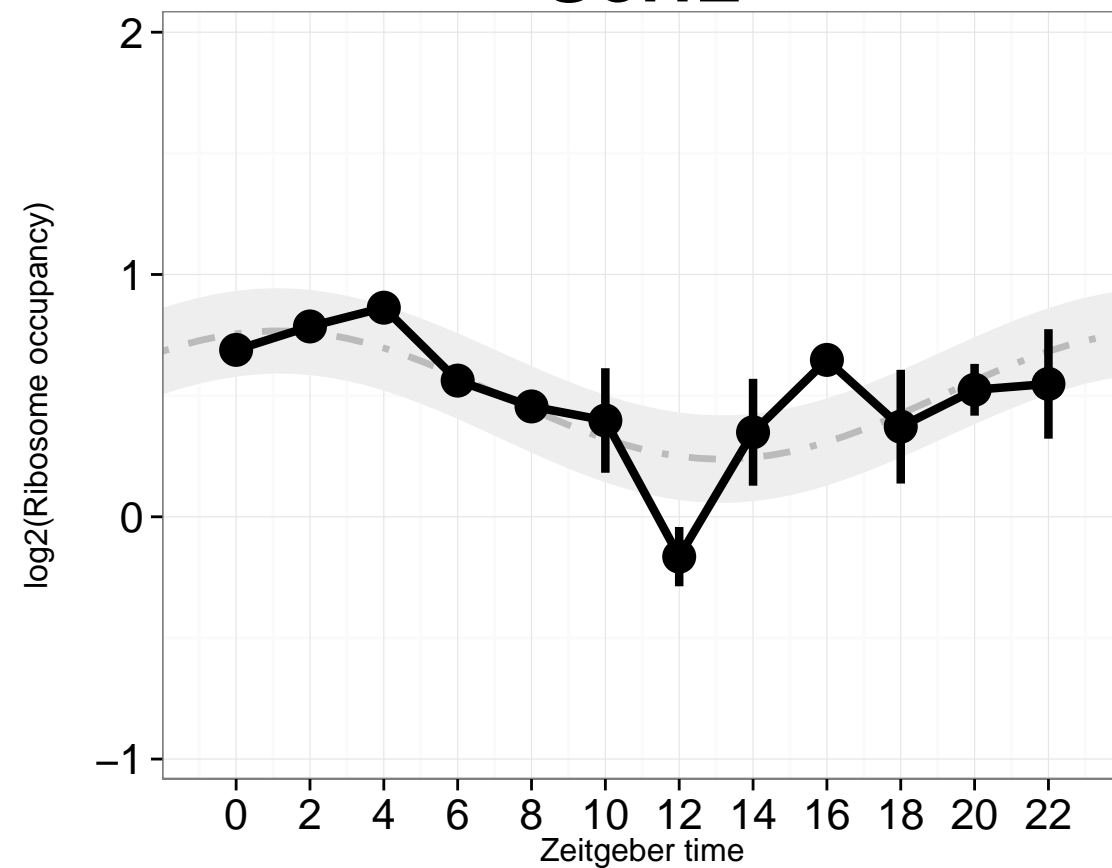

Supplement: Supplementary file 2592 [file 1]

# Ctnnbip1

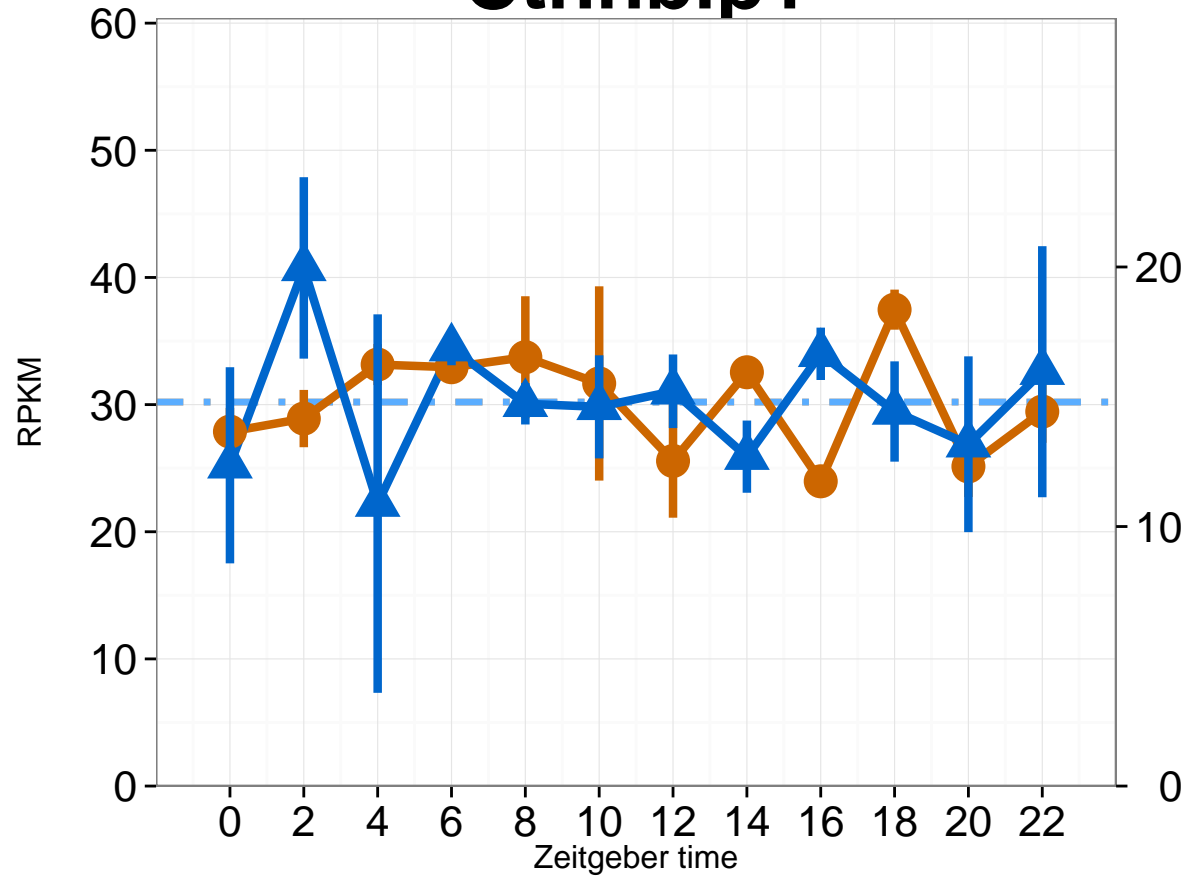

# Ctnnbip1

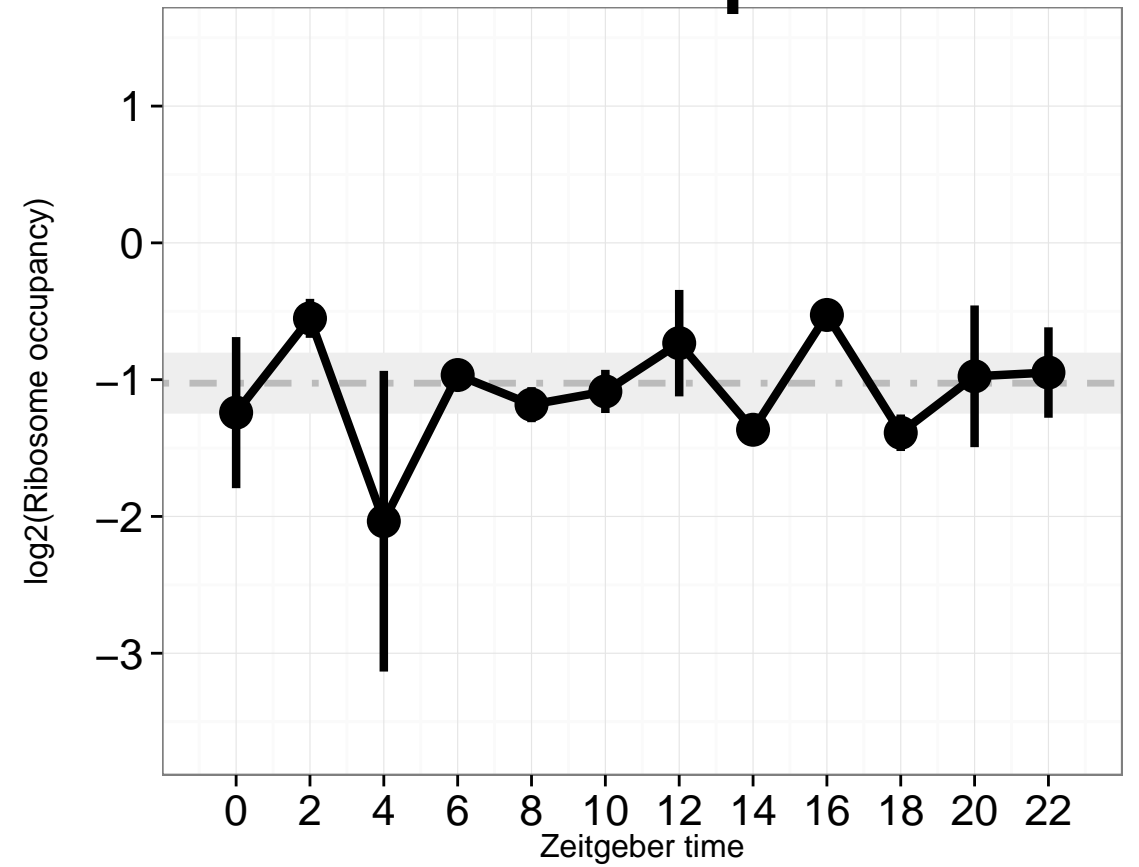

Supplement: Supplementary file 2593 [file 1]

**Nkx3-1 TR**

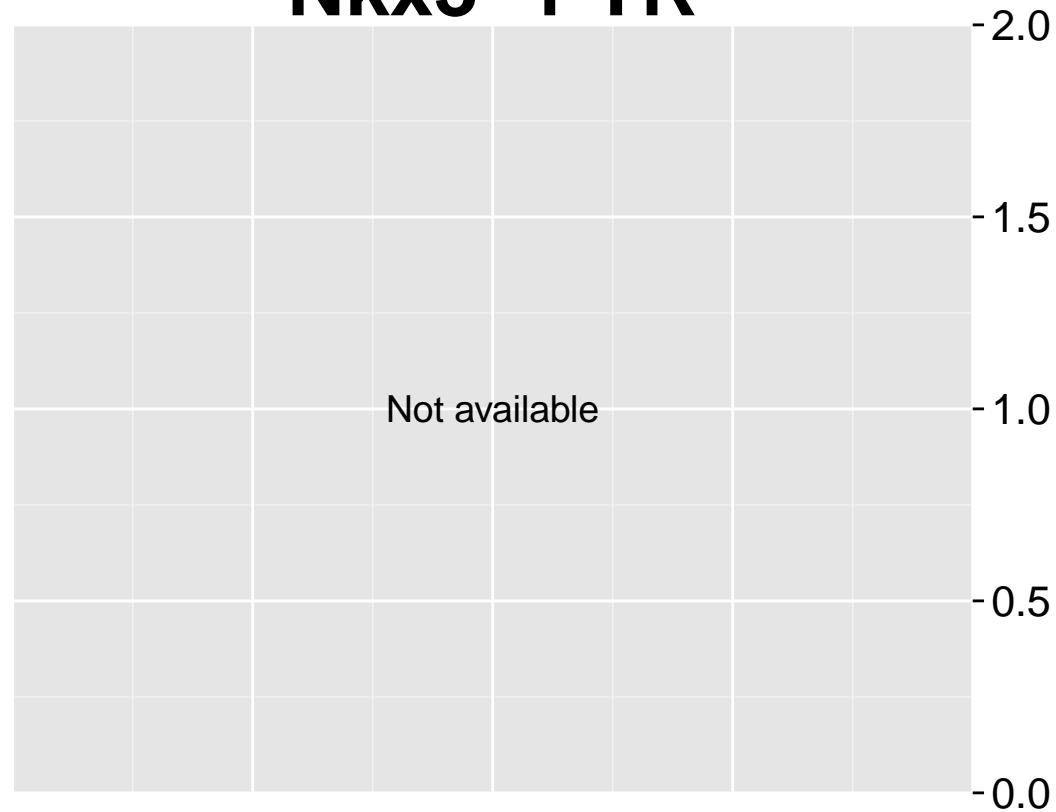

**Nkx3-1 log2(Ribosome occupancy**

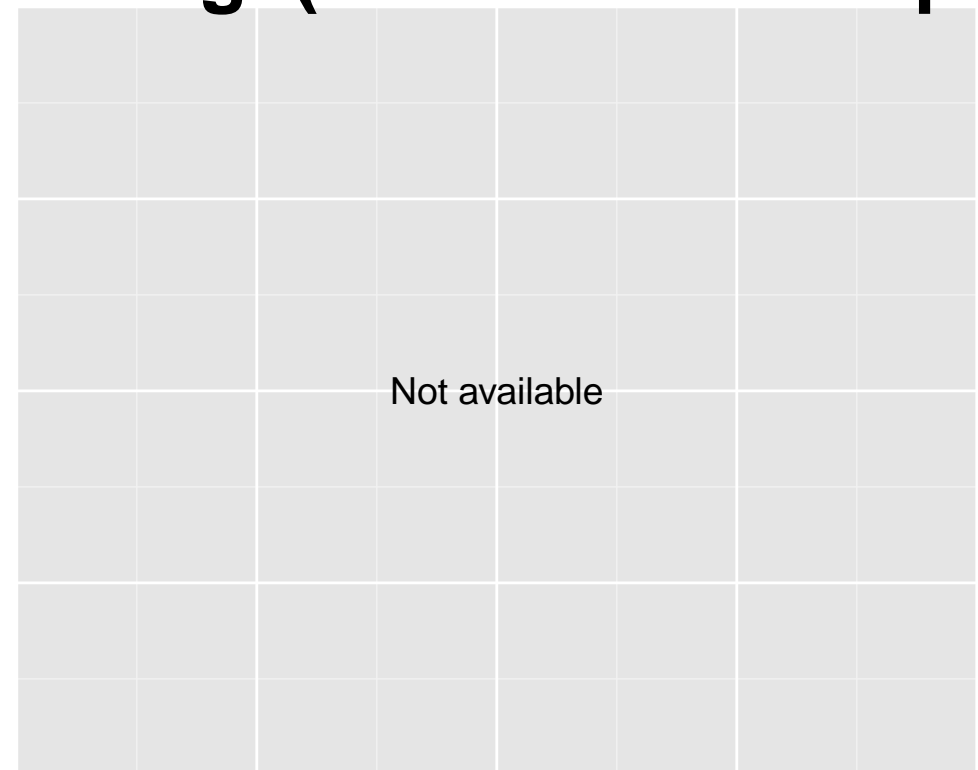

Supplement: Supplementary file 2594 [file 1]

# St5

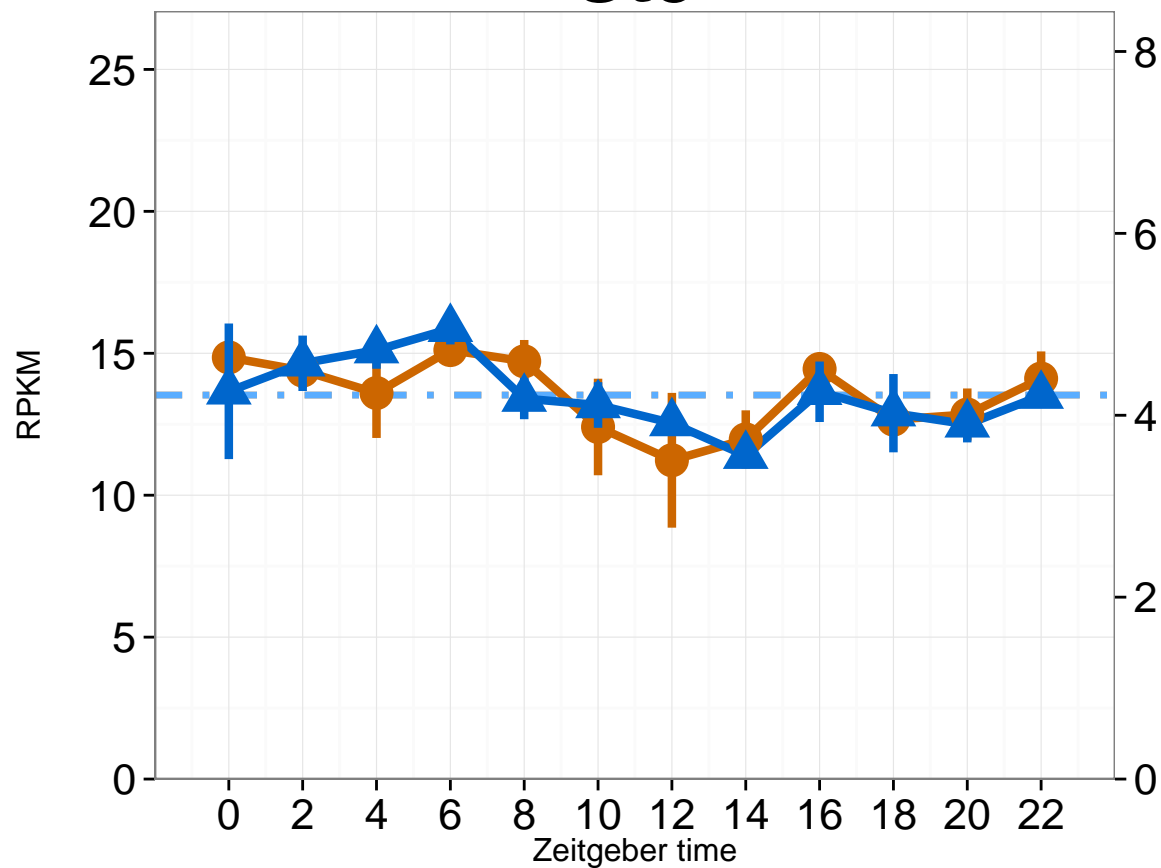

# St5

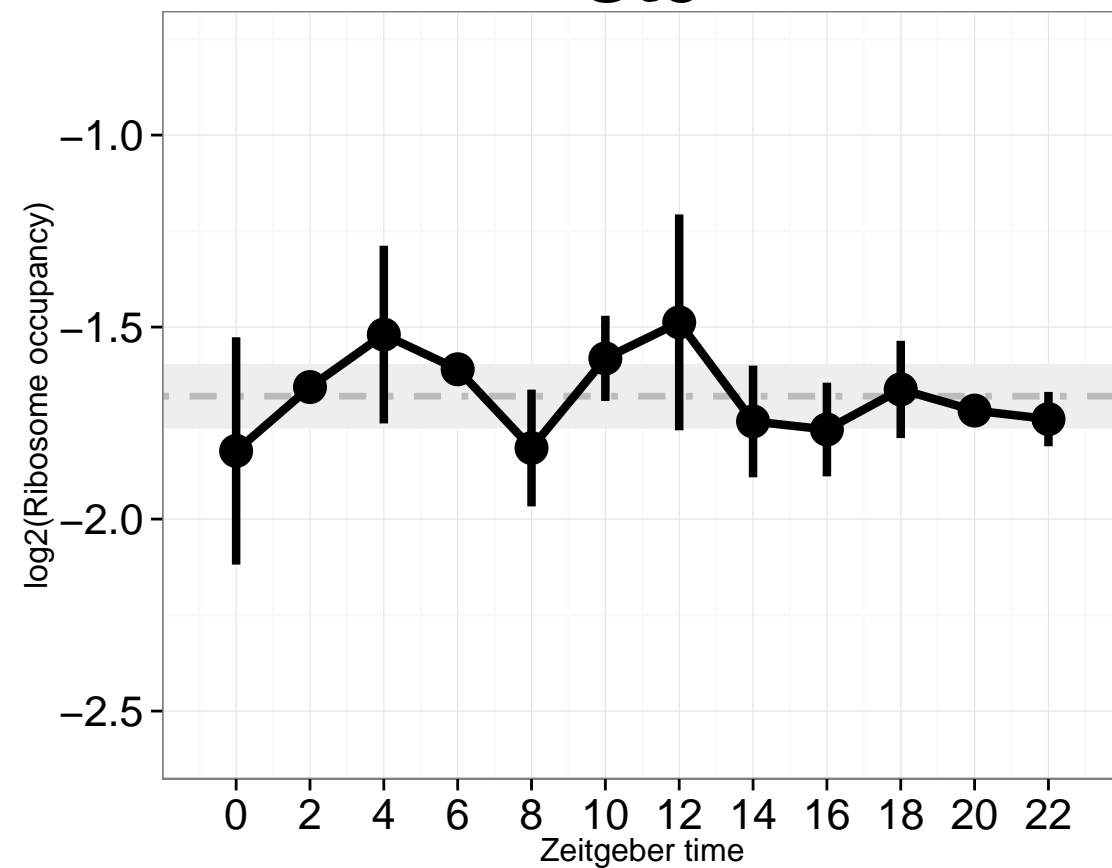

Supplement: Supplementary file 2595 [file 1]

# Hivep3

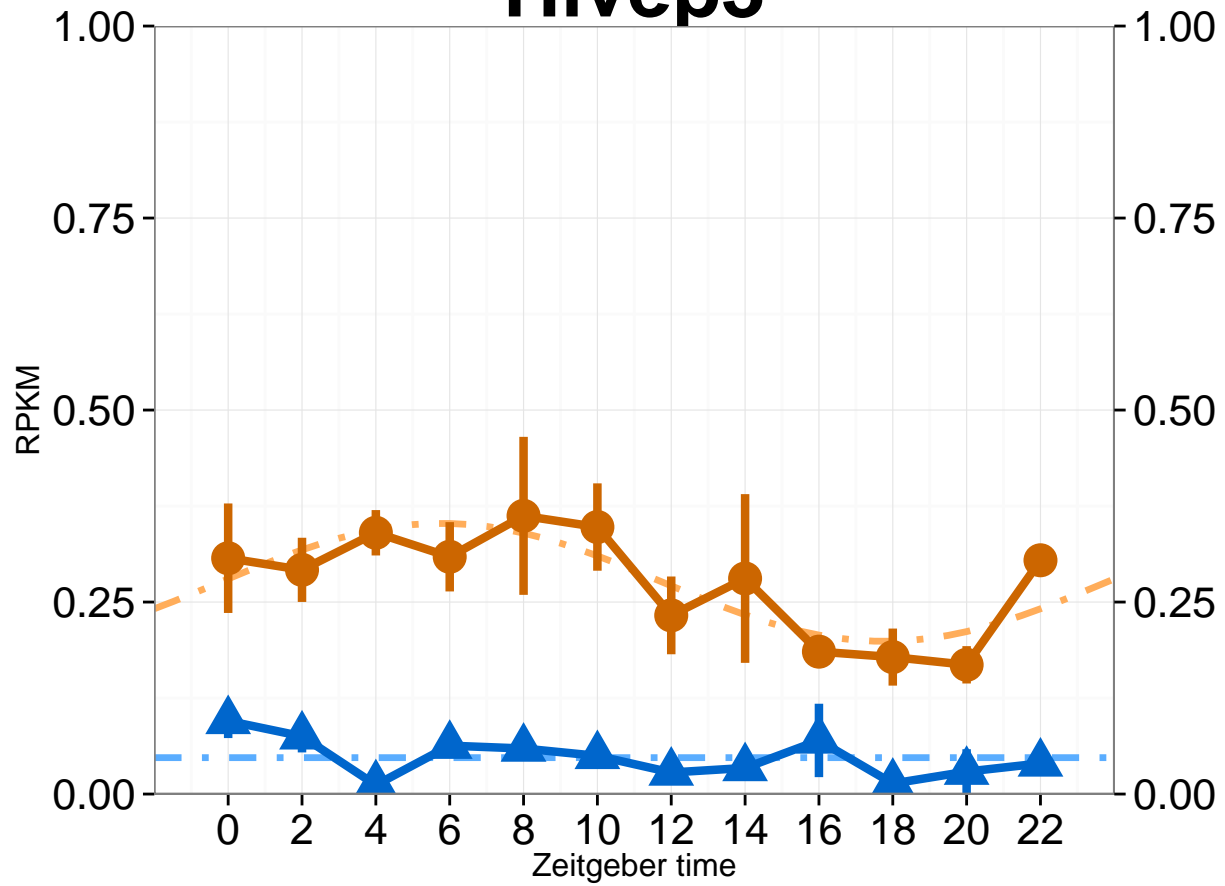

# Hivep3

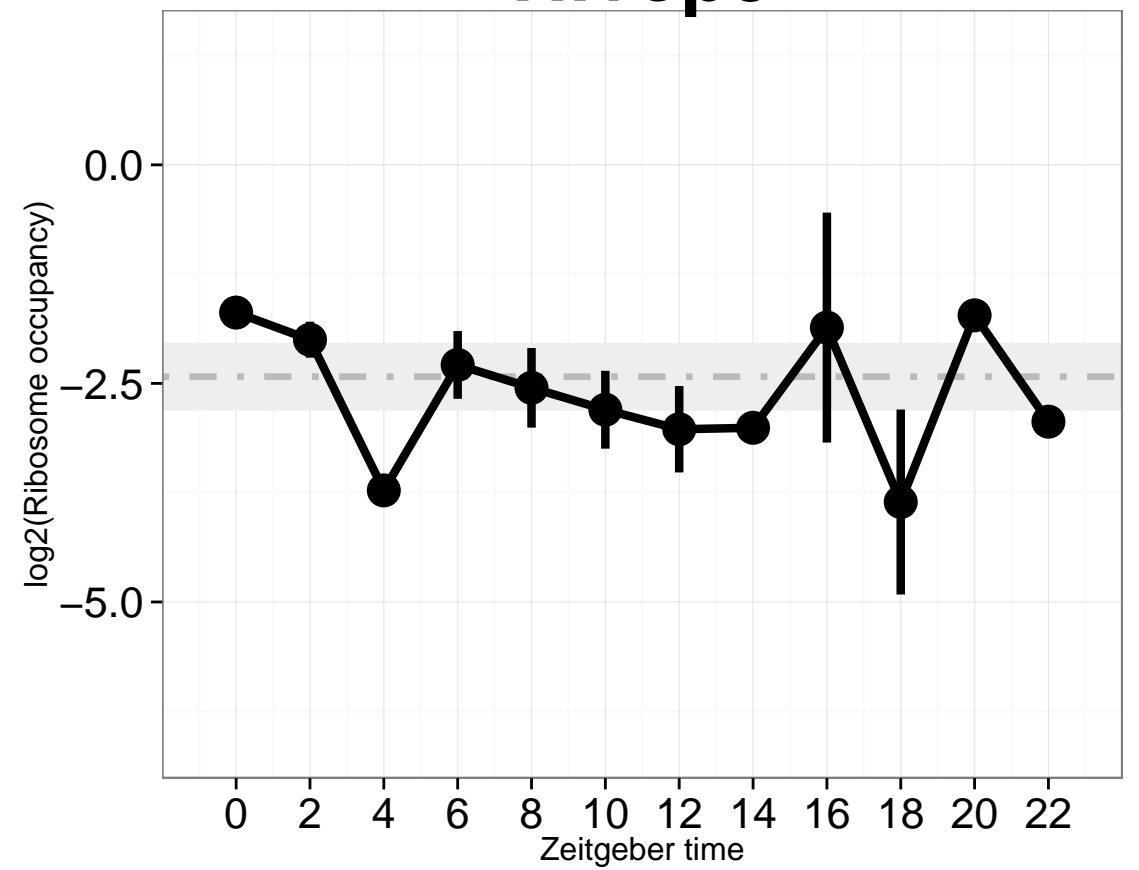

Supplement: Supplementary file 2596 [file 1]

# Zfp157

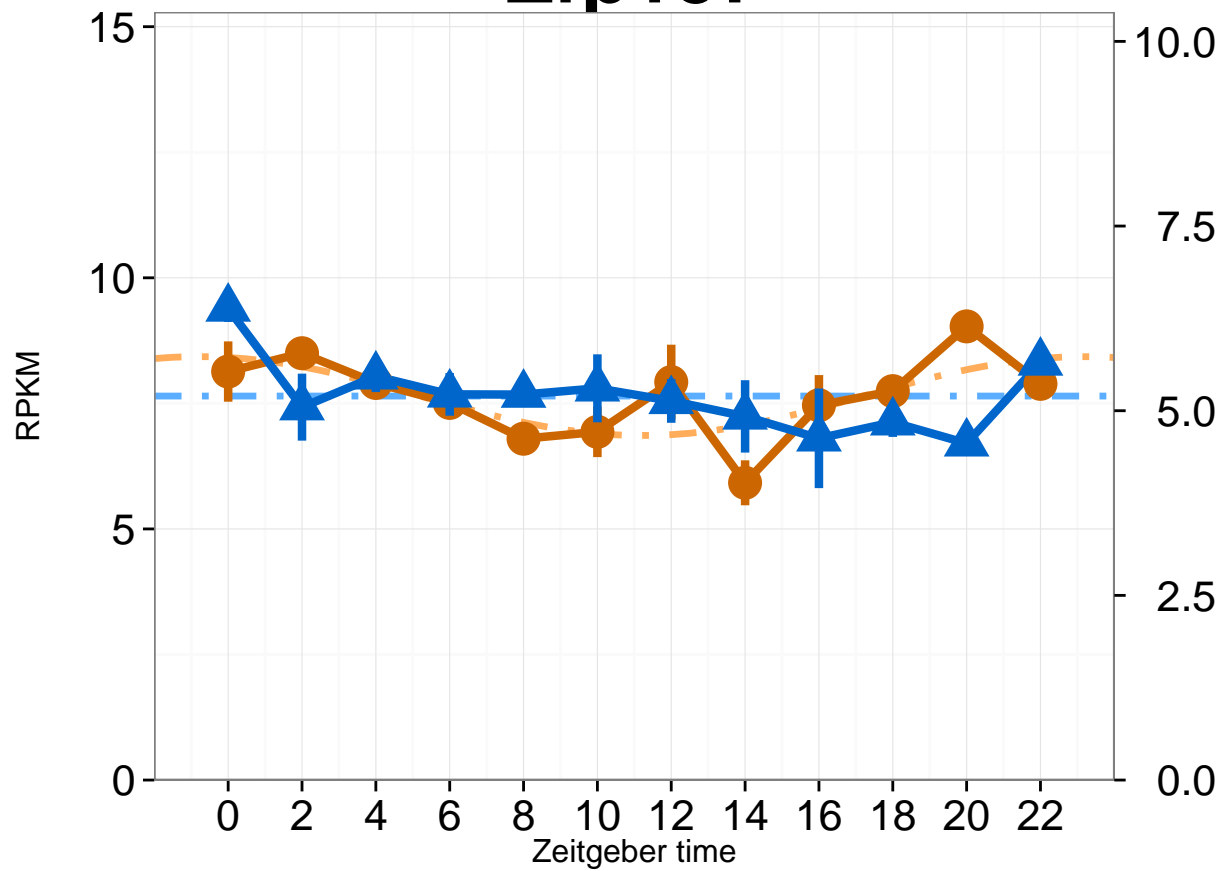

# Zfp157

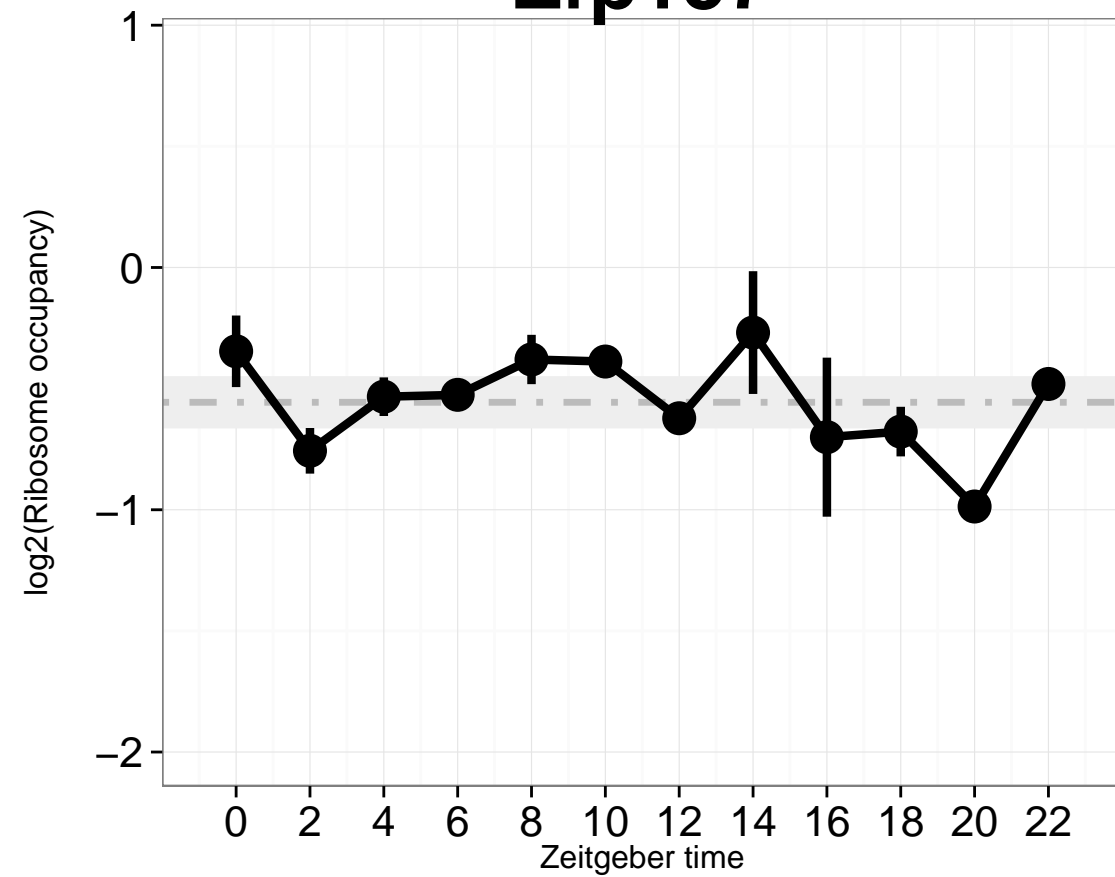

Supplement: Supplementary file 2597 [file 1]

# Clptm1

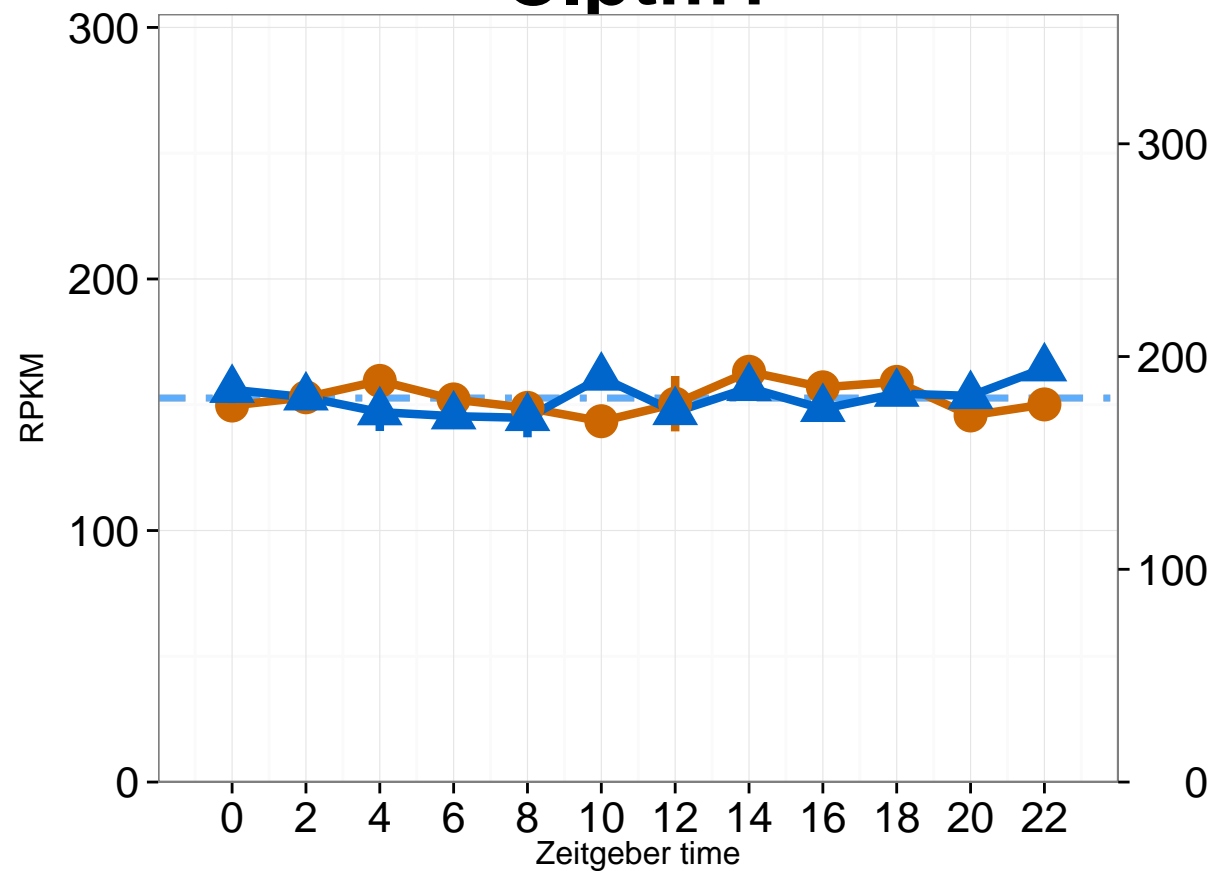

# Clptm1

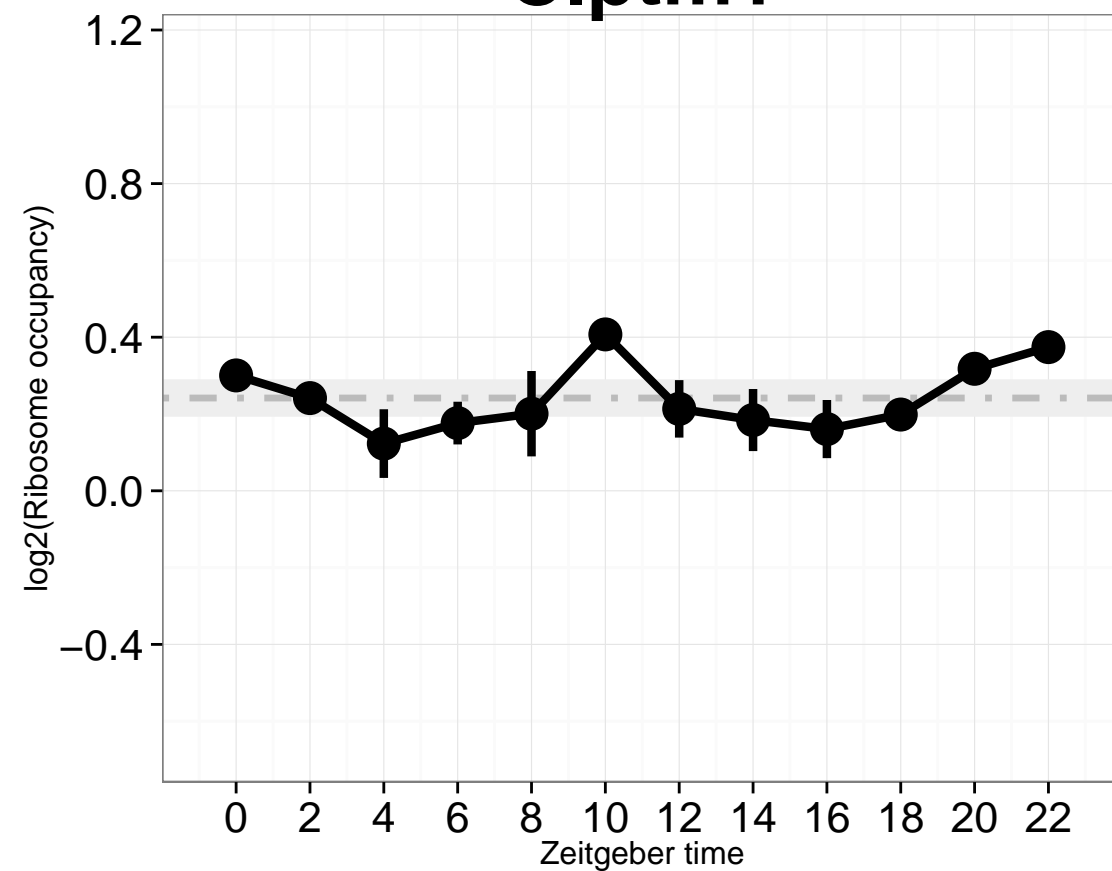

Supplement: Supplementary file 2598 [file 1]

## Cep104

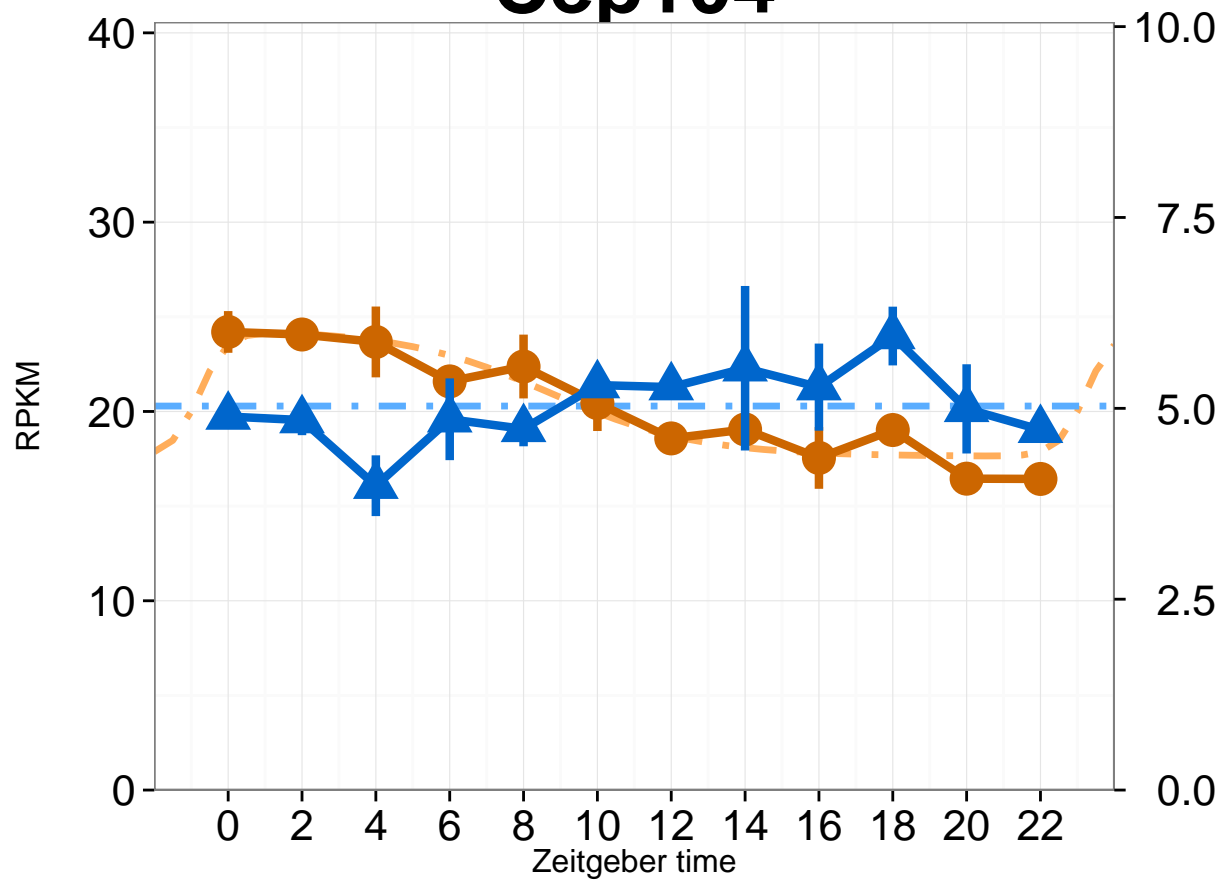

## Cep104

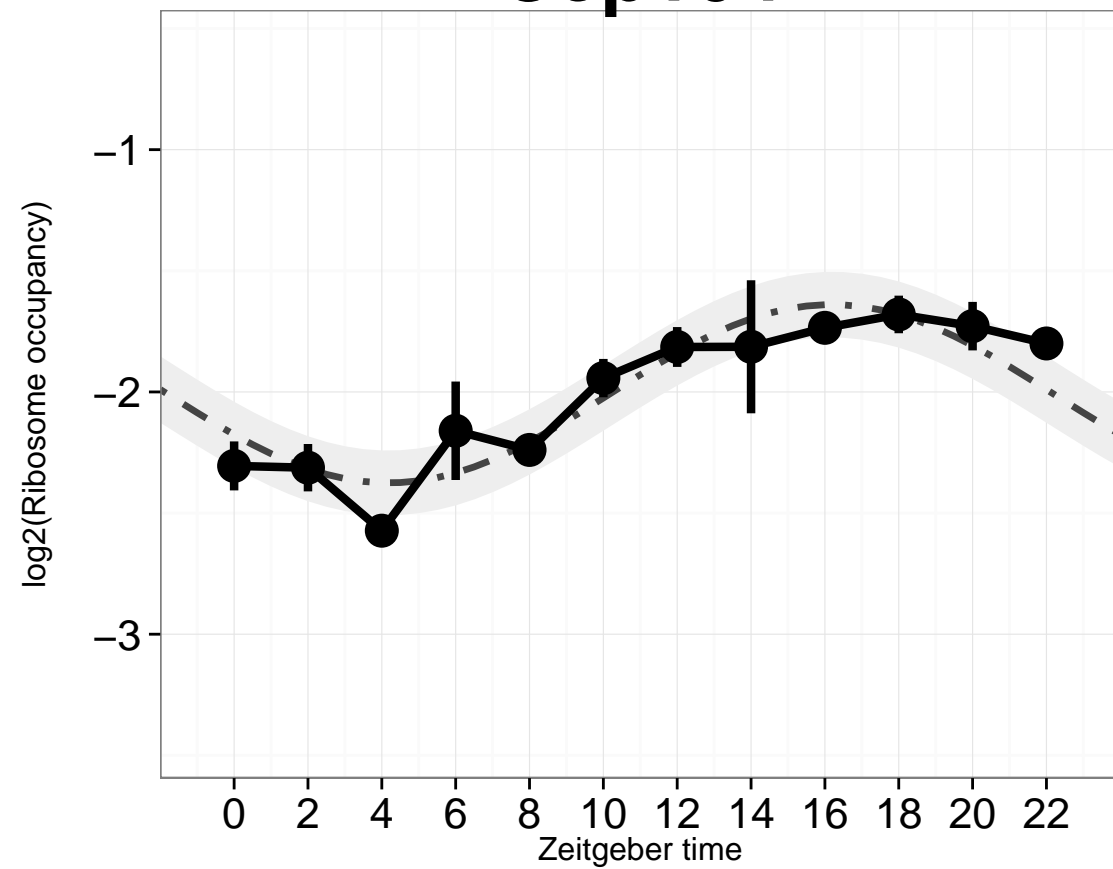

Supplement: Supplementary file 2599 [file 1]

## Lace1

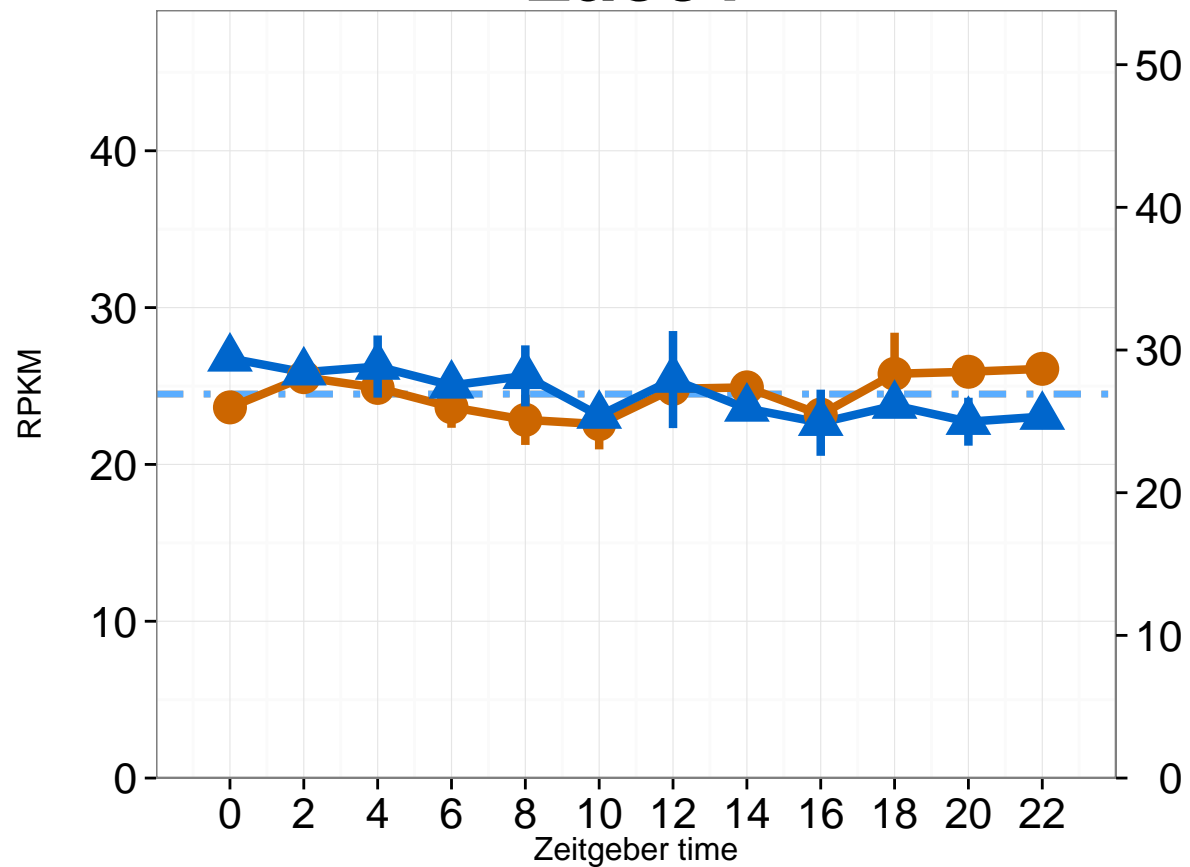

## Lace1

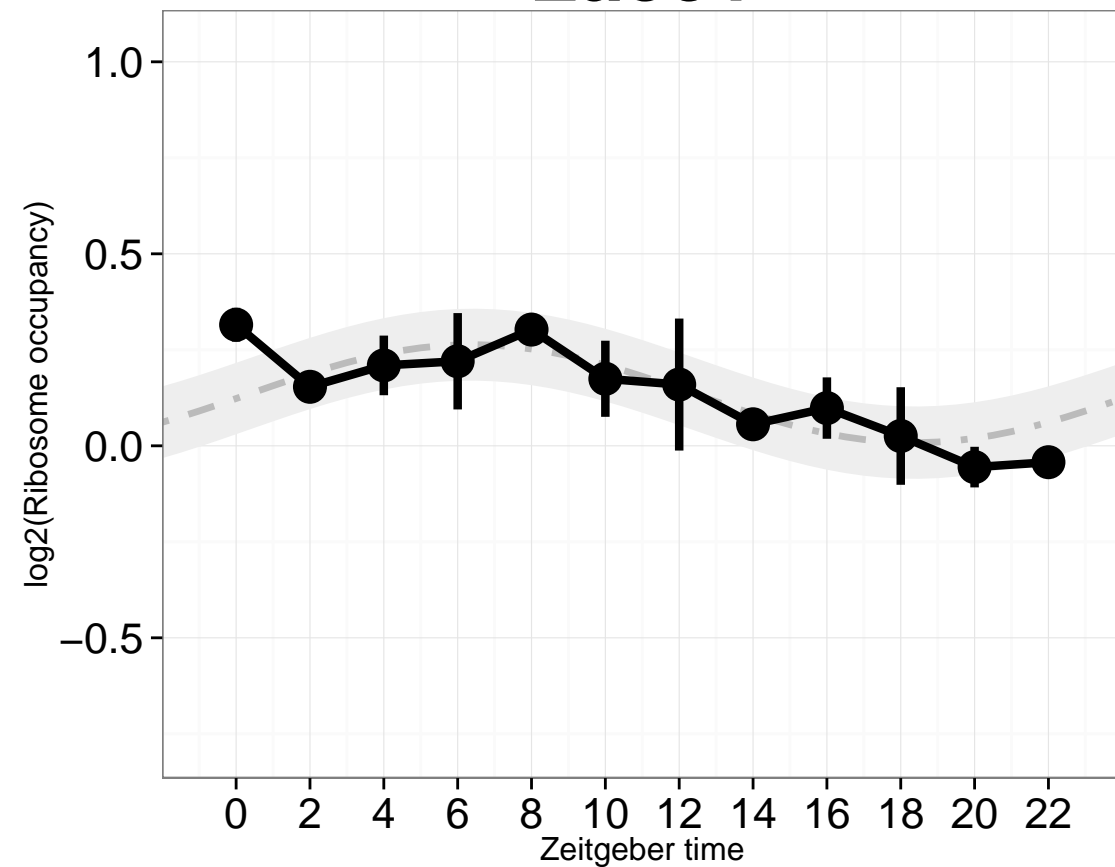

Supplement: Supplementary file 2600 [file 1]

## Mob2

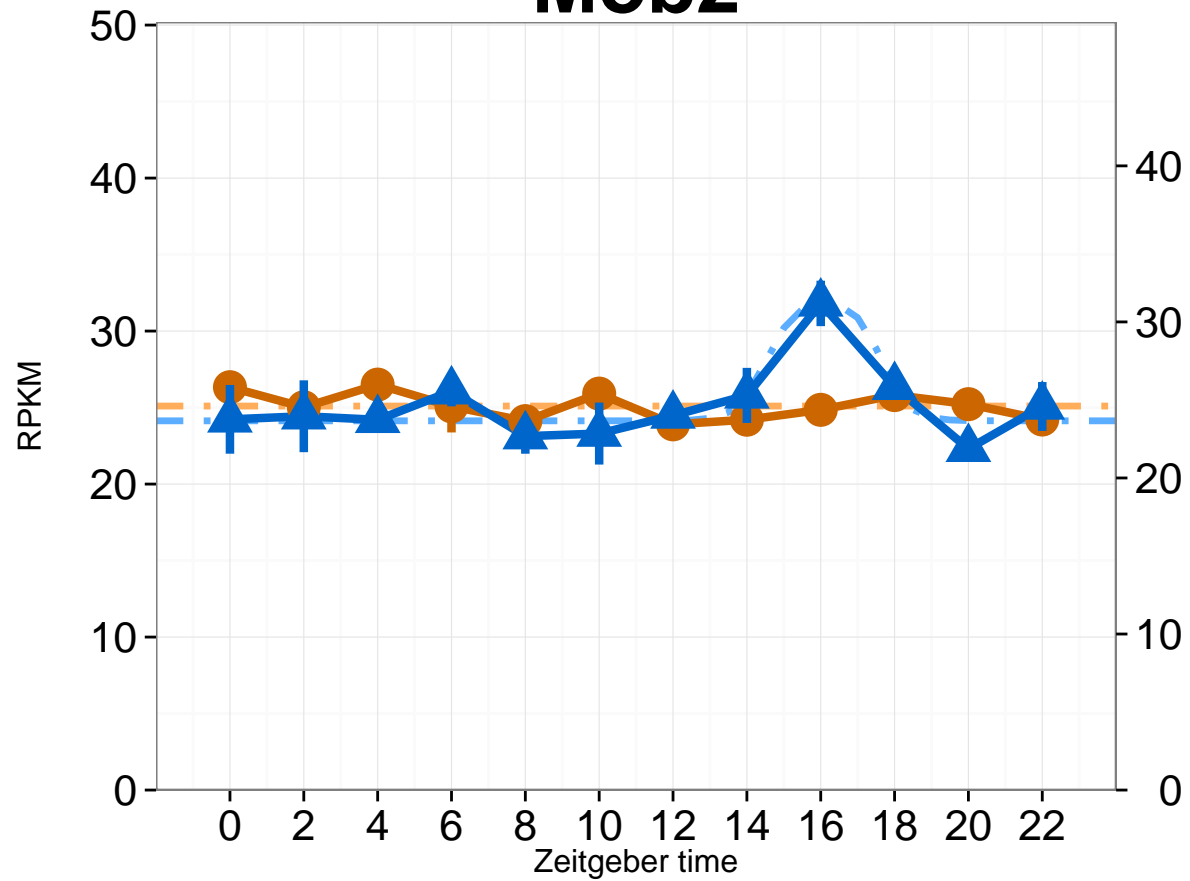

## Mob2

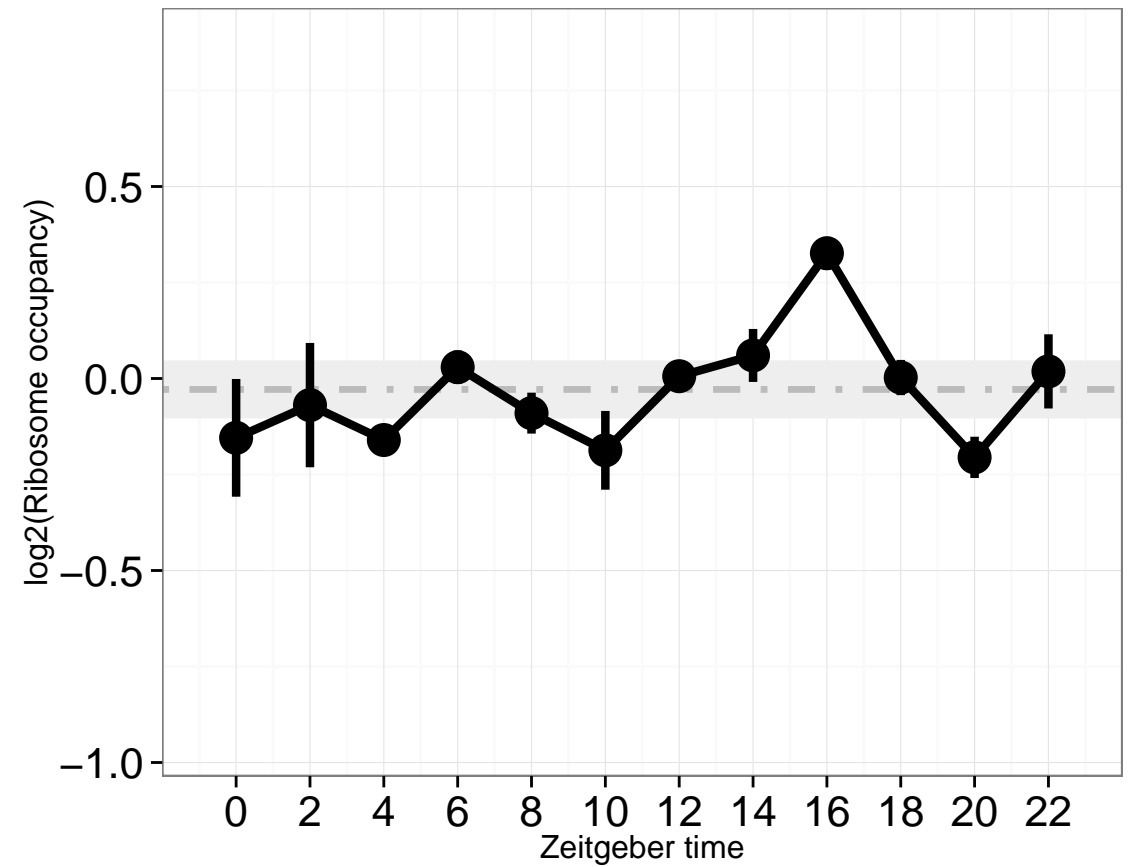

Supplement: Supplementary file 2601 [file 1]

## Bptf

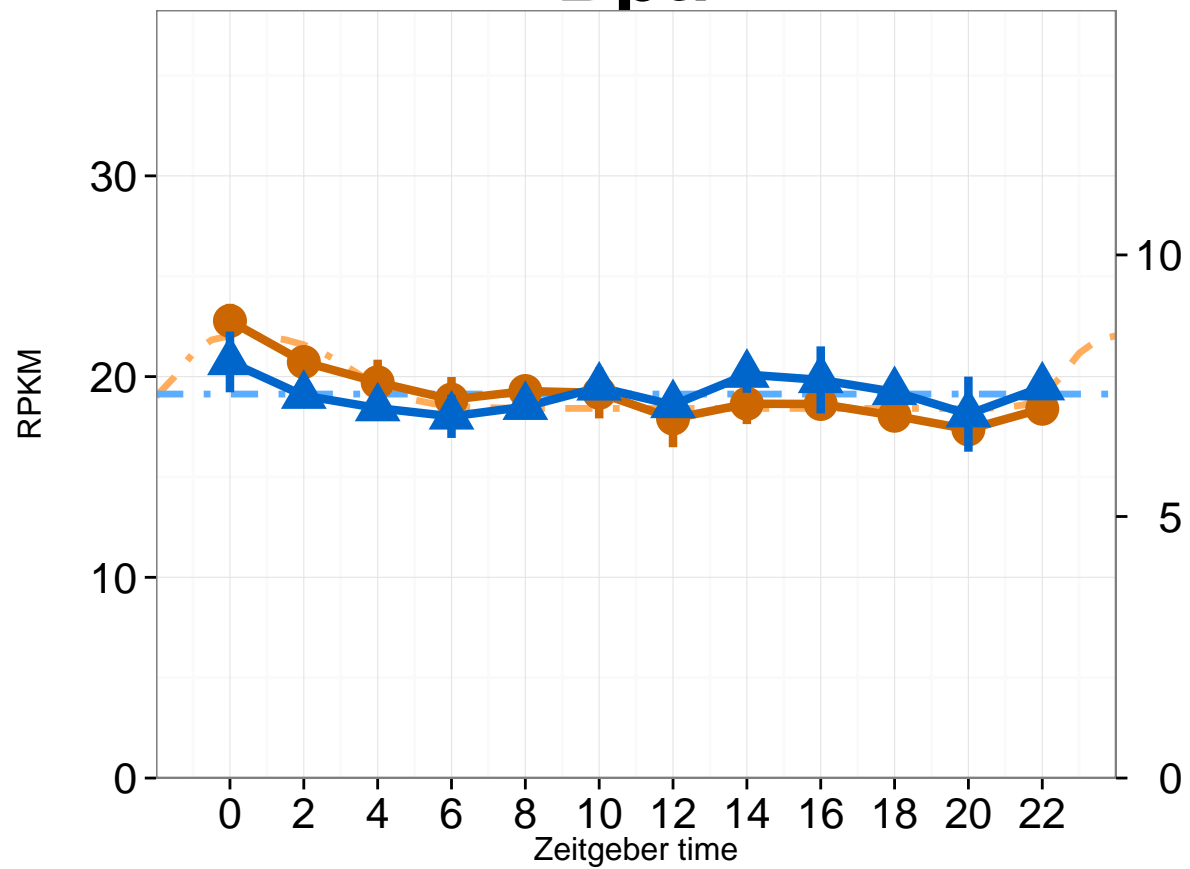

## Bptf

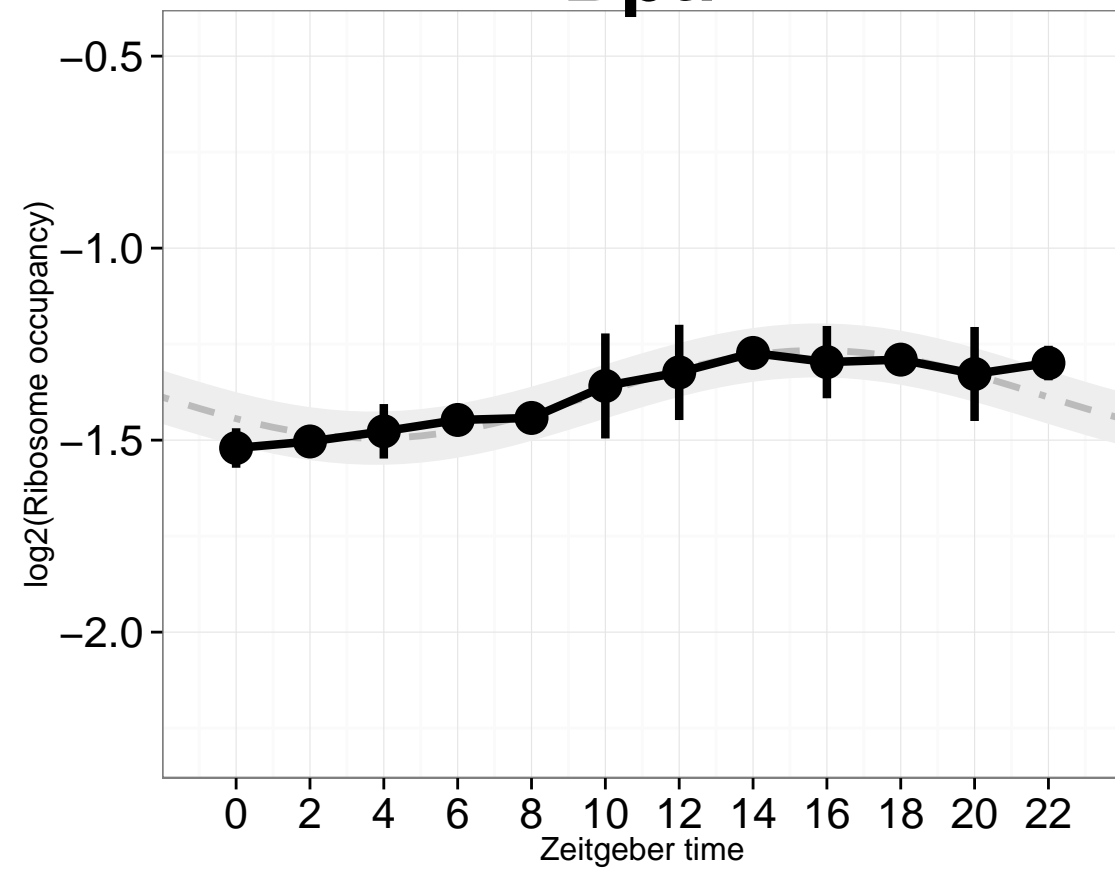

Supplement: Supplementary file 2602 [file 1]

# Mta2

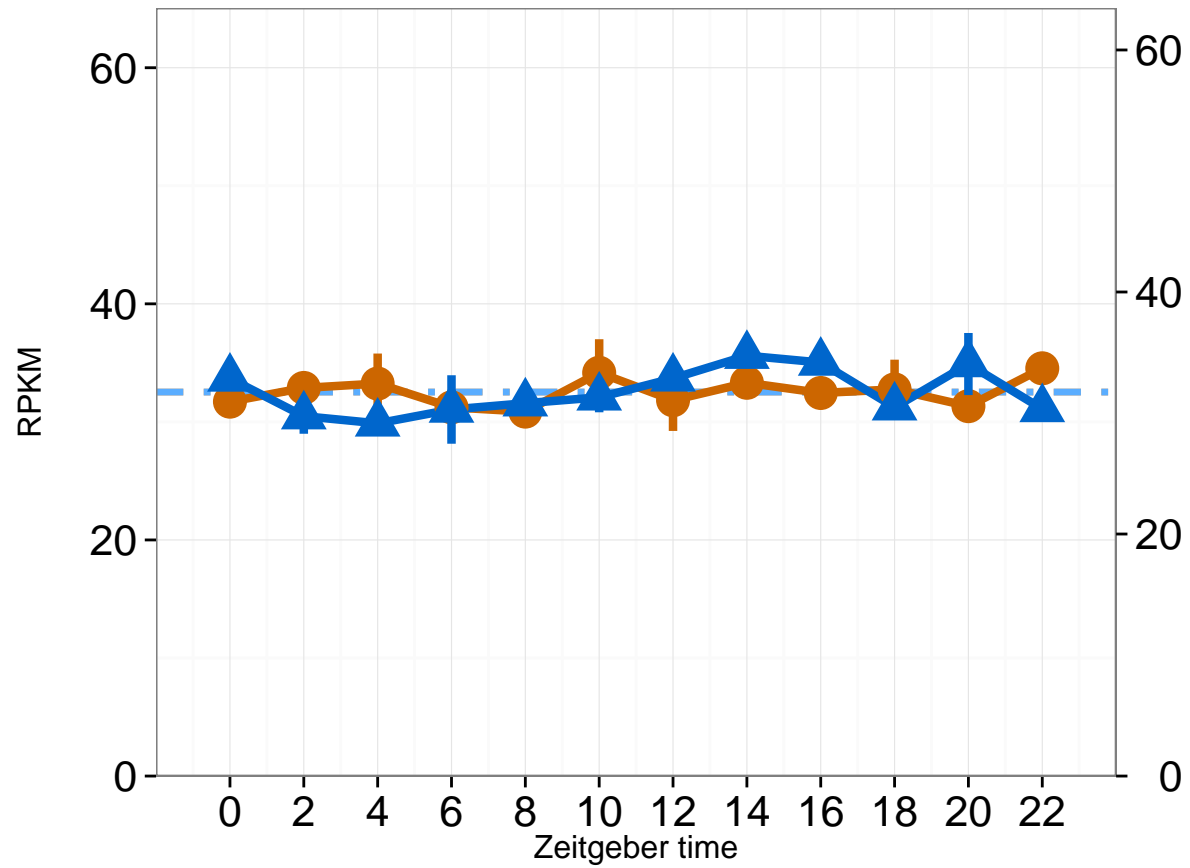

# Mta2

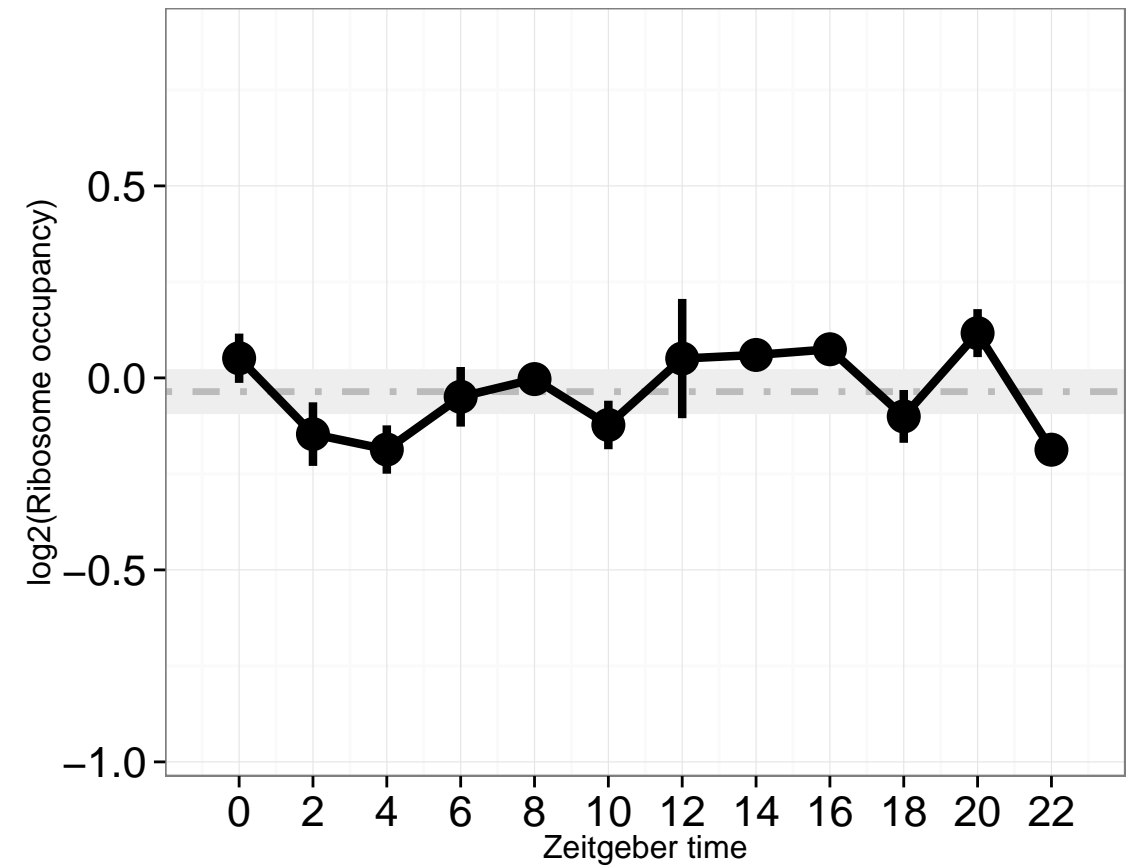

Supplement: Supplementary file 2603 [file 1]

## Tril

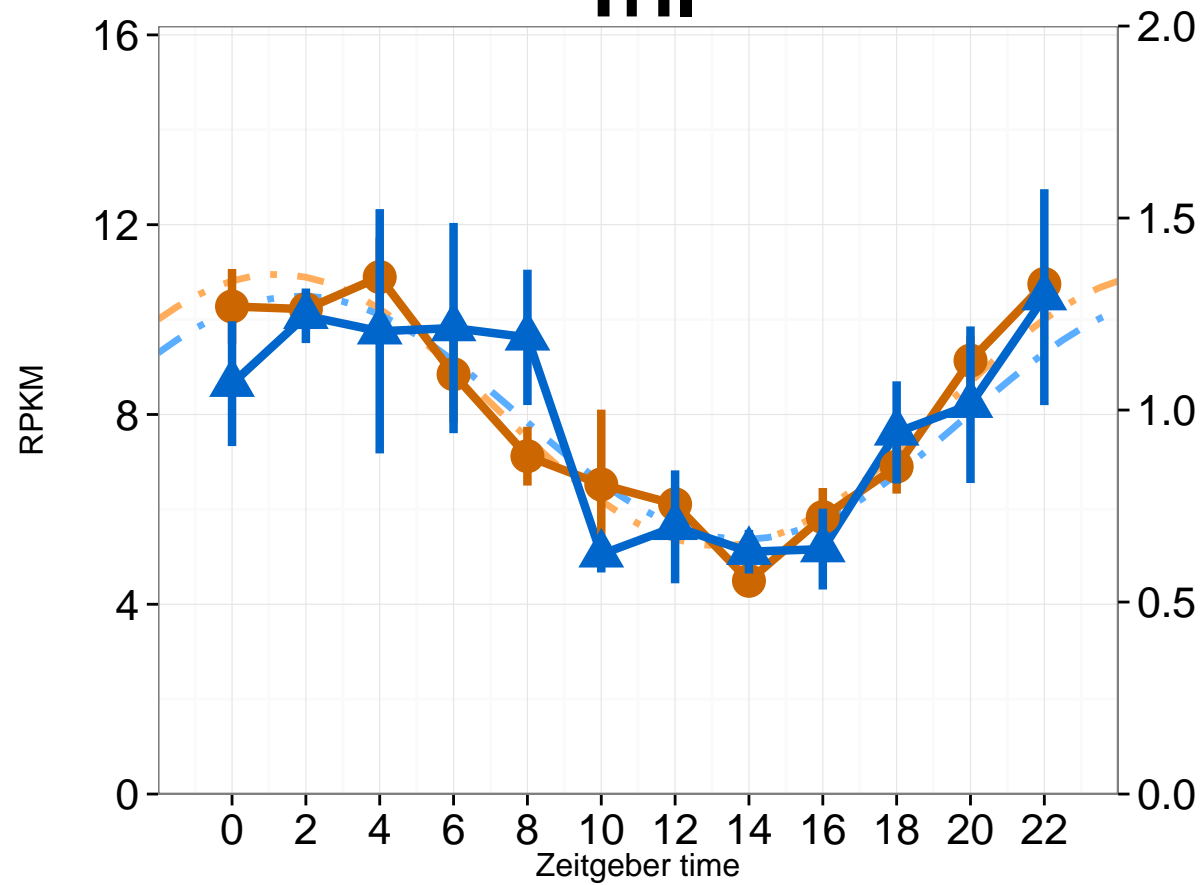

## Tril

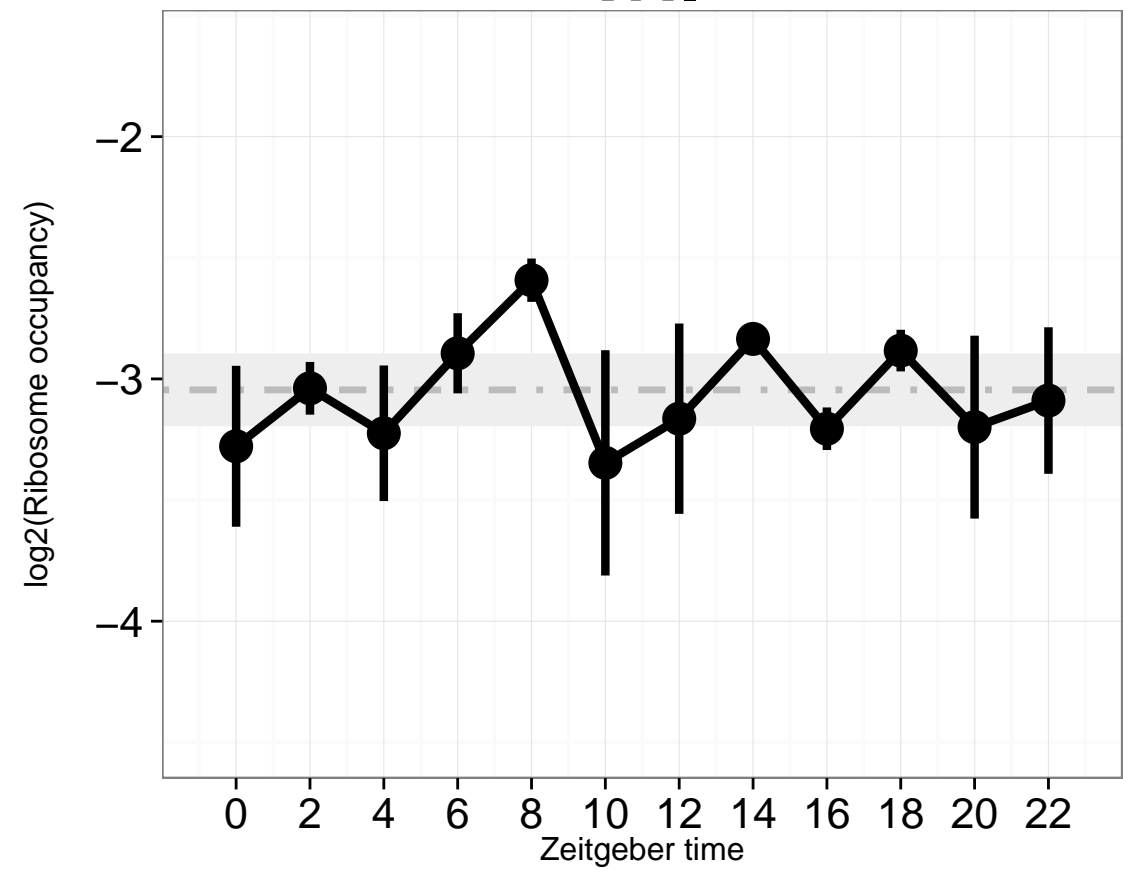

Supplement: Supplementary file 2604 [file 1]

## Snx6

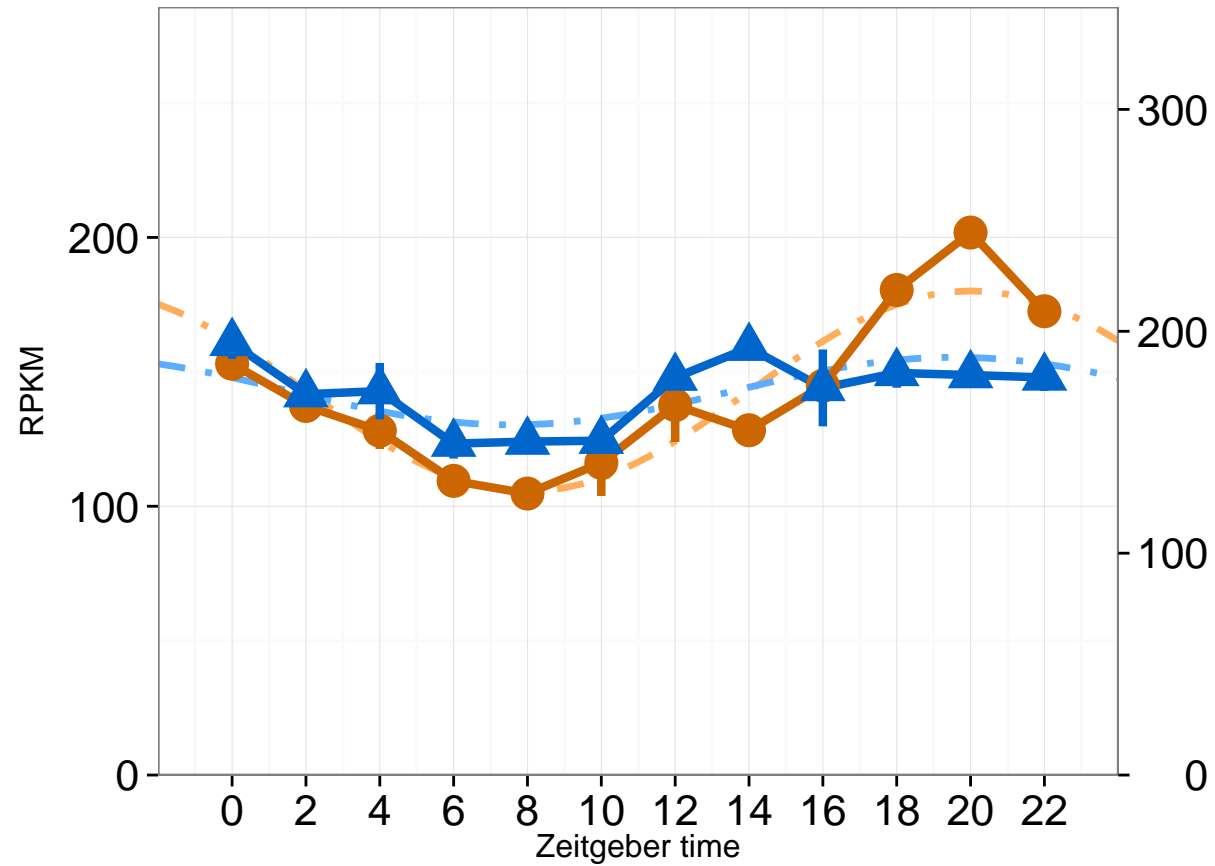

## Snx6

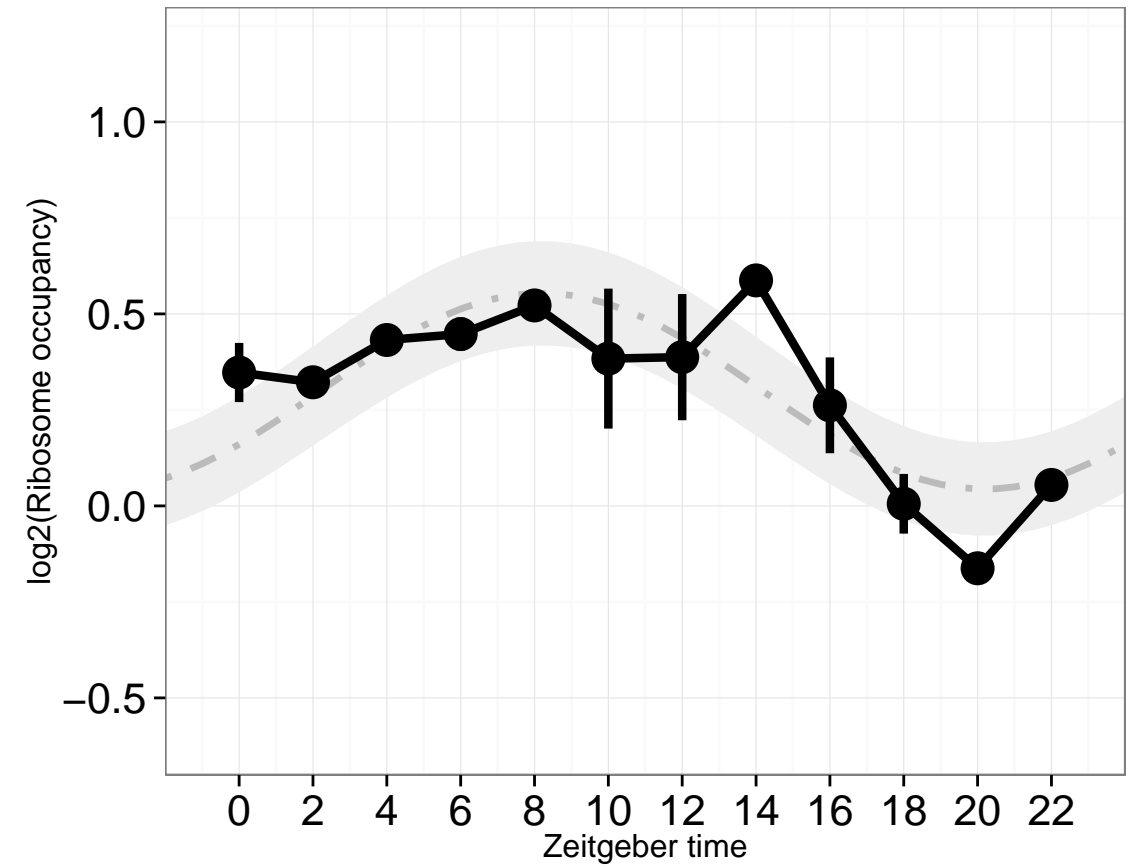

Supplement: Supplementary file 2605 [file 1]

## Mef2d

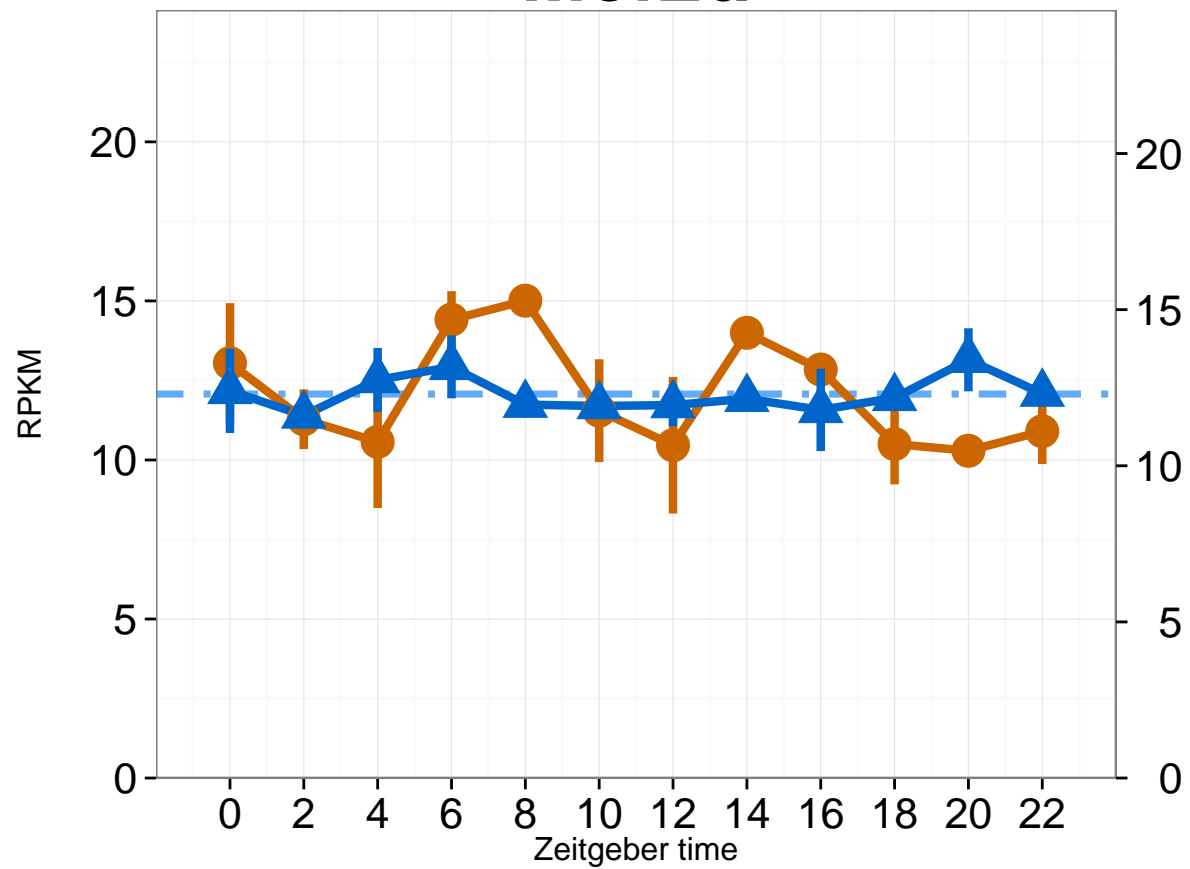

## Mef2d

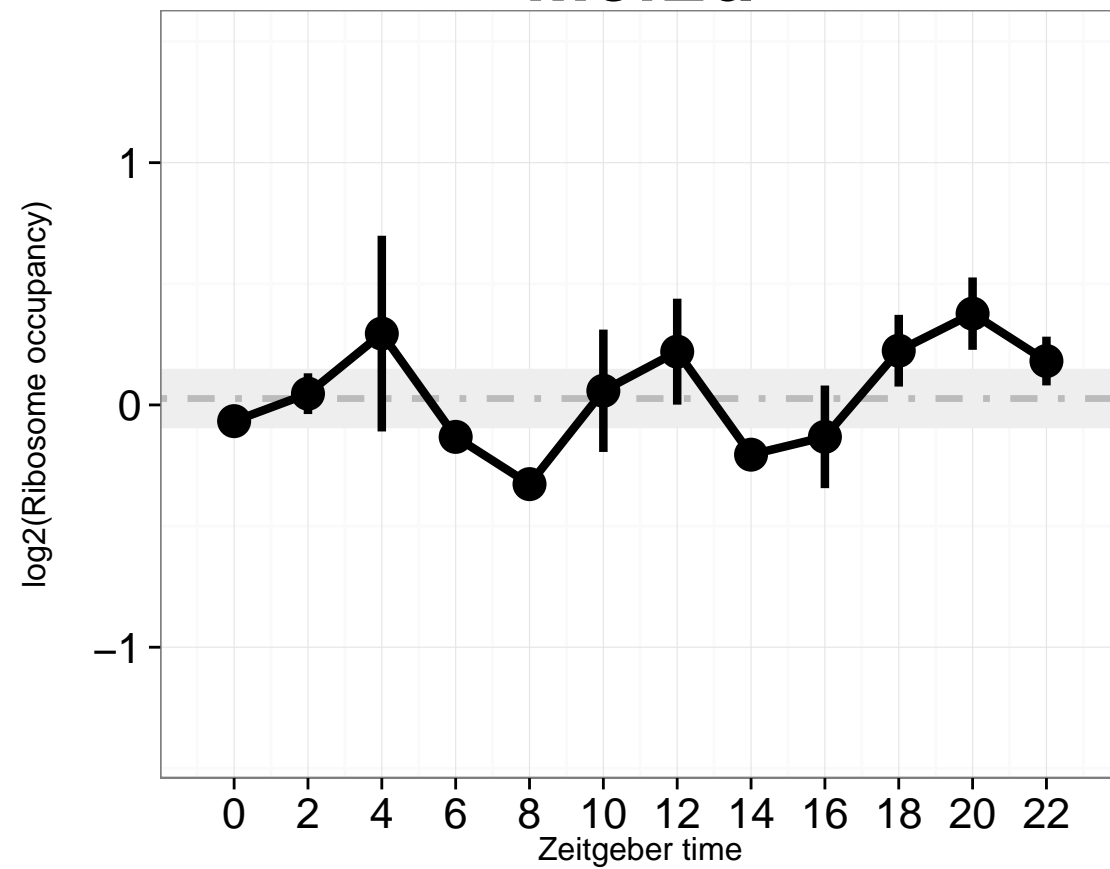

Supplement: Supplementary file 2606 [file 1]

## Irak4

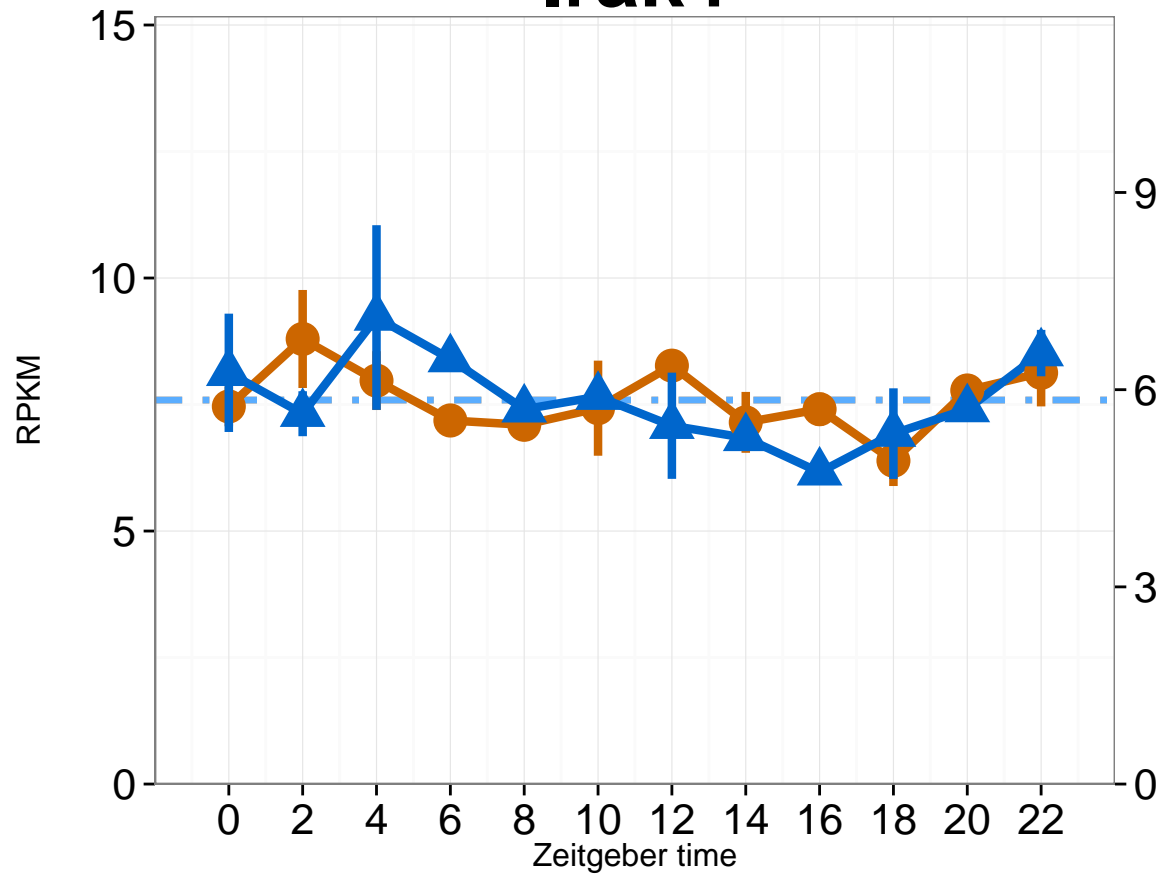

## Irak4

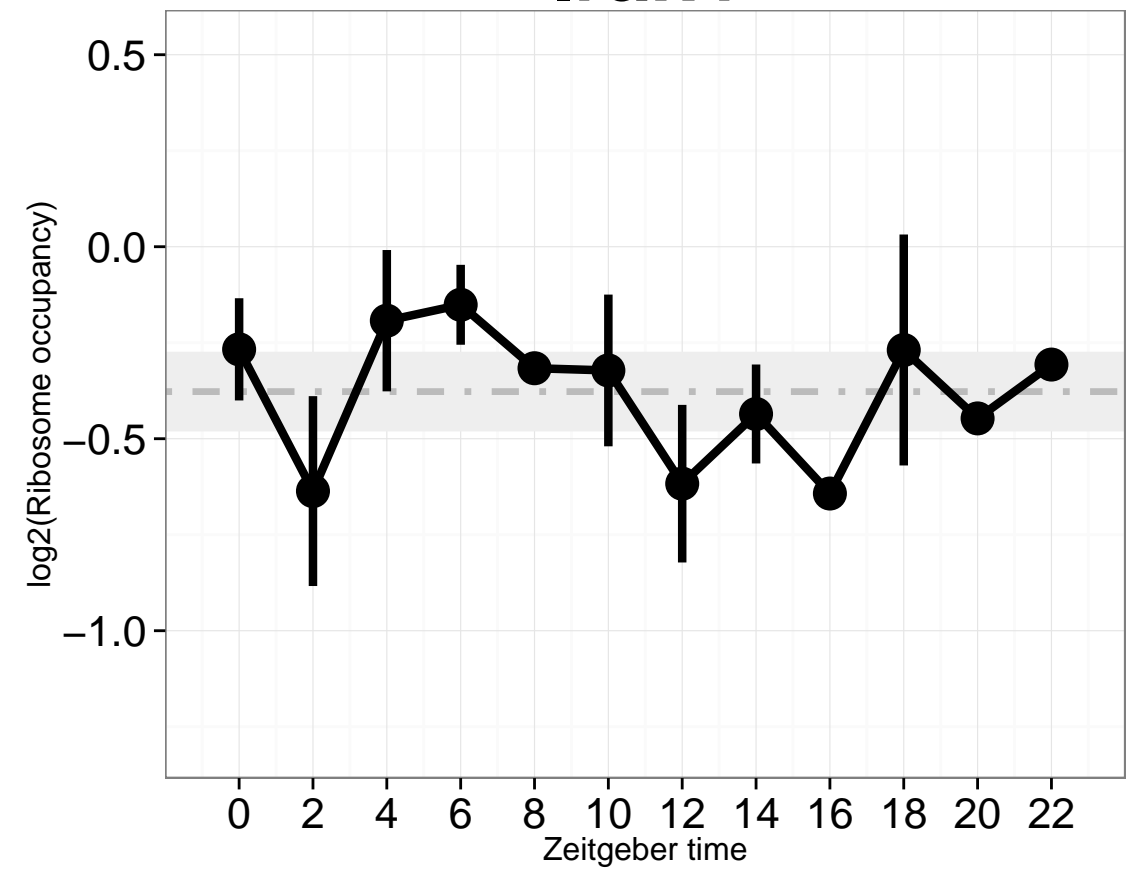

Supplement: Supplementary file 2607 [file 1]

# Akr1b7

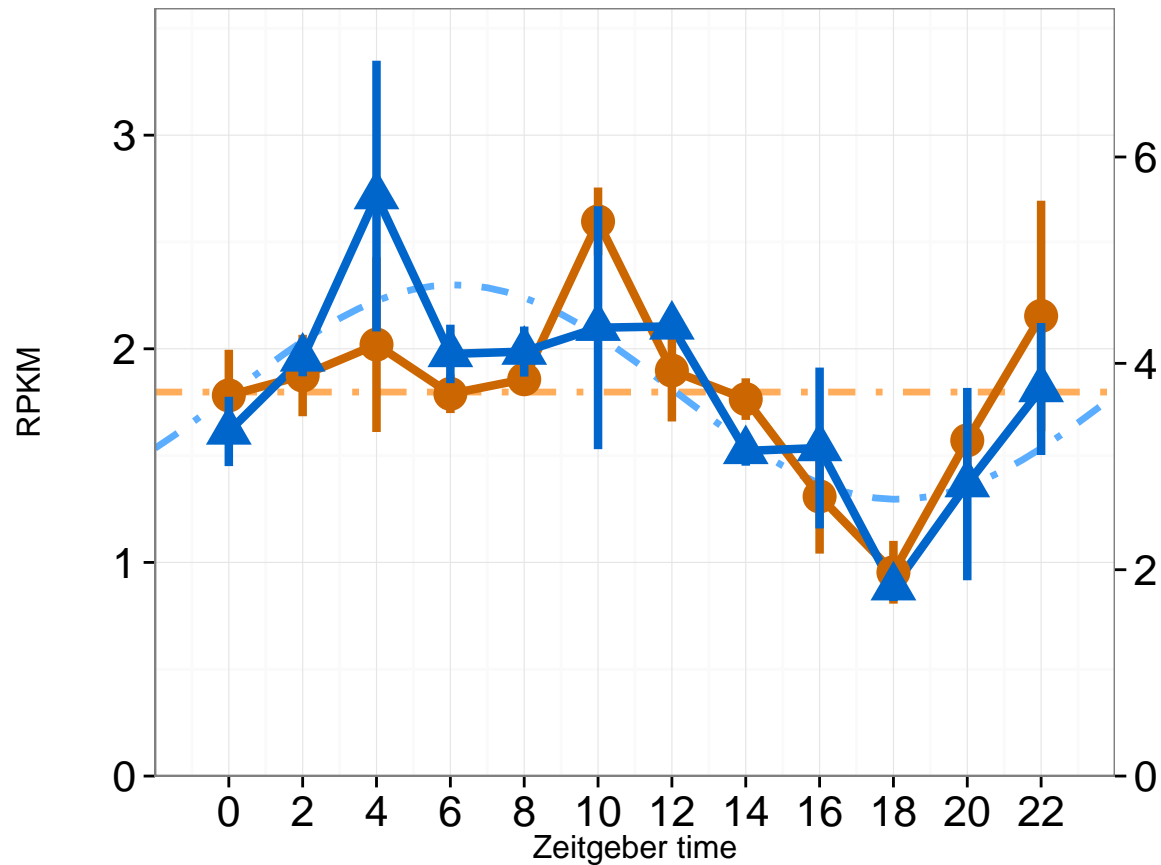

# Akr1b7

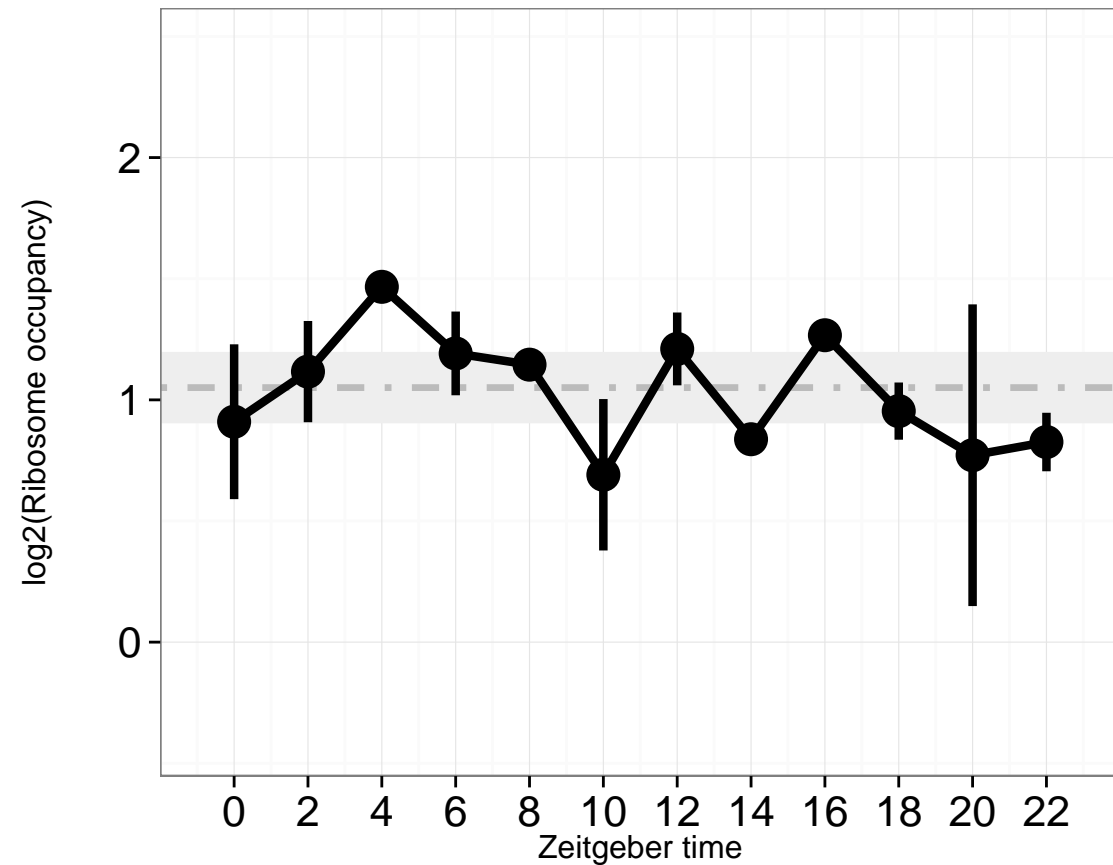

Supplement: Supplementary file 2608 [file 1]

## Dhrs7

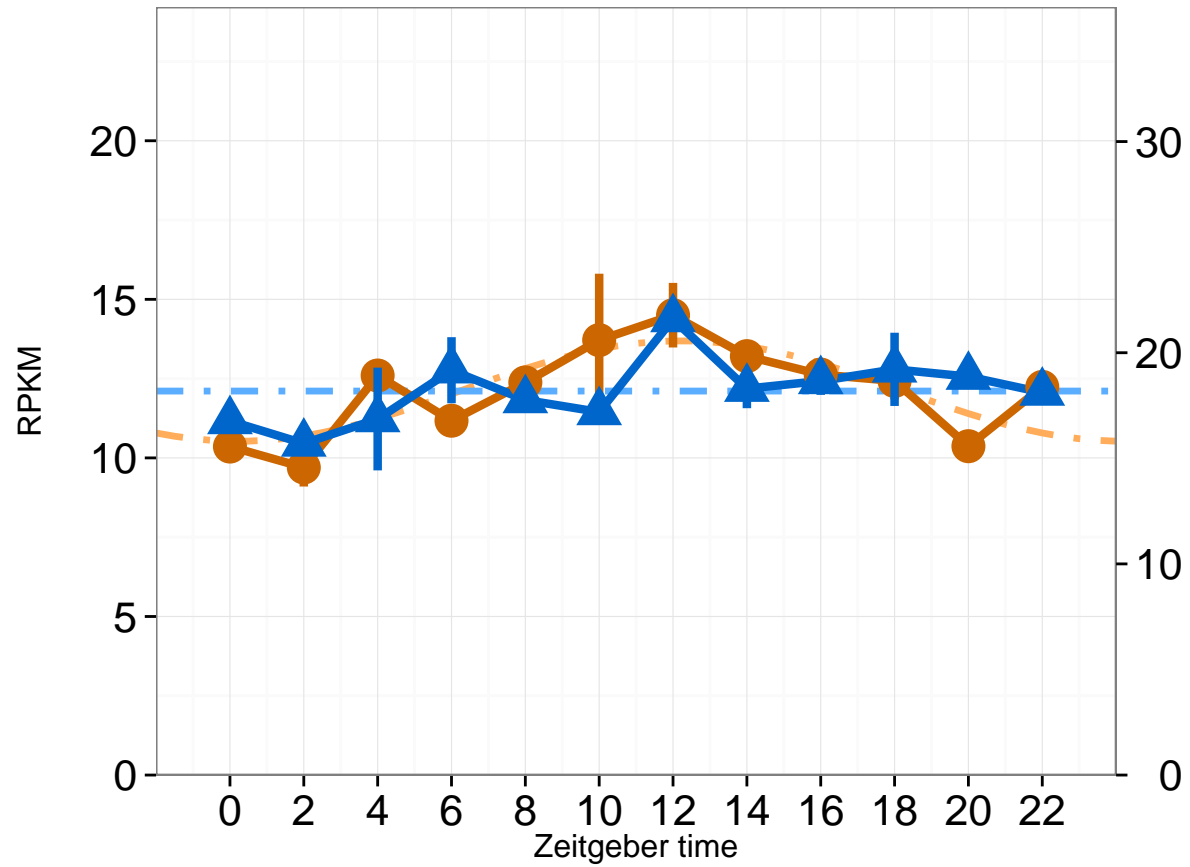

## Dhrs7

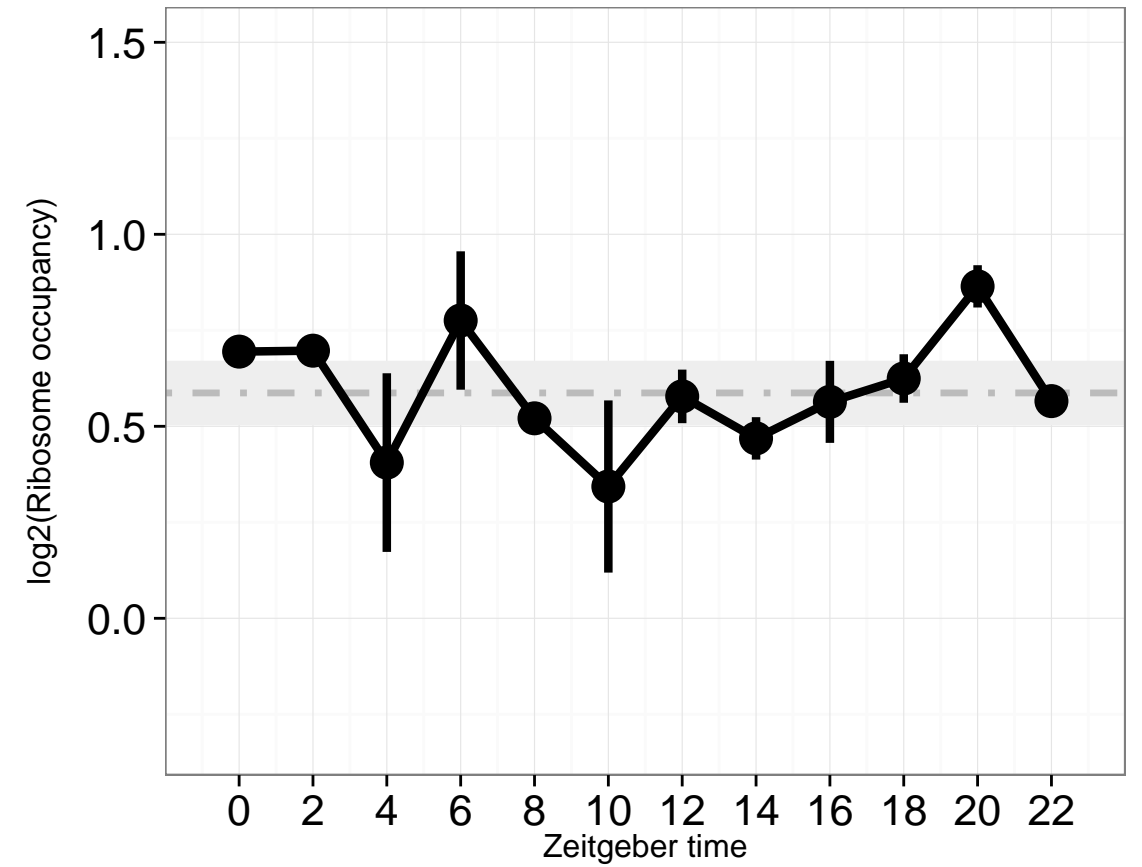

Supplement: Supplementary file 2609 [file 1]

## Mtif2

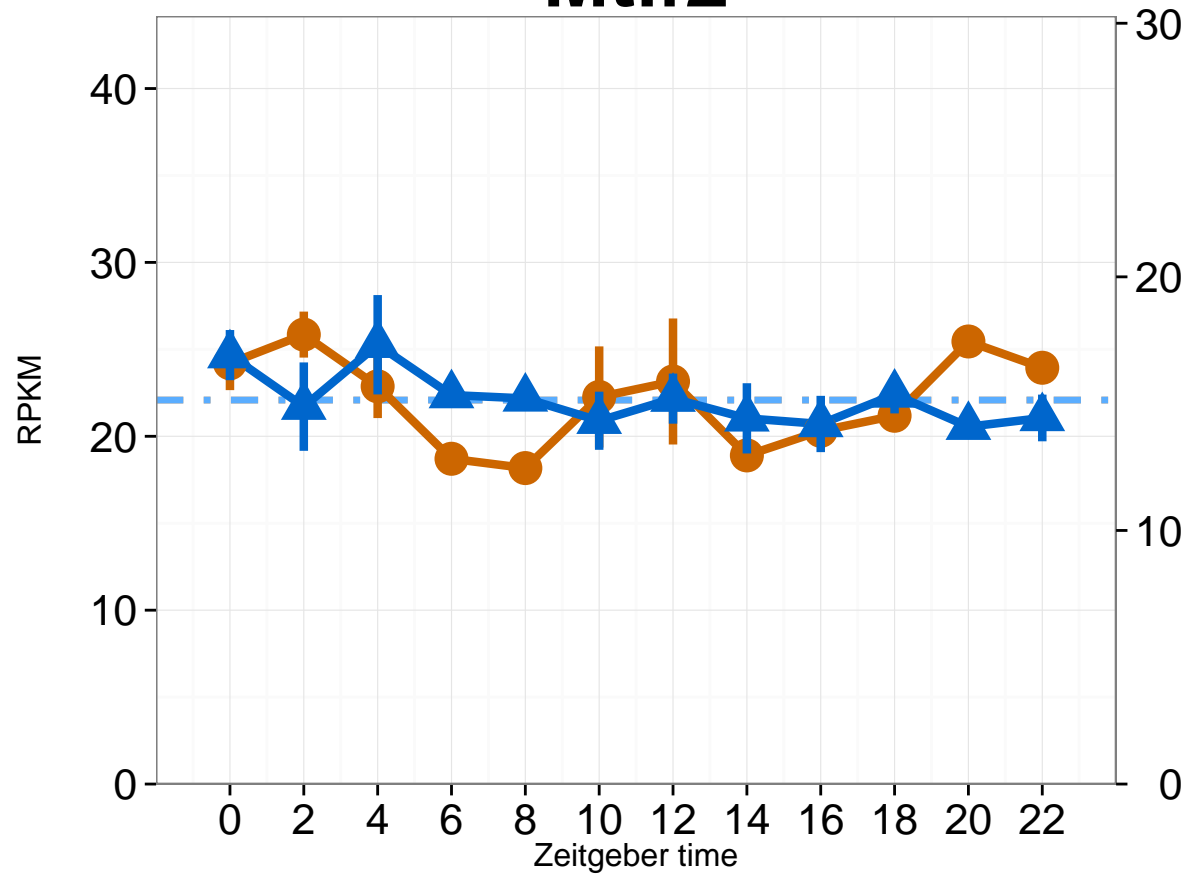

## Mtif2

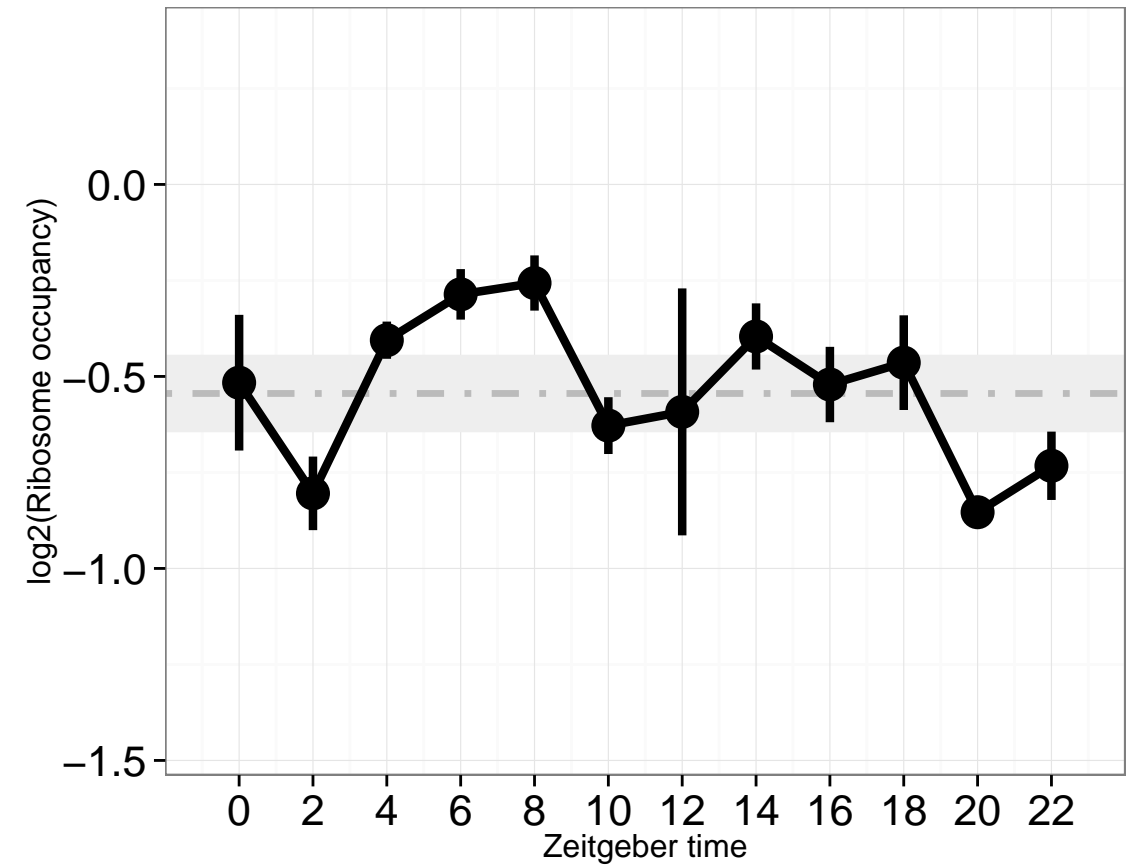

Supplement: Supplementary file 2610 [file 1]
