# Supplementary material (part 27 of 133)
Source: publisher figshare collection journal article supplement (https://springernature.figshare.com/articles/dataset/_/4903193)

# Fam84b

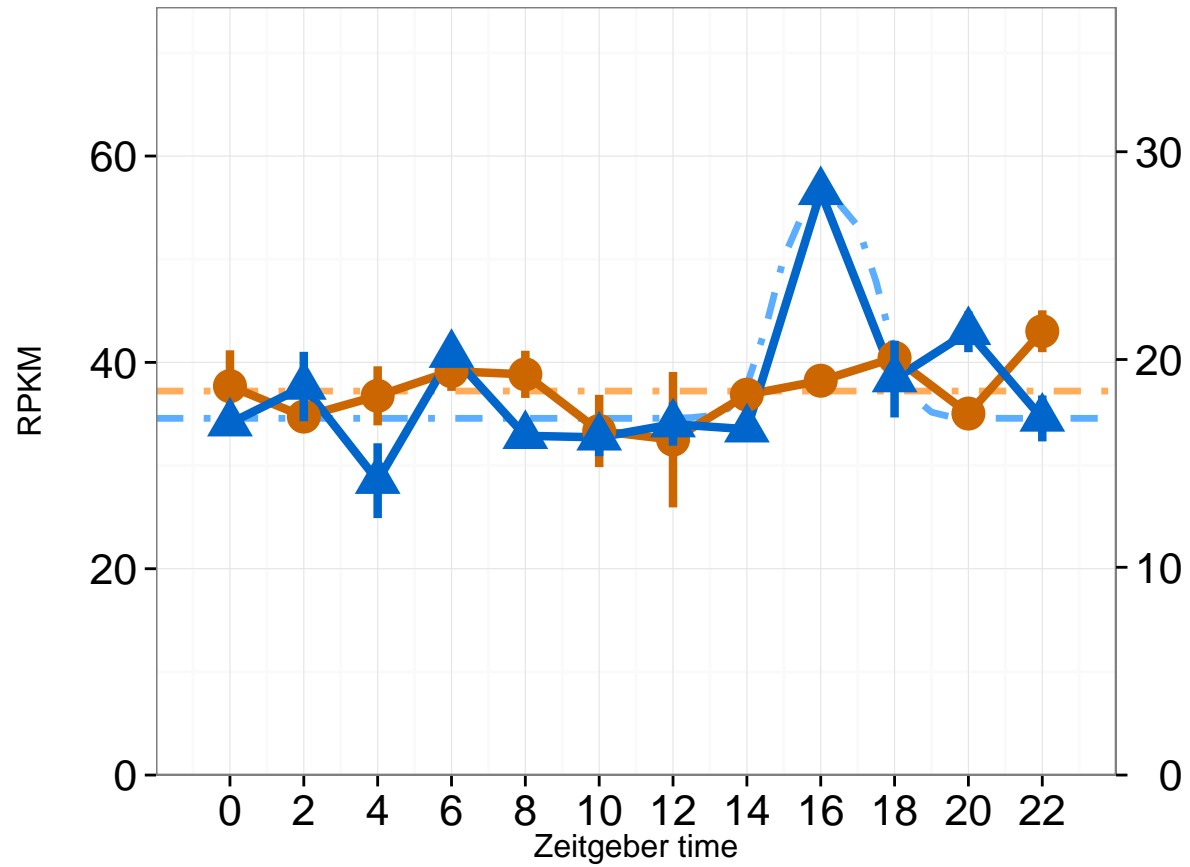

# Fam84b

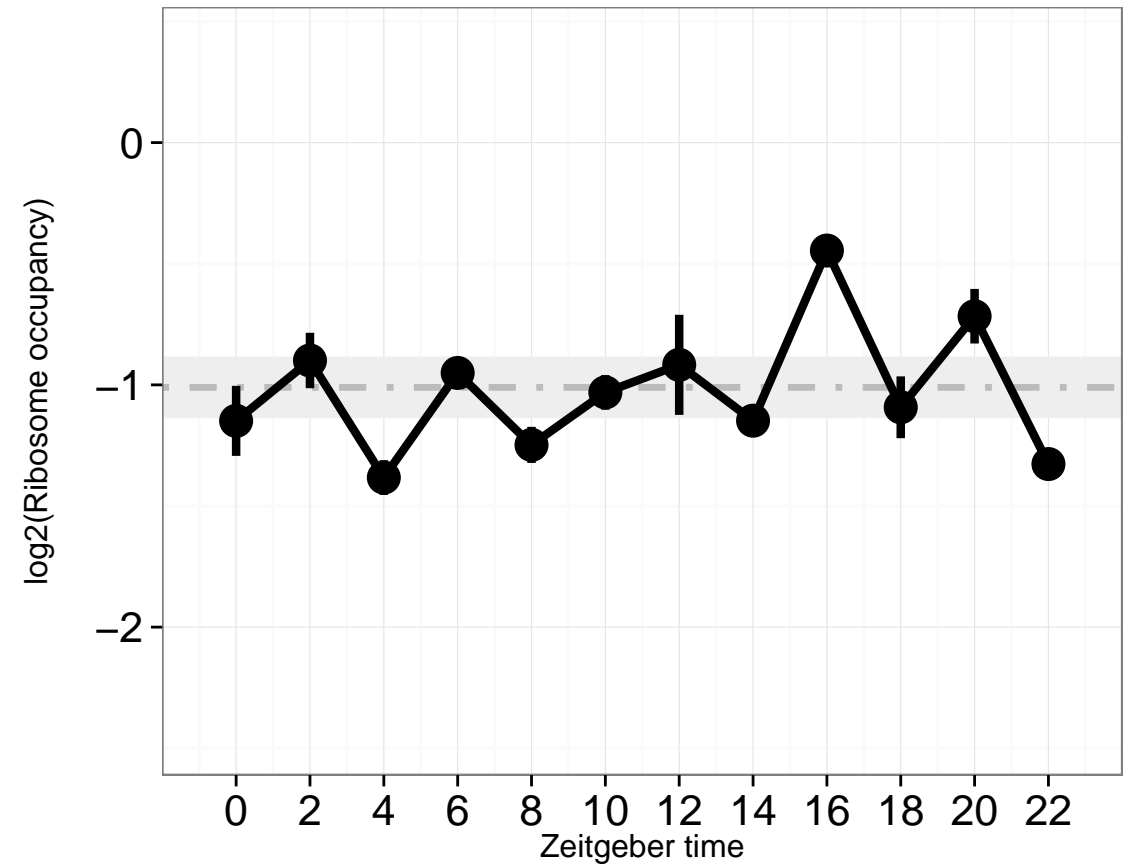

Supplement: Supplementary file 2611 [file 1]

# Adamts12

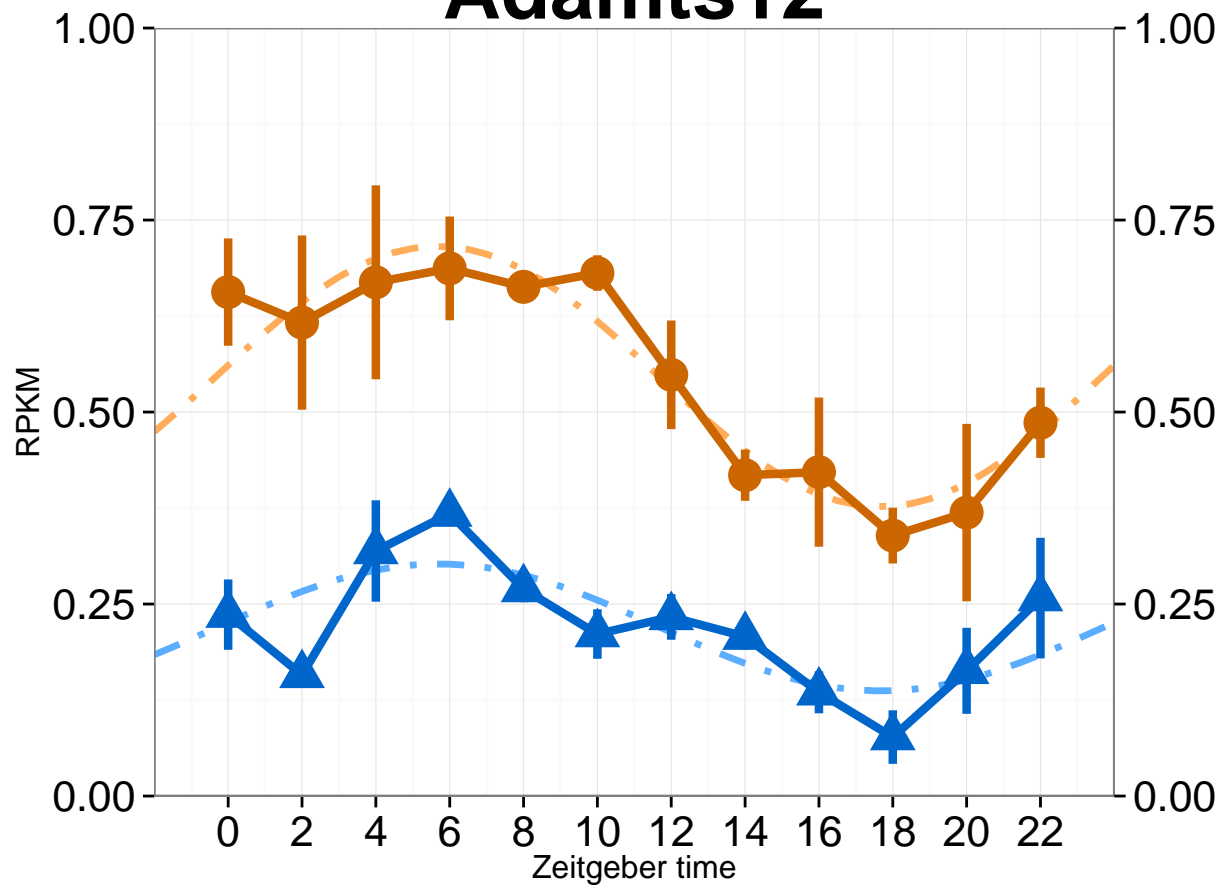

# Adamts12

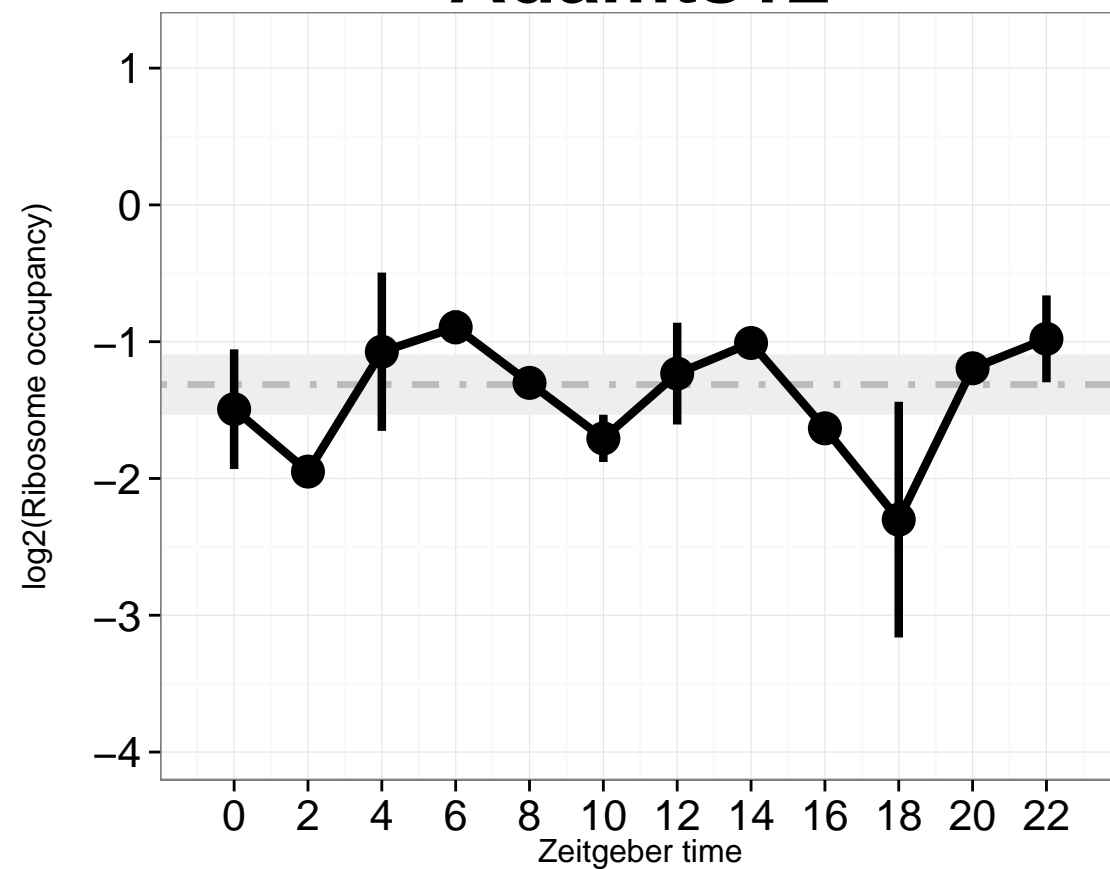

Supplement: Supplementary file 2612 [file 1]

## Ephx2

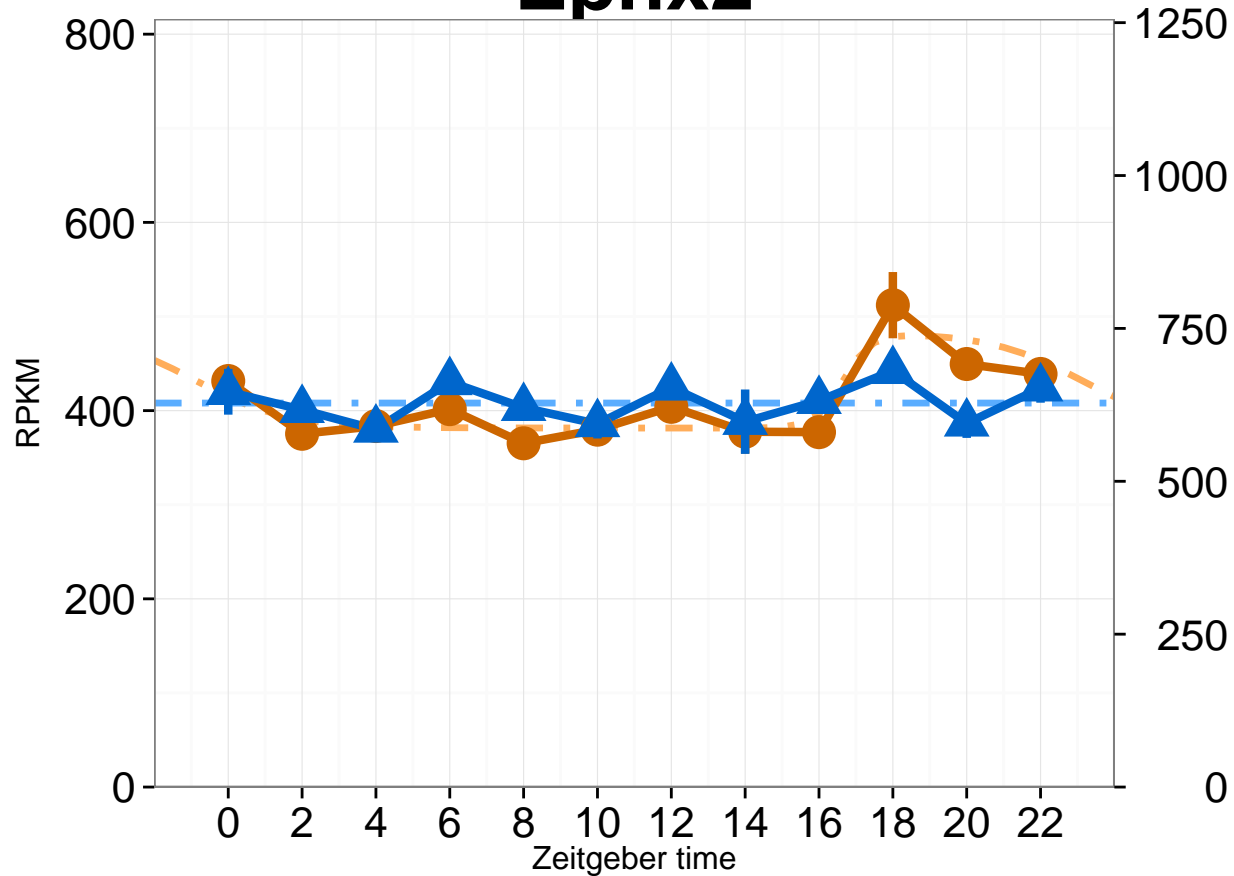

## Ephx2

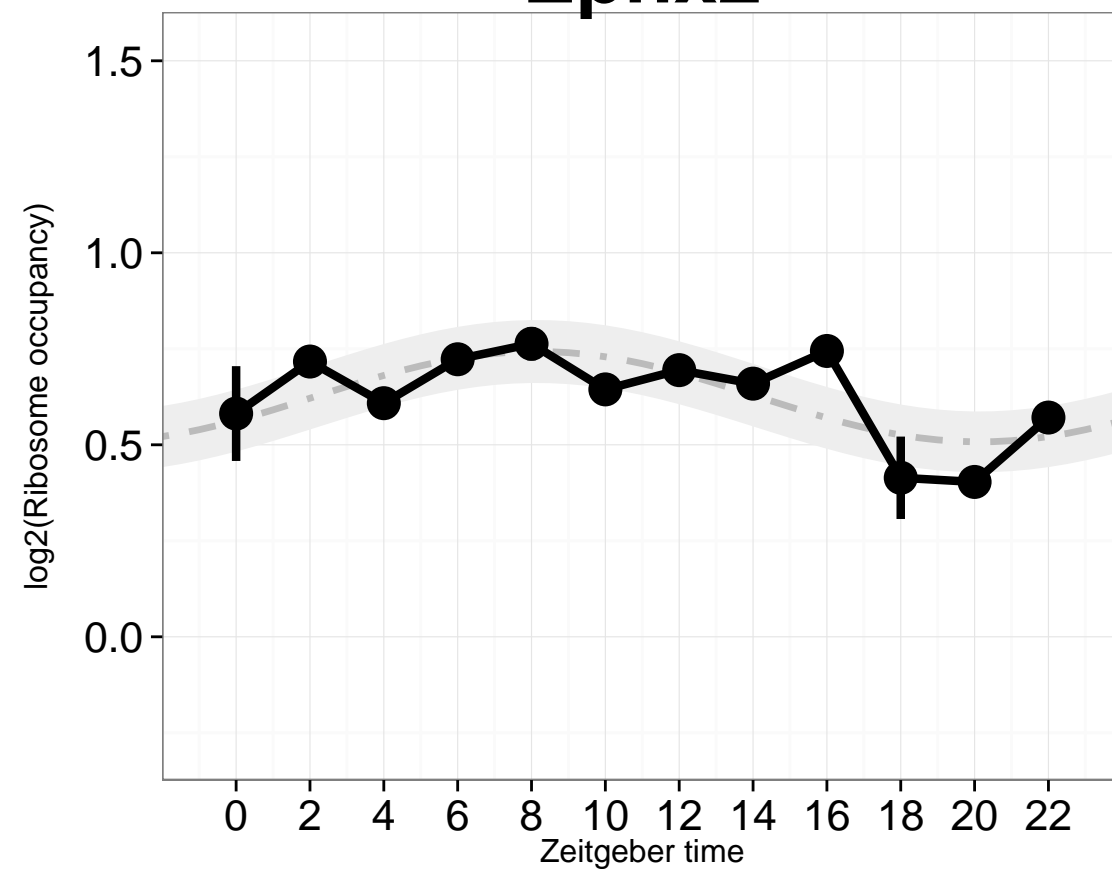

Supplement: Supplementary file 2613 [file 1]

# Gbp3

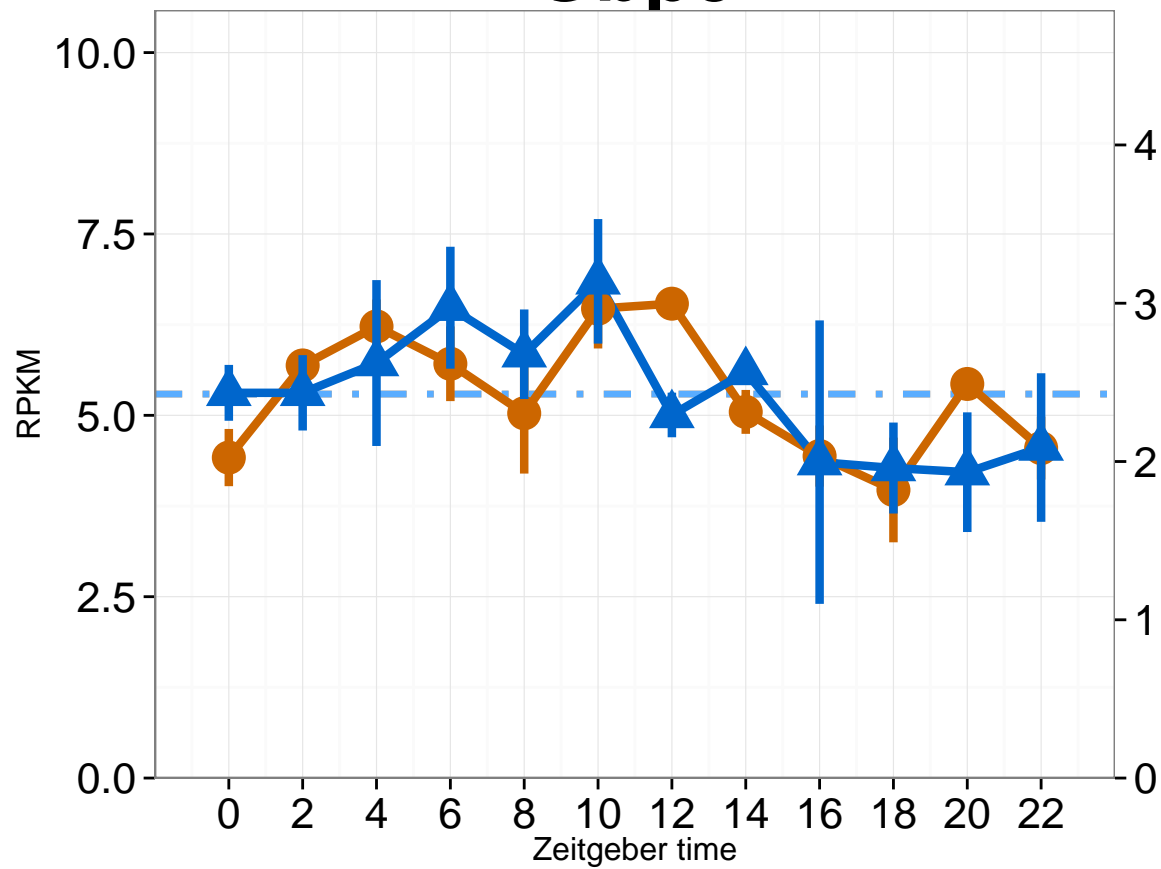

# Gbp3

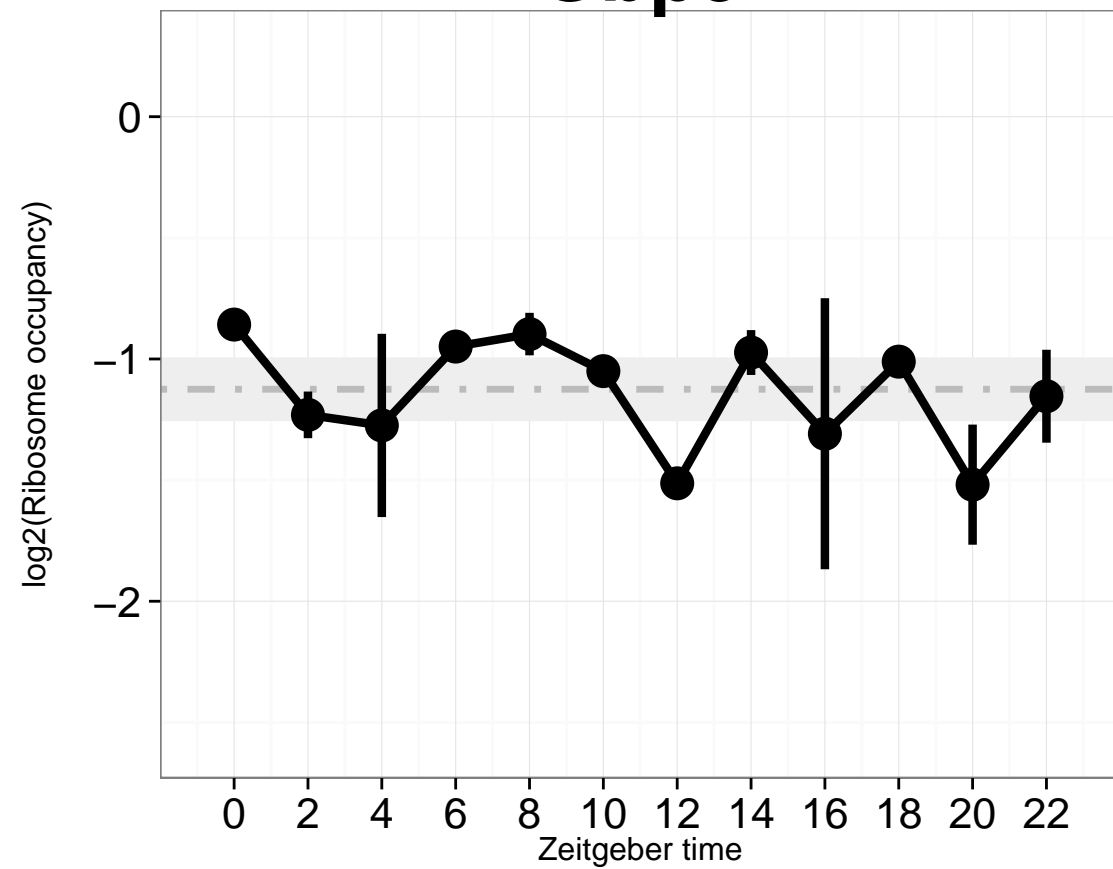

Supplement: Supplementary file 2614 [file 1]

# Ptpn11

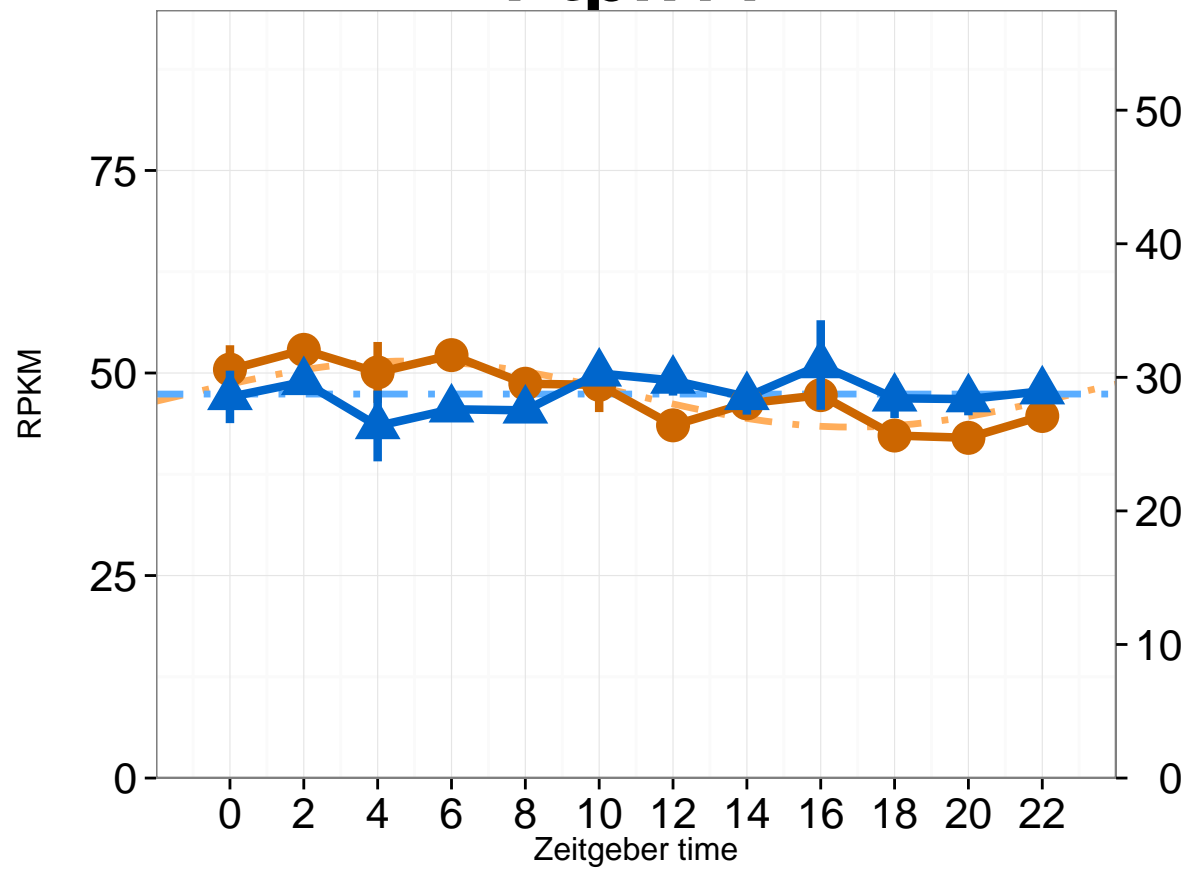

# Ptpn11

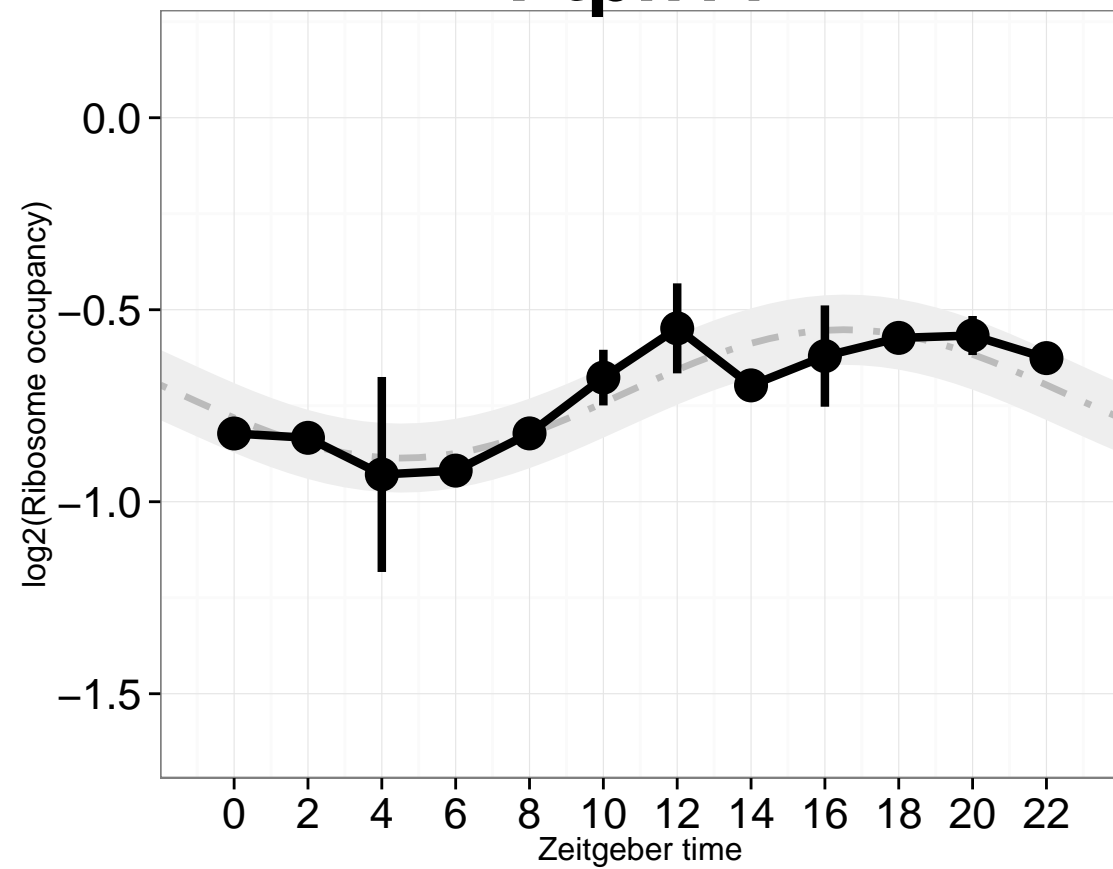

Supplement: Supplementary file 2615 [file 1]

## 2700081O15Rik

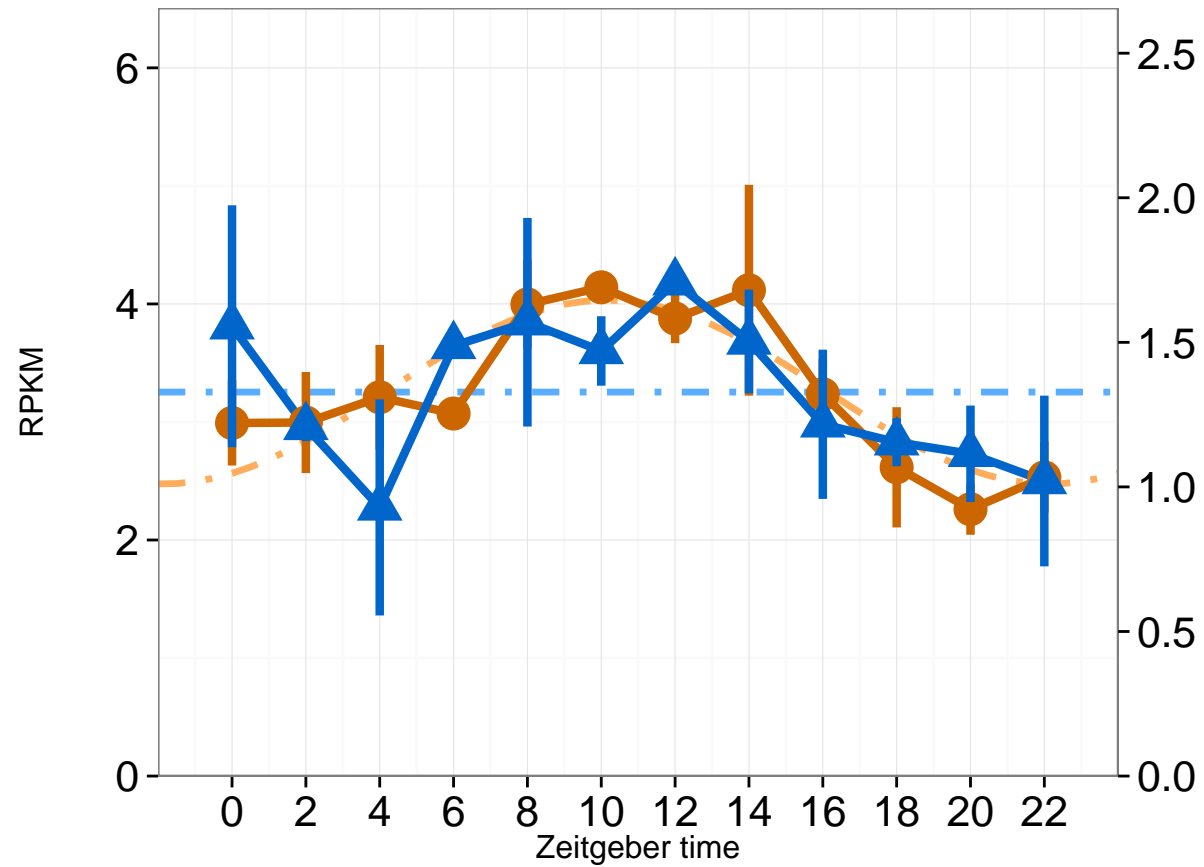

## 2700081O15Rik

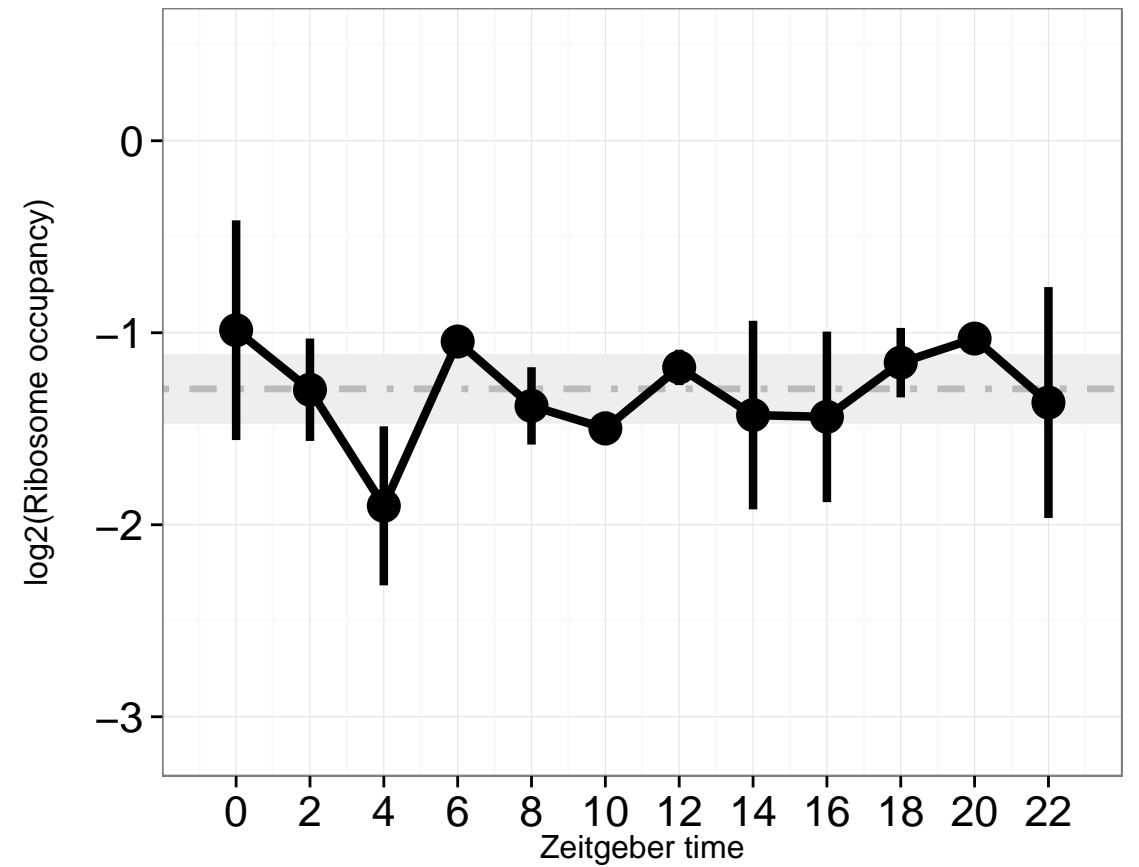

Supplement: Supplementary file 2616 [file 1]

## Gm5617

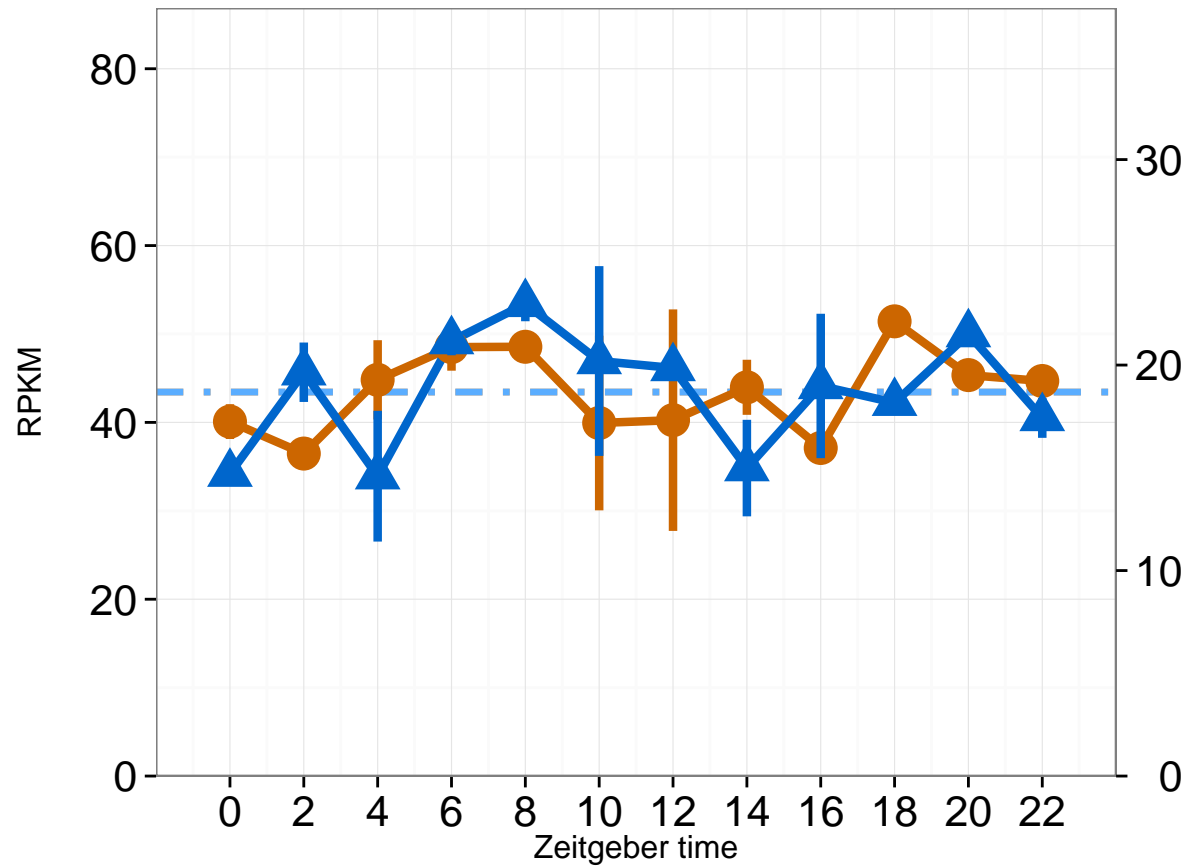

## Gm5617

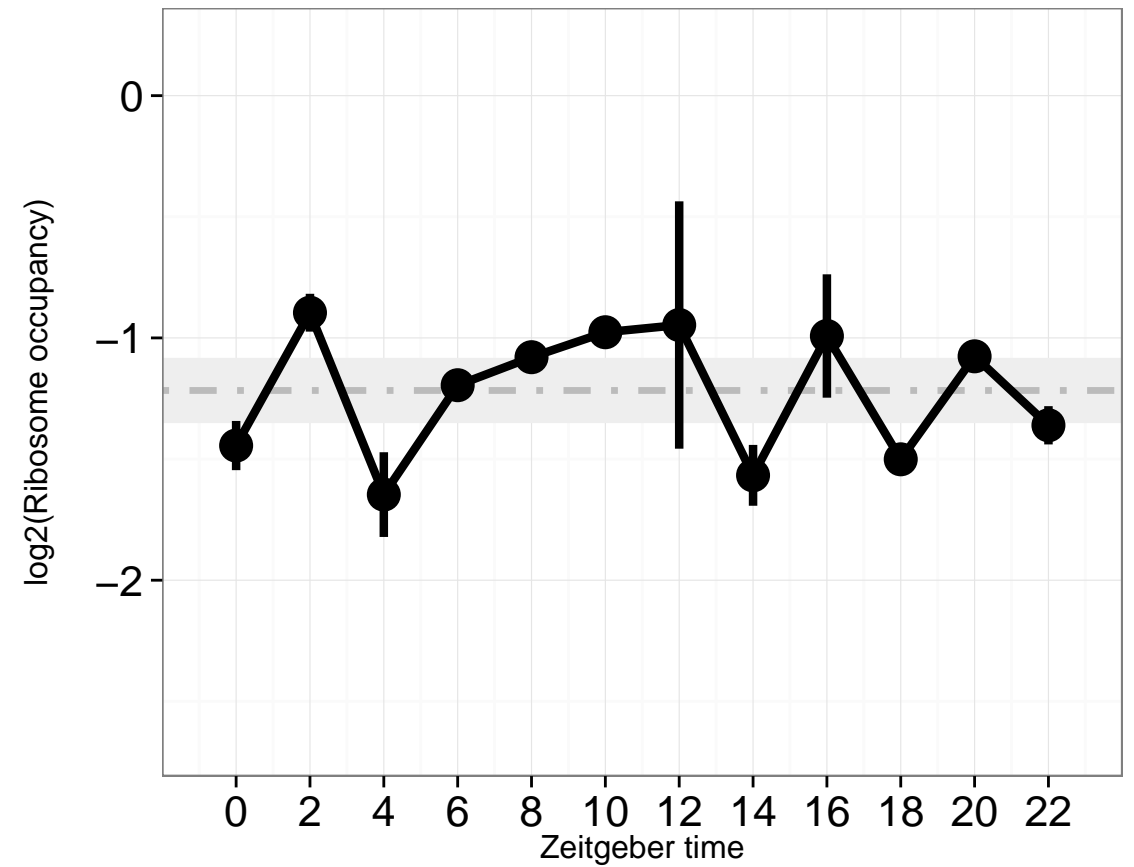

Supplement: Supplementary file 2617 [file 1]

## Efemp2

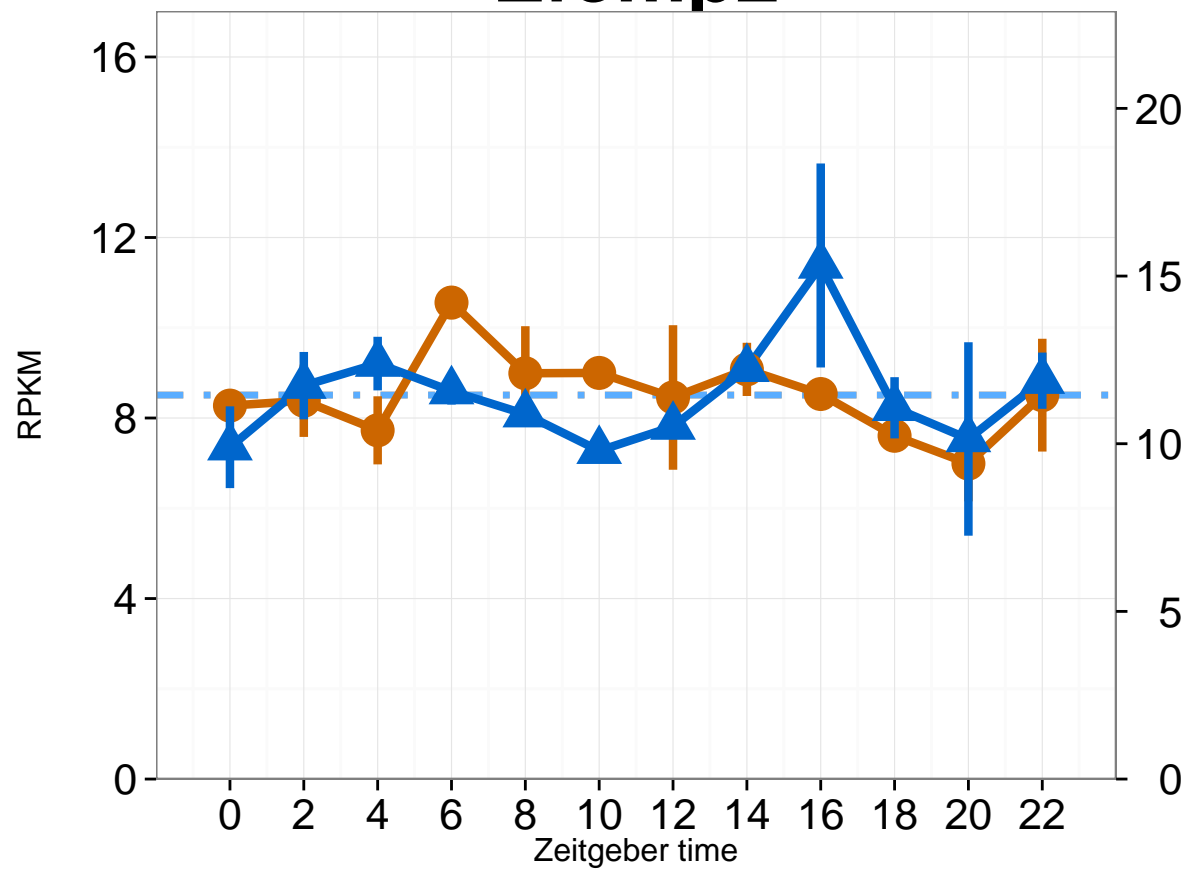

## Efemp2

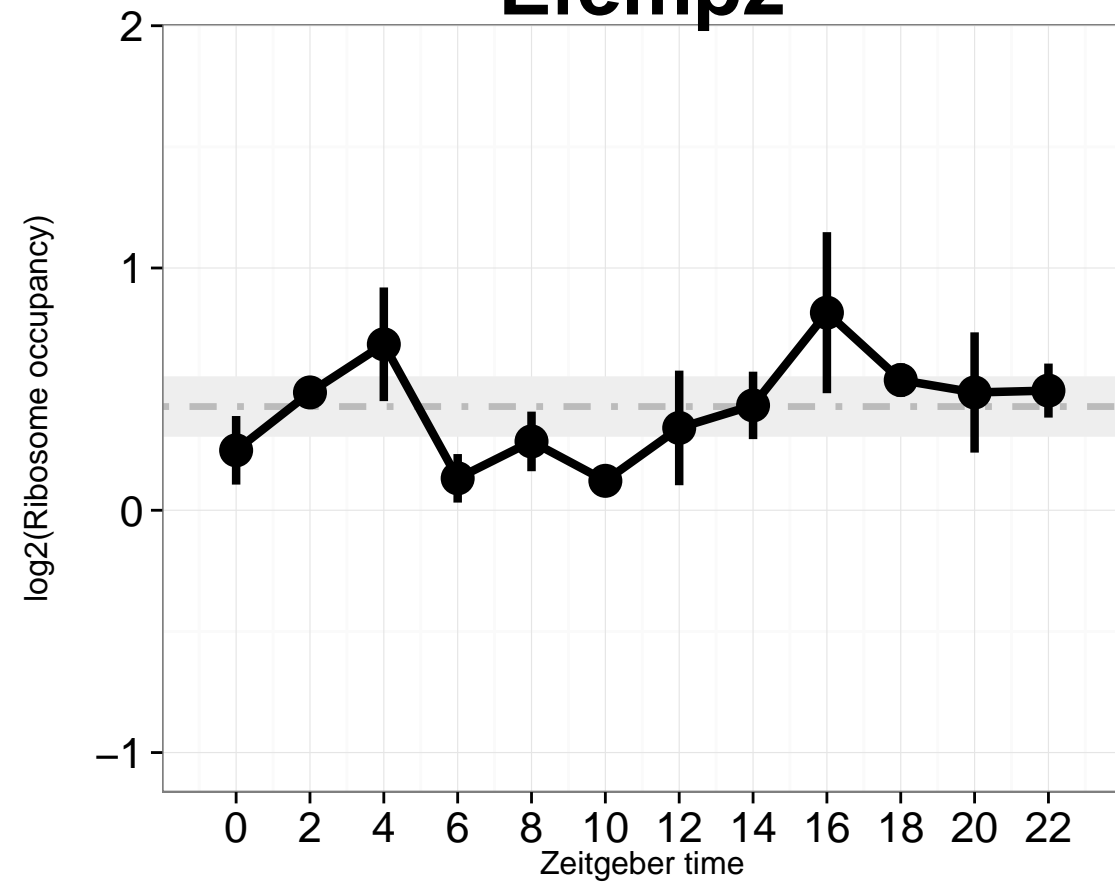

Supplement: Supplementary file 2618 [file 1]

# Zdhhc18

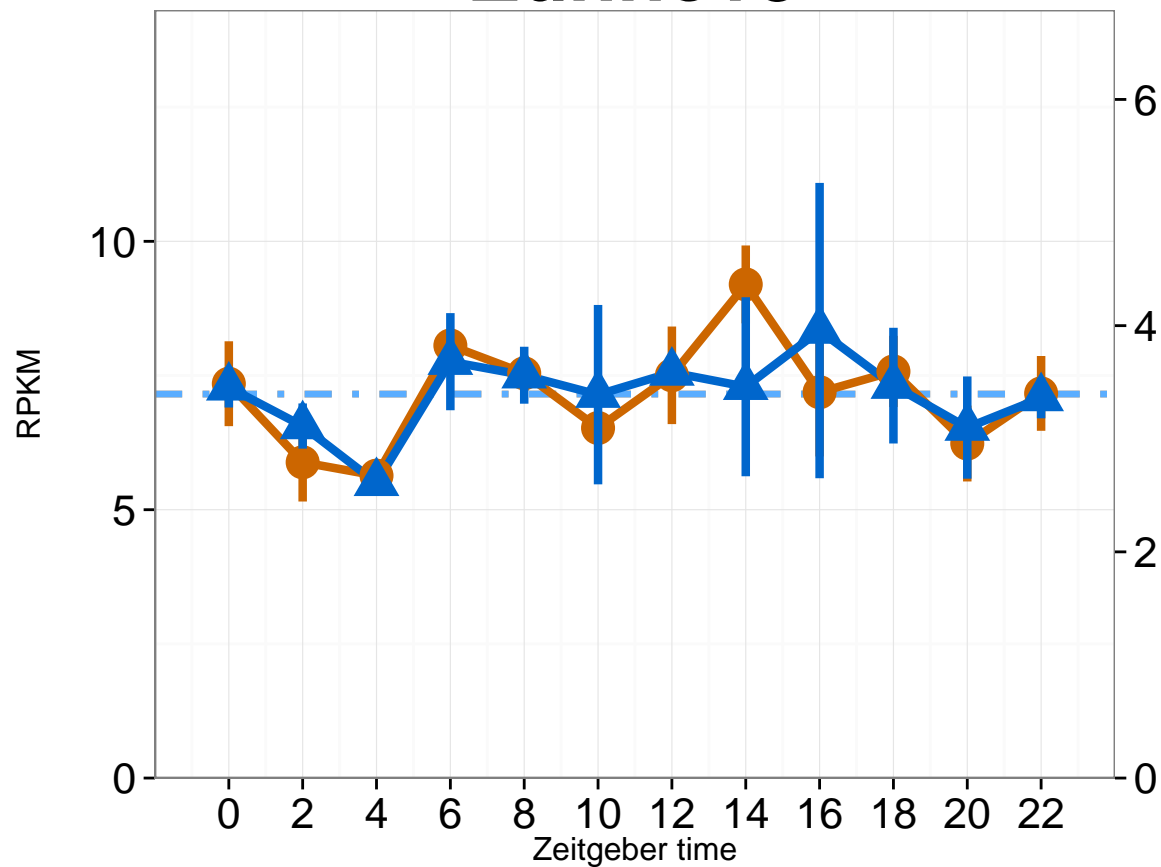

# Zdhhc18

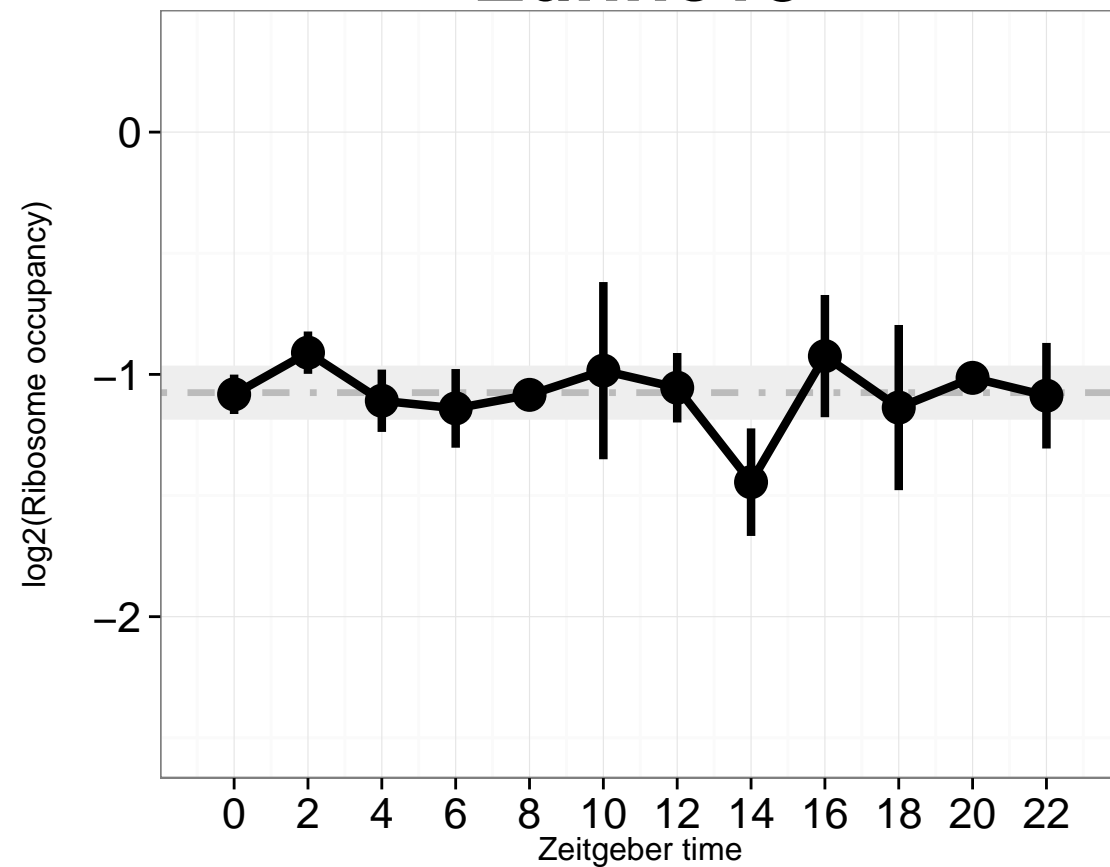

Supplement: Supplementary file 2619 [file 1]

## Txnrd3

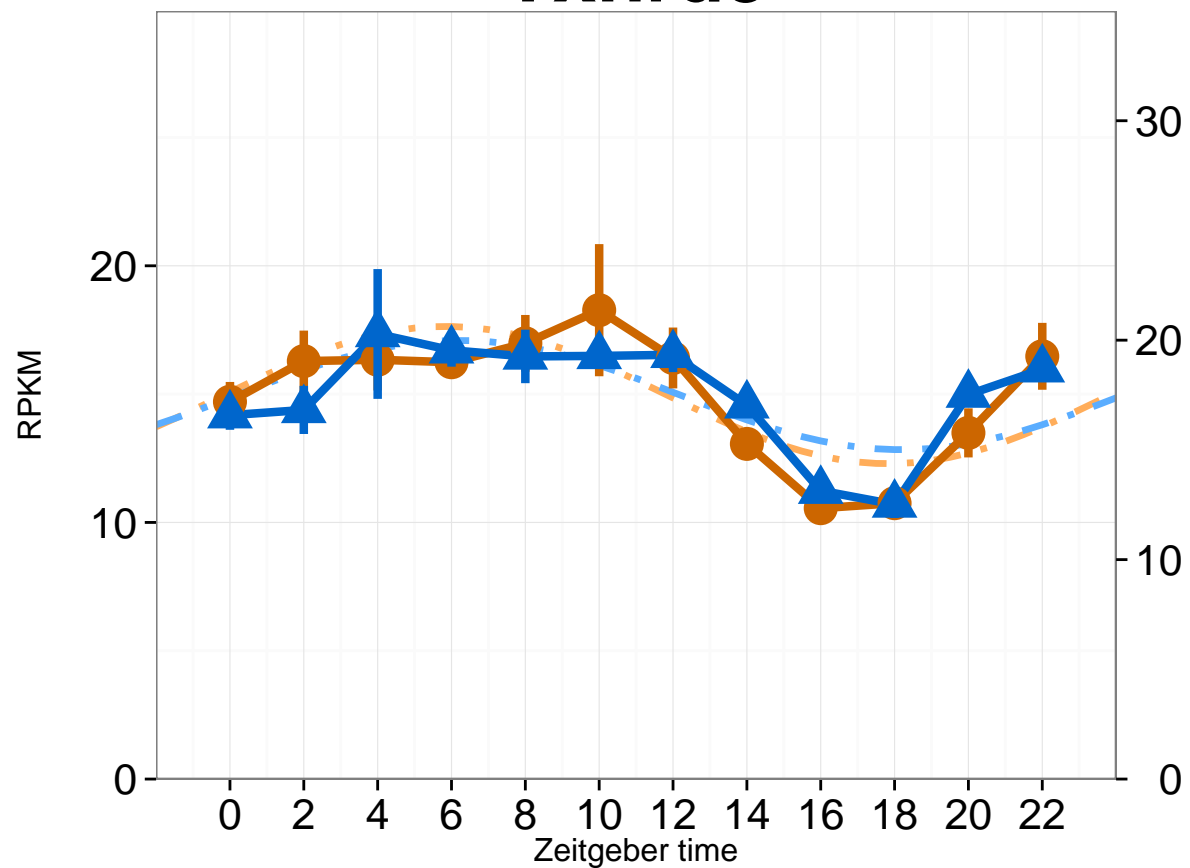

## Txnrd3

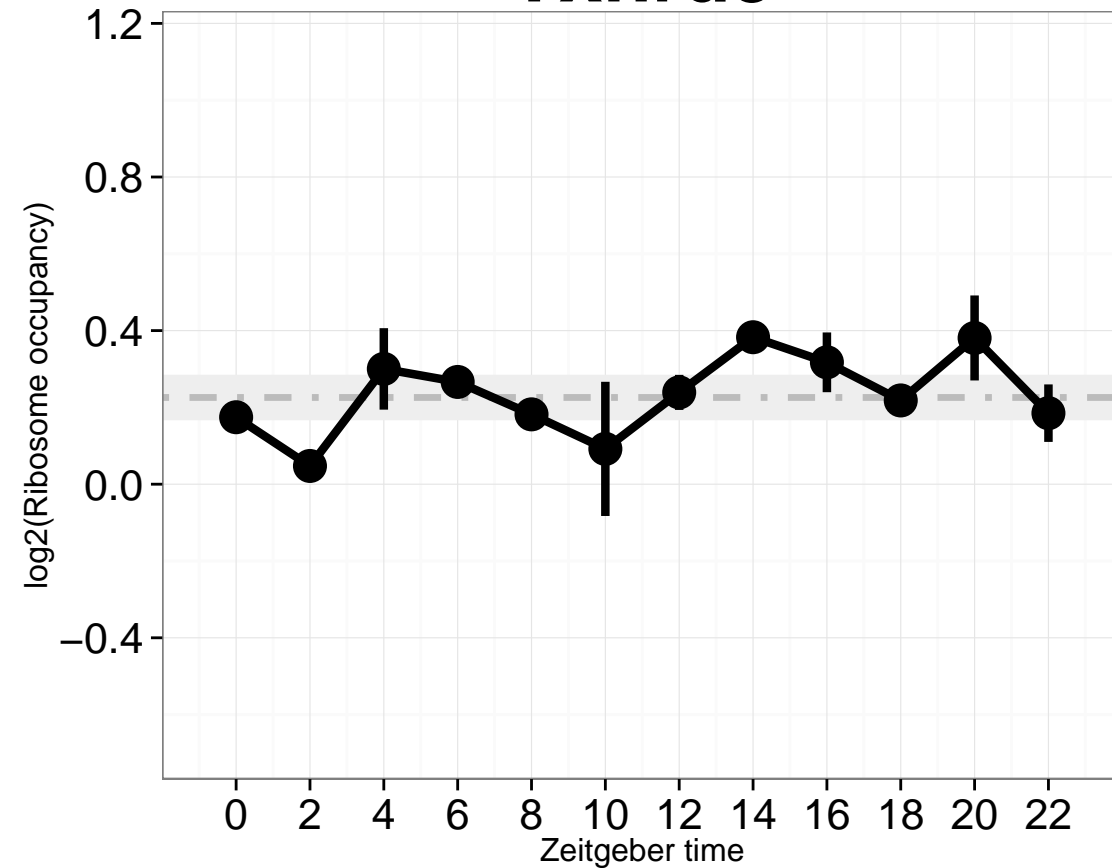

Supplement: Supplementary file 2620 [file 1]

## Tspyl5

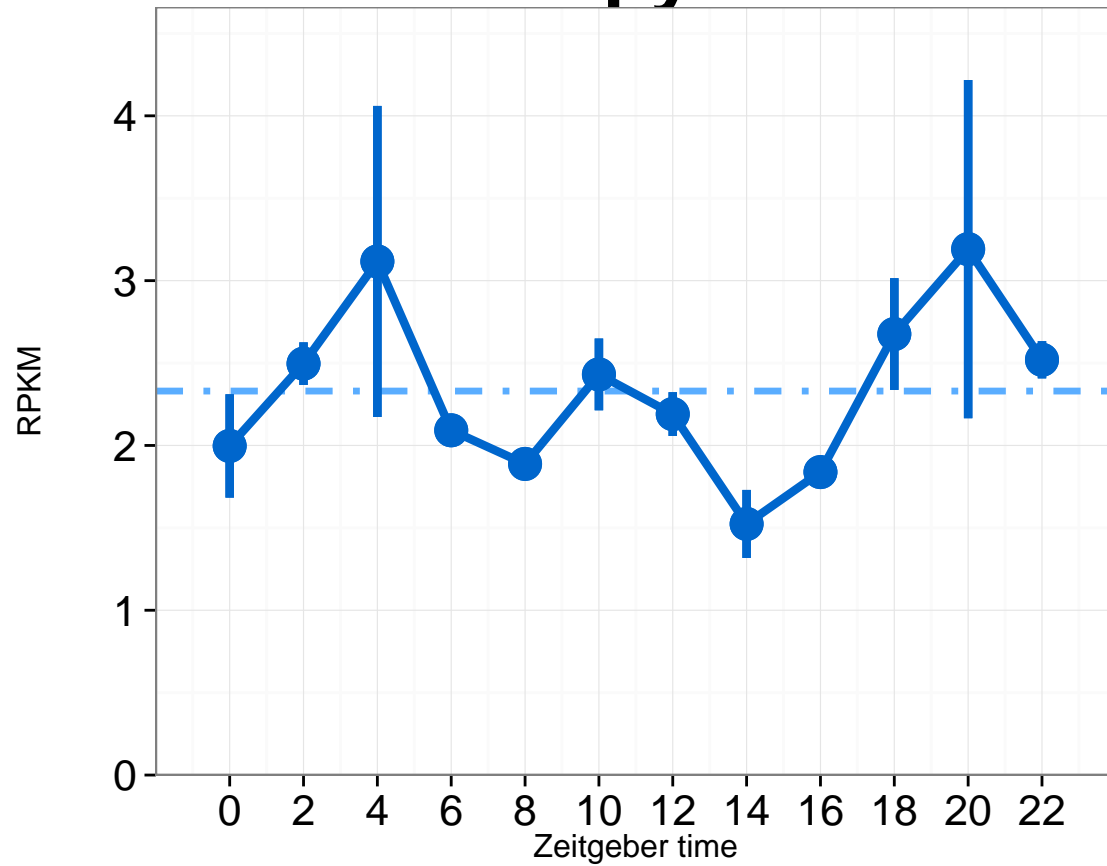

## Tspyl5 log2(Ribosome occupancy

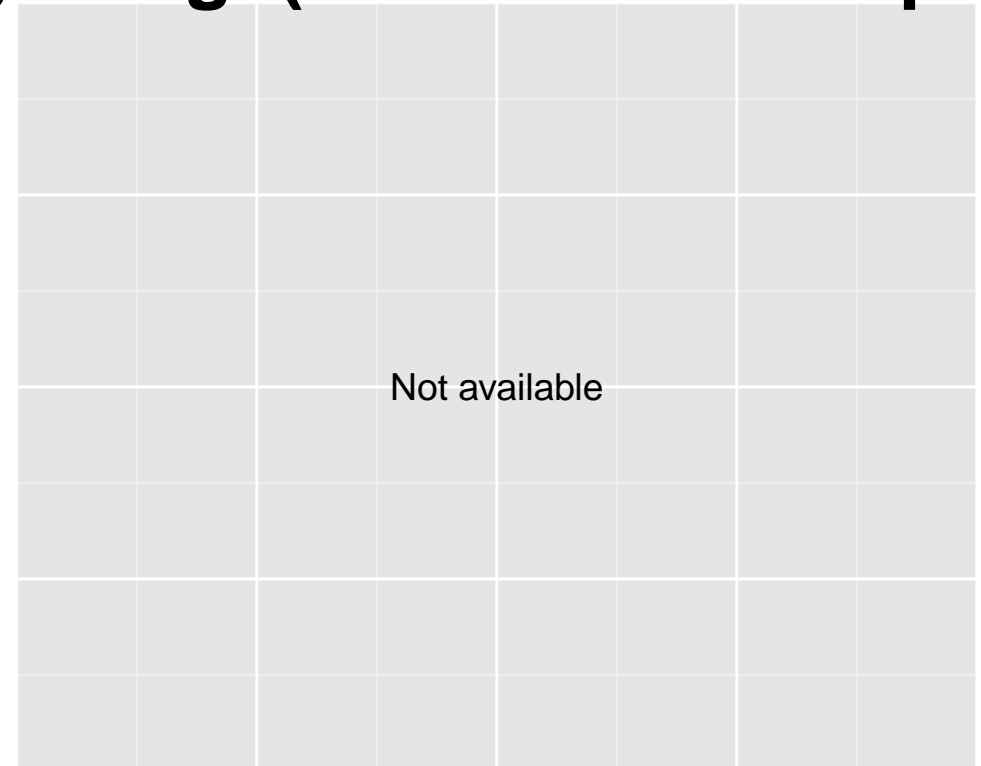

Supplement: Supplementary file 2621 [file 1]

# Carm1

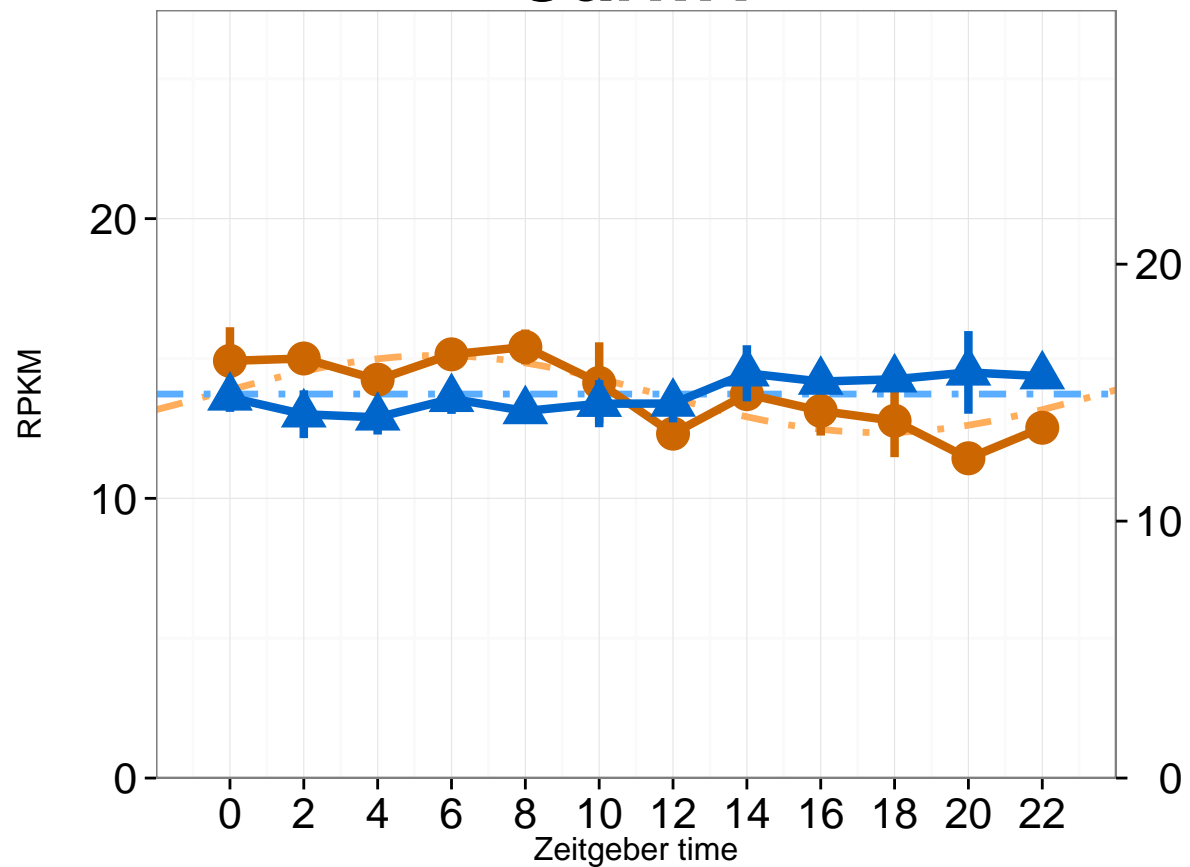

# Carm1

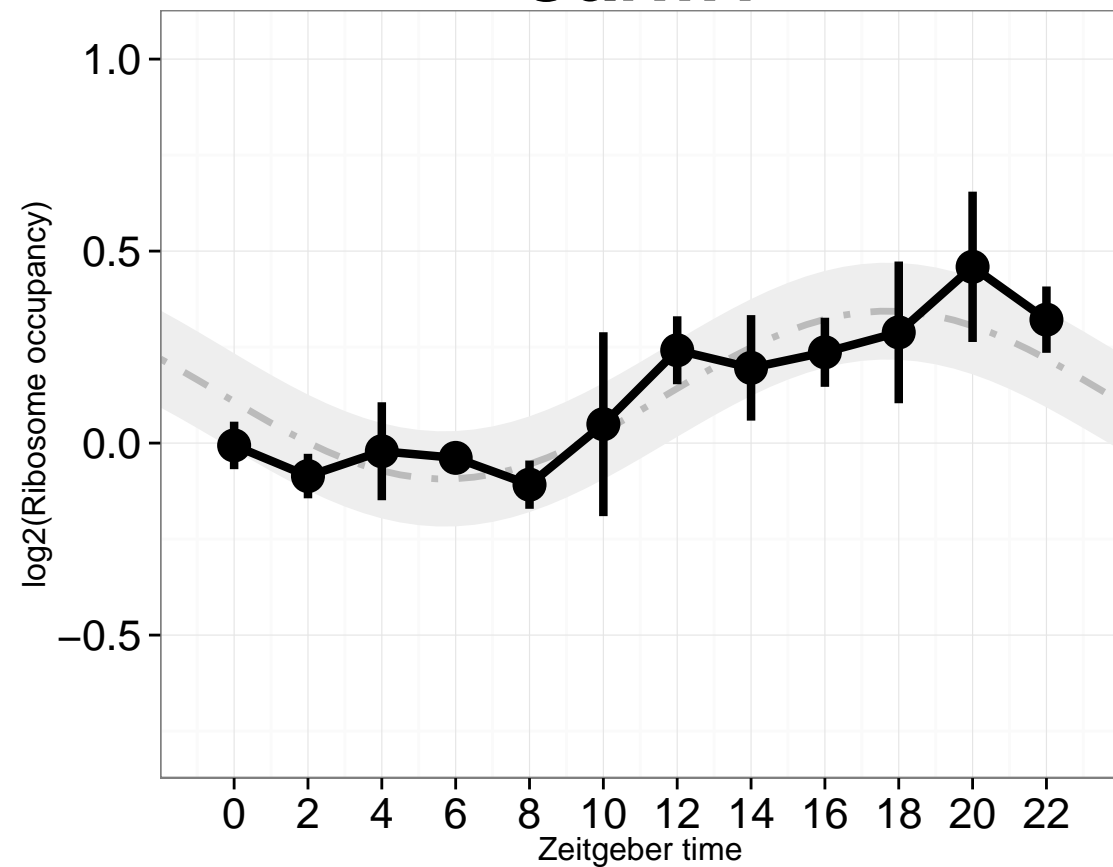

Supplement: Supplementary file 2622 [file 1]

## Zfp114

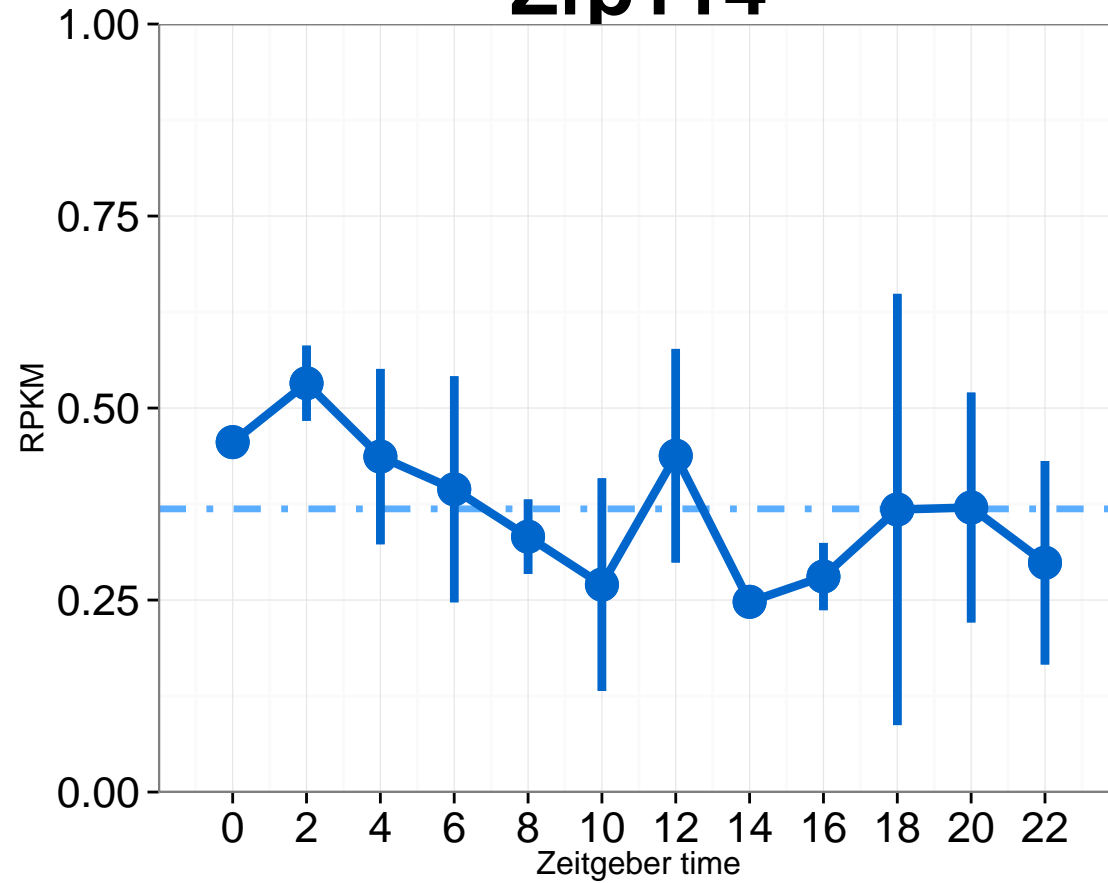

## Zfp114 log2(Ribosome occupancy

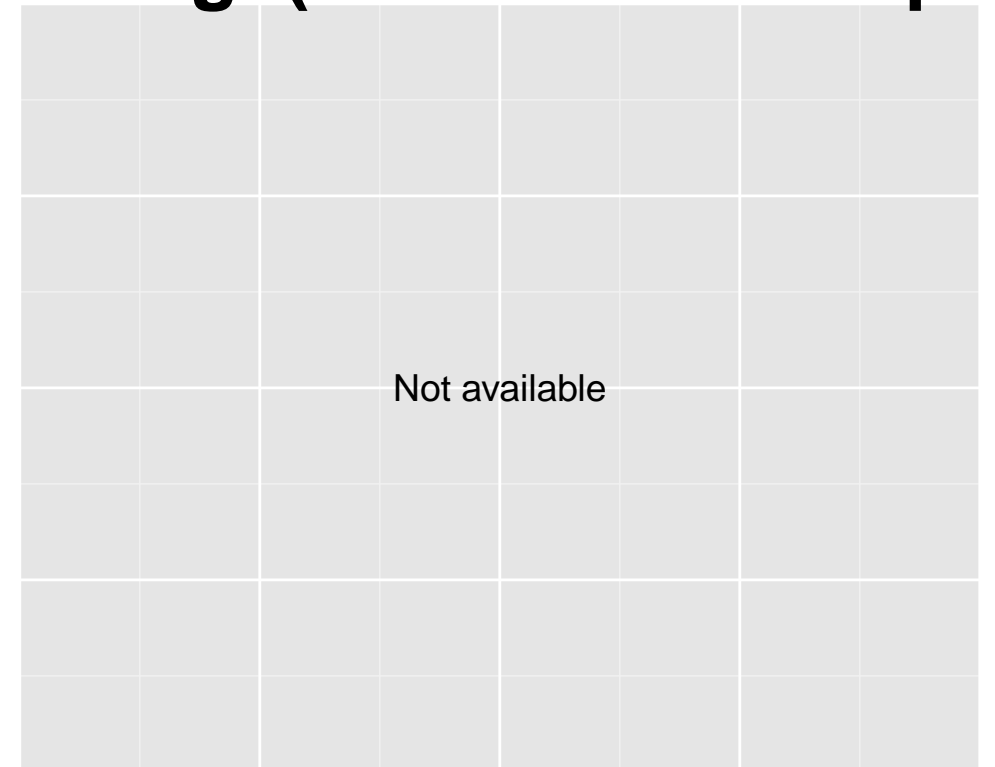

Supplement: Supplementary file 2623 [file 1]

# Yars2

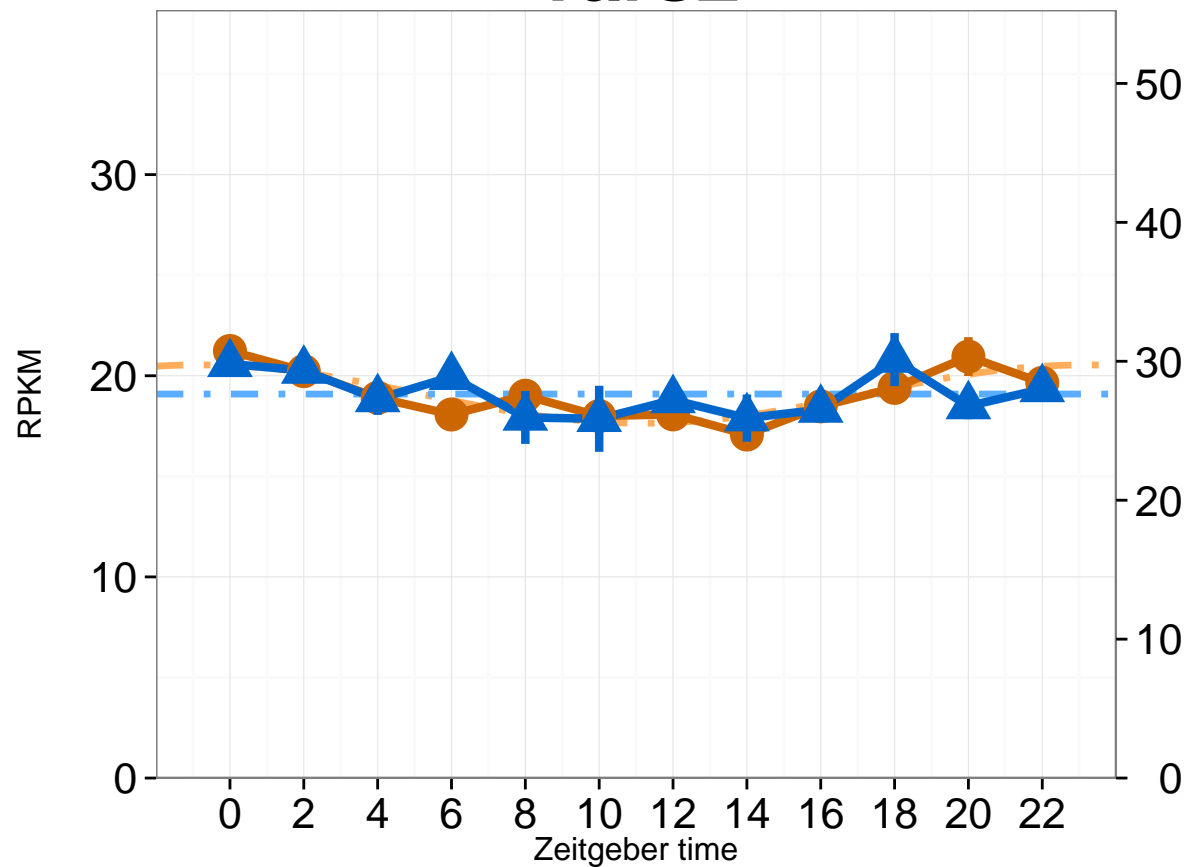

# Yars2

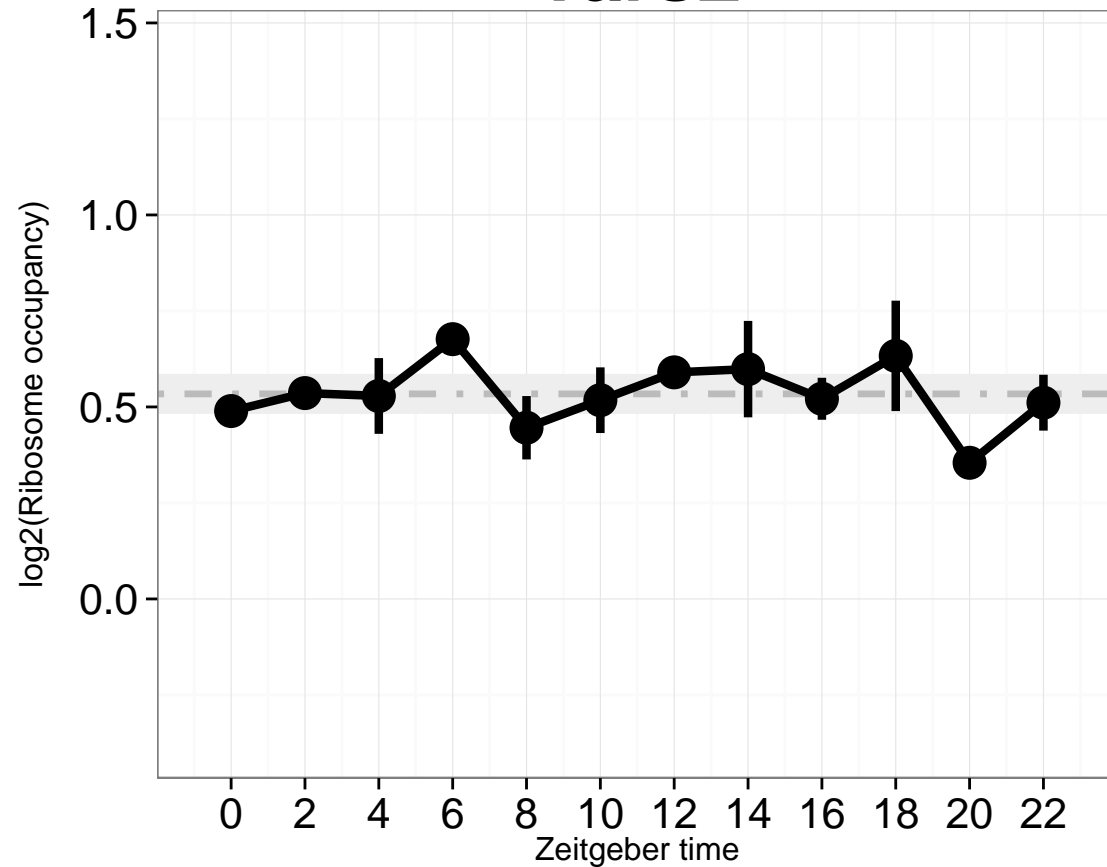

Supplement: Supplementary file 2624 [file 1]

# Pitpnc1

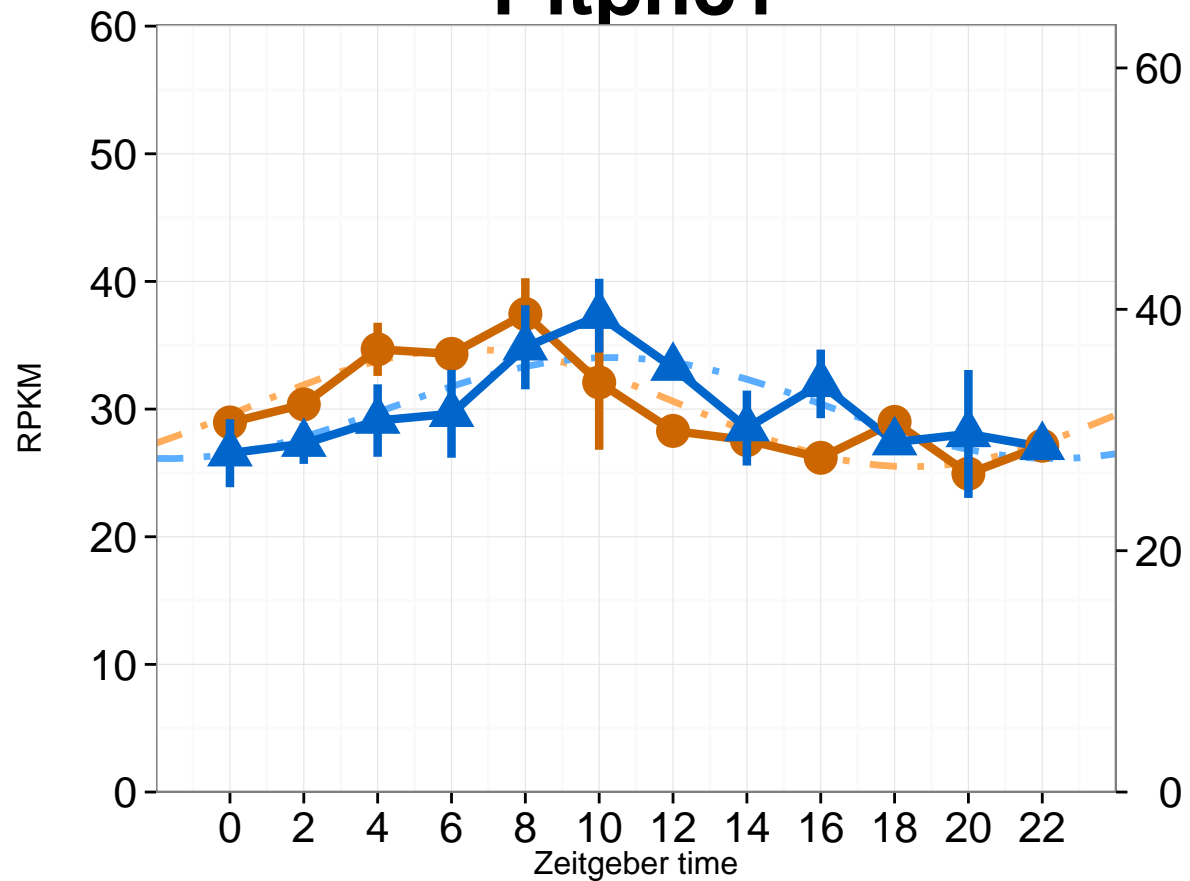

# Pitpnc1

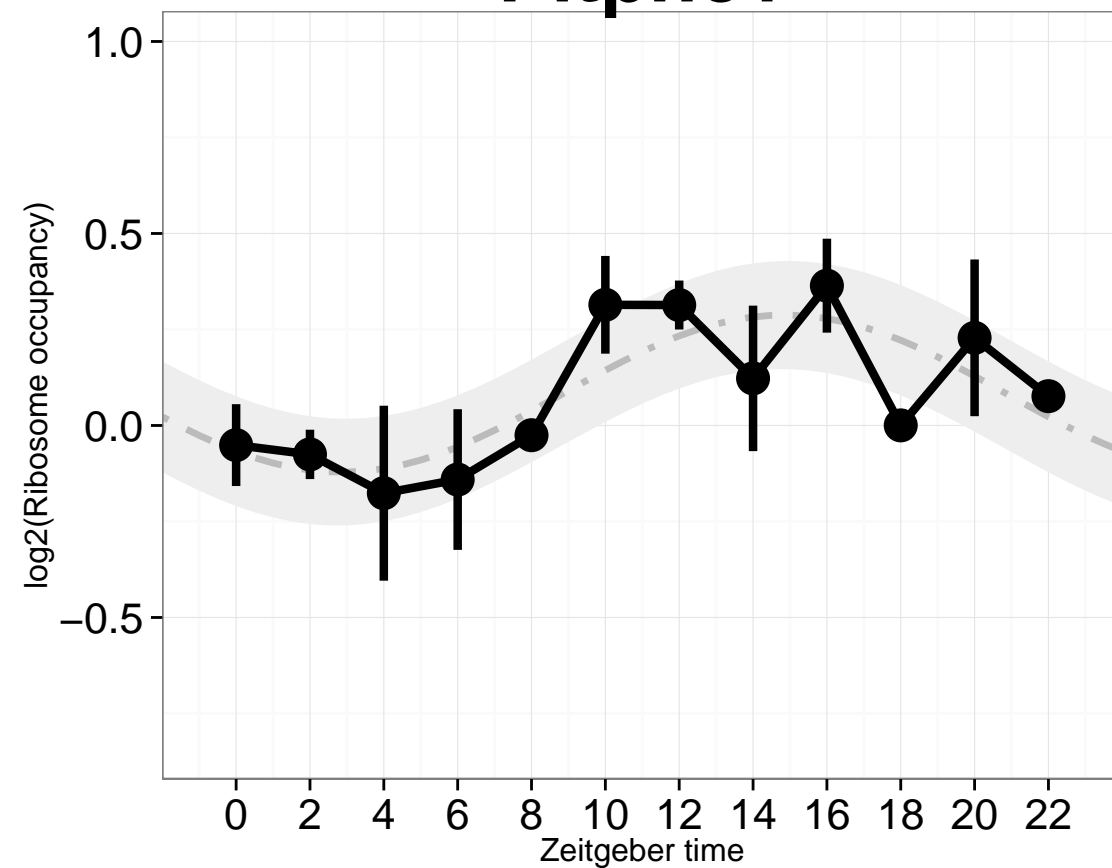

Supplement: Supplementary file 2625 [file 1]

# Col4a1

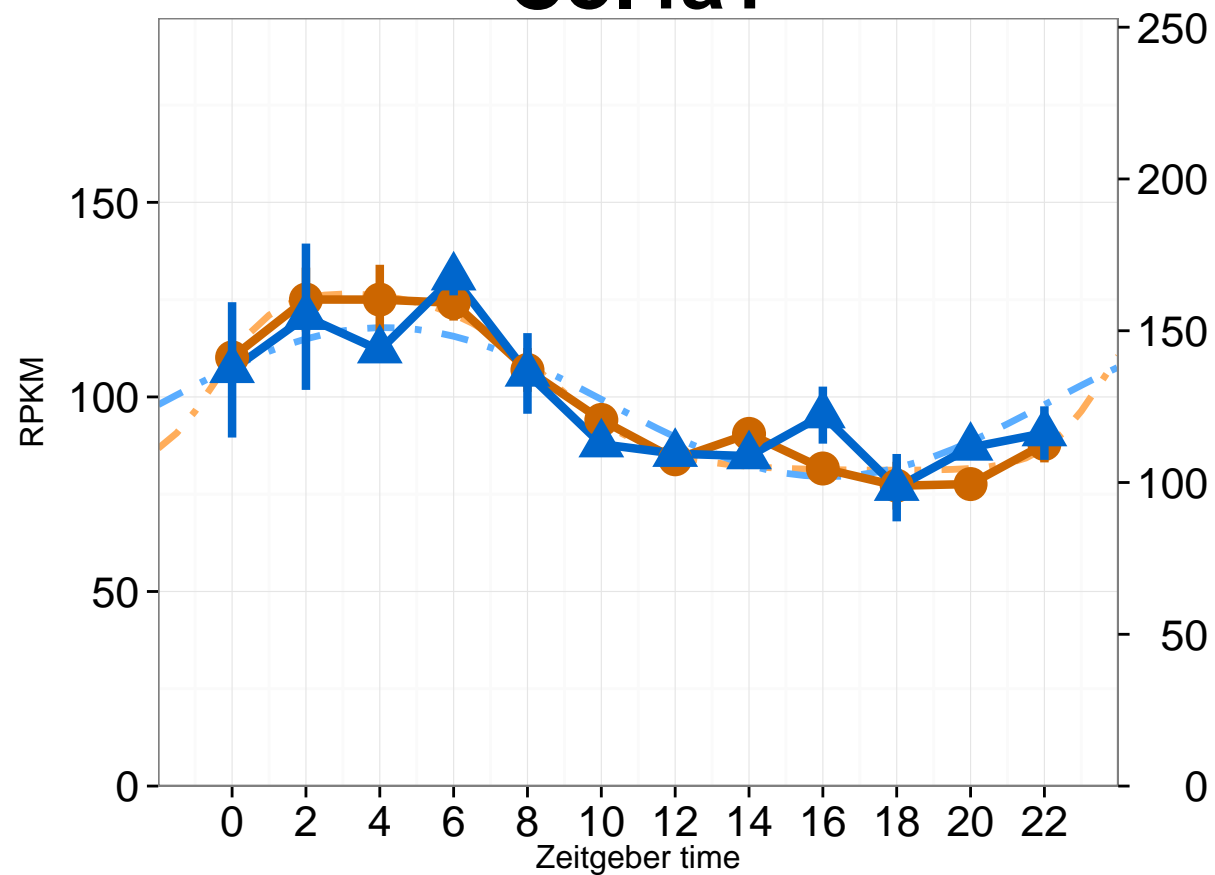

# Col4a1

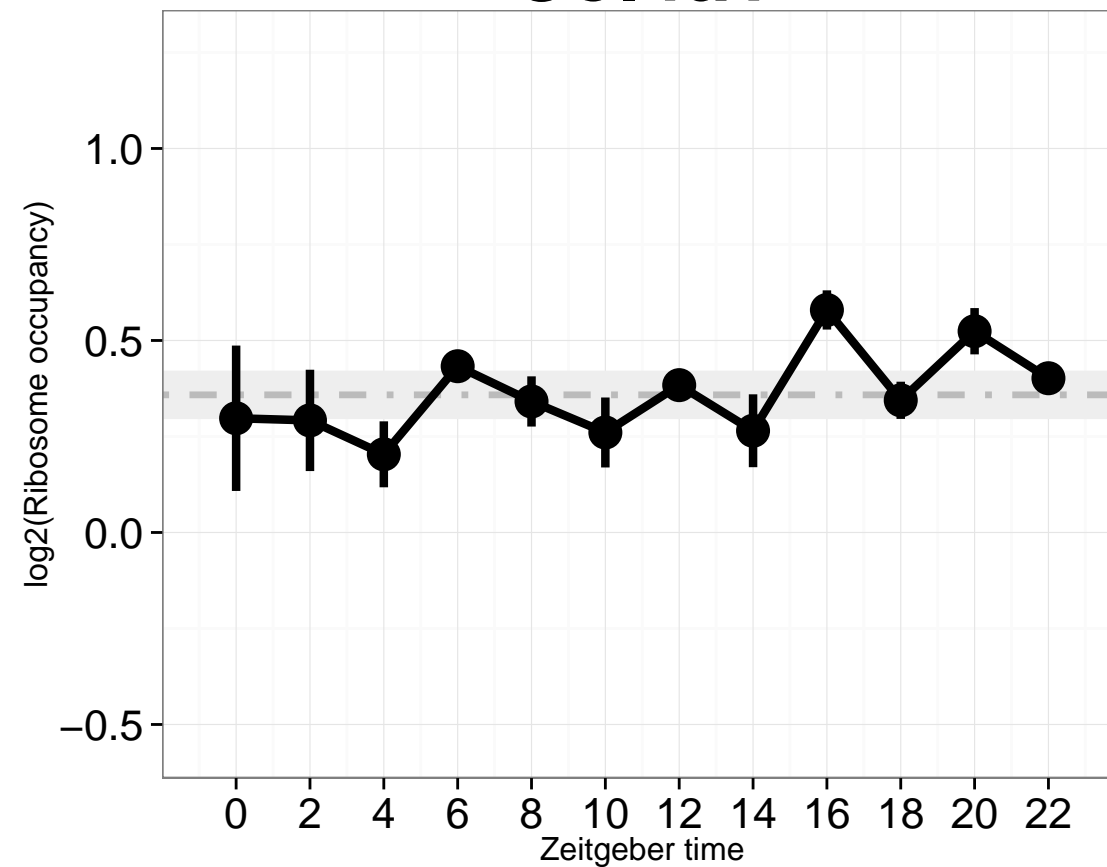

Supplement: Supplementary file 2626 [file 1]

## Susd2

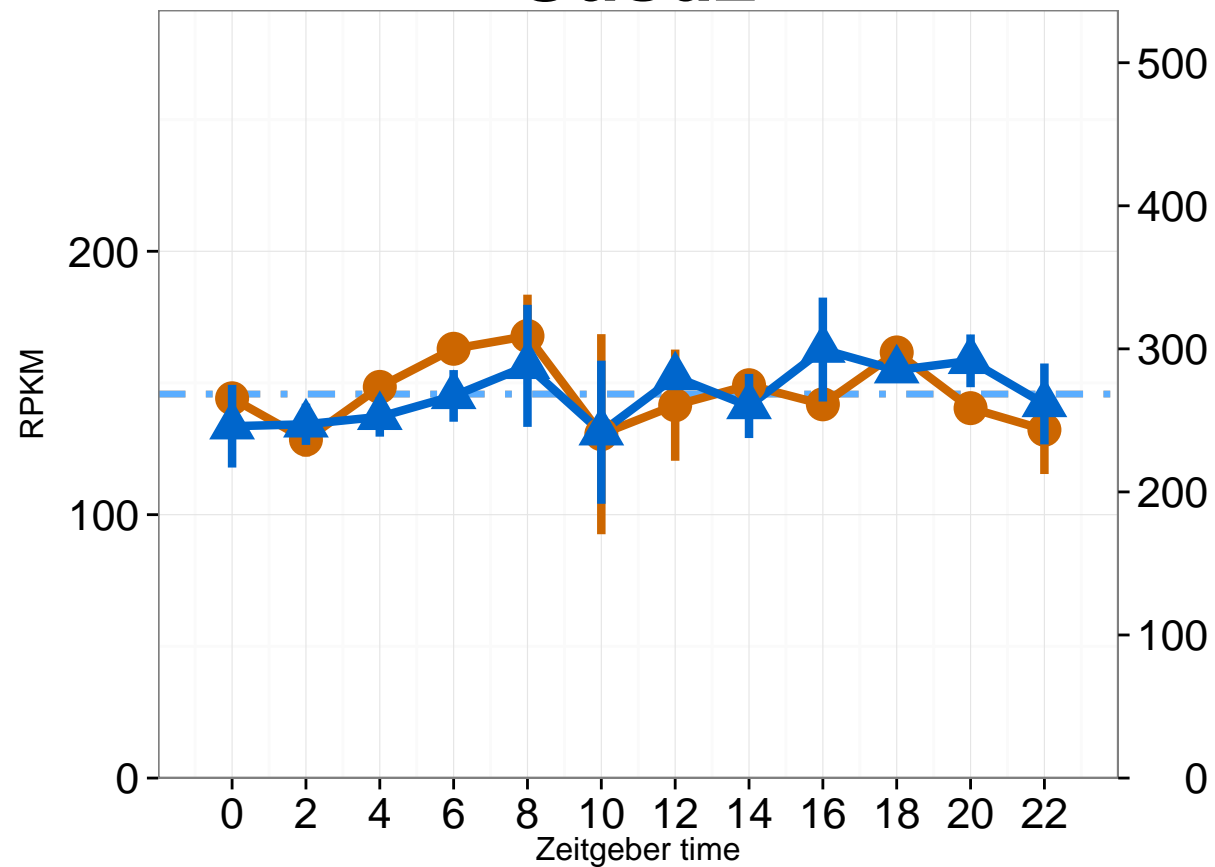

## Susd2

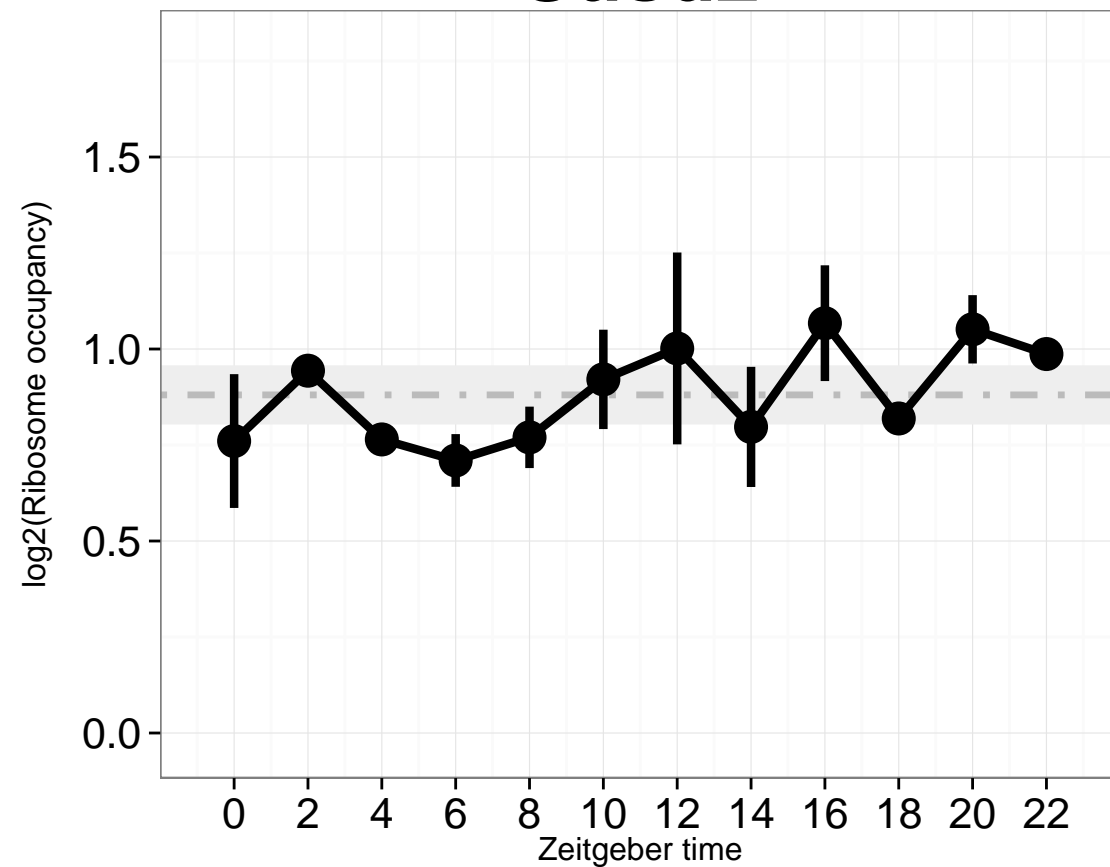

Supplement: Supplementary file 2627 [file 1]

# Gcgr

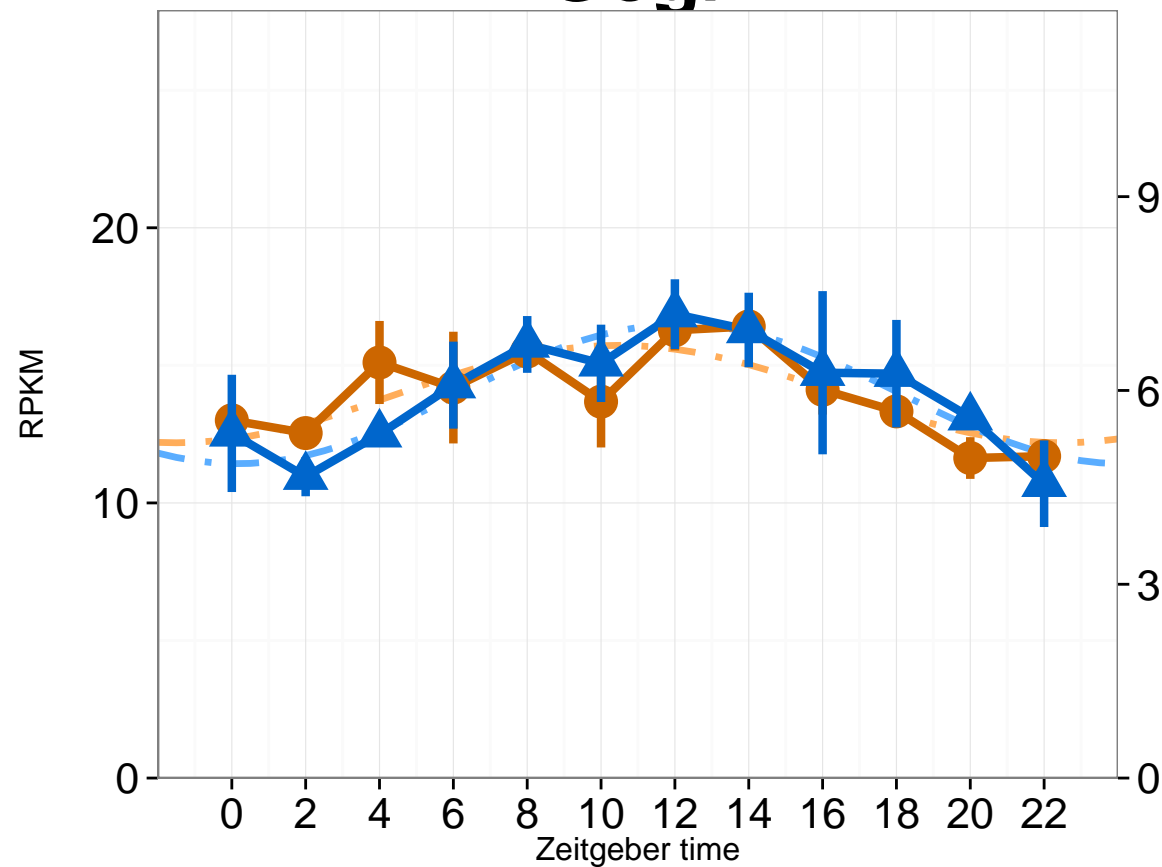

# Gcgr

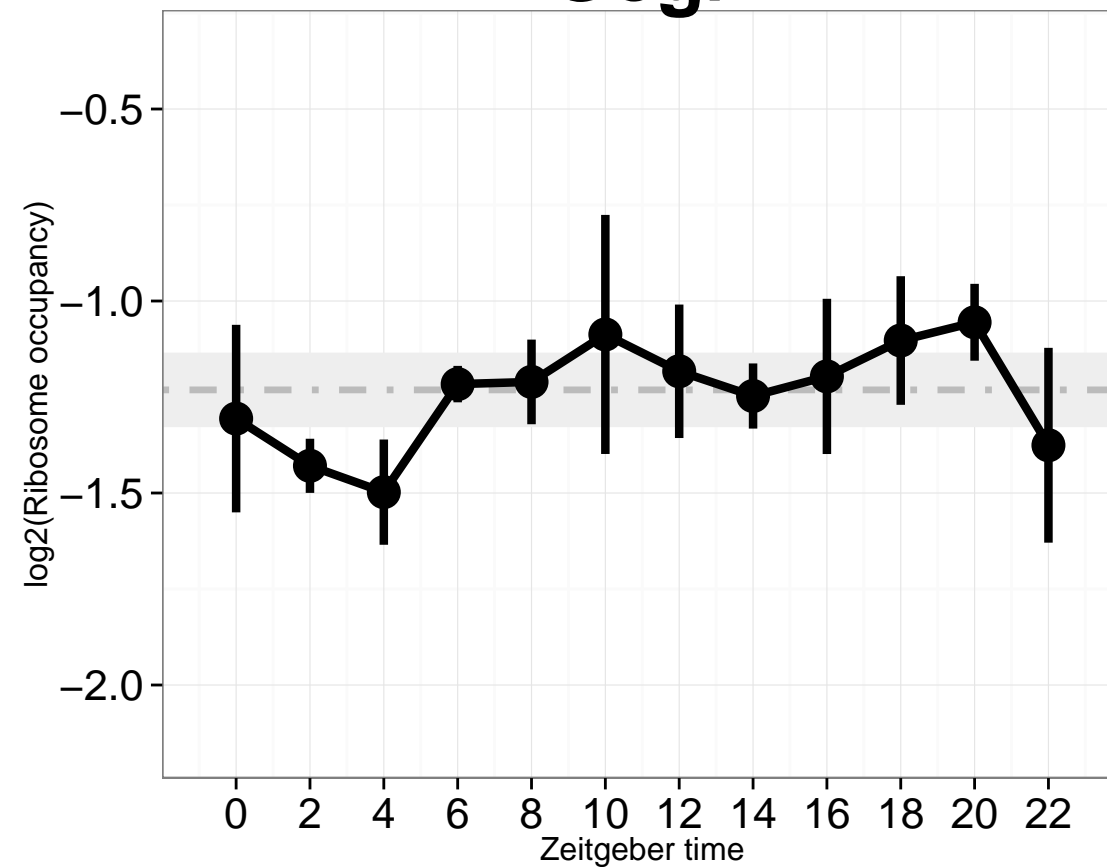

Supplement: Supplementary file 2628 [file 1]

# Ggps1

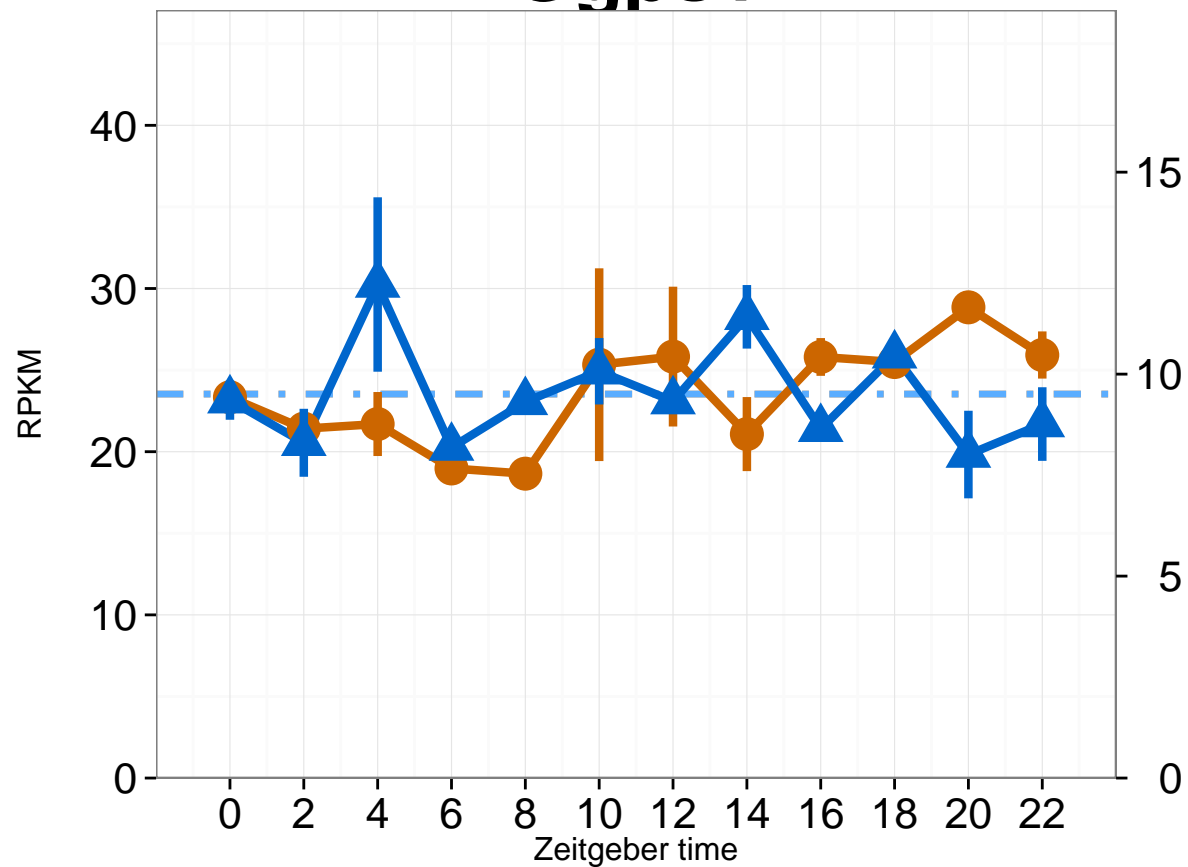

# Ggps1

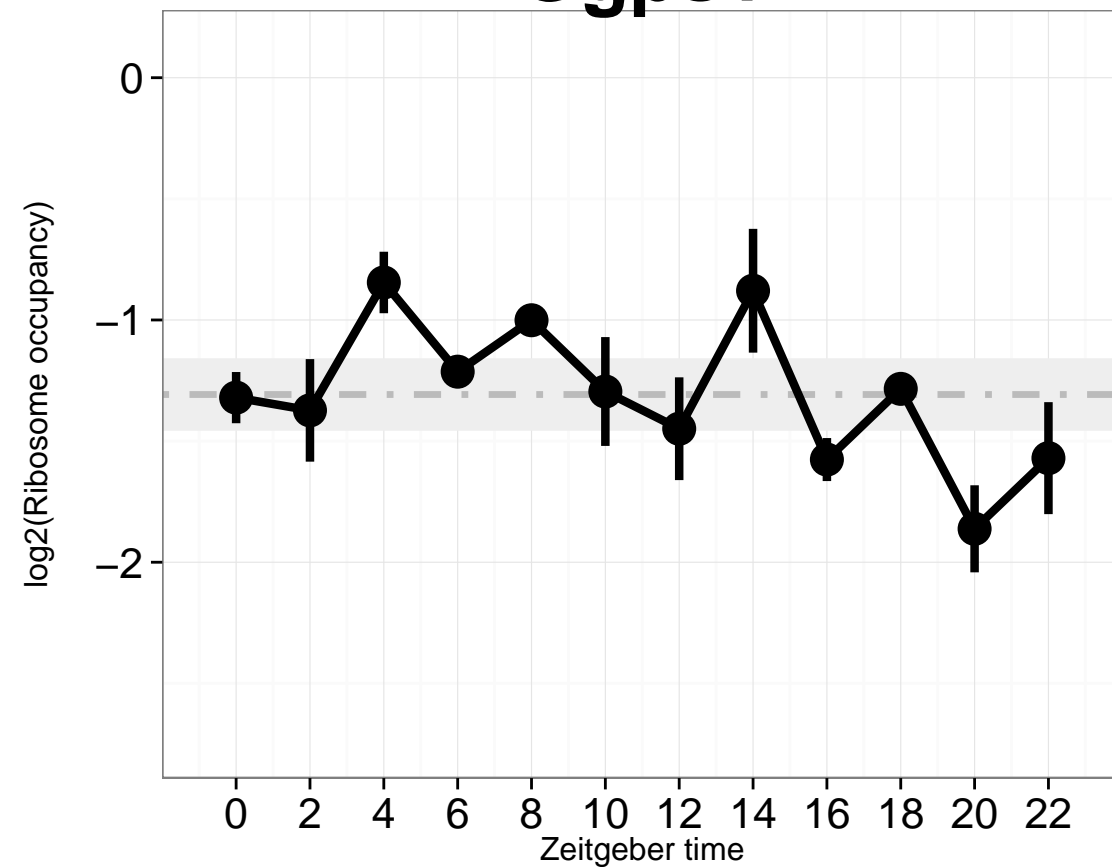

Supplement: Supplementary file 2629 [file 1]

## Eno3

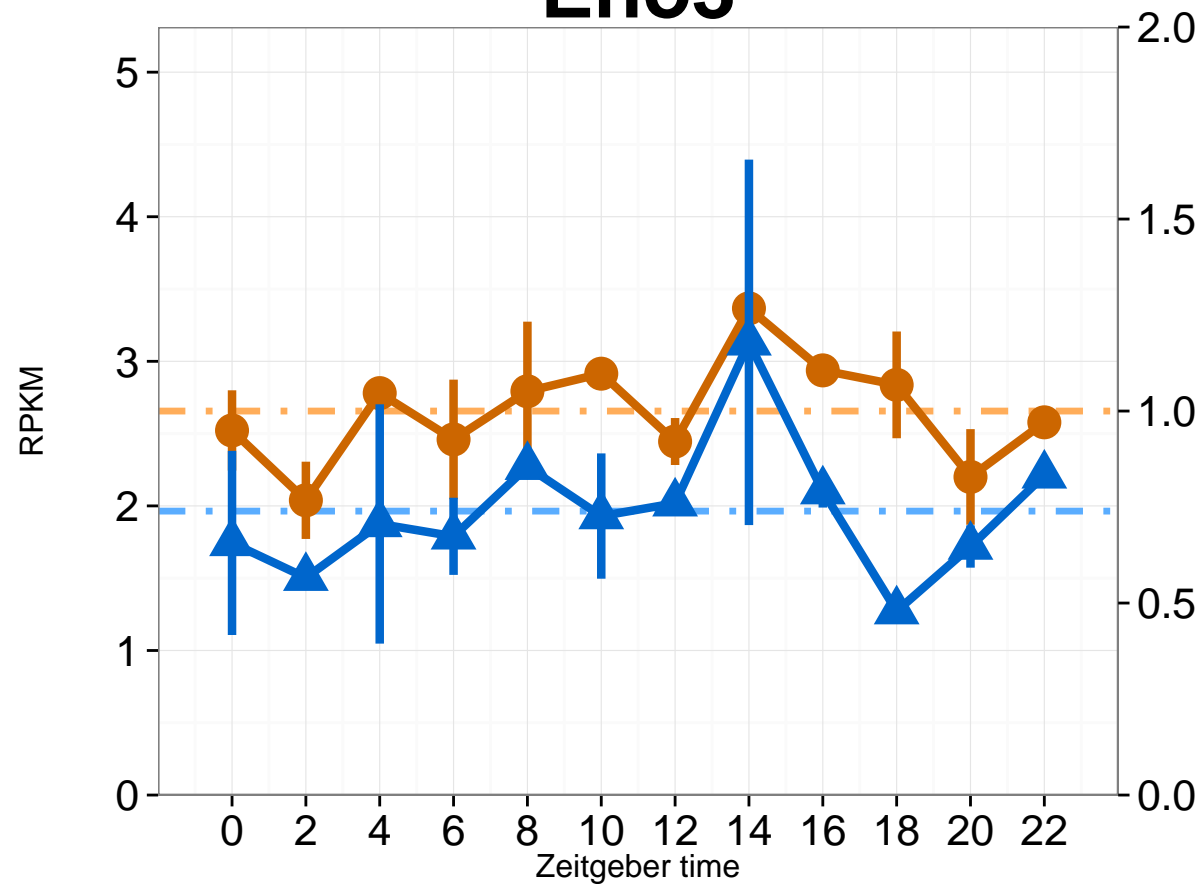

## Eno3

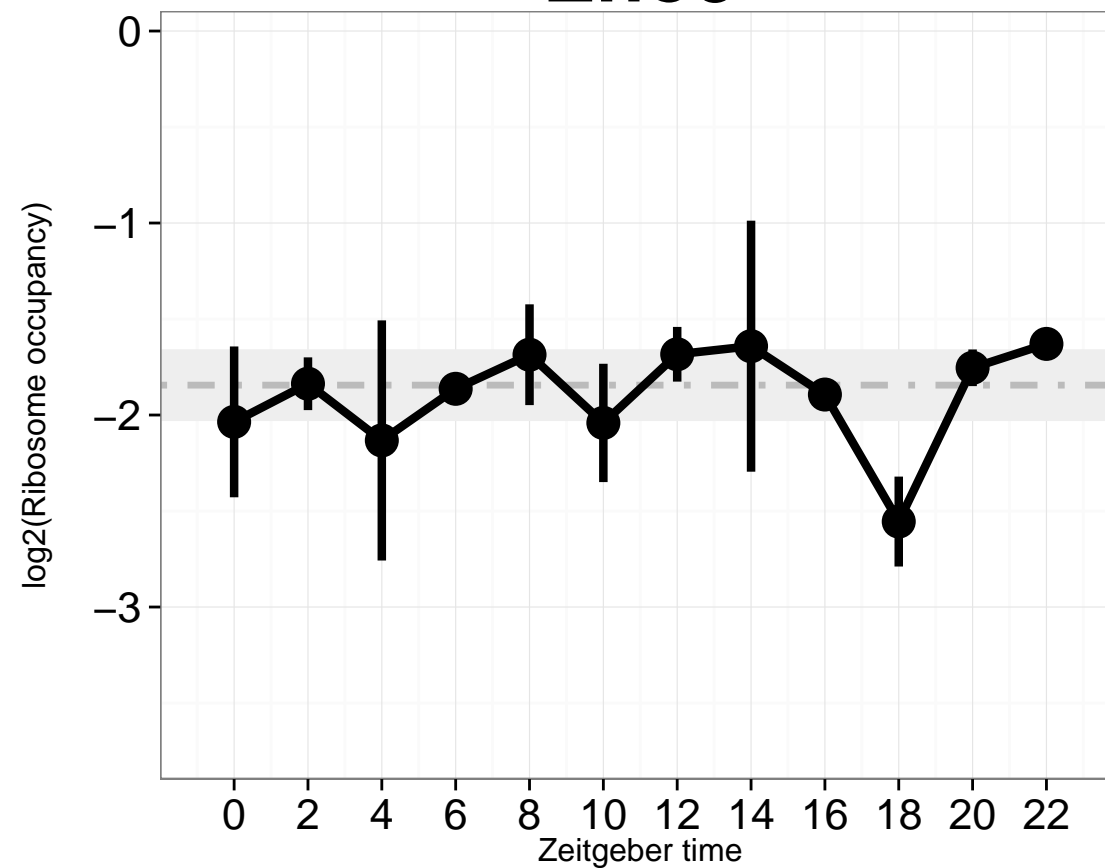

Supplement: Supplementary file 2630 [file 1]

# Lamp1

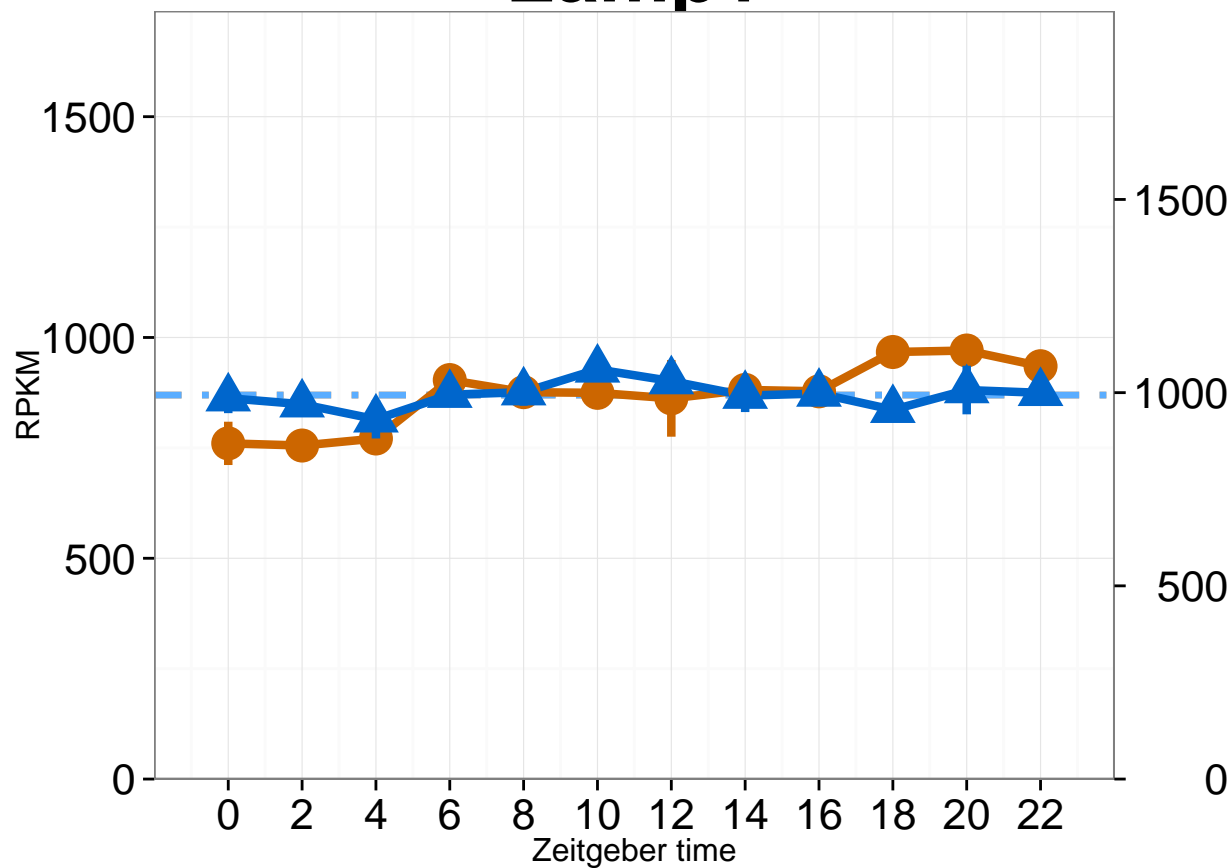

# Lamp1

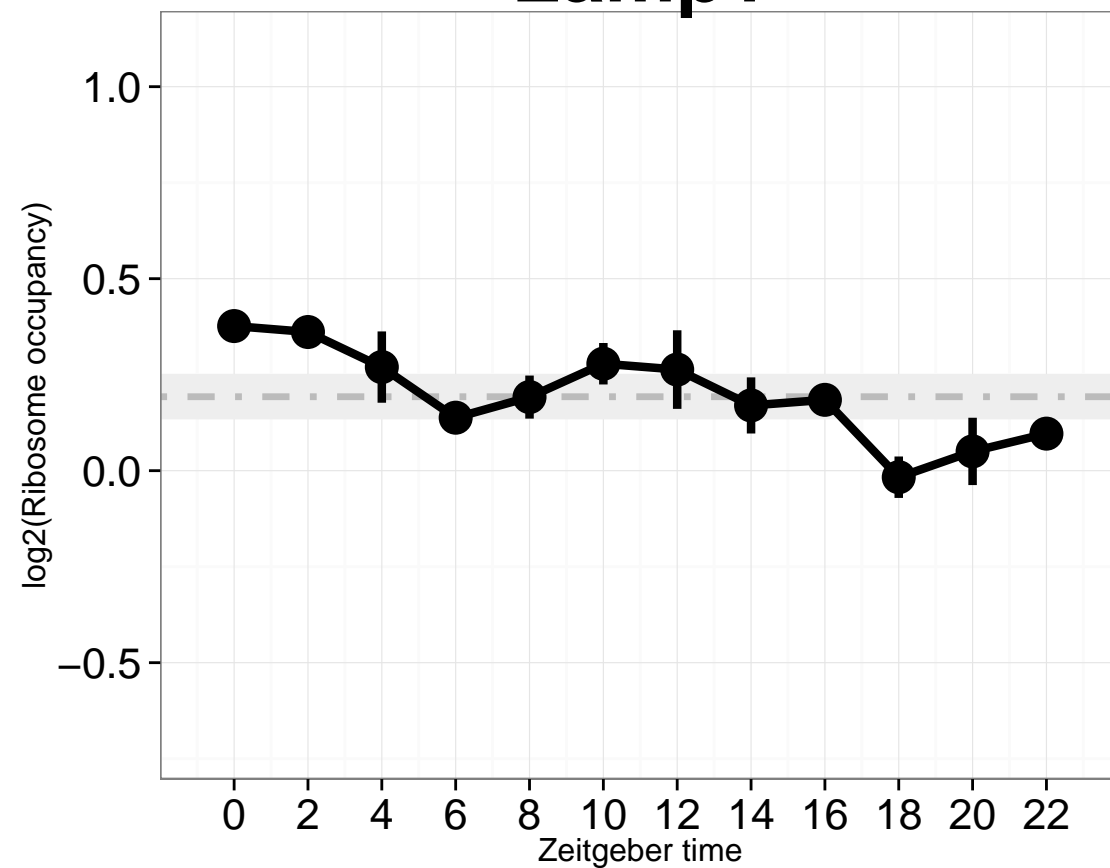

Supplement: Supplementary file 2631 [file 1]

# Map4

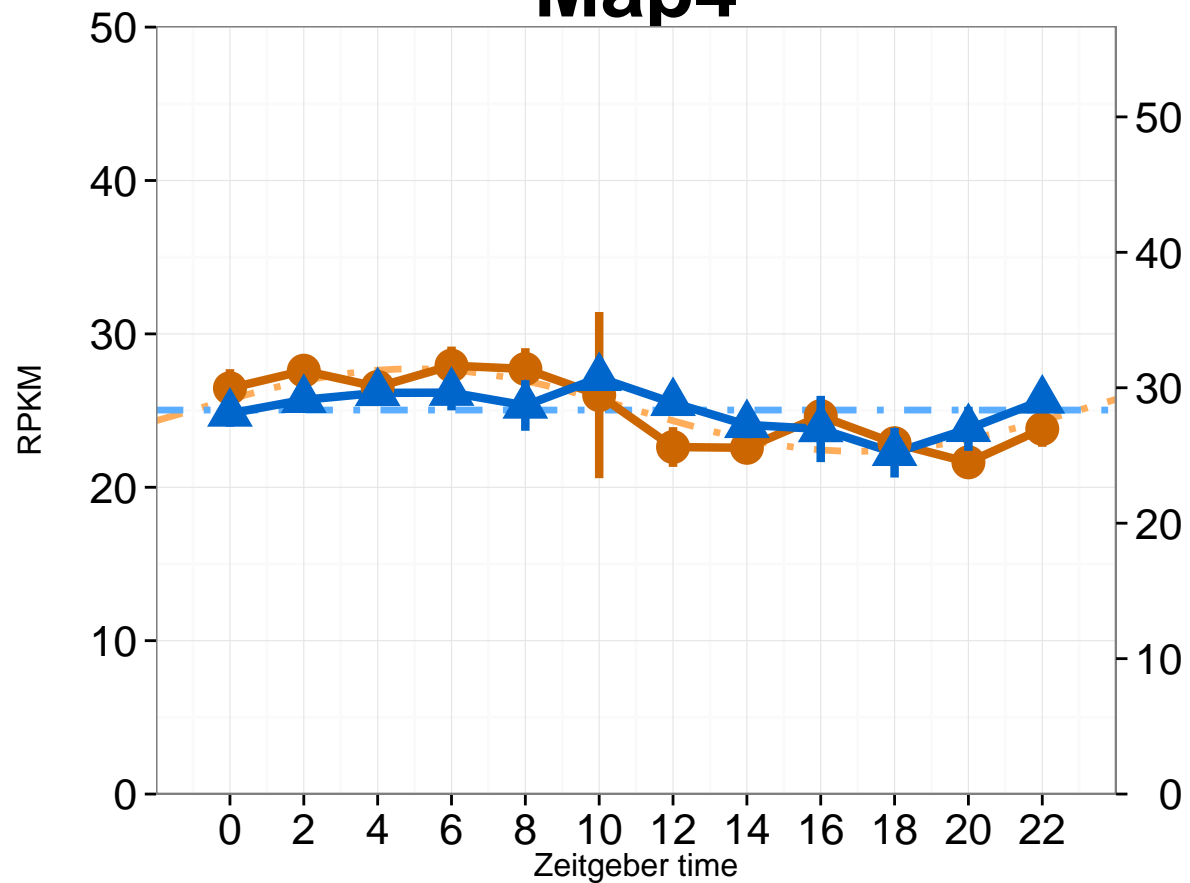

# Map4

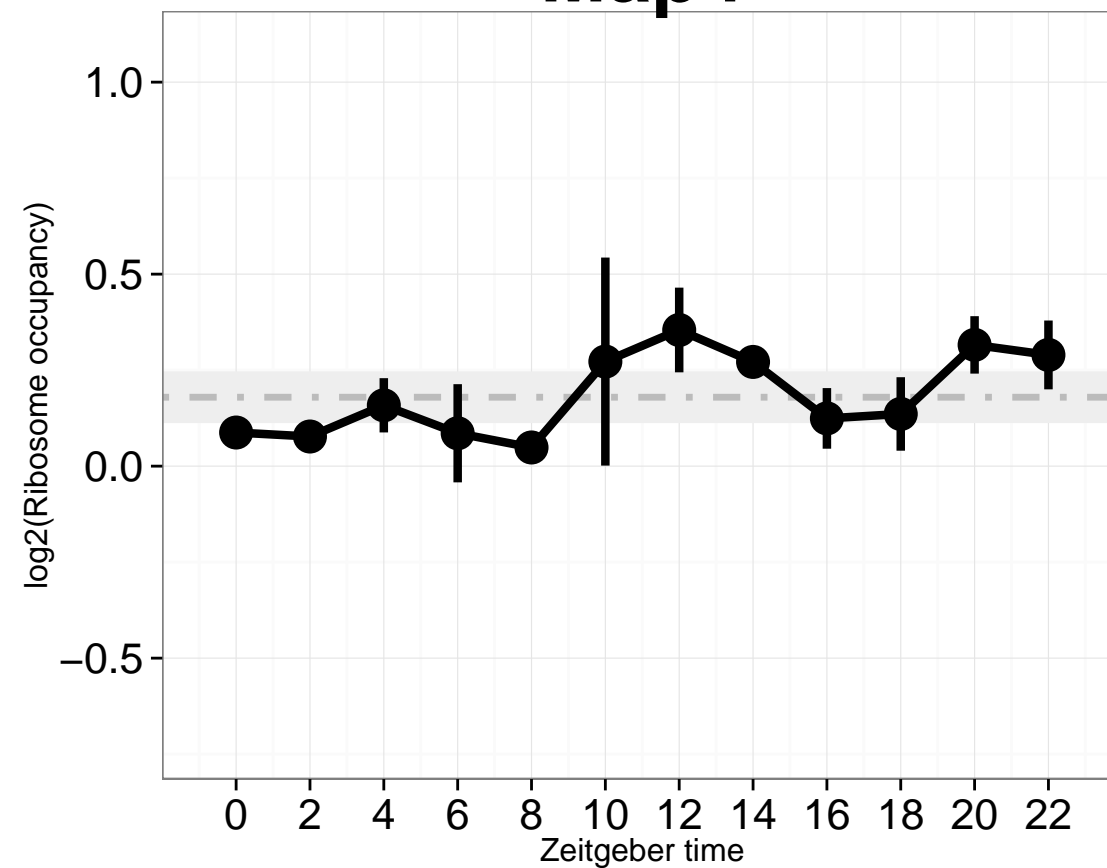

Supplement: Supplementary file 2632 [file 1]

# Sh3pxd2a

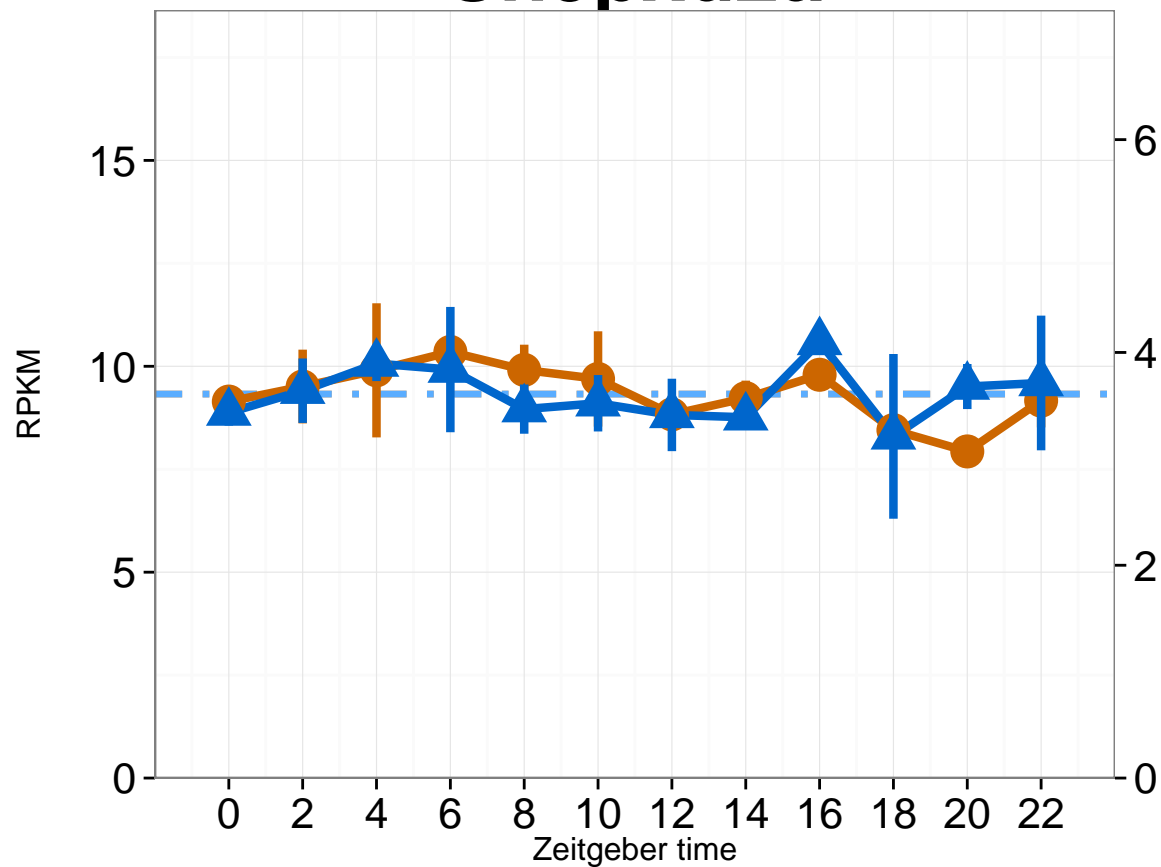

# Sh3pxd2a

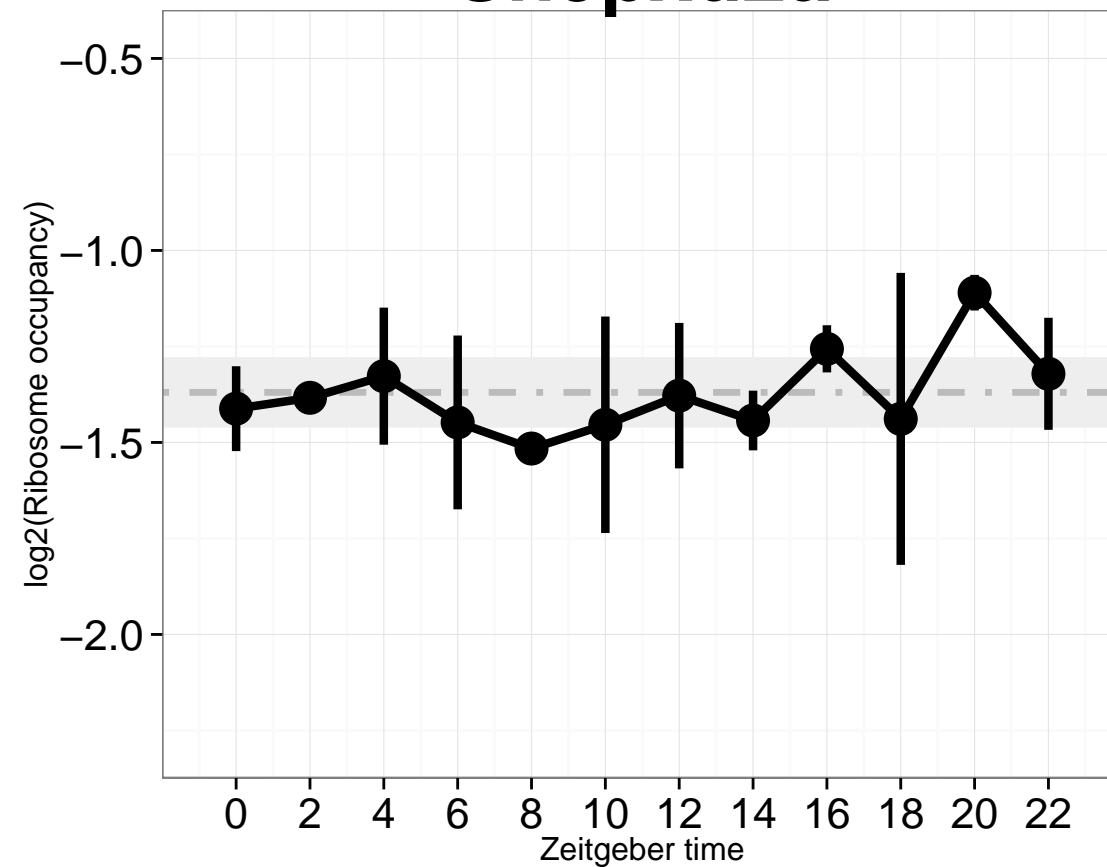

Supplement: Supplementary file 2633 [file 1]

# AI467606

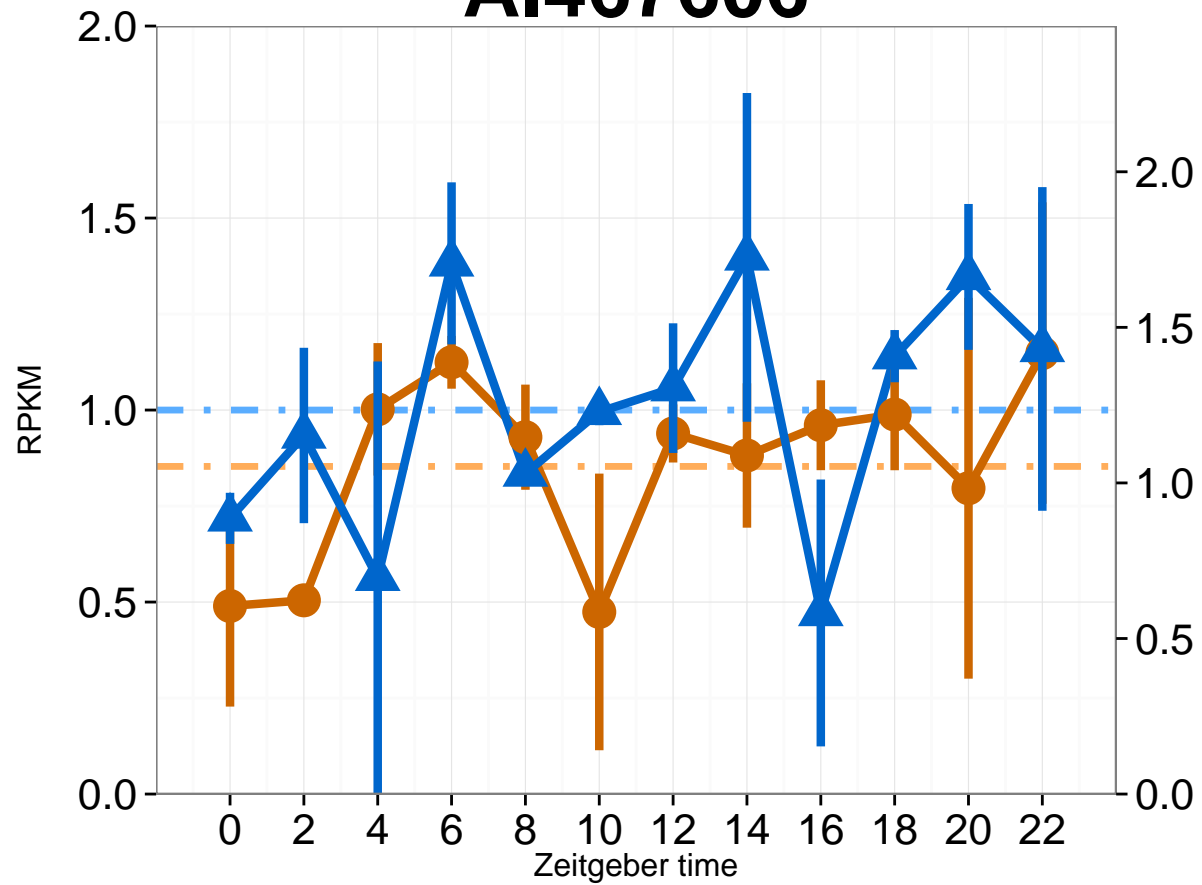

# AI467606

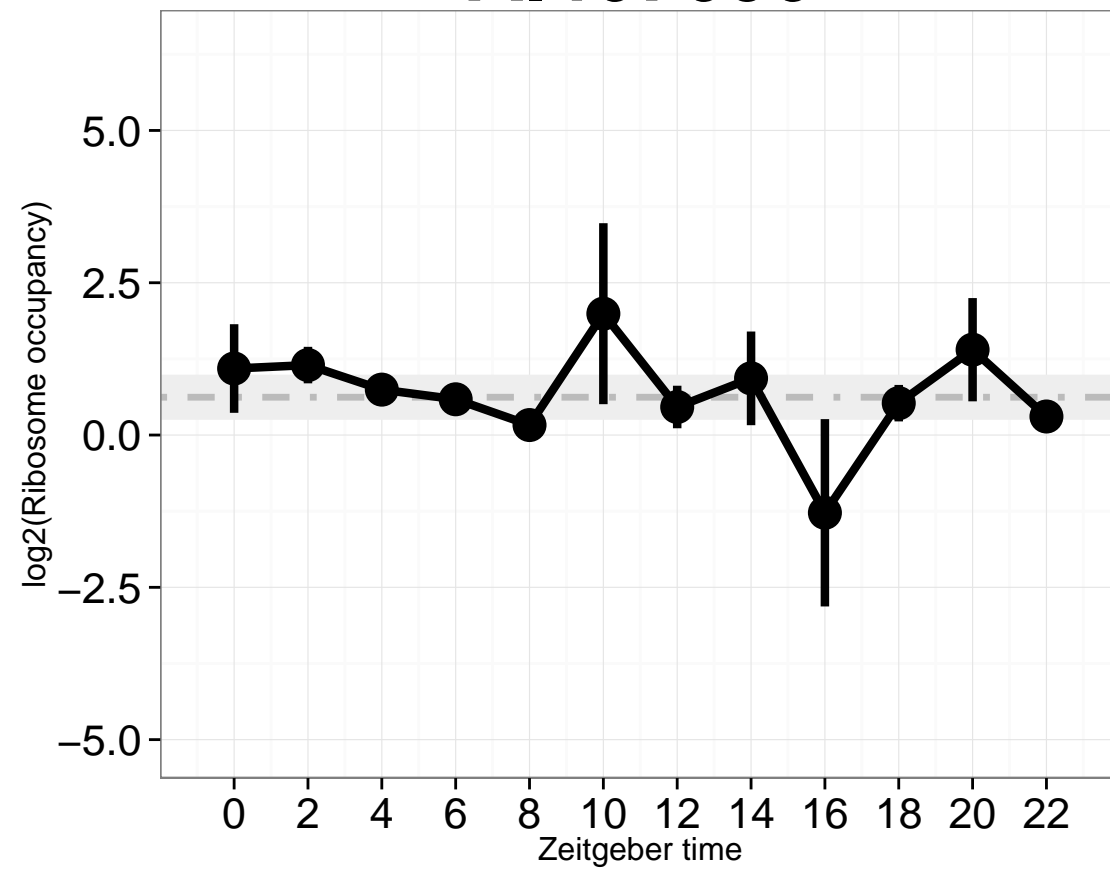

Supplement: Supplementary file 2634 [file 1]

## Adcy7

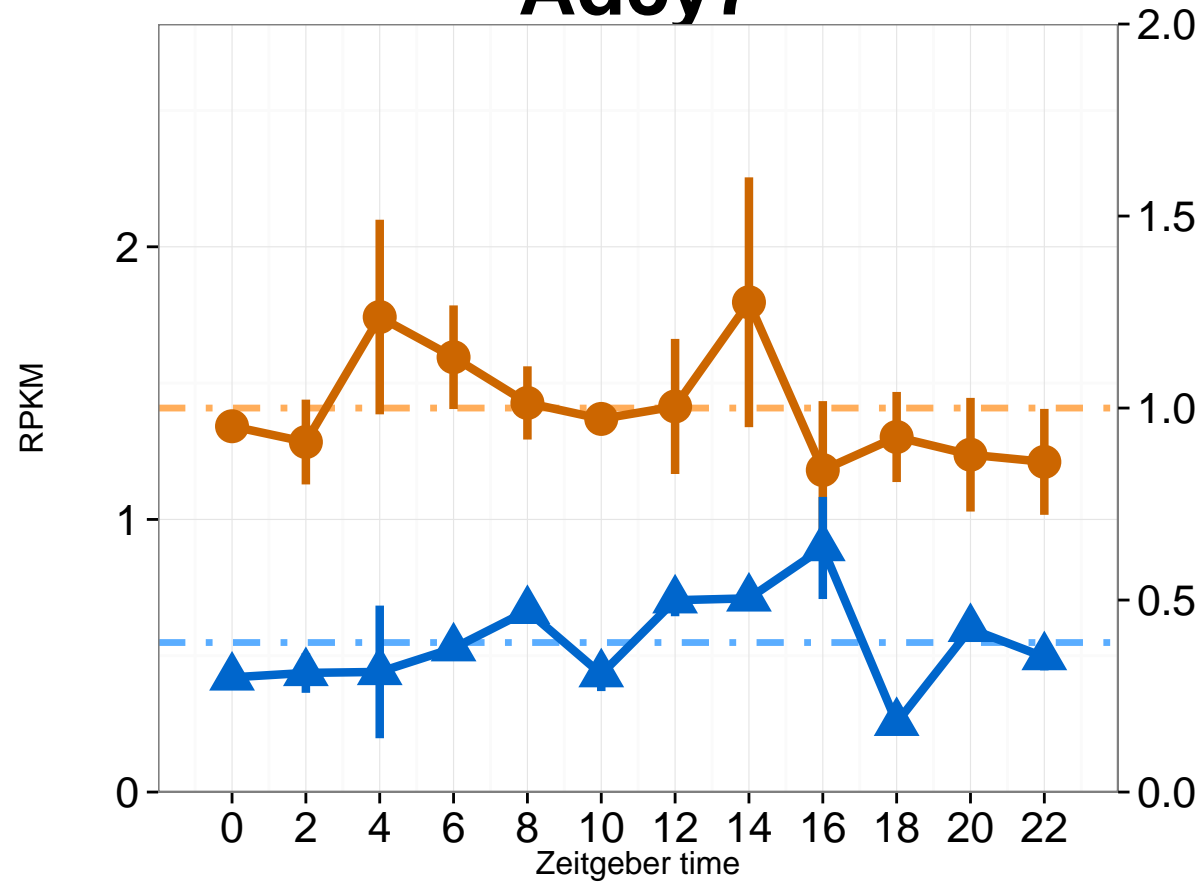

## Adcy7

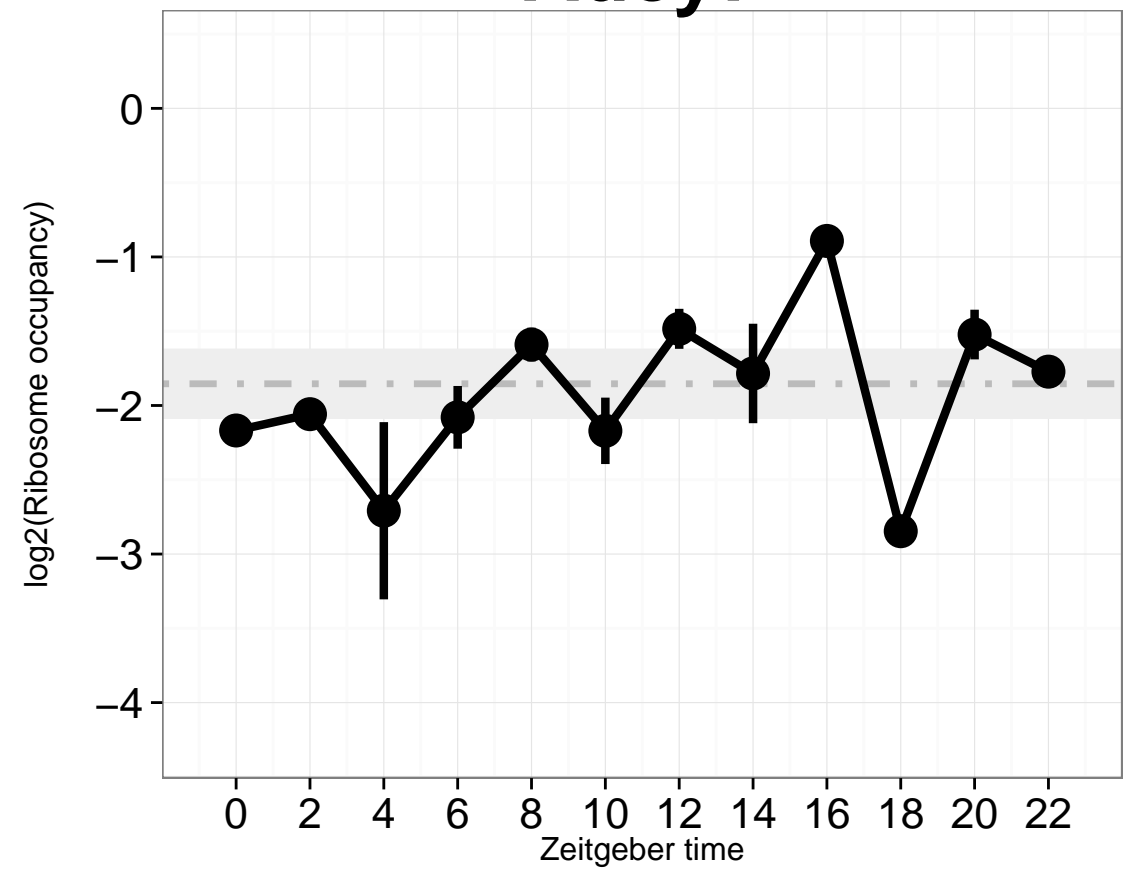

Supplement: Supplementary file 2635 [file 1]

## Akap11

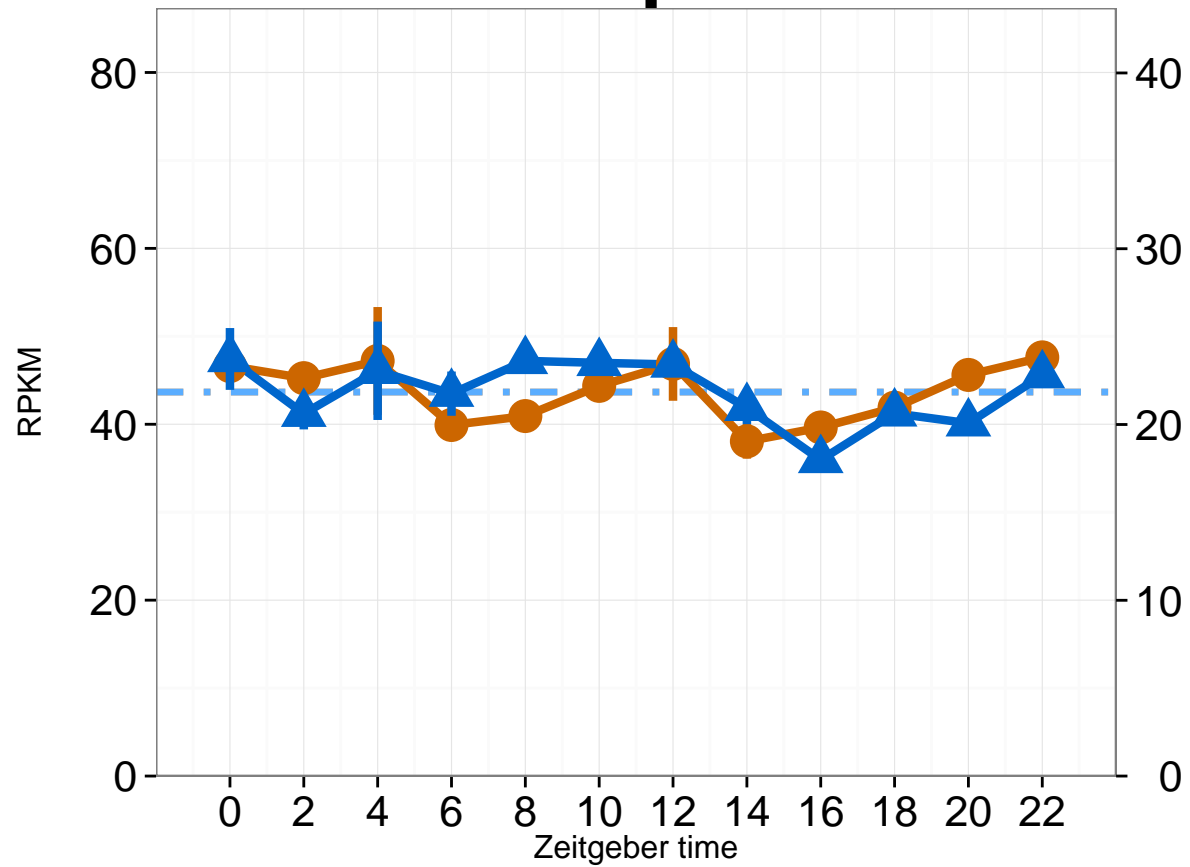

## Akap11

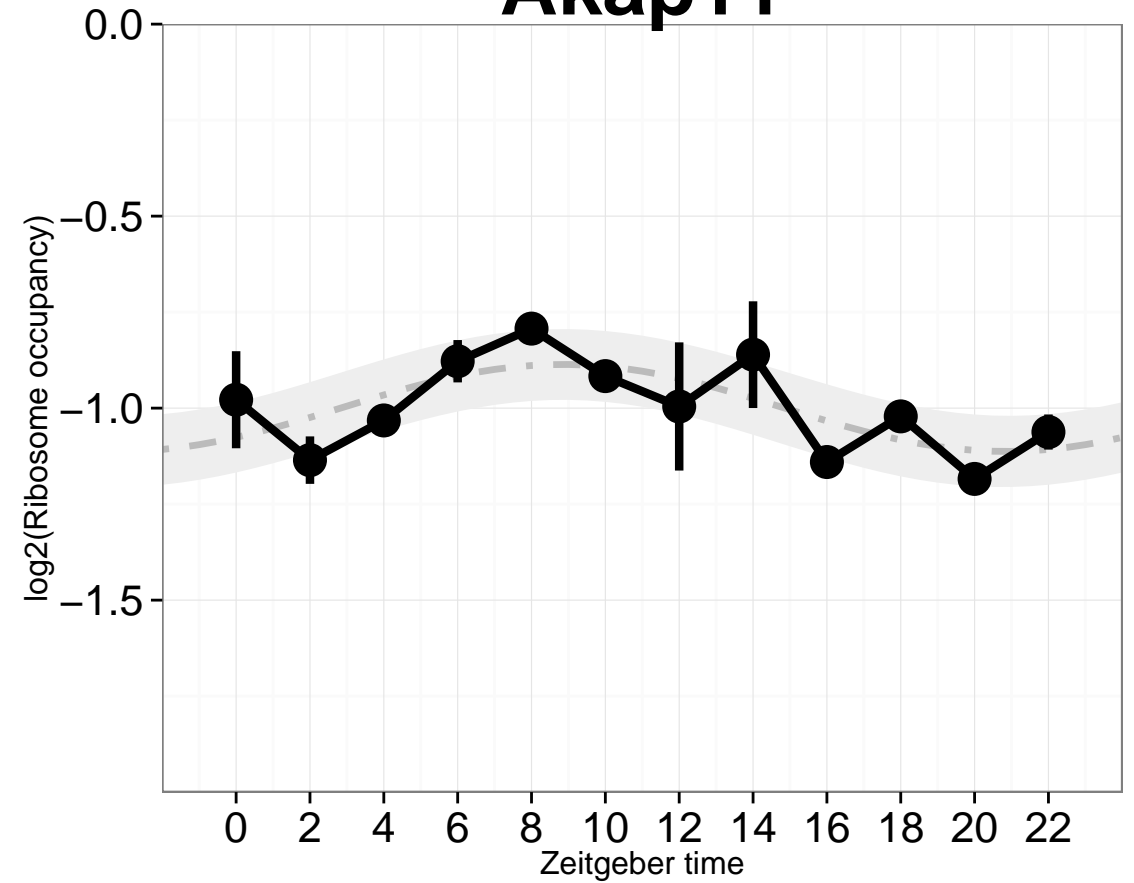

Supplement: Supplementary file 2636 [file 1]

# 4930425F17Rik

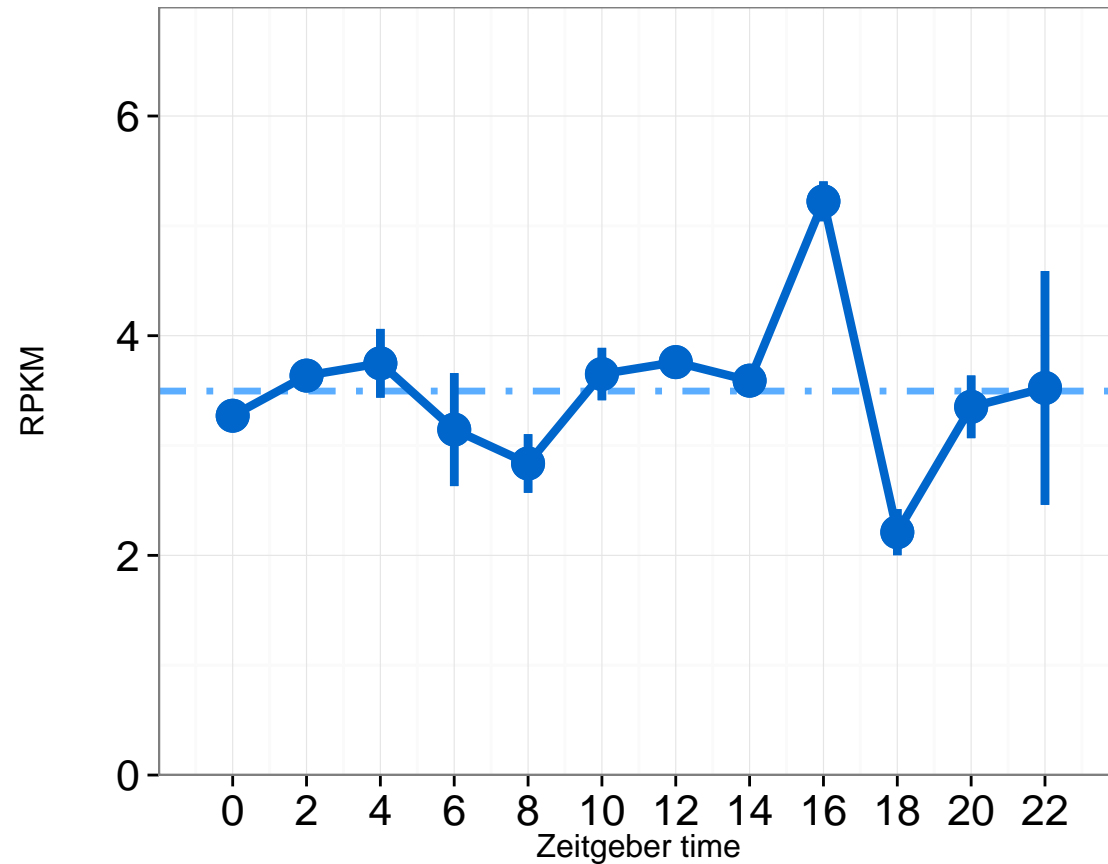

# 4930425F17Rik log2(Ribosome occupancy)

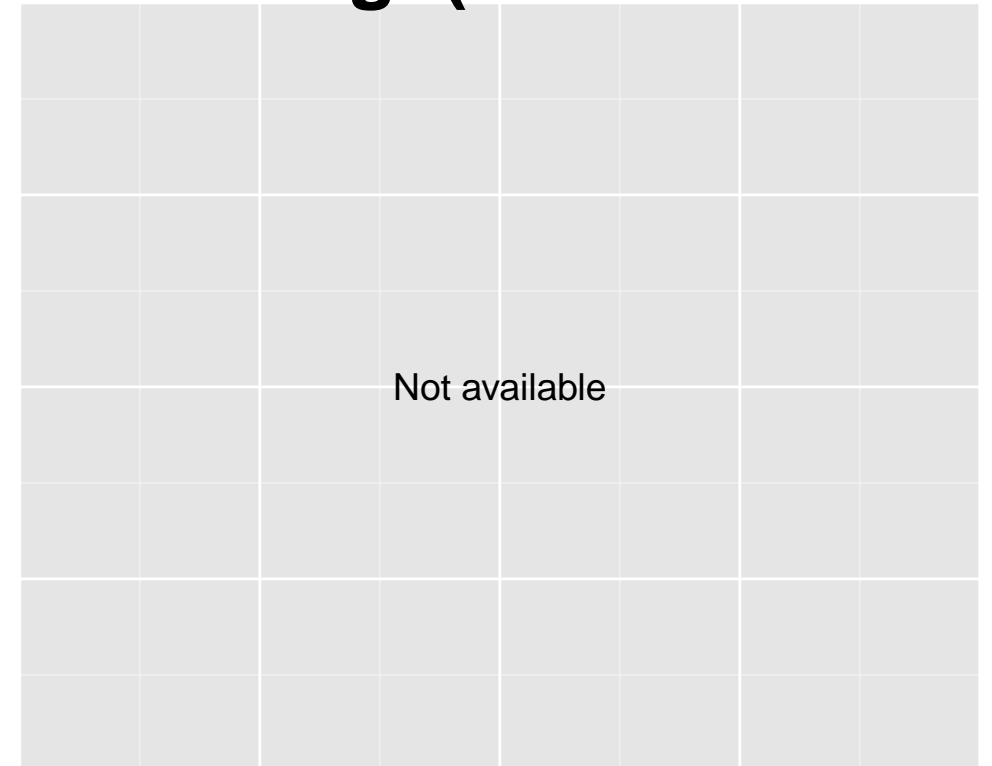

Supplement: Supplementary file 2637 [file 1]

## Acad8

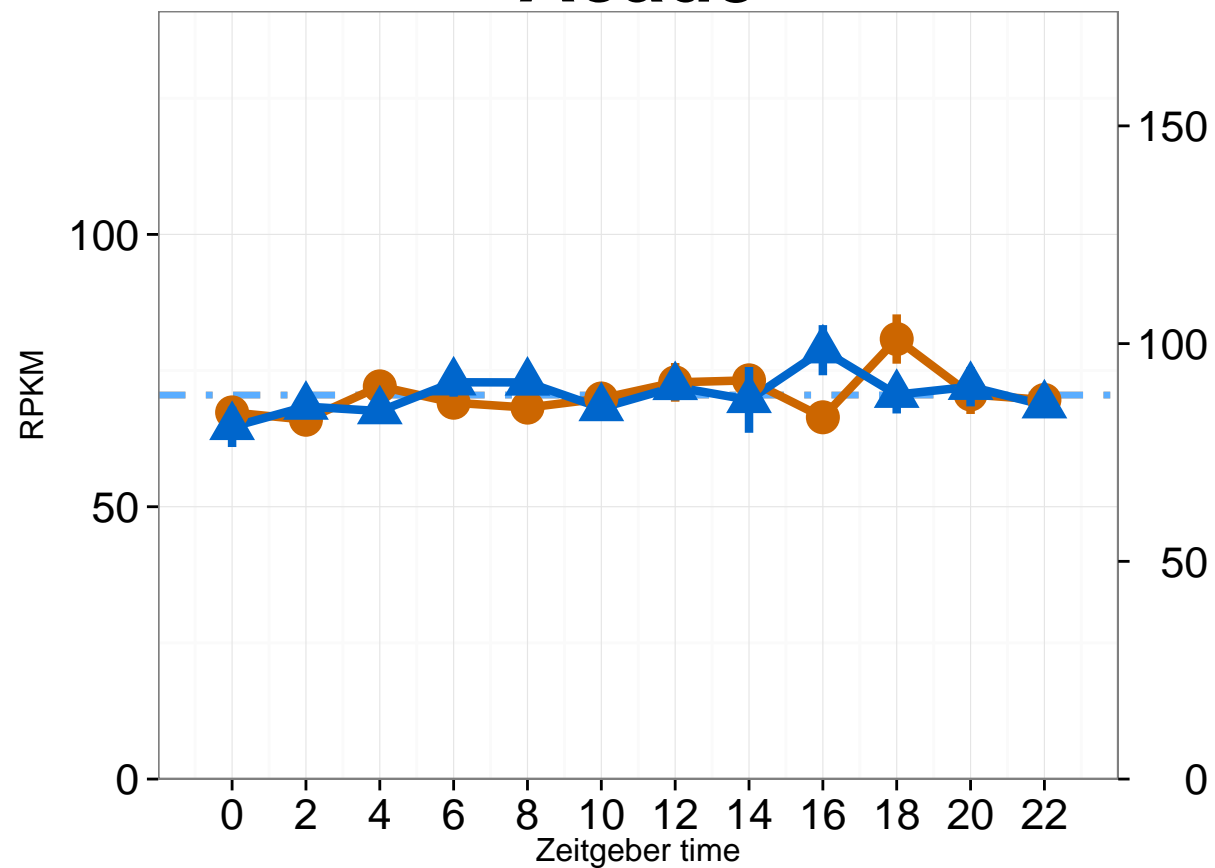

## Acad8

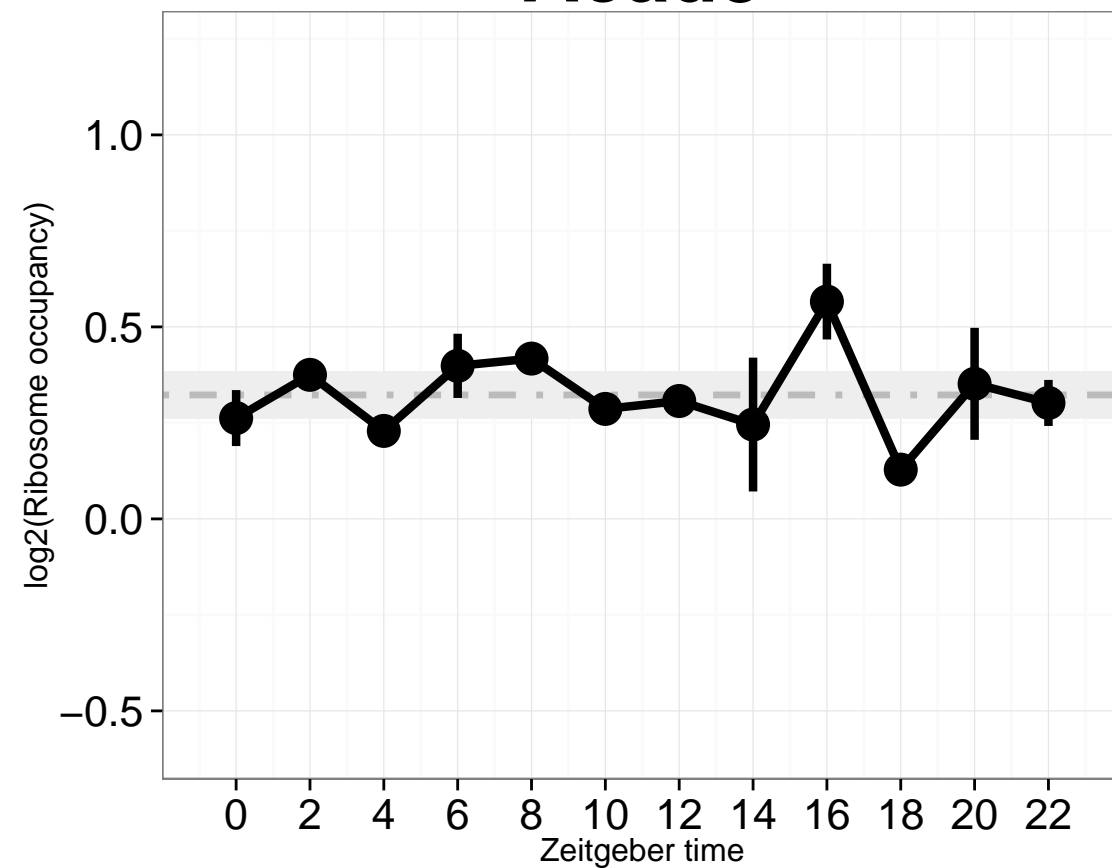

Supplement: Supplementary file 2638 [file 1]

## Nudcd2

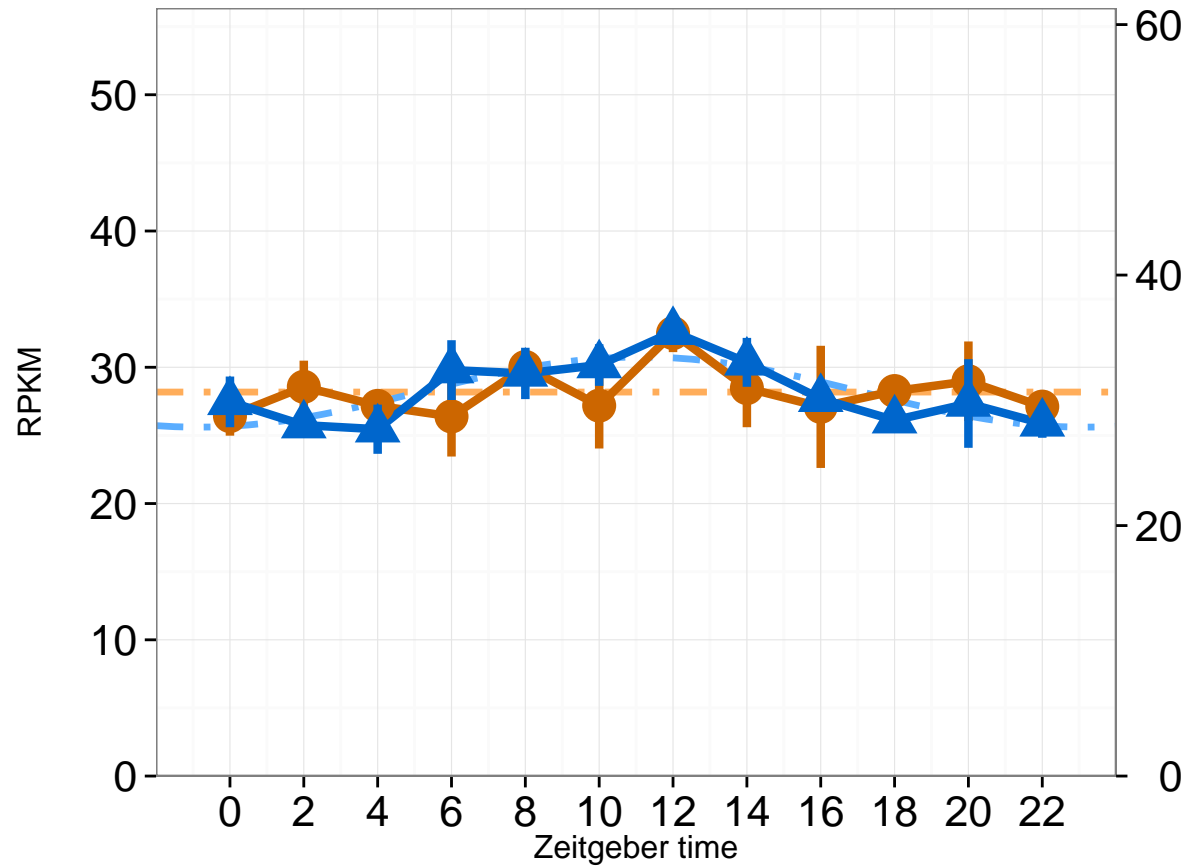

## Nudcd2

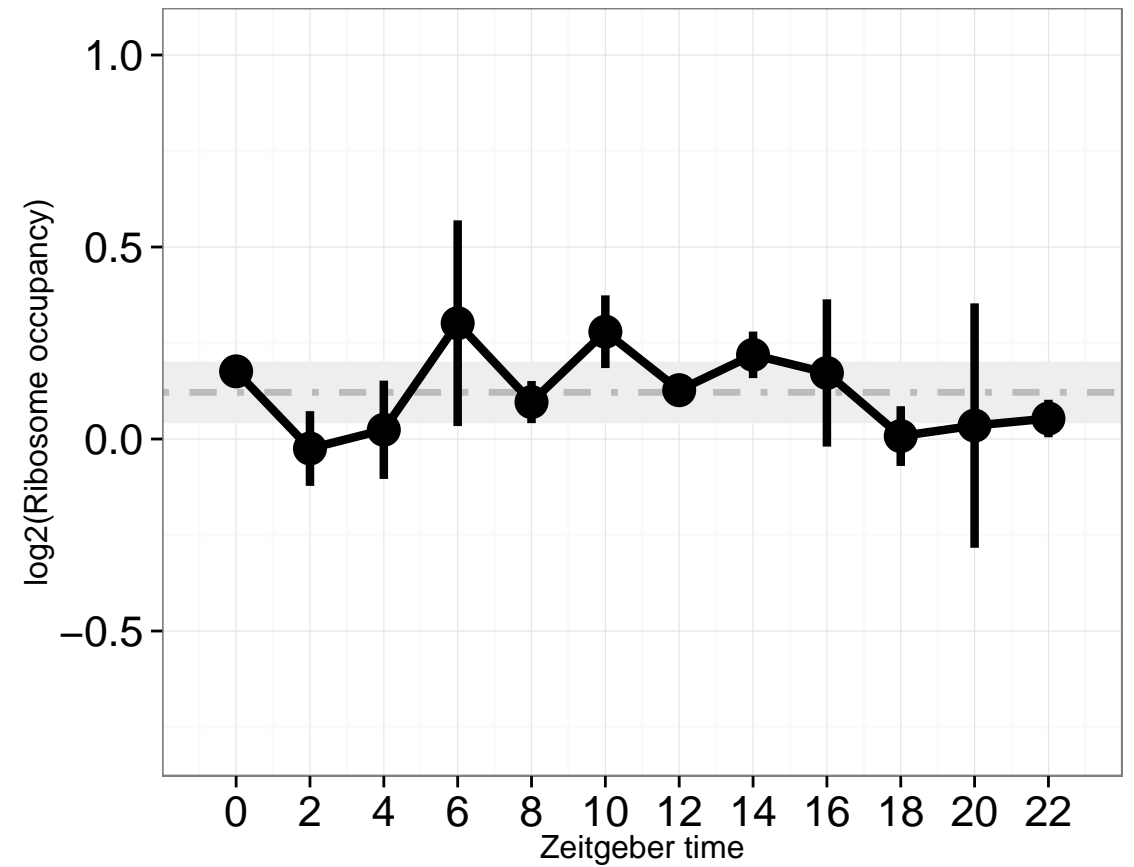

Supplement: Supplementary file 2639 [file 1]

## Tgs1

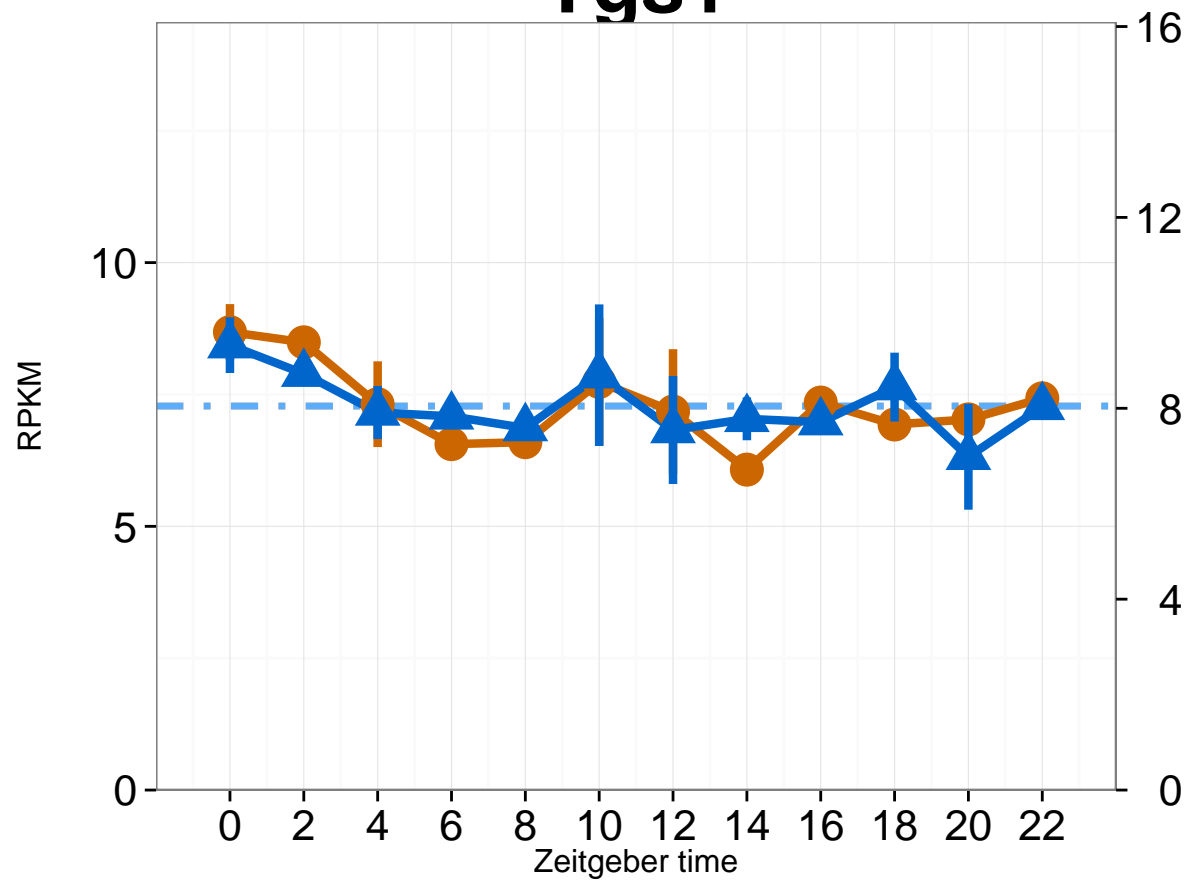

## Tgs1

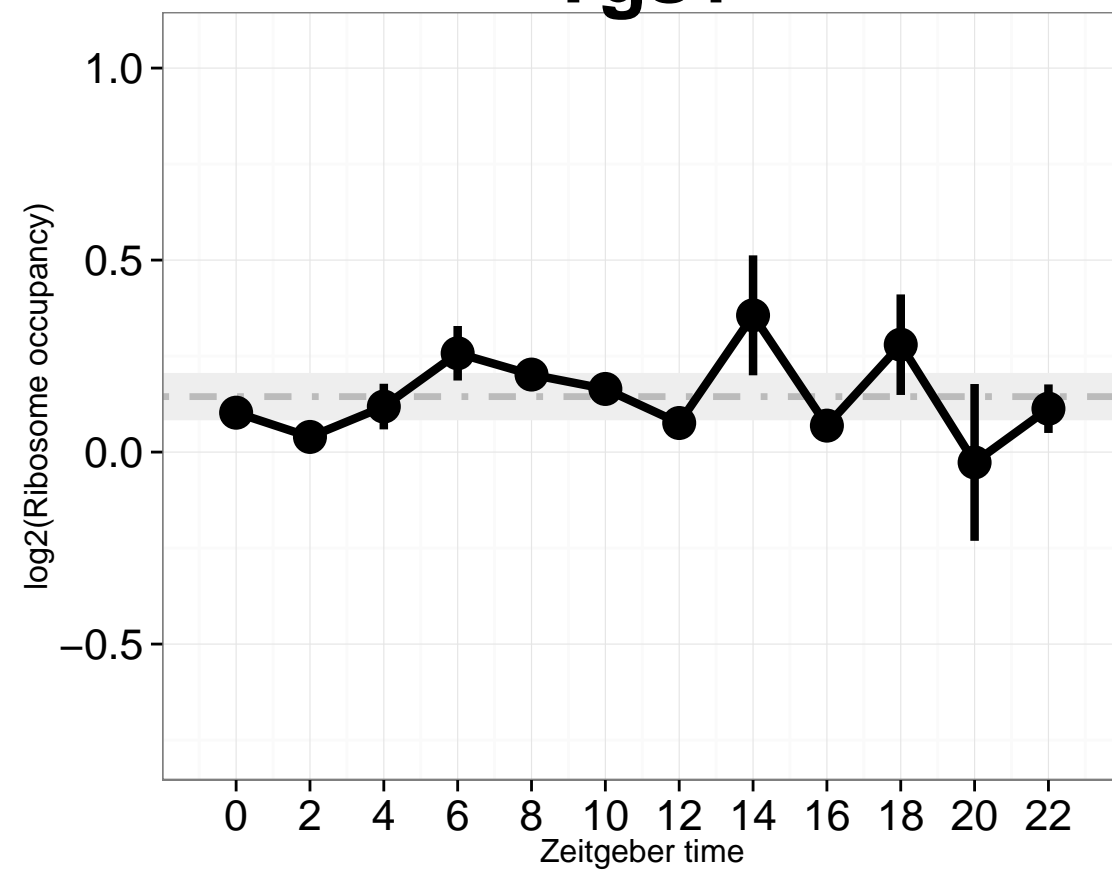

Supplement: Supplementary file 2640 [file 1]

## Khdrbs1

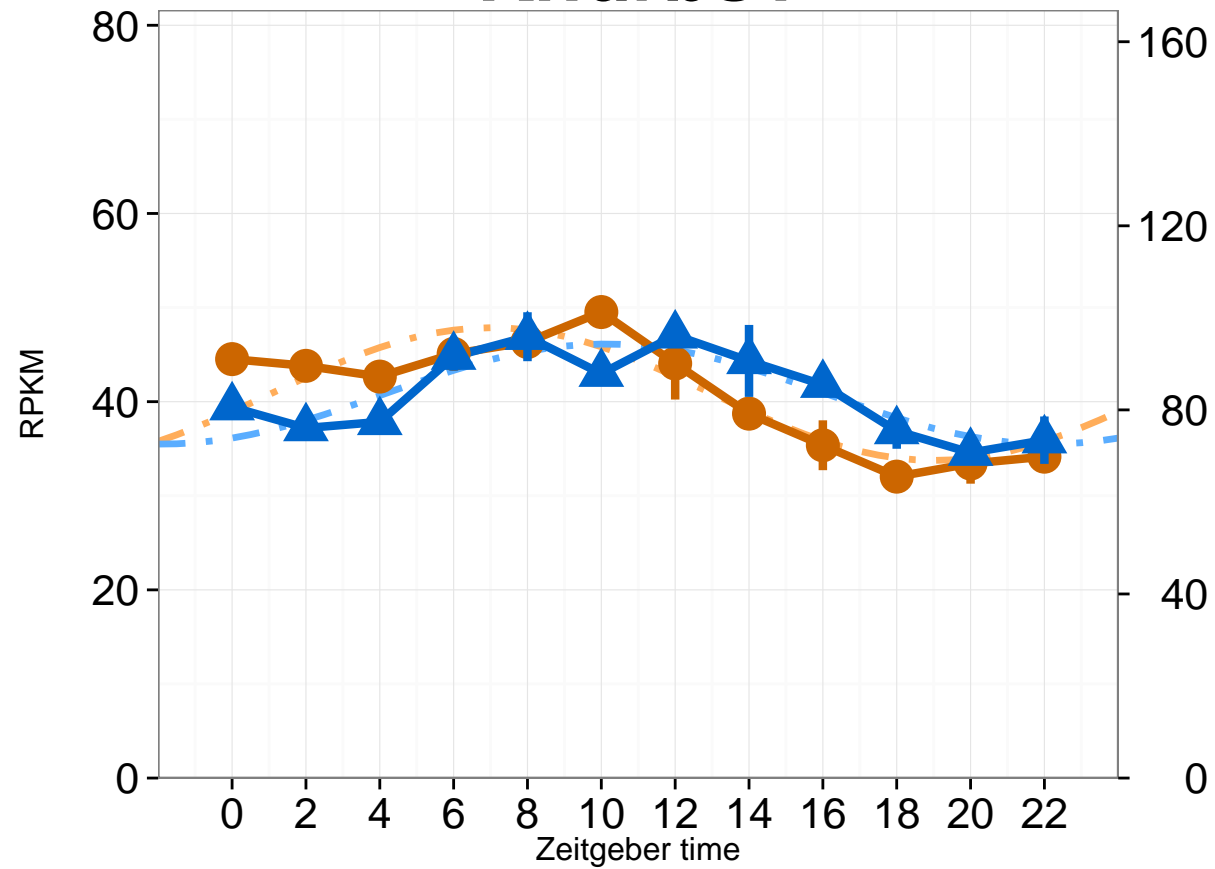

## Khdrbs1

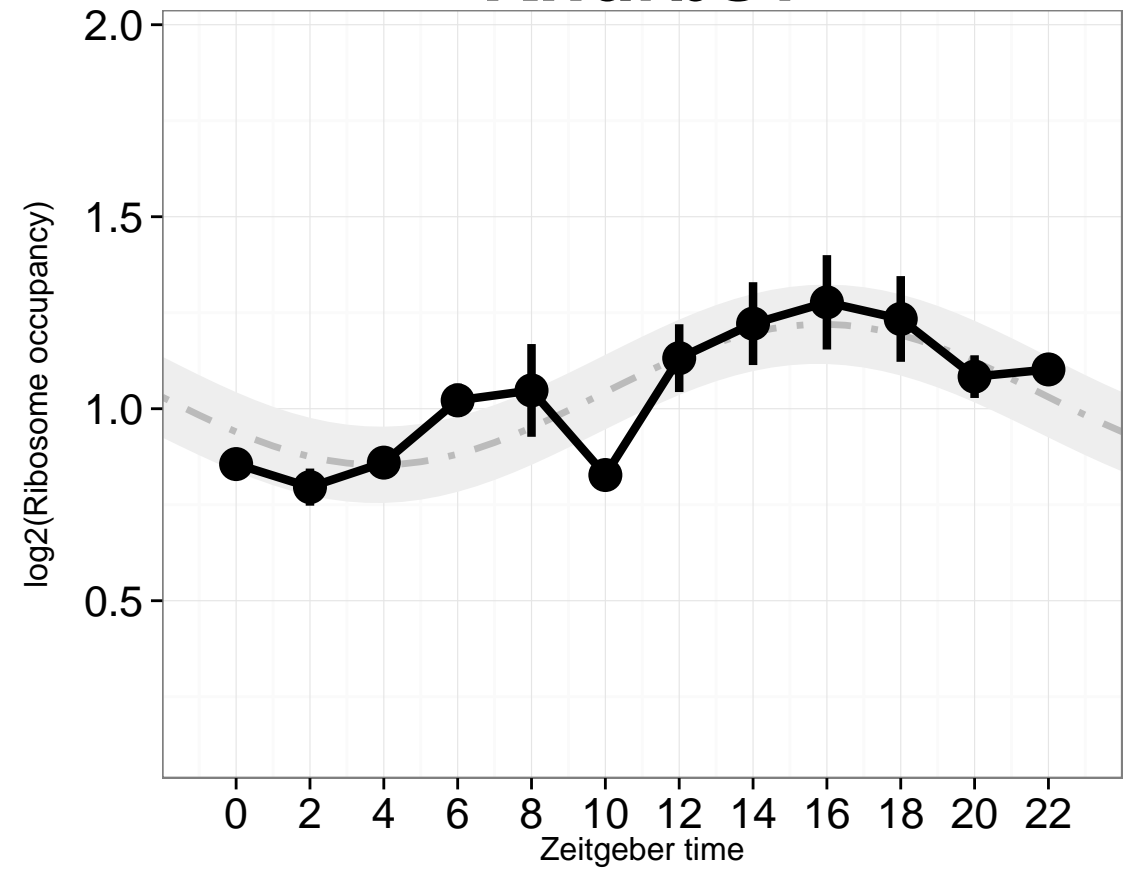

Supplement: Supplementary file 2641 [file 1]

# Scarf1

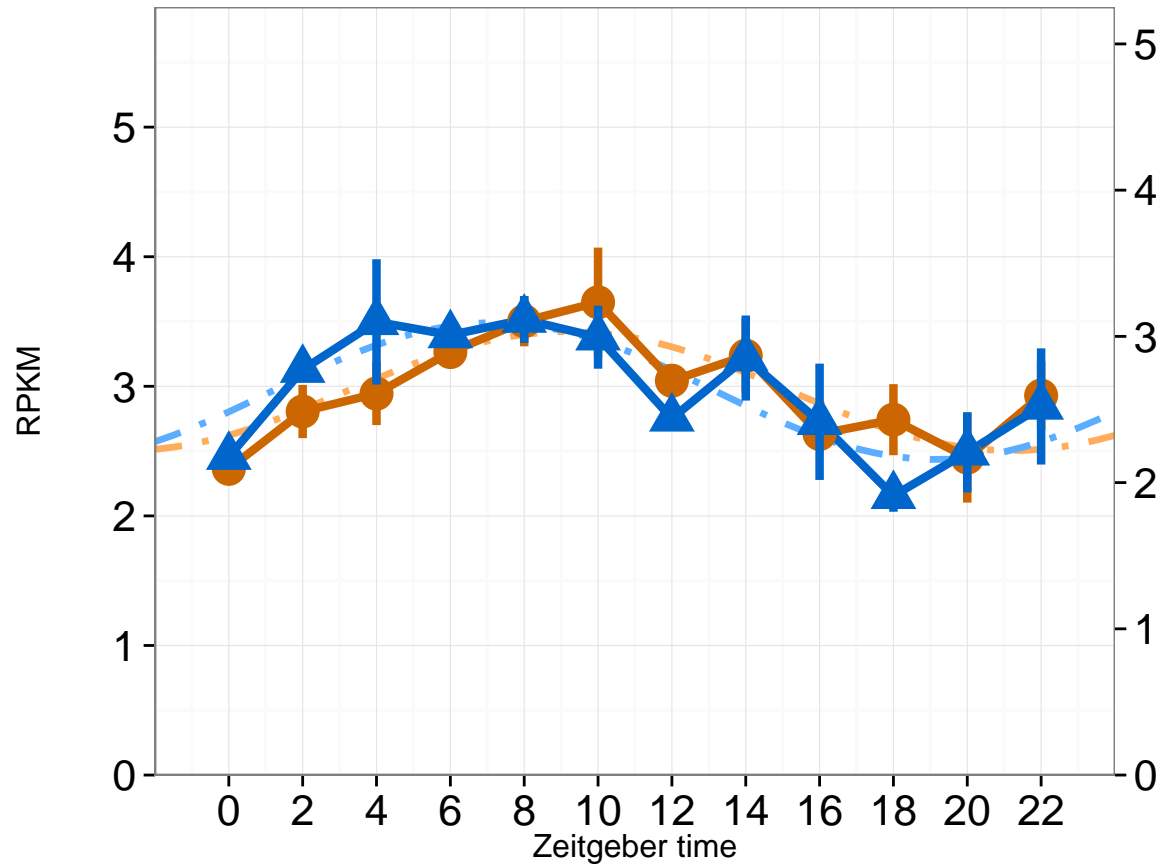

# Scarf1

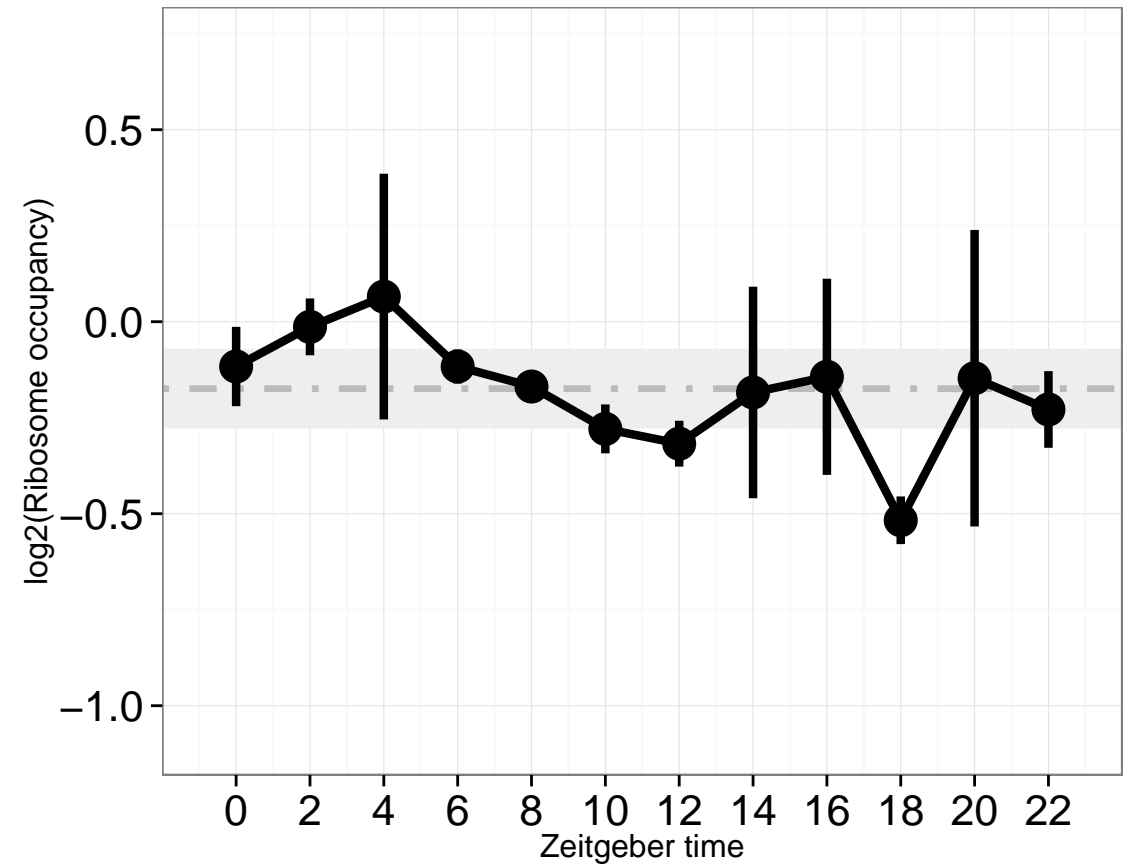

Supplement: Supplementary file 2642 [file 1]

# Utp18

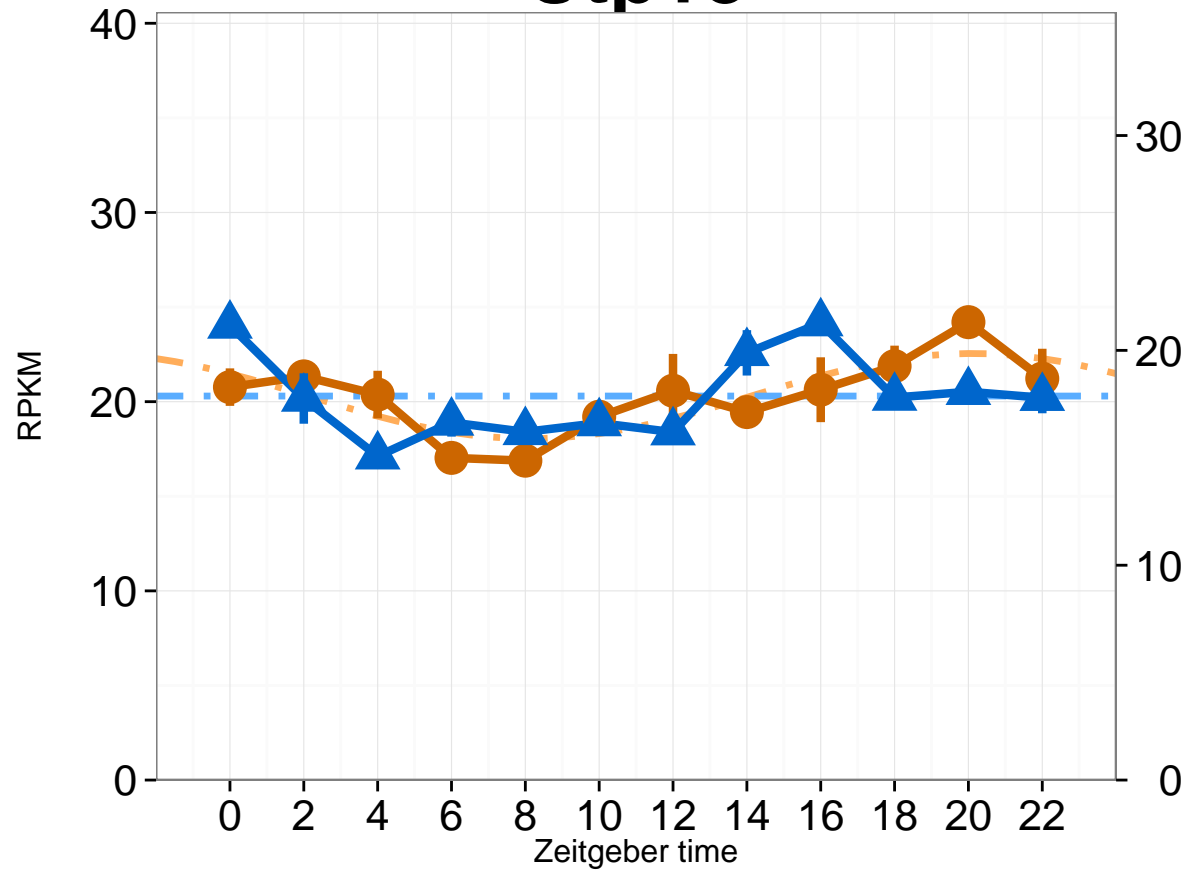

# Utp18

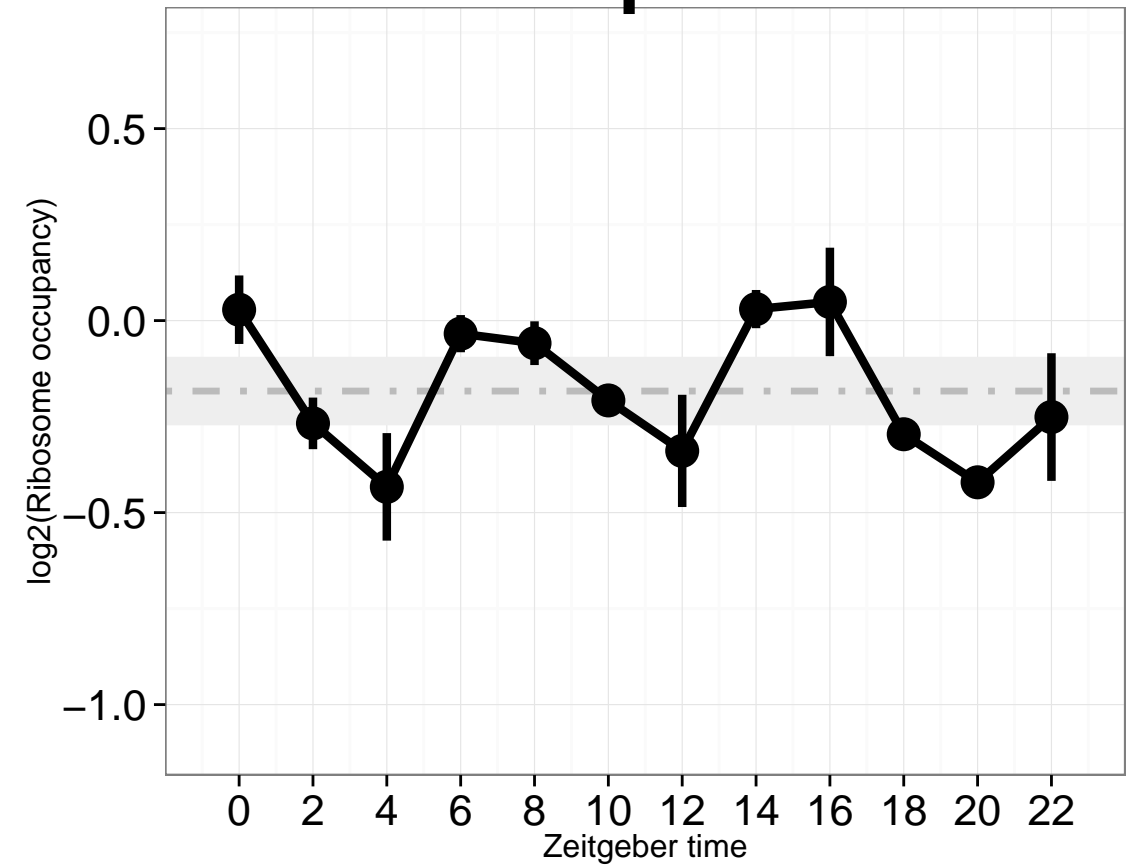

Supplement: Supplementary file 2643 [file 1]

## 9430016H08Rik

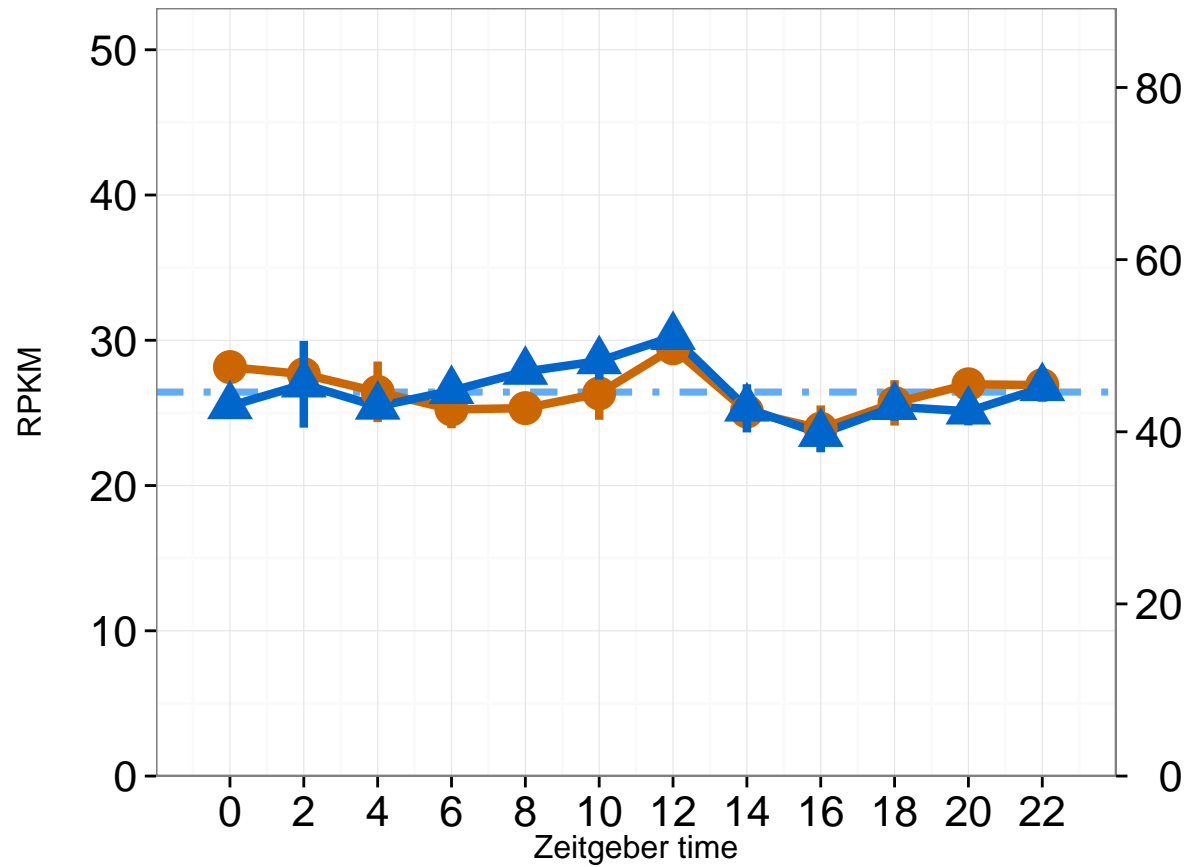

## 9430016H08Rik

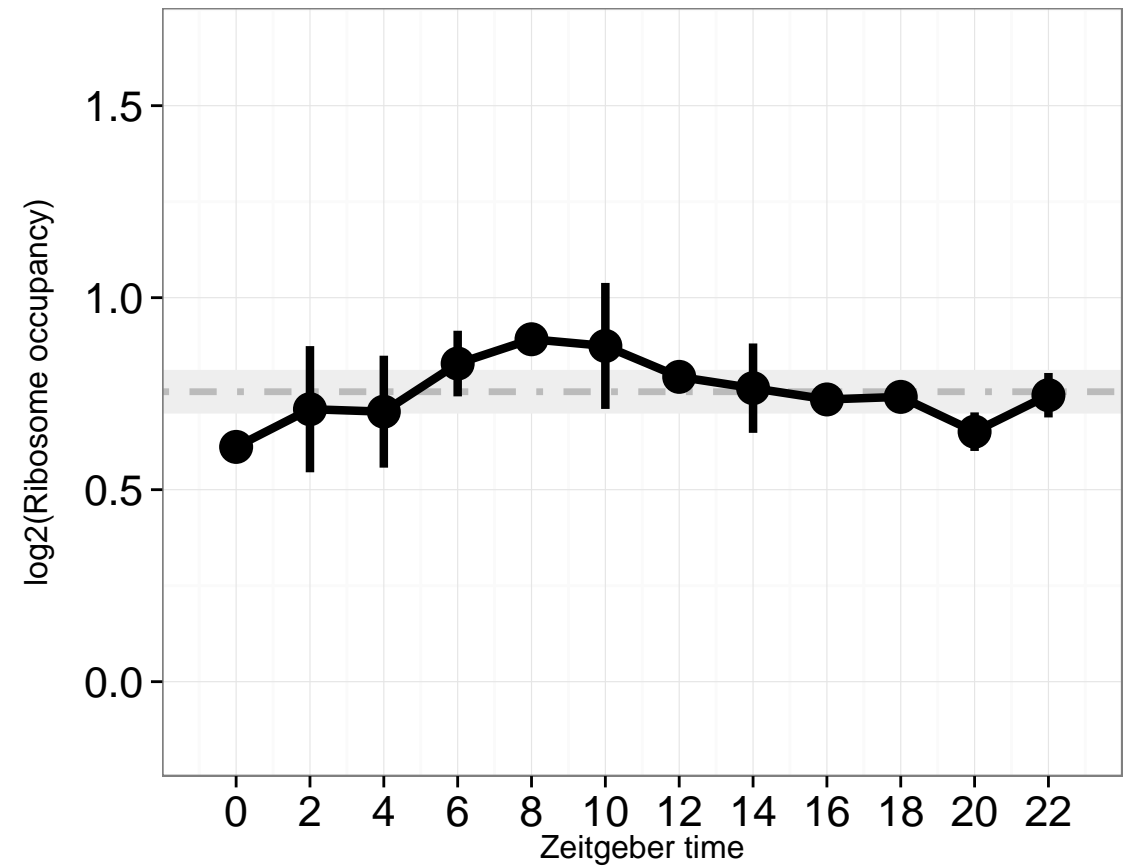

Supplement: Supplementary file 2644 [file 1]

## Trub2

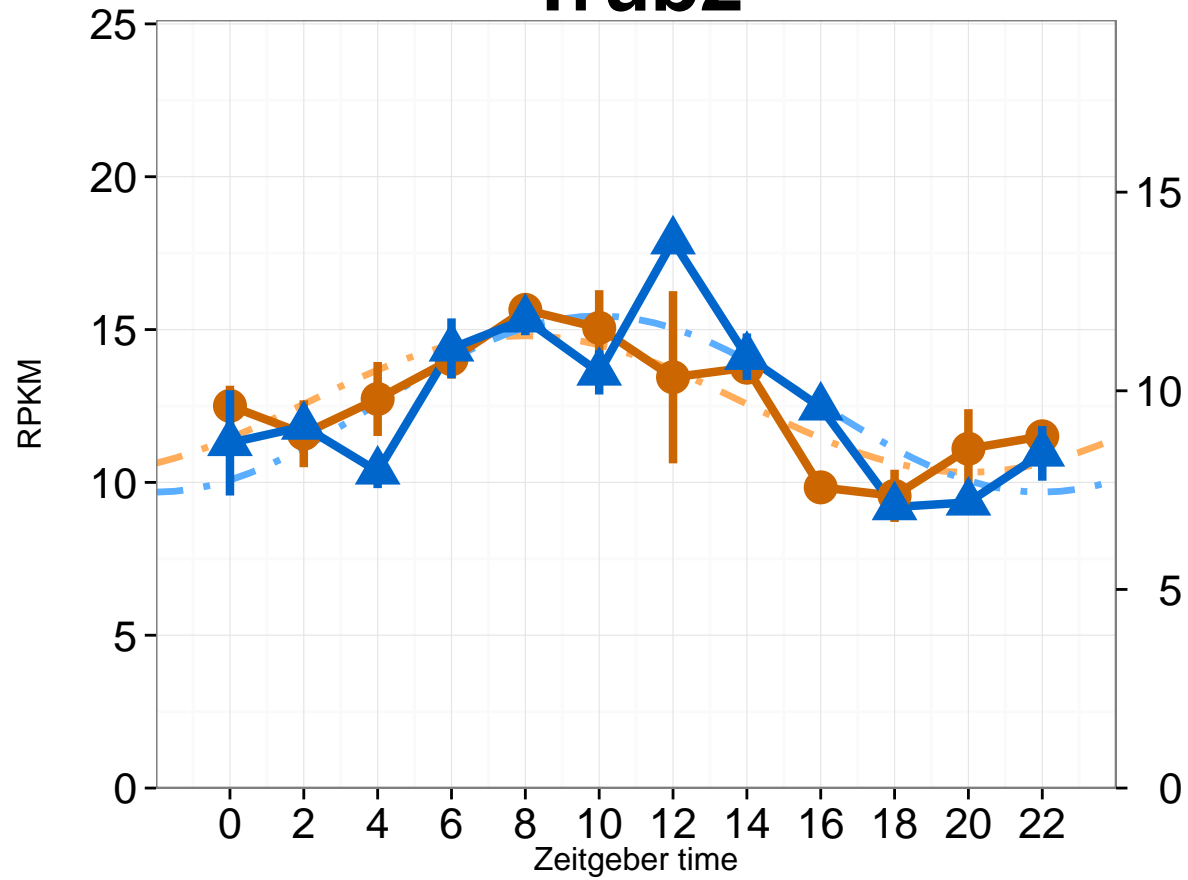

## Trub2

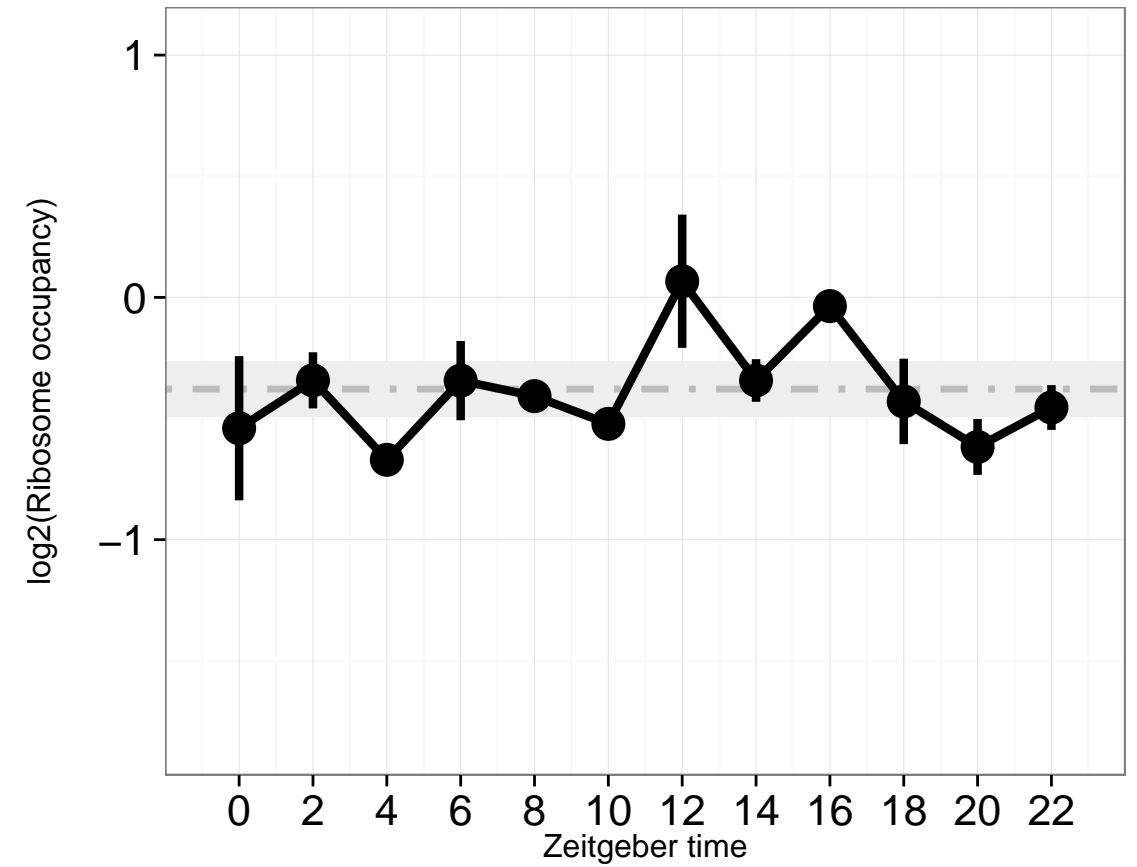

Supplement: Supplementary file 2645 [file 1]

## Cnot3

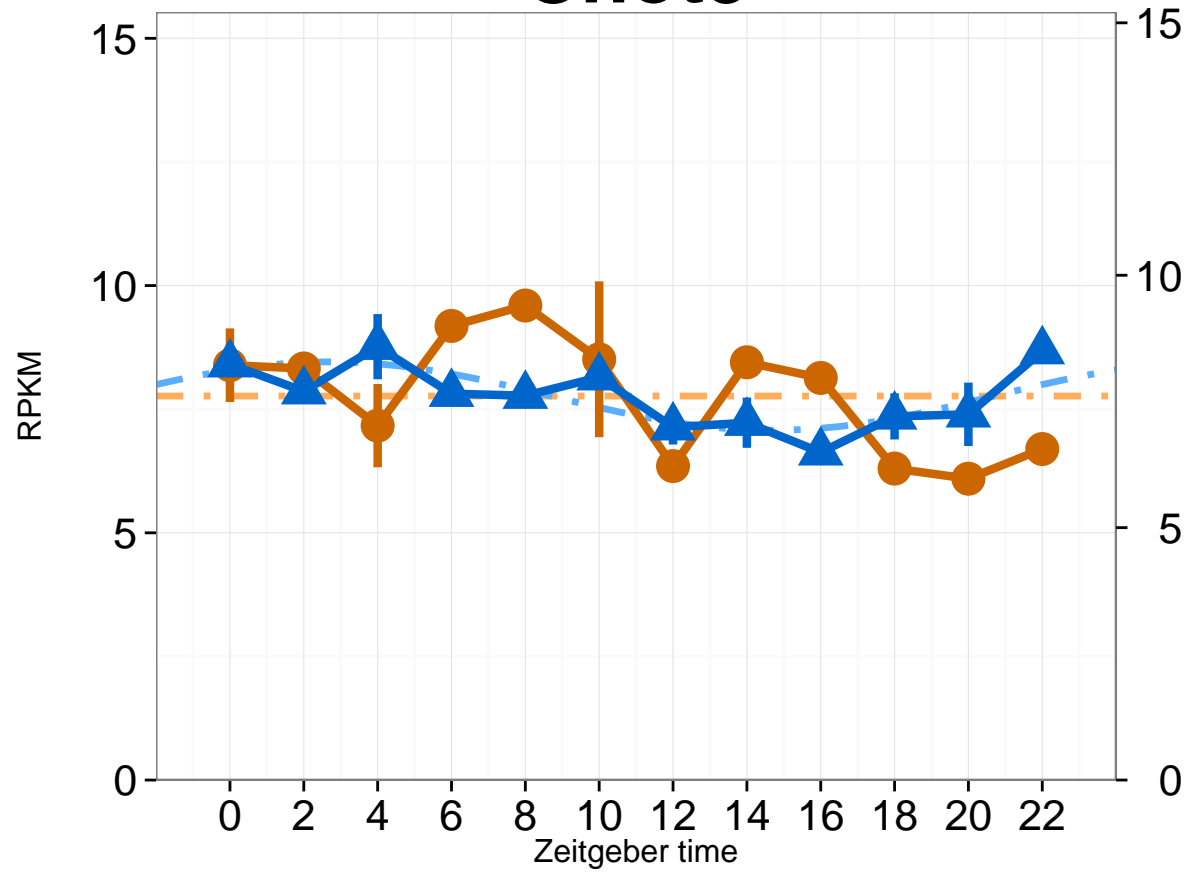

## Cnot3

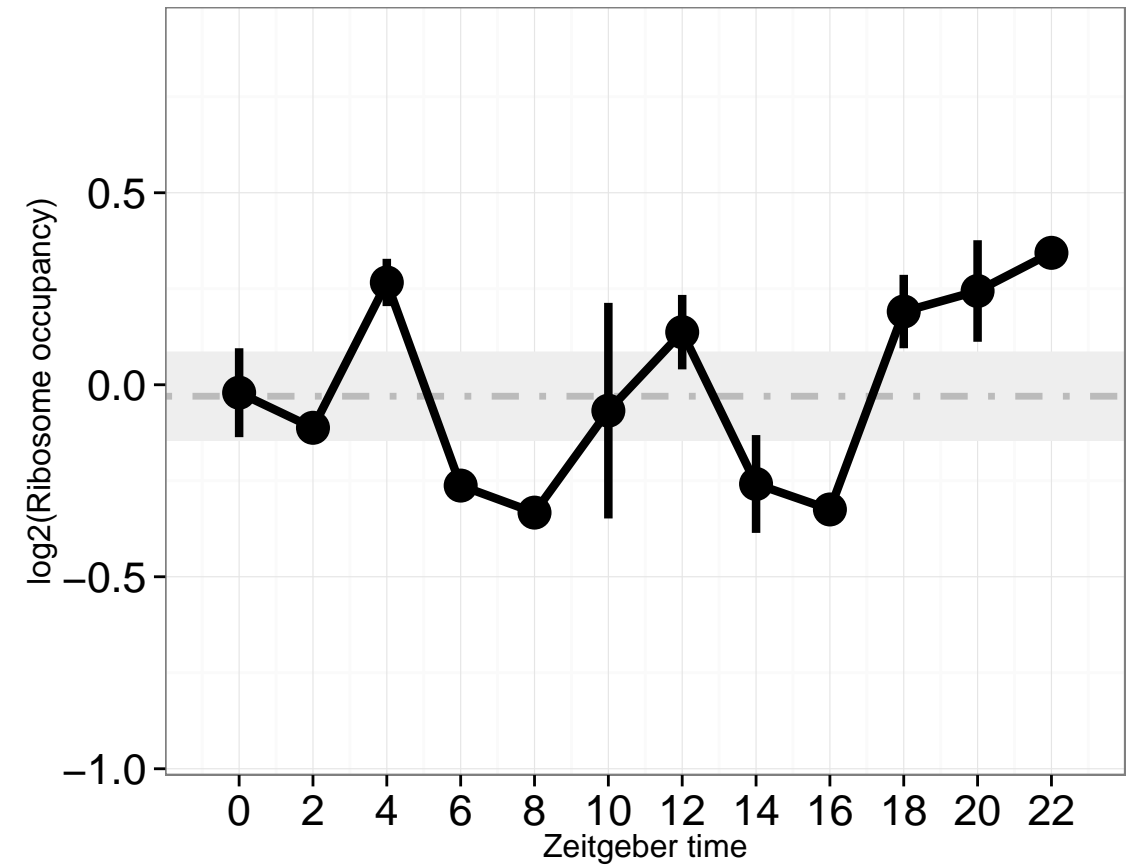

Supplement: Supplementary file 2646 [file 1]

# Arhgef10

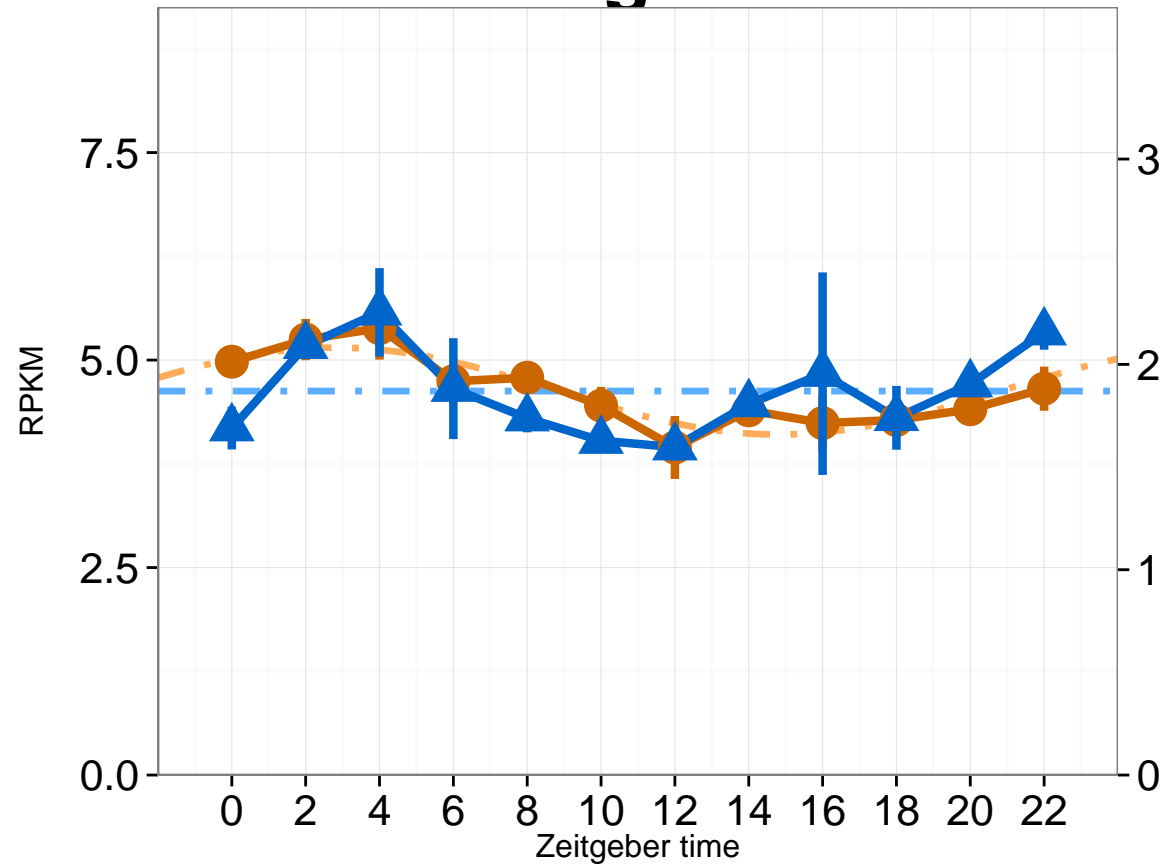

# Arhgef10

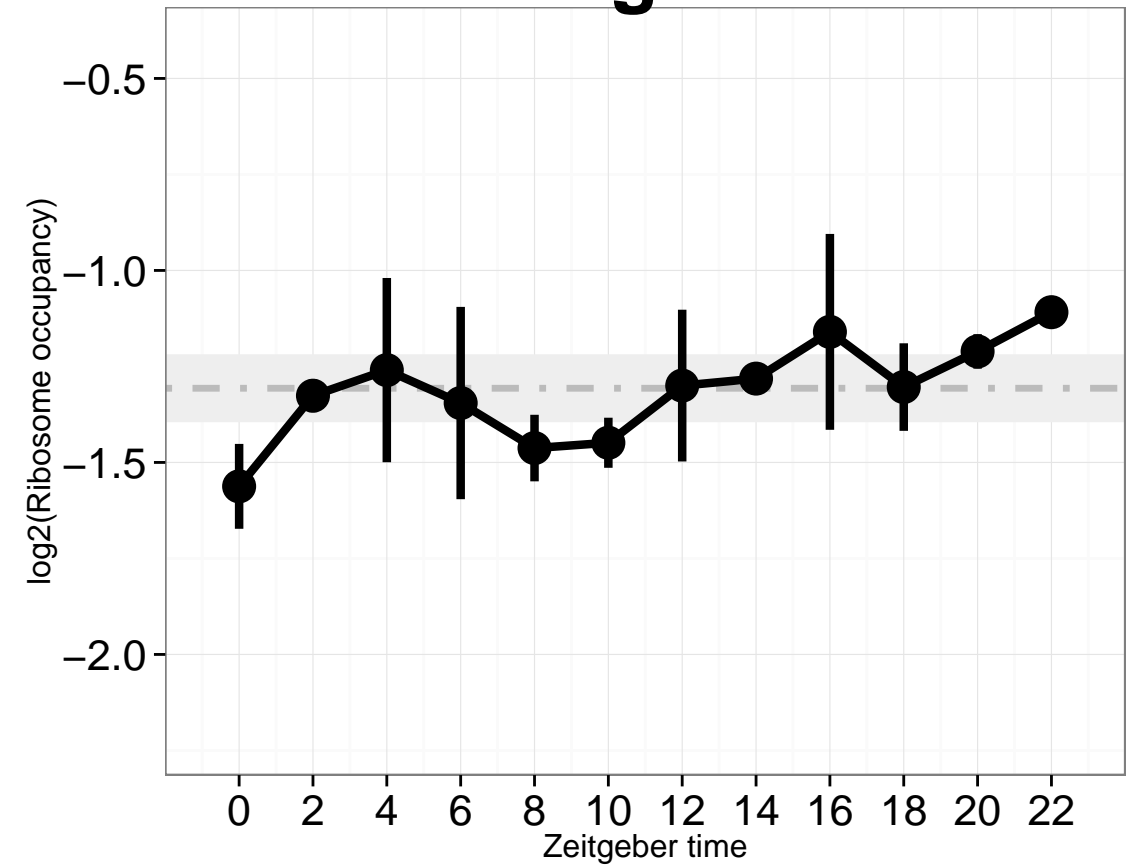

Supplement: Supplementary file 2647 [file 1]

# Exd1

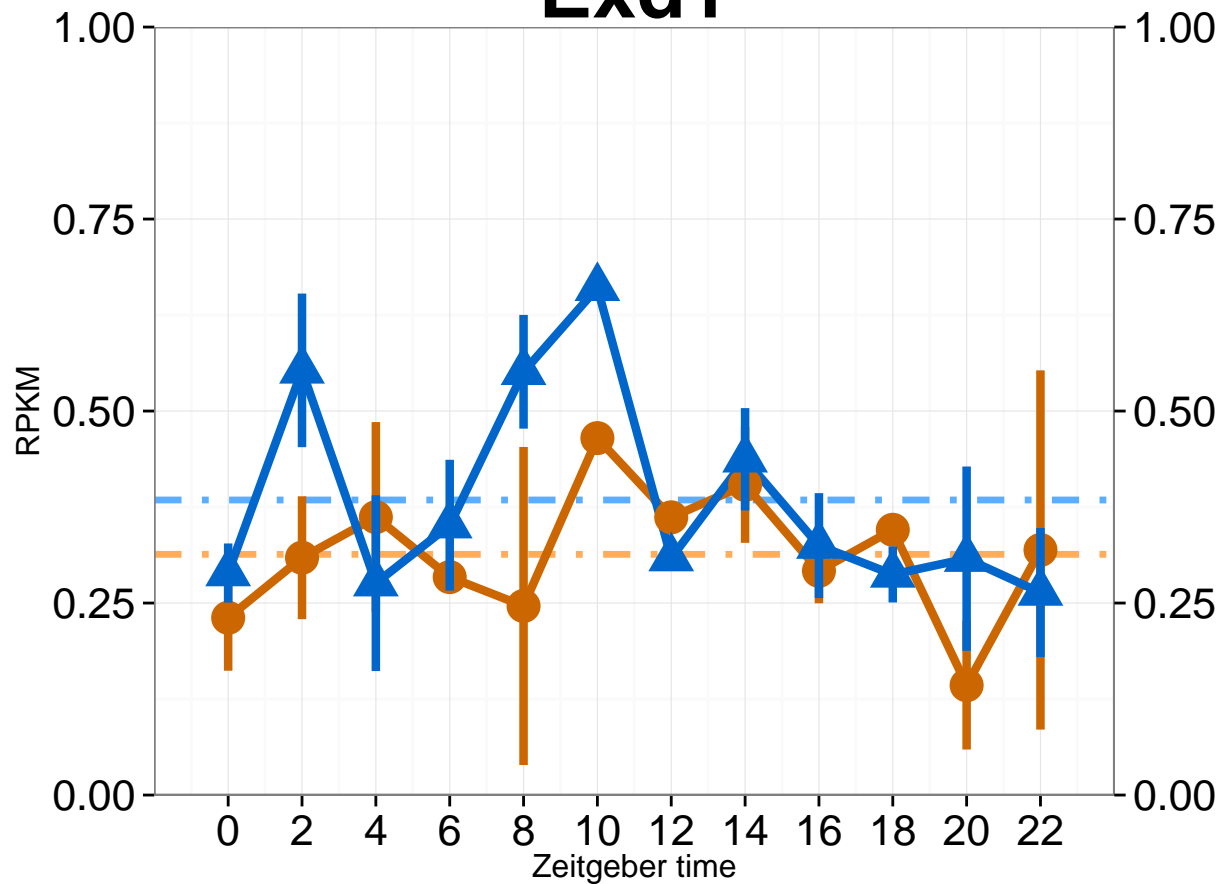

# Exd1

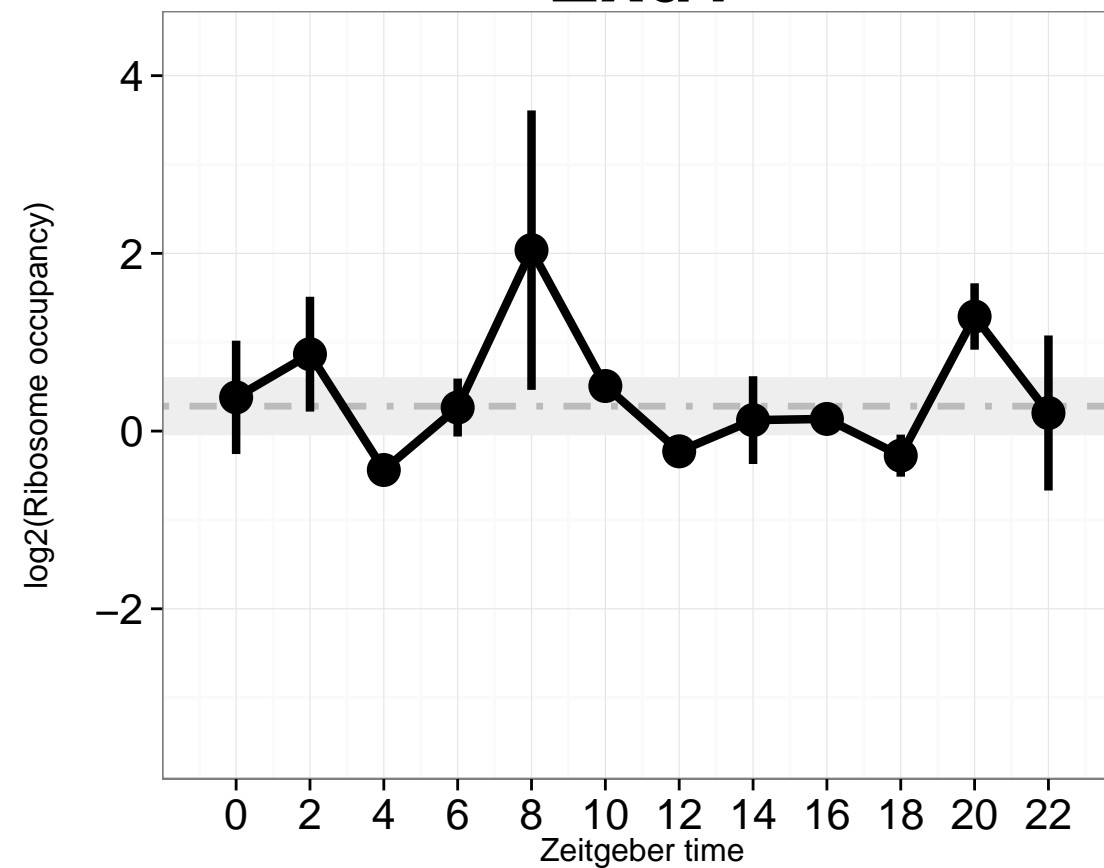

Supplement: Supplementary file 2648 [file 1]

# Pnrc2

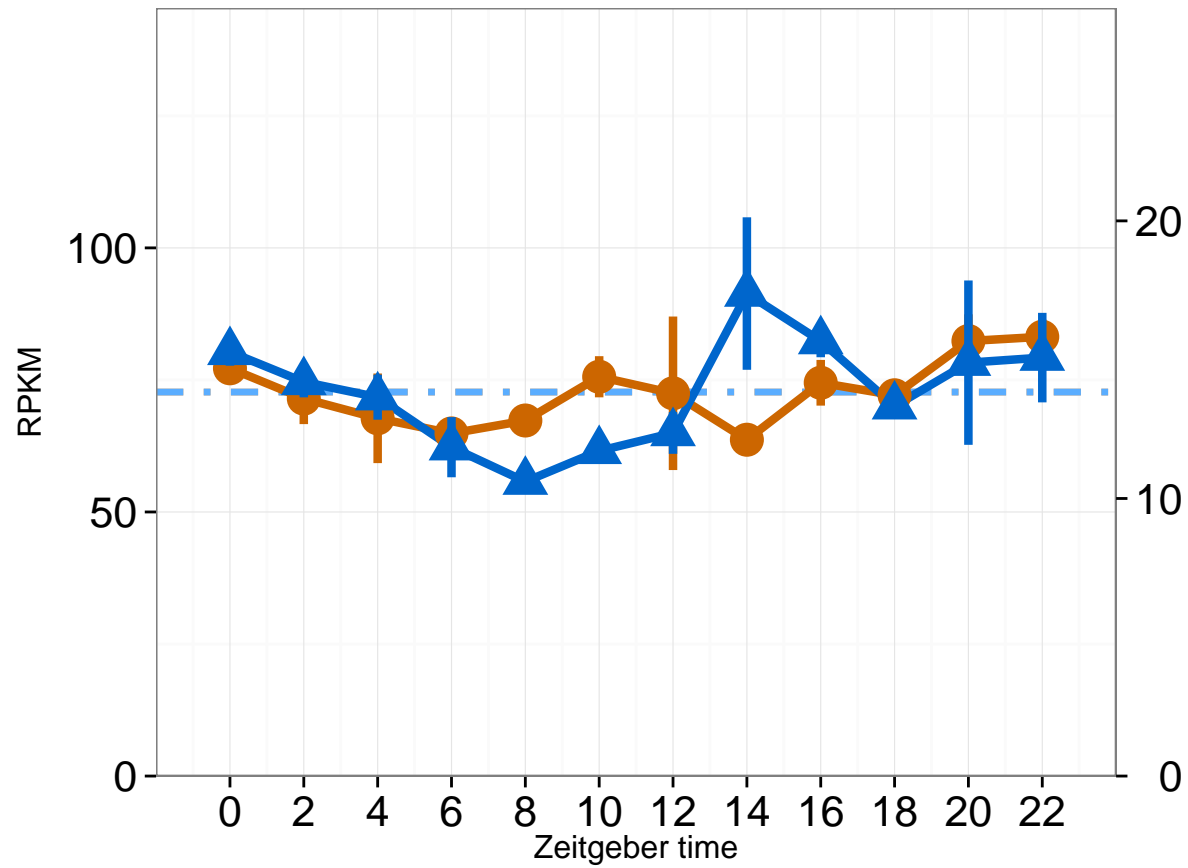

# Pnrc2

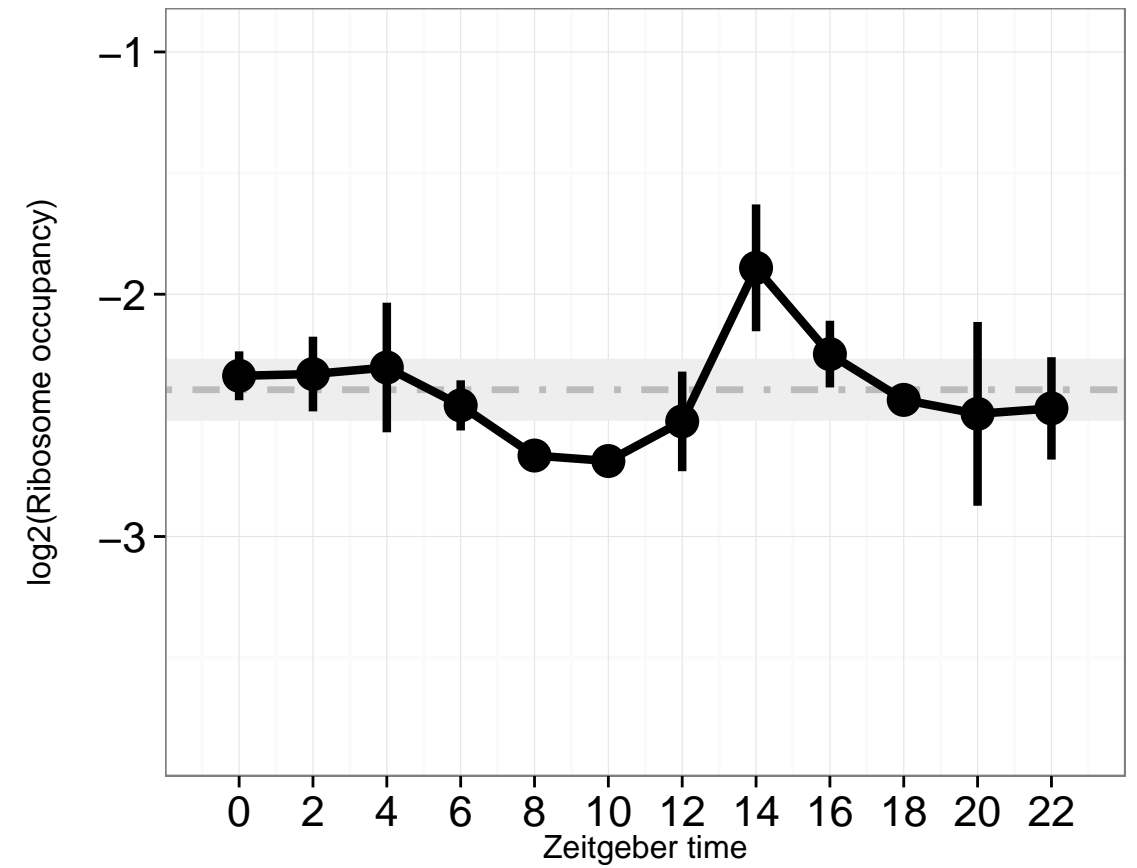

Supplement: Supplementary file 2649 [file 1]

# Pet112

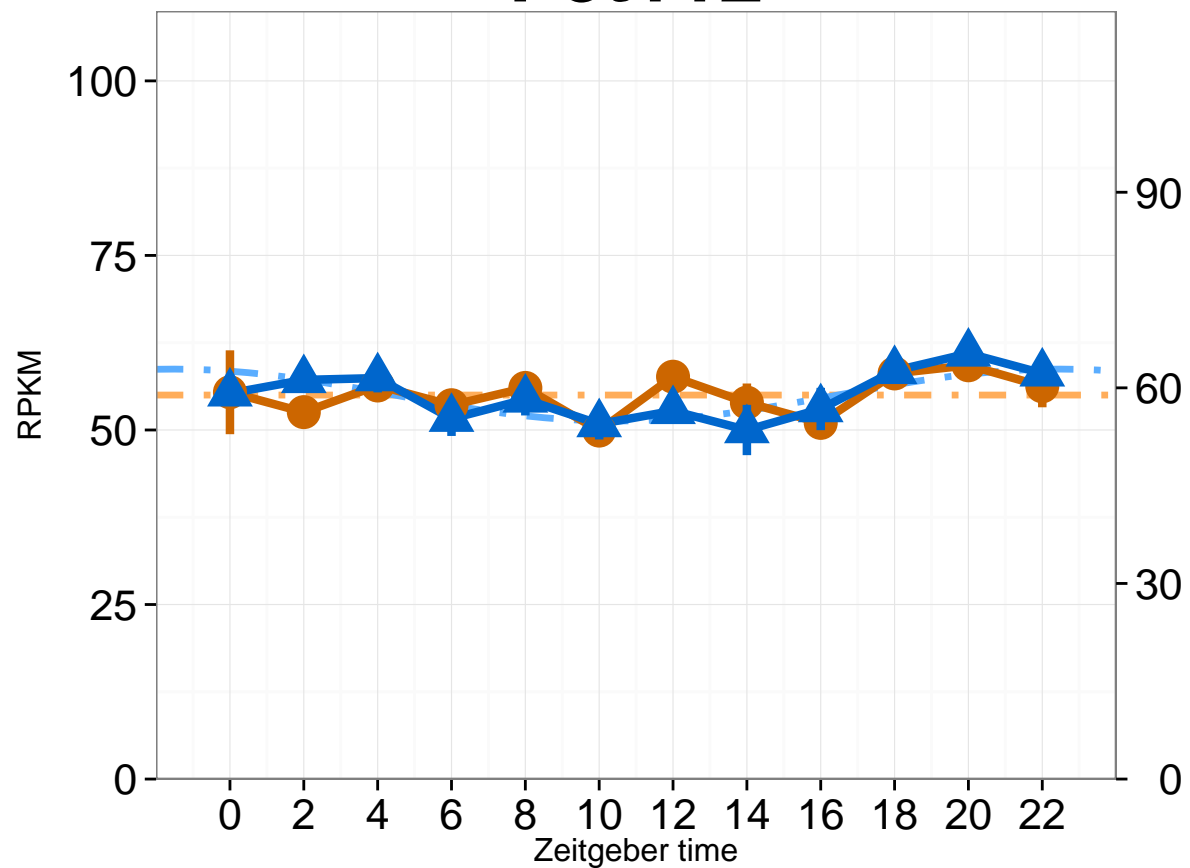

# Pet112

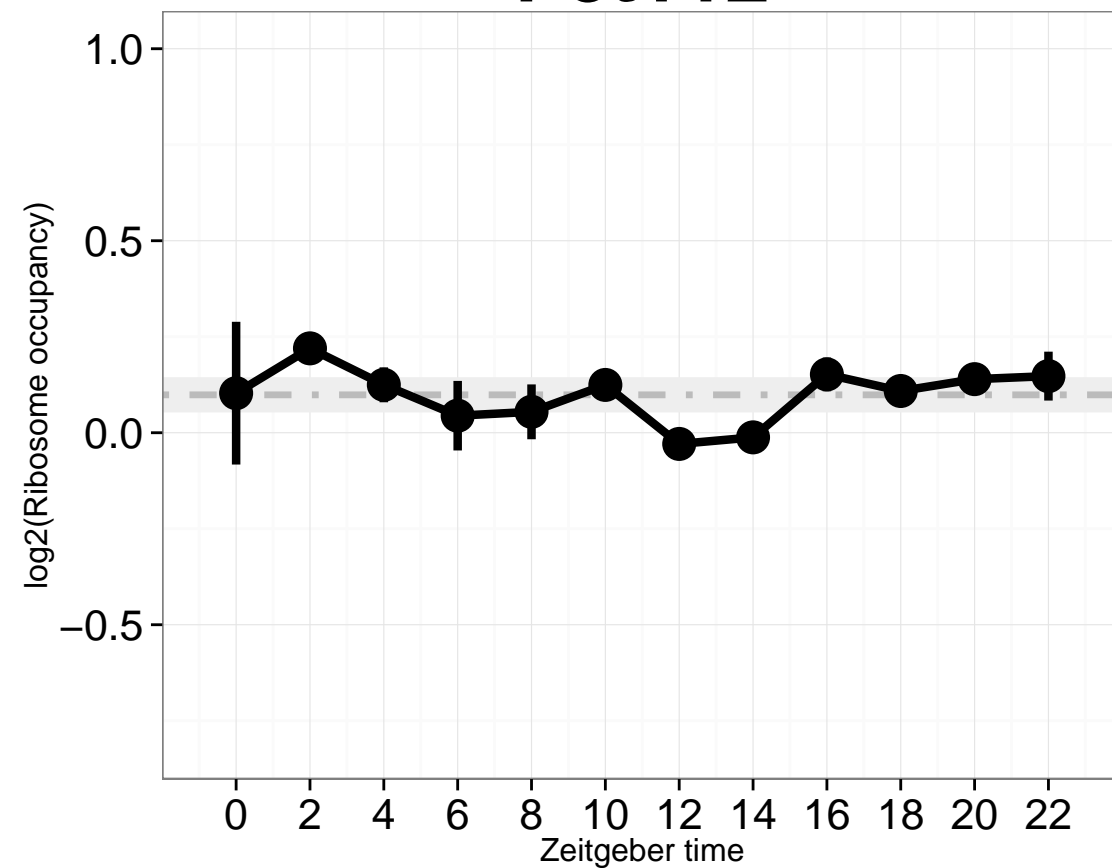

Supplement: Supplementary file 2650 [file 1]

# 4931406P16Rik

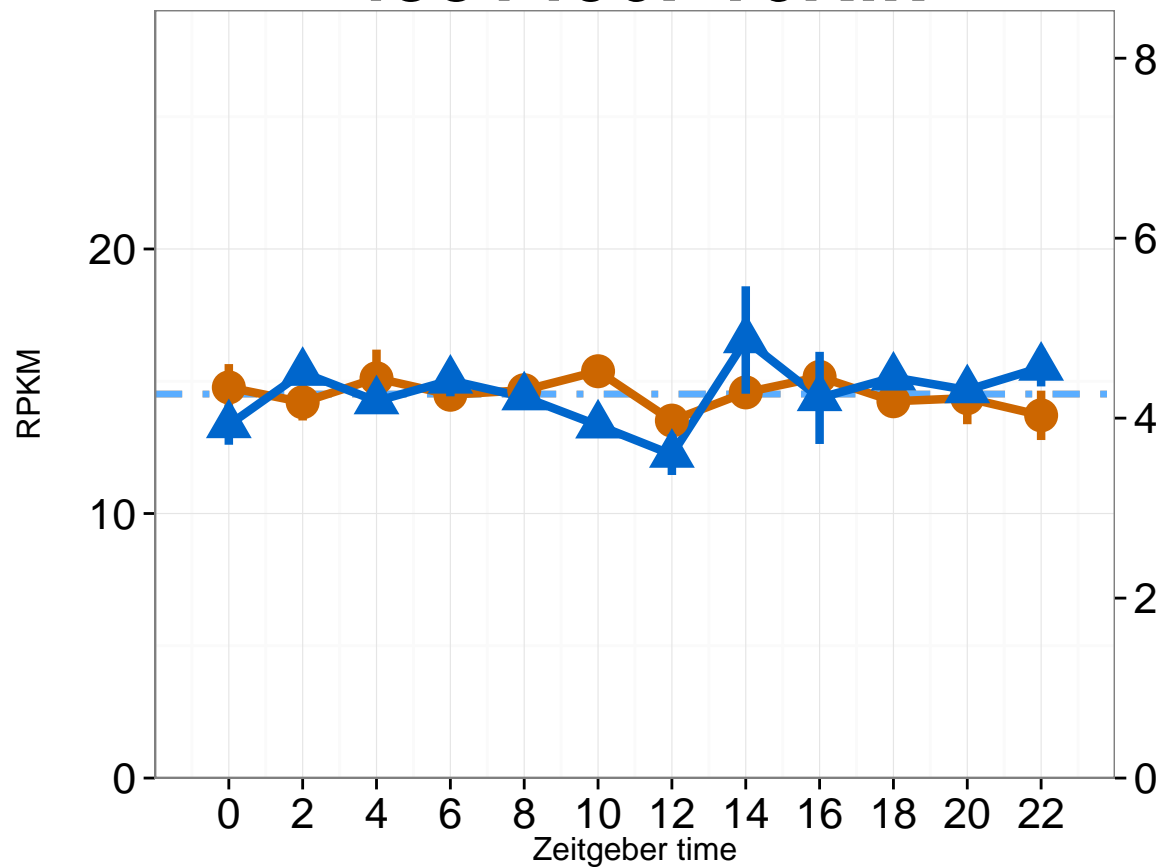

# 4931406P16Rik

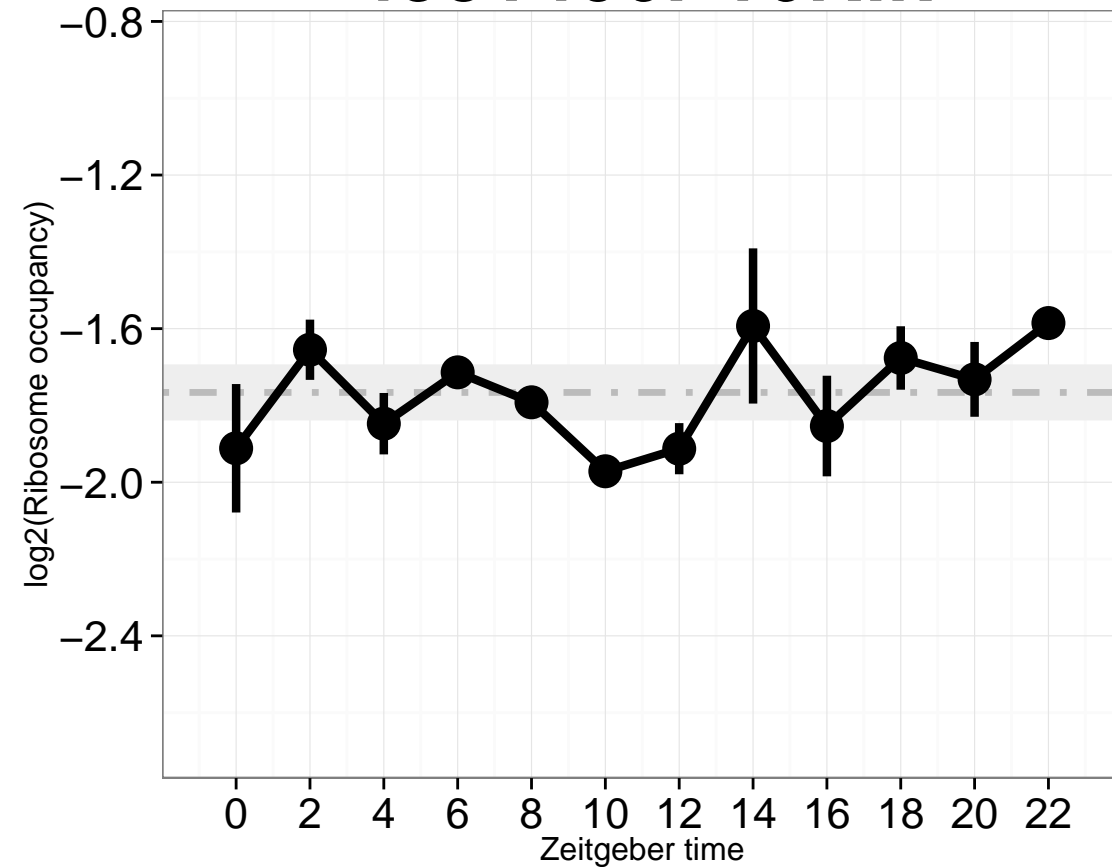

Supplement: Supplementary file 2651 [file 1]

# Anp32e

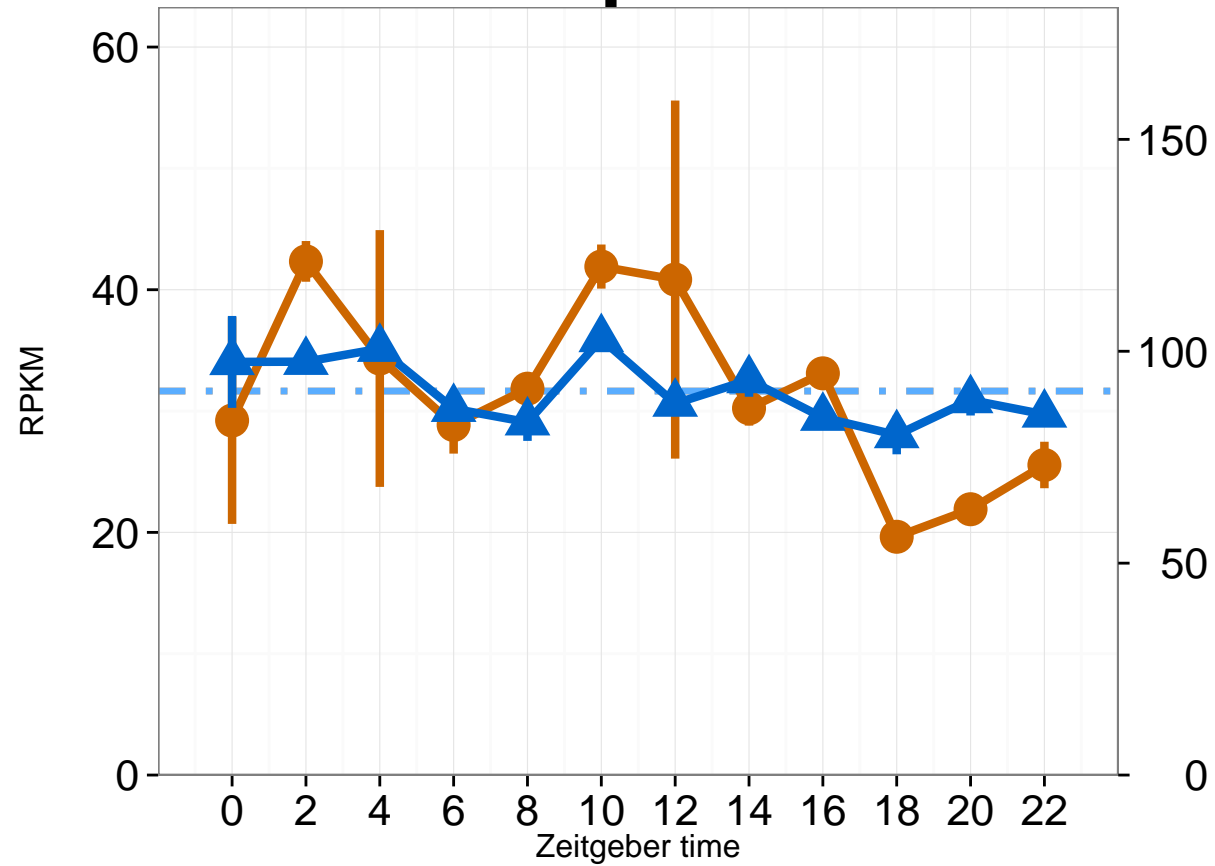

# Anp32e

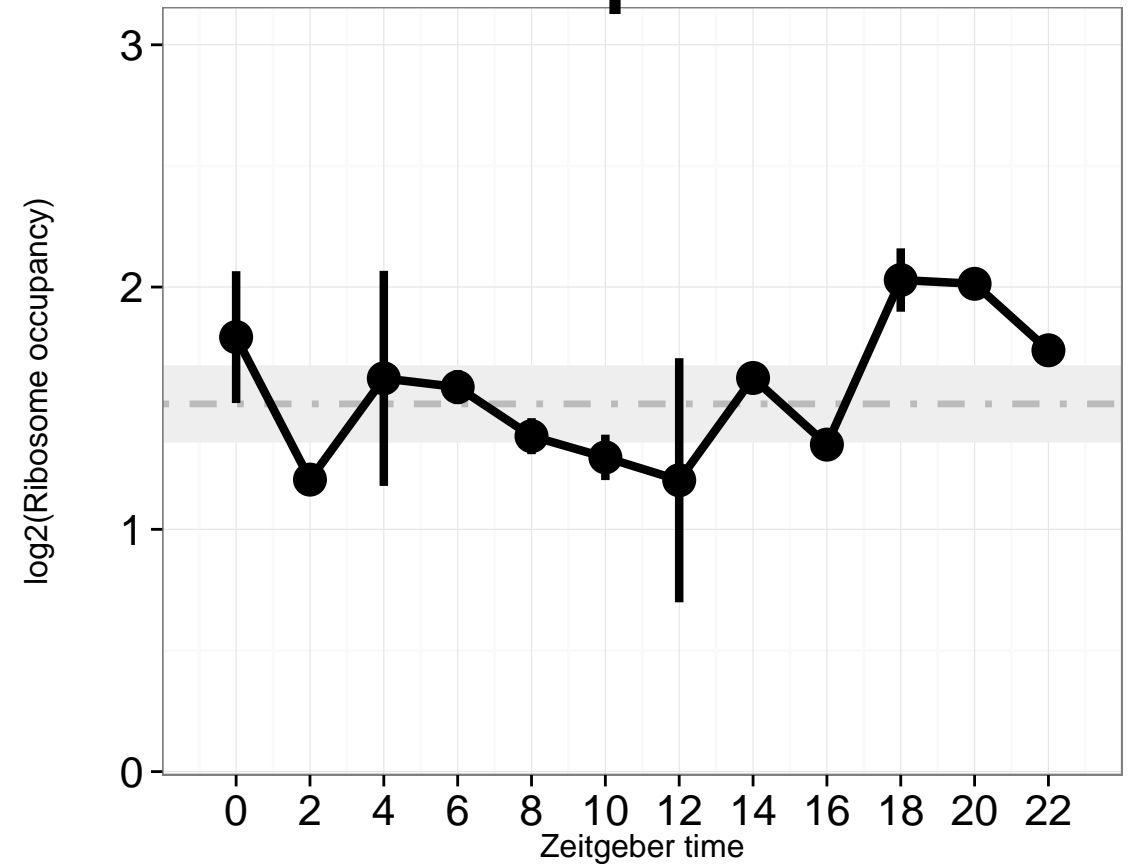

Supplement: Supplementary file 2652 [file 1]

# Eif4a3

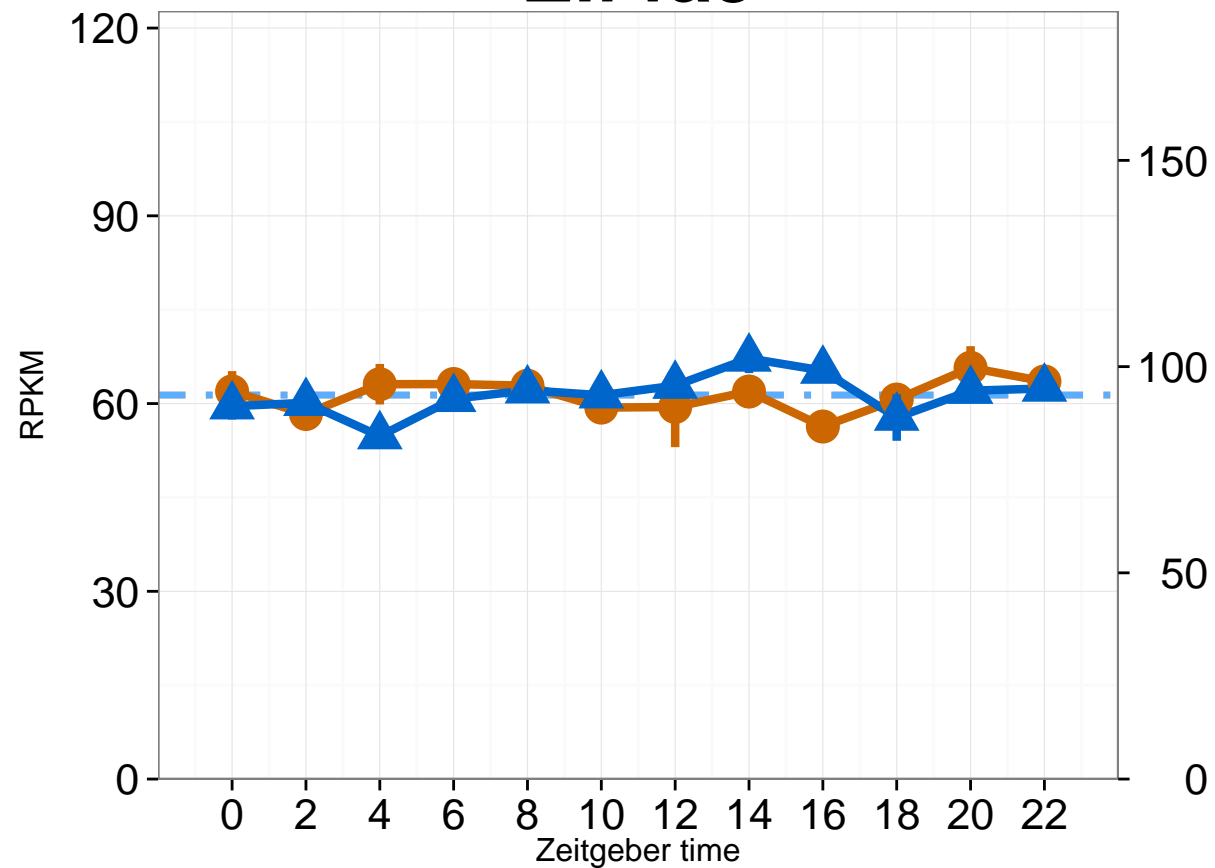

# Eif4a3

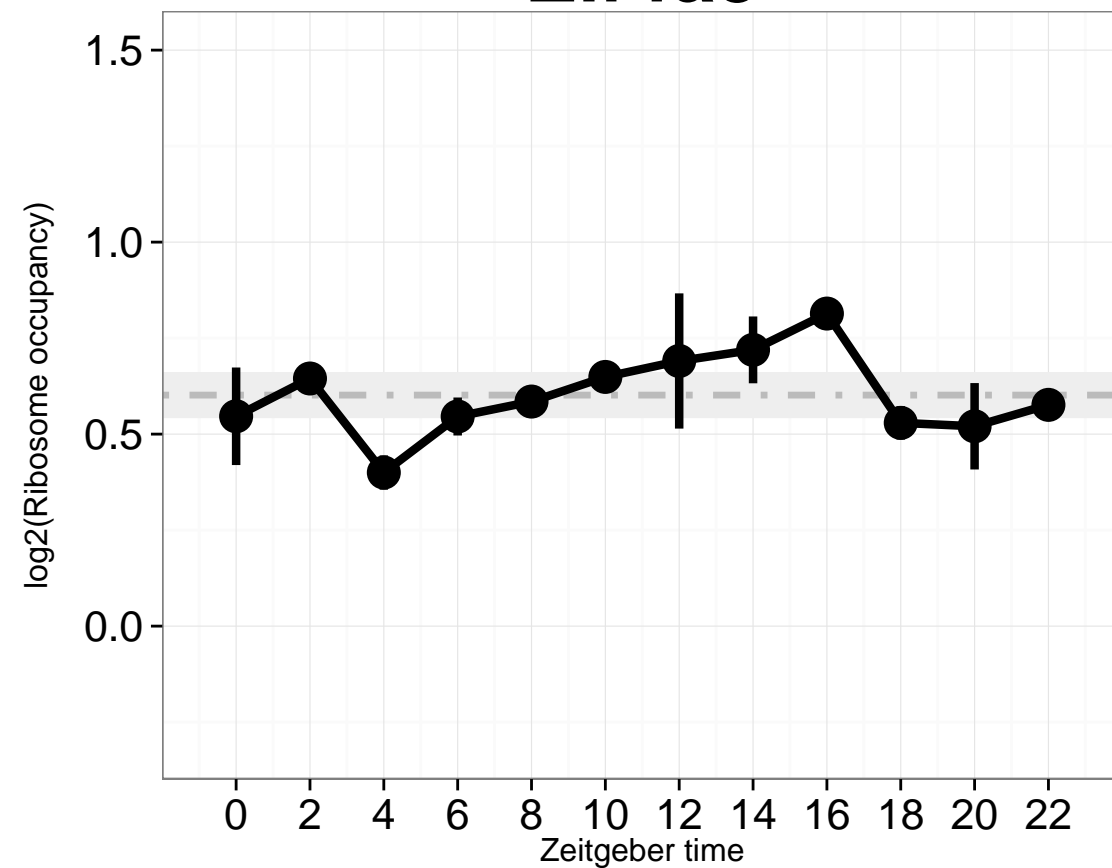

Supplement: Supplementary file 2653 [file 1]

# Pan2

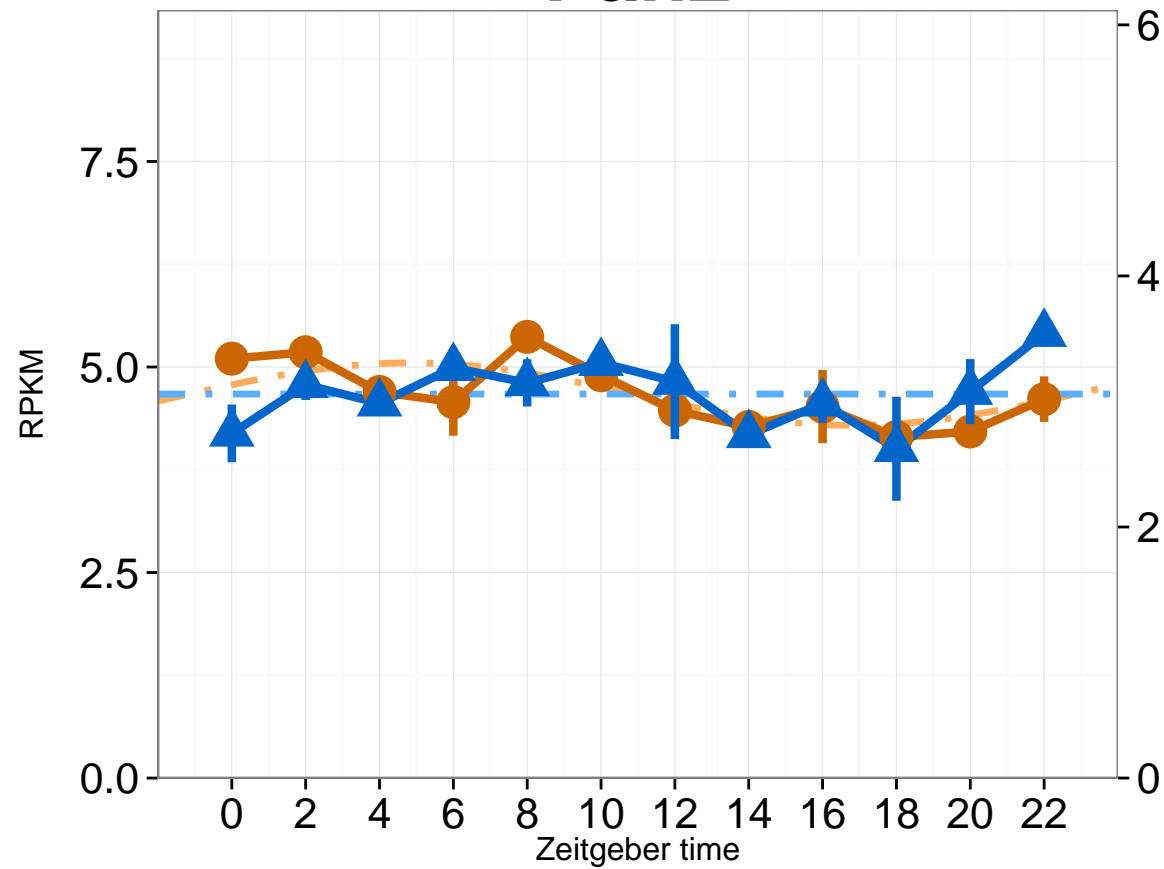

# Pan2

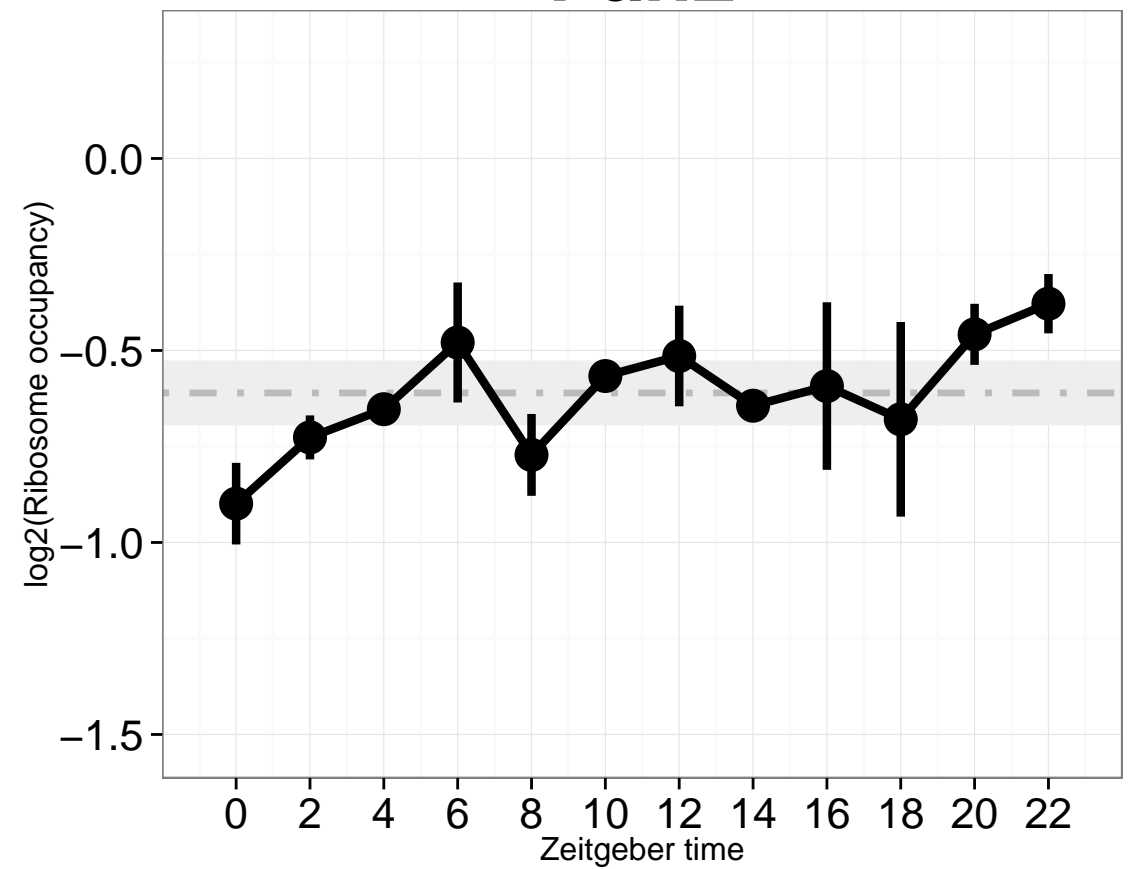

Supplement: Supplementary file 2654 [file 1]

## Zfyve16

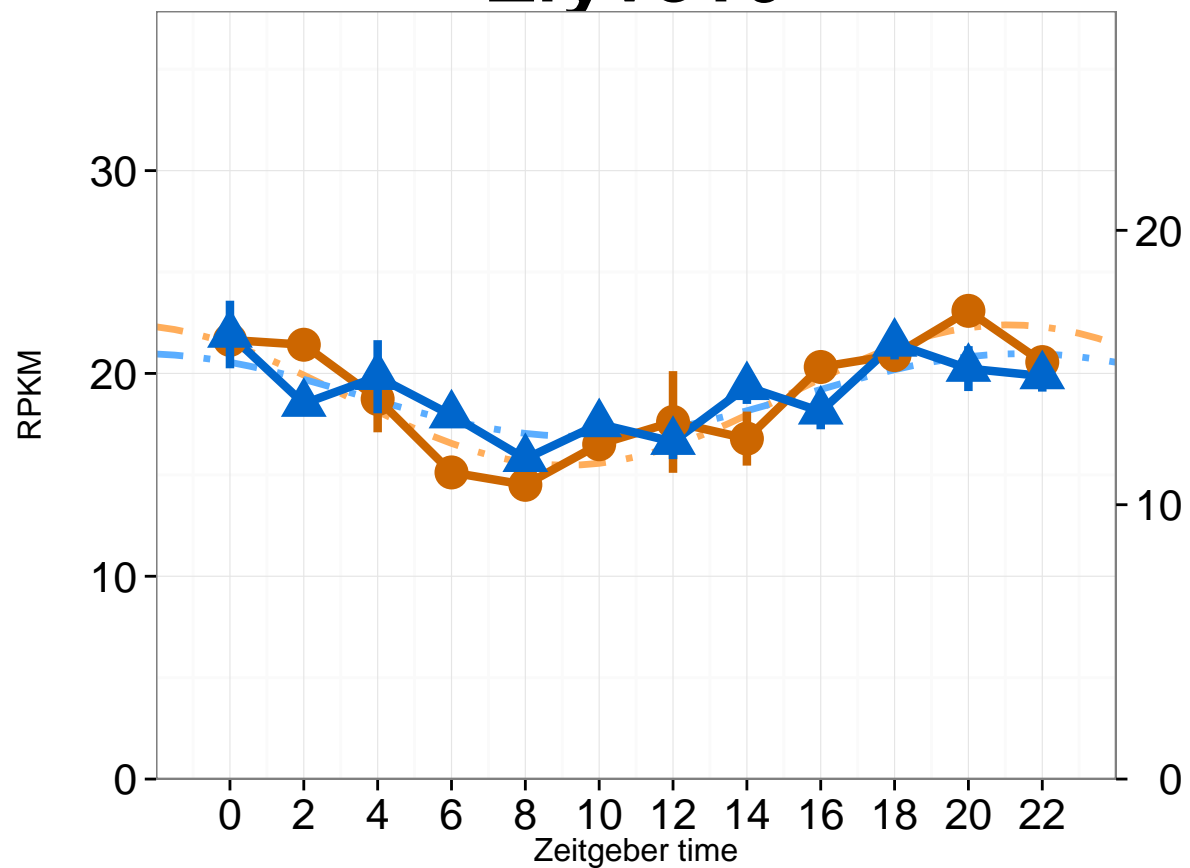

## Zfyve16

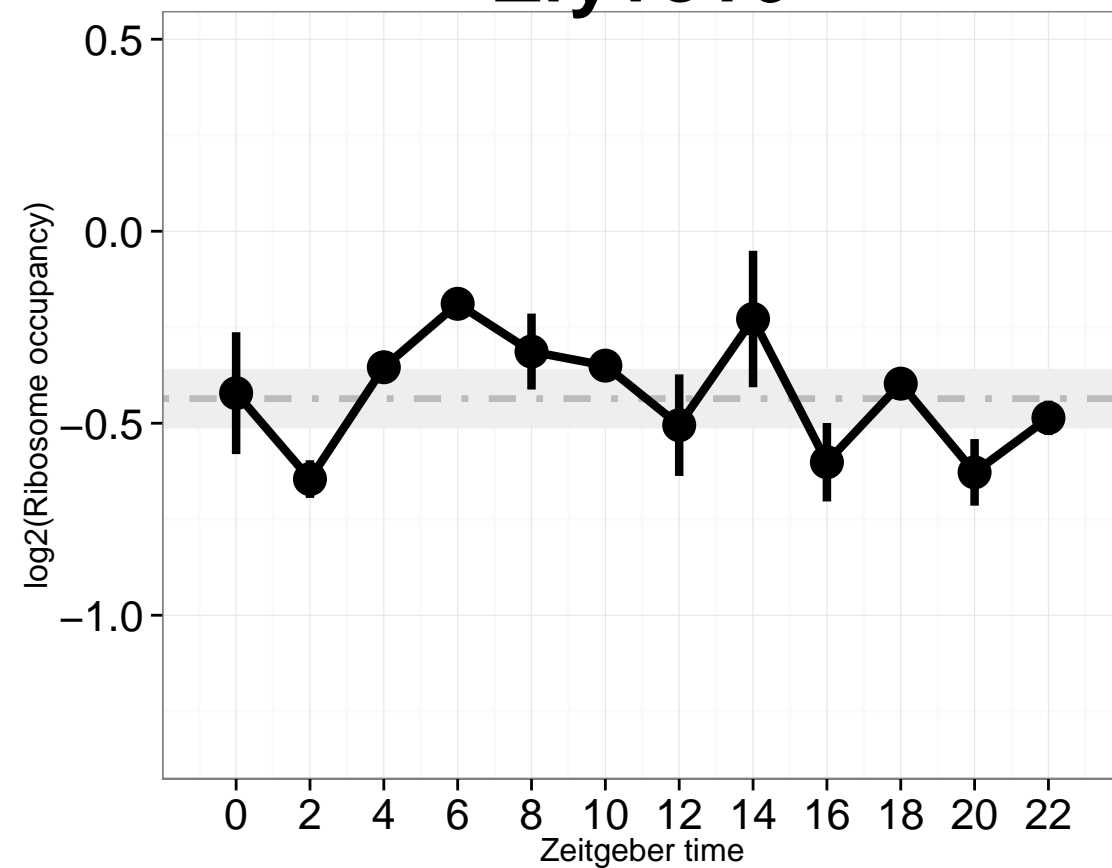

Supplement: Supplementary file 2655 [file 1]

## Cxcl14

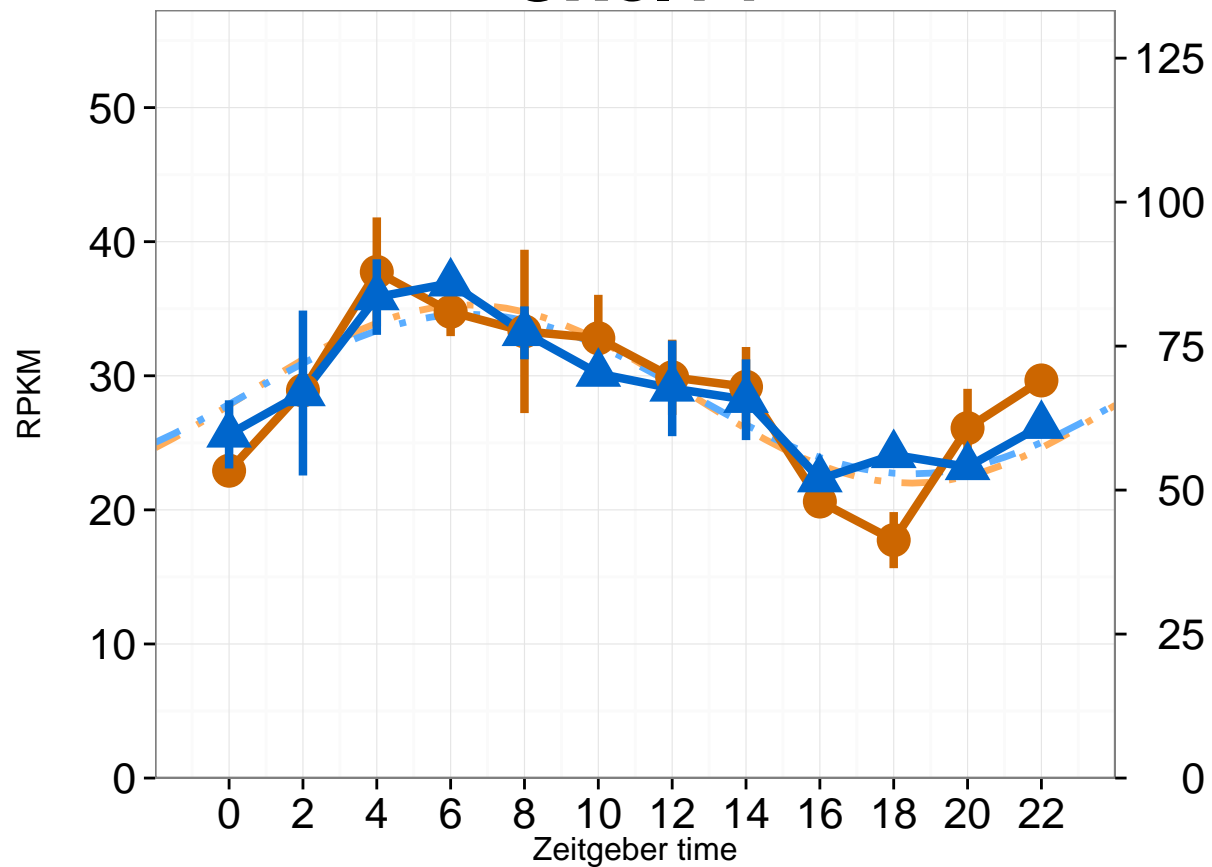

## Cxcl14

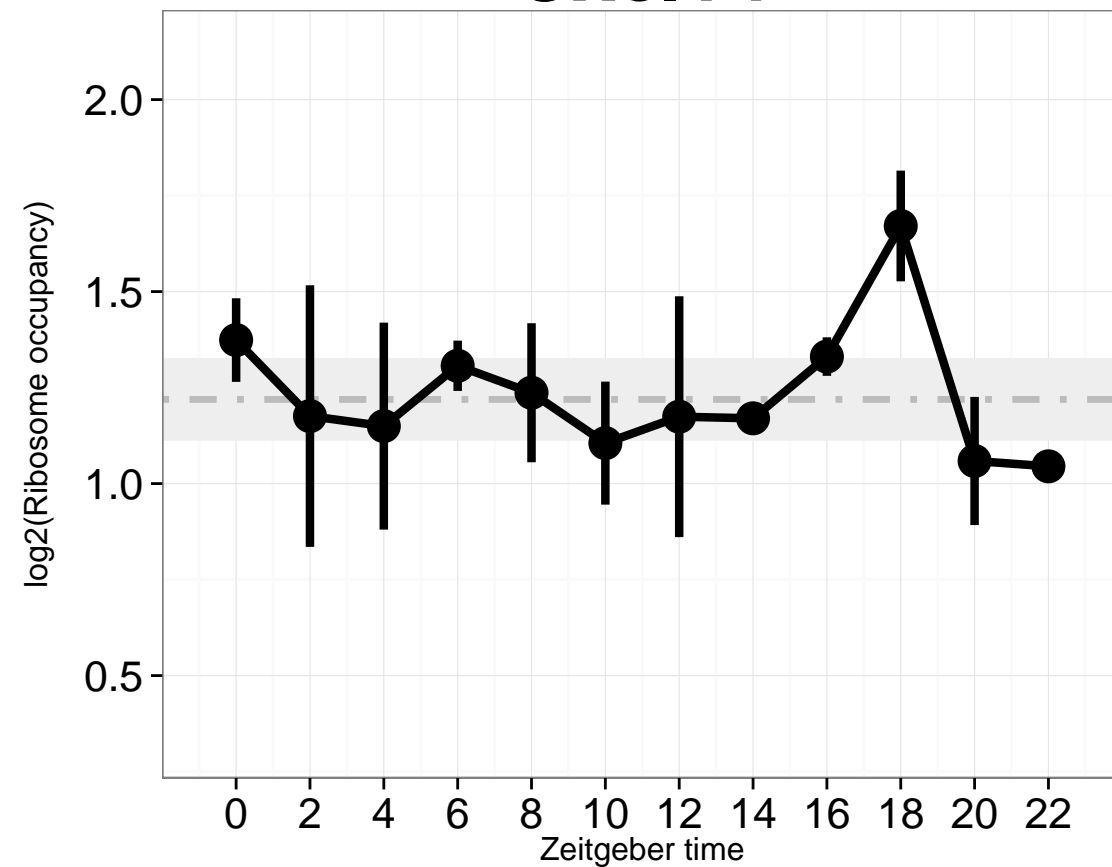

Supplement: Supplementary file 2656 [file 1]

## Afap1l2

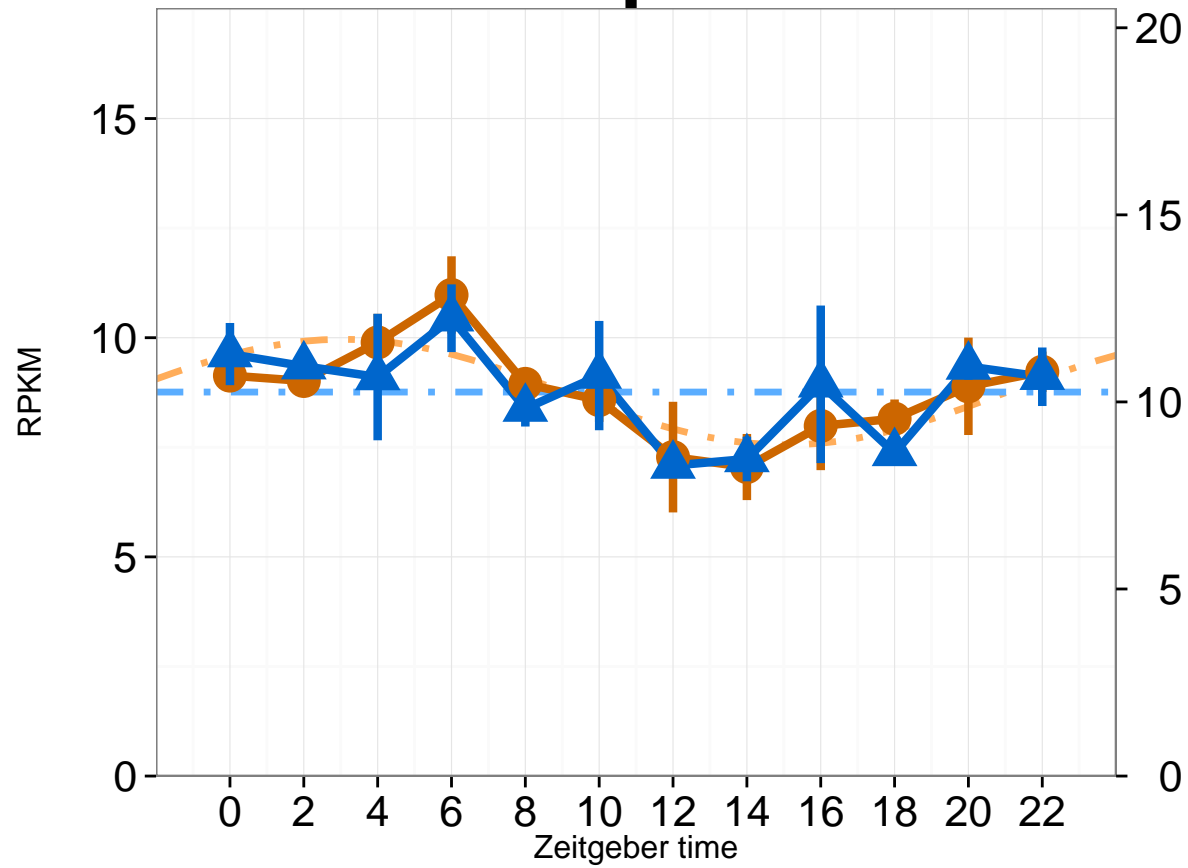

## Afap1l2

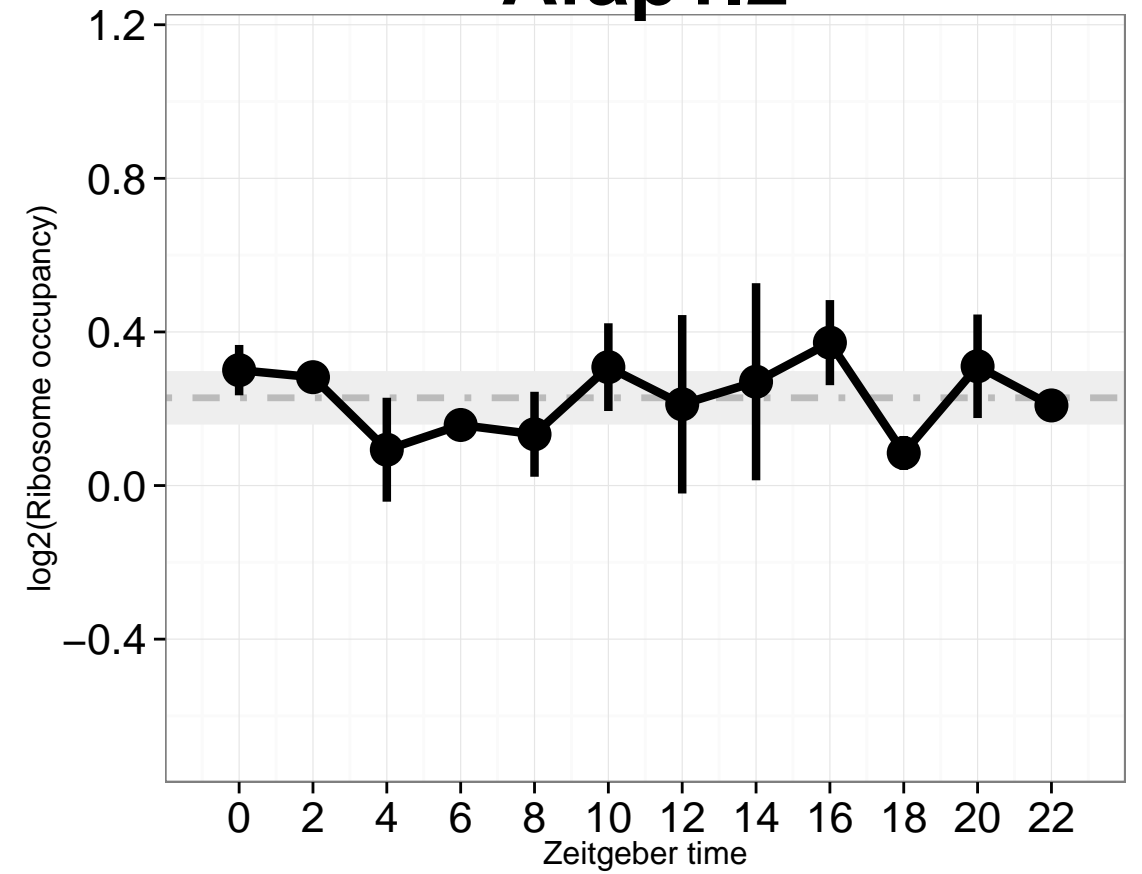

Supplement: Supplementary file 2657 [file 1]

# Pds5a

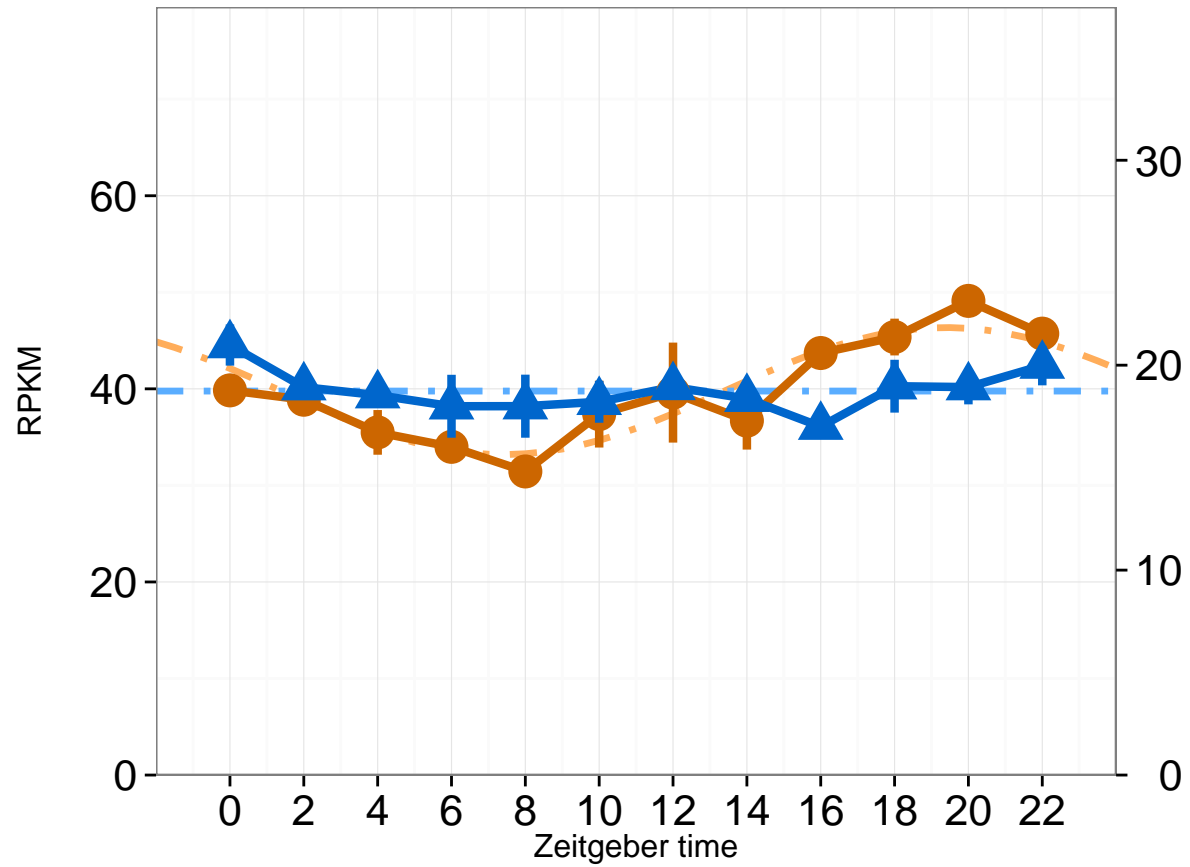

# Pds5a

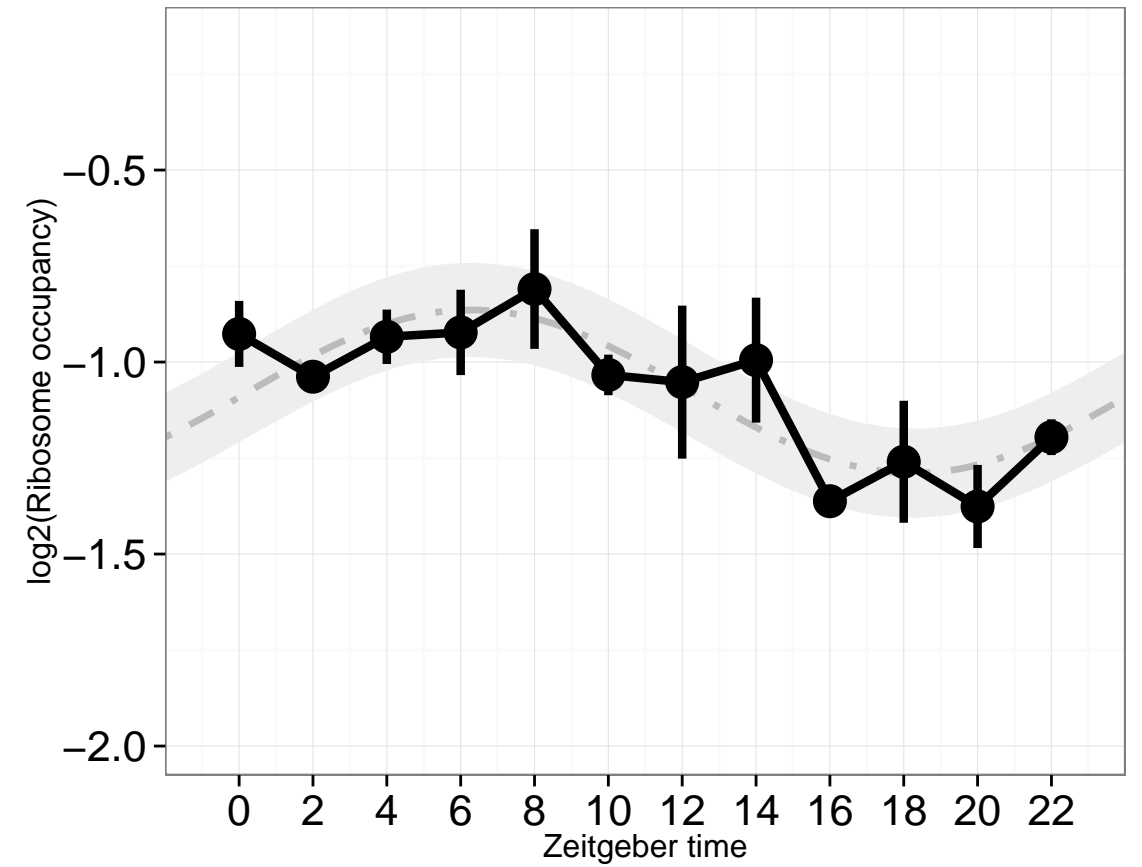

Supplement: Supplementary file 2658 [file 1]

## Acer3

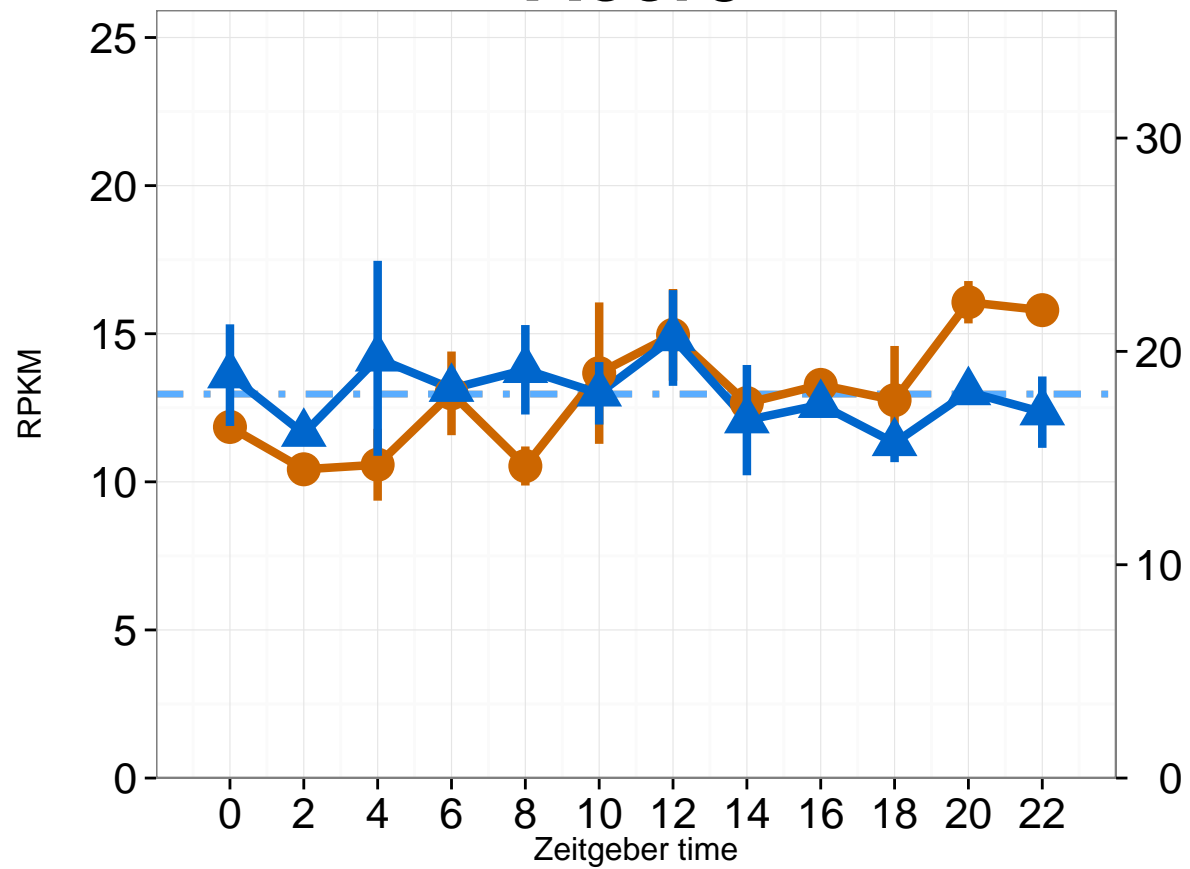

## Acer3

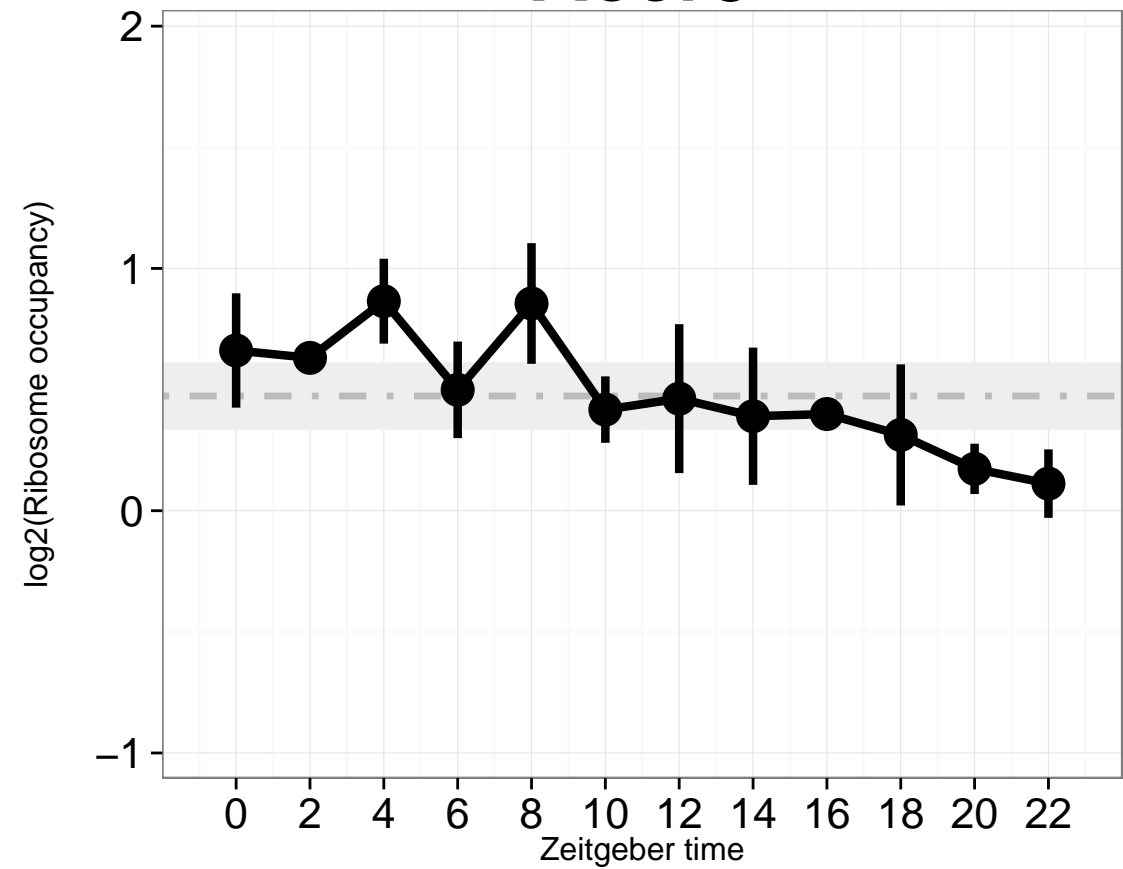

Supplement: Supplementary file 2659 [file 1]

**Nsl1 TR**

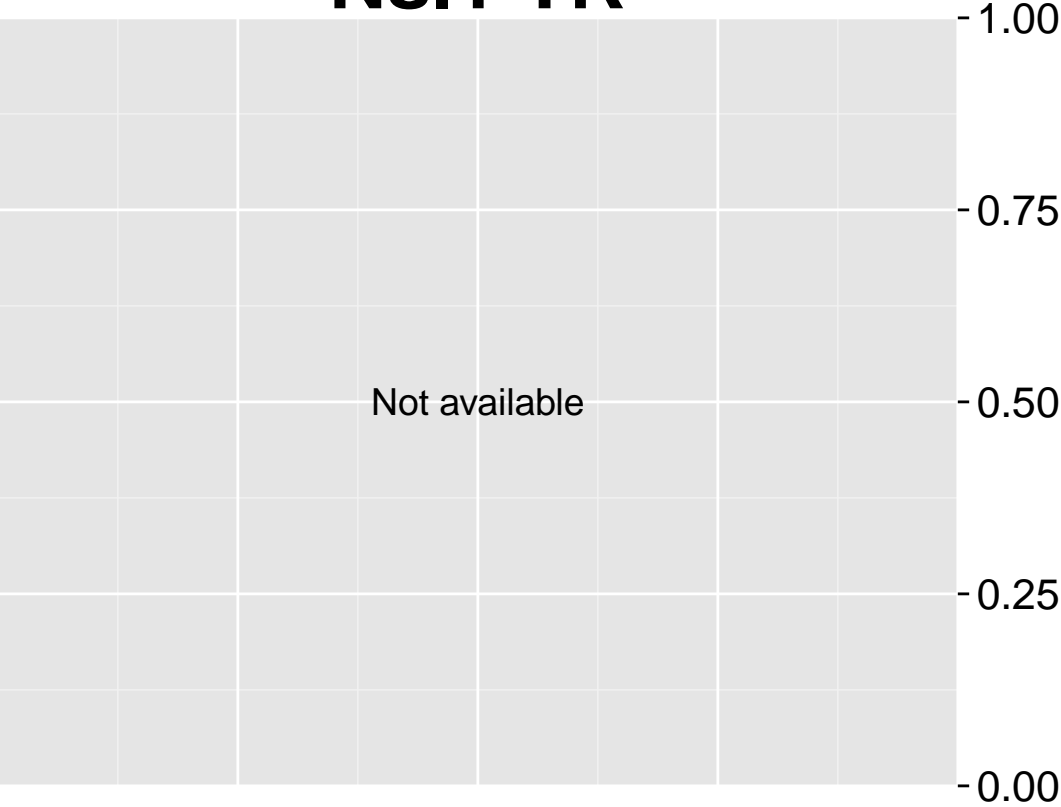

**Nsl1 log2(Ribosome occupancy)**

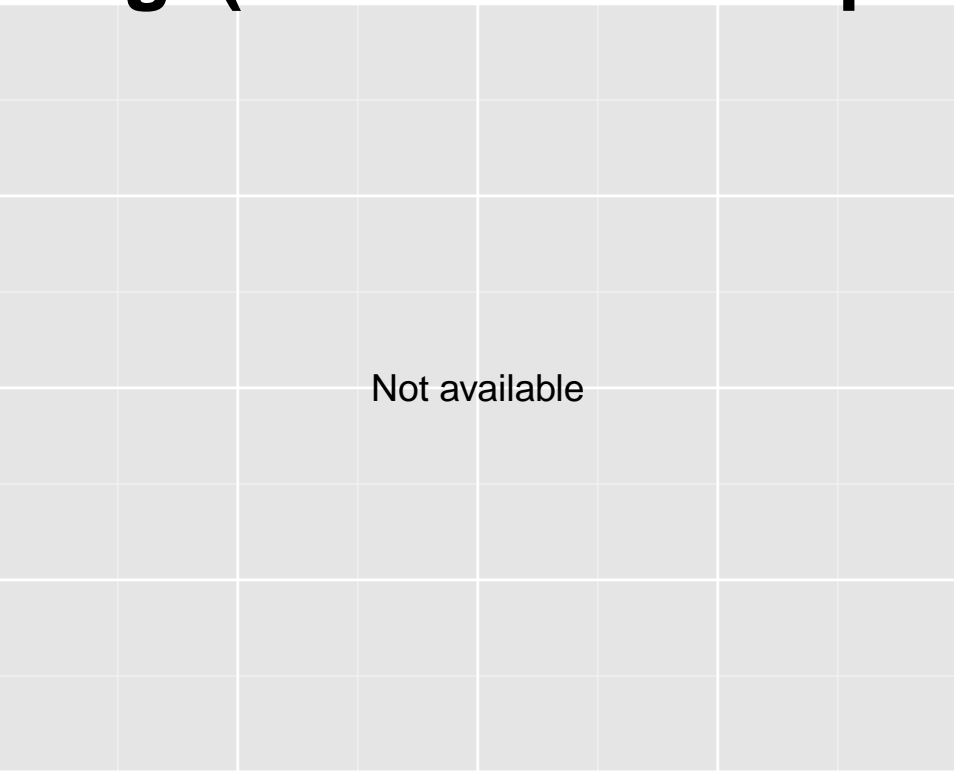

Supplement: Supplementary file 2660 [file 1]

# Gngt2

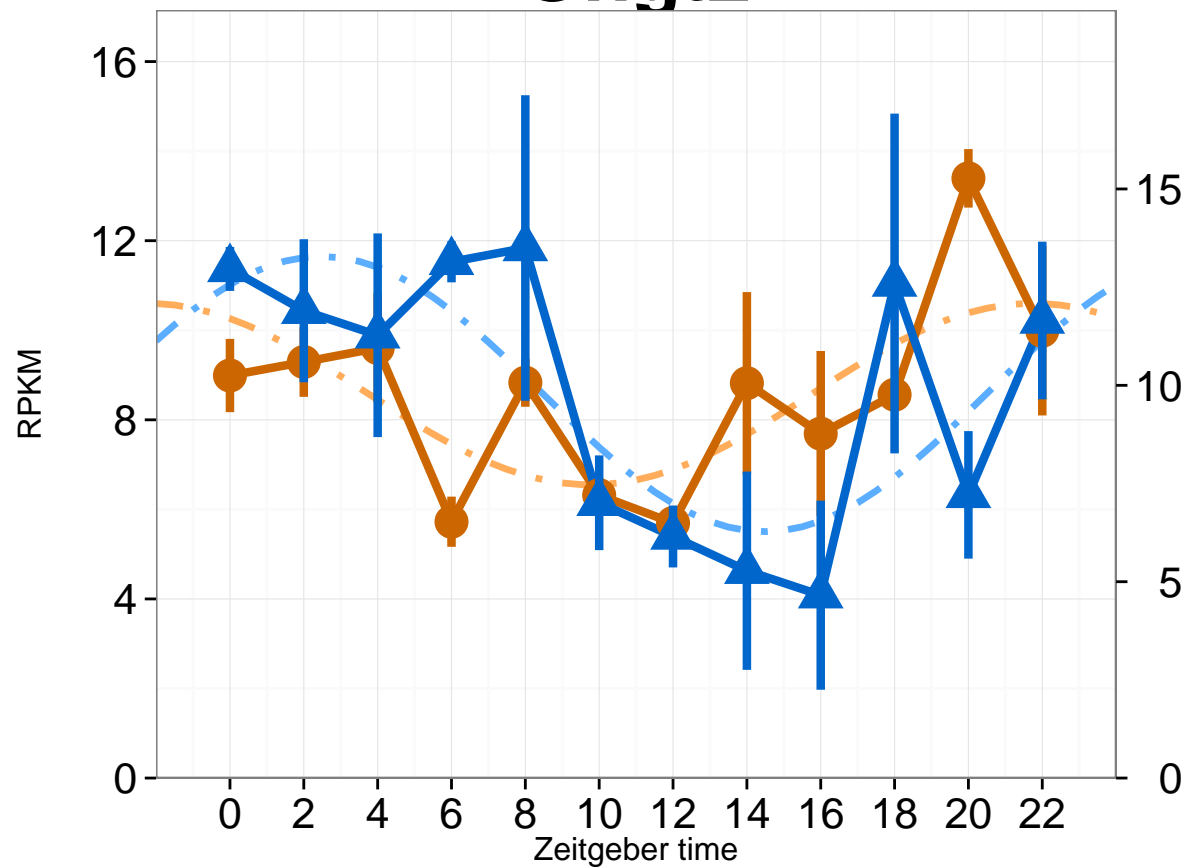

# Gngt2

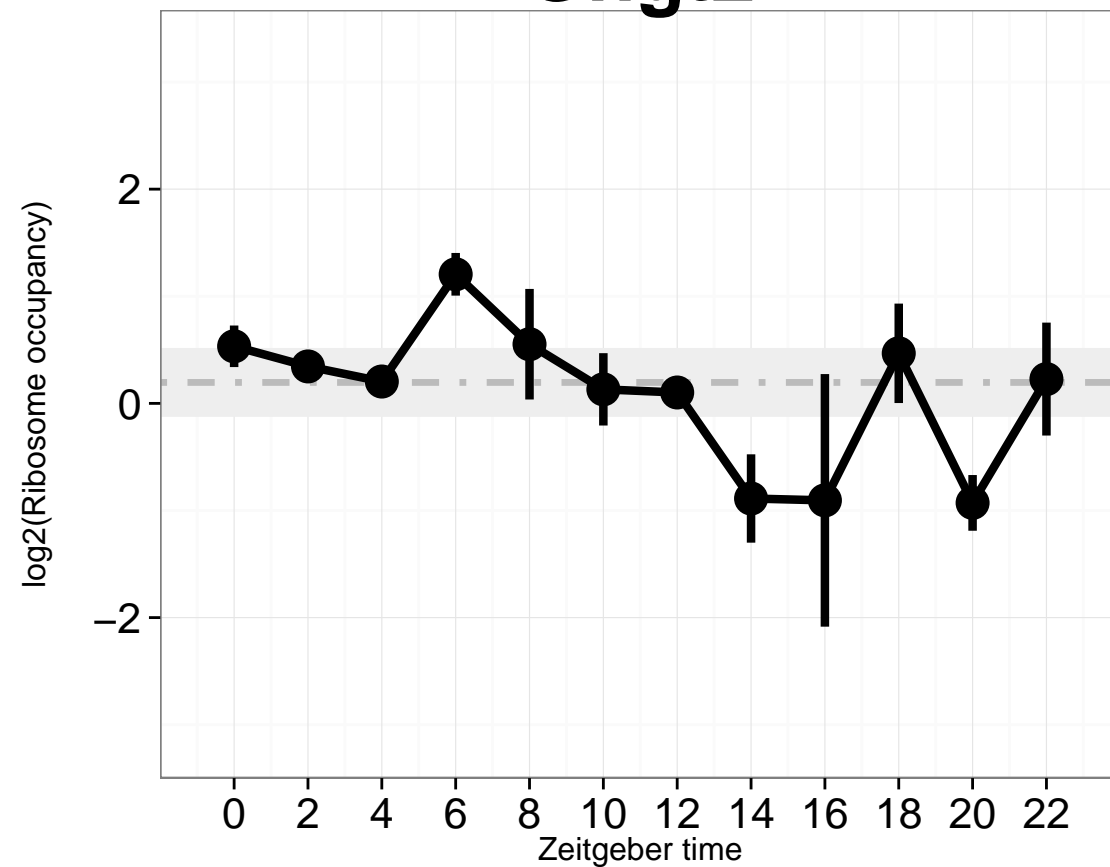

Supplement: Supplementary file 2661 [file 1]

# 4833420G17Rik

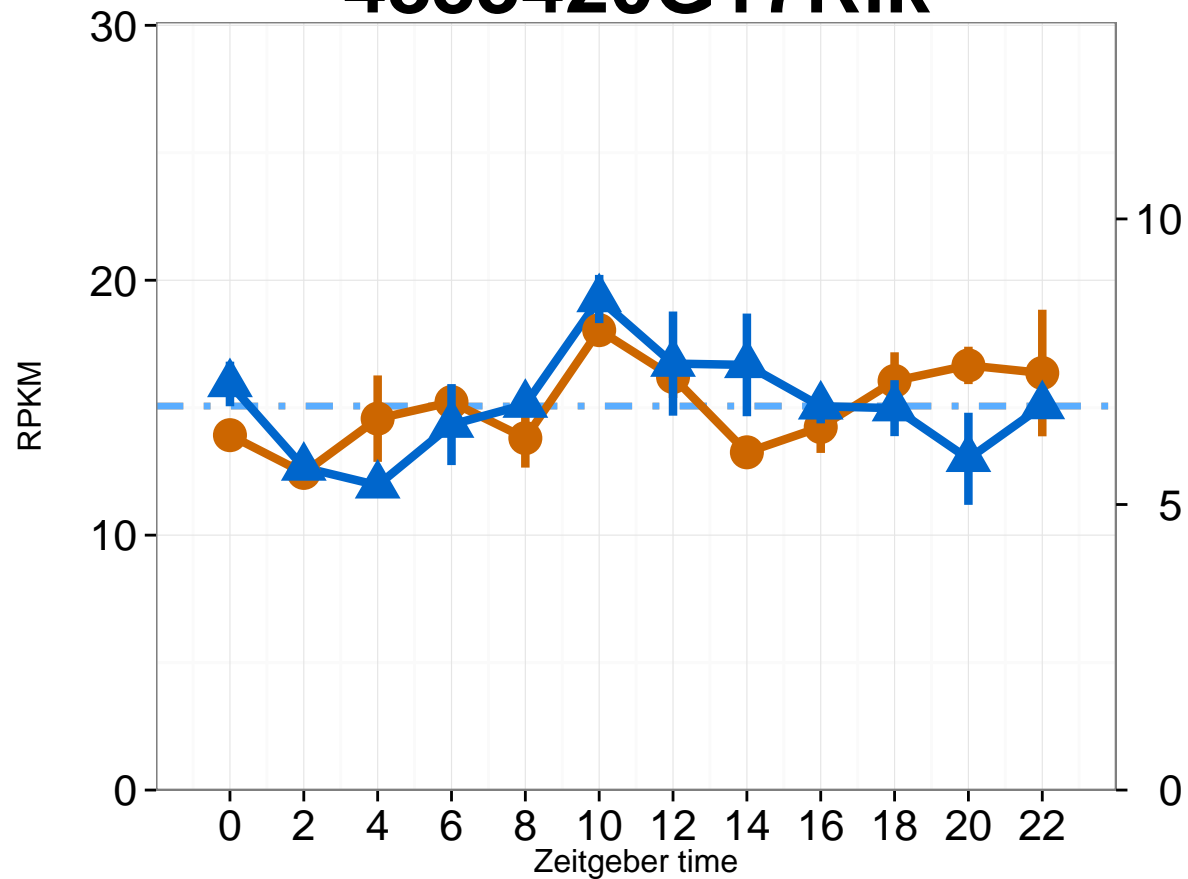

# 4833420G17Rik

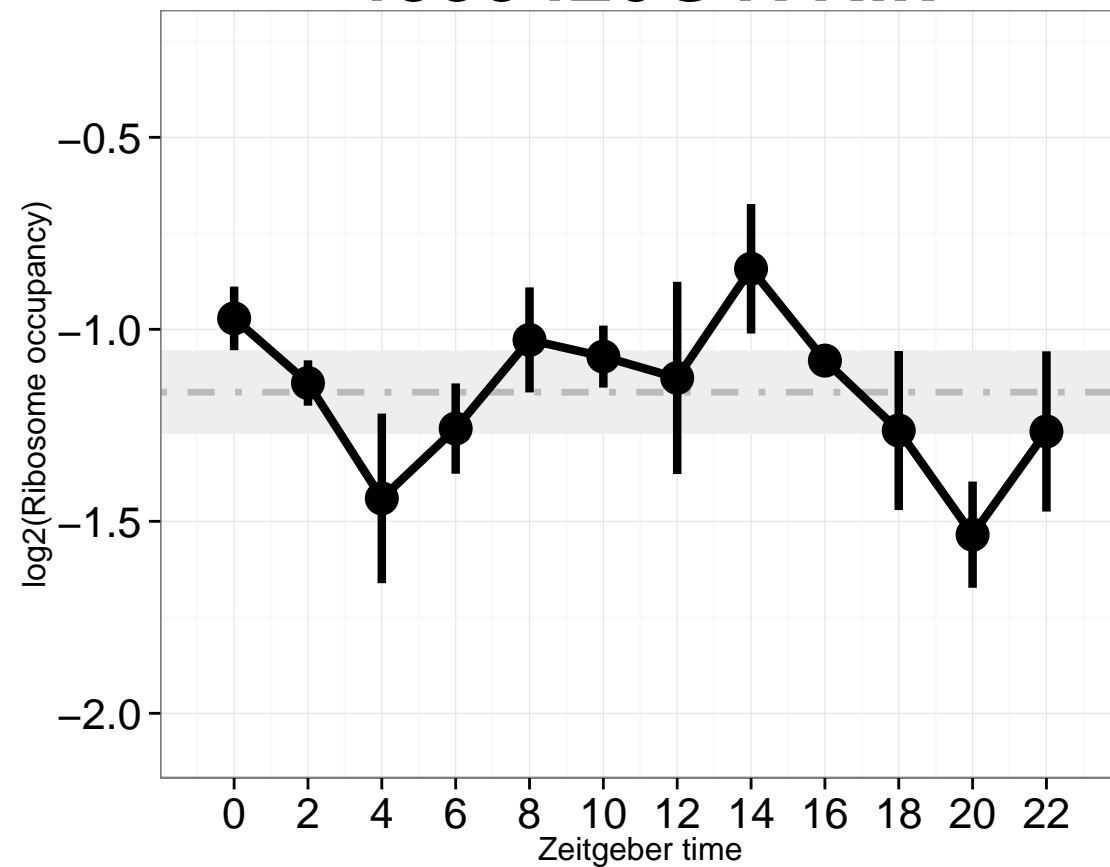

Supplement: Supplementary file 2662 [file 1]

# Agpat4

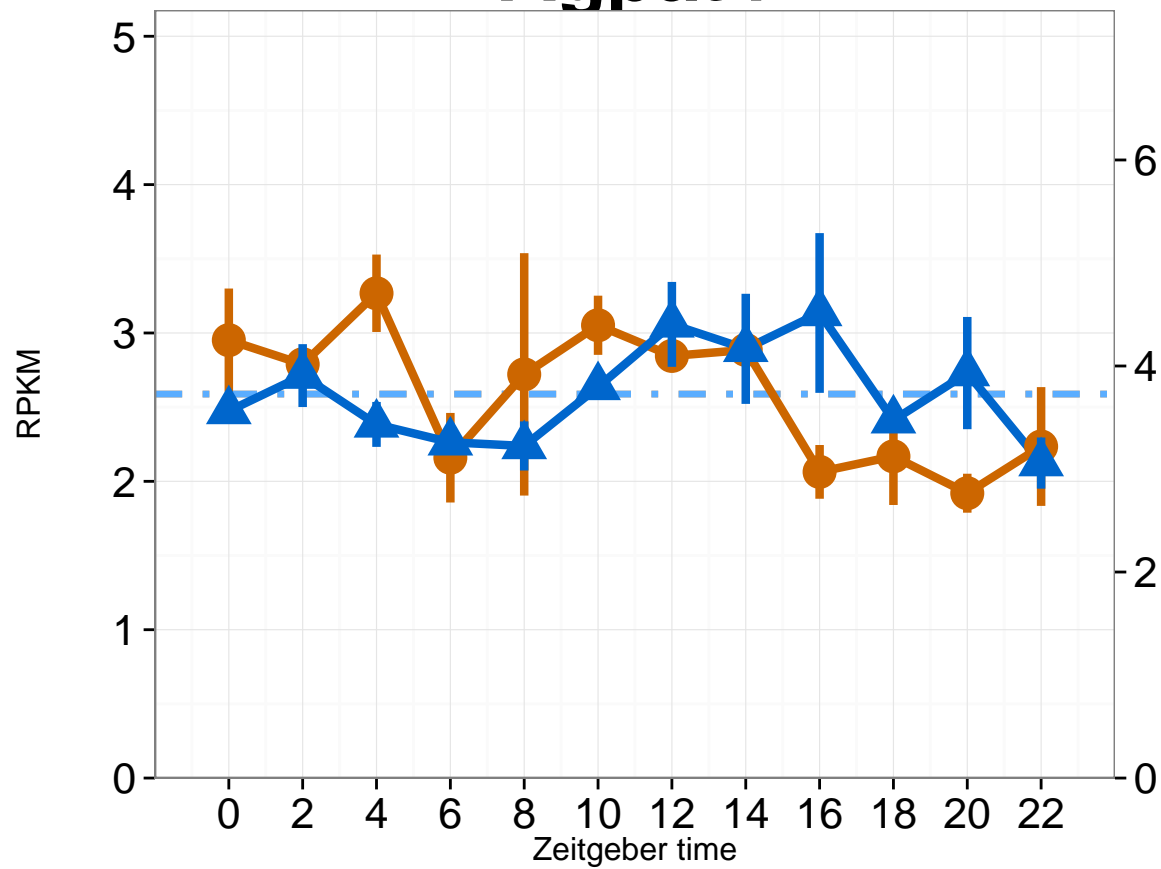

# Agpat4

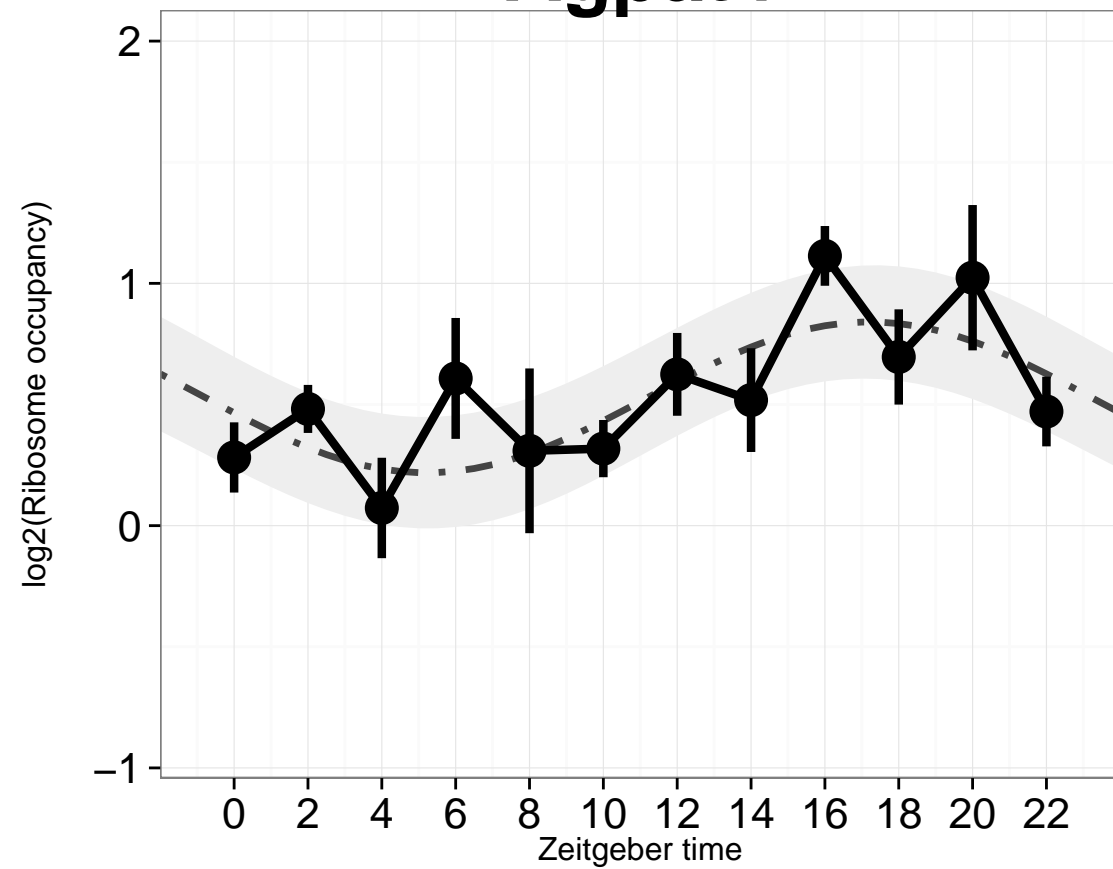

Supplement: Supplementary file 2663 [file 1]

# B3gnt8

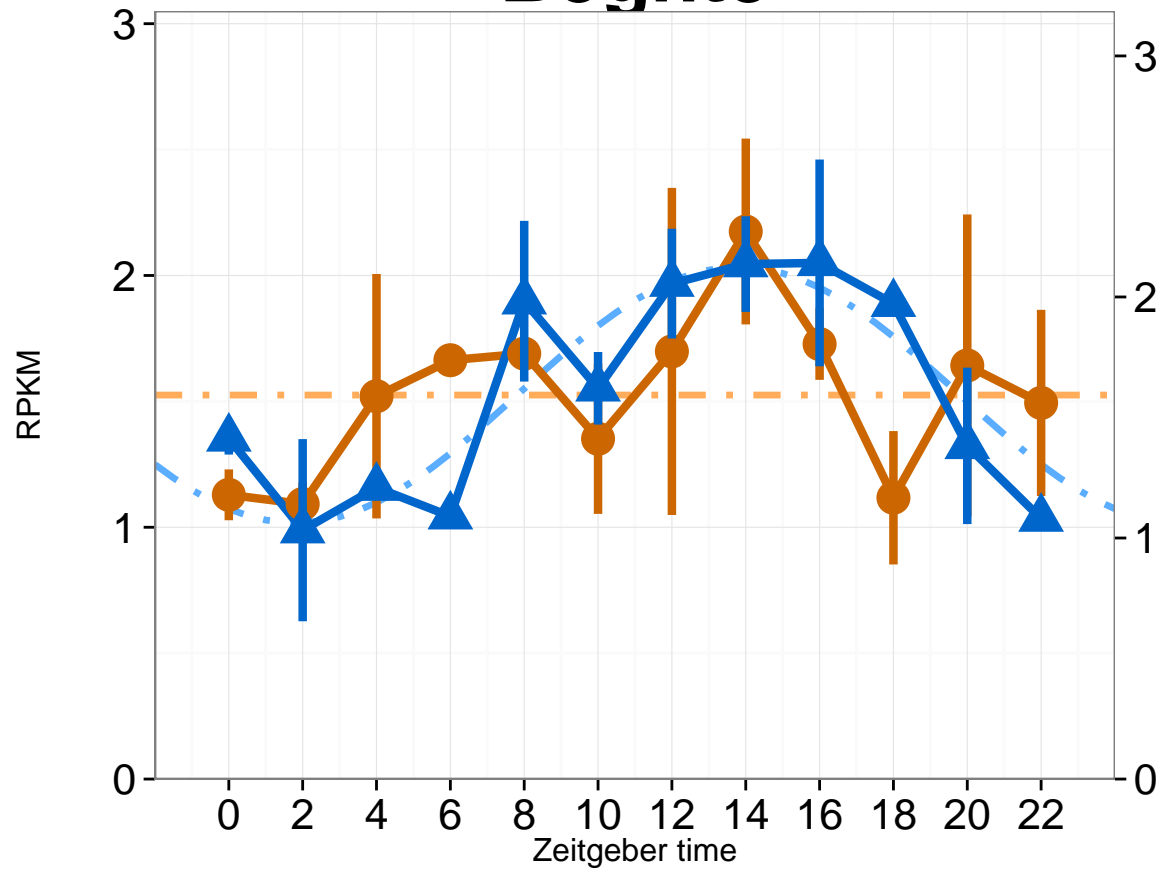

# B3gnt8

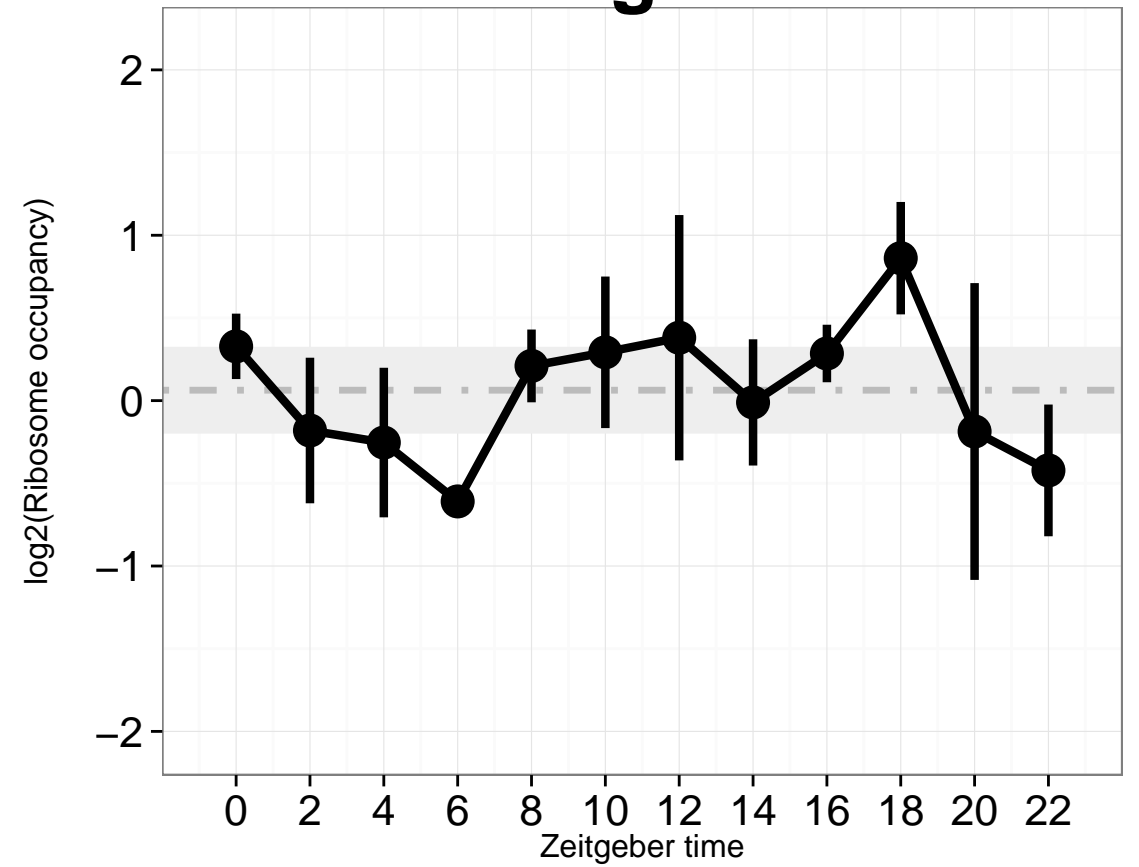

Supplement: Supplementary file 2664 [file 1]

## Marveld2

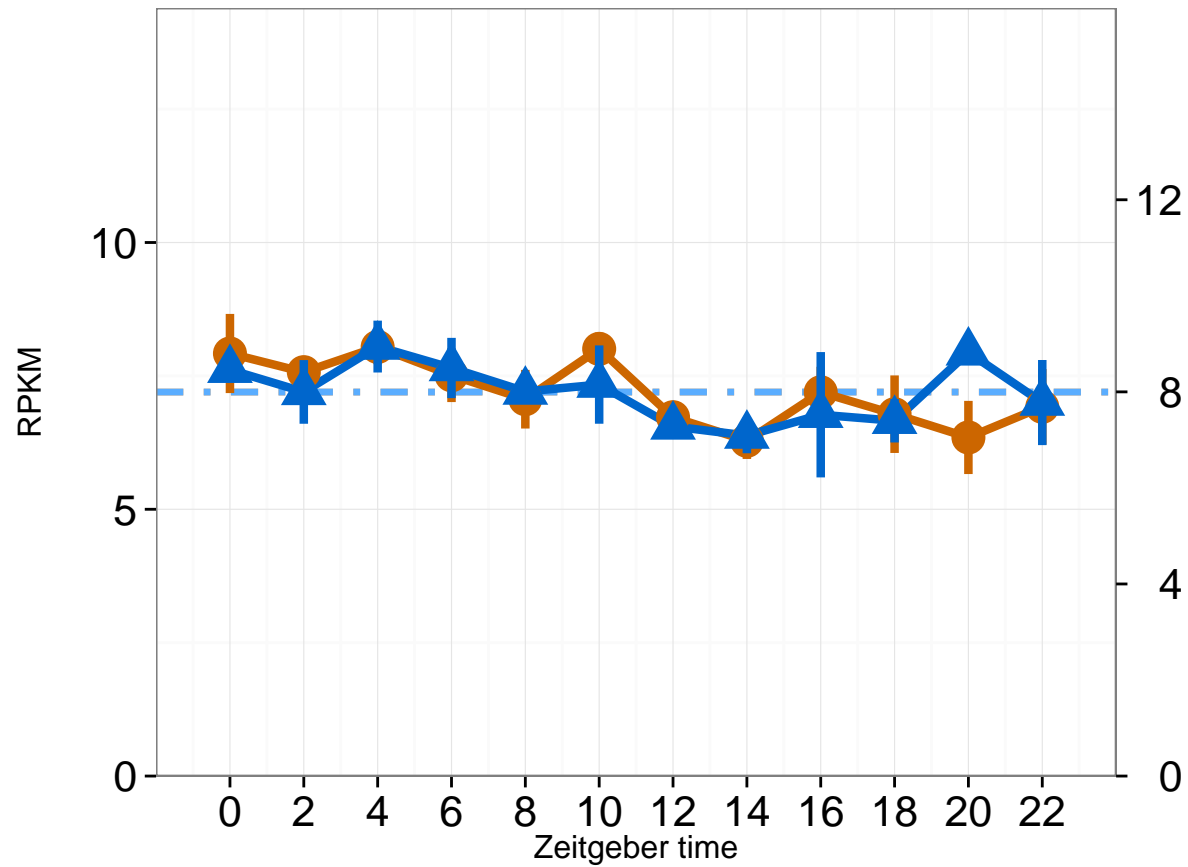

## Marveld2

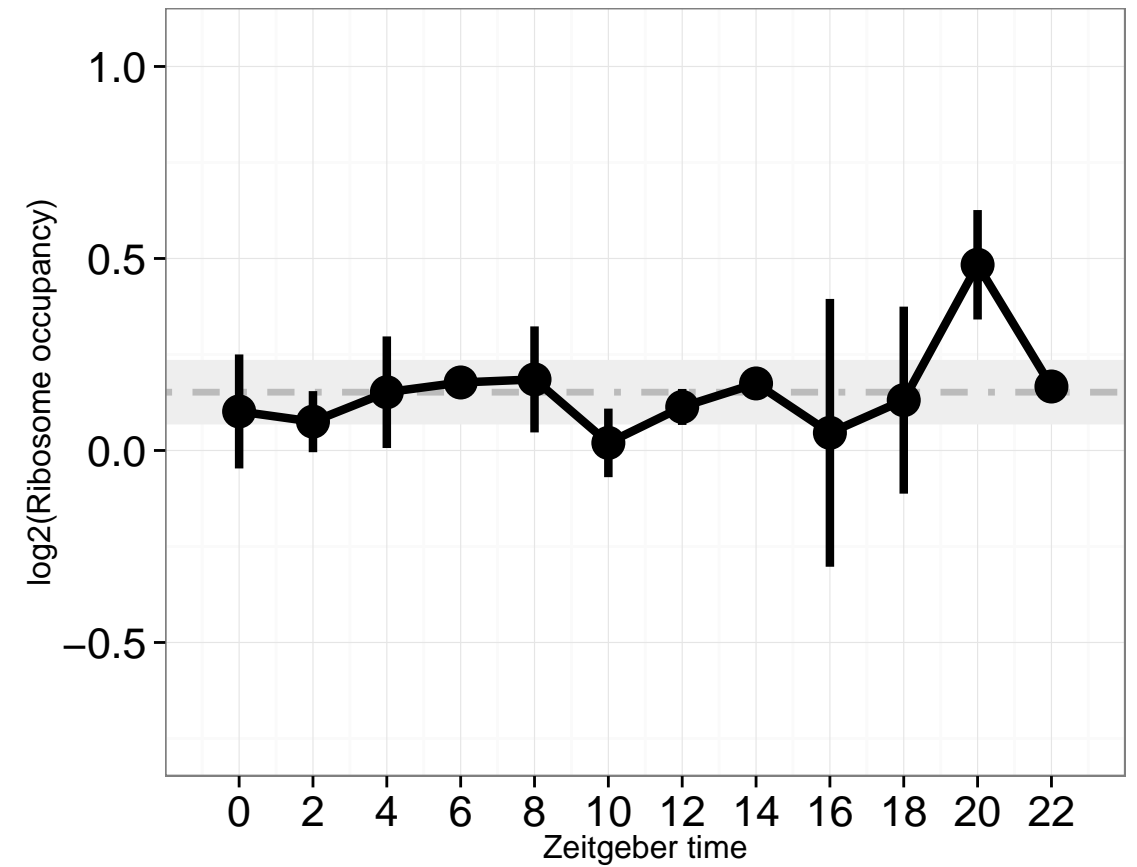

Supplement: Supplementary file 2665 [file 1]

# Gprasp1

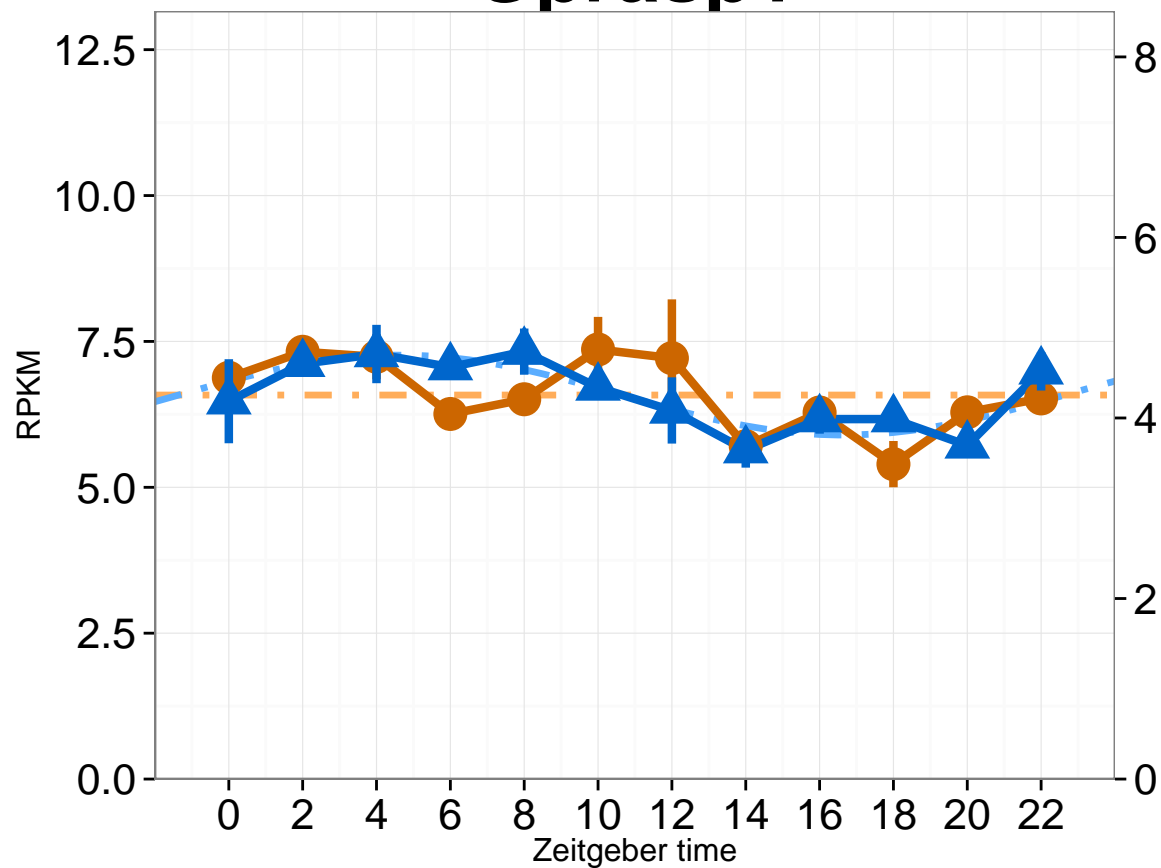

# Gprasp1

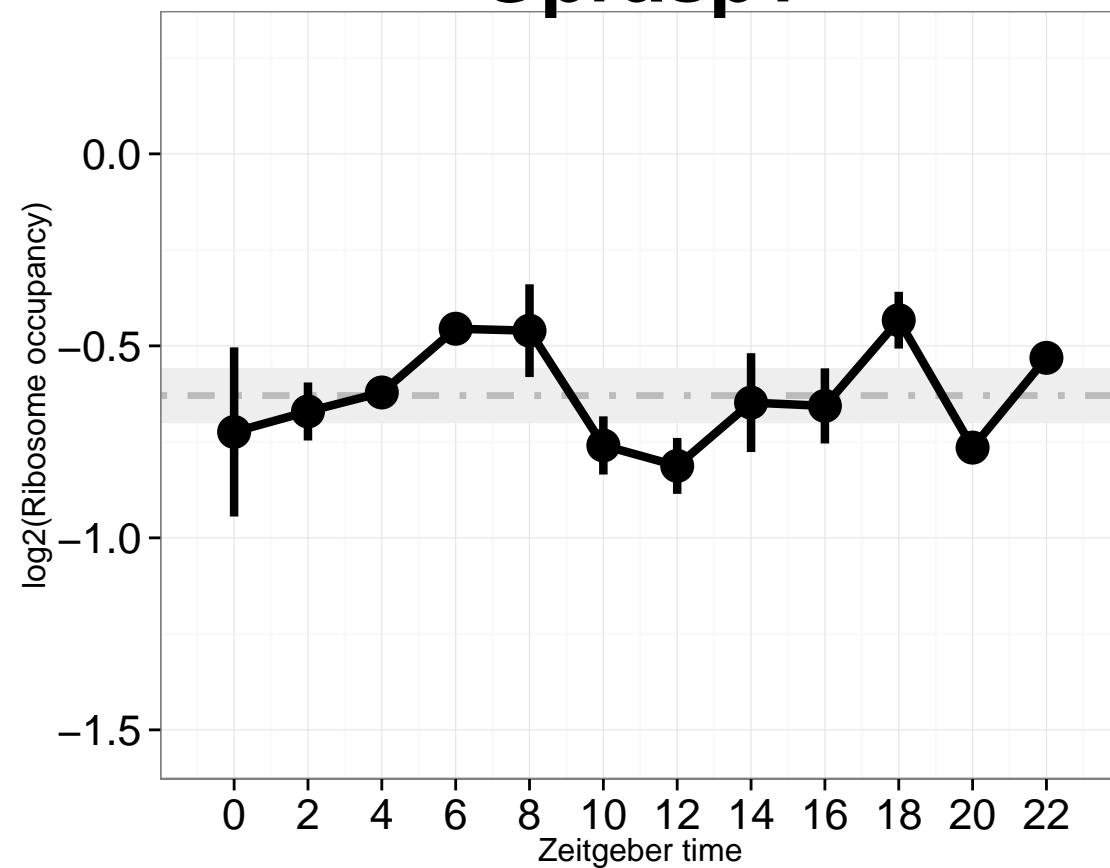

Supplement: Supplementary file 2666 [file 1]

## Jkamp

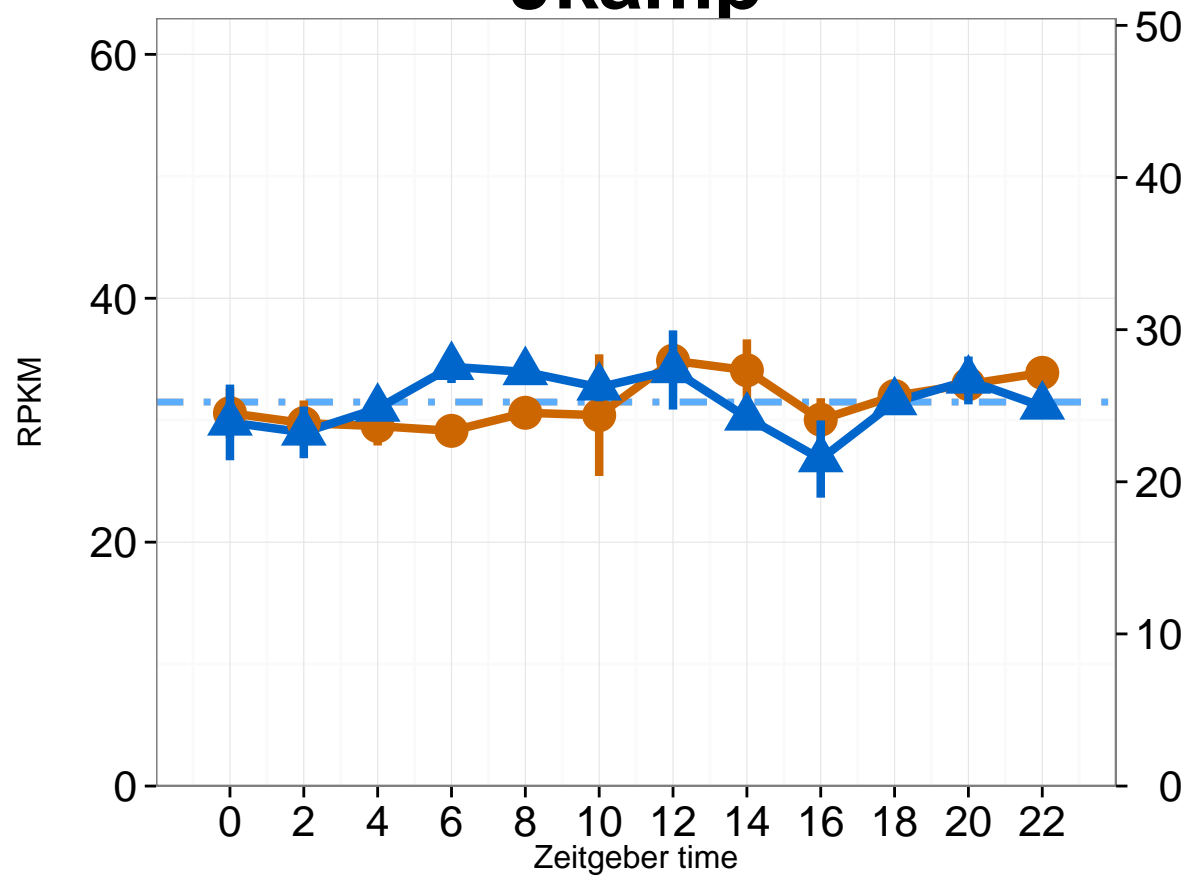

## Jkamp

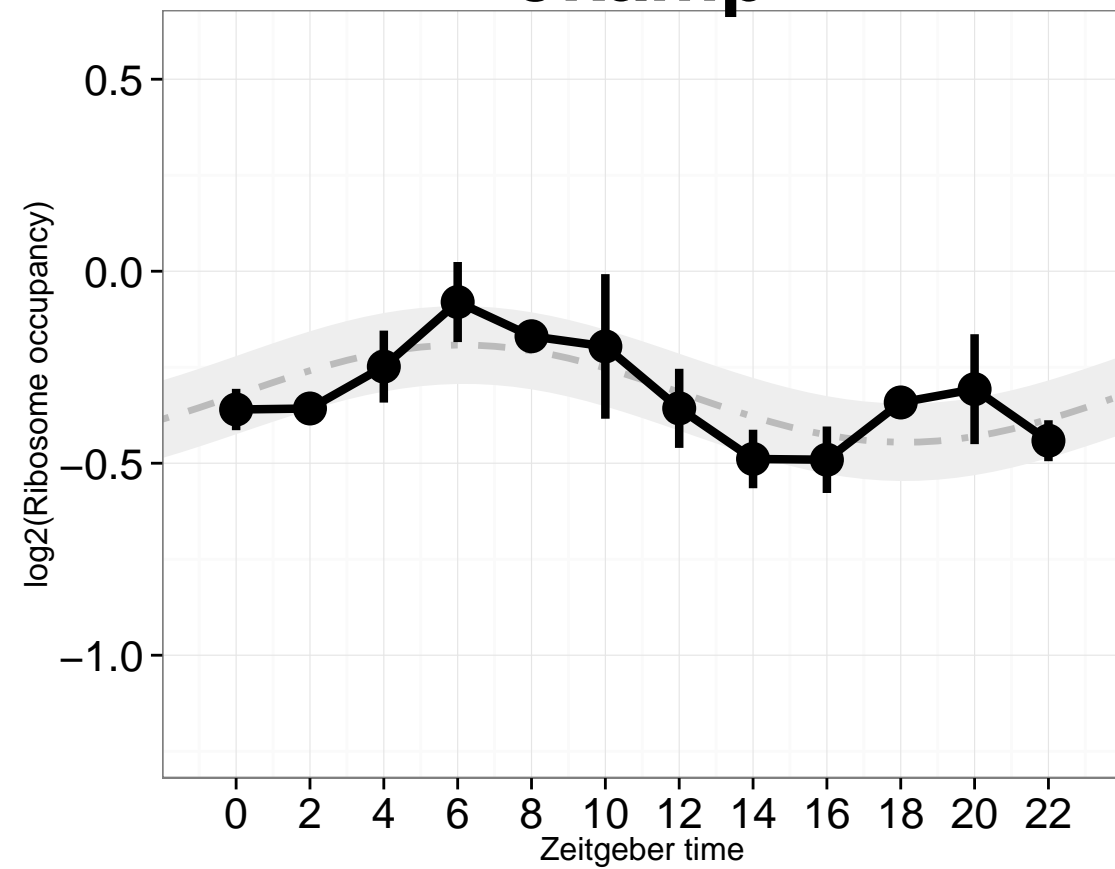

Supplement: Supplementary file 2667 [file 1]

# Cyp26b1

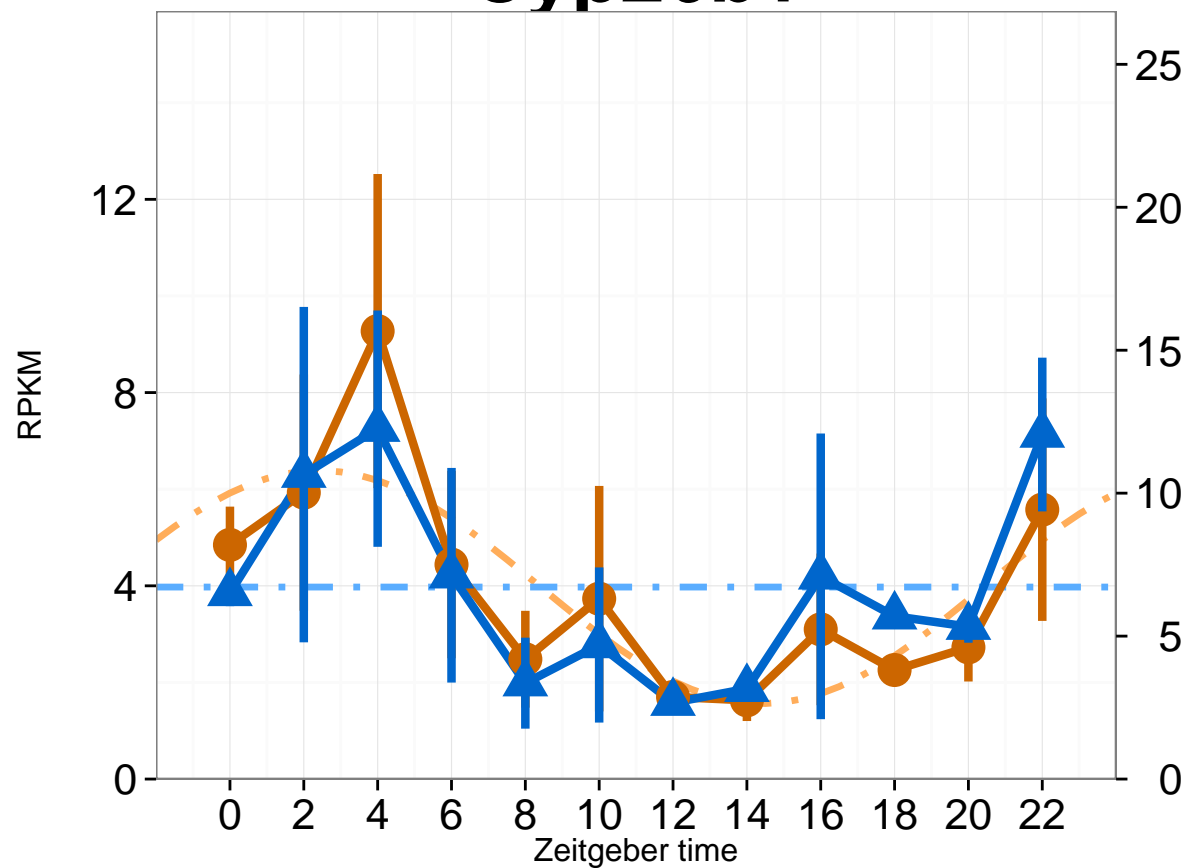

# Cyp26b1

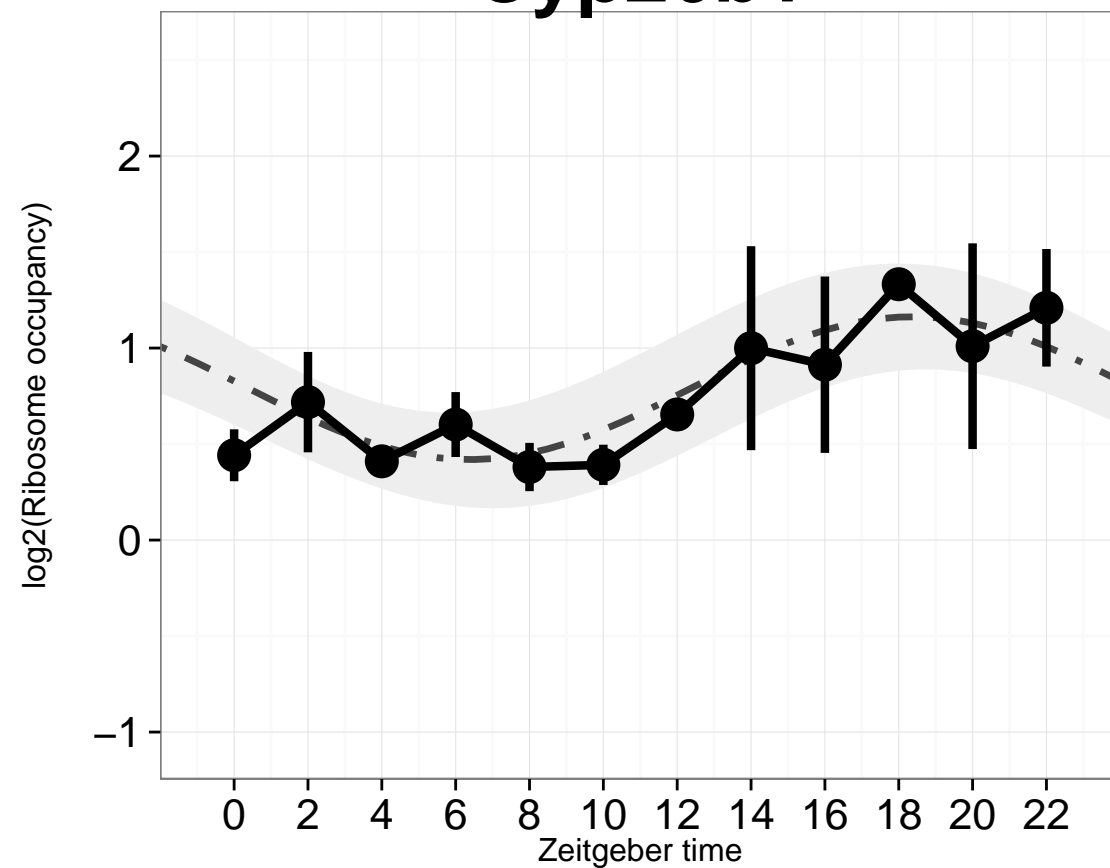

Supplement: Supplementary file 2668 [file 1]

# Polr3g

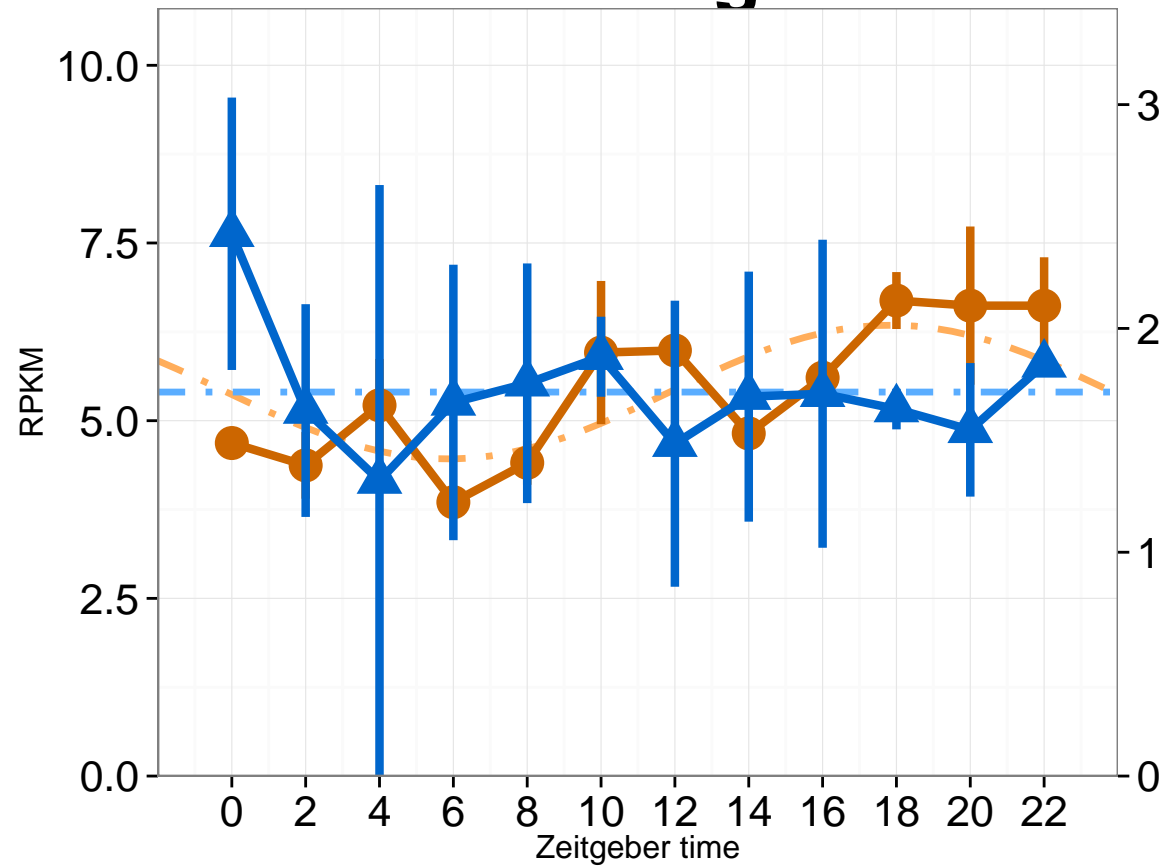

# Polr3g

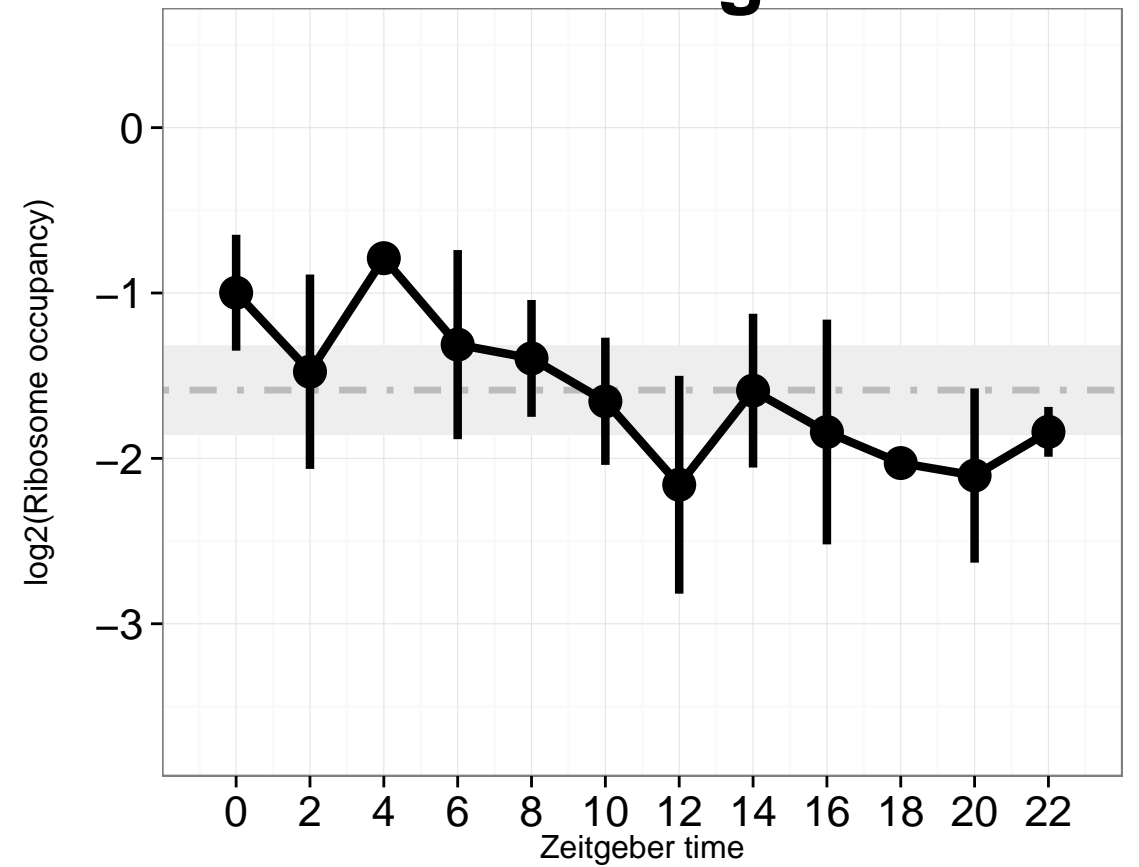

Supplement: Supplementary file 2669 [file 1]

## Il1rap

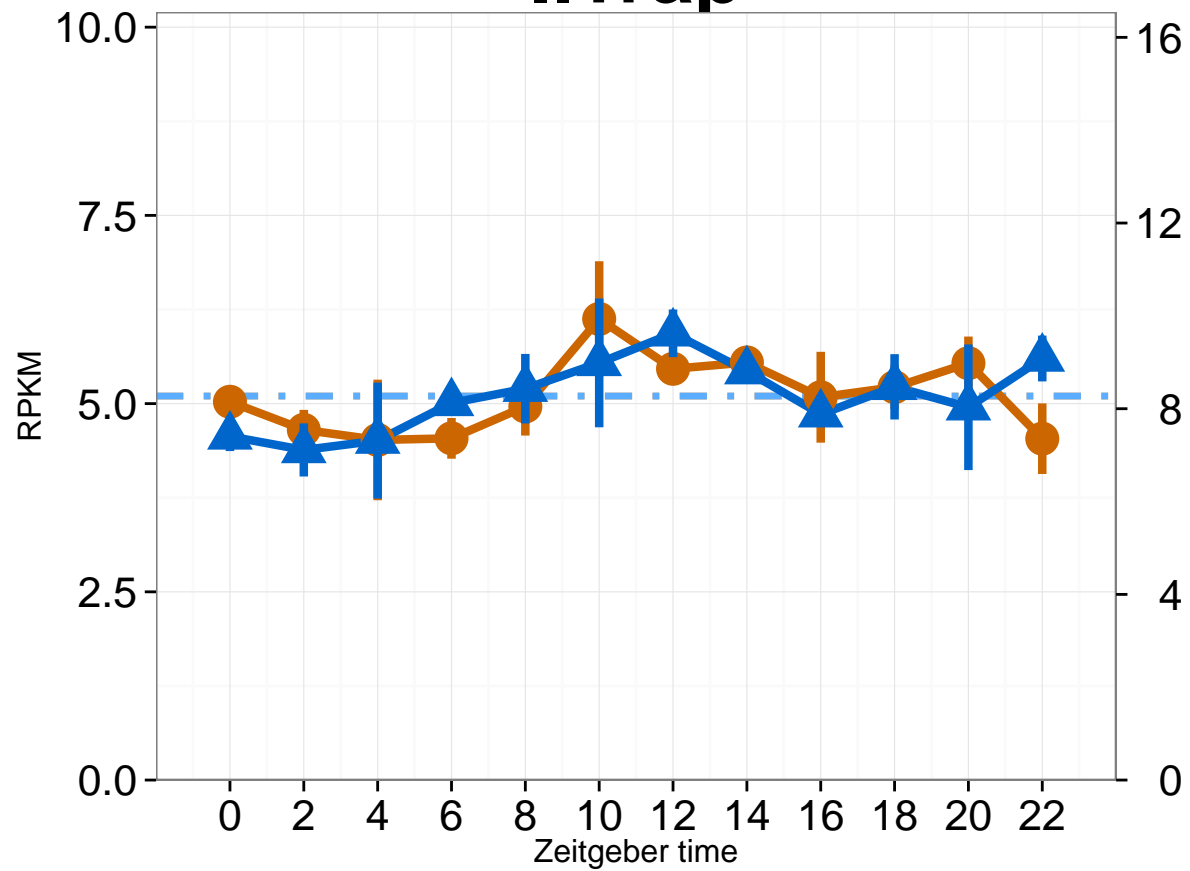

## Il1rap

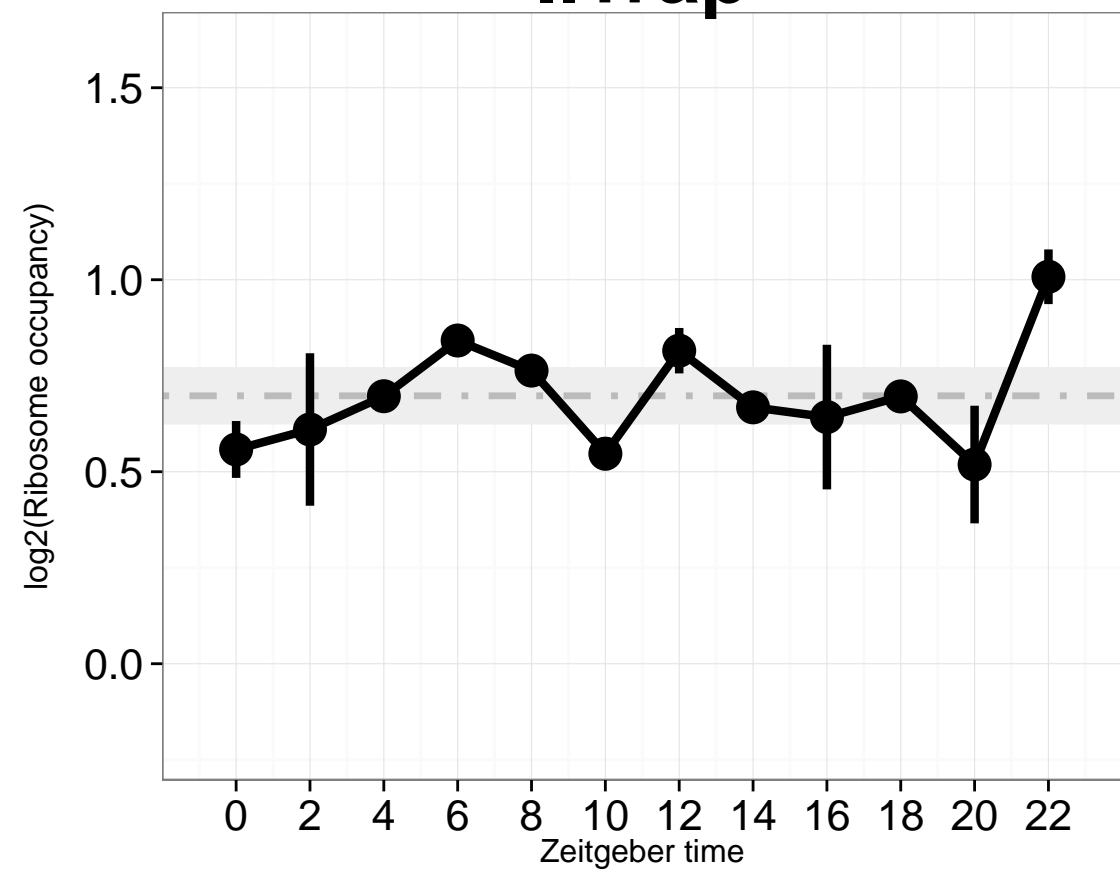

Supplement: Supplementary file 2670 [file 1]

# C1qb

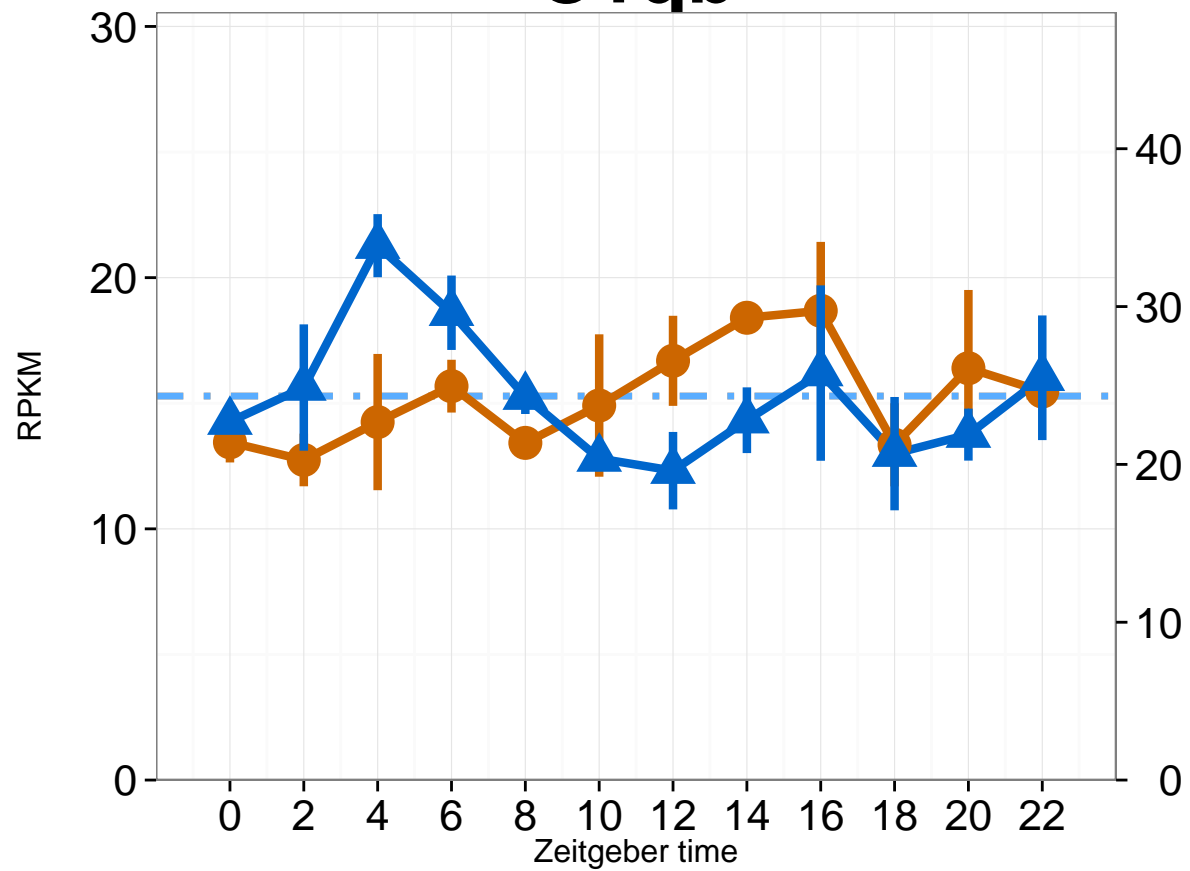

# C1qb

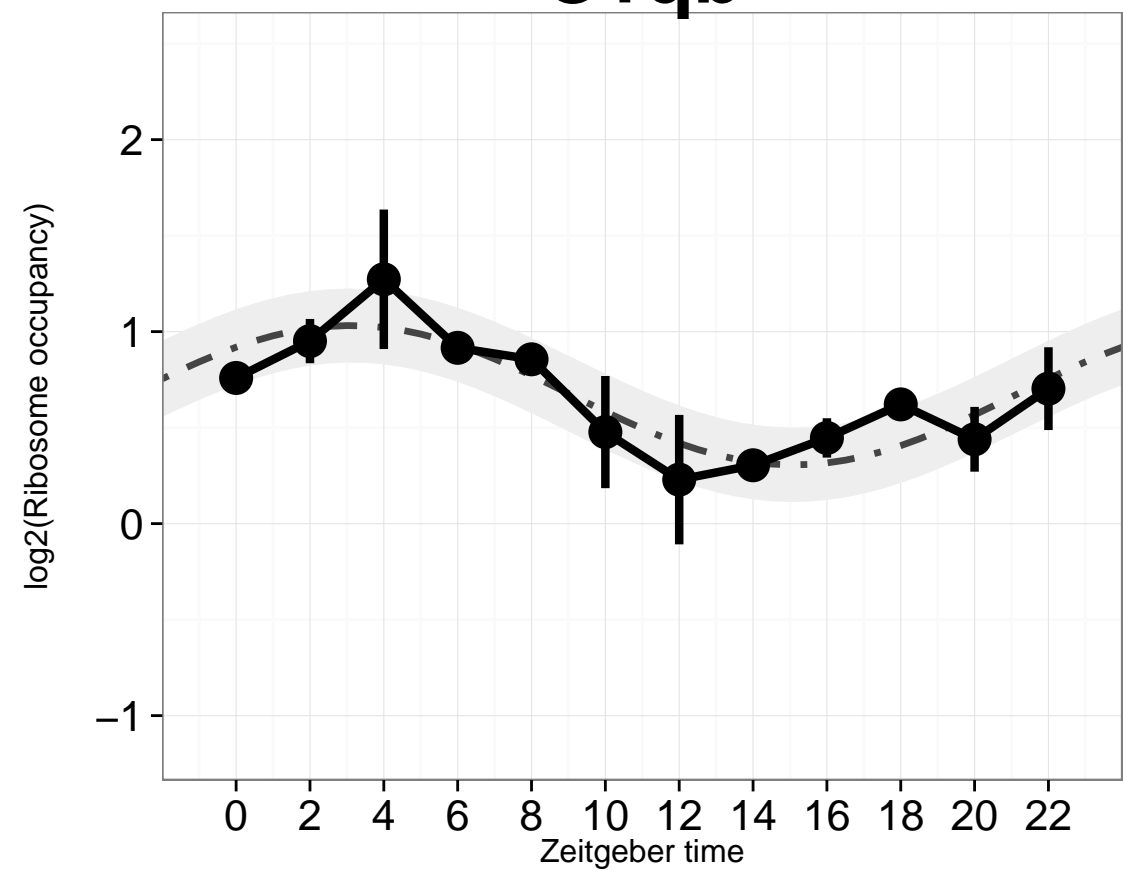

Supplement: Supplementary file 2671 [file 1]

## E2f2

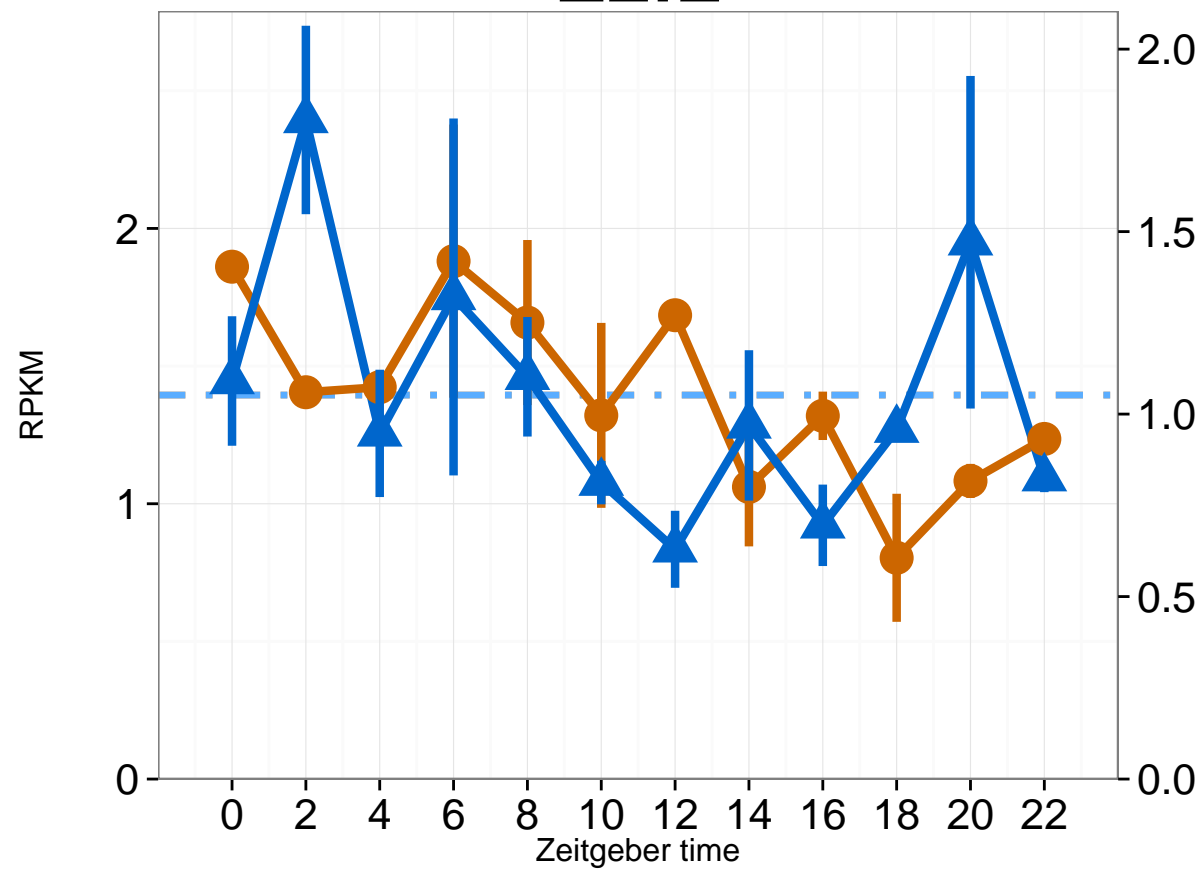

## E2f2

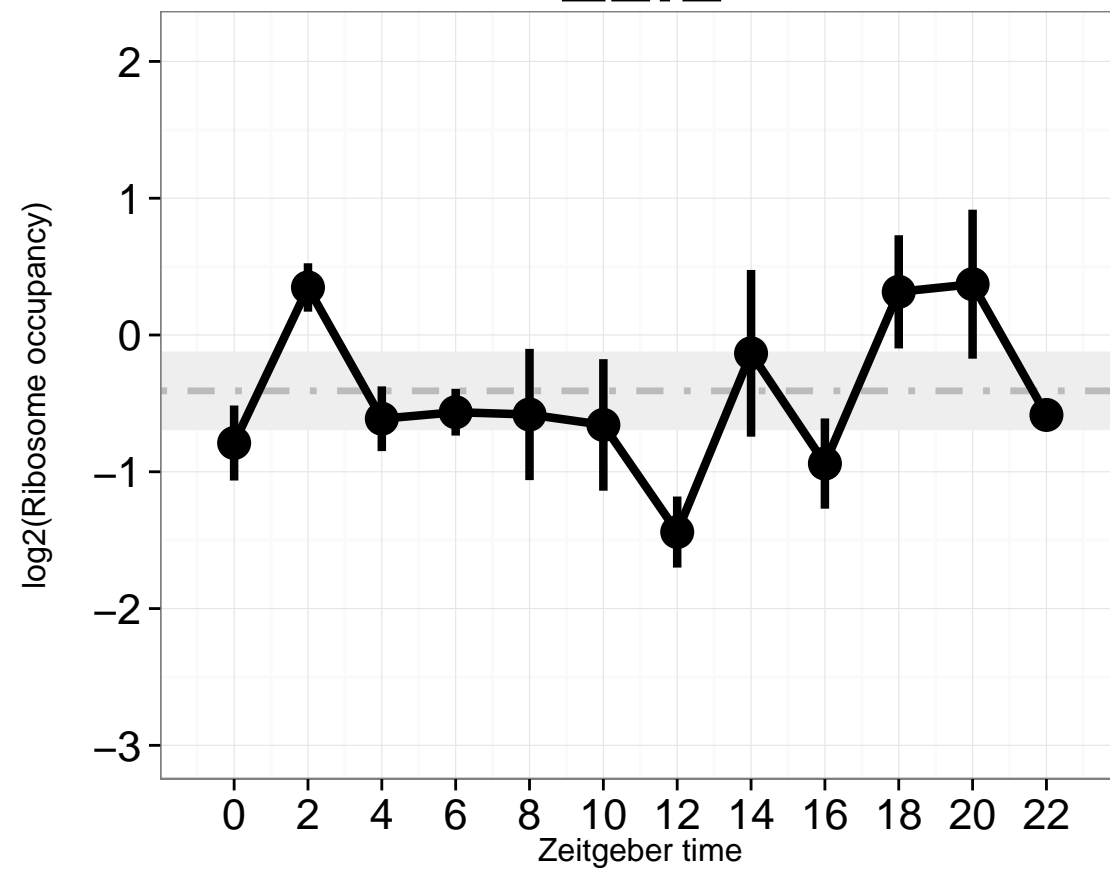

Supplement: Supplementary file 2672 [file 1]

## Amt

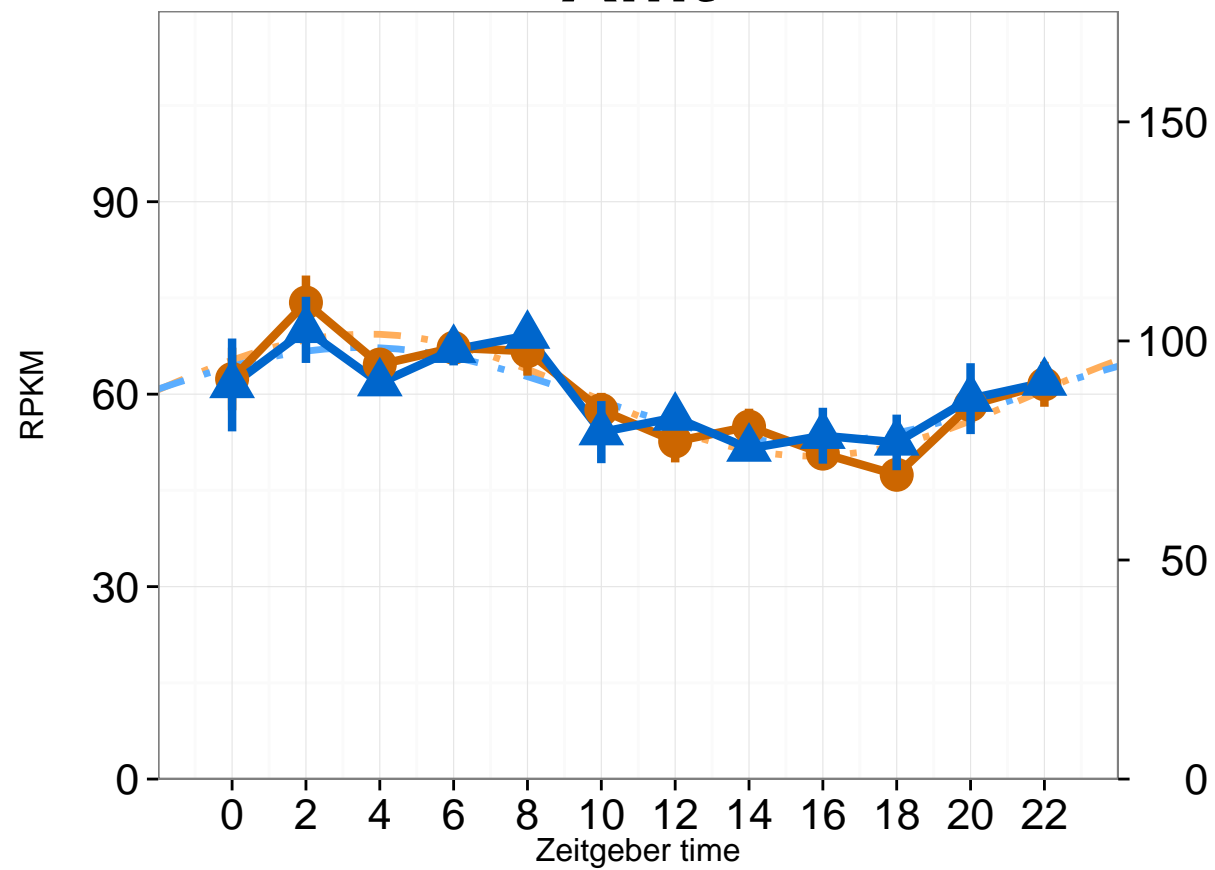

## Amt

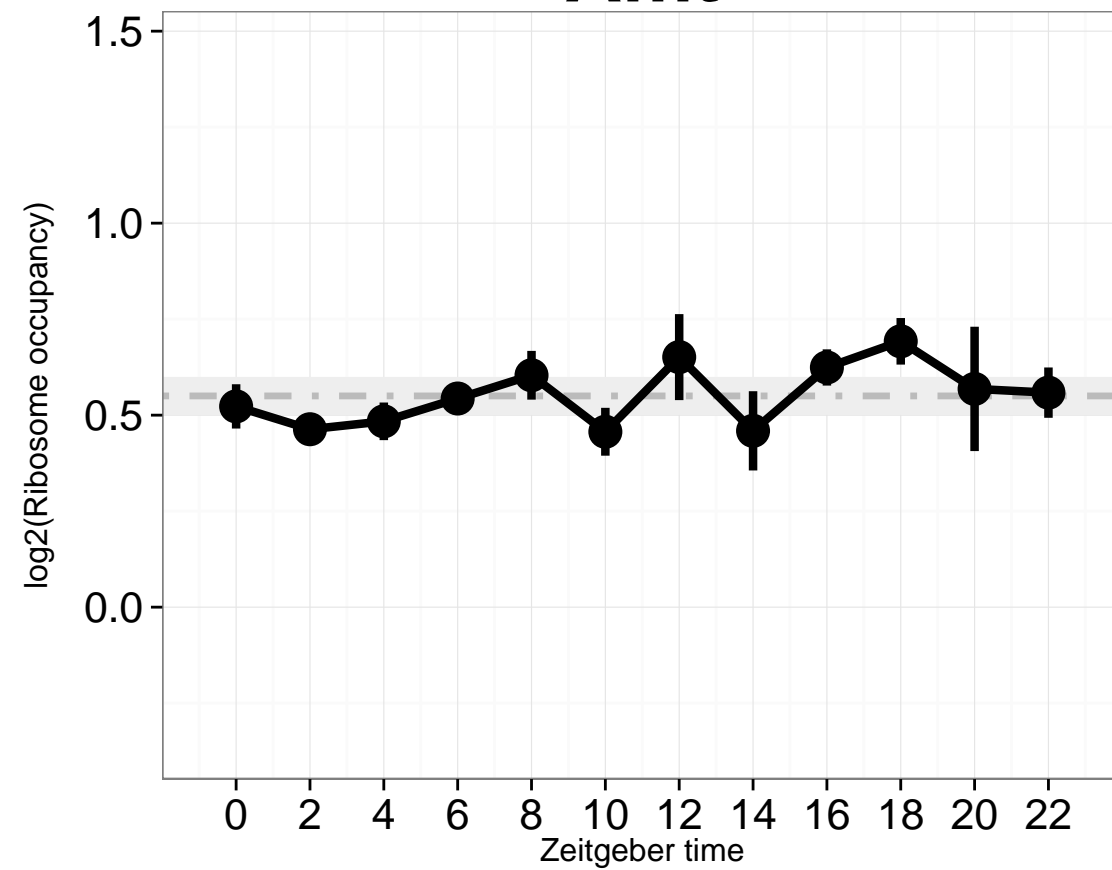

Supplement: Supplementary file 2673 [file 1]

## Tcf12

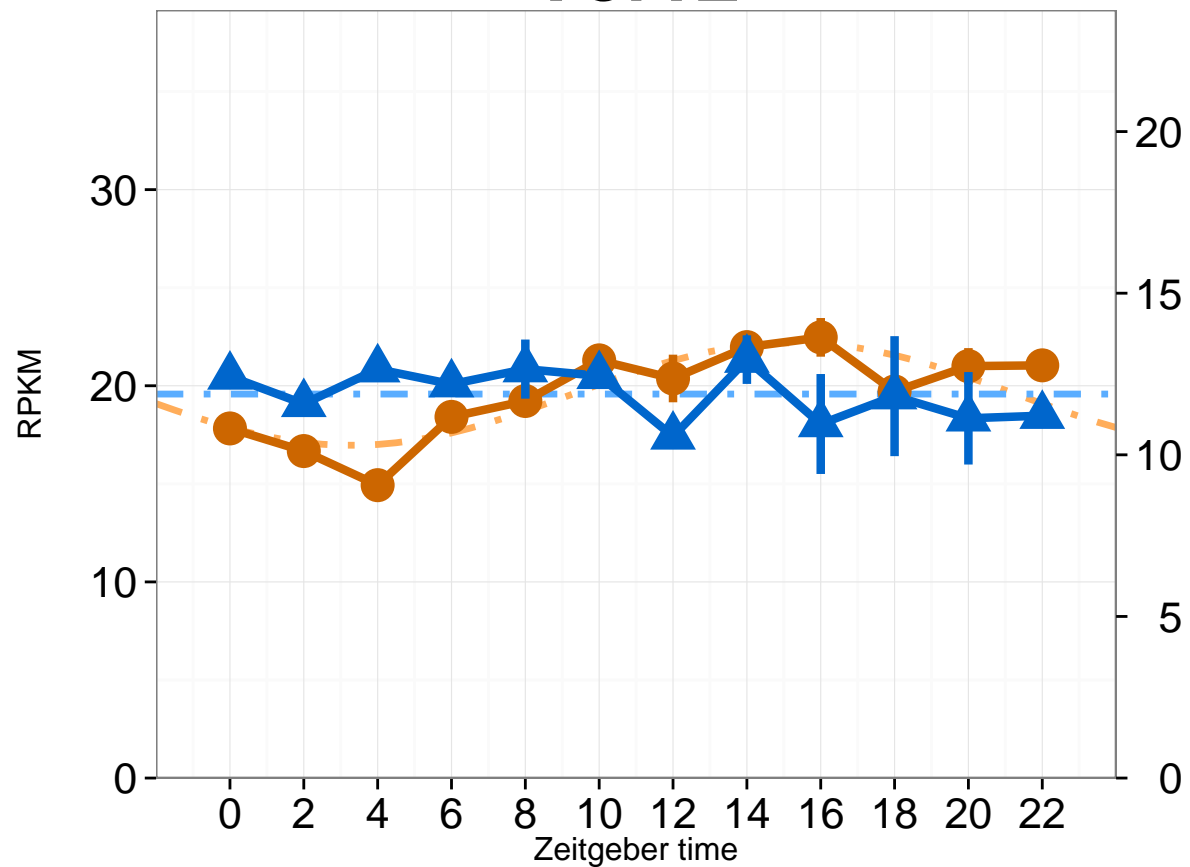

## Tcf12

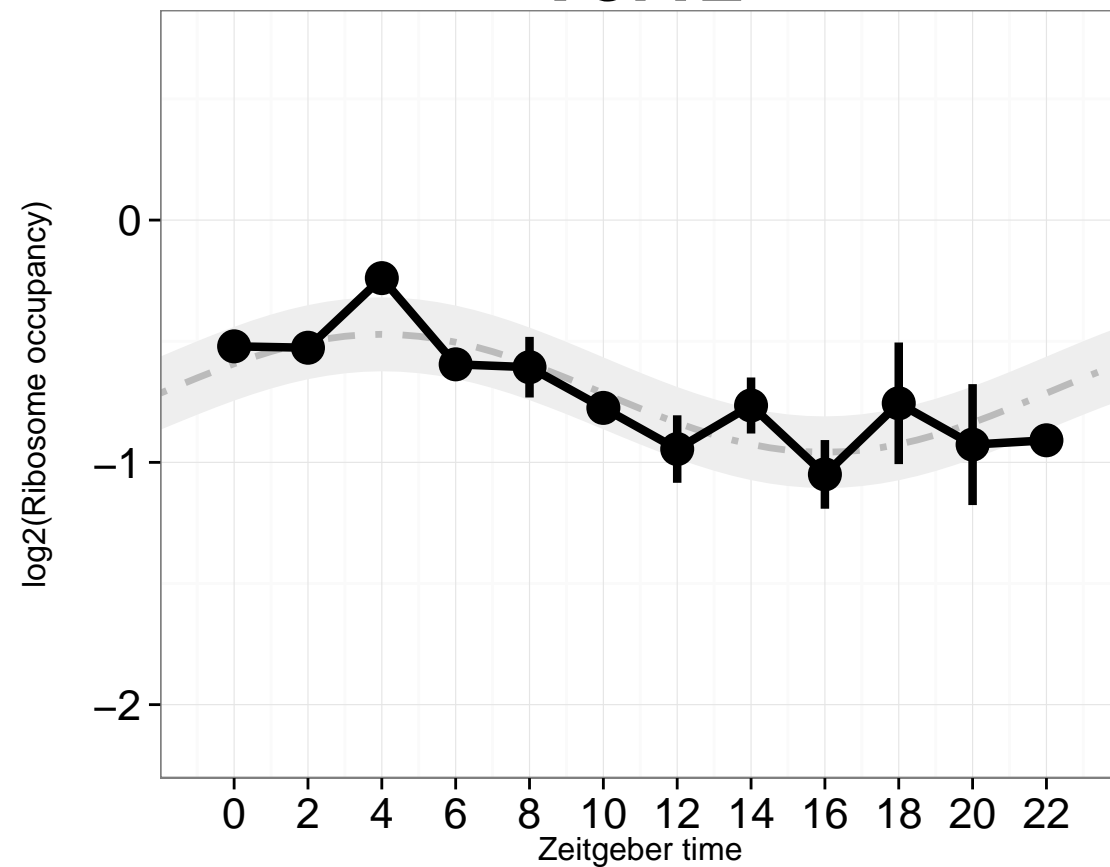

Supplement: Supplementary file 2674 [file 1]

## Shpk

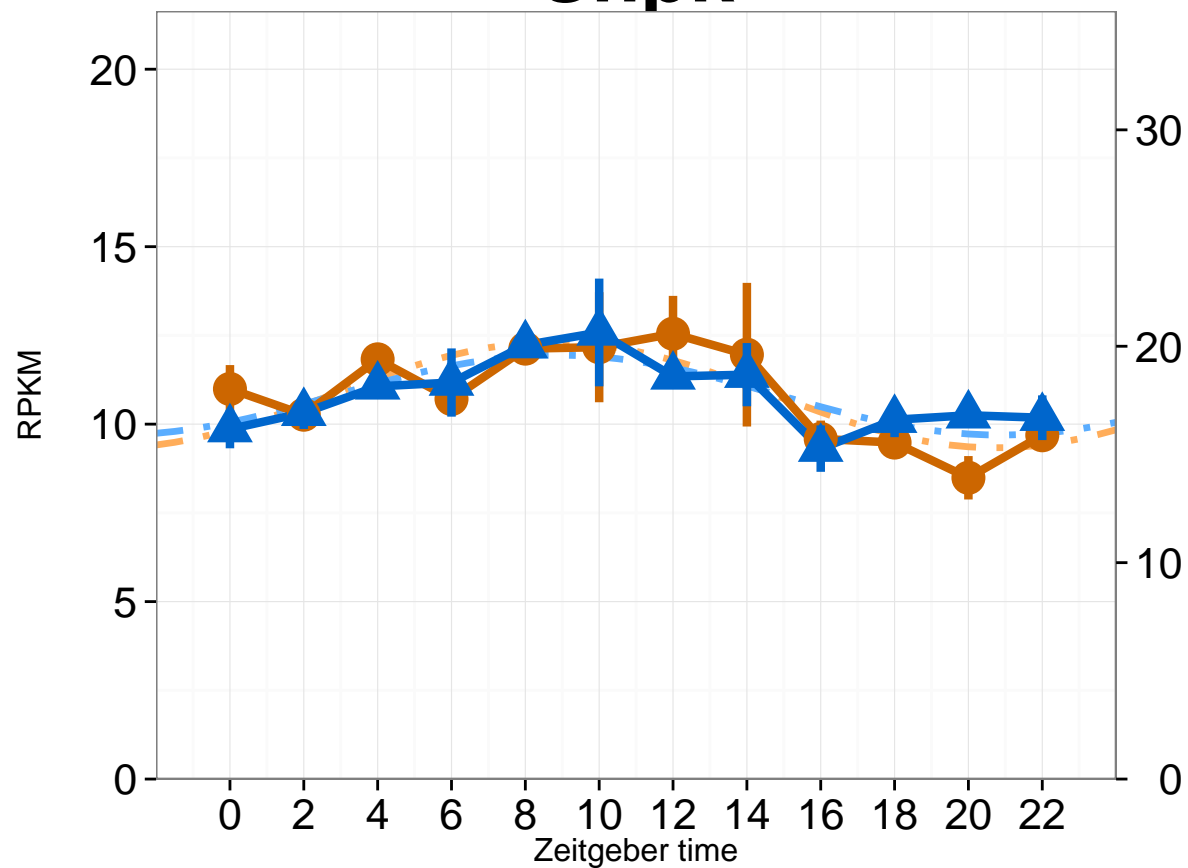

## Shpk

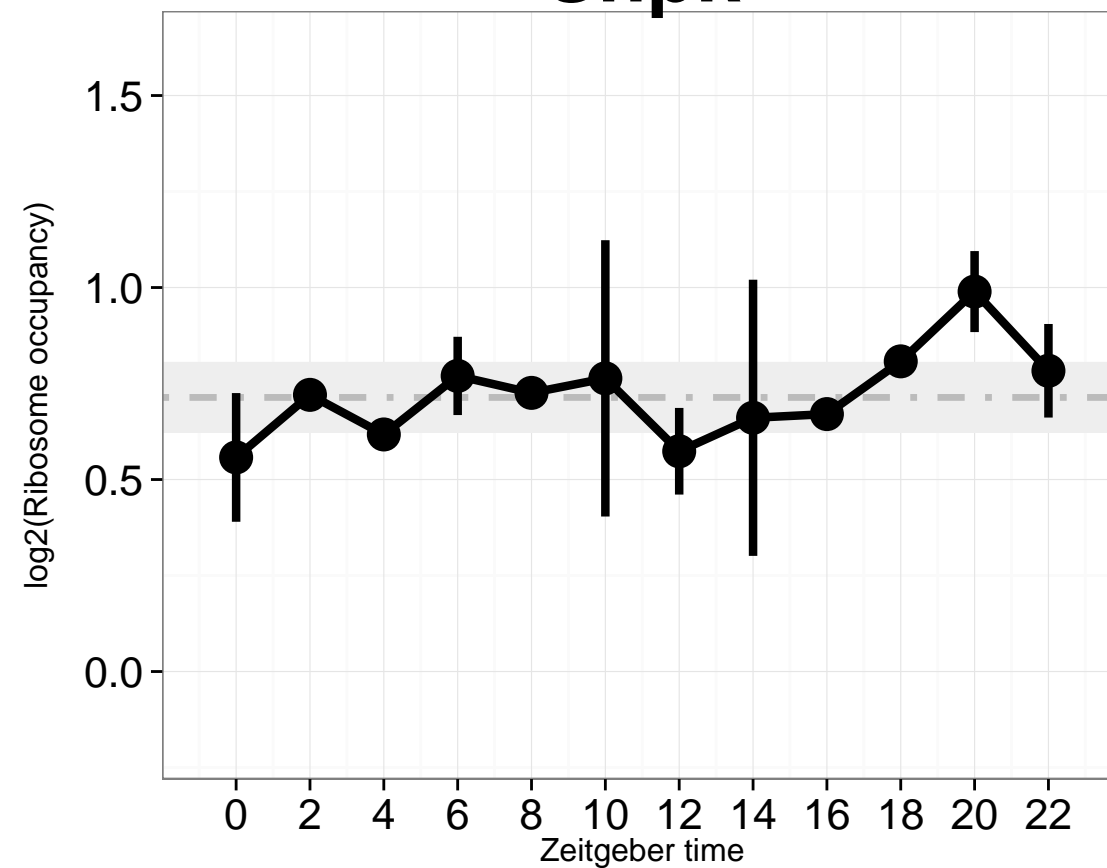

Supplement: Supplementary file 2675 [file 1]

## Dus3l

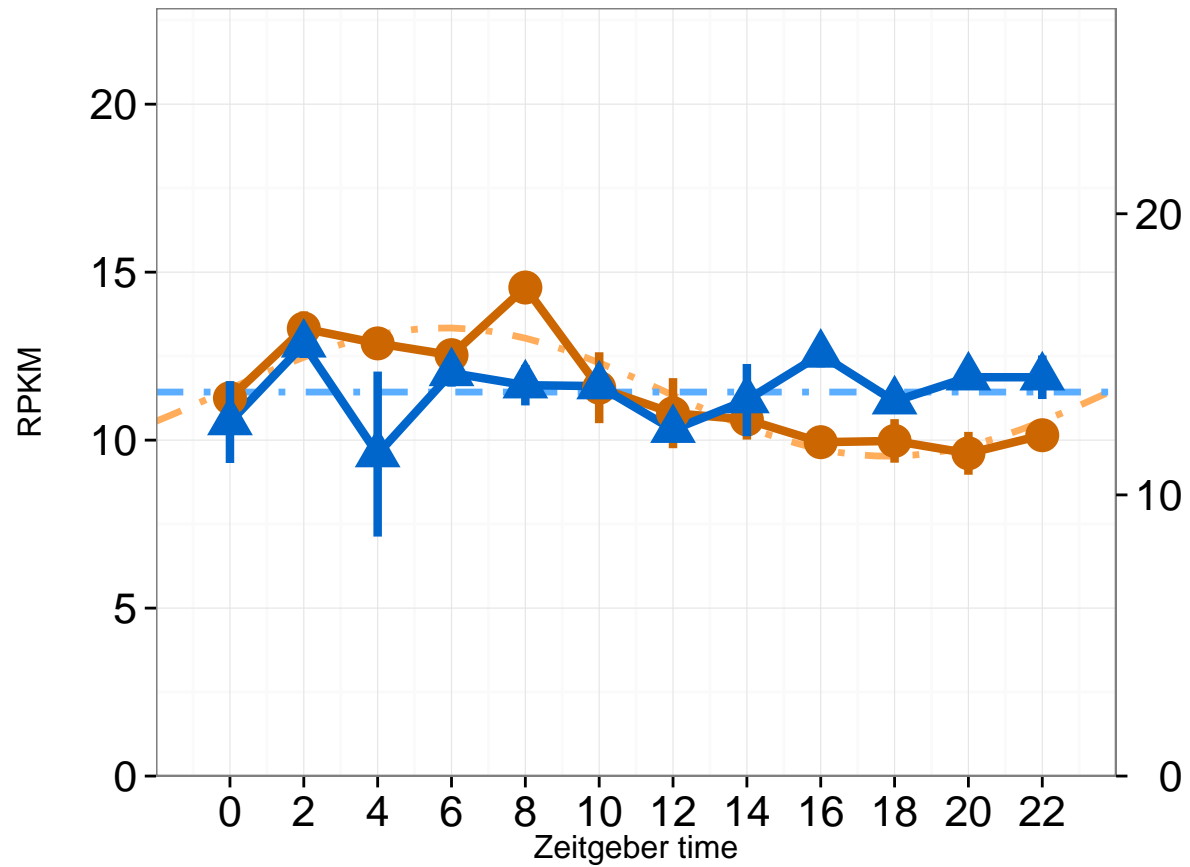

## Dus3l

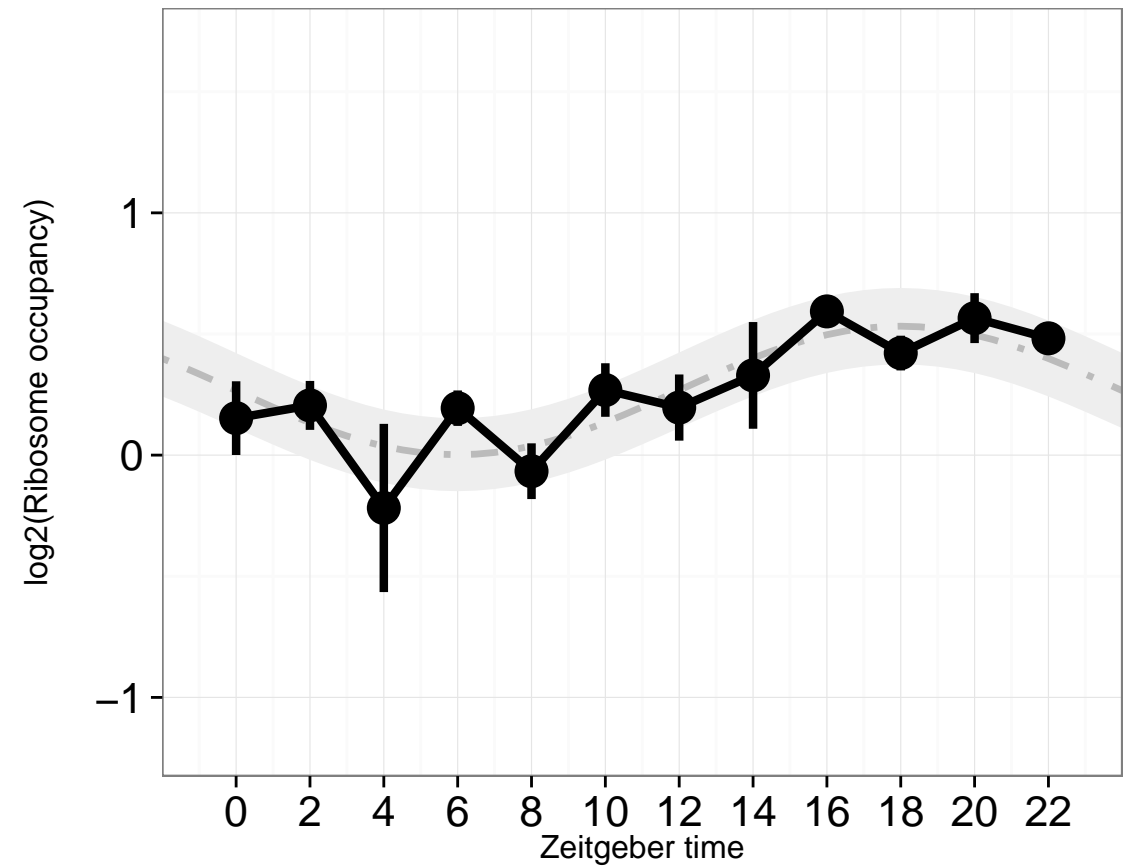

Supplement: Supplementary file 2676 [file 1]

# Ppm1a

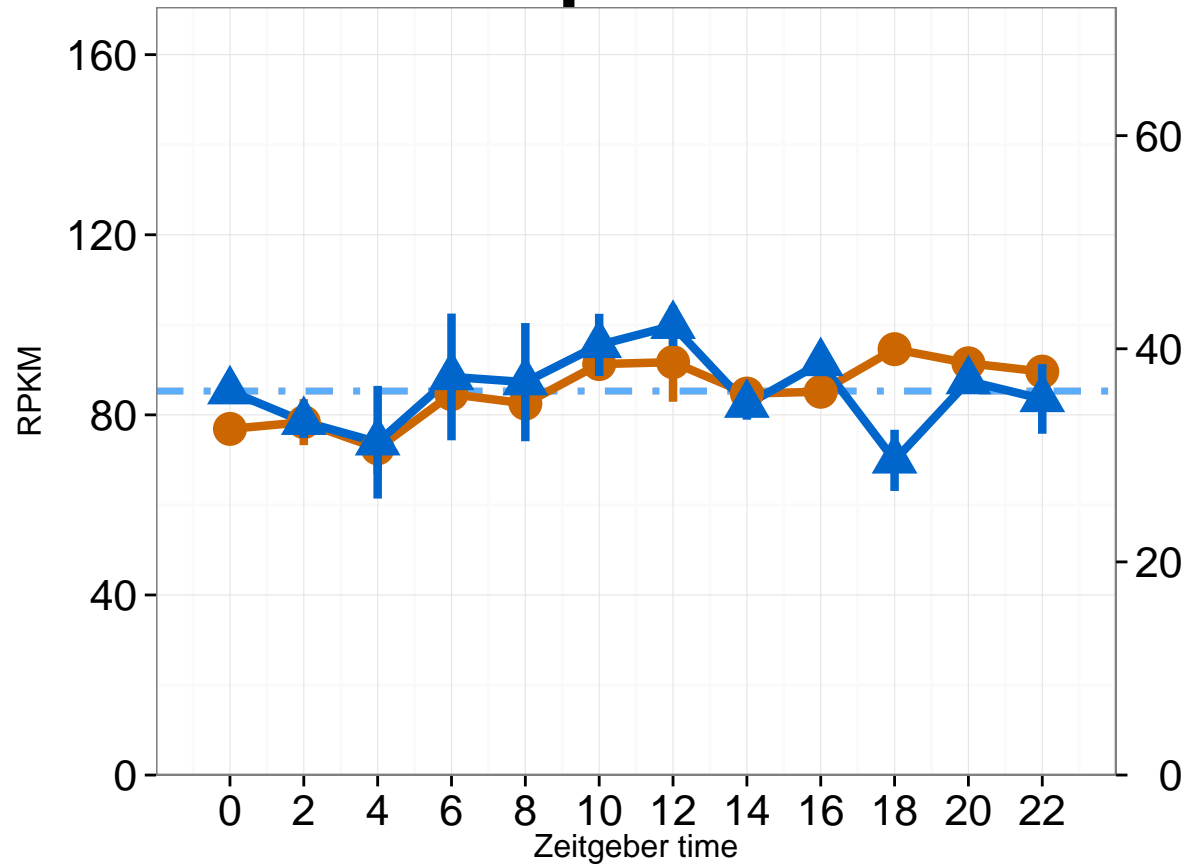

# Ppm1a

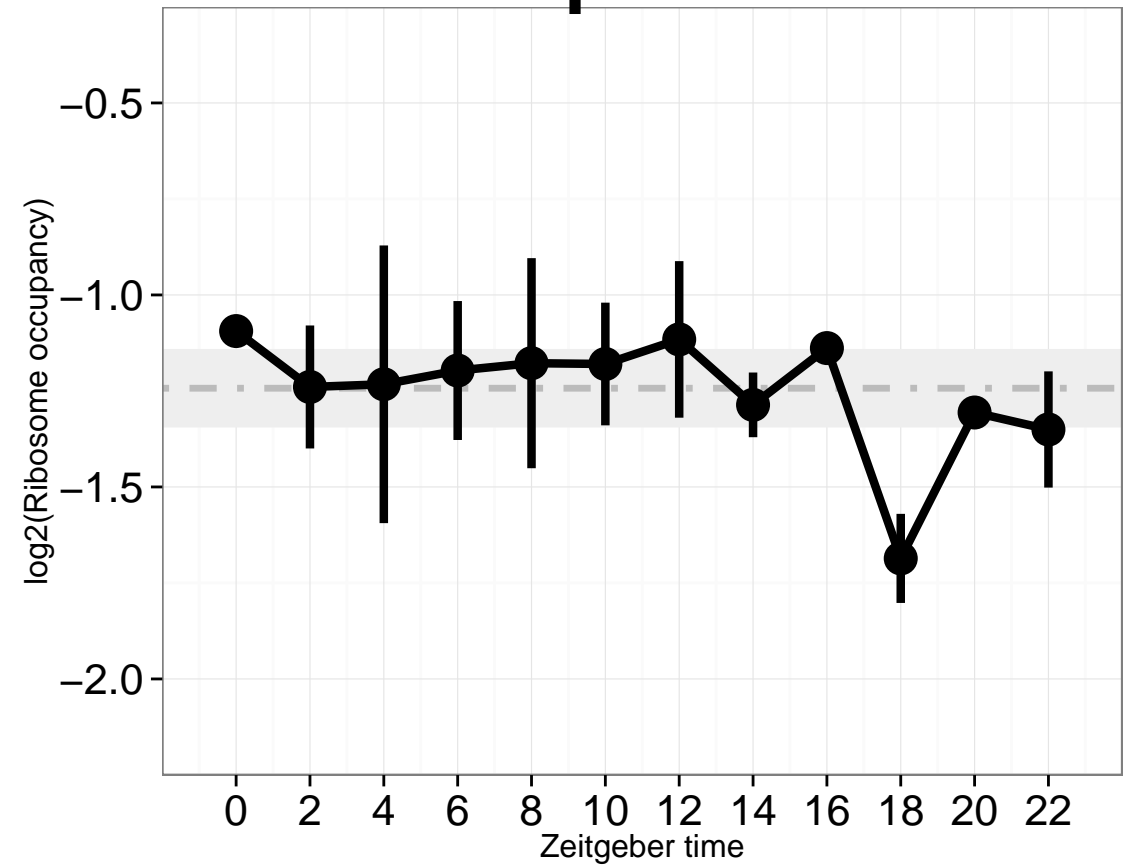

Supplement: Supplementary file 2677 [file 1]

## Antxr1

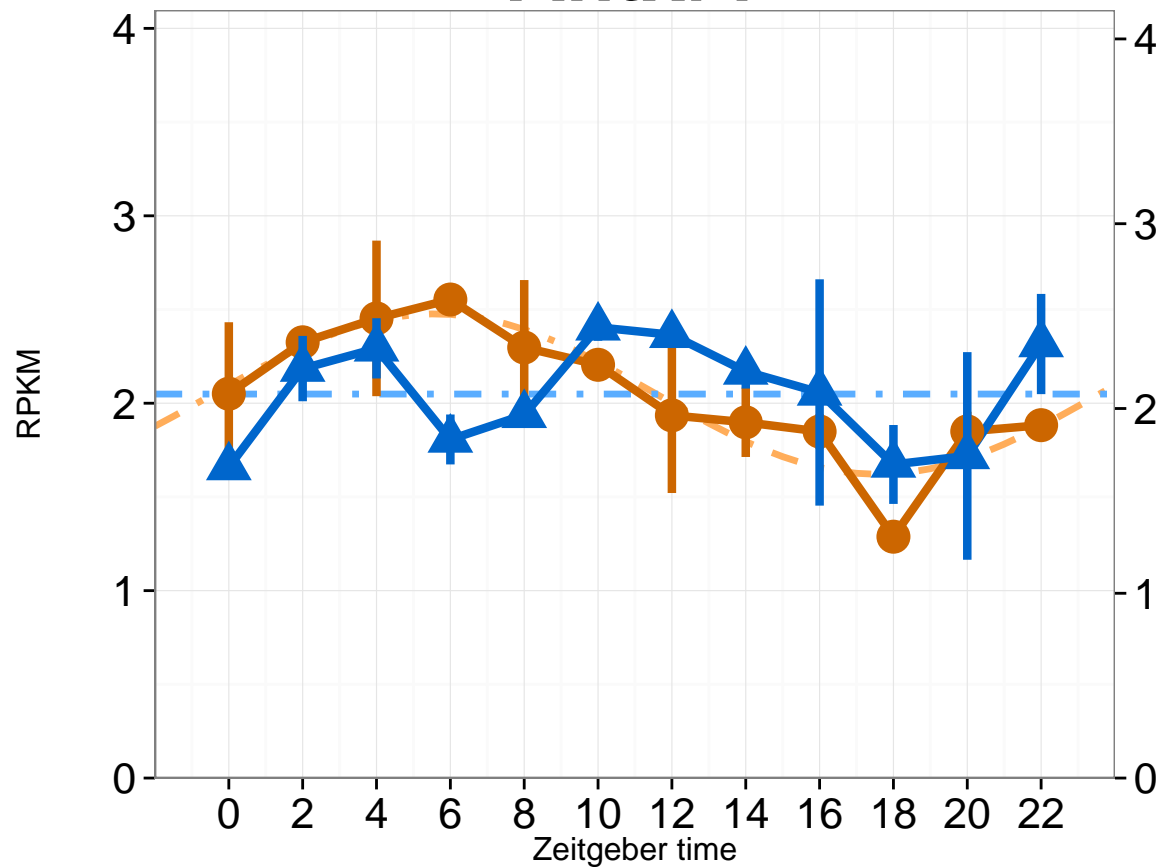

## Antxr1

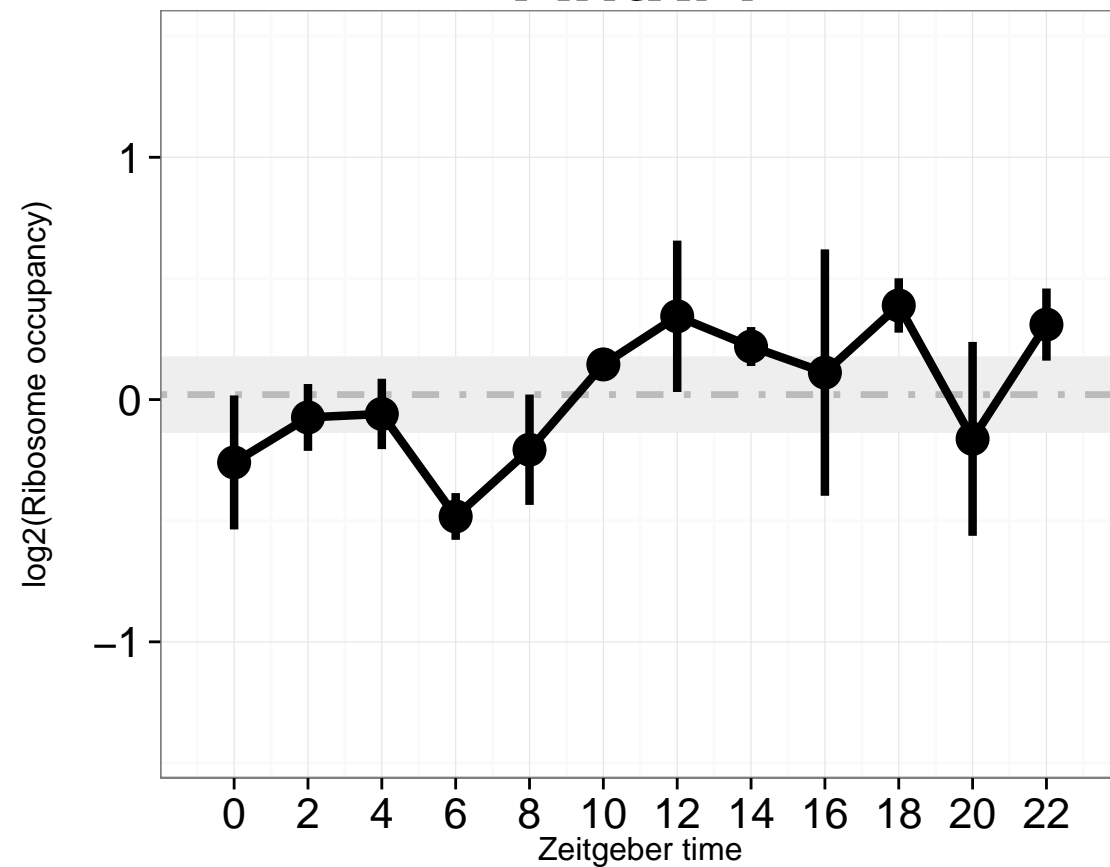

Supplement: Supplementary file 2678 [file 1]

# Rragd

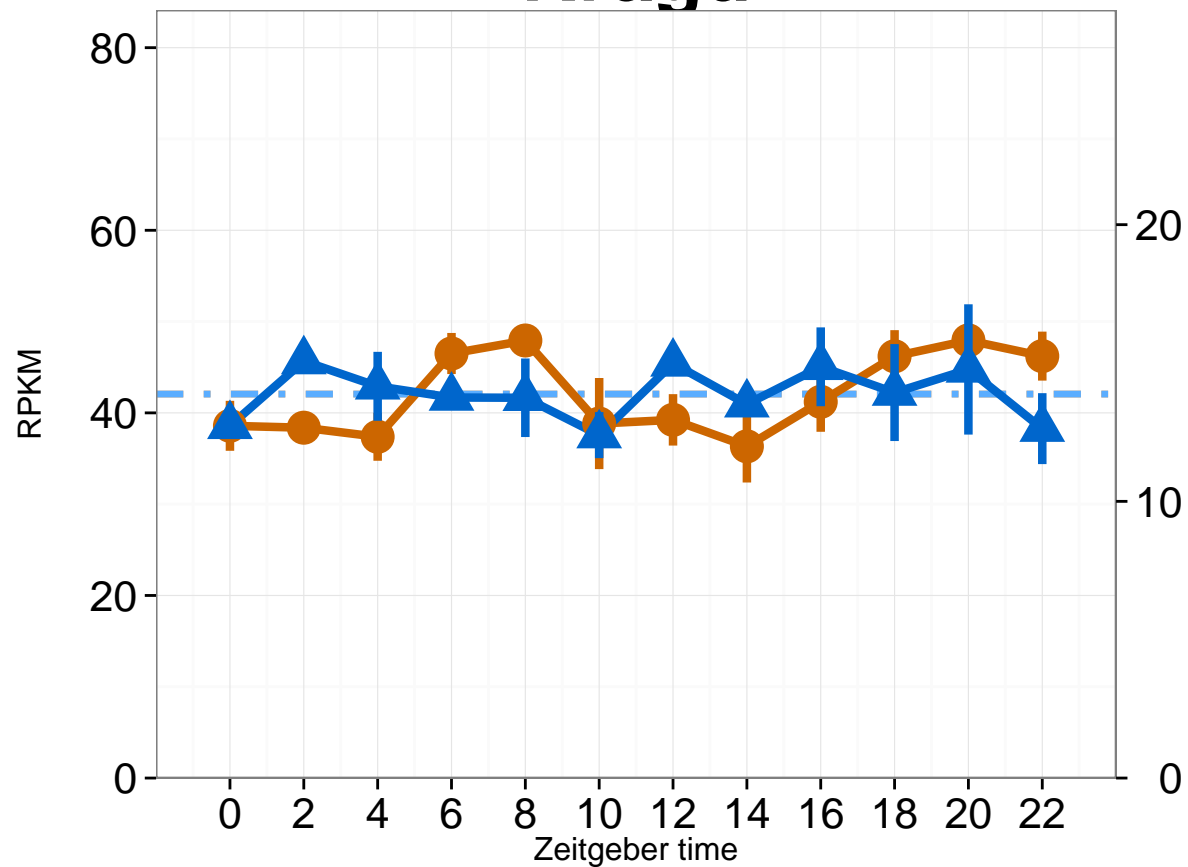

# Rragd

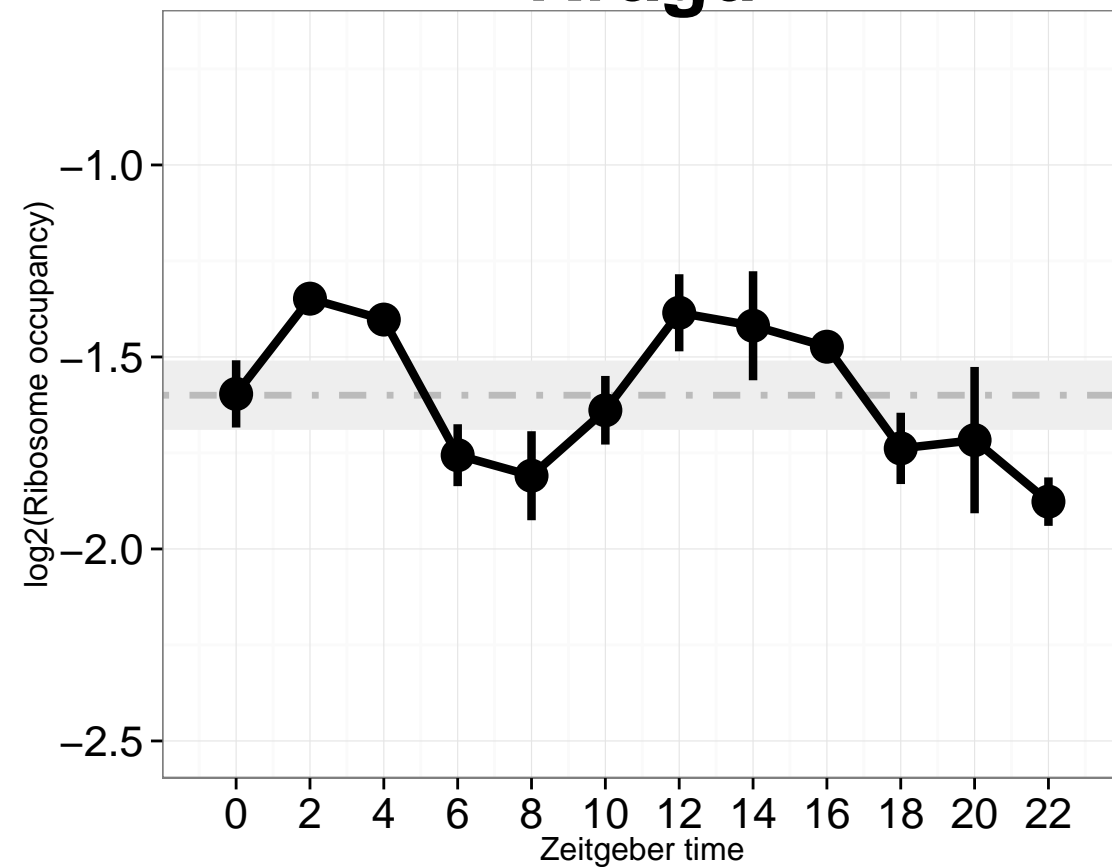

Supplement: Supplementary file 2679 [file 1]

## Ndufb4

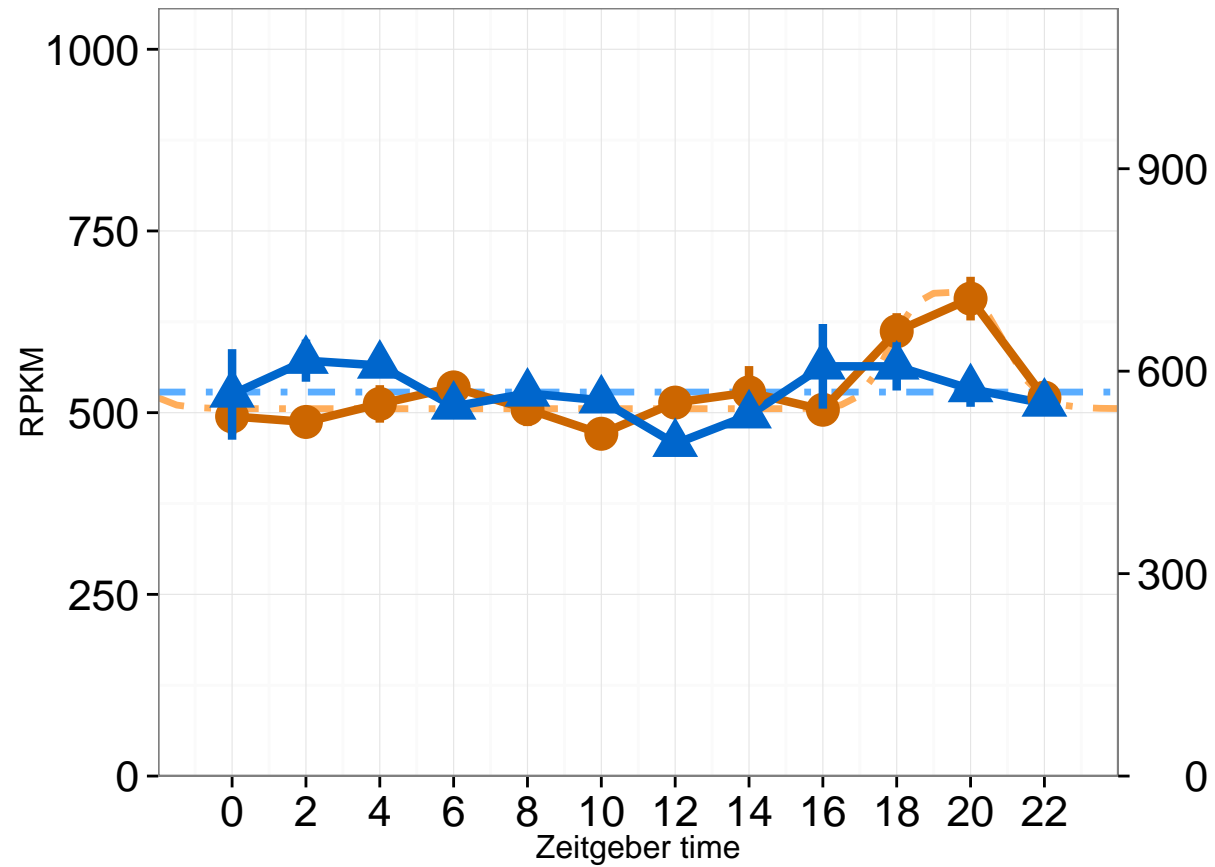

## Ndufb4

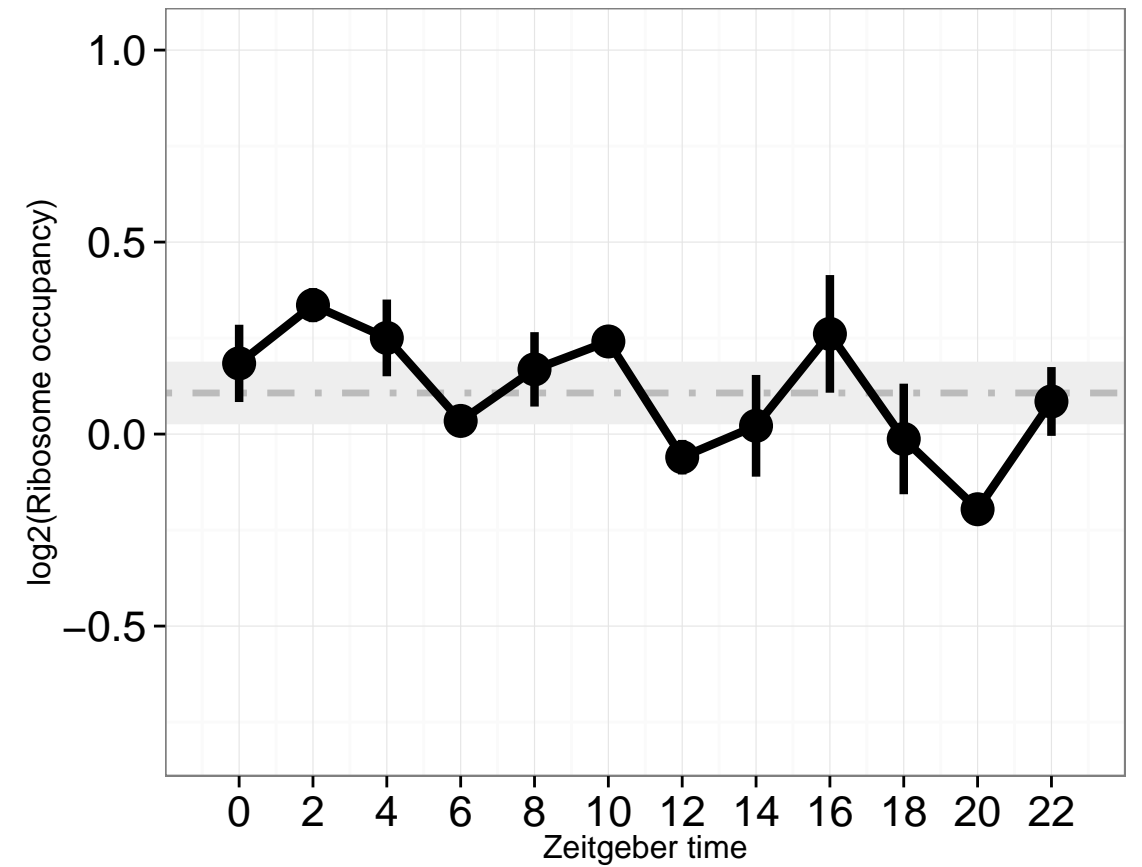

Supplement: Supplementary file 2680 [file 1]

# Zfp532

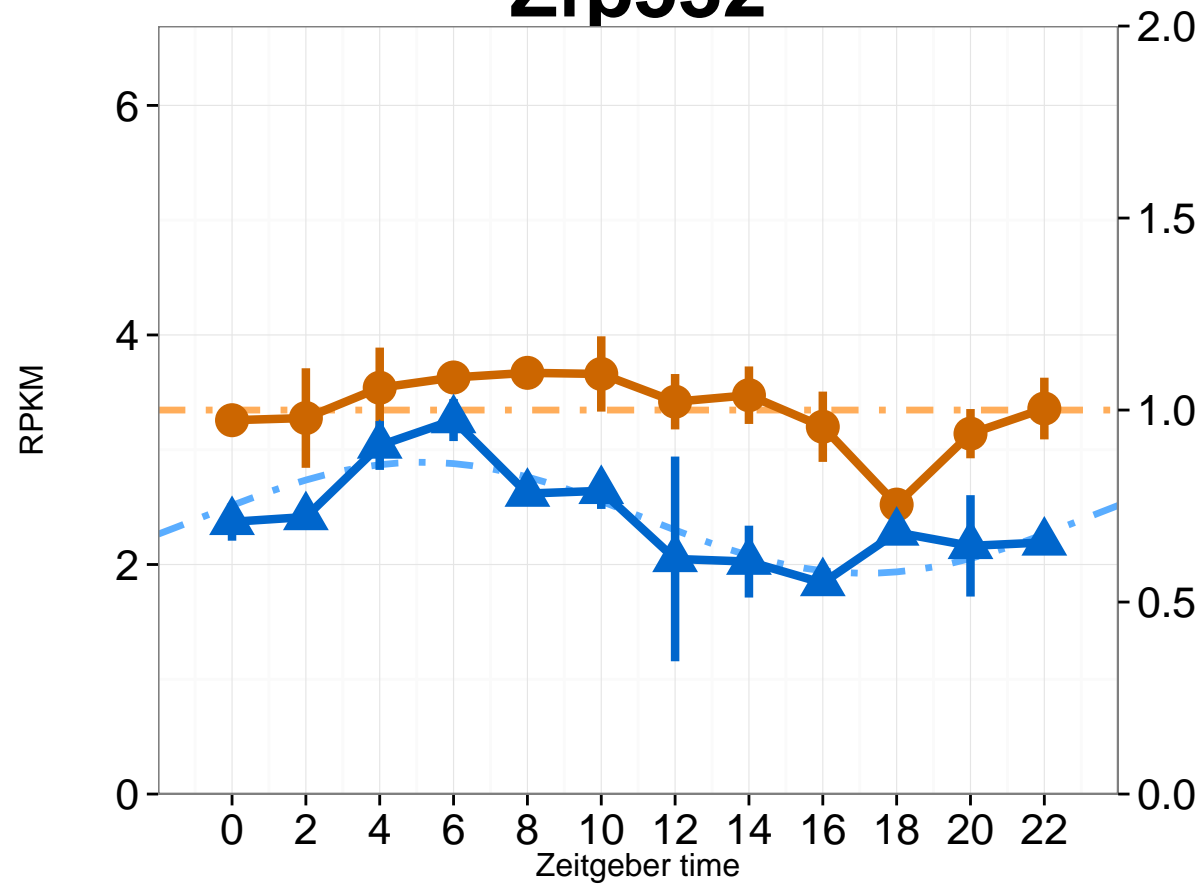

# Zfp532

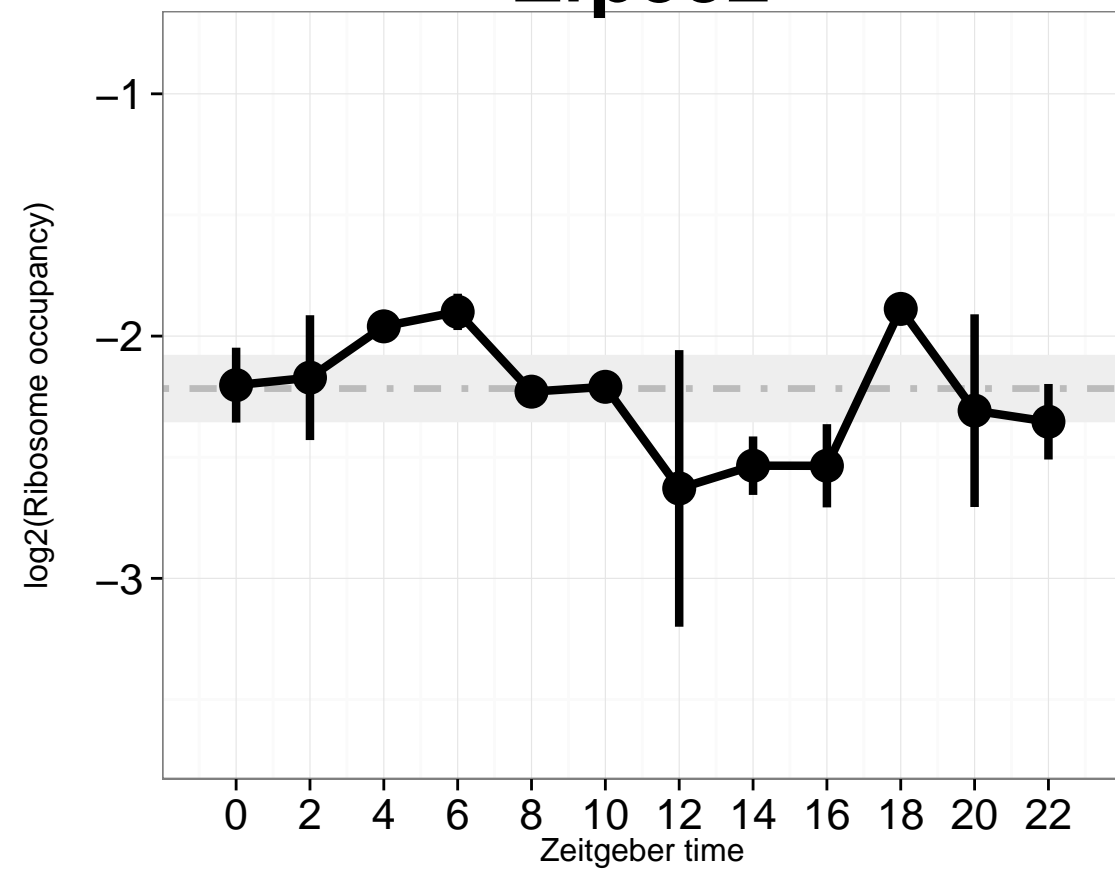

Supplement: Supplementary file 2681 [file 1]

## Smad9

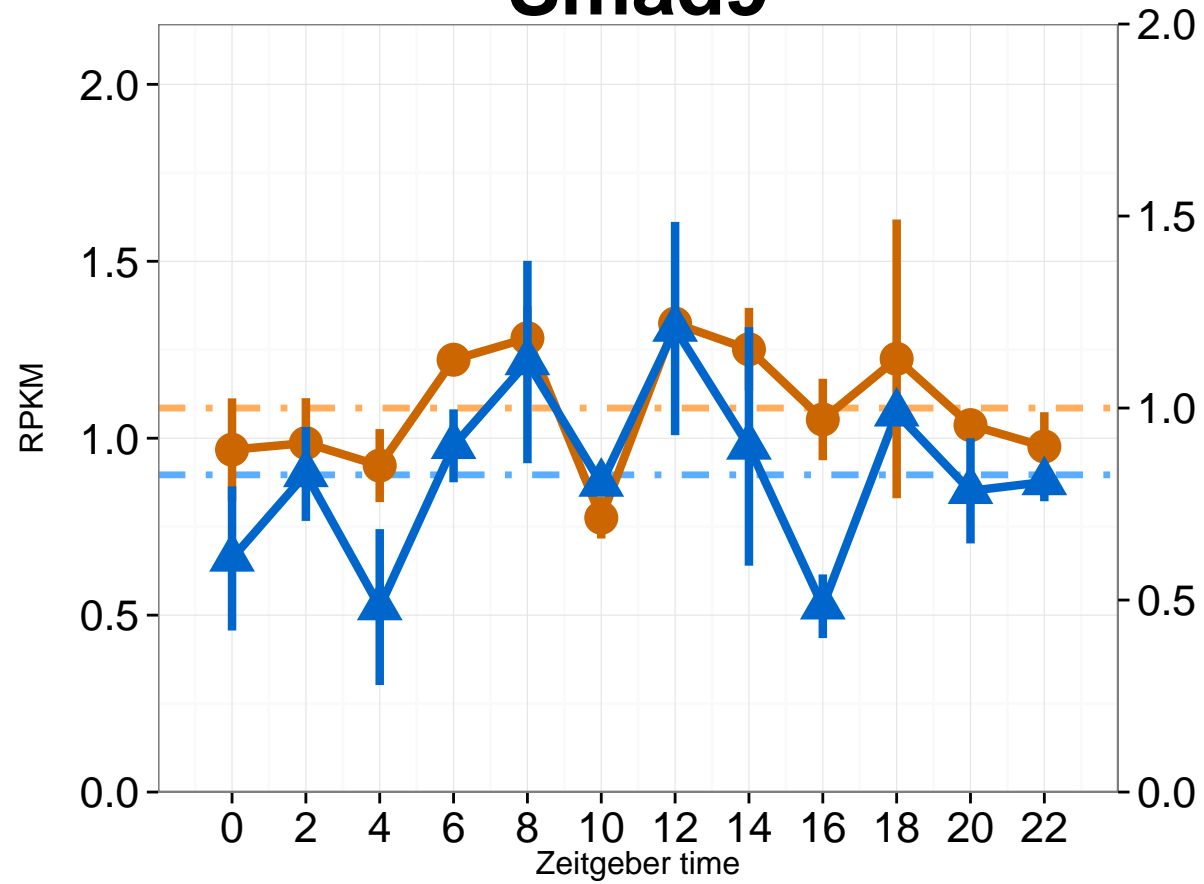

## Smad9

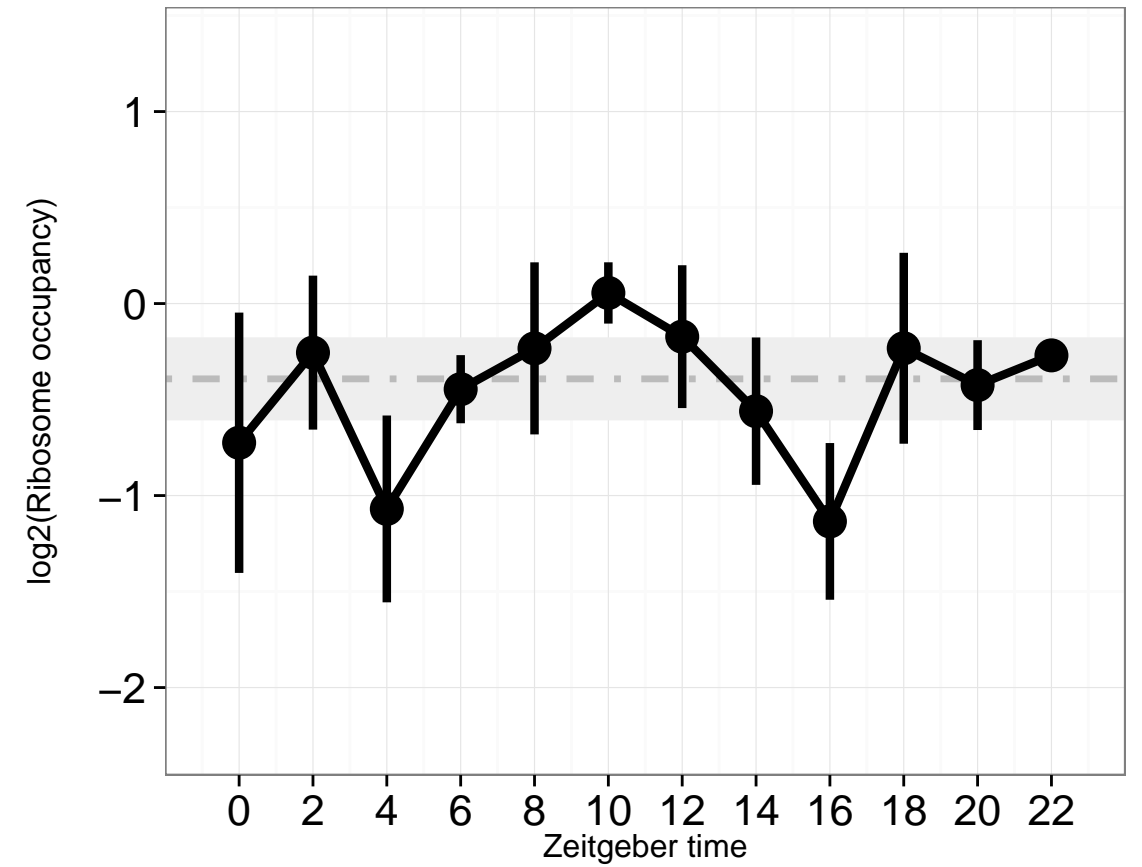

Supplement: Supplementary file 2682 [file 1]

## Lmna

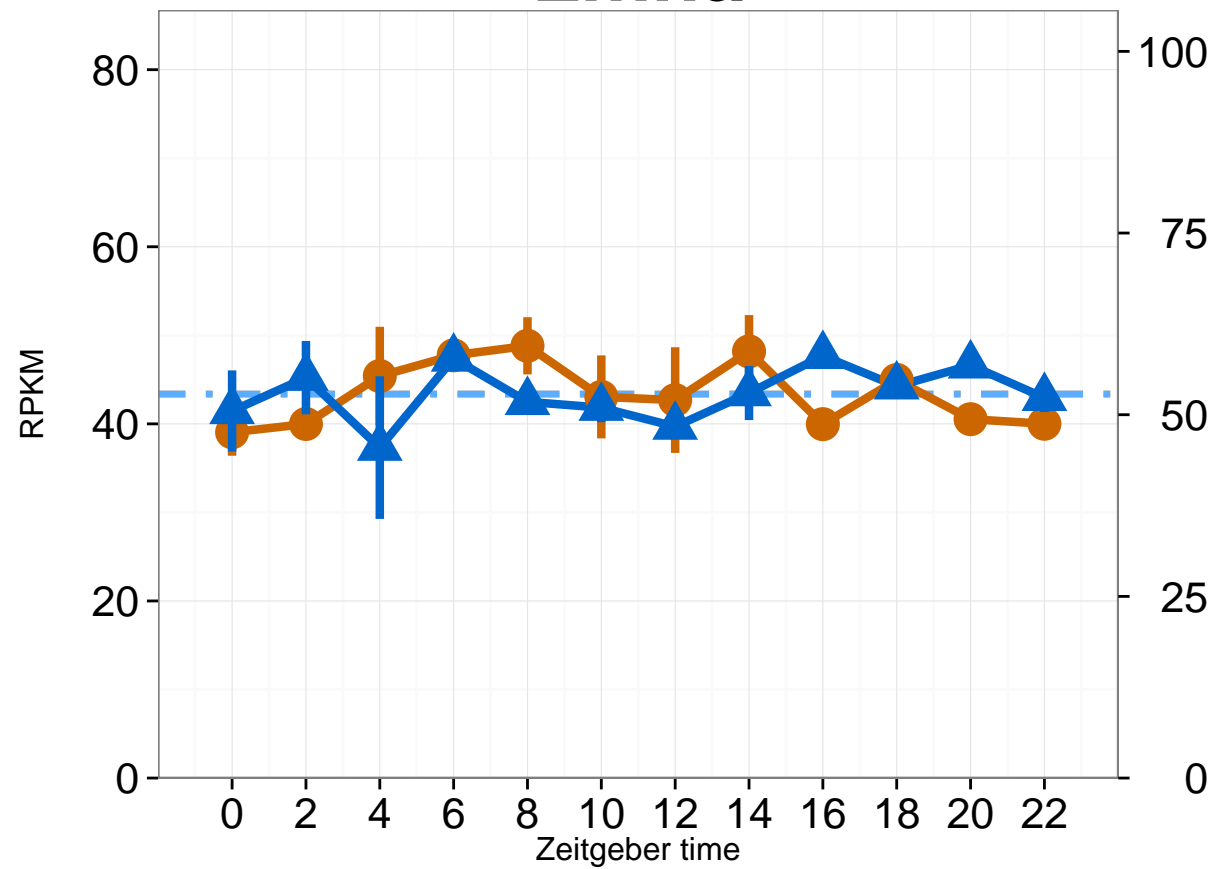

## Lmna

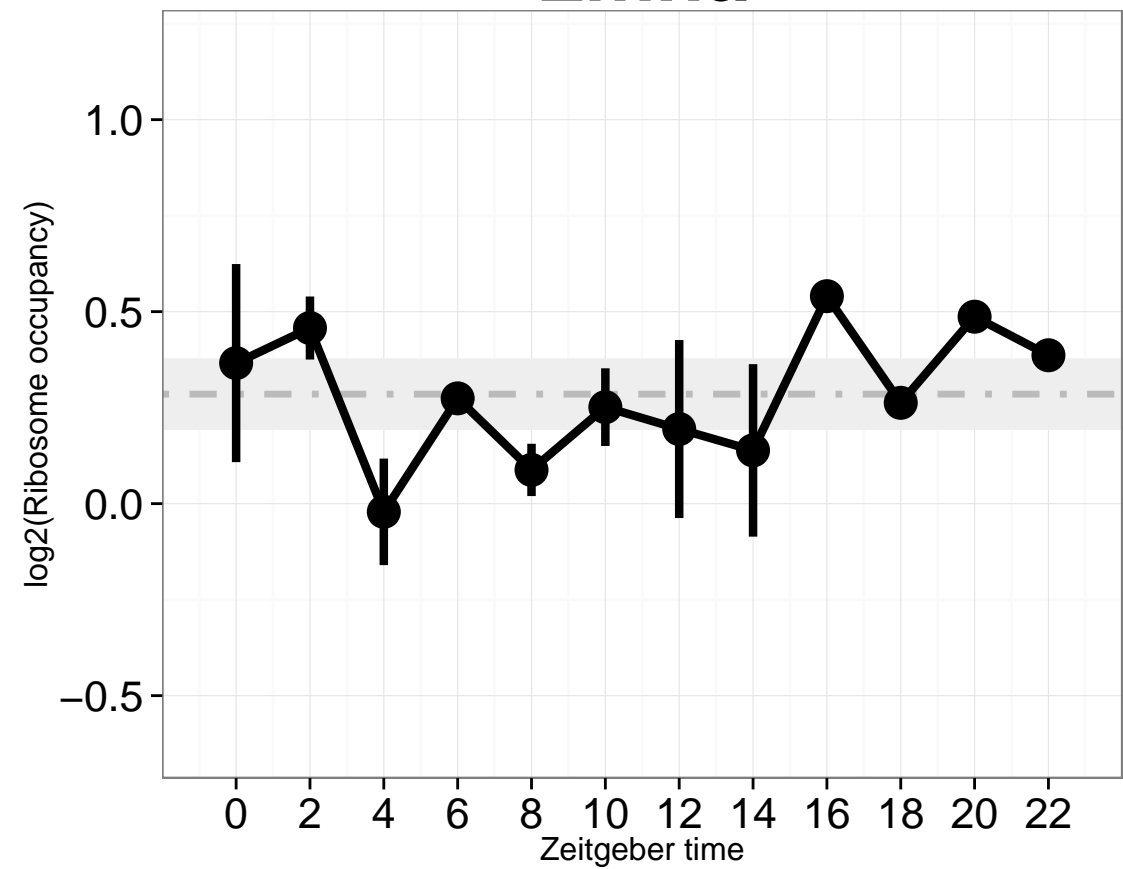

Supplement: Supplementary file 2683 [file 1]

## Itch

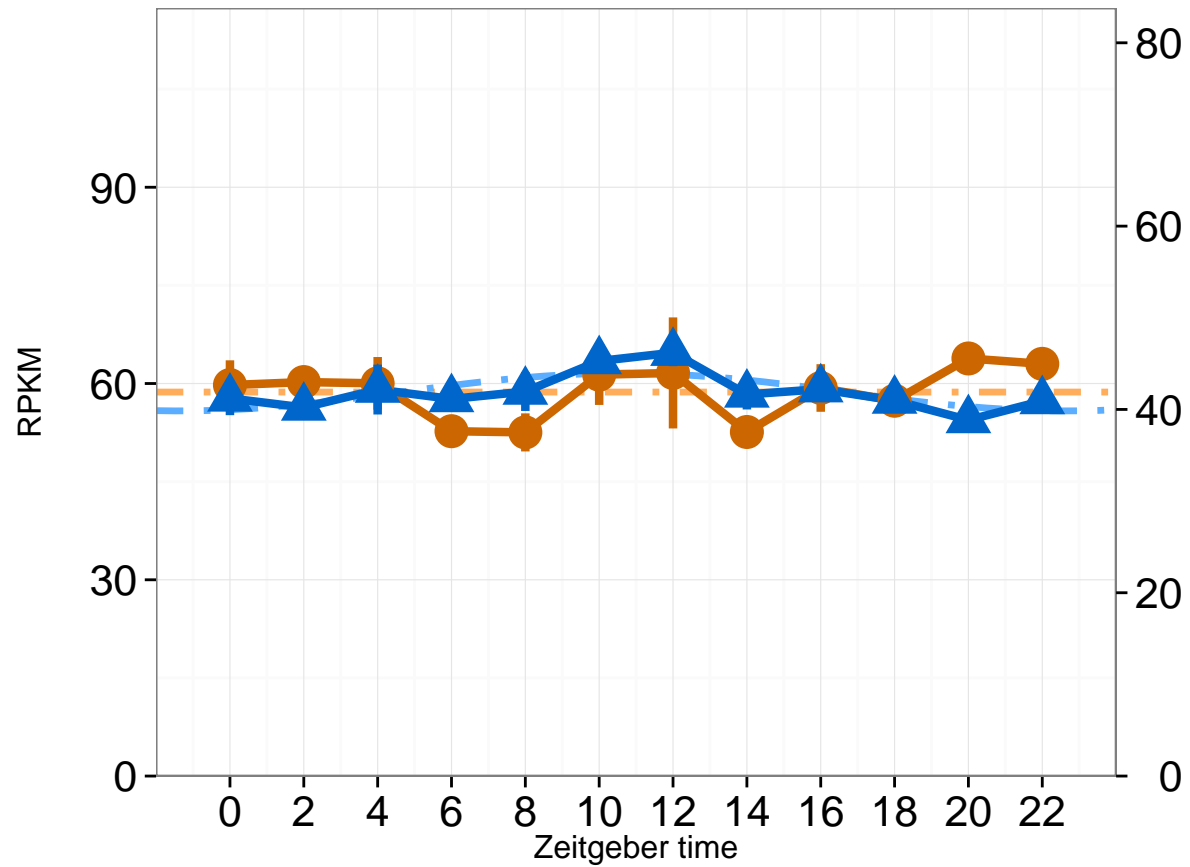

## Itch

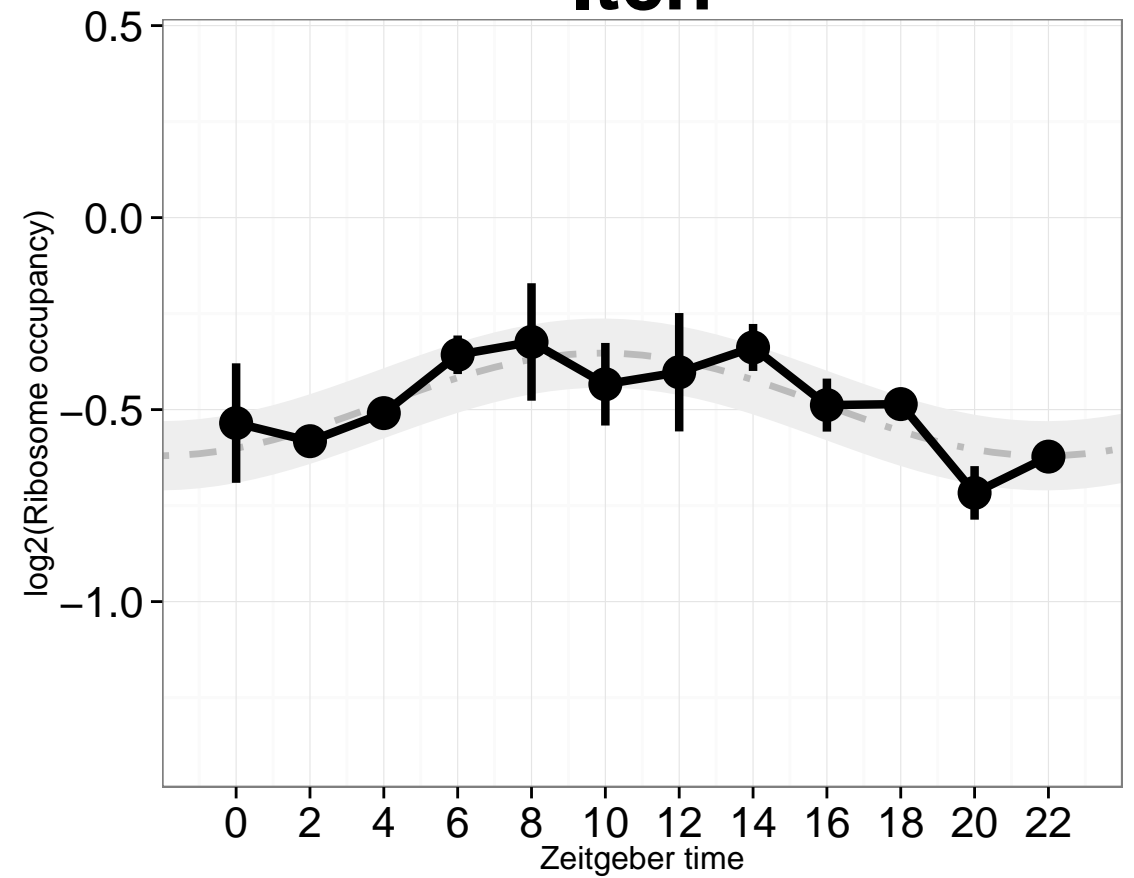

Supplement: Supplementary file 2684 [file 1]

# TagIn2

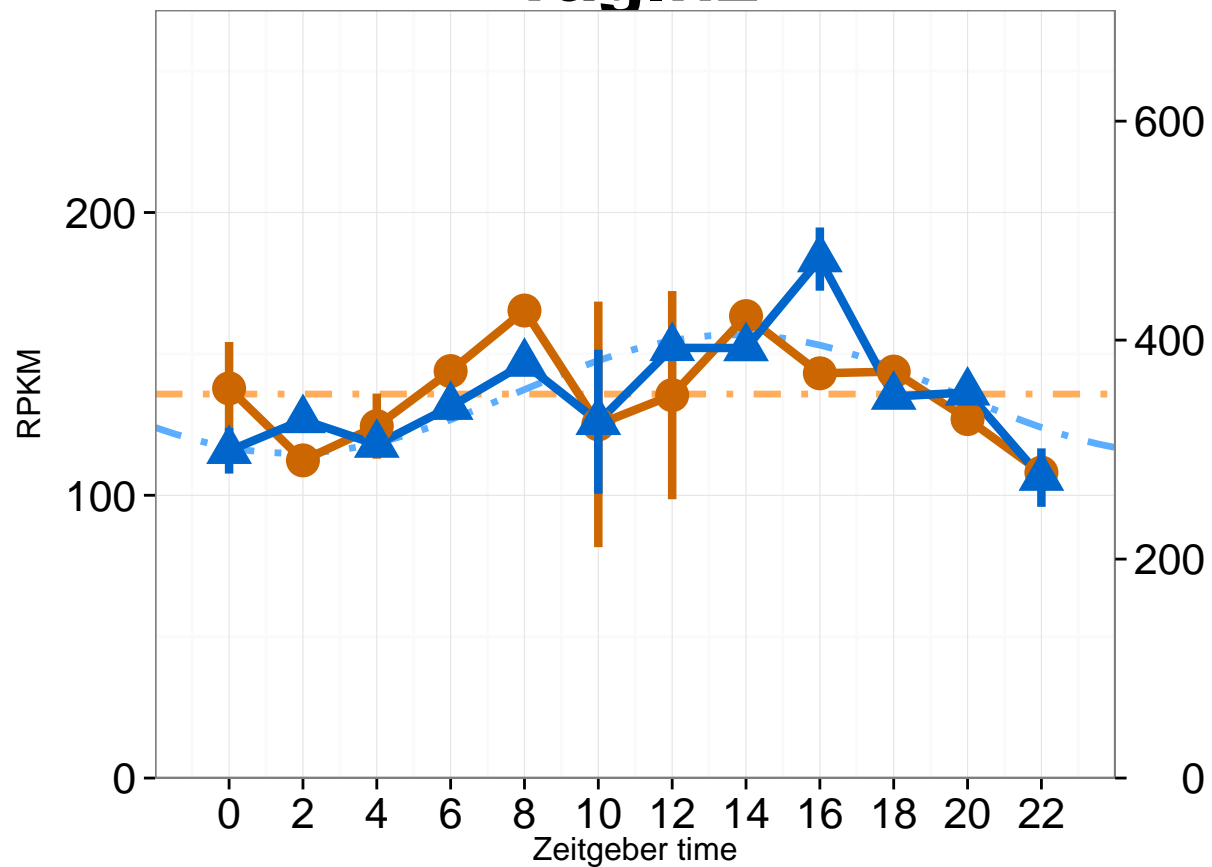

# TagIn2

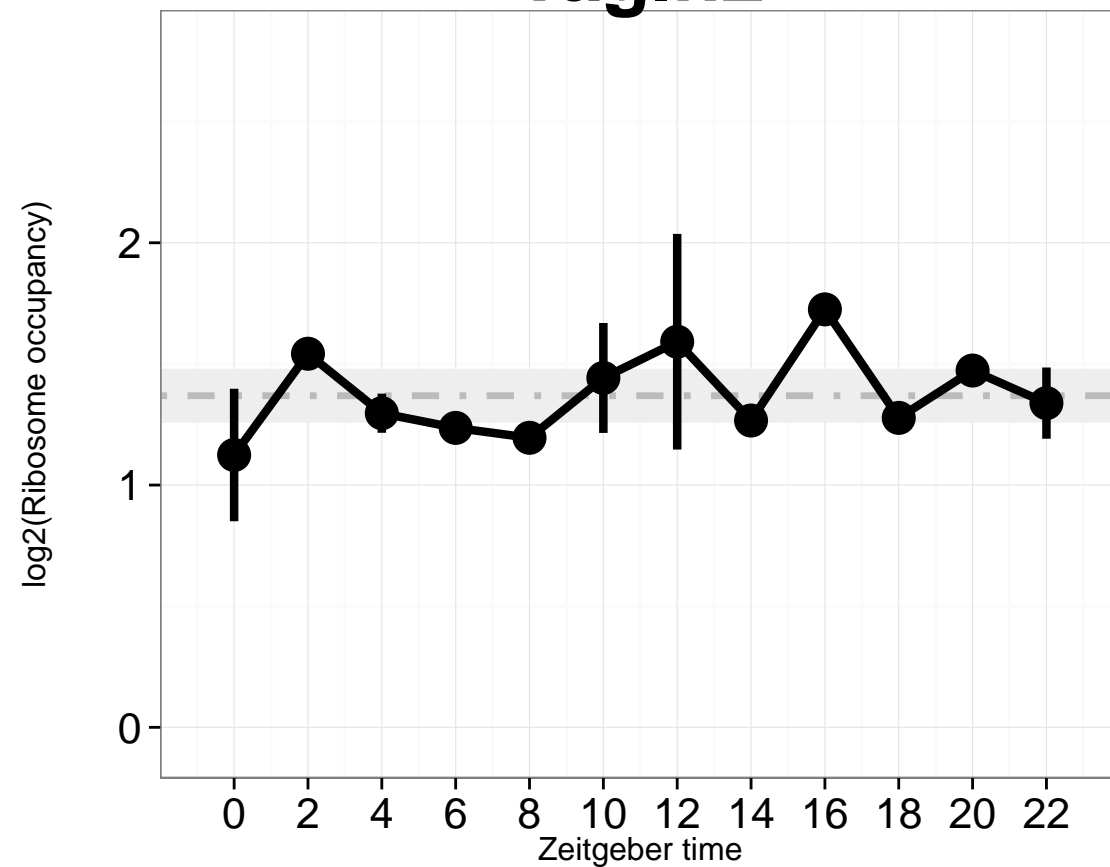

Supplement: Supplementary file 2685 [file 1]

## Sirt2

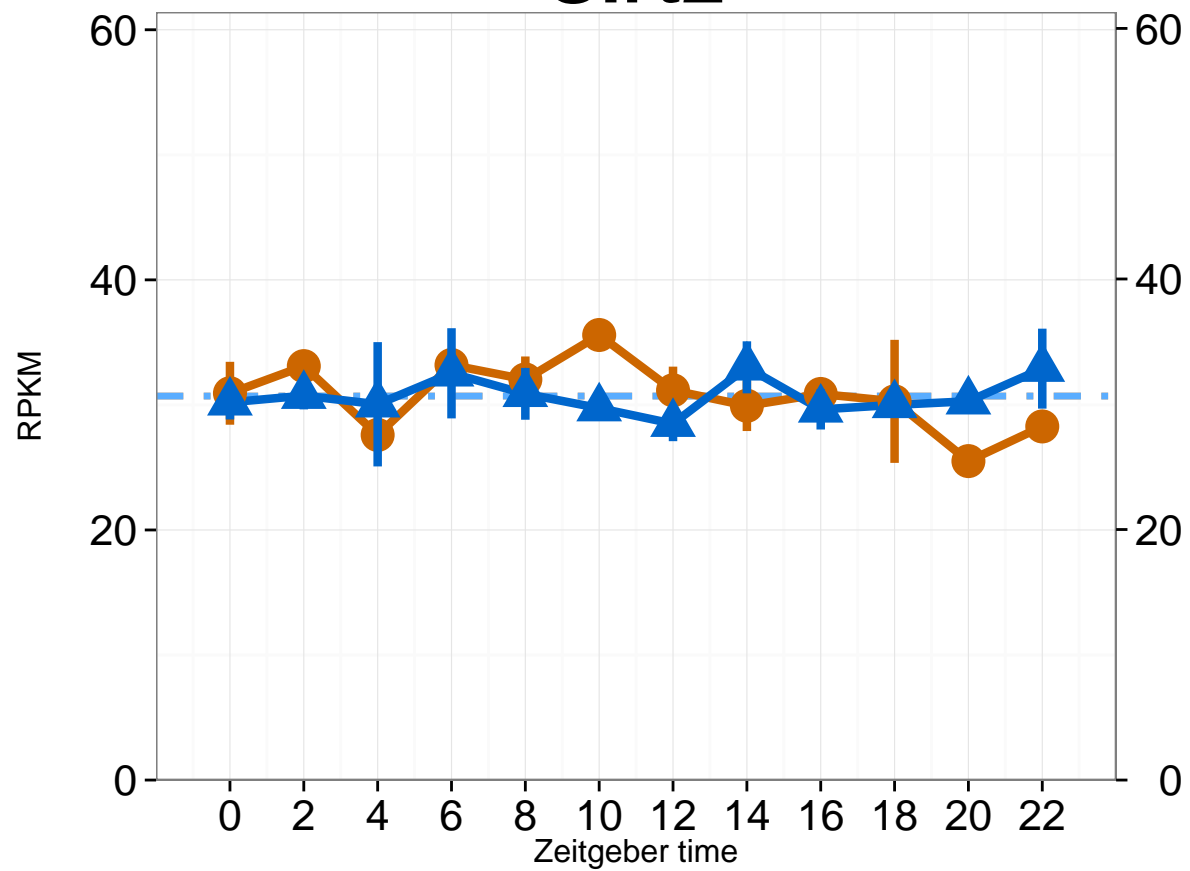

## Sirt2

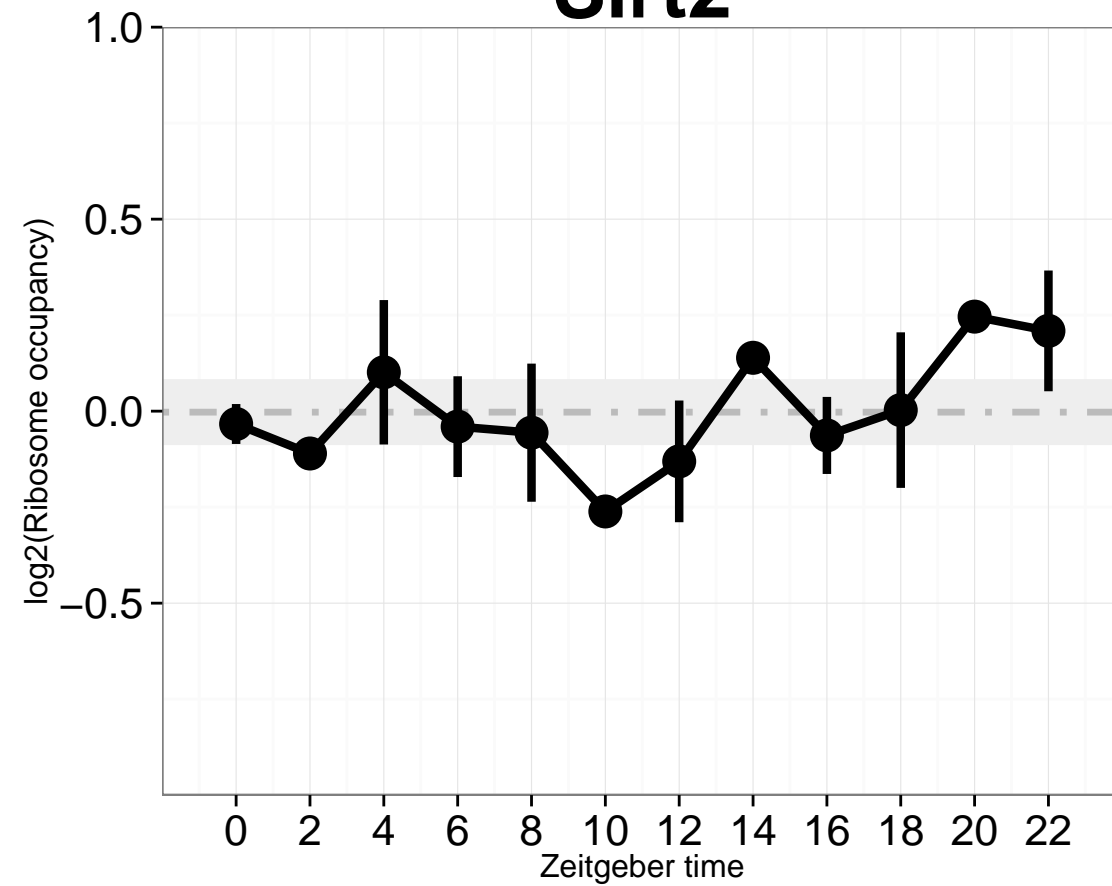

Supplement: Supplementary file 2686 [file 1]

## Foxk1

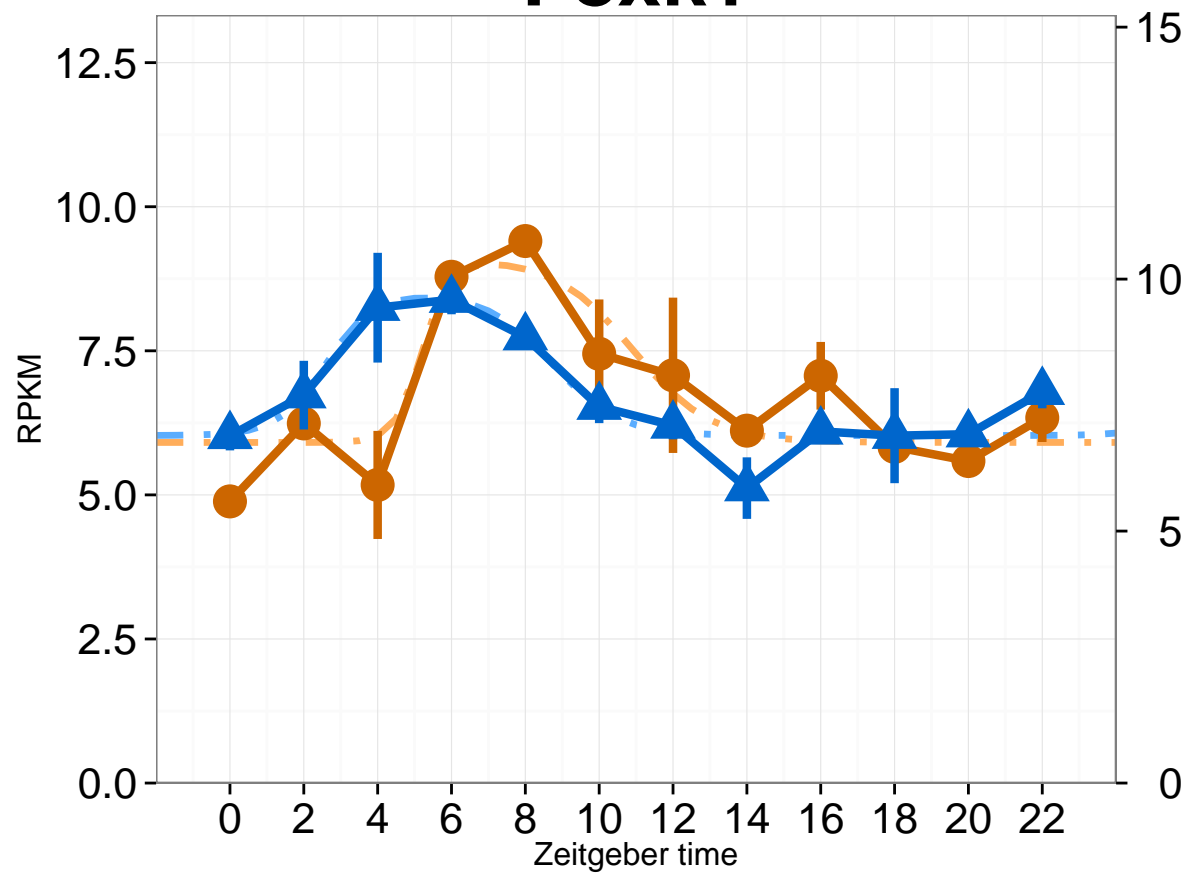

## Foxk1

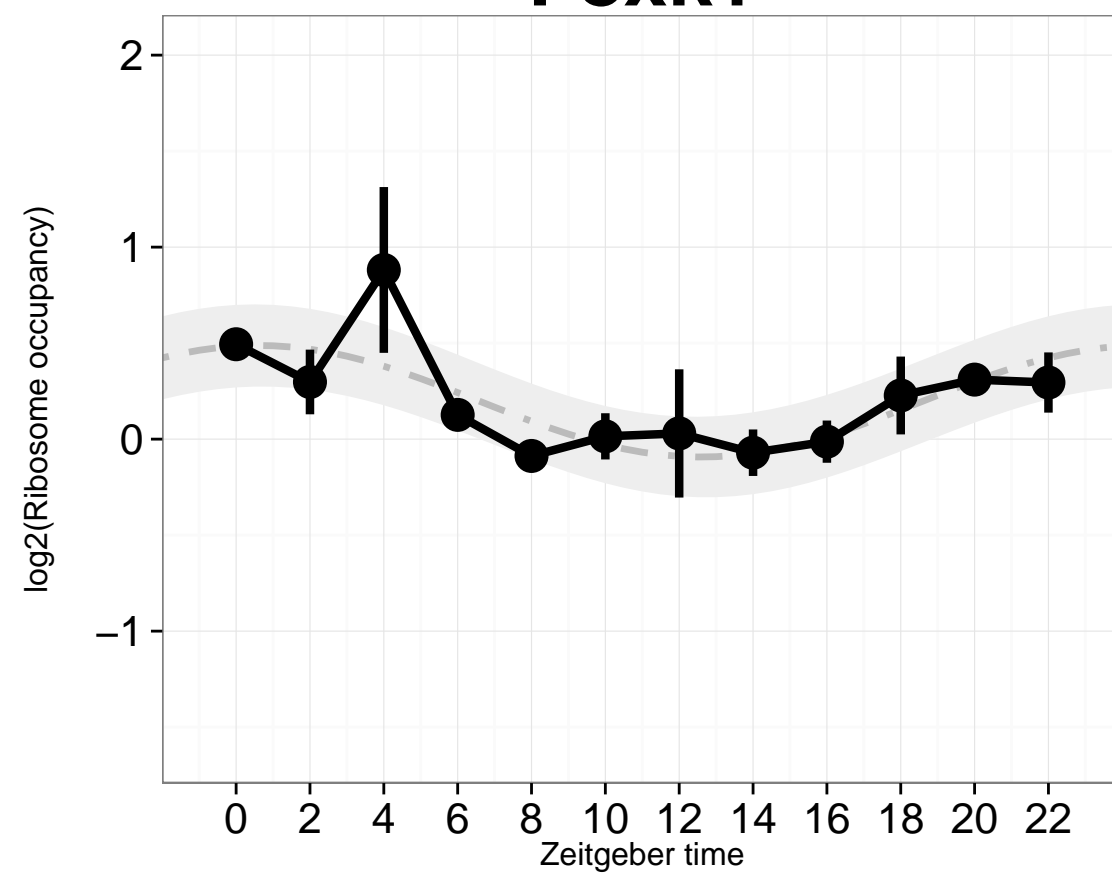

Supplement: Supplementary file 2687 [file 1]

## Efhd1

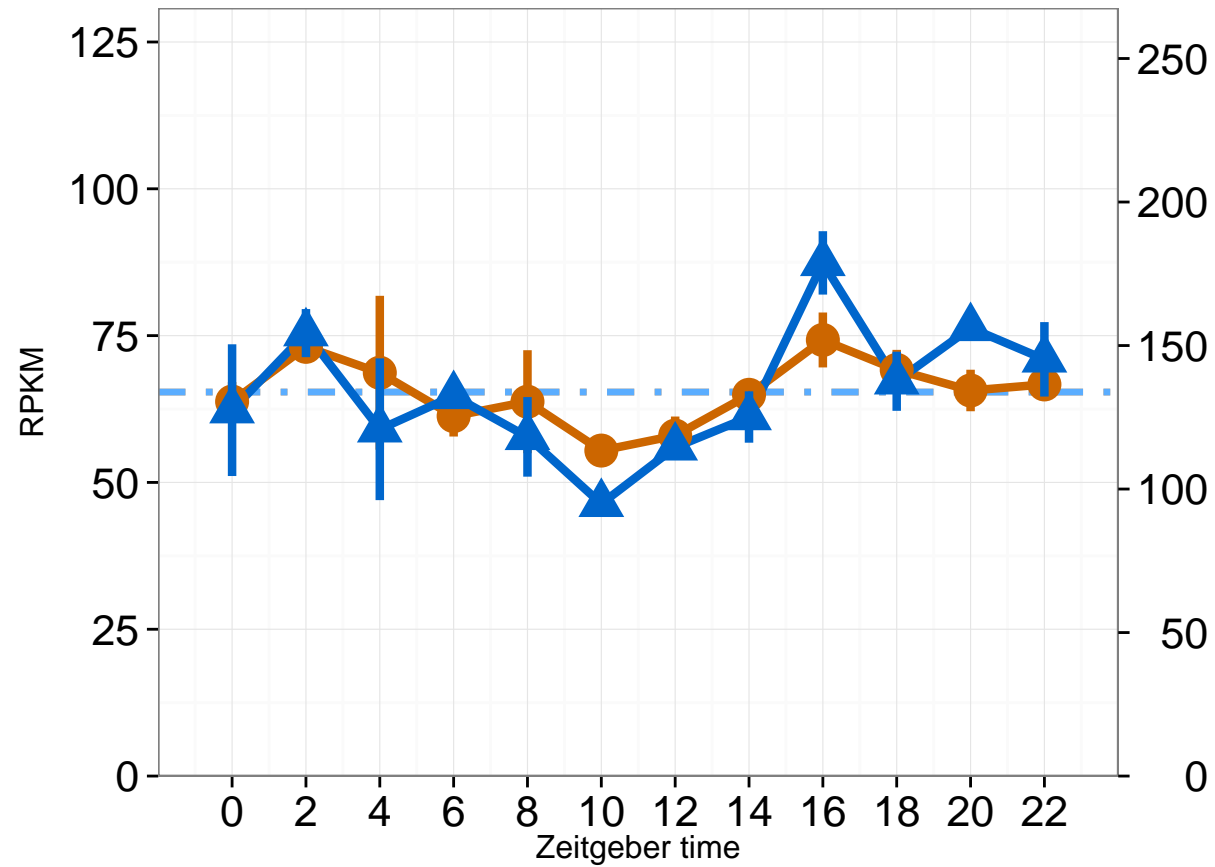

## Efhd1

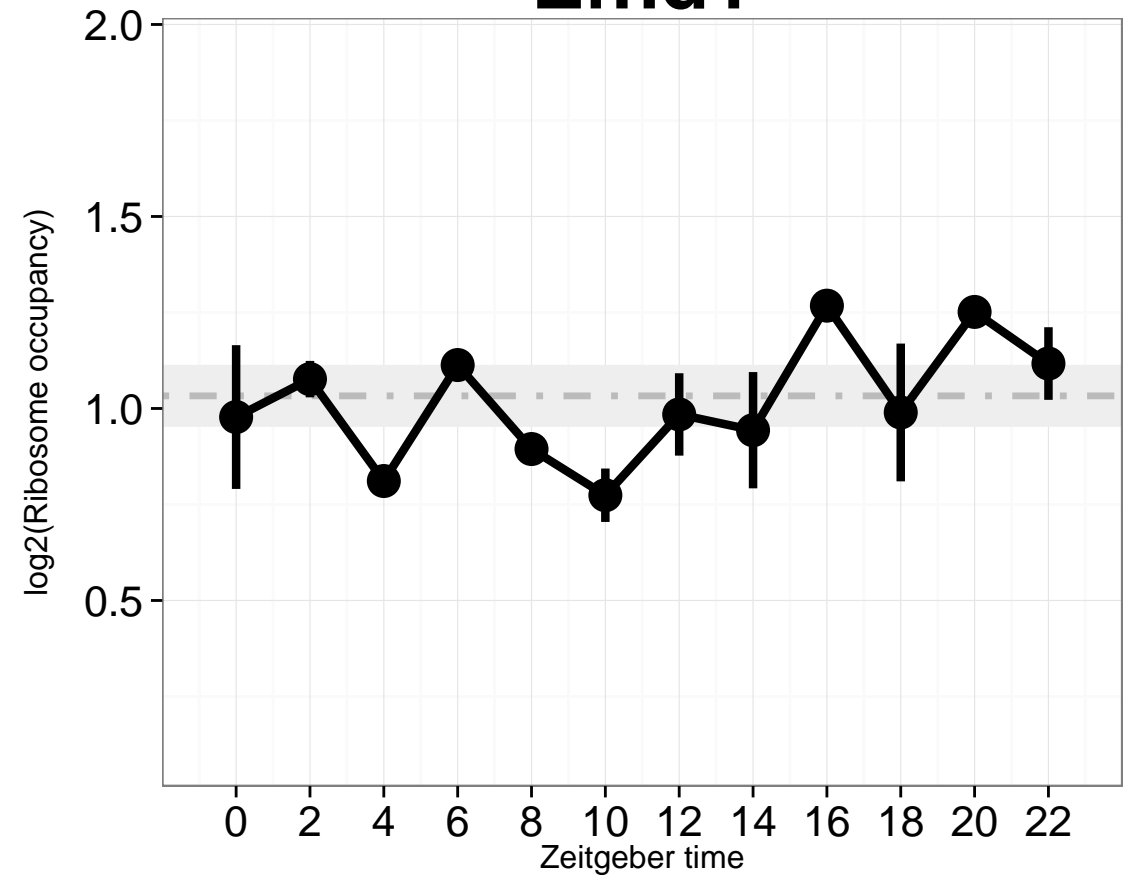

Supplement: Supplementary file 2688 [file 1]

**Prrg3 TR**

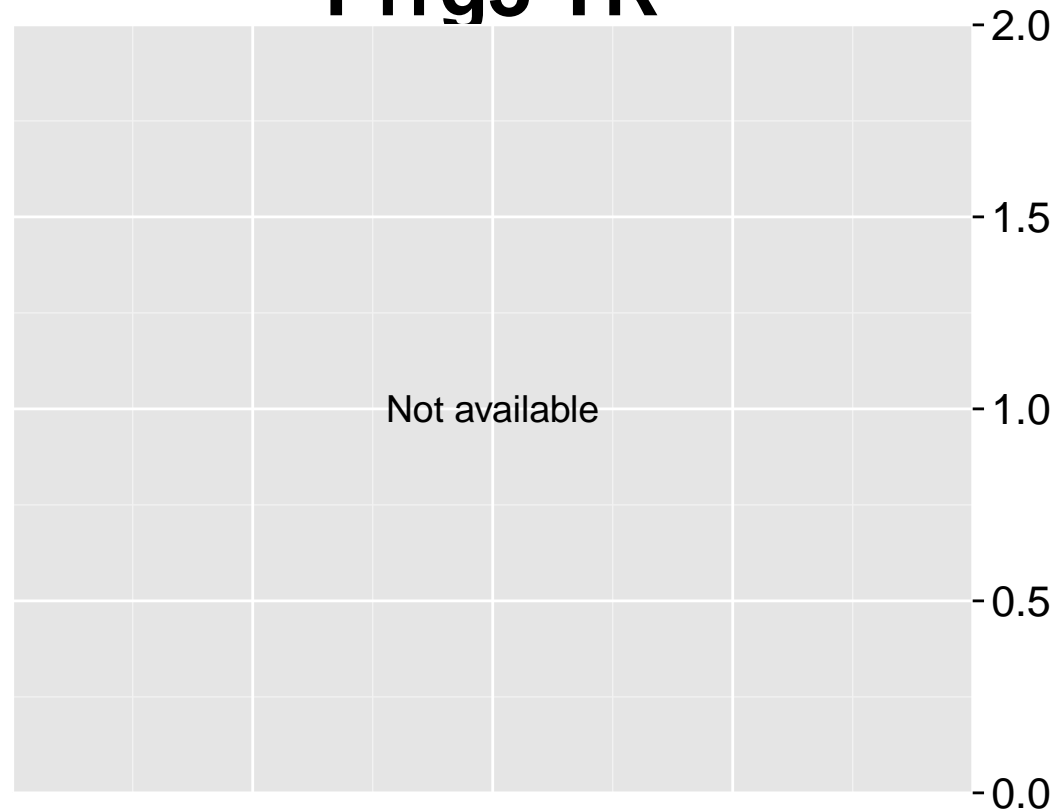

**Prrg3 log2(Ribosome occupancy)**

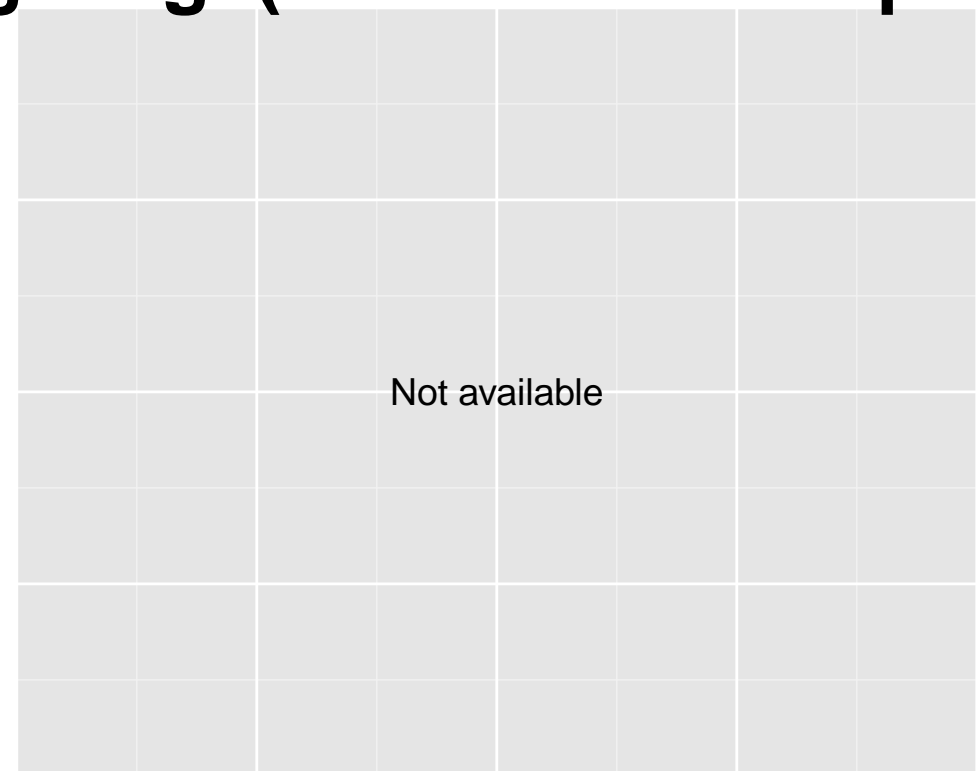

Supplement: Supplementary file 2689 [file 1]

## Sirt6

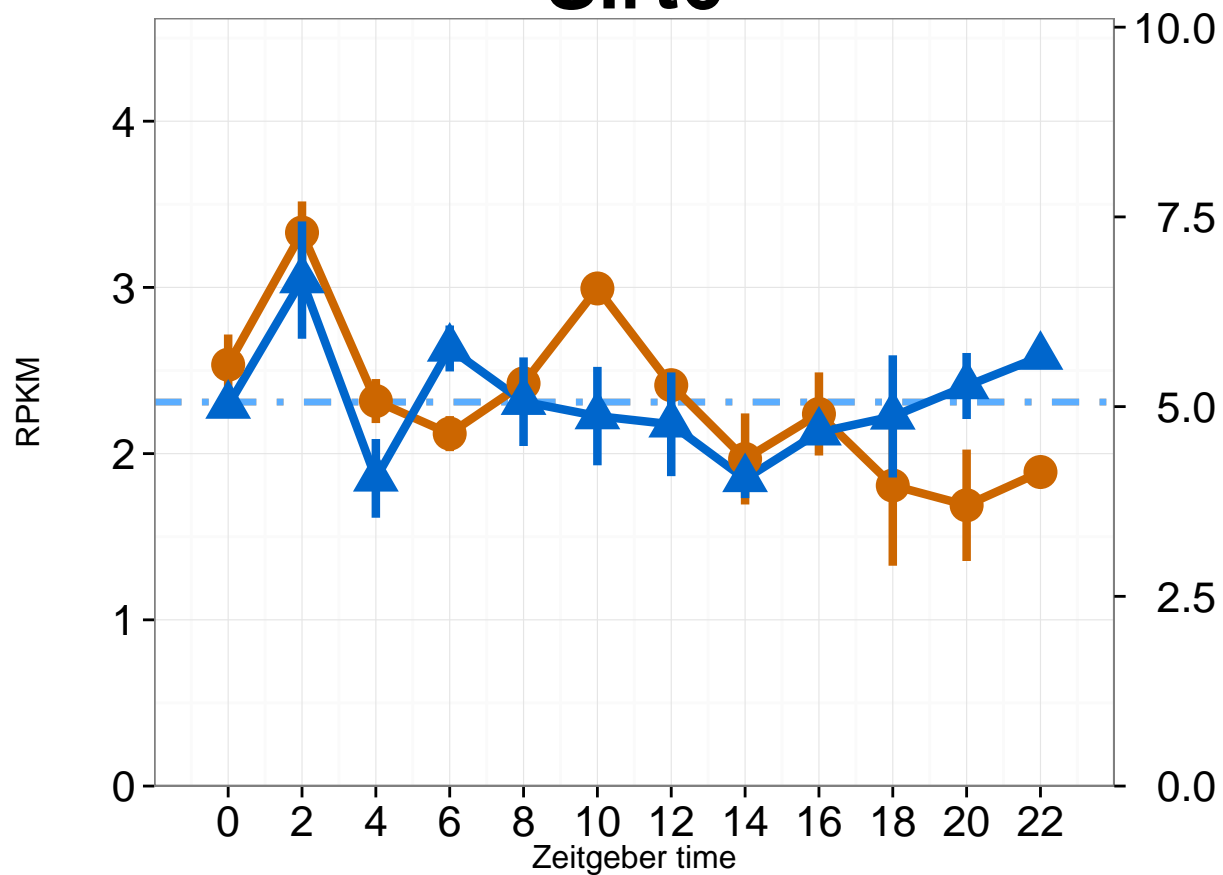

## Sirt6

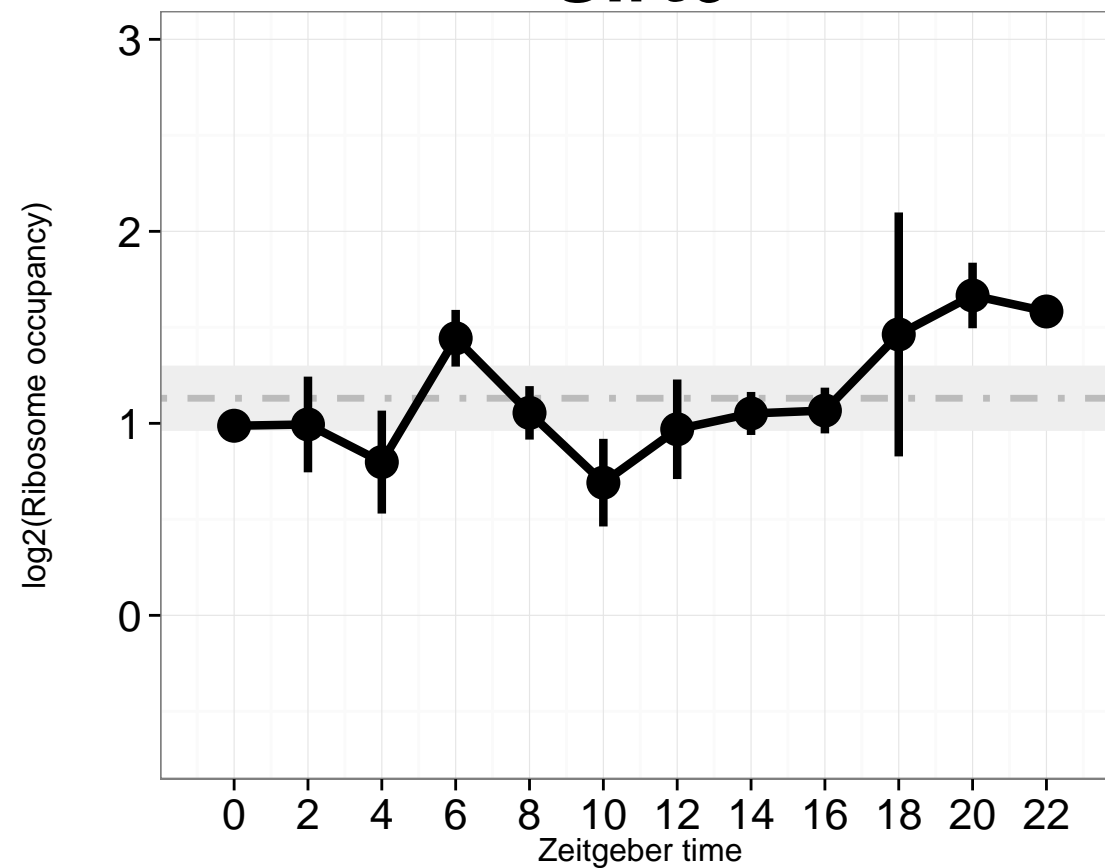

Supplement: Supplementary file 2690 [file 1]

# Frmd8

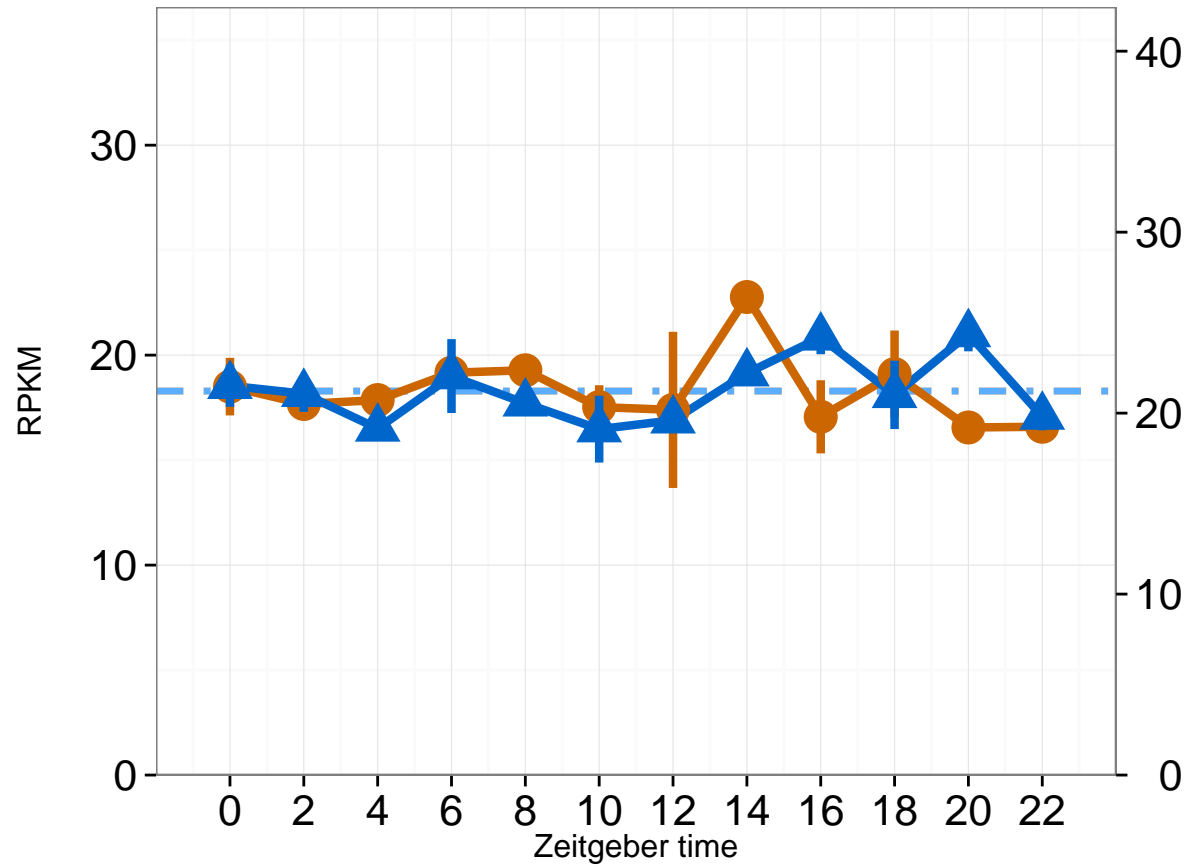

# Frmd8

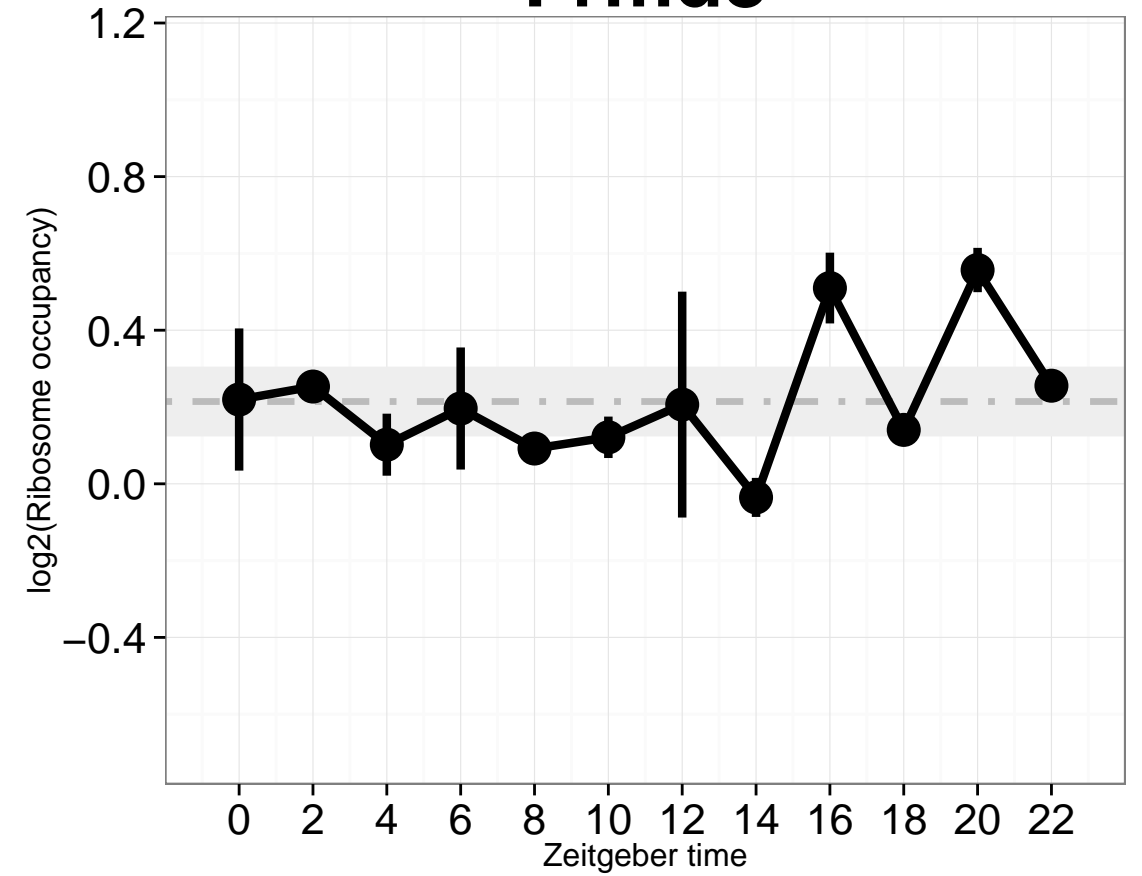

Supplement: Supplementary file 2691 [file 1]

## Naa30

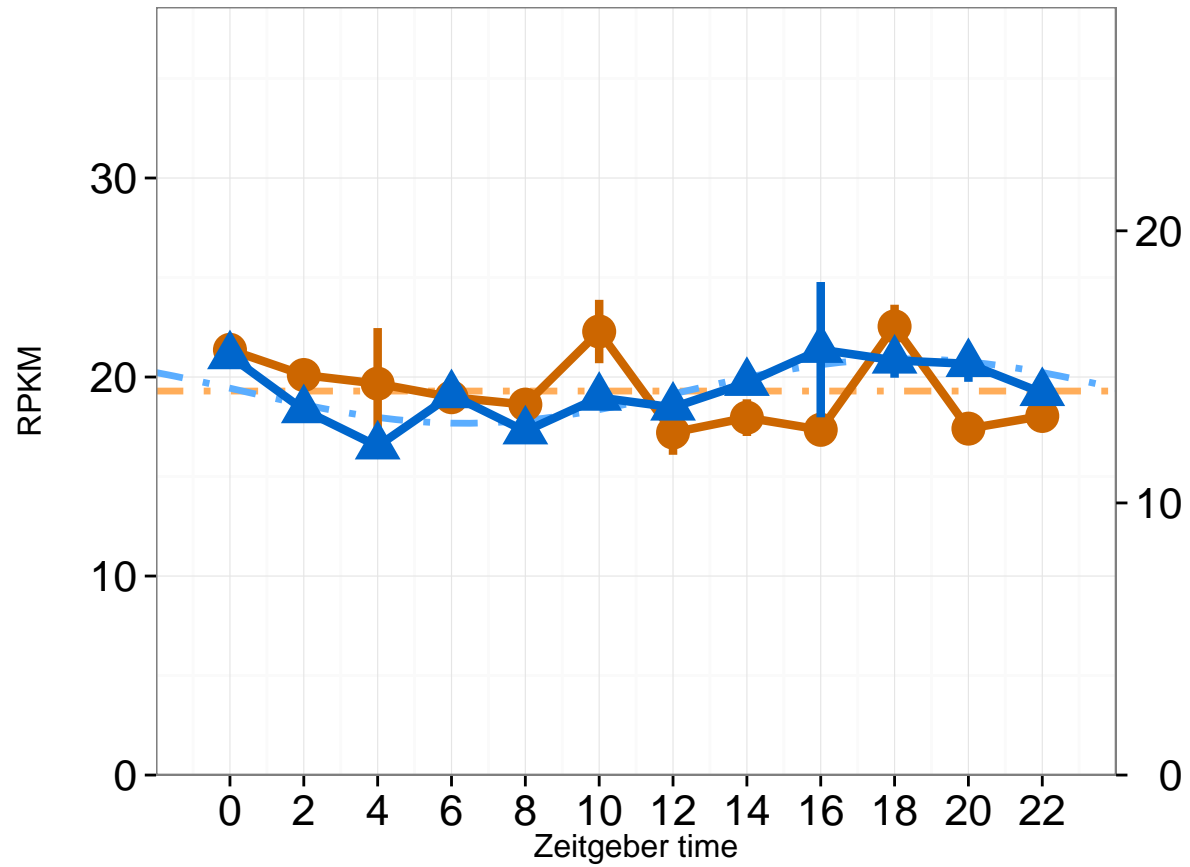

## Naa30

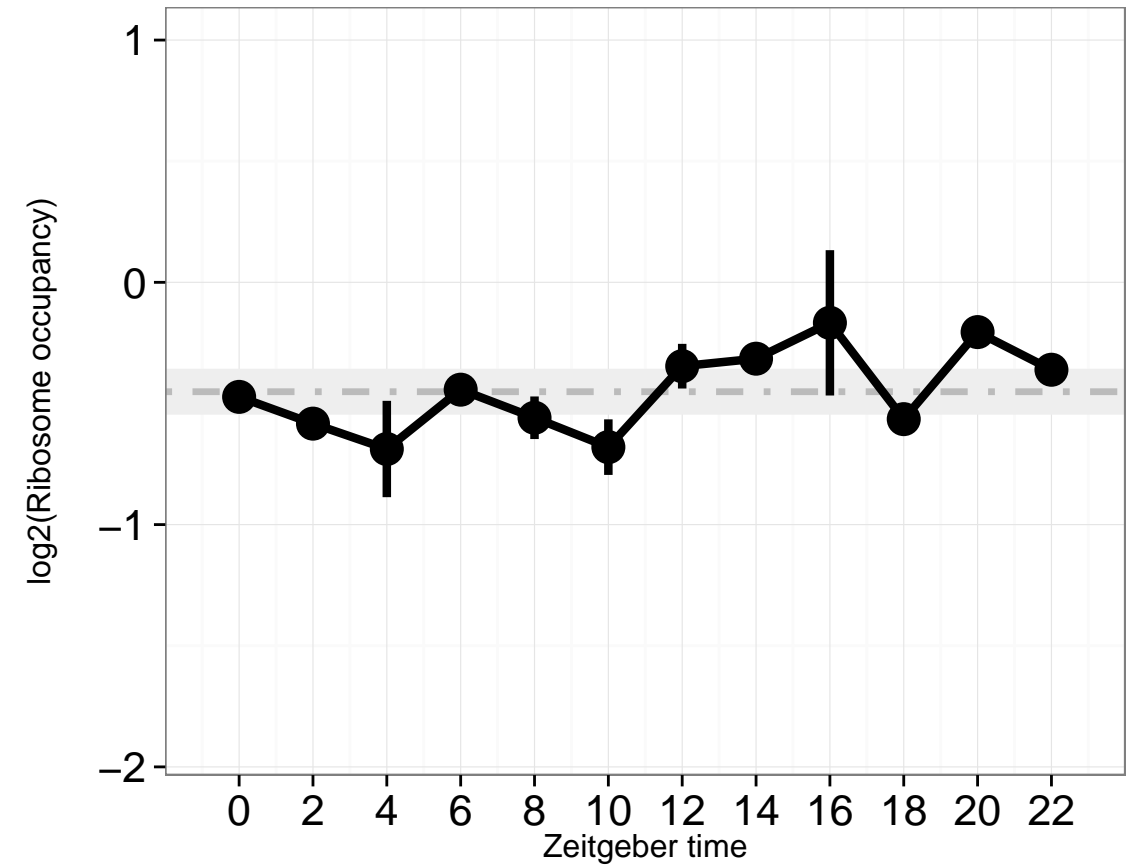

Supplement: Supplementary file 2692 [file 1]

# Fam57a

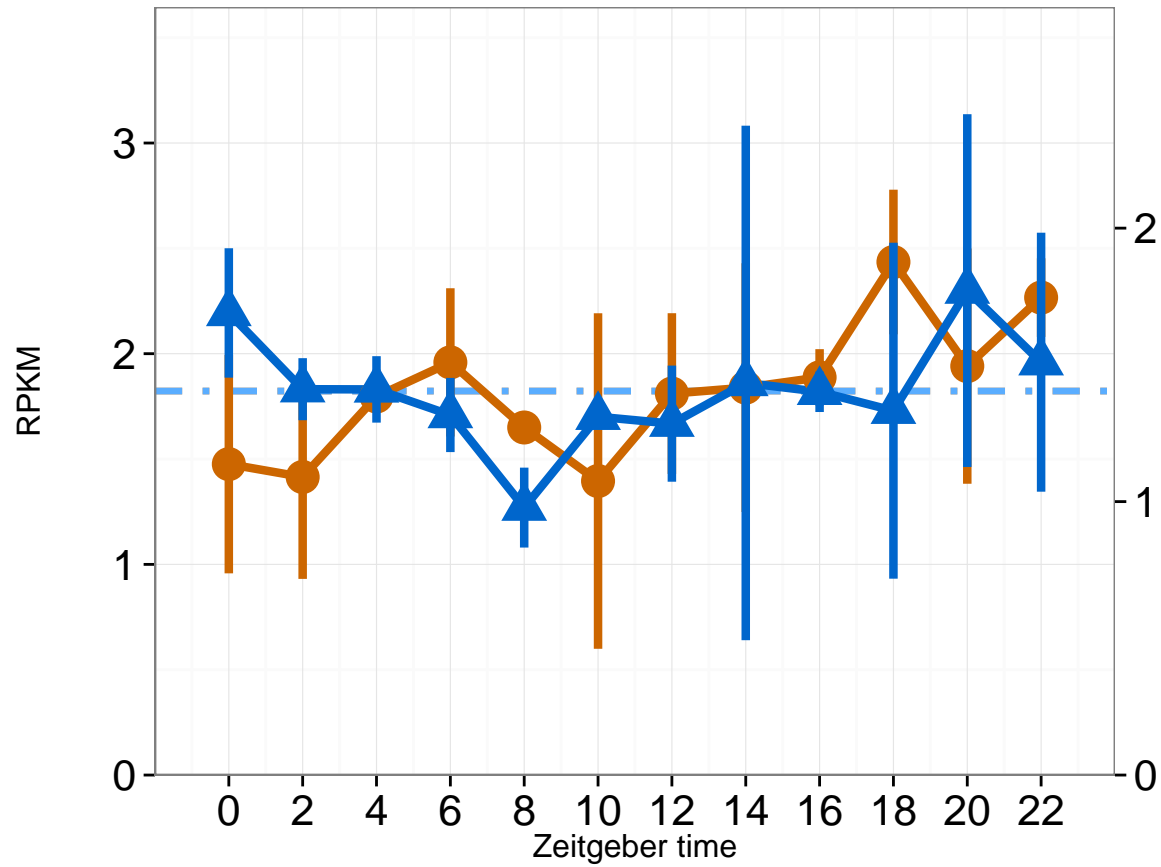

# Fam57a

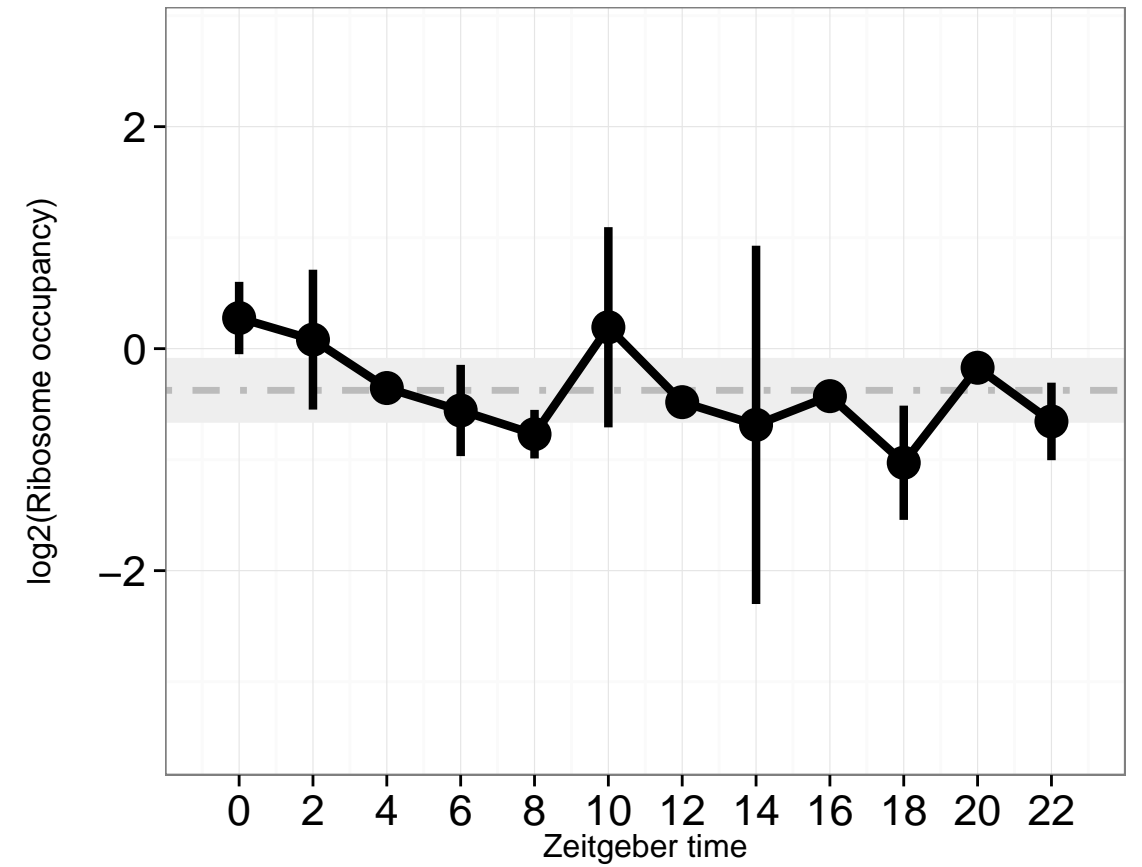

Supplement: Supplementary file 2693 [file 1]

## Smco4

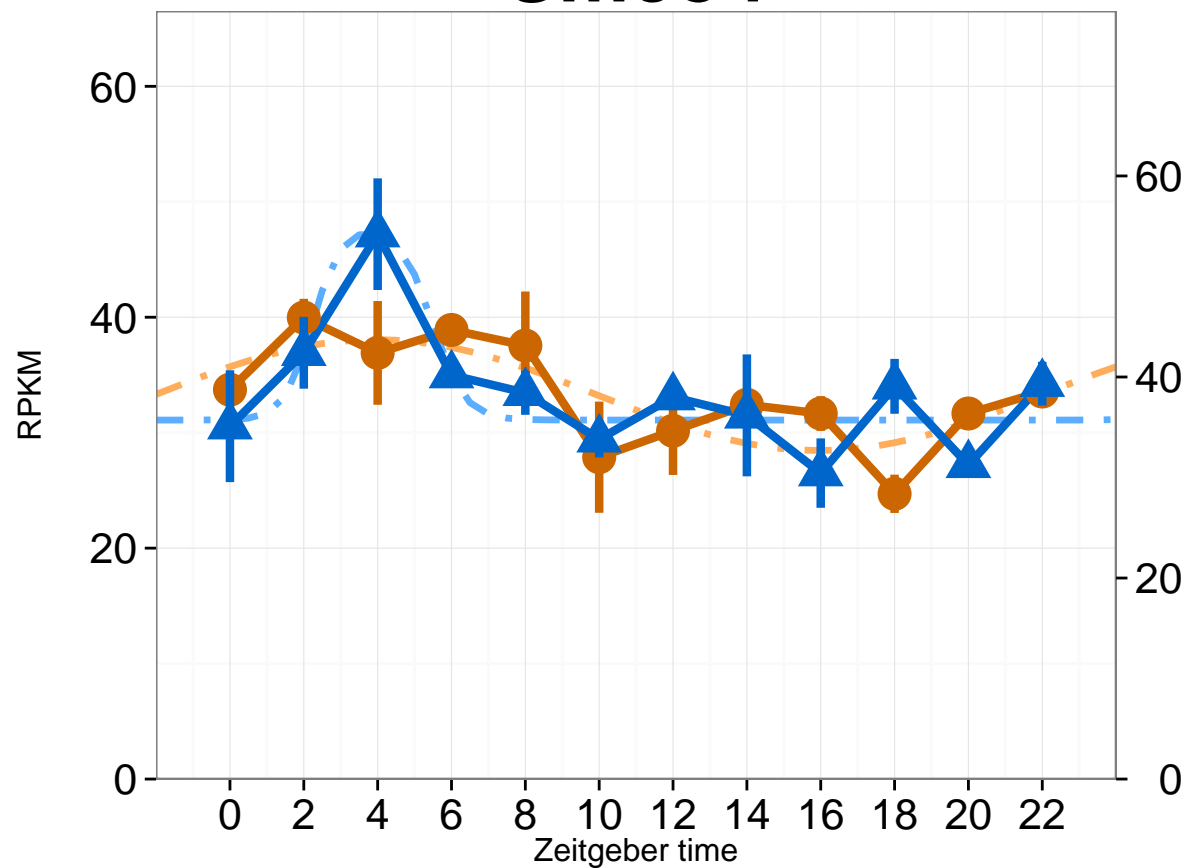

## Smco4

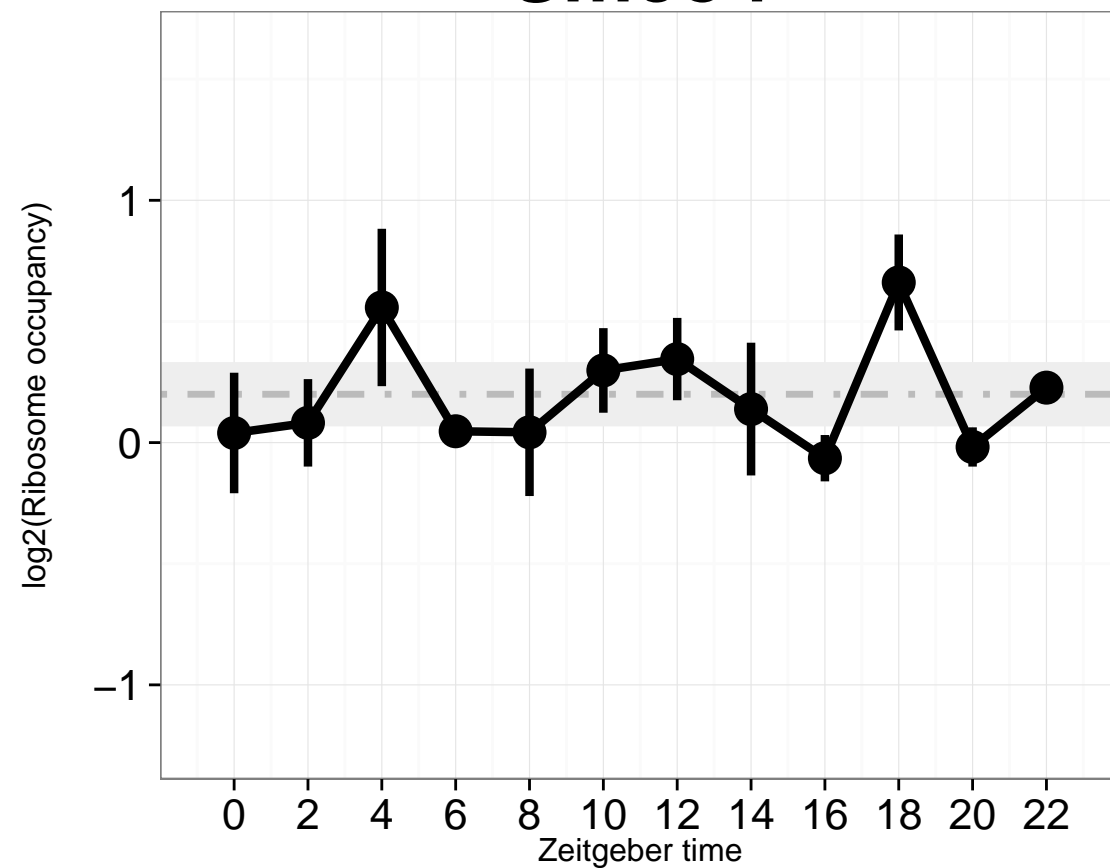

Supplement: Supplementary file 2694 [file 1]

## Ghr

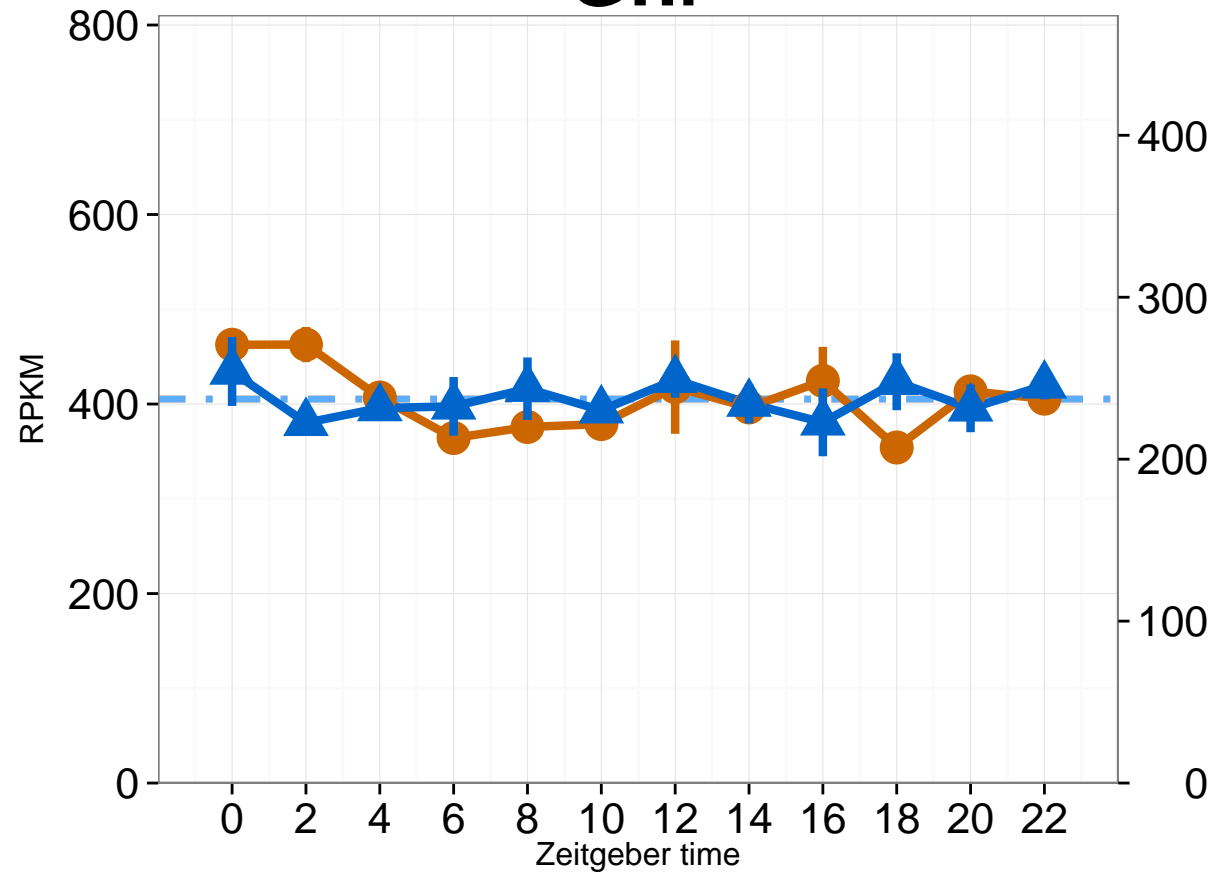

## Ghr

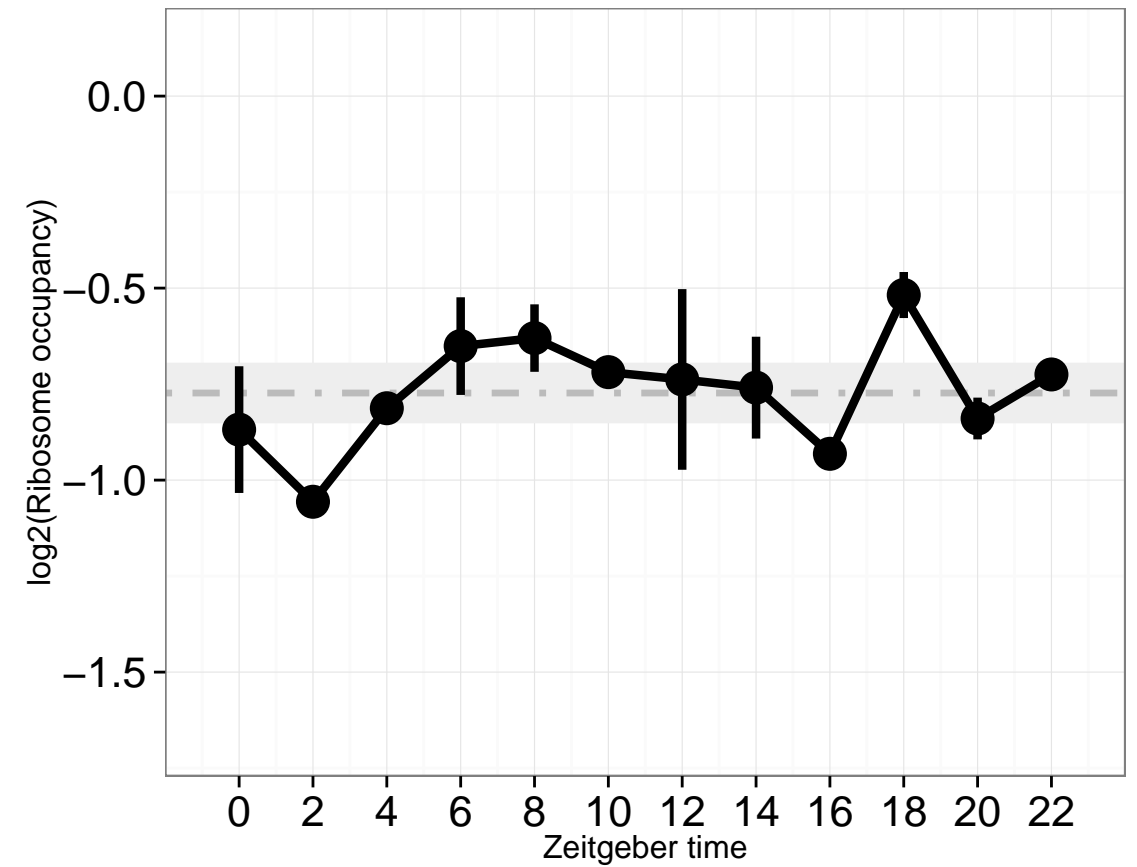

Supplement: Supplementary file 2695 [file 1]

# Gm10203

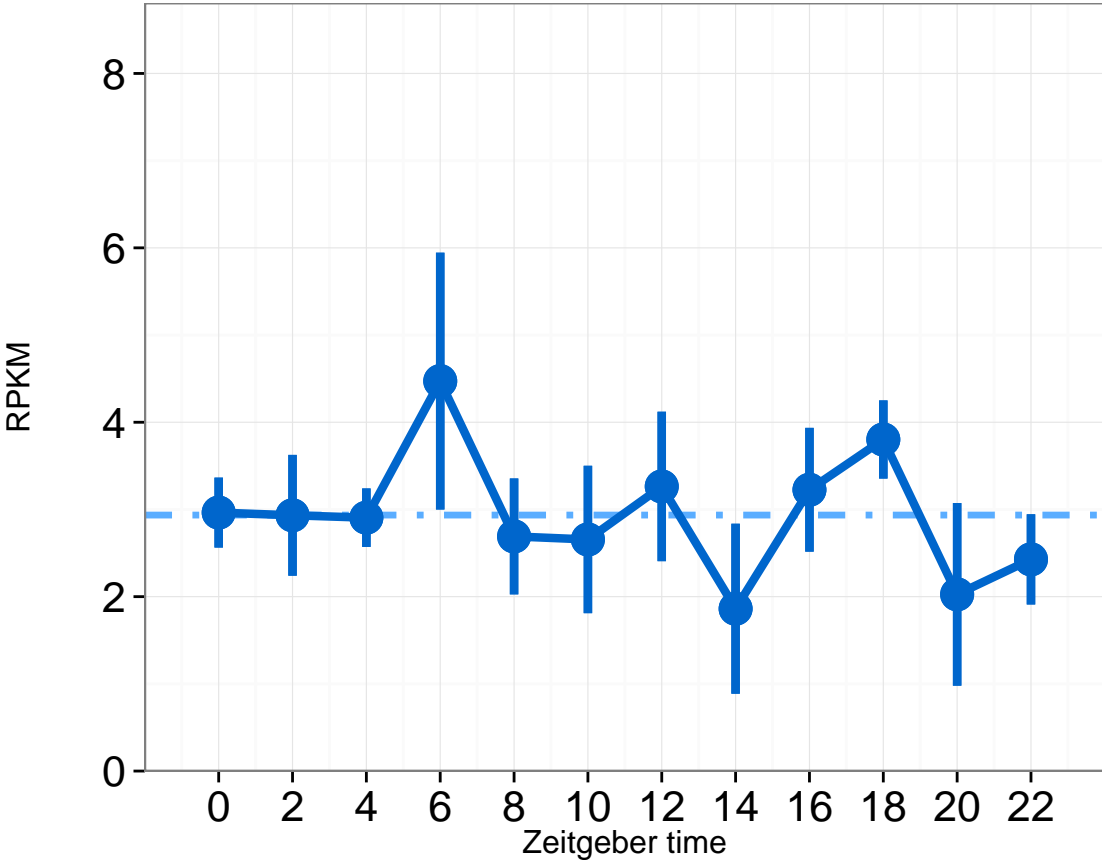

# Gm10203 log2(Ribosome occupancy)

Supplement: Supplementary file 2696 [file 1]

# Fbxw15

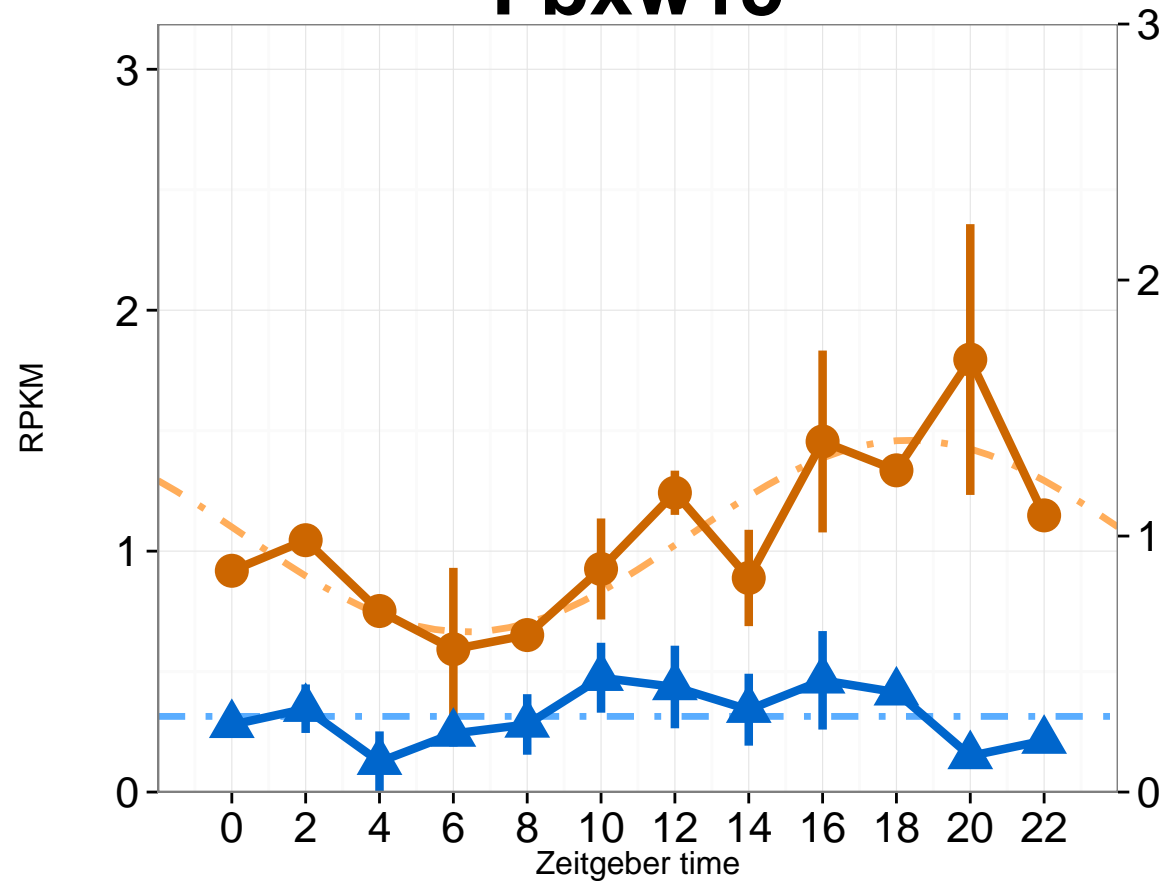

# Fbxw15

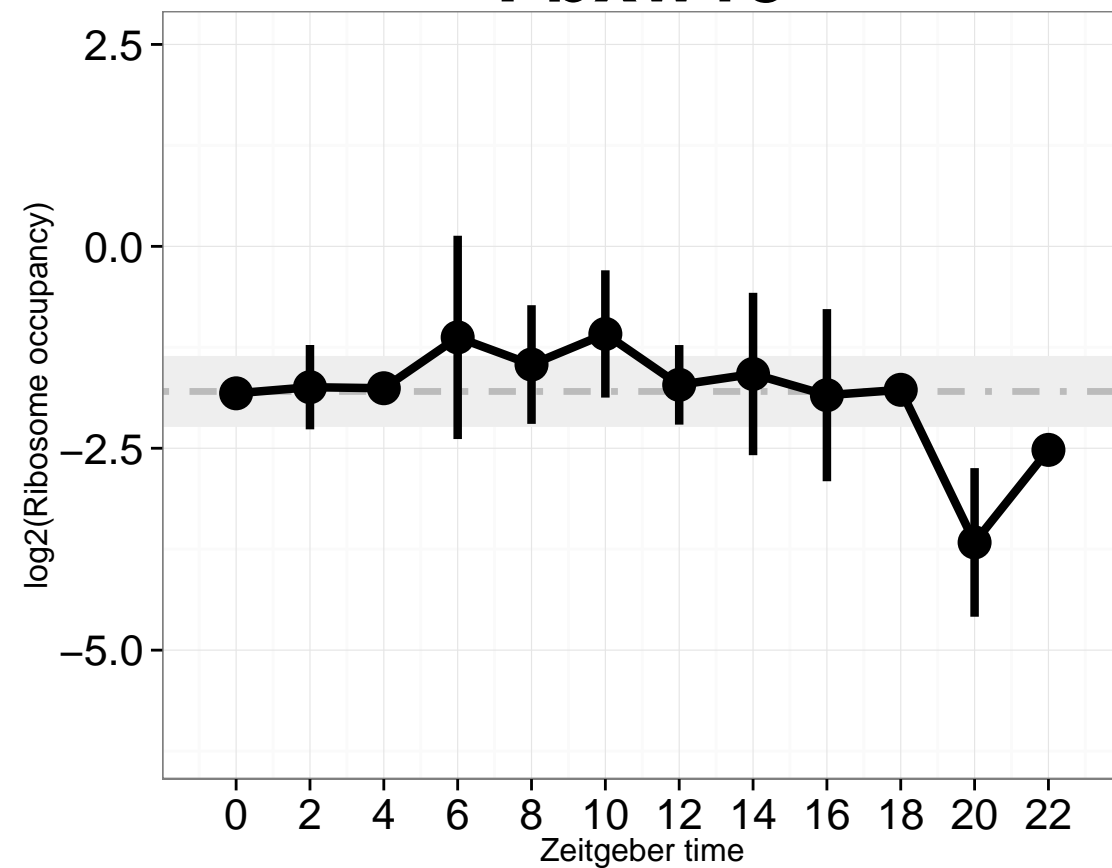

Supplement: Supplementary file 2697 [file 1]

# Arcn1

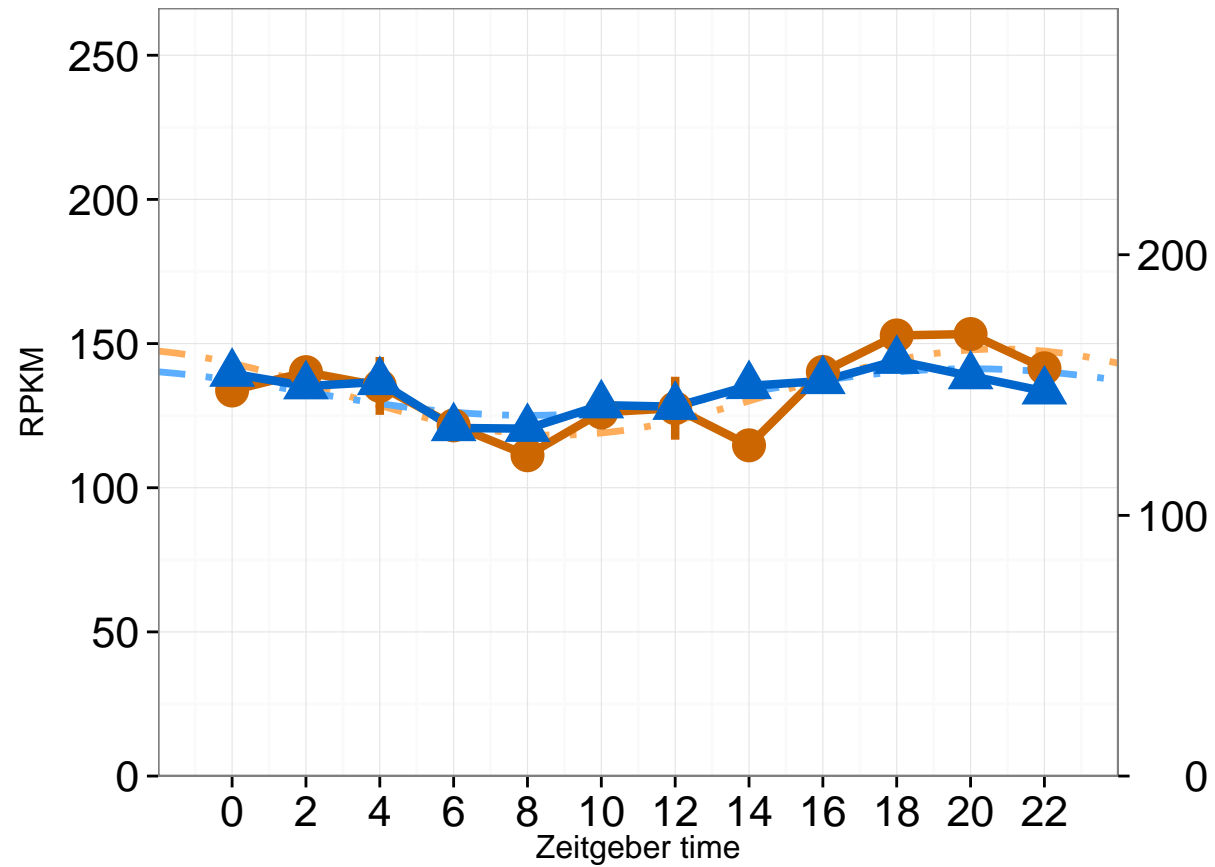

# Arcn1

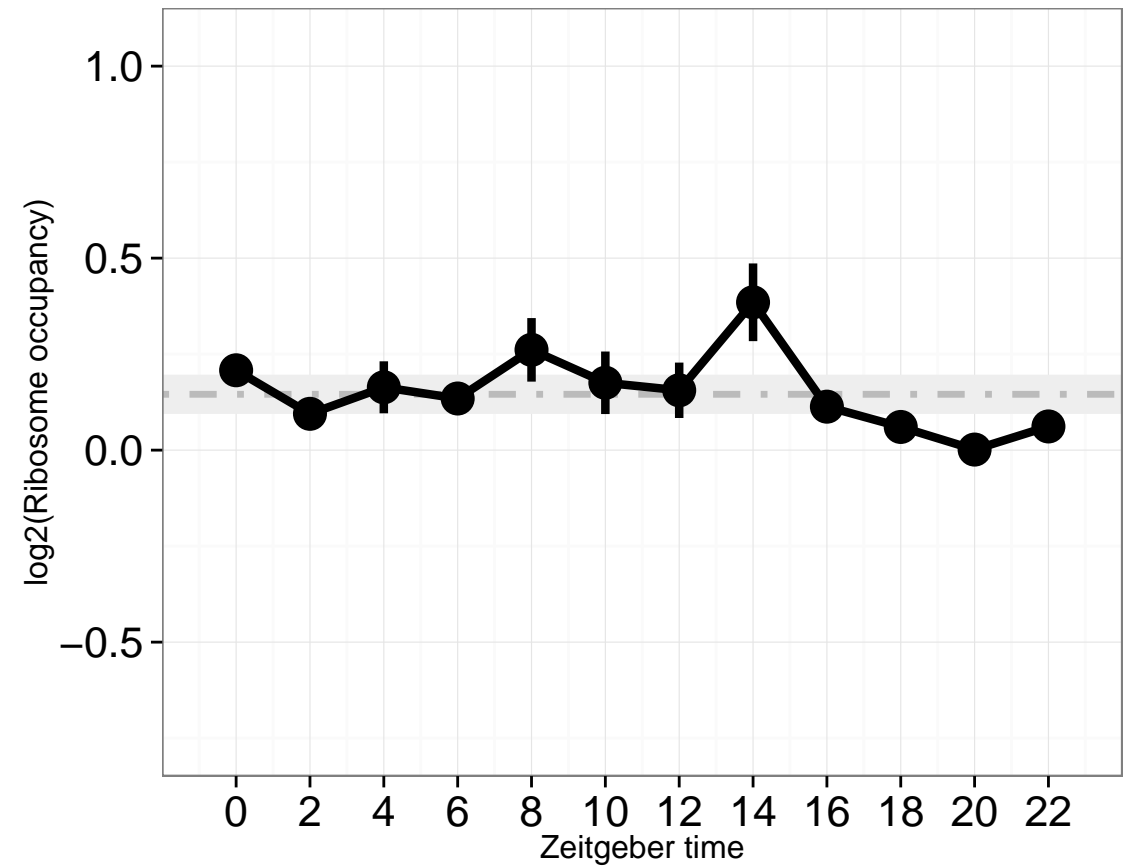

Supplement: Supplementary file 2698 [file 1]

## Sft2d3

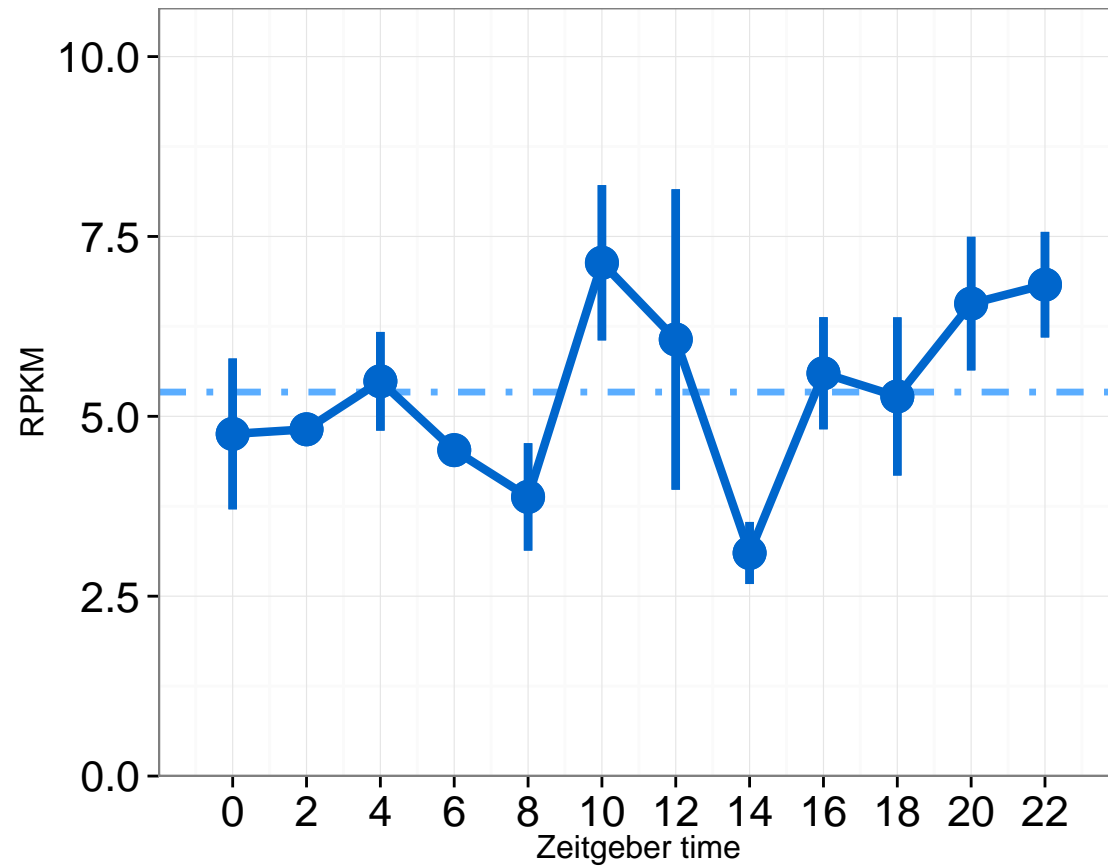

## Sft2d3 log2(Ribosome occupancy

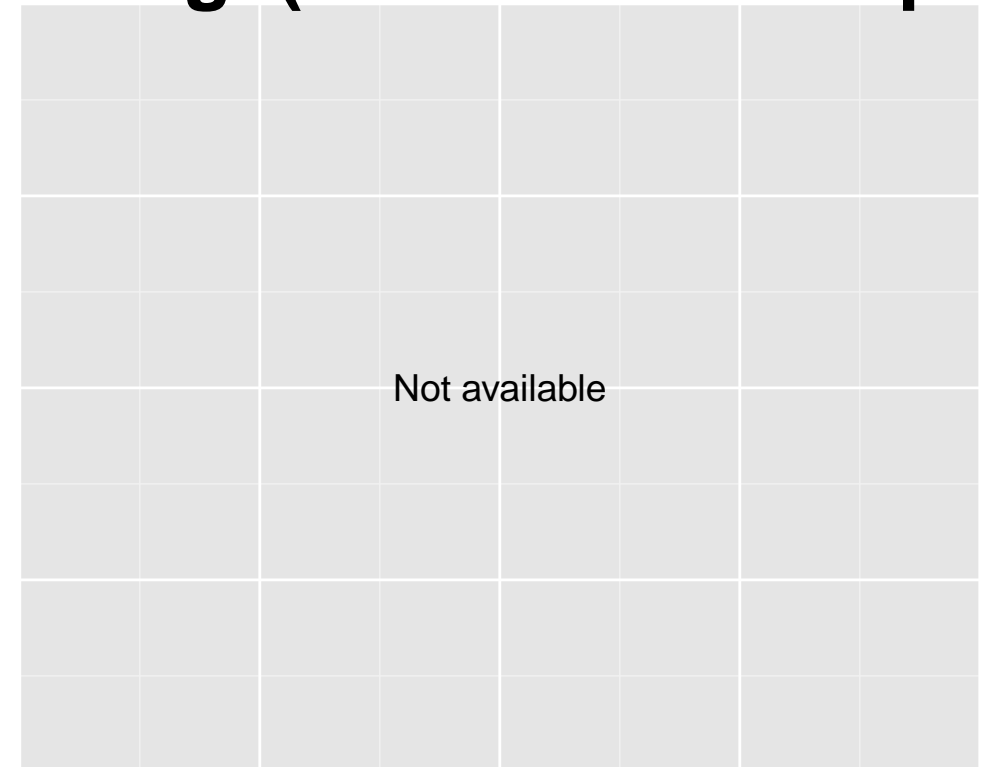

Supplement: Supplementary file 2699 [file 1]

## Gnl3l

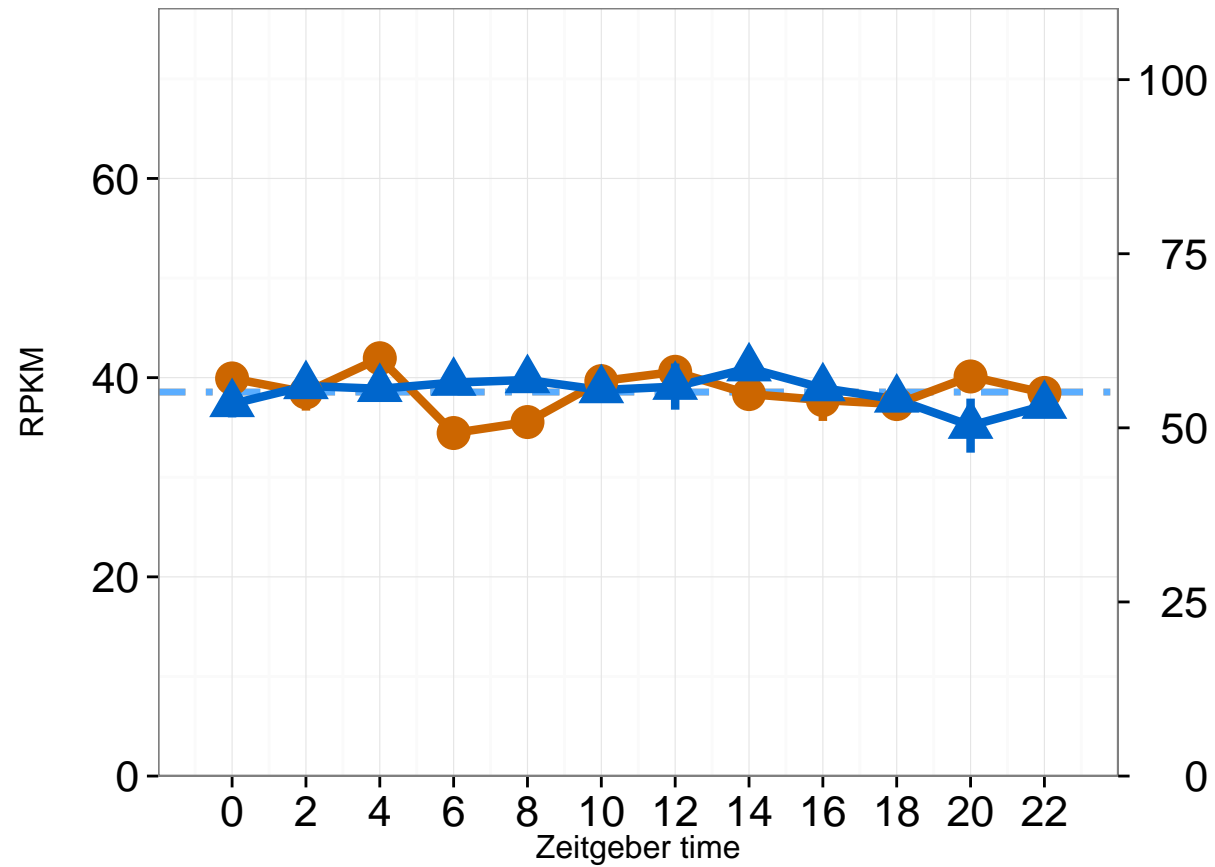

## Gnl3l

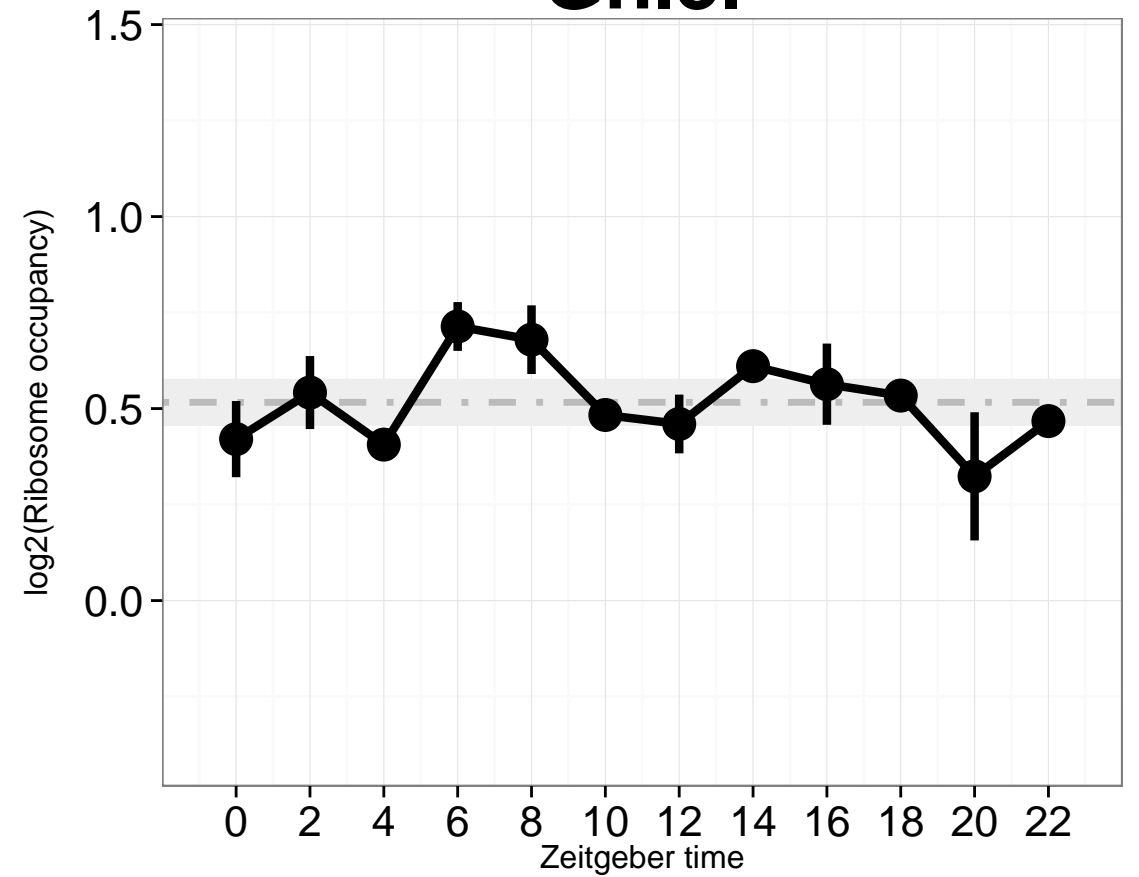

Supplement: Supplementary file 2700 [file 1]

# Kif13a

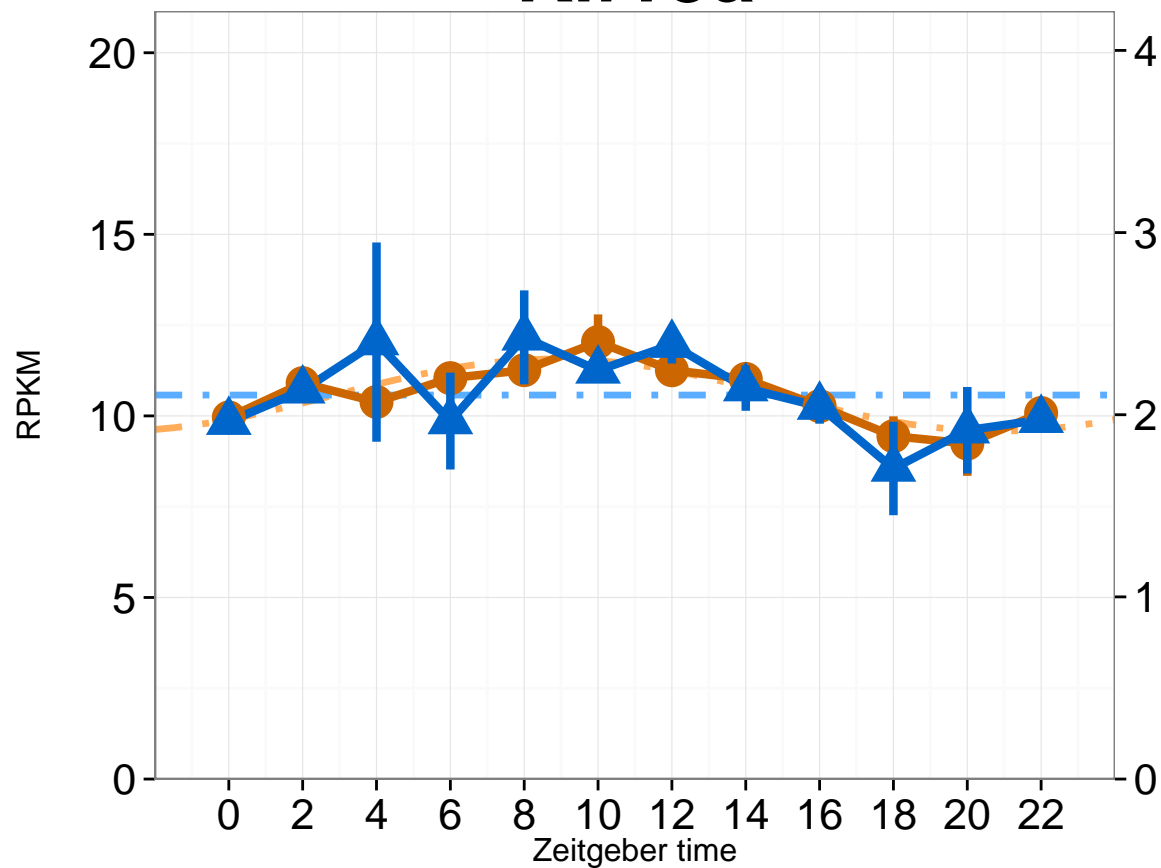

# Kif13a

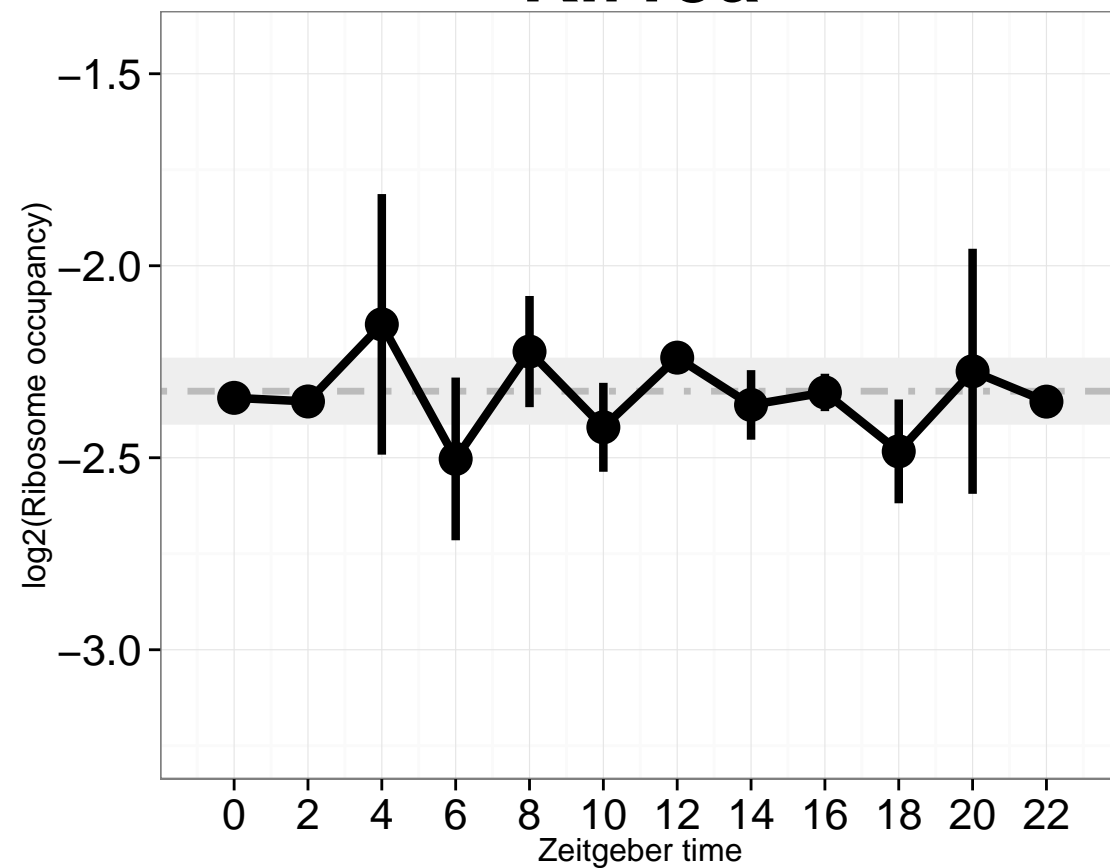

Supplement: Supplementary file 2701 [file 1]

# Vps37b

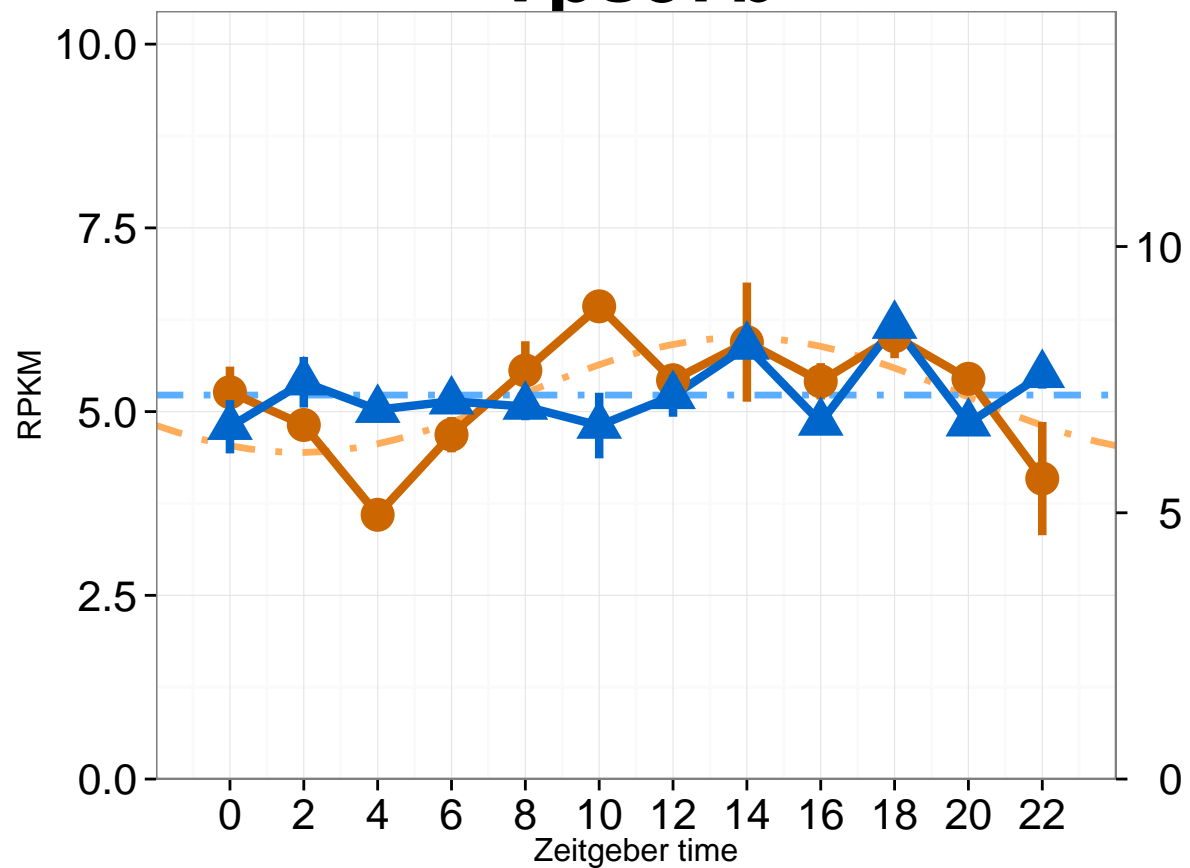

# Vps37b

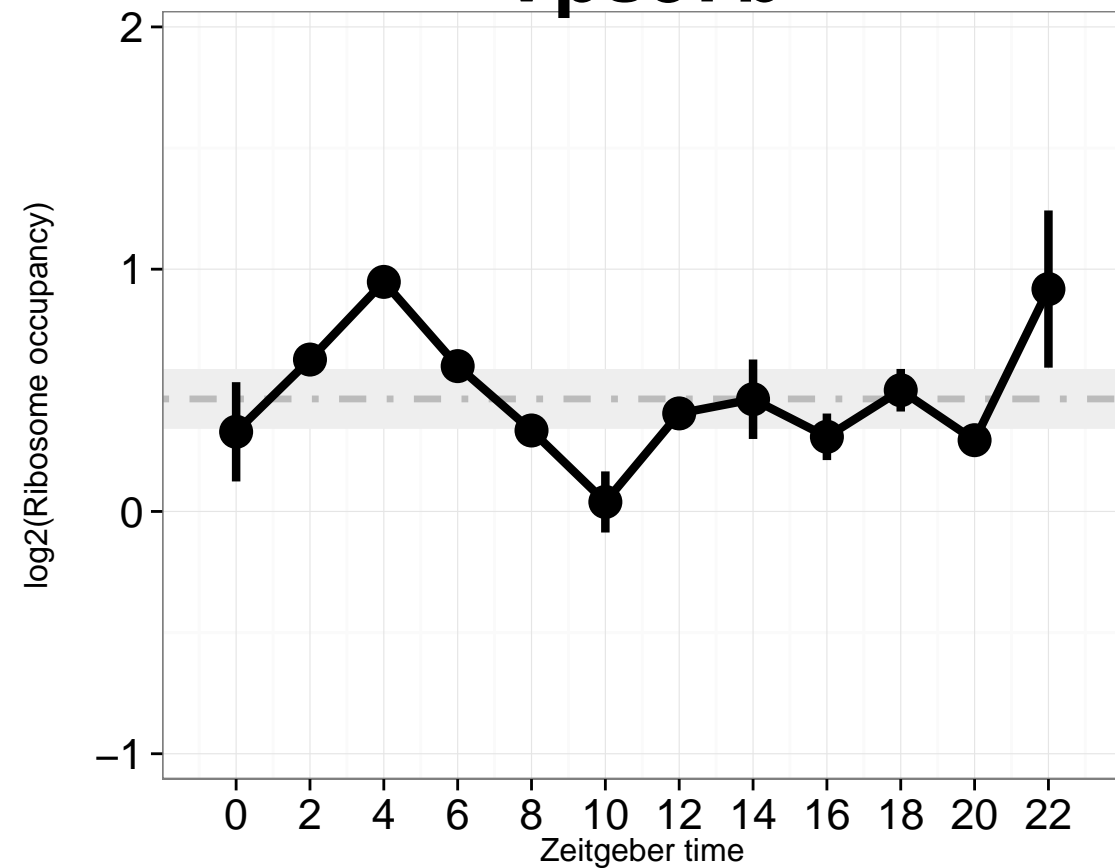

Supplement: Supplementary file 2702 [file 1]

# Ephb3

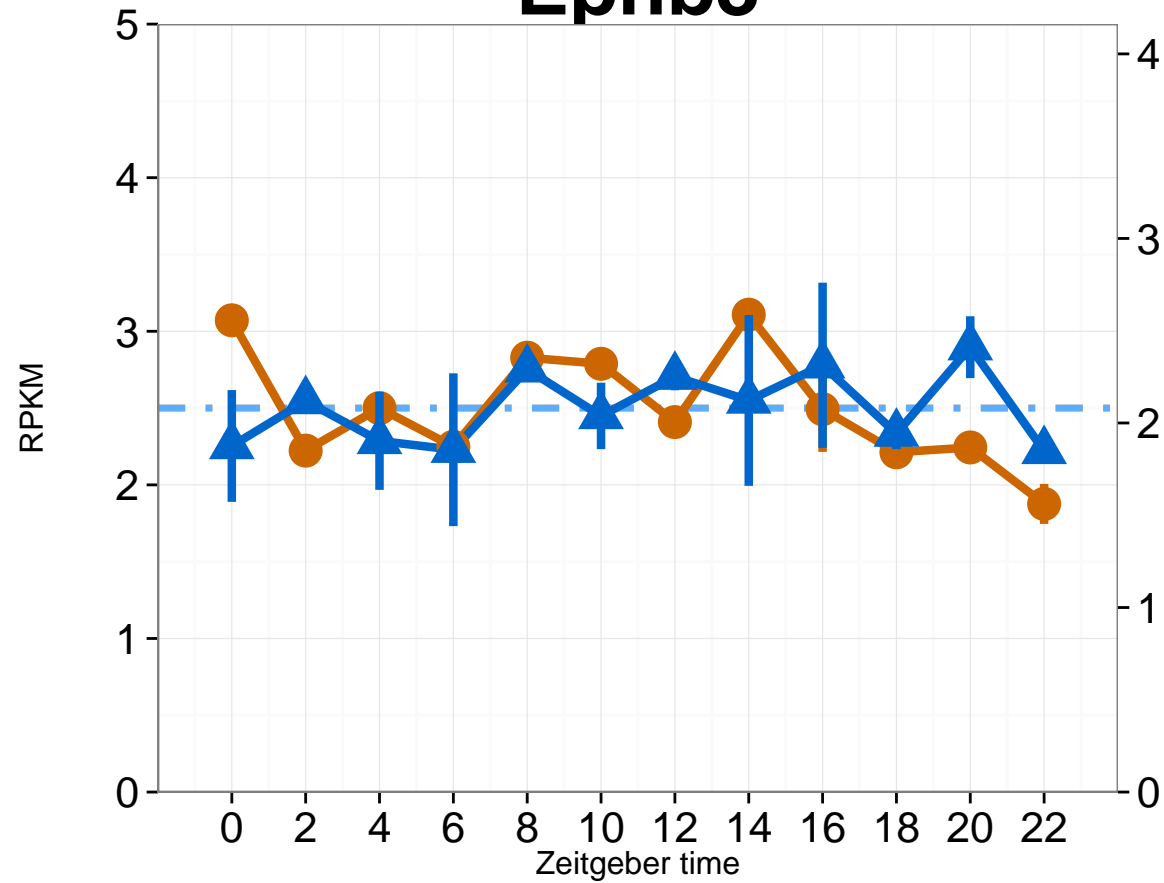

# Ephb3

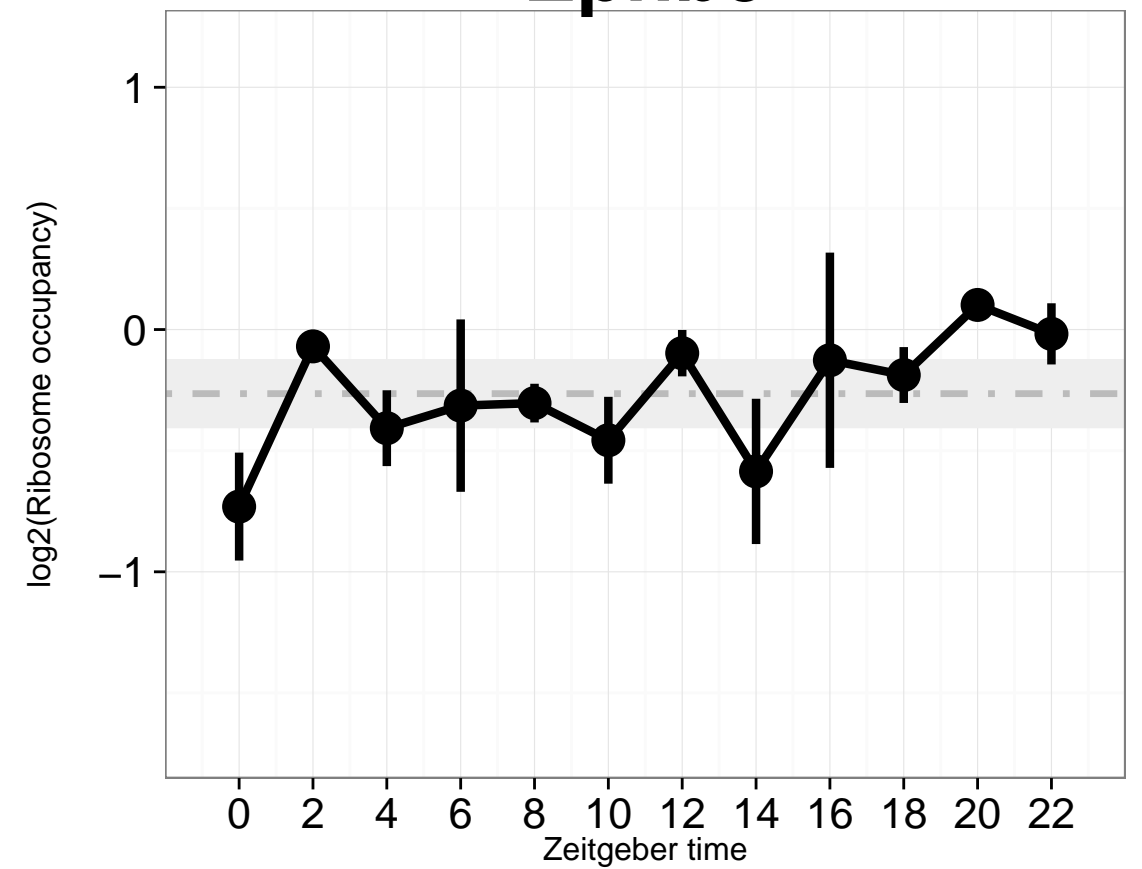

Supplement: Supplementary file 2703 [file 1]

**Samd5 TR**

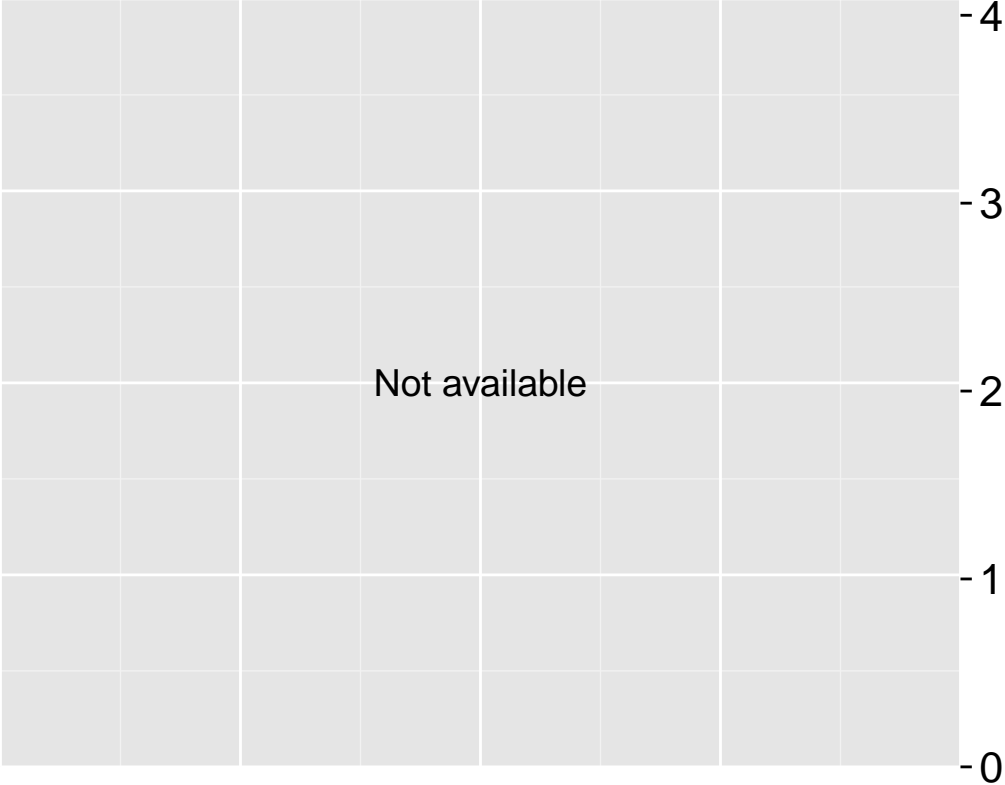

**Samd5 log2(Ribosome occupancy**

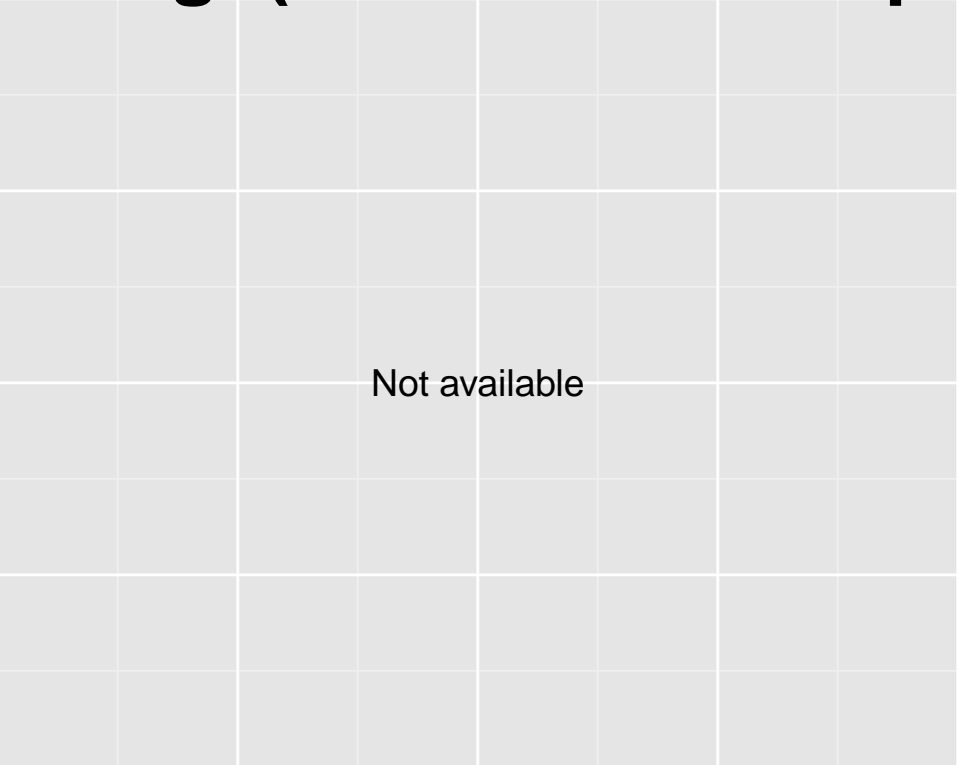

Supplement: Supplementary file 2704 [file 1]

# Pde2a

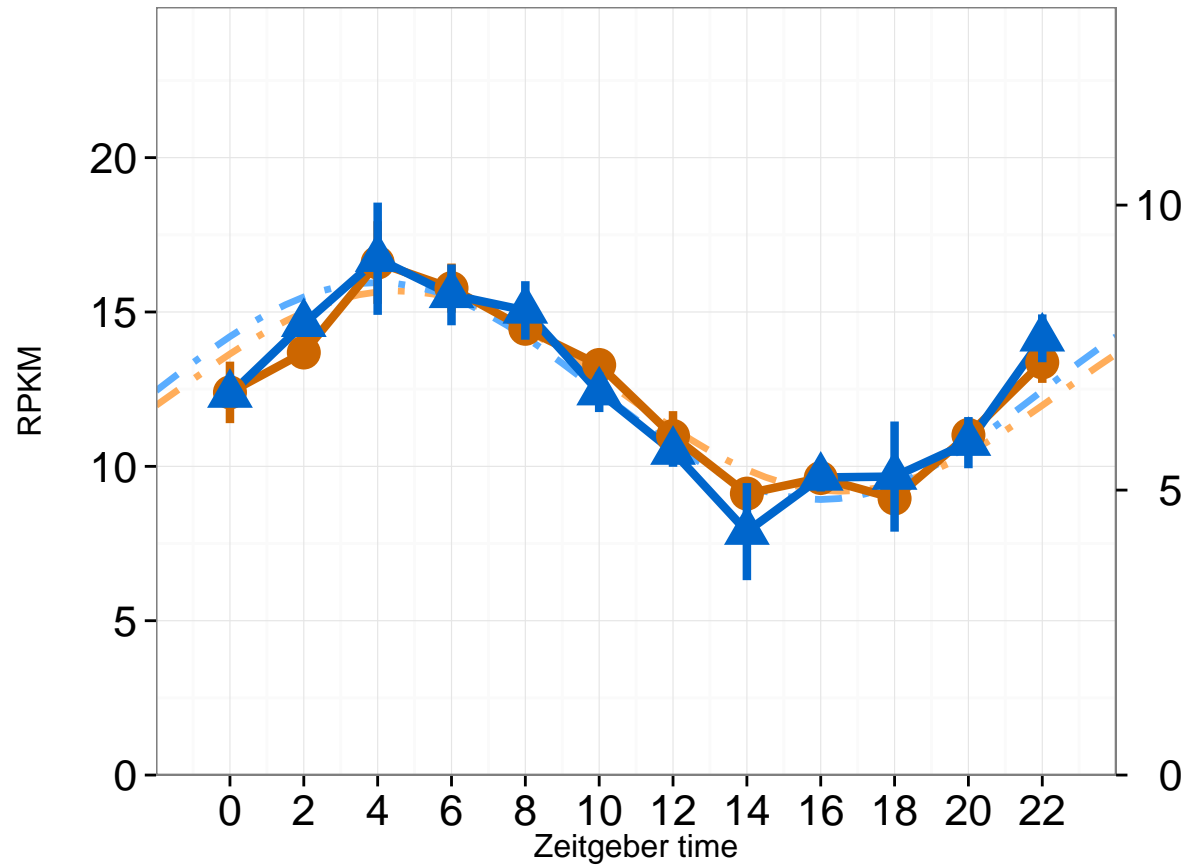

# Pde2a

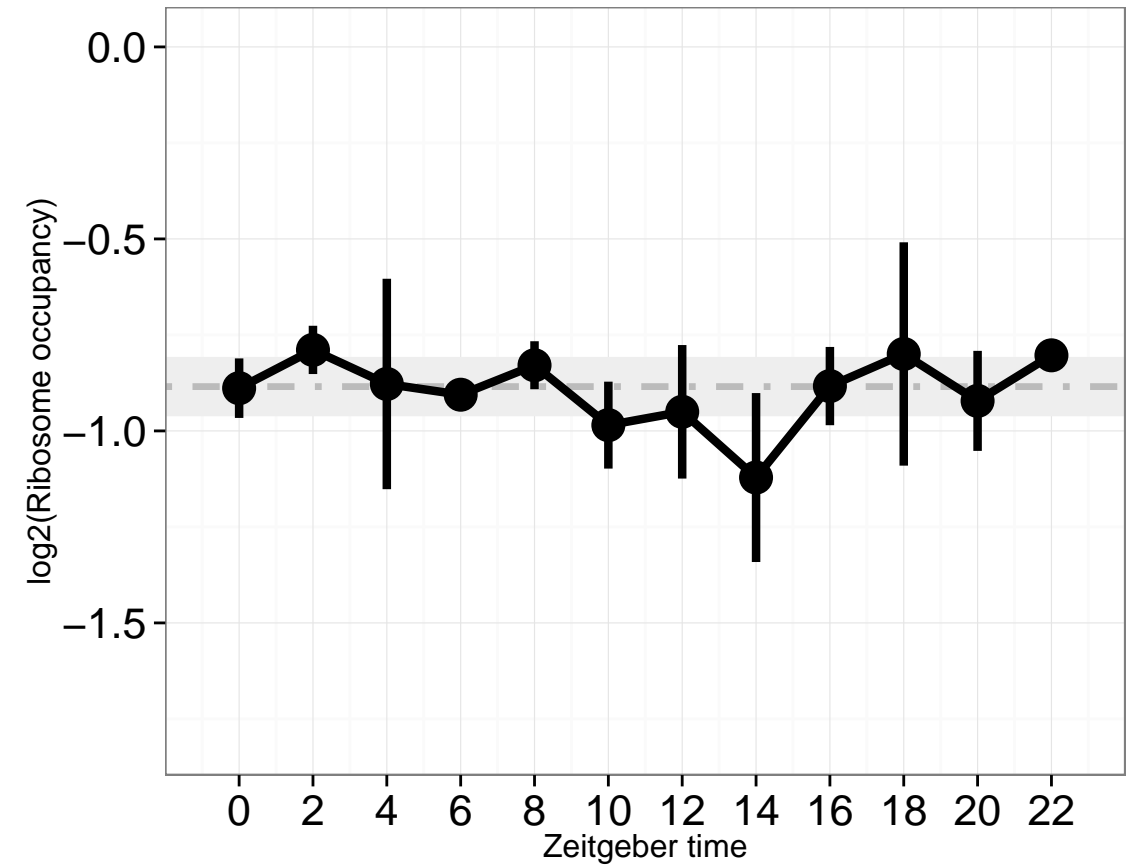

Supplement: Supplementary file 2705 [file 1]

# C030039L03Rik

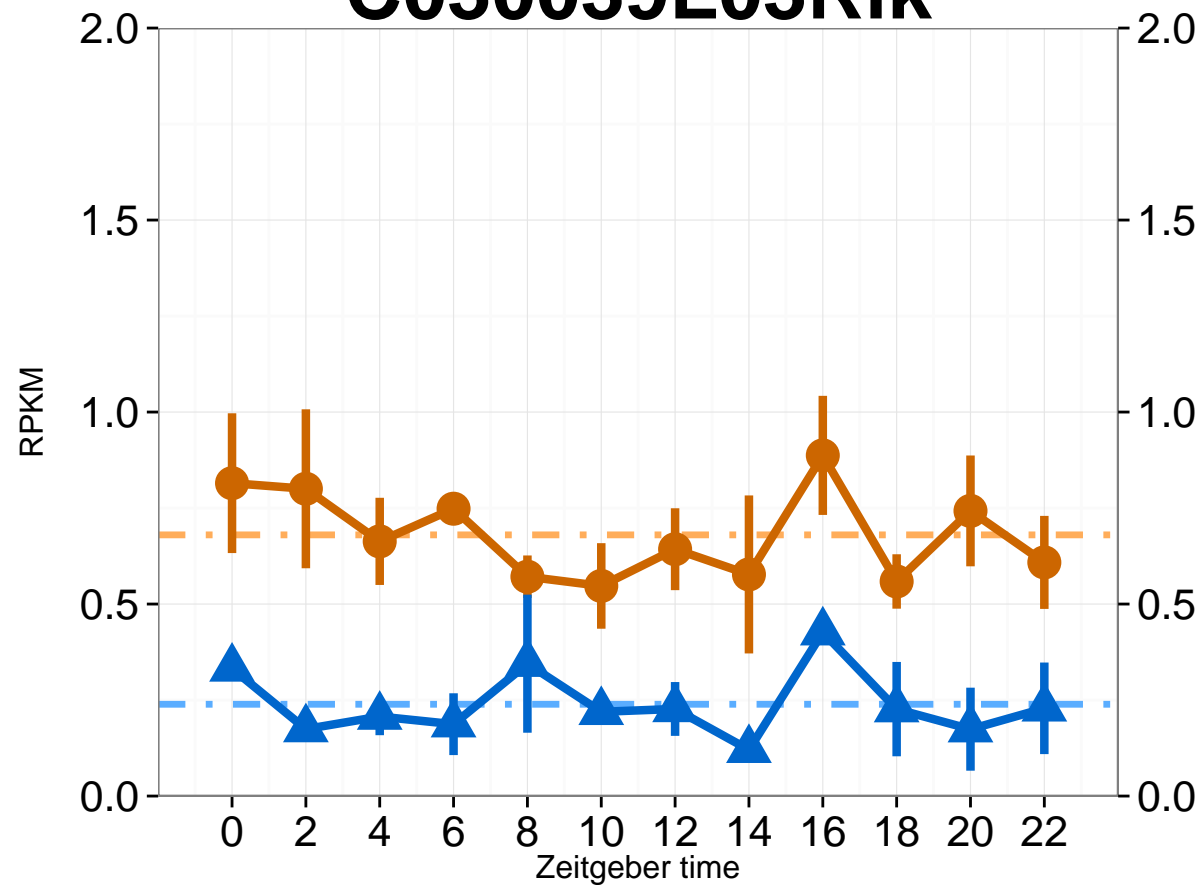

# C030039L03Rik

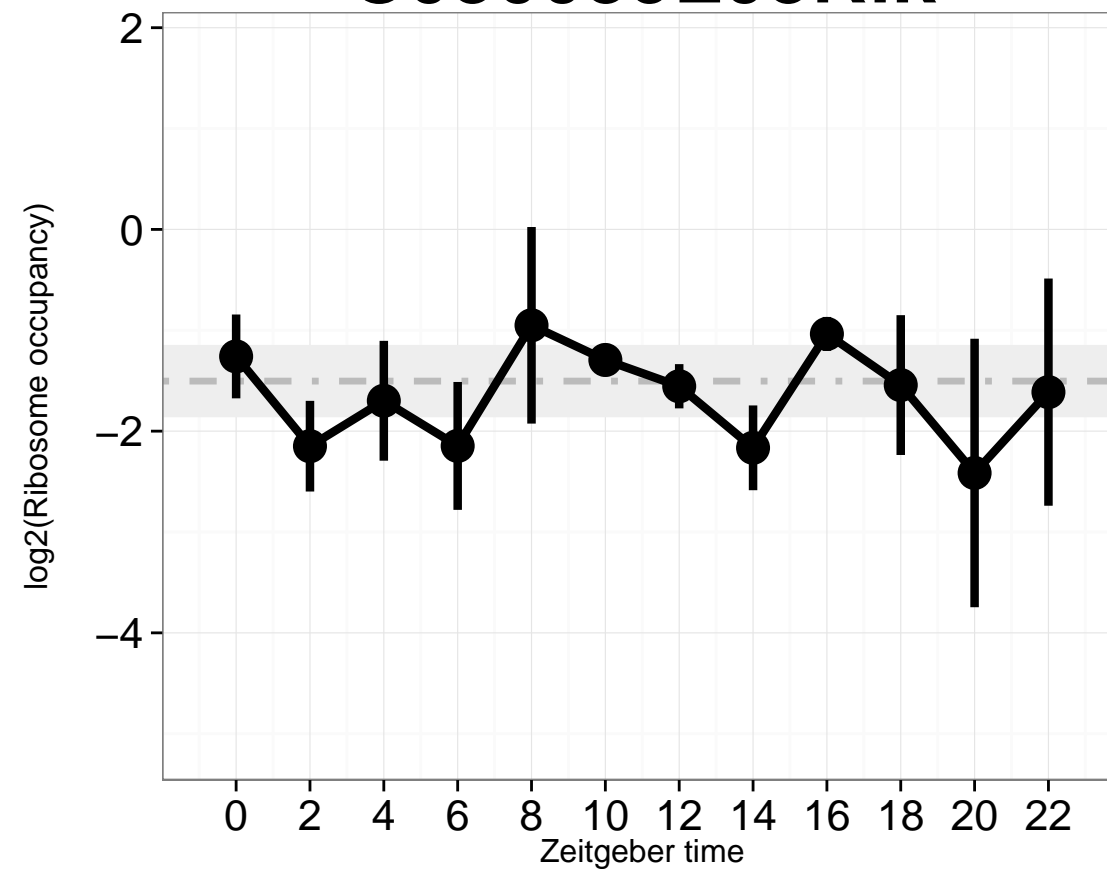

Supplement: Supplementary file 2706 [file 1]

# Stx17

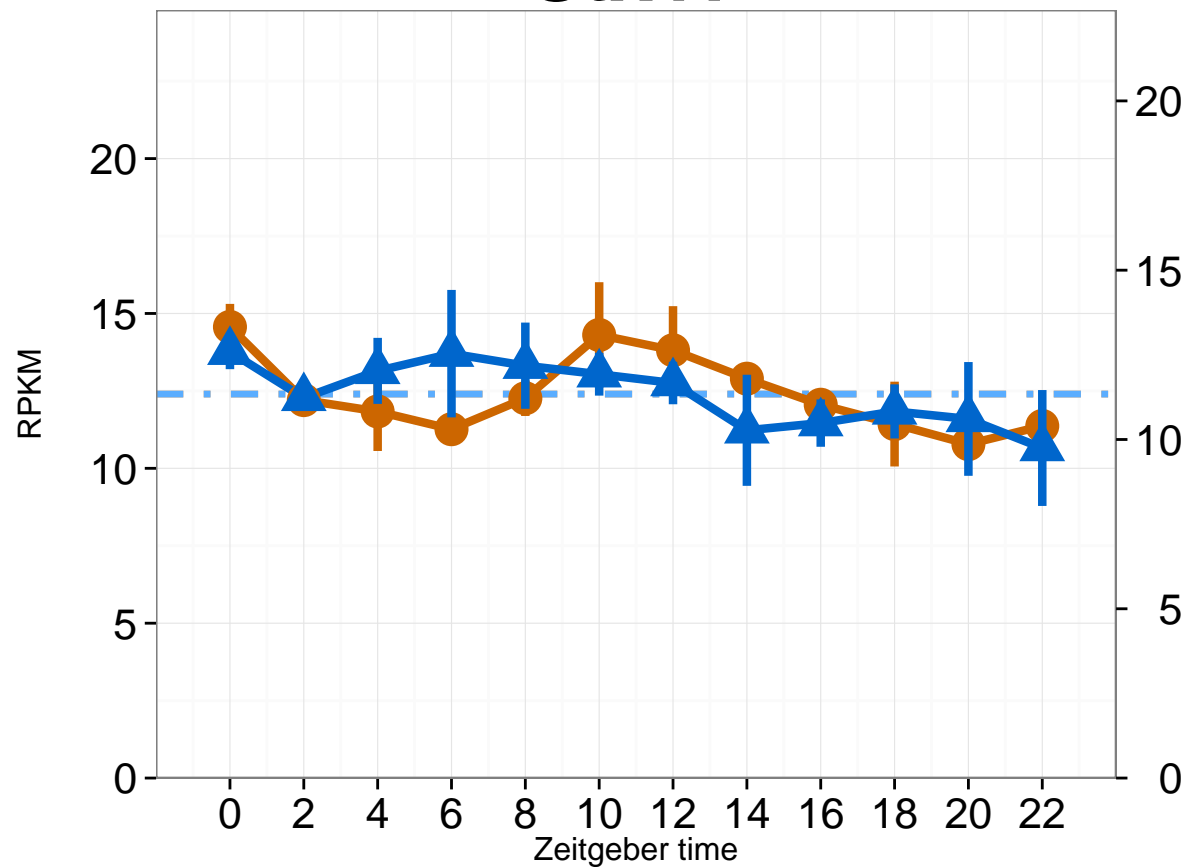

# Stx17

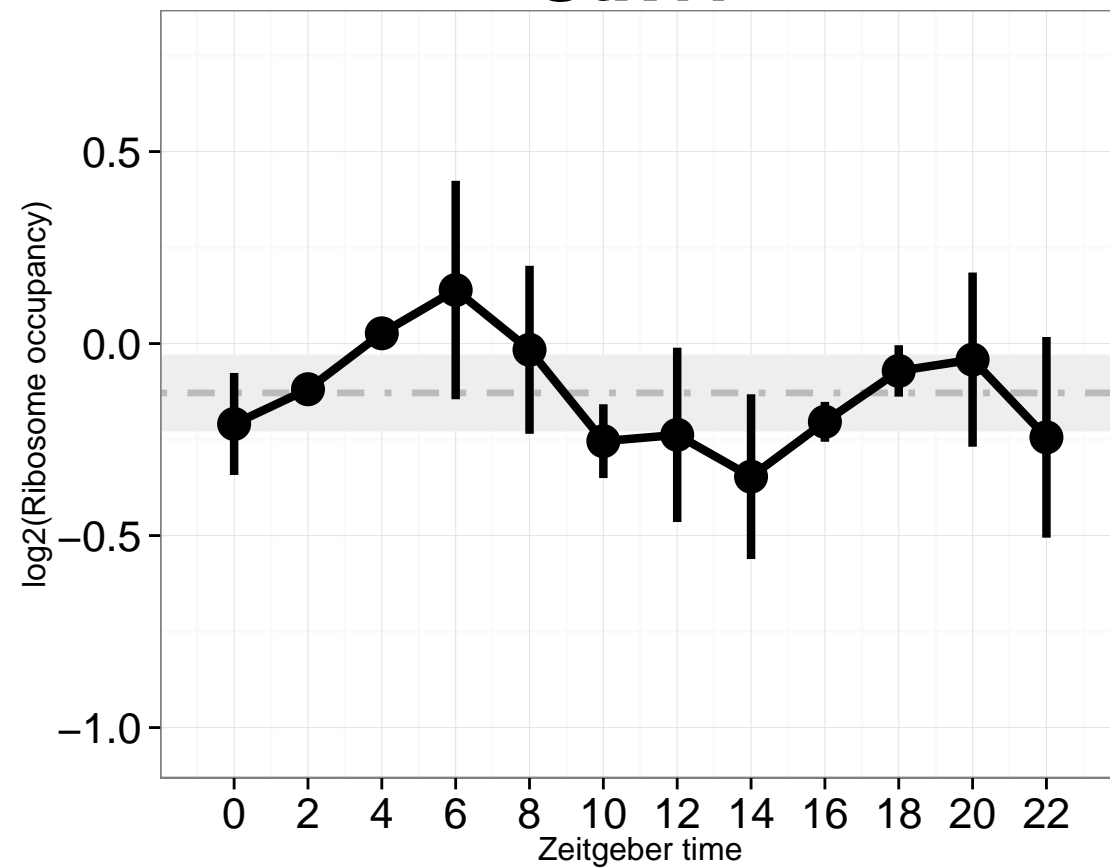

Supplement: Supplementary file 2707 [file 1]

## Pom121

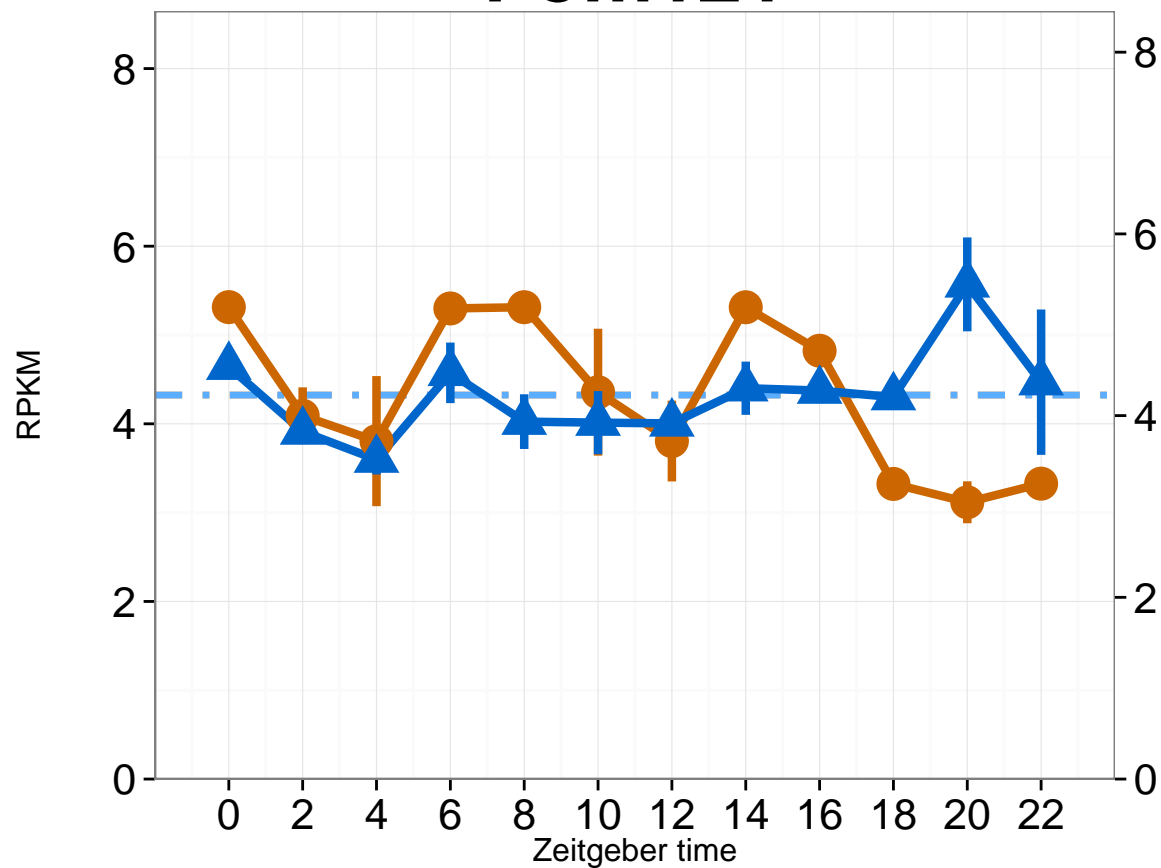

## Pom121

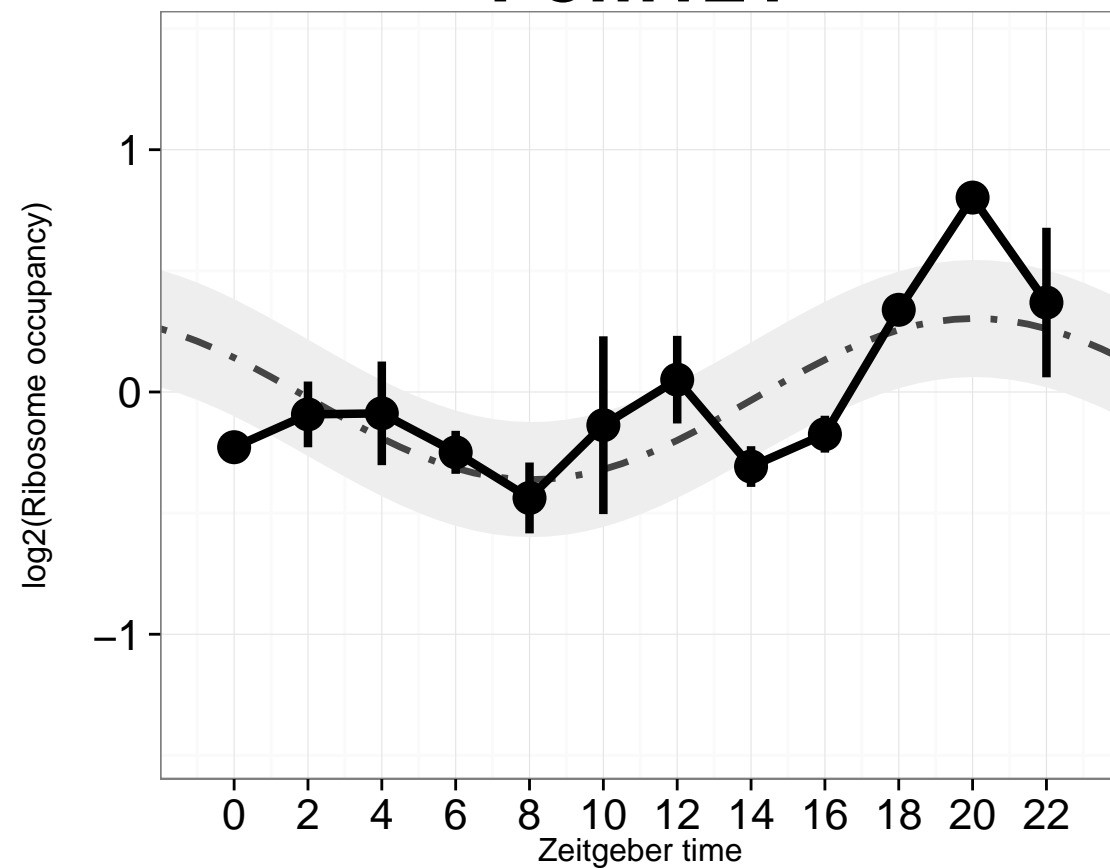

Supplement: Supplementary file 2708 [file 1]

## Cdk20

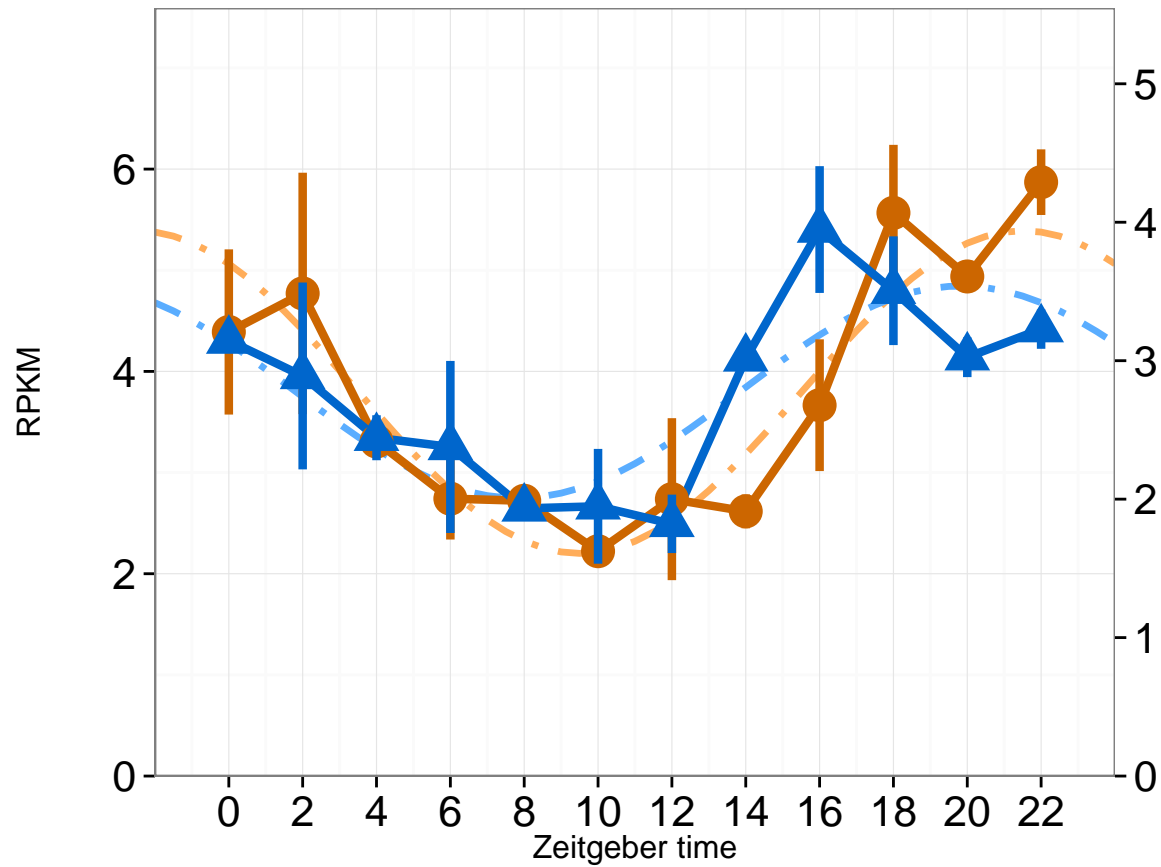

## Cdk20

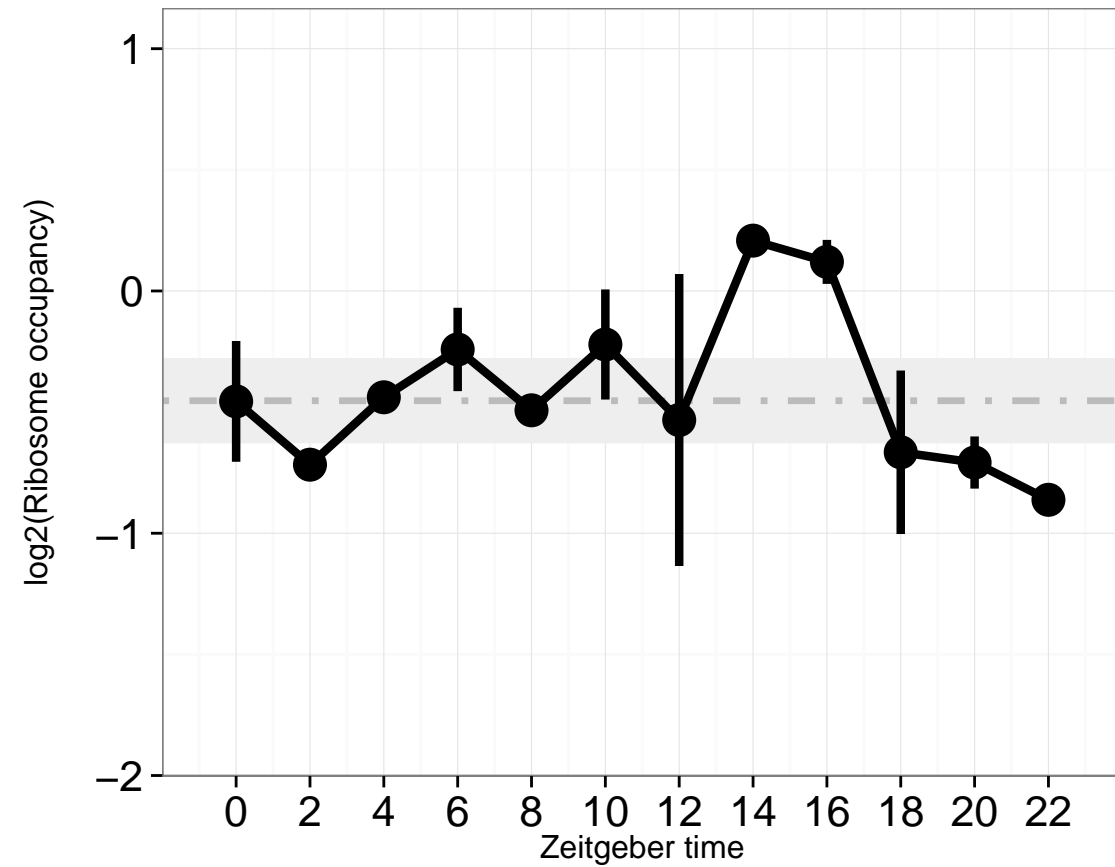

Supplement: Supplementary file 2709 [file 1]

# Col8a1

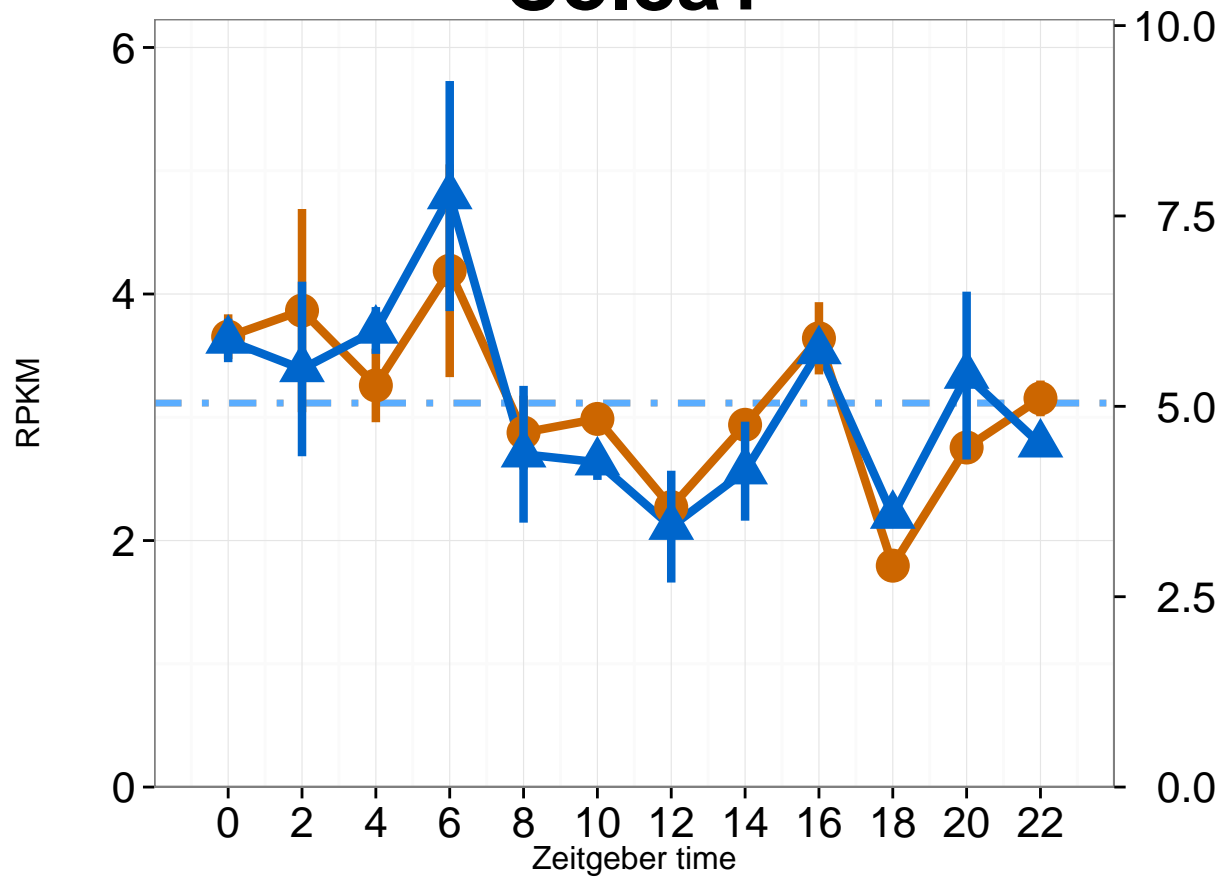

# Col8a1

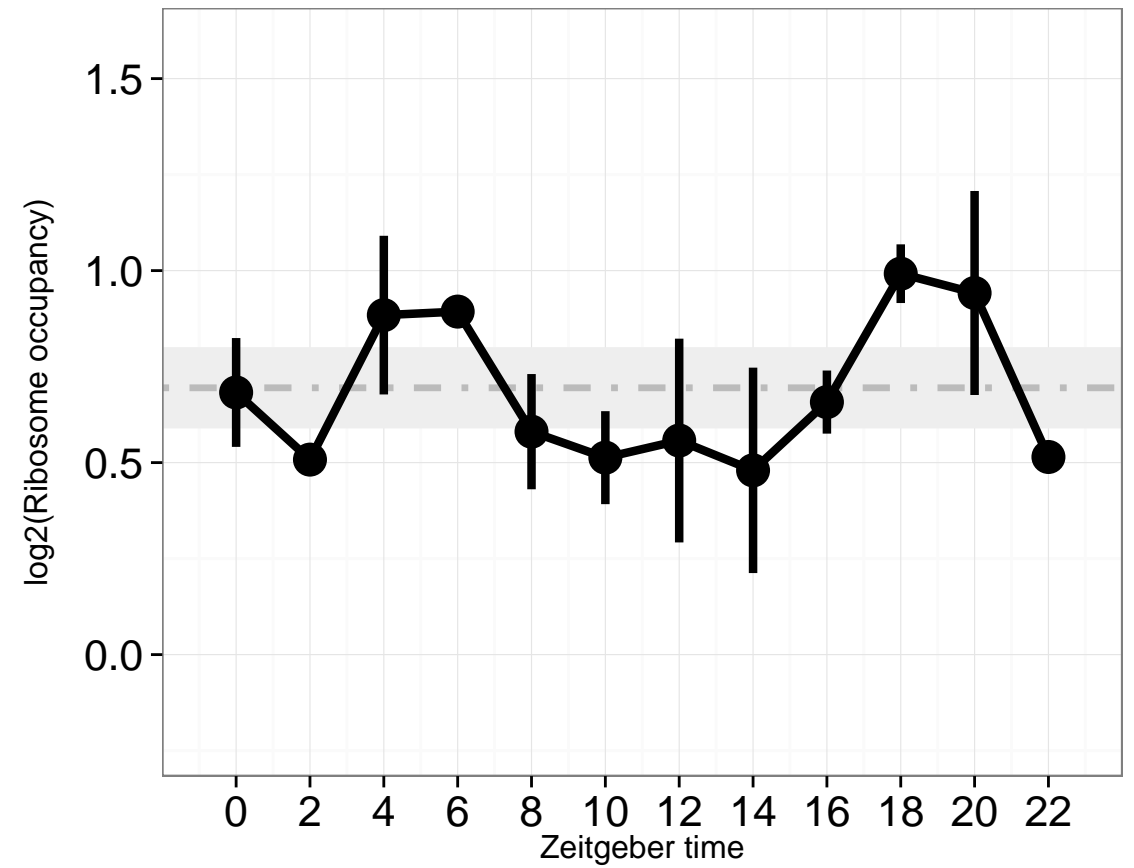

Supplement: Supplementary file 2710 [file 1]
