# Supplementary material (part 28 of 133)
Source: publisher figshare collection journal article supplement (https://springernature.figshare.com/articles/dataset/_/4903193)

# 9130019O22Rik

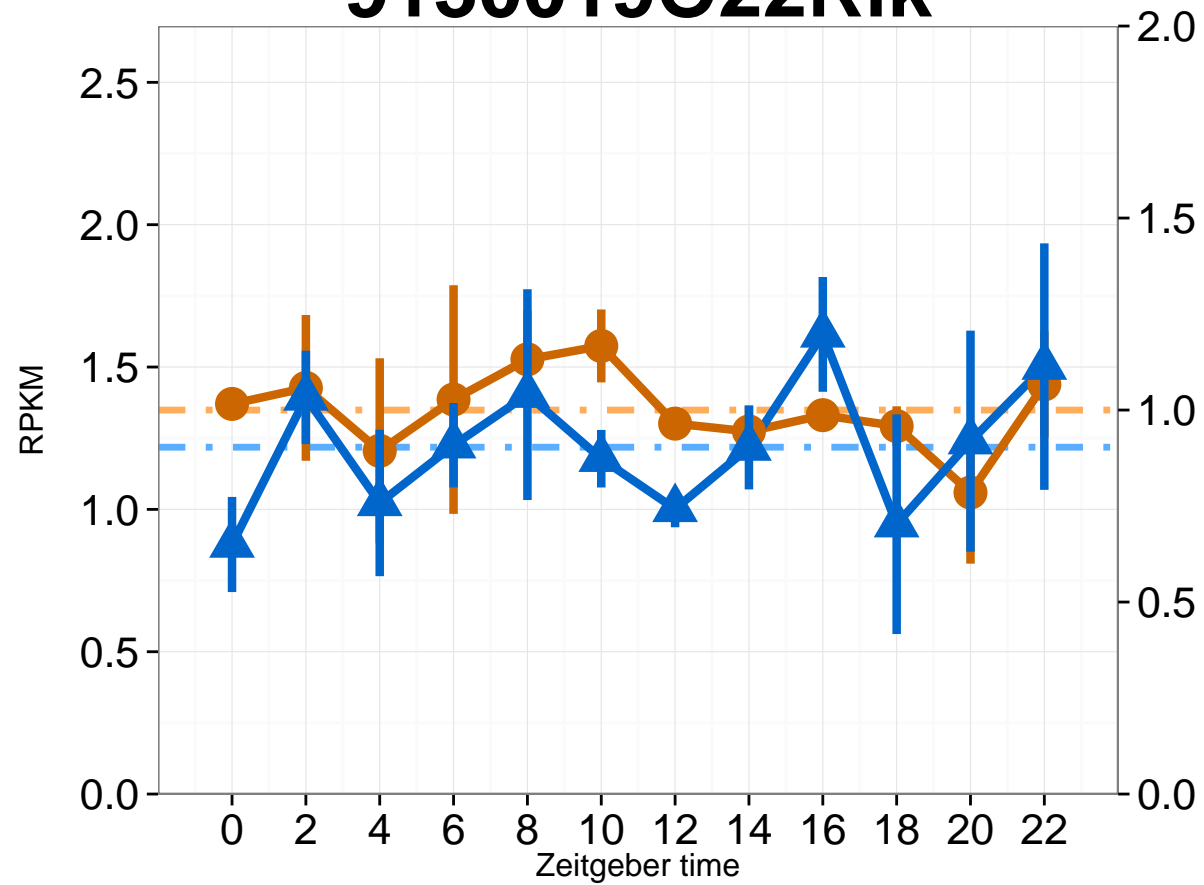

# 9130019O22Rik

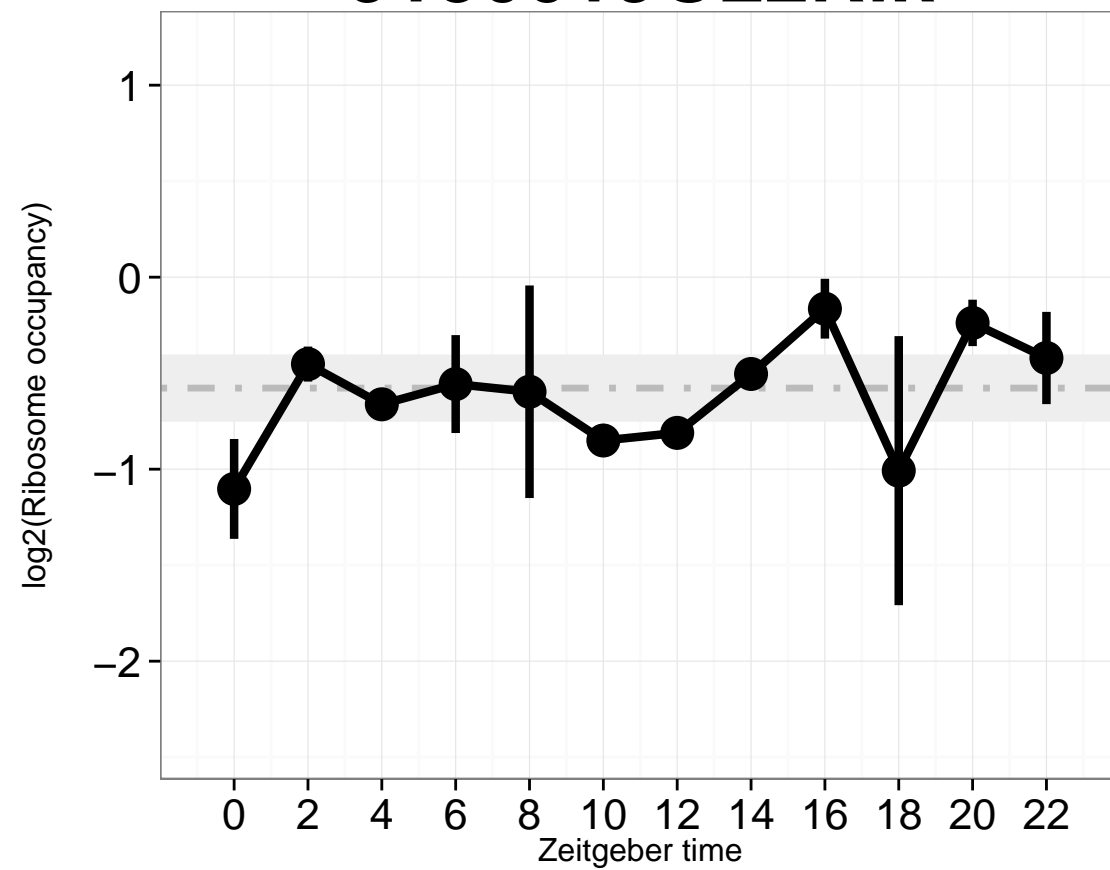

Supplement: Supplementary file 2711 [file 1]

## Pgls

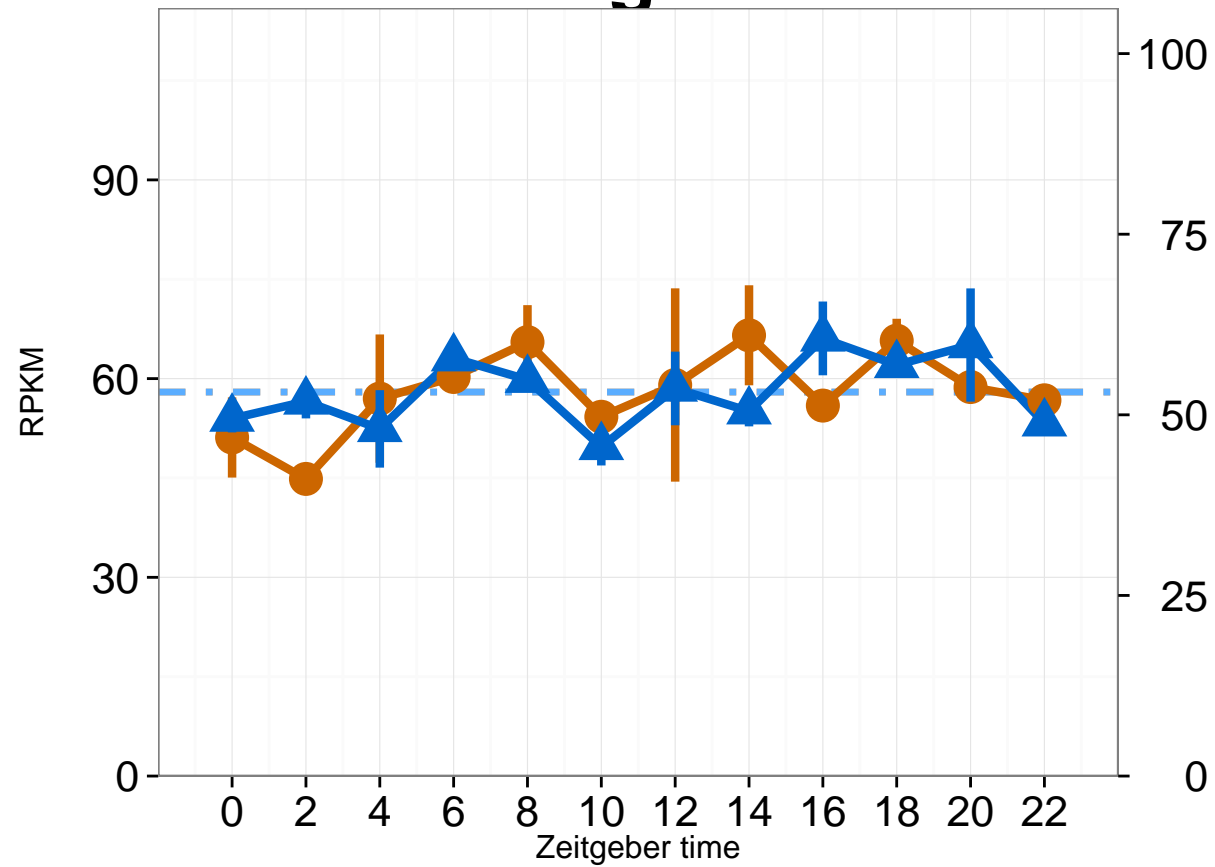

## Pgls

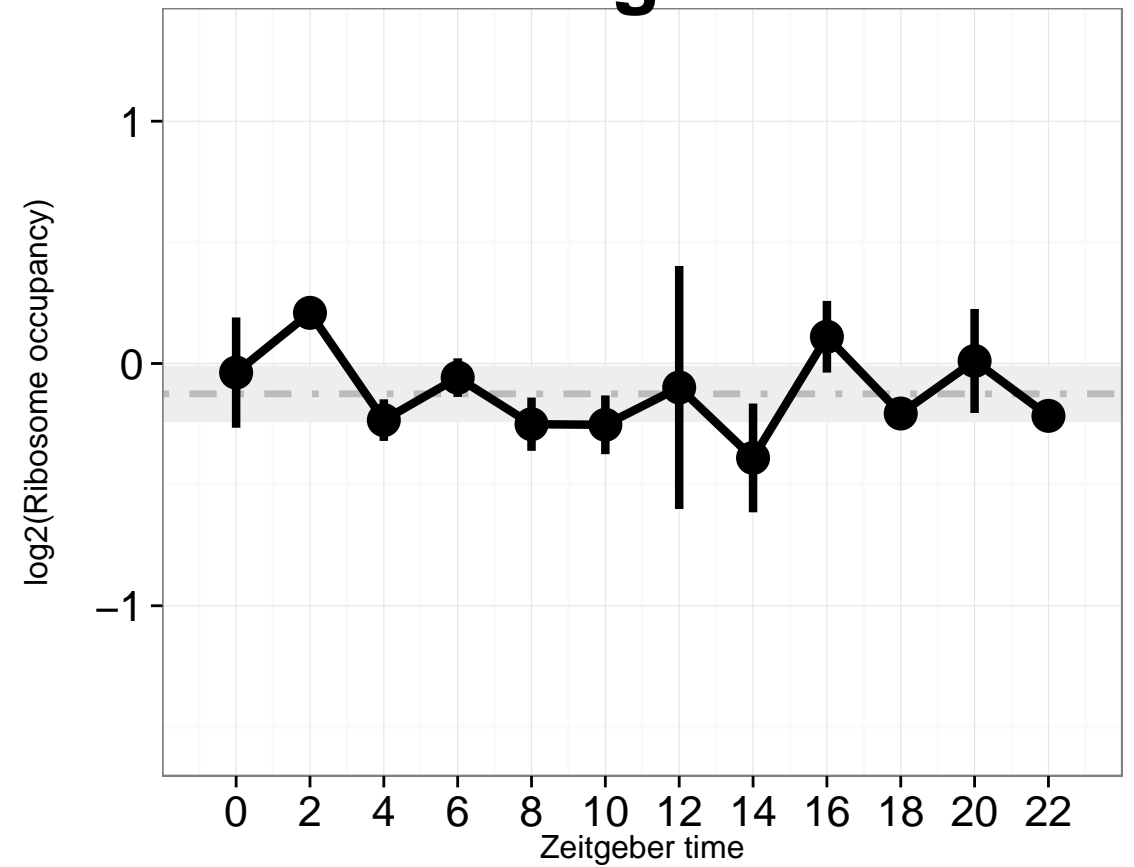

Supplement: Supplementary file 2712 [file 1]

## Asf1b TR

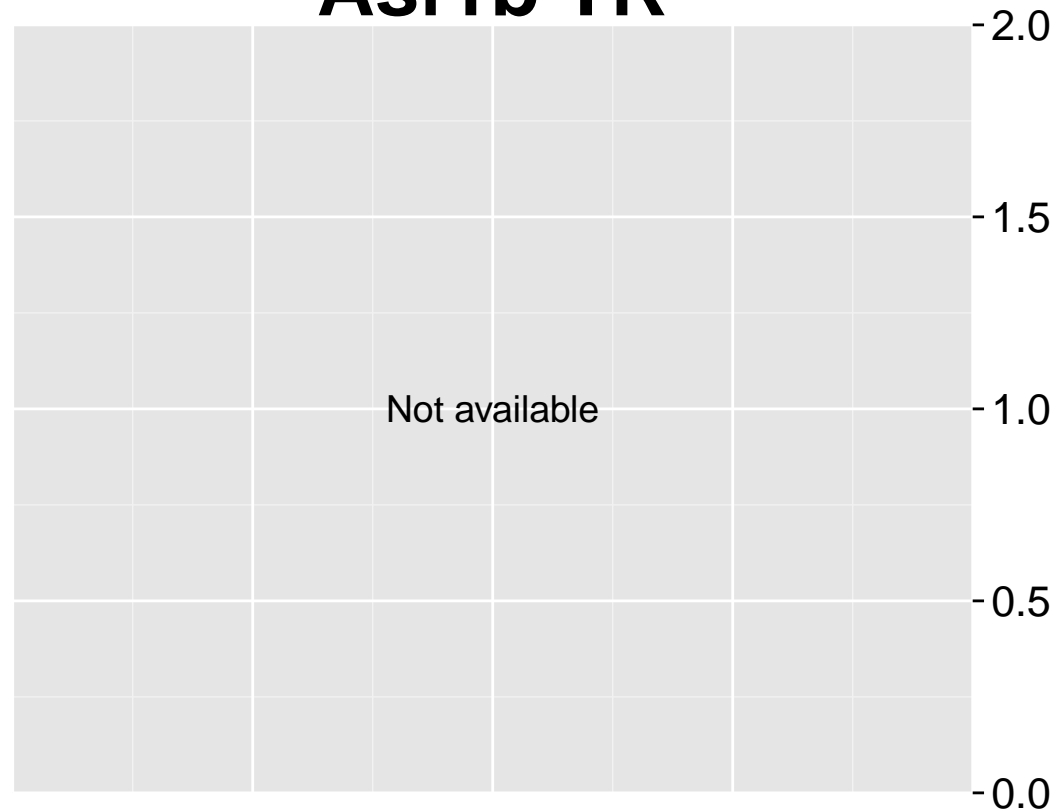

## Asf1b log2(Ribosome occupancy

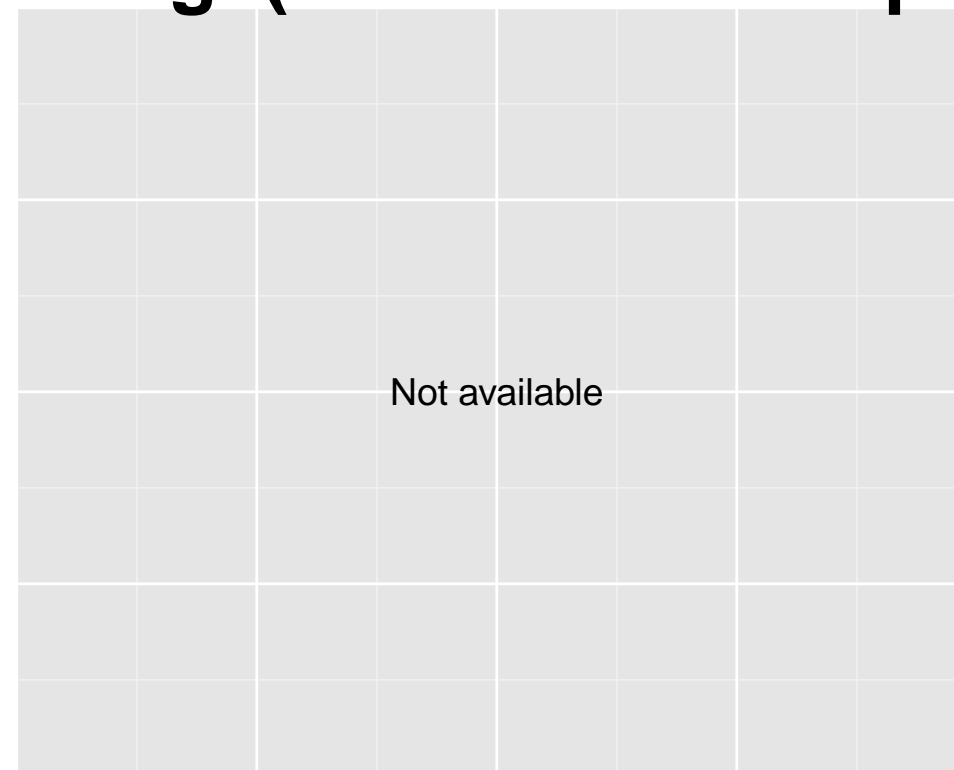

Supplement: Supplementary file 2713 [file 1]

## 2310036O22Rik

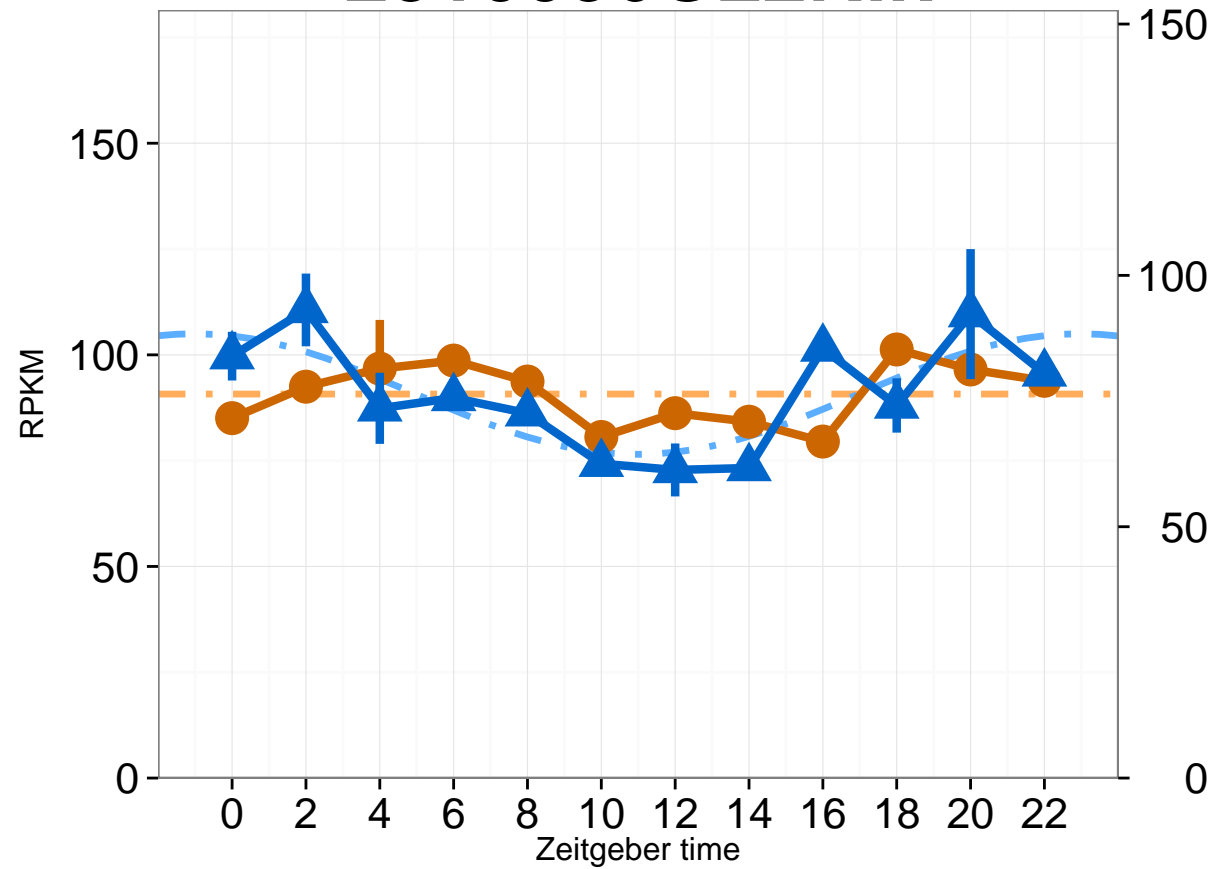

## 2310036O22Rik

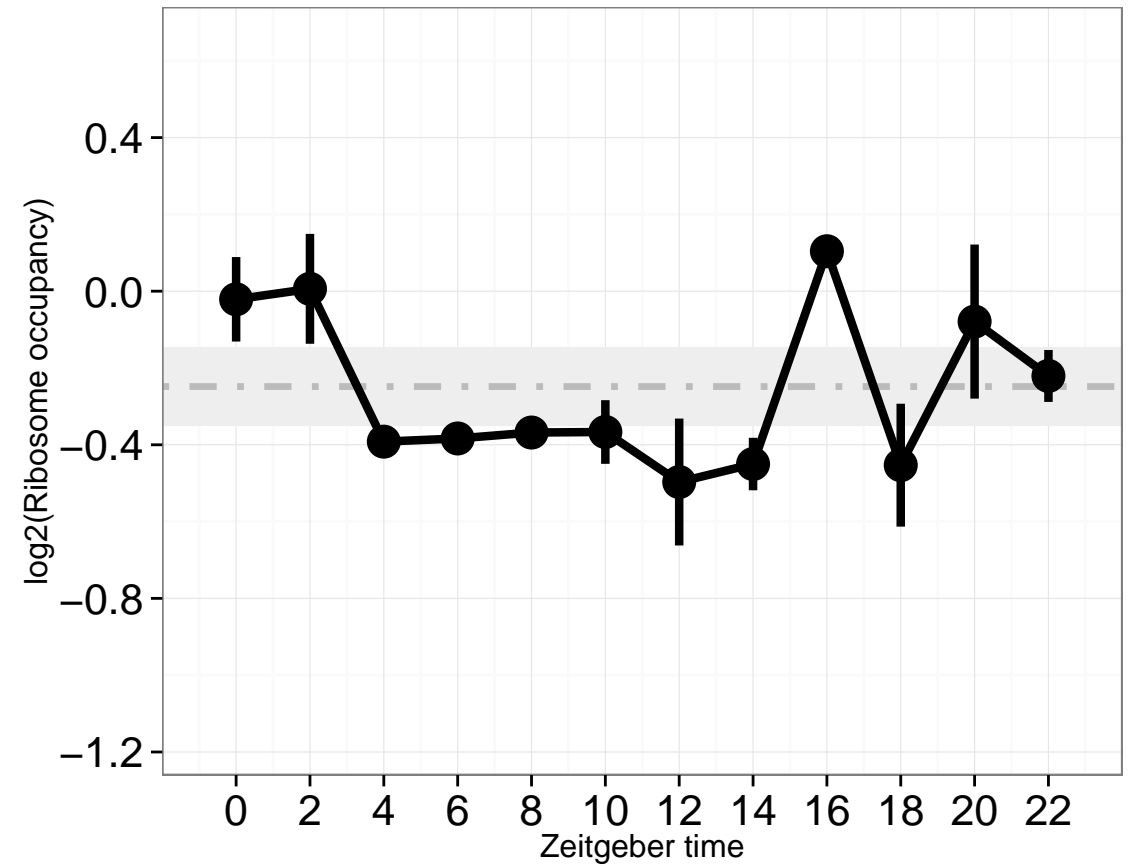

Supplement: Supplementary file 2714 [file 1]

# Rabl3

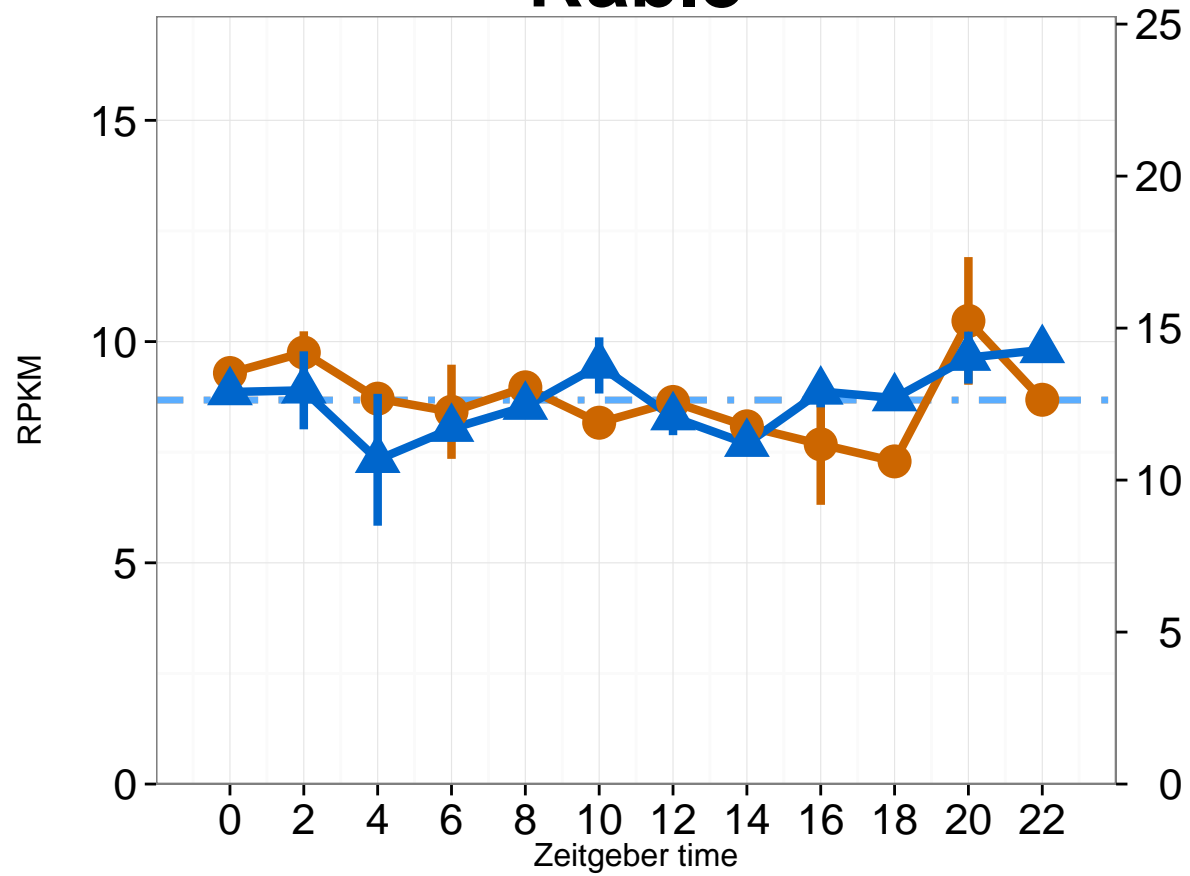

# Rabl3

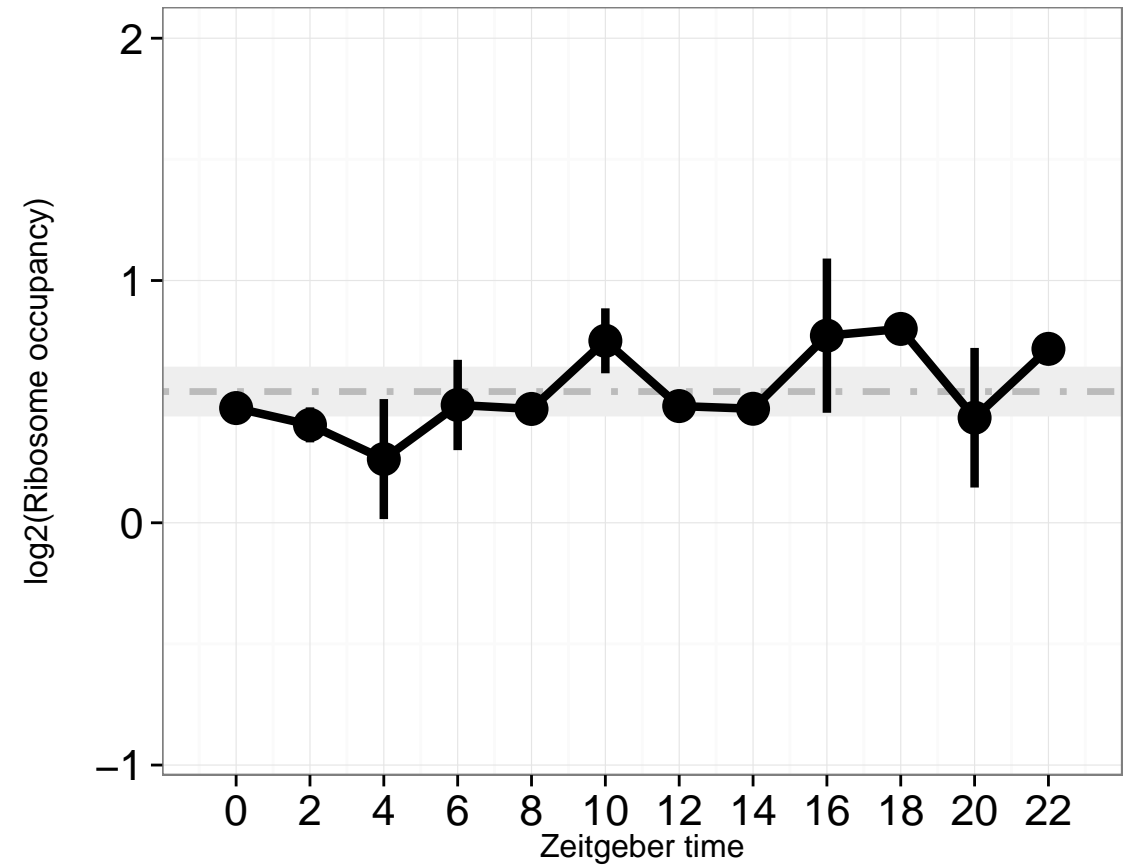

Supplement: Supplementary file 2715 [file 1]

## Klf2

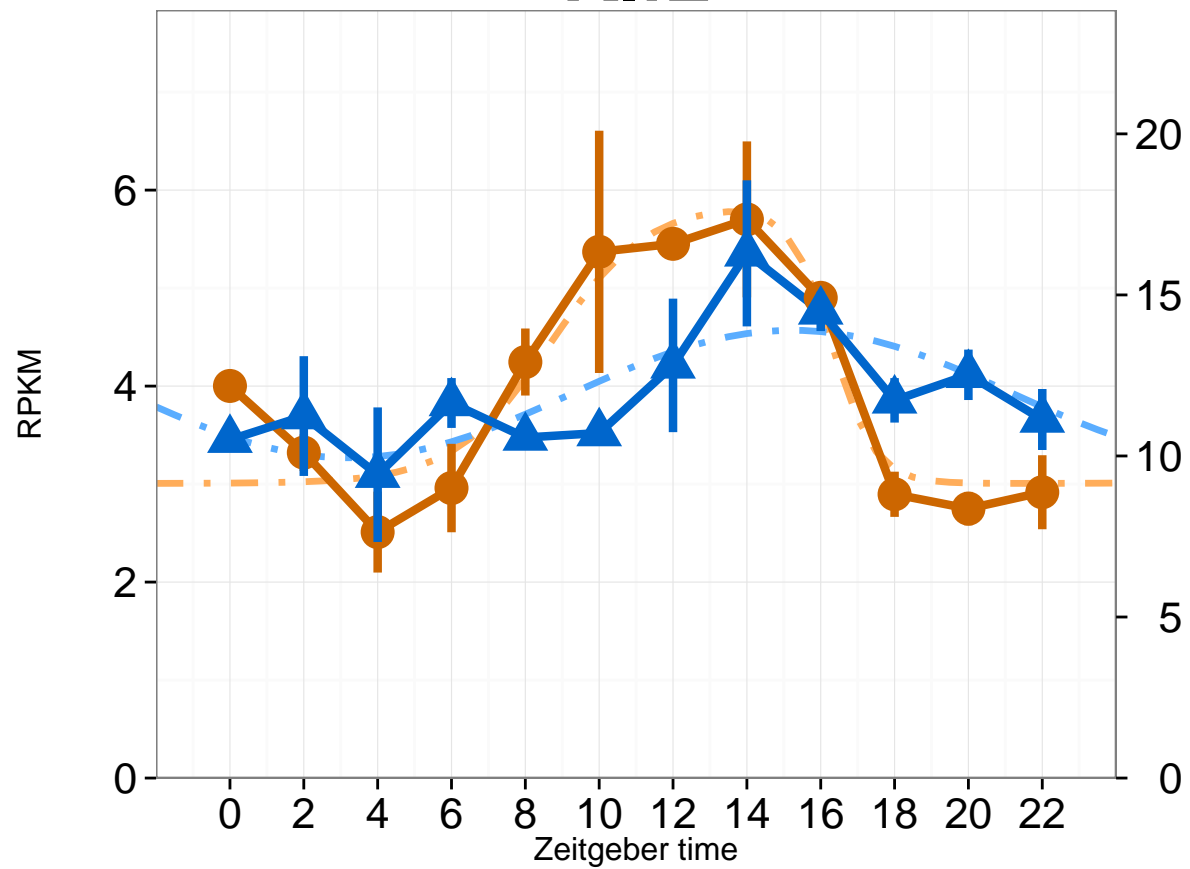

## Klf2

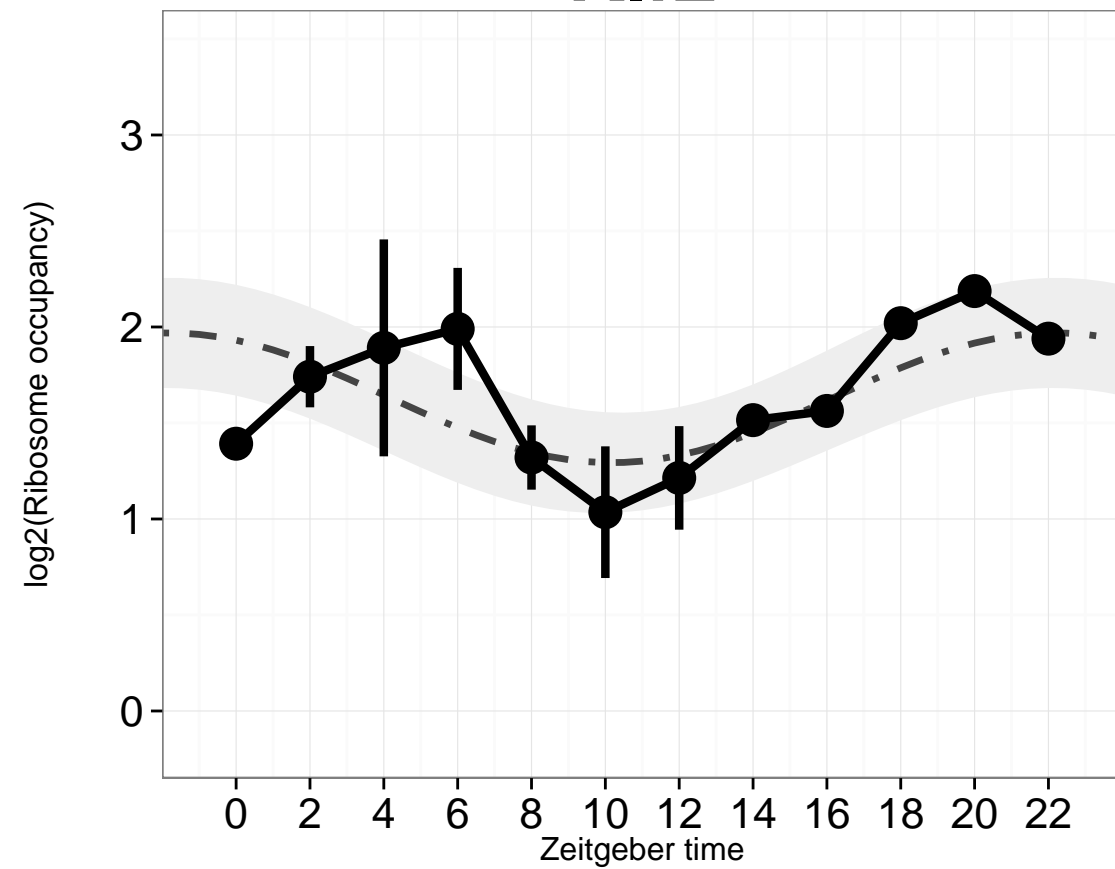

Supplement: Supplementary file 2716 [file 1]

## Larp7

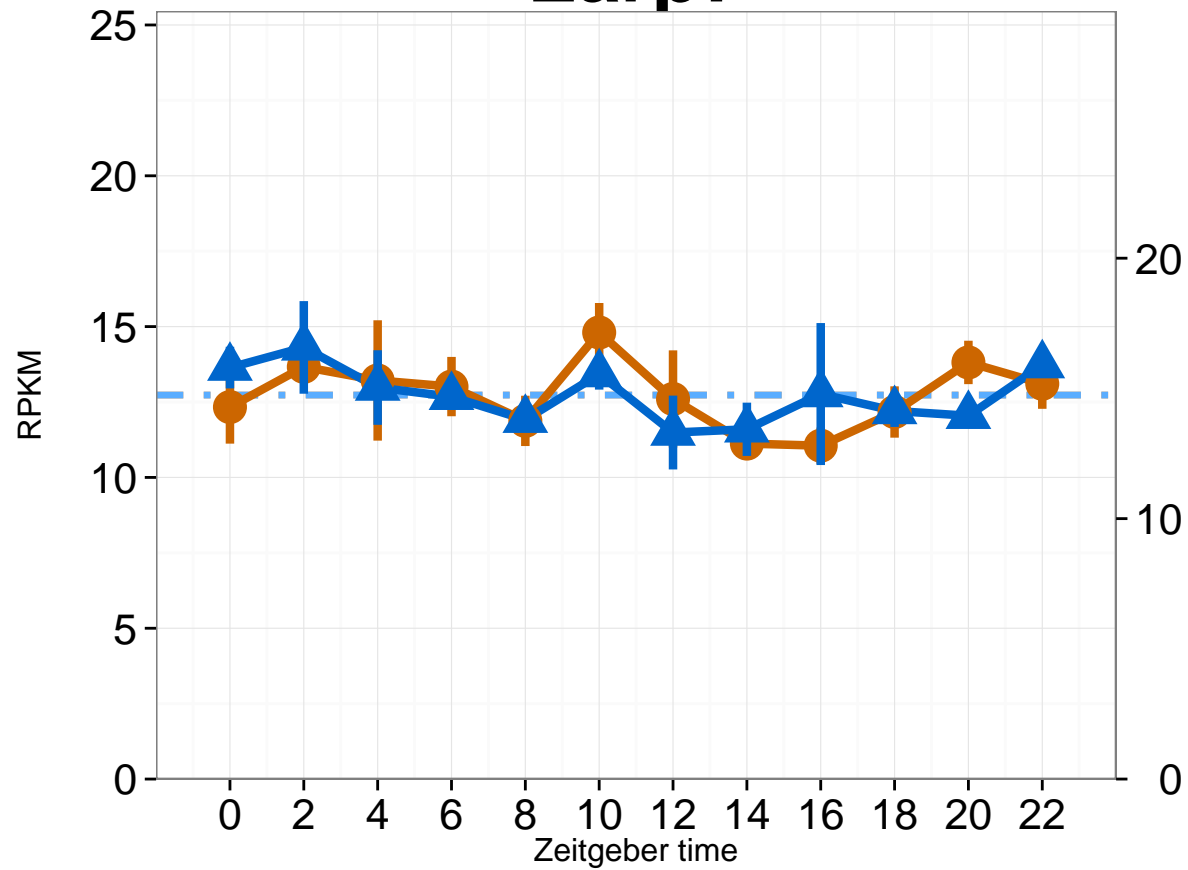

## Larp7

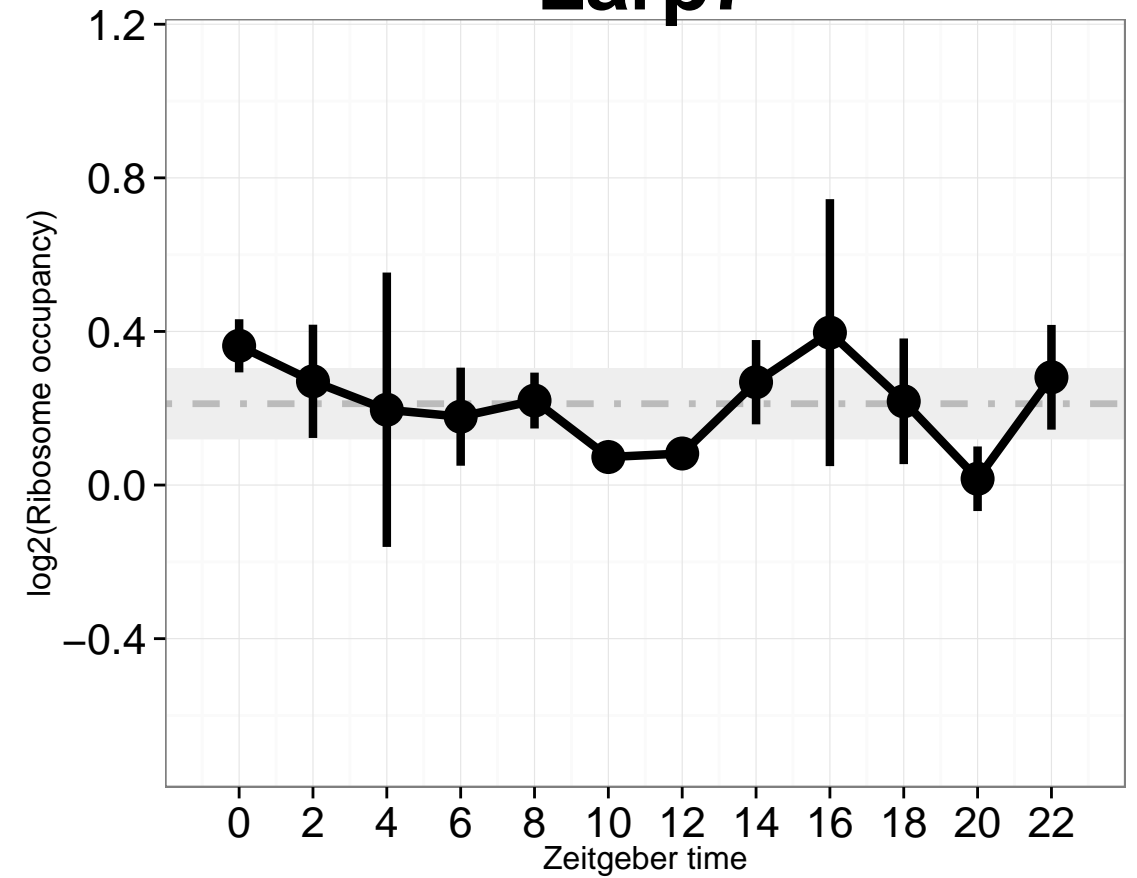

Supplement: Supplementary file 2717 [file 1]

# 3110057O12Rik

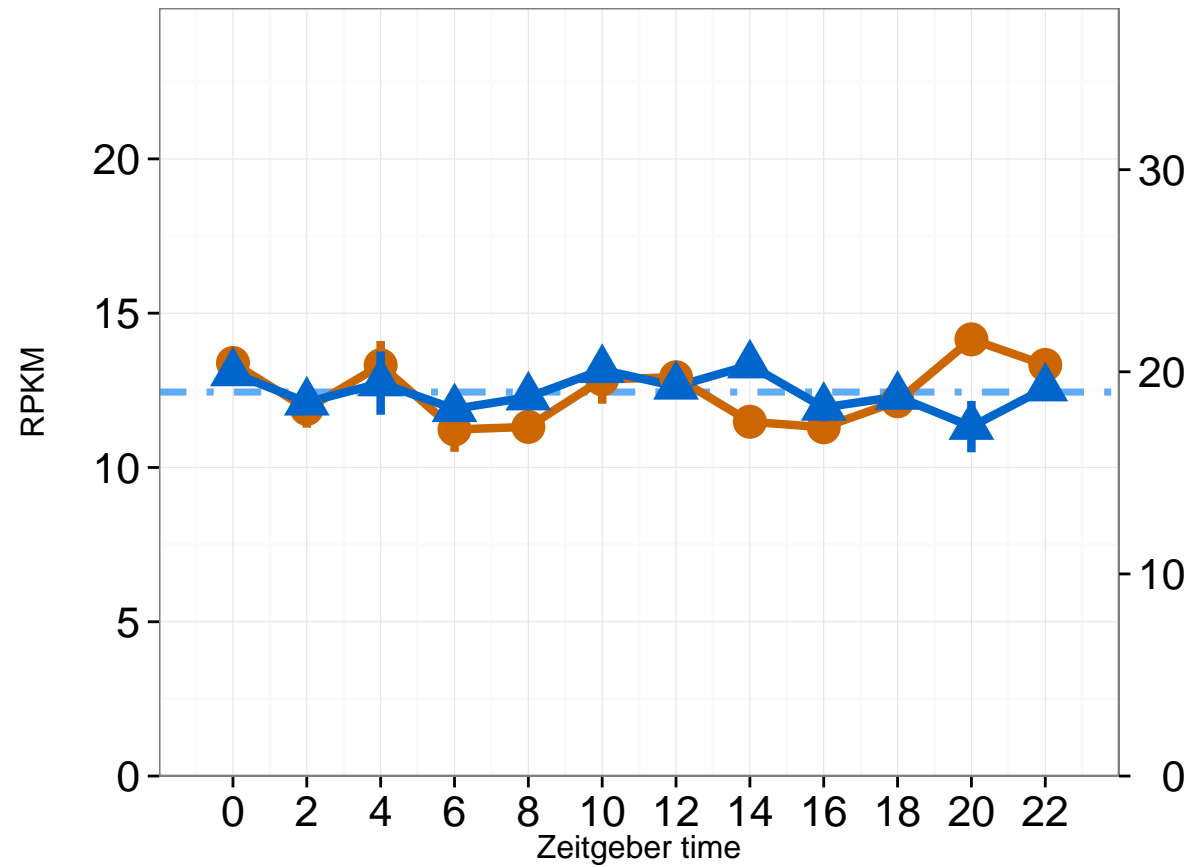

# 3110057O12Rik

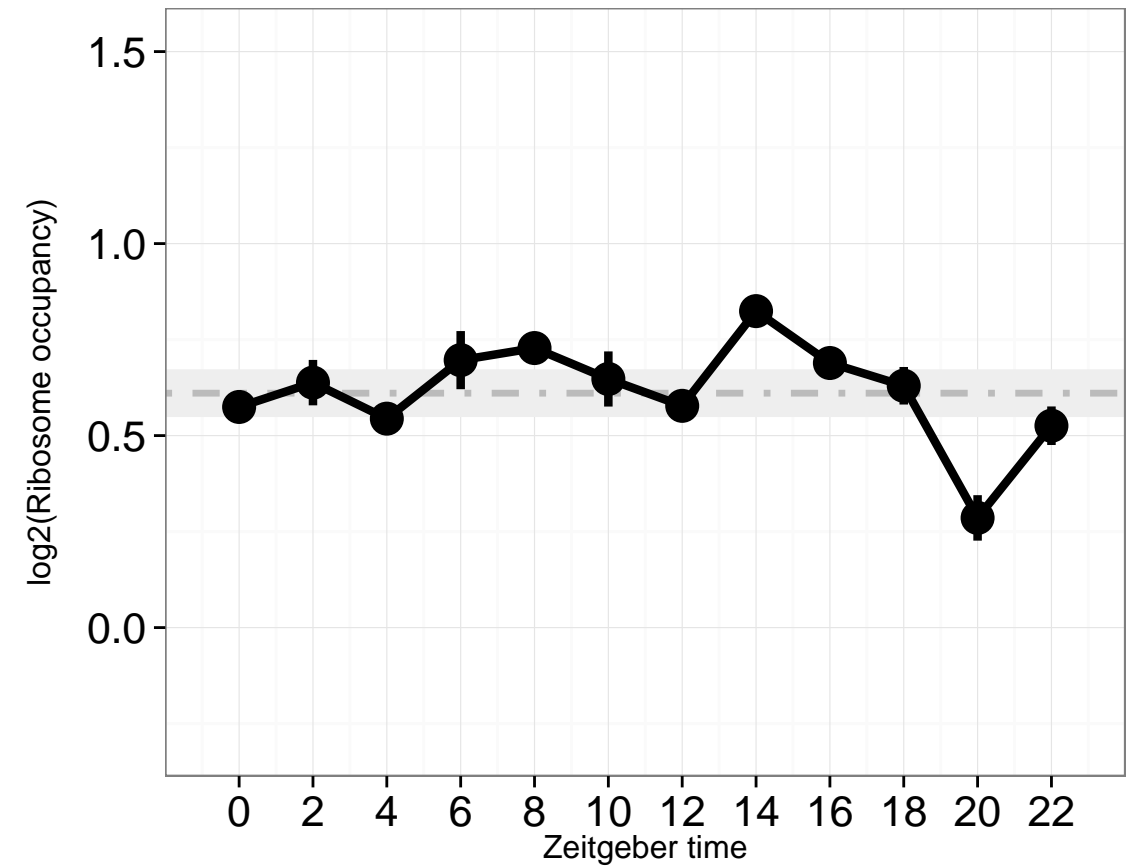

Supplement: Supplementary file 2718 [file 1]

## Foxi1

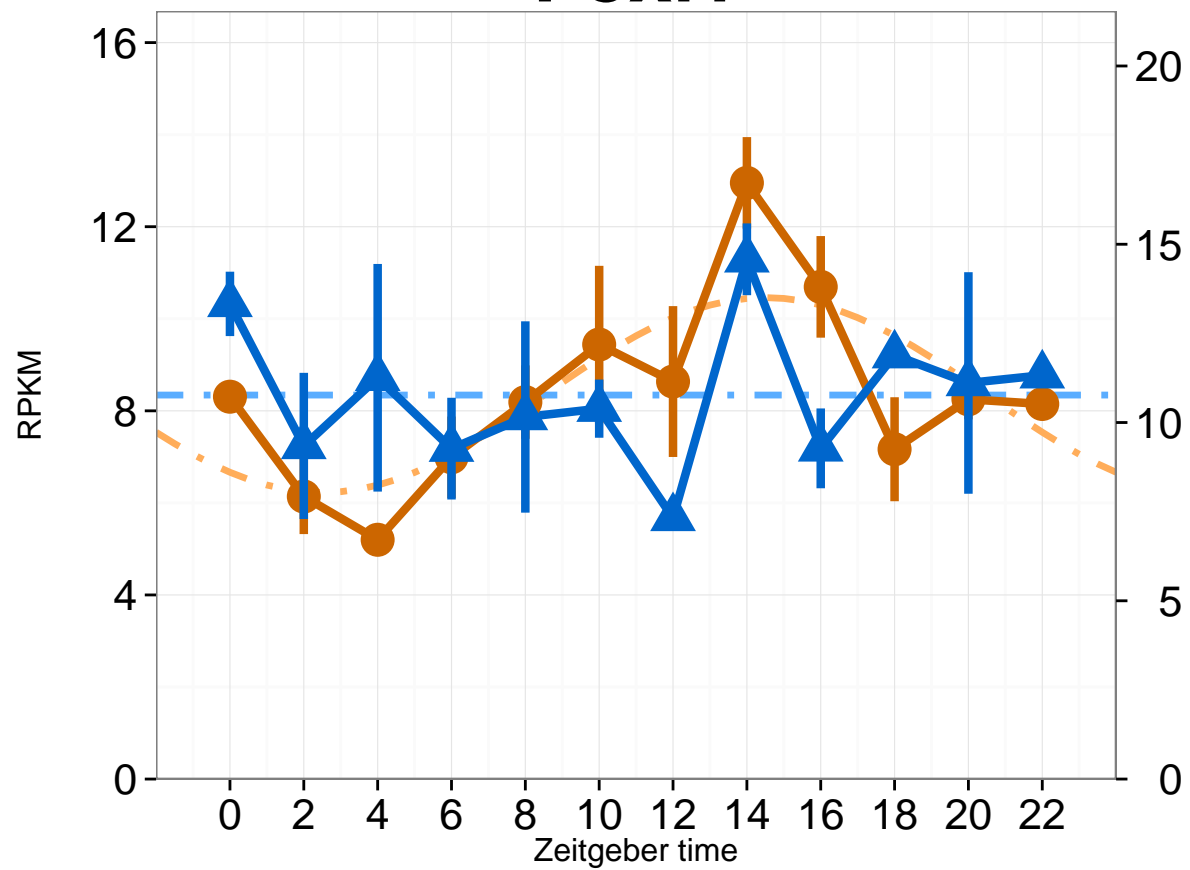

## Foxi1

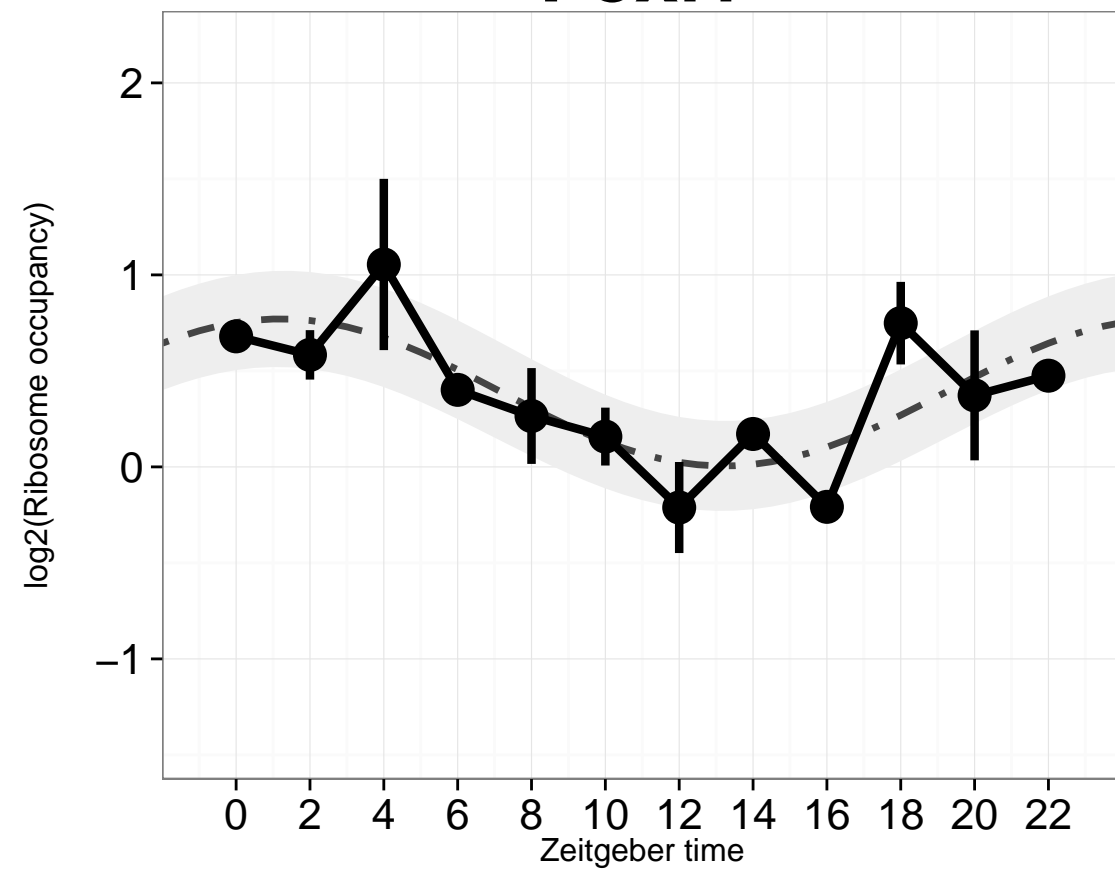

Supplement: Supplementary file 2719 [file 1]

## Ccnf

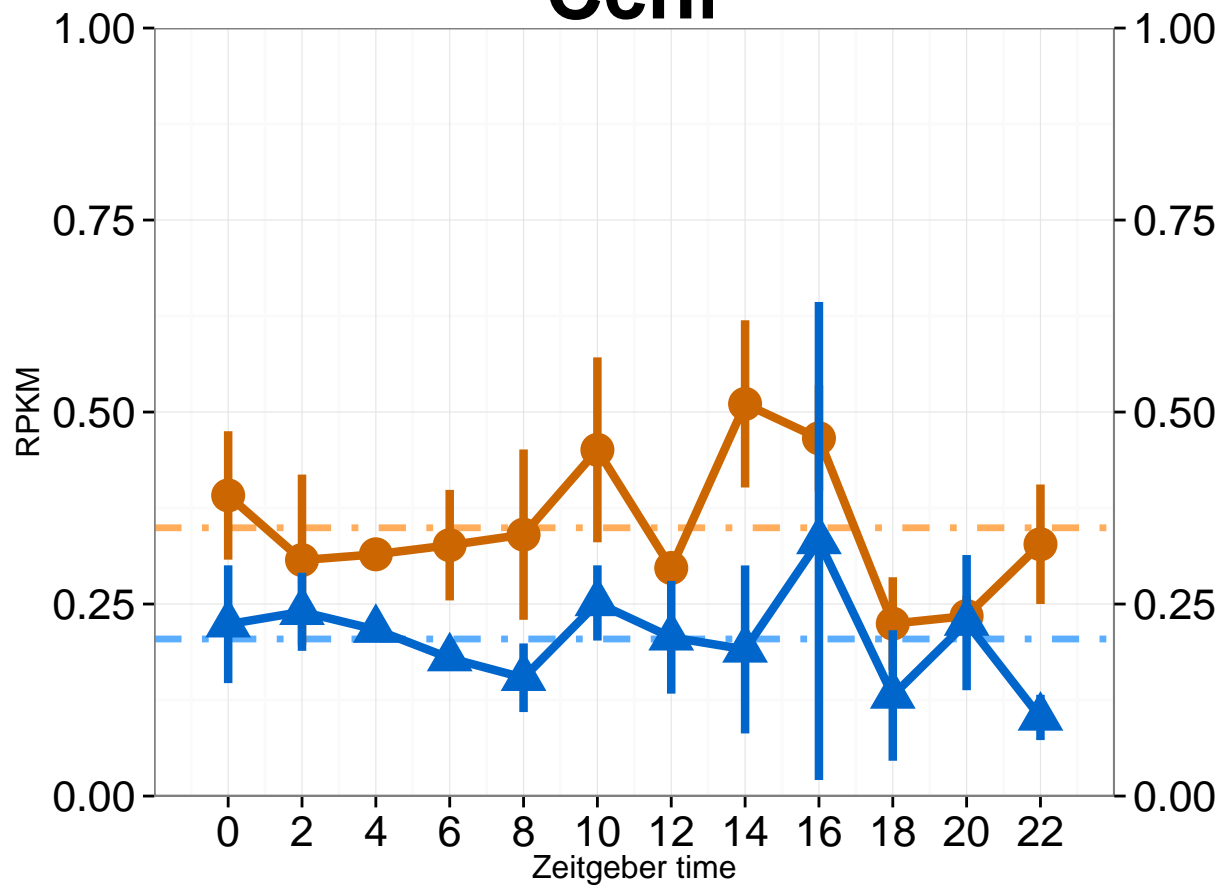

## Ccnf

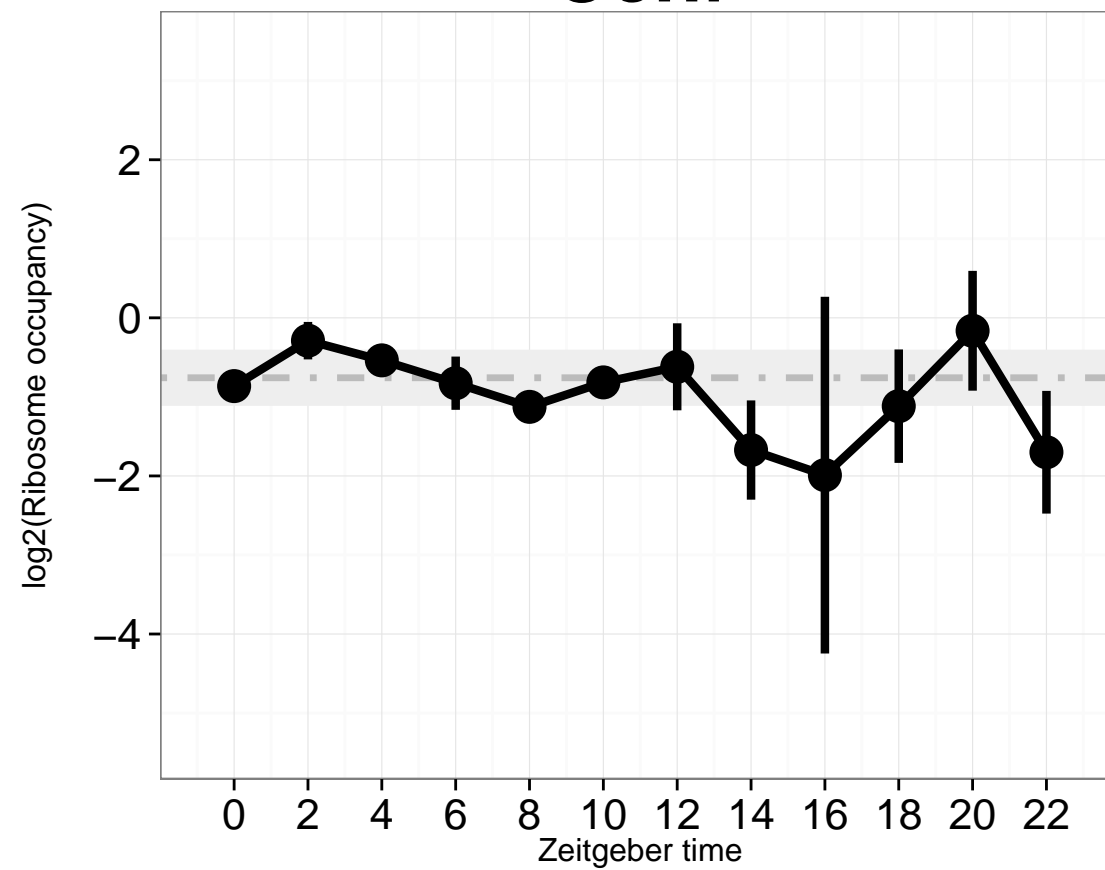

Supplement: Supplementary file 2720 [file 1]

# Cramp1l

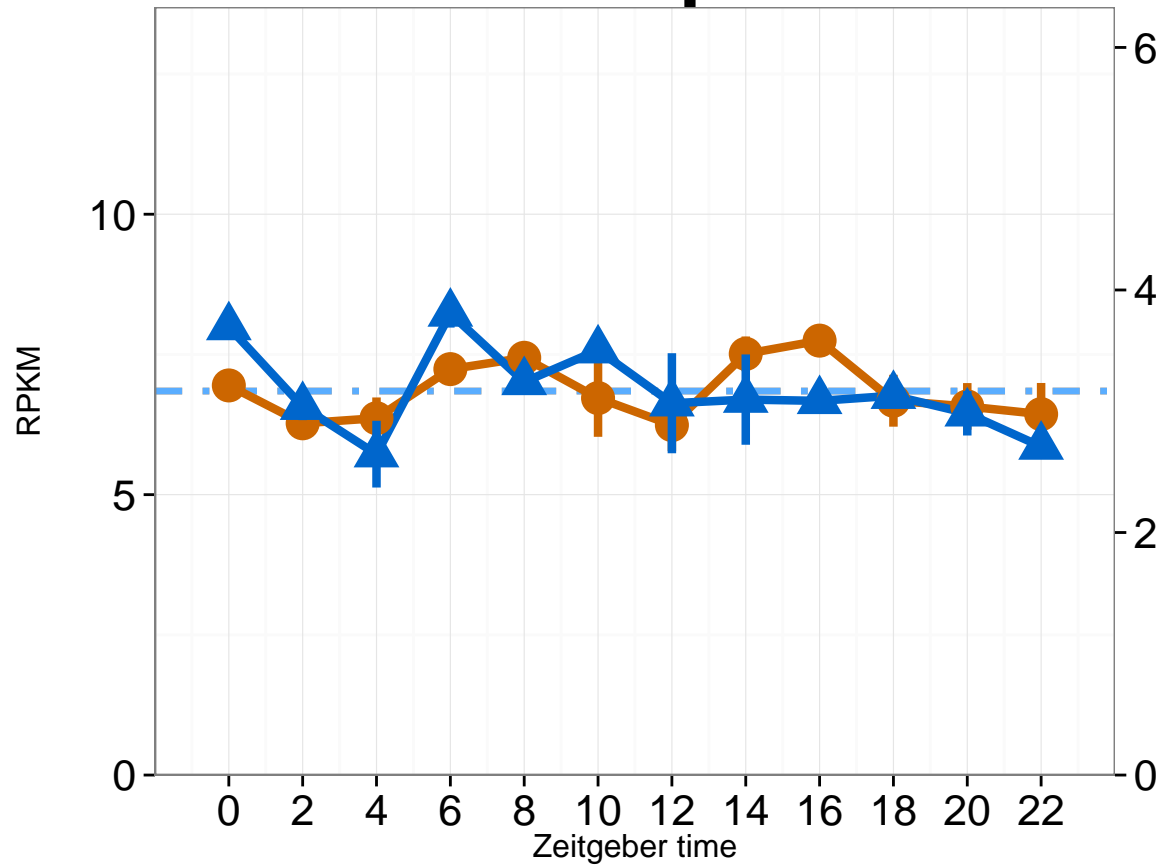

# Cramp1l

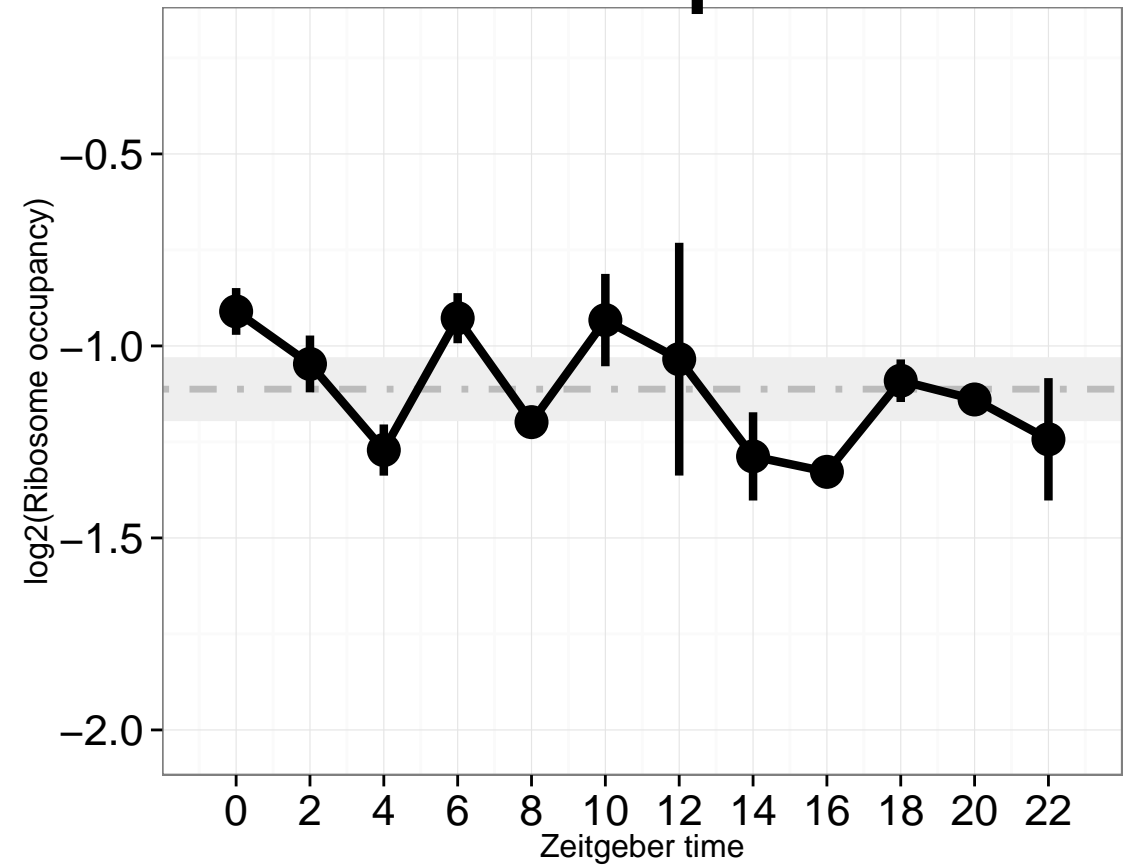

Supplement: Supplementary file 2721 [file 1]

# Lrch1

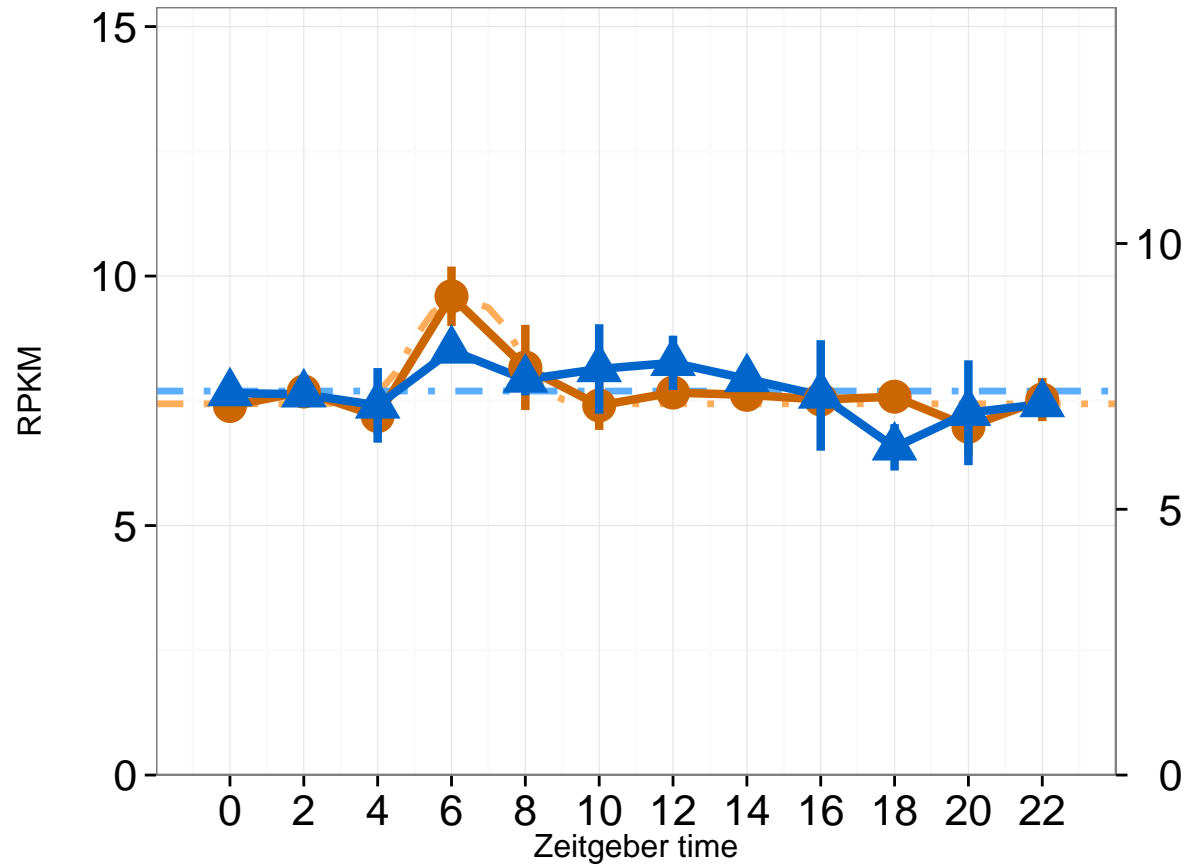

# Lrch1

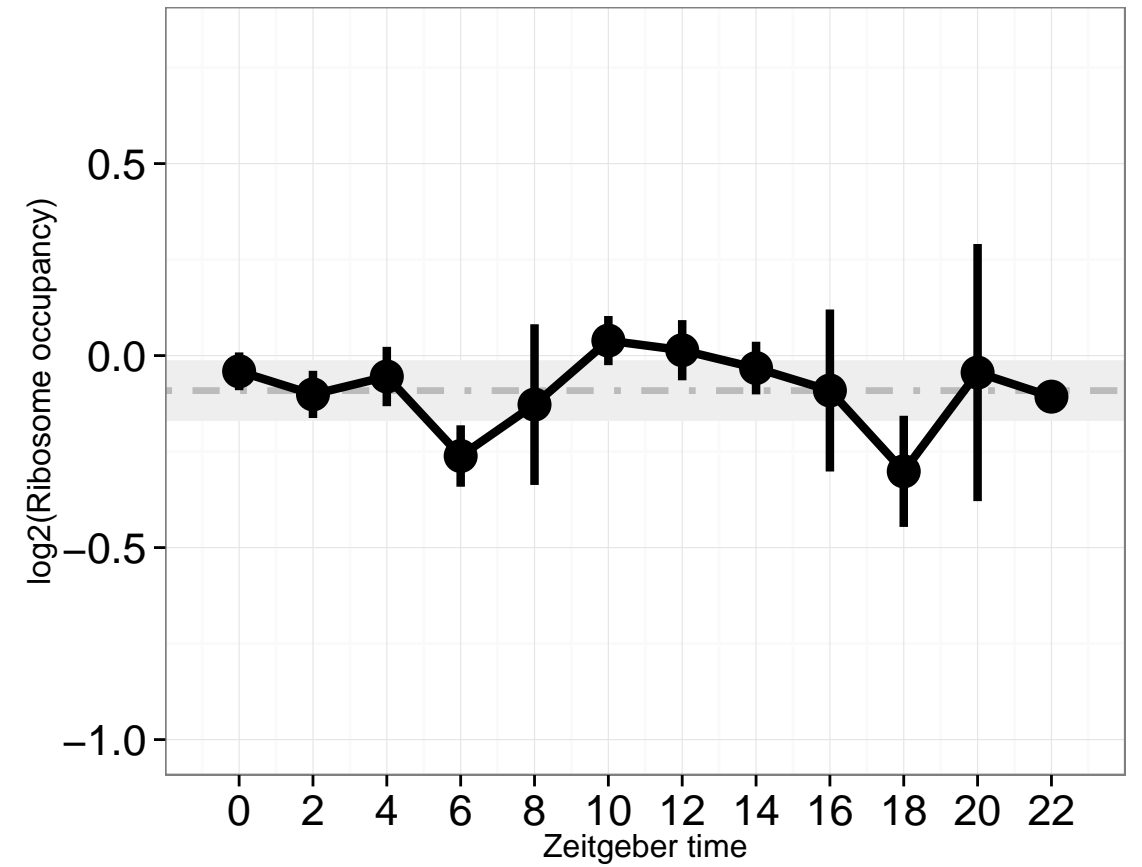

Supplement: Supplementary file 2722 [file 1]

# Nudt1

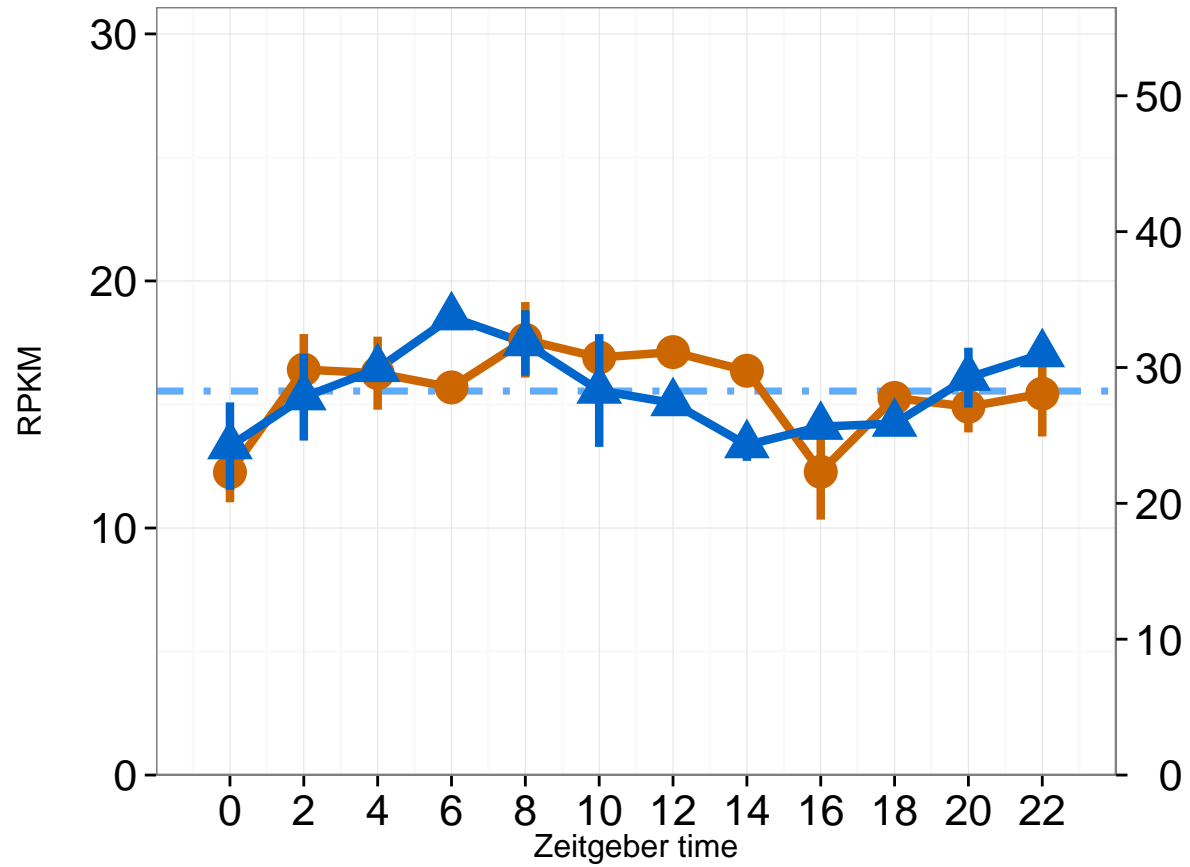

# Nudt1

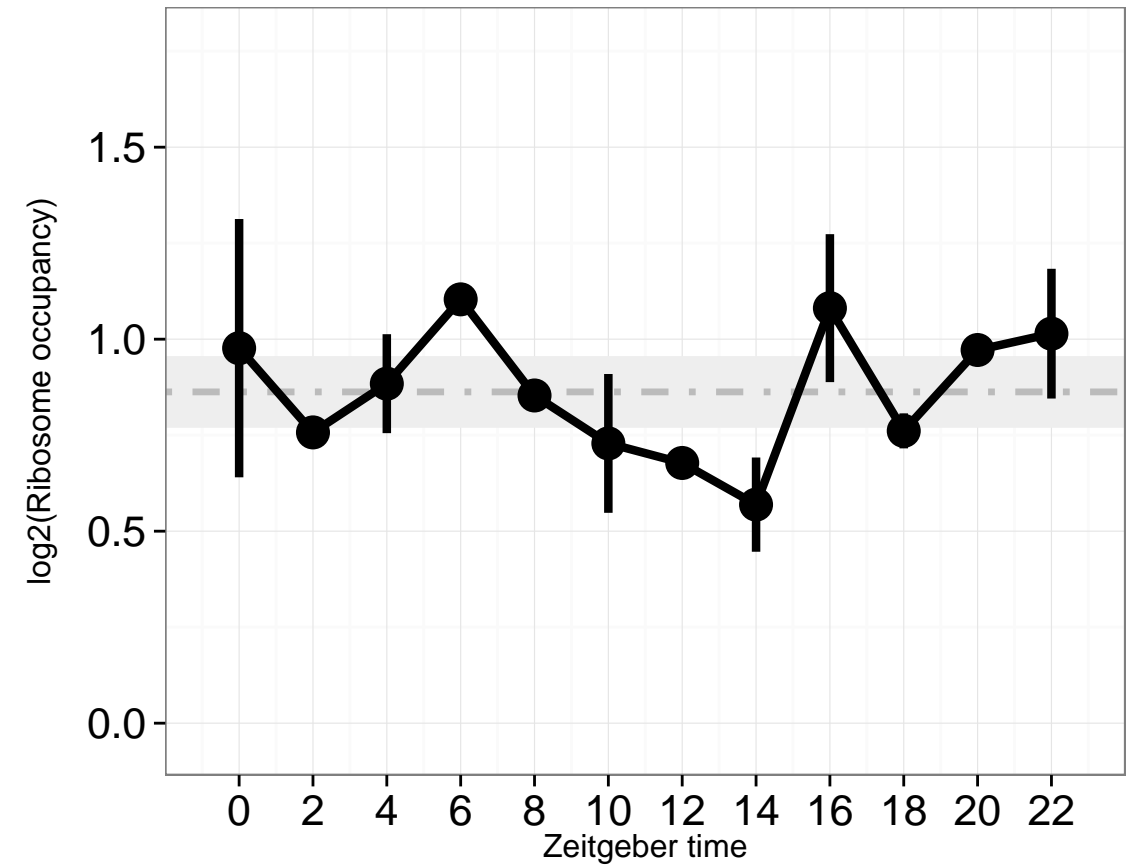

Supplement: Supplementary file 2723 [file 1]

Yy1

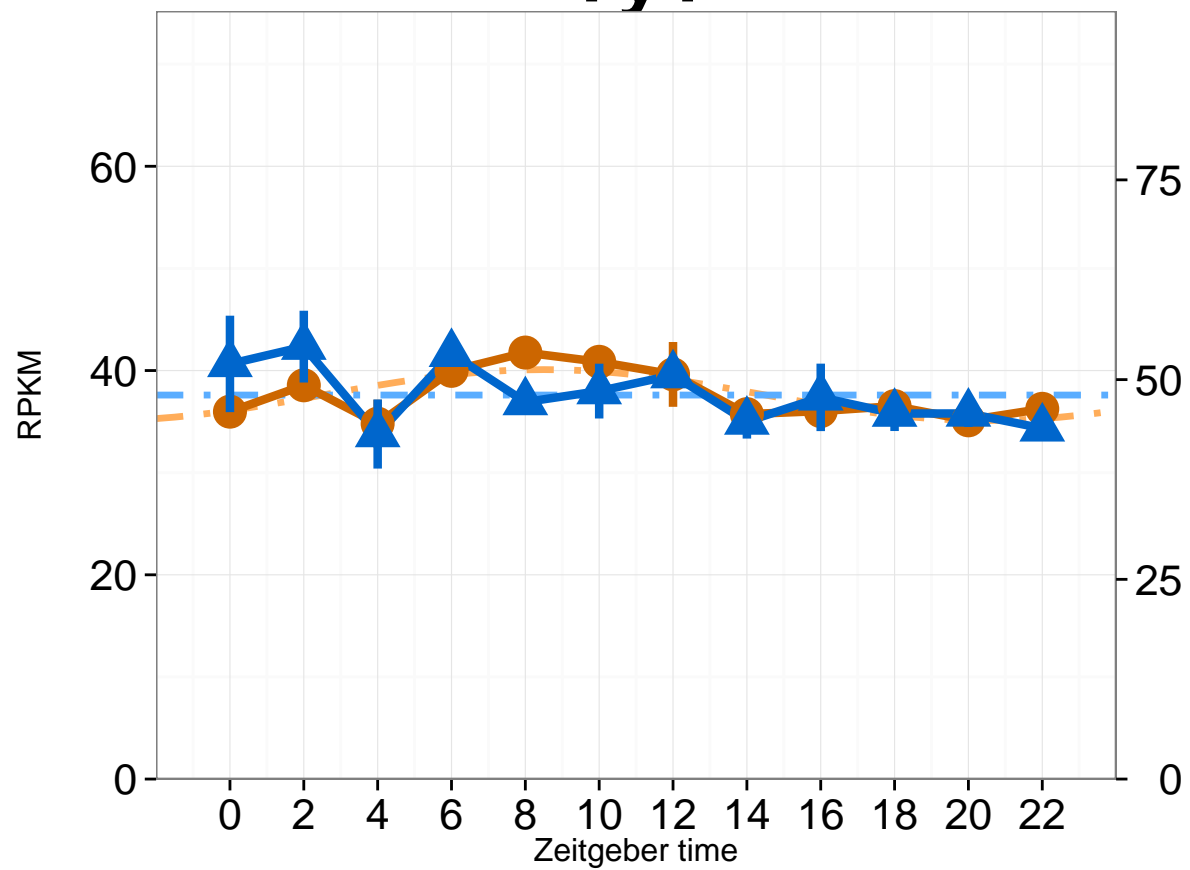

Yy1

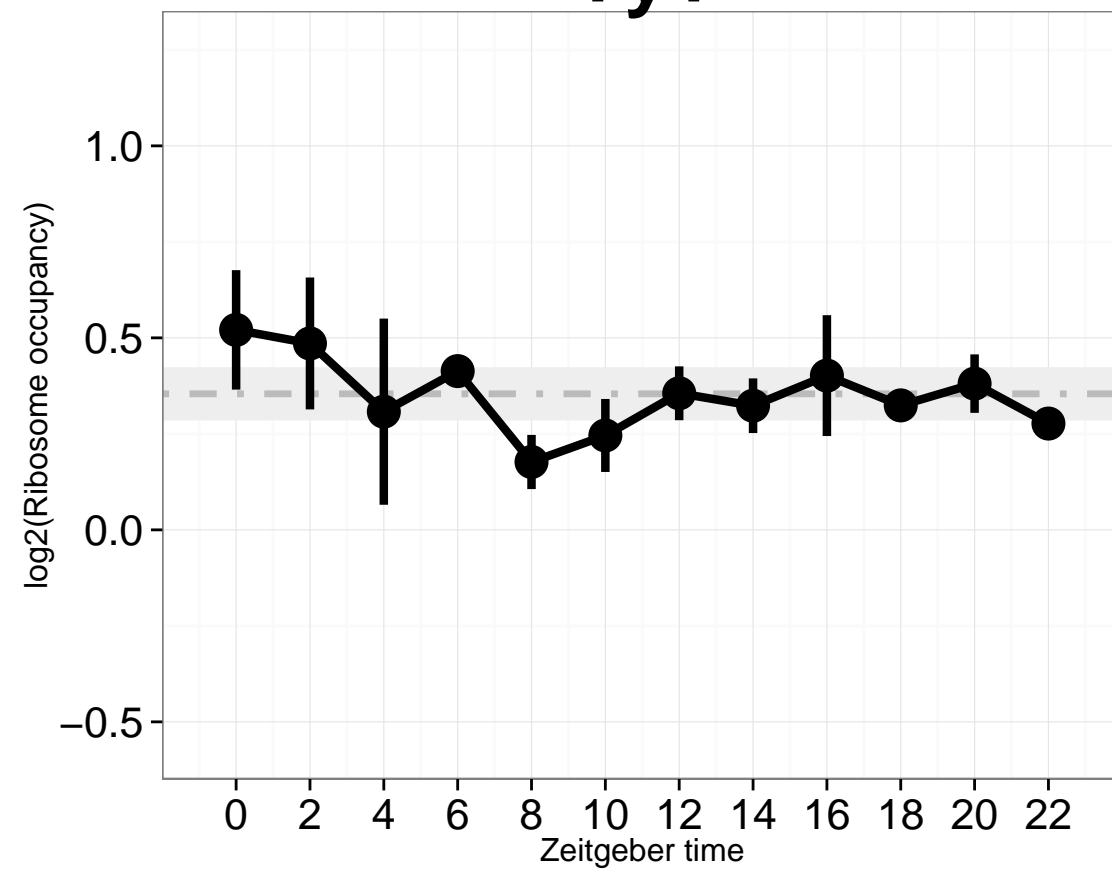

Supplement: Supplementary file 2724 [file 1]

# Sp110

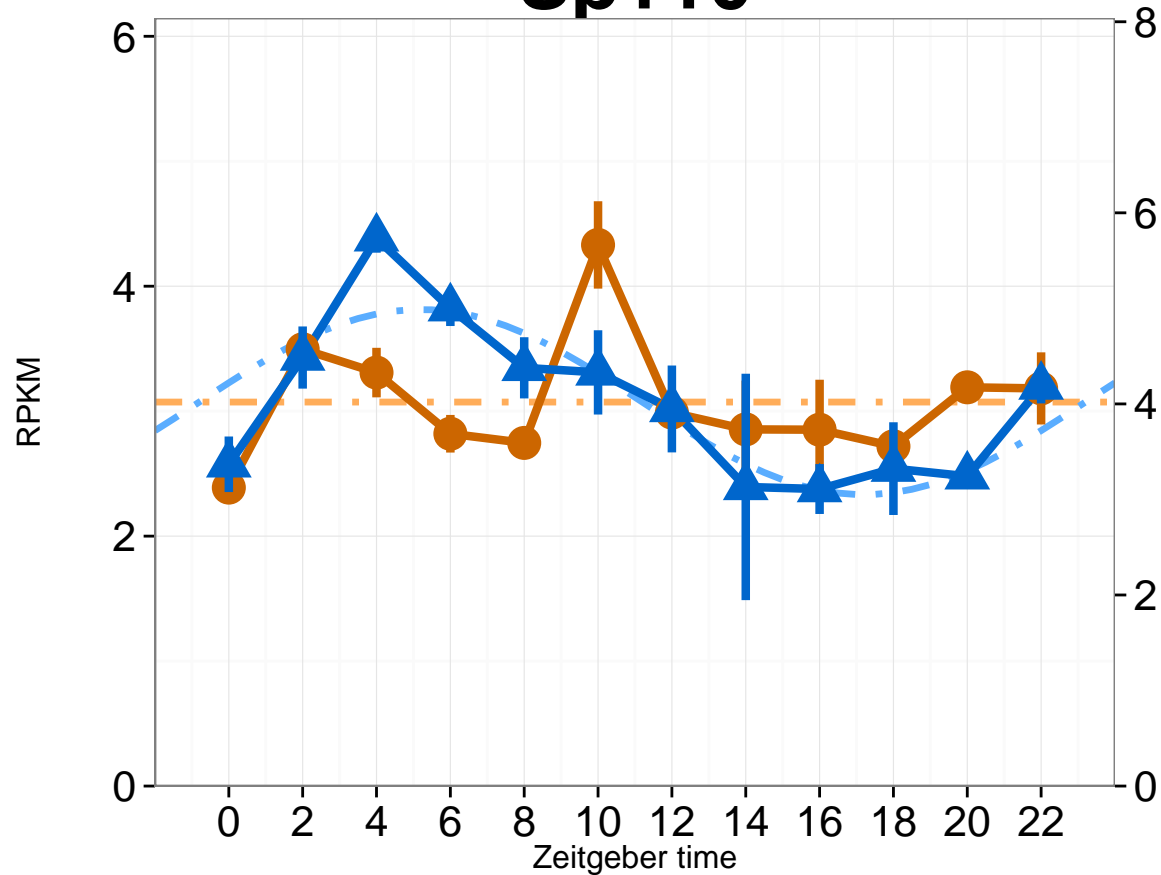

# Sp110

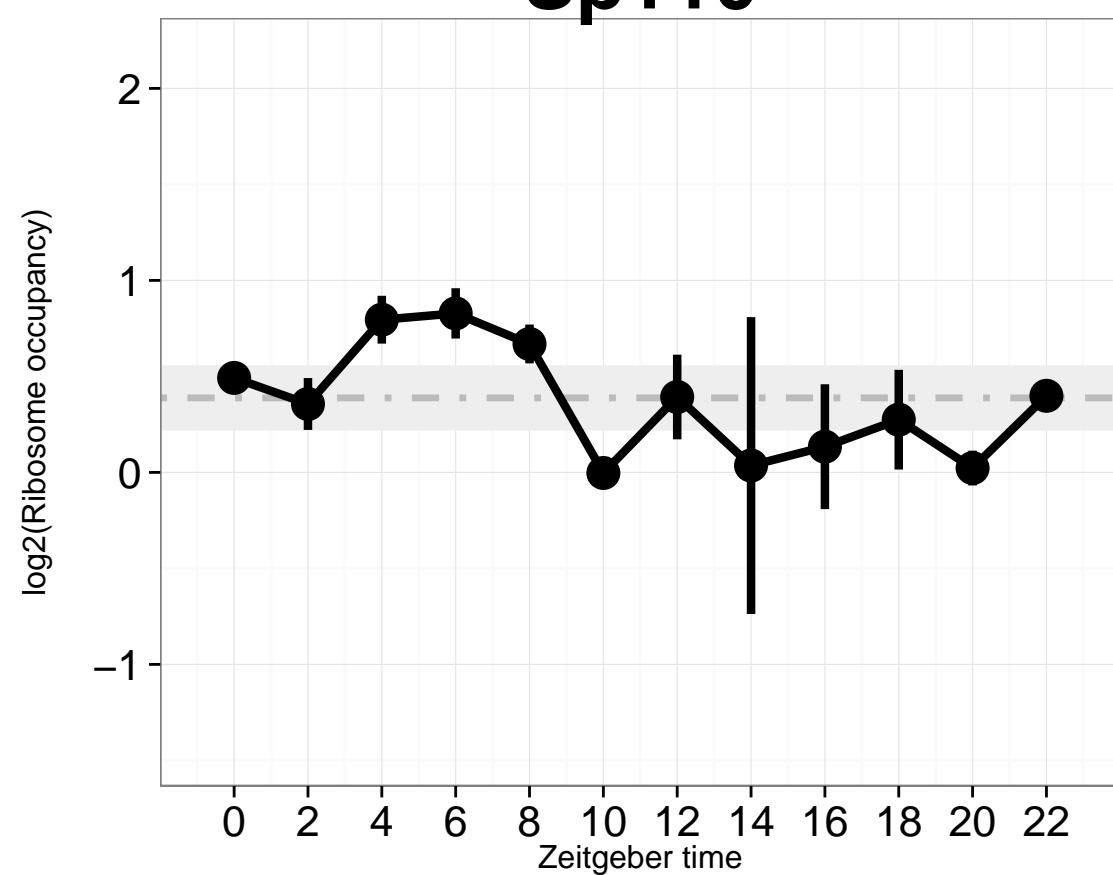

Supplement: Supplementary file 2725 [file 1]

## Rab7

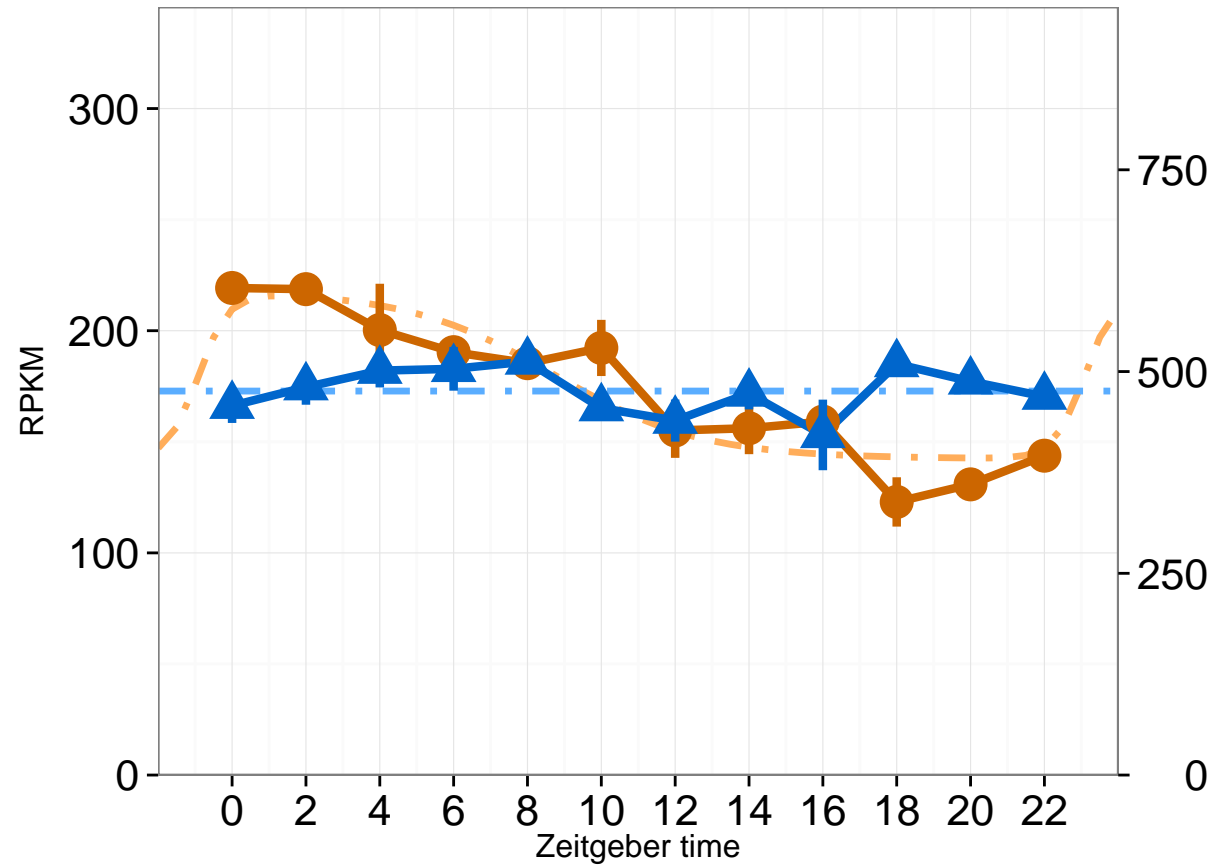

## Rab7

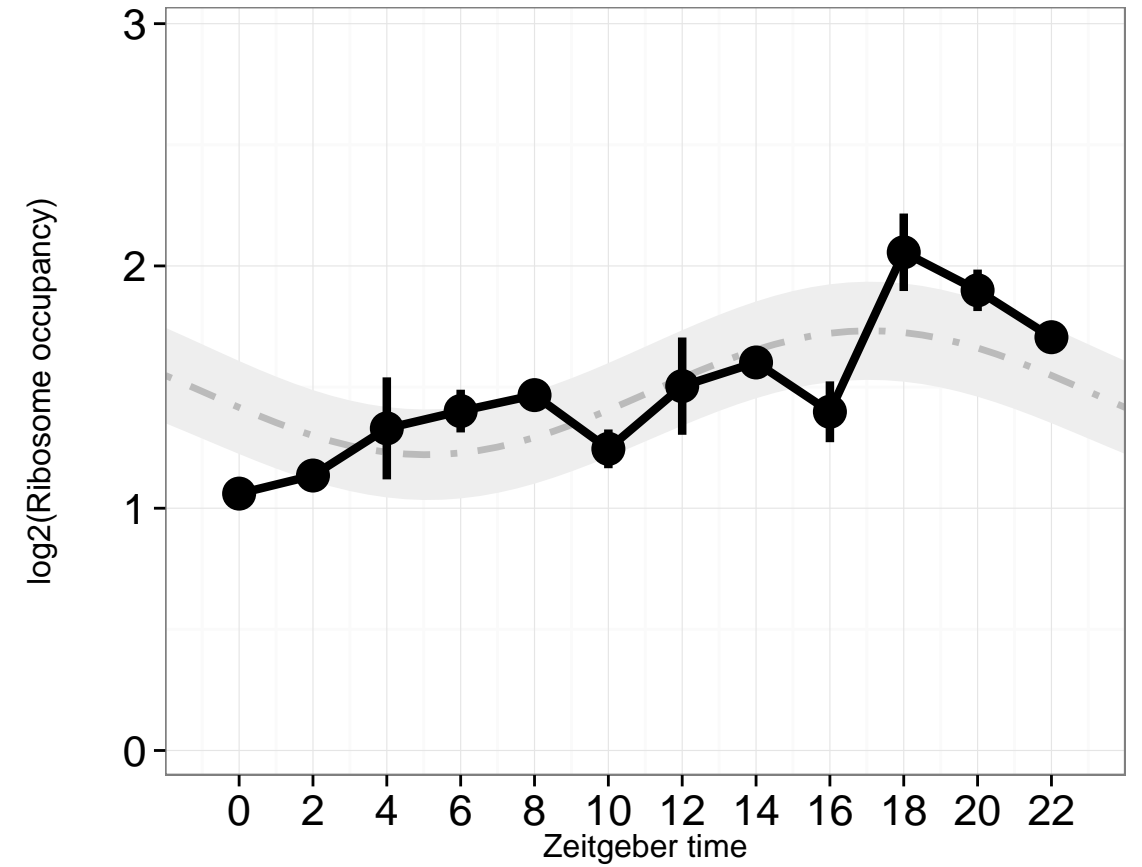

Supplement: Supplementary file 2726 [file 1]

## Wdhd1

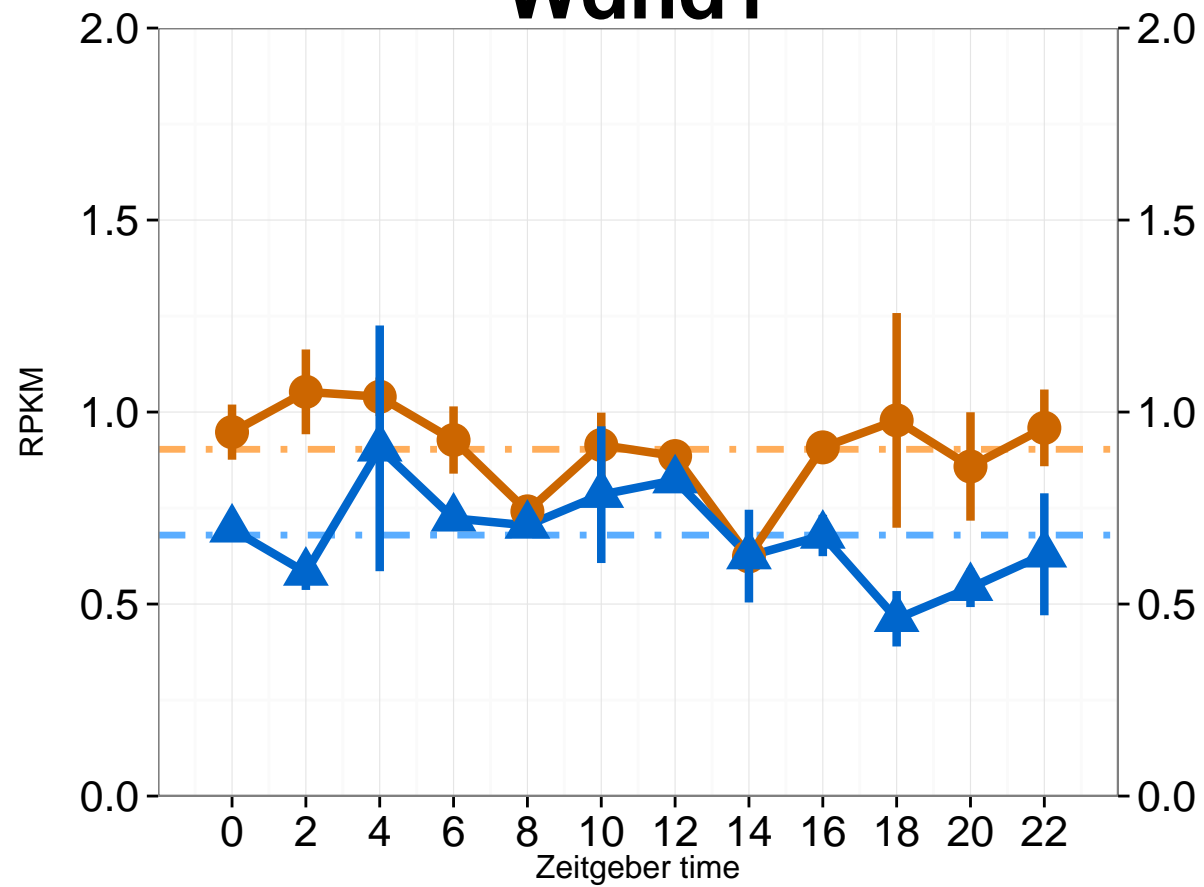

## Wdhd1

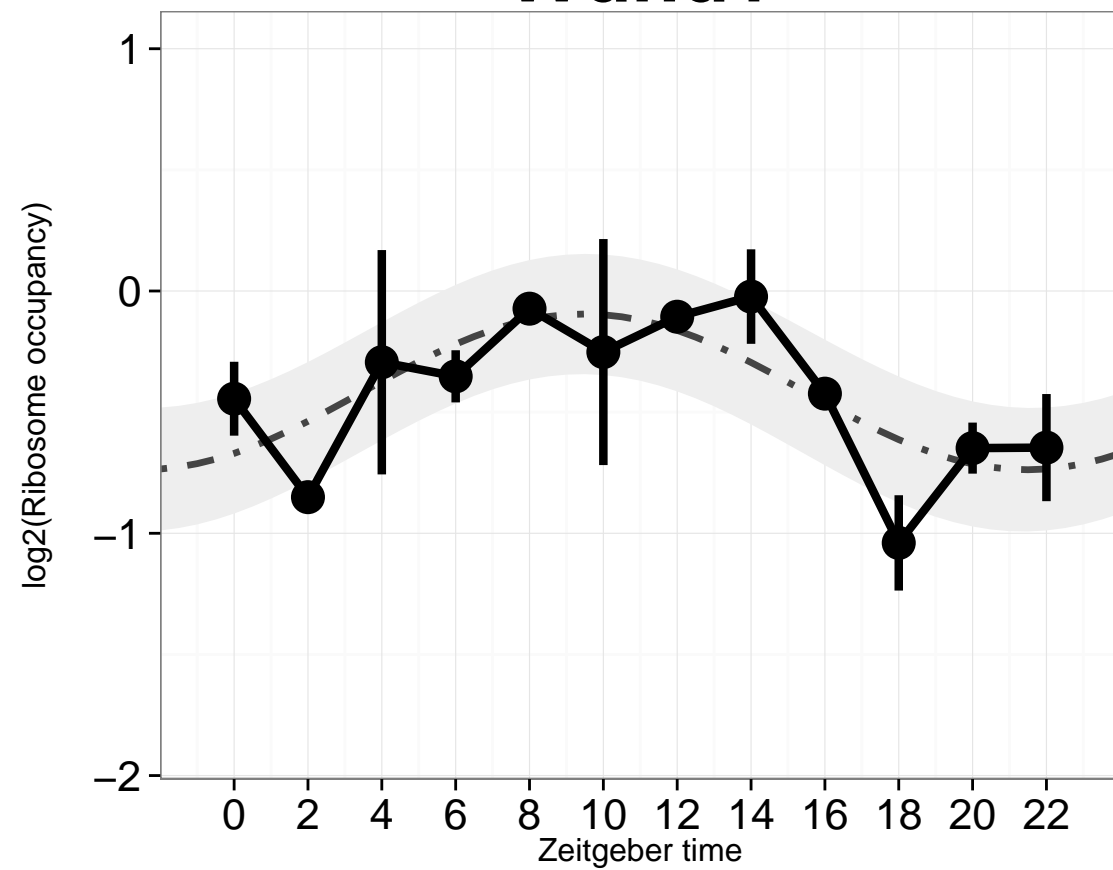

Supplement: Supplementary file 2727 [file 1]

## Tsr2

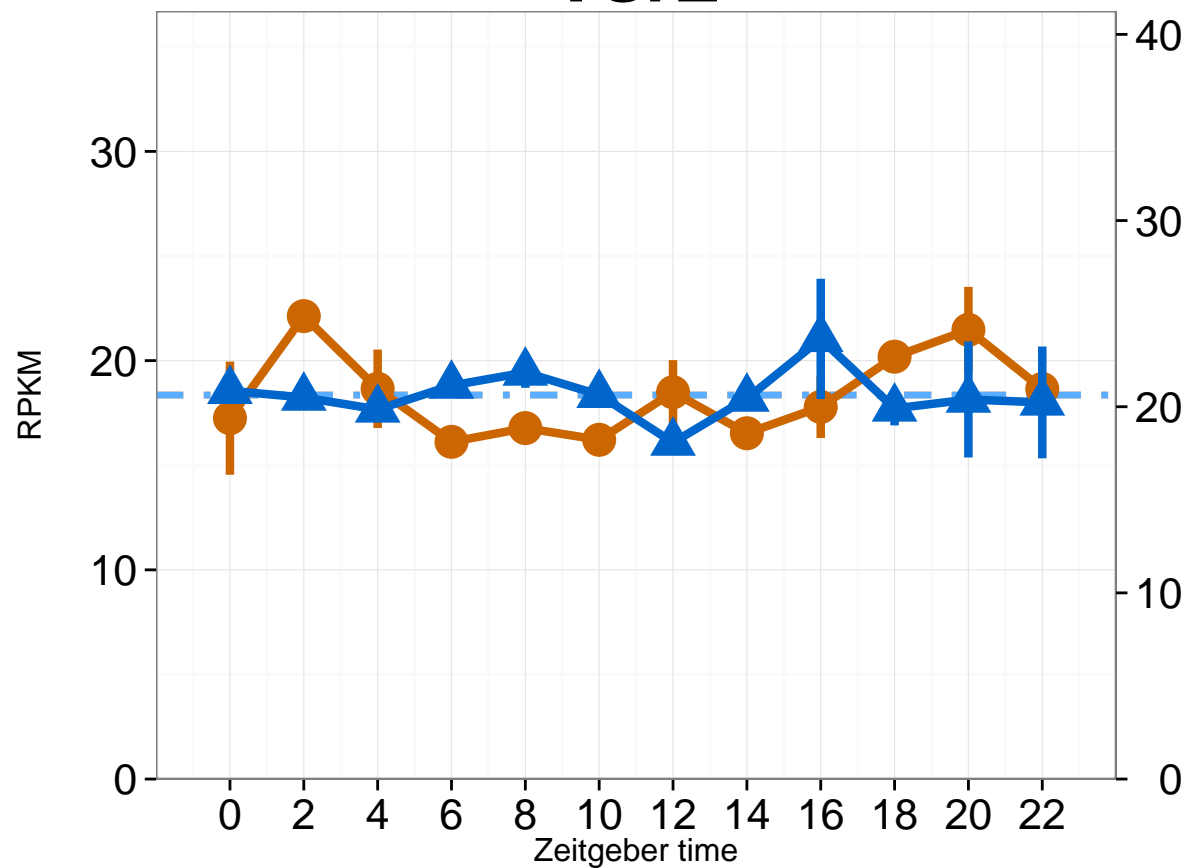

## Tsr2

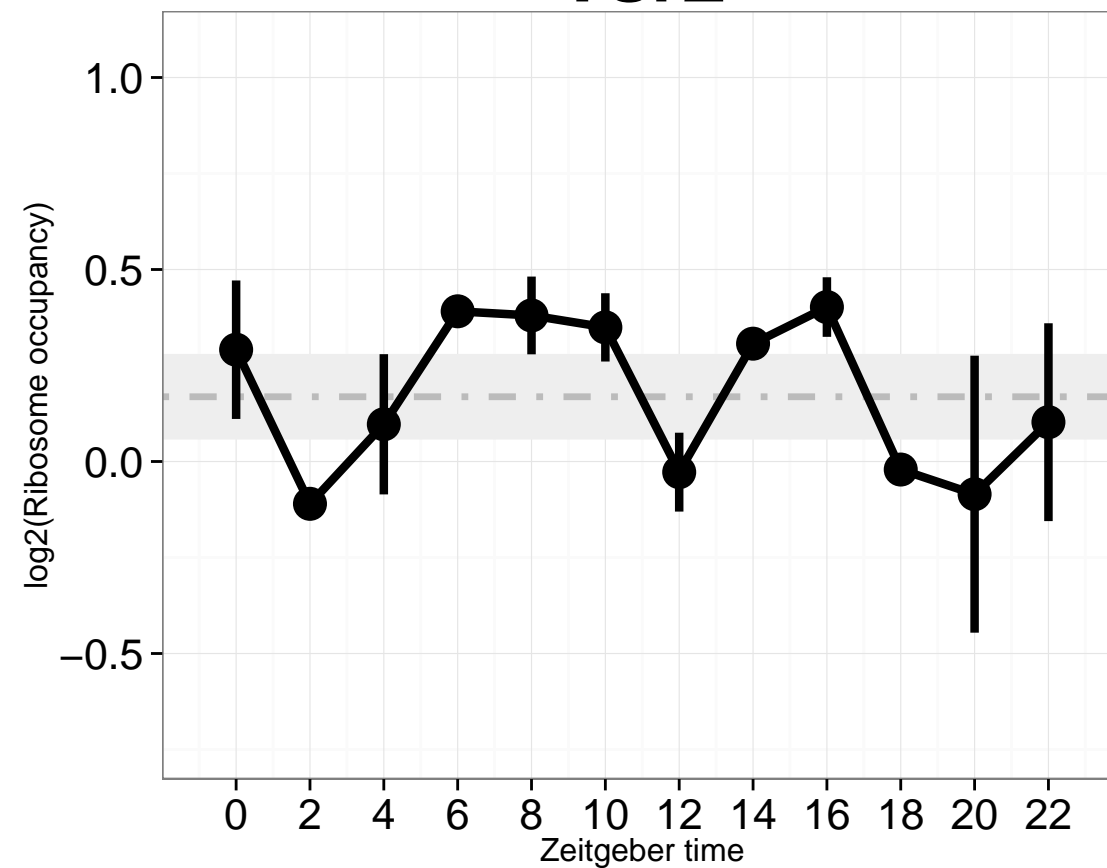

Supplement: Supplementary file 2728 [file 1]

# Gm2a

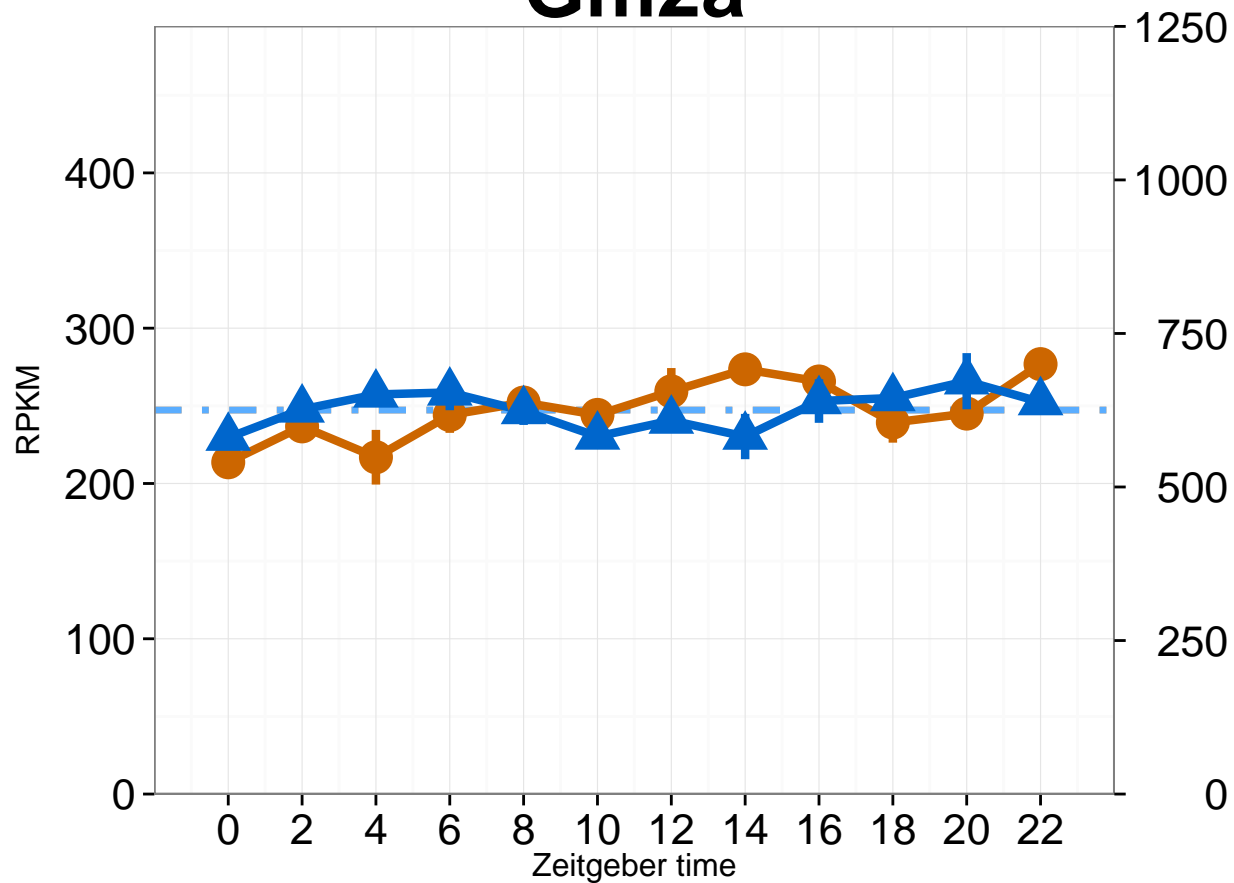

# Gm2a

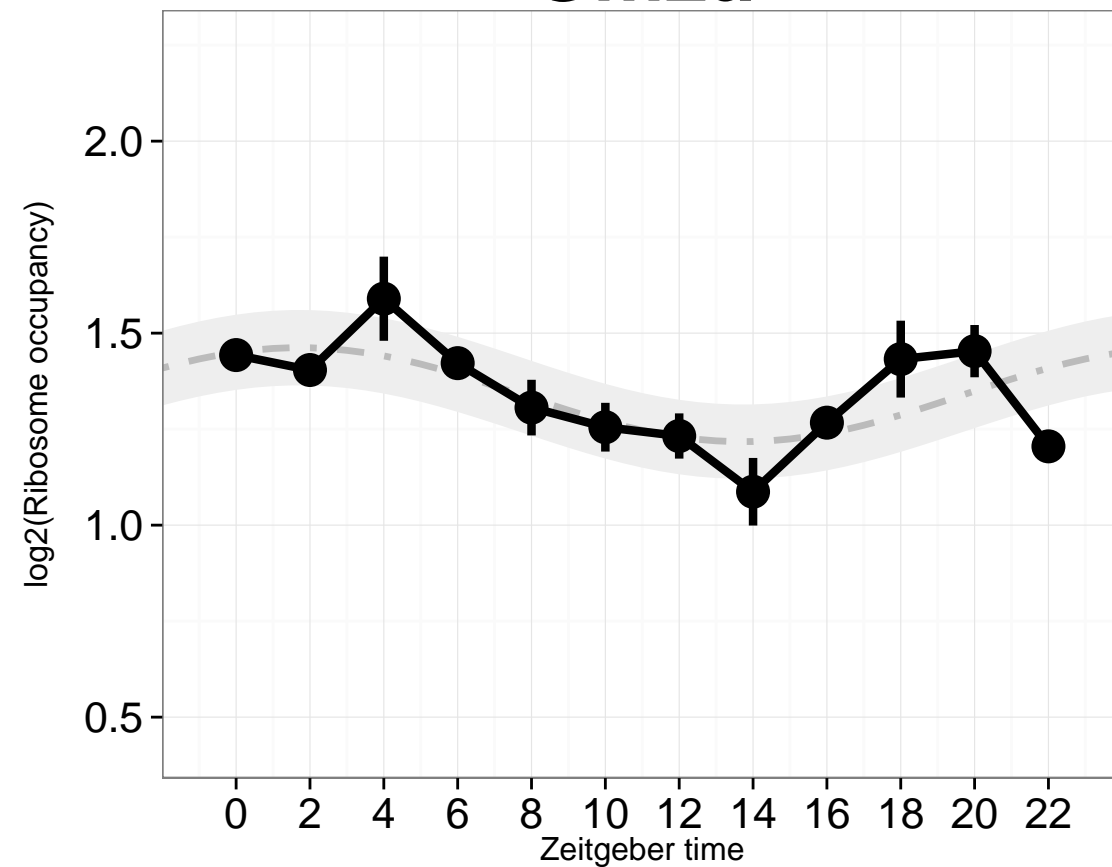

Supplement: Supplementary file 2729 [file 1]

# Mtch1

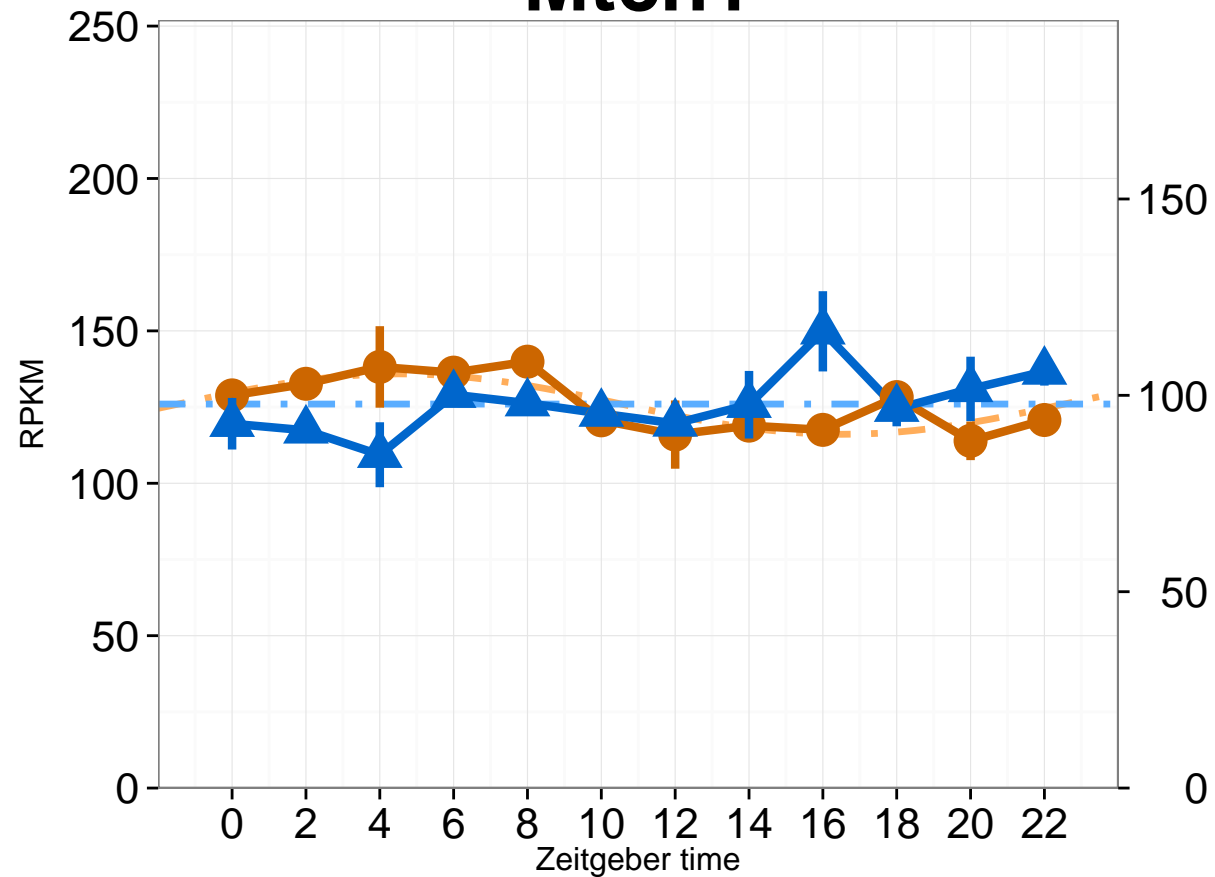

# Mtch1

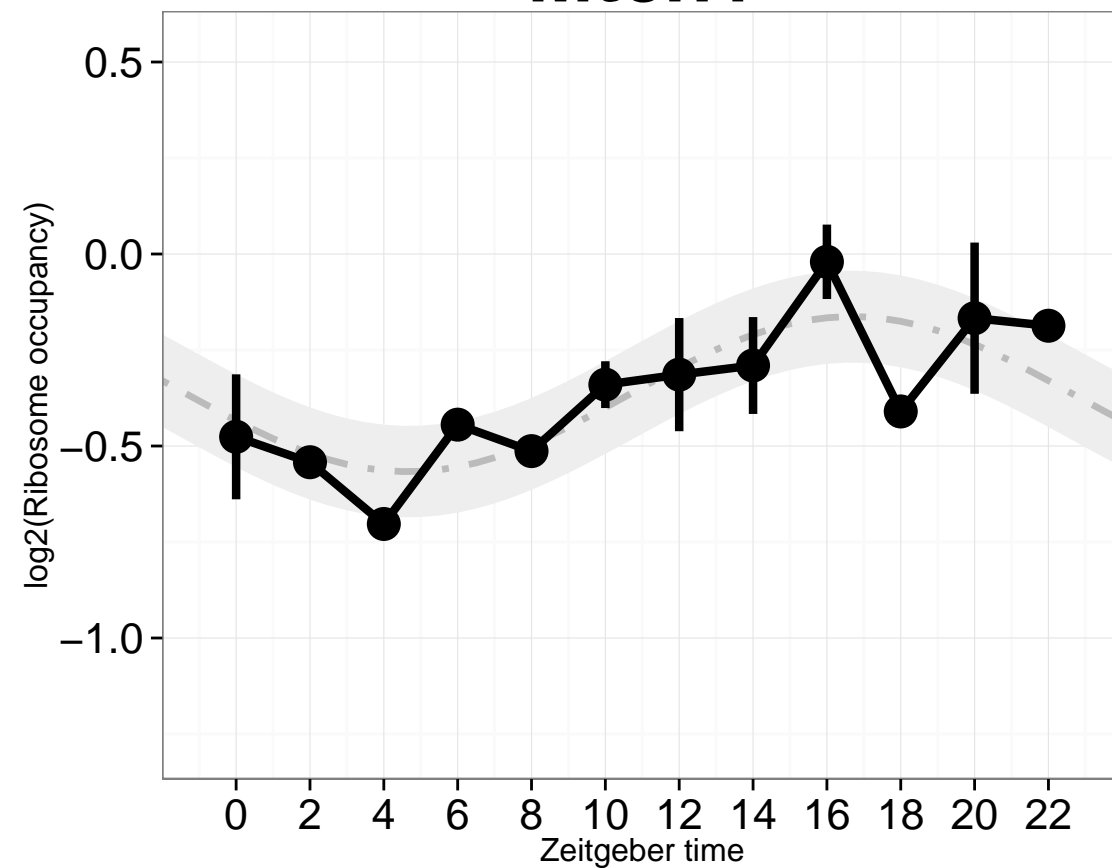

Supplement: Supplementary file 2730 [file 1]

# Tmem184a

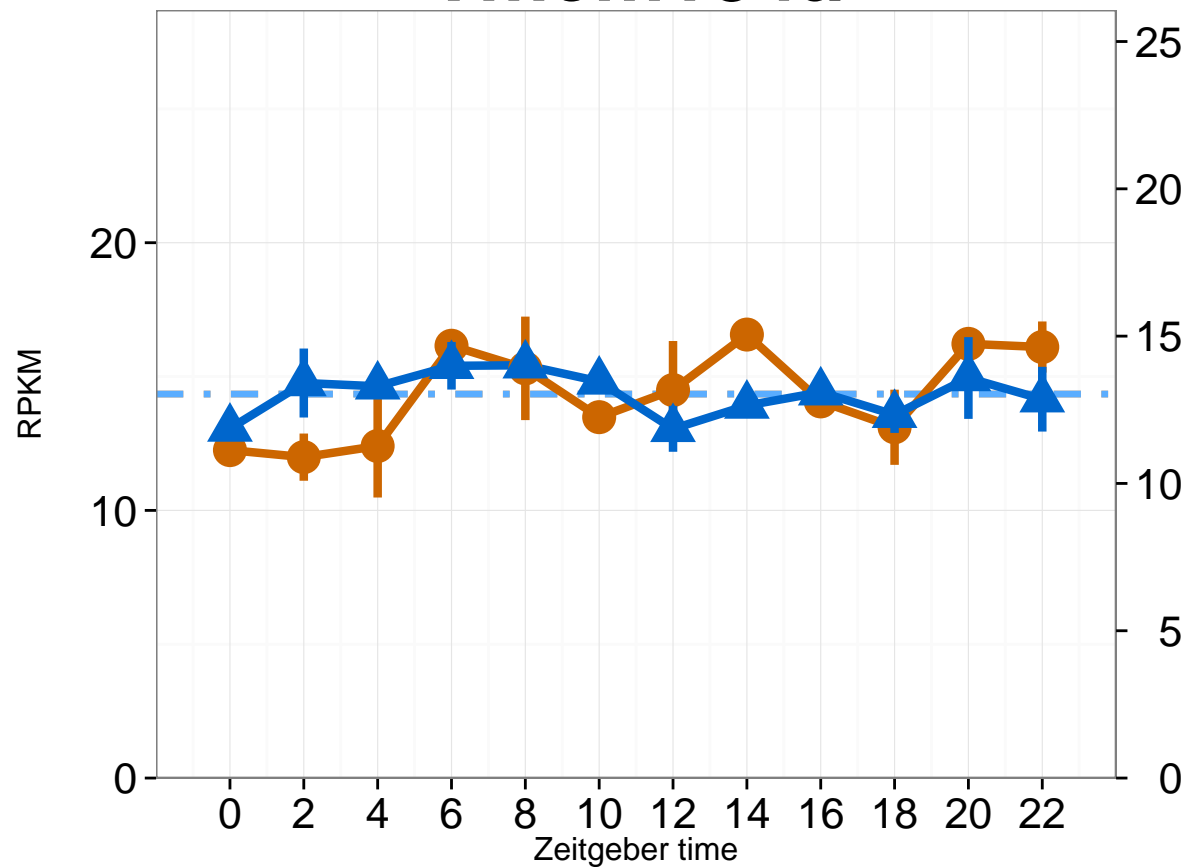

# Tmem184a

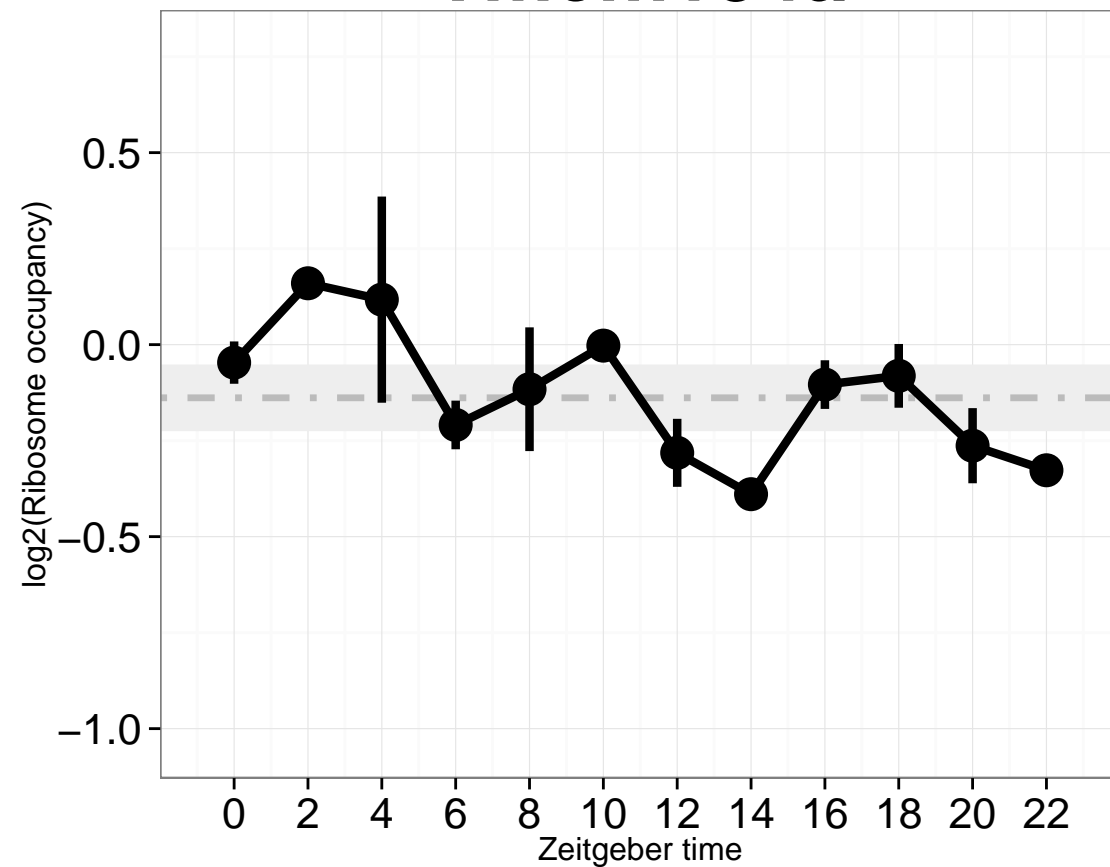

Supplement: Supplementary file 2731 [file 1]

## Stk16

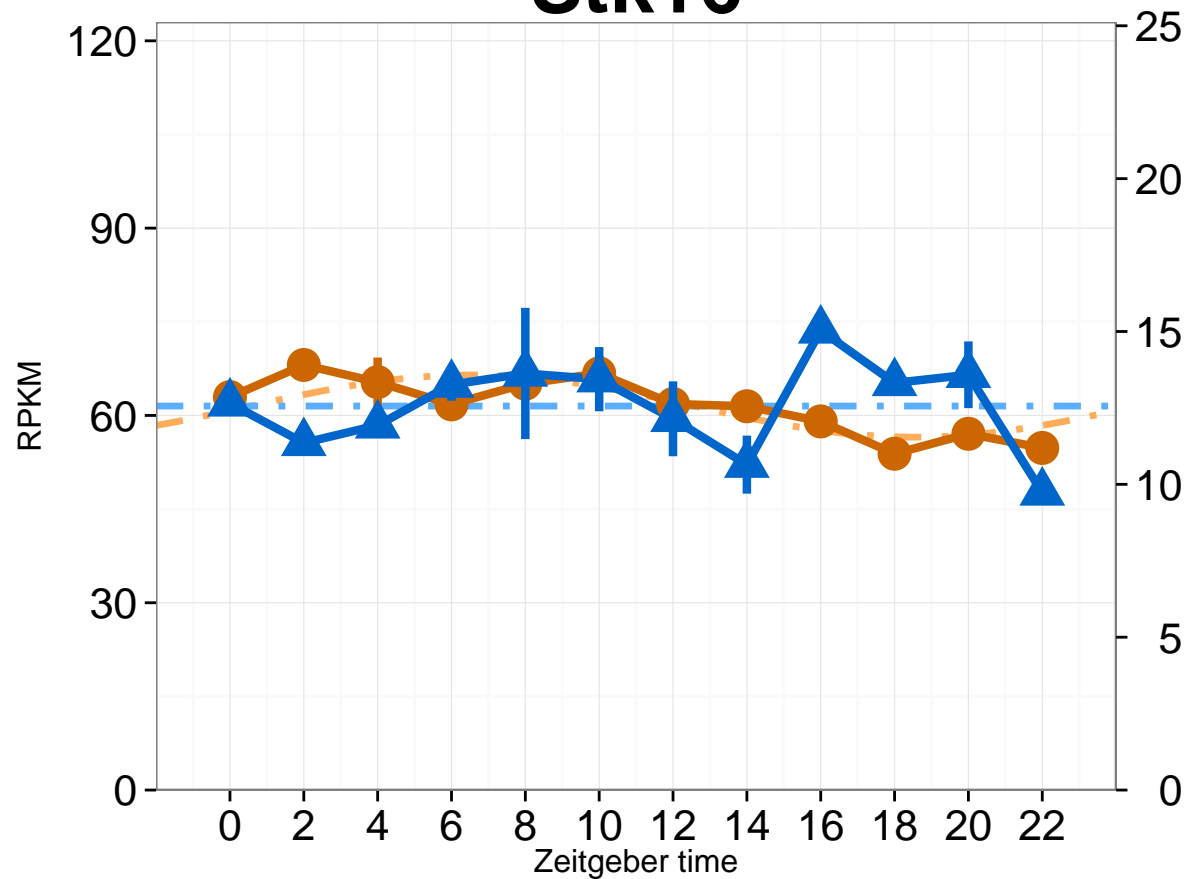

## Stk16

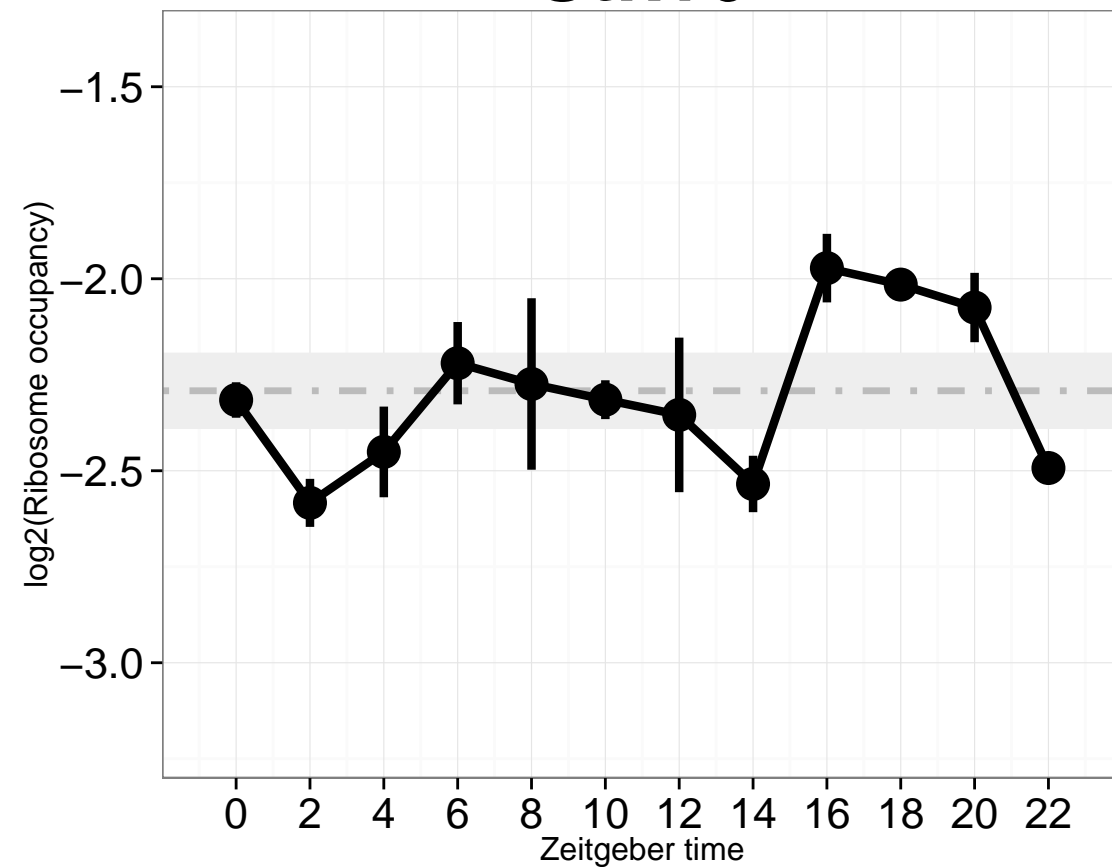

Supplement: Supplementary file 2732 [file 1]

# Pde1c

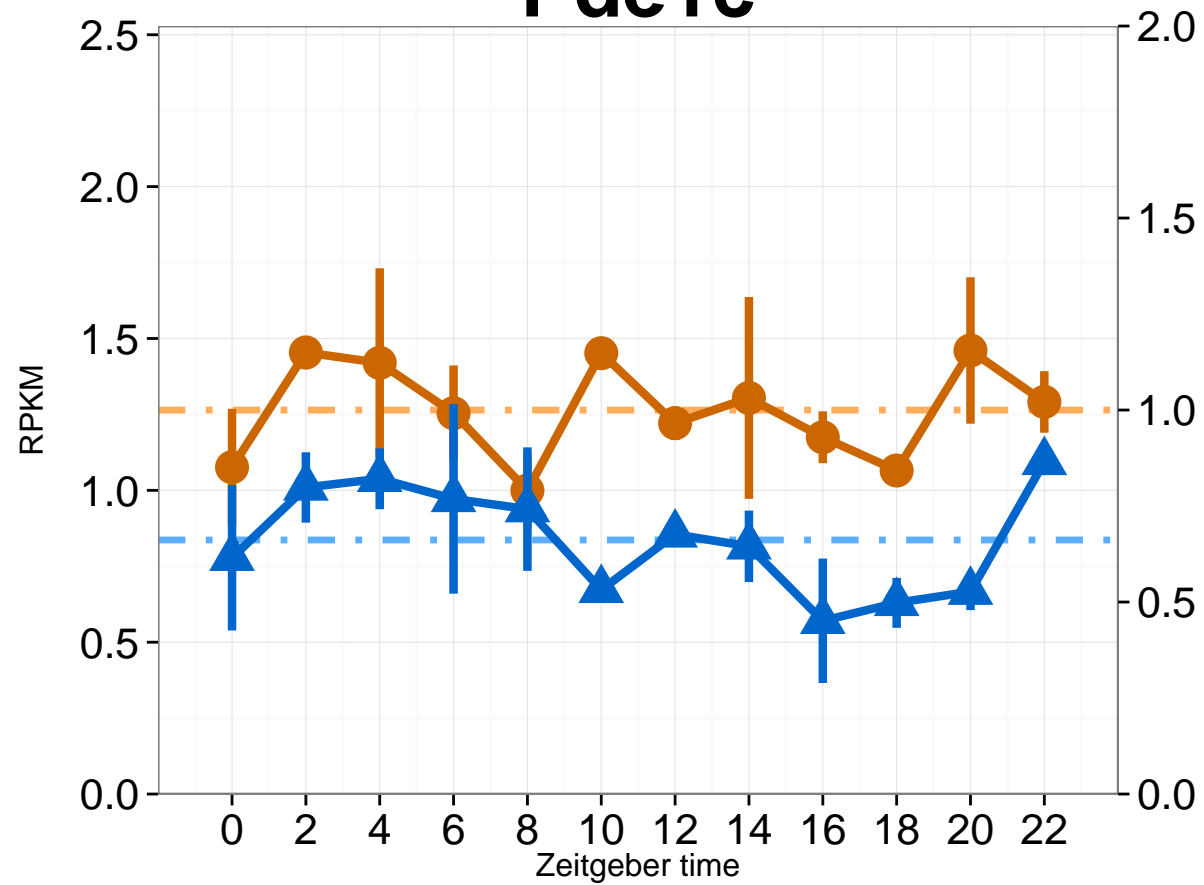

# Pde1c

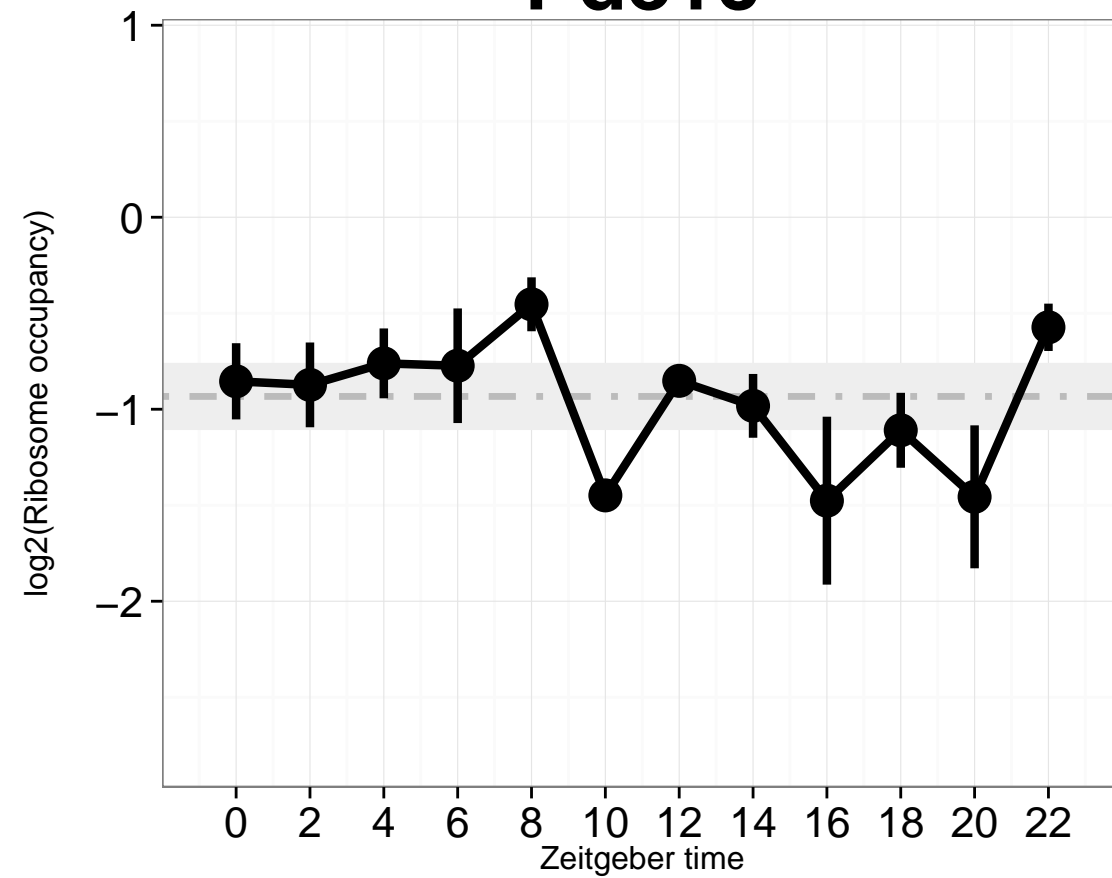

Supplement: Supplementary file 2733 [file 1]

## Exd2

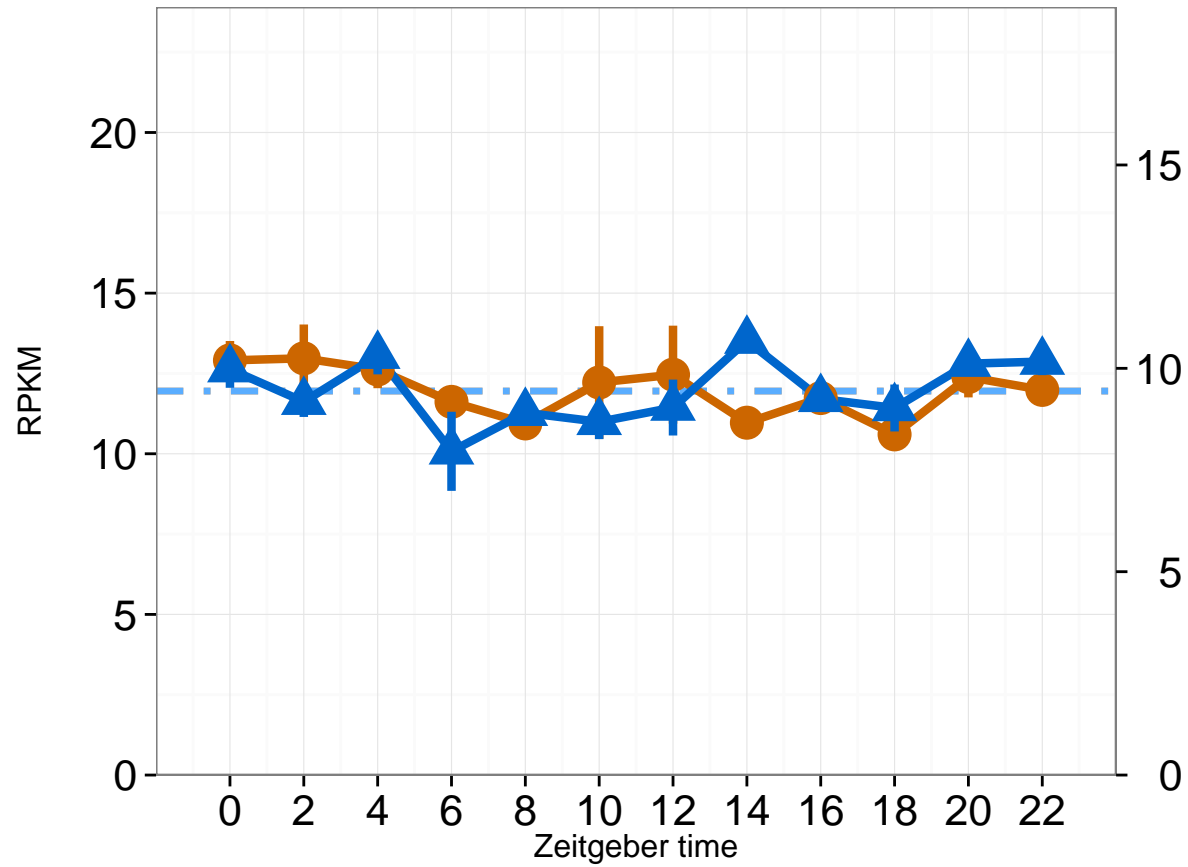

## Exd2

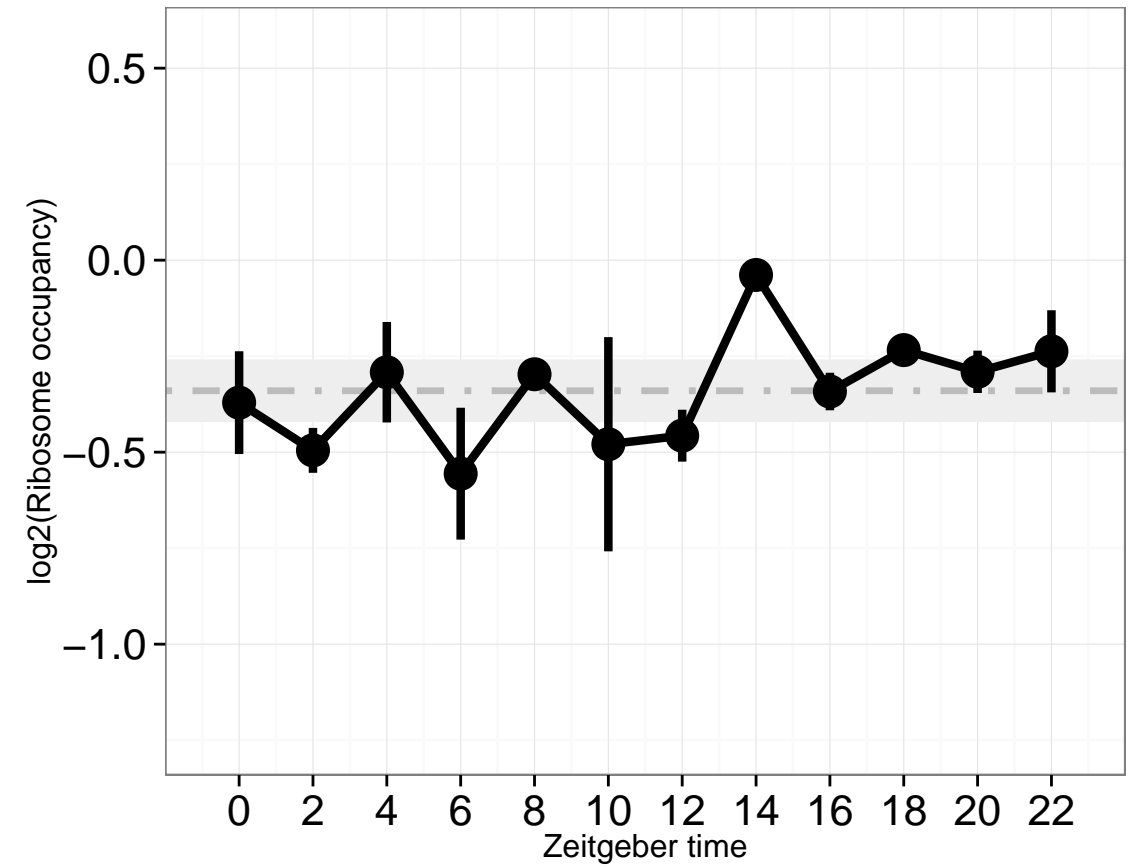

Supplement: Supplementary file 2734 [file 1]

# Zfp449

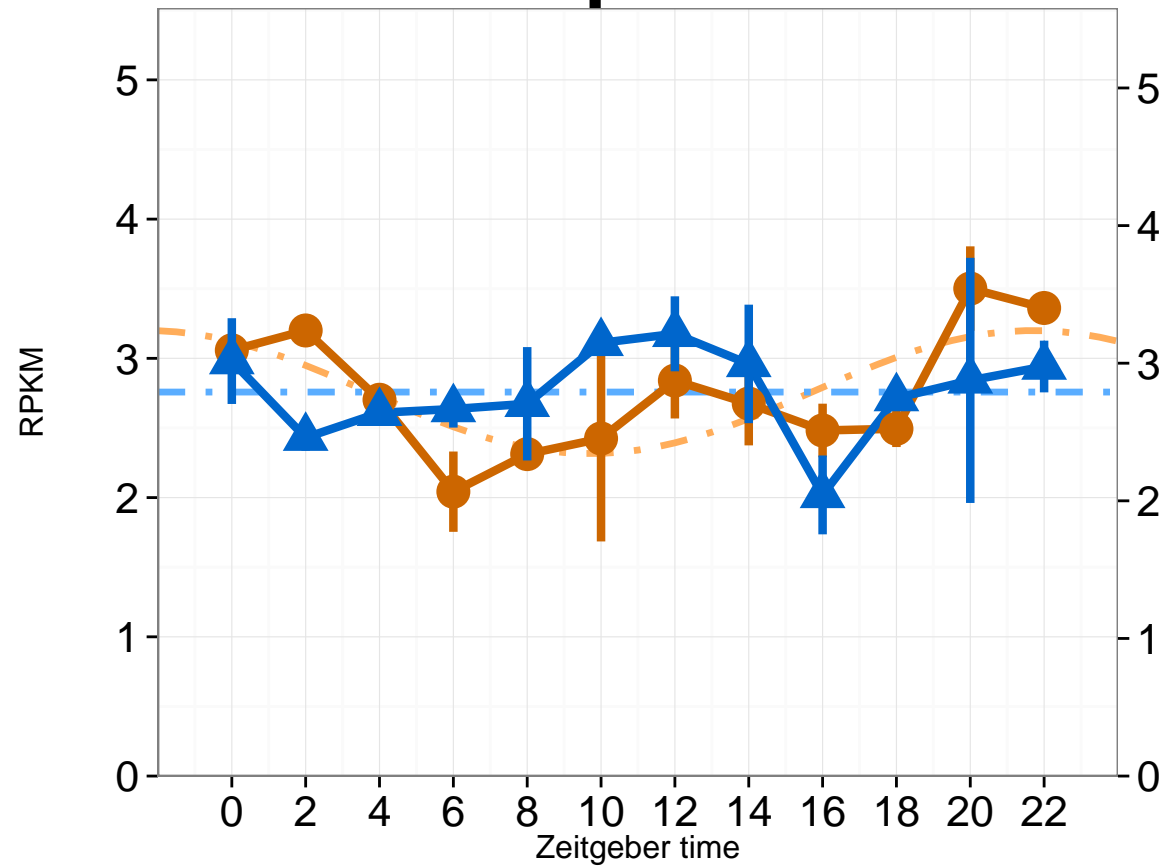

# Zfp449

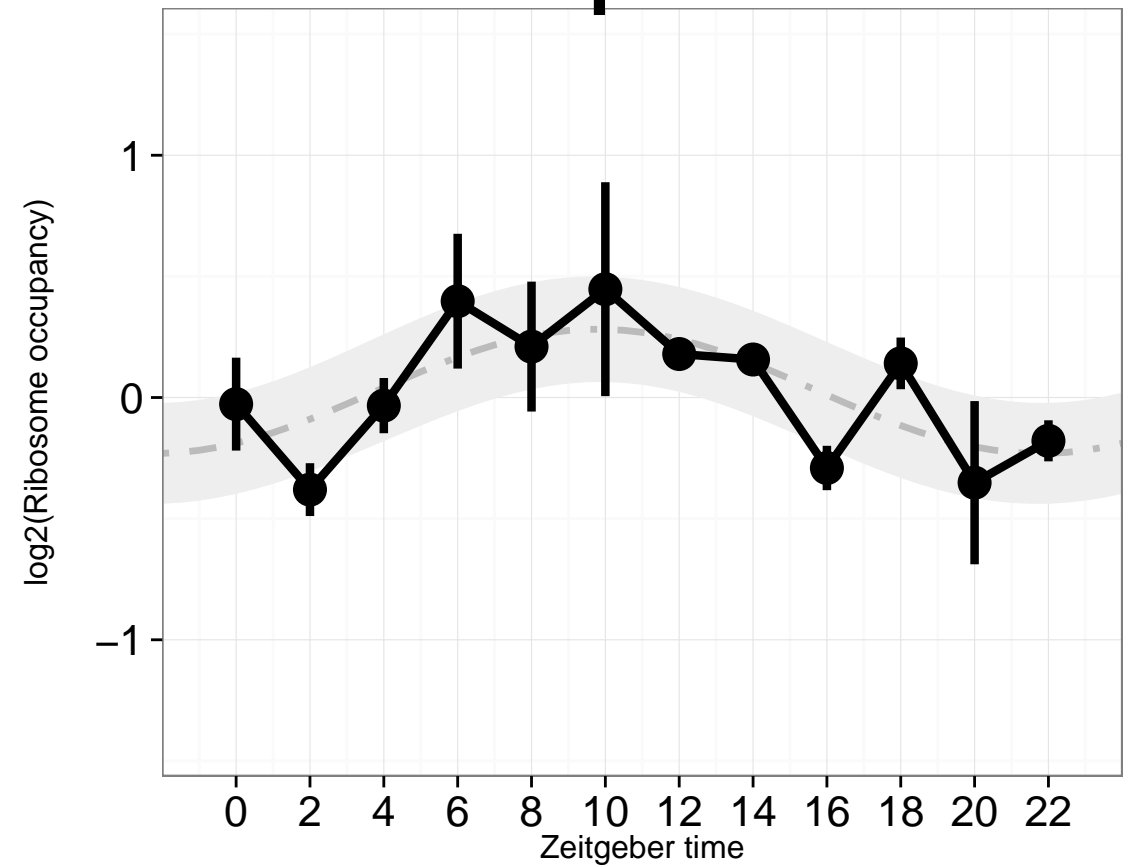

Supplement: Supplementary file 2735 [file 1]

# BC049715

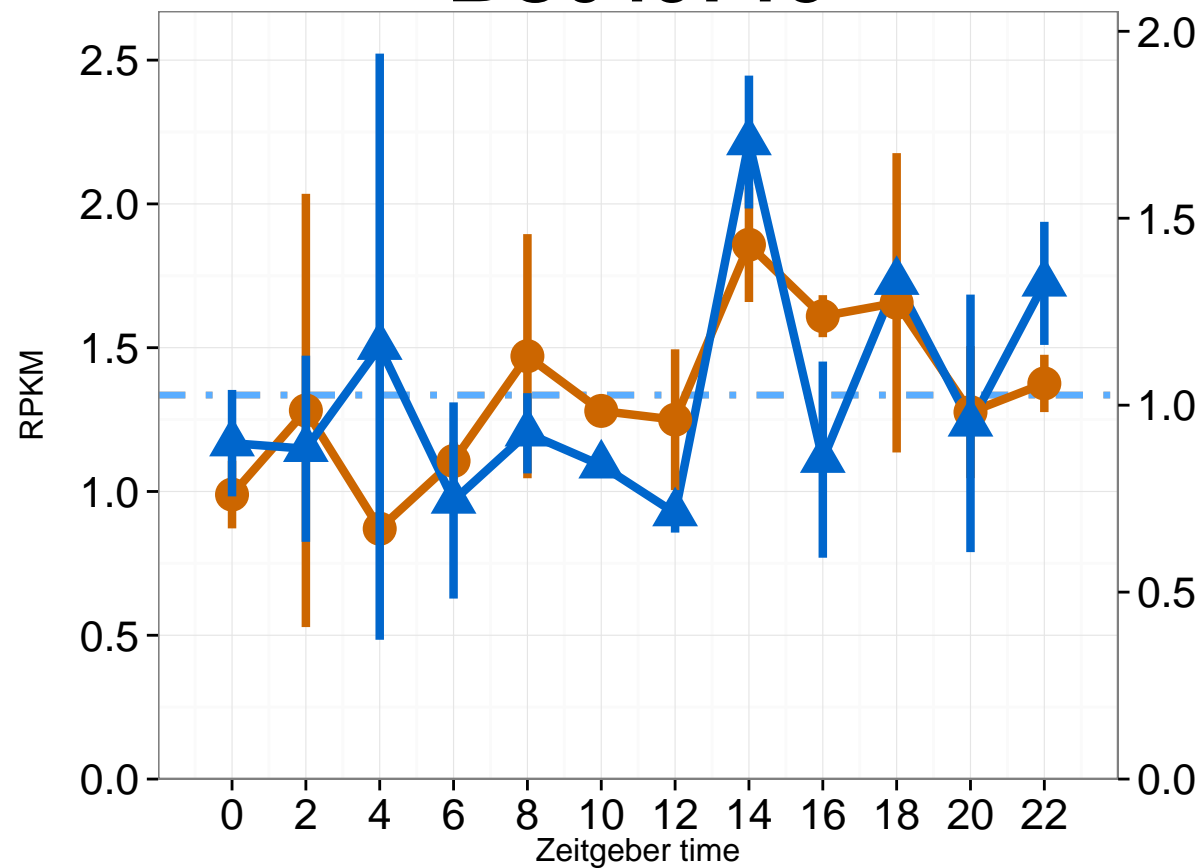

# BC049715

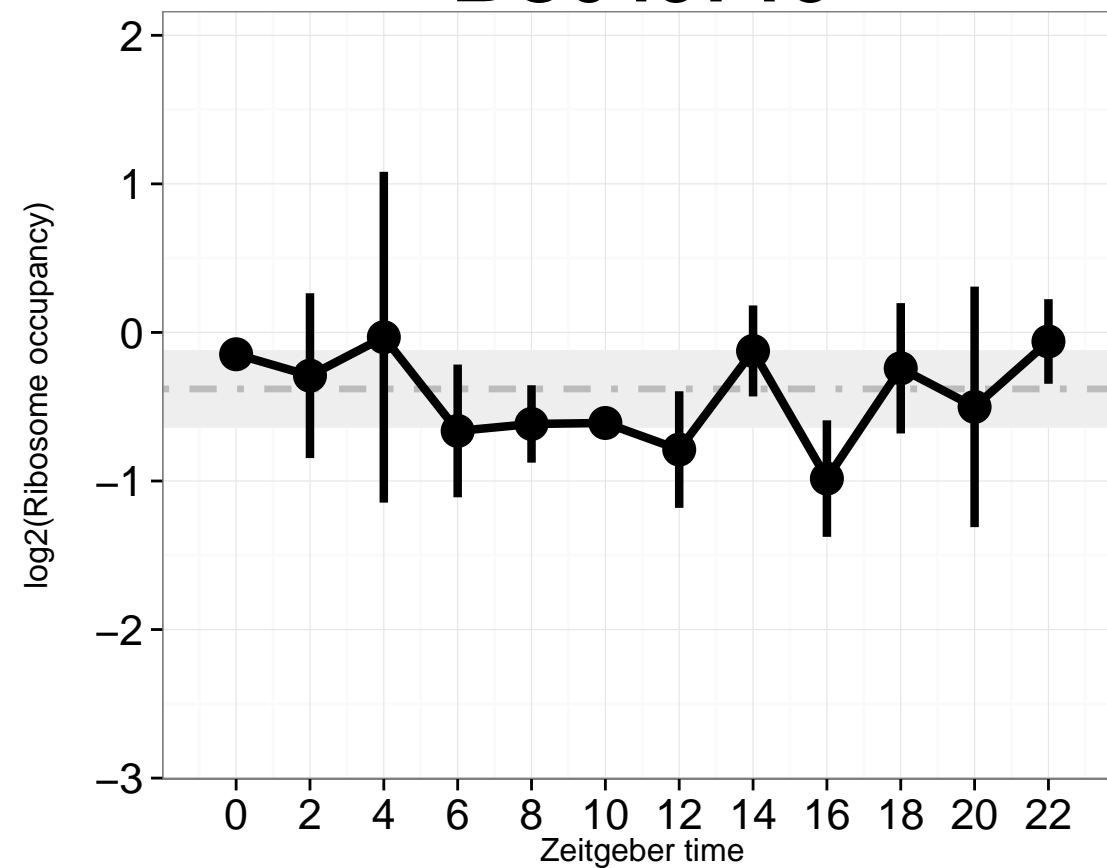

Supplement: Supplementary file 2736 [file 1]

# Zfp654

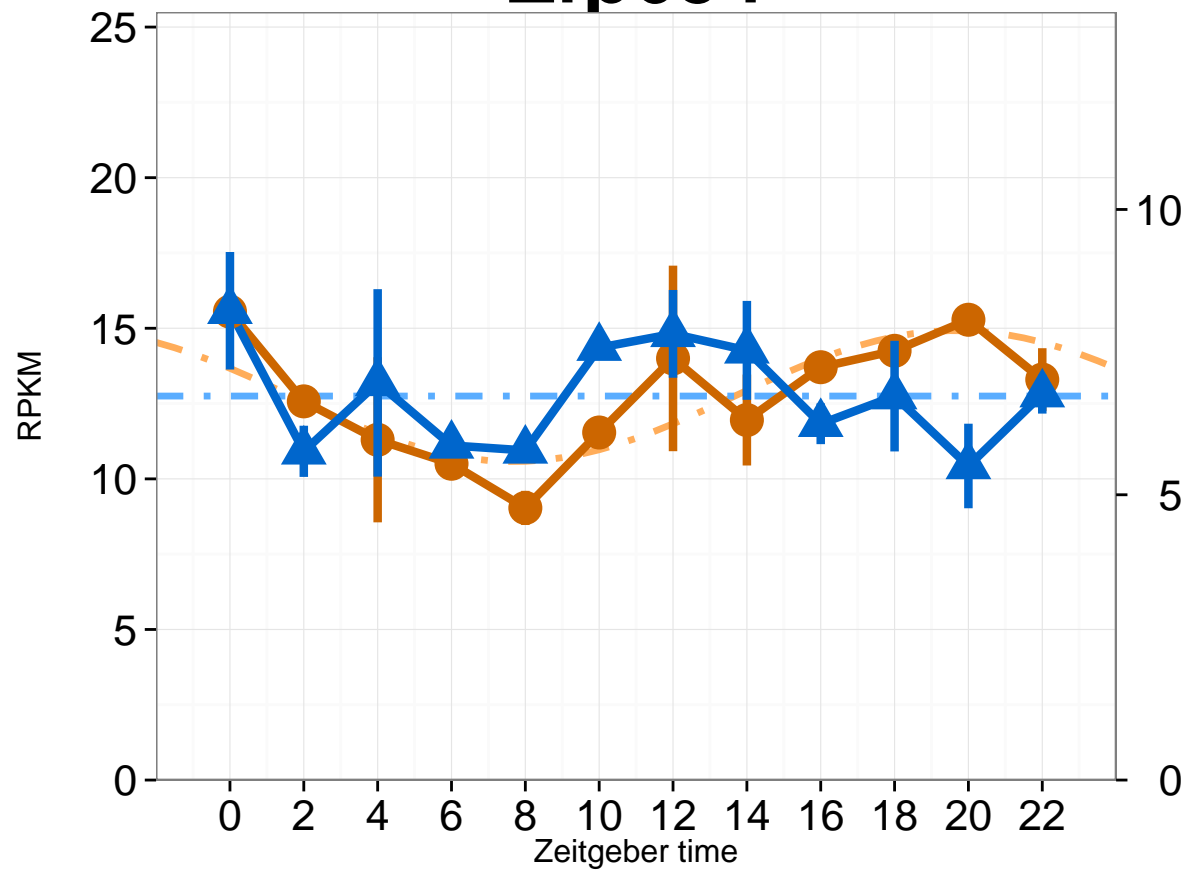

# Zfp654

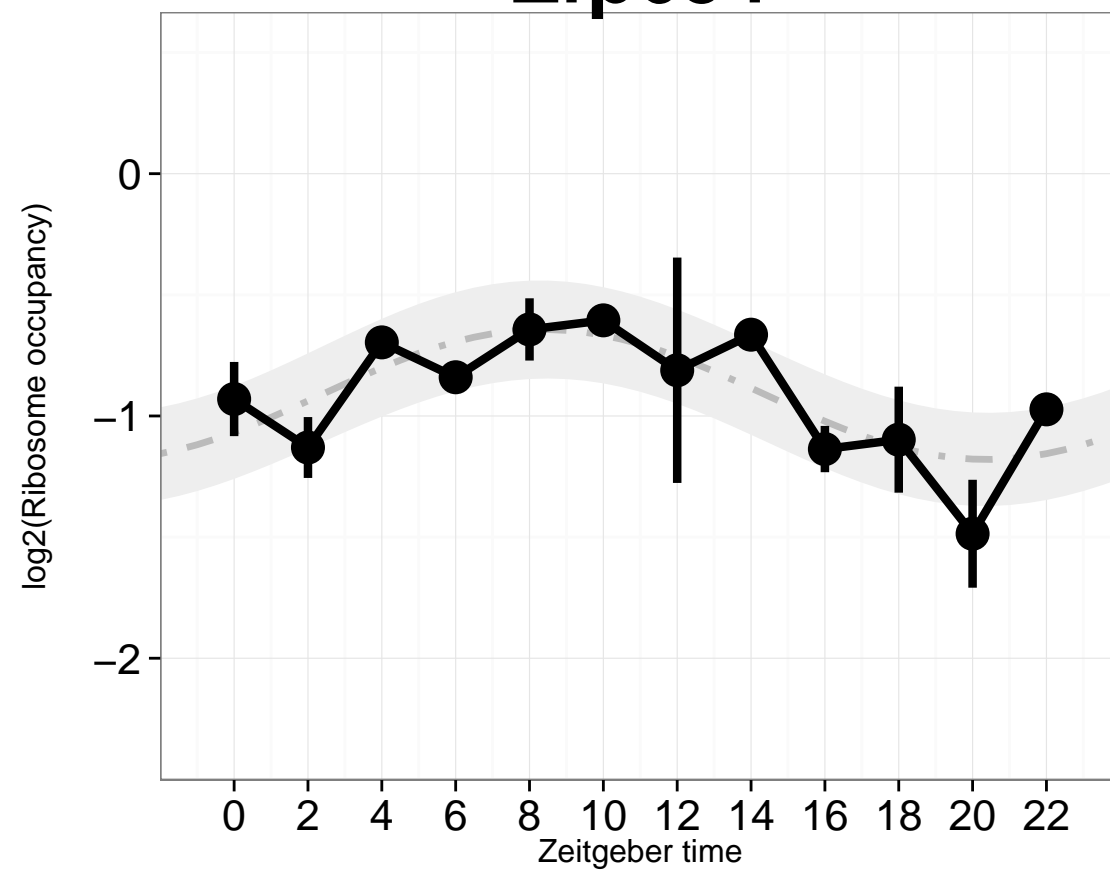

Supplement: Supplementary file 2737 [file 1]

## Ypel5

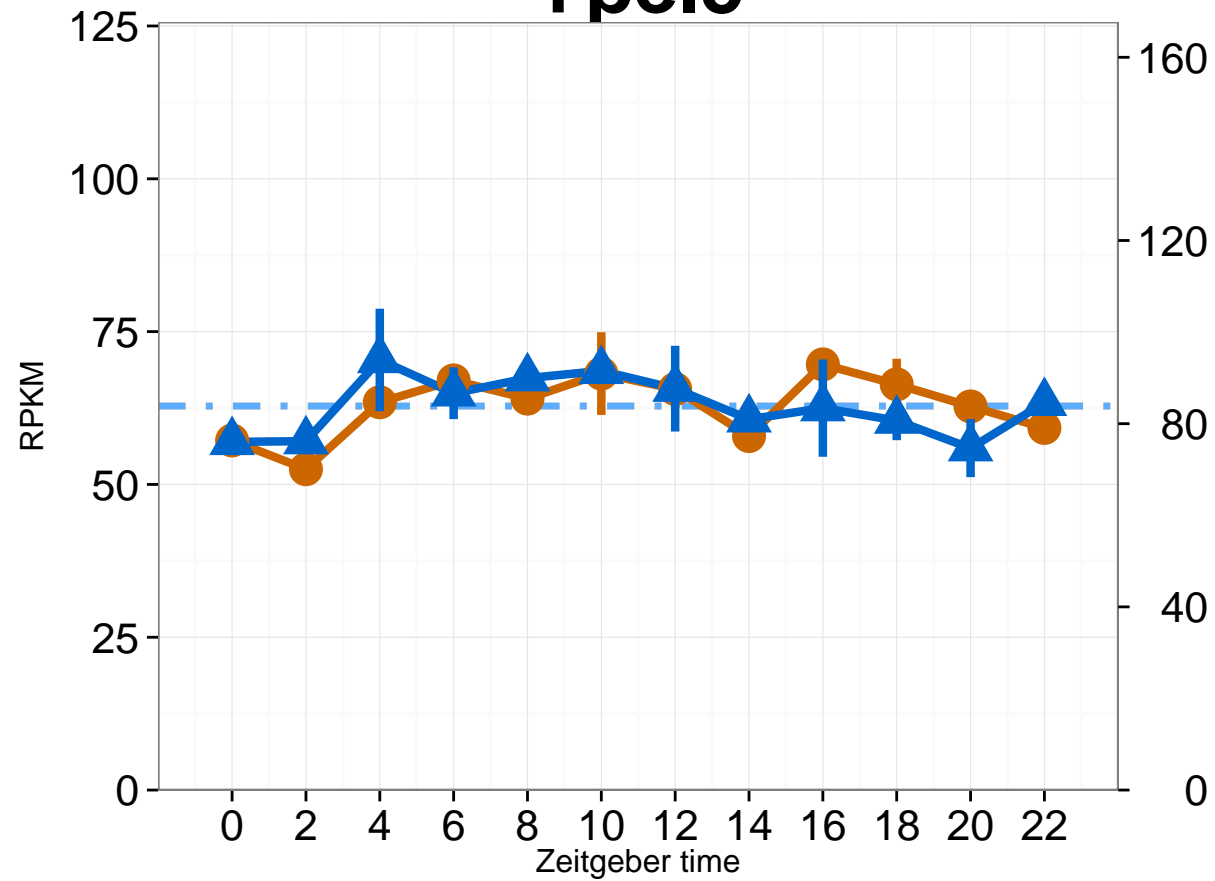

## Ypel5

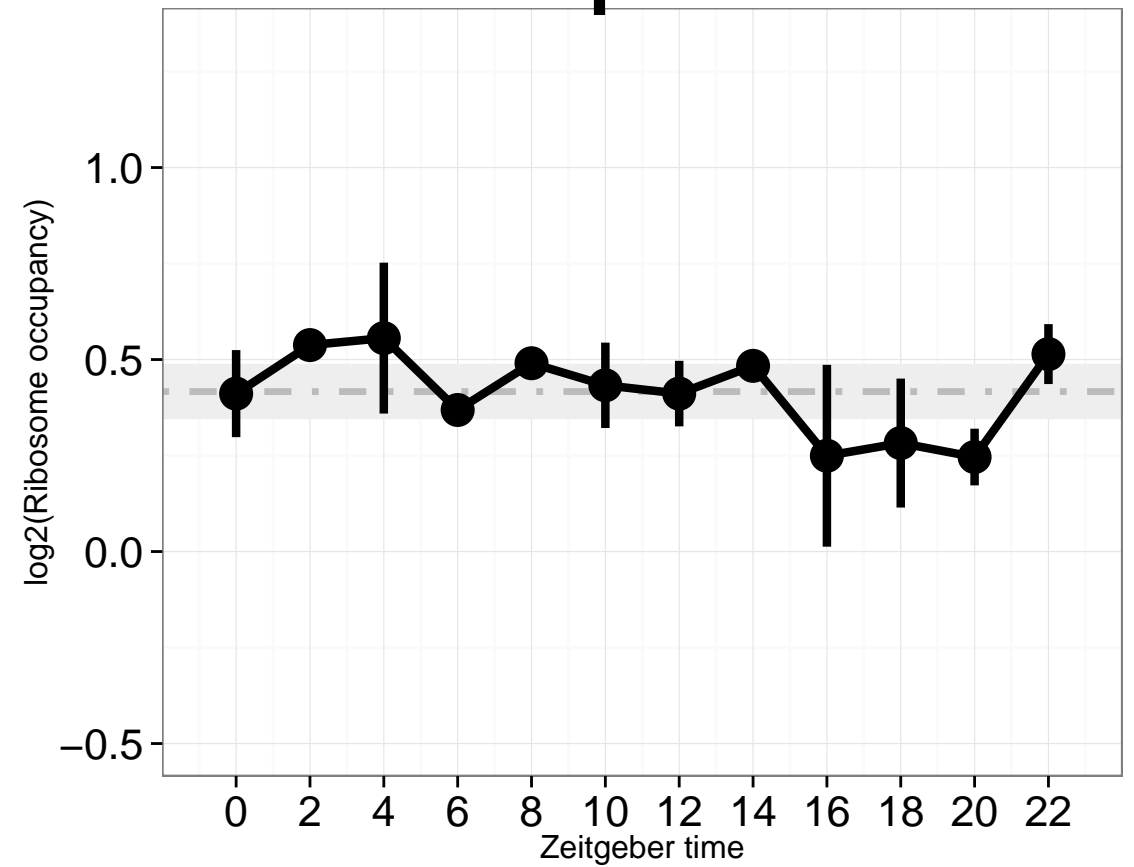

Supplement: Supplementary file 2738 [file 1]

## Junb

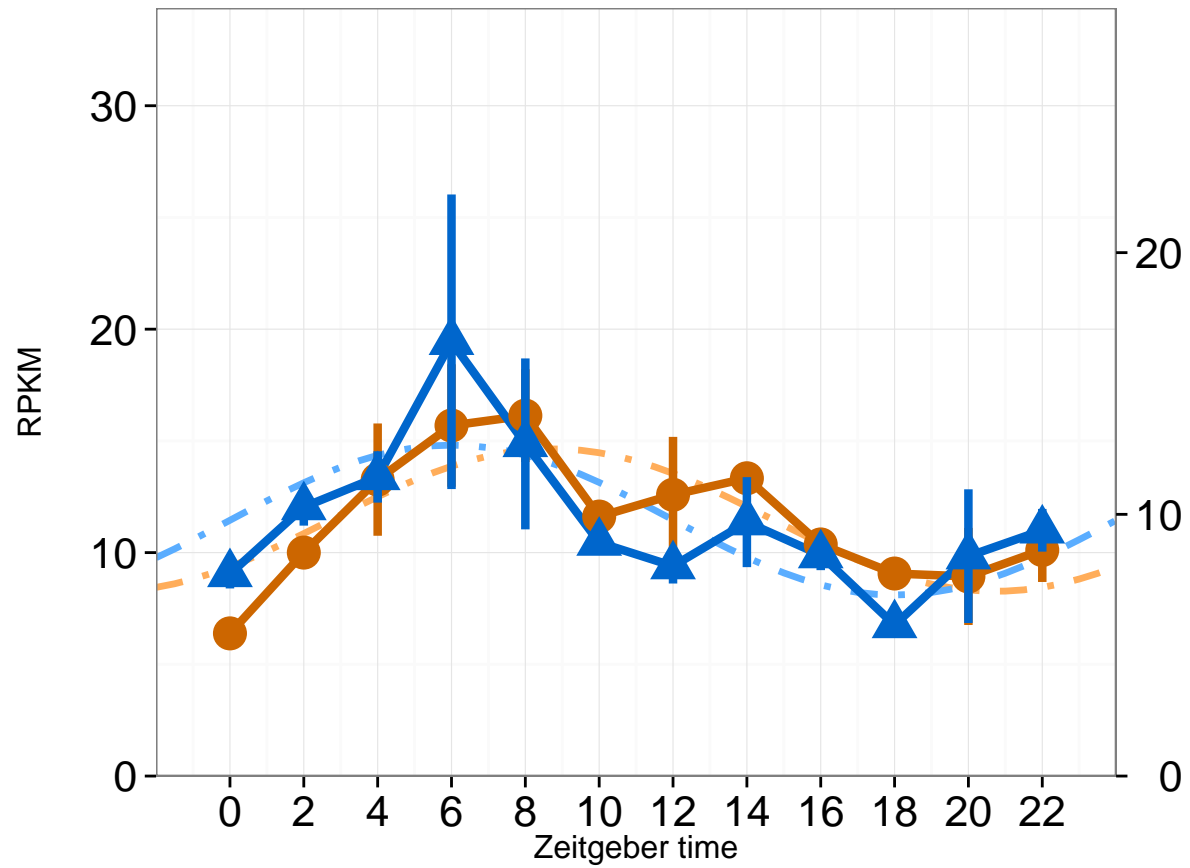

## Junb

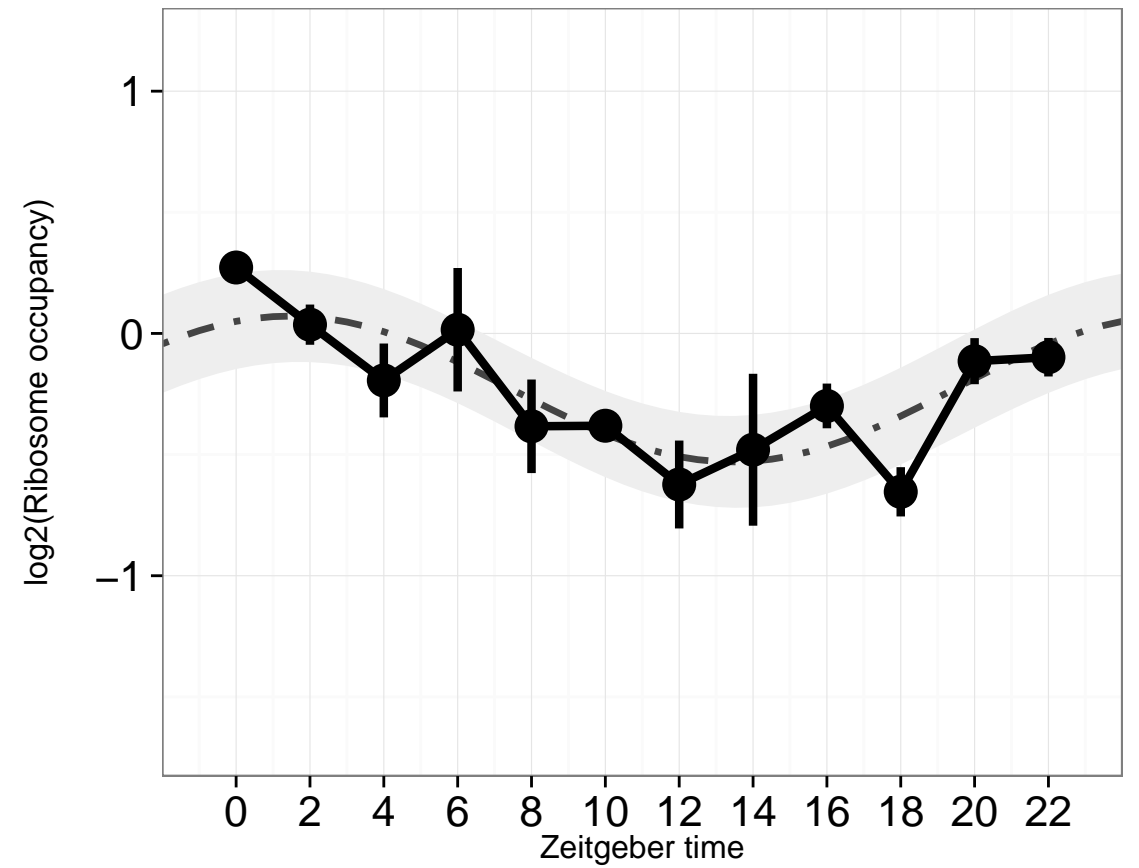

Supplement: Supplementary file 2739 [file 1]

# Pik3c2g

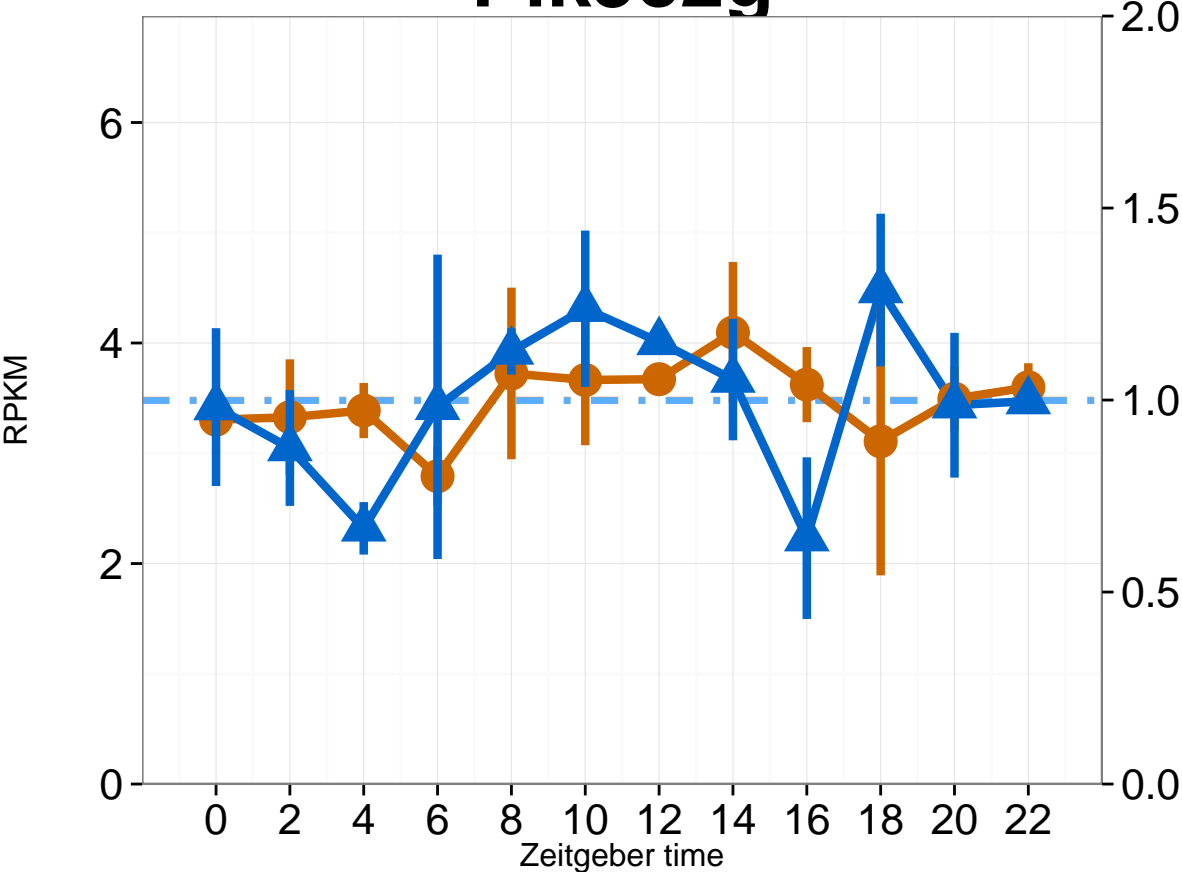

# Pik3c2g

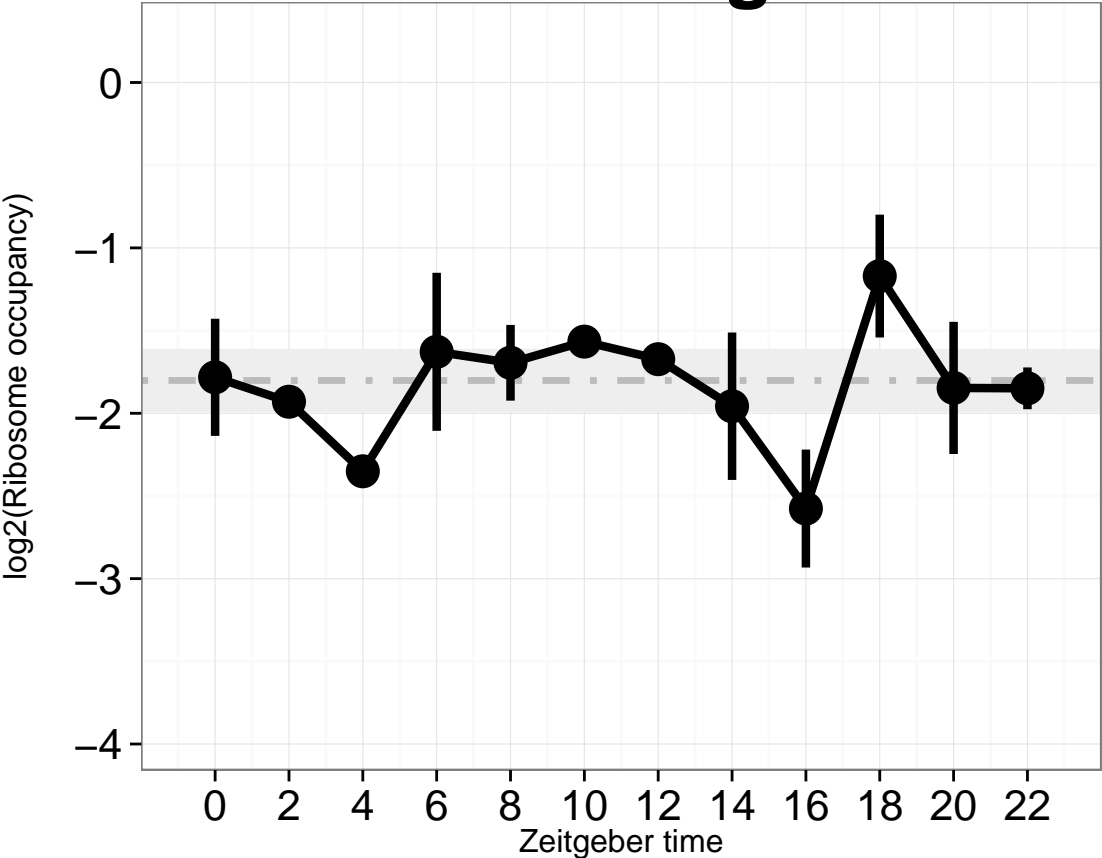

Supplement: Supplementary file 2740 [file 1]

# Slc13a3

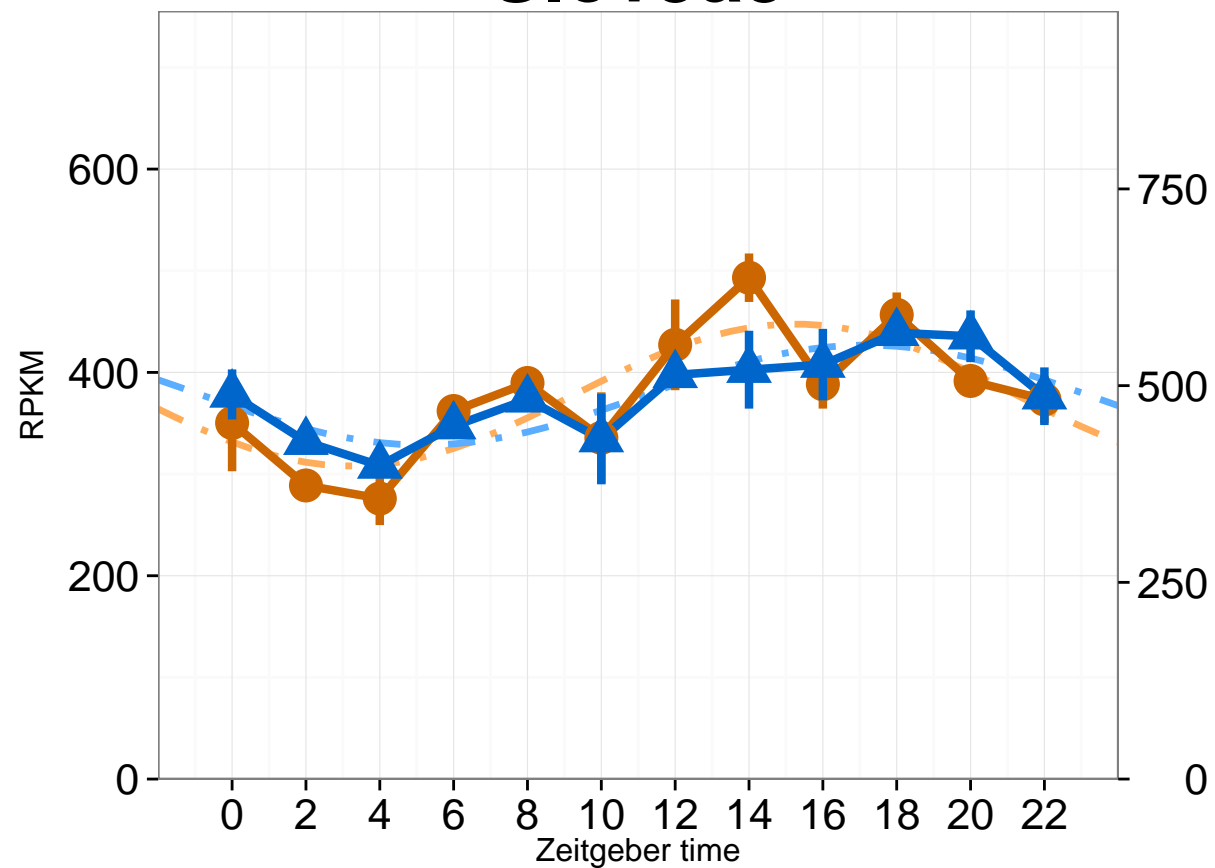

# Slc13a3

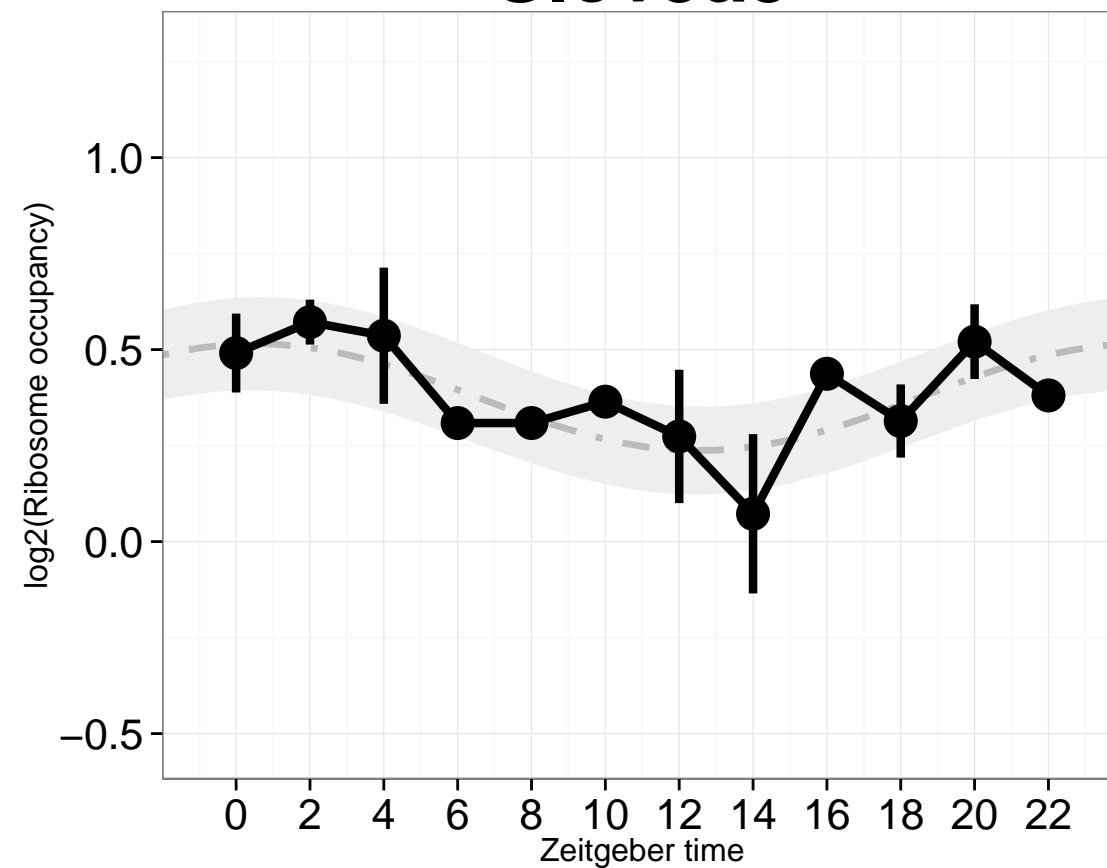

Supplement: Supplementary file 2741 [file 1]

# Nxpe4

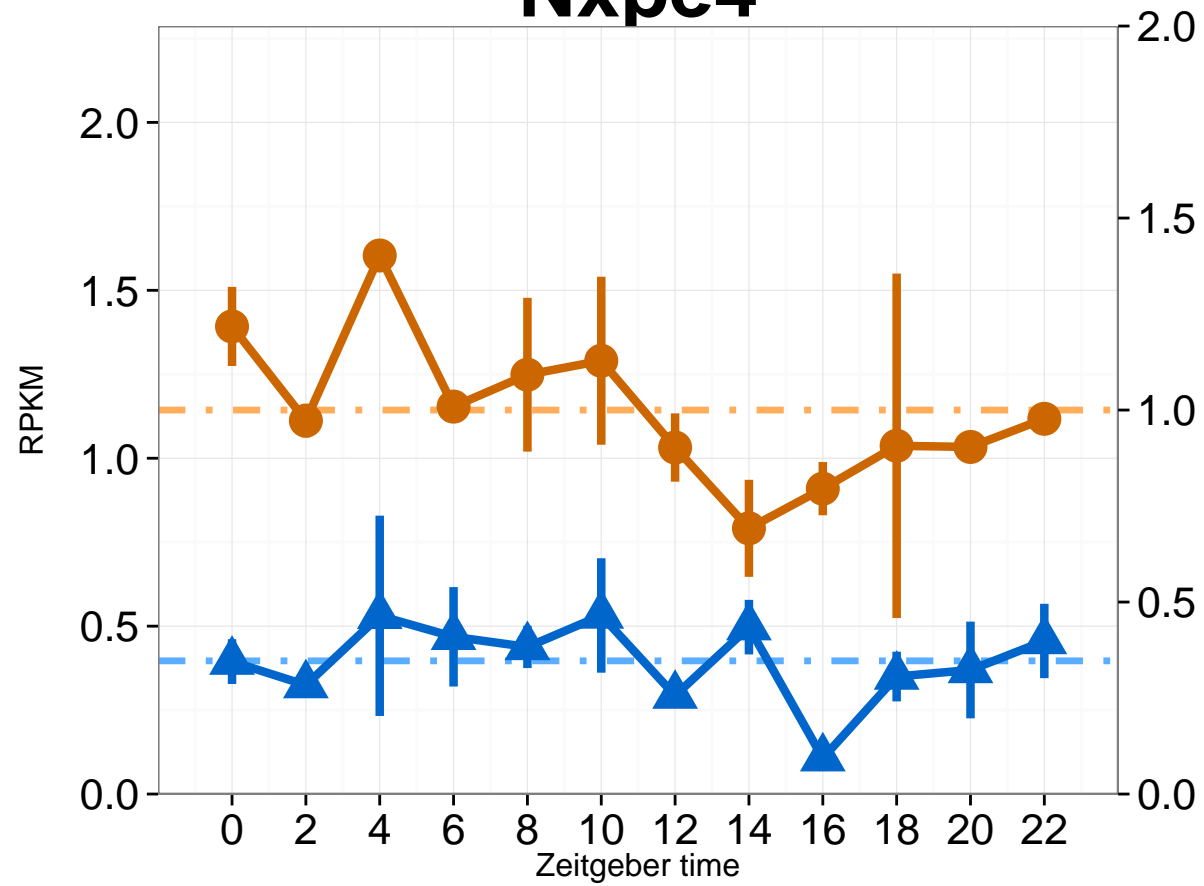

# Nxpe4

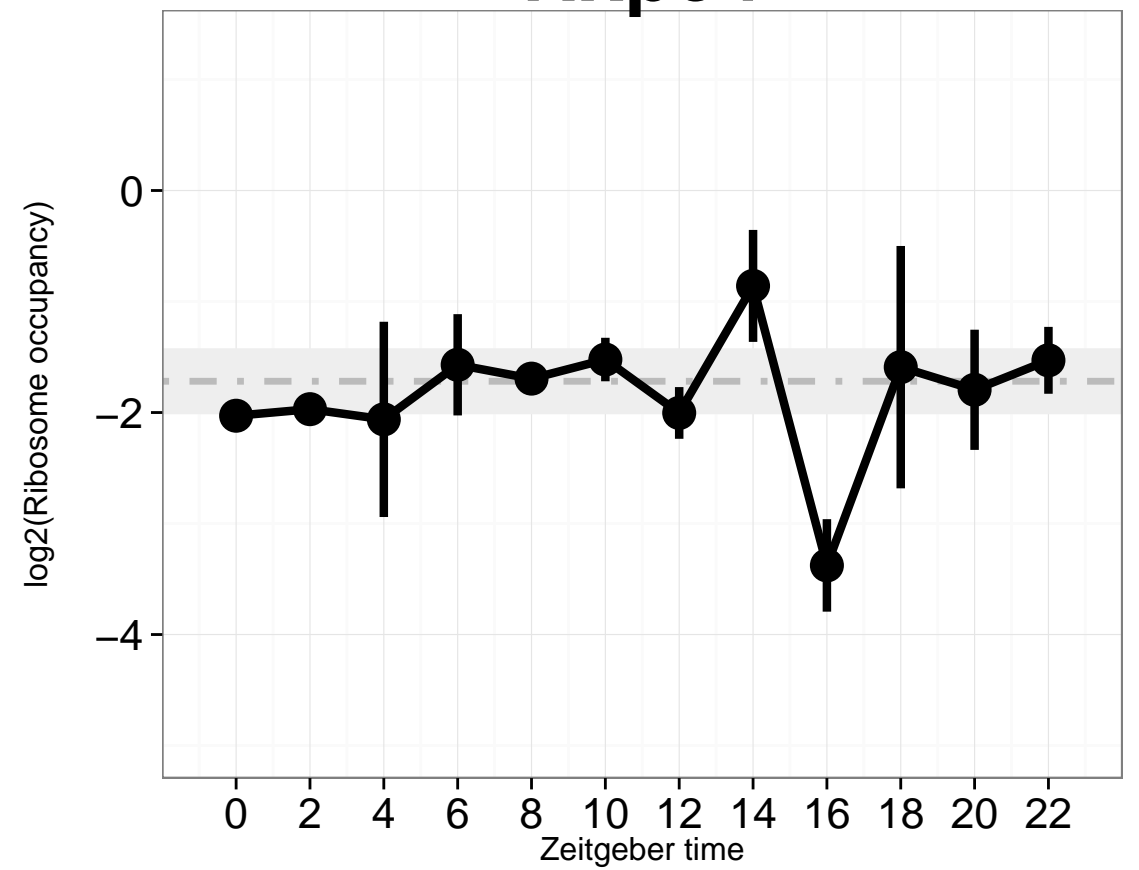

Supplement: Supplementary file 2742 [file 1]

## Pkd1

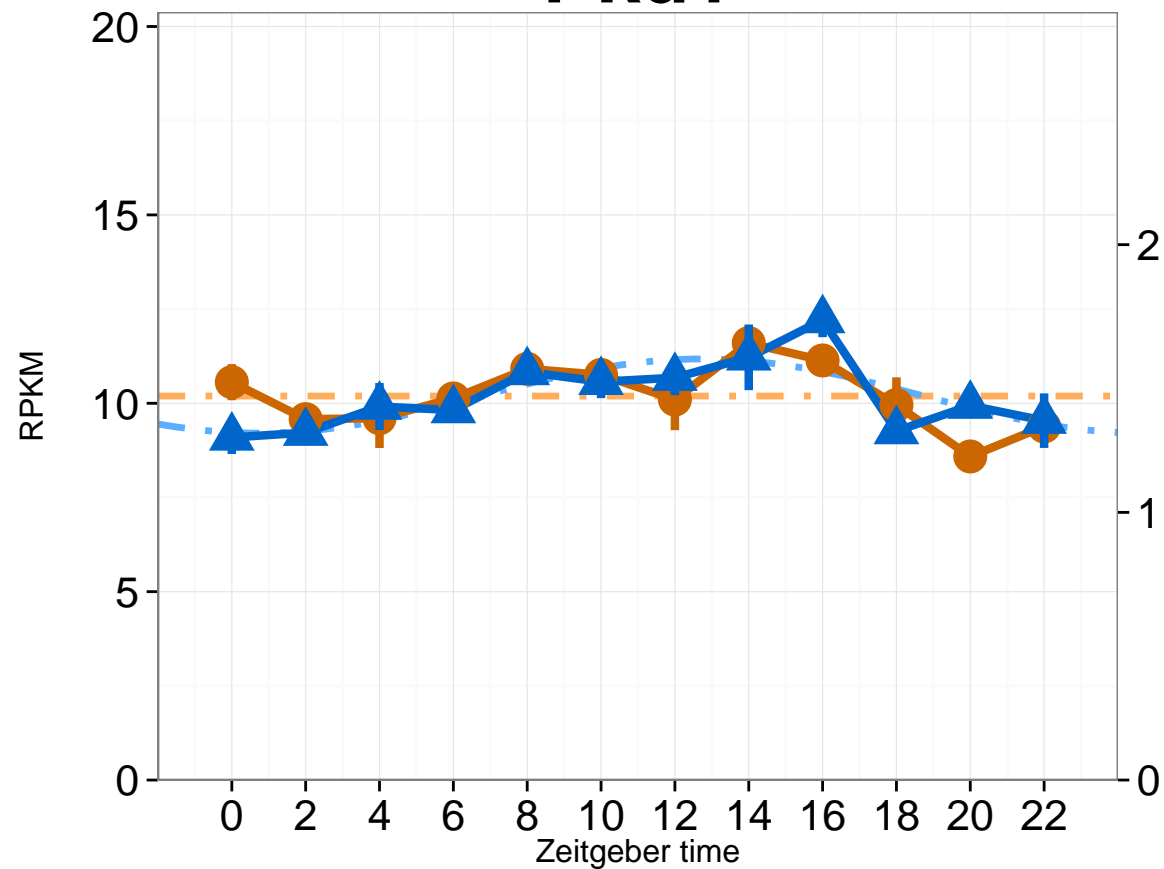

## Pkd1

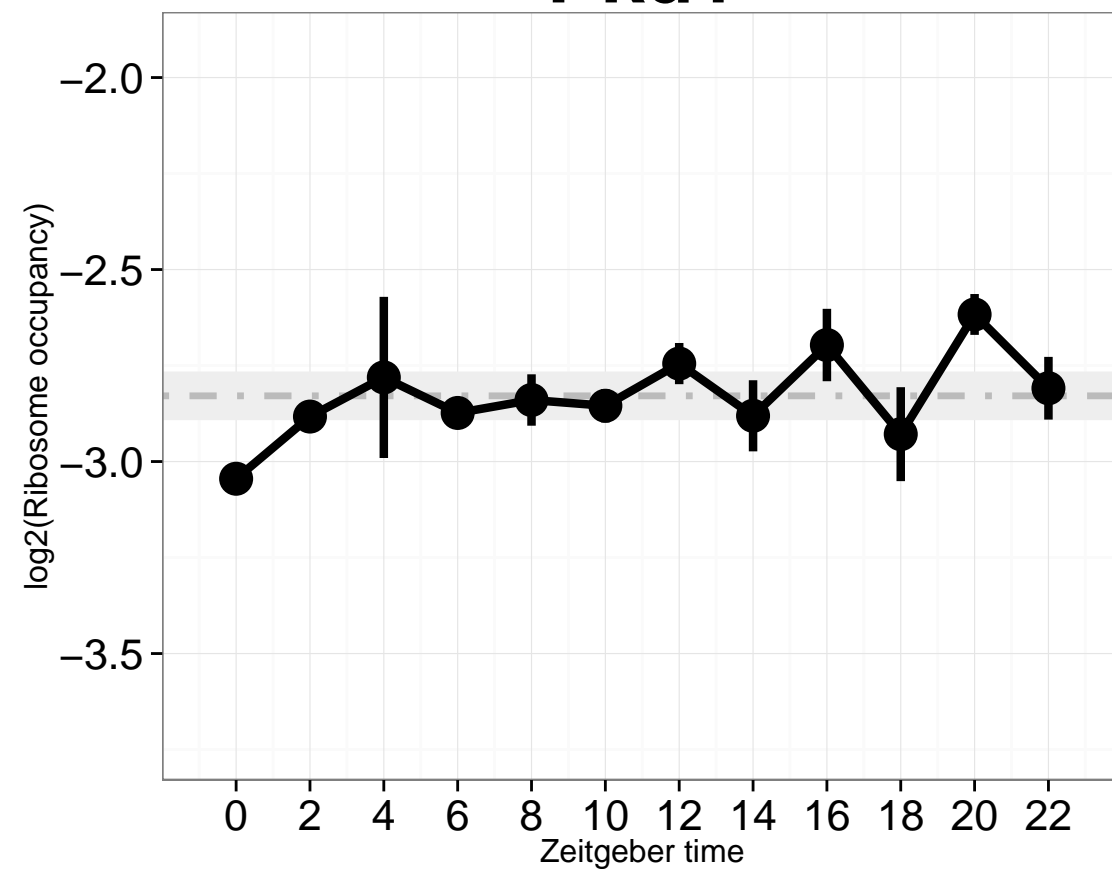

Supplement: Supplementary file 2743 [file 1]

# Gpr39

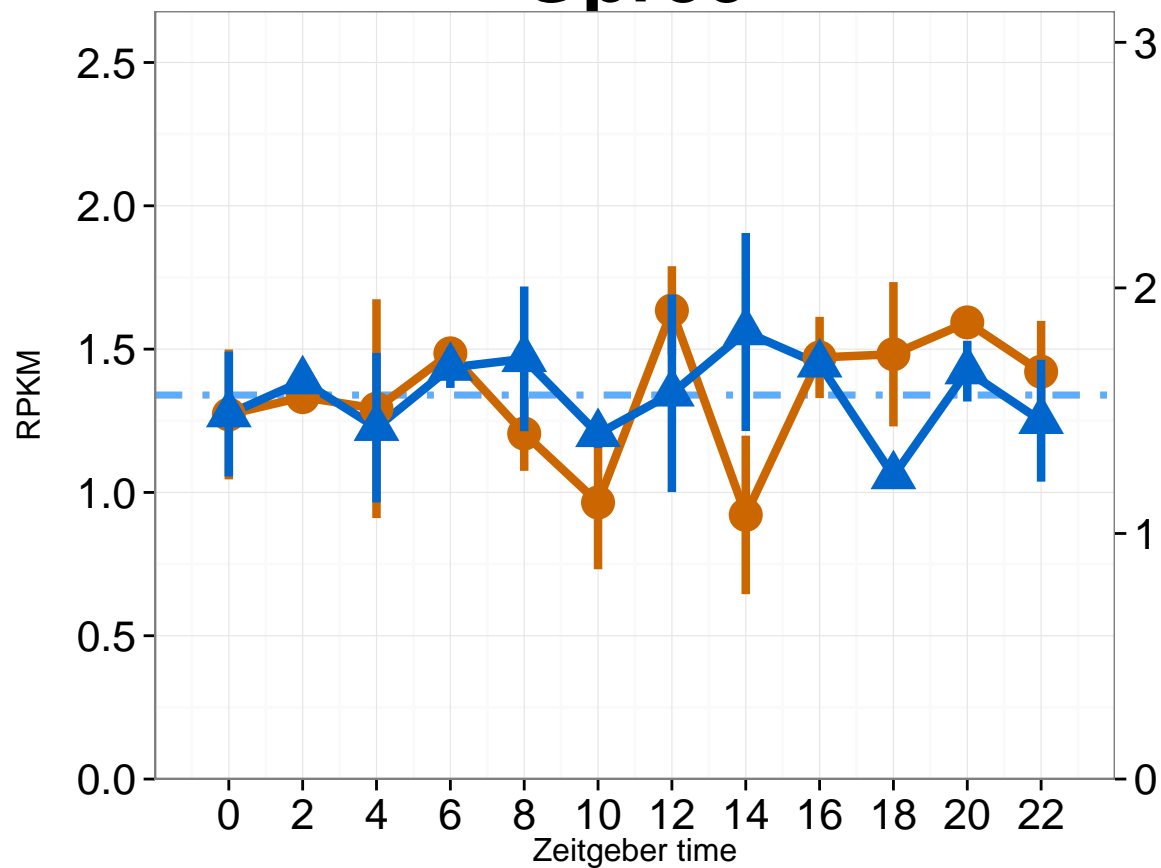

# Gpr39

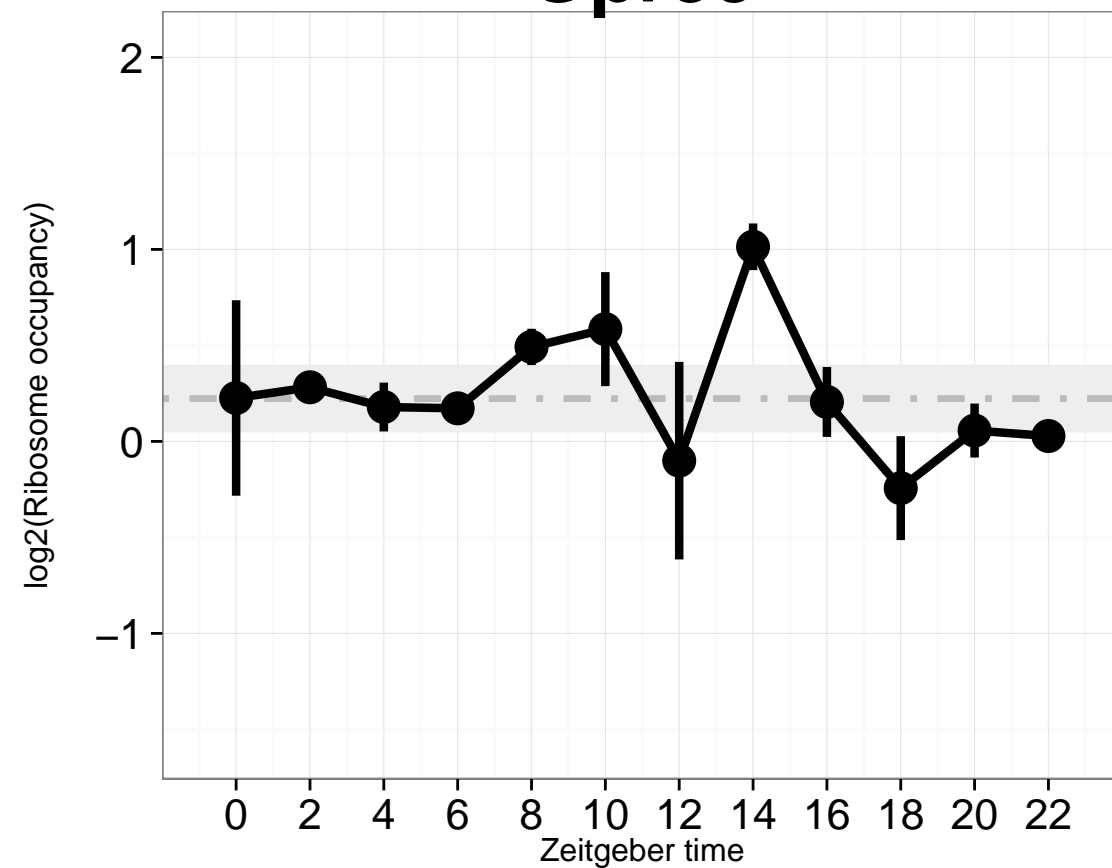

Supplement: Supplementary file 2744 [file 1]

# Ttc37

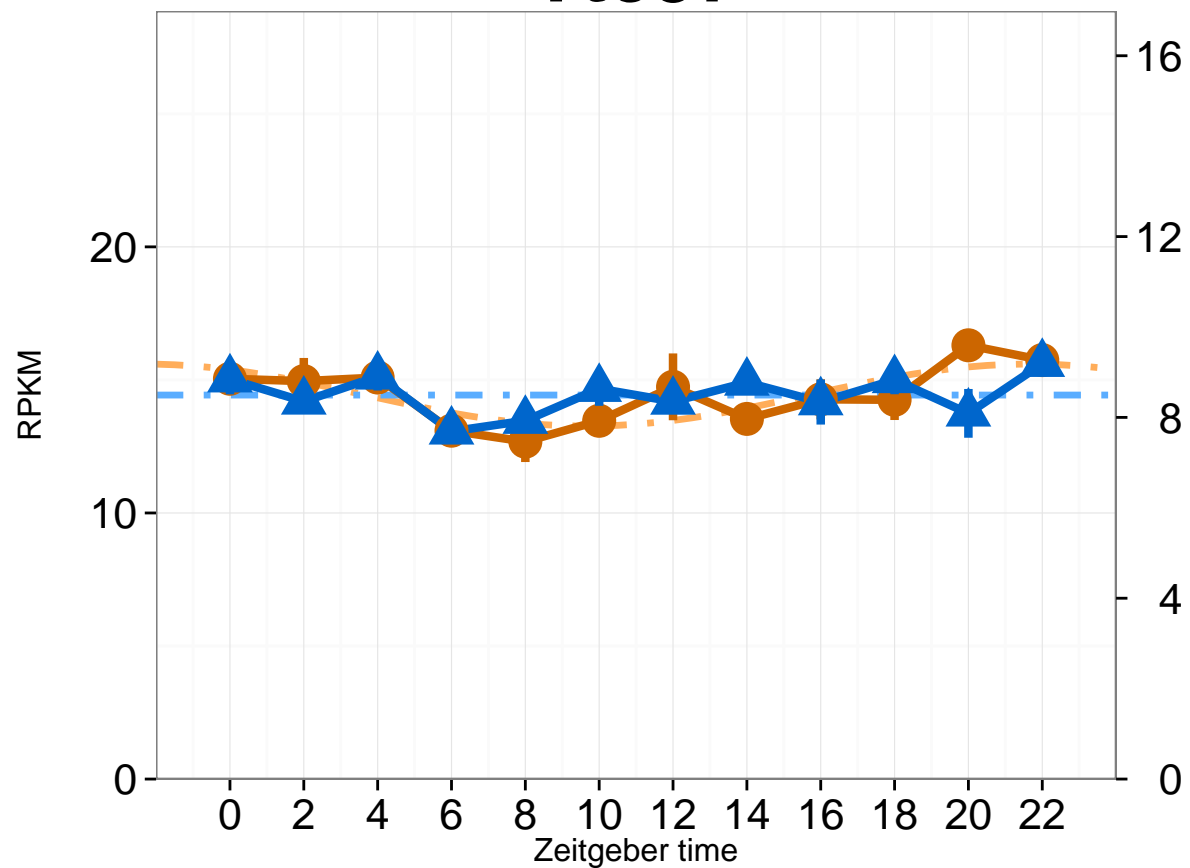

# Ttc37

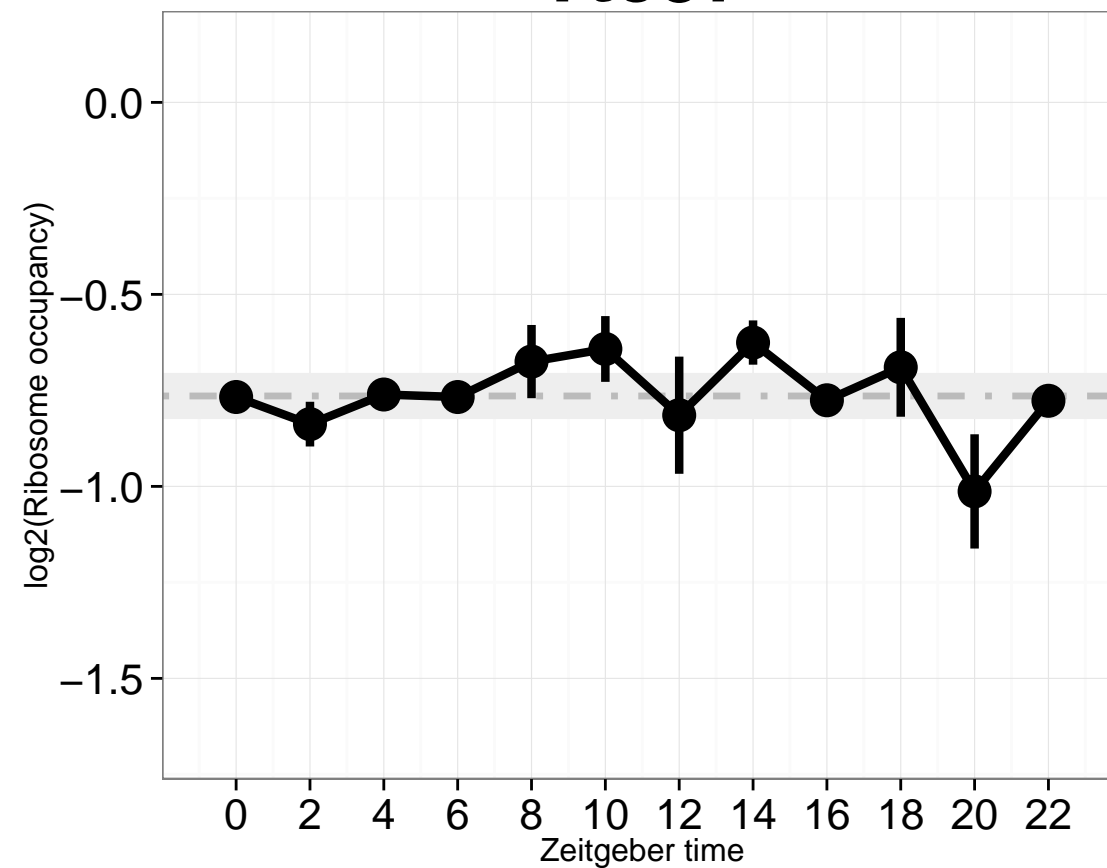

Supplement: Supplementary file 2745 [file 1]

## D7Ertd443e

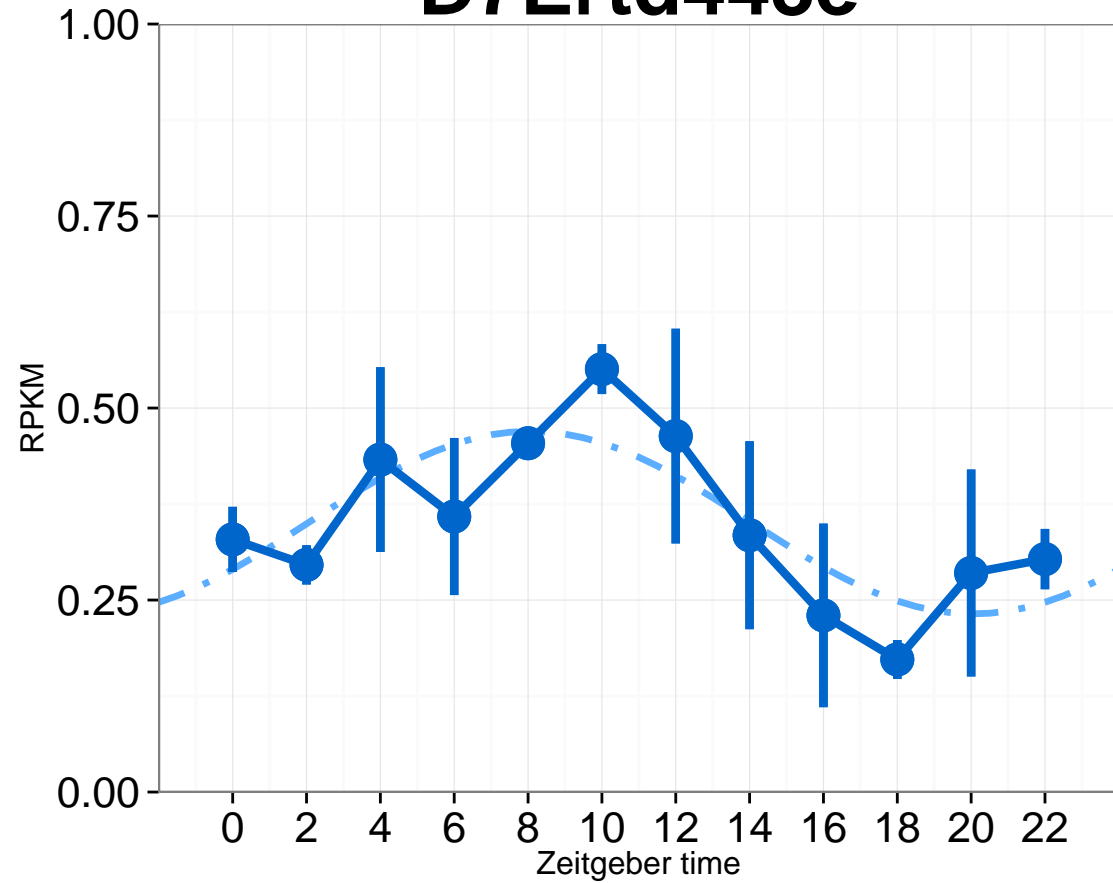

## D7Ertd443e log<sub>2</sub>(Ribosome occupan

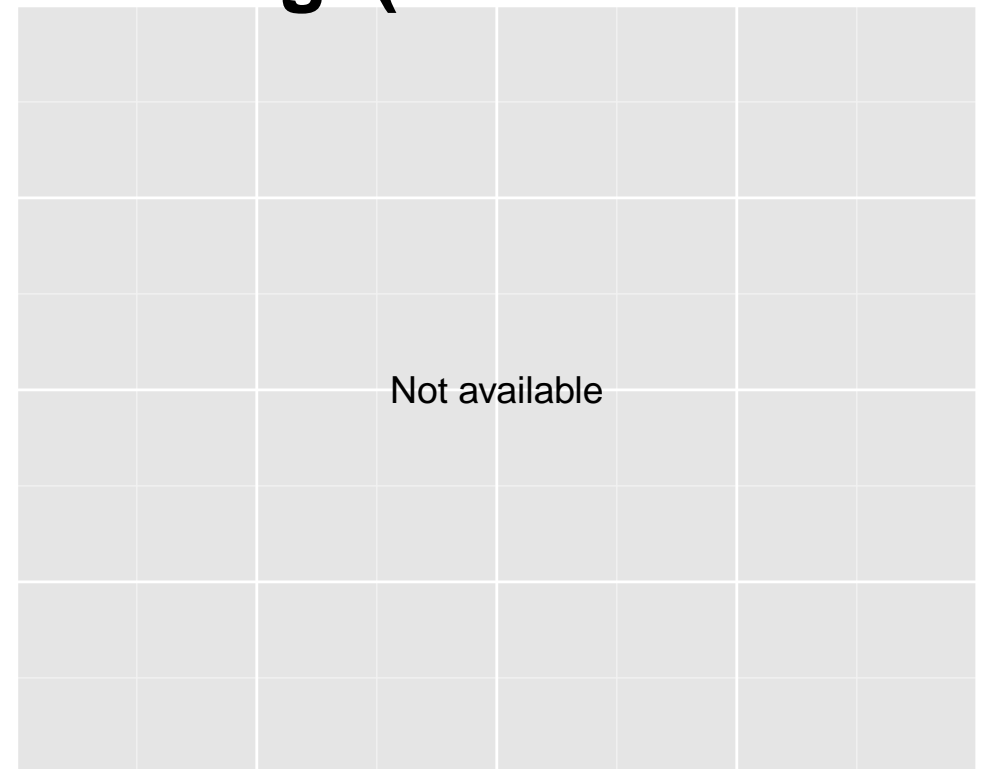

Supplement: Supplementary file 2746 [file 1]

# Avpi1

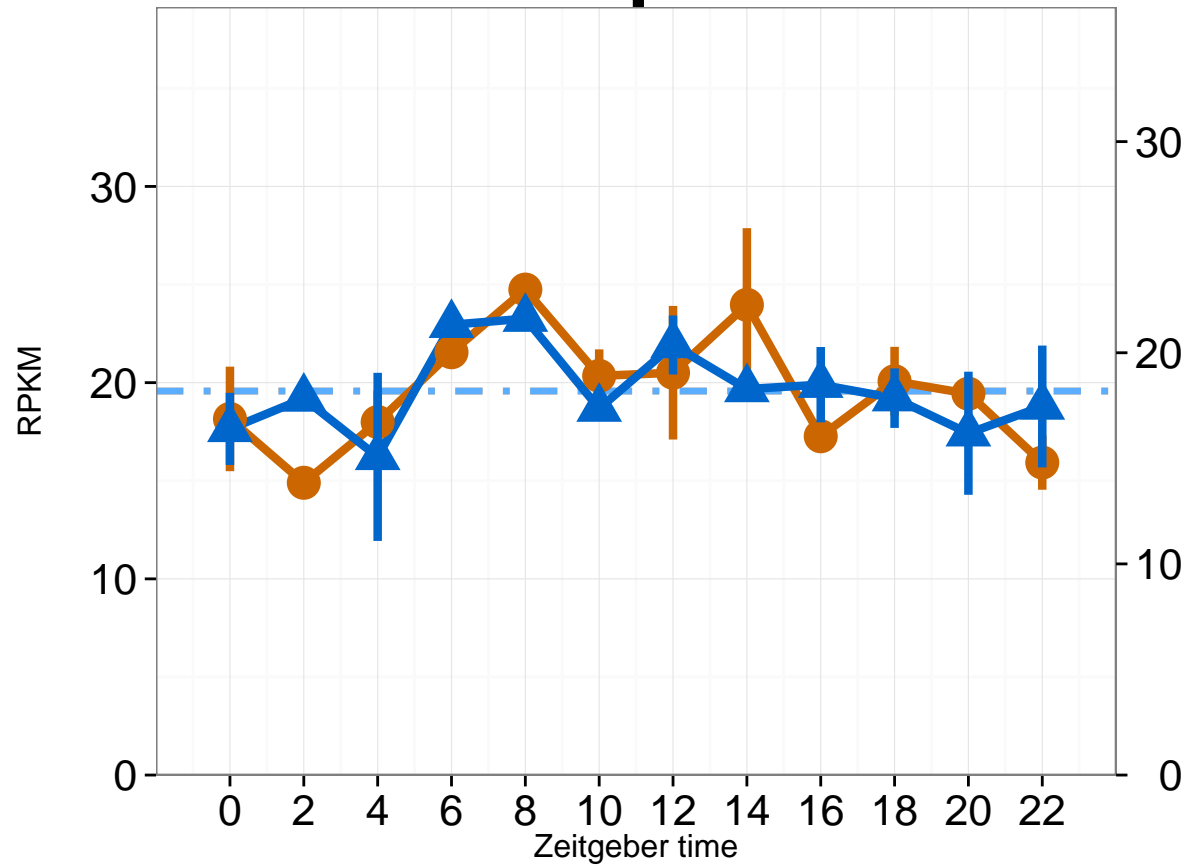

# Avpi1

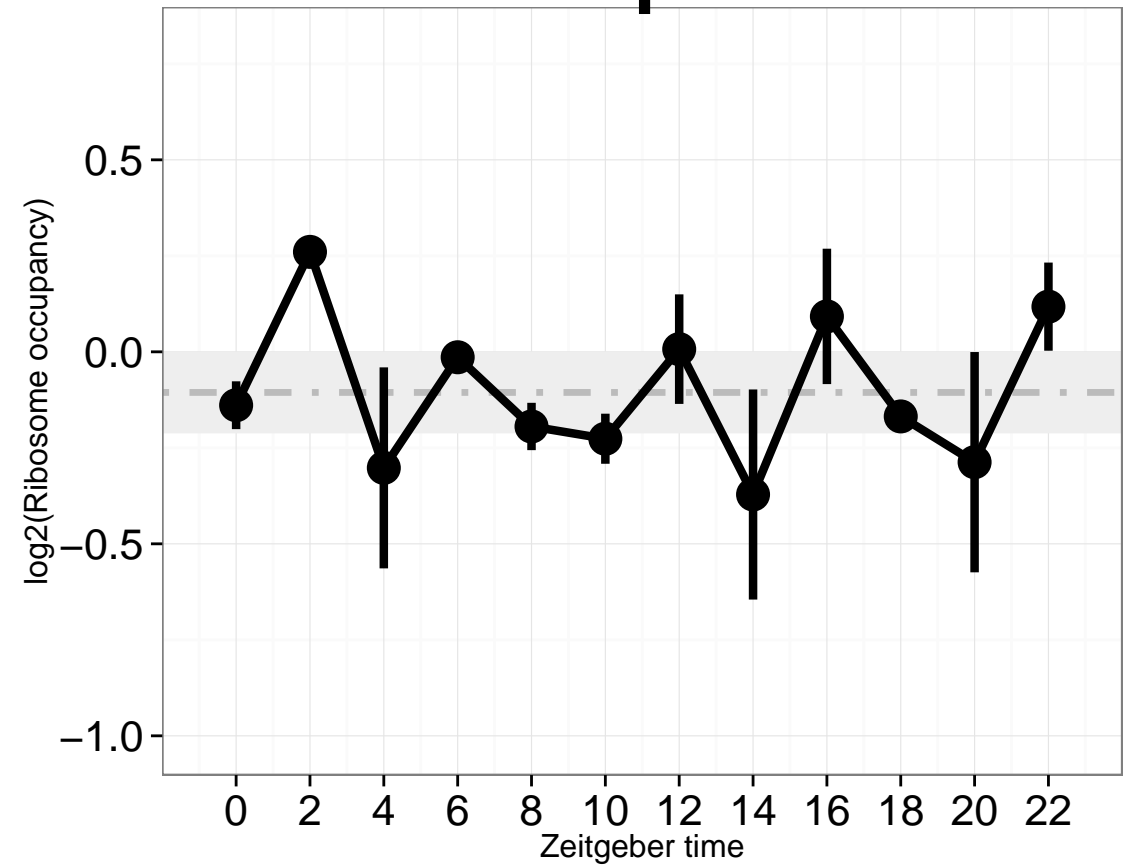

Supplement: Supplementary file 2747 [file 1]

# Gm7325

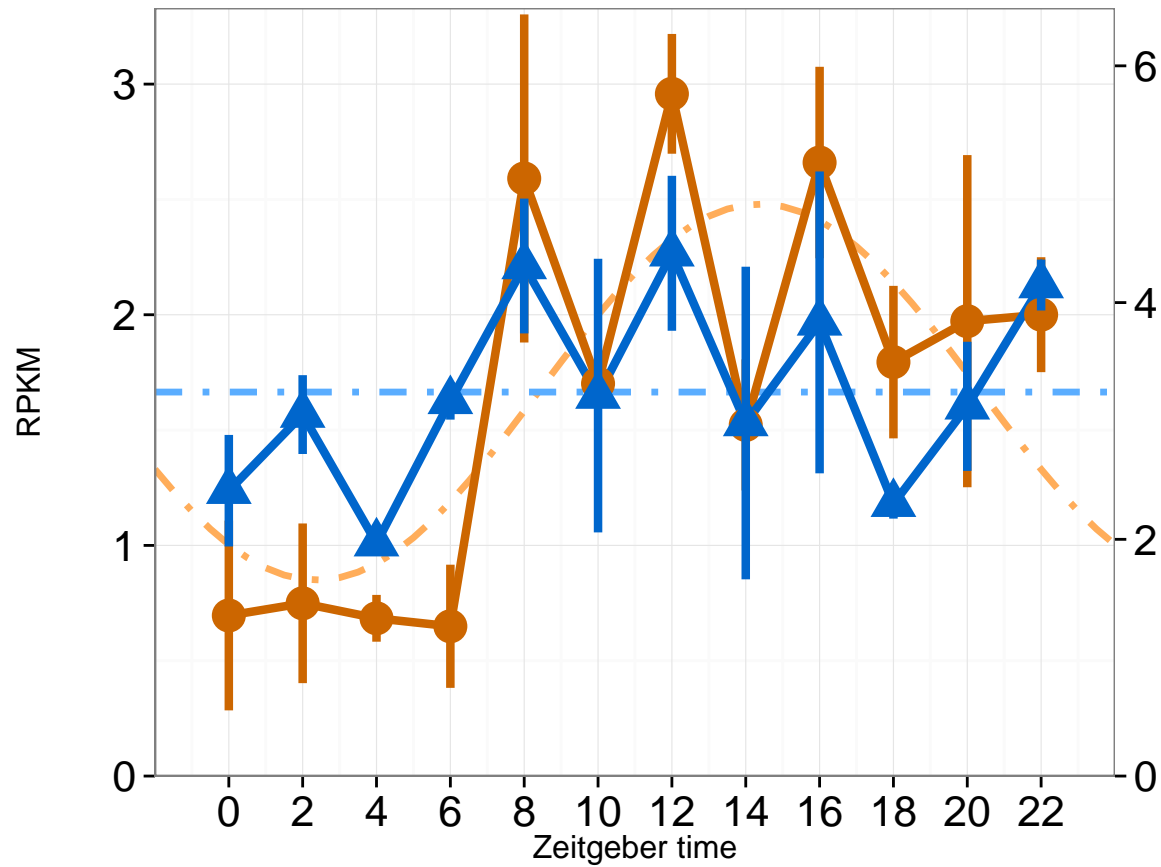

# Gm7325

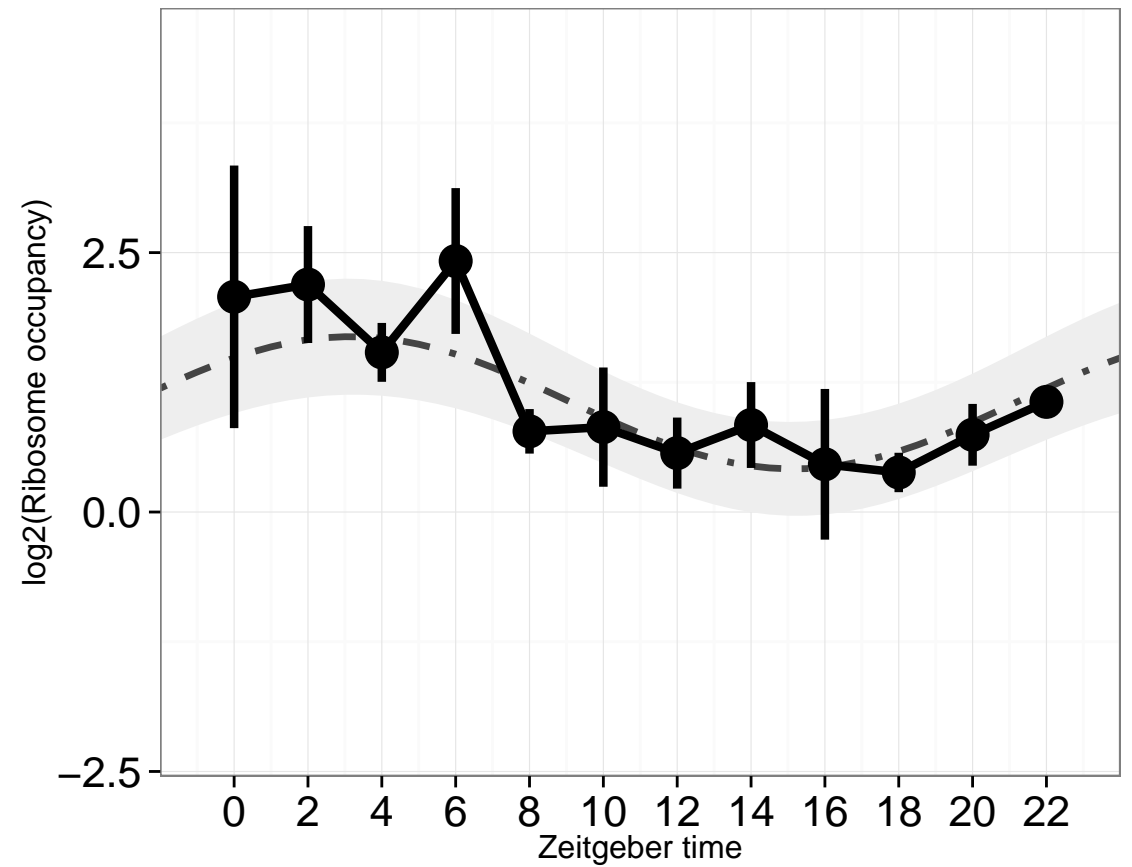

Supplement: Supplementary file 2748 [file 1]

# Ppm1m

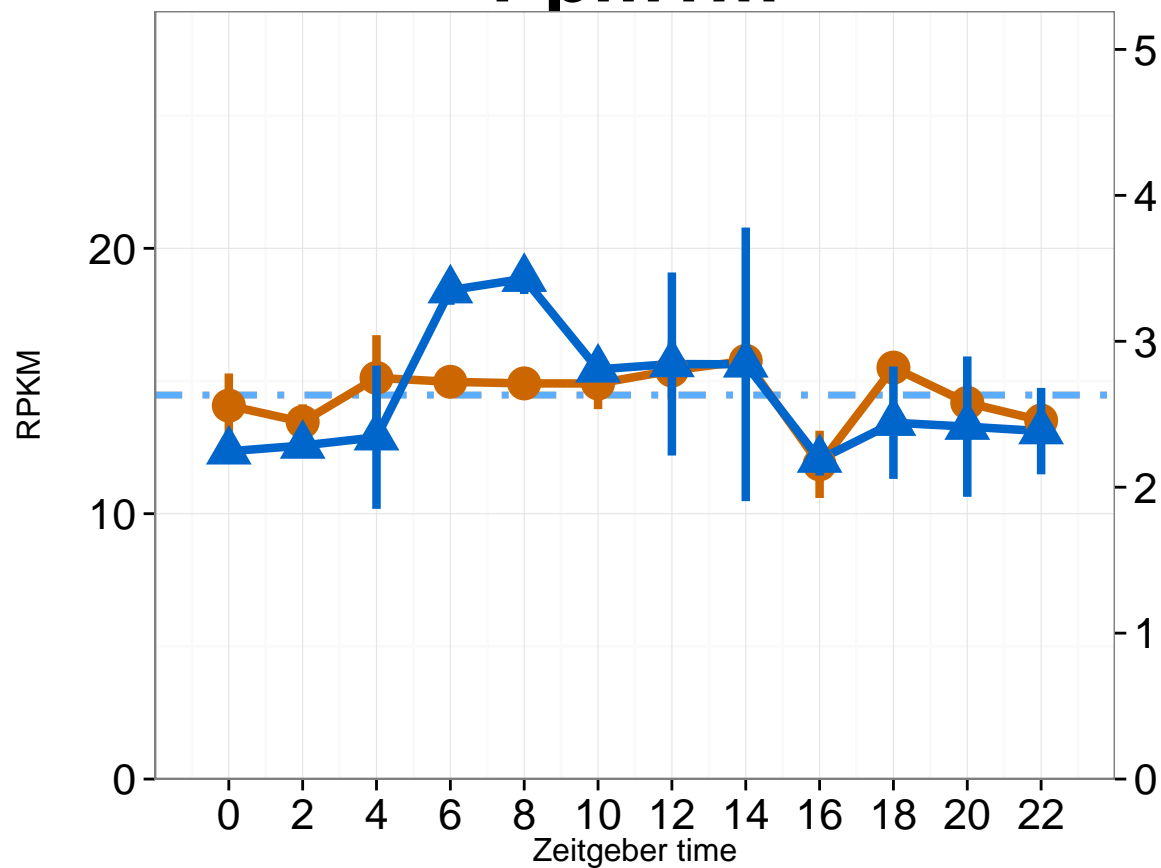

# Ppm1m

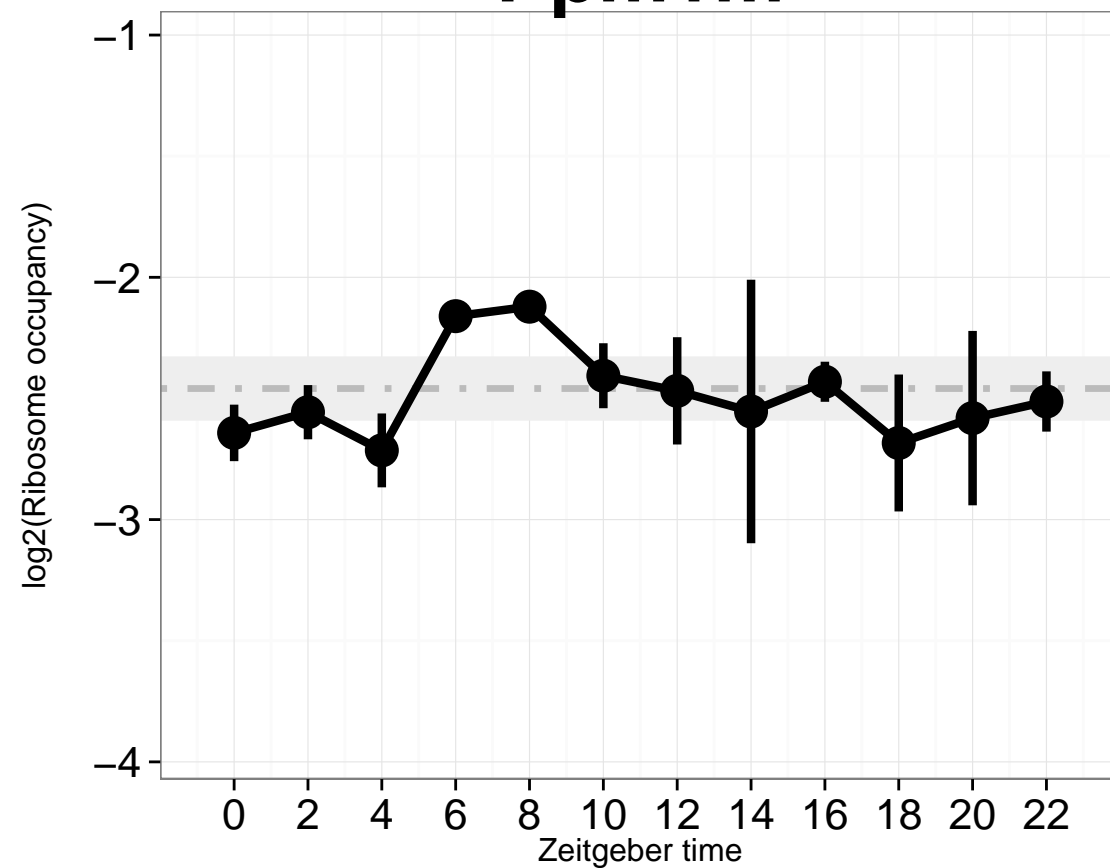

Supplement: Supplementary file 2749 [file 1]

## MiIt4

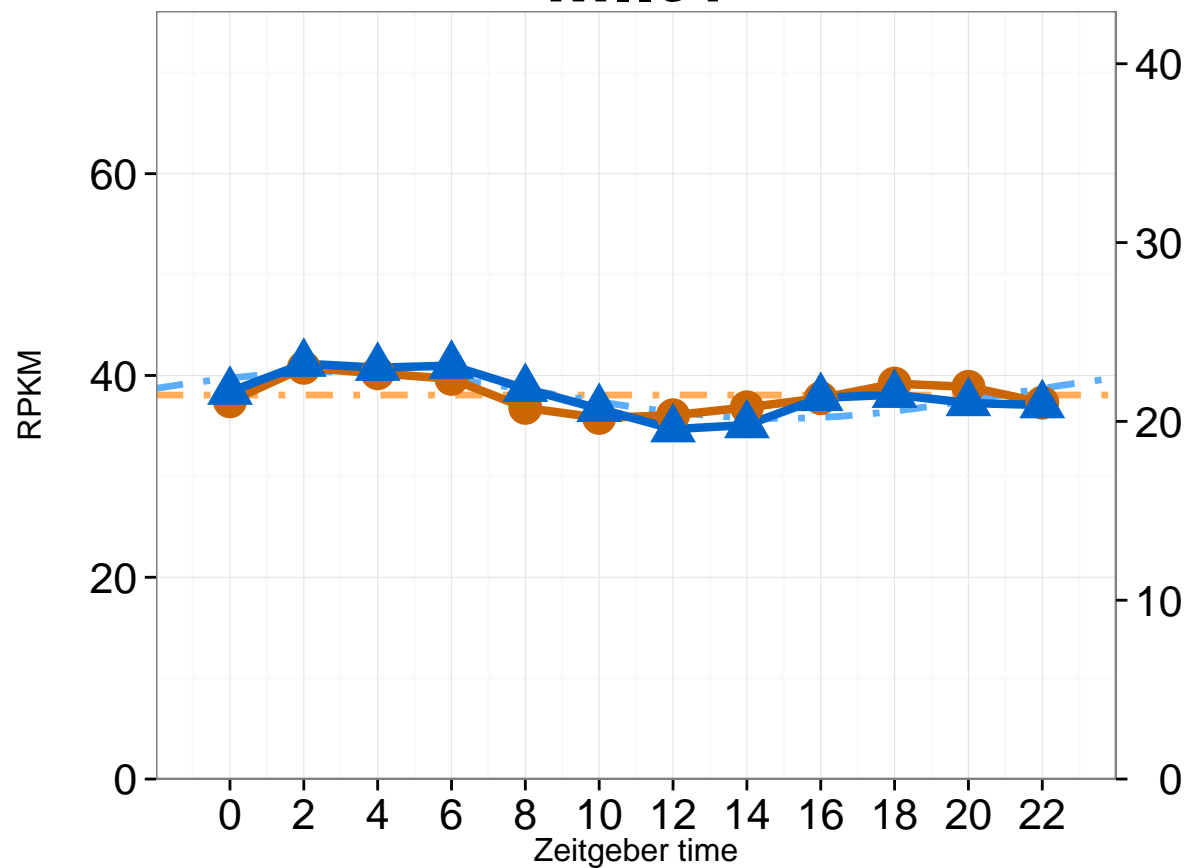

## MiIt4

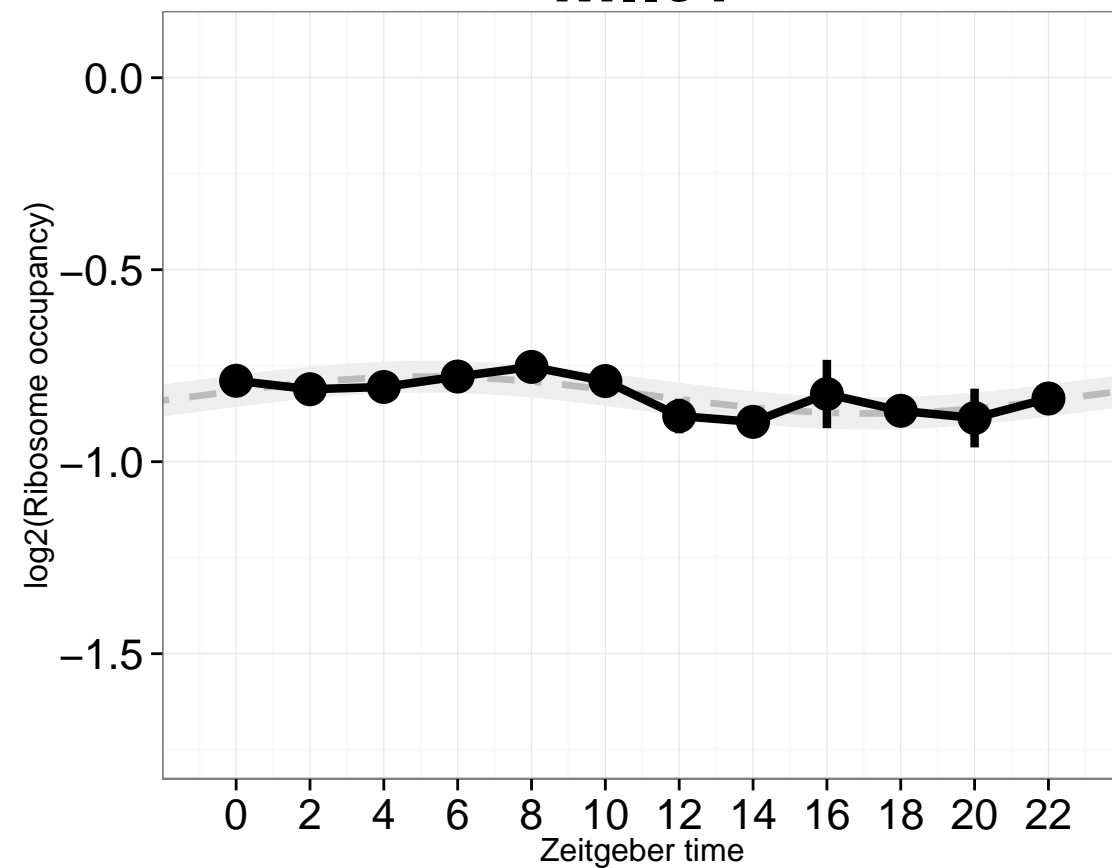

Supplement: Supplementary file 2750 [file 1]

## DII4

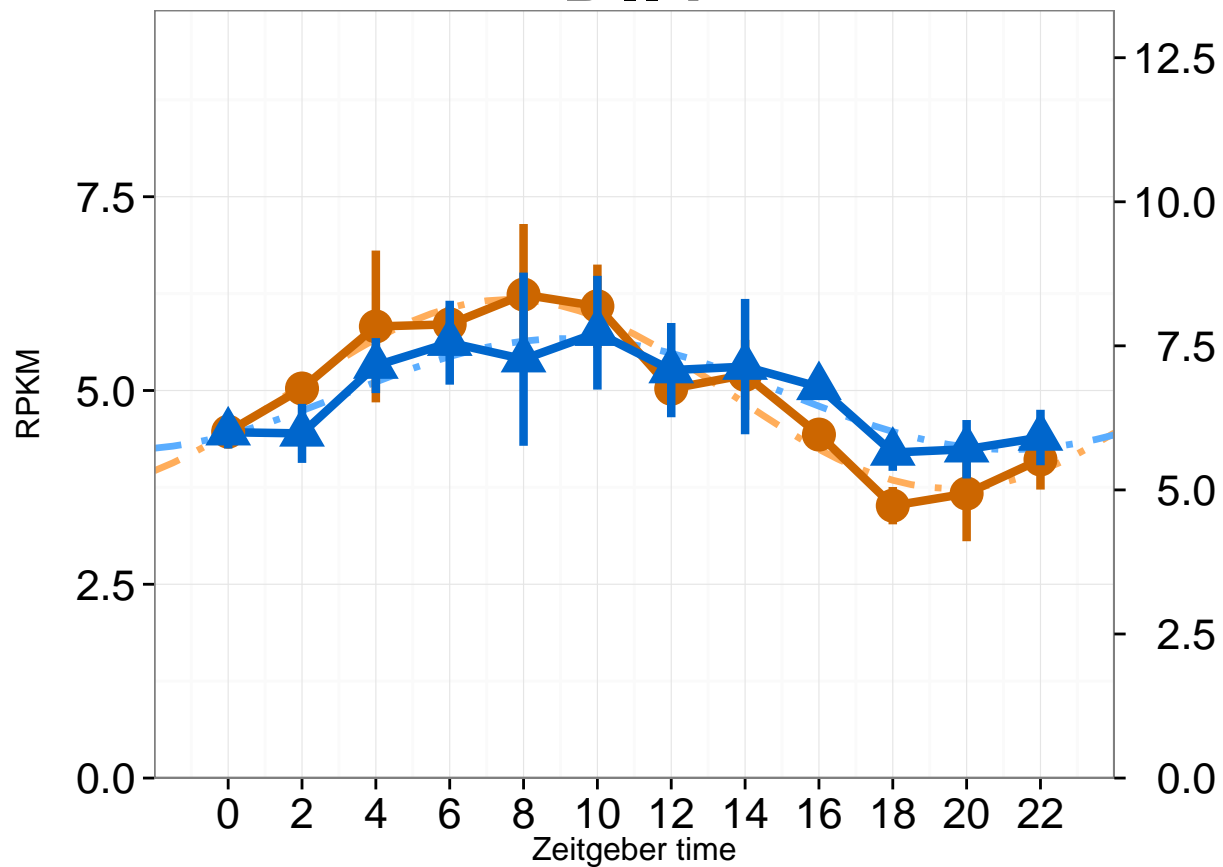

## DII4

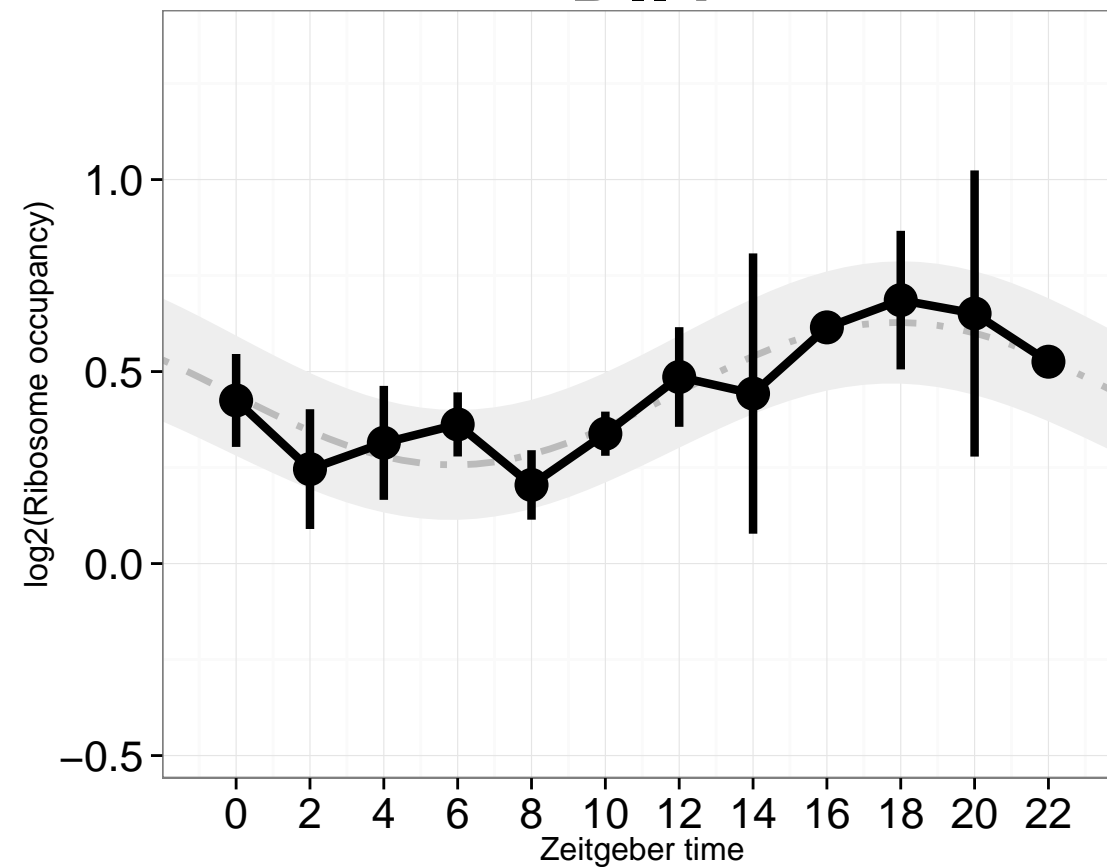

Supplement: Supplementary file 2751 [file 1]

# Stk30

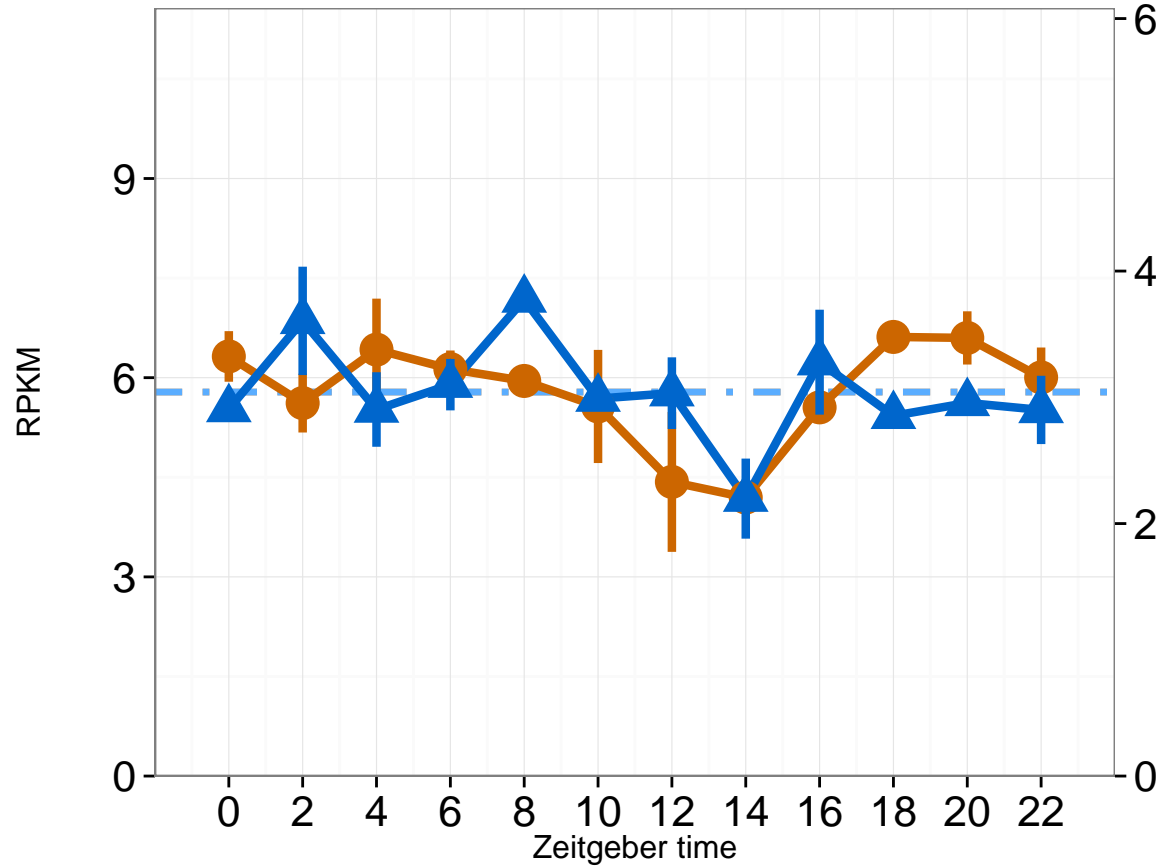

# Stk30

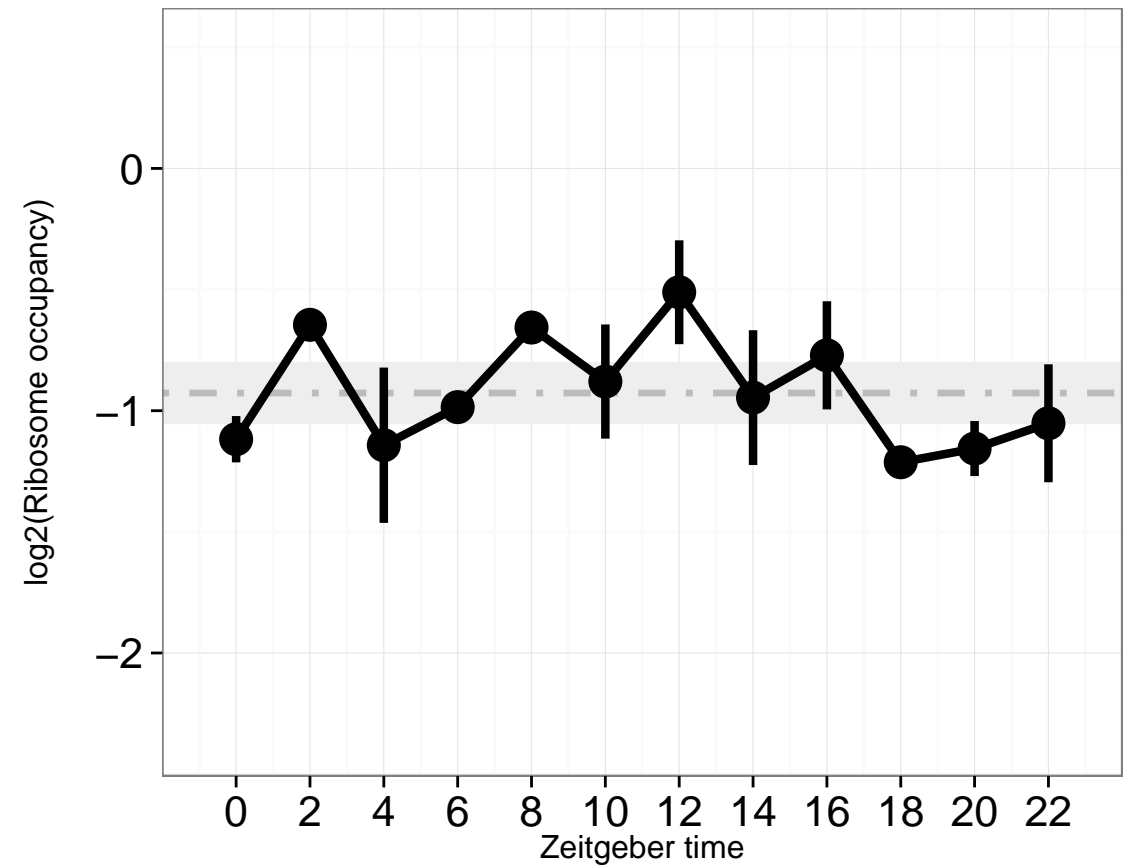

Supplement: Supplementary file 2752 [file 1]

# Pi4k2b

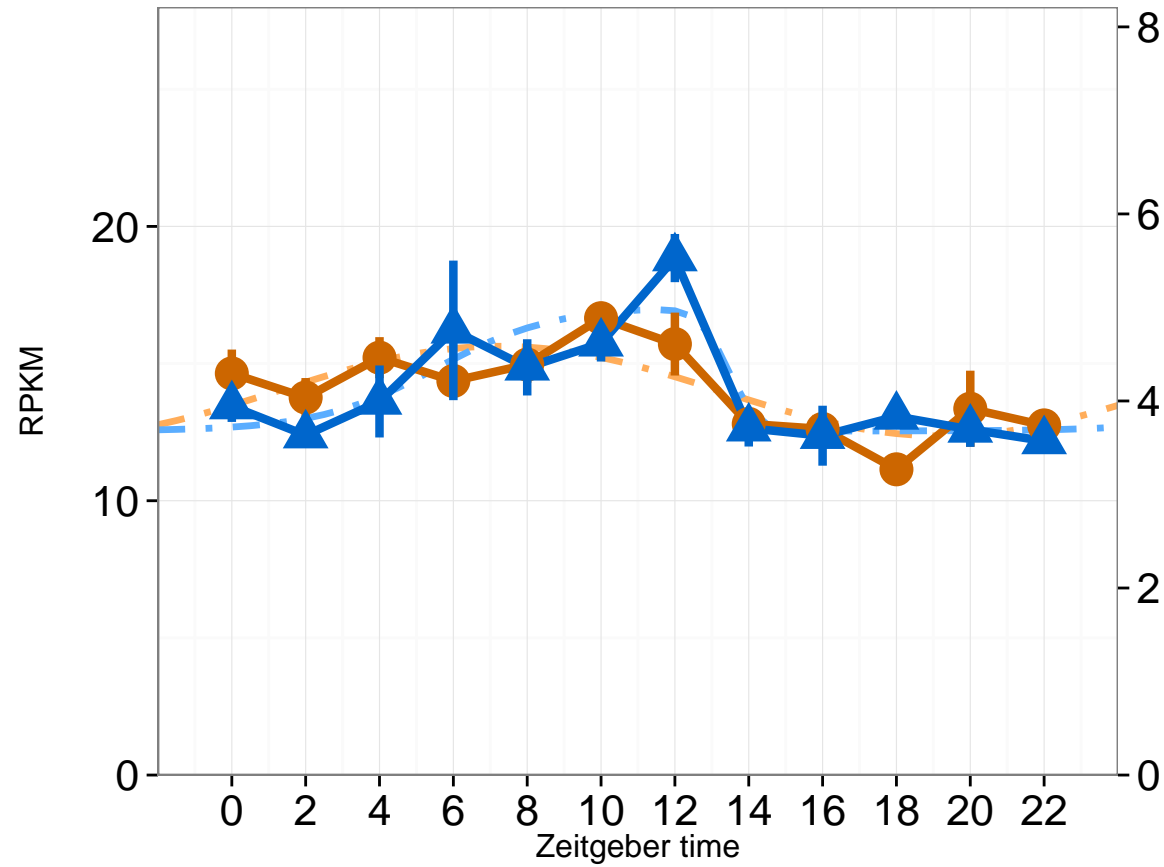

# Pi4k2b

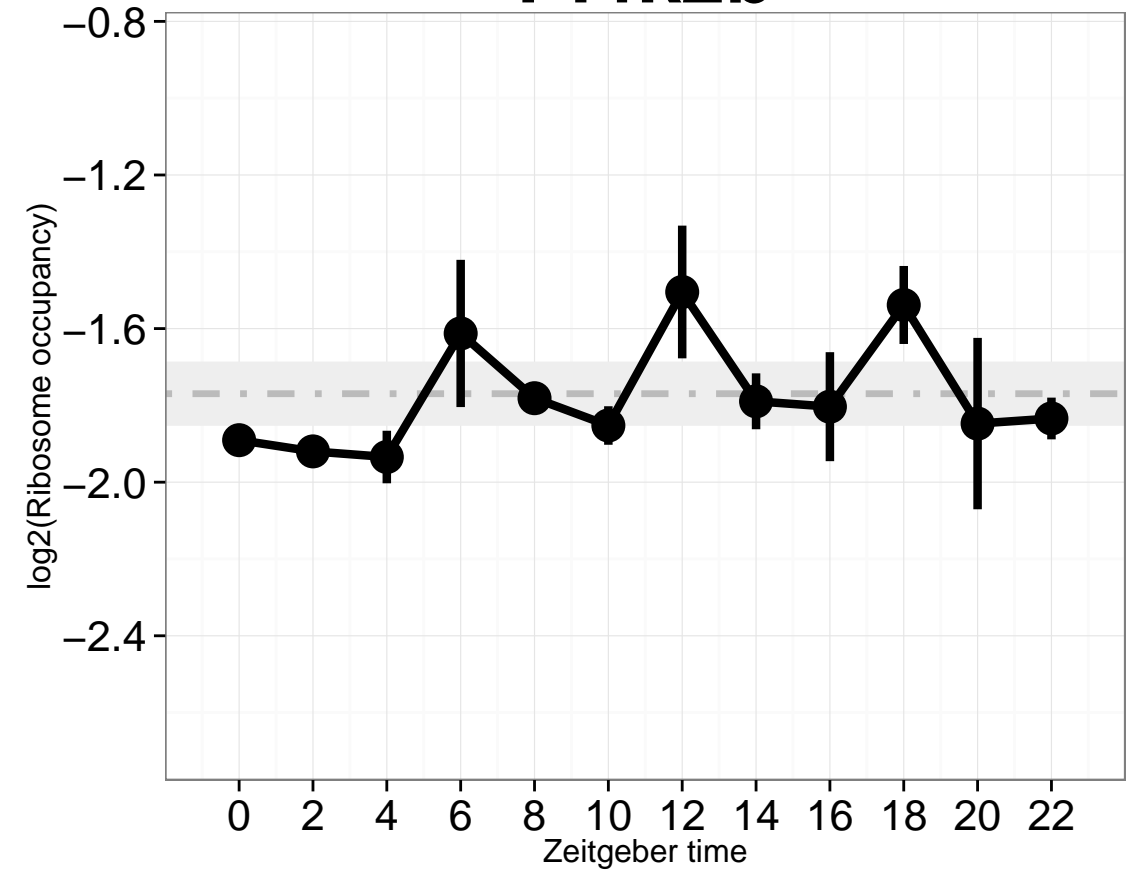

Supplement: Supplementary file 2753 [file 1]

# Rftn1

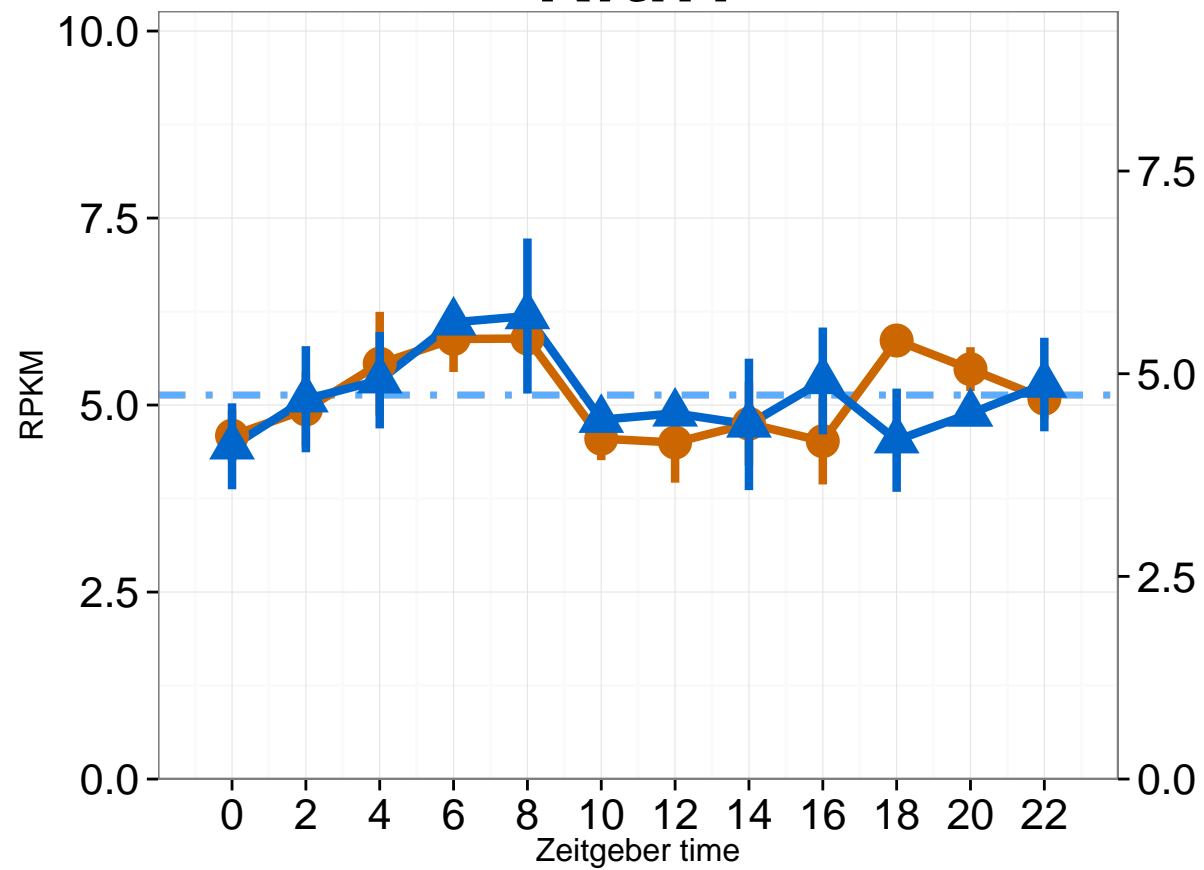

# Rftn1

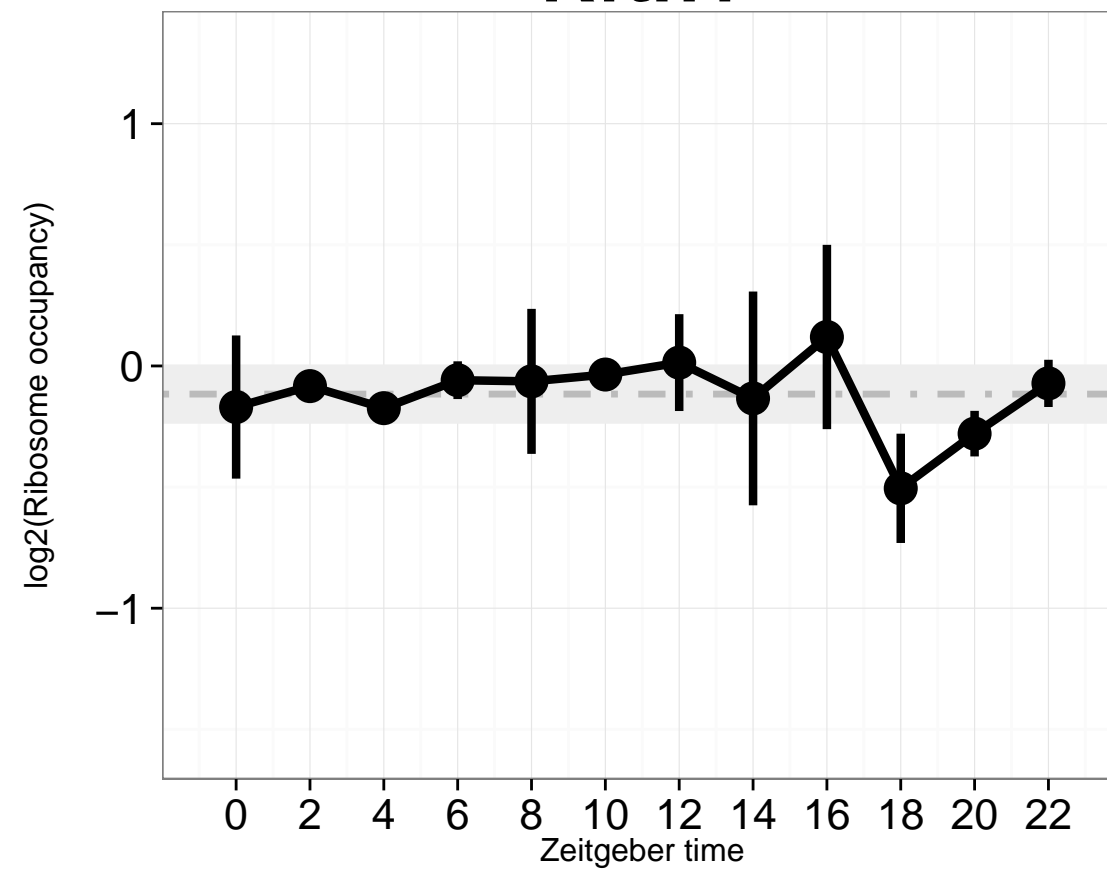

Supplement: Supplementary file 2754 [file 1]

# Pard6a

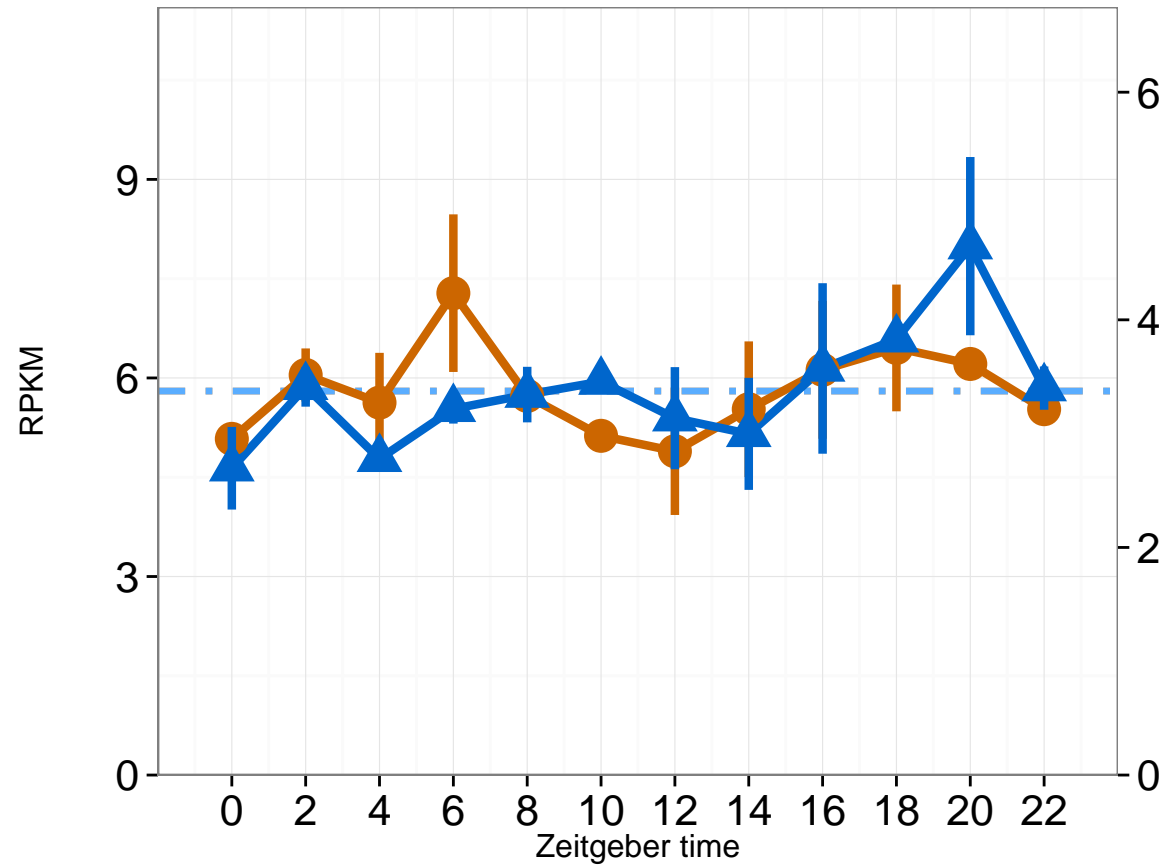

# Pard6a

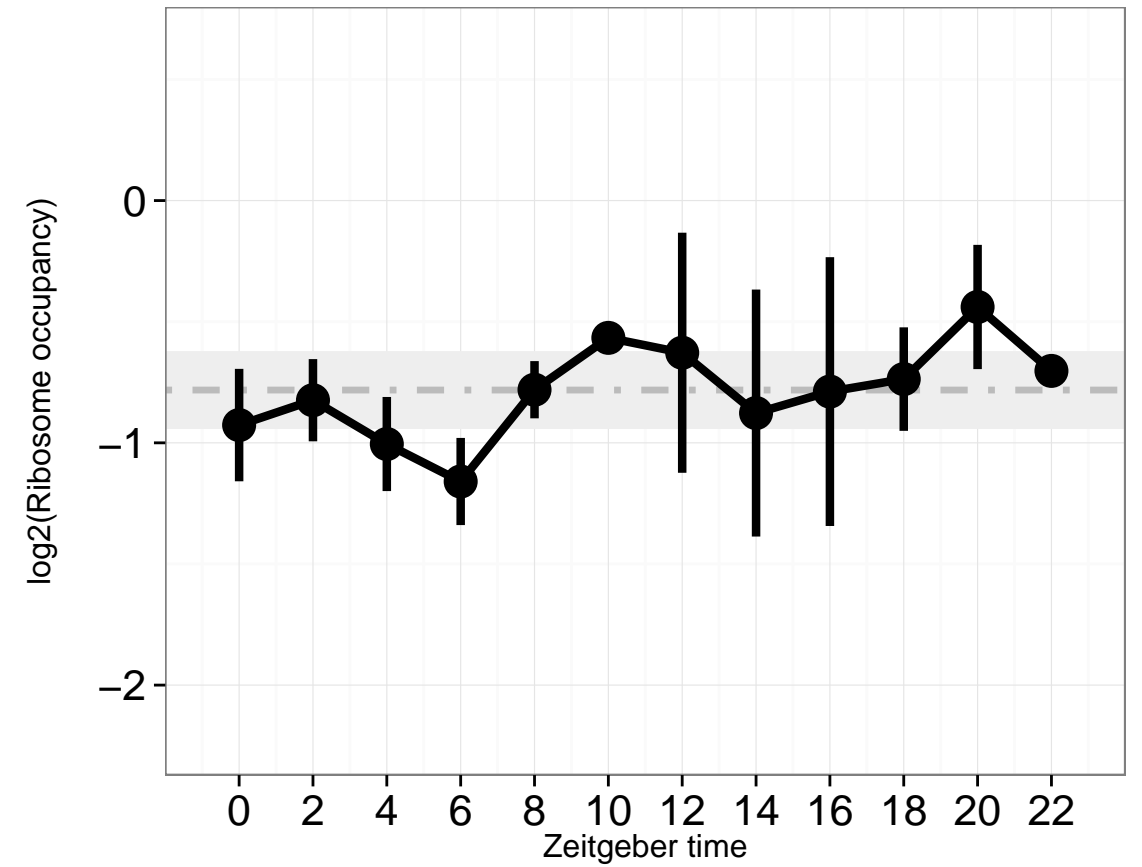

Supplement: Supplementary file 2755 [file 1]

## Prdm5

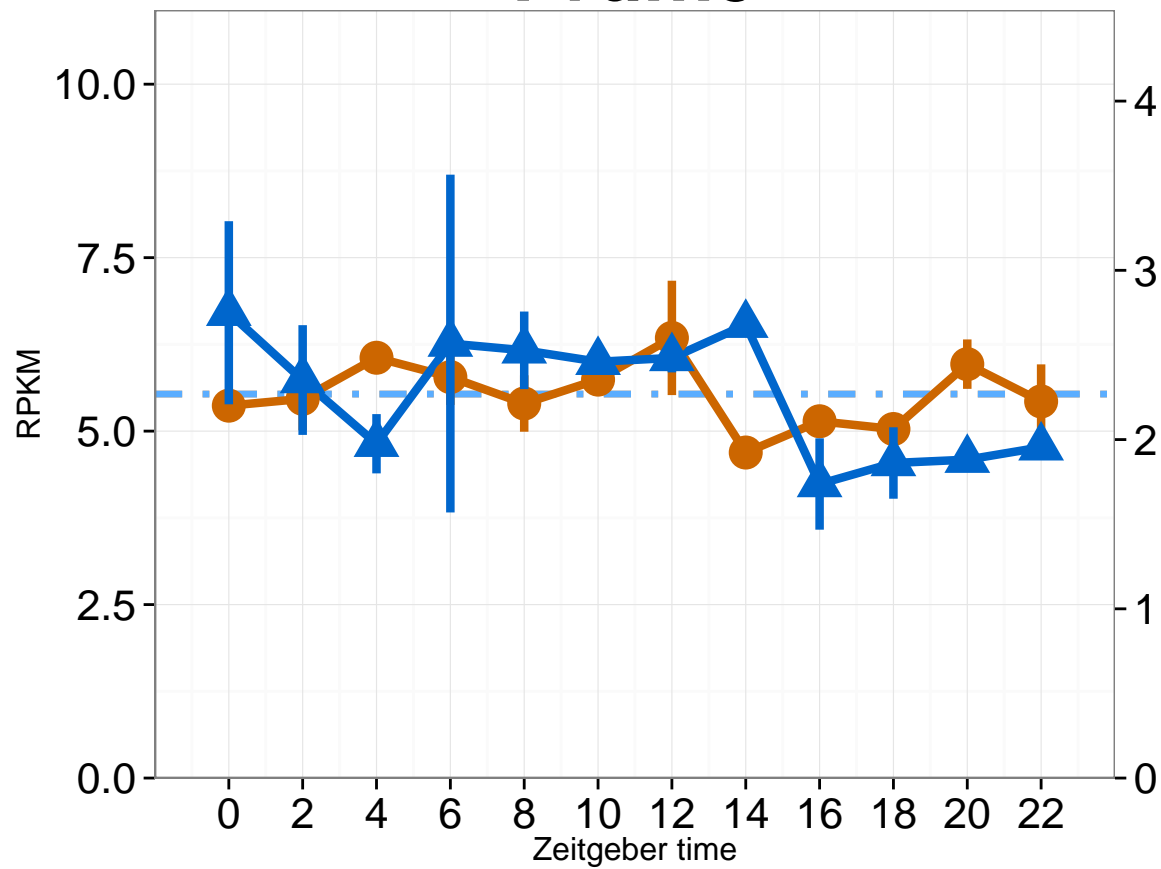

## Prdm5

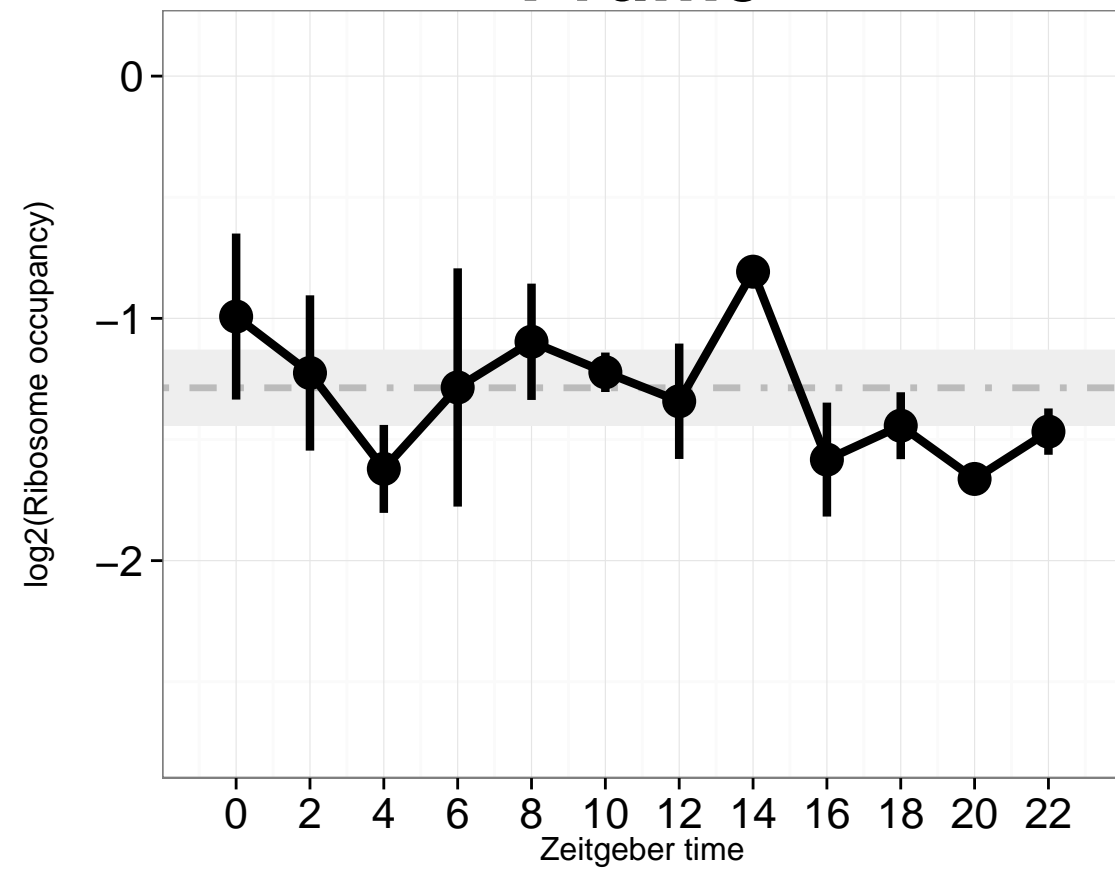

Supplement: Supplementary file 2756 [file 1]

# Cry1

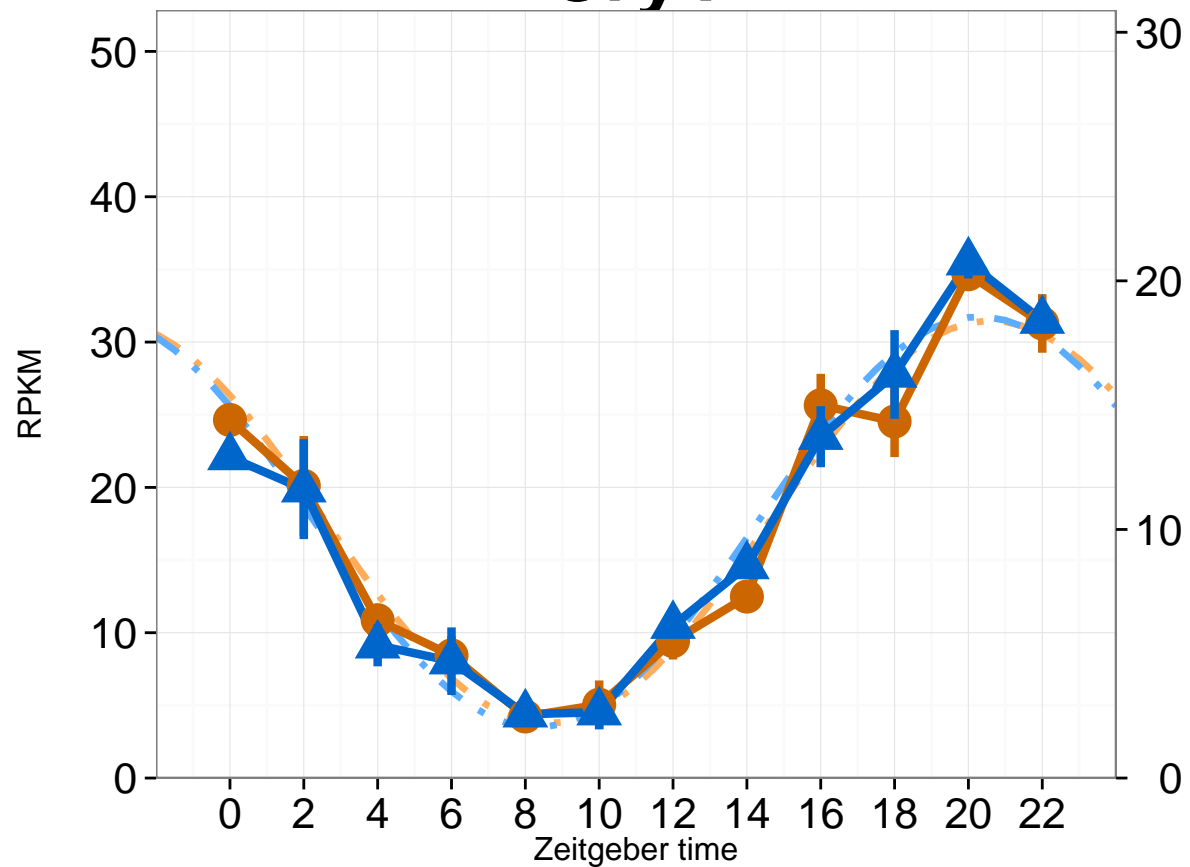

# Cry1

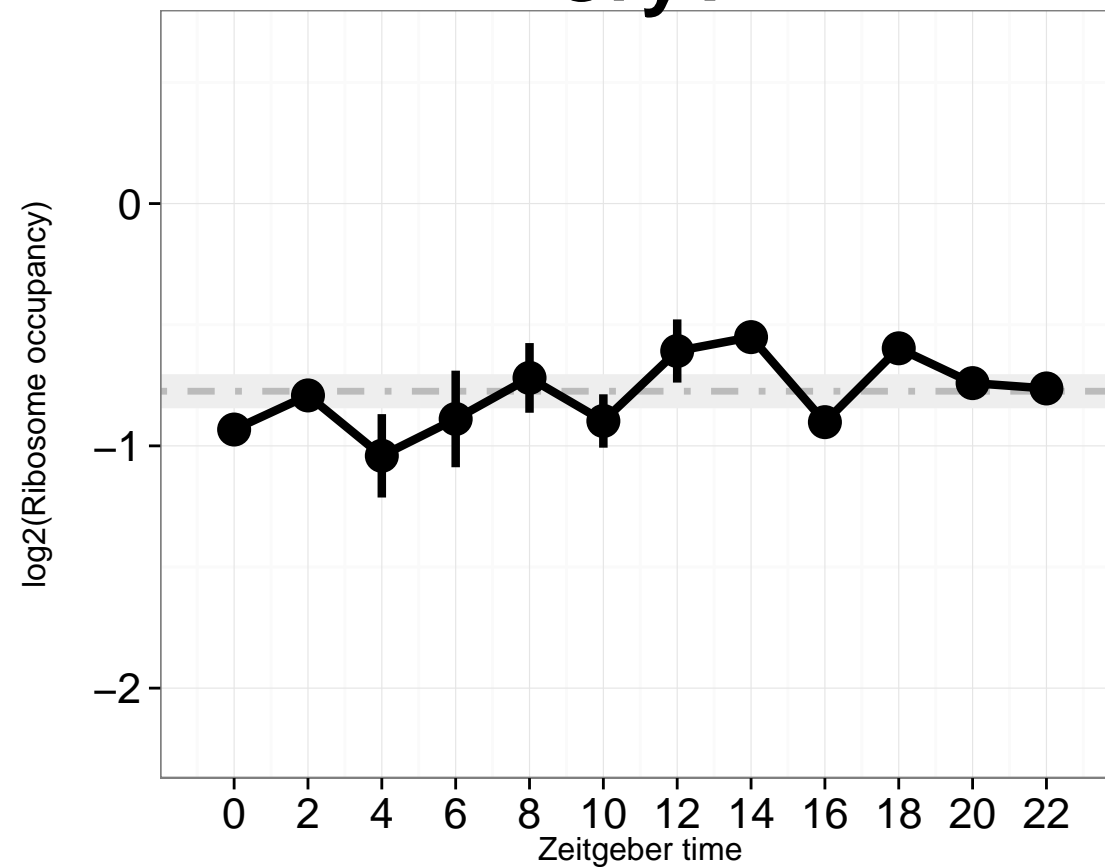

Supplement: Supplementary file 2757 [file 1]

## Skp2

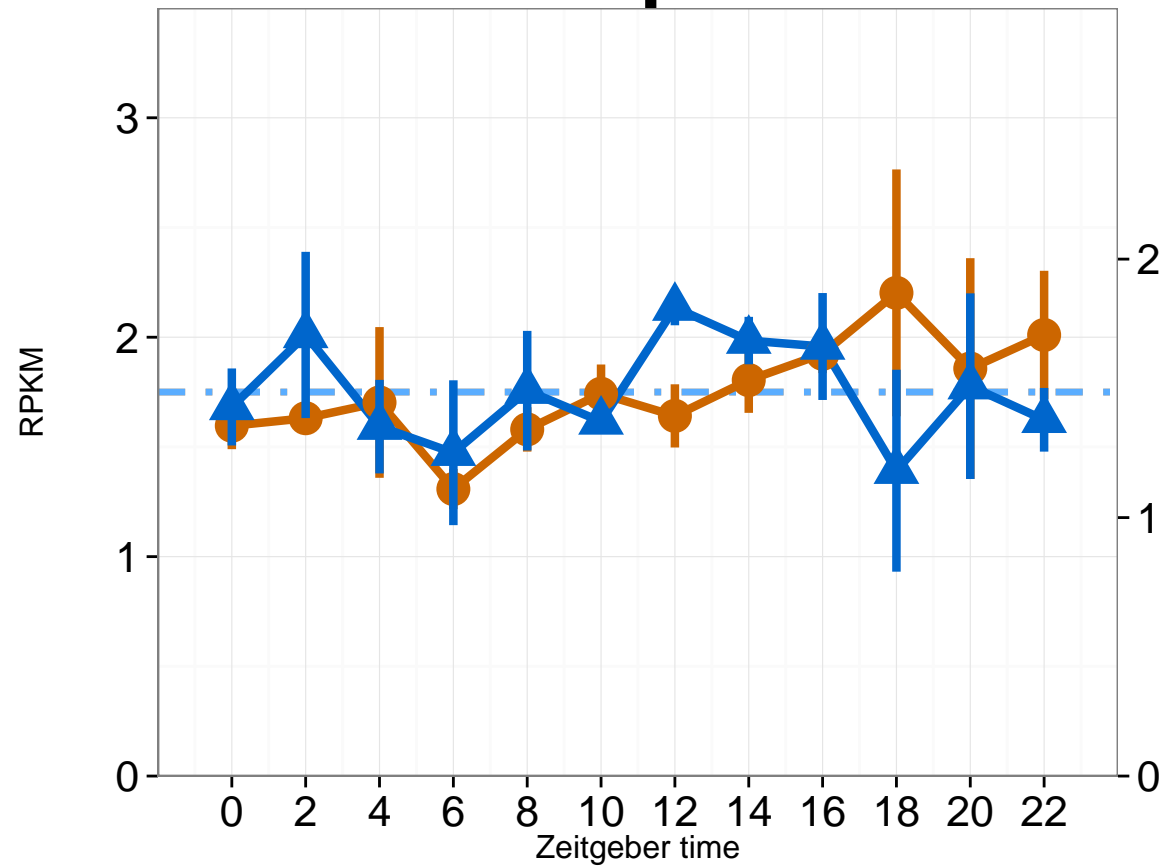

## Skp2

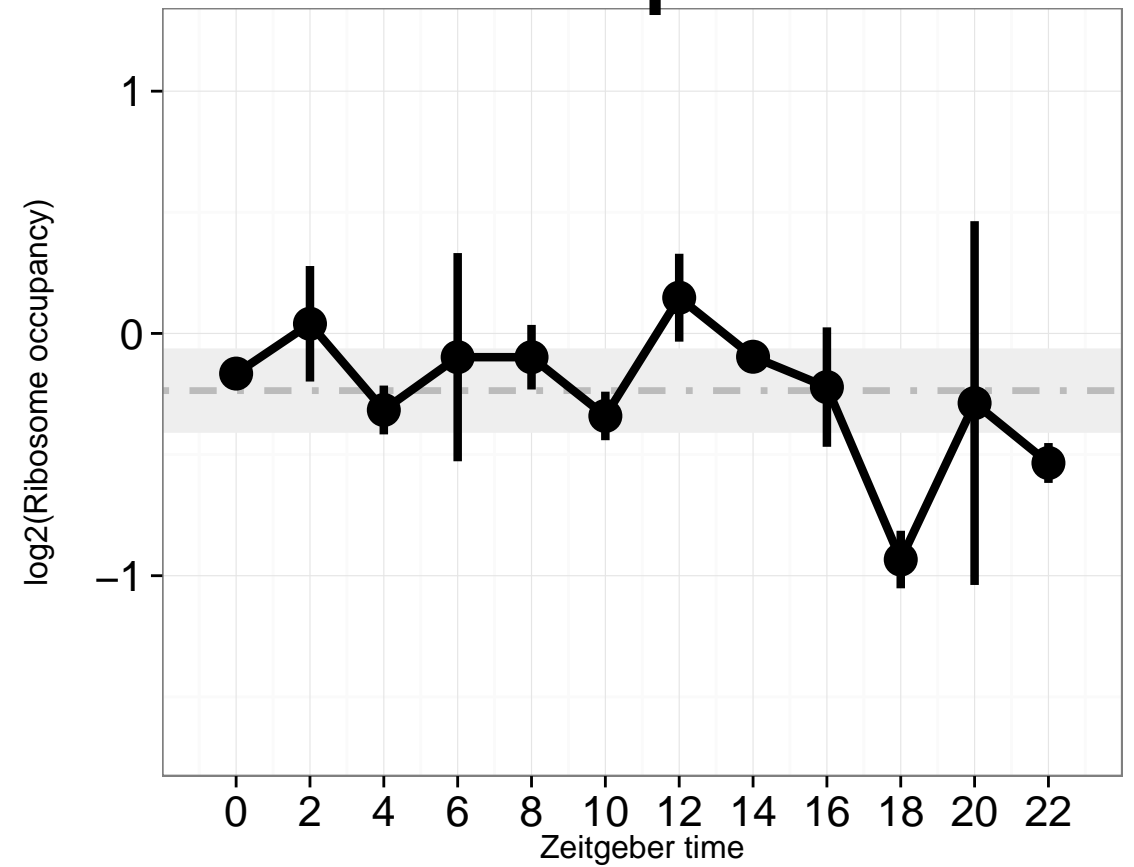

Supplement: Supplementary file 2758 [file 1]

# Agtr1a

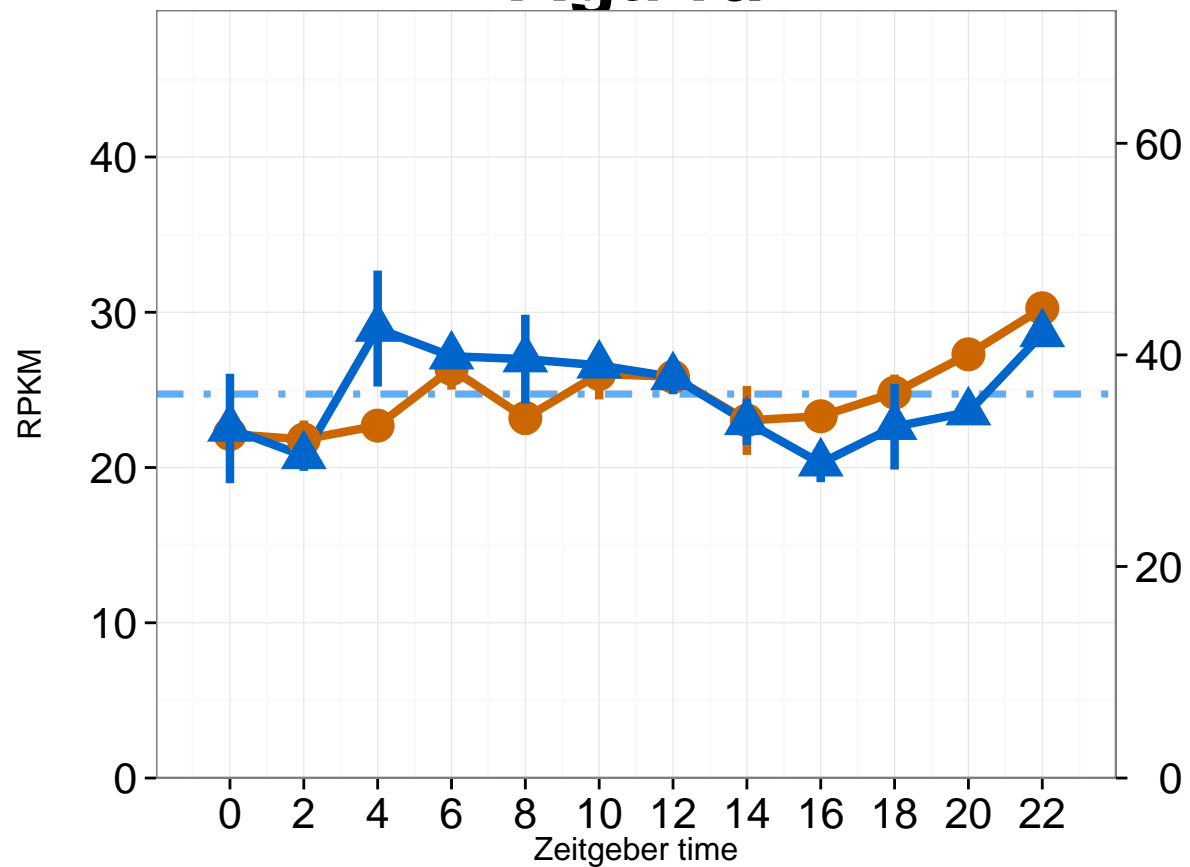

# Agtr1a

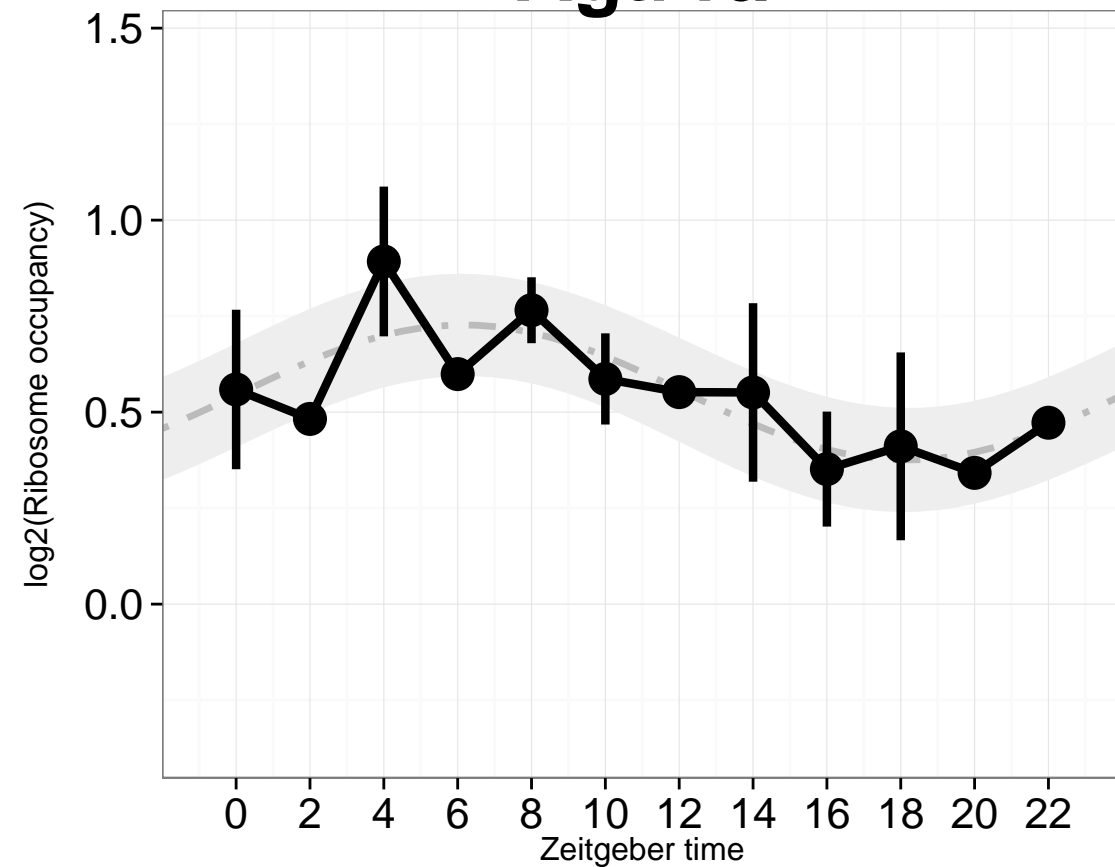

Supplement: Supplementary file 2759 [file 1]

## Mest

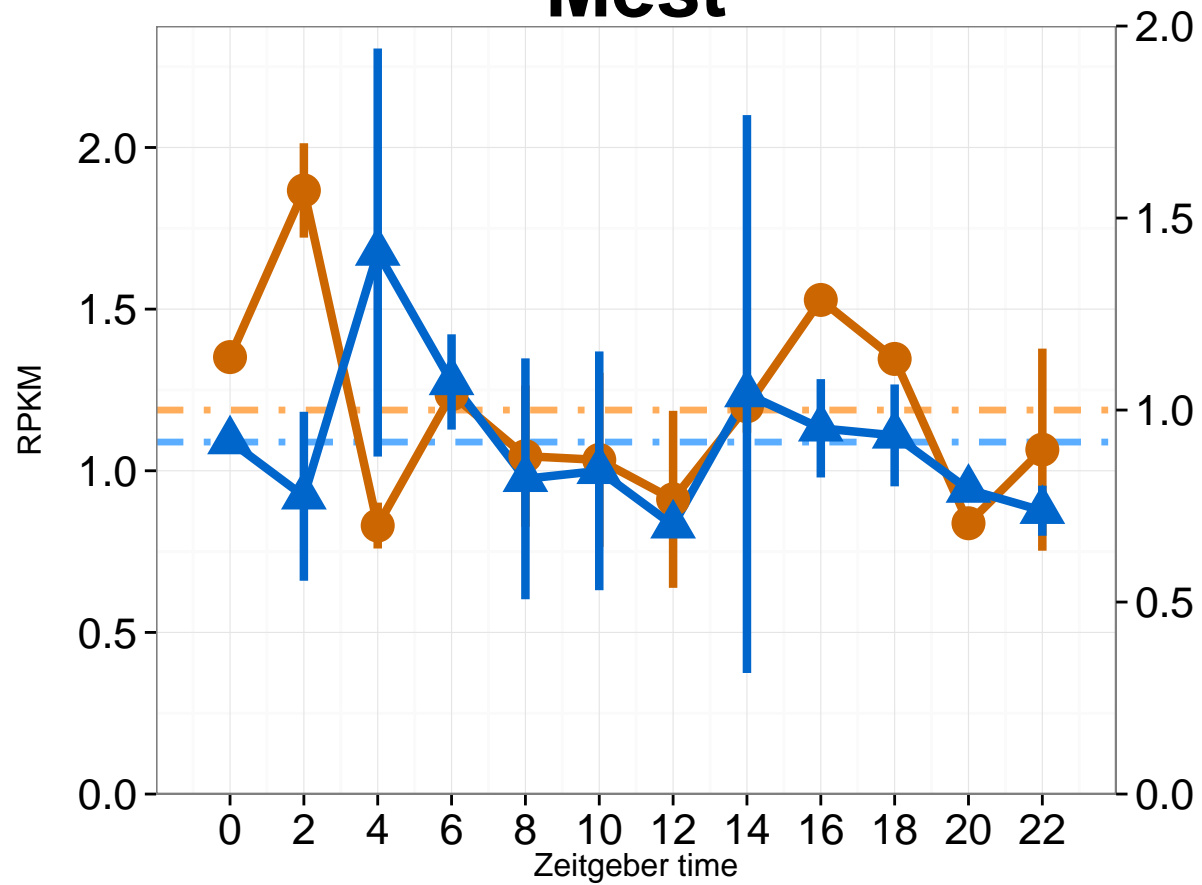

## Mest

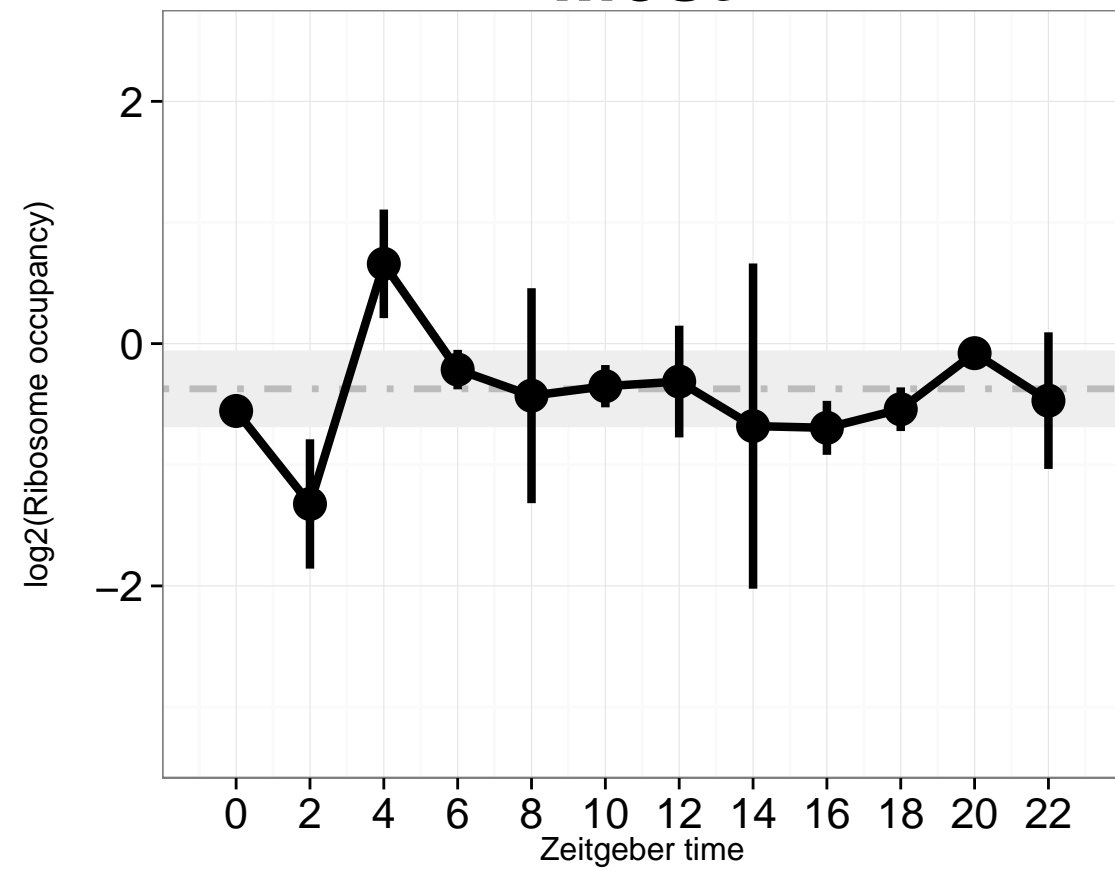

Supplement: Supplementary file 2760 [file 1]

# Zc3h12d

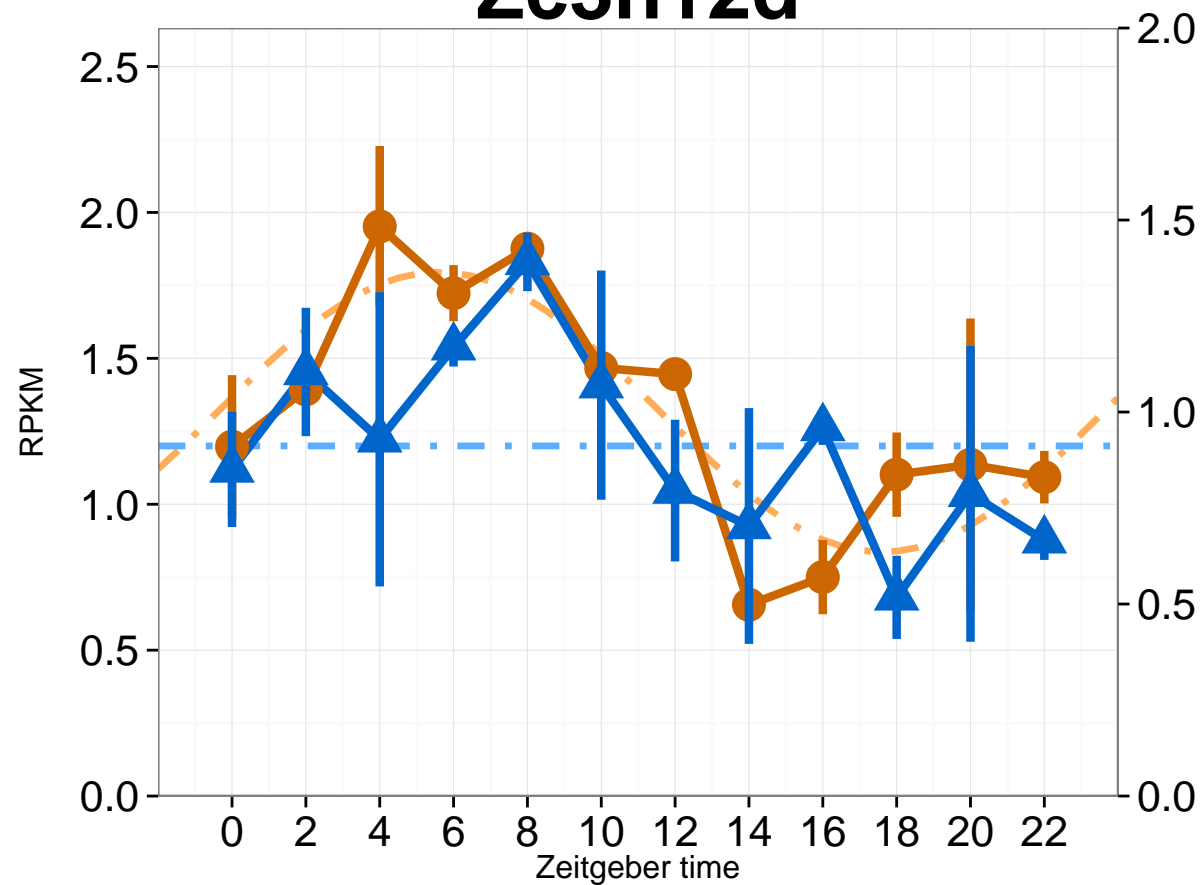

# Zc3h12d

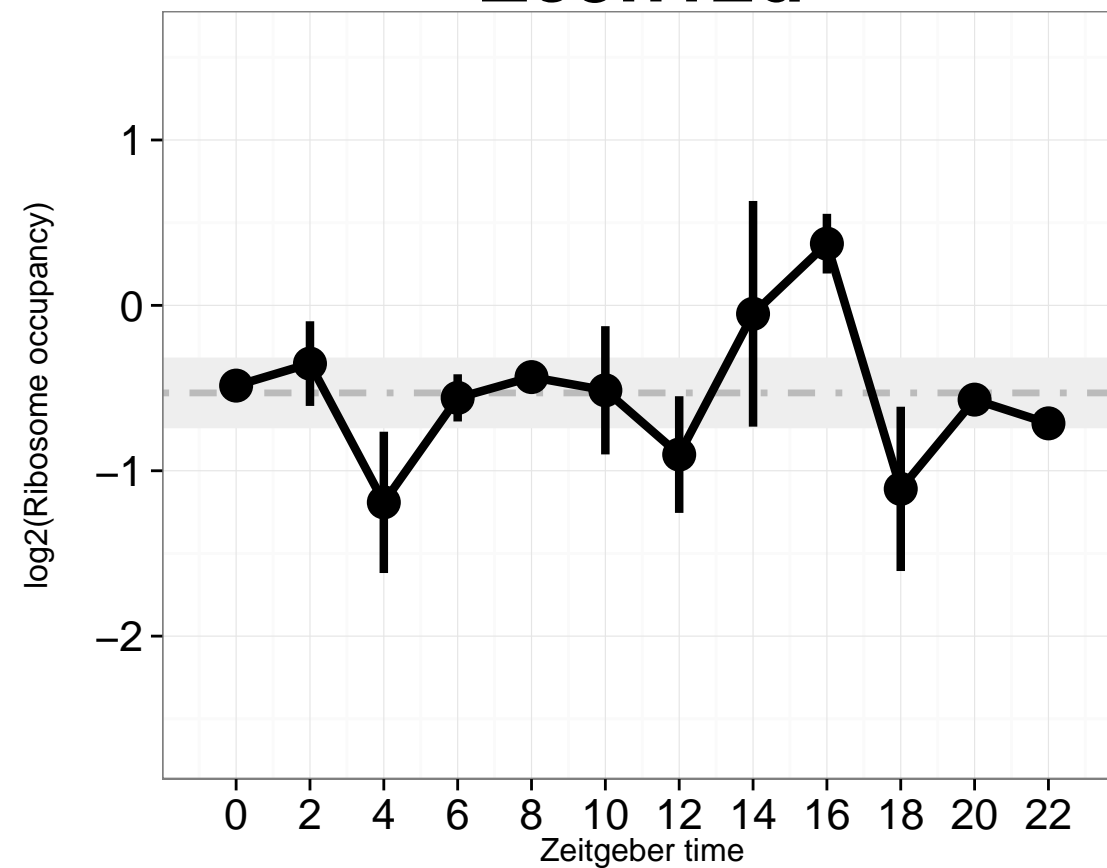

Supplement: Supplementary file 2761 [file 1]

# Hbb-bt

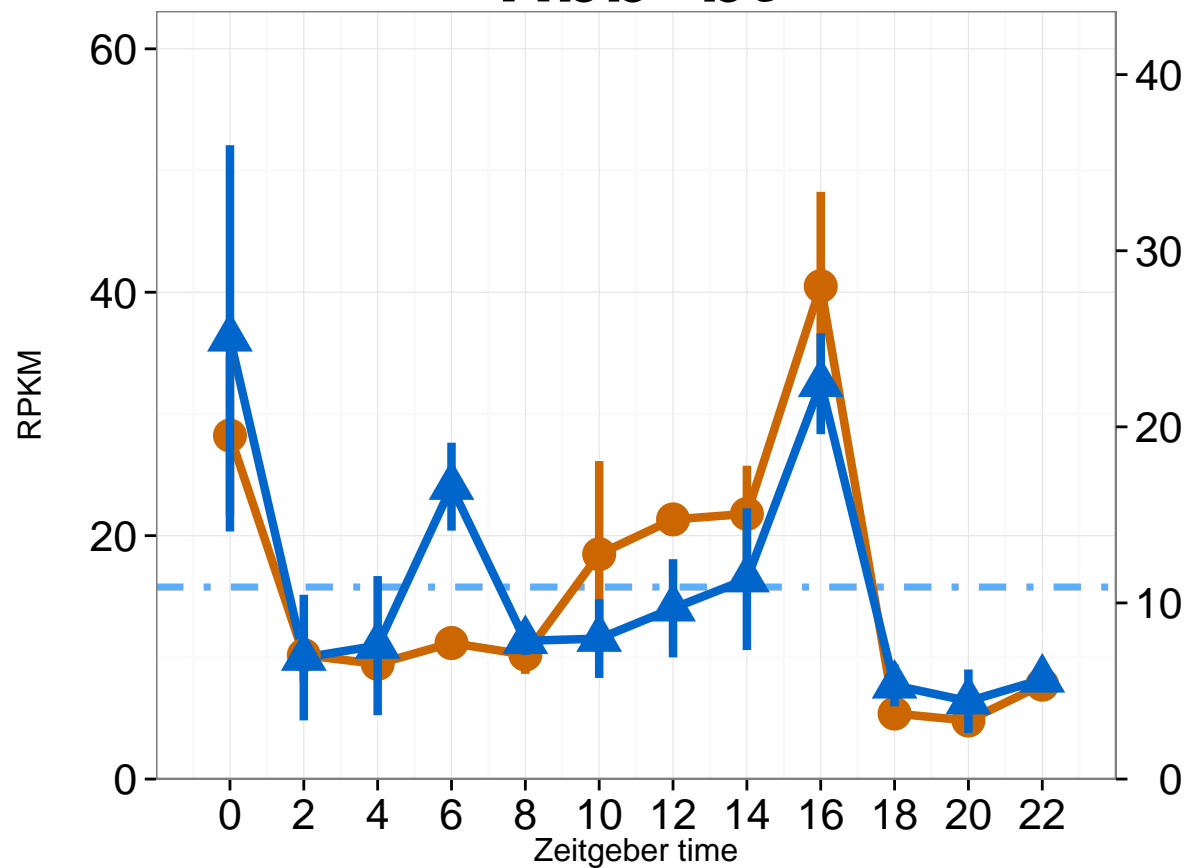

# Hbb-bt

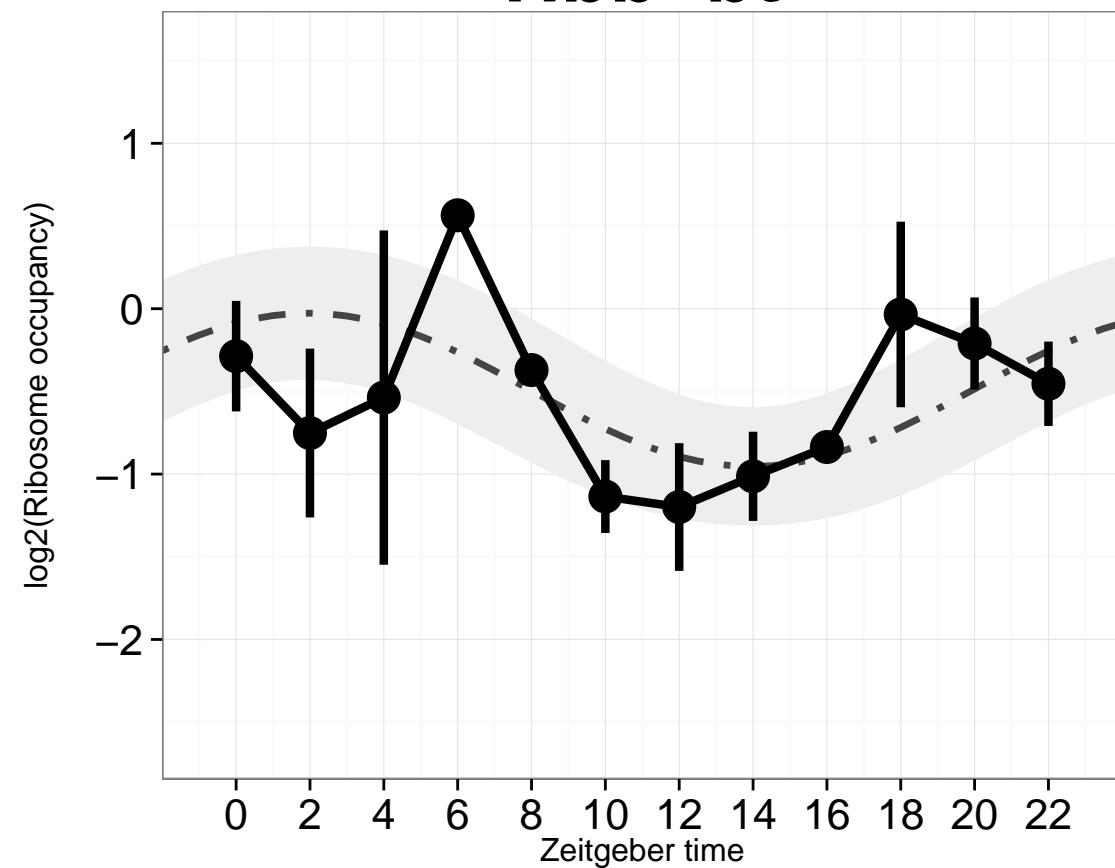

Supplement: Supplementary file 2762 [file 1]

# Cops7a

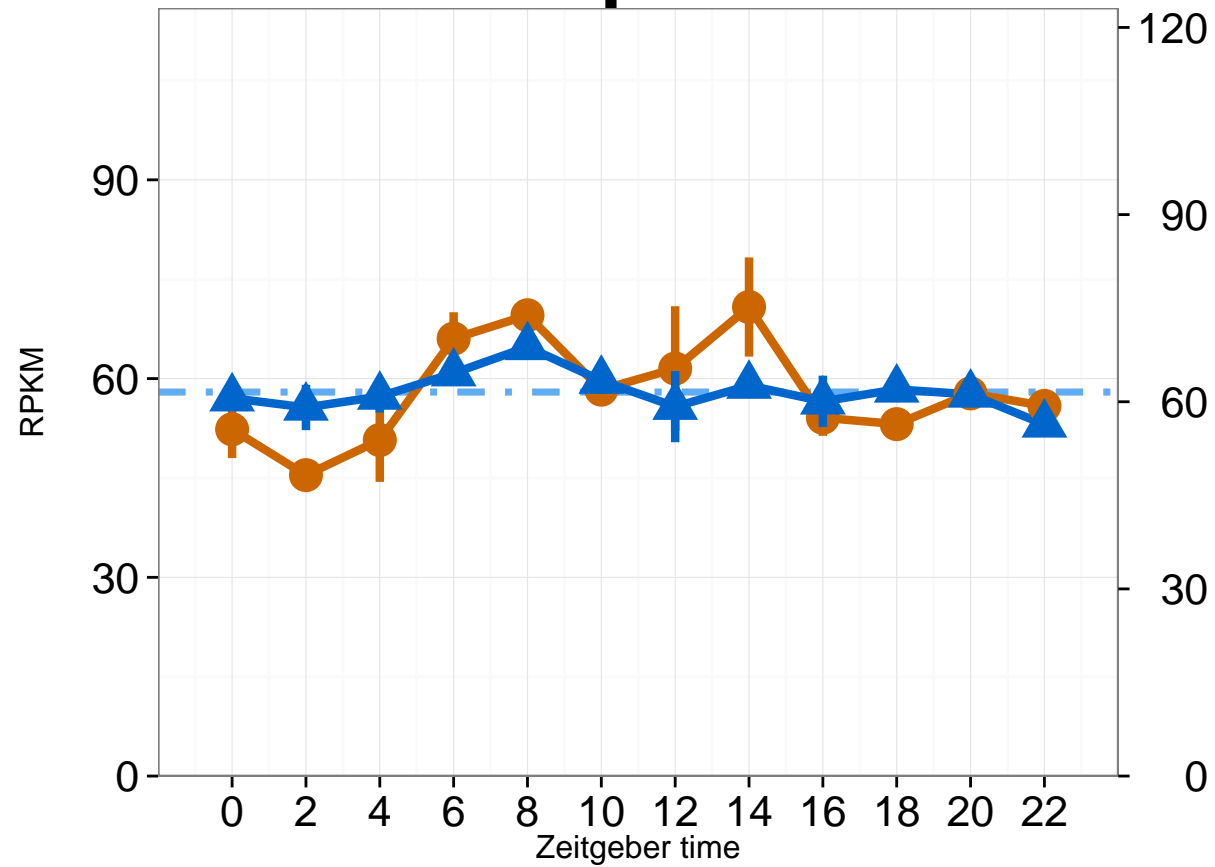

# Cops7a

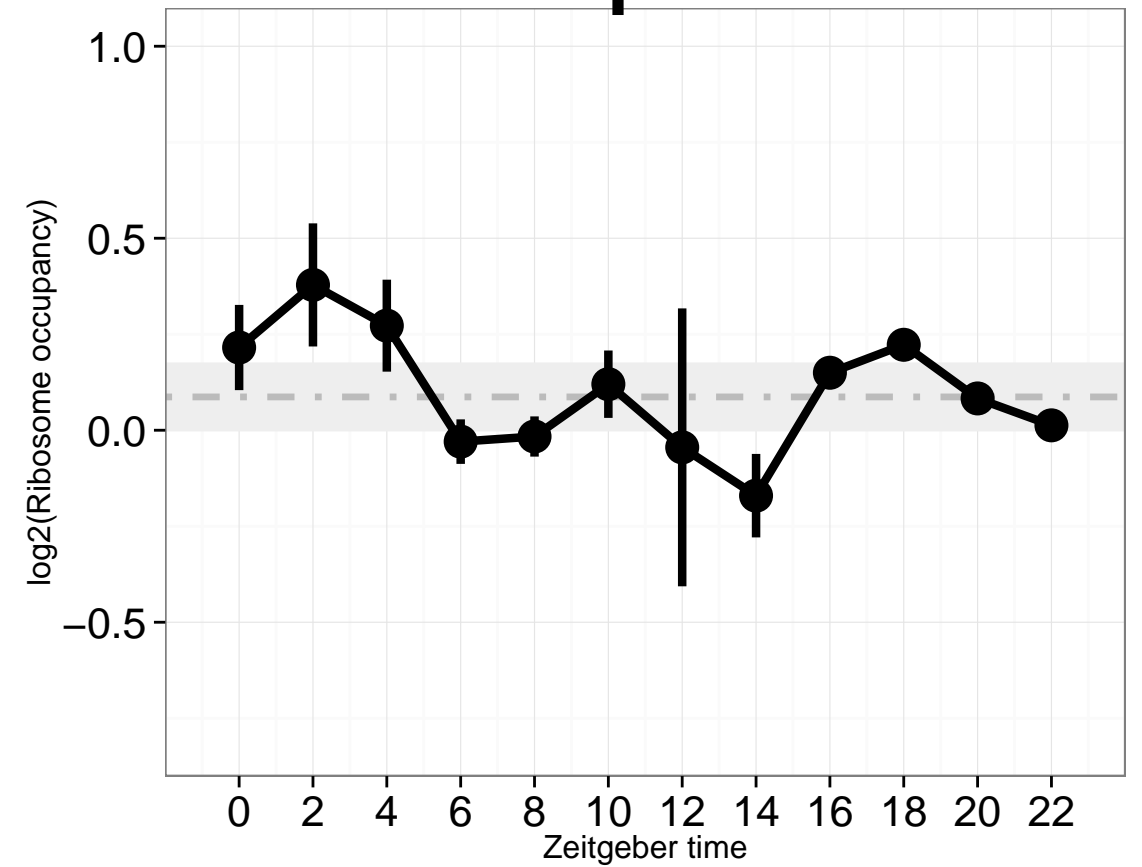

Supplement: Supplementary file 2763 [file 1]

## Hmbox1

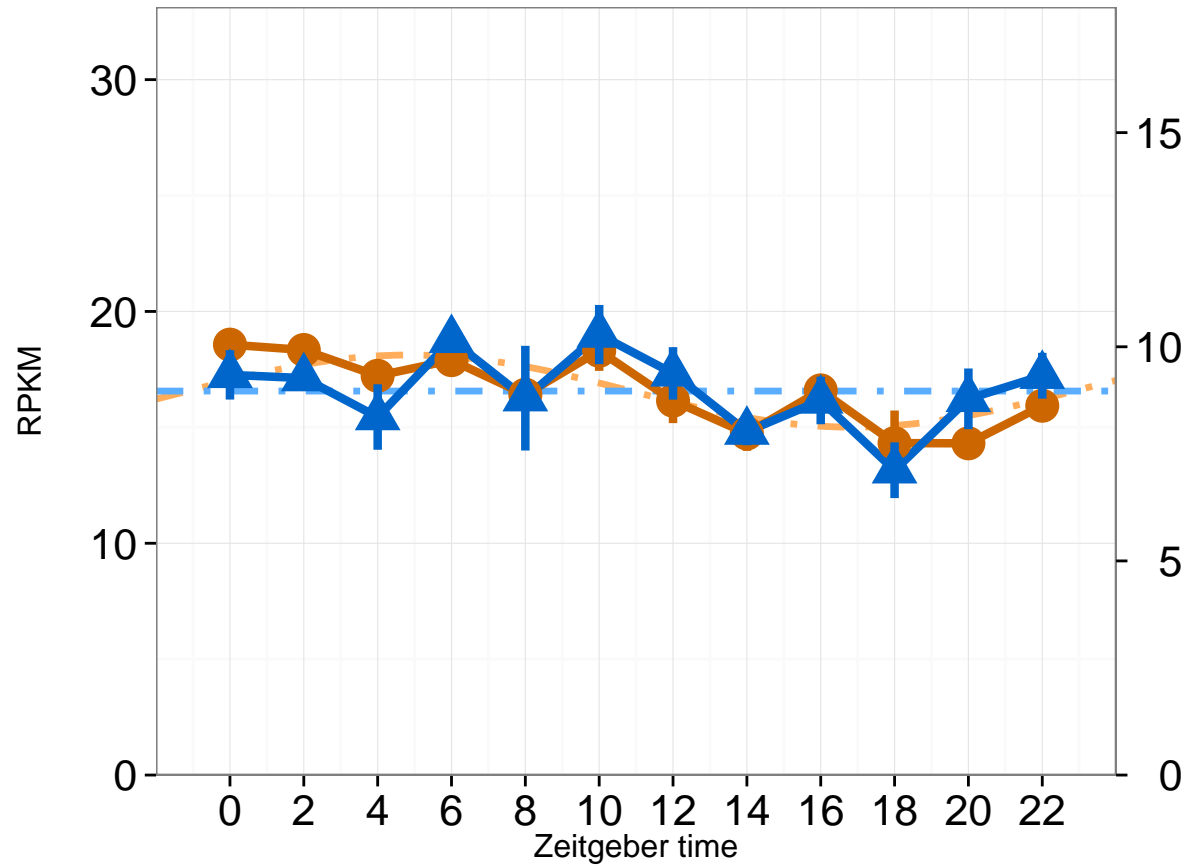

## Hmbox1

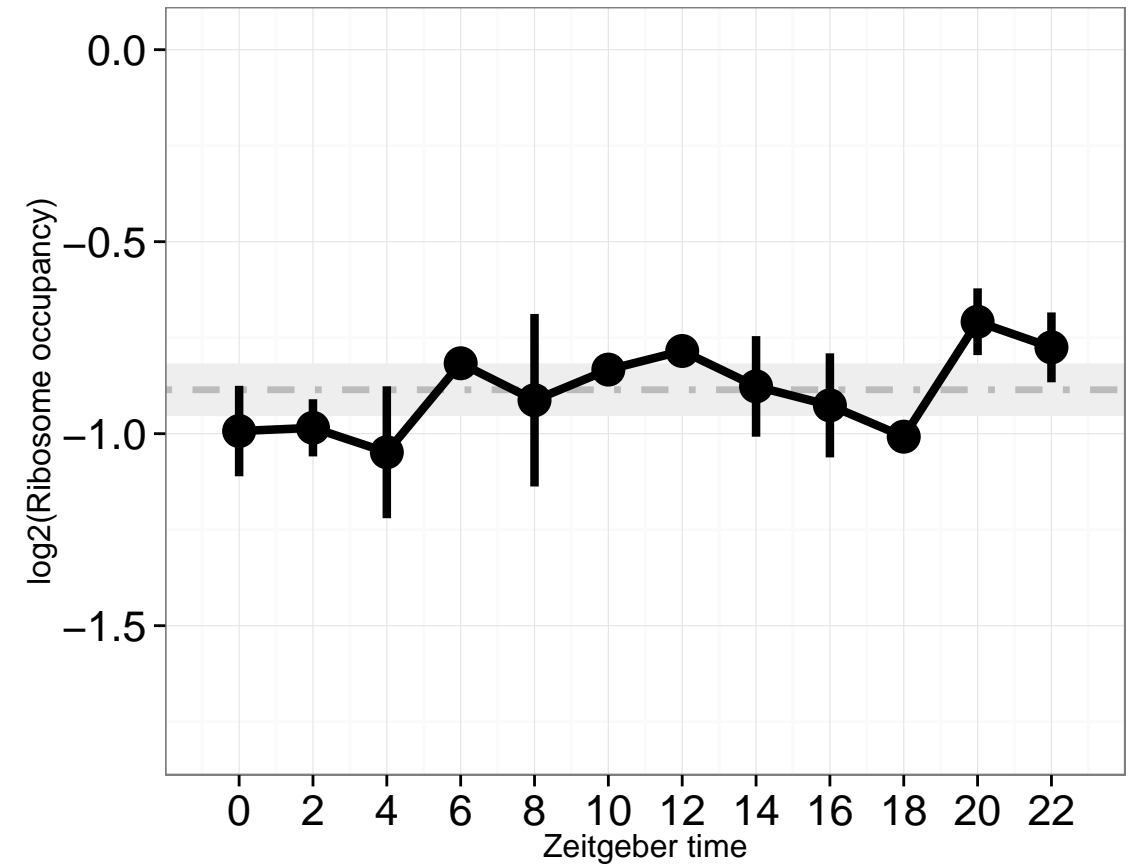

Supplement: Supplementary file 2764 [file 1]

## Zeb1

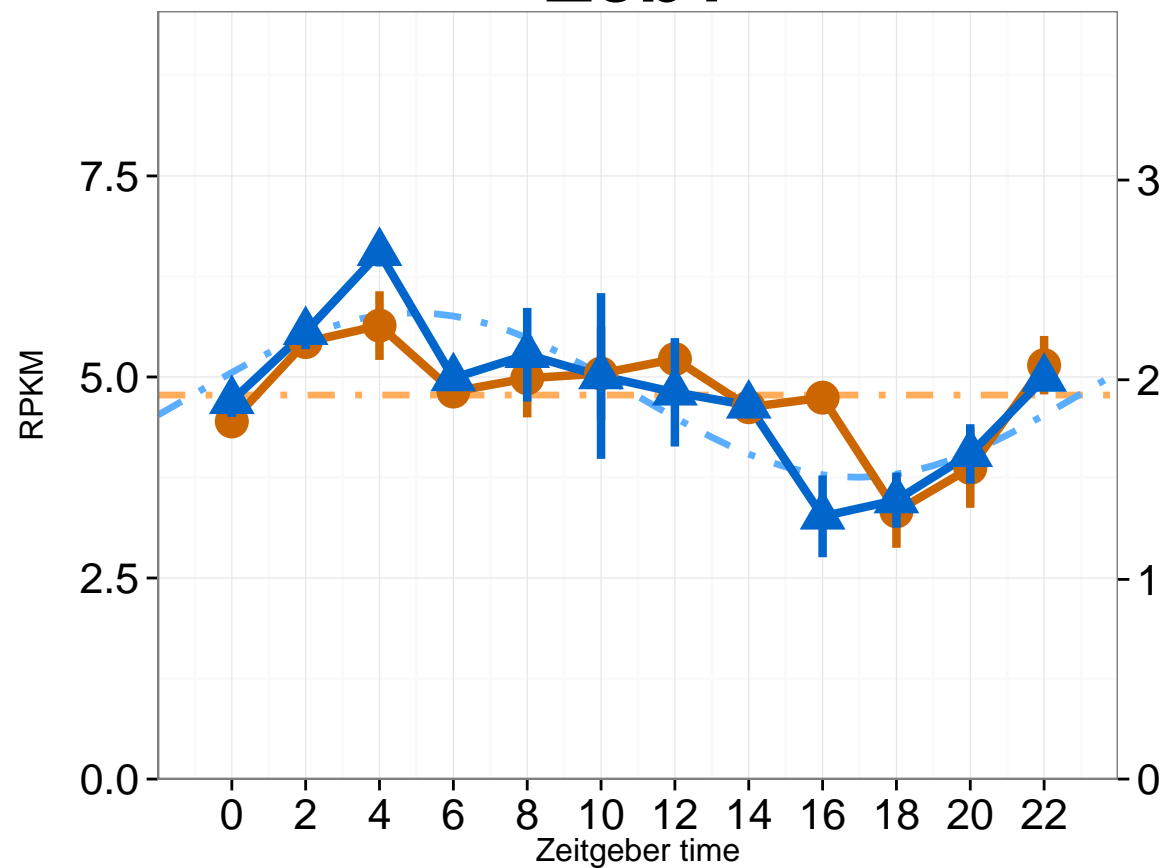

## Zeb1

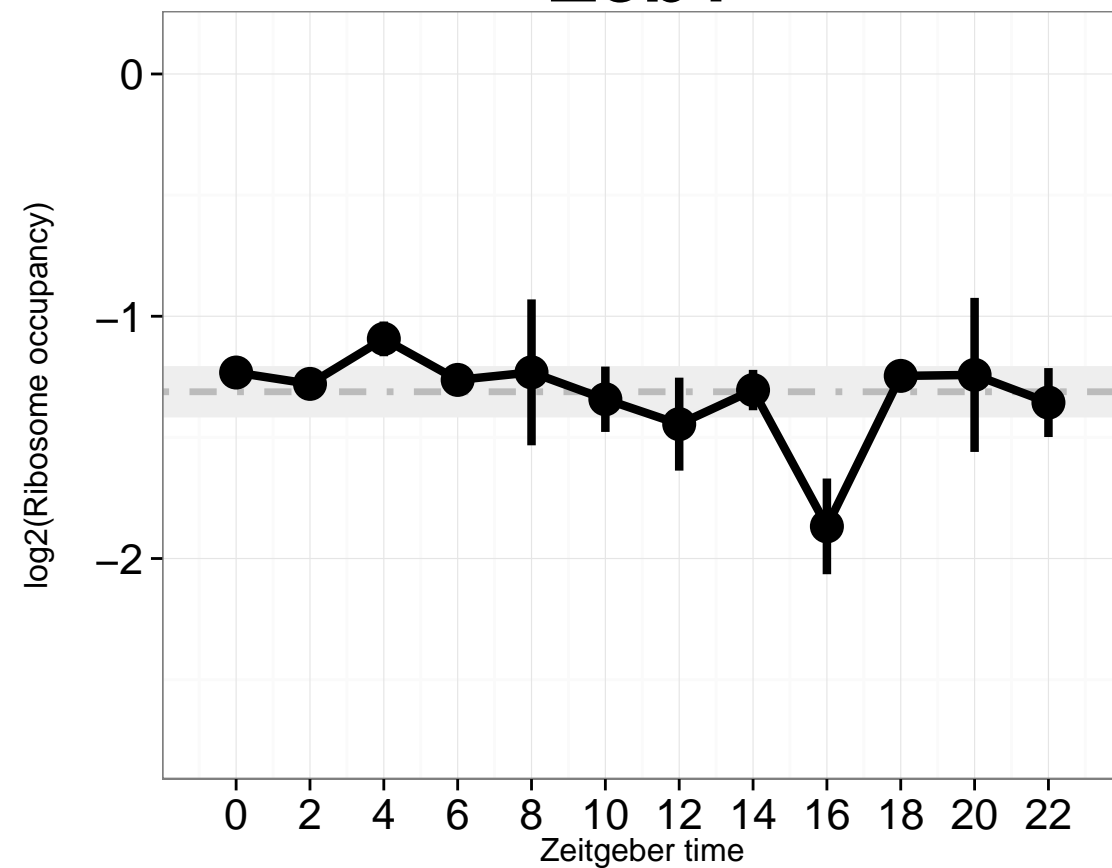

Supplement: Supplementary file 2765 [file 1]

# Adra2b

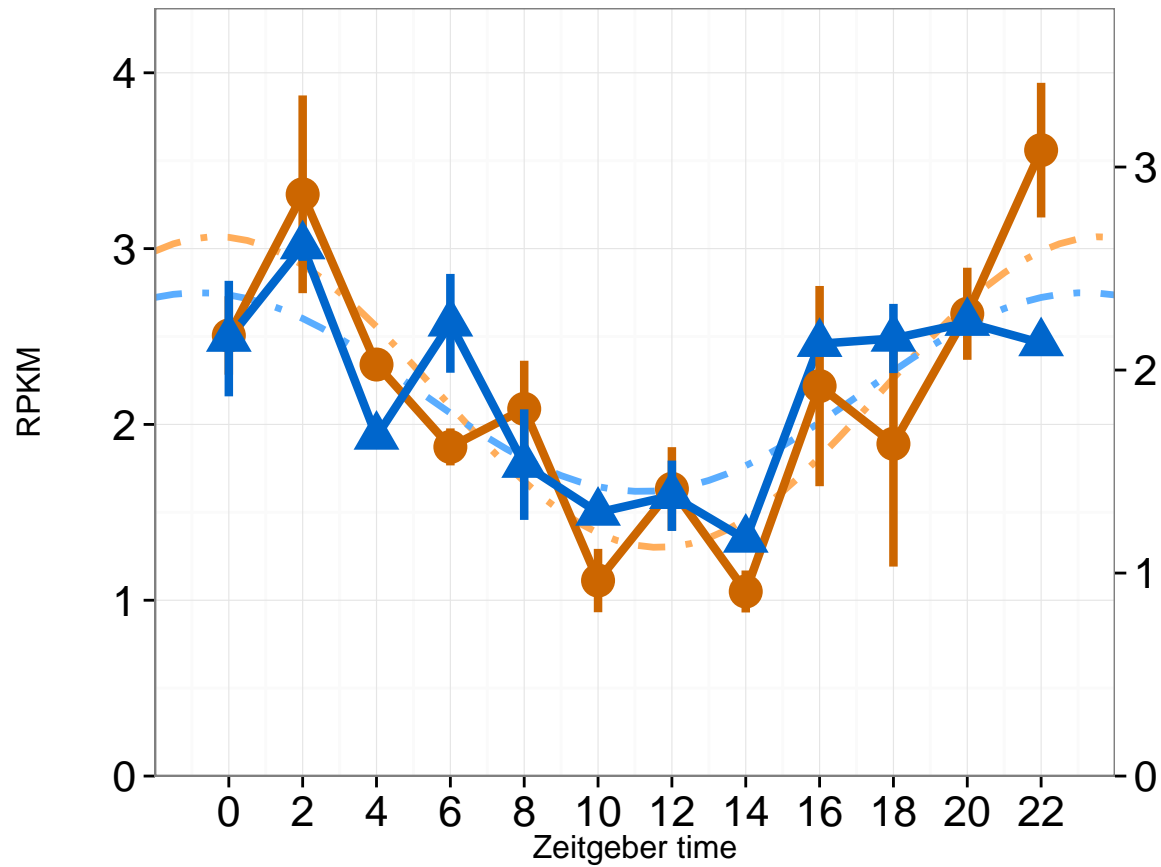

# Adra2b

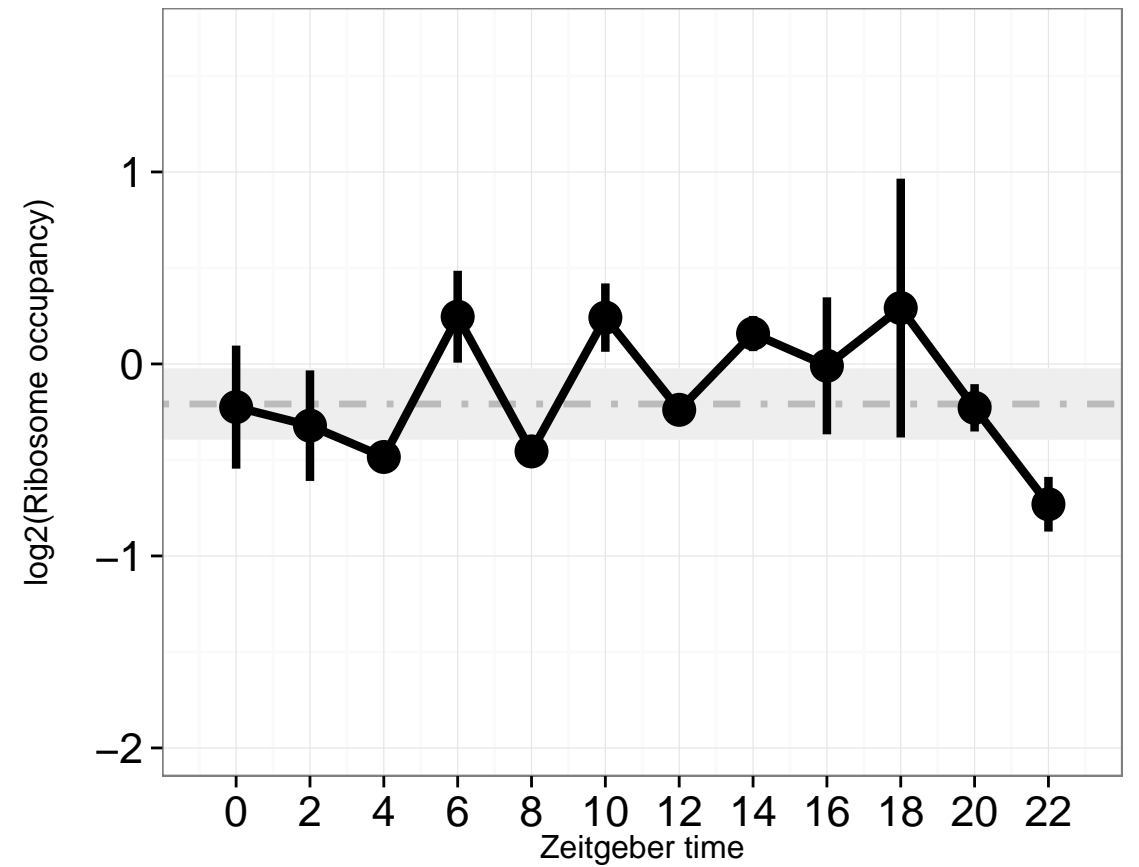

Supplement: Supplementary file 2766 [file 1]

## Junb

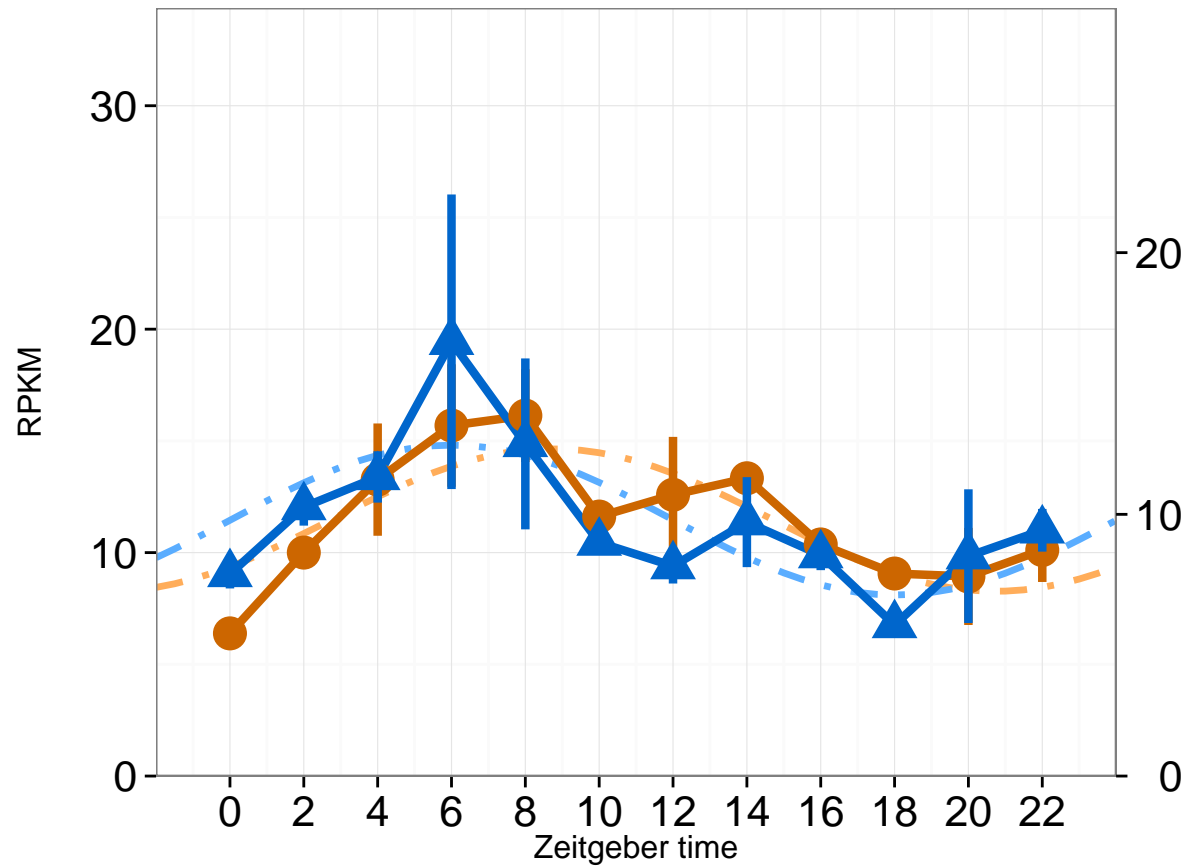

## Junb

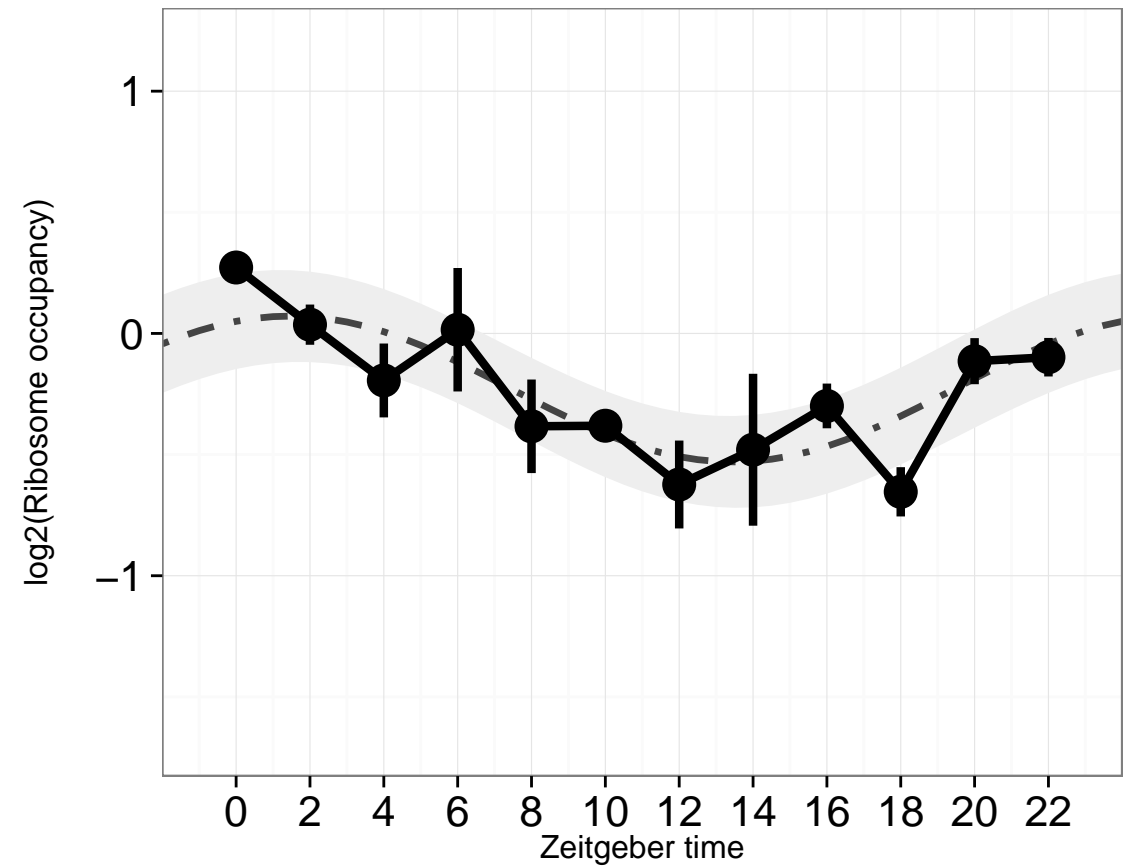

Supplement: Supplementary file 2767 [file 1]

## Trim61

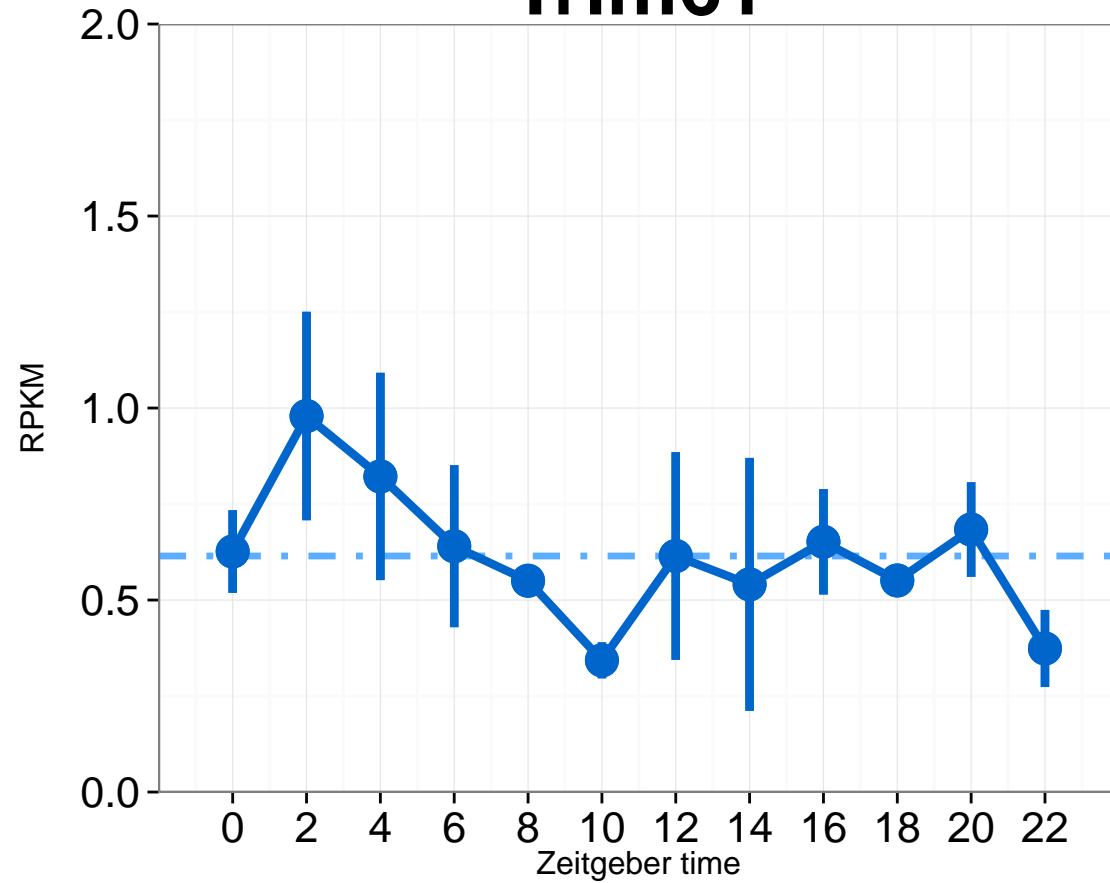

## Trim61 log2(Ribosome occupancy

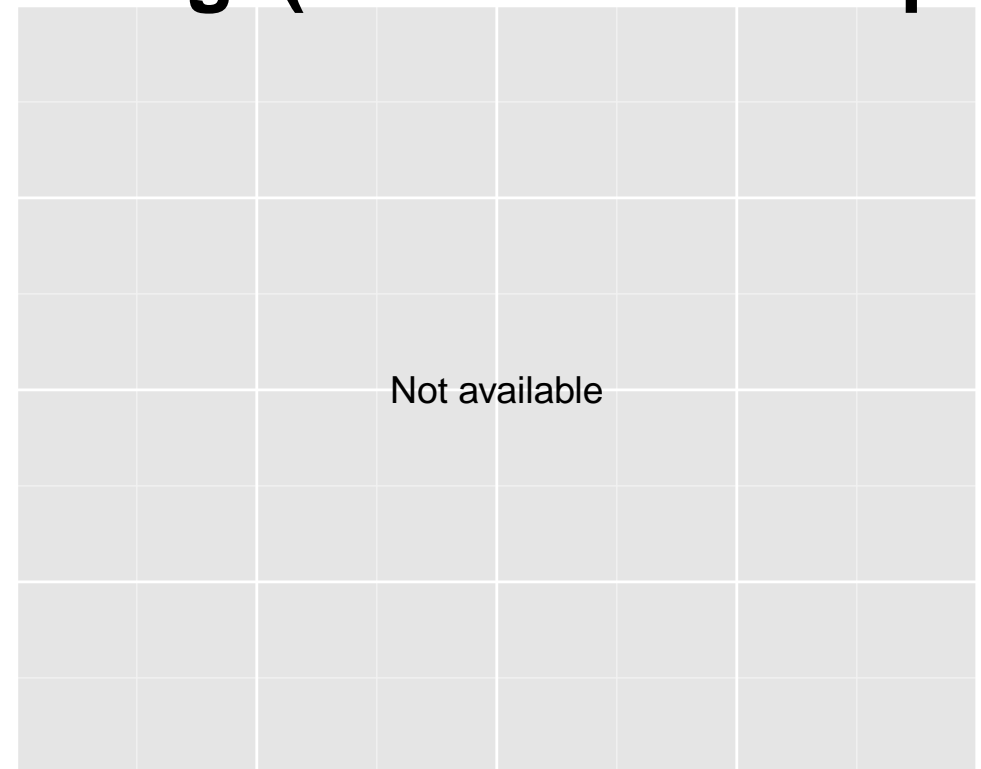

Supplement: Supplementary file 2768 [file 1]

## Ccr5

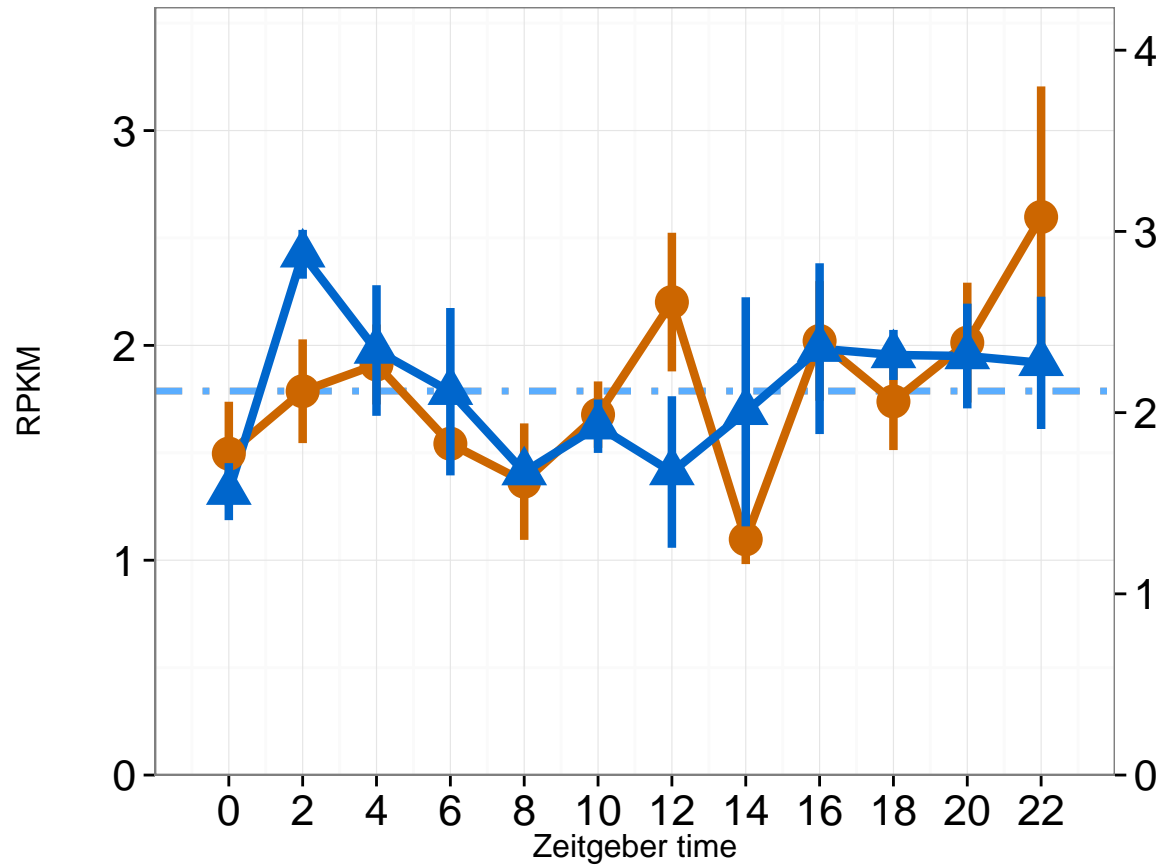

## Ccr5

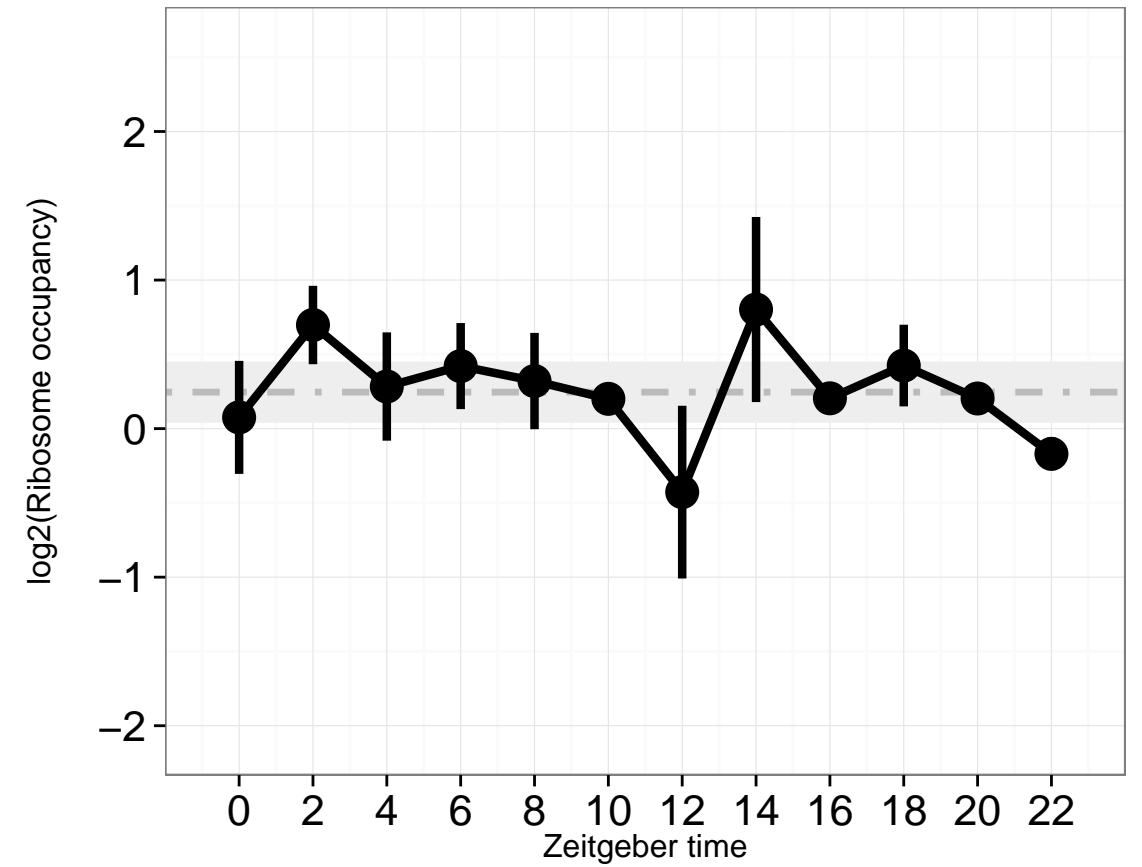

Supplement: Supplementary file 2769 [file 1]

## Cdh1

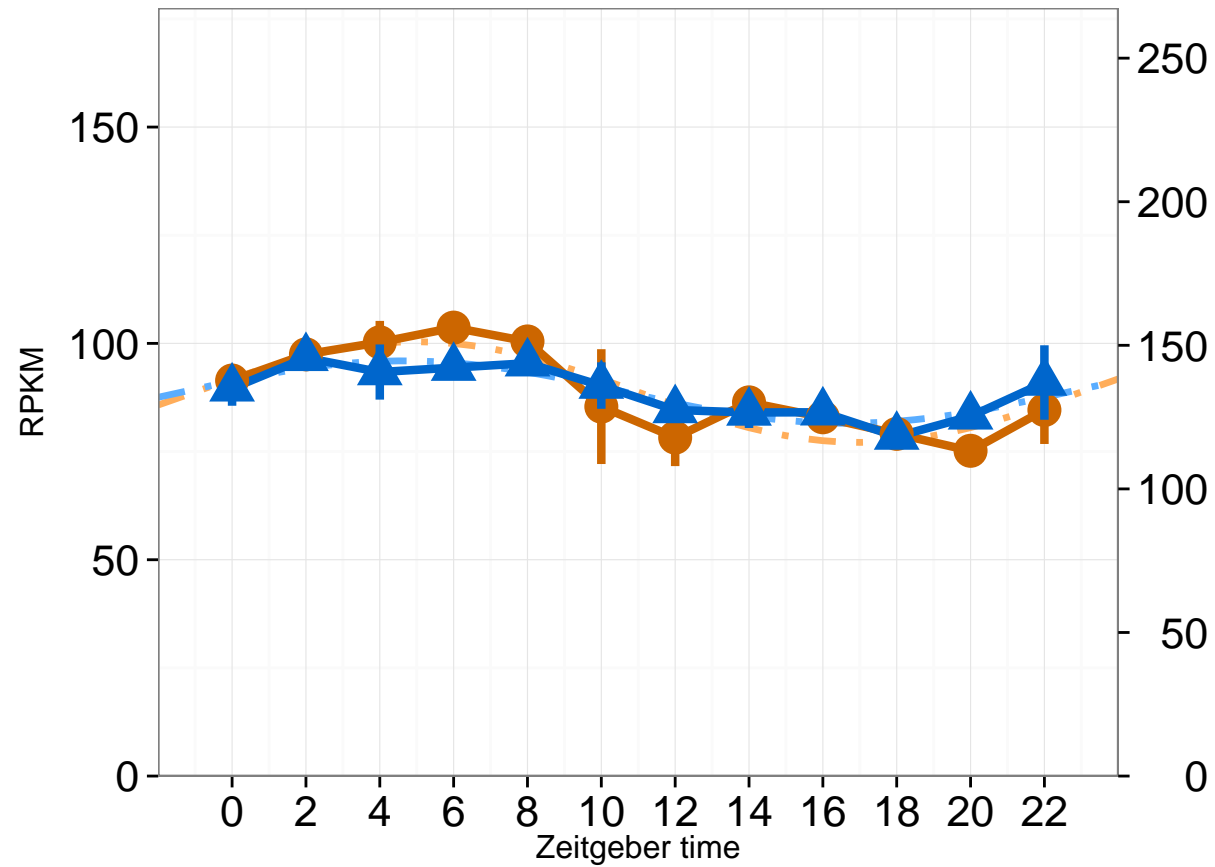

## Cdh1

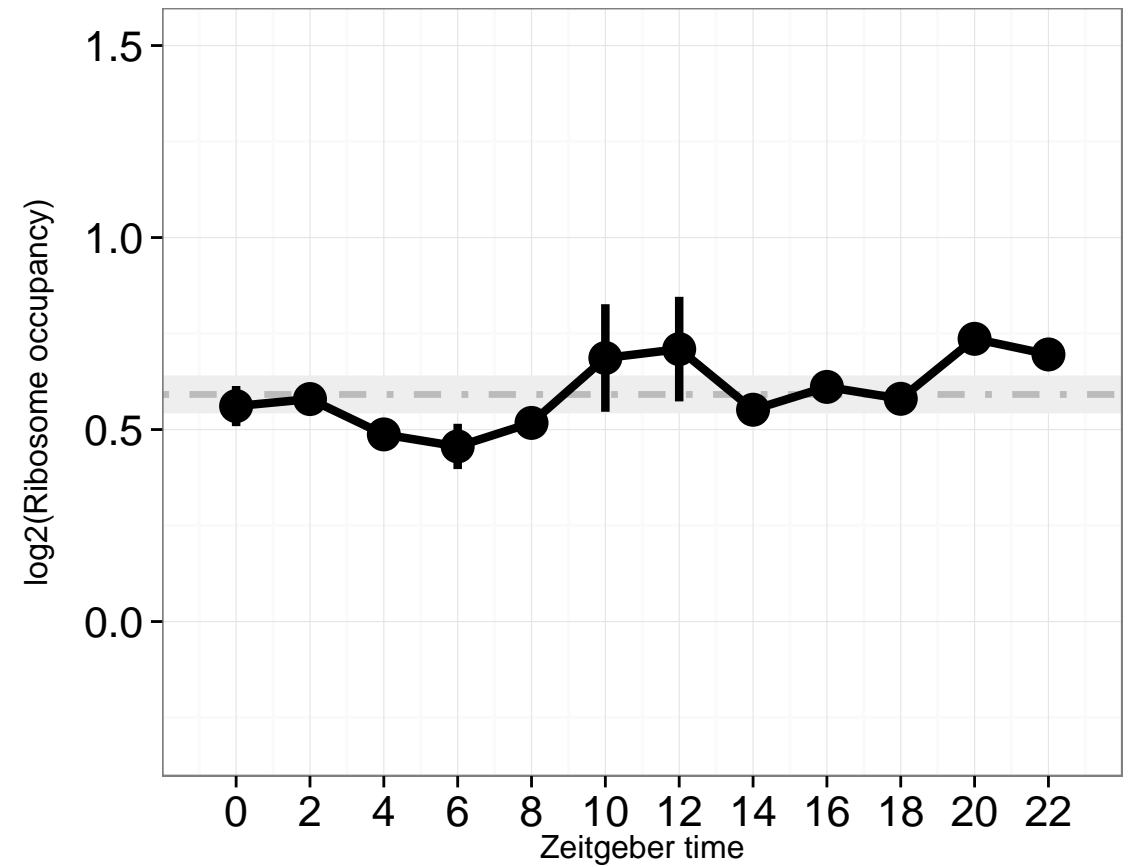

Supplement: Supplementary file 2770 [file 1]

## Dcaf17

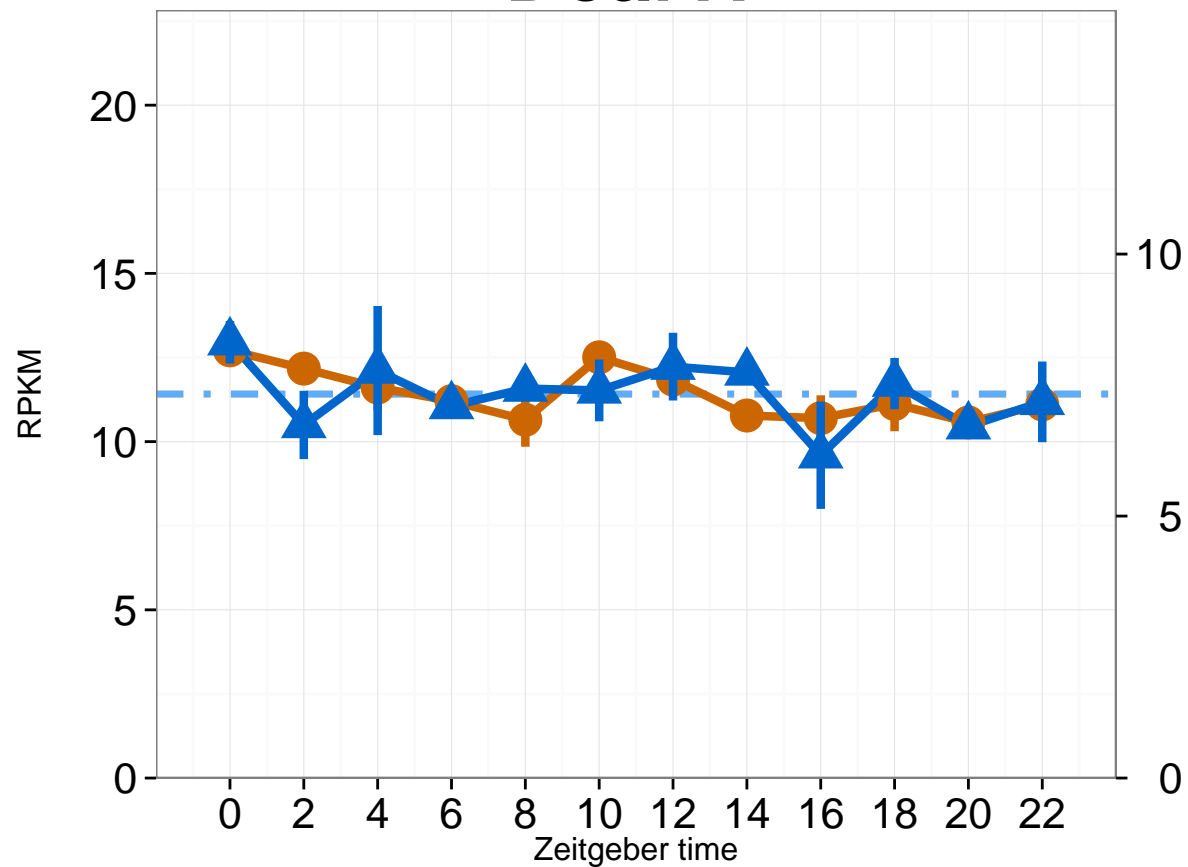

## Dcaf17

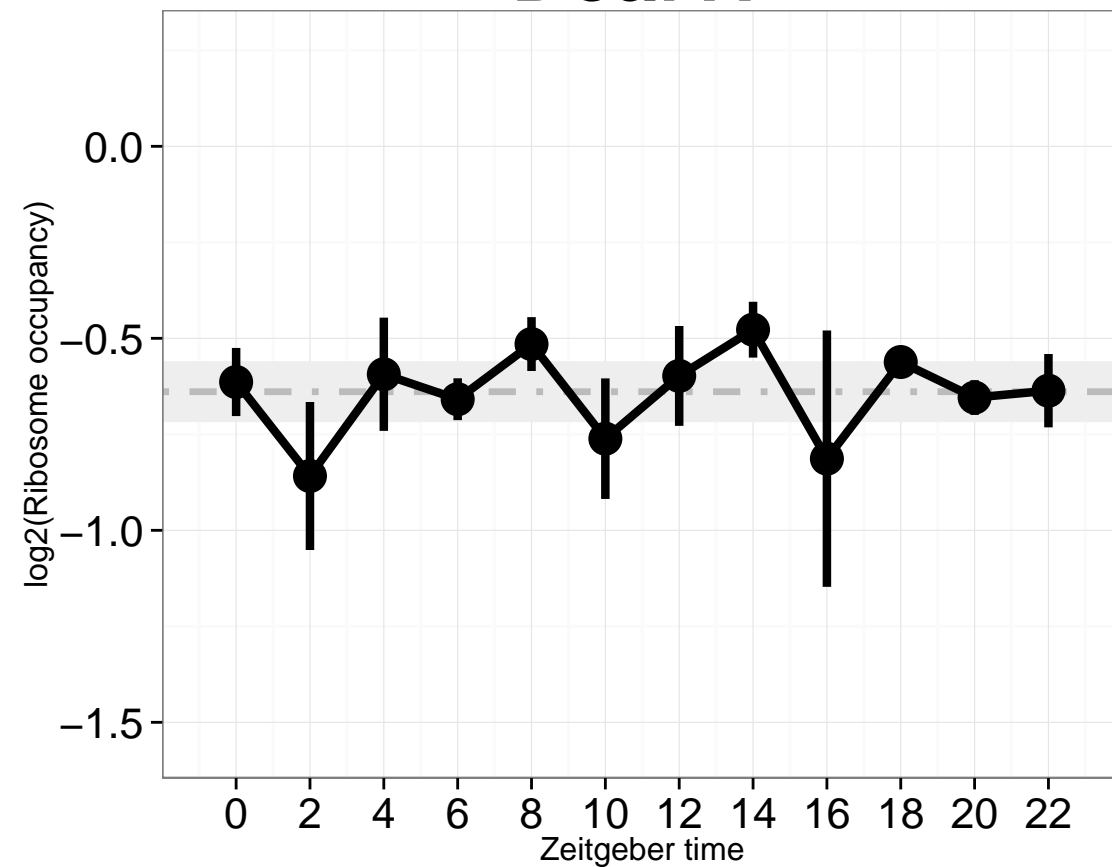

Supplement: Supplementary file 2771 [file 1]

## Bcas3

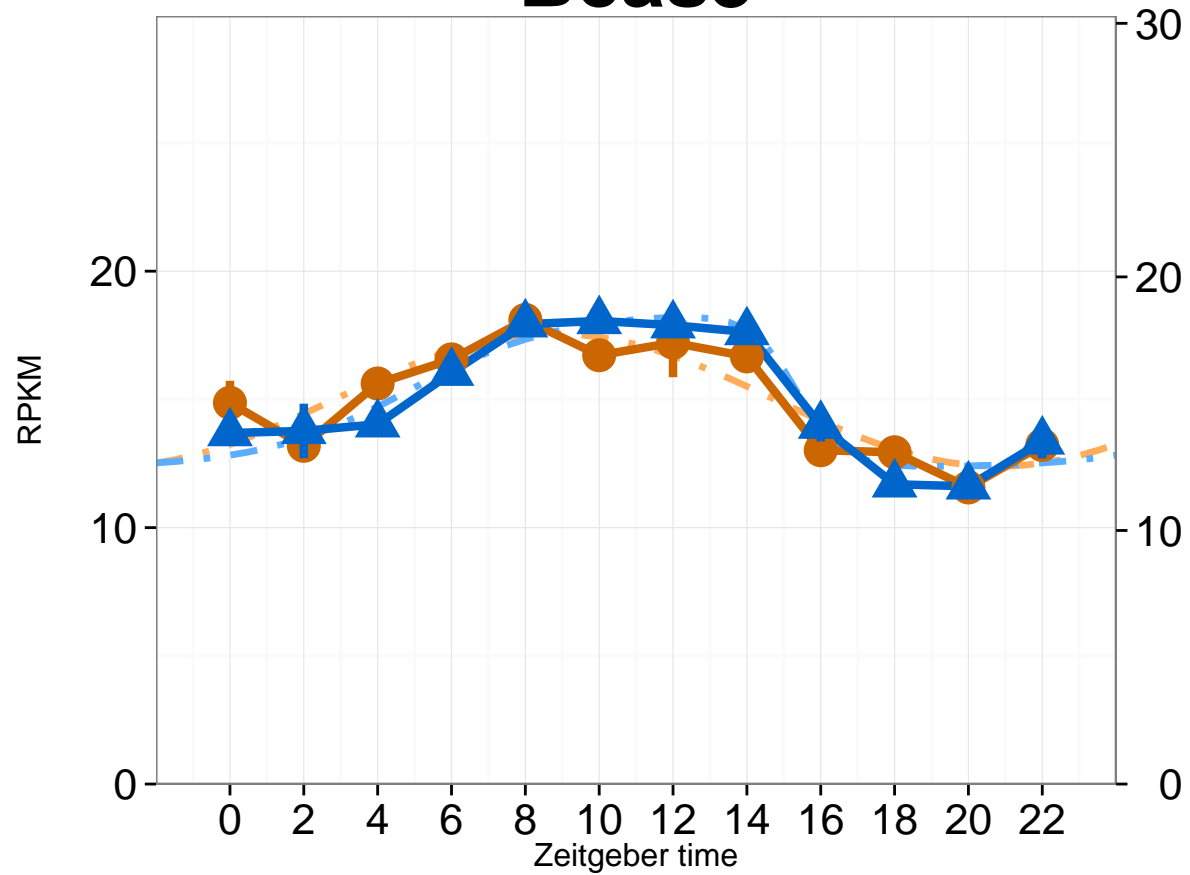

## Bcas3

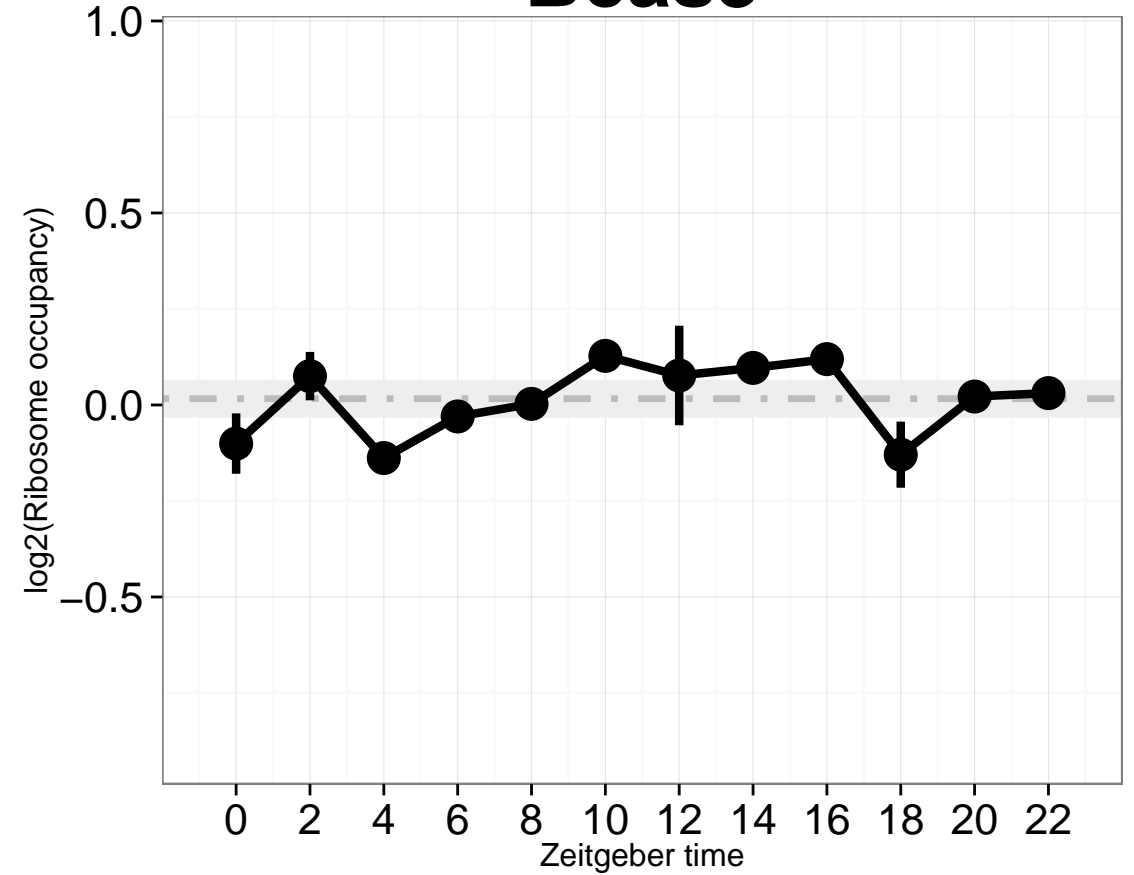

Supplement: Supplementary file 2772 [file 1]

# Gpr162

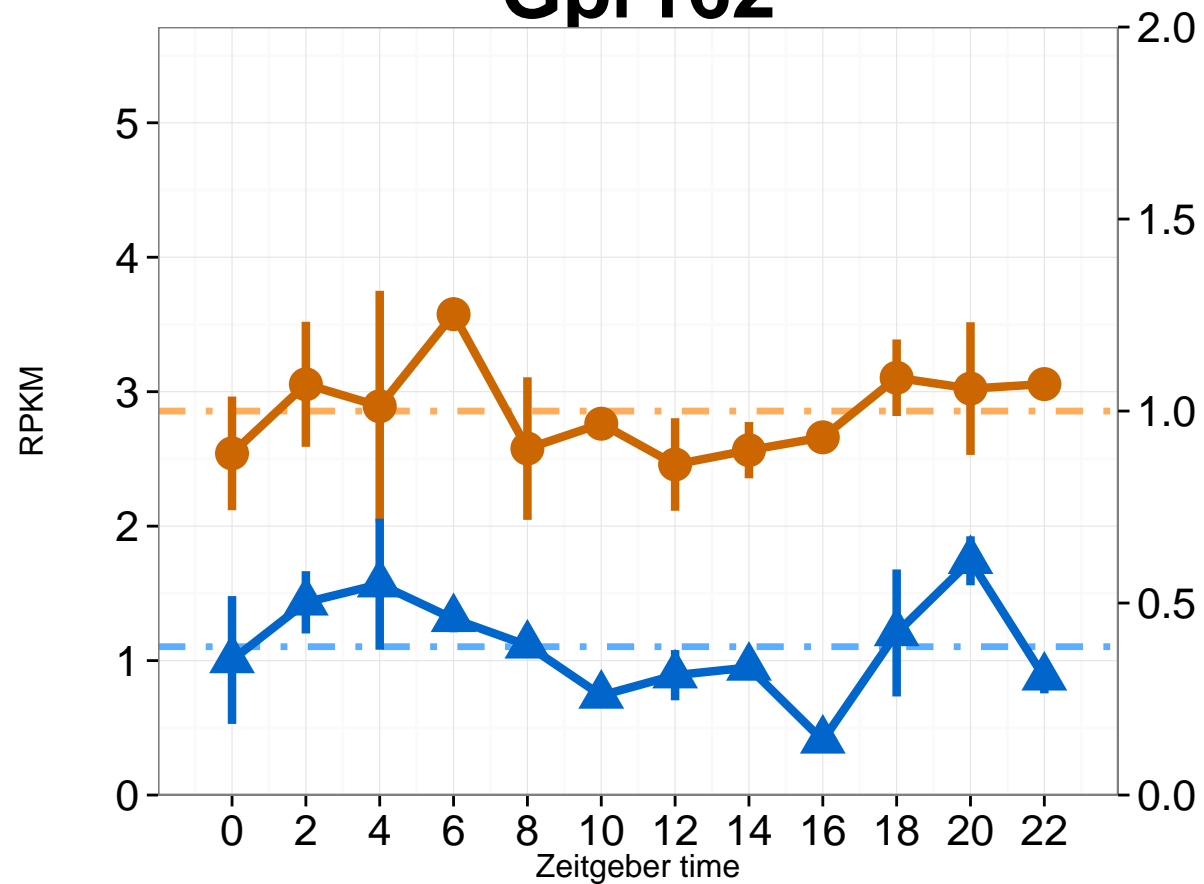

# Gpr162

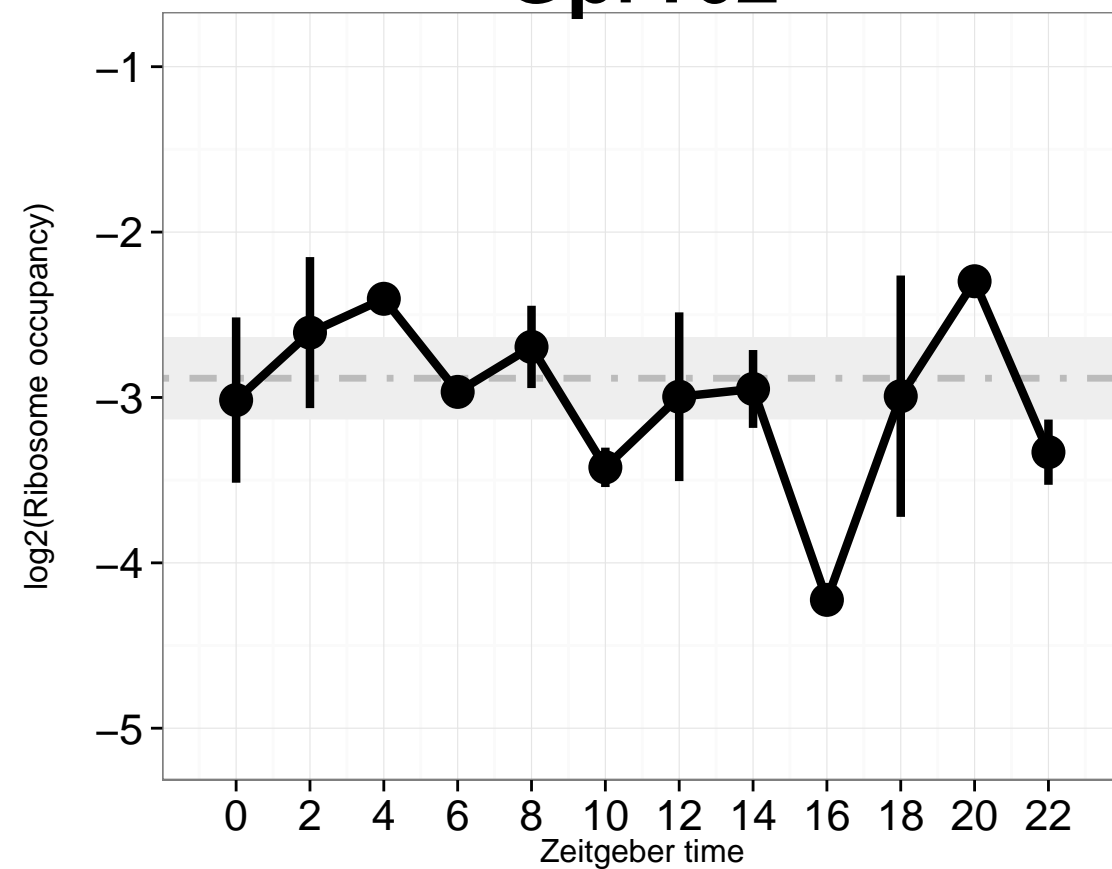

Supplement: Supplementary file 2773 [file 1]

## Cacfd1

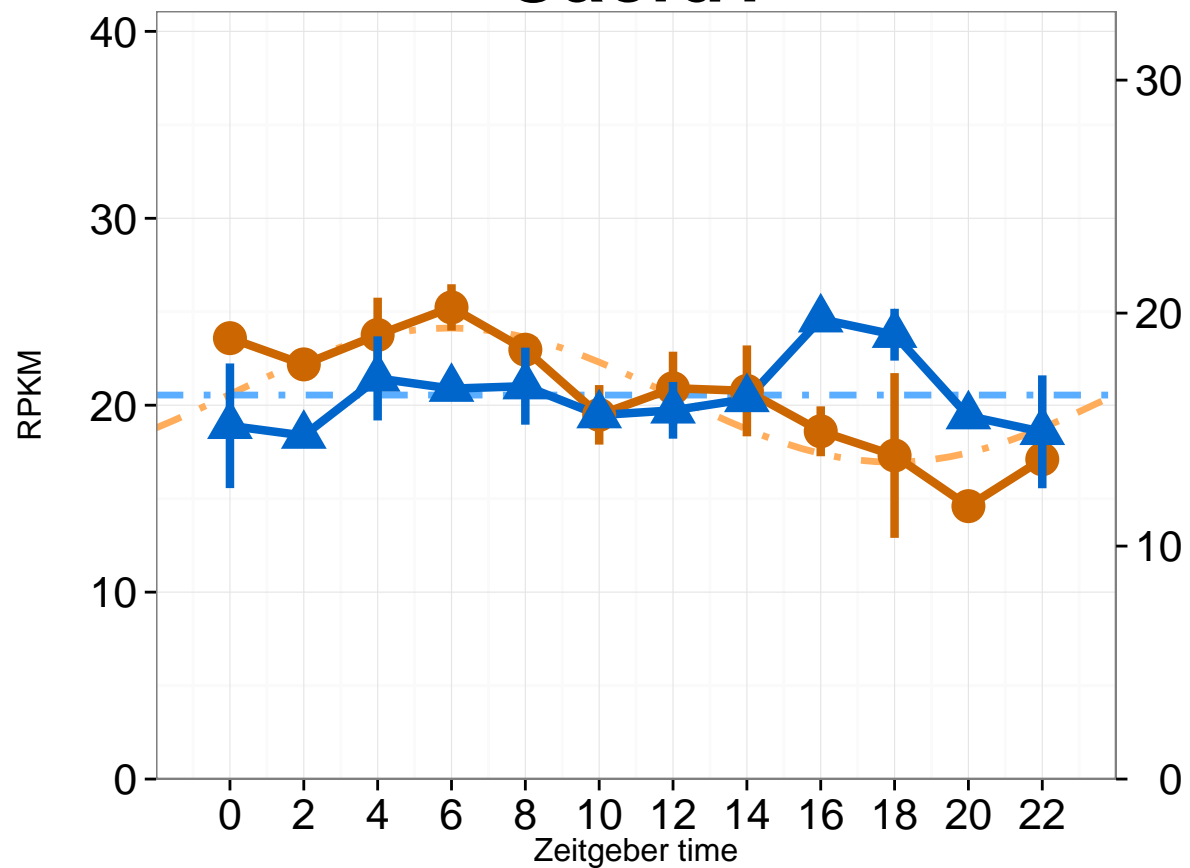

## Cacfd1

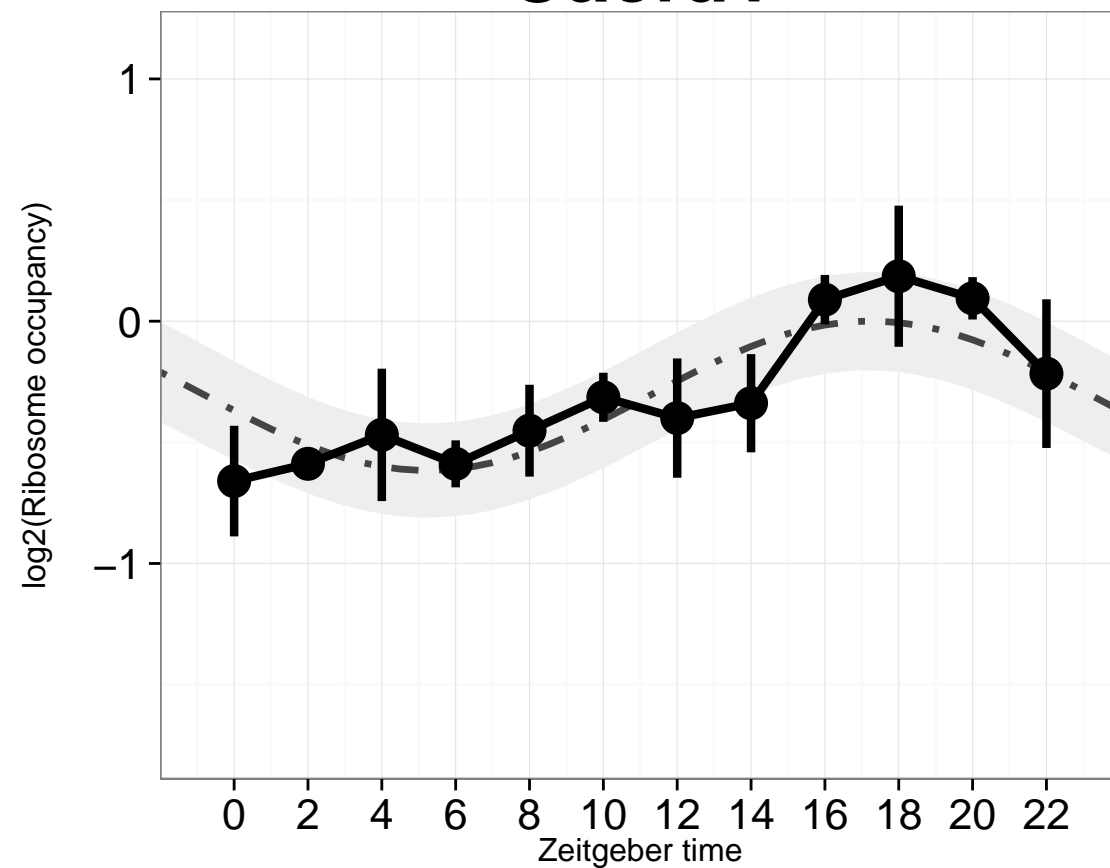

Supplement: Supplementary file 2774 [file 1]

# Akr1c21

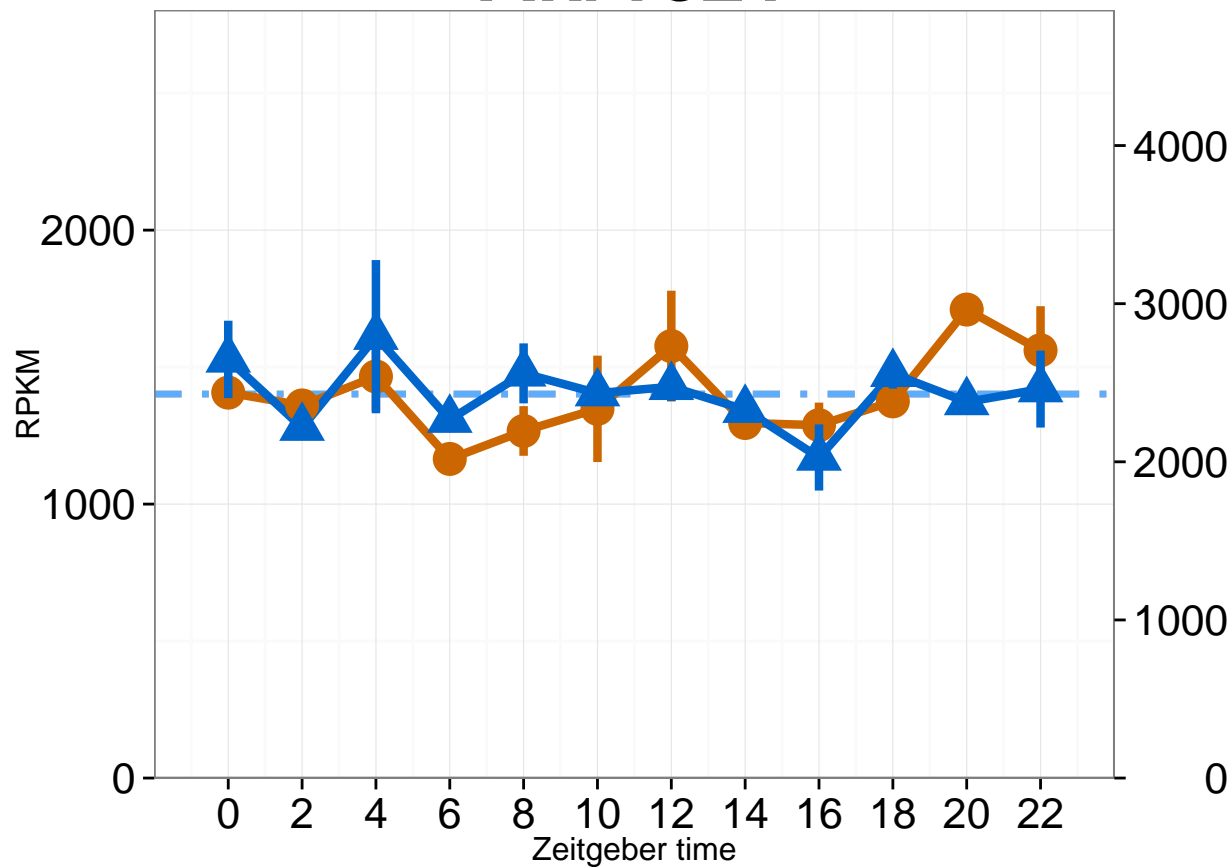

# Akr1c21

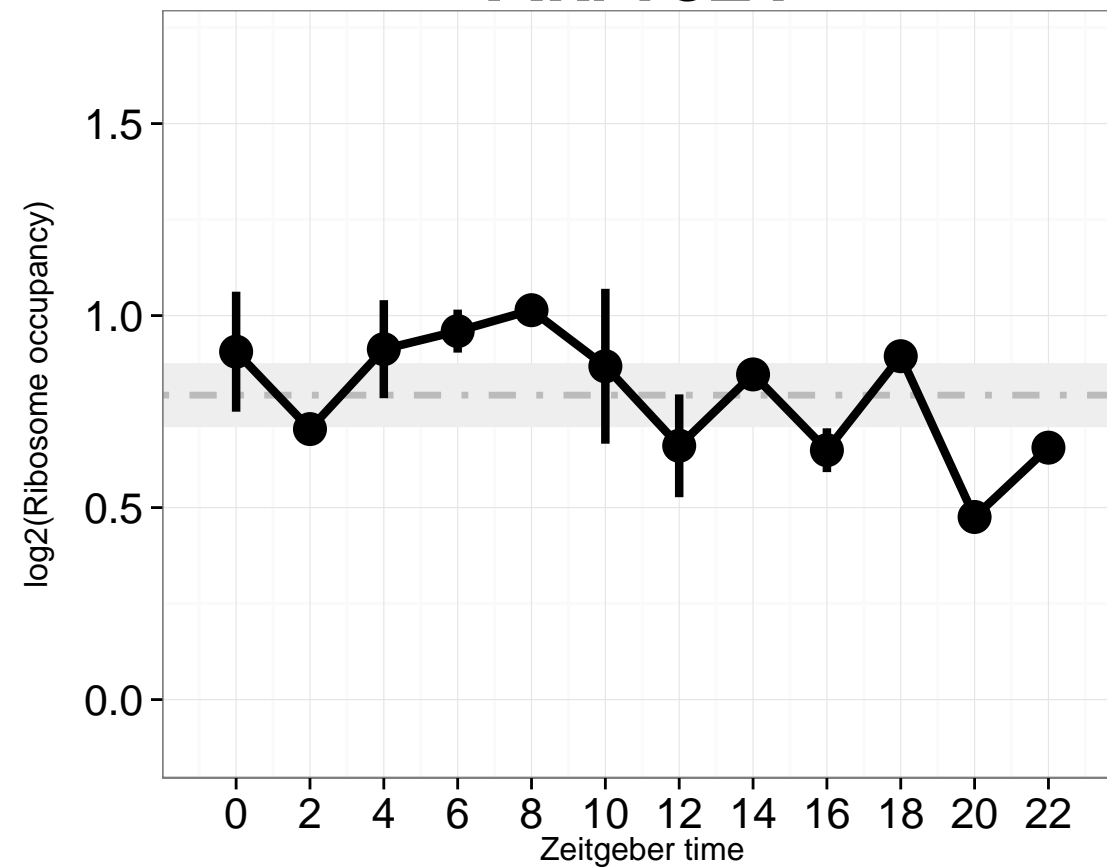

Supplement: Supplementary file 2775 [file 1]

# Mpc2

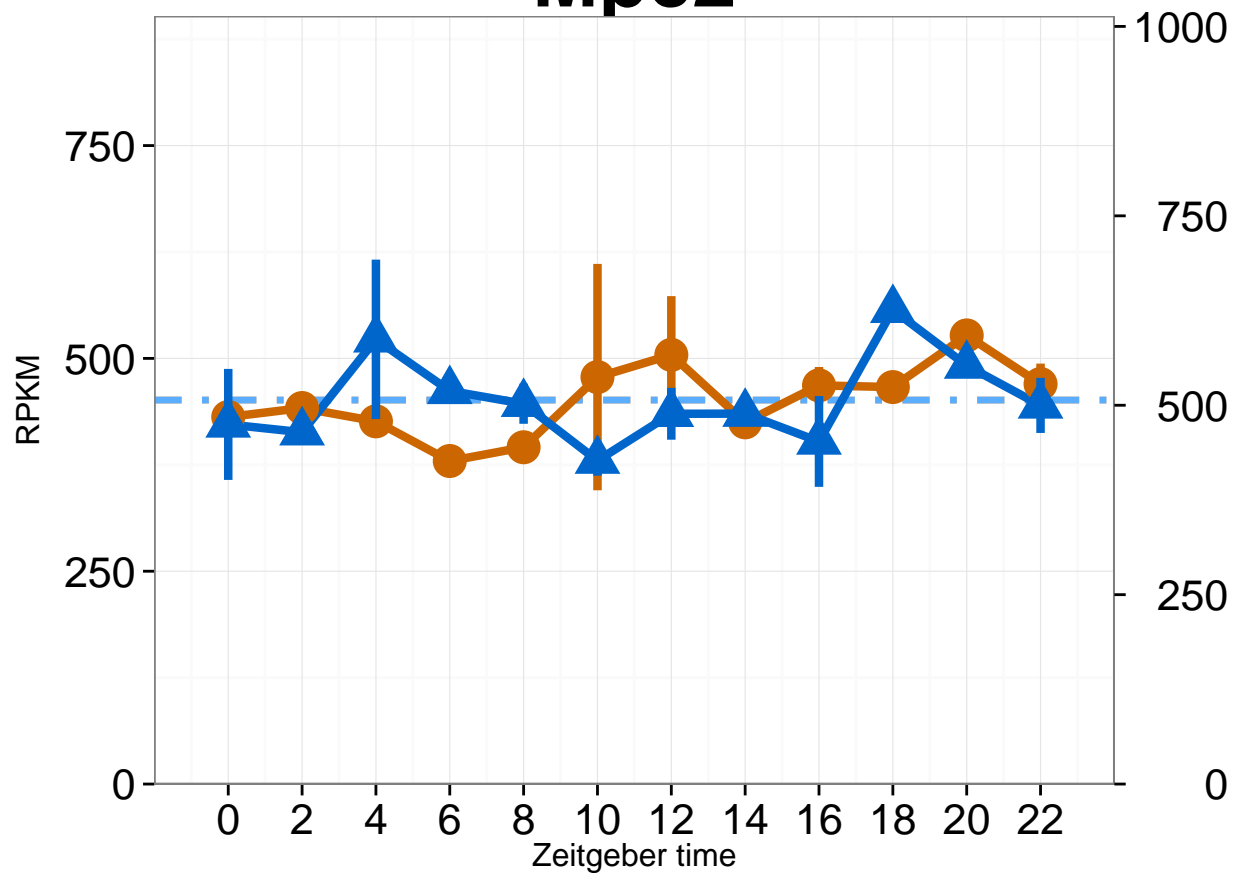

# Mpc2

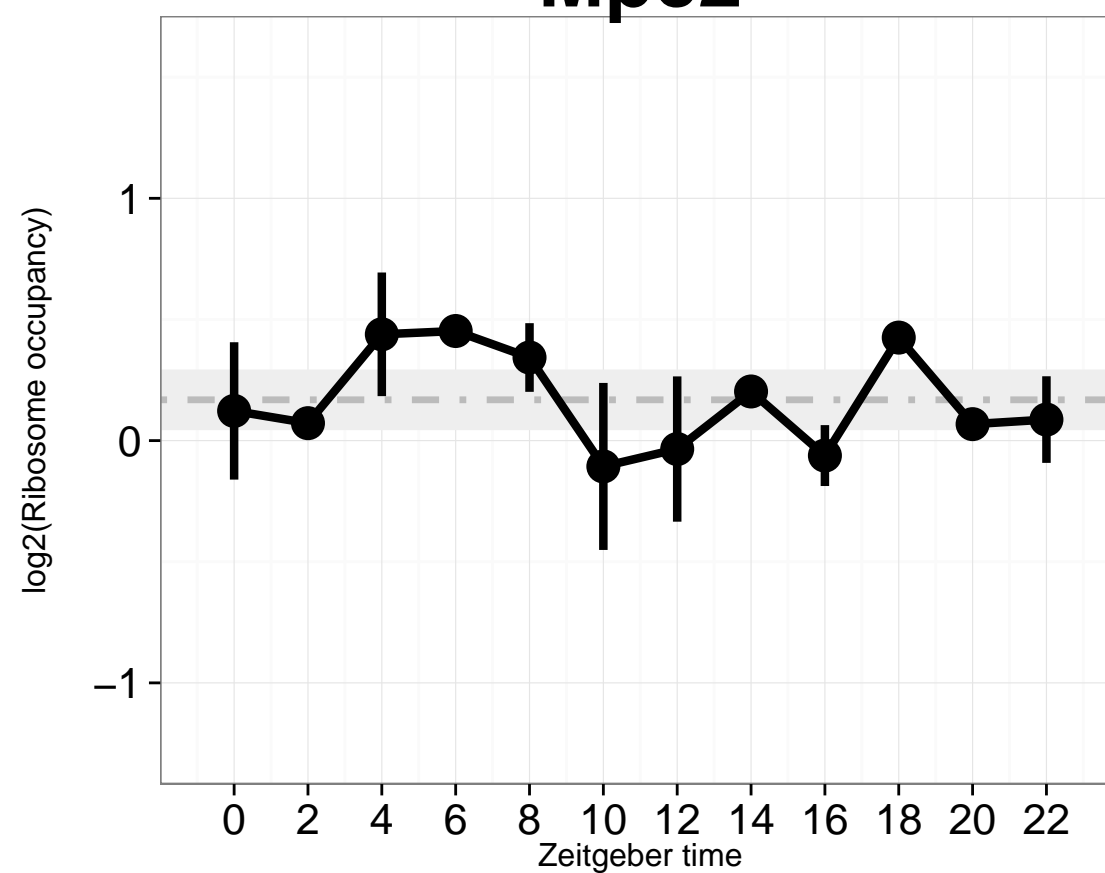

Supplement: Supplementary file 2776 [file 1]

# Gata2

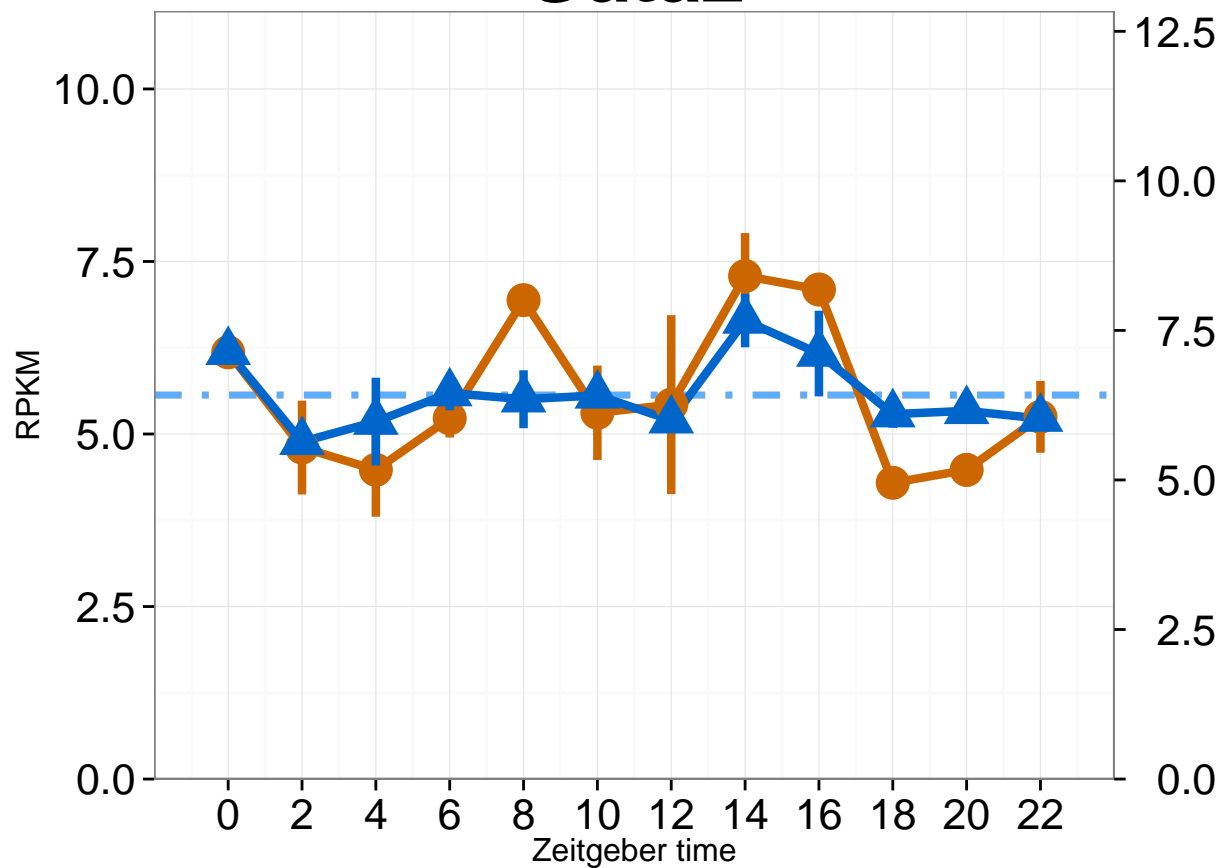

# Gata2

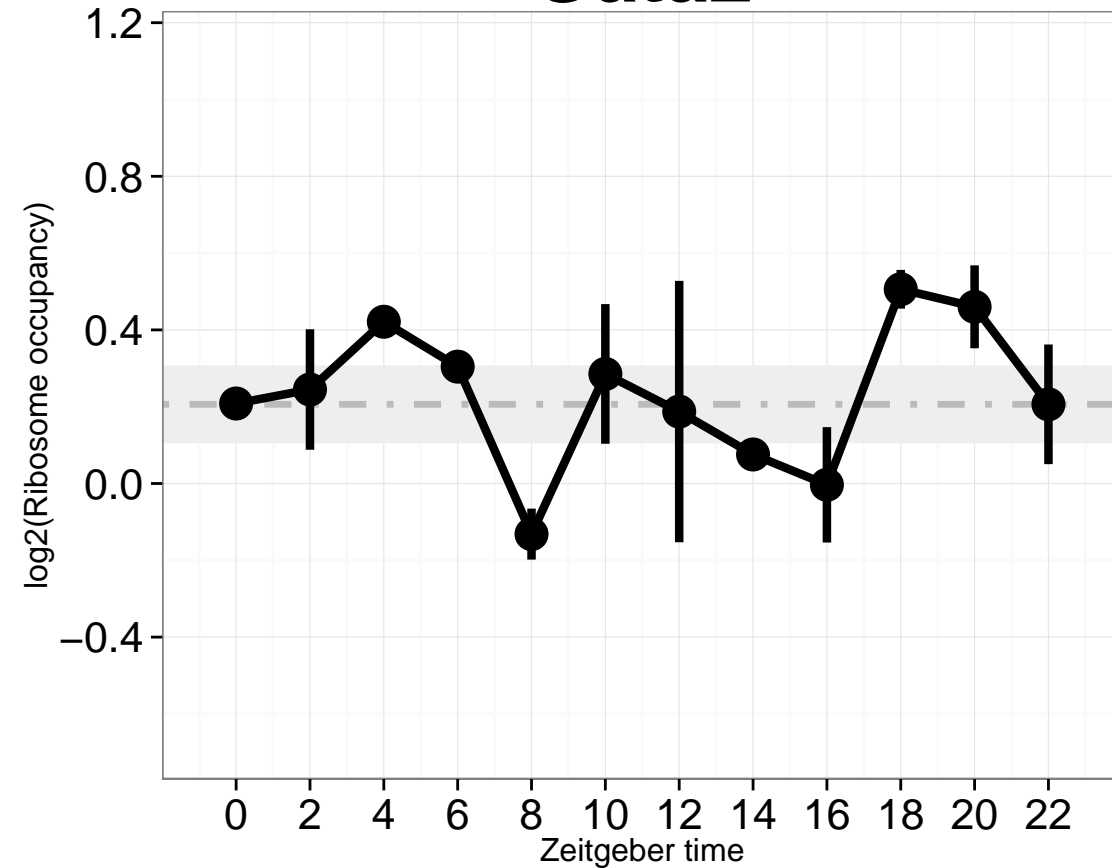

Supplement: Supplementary file 2777 [file 1]

## Cdh6

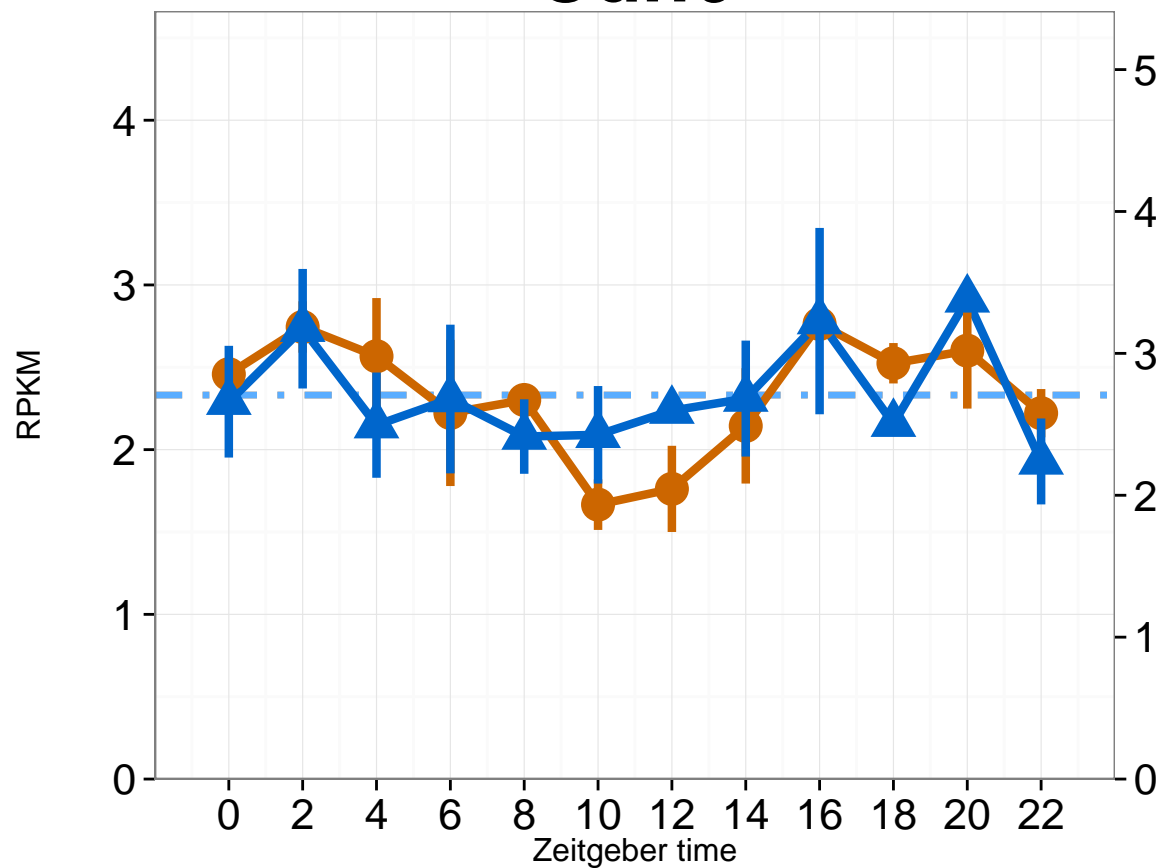

## Cdh6

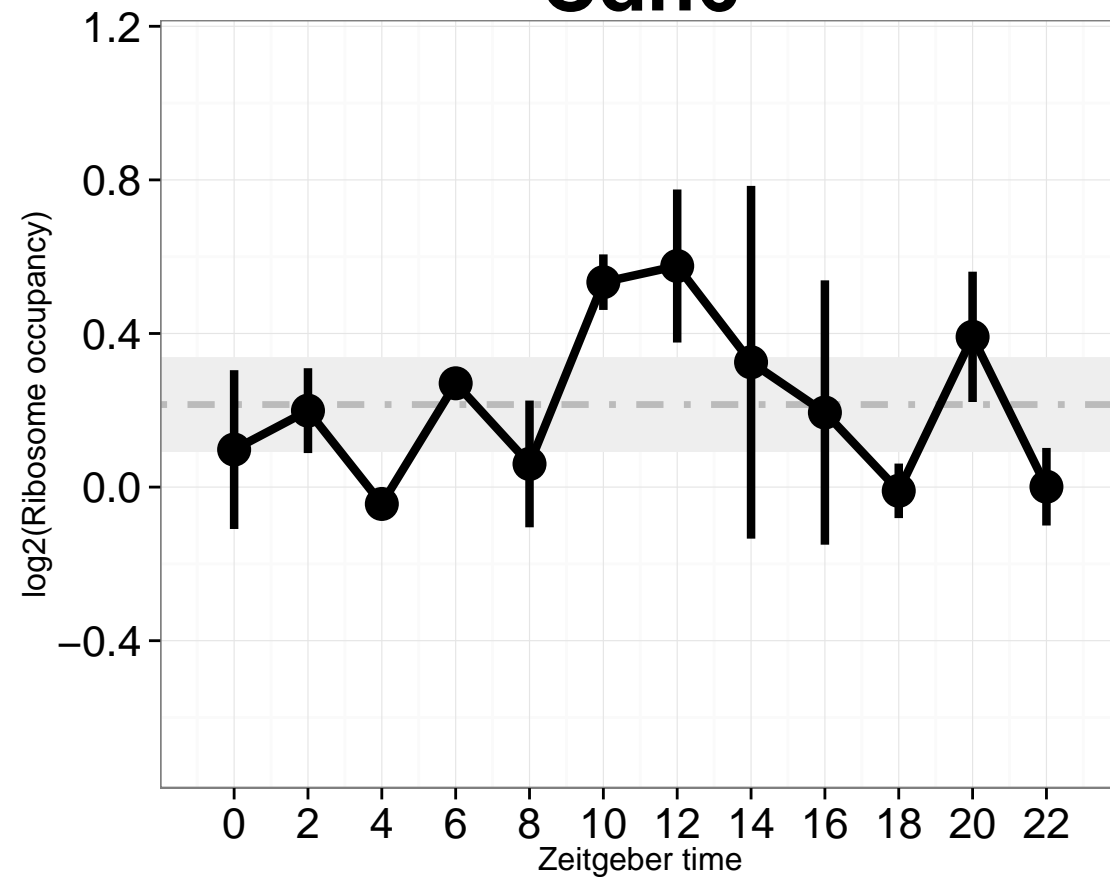

Supplement: Supplementary file 2778 [file 1]

# Map1s

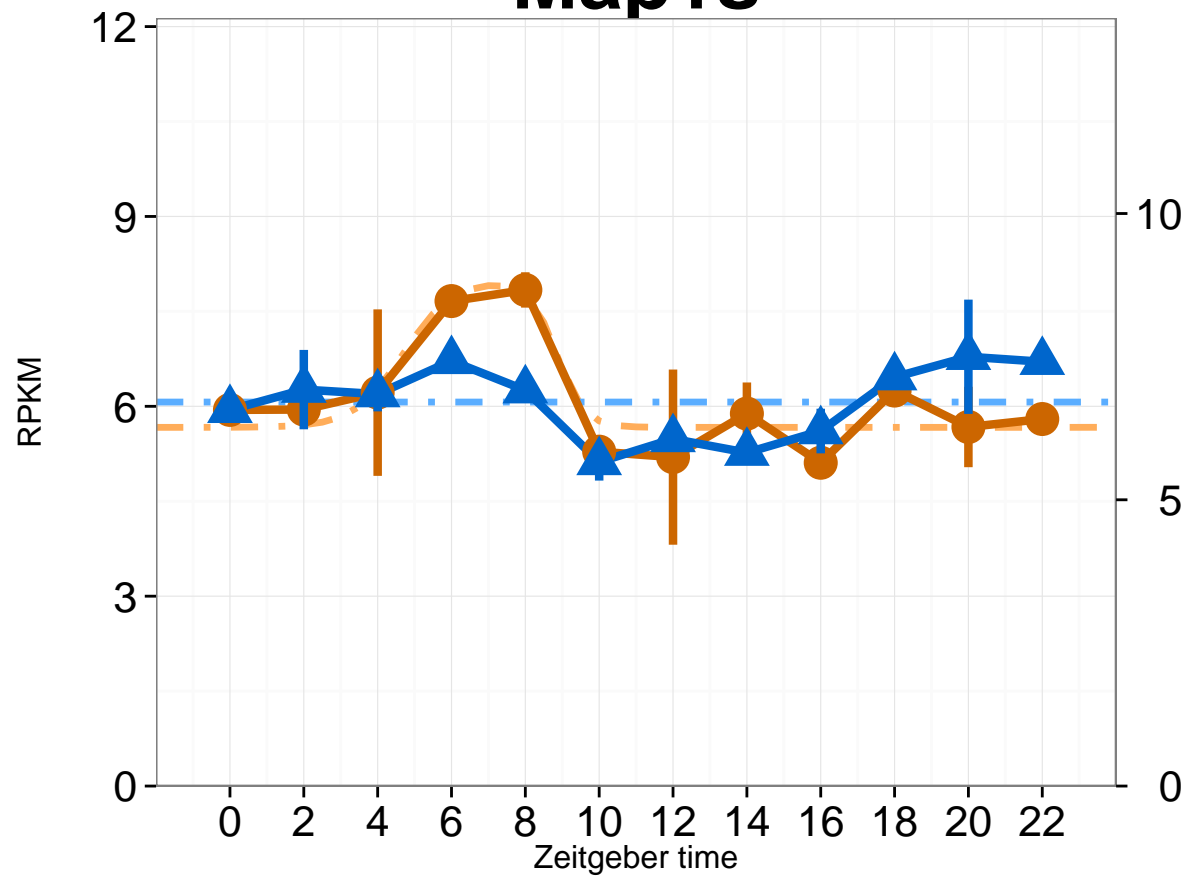

# Map1s

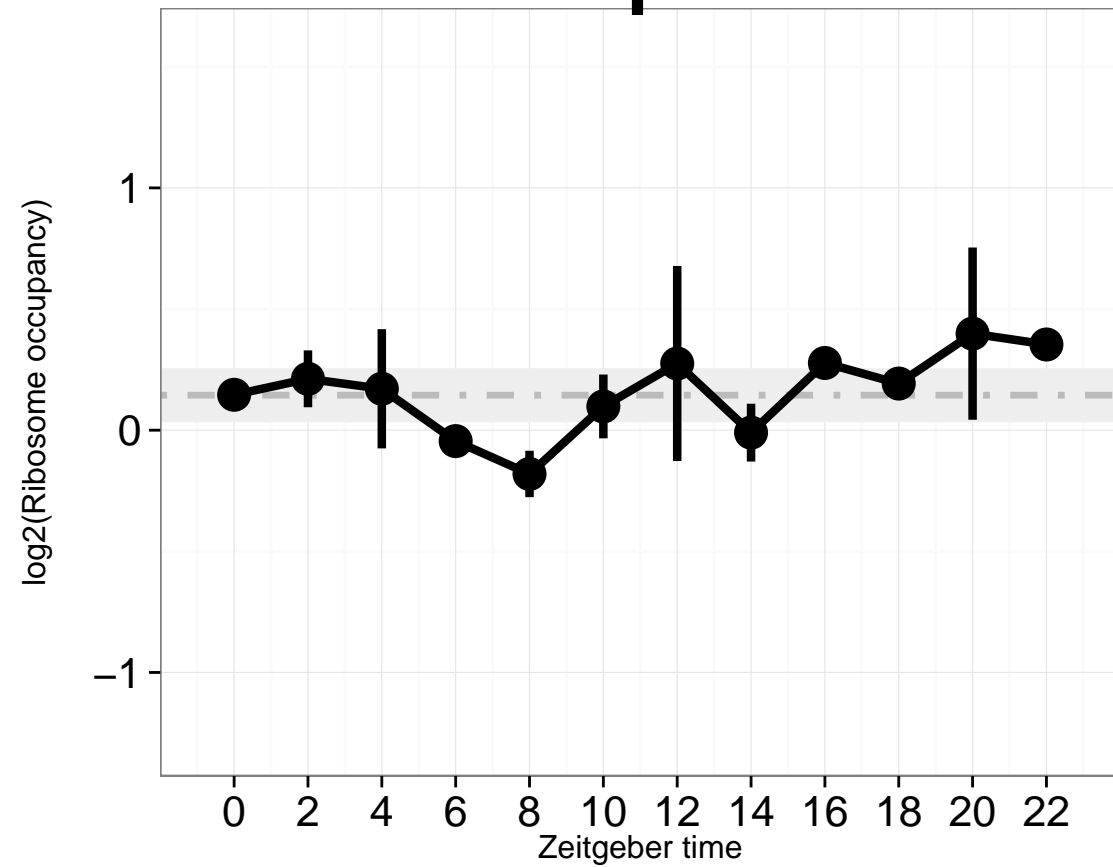

Supplement: Supplementary file 2779 [file 1]

# Ccpg1

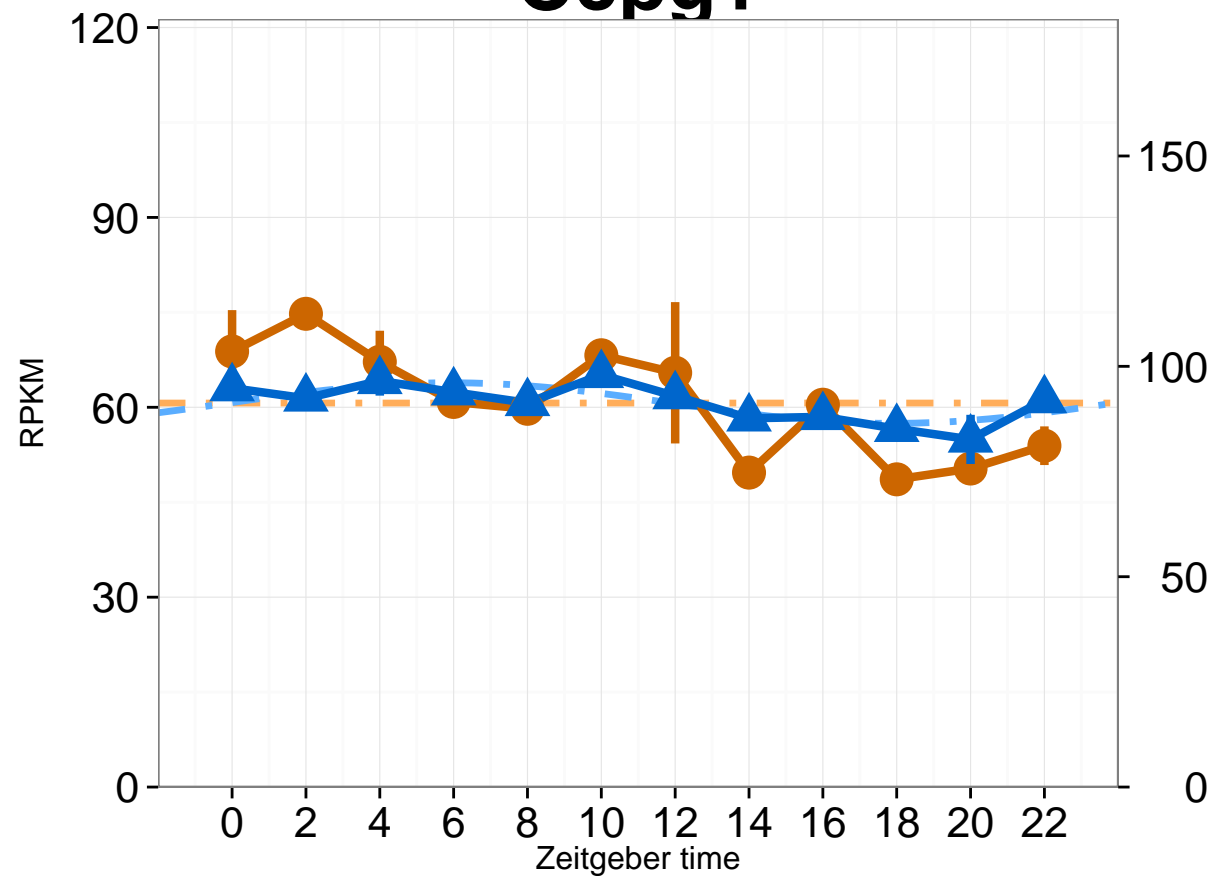

# Ccpg1

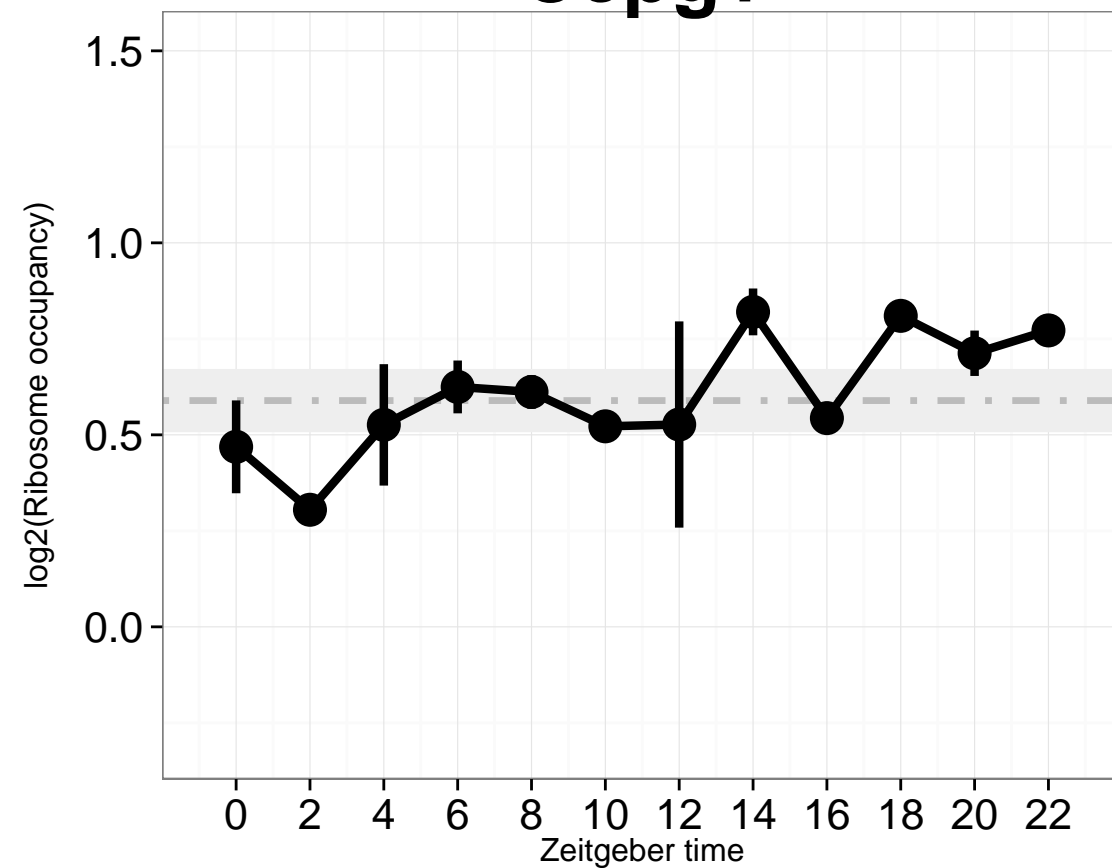

Supplement: Supplementary file 2780 [file 1]

## Usp11

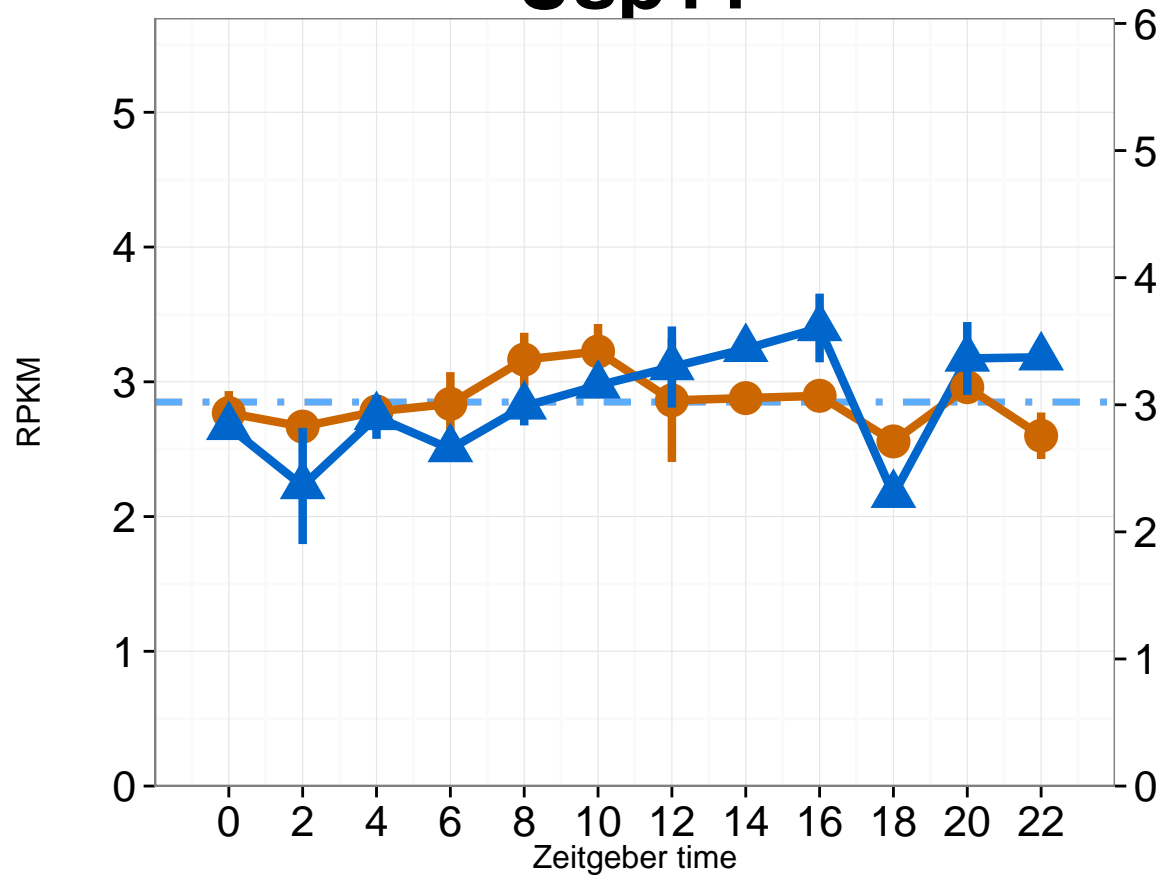

## Usp11

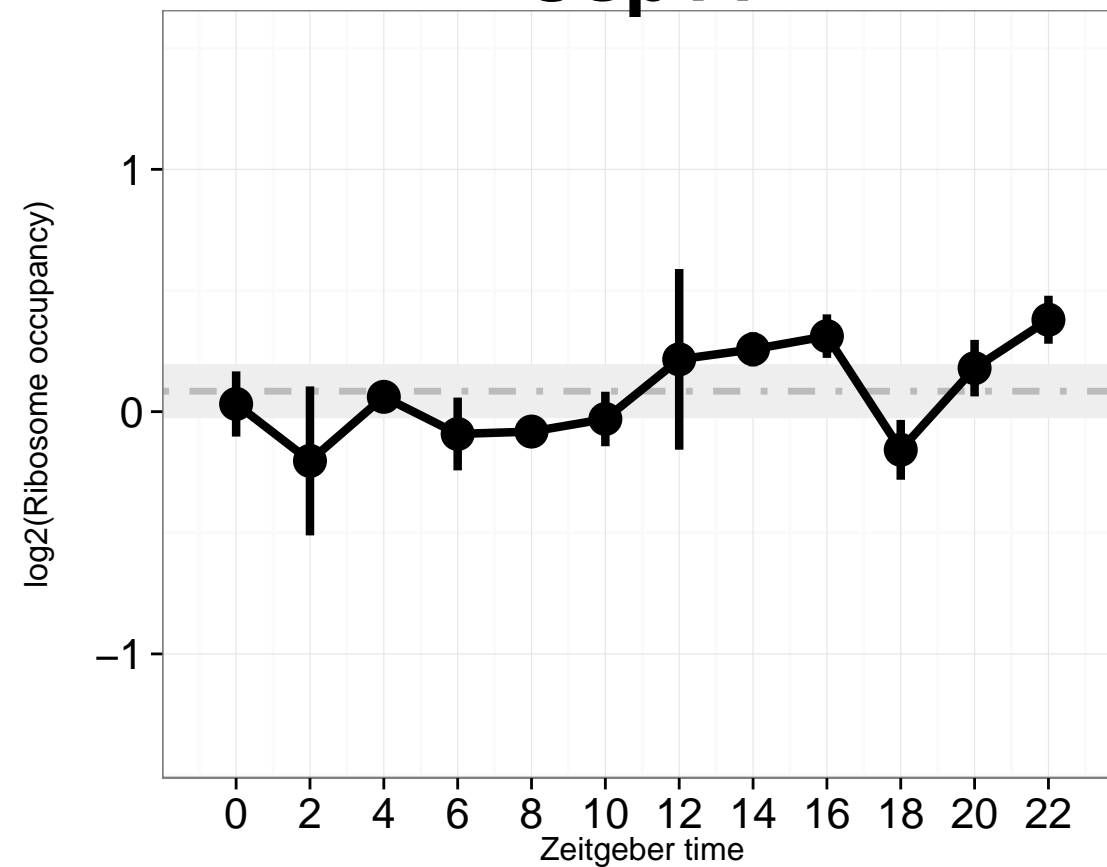

Supplement: Supplementary file 2781 [file 1]

## Usp24

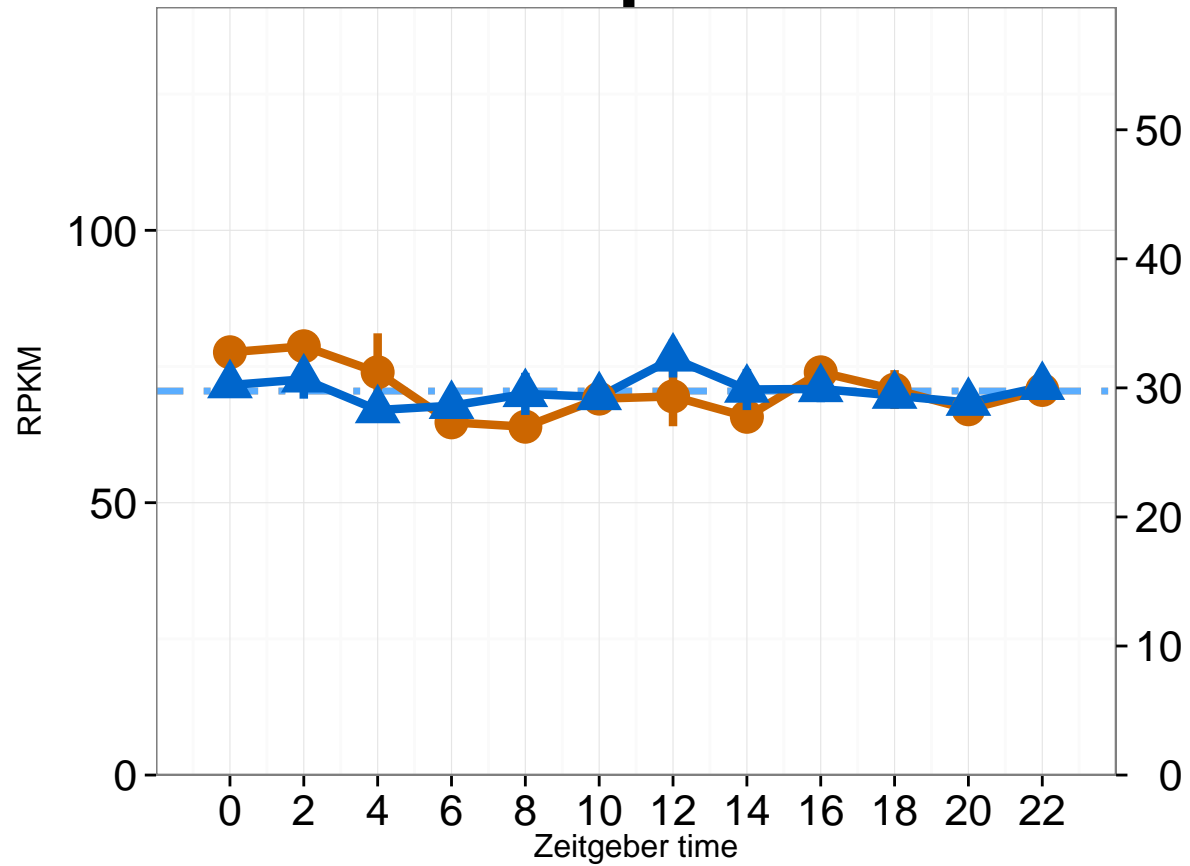

## Usp24

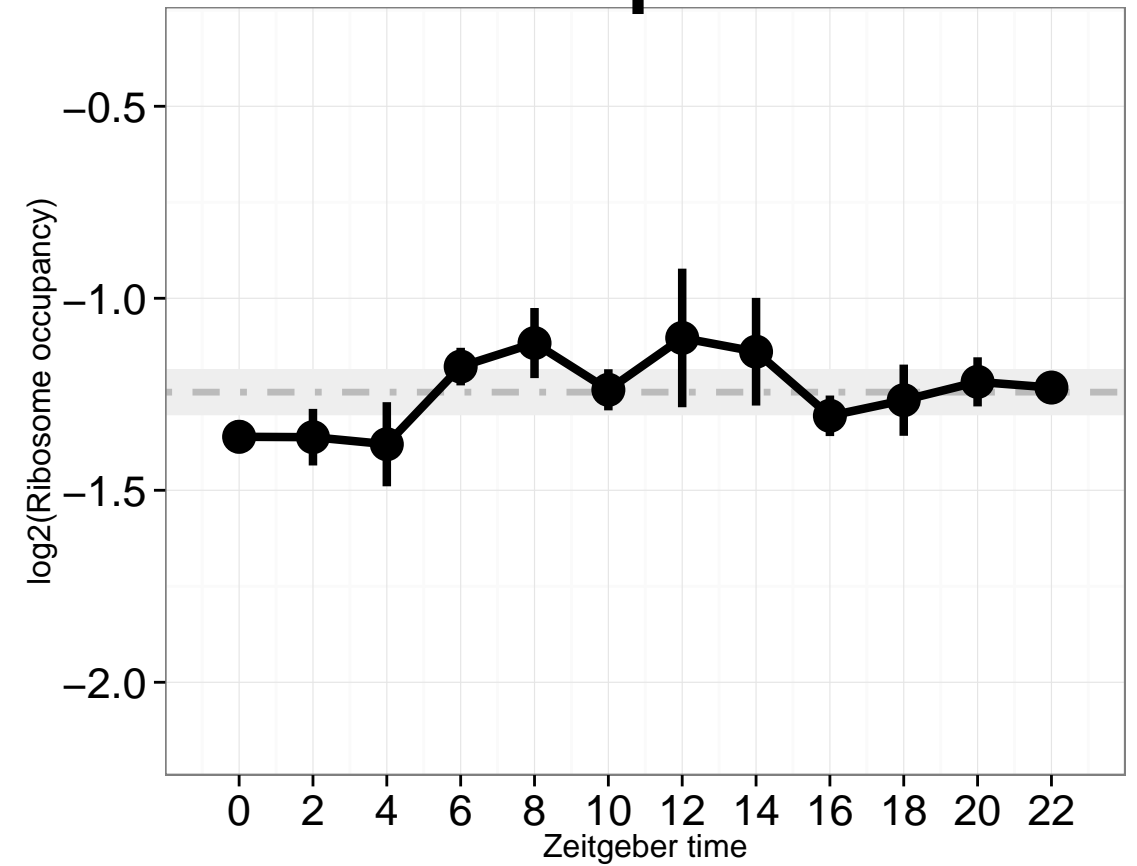

Supplement: Supplementary file 2782 [file 1]

## Lepr

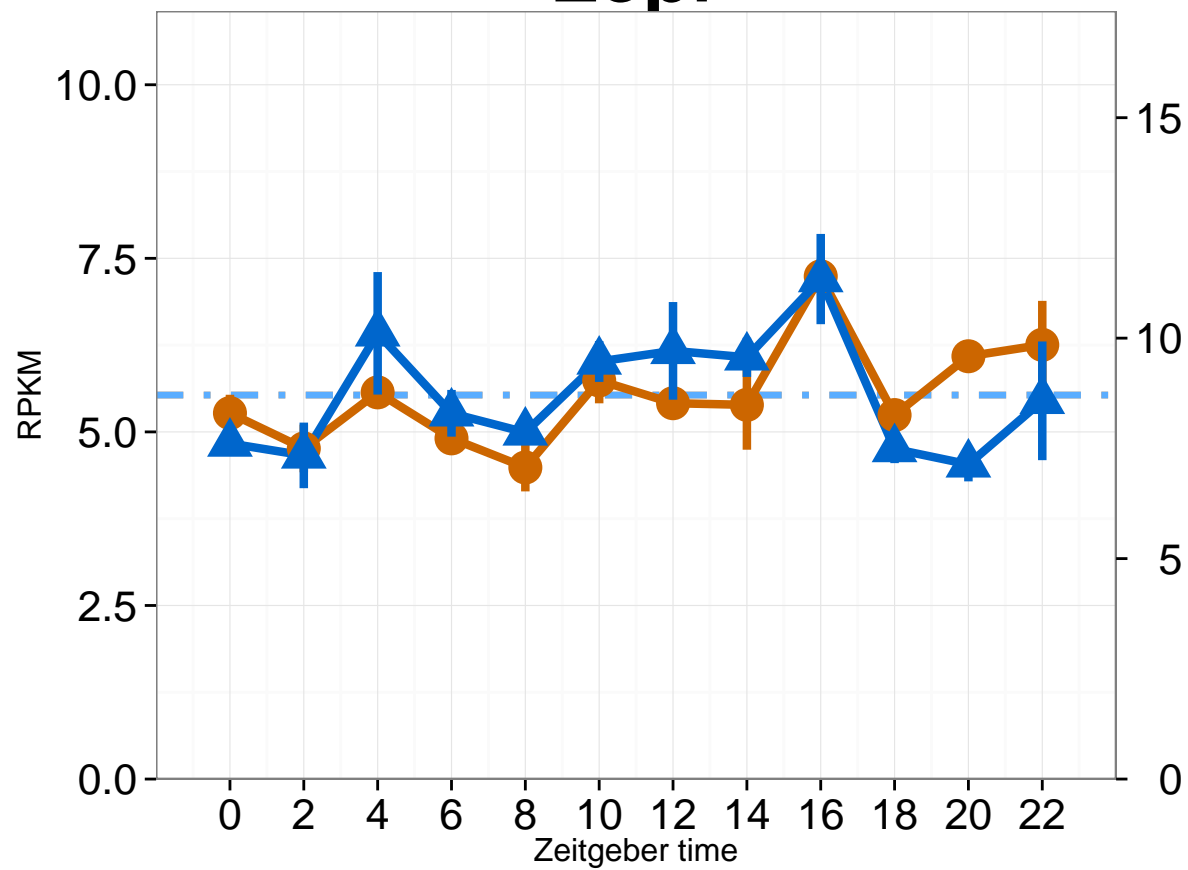

## Lepr

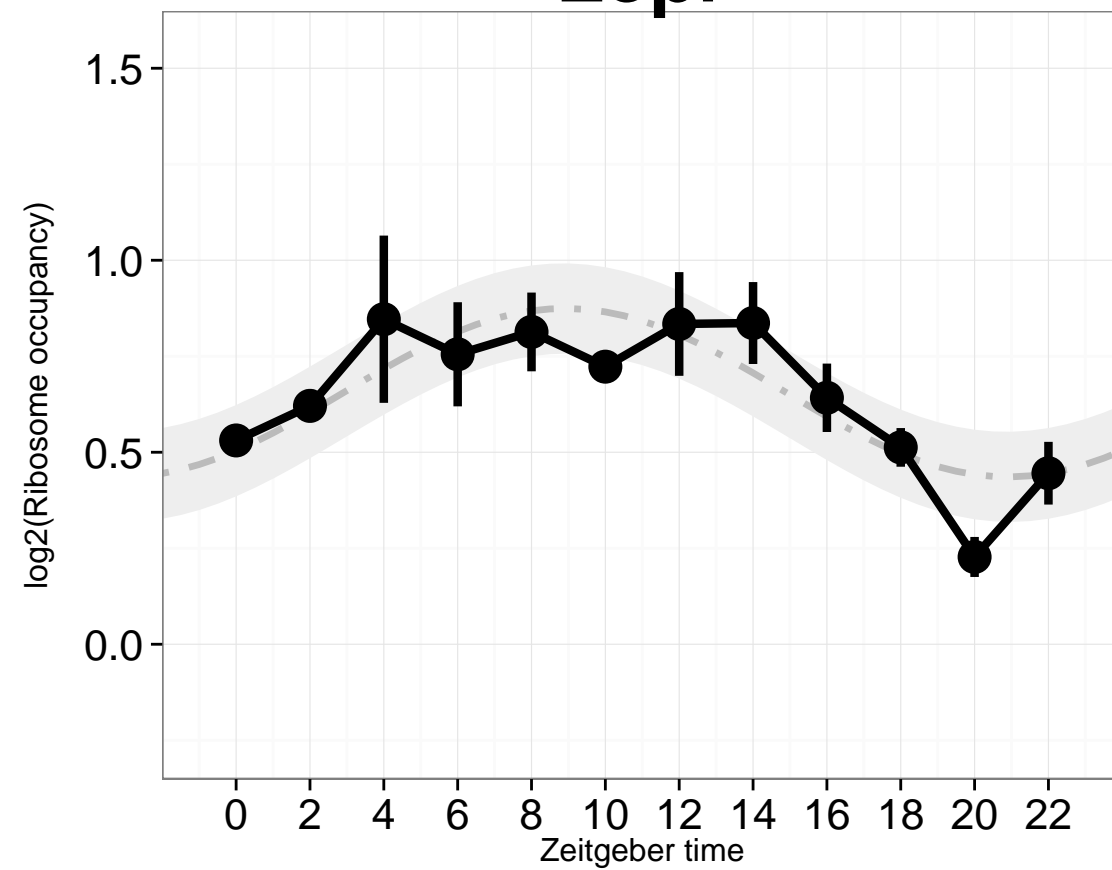

Supplement: Supplementary file 2783 [file 1]

## Folr1

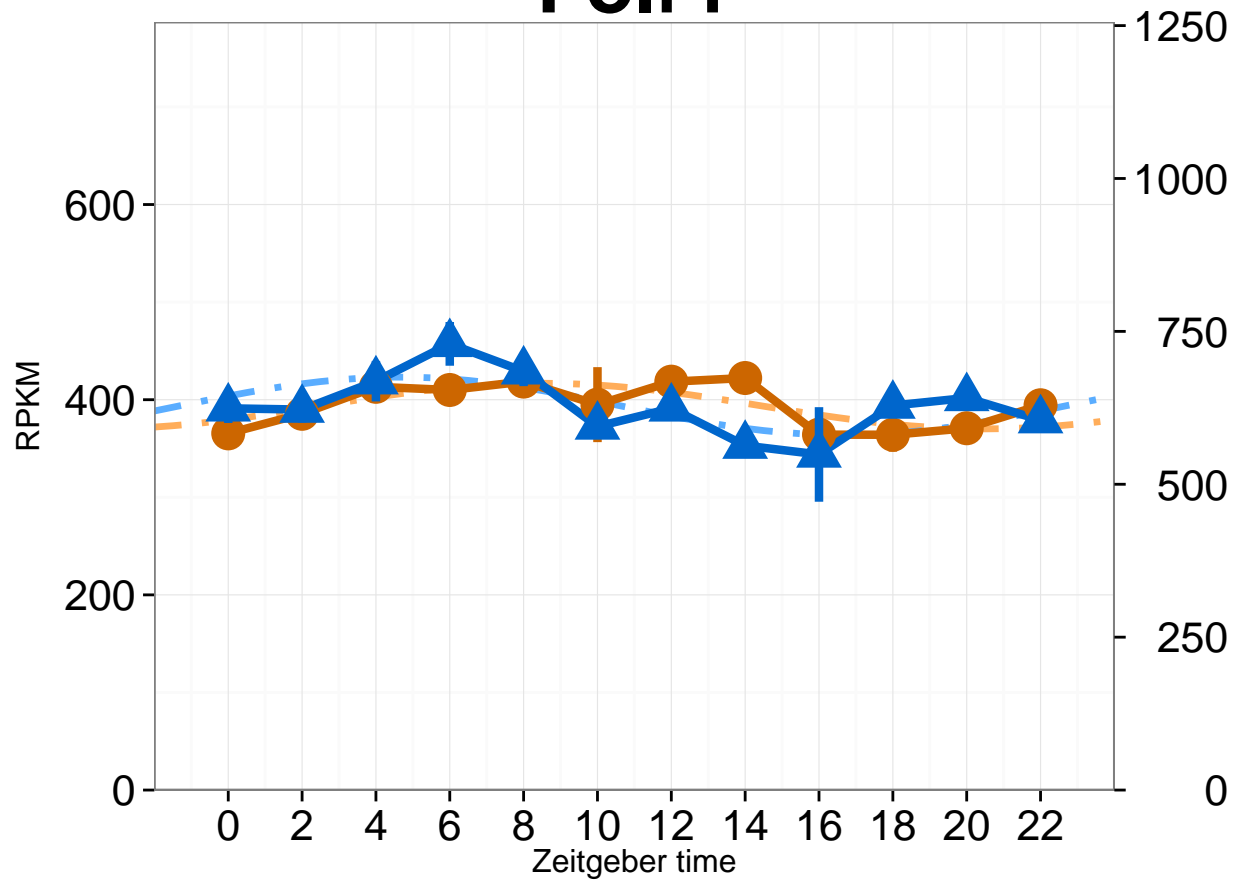

## Folr1

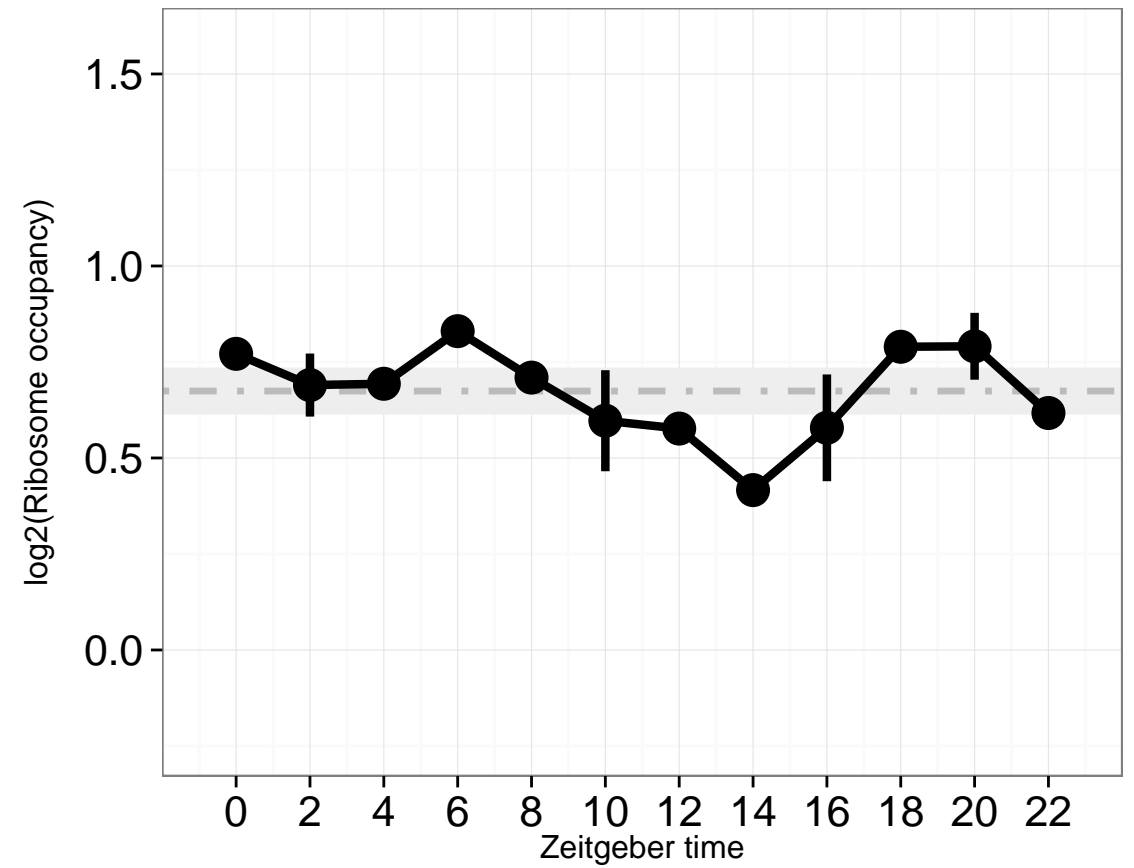

Supplement: Supplementary file 2784 [file 1]

## Denr

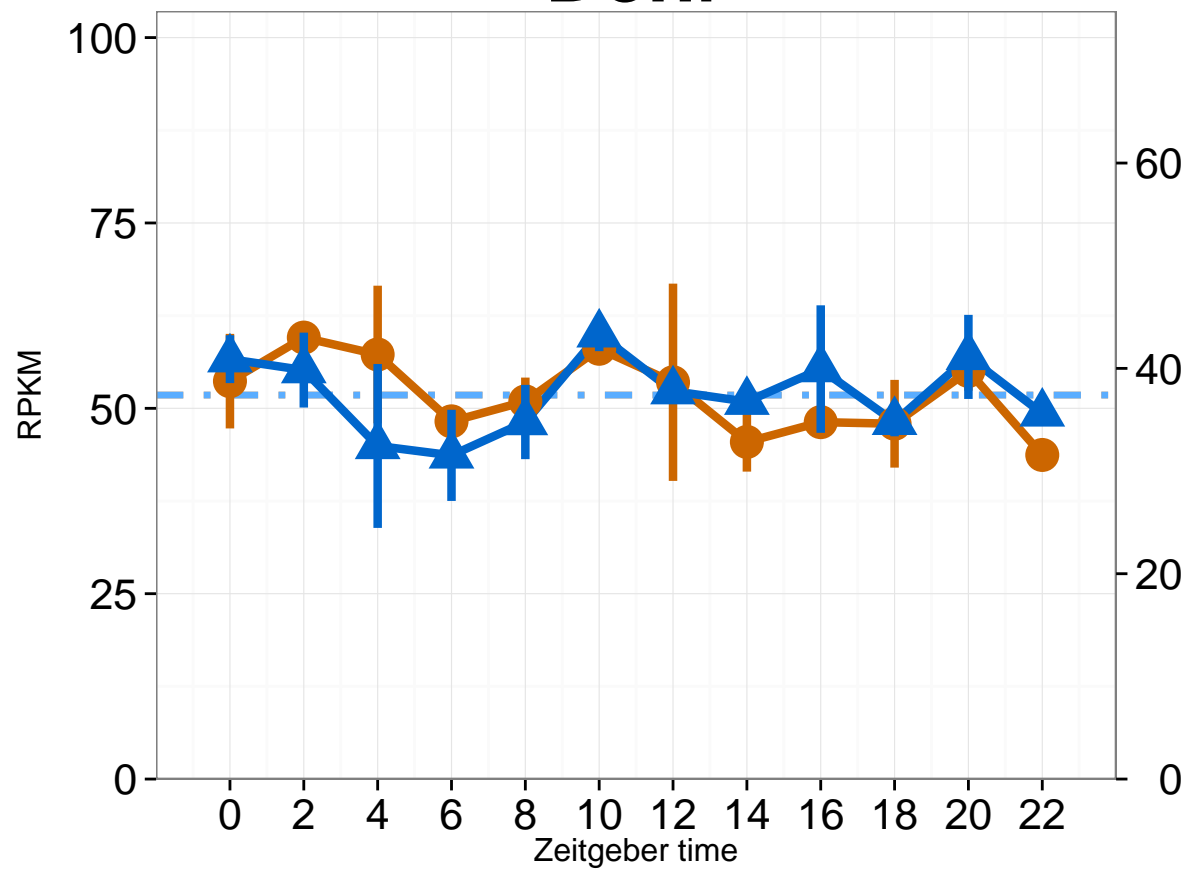

## Denr

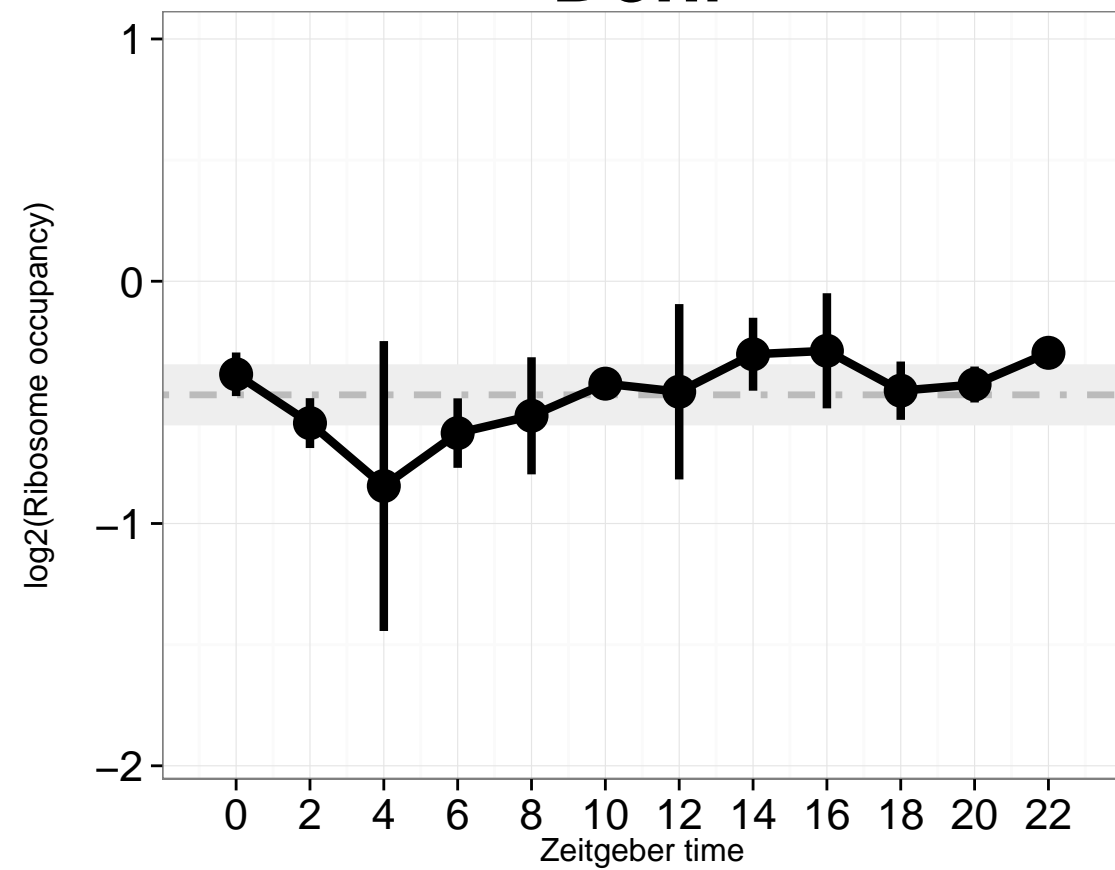

Supplement: Supplementary file 2785 [file 1]

# Fgd1

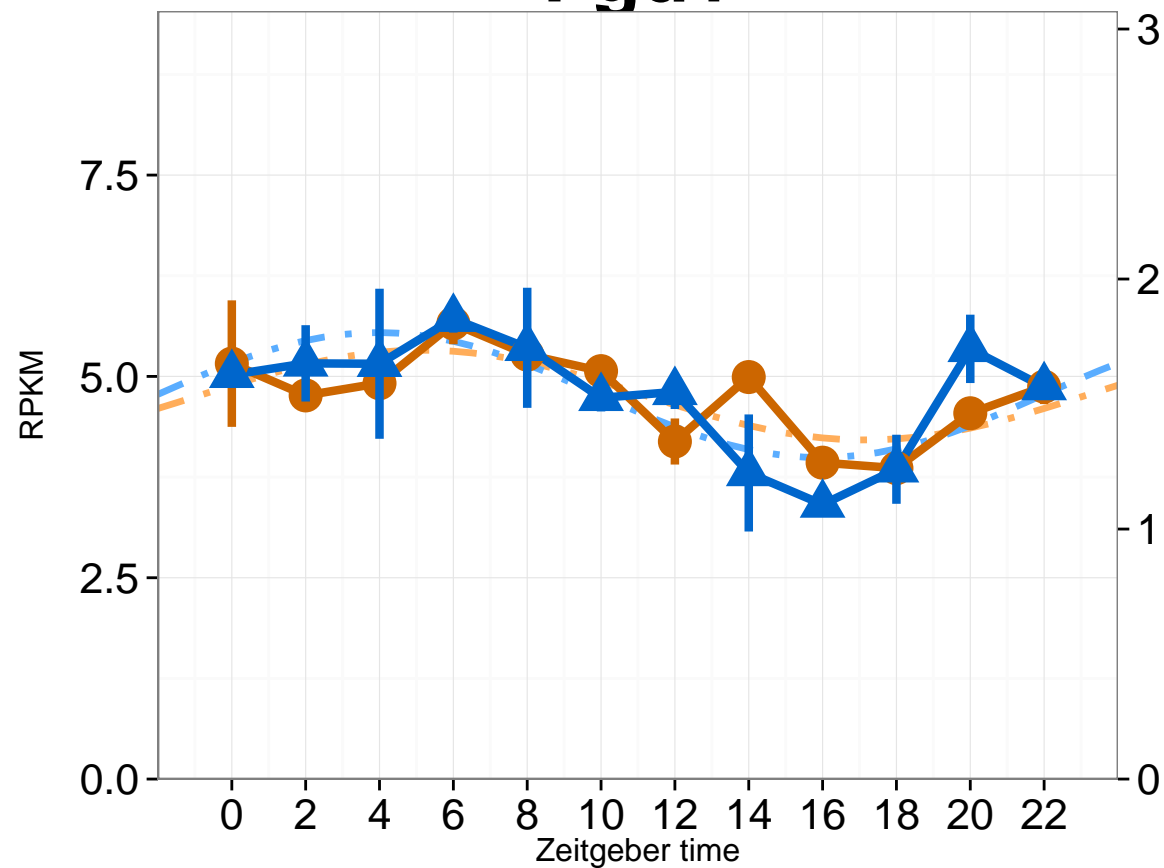

# Fgd1

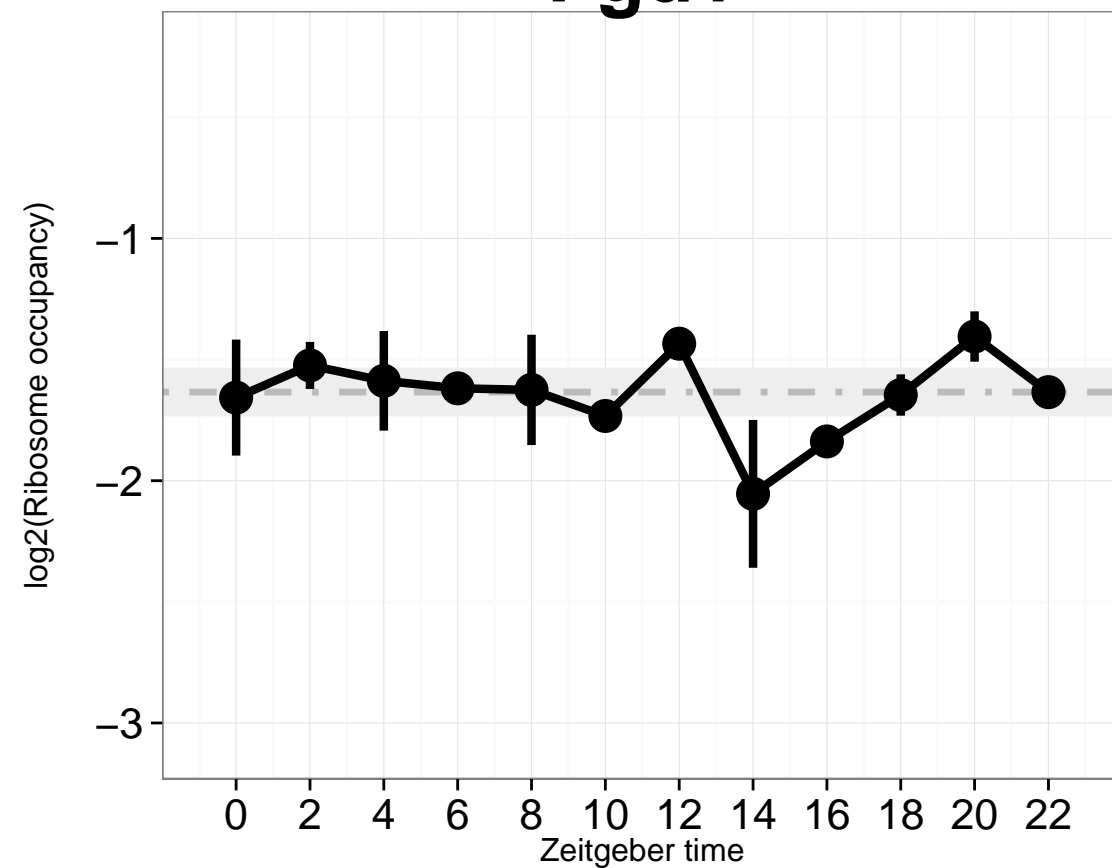

Supplement: Supplementary file 2786 [file 1]

## Tbc1d23

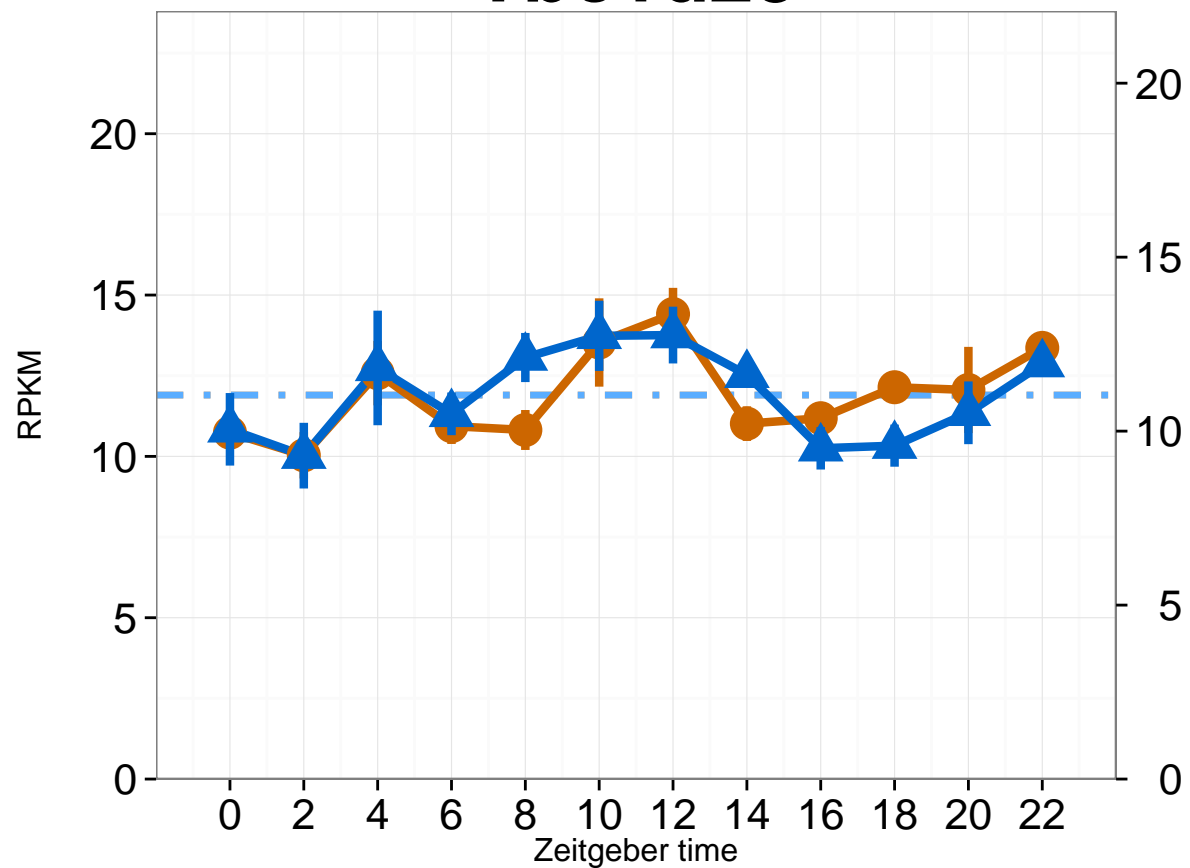

## Tbc1d23

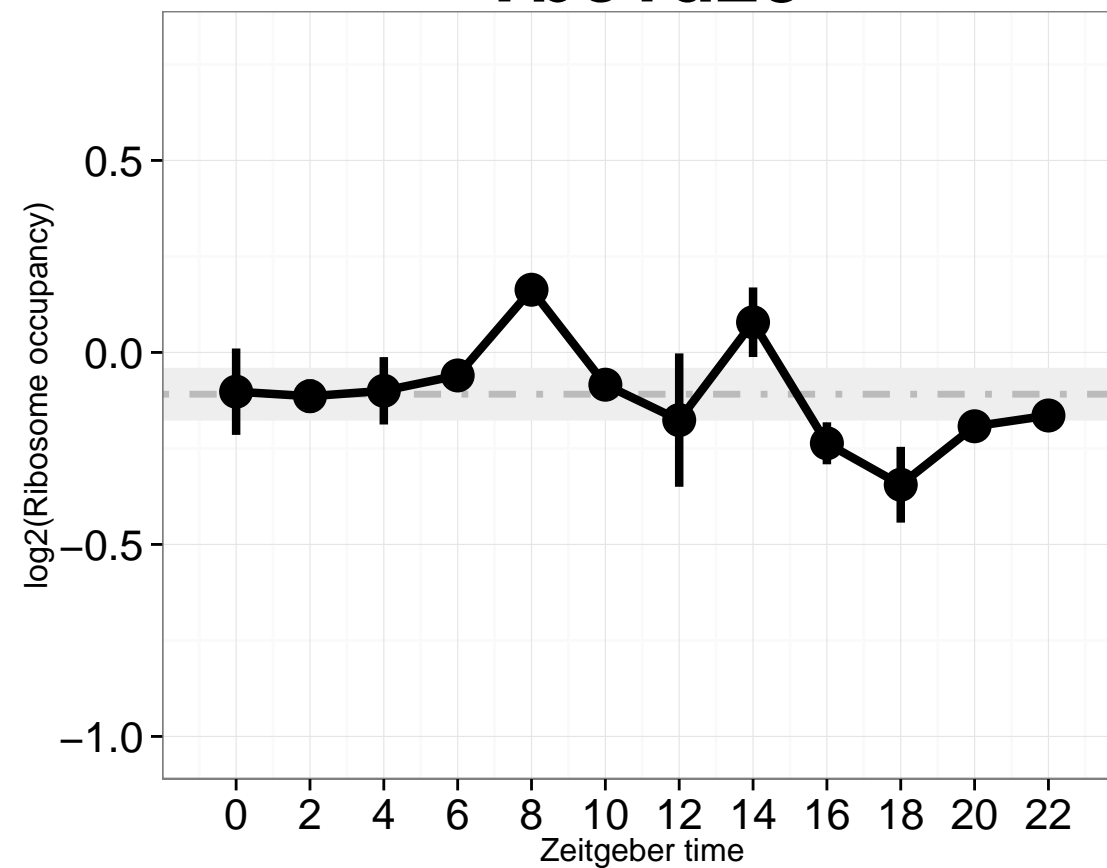

Supplement: Supplementary file 2787 [file 1]

## Pkp3

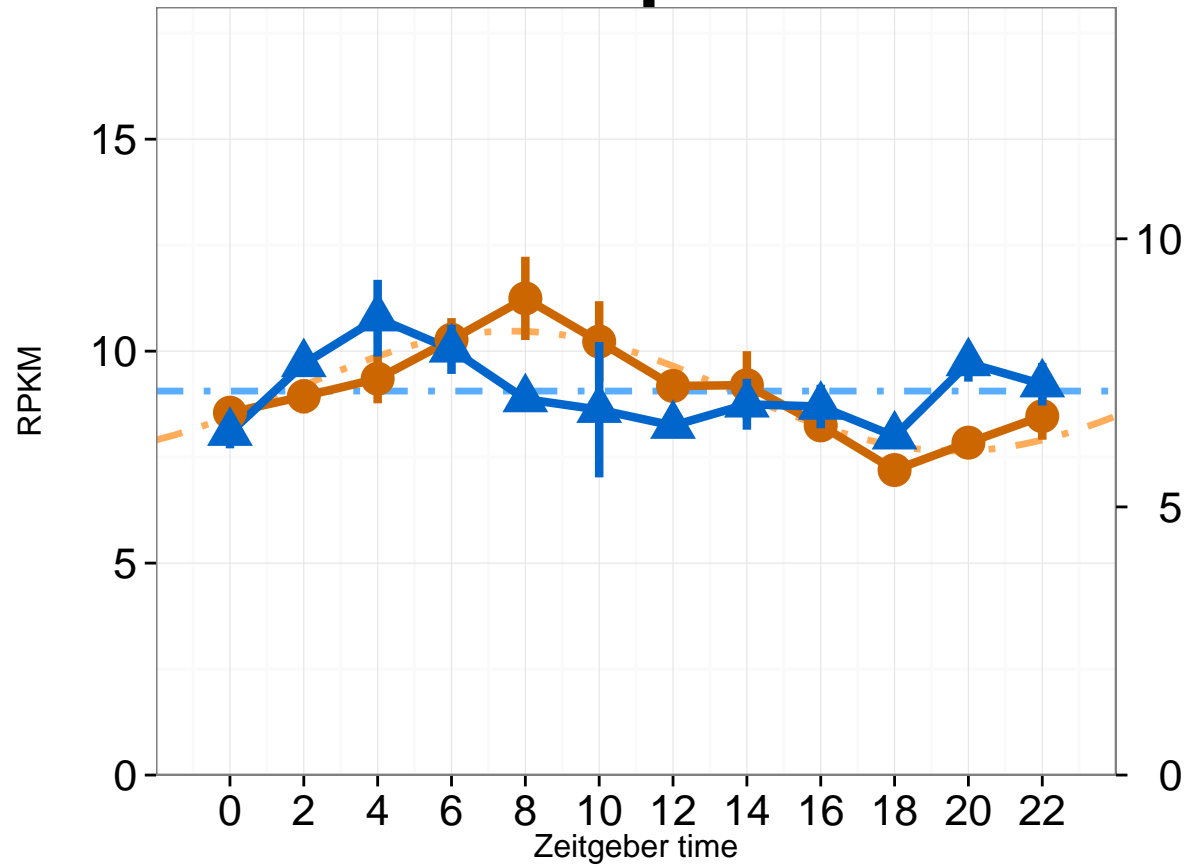

## Pkp3

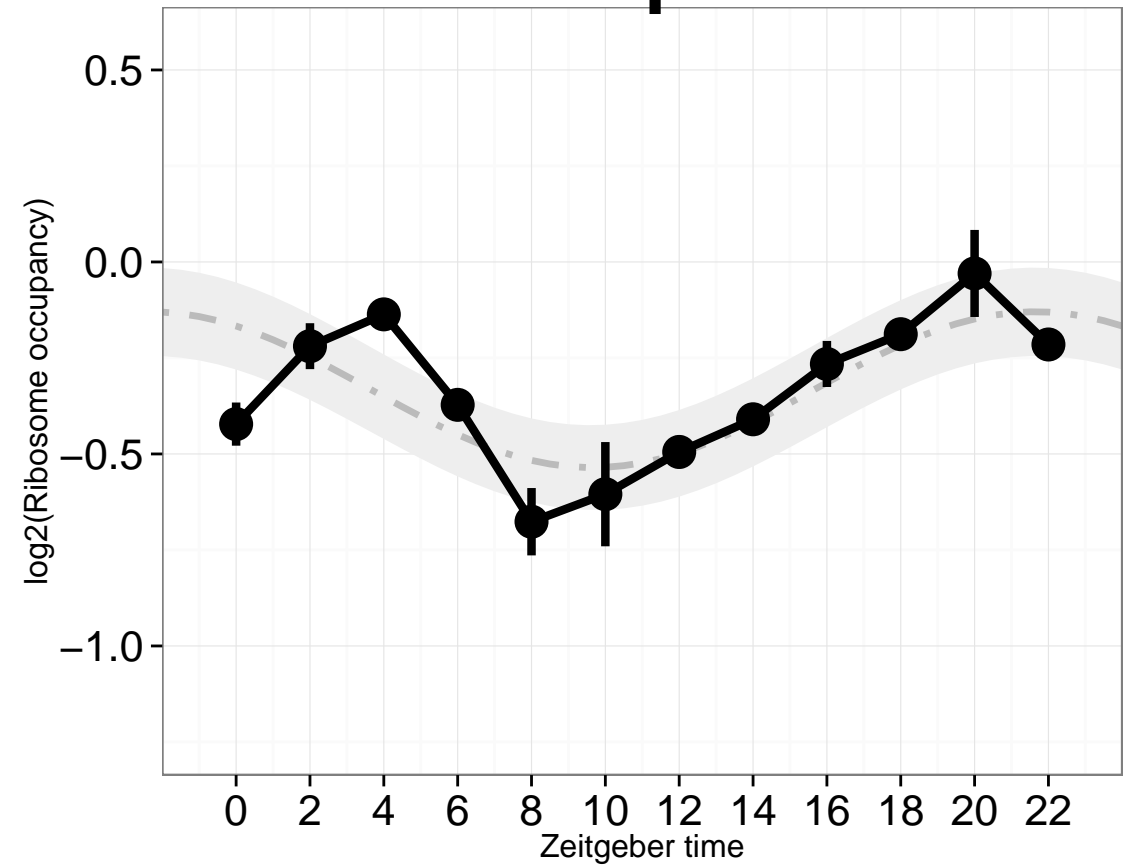

Supplement: Supplementary file 2788 [file 1]

# Wdfy1

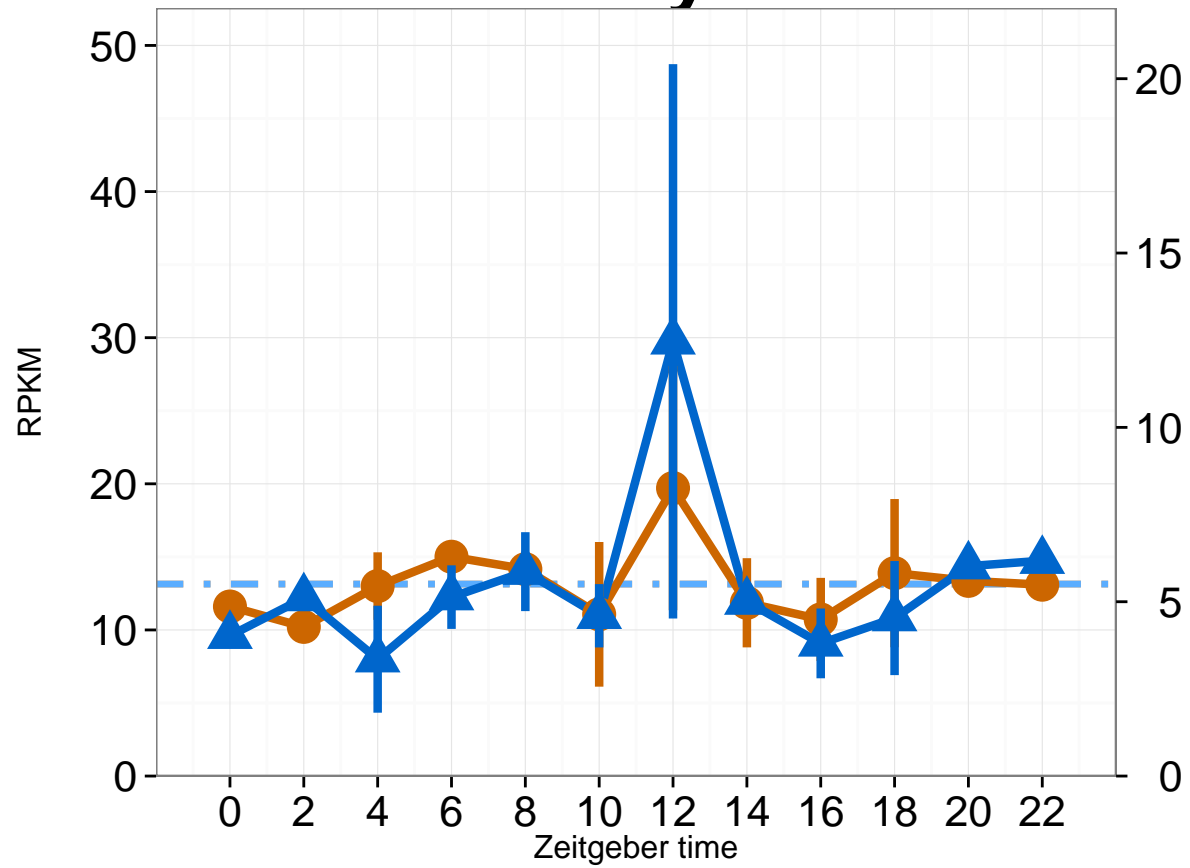

# Wdfy1

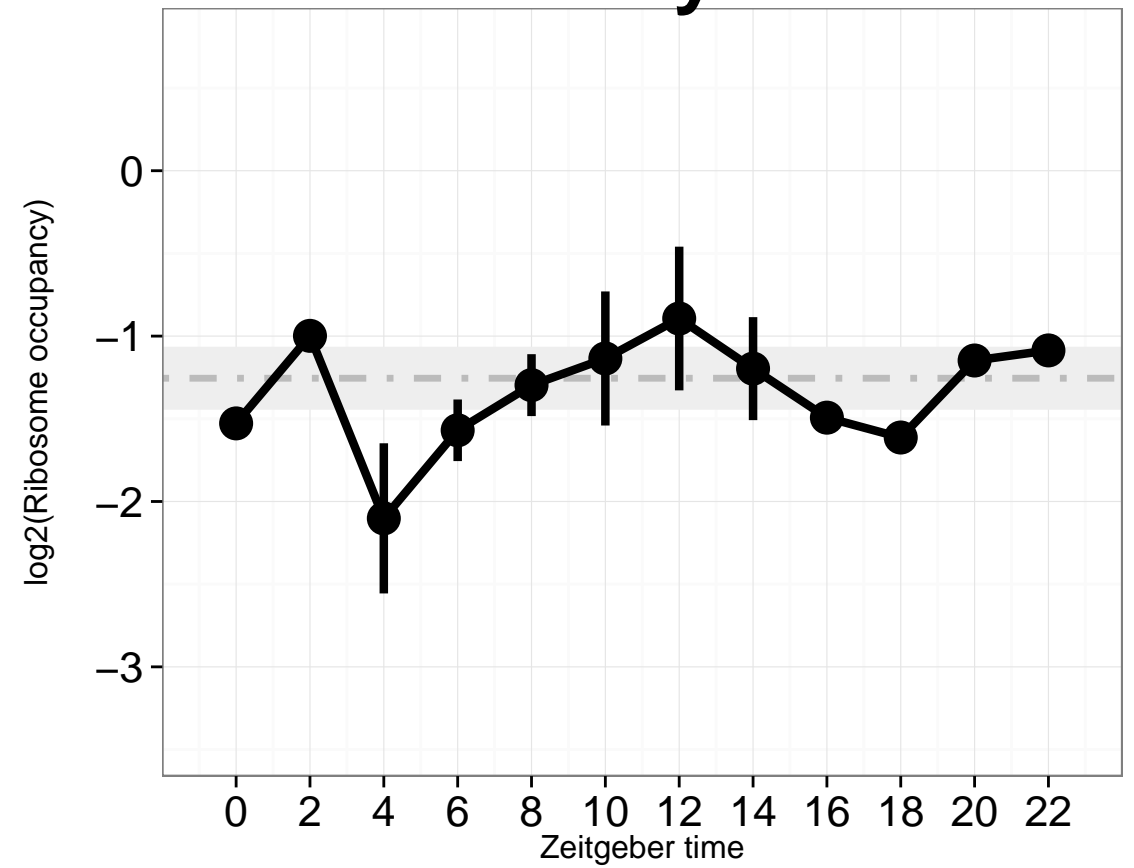

Supplement: Supplementary file 2789 [file 1]

## Noxo1

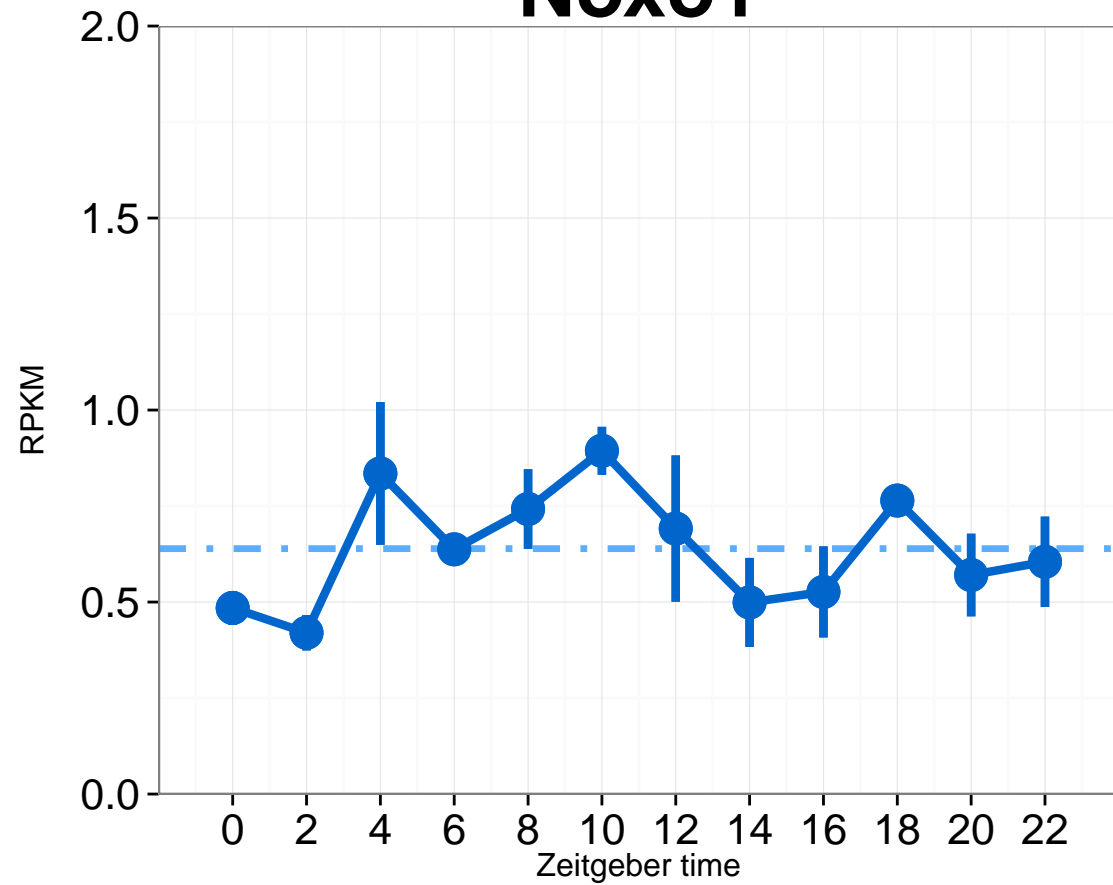

## Noxo1 log2(Ribosome occupancy

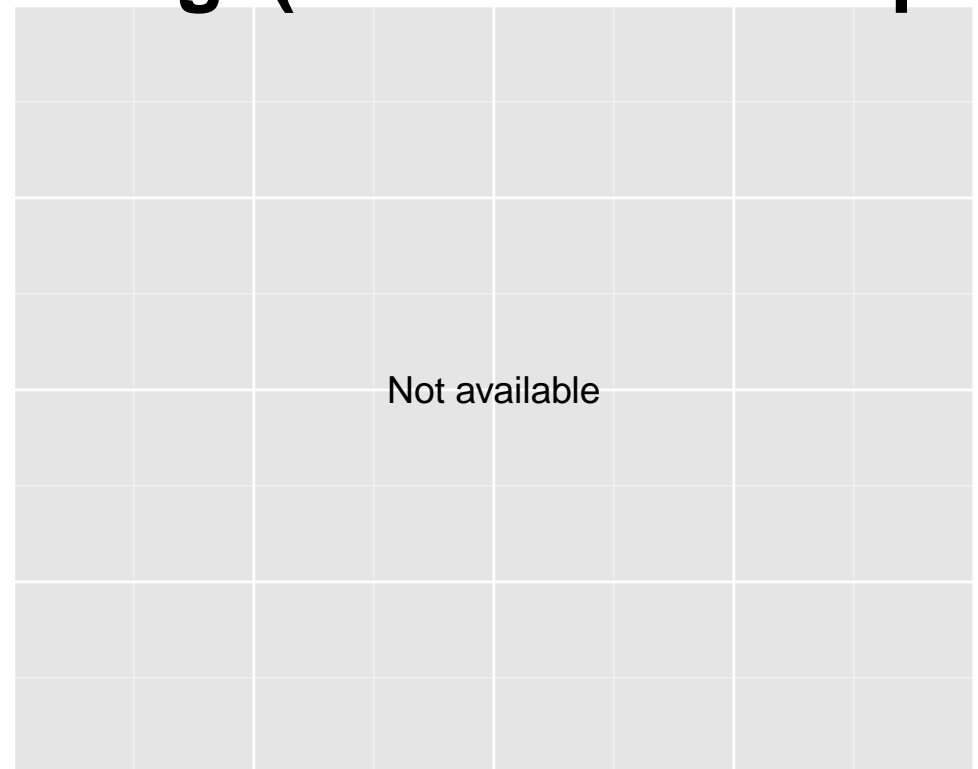

Supplement: Supplementary file 2790 [file 1]

## Pik3r4

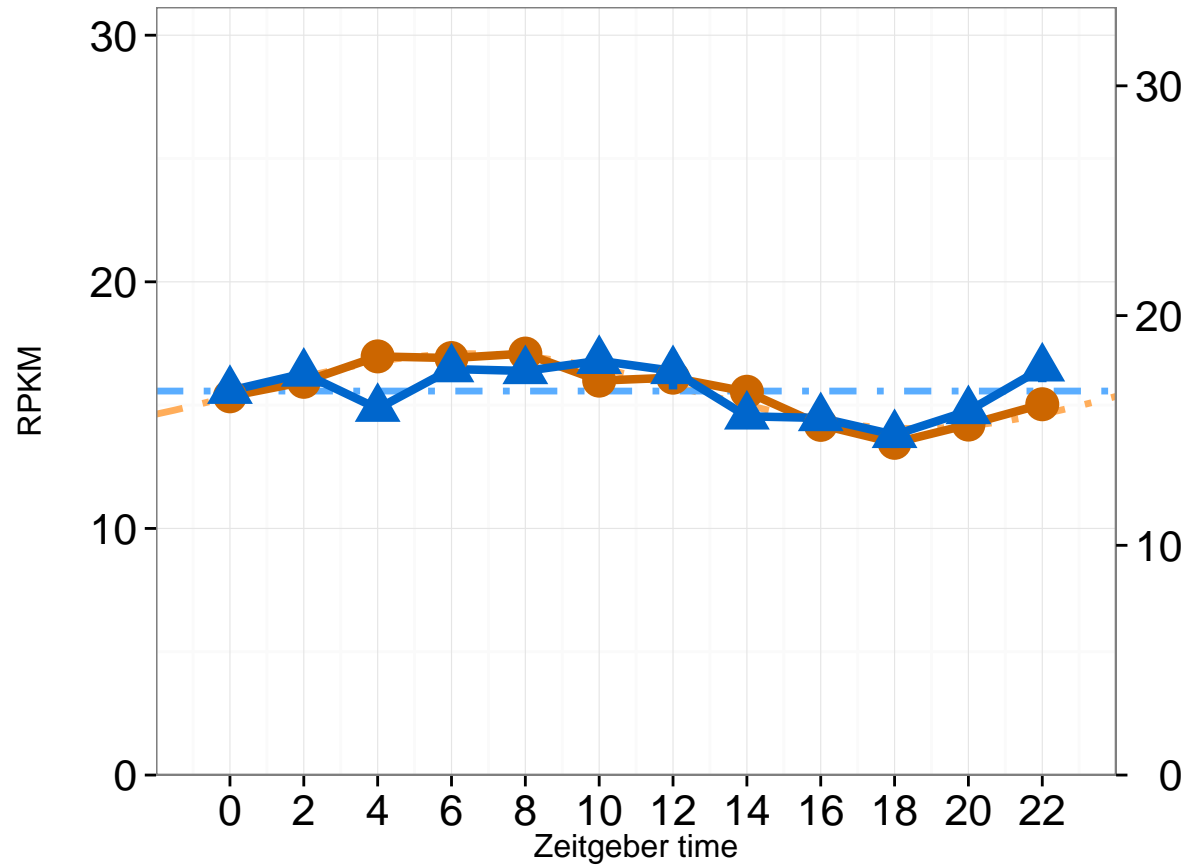

## Pik3r4

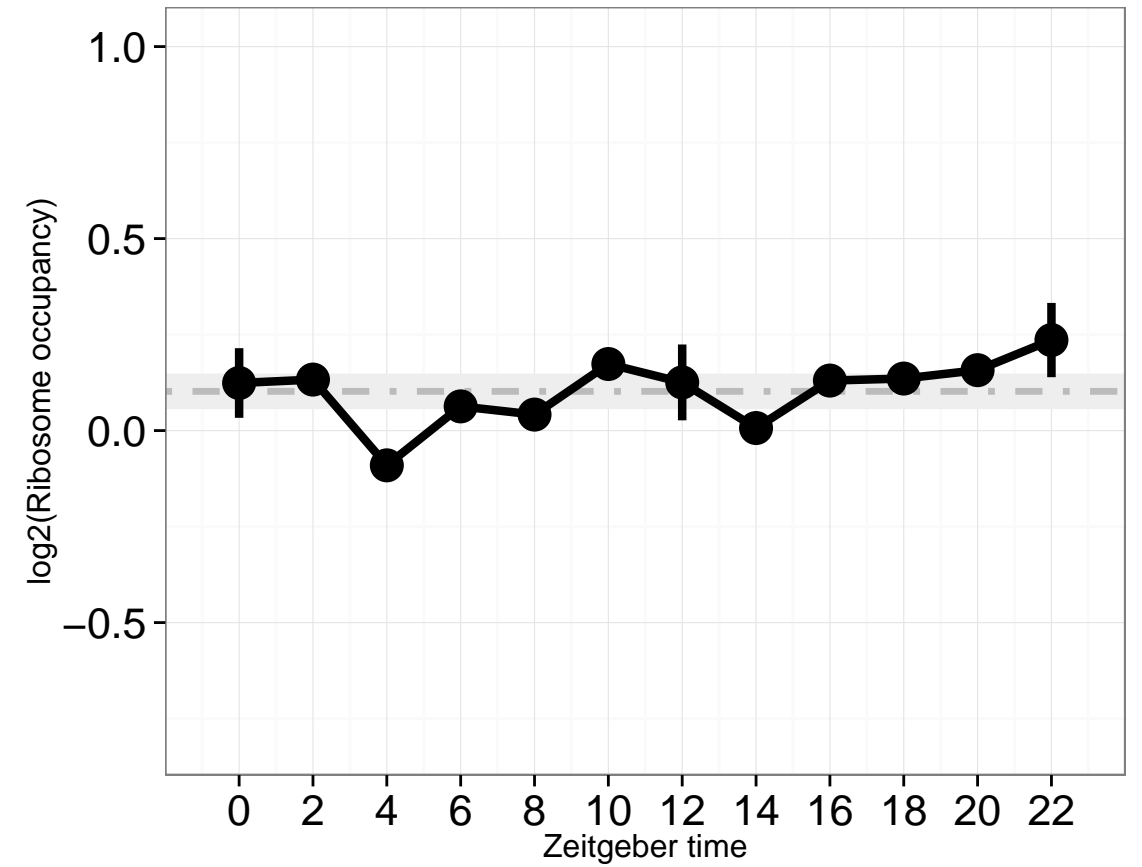

Supplement: Supplementary file 2791 [file 1]

## Uba5

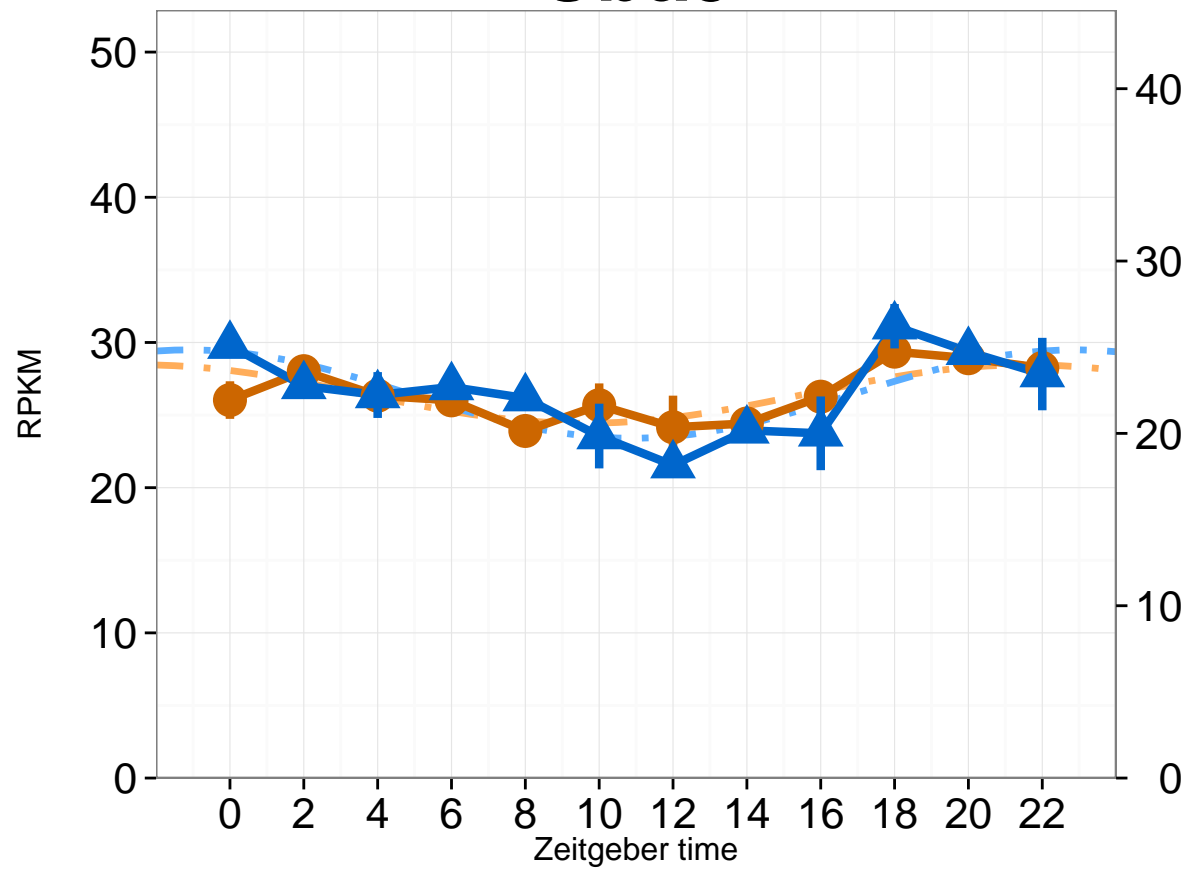

## Uba5

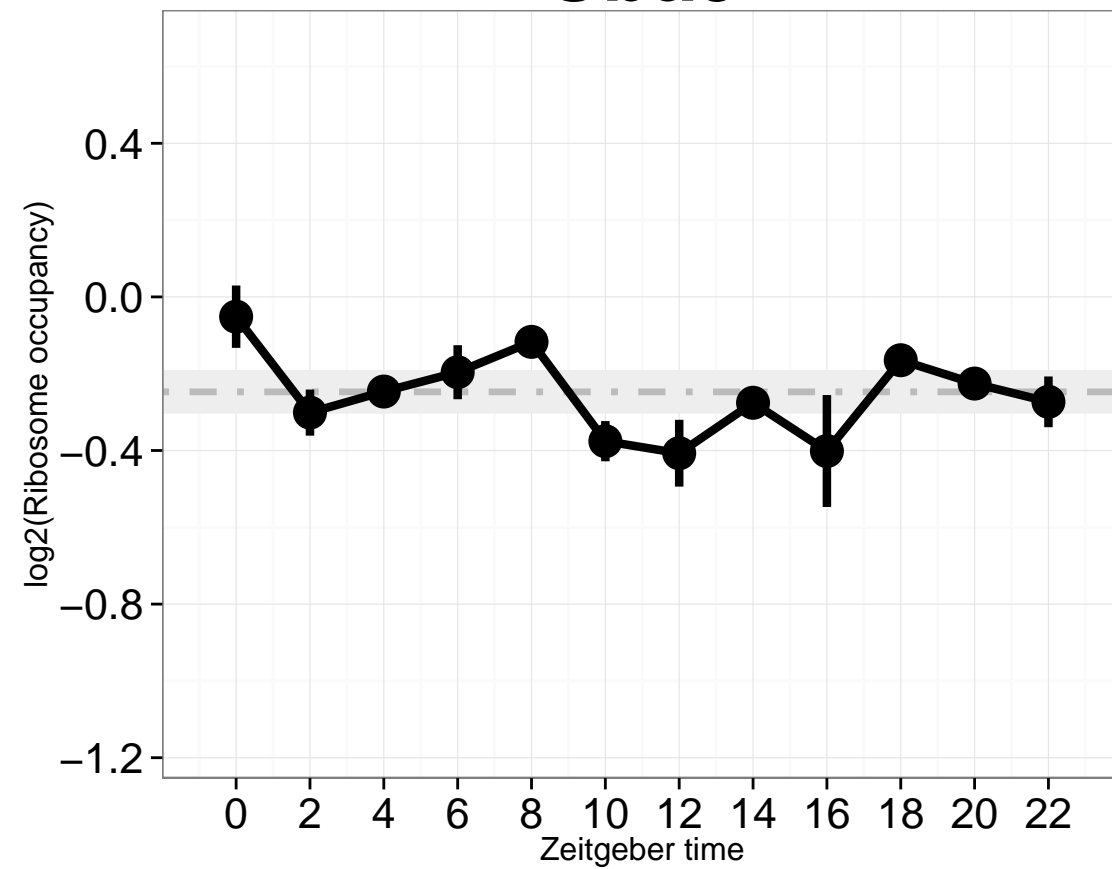

Supplement: Supplementary file 2792 [file 1]

# Tmem208

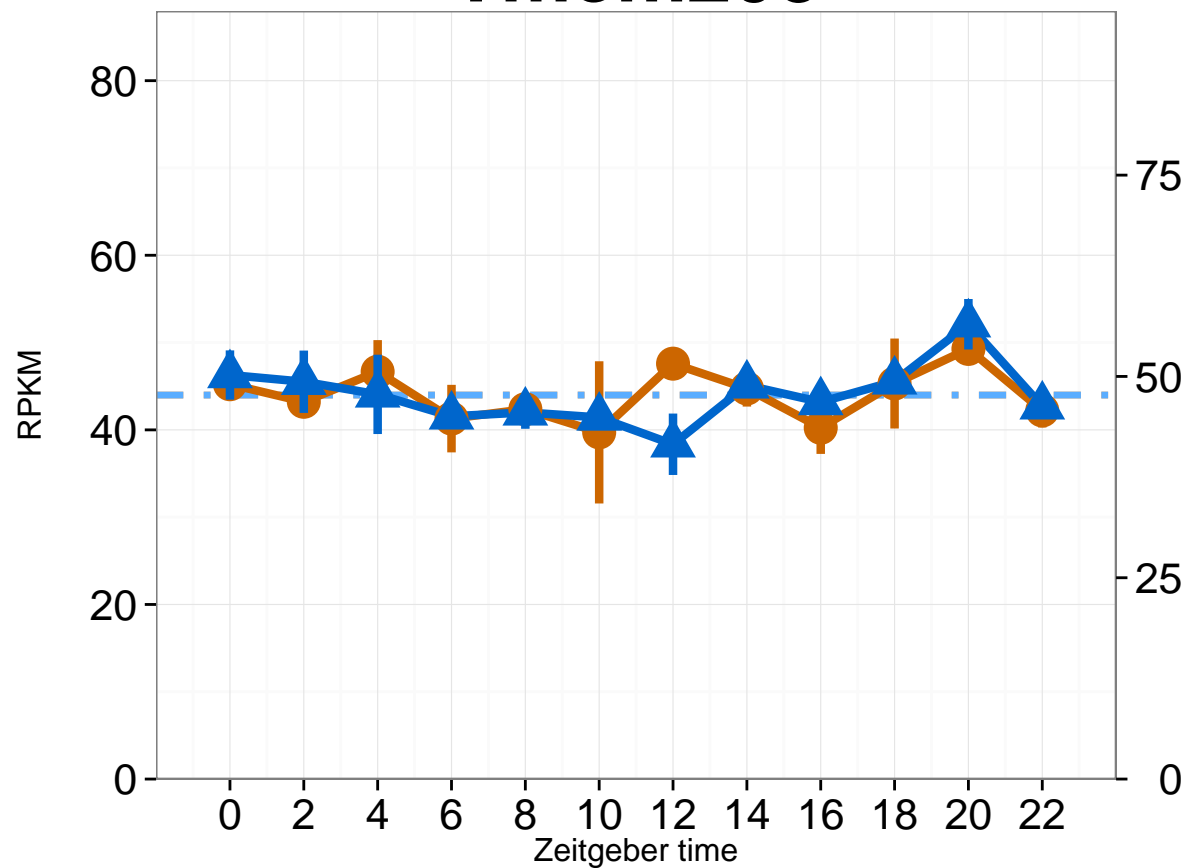

# Tmem208

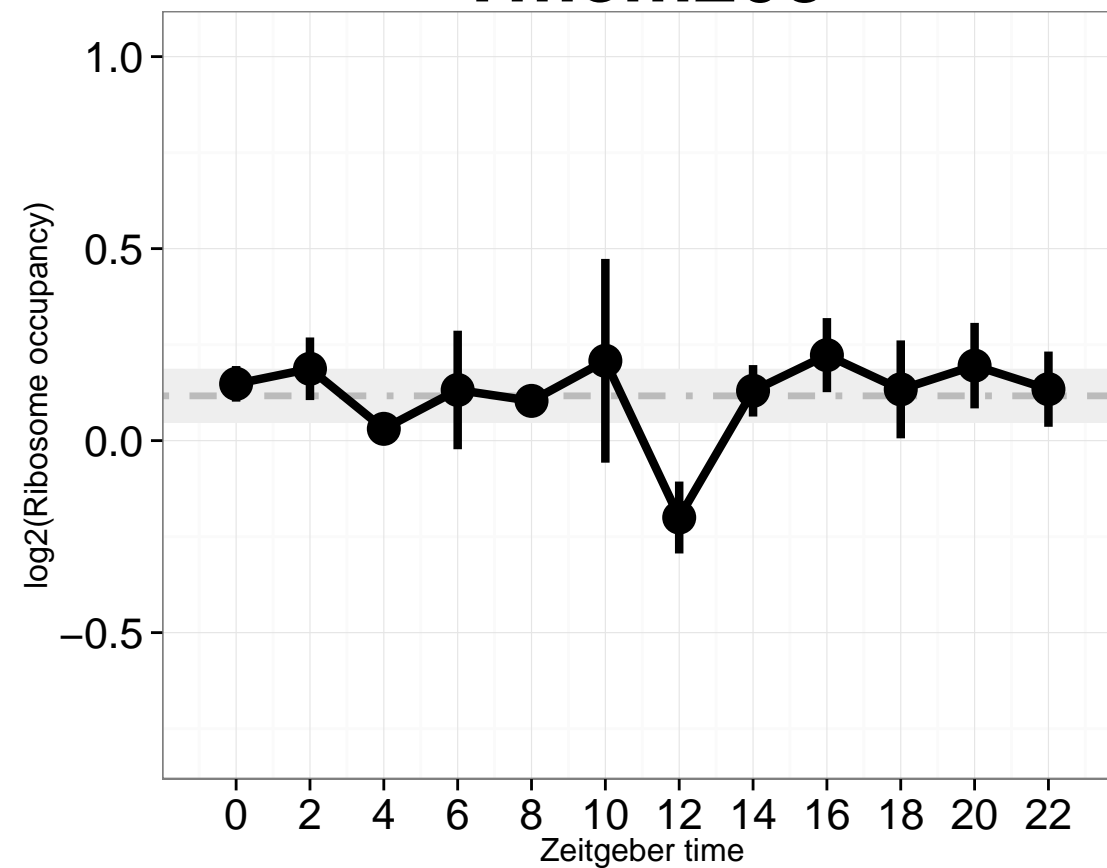

Supplement: Supplementary file 2793 [file 1]

## Smoc2

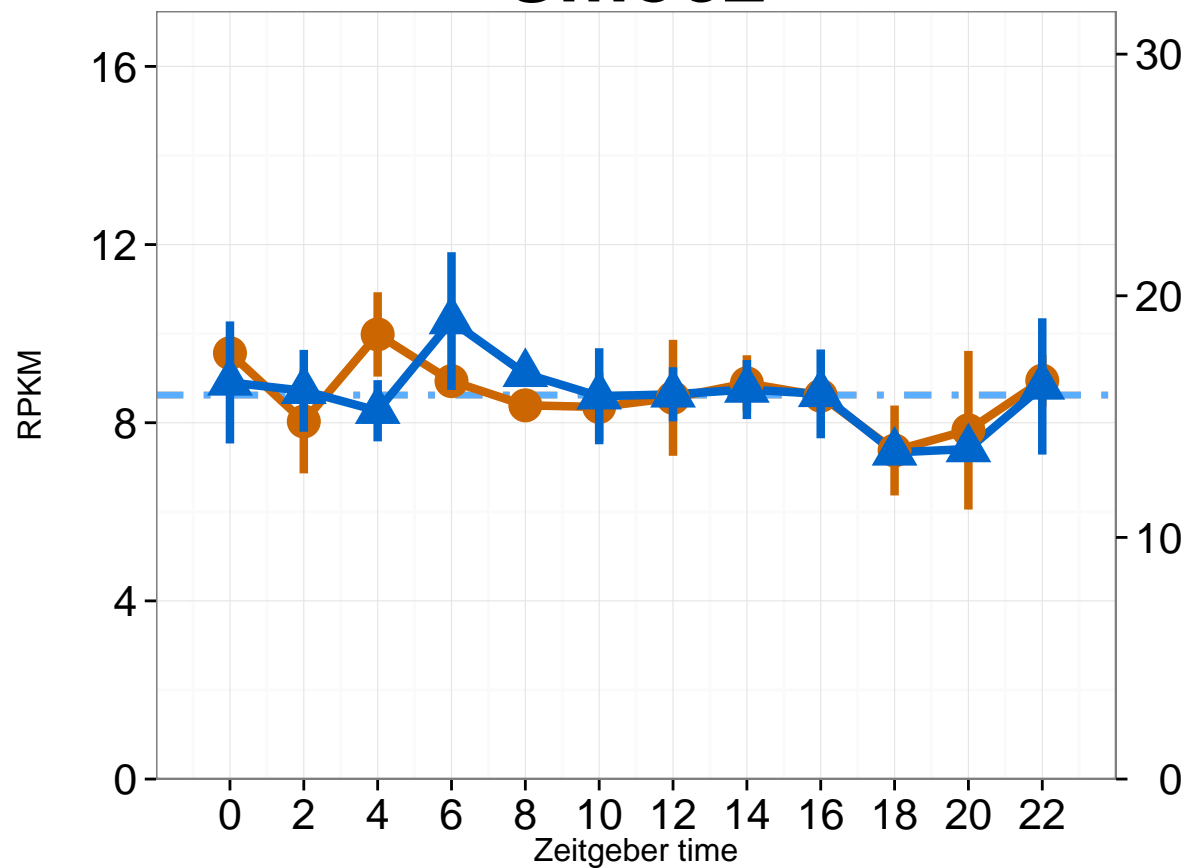

## Smoc2

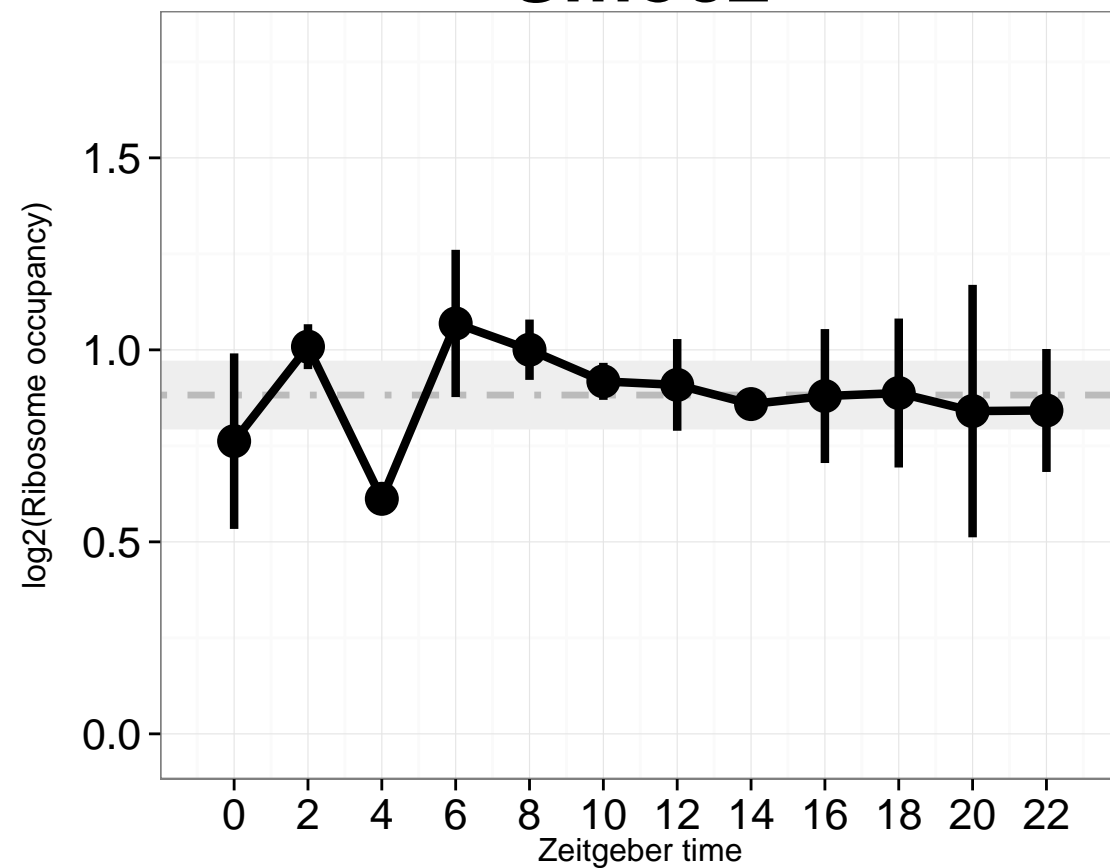

Supplement: Supplementary file 2794 [file 1]

## Klf16

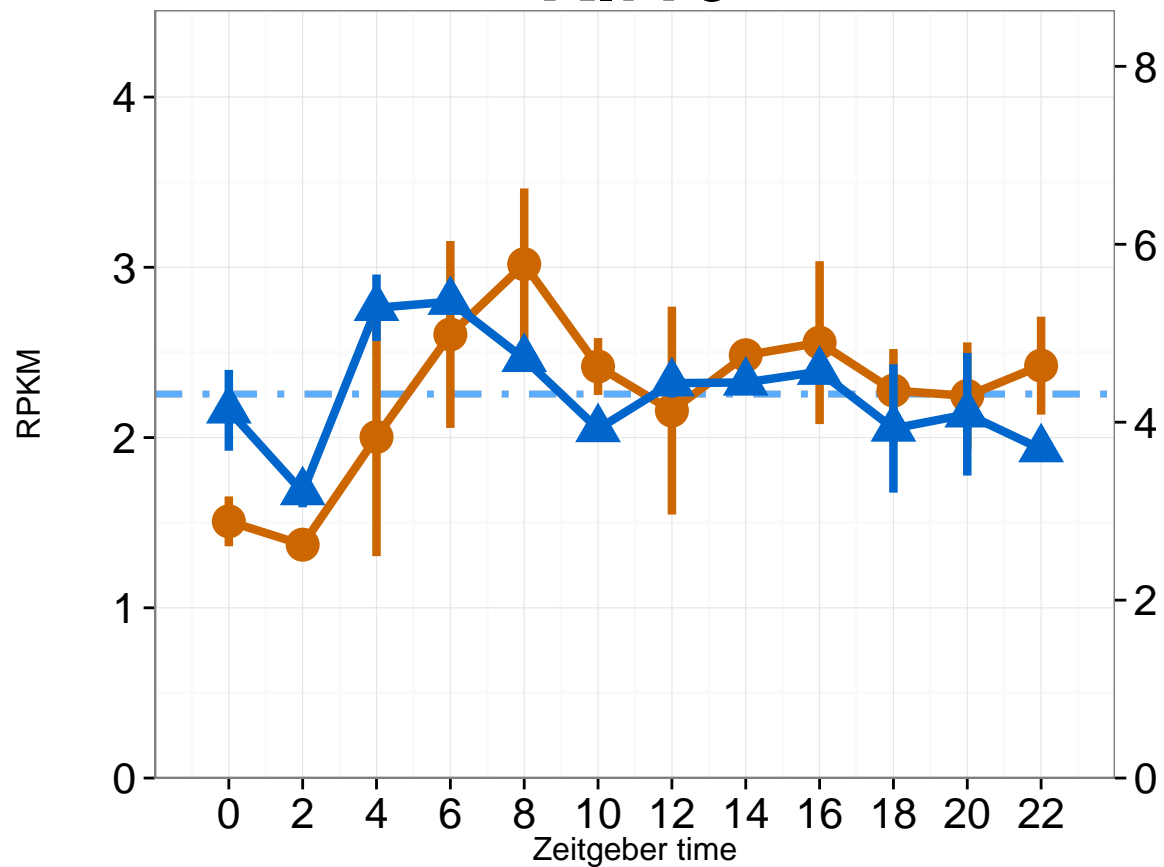

## Klf16

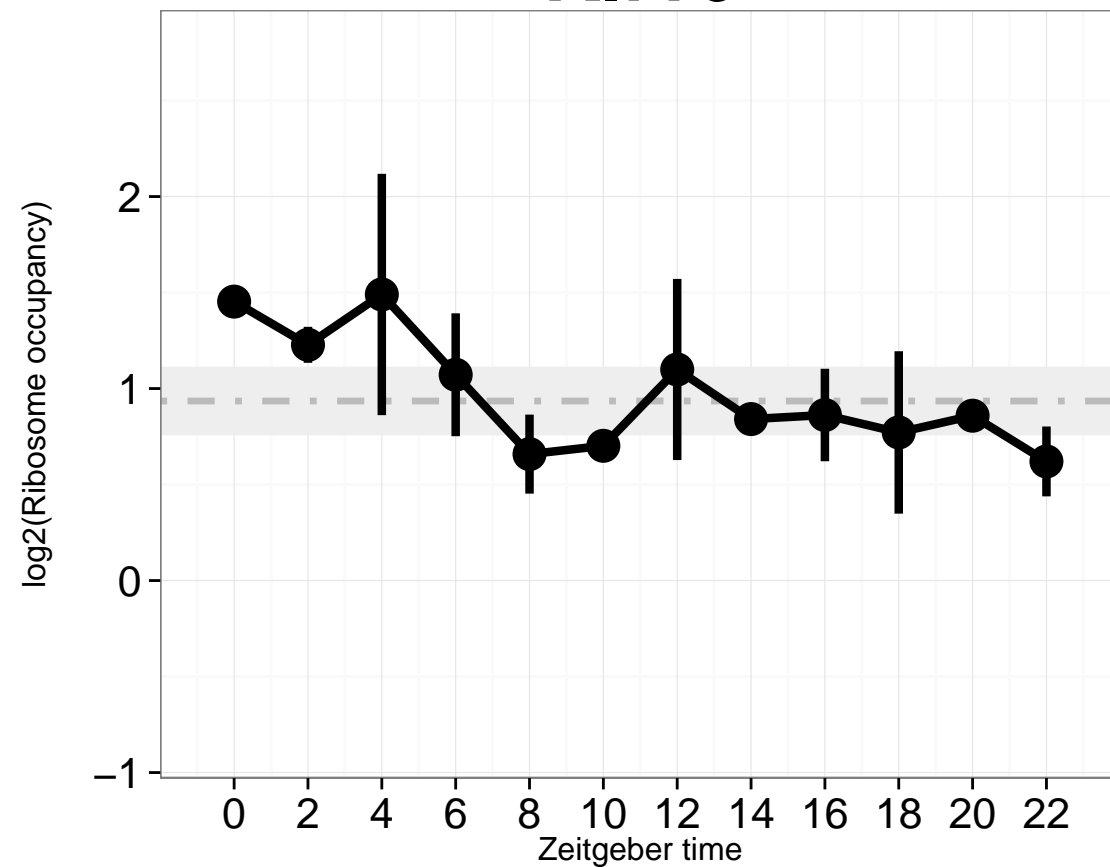

Supplement: Supplementary file 2795 [file 1]

## Mief2

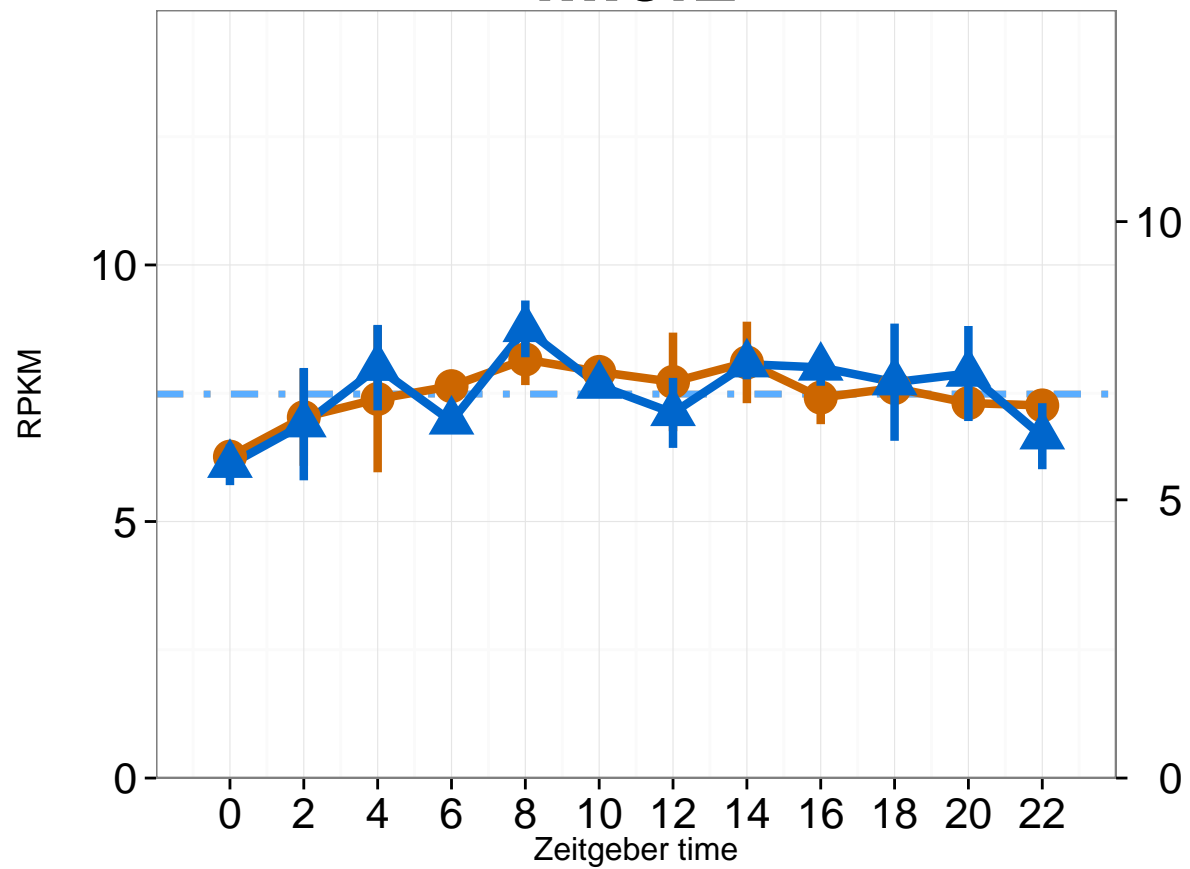

## Mief2

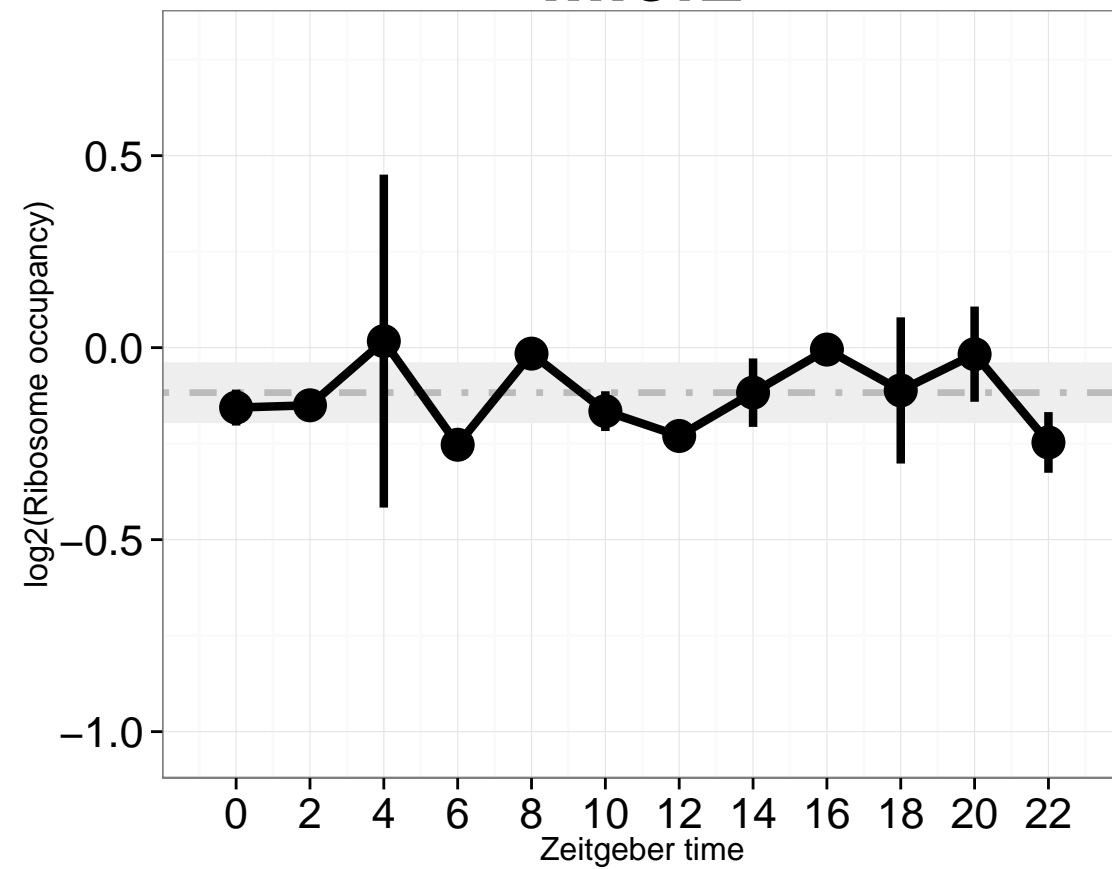

Supplement: Supplementary file 2796 [file 1]

## Sfn

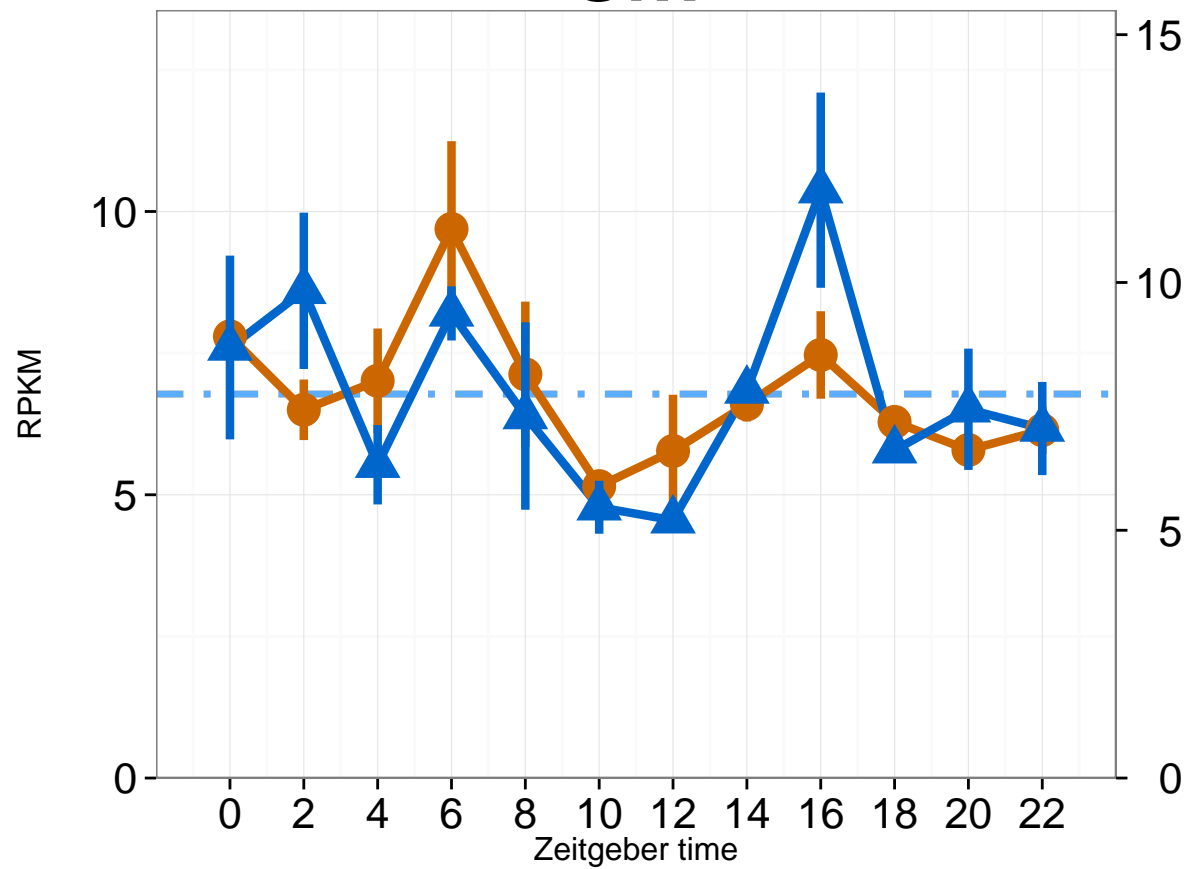

## Sfn

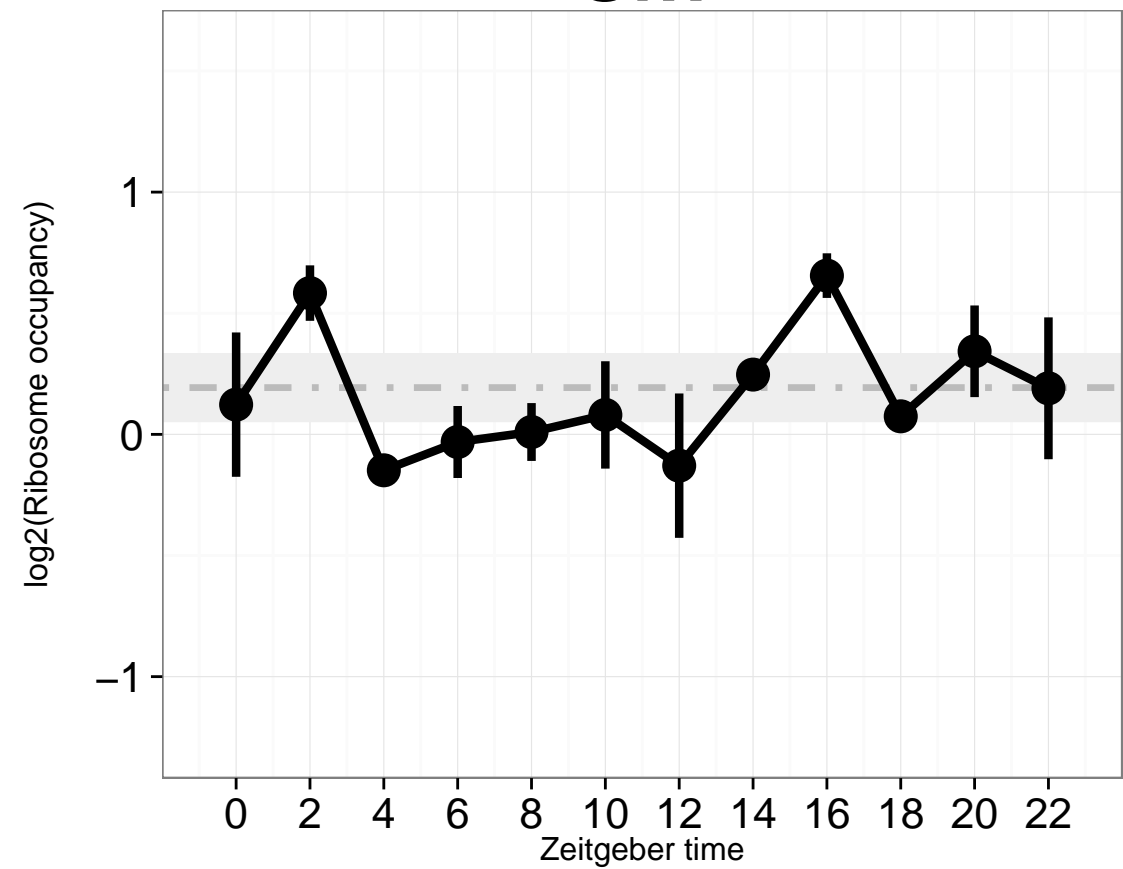

Supplement: Supplementary file 2797 [file 1]

# Brpf1

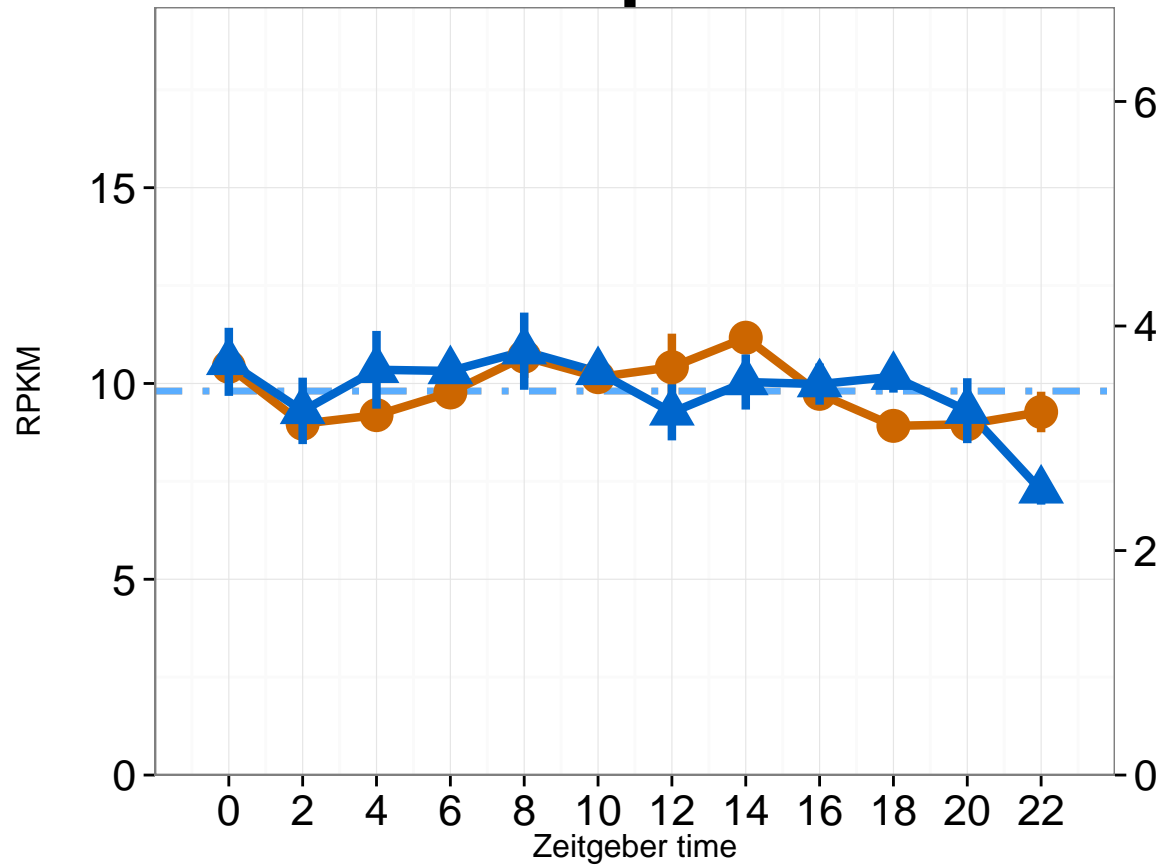

# Brpf1

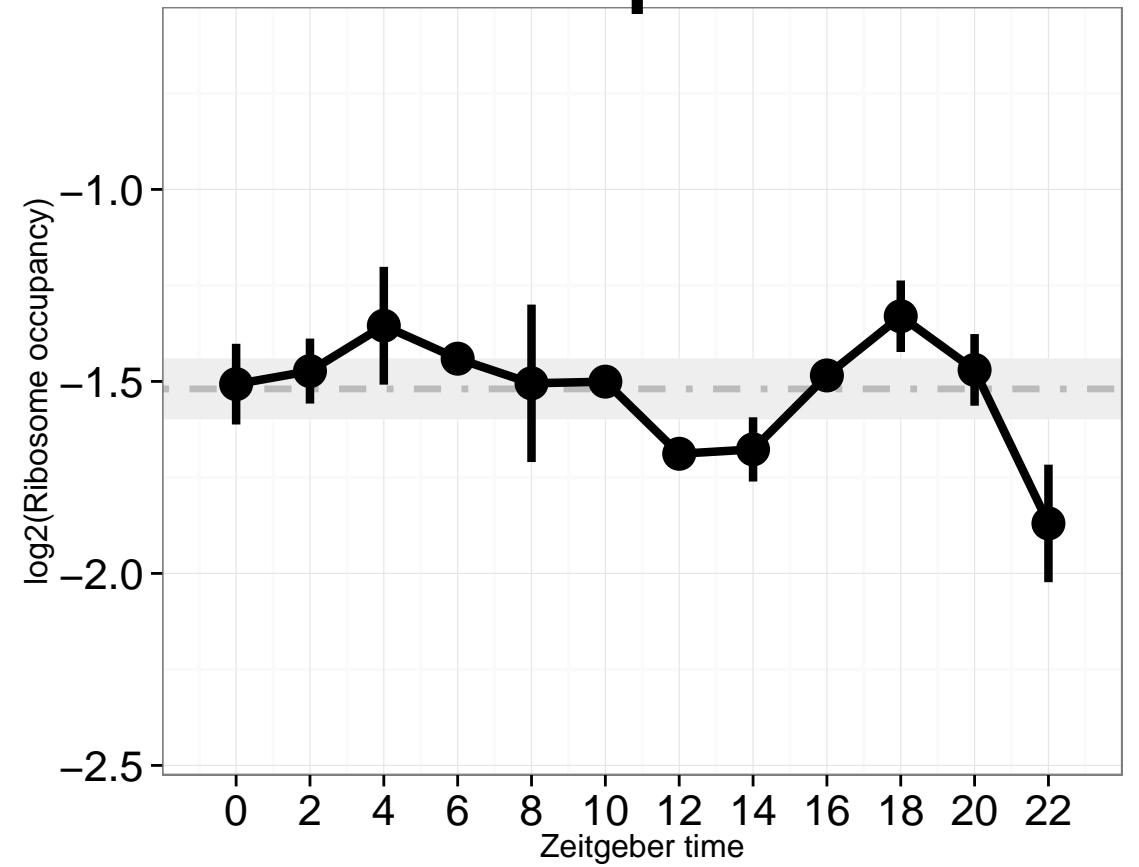

Supplement: Supplementary file 2798 [file 1]

# Prox1

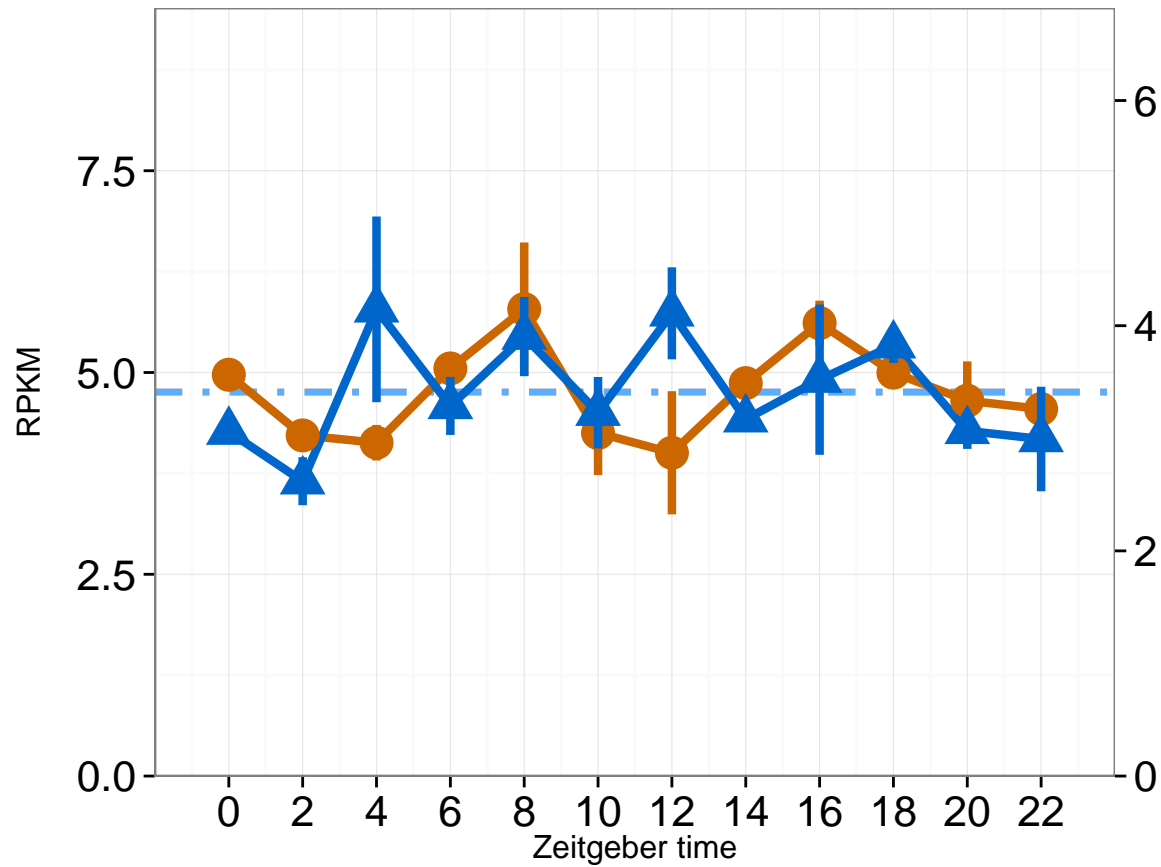

# Prox1

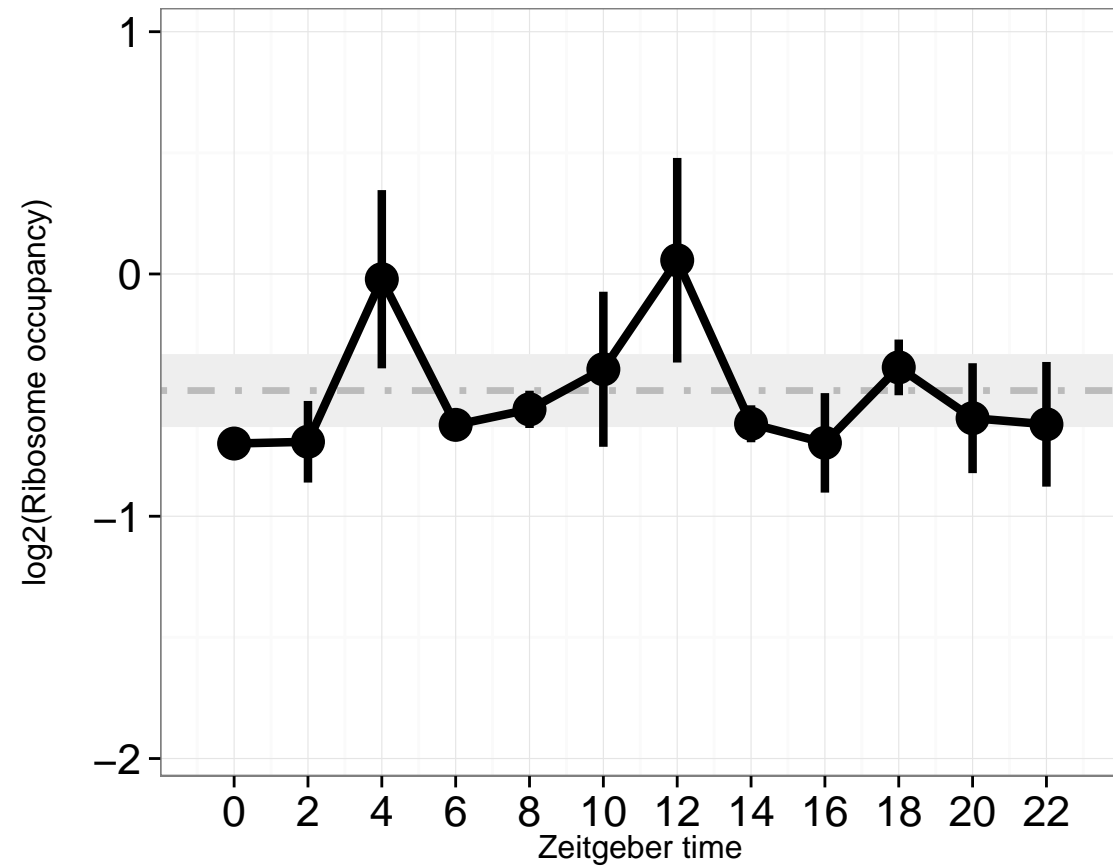

Supplement: Supplementary file 2799 [file 1]

## Plekhm3

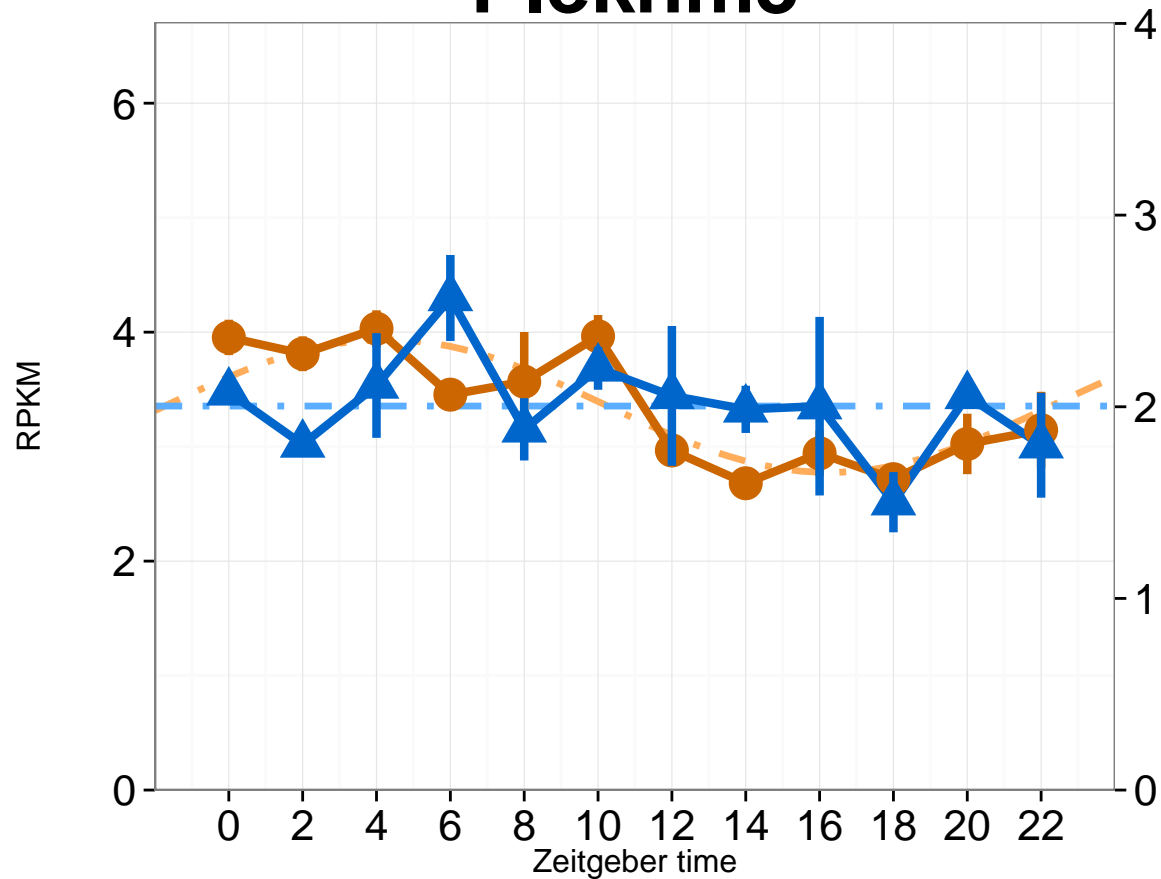

## Plekhm3

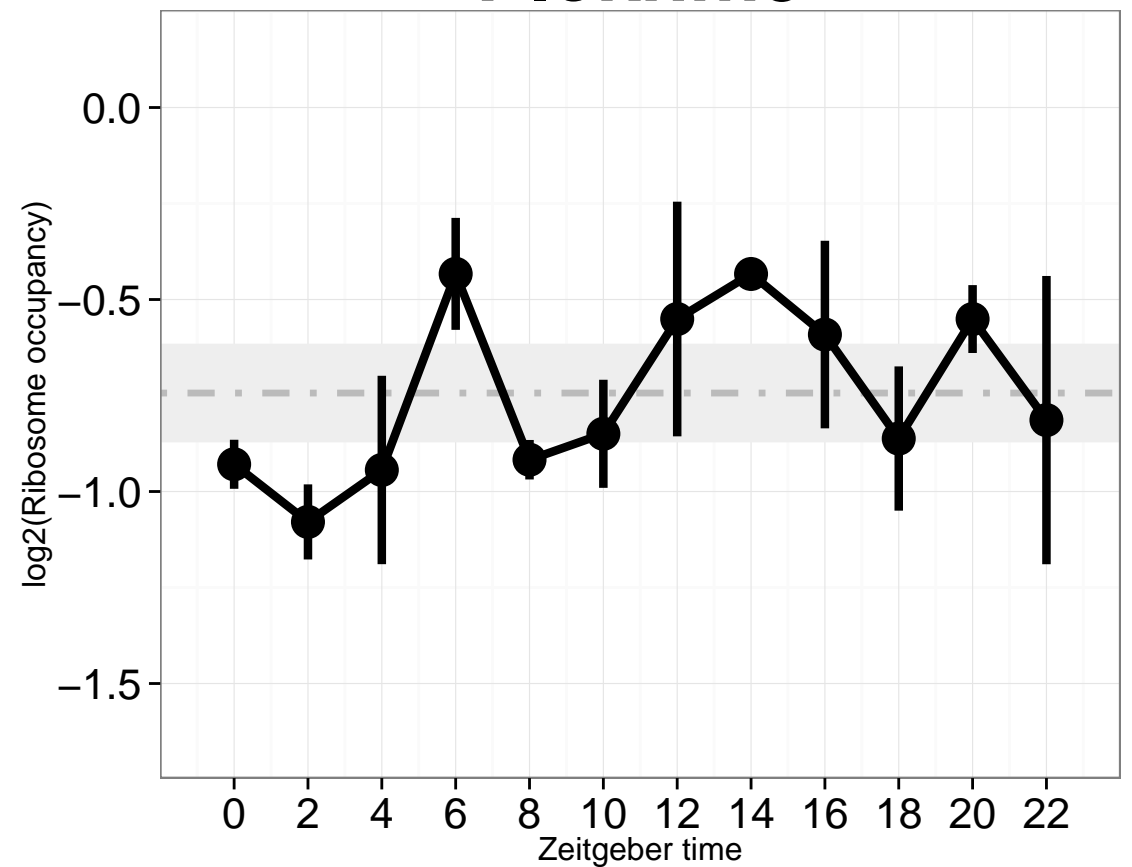

Supplement: Supplementary file 2800 [file 1]

## Ocln

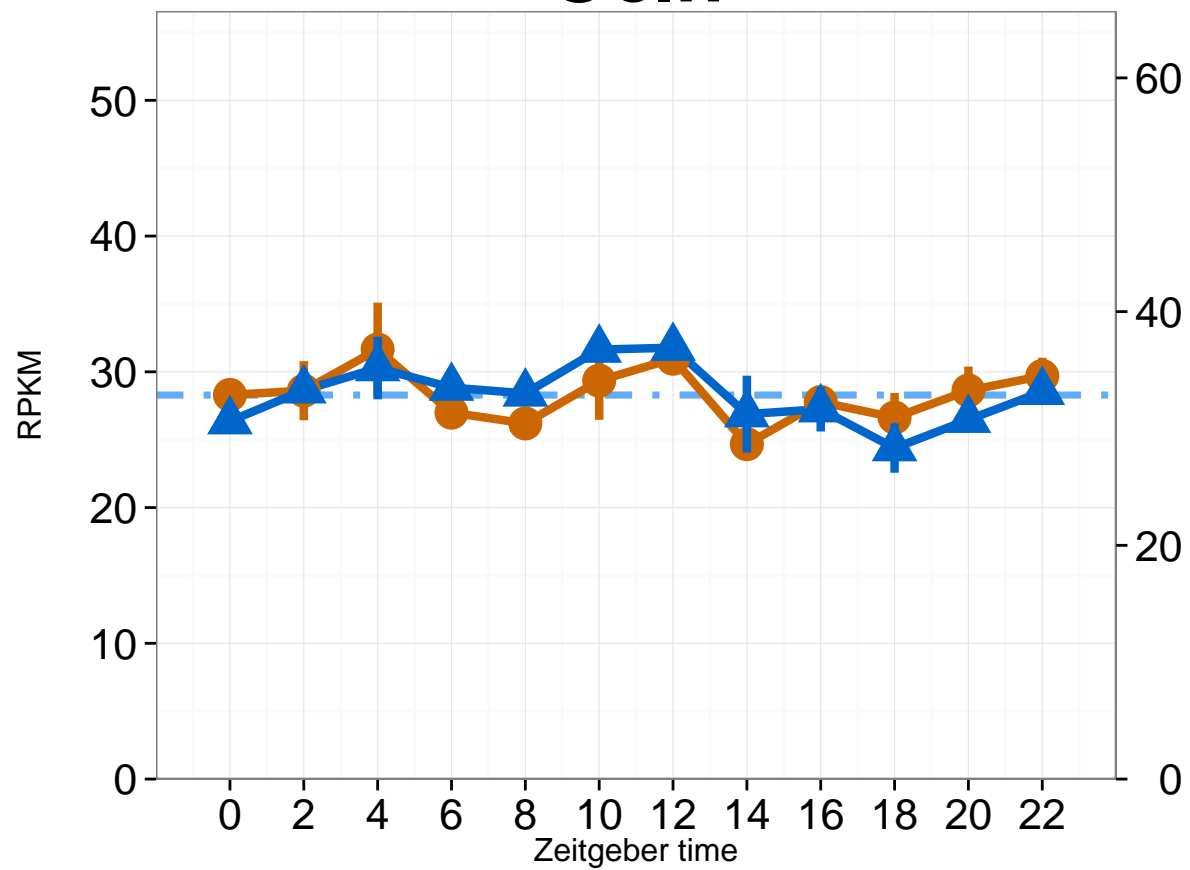

## Ocln

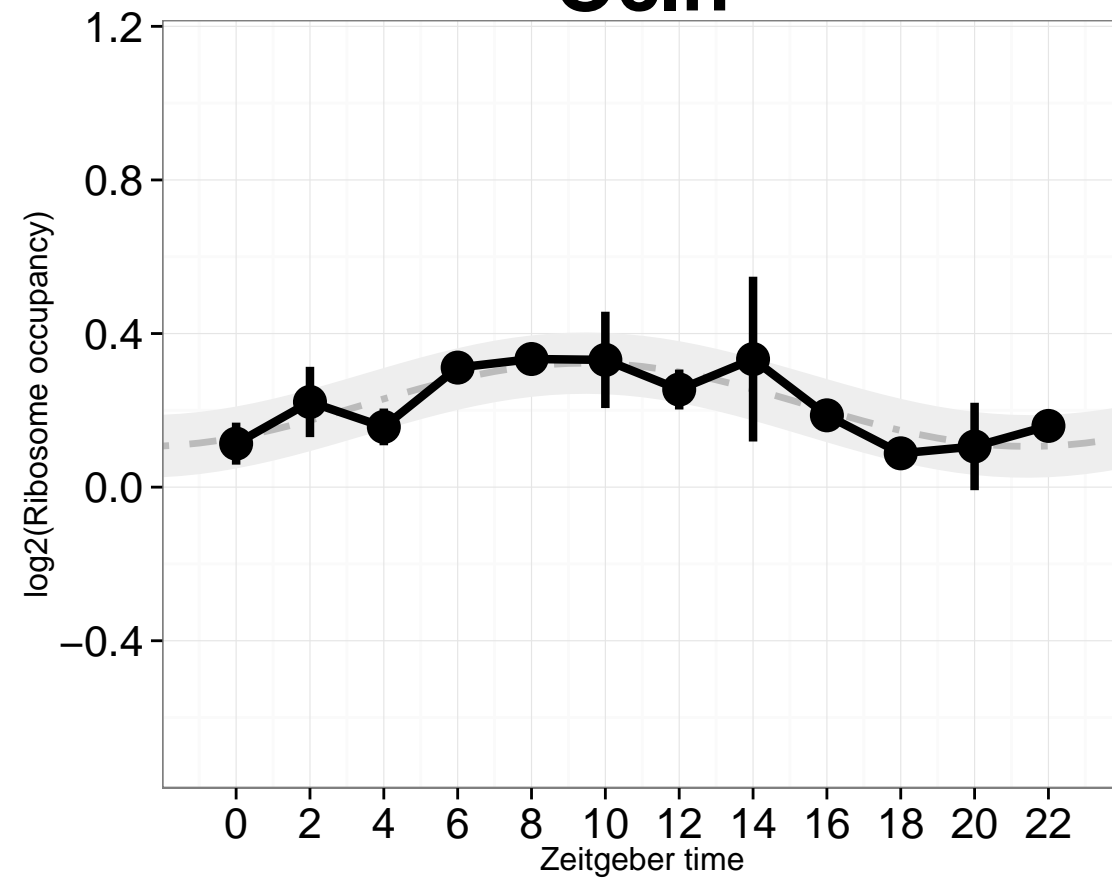

Supplement: Supplementary file 2801 [file 1]

# Rngtt

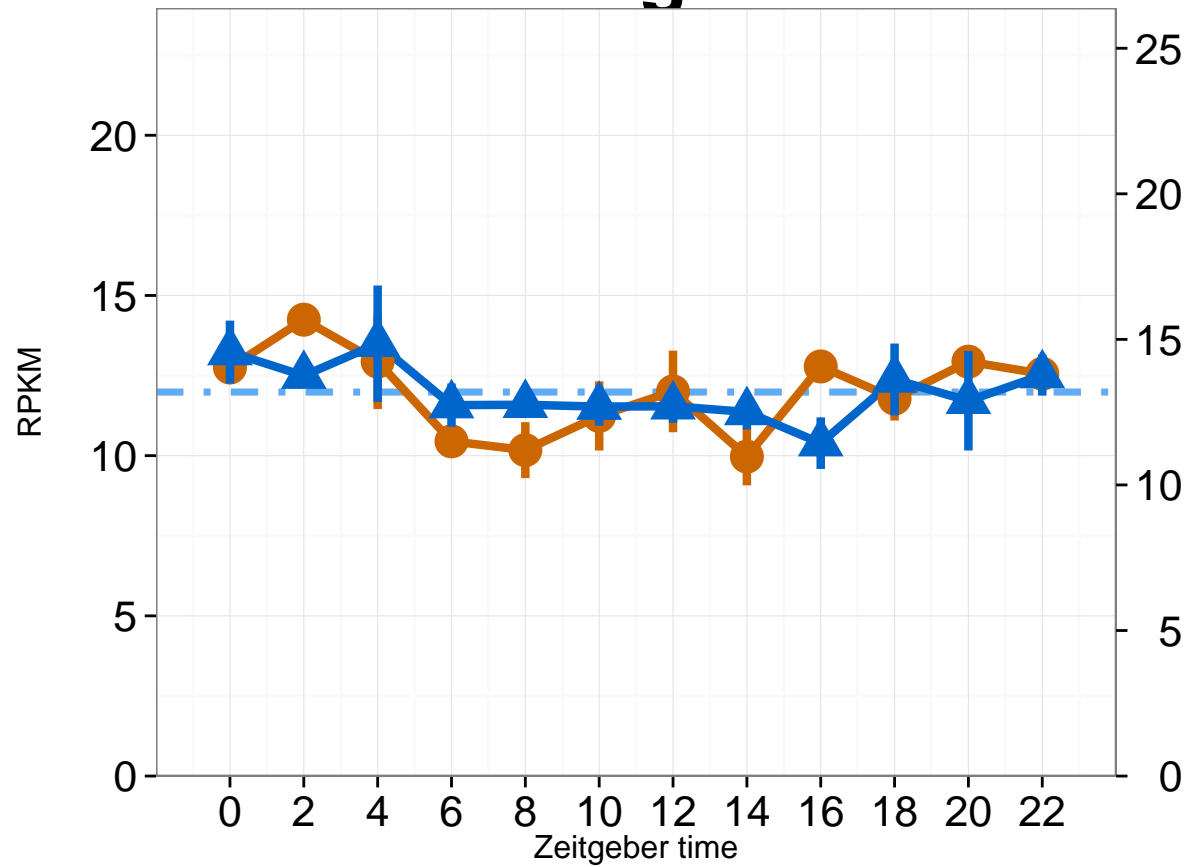

# Rngtt

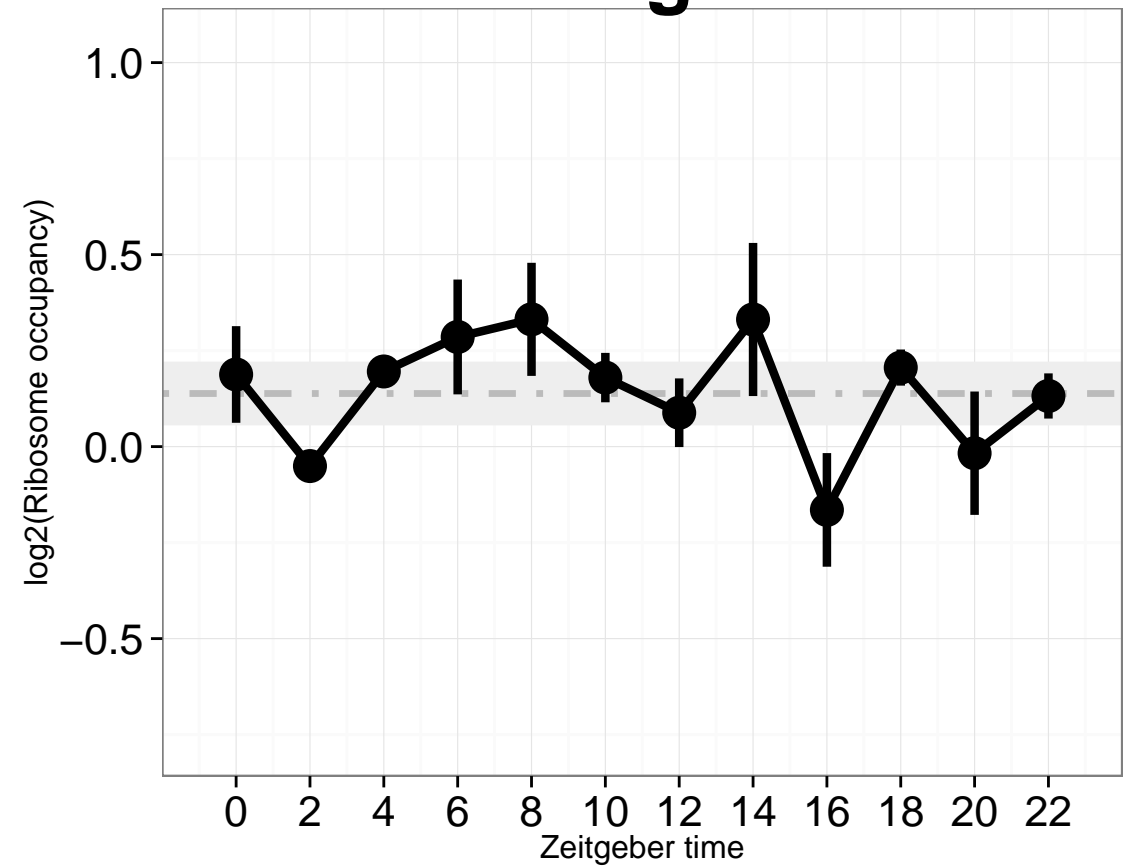

Supplement: Supplementary file 2802 [file 1]

## Slc43a2

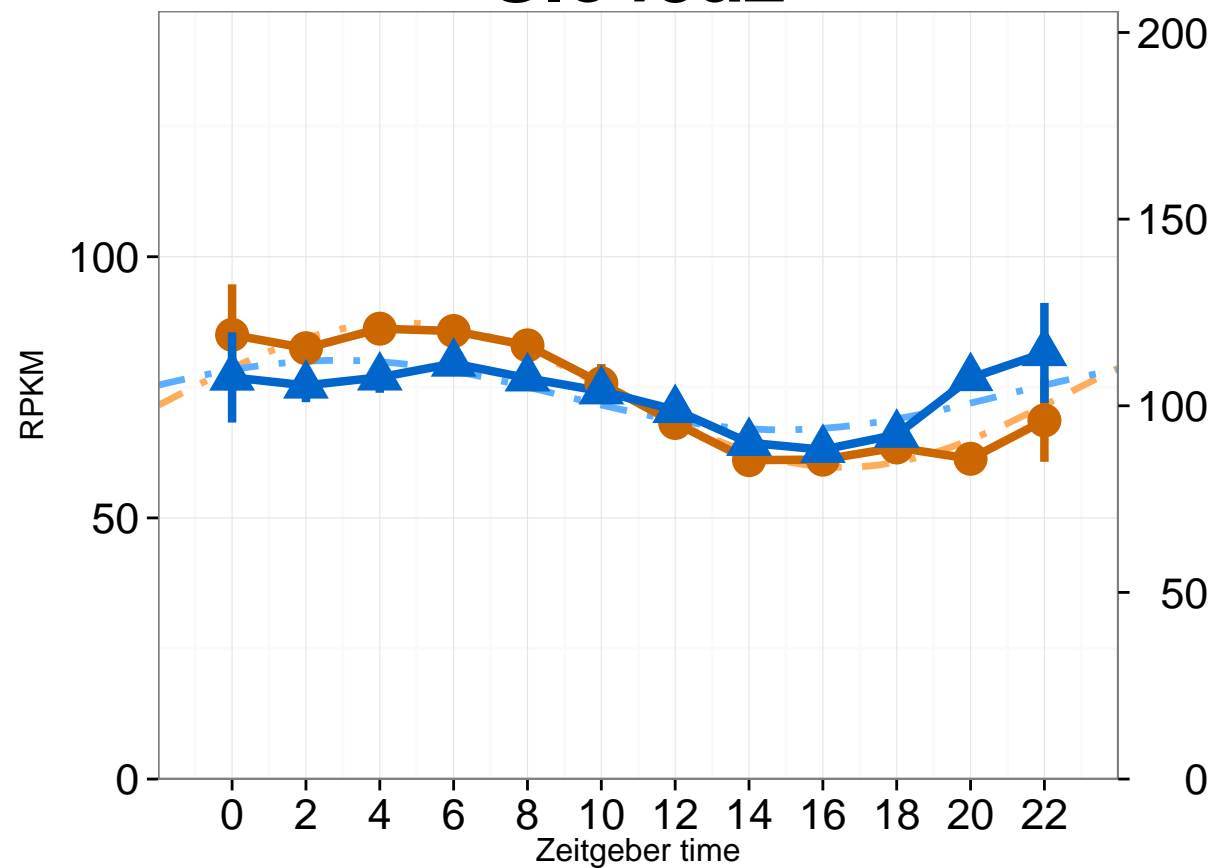

## Slc43a2

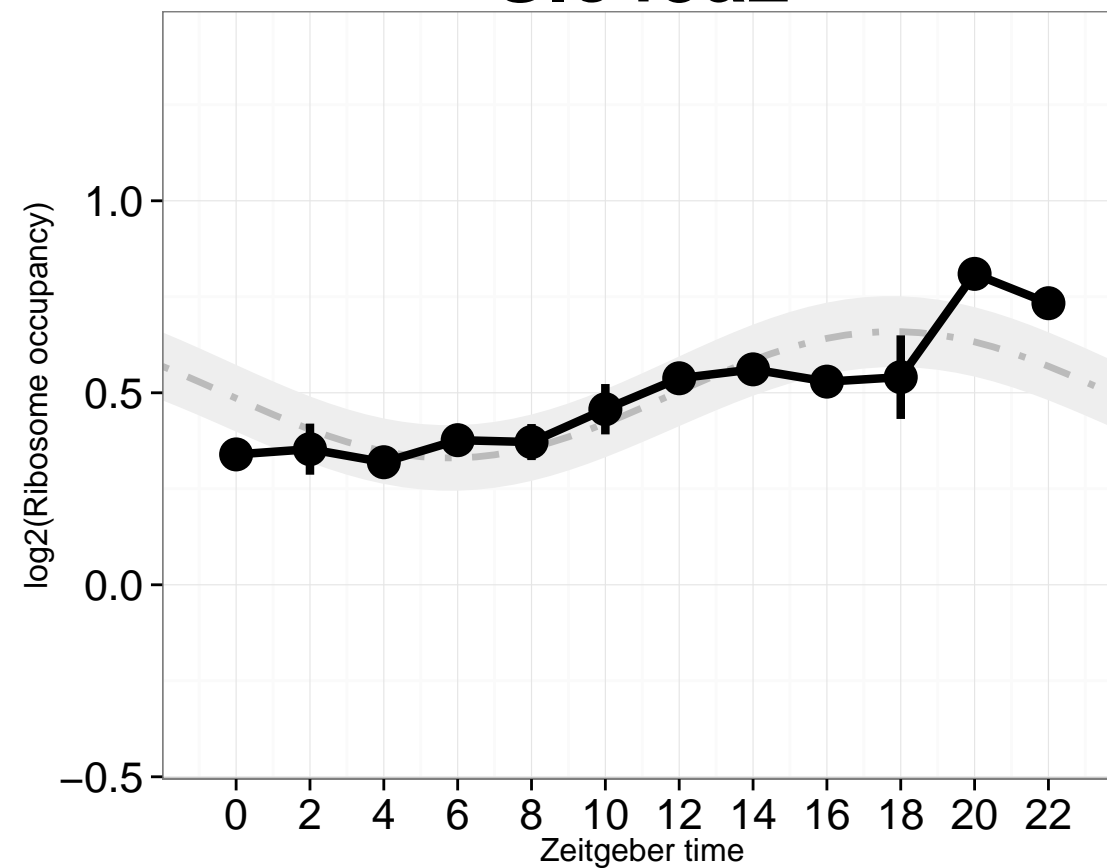

Supplement: Supplementary file 2803 [file 1]

## Clk3

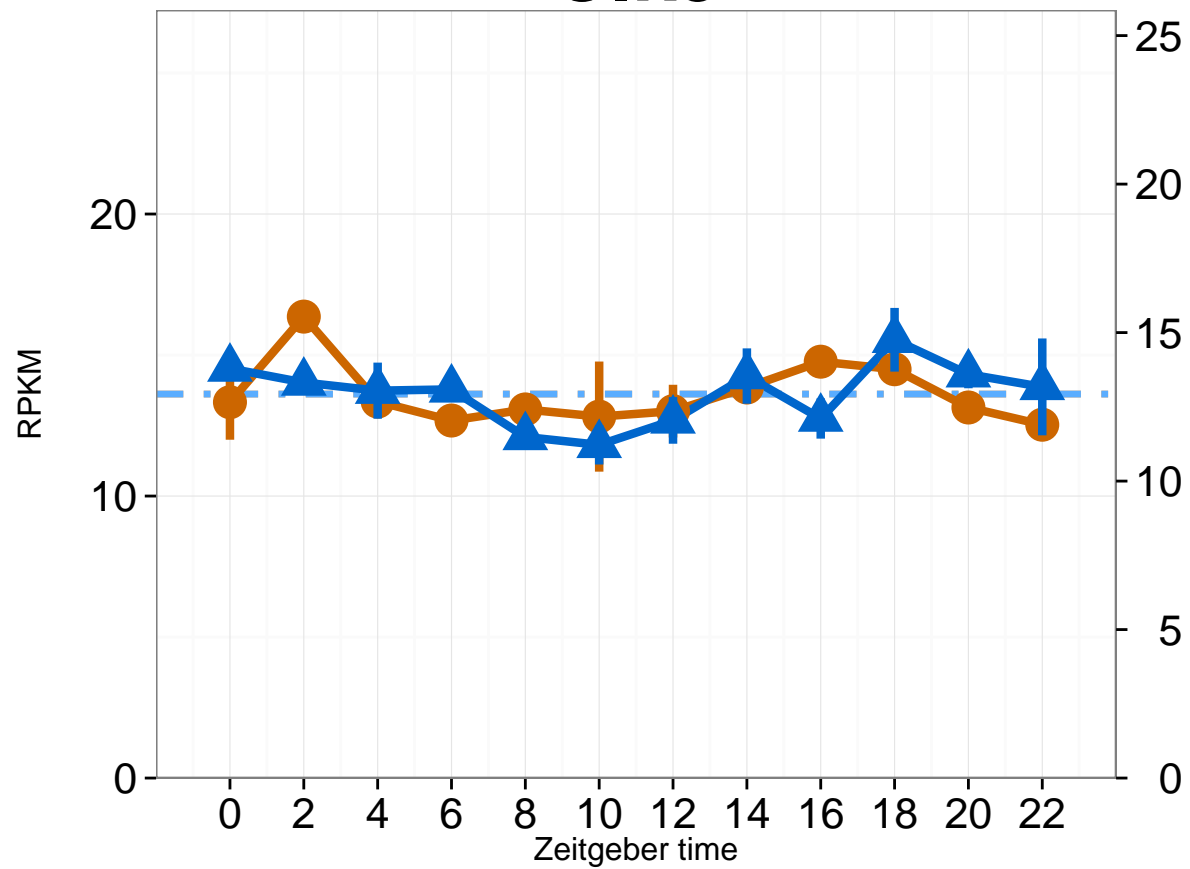

## Clk3

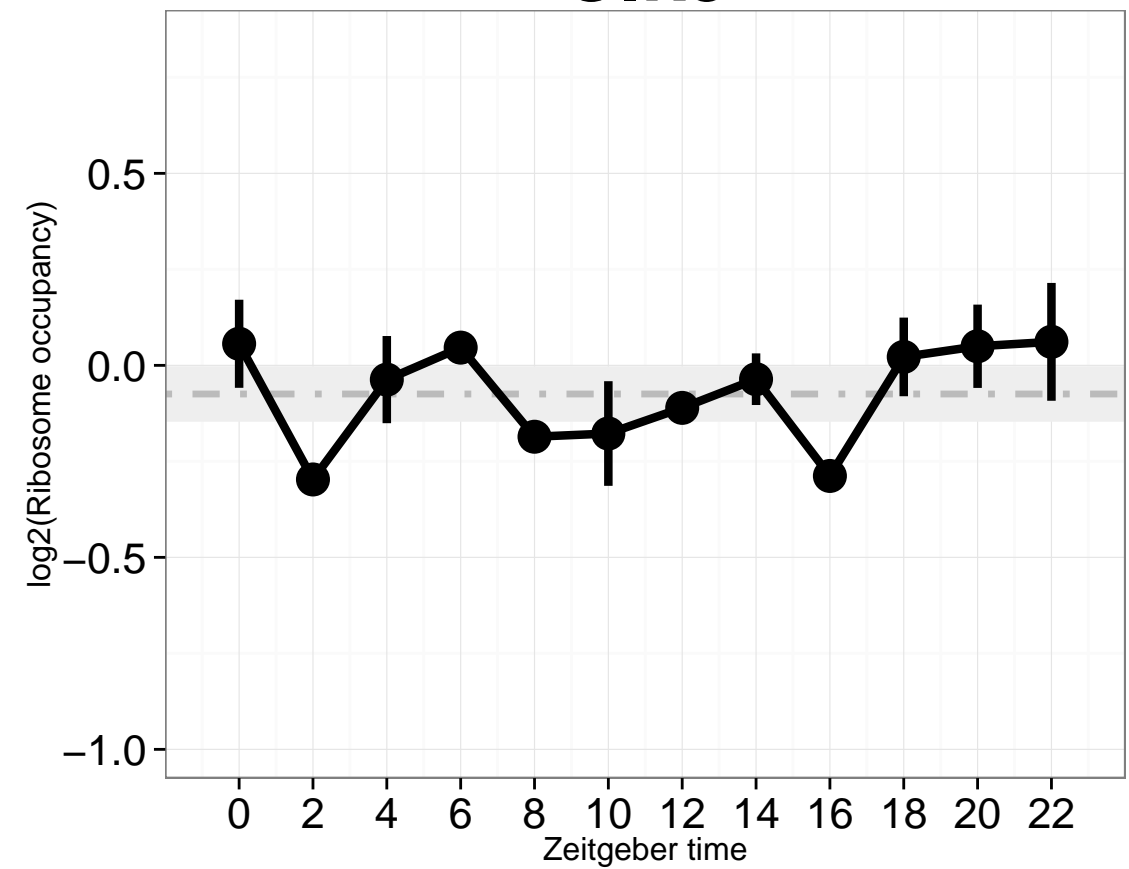

Supplement: Supplementary file 2804 [file 1]

# Apoa1

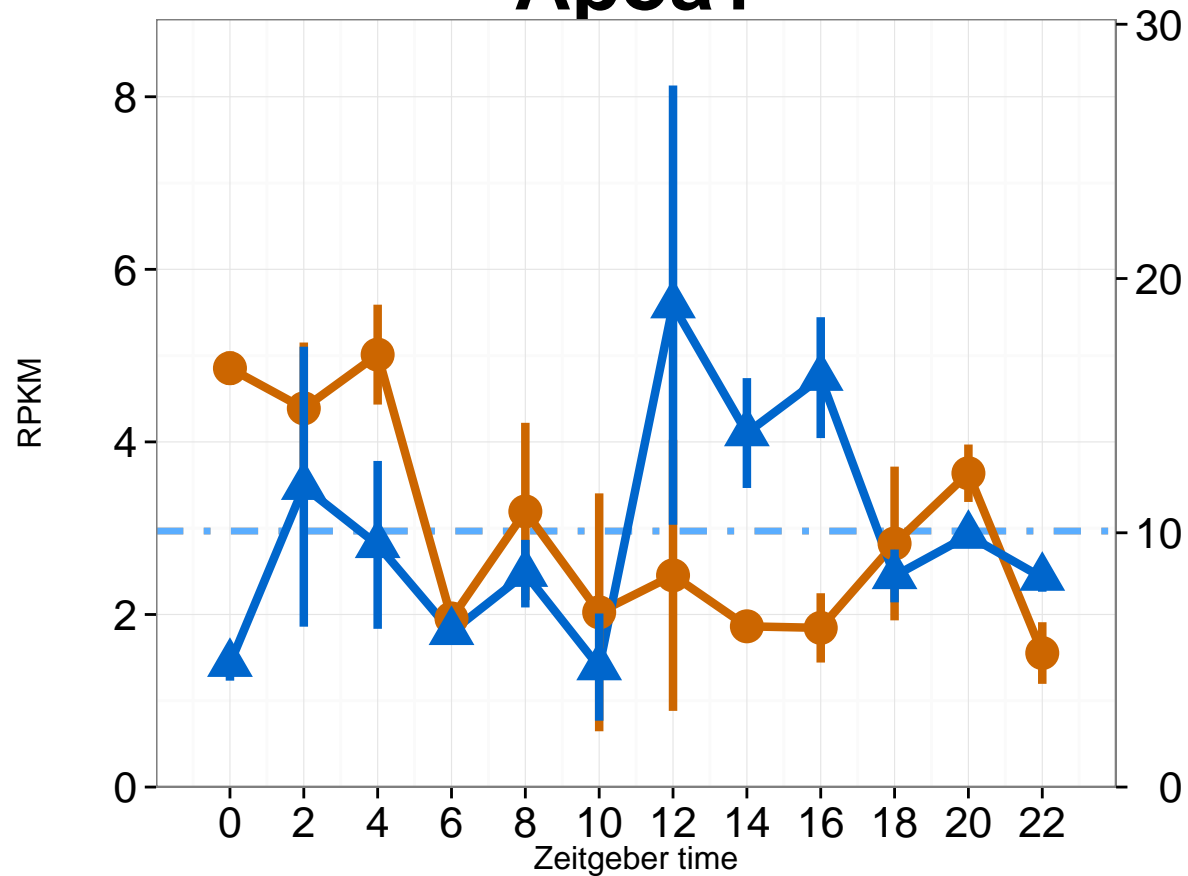

# Apoa1

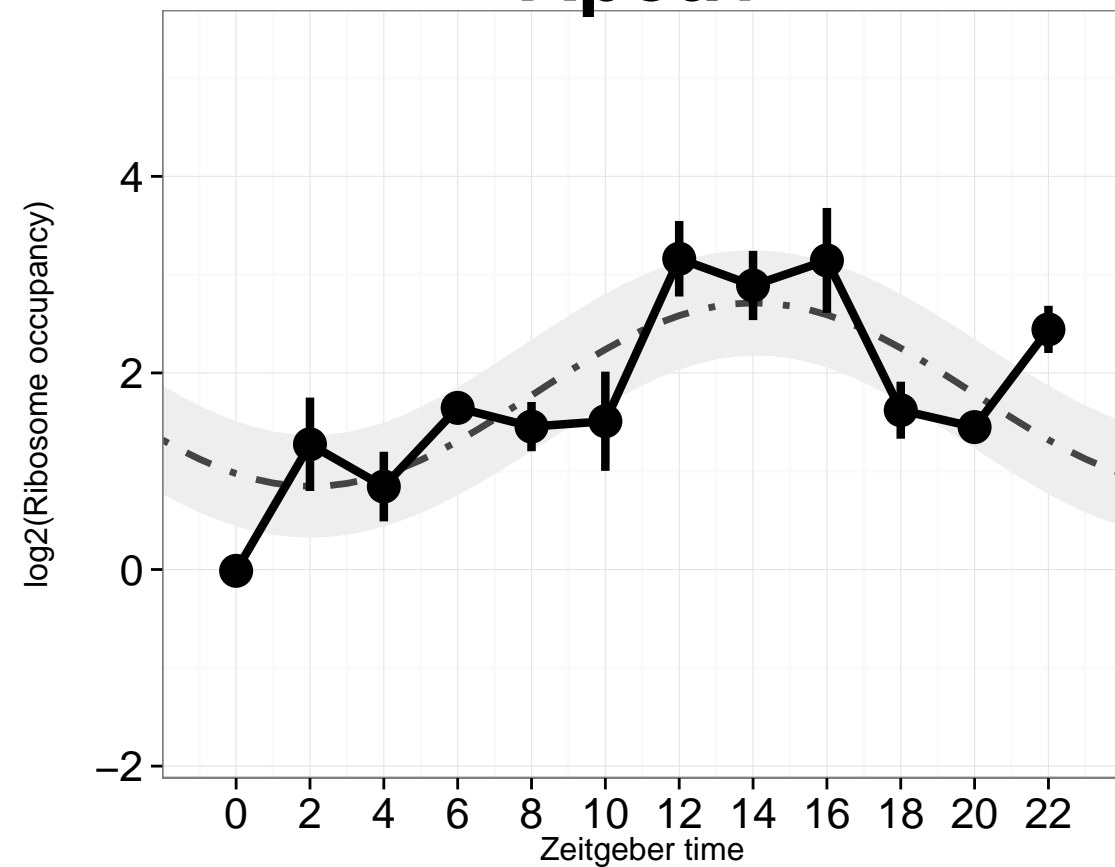

Supplement: Supplementary file 2805 [file 1]

## 2310044G17Rik

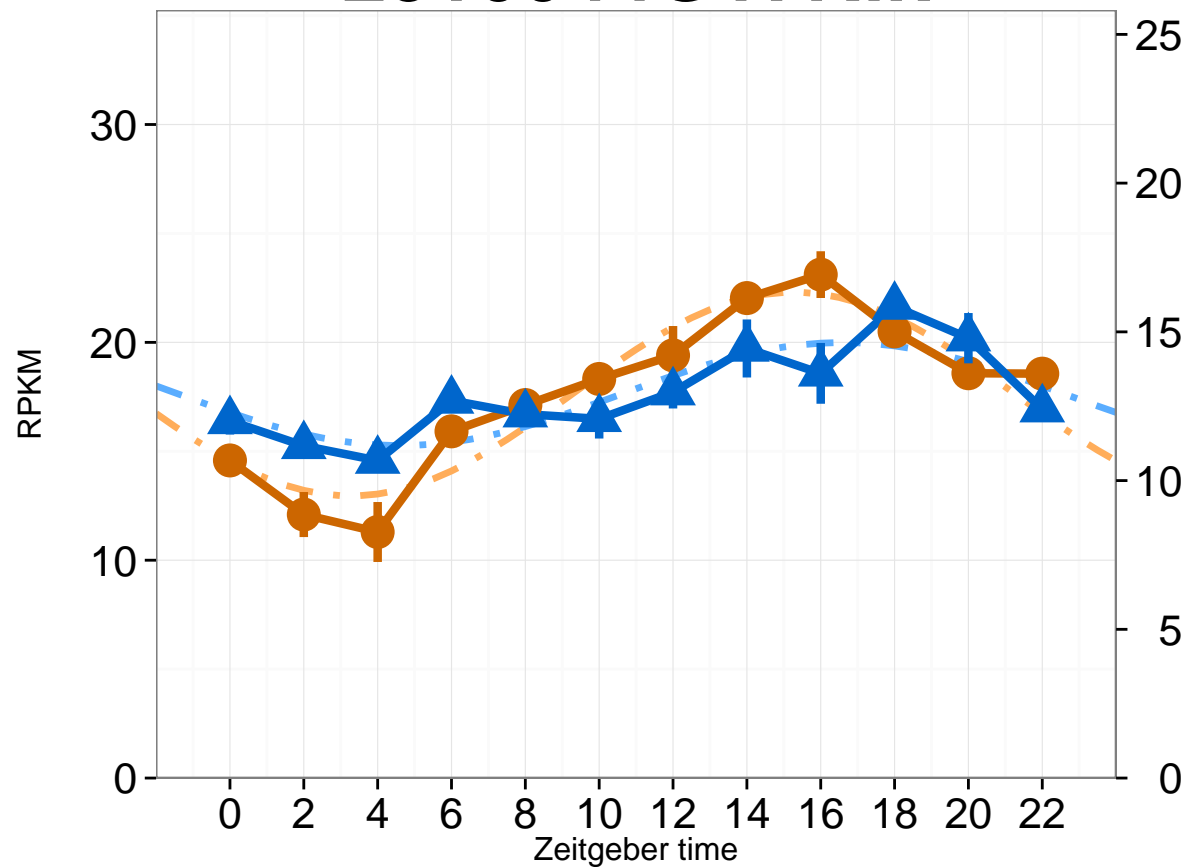

## 2310044G17Rik

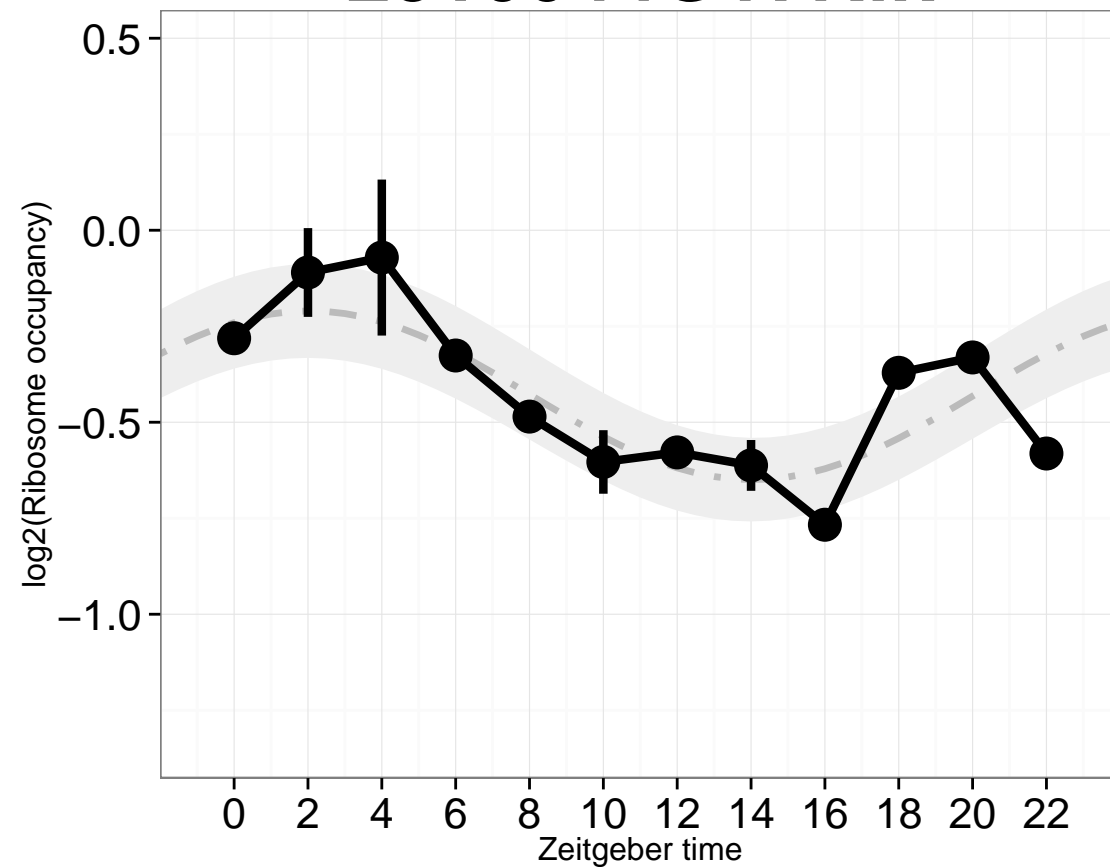

Supplement: Supplementary file 2806 [file 1]

## Lama4

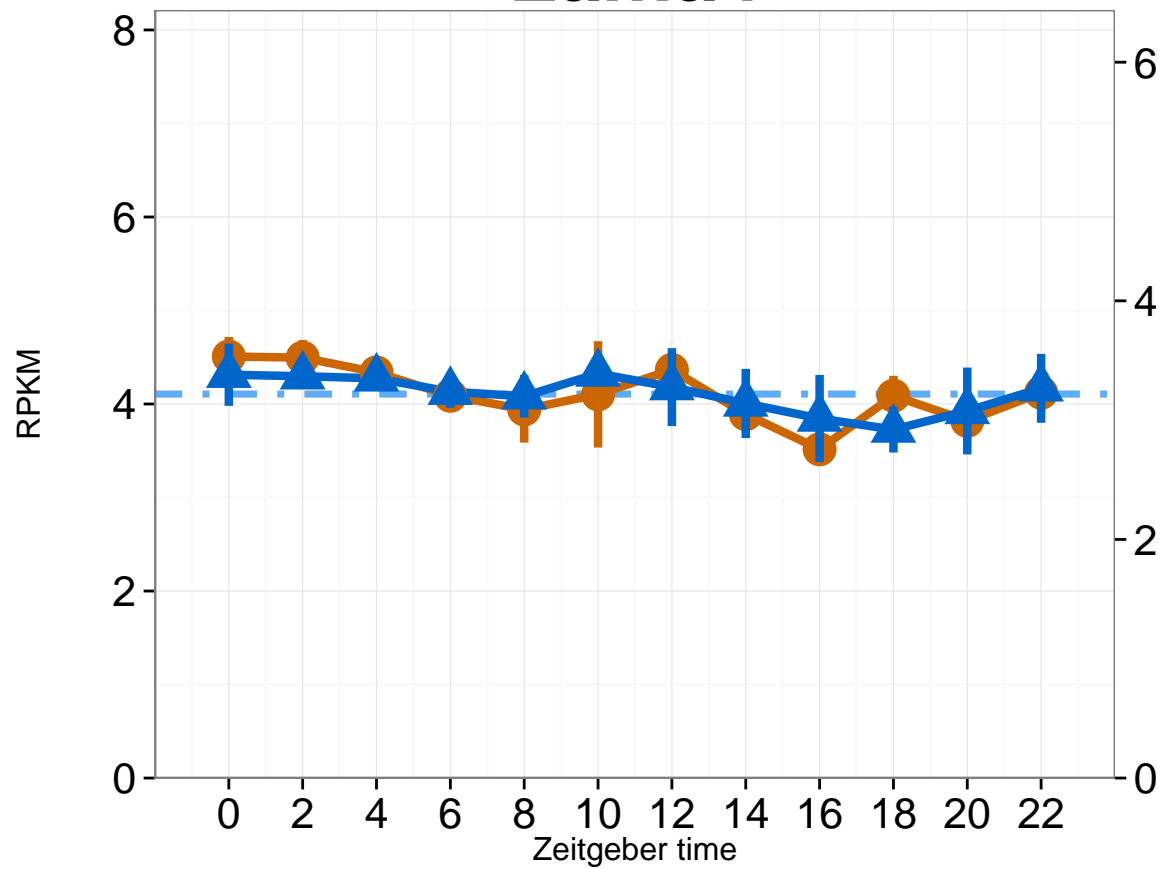

## Lama4

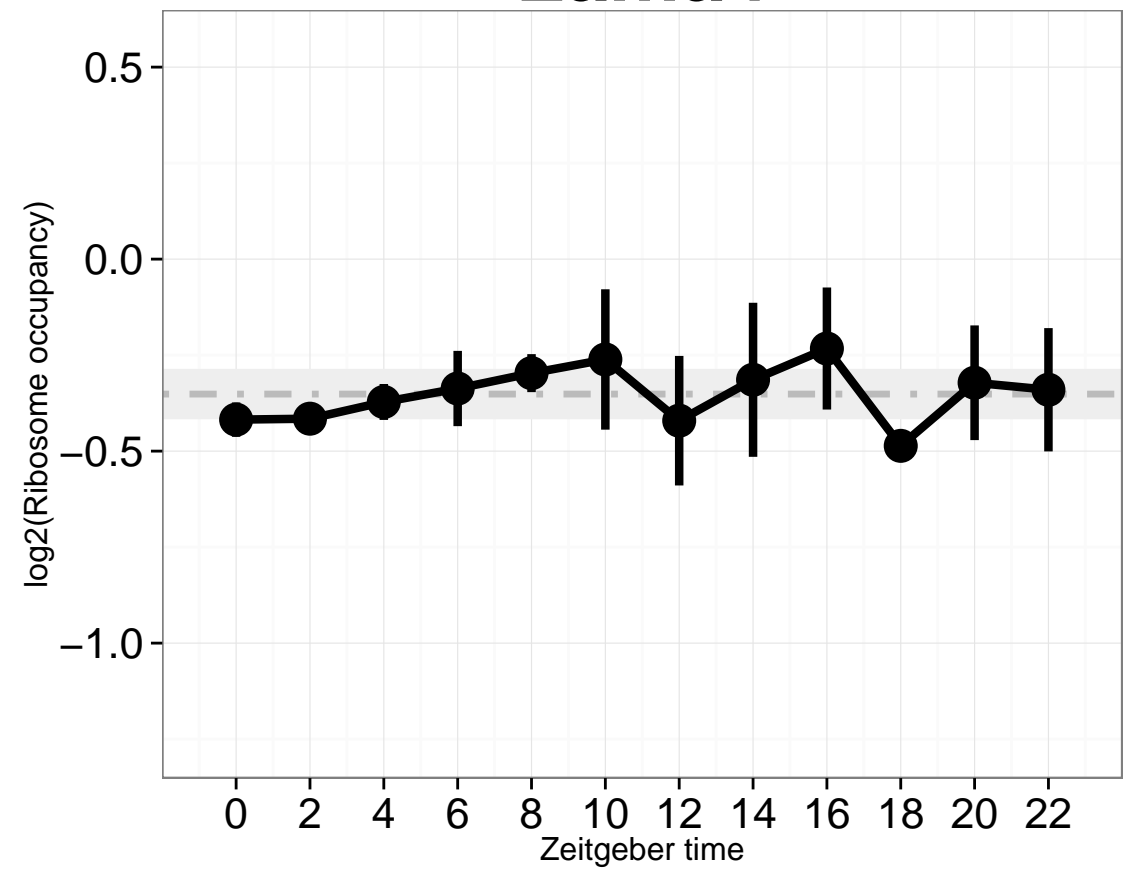

Supplement: Supplementary file 2807 [file 1]

## Eif3l

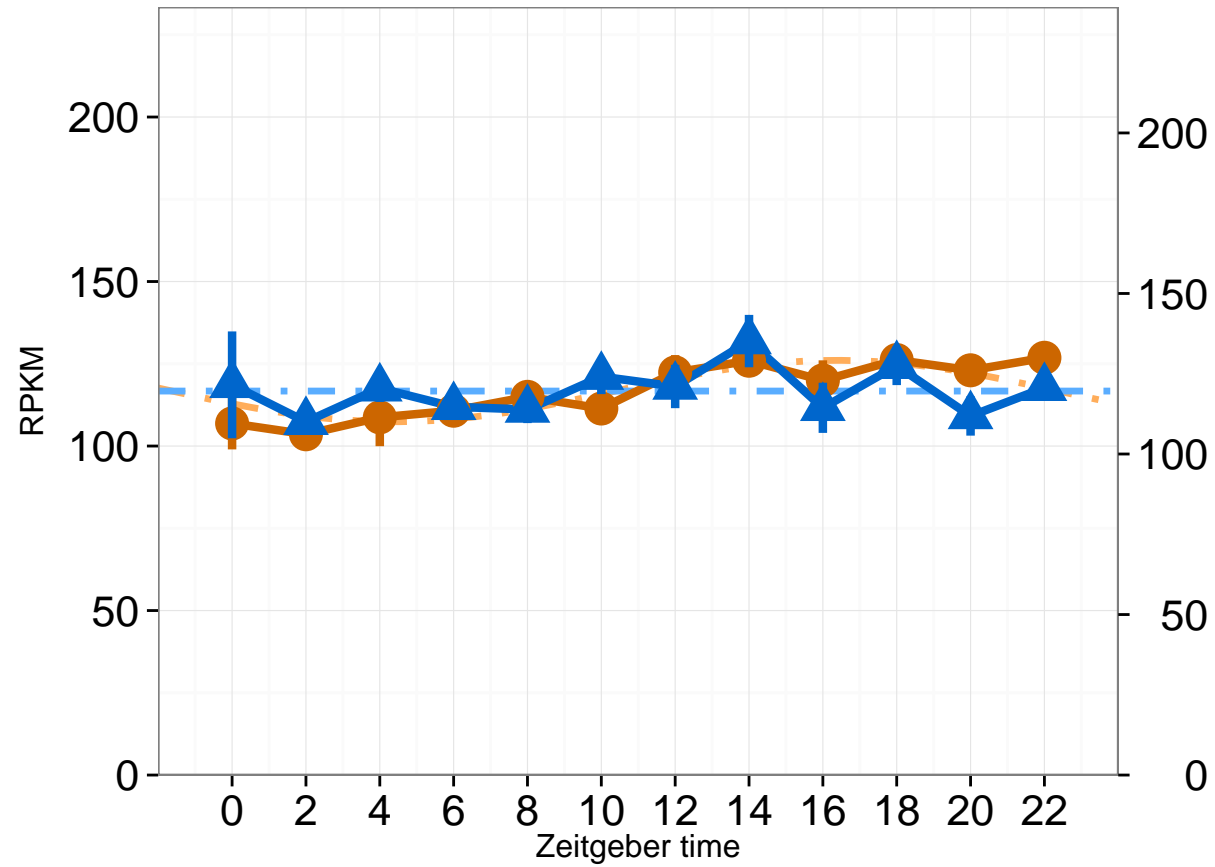

## Eif3l

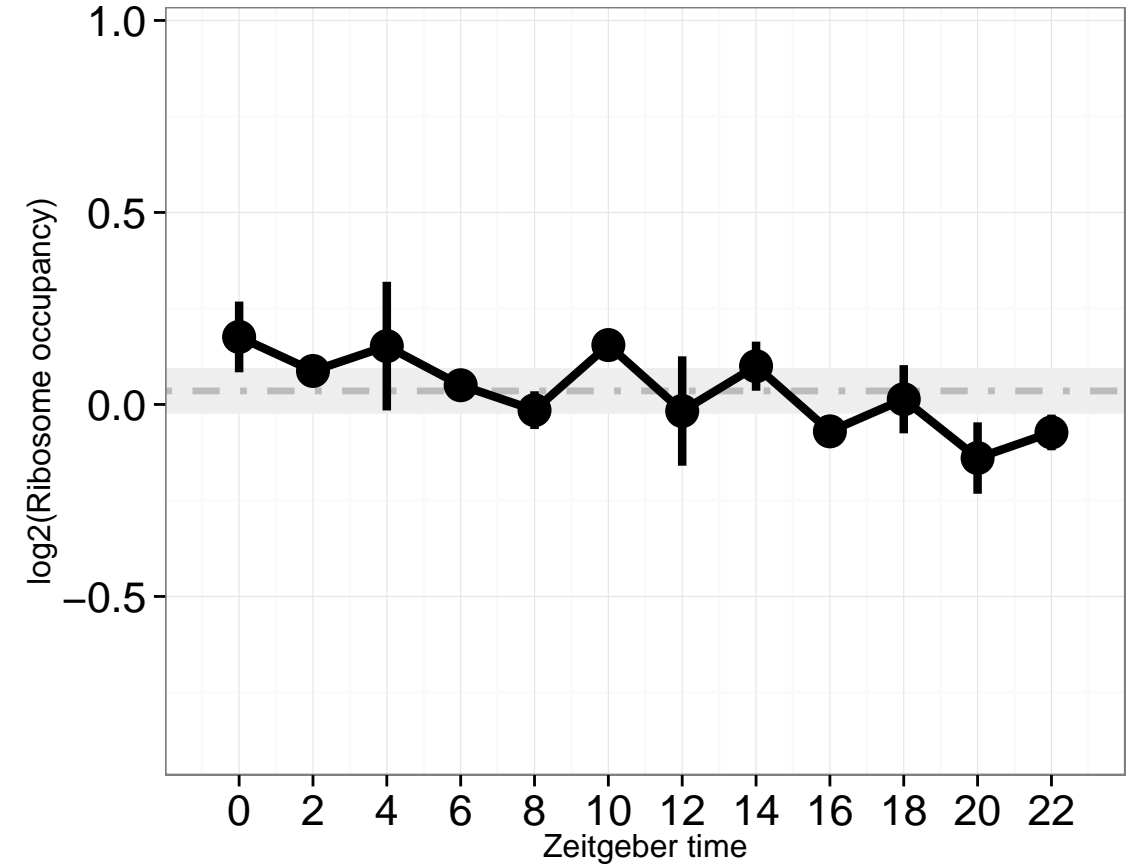

Supplement: Supplementary file 2808 [file 1]

## Esyt2

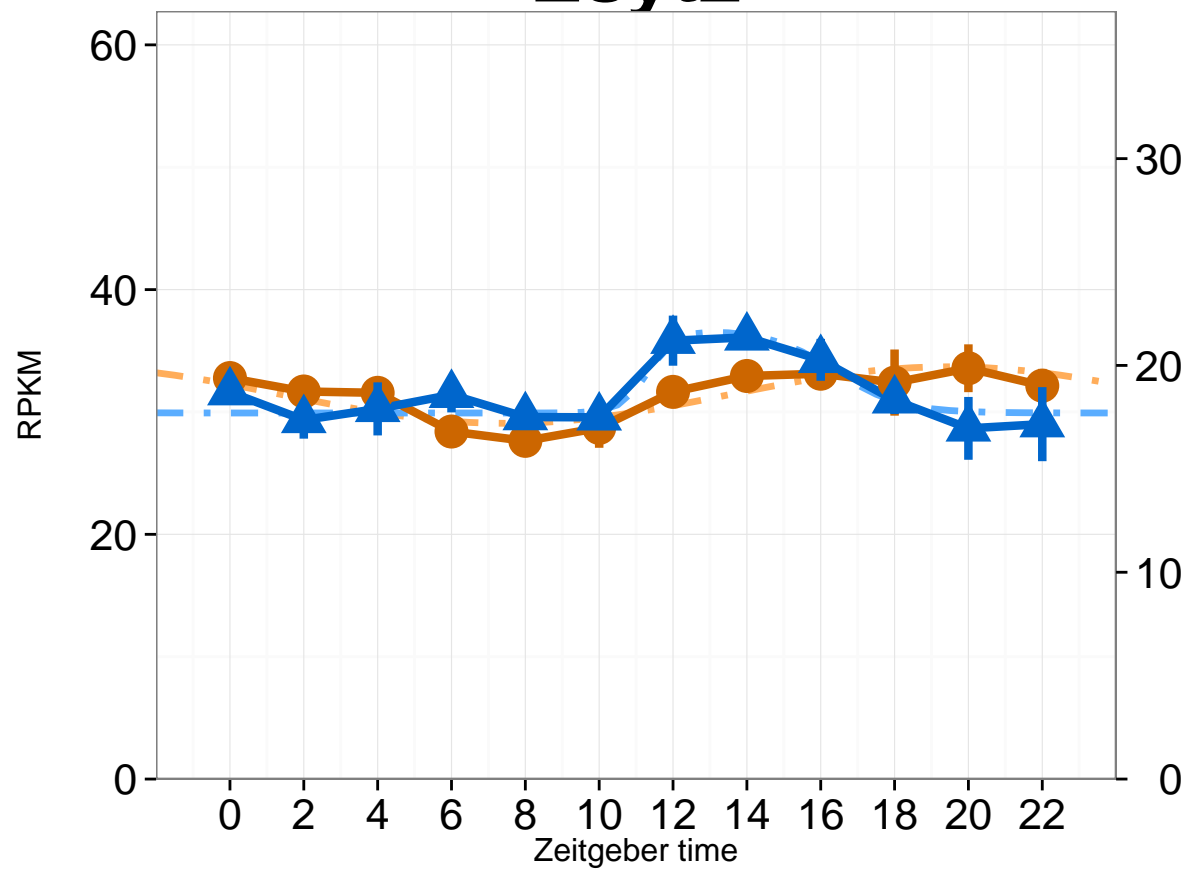

## Esyt2

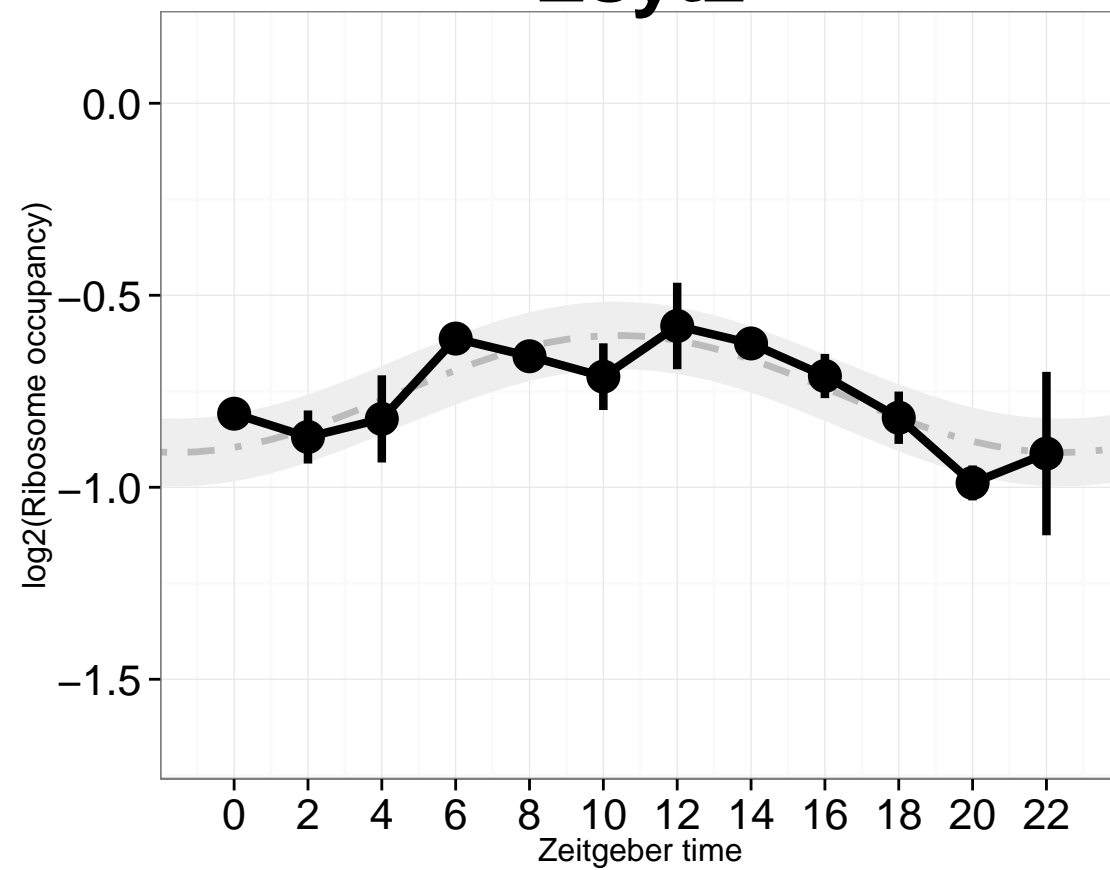

Supplement: Supplementary file 2809 [file 1]

# Slc10a3

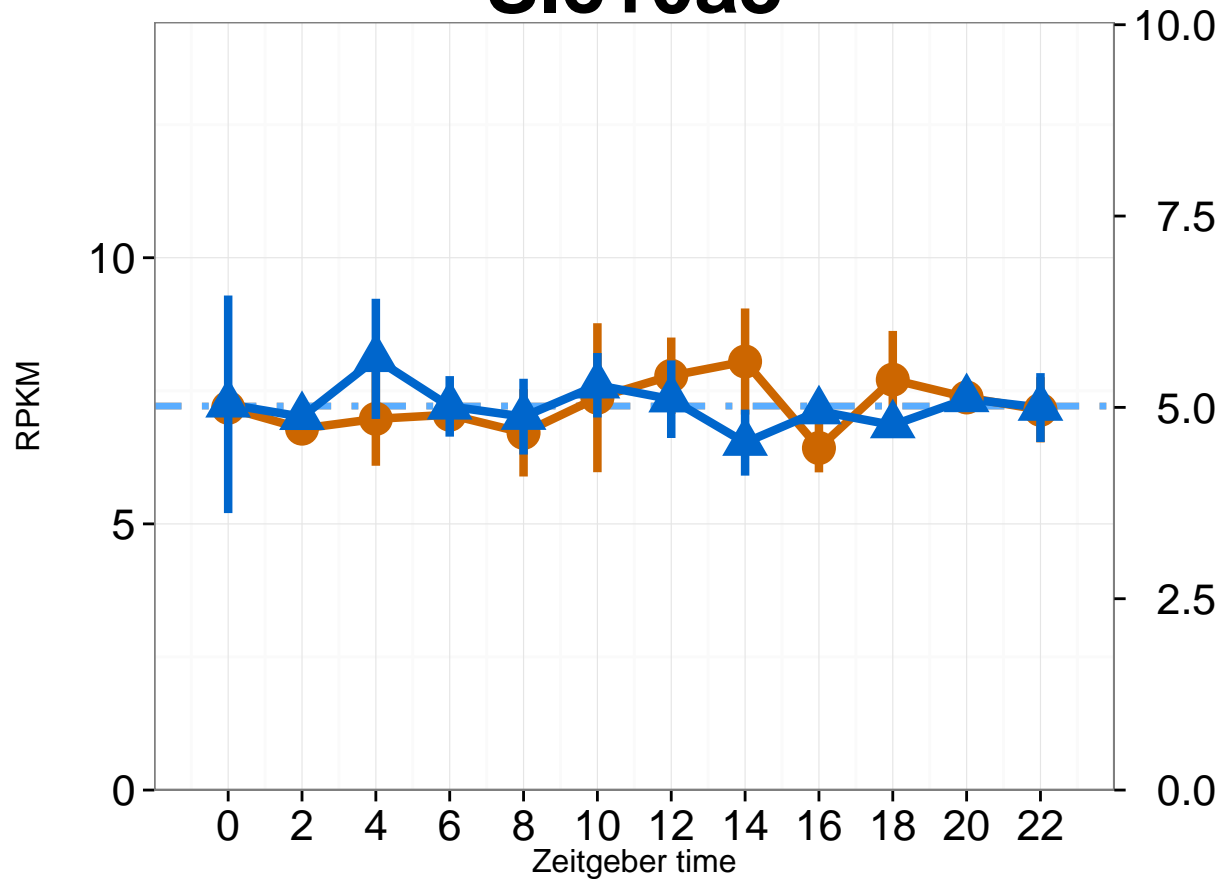

# Slc10a3

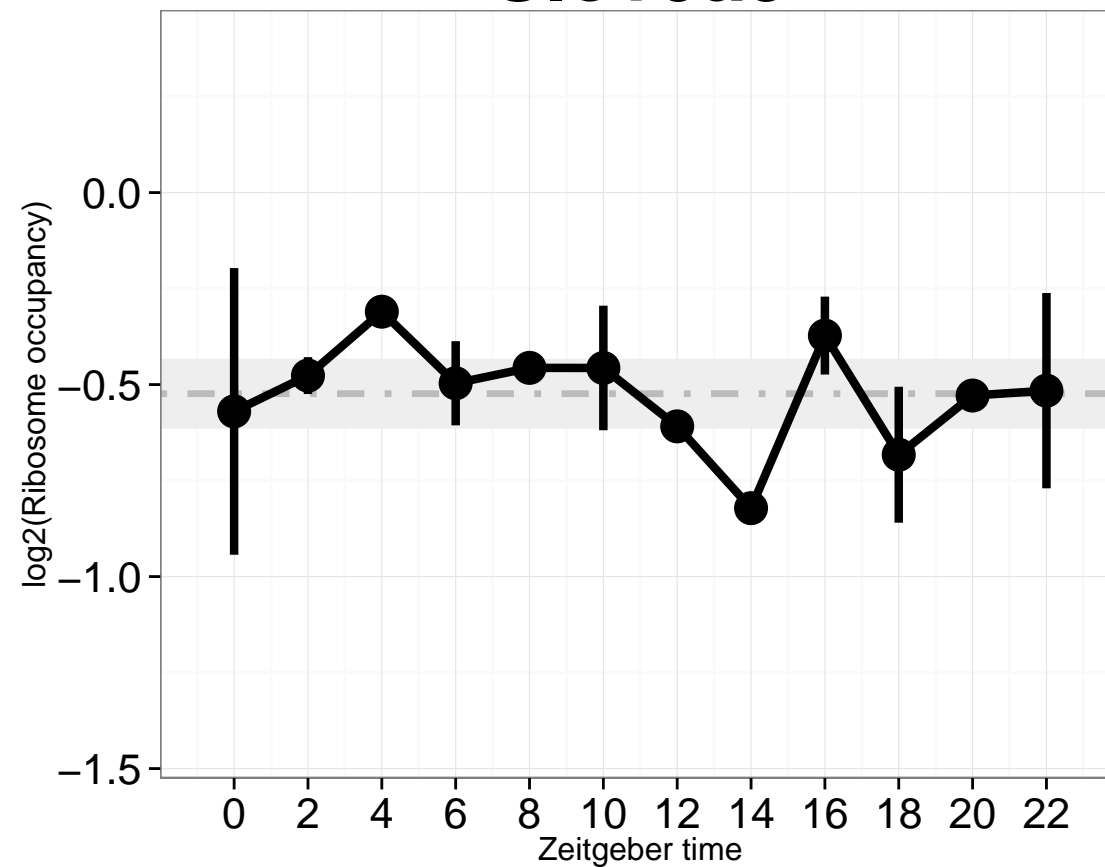

Supplement: Supplementary file 2810 [file 1]
