# Supplementary material (part 29 of 133)
Source: publisher figshare collection journal article supplement (https://springernature.figshare.com/articles/dataset/_/4903193)

## Dtnb

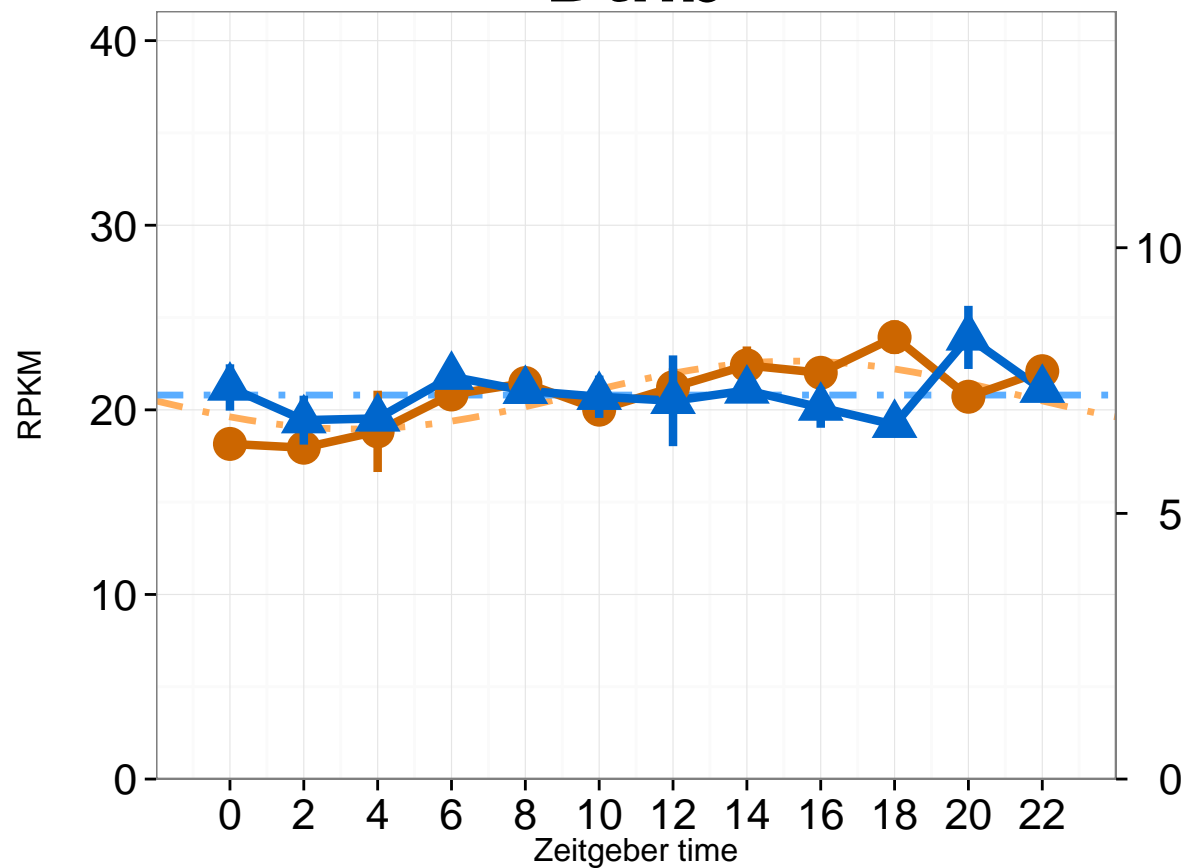

## Dtnb

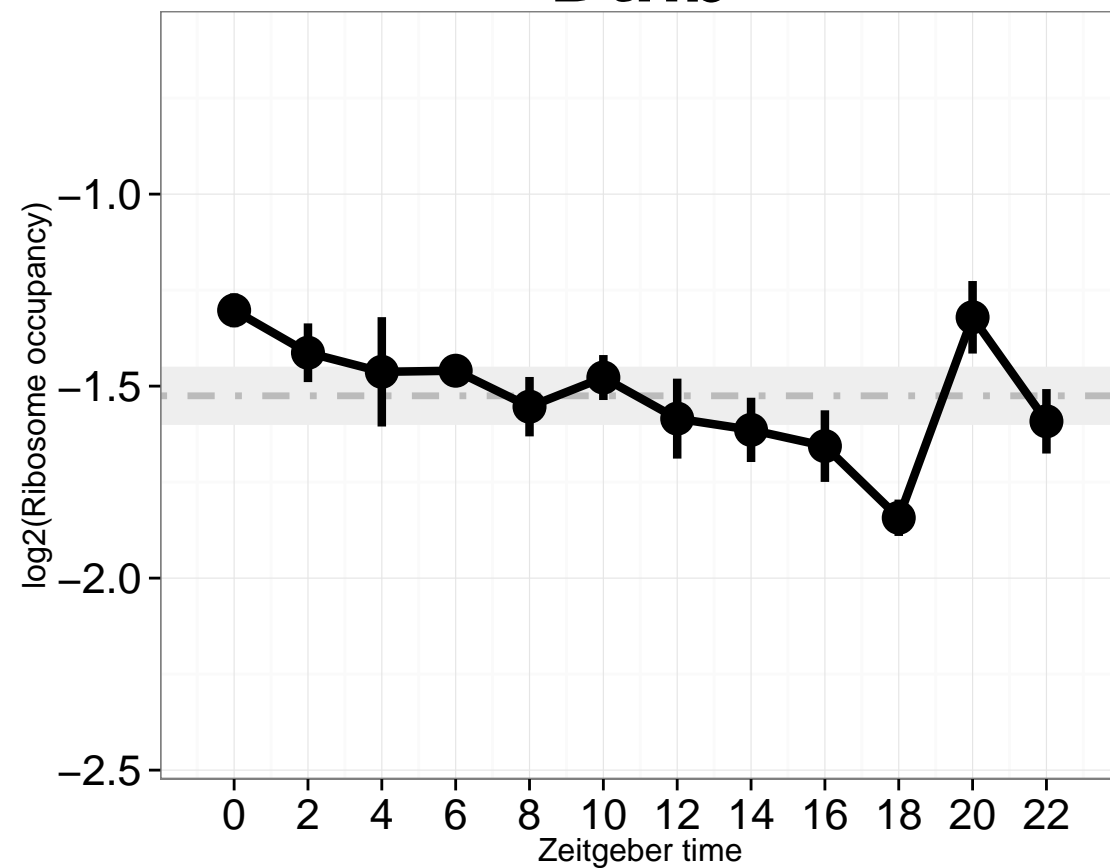

Supplement: Supplementary file 2811 [file 1]

## Xpo7

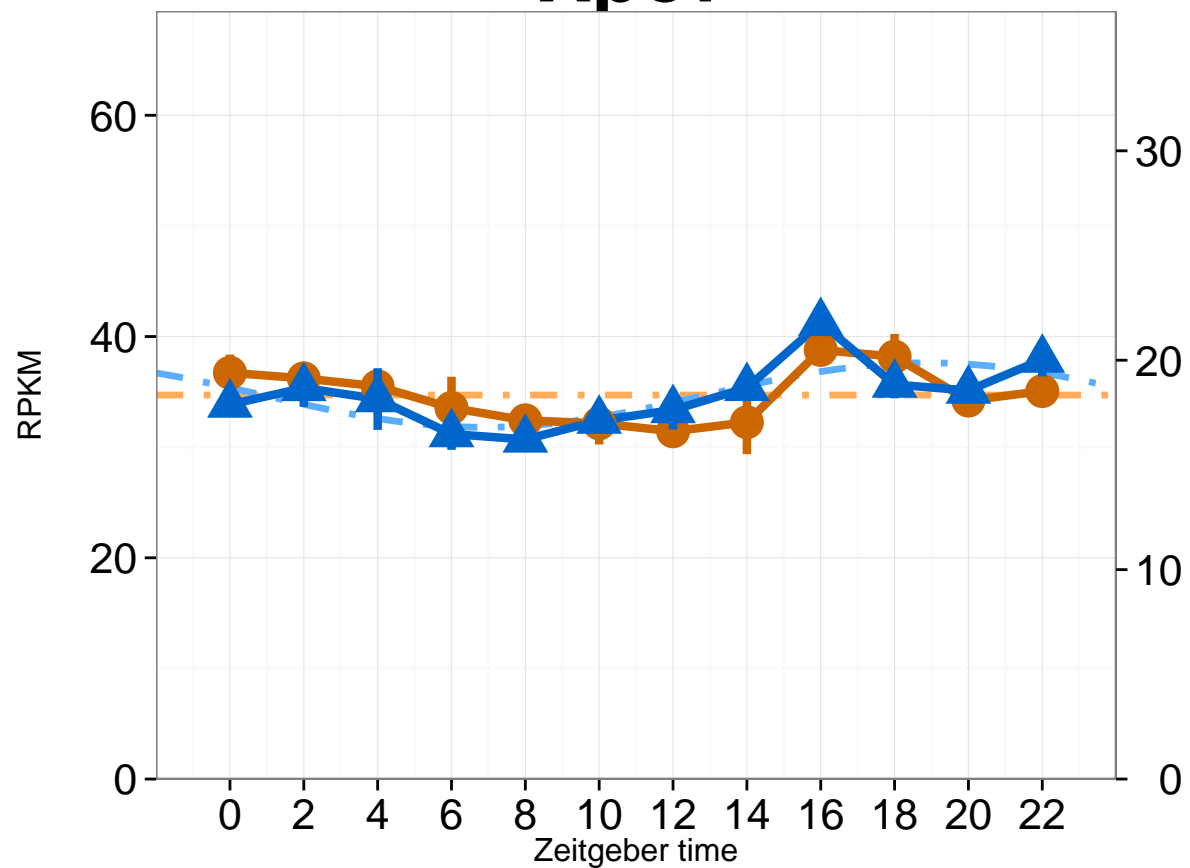

## Xpo7

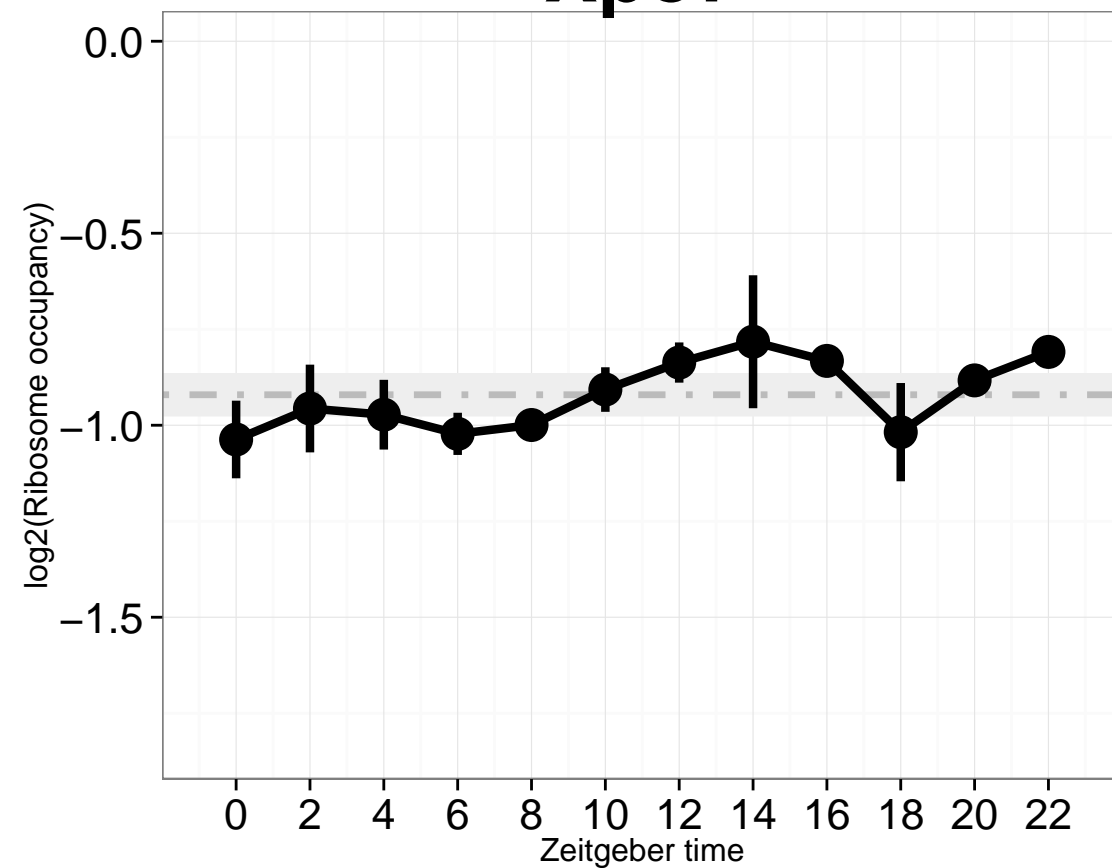

Supplement: Supplementary file 2812 [file 1]

# Sat2

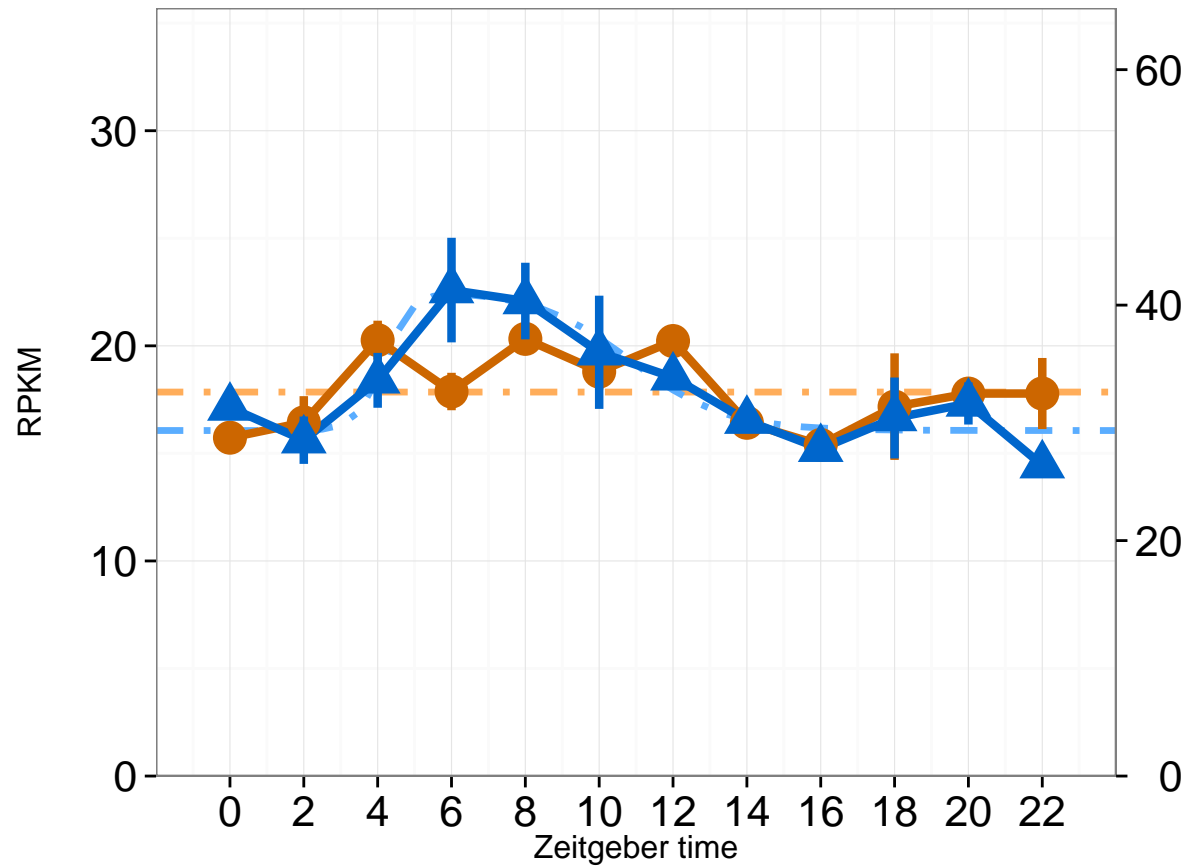

# Sat2

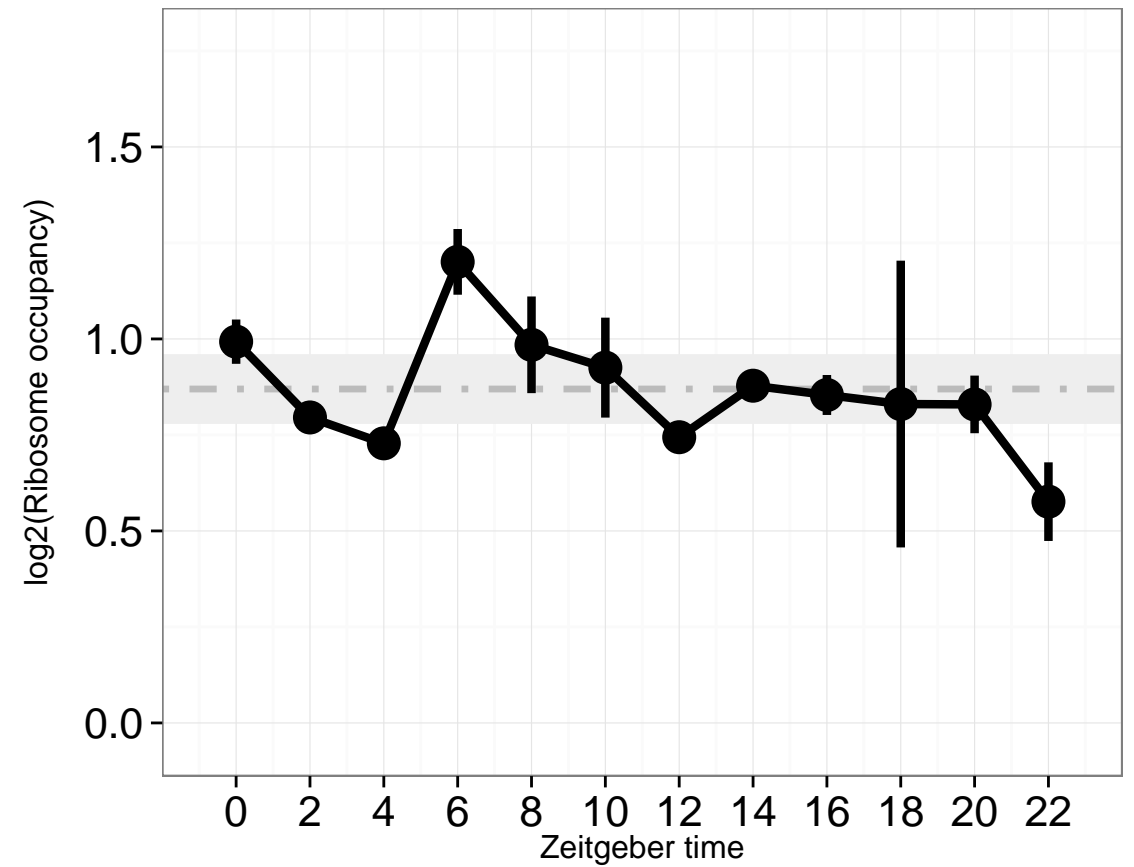

Supplement: Supplementary file 2813 [file 1]

## Ostf1

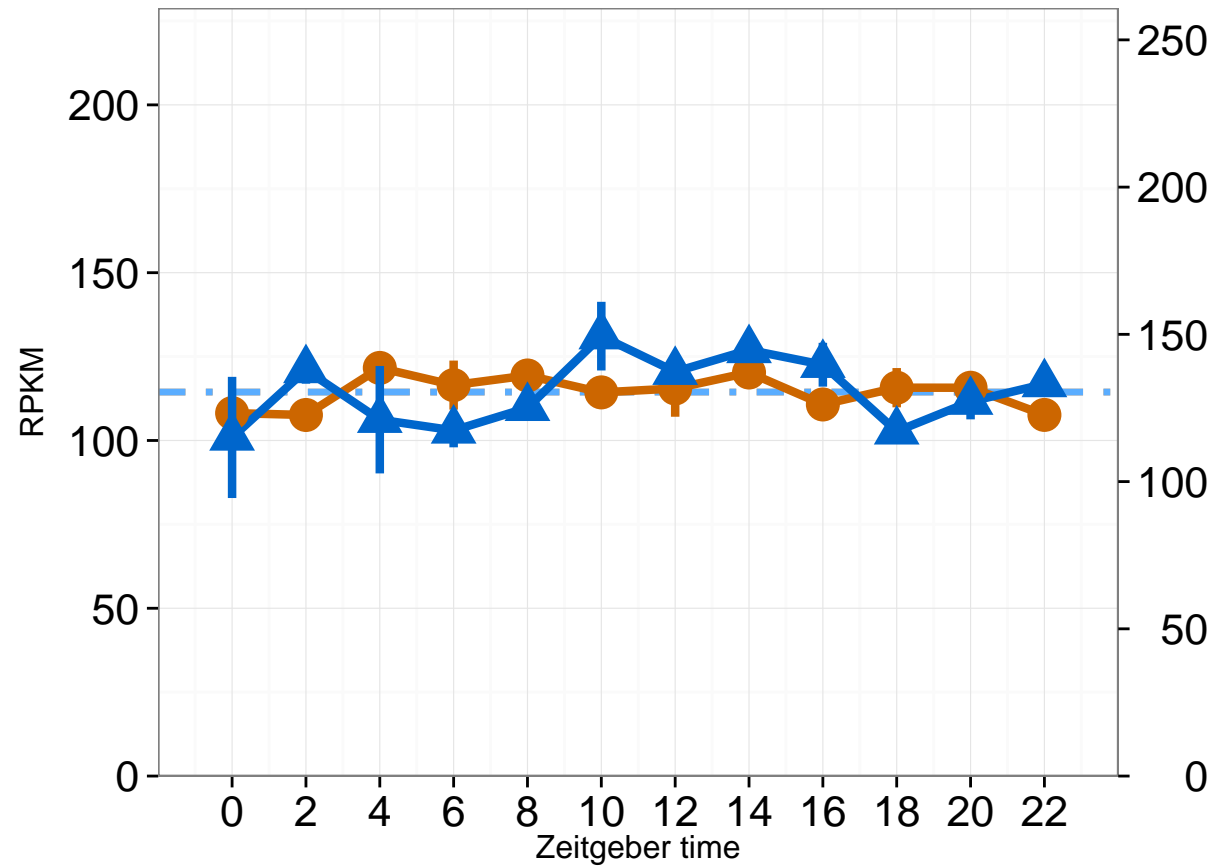

## Ostf1

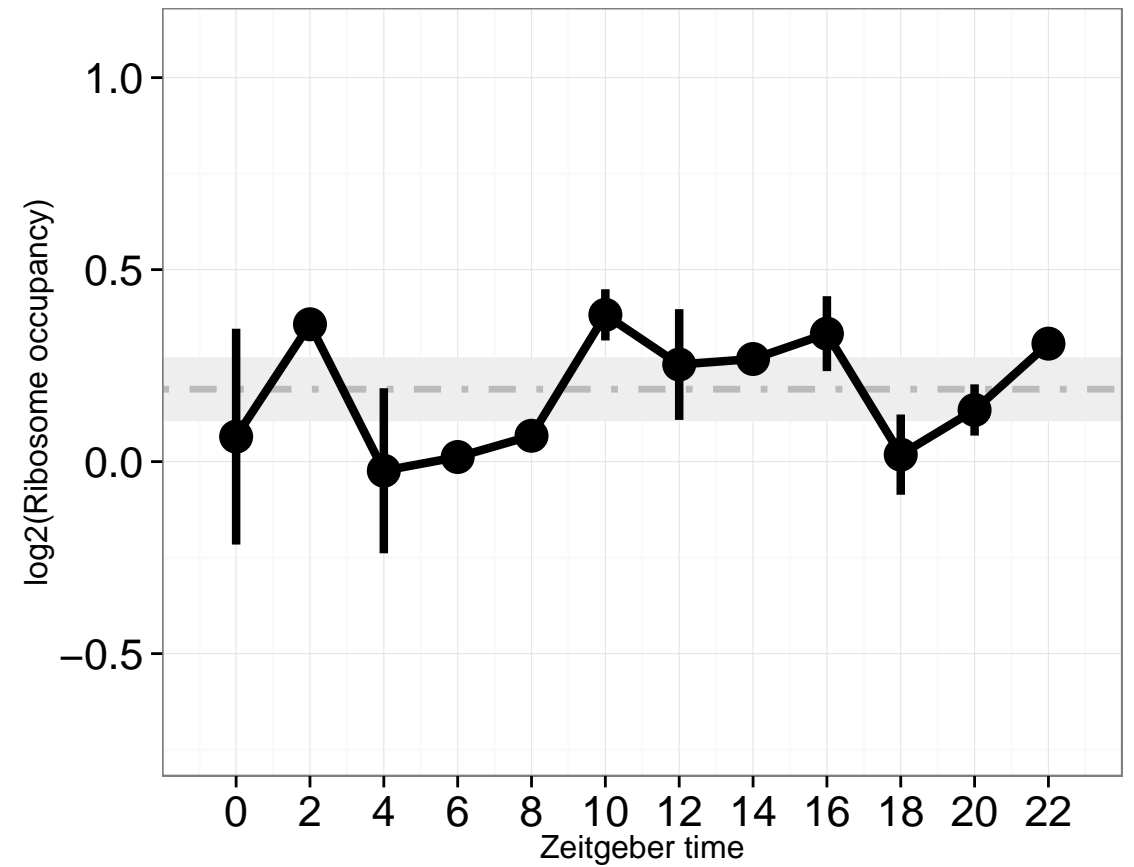

Supplement: Supplementary file 2814 [file 1]

# Tmem109

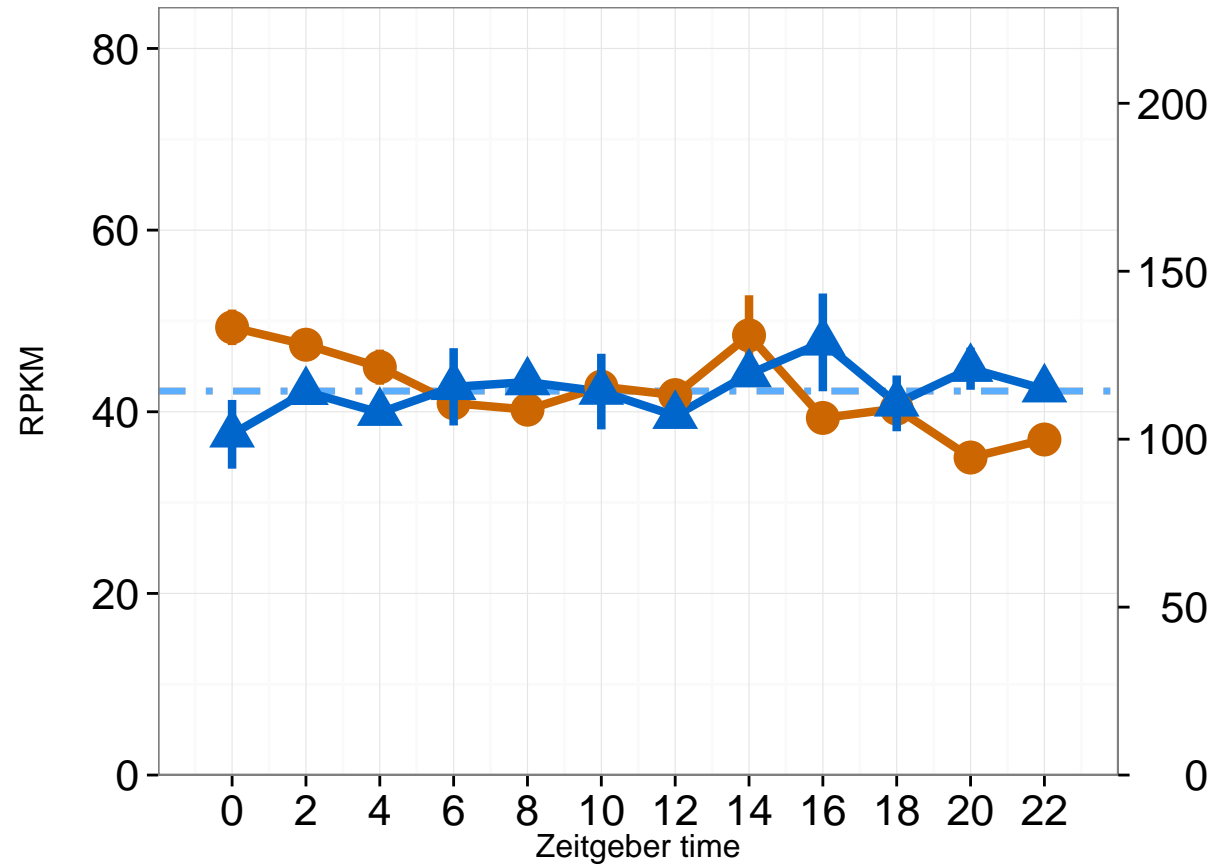

# Tmem109

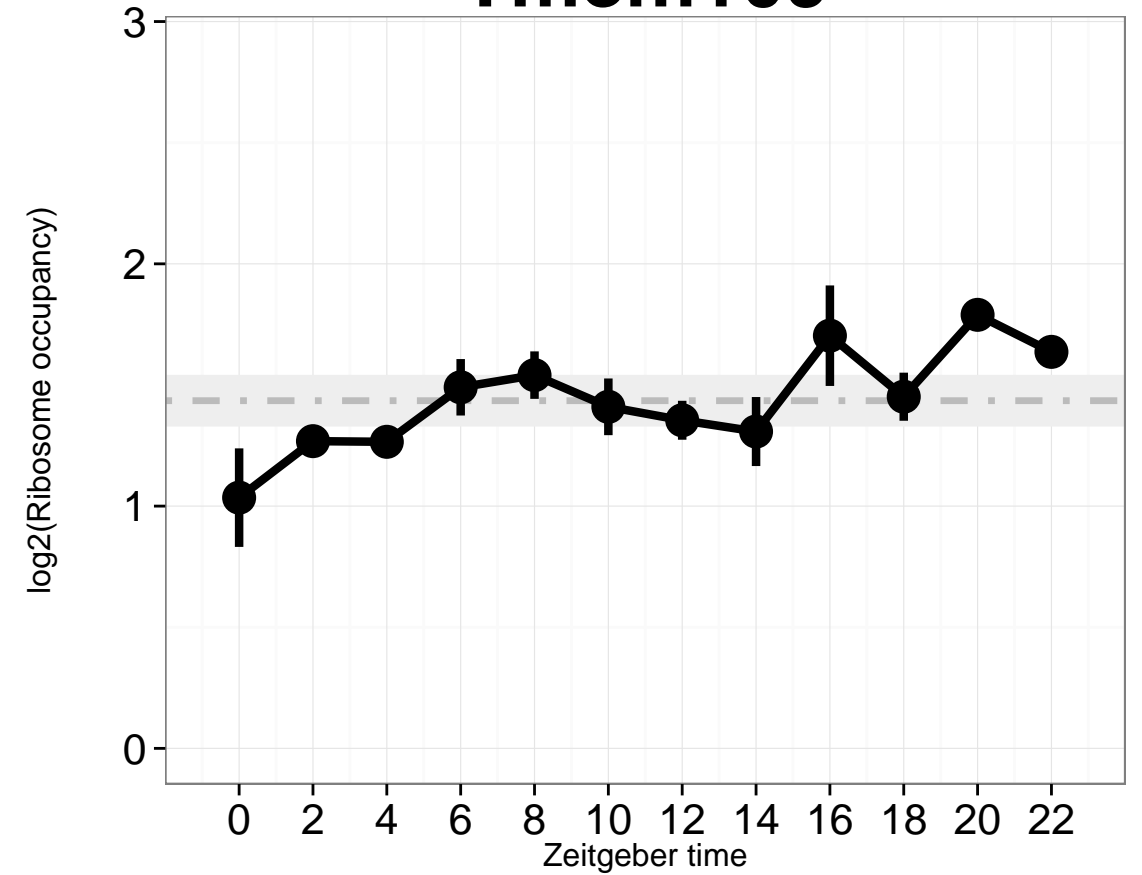

Supplement: Supplementary file 2815 [file 1]

## Plxna2

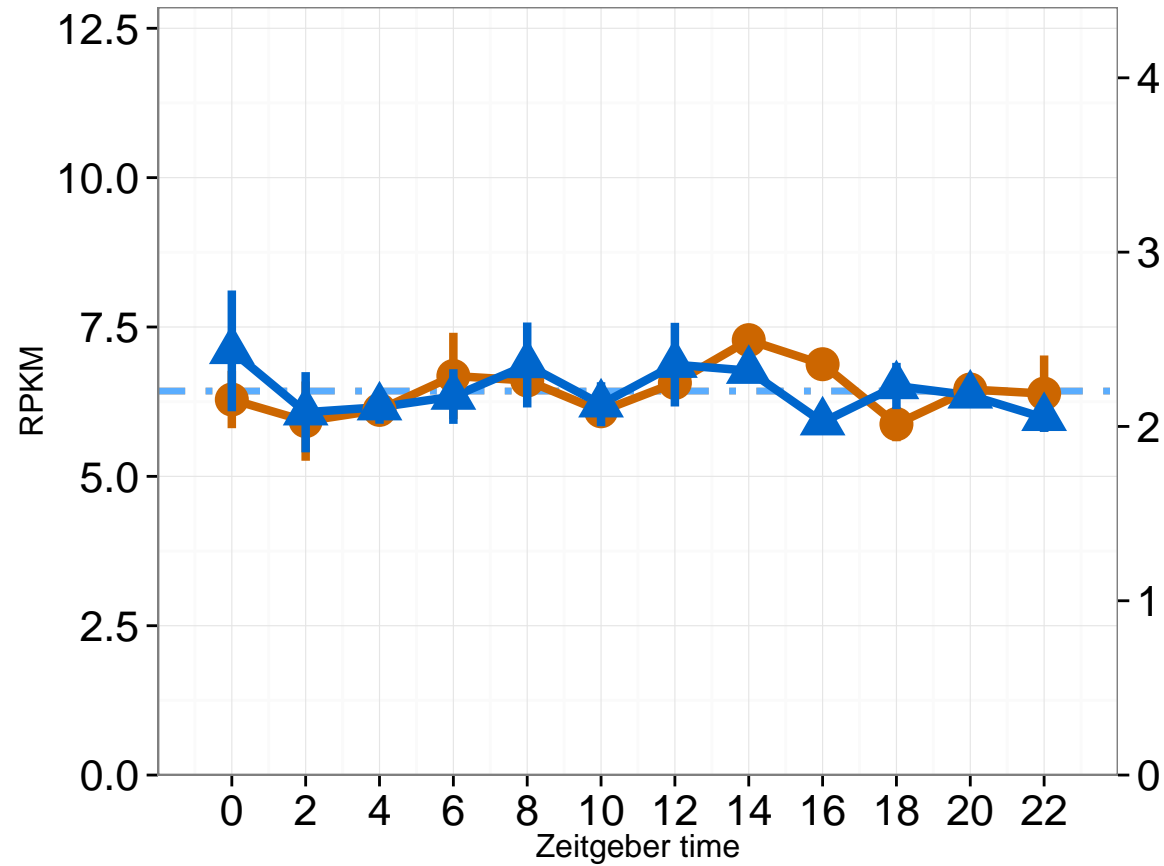

## Plxna2

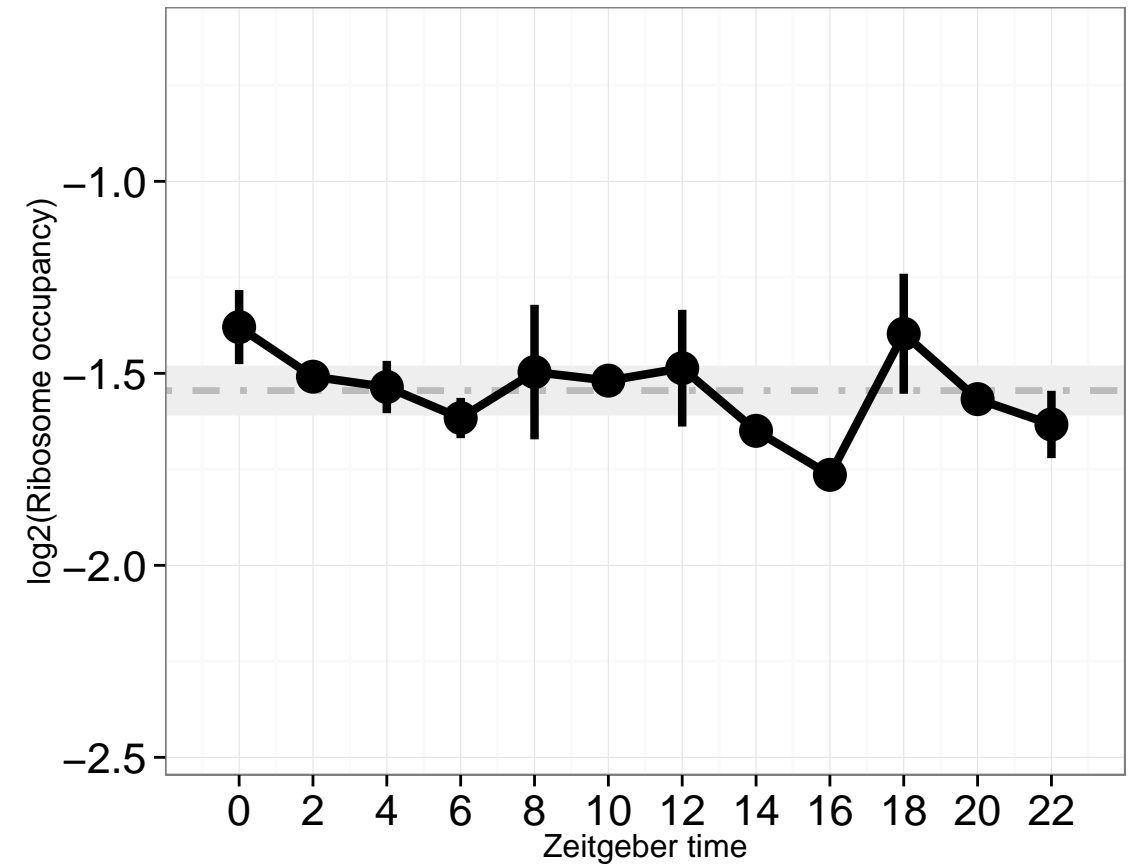

Supplement: Supplementary file 2816 [file 1]

# Slc9a3r1

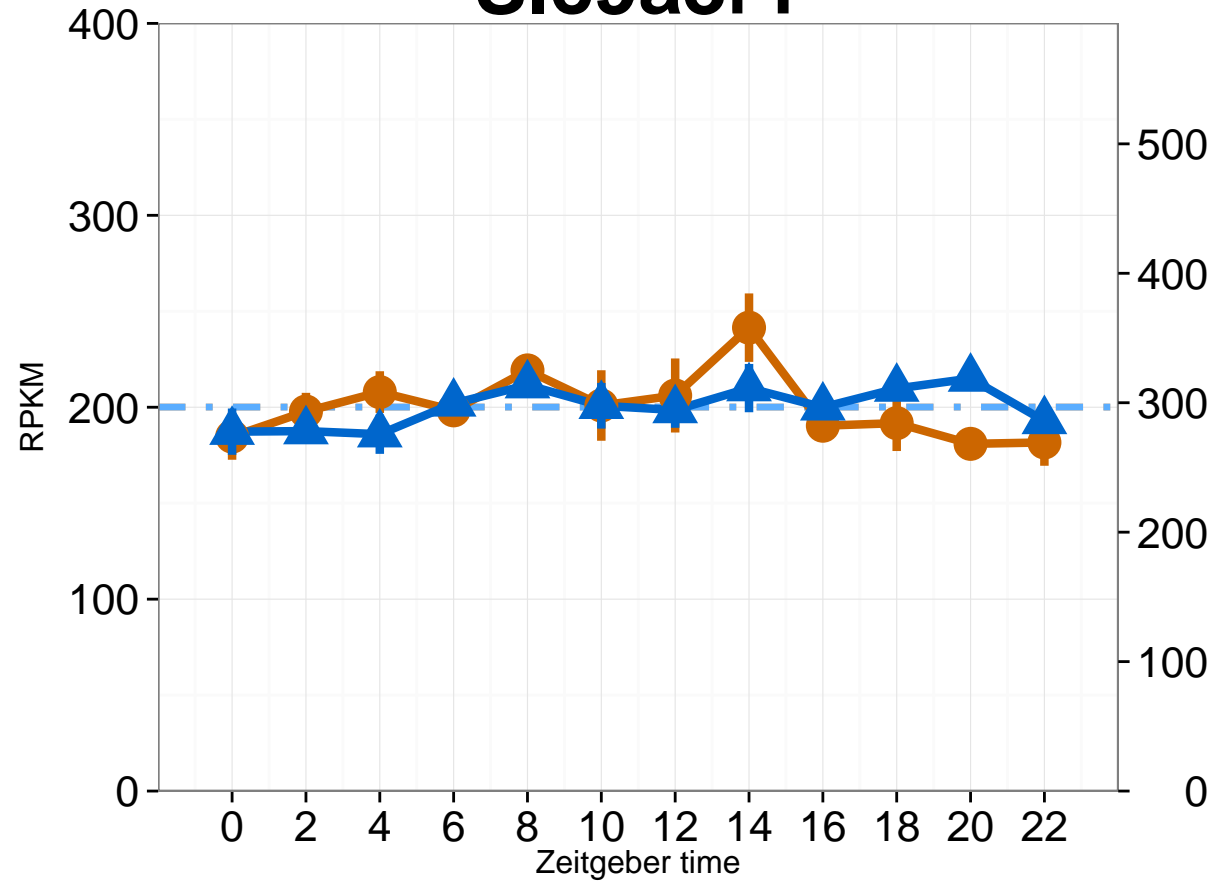

# Slc9a3r1

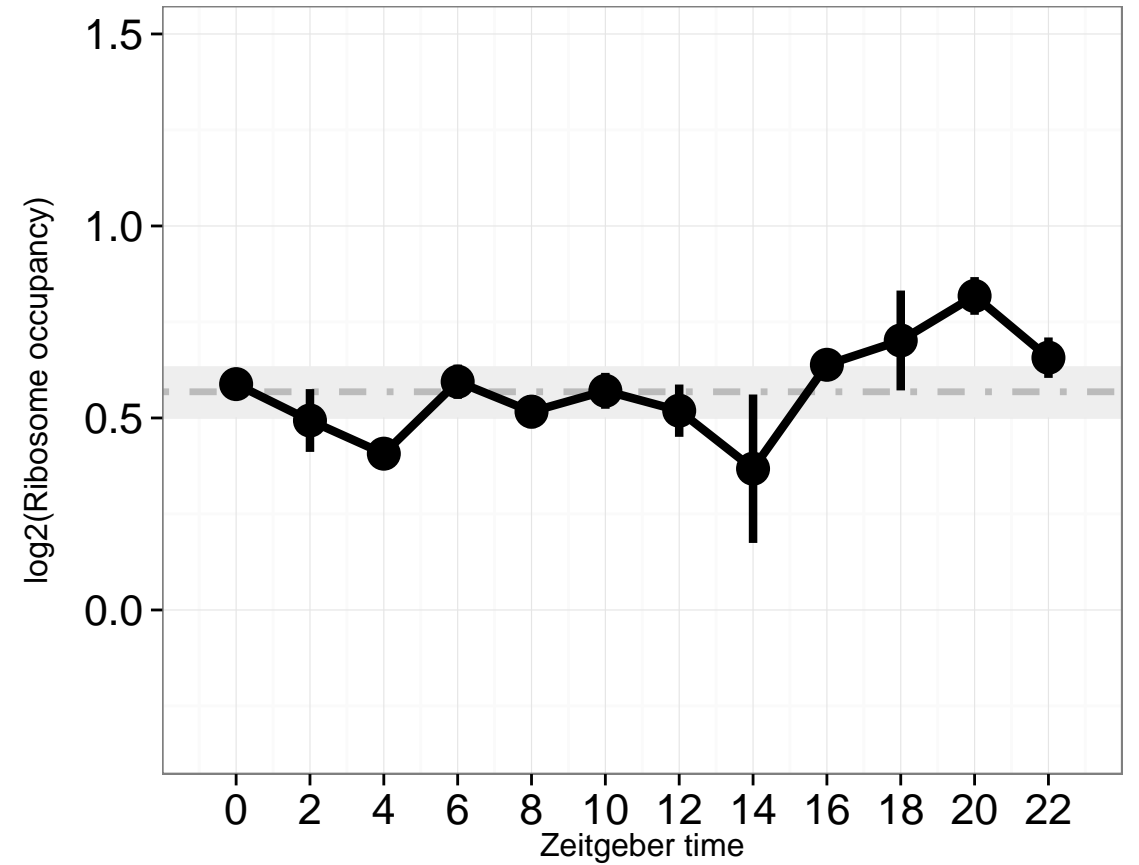

Supplement: Supplementary file 2817 [file 1]

# Chrnb1

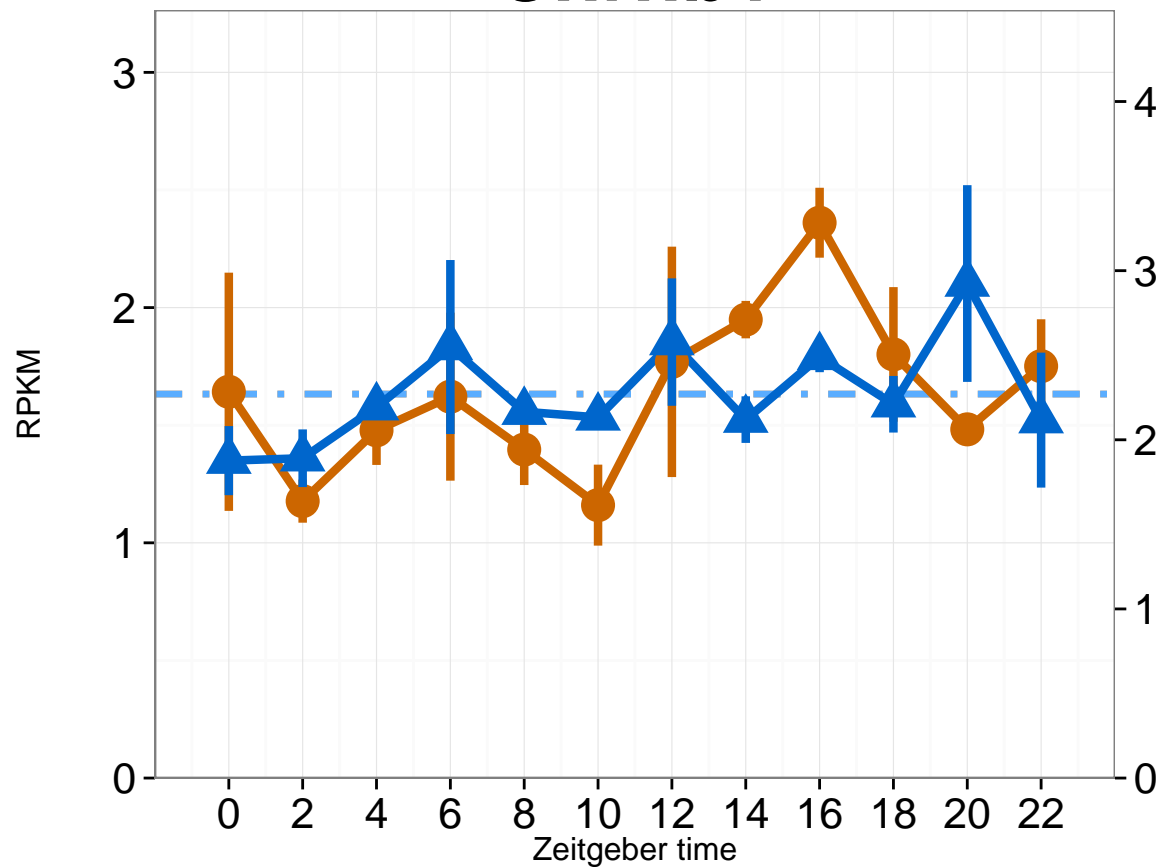

# Chrnb1

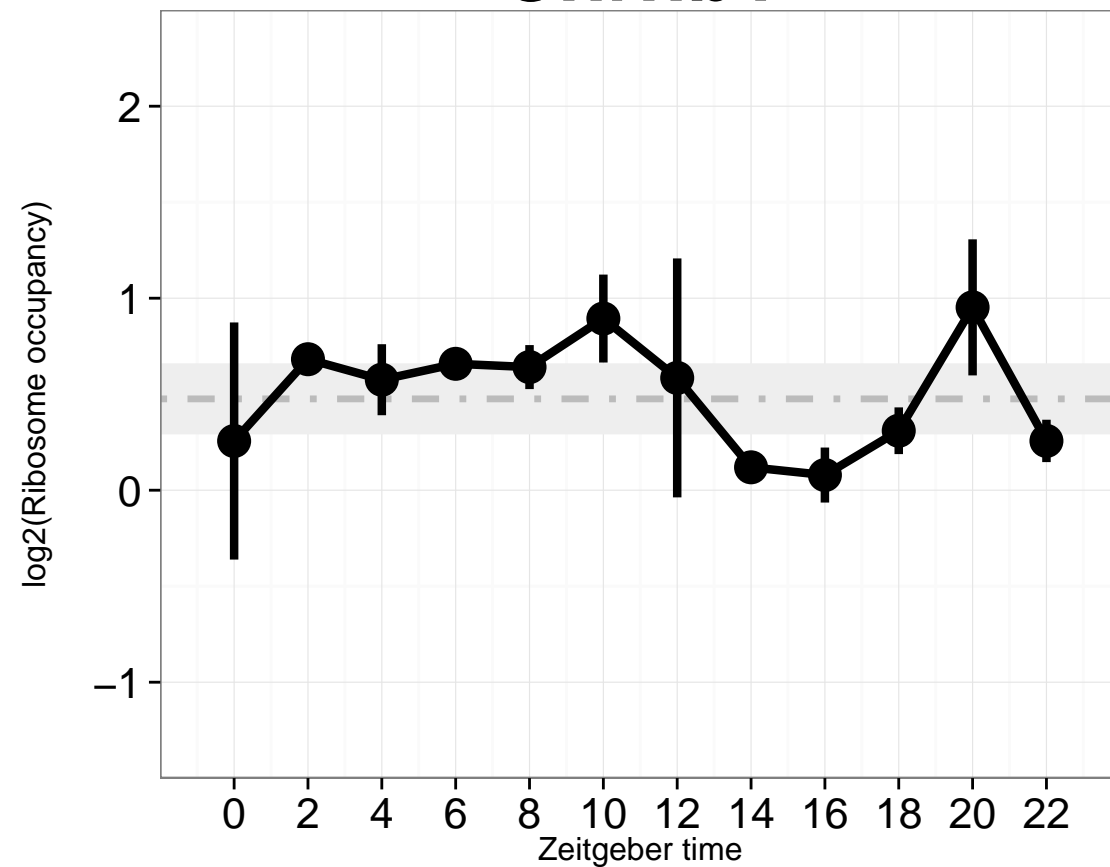

Supplement: Supplementary file 2818 [file 1]

# Ctgf

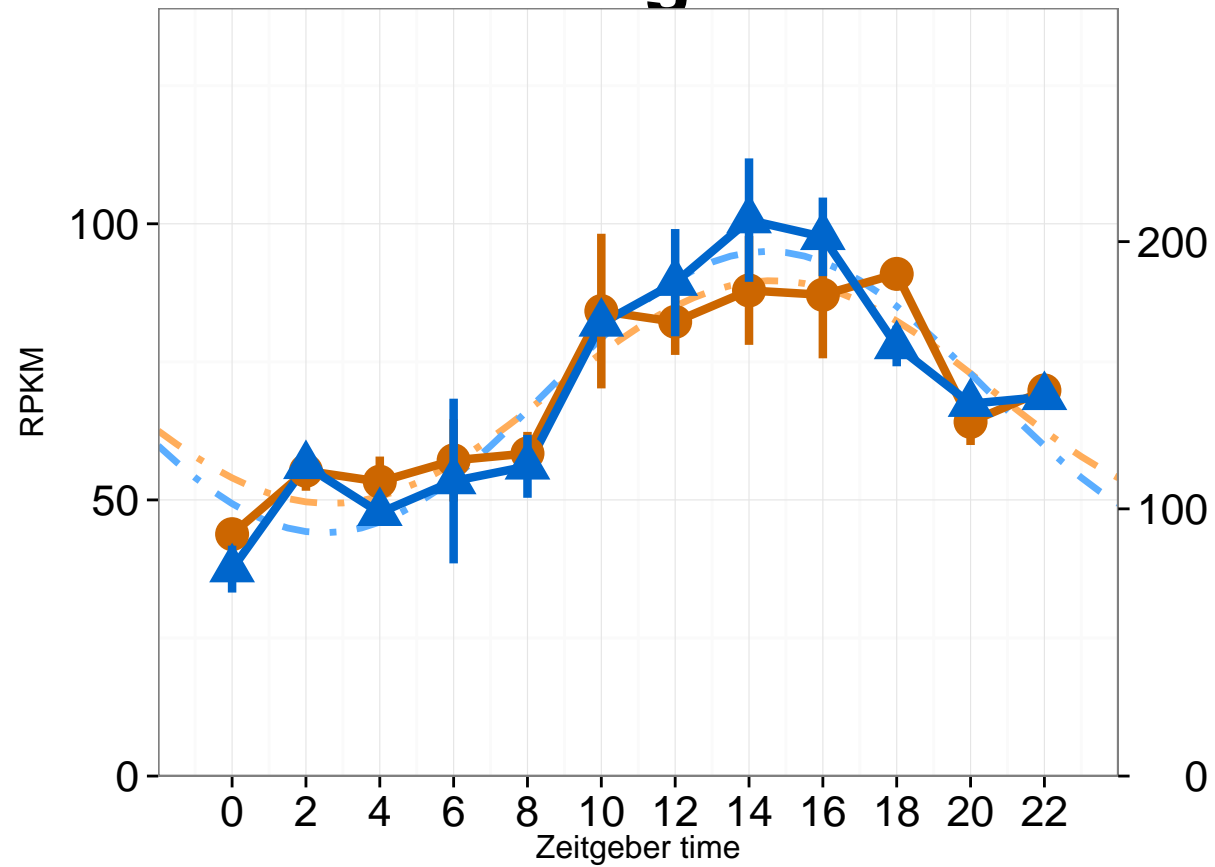

# Ctgf

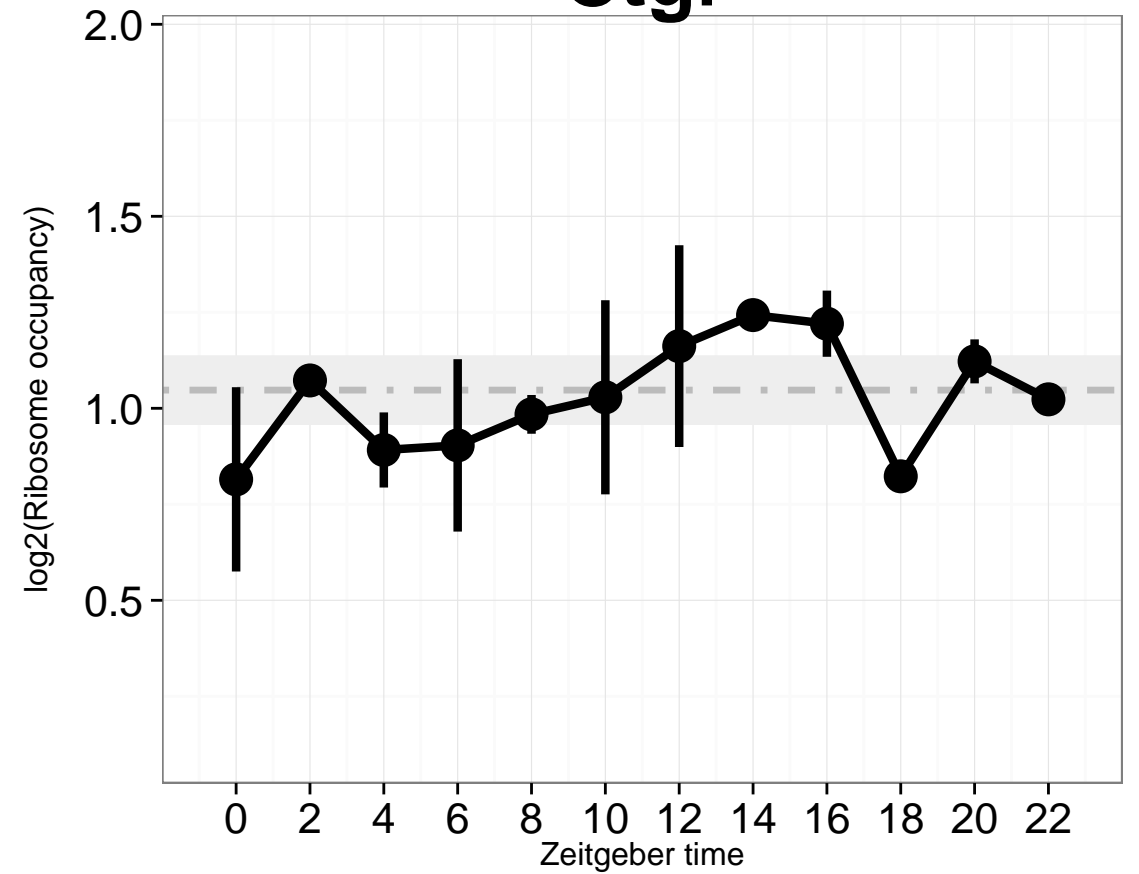

Supplement: Supplementary file 2819 [file 1]

# Wdr78

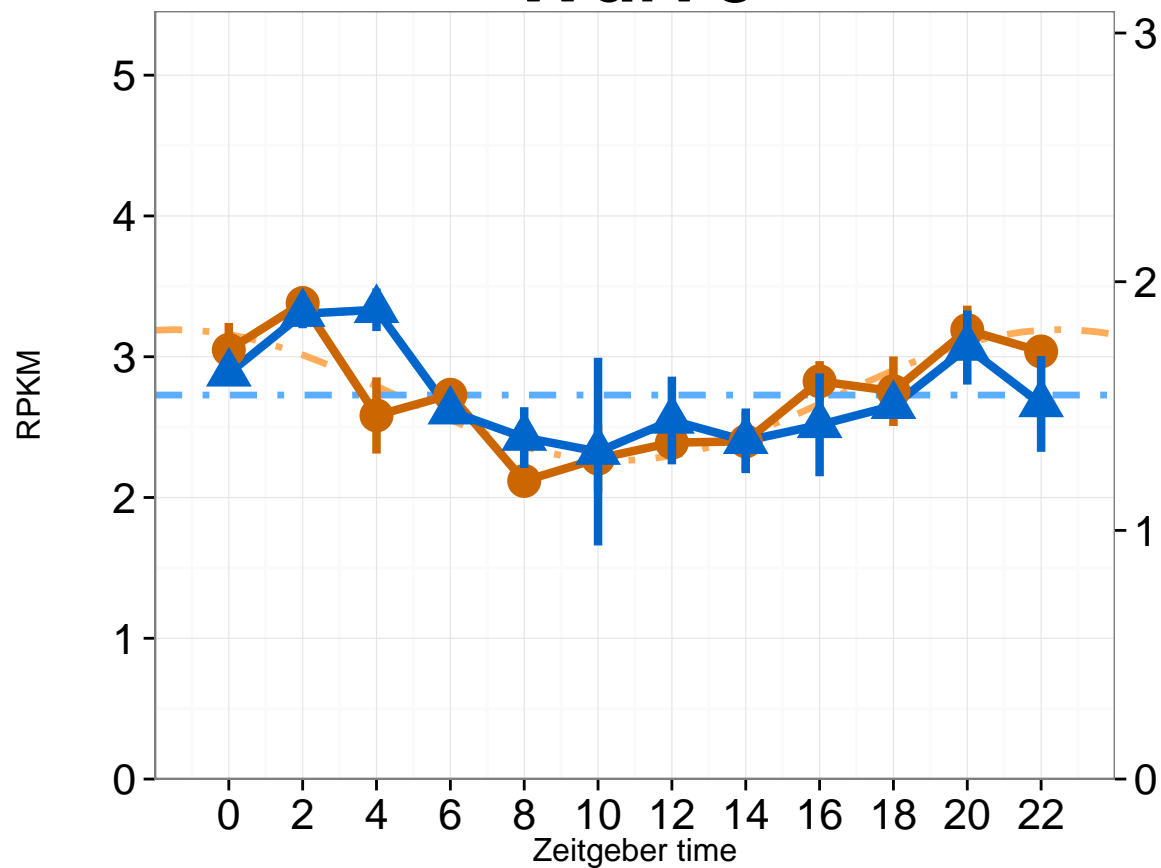

# Wdr78

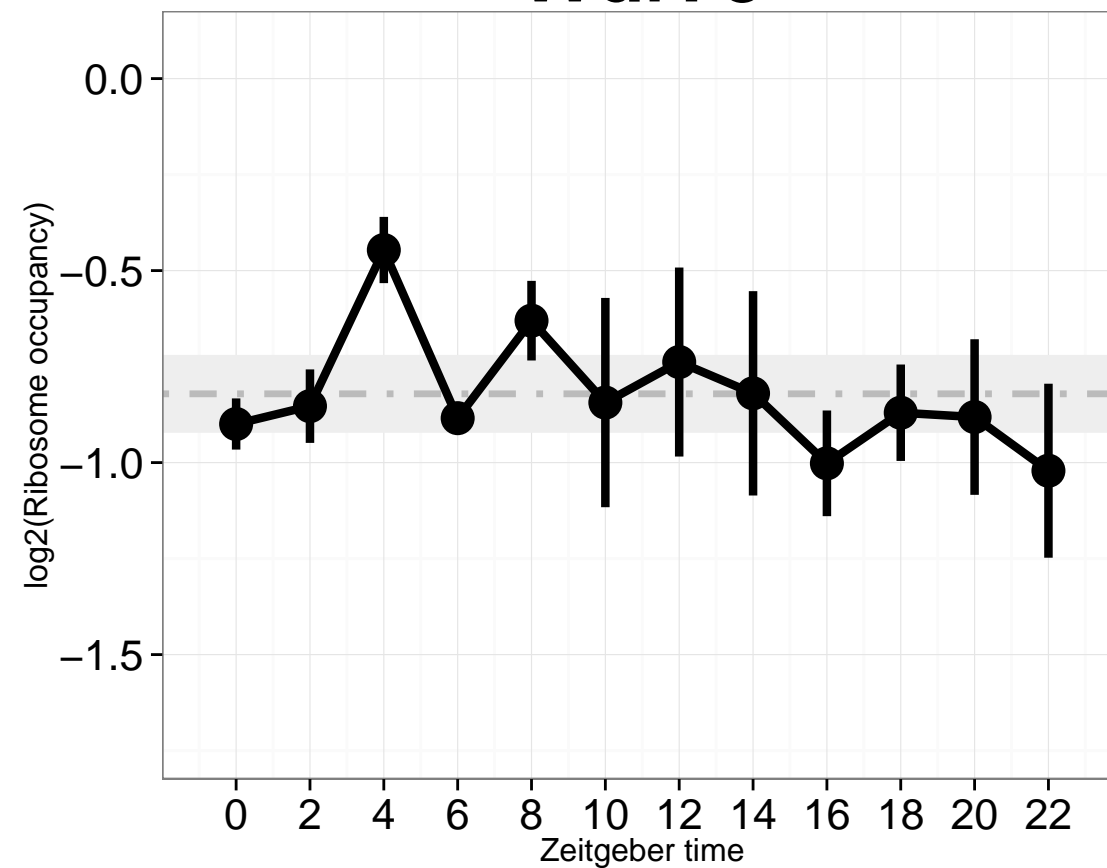

Supplement: Supplementary file 2820 [file 1]

# Zfp791

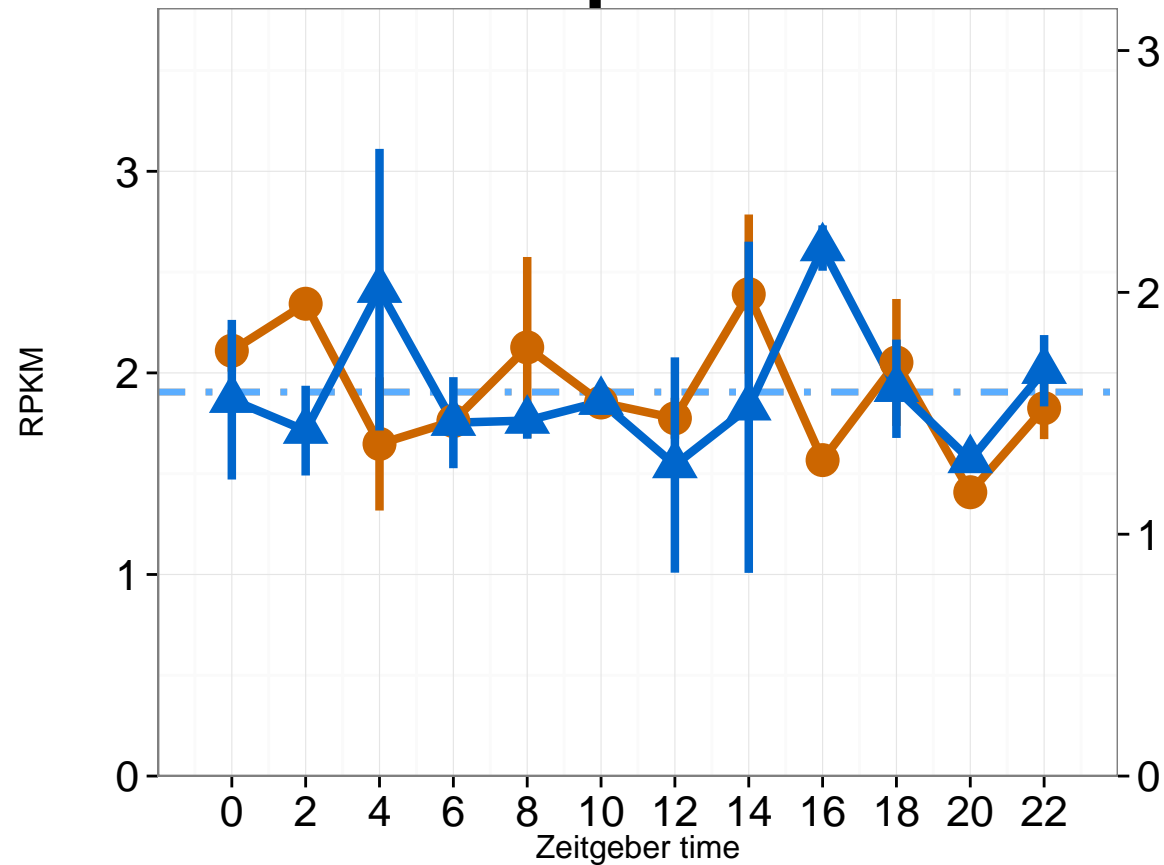

# Zfp791

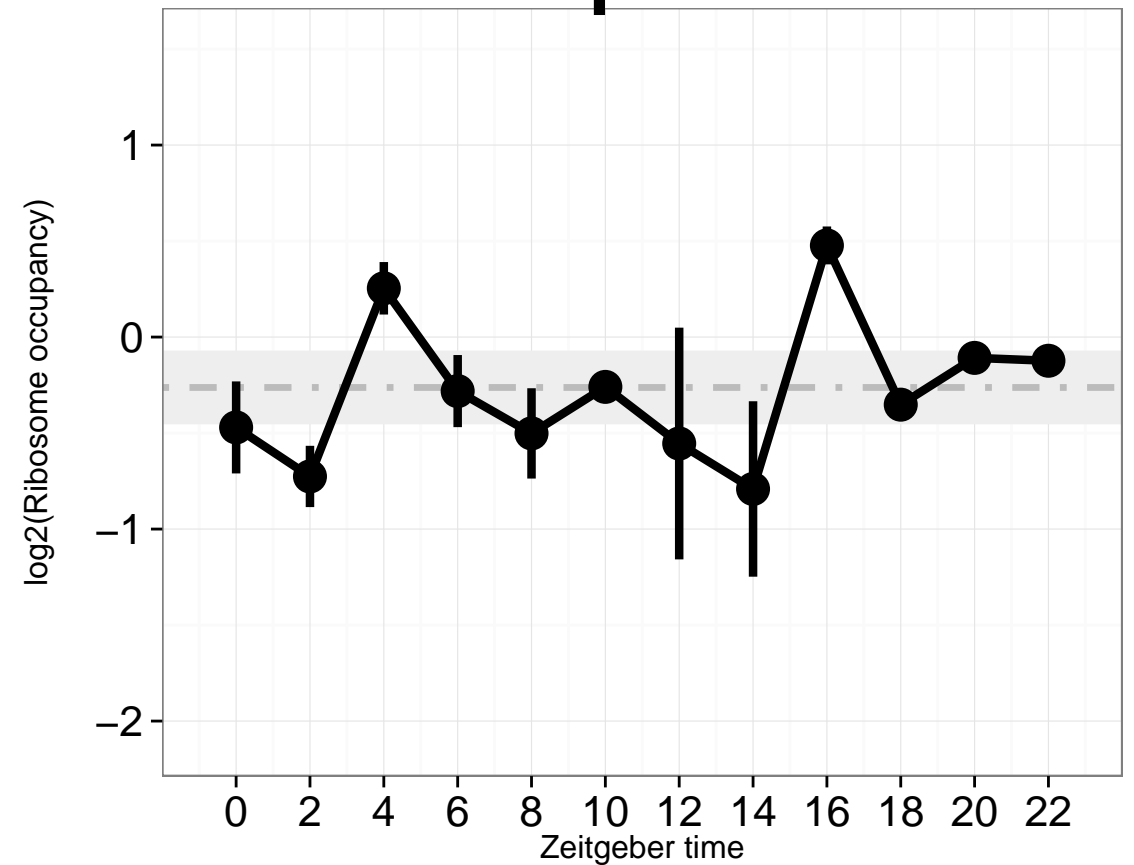

Supplement: Supplementary file 2821 [file 1]

## Ngfr

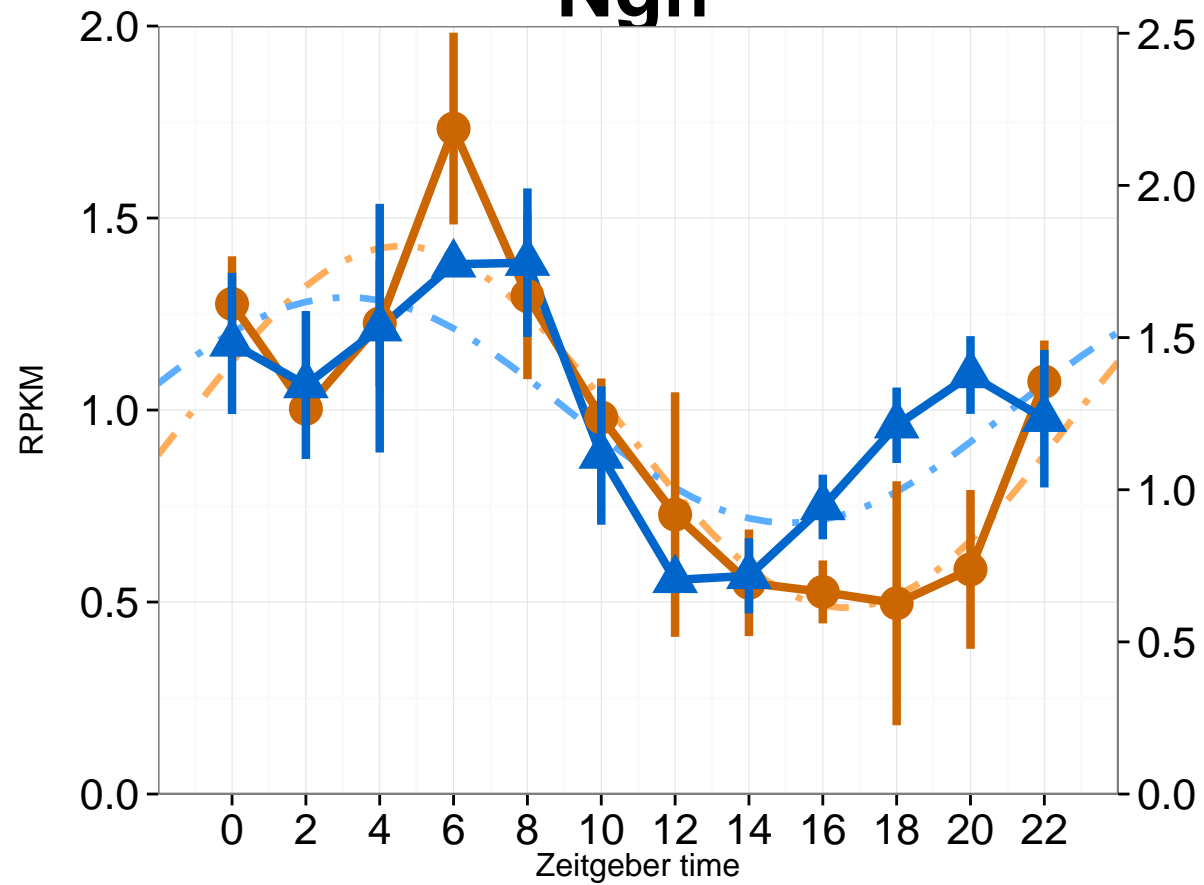

## Ngfr

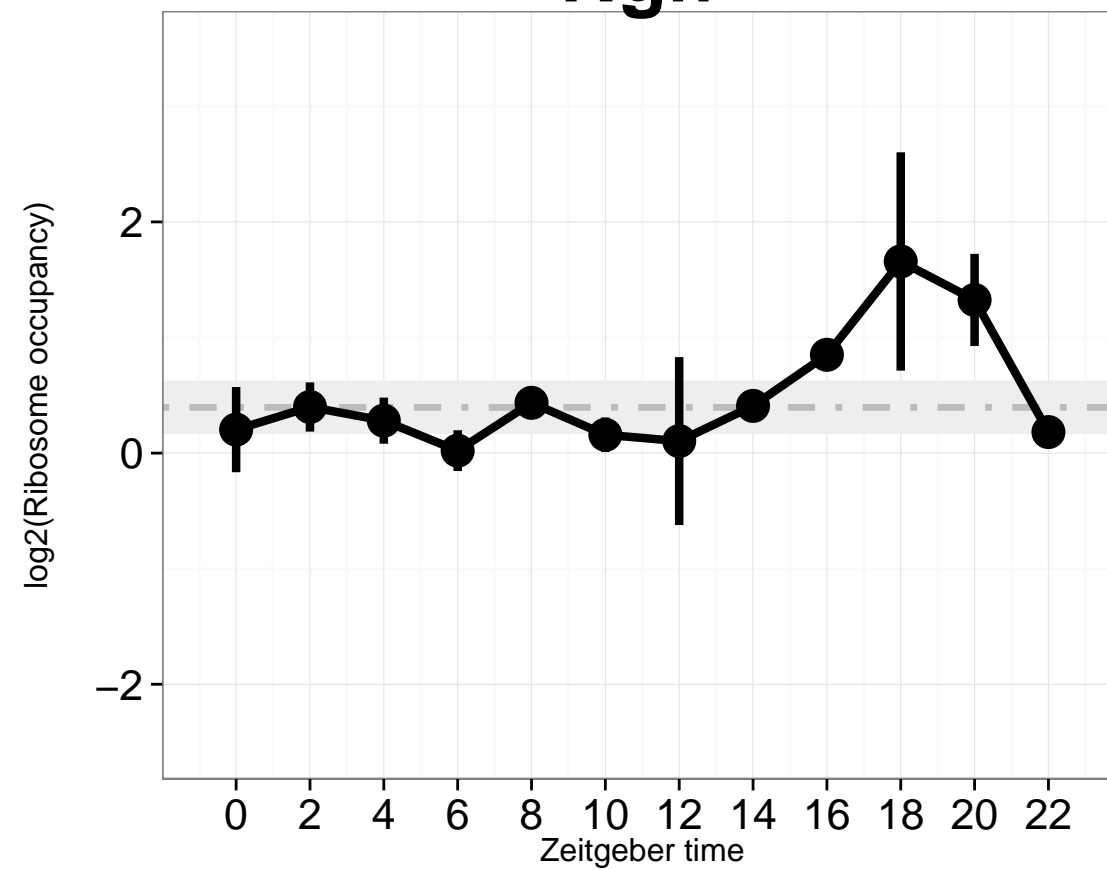

Supplement: Supplementary file 2822 [file 1]

# Agpat9

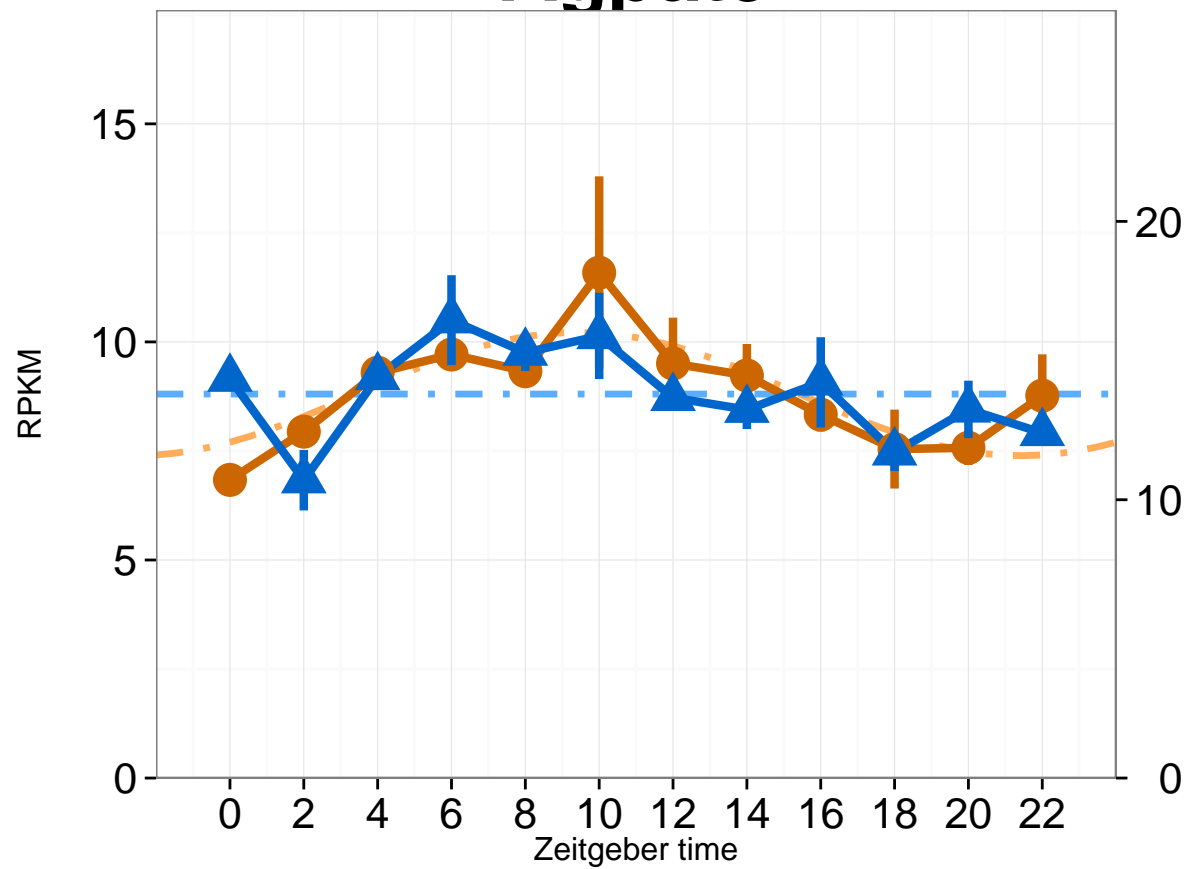

# Agpat9

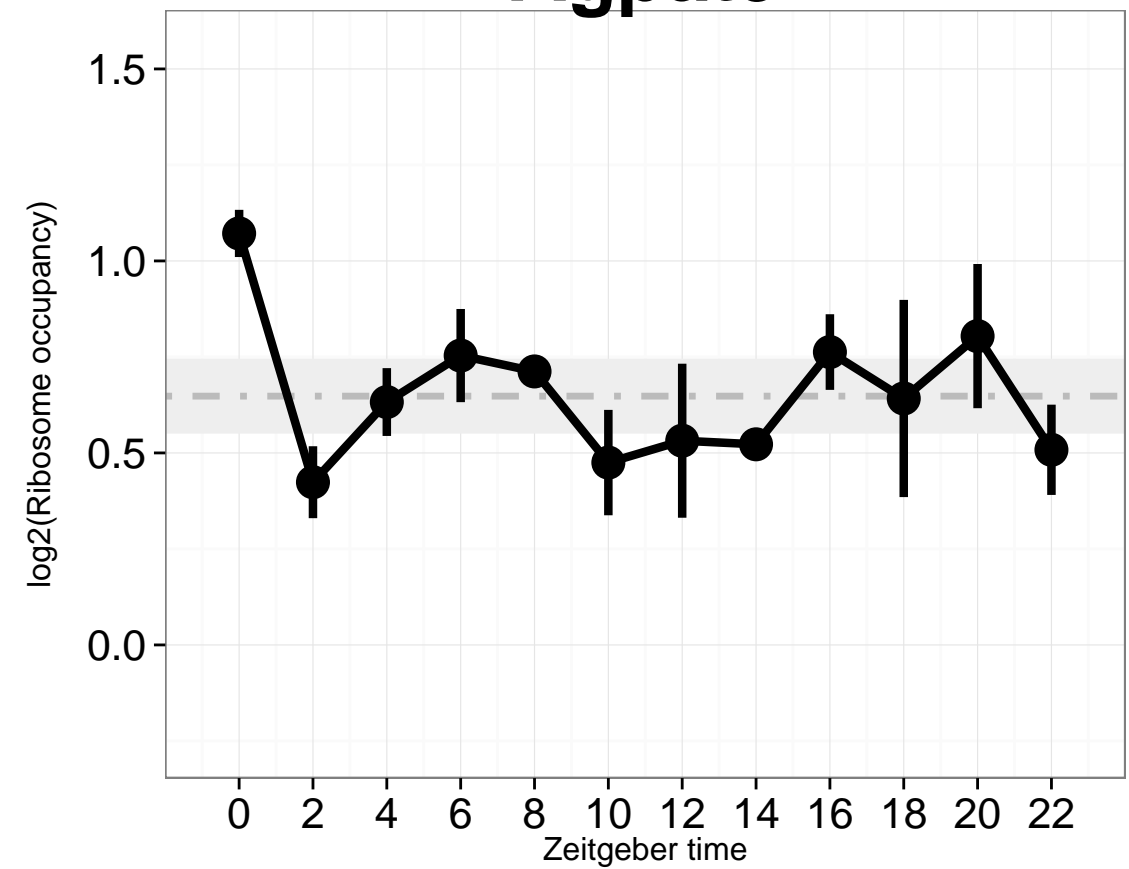

Supplement: Supplementary file 2823 [file 1]

# Atp5a1

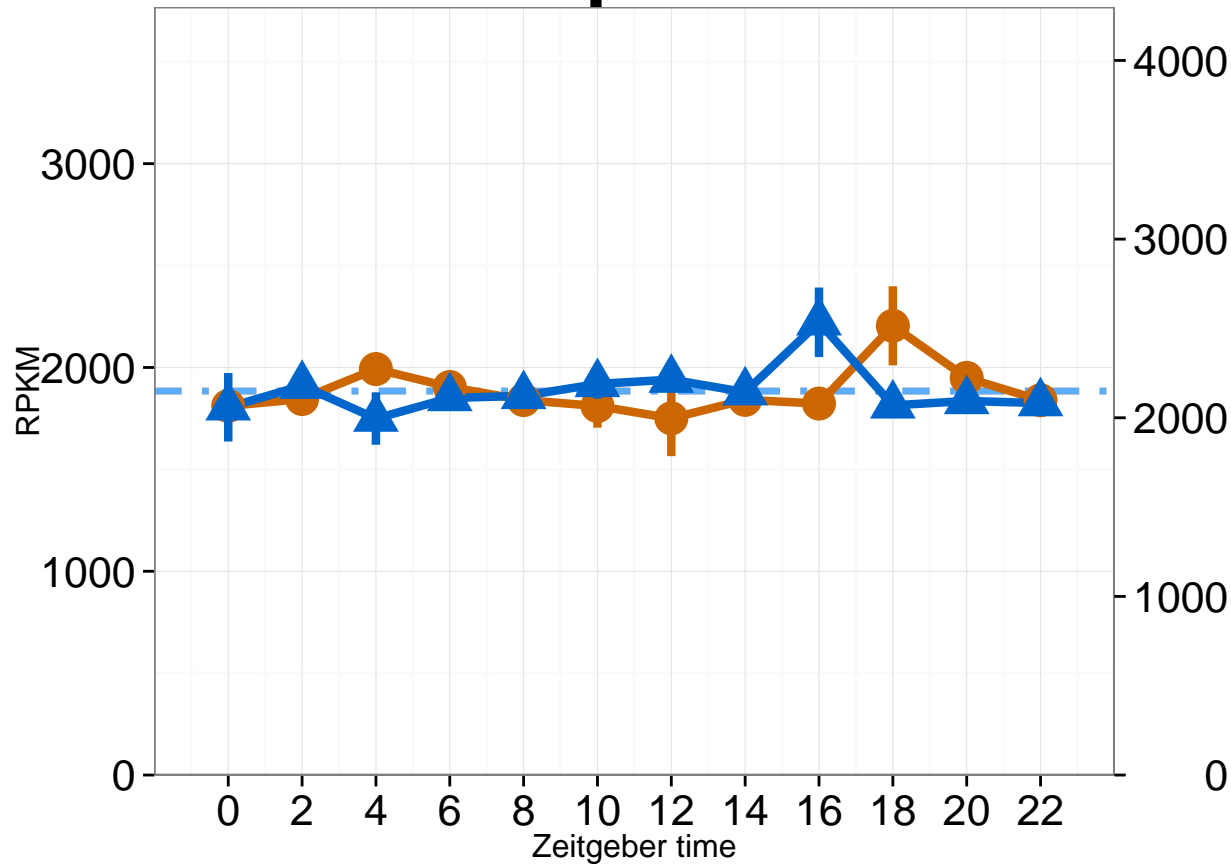

# Atp5a1

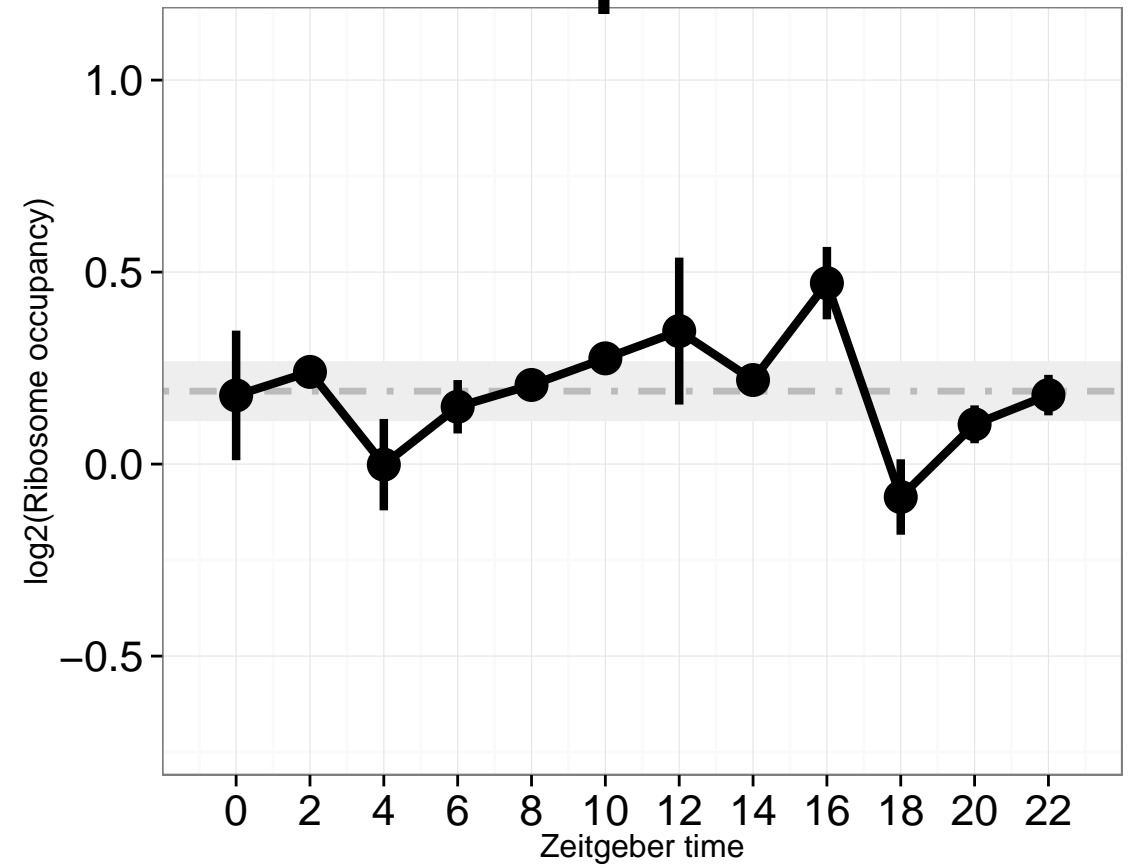

Supplement: Supplementary file 2824 [file 1]

# Sned1

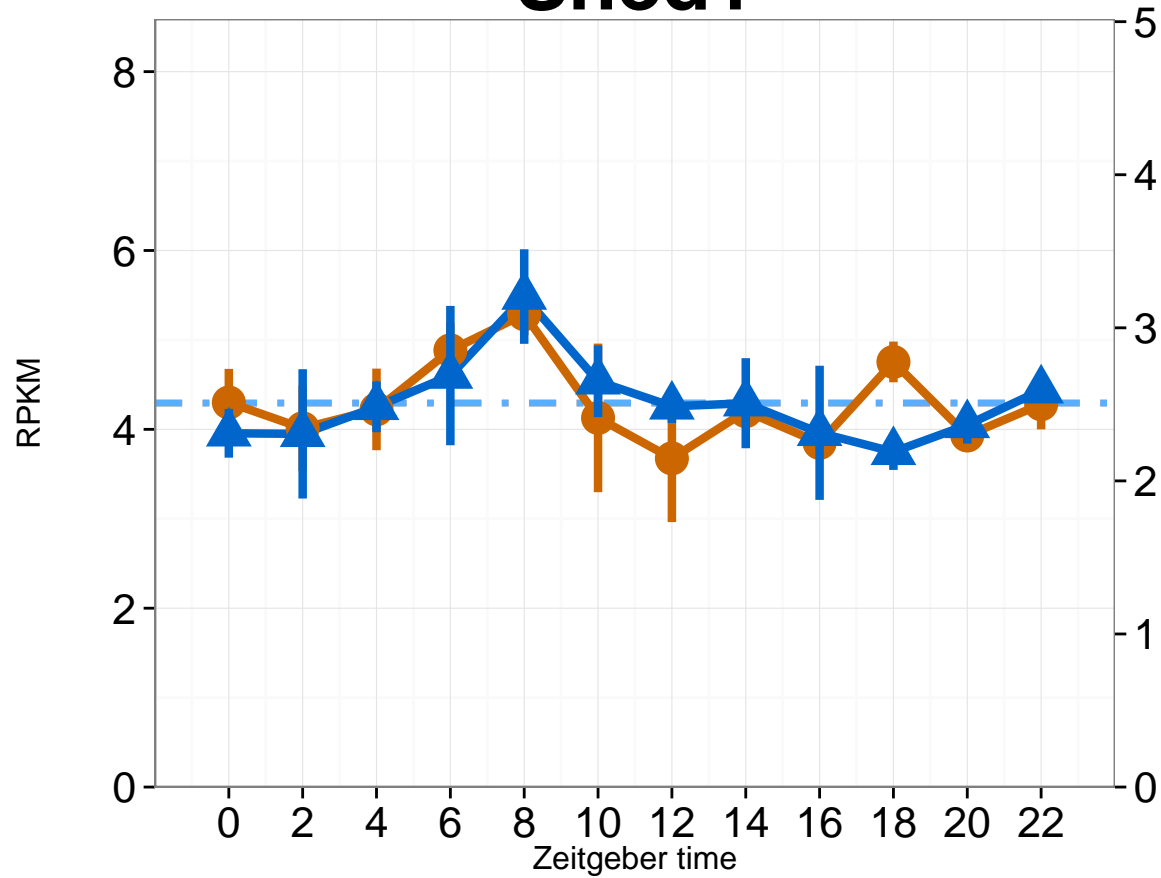

# Sned1

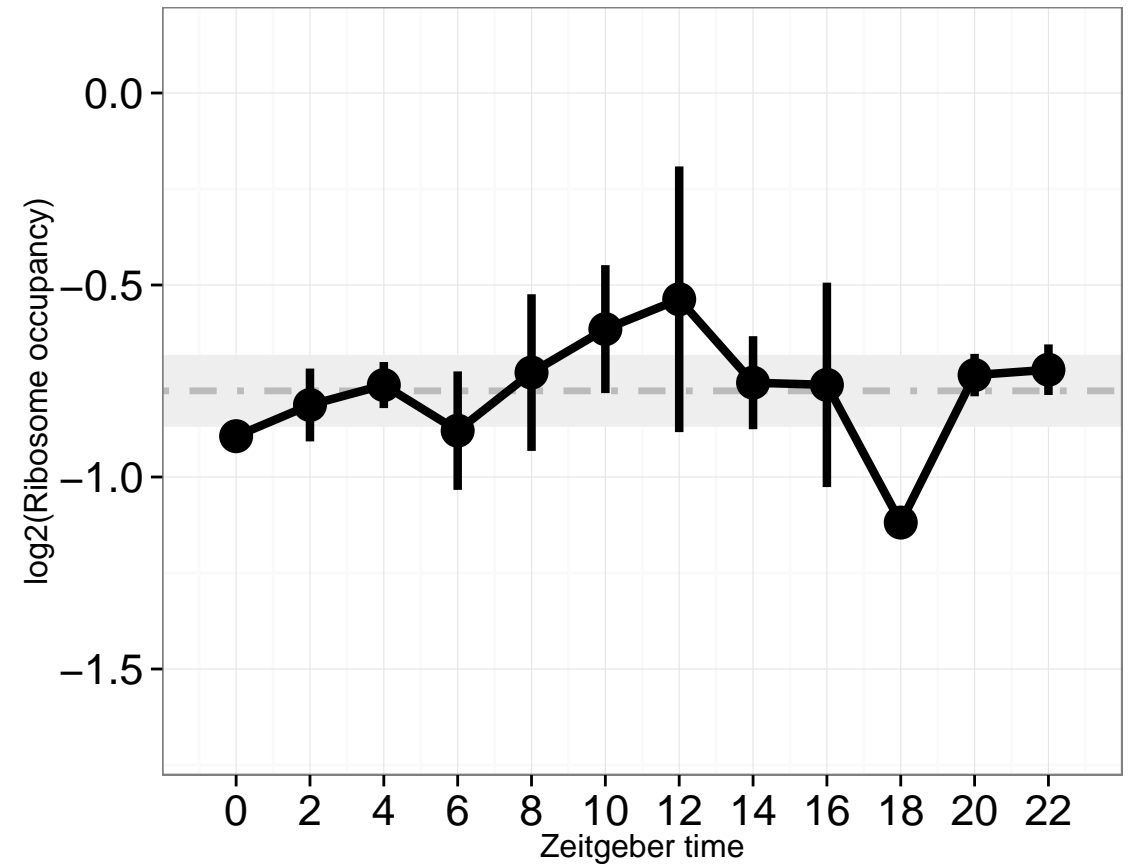

Supplement: Supplementary file 2825 [file 1]

# Tubb2a

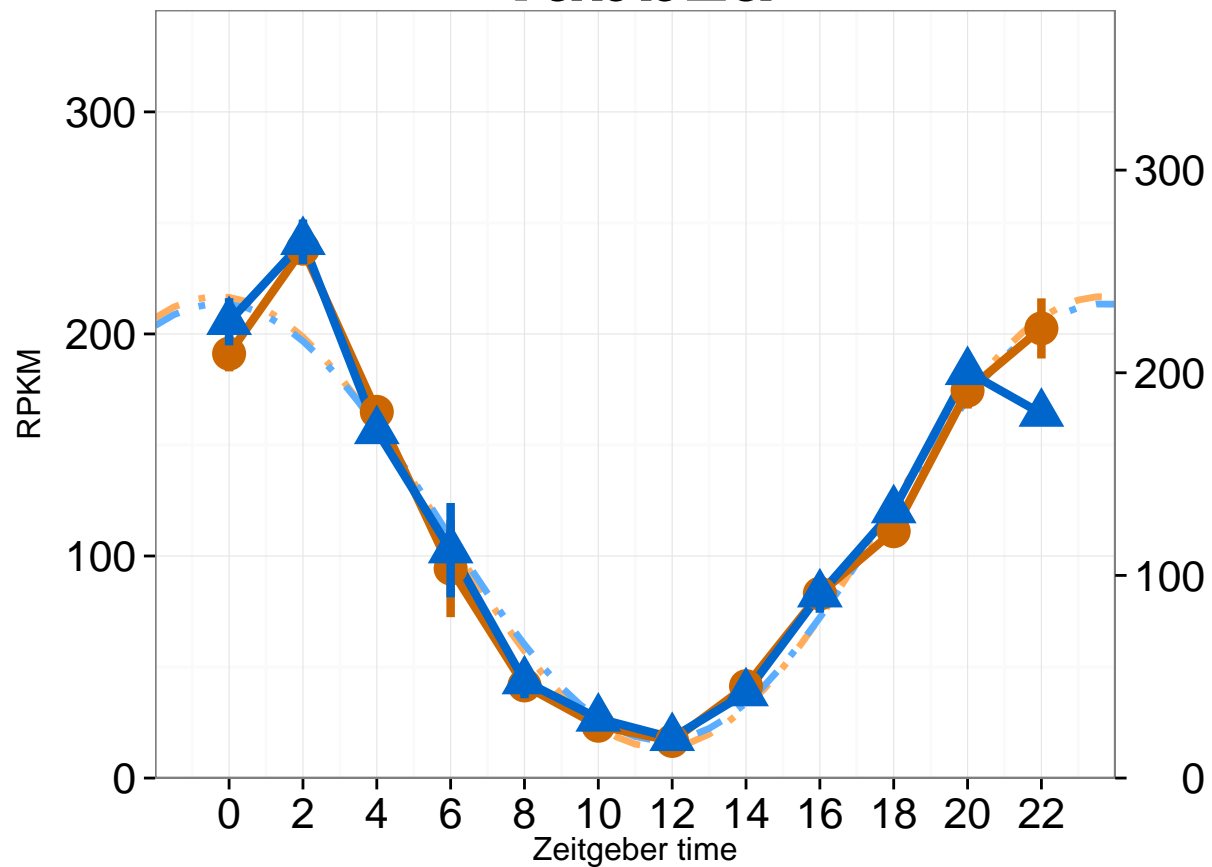

# Tubb2a

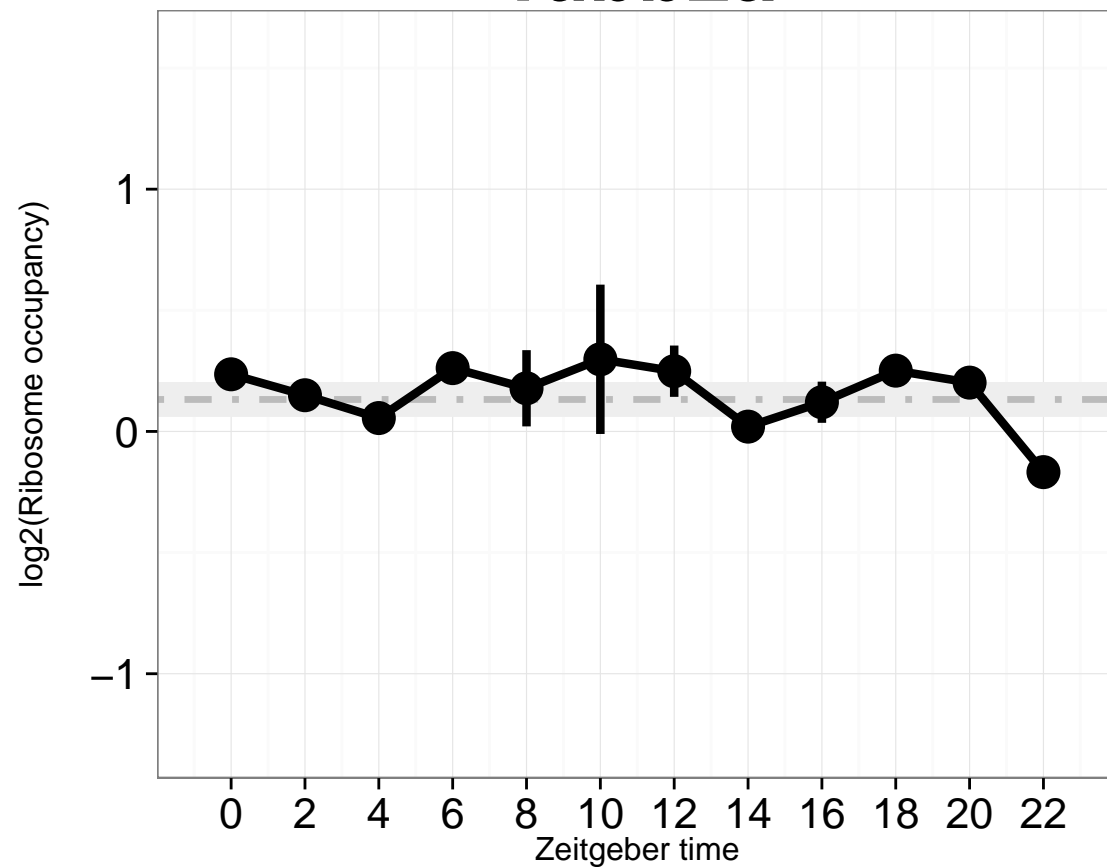

Supplement: Supplementary file 2826 [file 1]

## Lman2l

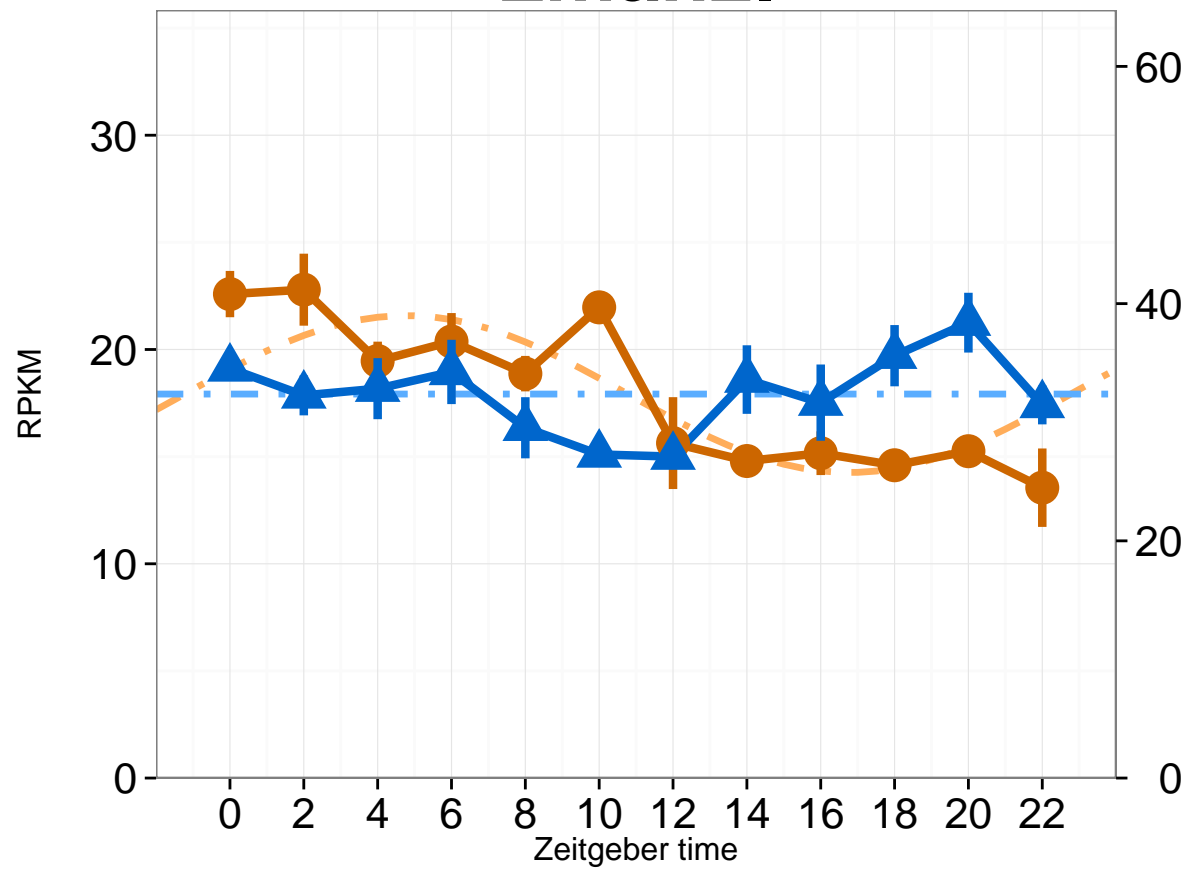

## Lman2l

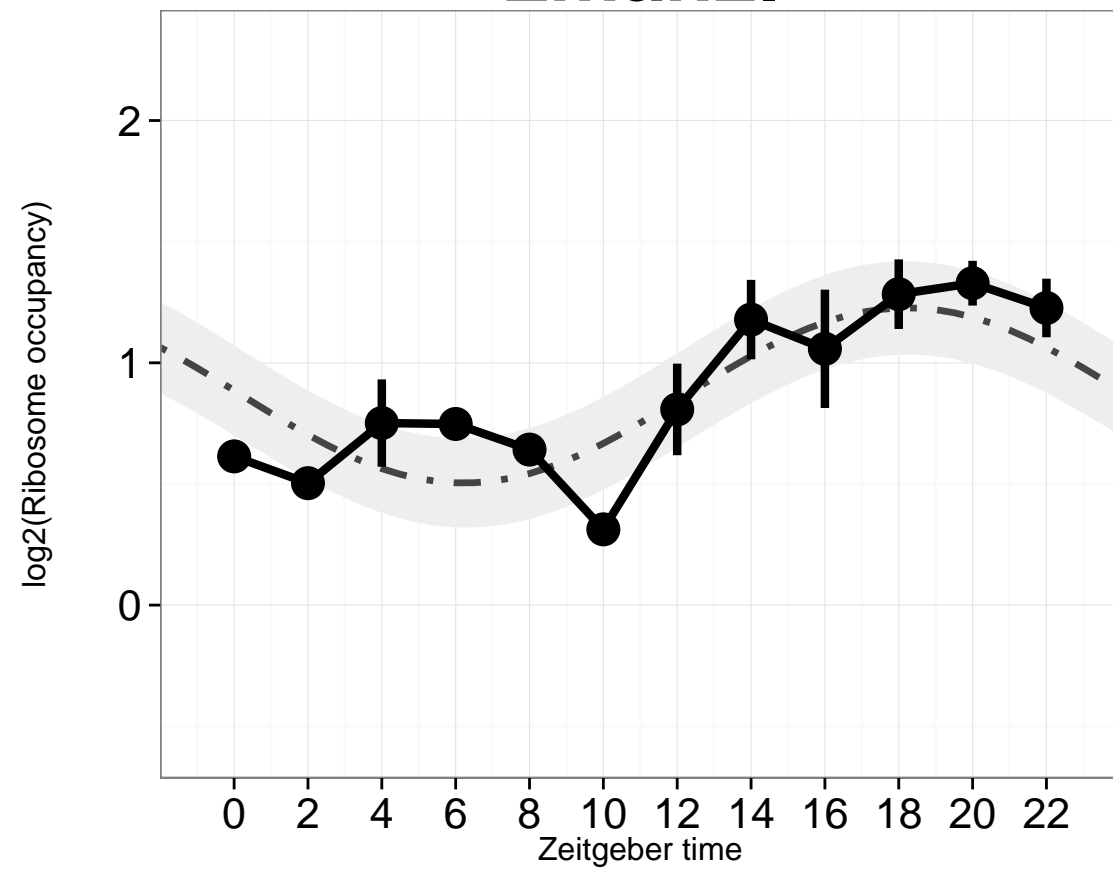

Supplement: Supplementary file 2827 [file 1]

## Tcta

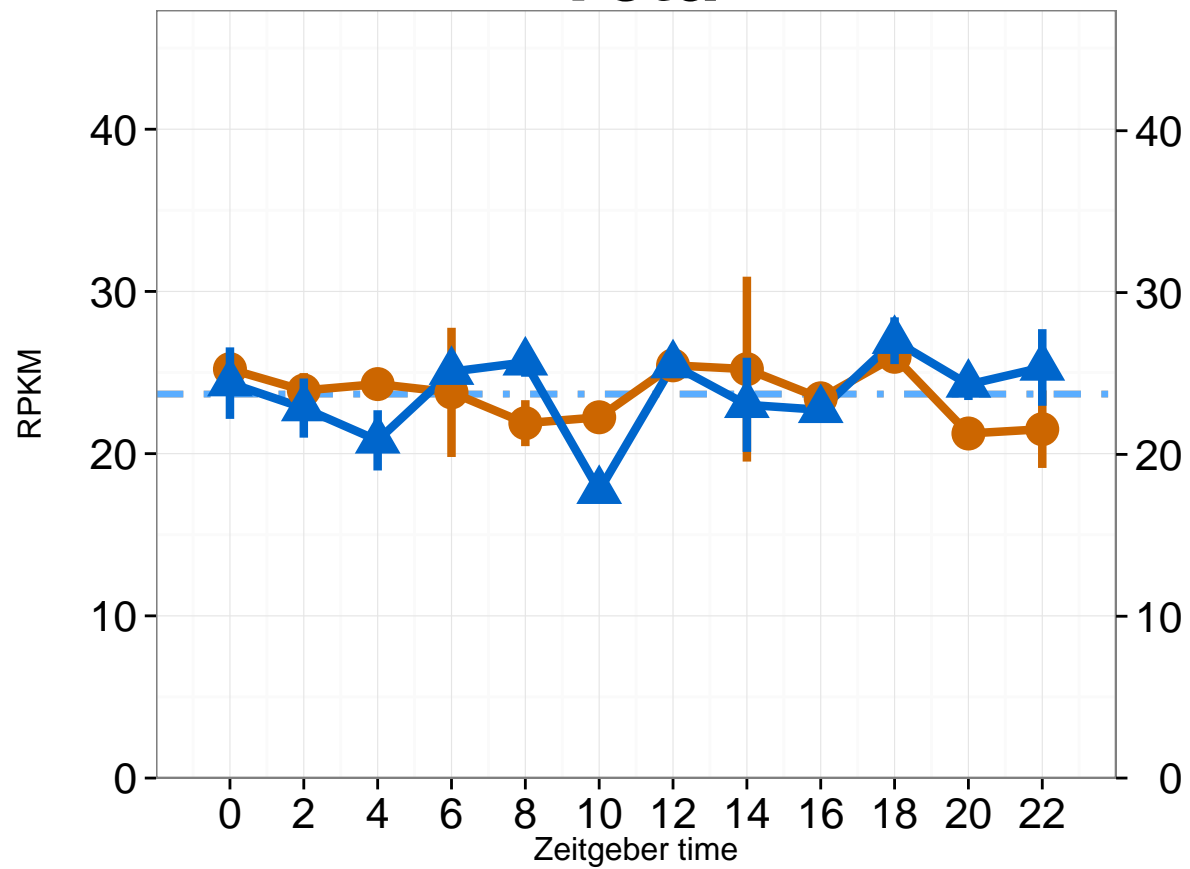

## Tcta

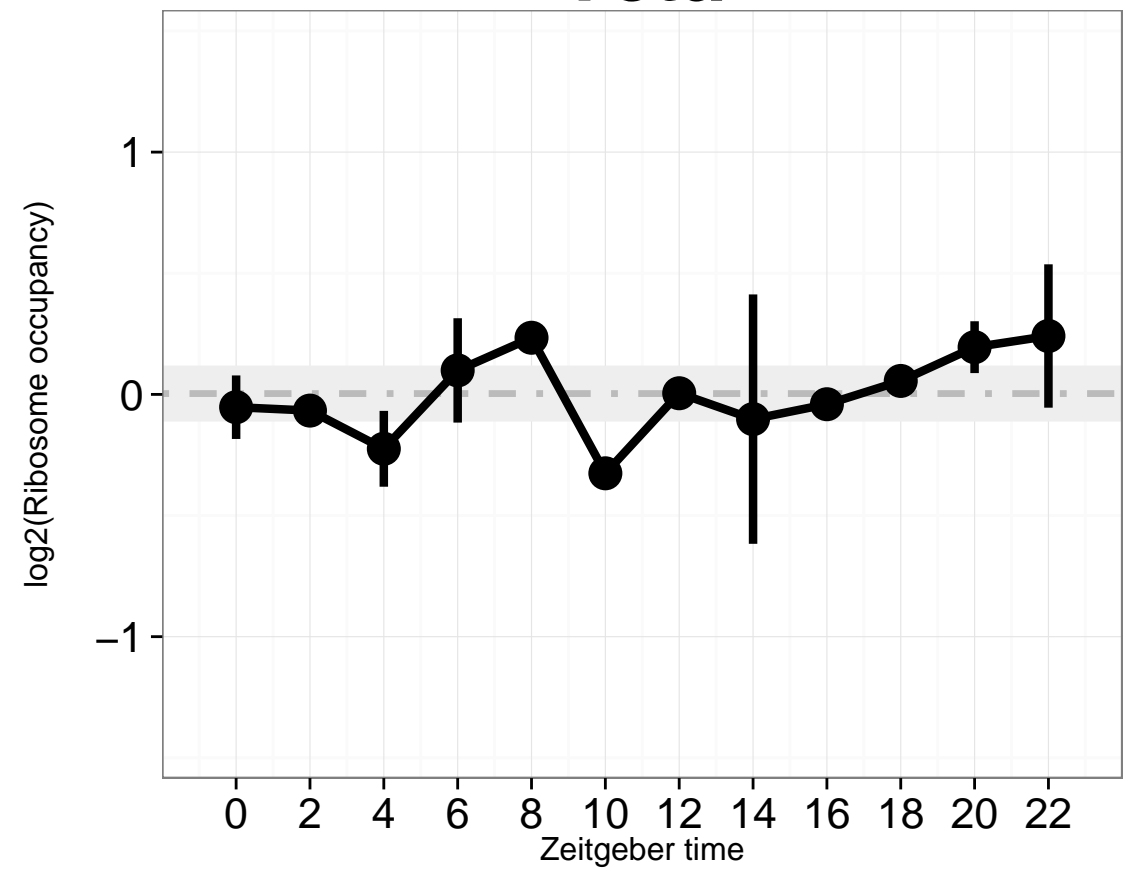

Supplement: Supplementary file 2828 [file 1]

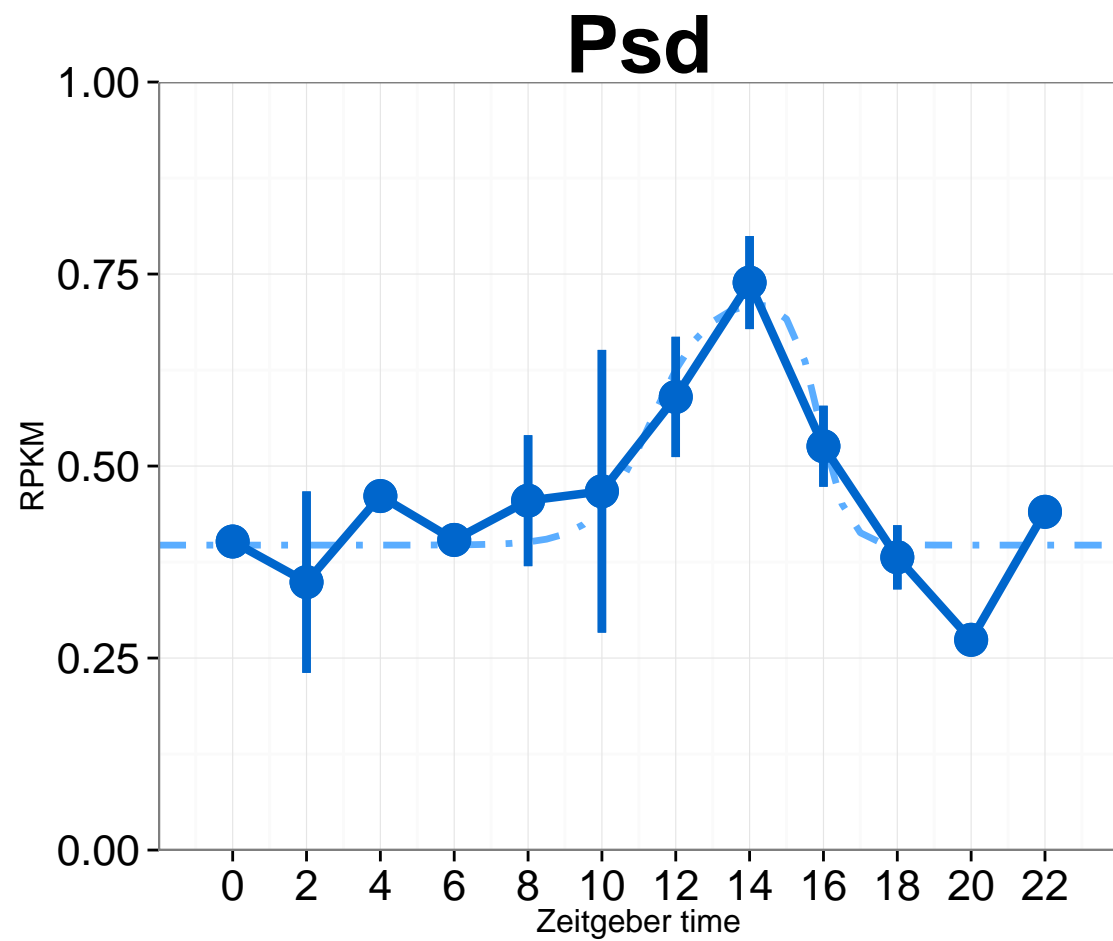

### Psd log2(Ribosome occupancy)

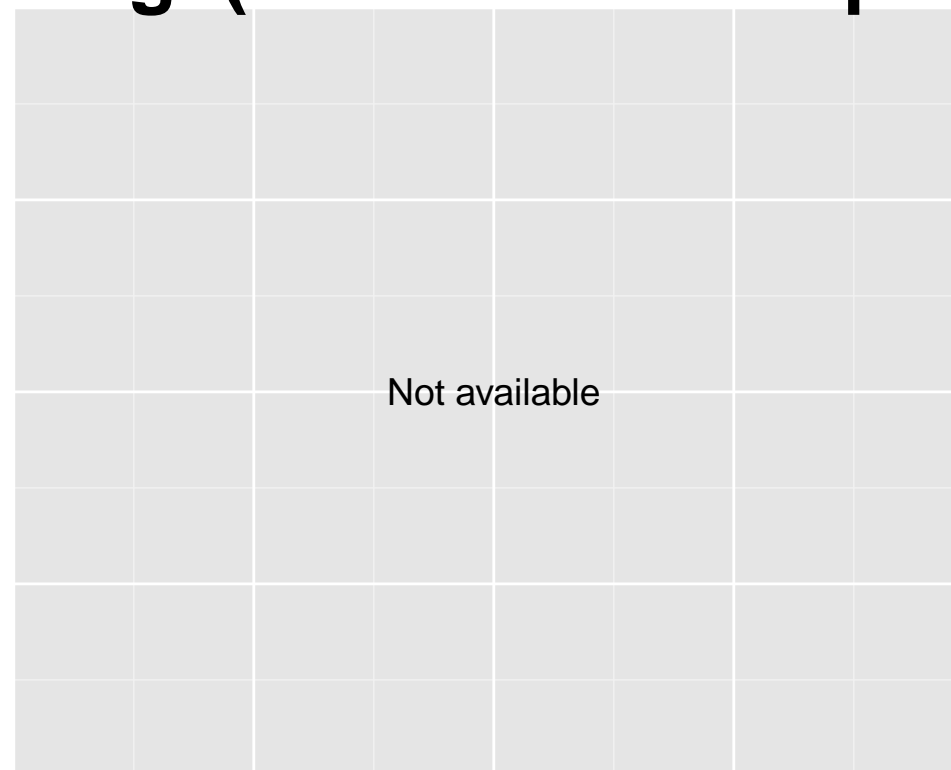

Supplement: Supplementary file 2829 [file 1]

## Lpin2

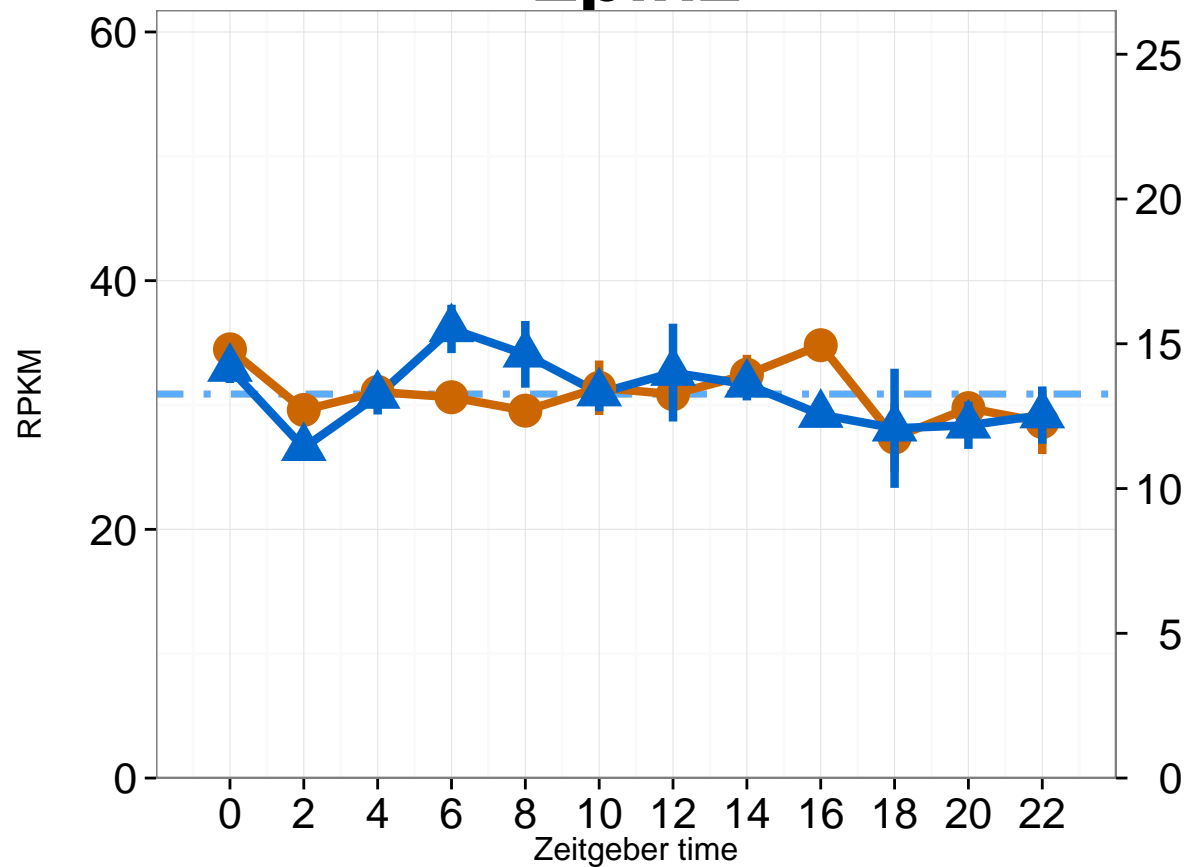

## Lpin2

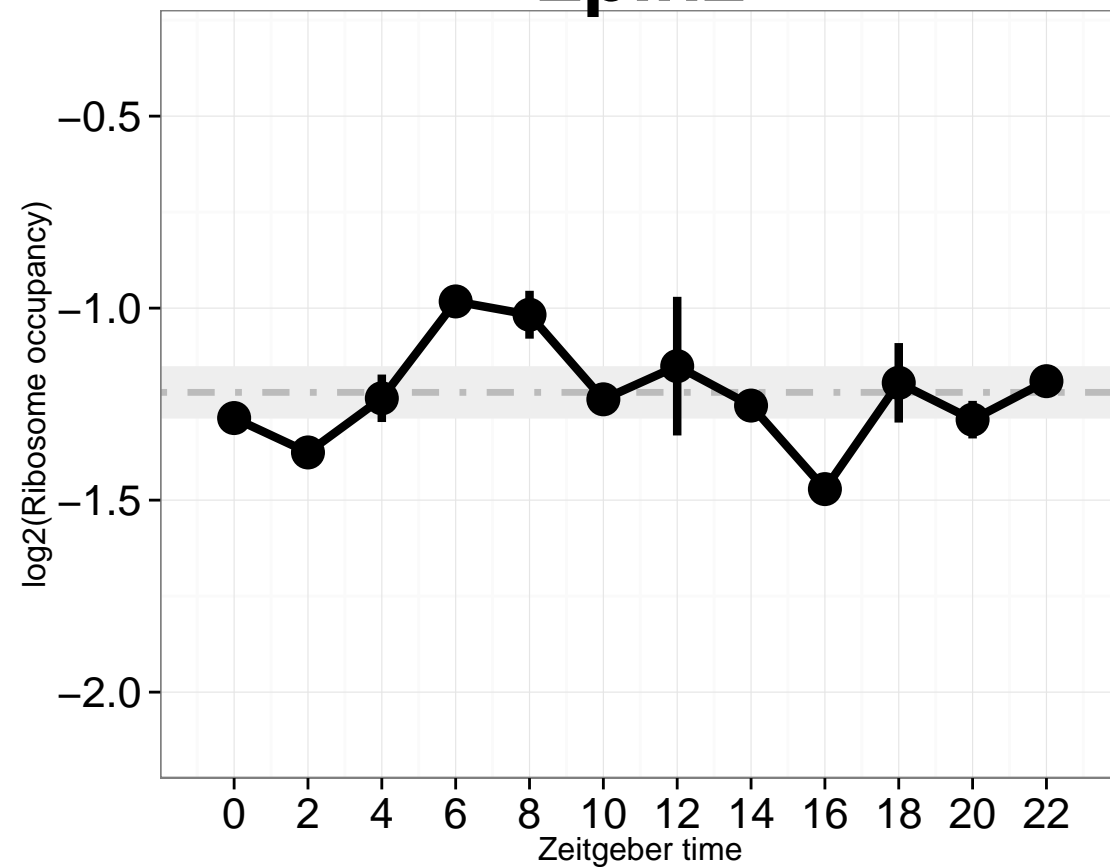

Supplement: Supplementary file 2830 [file 1]

# Arap1

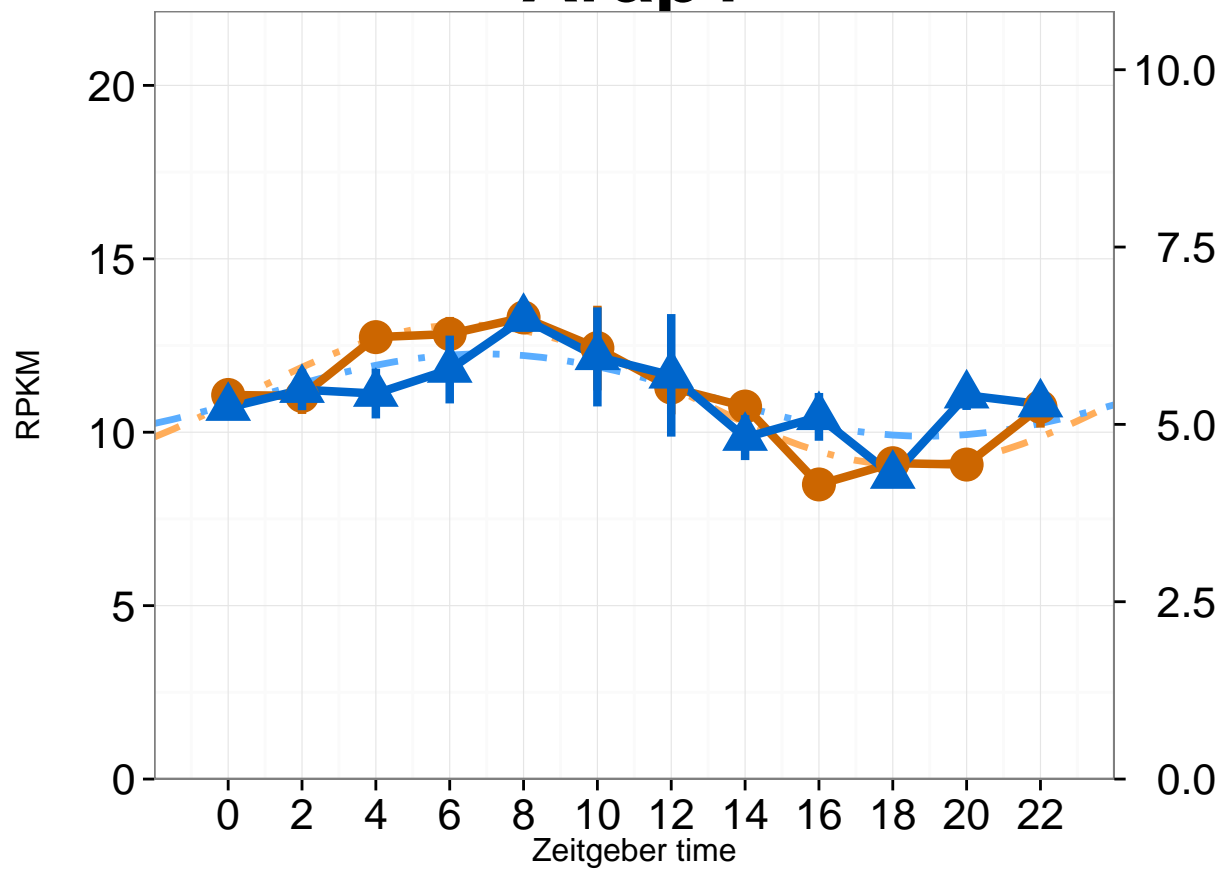

# Arap1

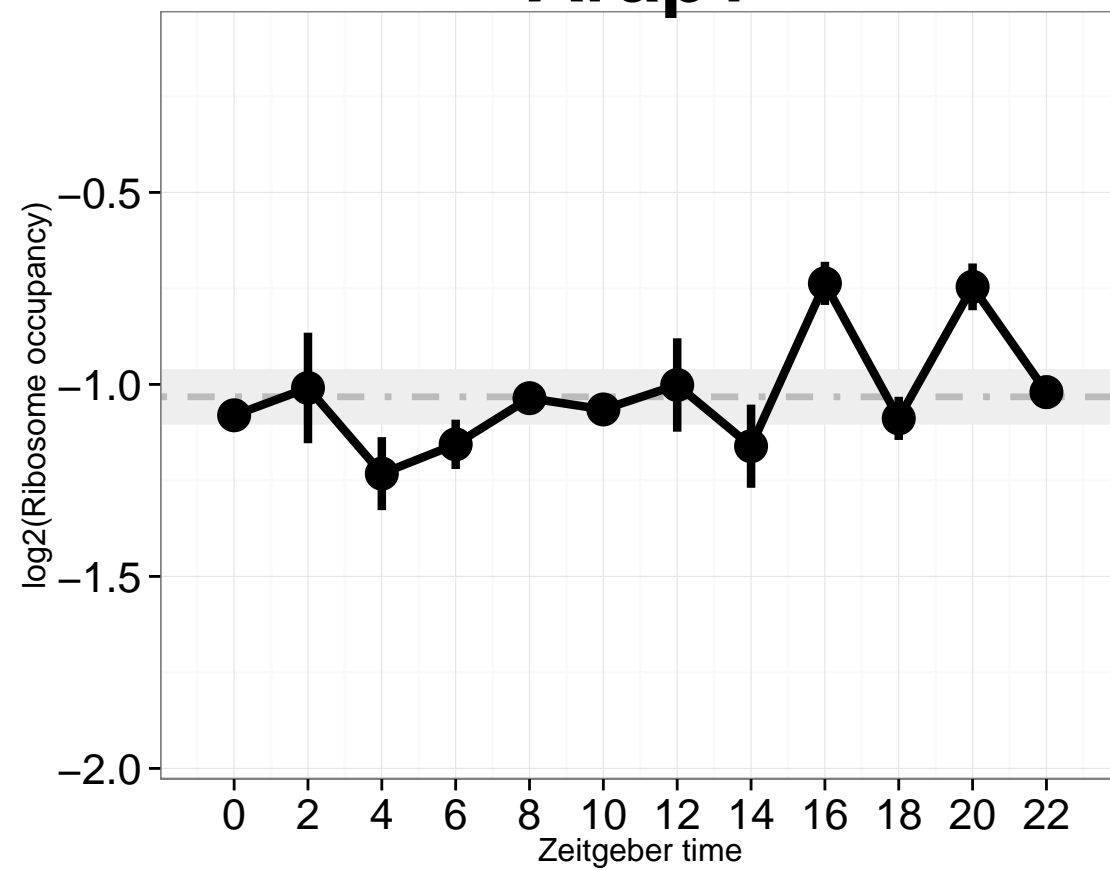

Supplement: Supplementary file 2831 [file 1]

## H2-K1

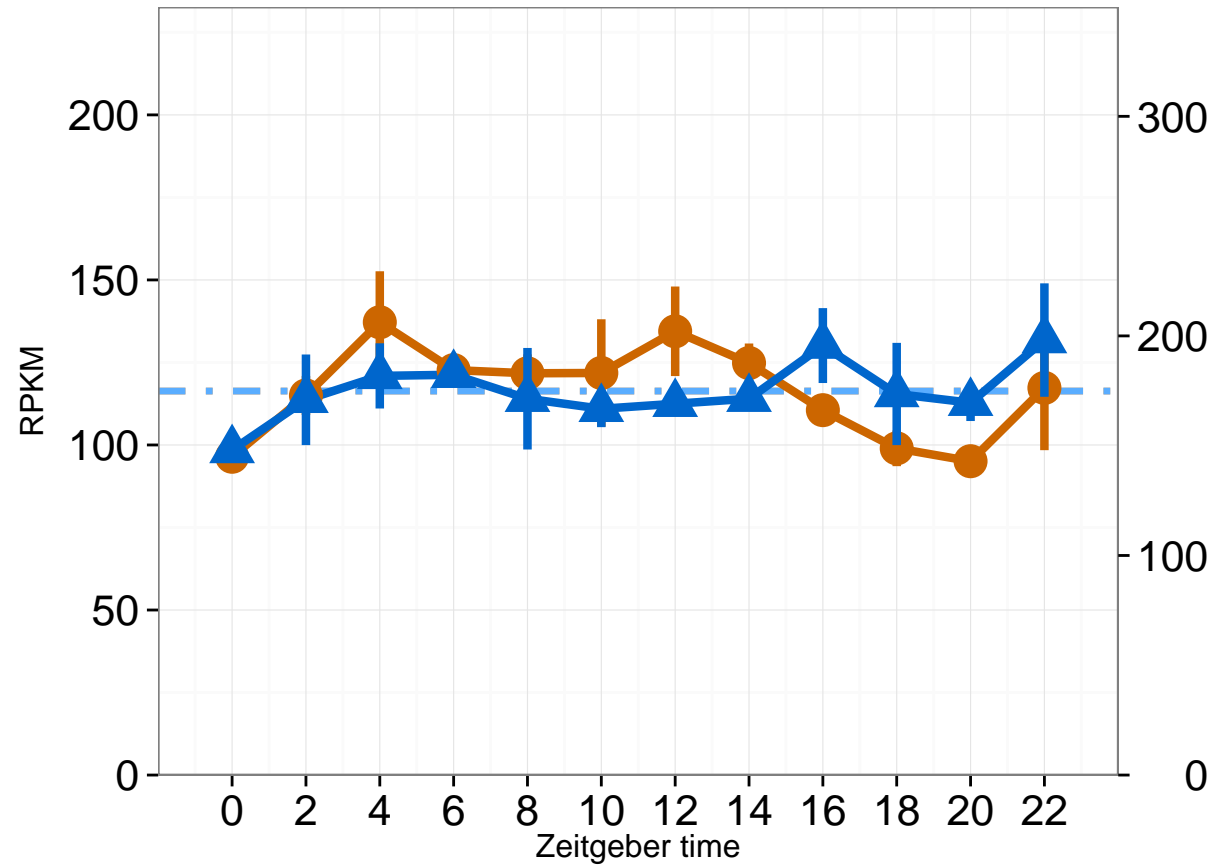

## H2-K1

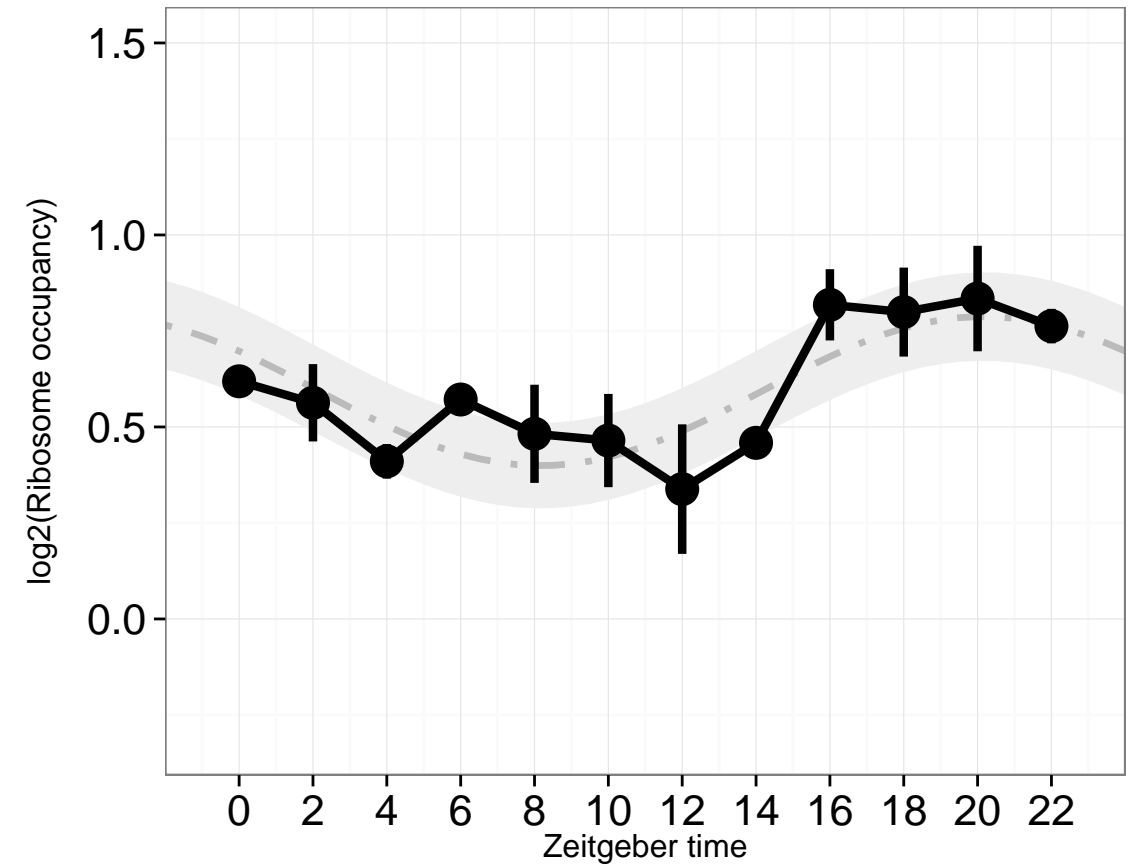

Supplement: Supplementary file 2832 [file 1]

# 1700094D03Rik

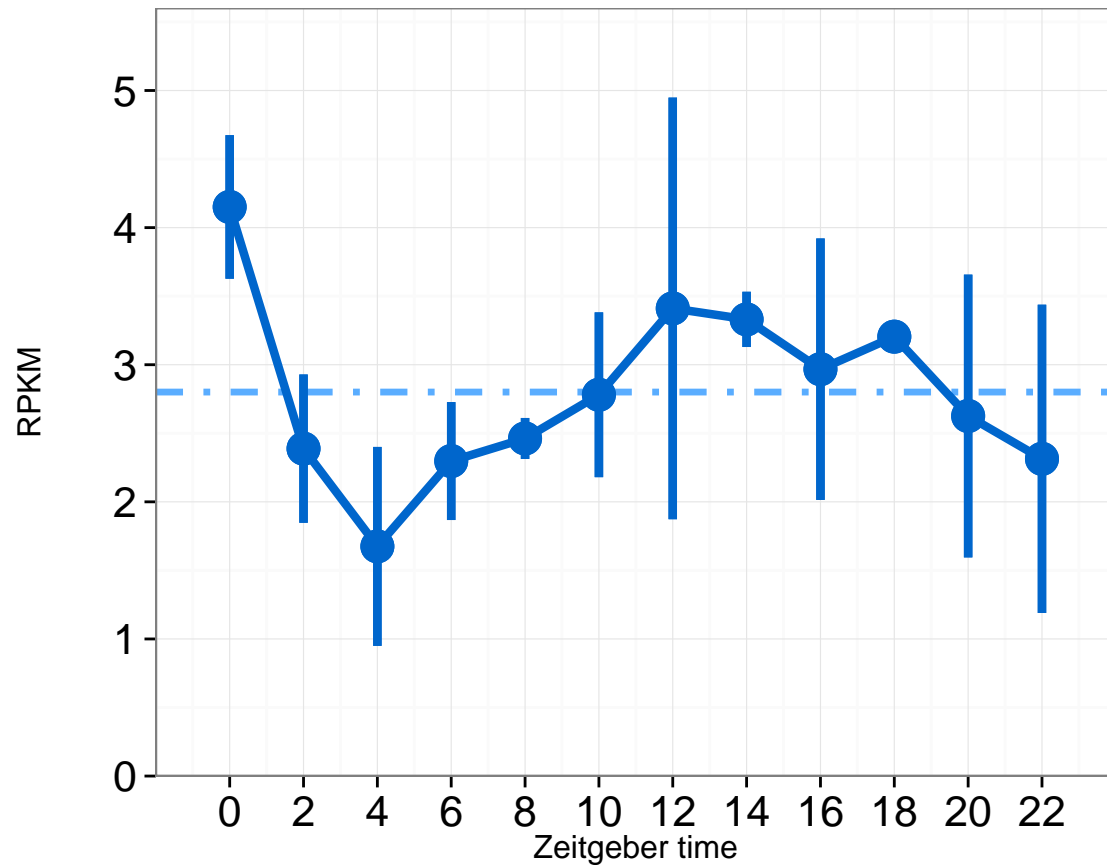

# 1700094D03Rik log2(Ribosome occup

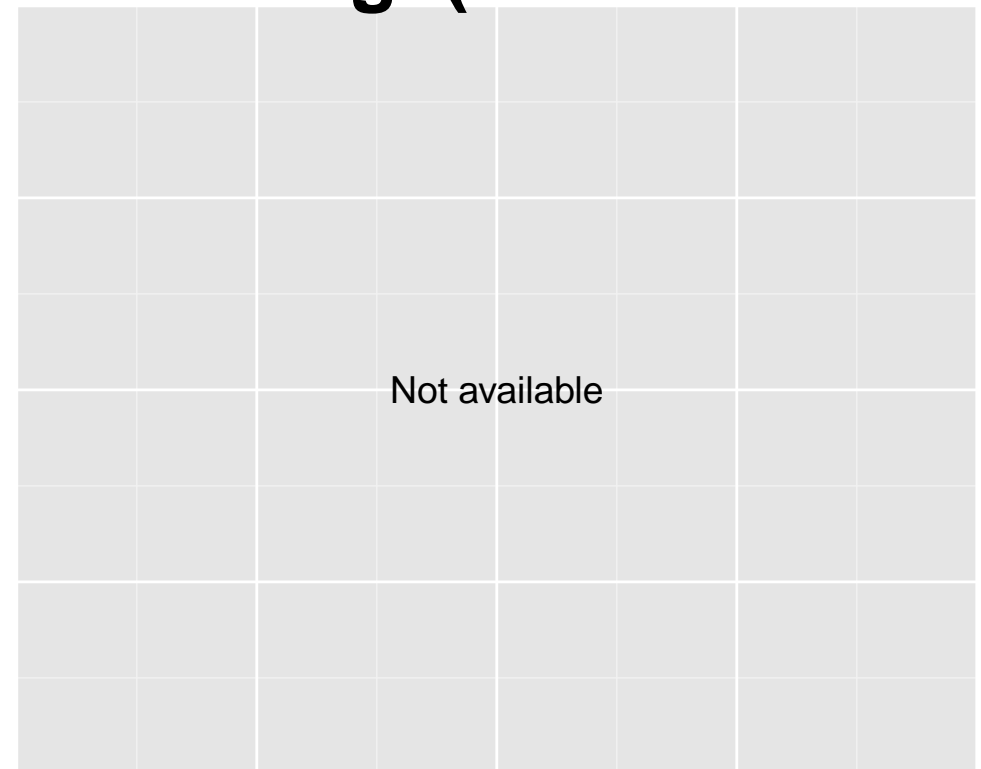

Supplement: Supplementary file 2833 [file 1]

## Irgm2

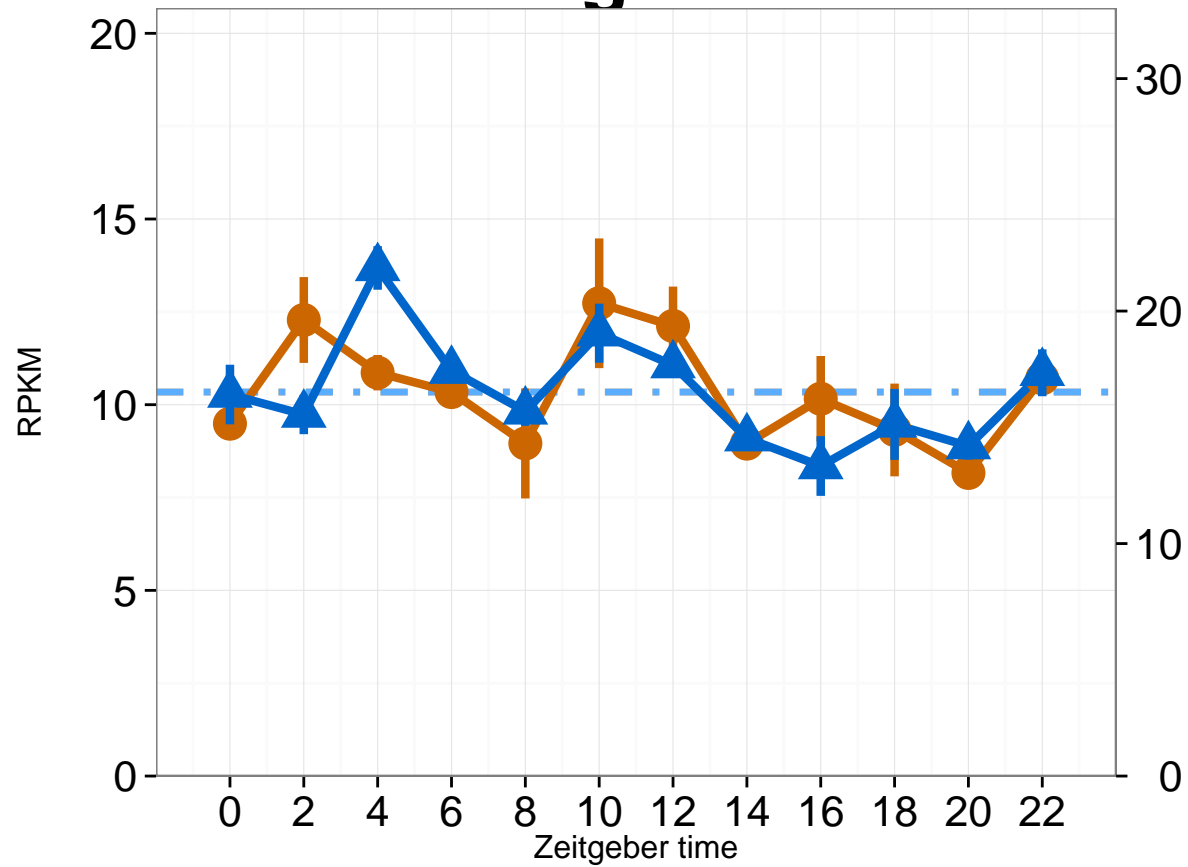

## Irgm2

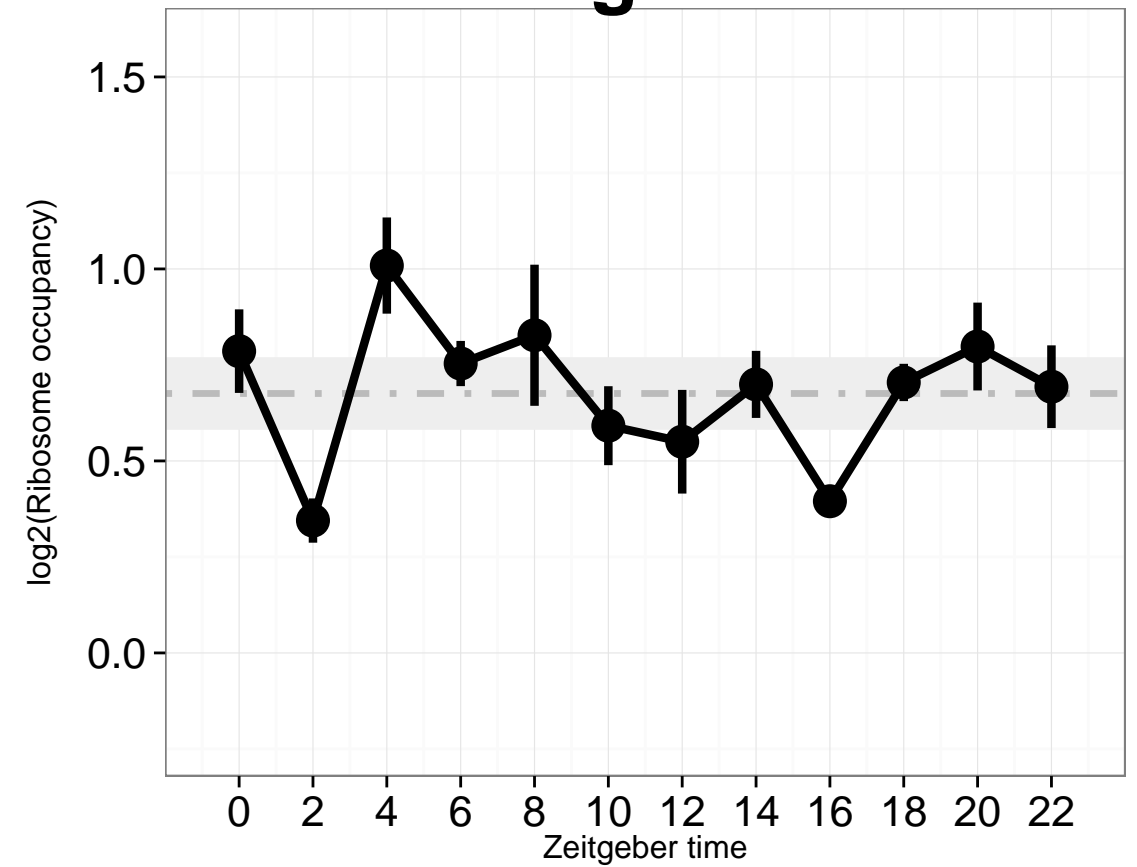

Supplement: Supplementary file 2834 [file 1]

## Bbx

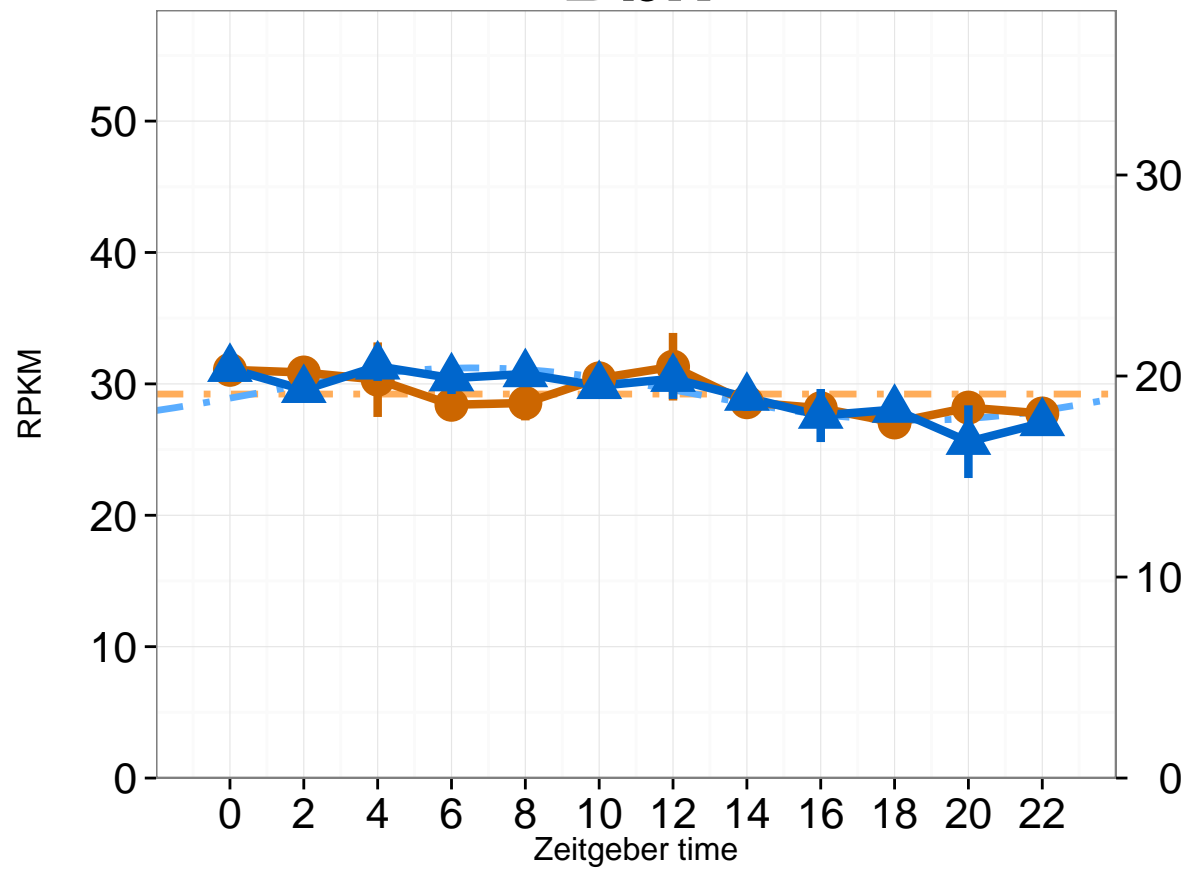

## Bbx

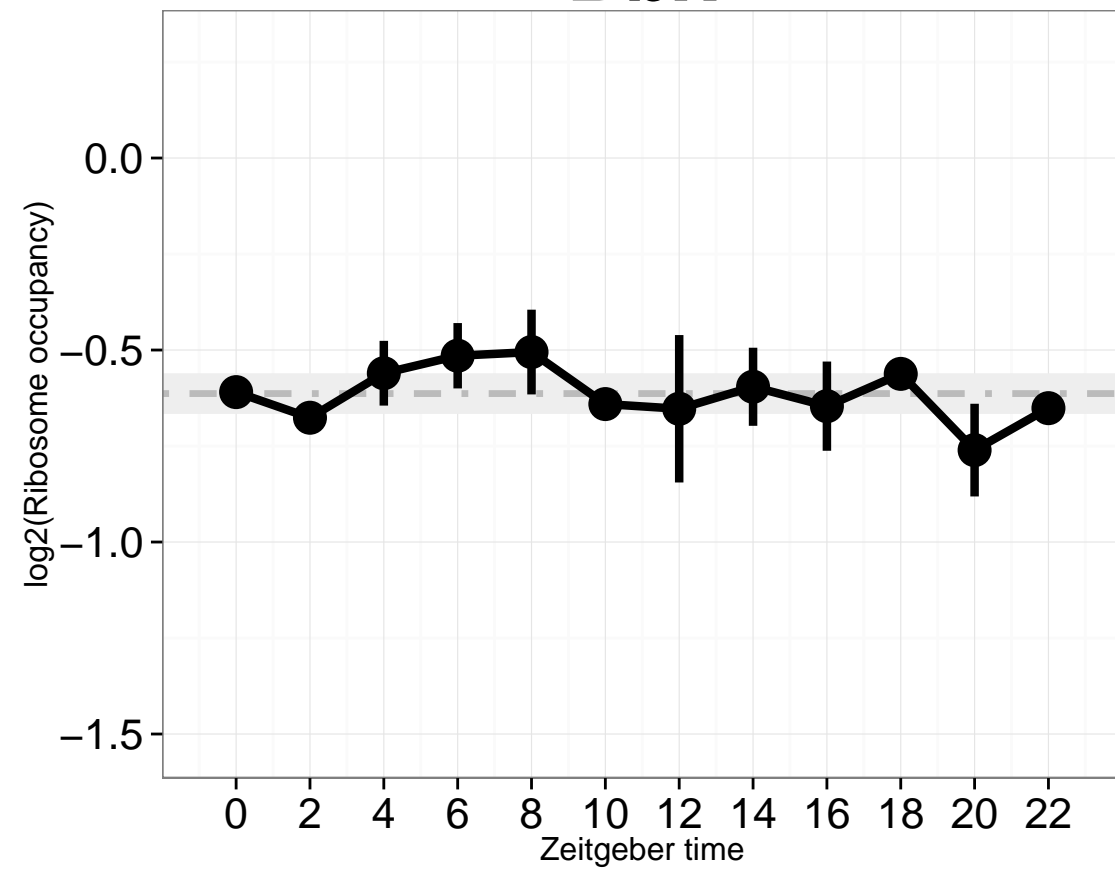

Supplement: Supplementary file 2835 [file 1]

## Sh3bp5

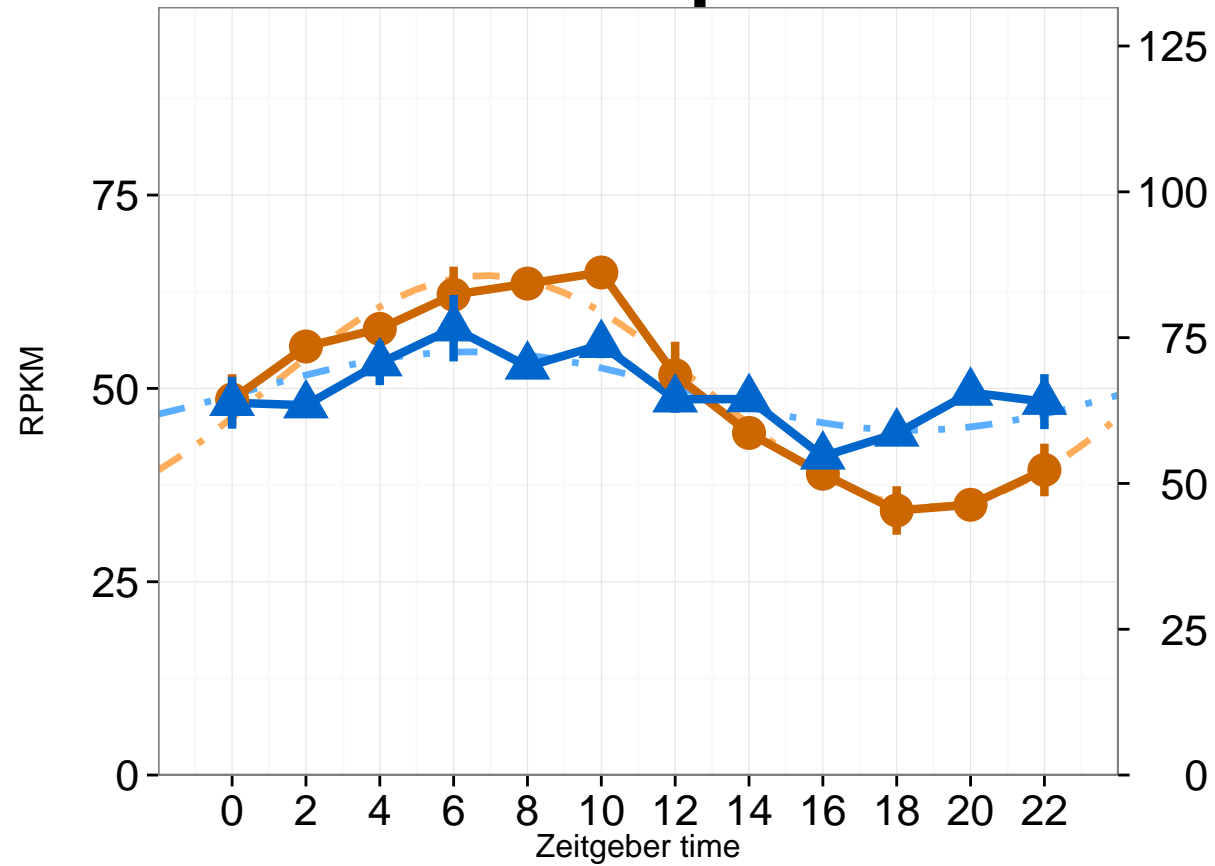

## Sh3bp5

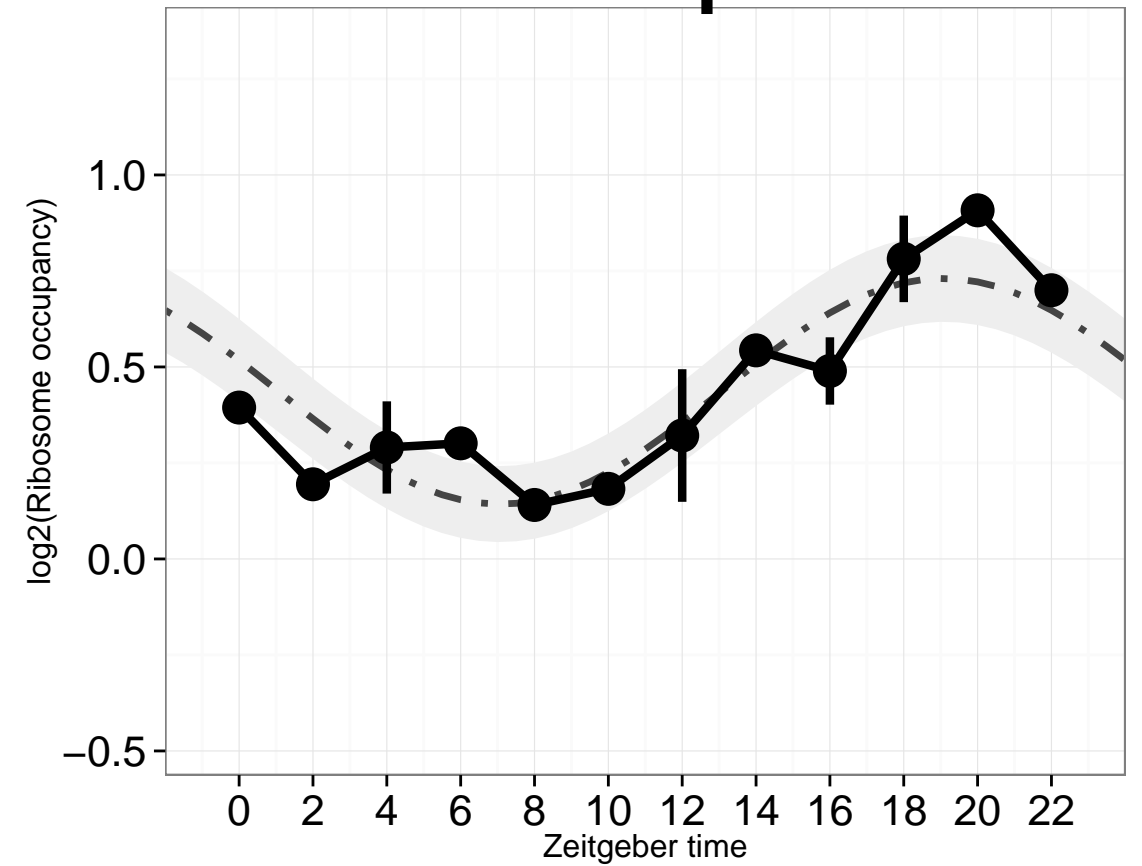

Supplement: Supplementary file 2836 [file 1]

## Ccl21a

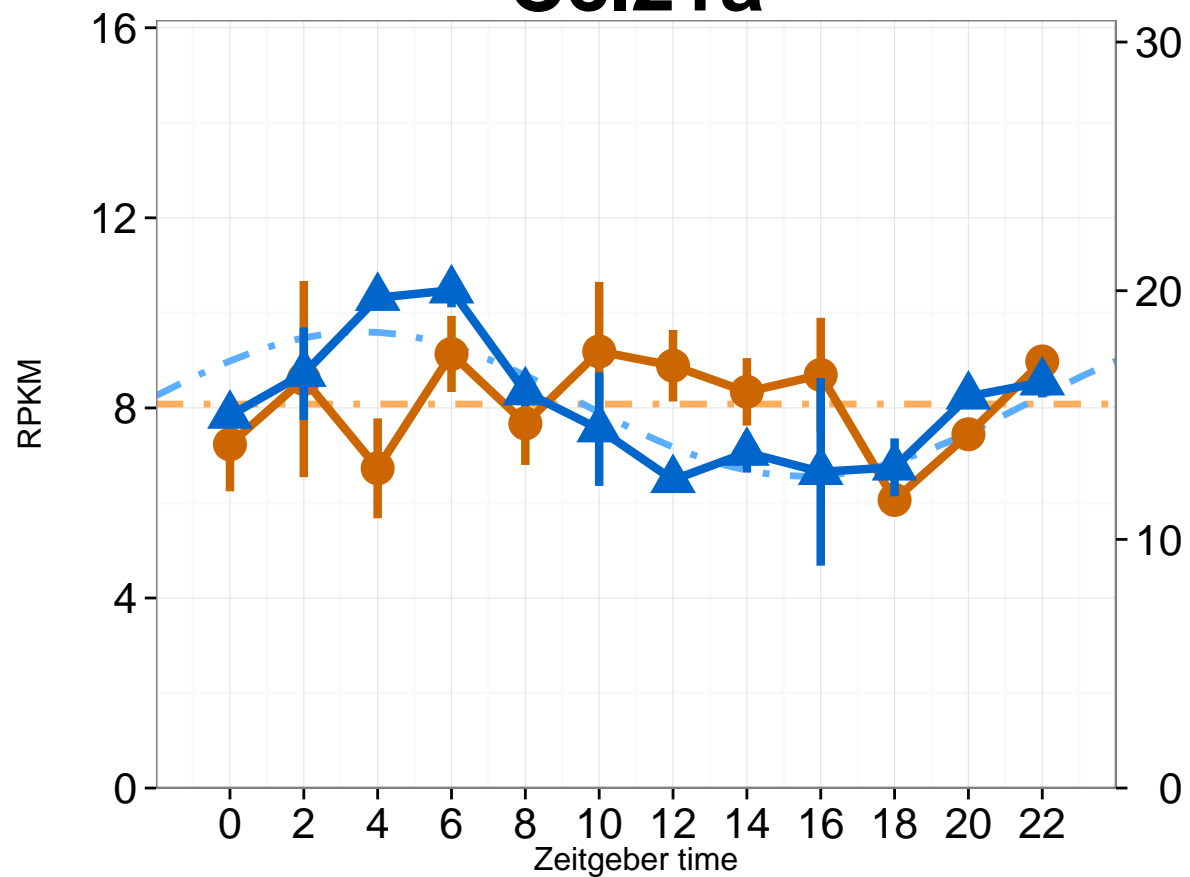

## Ccl21a

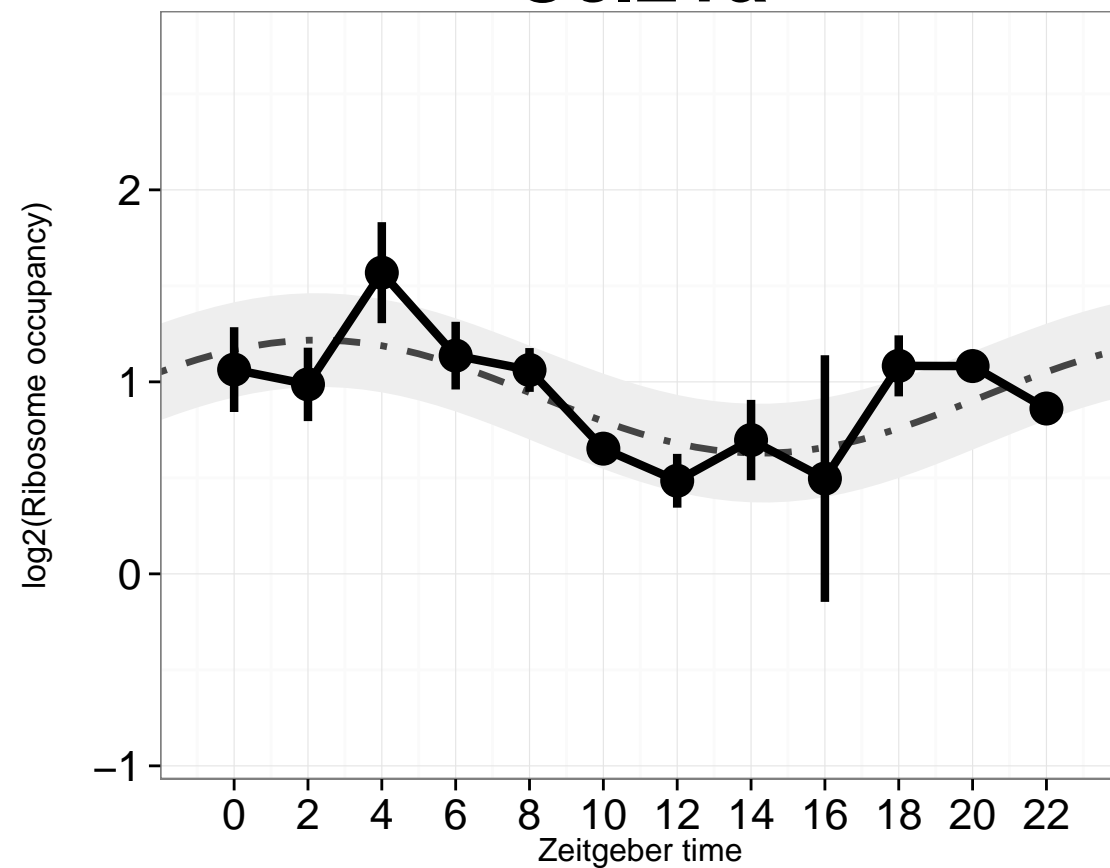

Supplement: Supplementary file 2837 [file 1]

## Dpysl2

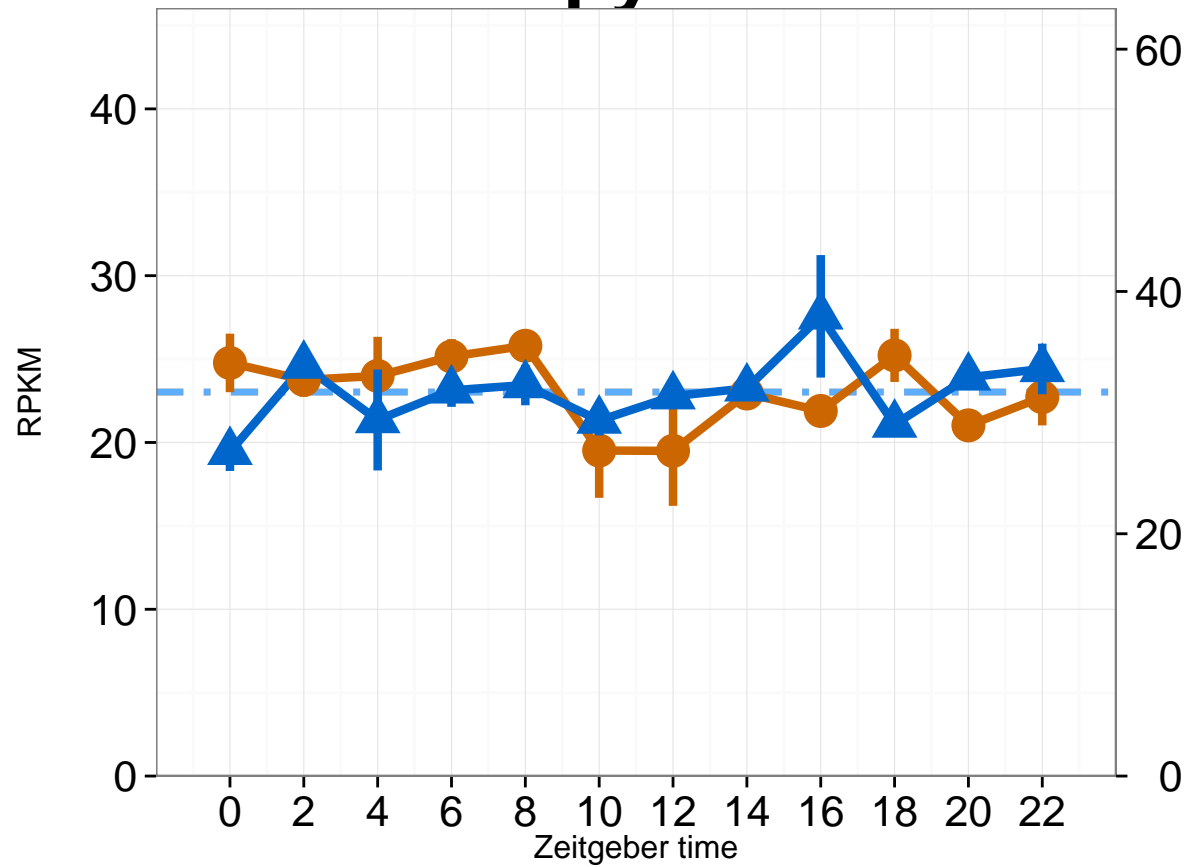

## Dpysl2

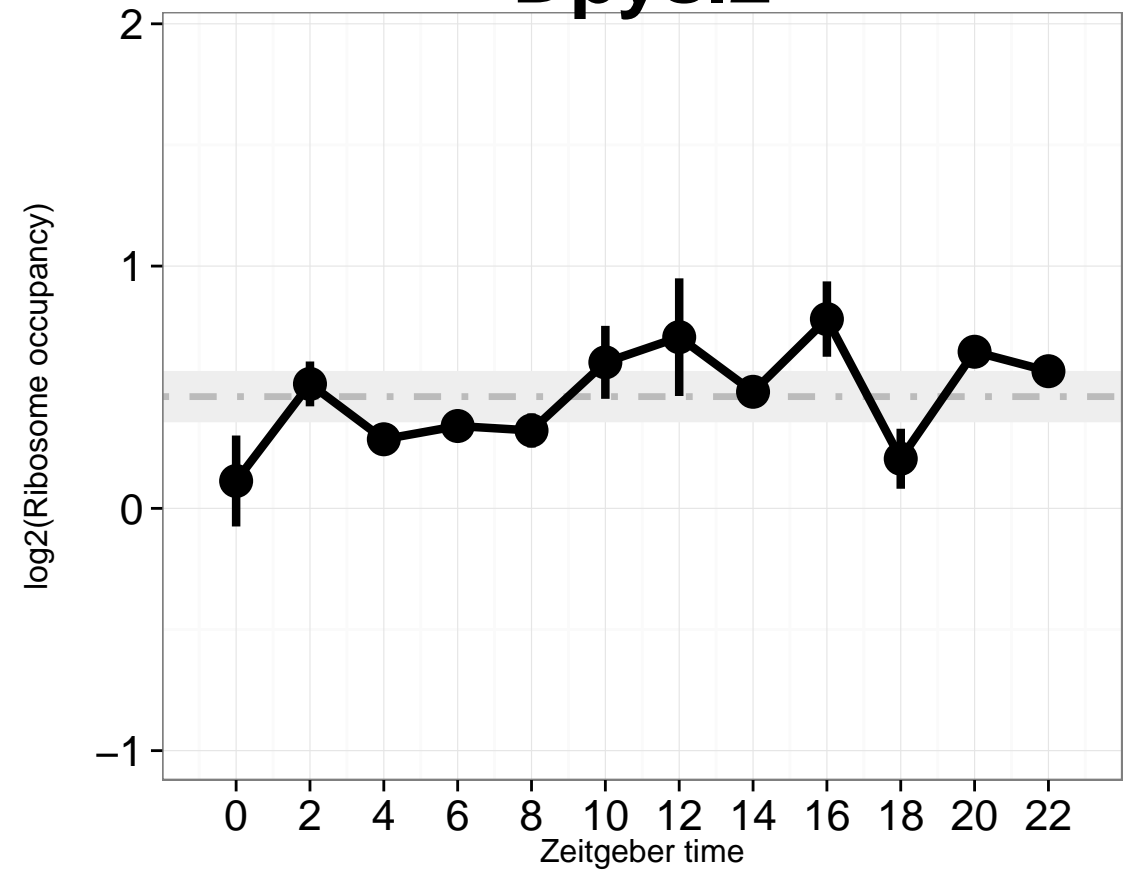

Supplement: Supplementary file 2838 [file 1]

## Mgam

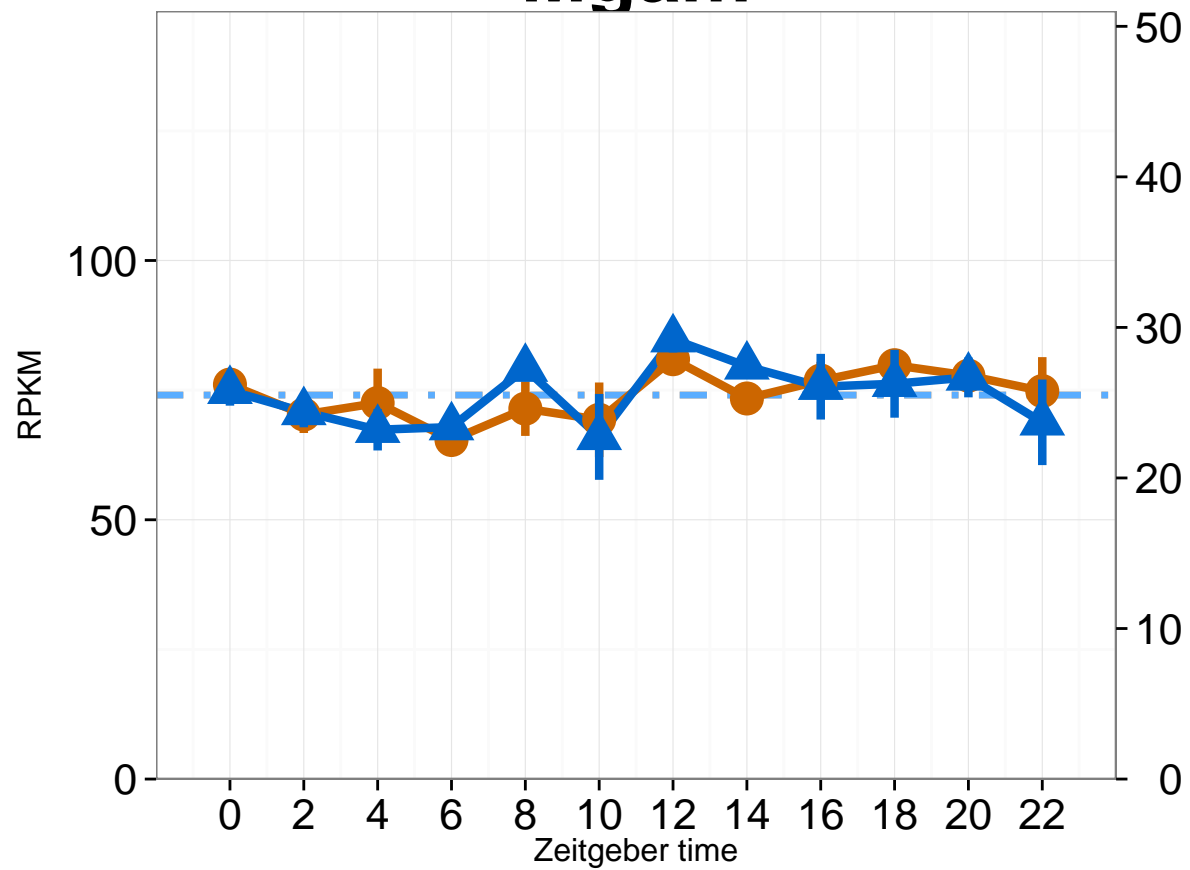

## Mgam

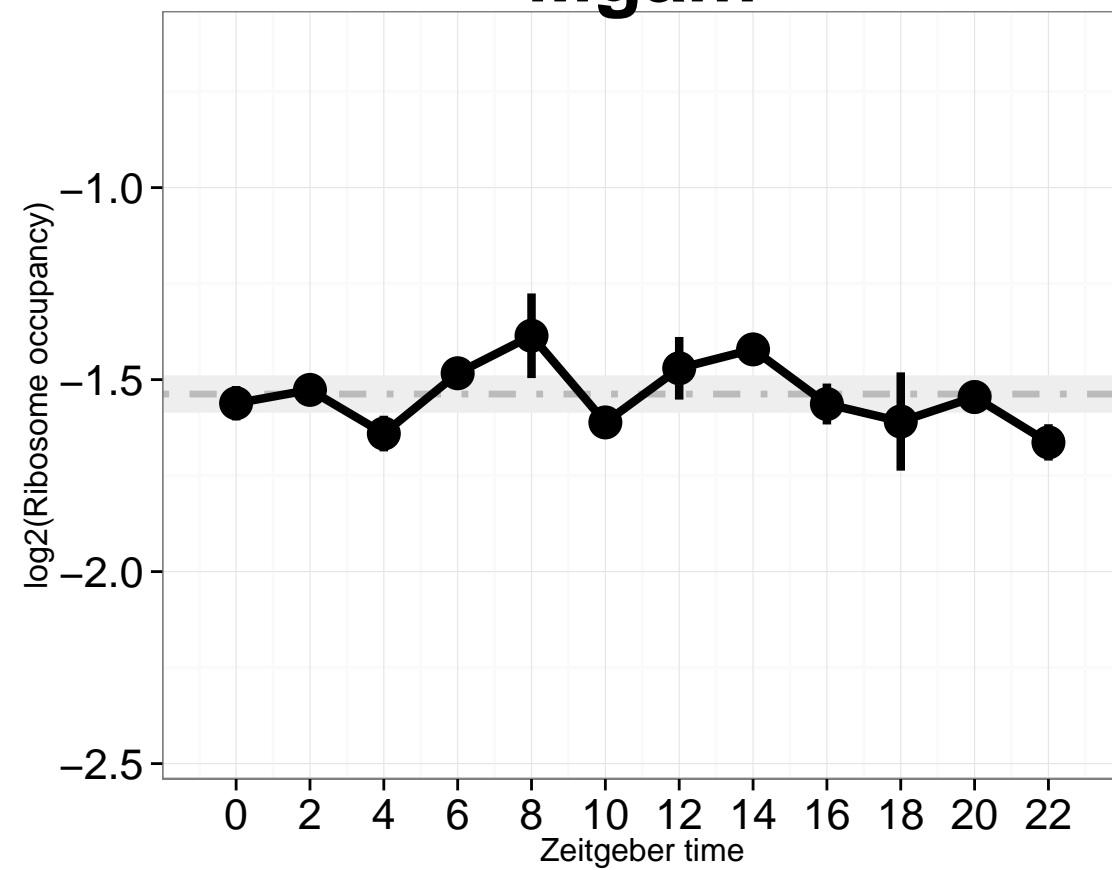

Supplement: Supplementary file 2839 [file 1]

## Wdr43

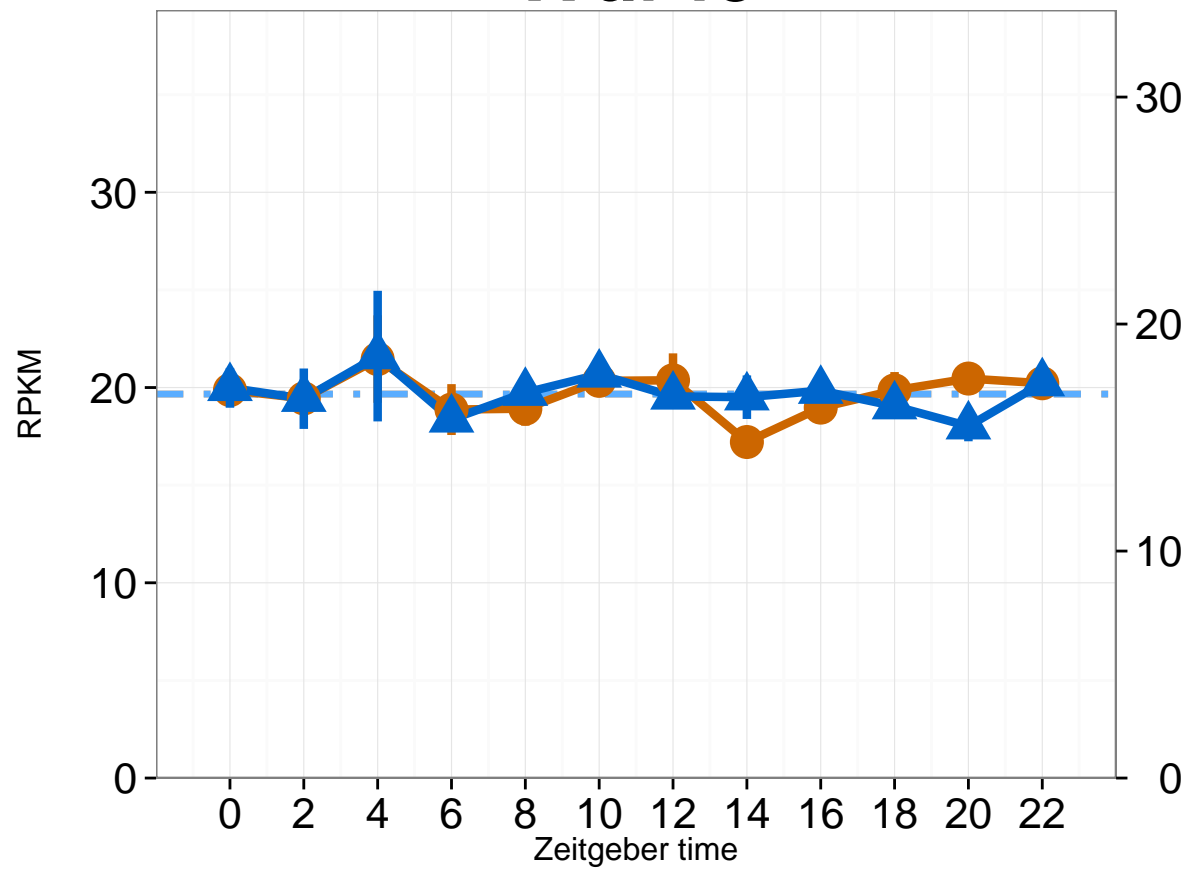

## Wdr43

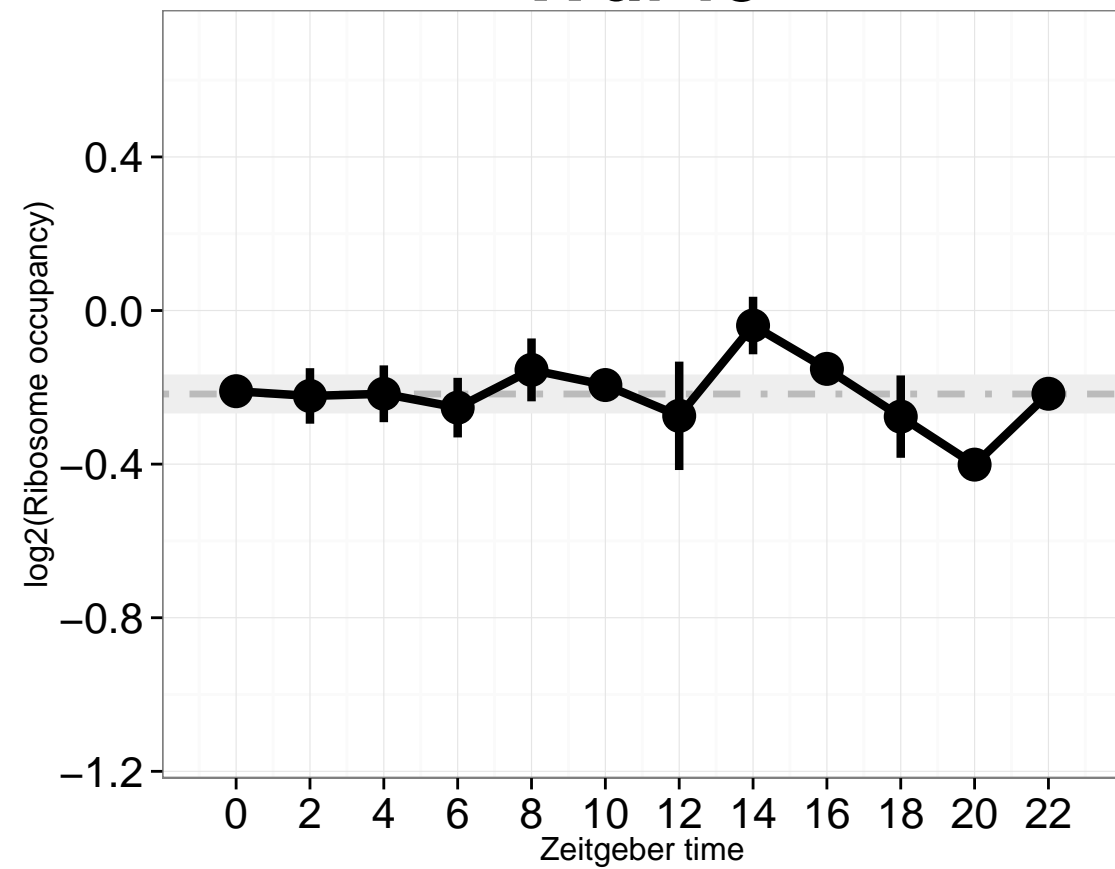

Supplement: Supplementary file 2840 [file 1]

# Gltpd1

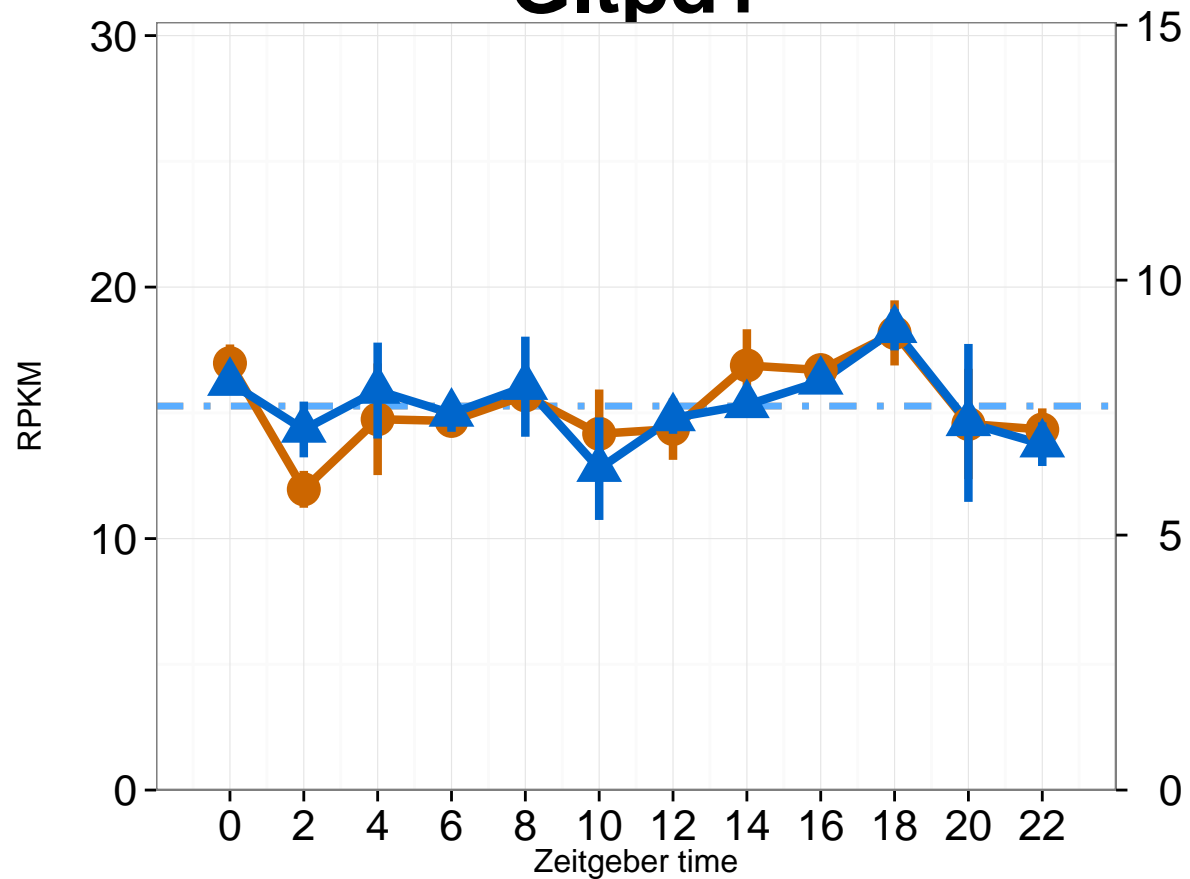

# Gltpd1

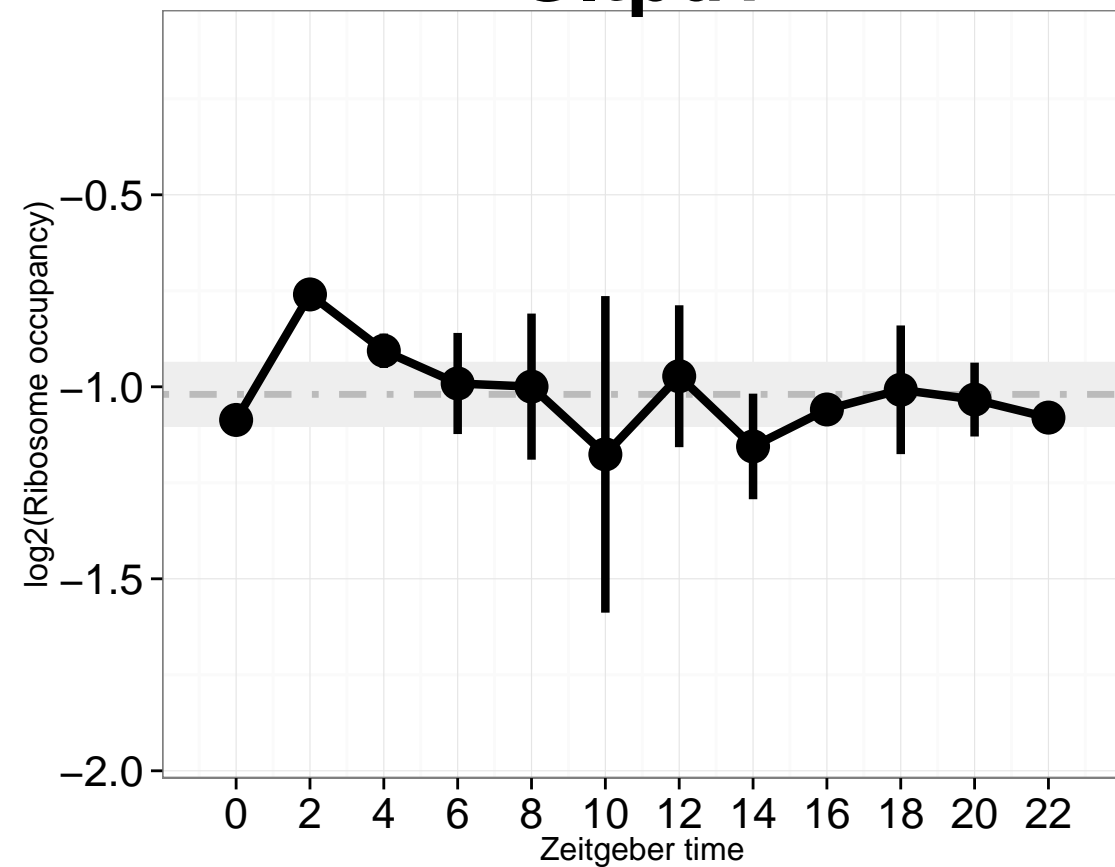

Supplement: Supplementary file 2841 [file 1]

## Asx13

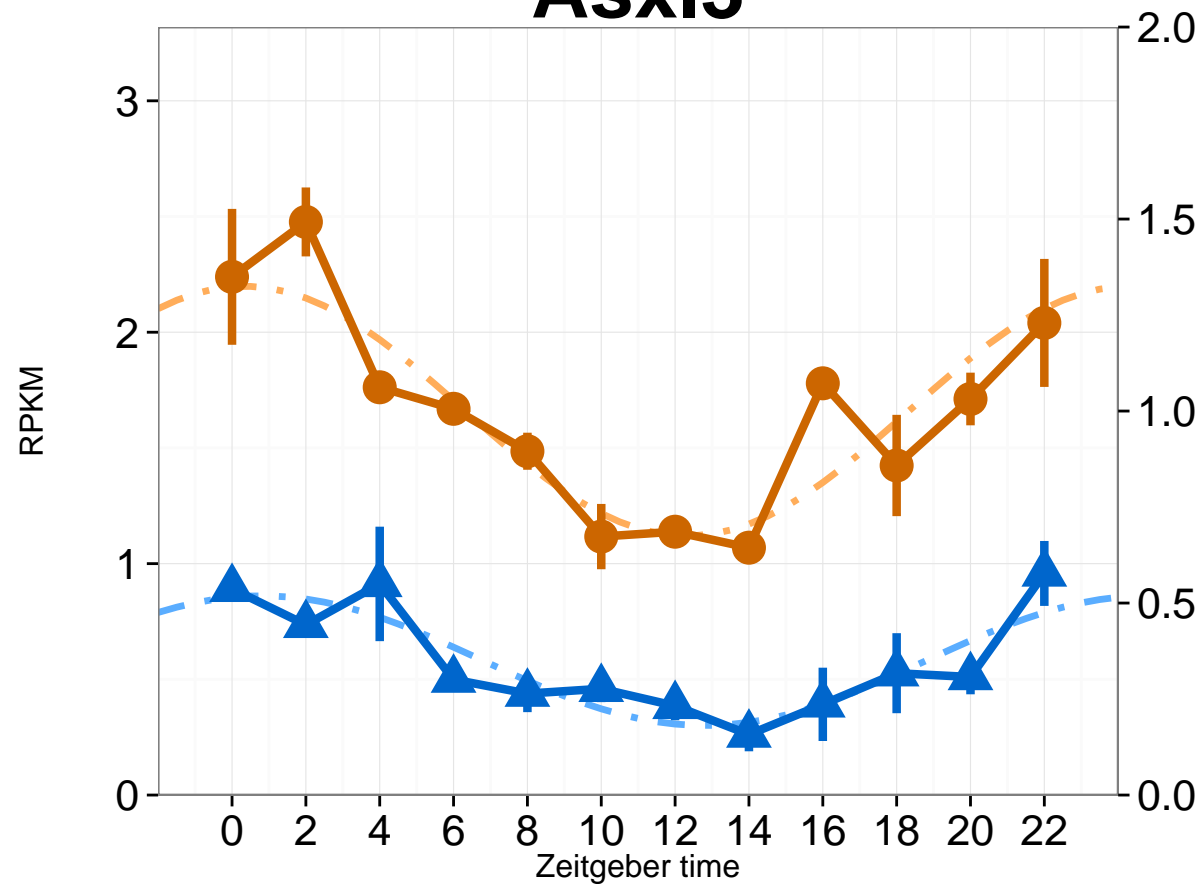

## Asx13

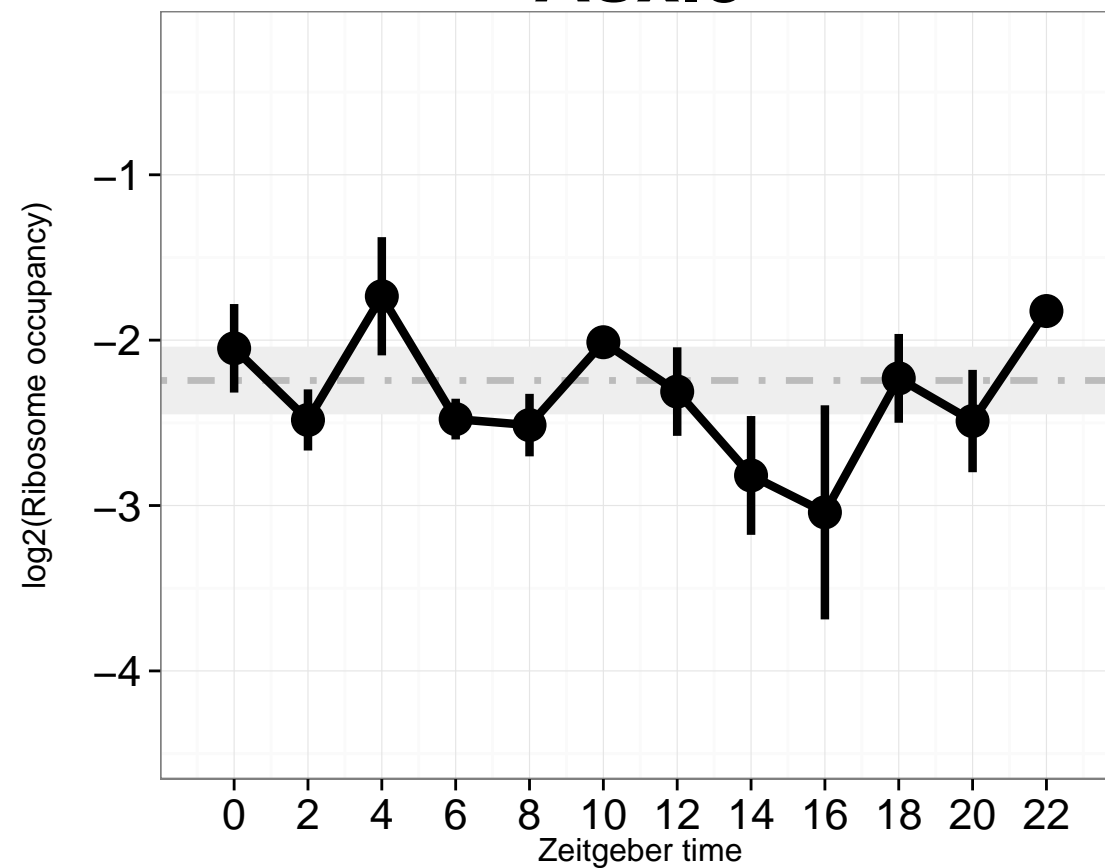

Supplement: Supplementary file 2842 [file 1]

## Apbb2

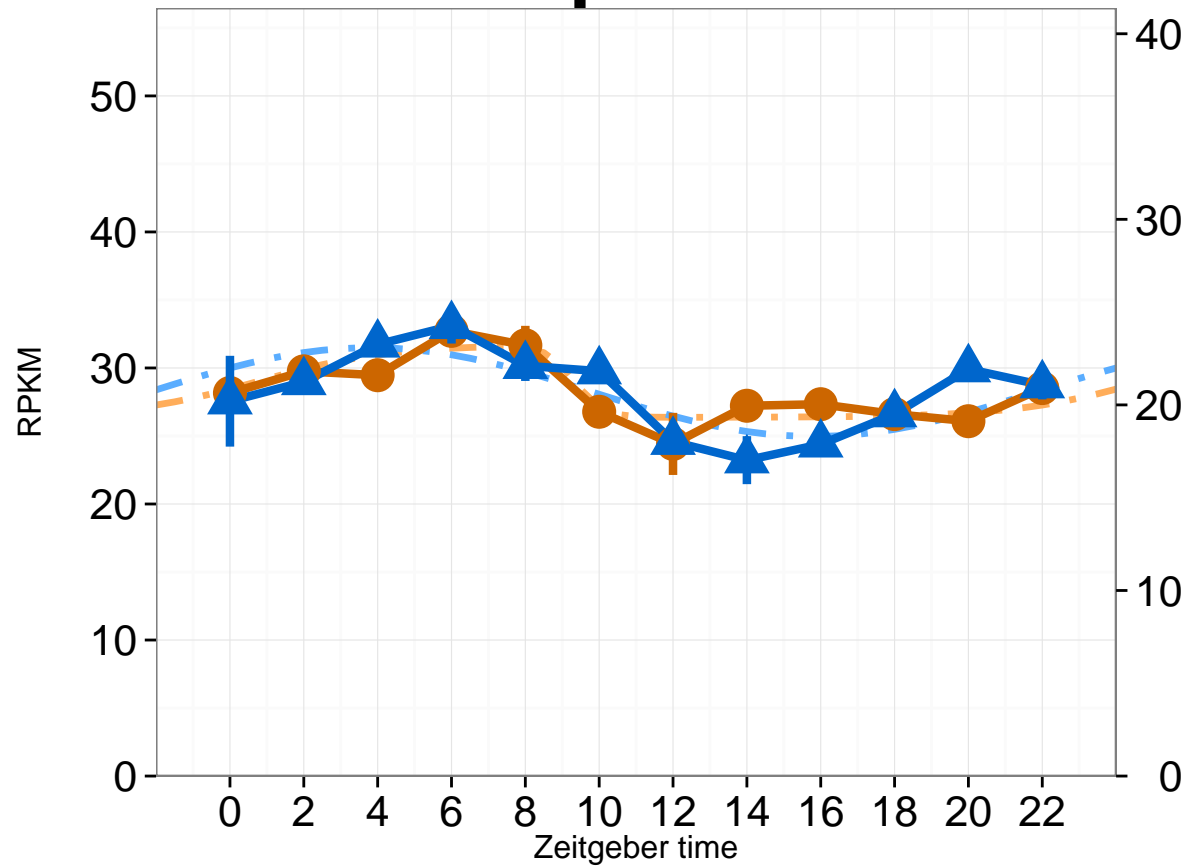

## Apbb2

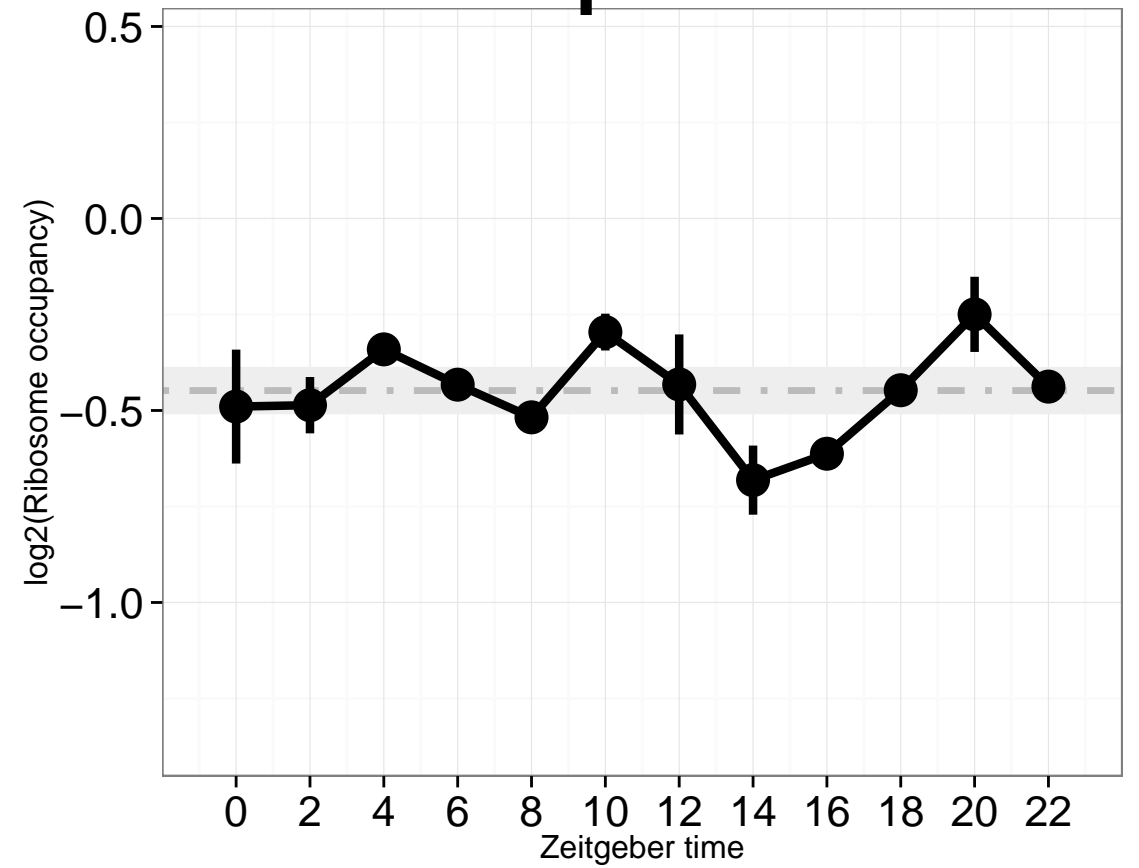

Supplement: Supplementary file 2843 [file 1]

# Serinc1

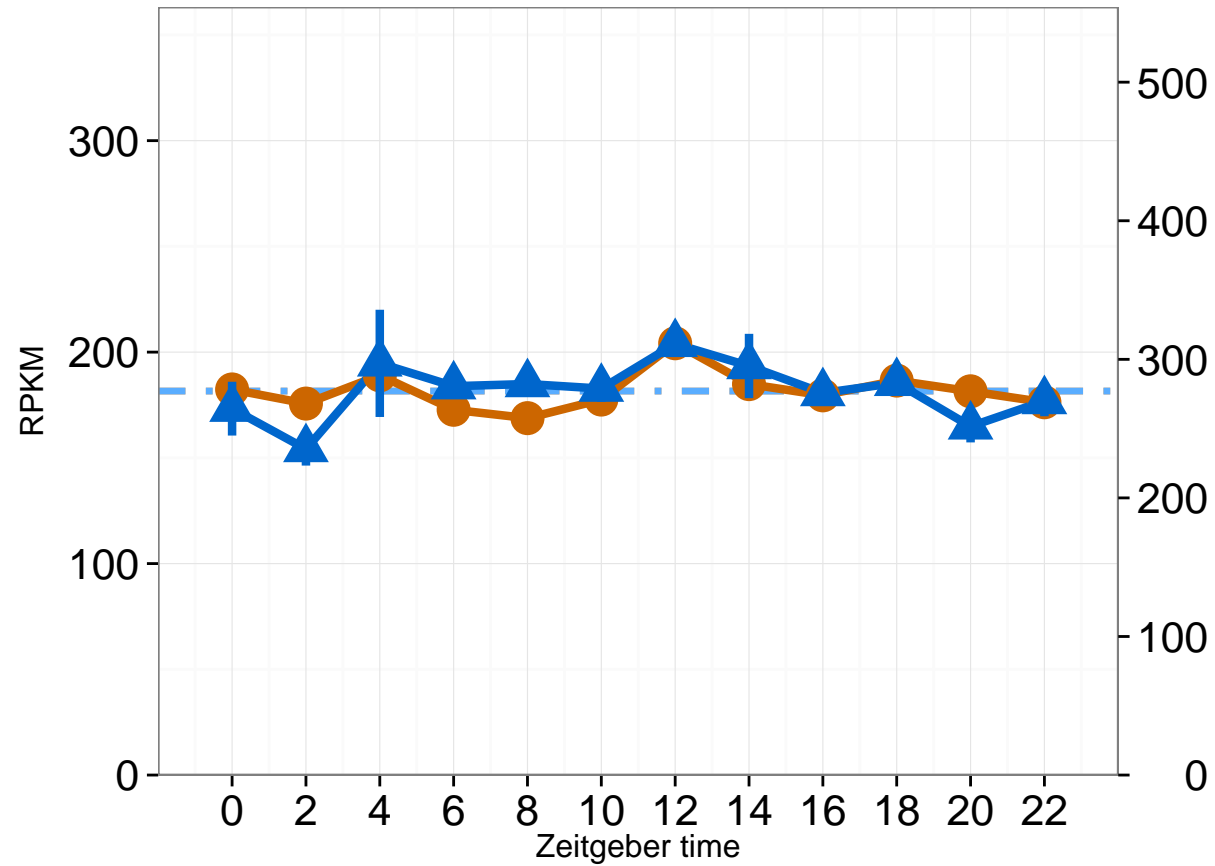

# Serinc1

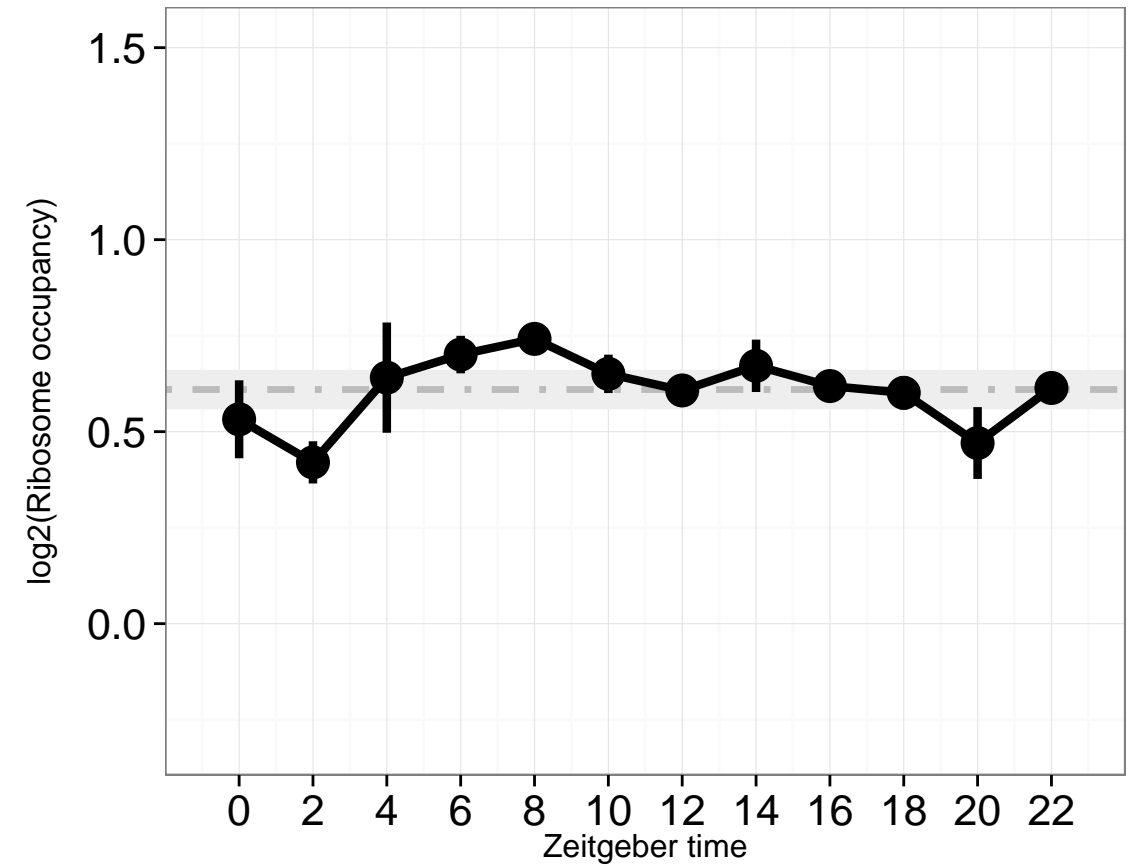

Supplement: Supplementary file 2844 [file 1]

# Rab3ip

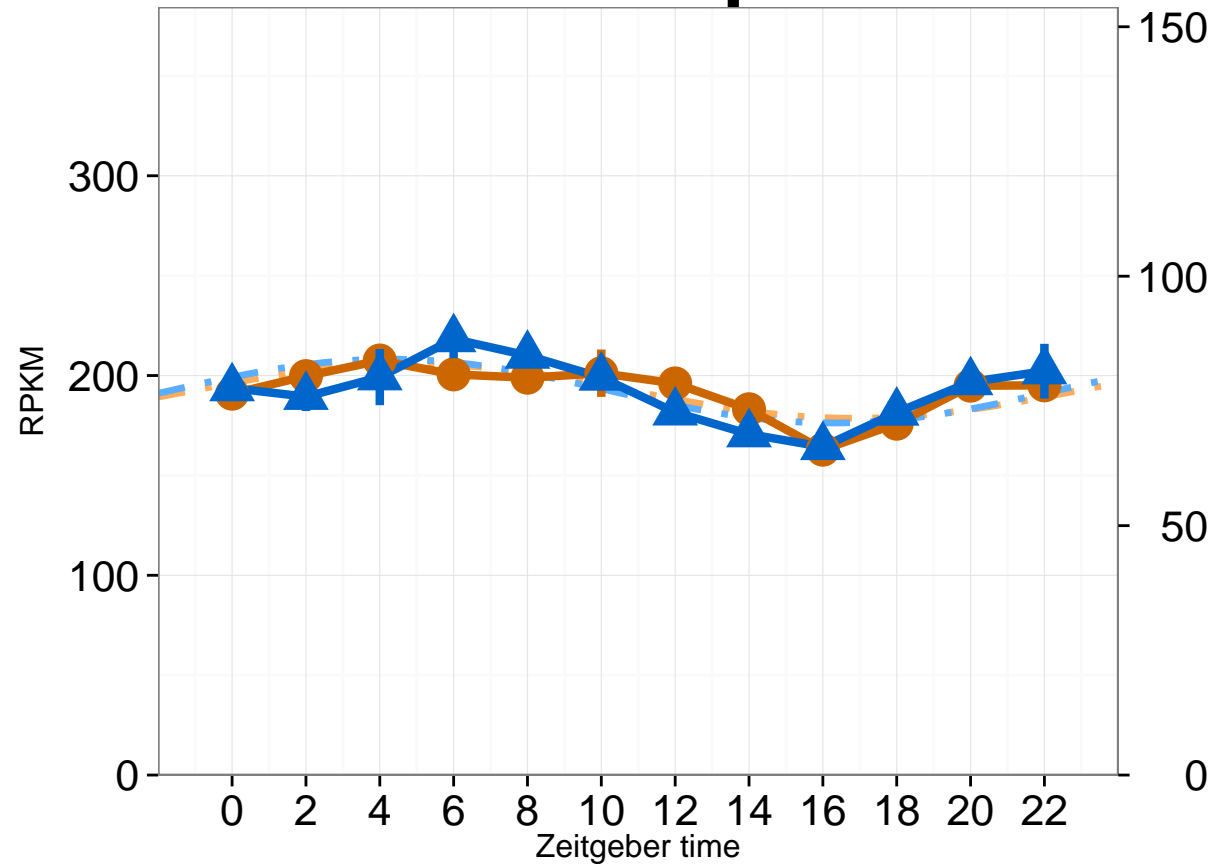

# Rab3ip

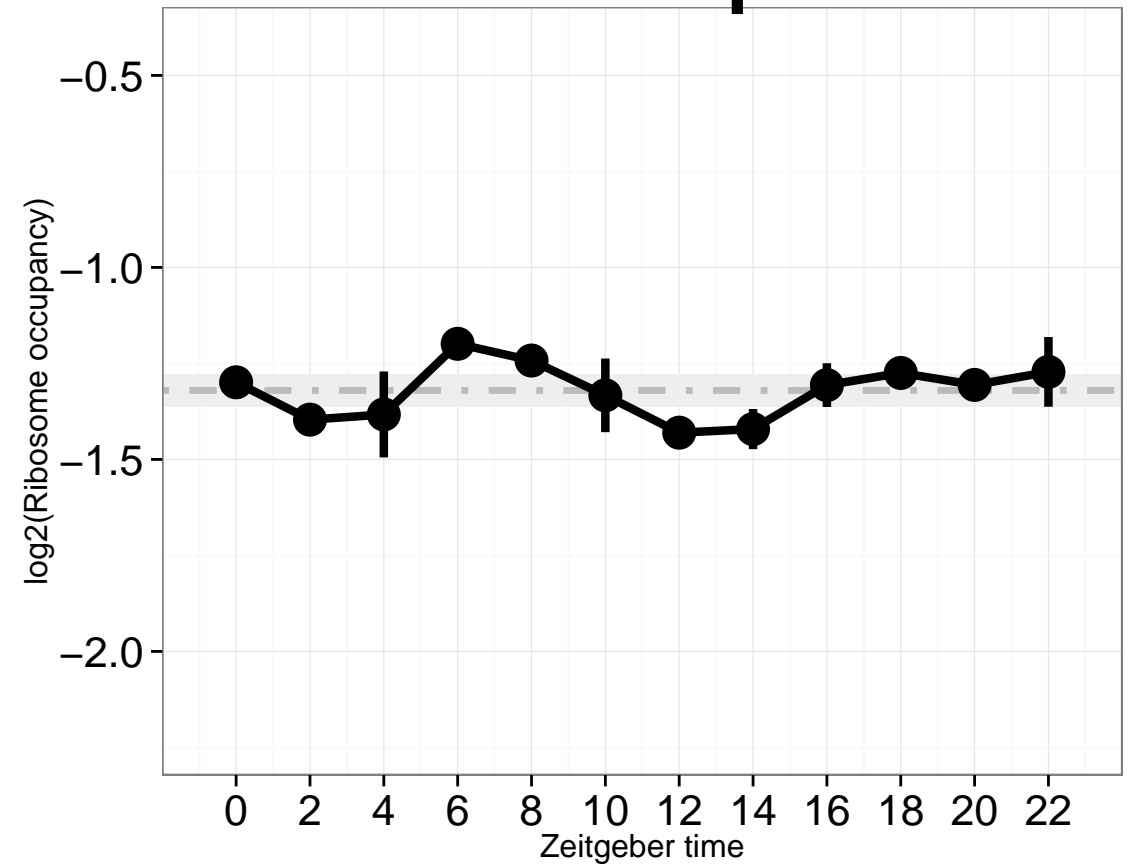

Supplement: Supplementary file 2845 [file 1]

## KIhI24

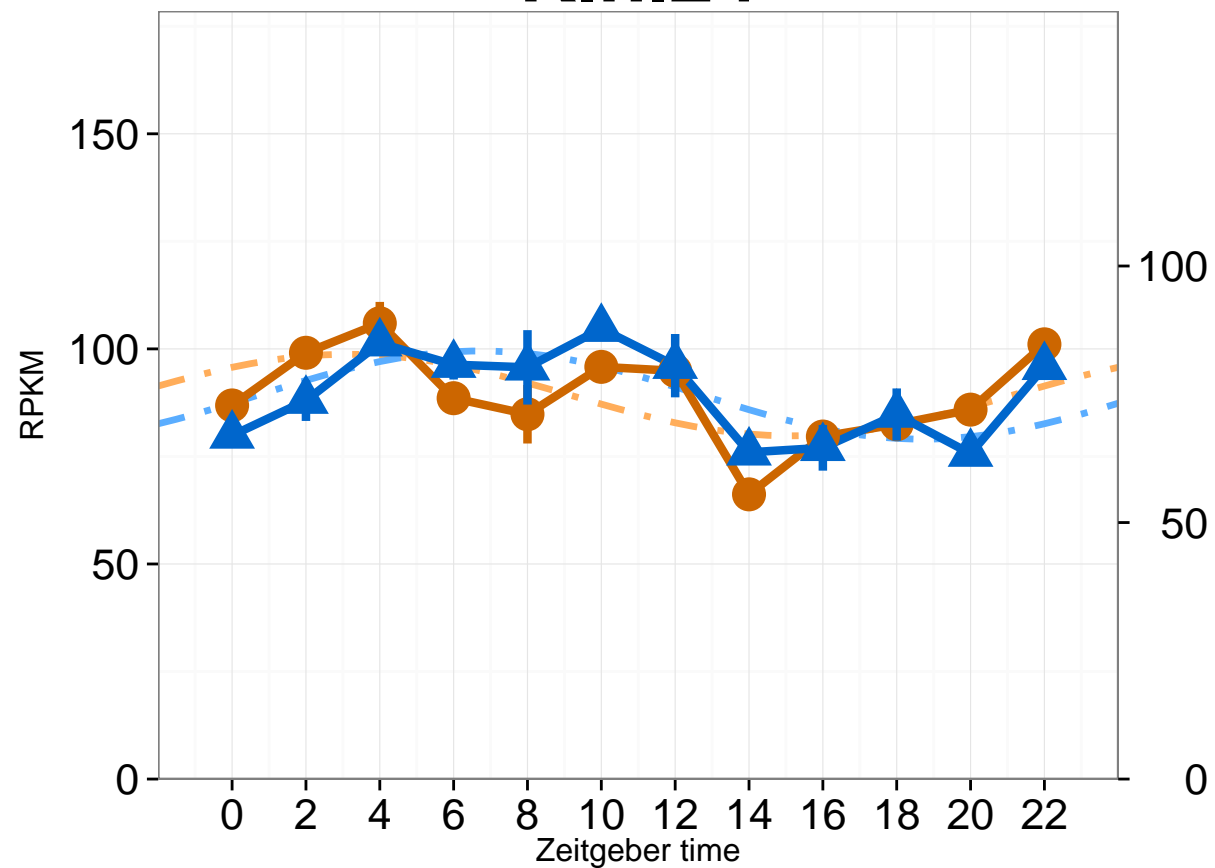

## KIhI24

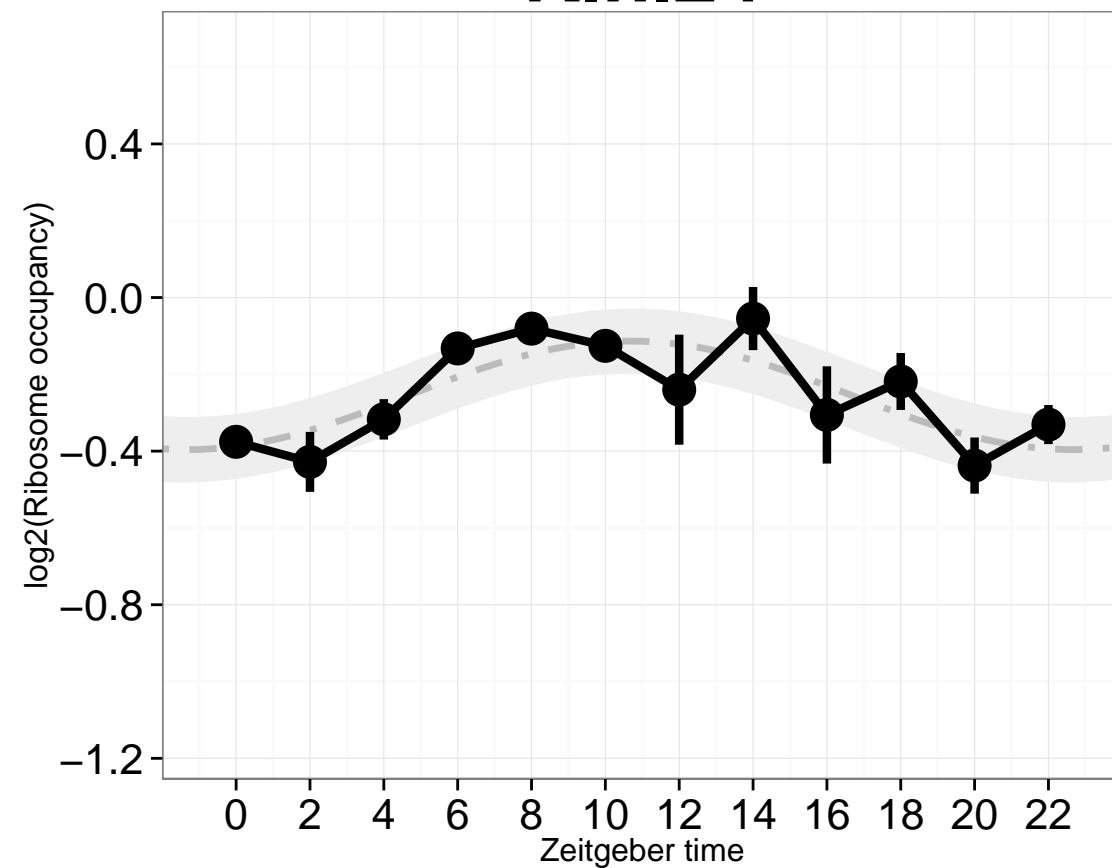

Supplement: Supplementary file 2846 [file 1]

# Pbld1

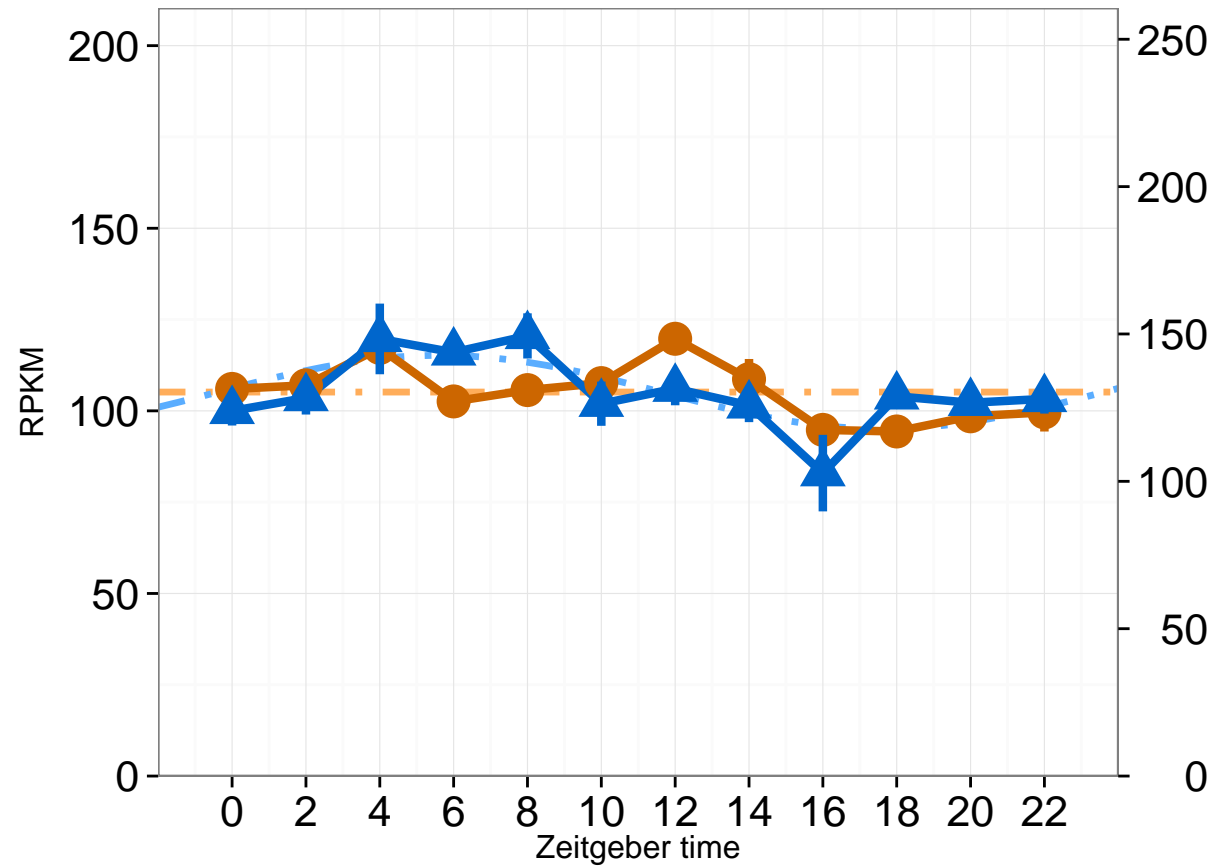

# Pbld1

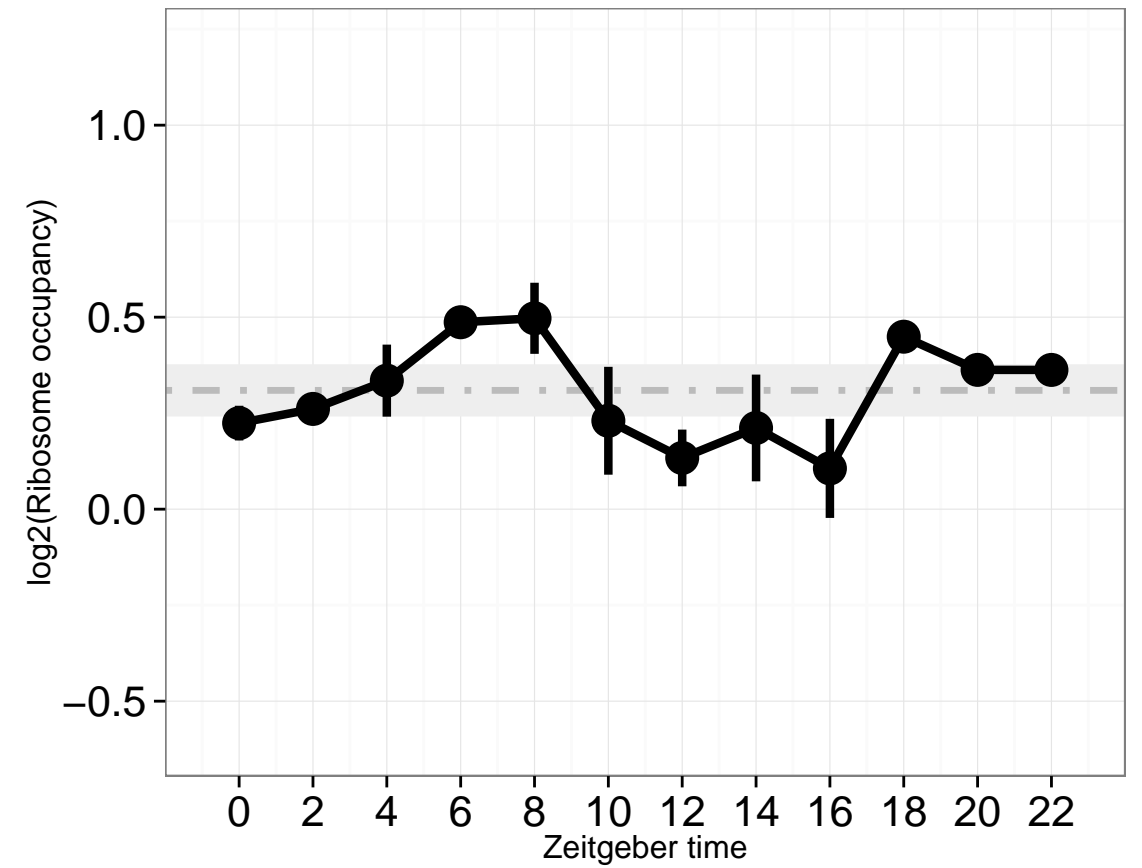

Supplement: Supplementary file 2847 [file 1]

## E2f4

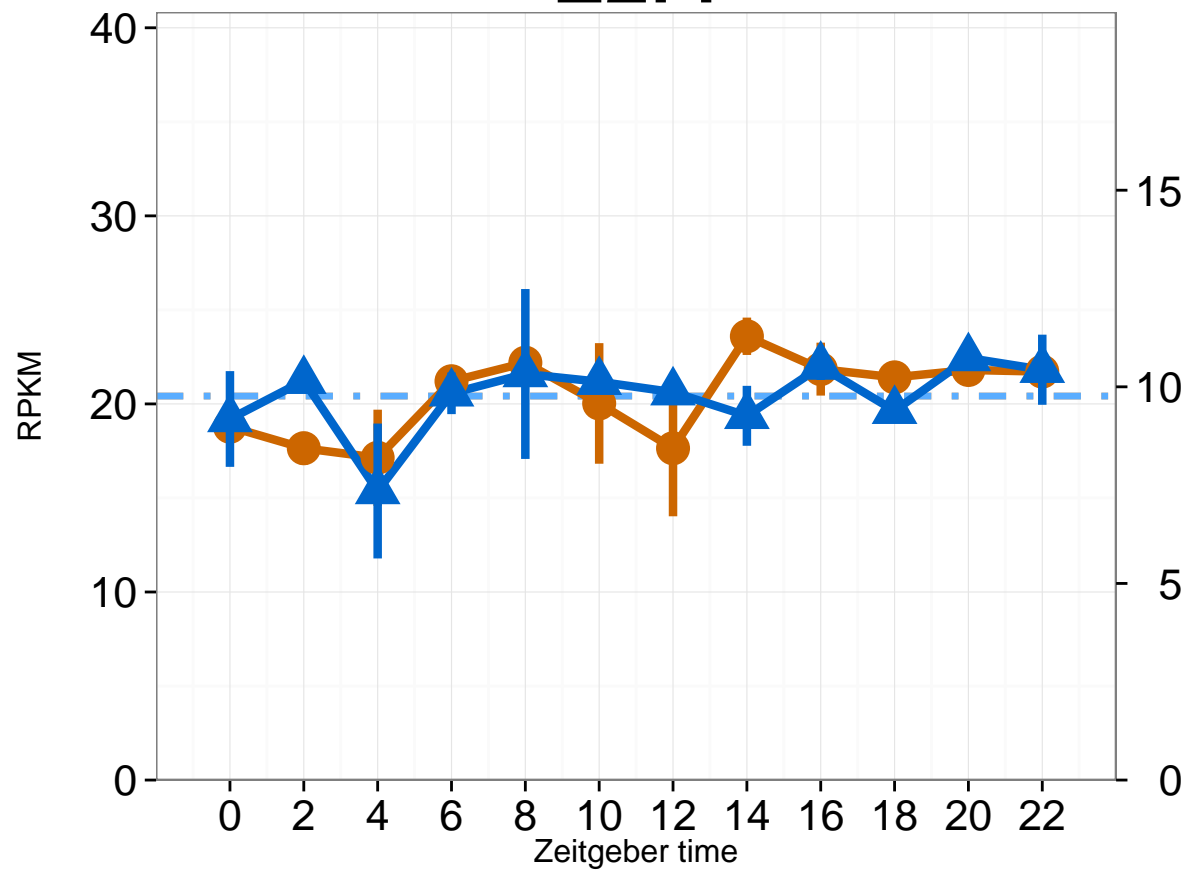

## E2f4

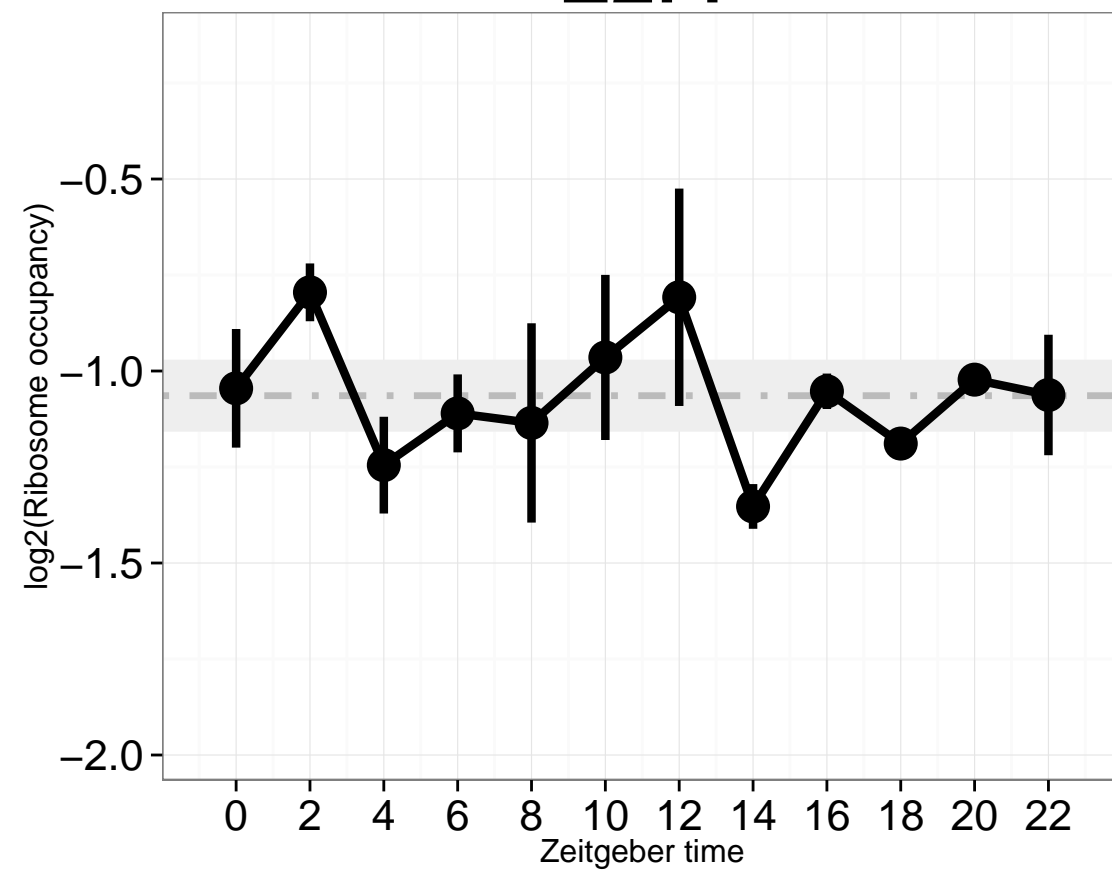

Supplement: Supplementary file 2848 [file 1]

## Kif9

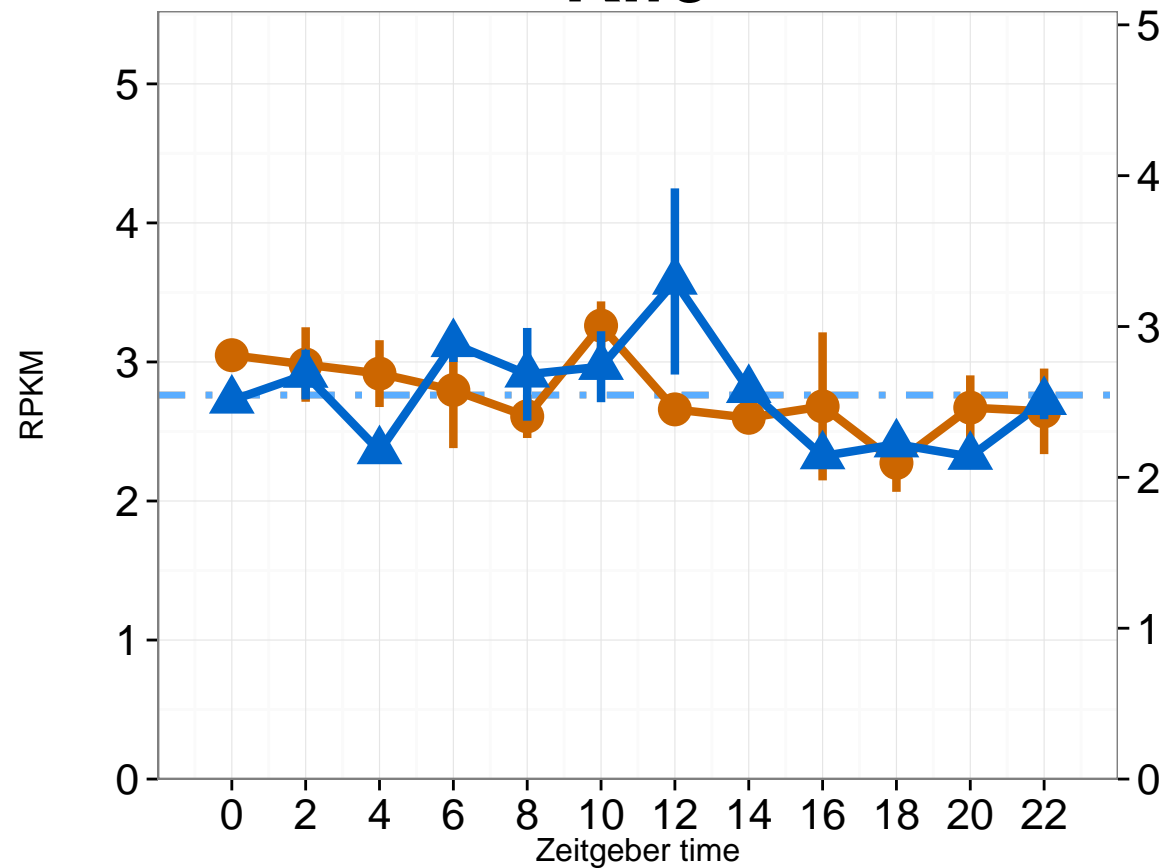

## Kif9

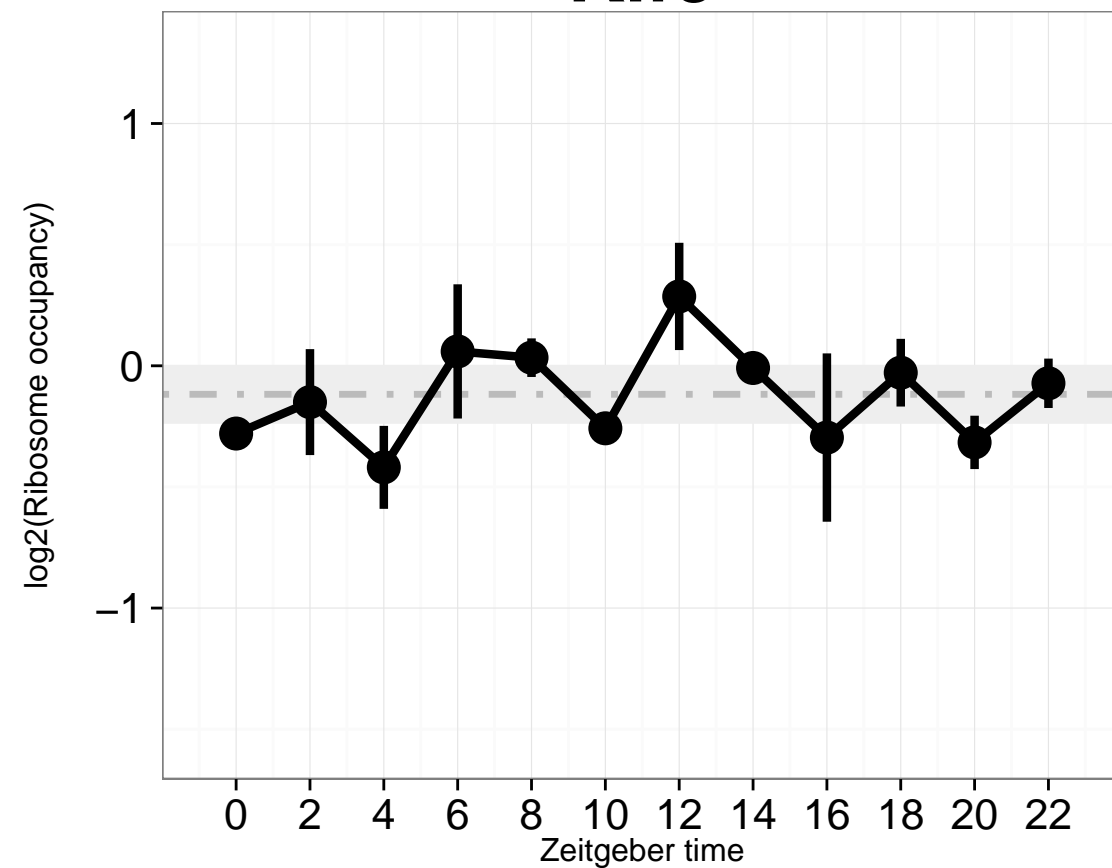

Supplement: Supplementary file 2849 [file 1]

# Zbtb45

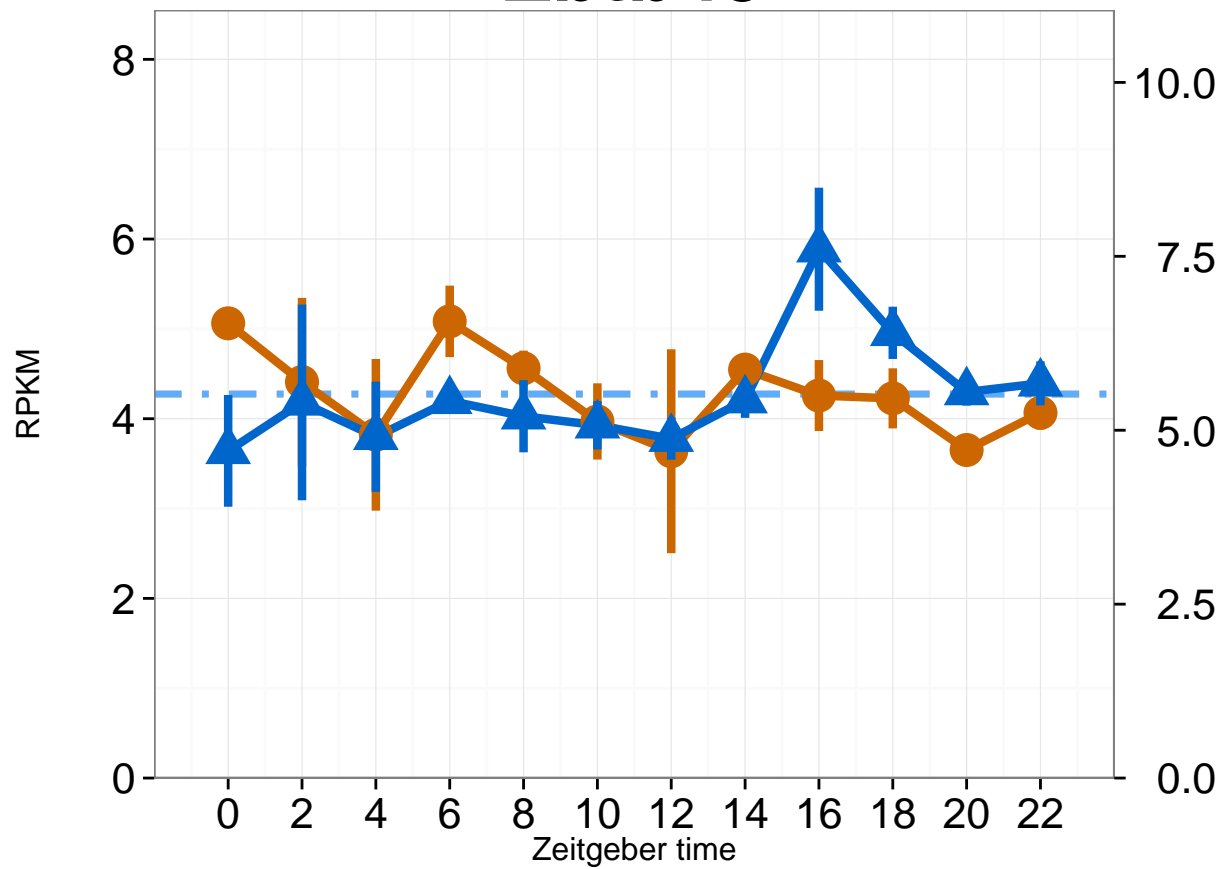

# Zbtb45

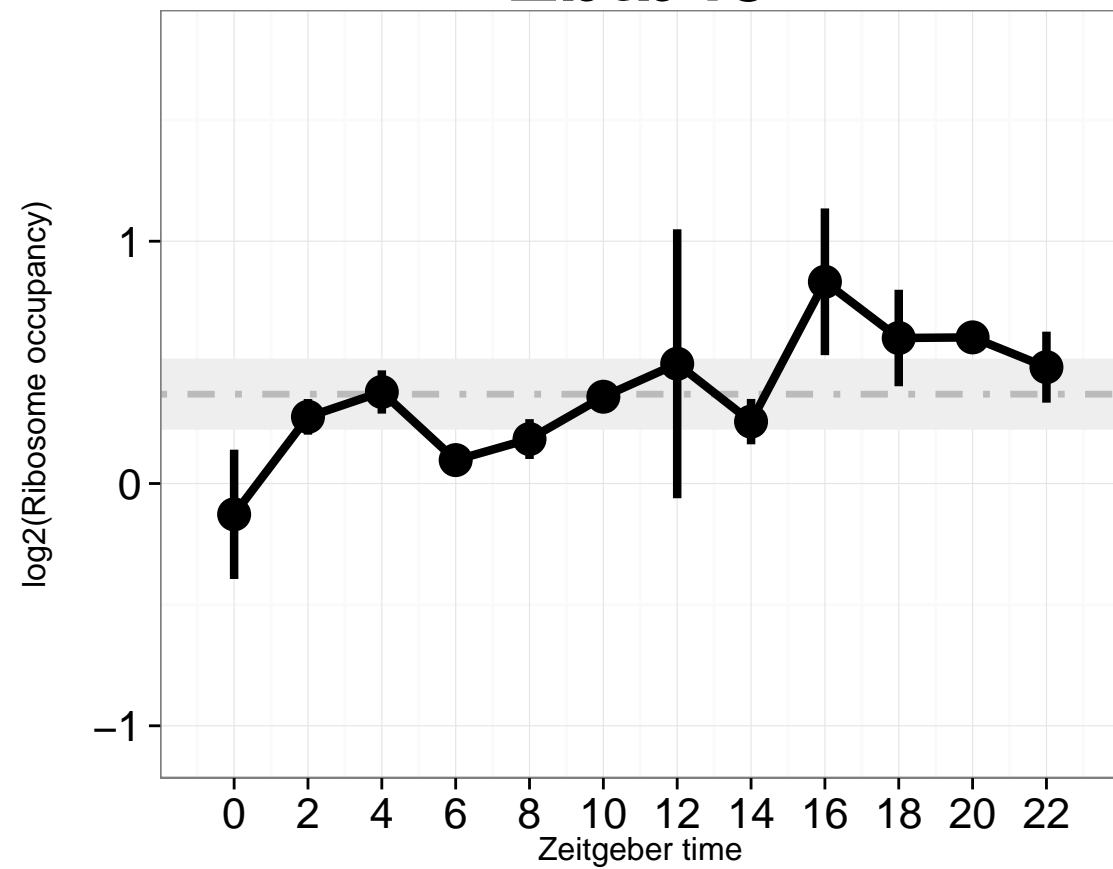

Supplement: Supplementary file 2850 [file 1]

## Pcsk5

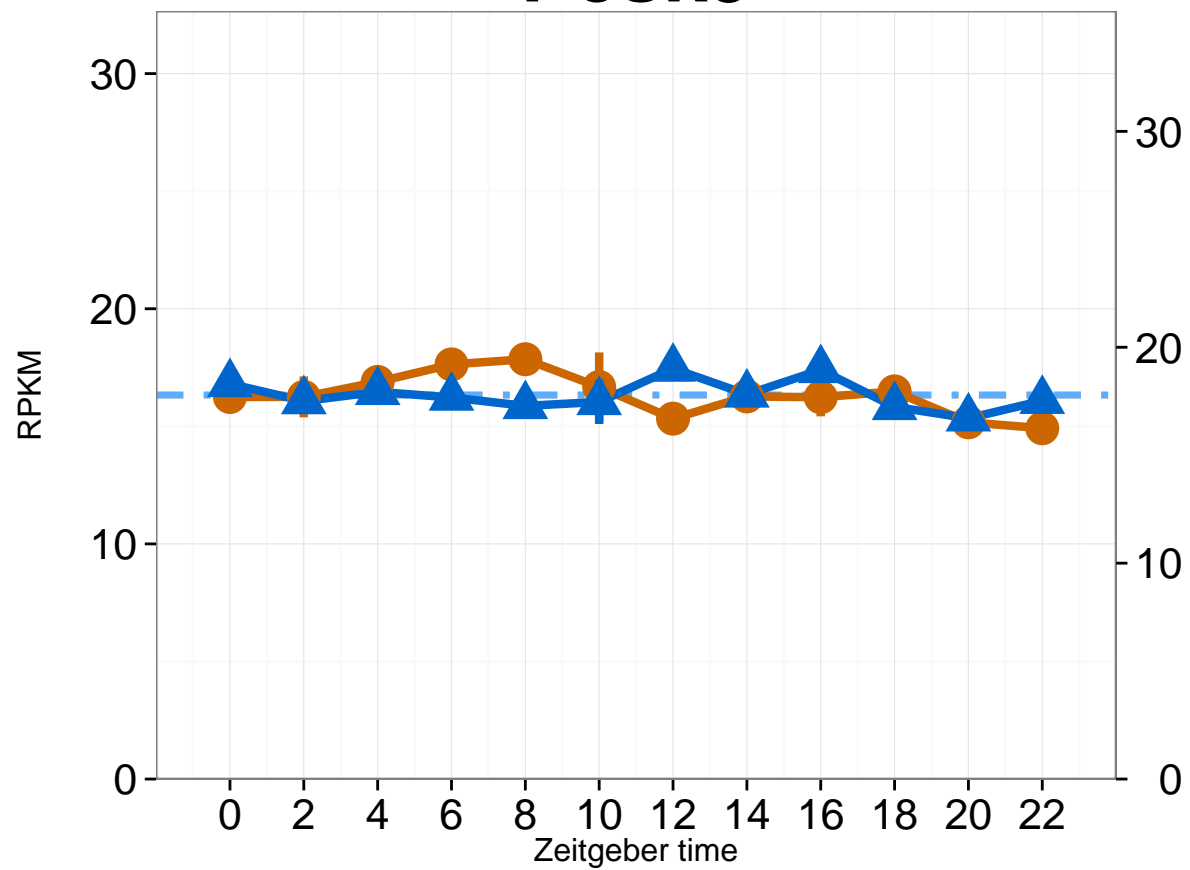

## Pcsk5

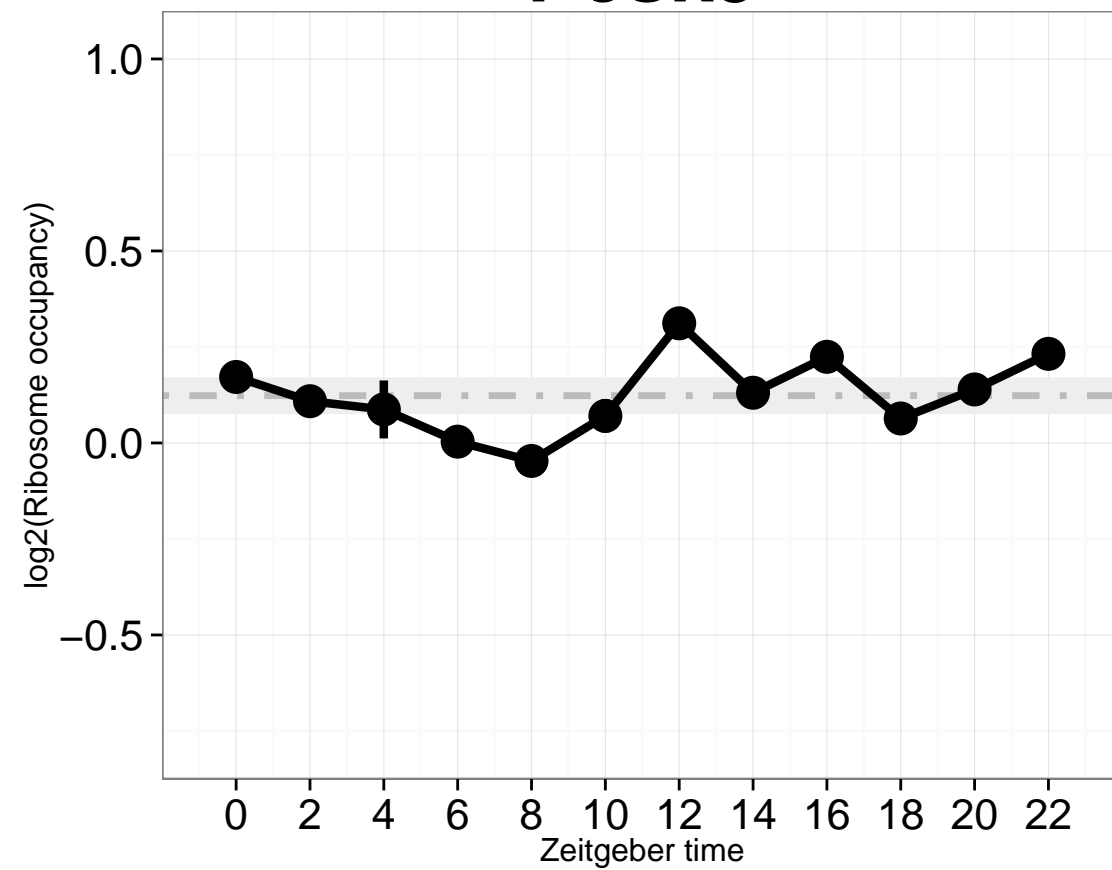

Supplement: Supplementary file 2851 [file 1]

# Fam102a

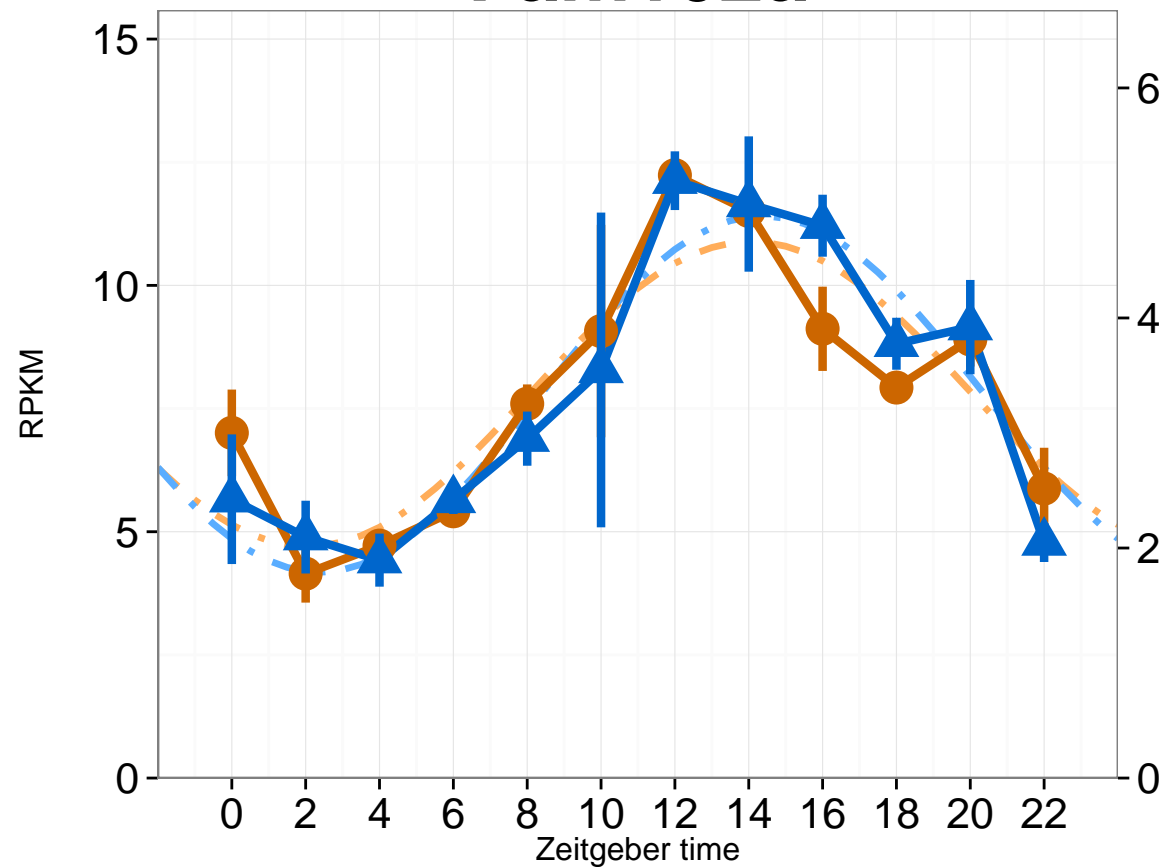

# Fam102a

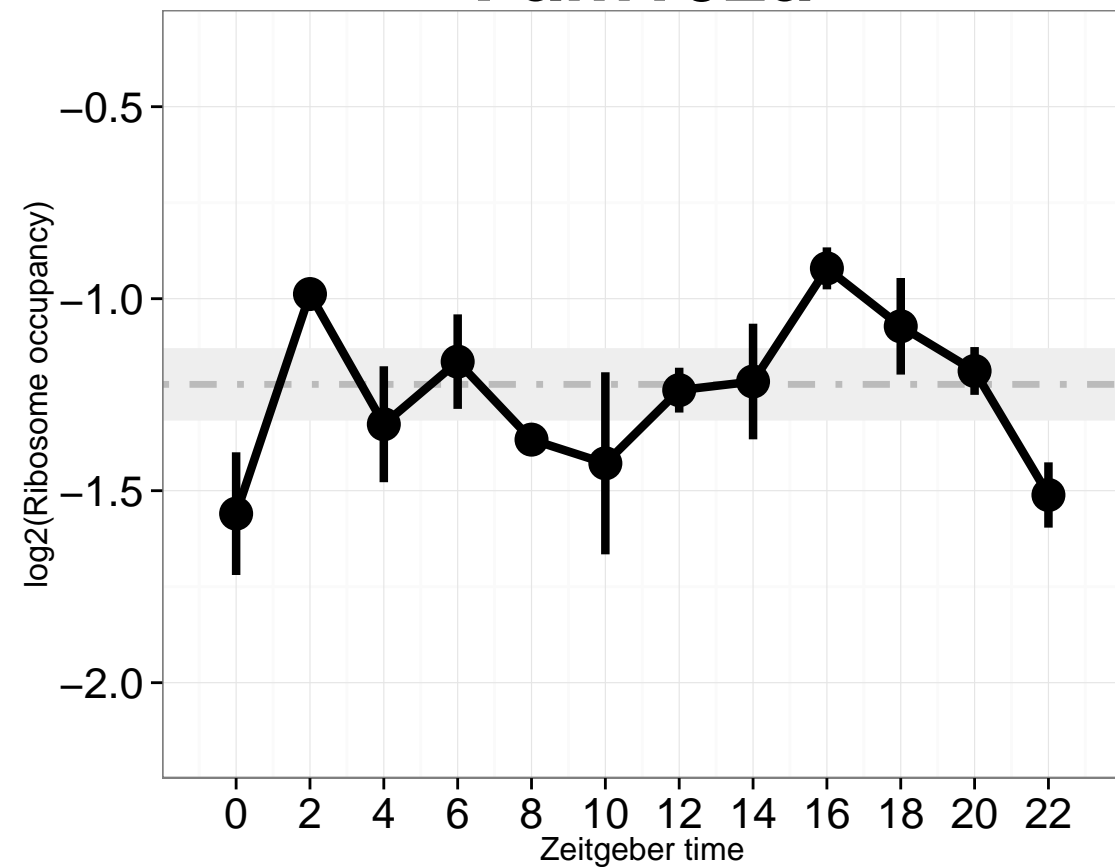

Supplement: Supplementary file 2852 [file 1]

## BIm

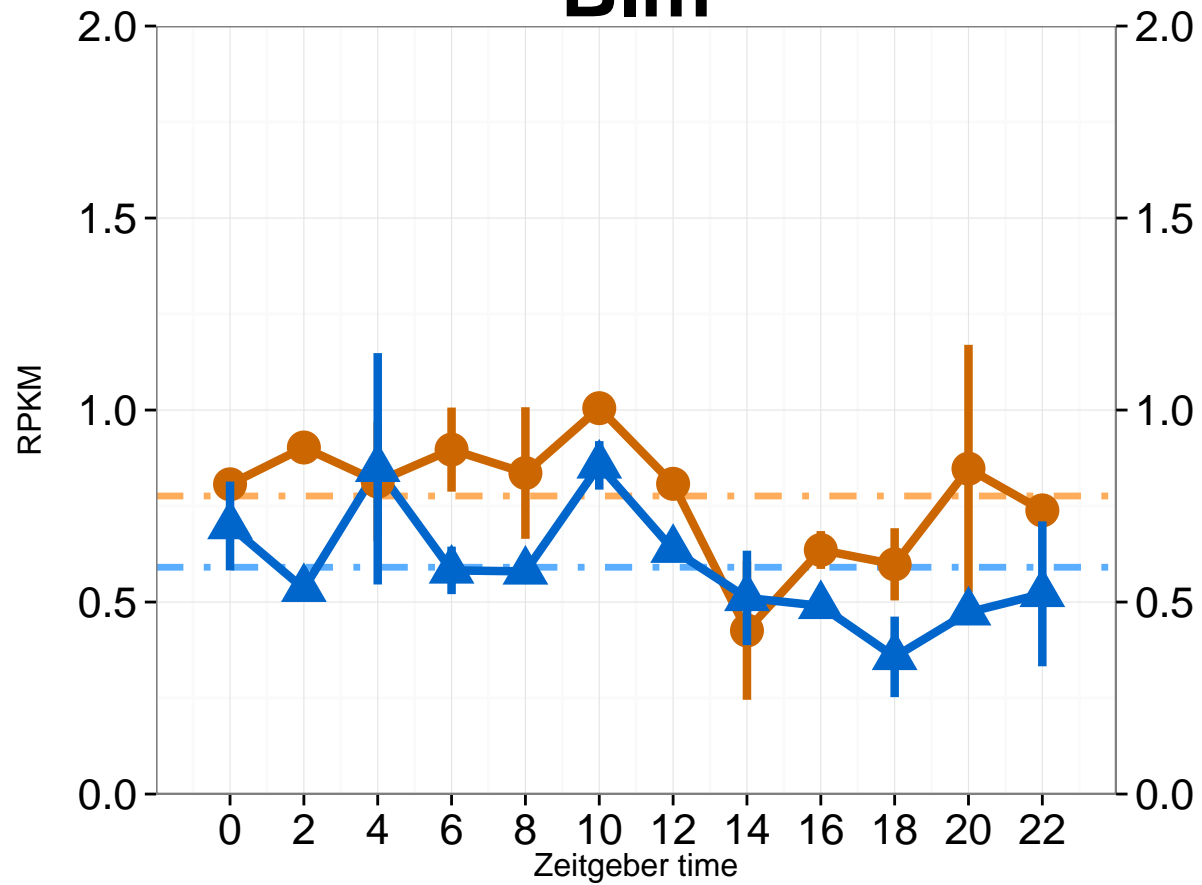

## BIm

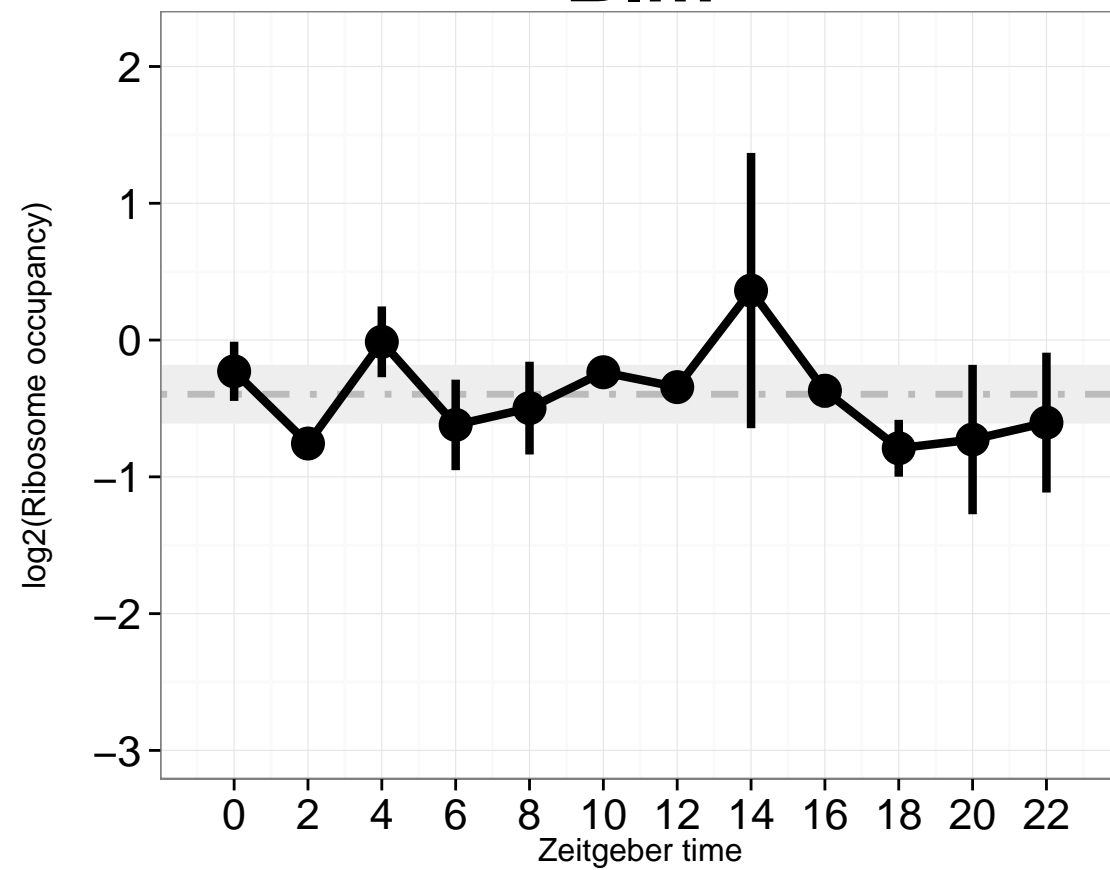

Supplement: Supplementary file 2853 [file 1]

## Nars2

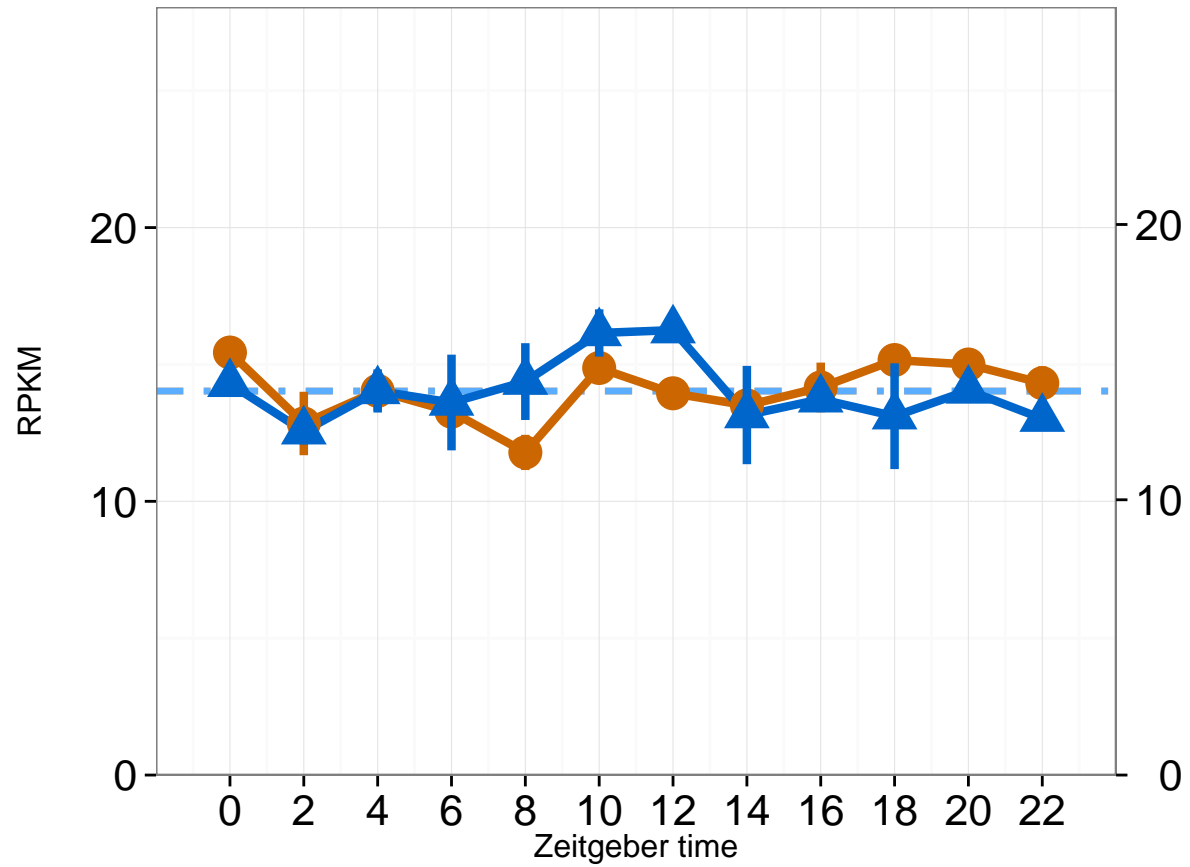

## Nars2

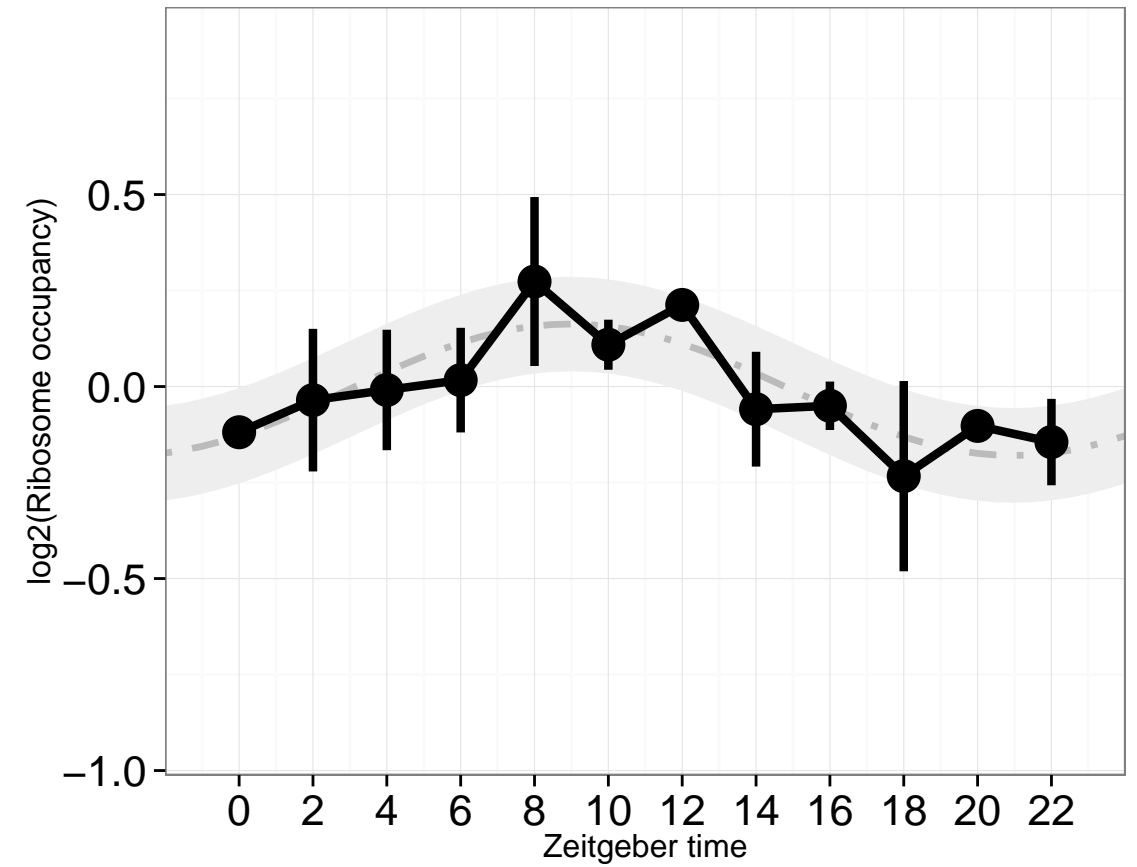

Supplement: Supplementary file 2854 [file 1]

## Slc34a3

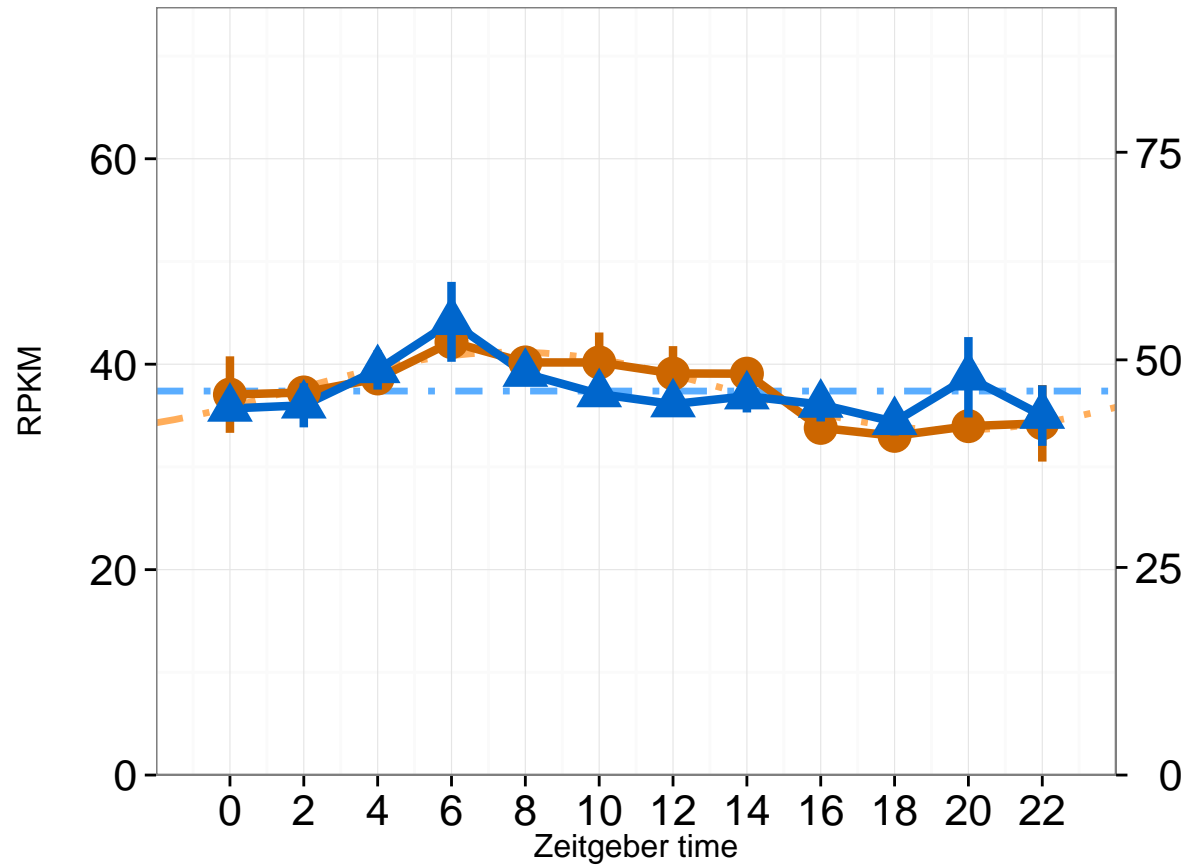

## Slc34a3

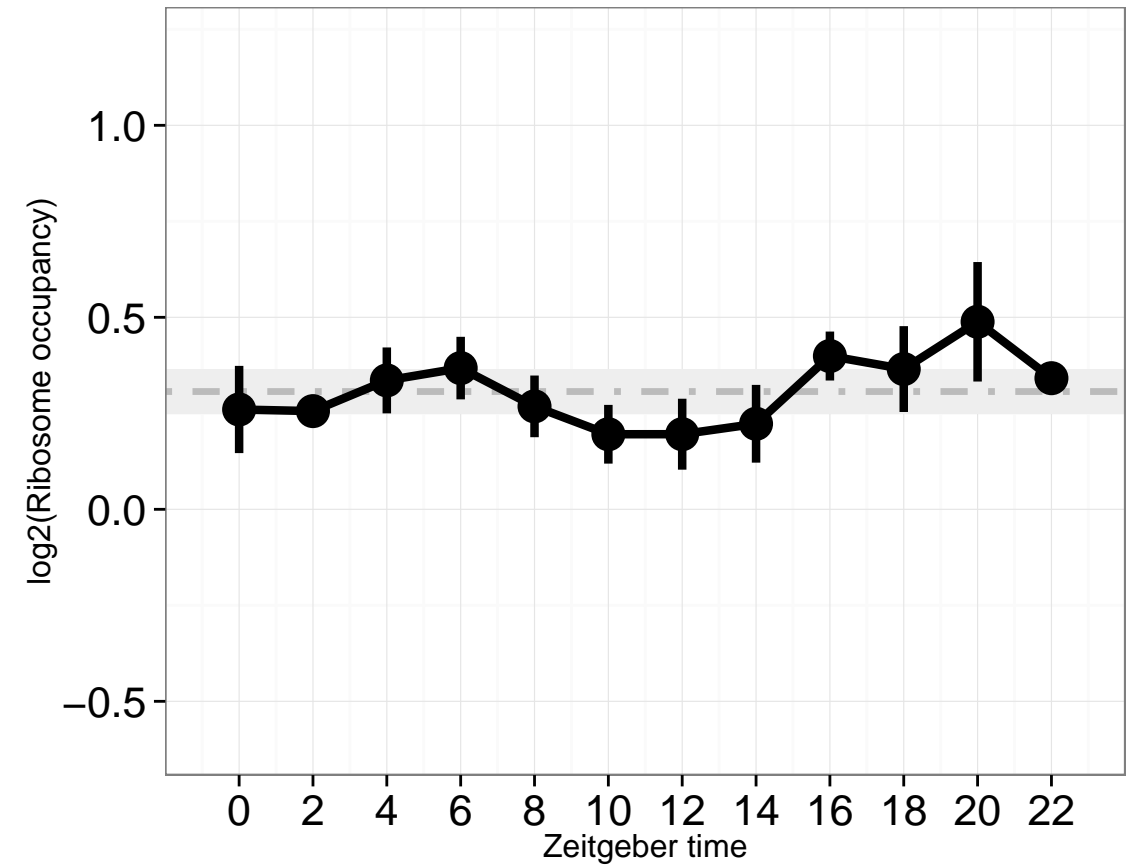

Supplement: Supplementary file 2855 [file 1]

# Tmem59

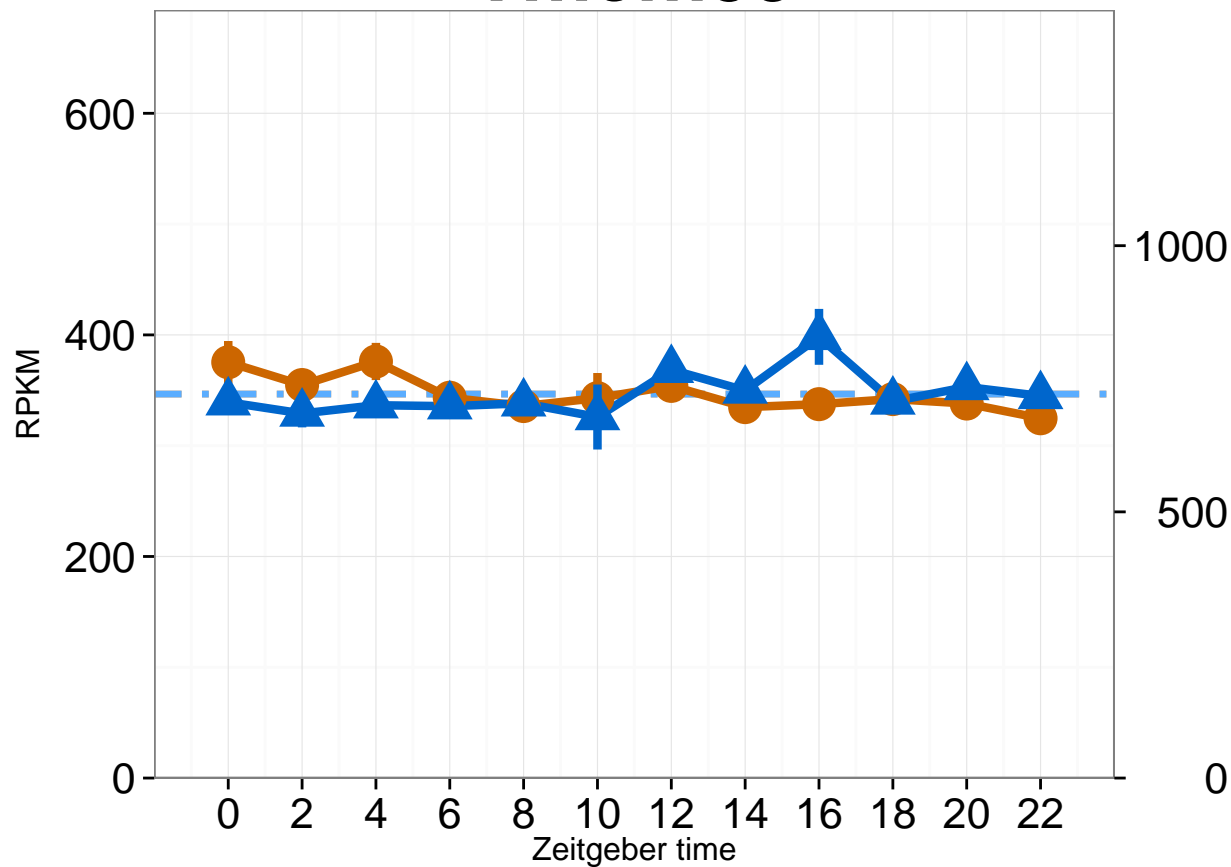

# Tmem59

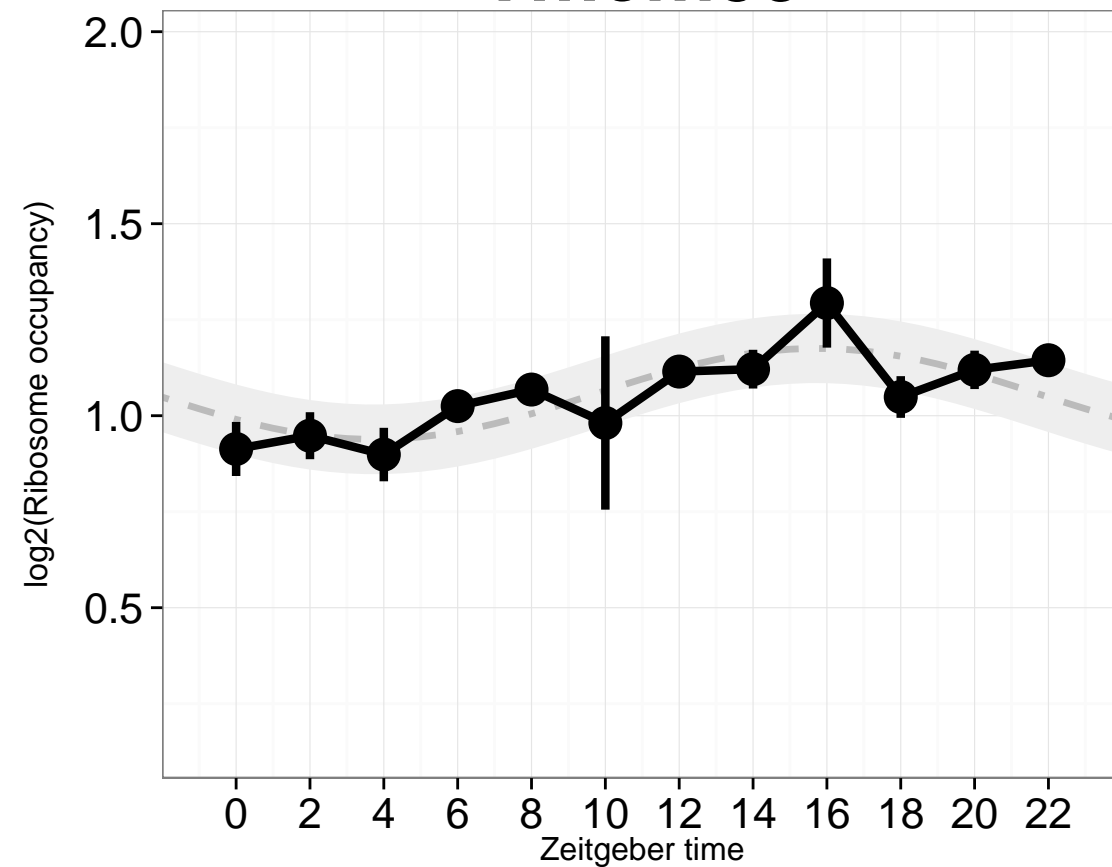

Supplement: Supplementary file 2856 [file 1]

# Arhgap28

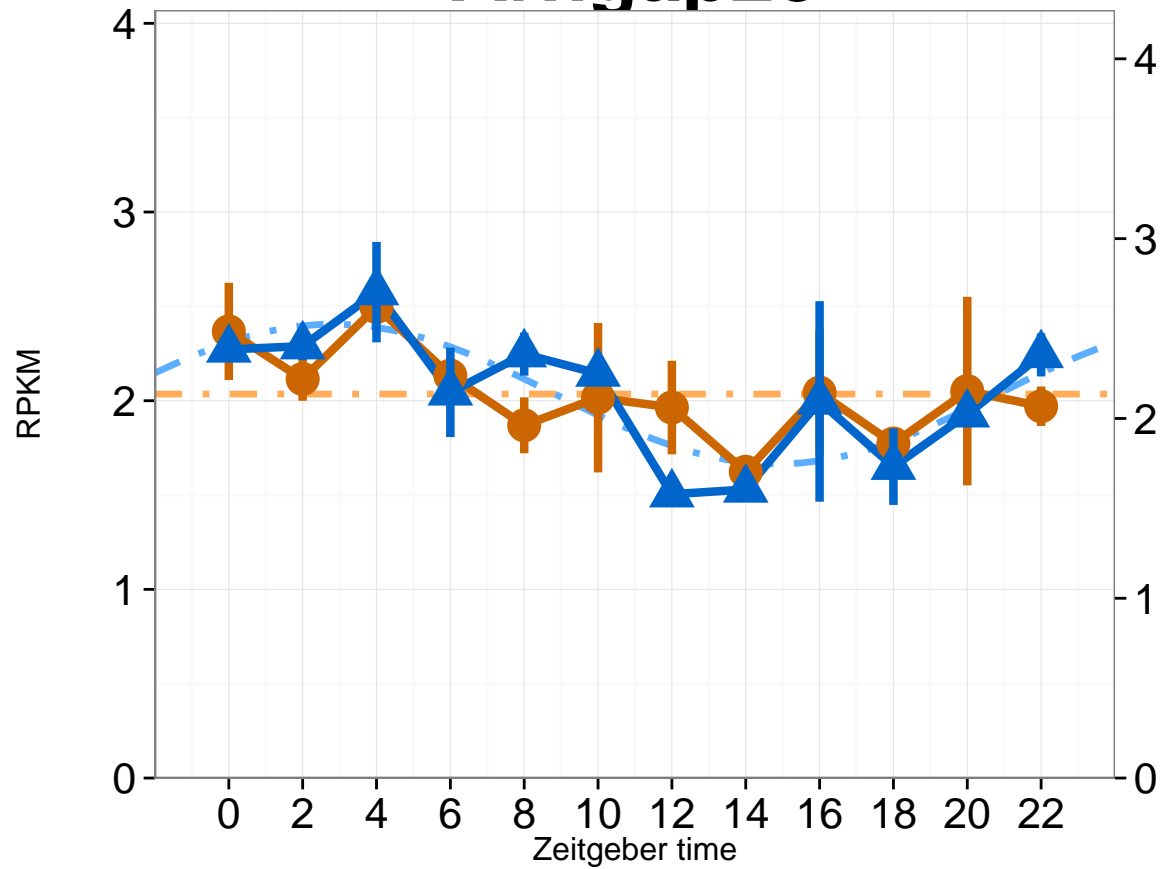

# Arhgap28

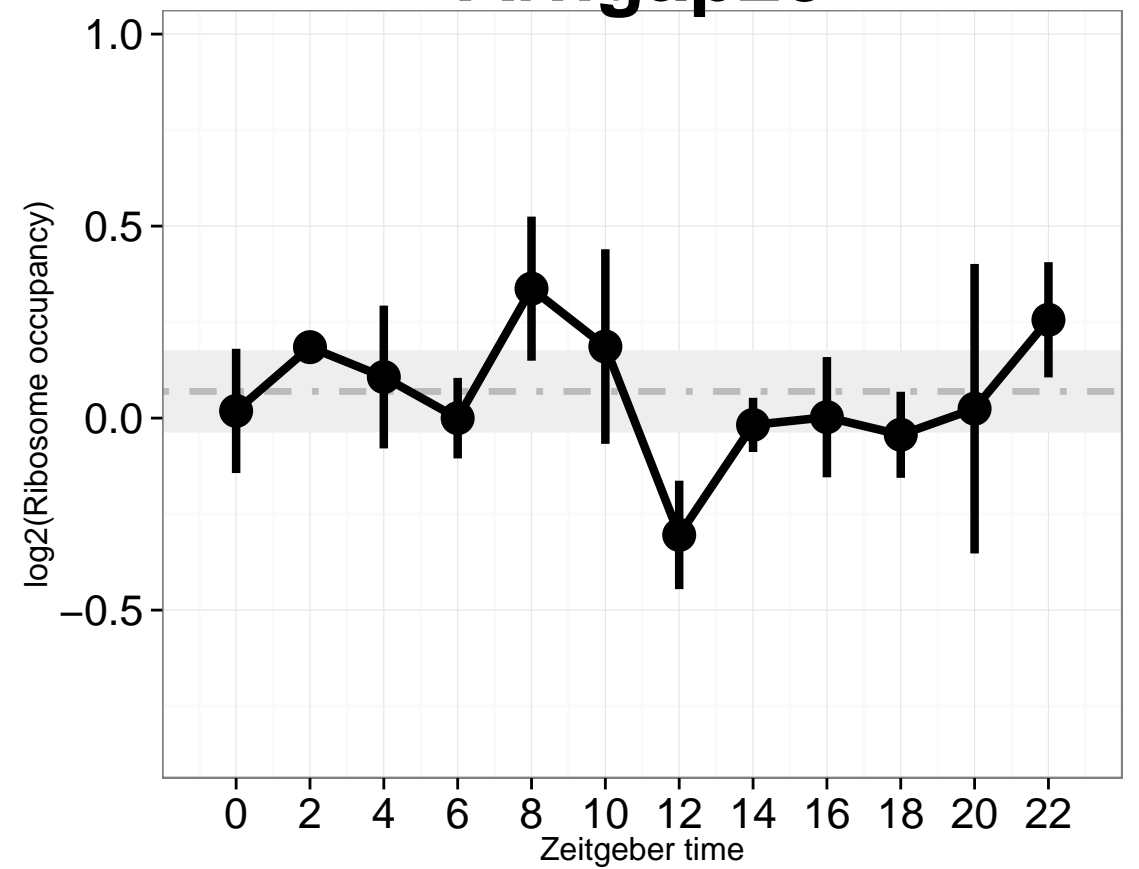

Supplement: Supplementary file 2857 [file 1]

## Eif3h

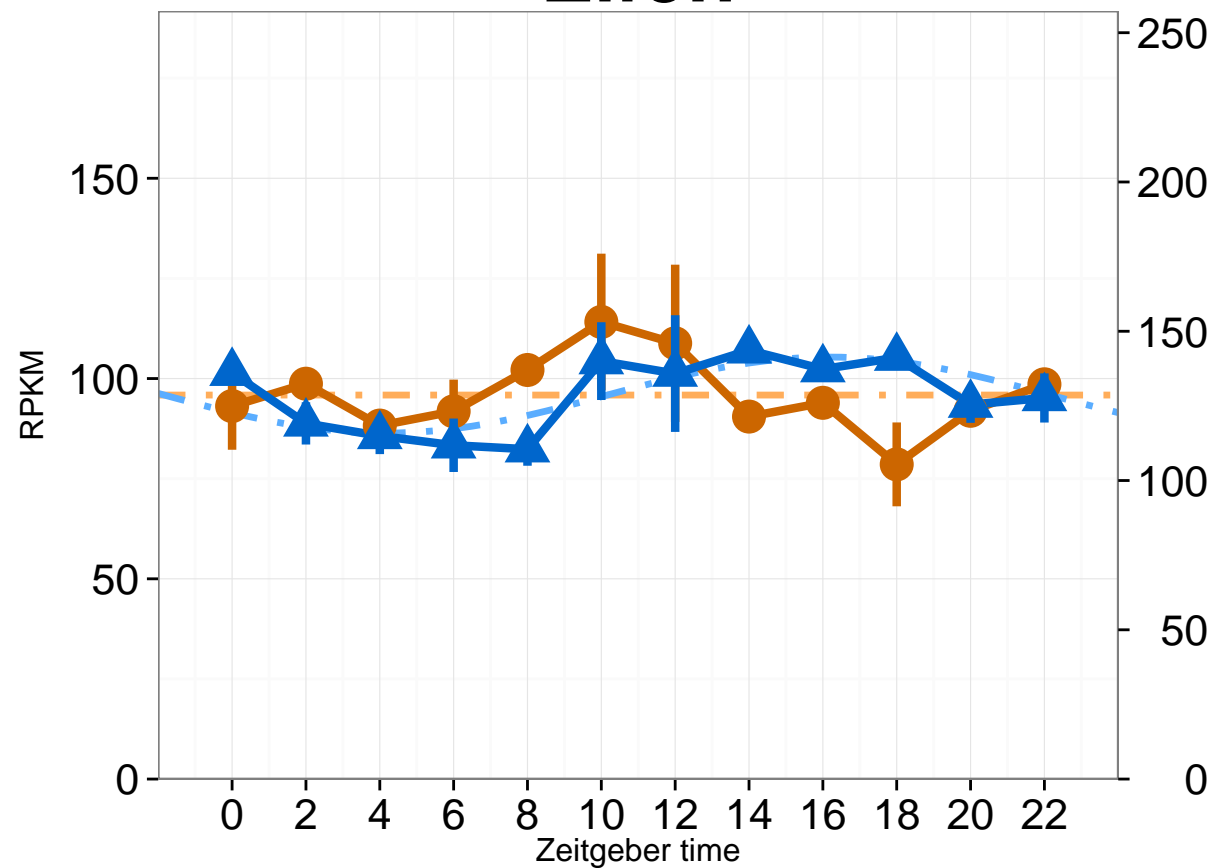

## Eif3h

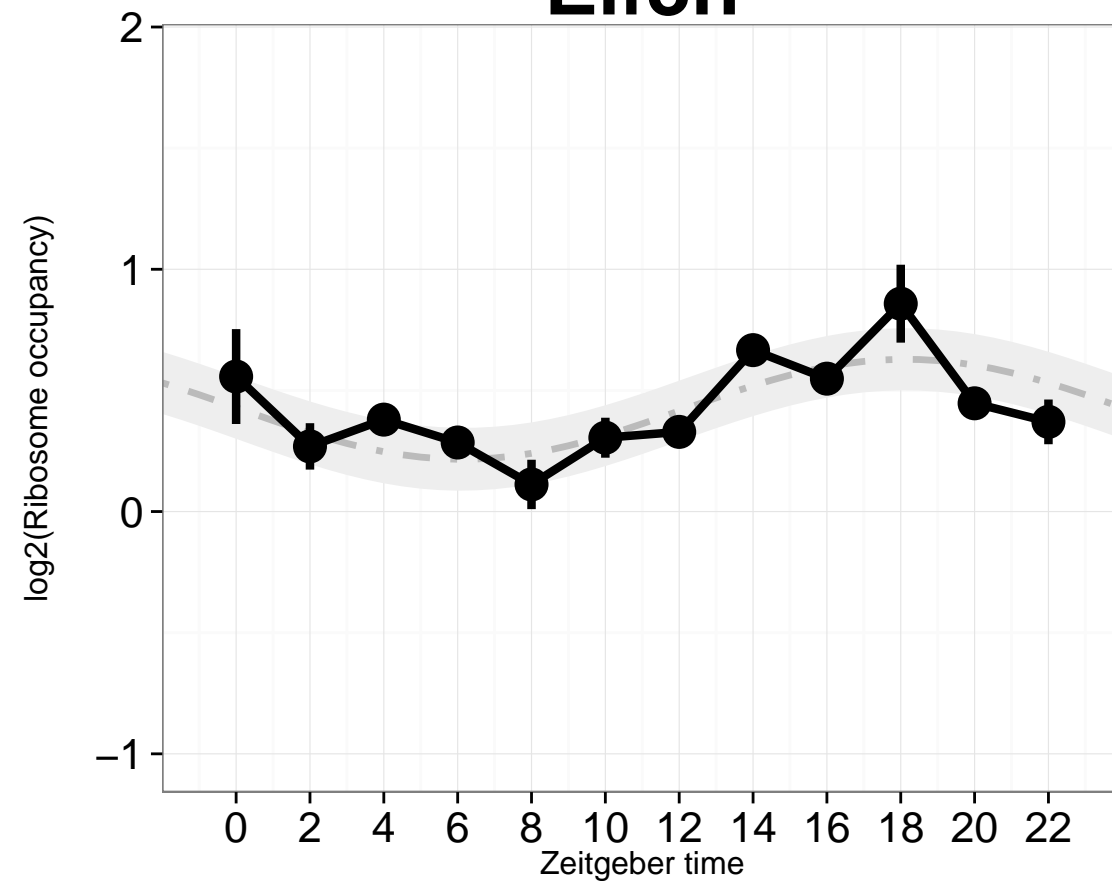

Supplement: Supplementary file 2858 [file 1]

# Clca1

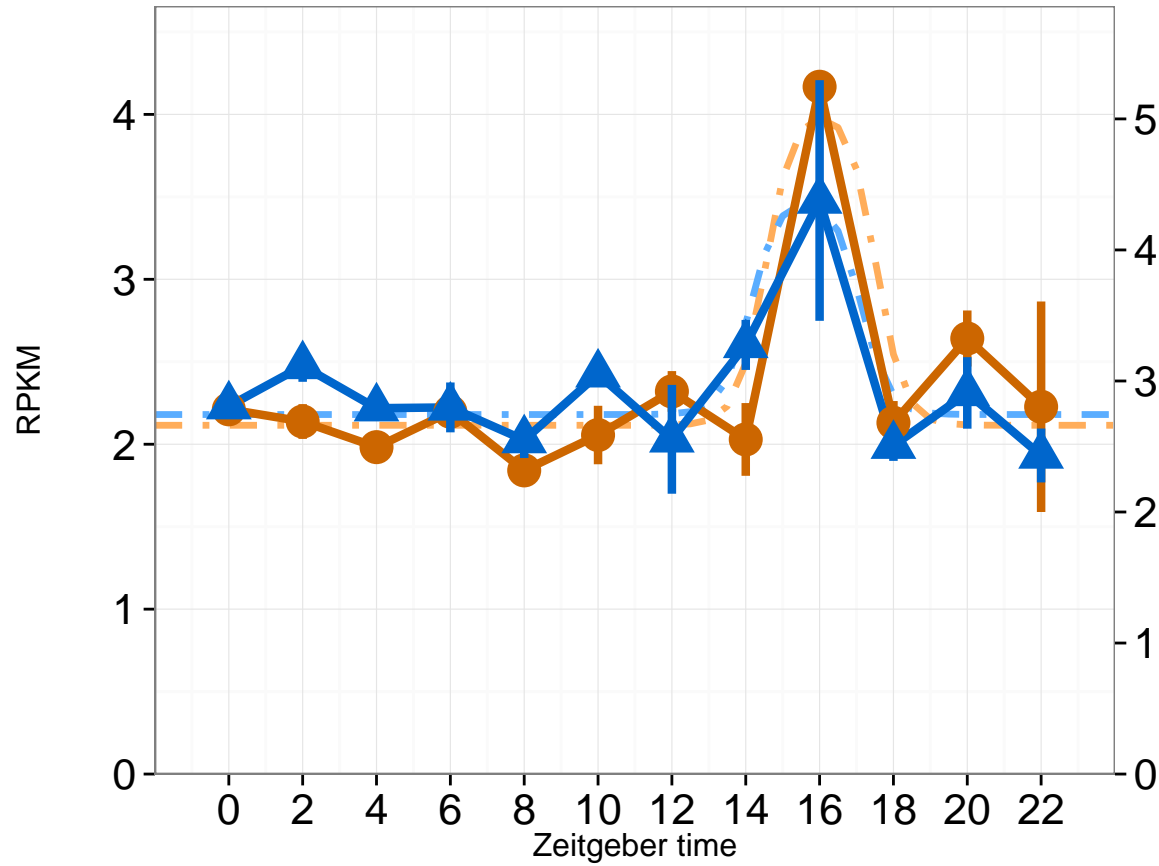

# Clca1

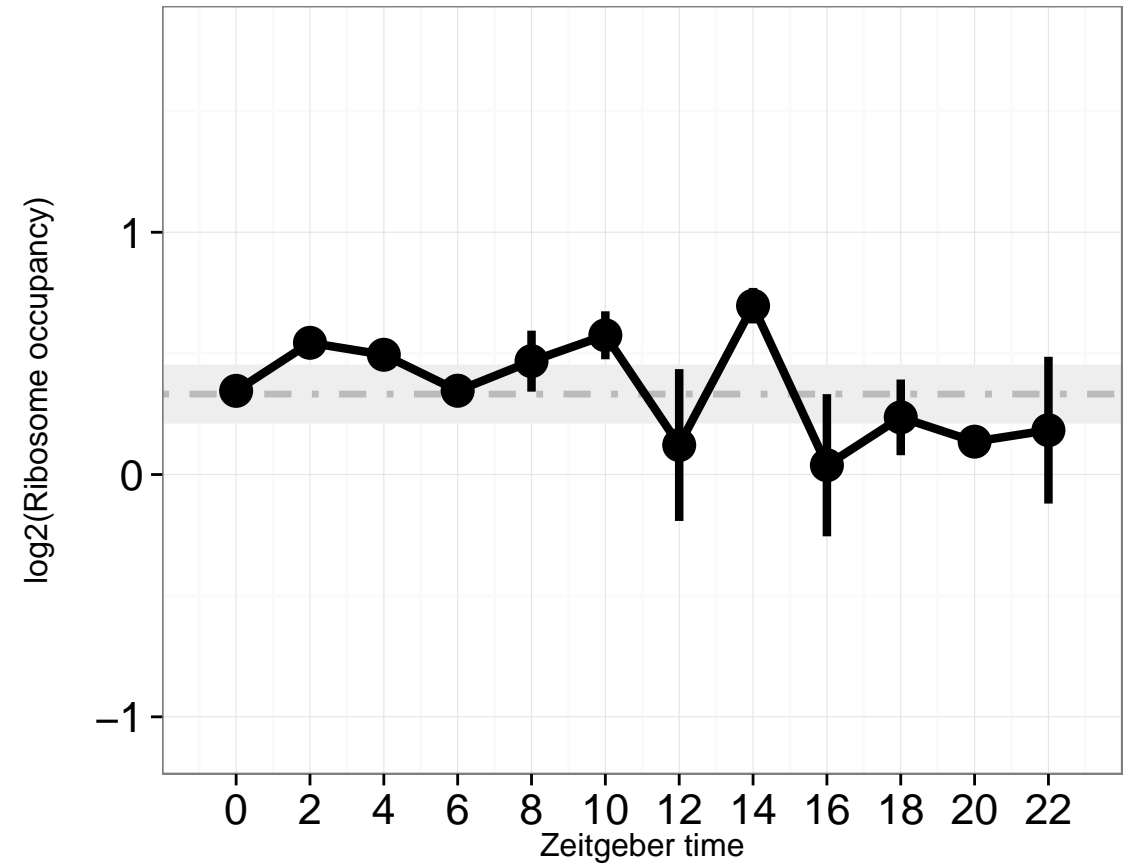

Supplement: Supplementary file 2859 [file 1]

## Nradd

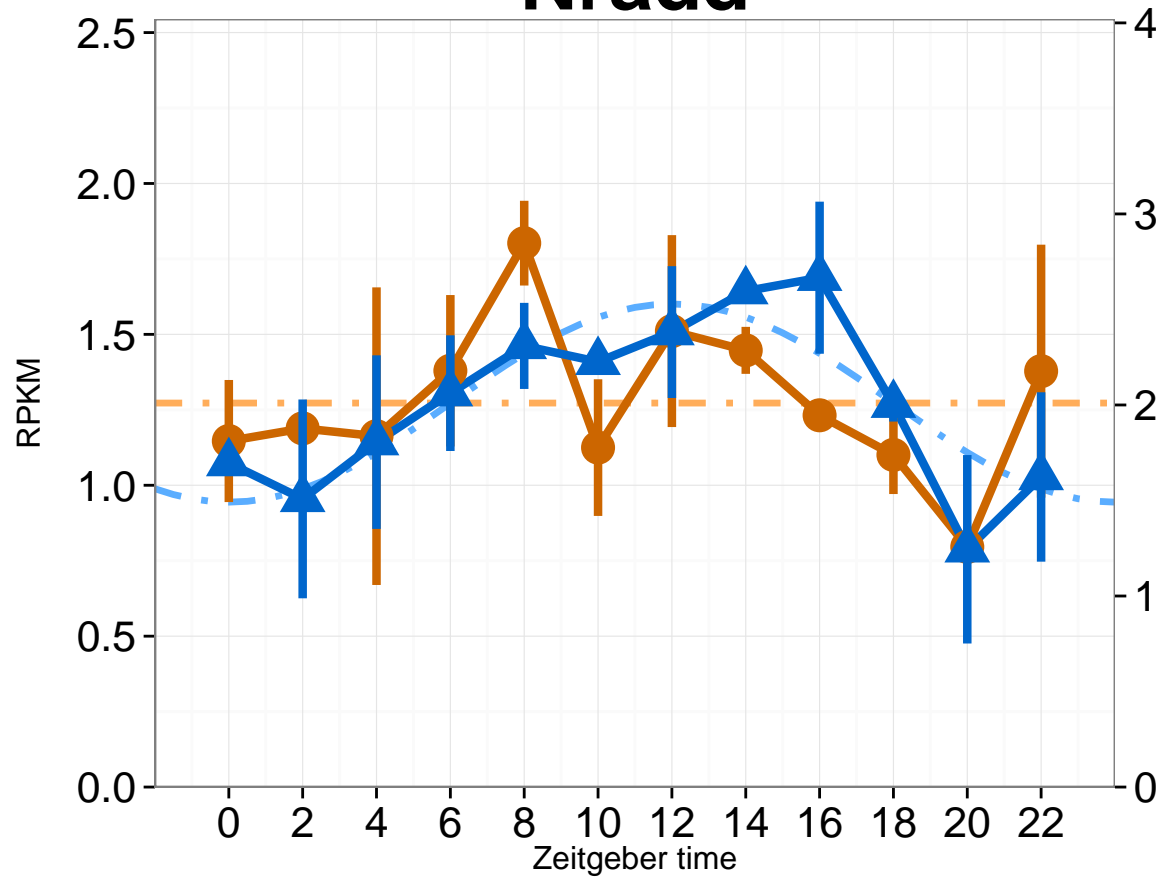

## Nradd

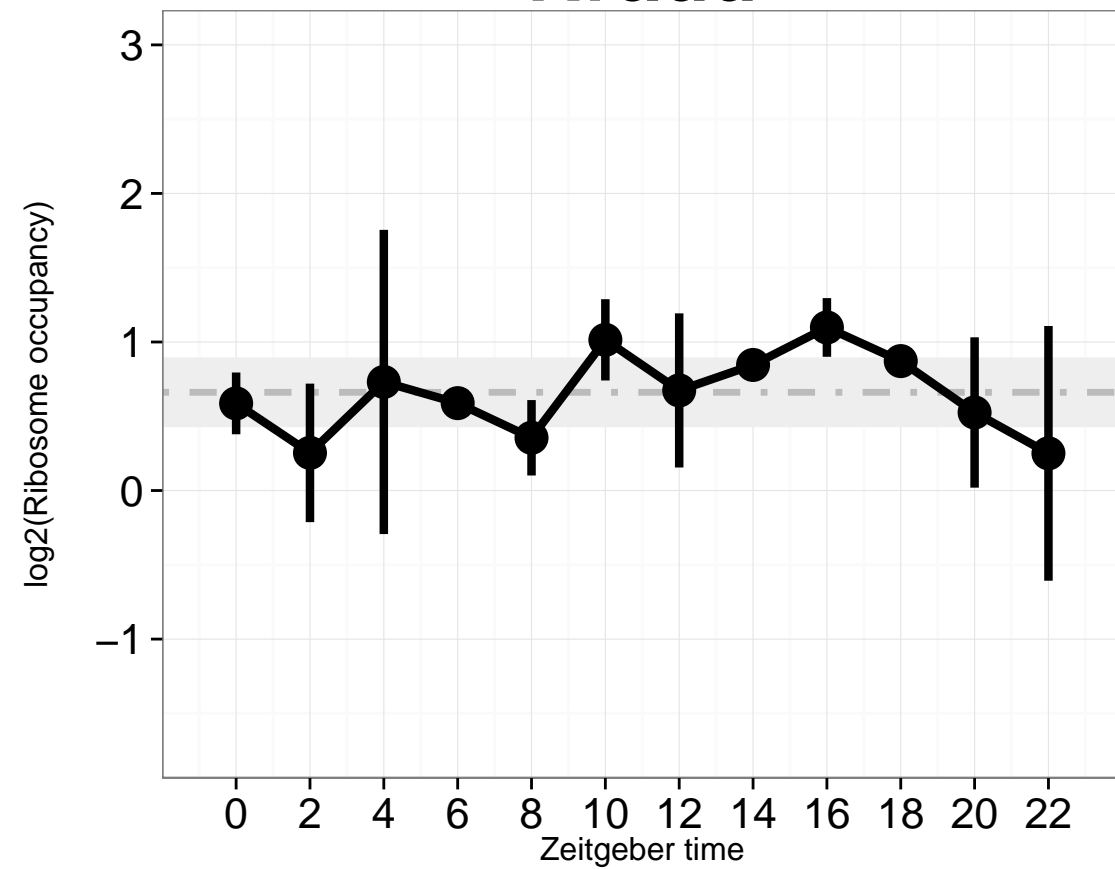

Supplement: Supplementary file 2860 [file 1]

## Pygm

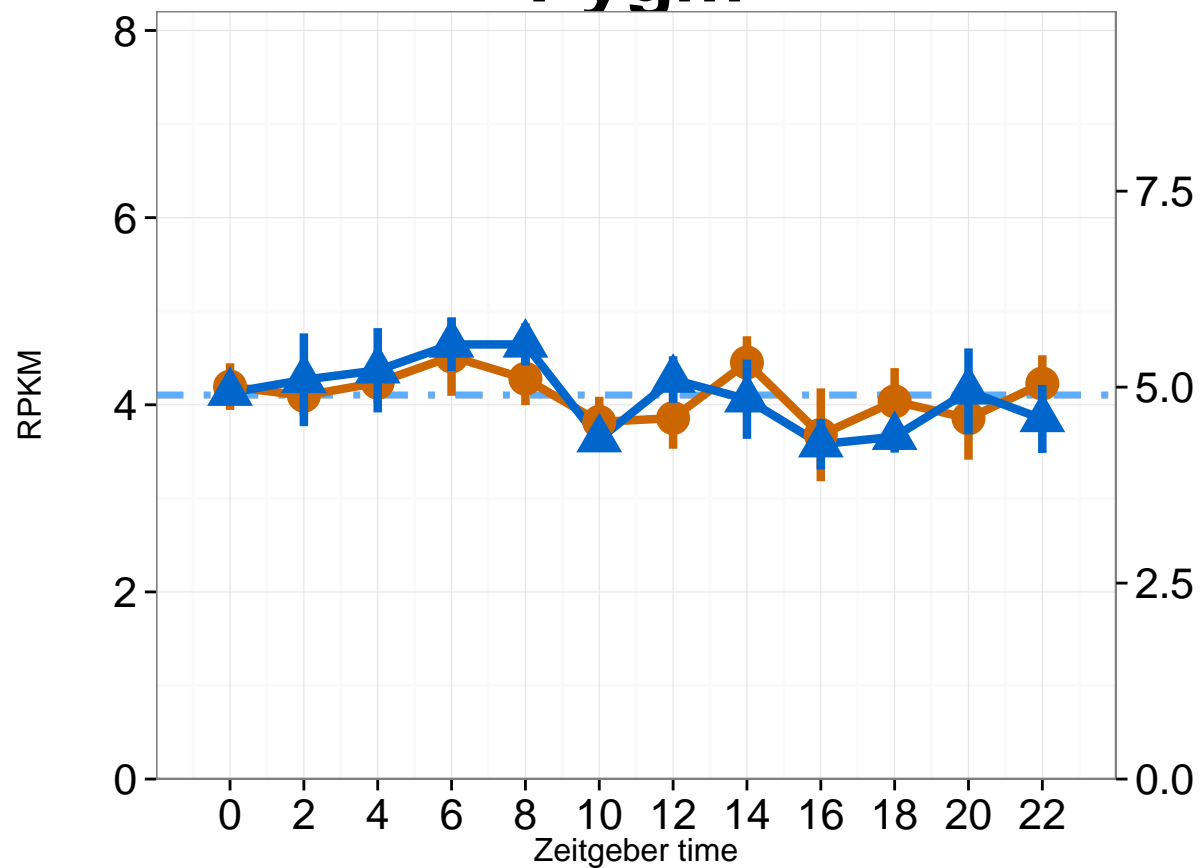

## Pygm

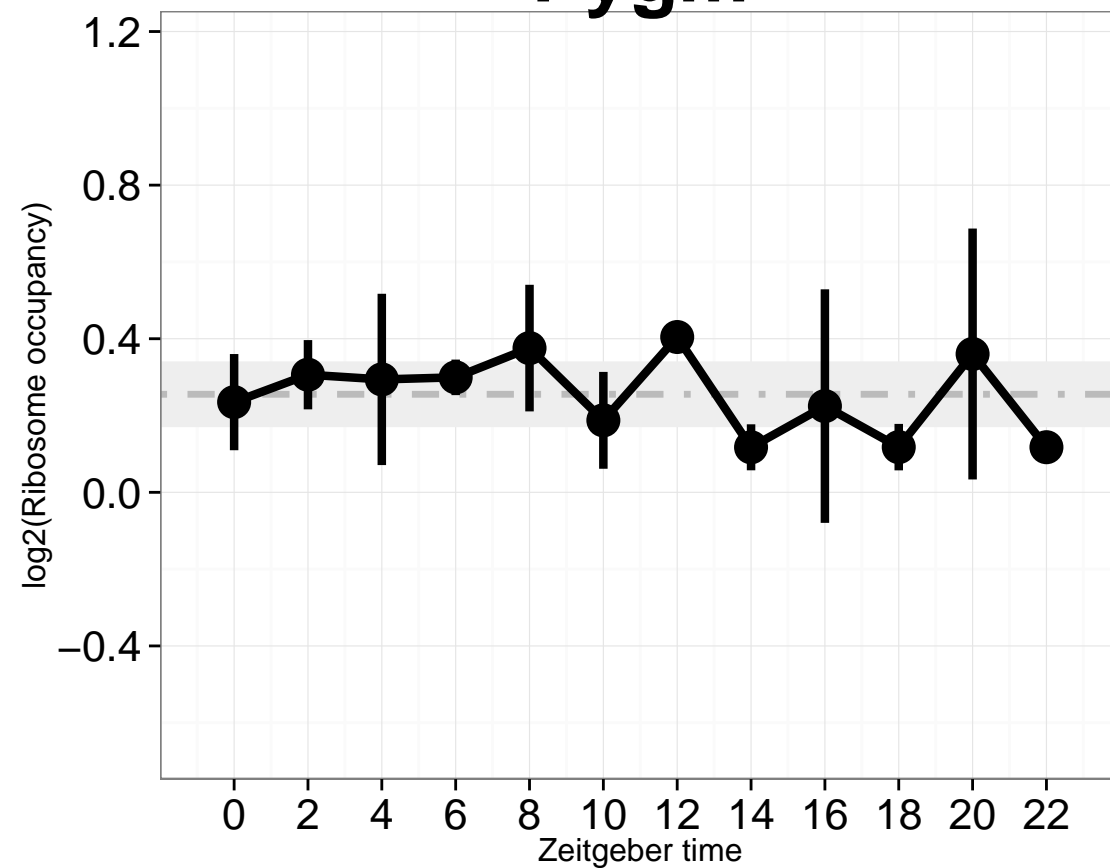

Supplement: Supplementary file 2861 [file 1]

## Bcl7c

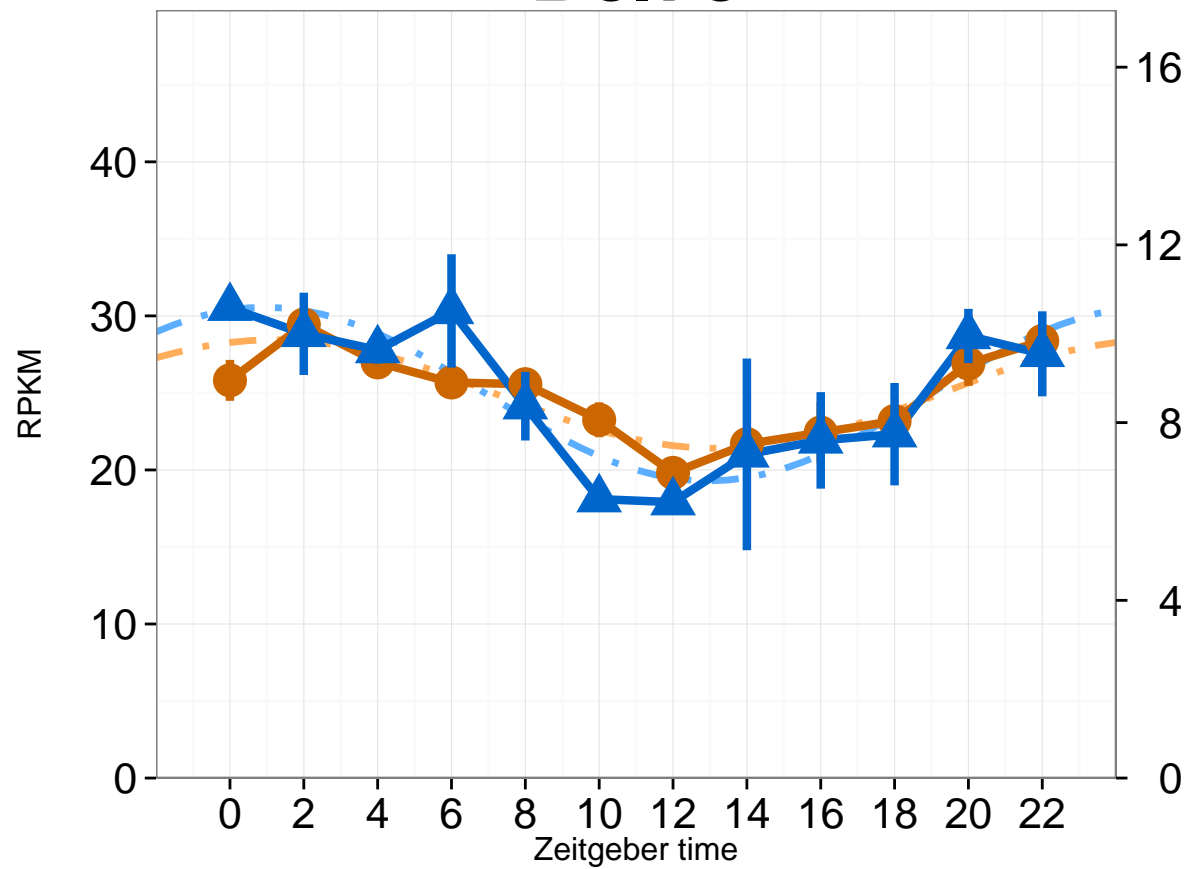

## Bcl7c

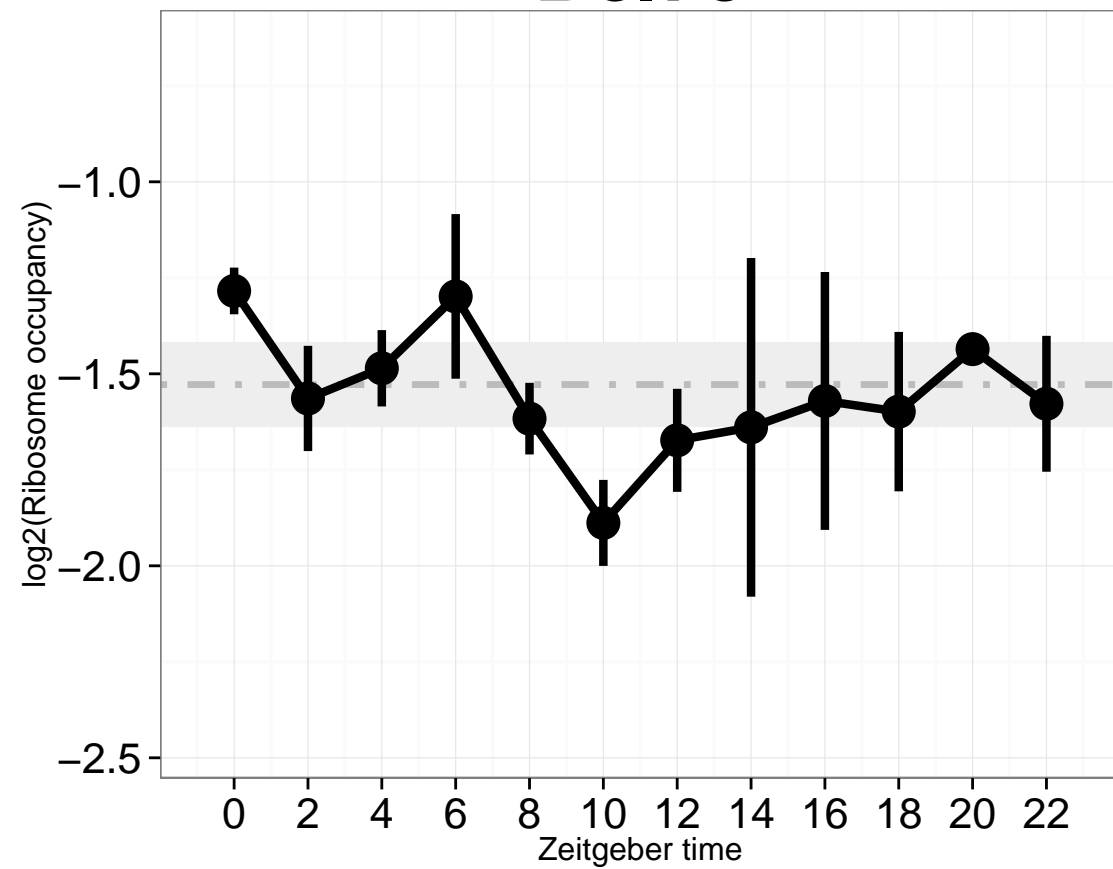

Supplement: Supplementary file 2862 [file 1]

## Nlrc5

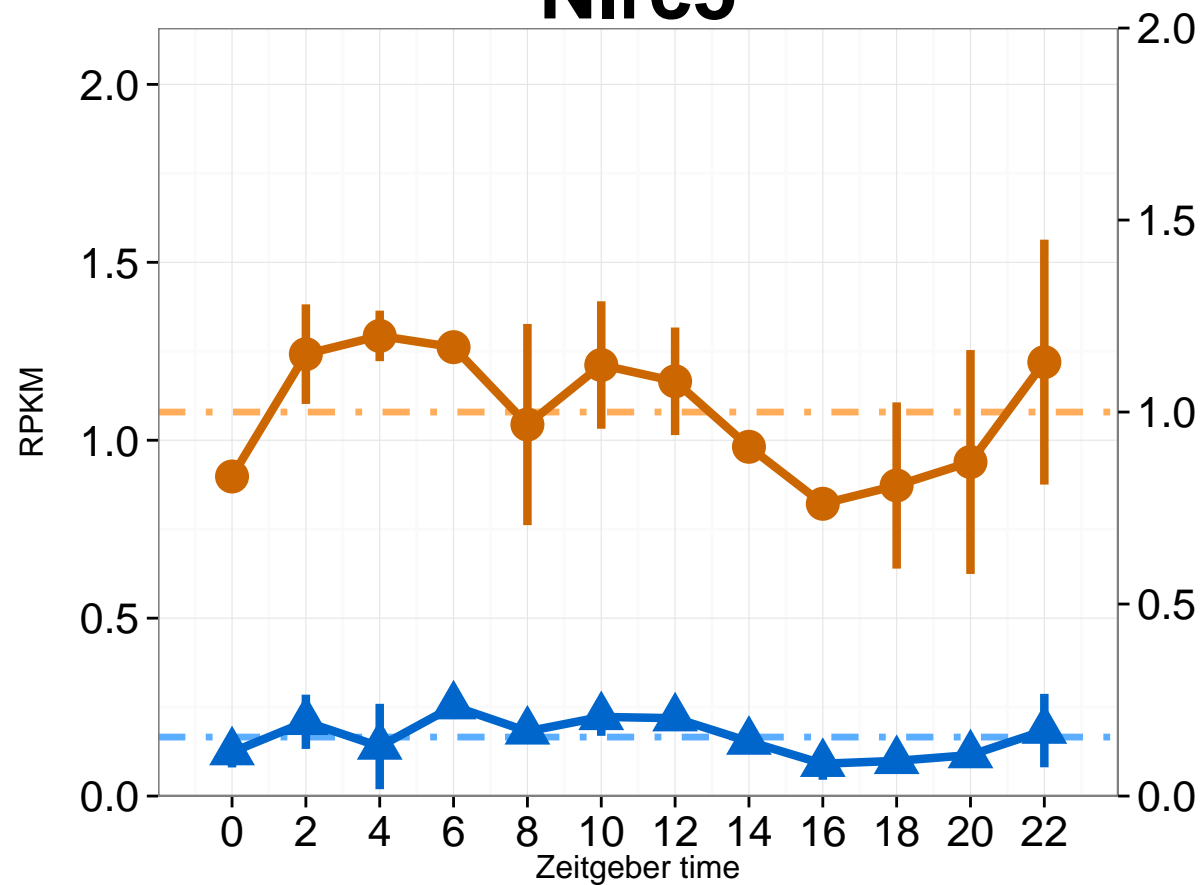

## Nlrc5

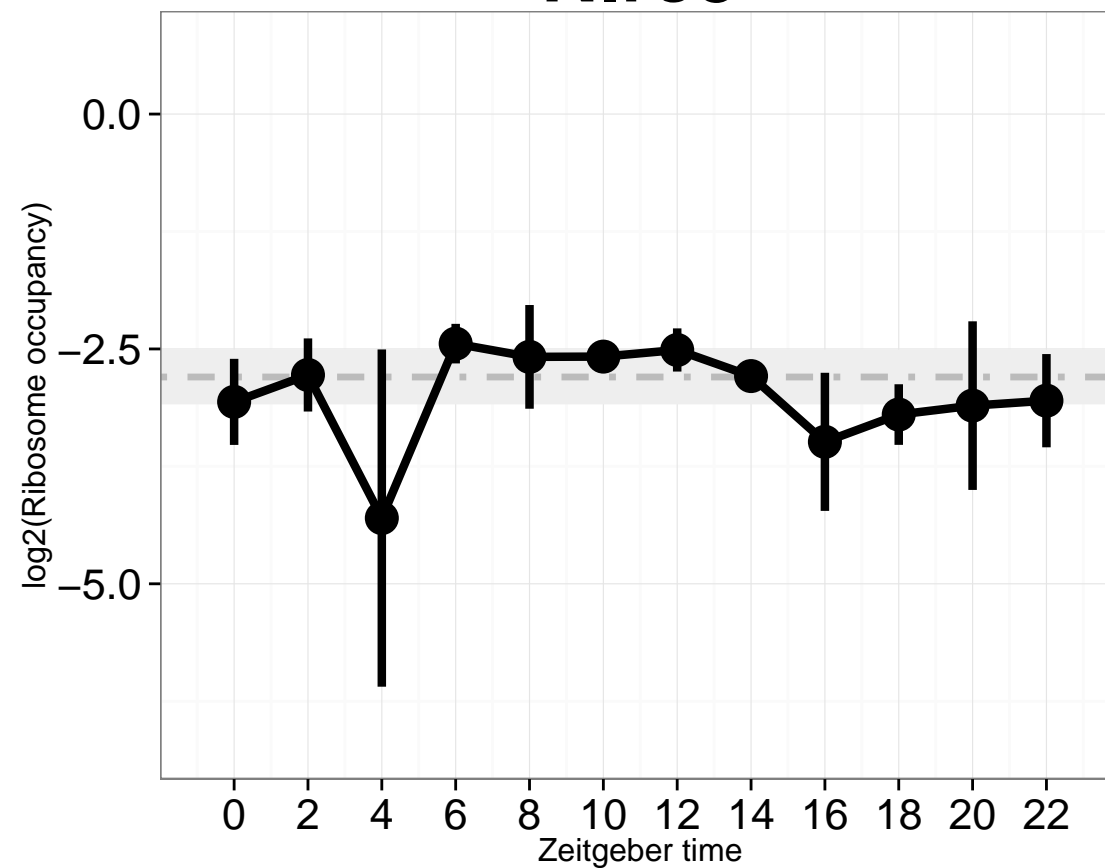

Supplement: Supplementary file 2863 [file 1]

# Cnot10

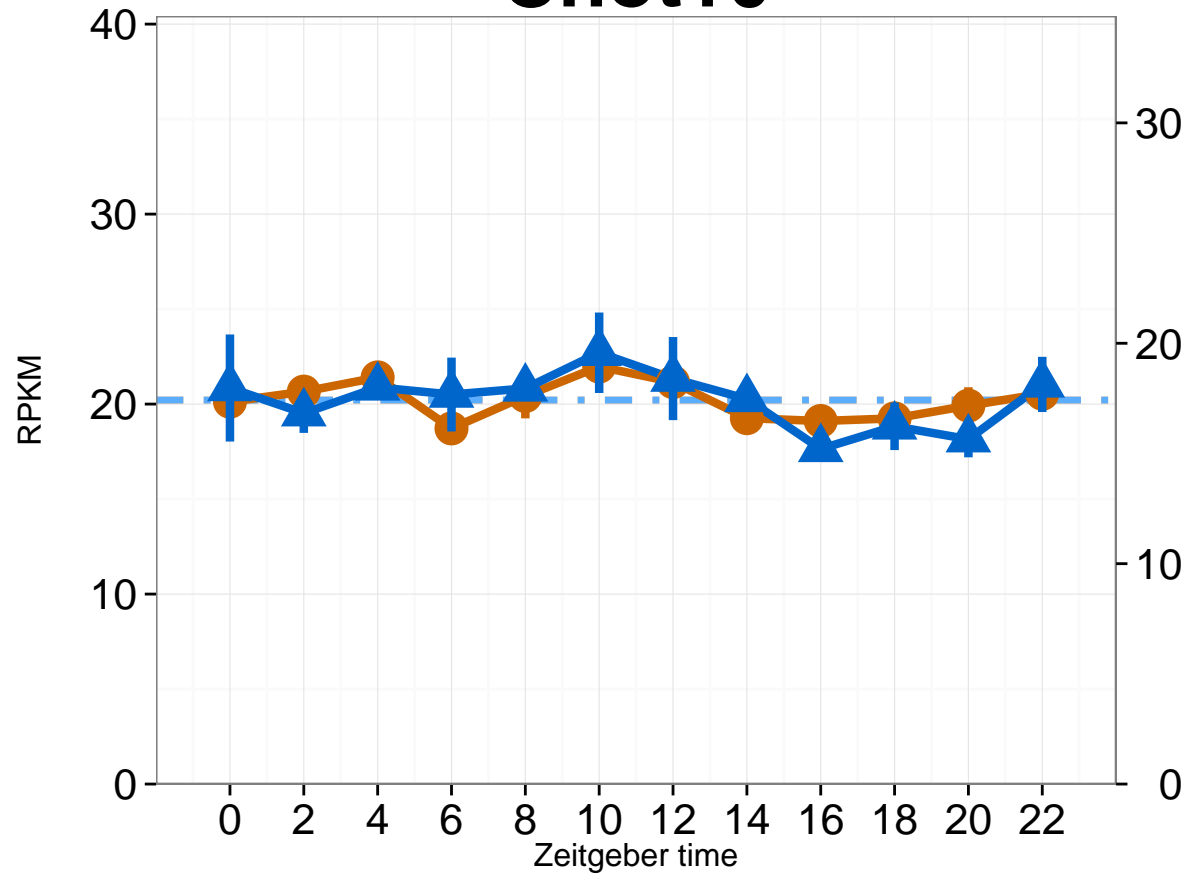

# Cnot10

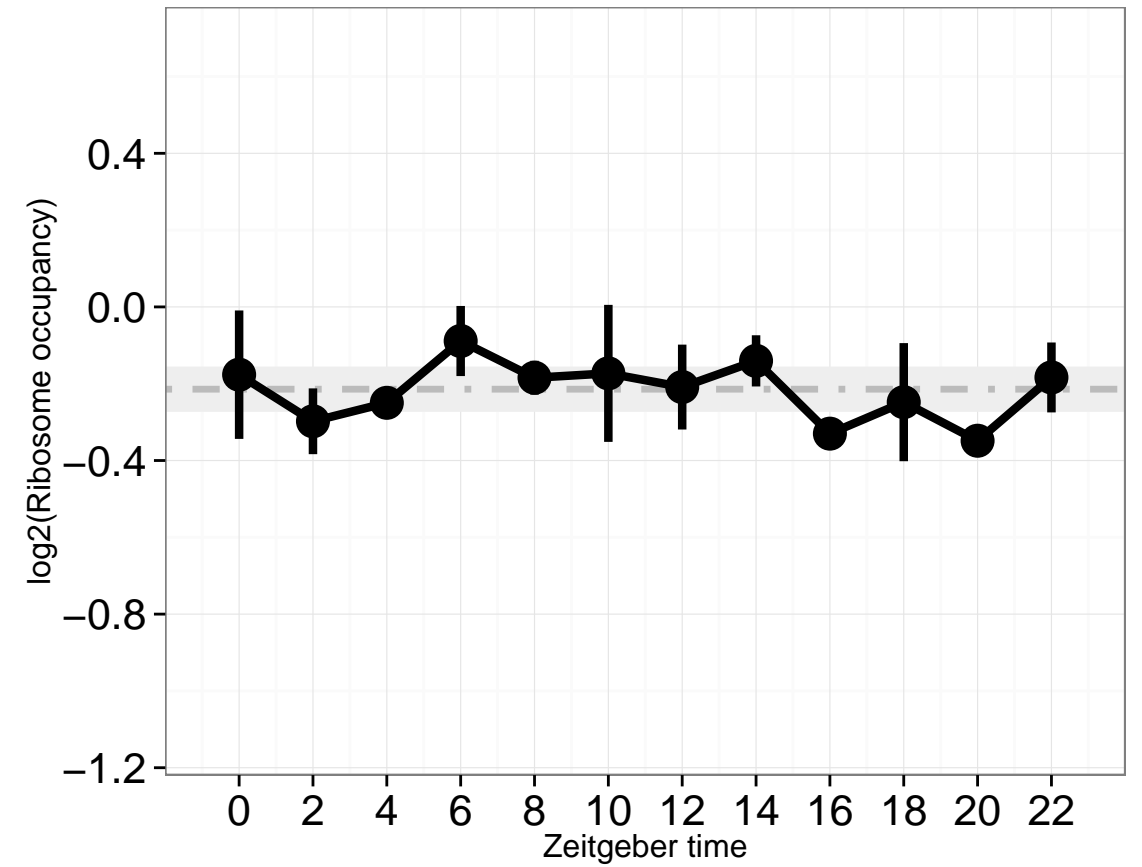

Supplement: Supplementary file 2864 [file 1]

# Fam49b

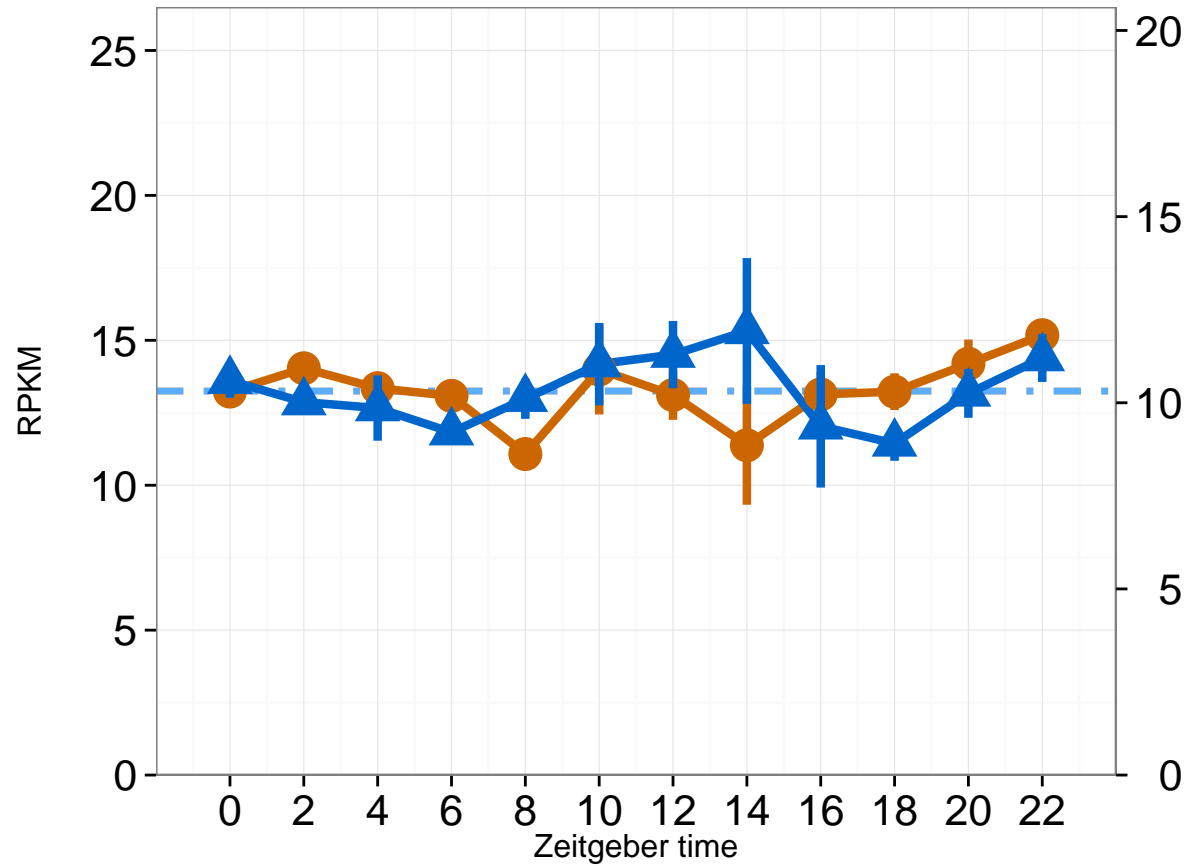

# Fam49b

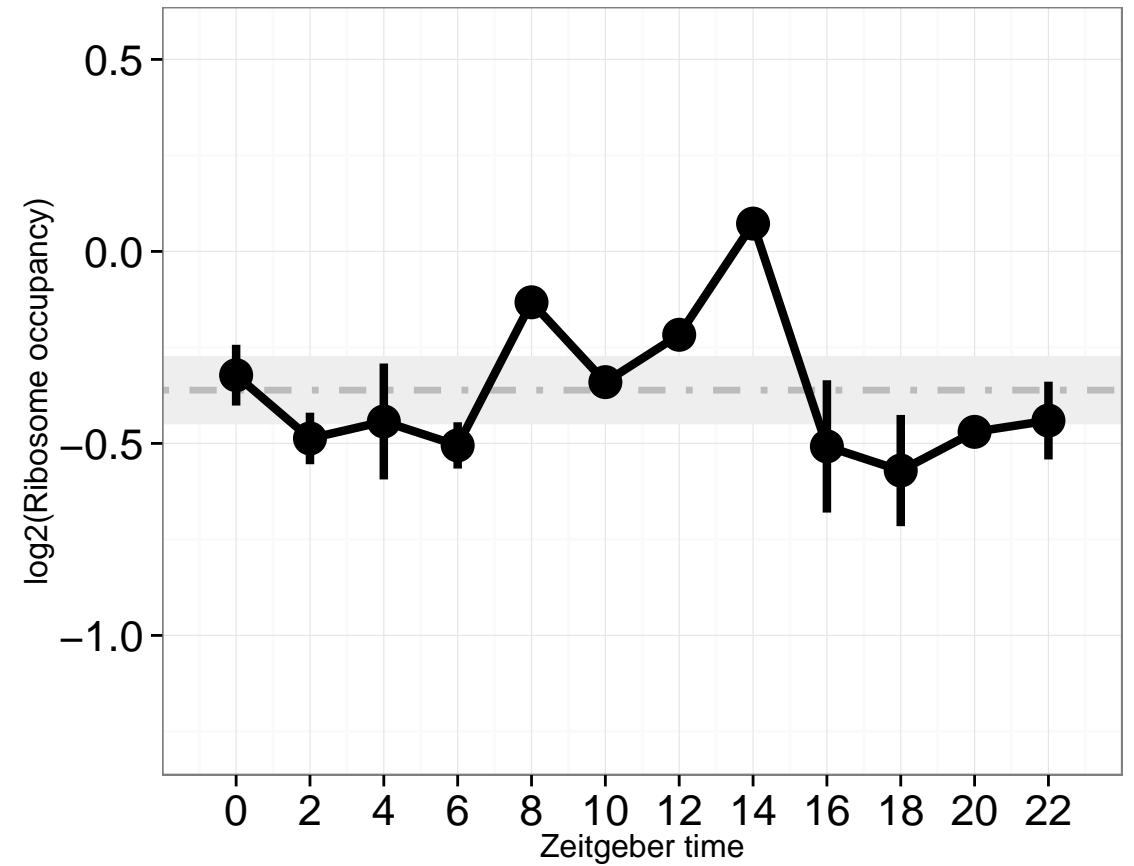

Supplement: Supplementary file 2865 [file 1]

# Mex3b

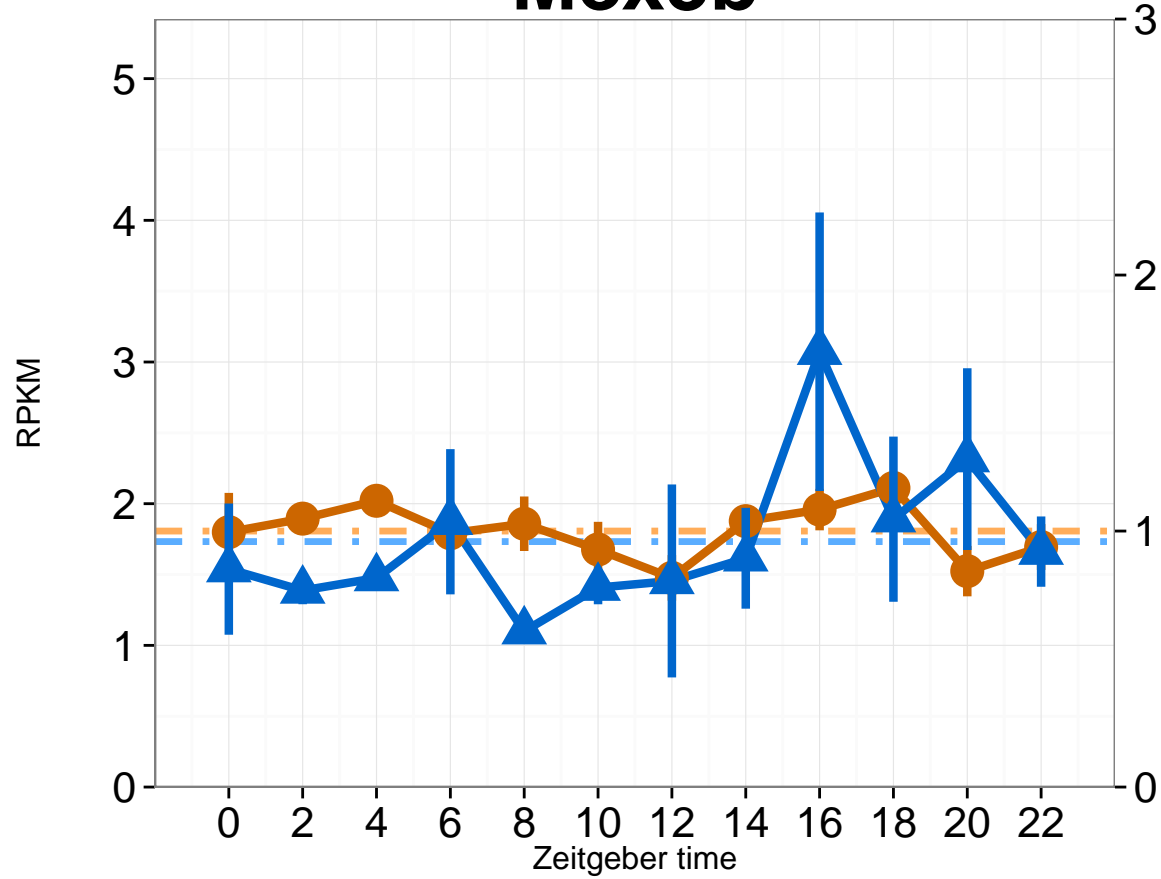

# Mex3b

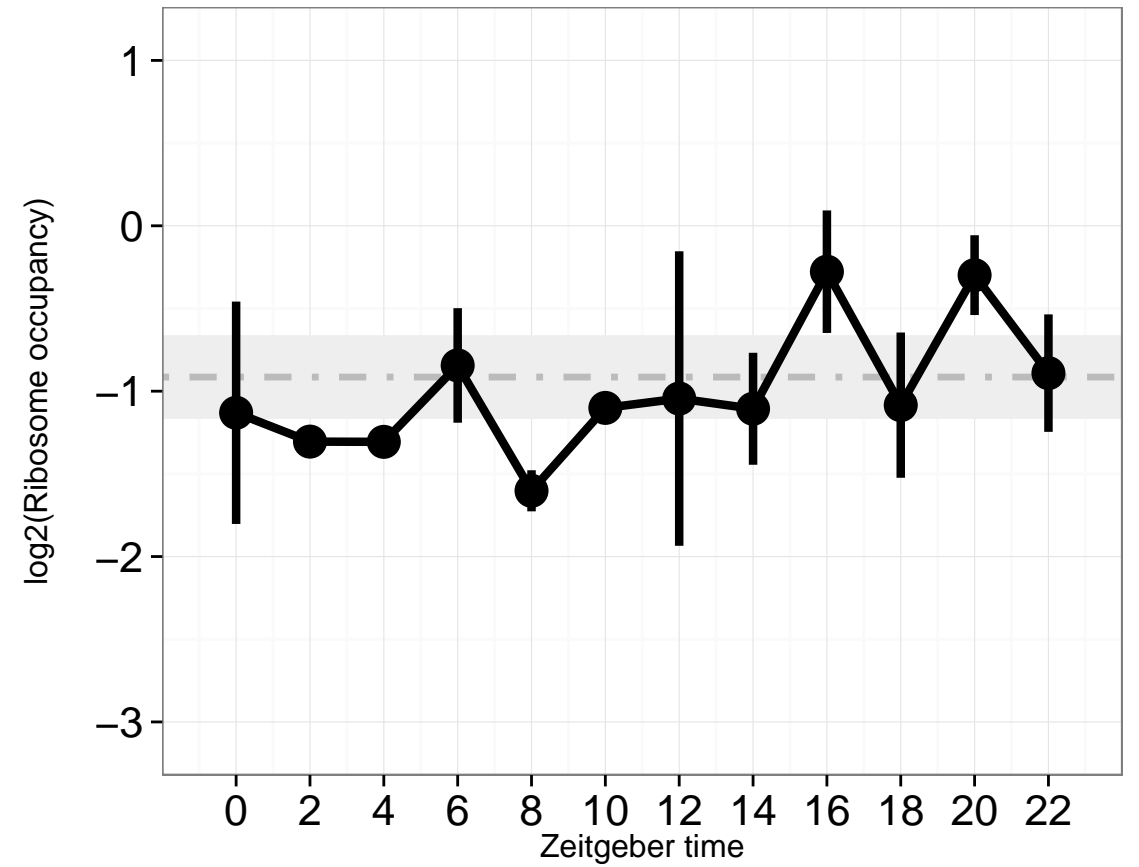

Supplement: Supplementary file 2866 [file 1]

# Anxa8

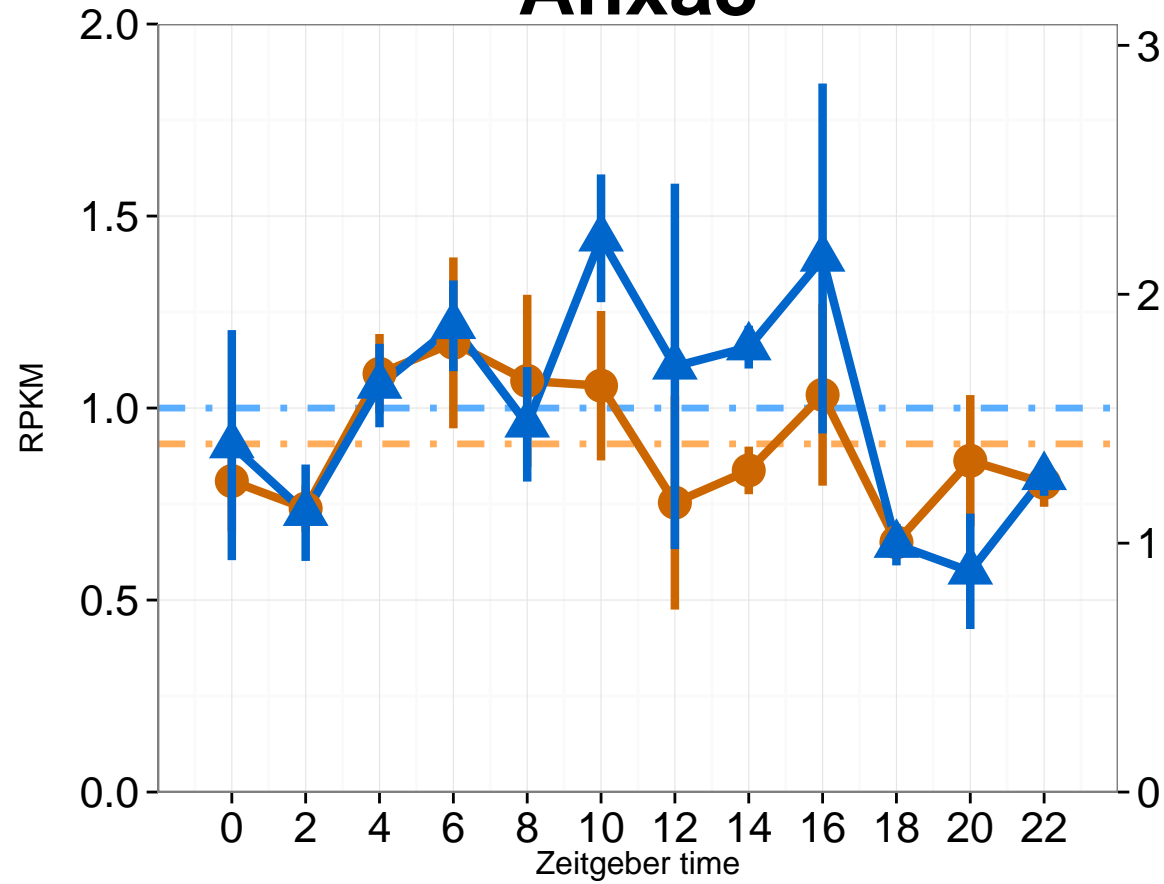

# Anxa8

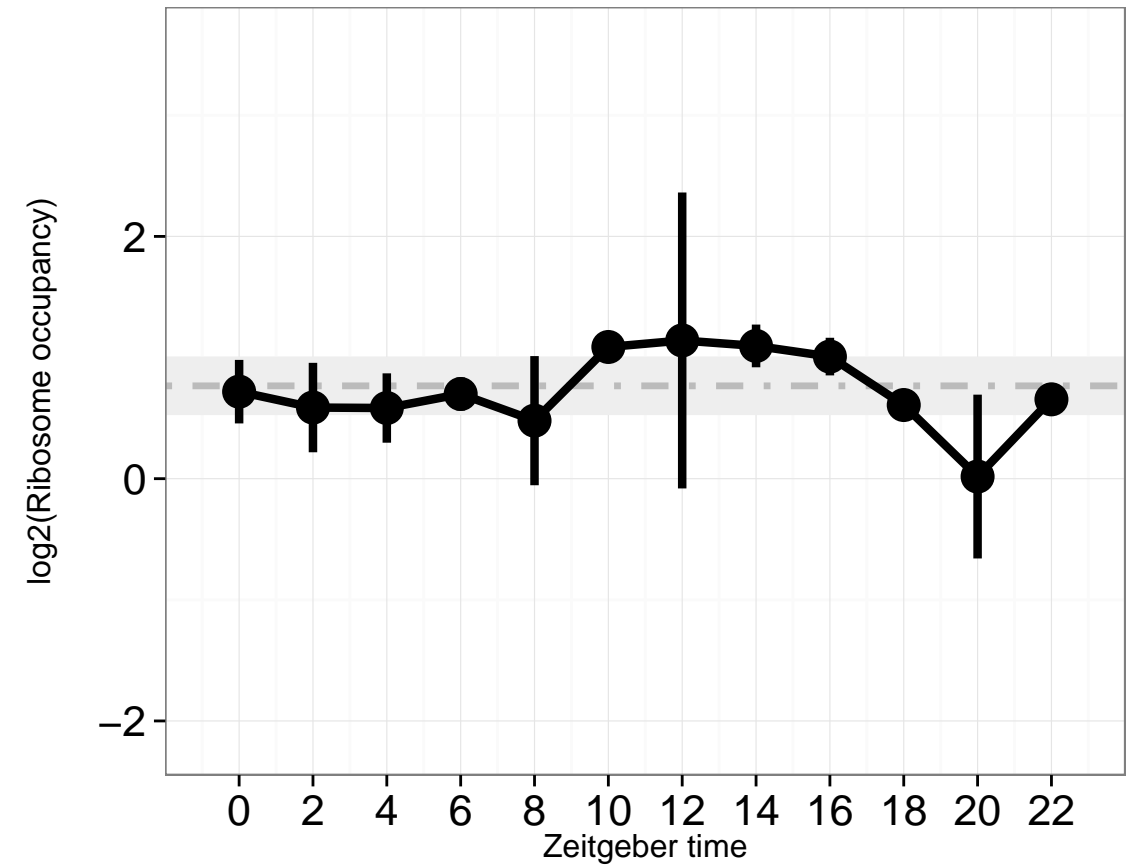

Supplement: Supplementary file 2867 [file 1]

# Fam172a

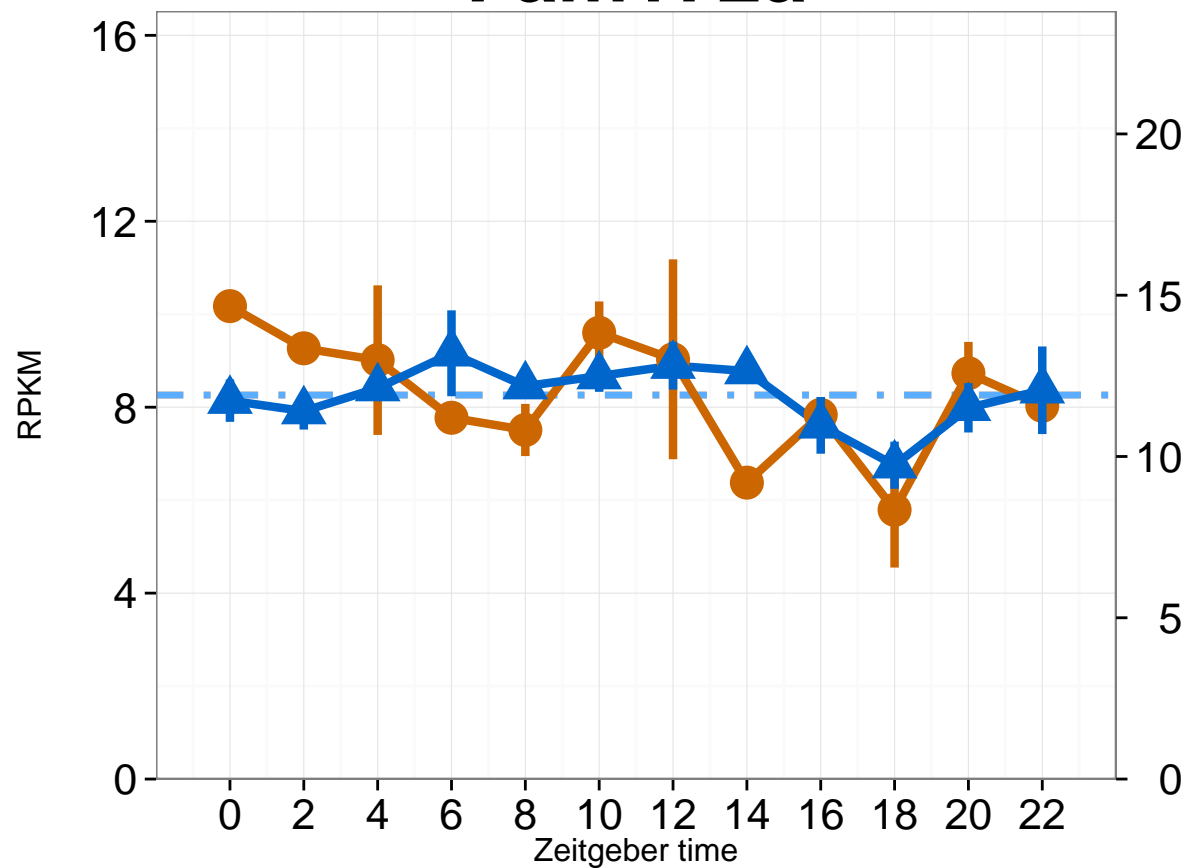

# Fam172a

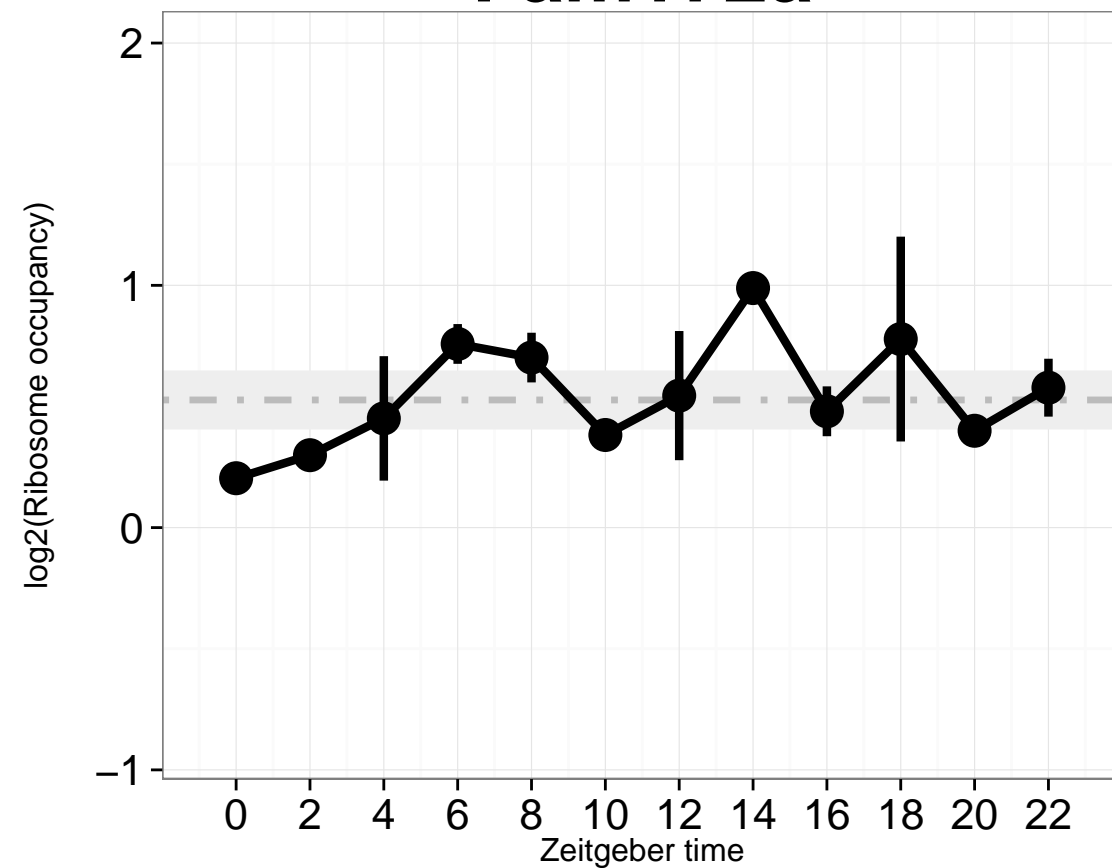

Supplement: Supplementary file 2868 [file 1]

## Golph3

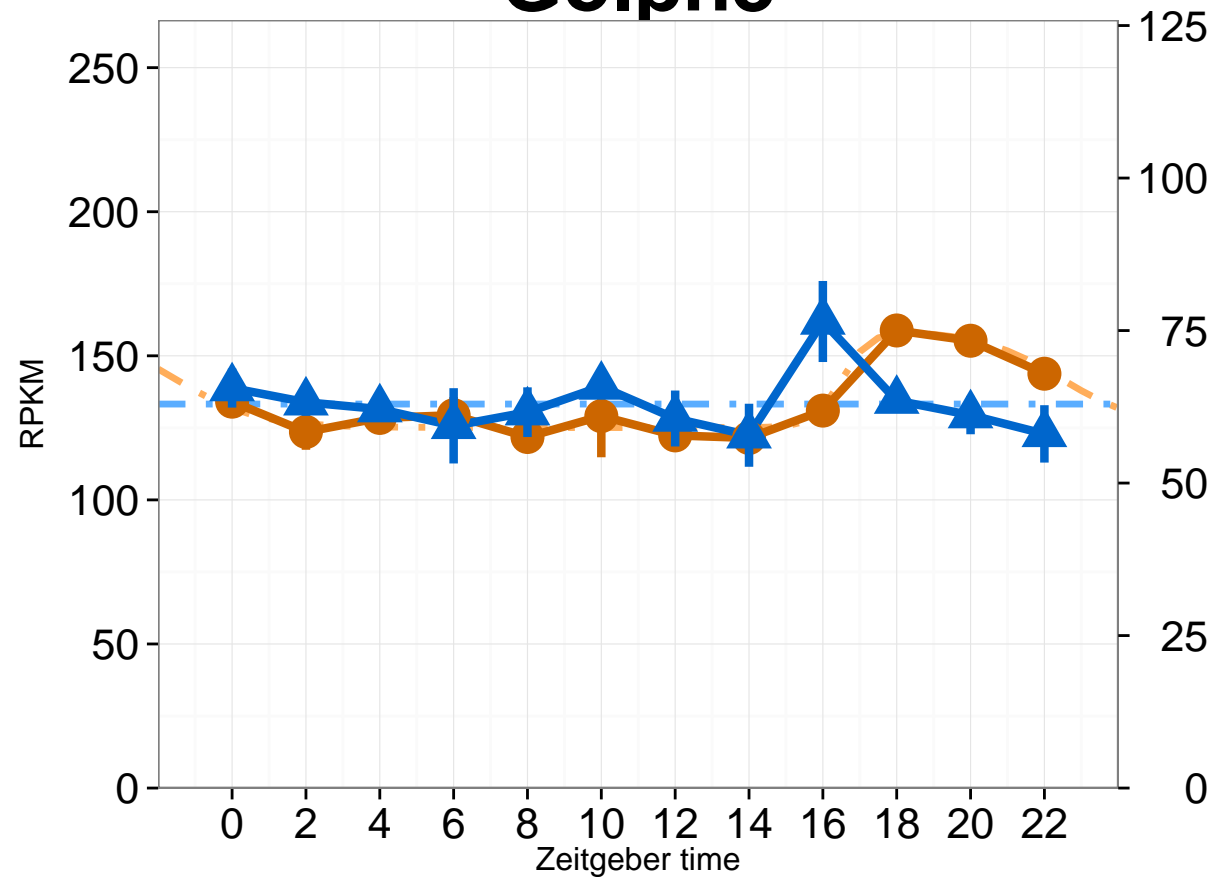

## Golph3

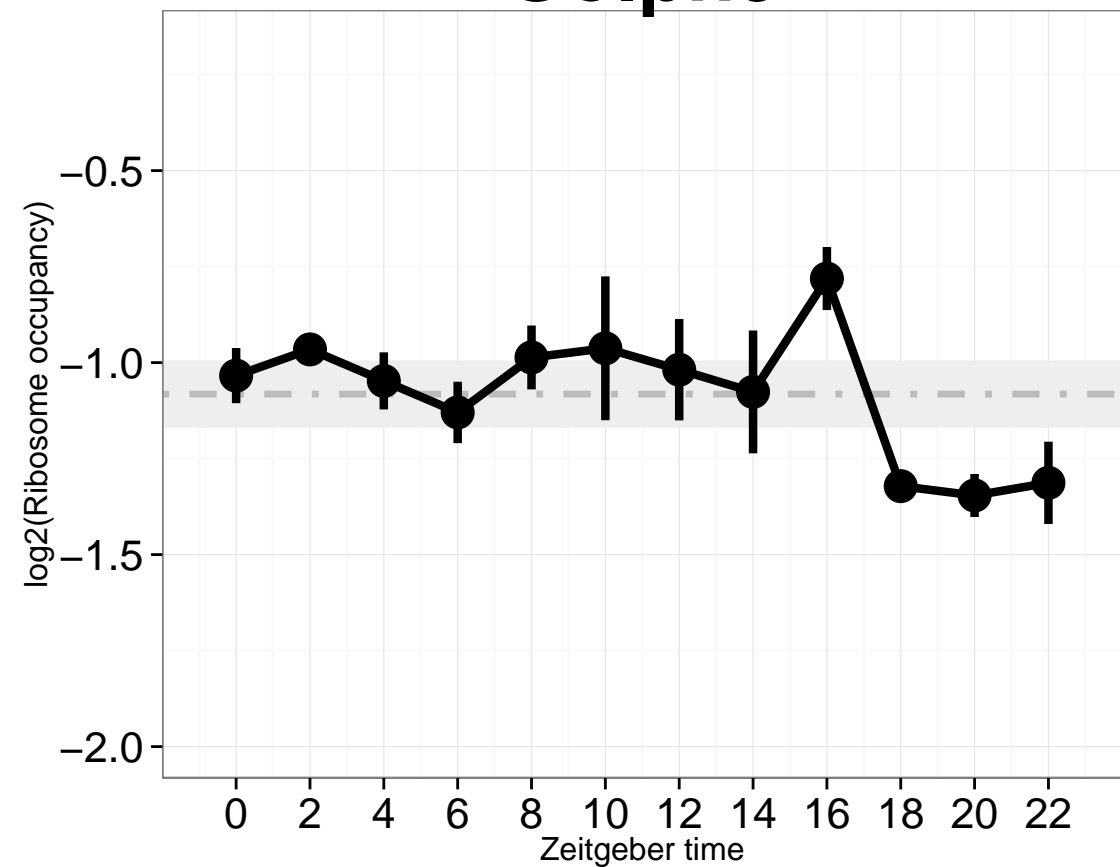

Supplement: Supplementary file 2869 [file 1]

# Tspan31

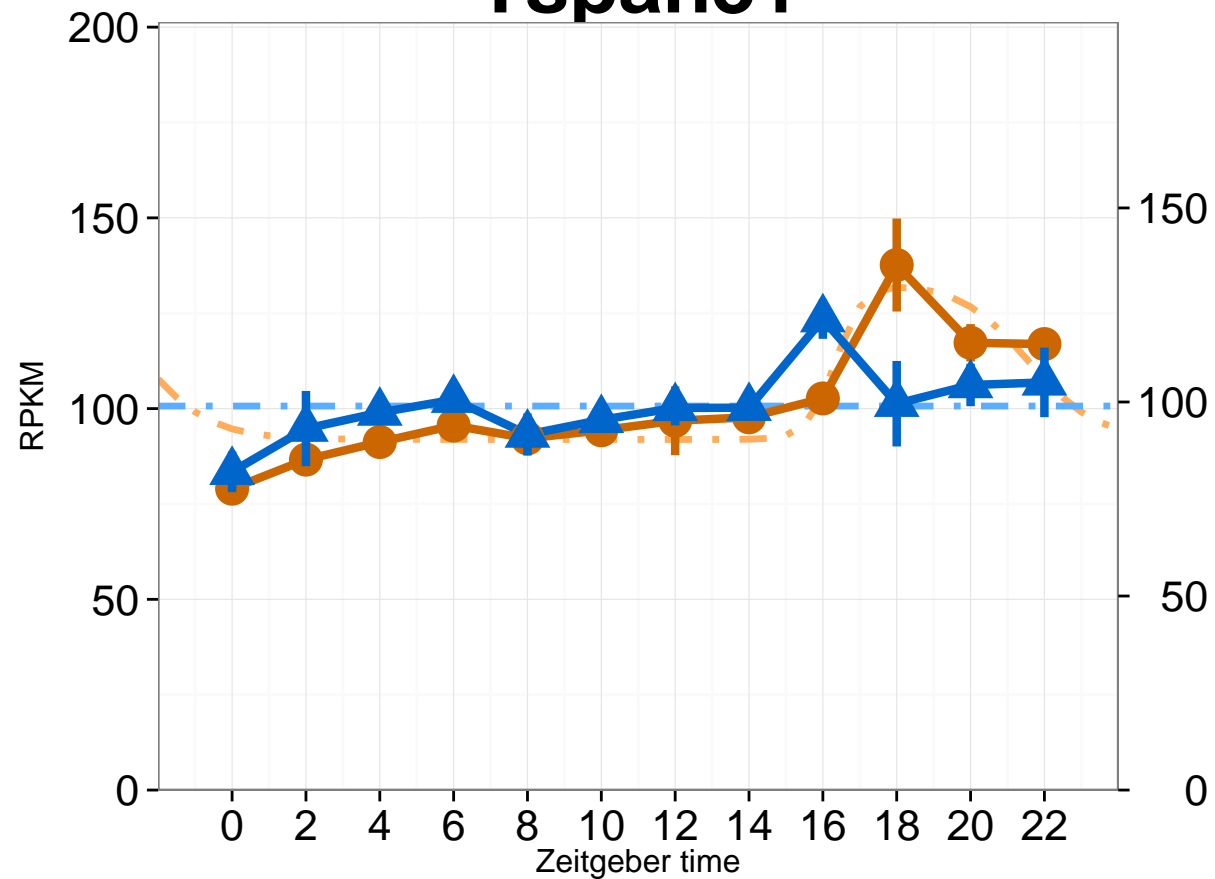

# Tspan31

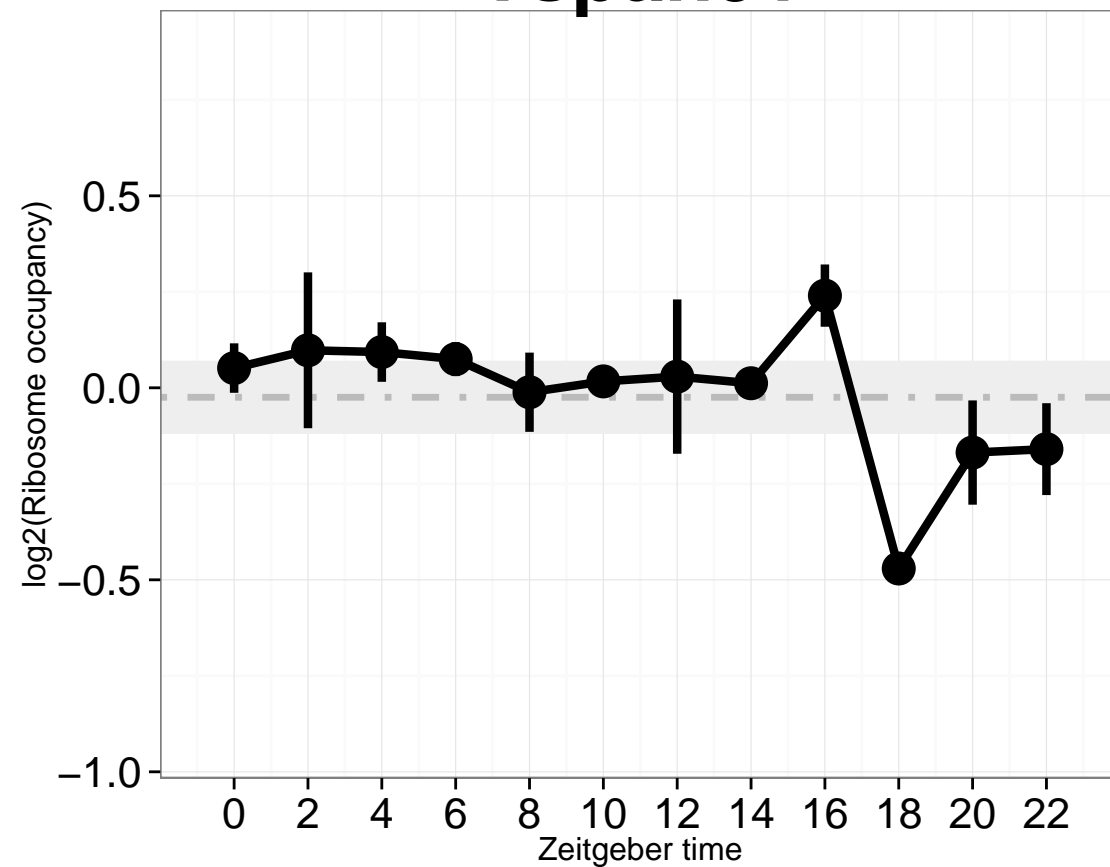

Supplement: Supplementary file 2870 [file 1]

## Mpst

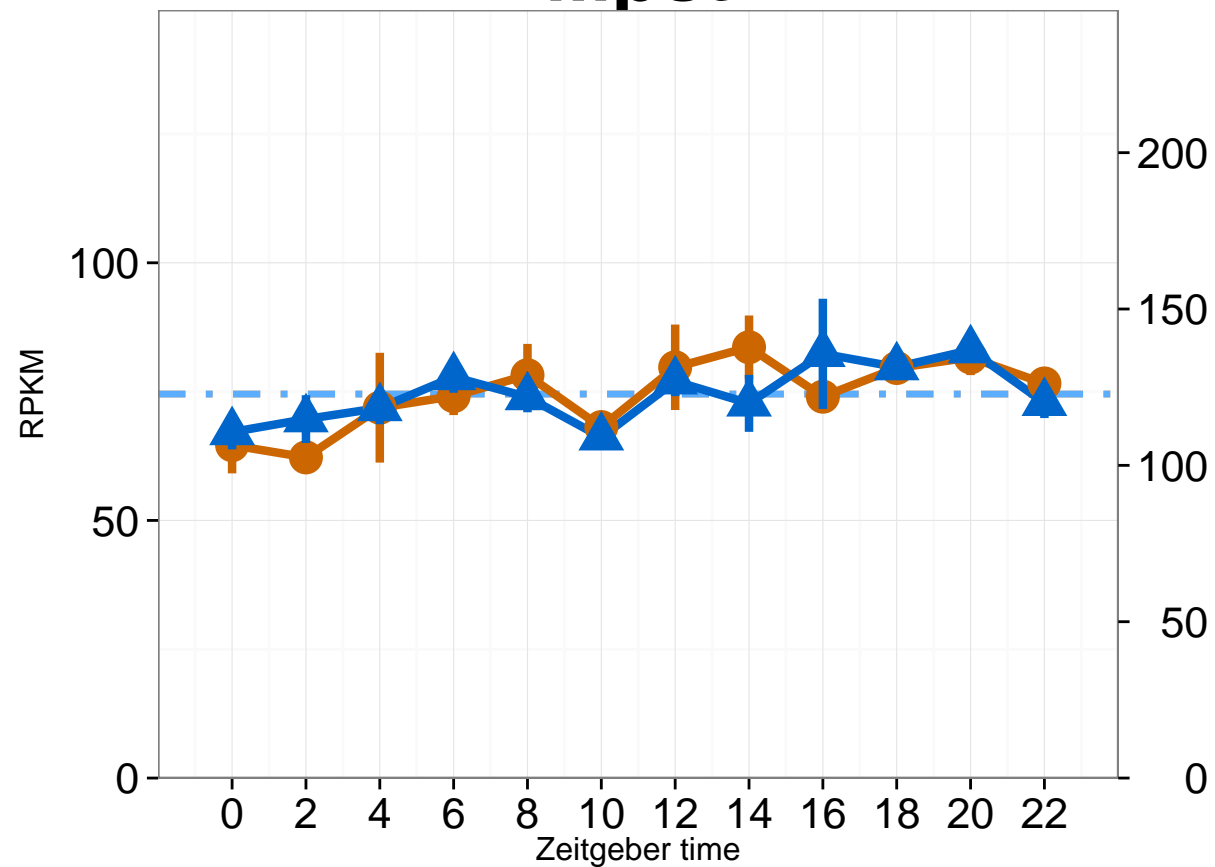

## Mpst

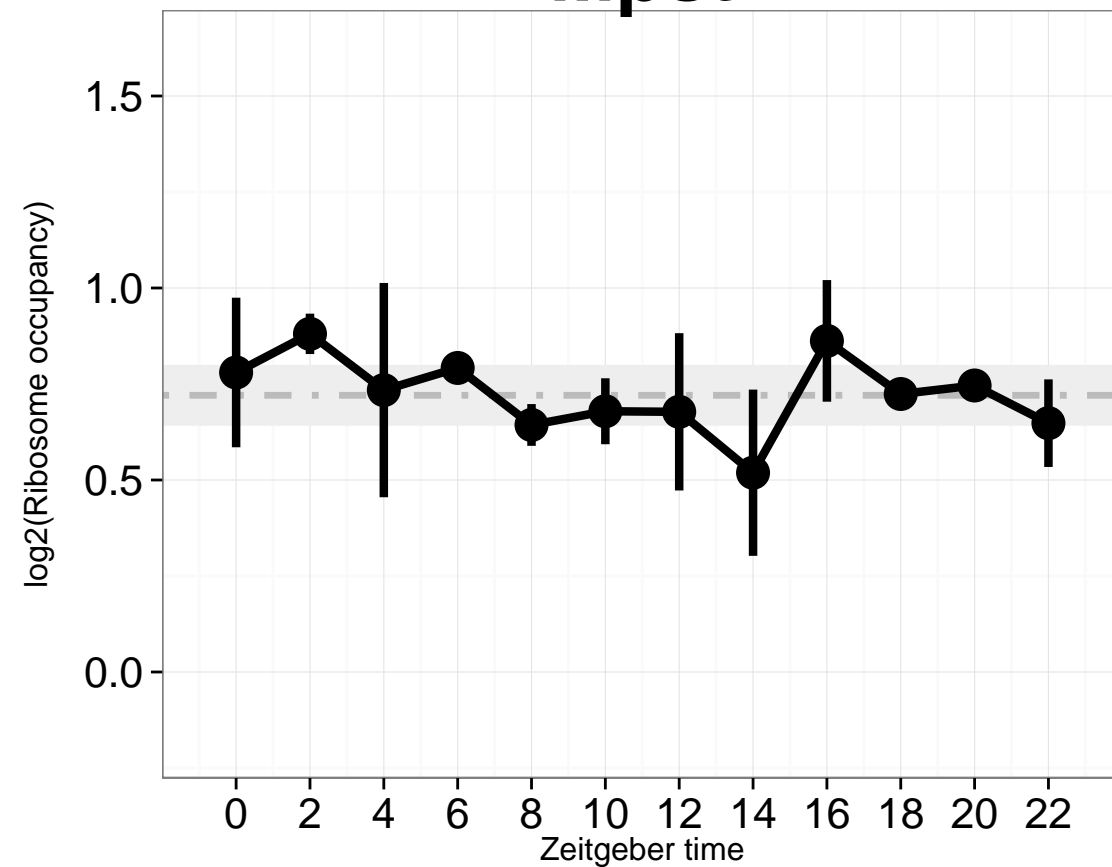

Supplement: Supplementary file 2871 [file 1]

# Chchd1

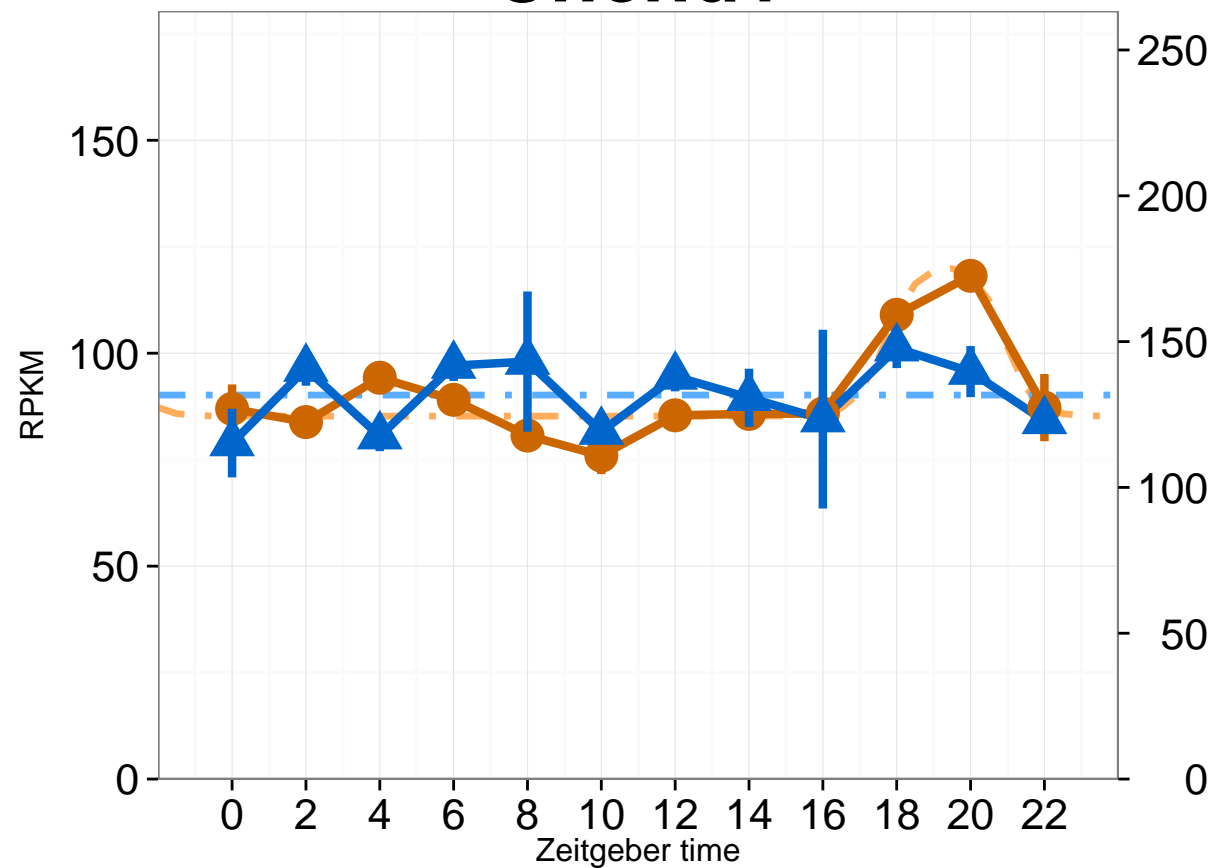

# Chchd1

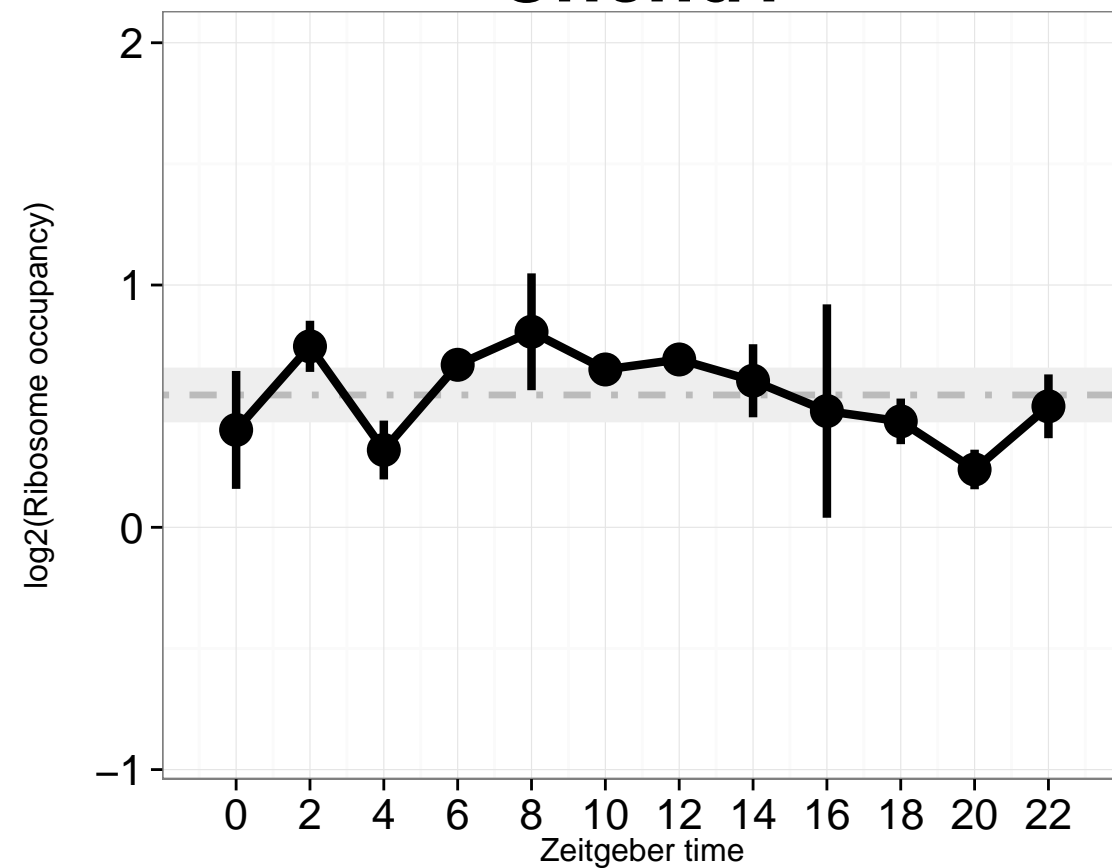

Supplement: Supplementary file 2872 [file 1]

# Ppp1r12a

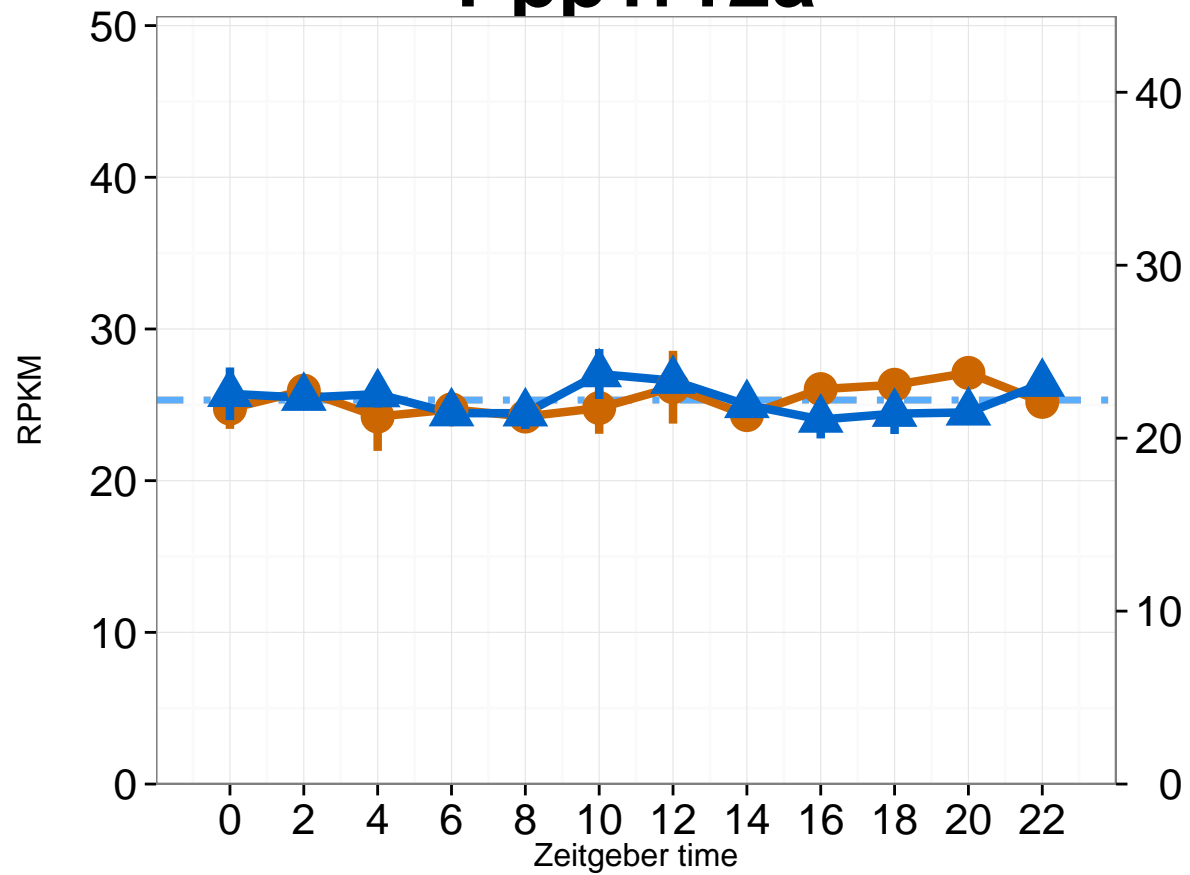

# Ppp1r12a

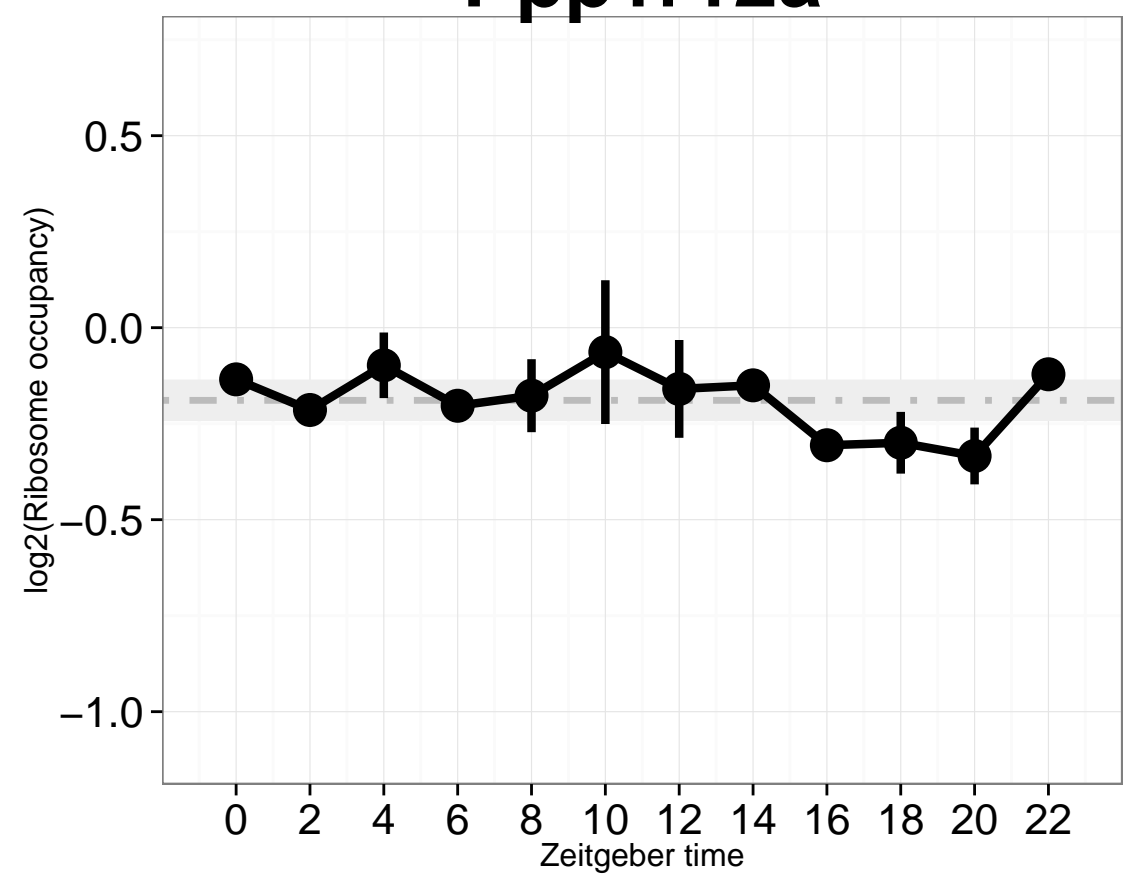

Supplement: Supplementary file 2873 [file 1]

## Bub3

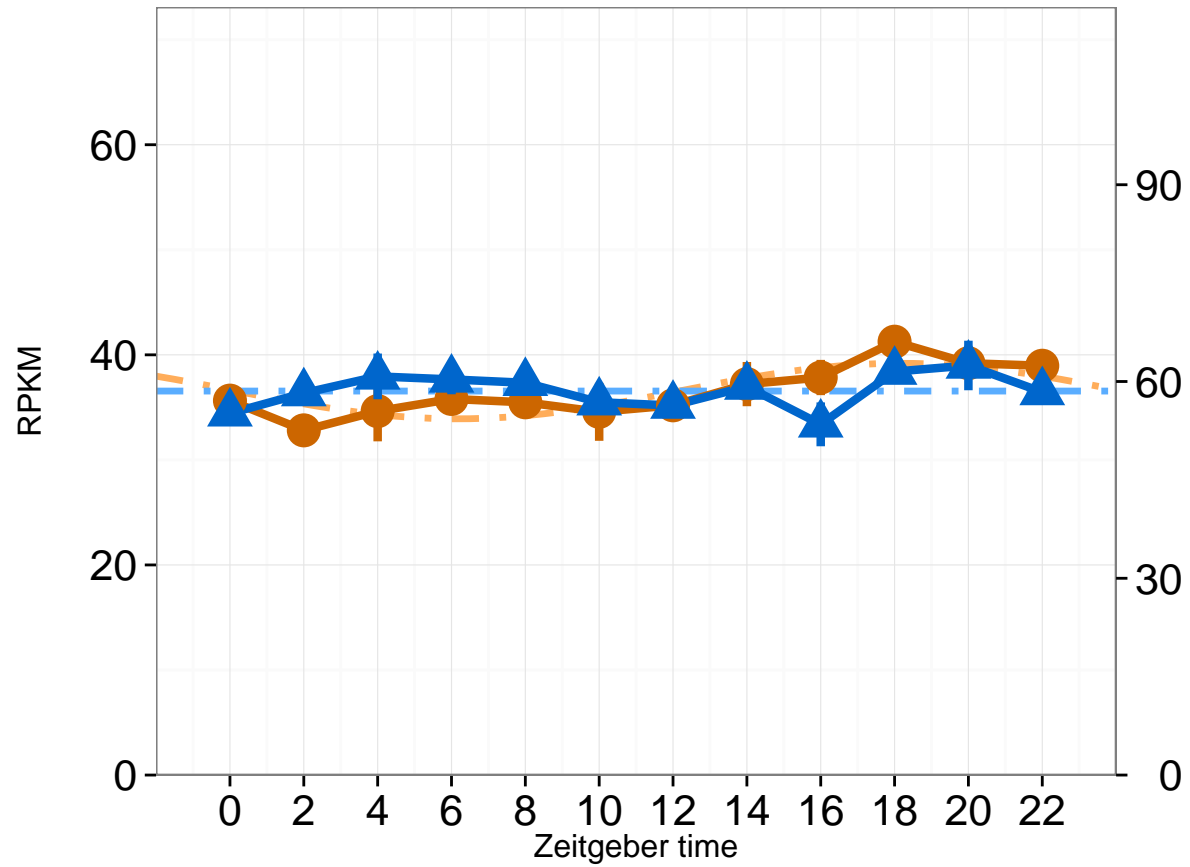

## Bub3

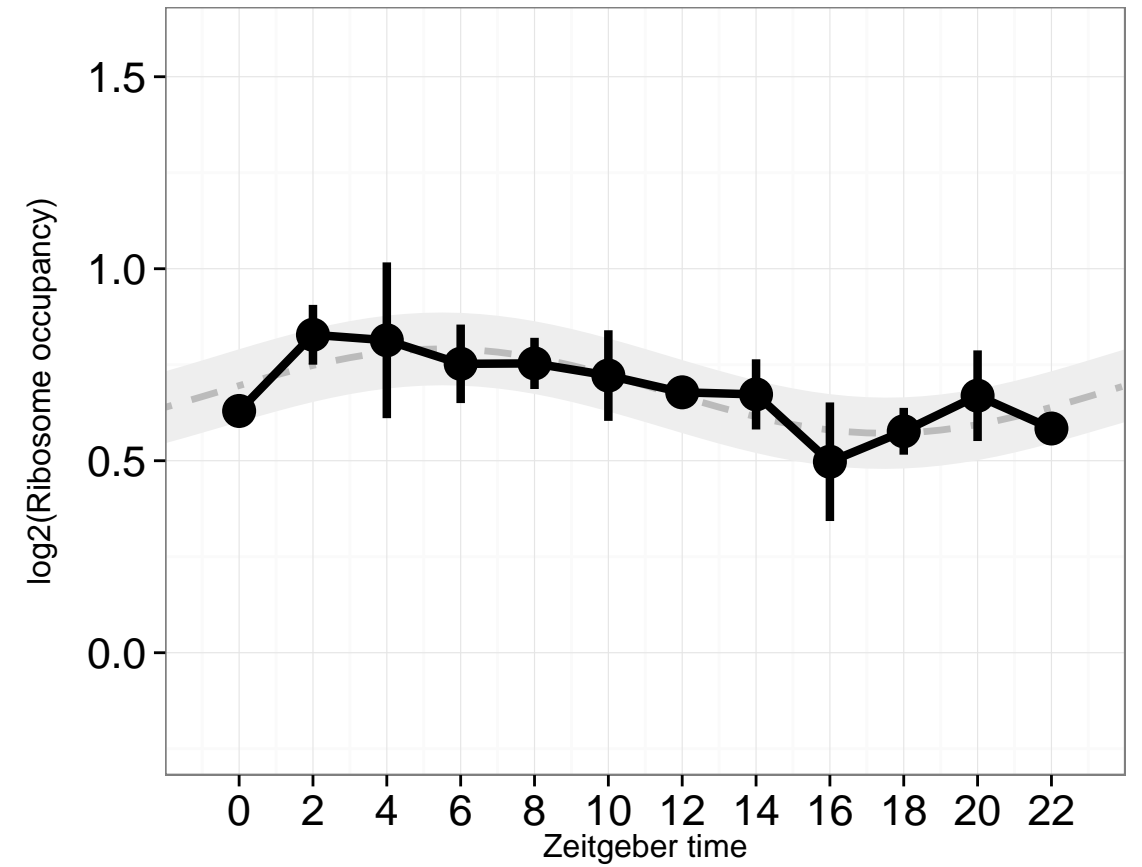

Supplement: Supplementary file 2874 [file 1]

## Ncoa4

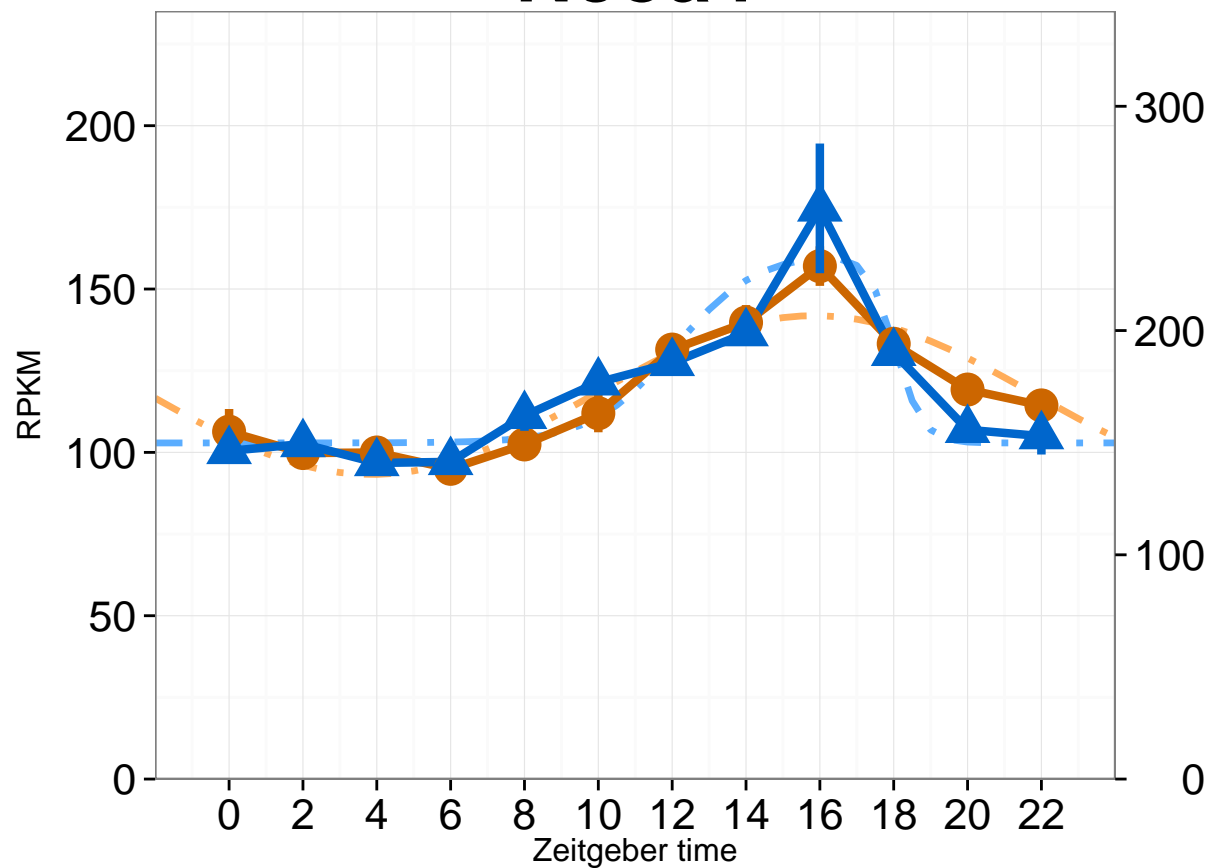

## Ncoa4

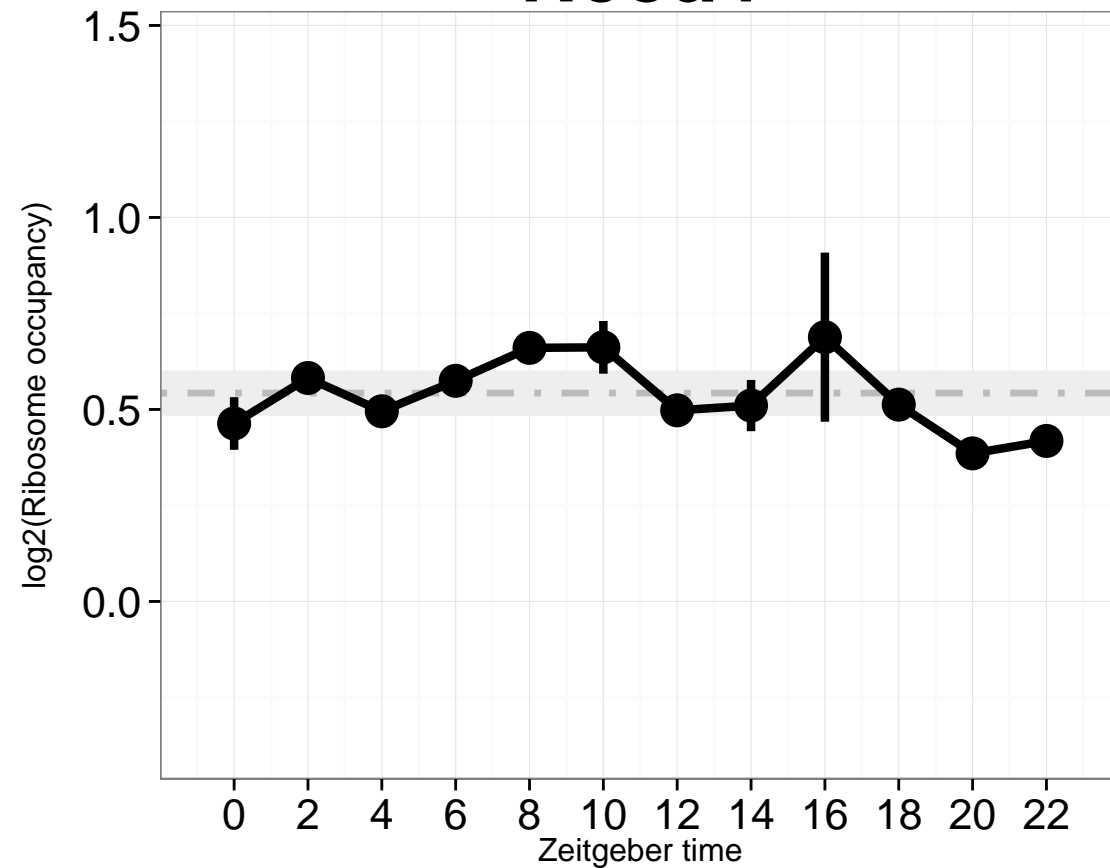

Supplement: Supplementary file 2875 [file 1]

# Cystm1

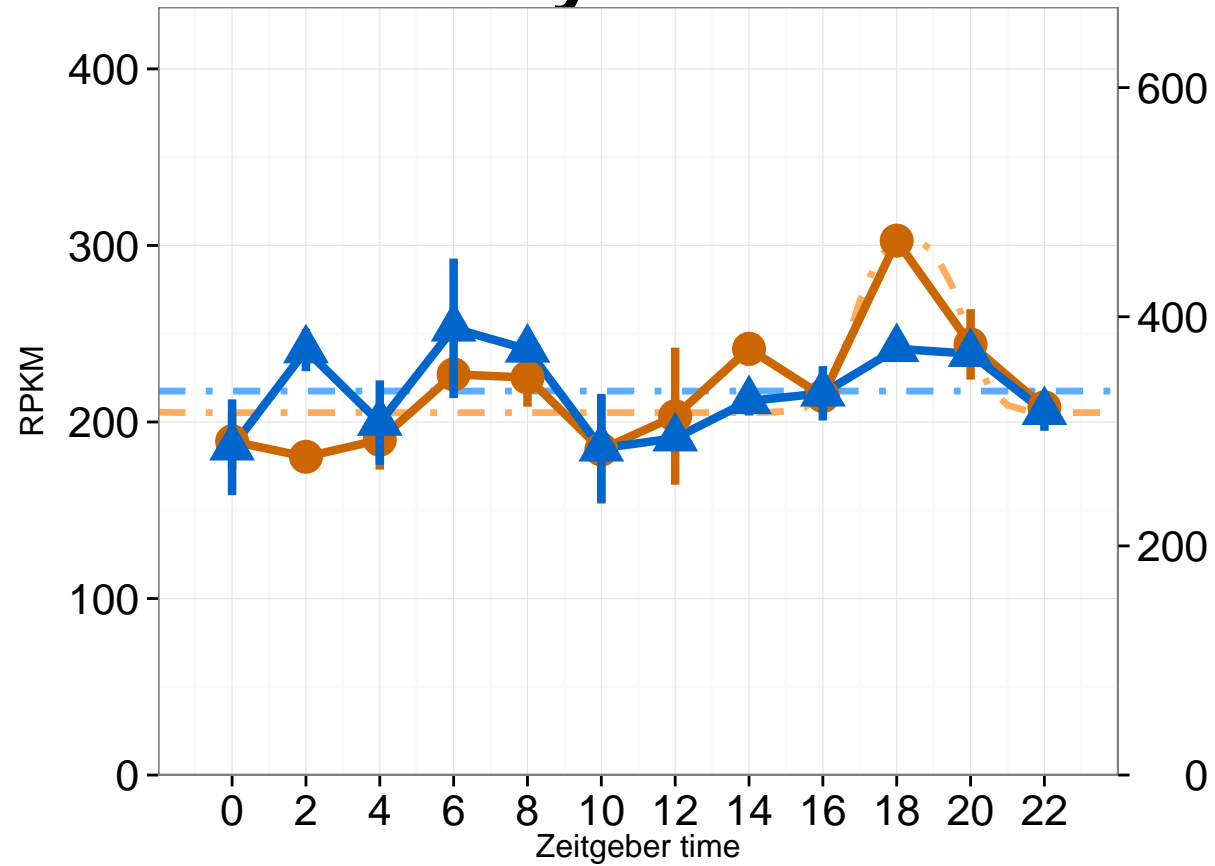

# Cystm1

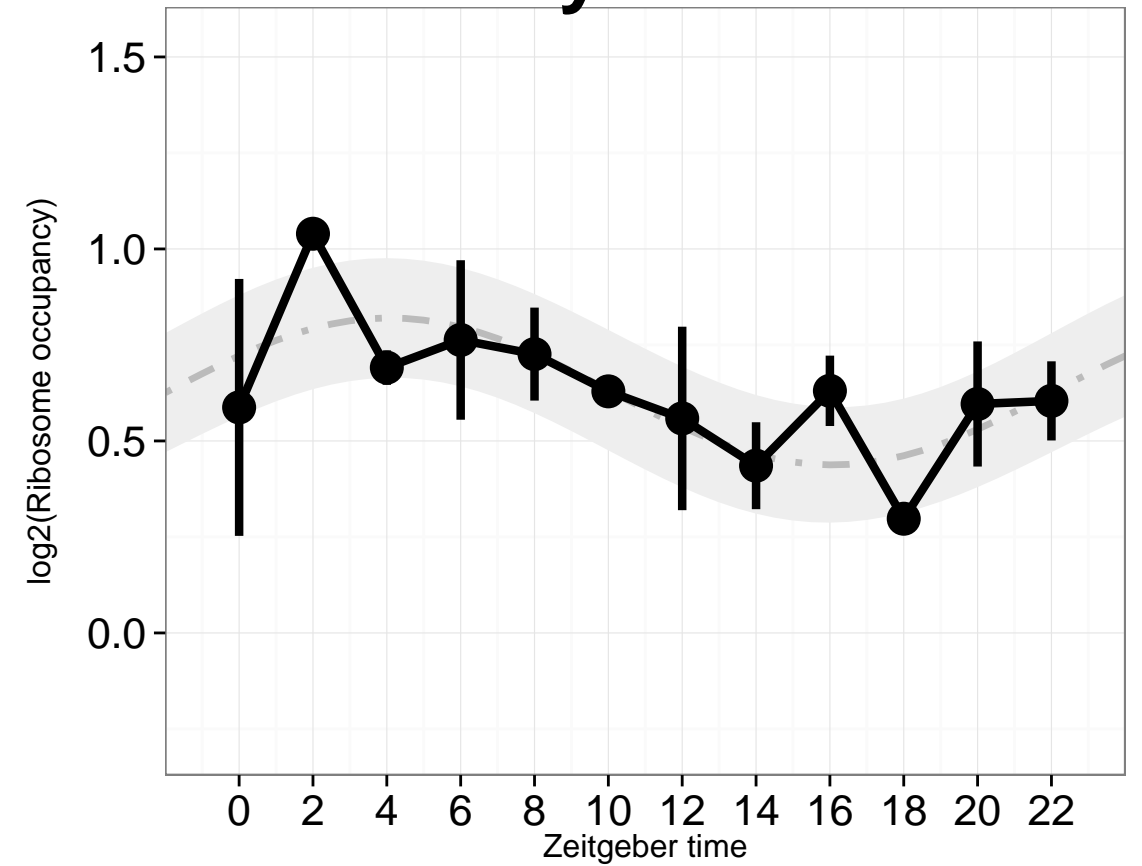

Supplement: Supplementary file 2876 [file 1]

## Fhit

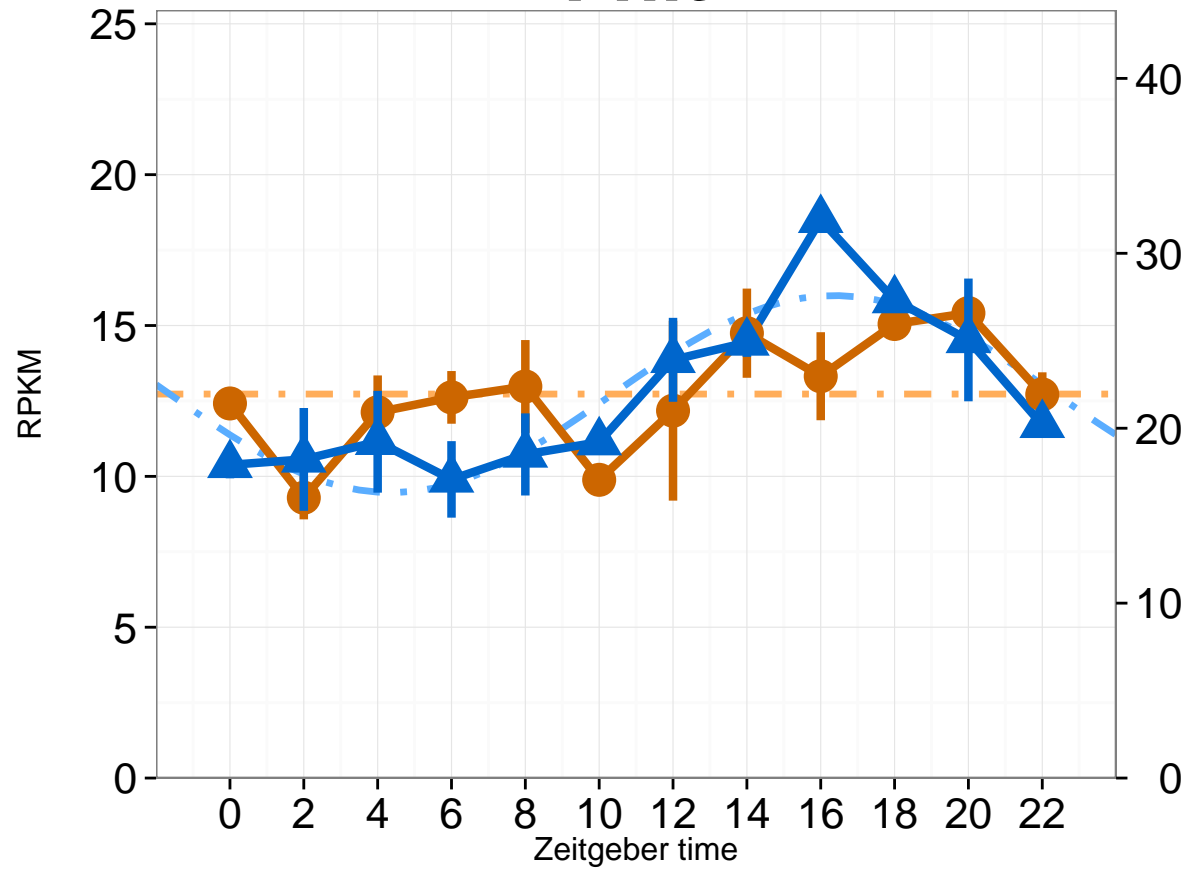

## Fhit

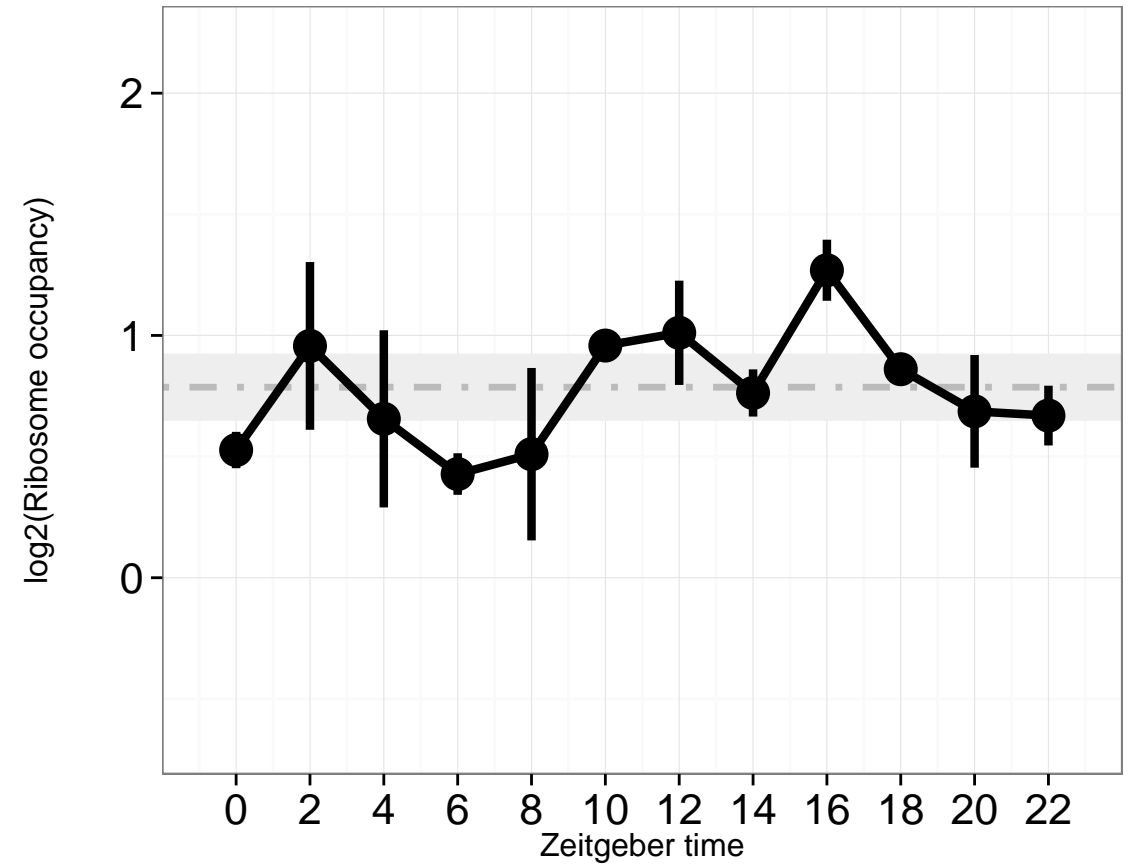

Supplement: Supplementary file 2877 [file 1]

# Prkaa2

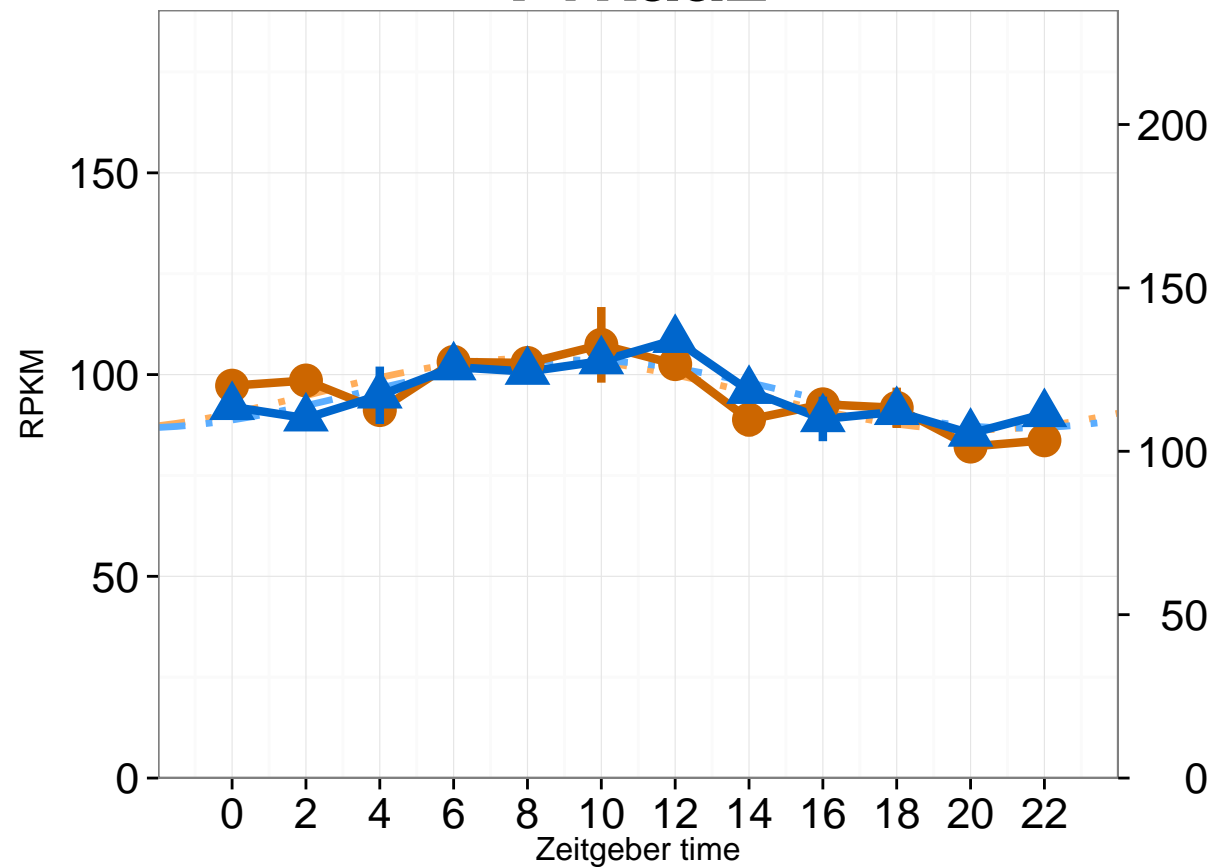

# Prkaa2

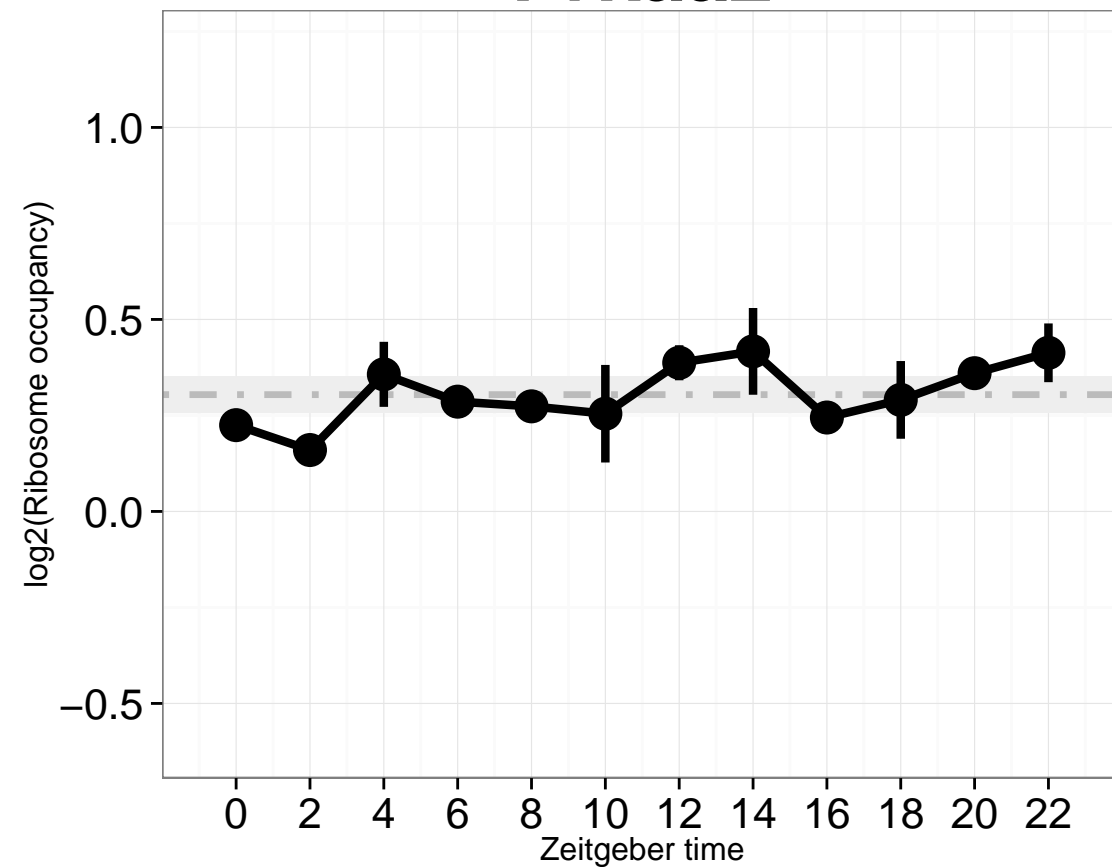

Supplement: Supplementary file 2878 [file 1]

## Col4a2

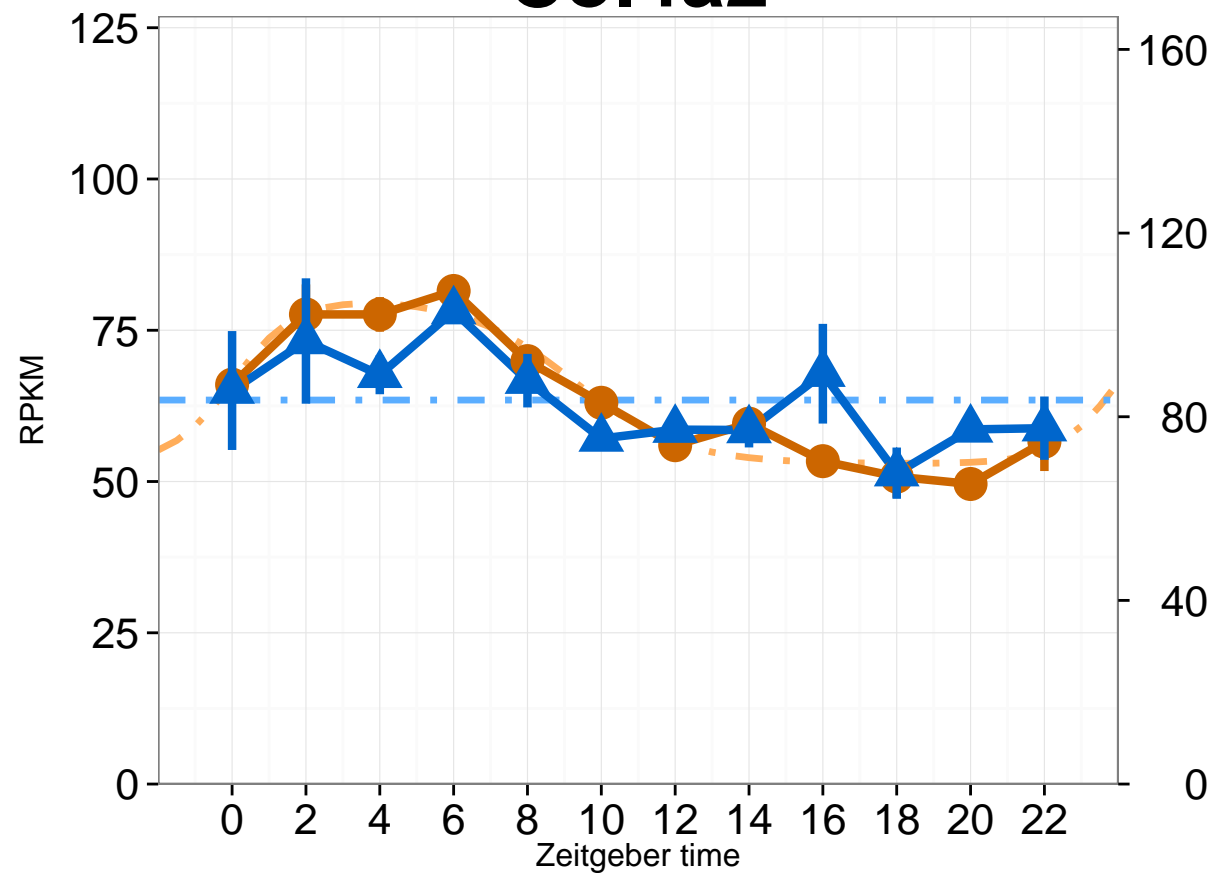

## Col4a2

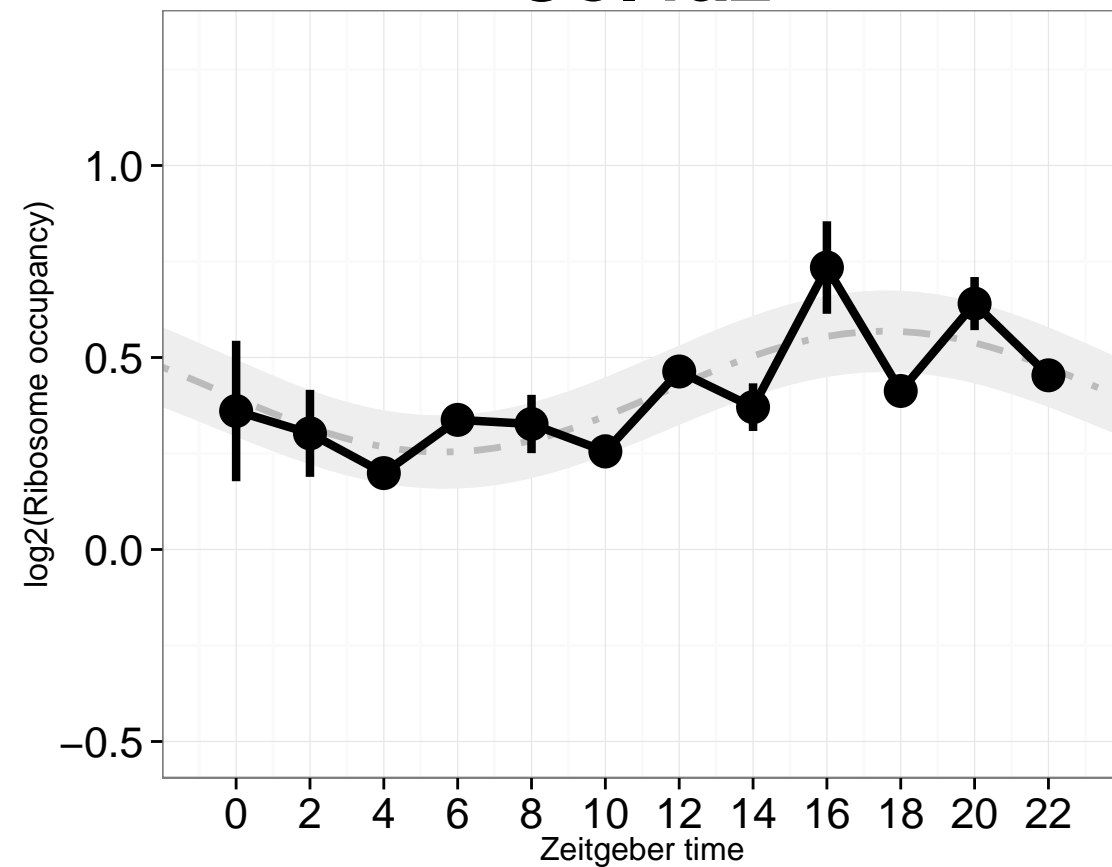

Supplement: Supplementary file 2879 [file 1]

# Ift27

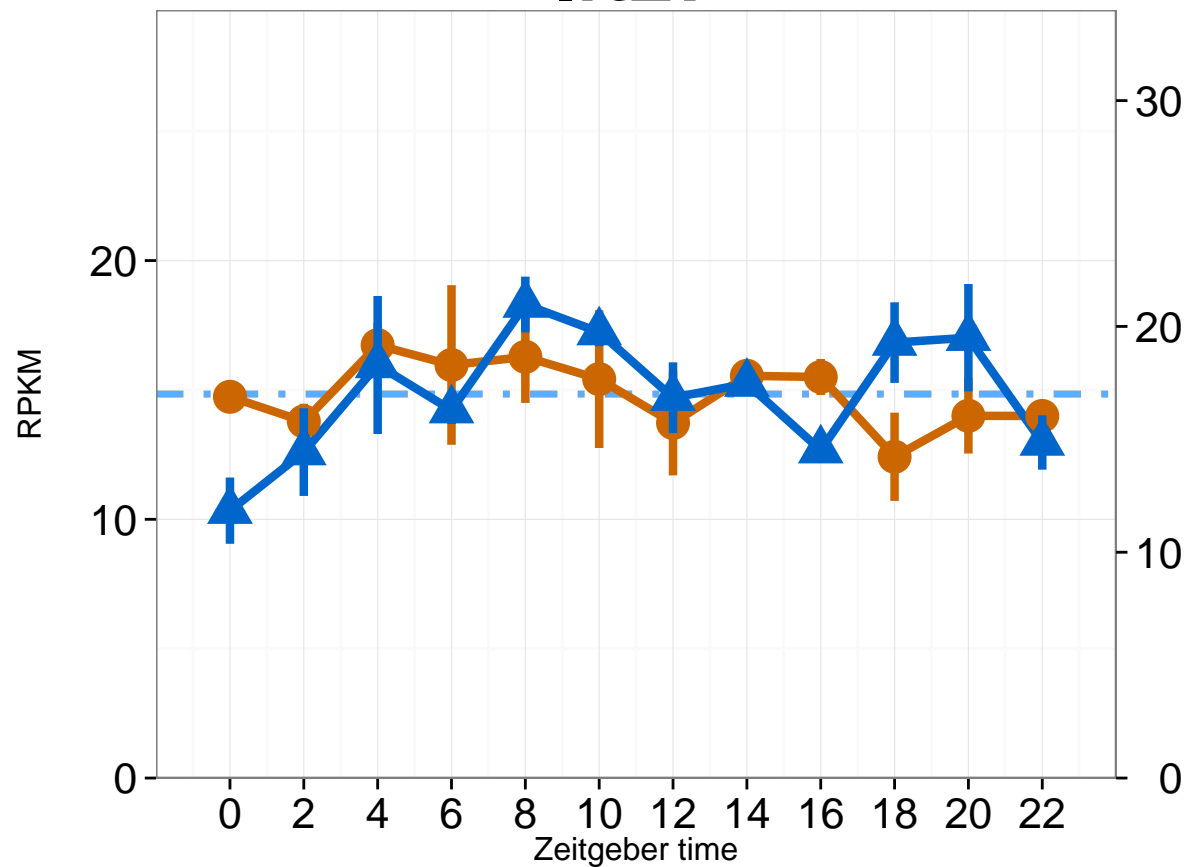

# Ift27

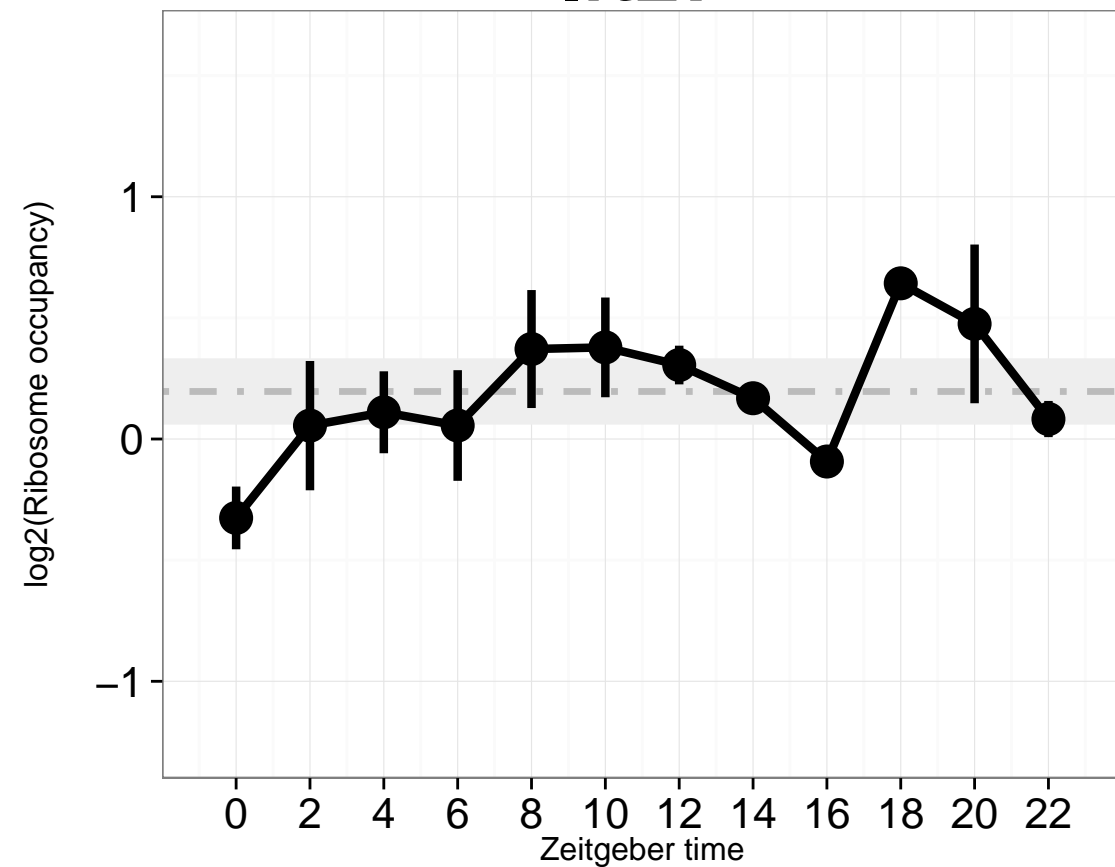

Supplement: Supplementary file 2880 [file 1]

## Cnnm3

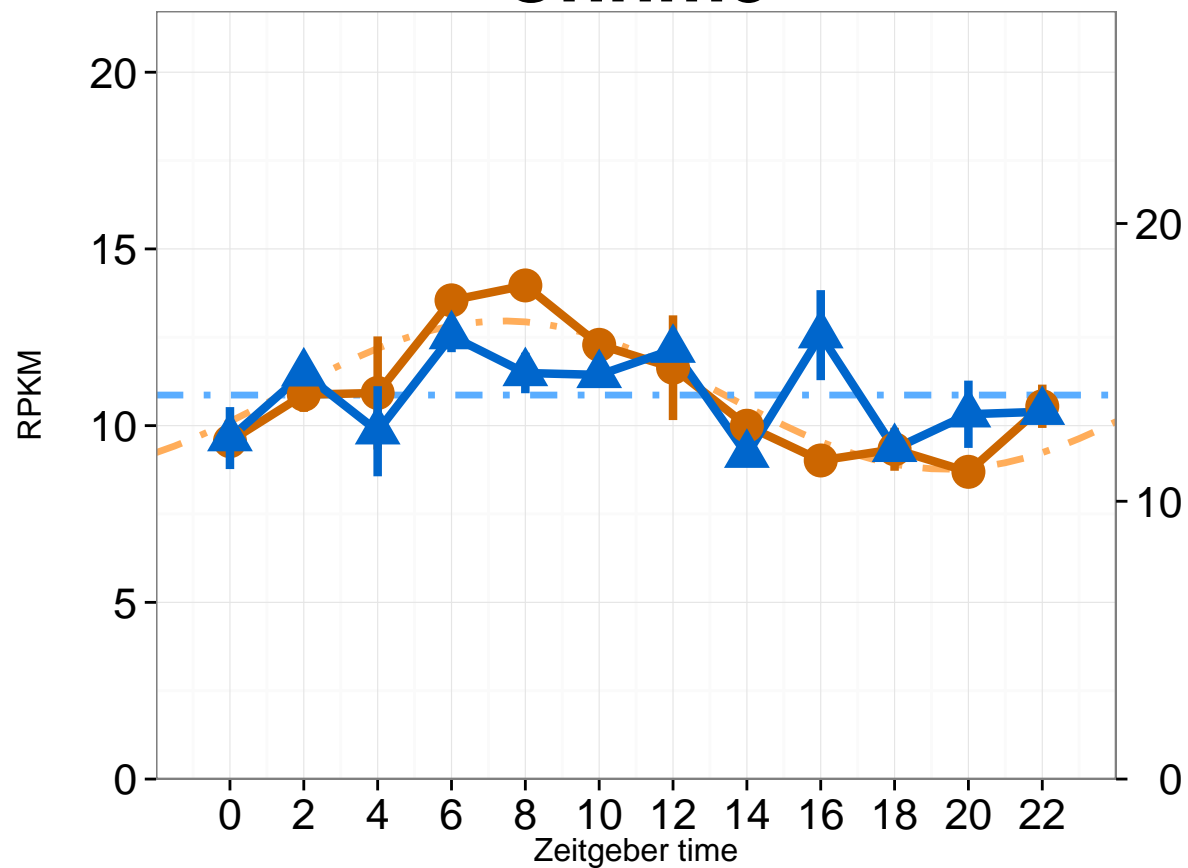

## Cnnm3

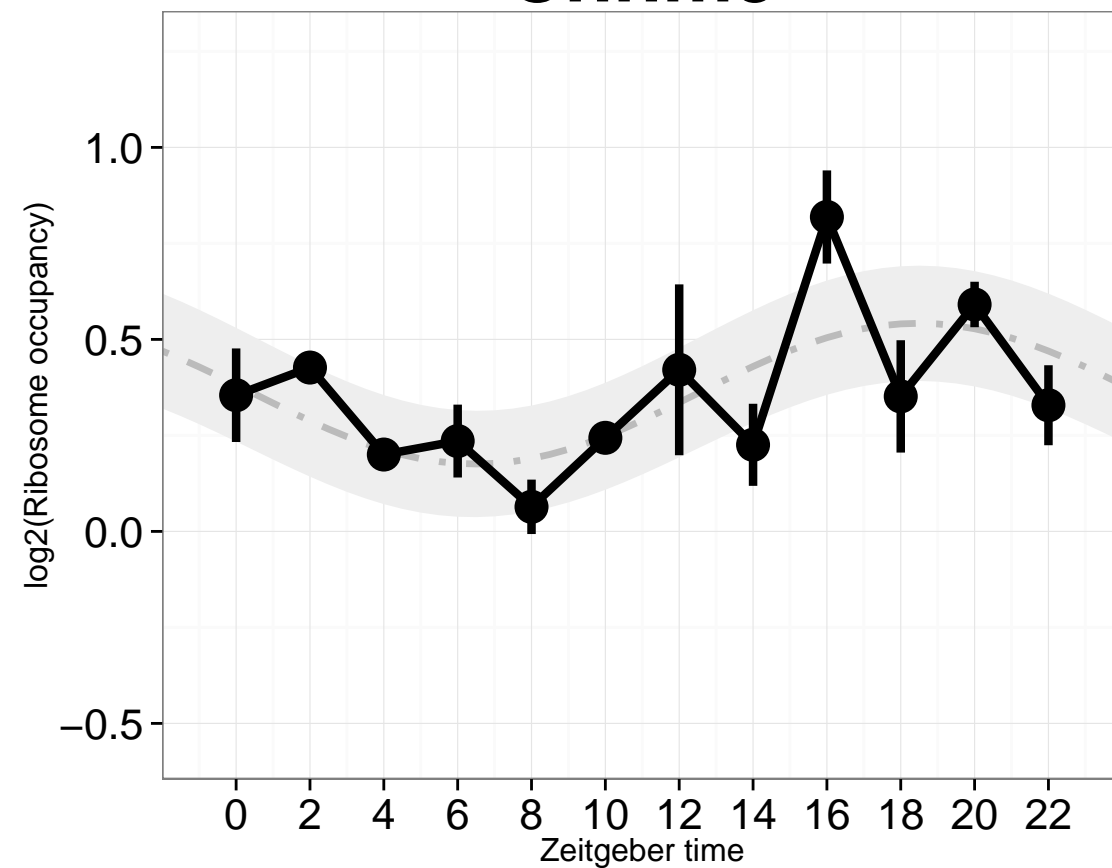

Supplement: Supplementary file 2881 [file 1]

## Prkci

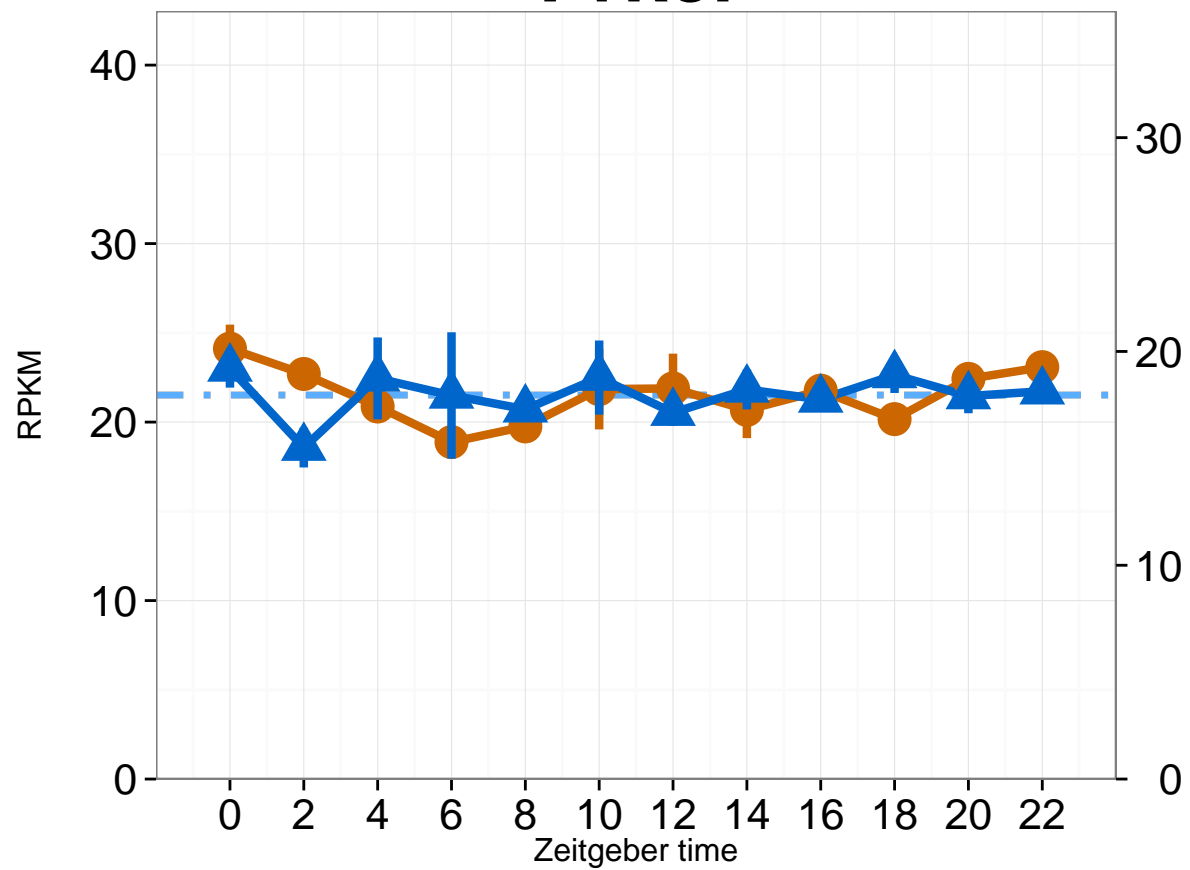

## Prkci

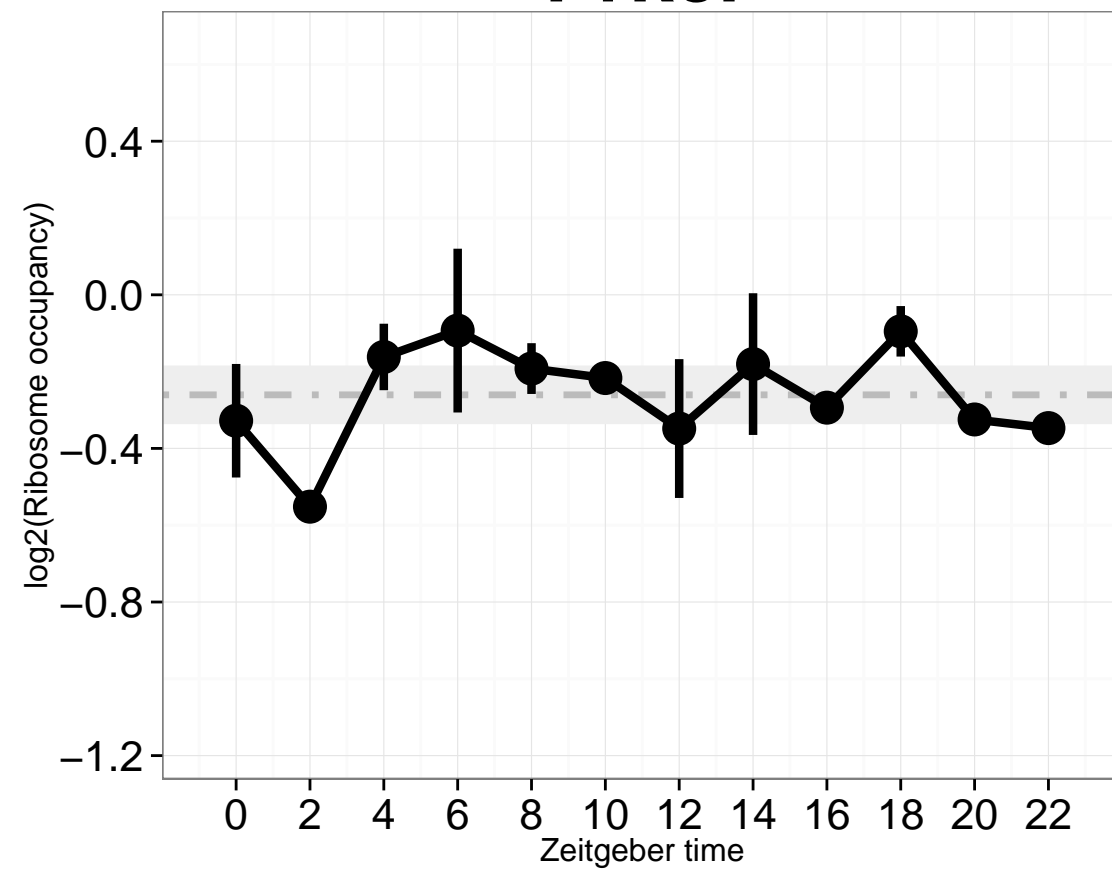

Supplement: Supplementary file 2882 [file 1]

## Gm21846

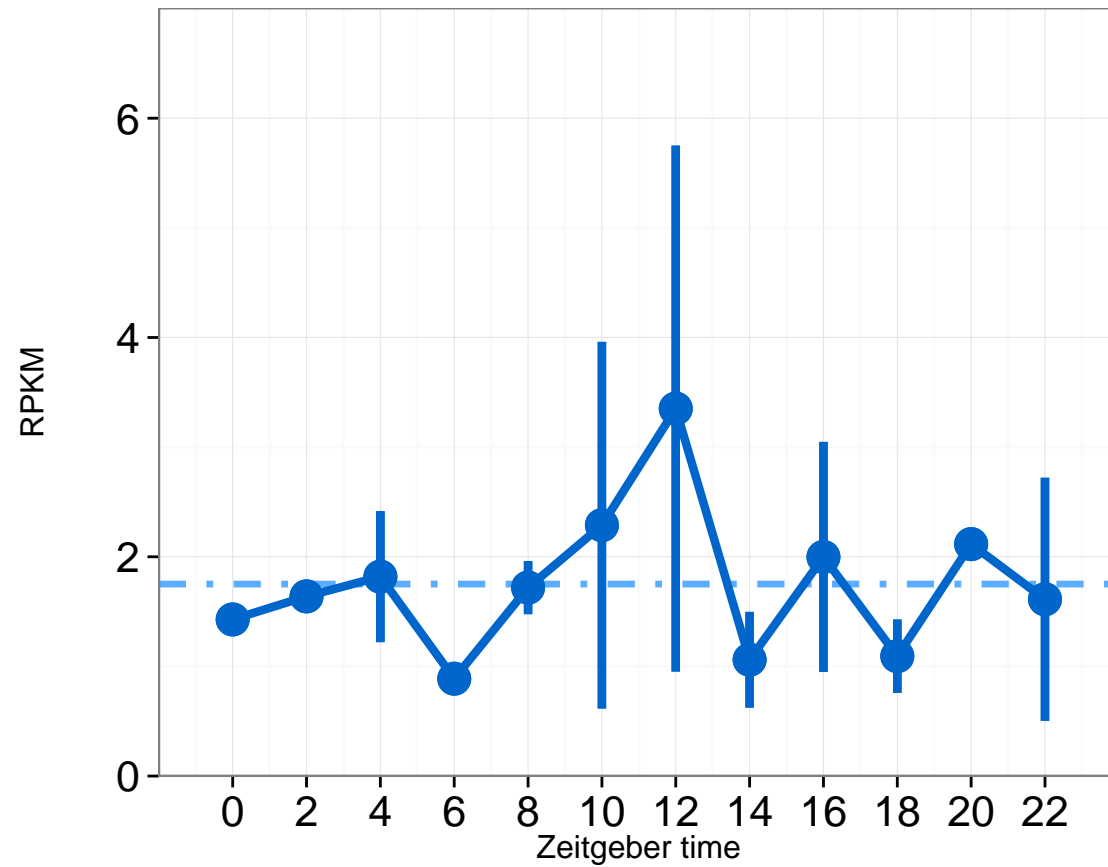

## Gm21846 log2(Ribosome occupanc

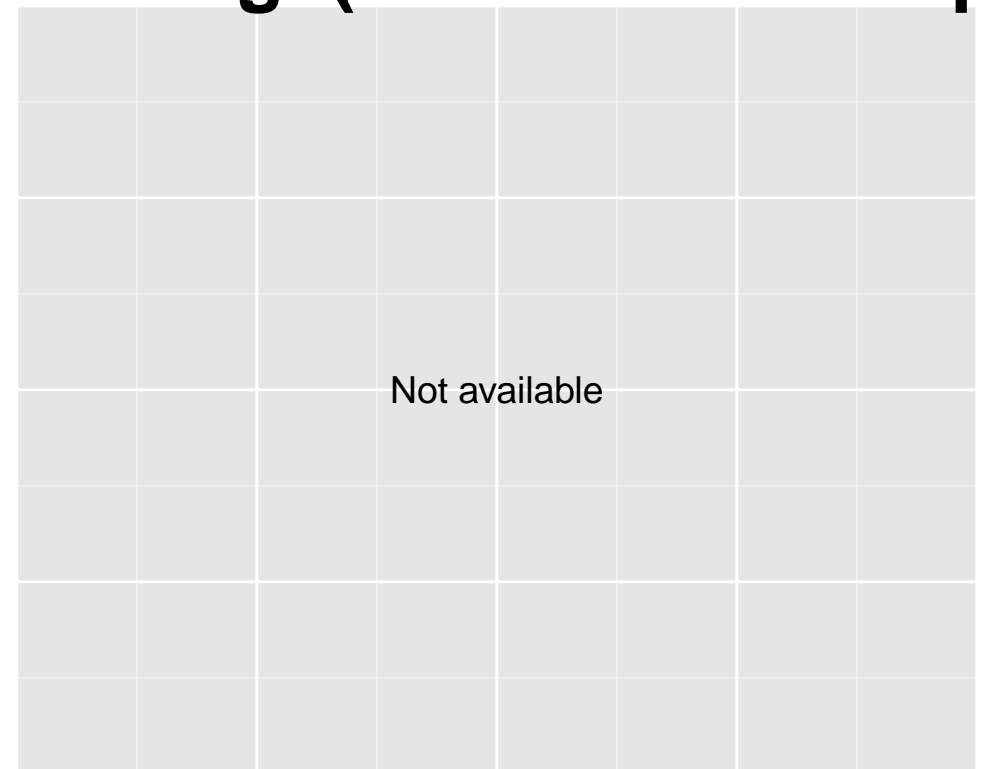

Supplement: Supplementary file 2883 [file 1]

## Asah1

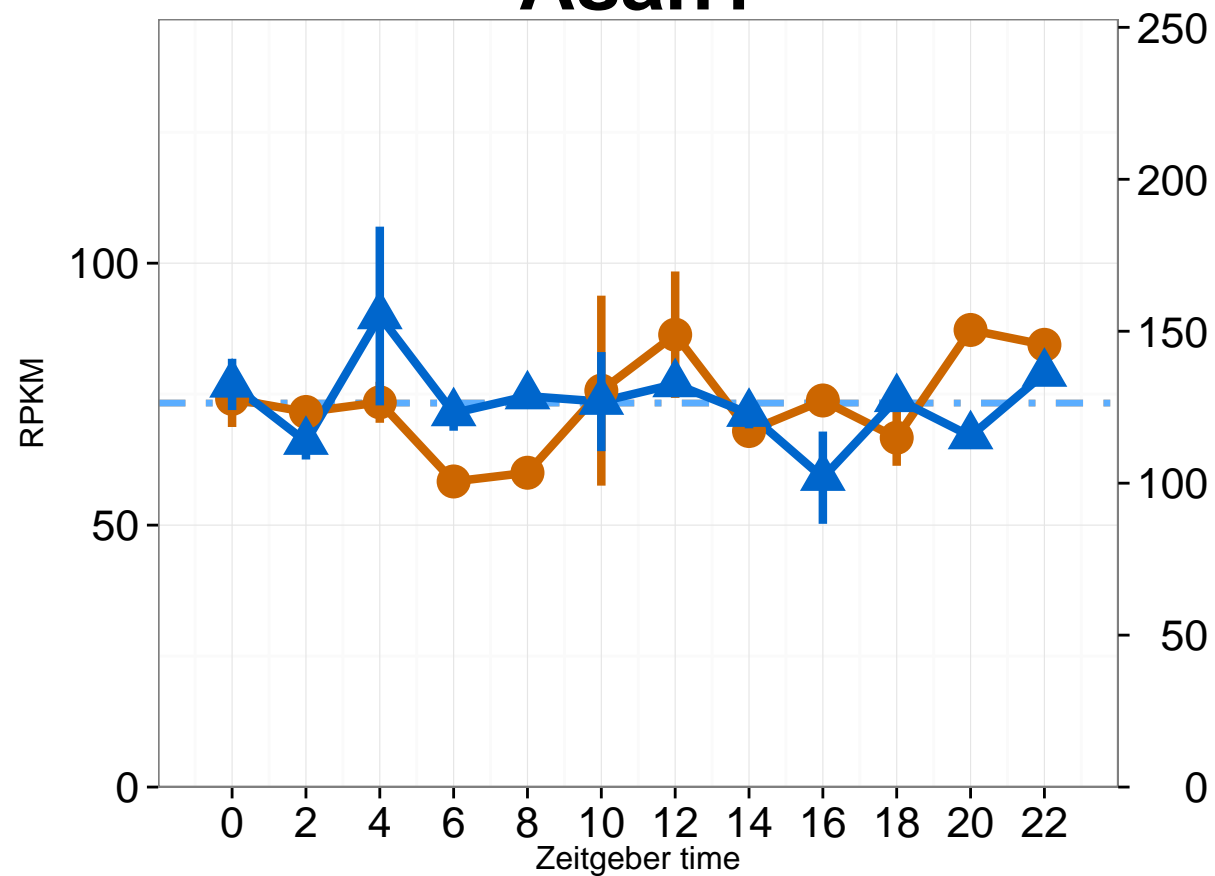

## Asah1

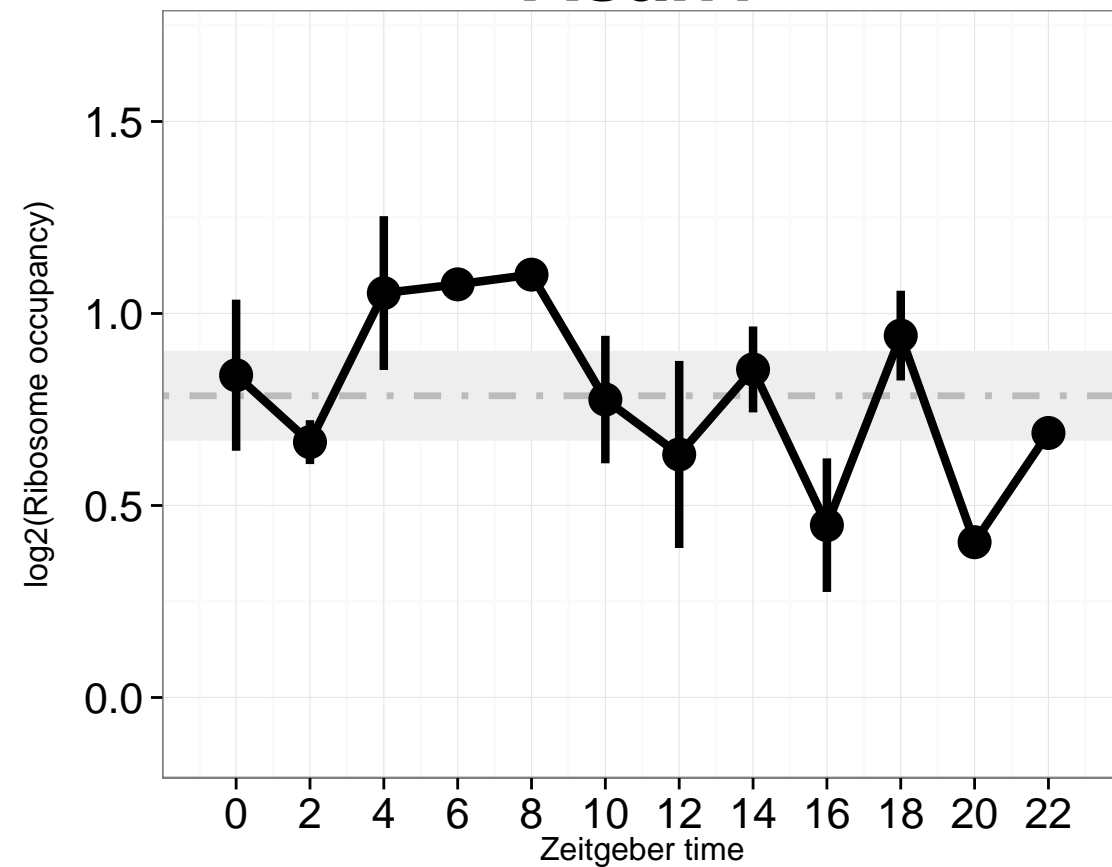

Supplement: Supplementary file 2884 [file 1]

# Ccdc158

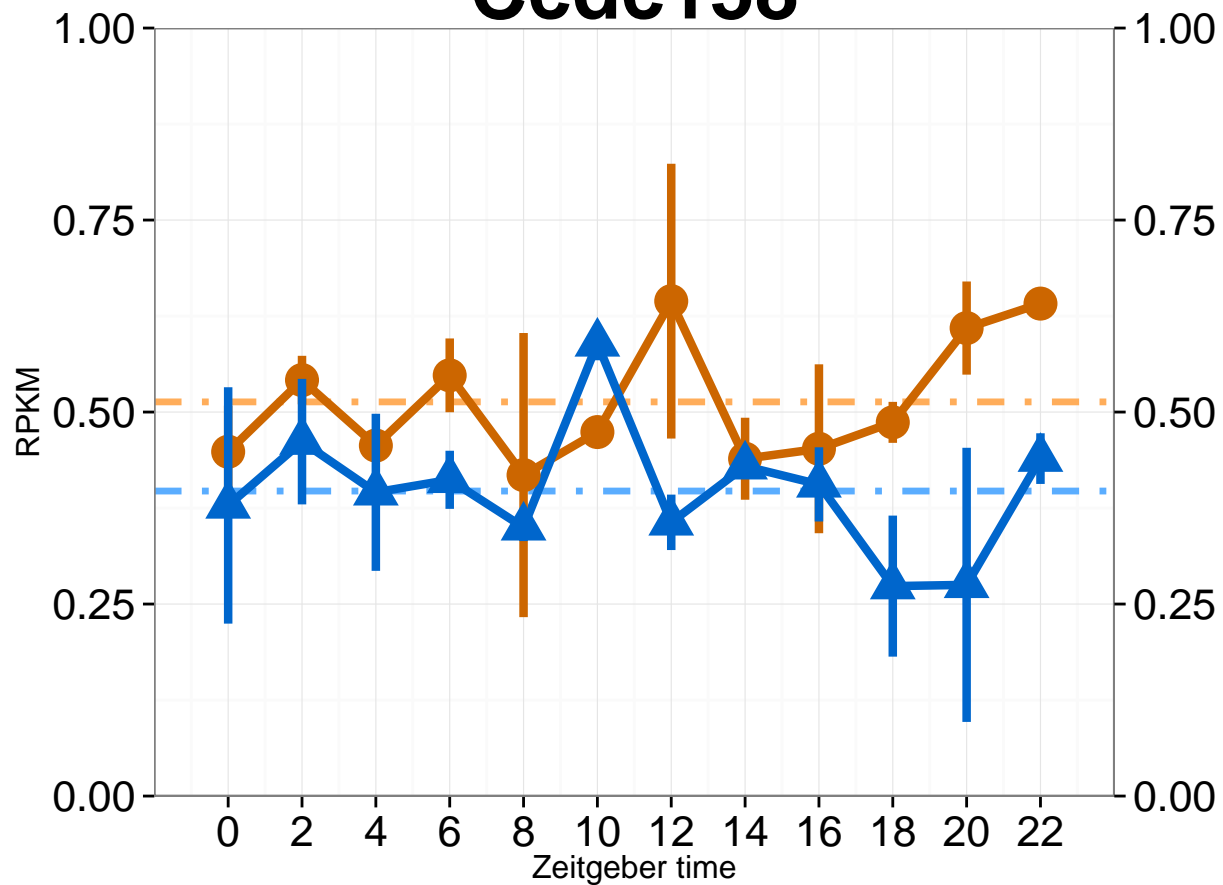

# Ccdc158

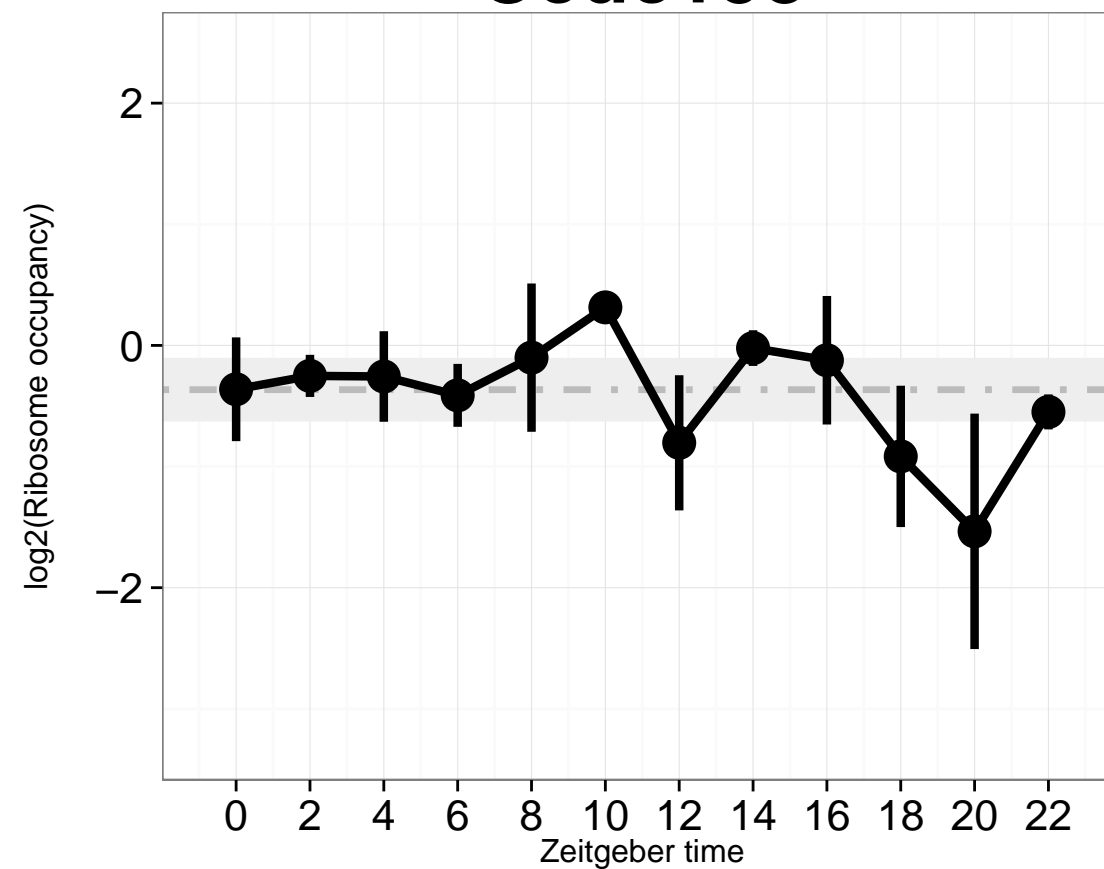

Supplement: Supplementary file 2885 [file 1]

## Zc3h15

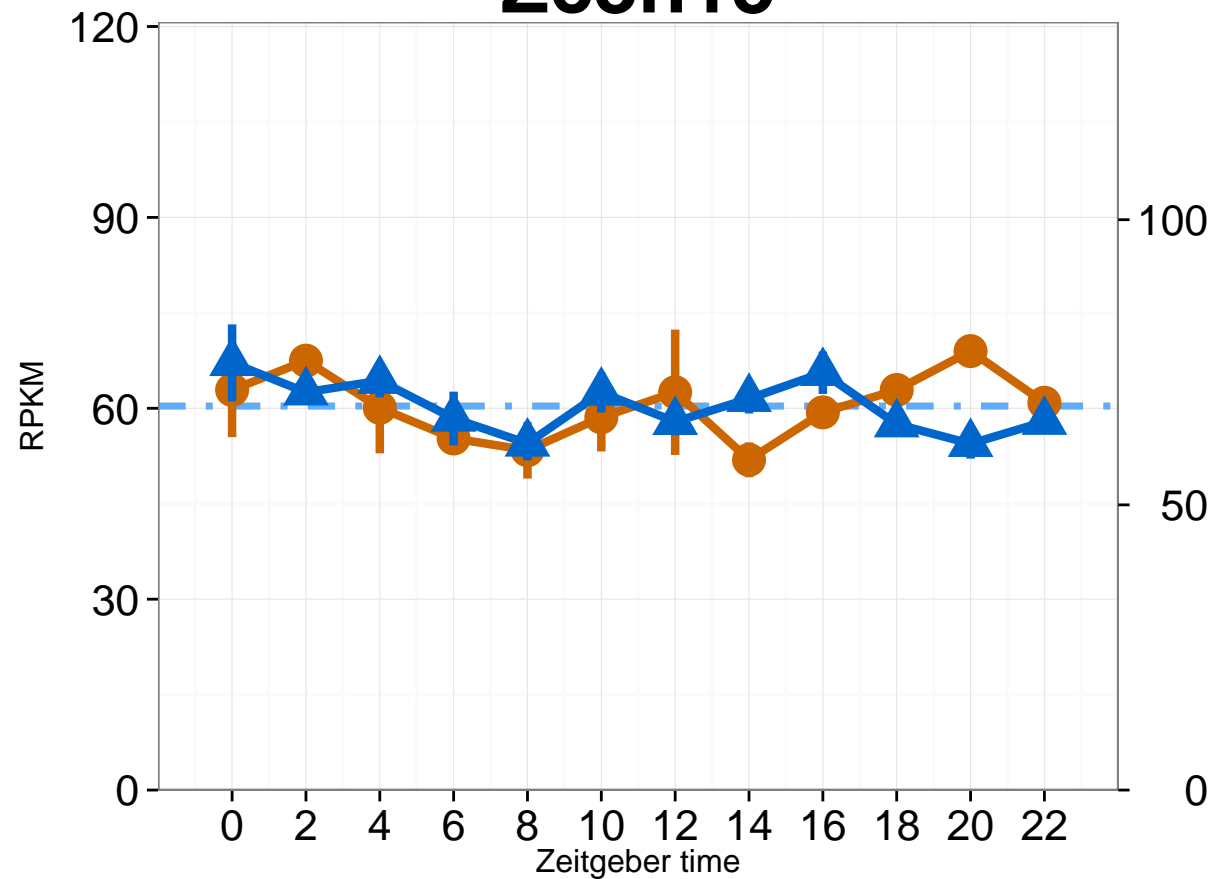

## Zc3h15

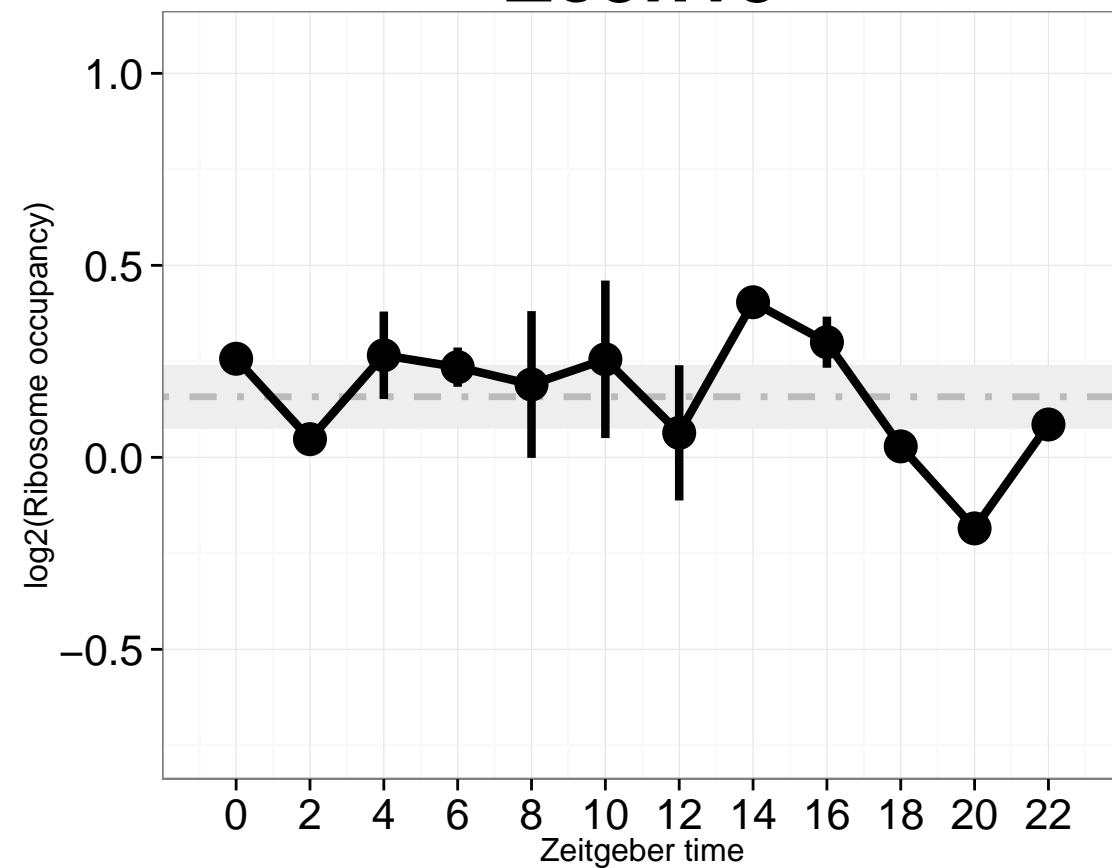

Supplement: Supplementary file 2886 [file 1]

## Syt12

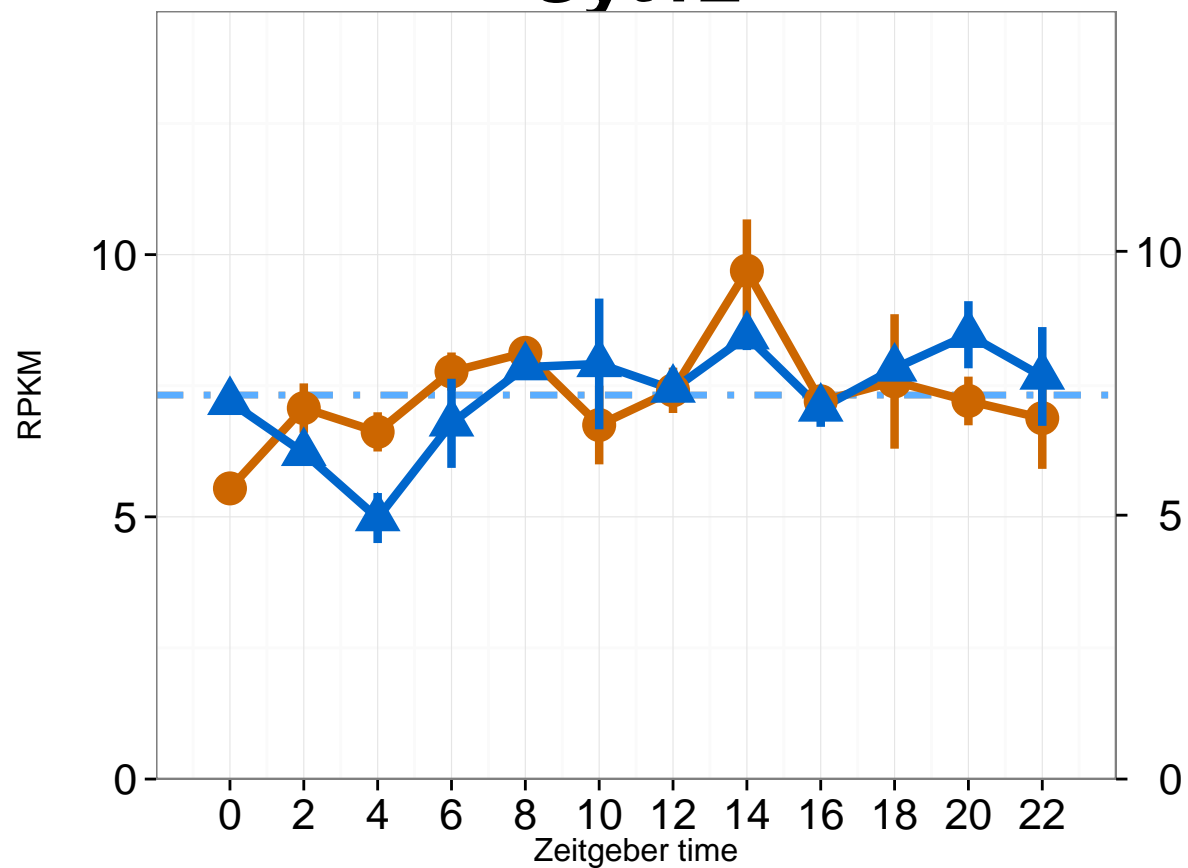

## Syt12

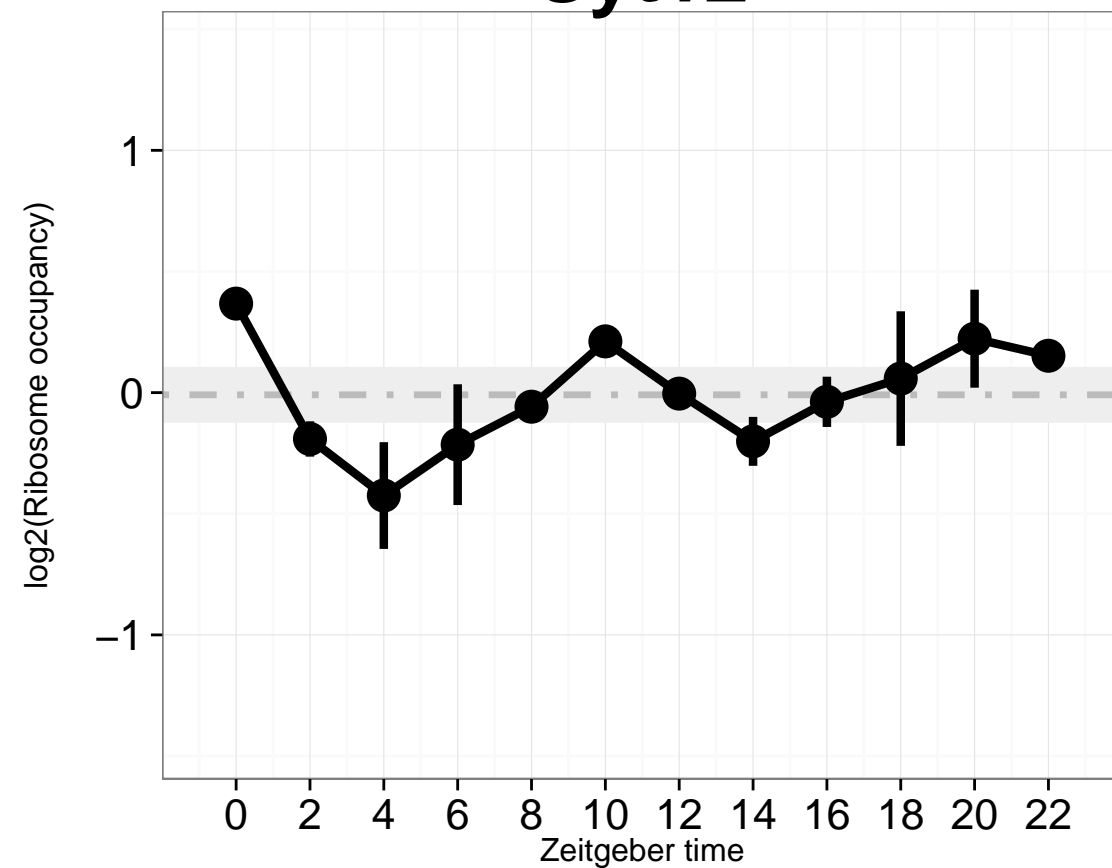

Supplement: Supplementary file 2887 [file 1]

# Dyx1c1

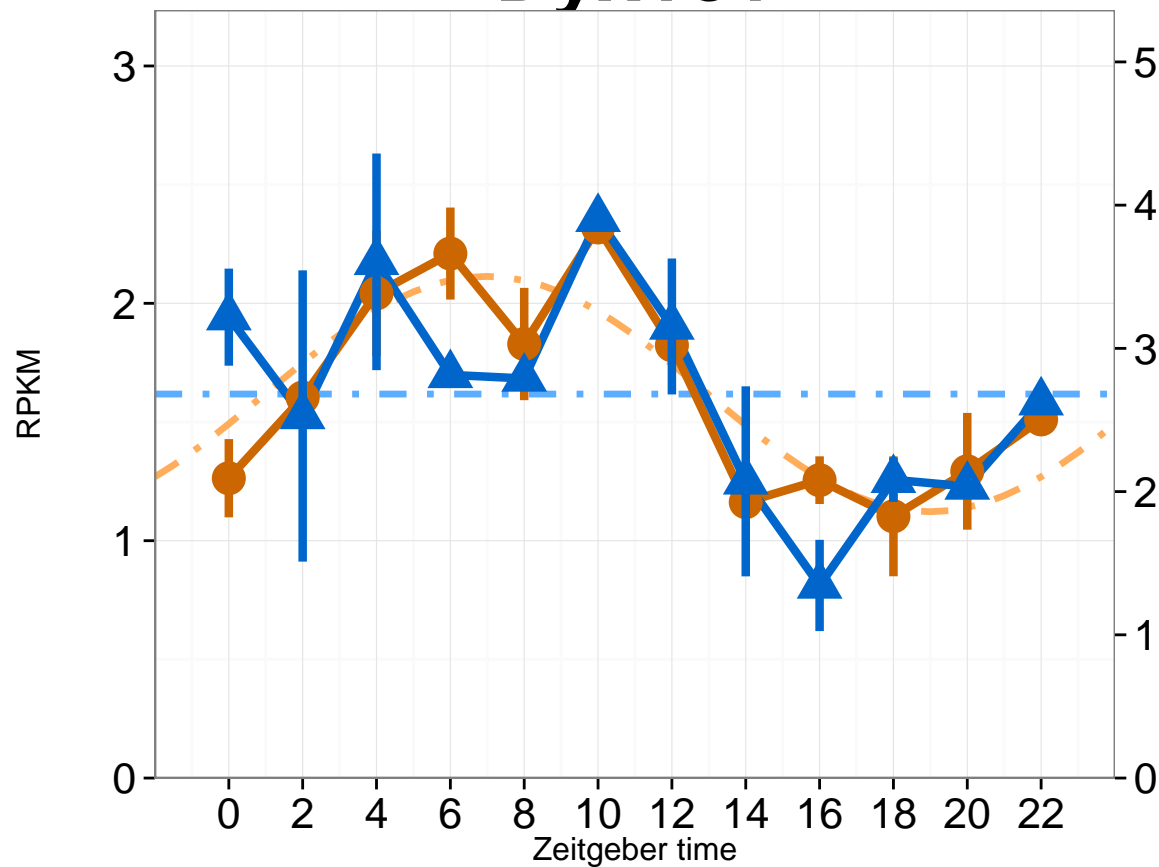

# Dyx1c1

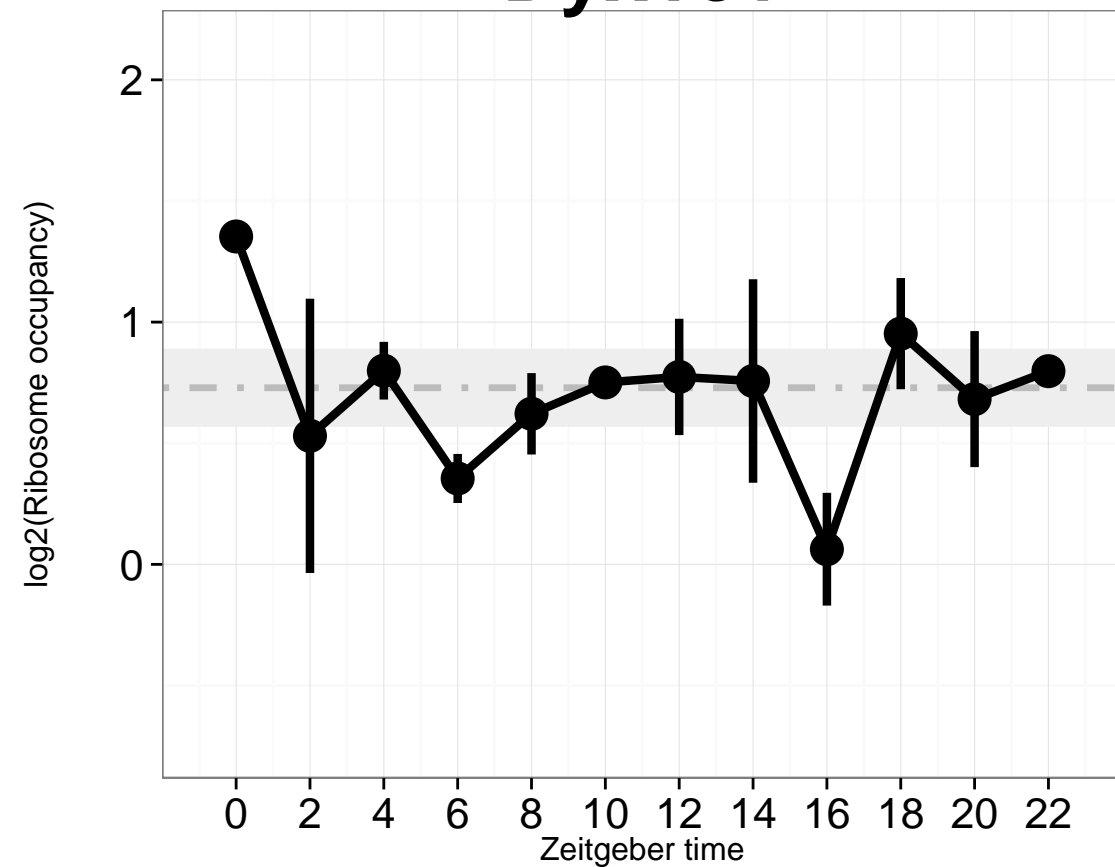

Supplement: Supplementary file 2888 [file 1]

# H2-T22

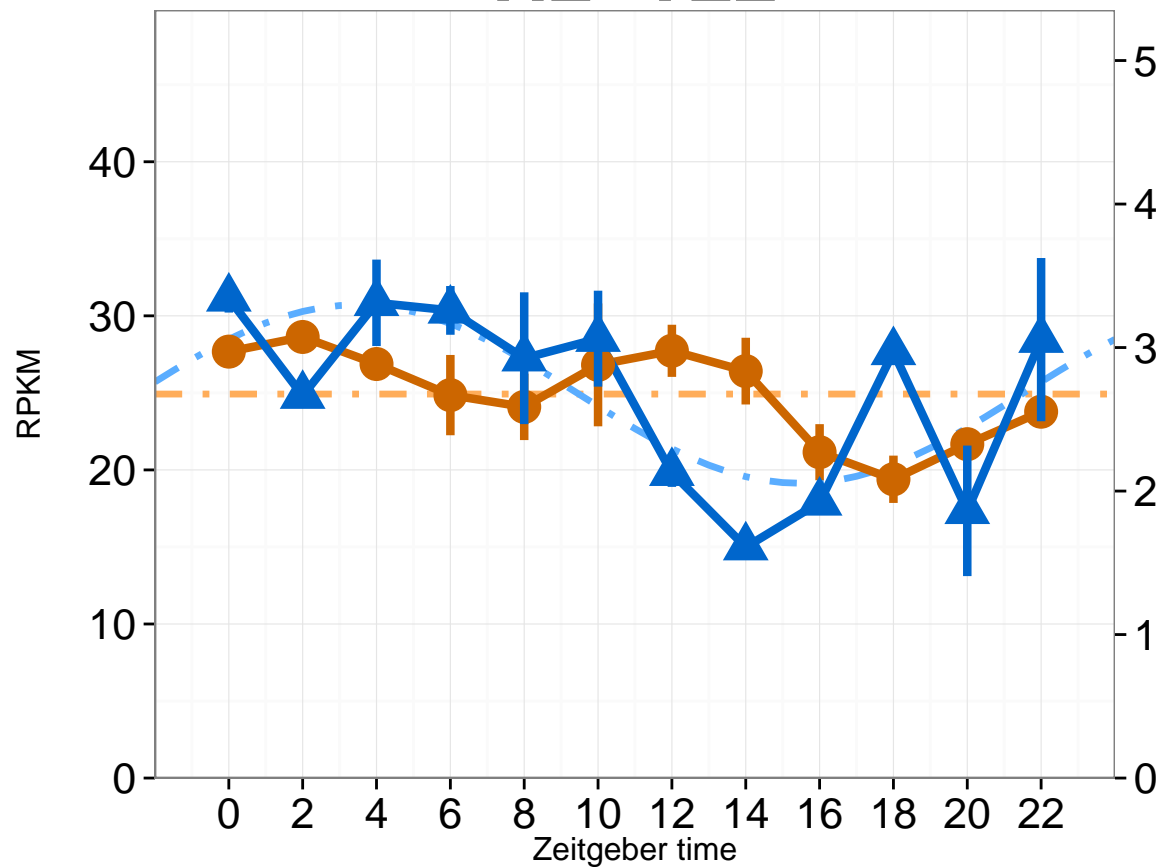

# H2-T22

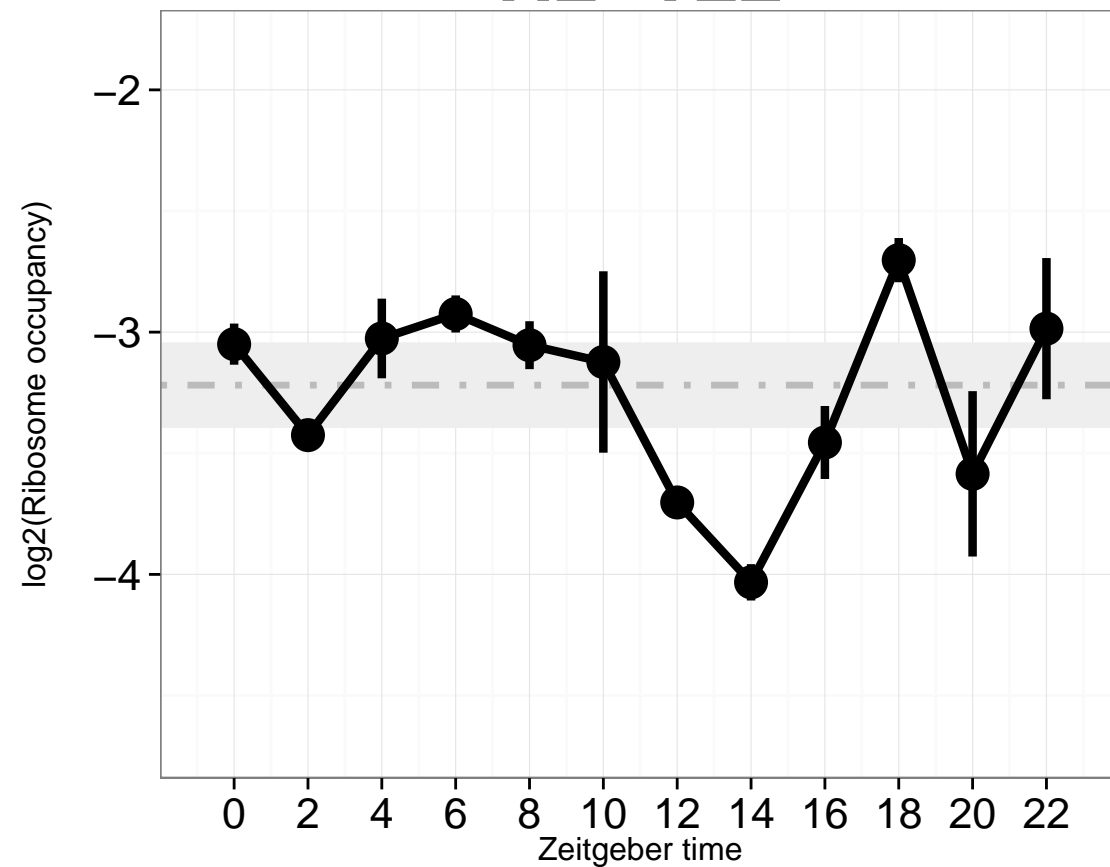

Supplement: Supplementary file 2889 [file 1]

# Dennd1a

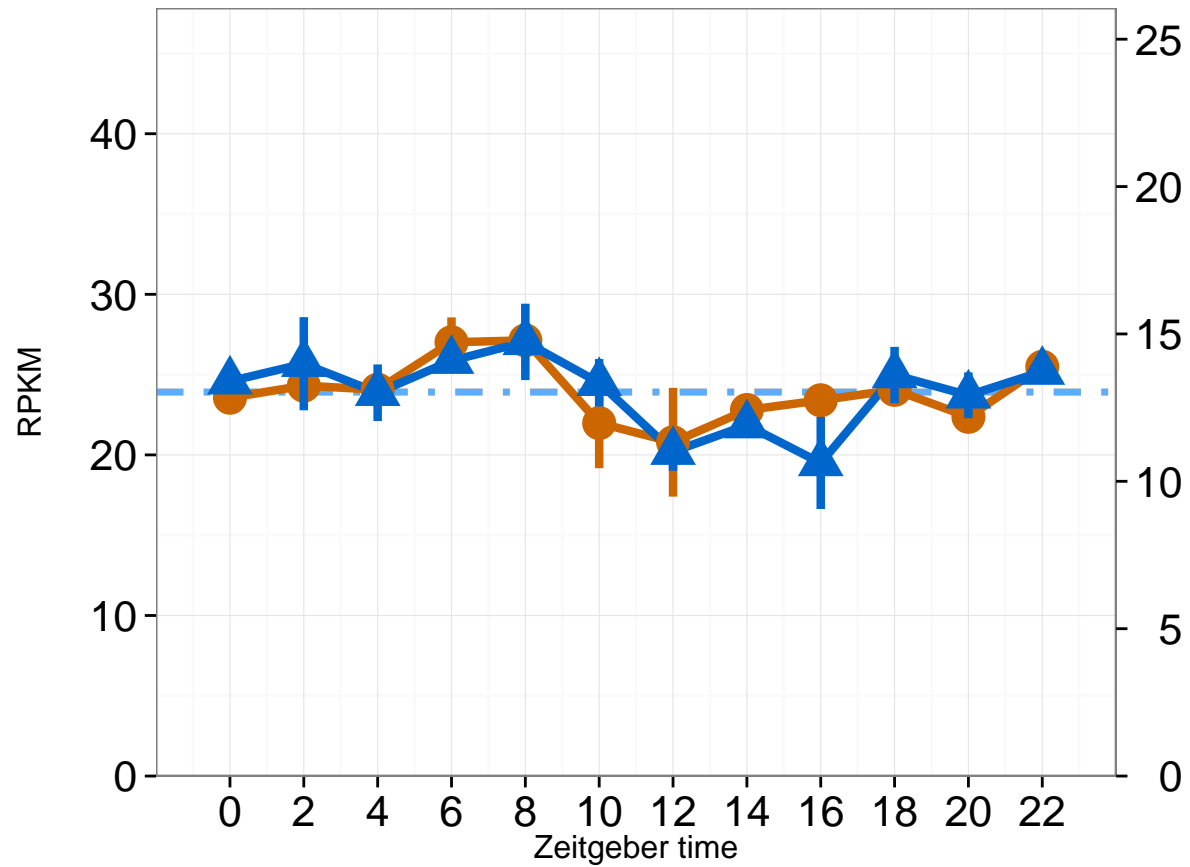

# Dennd1a

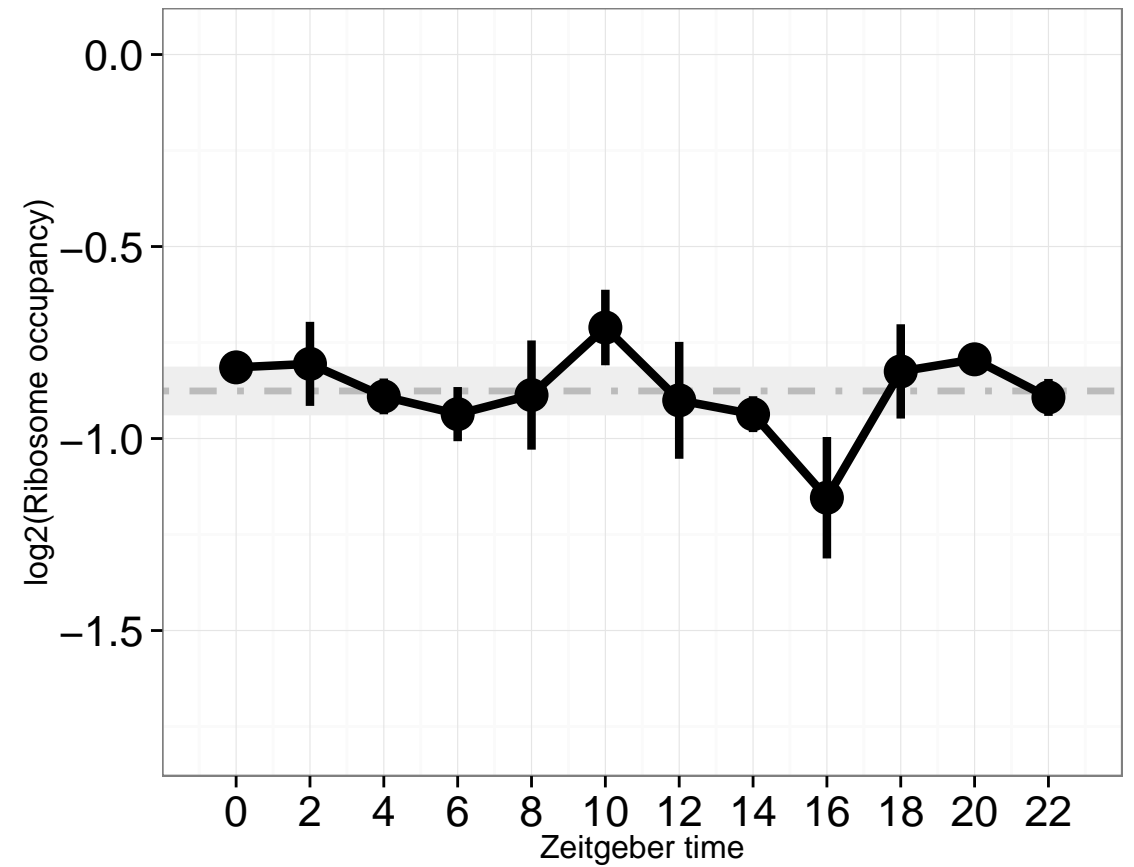

Supplement: Supplementary file 2890 [file 1]

# Ccna2

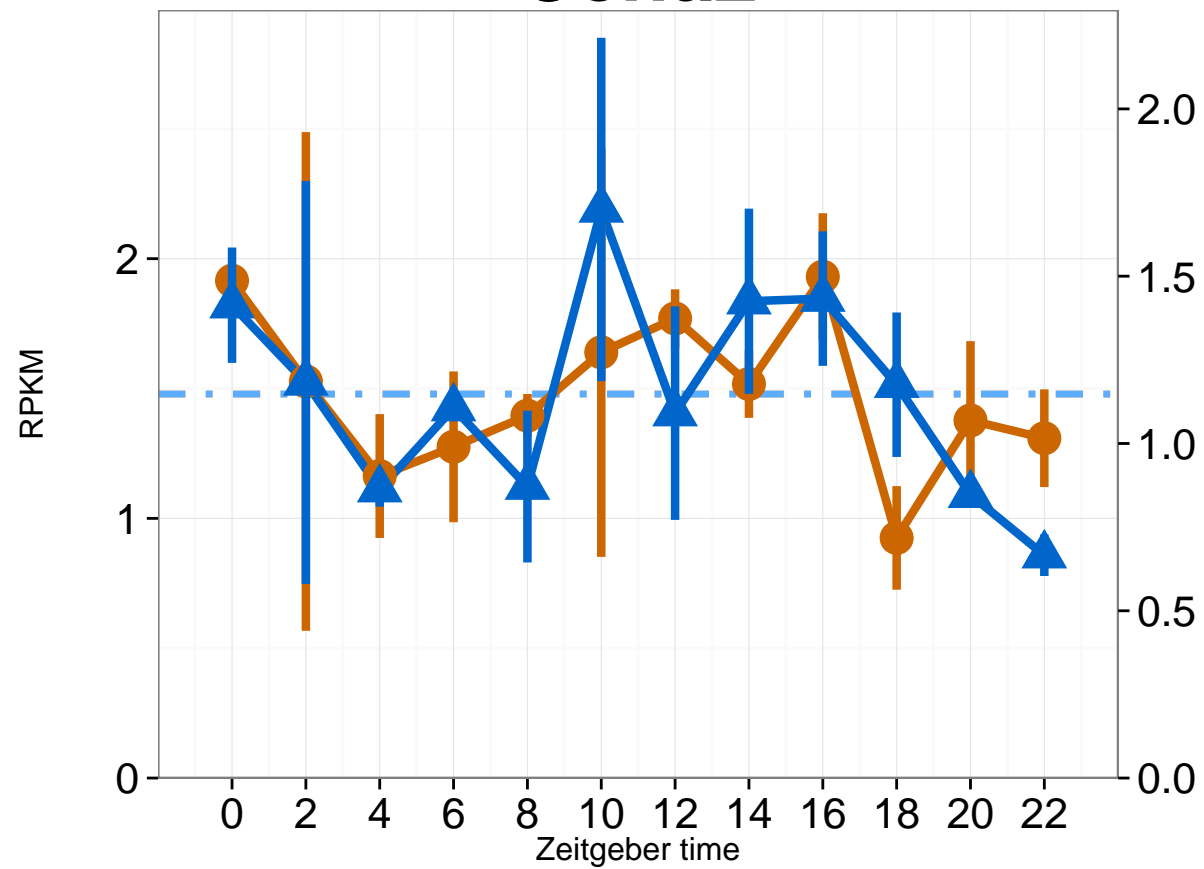

# Ccna2

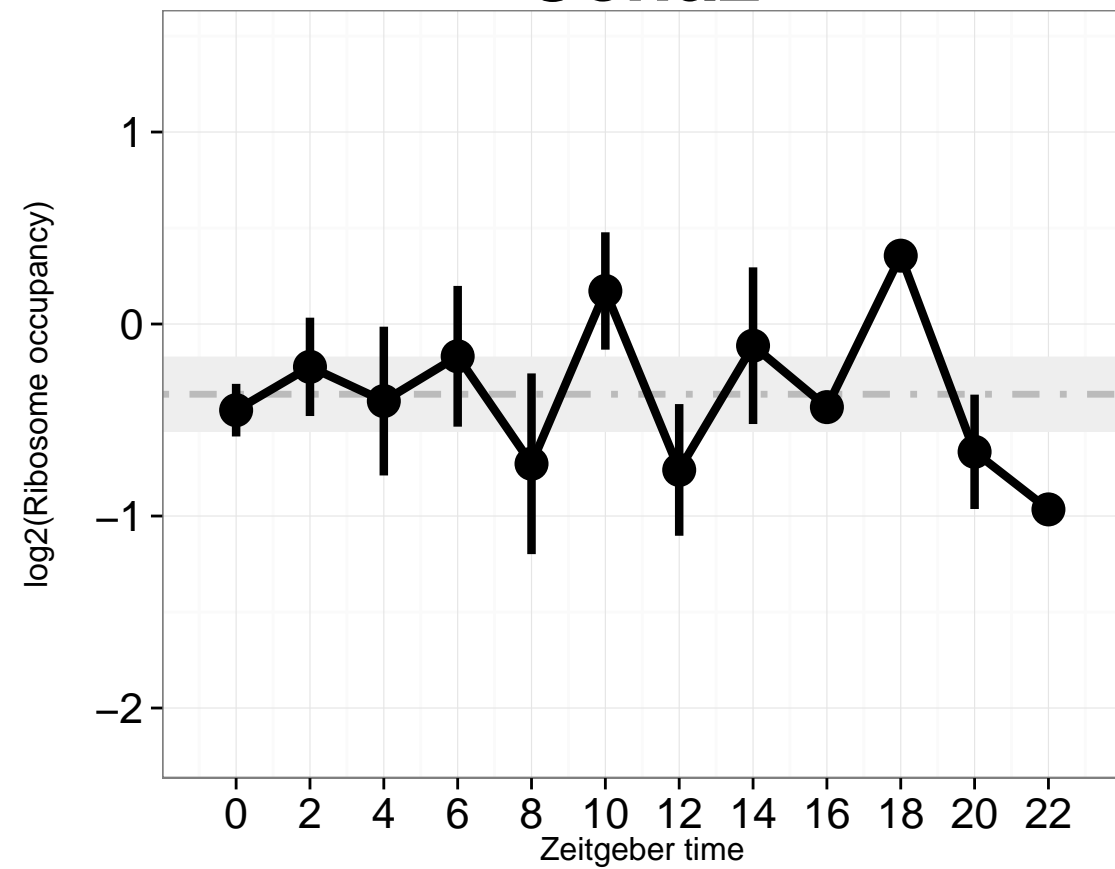

Supplement: Supplementary file 2891 [file 1]

# Fam214b

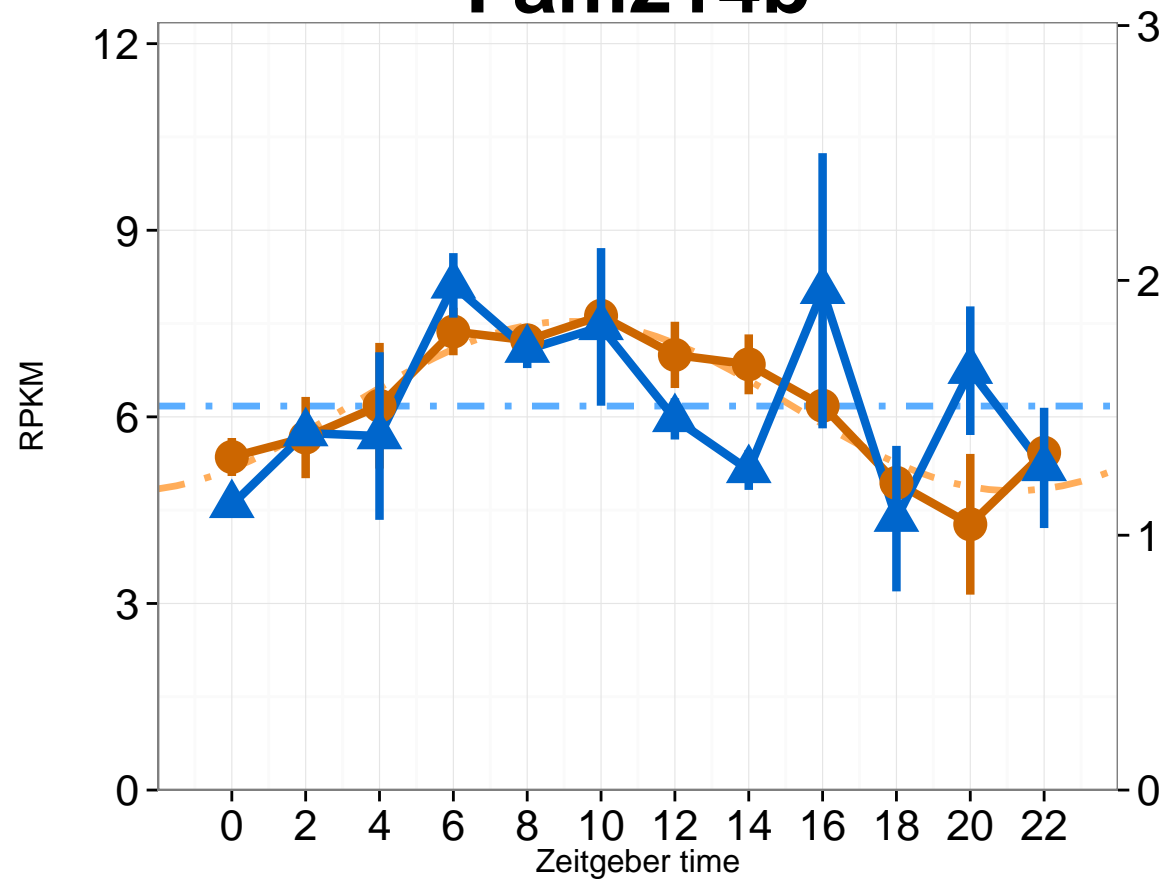

# Fam214b

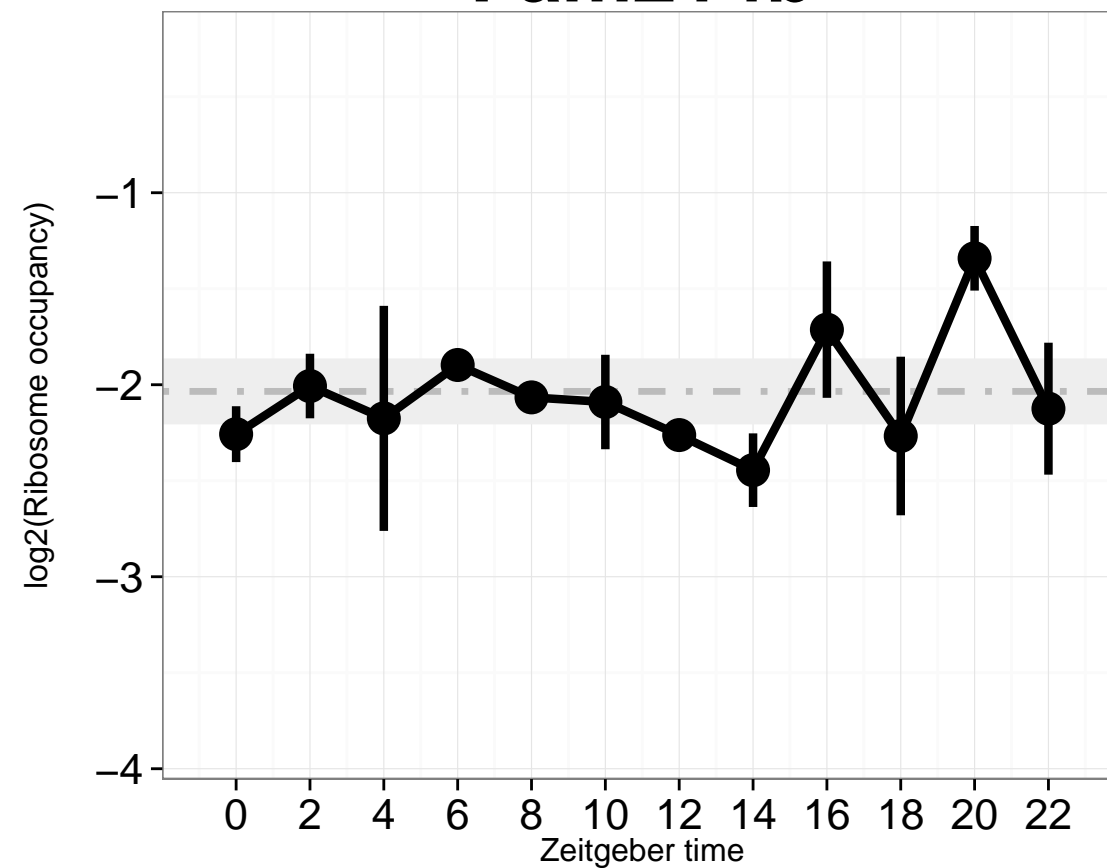

Supplement: Supplementary file 2892 [file 1]

# BC068281

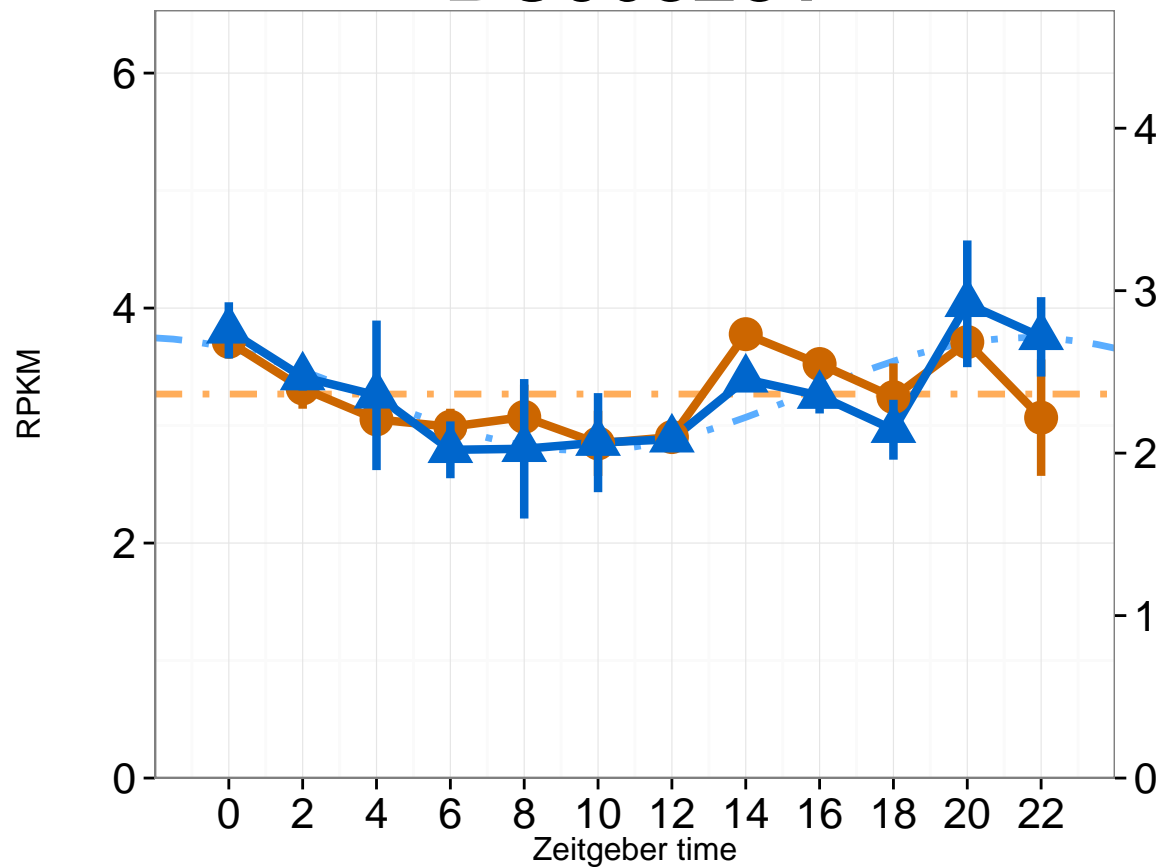

# BC068281

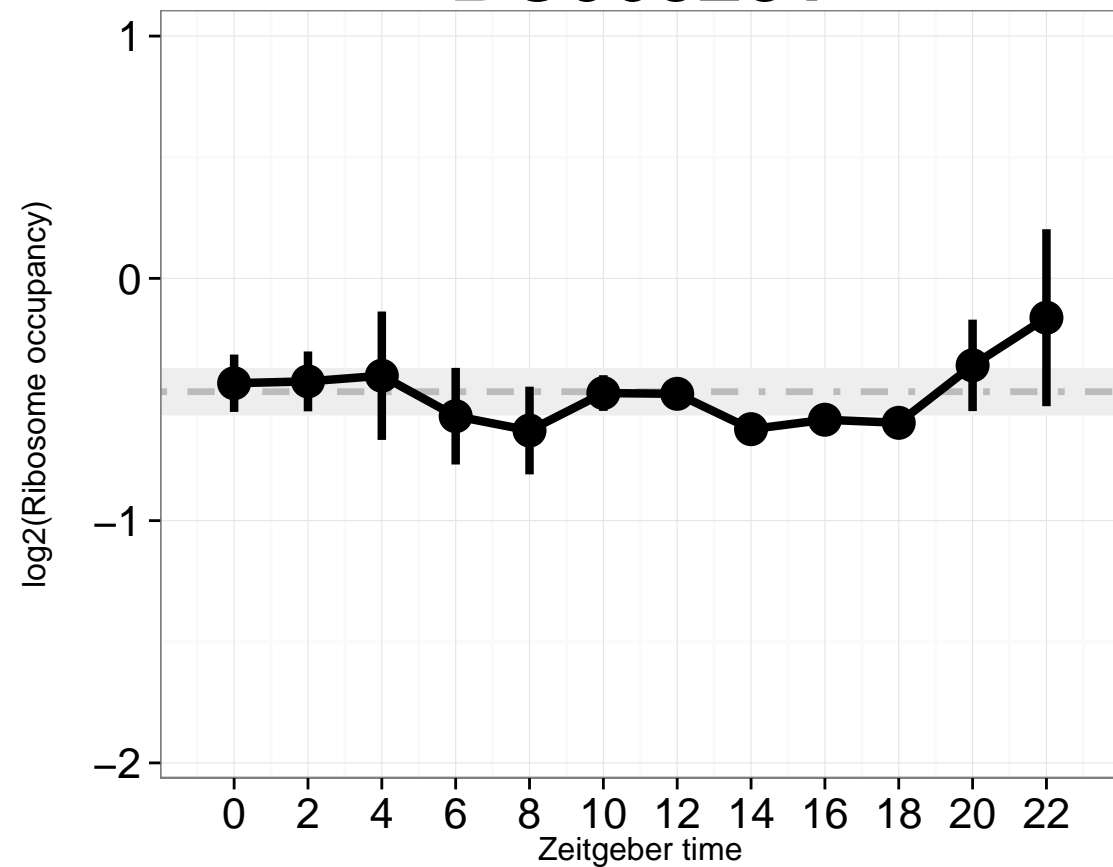

Supplement: Supplementary file 2893 [file 1]

# Inca1

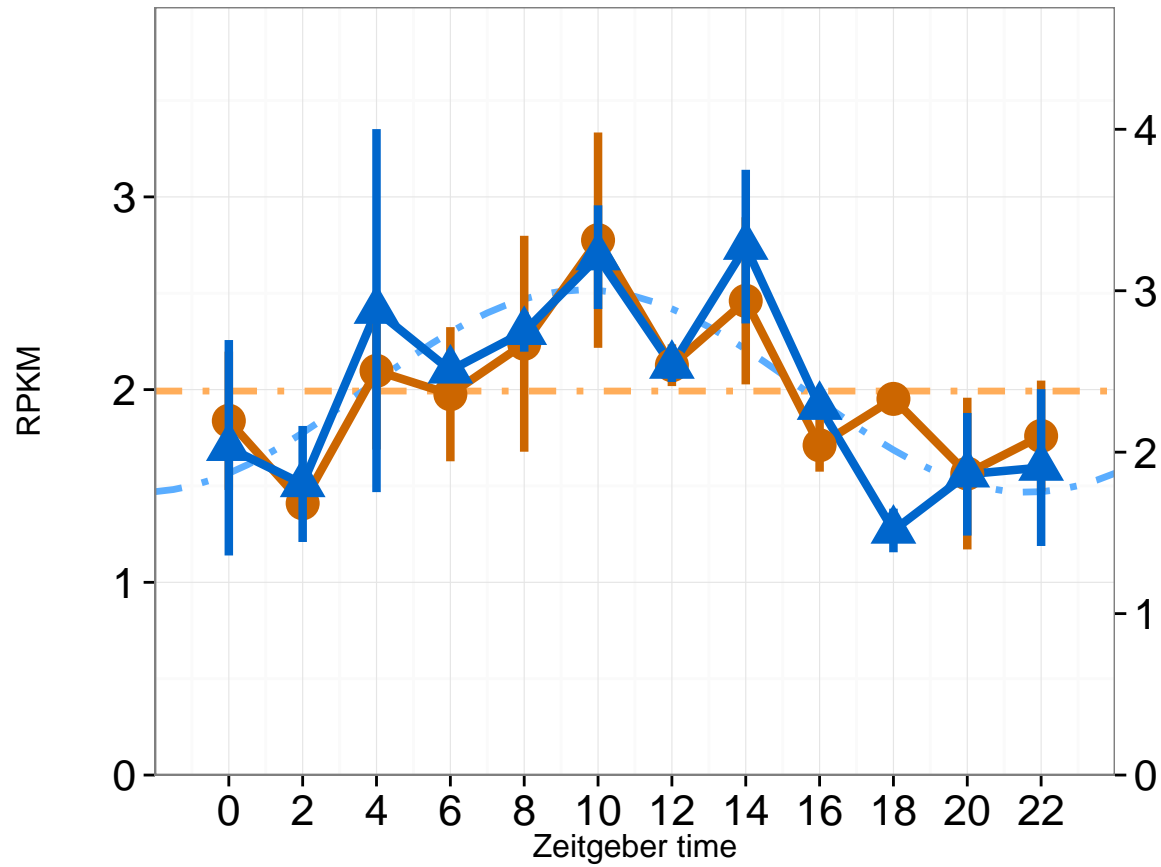

# Inca1

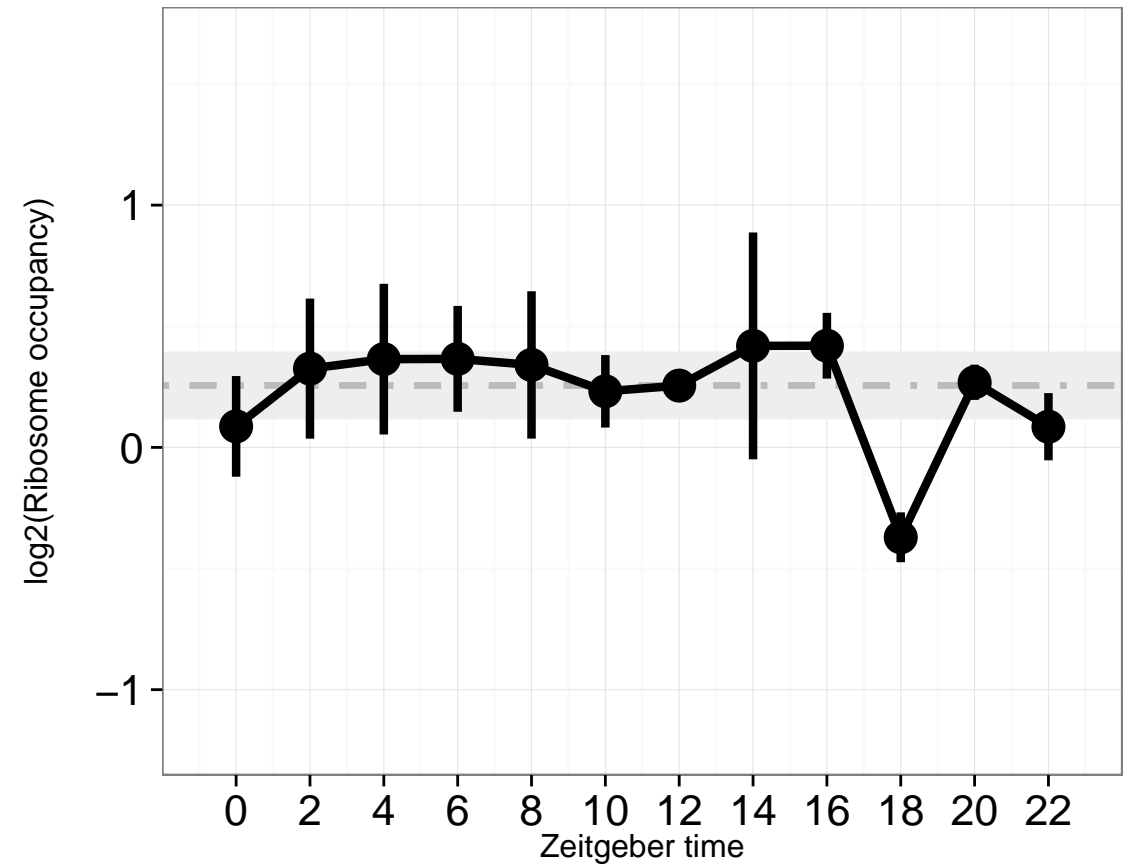

Supplement: Supplementary file 2894 [file 1]

## Glo1

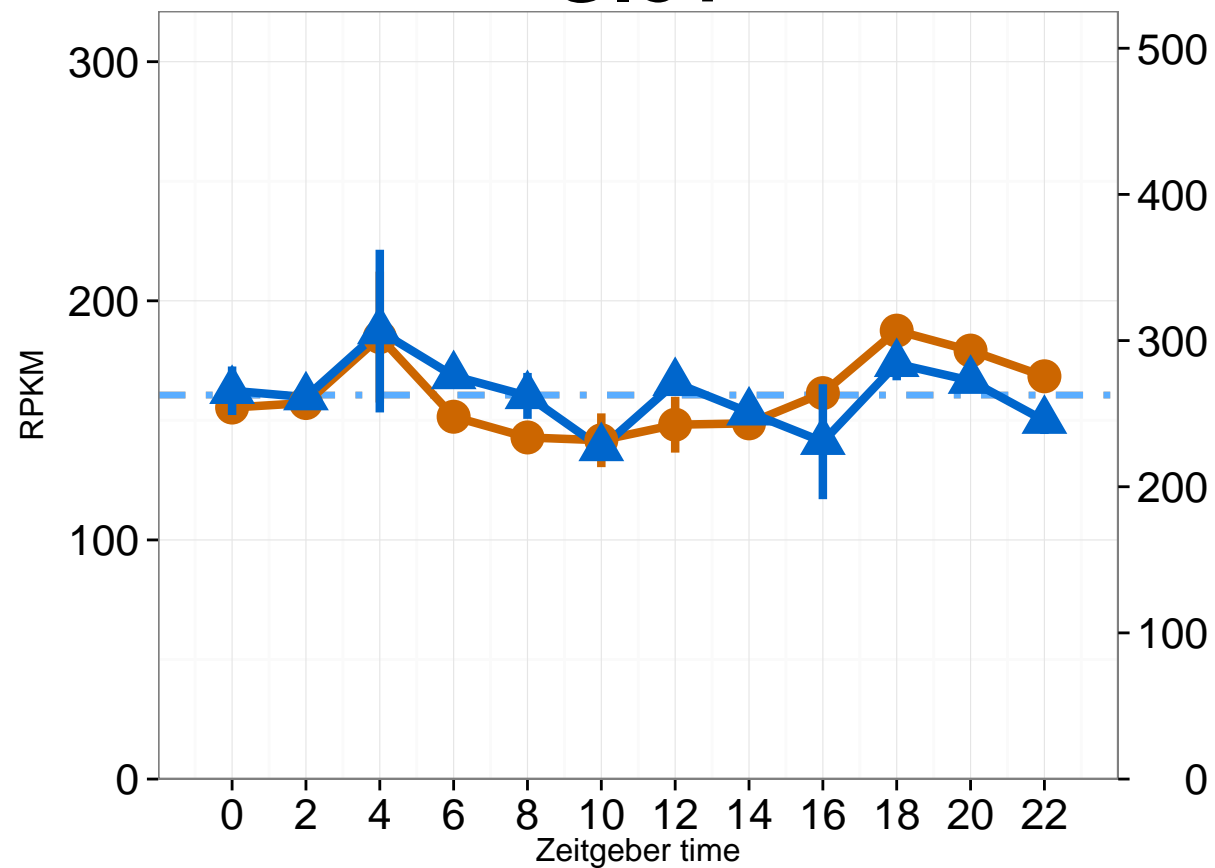

## Glo1

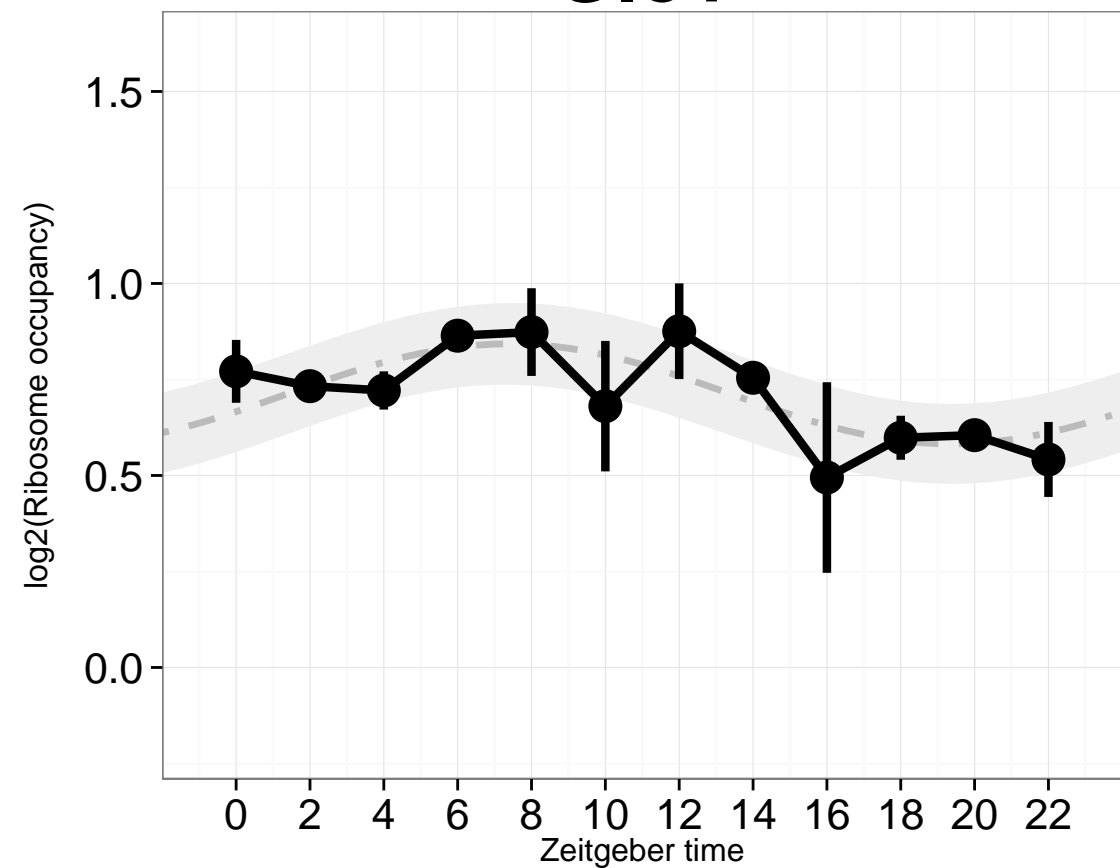

Supplement: Supplementary file 2895 [file 1]

## Igf2r

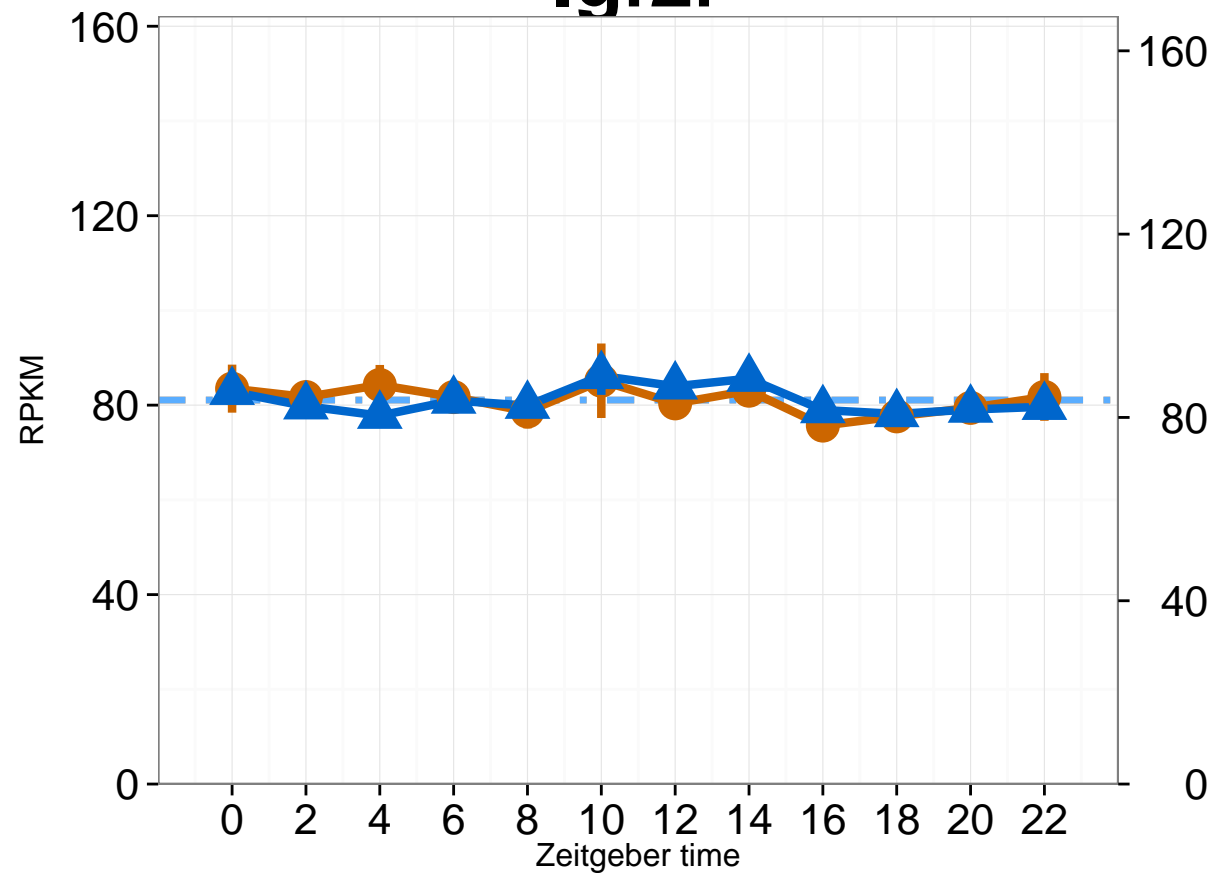

## Igf2r

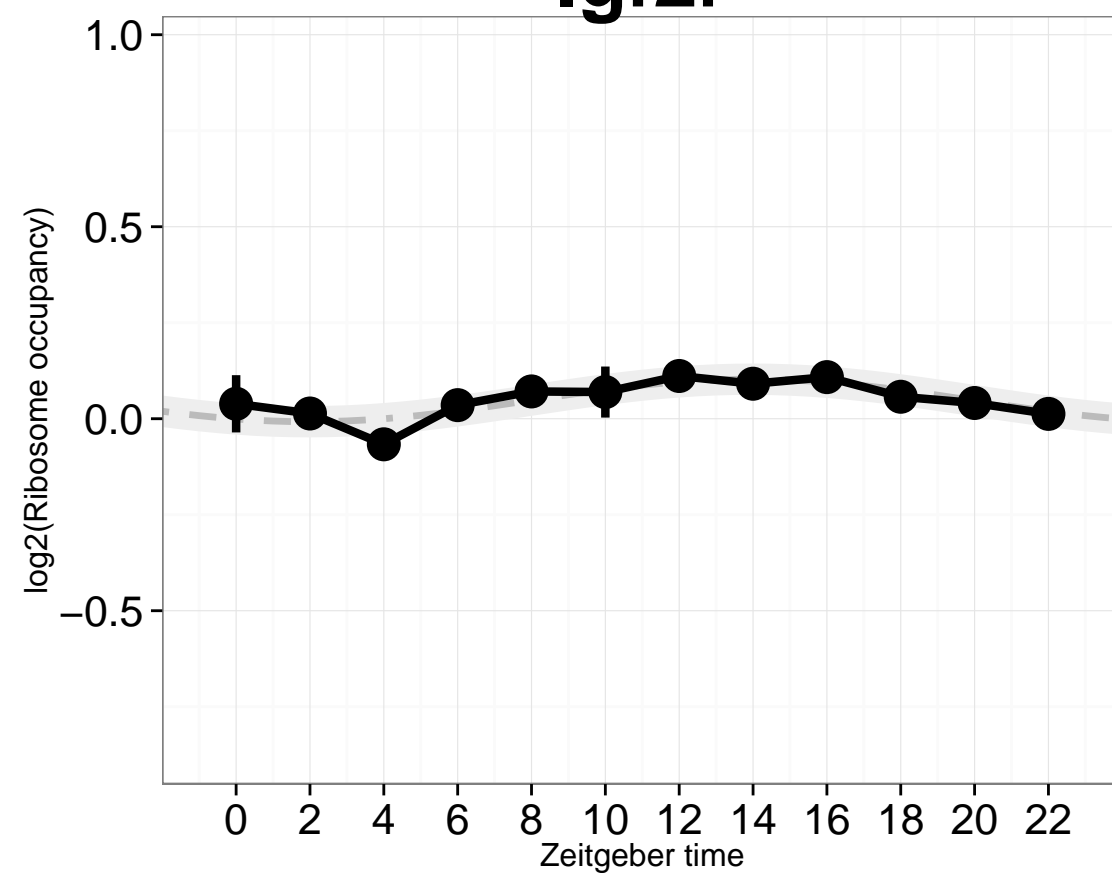

Supplement: Supplementary file 2896 [file 1]

## Gatsl2

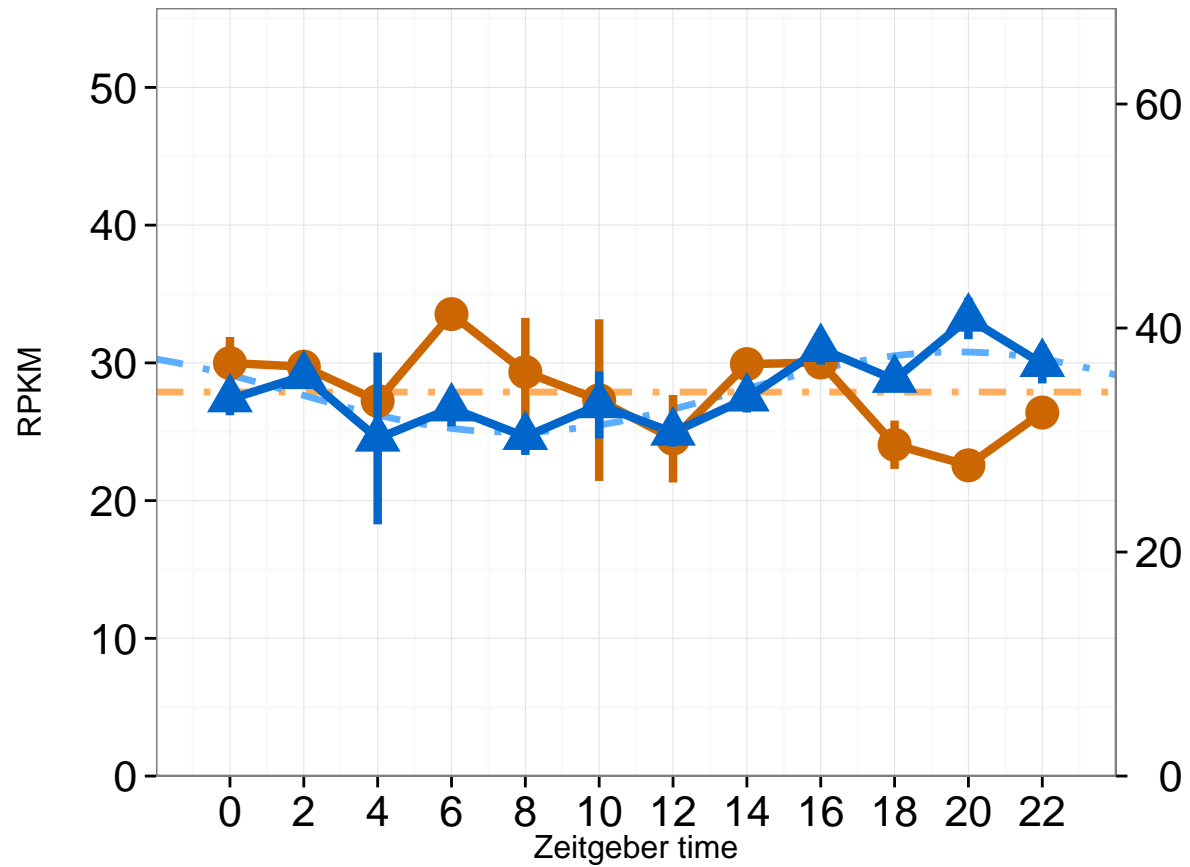

## Gatsl2

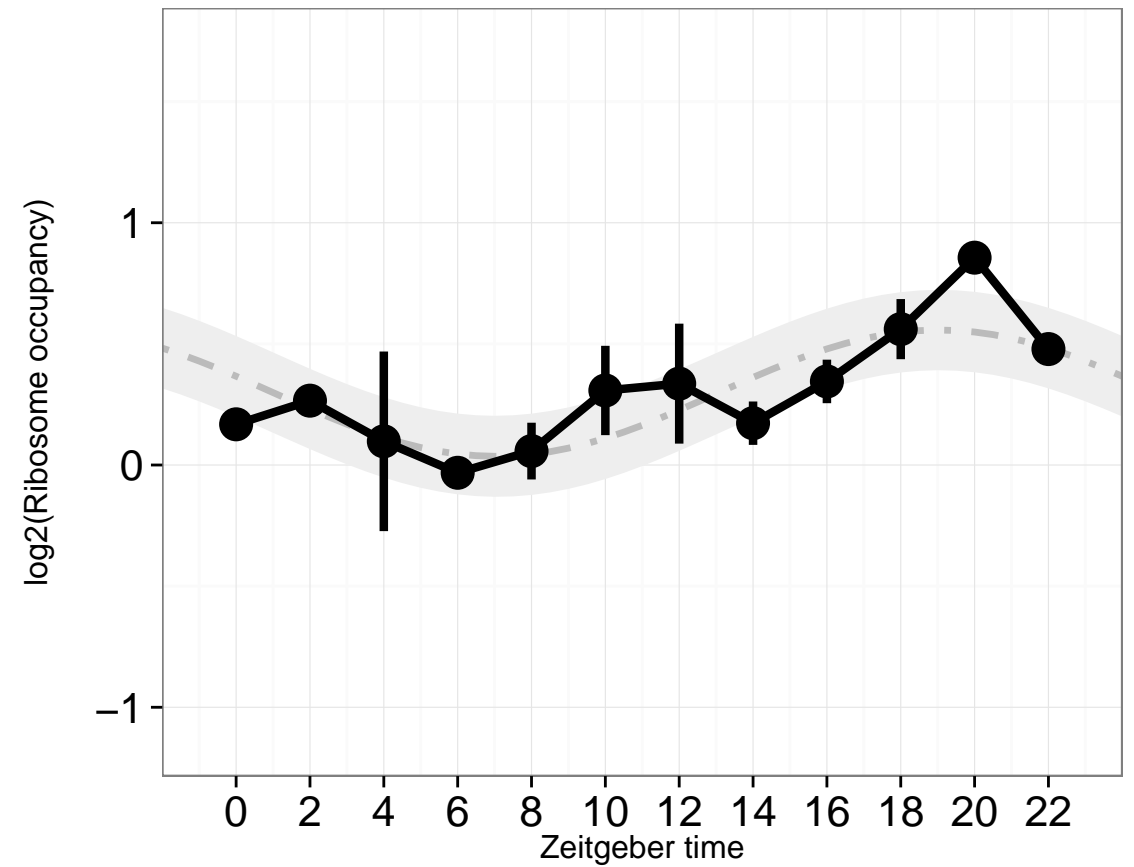

Supplement: Supplementary file 2897 [file 1]

# Arhgef39

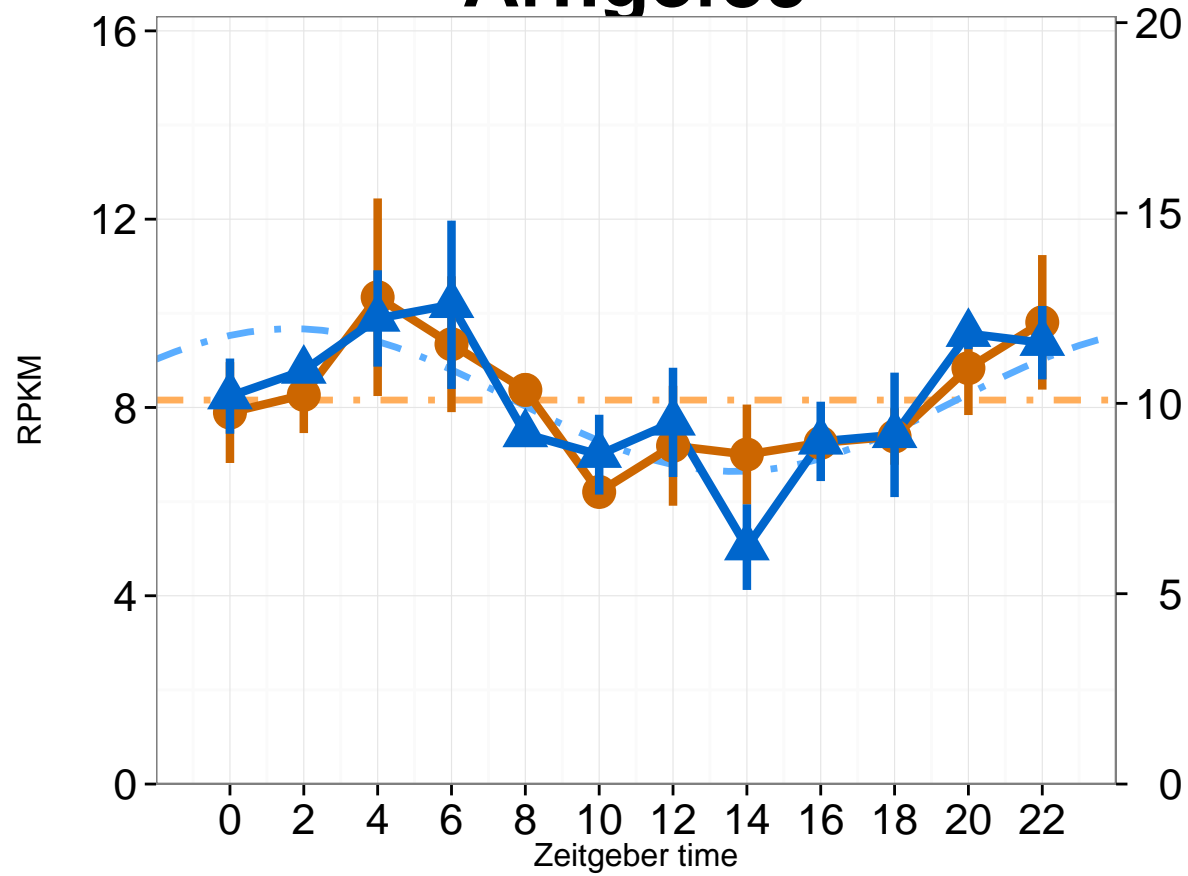

# Arhgef39

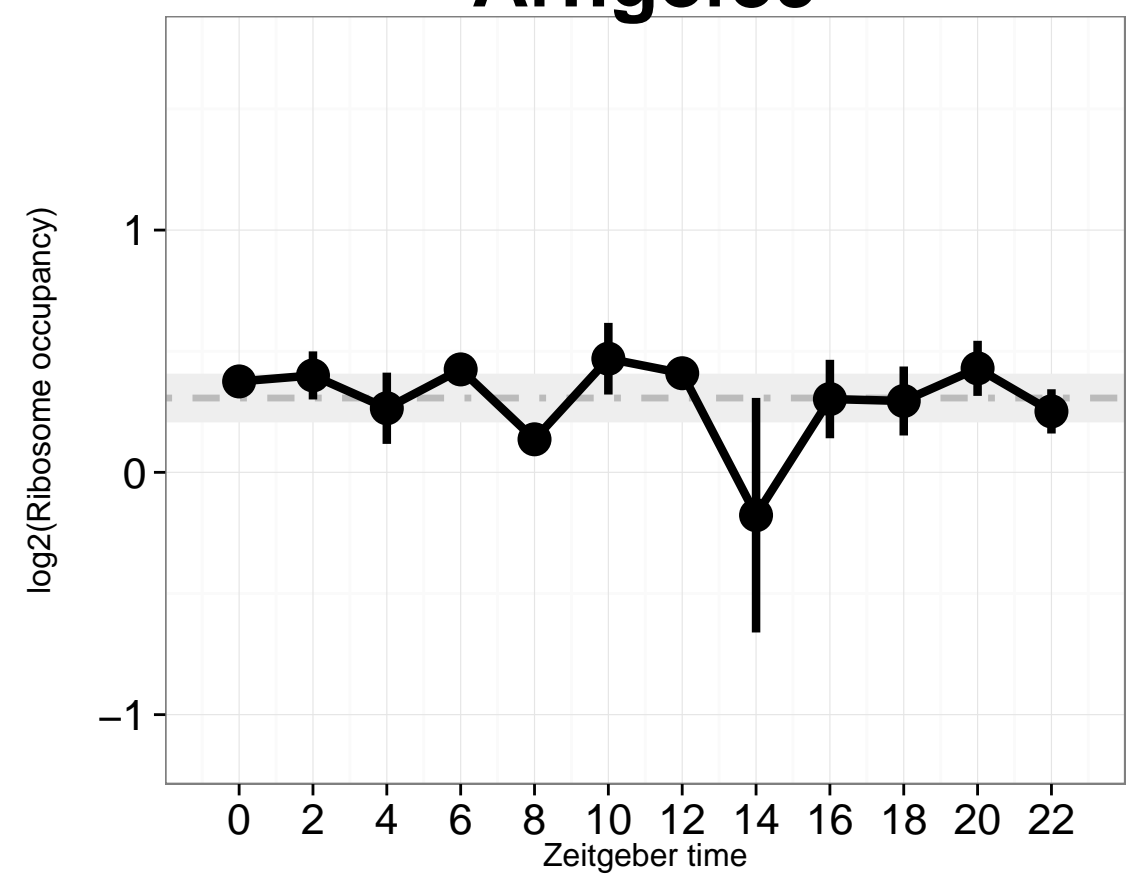

Supplement: Supplementary file 2898 [file 1]

# Maf1

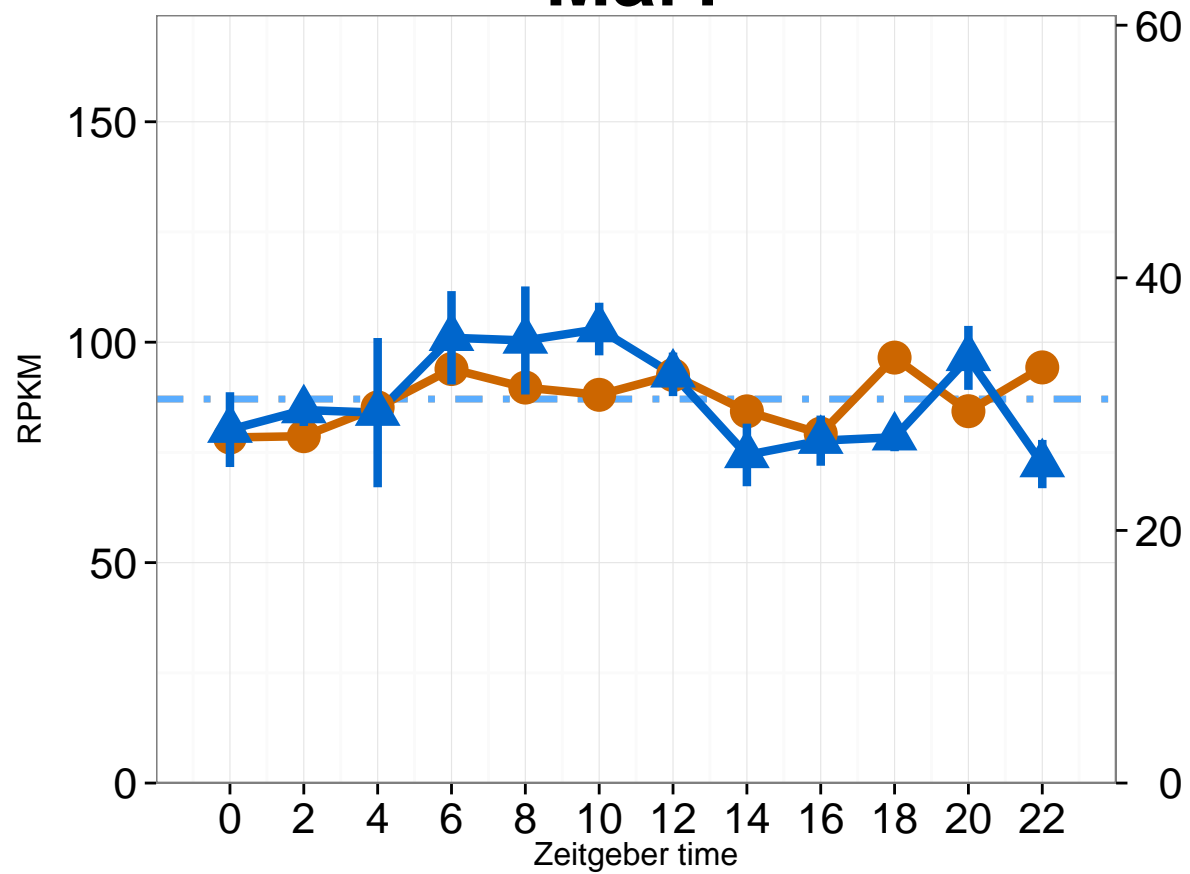

# Maf1

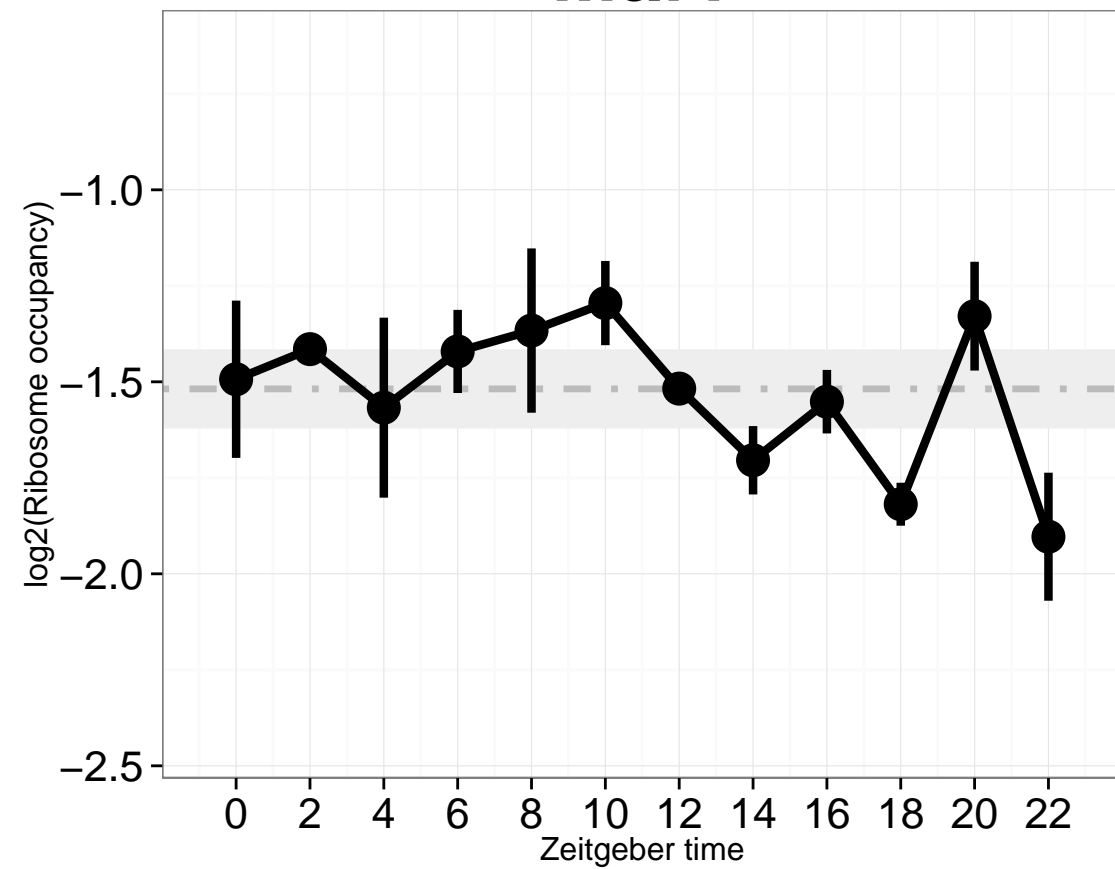

Supplement: Supplementary file 2899 [file 1]

# Acvr2b

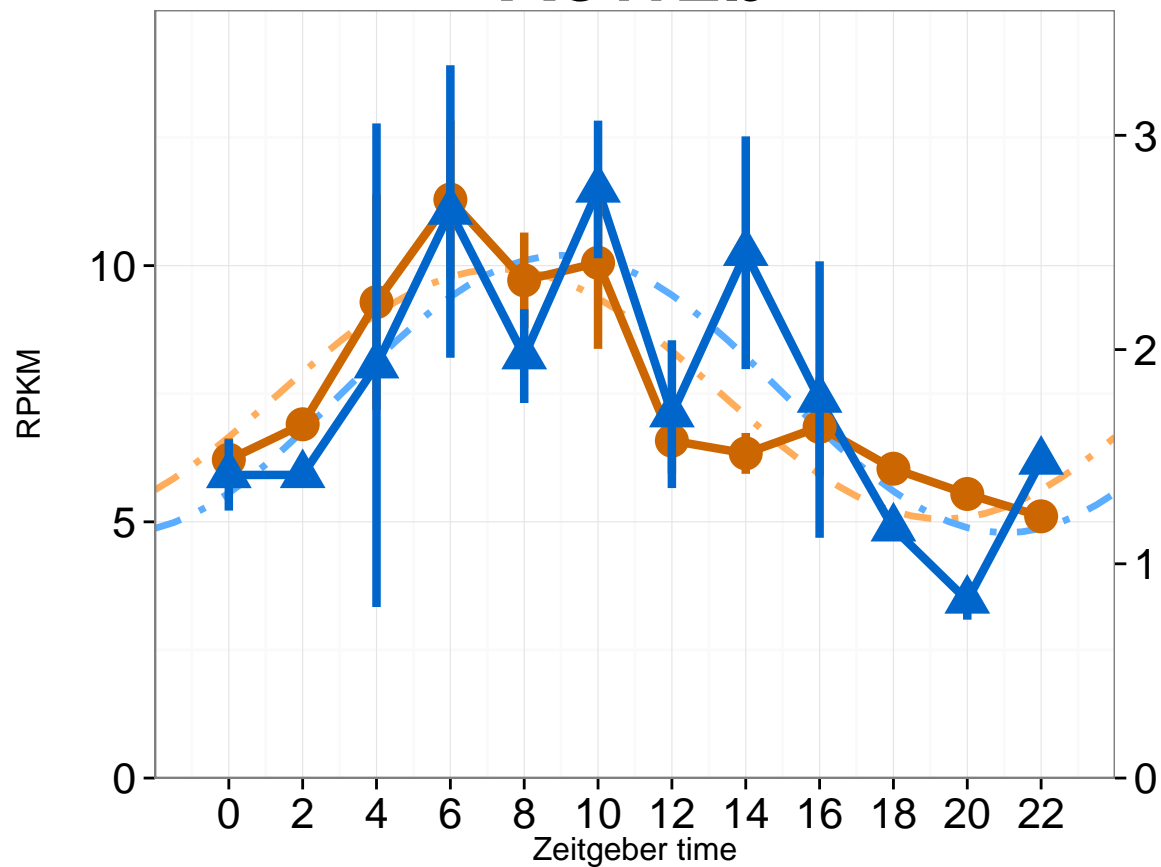

# Acvr2b

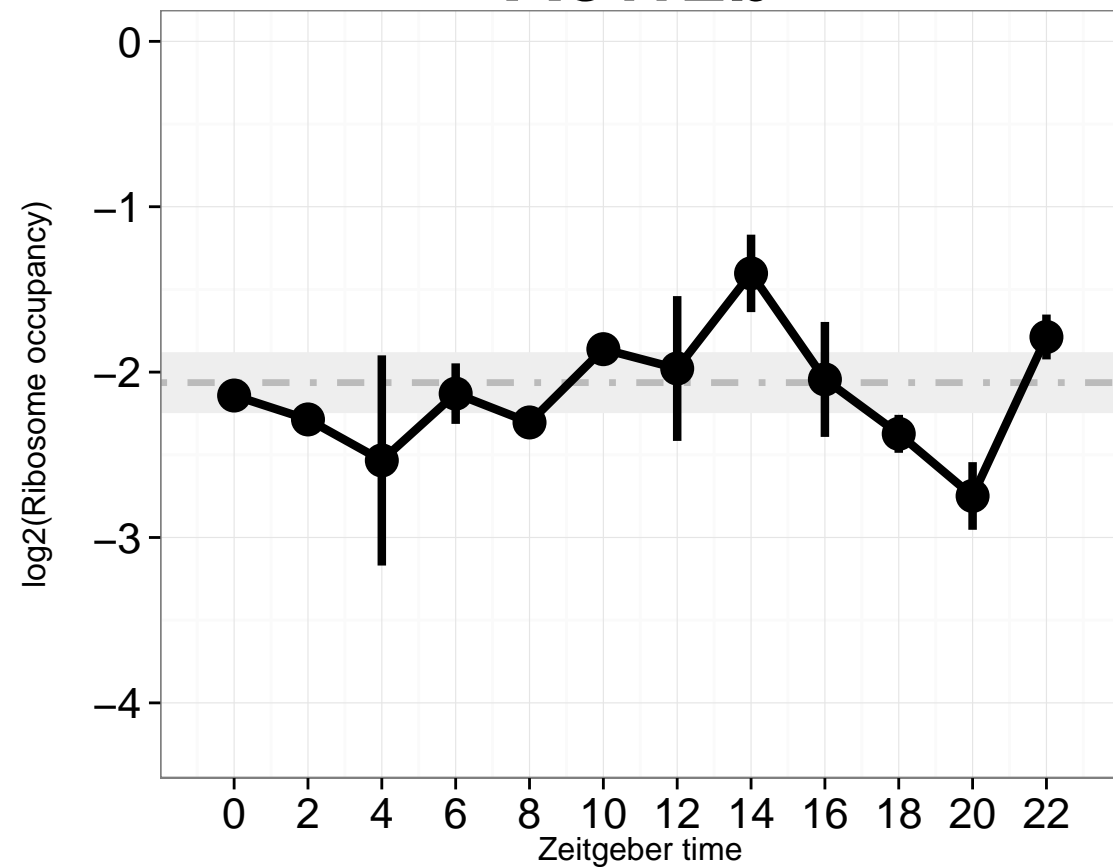

Supplement: Supplementary file 2900 [file 1]

## Ict1

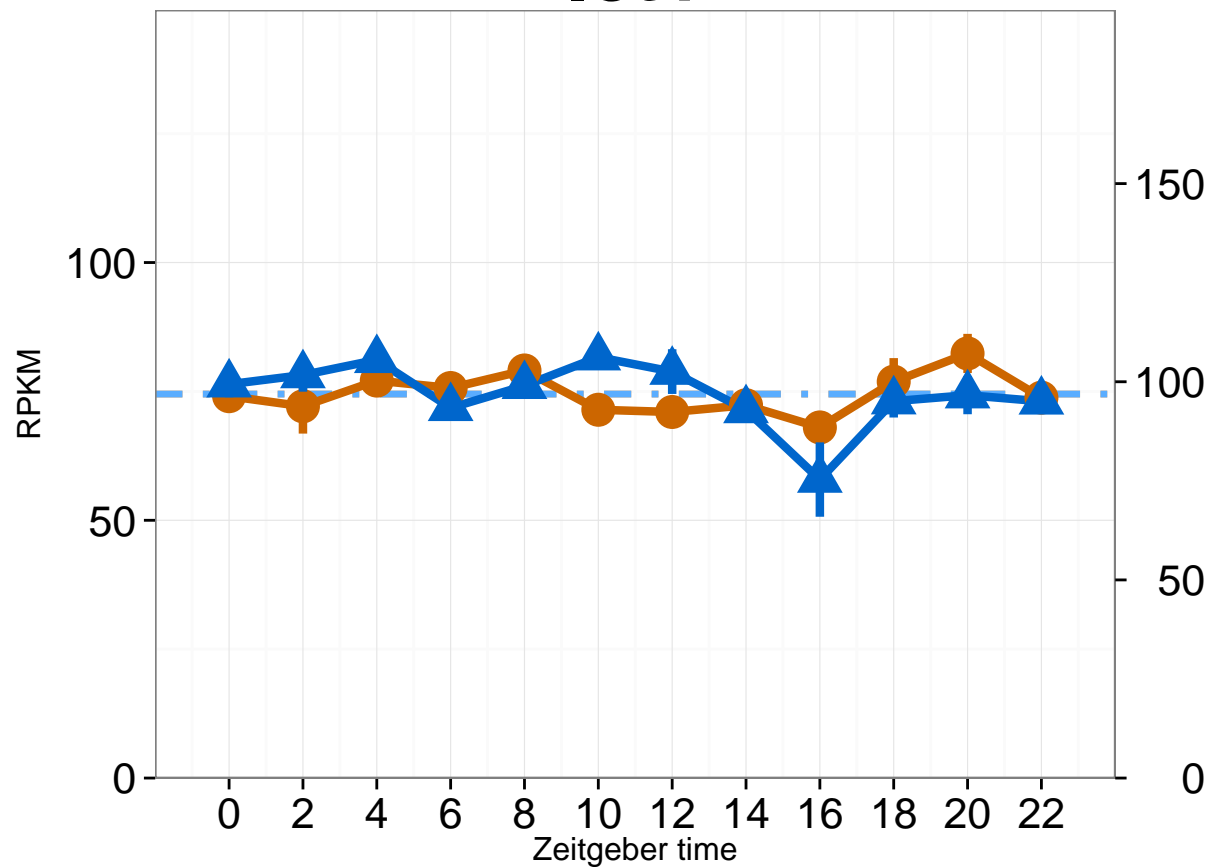

## Ict1

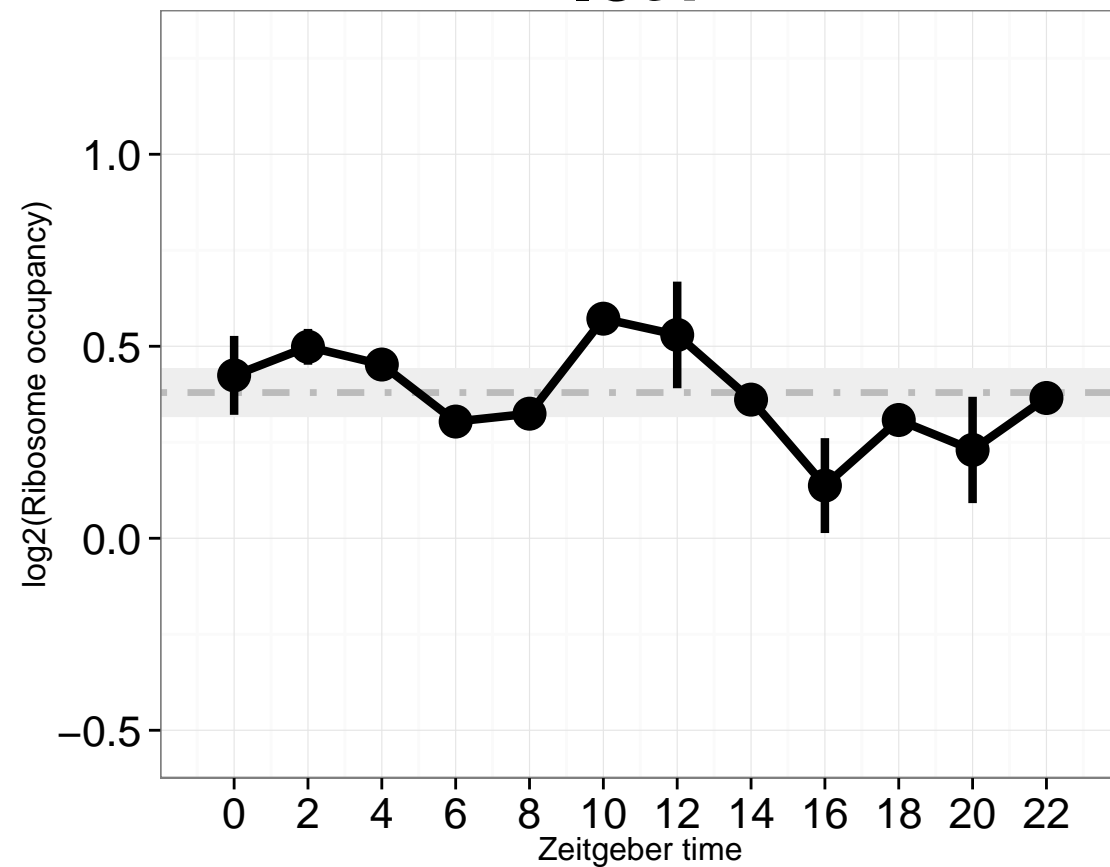

Supplement: Supplementary file 2901 [file 1]

## Rara

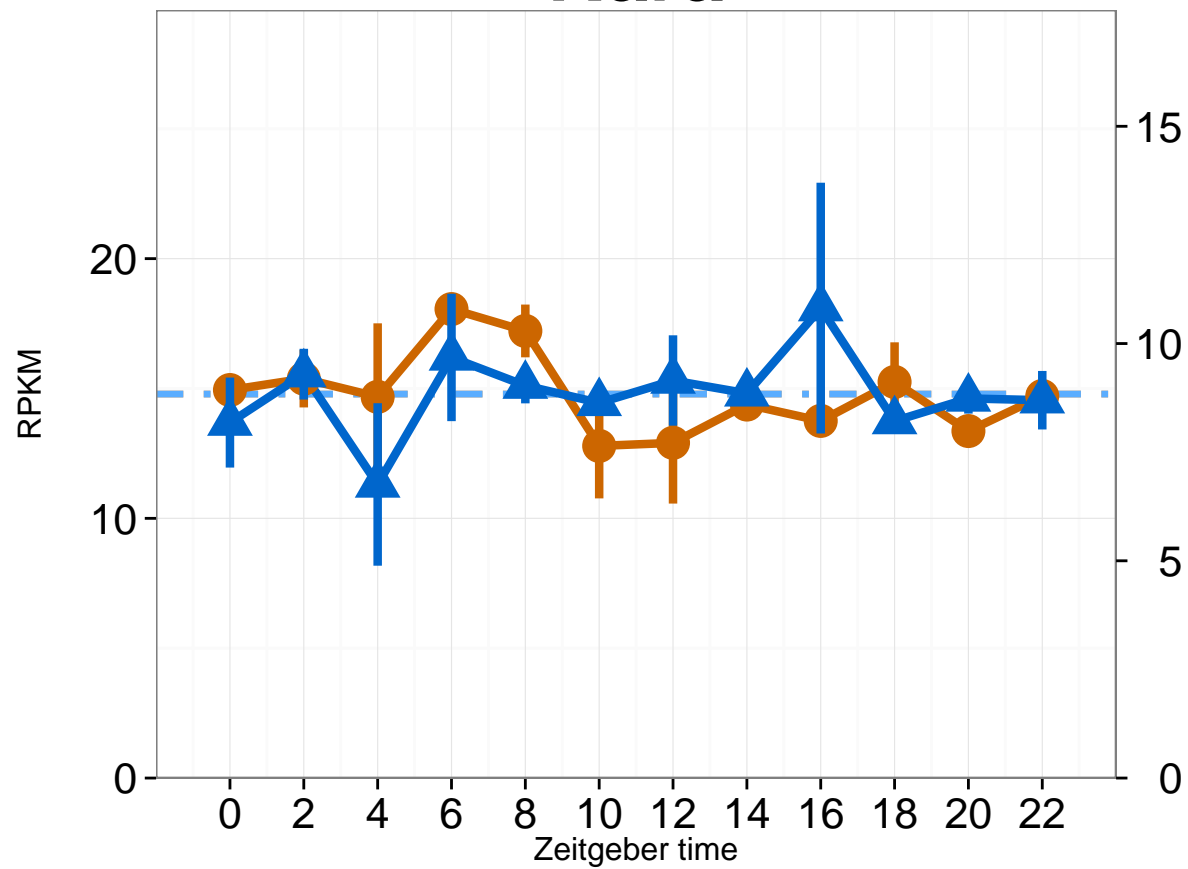

## Rara

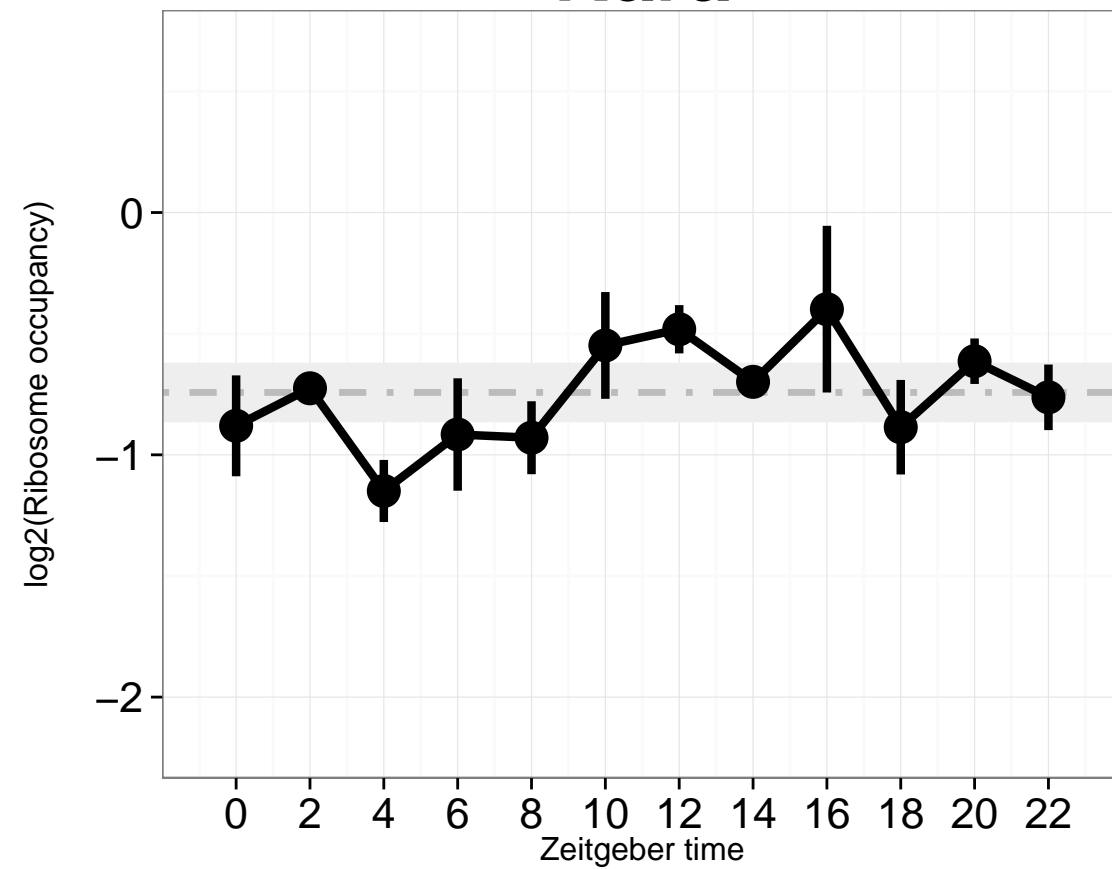

Supplement: Supplementary file 2902 [file 1]

# Slc35e1

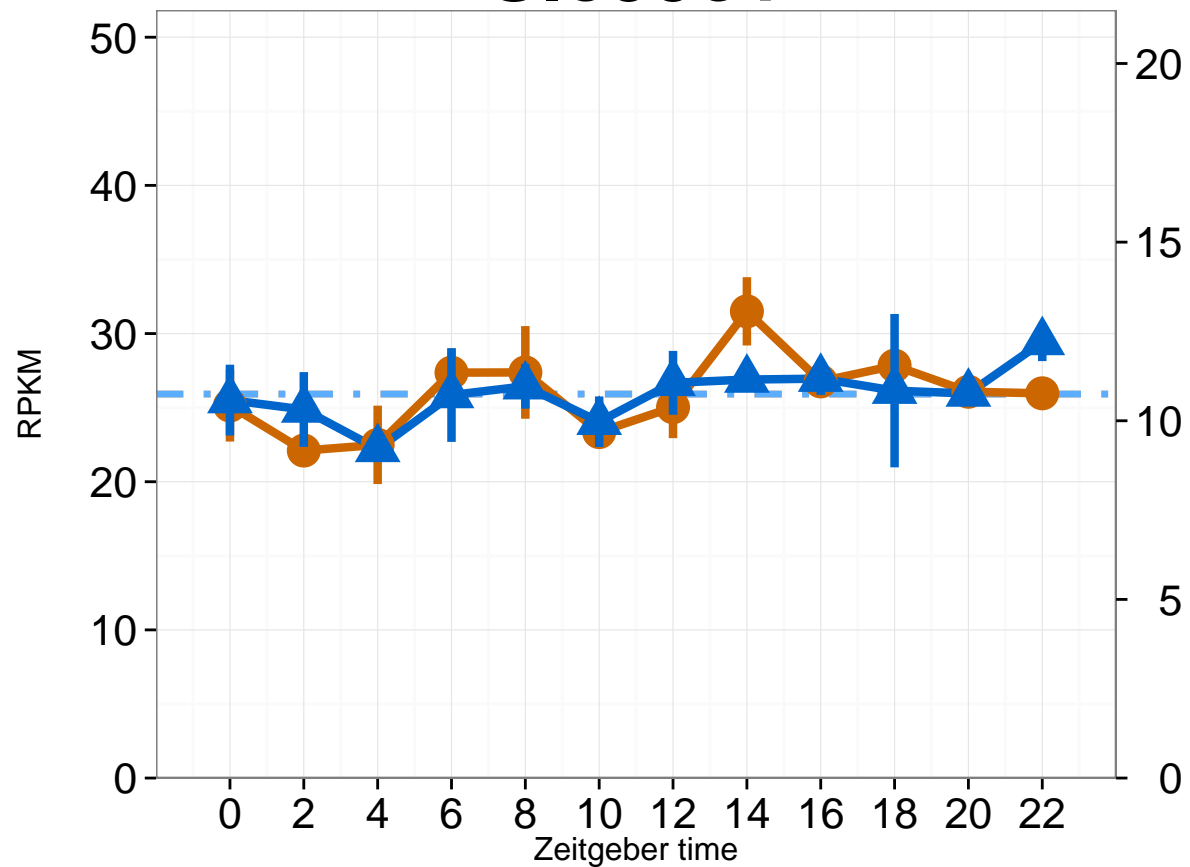

# Slc35e1

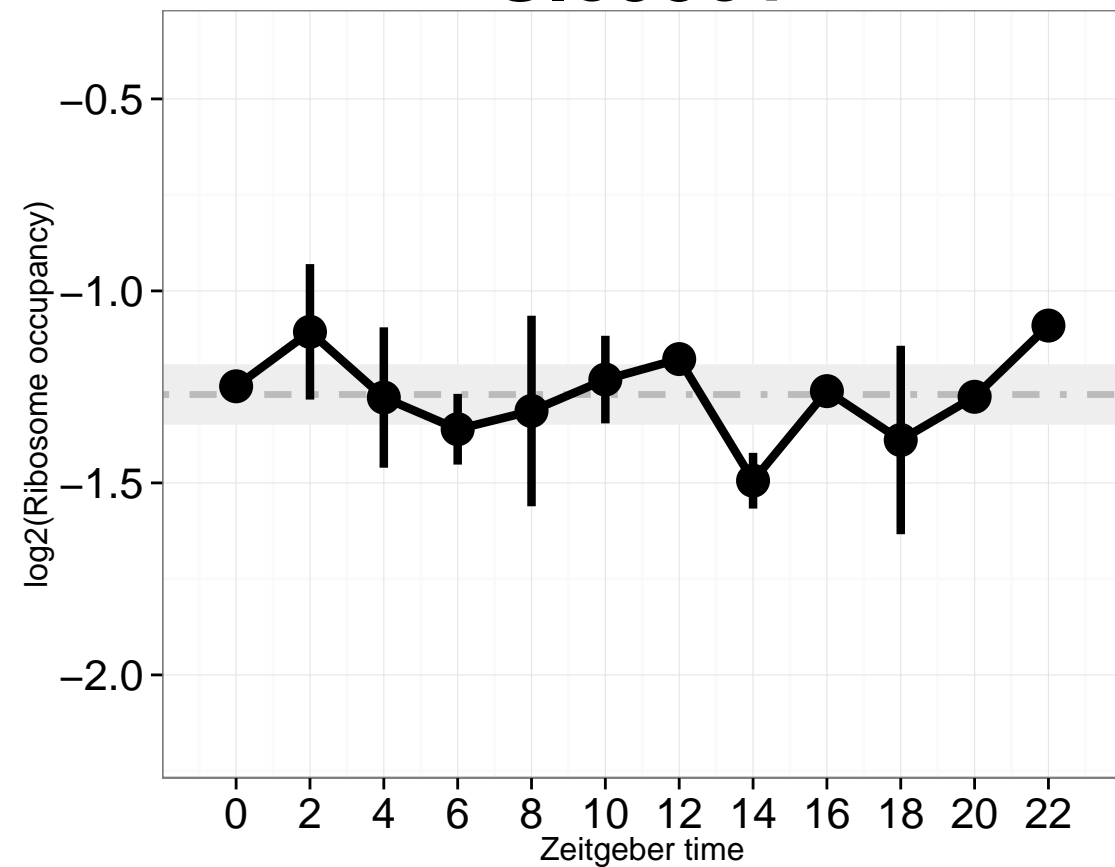

Supplement: Supplementary file 2903 [file 1]

## Appbp2

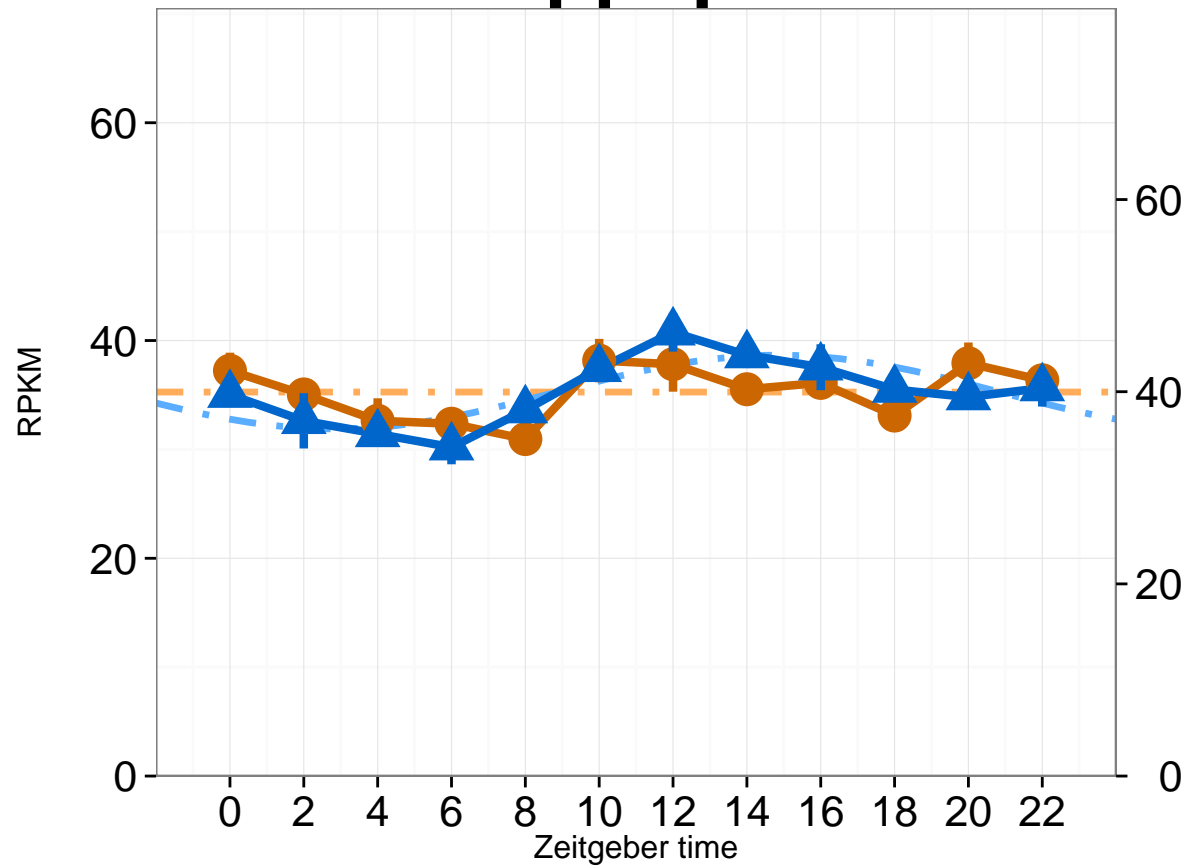

## Appbp2

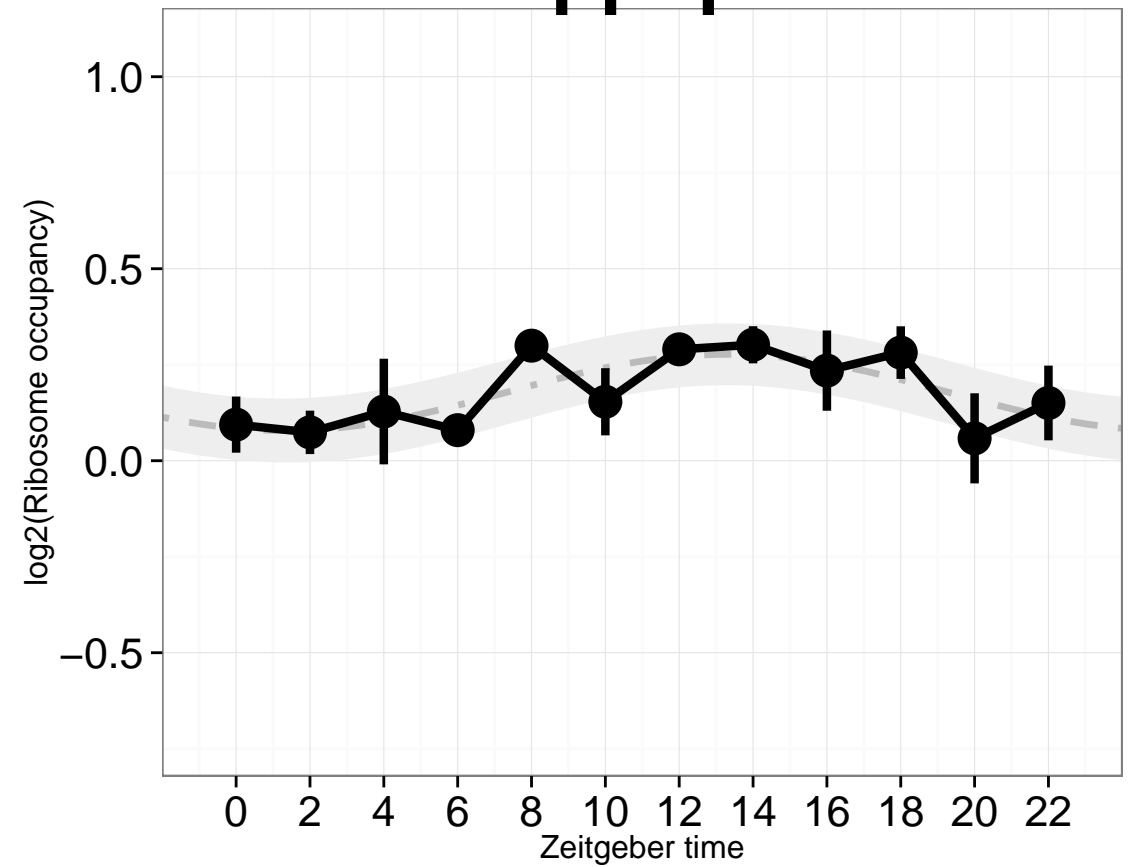

Supplement: Supplementary file 2904 [file 1]

## Ralgps2

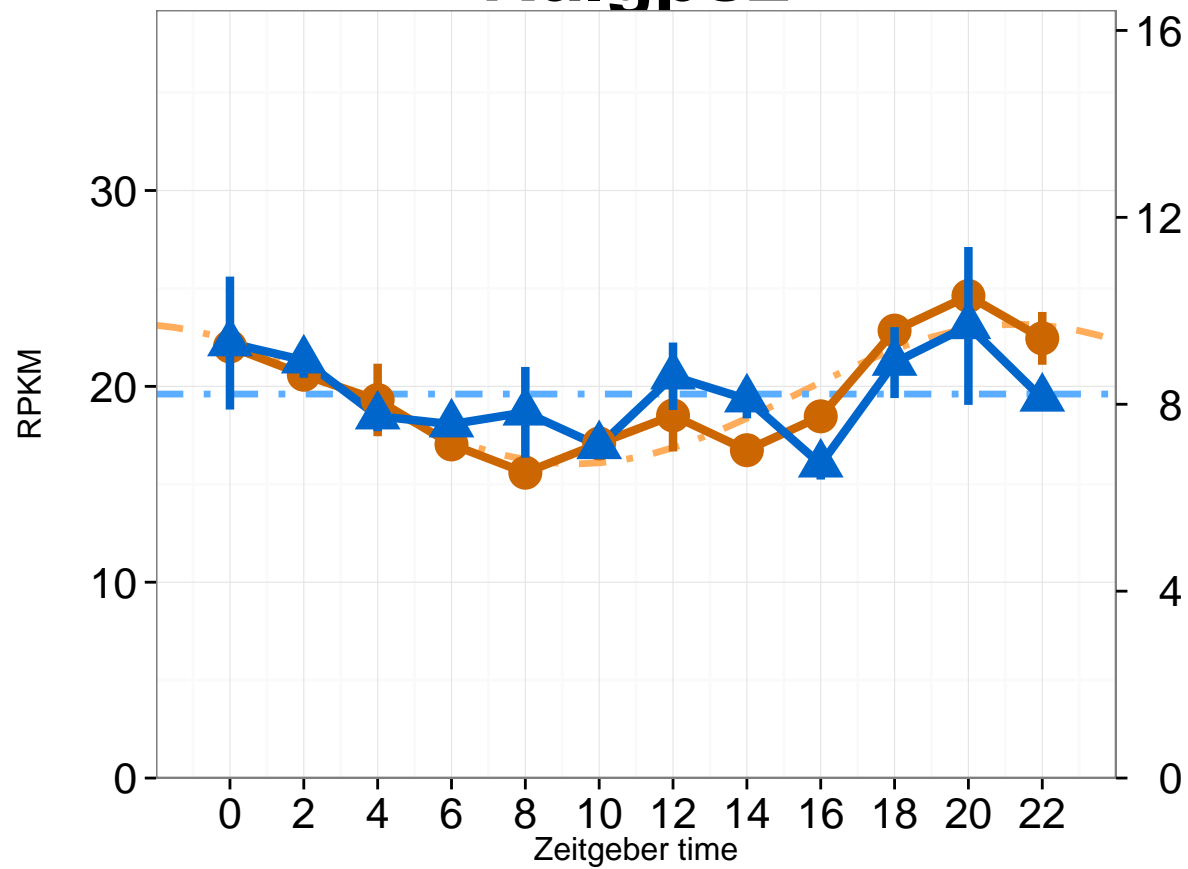

## Ralgps2

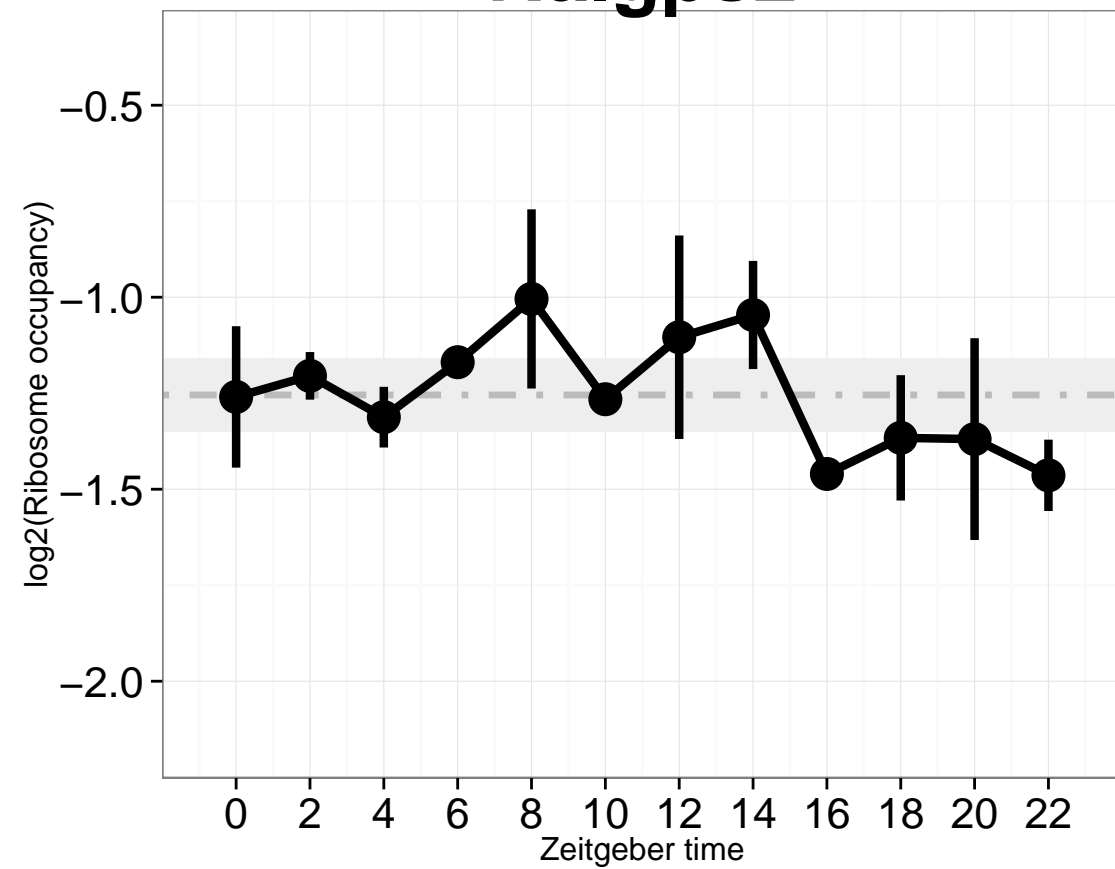

Supplement: Supplementary file 2905 [file 1]

## Abhd11

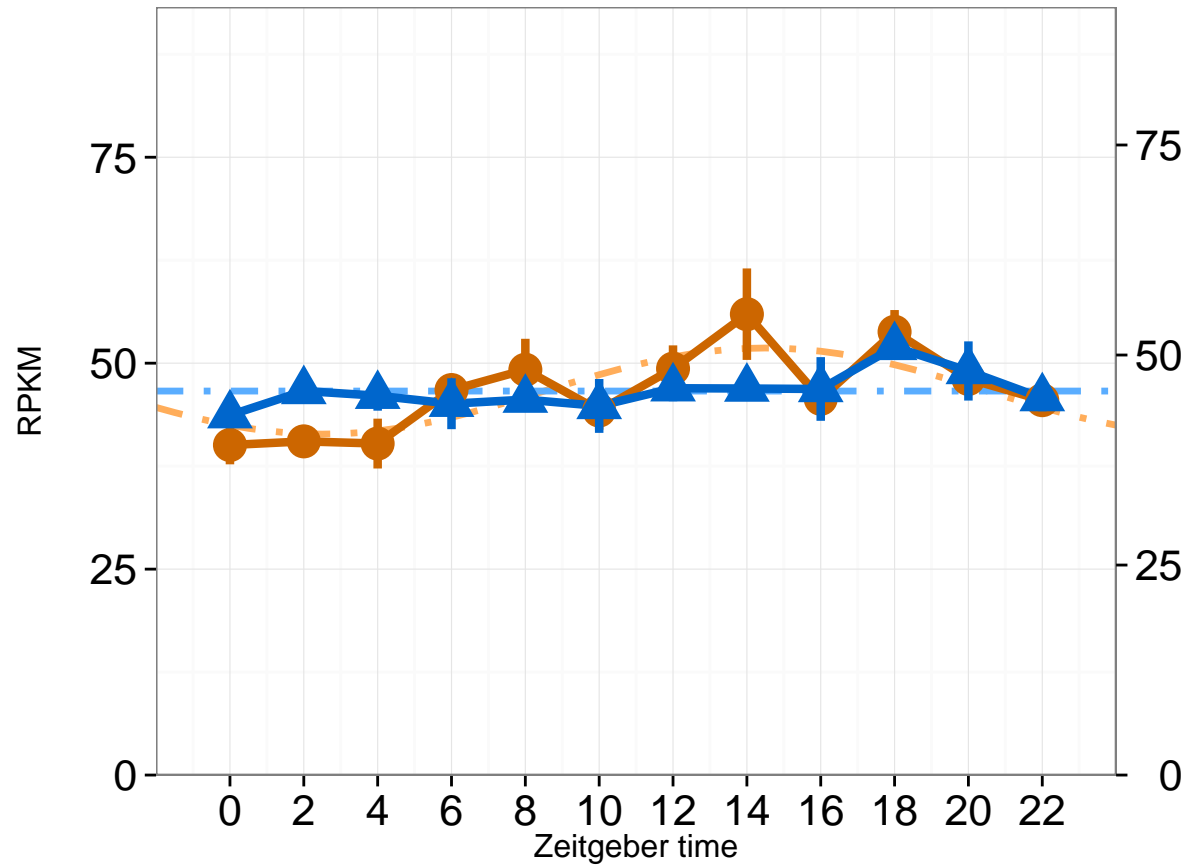

## Abhd11

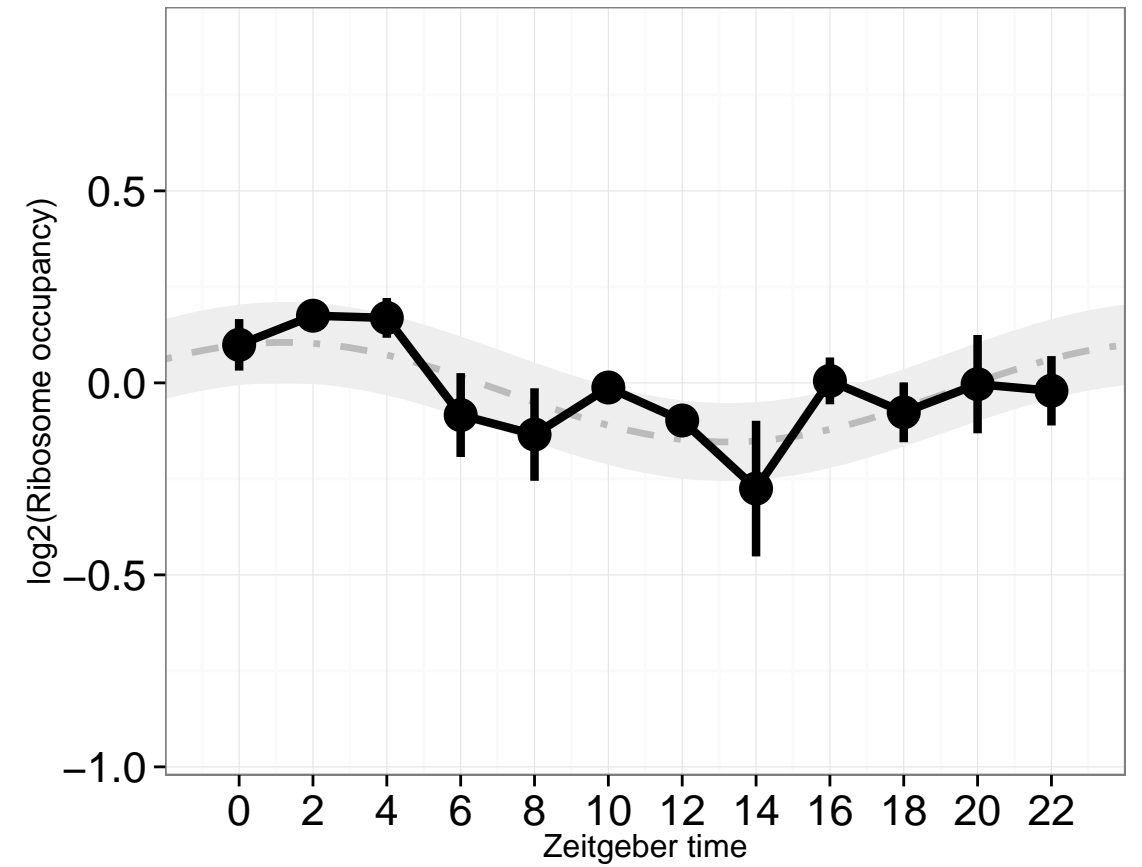

Supplement: Supplementary file 2906 [file 1]

# Hist2h2be

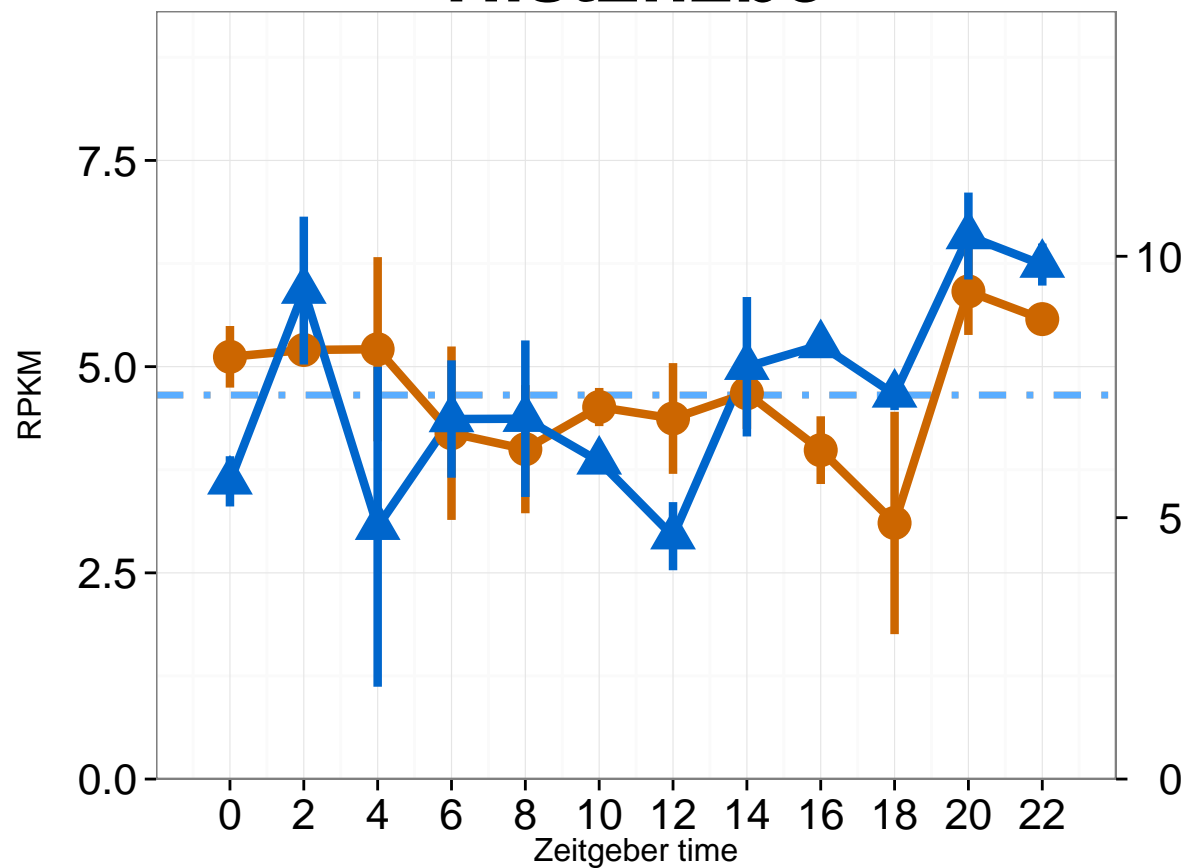

# Hist2h2be

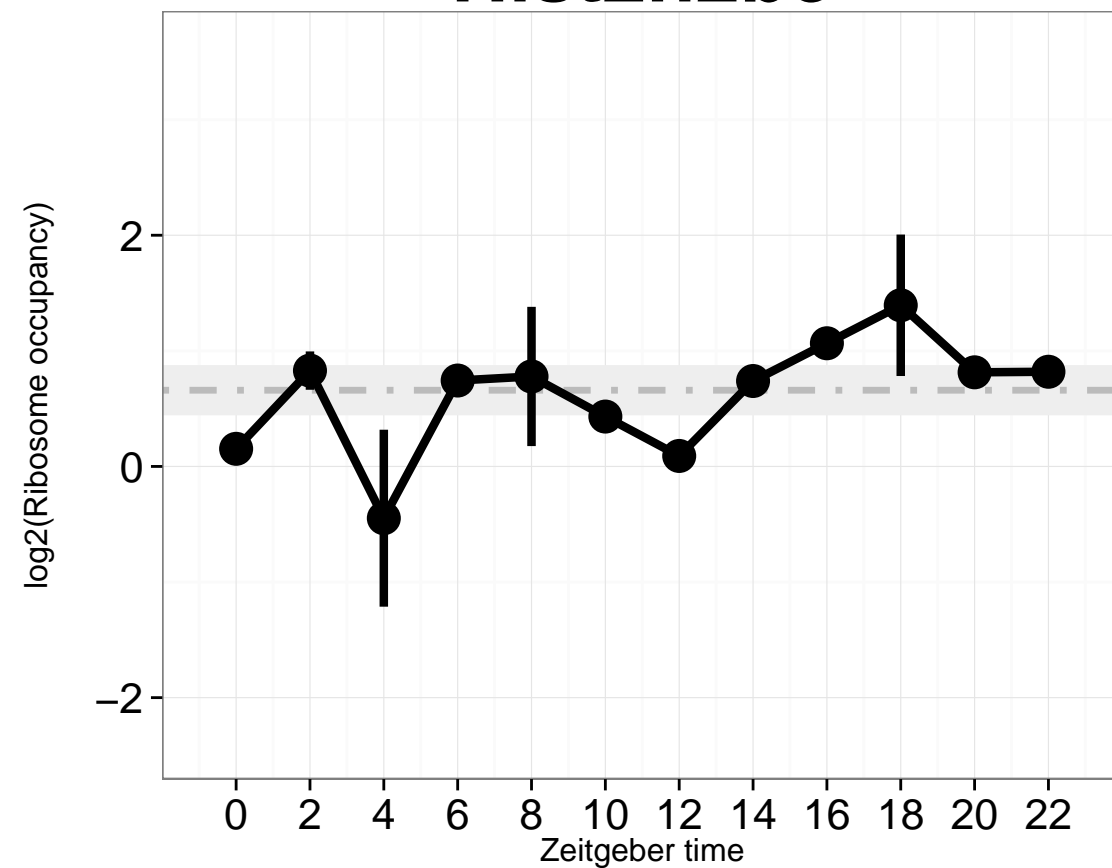

Supplement: Supplementary file 2907 [file 1]

## Zxdb

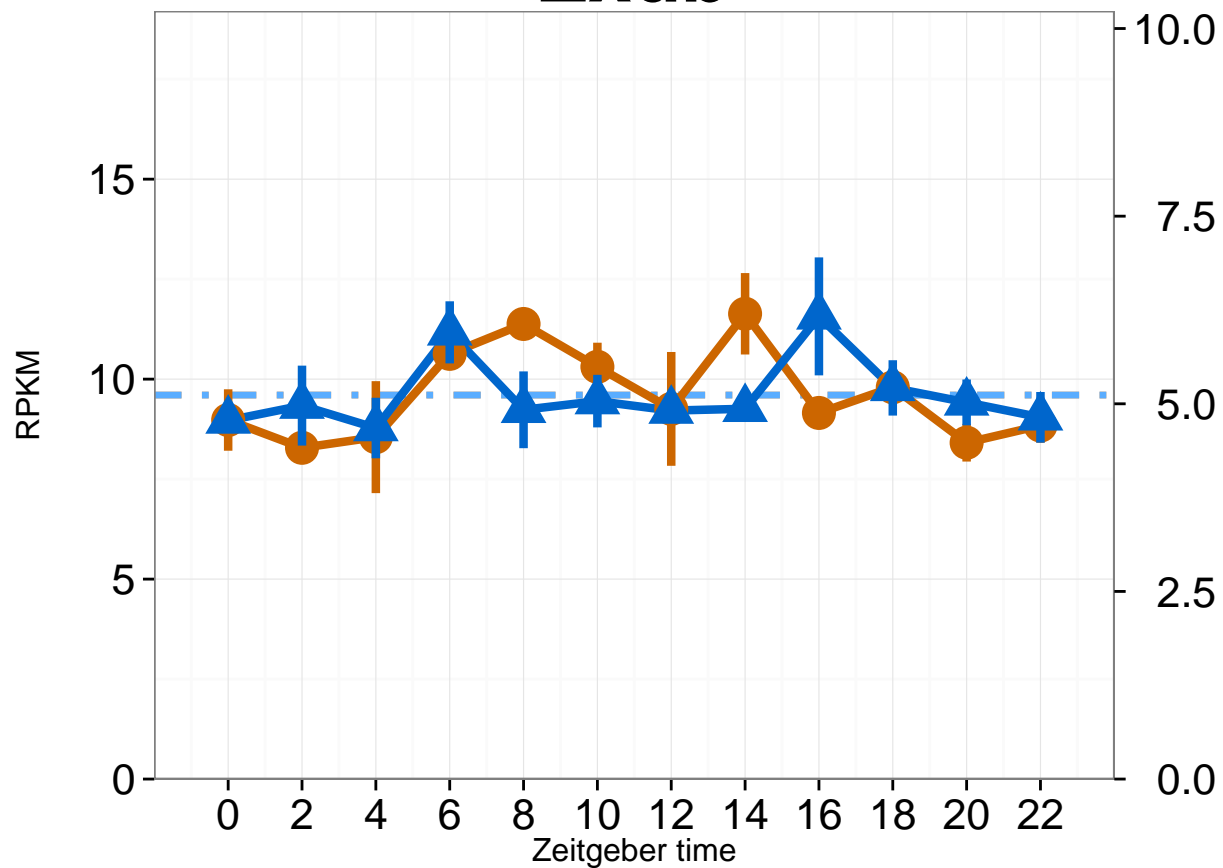

## Zxdb

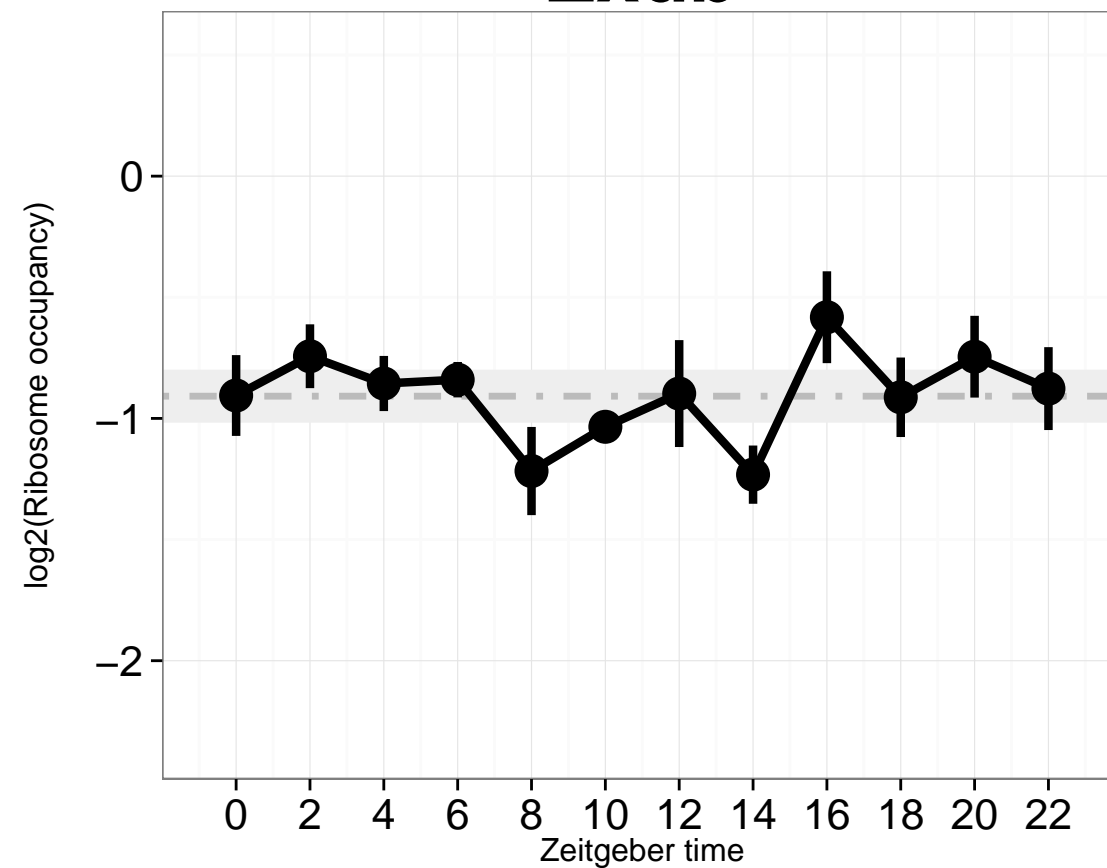

Supplement: Supplementary file 2908 [file 1]

## Traf4

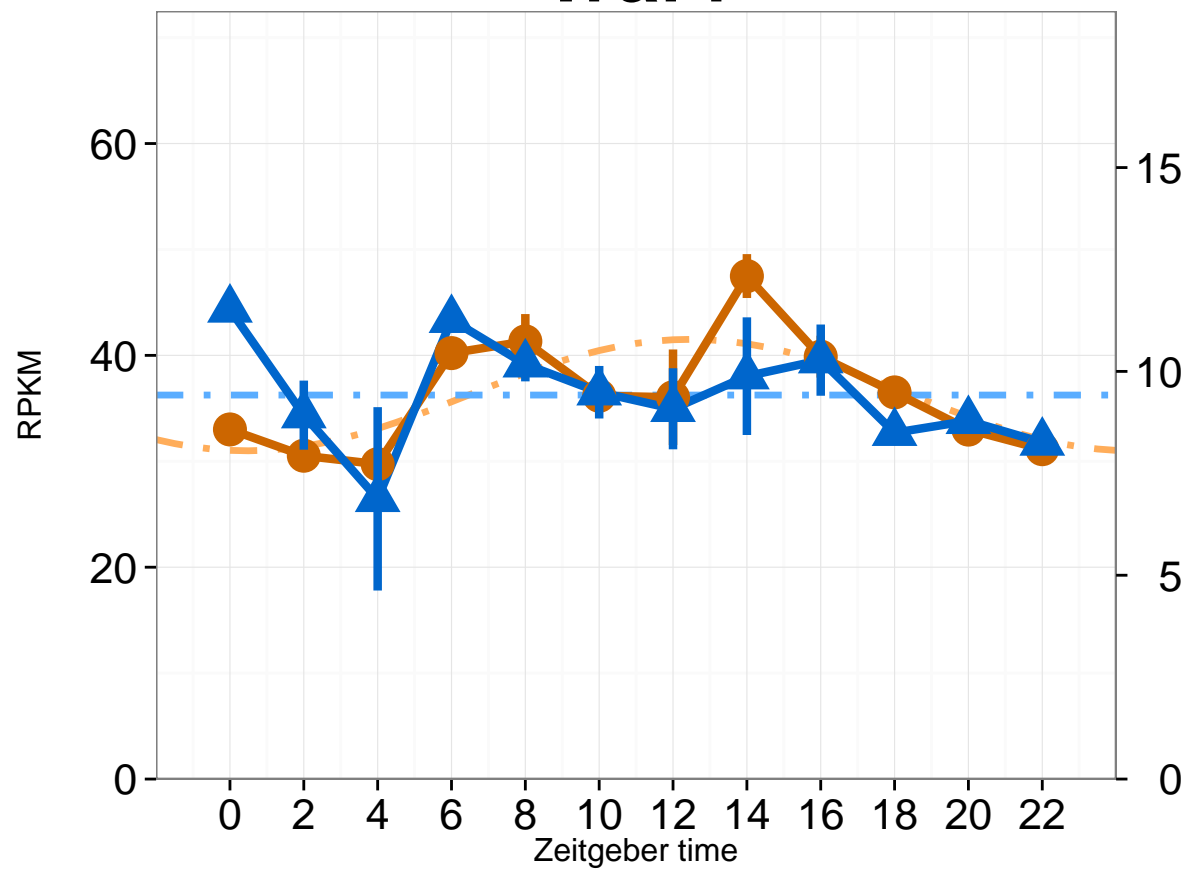

## Traf4

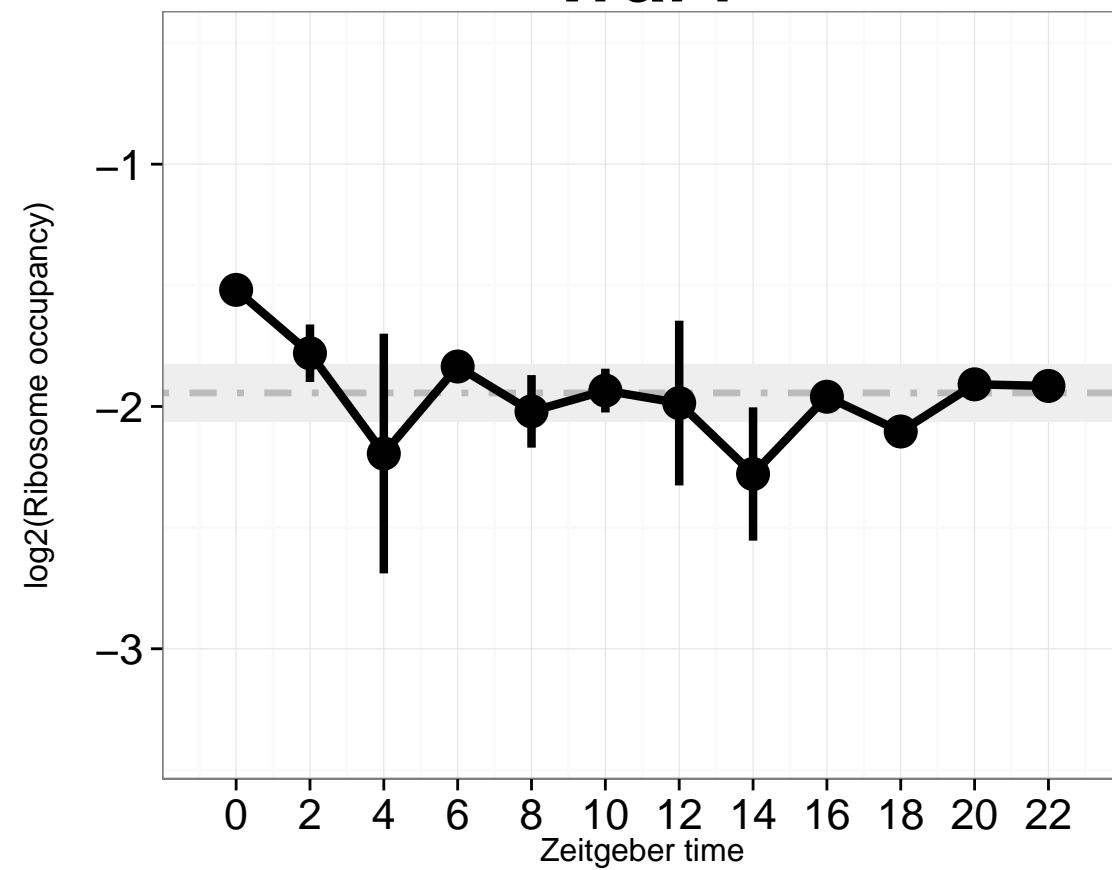

Supplement: Supplementary file 2909 [file 1]

# Cby1

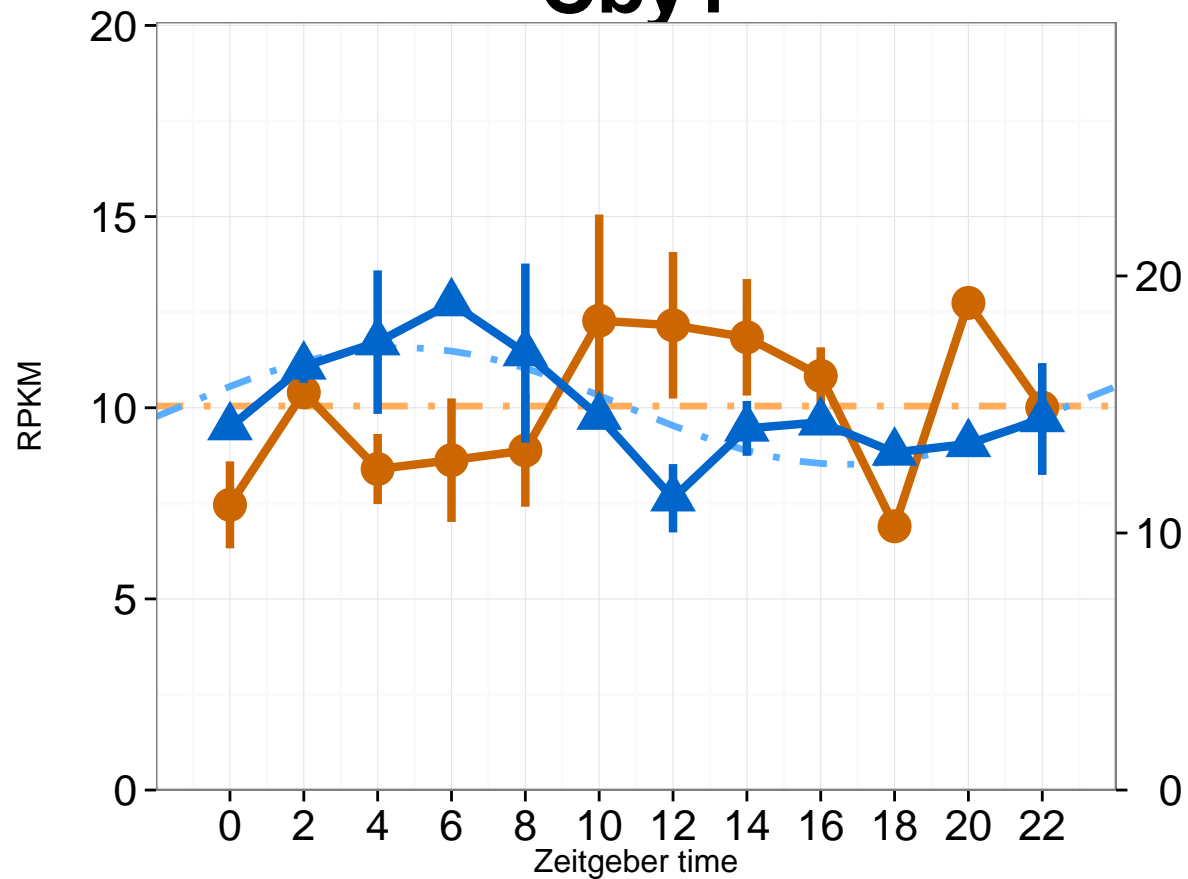

# Cby1

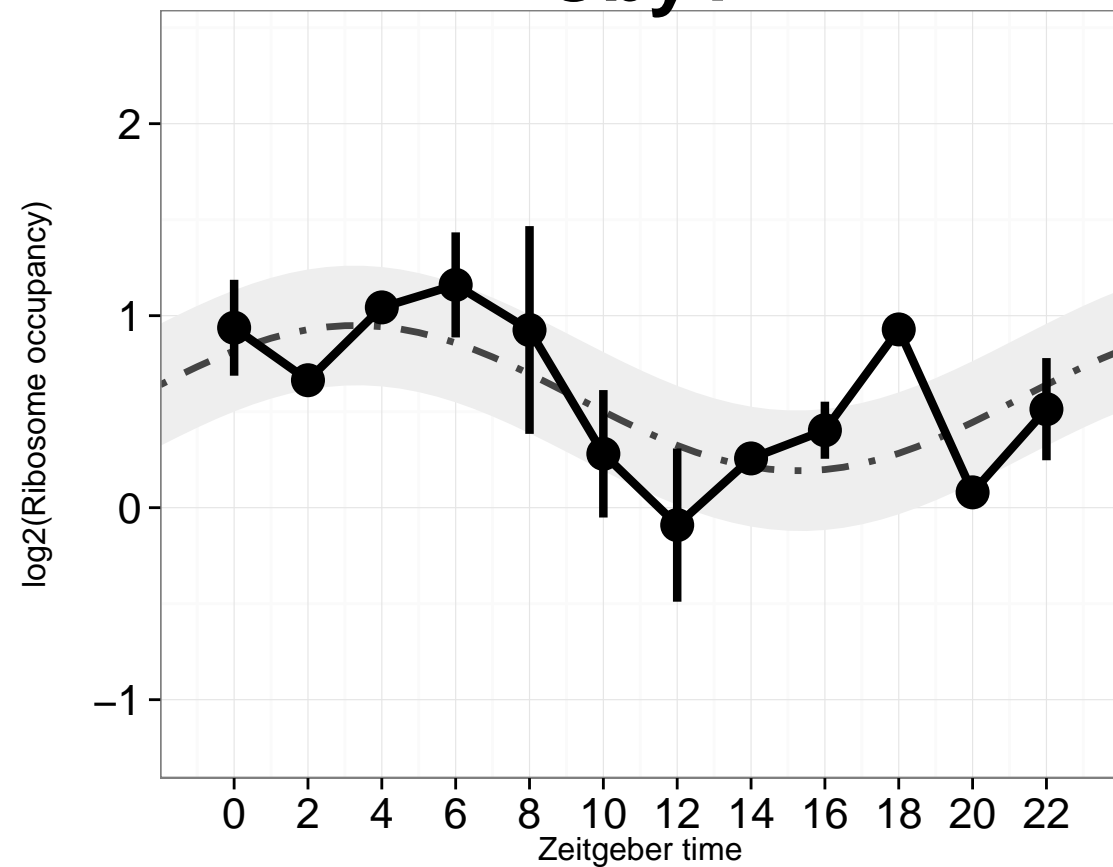

Supplement: Supplementary file 2910 [file 1]
