# Supplementary material (part 30 of 133)
Source: publisher figshare collection journal article supplement (https://springernature.figshare.com/articles/dataset/_/4903193)

# Gpr182

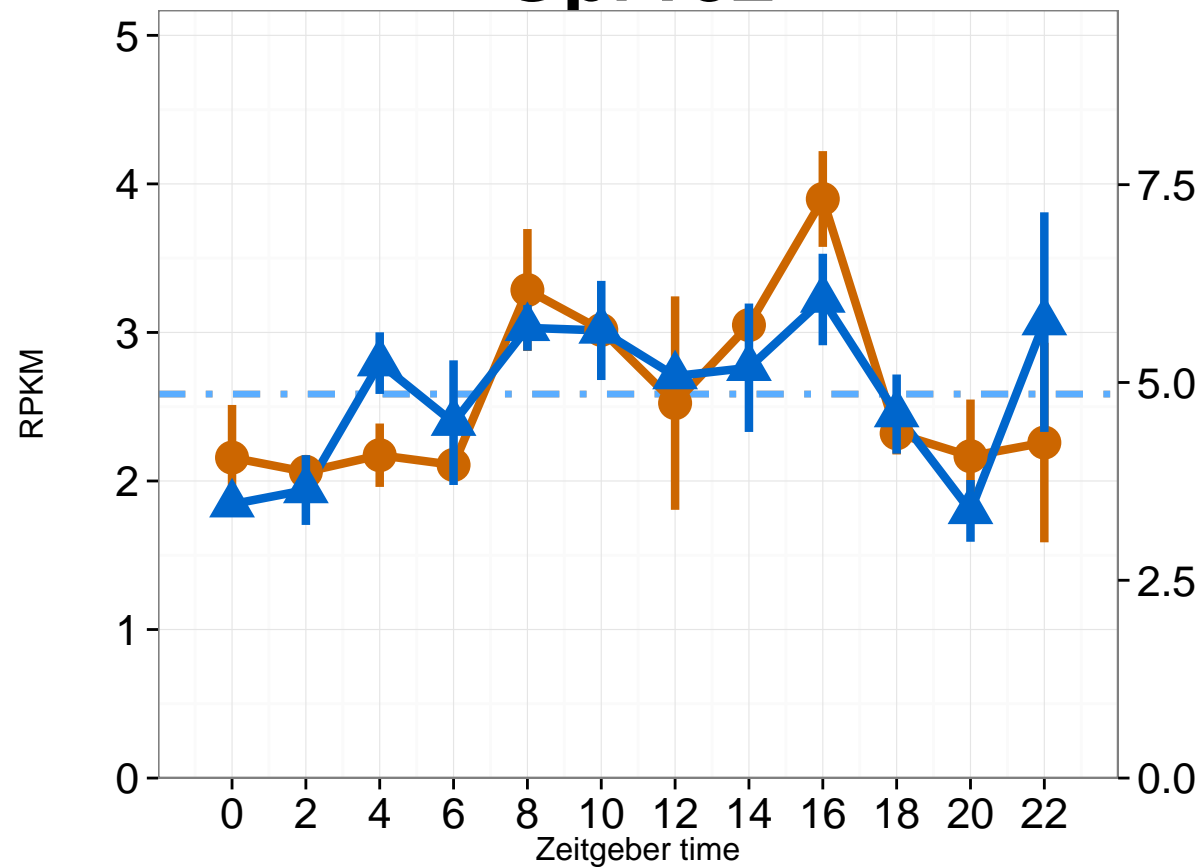

# Gpr182

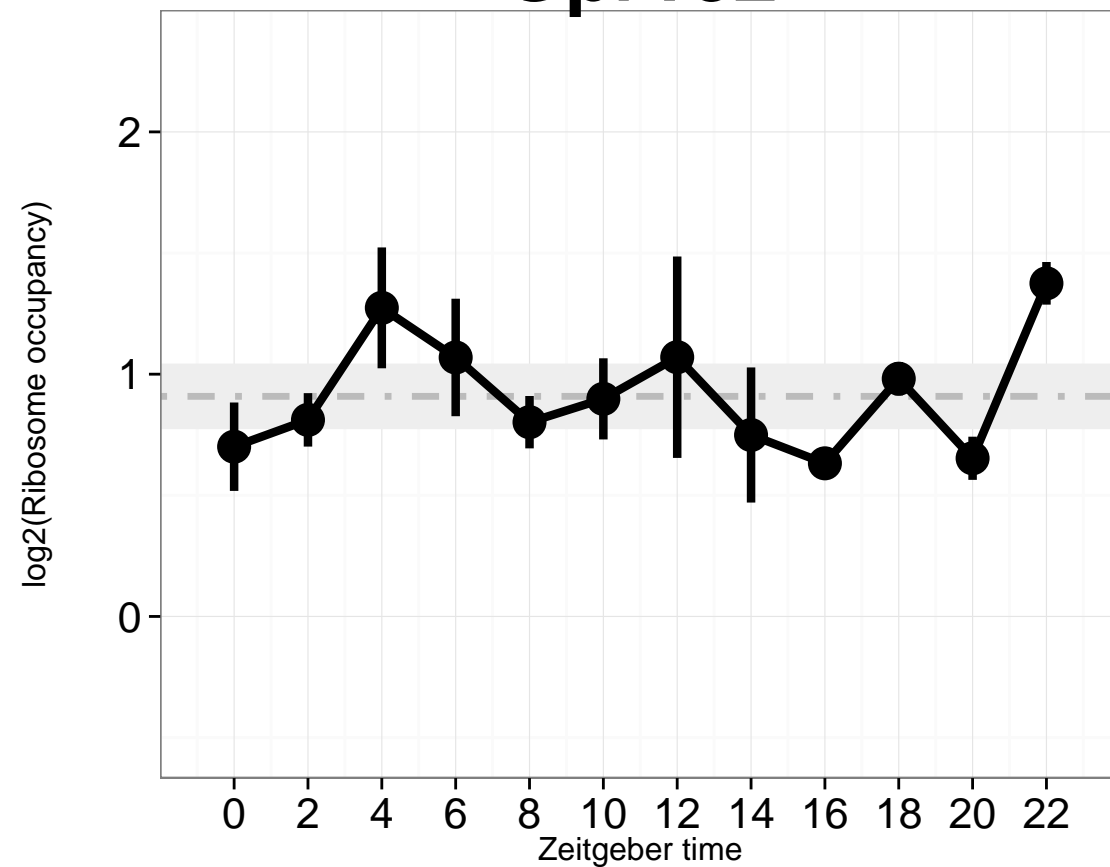

Supplement: Supplementary file 2911 [file 1]

## 2610002M06Rik

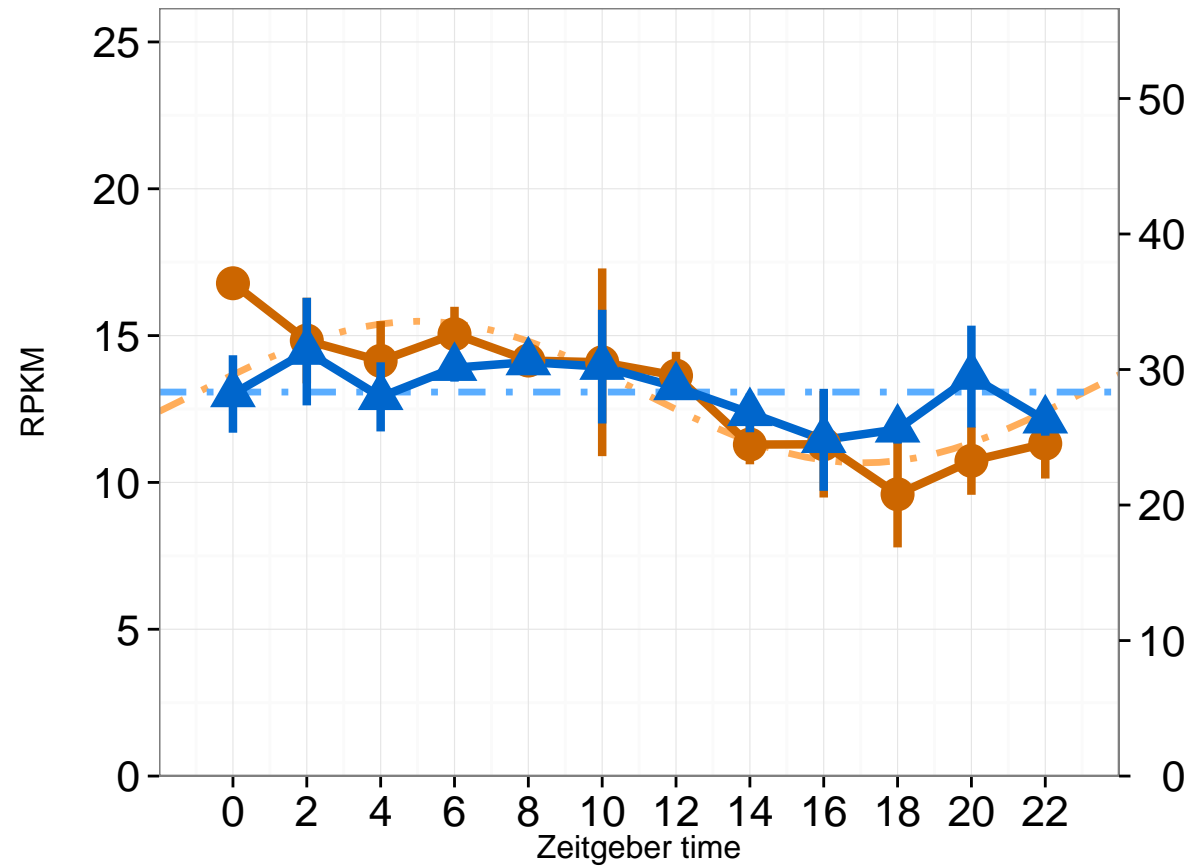

## 2610002M06Rik

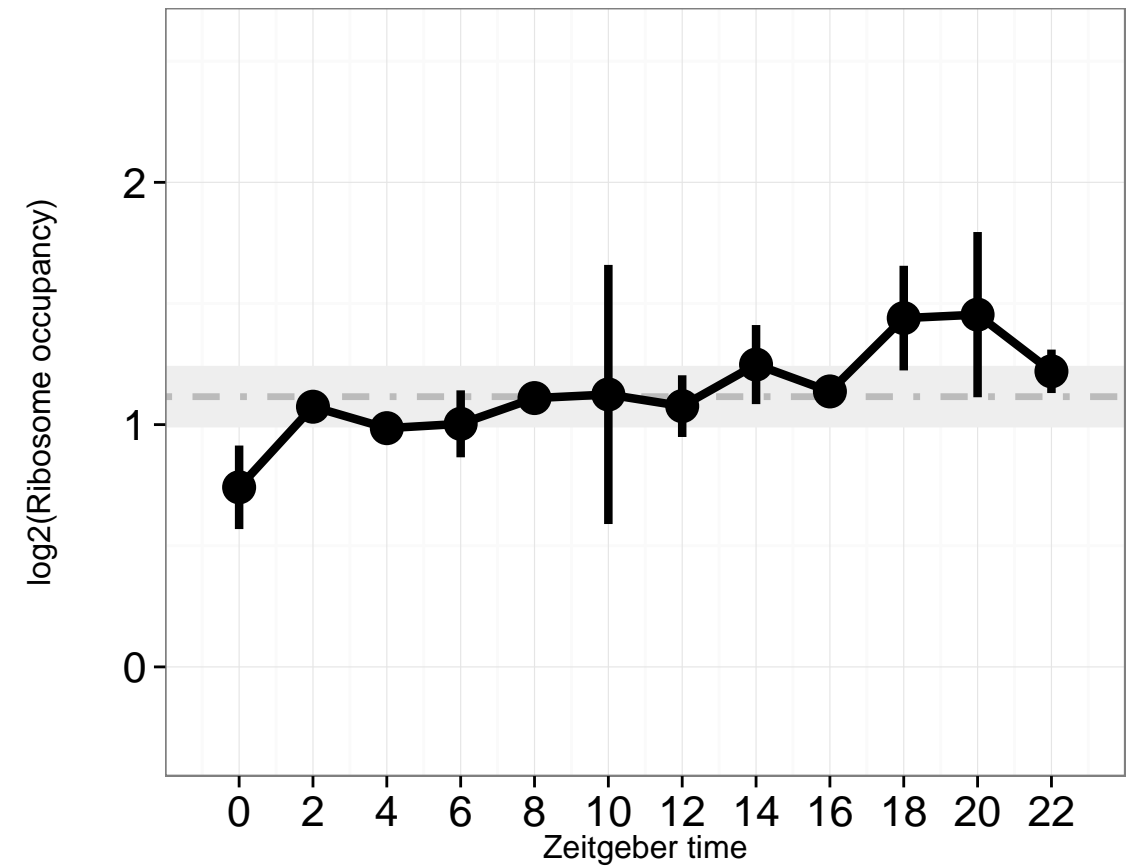

Supplement: Supplementary file 2912 [file 1]

# Siah1a

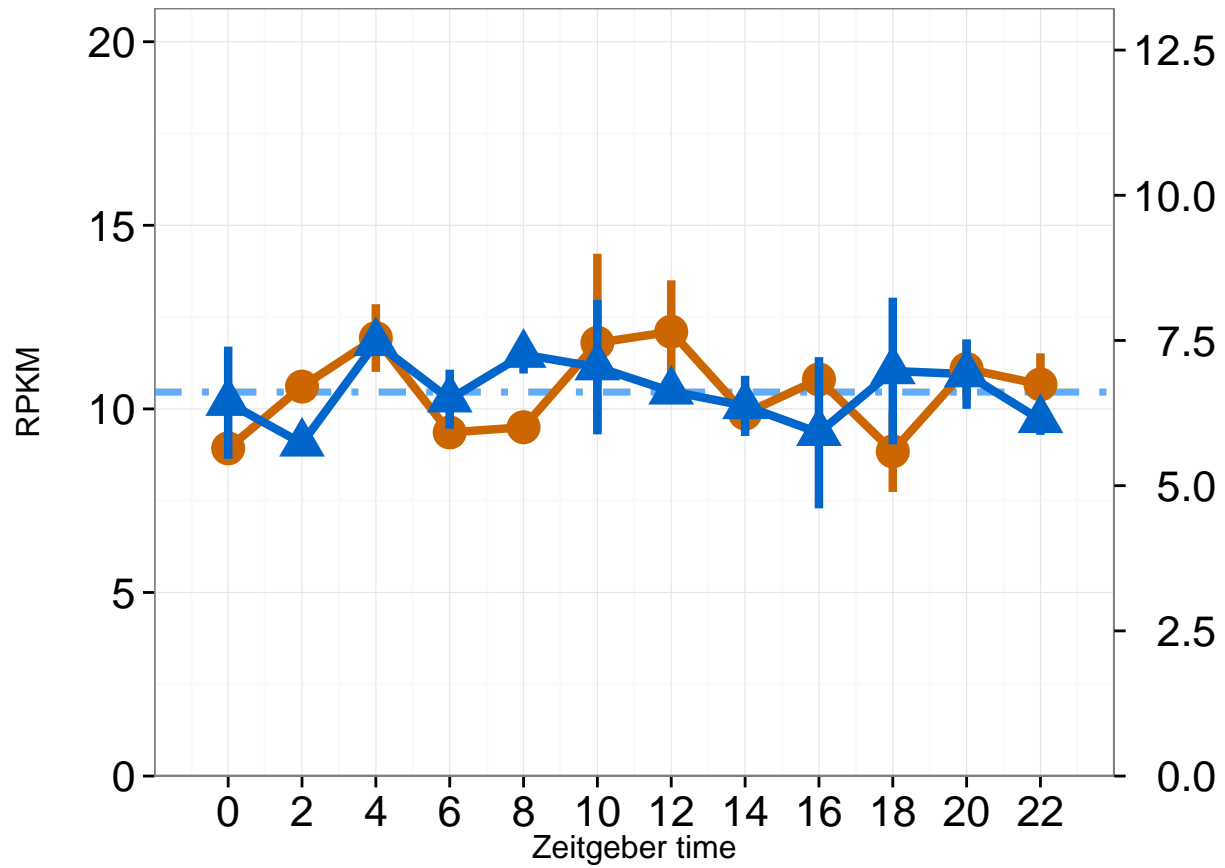

# Siah1a

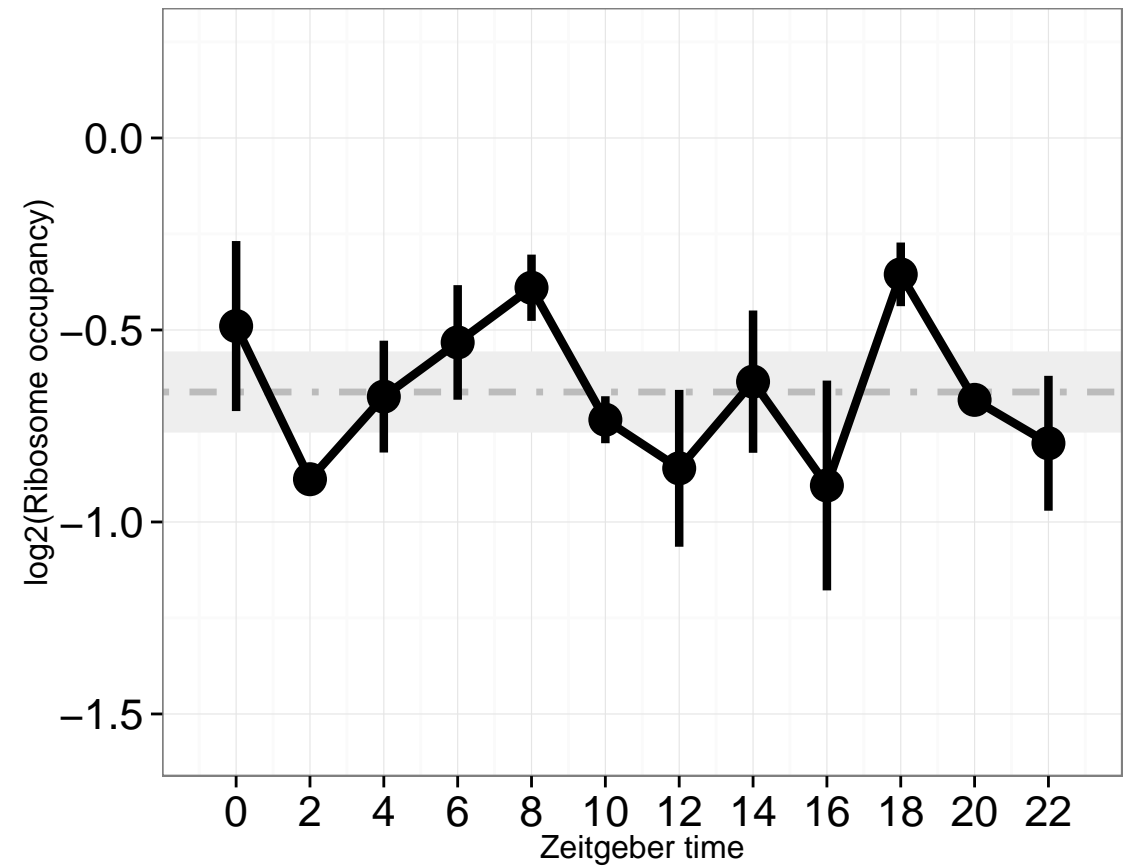

Supplement: Supplementary file 2913 [file 1]

## Nynrin

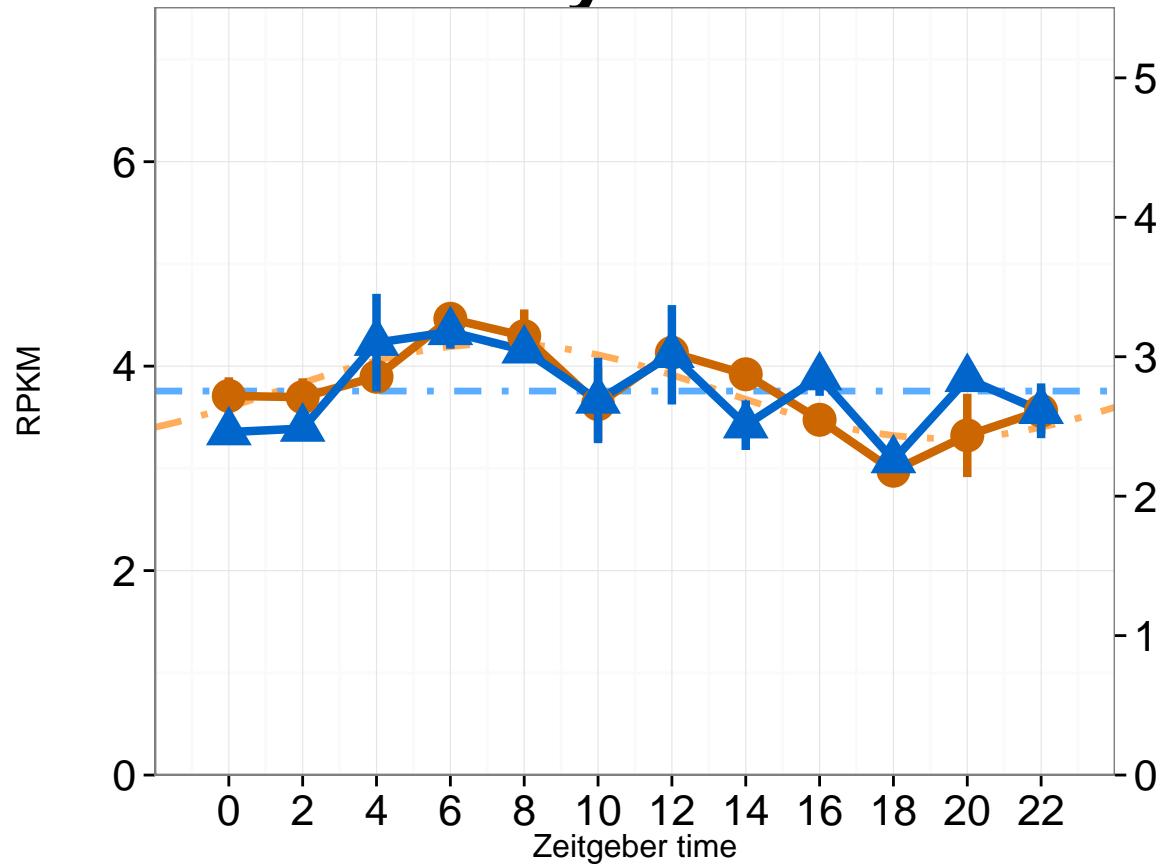

## Nynrin

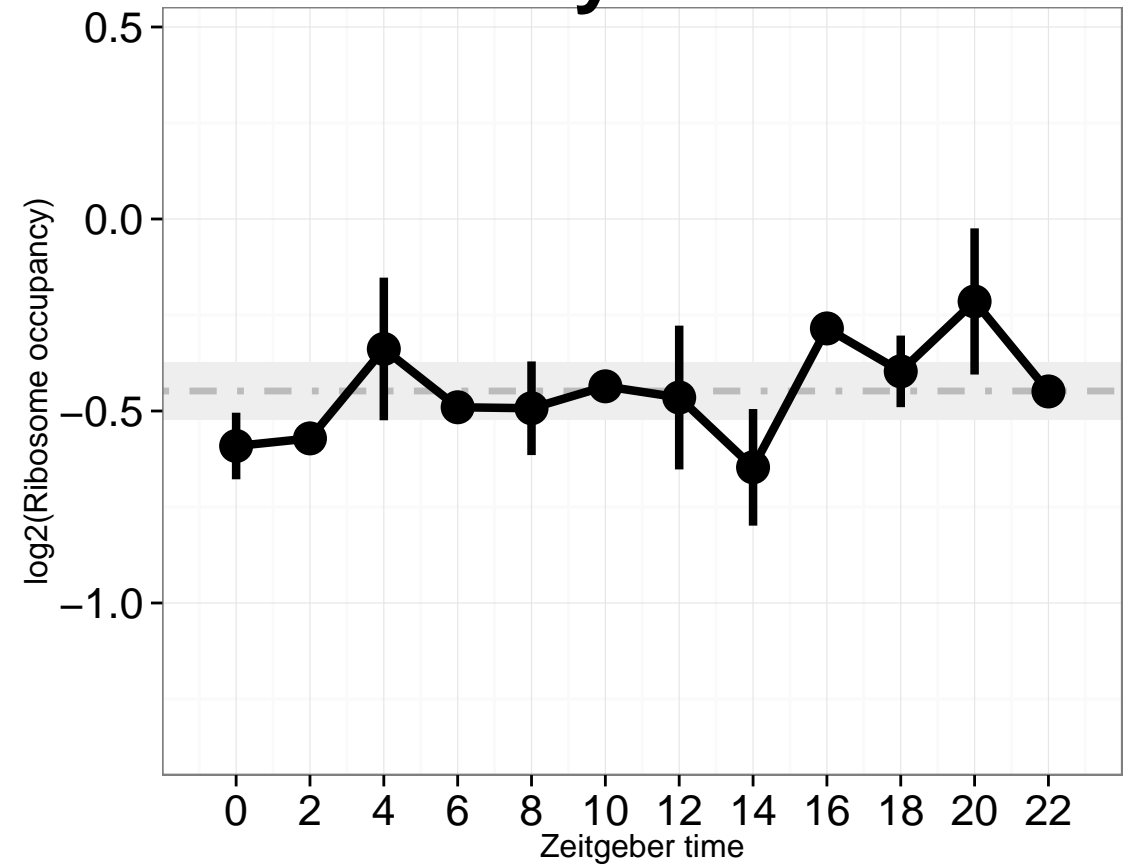

Supplement: Supplementary file 2914 [file 1]

## Neo1

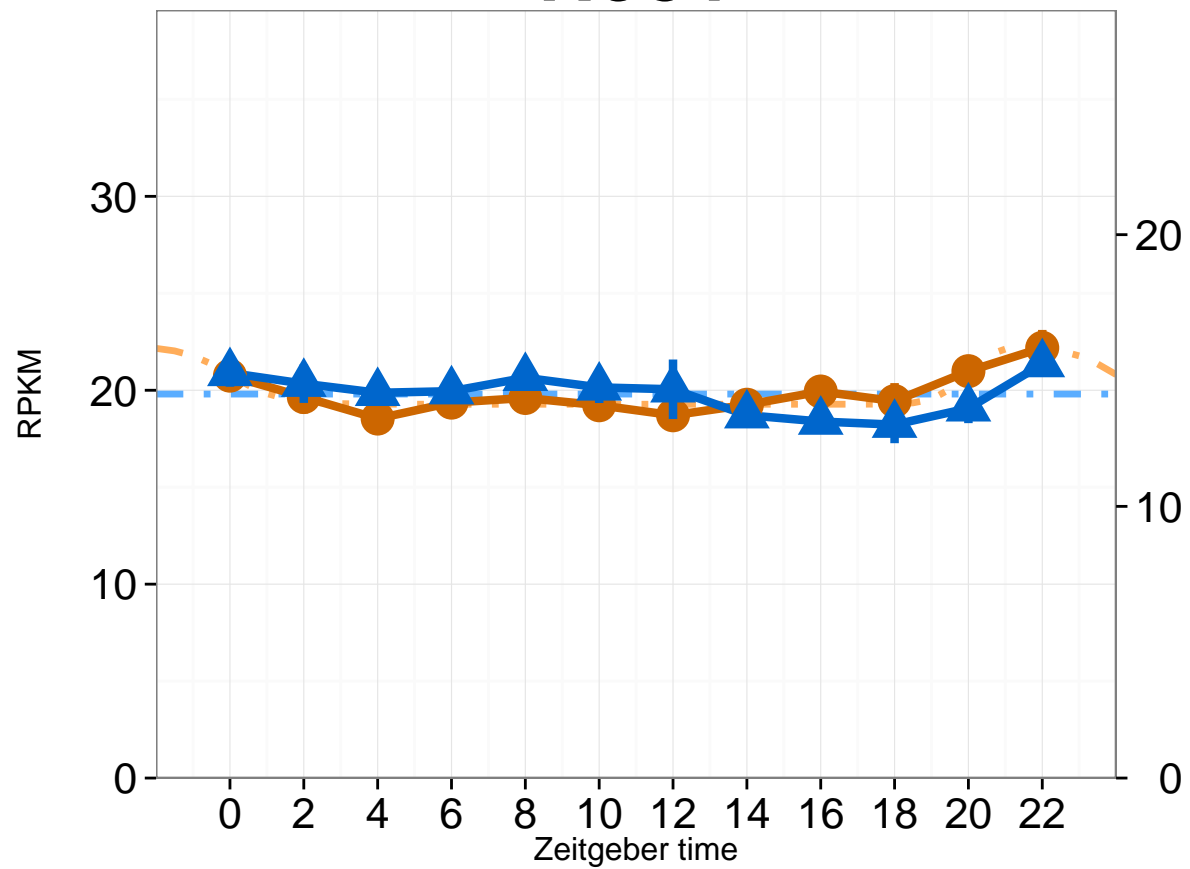

## Neo1

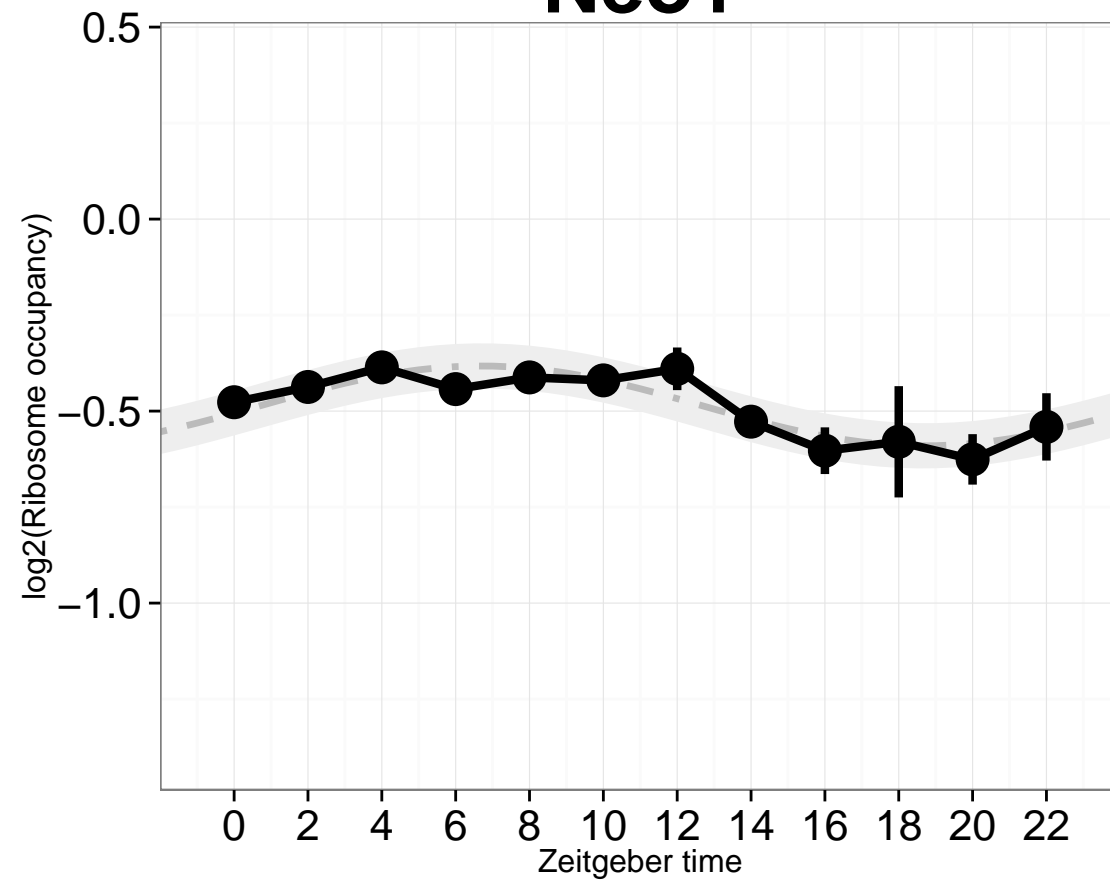

Supplement: Supplementary file 2915 [file 1]

## Mnat1

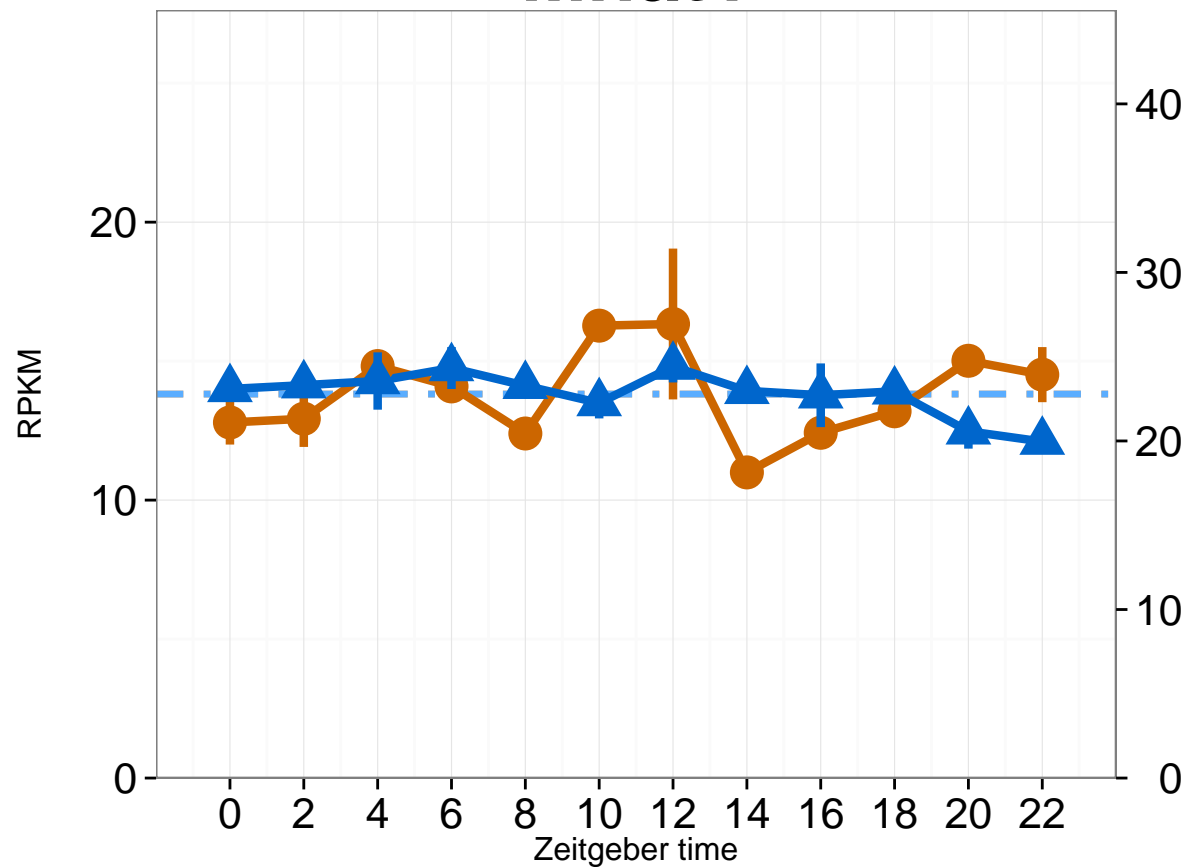

## Mnat1

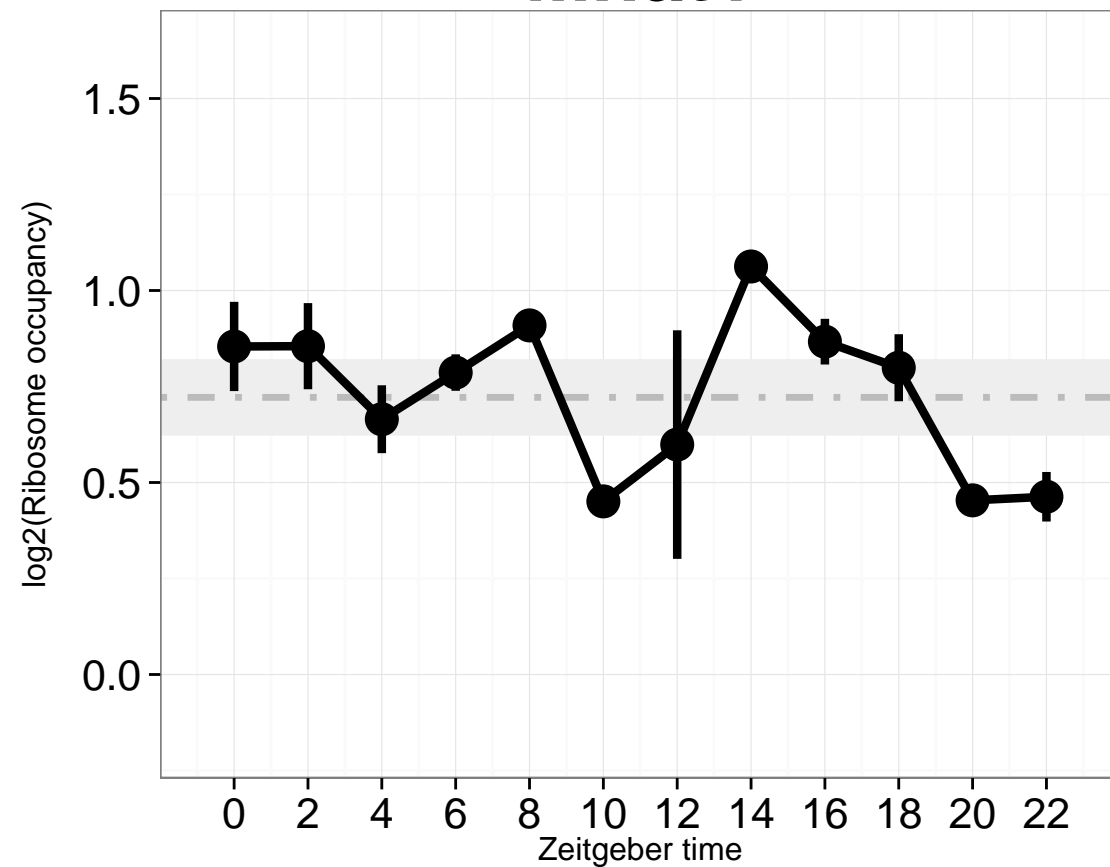

Supplement: Supplementary file 2916 [file 1]

## Rassf7

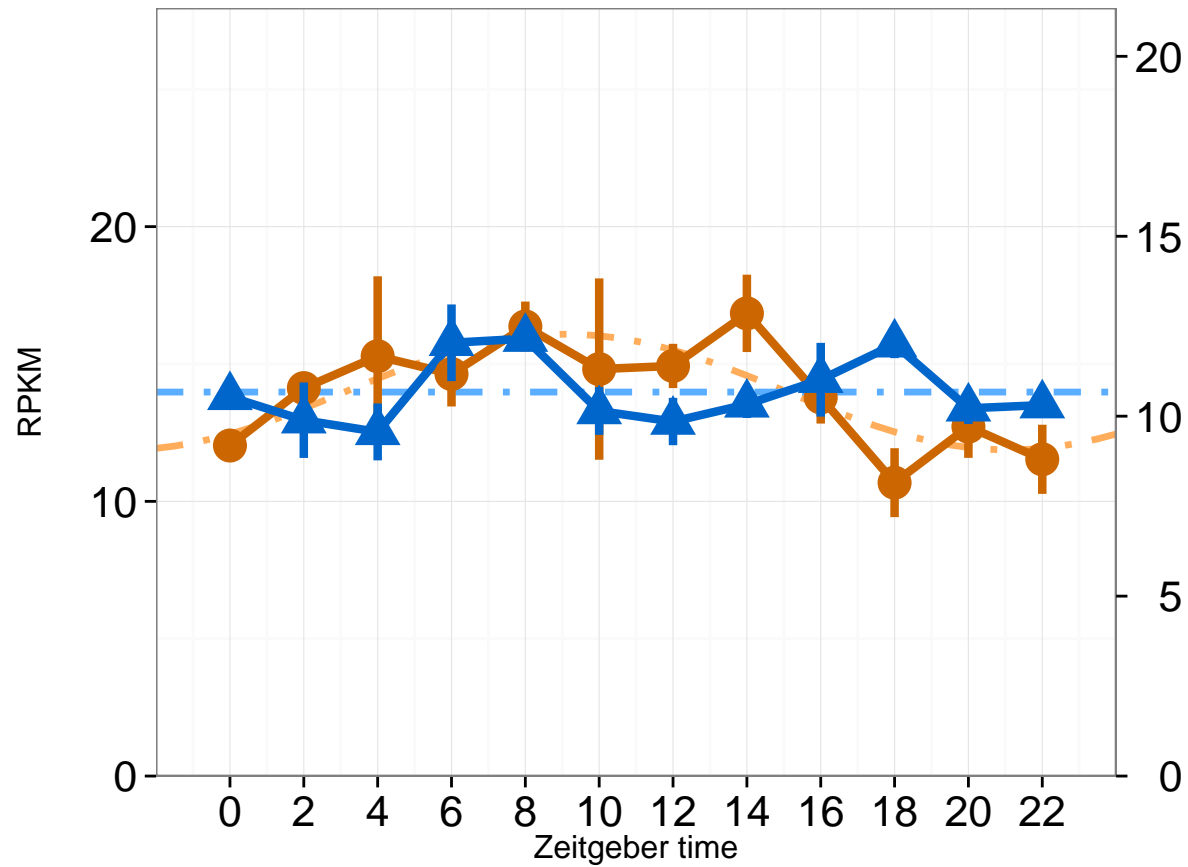

## Rassf7

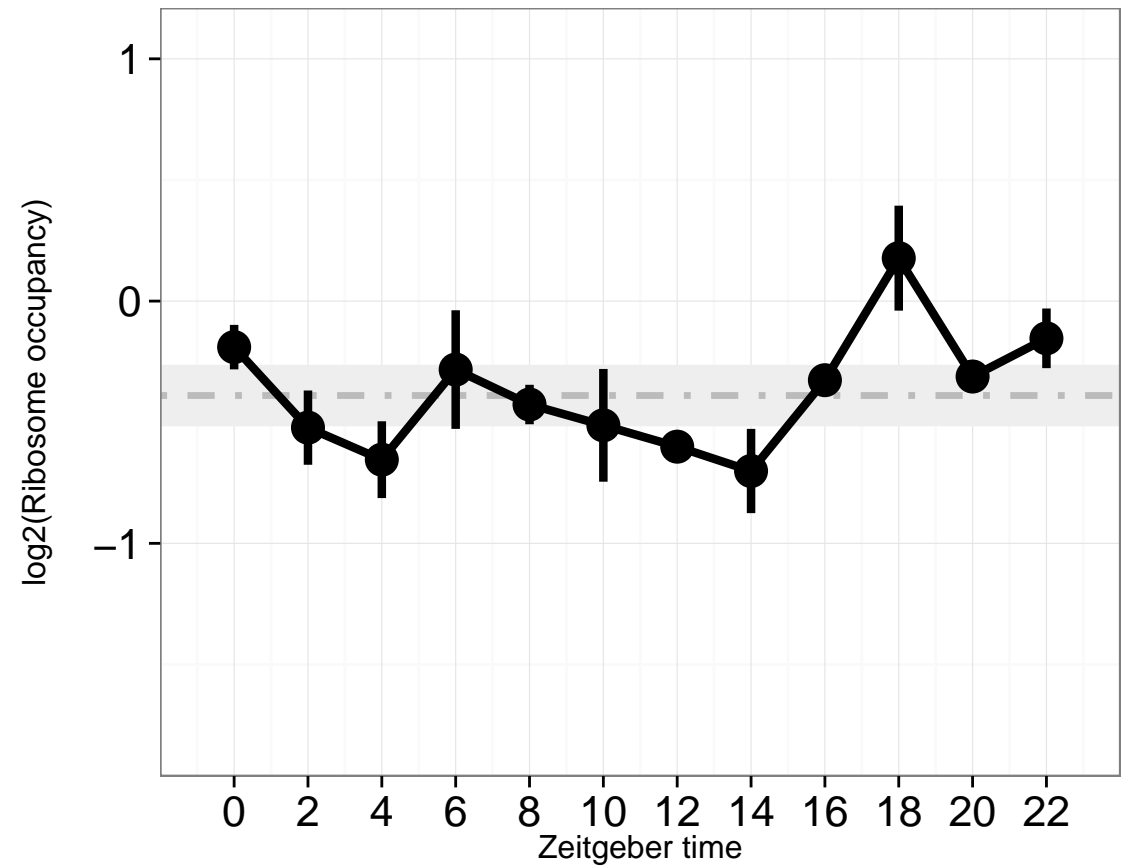

Supplement: Supplementary file 2917 [file 1]

# Zfp606

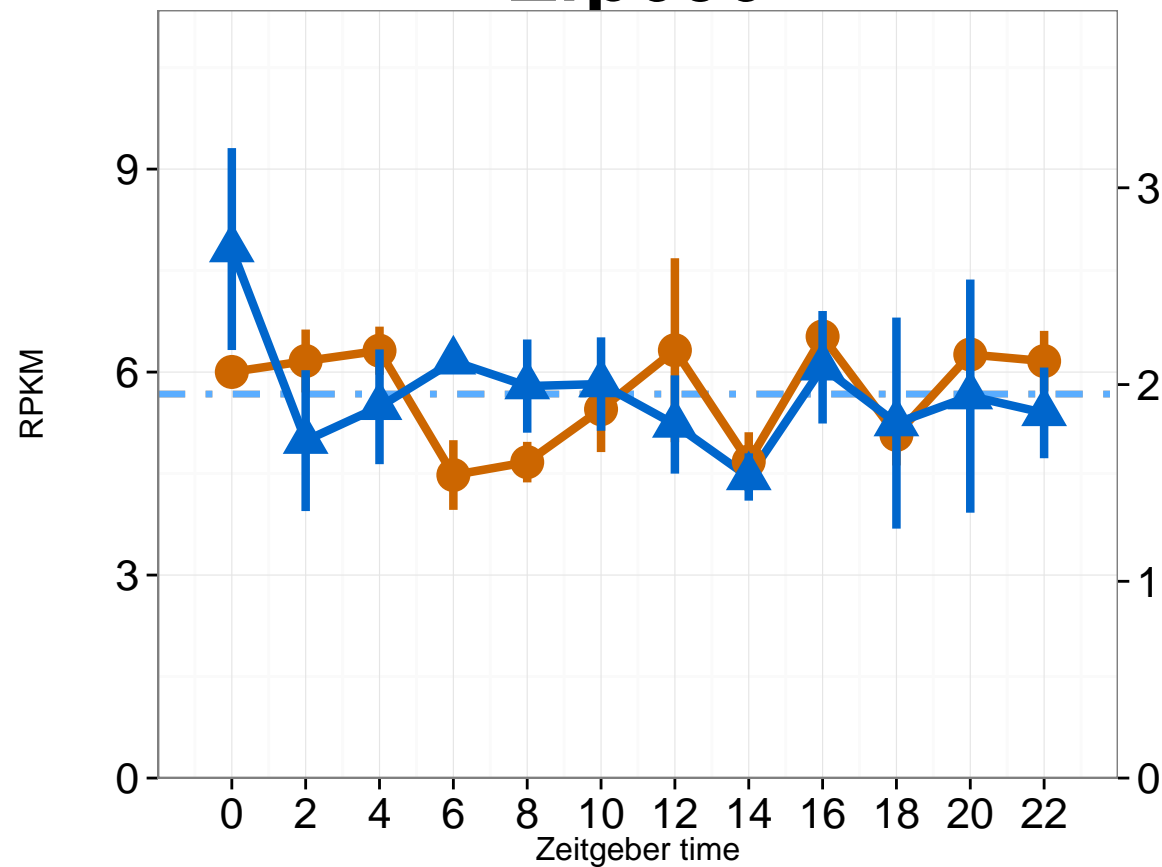

# Zfp606

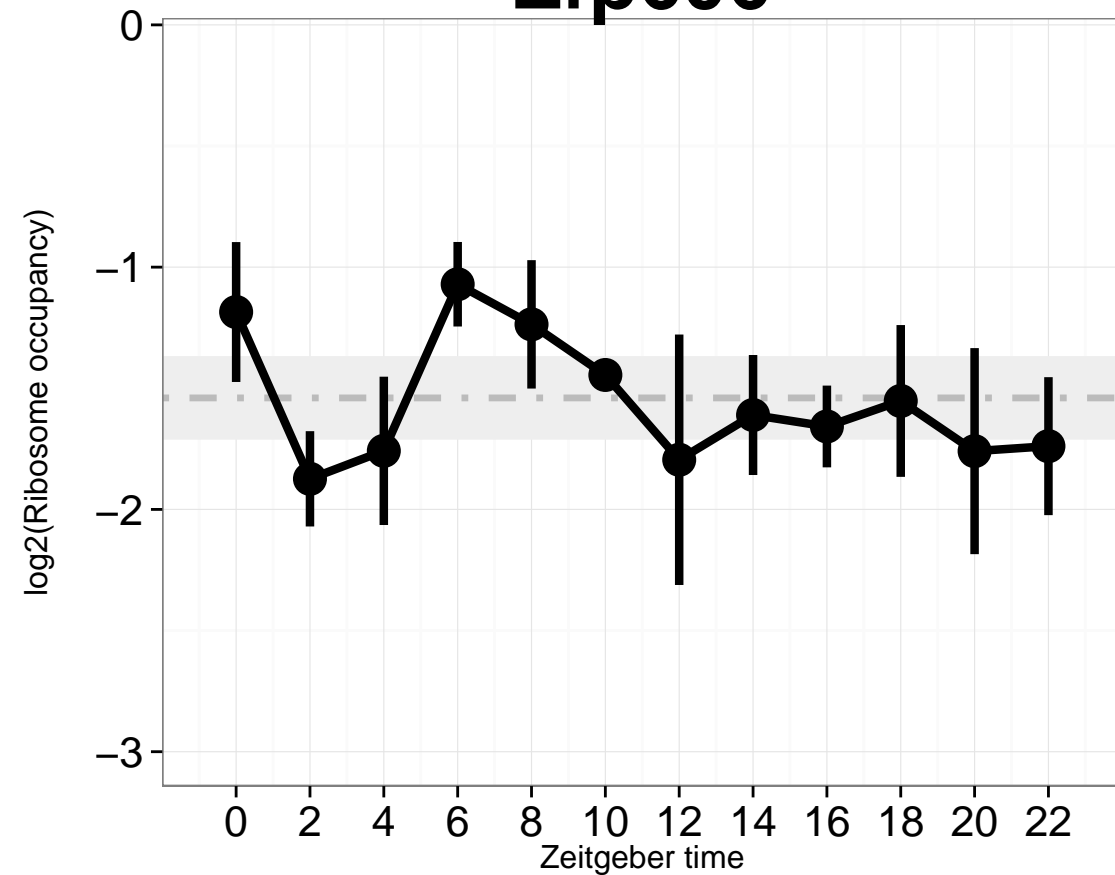

Supplement: Supplementary file 2918 [file 1]

# Avpr2

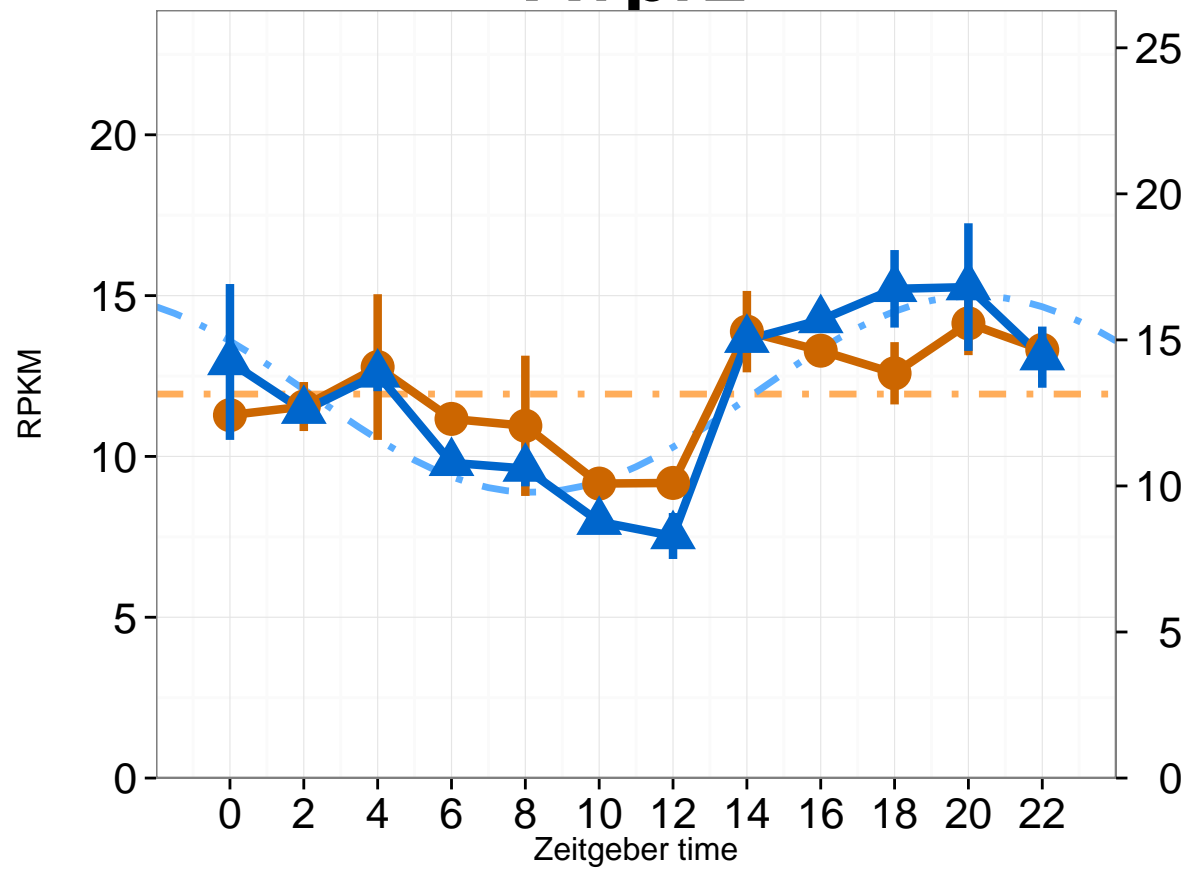

# Avpr2

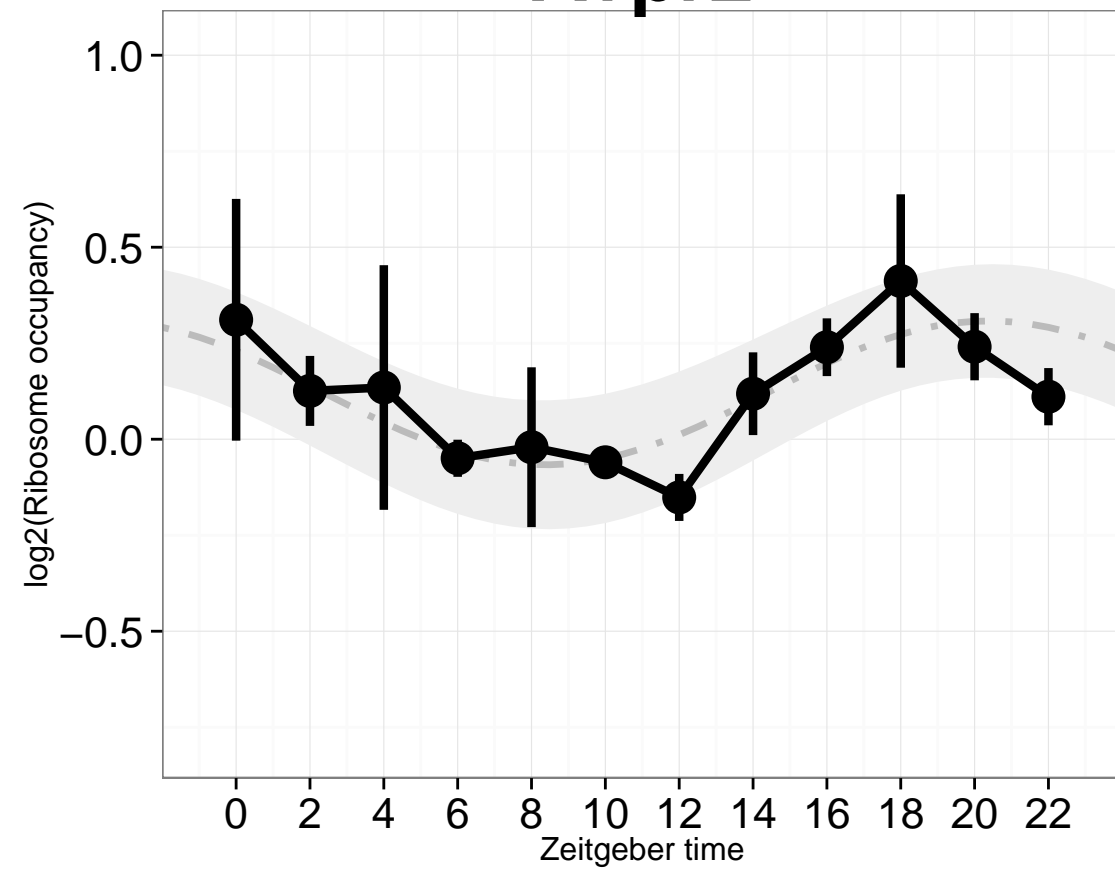

Supplement: Supplementary file 2919 [file 1]

## Rab20

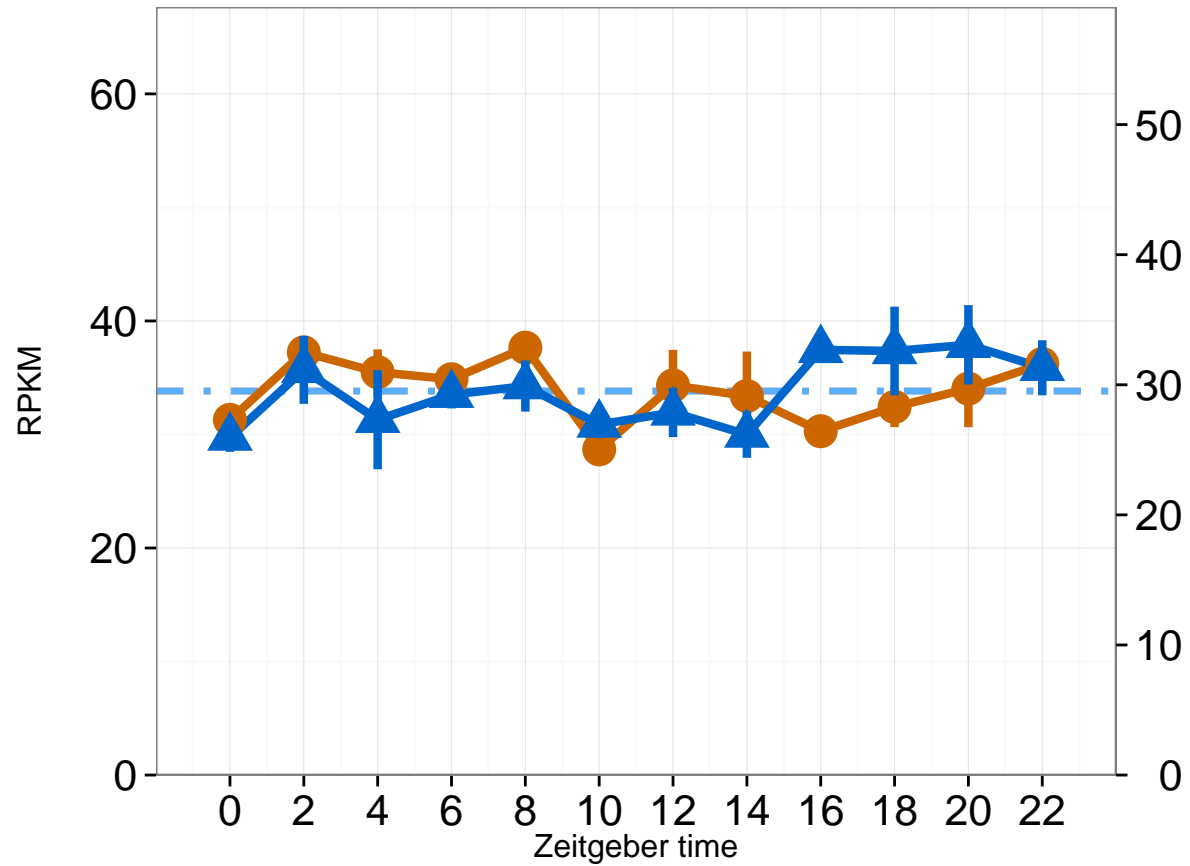

## Rab20

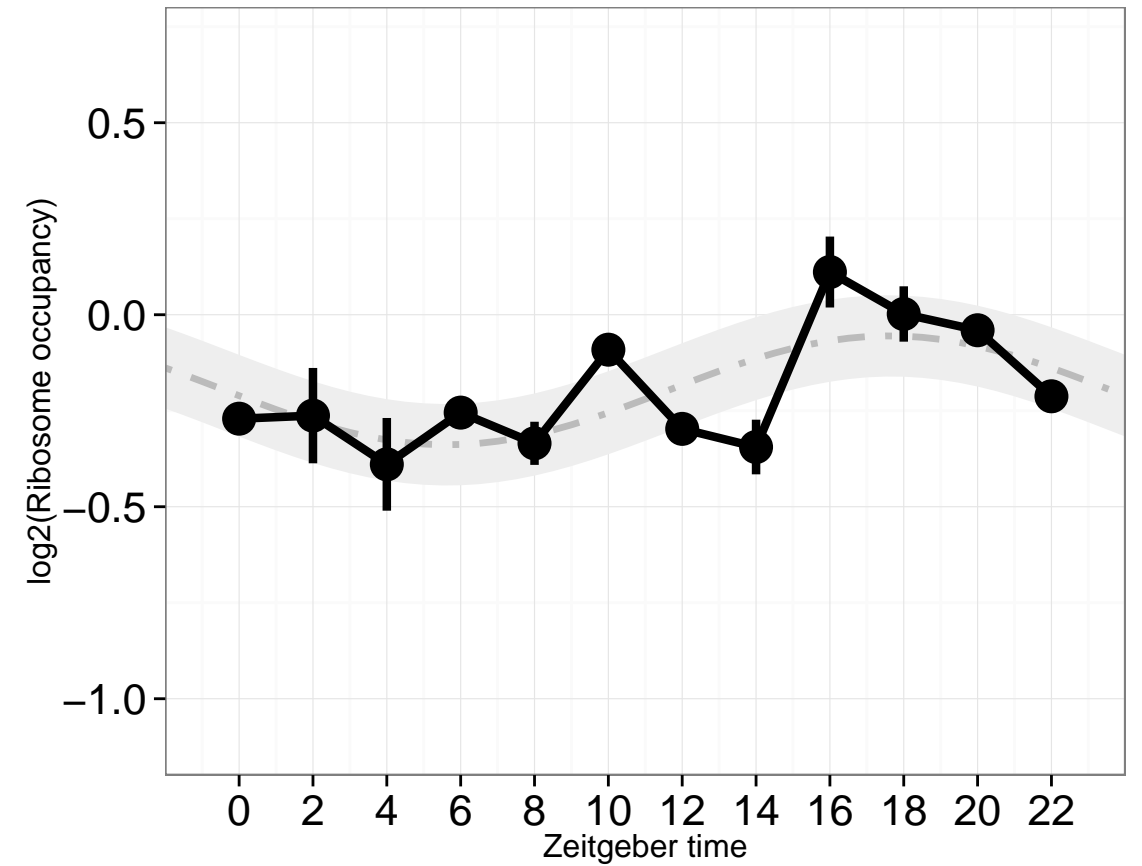

Supplement: Supplementary file 2920 [file 1]

# Gprin3

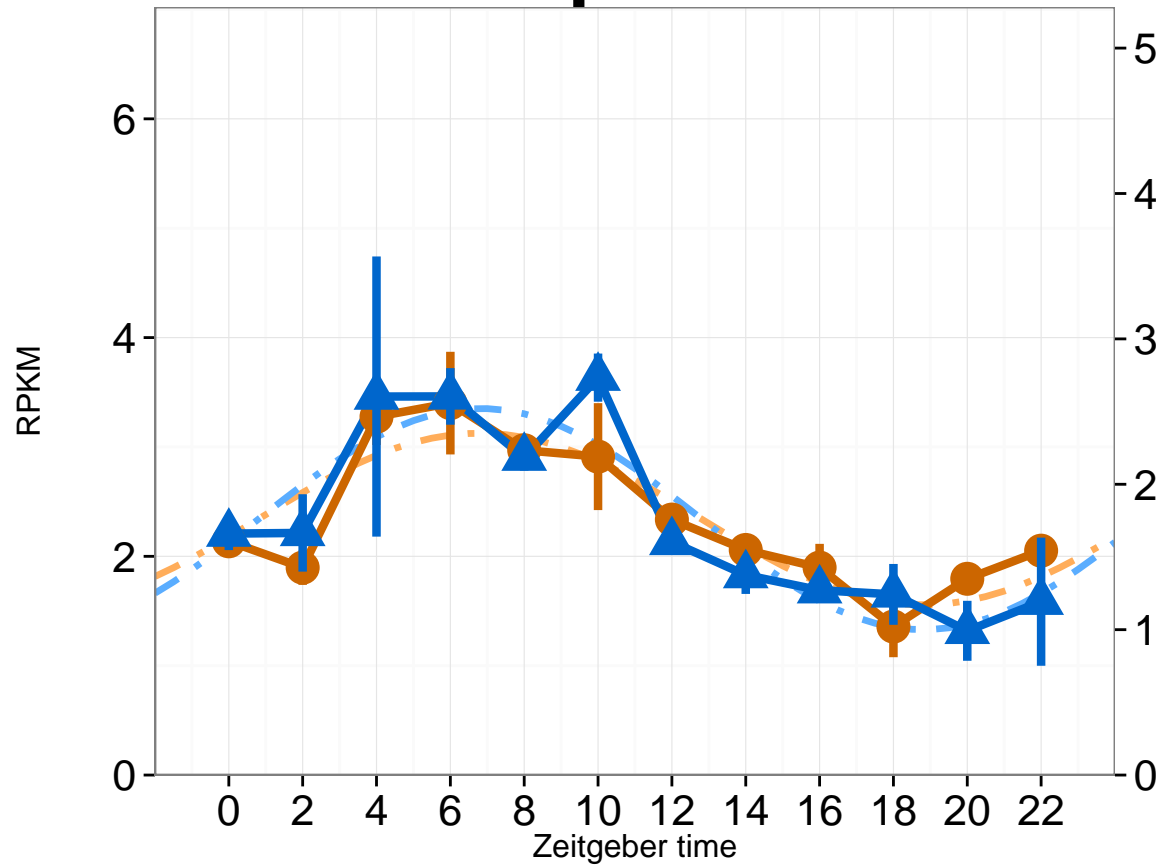

# Gprin3

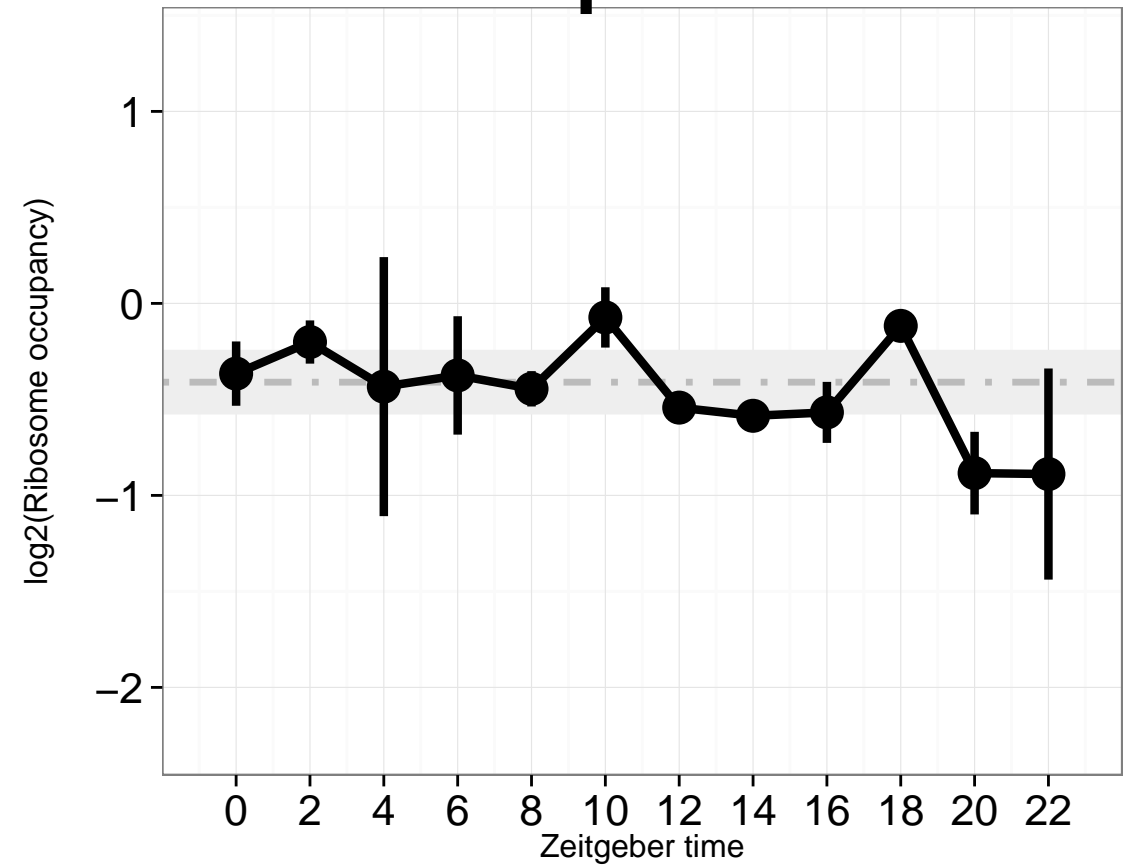

Supplement: Supplementary file 2921 [file 1]

# Ndufa8

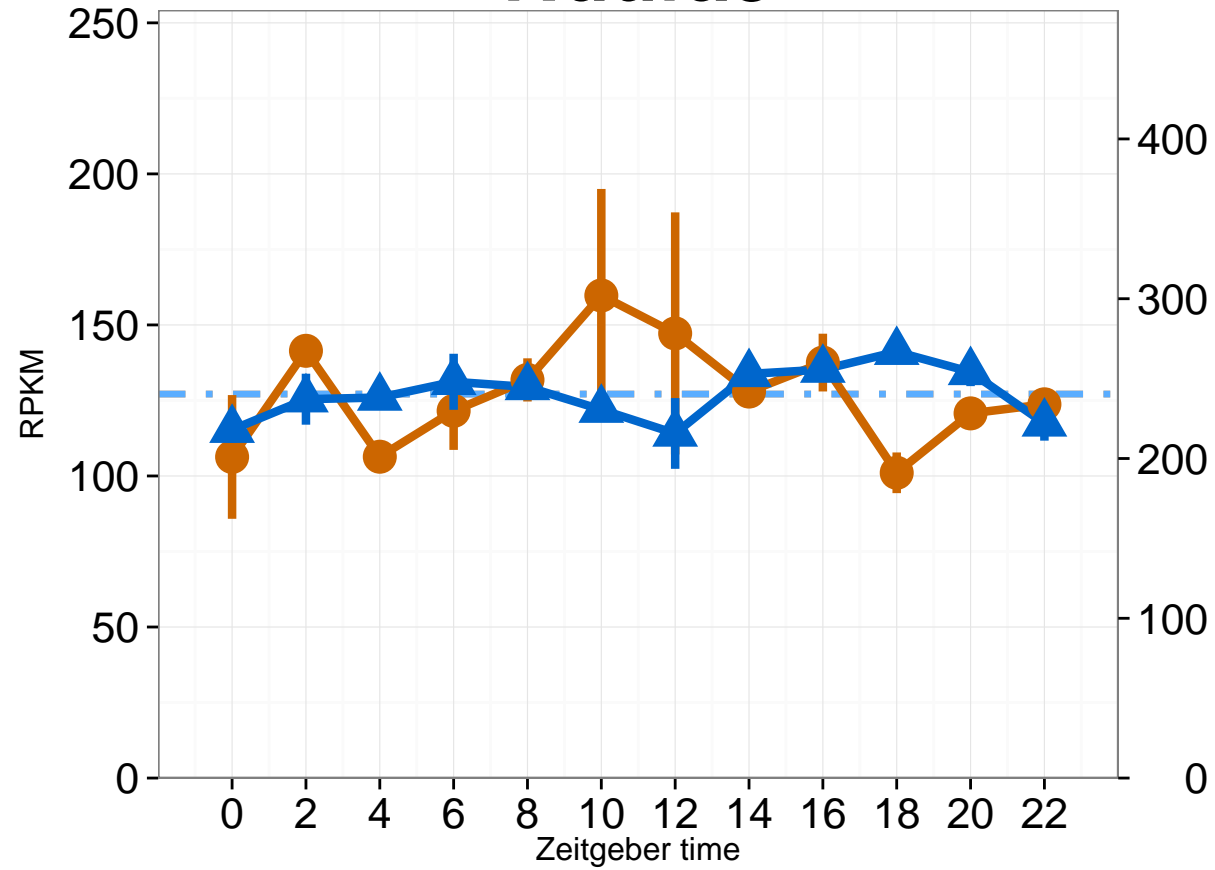

# Ndufa8

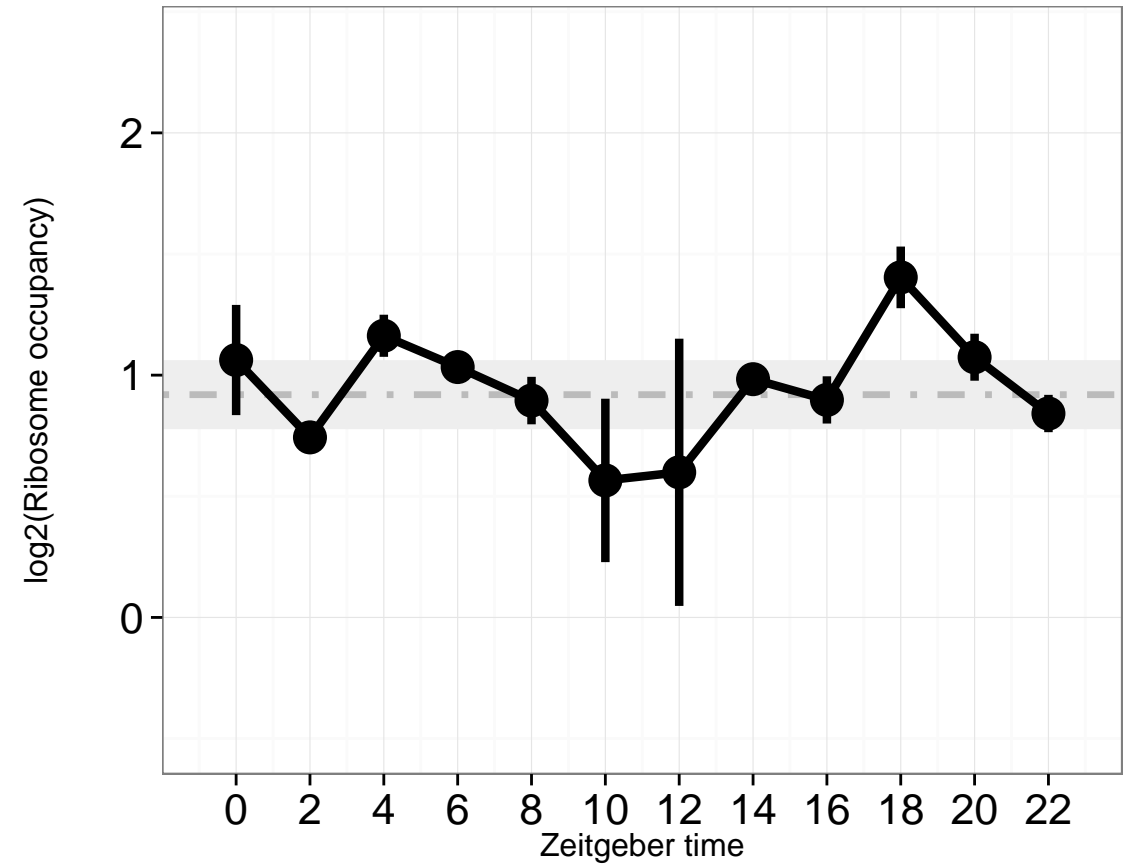

Supplement: Supplementary file 2922 [file 1]

# Chst11

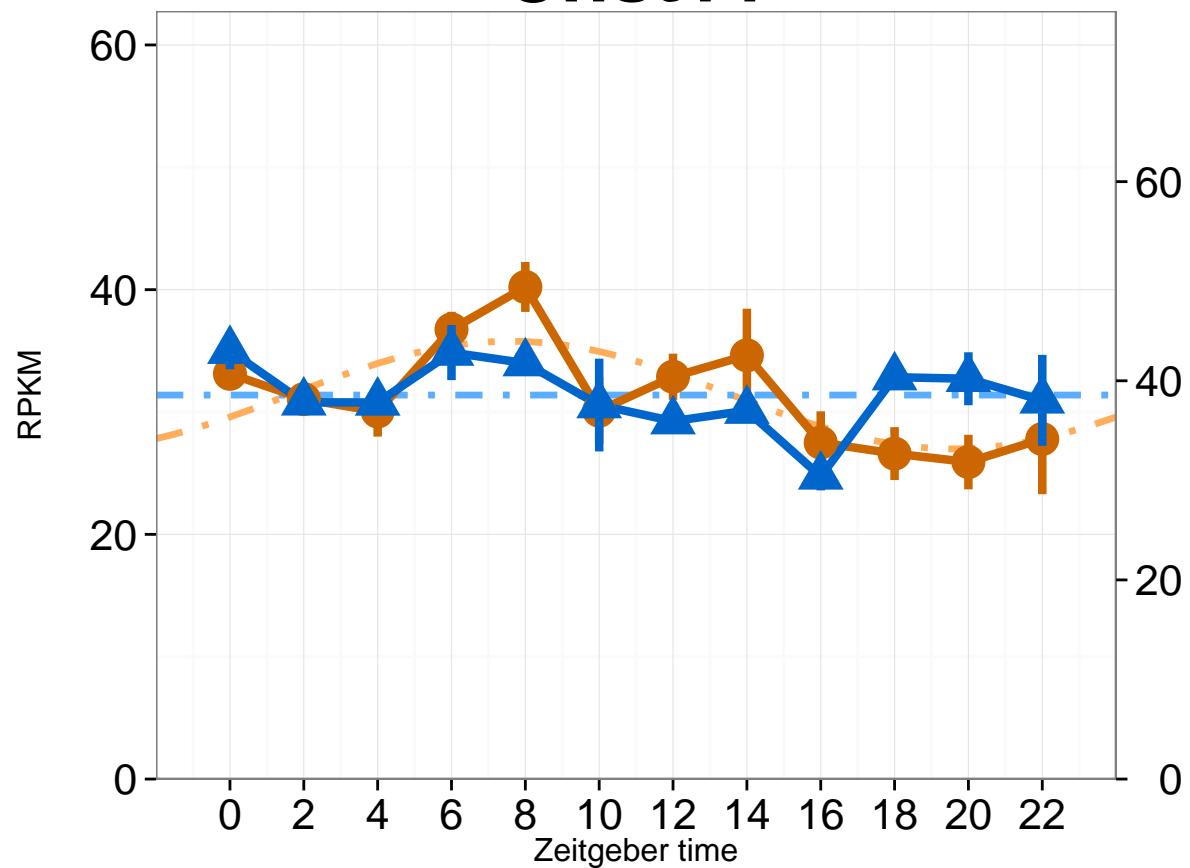

# Chst11

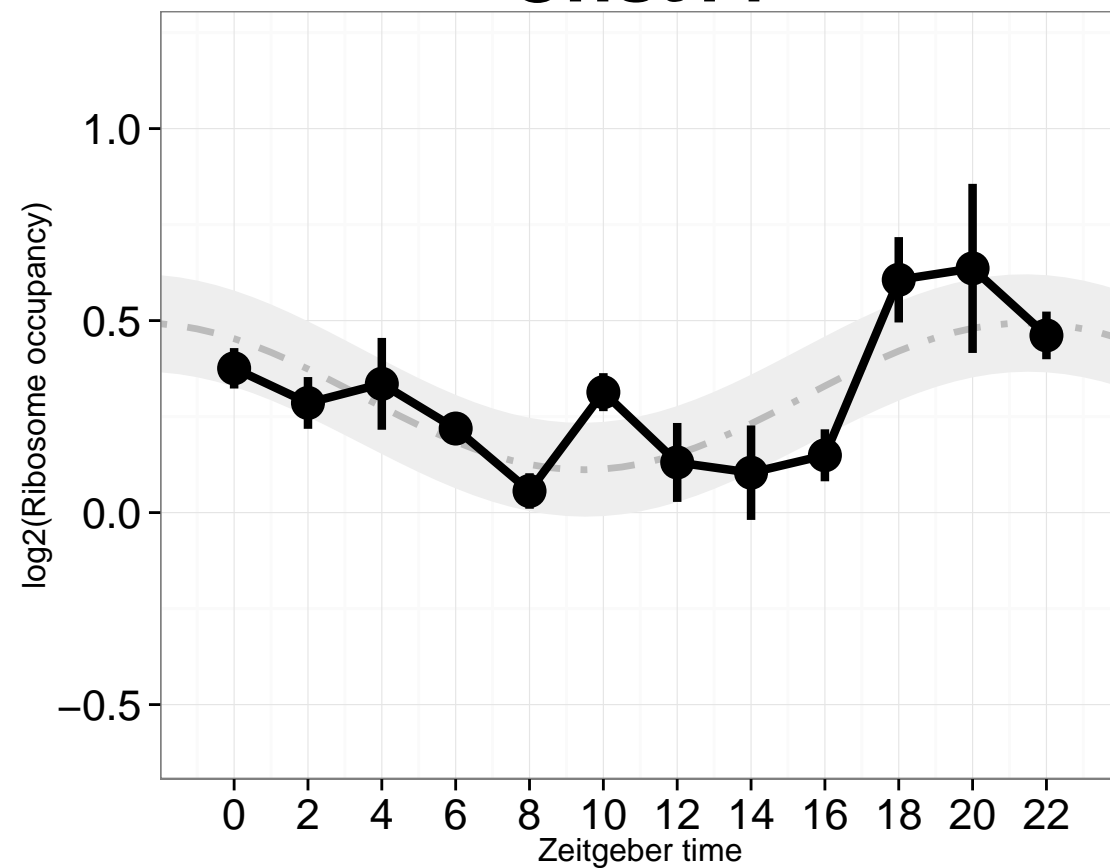

Supplement: Supplementary file 2923 [file 1]

# KI

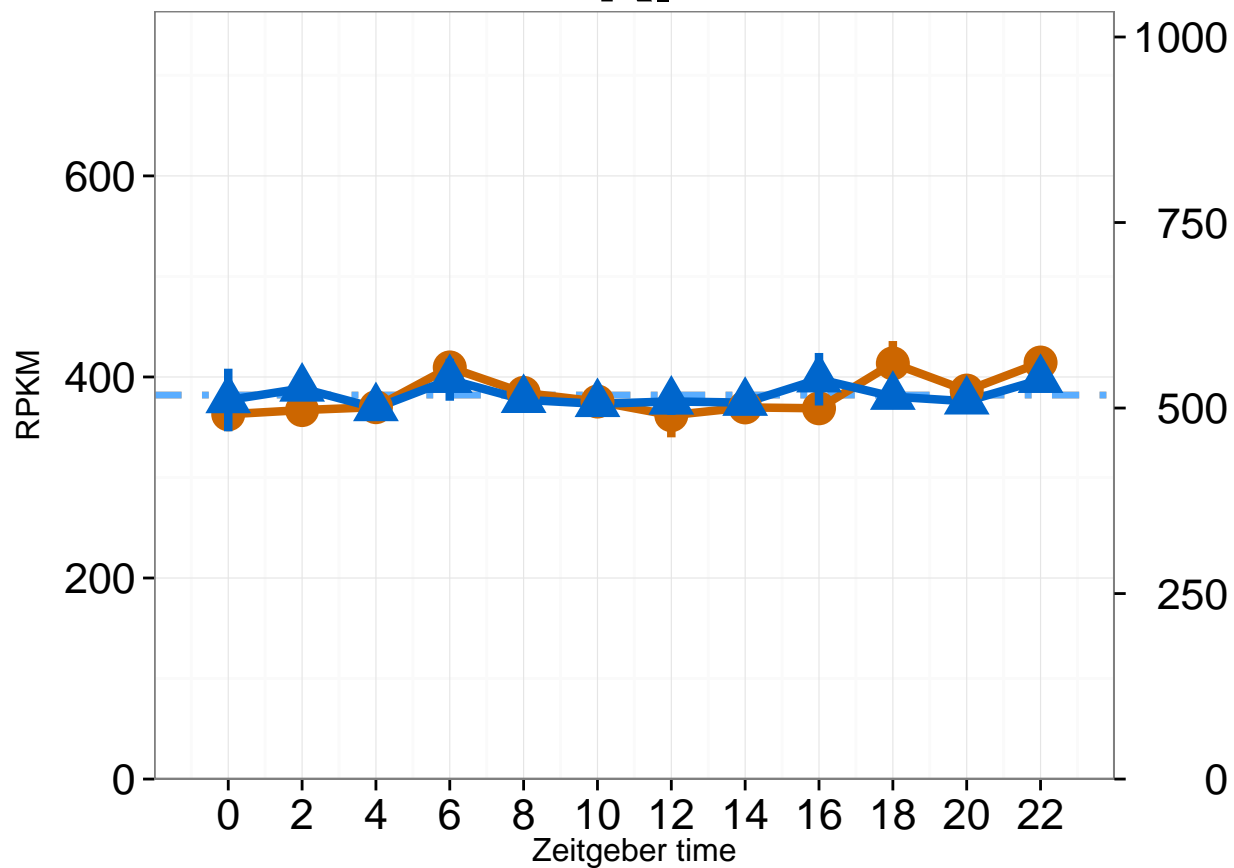

# KI

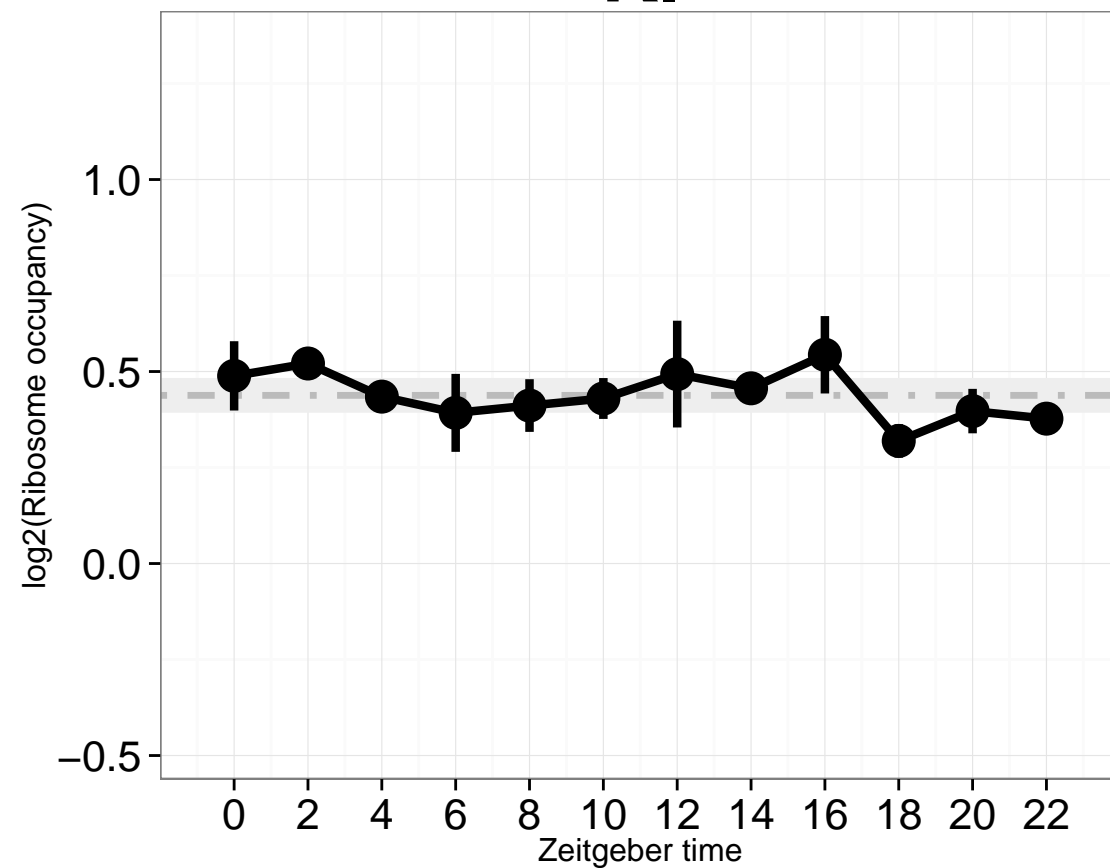

Supplement: Supplementary file 2924 [file 1]

## Brms1

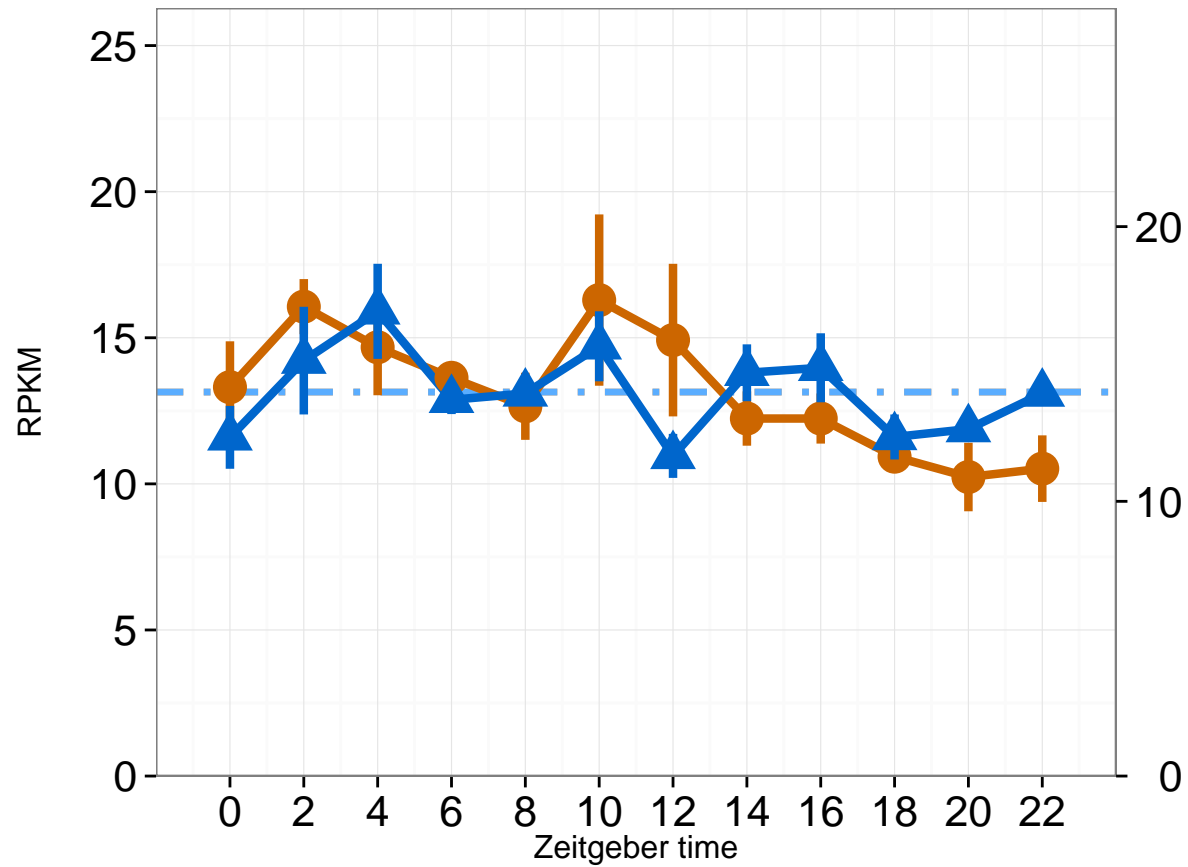

## Brms1

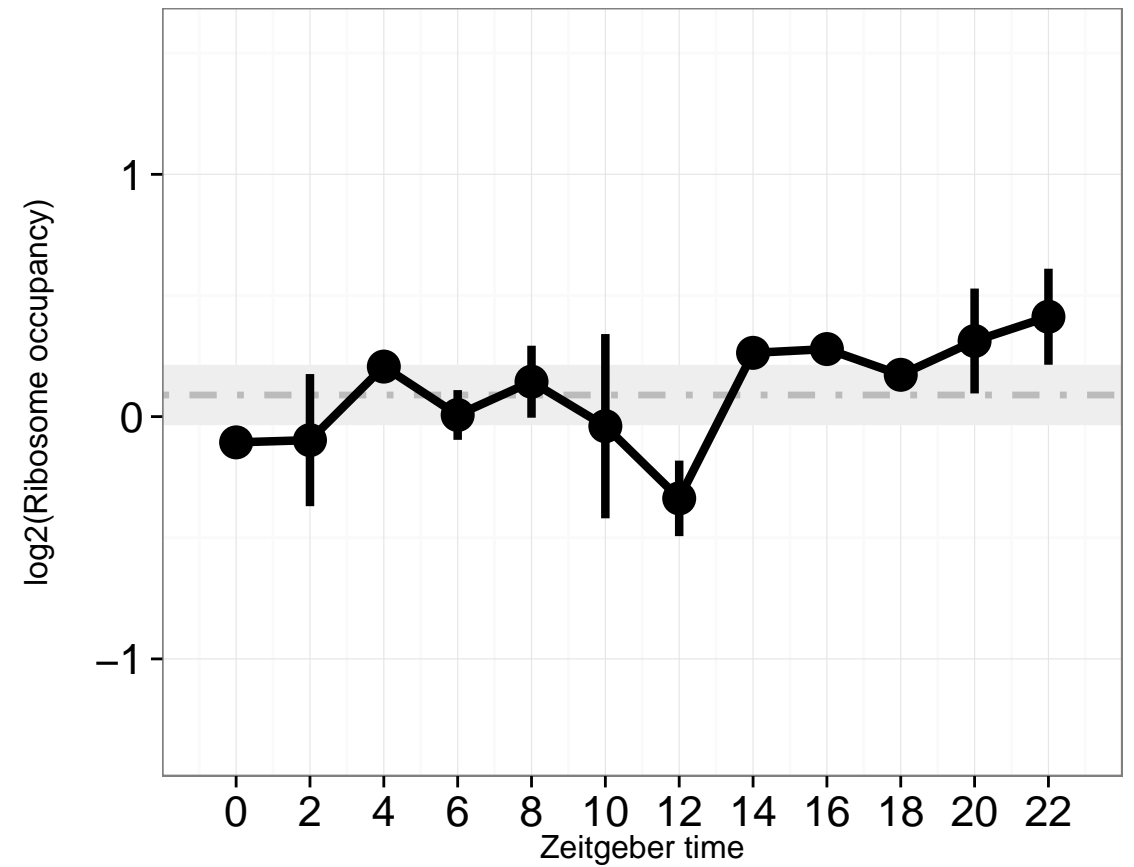

Supplement: Supplementary file 2925 [file 1]

**Fam169a TR**

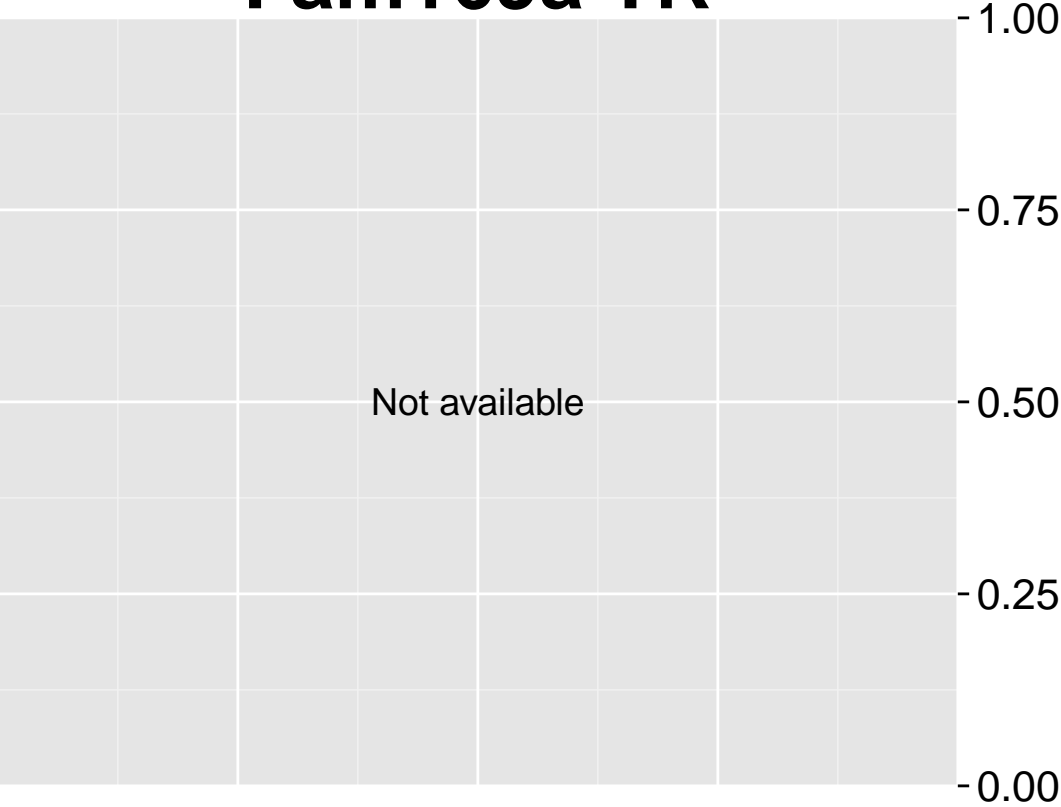

**Fam169a log2(Ribosome occupanc**

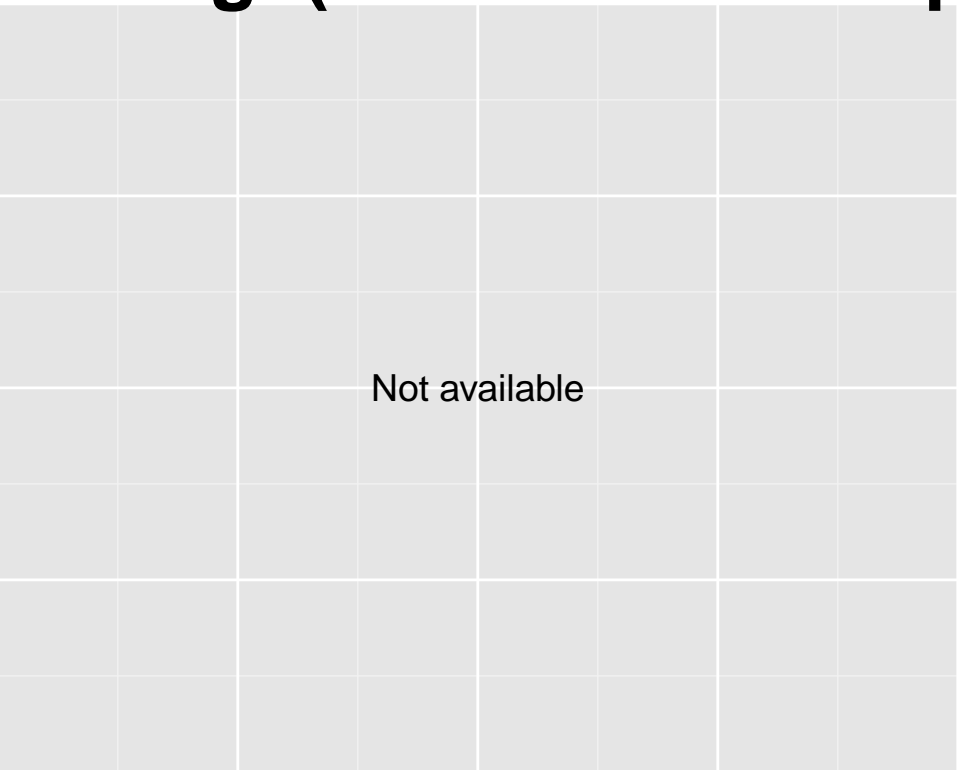

Supplement: Supplementary file 2926 [file 1]

## Cndp1

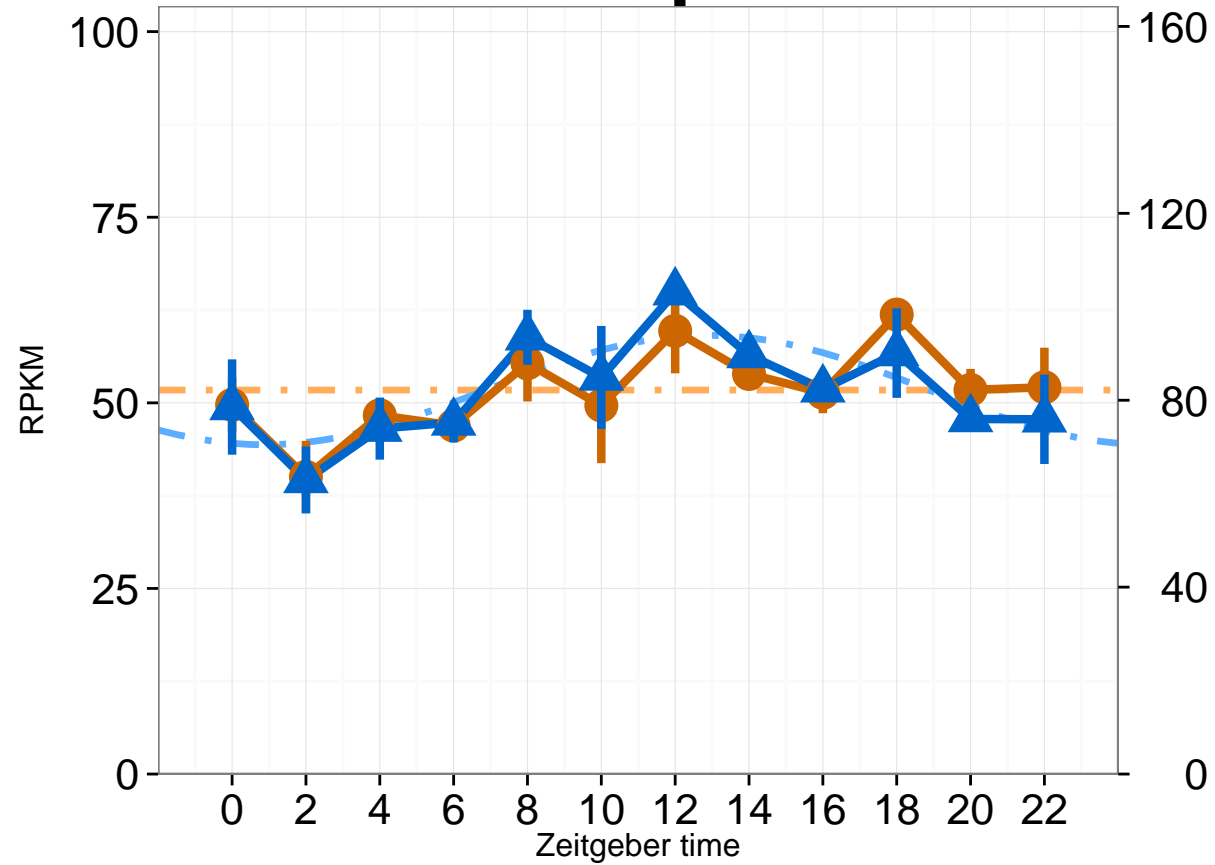

## Cndp1

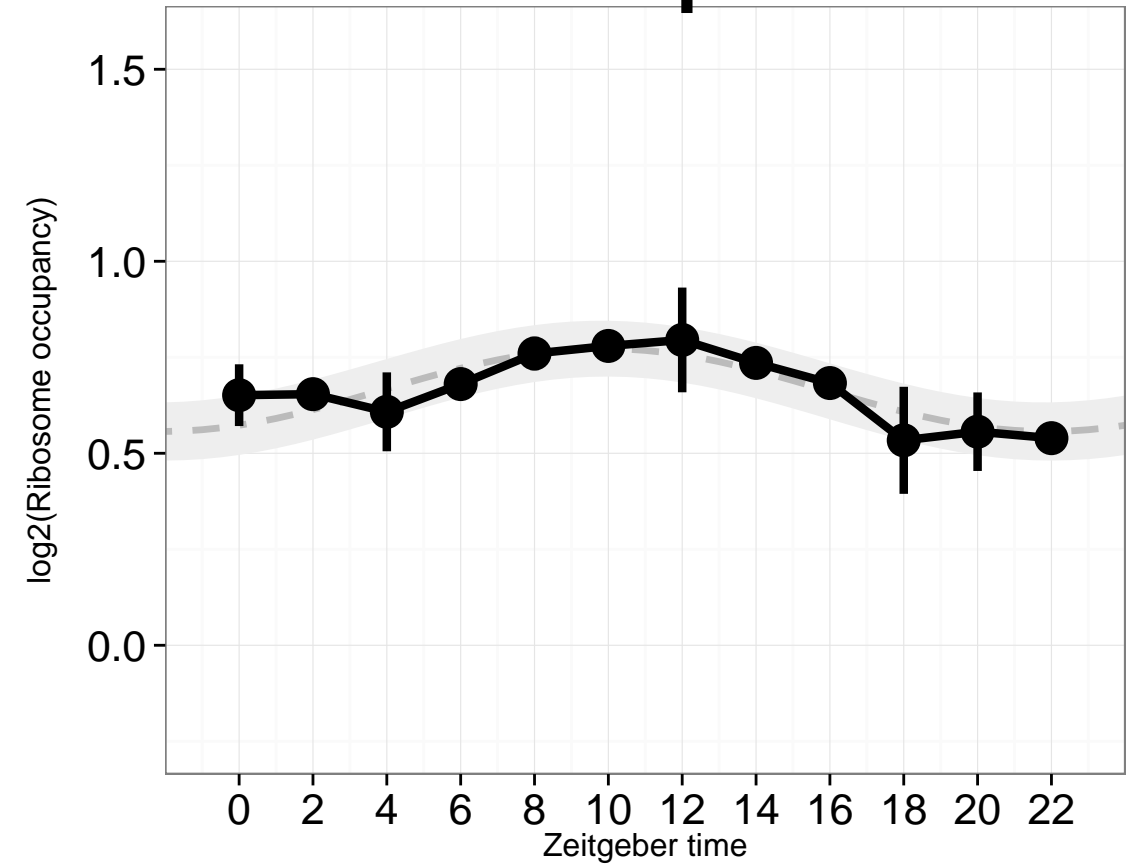

Supplement: Supplementary file 2927 [file 1]

## Gorab

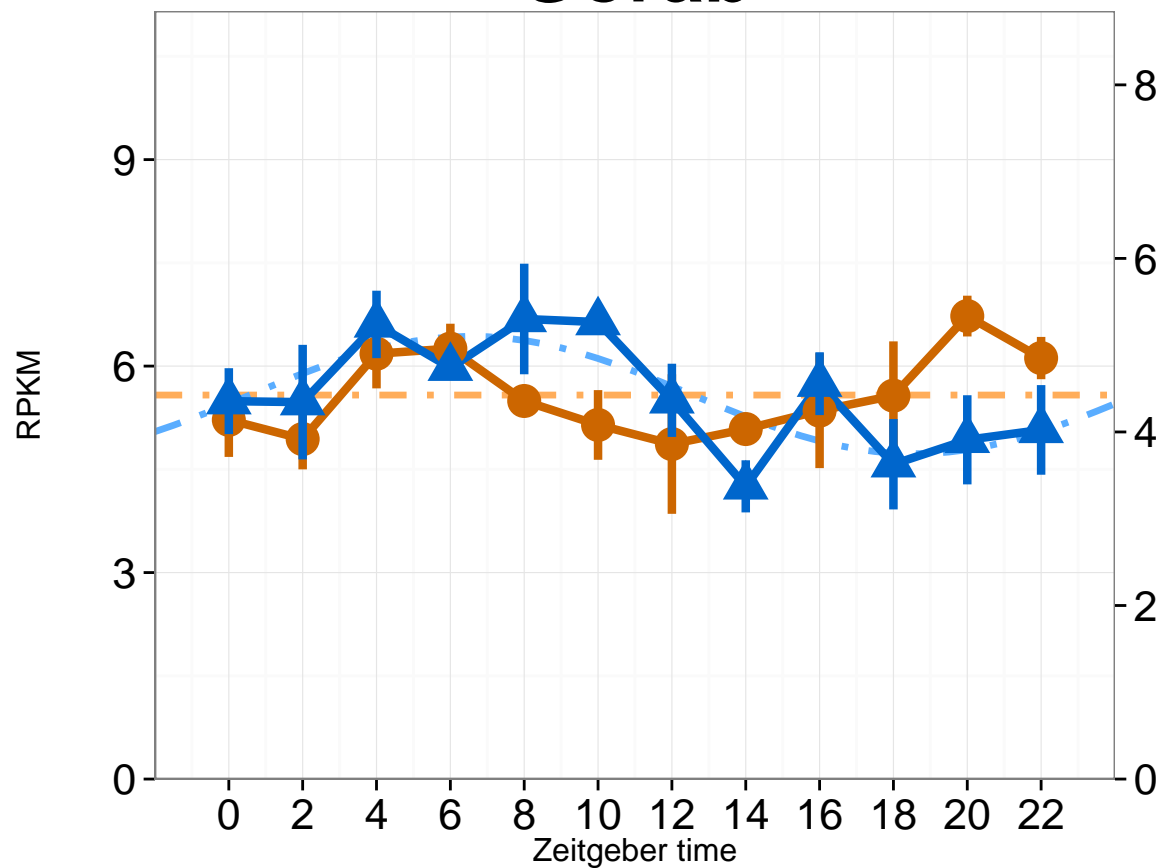

## Gorab

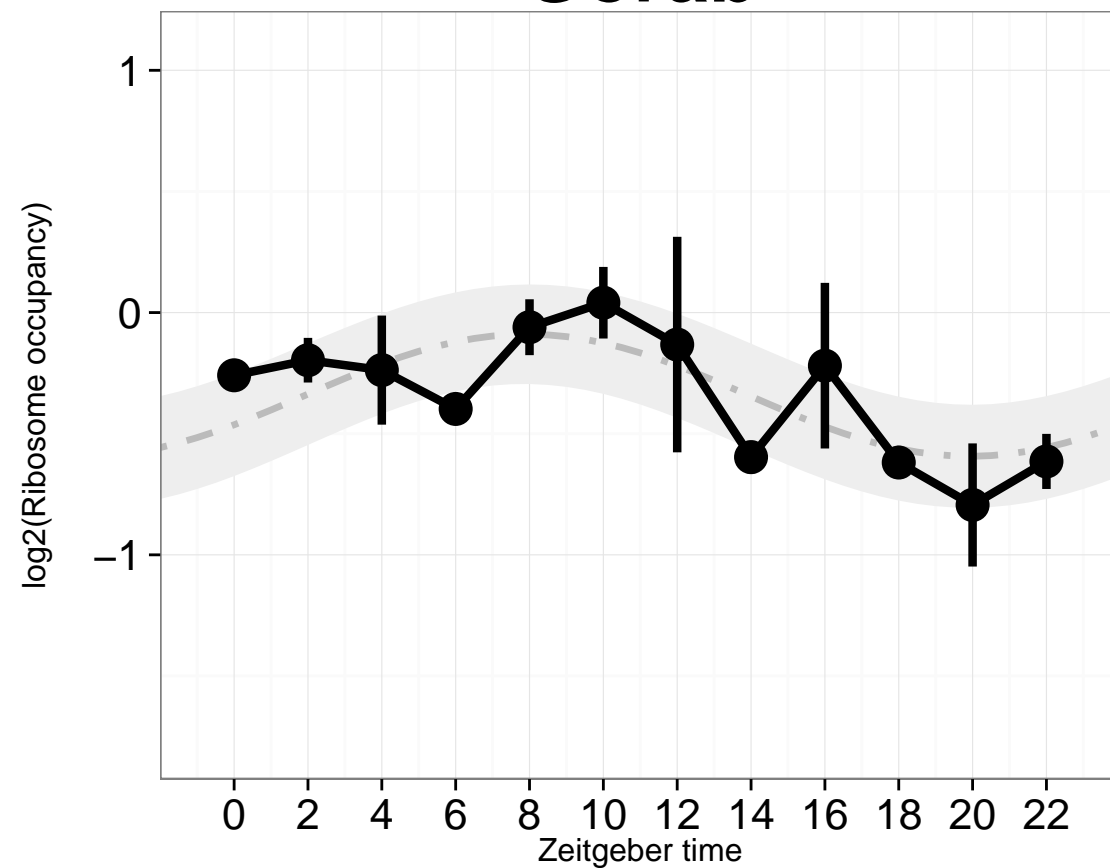

Supplement: Supplementary file 2928 [file 1]

## Ahsa2

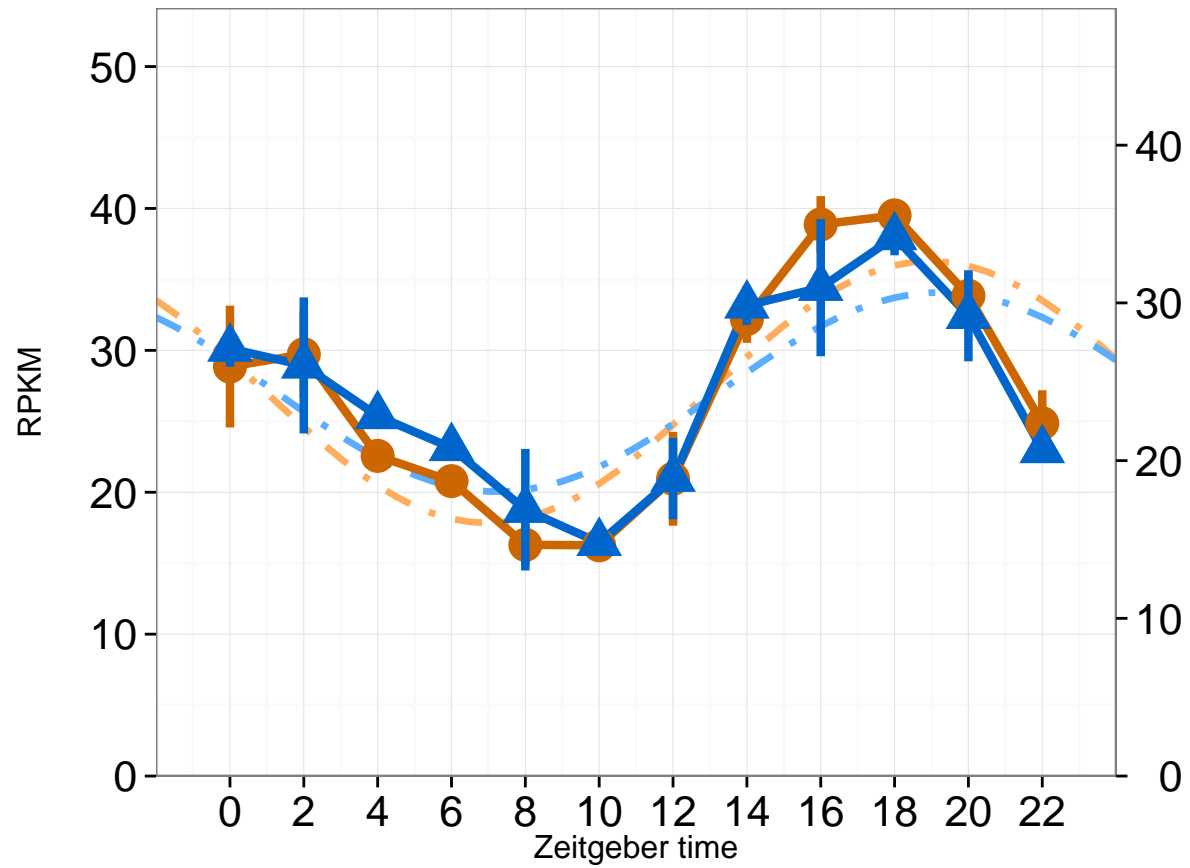

## Ahsa2

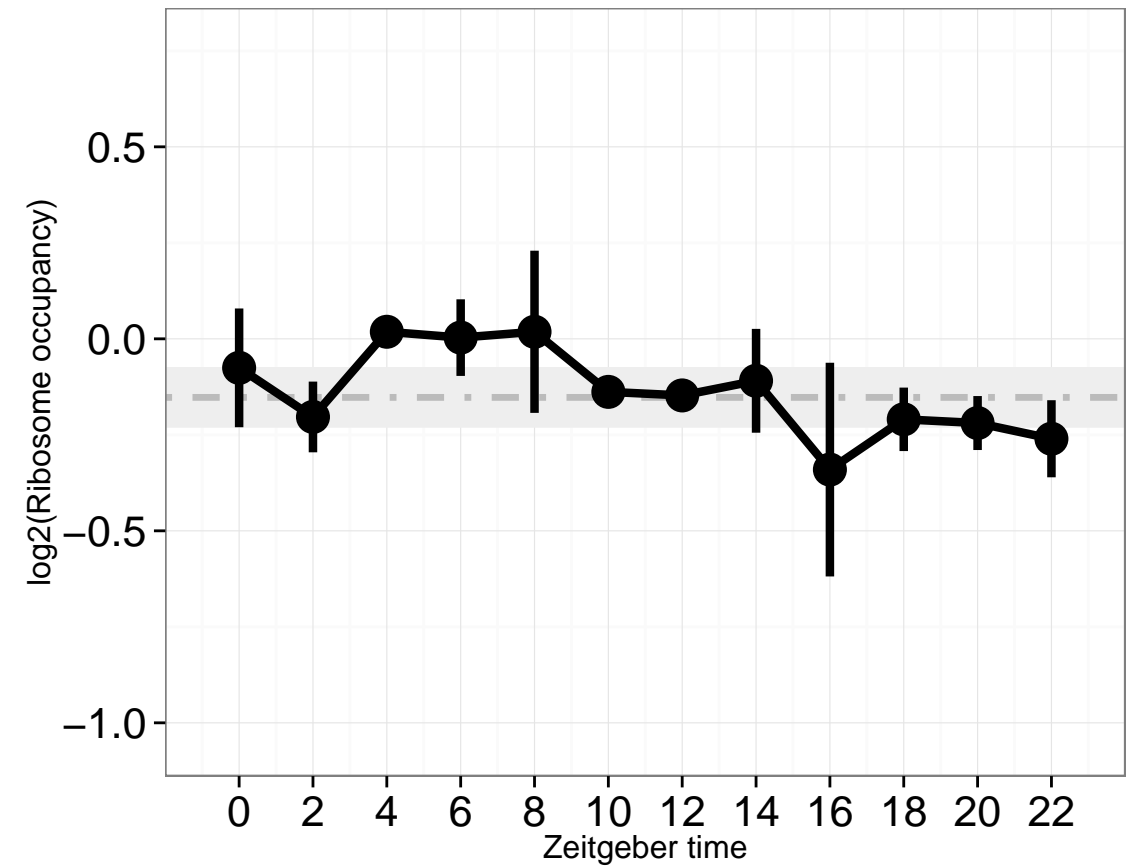

Supplement: Supplementary file 2929 [file 1]

# Ppp2r5d

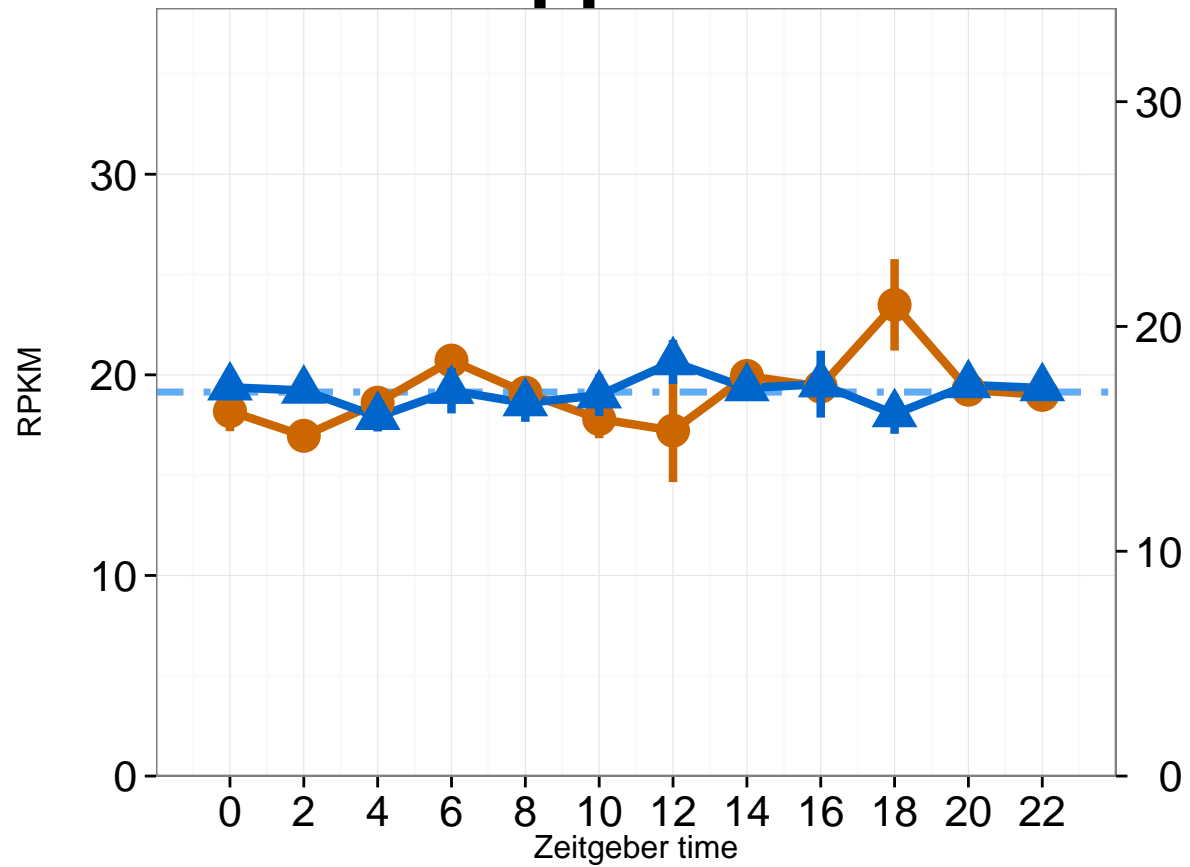

# Ppp2r5d

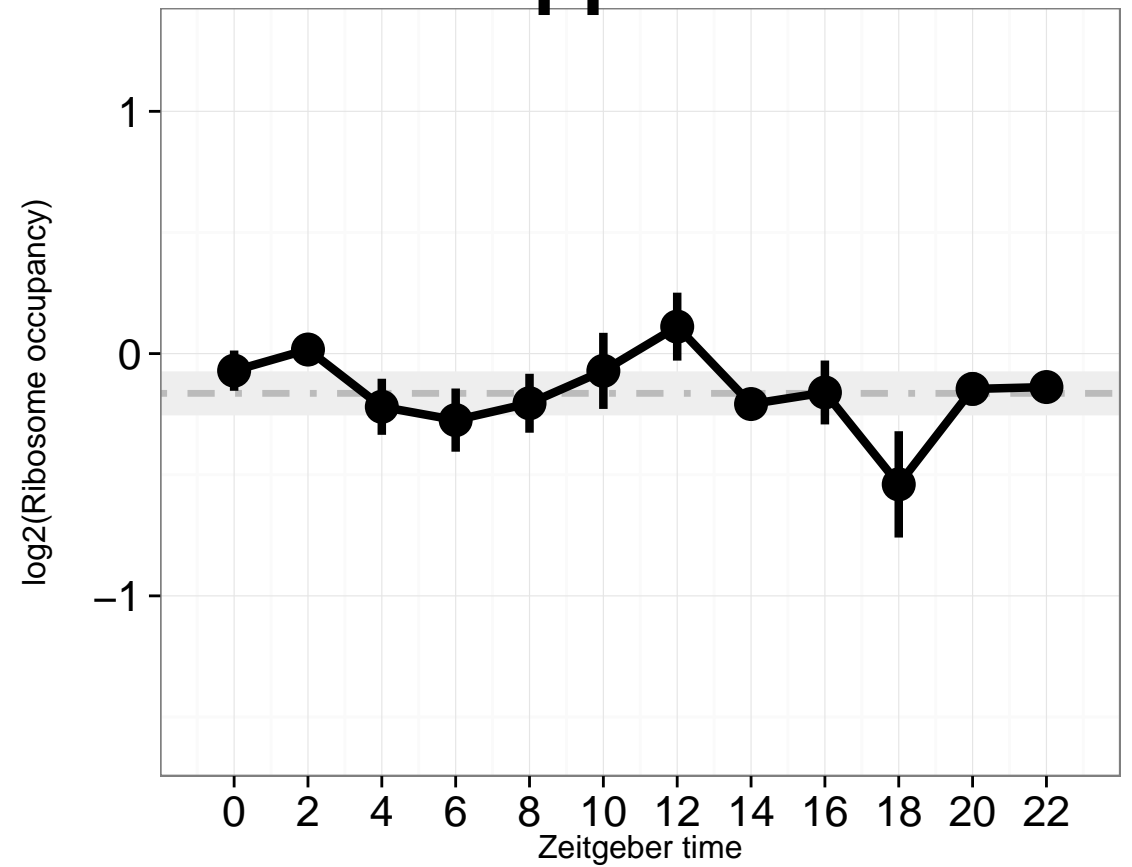

Supplement: Supplementary file 2930 [file 1]

# Insig1

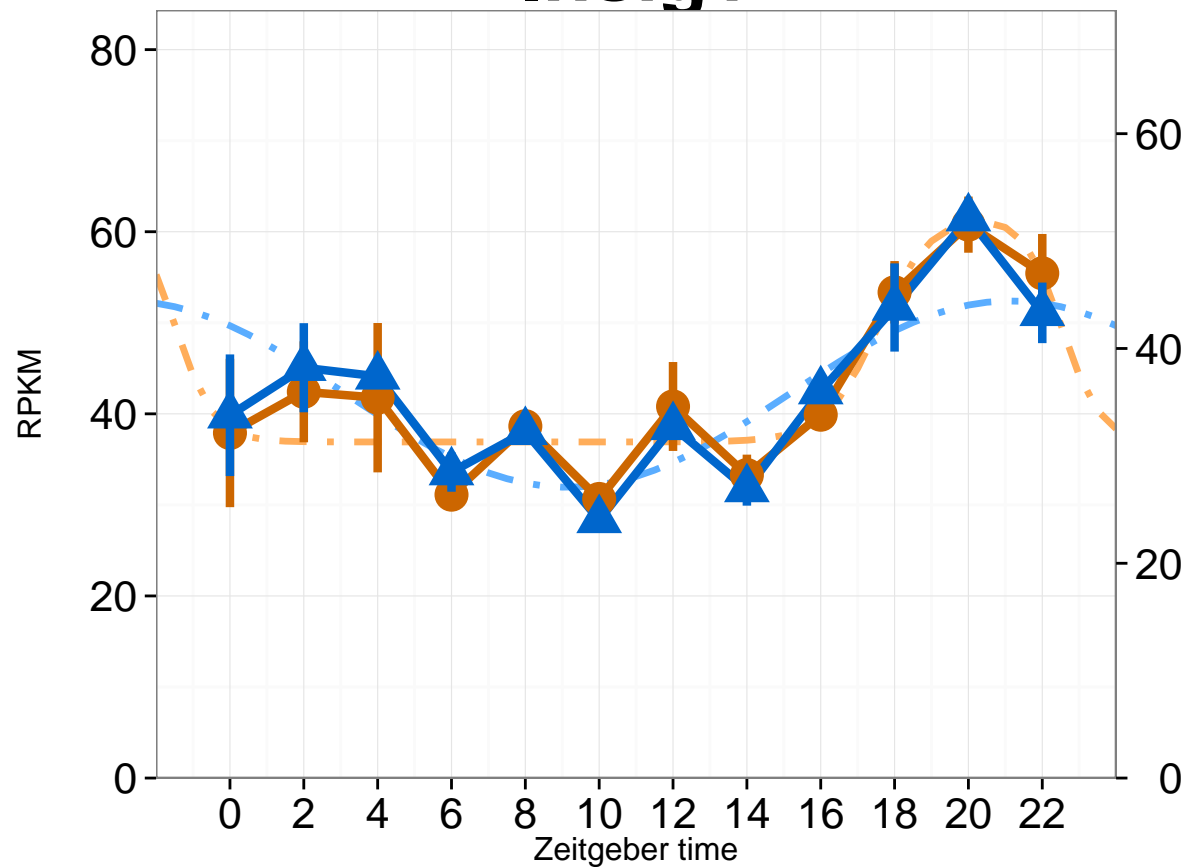

# Insig1

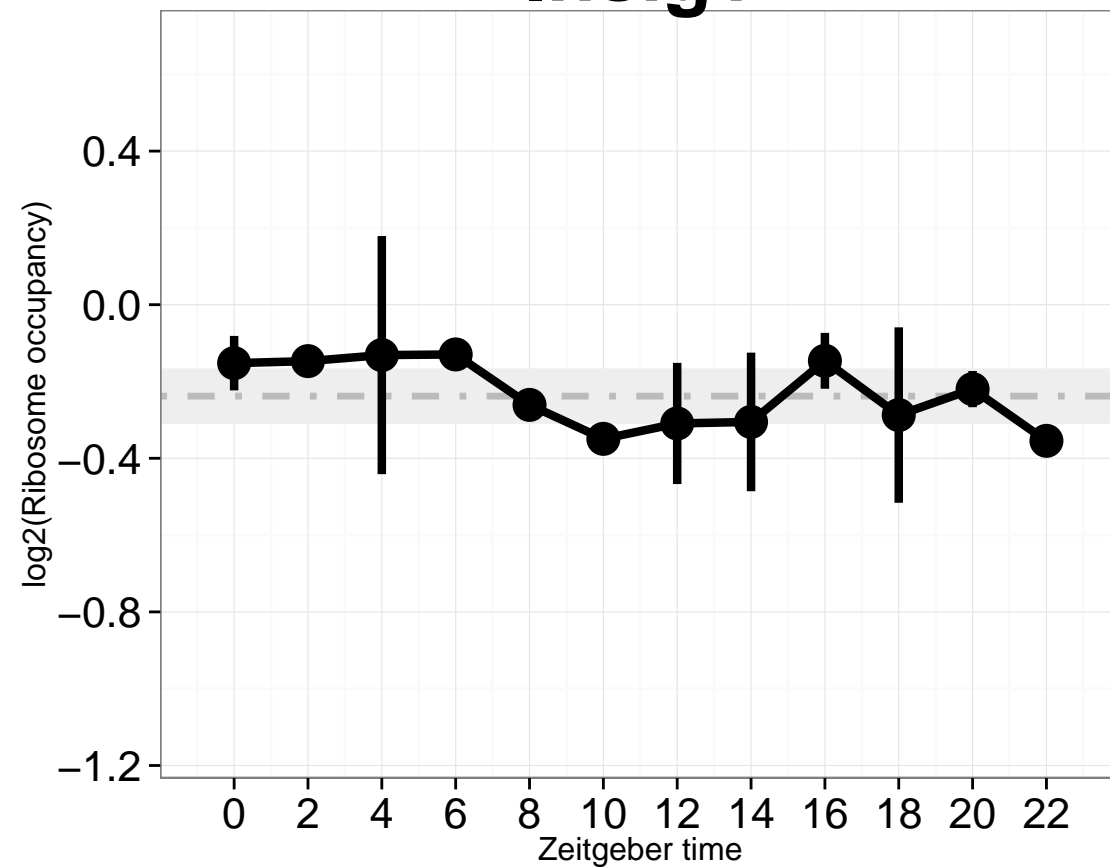

Supplement: Supplementary file 2931 [file 1]

## Nacc1

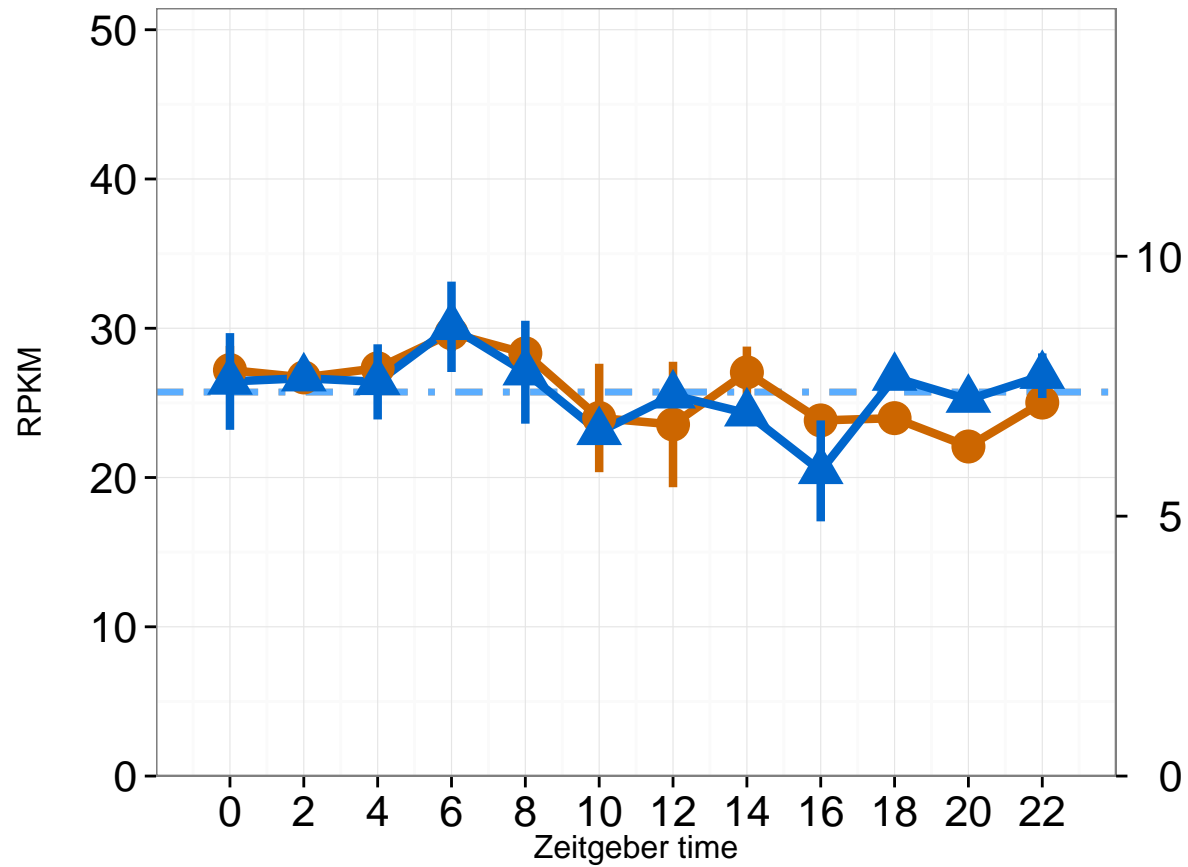

## Nacc1

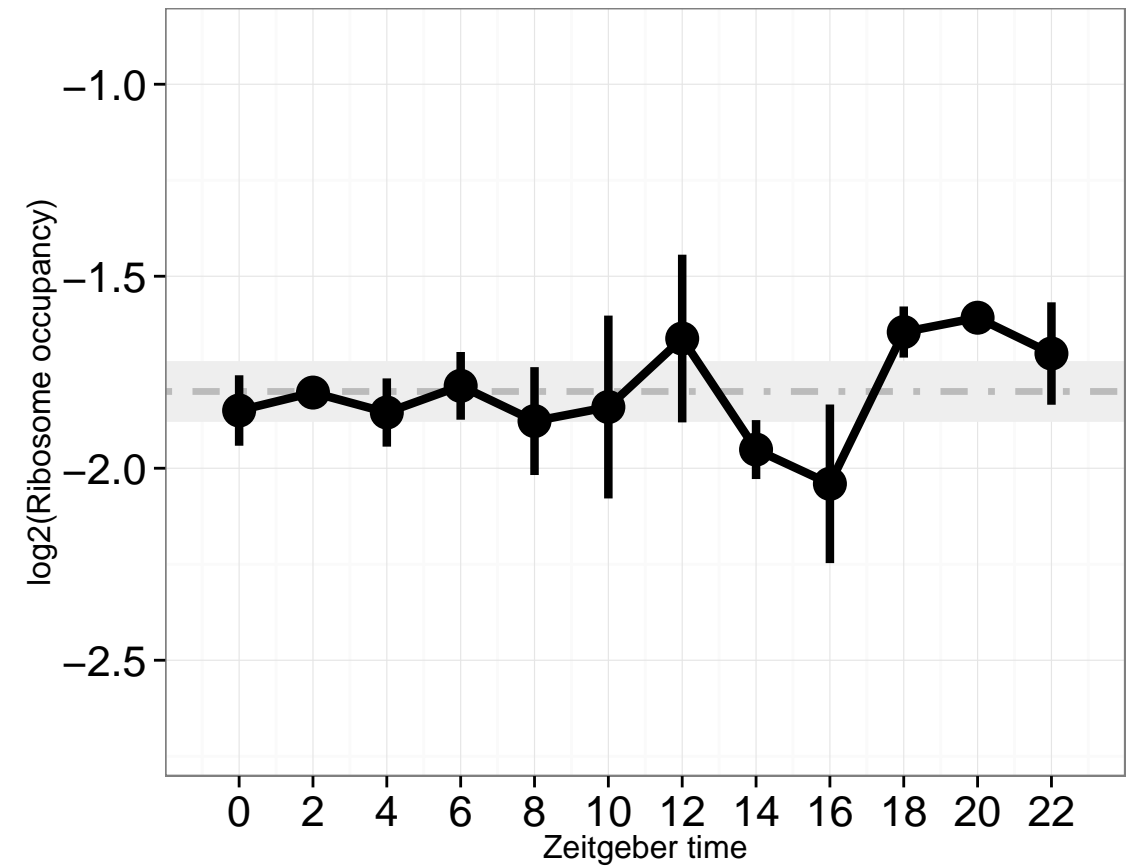

Supplement: Supplementary file 2932 [file 1]

## Bcl2l1

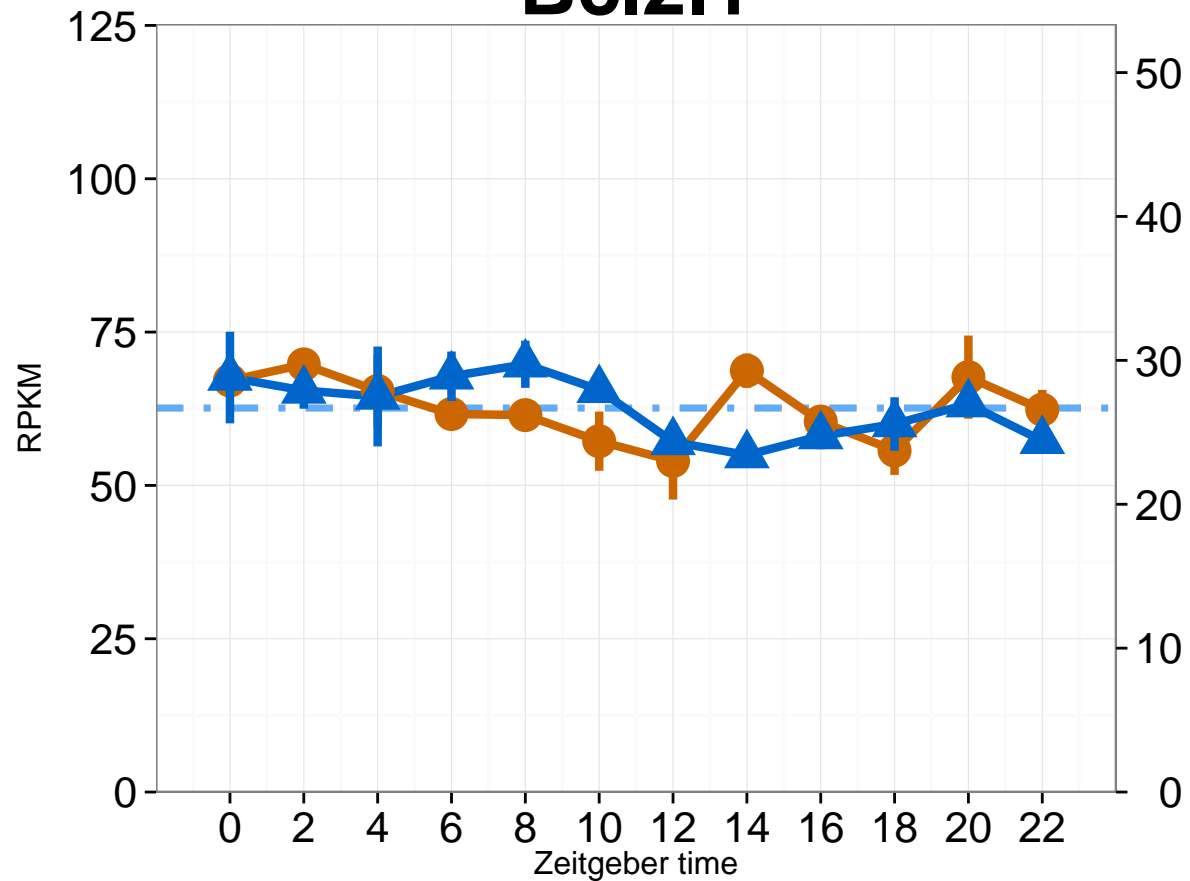

## Bcl2l1

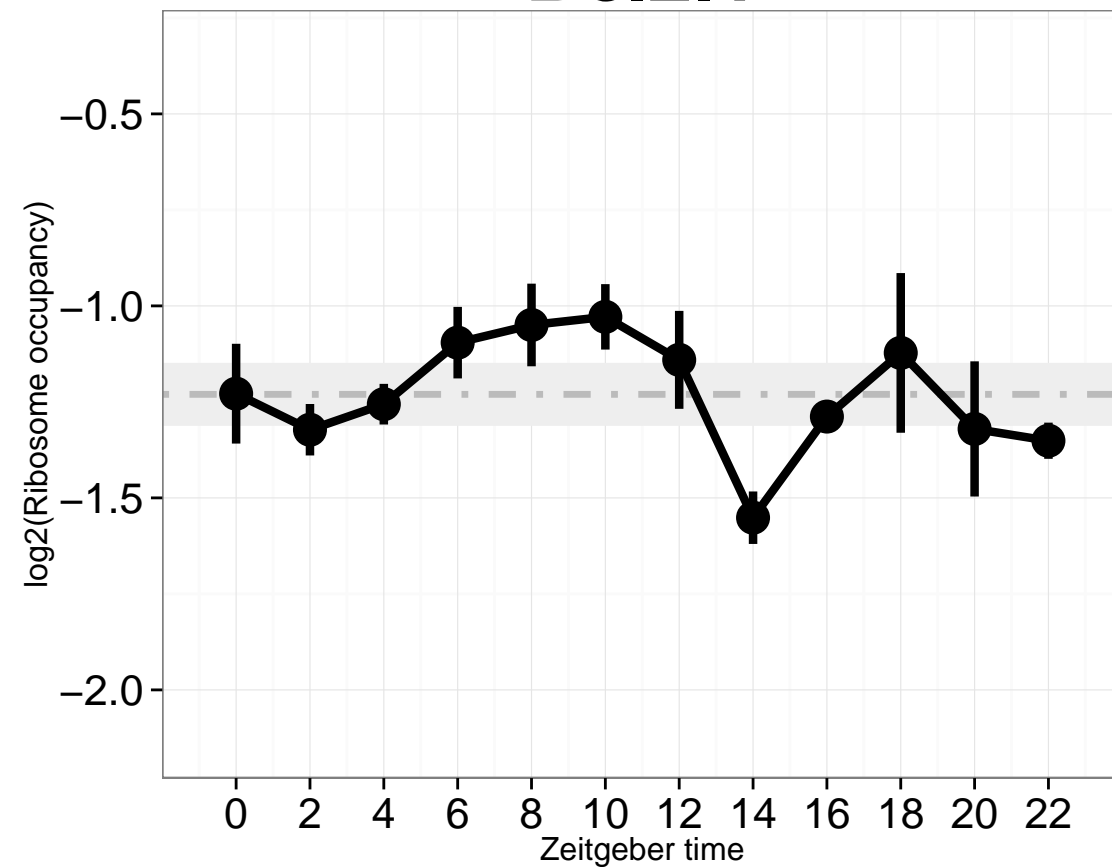

Supplement: Supplementary file 2933 [file 1]

**Slc13a5**

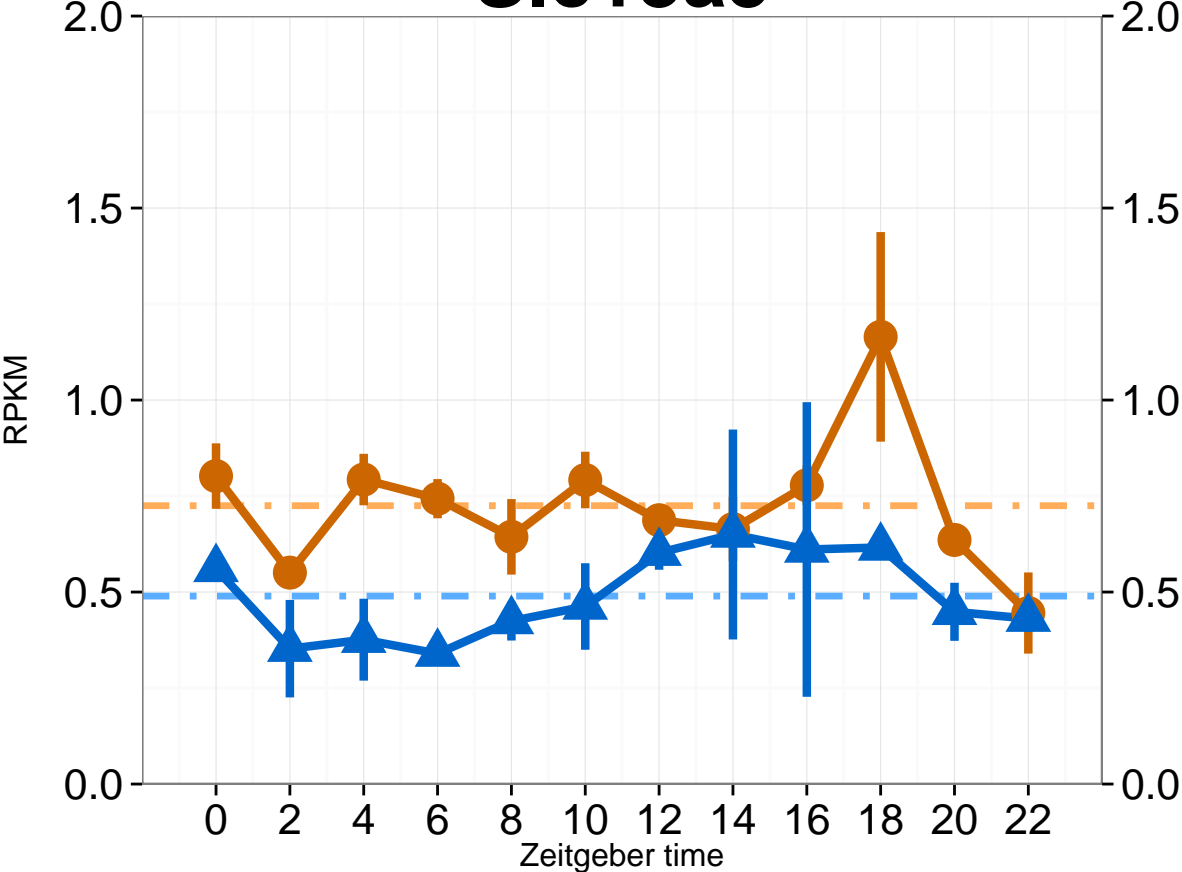

**Slc13a5**

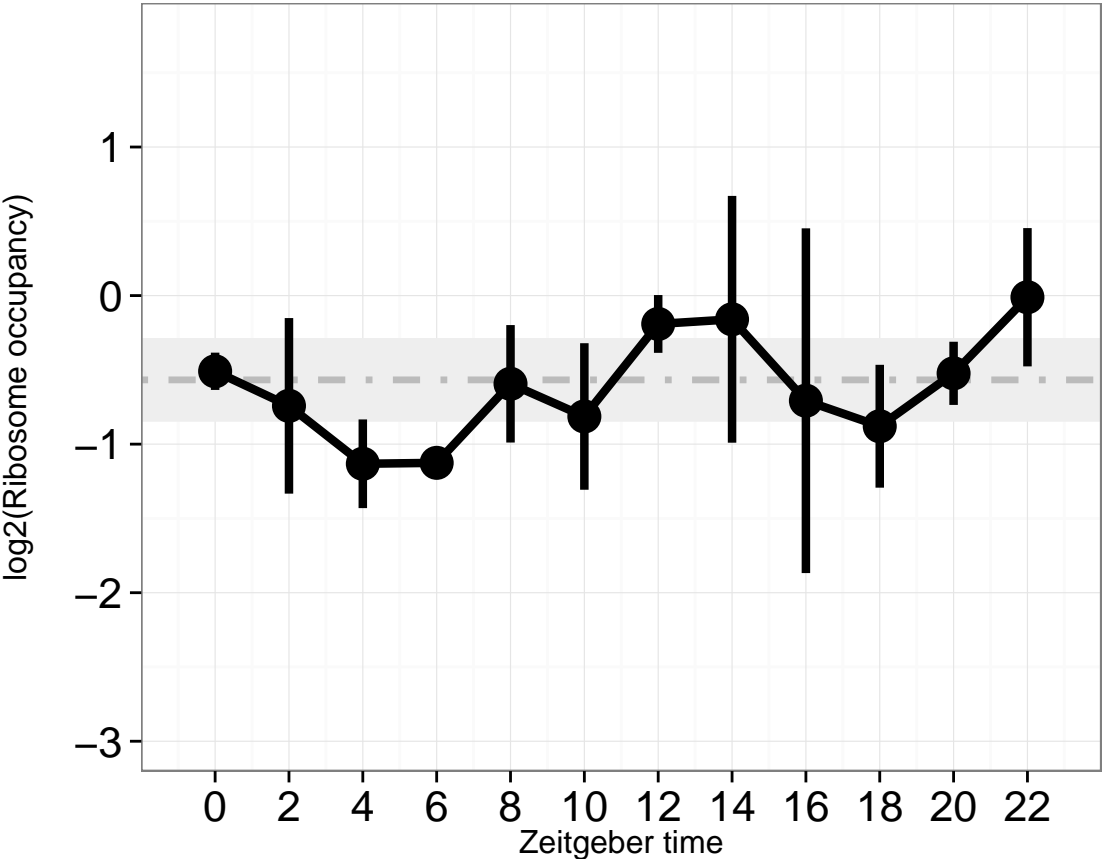

Supplement: Supplementary file 2934 [file 1]

# Dcaf12

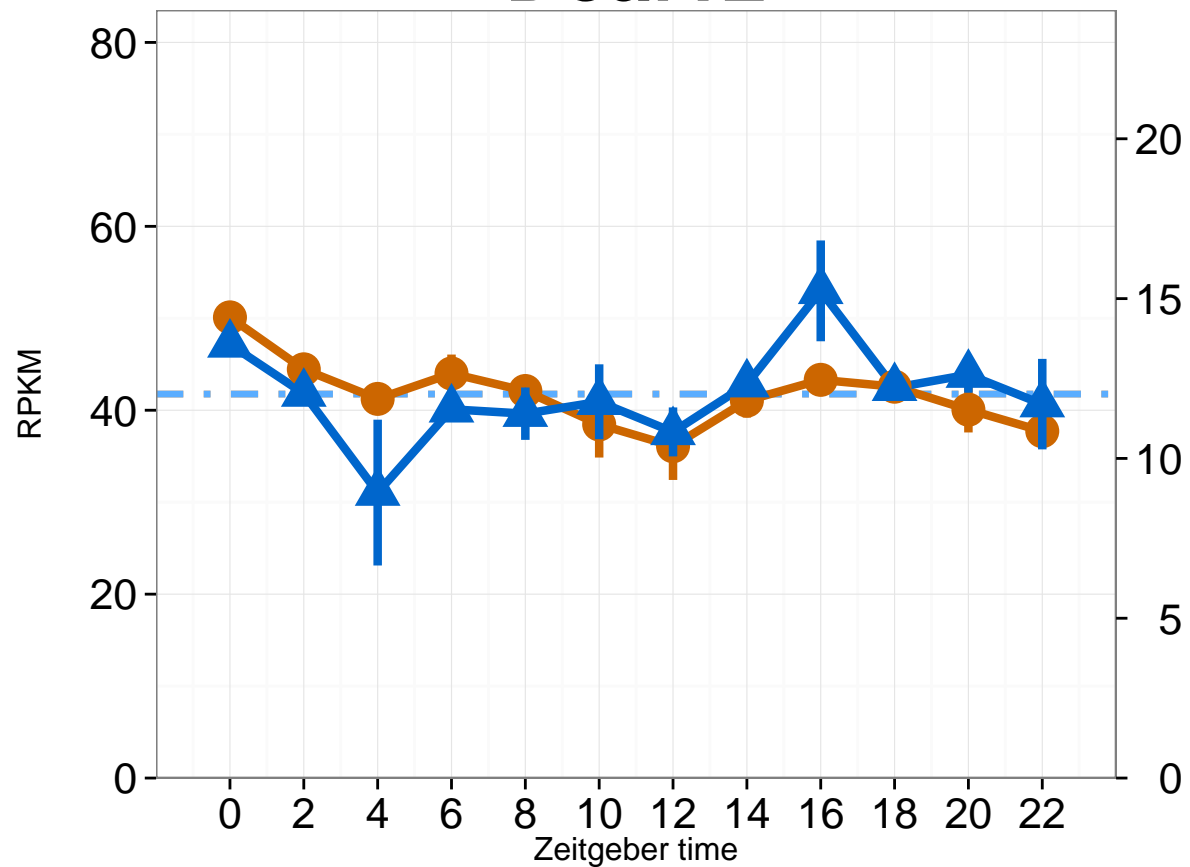

# Dcaf12

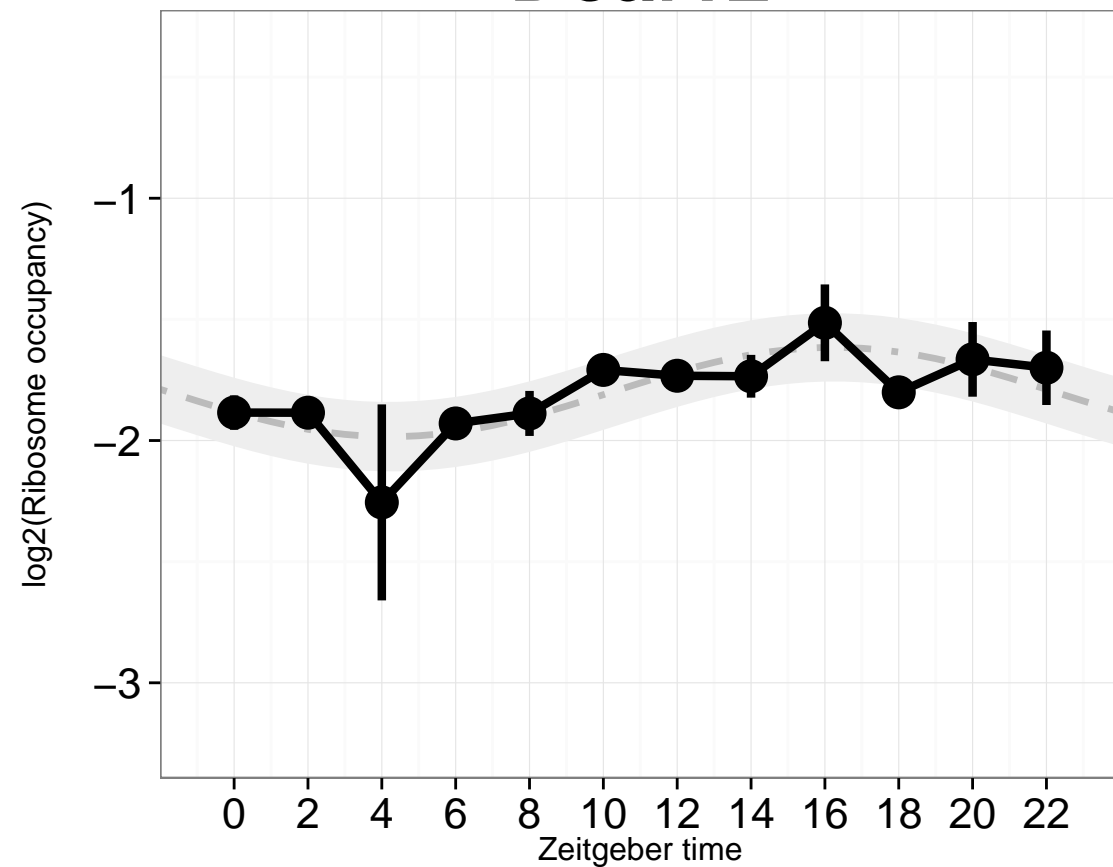

Supplement: Supplementary file 2935 [file 1]

## Arhgap5

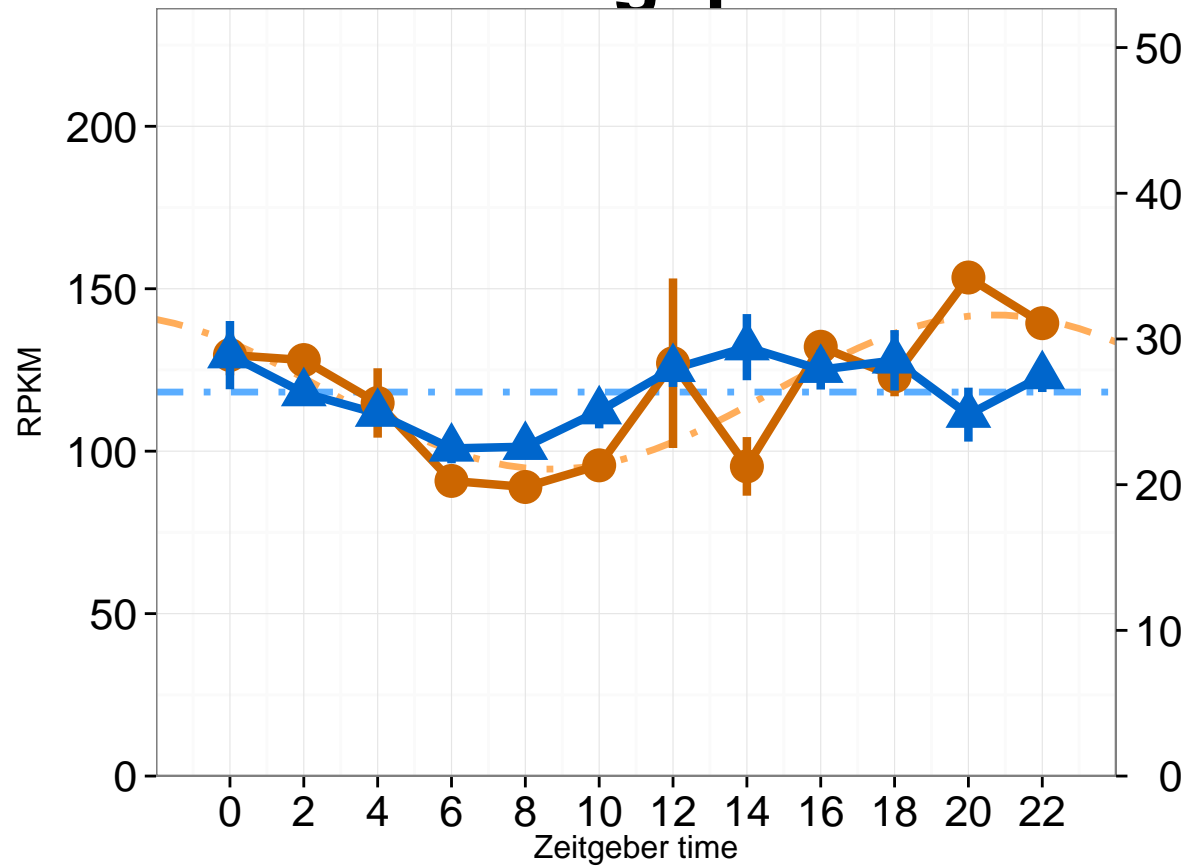

## Arhgap5

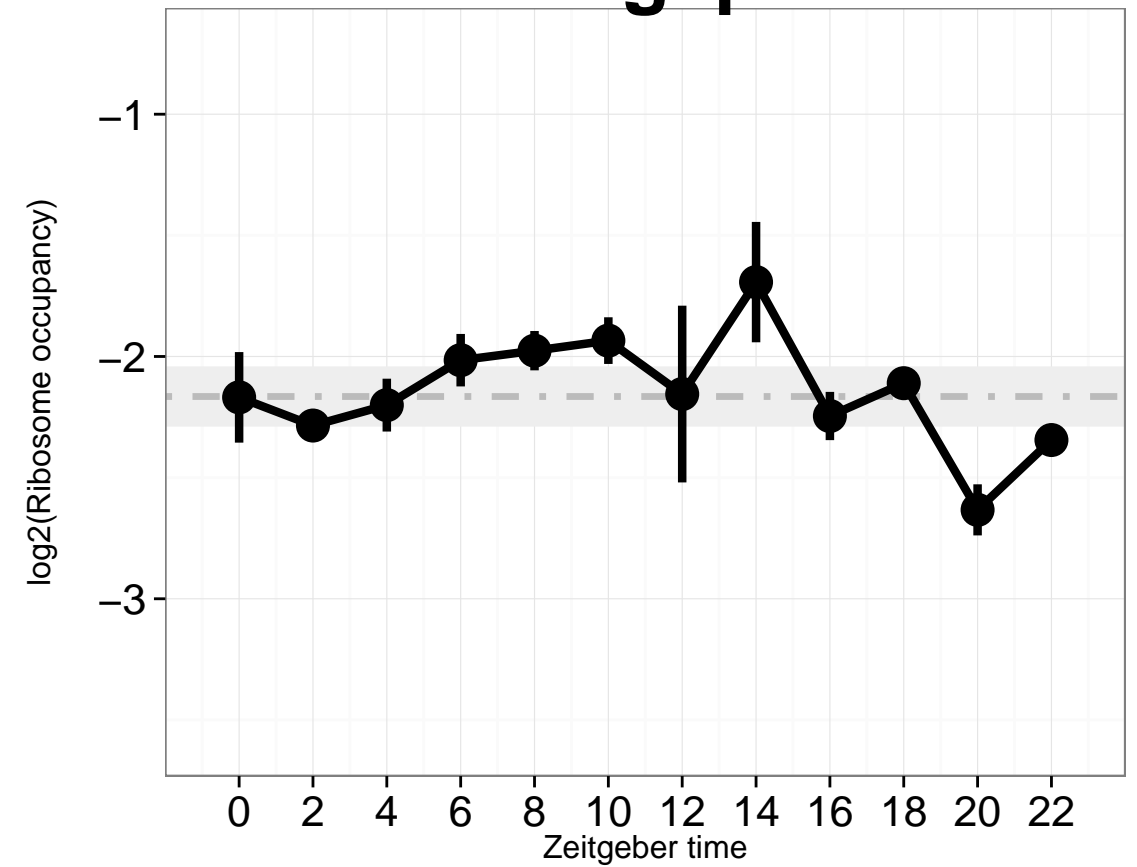

Supplement: Supplementary file 2936 [file 1]

# Adra1d

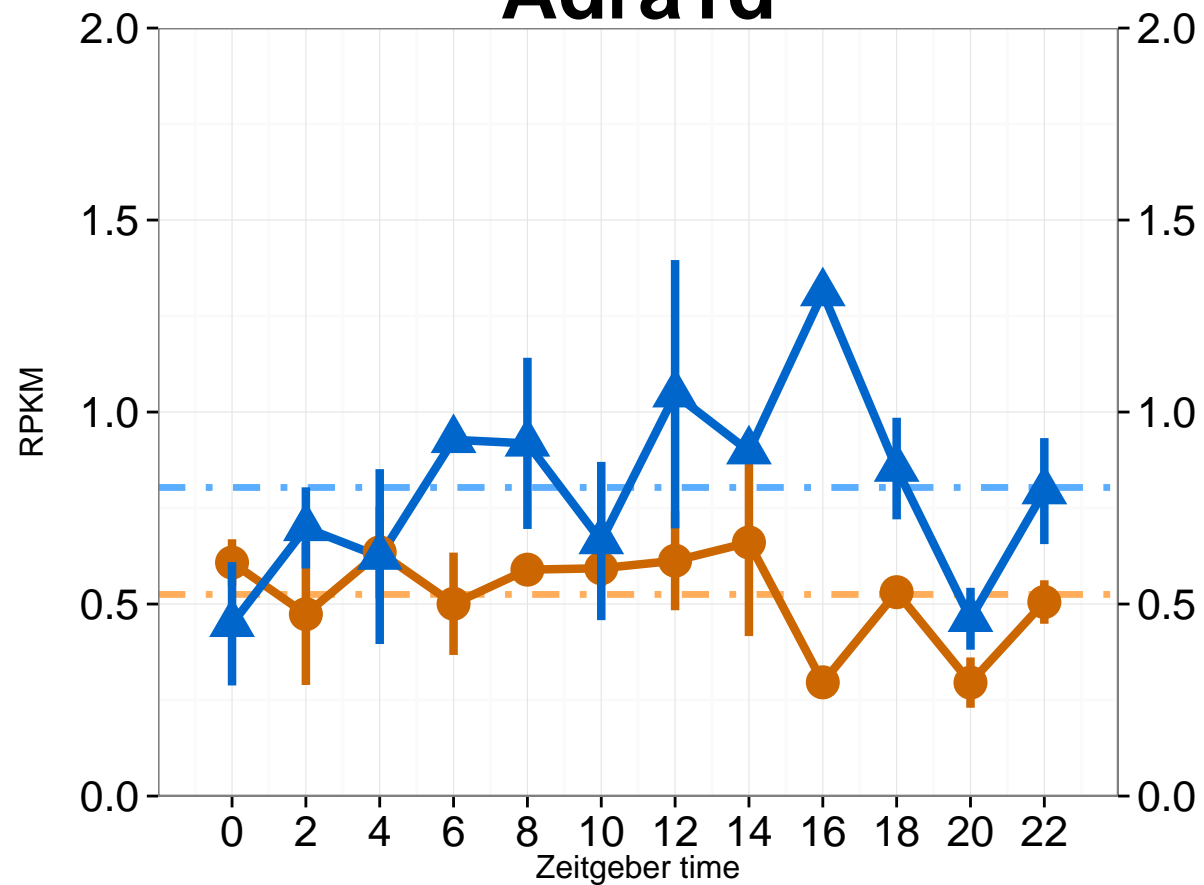

# Adra1d

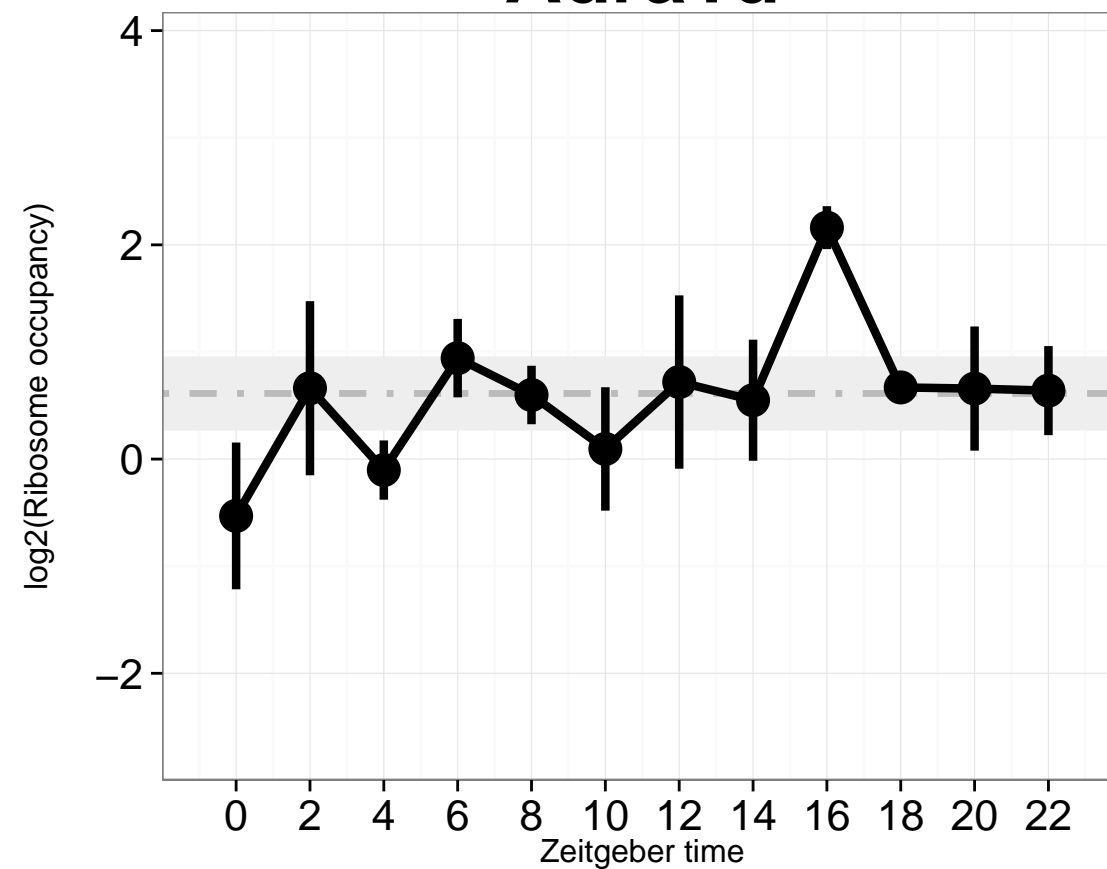

Supplement: Supplementary file 2937 [file 1]

# Aifm2

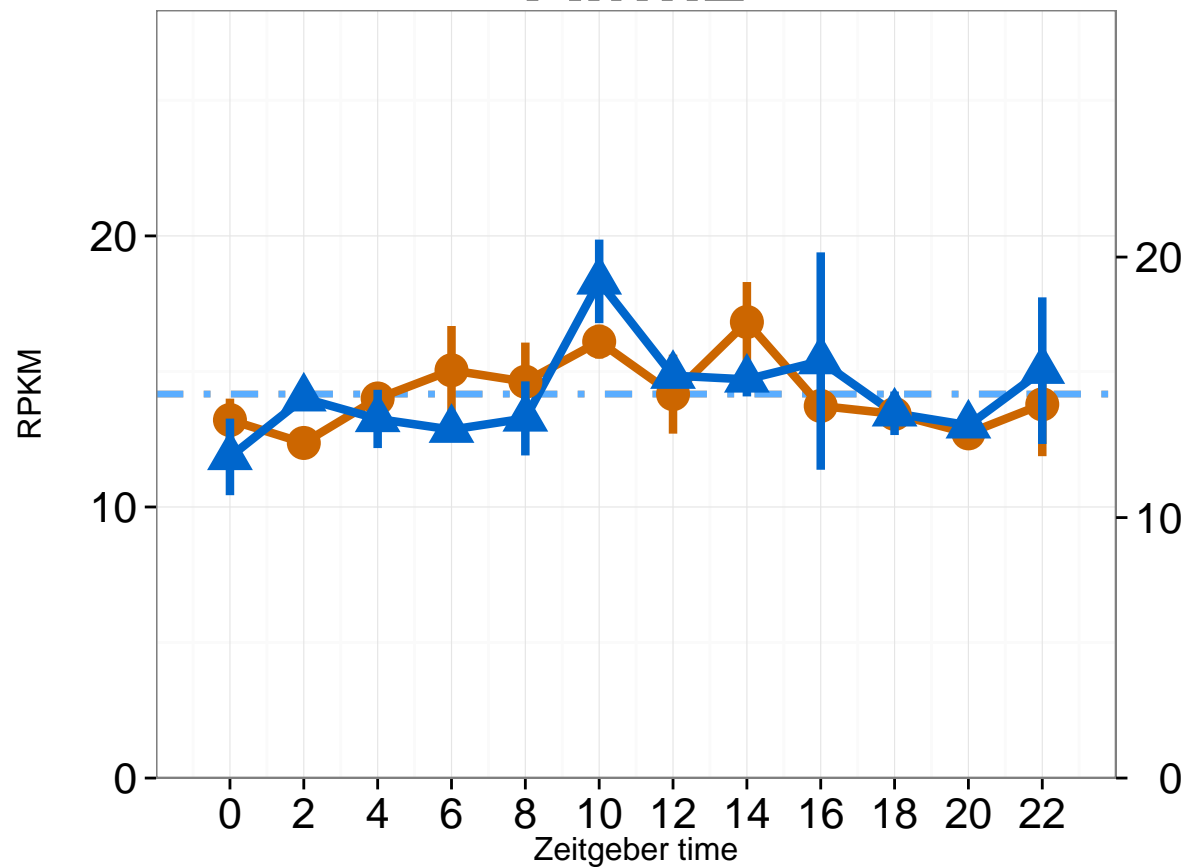

# Aifm2

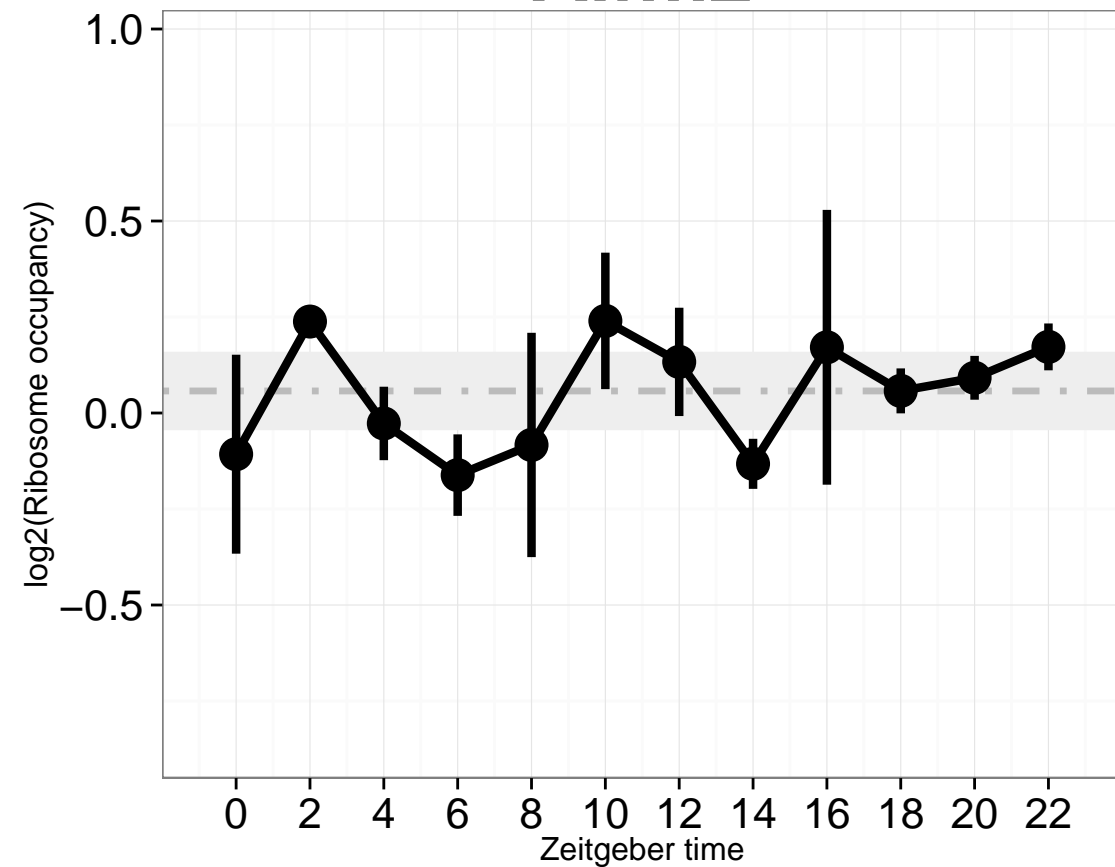

Supplement: Supplementary file 2938 [file 1]

## Ltbp4

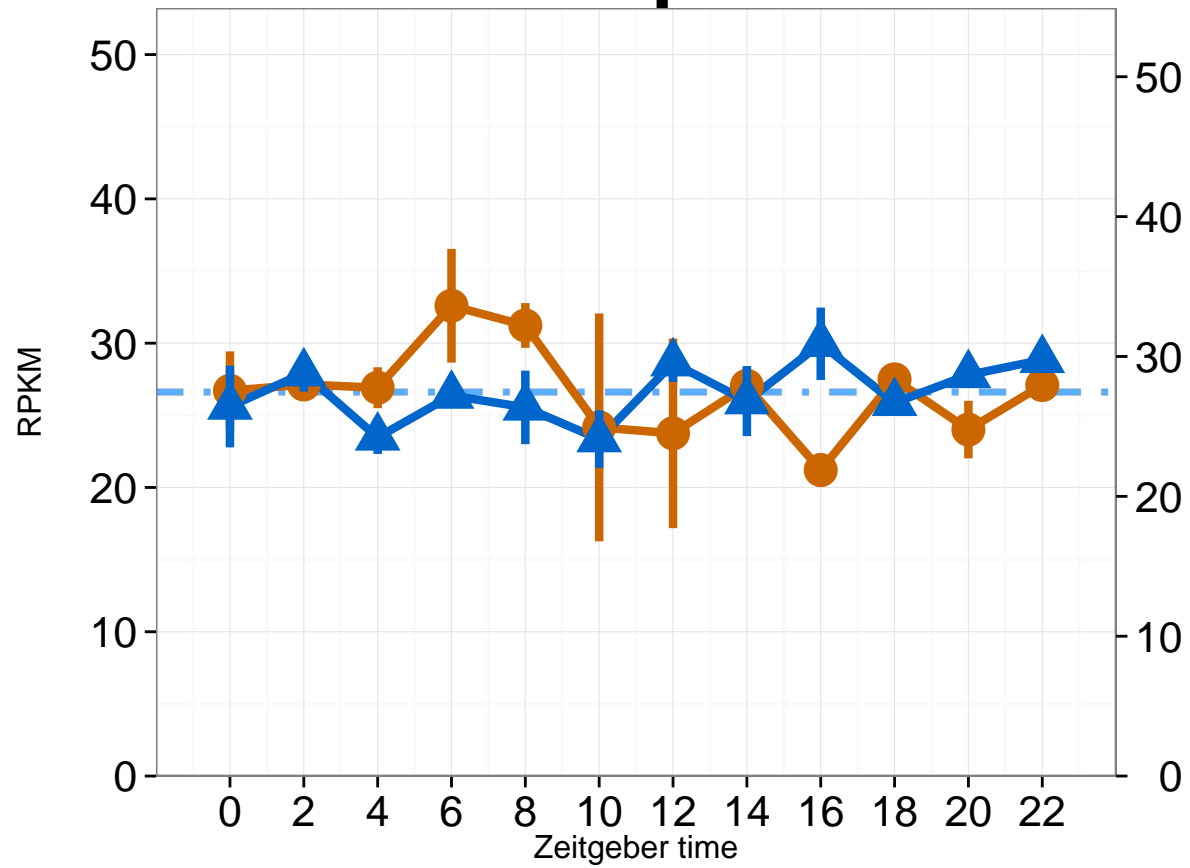

## Ltbp4

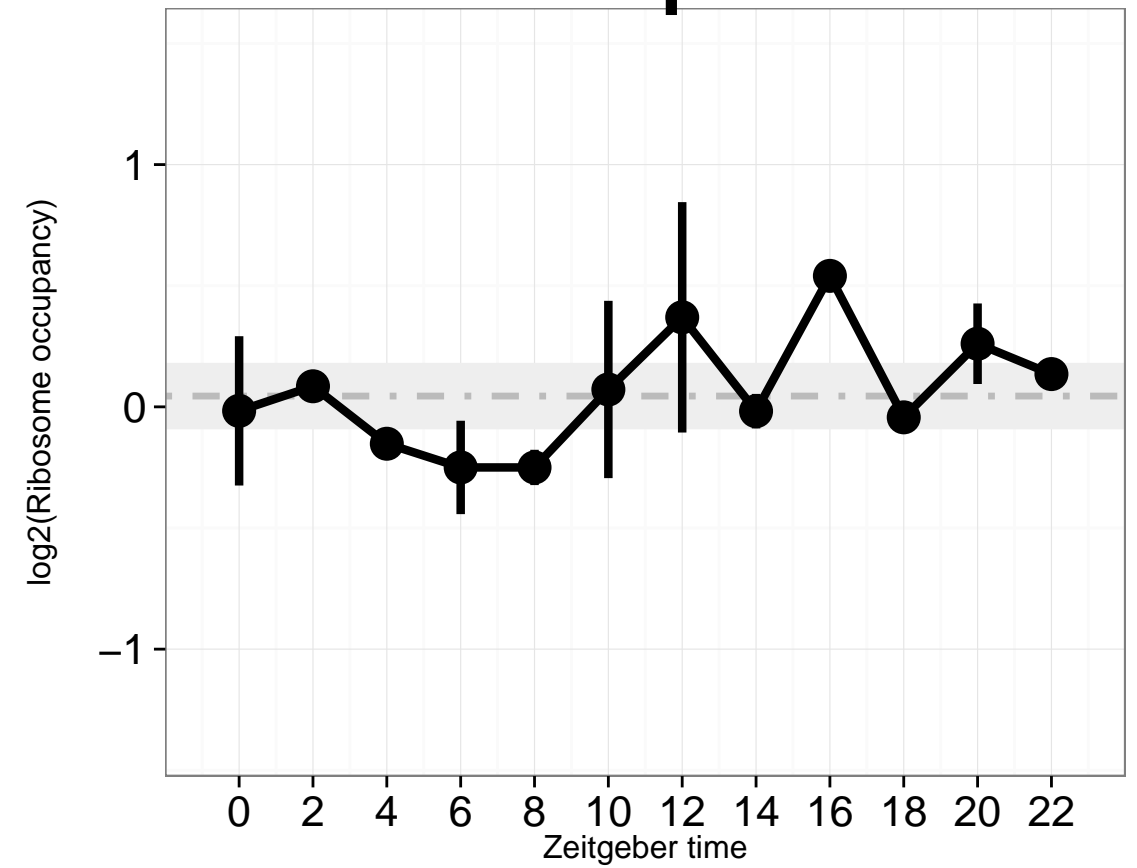

Supplement: Supplementary file 2939 [file 1]

## Mical3

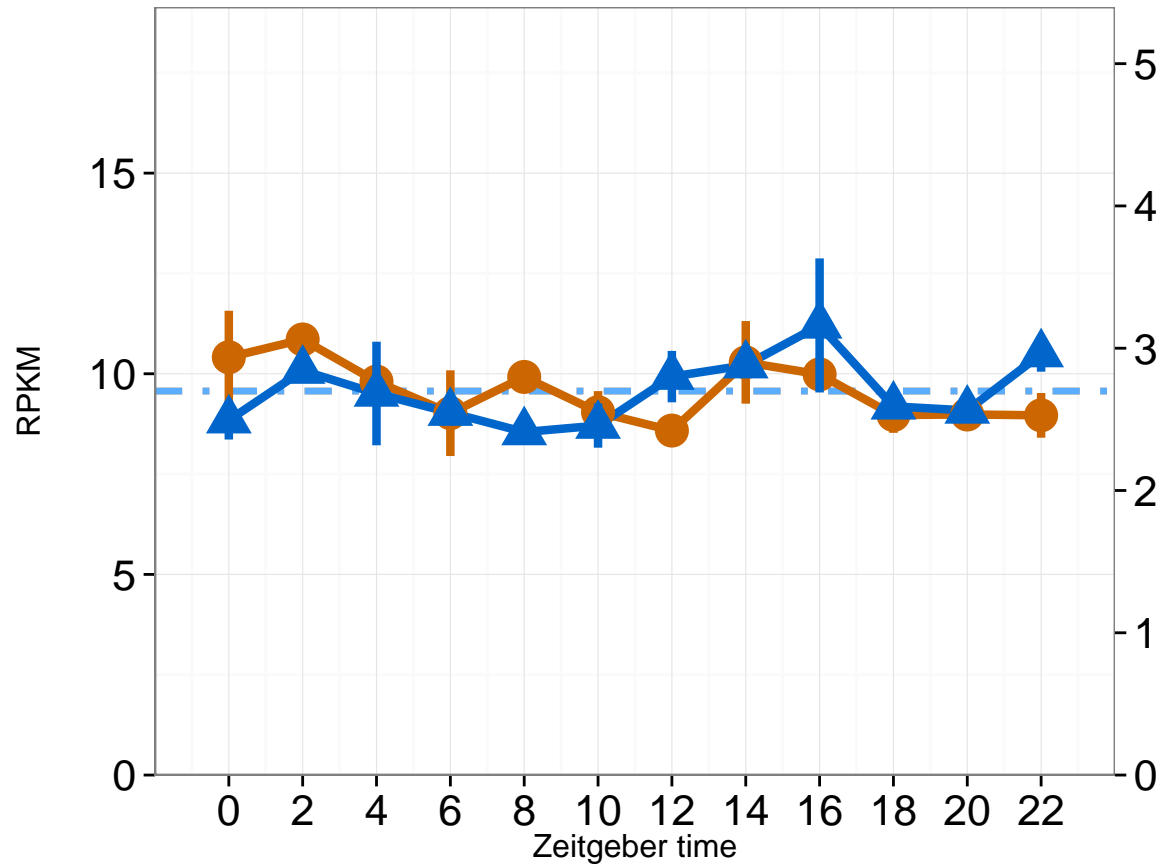

## Mical3

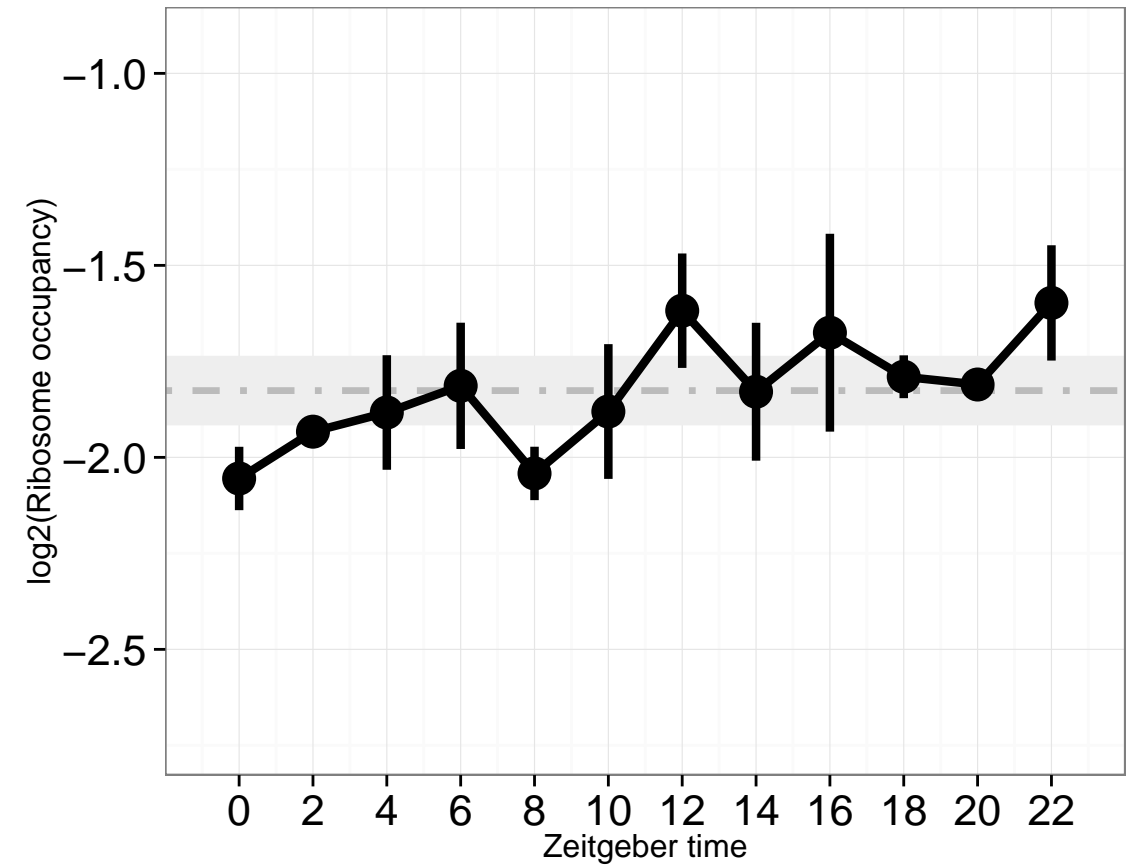

Supplement: Supplementary file 2940 [file 1]

# Zfp715

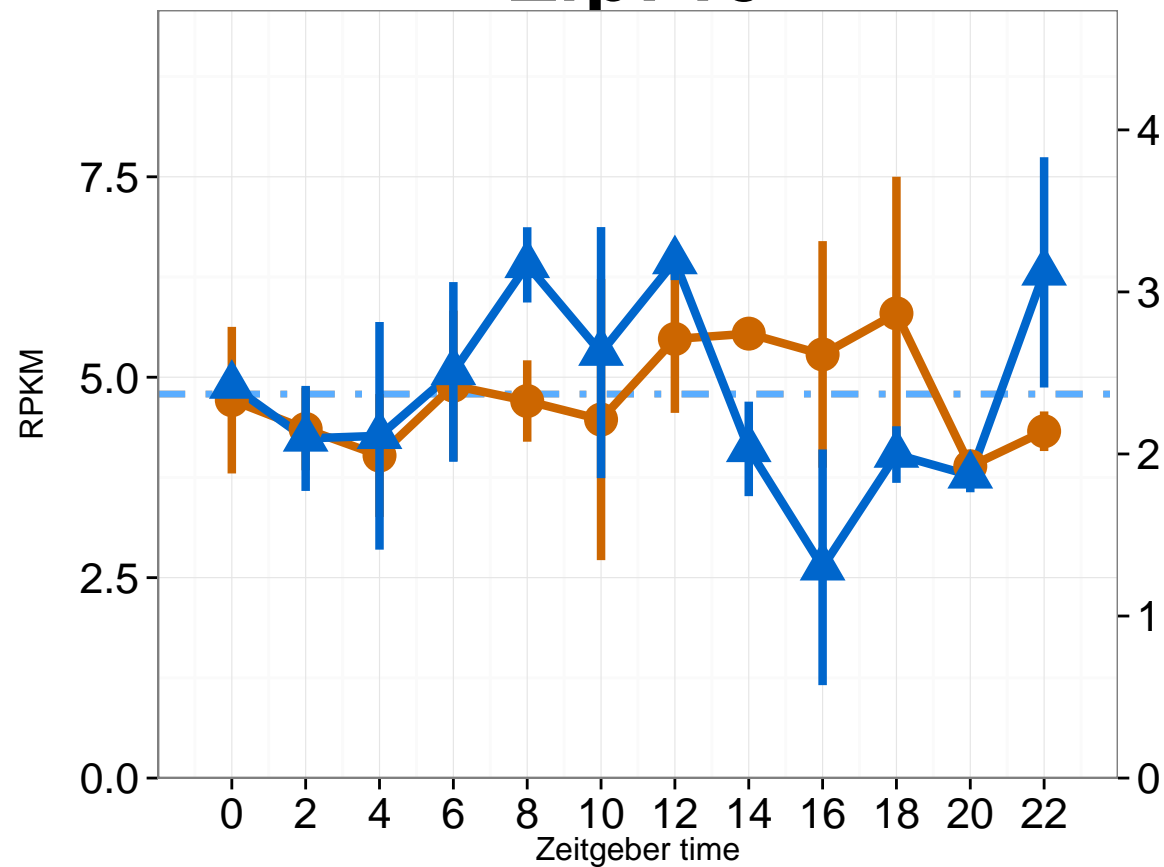

# Zfp715

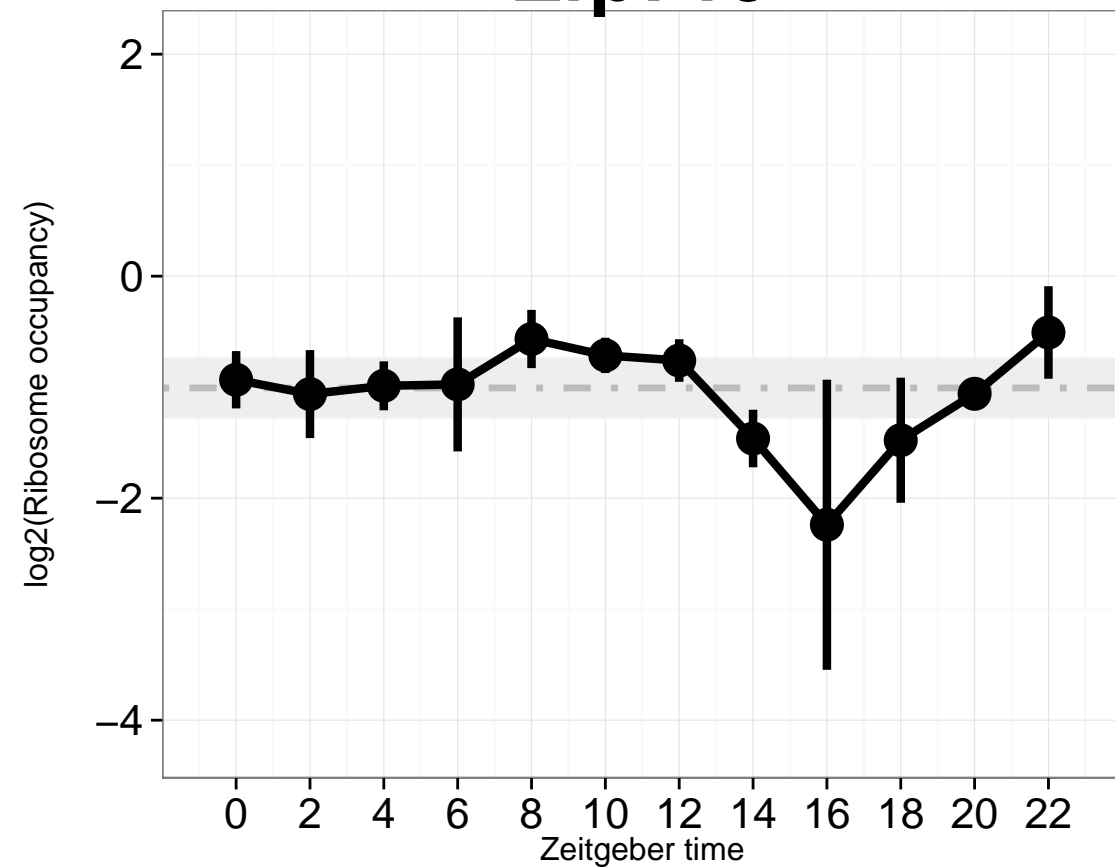

Supplement: Supplementary file 2941 [file 1]

## Ak2

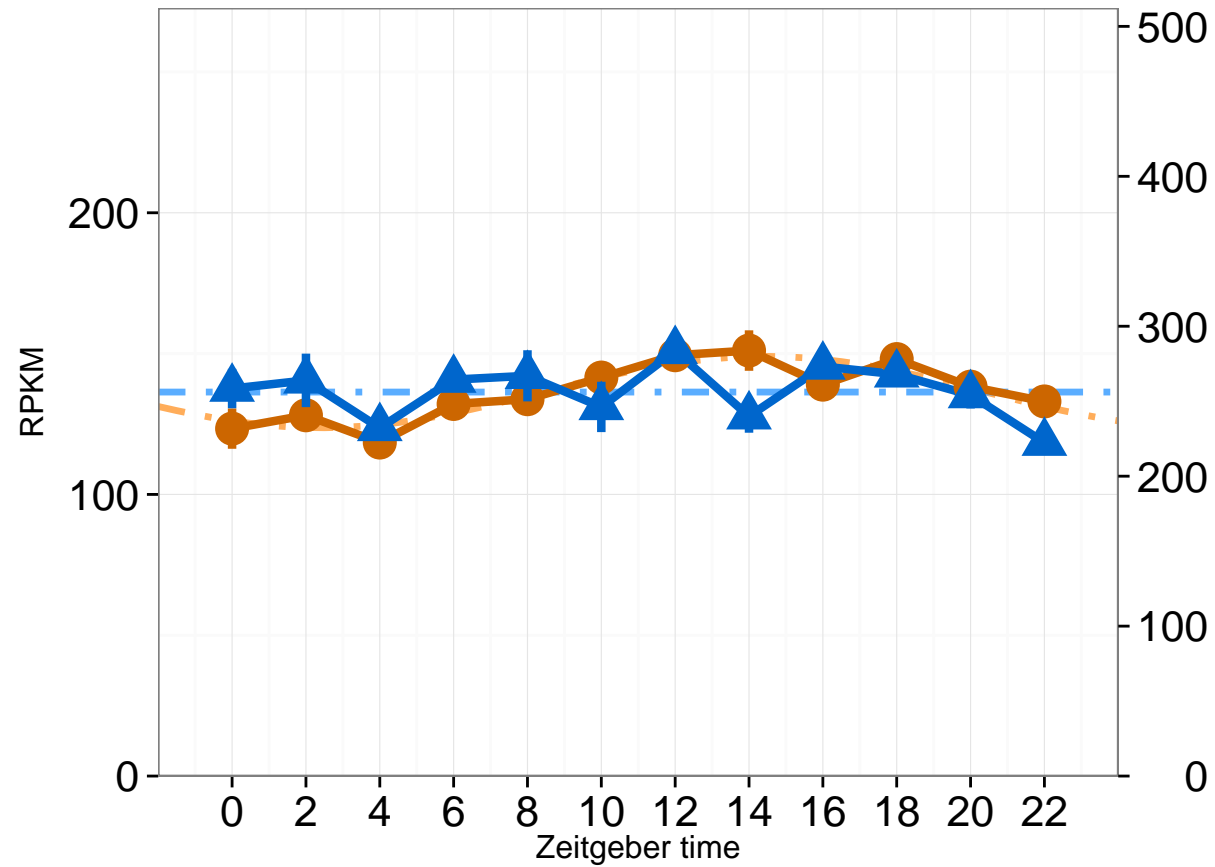

## Ak2

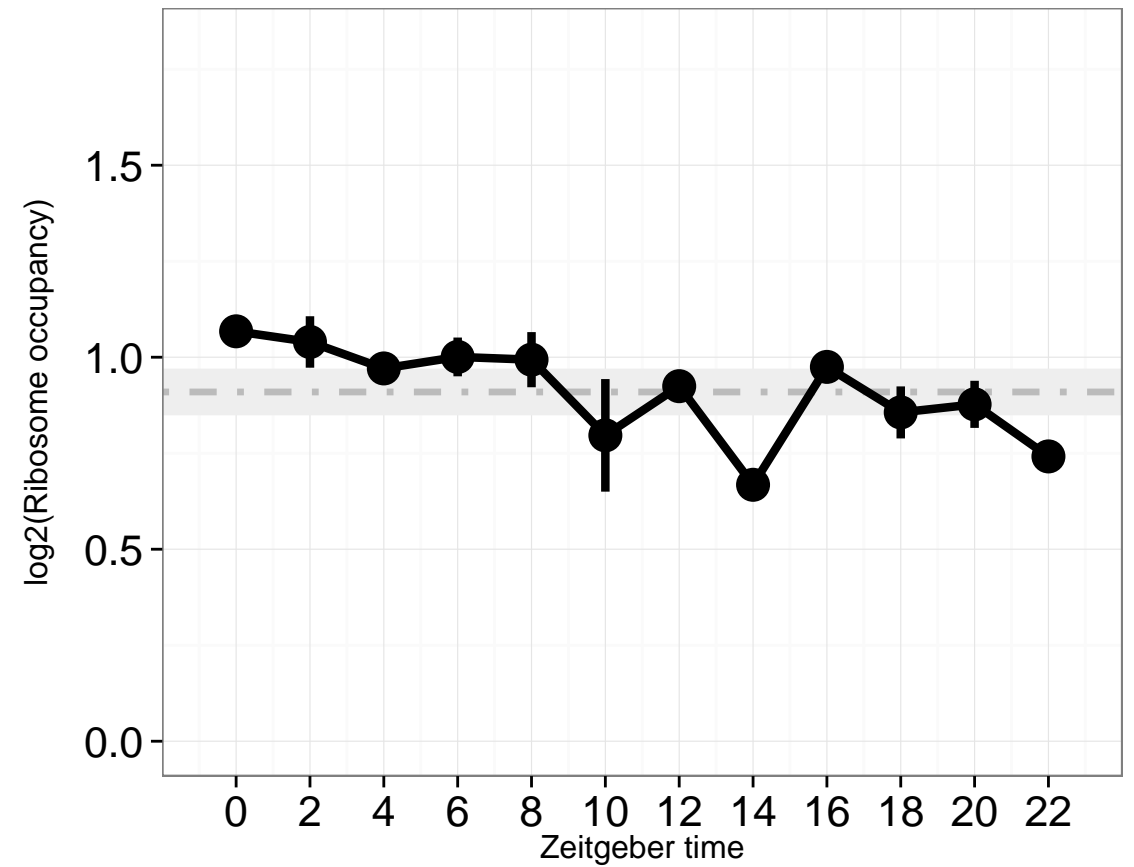

Supplement: Supplementary file 2942 [file 1]

# Spef1

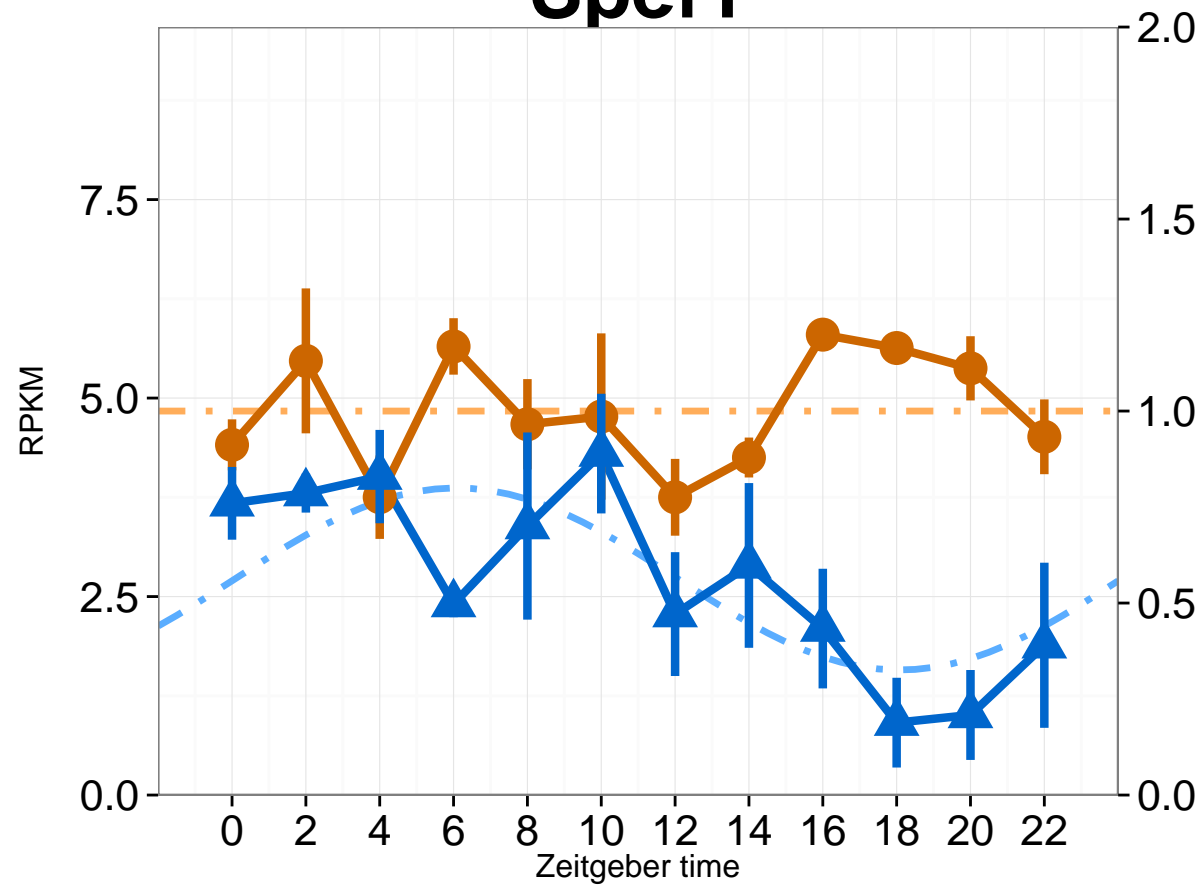

# Spef1

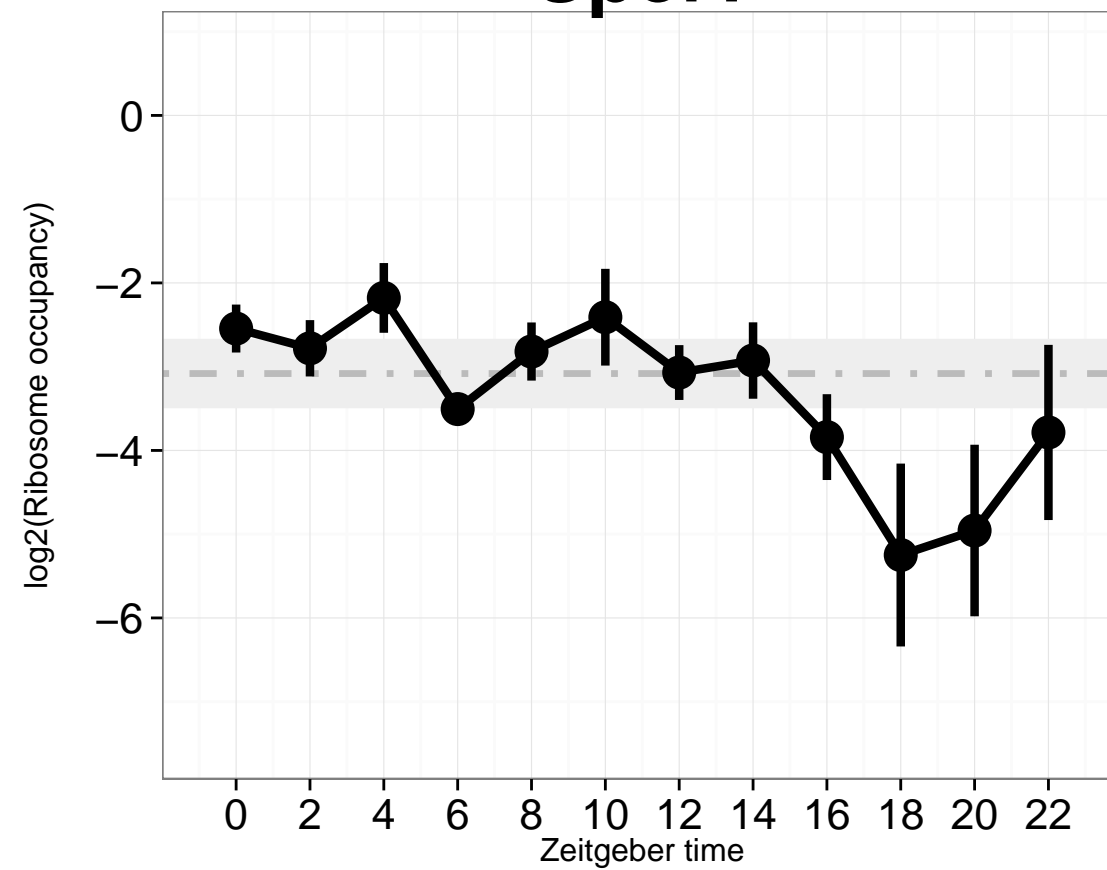

Supplement: Supplementary file 2943 [file 1]

## Slc22a2

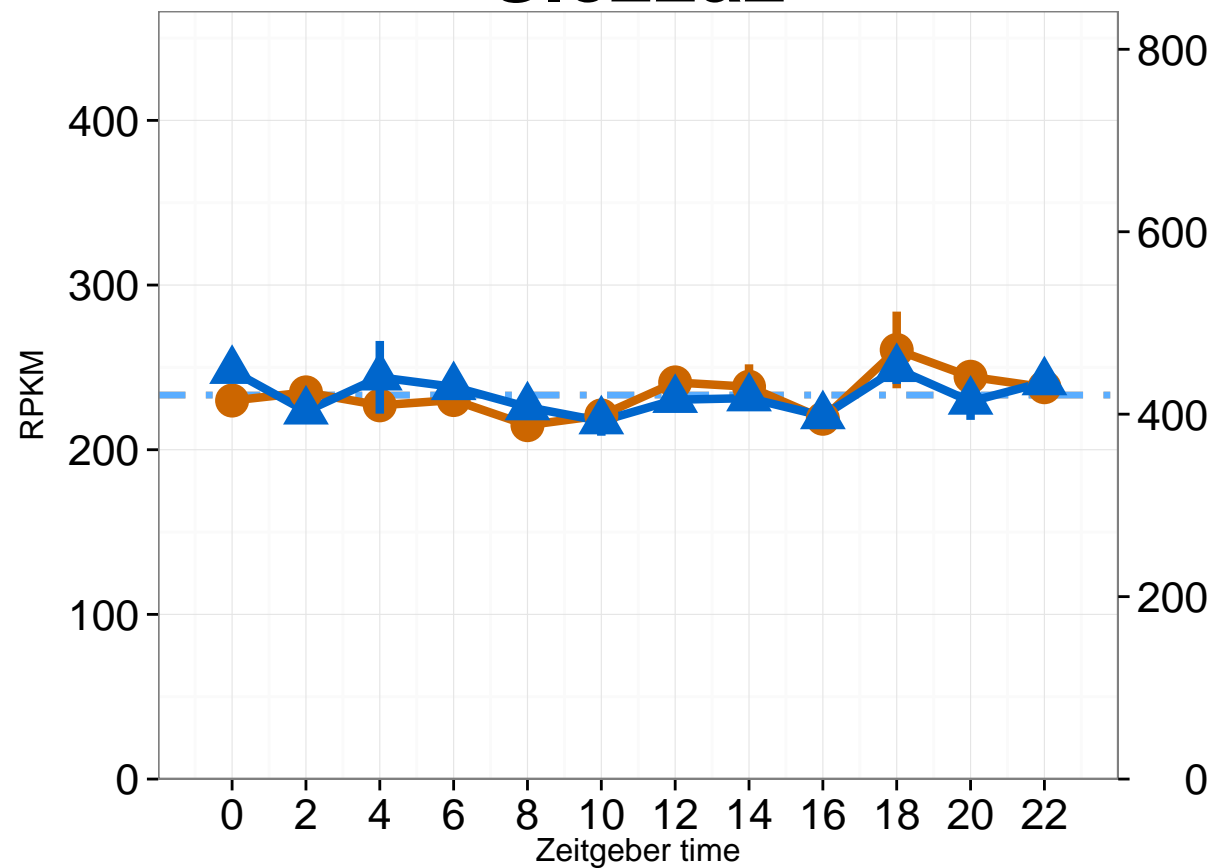

## Slc22a2

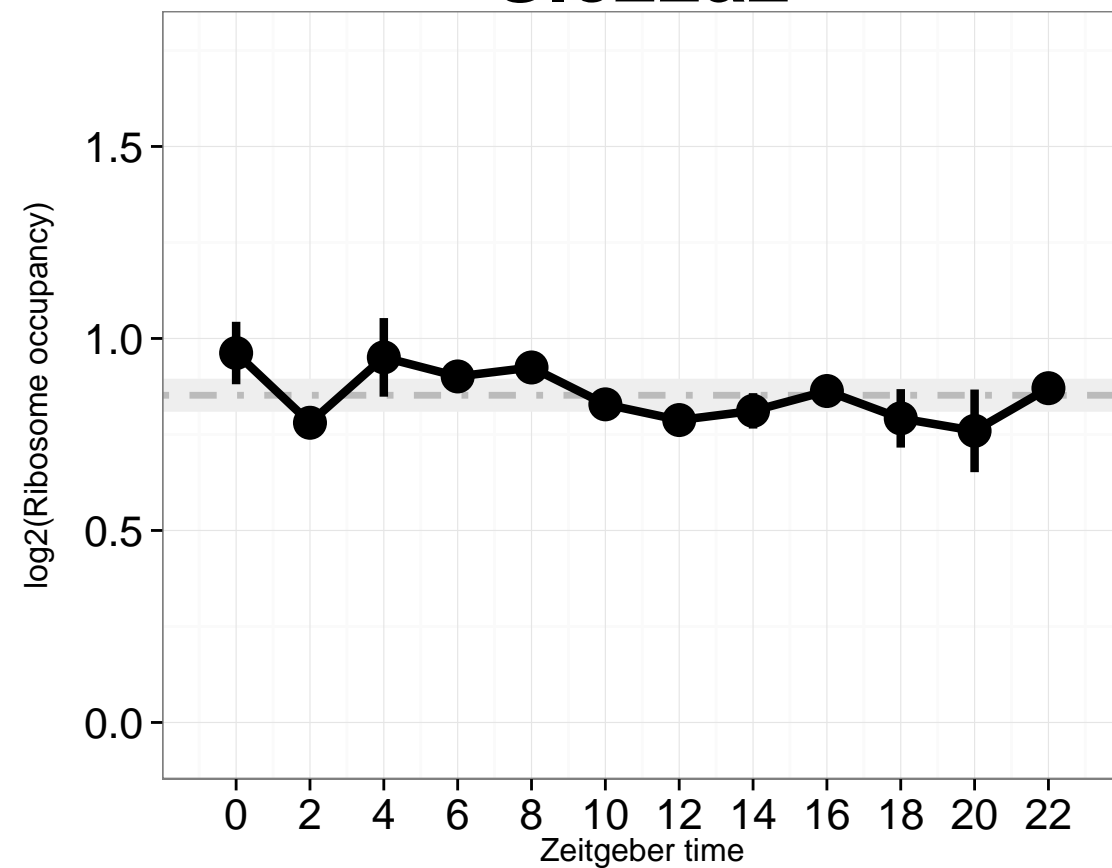

Supplement: Supplementary file 2944 [file 1]

## Zc3h13

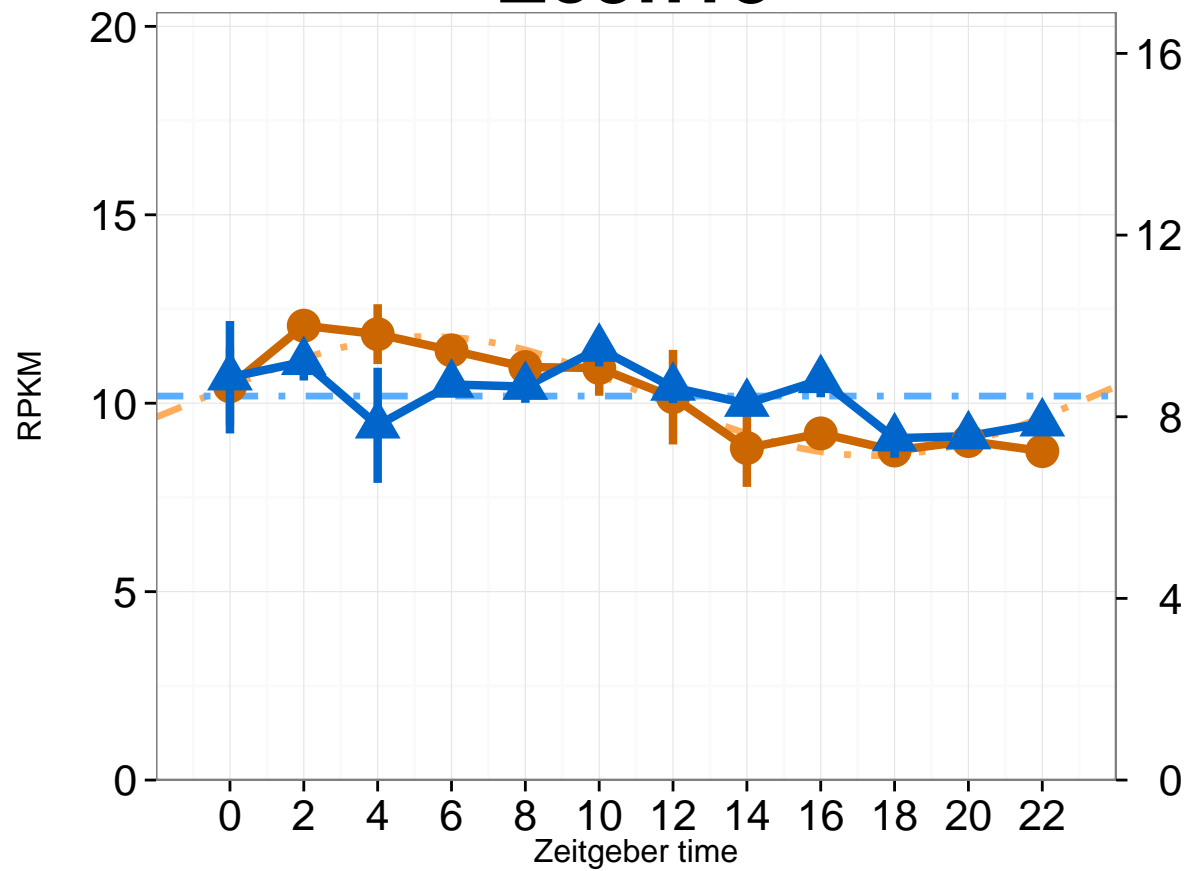

## Zc3h13

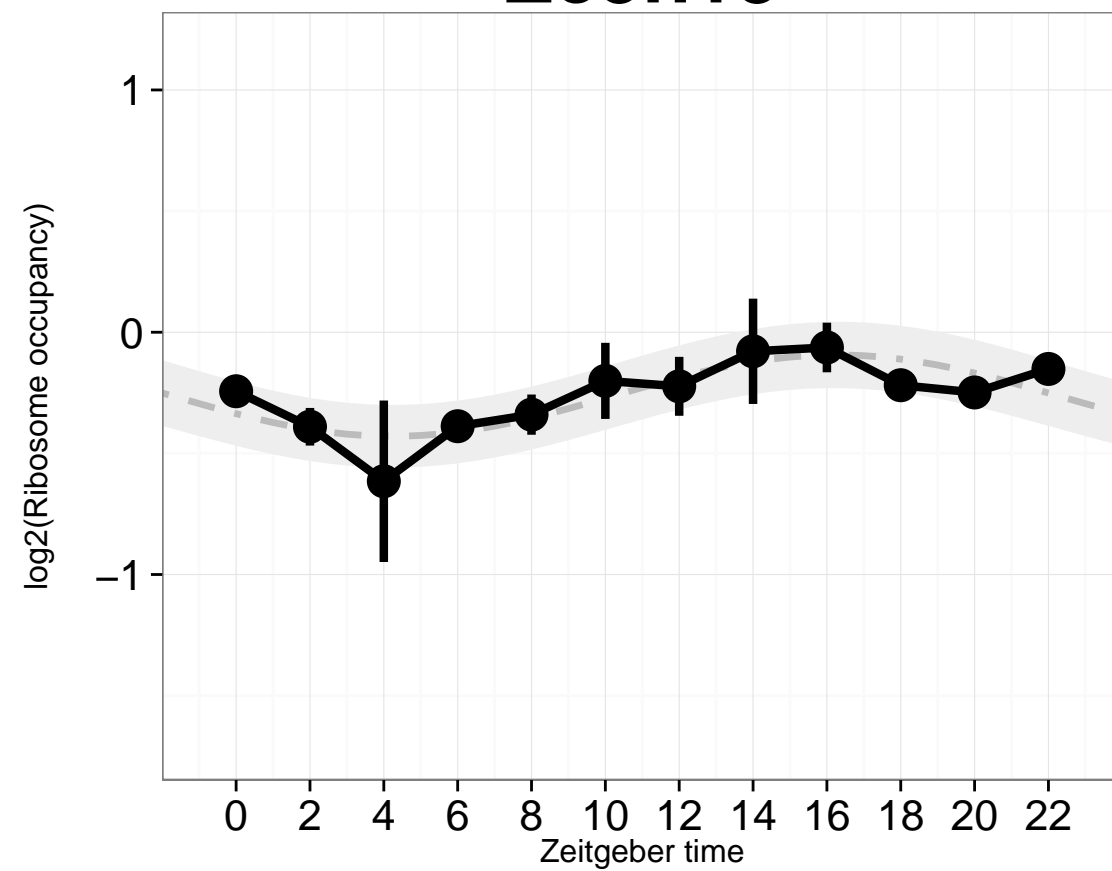

Supplement: Supplementary file 2945 [file 1]

# Mat2b

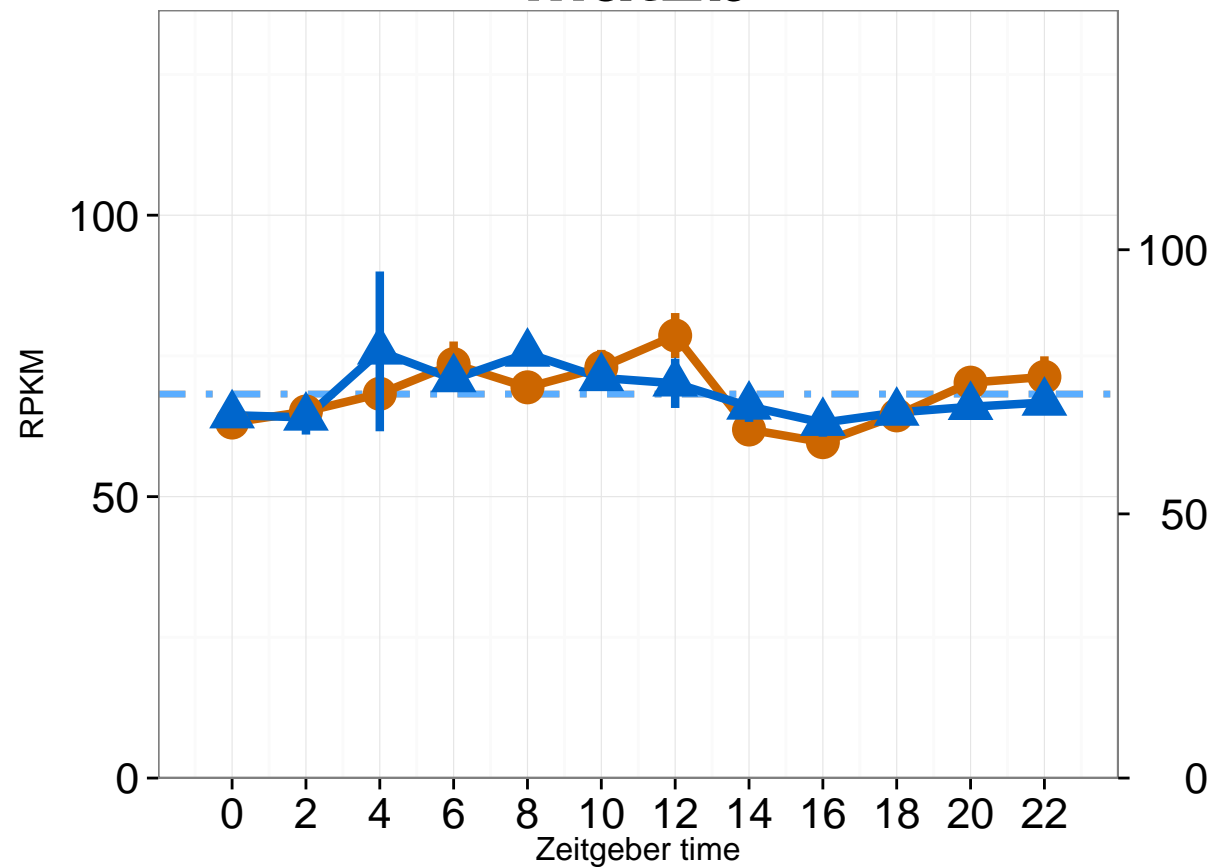

# Mat2b

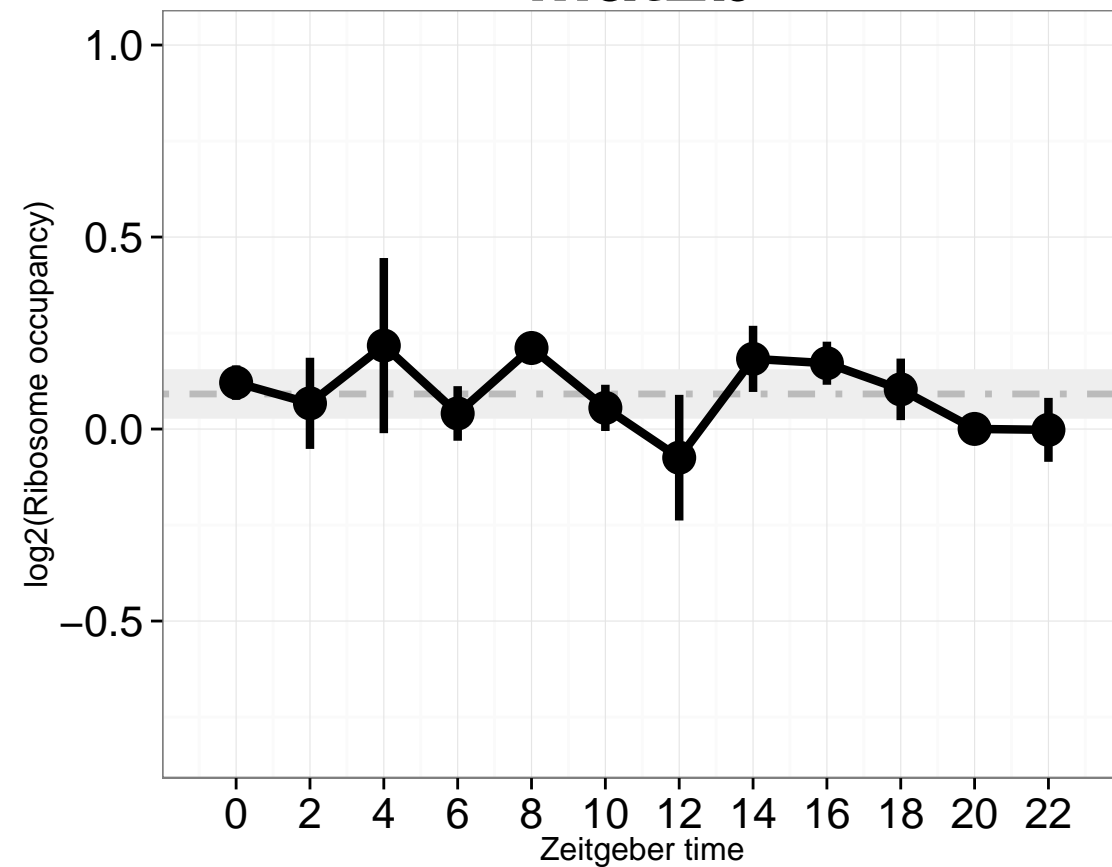

Supplement: Supplementary file 2946 [file 1]

## Zcchc10

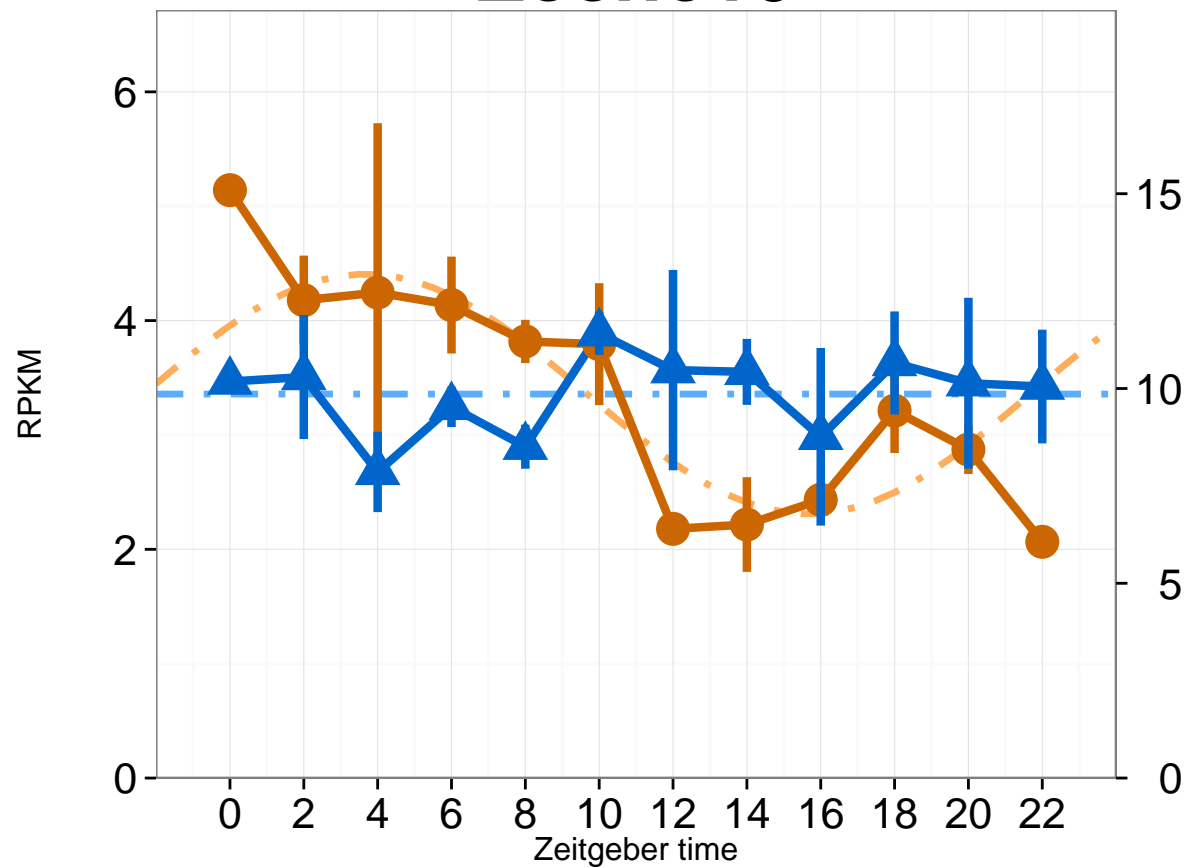

## Zcchc10

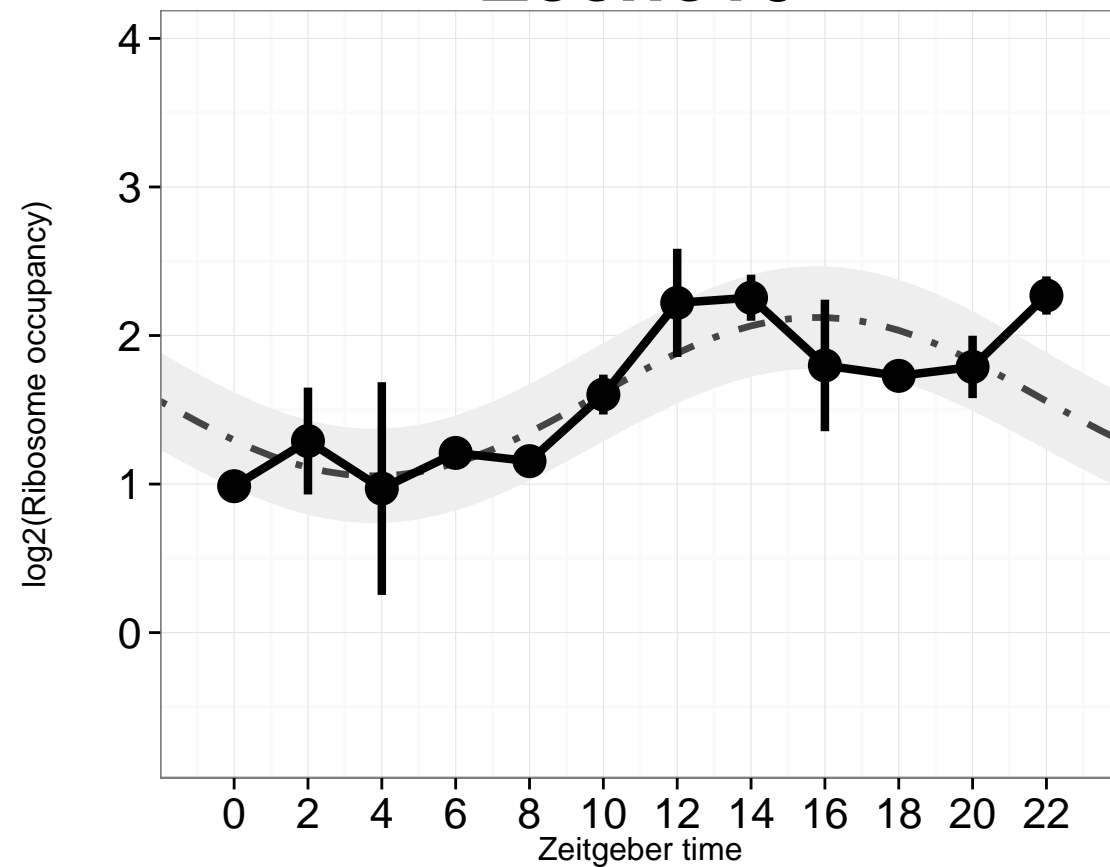

Supplement: Supplementary file 2947 [file 1]

## Peg3

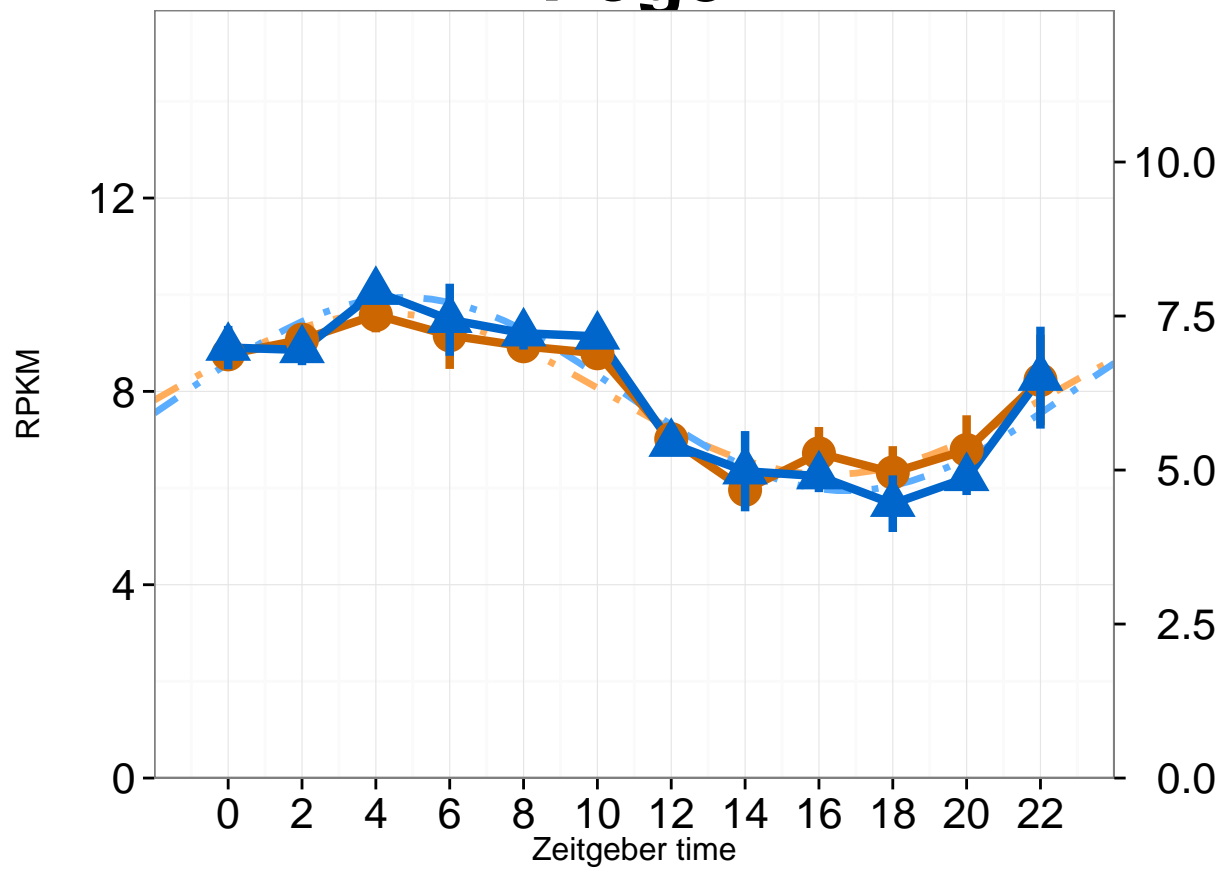

## Peg3

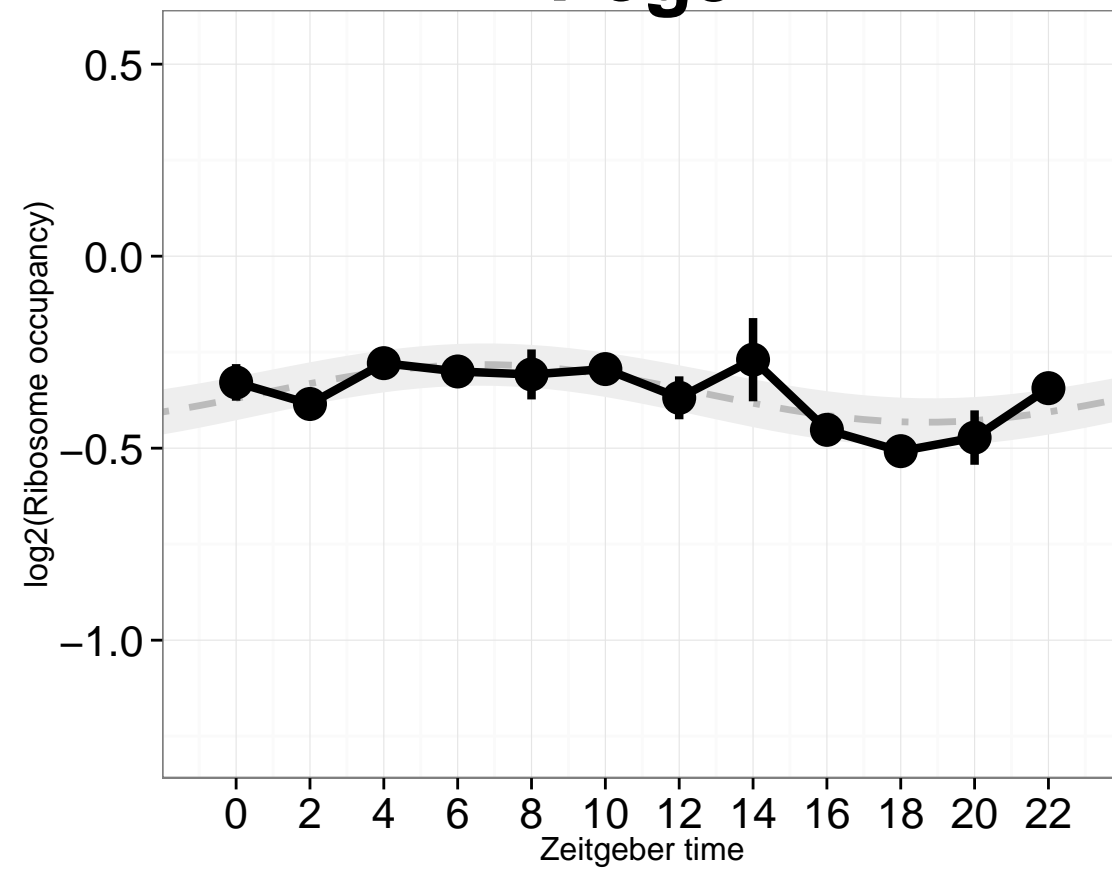

Supplement: Supplementary file 2948 [file 1]

## Angptl7

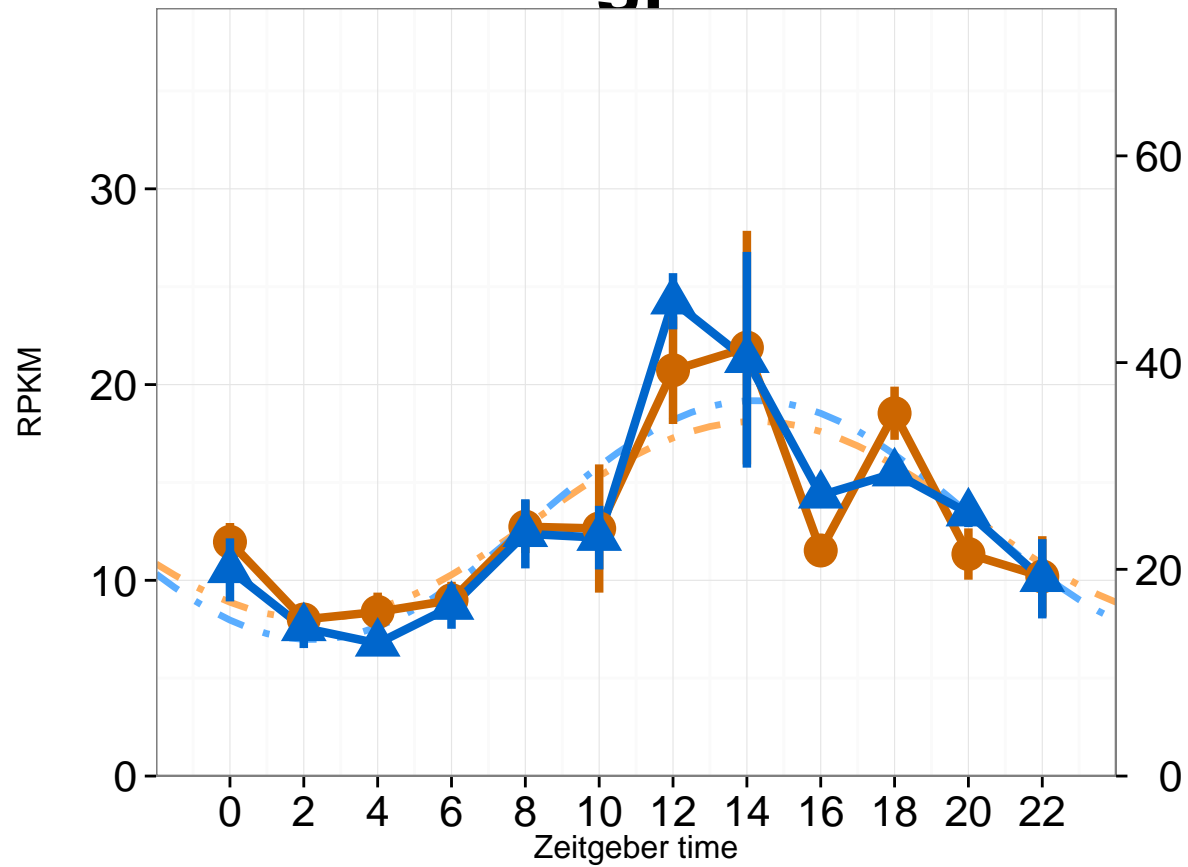

## Angptl7

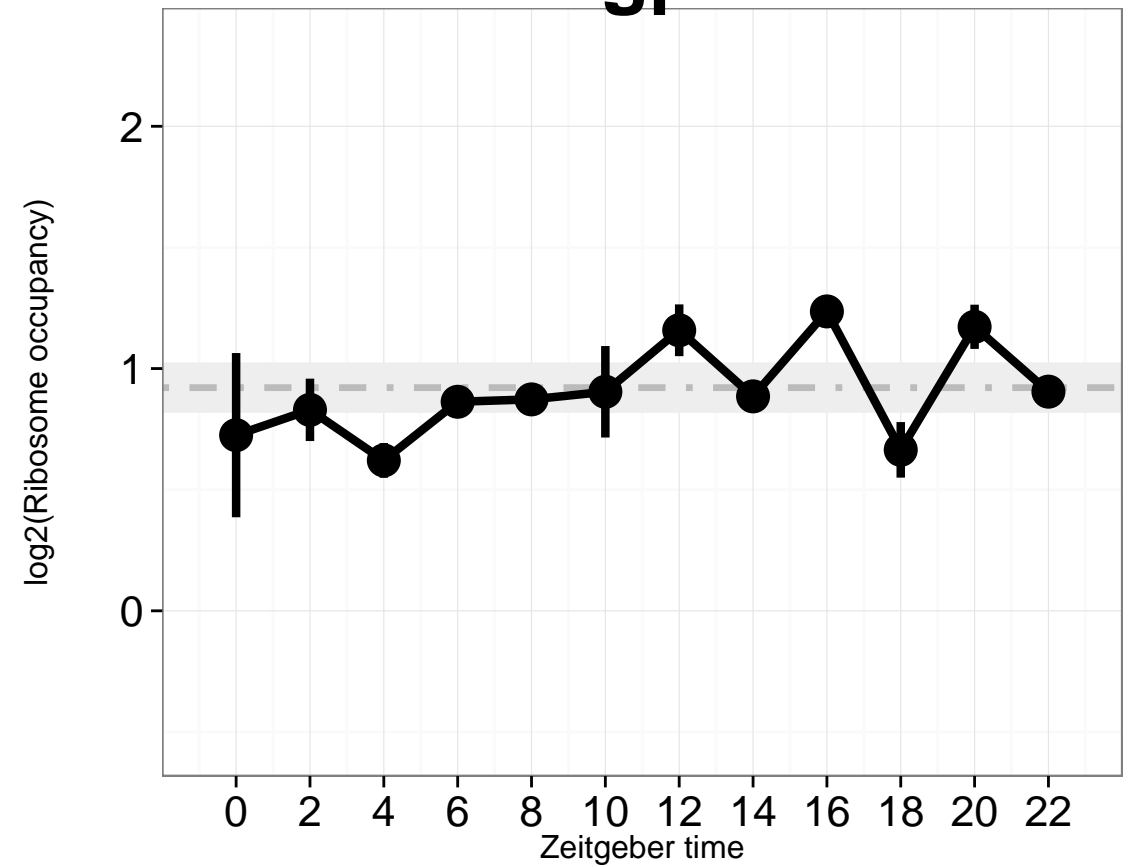

Supplement: Supplementary file 2949 [file 1]

## Dbt

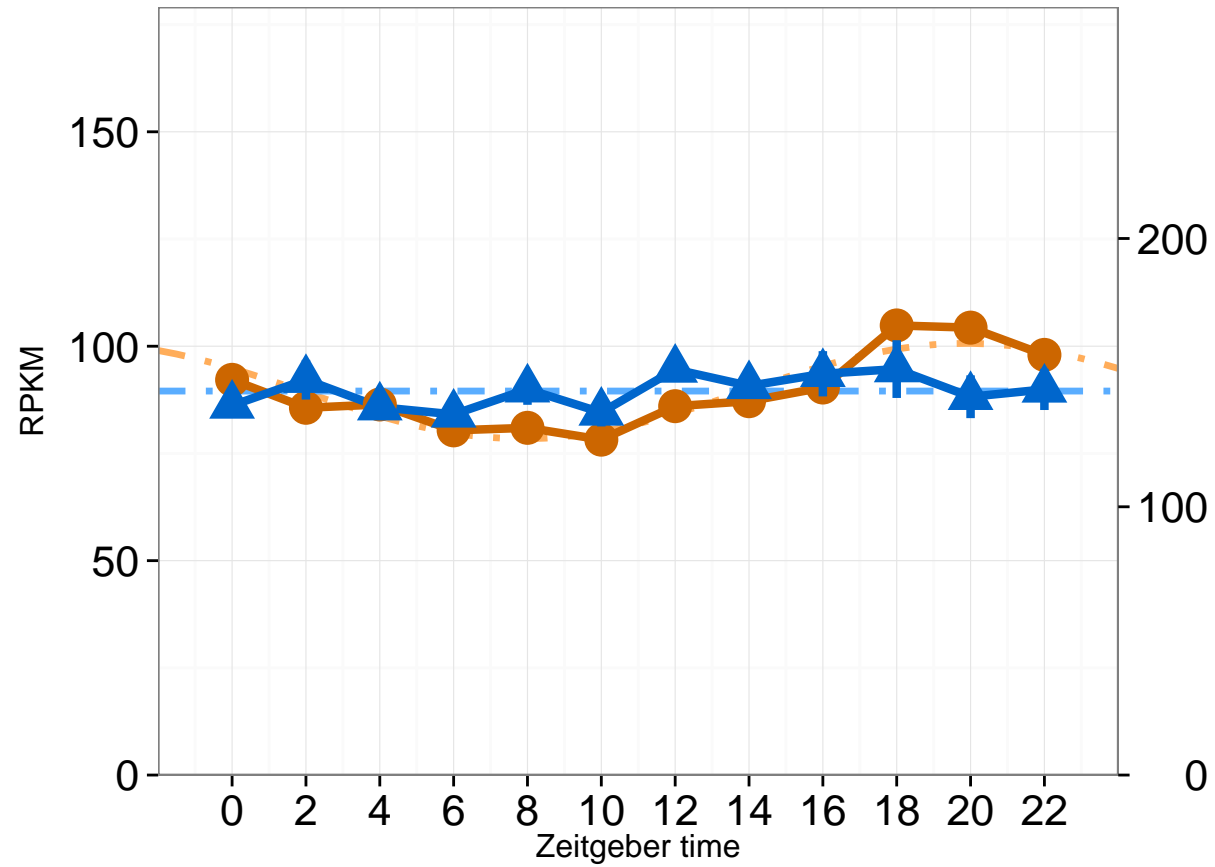

## Dbt

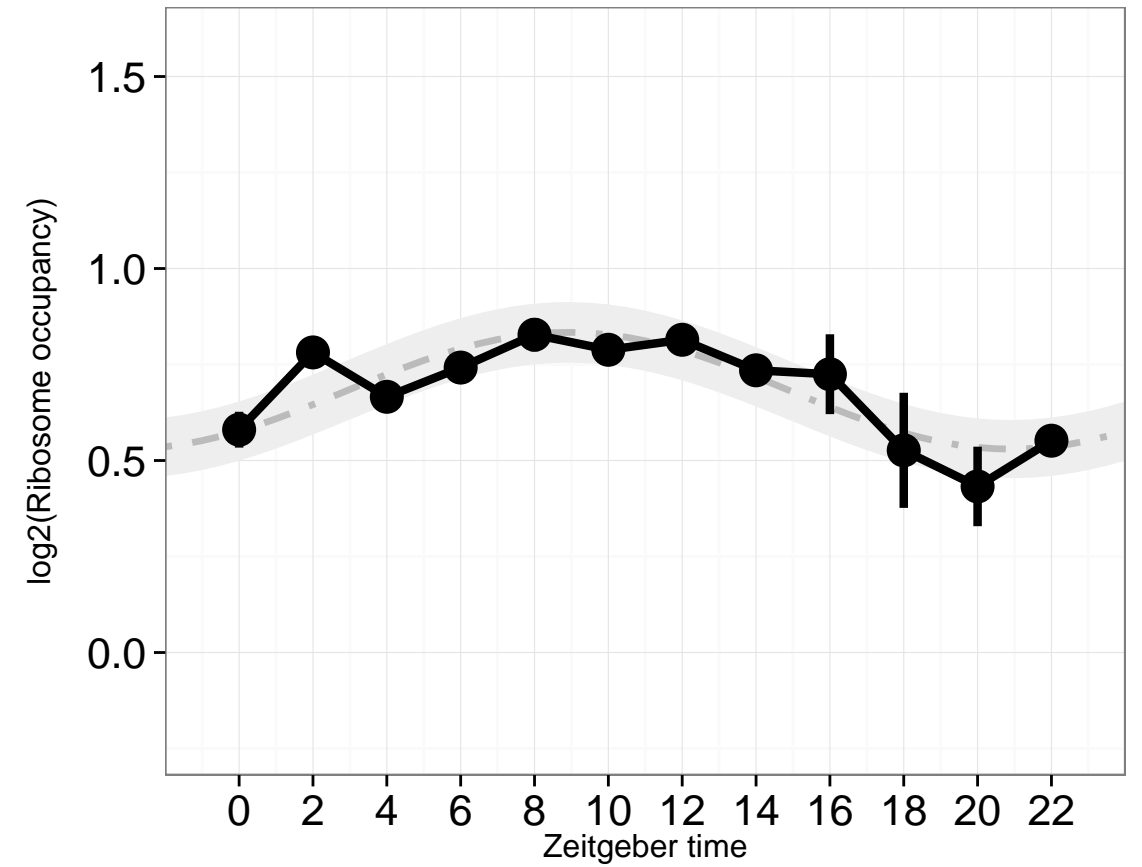

Supplement: Supplementary file 2950 [file 1]

# B230219D22Rik

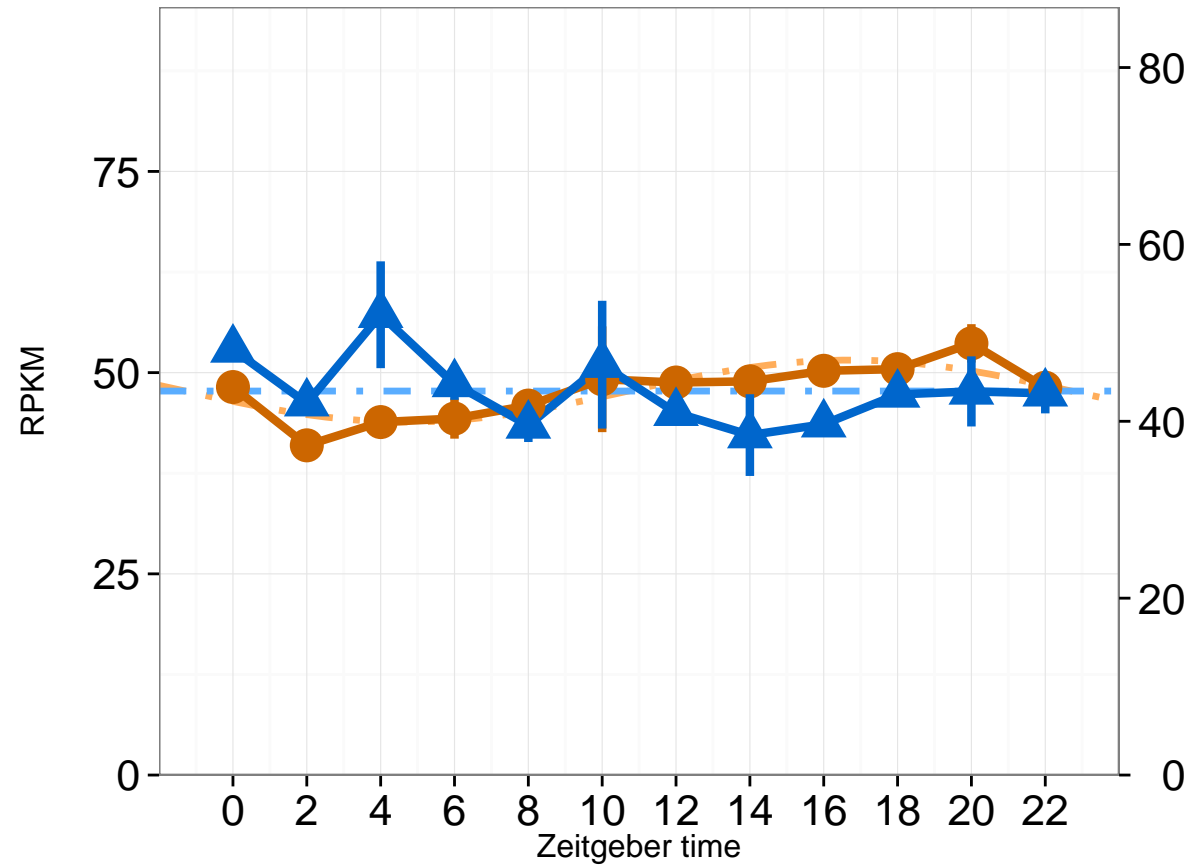

# B230219D22Rik

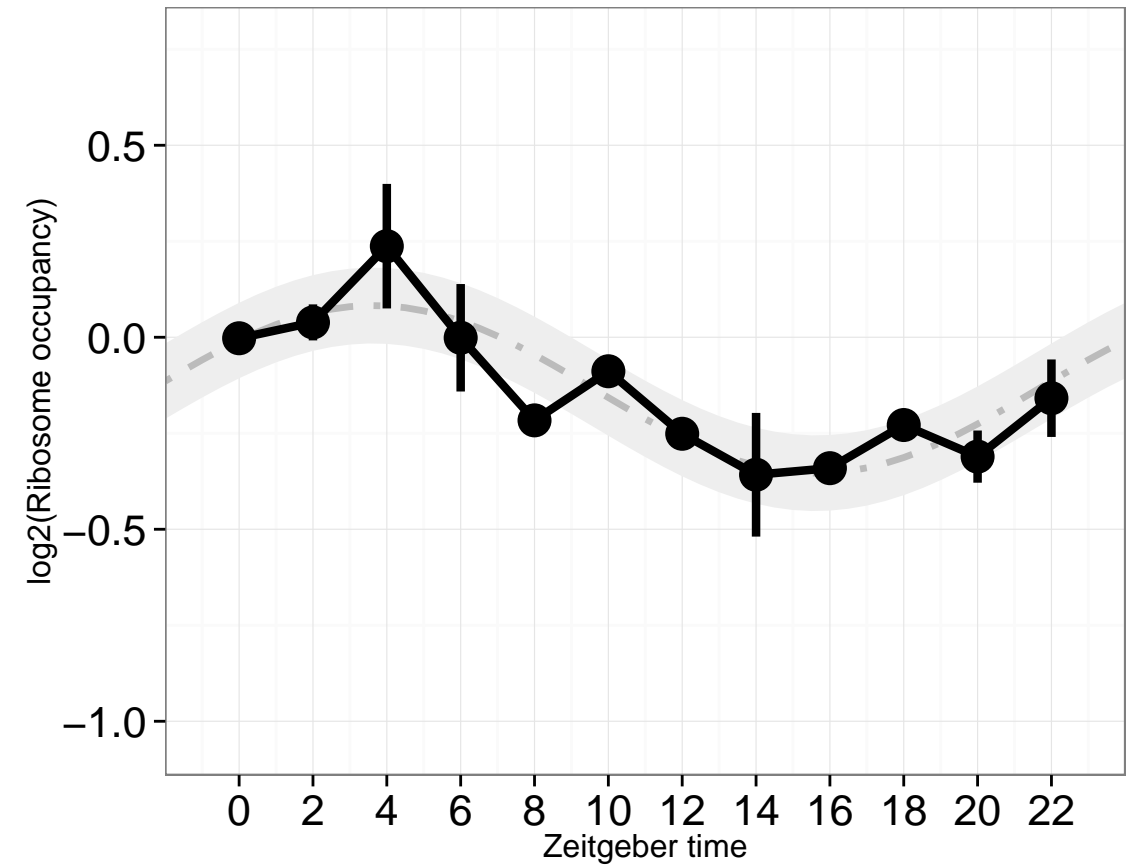

Supplement: Supplementary file 2951 [file 1]

## Fopnl

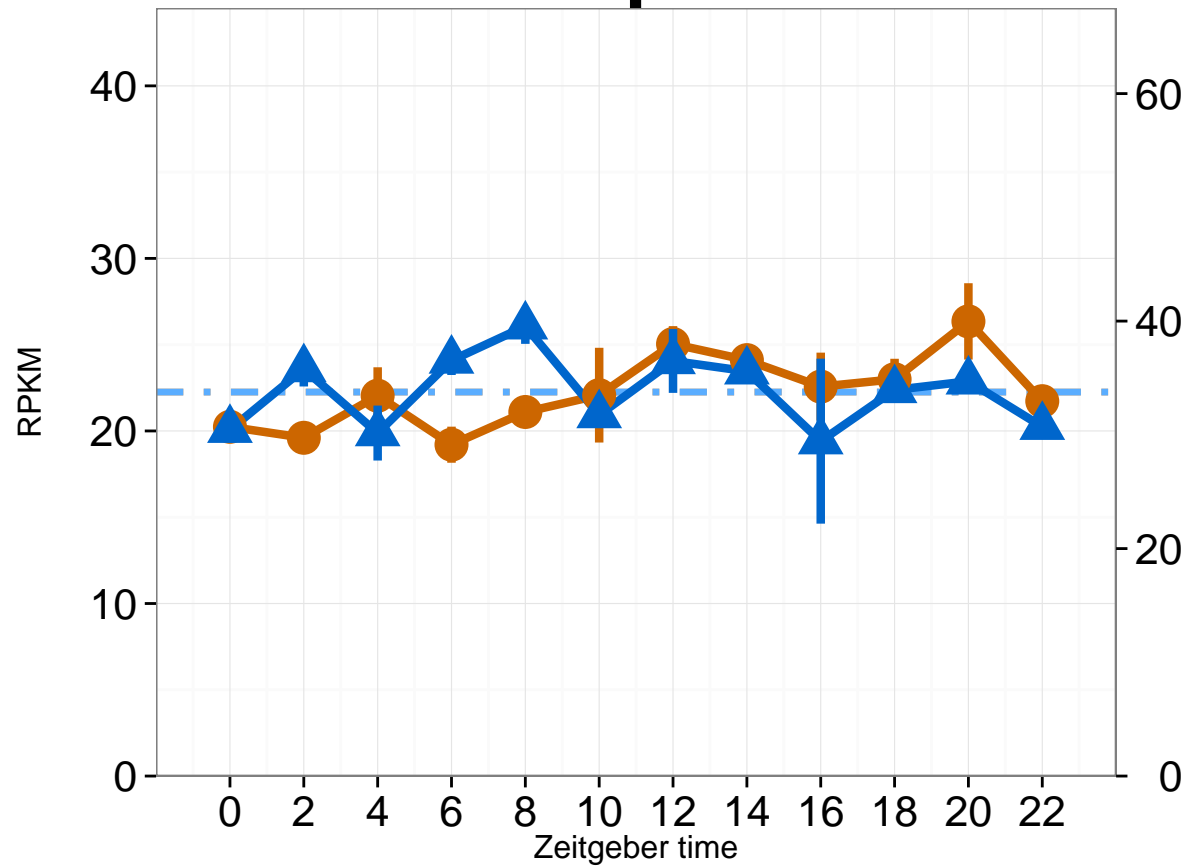

## Fopnl

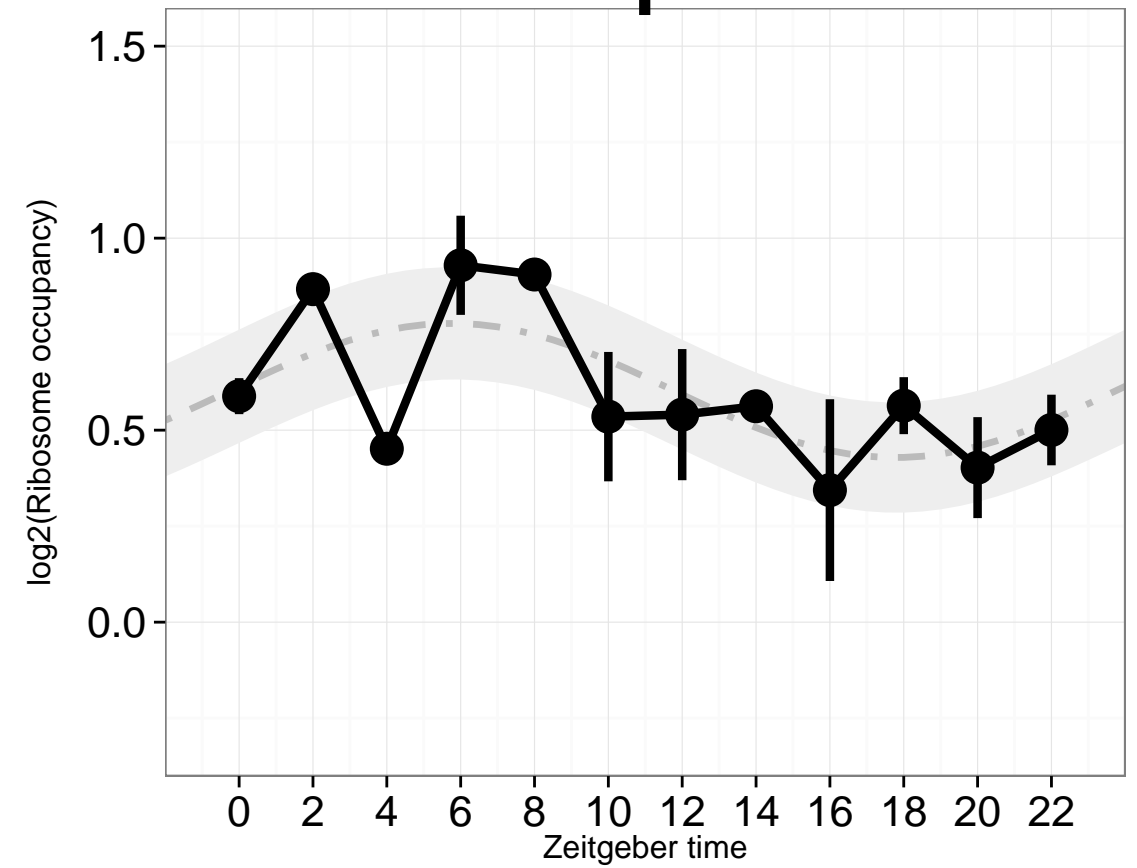

Supplement: Supplementary file 2952 [file 1]

# Tmbim1

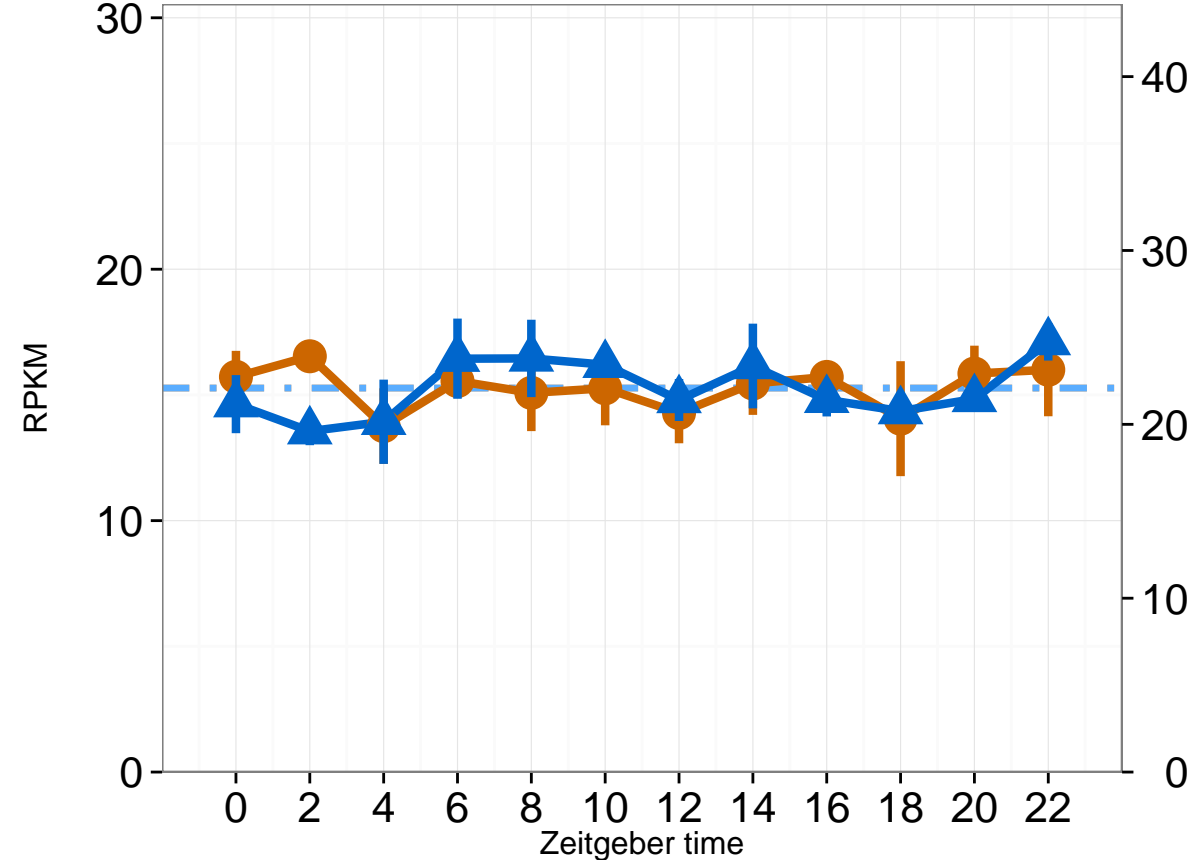

# Tmbim1

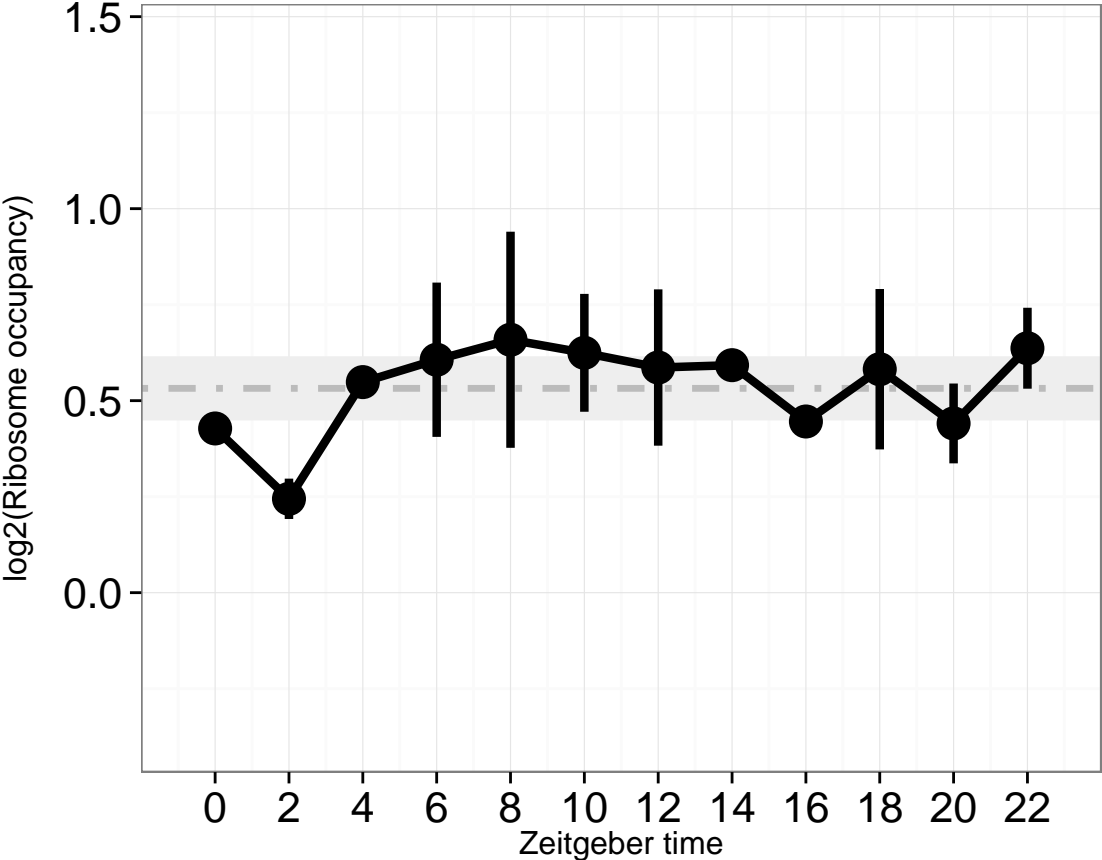

Supplement: Supplementary file 2953 [file 1]

## Ppil4

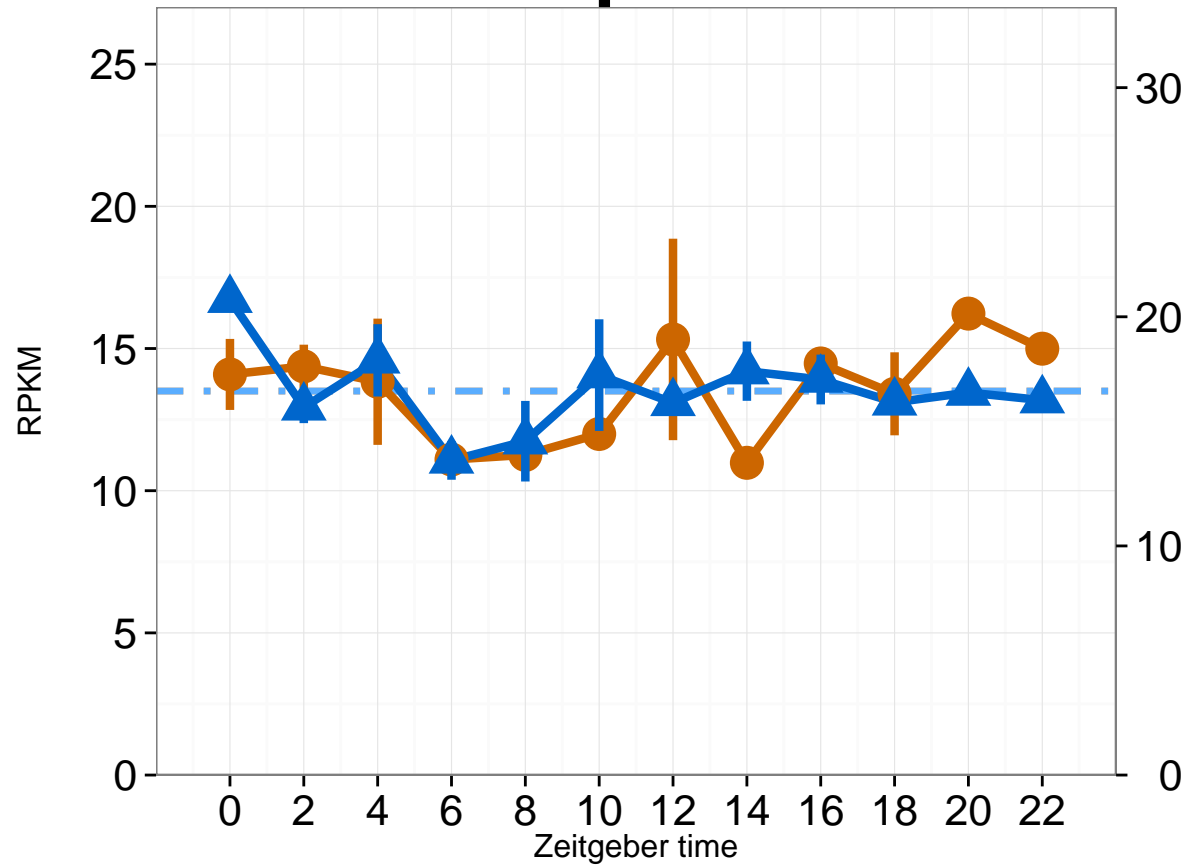

## Ppil4

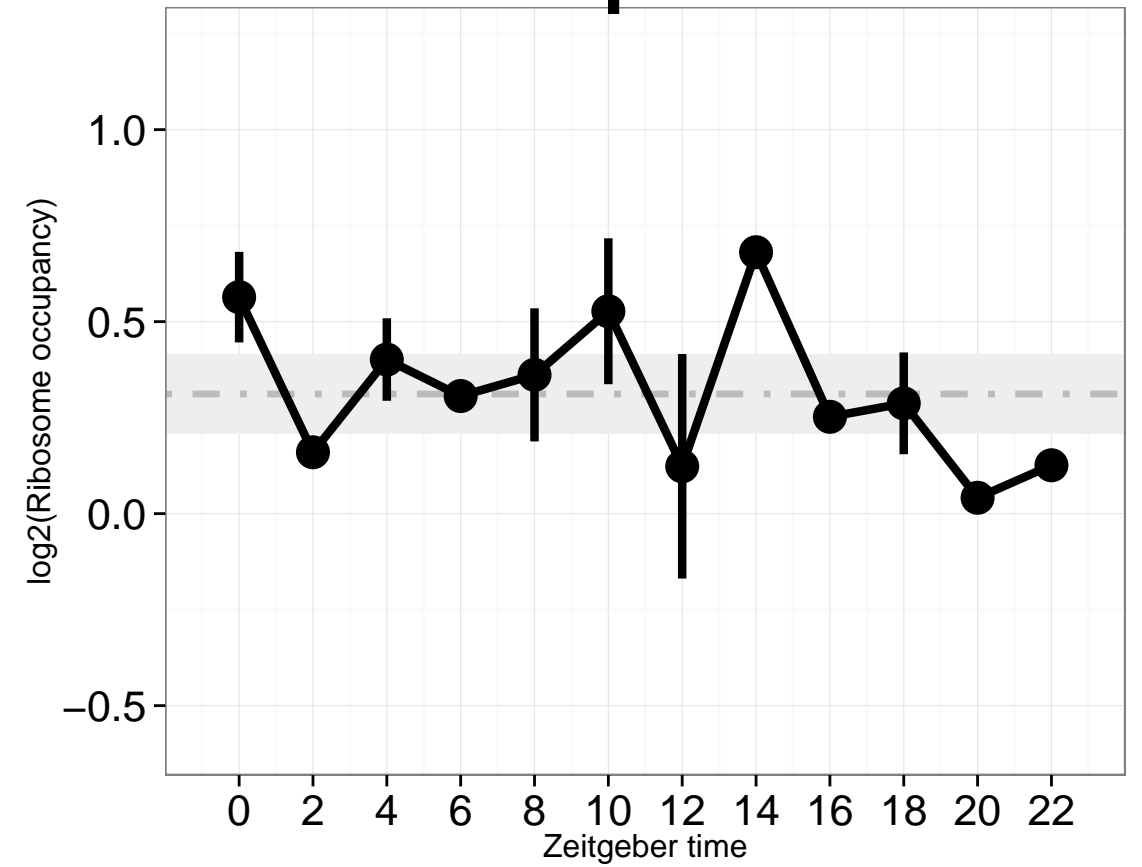

Supplement: Supplementary file 2954 [file 1]

## Cyfip1

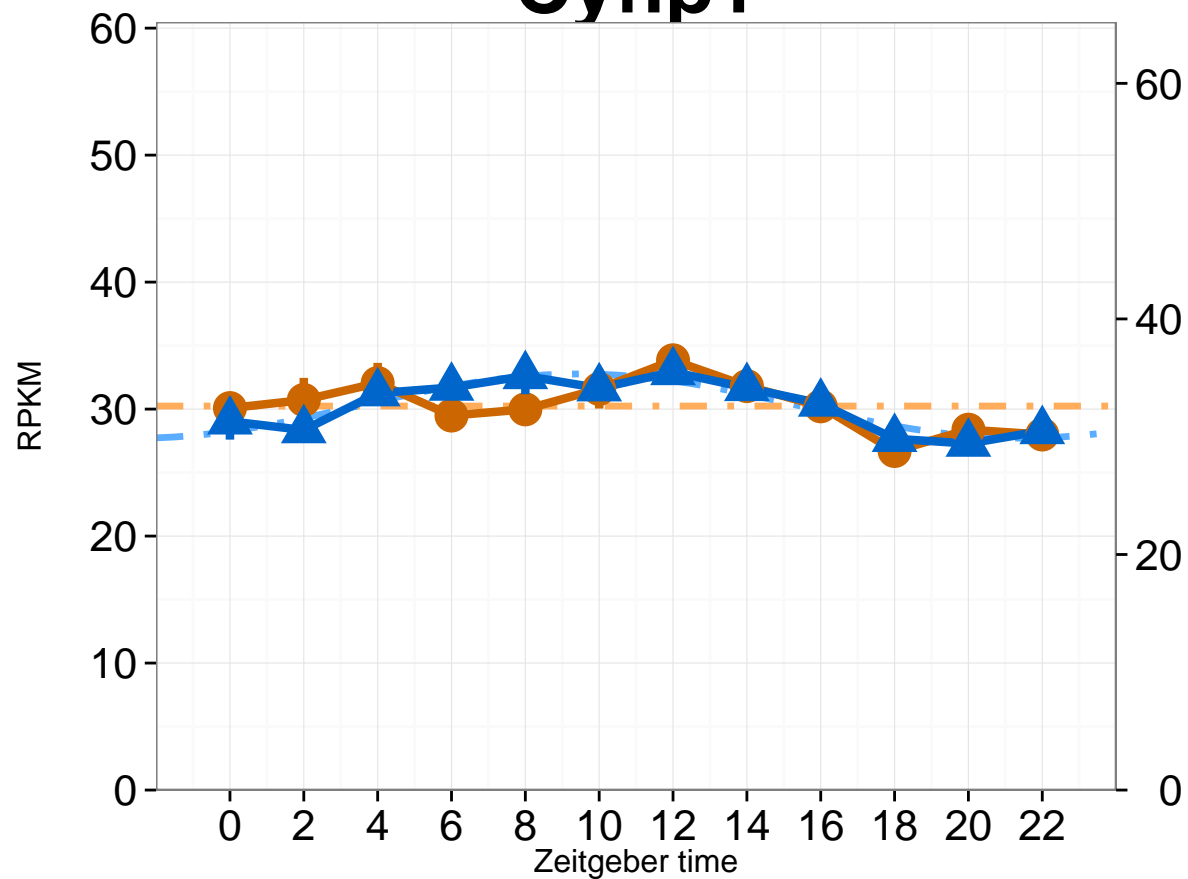

## Cyfip1

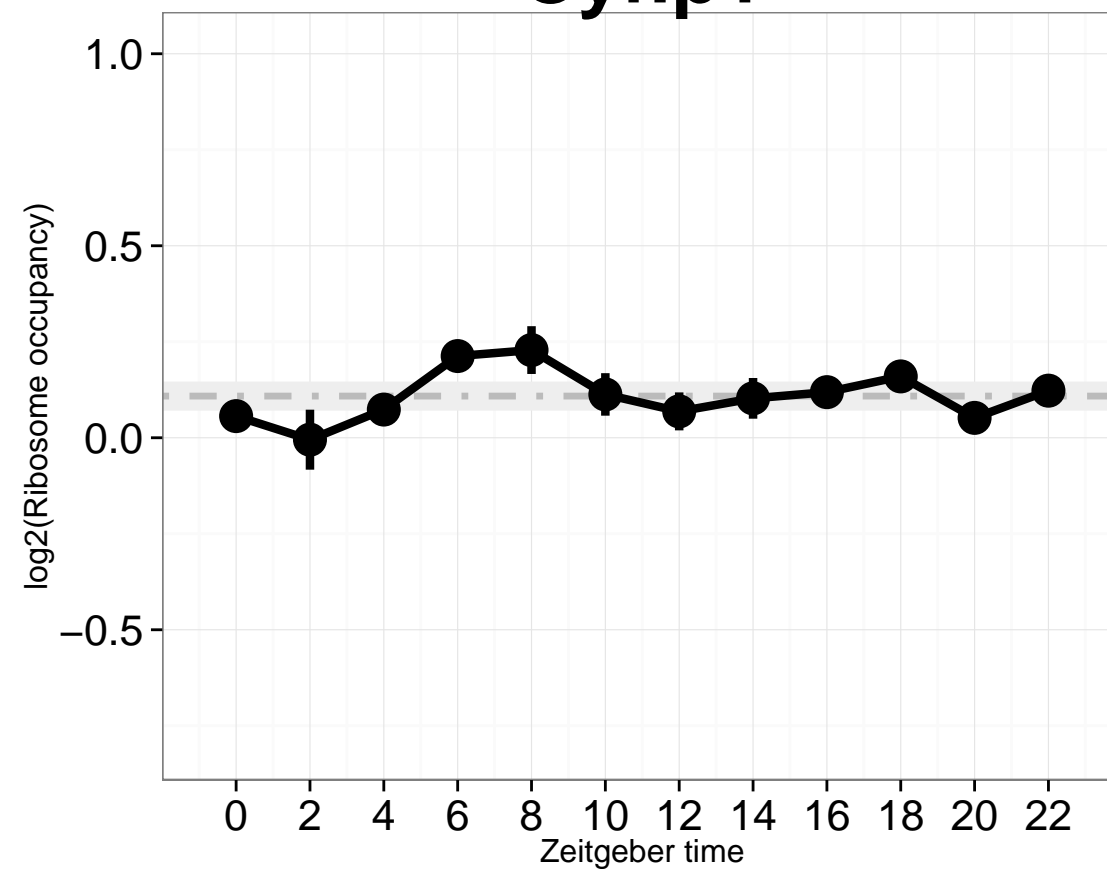

Supplement: Supplementary file 2955 [file 1]

## Kdm4c

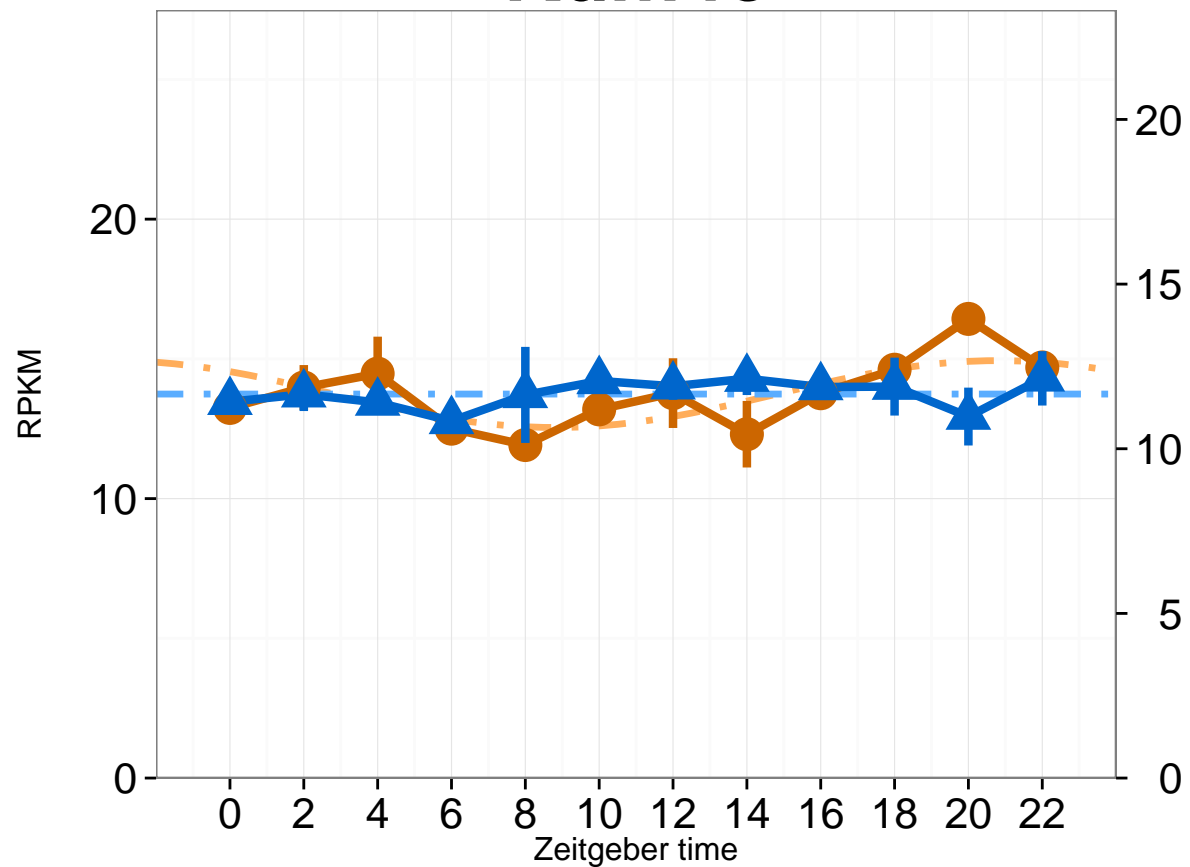

## Kdm4c

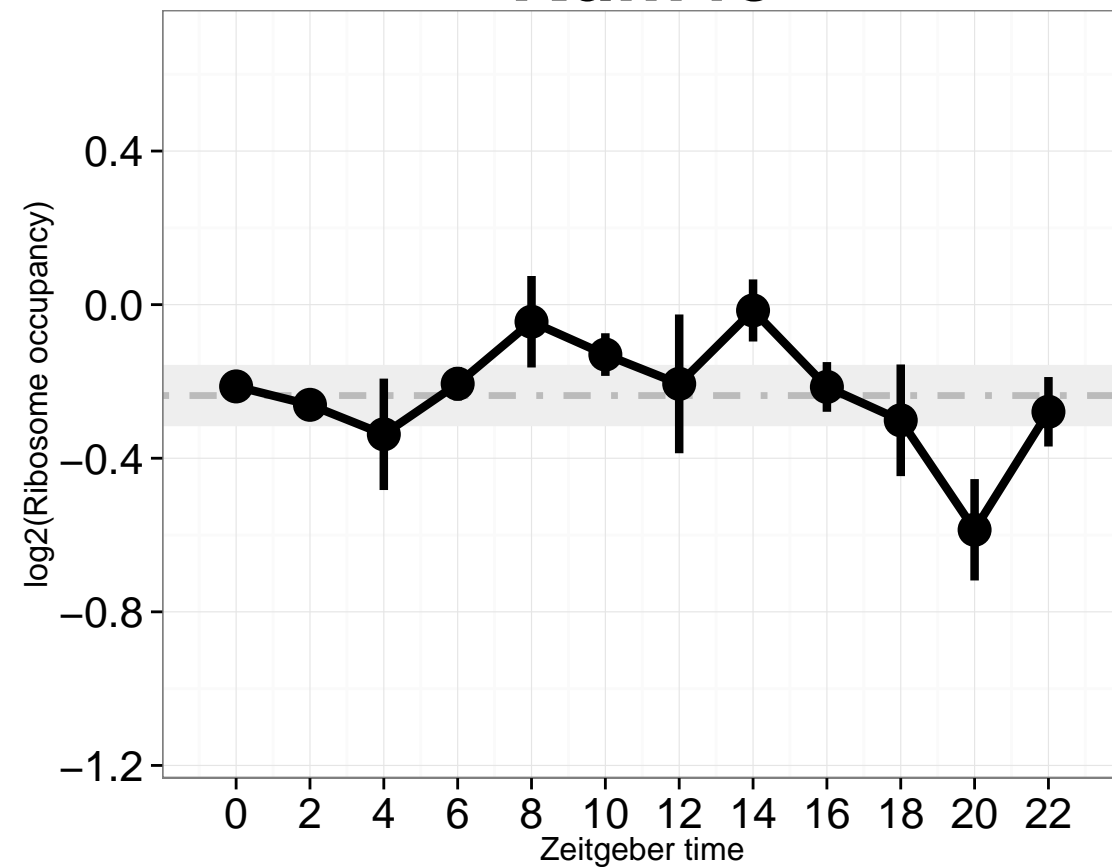

Supplement: Supplementary file 2956 [file 1]

## Nop2

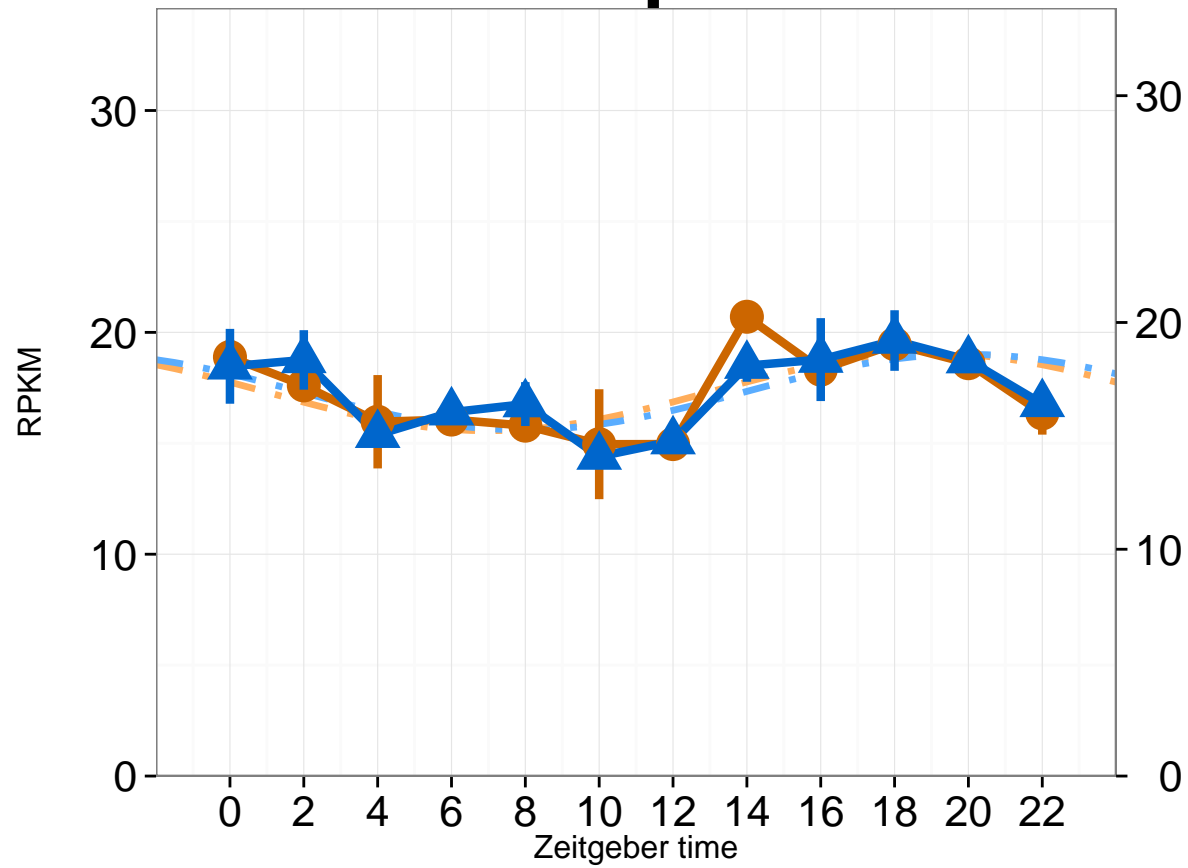

## Nop2

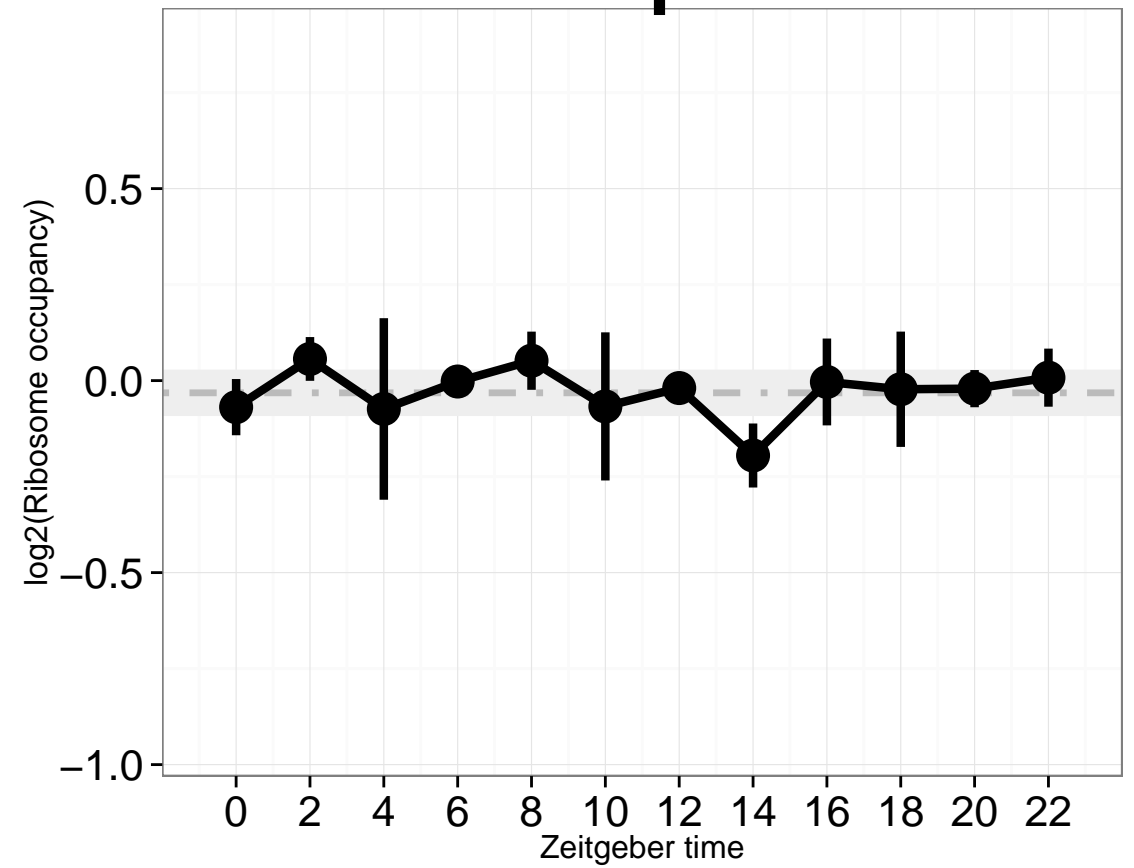

Supplement: Supplementary file 2957 [file 1]

# Ccdc22

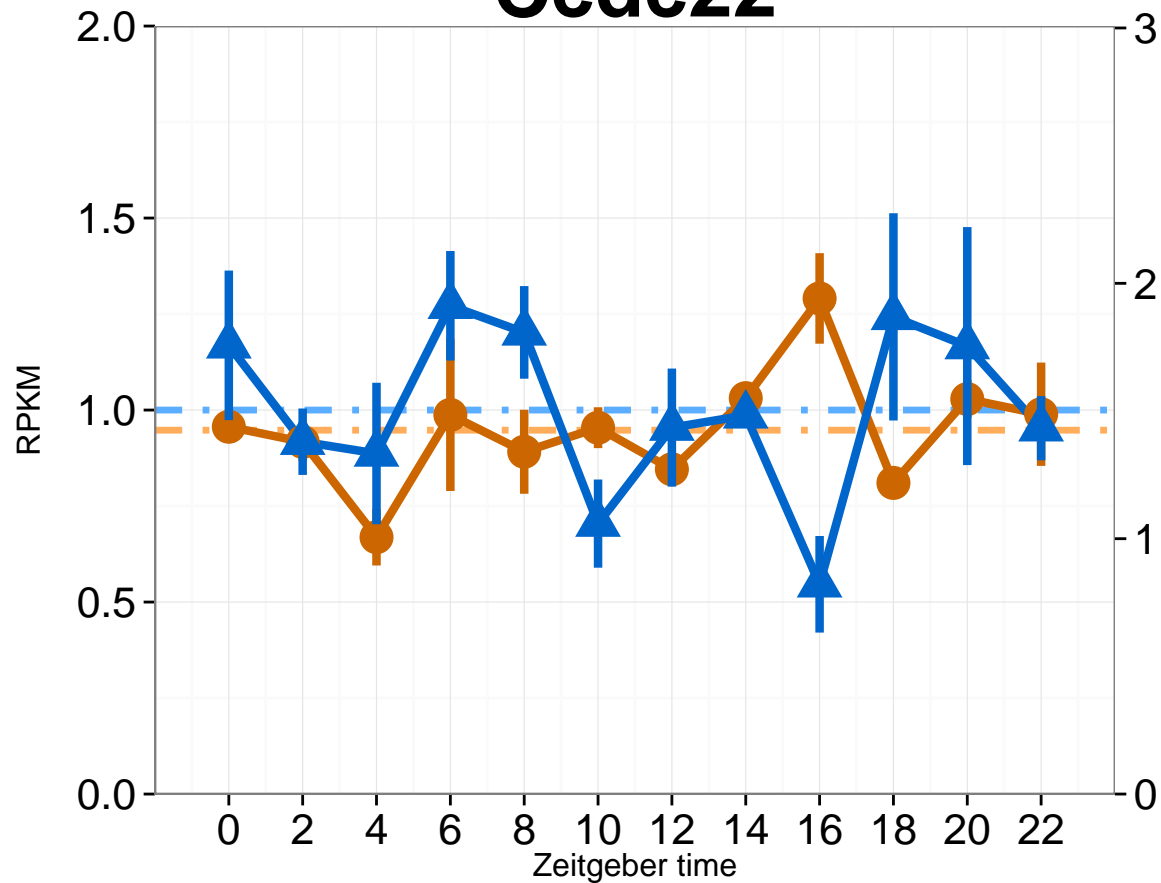

# Ccdc22

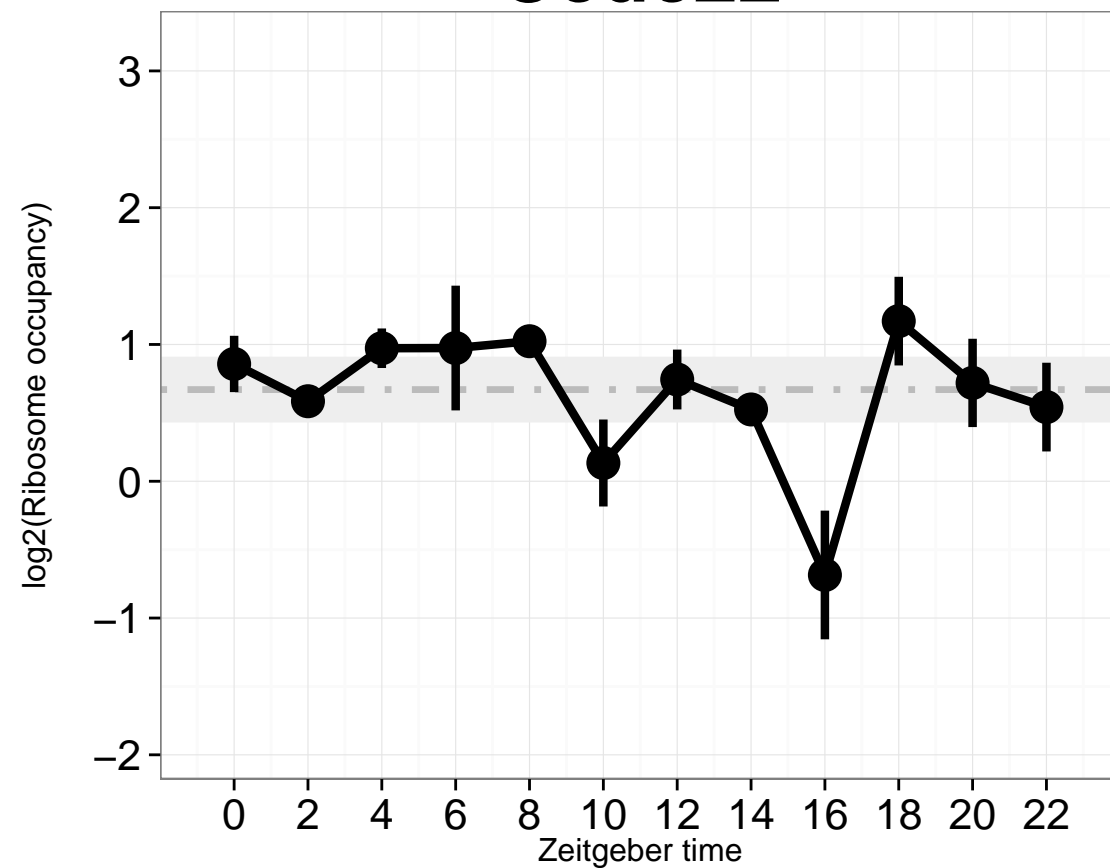

Supplement: Supplementary file 2958 [file 1]

**S100a14 TR**

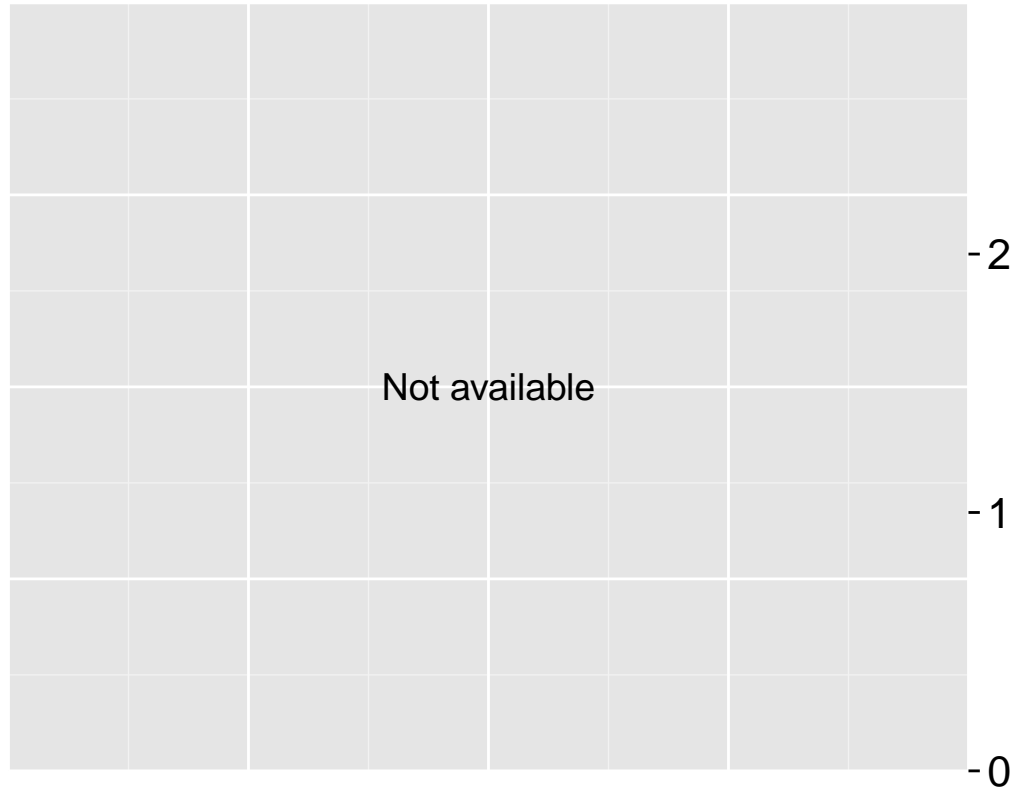

**S100a14 log2(Ribosome occupanc**

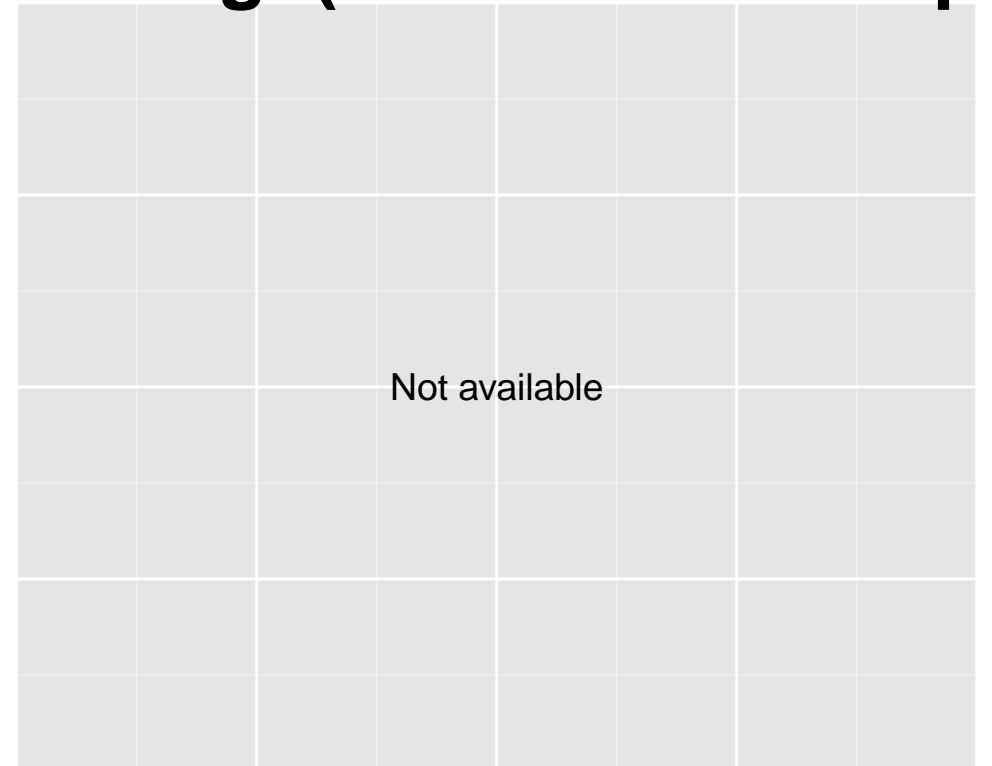

Supplement: Supplementary file 2959 [file 1]

## 9130221H12Rik

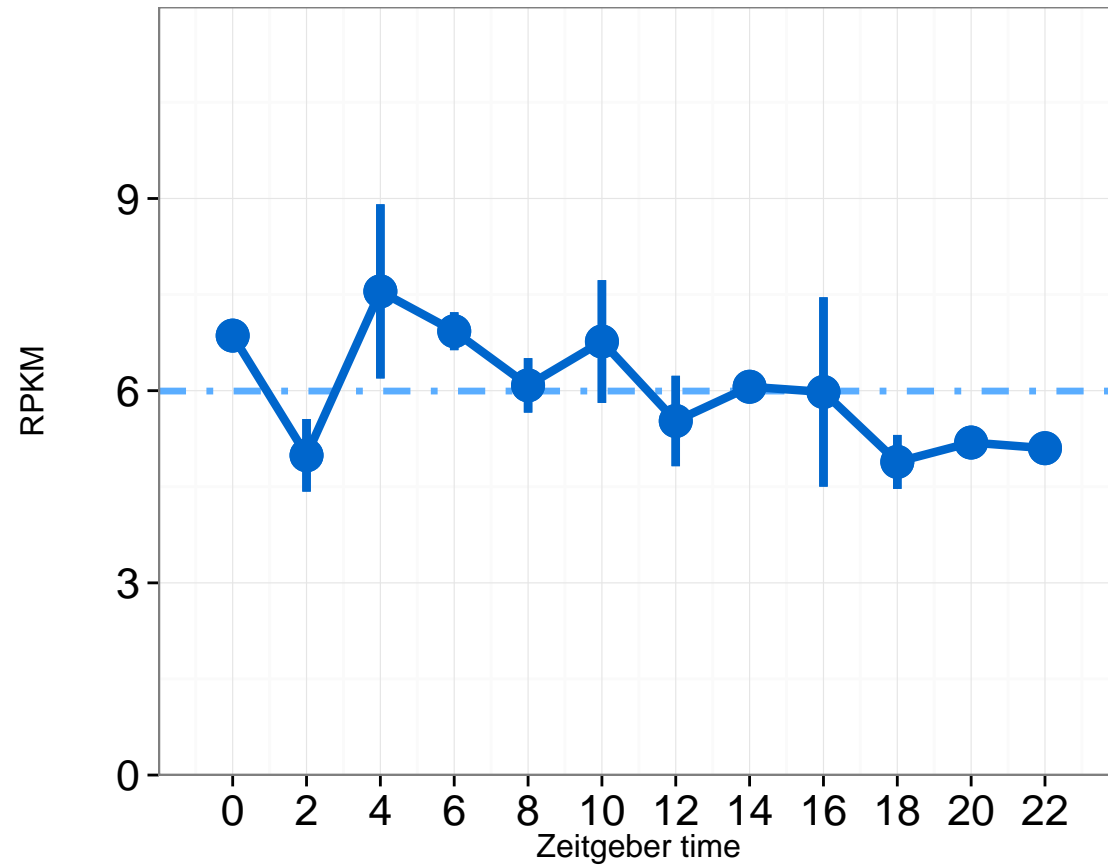

## 9130221H12Rik log2(Ribosome occup

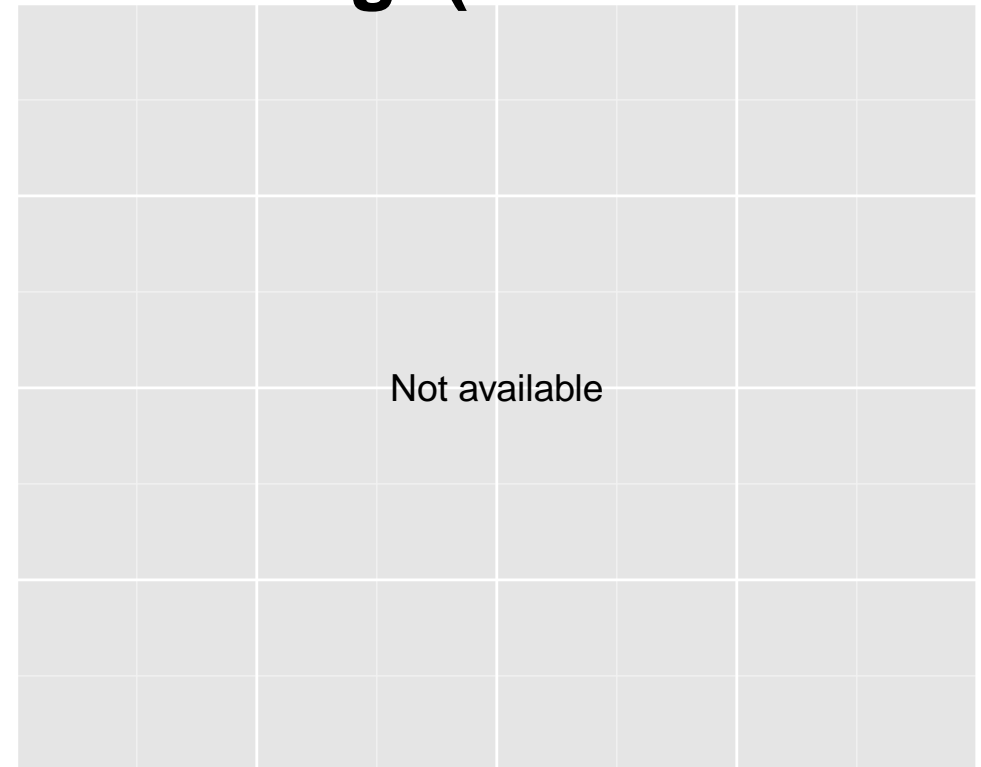

Supplement: Supplementary file 2960 [file 1]

**C6**

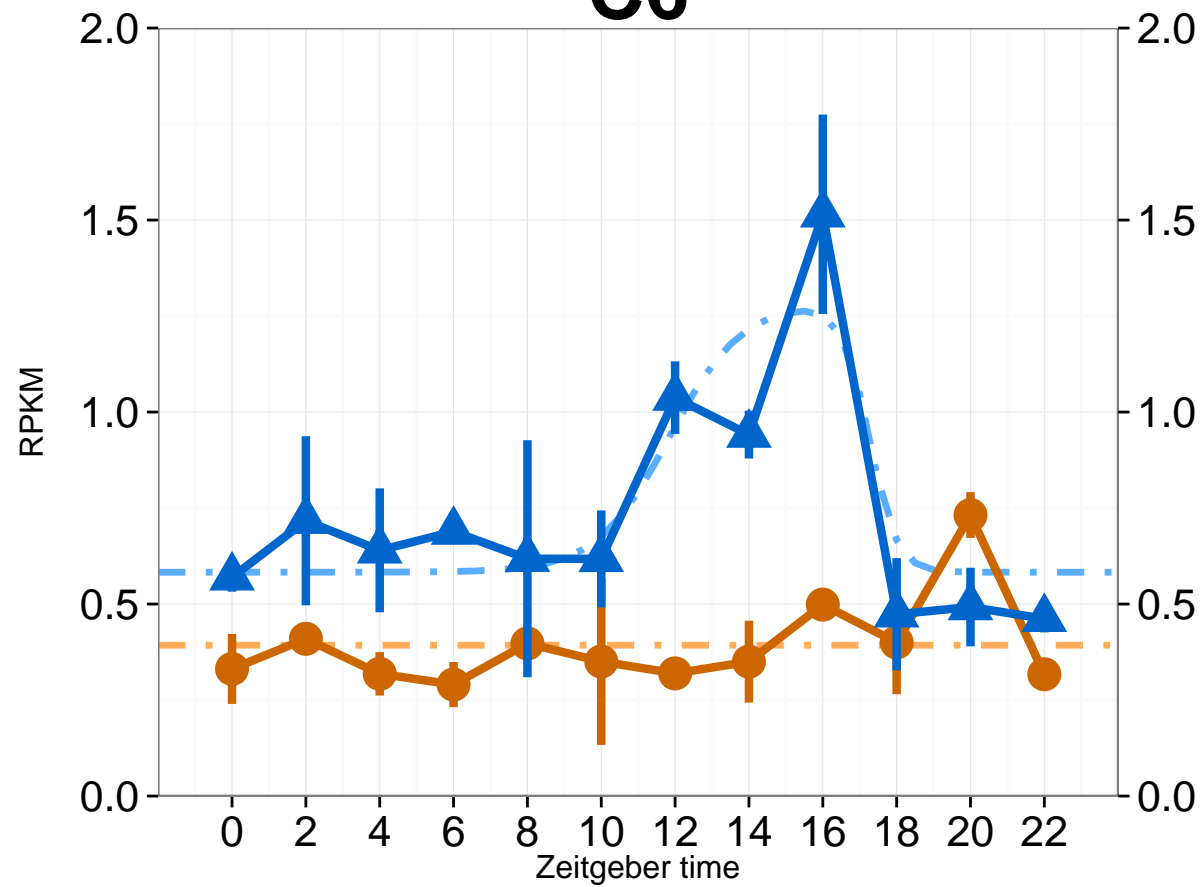

**C6**

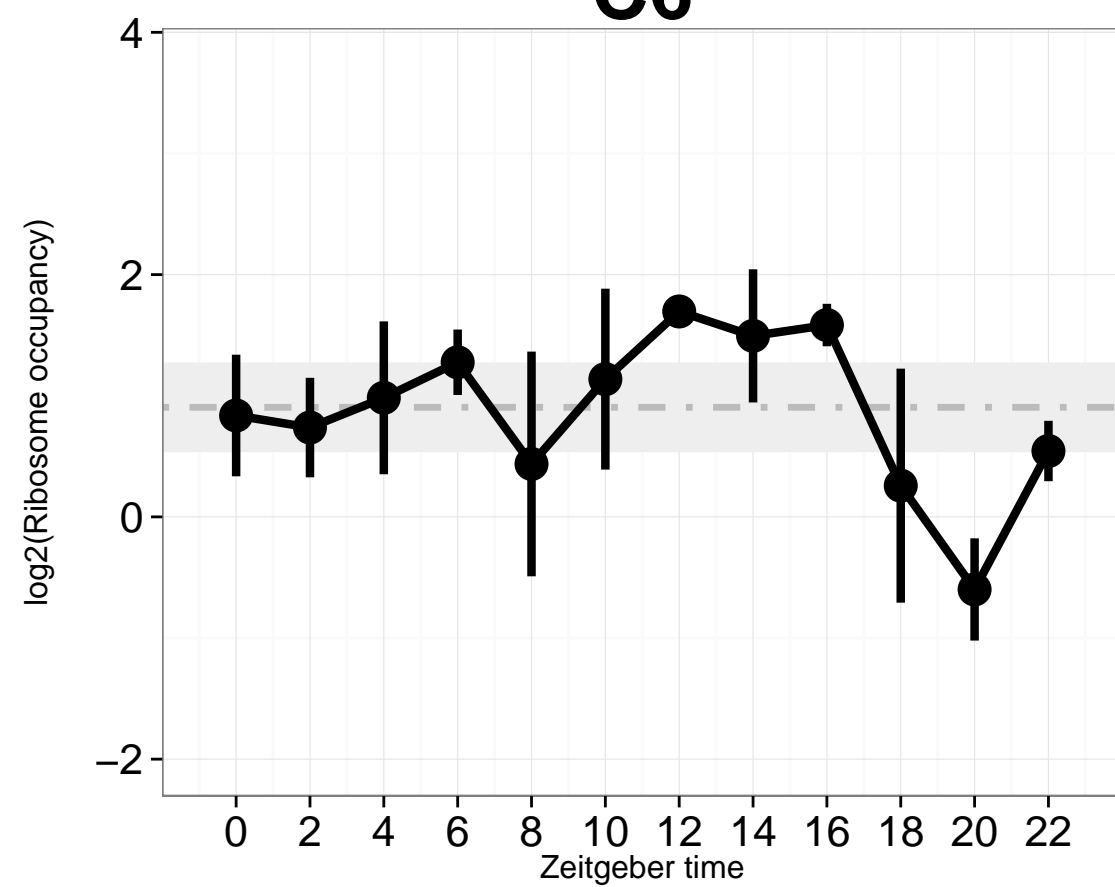

Supplement: Supplementary file 2961 [file 1]

# Cyp2e1

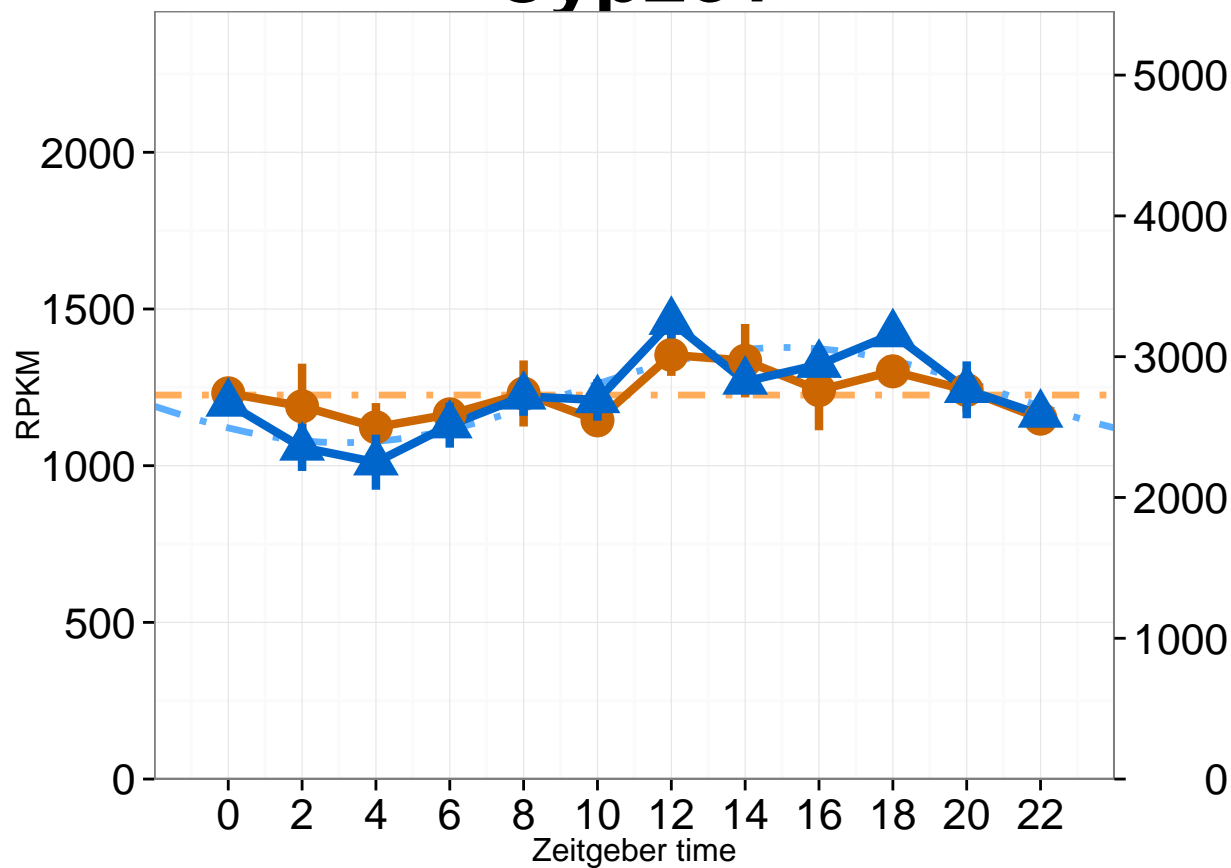

# Cyp2e1

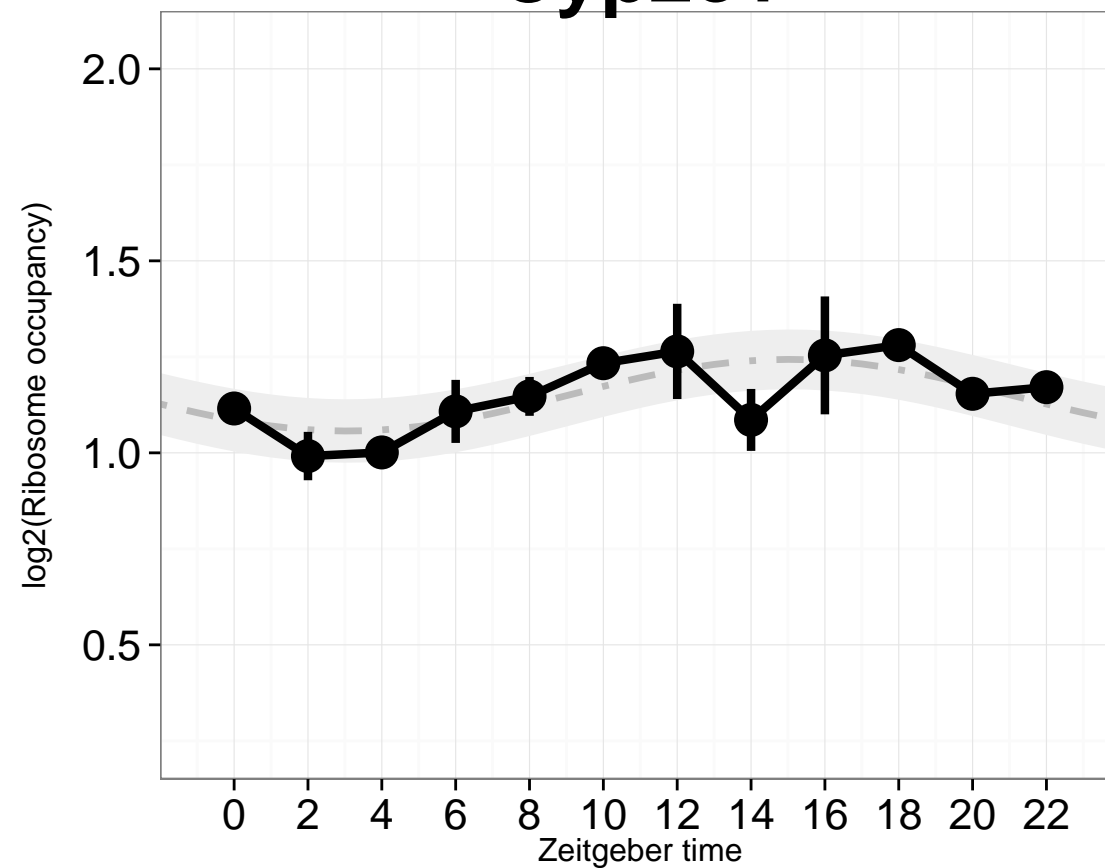

Supplement: Supplementary file 2962 [file 1]

## Rabggtb

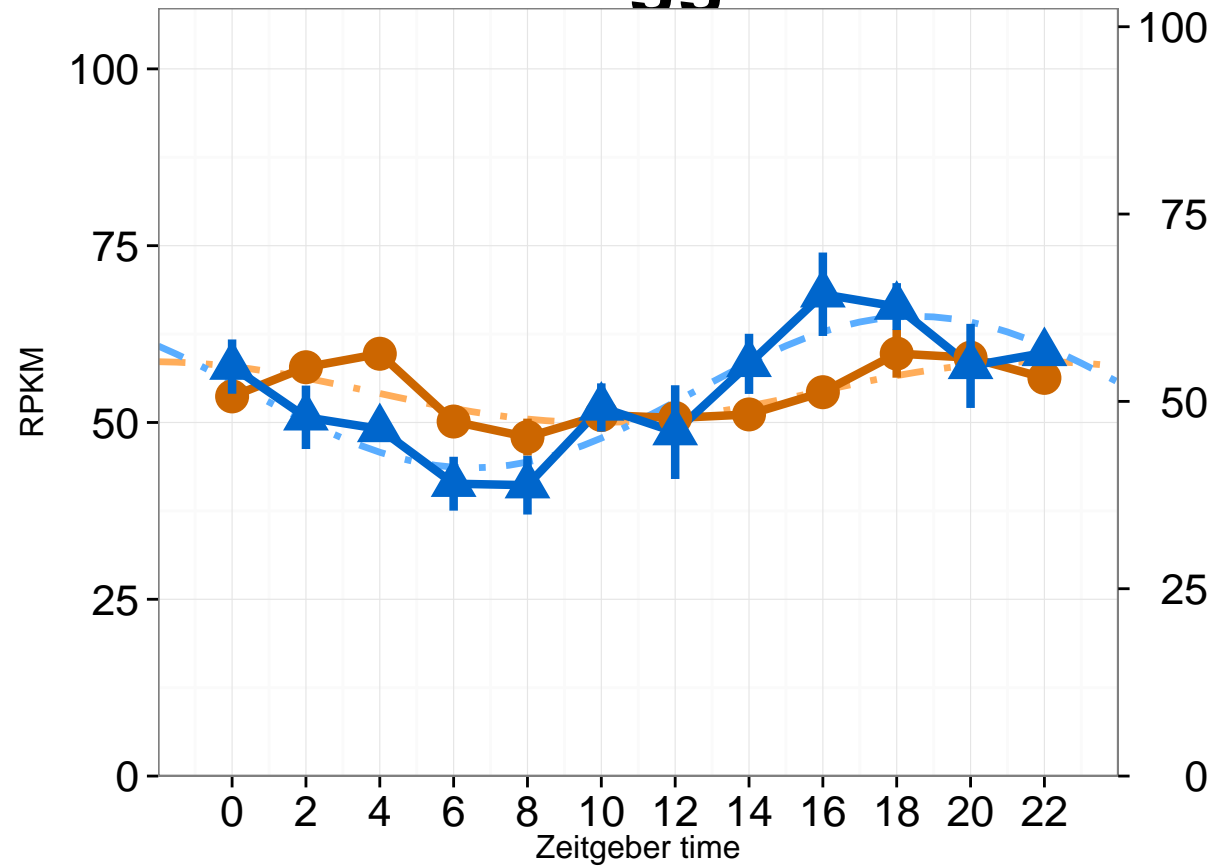

## Rabggtb

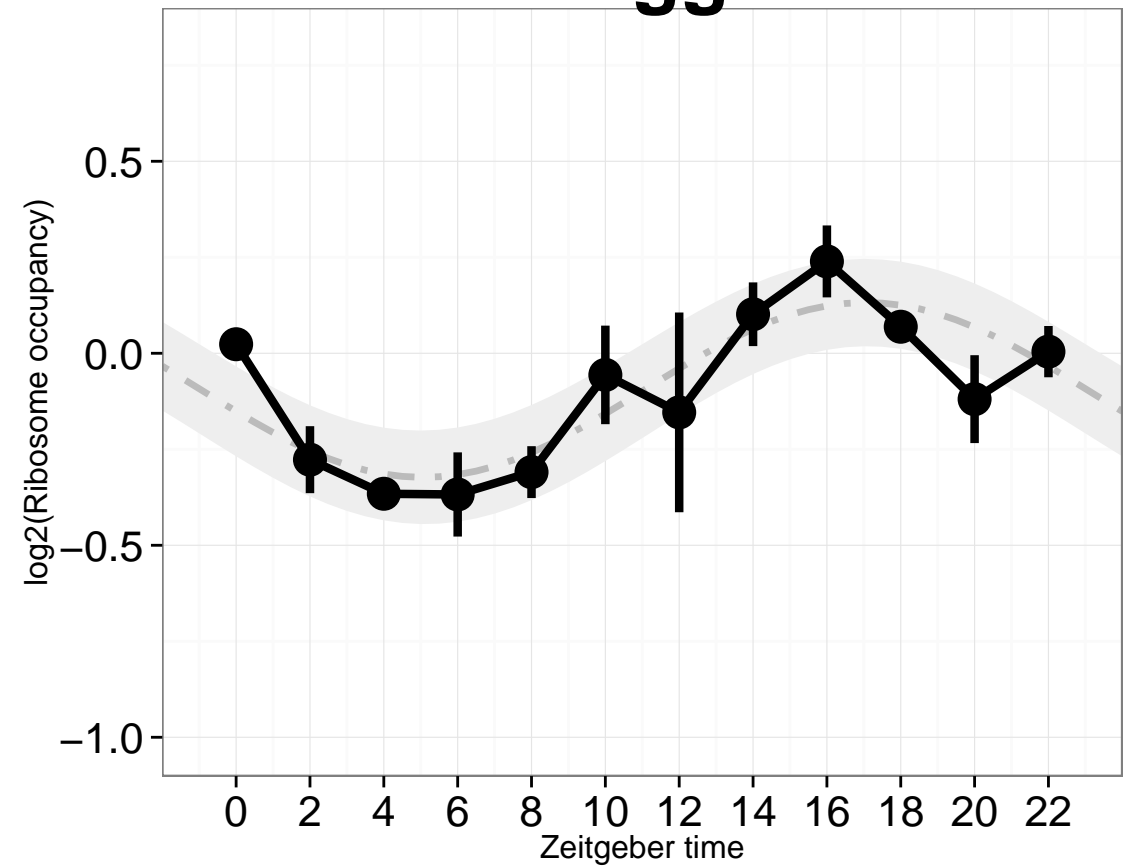

Supplement: Supplementary file 2963 [file 1]

## Npnt

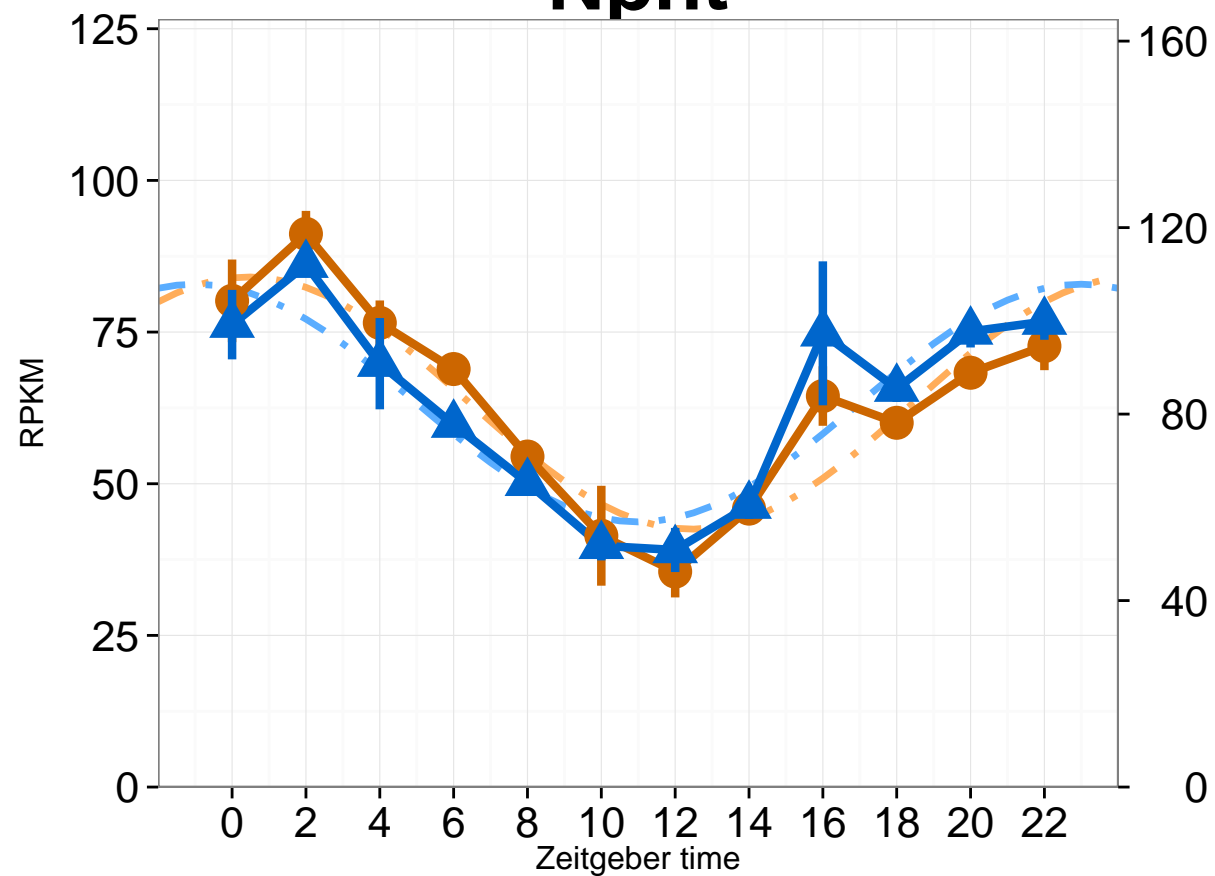

## Npnt

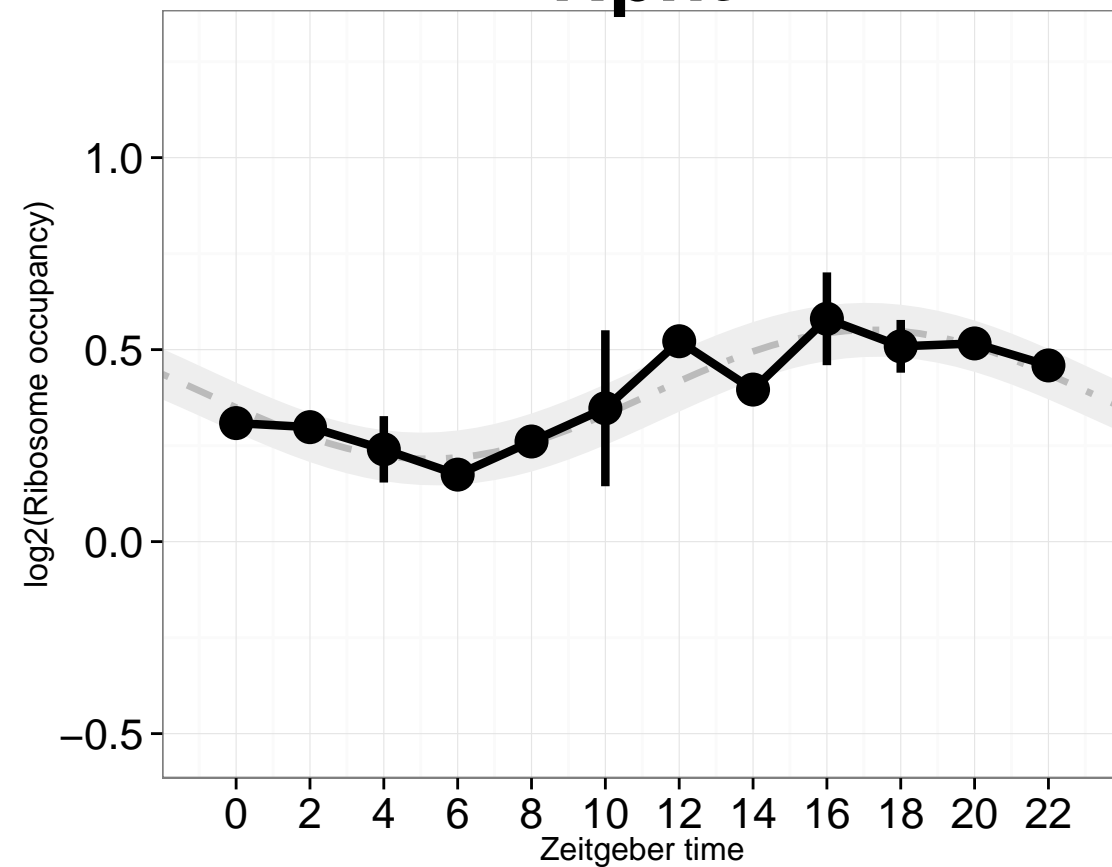

Supplement: Supplementary file 2964 [file 1]

# Bbs12

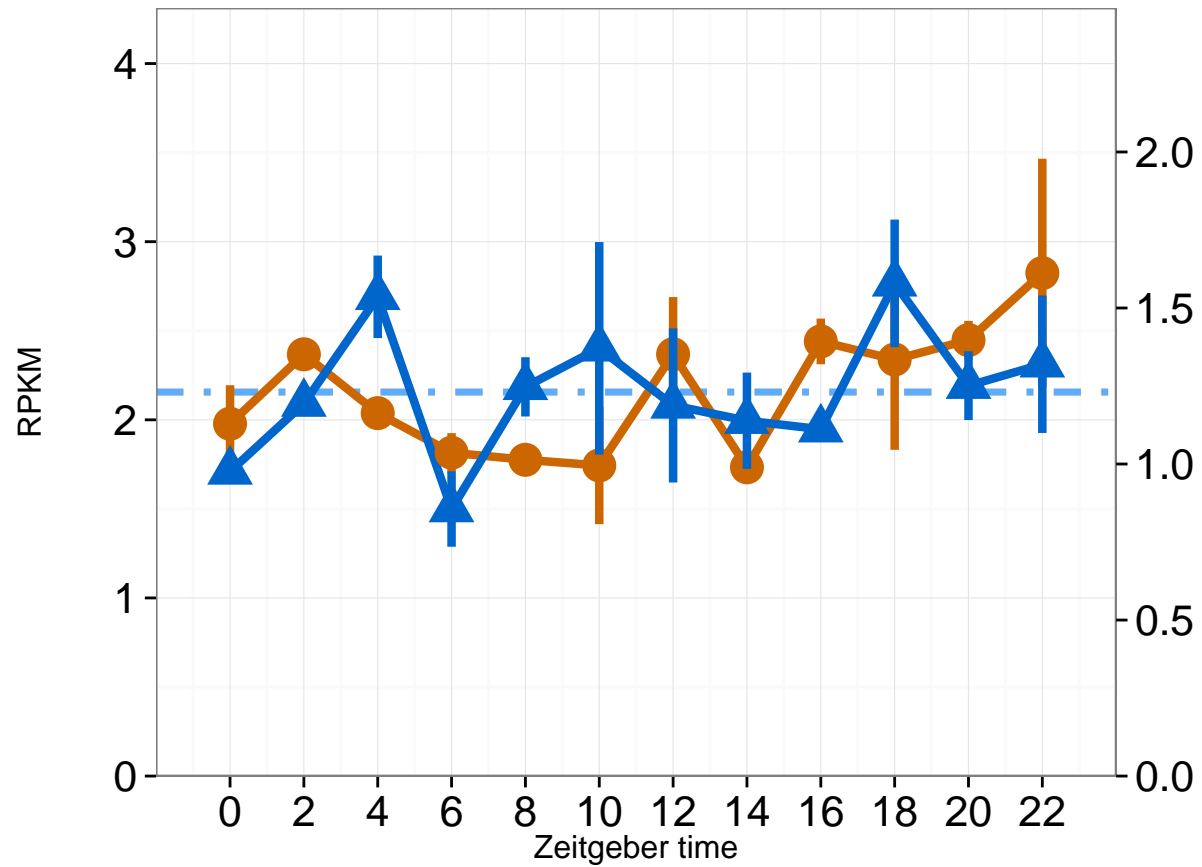

# Bbs12

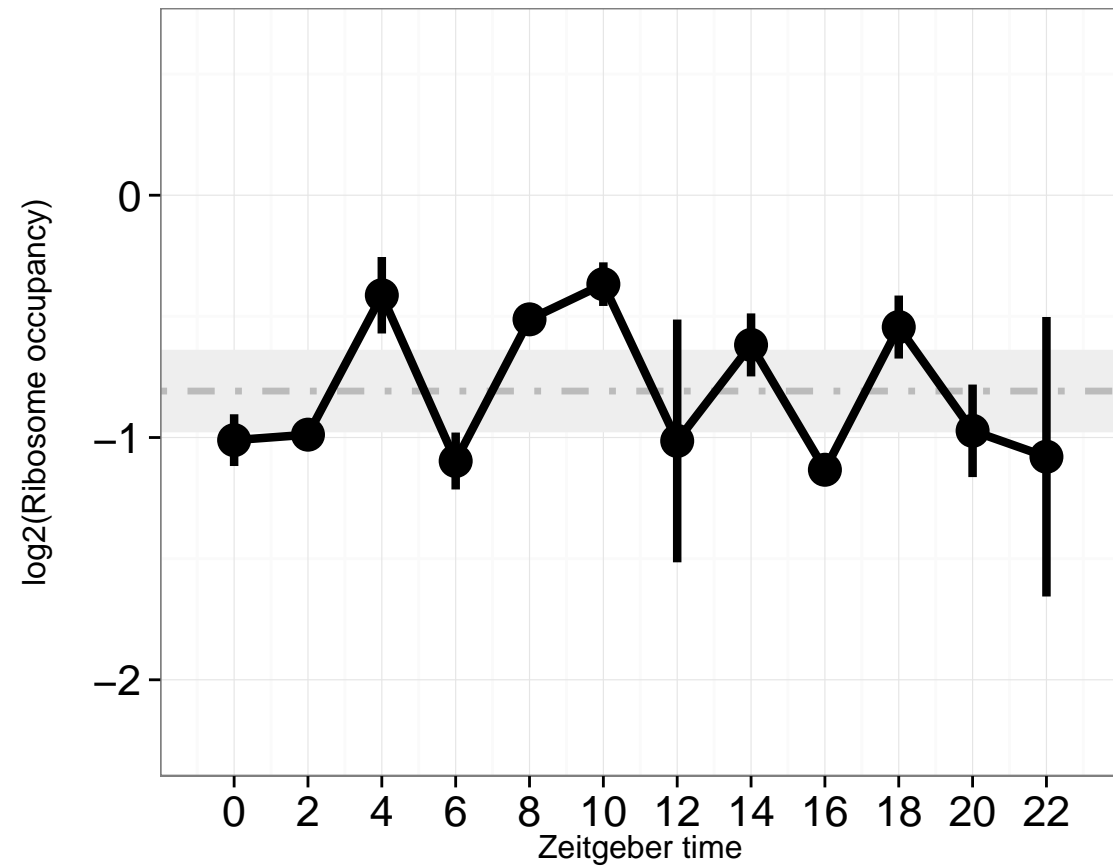

Supplement: Supplementary file 2965 [file 1]

## Atf1

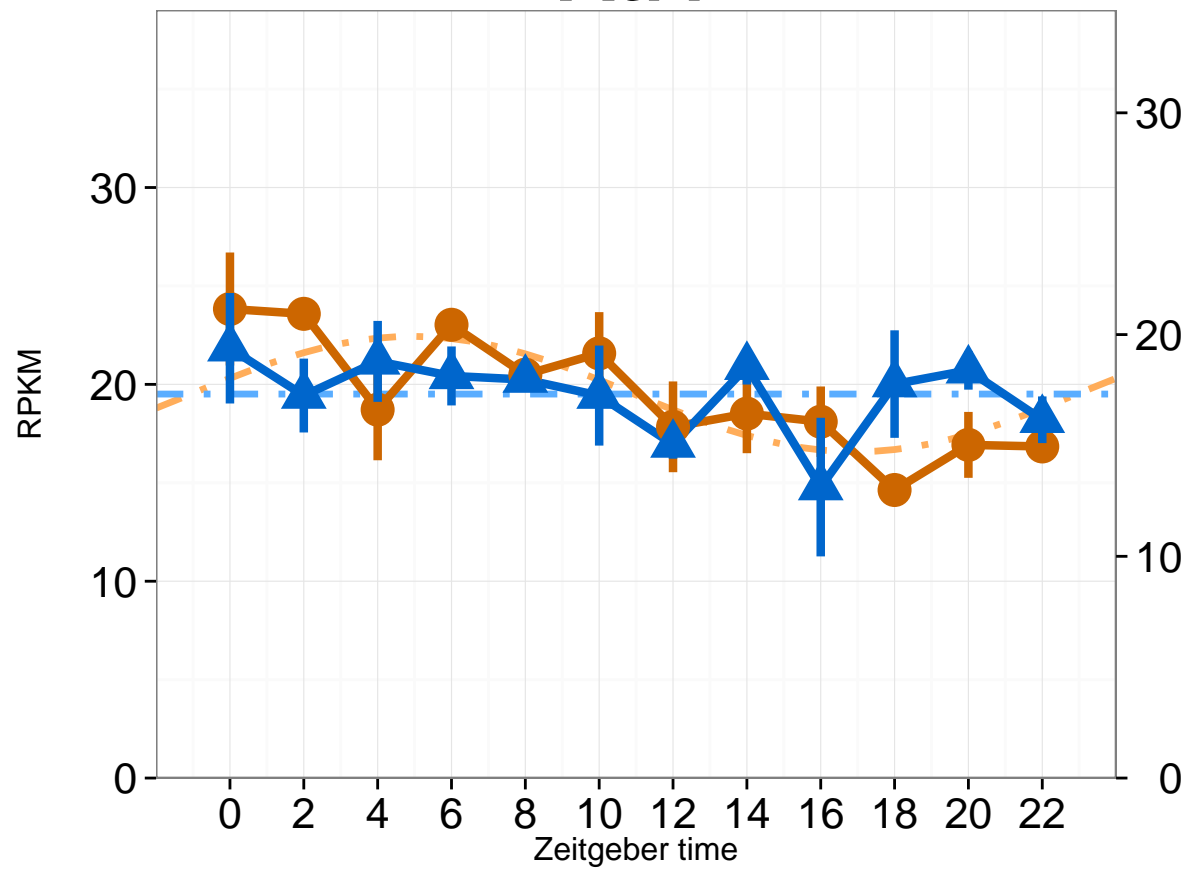

## Atf1

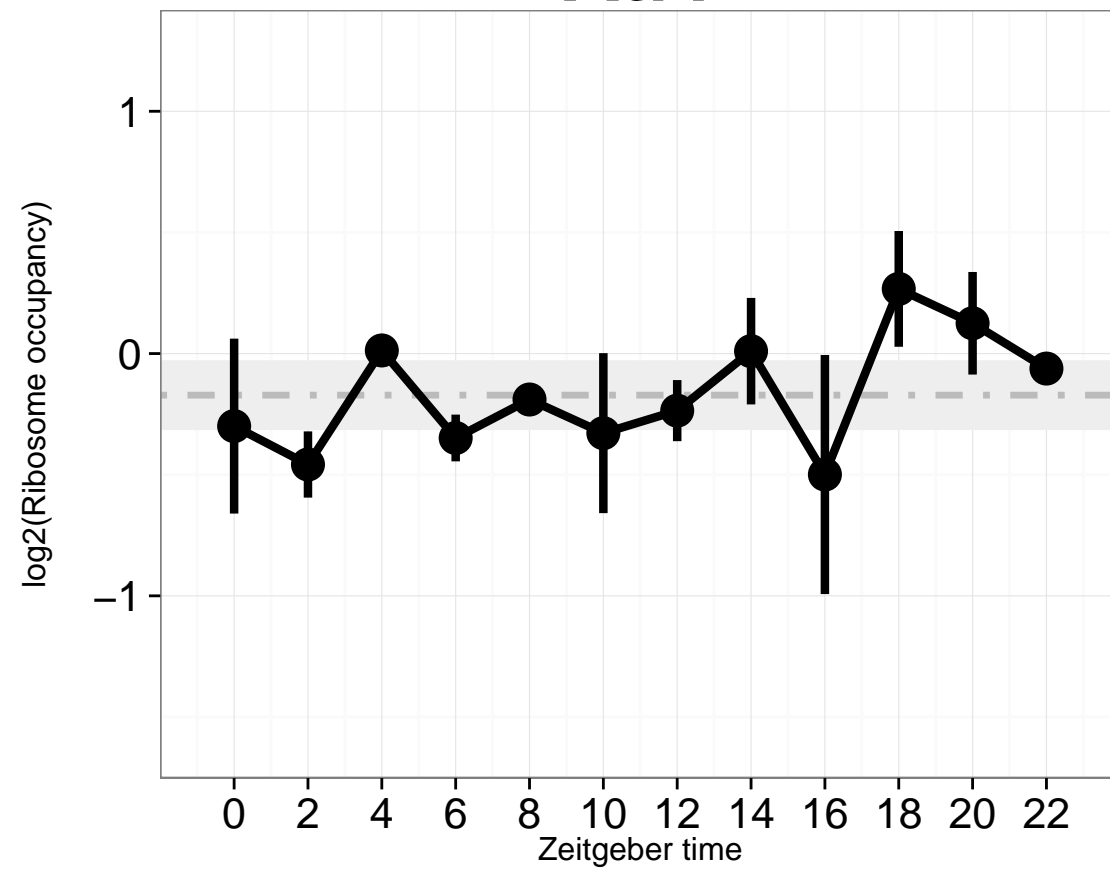

Supplement: Supplementary file 2966 [file 1]

## Slc7a2

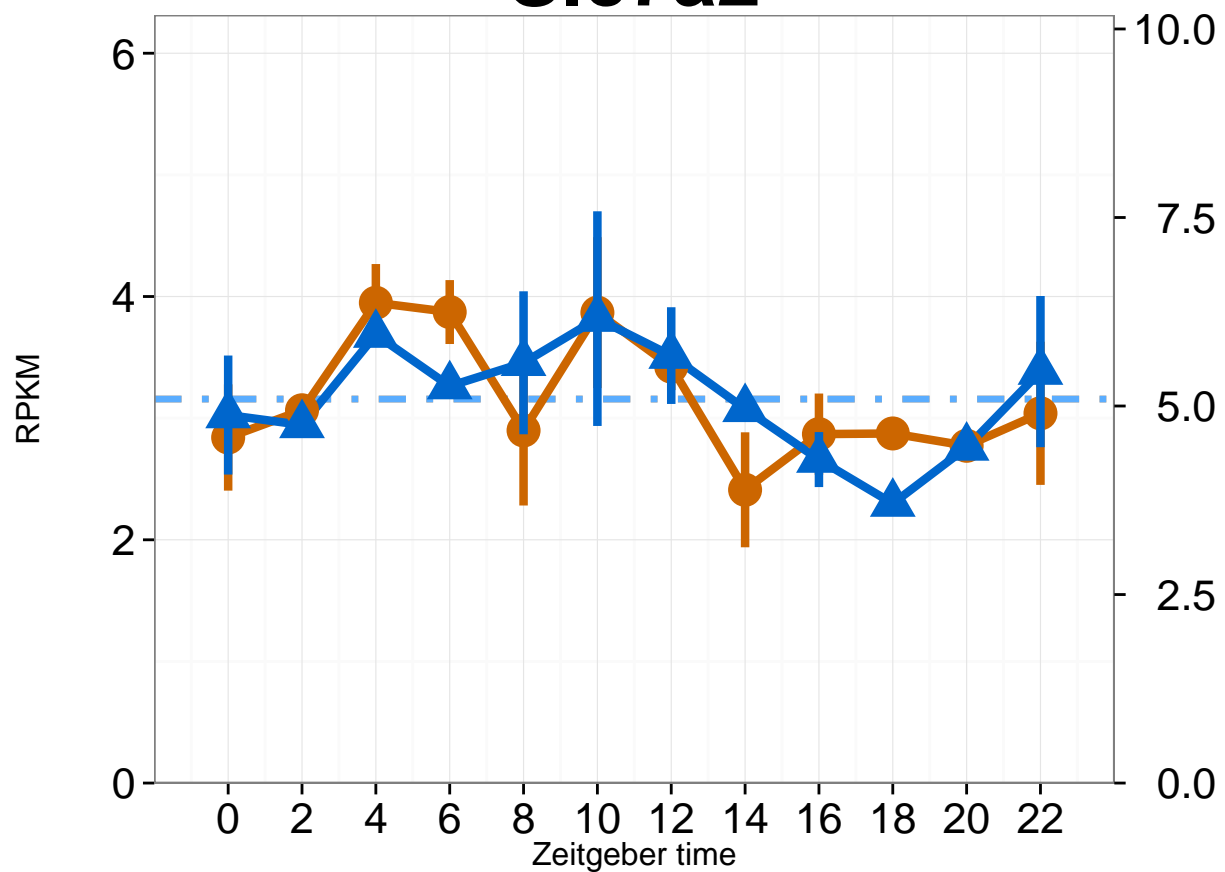

## Slc7a2

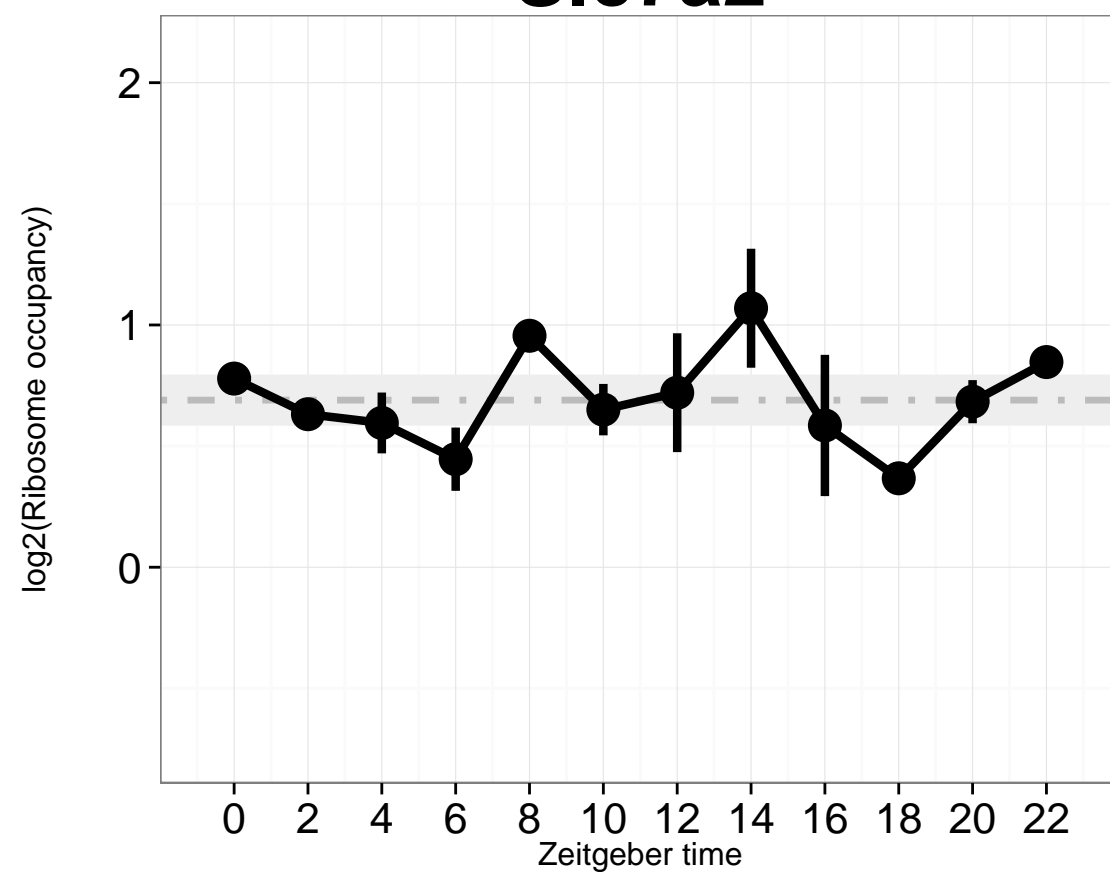

Supplement: Supplementary file 2967 [file 1]

## Pinx1

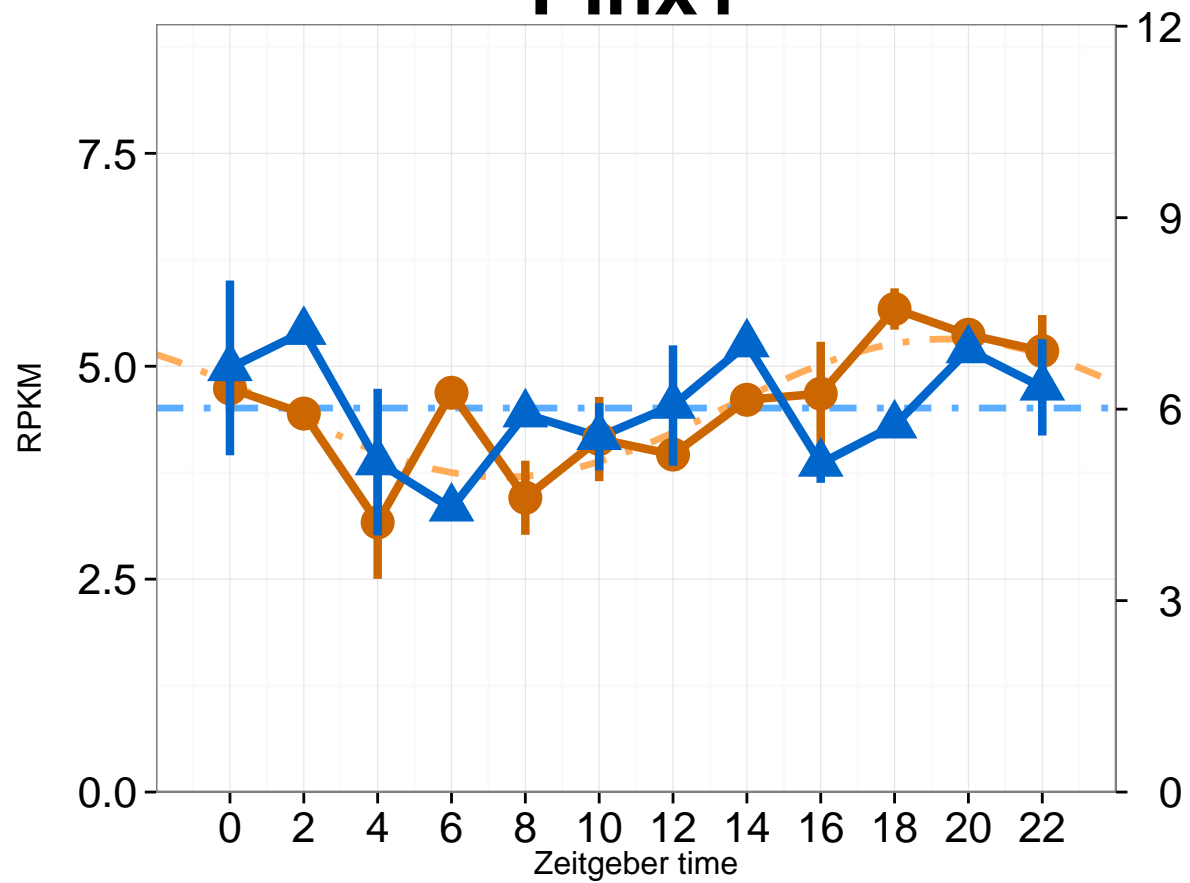

## Pinx1

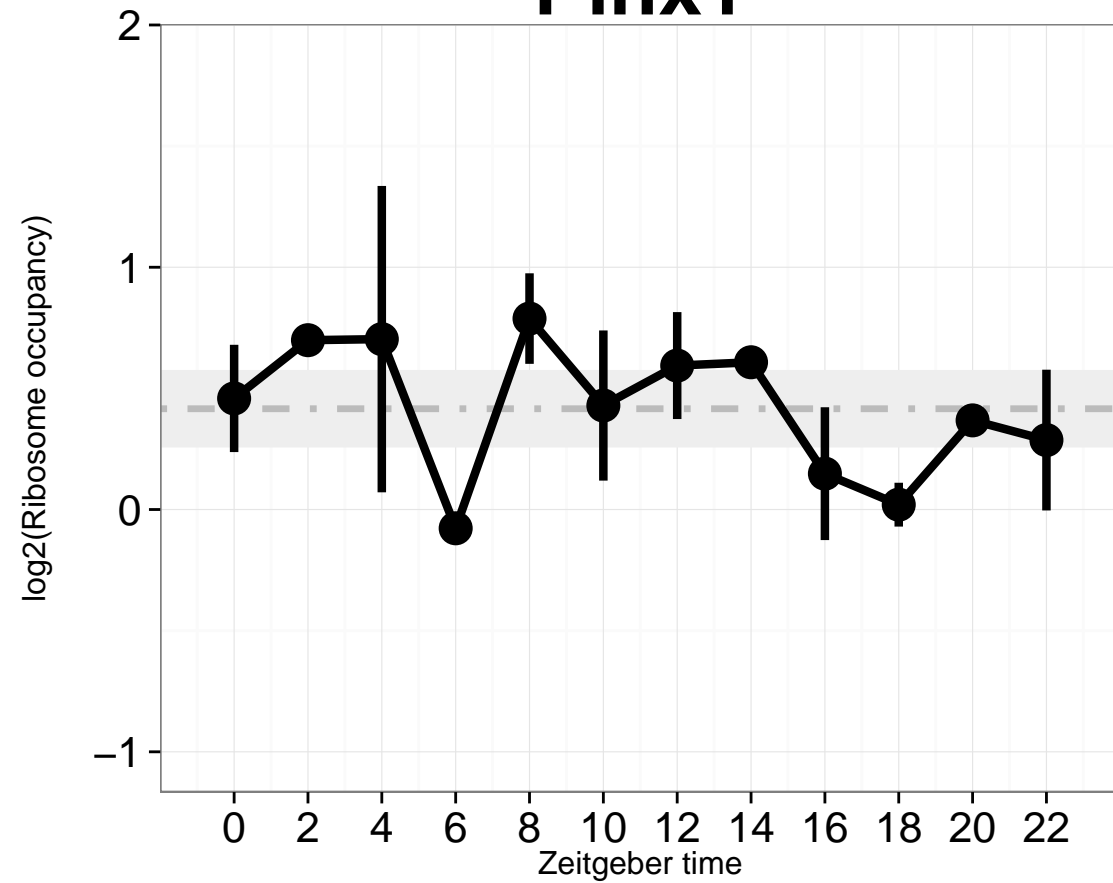

Supplement: Supplementary file 2968 [file 1]

## Socs2

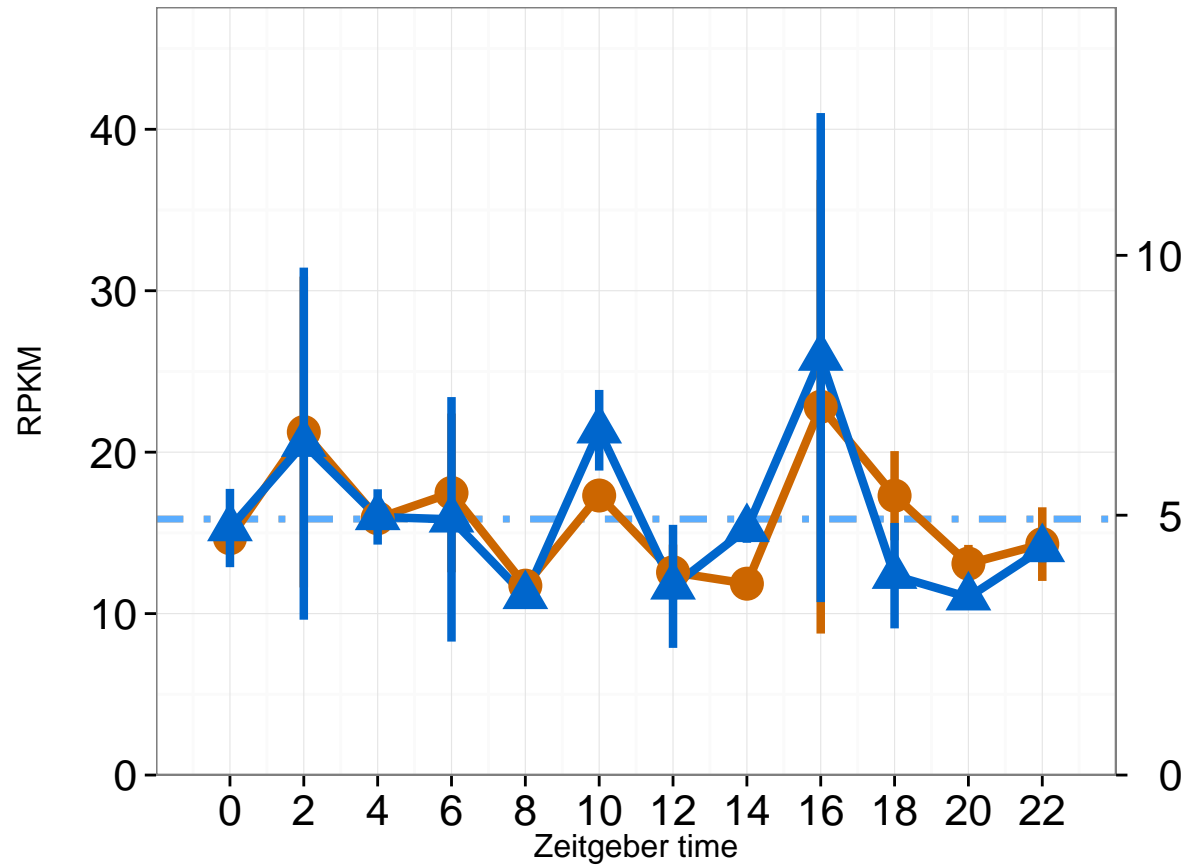

## Socs2

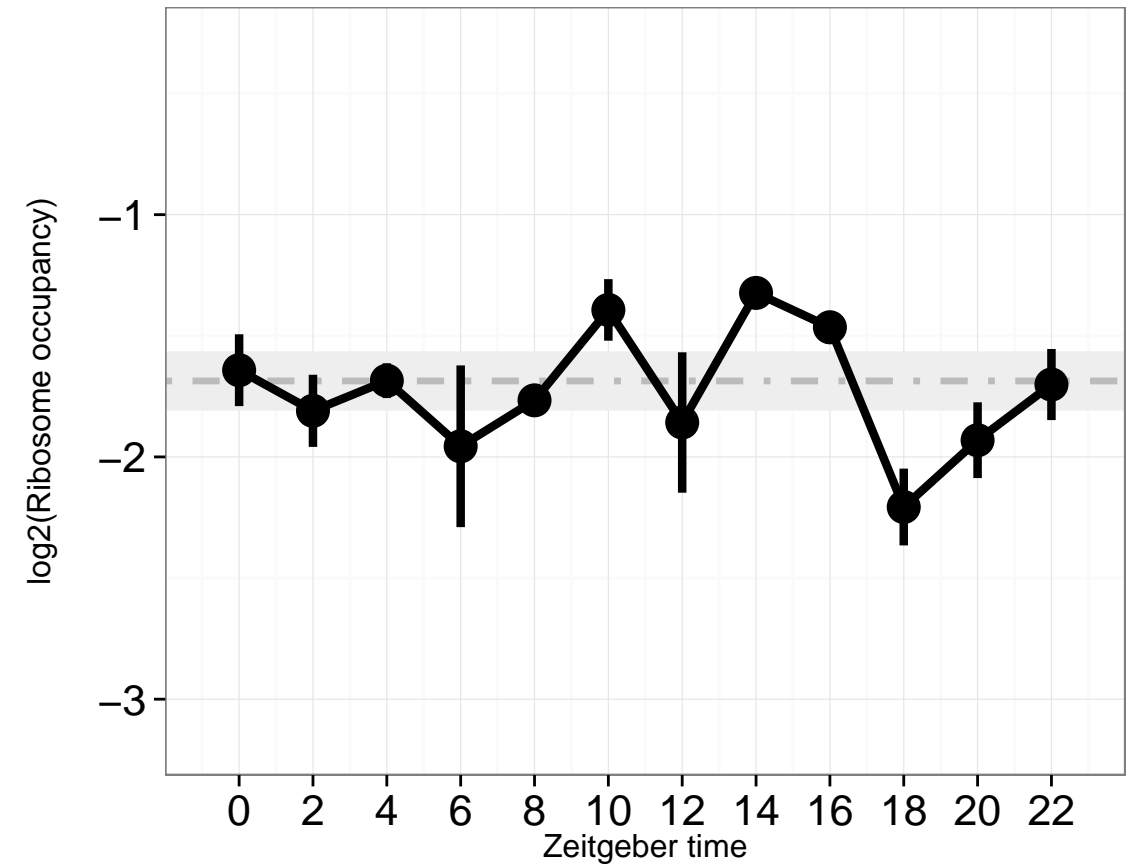

Supplement: Supplementary file 2969 [file 1]

# Tmem55a

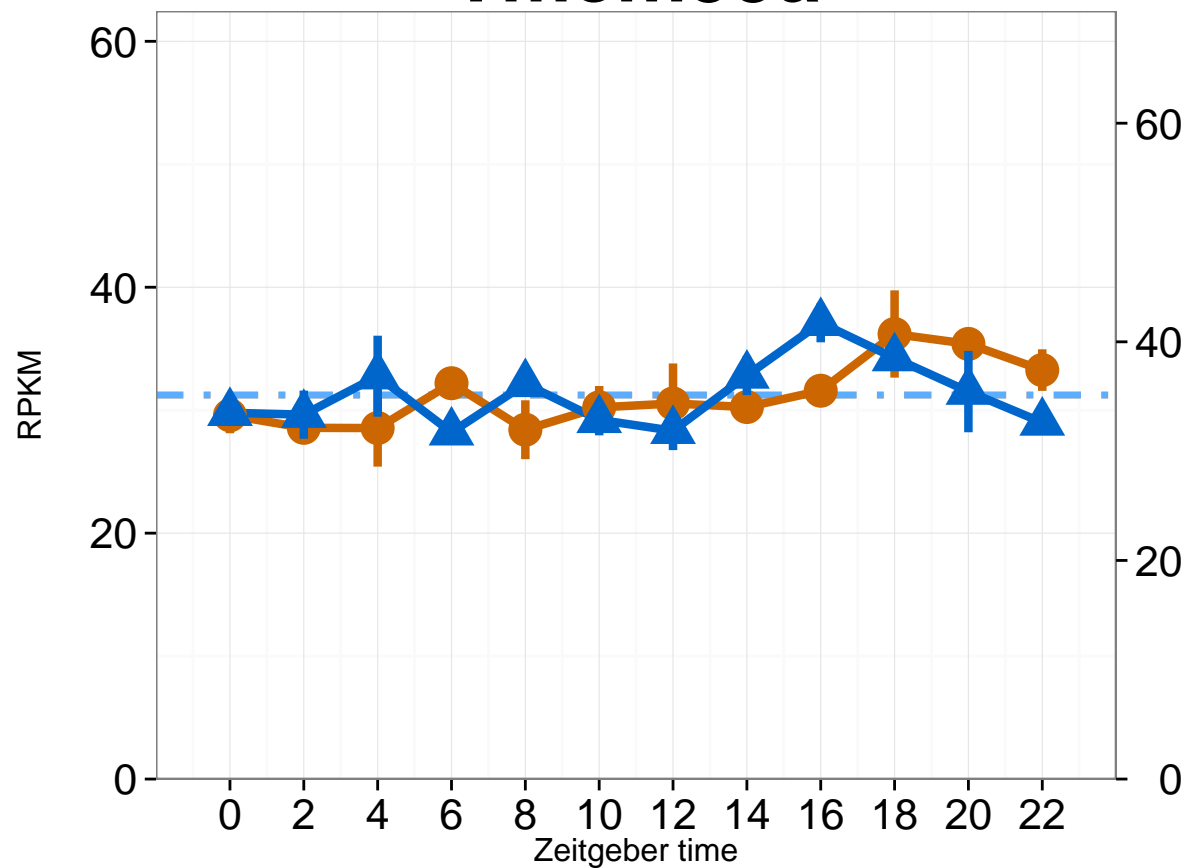

# Tmem55a

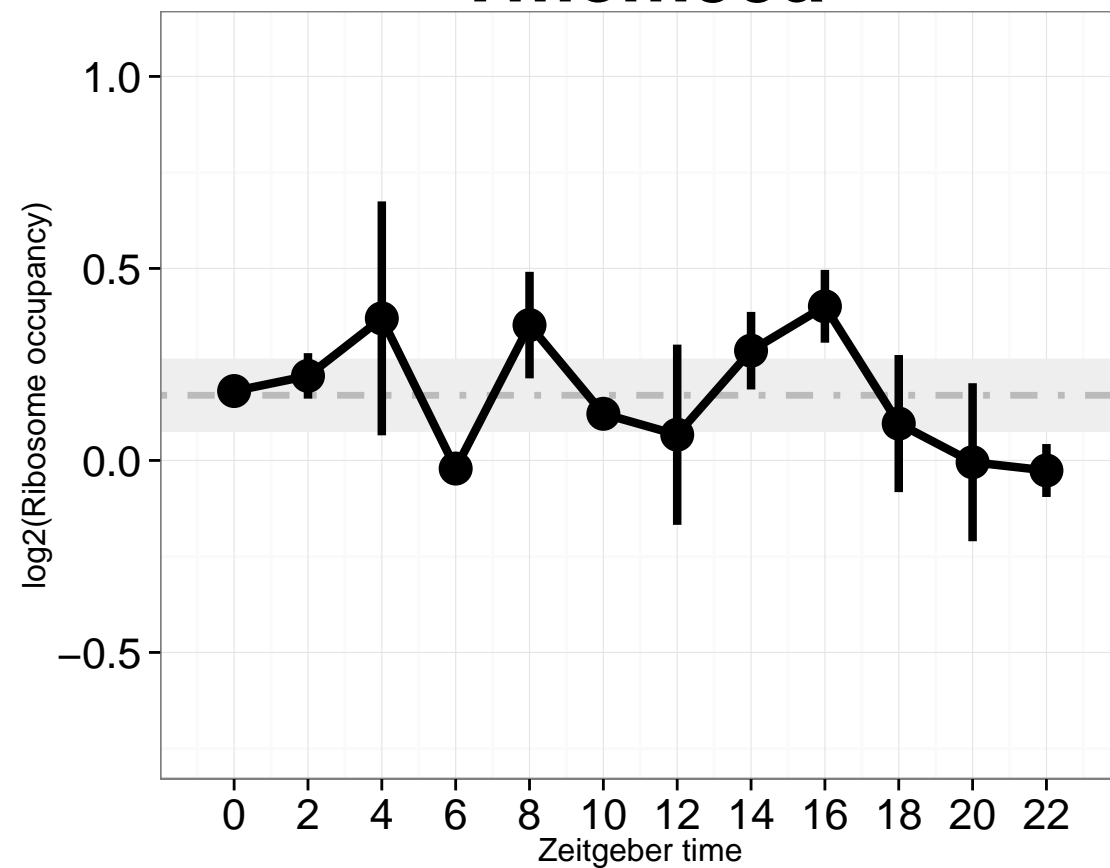

Supplement: Supplementary file 2970 [file 1]

## Flcn

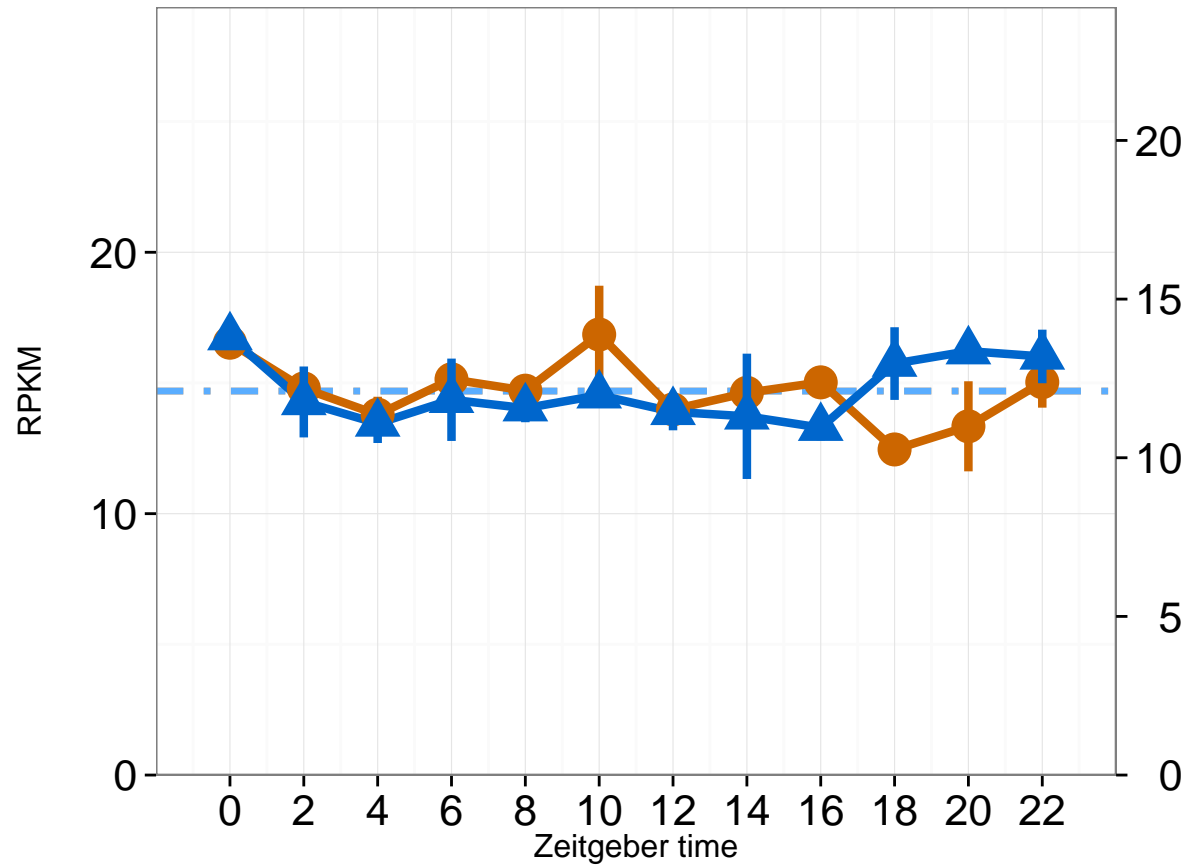

## Flcn

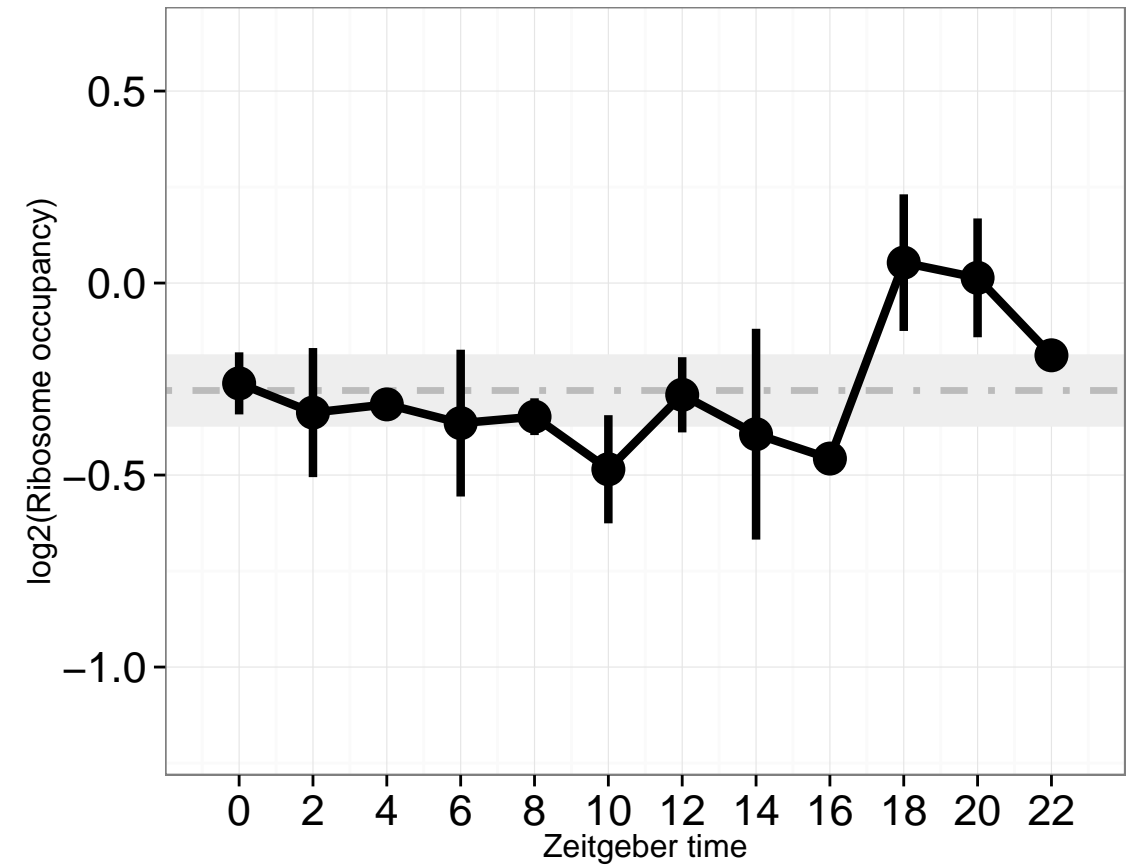

Supplement: Supplementary file 2971 [file 1]

## Sema6a

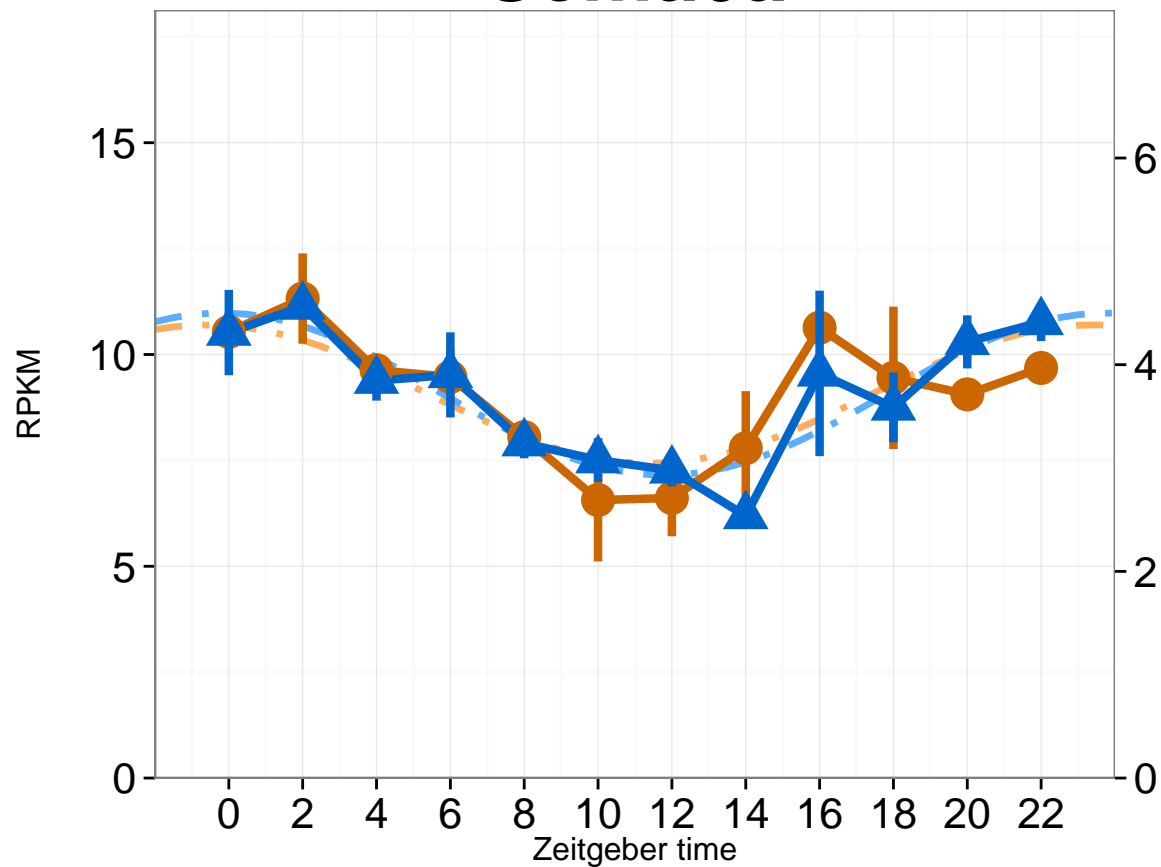

## Sema6a

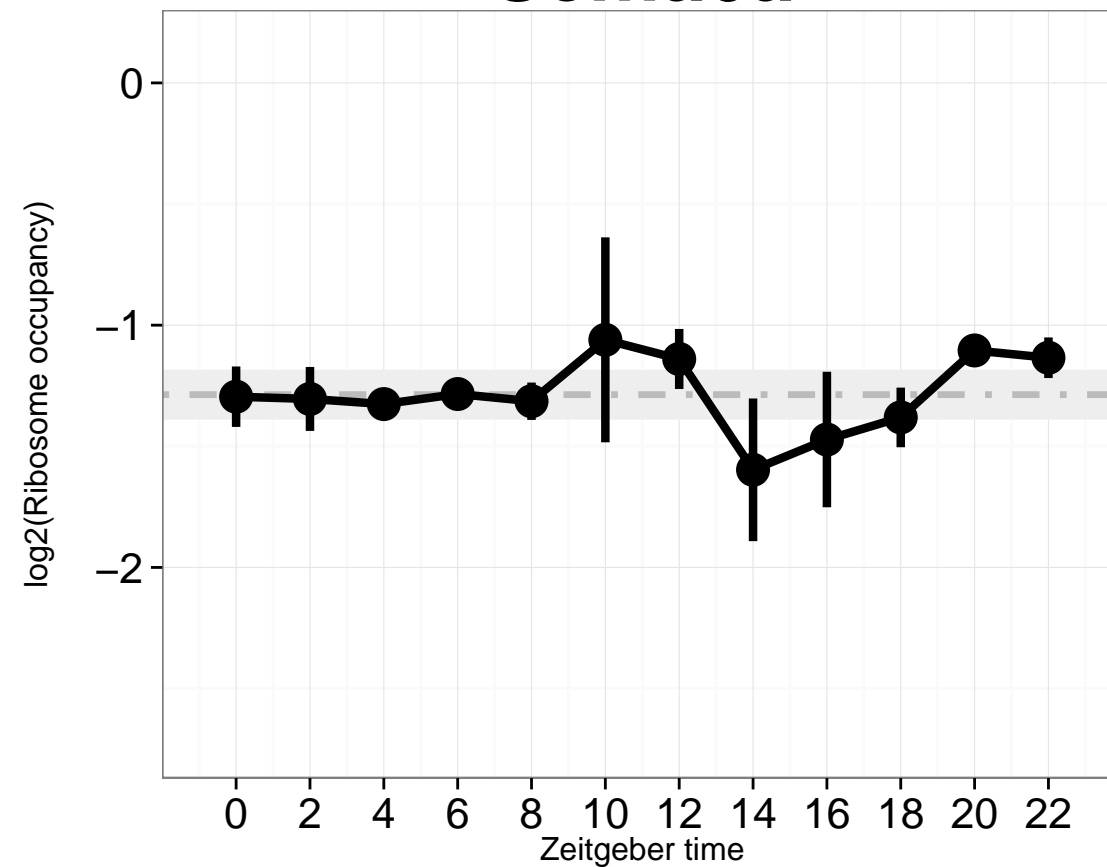

Supplement: Supplementary file 2972 [file 1]

## Myo1f

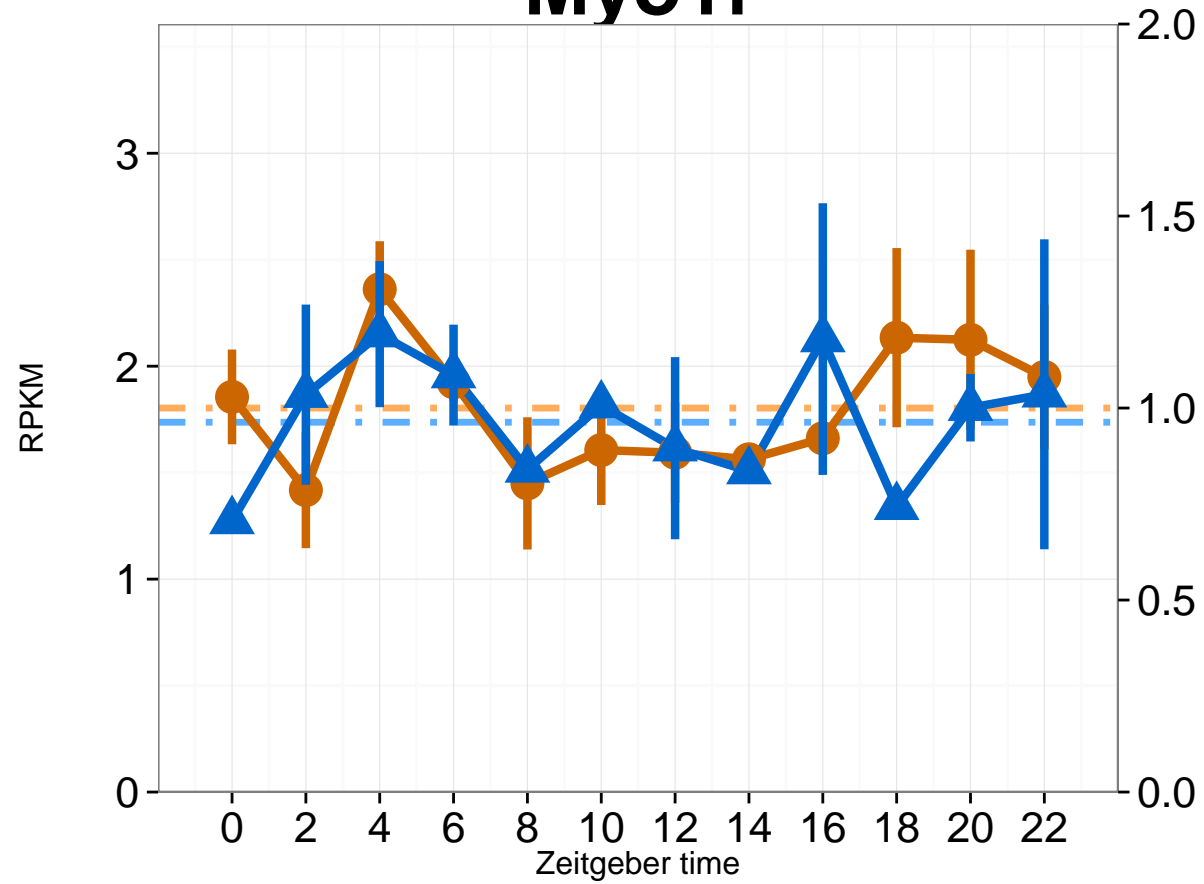

## Myo1f

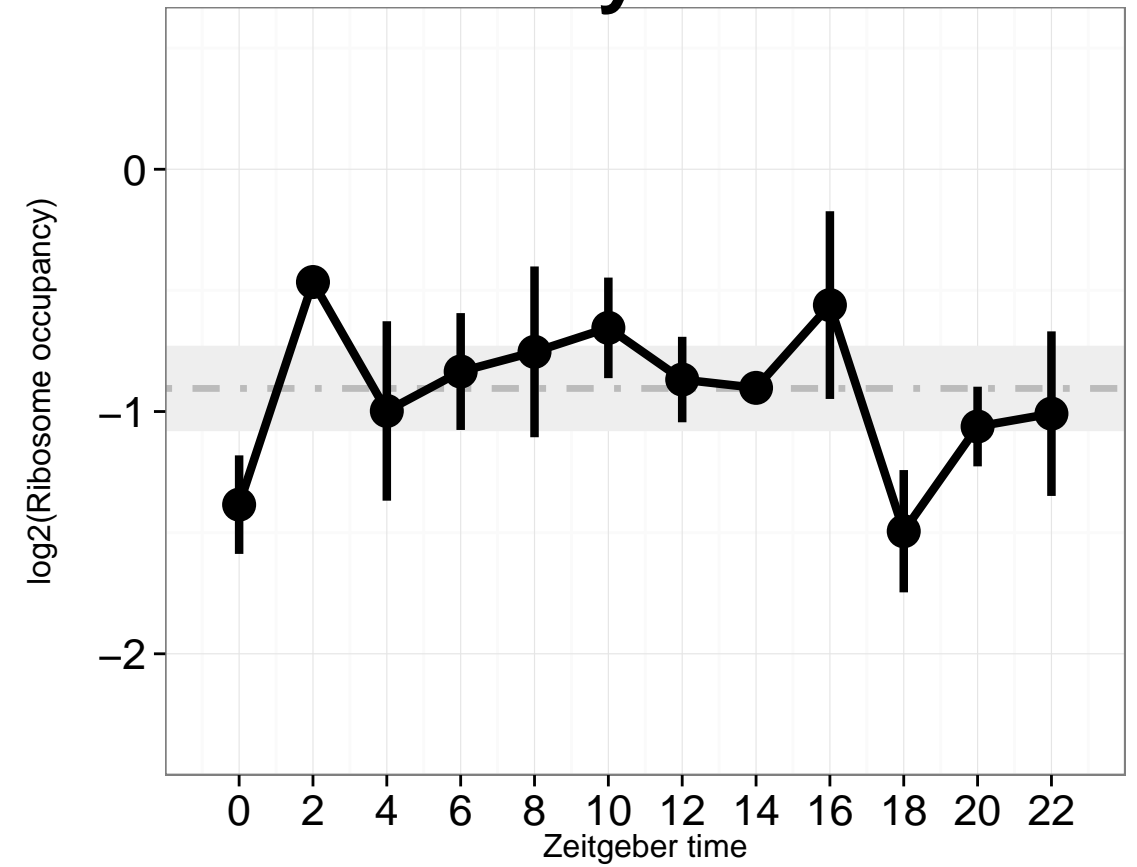

Supplement: Supplementary file 2973 [file 1]

# E130309D02Rik

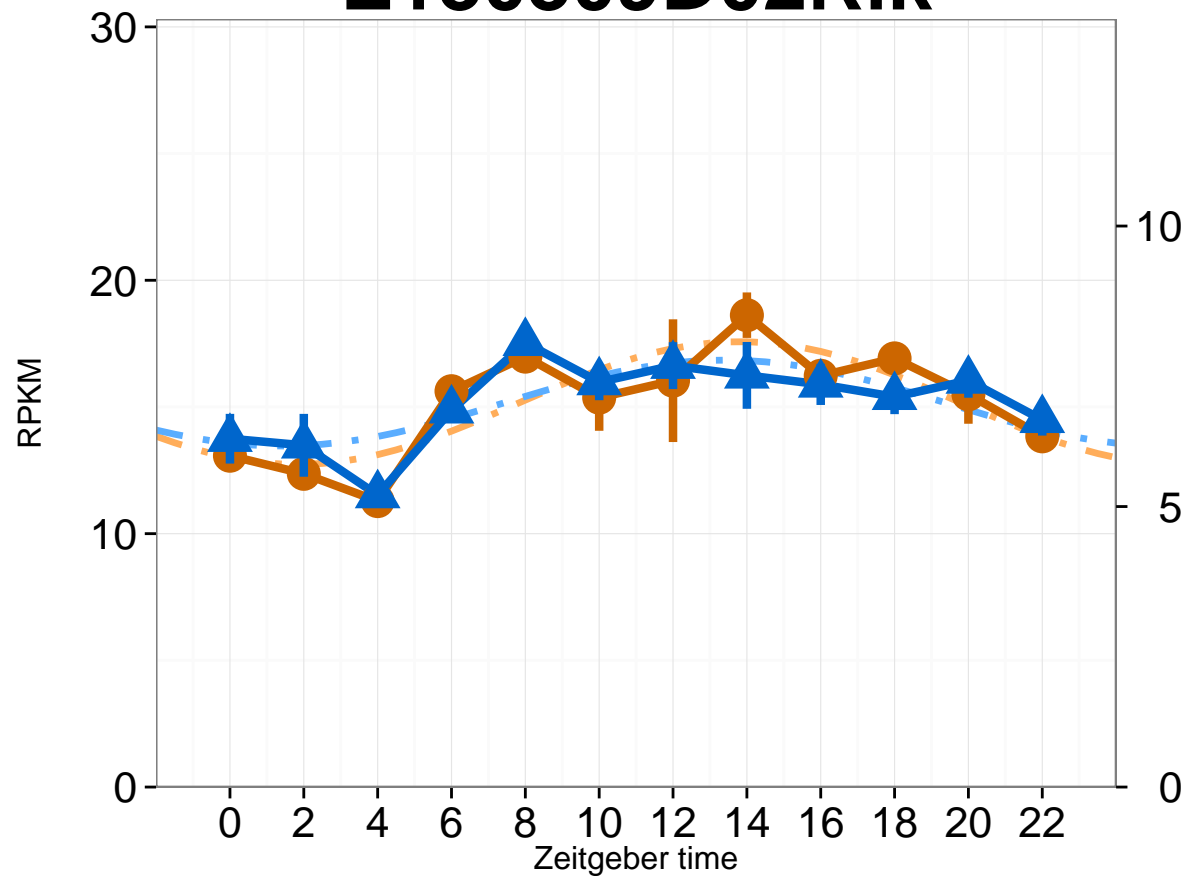

# E130309D02Rik

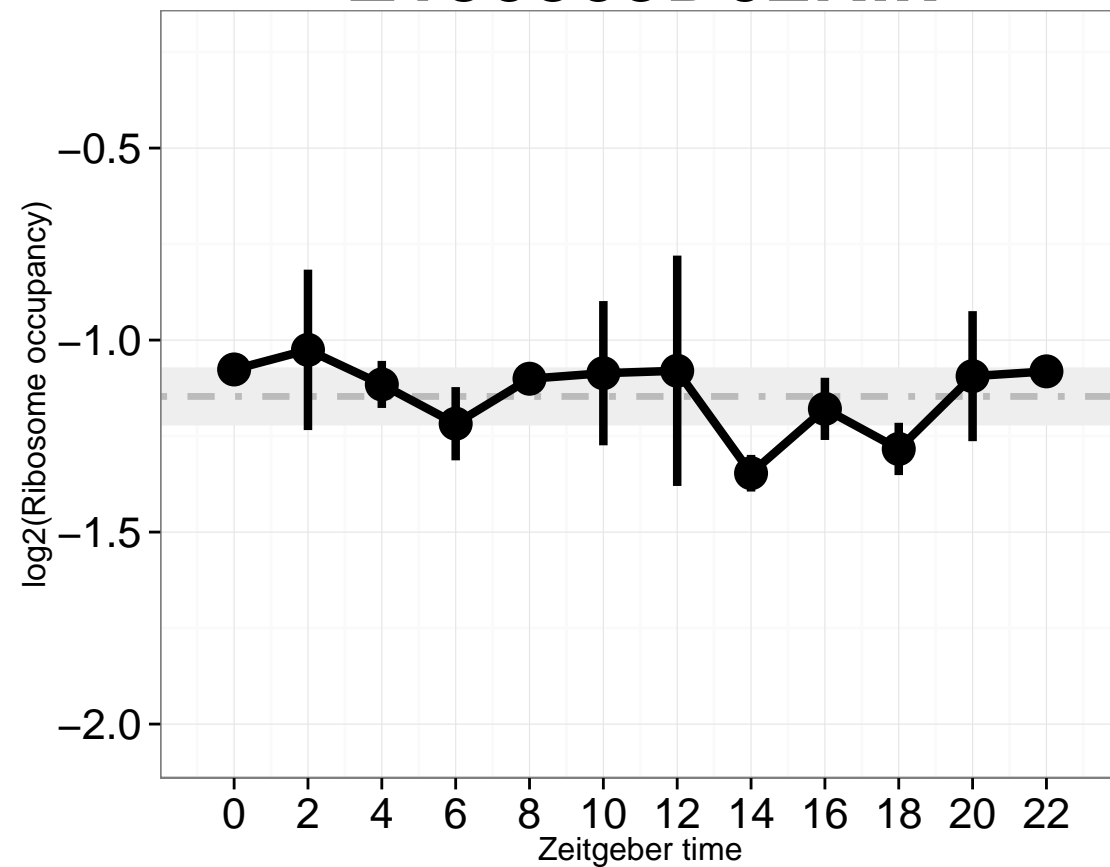

Supplement: Supplementary file 2974 [file 1]

## Rsbn1l

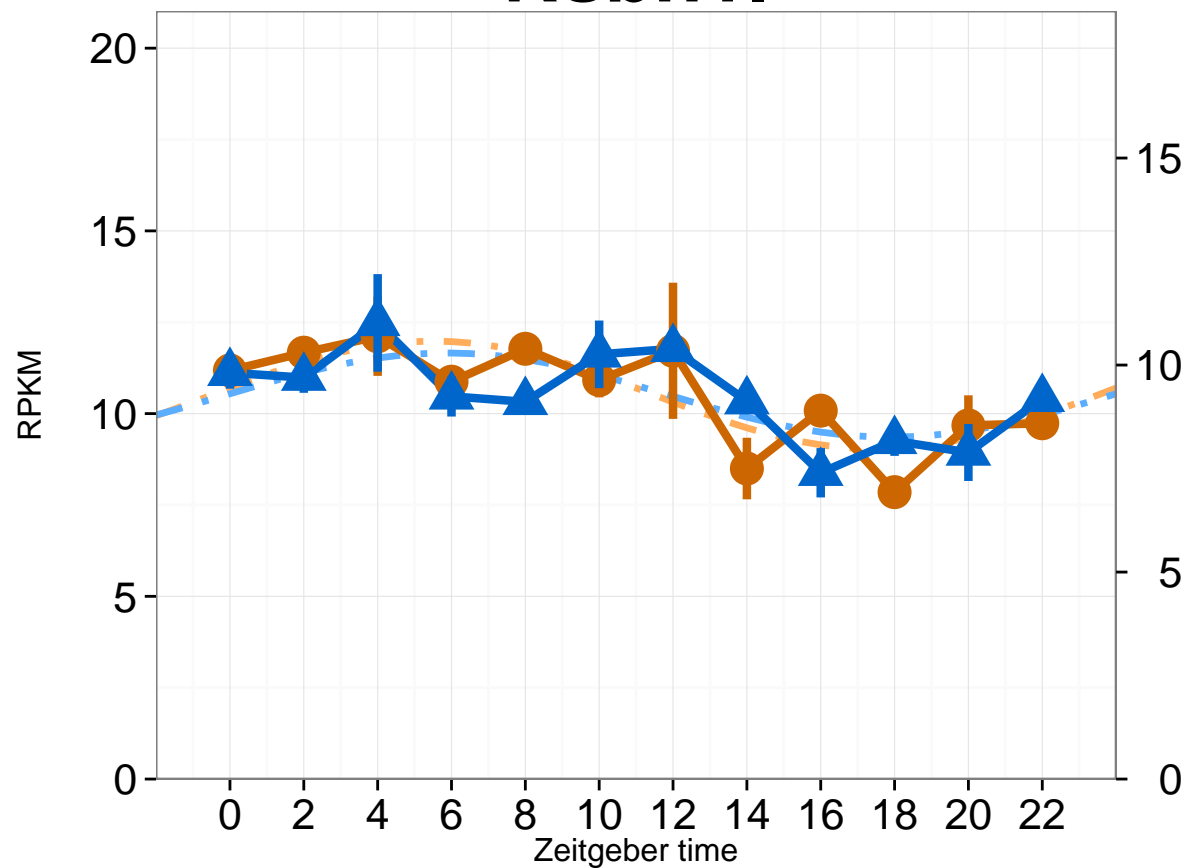

## Rsbn1l

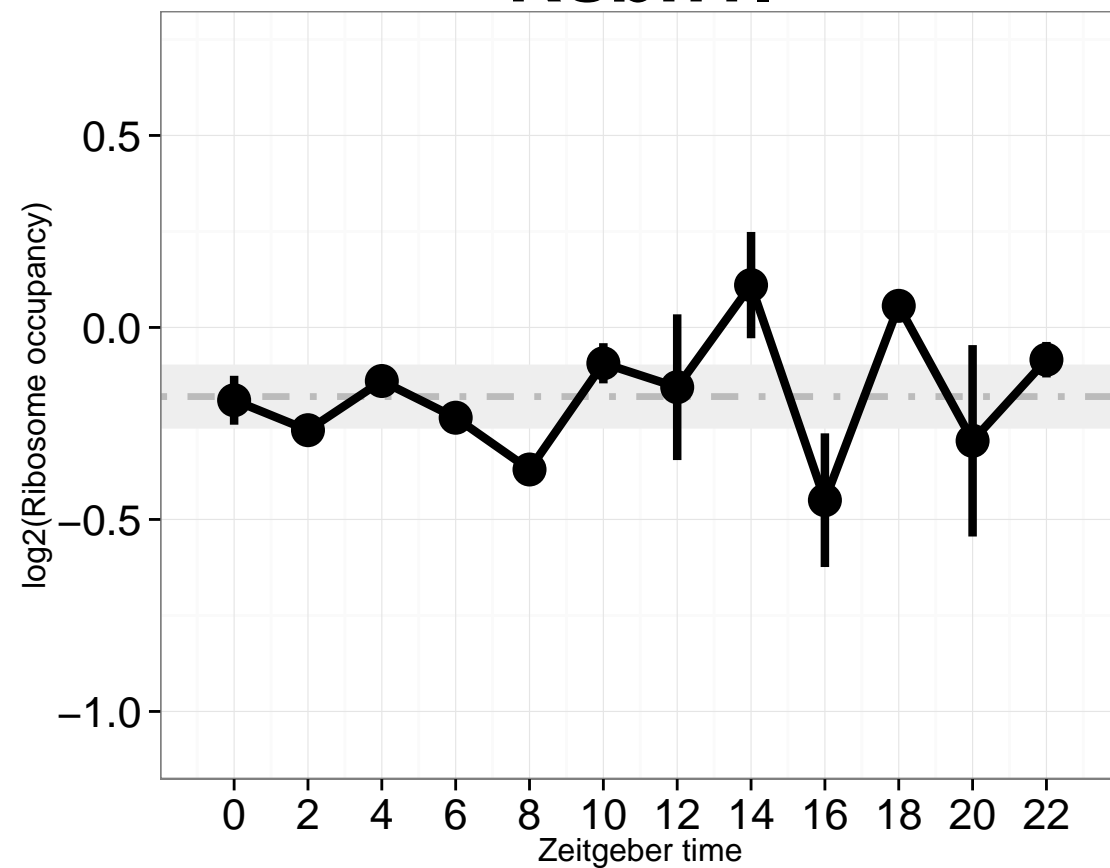

Supplement: Supplementary file 2975 [file 1]

## Flnb

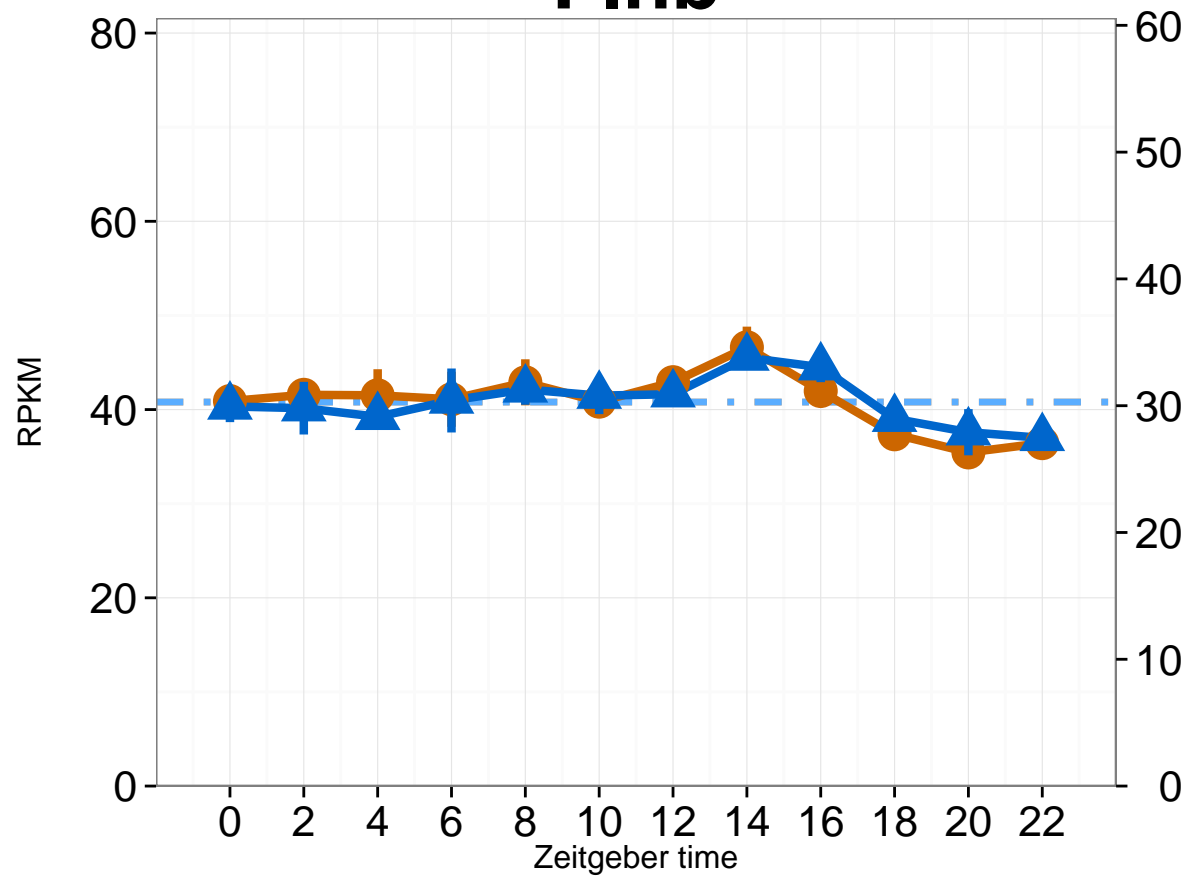

## Flnb

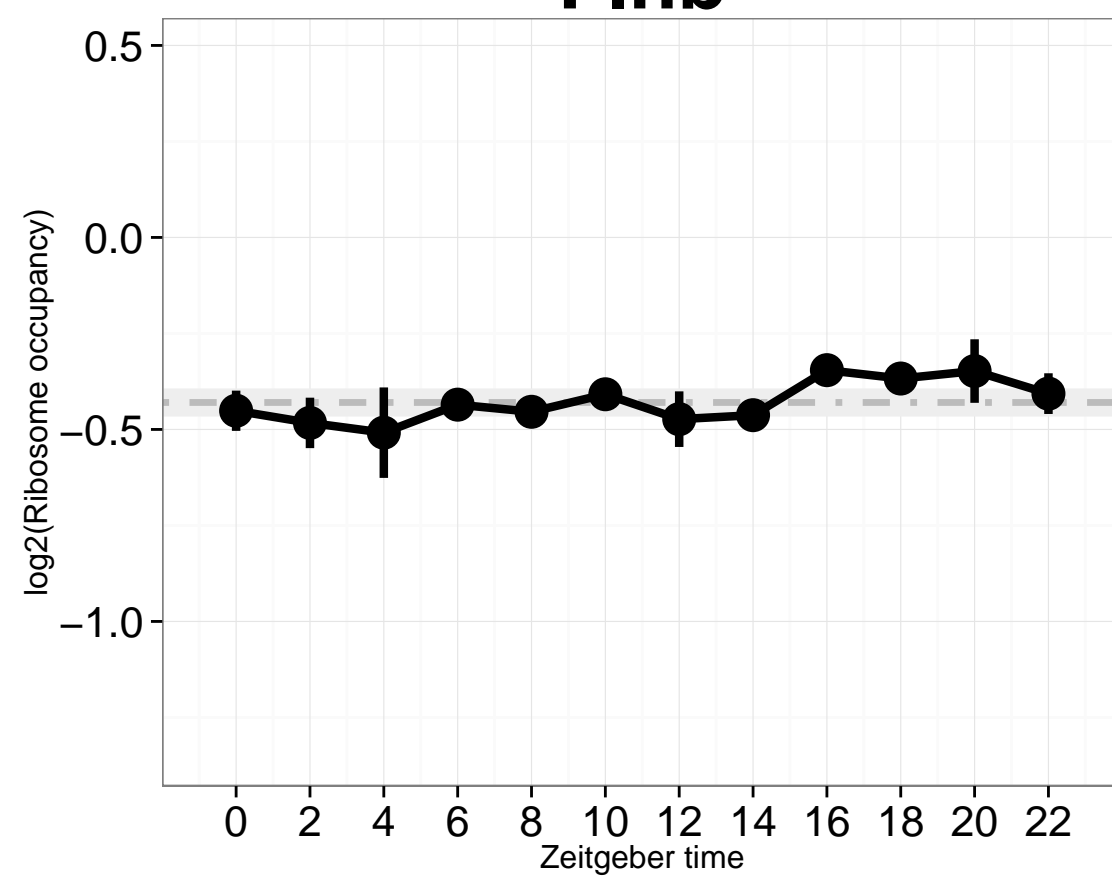

Supplement: Supplementary file 2976 [file 1]

# Arl5a

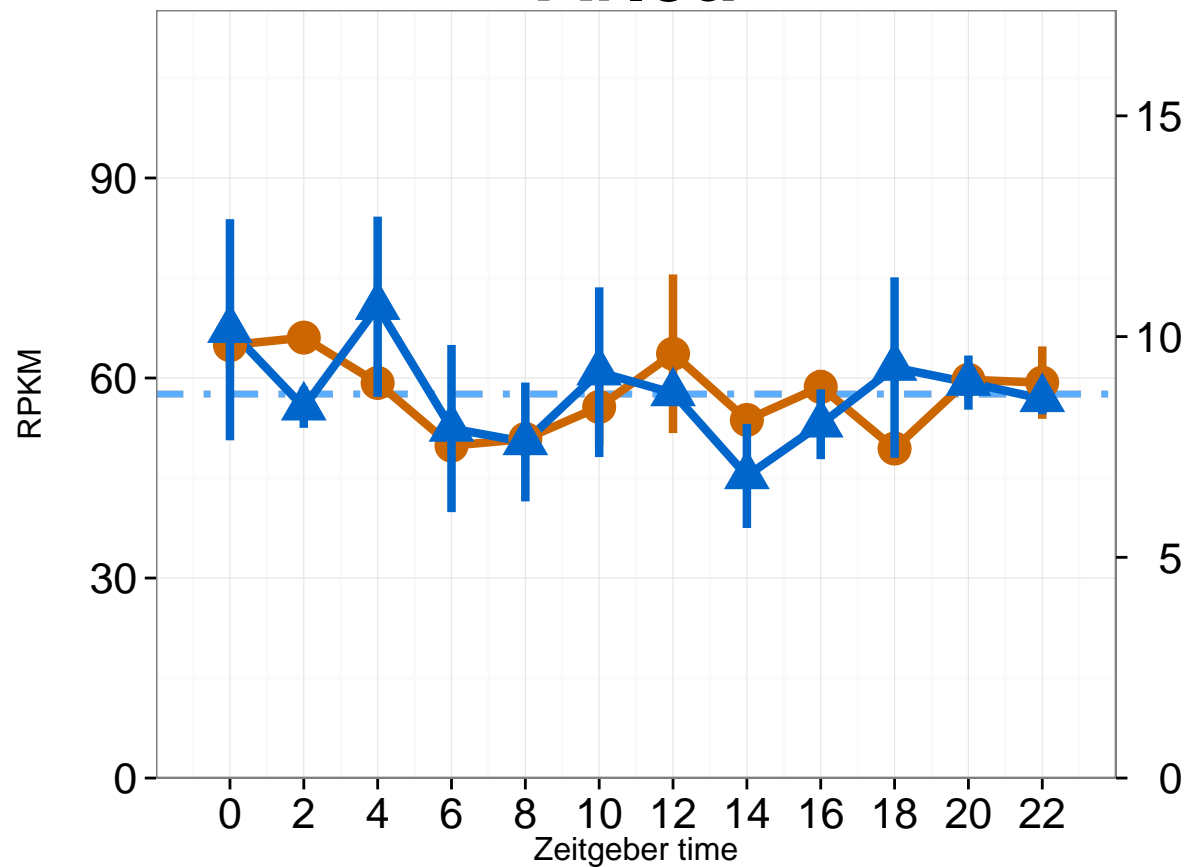

# Arl5a

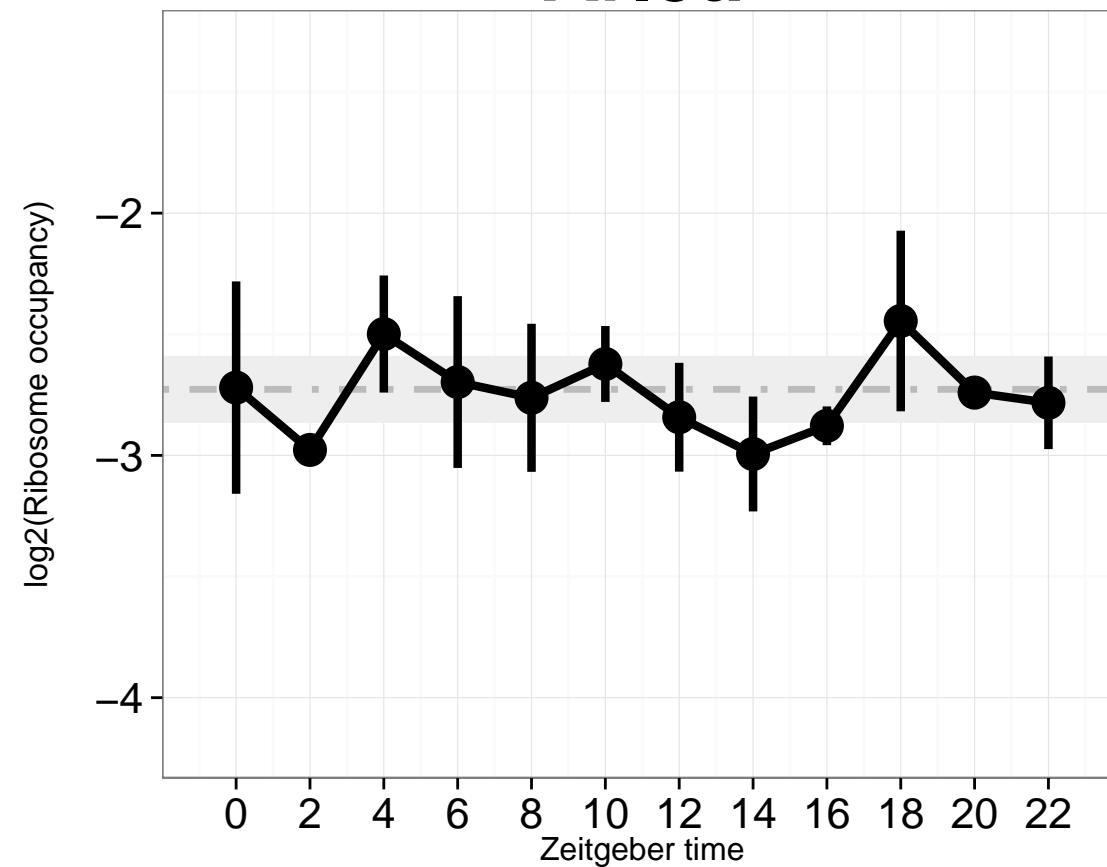

Supplement: Supplementary file 2977 [file 1]

## Nfic

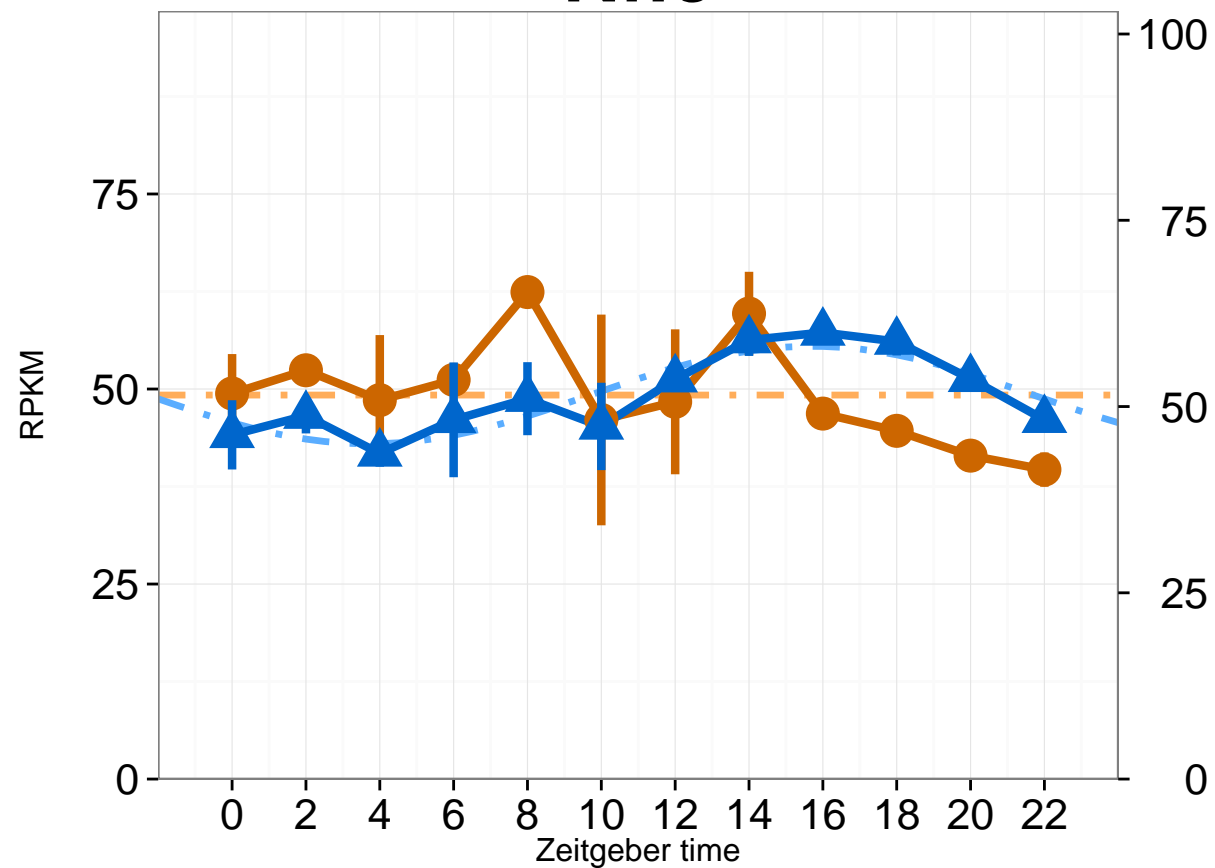

## Nfic

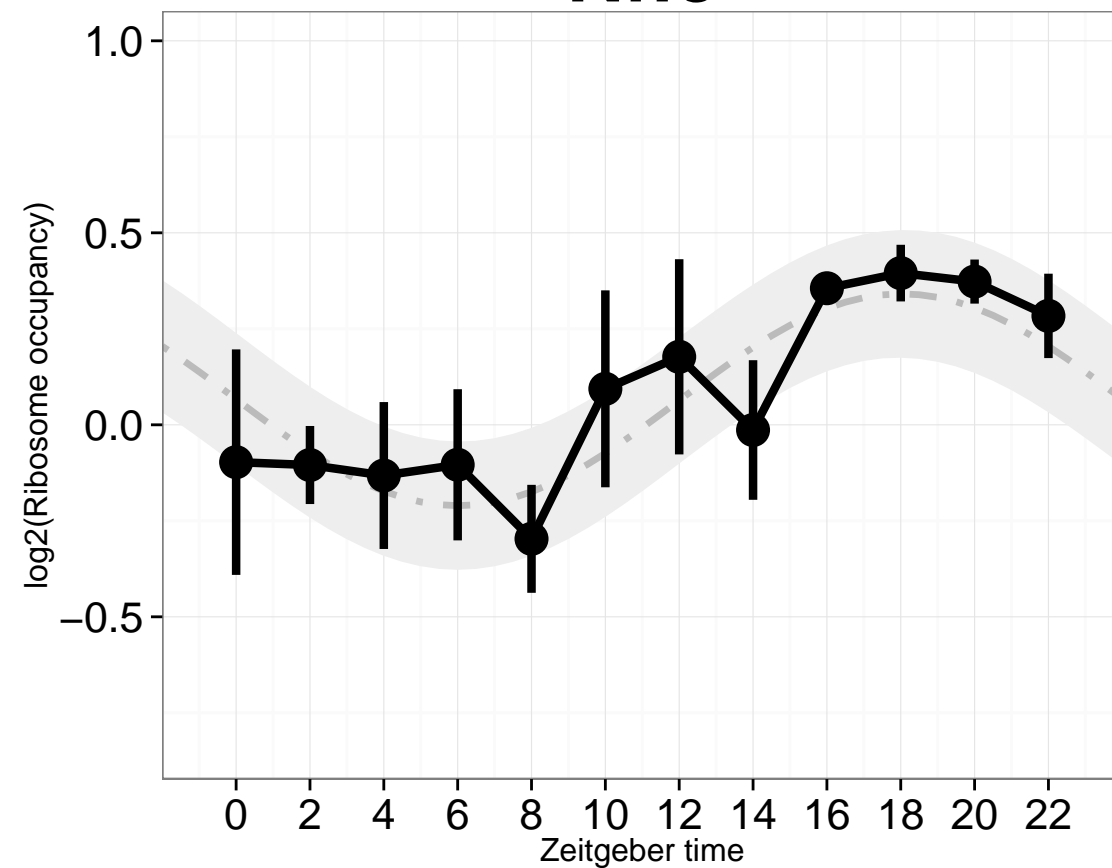

Supplement: Supplementary file 2978 [file 1]

## Gmps

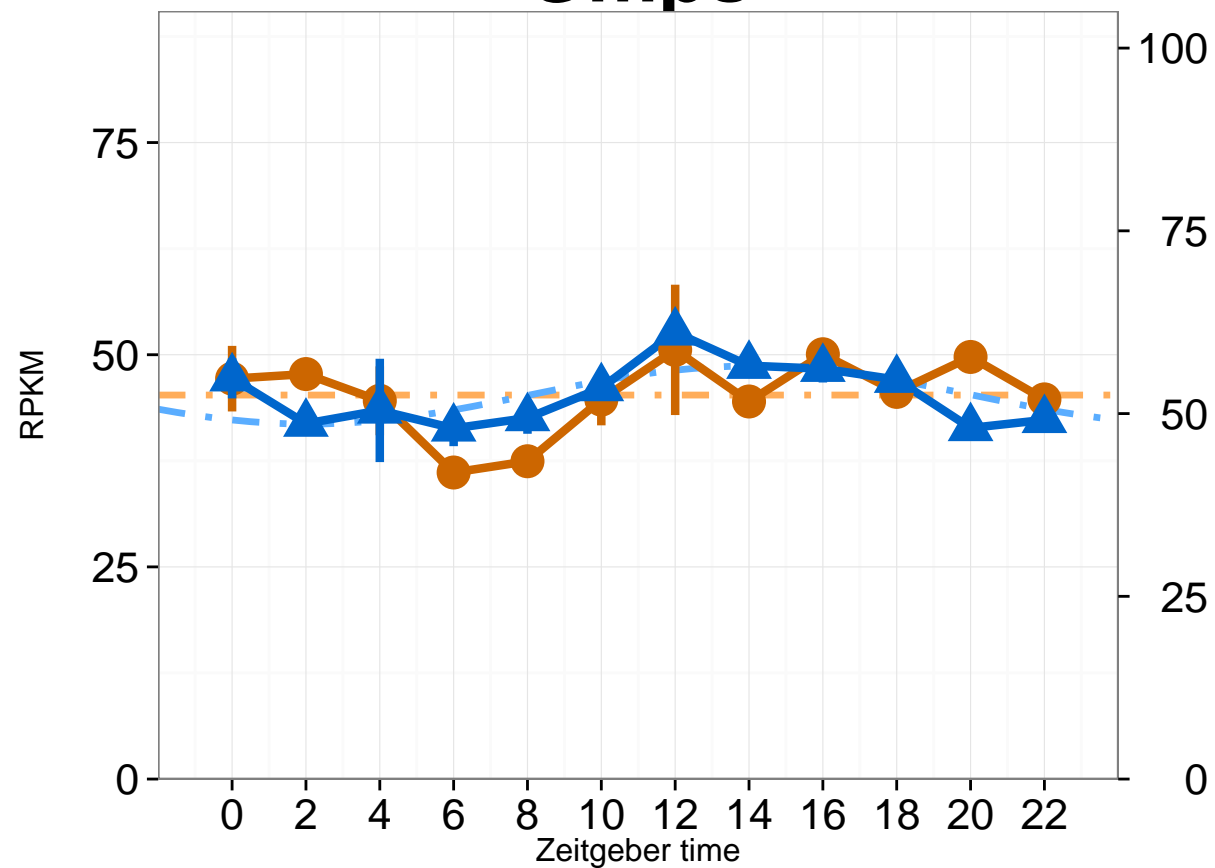

## Gmps

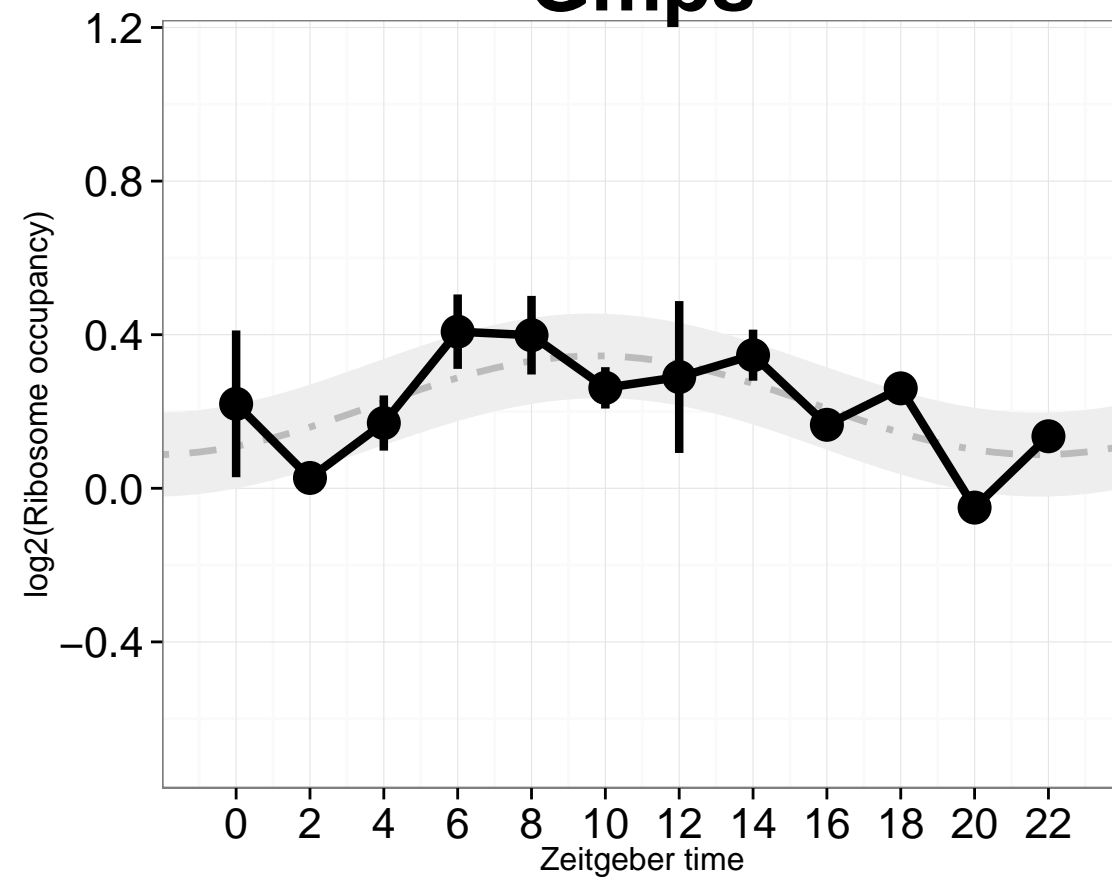

Supplement: Supplementary file 2979 [file 1]

# Tob1

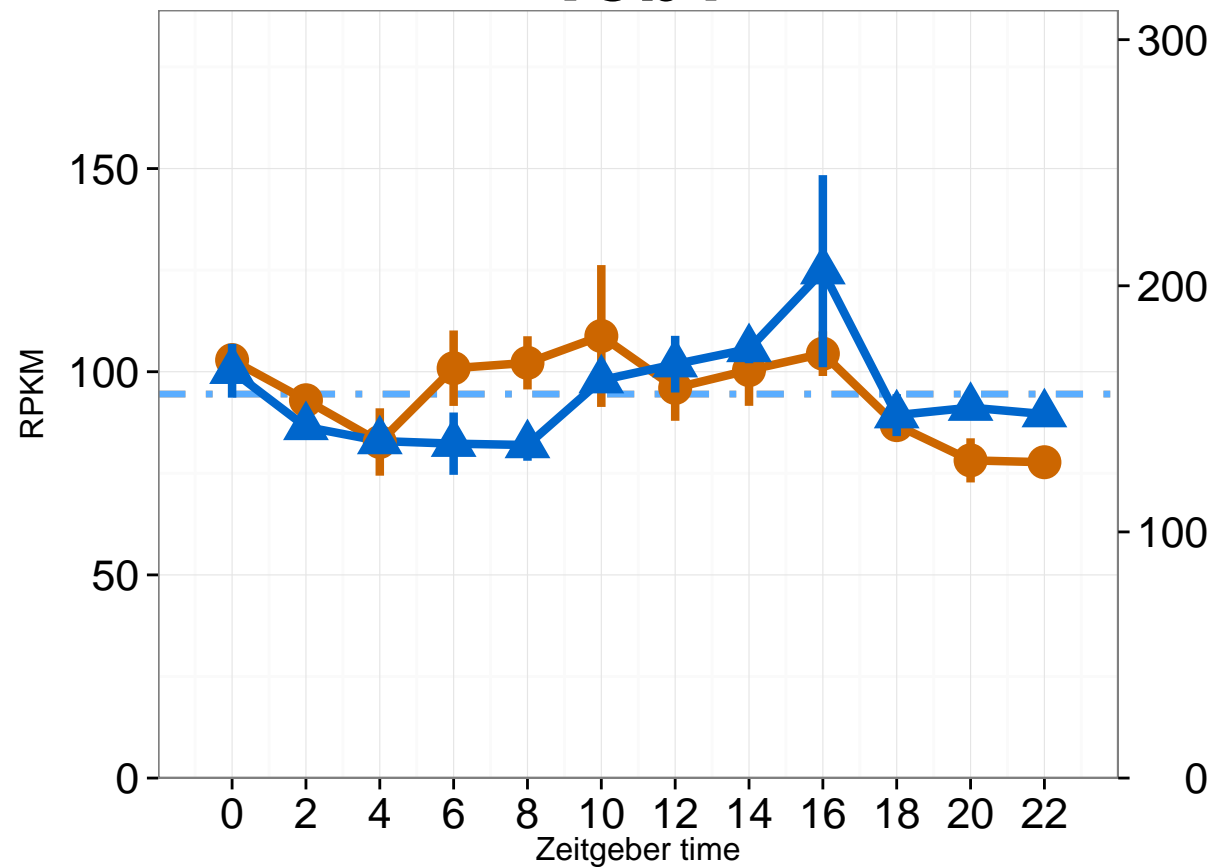

# Tob1

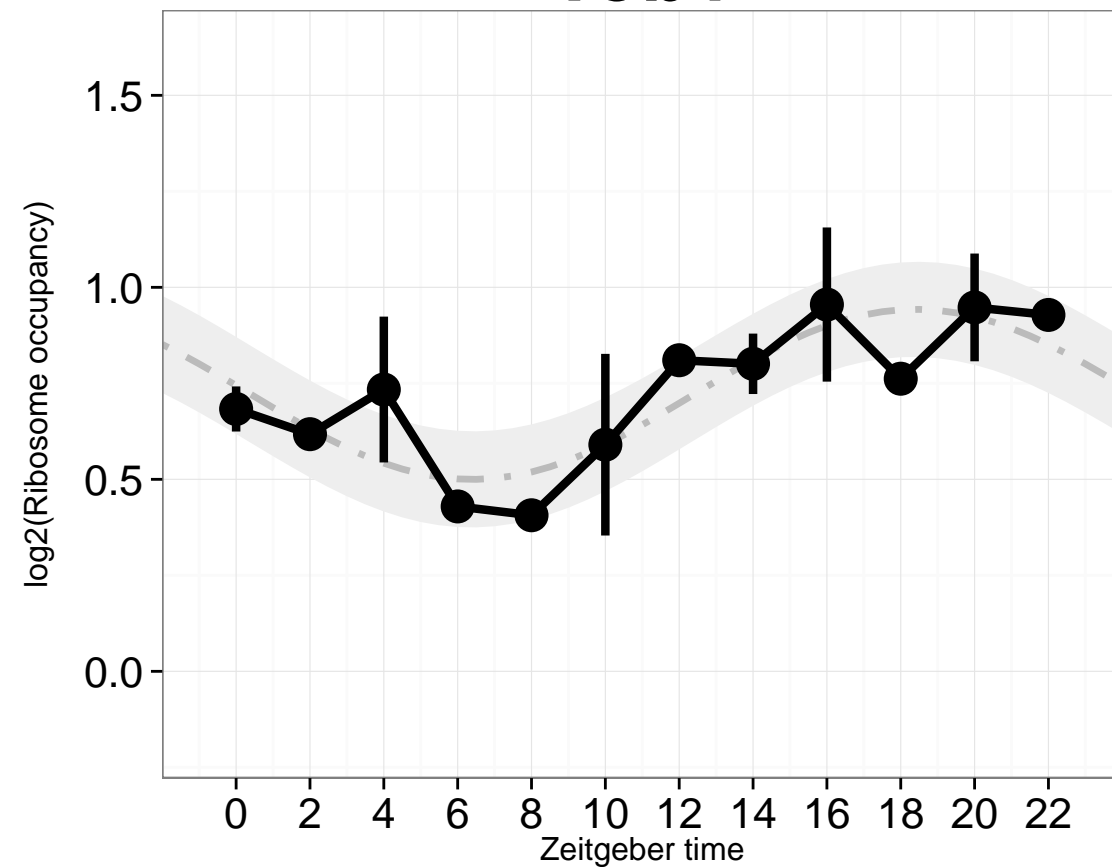

Supplement: Supplementary file 2980 [file 1]

## Grlf1

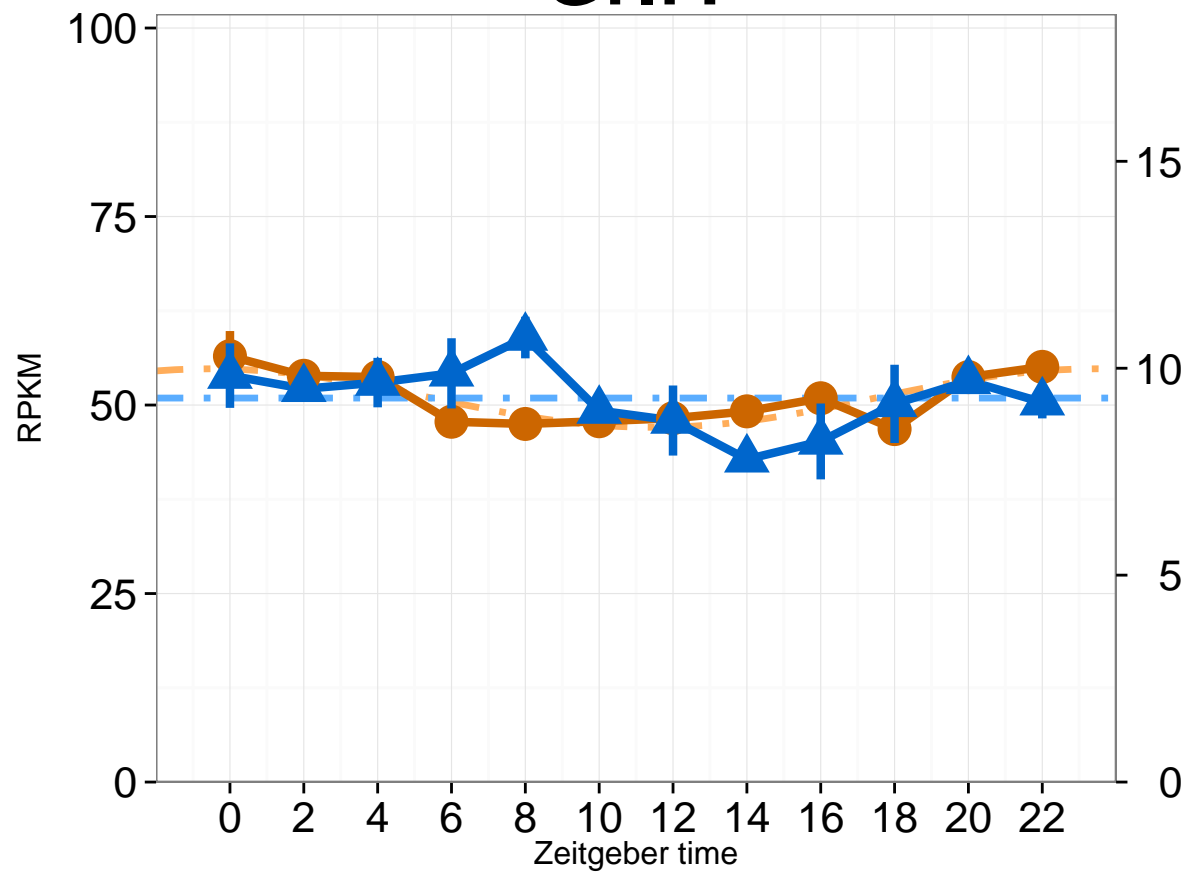

## Grlf1

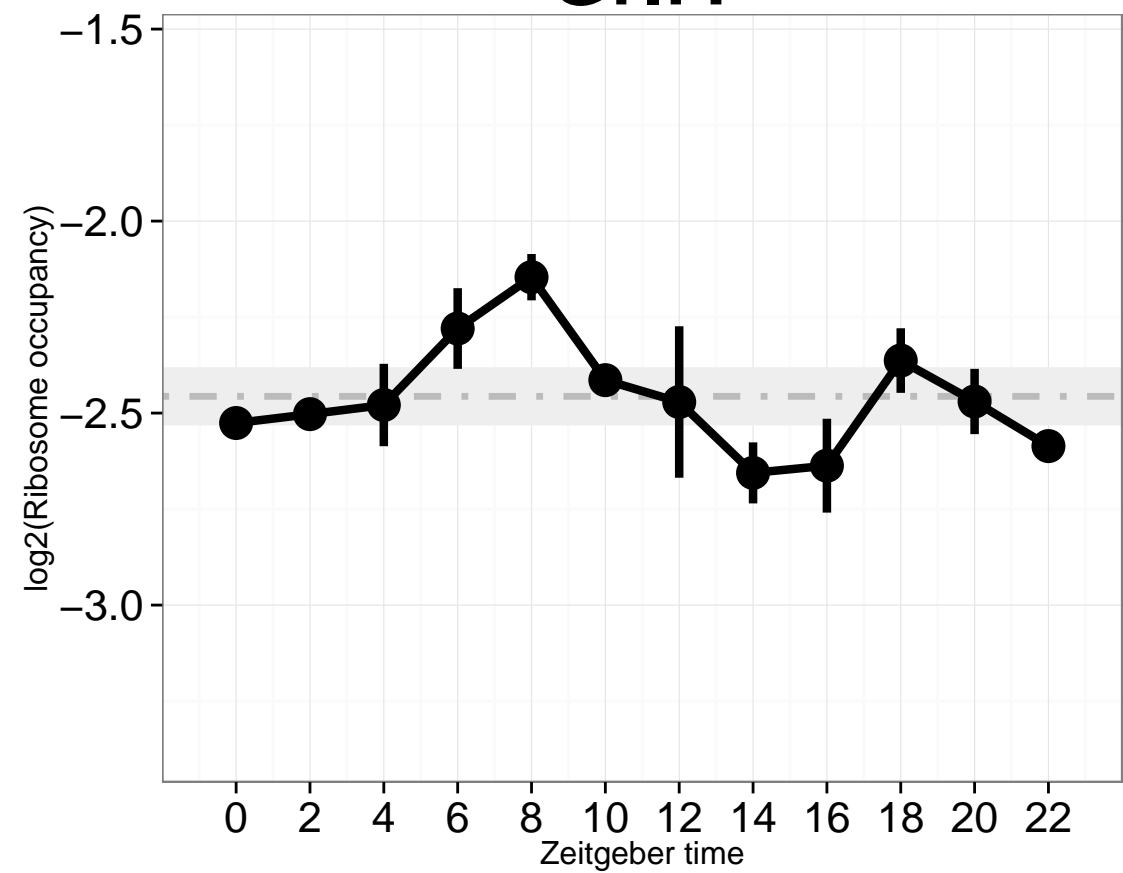

Supplement: Supplementary file 2981 [file 1]

# Arl6ip6

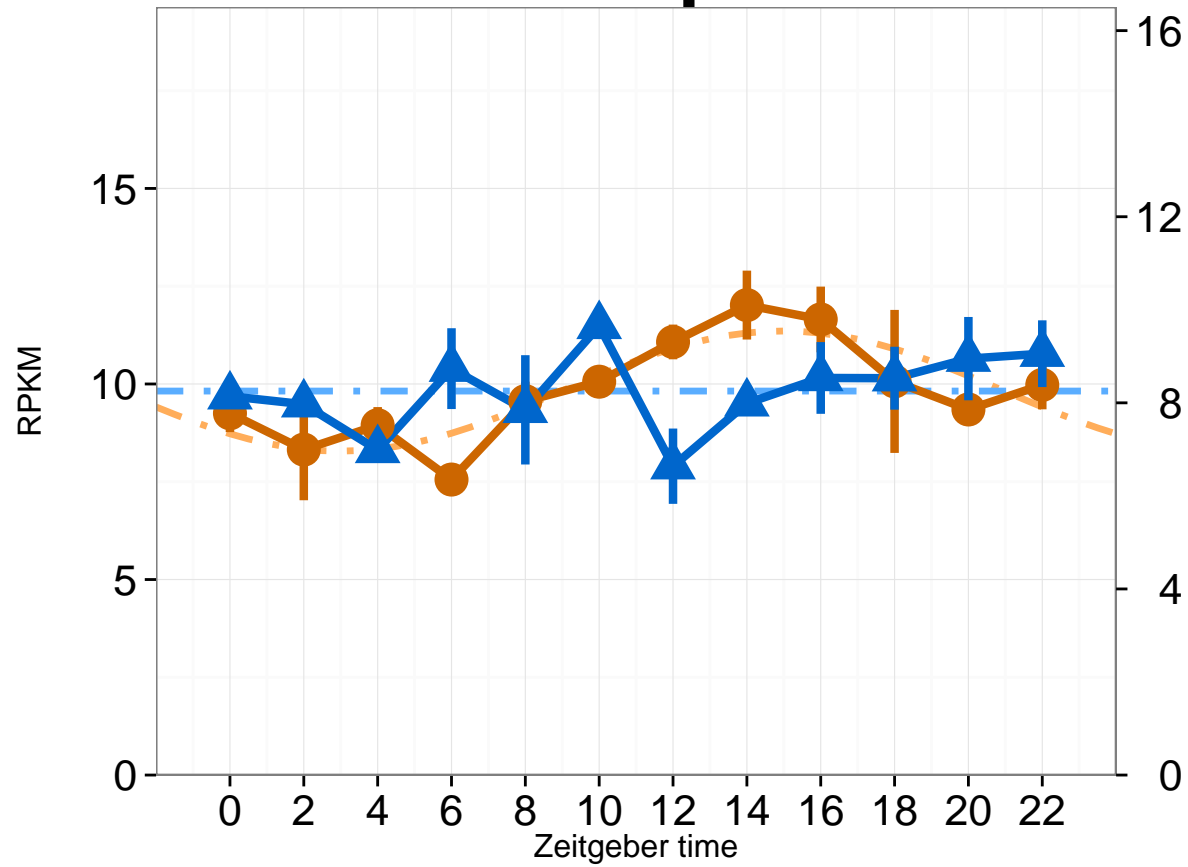

# Arl6ip6

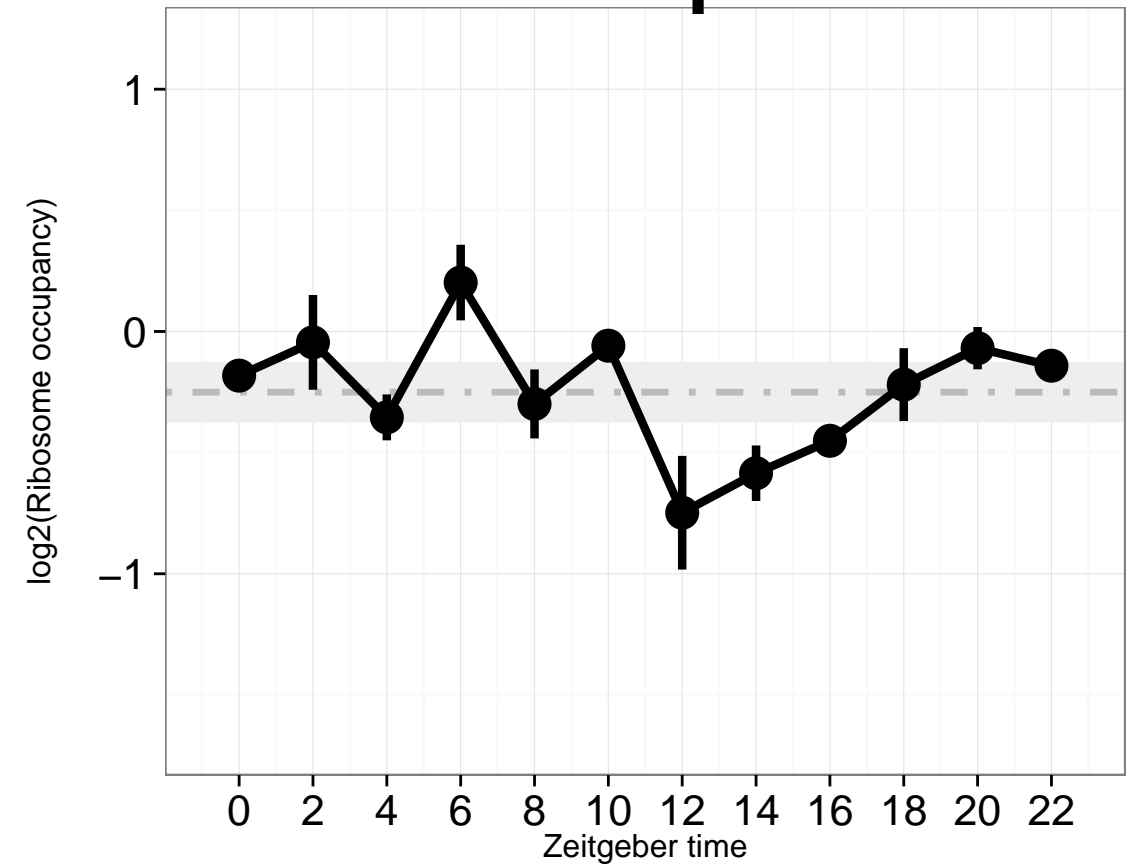

Supplement: Supplementary file 2982 [file 1]

## Lphn2

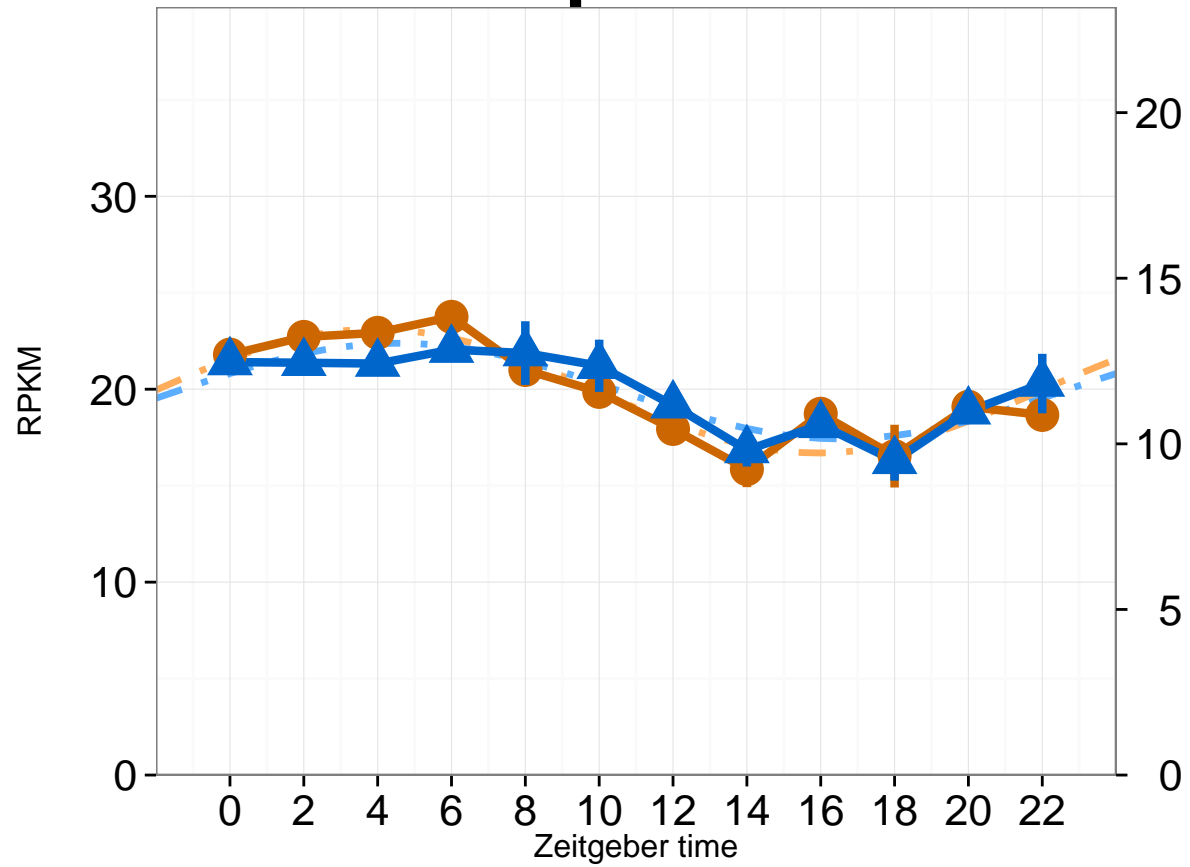

## Lphn2

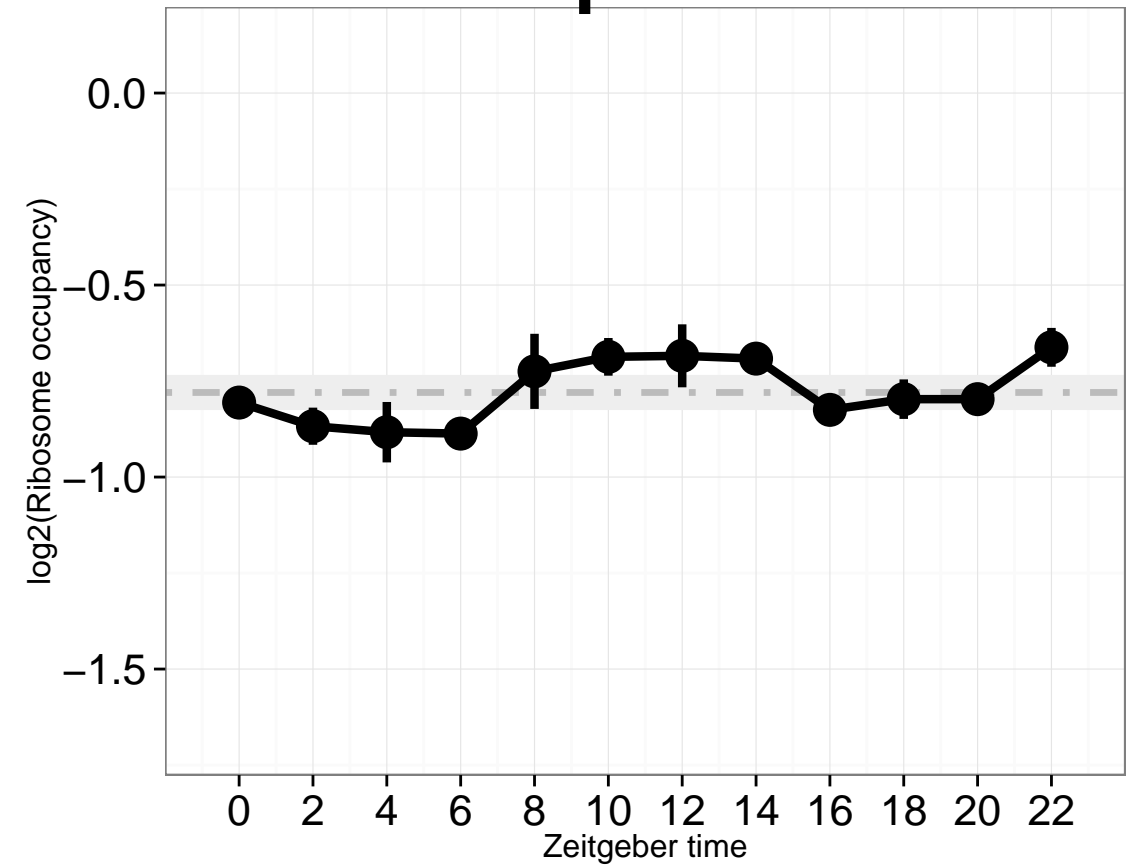

Supplement: Supplementary file 2983 [file 1]

# Pde6a

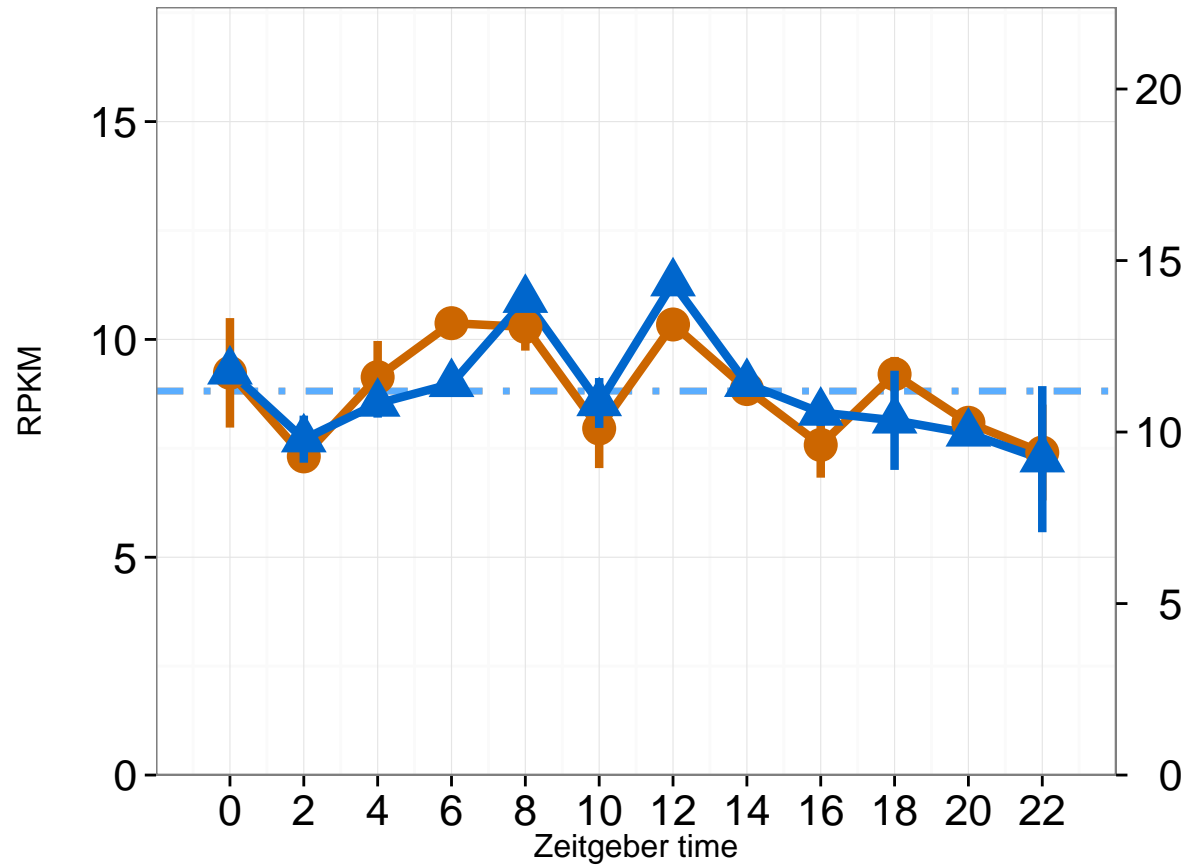

# Pde6a

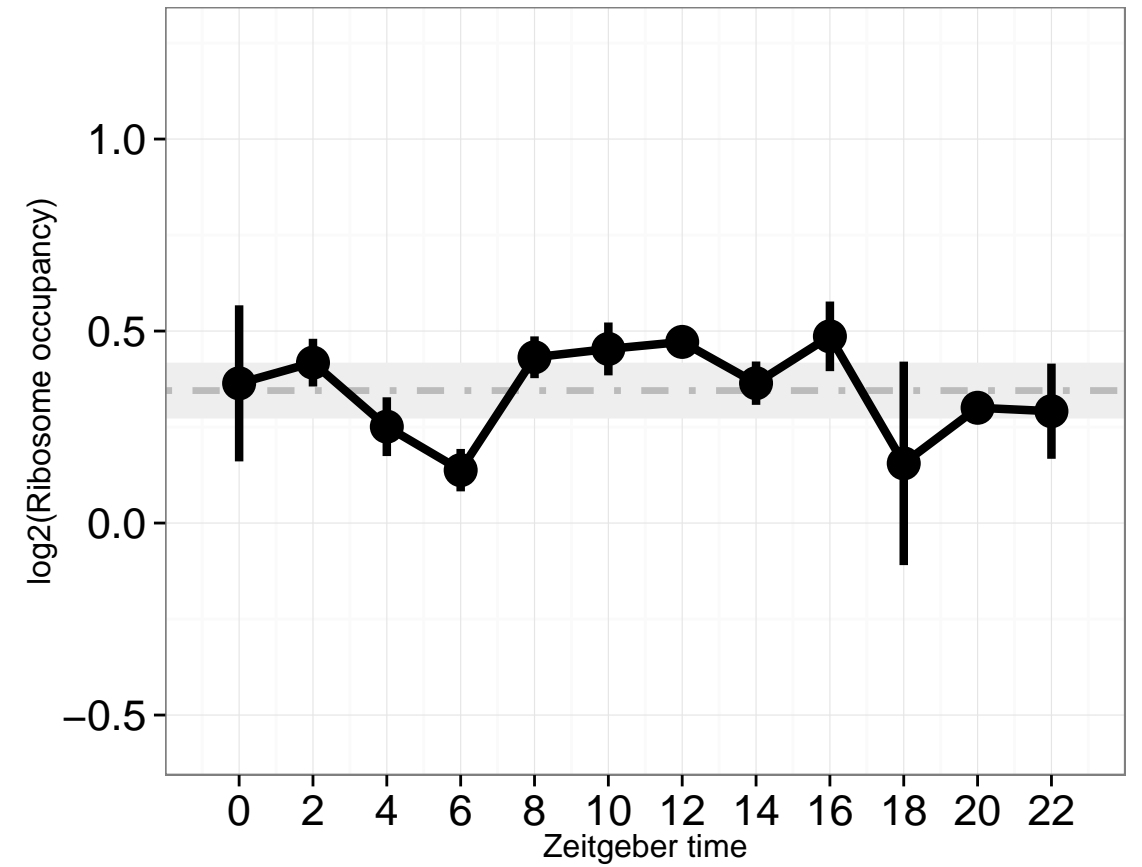

Supplement: Supplementary file 2984 [file 1]

## Tlhc2

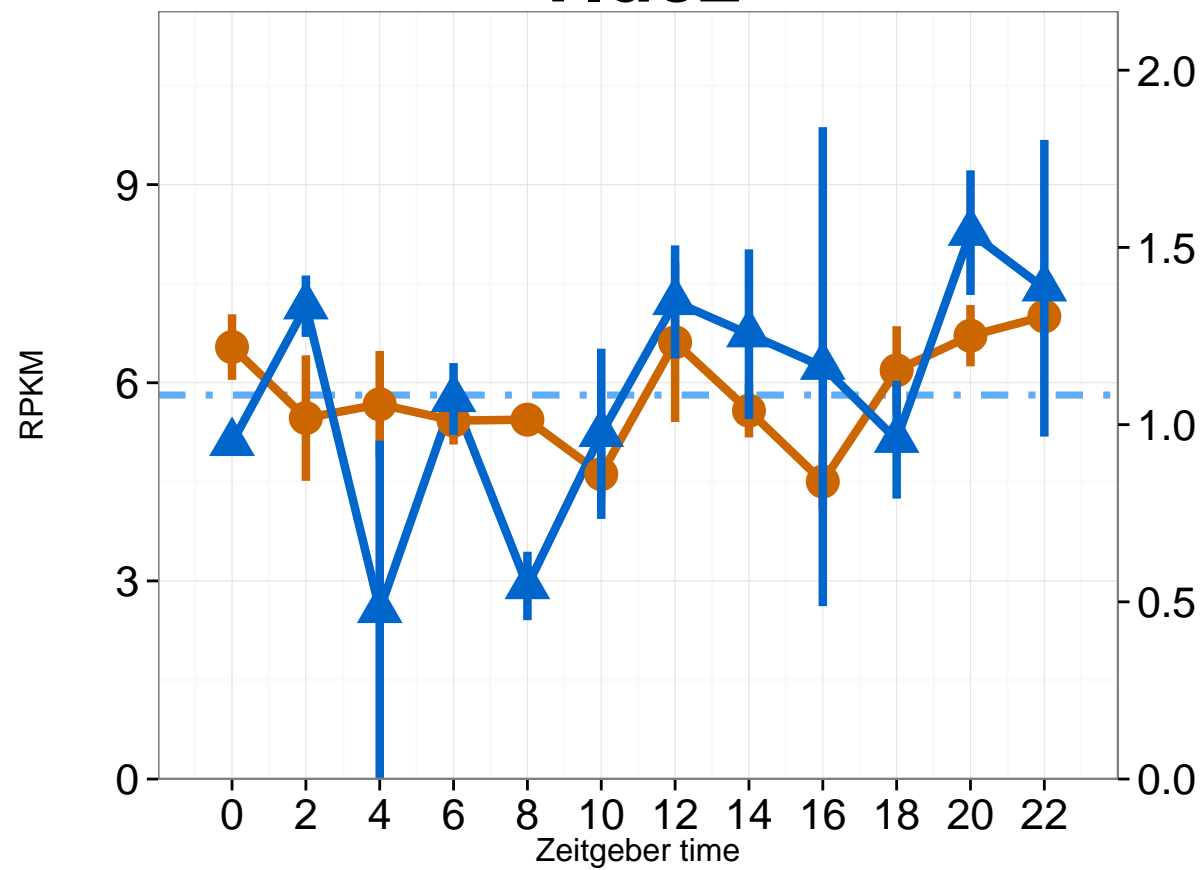

## Tlhc2

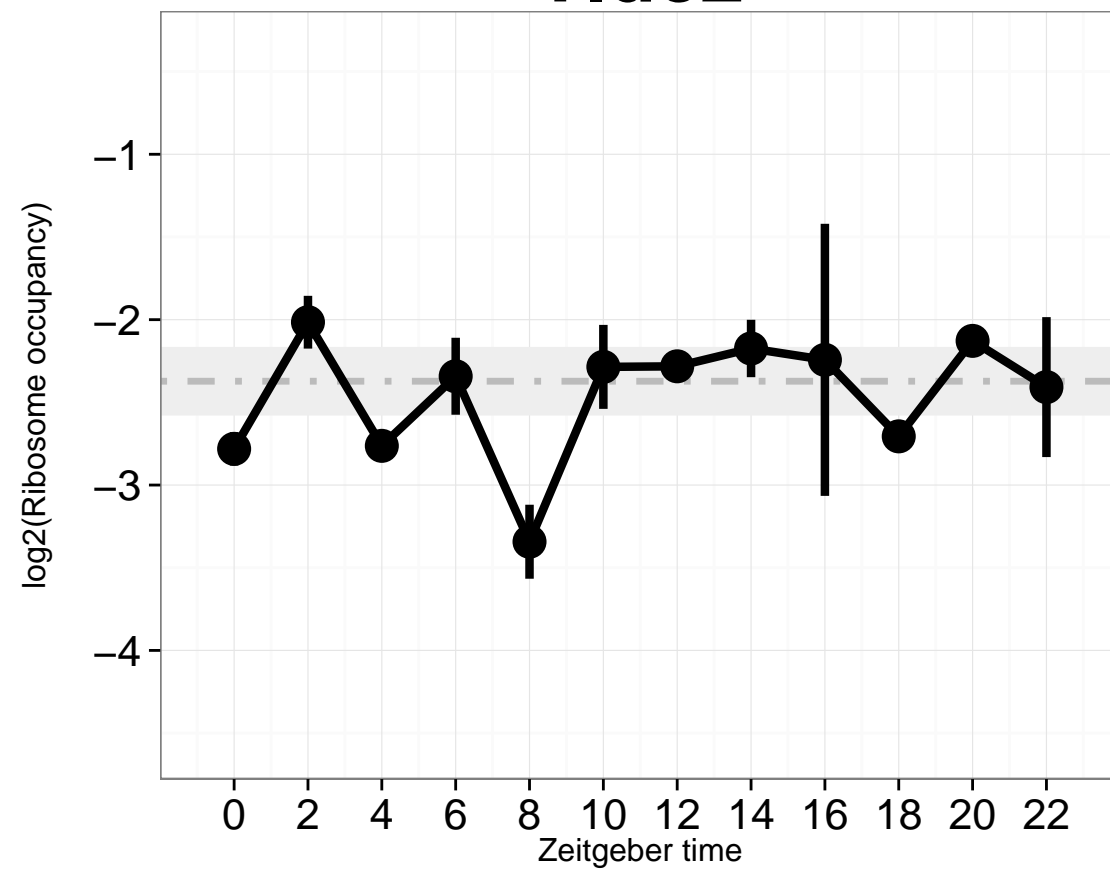

Supplement: Supplementary file 2985 [file 1]

# Stk11ip

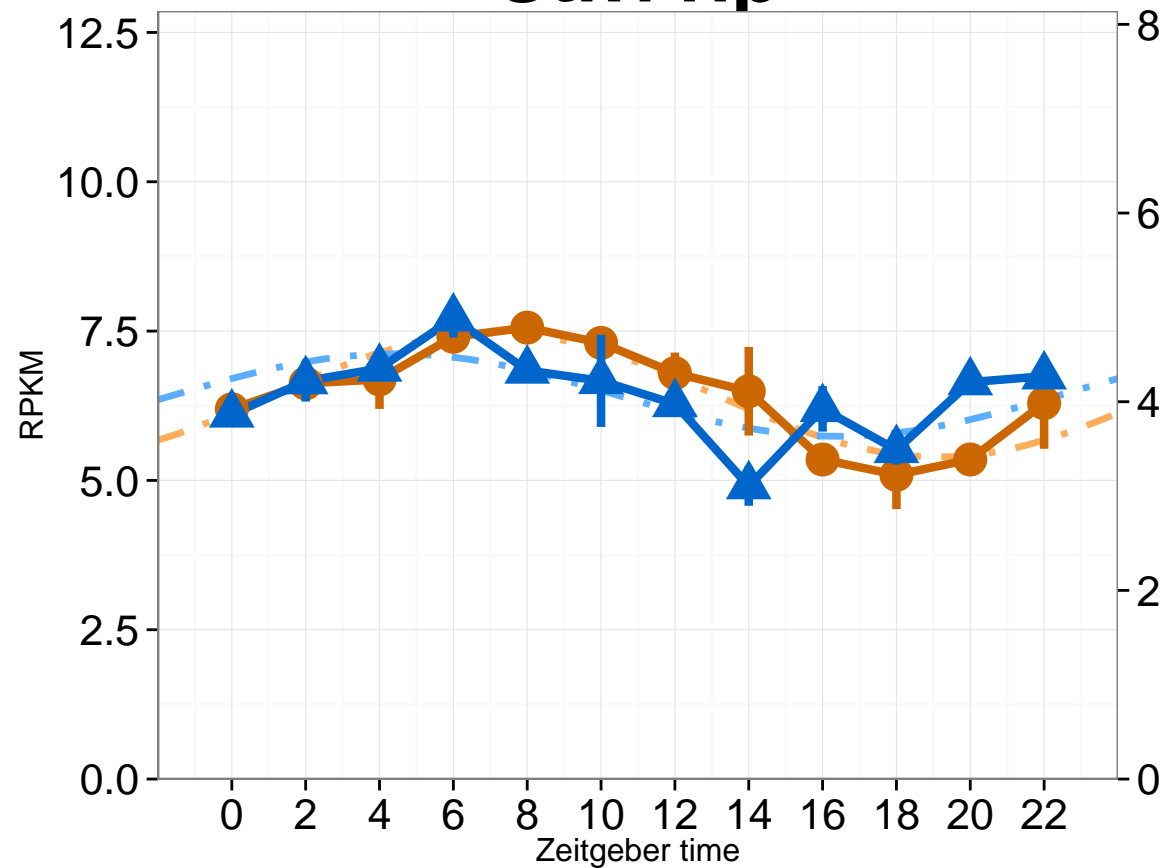

# Stk11ip

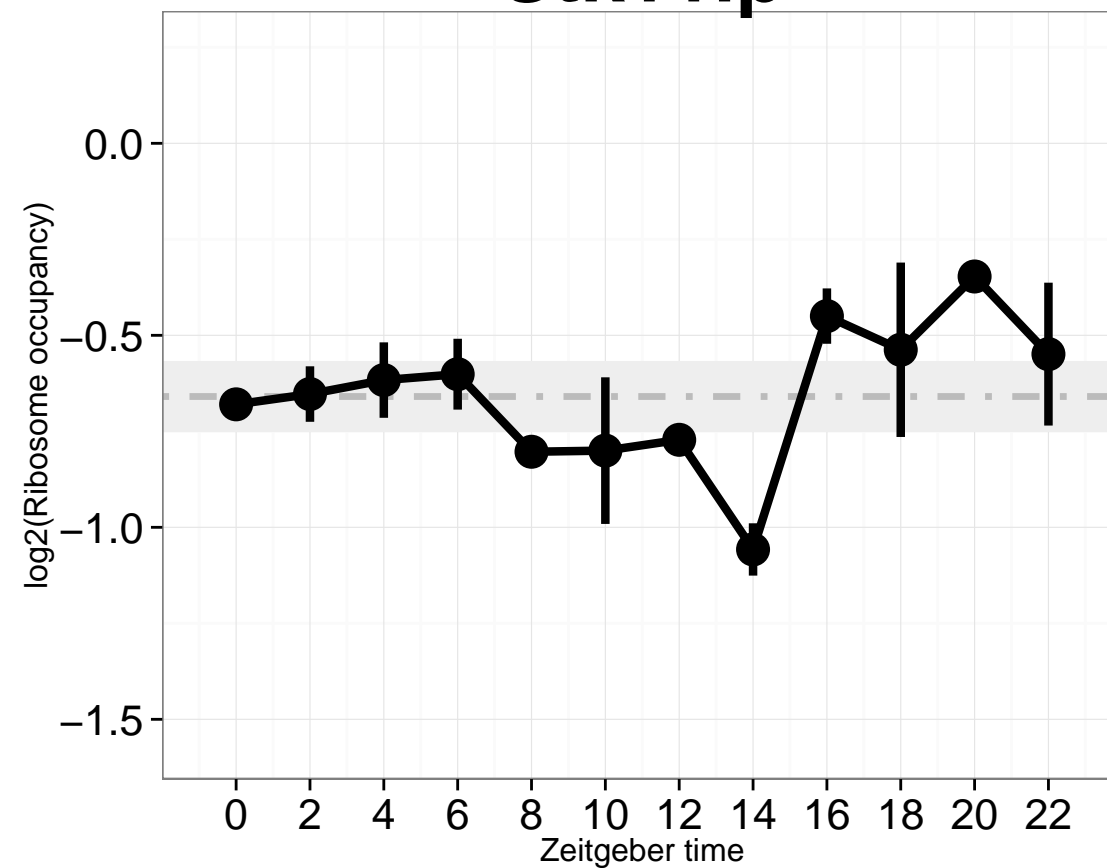

Supplement: Supplementary file 2986 [file 1]

## Gpcpd1

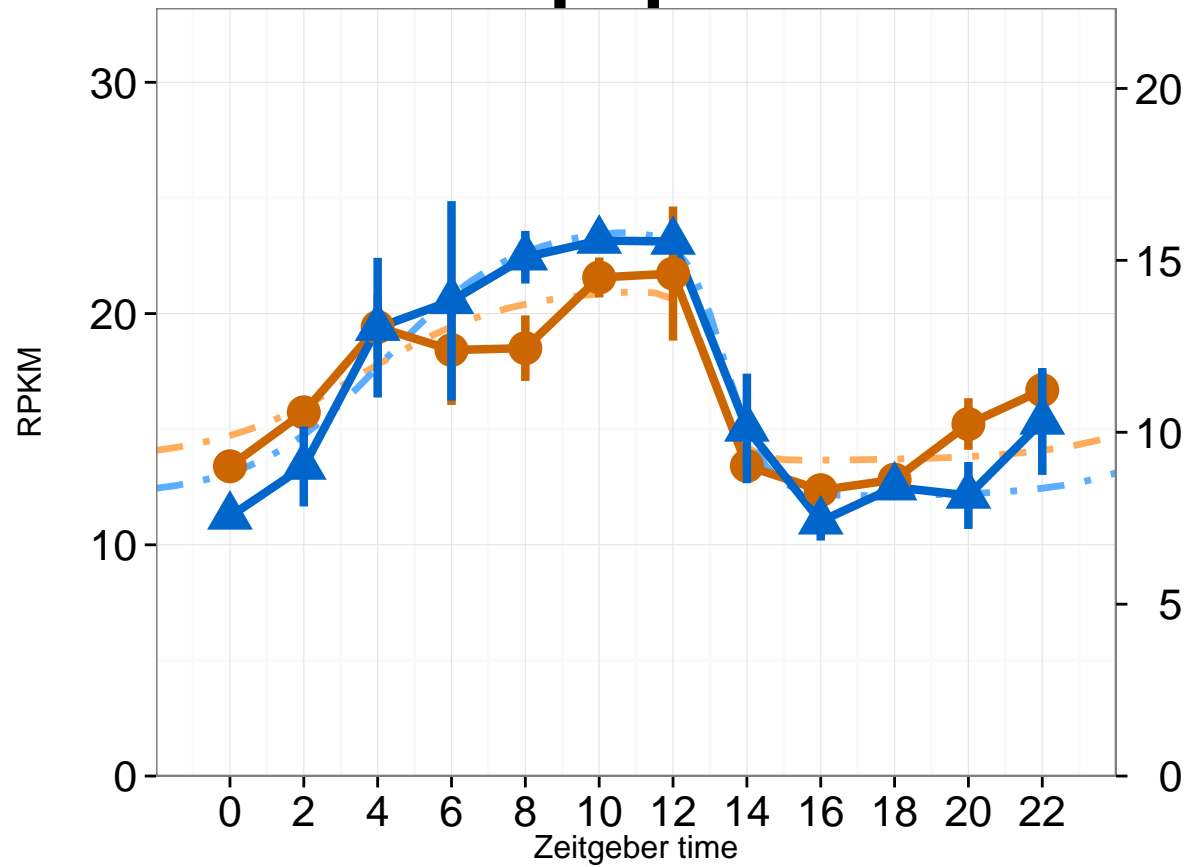

## Gpcpd1

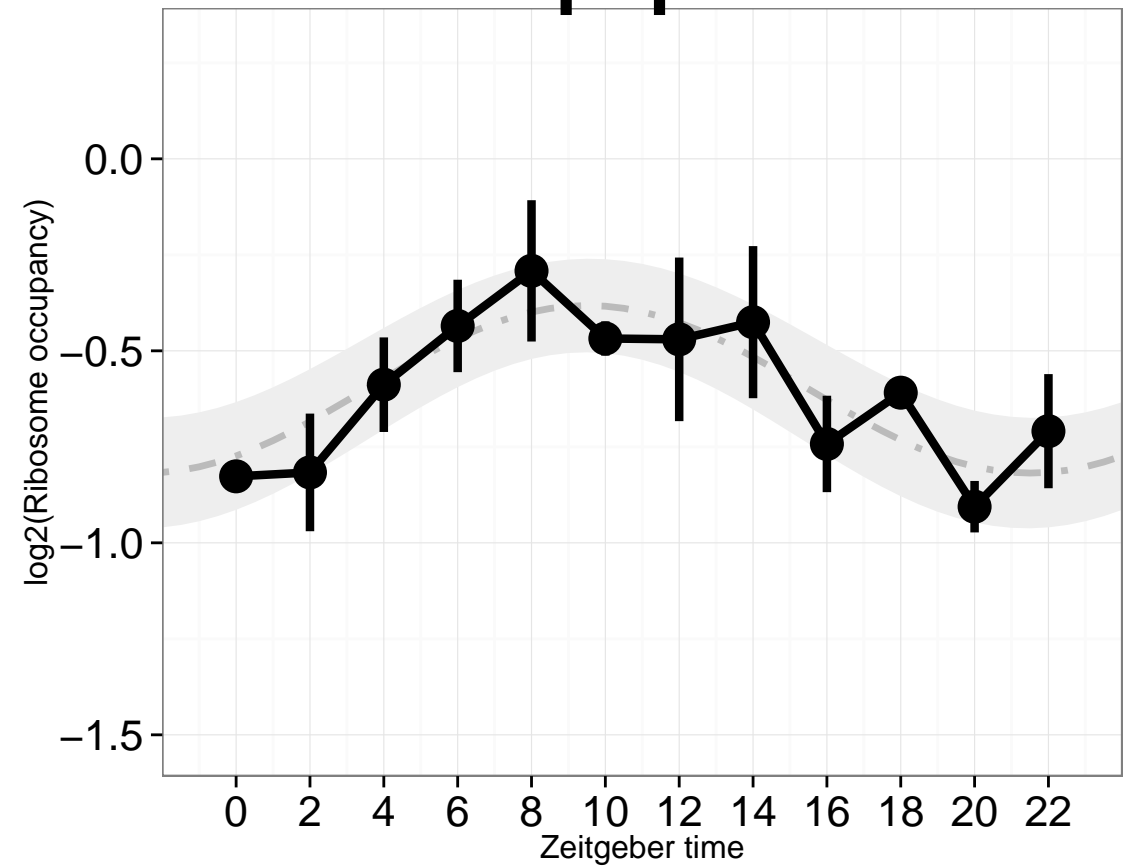

Supplement: Supplementary file 2987 [file 1]

## Deptor

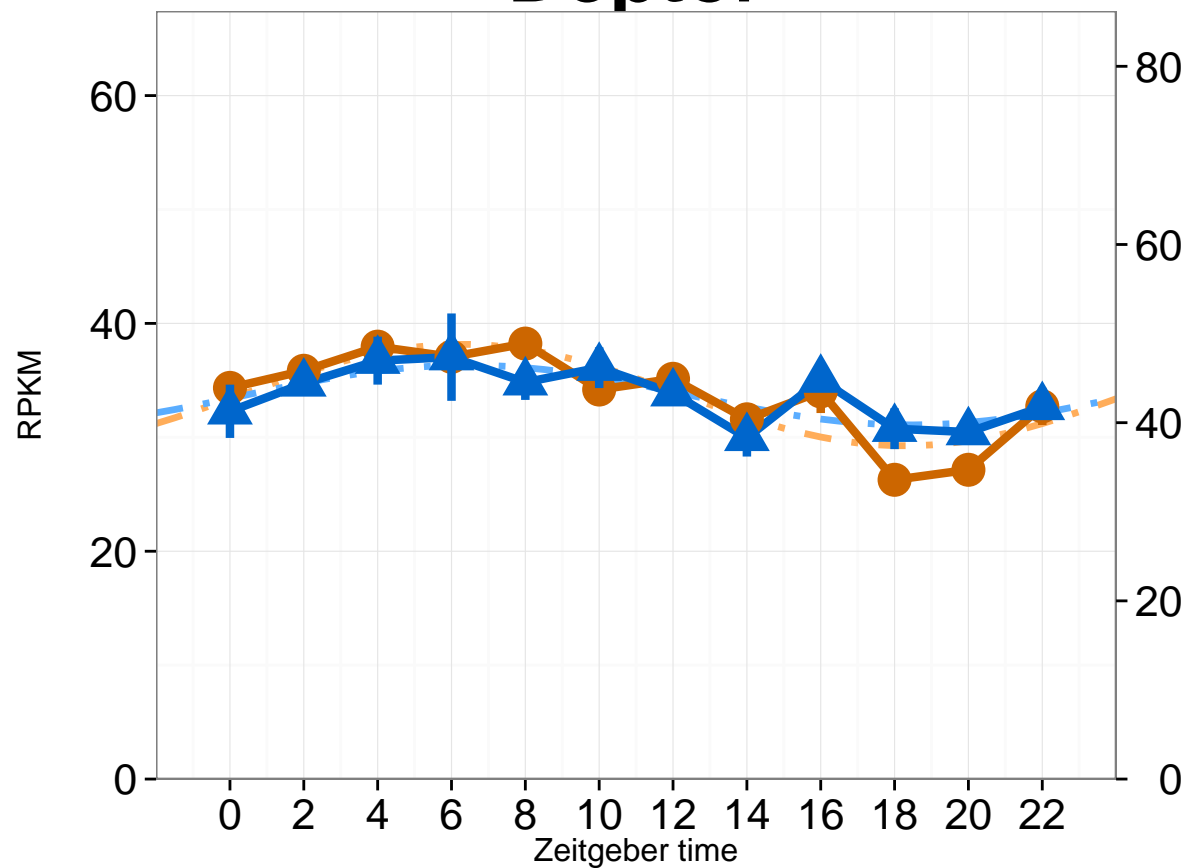

## Deptor

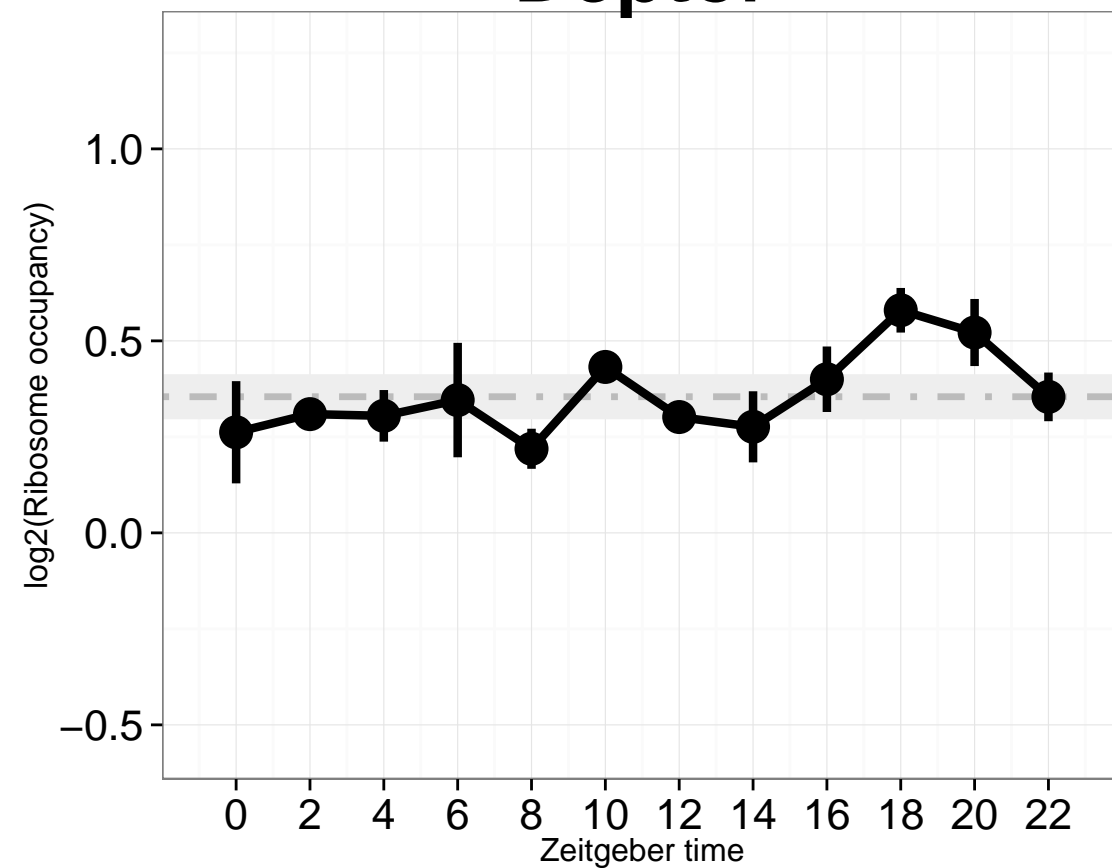

Supplement: Supplementary file 2988 [file 1]

## Nelfe

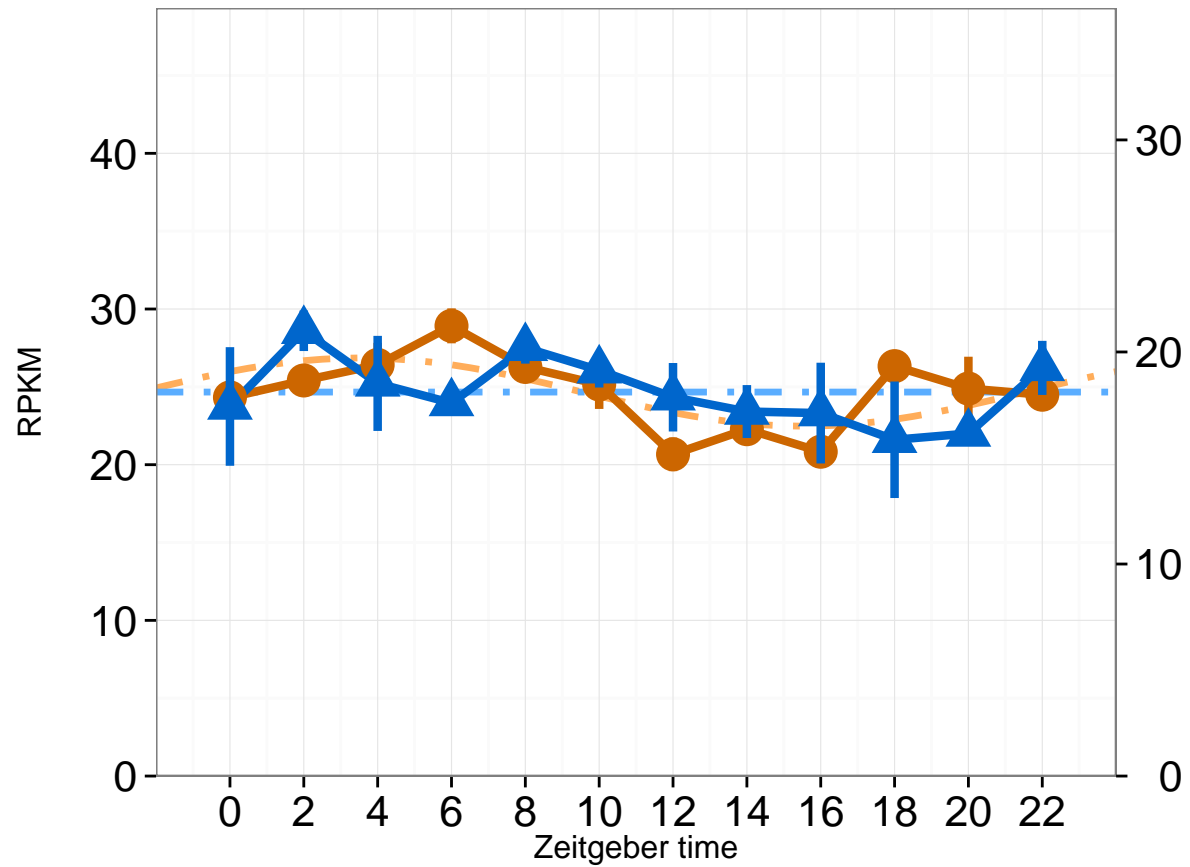

## Nelfe

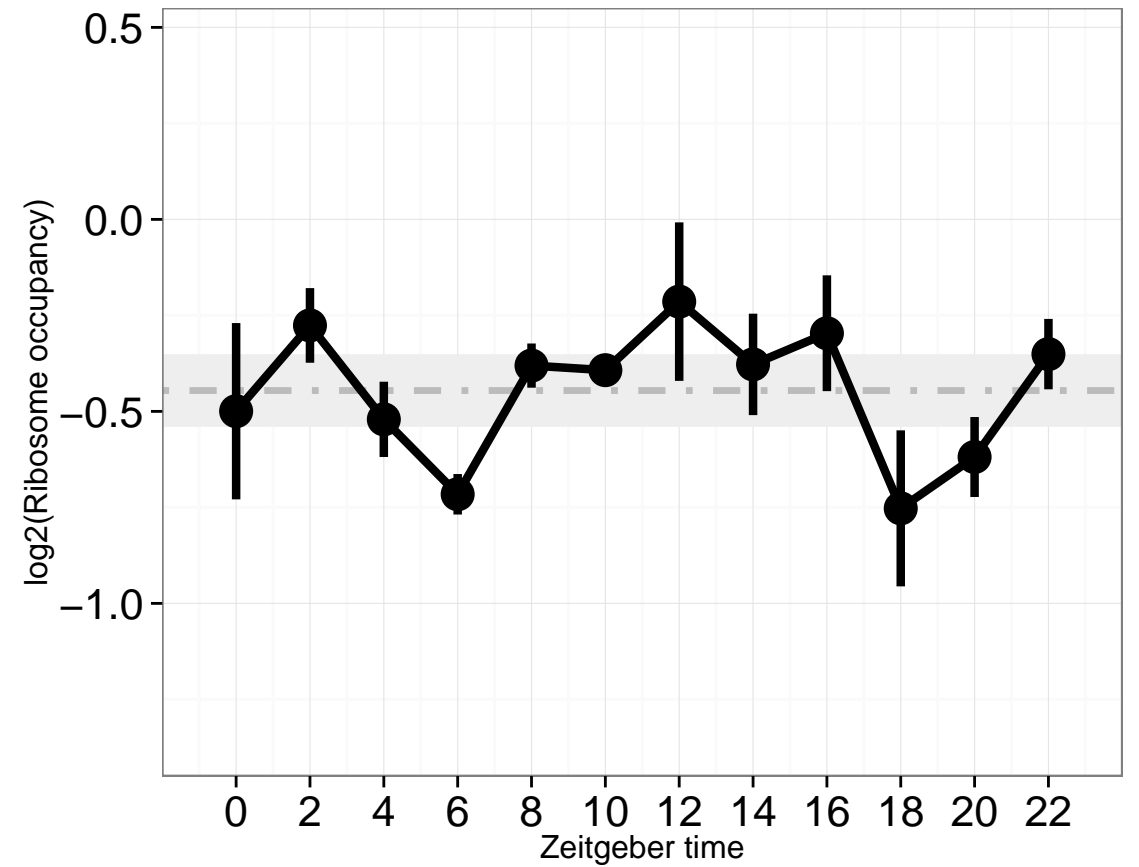

Supplement: Supplementary file 2989 [file 1]

# Tbc1d32

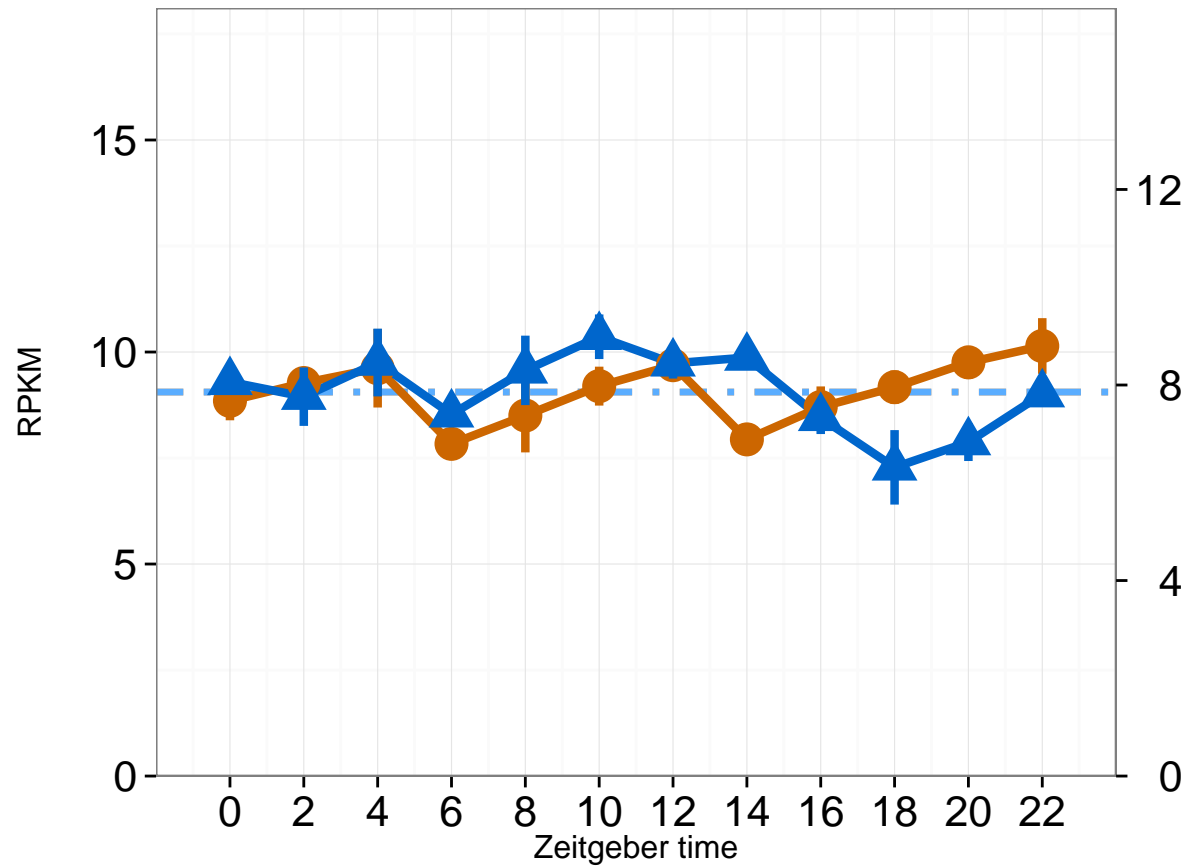

# Tbc1d32

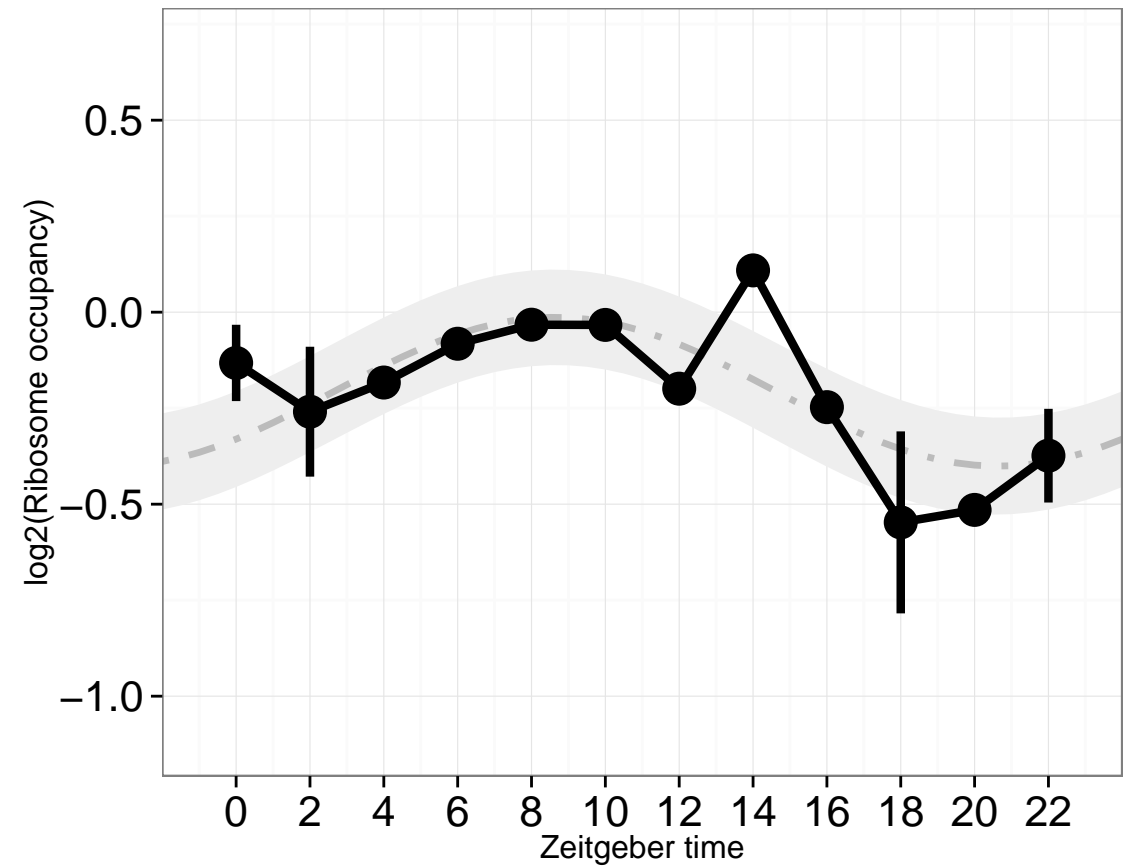

Supplement: Supplementary file 2990 [file 1]

## Camkk2

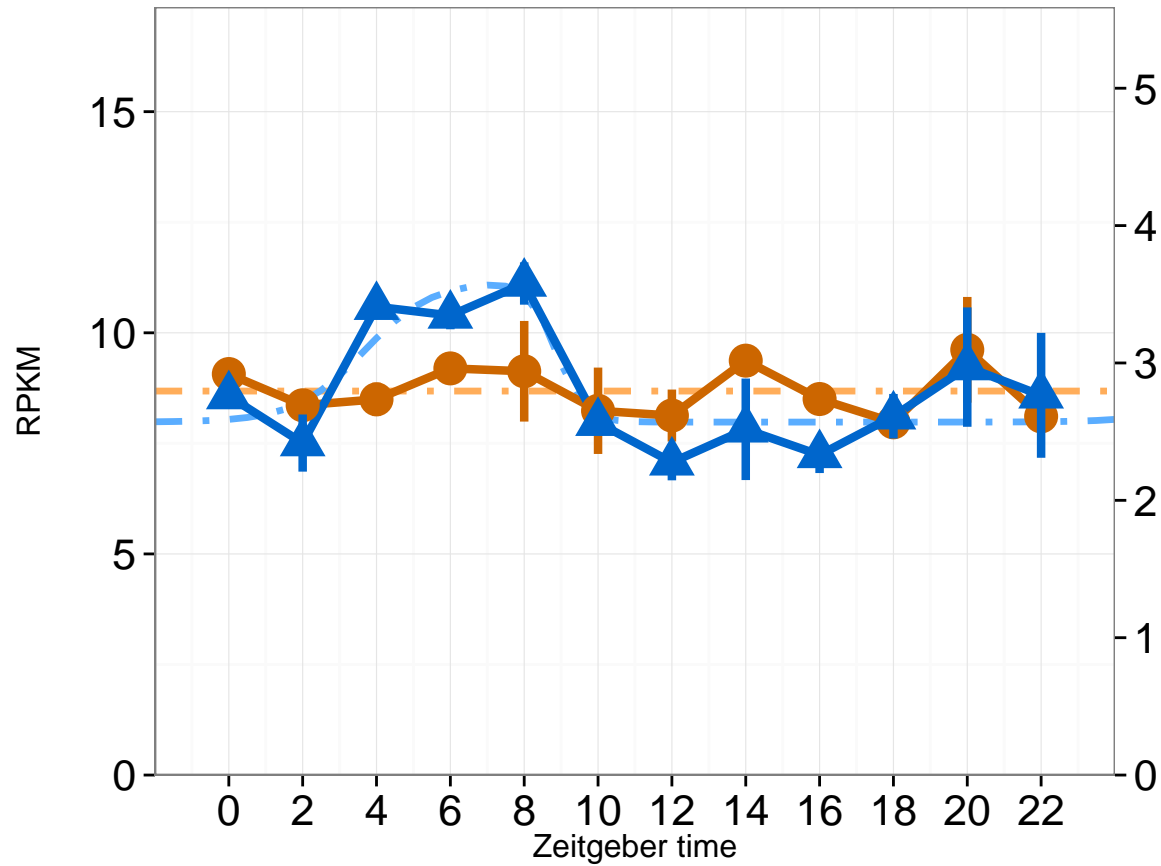

## Camkk2

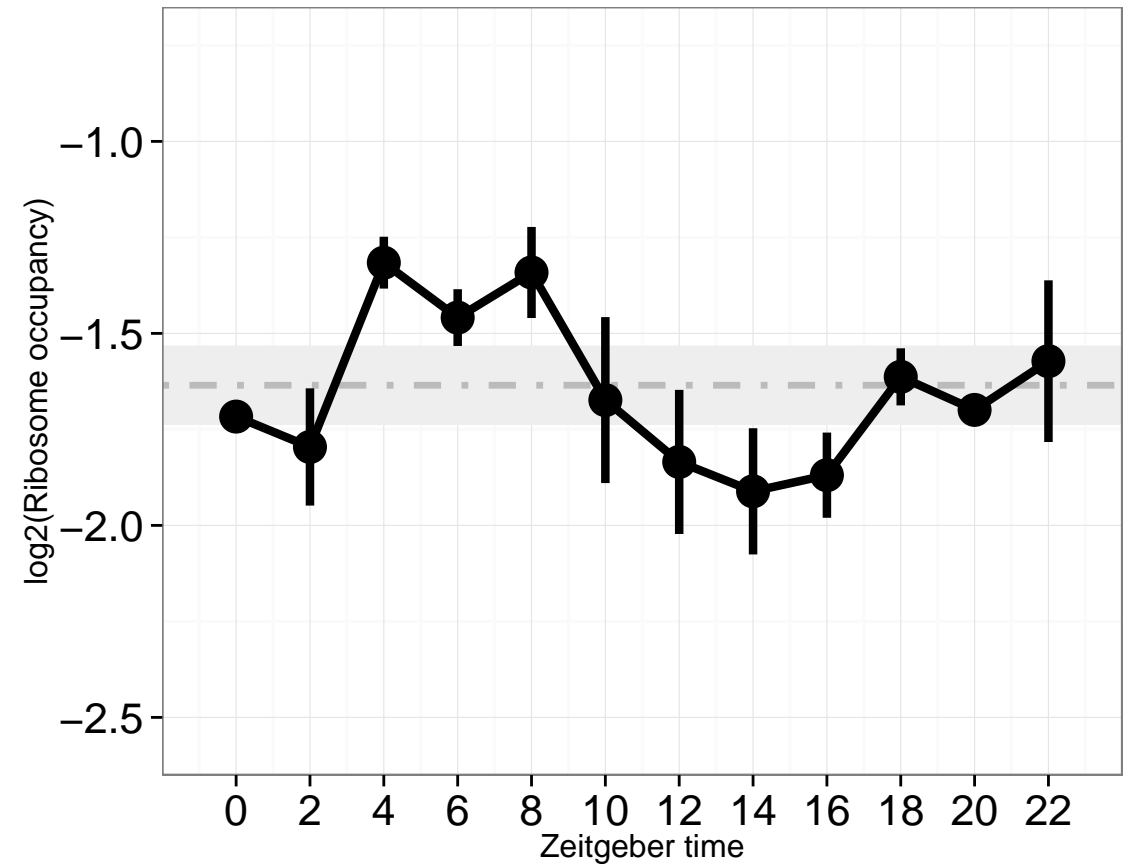

Supplement: Supplementary file 2991 [file 1]

## Slc35f2

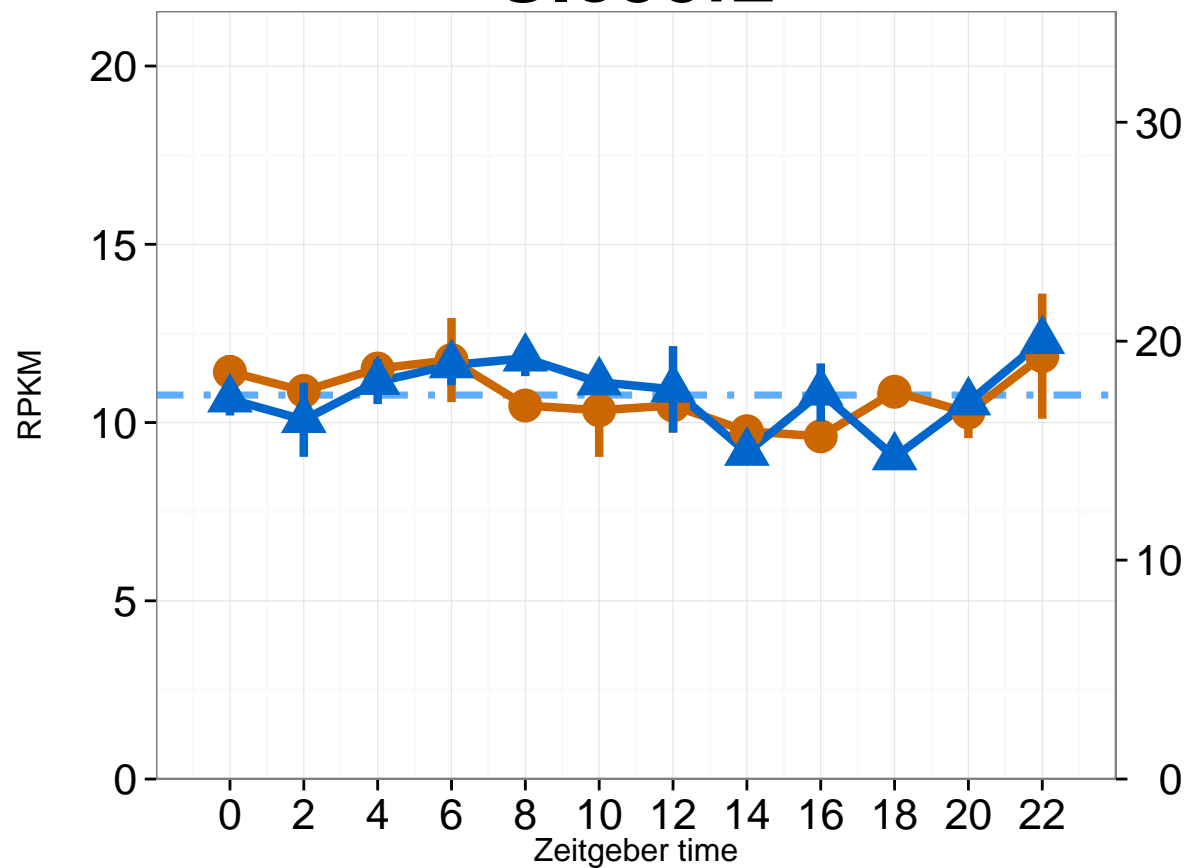

## Slc35f2

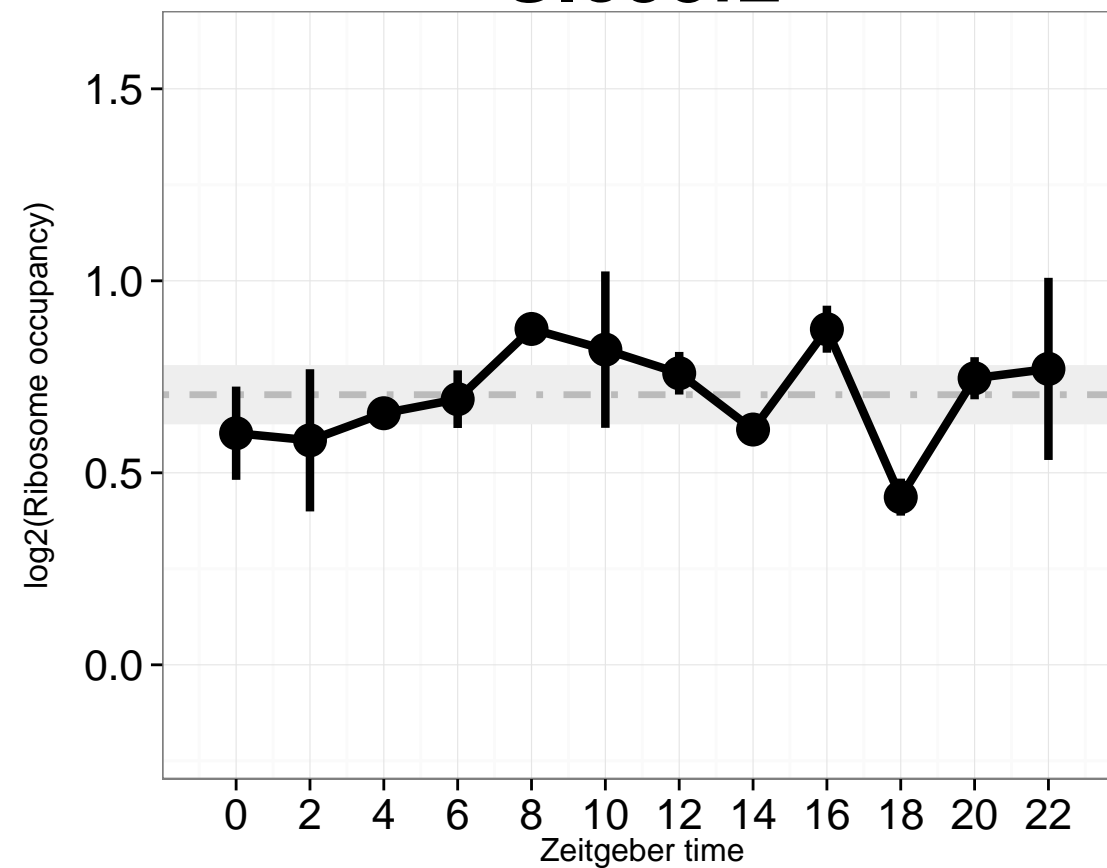

Supplement: Supplementary file 2992 [file 1]

## H2-DMb1

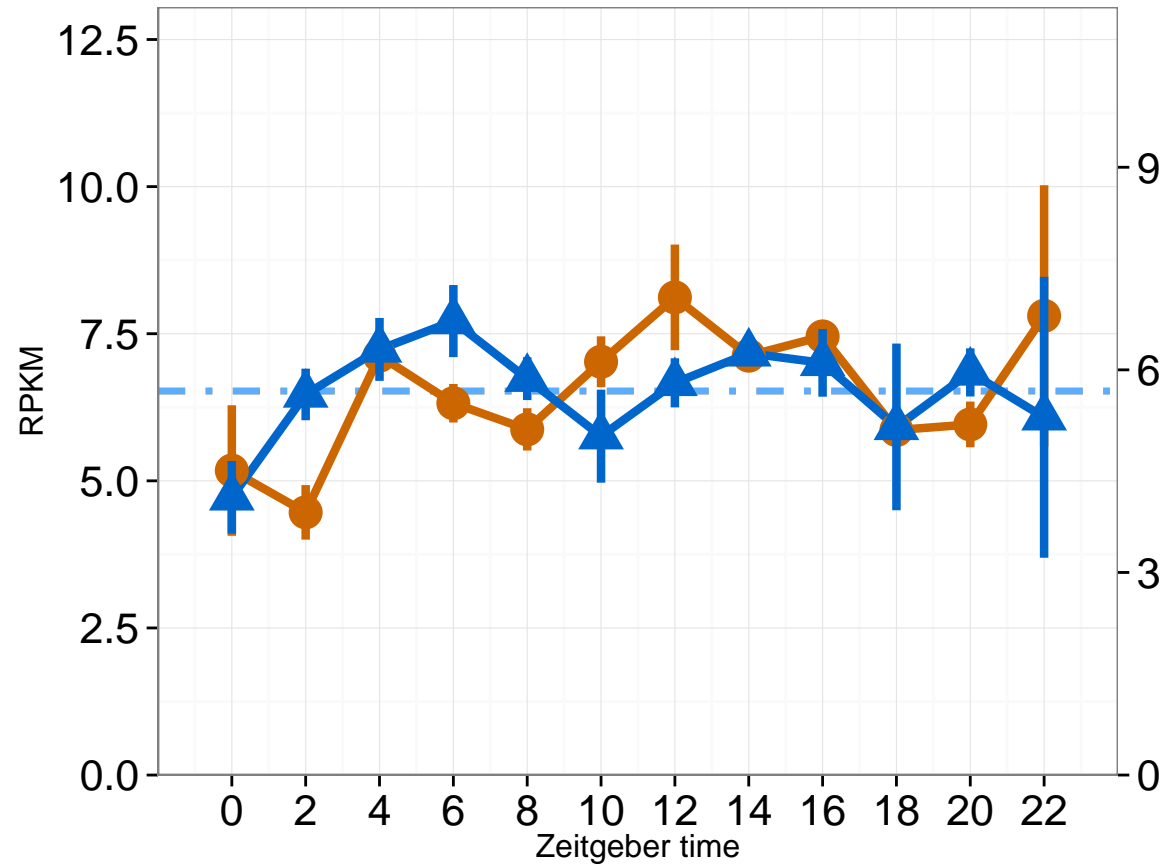

## H2-DMb1

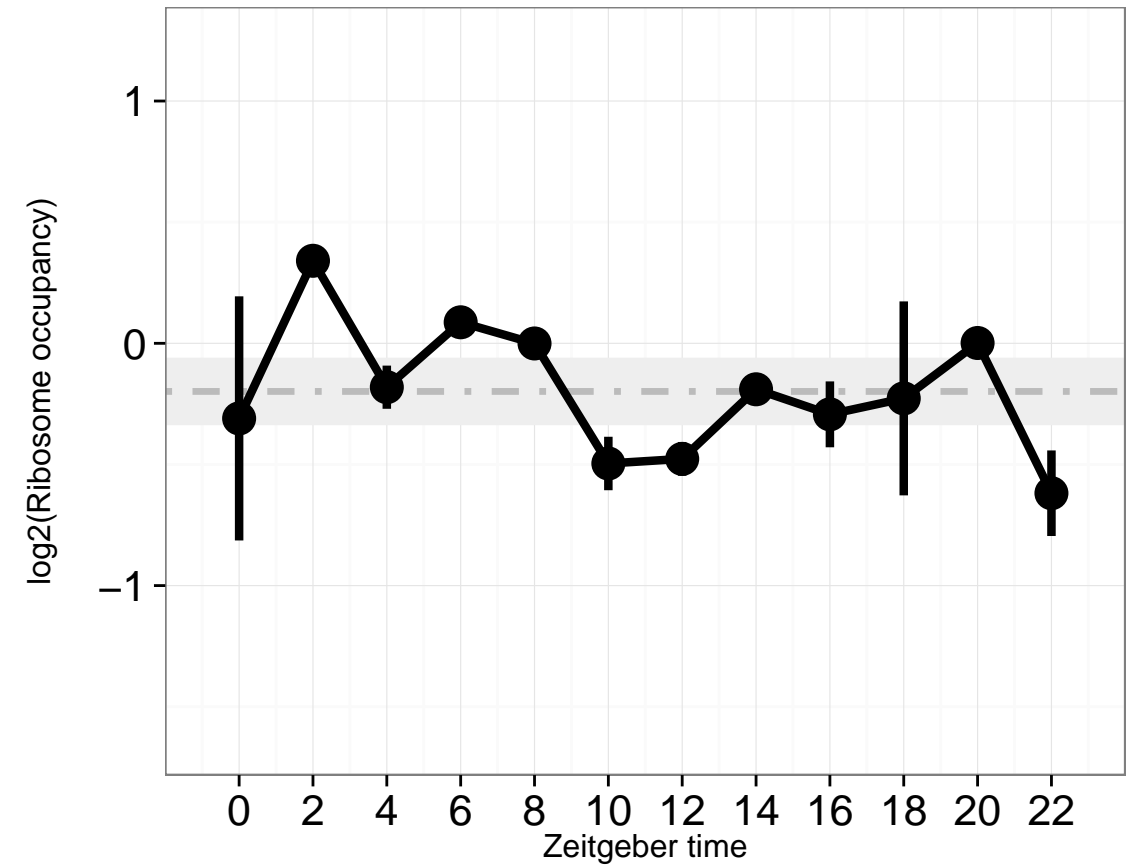

Supplement: Supplementary file 2993 [file 1]

# Anapc13

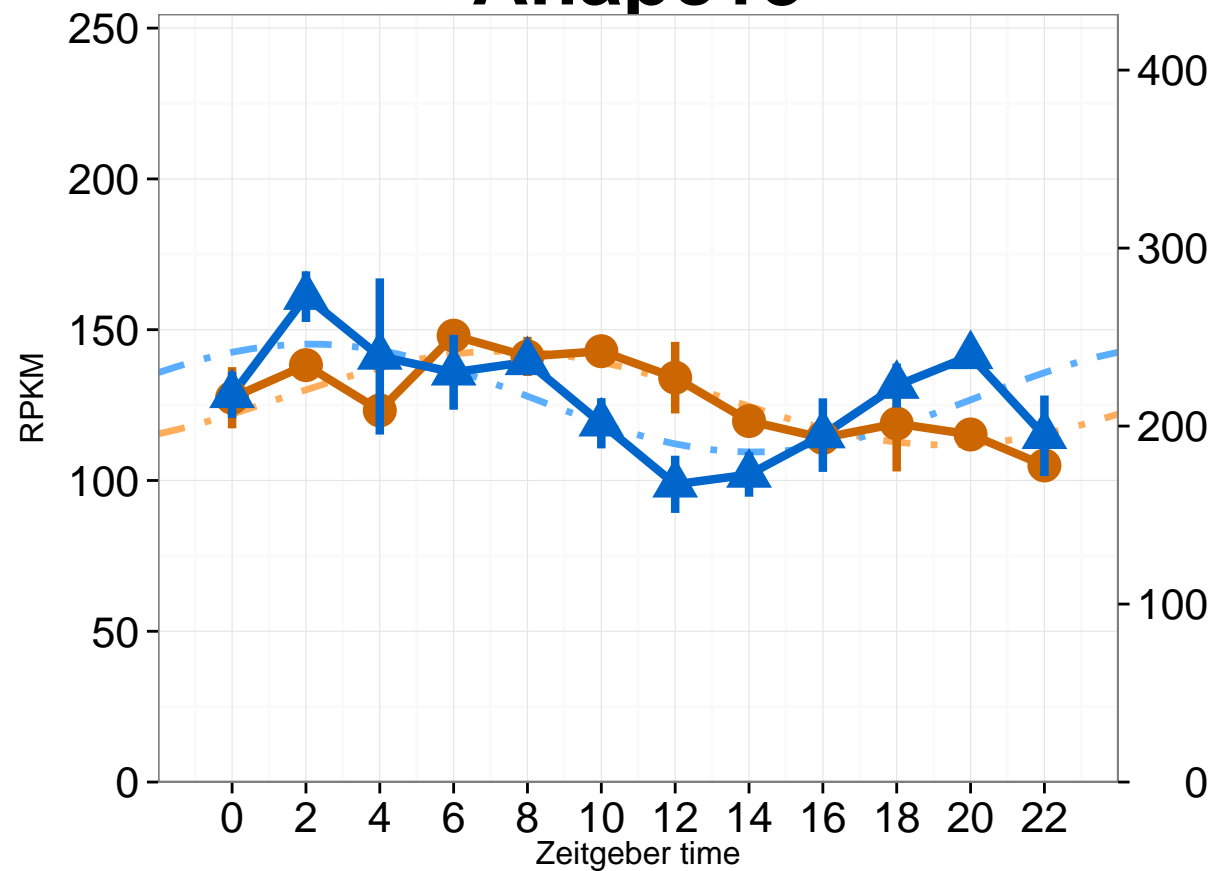

# Anapc13

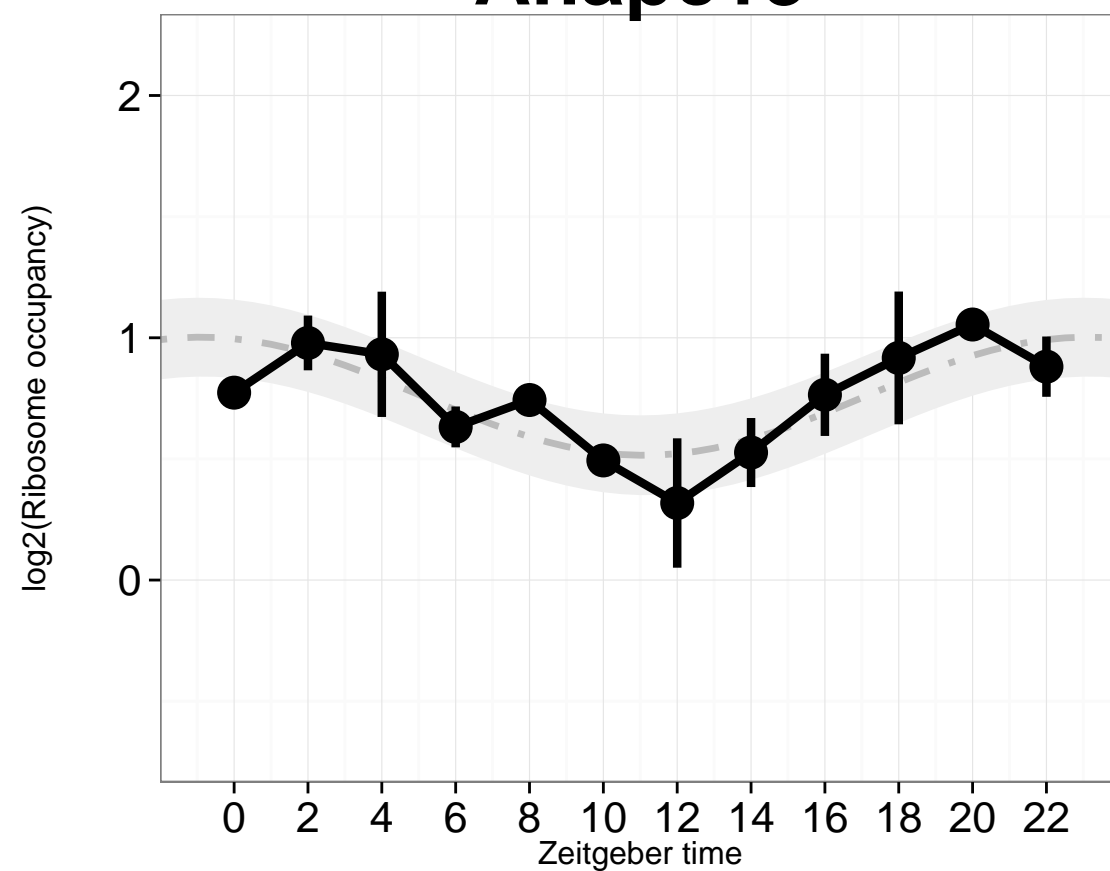

Supplement: Supplementary file 2994 [file 1]

## Ccdc115

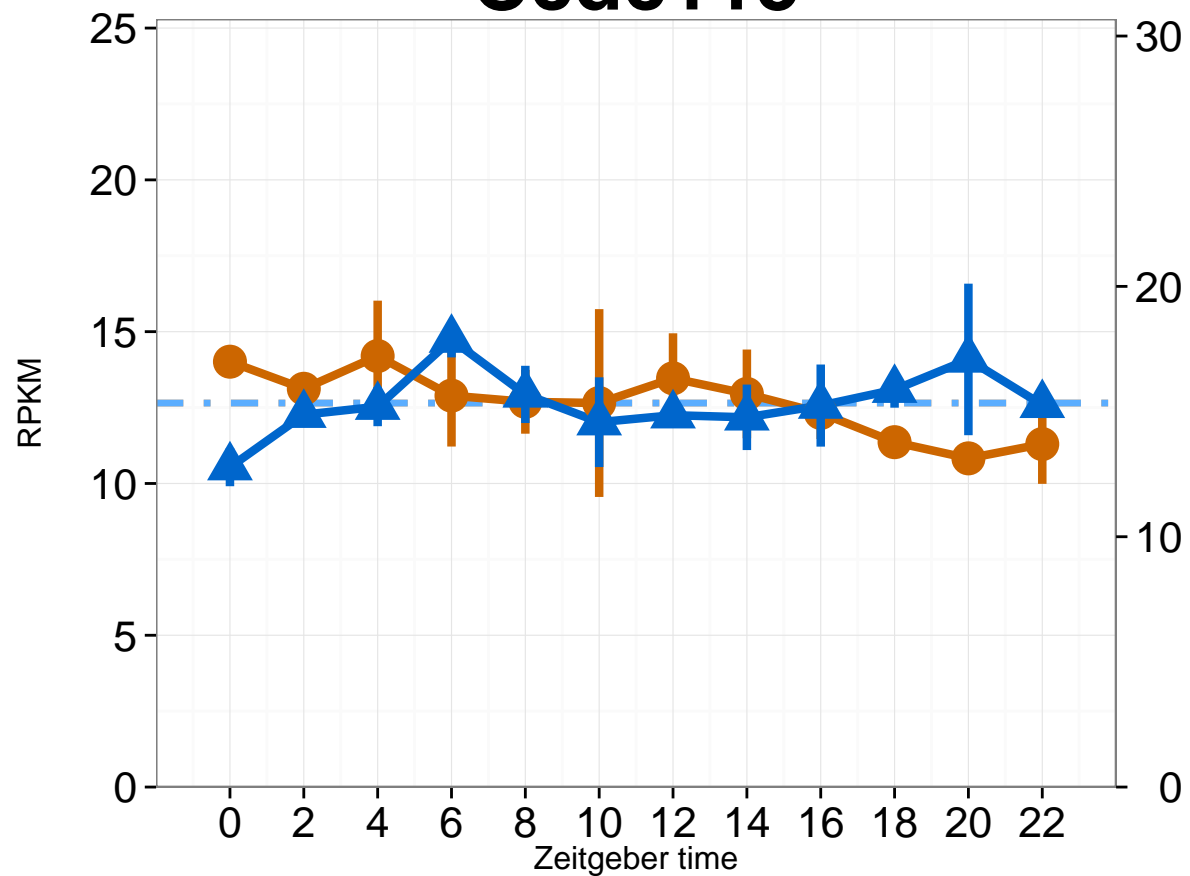

## Ccdc115

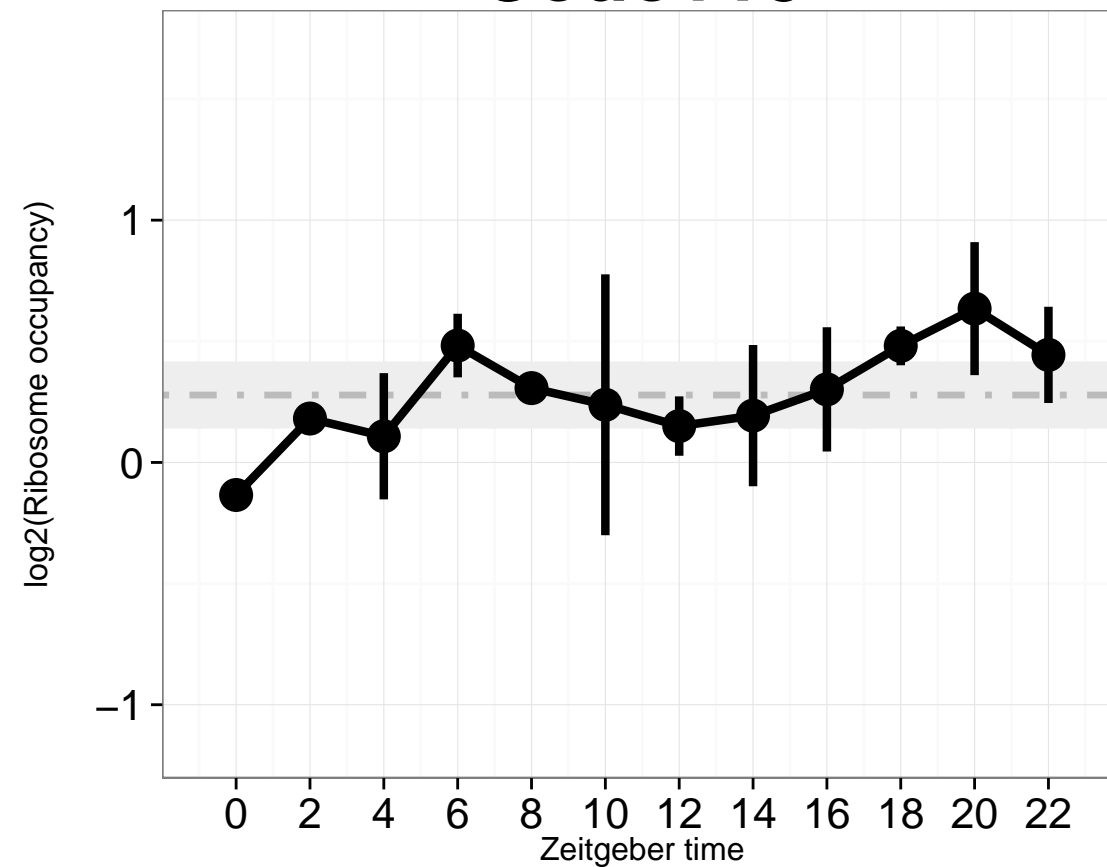

Supplement: Supplementary file 2995 [file 1]

## Cstf1

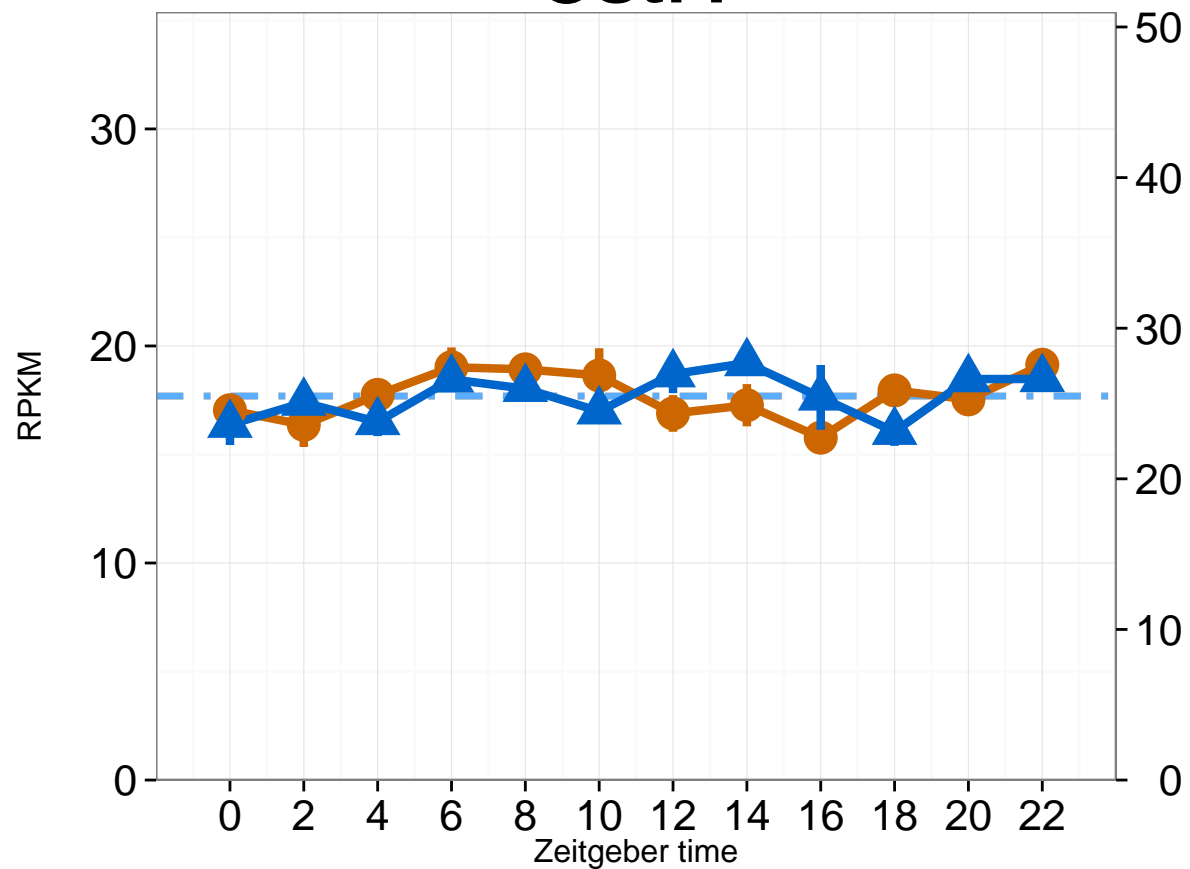

## Cstf1

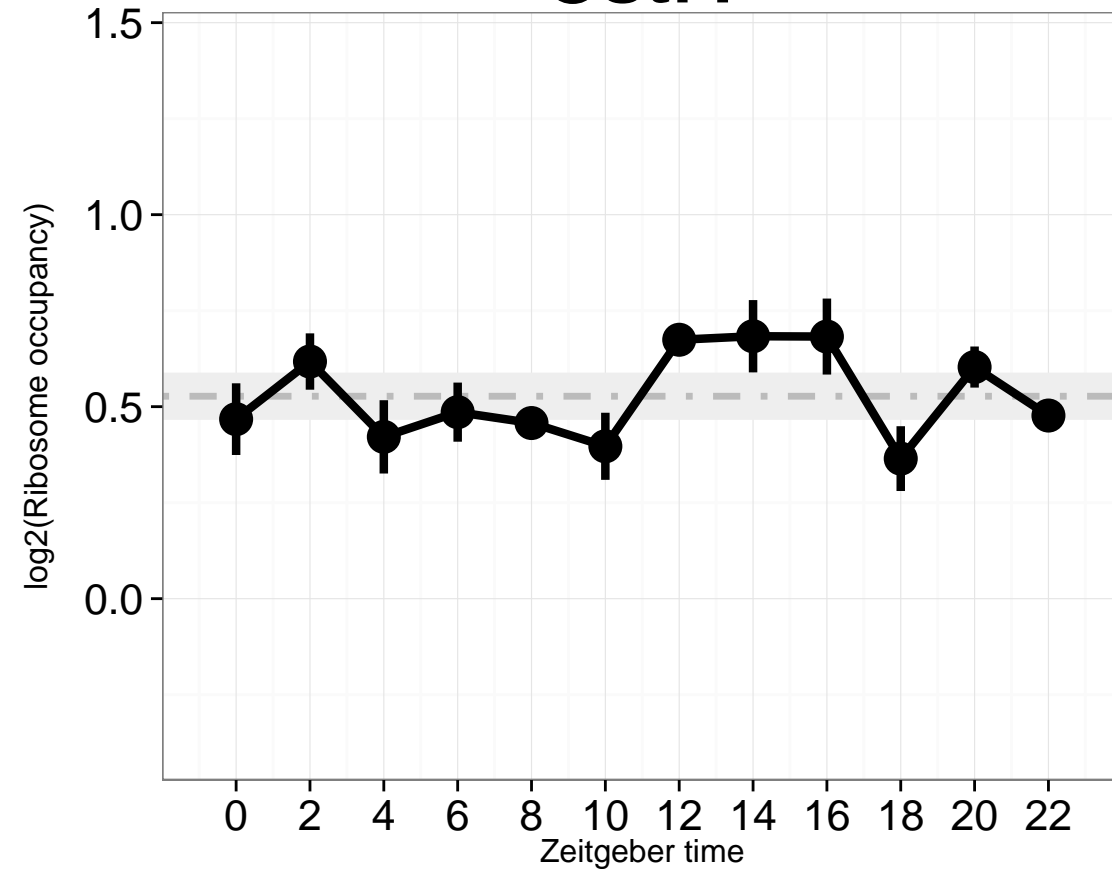

Supplement: Supplementary file 2996 [file 1]

# Ahdc1

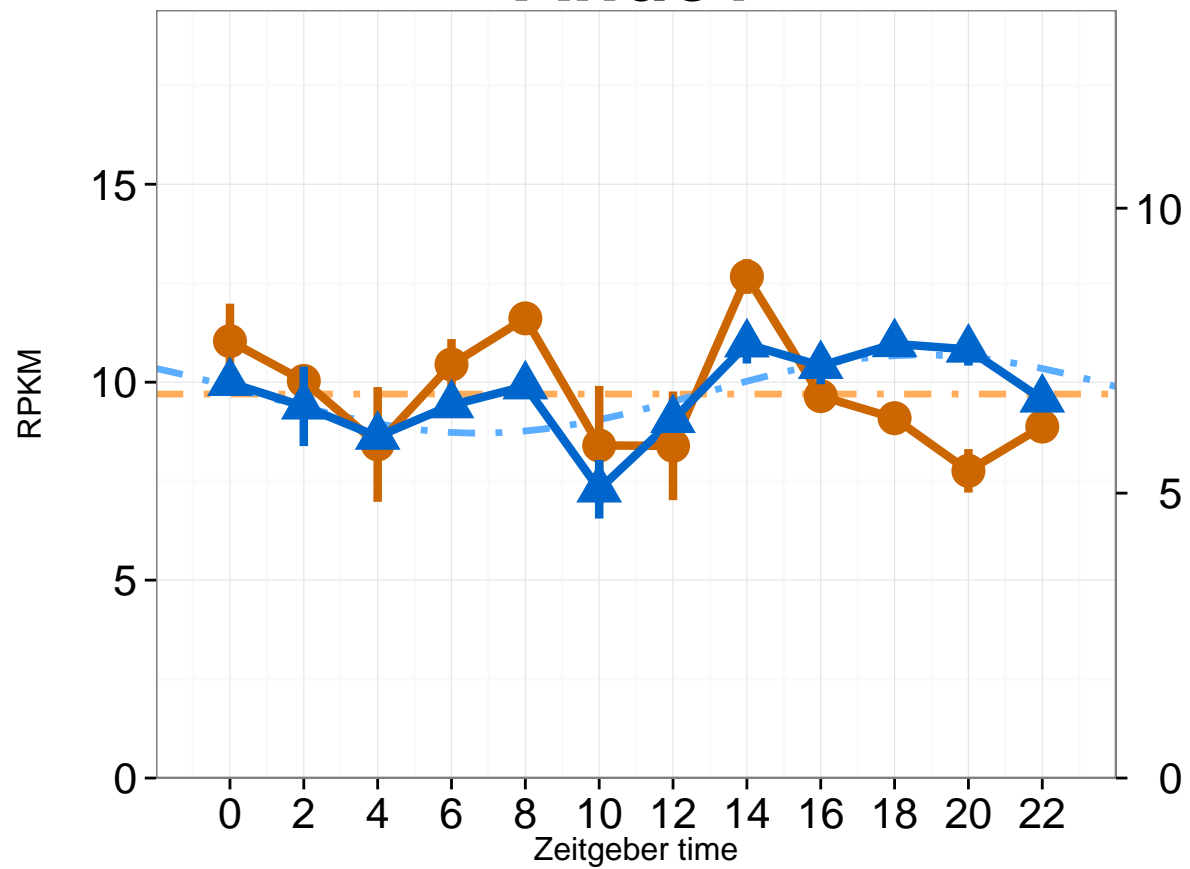

# Ahdc1

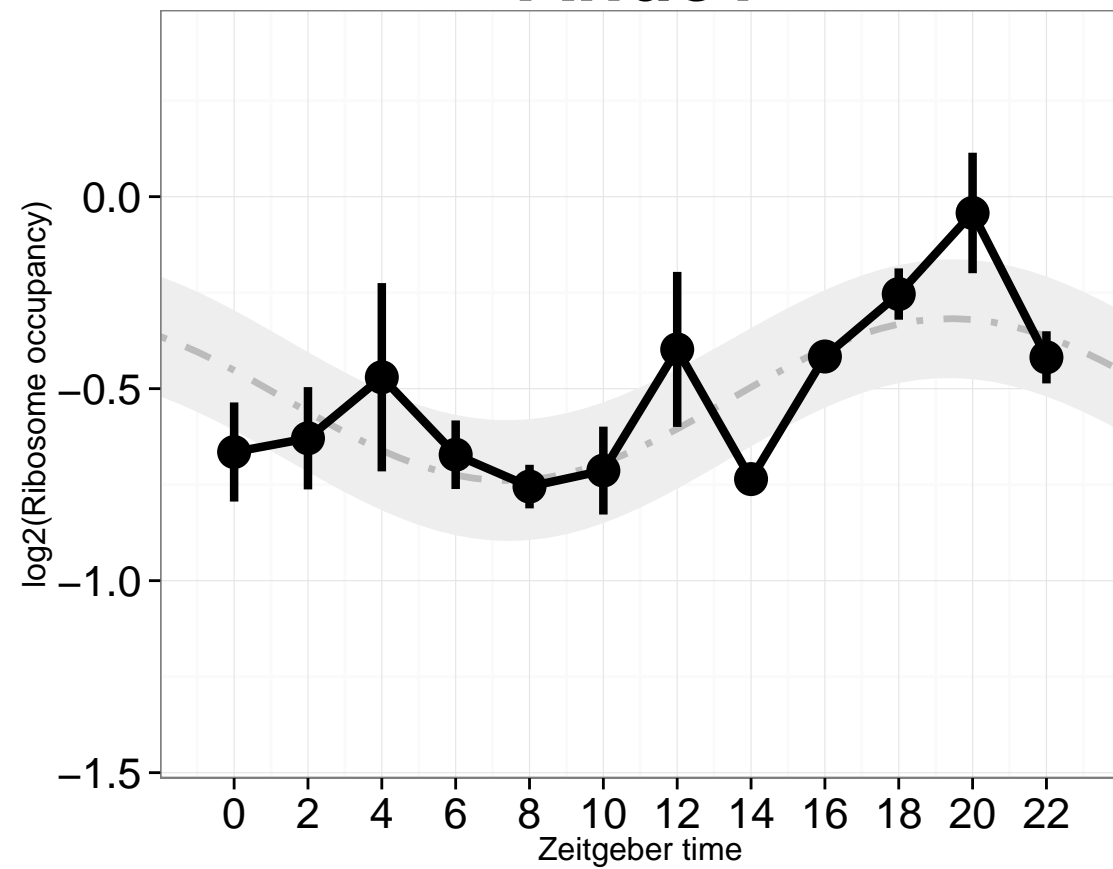

Supplement: Supplementary file 2997 [file 1]

# Pdcd7

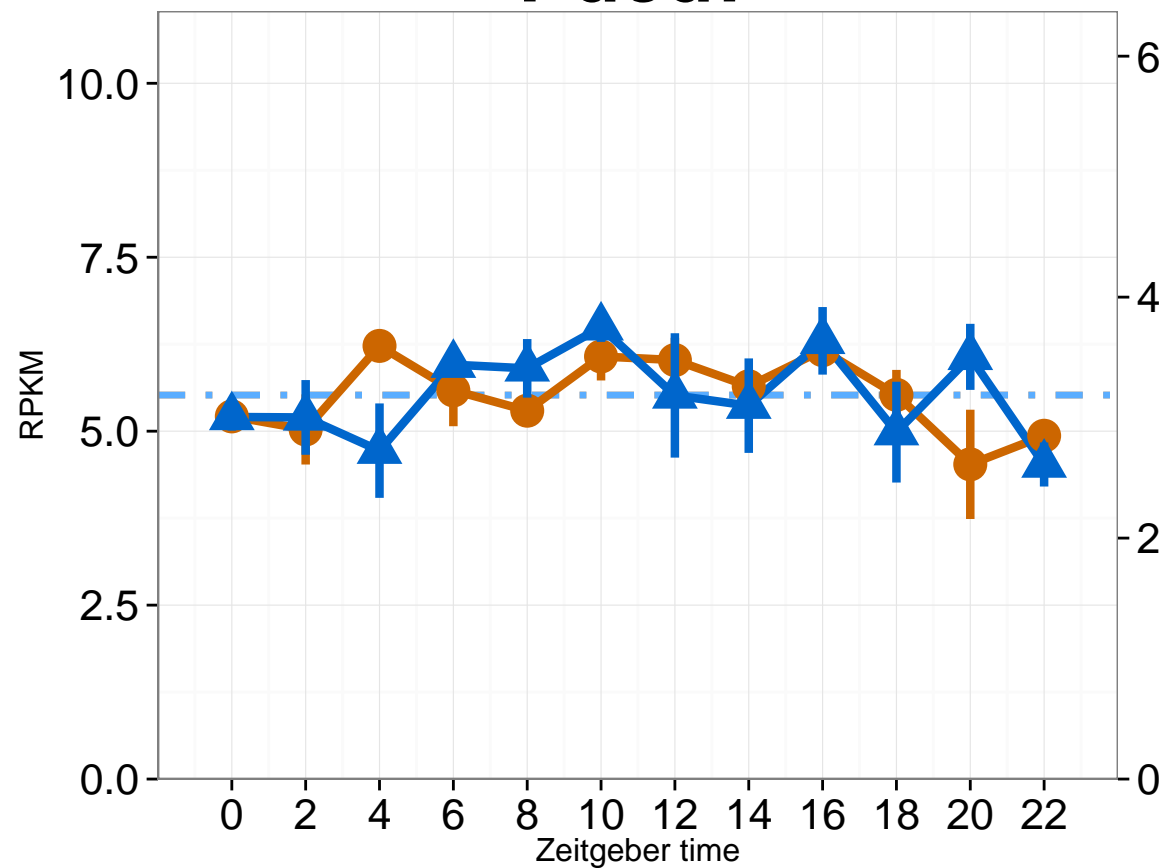

# Pdcd7

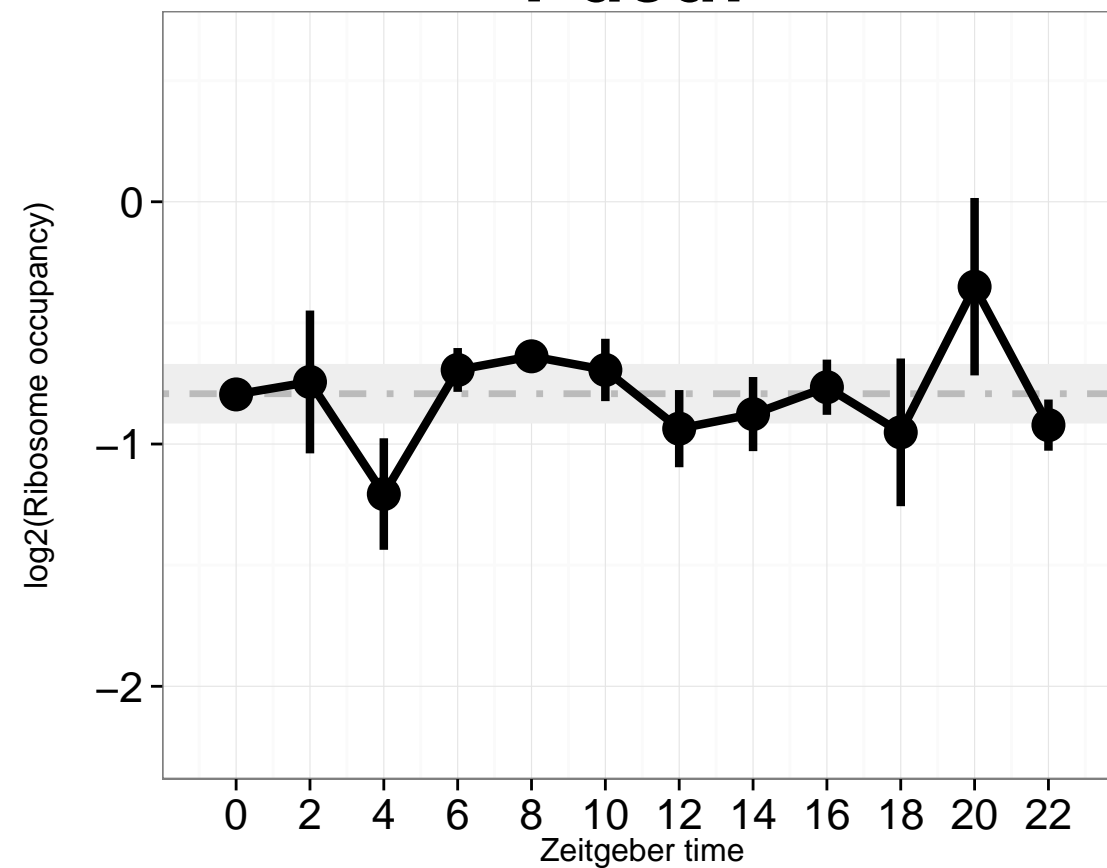

Supplement: Supplementary file 2998 [file 1]

## Clstn2

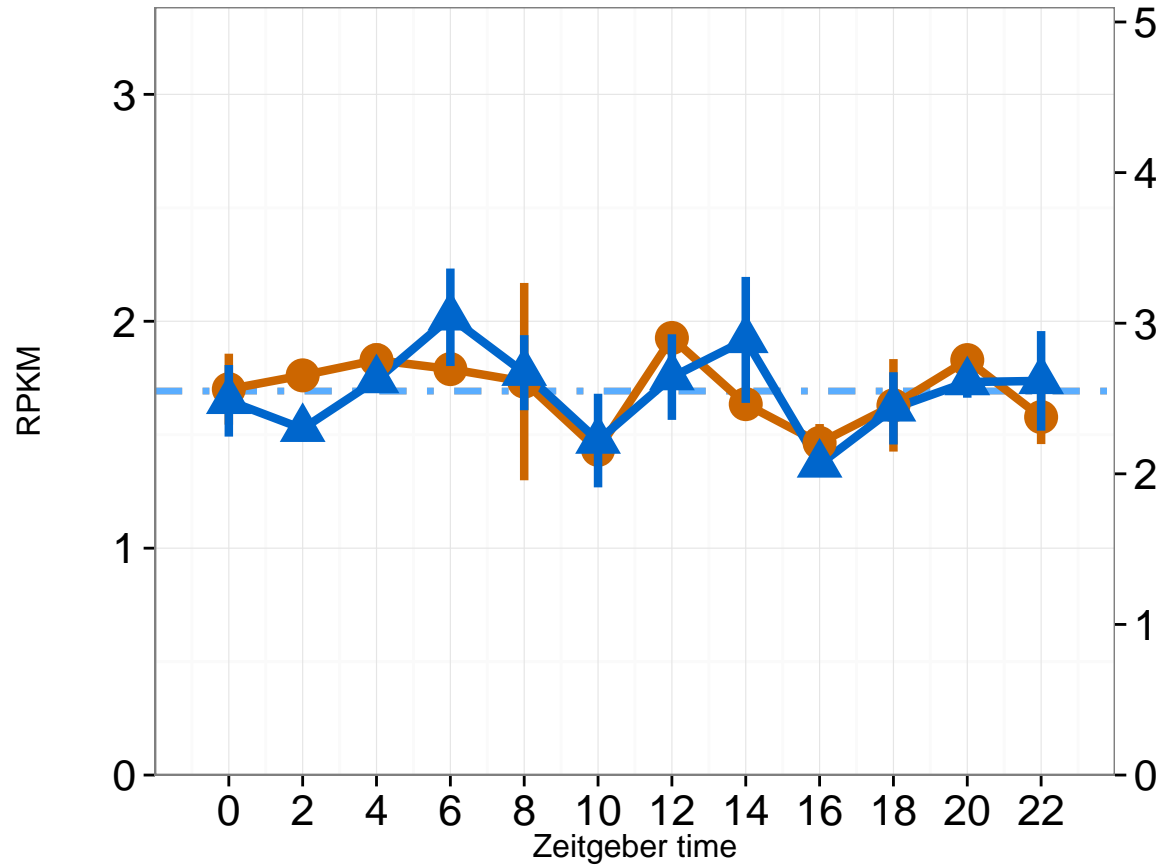

## Clstn2

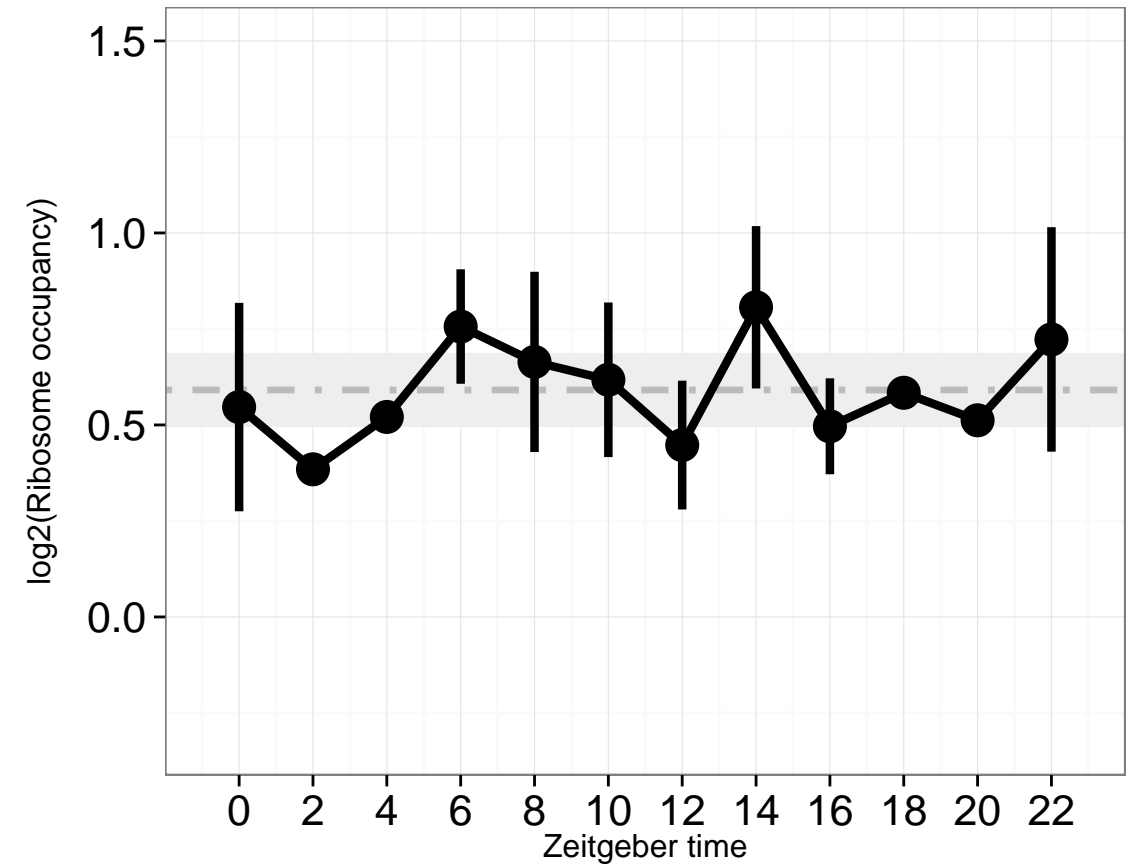

Supplement: Supplementary file 2999 [file 1]

## Golga7

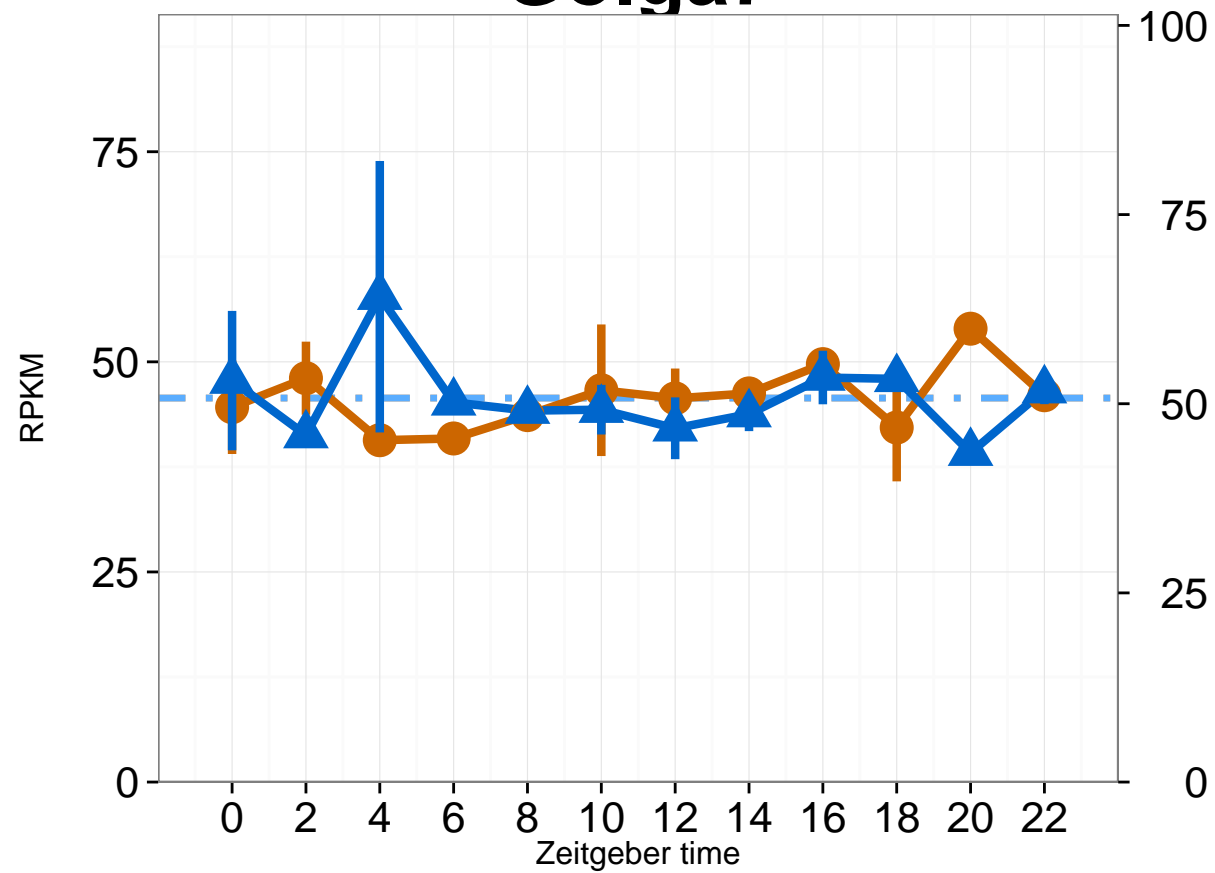

## Golga7

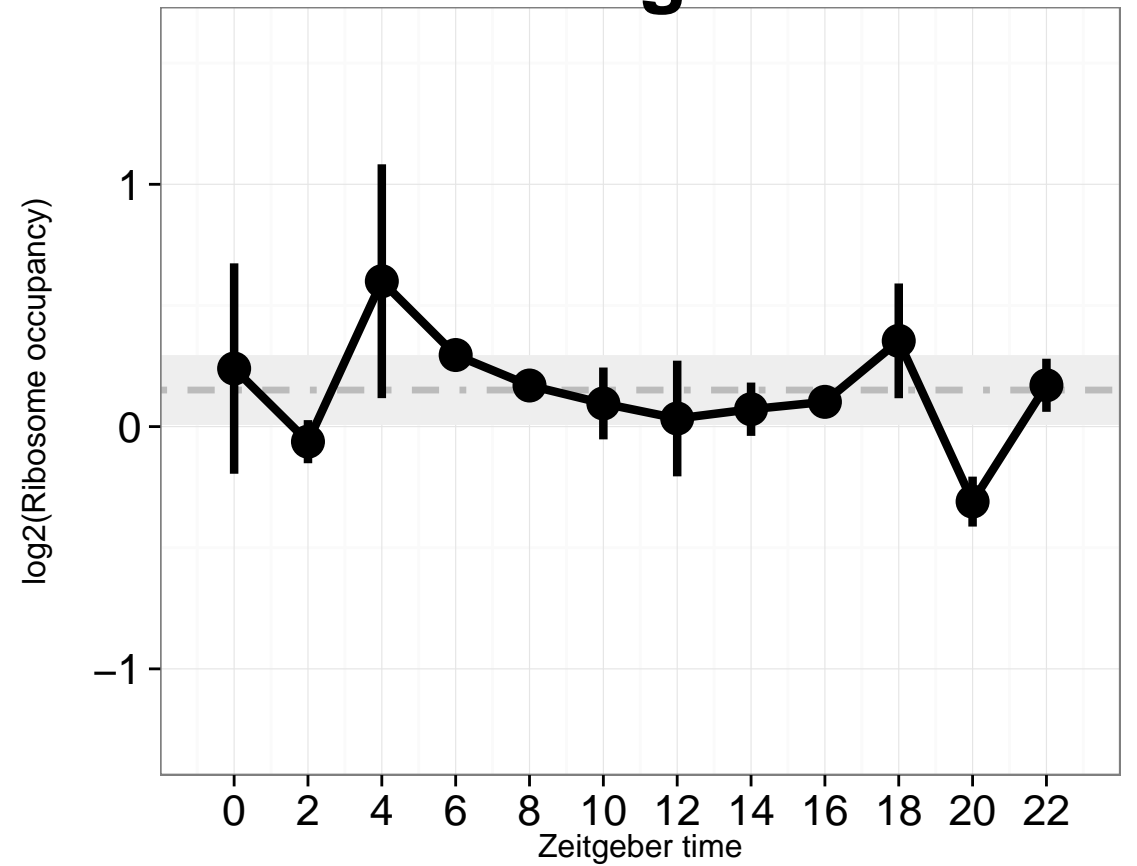

Supplement: Supplementary file 3000 [file 1]

## Stab2

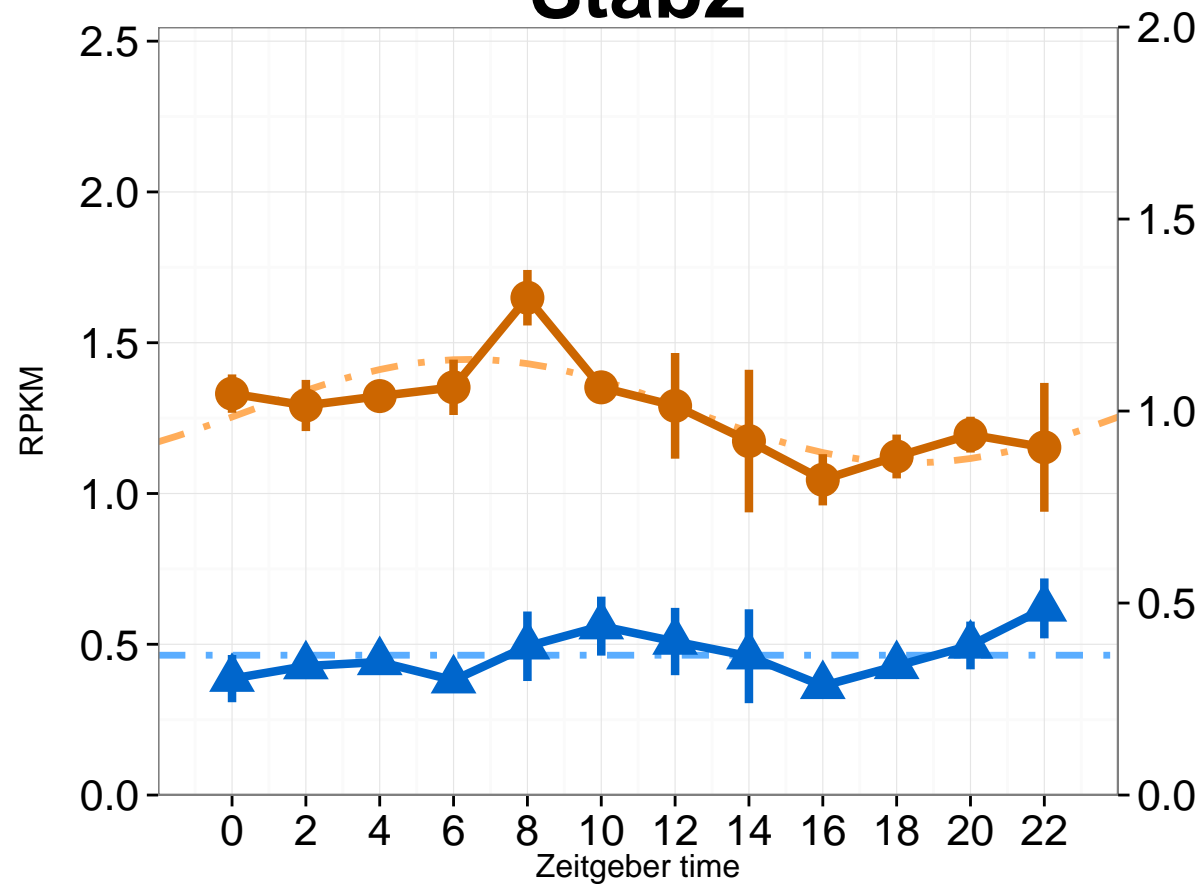

## Stab2

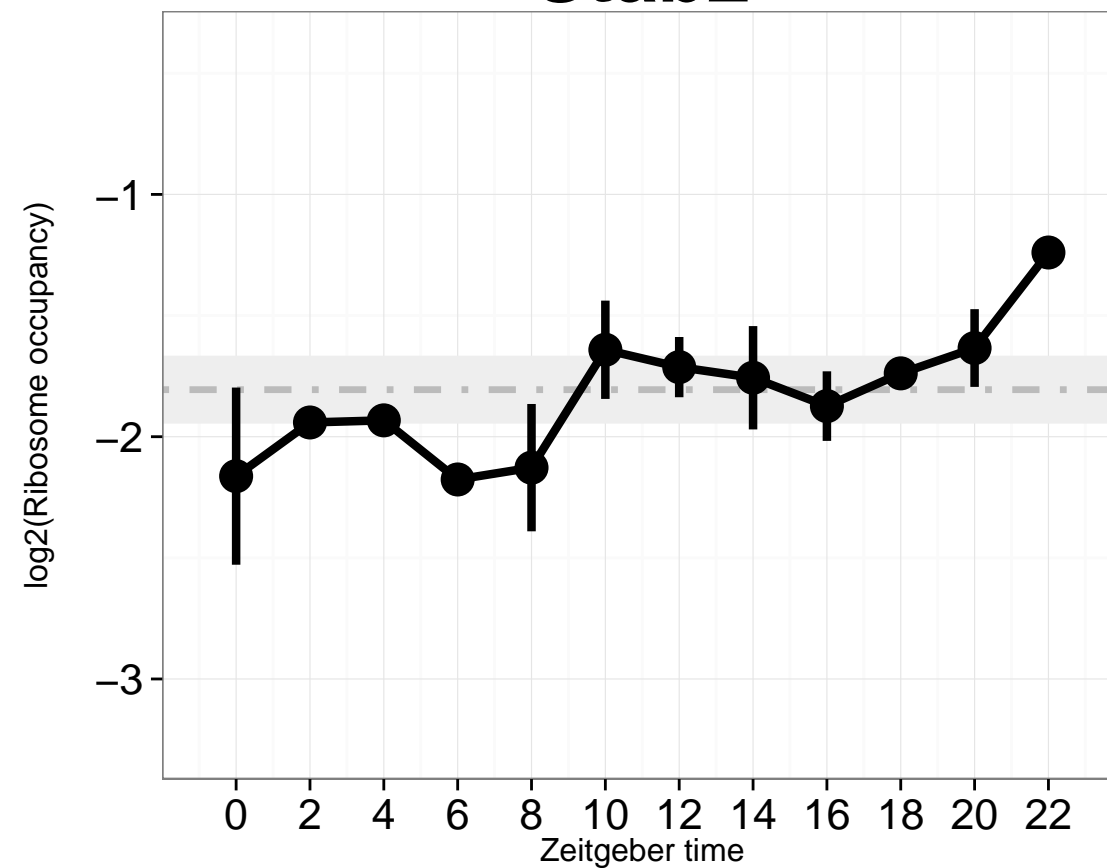

Supplement: Supplementary file 3001 [file 1]

## Itih2

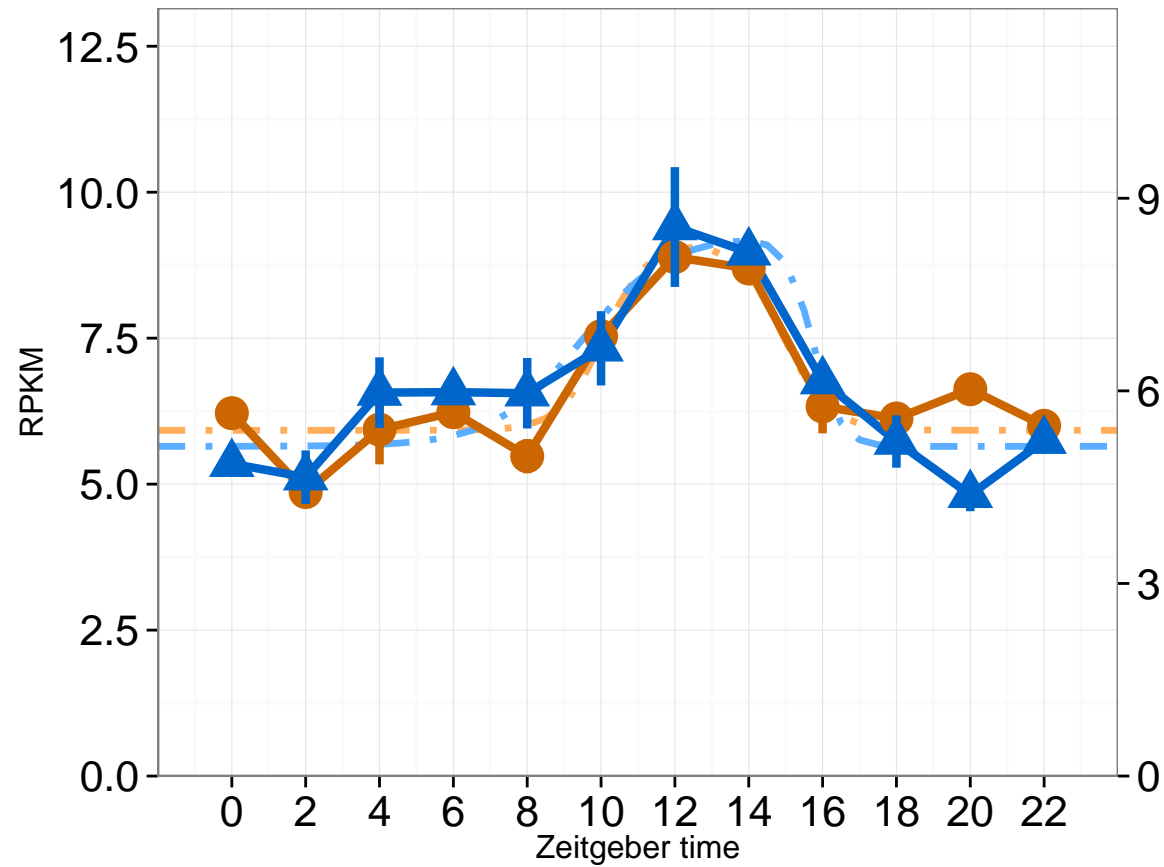

## Itih2

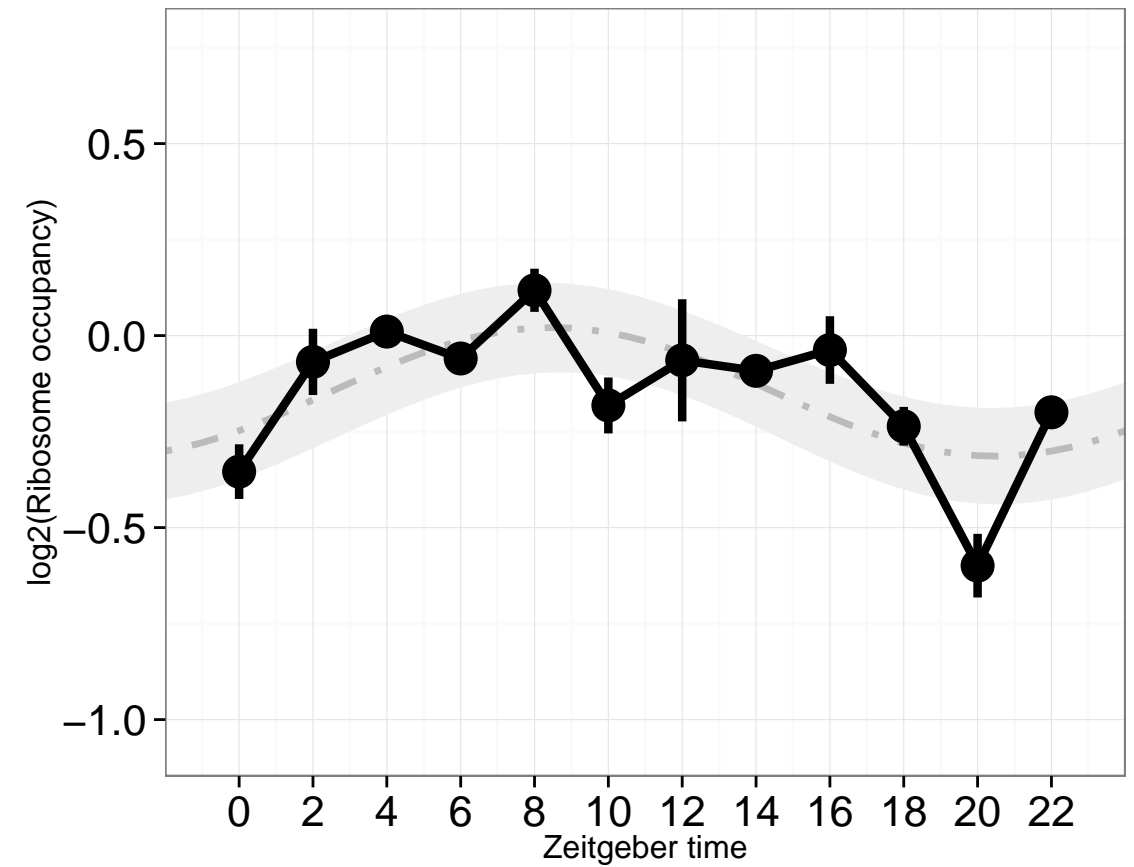

Supplement: Supplementary file 3002 [file 1]

## Dapk2

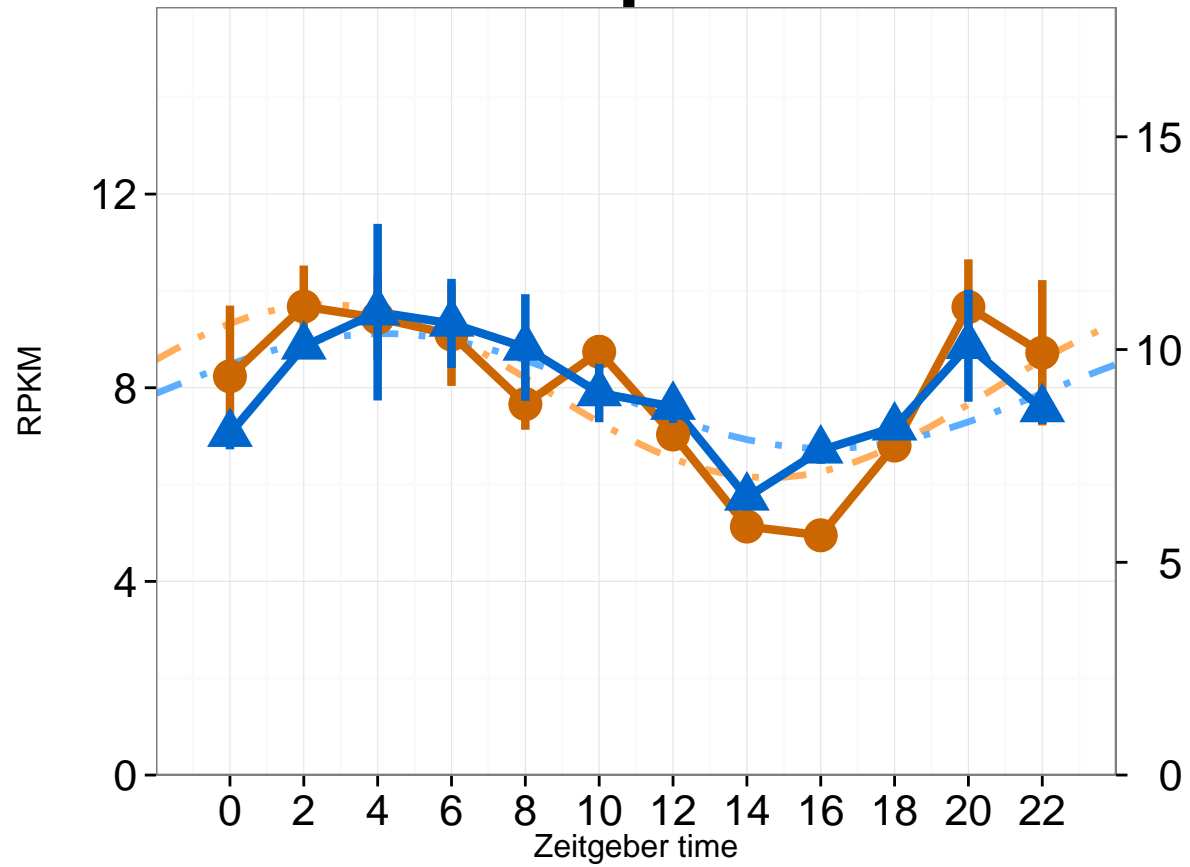

## Dapk2

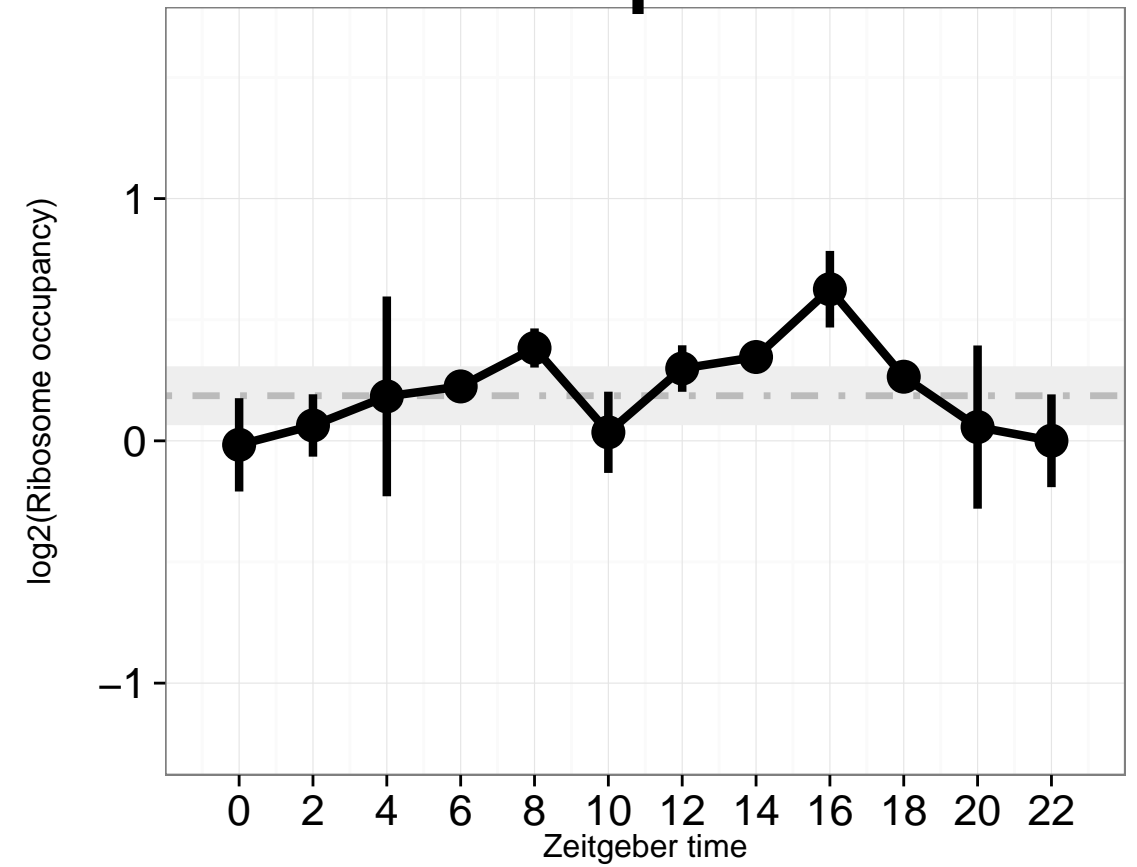

Supplement: Supplementary file 3003 [file 1]

# Ppm1f

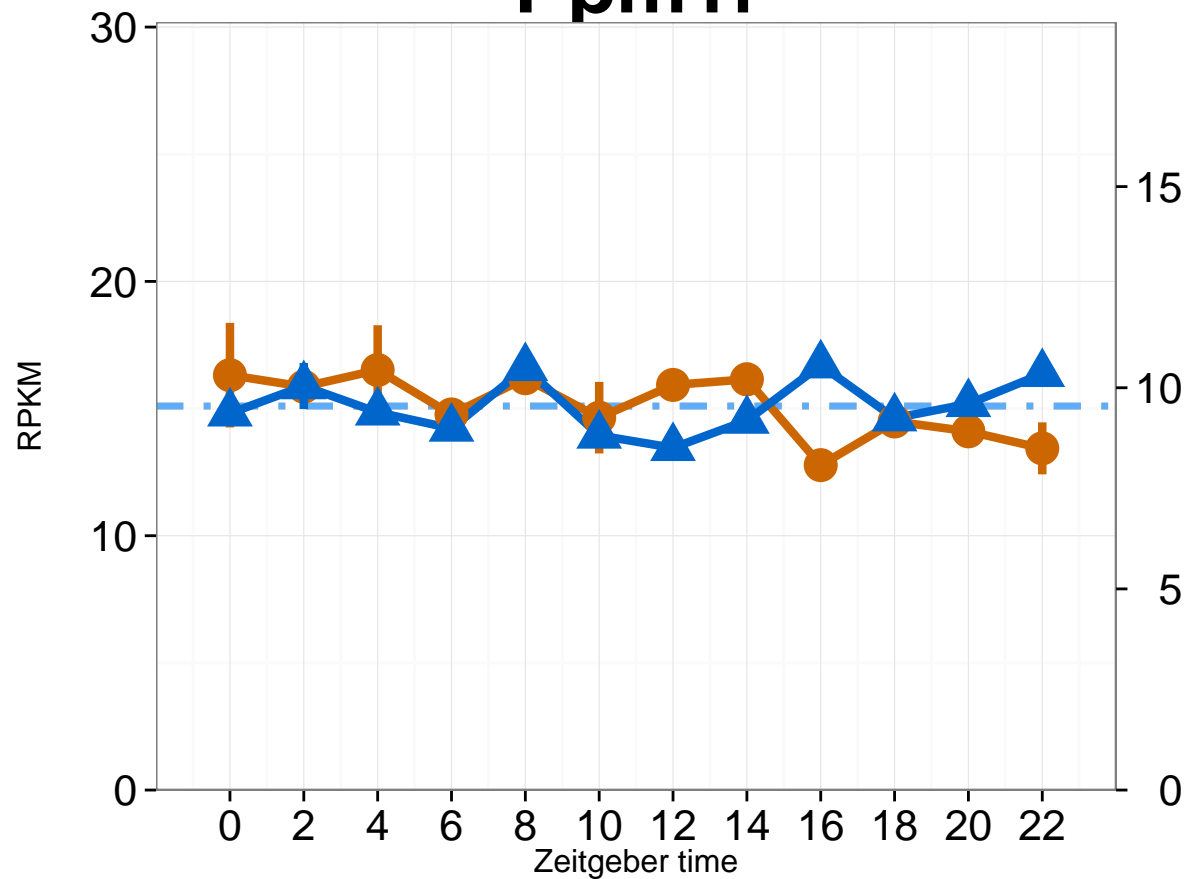

# Ppm1f

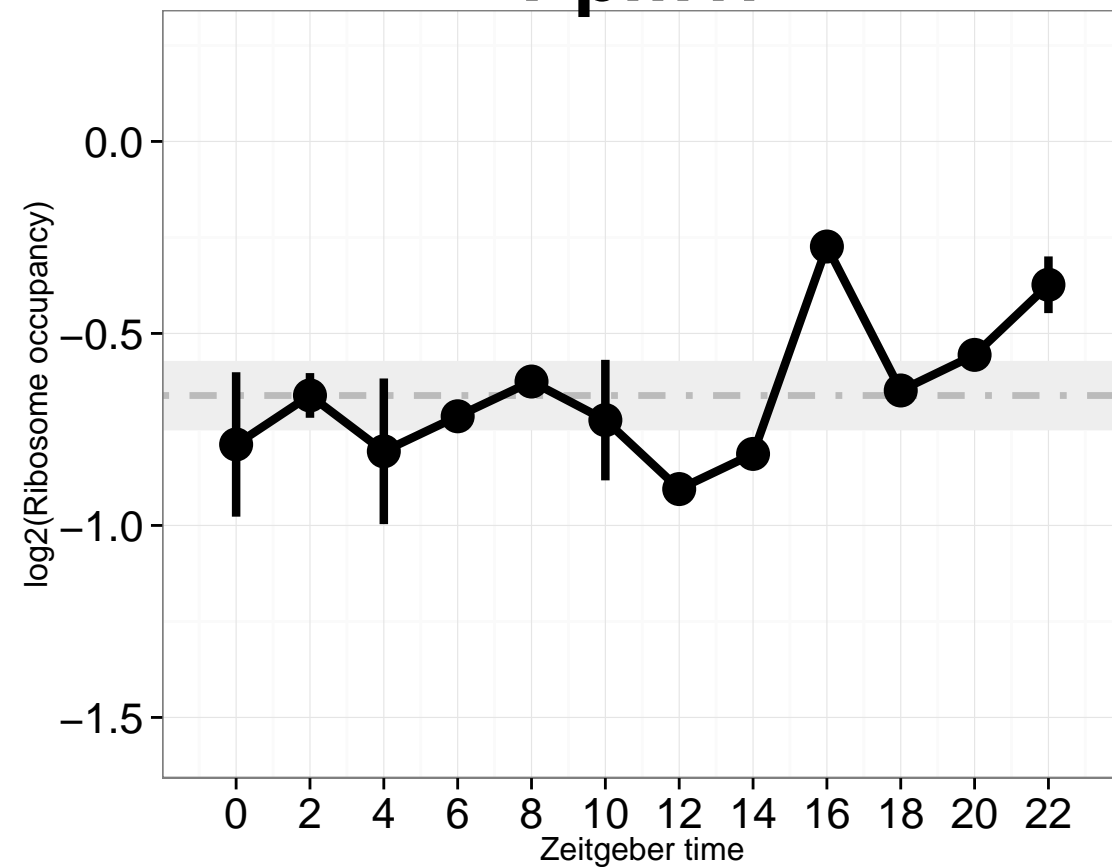

Supplement: Supplementary file 3004 [file 1]

## Gpr116

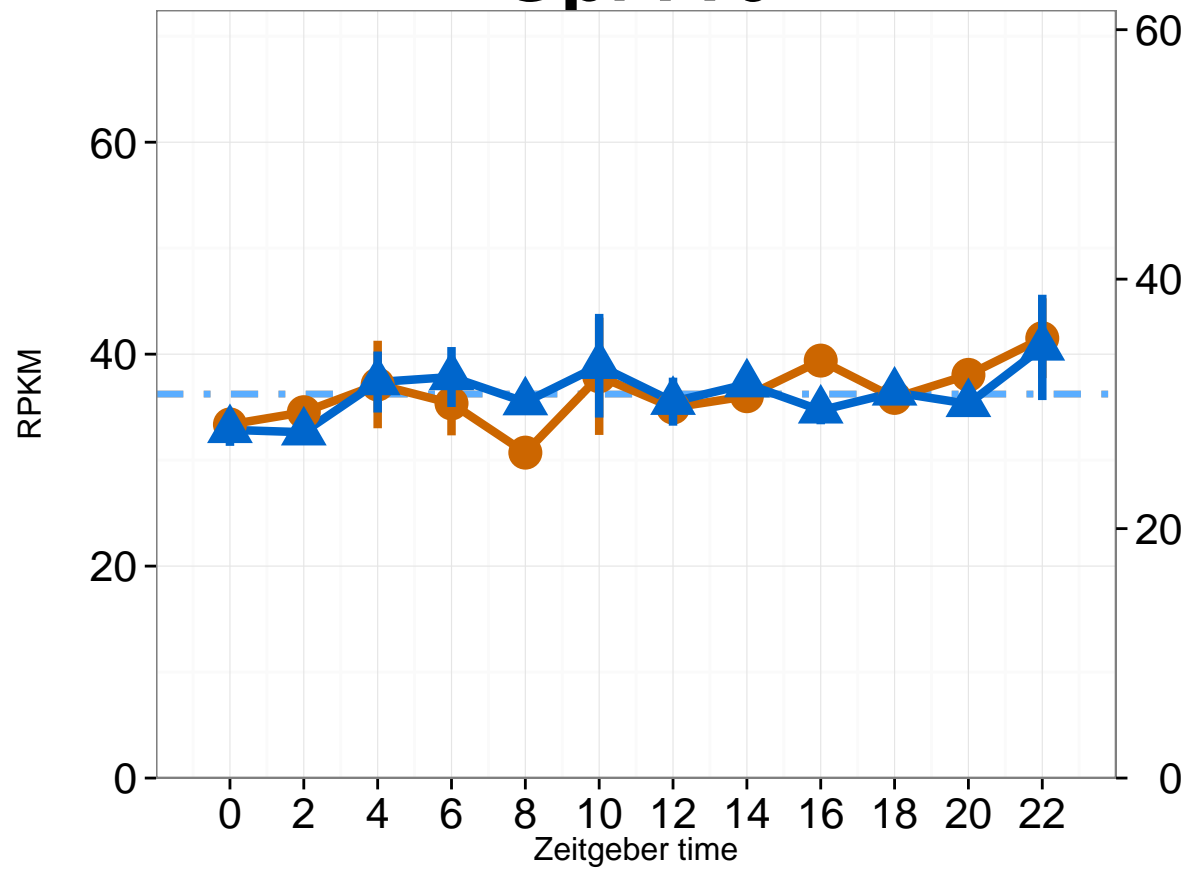

## Gpr116

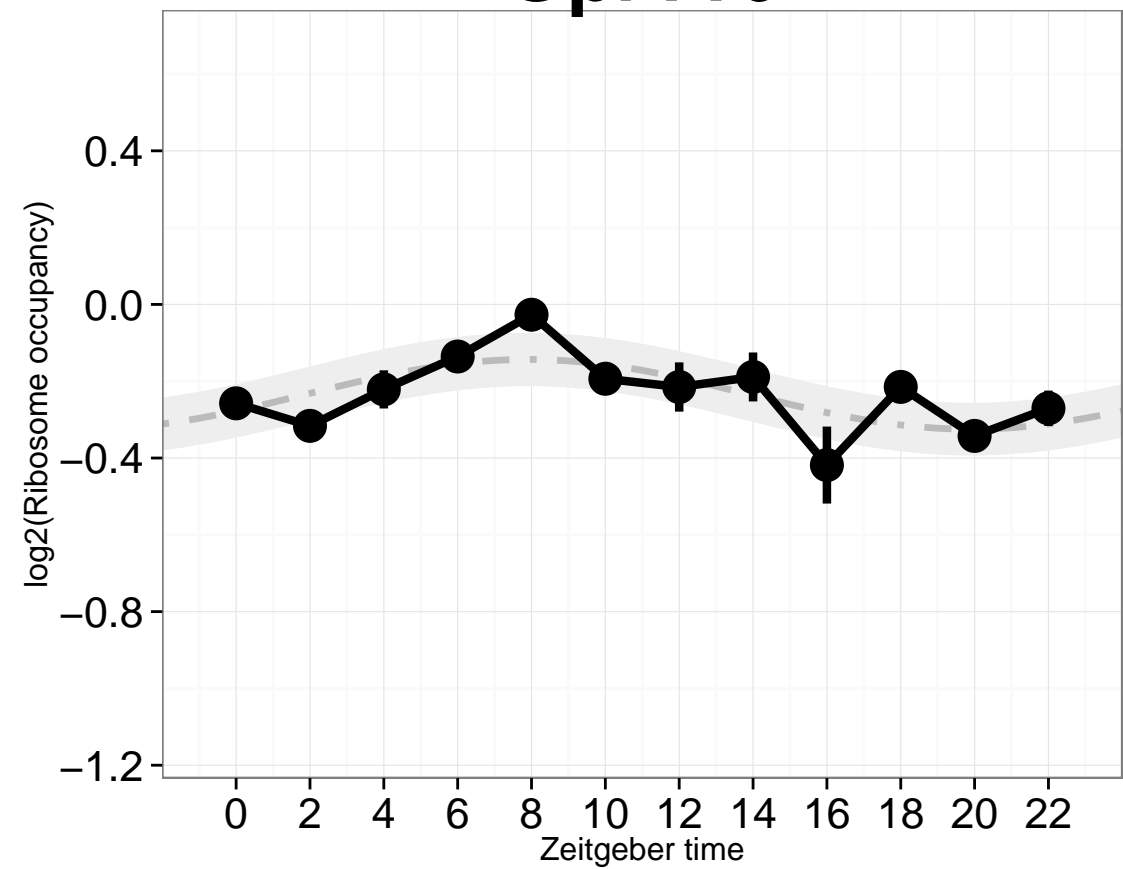

Supplement: Supplementary file 3005 [file 1]

## Ogt

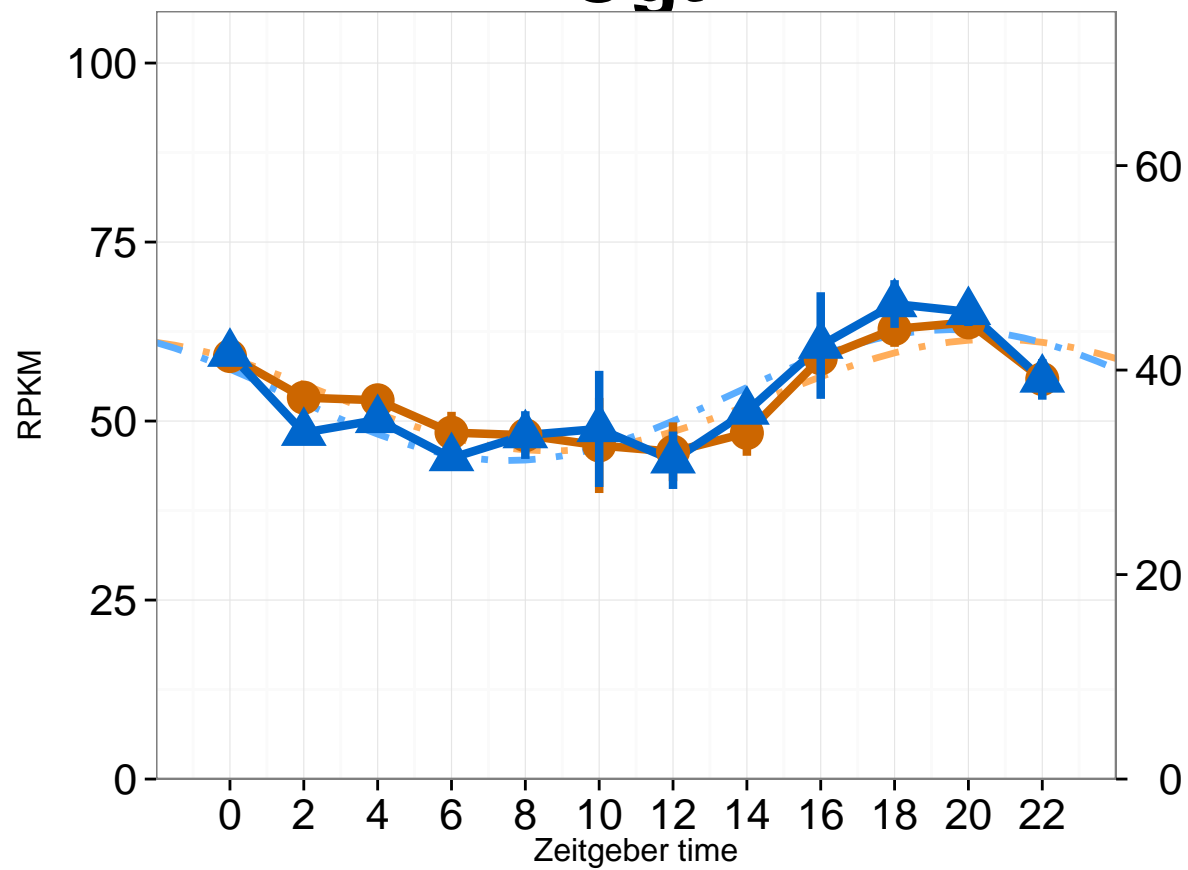

## Ogt

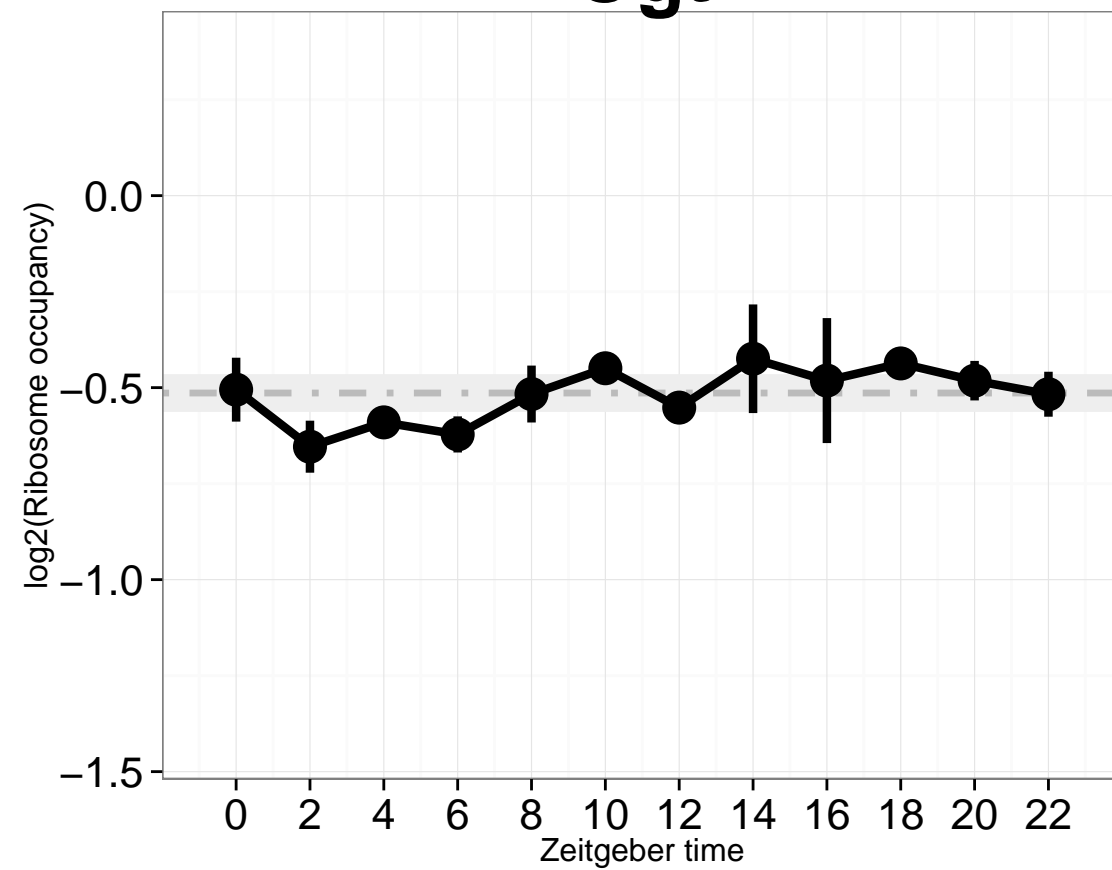

Supplement: Supplementary file 3006 [file 1]

## Phlpp2

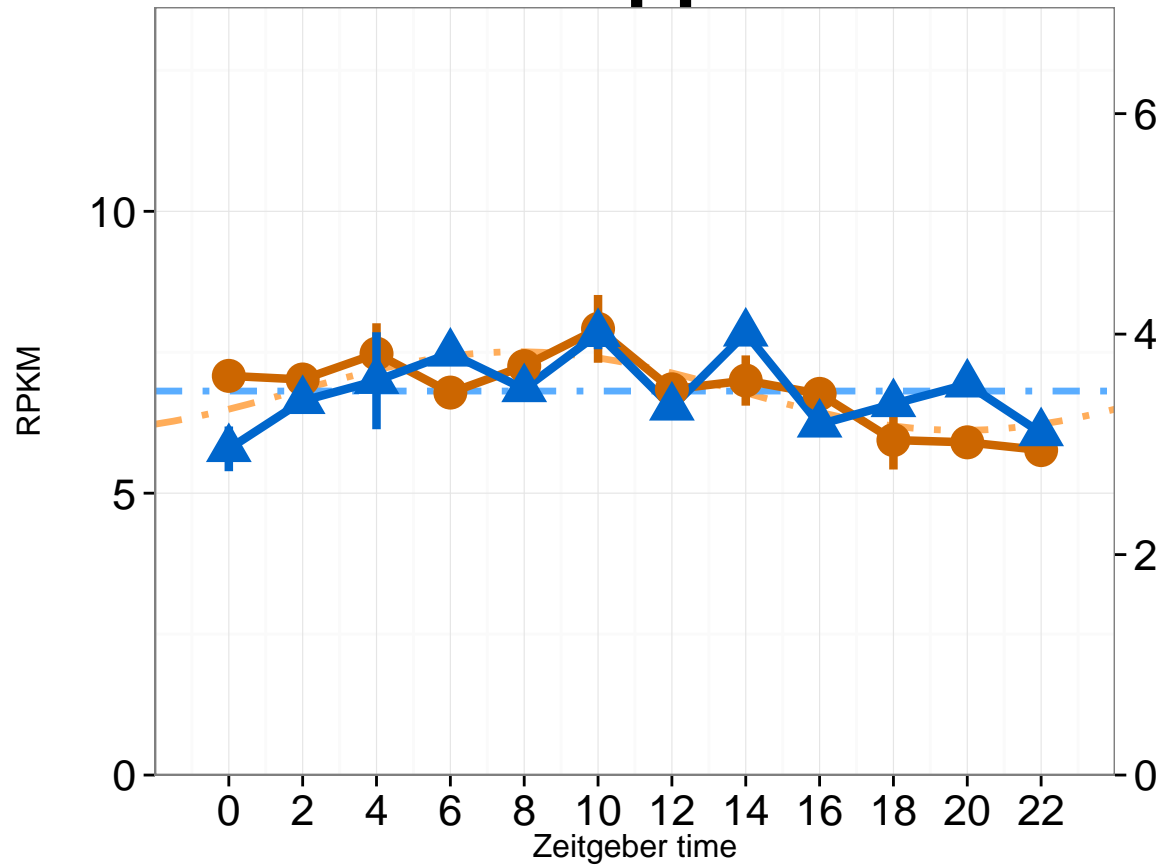

## Phlpp2

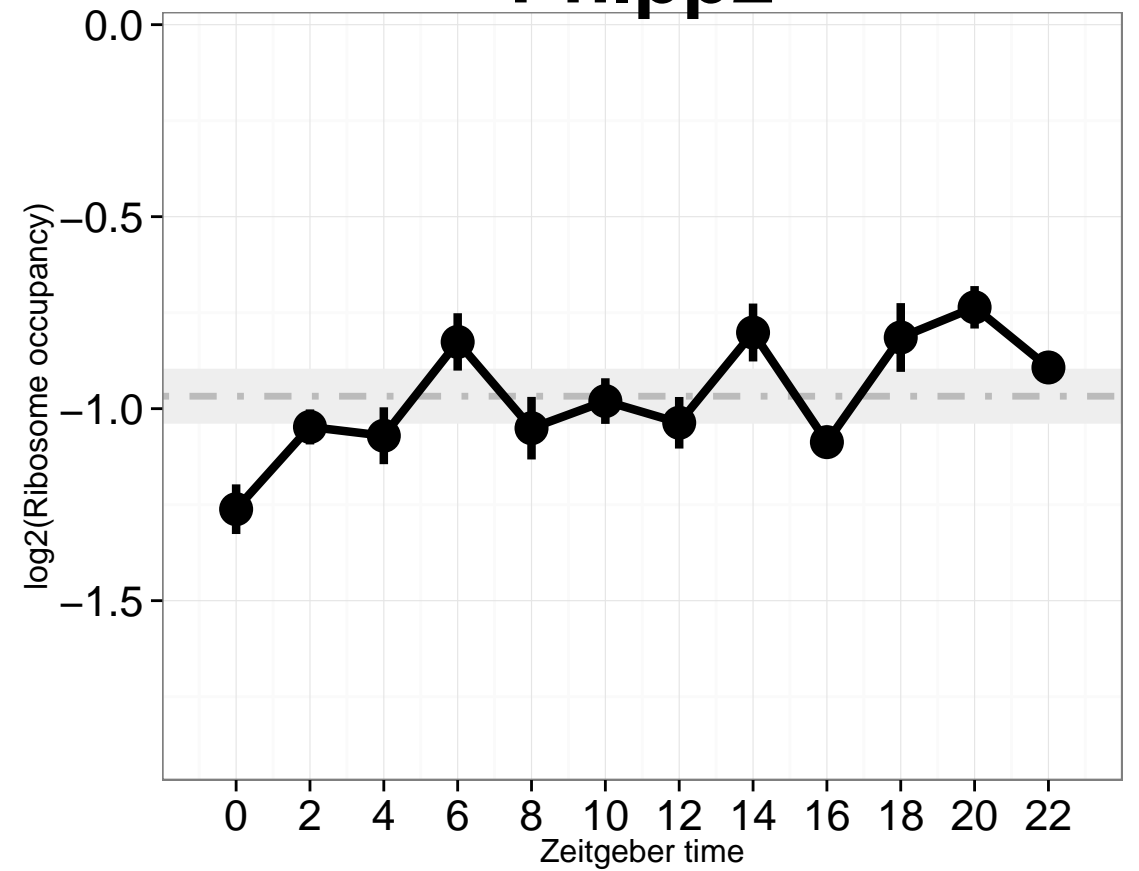

Supplement: Supplementary file 3007 [file 1]

## Ganab

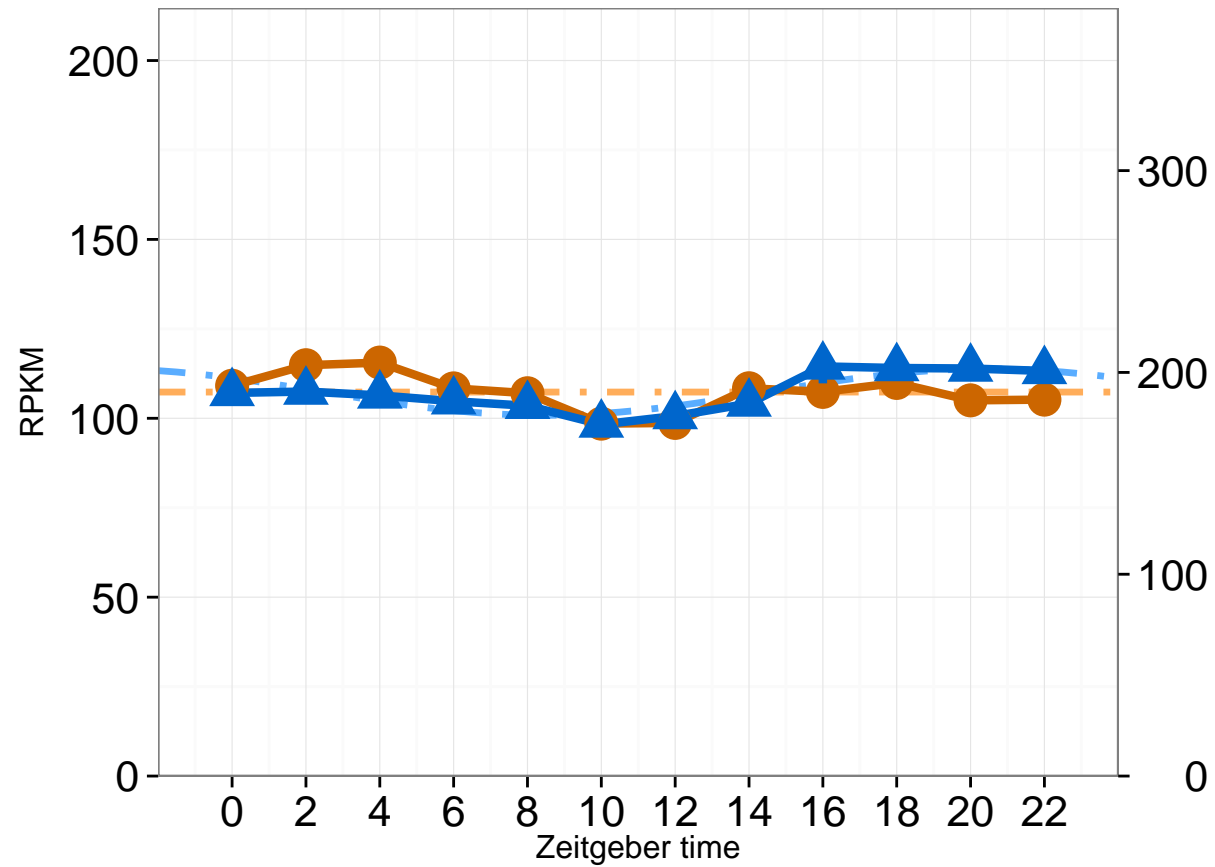

## Ganab

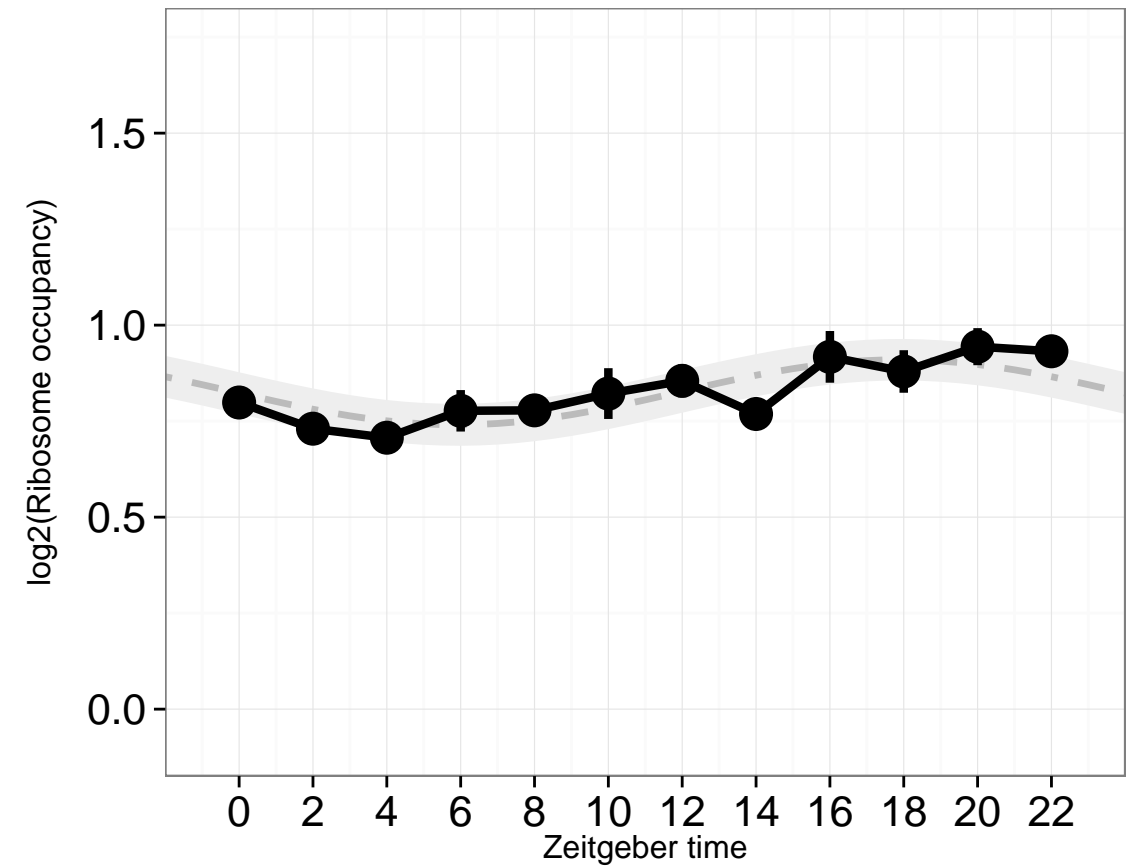

Supplement: Supplementary file 3008 [file 1]

# Fam160a2

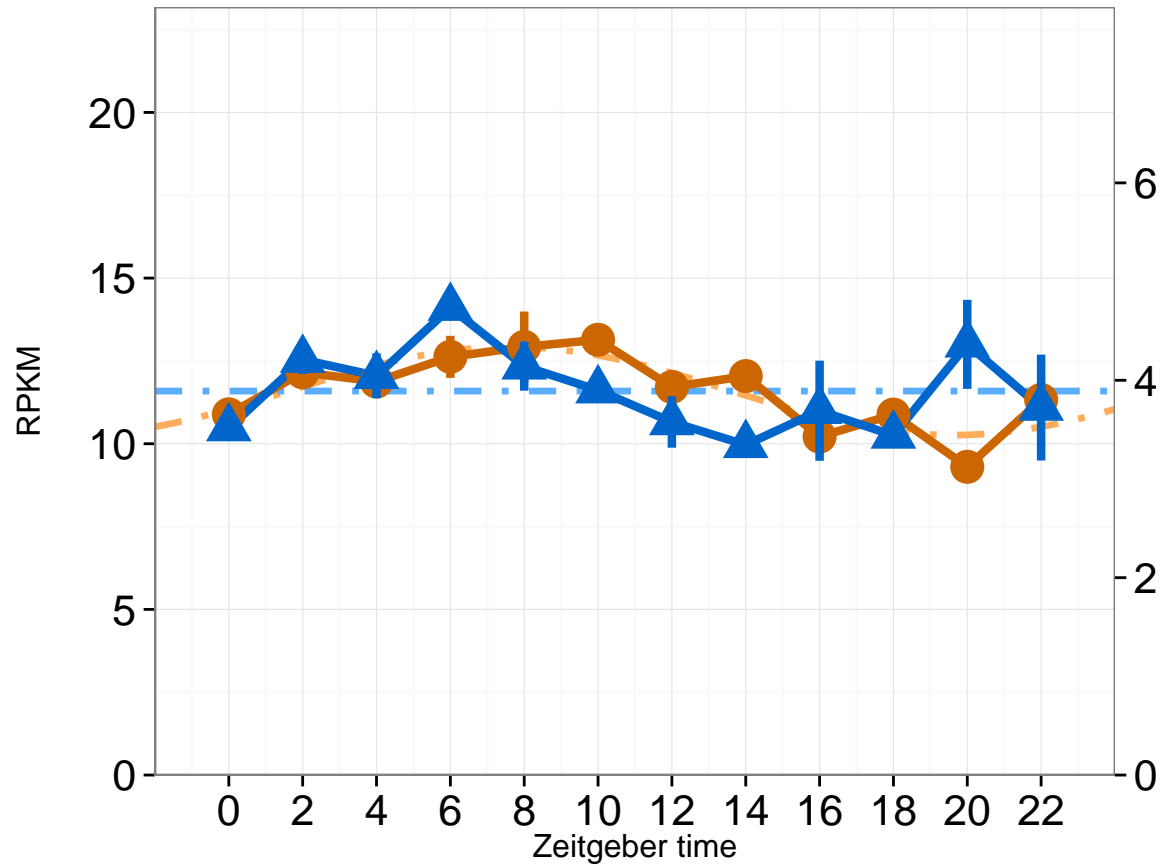

# Fam160a2

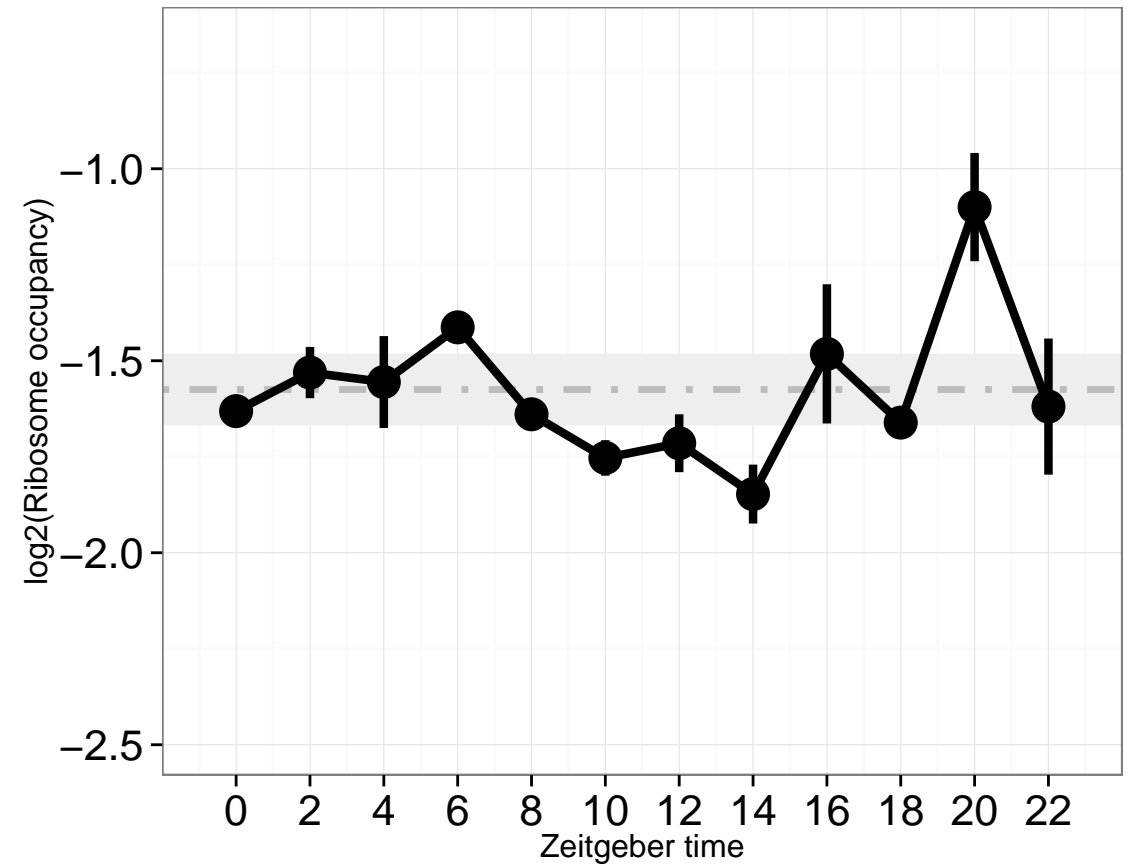

Supplement: Supplementary file 3009 [file 1]

# Nrarp

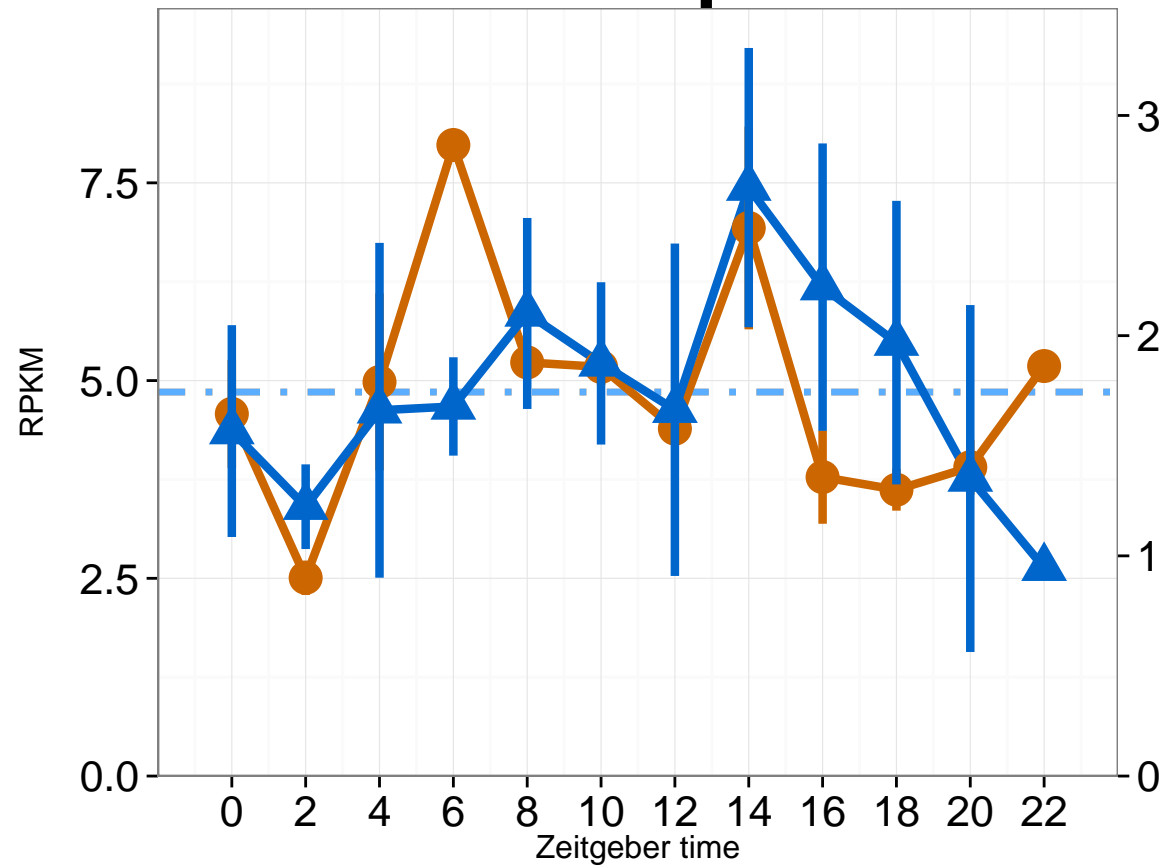

# Nrarp

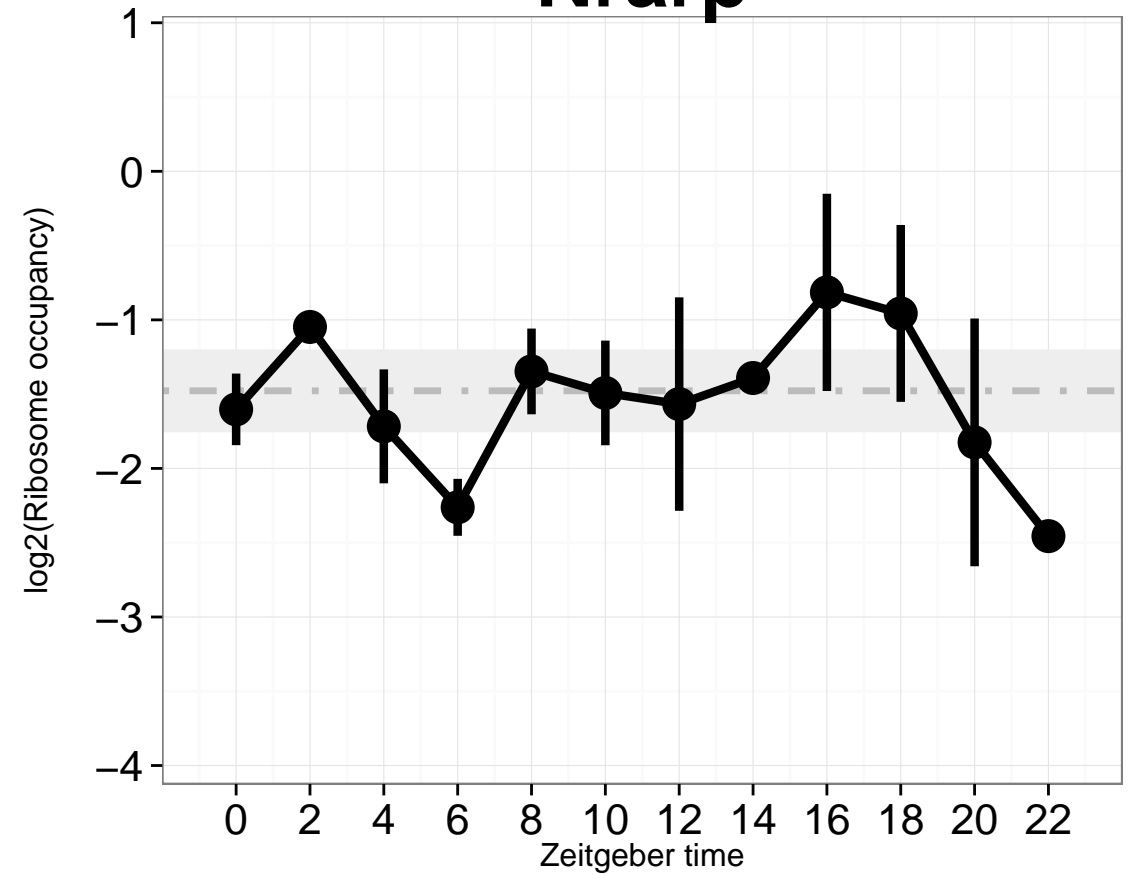

Supplement: Supplementary file 3010 [file 1]
