# Supplementary material (part 31 of 133)
Source: publisher figshare collection journal article supplement (https://springernature.figshare.com/articles/dataset/_/4903193)

## Mta3

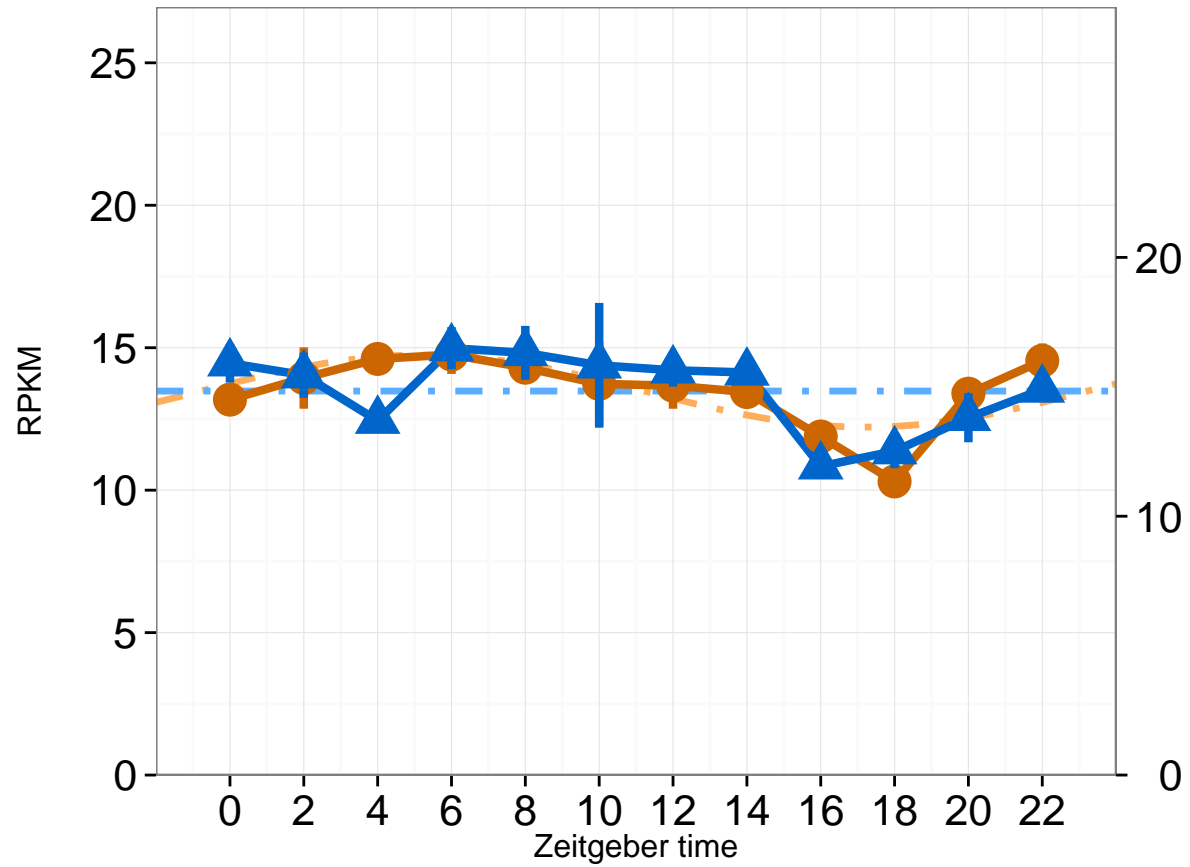

## Mta3

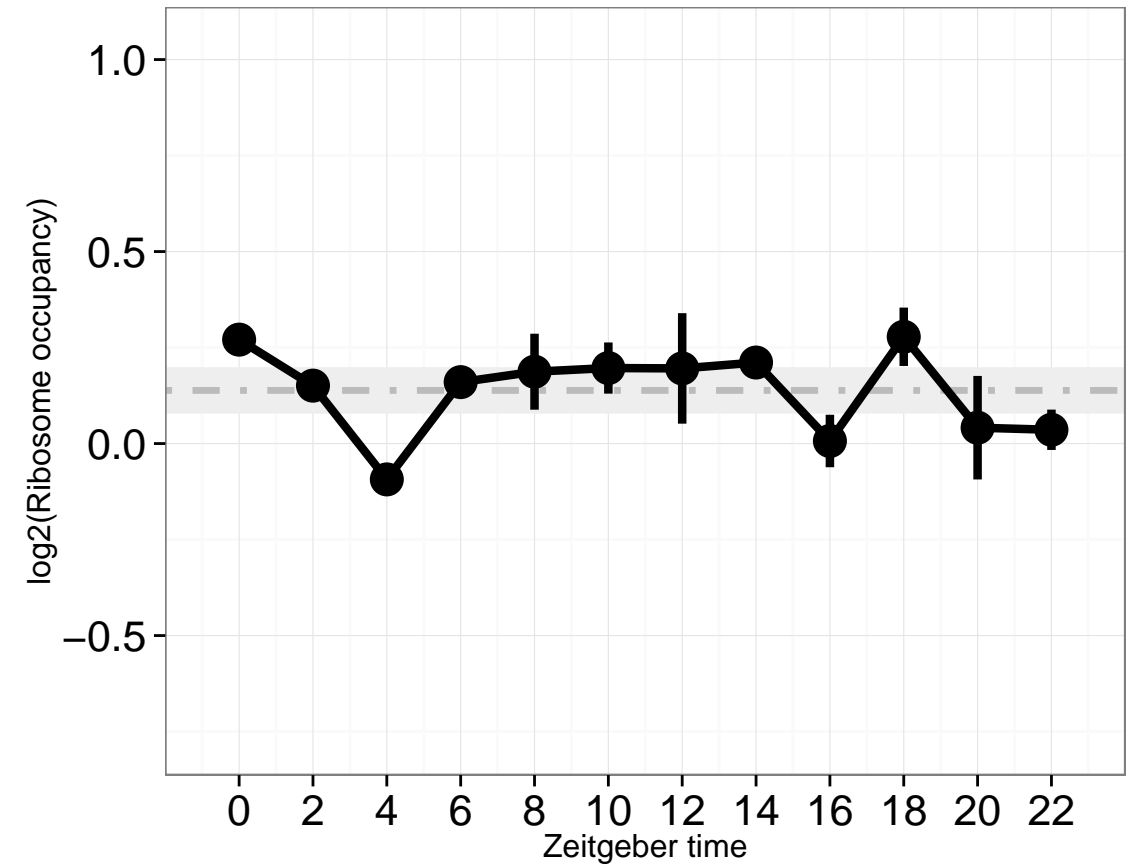

Supplement: Supplementary file 3011 [file 1]

## Gcsh

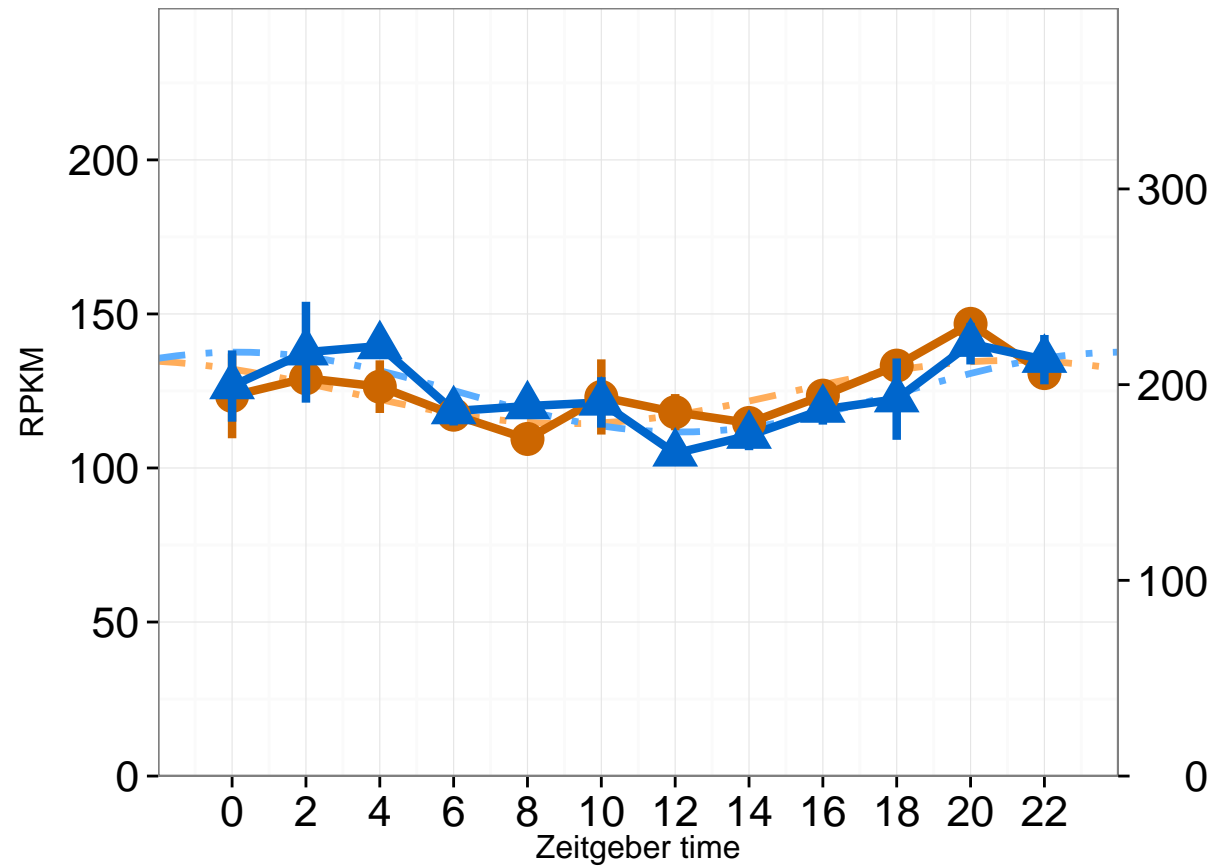

## Gcsh

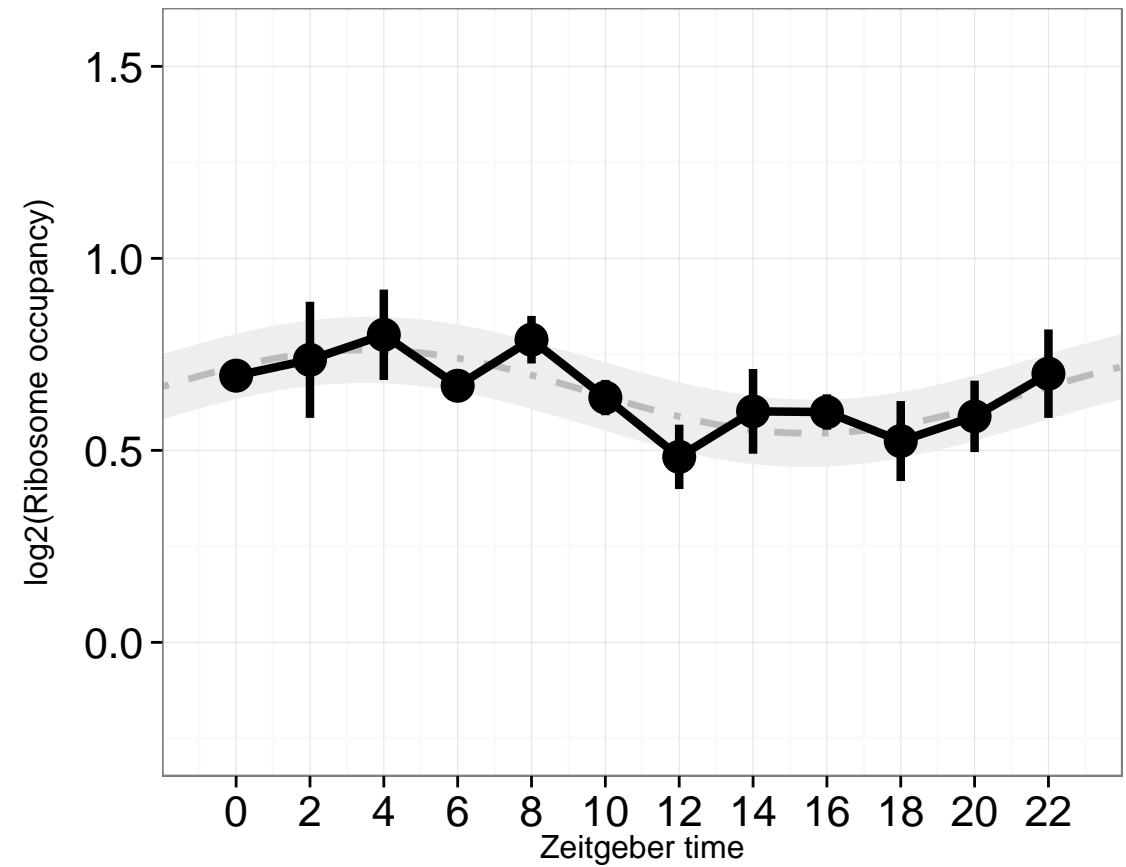

Supplement: Supplementary file 3012 [file 1]

## HsdI2

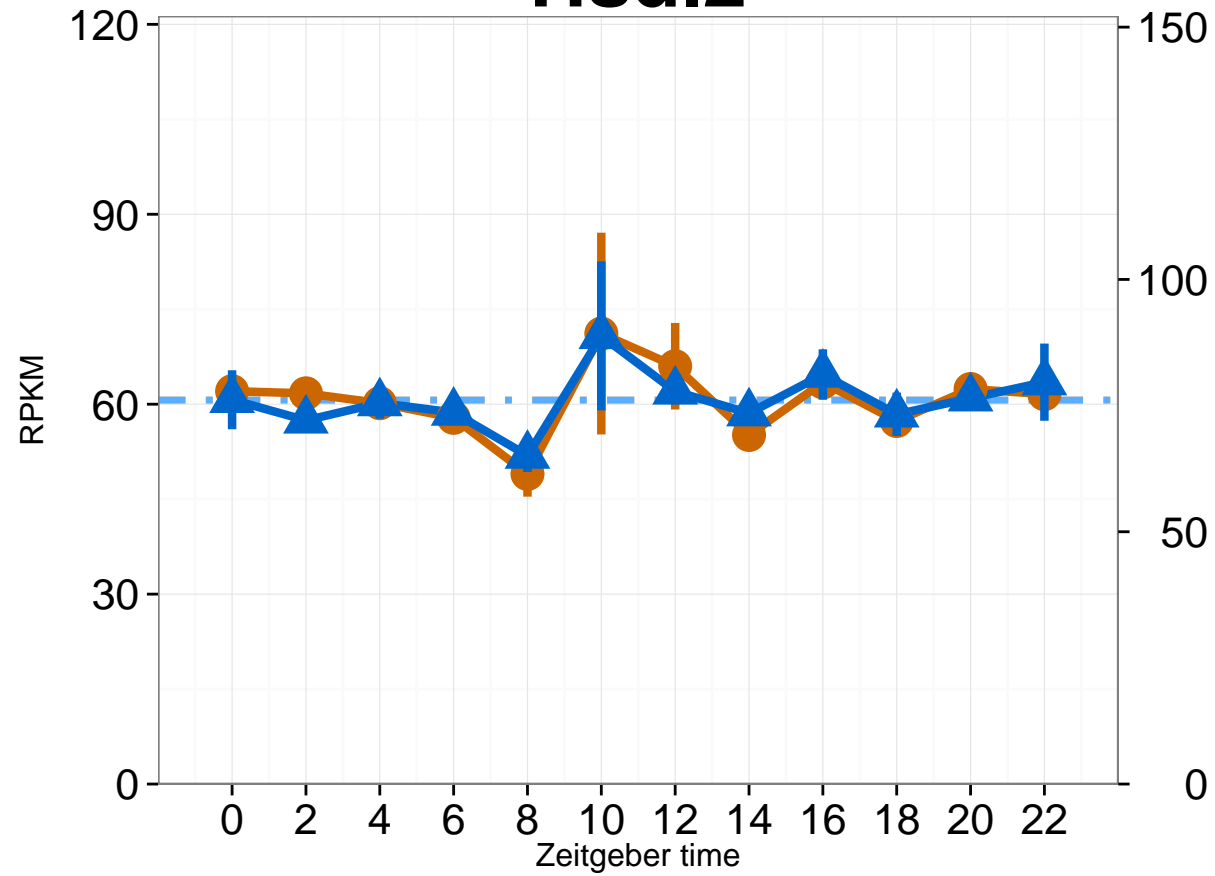

## HsdI2

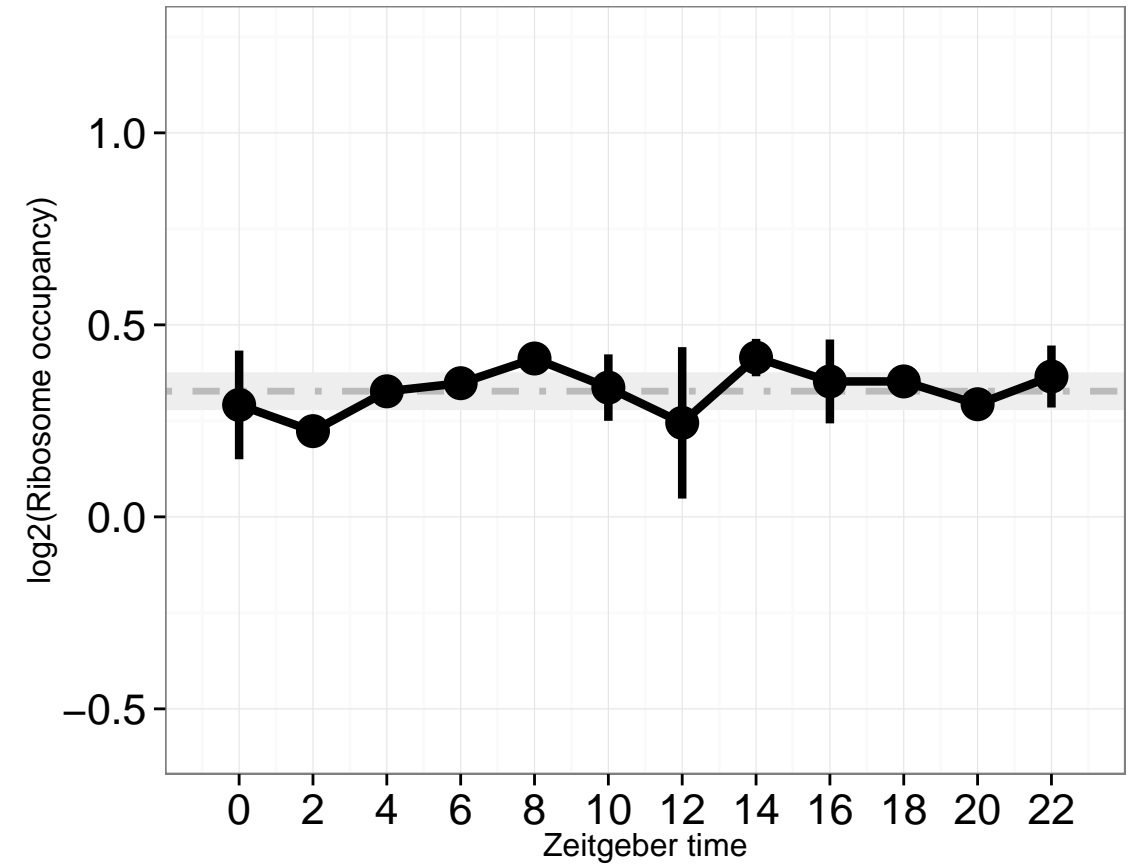

Supplement: Supplementary file 3013 [file 1]

## Ccdc64

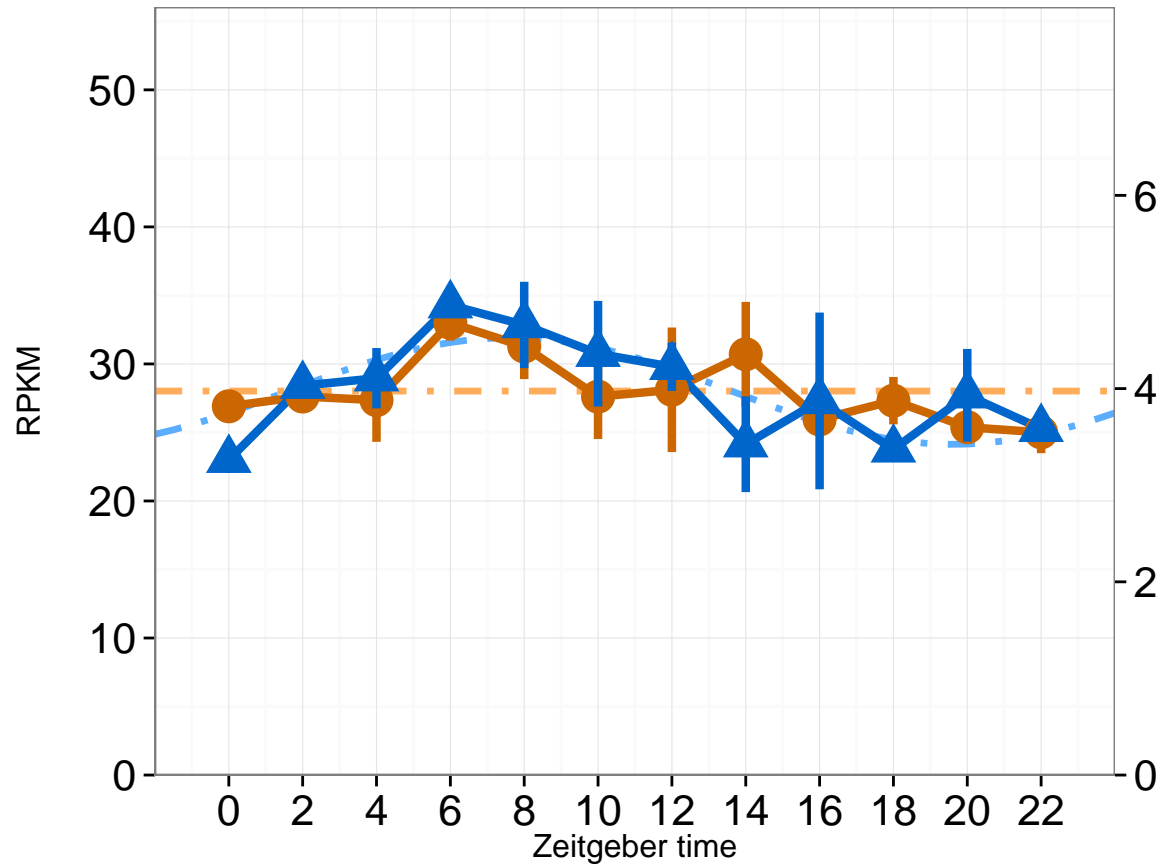

## Ccdc64

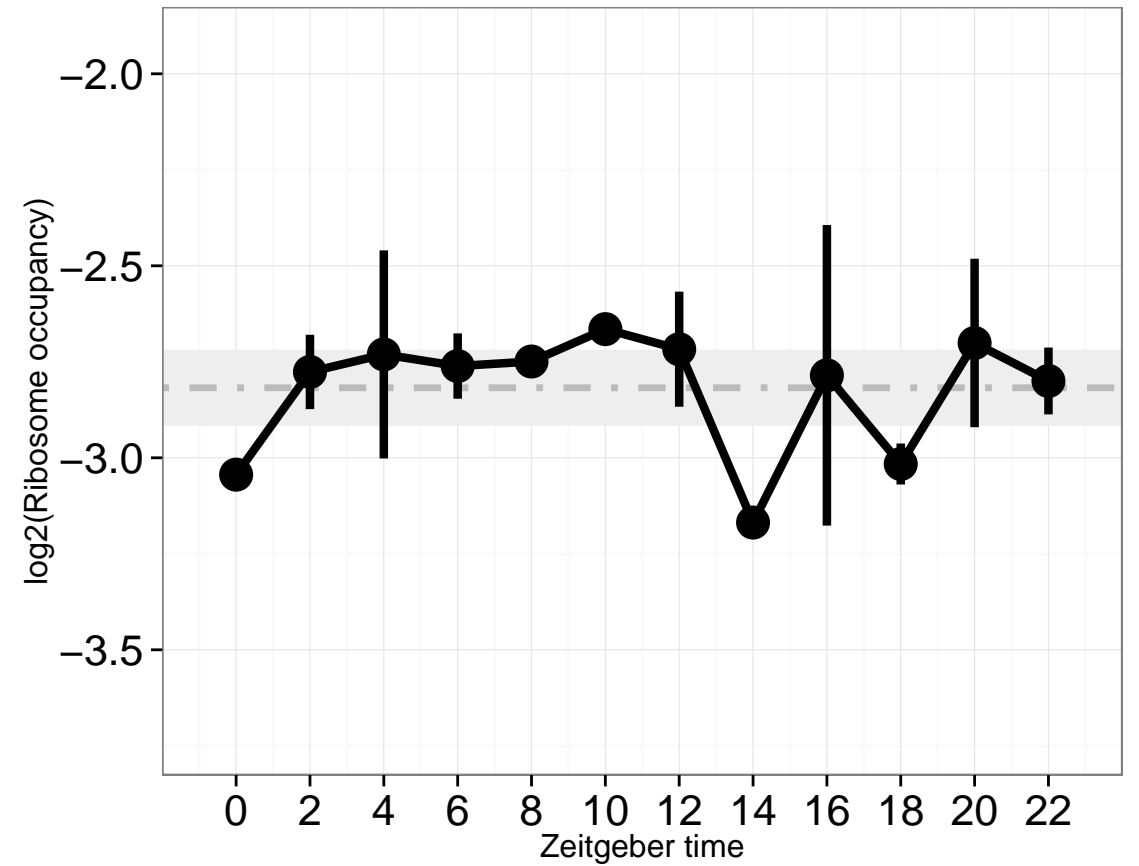

Supplement: Supplementary file 3014 [file 1]

## Ahcy

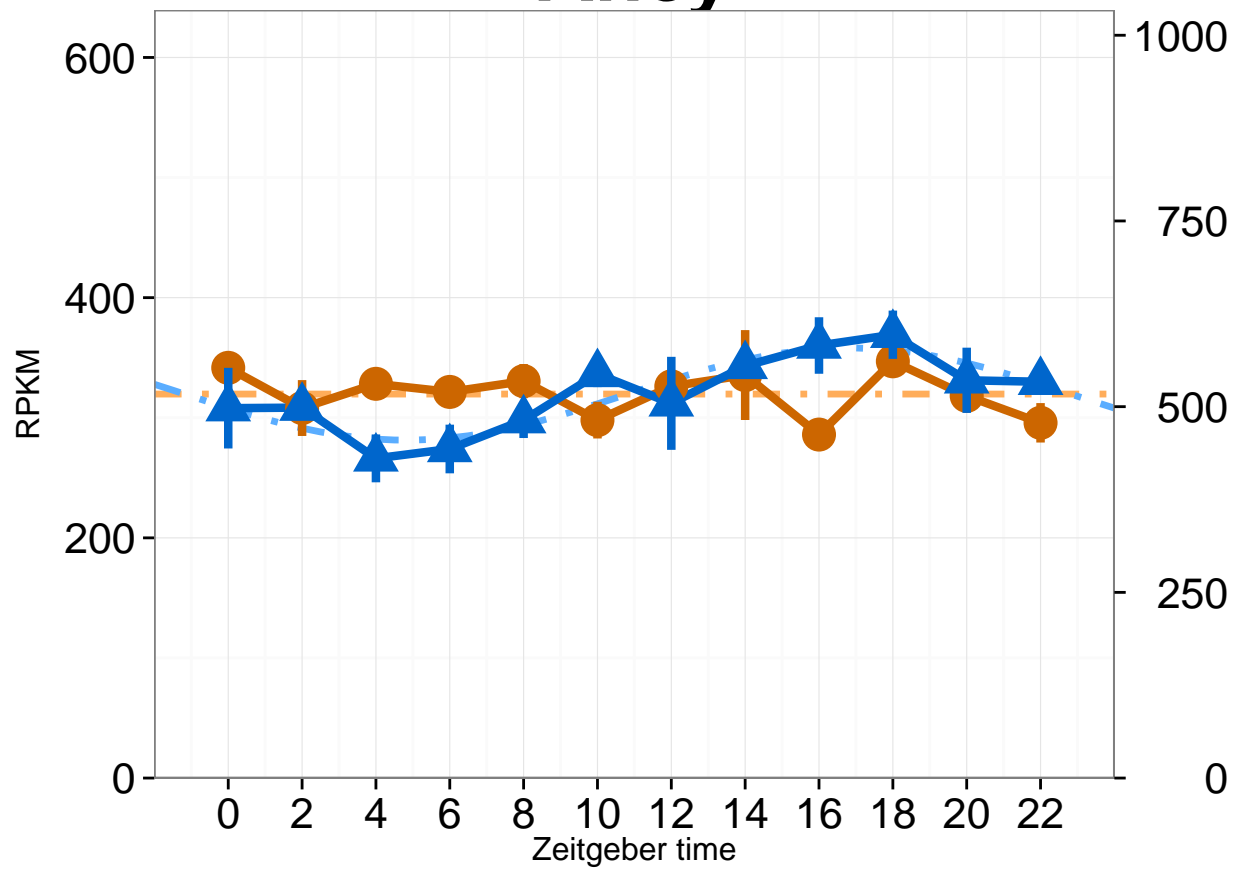

## Ahcy

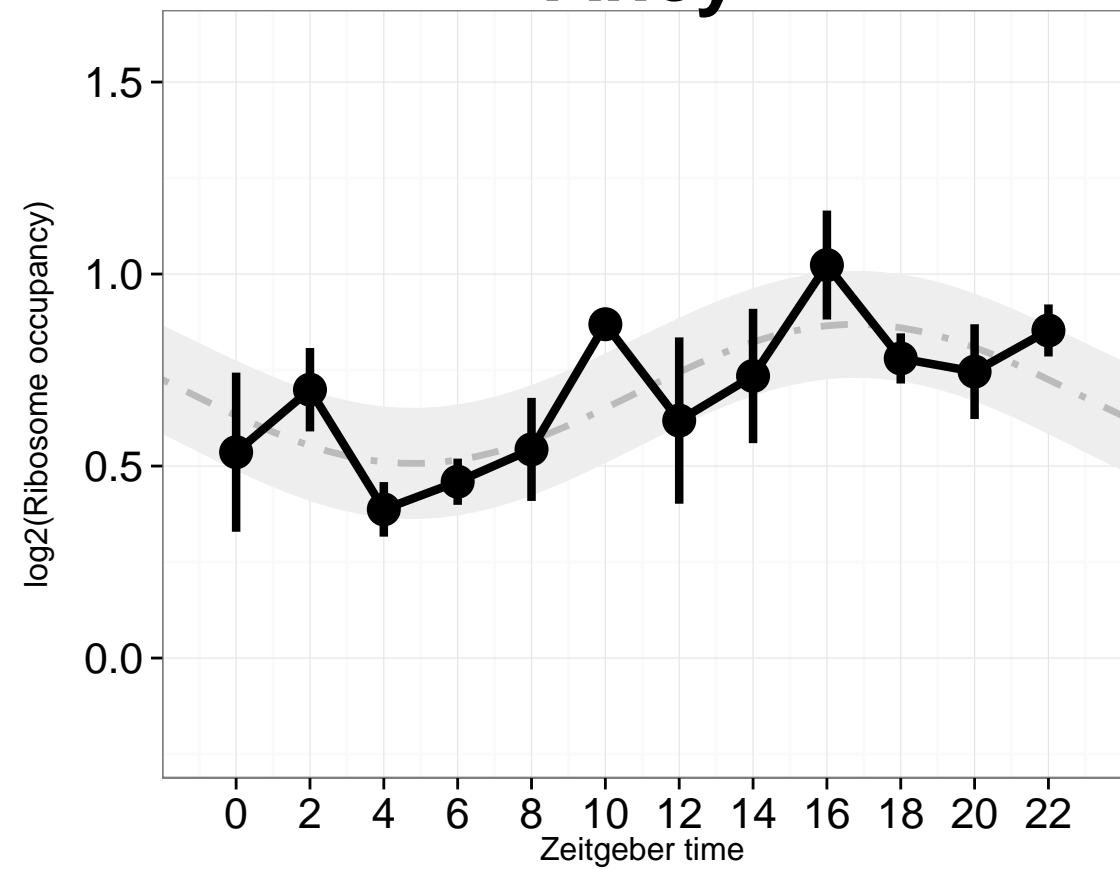

Supplement: Supplementary file 3015 [file 1]

## Mcm2

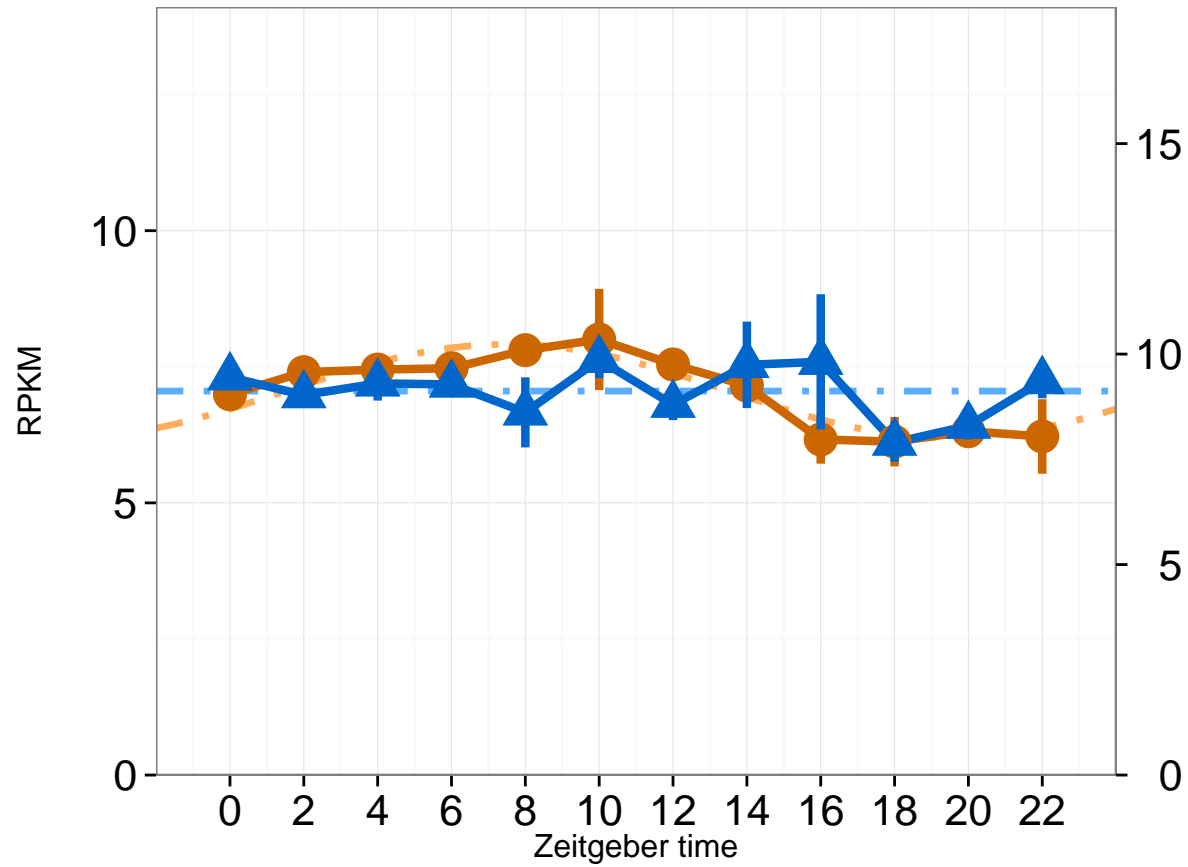

## Mcm2

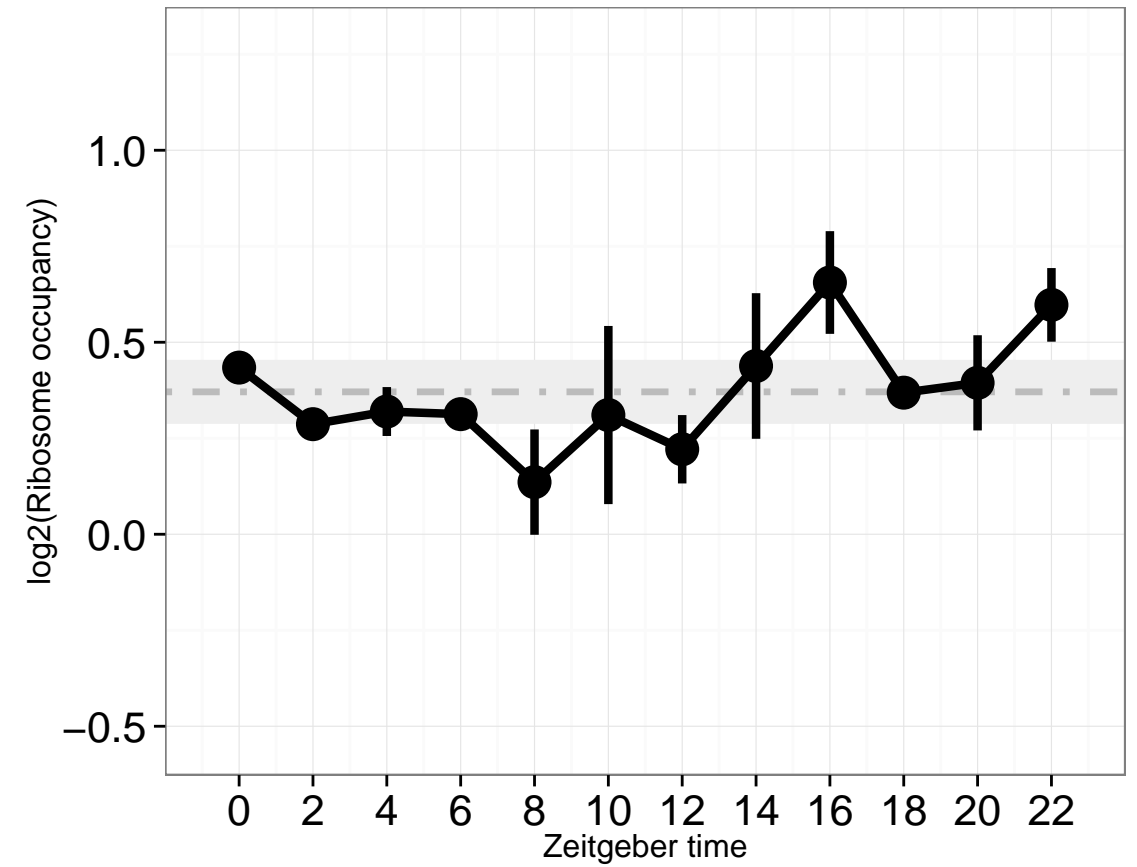

Supplement: Supplementary file 3016 [file 1]

## Ramp2

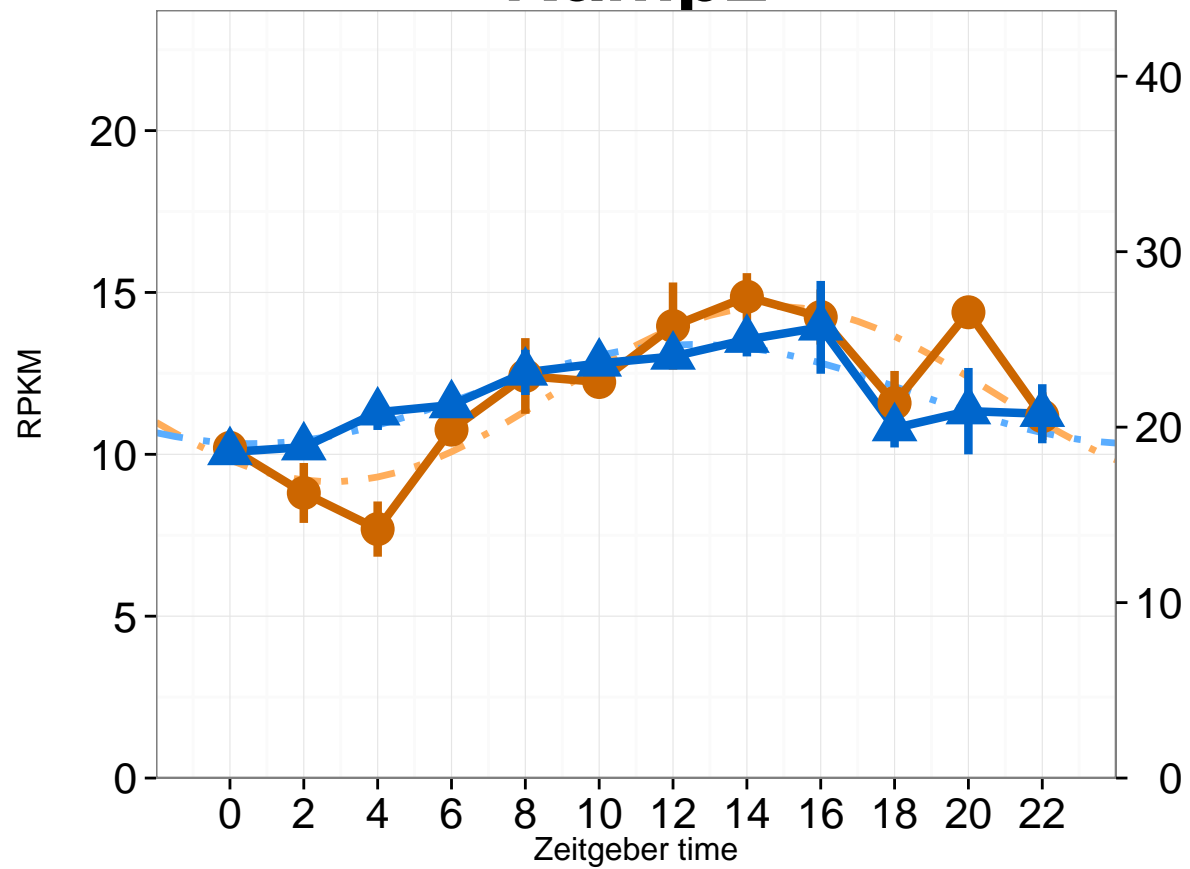

## Ramp2

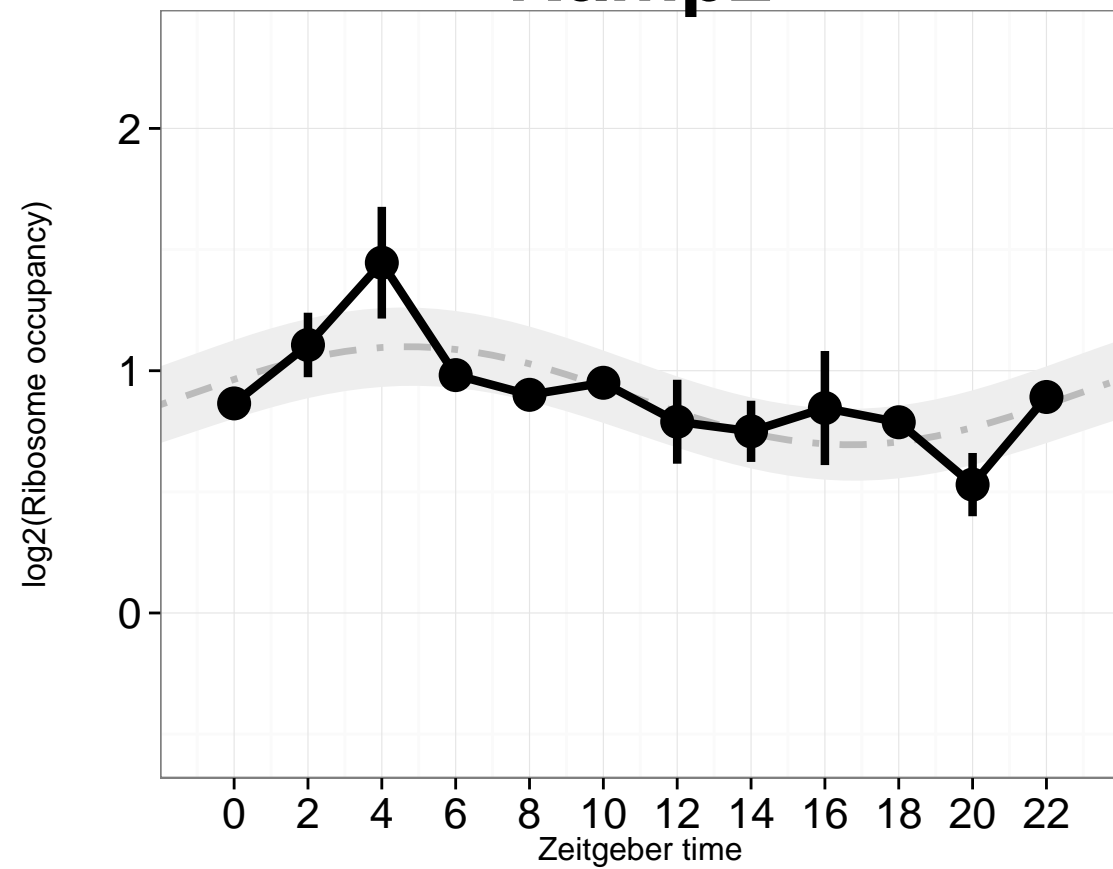

Supplement: Supplementary file 3017 [file 1]

## Plau

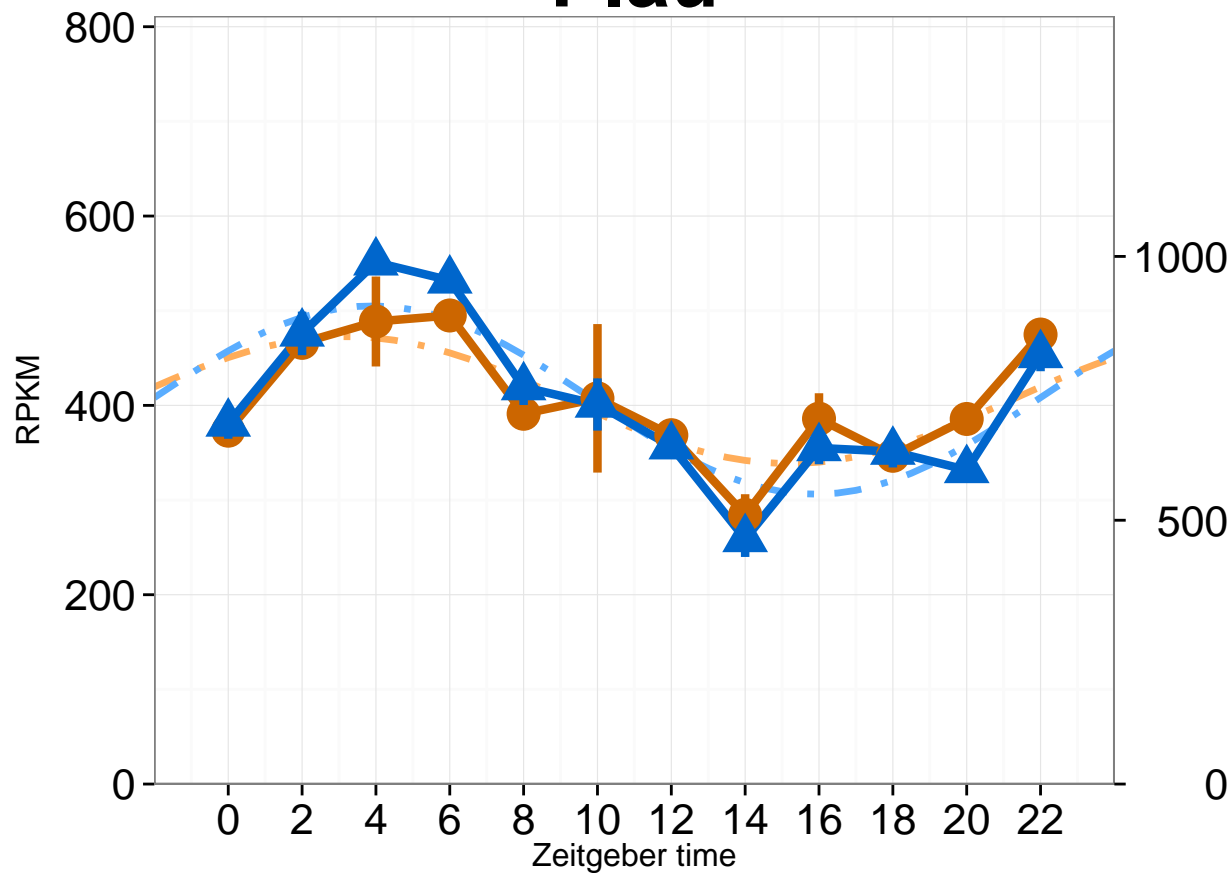

## Plau

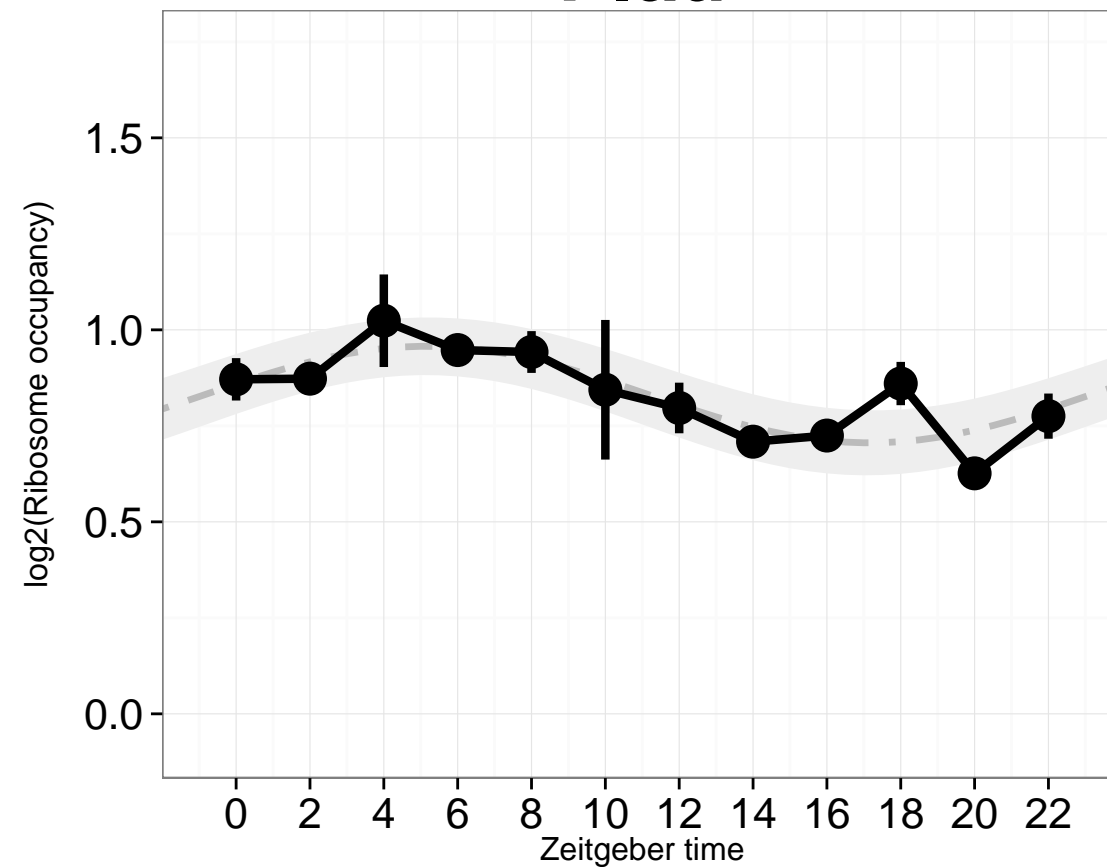

Supplement: Supplementary file 3018 [file 1]

# Capn1

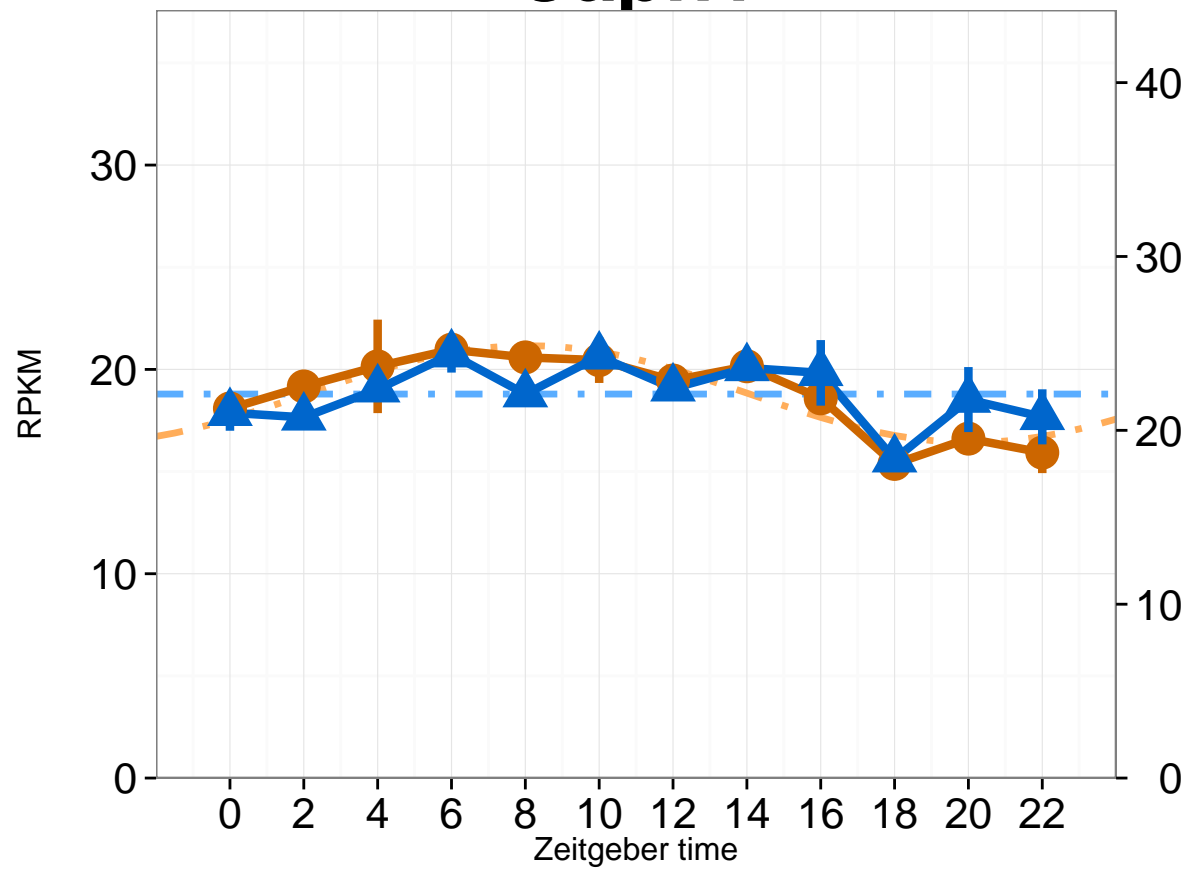

# Capn1

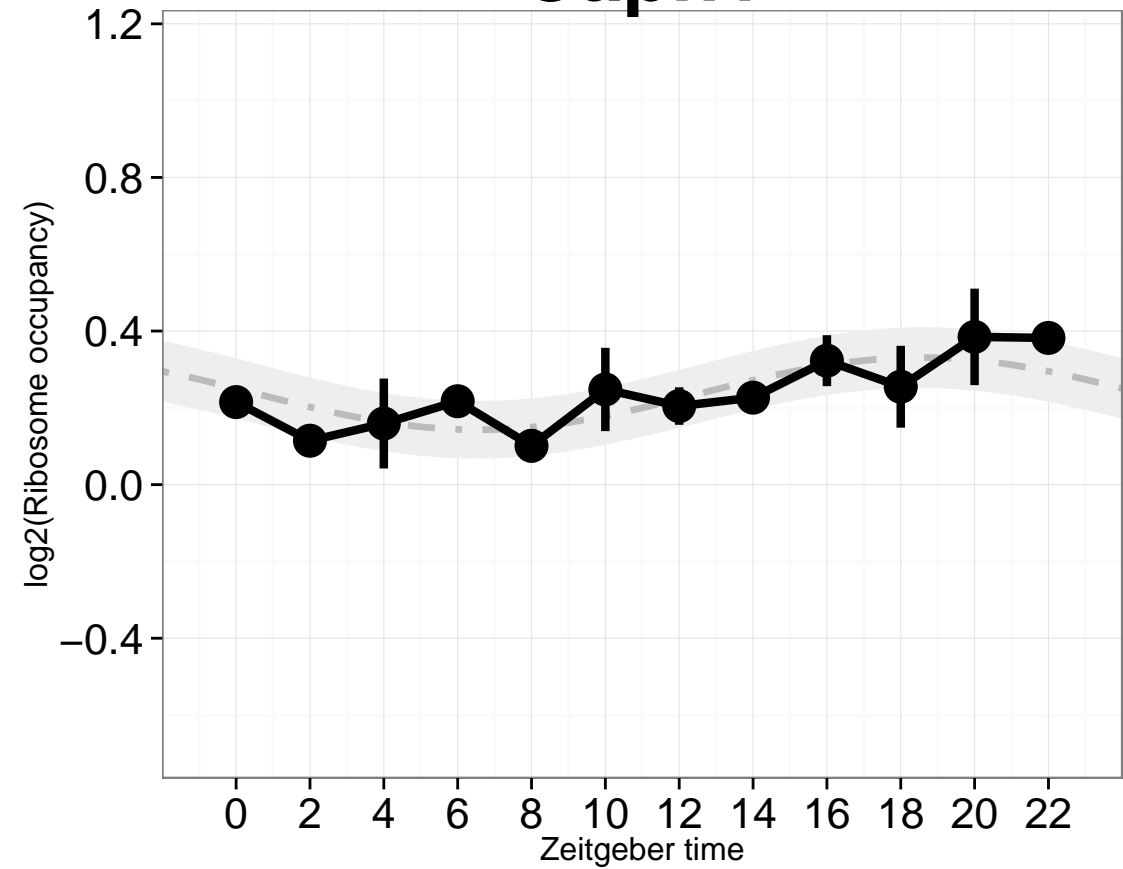

Supplement: Supplementary file 3019 [file 1]

## Rhbdl3

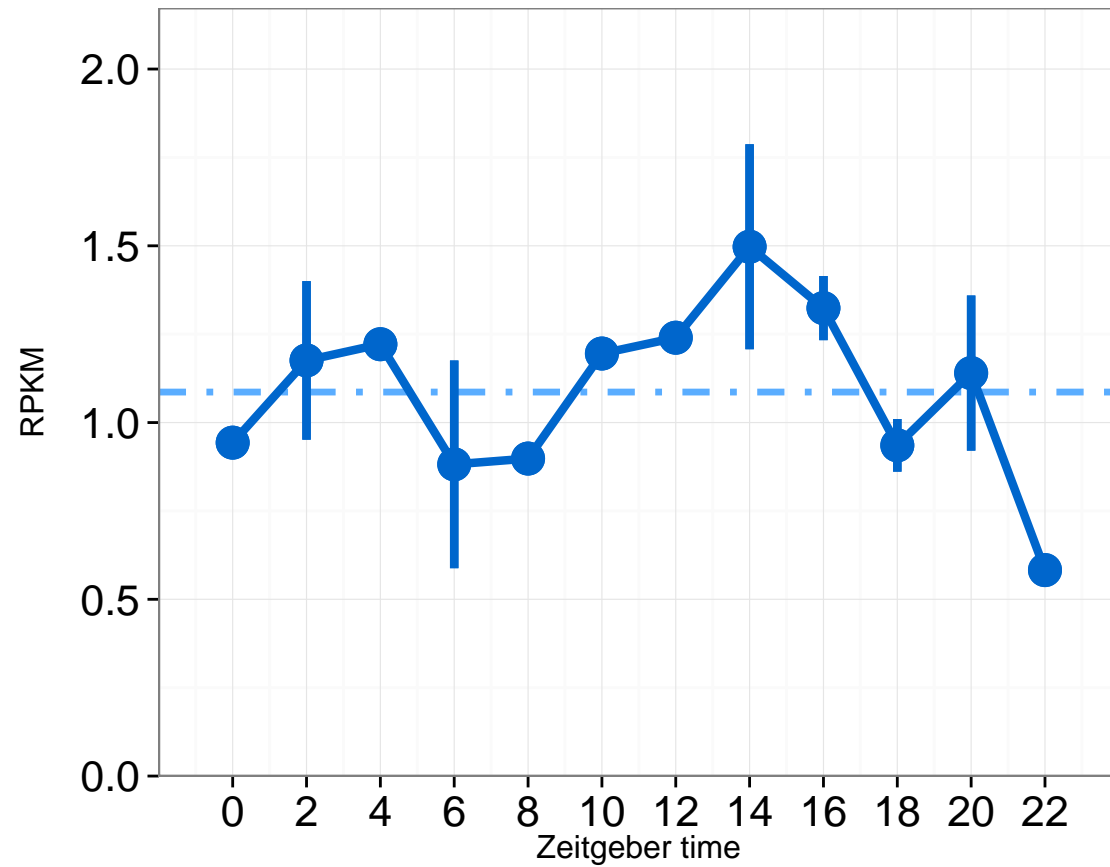

## Rhbdl3 log2(Ribosome occupancy

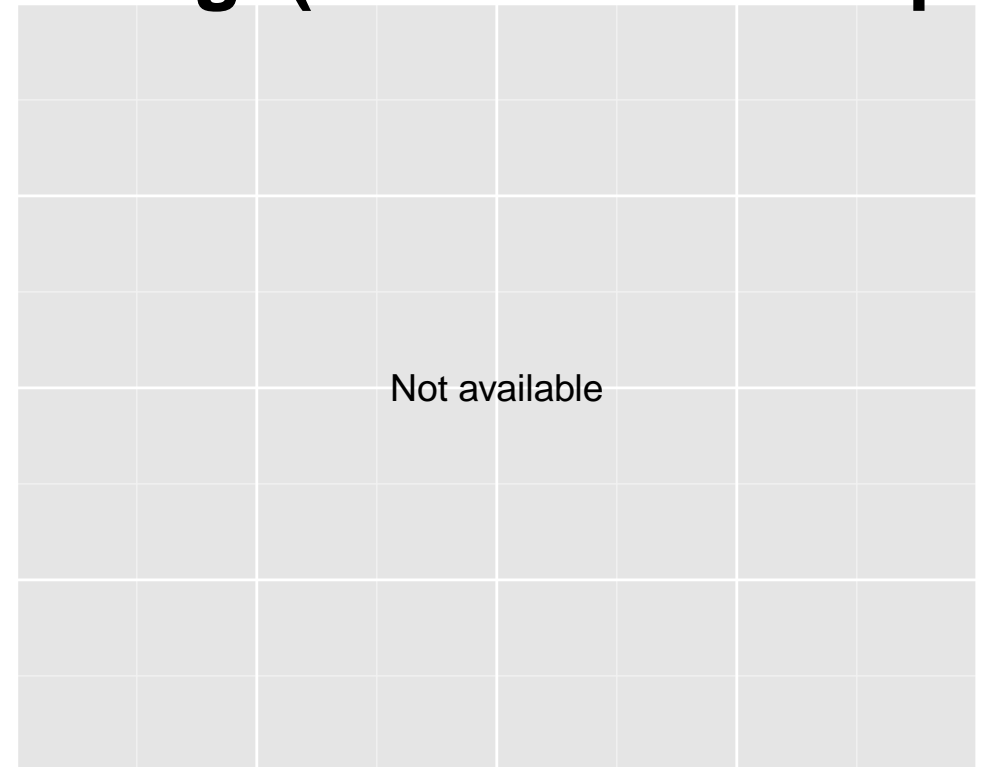

Supplement: Supplementary file 3020 [file 1]

# Eif3m

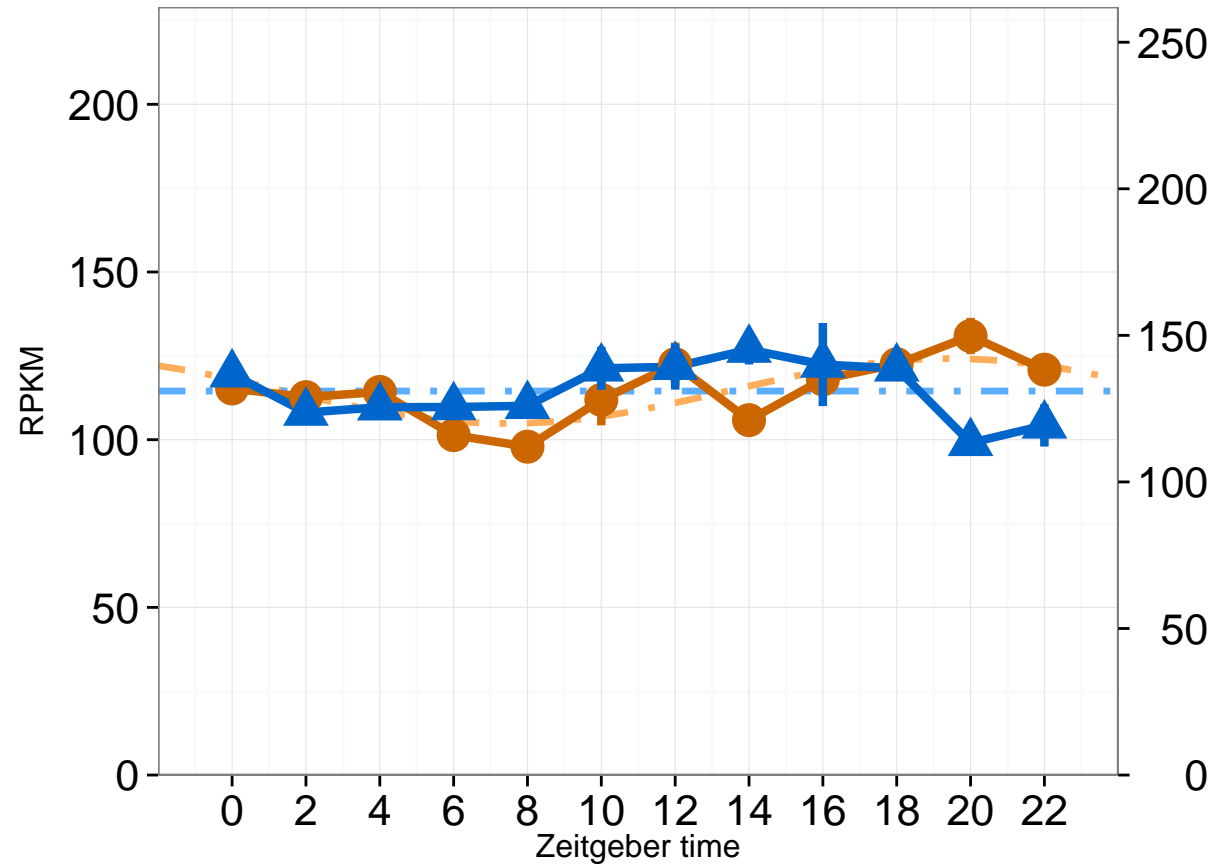

# Eif3m

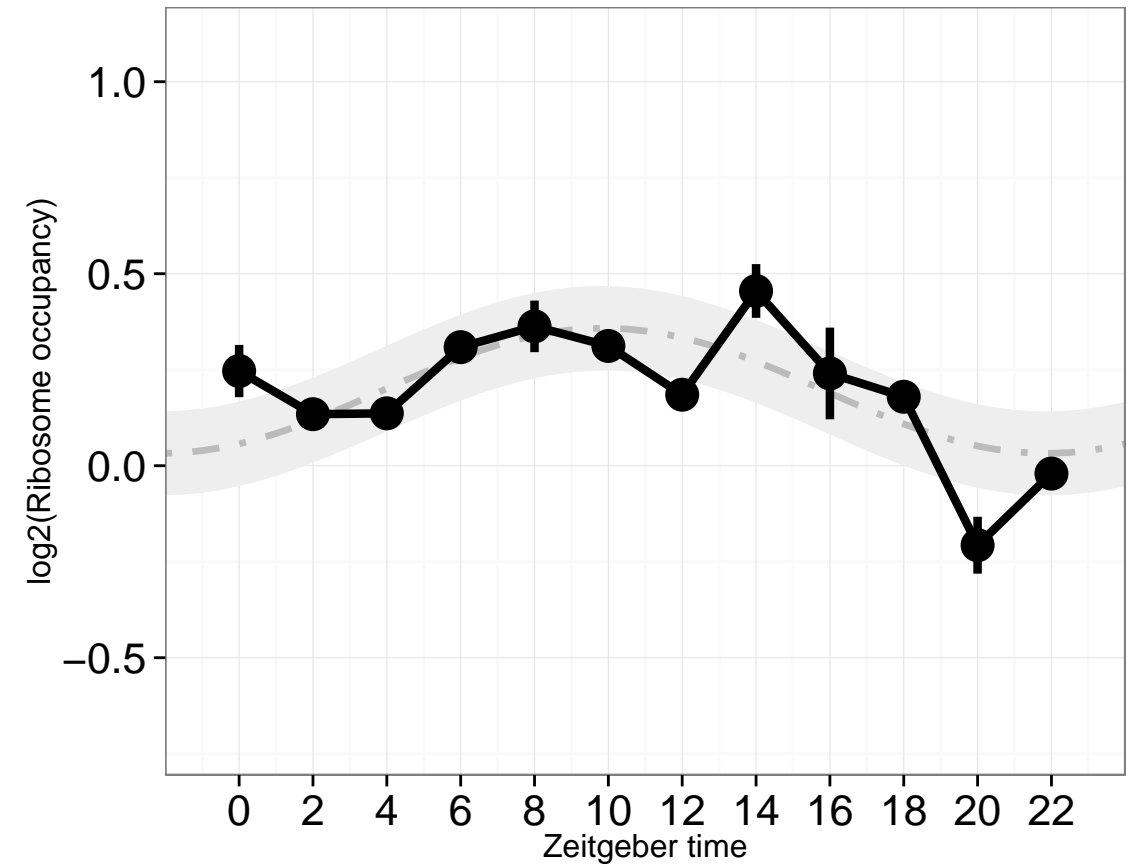

Supplement: Supplementary file 3021 [file 1]

# Ndufab1

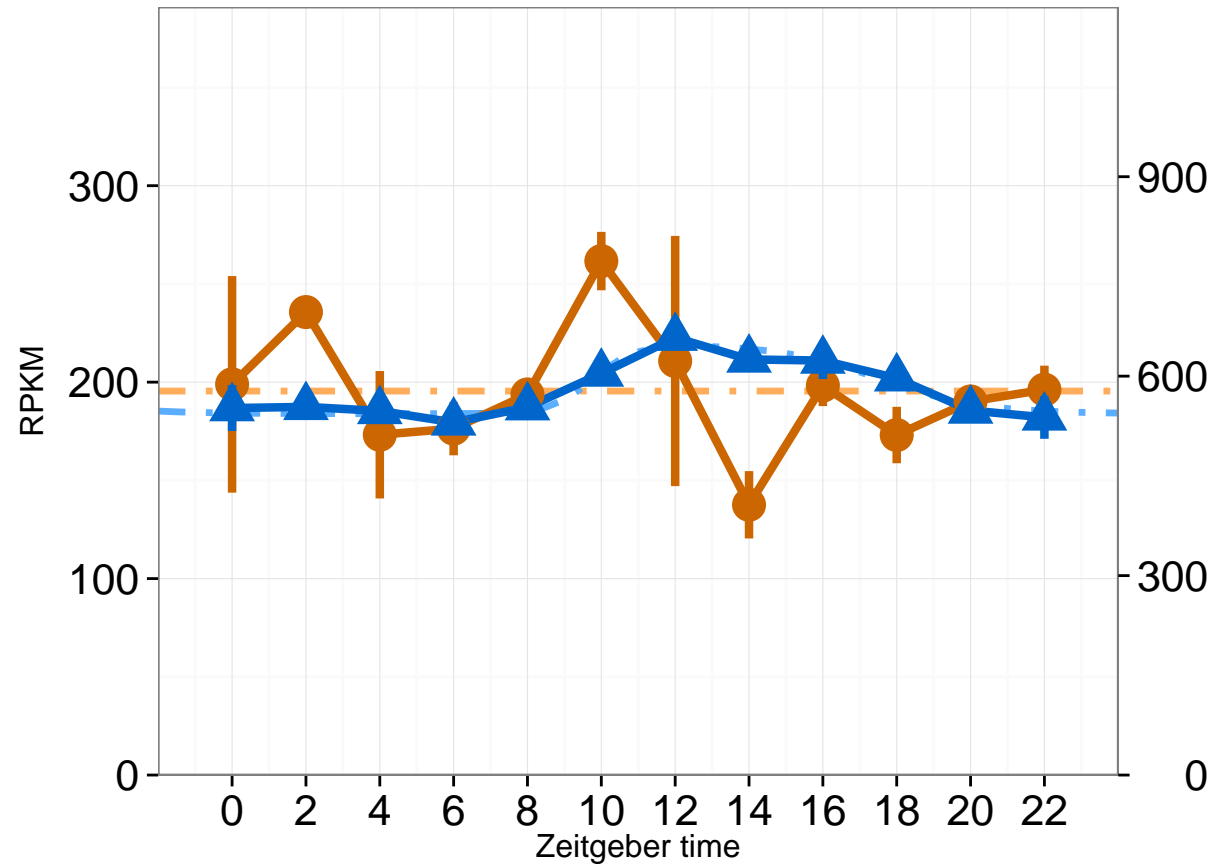

# Ndufab1

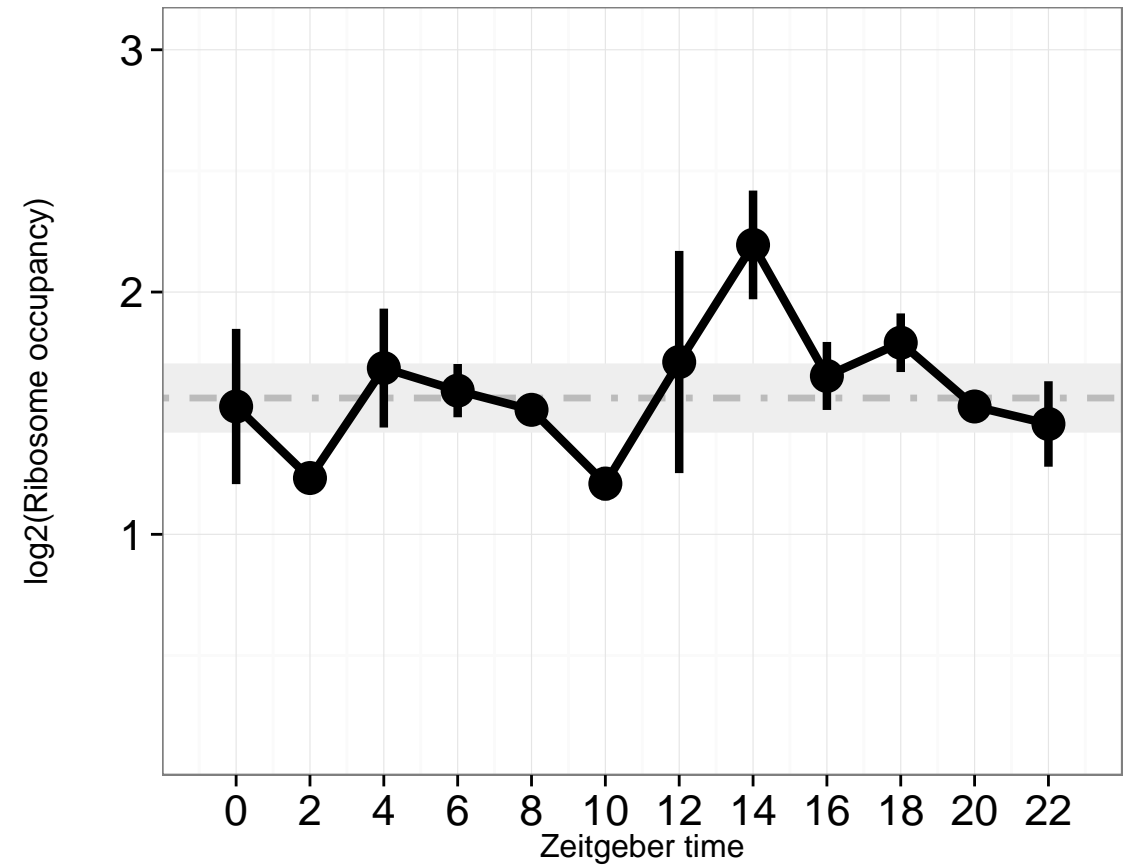

Supplement: Supplementary file 3022 [file 1]

## Ago1

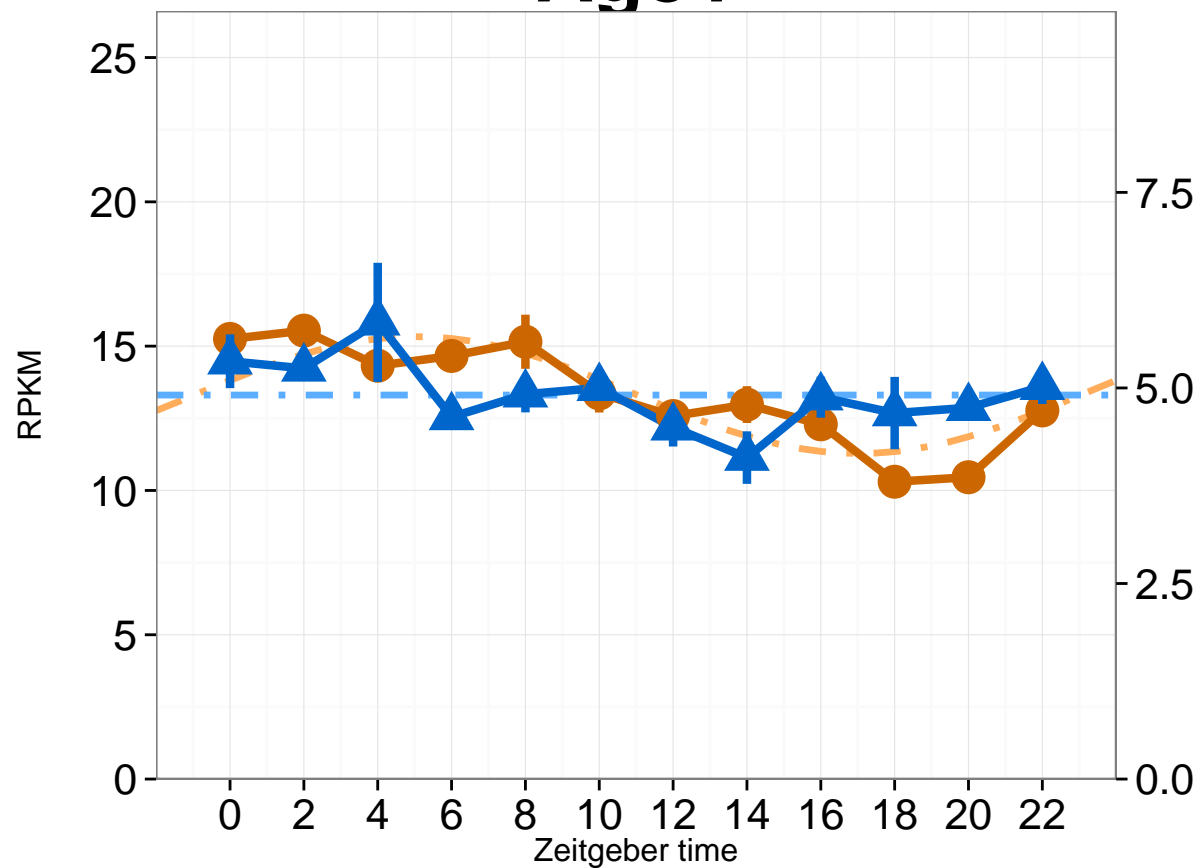

## Ago1

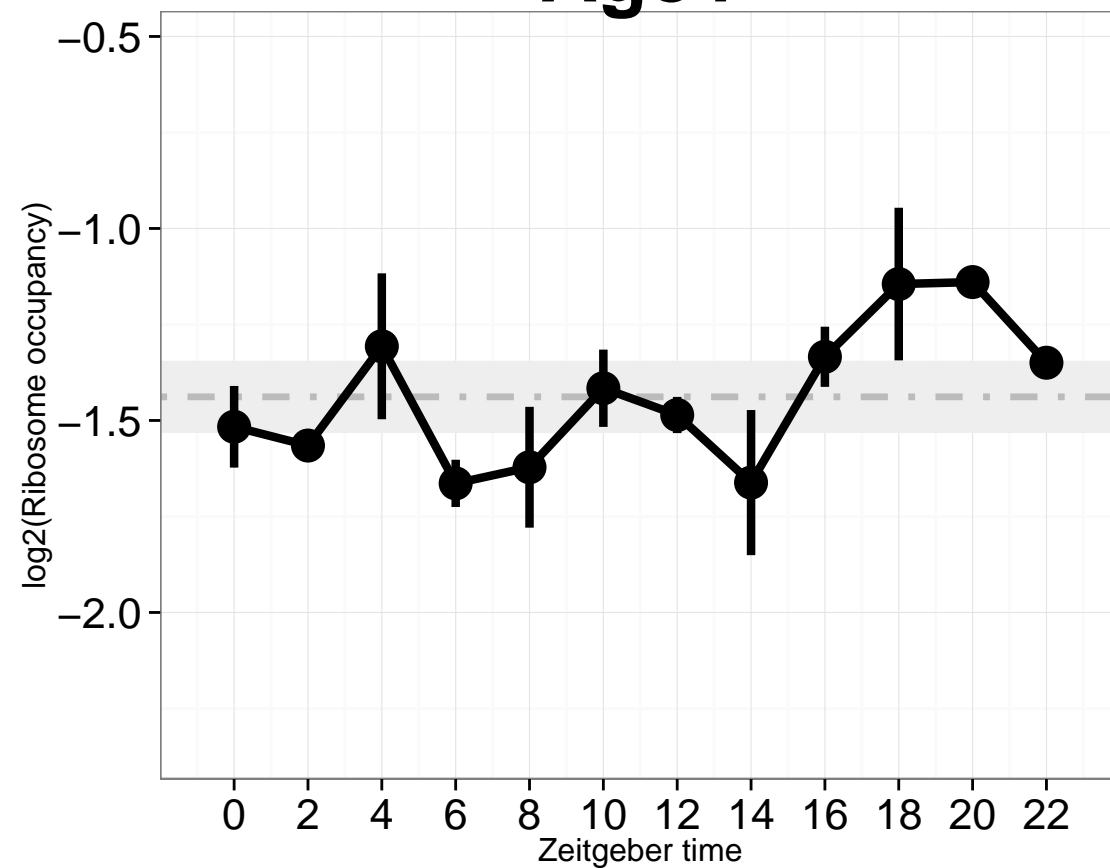

Supplement: Supplementary file 3023 [file 1]

# Srcap

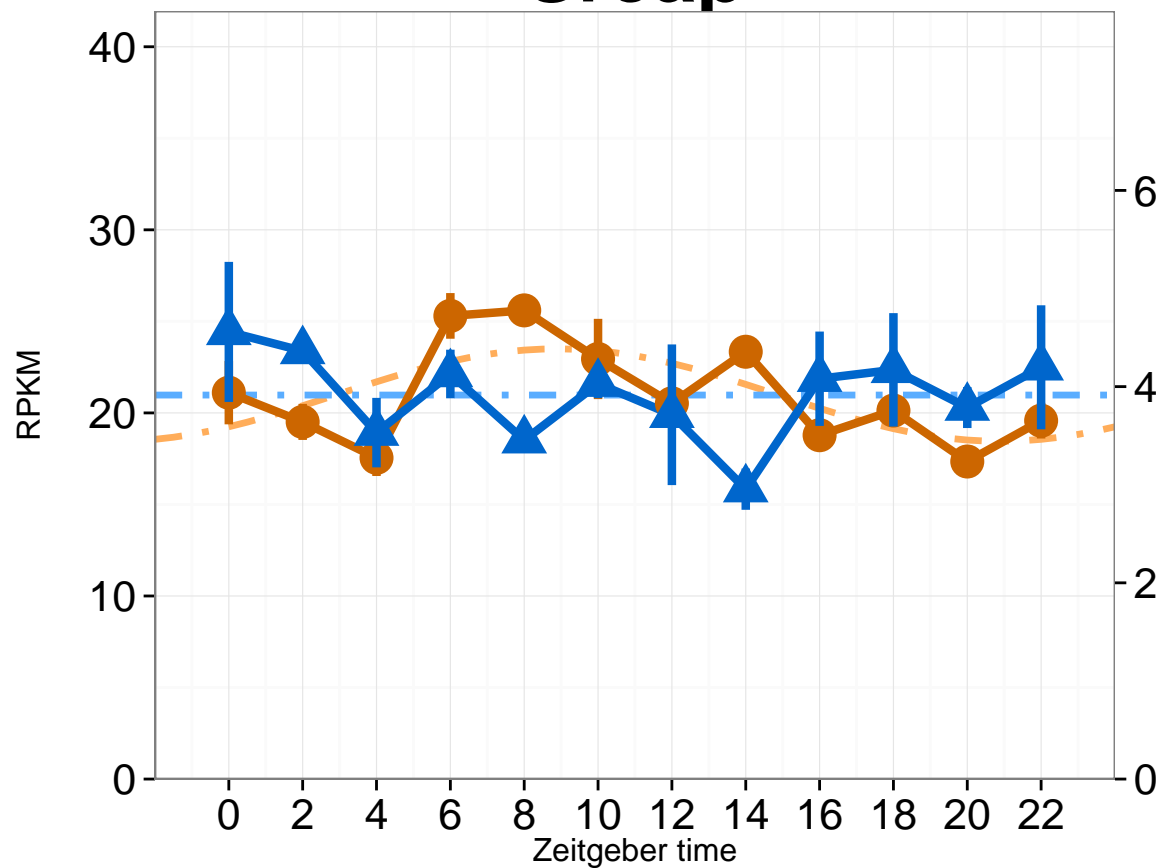

# Srcap

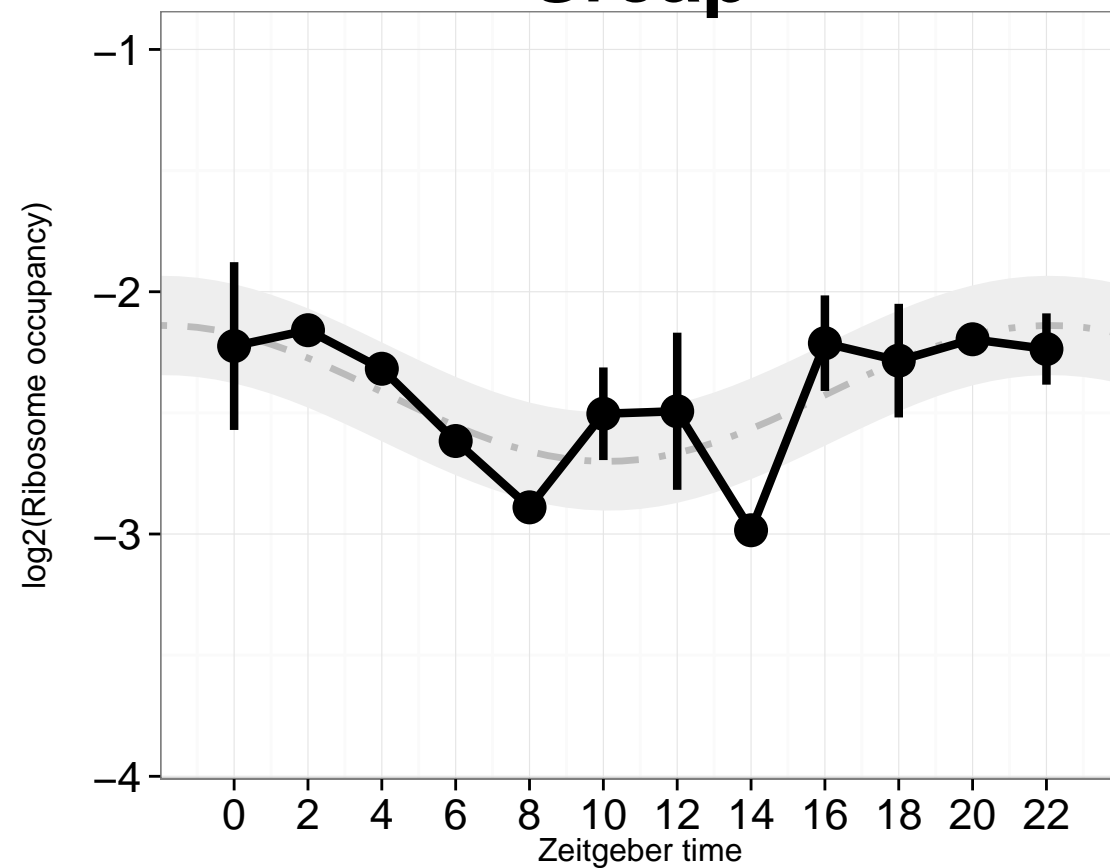

Supplement: Supplementary file 3024 [file 1]

## Tcp11l2

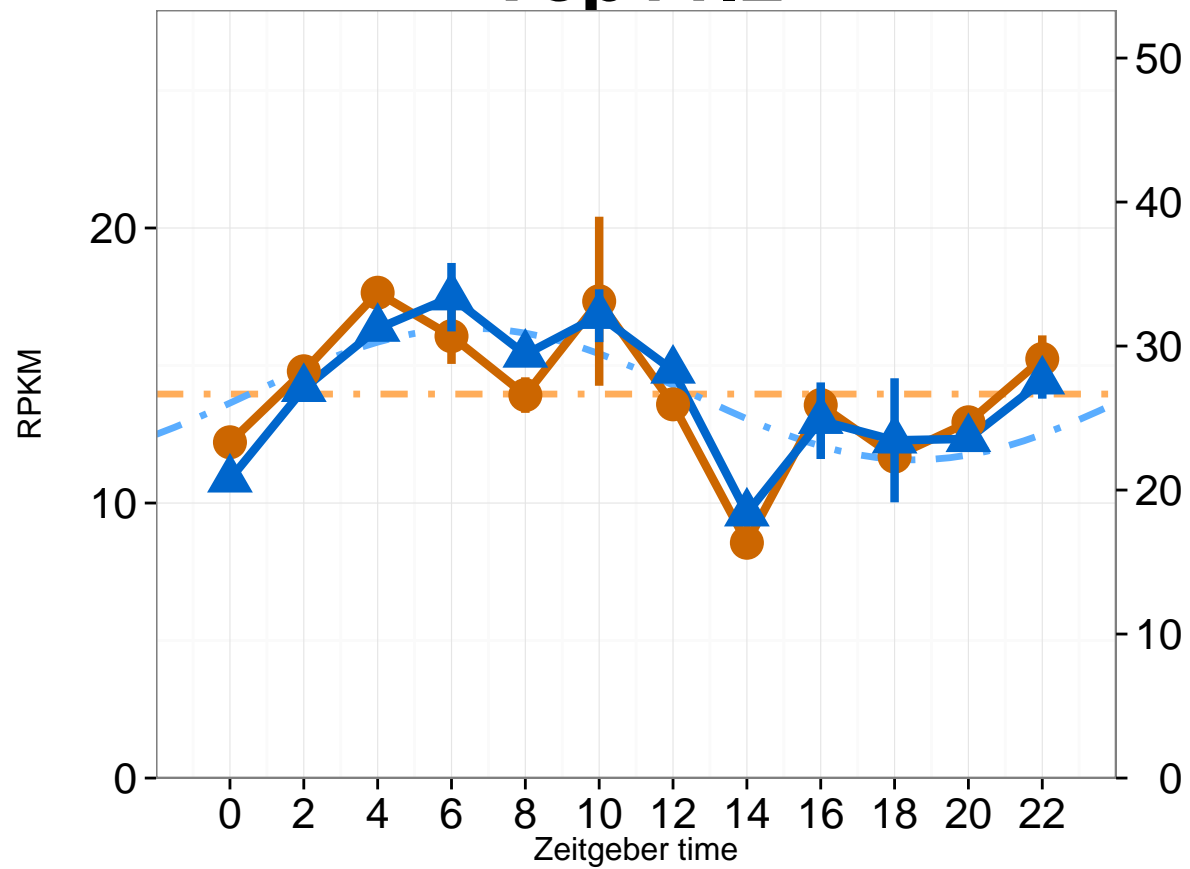

## Tcp11l2

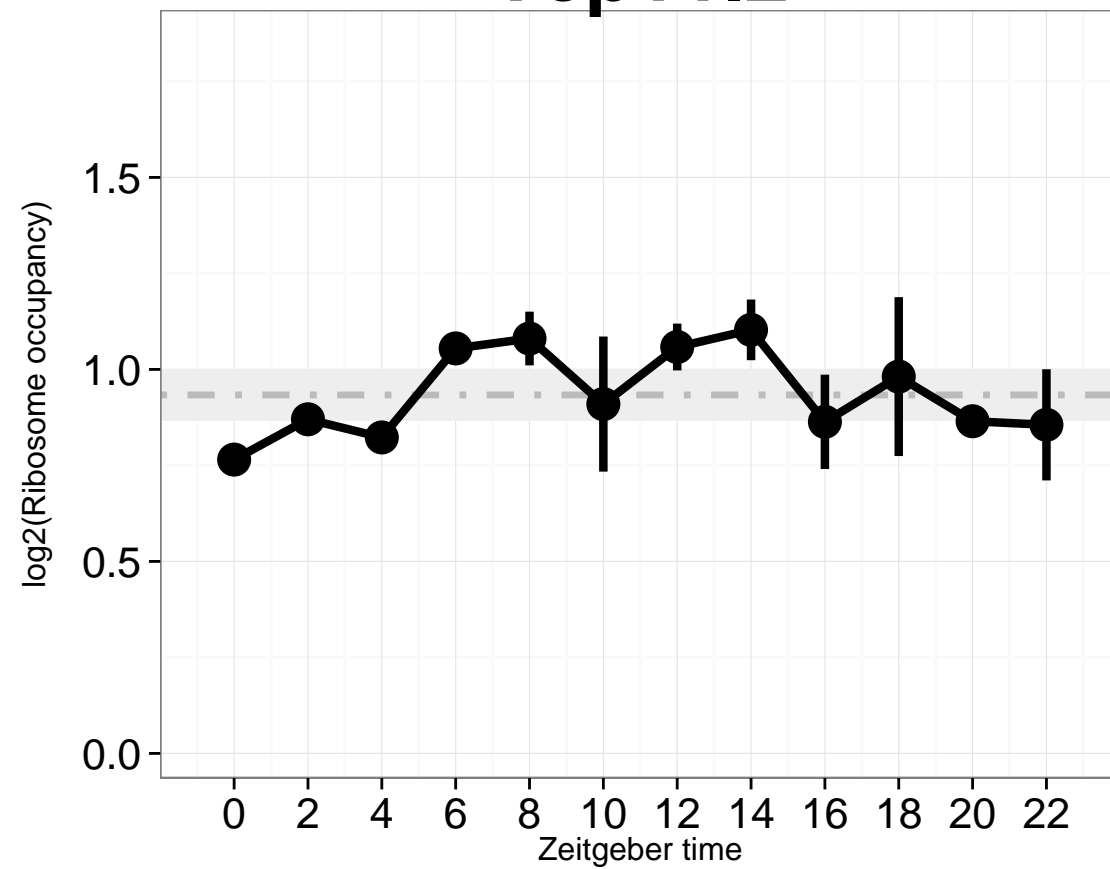

Supplement: Supplementary file 3025 [file 1]

## Srgap2

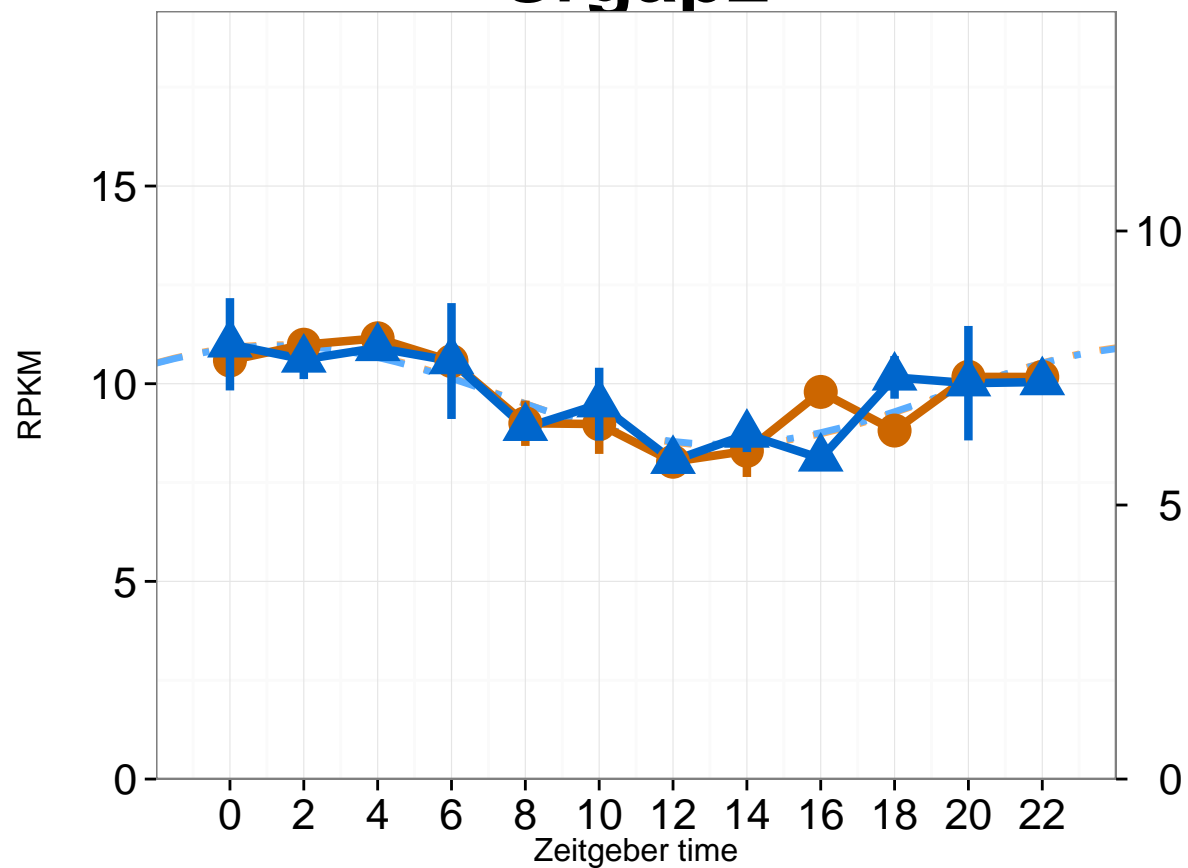

## Srgap2

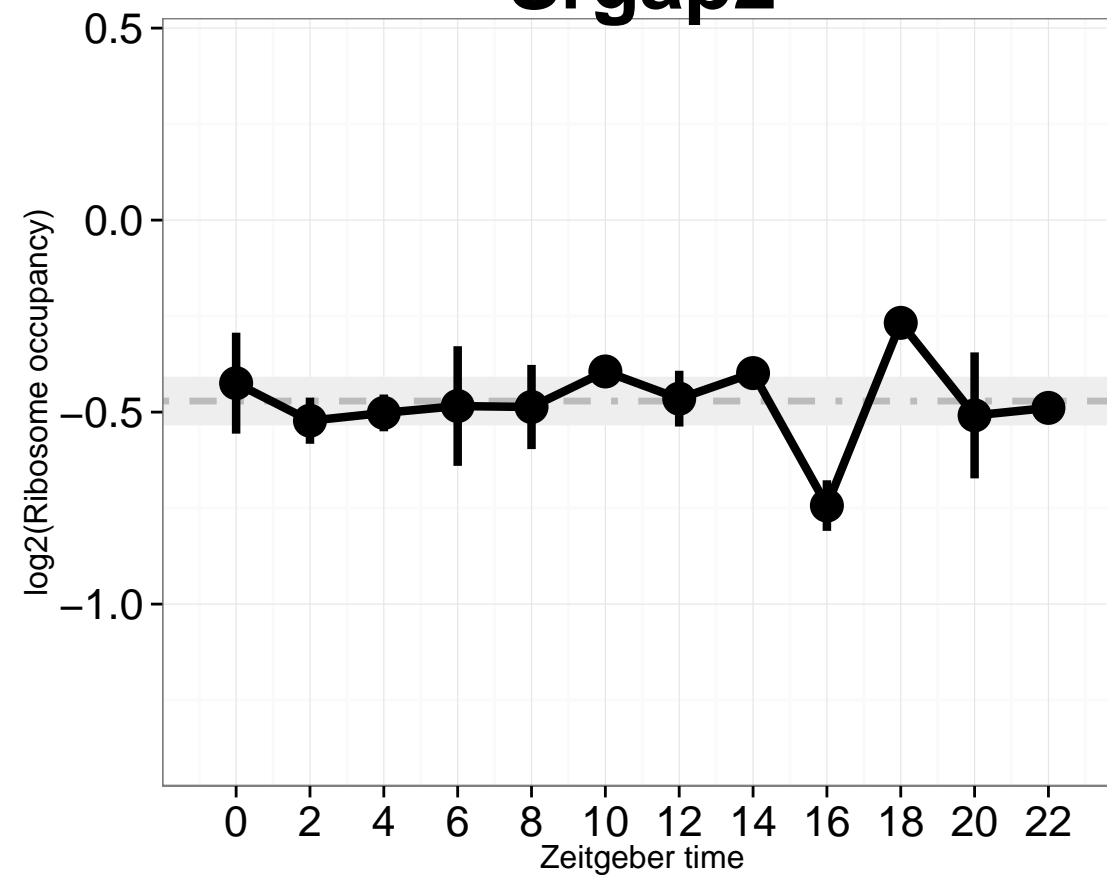

Supplement: Supplementary file 3026 [file 1]

## Npr1

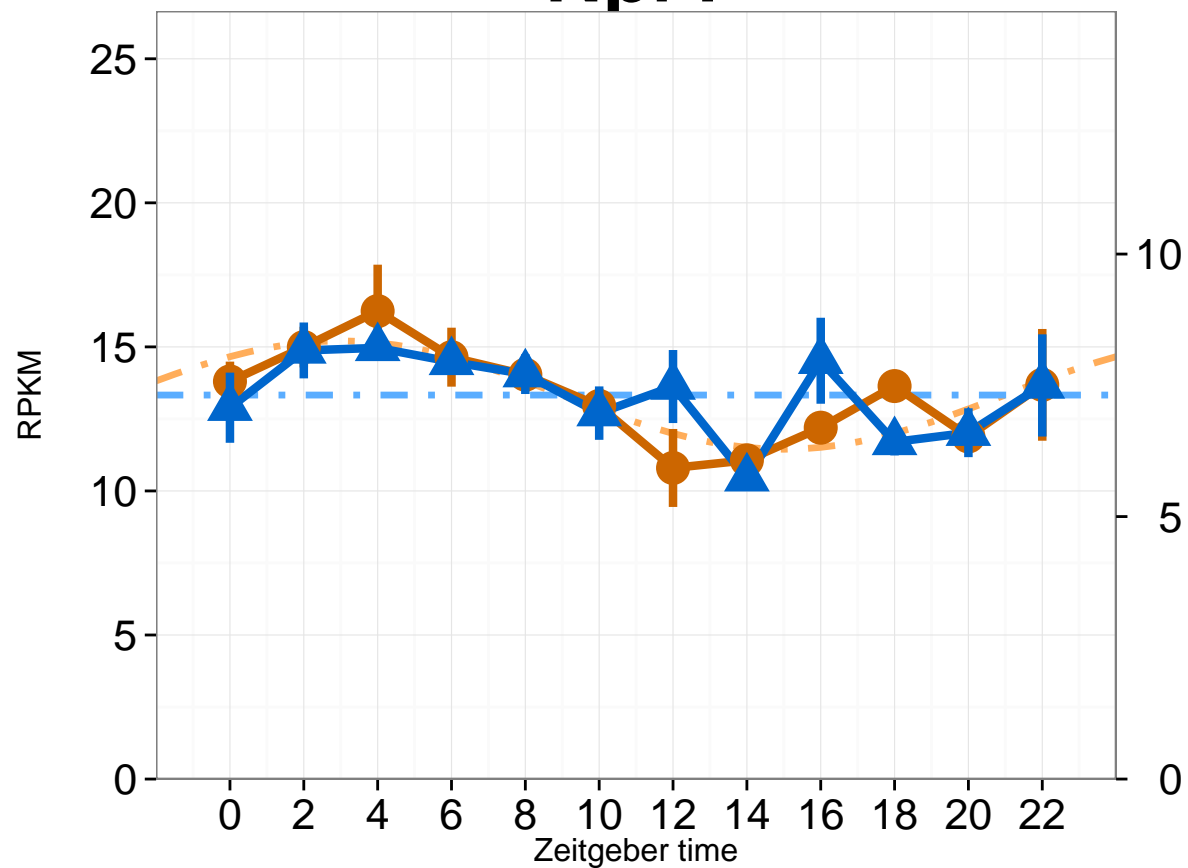

## Npr1

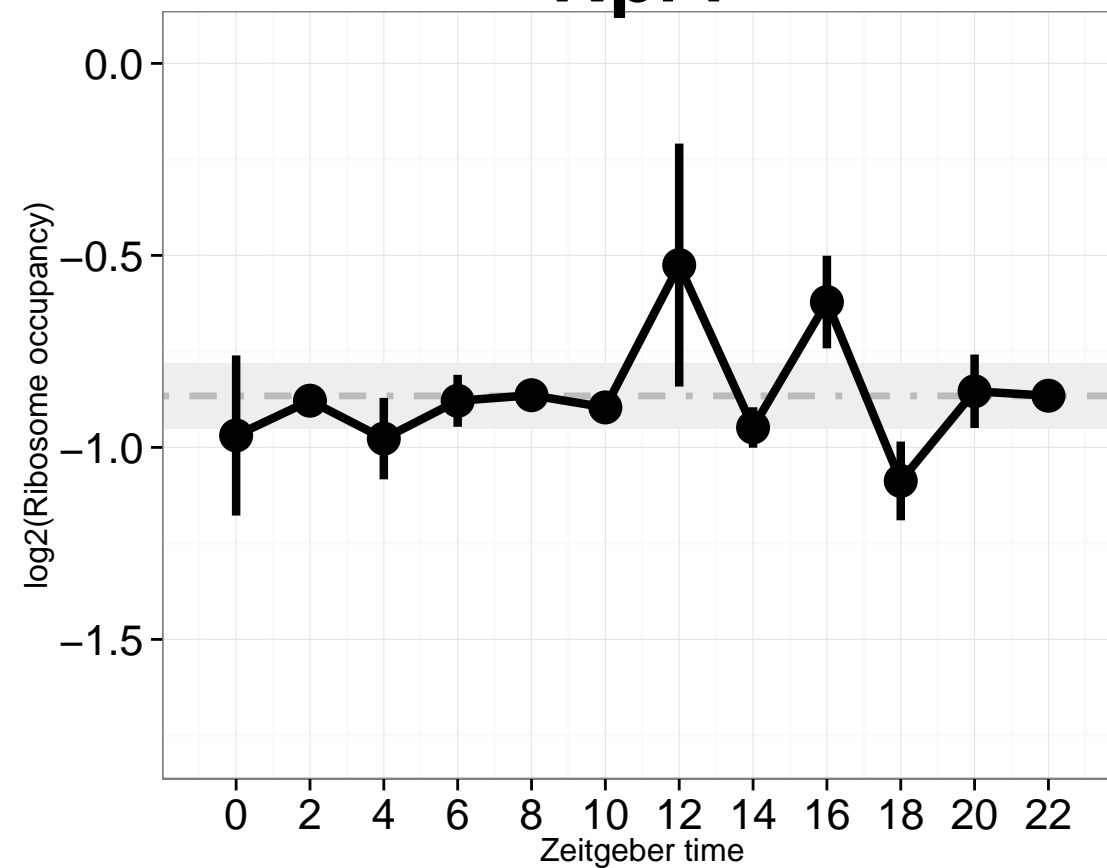

Supplement: Supplementary file 3027 [file 1]

# Slc35c1

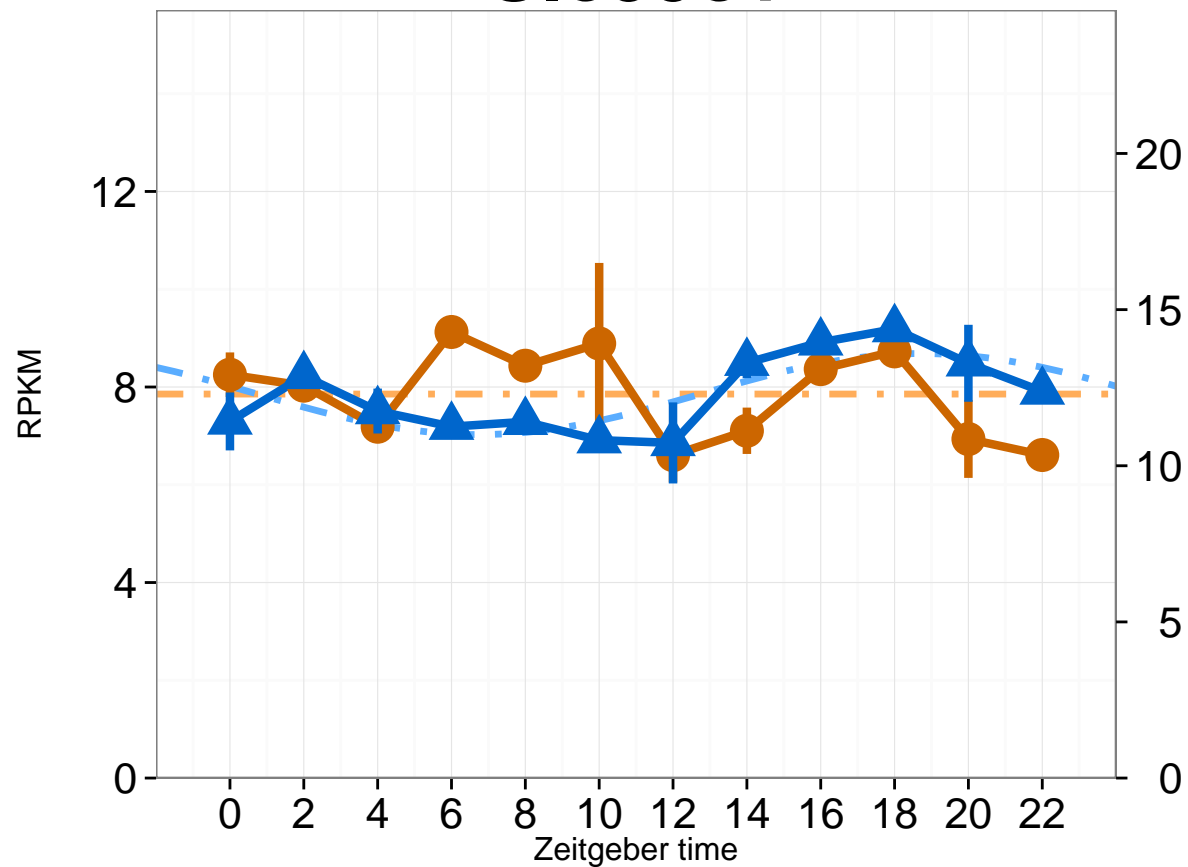

# Slc35c1

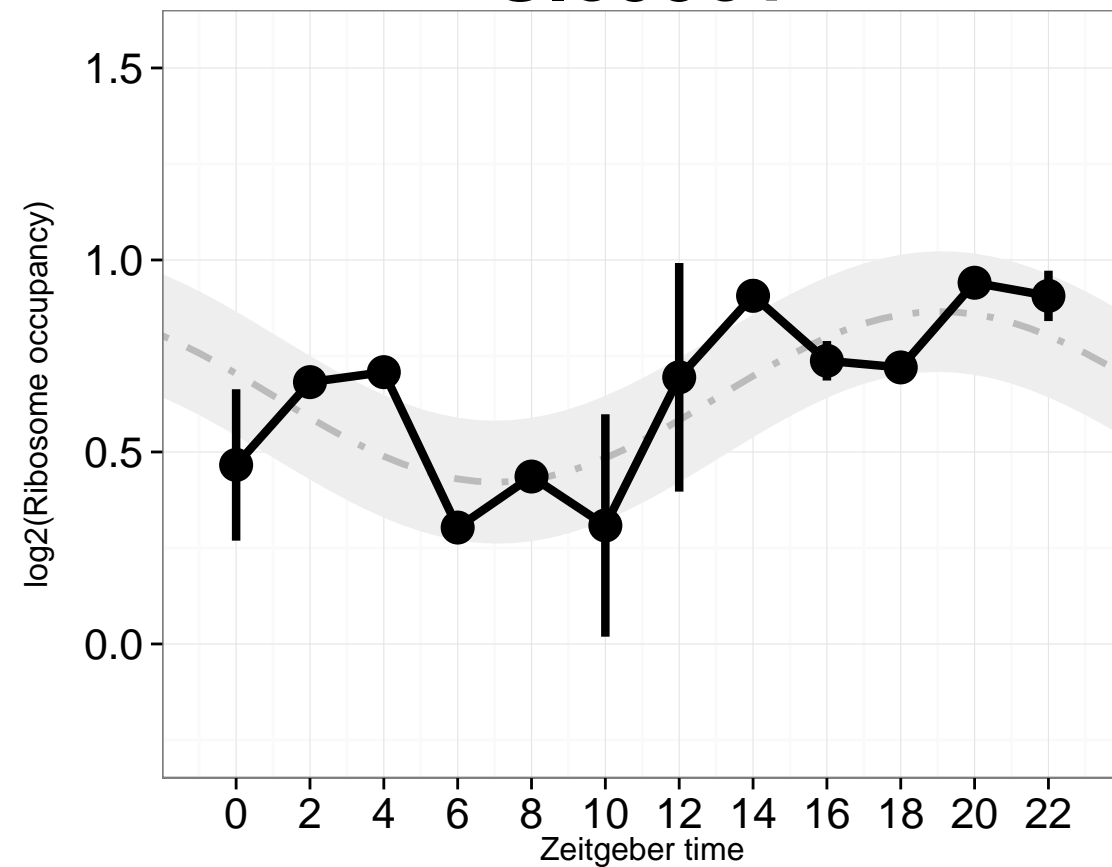

Supplement: Supplementary file 3028 [file 1]

## Etv4

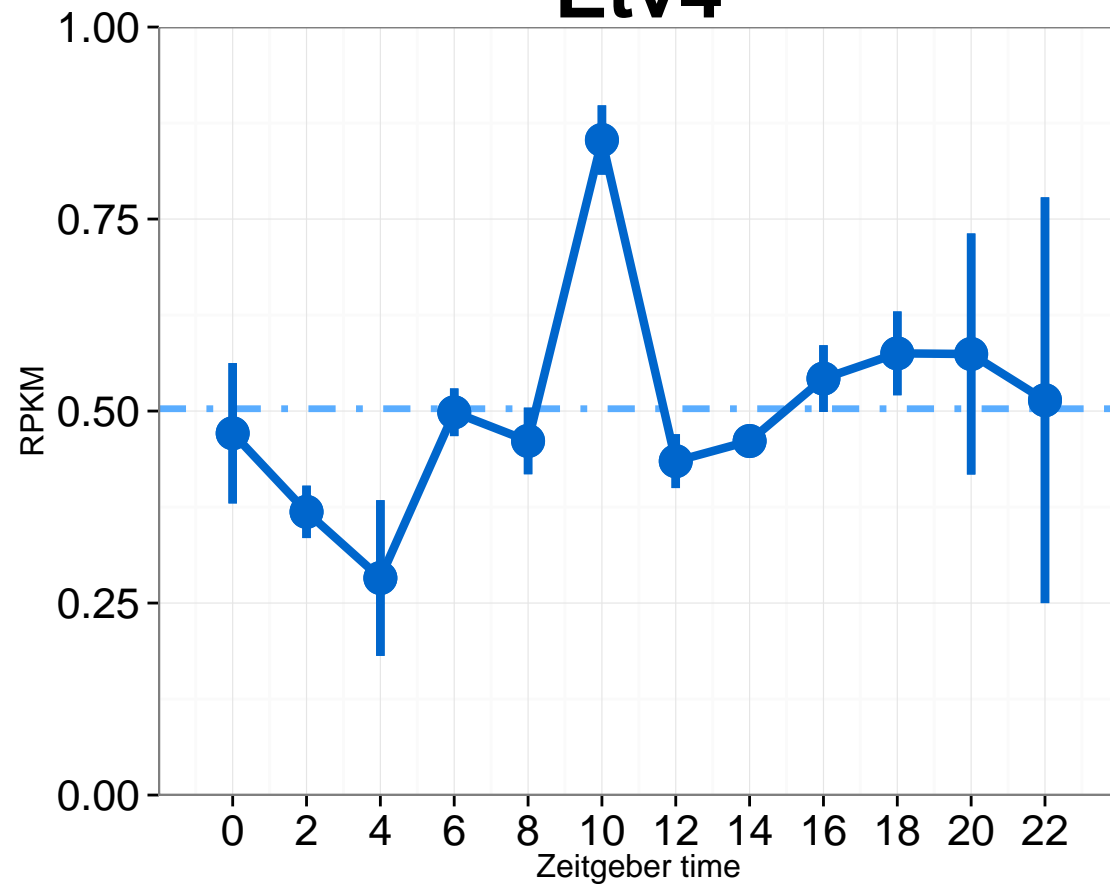

## Etv4 log2(Ribosome occupancy)

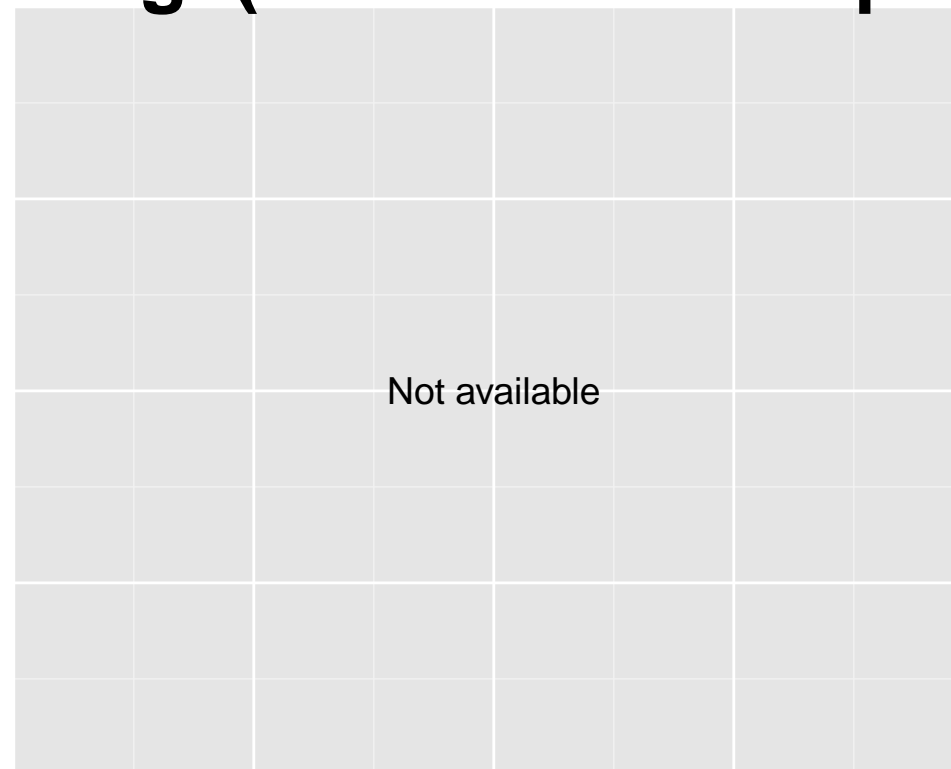

Supplement: Supplementary file 3029 [file 1]

## Arl6ip5

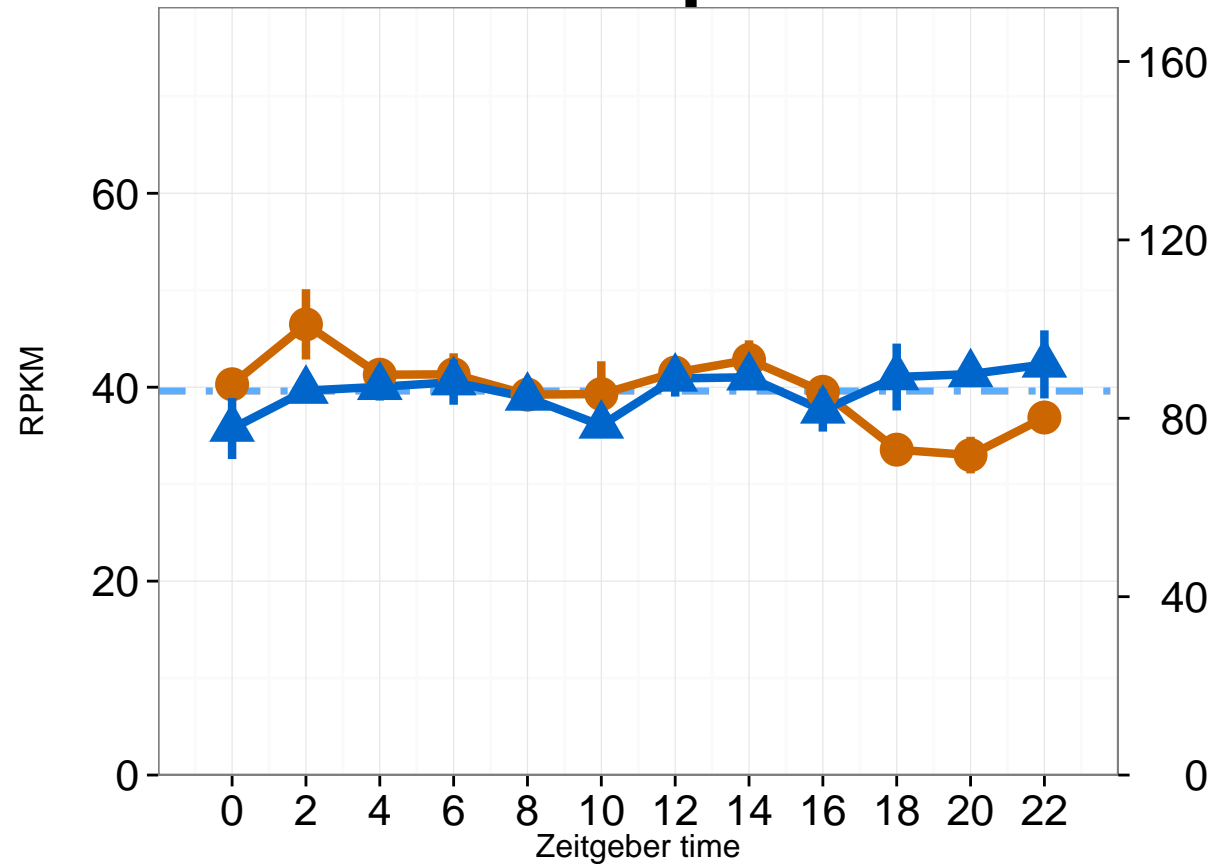

## Arl6ip5

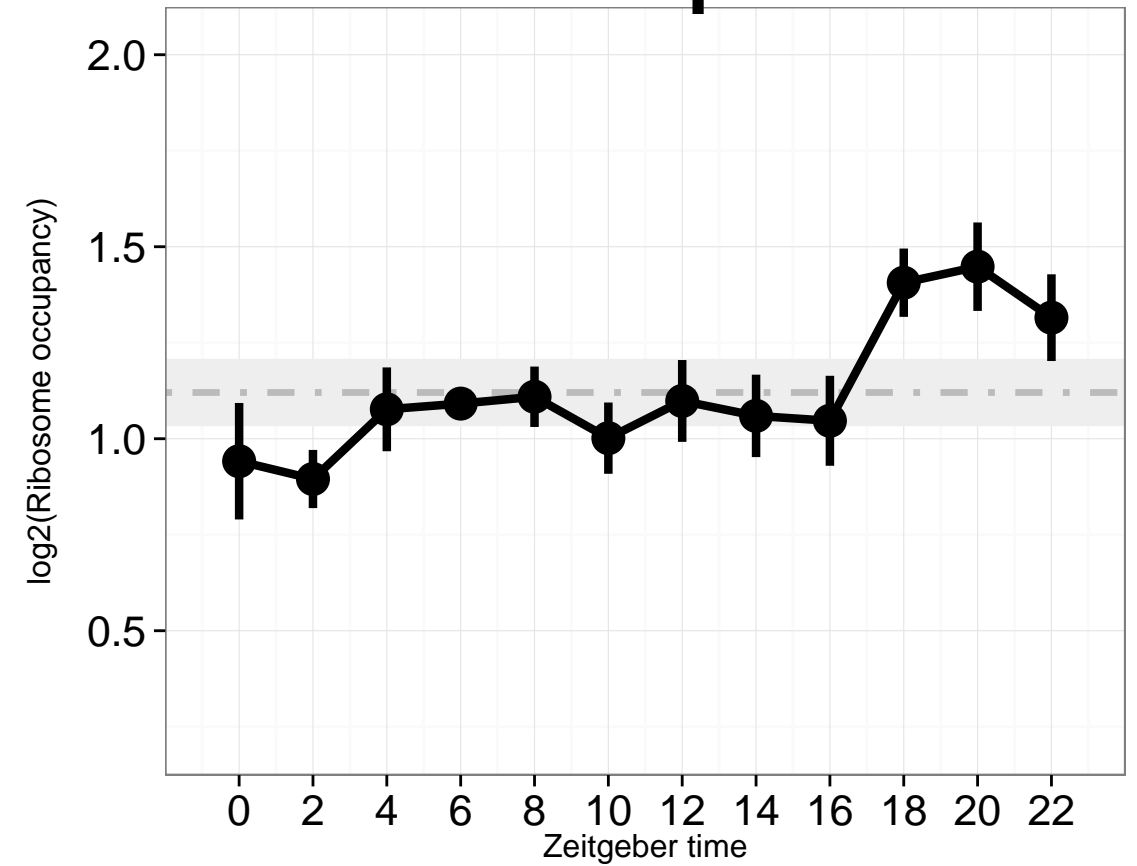

Supplement: Supplementary file 3030 [file 1]

**Shh TR**

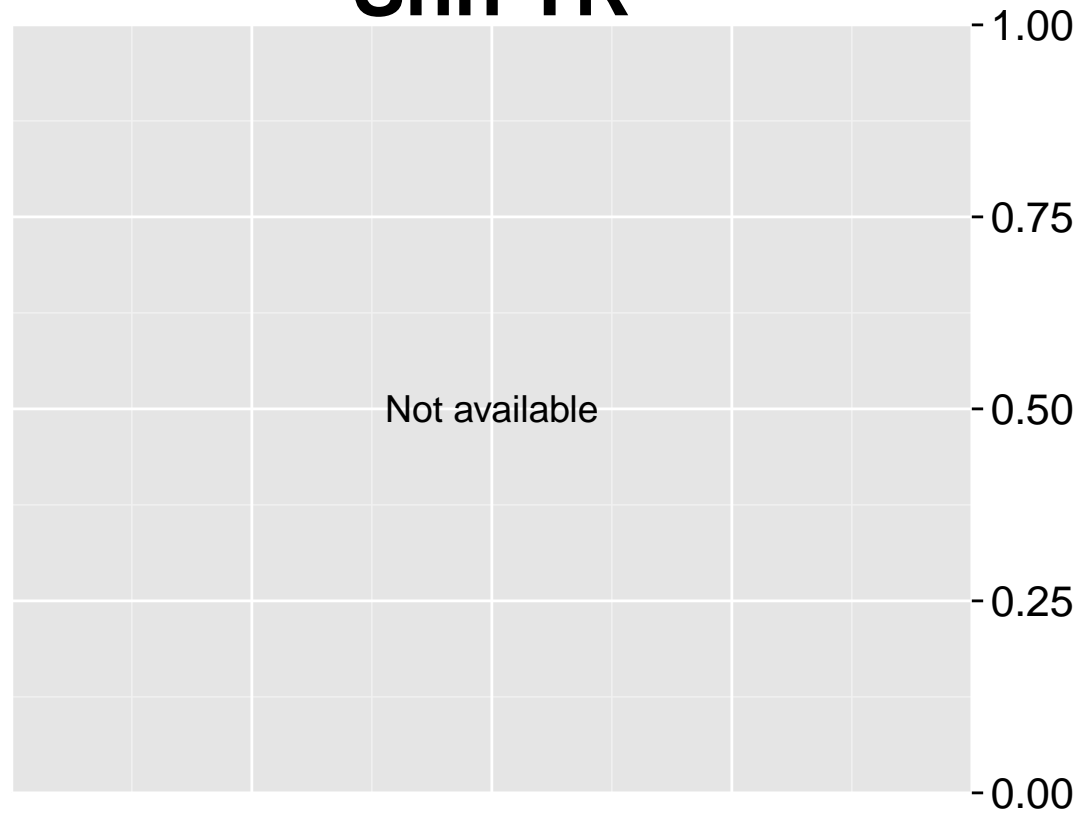

**Shh log2(Ribosome occupancy)**

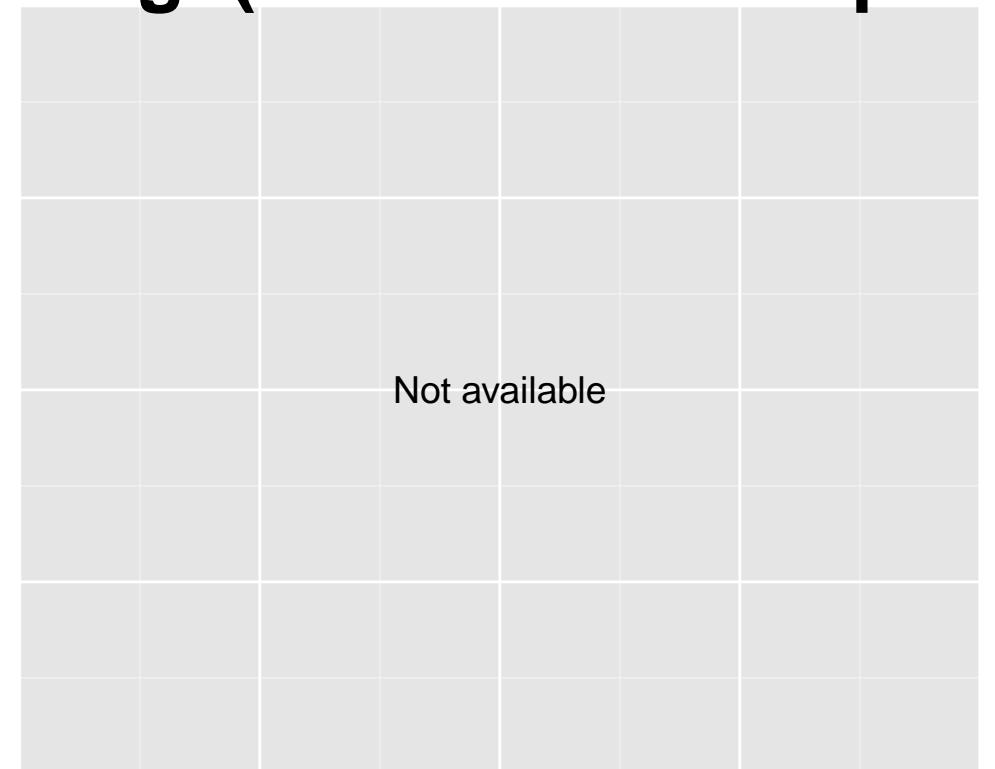

Supplement: Supplementary file 3031 [file 1]

# Wnt5b

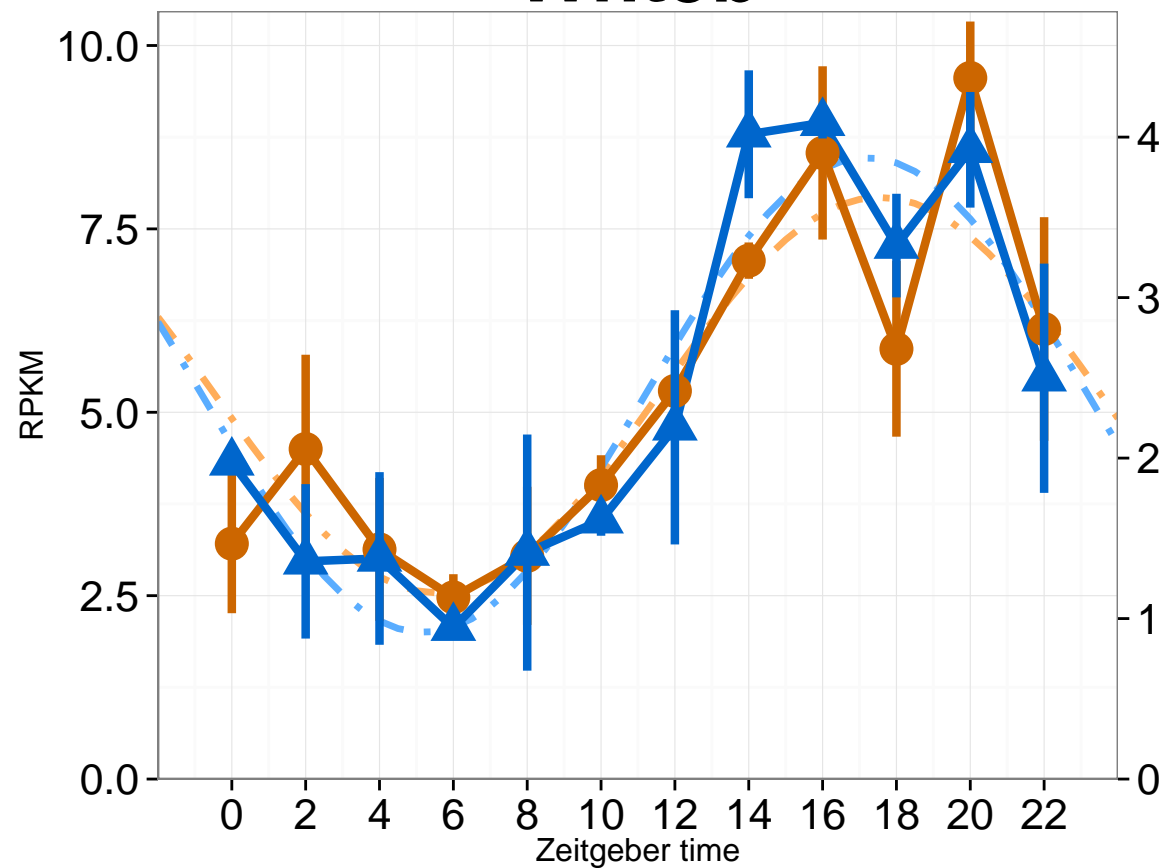

# Wnt5b

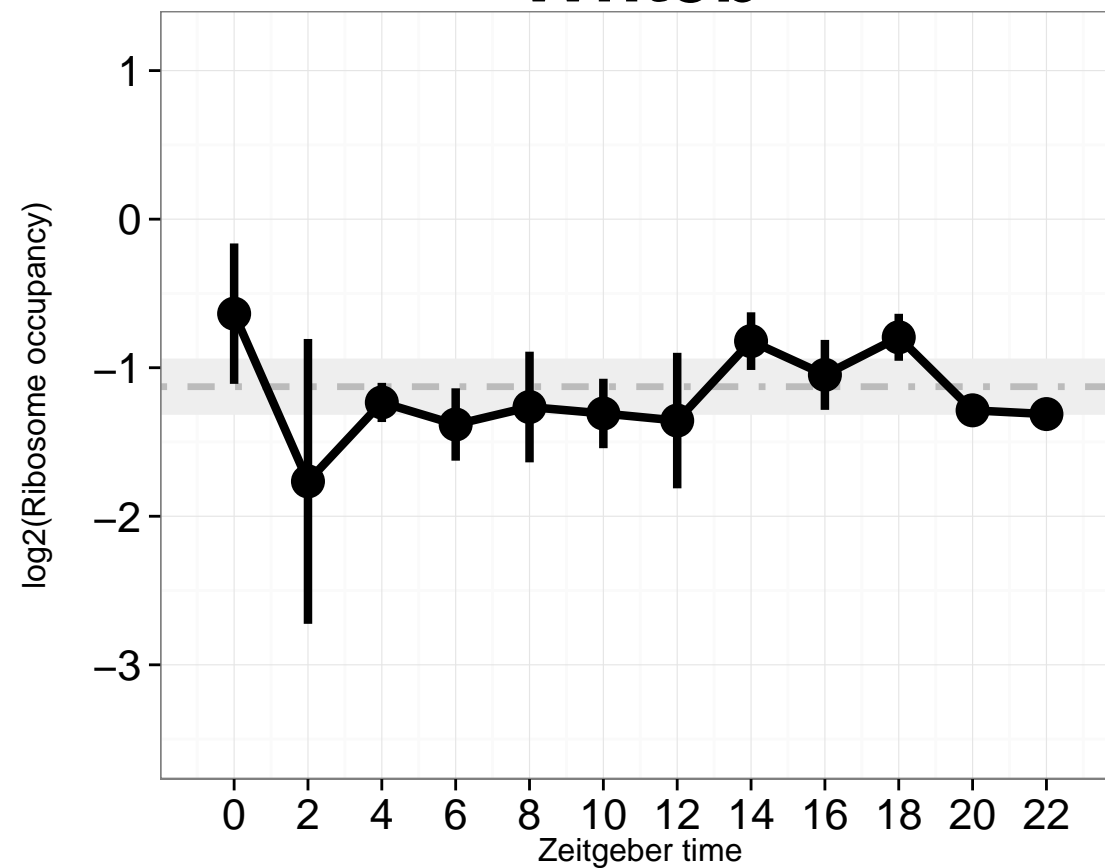

Supplement: Supplementary file 3032 [file 1]

## Nup88

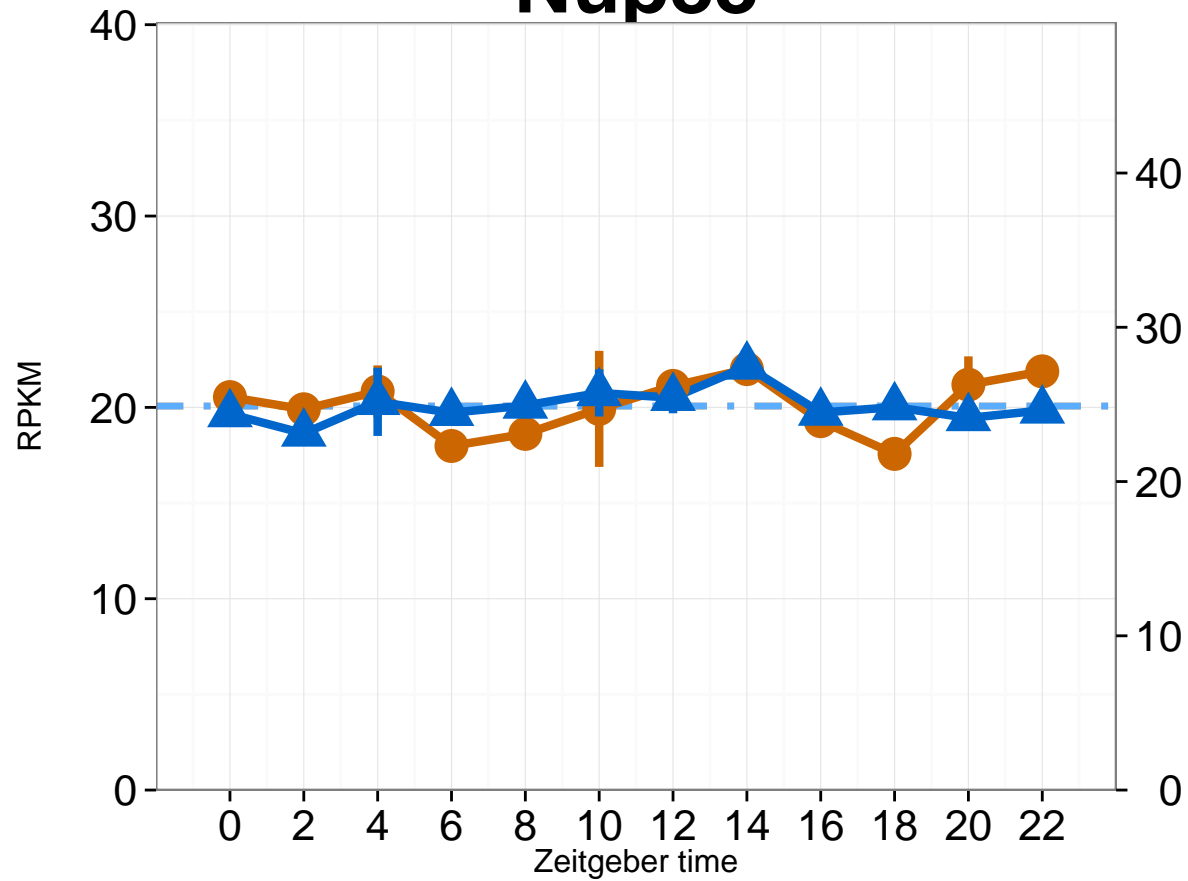

## Nup88

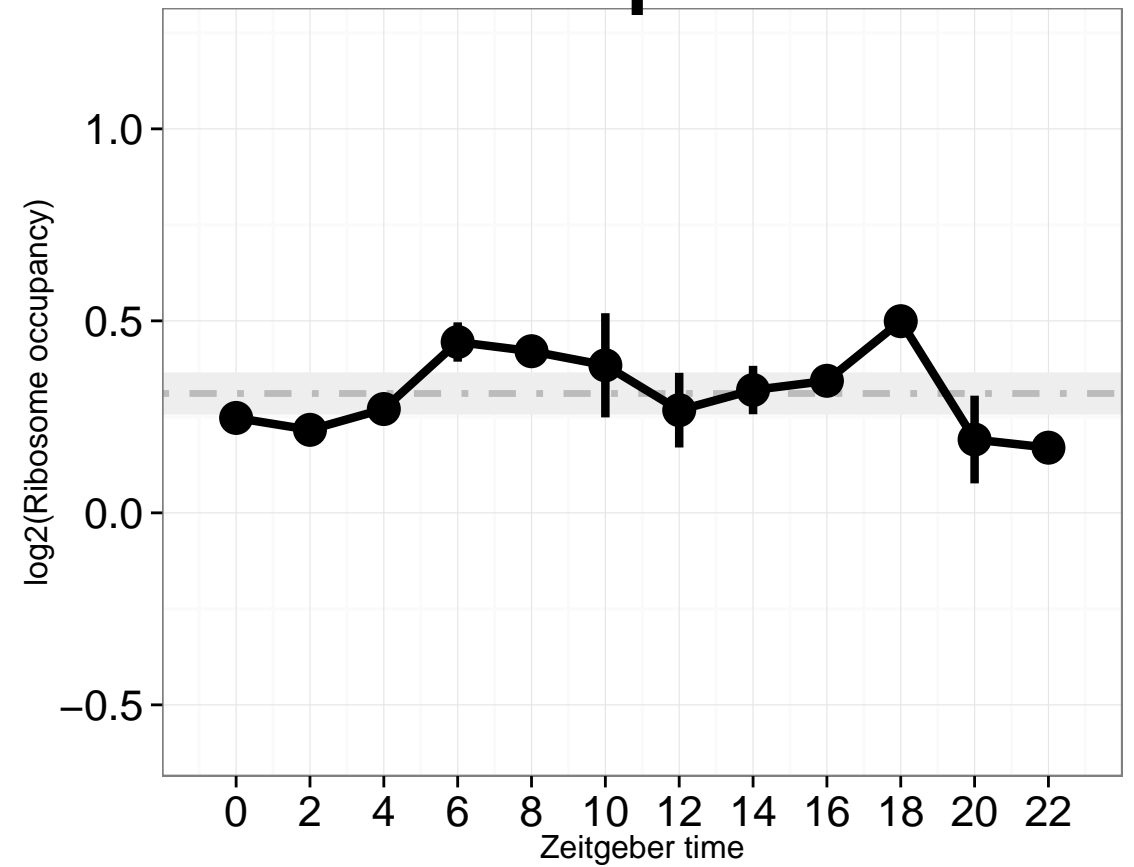

Supplement: Supplementary file 3033 [file 1]

# Pitpnm3

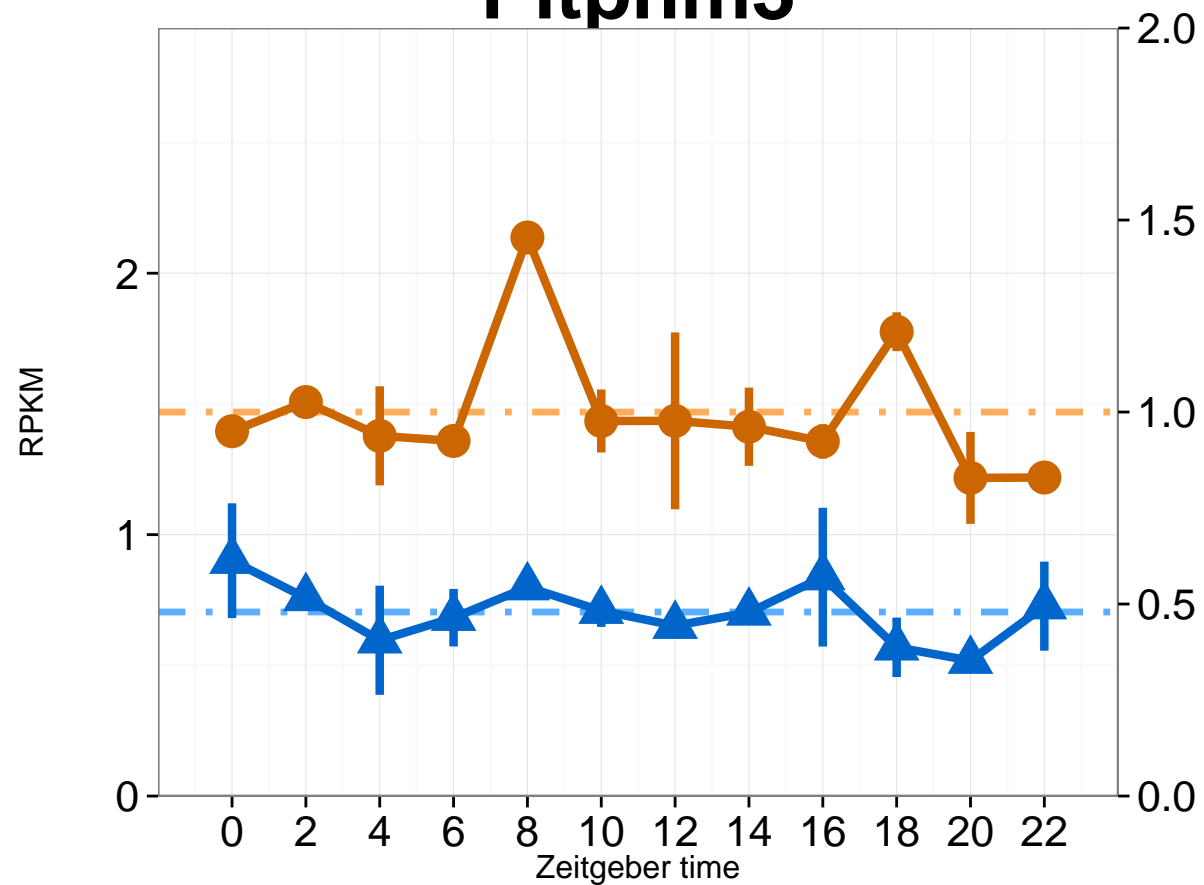

# Pitpnm3

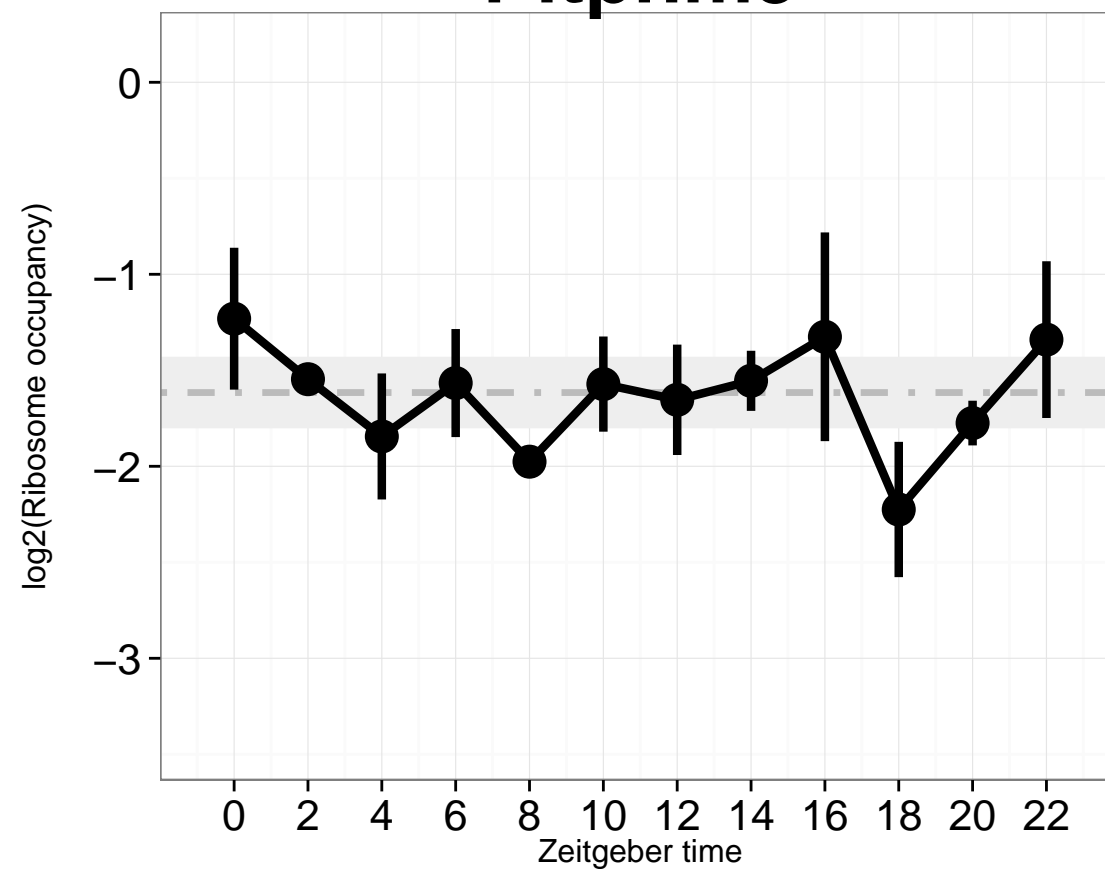

Supplement: Supplementary file 3034 [file 1]

## Dapk3

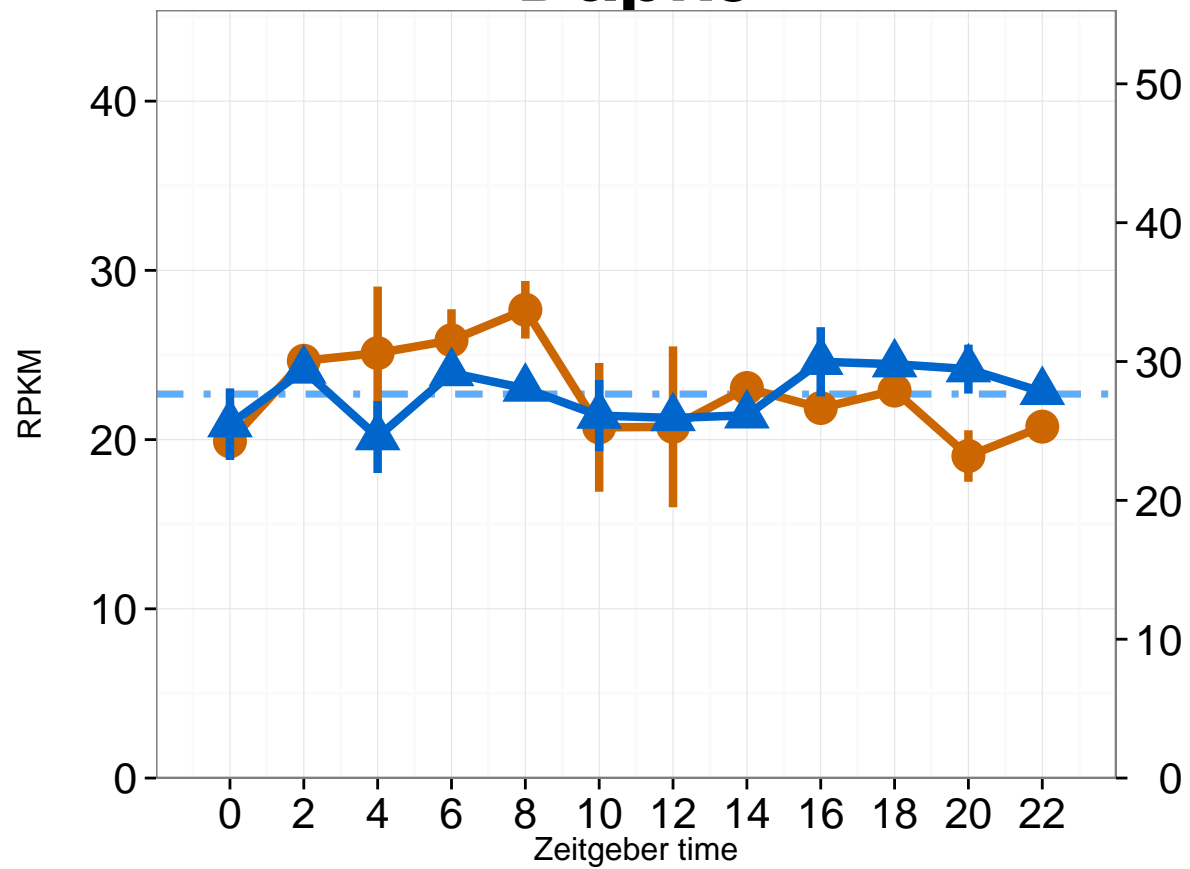

## Dapk3

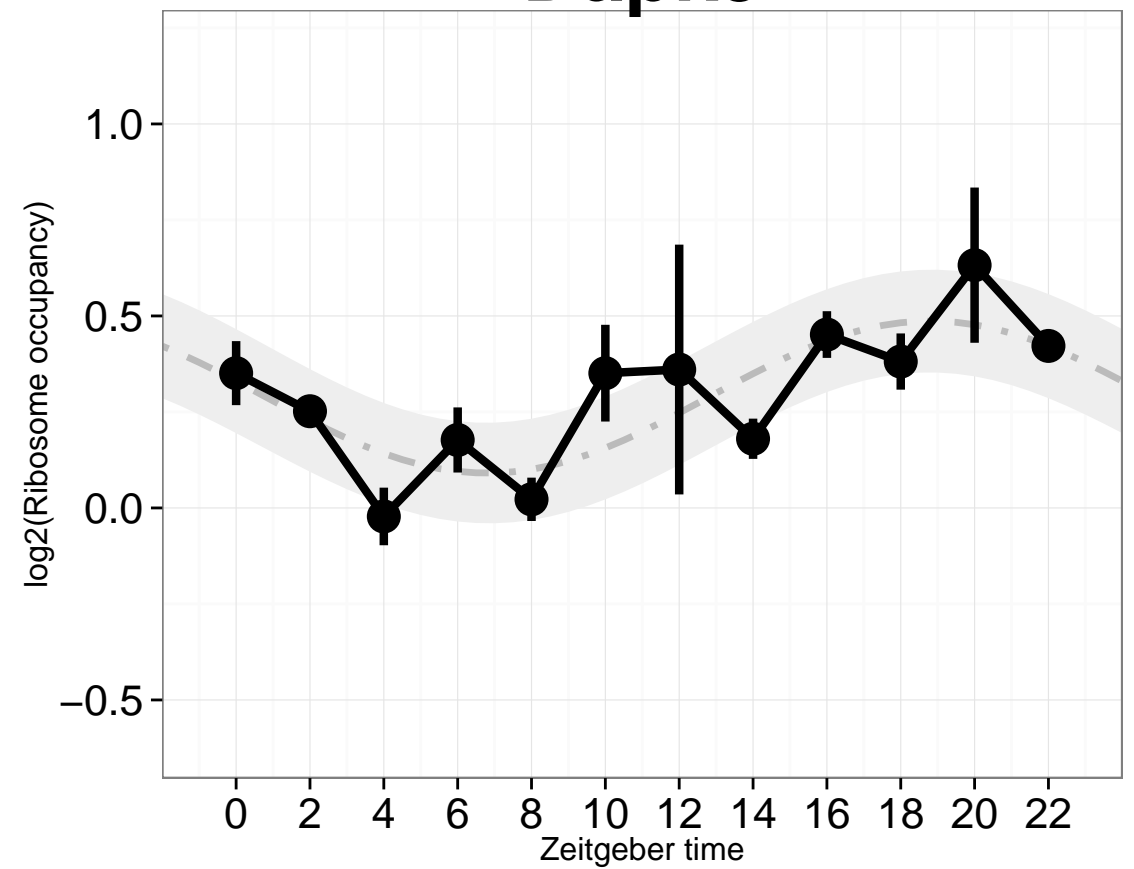

Supplement: Supplementary file 3035 [file 1]

## Sox12

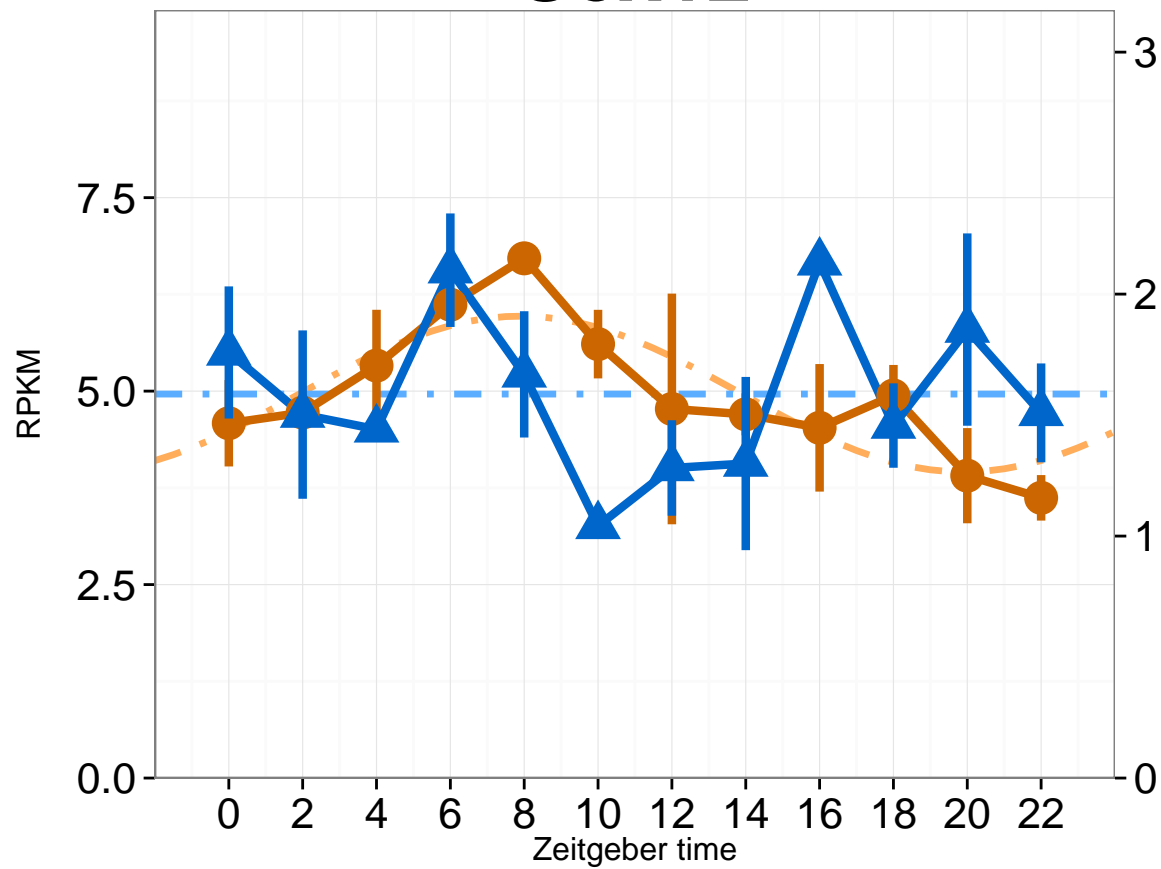

## Sox12

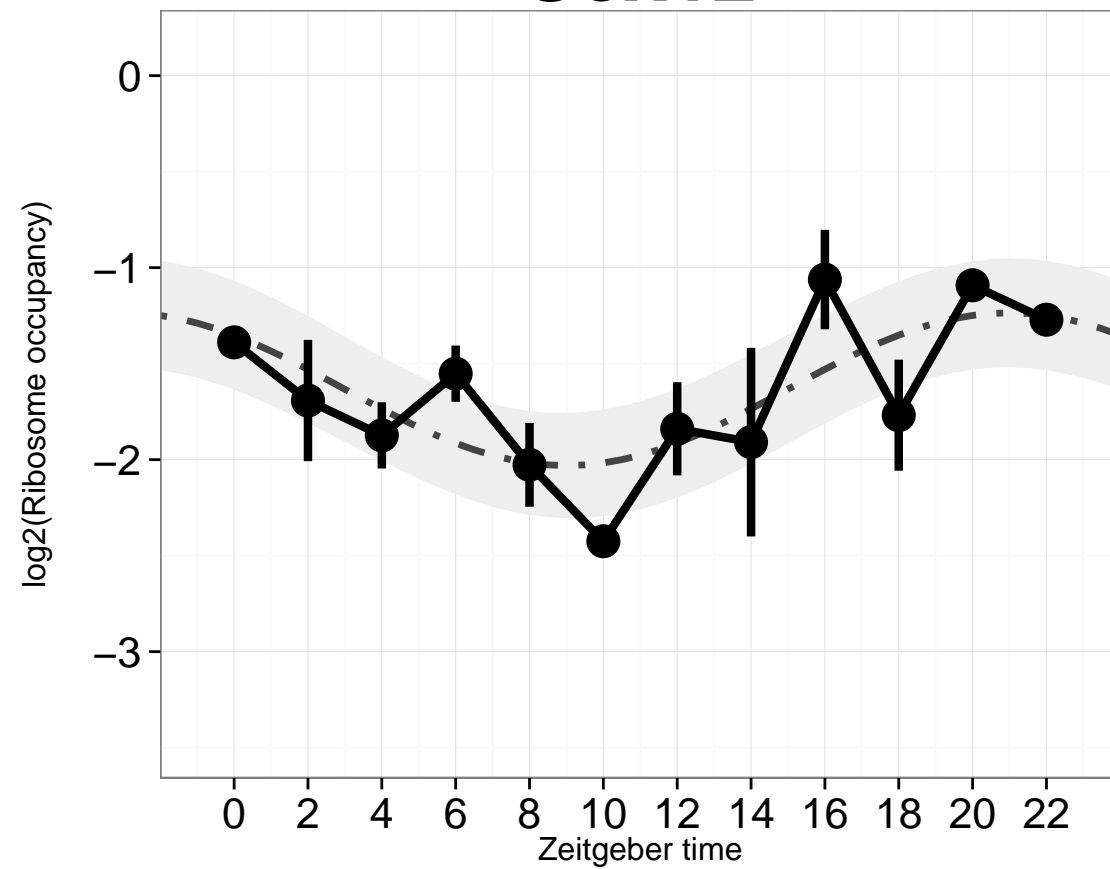

Supplement: Supplementary file 3036 [file 1]

## Tm4sf1

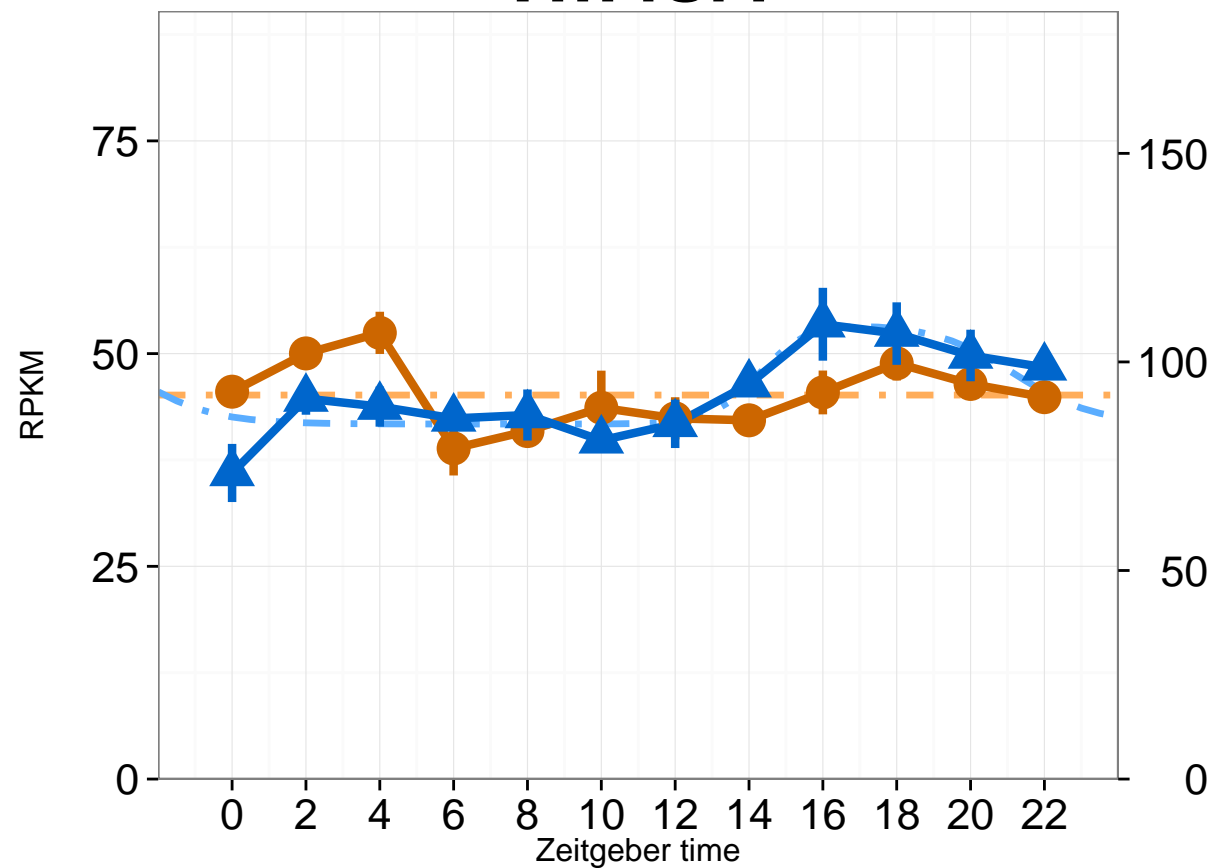

## Tm4sf1

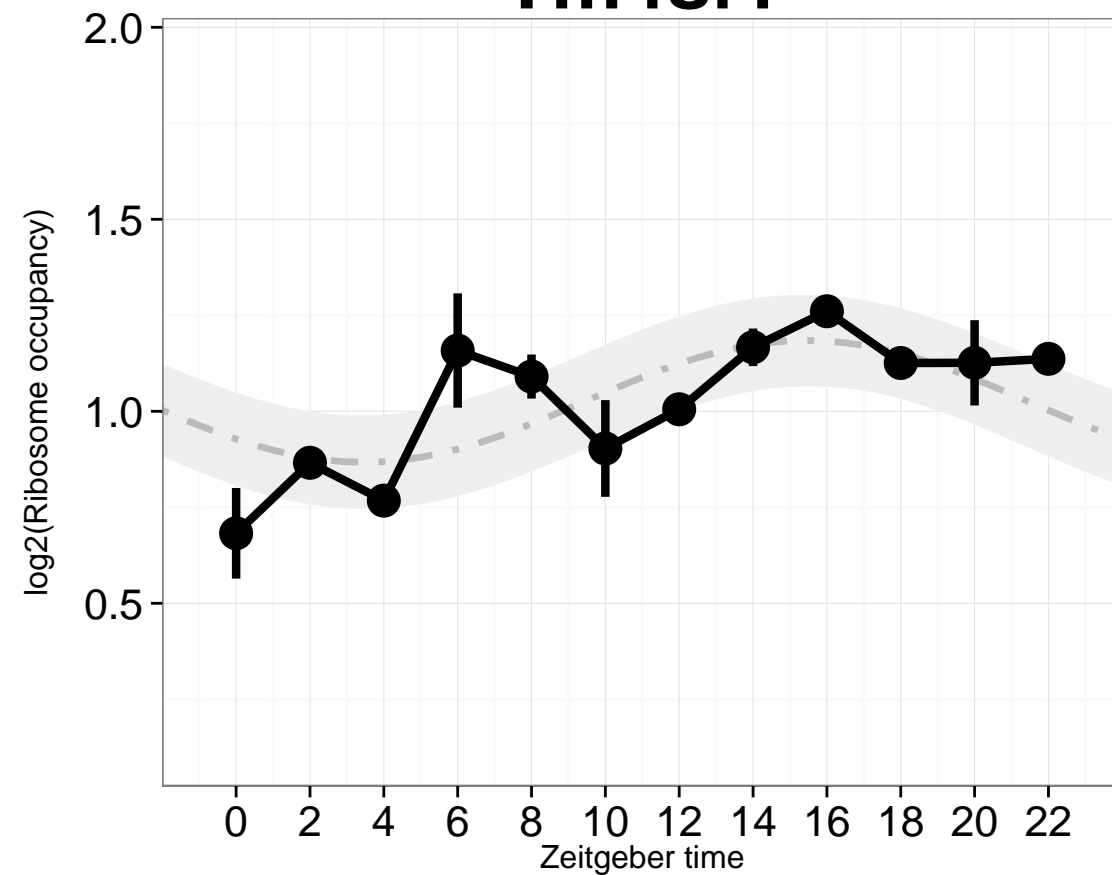

Supplement: Supplementary file 3037 [file 1]

Ccdc130

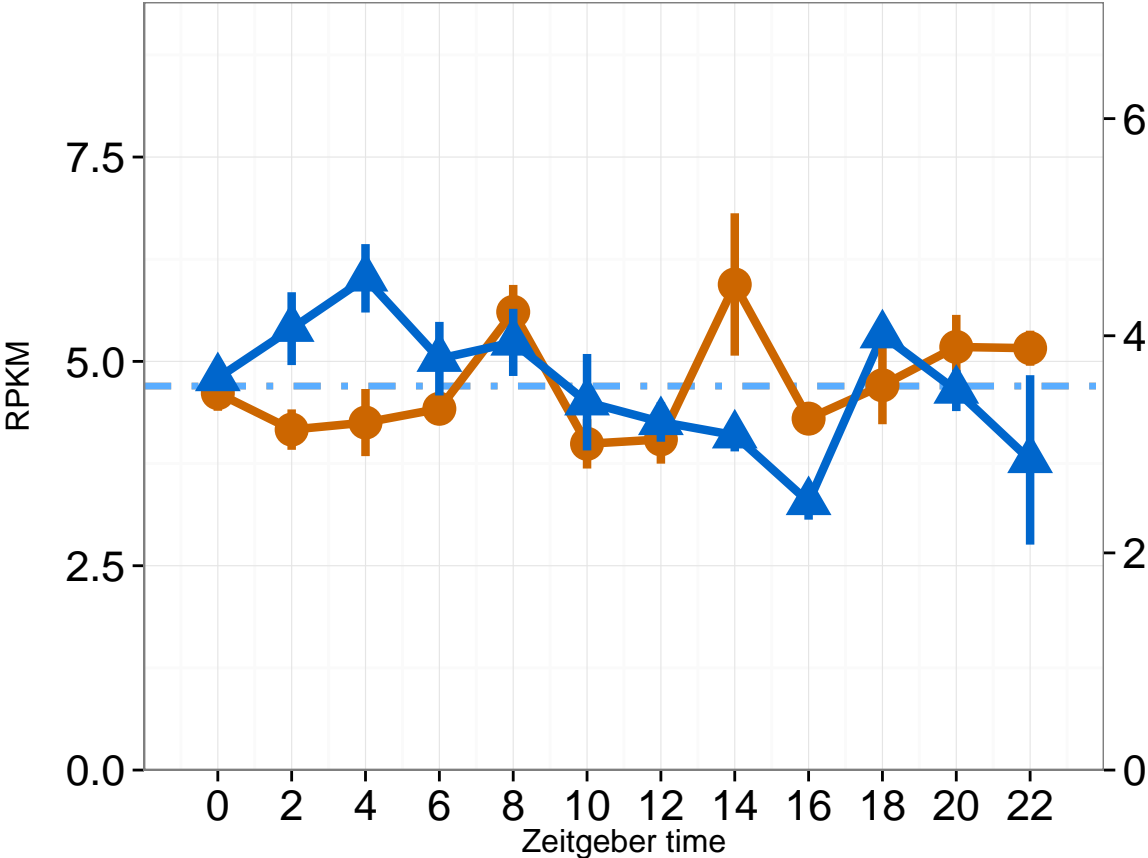

Ccdc130

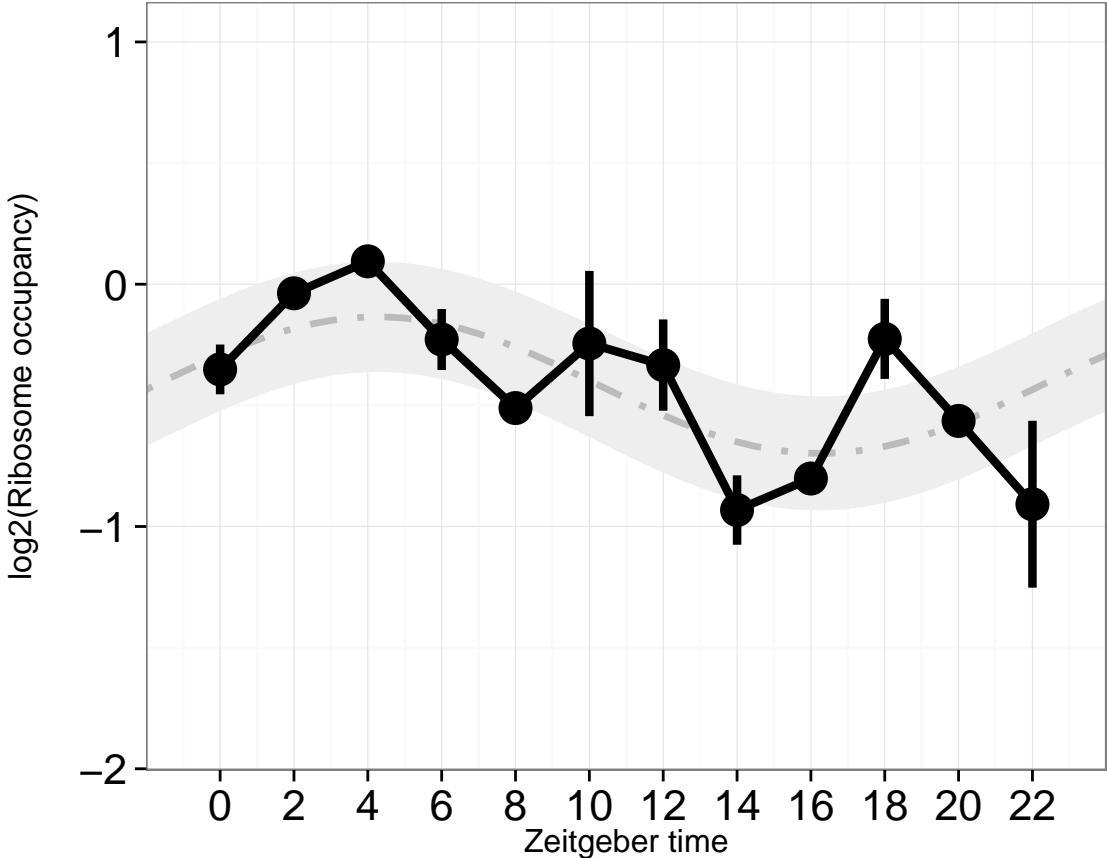

Supplement: Supplementary file 3038 [file 1]

## Mdm4

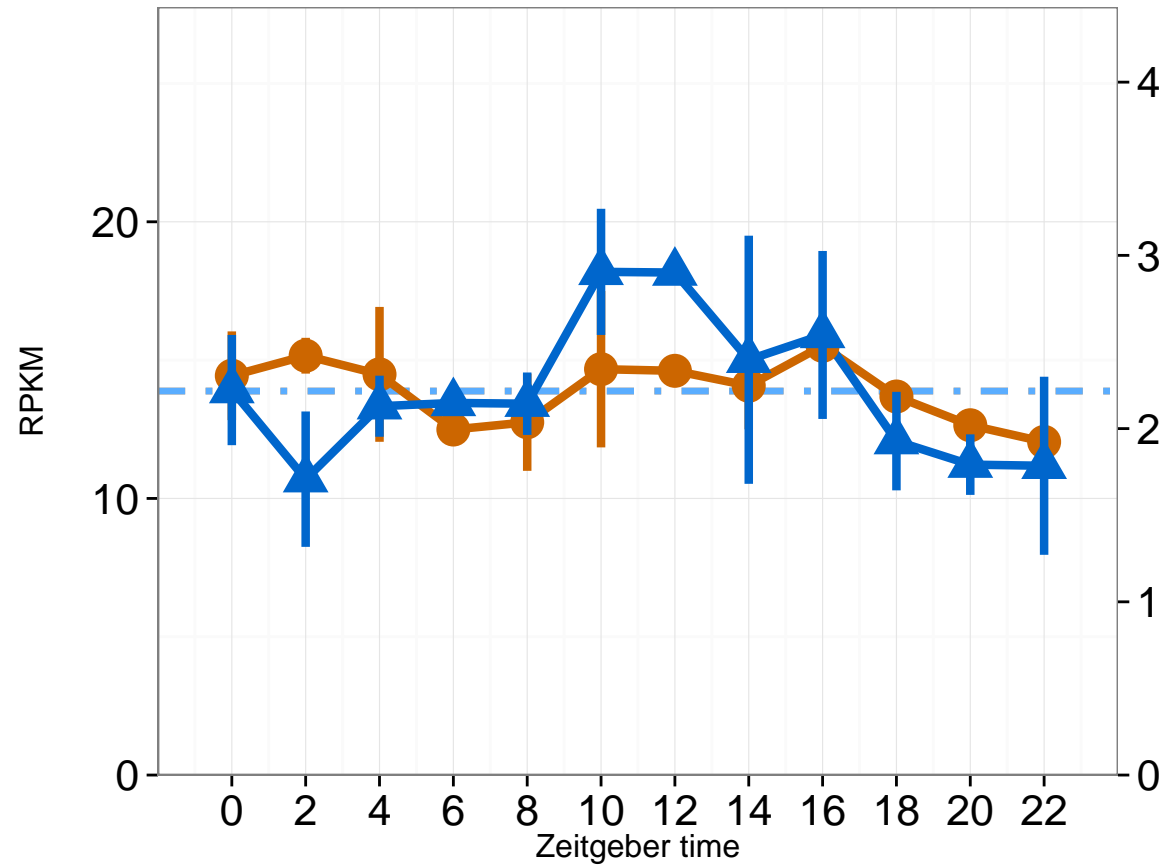

## Mdm4

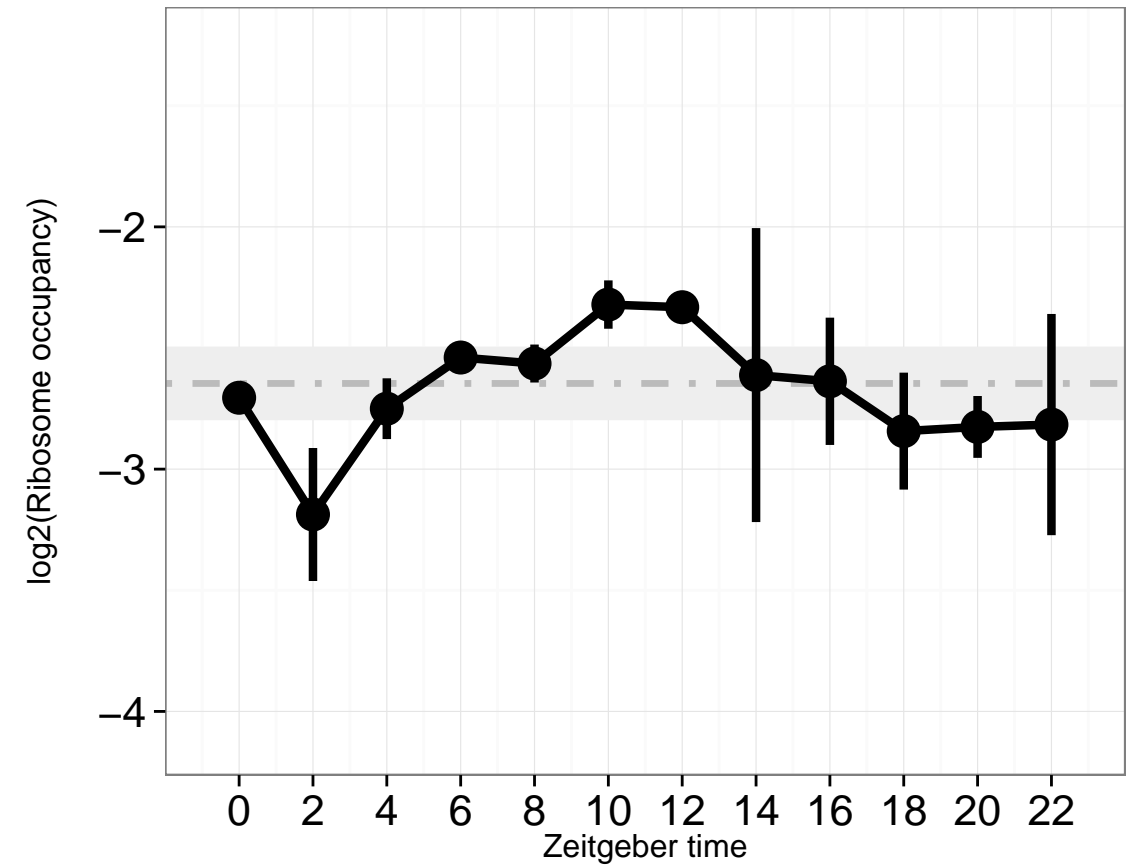

Supplement: Supplementary file 3039 [file 1]

## Mrrf

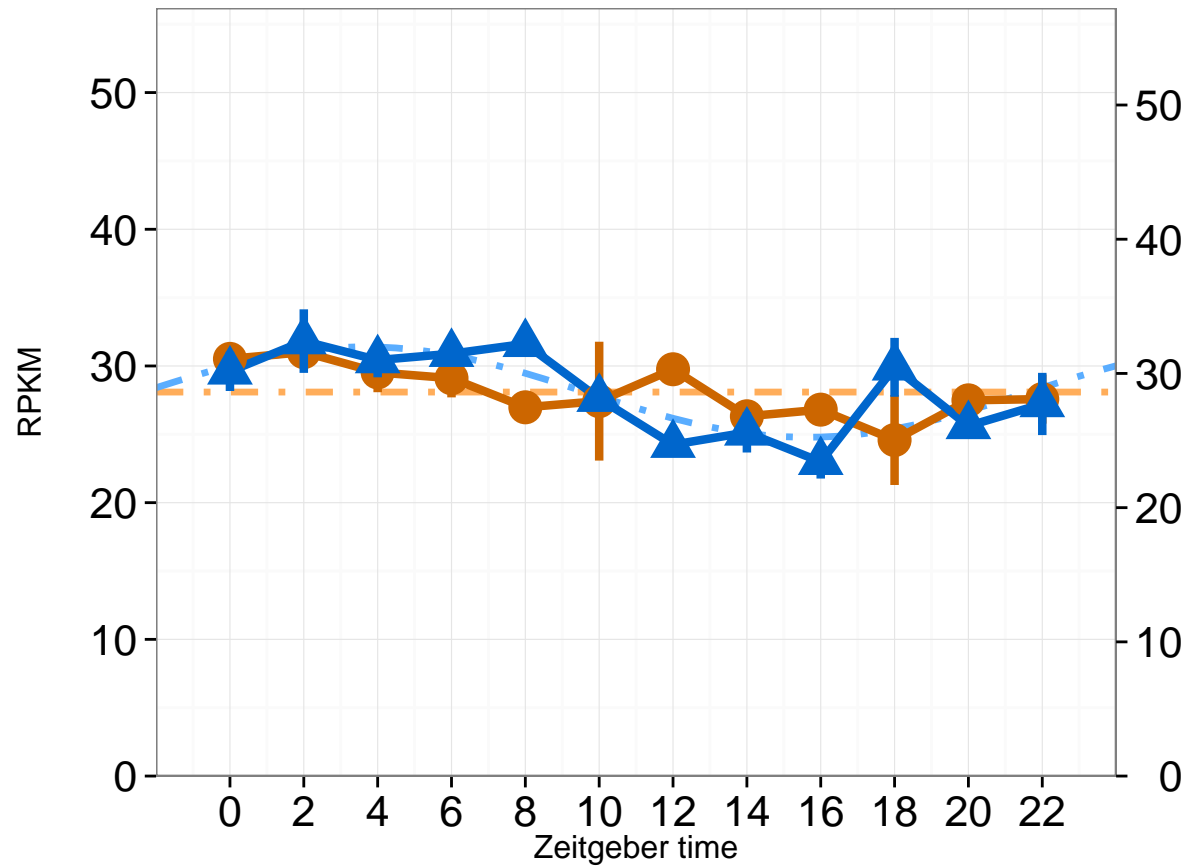

## Mrrf

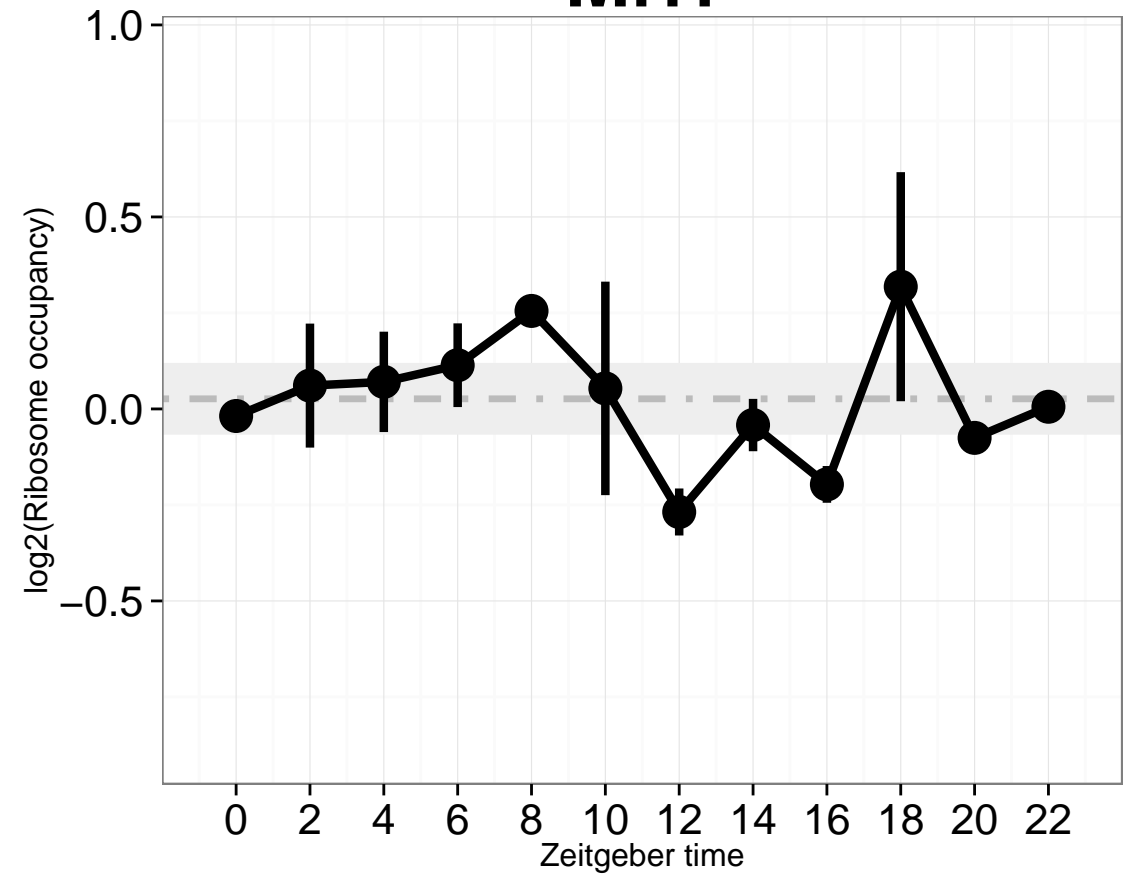

Supplement: Supplementary file 3040 [file 1]

## Dusp3

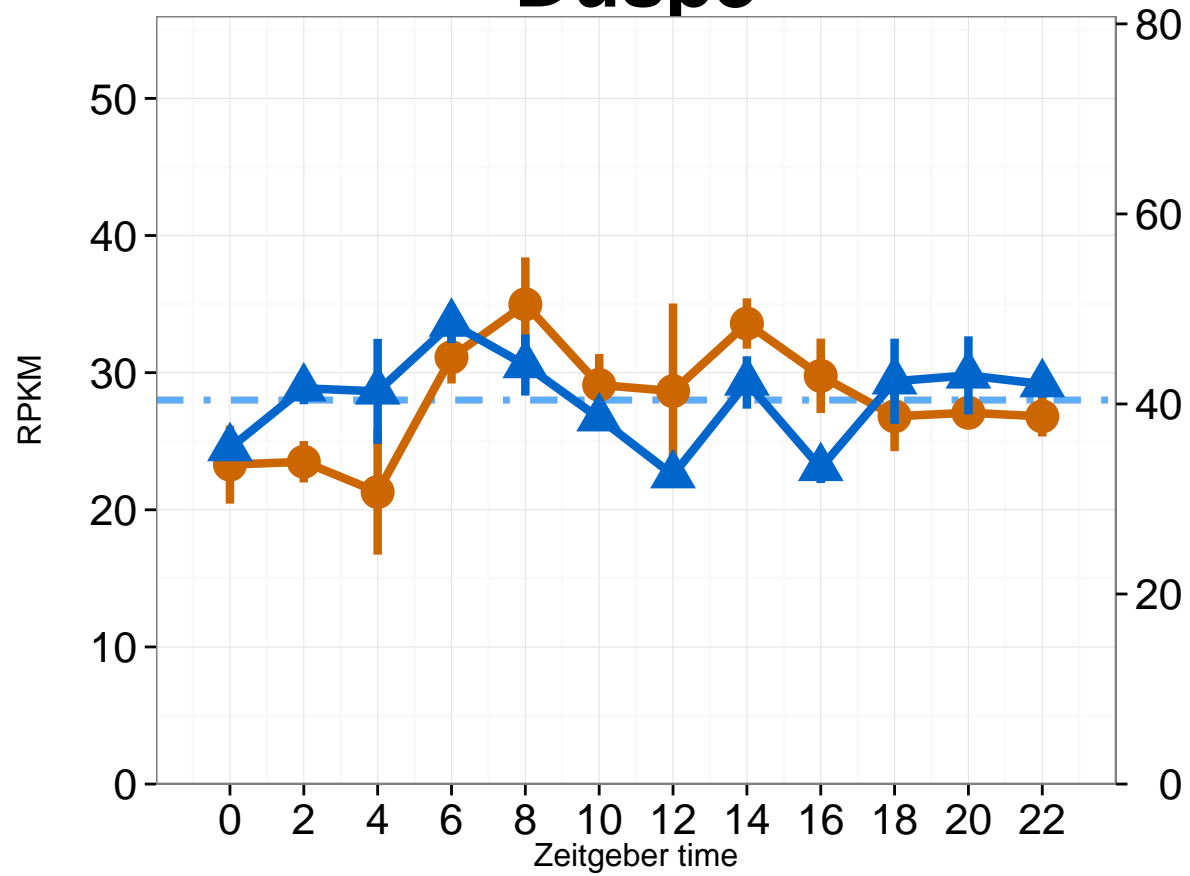

## Dusp3

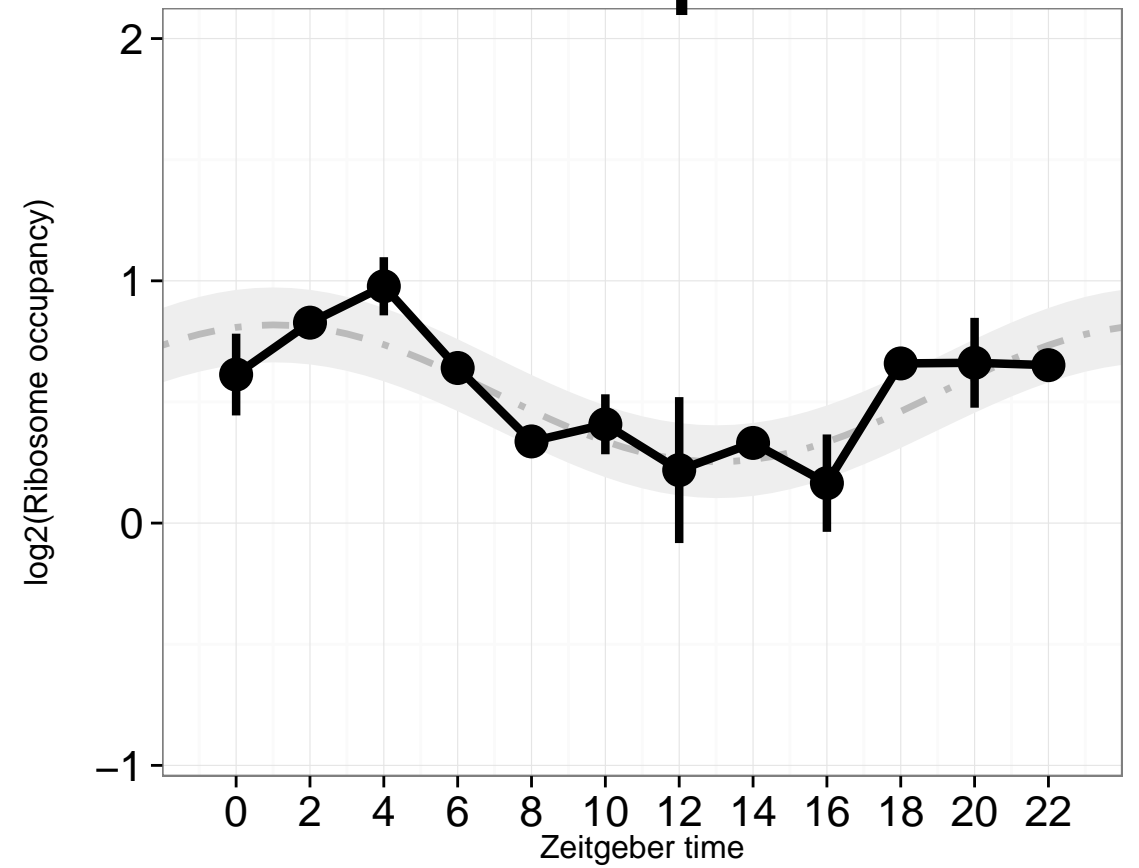

Supplement: Supplementary file 3041 [file 1]

## Ckb

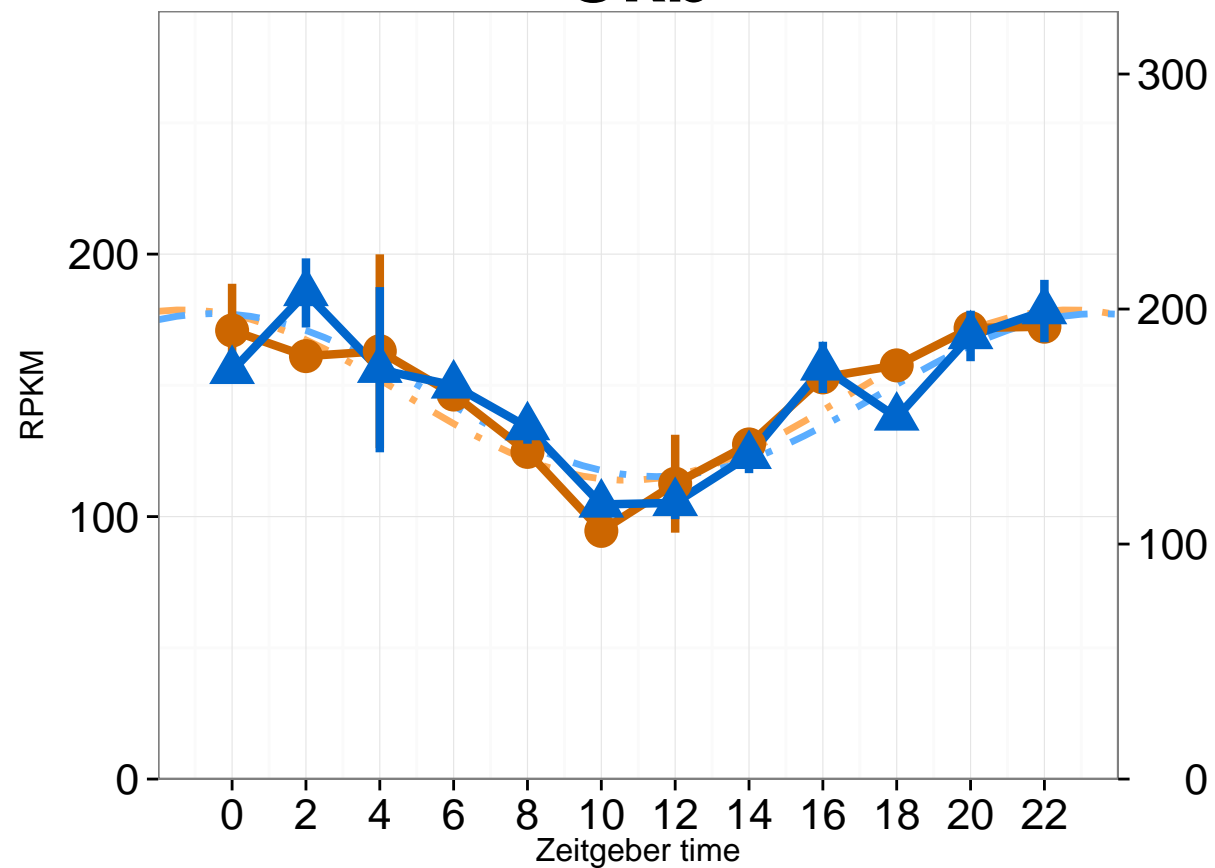

## Ckb

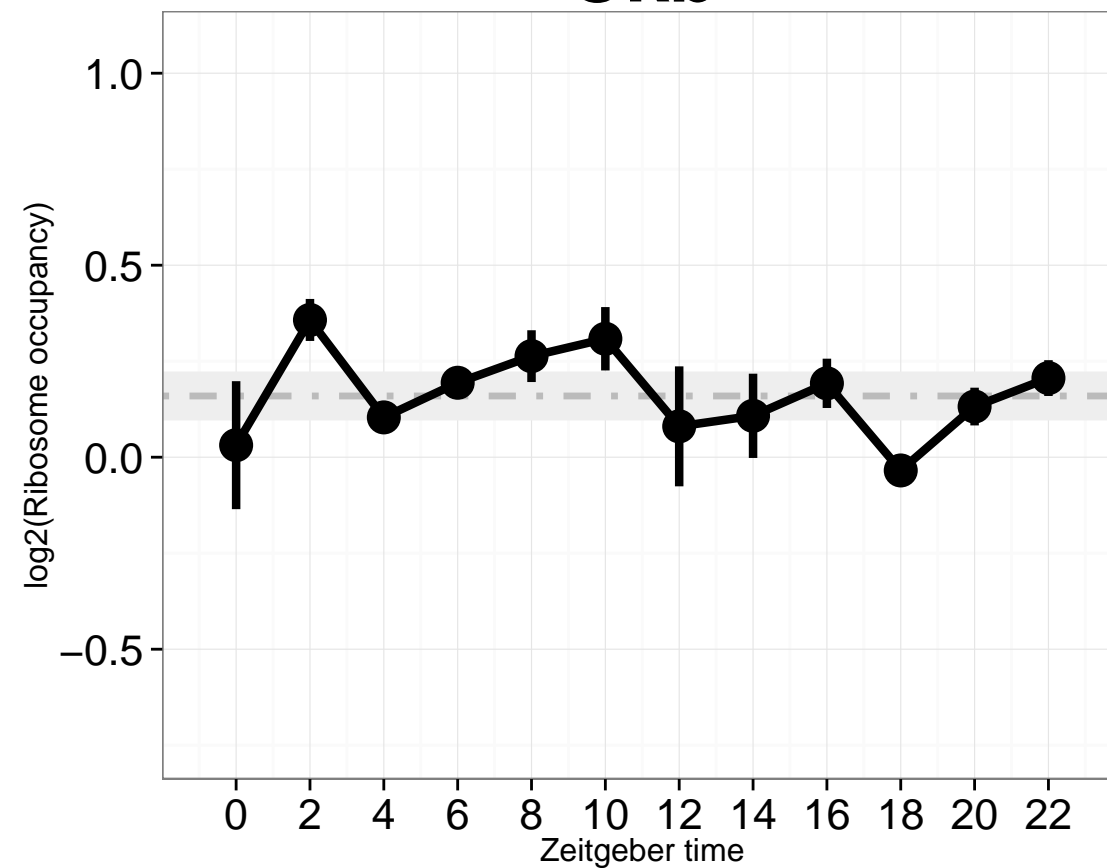

Supplement: Supplementary file 3042 [file 1]

## Wdr61

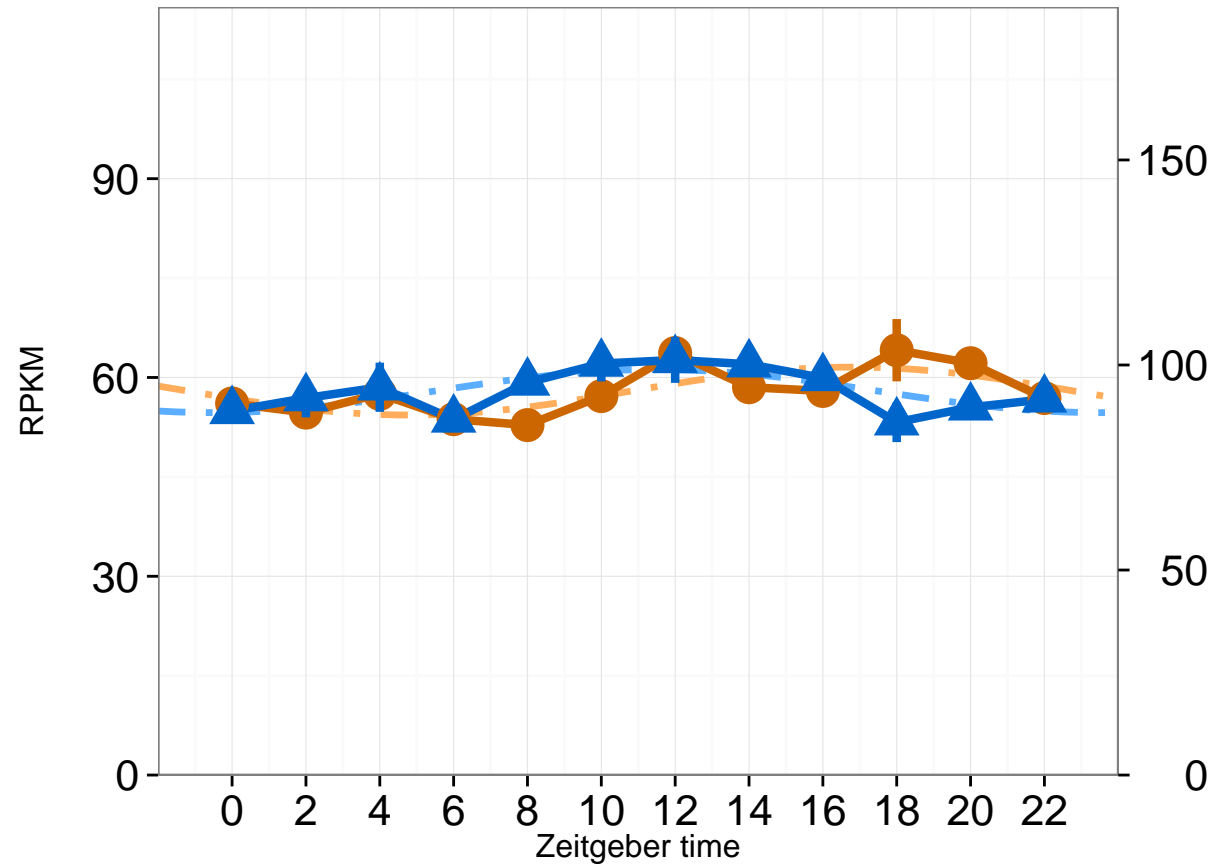

## Wdr61

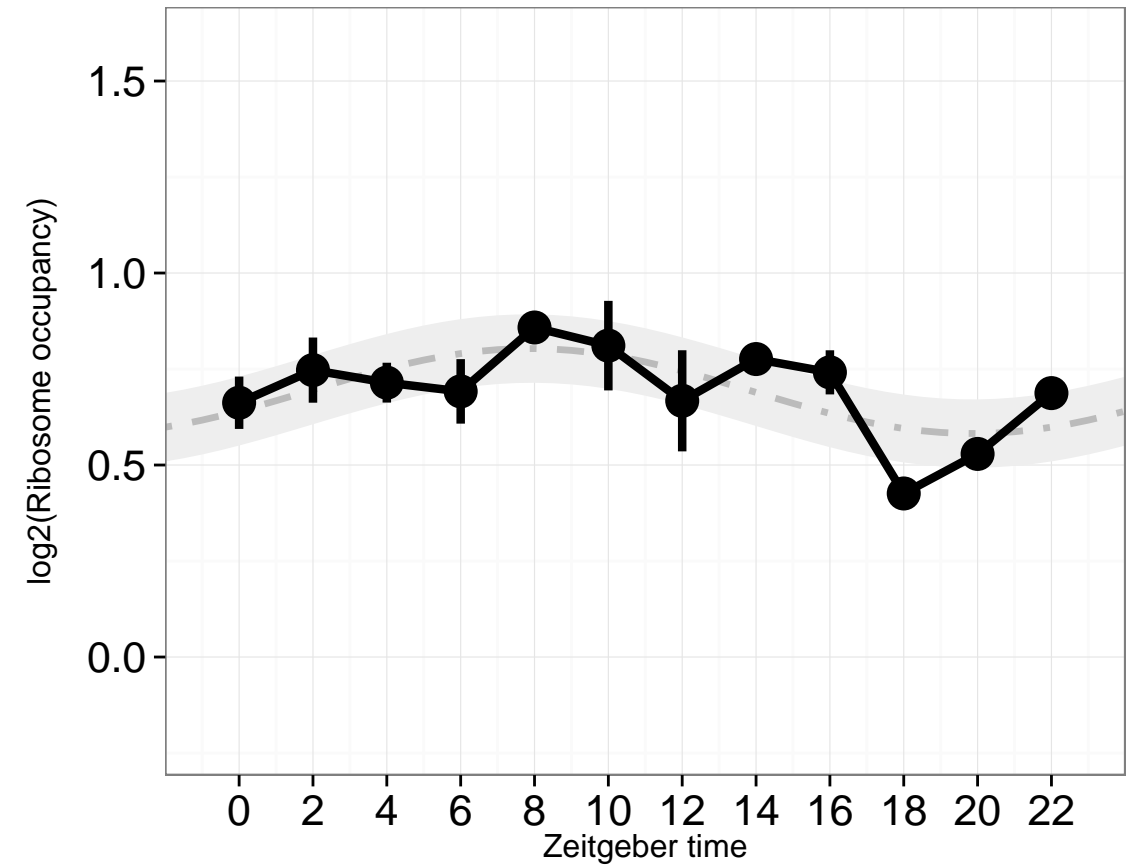

Supplement: Supplementary file 3043 [file 1]

## Gldc

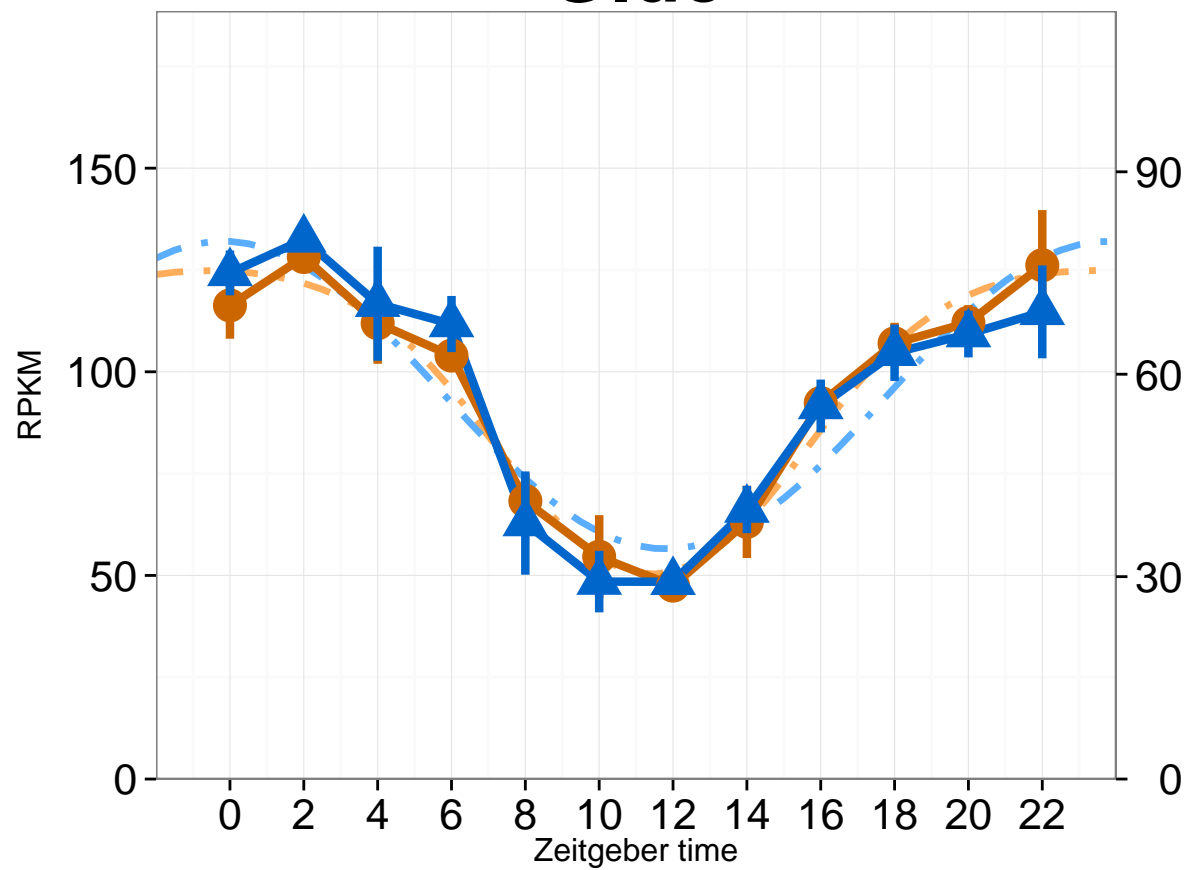

## Gldc

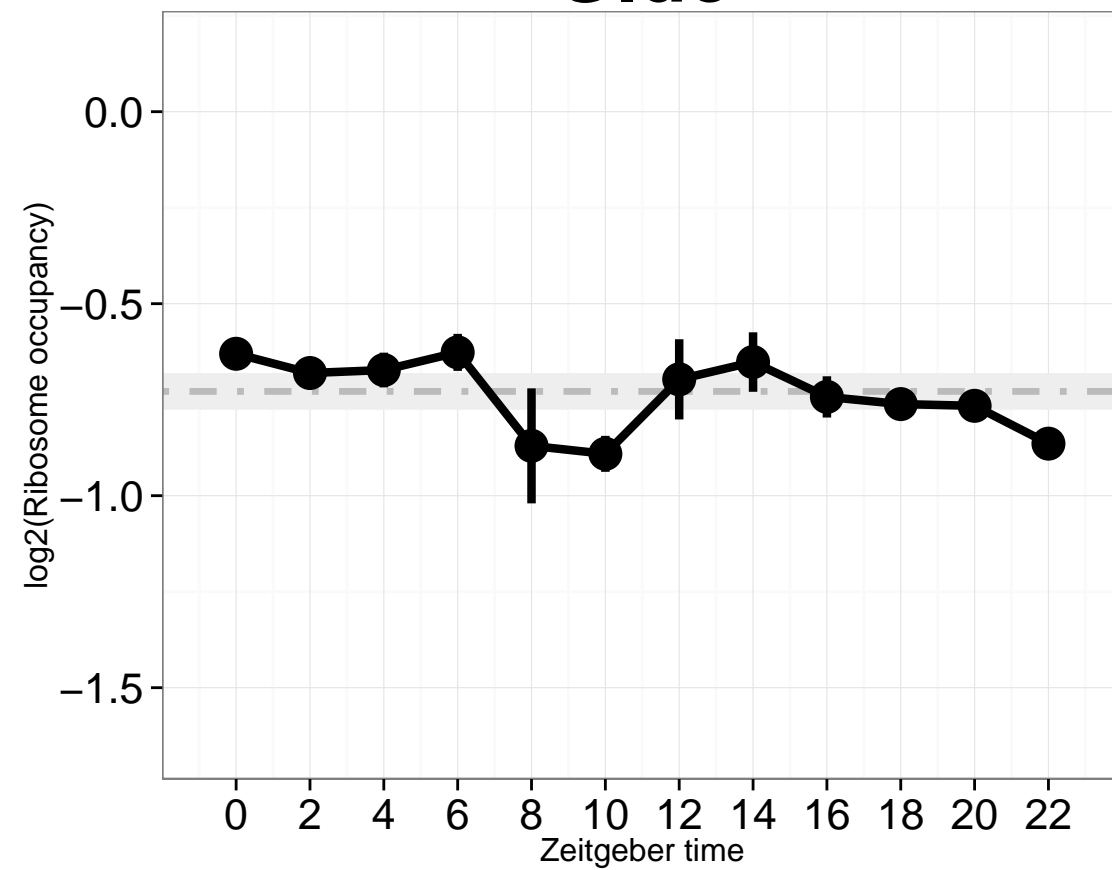

Supplement: Supplementary file 3044 [file 1]

# P2rx7

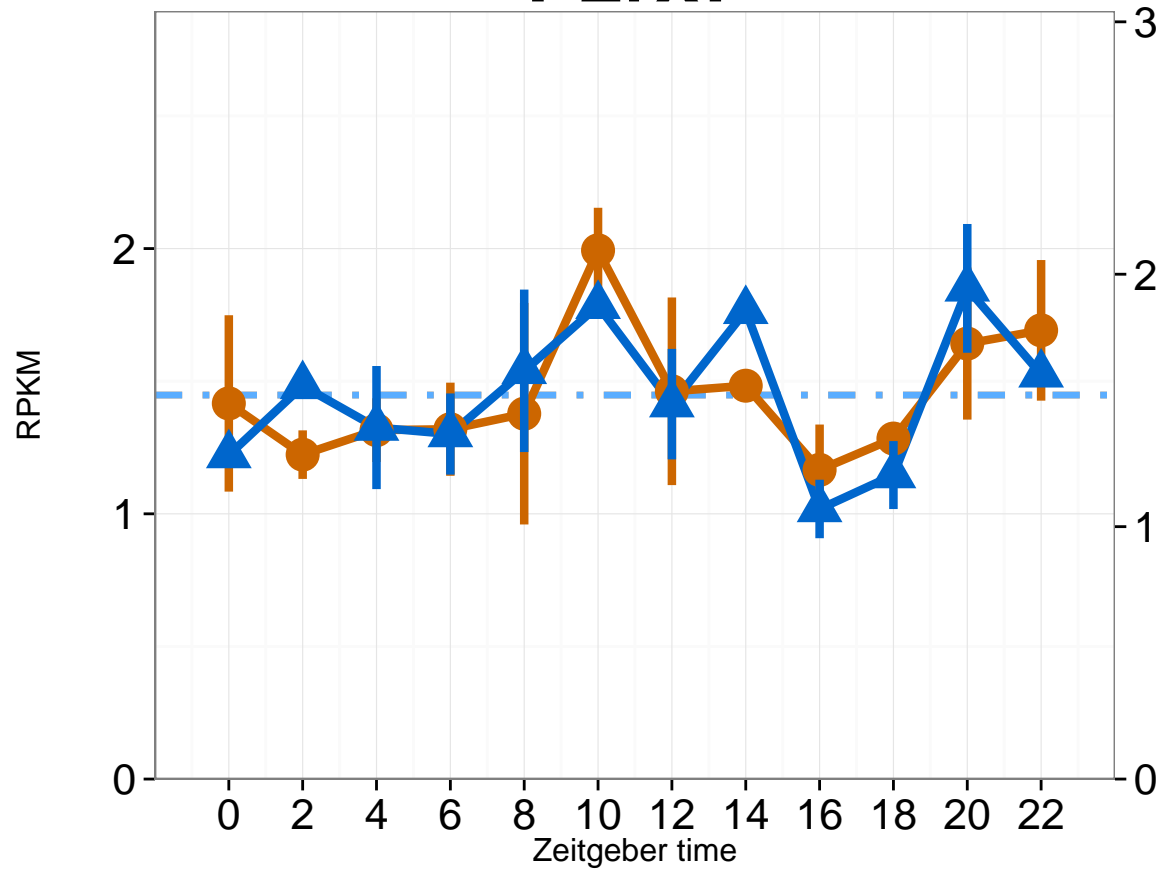

# P2rx7

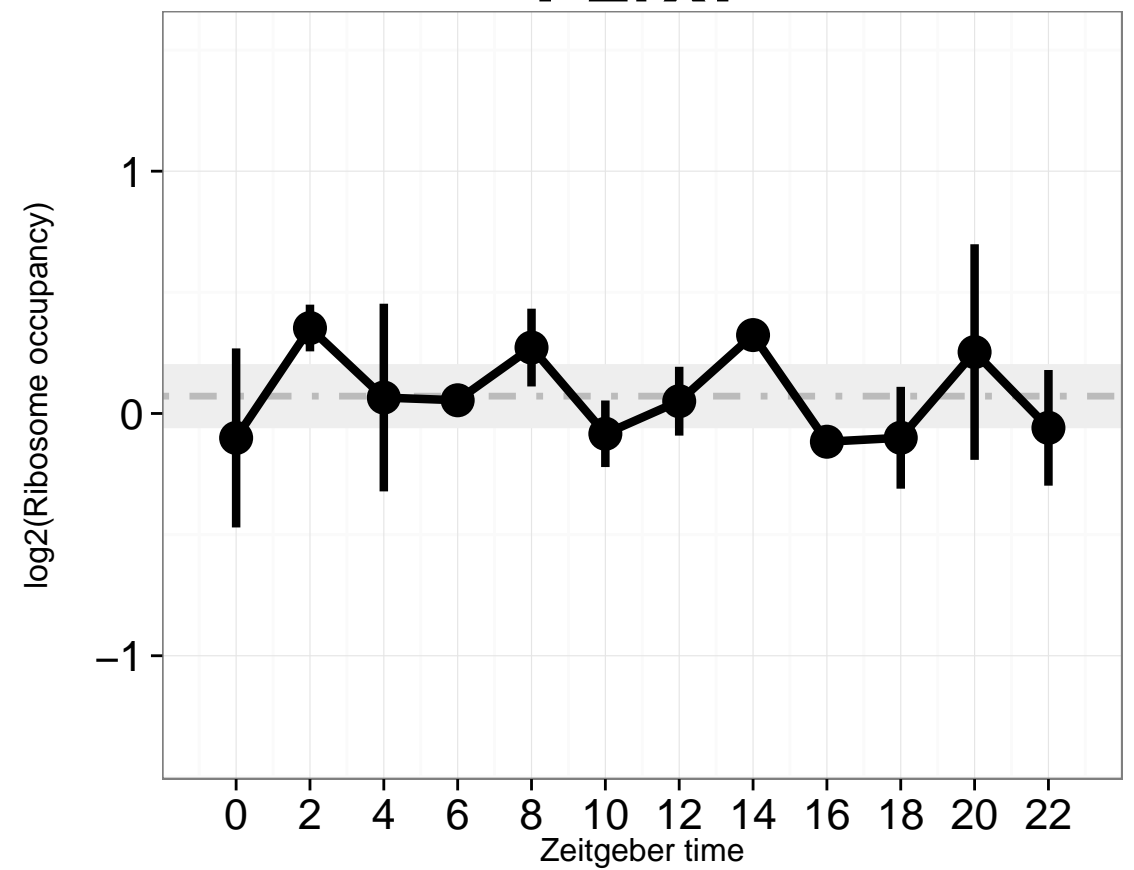

Supplement: Supplementary file 3045 [file 1]

# Ptgr2

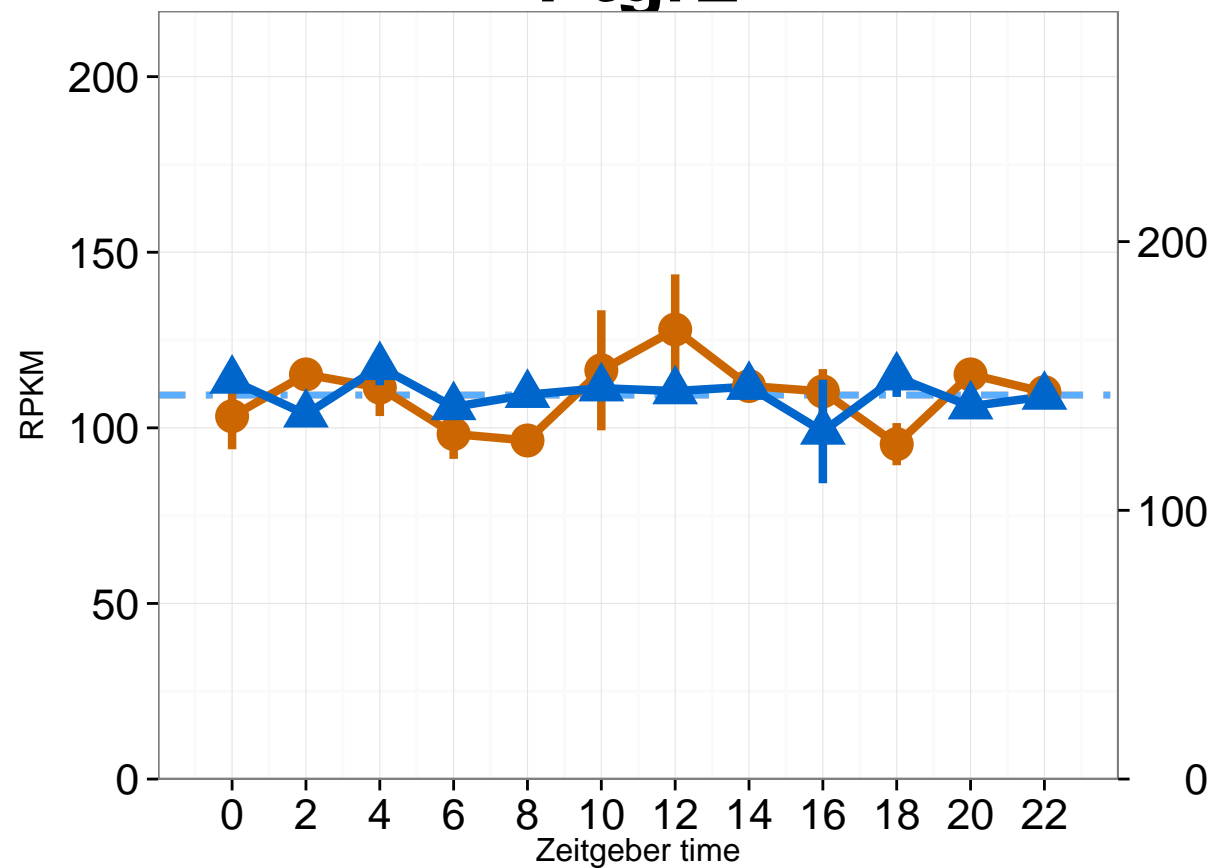

# Ptgr2

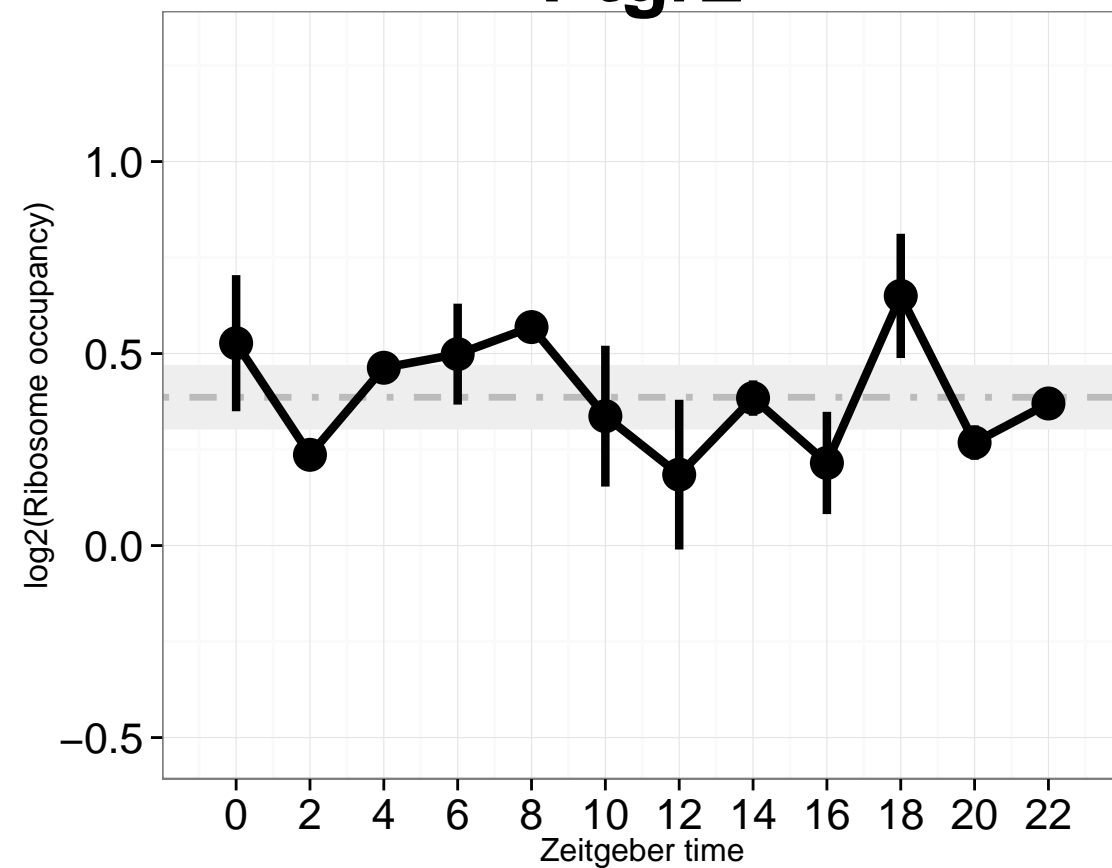

Supplement: Supplementary file 3046 [file 1]

# Hsd17b11

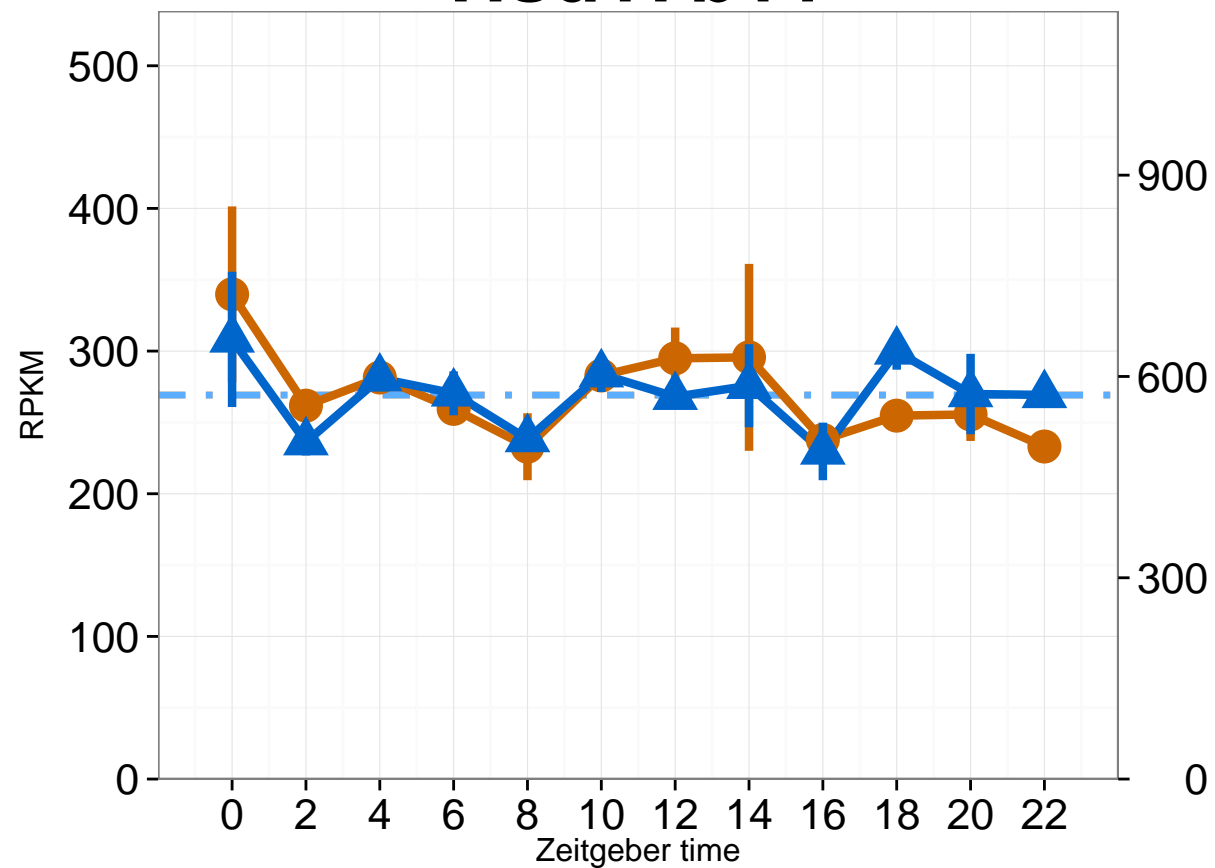

# Hsd17b11

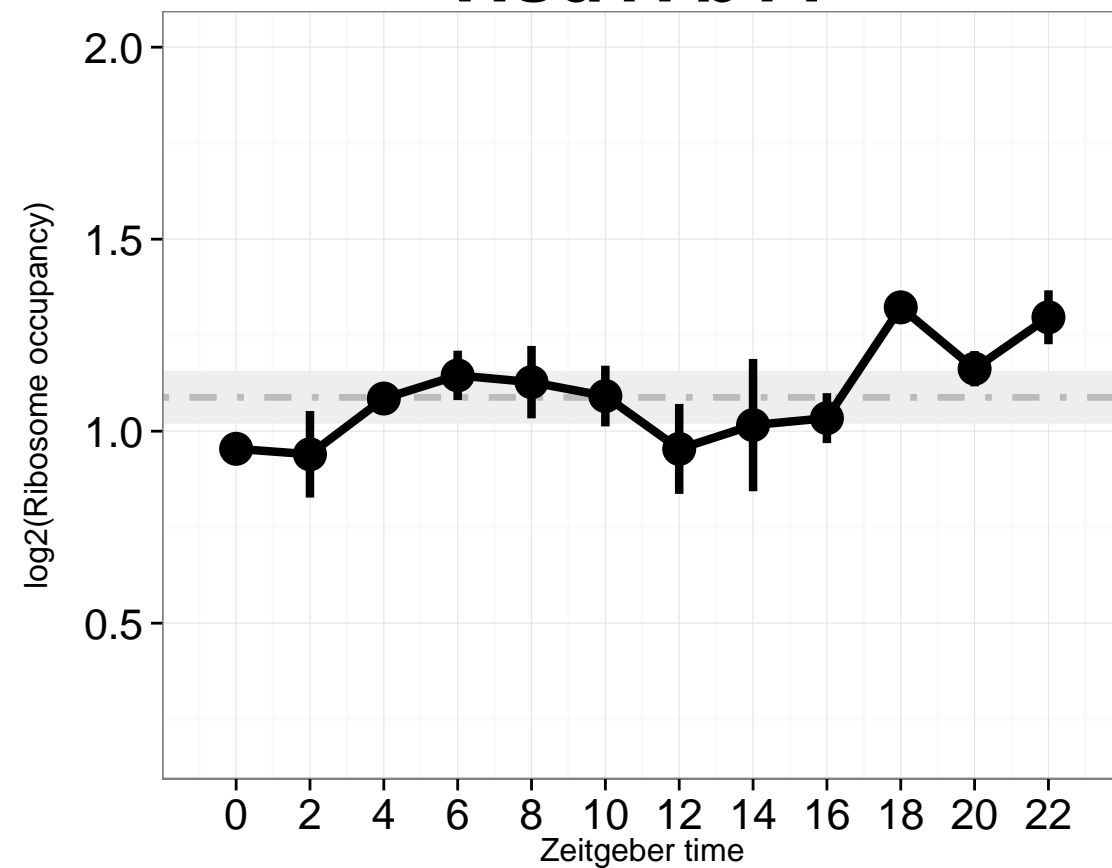

Supplement: Supplementary file 3047 [file 1]

## Sgta

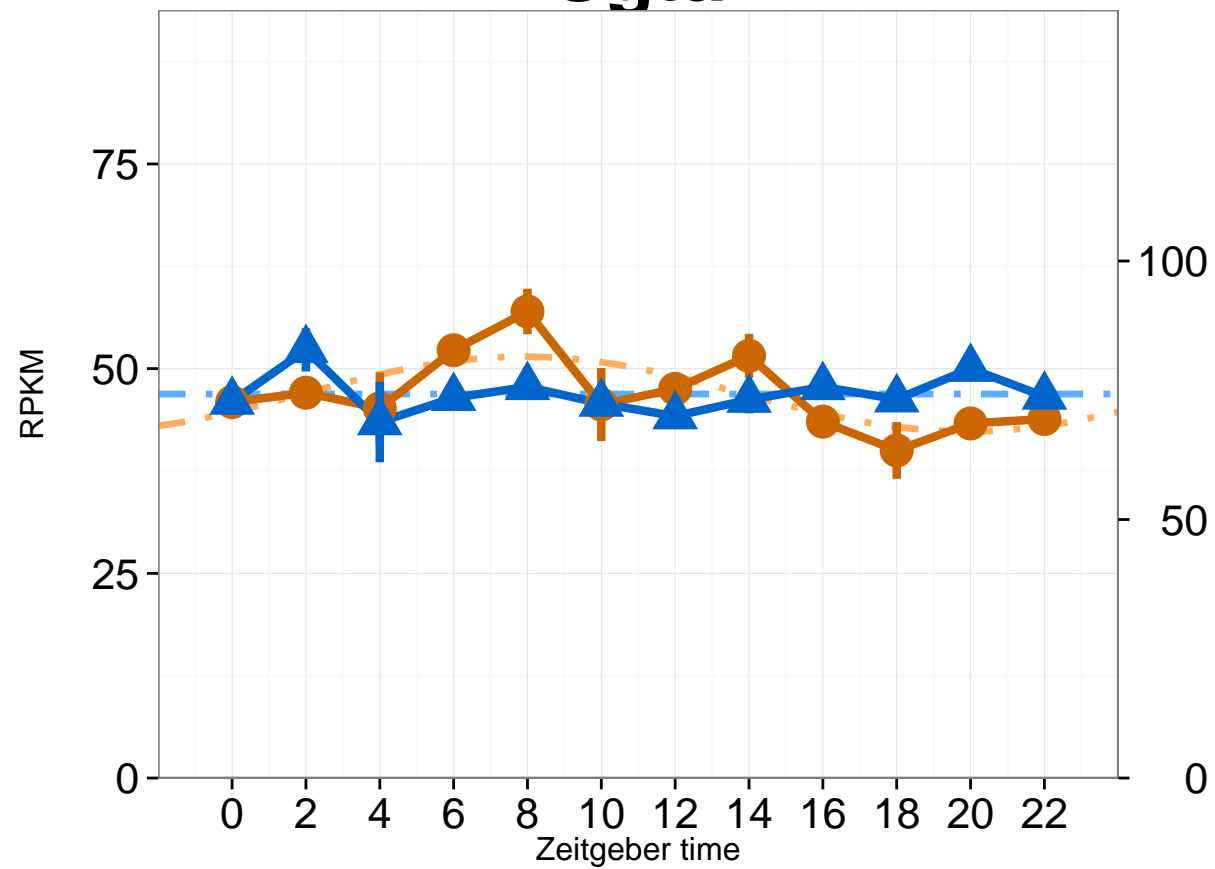

## Sgta

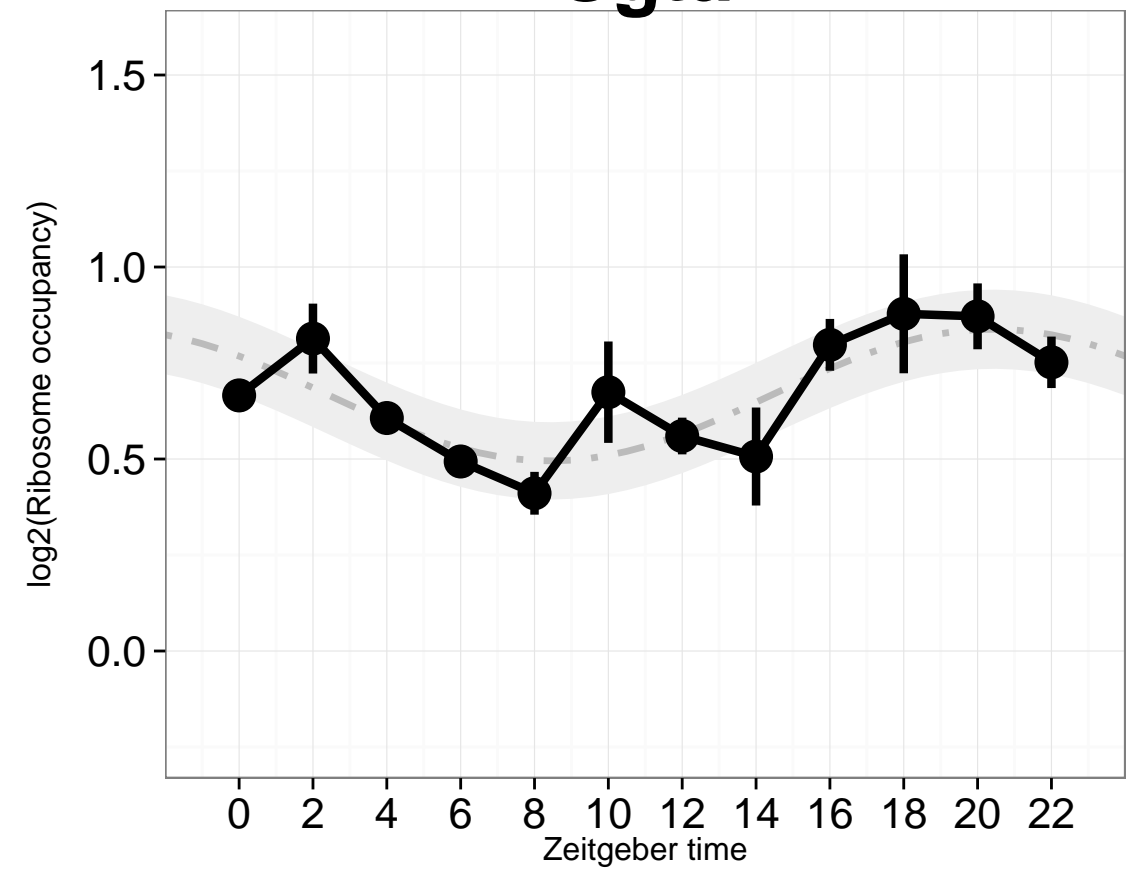

Supplement: Supplementary file 3048 [file 1]

Gm7932

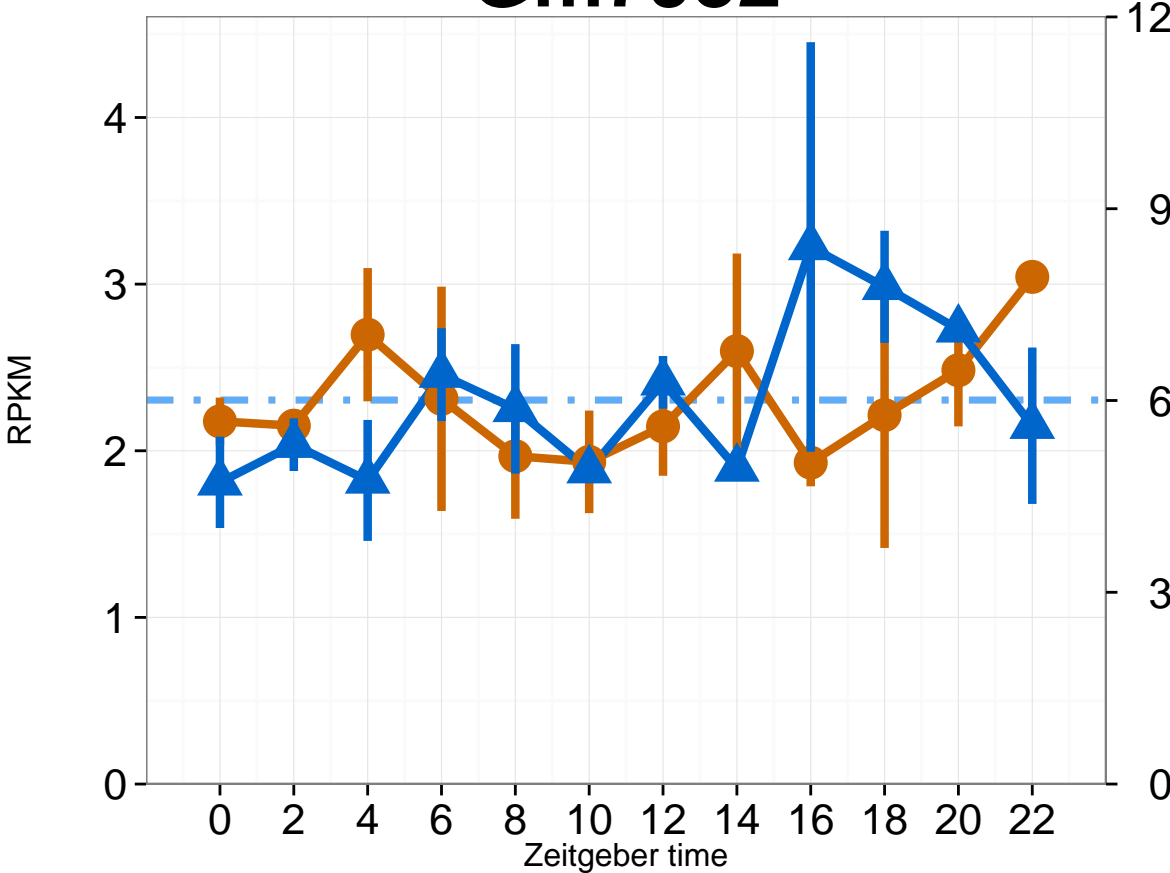

Gm7932

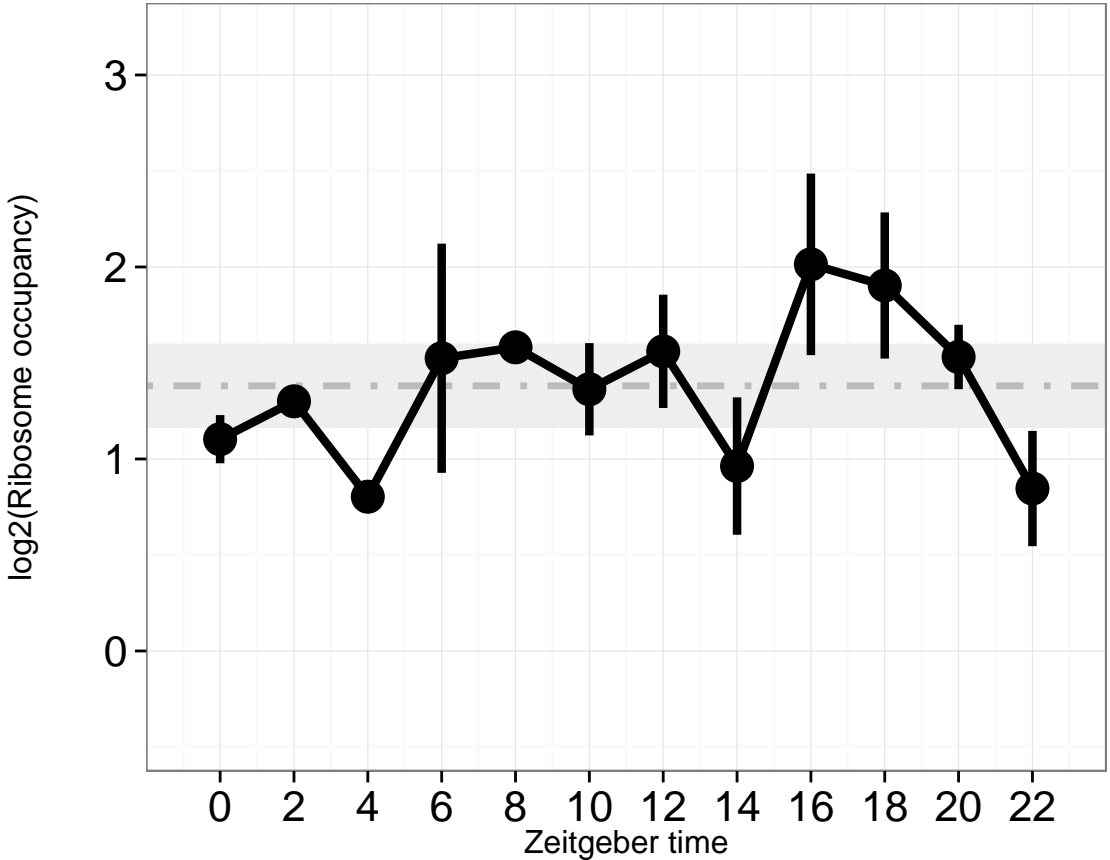

Supplement: Supplementary file 3049 [file 1]

# Rps20

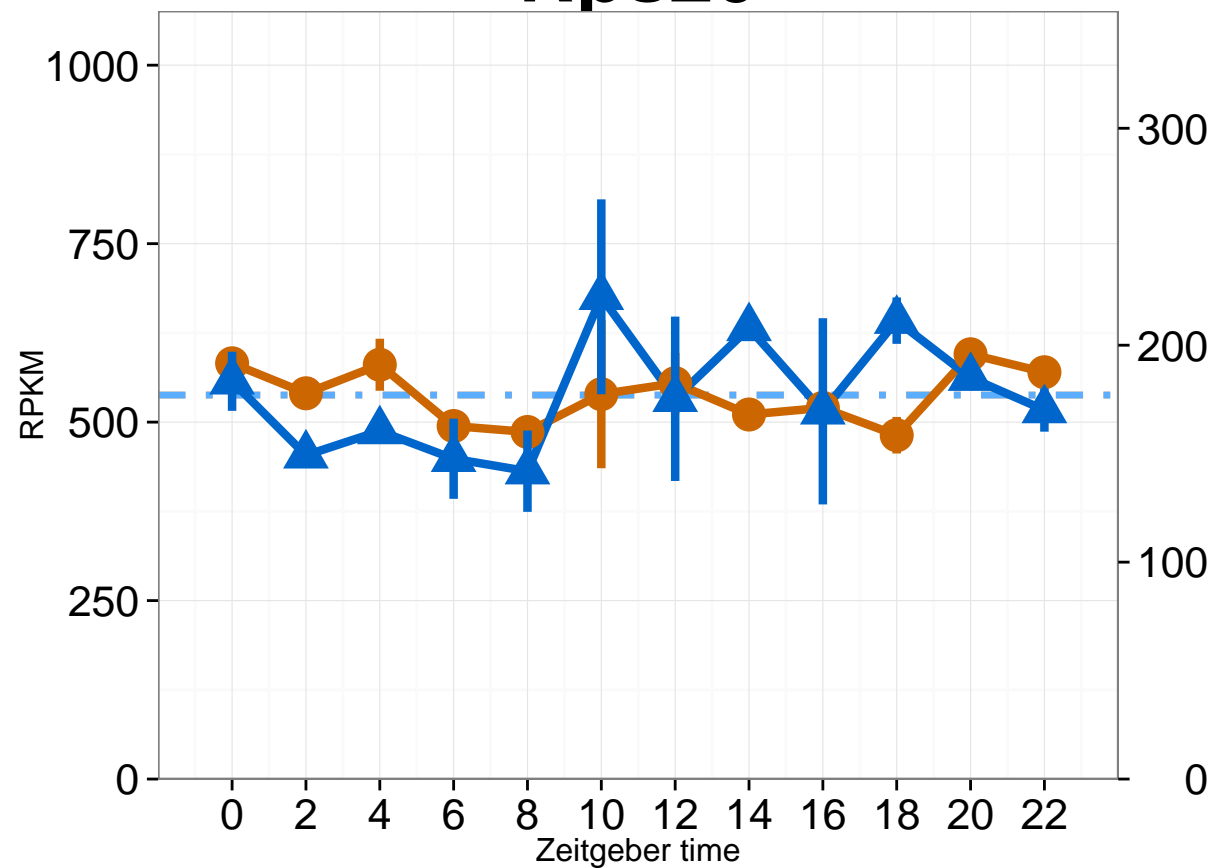

# Rps20

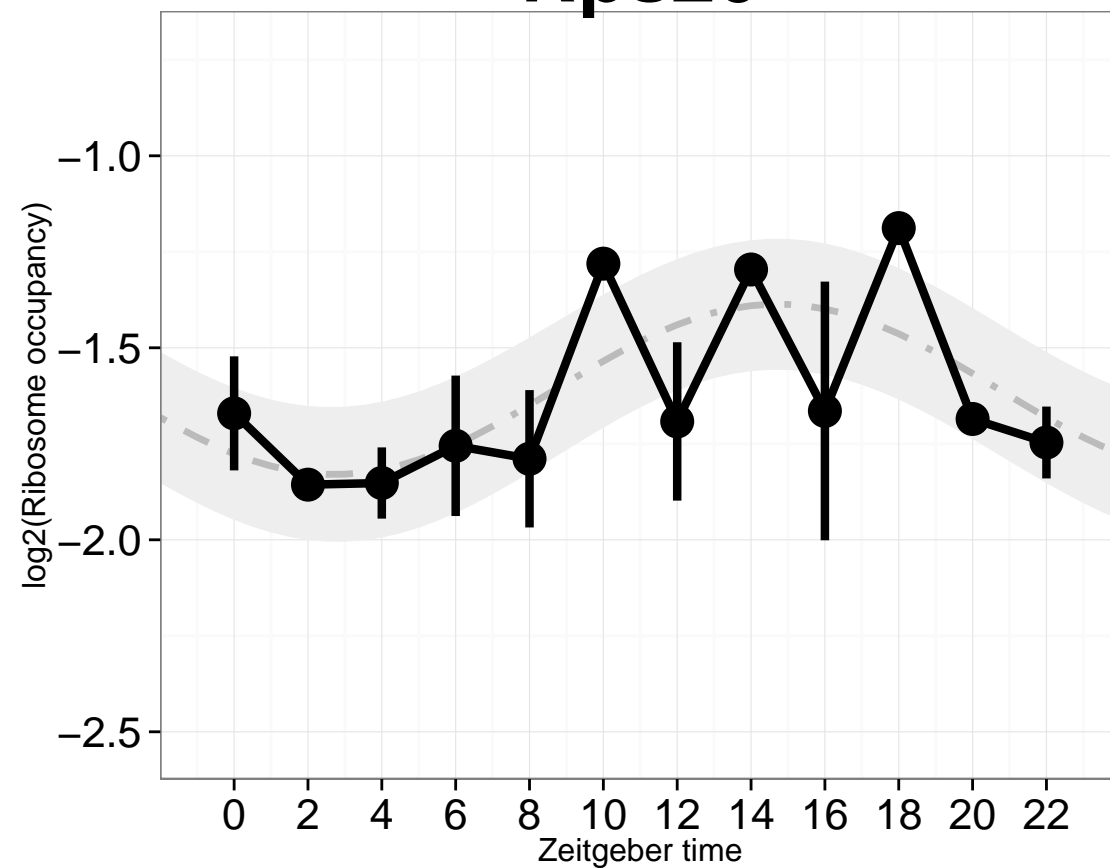

Supplement: Supplementary file 3050 [file 1]

## Mecp2

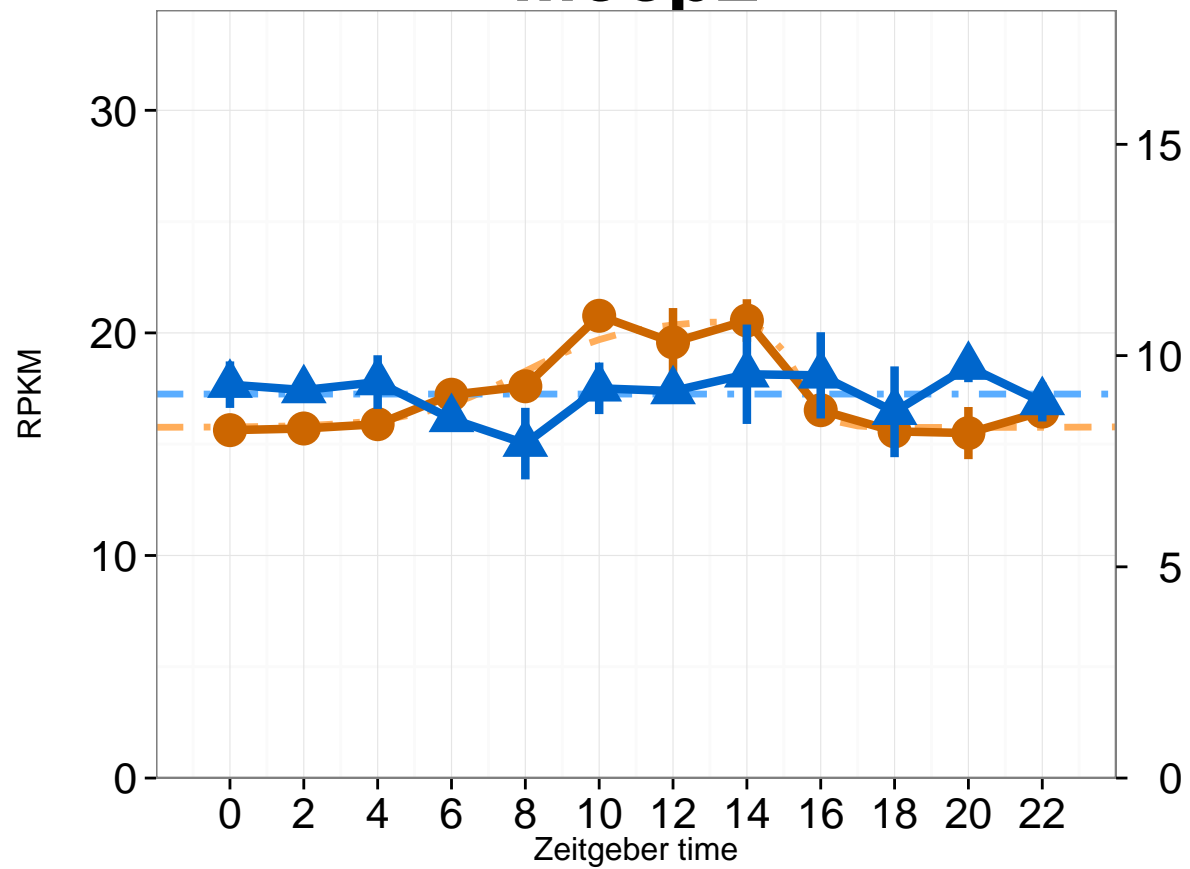

## Mecp2

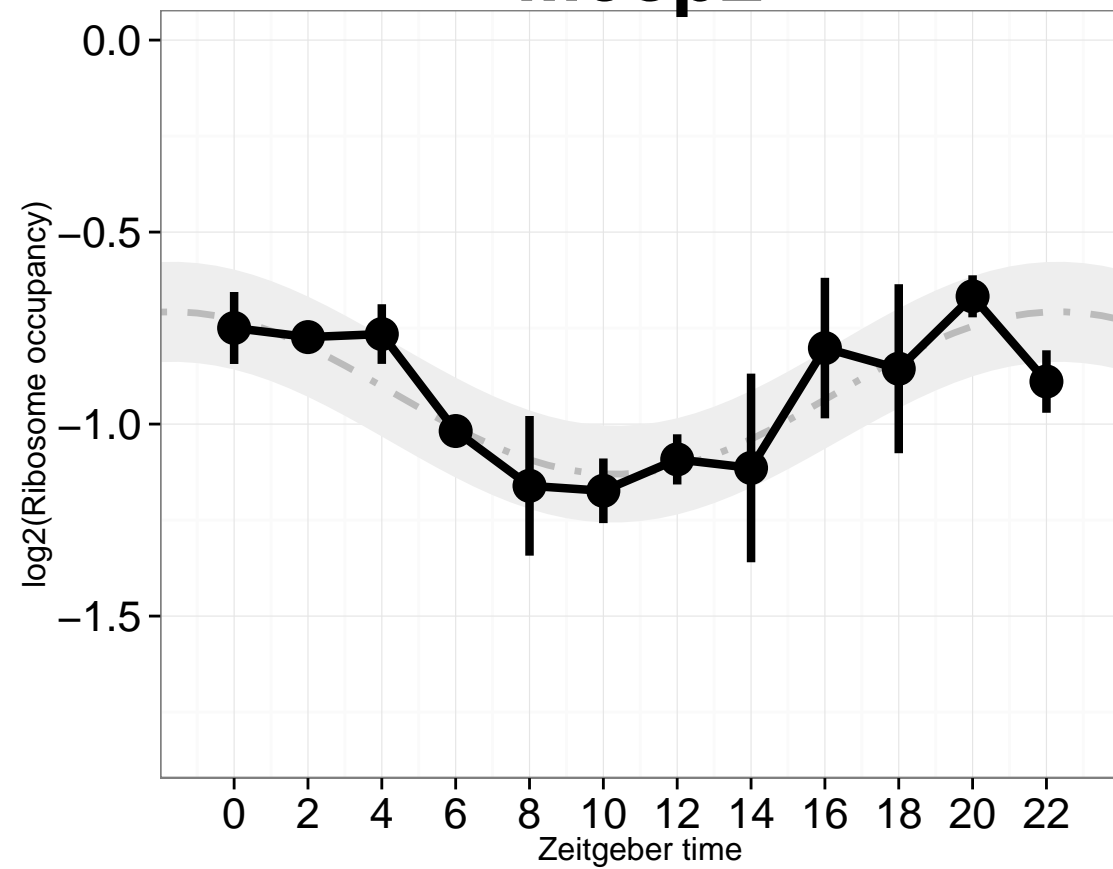

Supplement: Supplementary file 3051 [file 1]

## Ddx17

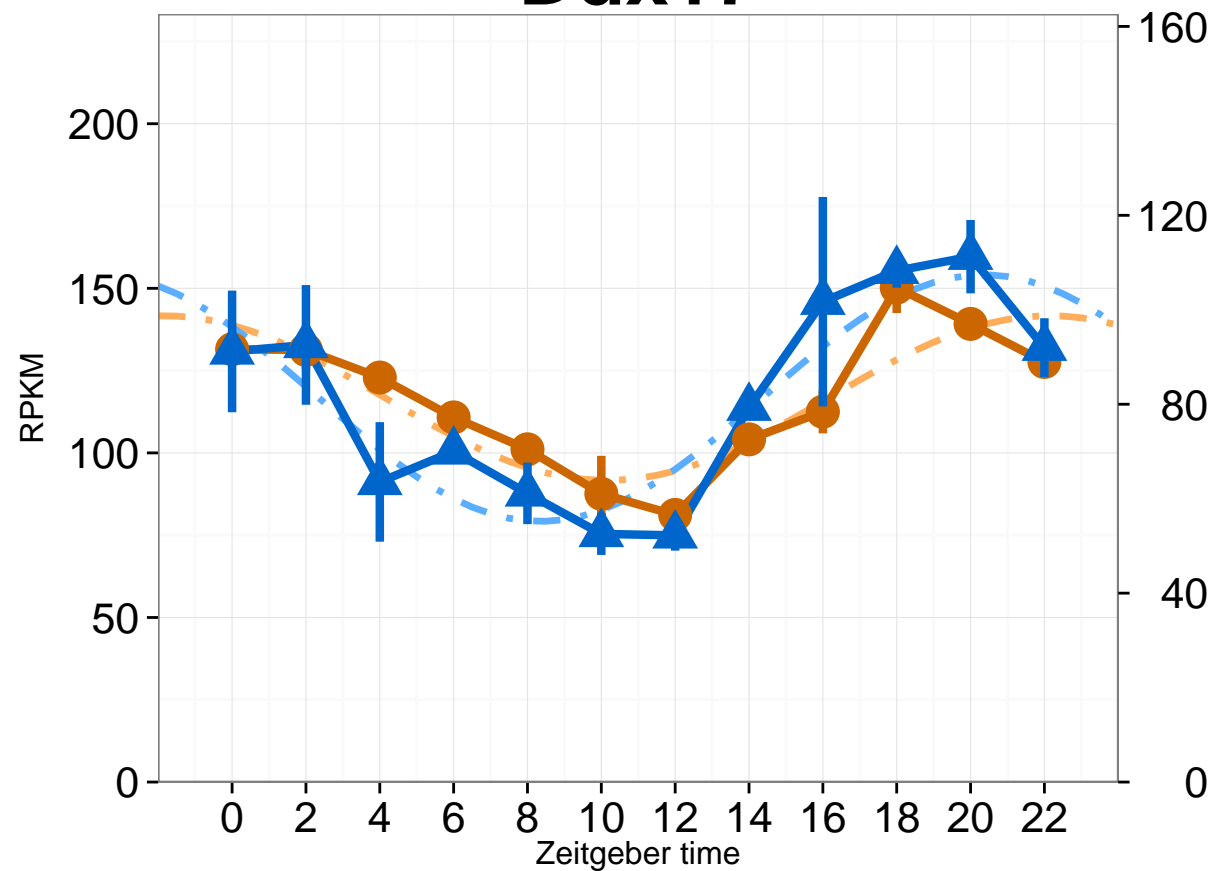

## Ddx17

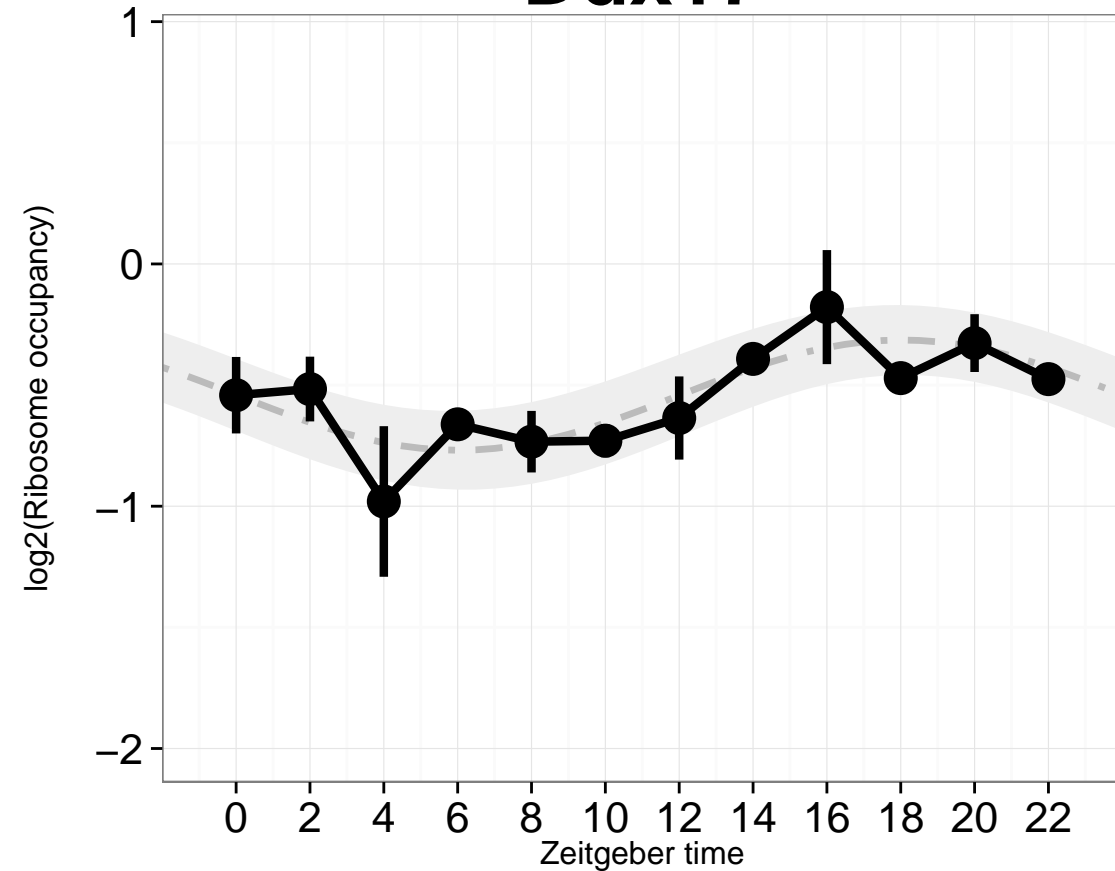

Supplement: Supplementary file 3052 [file 1]

## Kap

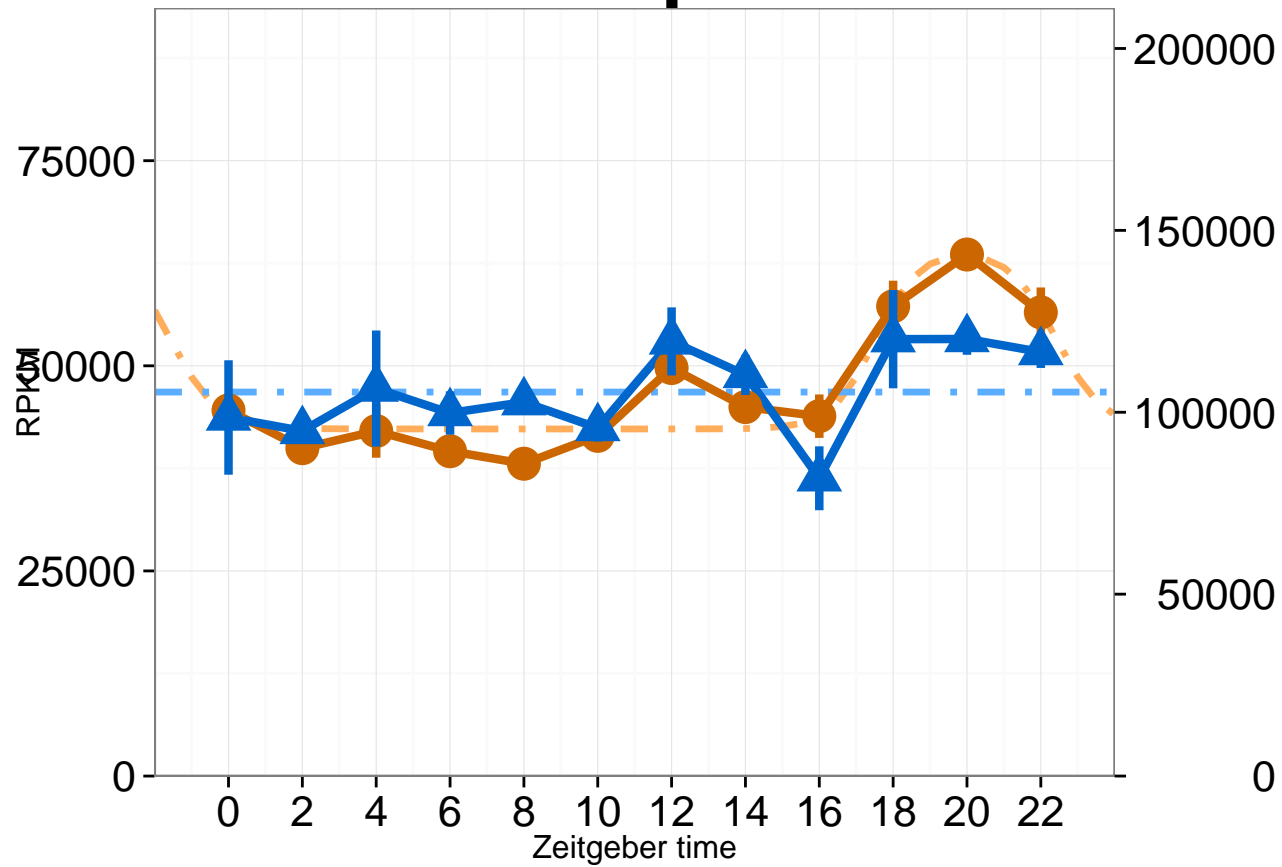

## Kap

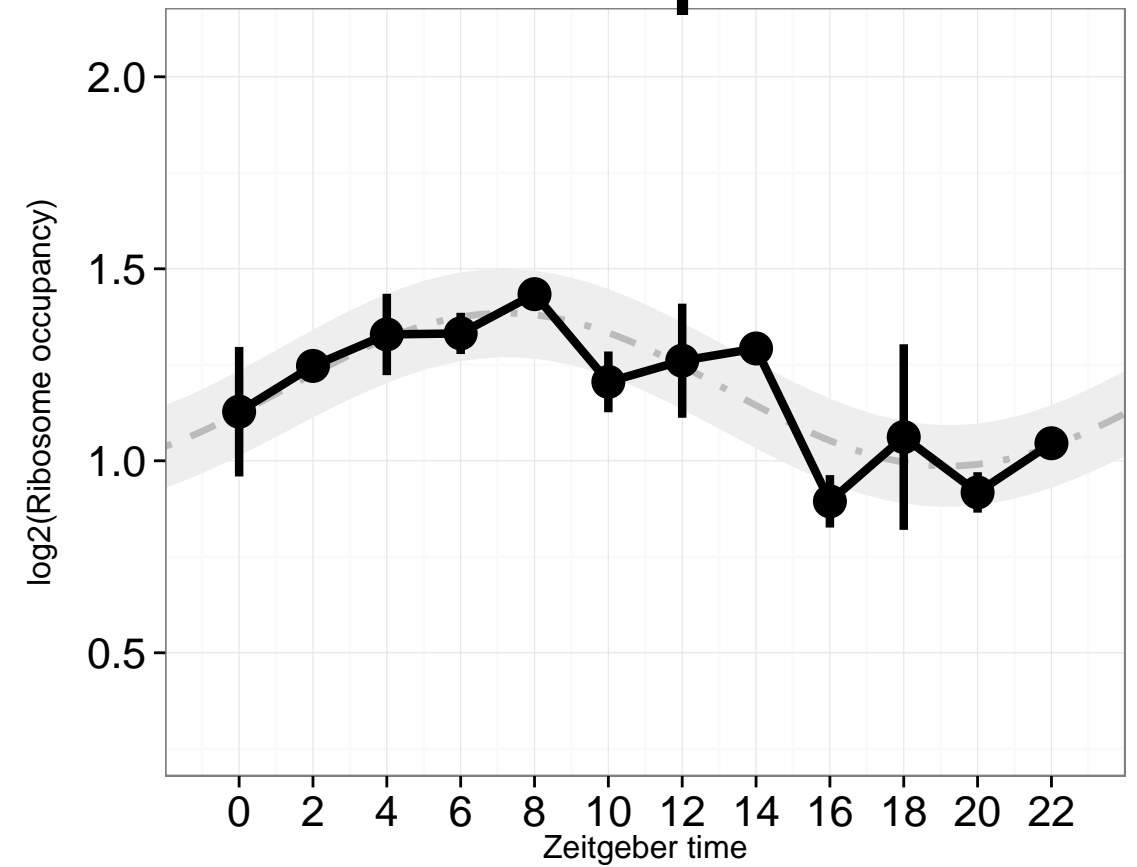

Supplement: Supplementary file 3053 [file 1]

## Tox4

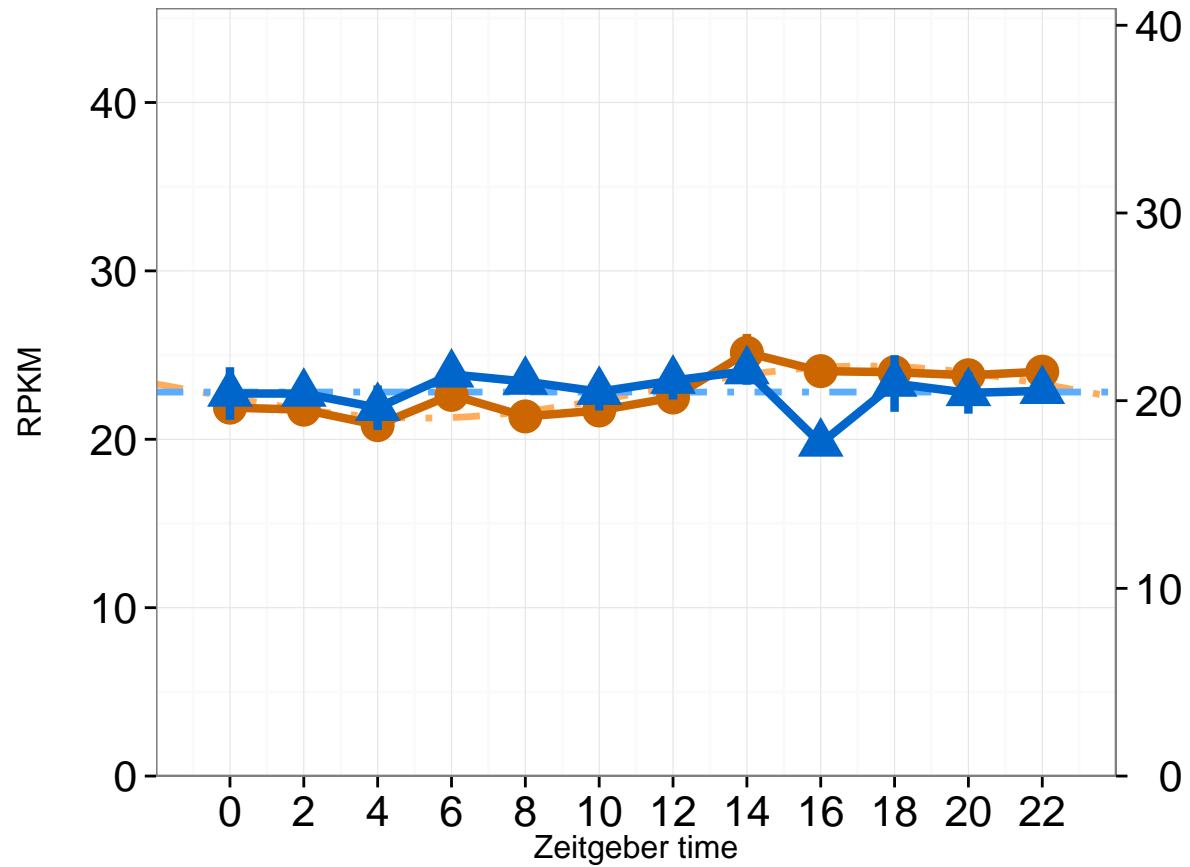

## Tox4

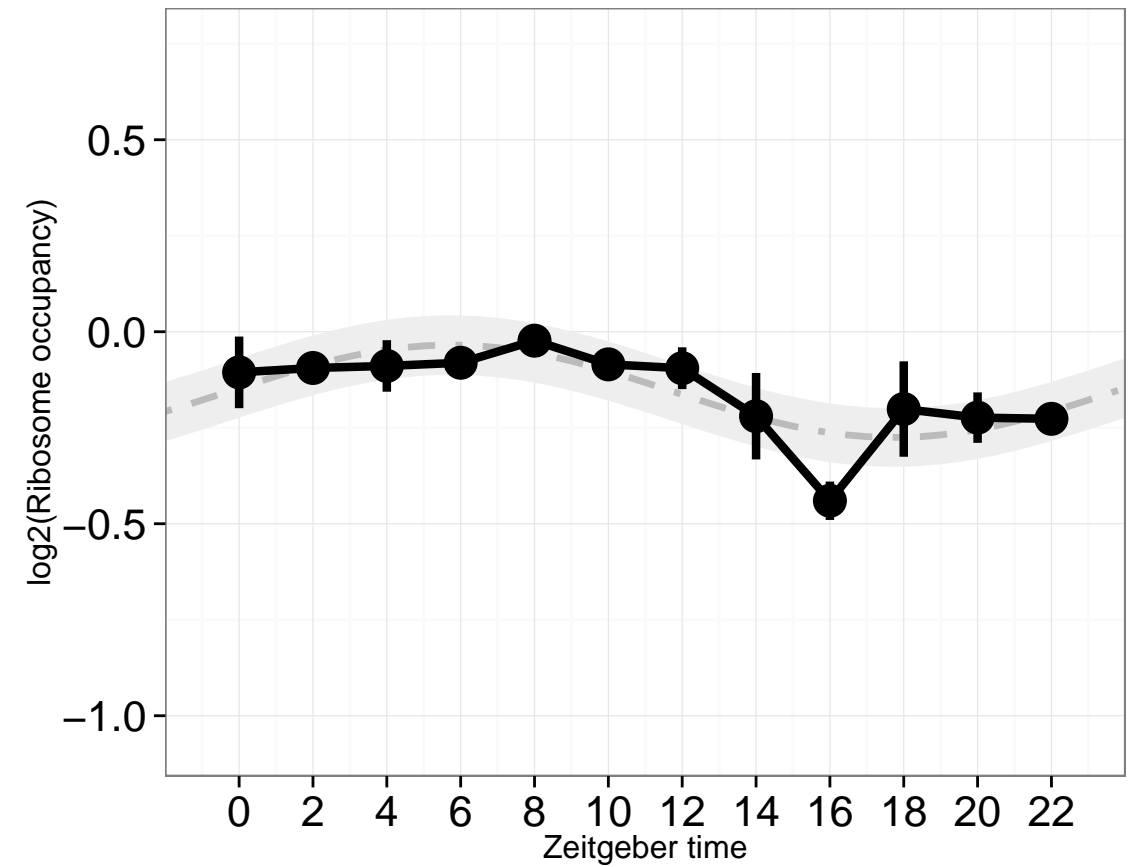

Supplement: Supplementary file 3054 [file 1]

## Bdnf

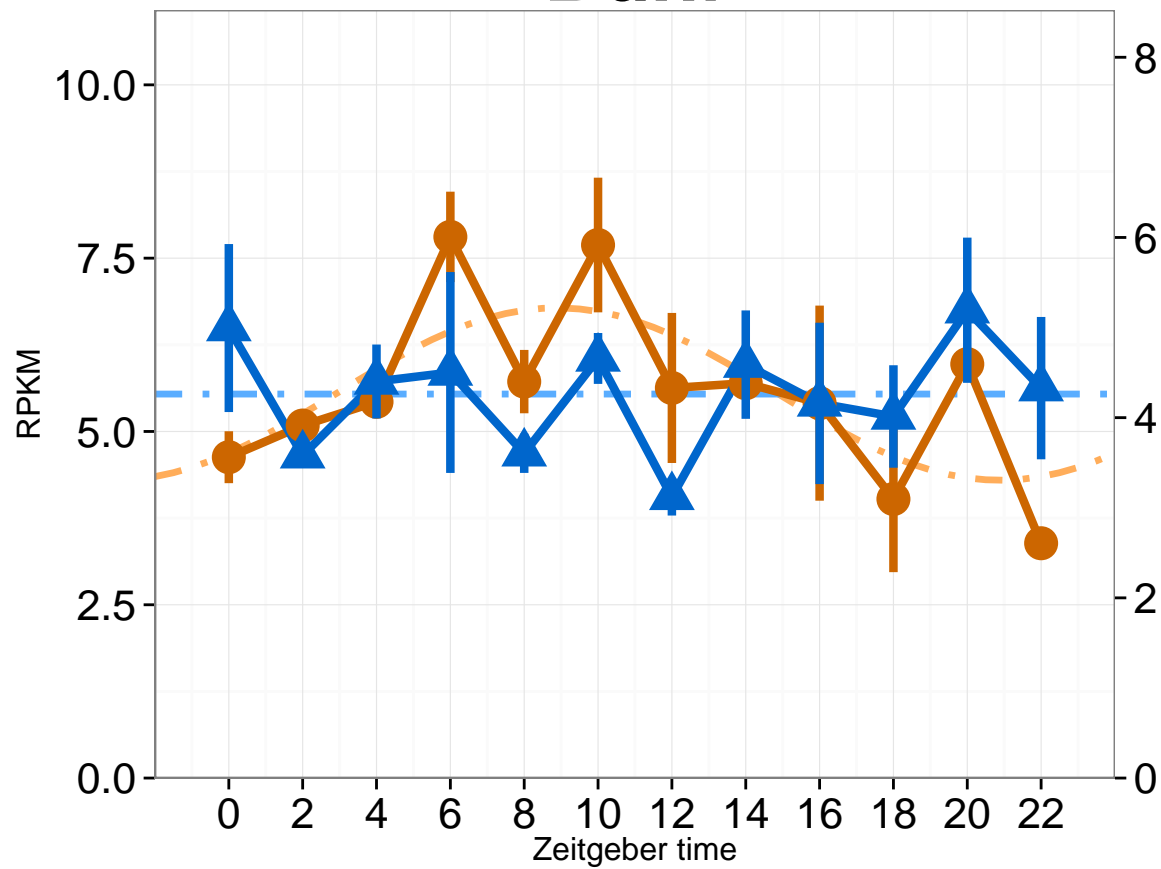

## Bdnf

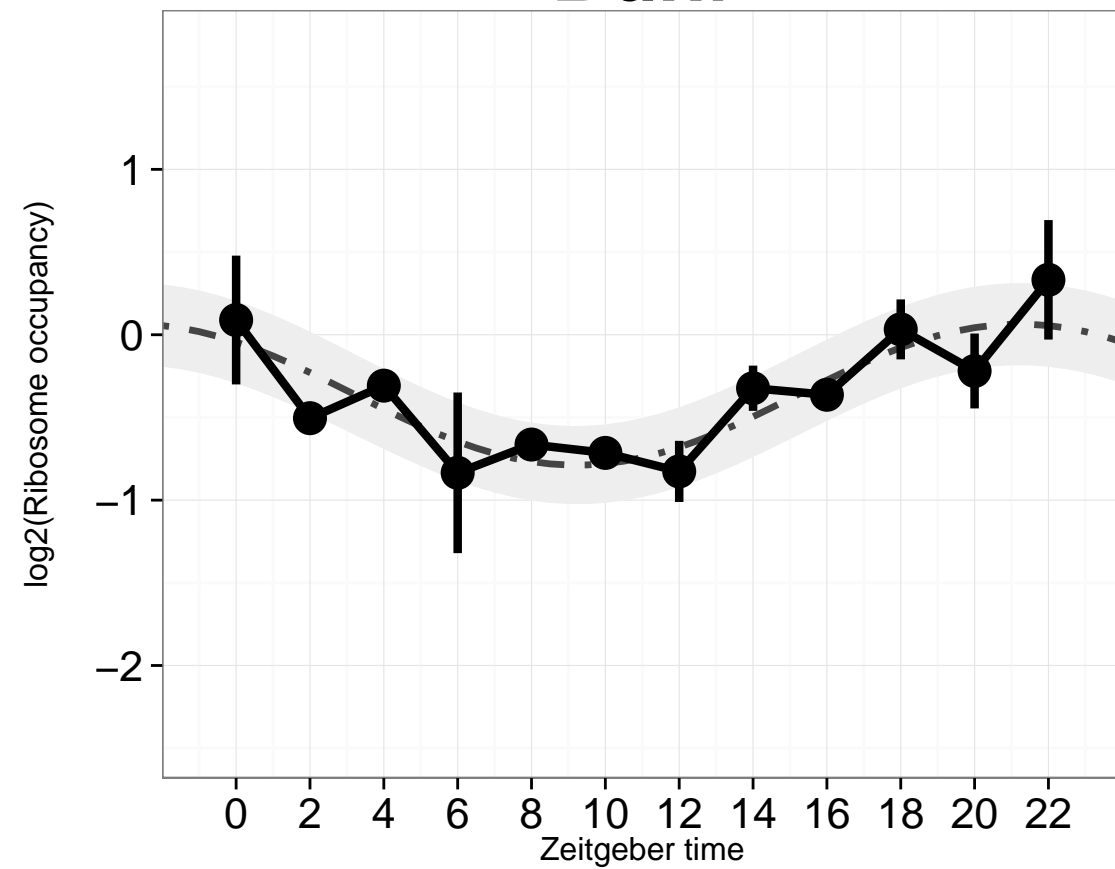

Supplement: Supplementary file 3055 [file 1]

# Acap1

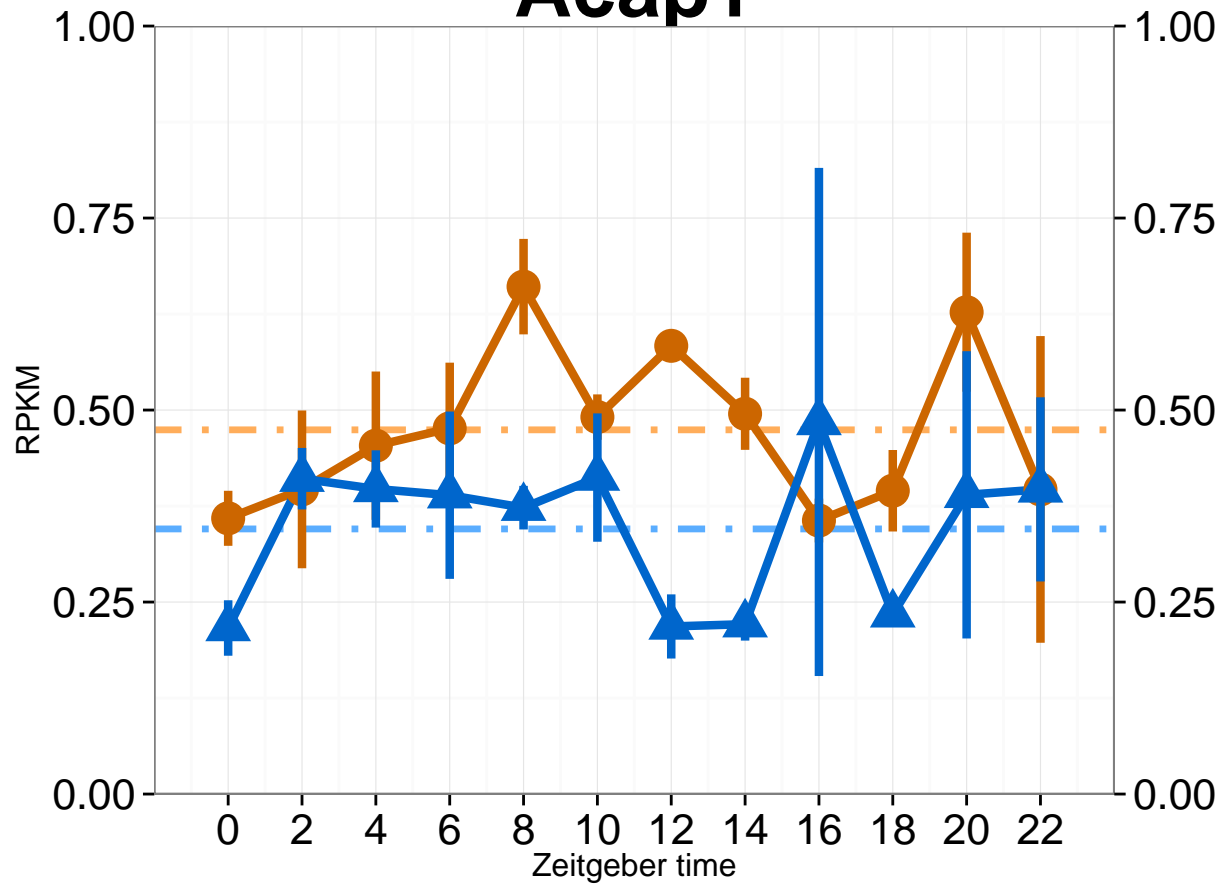

# Acap1

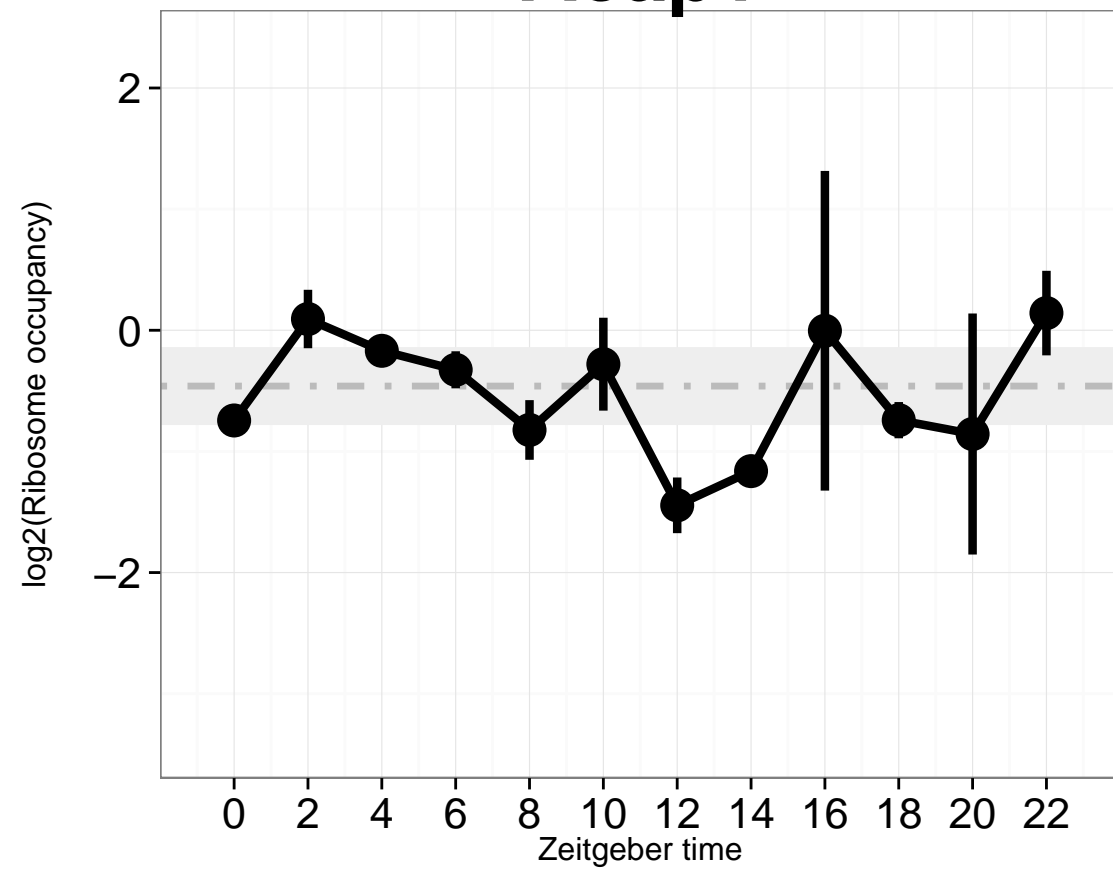

Supplement: Supplementary file 3056 [file 1]

## Adprh

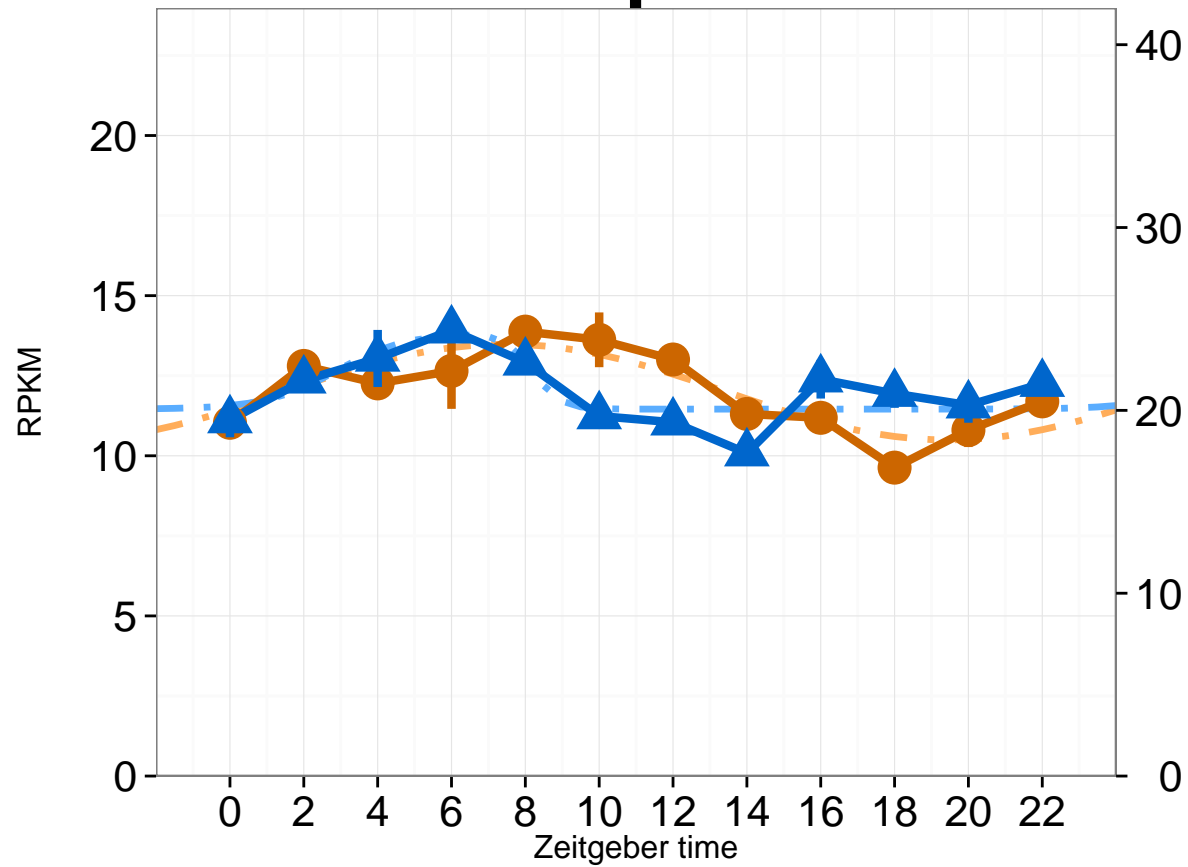

## Adprh

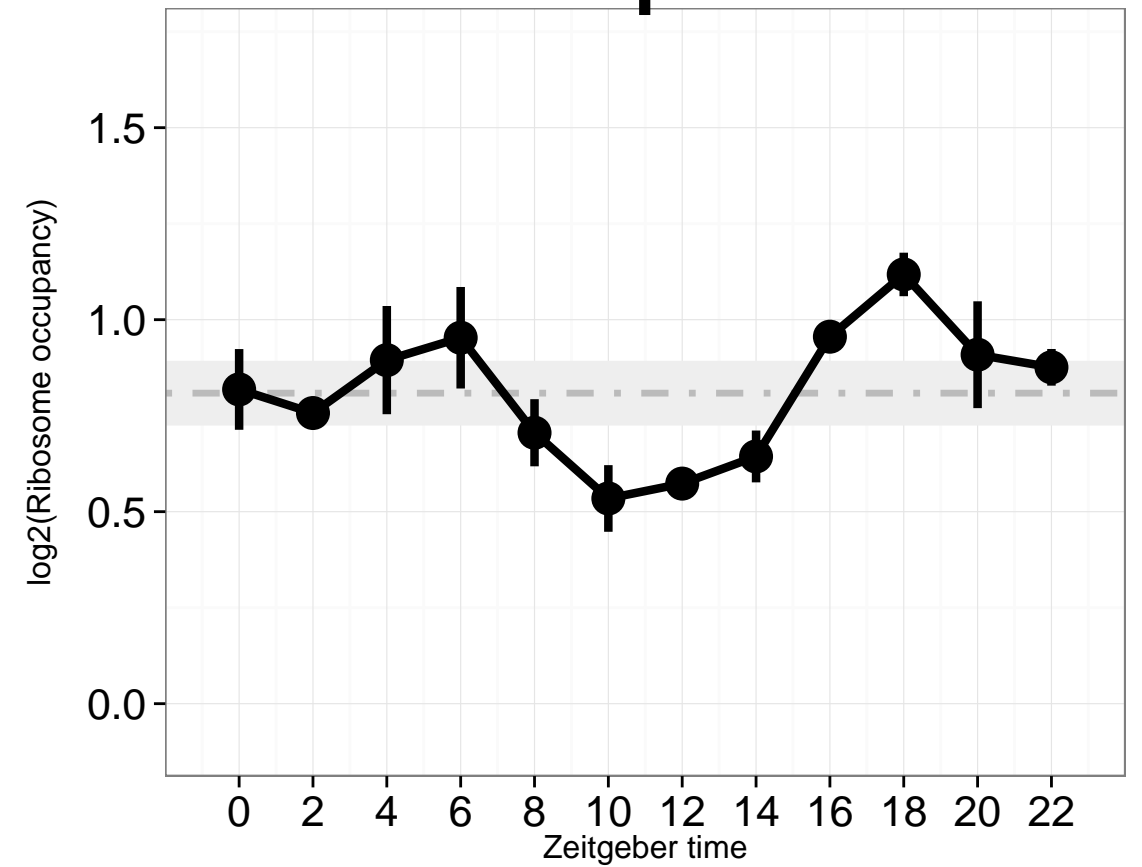

Supplement: Supplementary file 3057 [file 1]

# Cntnap5a

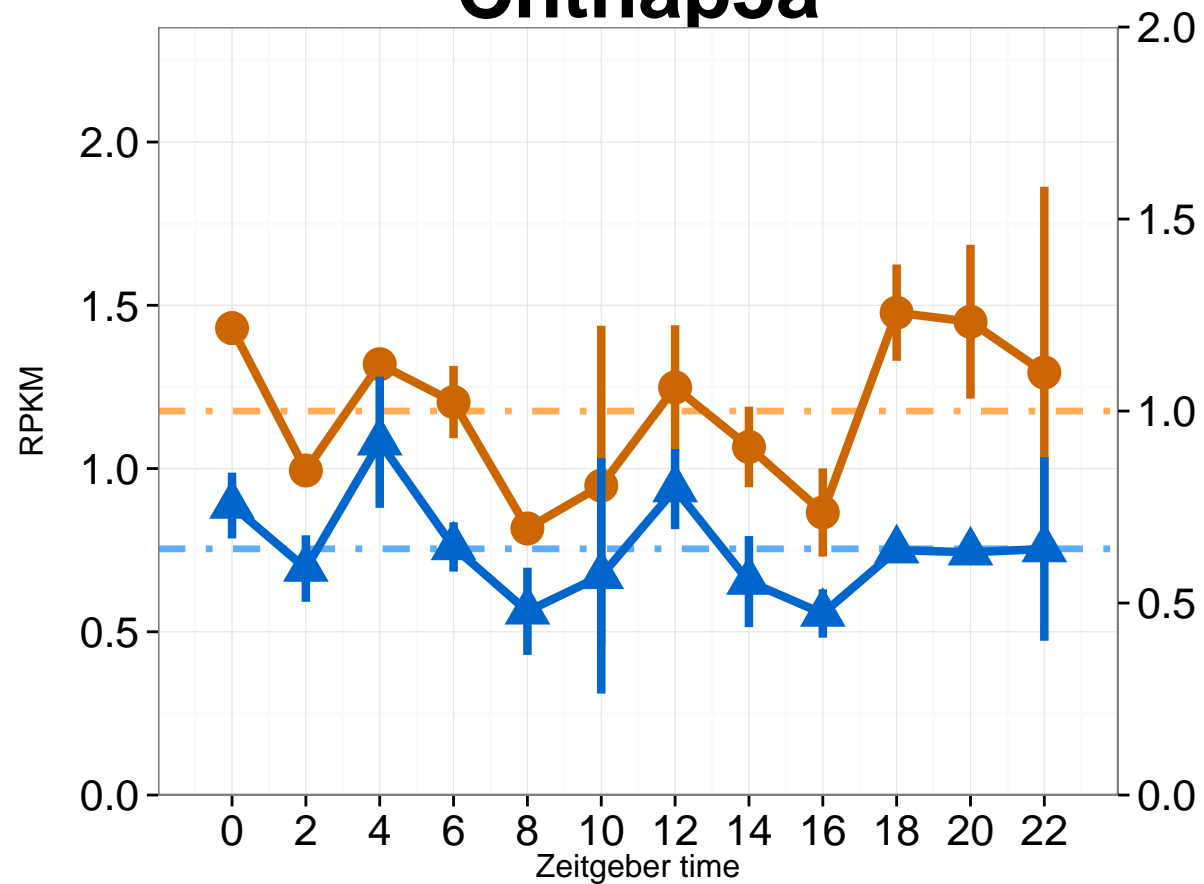

# Cntnap5a

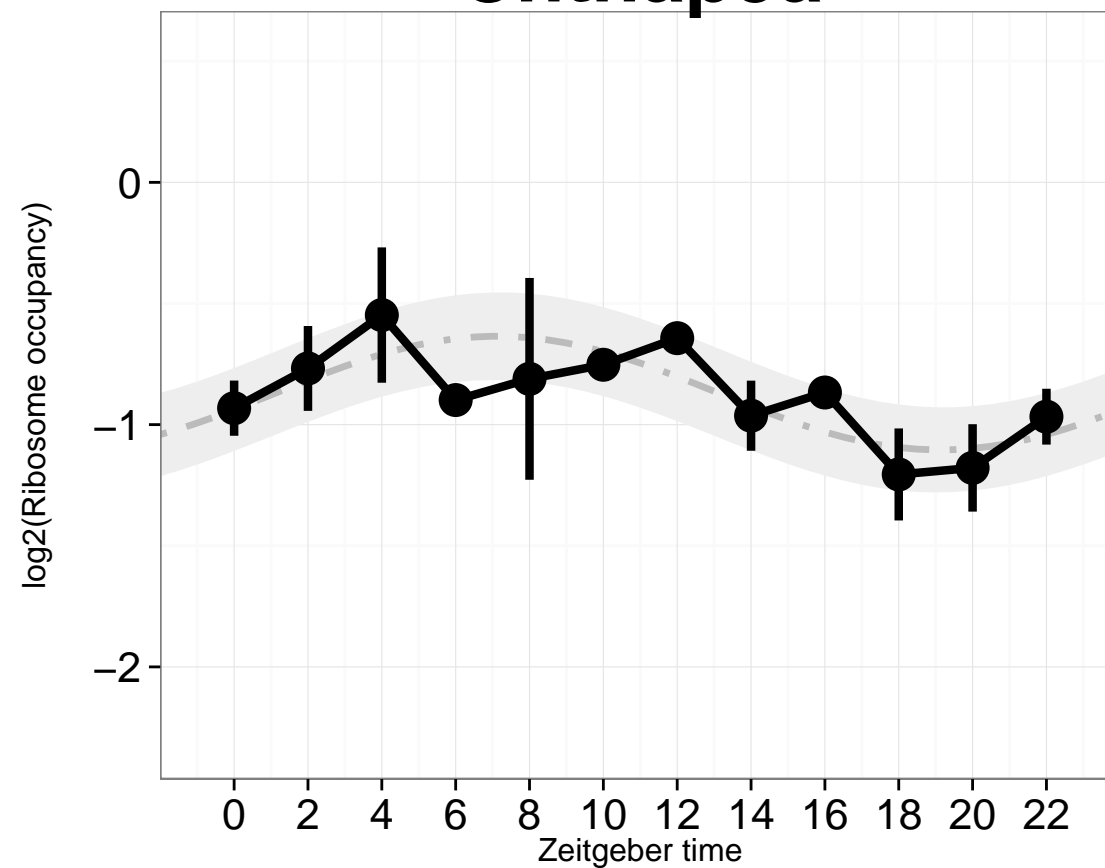

Supplement: Supplementary file 3058 [file 1]

## Usp37

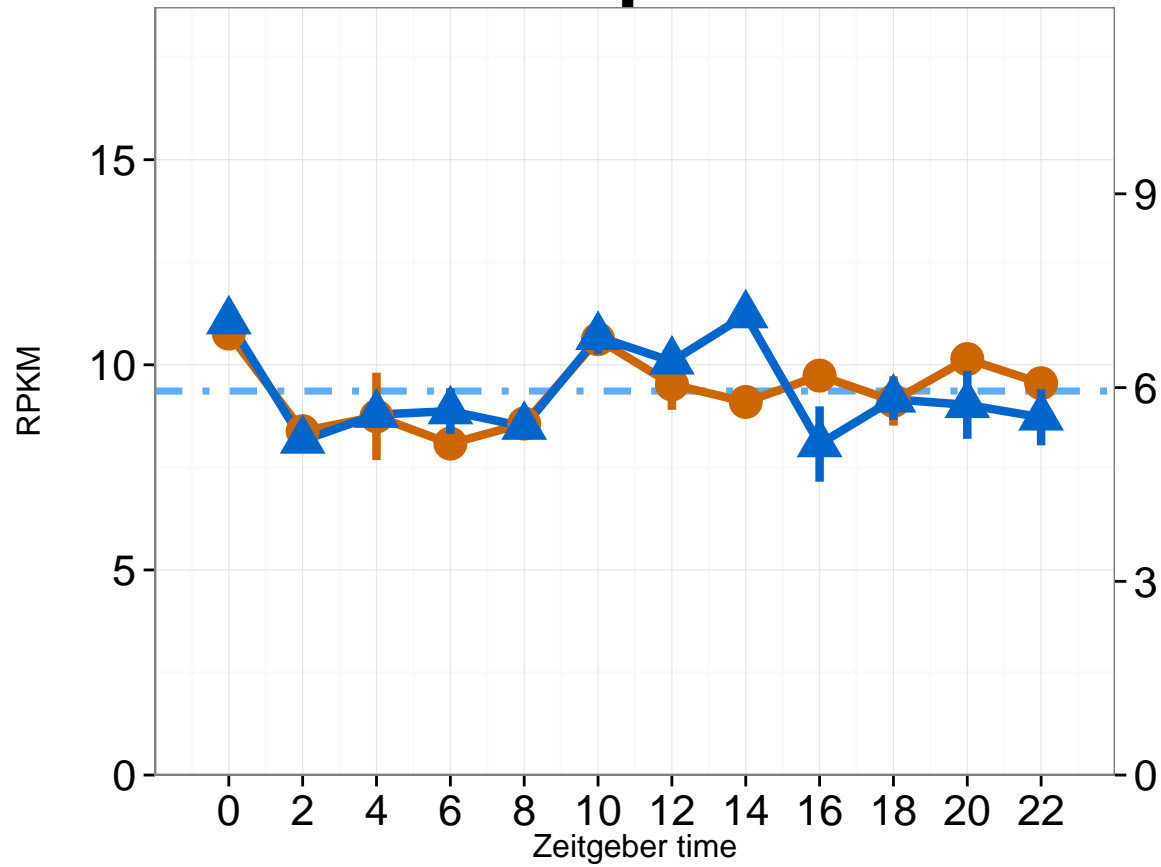

## Usp37

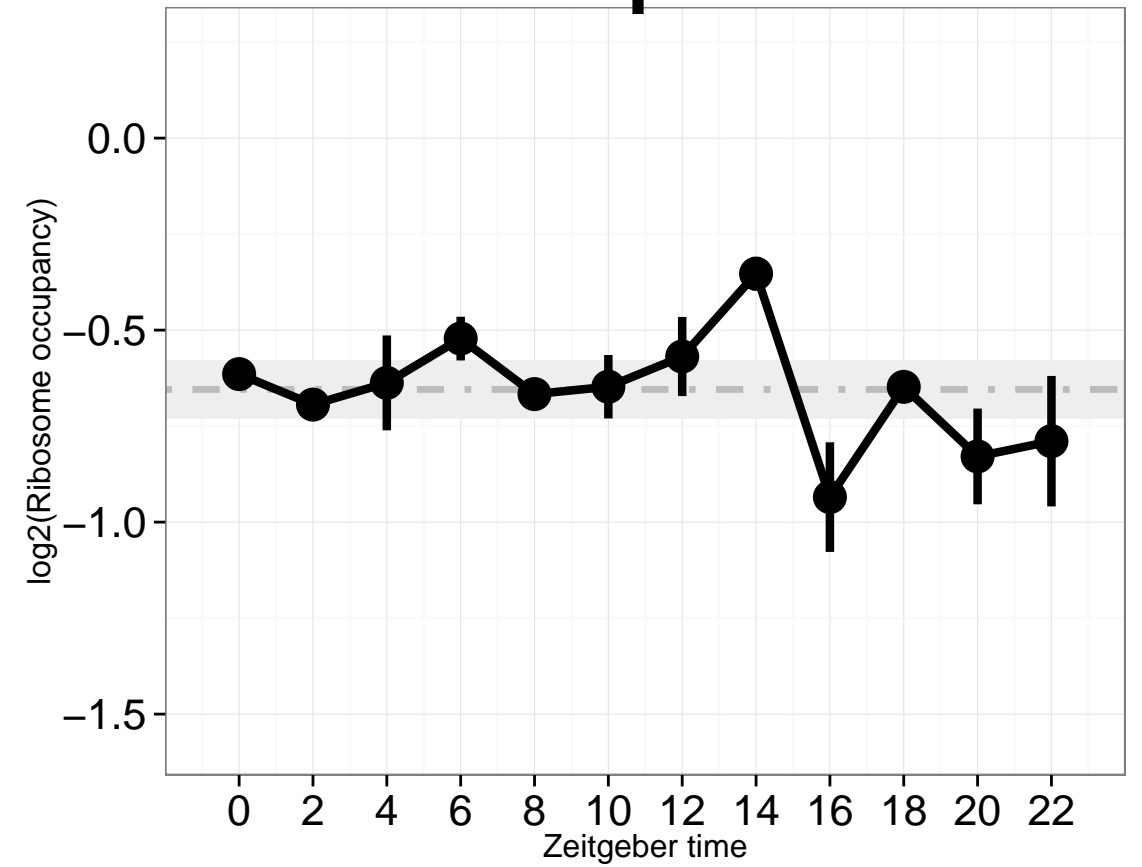

Supplement: Supplementary file 3059 [file 1]

## Colgalt2

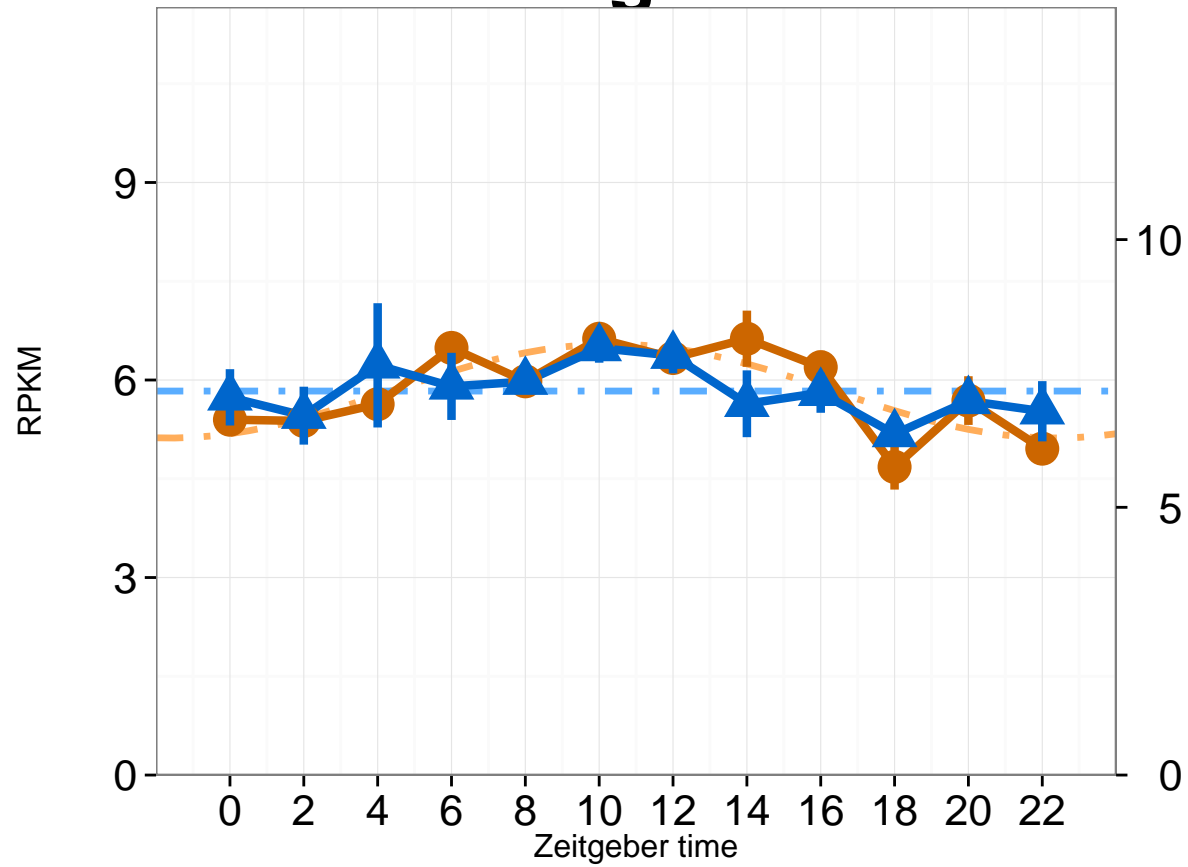

## Colgalt2

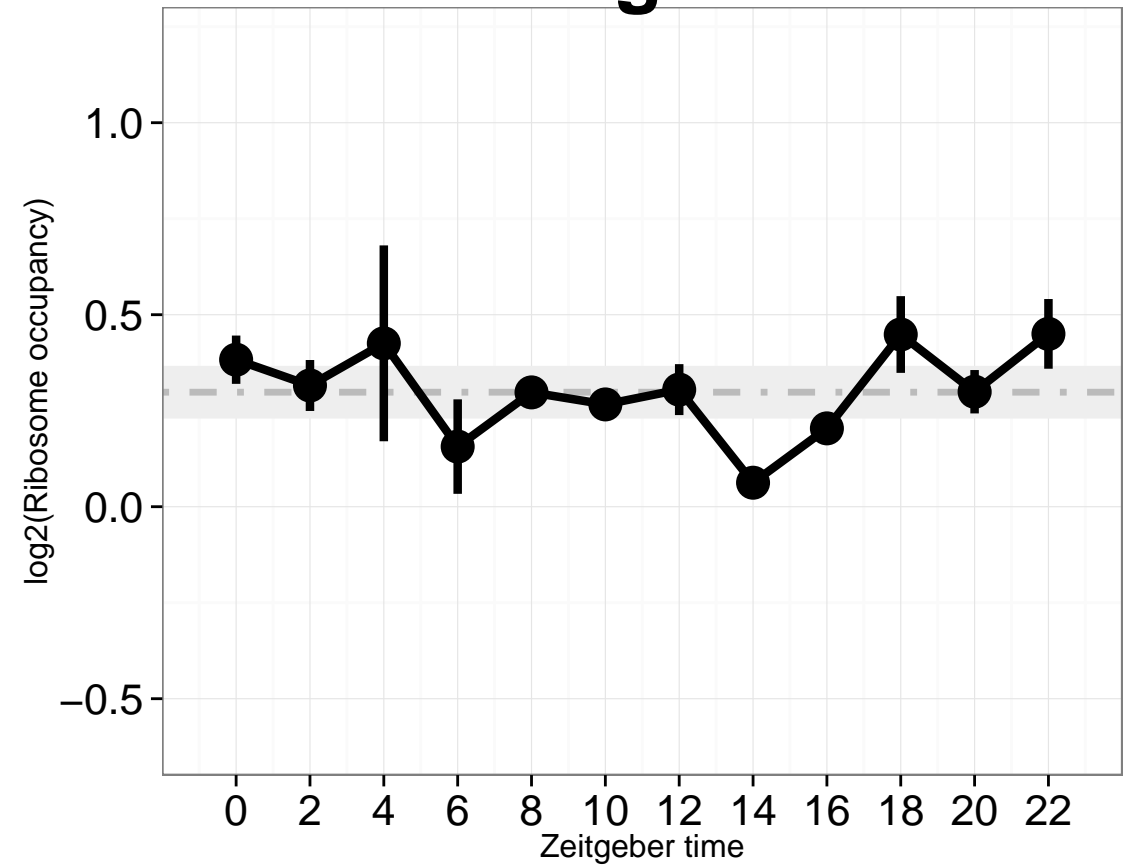

Supplement: Supplementary file 3060 [file 1]

## 4921524J17Rik

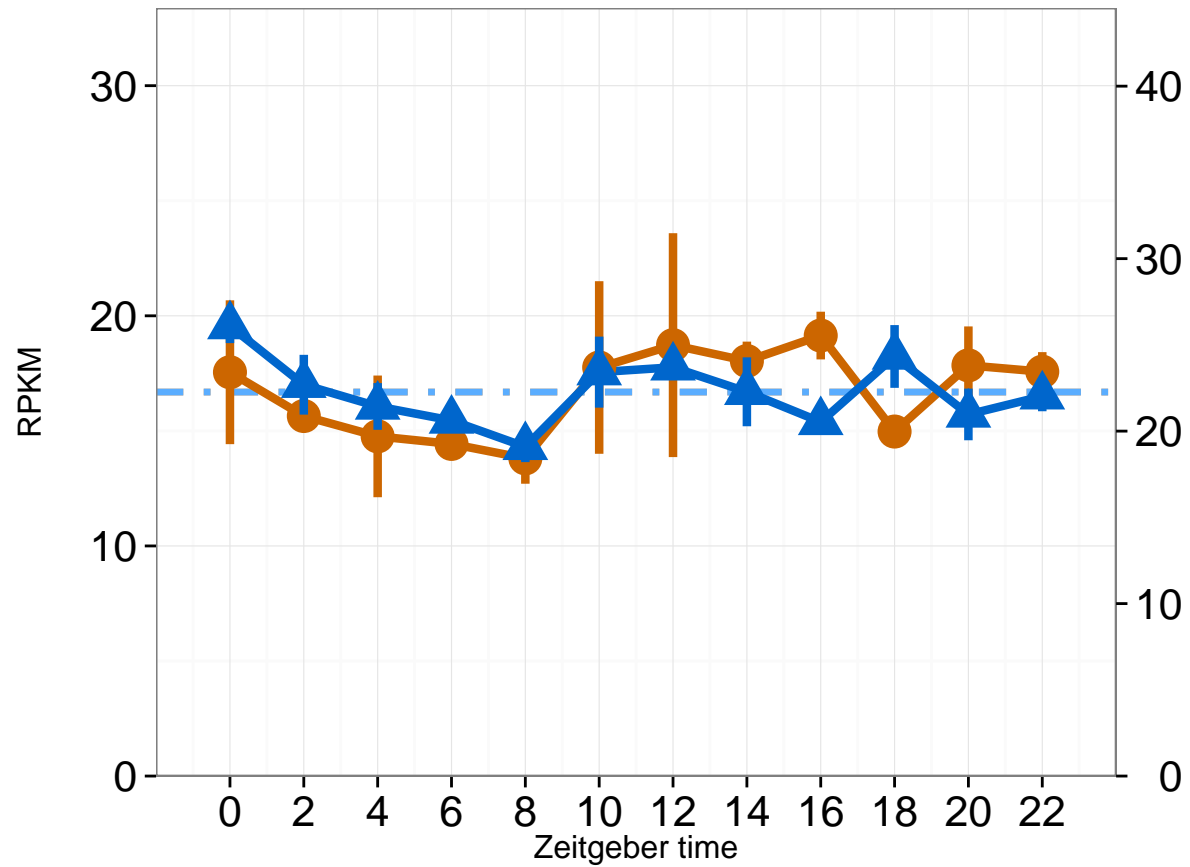

## 4921524J17Rik

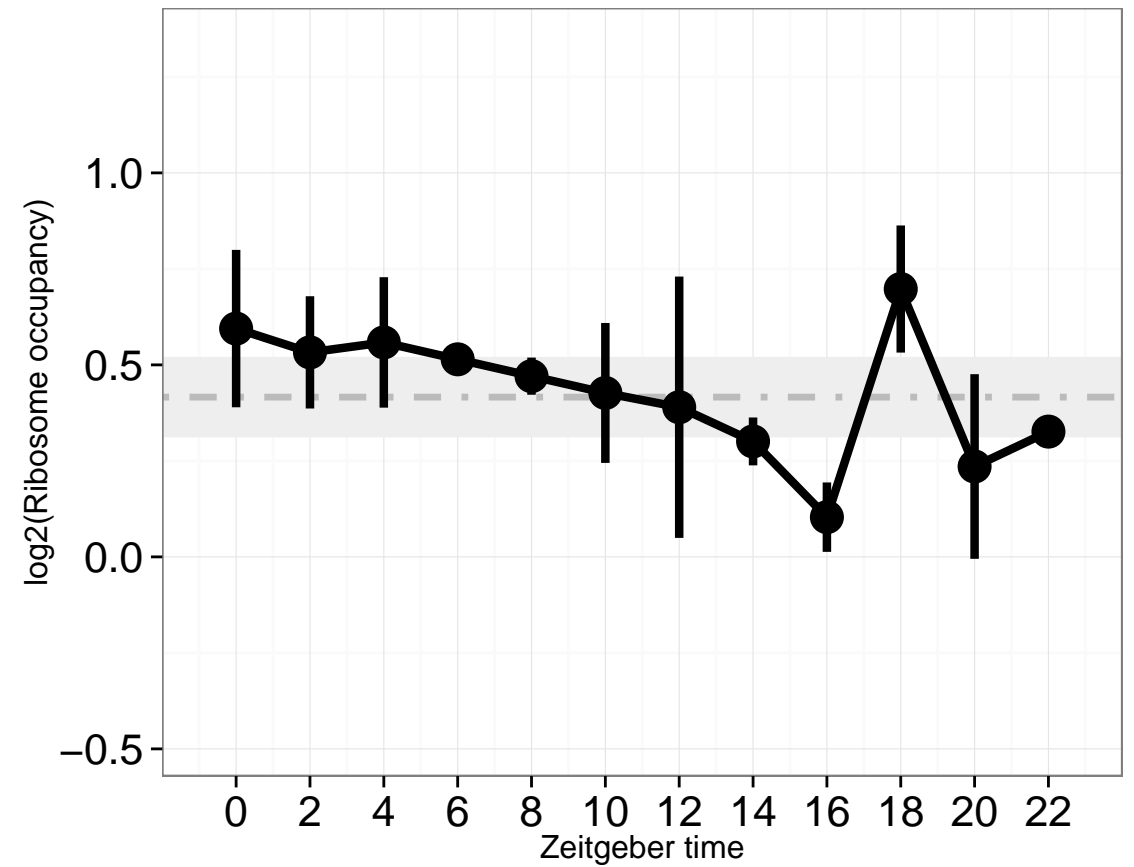

Supplement: Supplementary file 3061 [file 1]

# Gfod1

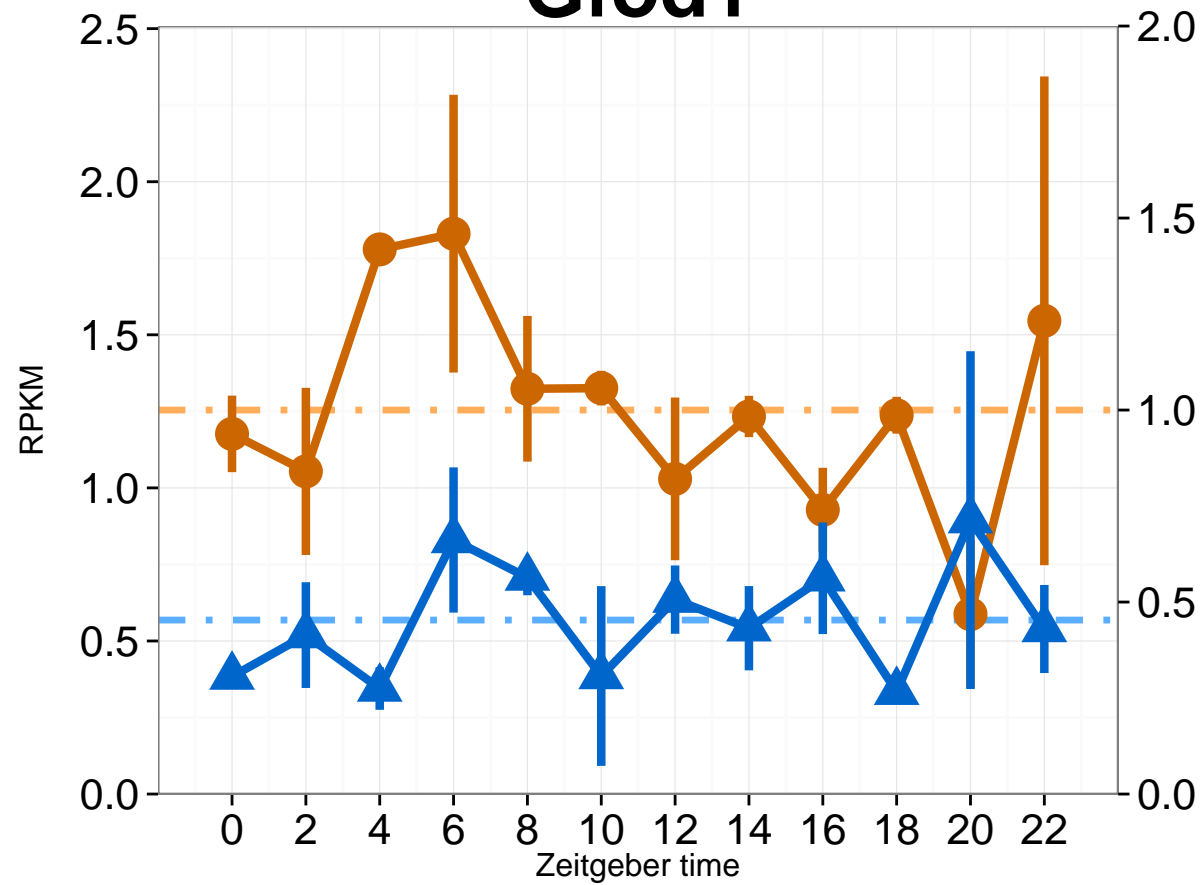

# Gfod1

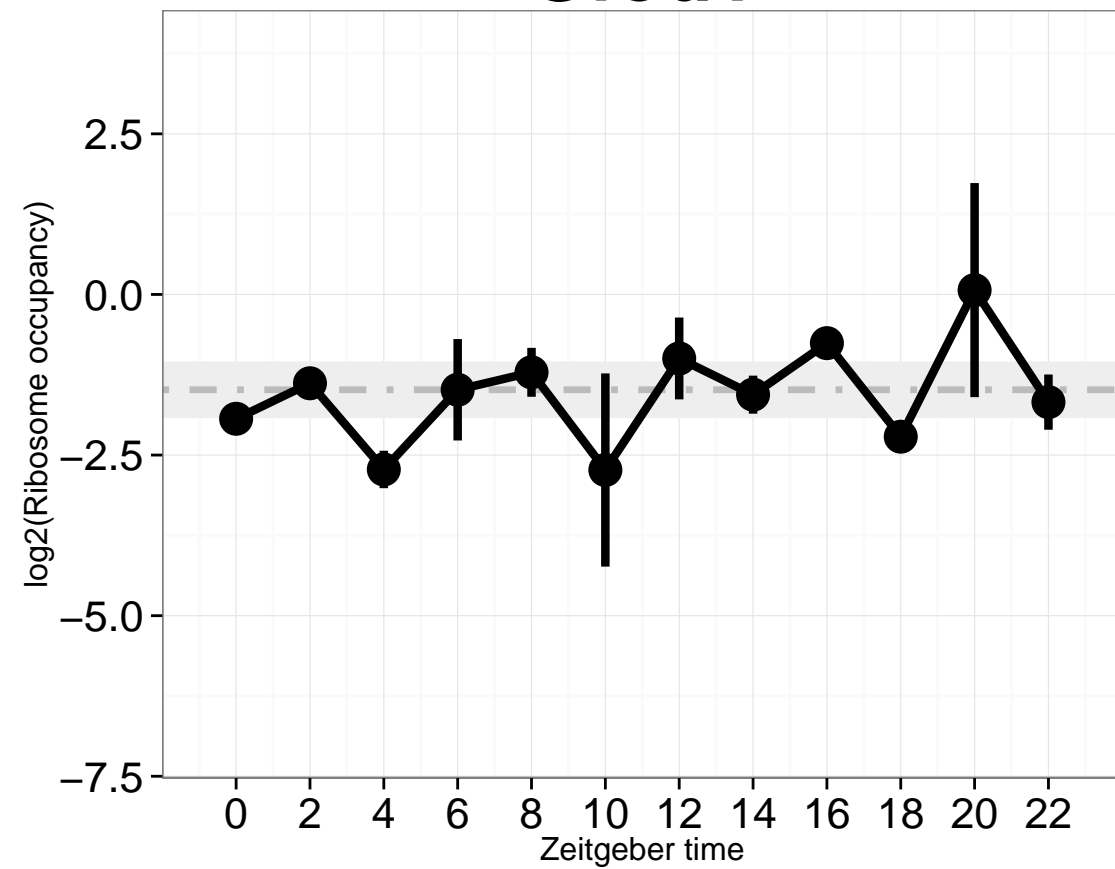

Supplement: Supplementary file 3062 [file 1]

## Zbtb33

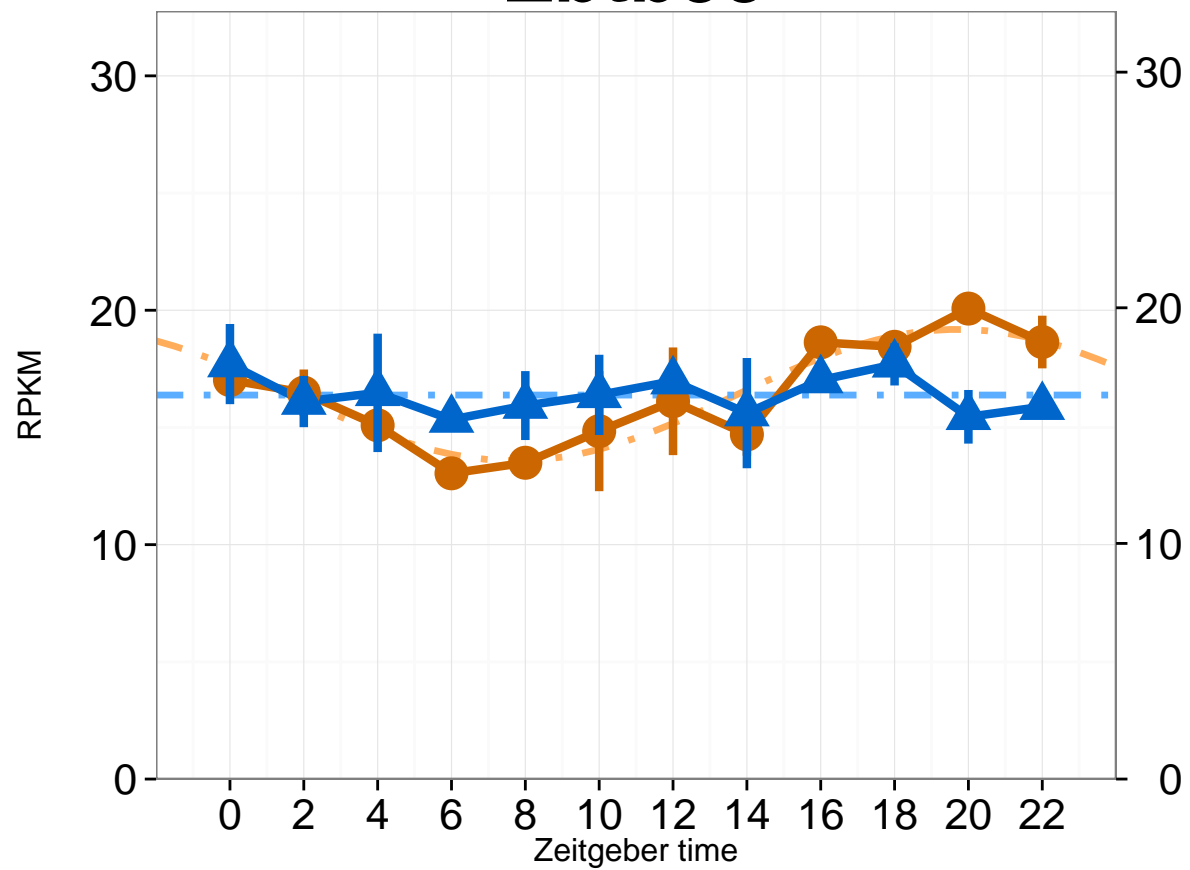

## Zbtb33

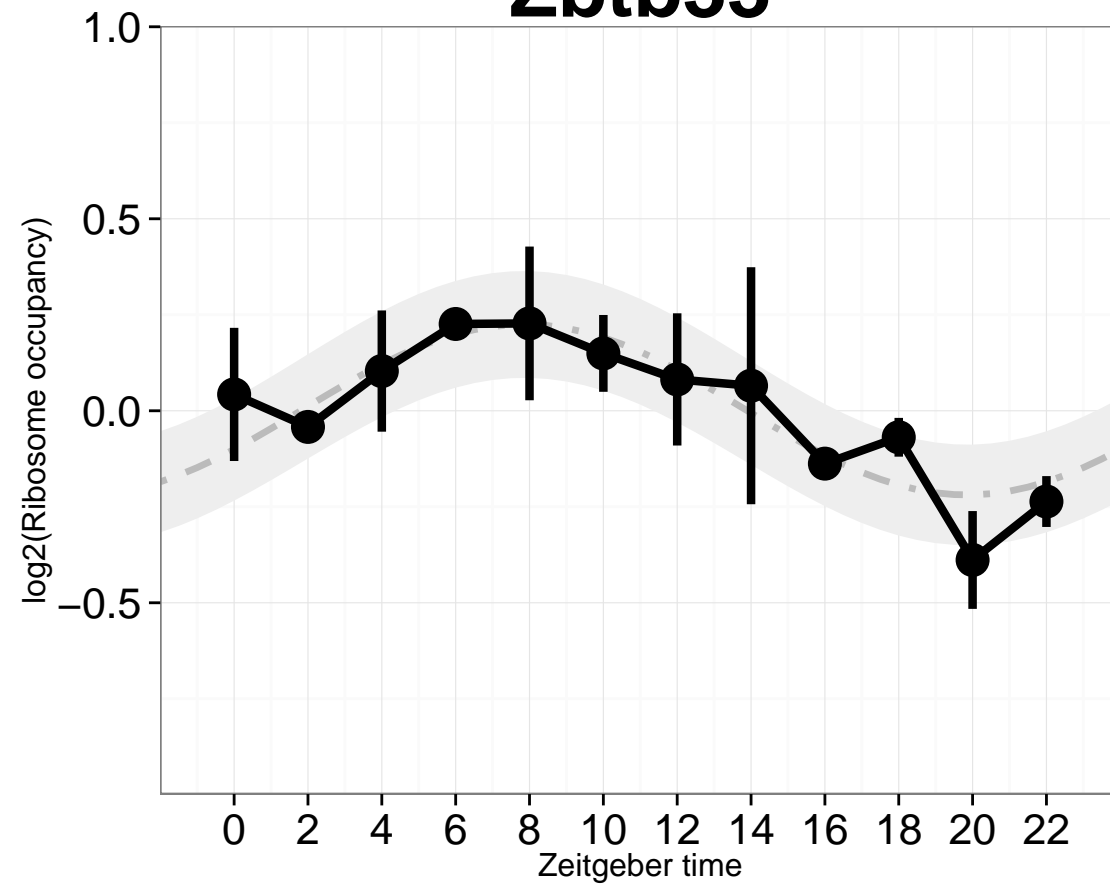

Supplement: Supplementary file 3063 [file 1]

# Lzts2

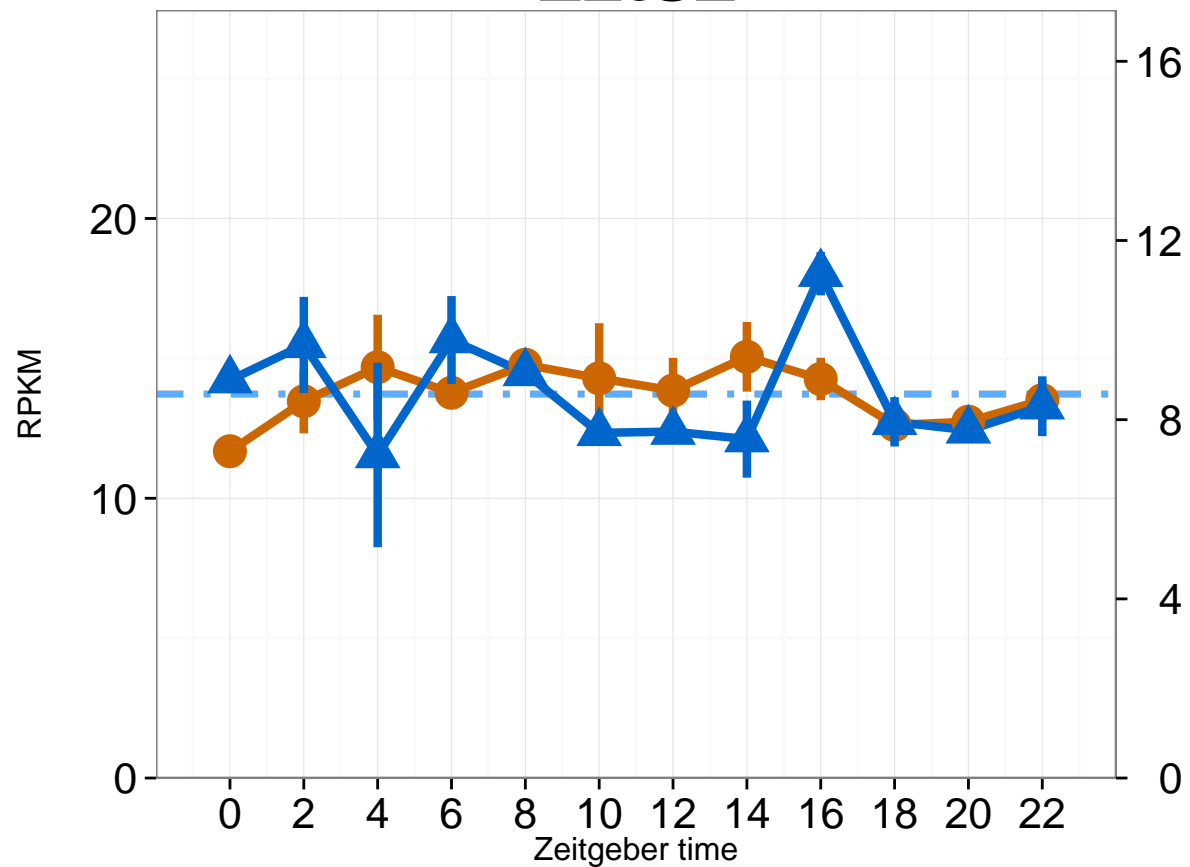

# Lzts2

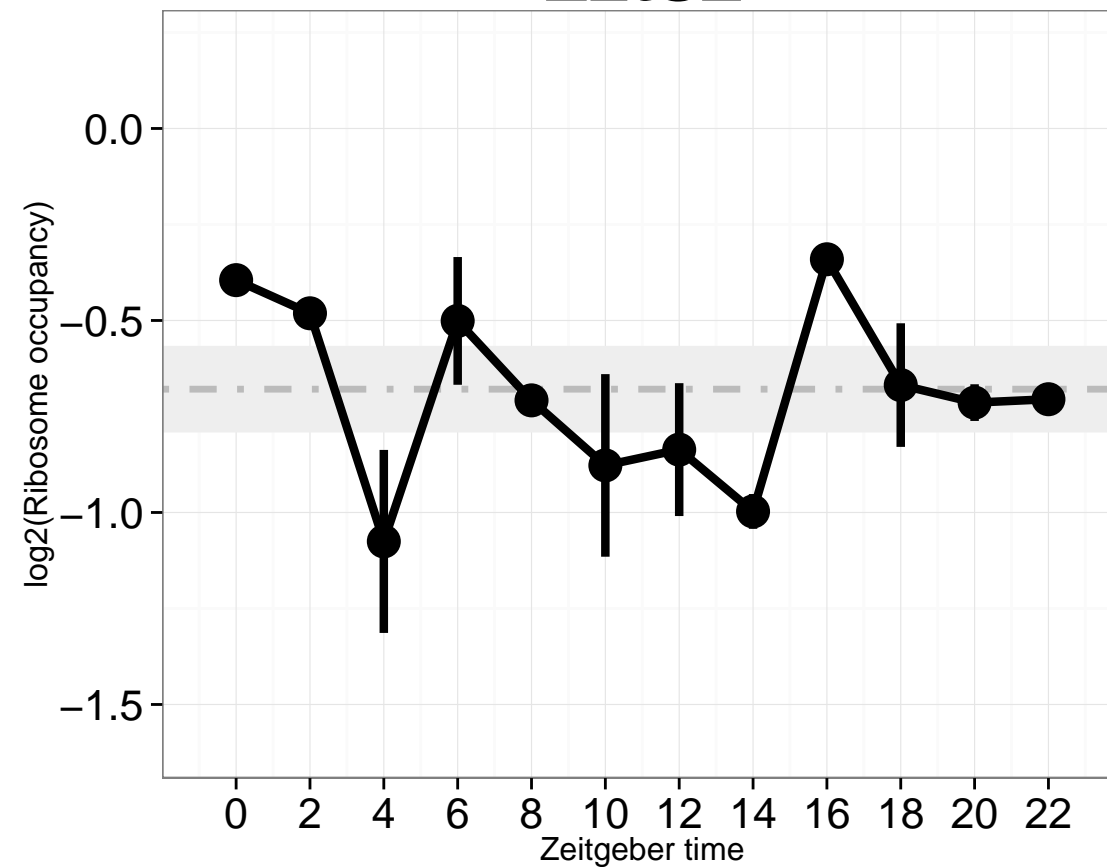

Supplement: Supplementary file 3064 [file 1]

## Rap2c

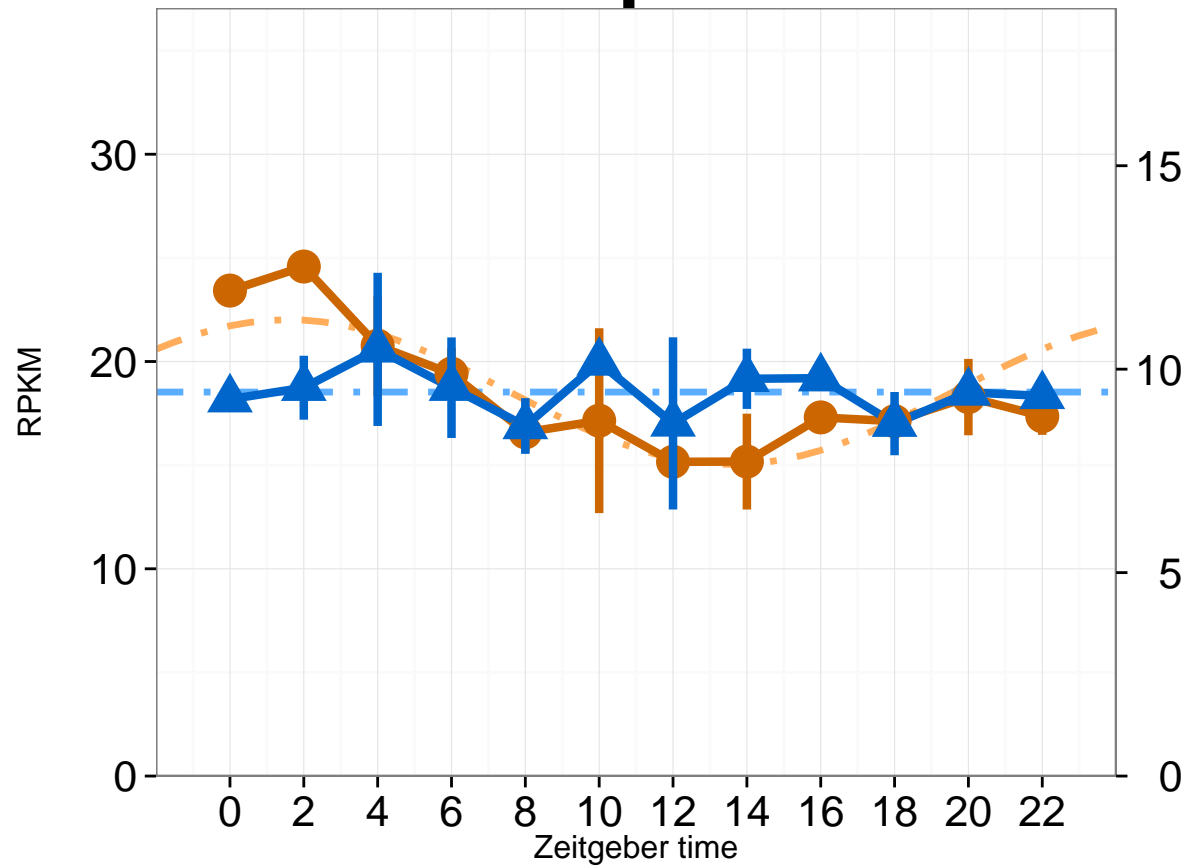

## Rap2c

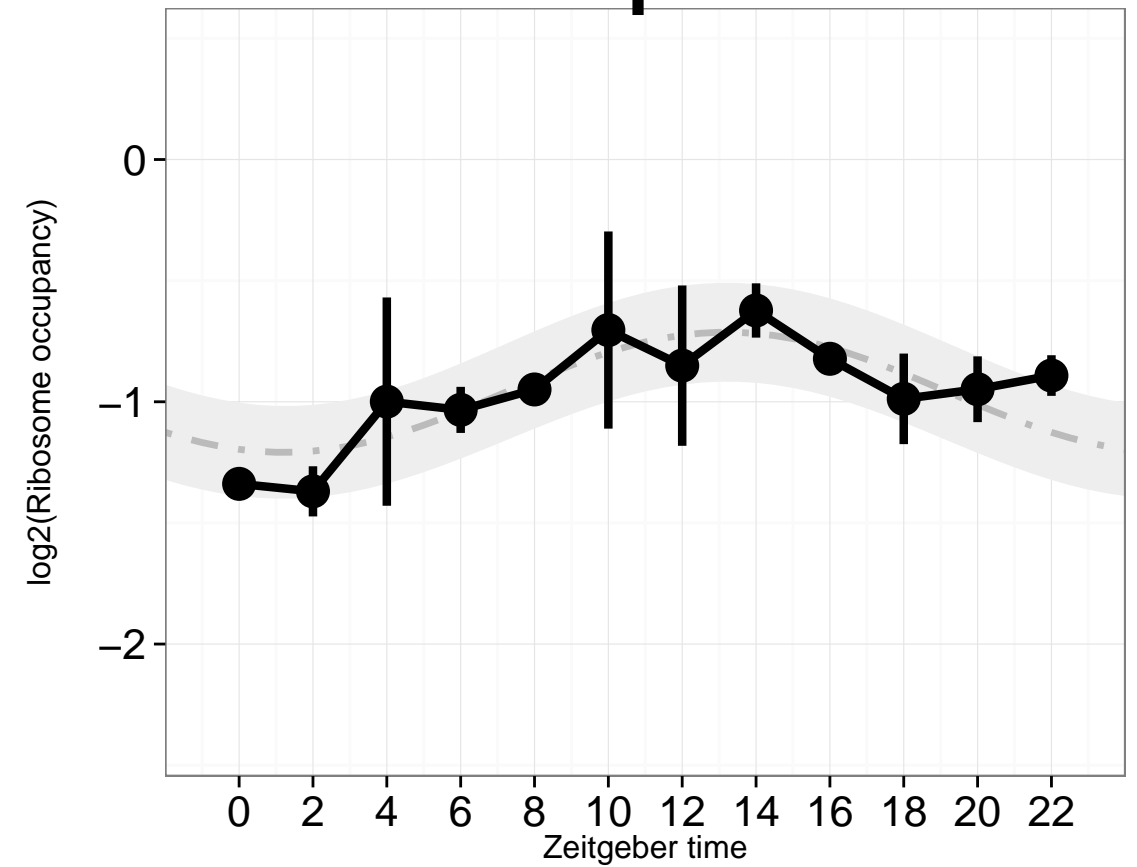

Supplement: Supplementary file 3065 [file 1]

# Camk1g

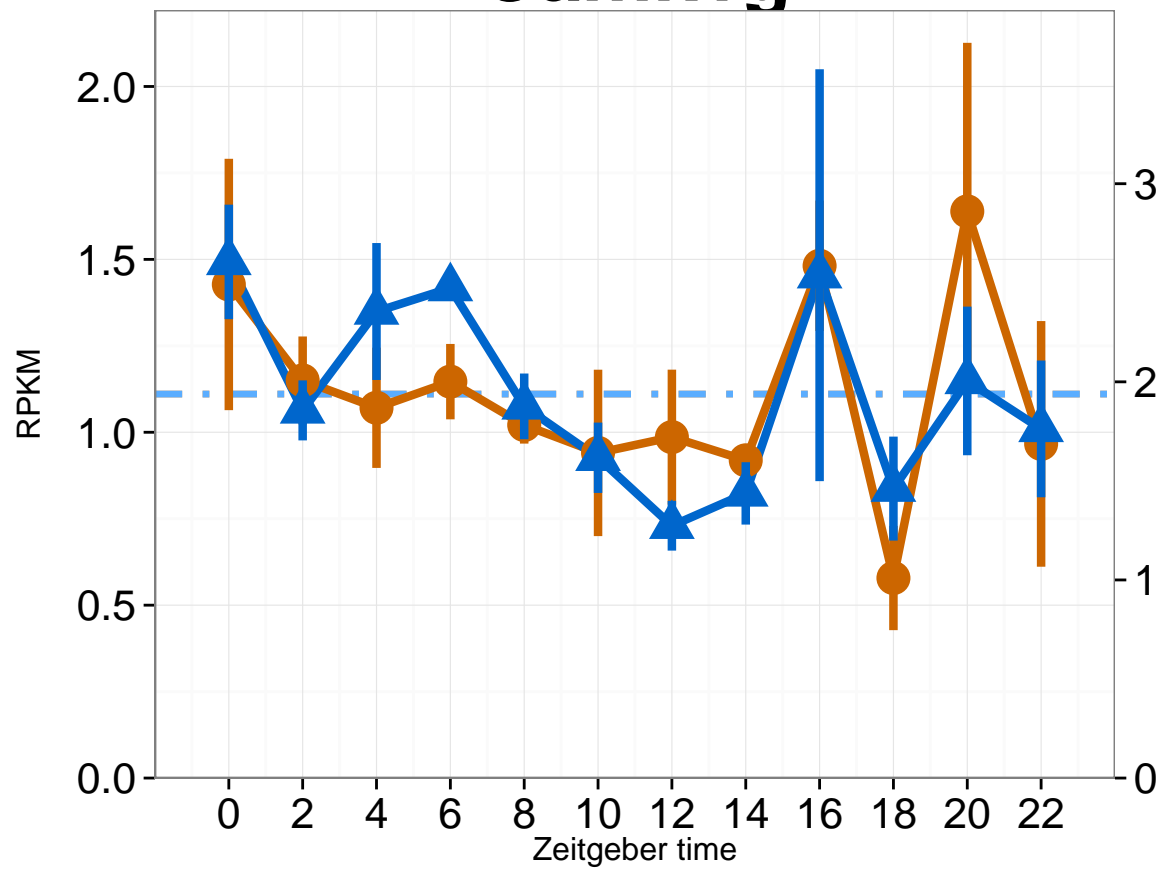

# Camk1g

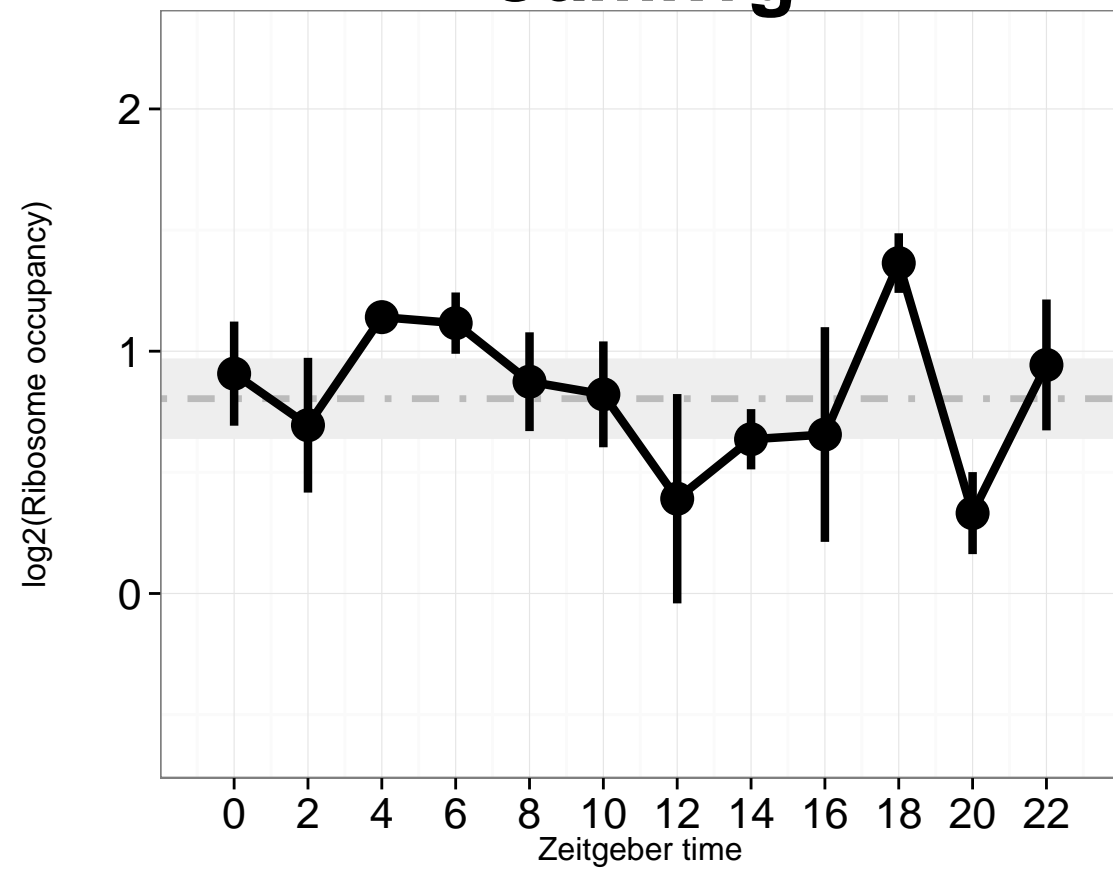

Supplement: Supplementary file 3066 [file 1]

# Atp2b1

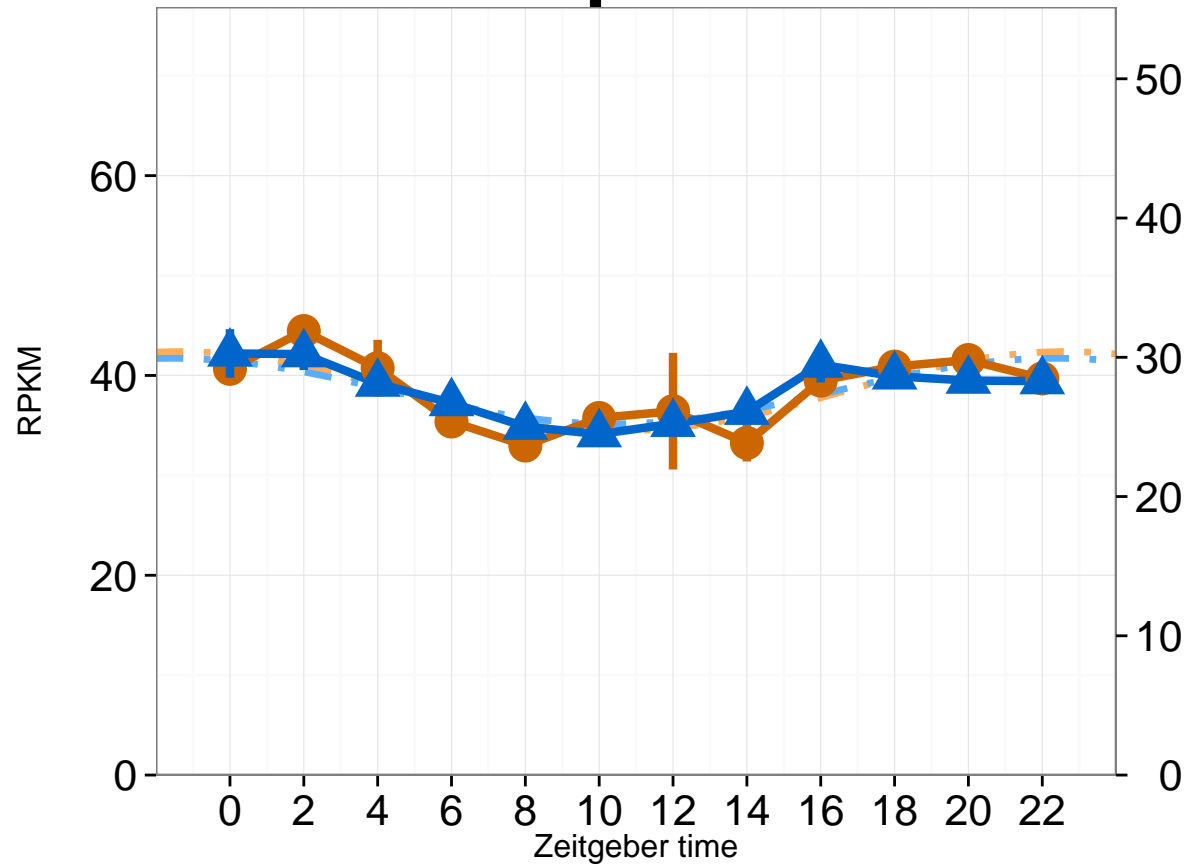

# Atp2b1

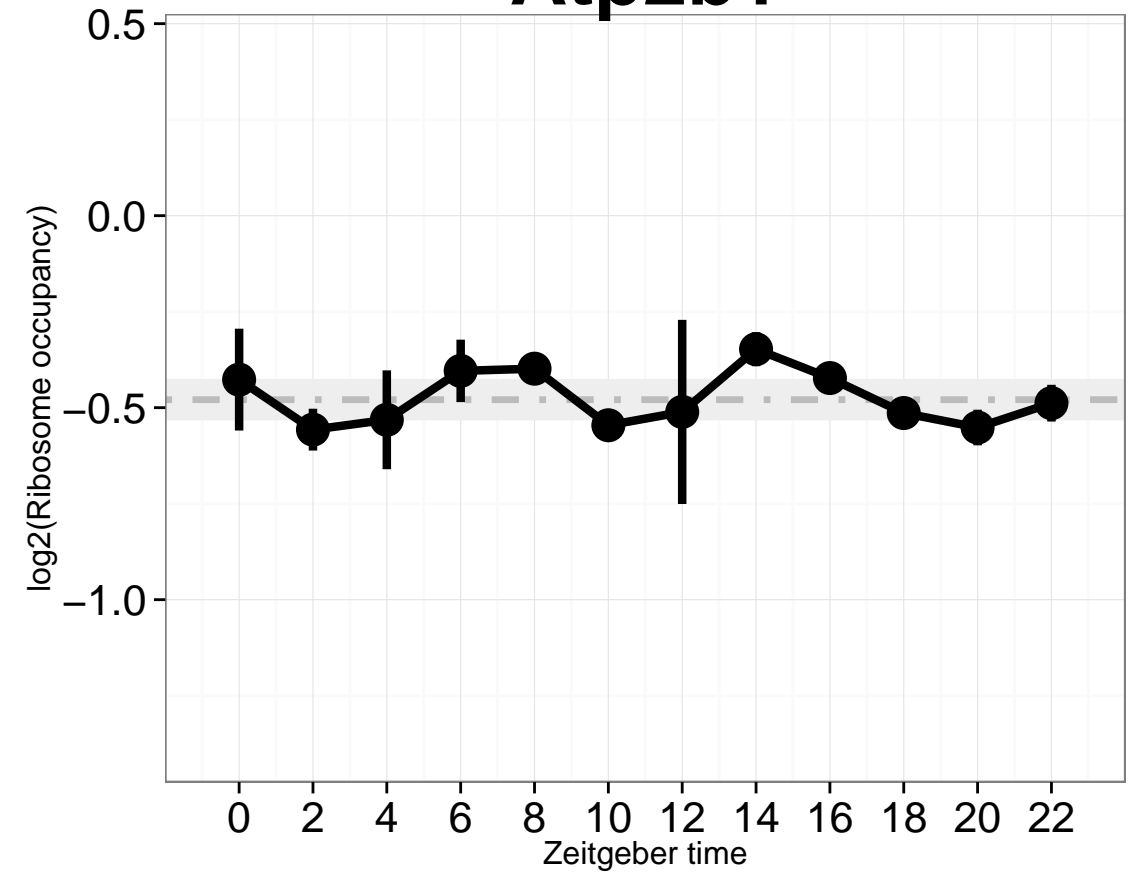

Supplement: Supplementary file 3067 [file 1]

# Msto1

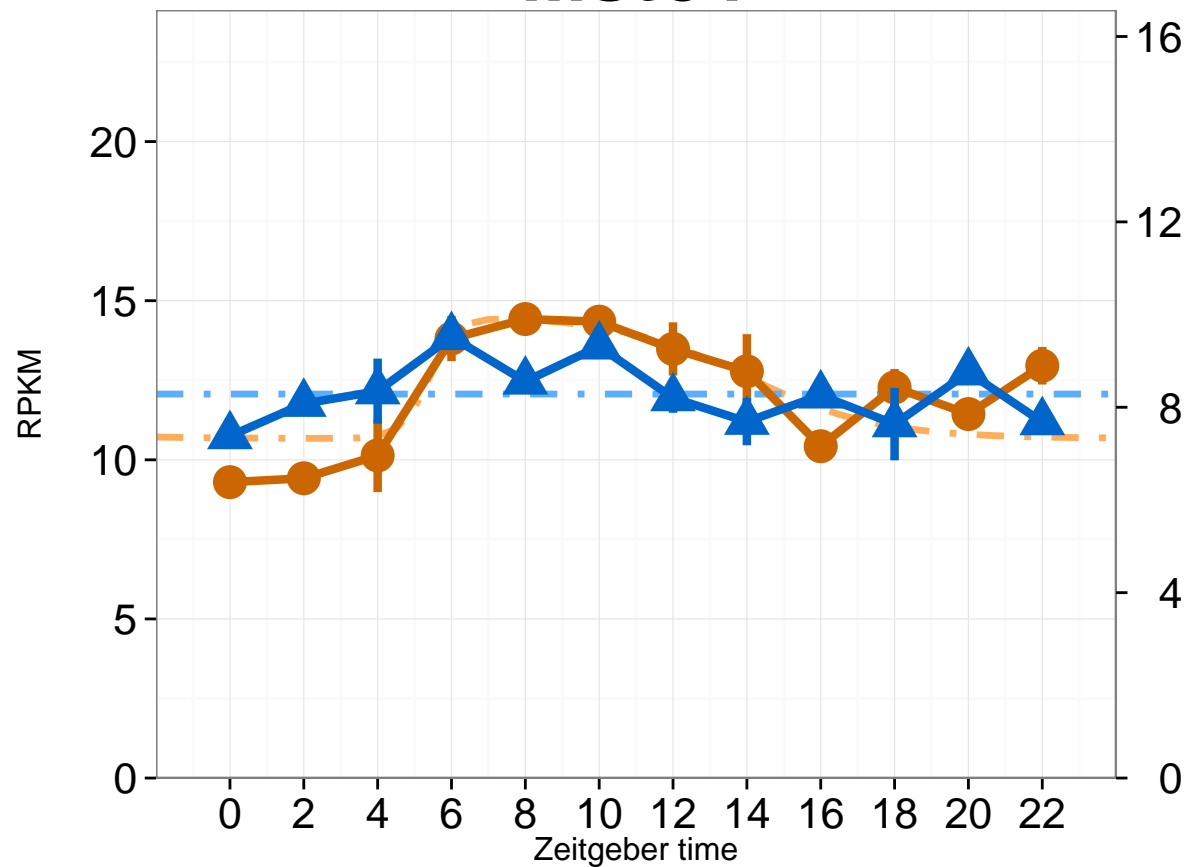

# Msto1

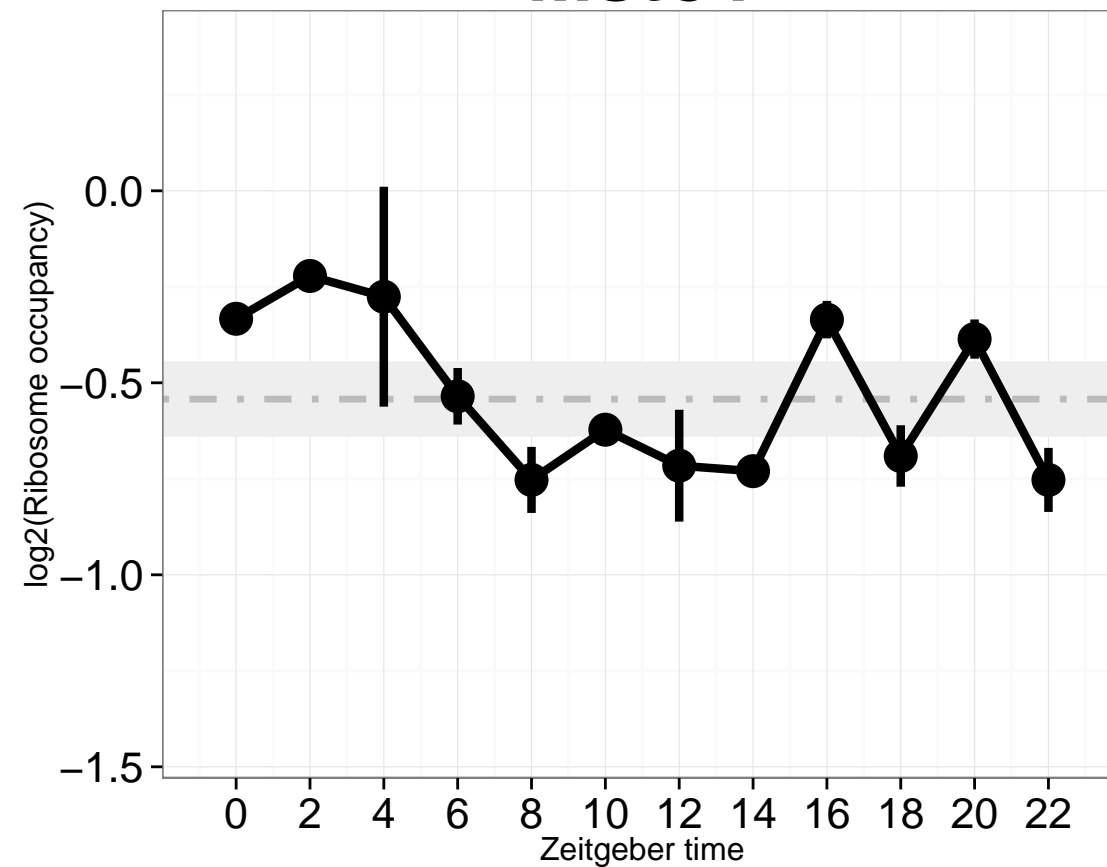

Supplement: Supplementary file 3068 [file 1]

# Prrc2a

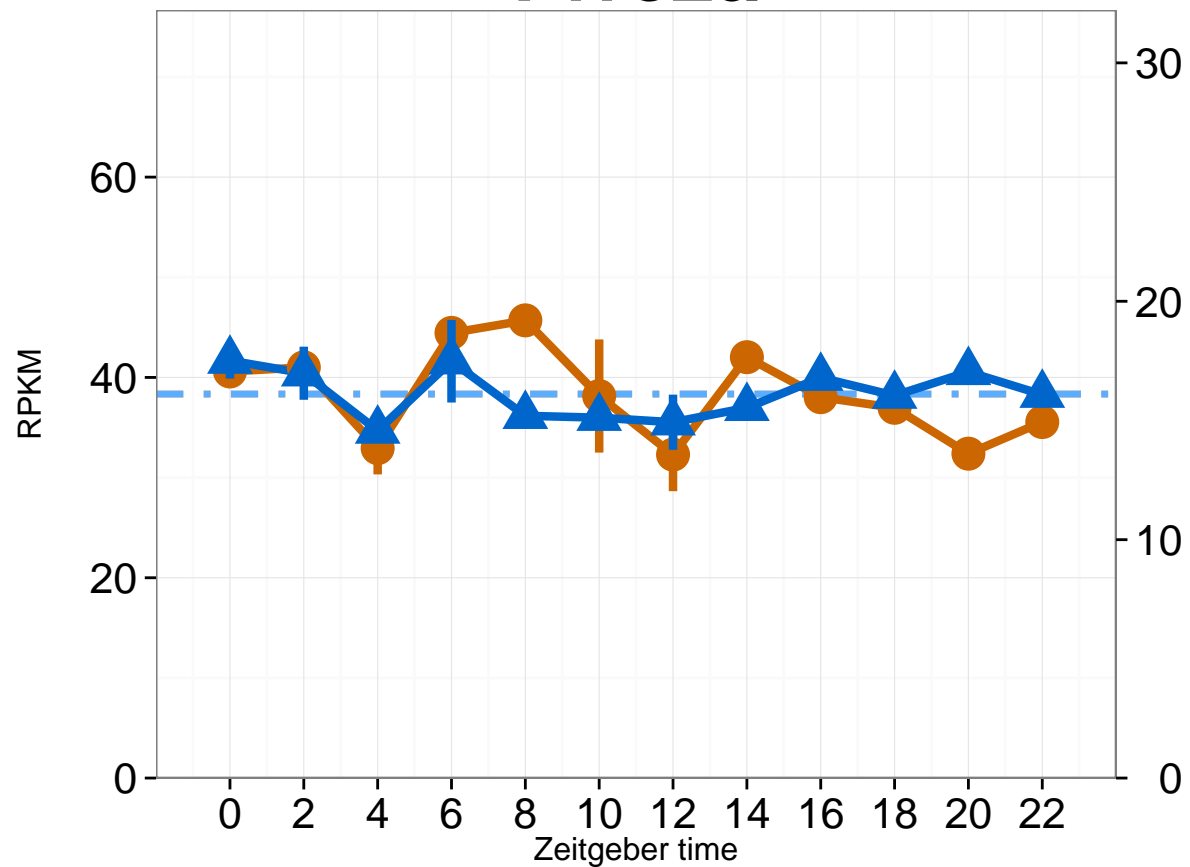

# Prrc2a

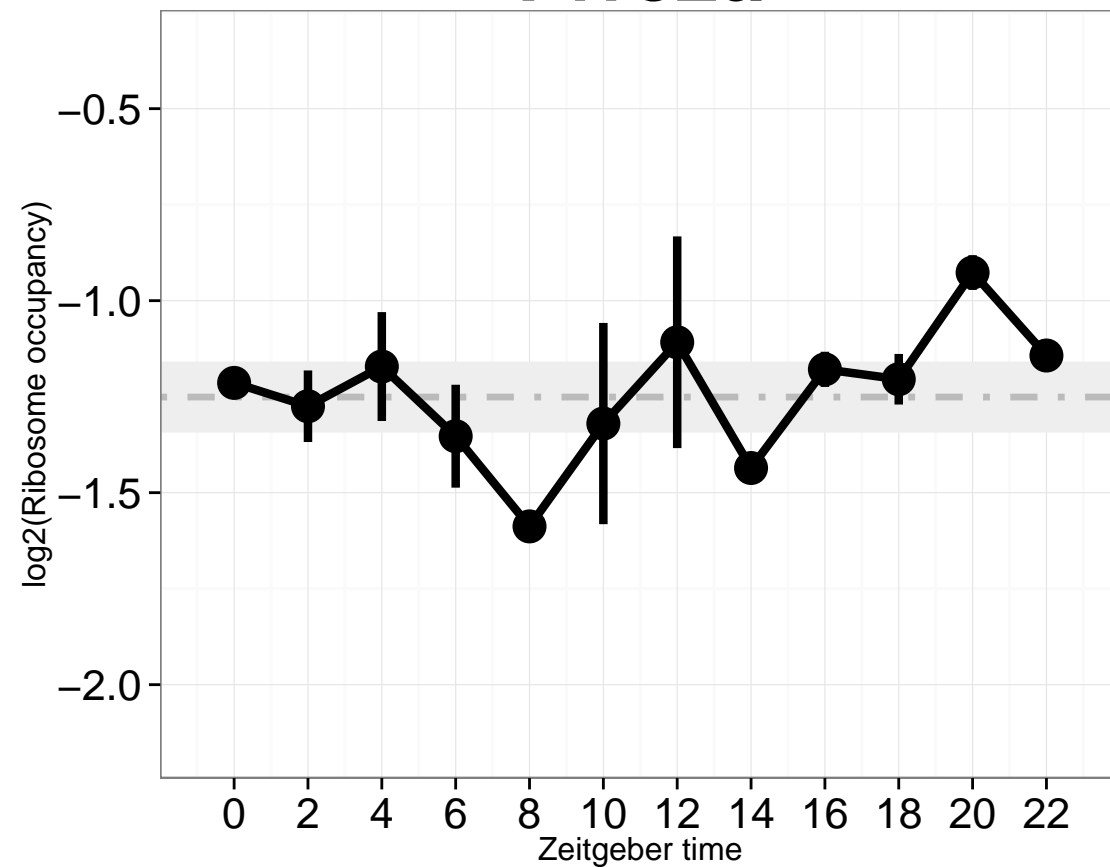

Supplement: Supplementary file 3069 [file 1]

## Hdgfrp3

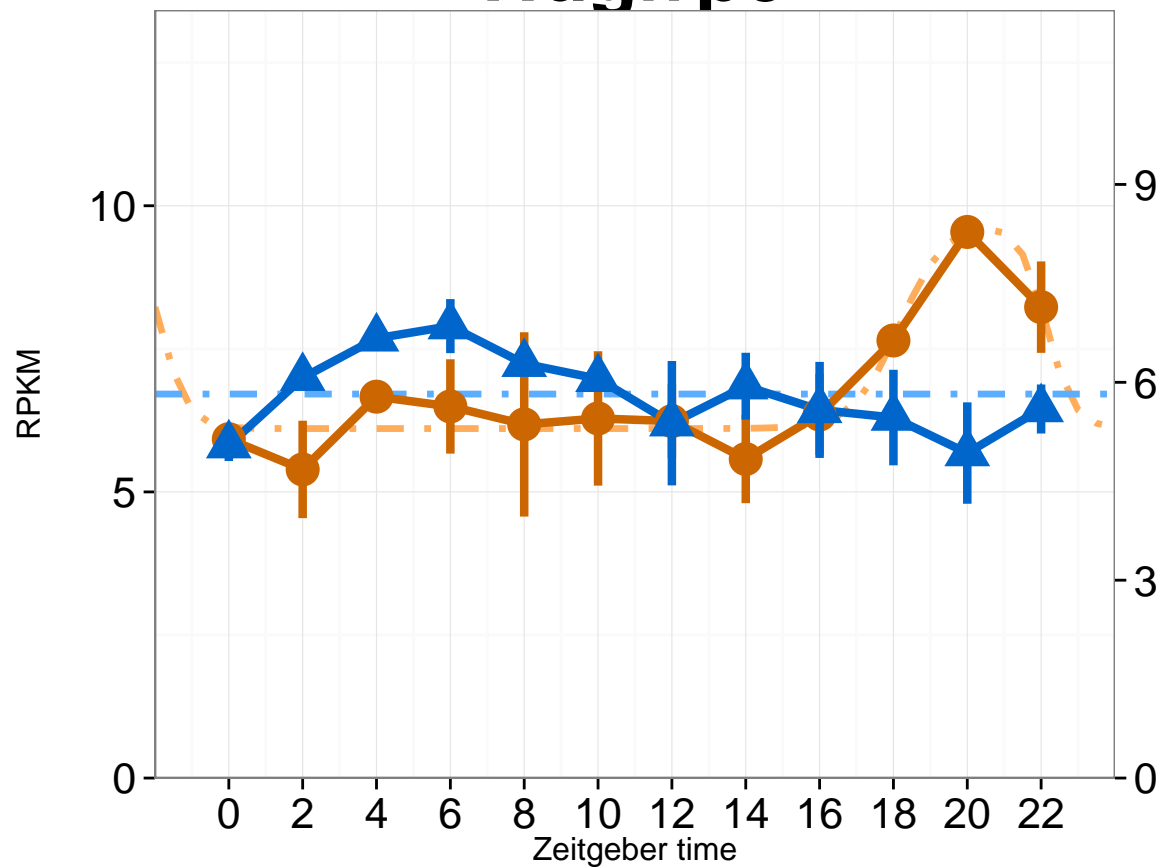

## Hdgfrp3

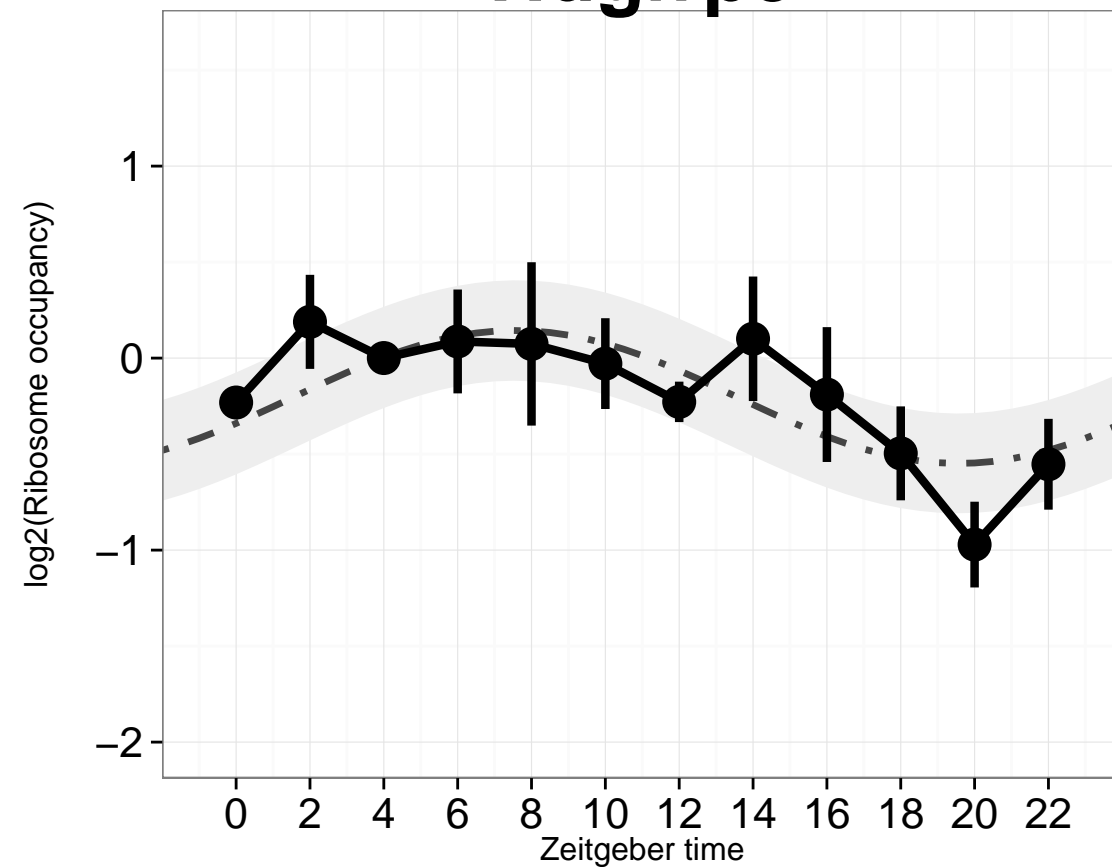

Supplement: Supplementary file 3070 [file 1]

## Tlr3

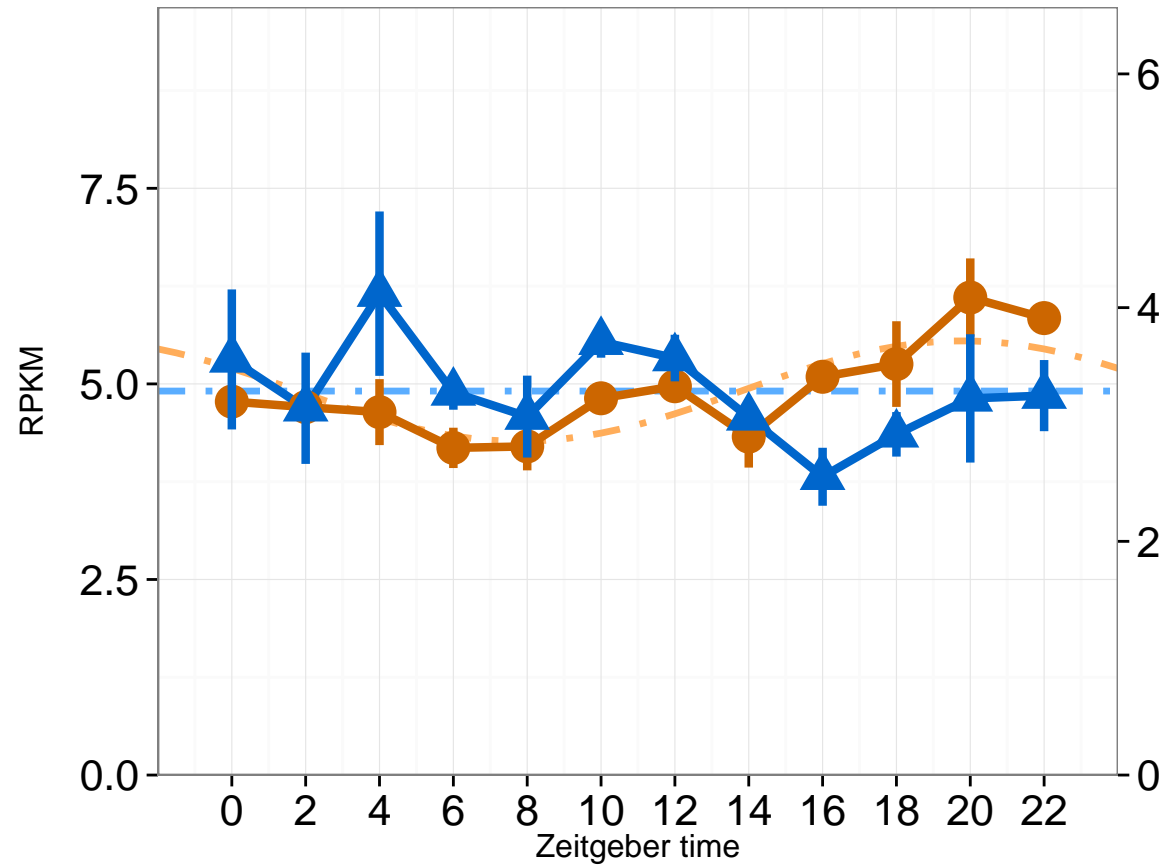

## Tlr3

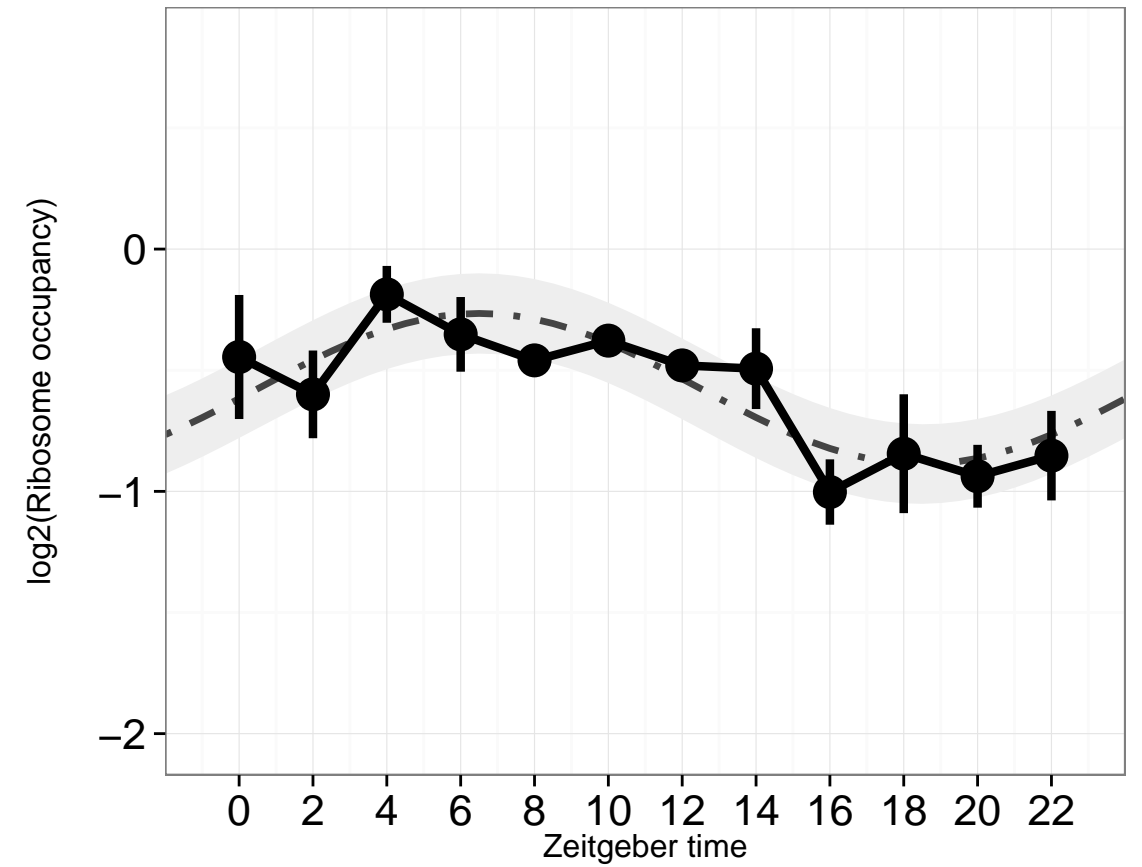

Supplement: Supplementary file 3071 [file 1]

# Calr3

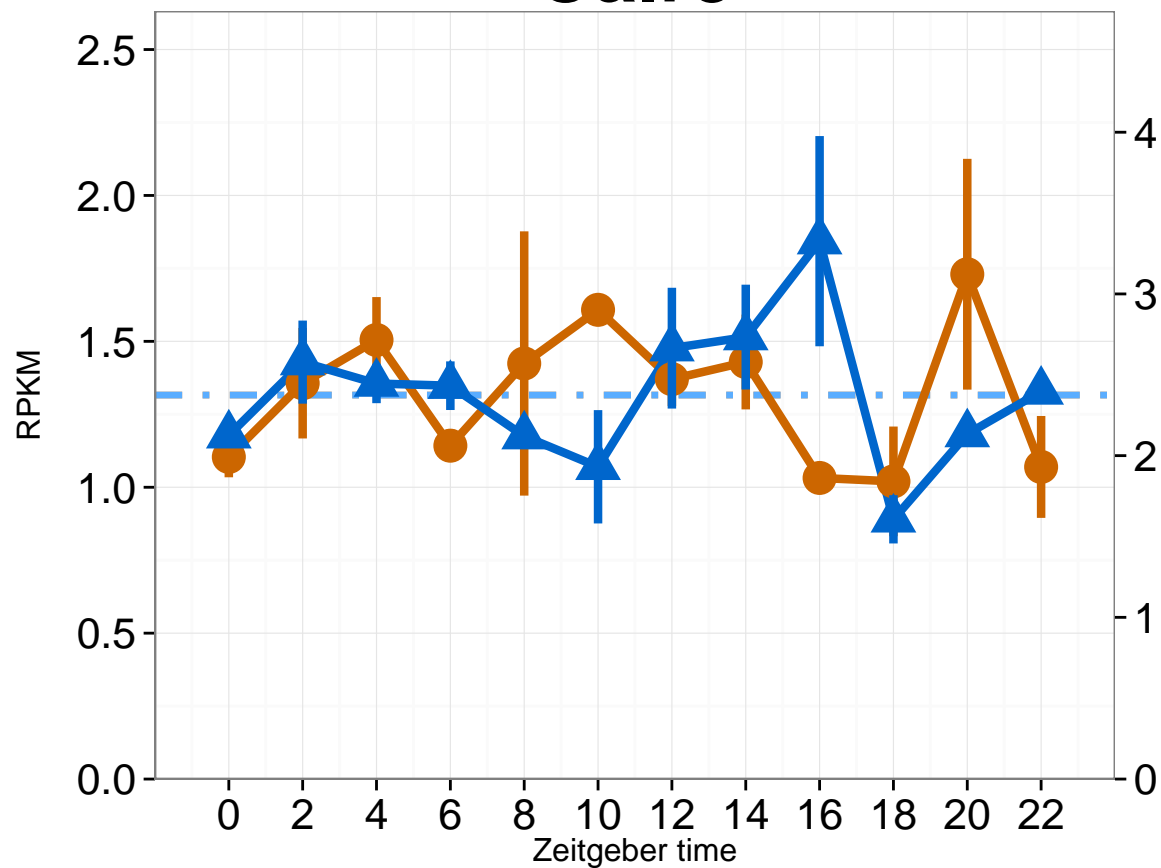

# Calr3

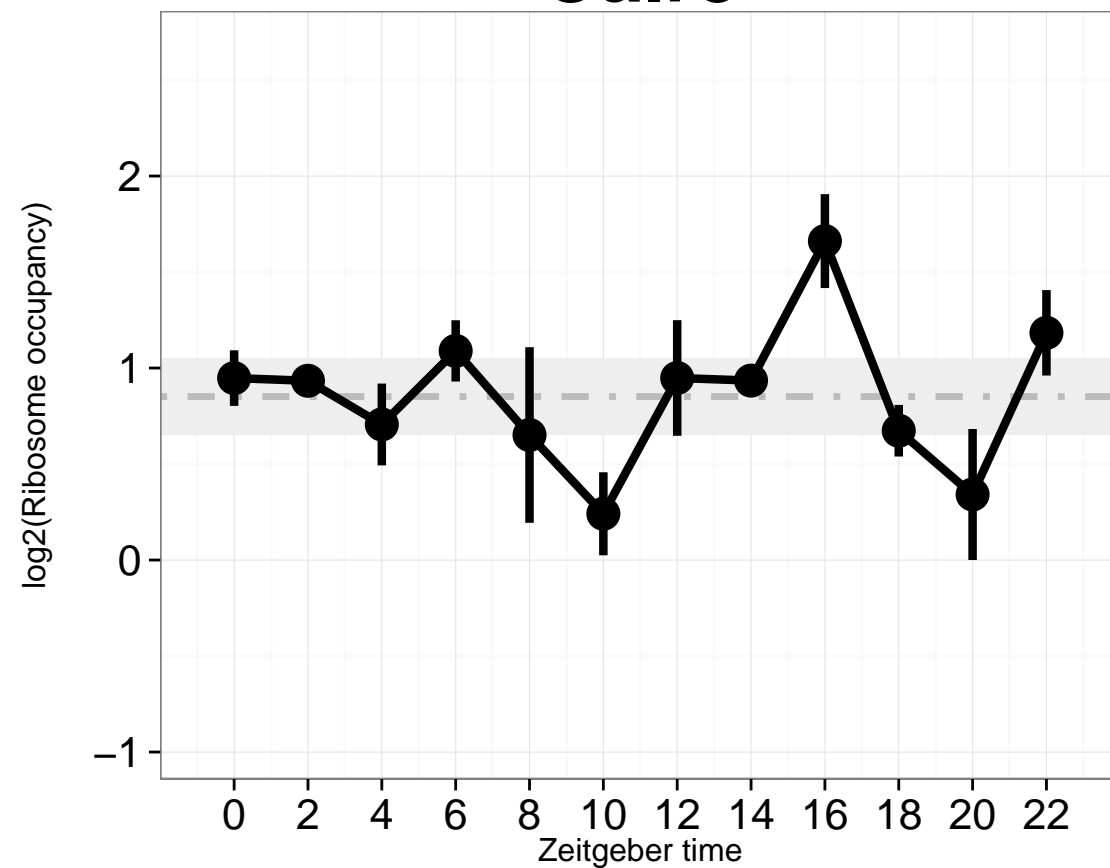

Supplement: Supplementary file 3072 [file 1]

## Csrnp1

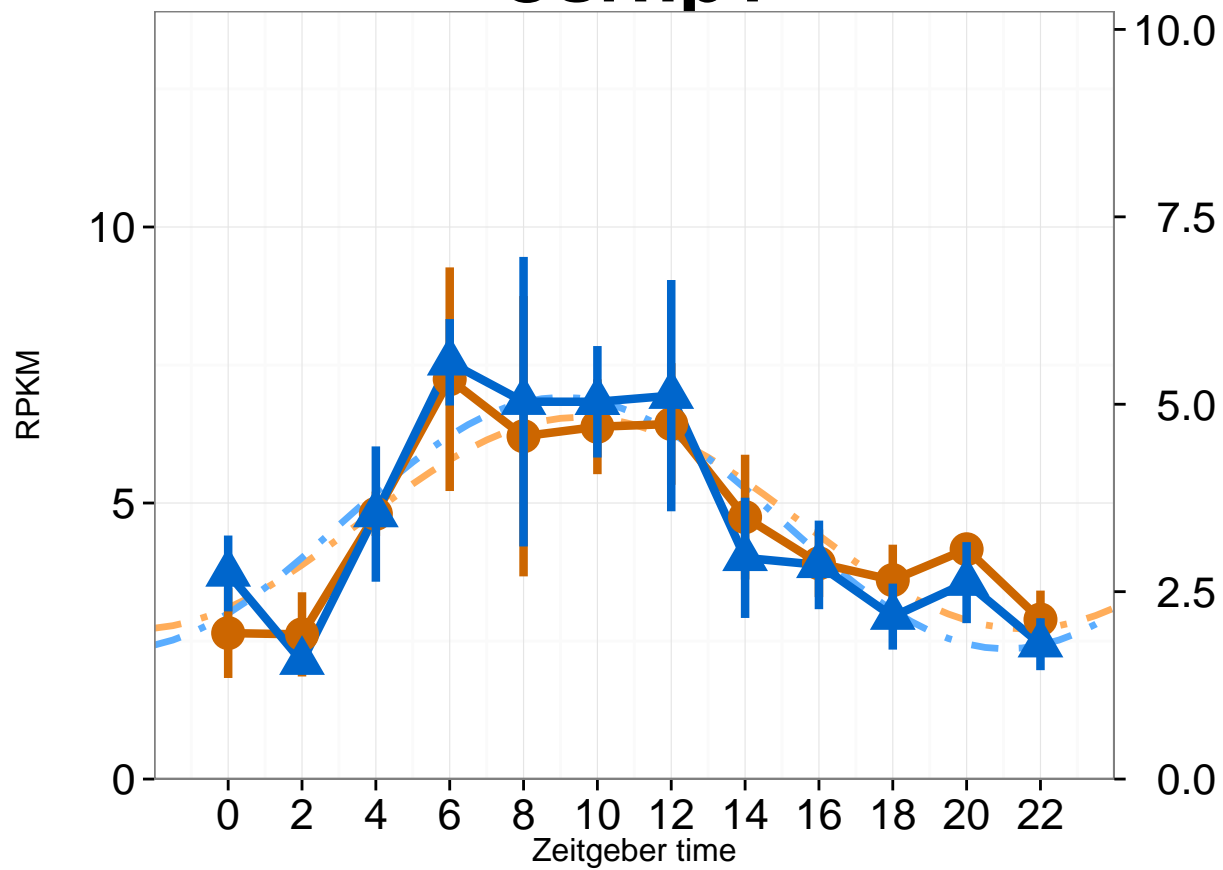

## Csrnp1

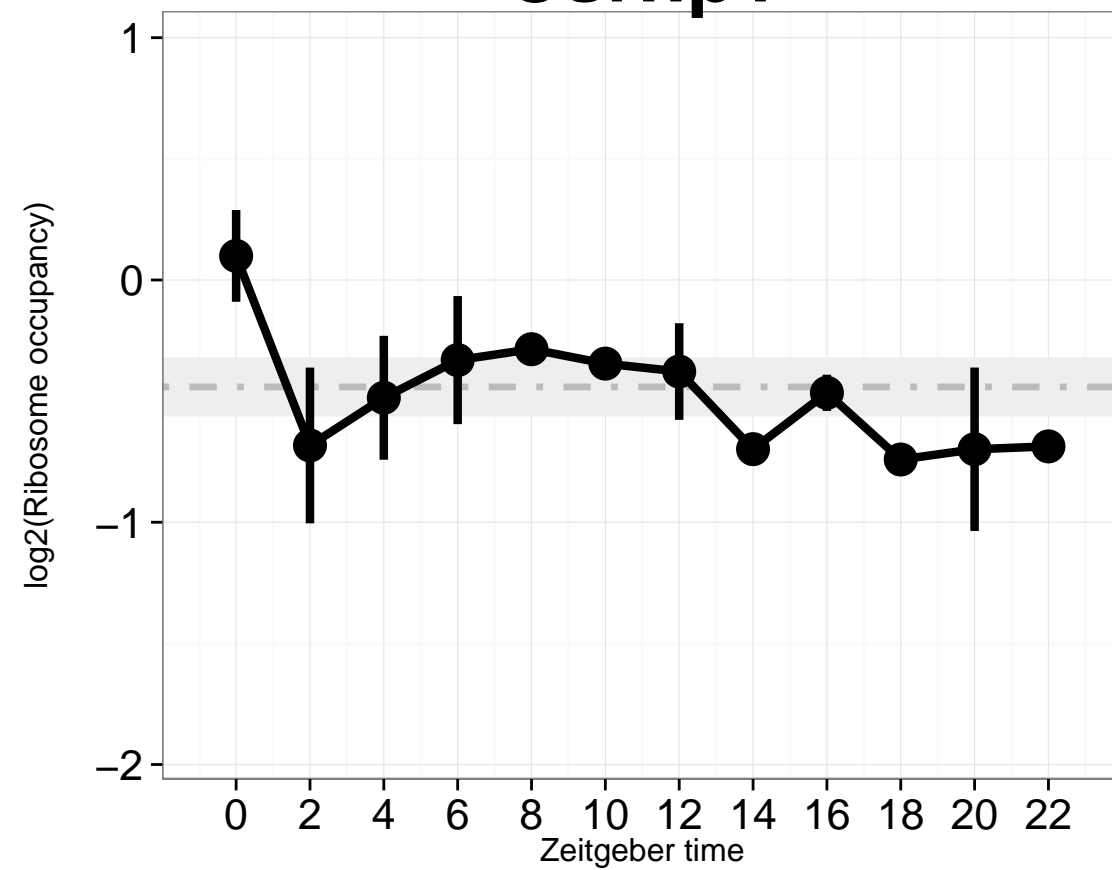

Supplement: Supplementary file 3073 [file 1]

# Slc16a14

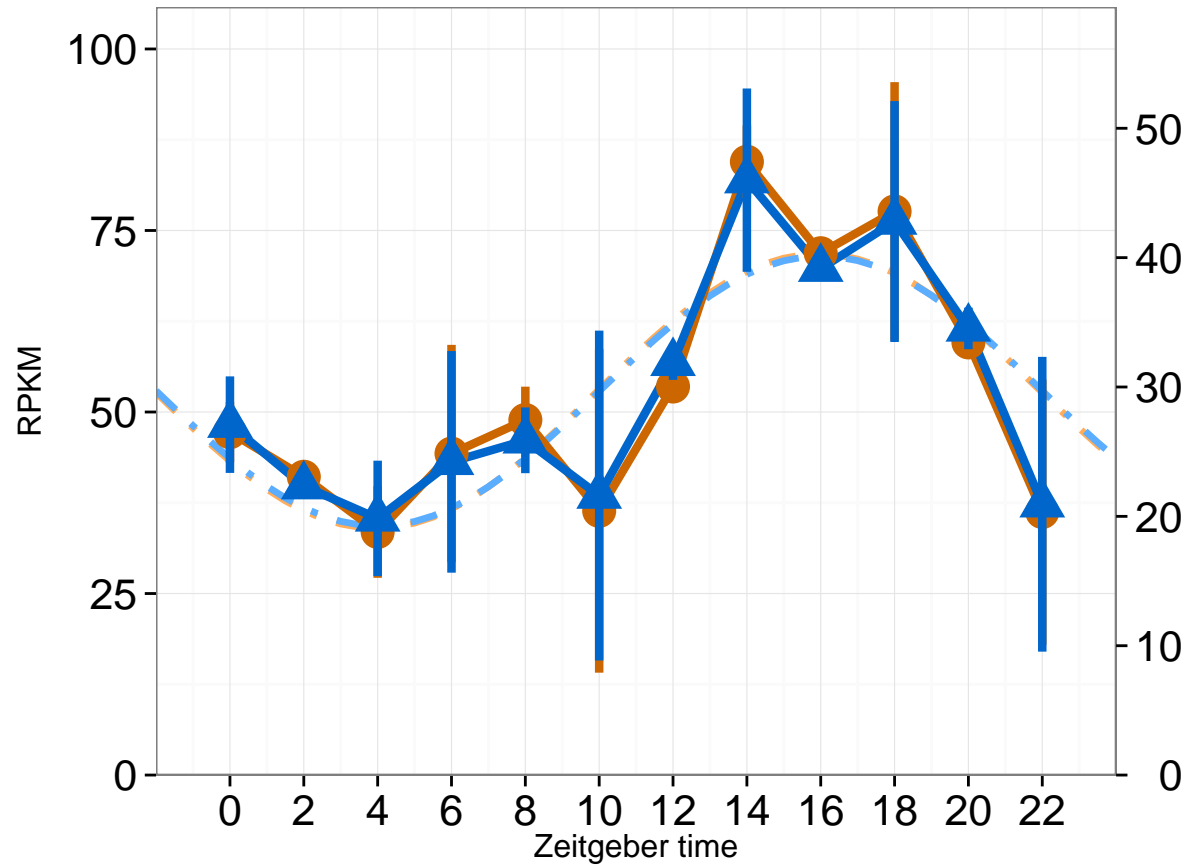

# Slc16a14

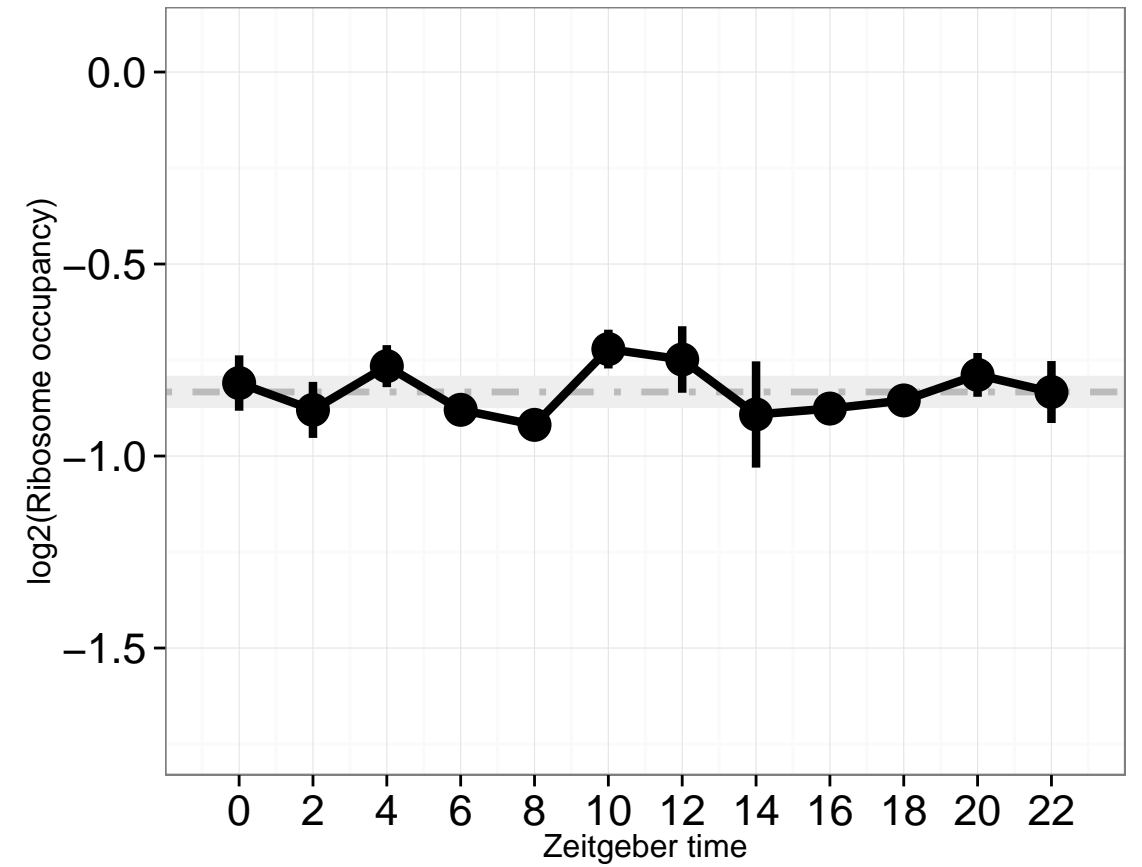

Supplement: Supplementary file 3074 [file 1]

## Rpp25l

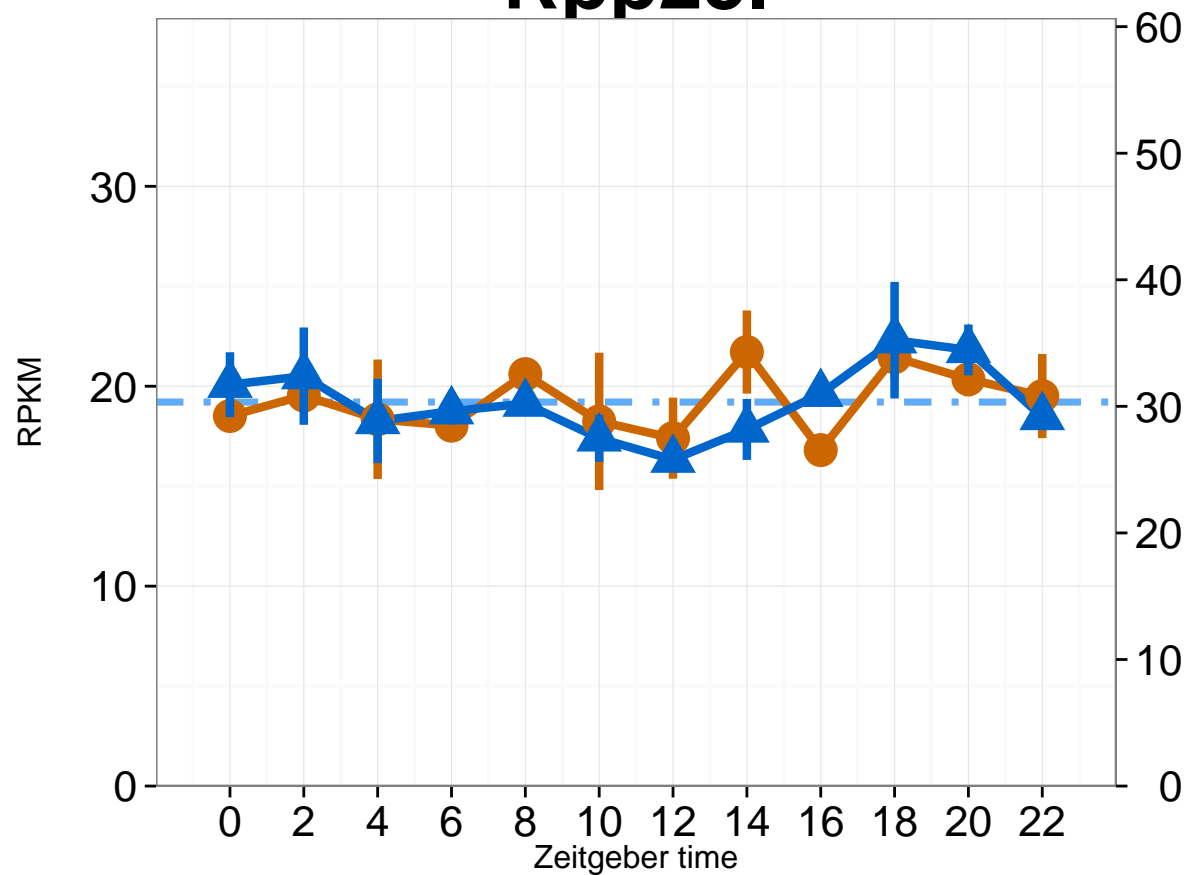

## Rpp25l

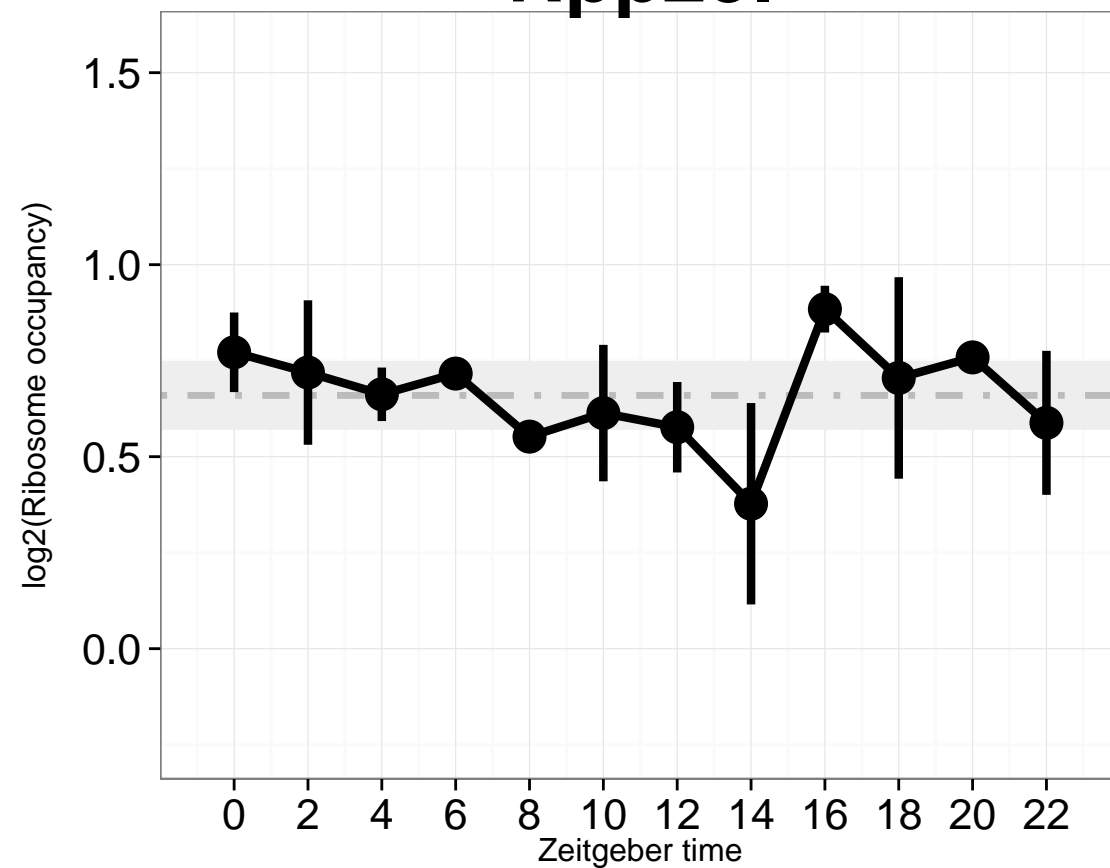

Supplement: Supplementary file 3075 [file 1]

# Hsbp1

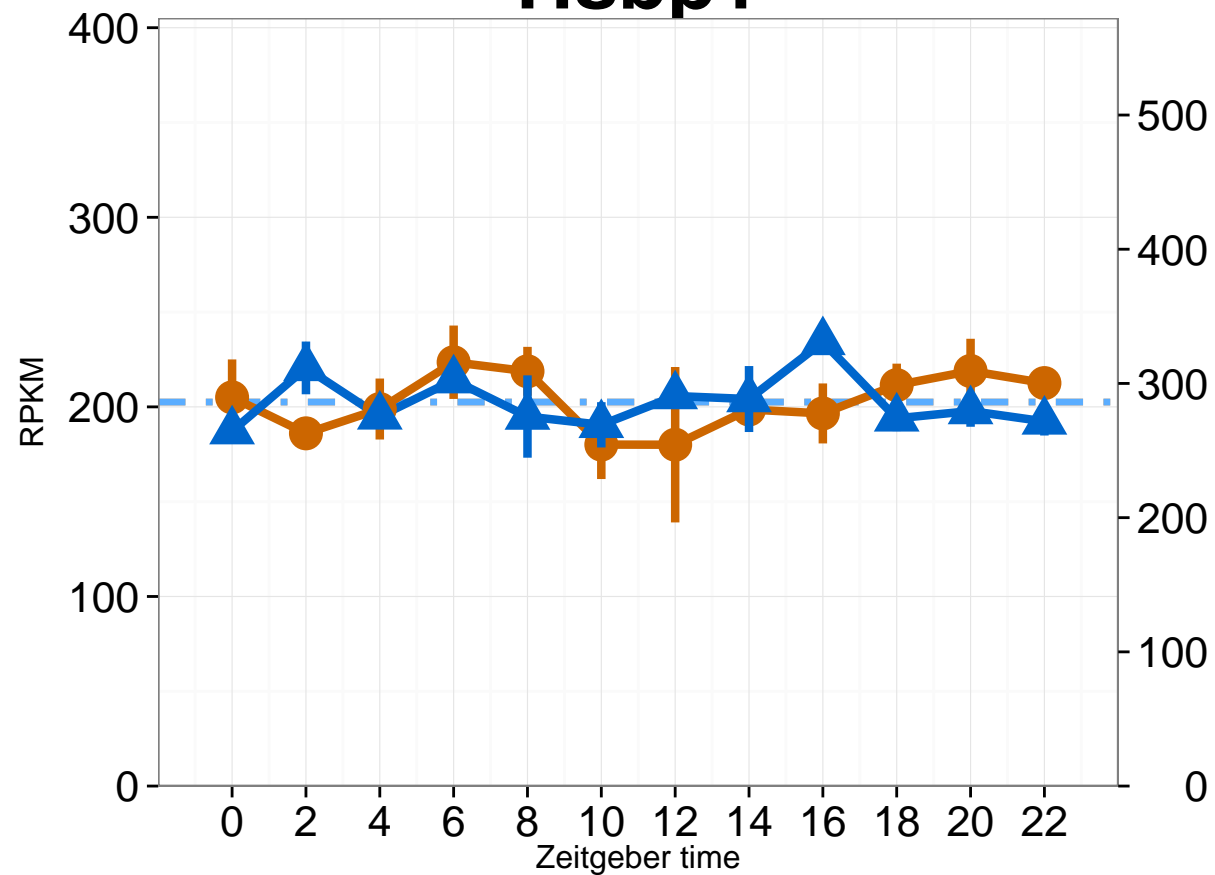

# Hsbp1

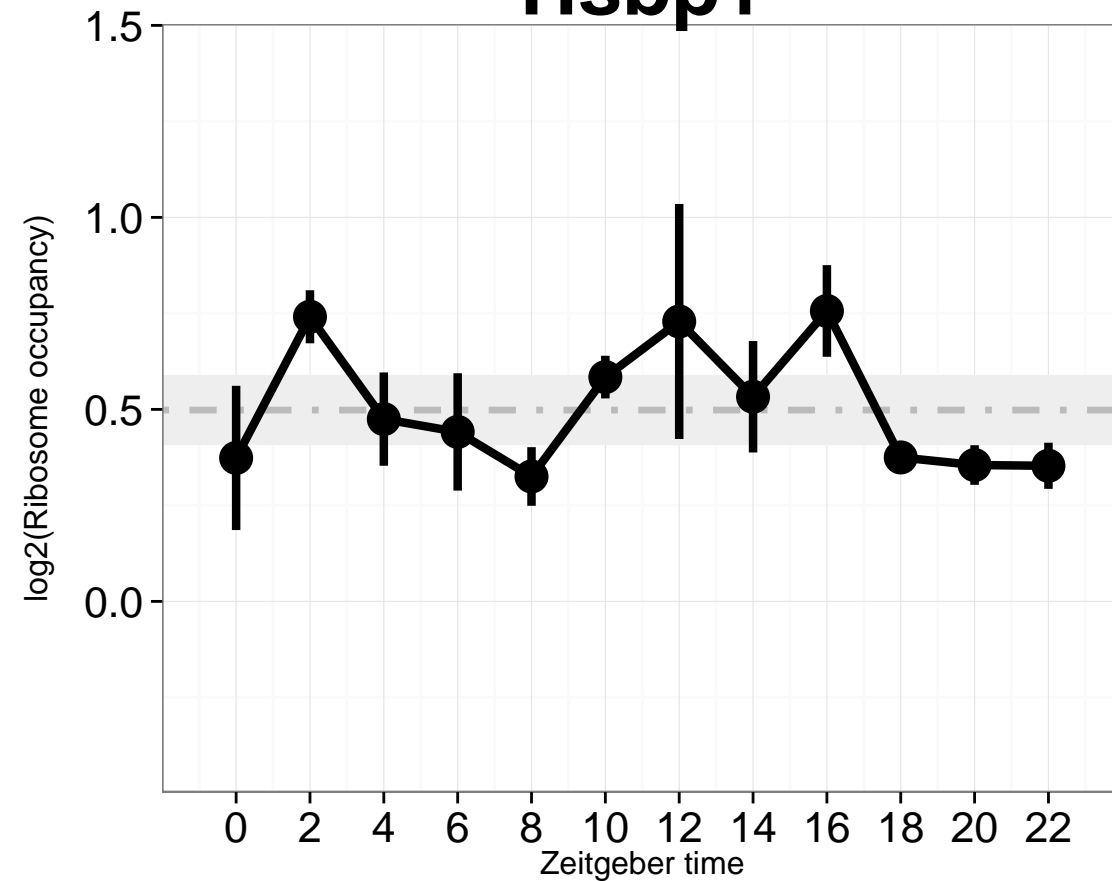

Supplement: Supplementary file 3076 [file 1]

## Uevld

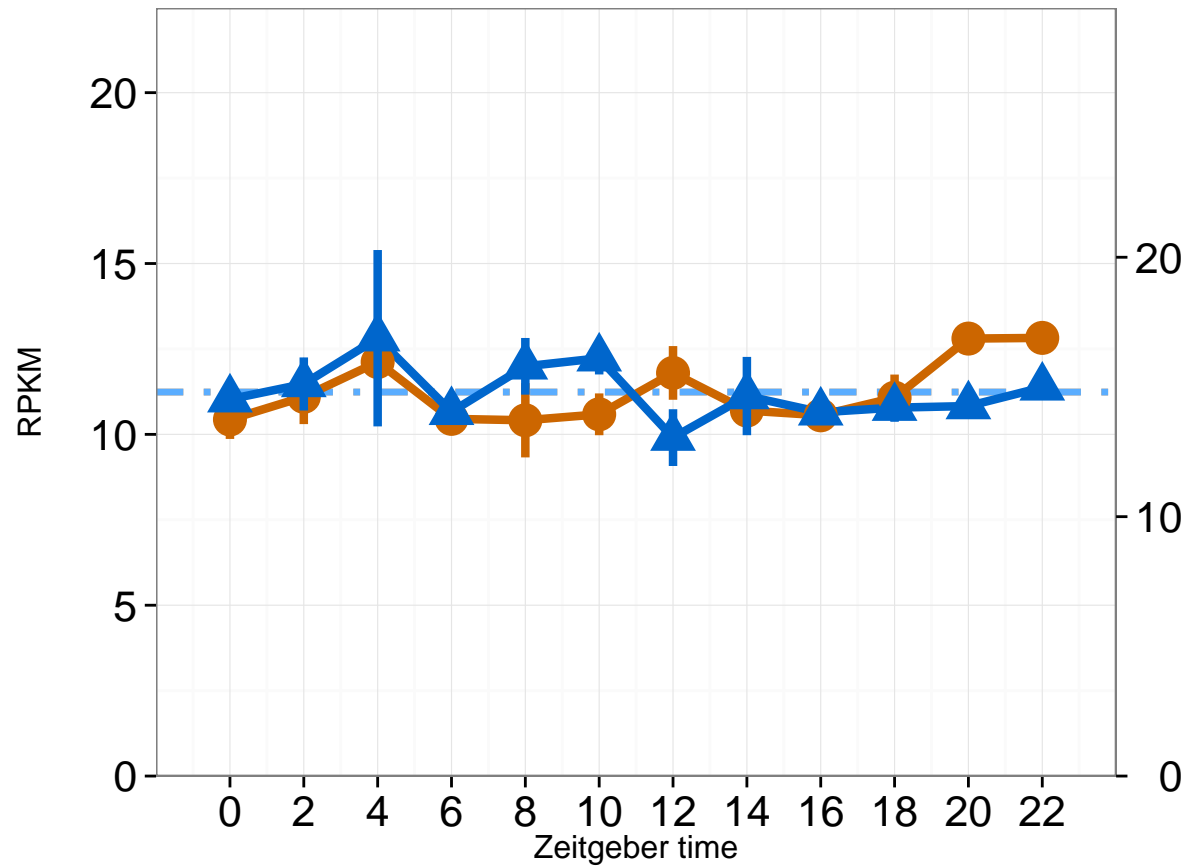

## Uevld

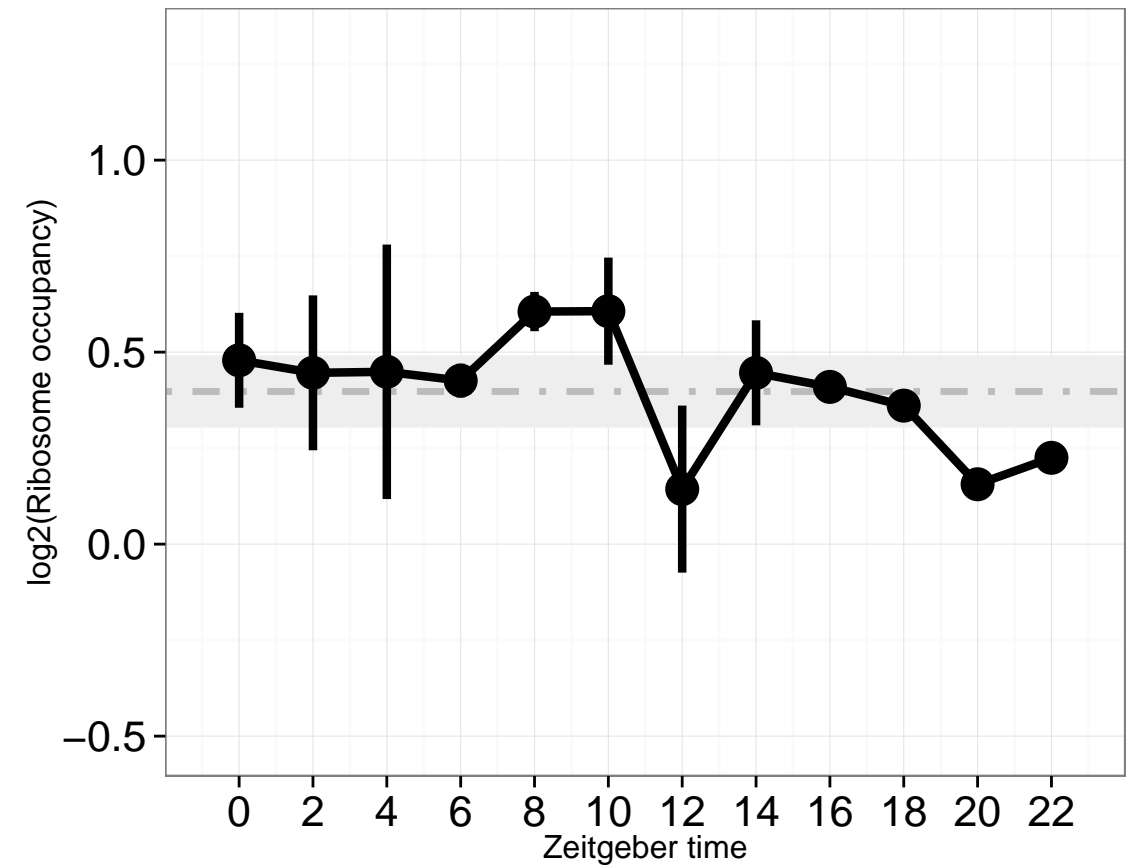

Supplement: Supplementary file 3077 [file 1]

# Timm13

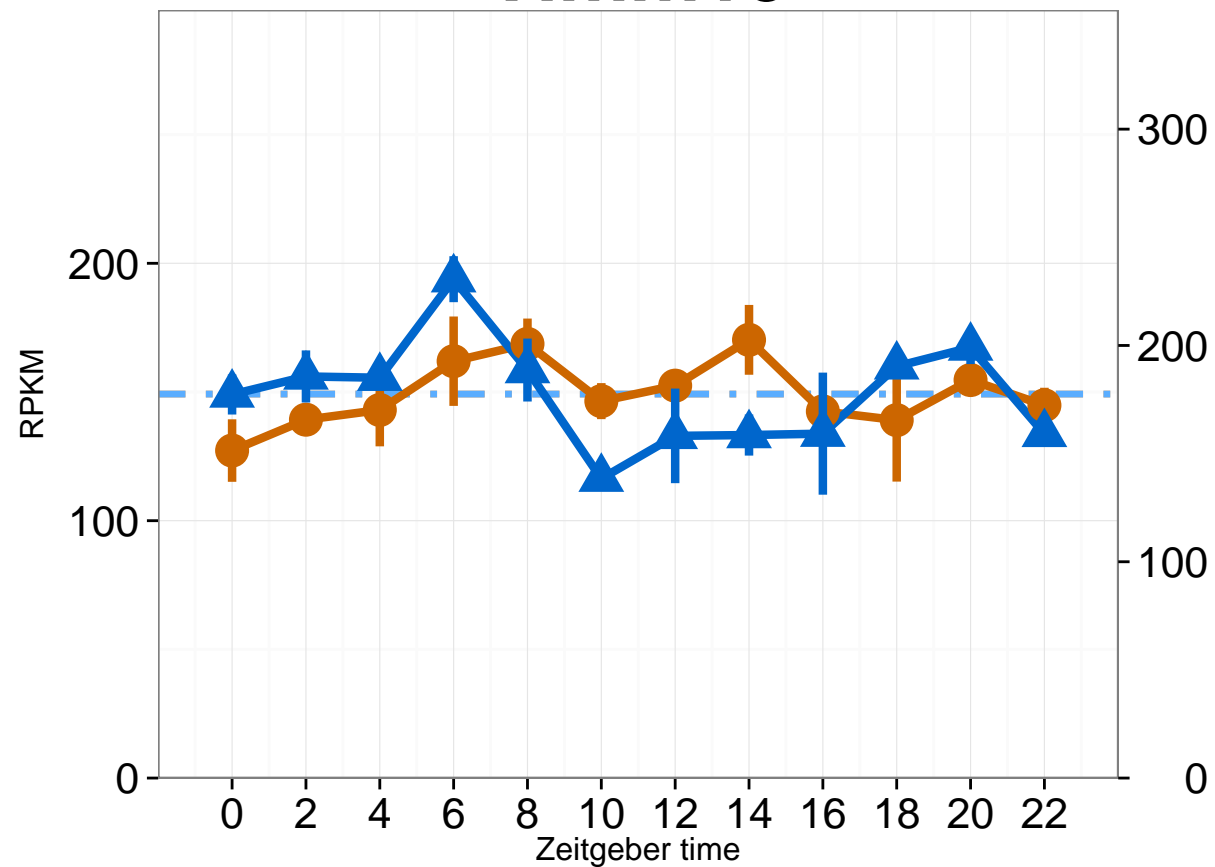

# Timm13

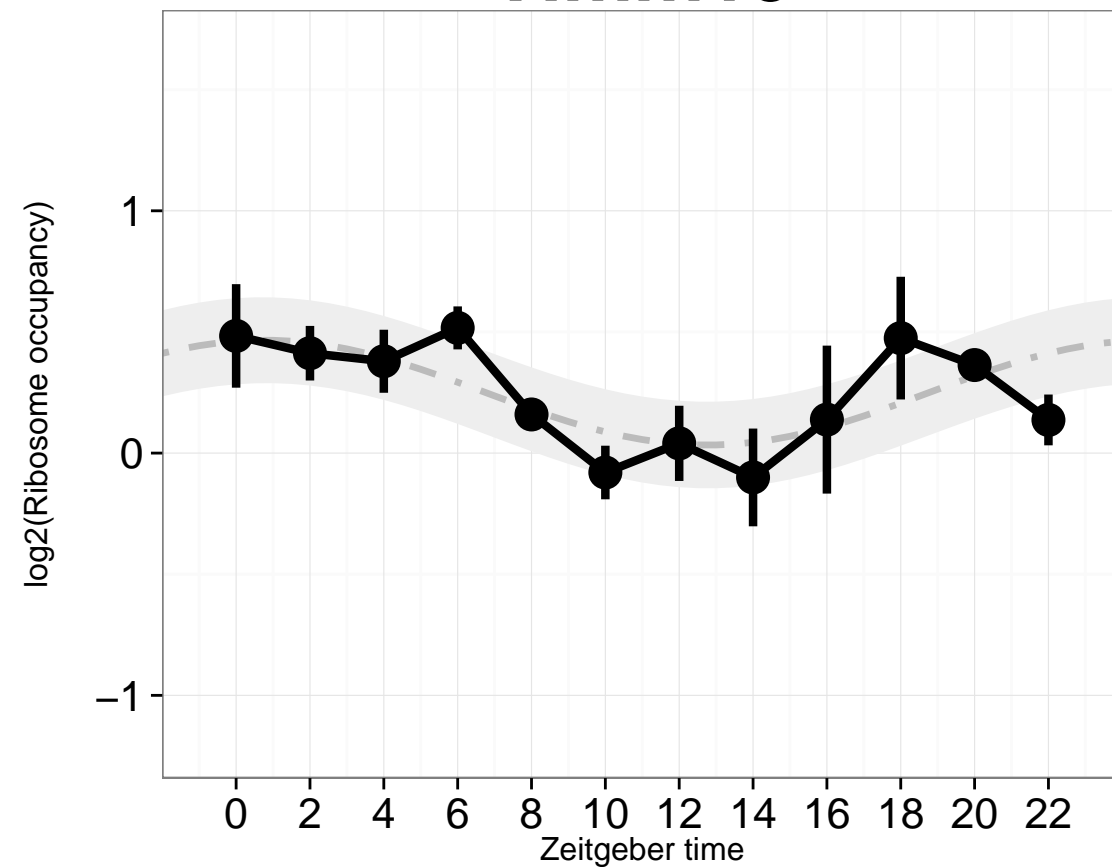

Supplement: Supplementary file 3078 [file 1]

## Mrpl9

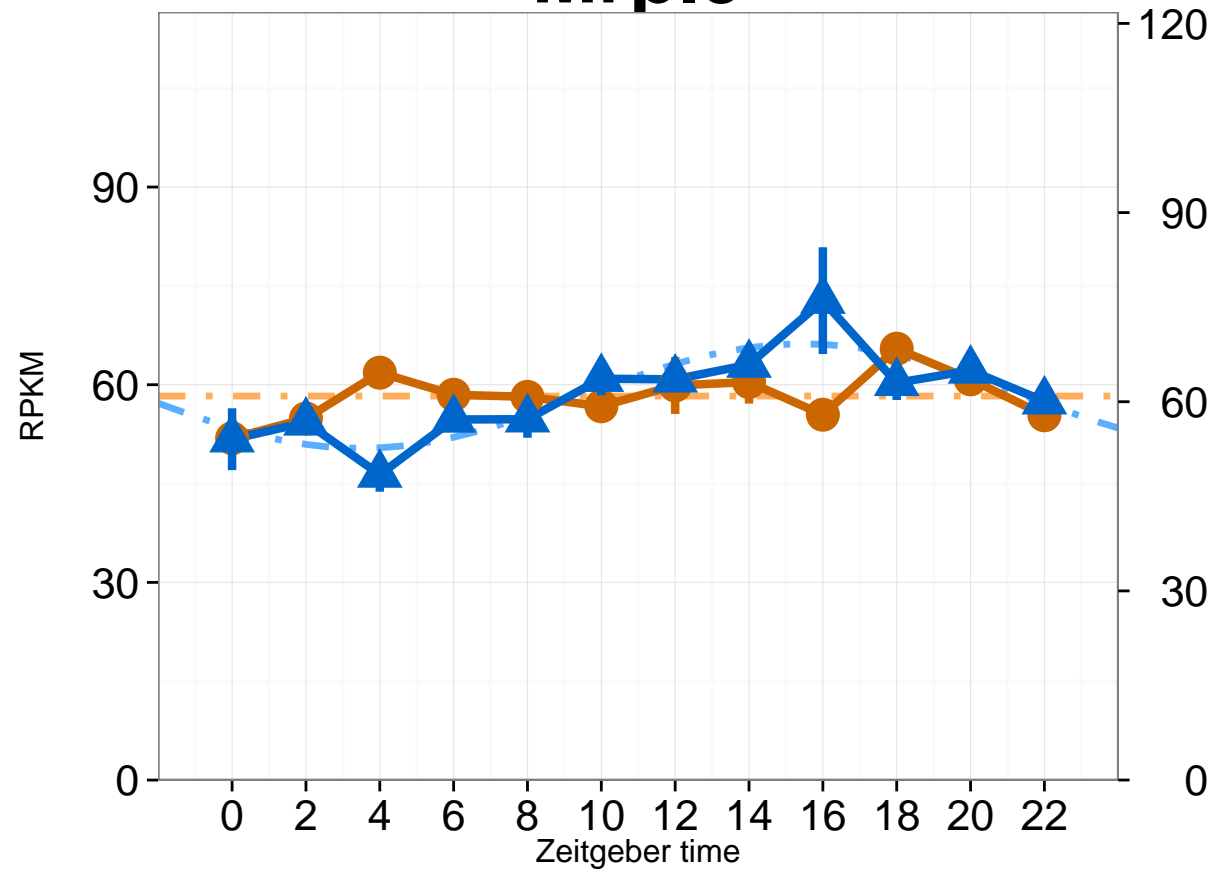

## Mrpl9

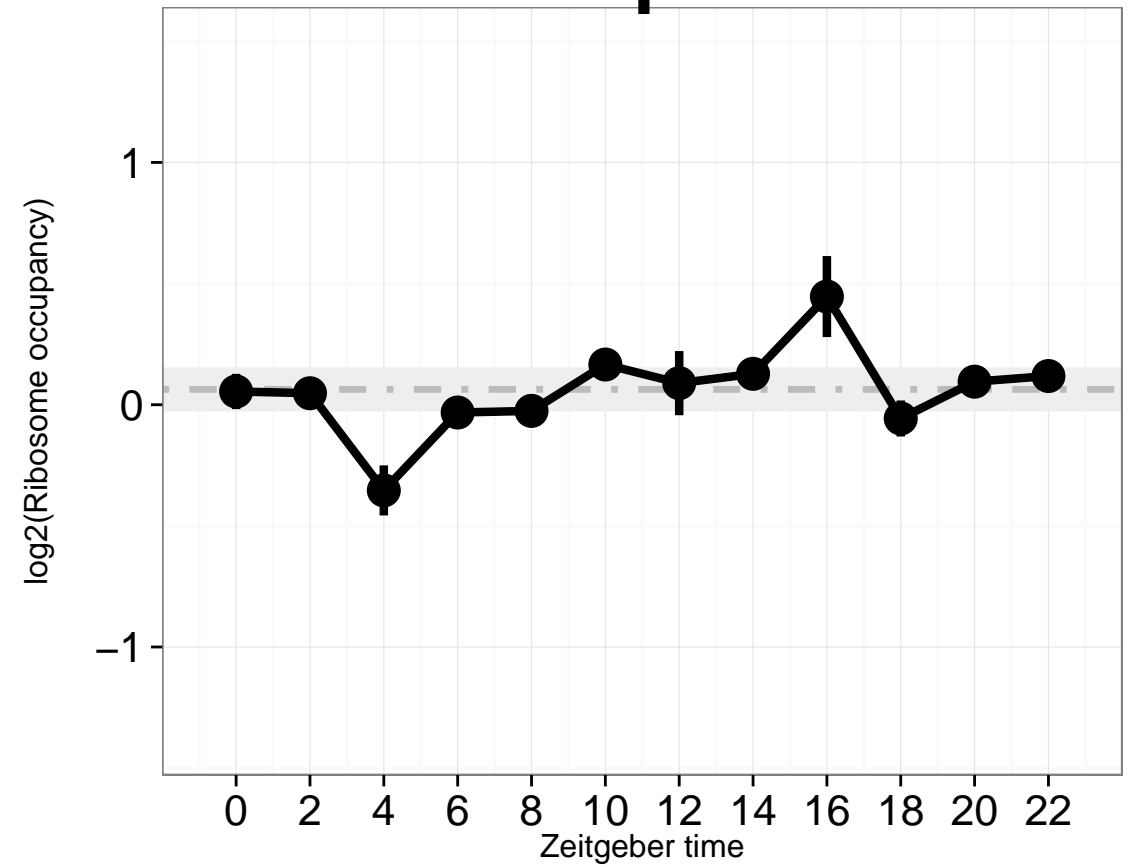

Supplement: Supplementary file 3079 [file 1]

# Taf11

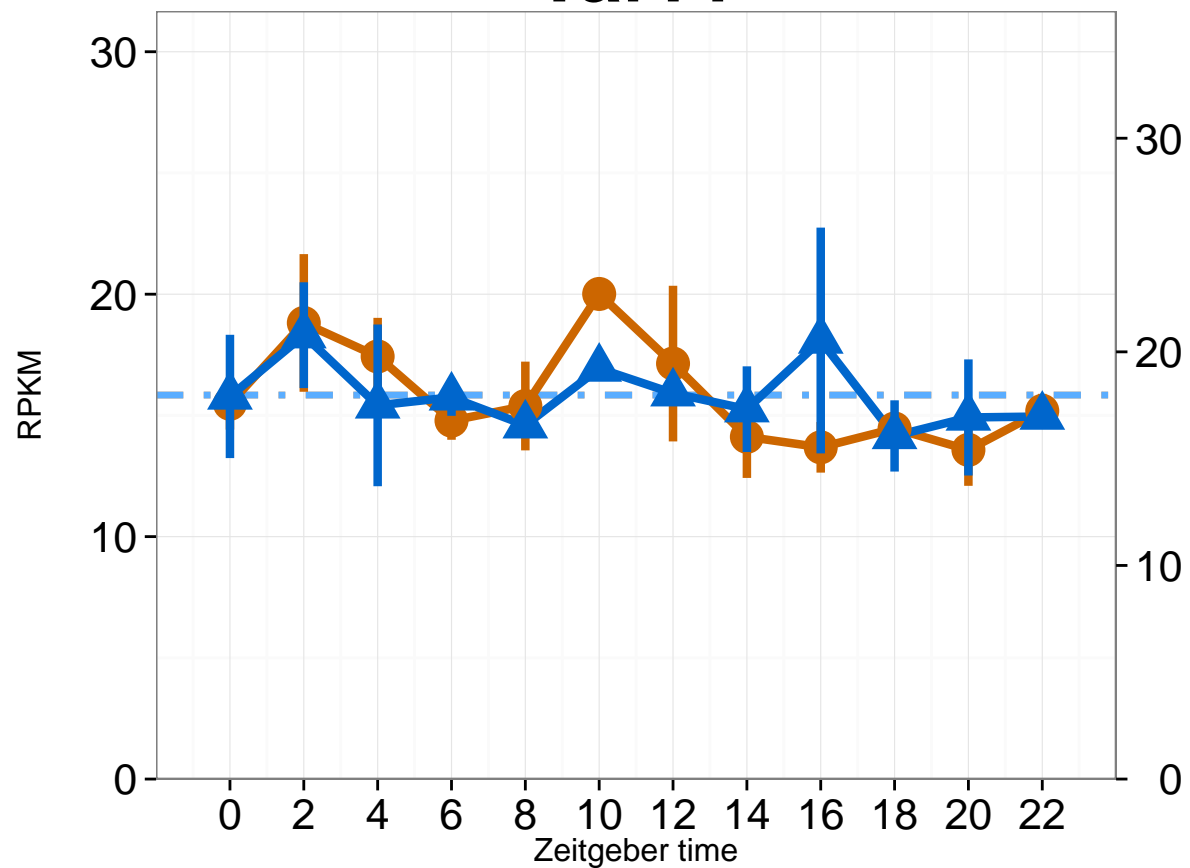

# Taf11

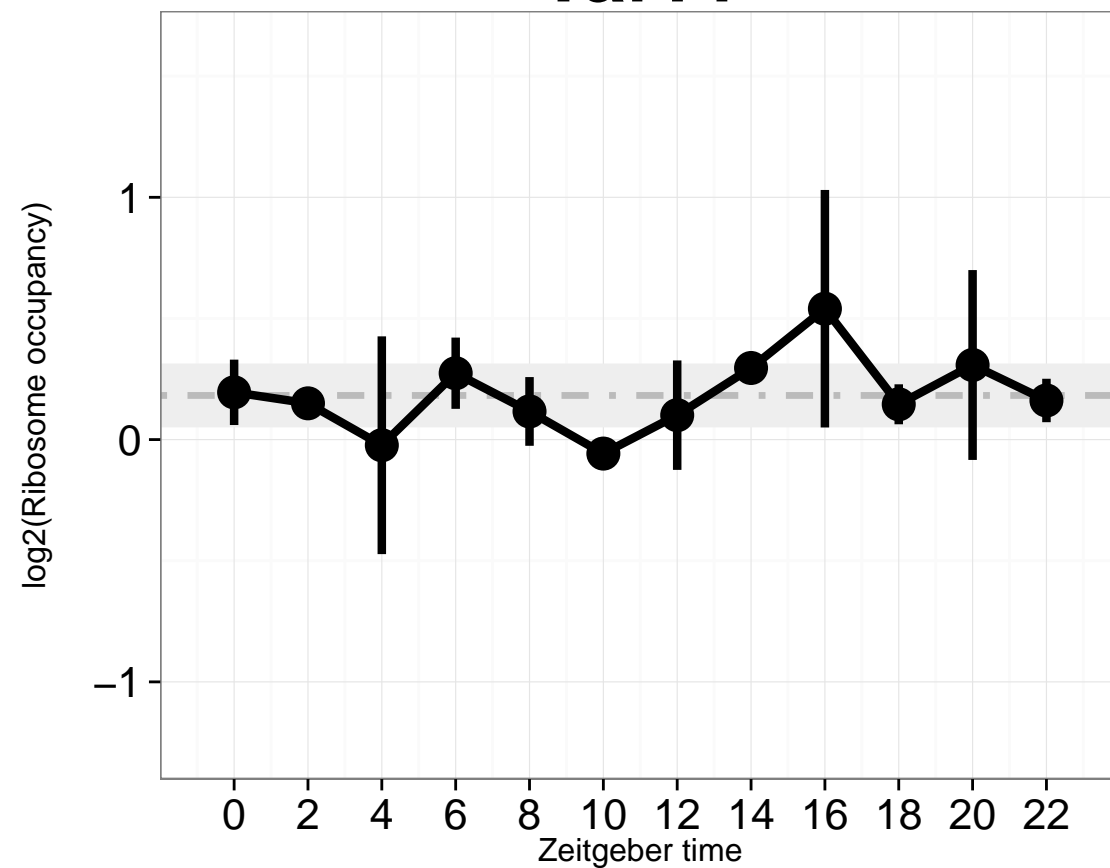

Supplement: Supplementary file 3080 [file 1]

## Smpd1

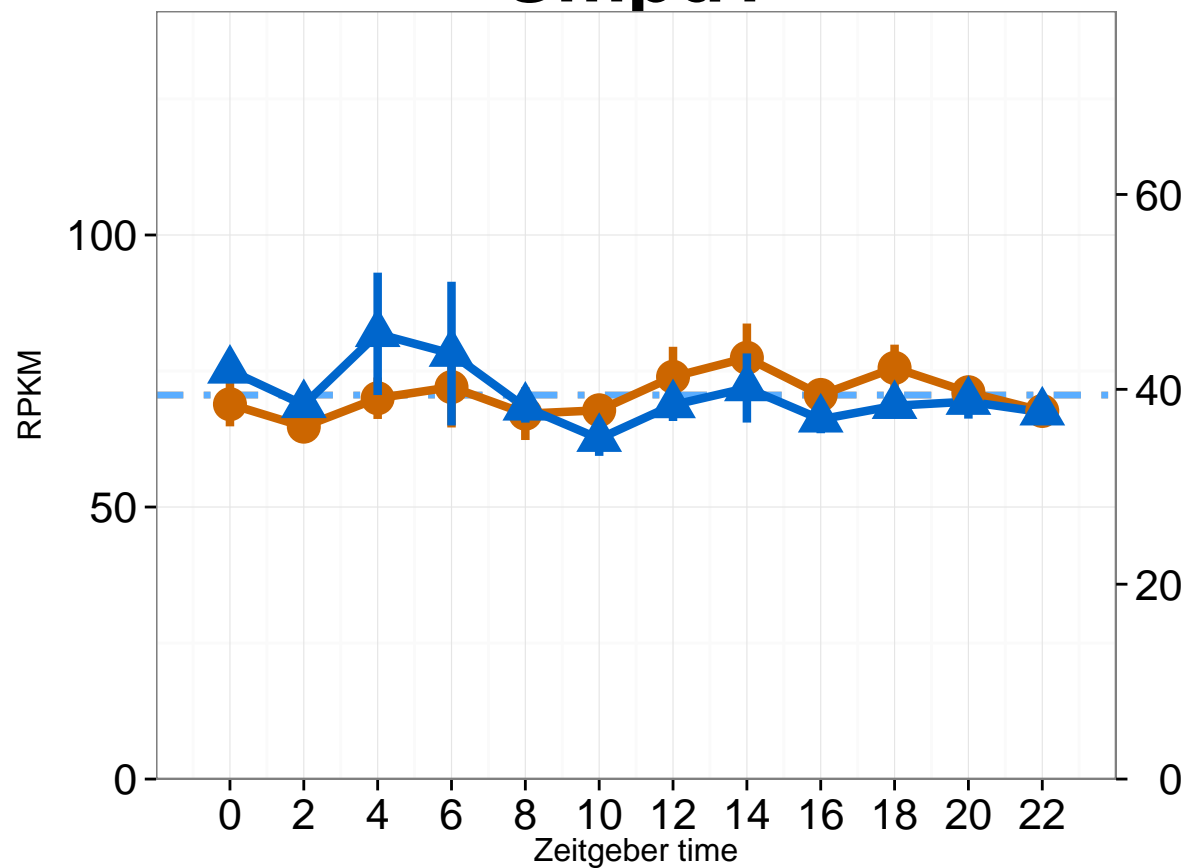

## Smpd1

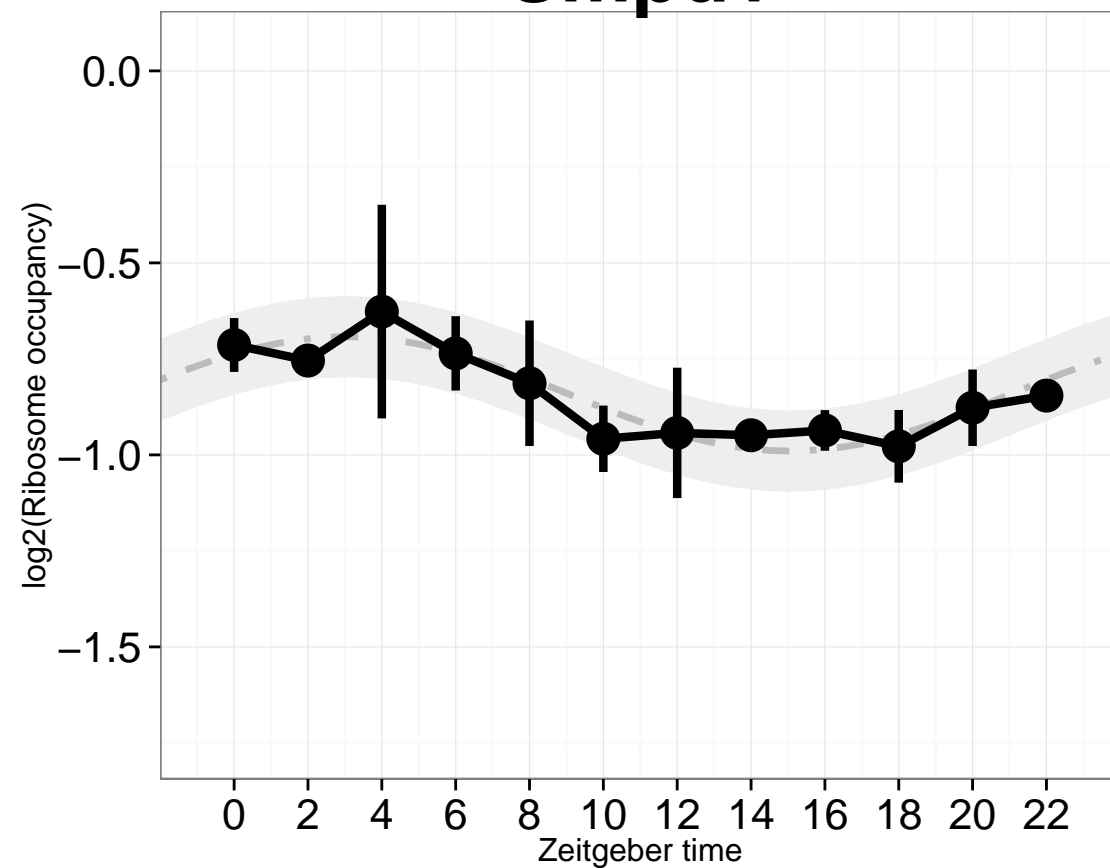

Supplement: Supplementary file 3081 [file 1]

## Dusp18

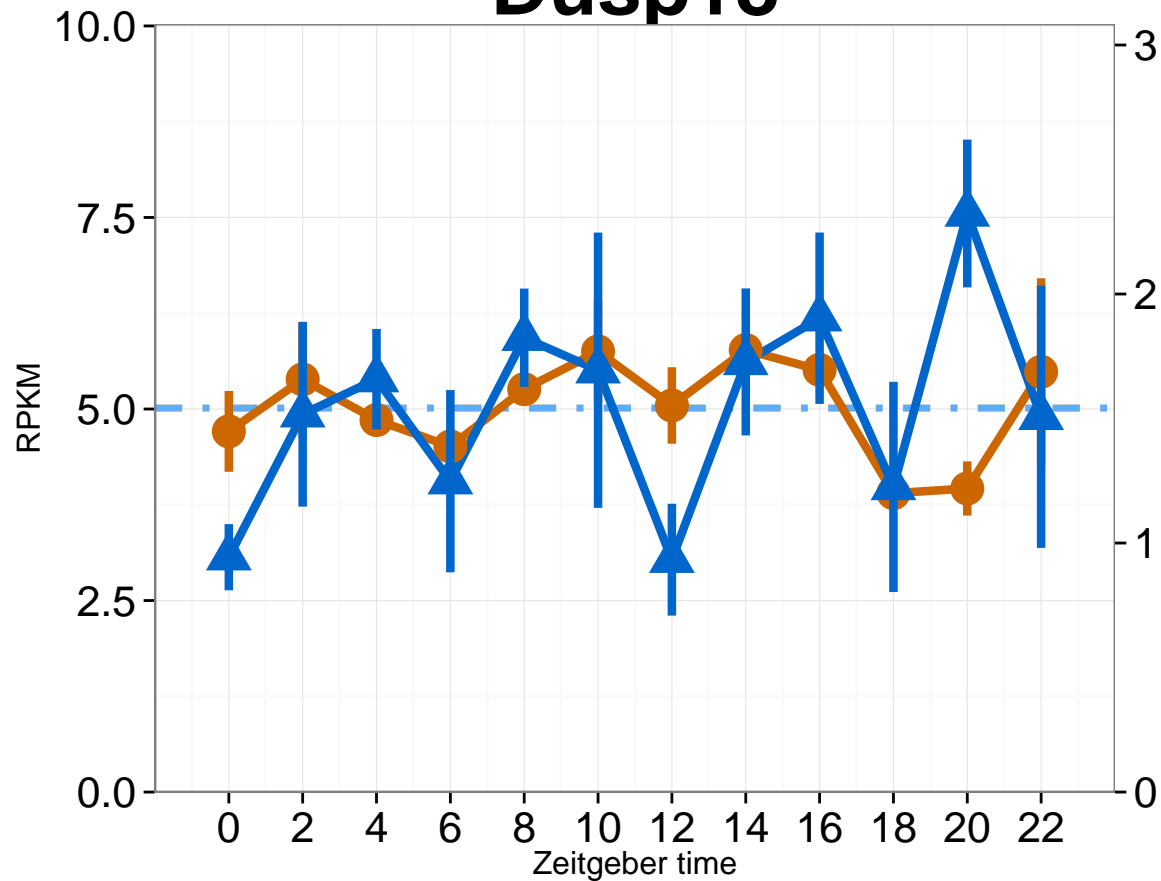

## Dusp18

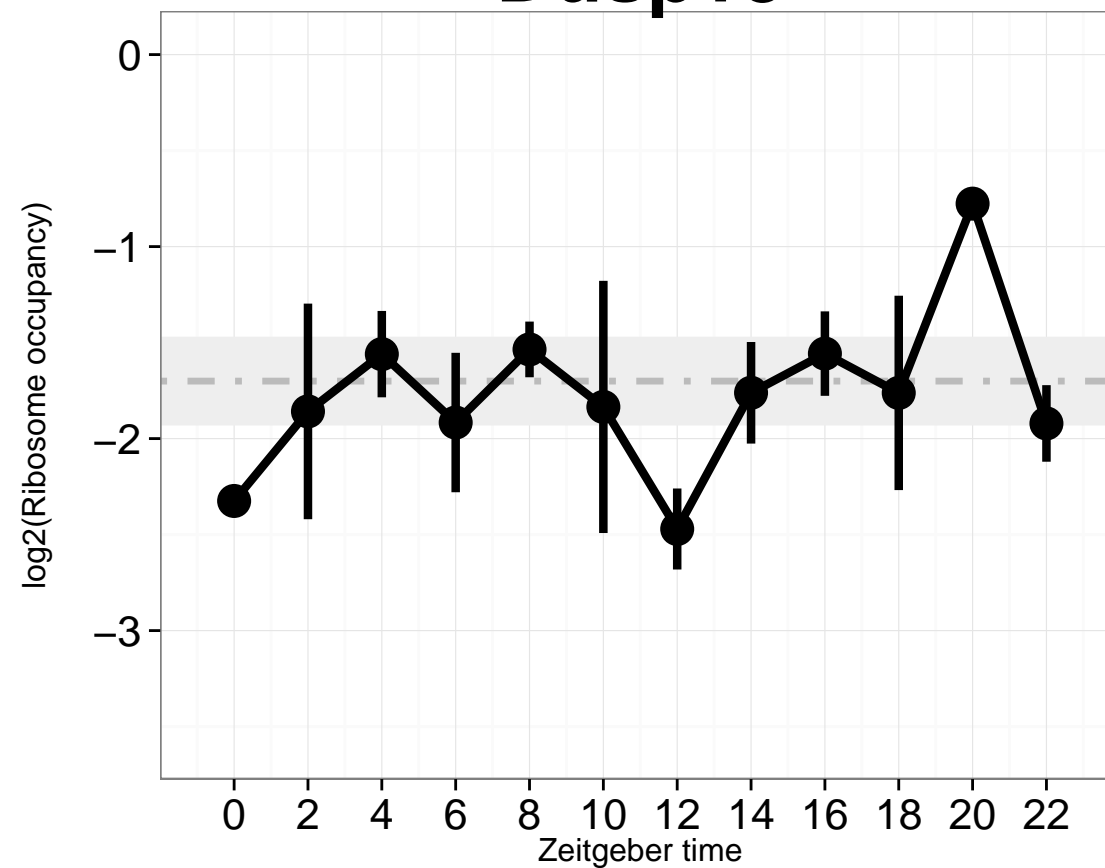

Supplement: Supplementary file 3082 [file 1]

# Lrrc56

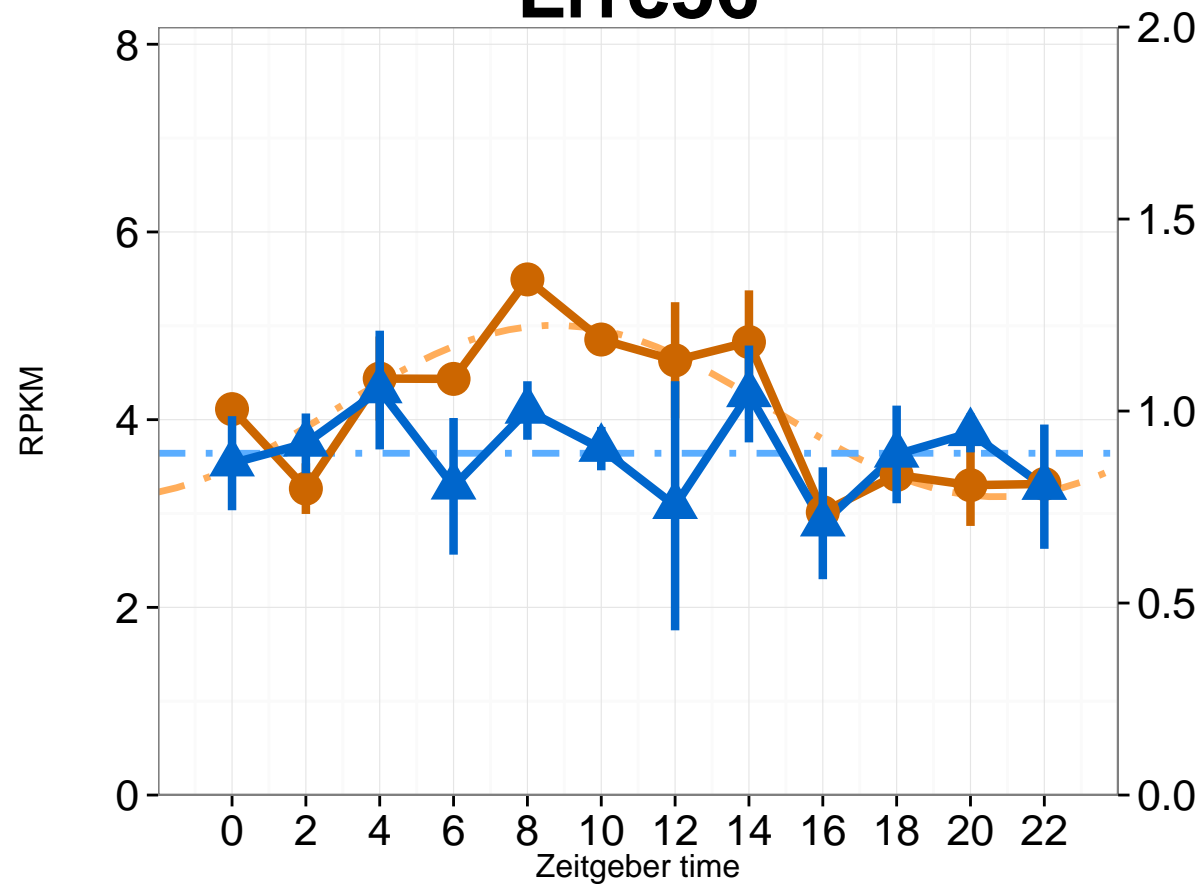

# Lrrc56

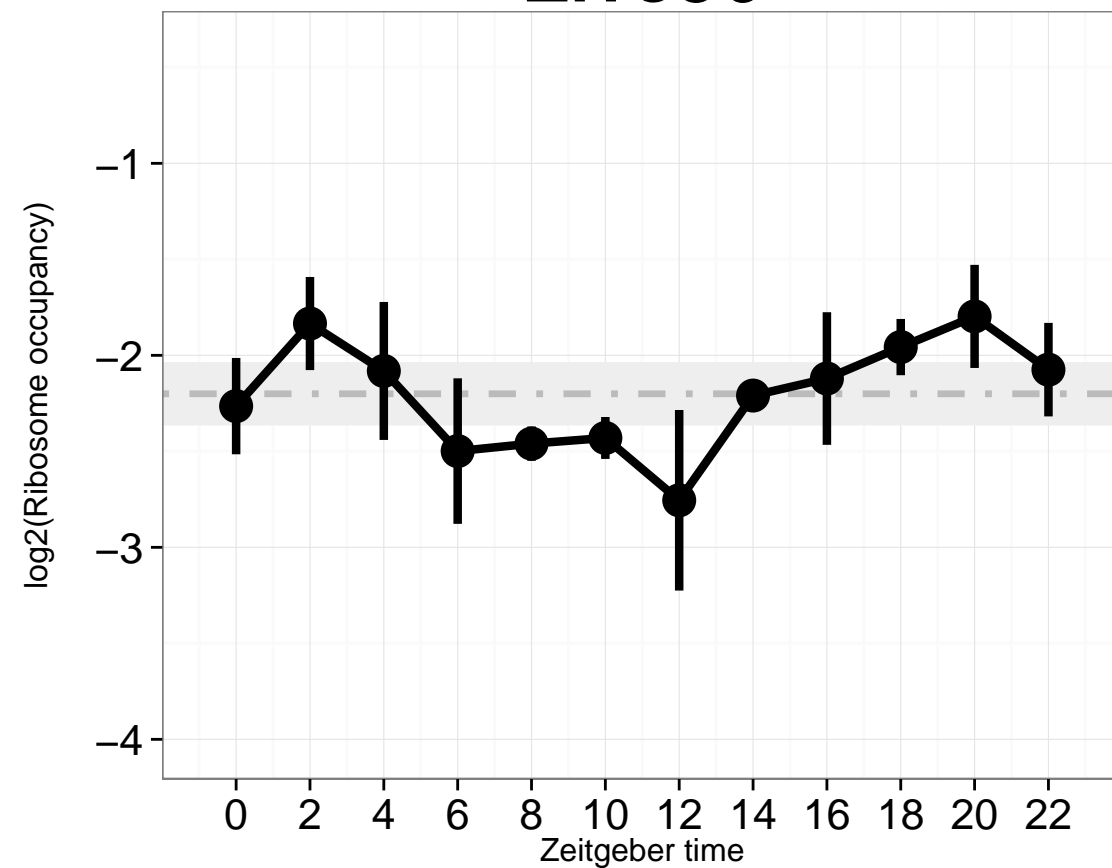

Supplement: Supplementary file 3083 [file 1]

# Dnajb5

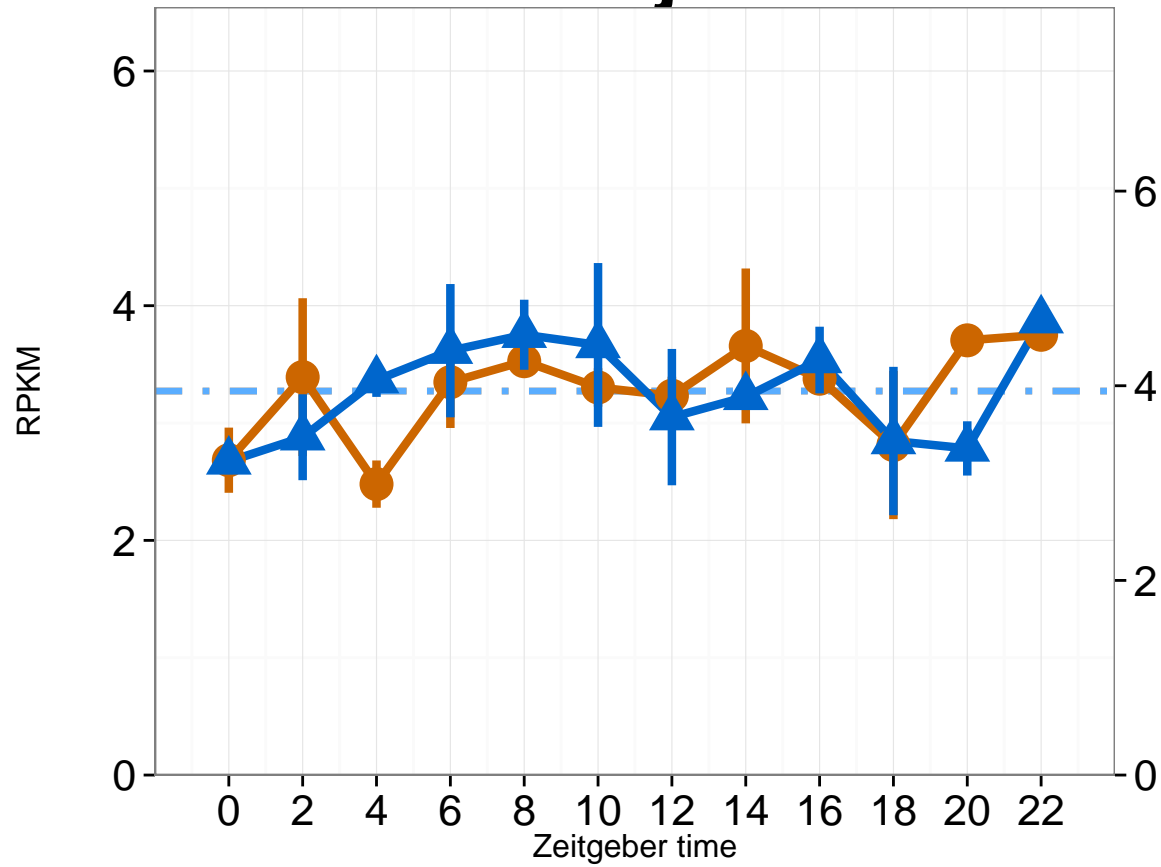

# Dnajb5

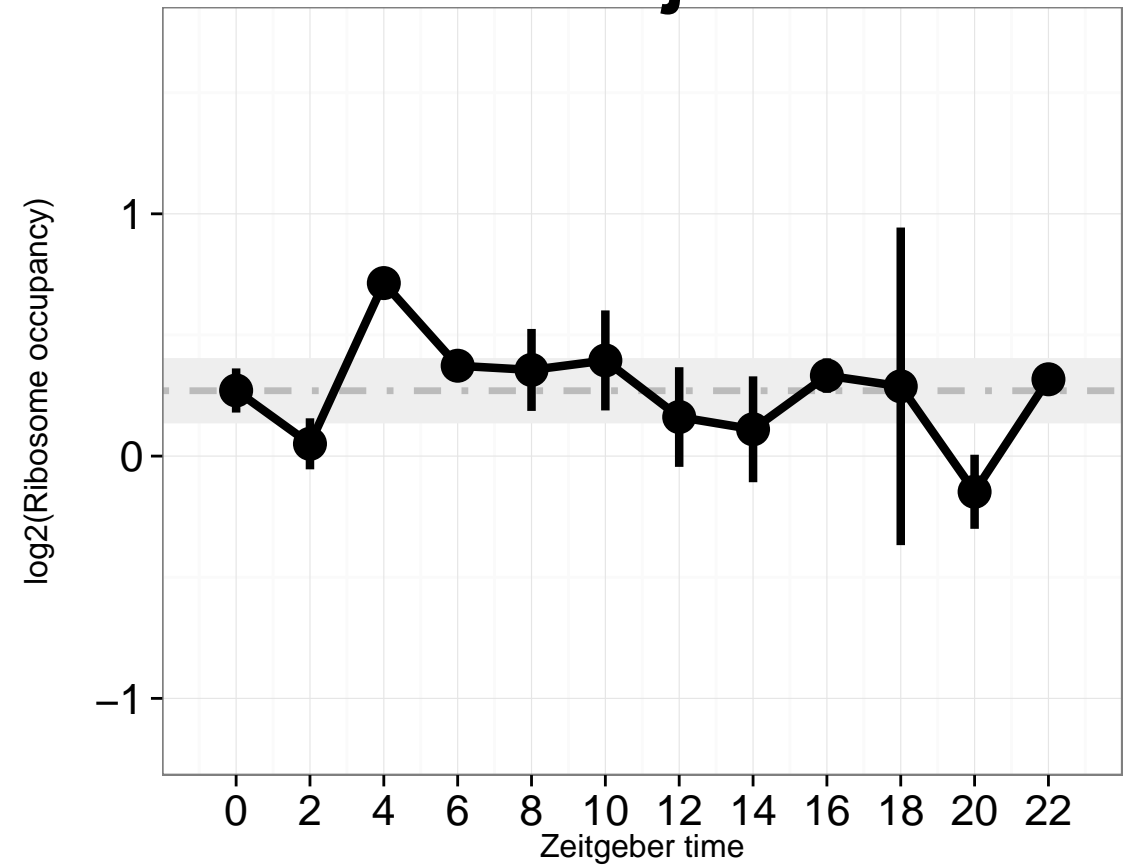

Supplement: Supplementary file 3084 [file 1]

# Zfp81

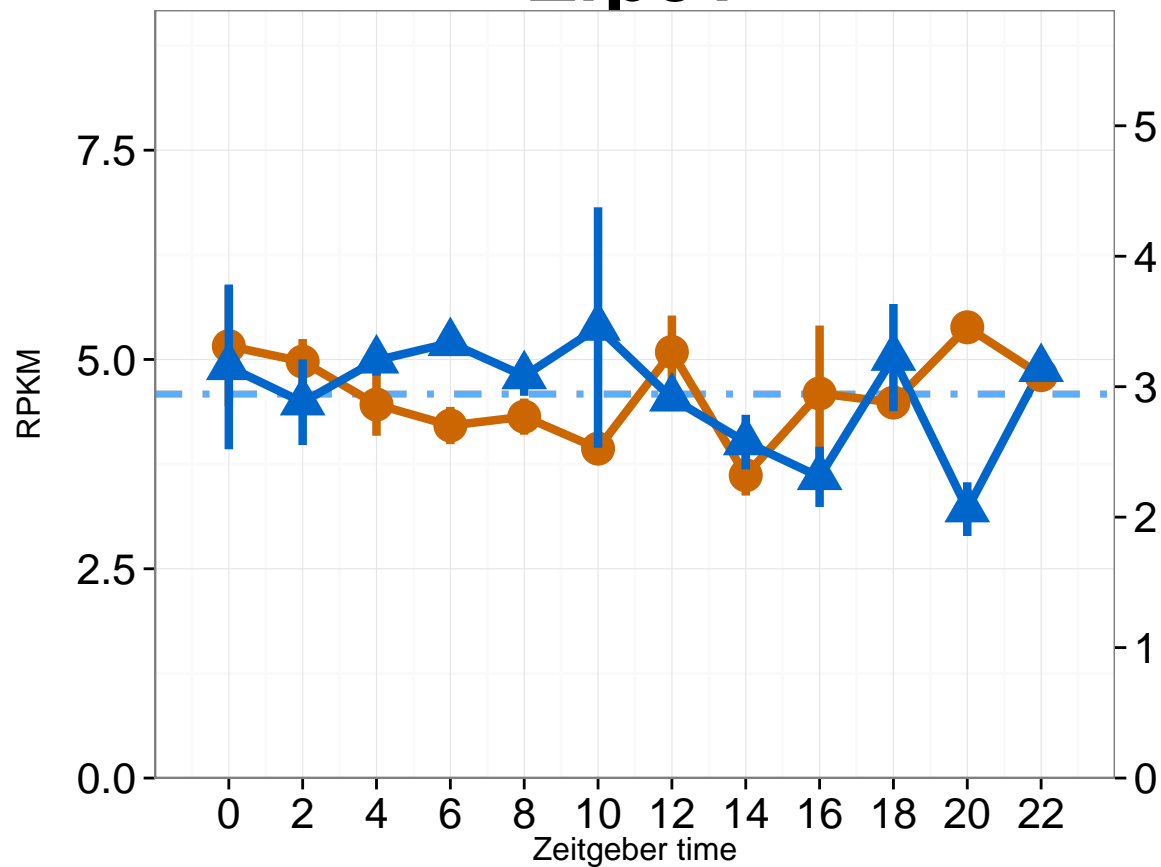

# Zfp81

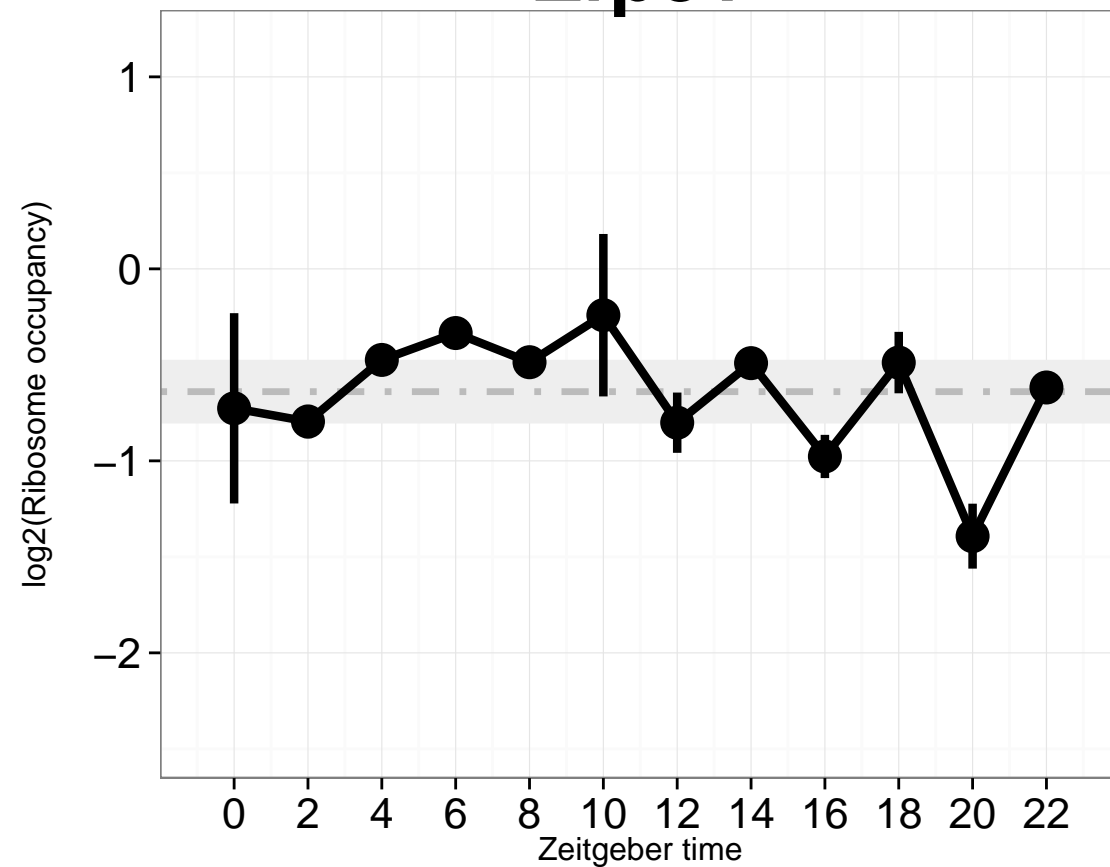

Supplement: Supplementary file 3085 [file 1]

# Mansc4

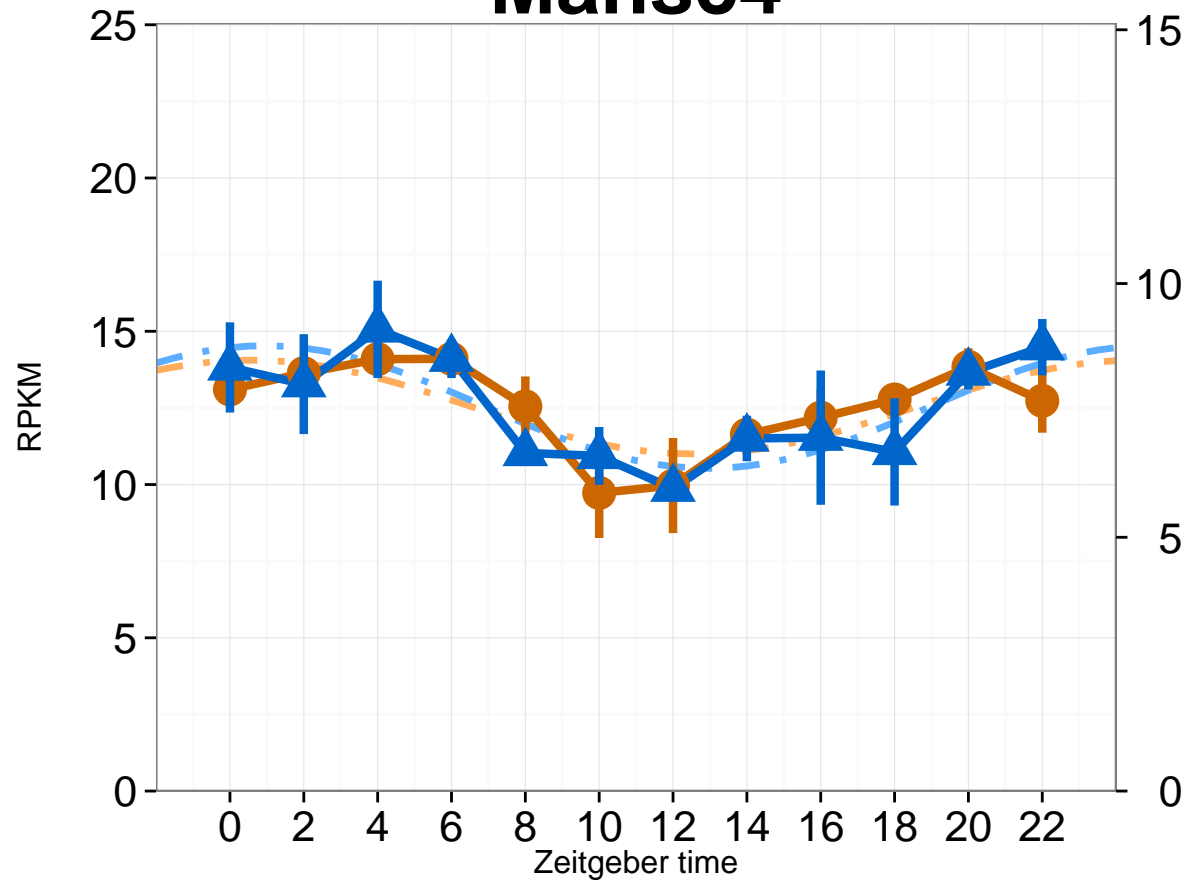

# Mansc4

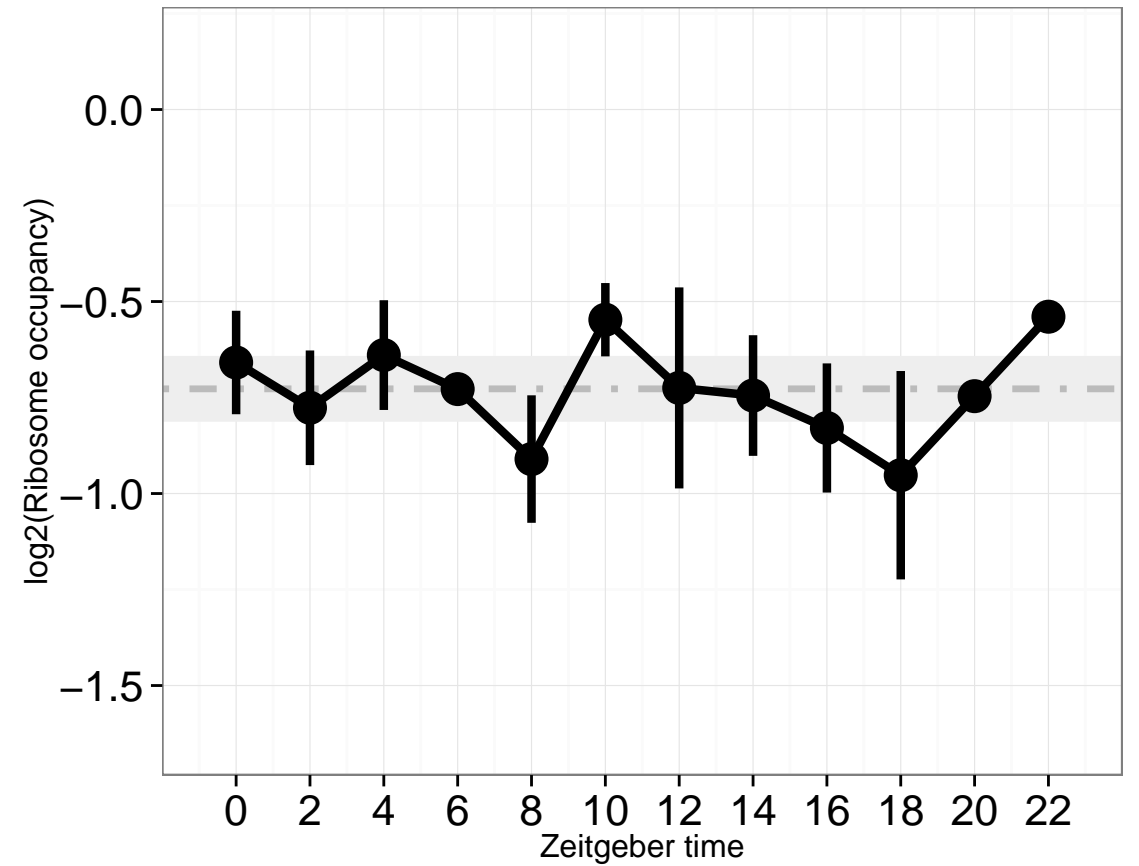

Supplement: Supplementary file 3086 [file 1]

# Aarsd1

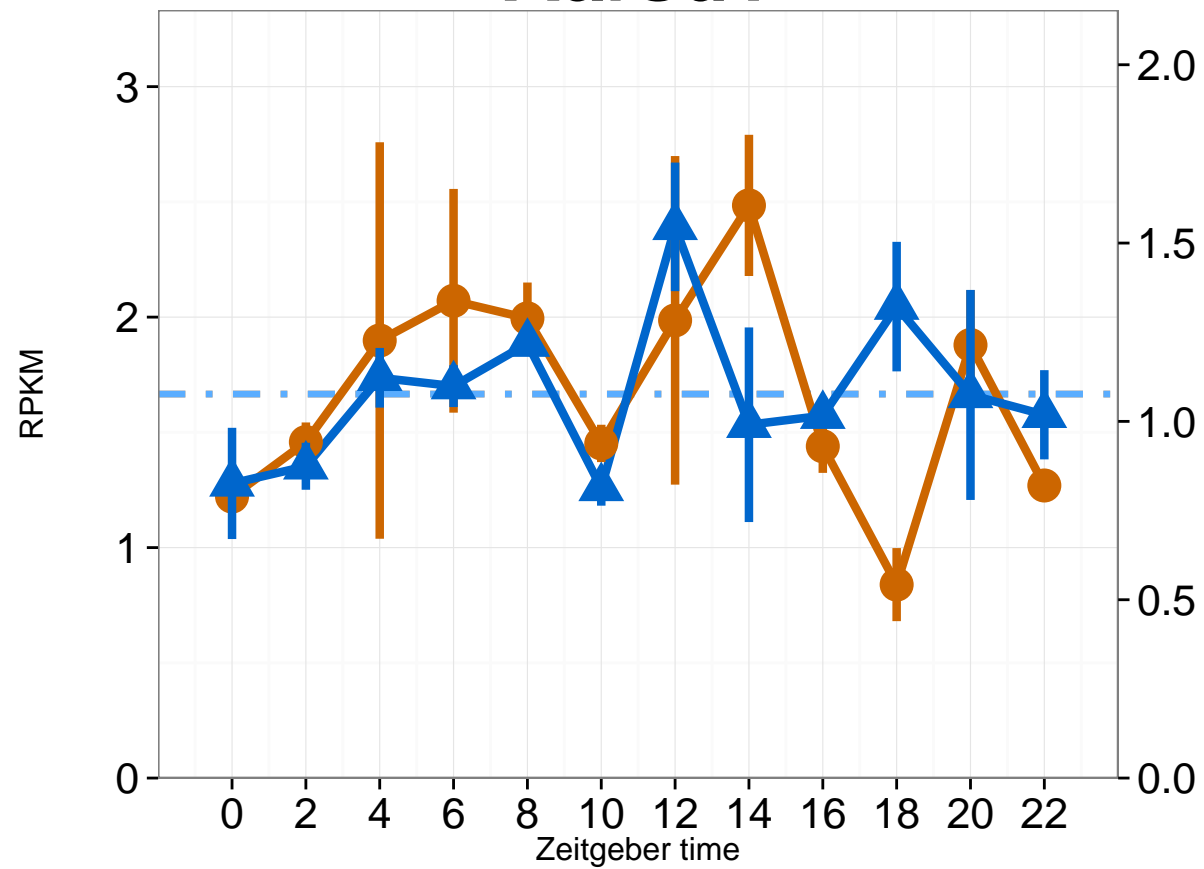

# Aarsd1

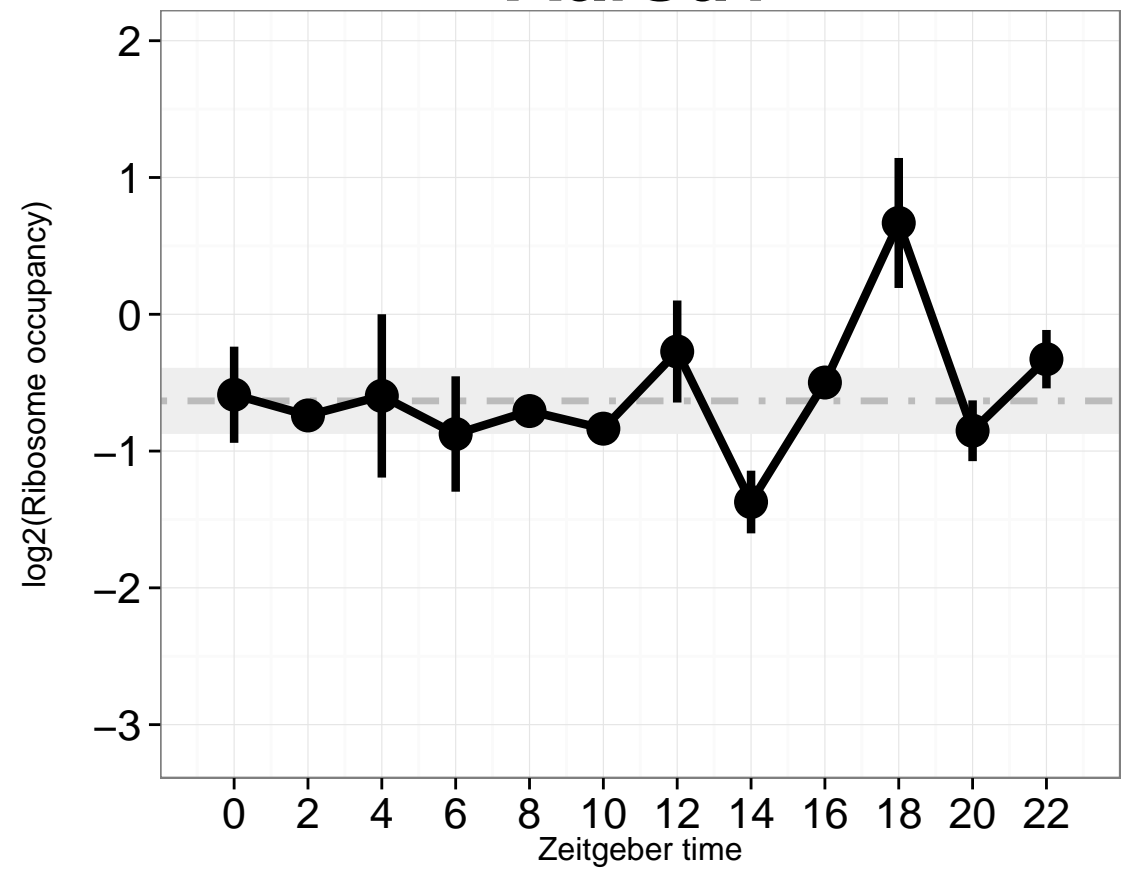

Supplement: Supplementary file 3087 [file 1]

# Hp1bp3

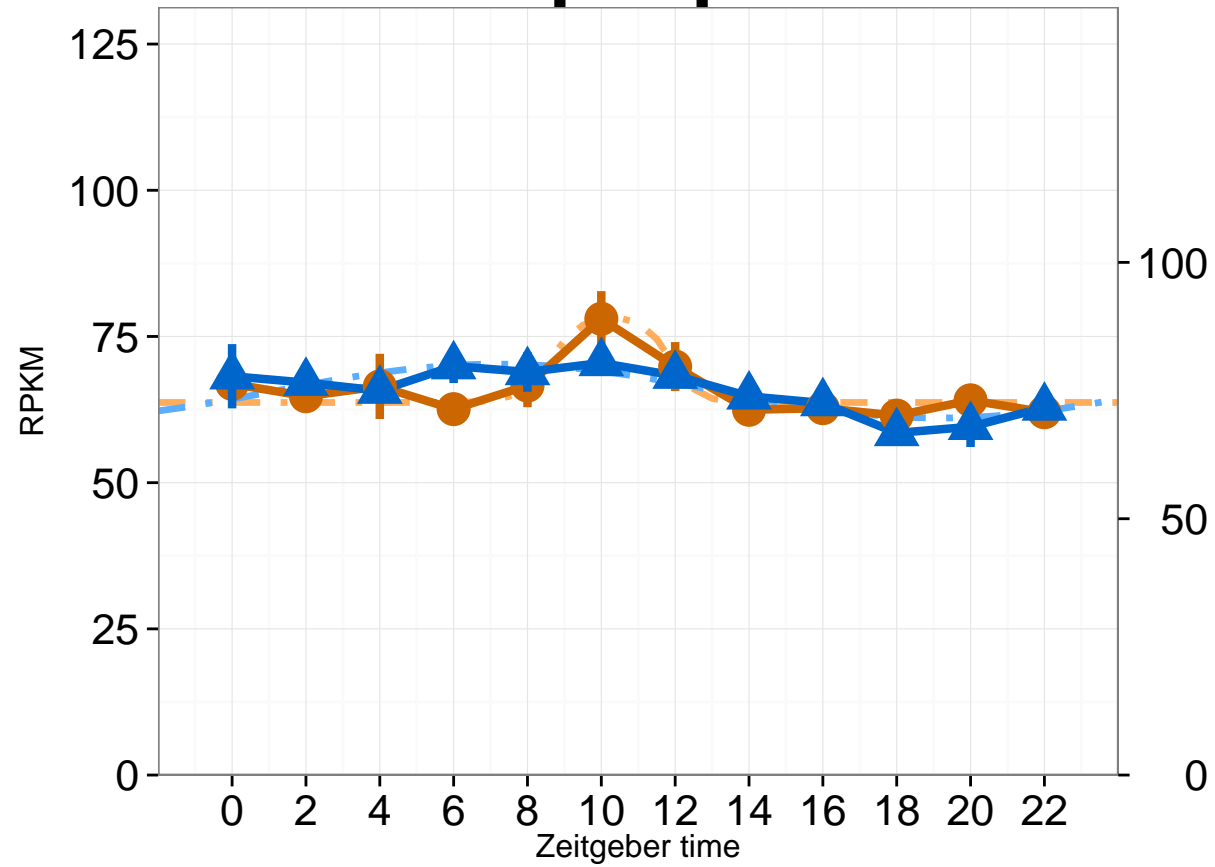

# Hp1bp3

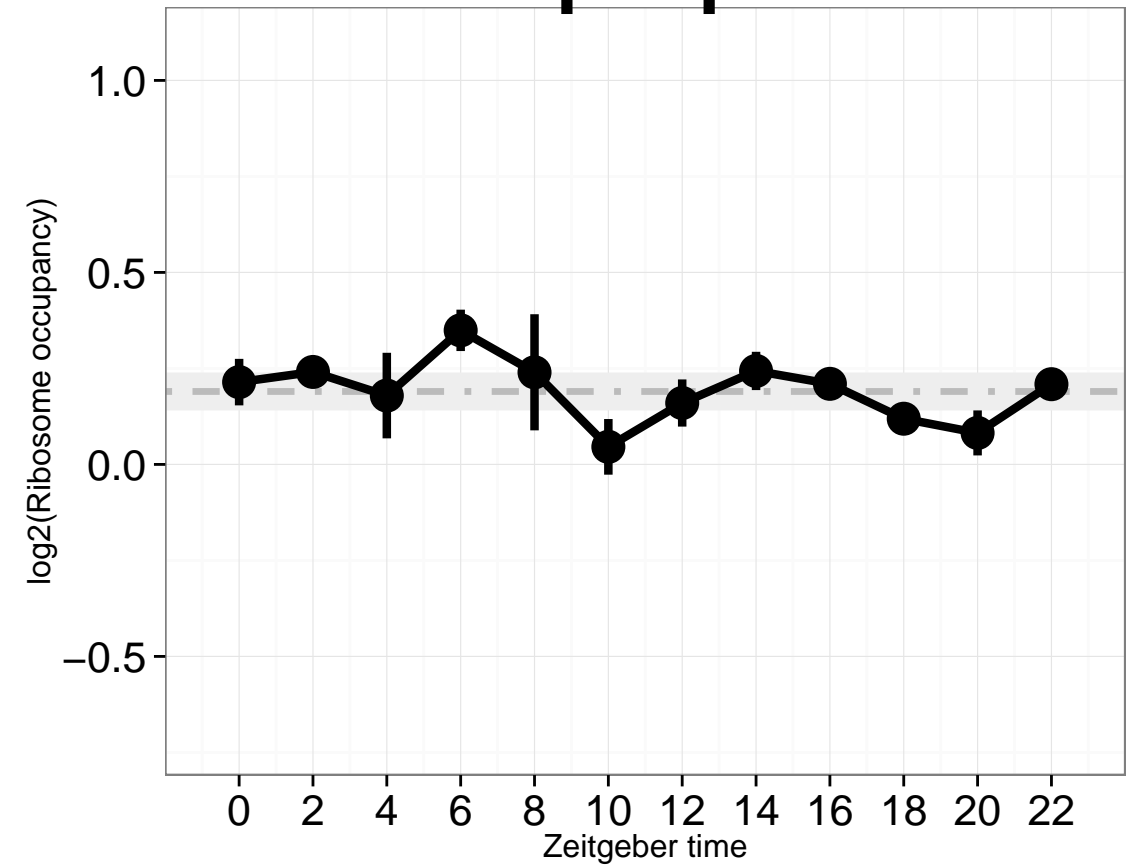

Supplement: Supplementary file 3088 [file 1]

# Sgpp1

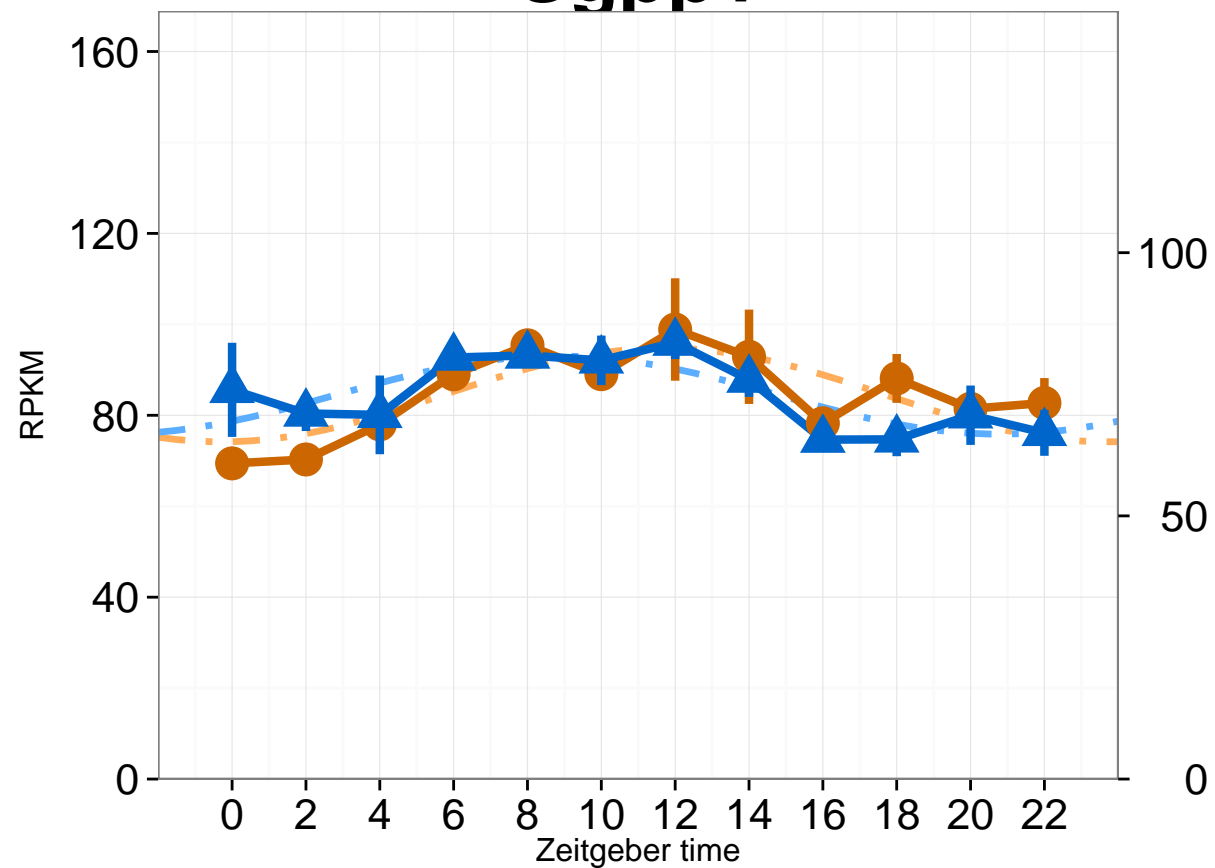

# Sgpp1

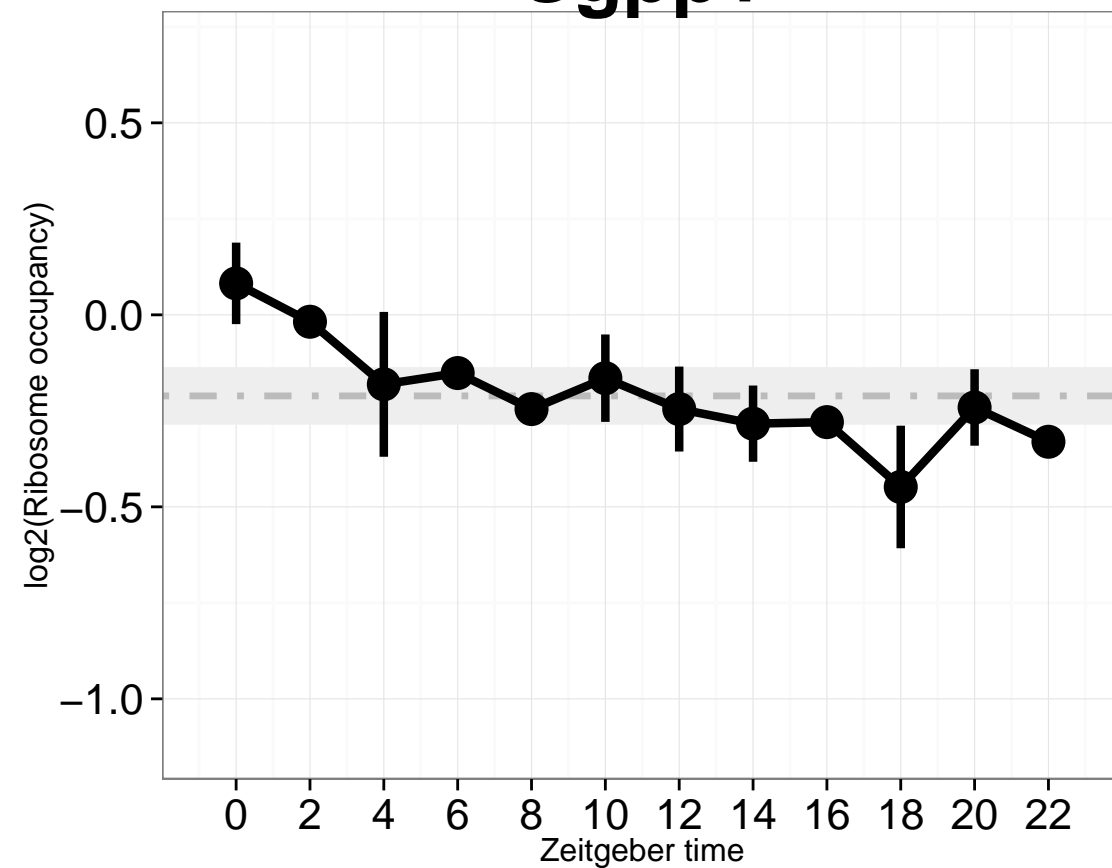

Supplement: Supplementary file 3089 [file 1]

## Sema6d

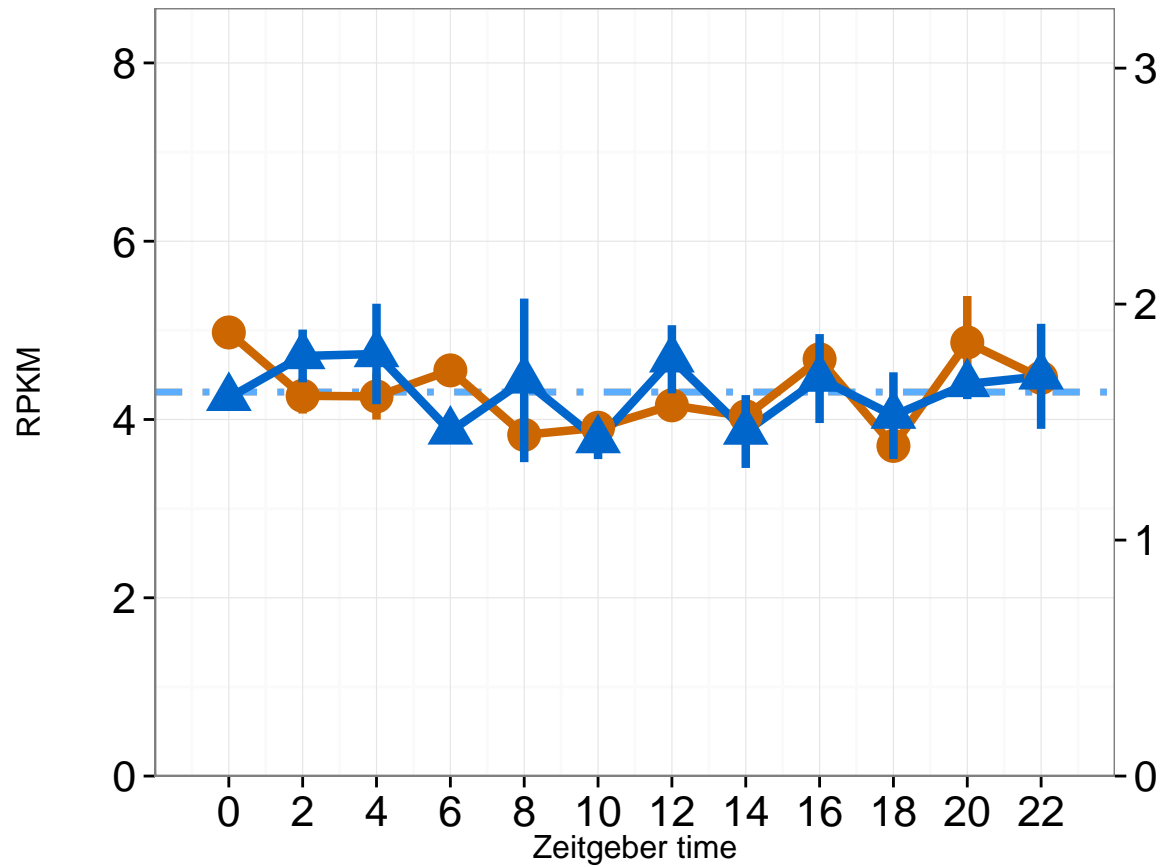

## Sema6d

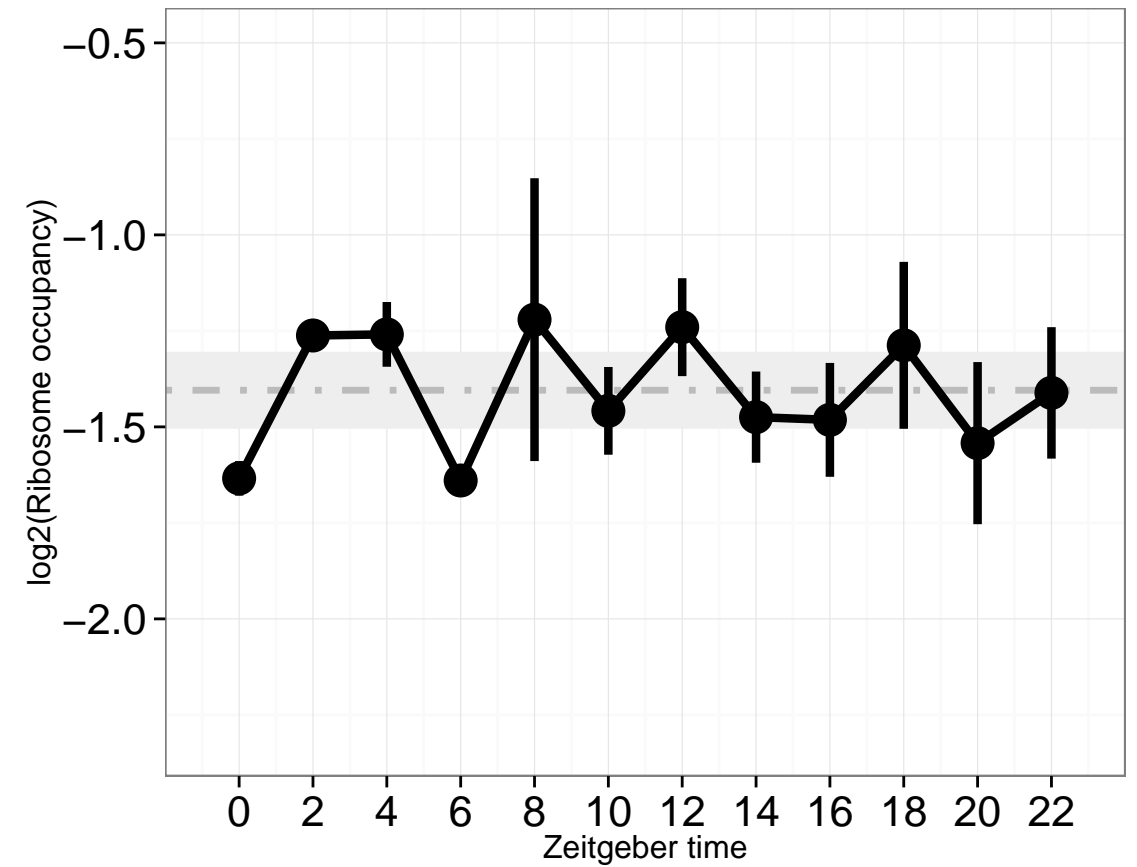

Supplement: Supplementary file 3090 [file 1]

## Zc3h3

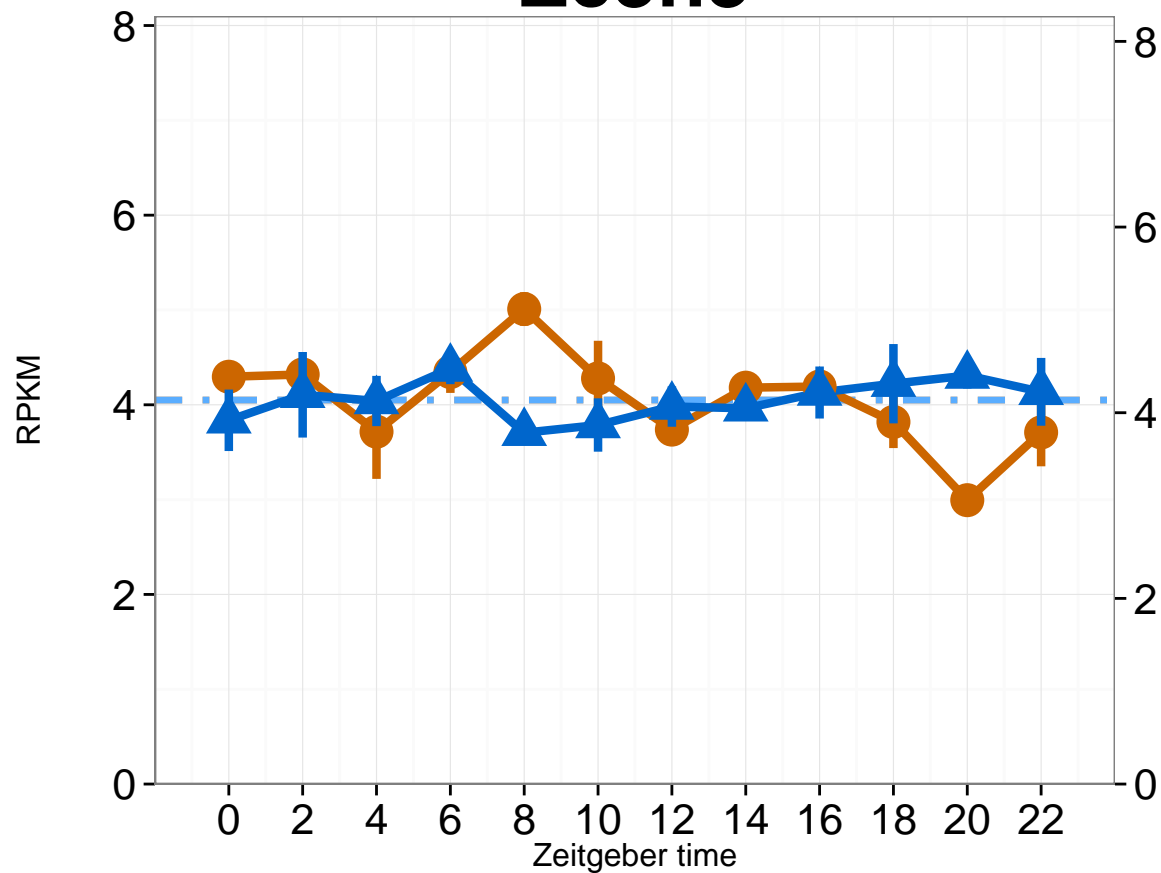

## Zc3h3

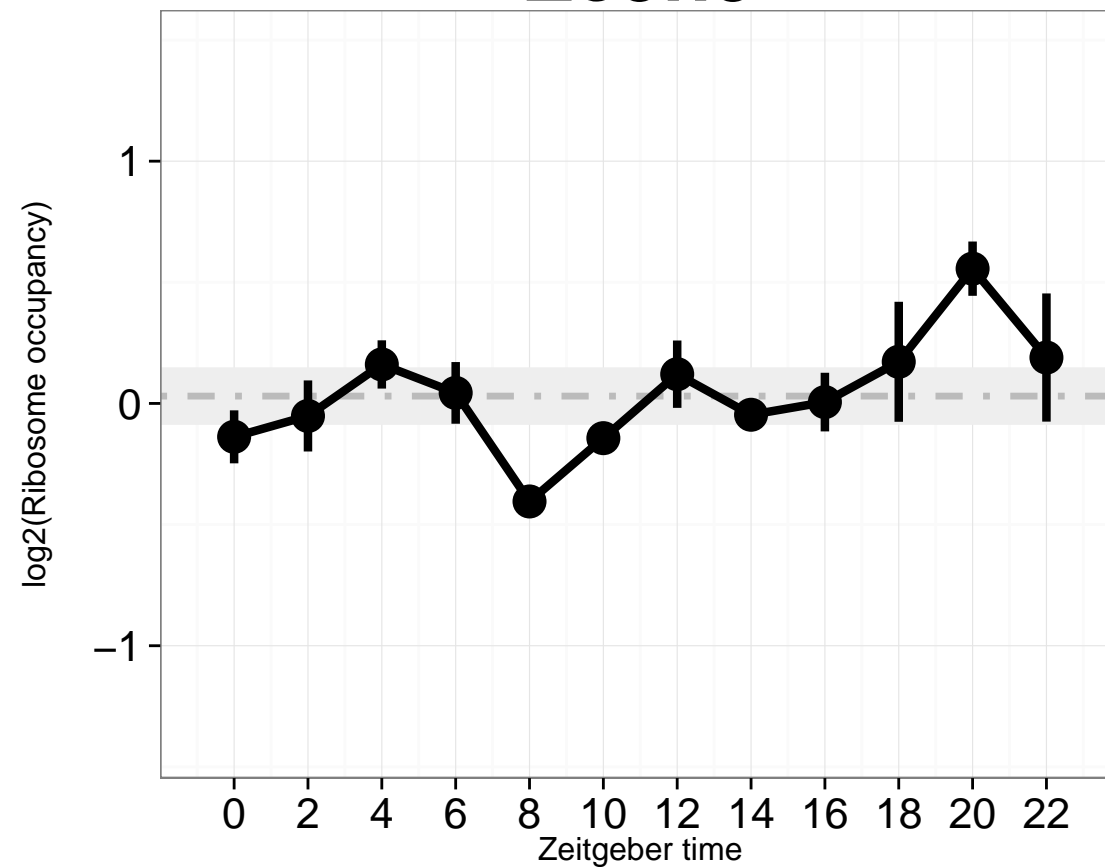

Supplement: Supplementary file 3091 [file 1]

## Rfx5

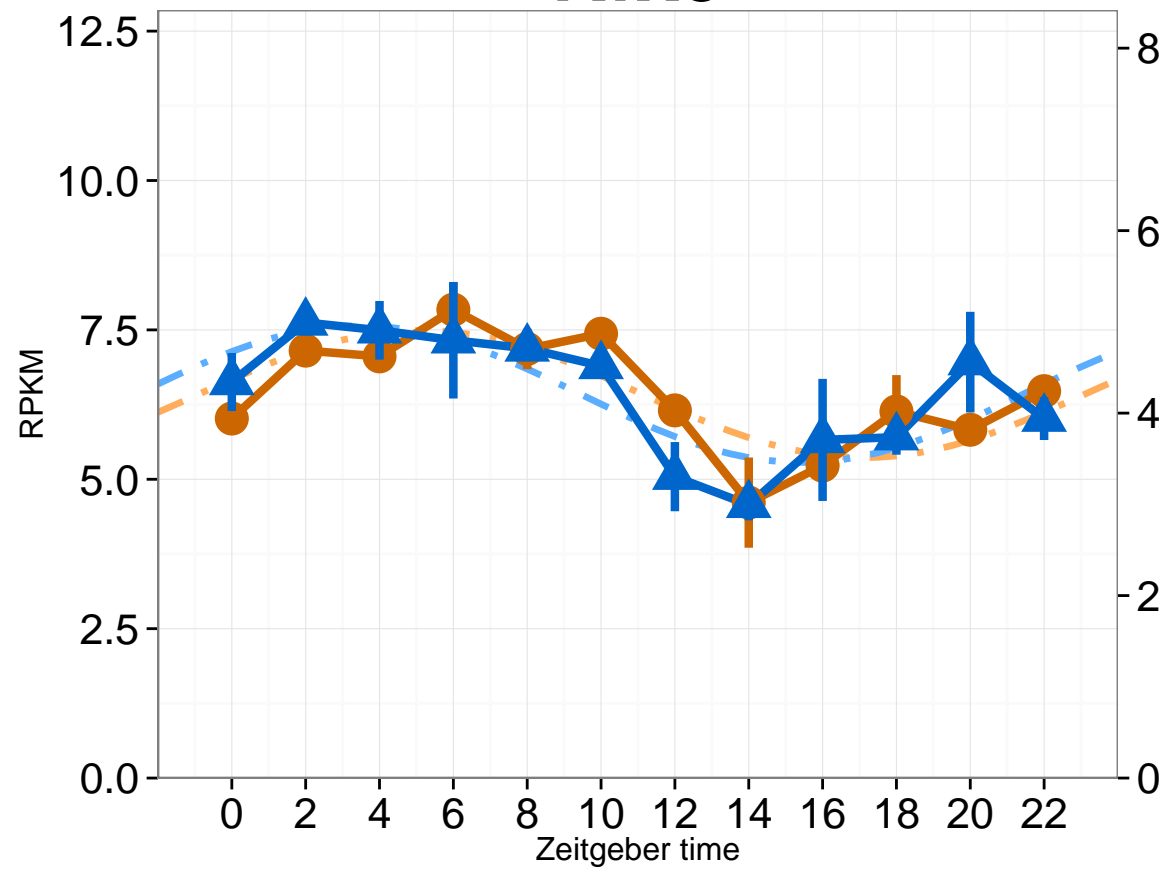

## Rfx5

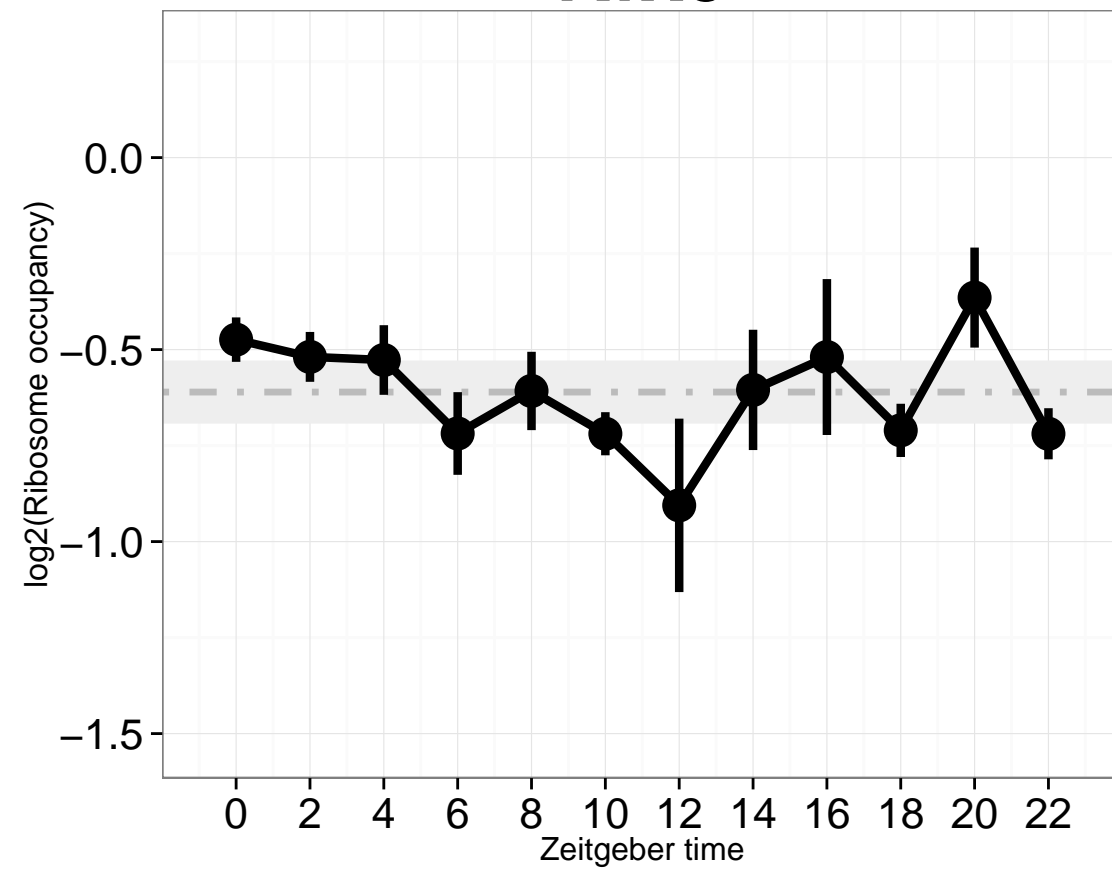

Supplement: Supplementary file 3092 [file 1]

# Arhgef28

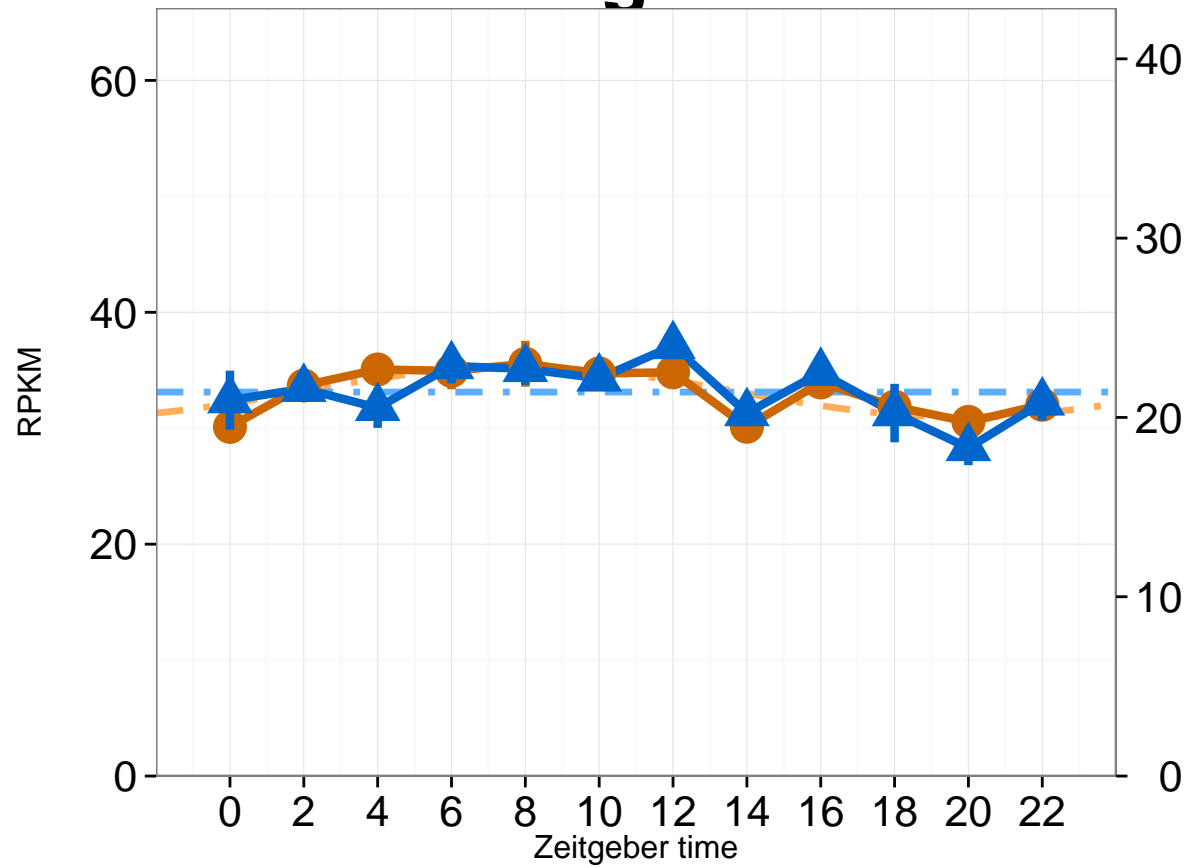

# Arhgef28

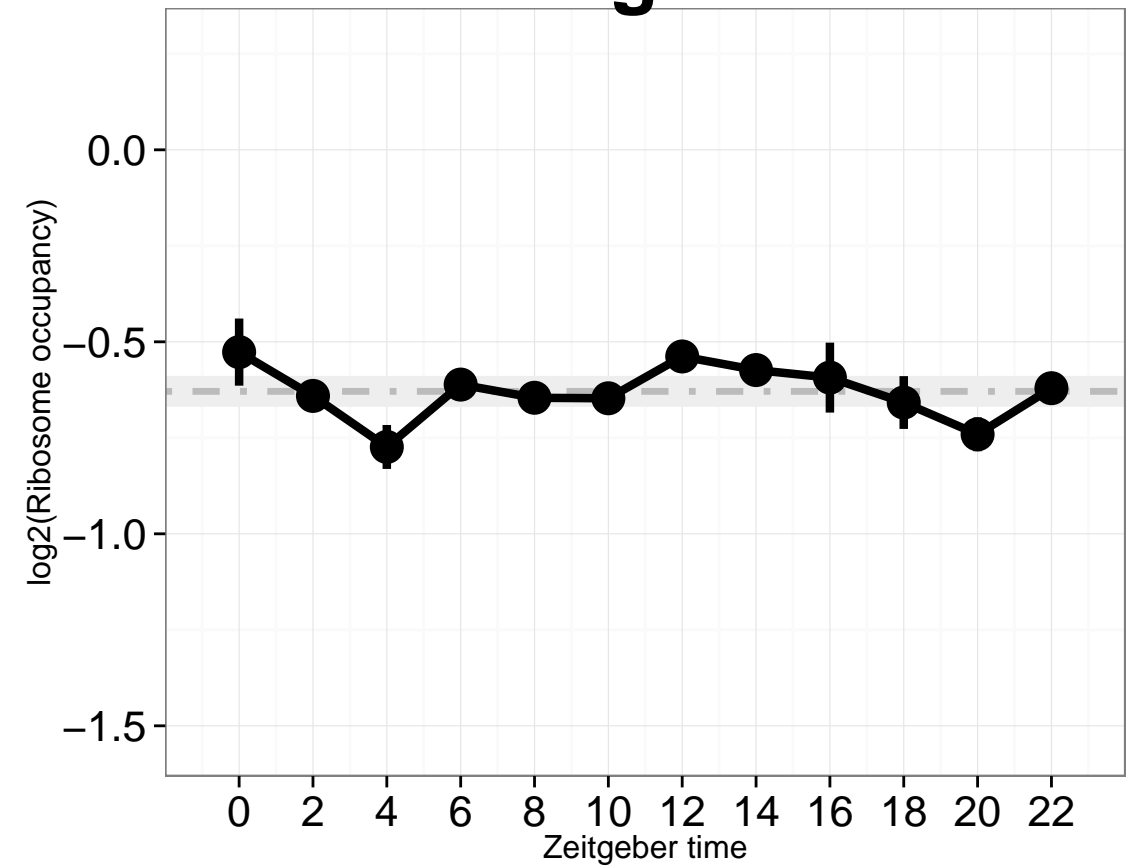

Supplement: Supplementary file 3093 [file 1]

## Pcdh12

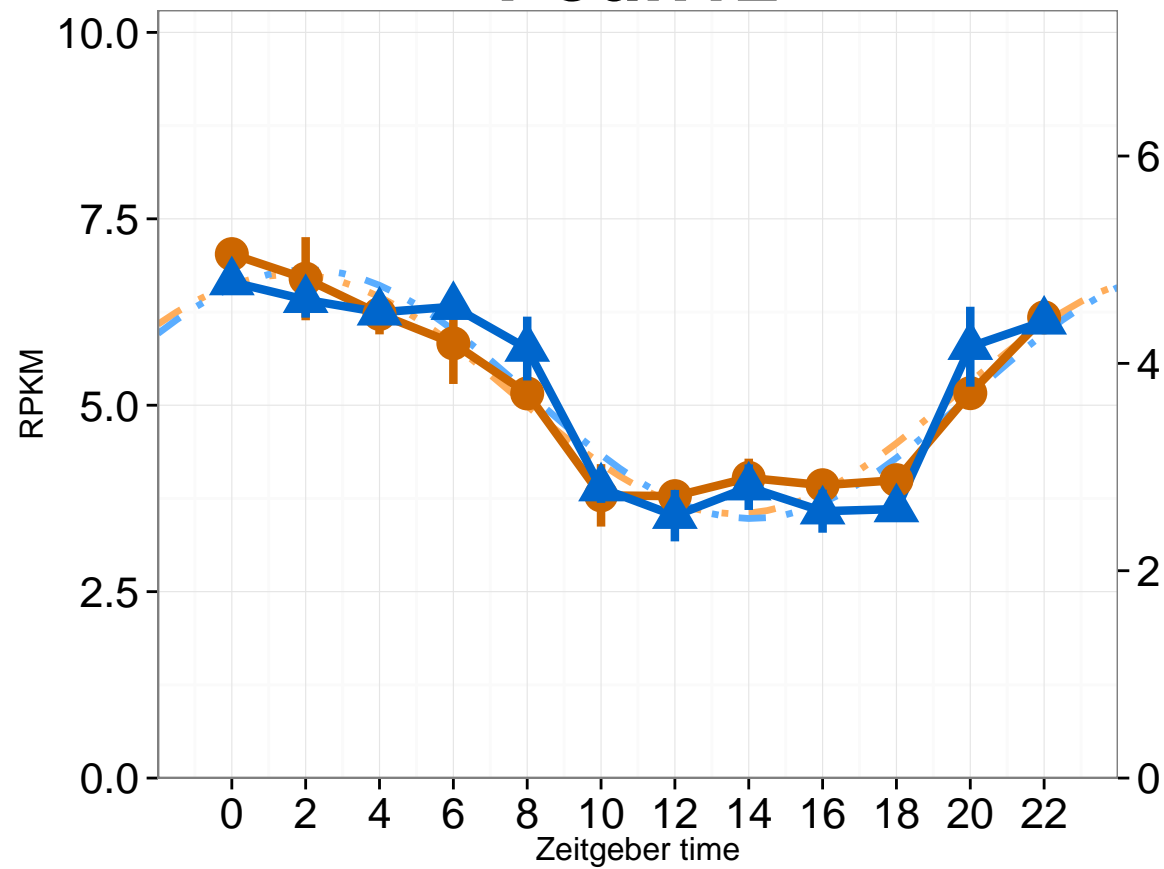

## Pcdh12

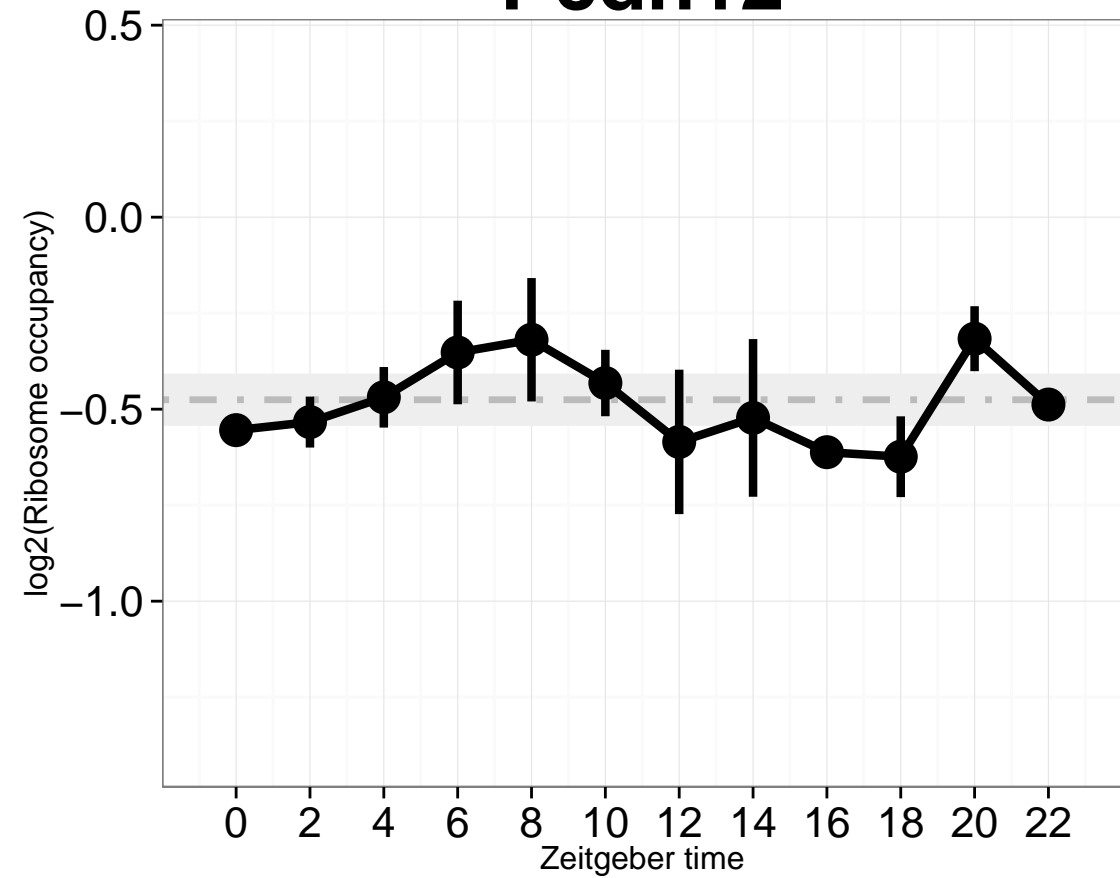

Supplement: Supplementary file 3094 [file 1]

## Bdh1

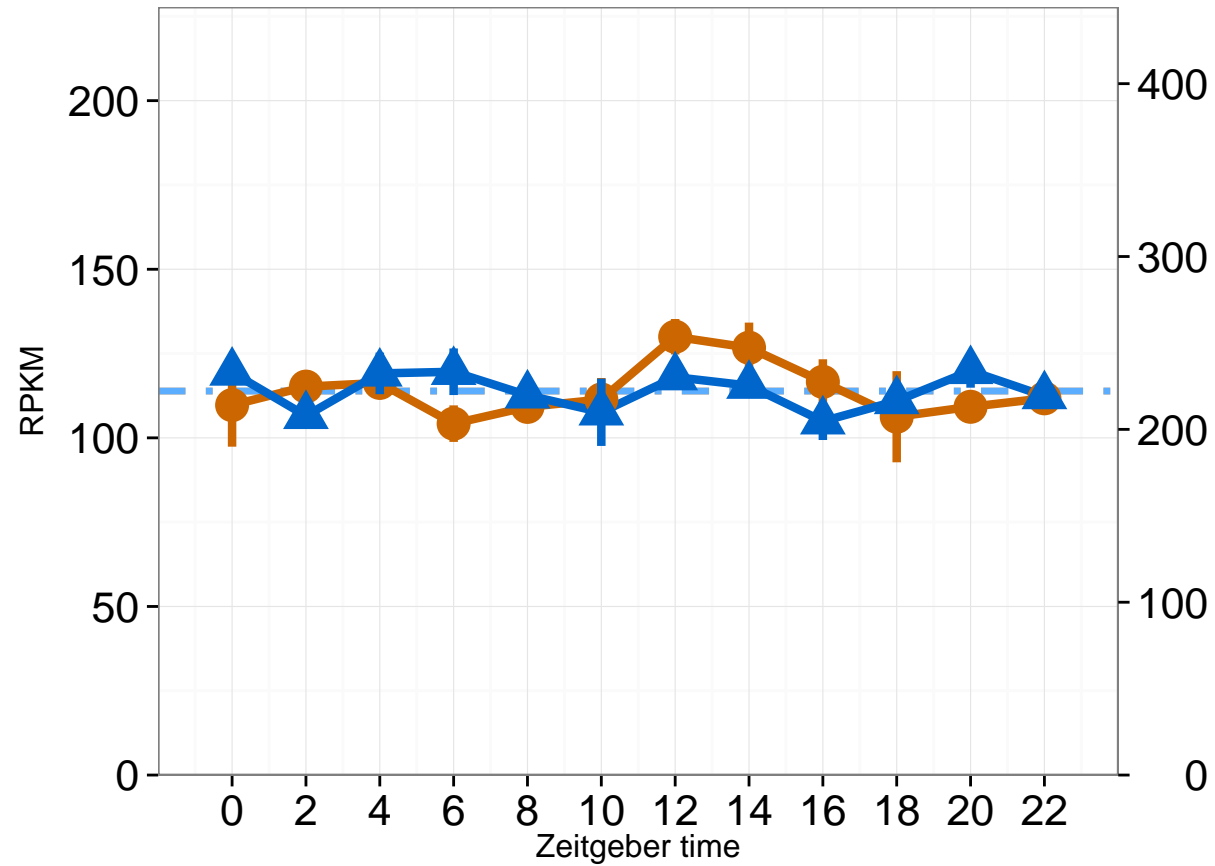

## Bdh1

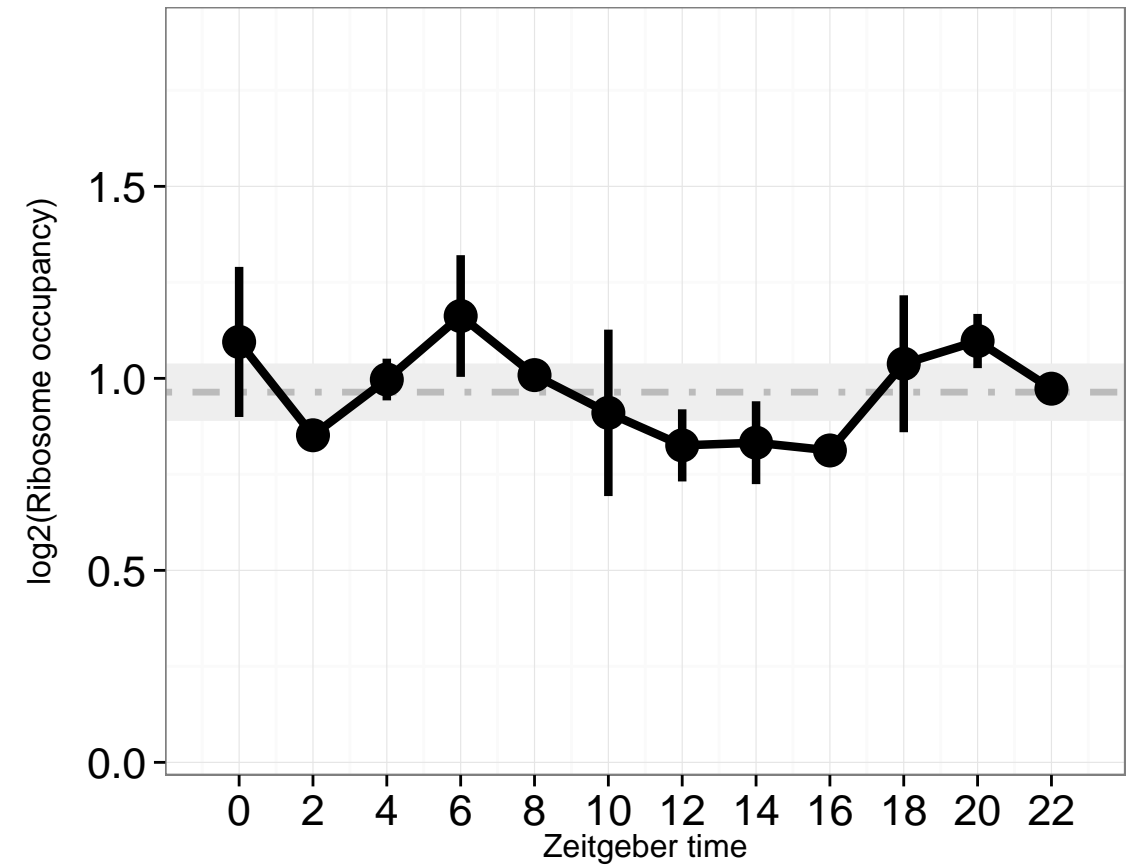

Supplement: Supplementary file 3095 [file 1]

# Mtfr1

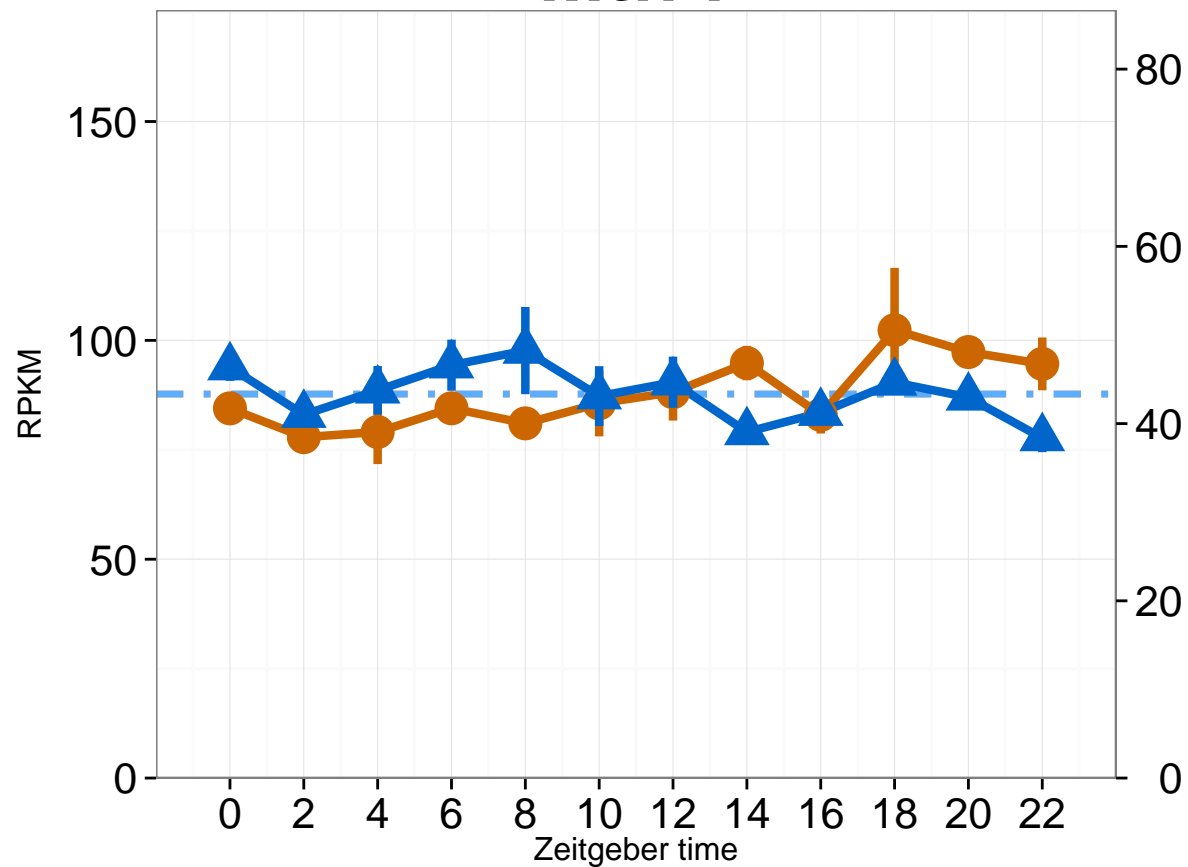

# Mtfr1

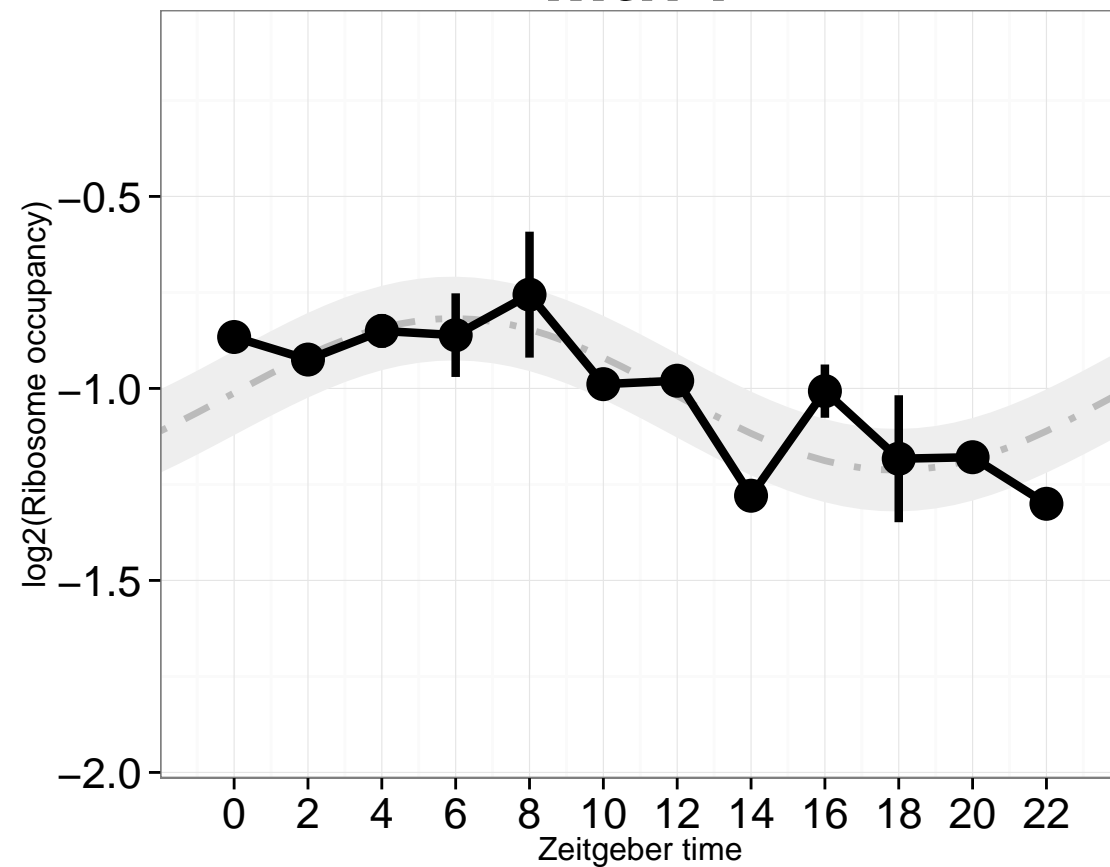

Supplement: Supplementary file 3096 [file 1]

# Traf5

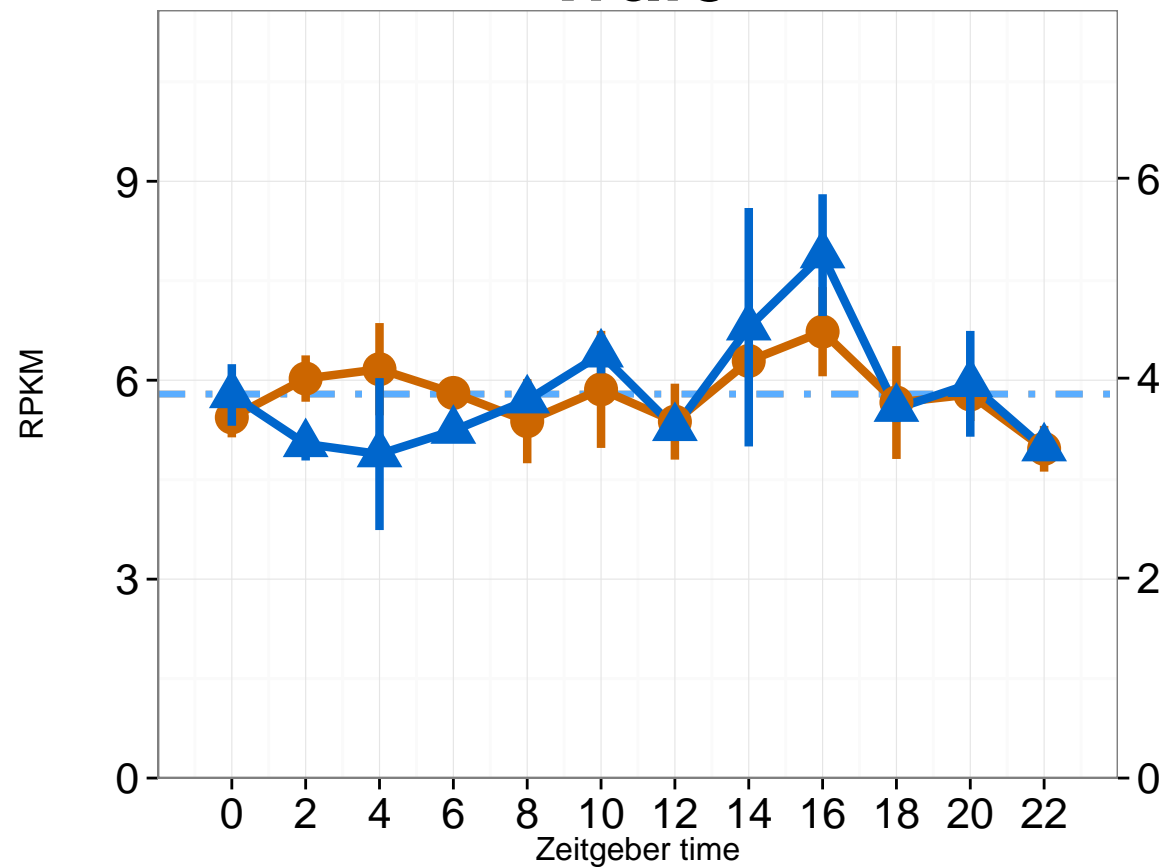

# Traf5

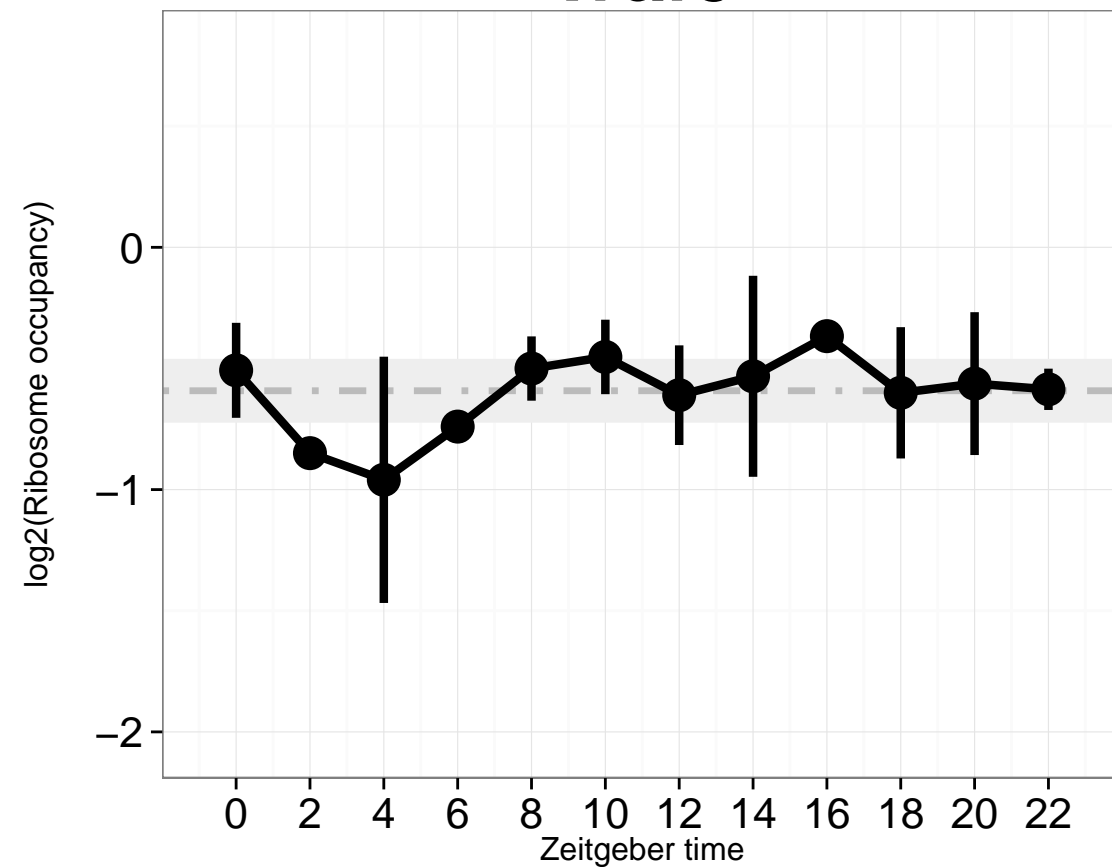

Supplement: Supplementary file 3097 [file 1]

## Suv420h2

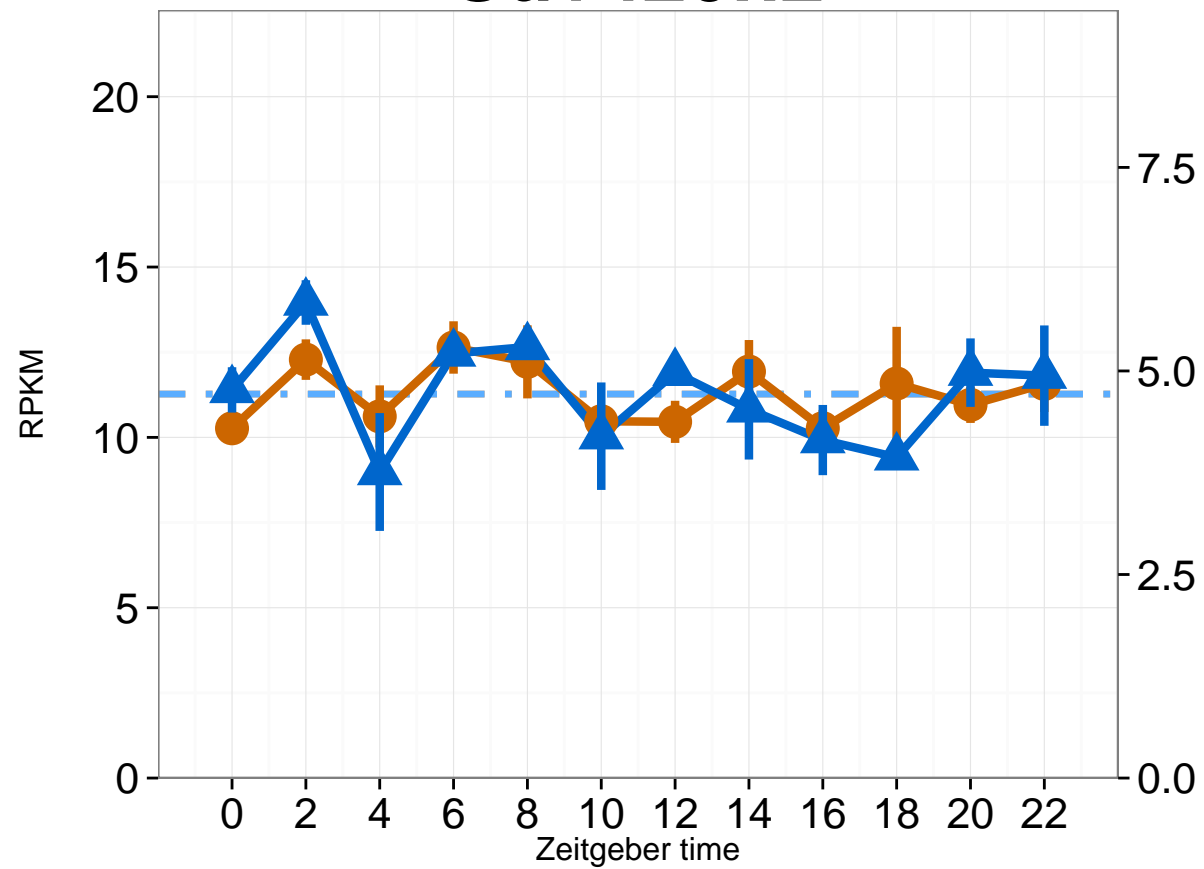

## Suv420h2

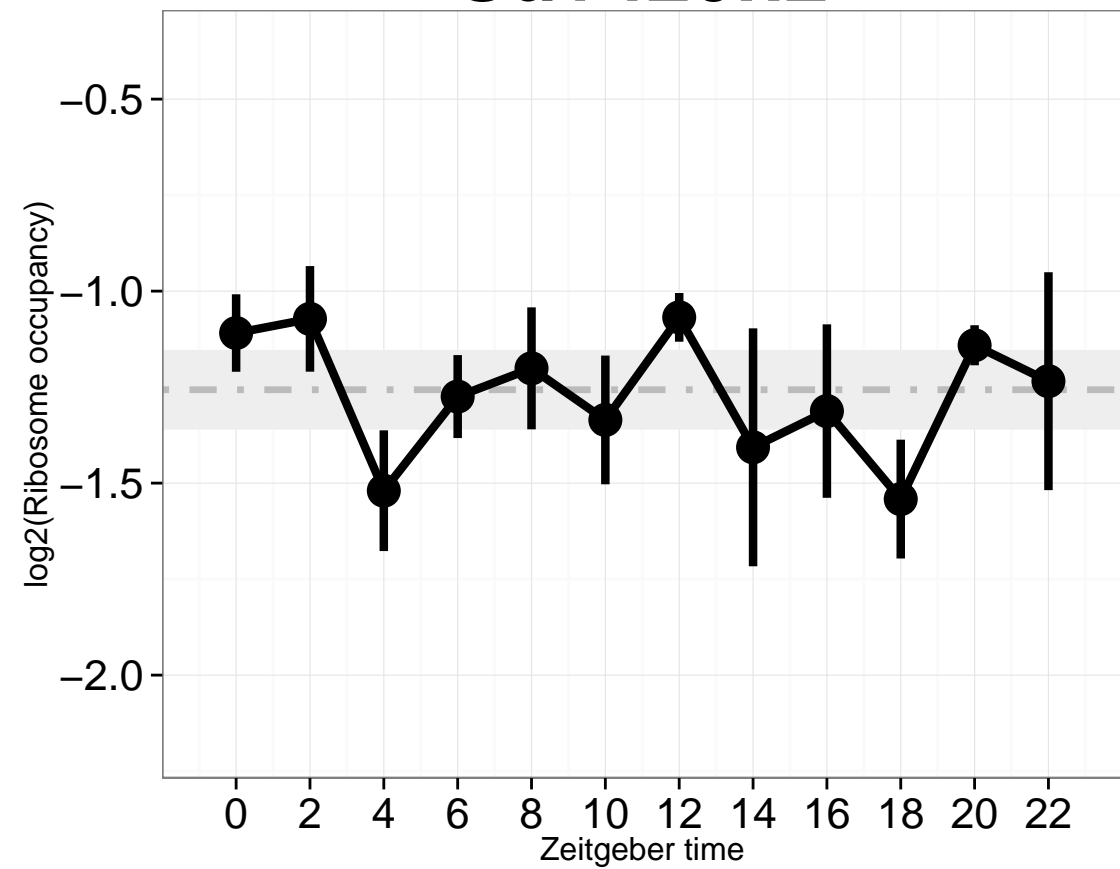

Supplement: Supplementary file 3098 [file 1]

## Thrsp

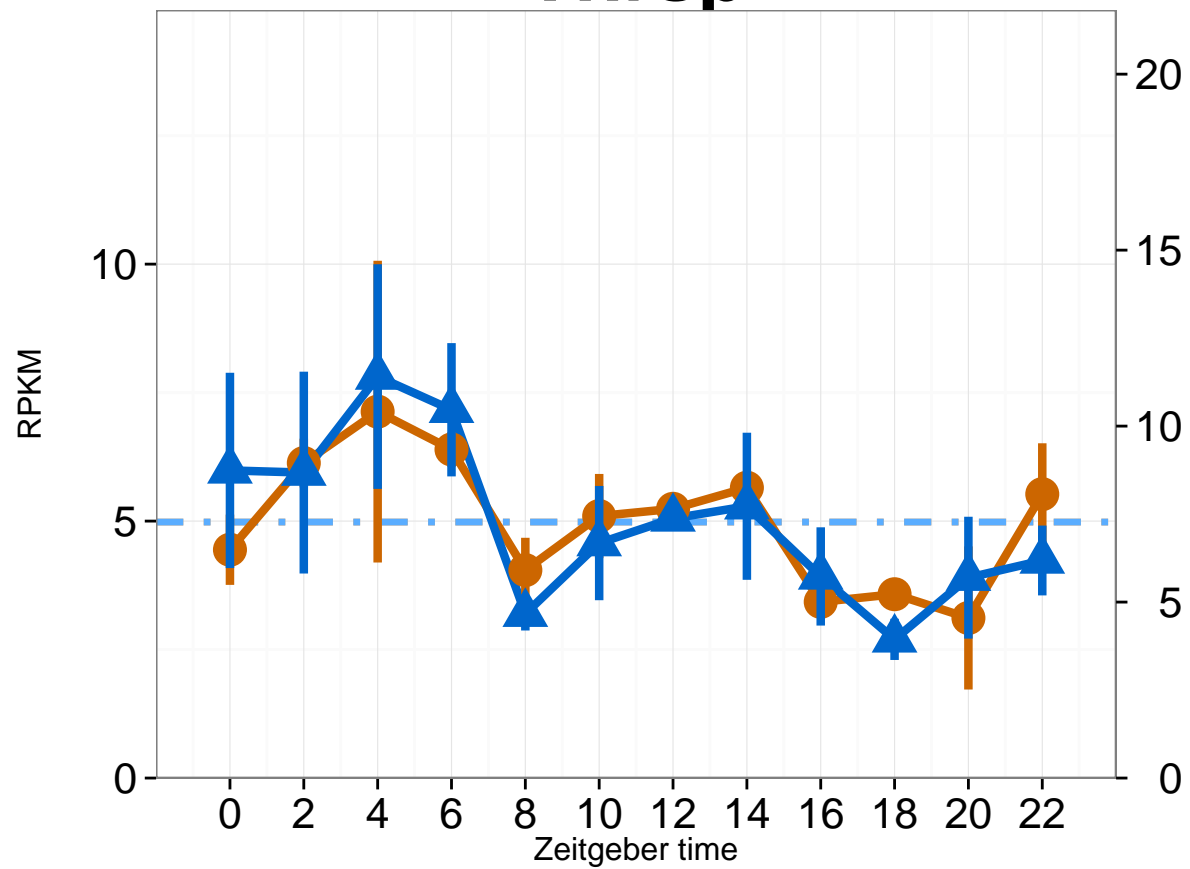

## Thrsp

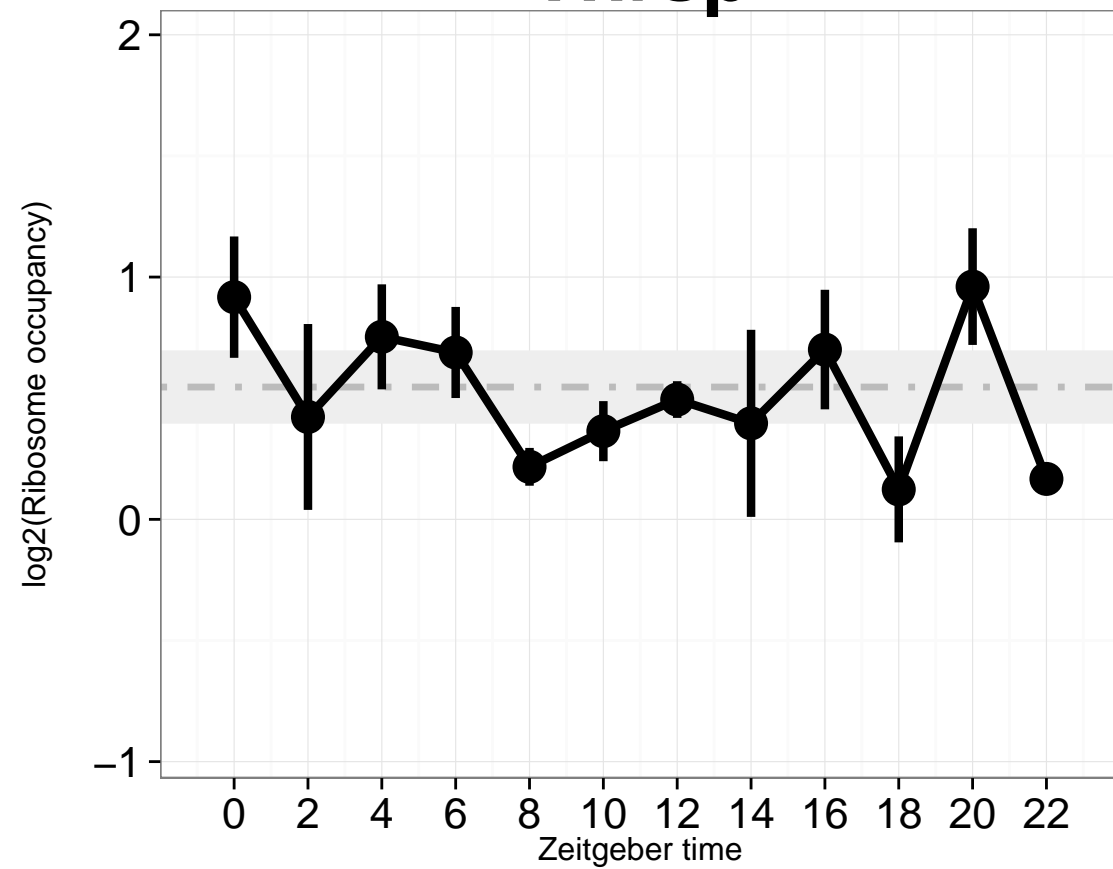

Supplement: Supplementary file 3099 [file 1]

## Nufip2

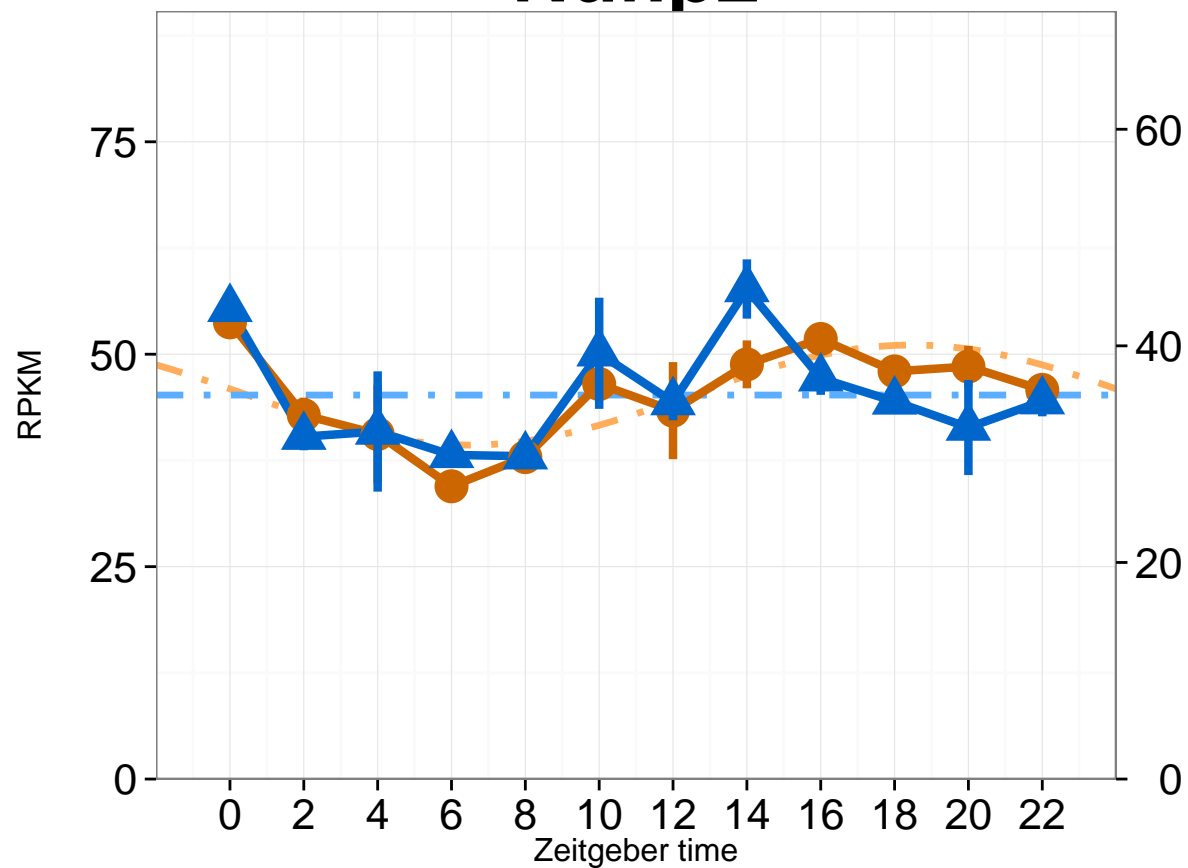

## Nufip2

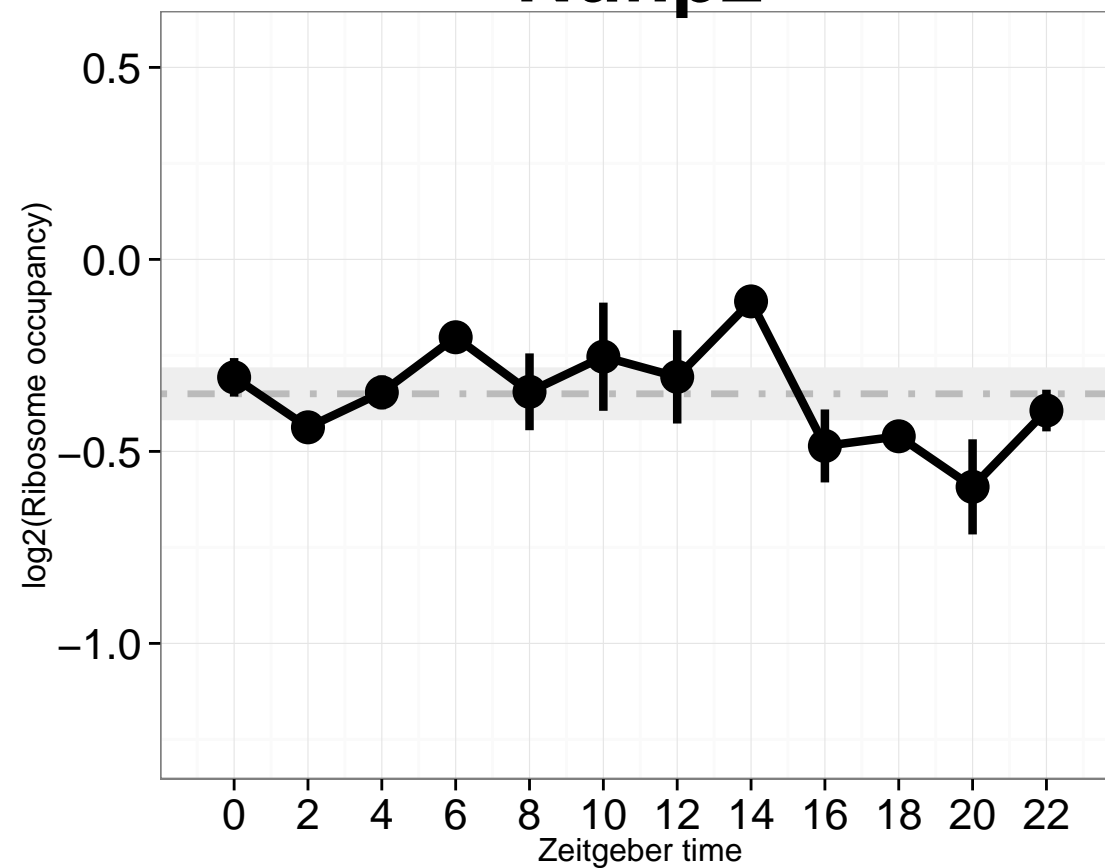

Supplement: Supplementary file 3100 [file 1]

## Dnaja3

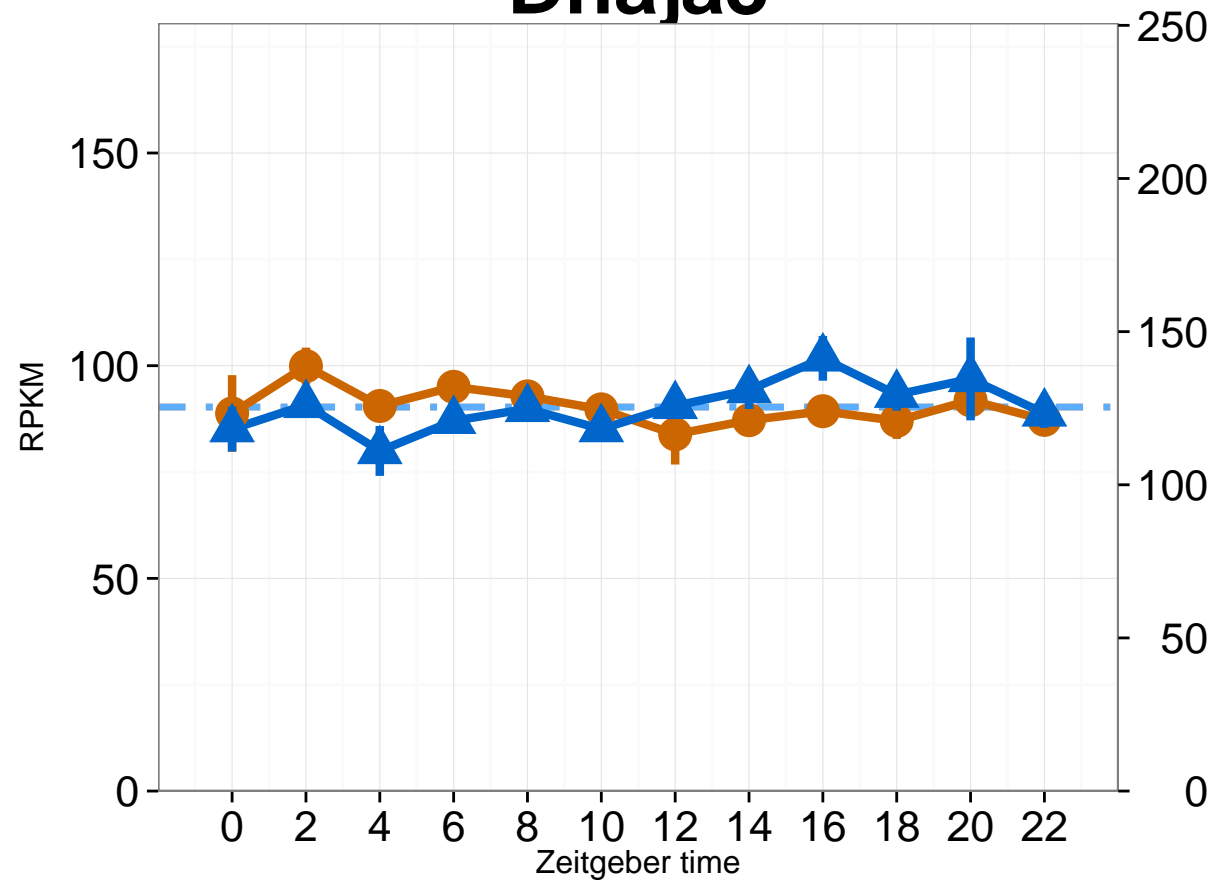

## Dnaja3

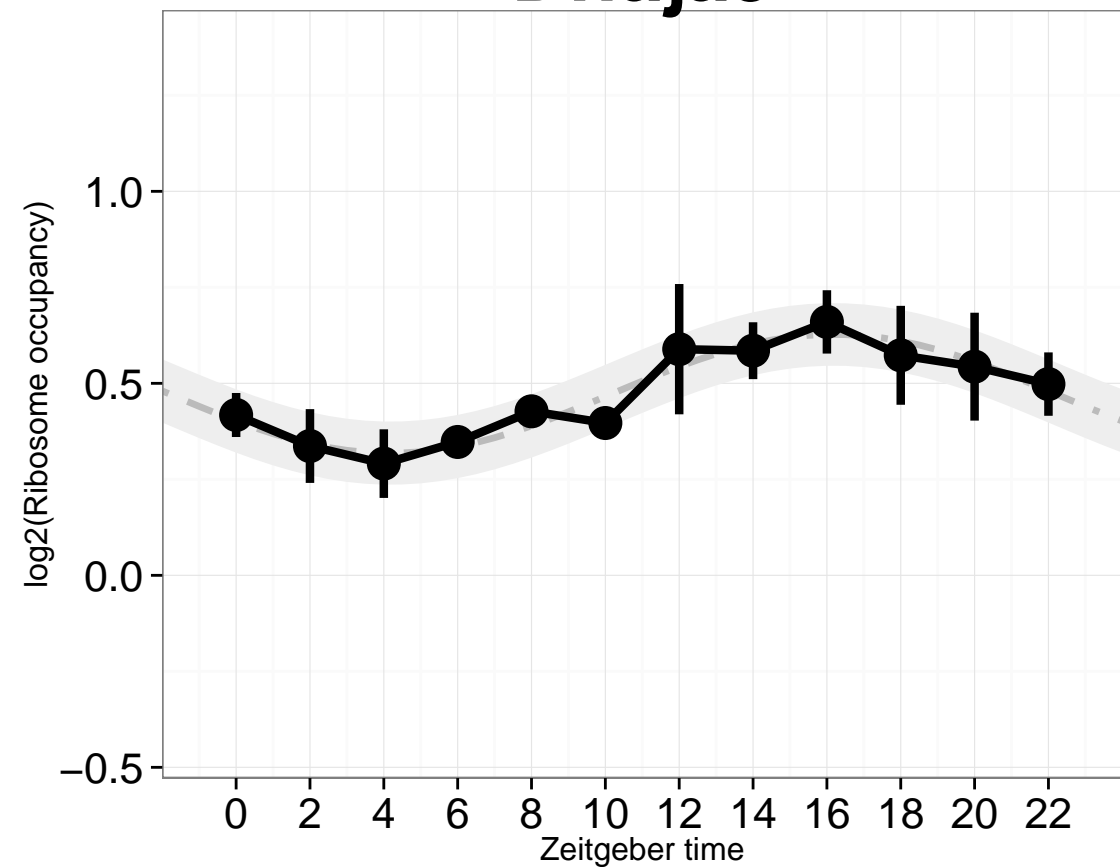

Supplement: Supplementary file 3101 [file 1]

## Zmiz2

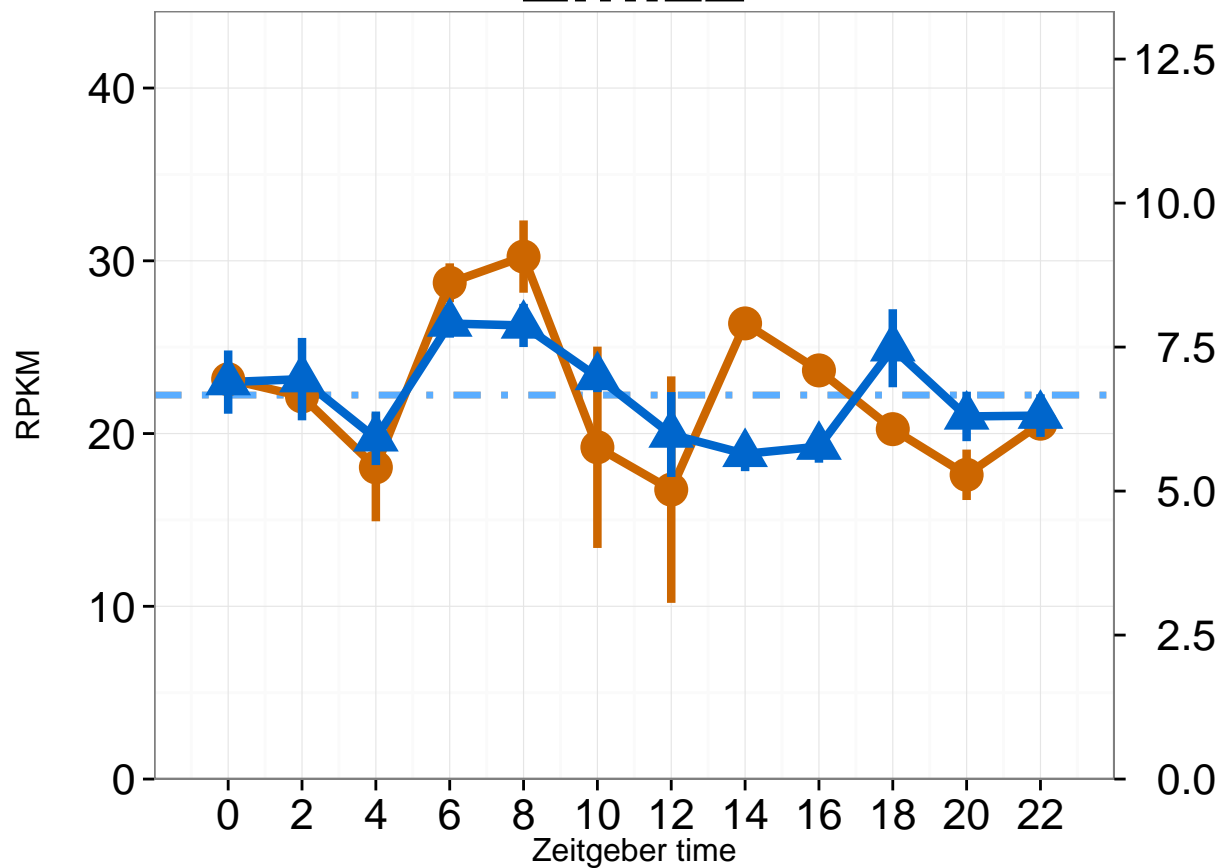

## Zmiz2

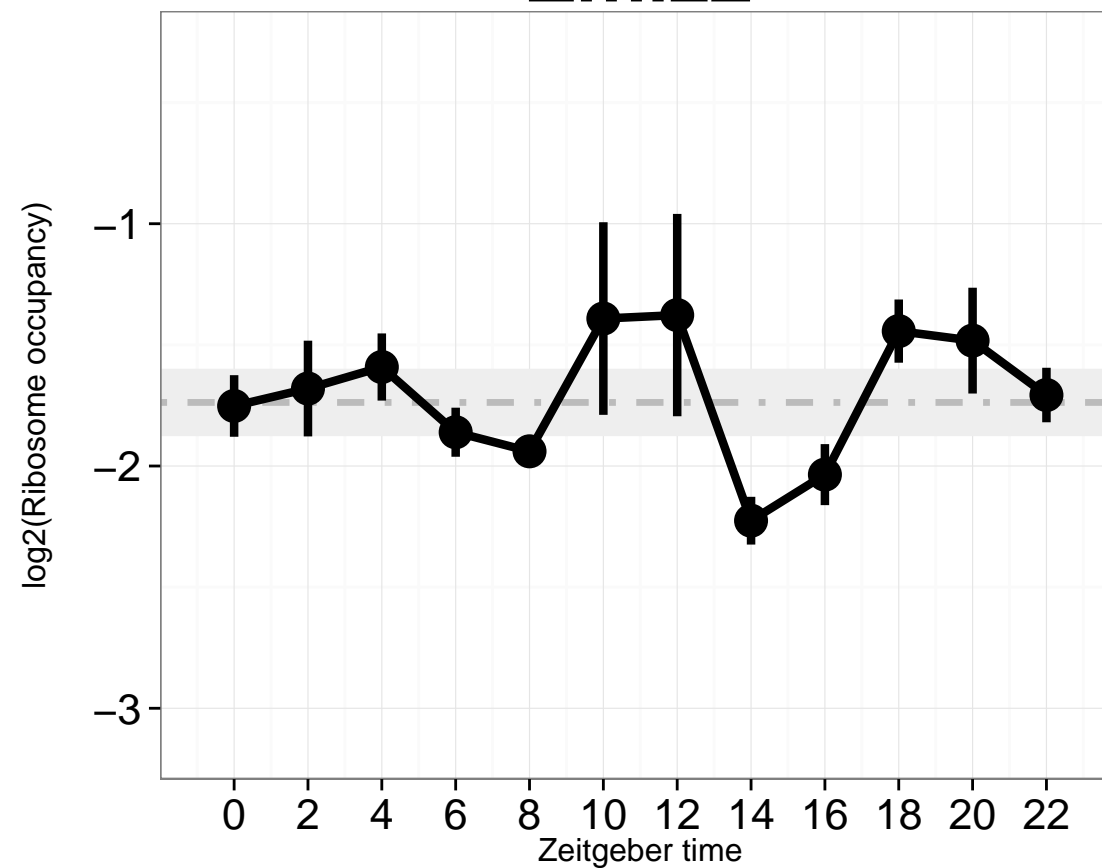

Supplement: Supplementary file 3102 [file 1]

# Stau1

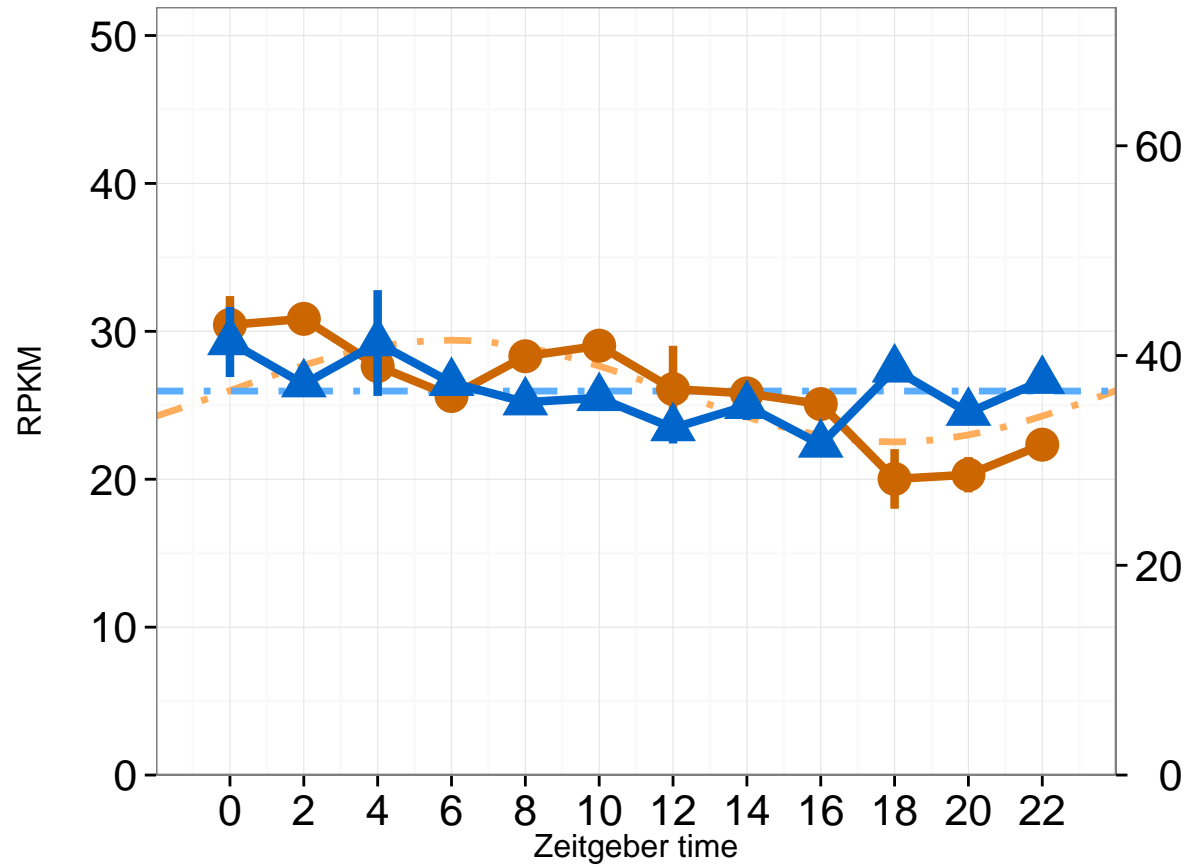

# Stau1

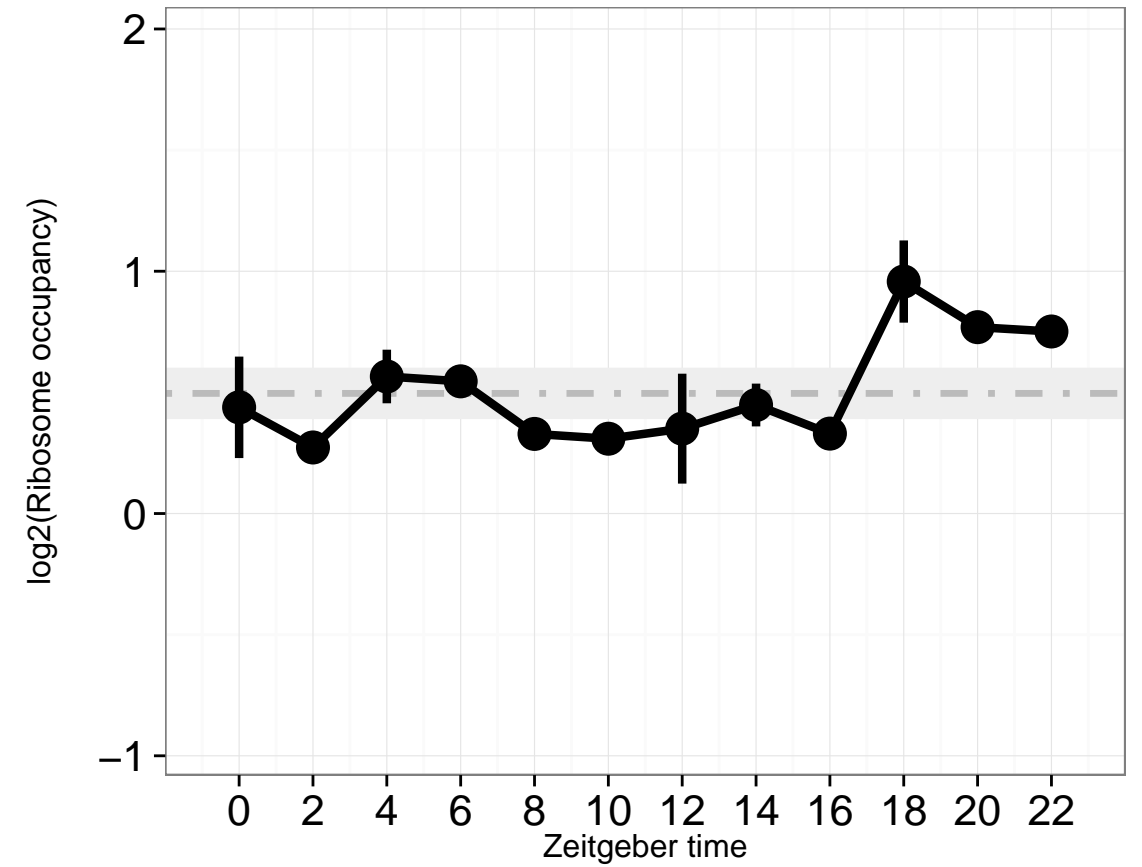

Supplement: Supplementary file 3103 [file 1]

## Rhoc

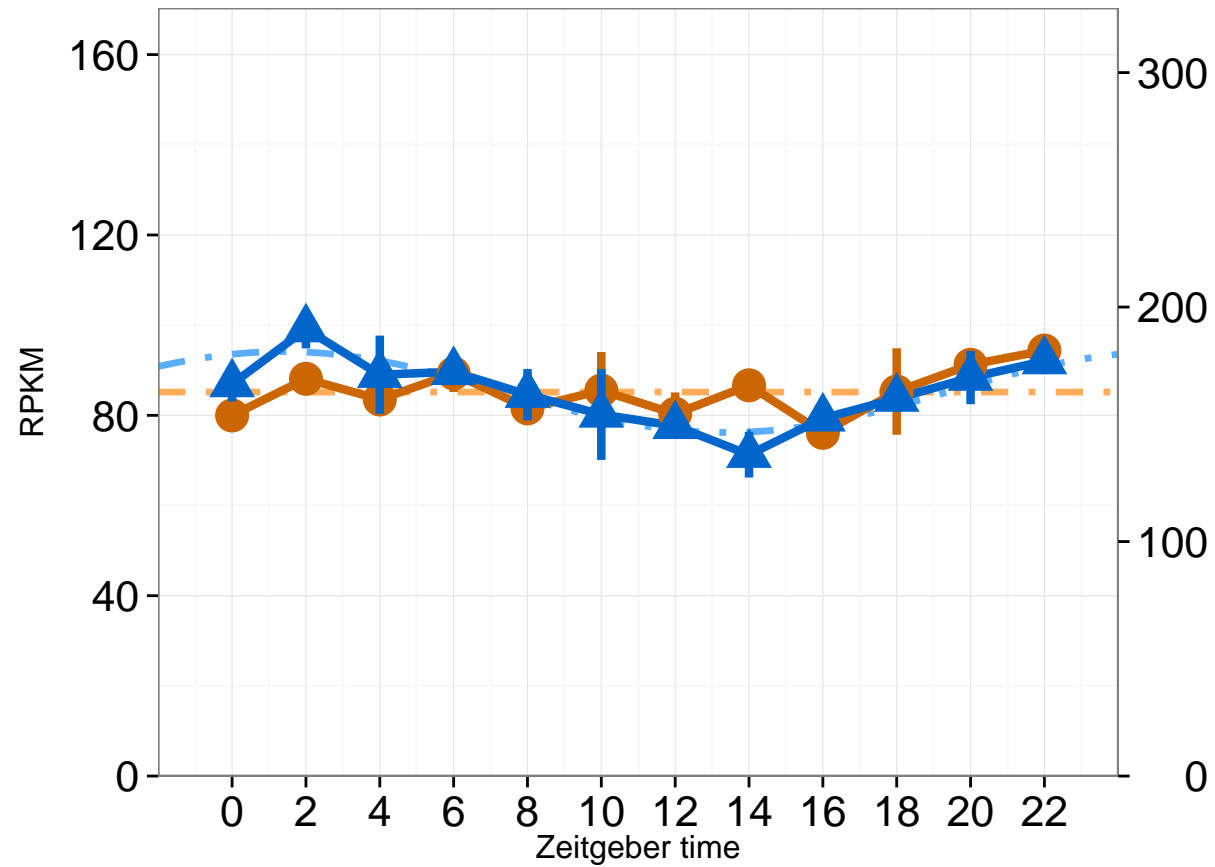

## Rhoc

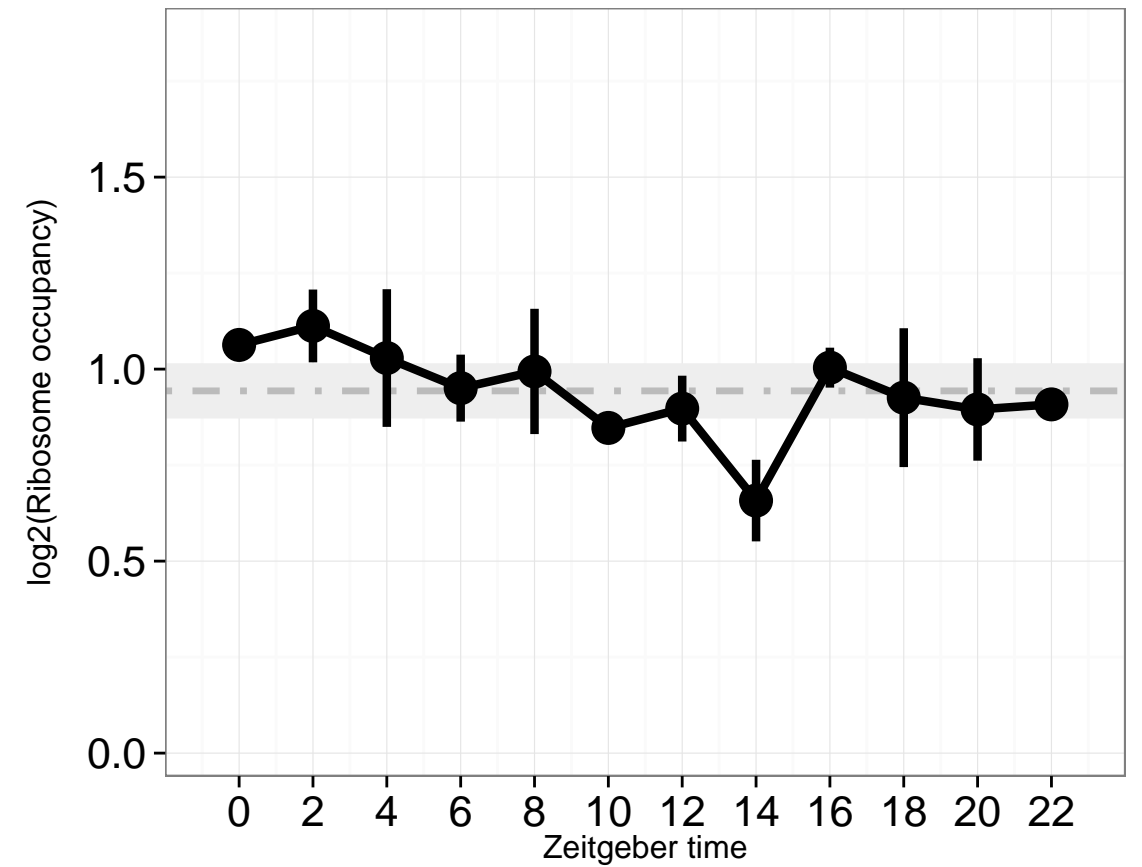

Supplement: Supplementary file 3104 [file 1]

# Slc25a4

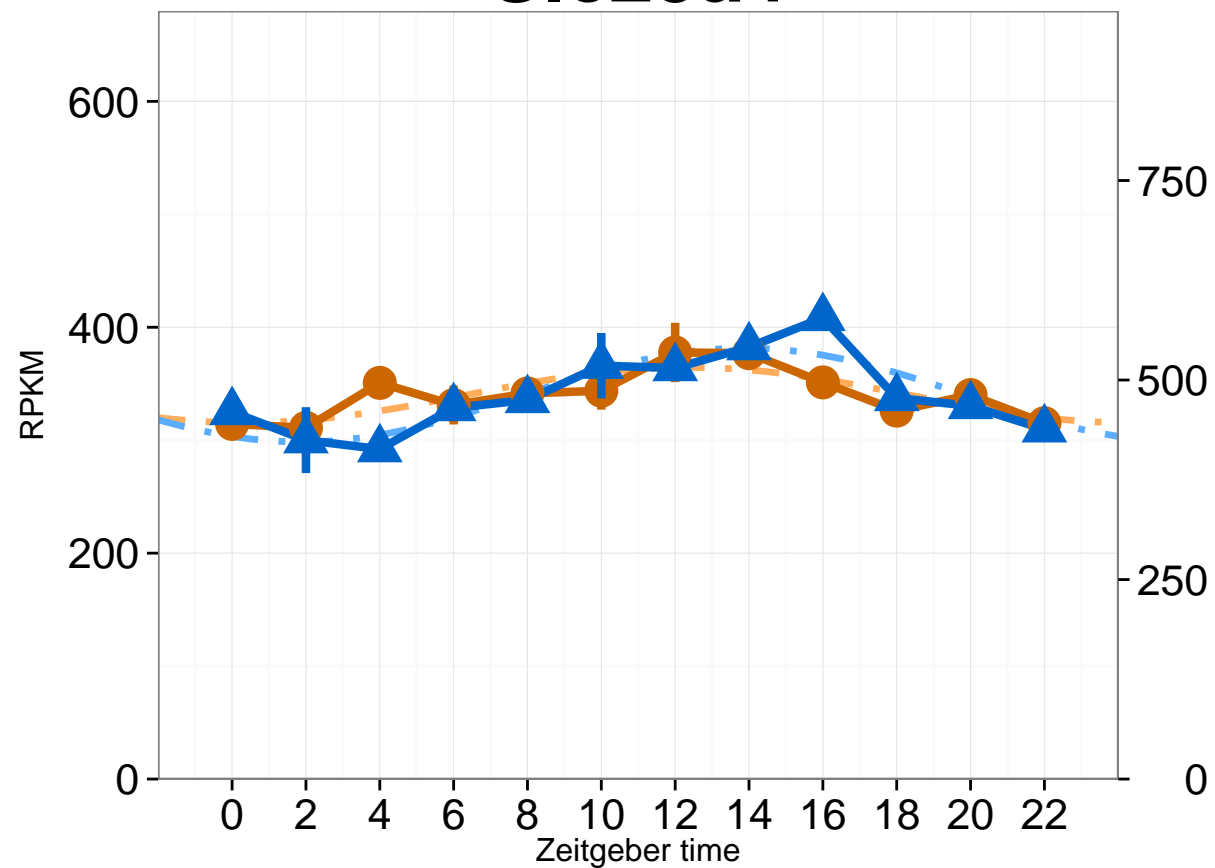

# Slc25a4

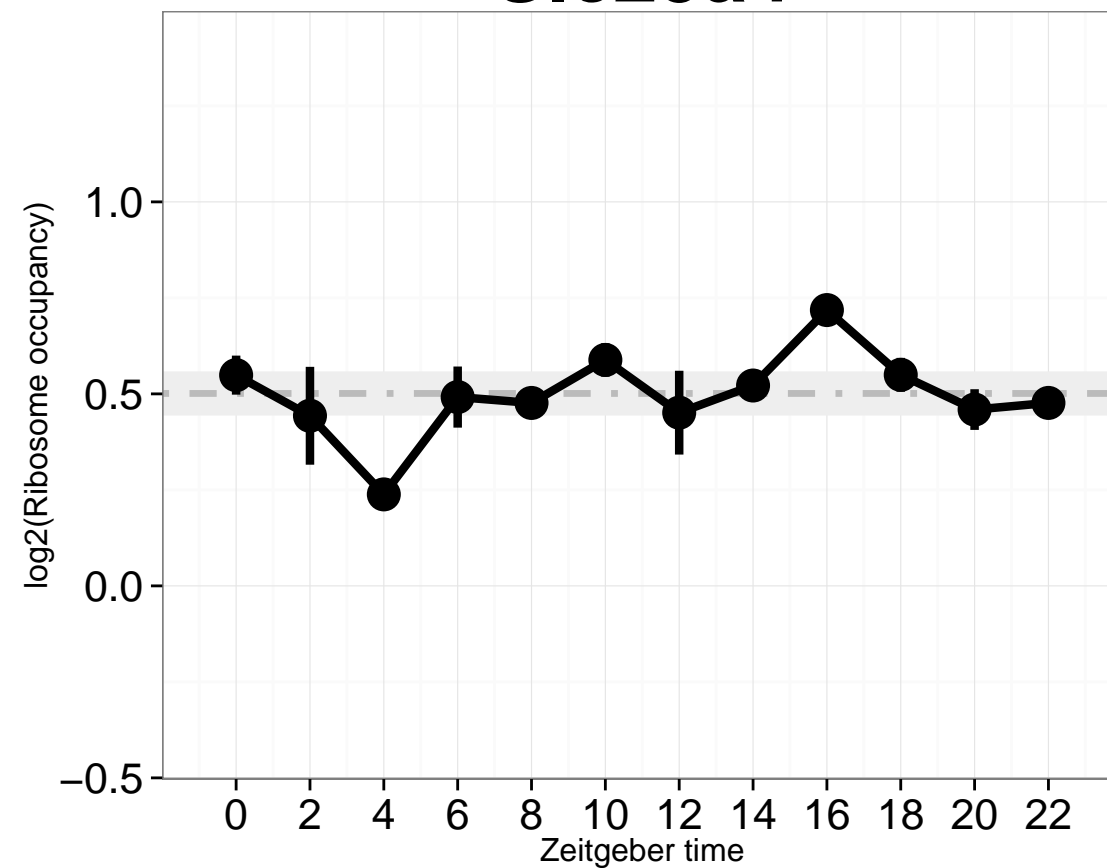

Supplement: Supplementary file 3105 [file 1]

# Prpf18

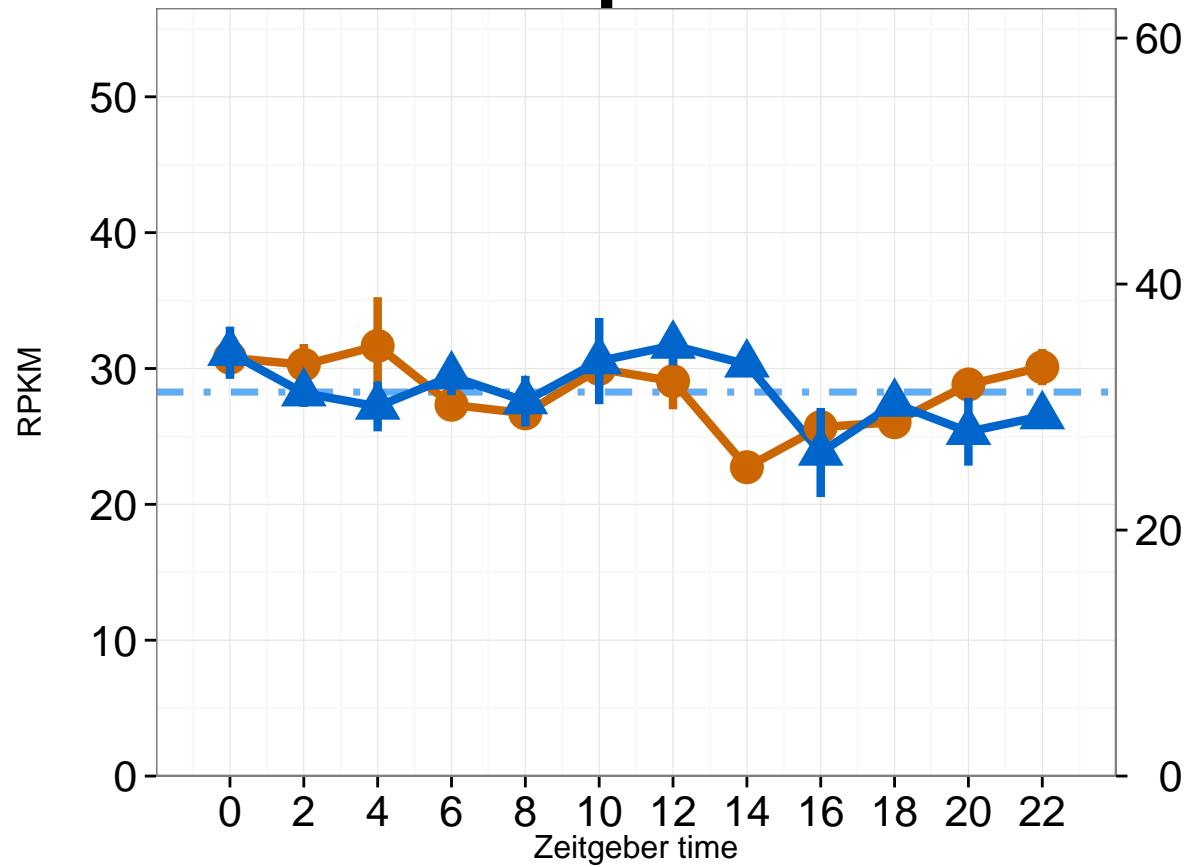

# Prpf18

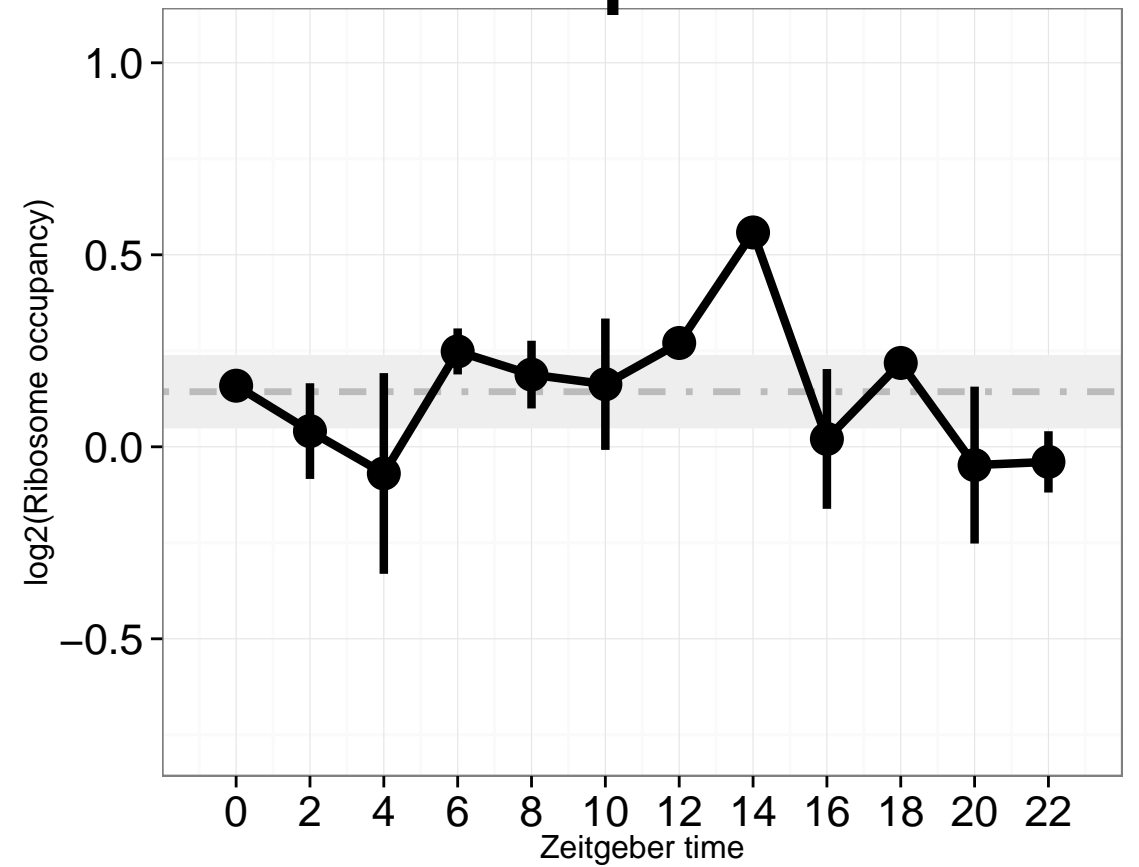

Supplement: Supplementary file 3106 [file 1]

# Atp2a2

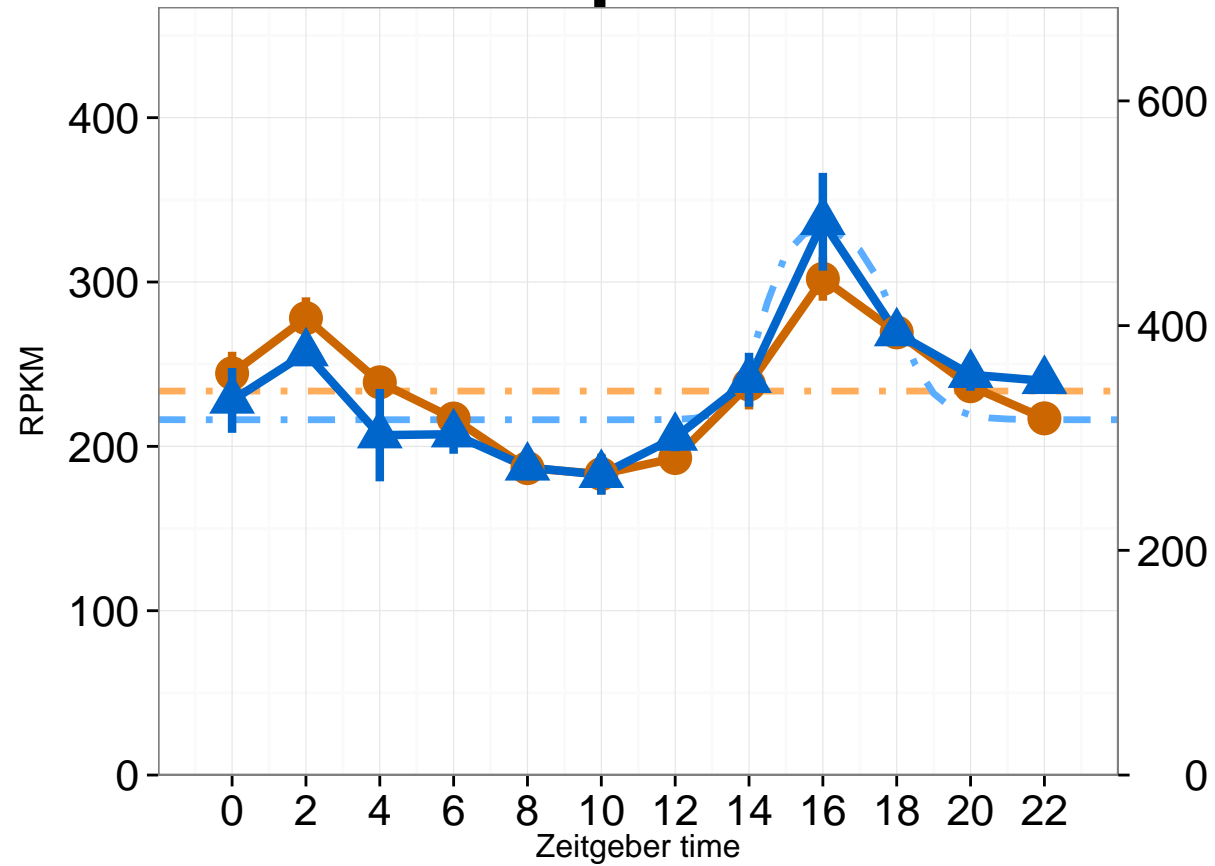

# Atp2a2

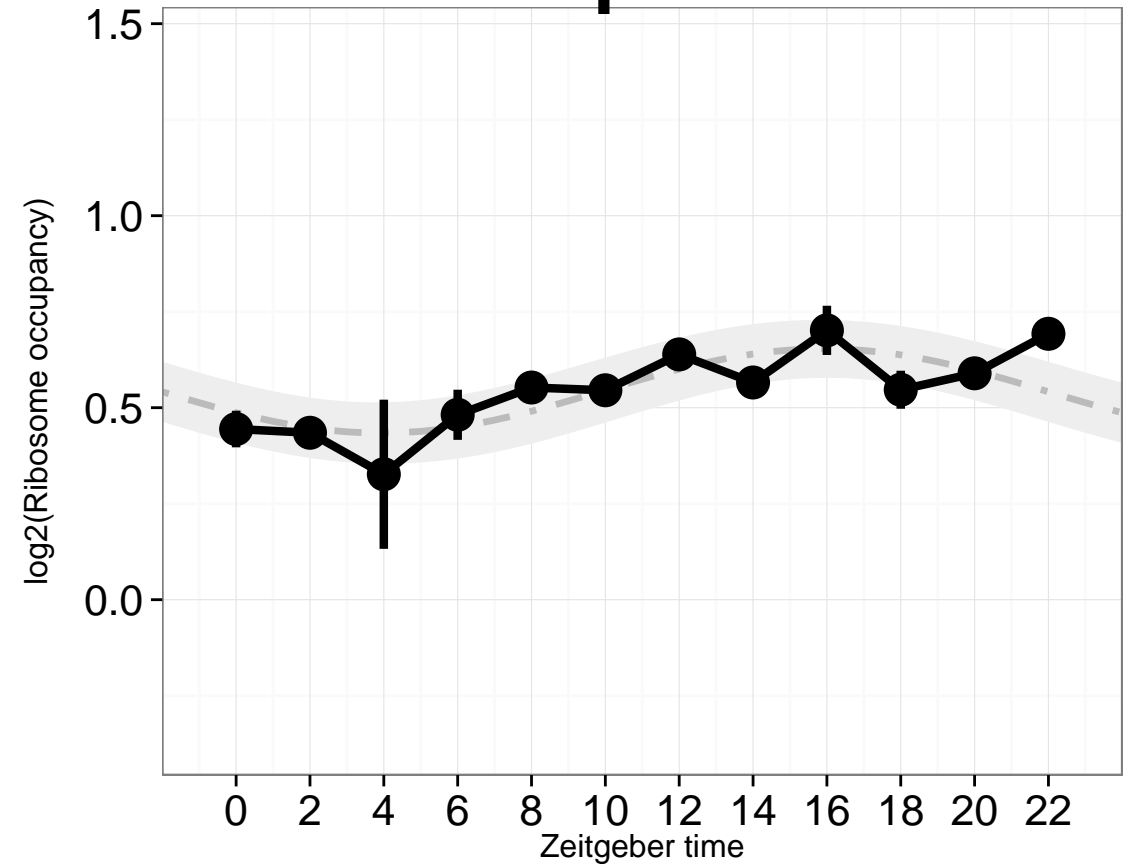

Supplement: Supplementary file 3107 [file 1]

# Tpmt

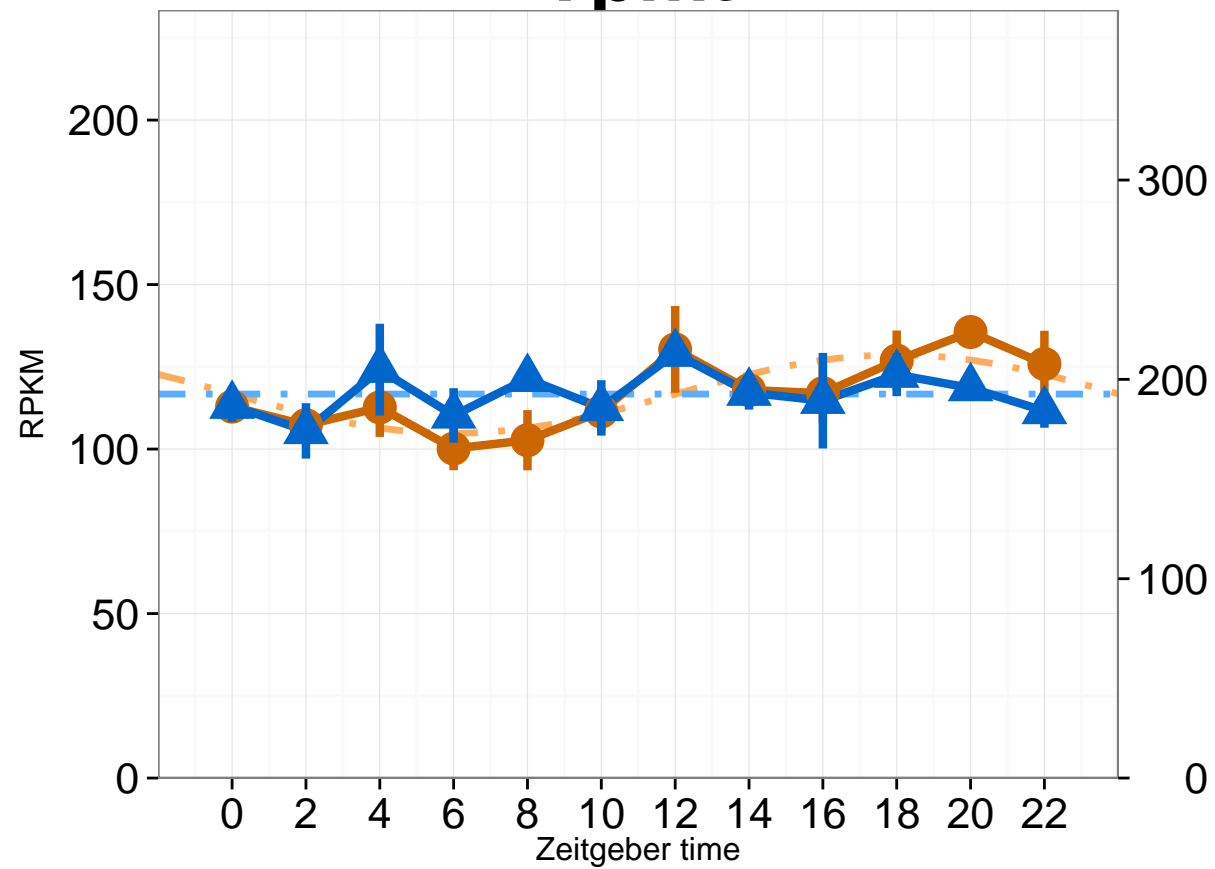

# Tpmt

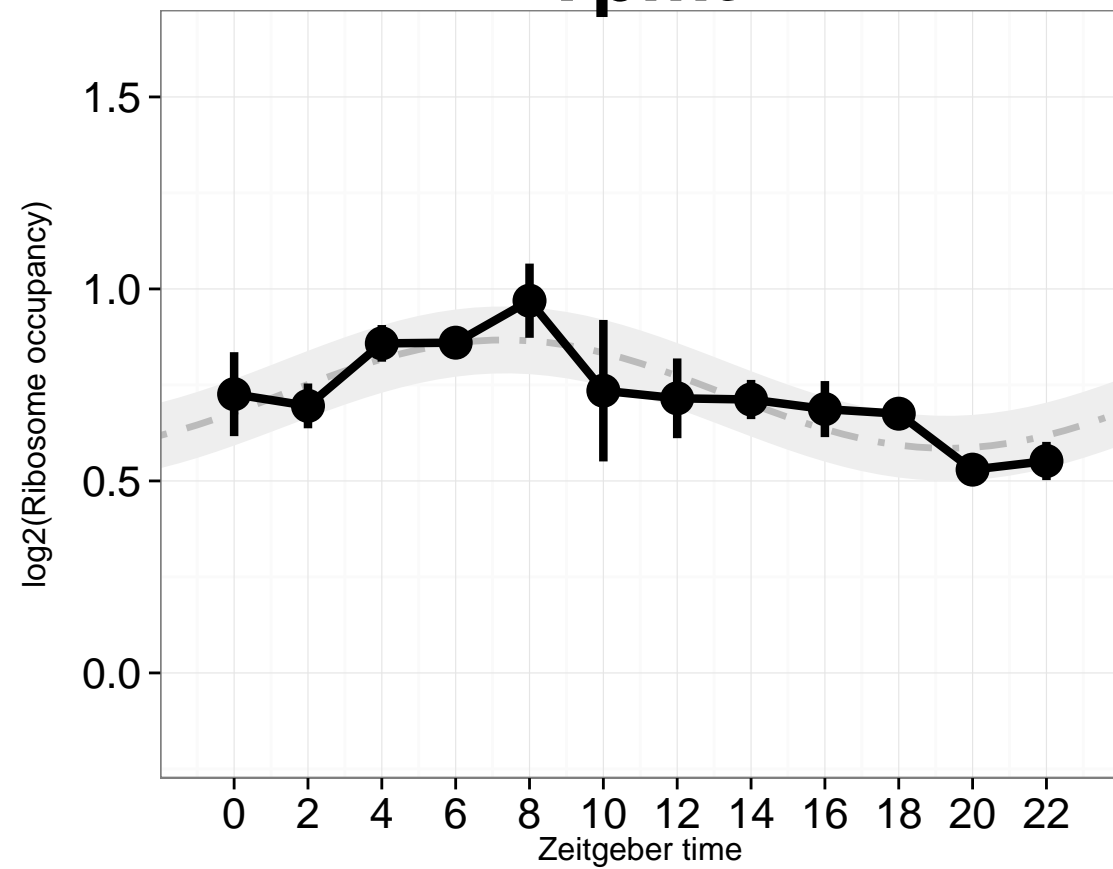

Supplement: Supplementary file 3108 [file 1]

## Ogn

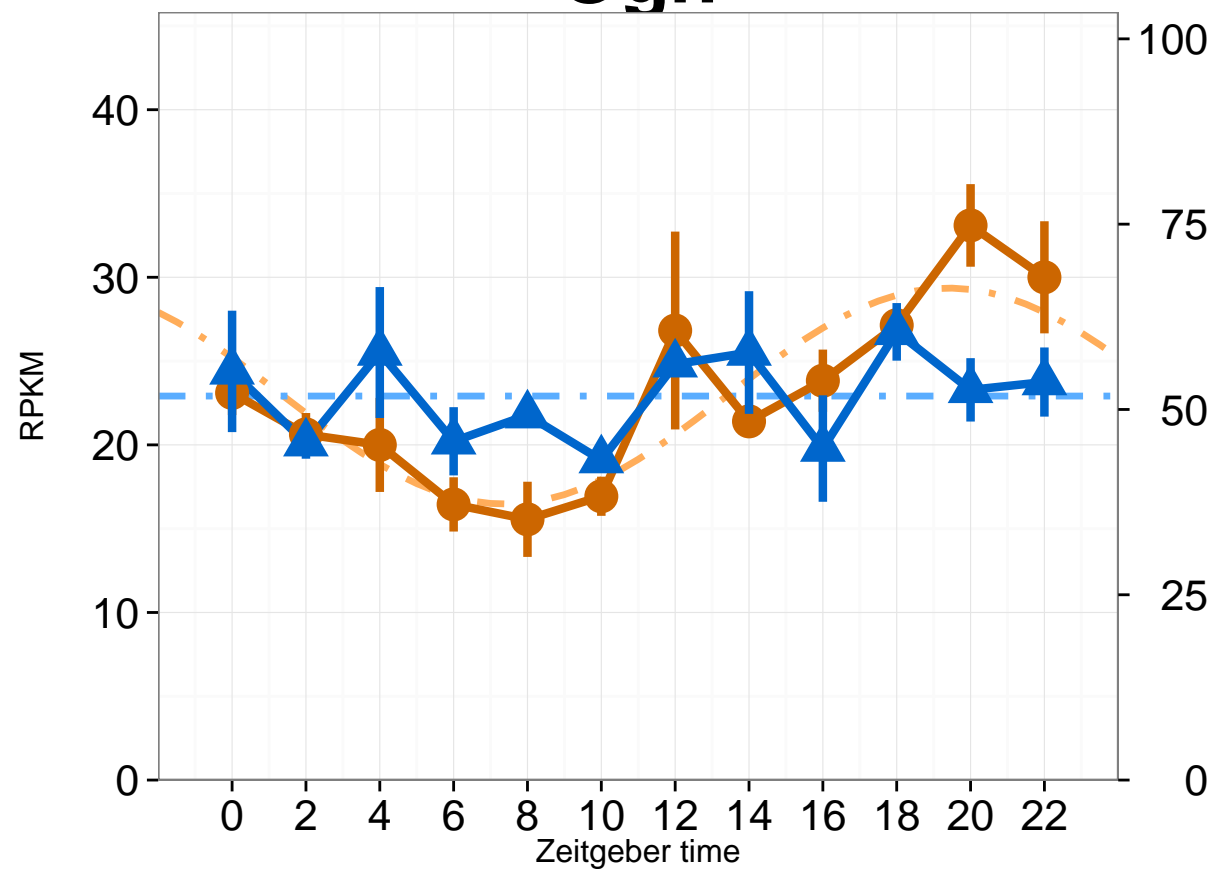

## Ogn

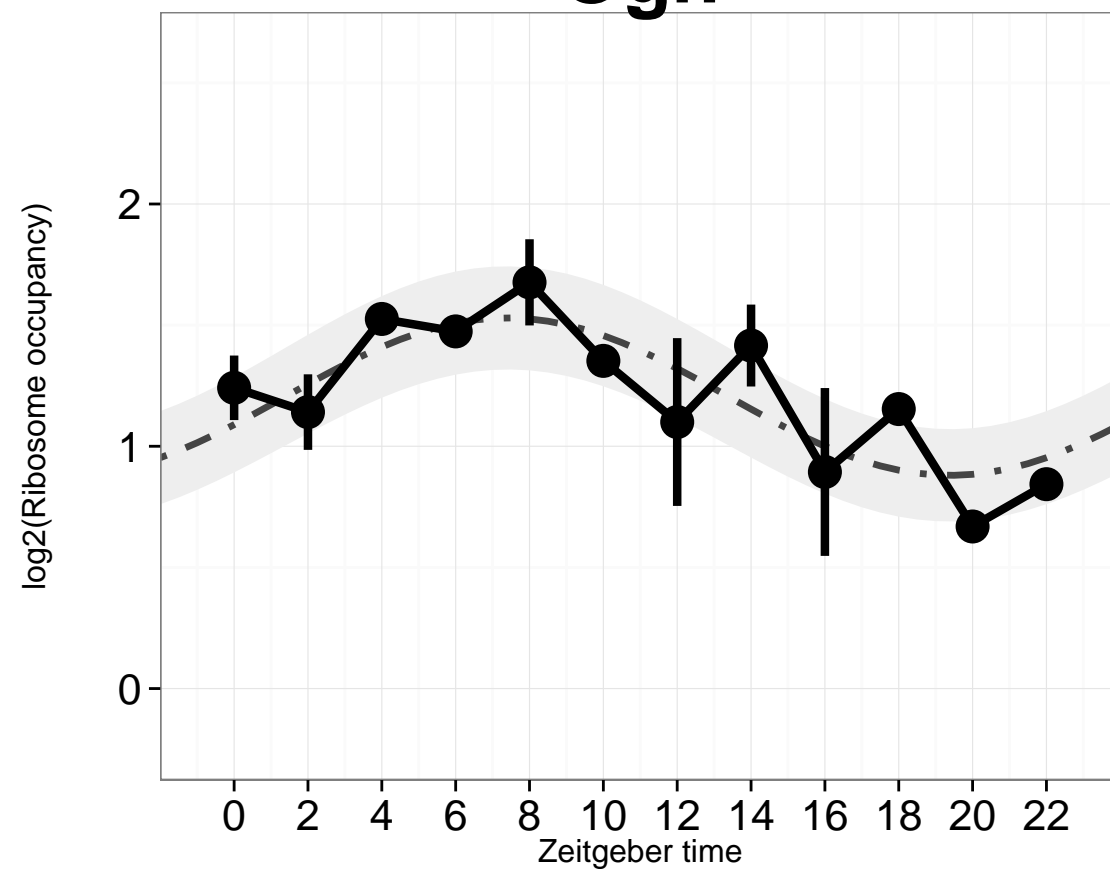

Supplement: Supplementary file 3109 [file 1]

## Stk24

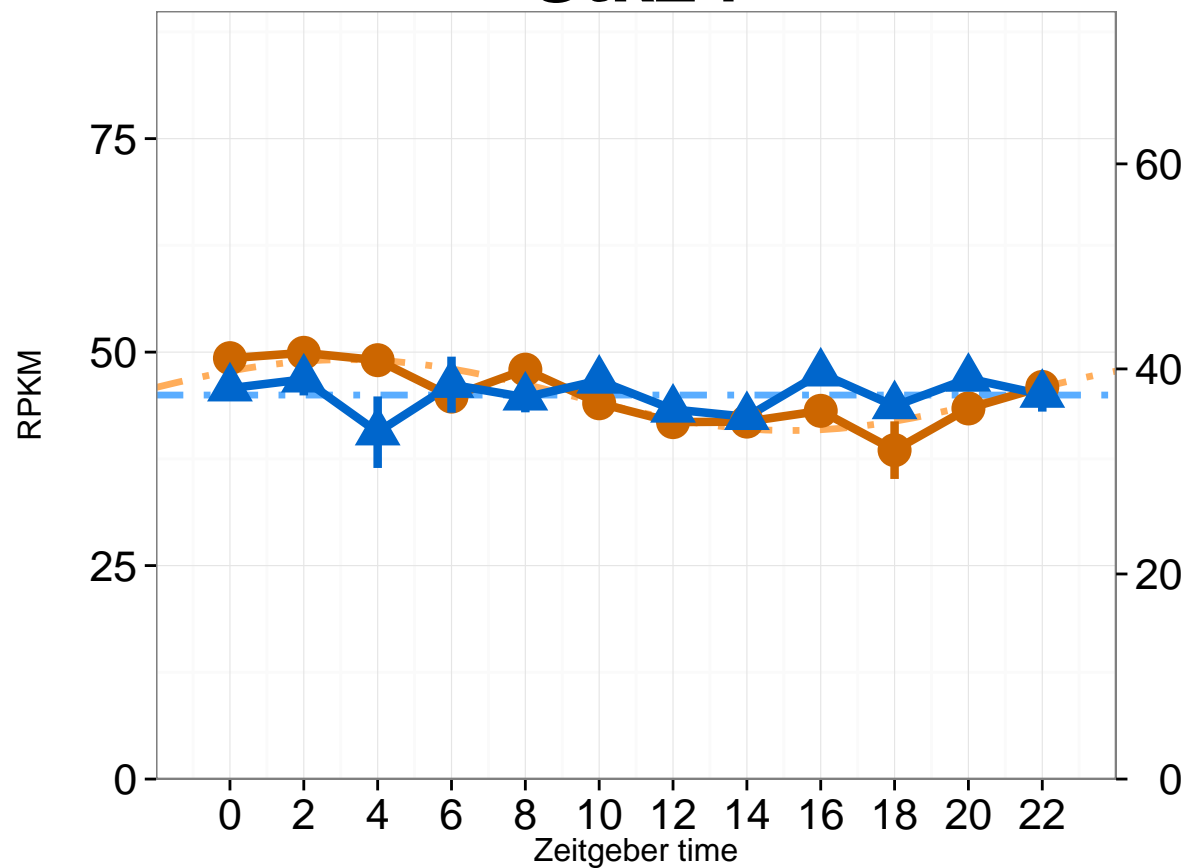

## Stk24

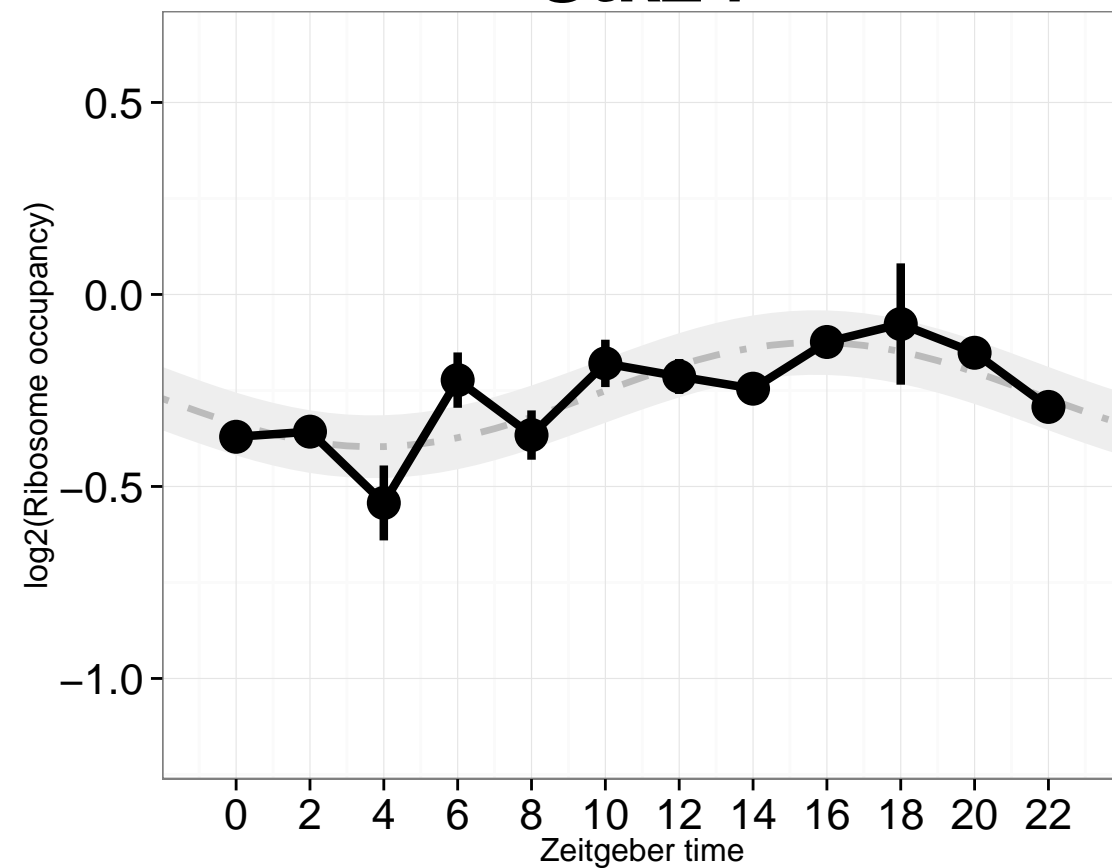

Supplement: Supplementary file 3110 [file 1]
