# Supplementary material (part 32 of 133)
Source: publisher figshare collection journal article supplement (https://springernature.figshare.com/articles/dataset/_/4903193)

## Zdhhc21

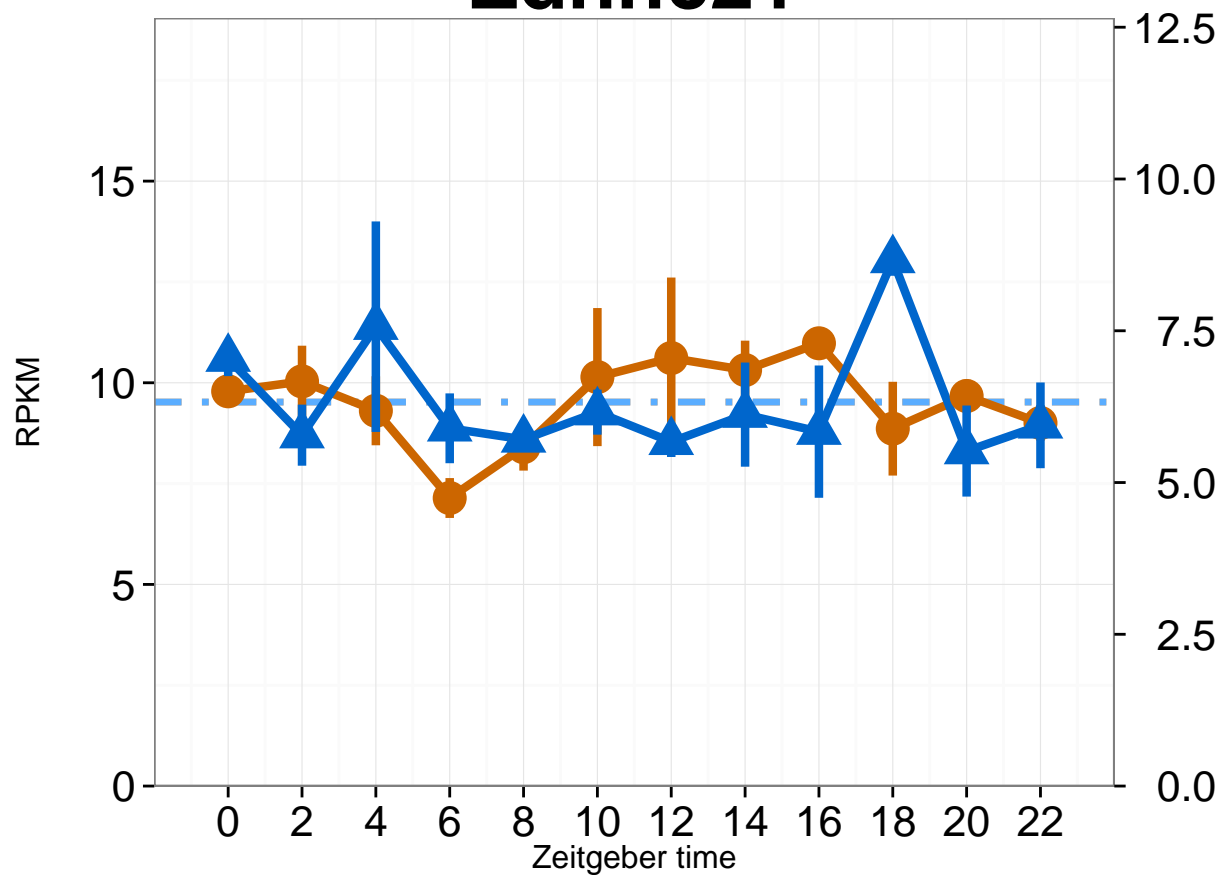

## Zdhhc21

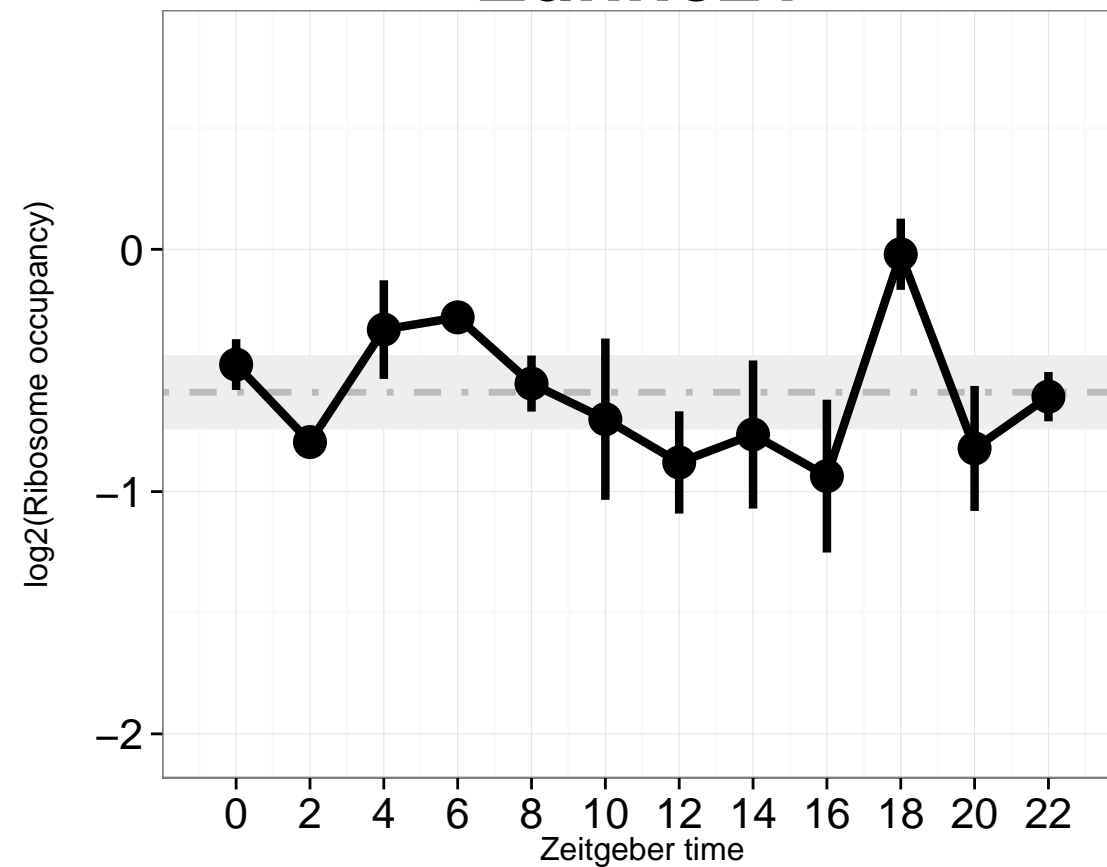

Supplement: Supplementary file 3111 [file 1]

## Mcur1

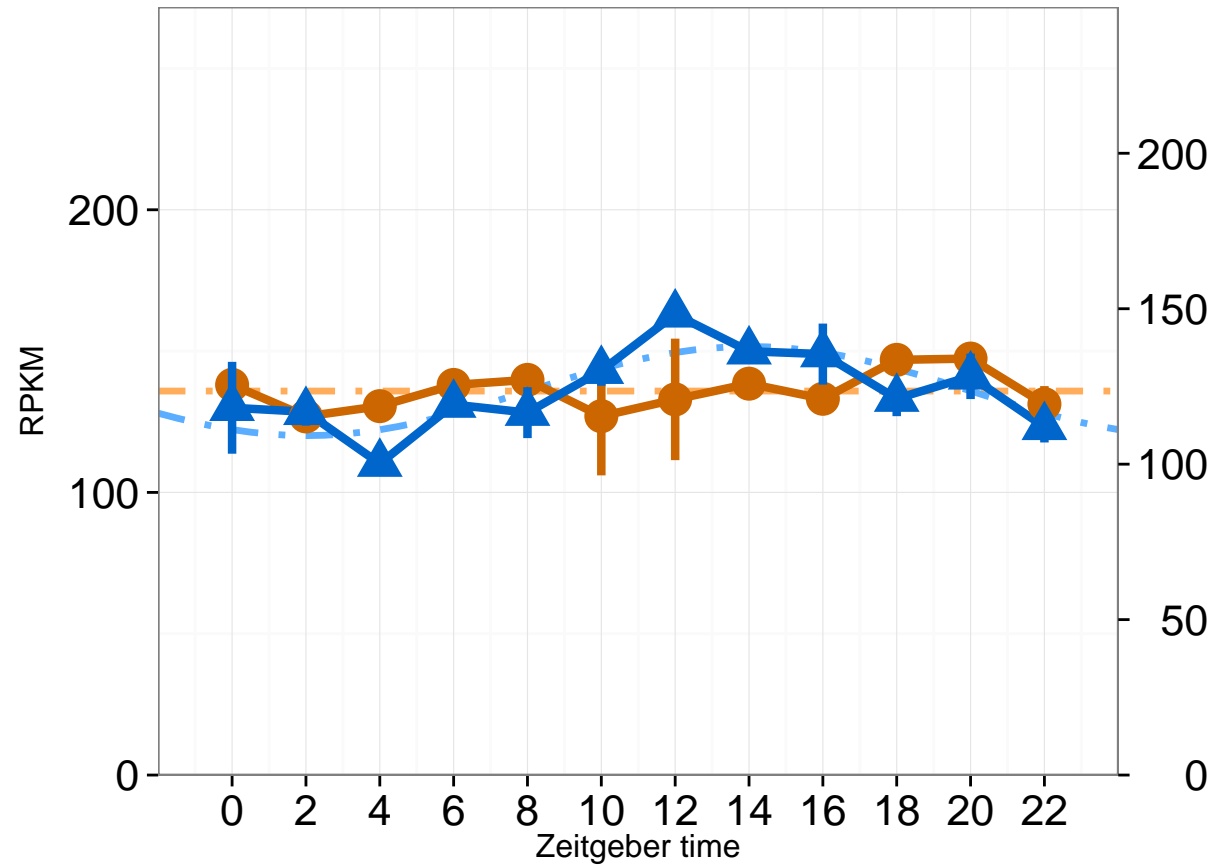

## Mcur1

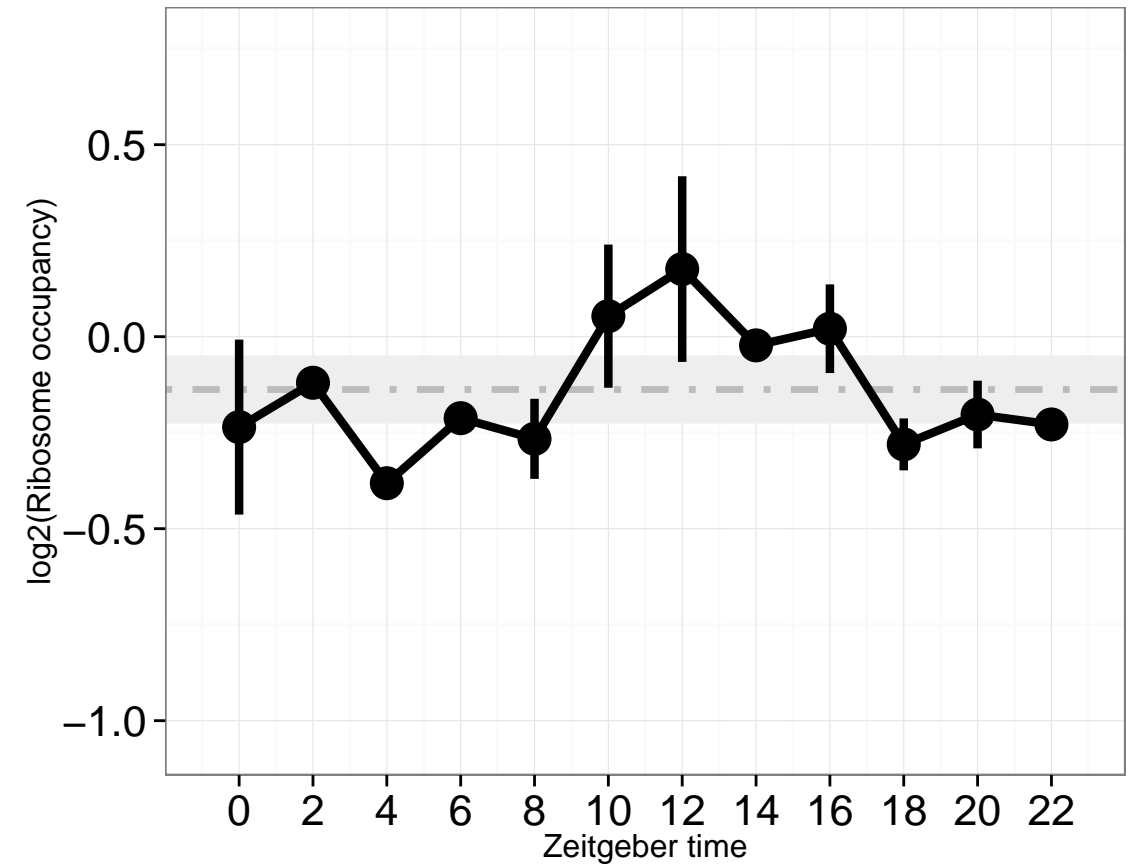

Supplement: Supplementary file 3112 [file 1]

## Usp18

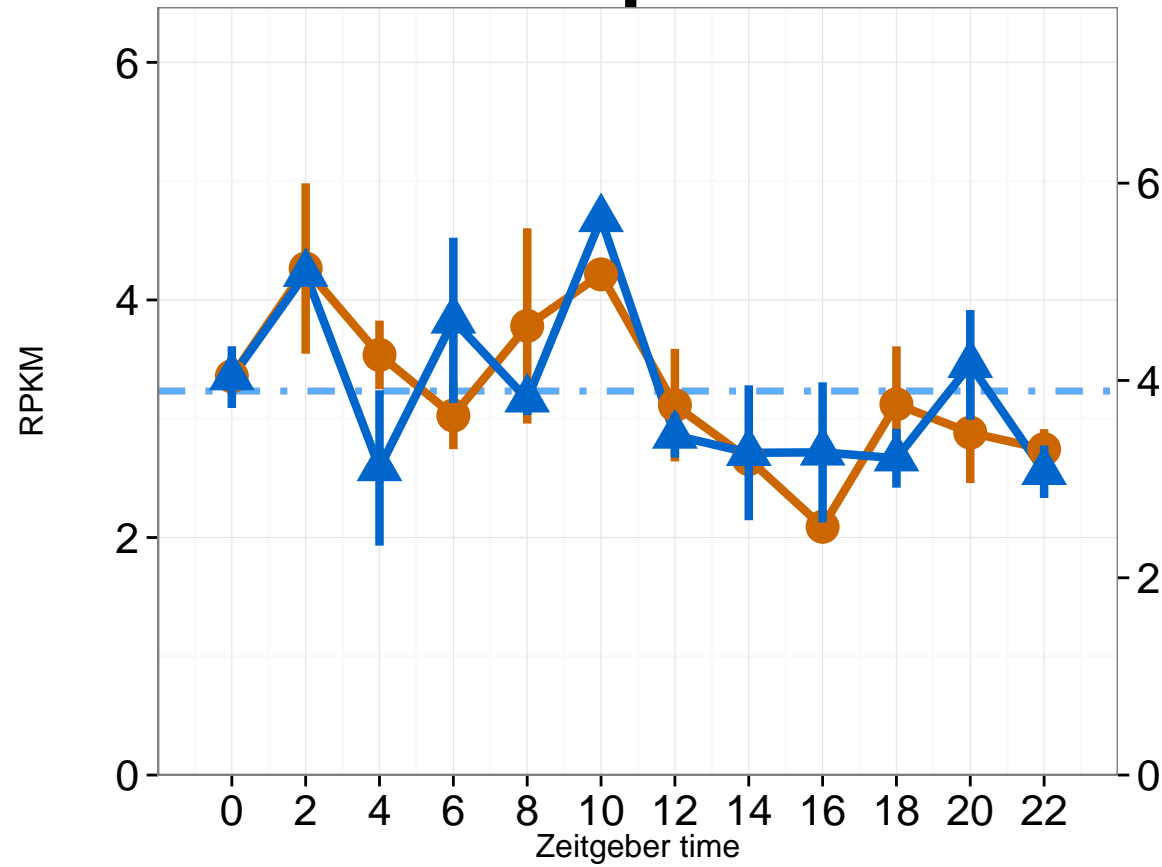

## Usp18

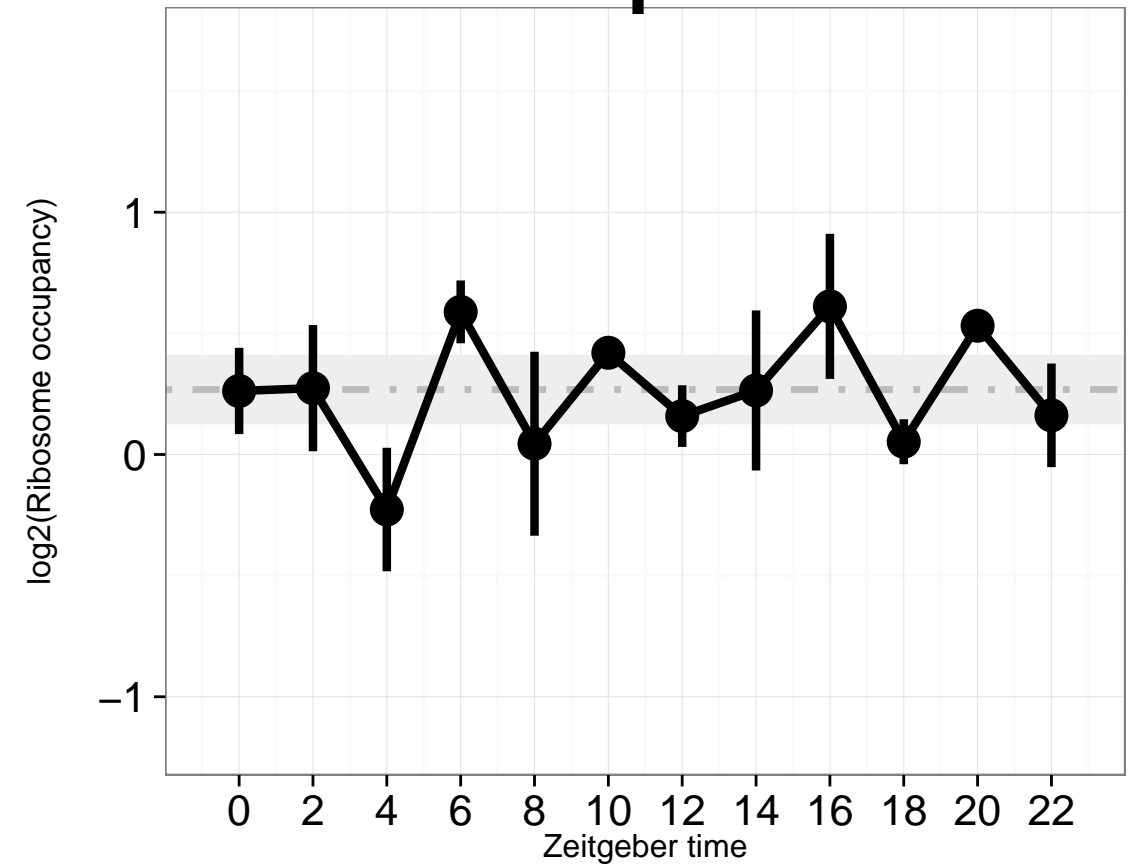

Supplement: Supplementary file 3113 [file 1]

## Fan1

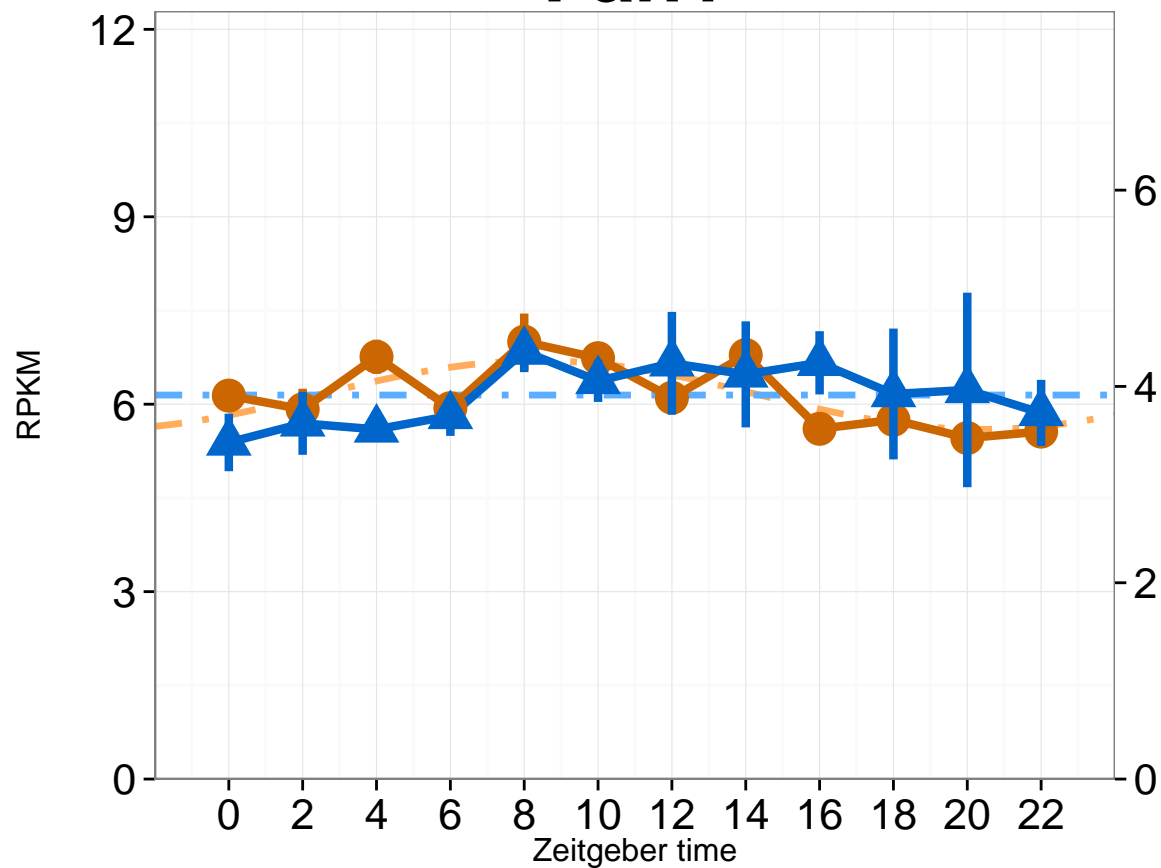

## Fan1

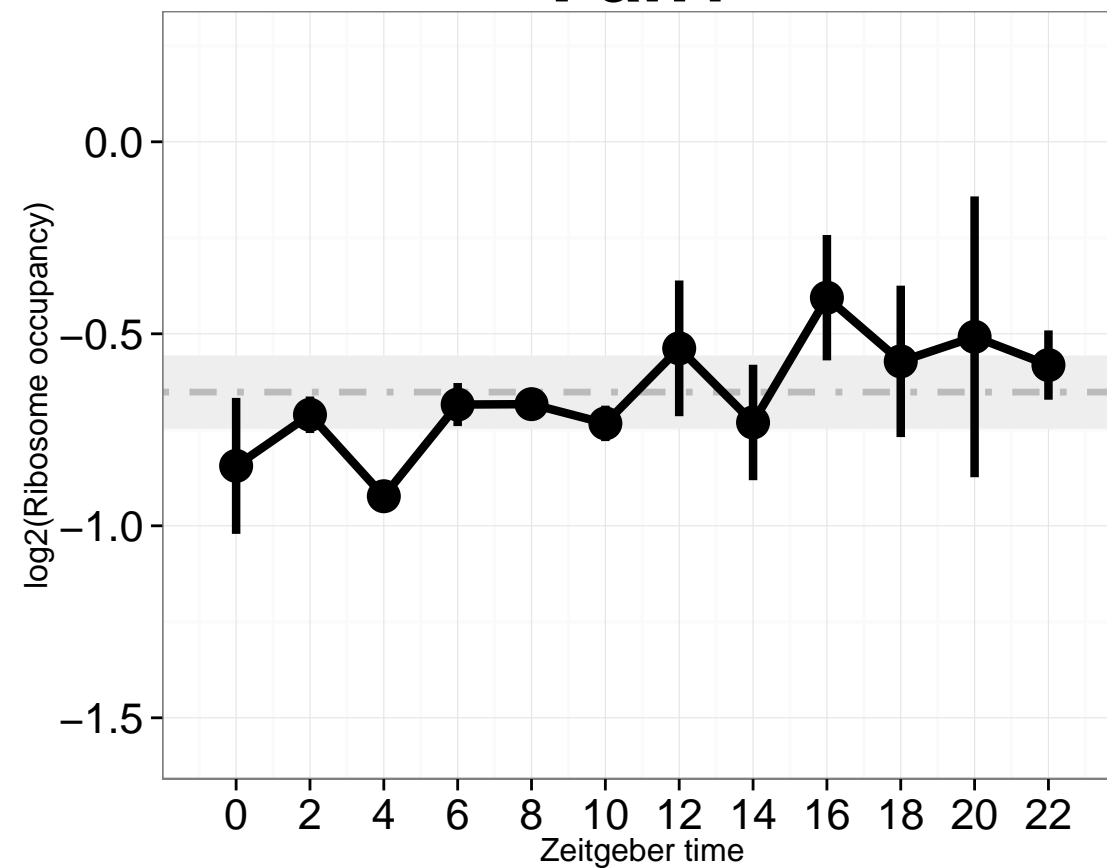

Supplement: Supplementary file 3114 [file 1]

# Fblim1

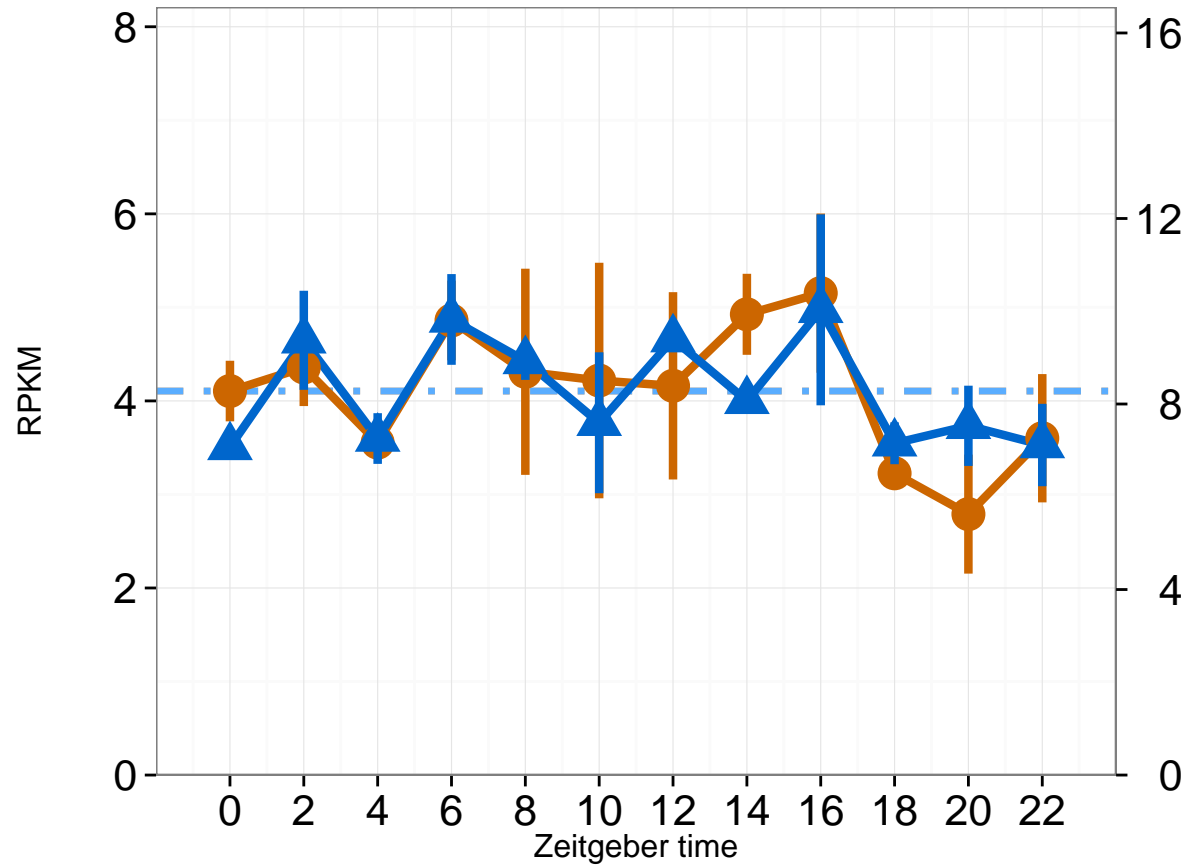

# Fblim1

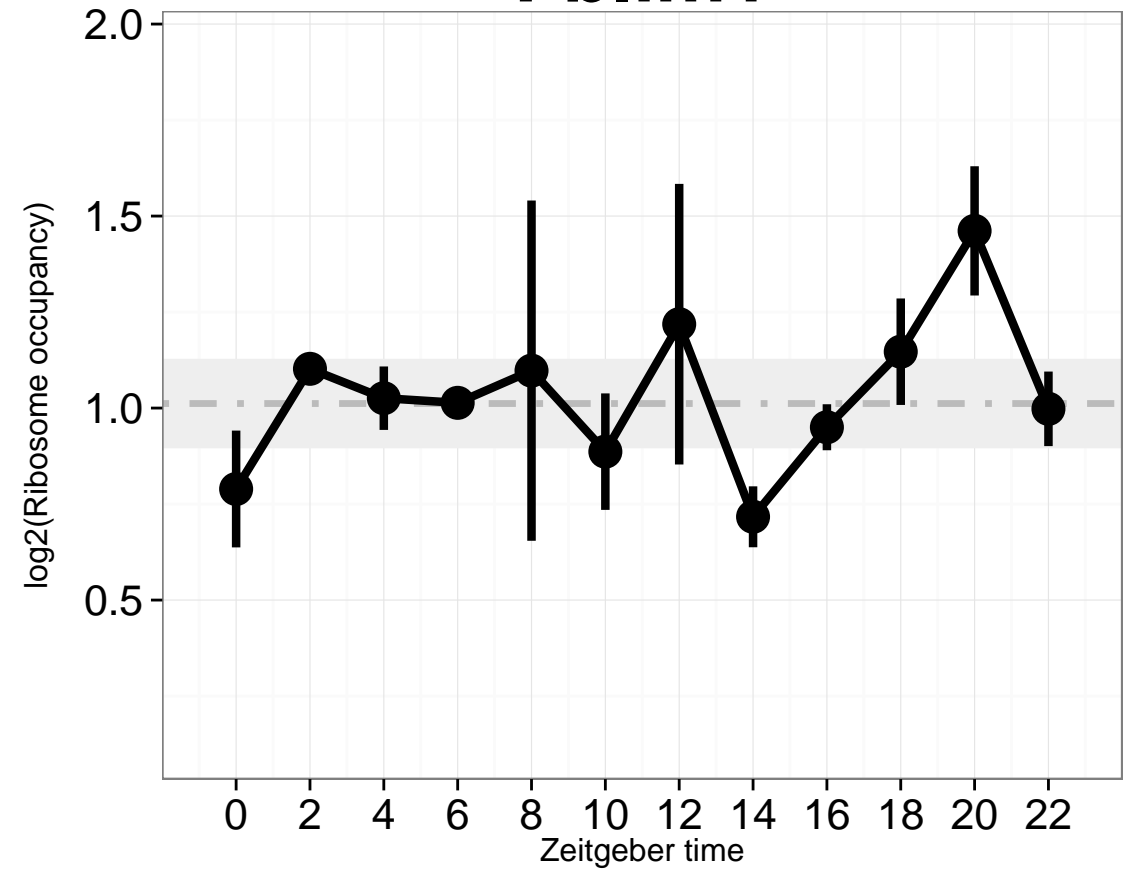

Supplement: Supplementary file 3115 [file 1]

## Fat1

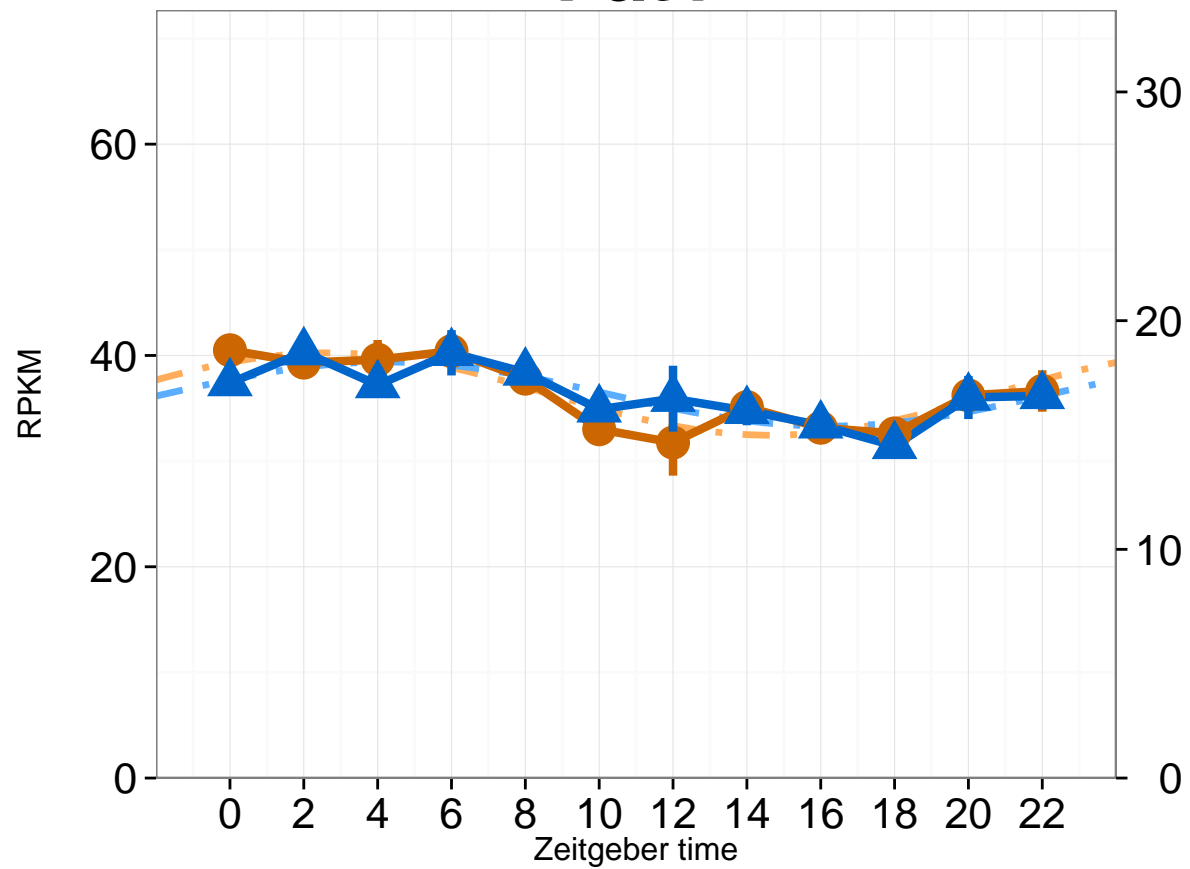

## Fat1

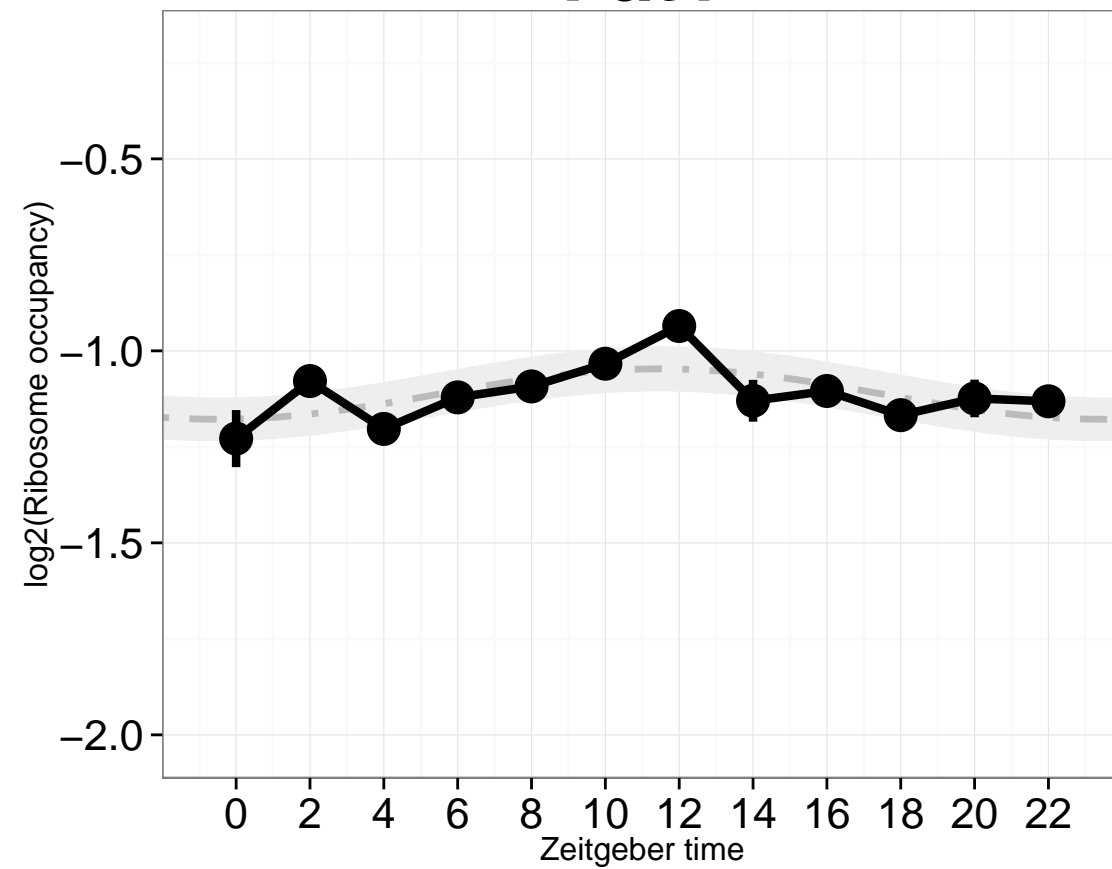

Supplement: Supplementary file 3116 [file 1]

## Pdia6

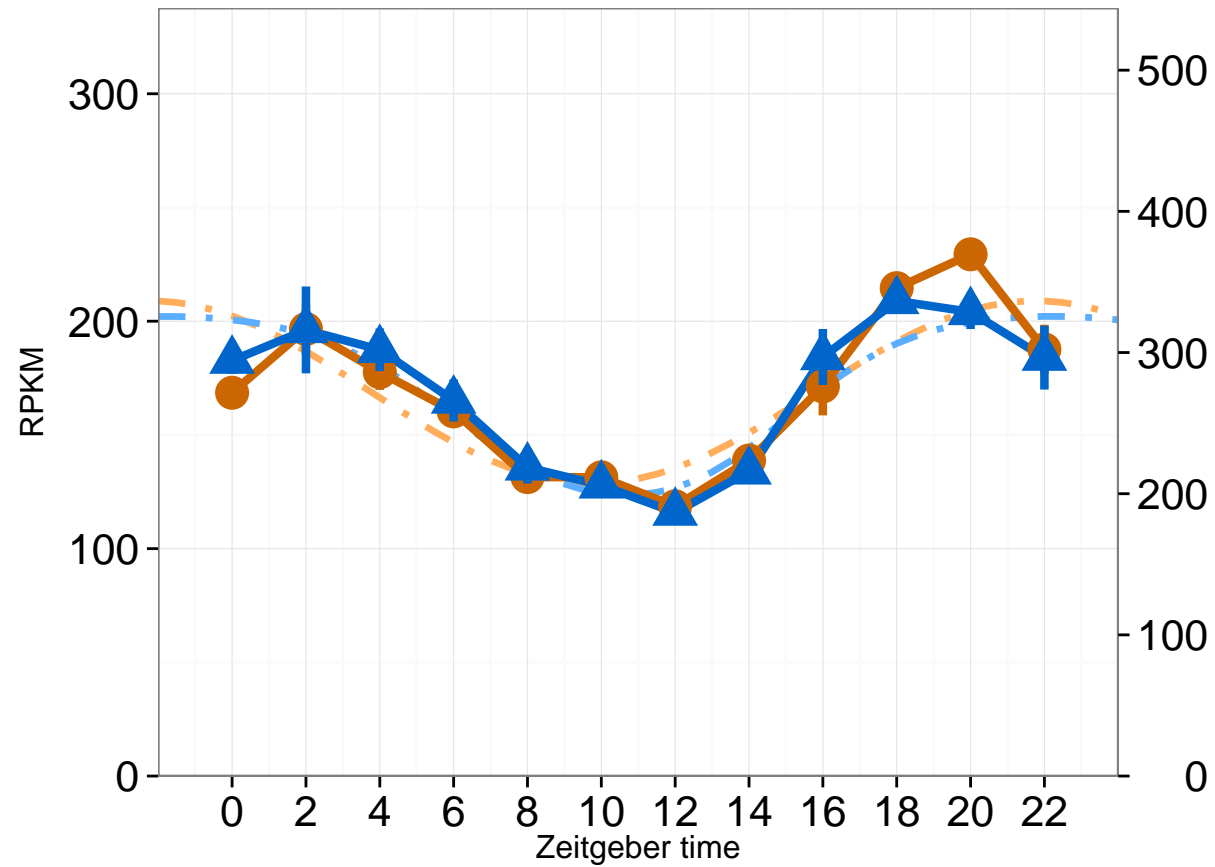

## Pdia6

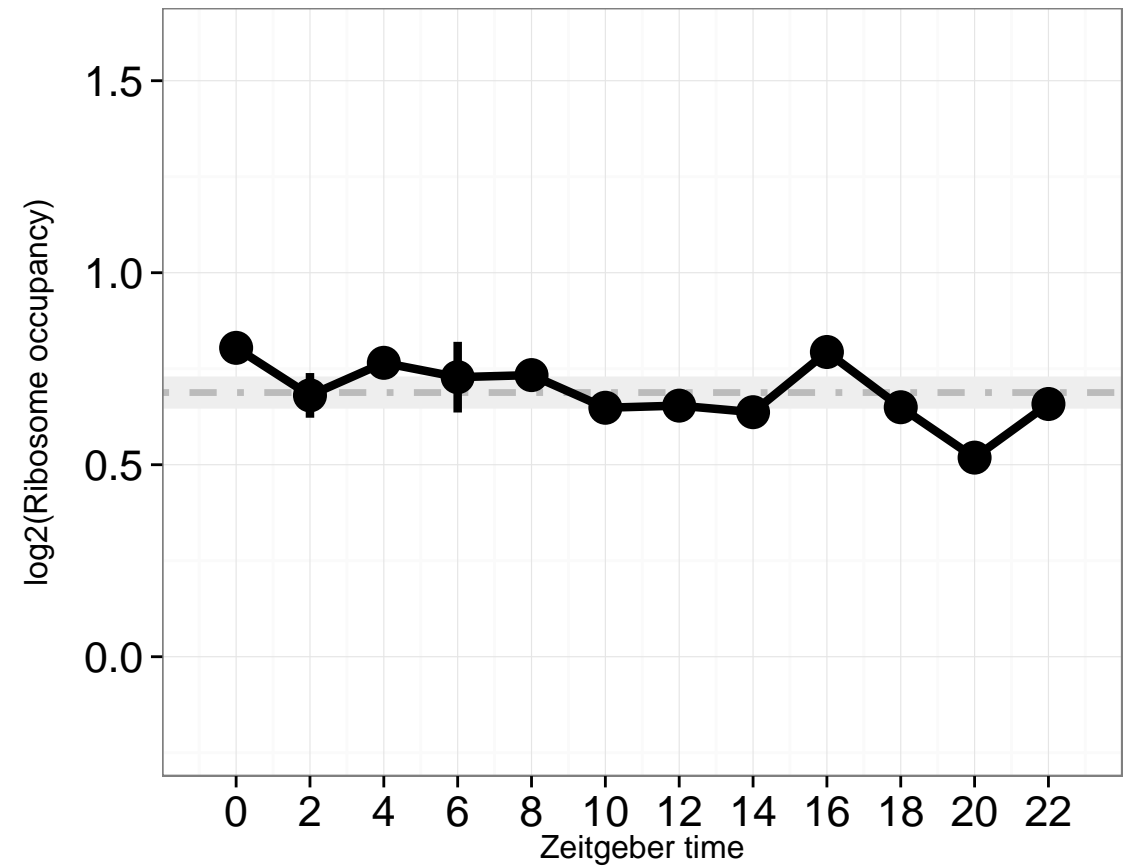

Supplement: Supplementary file 3117 [file 1]

## 2700060E02Rik

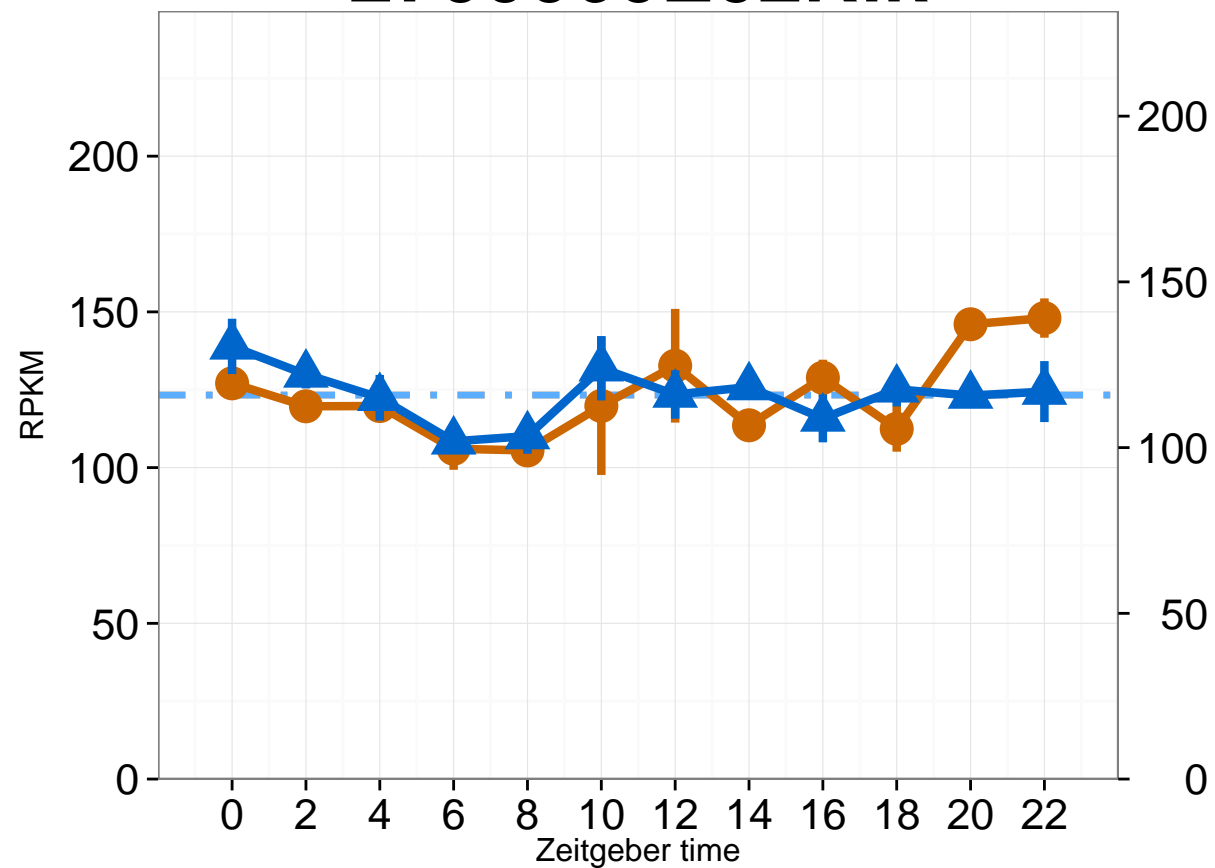

## 2700060E02Rik

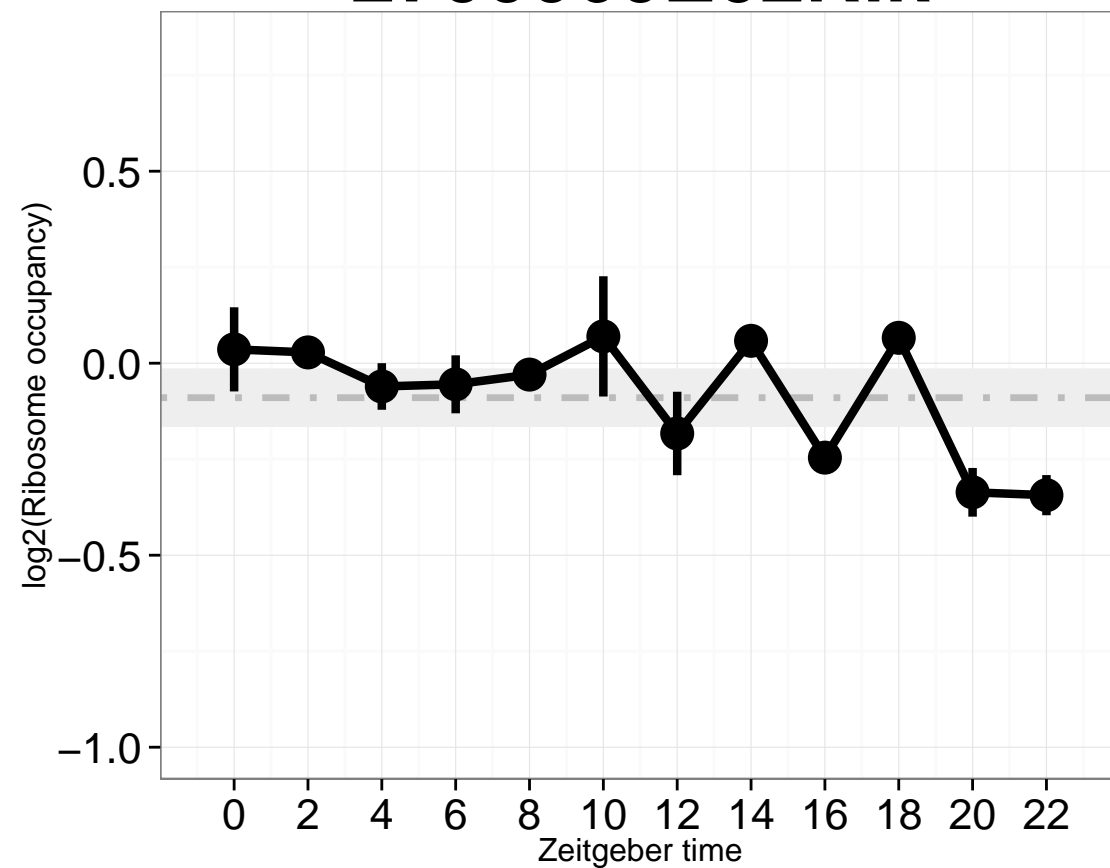

Supplement: Supplementary file 3118 [file 1]

# Bcdin3d

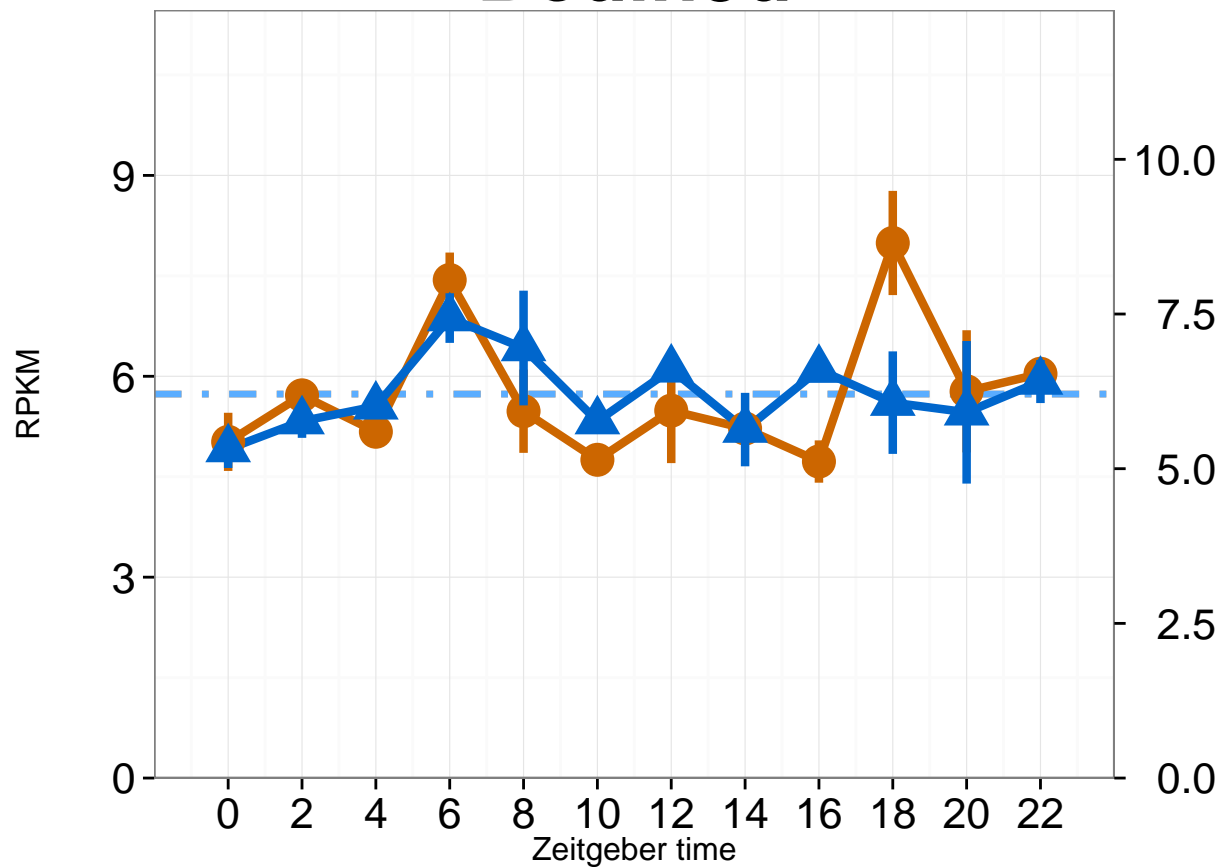

# Bcdin3d

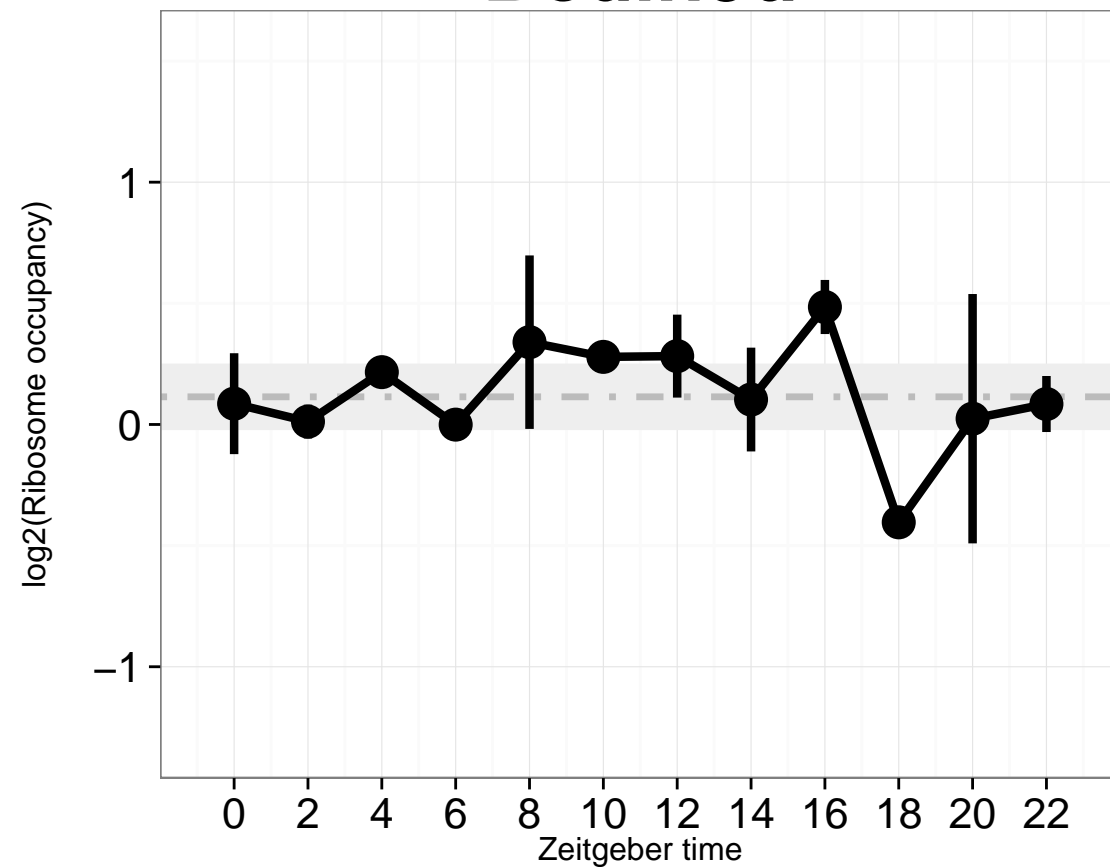

Supplement: Supplementary file 3119 [file 1]

## Mipep

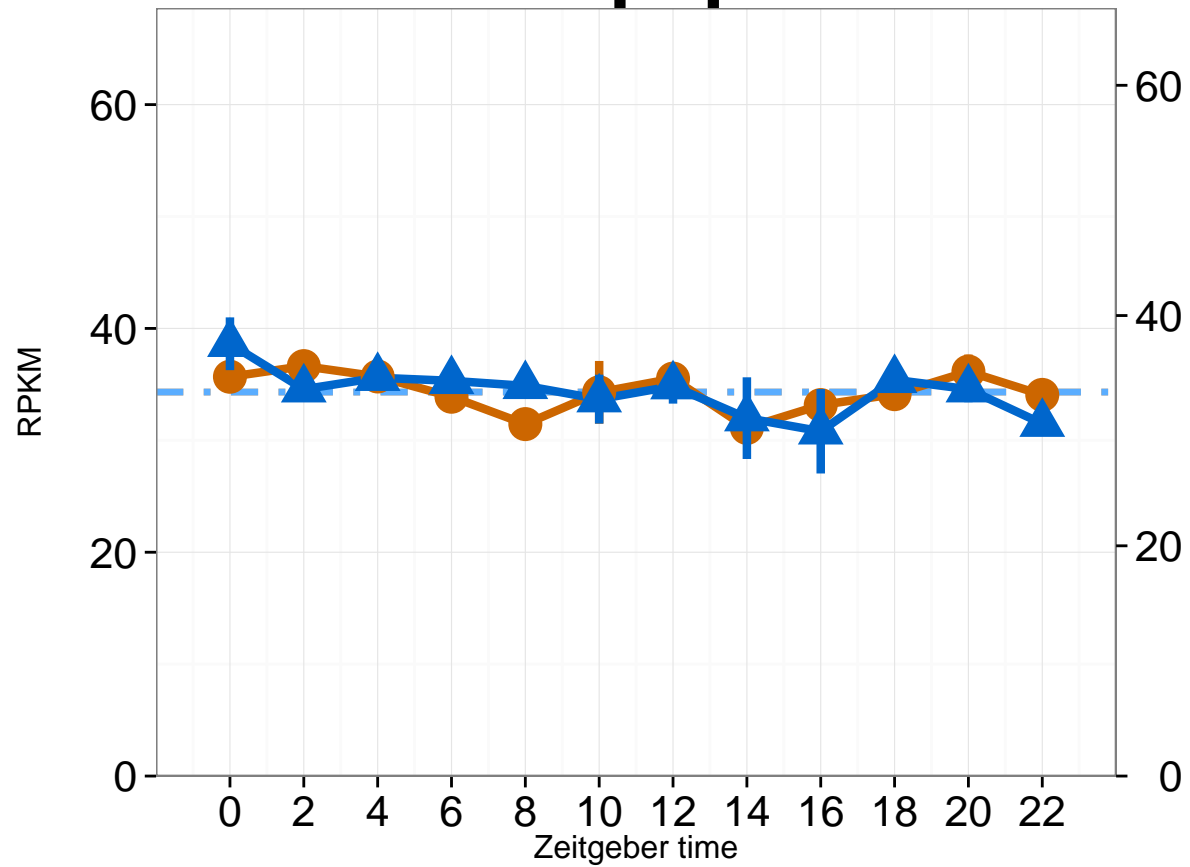

## Mipep

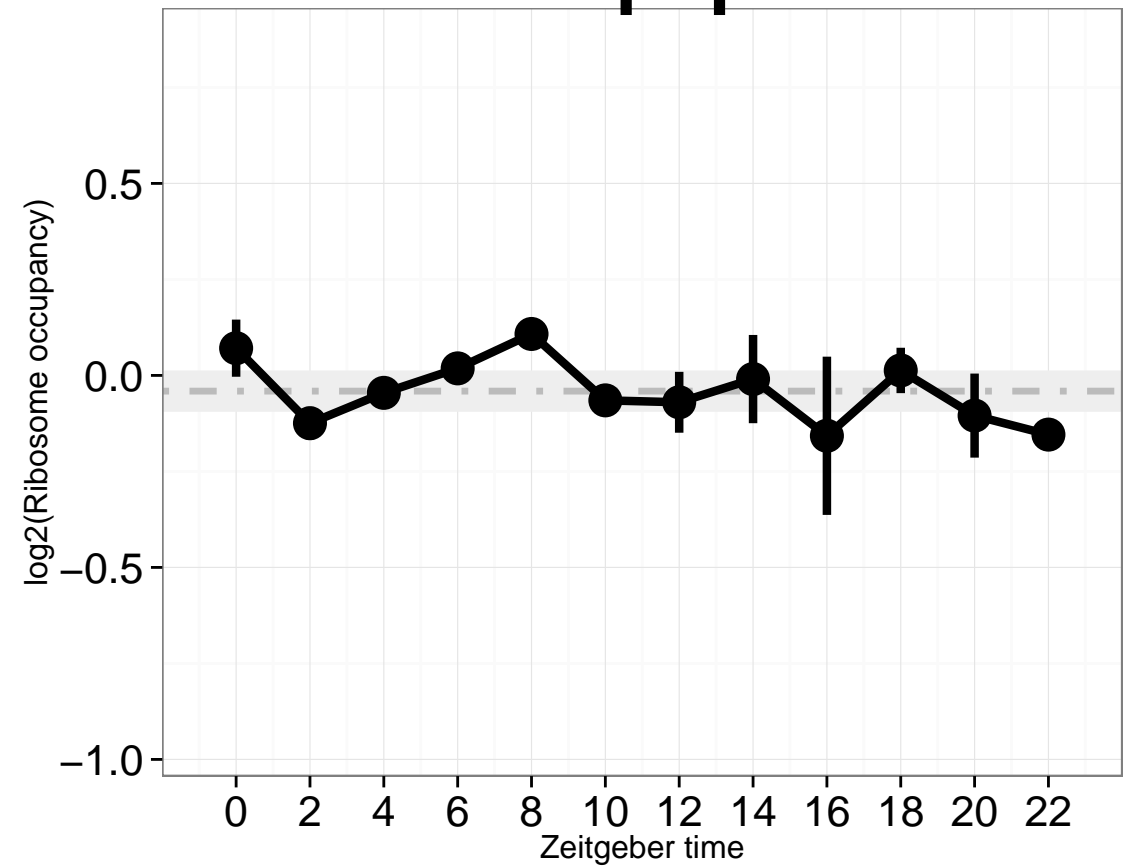

Supplement: Supplementary file 3120 [file 1]

# Ndufb5

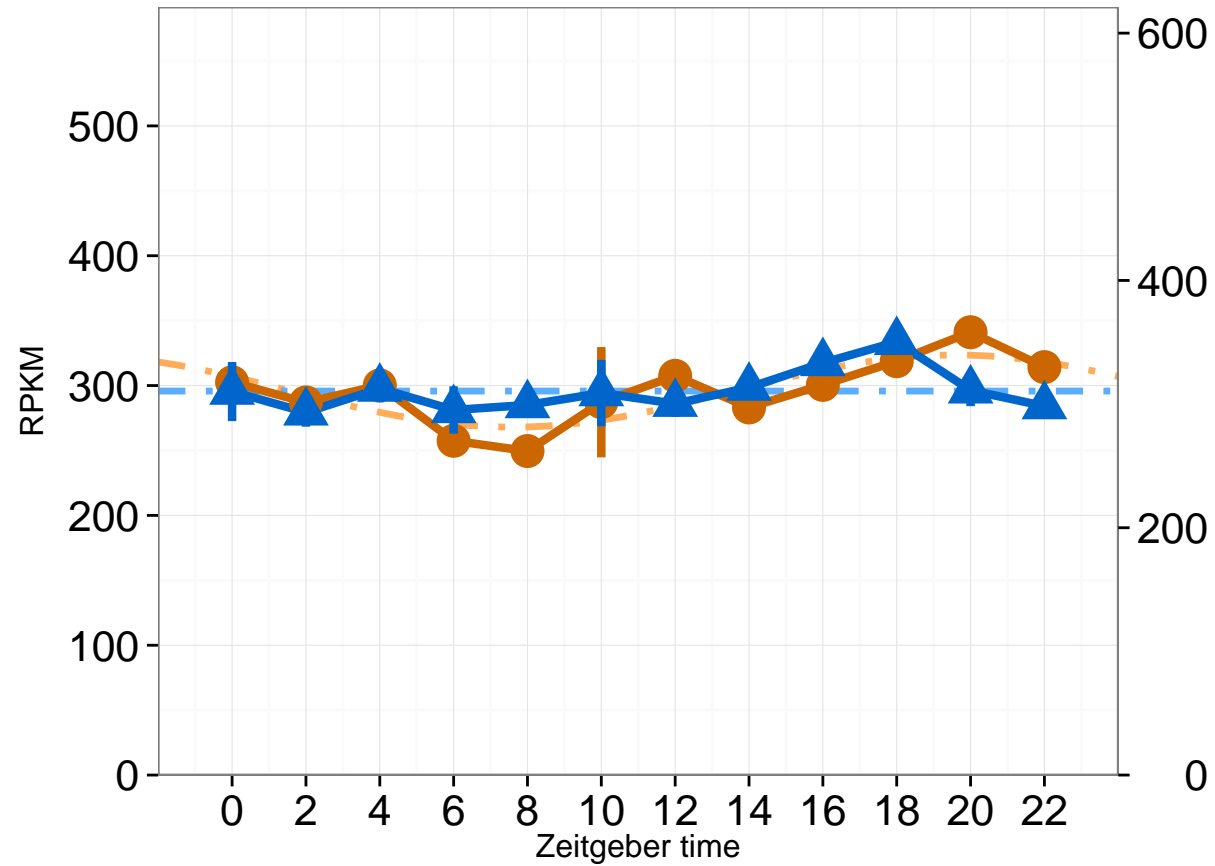

# Ndufb5

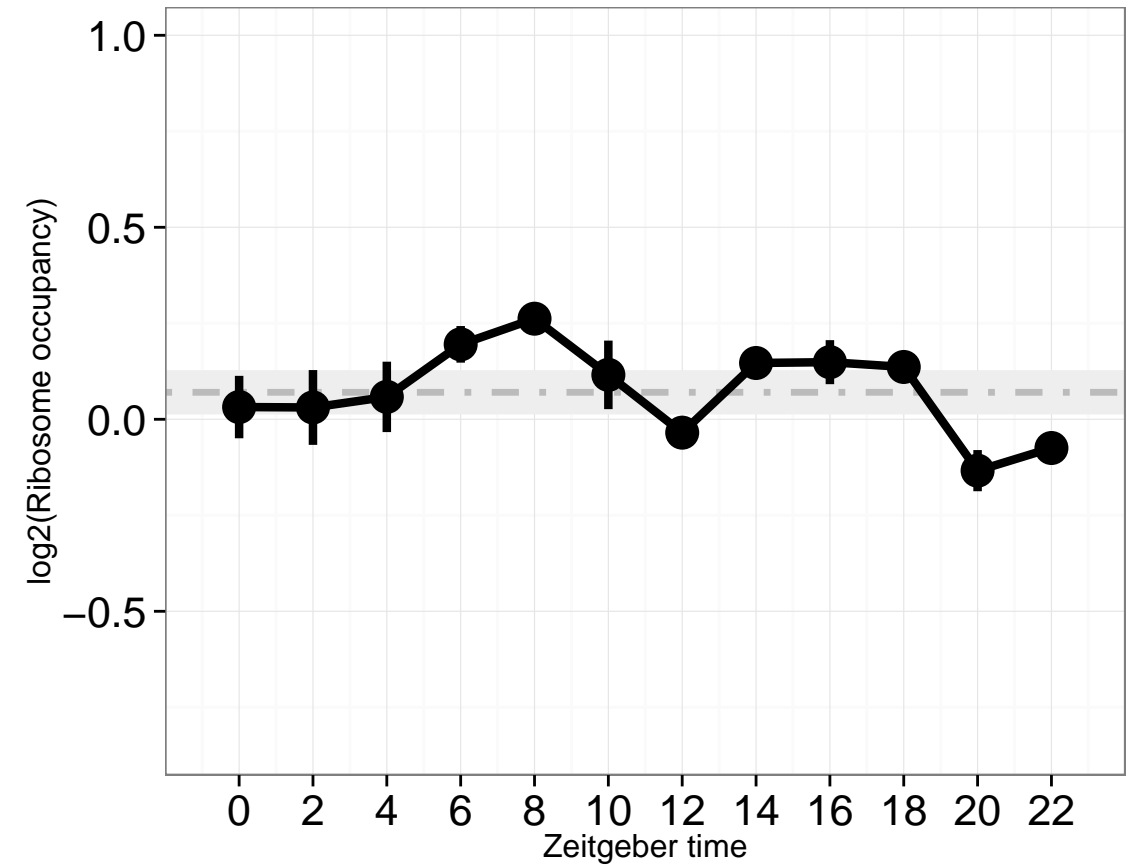

Supplement: Supplementary file 3121 [file 1]

# 5031439G07Rik

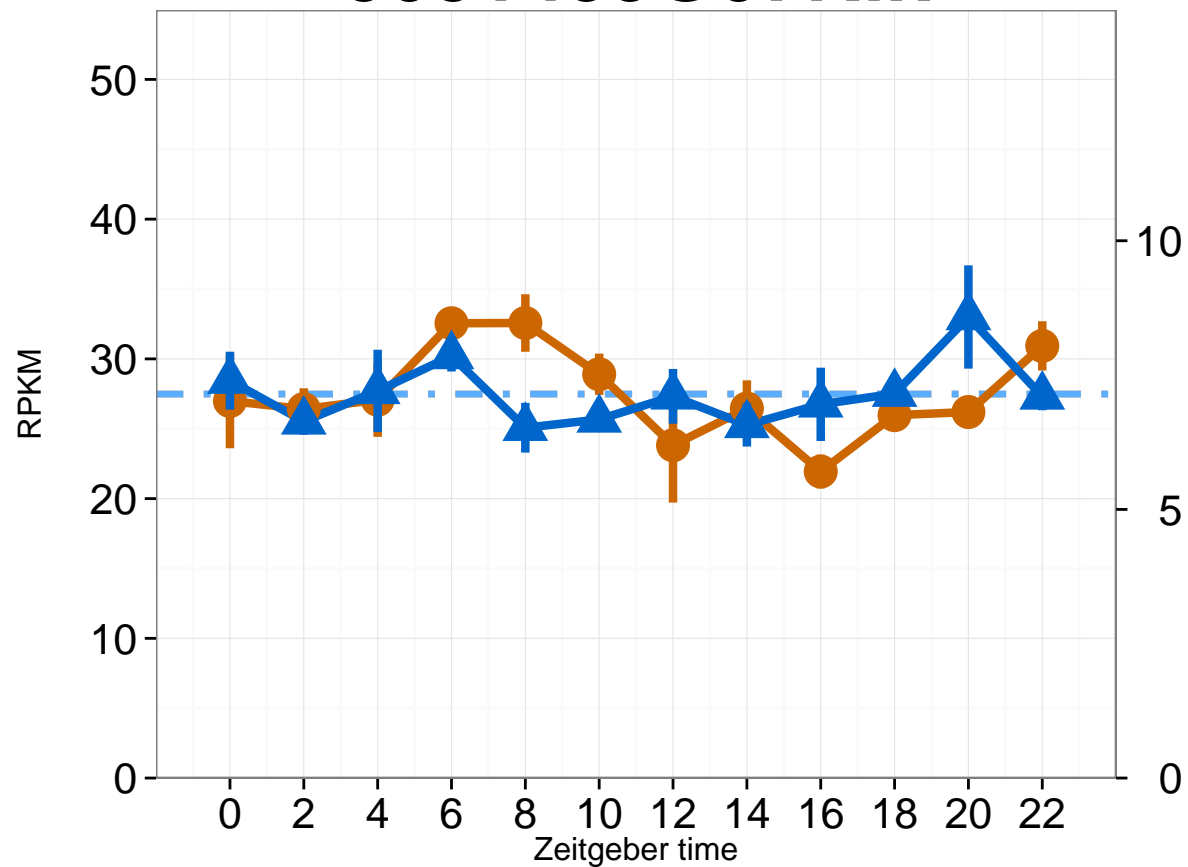

# 5031439G07Rik

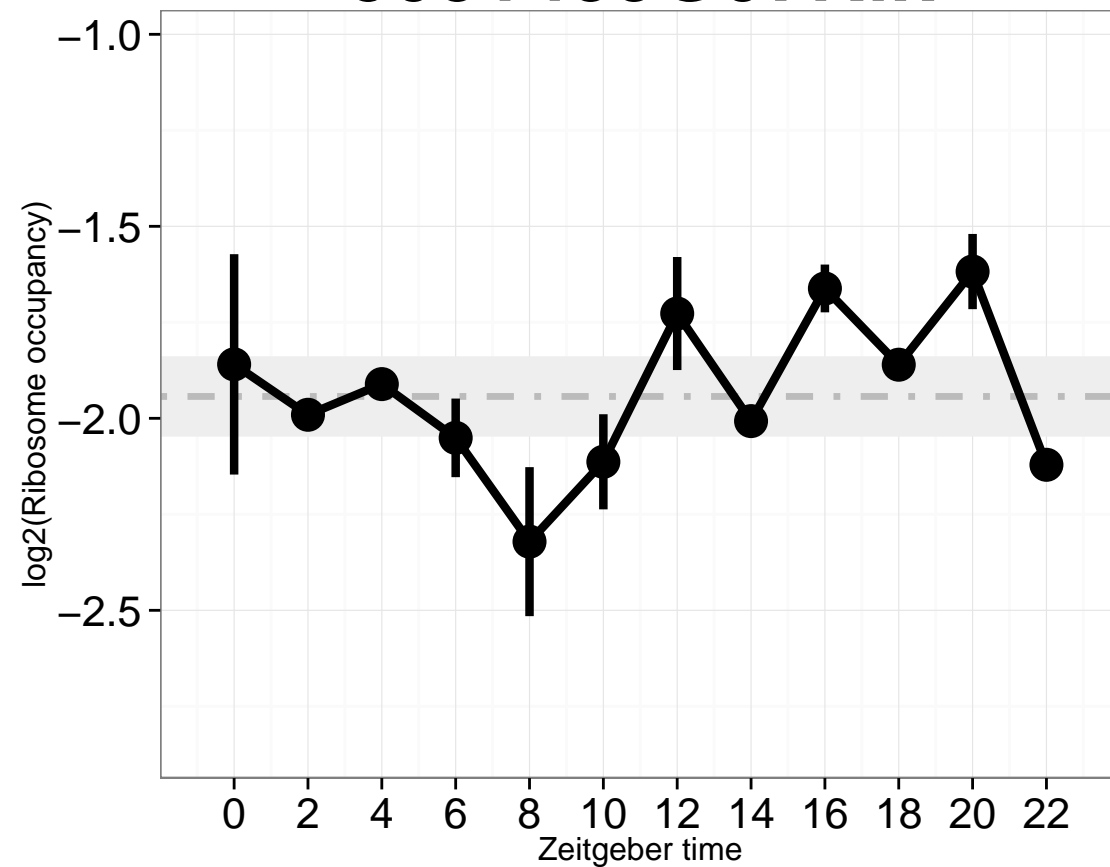

Supplement: Supplementary file 3122 [file 1]

# II33

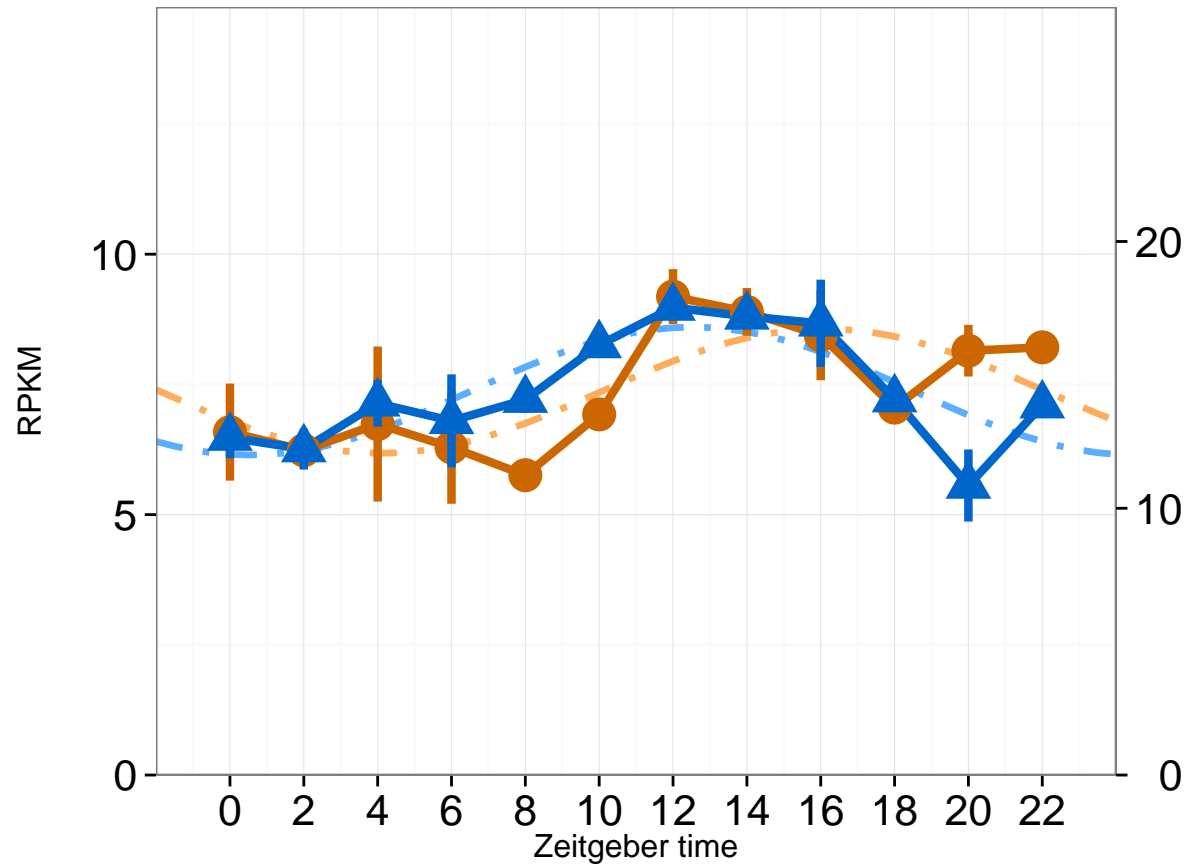

# II33

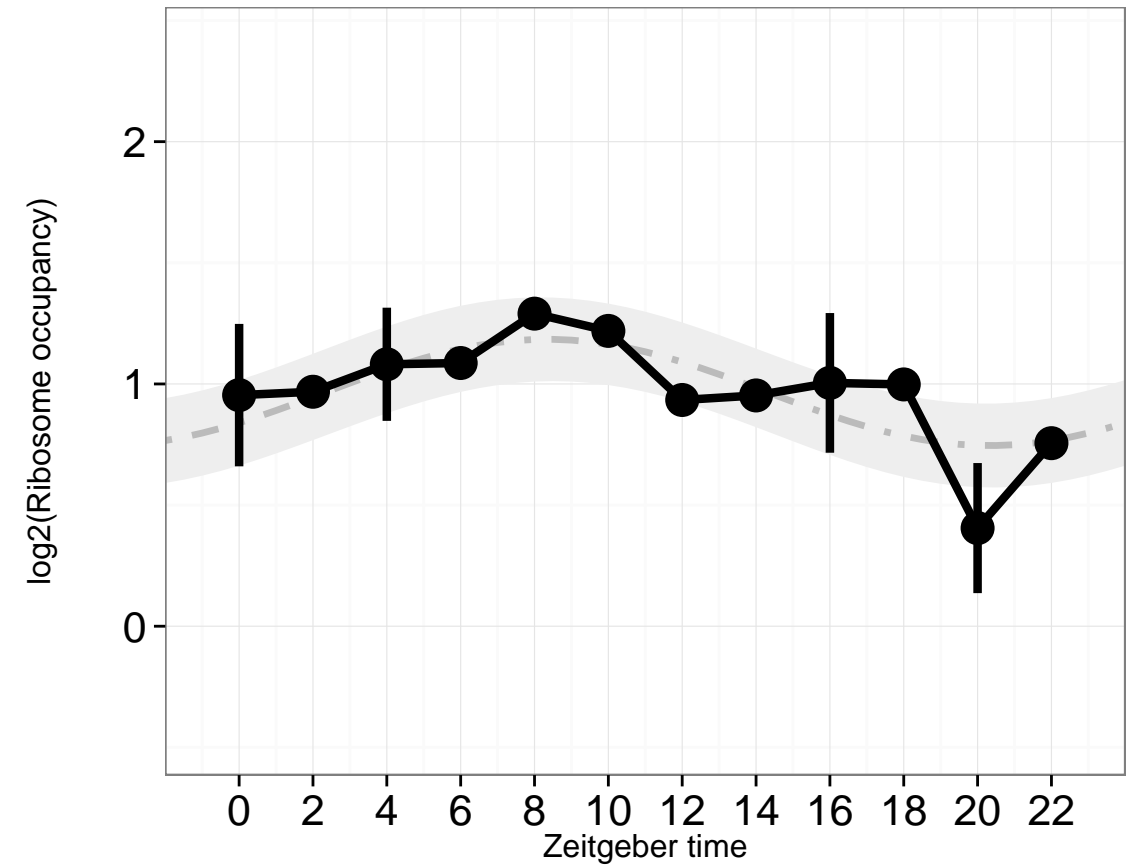

Supplement: Supplementary file 3123 [file 1]

# Trmt10a

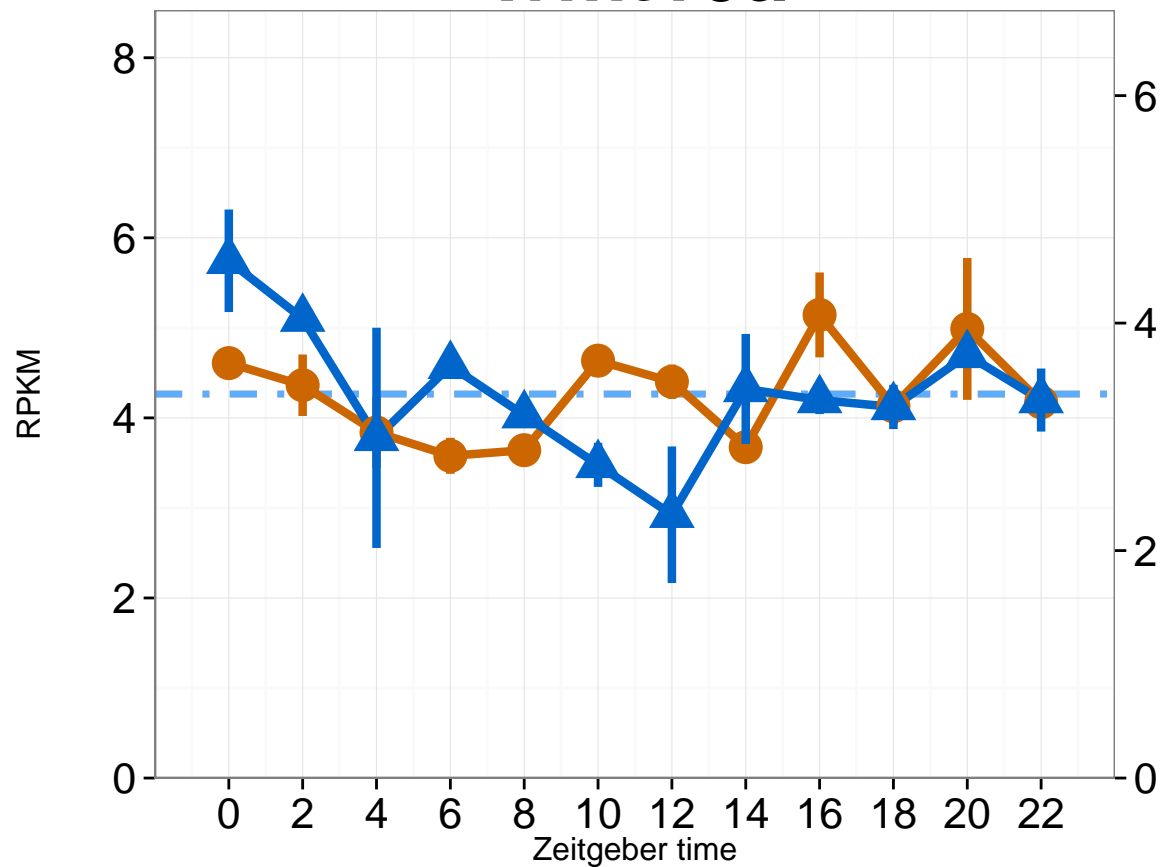

# Trmt10a

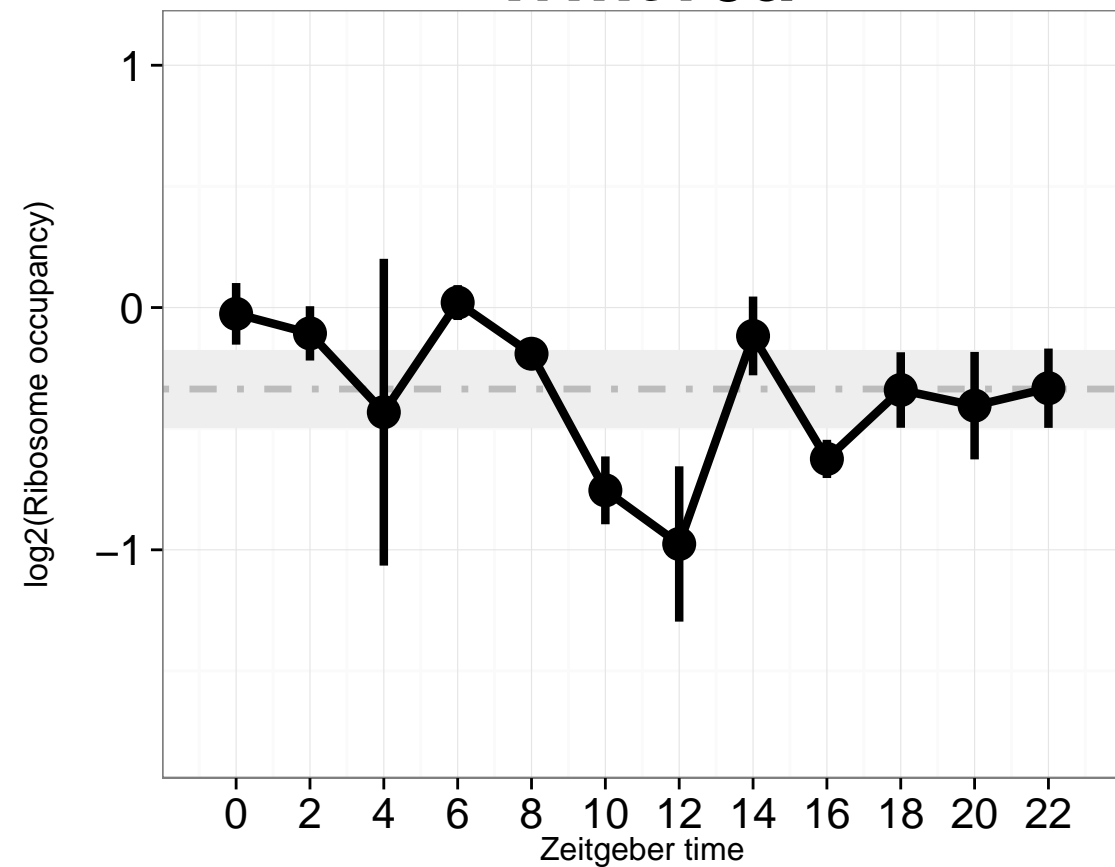

Supplement: Supplementary file 3124 [file 1]

## Snx8

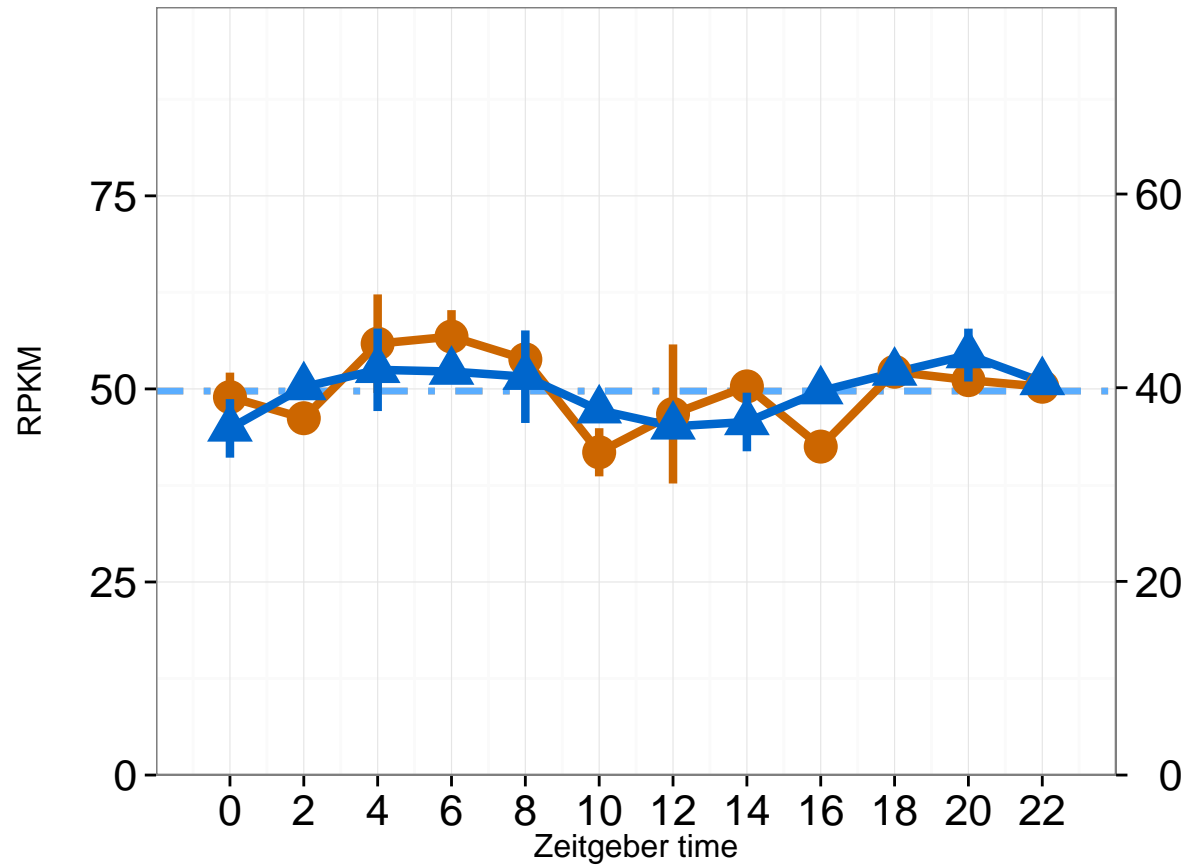

## Snx8

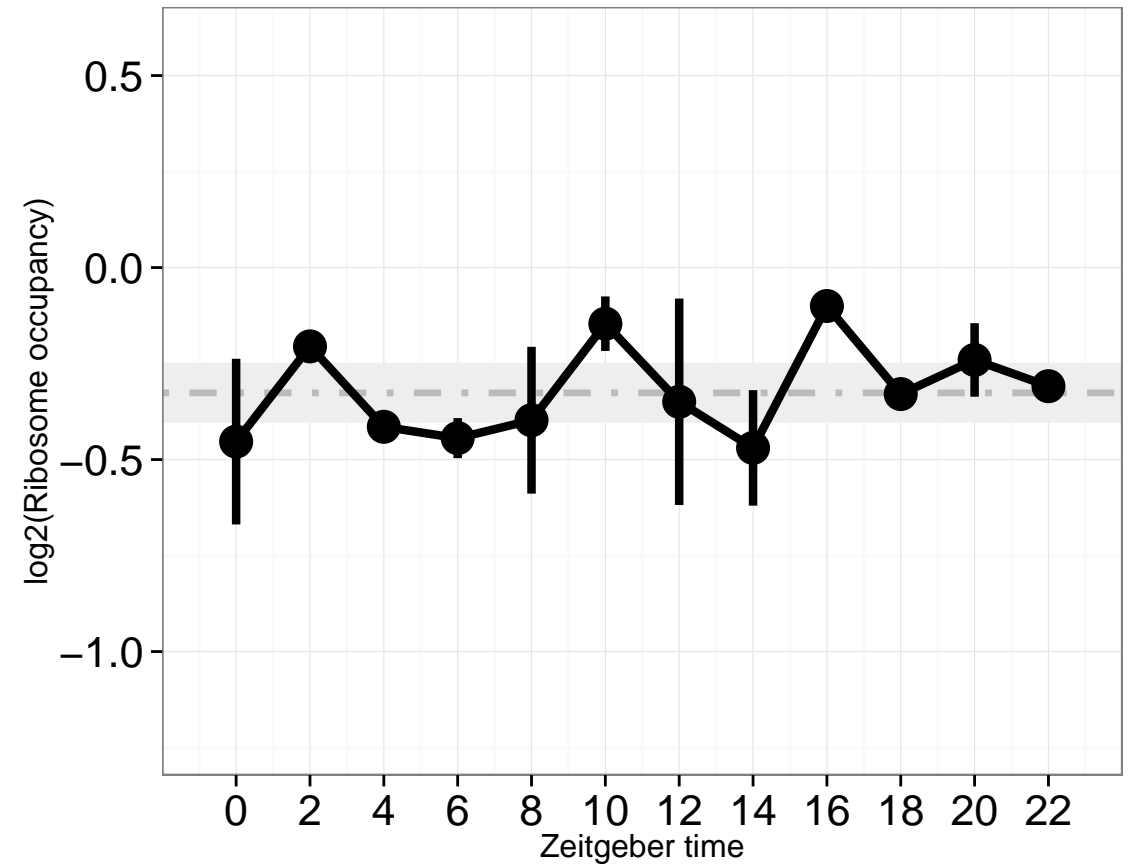

Supplement: Supplementary file 3125 [file 1]

## Pigv

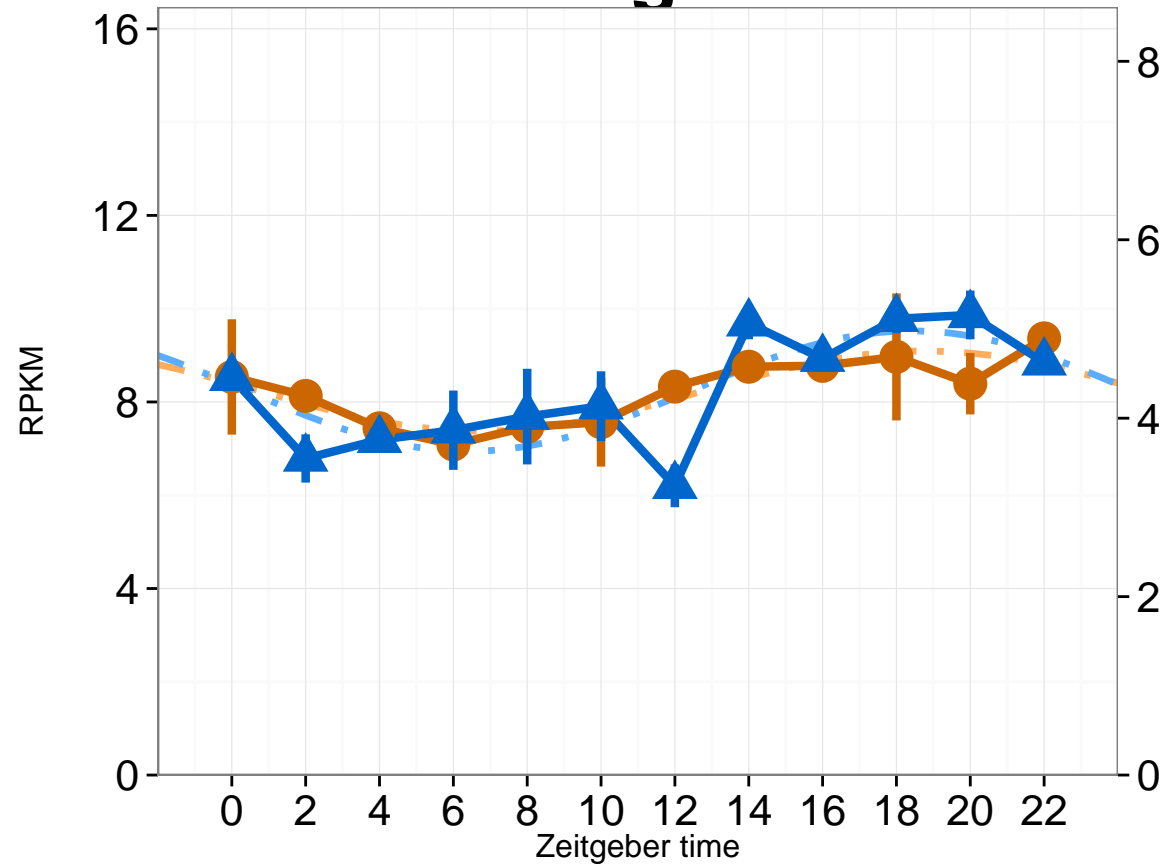

## Pigv

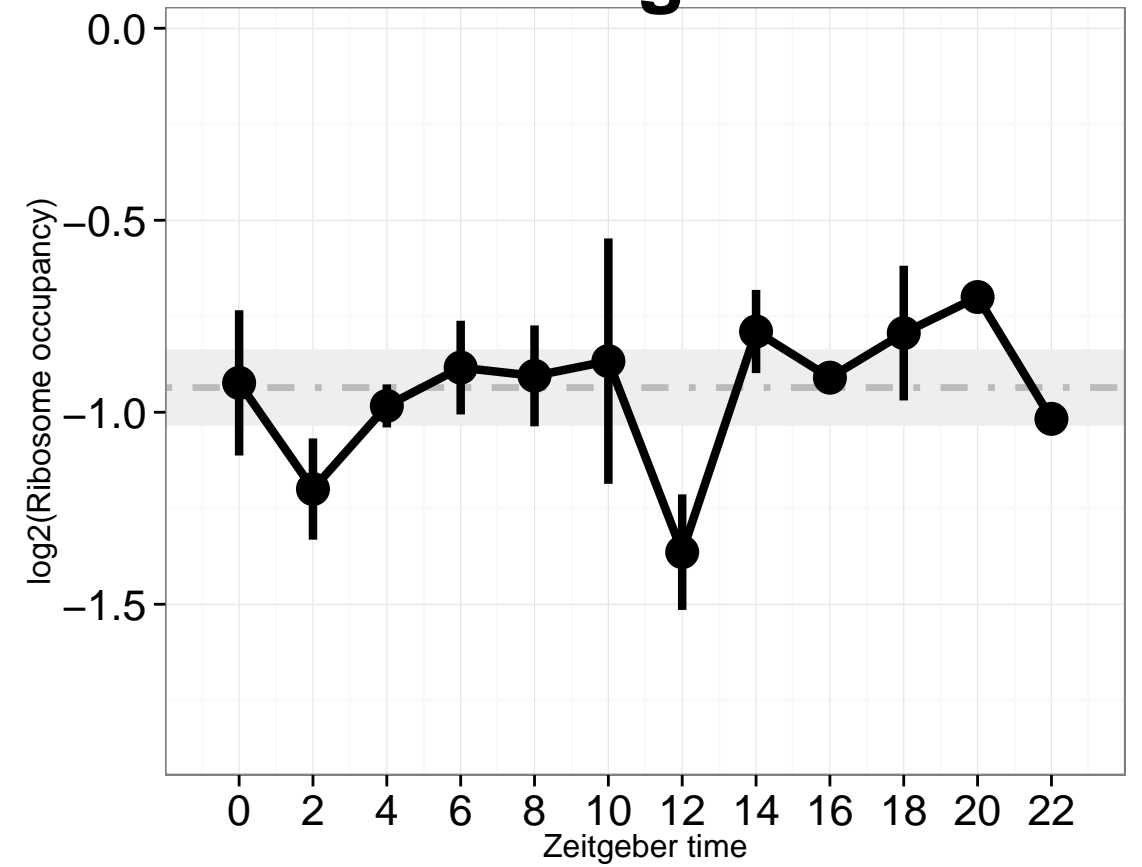

Supplement: Supplementary file 3126 [file 1]

## Kdm5c

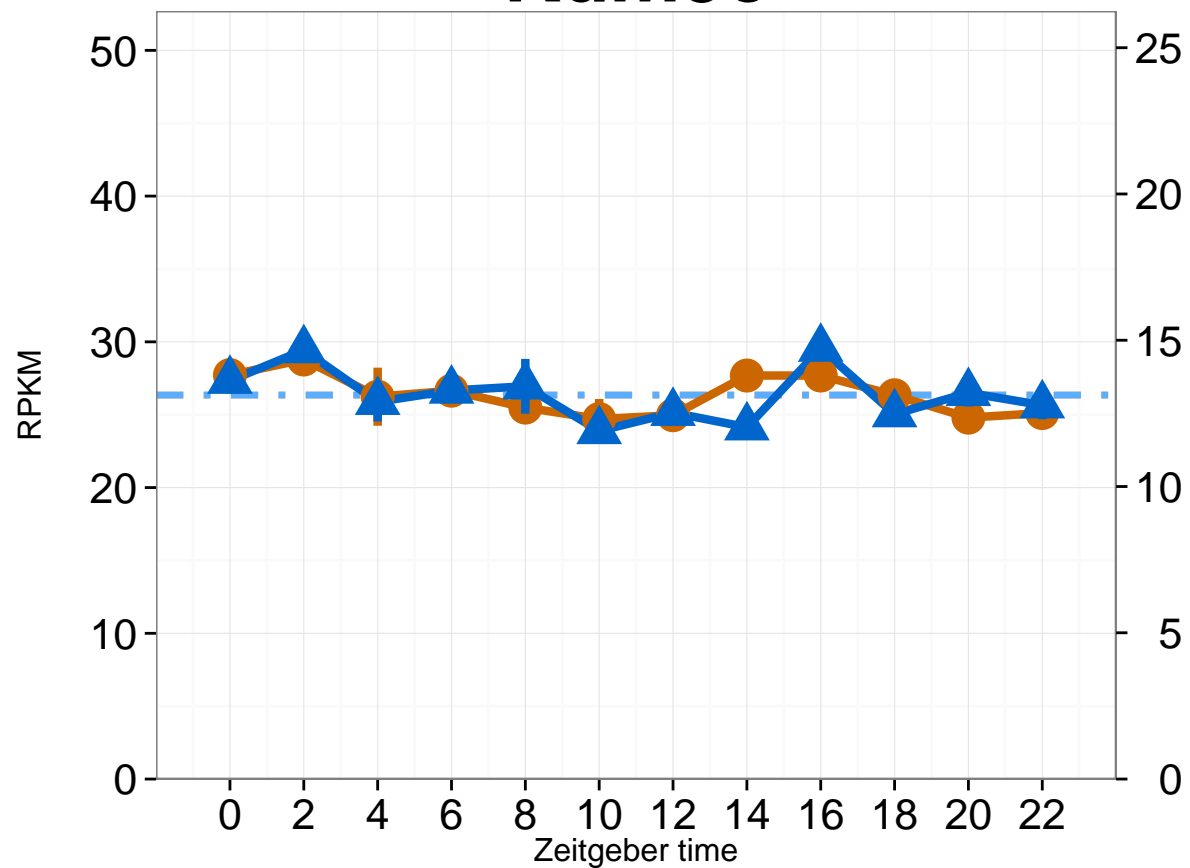

## Kdm5c

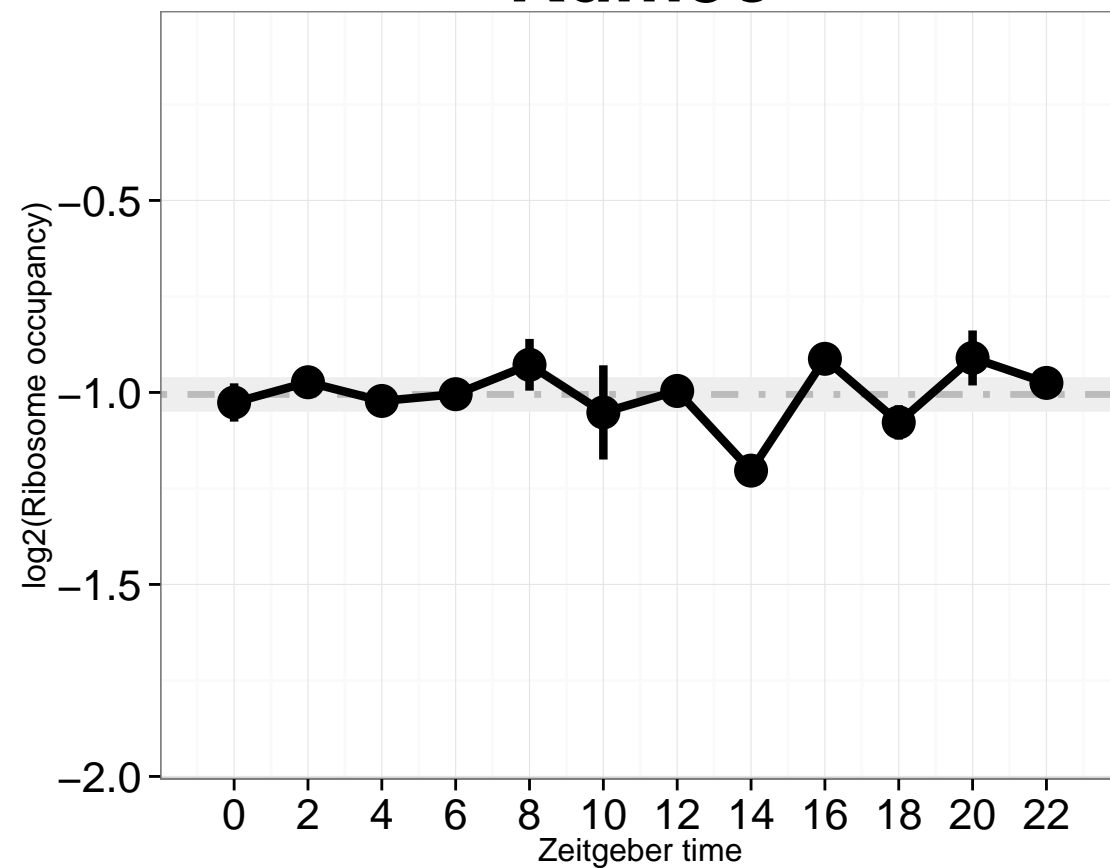

Supplement: Supplementary file 3127 [file 1]

**Qk**

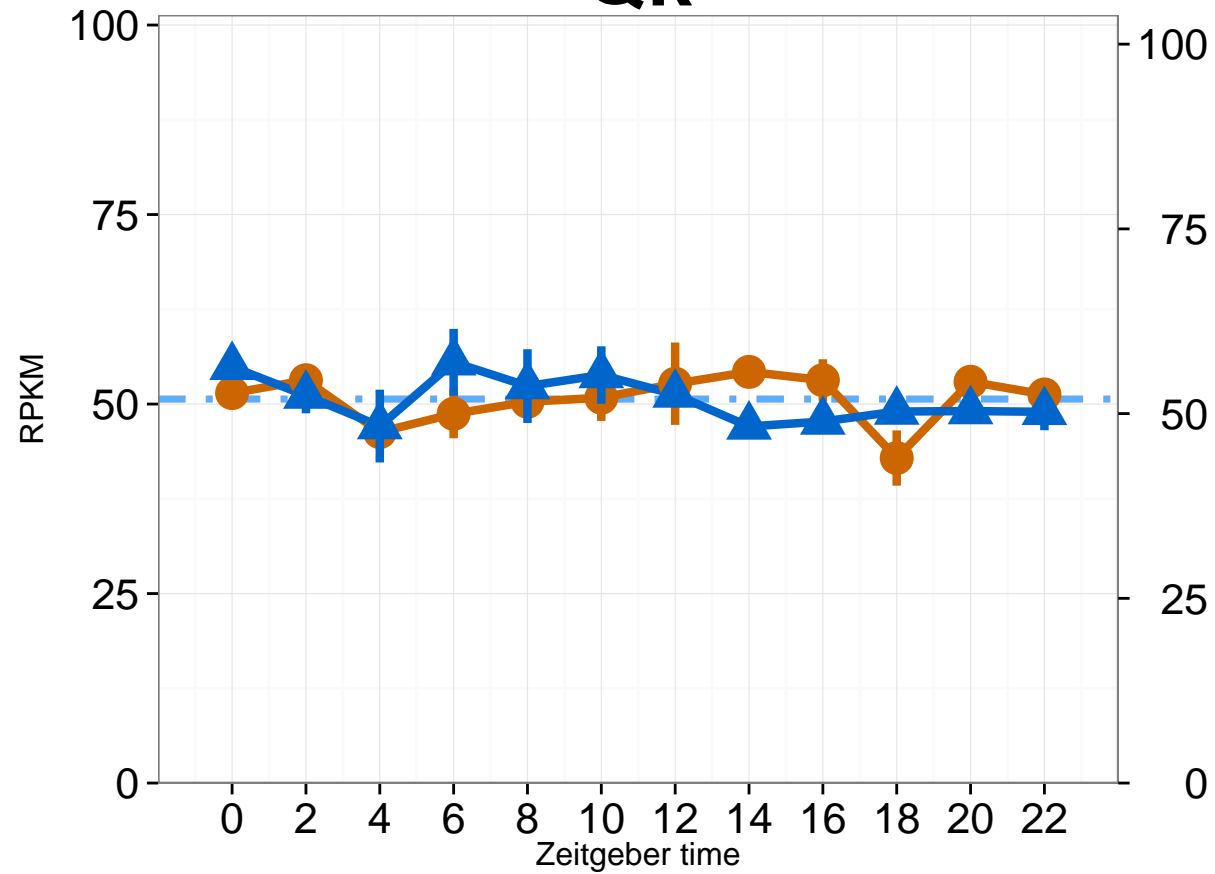

**Qk**

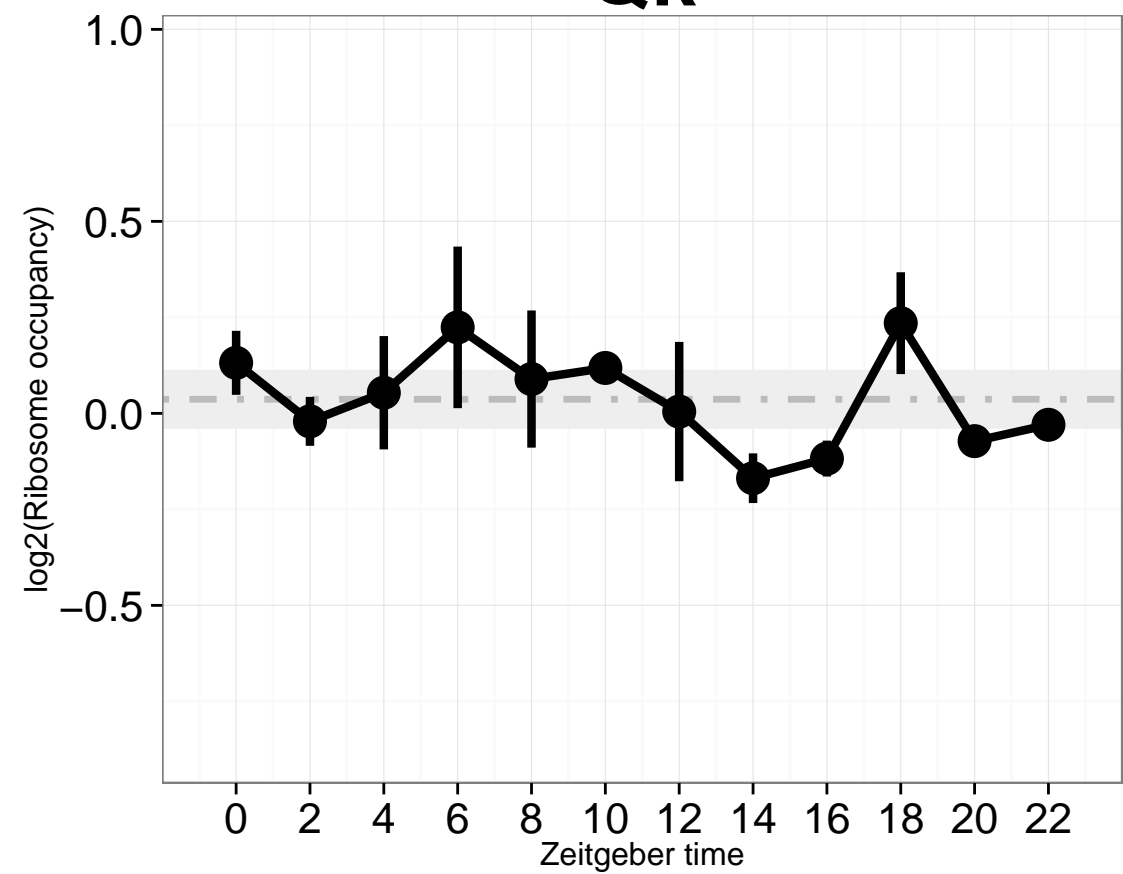

Supplement: Supplementary file 3128 [file 1]

# Prrc2b

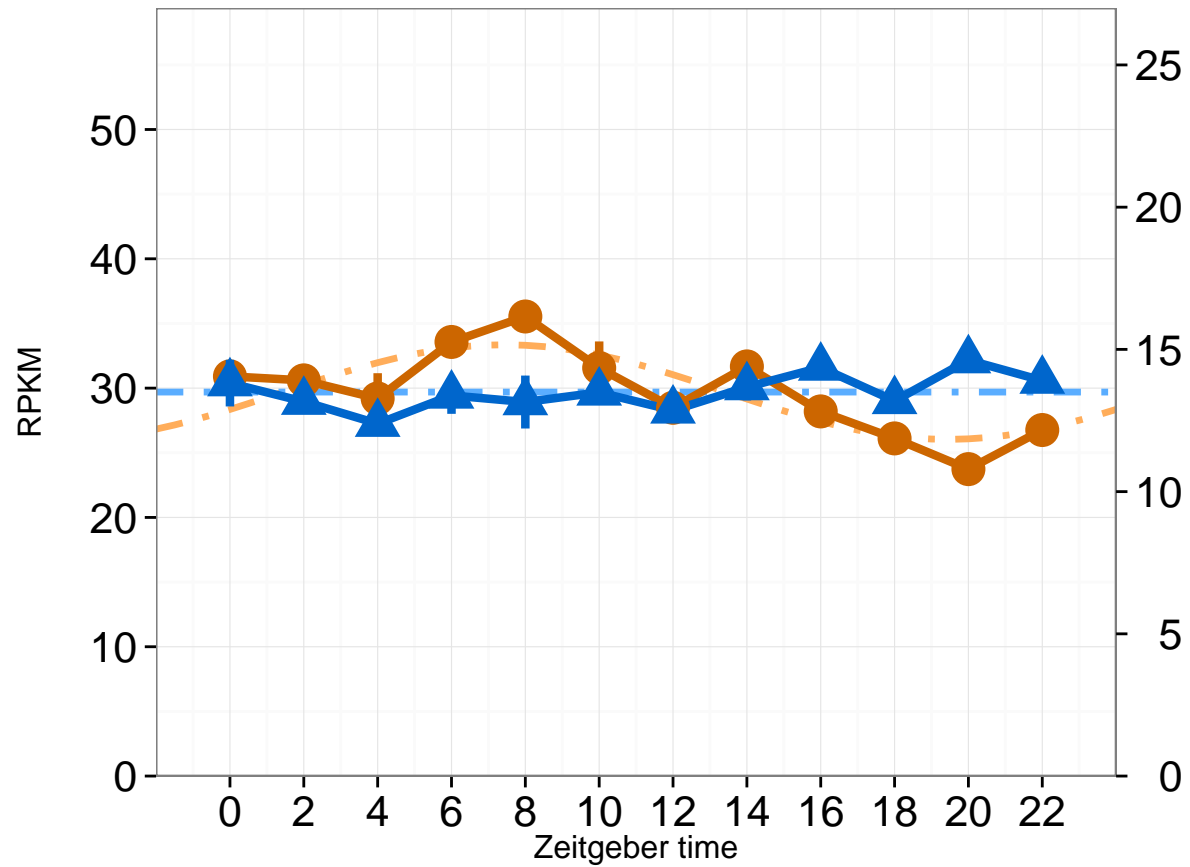

# Prrc2b

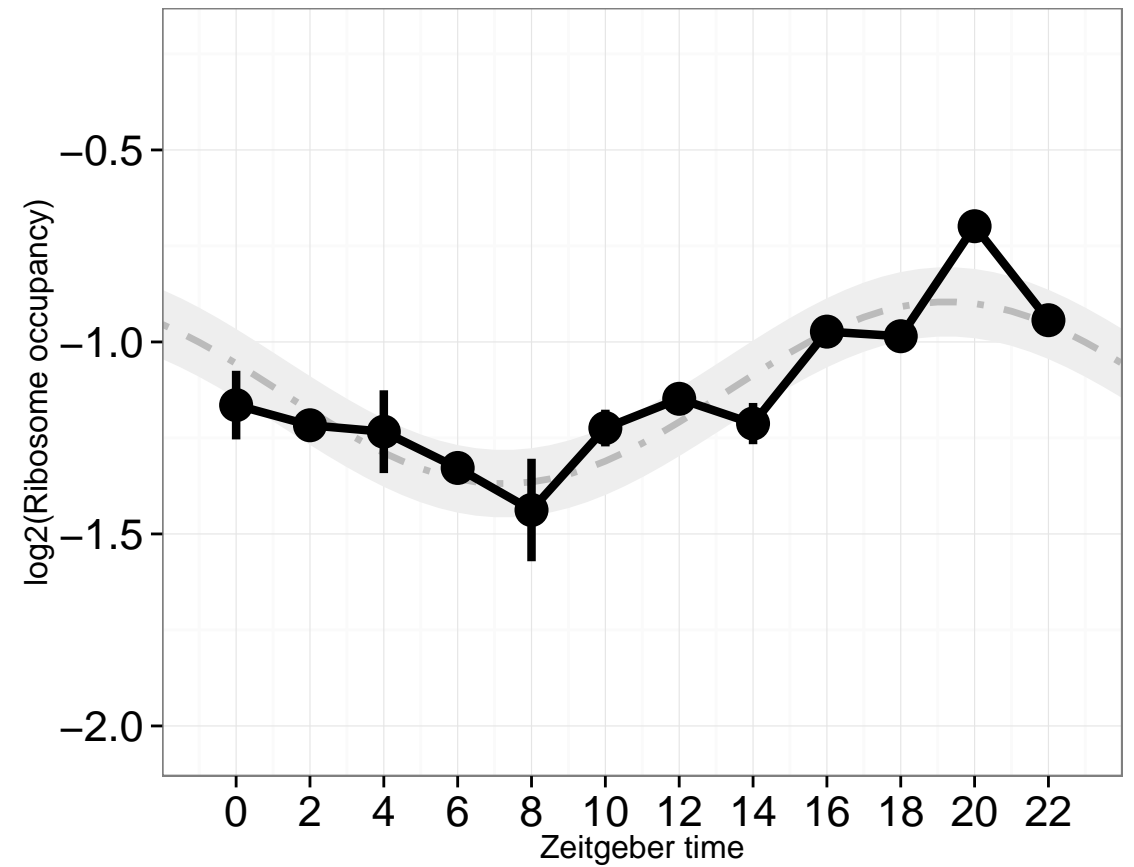

Supplement: Supplementary file 3129 [file 1]

## Wnk4

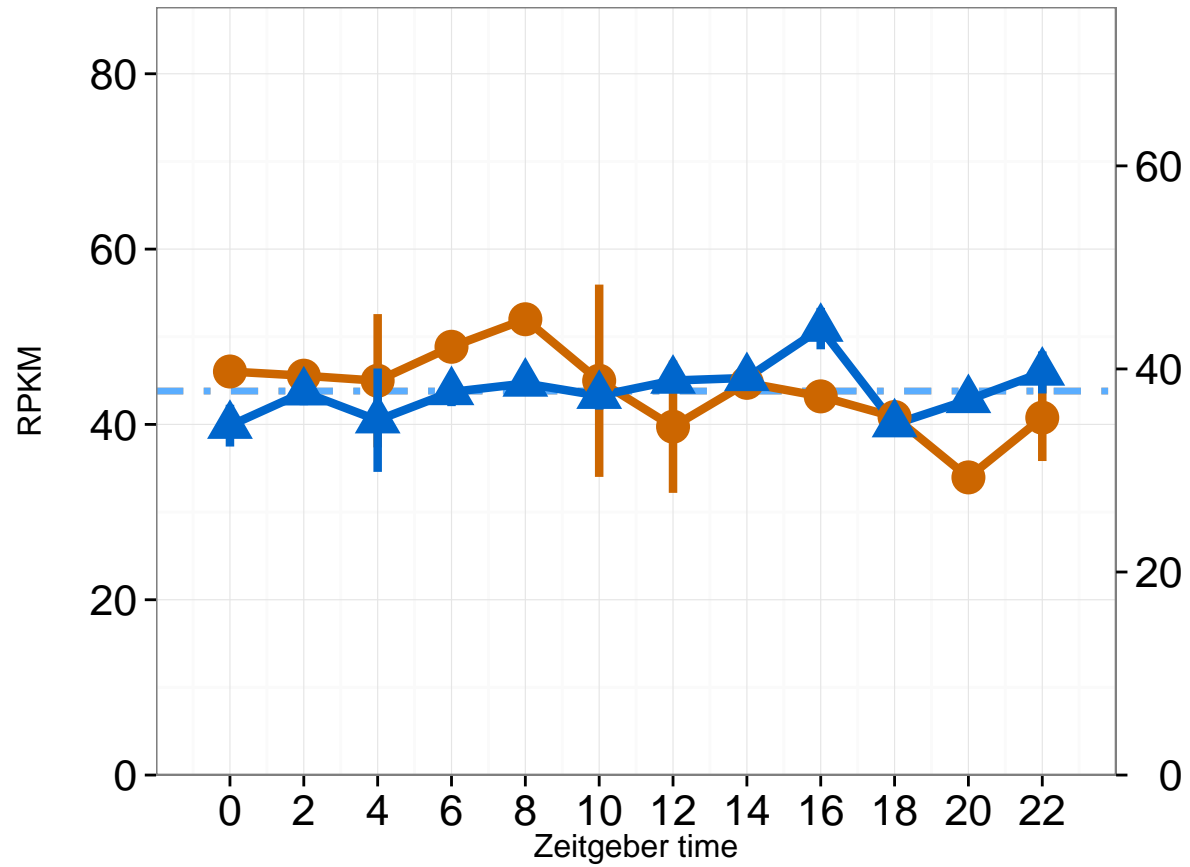

## Wnk4

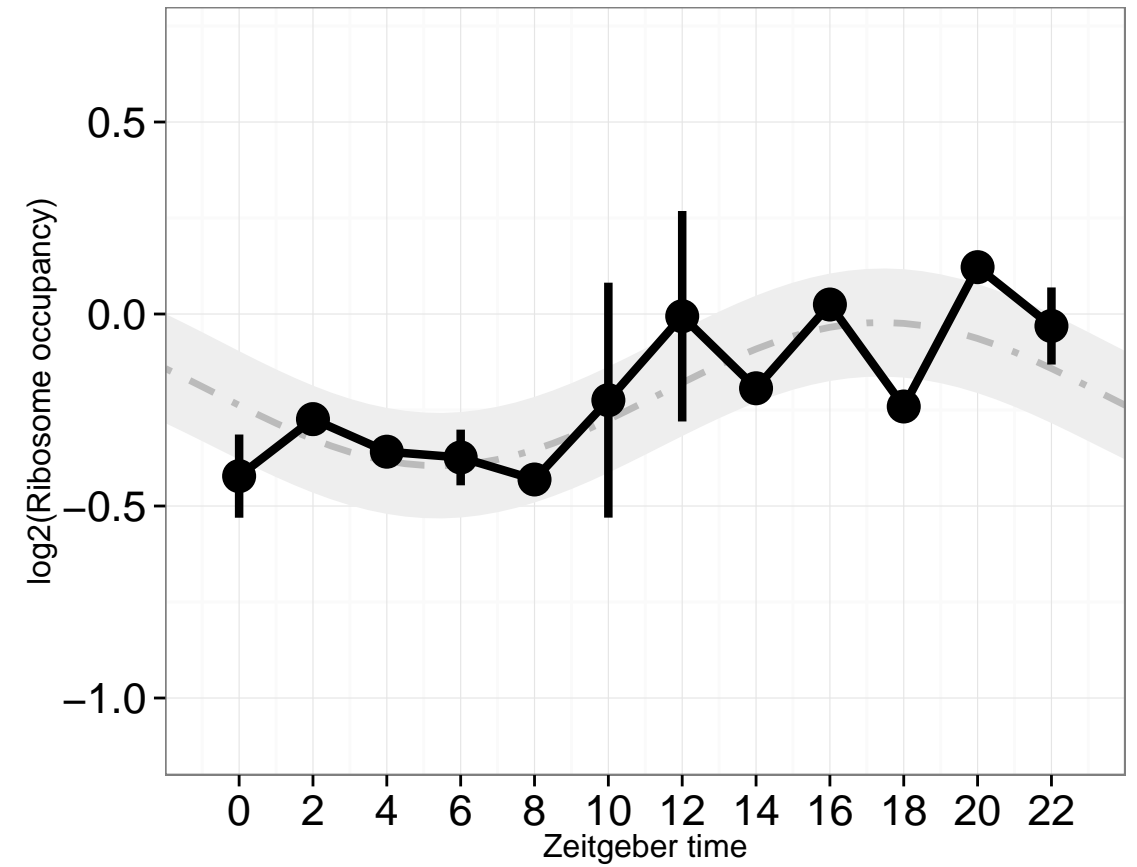

Supplement: Supplementary file 3130 [file 1]

# Dync1h1

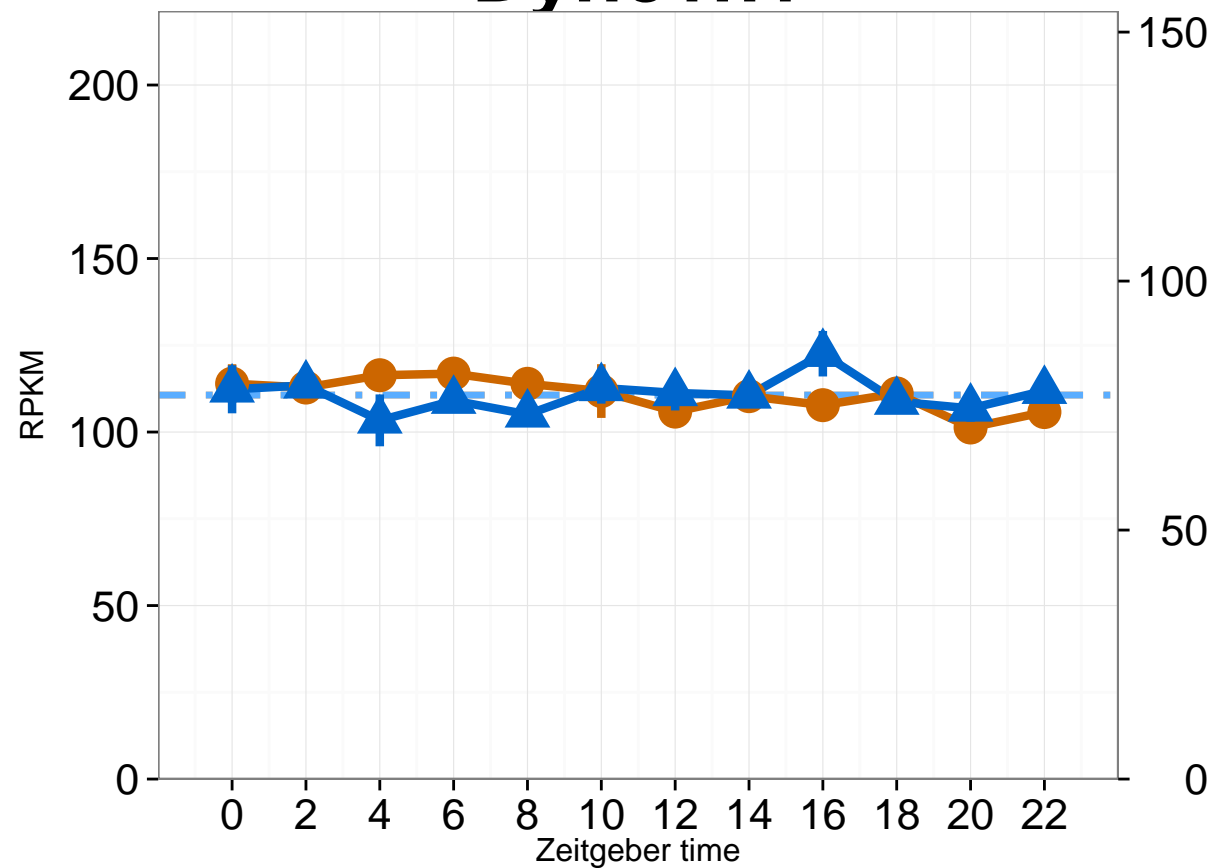

# Dync1h1

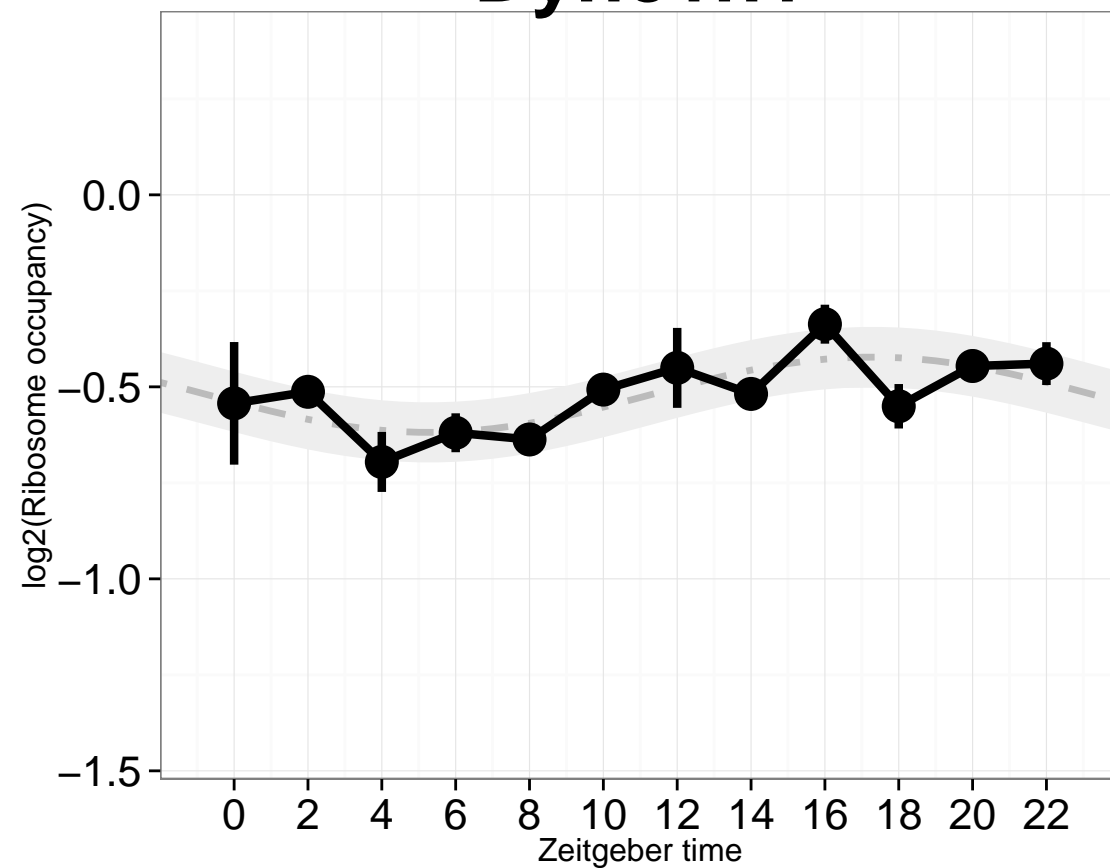

Supplement: Supplementary file 3131 [file 1]

## Tfrc

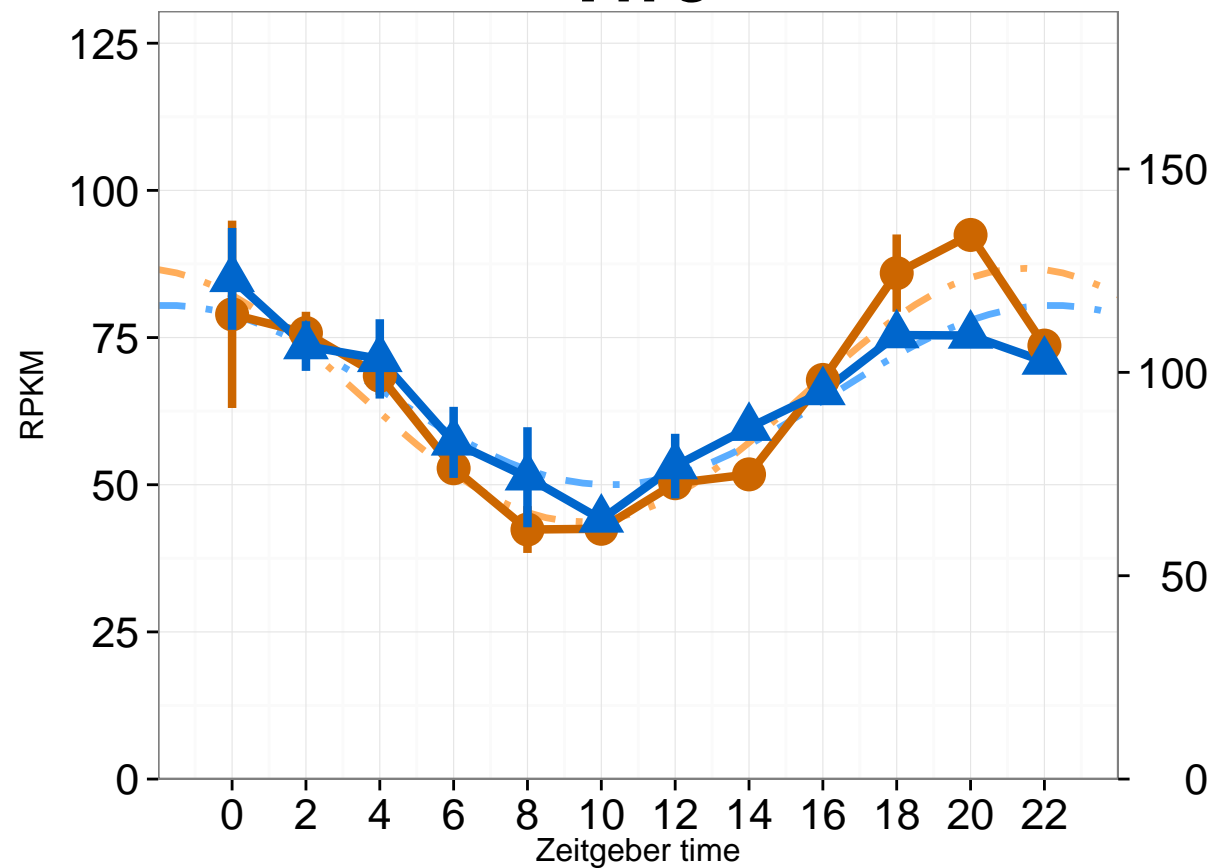

## Tfrc

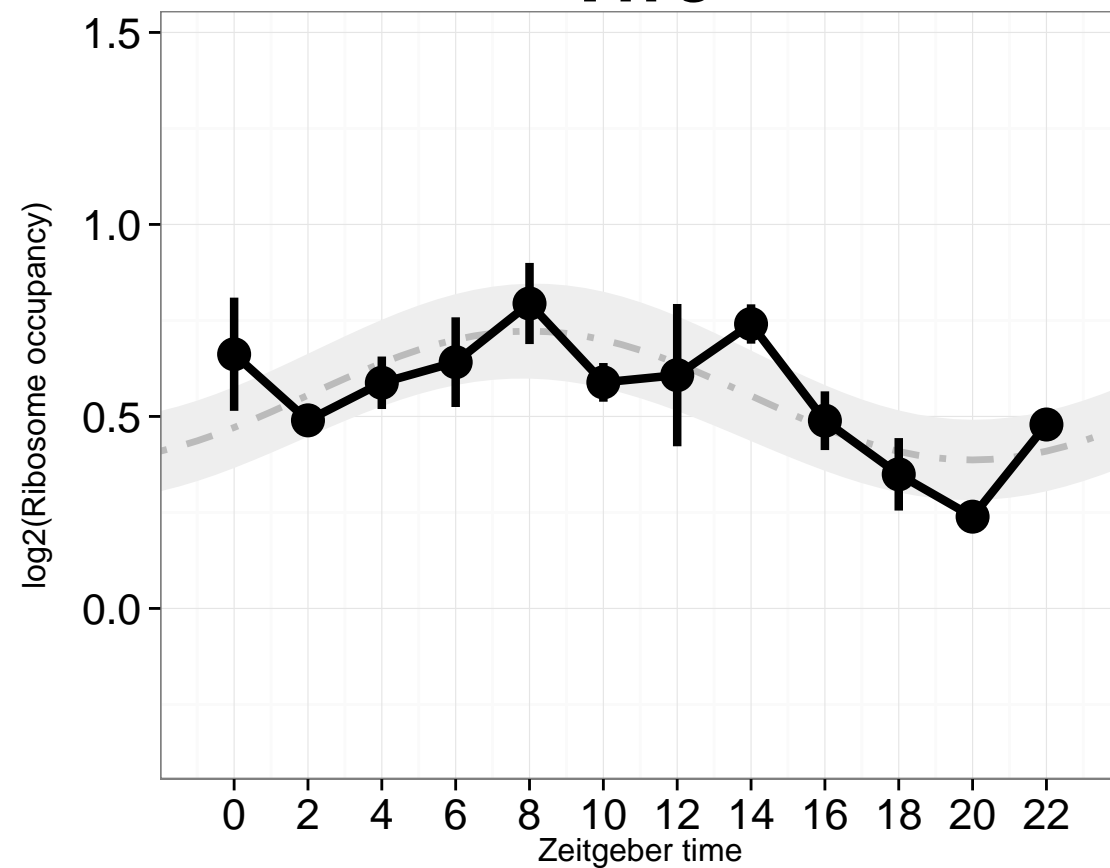

Supplement: Supplementary file 3132 [file 1]

## Adk

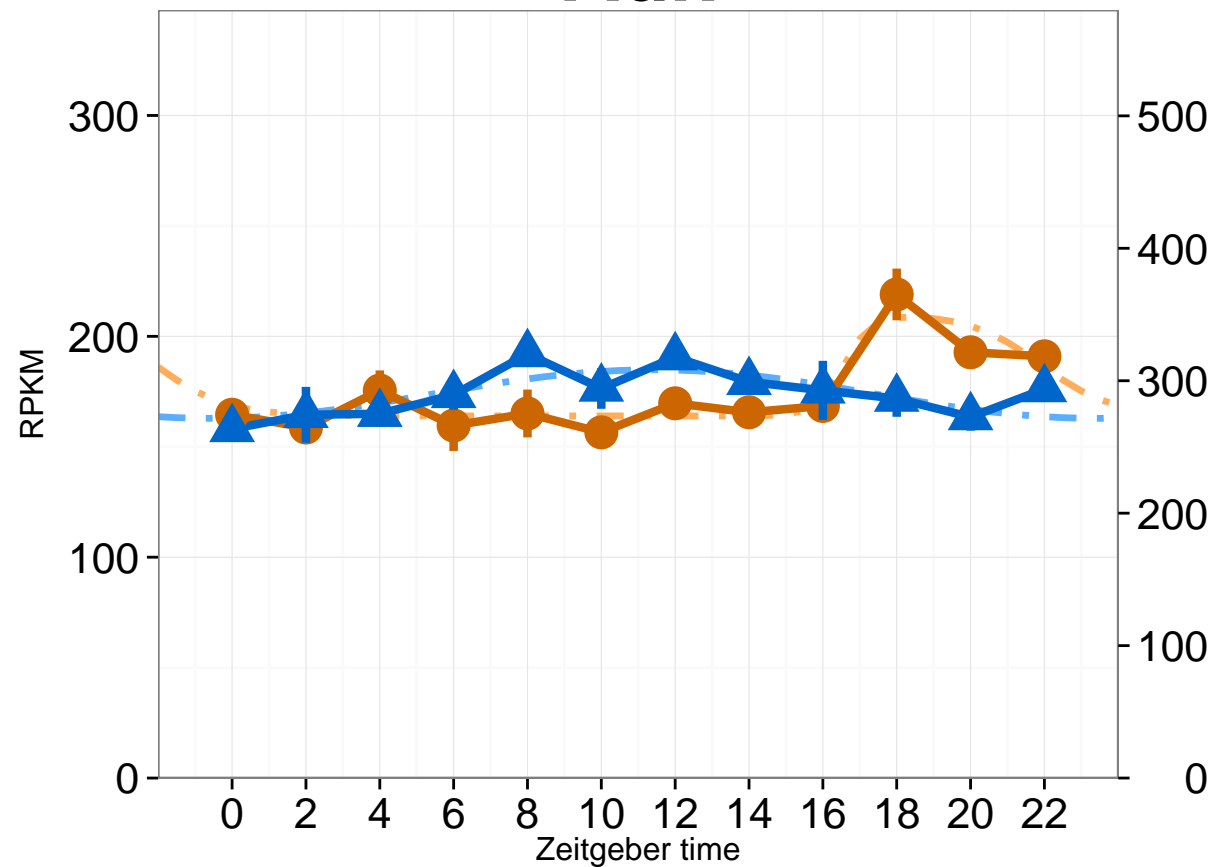

## Adk

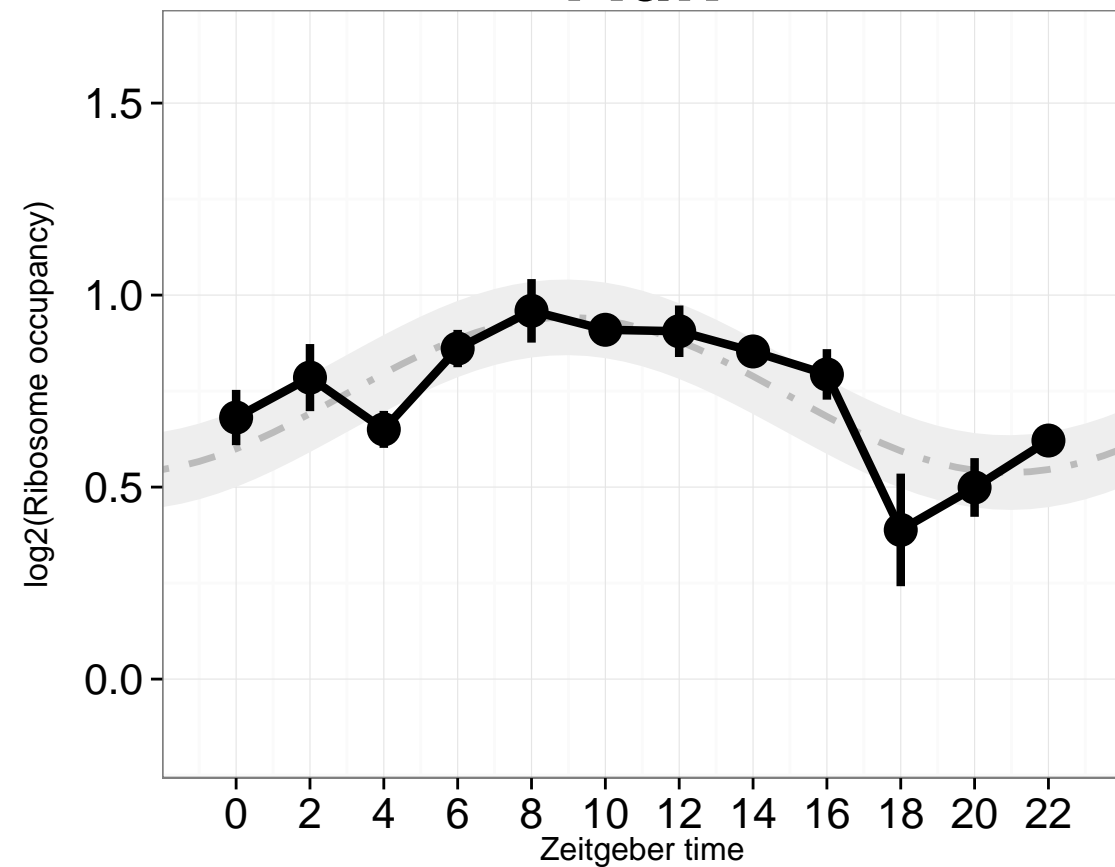

Supplement: Supplementary file 3133 [file 1]

## Myrip

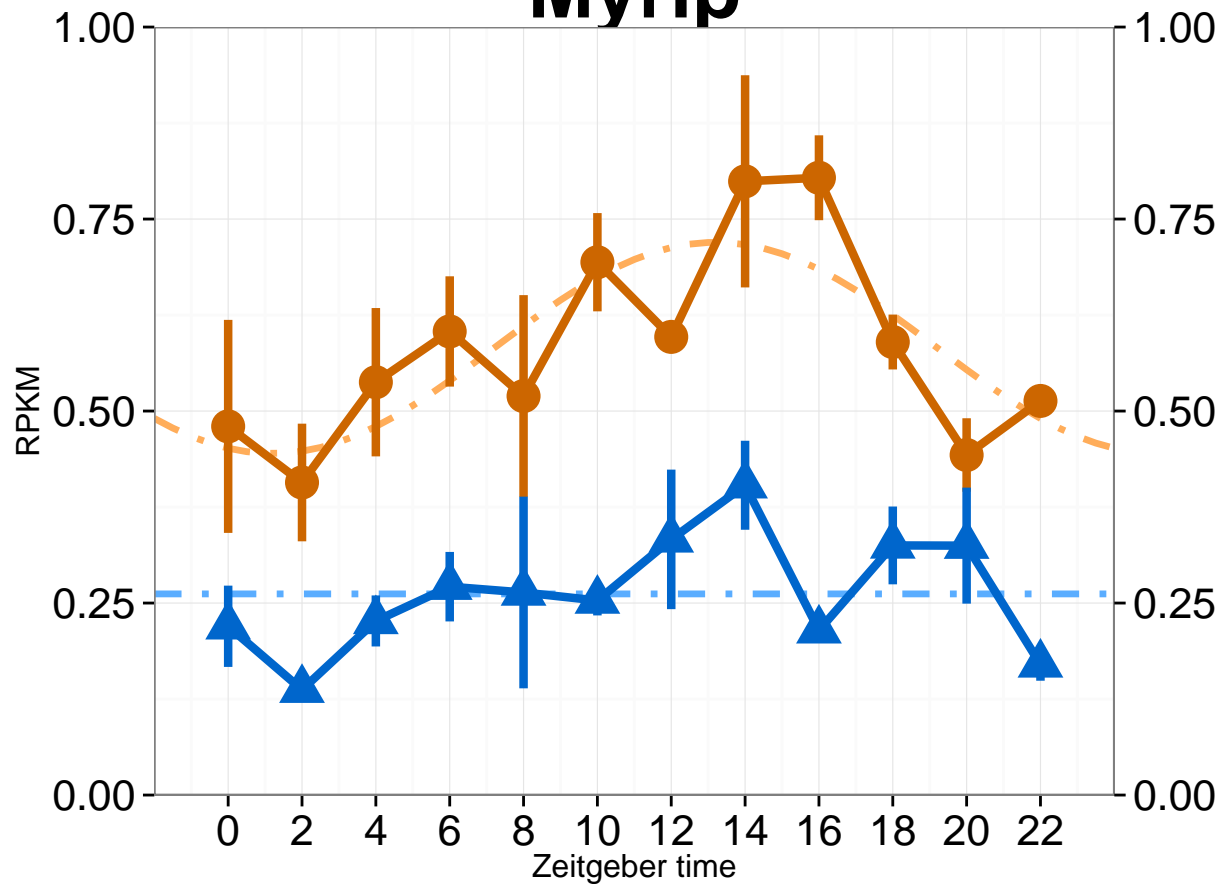

## Myrip

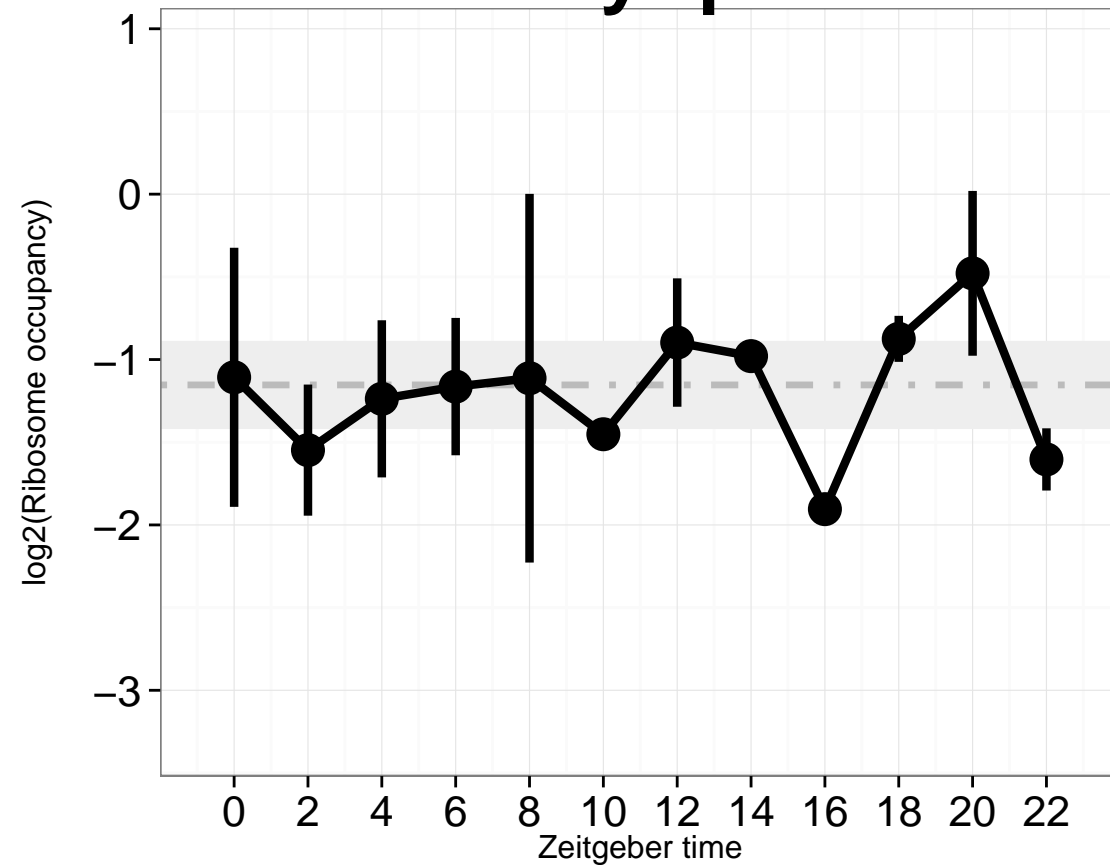

Supplement: Supplementary file 3134 [file 1]

## Pibf1

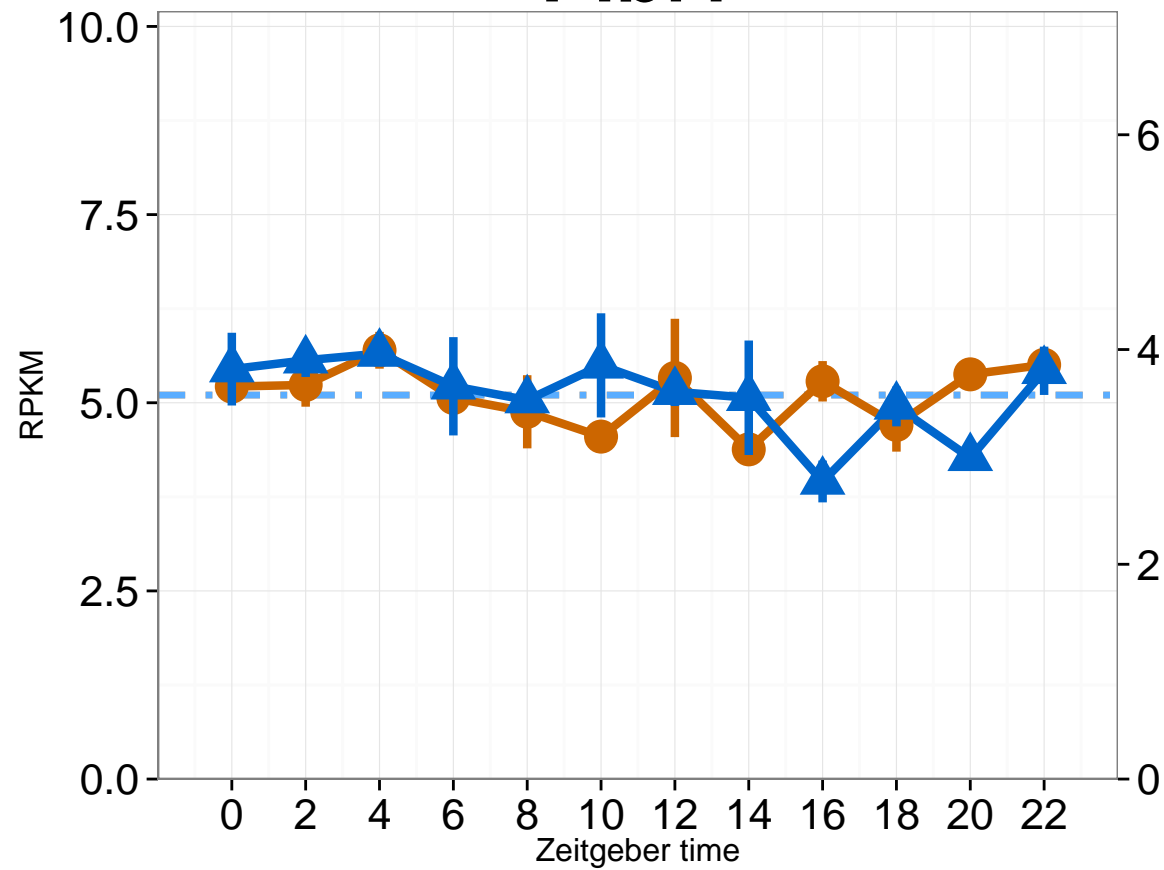

## Pibf1

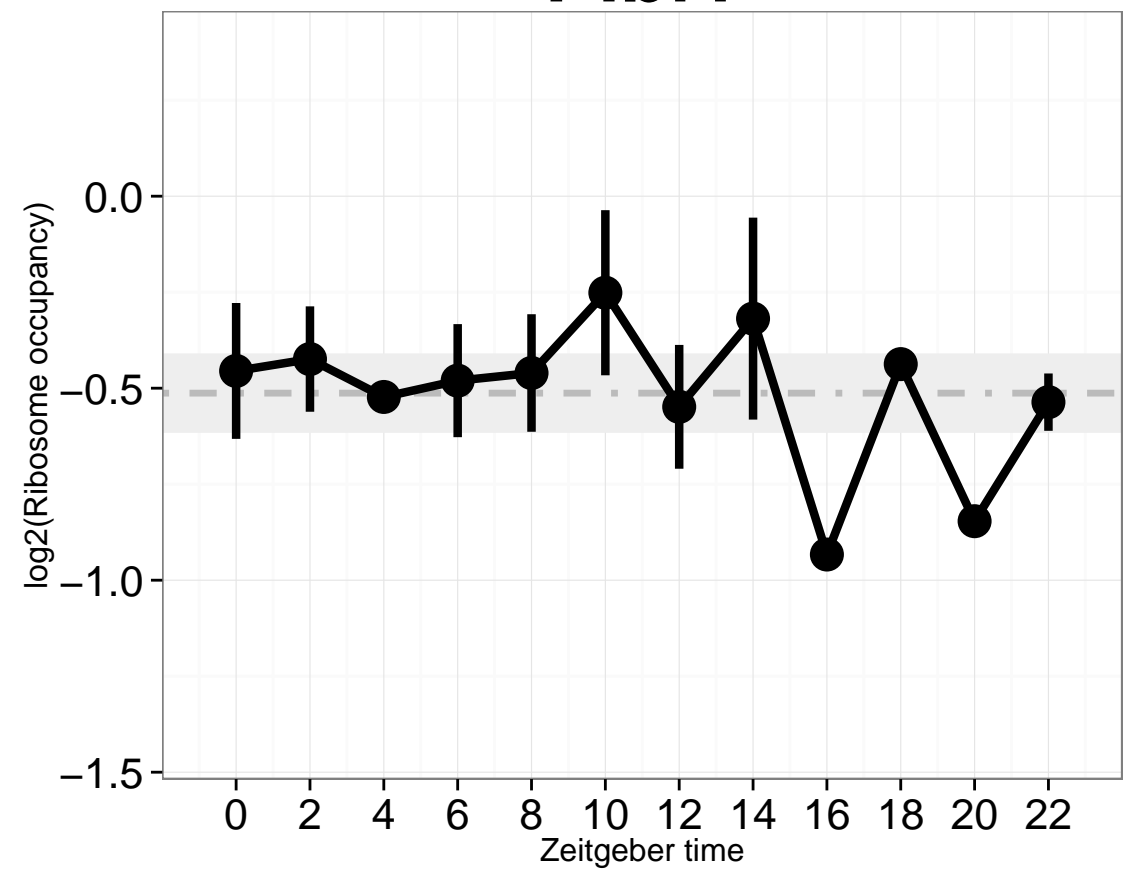

Supplement: Supplementary file 3135 [file 1]

## Kat2b

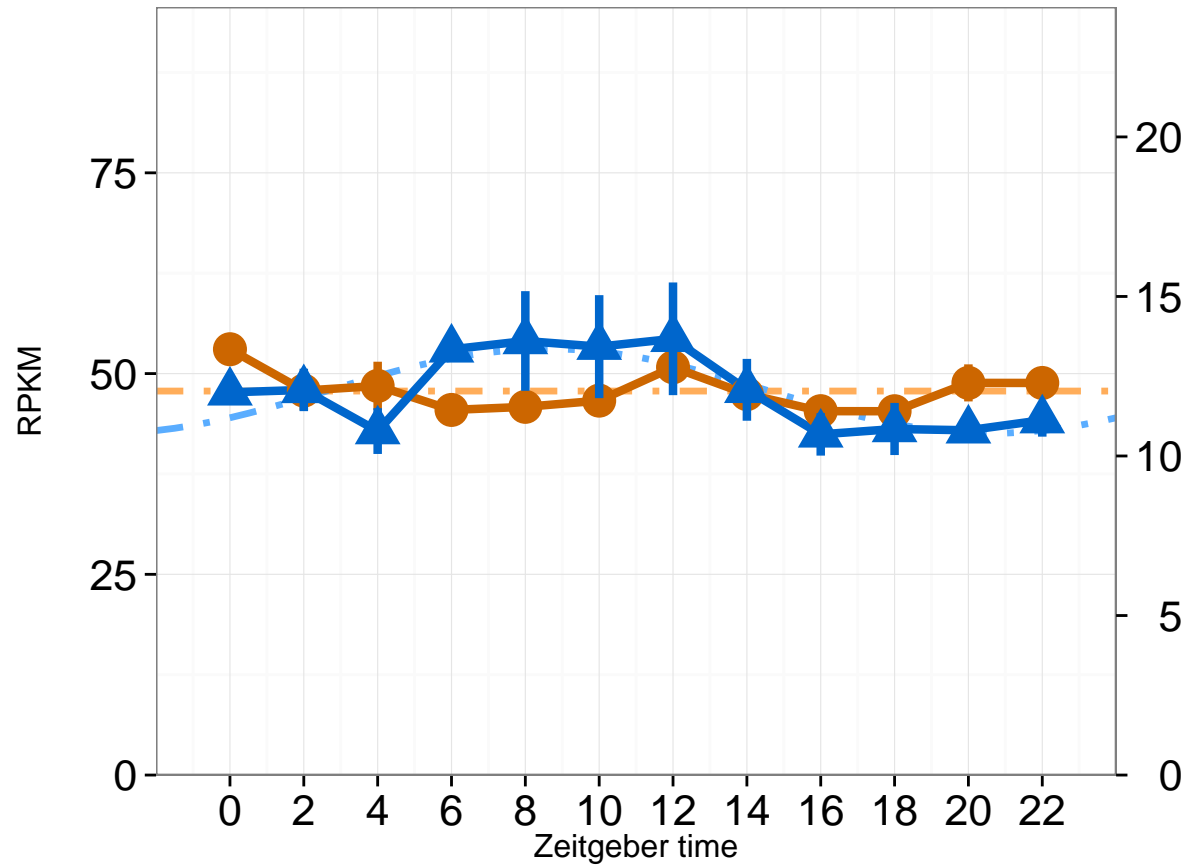

## Kat2b

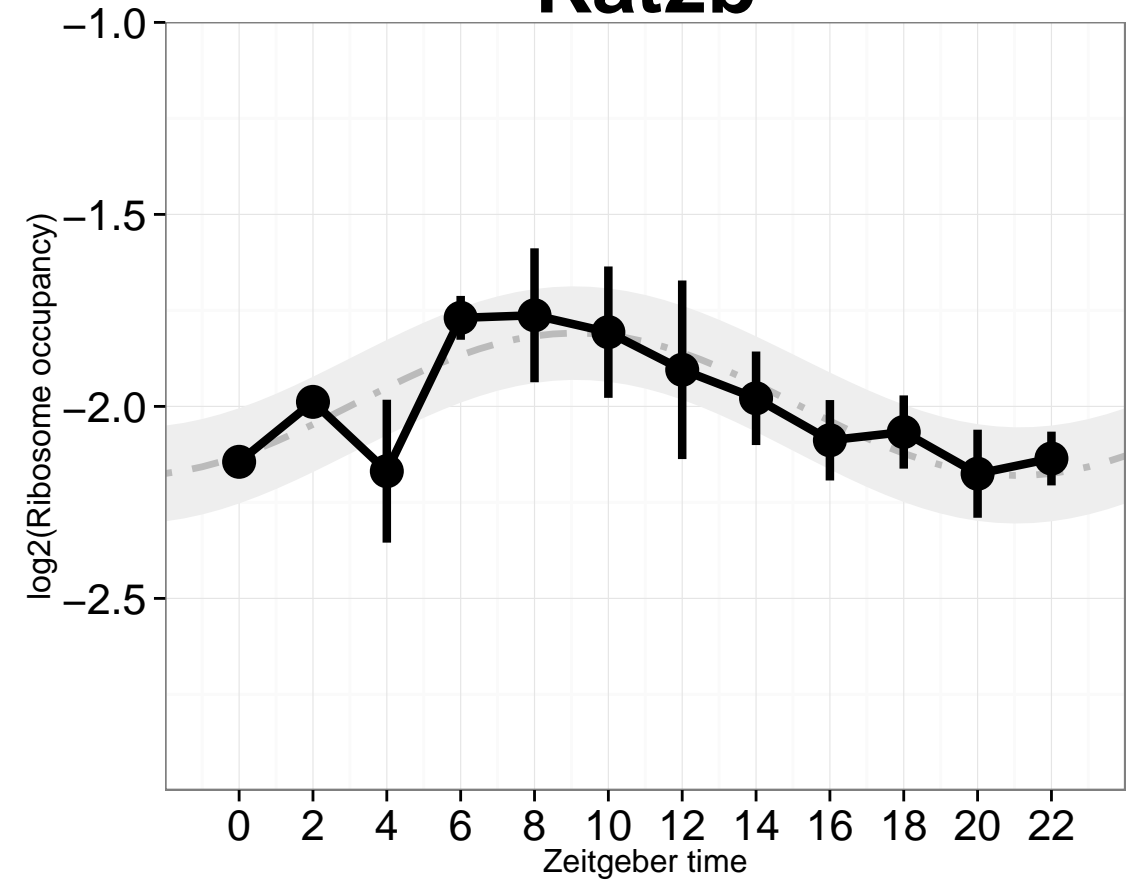

Supplement: Supplementary file 3136 [file 1]

# Zfp423

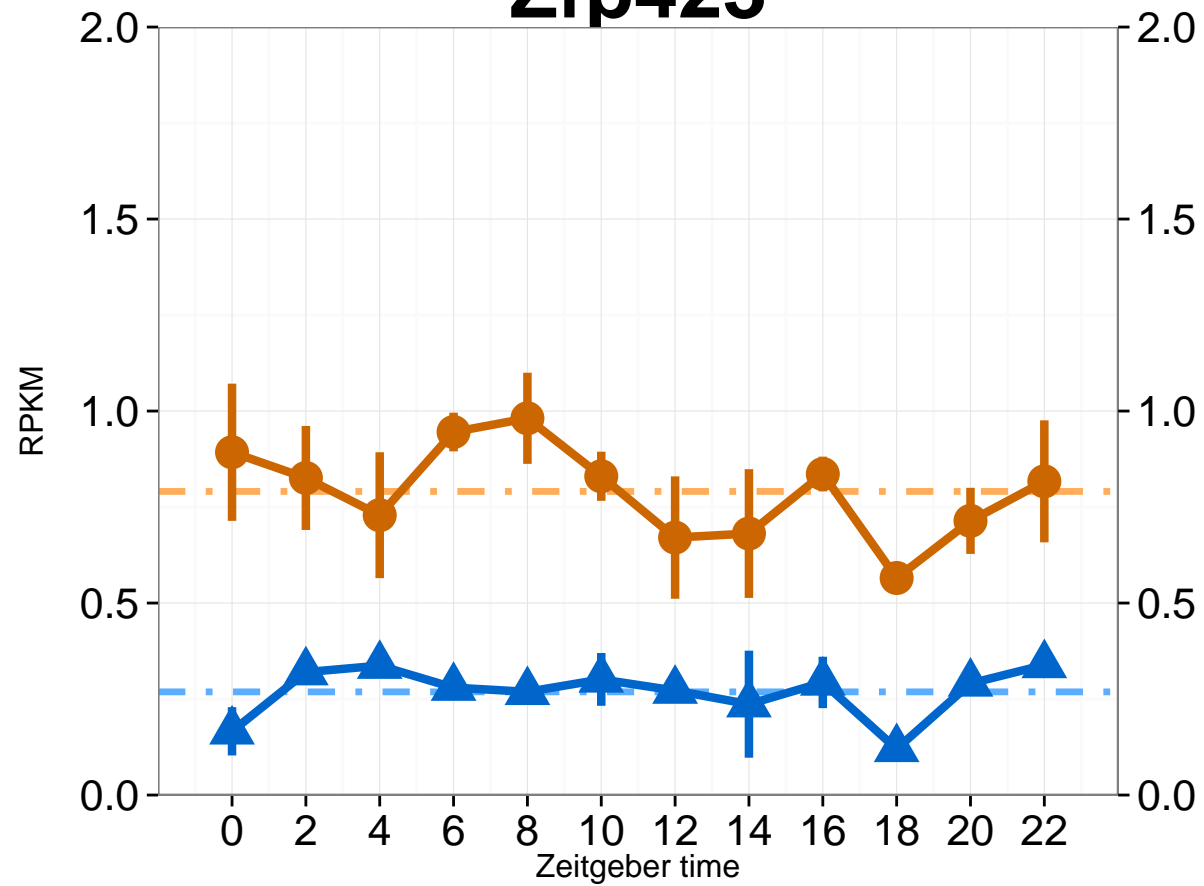

# Zfp423

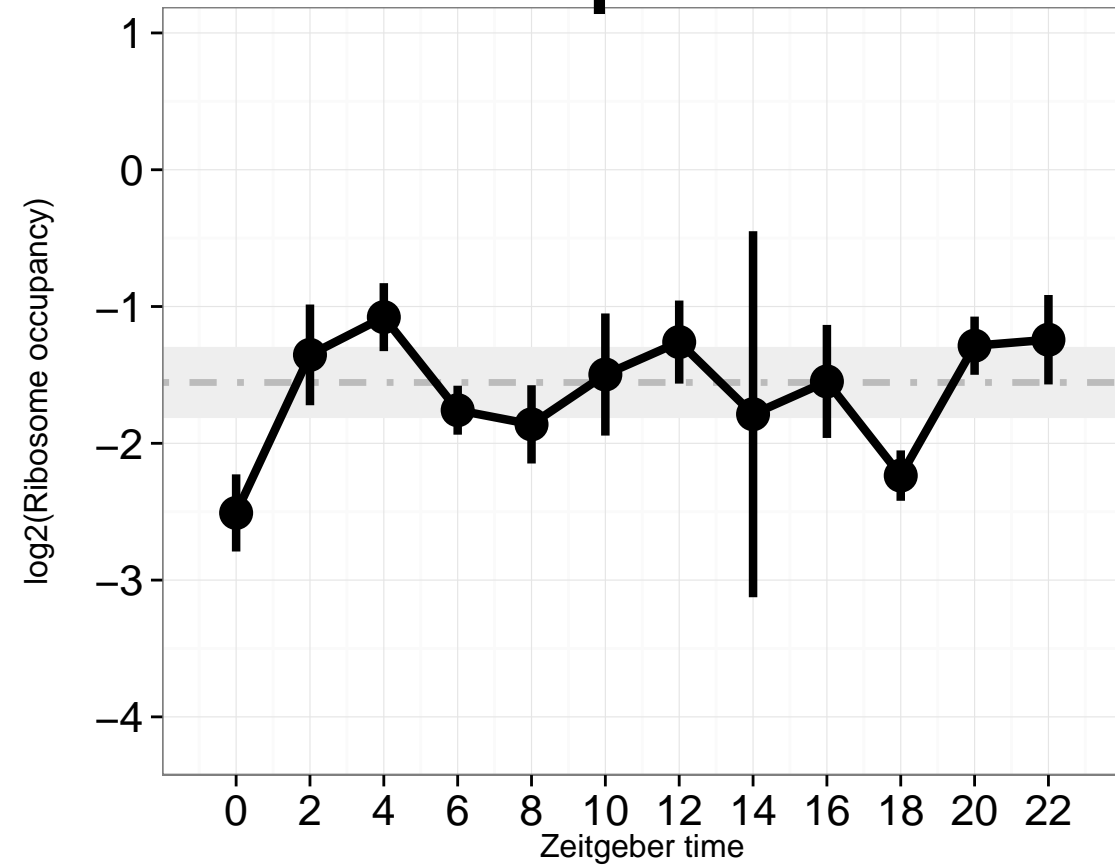

Supplement: Supplementary file 3137 [file 1]

## Neil1

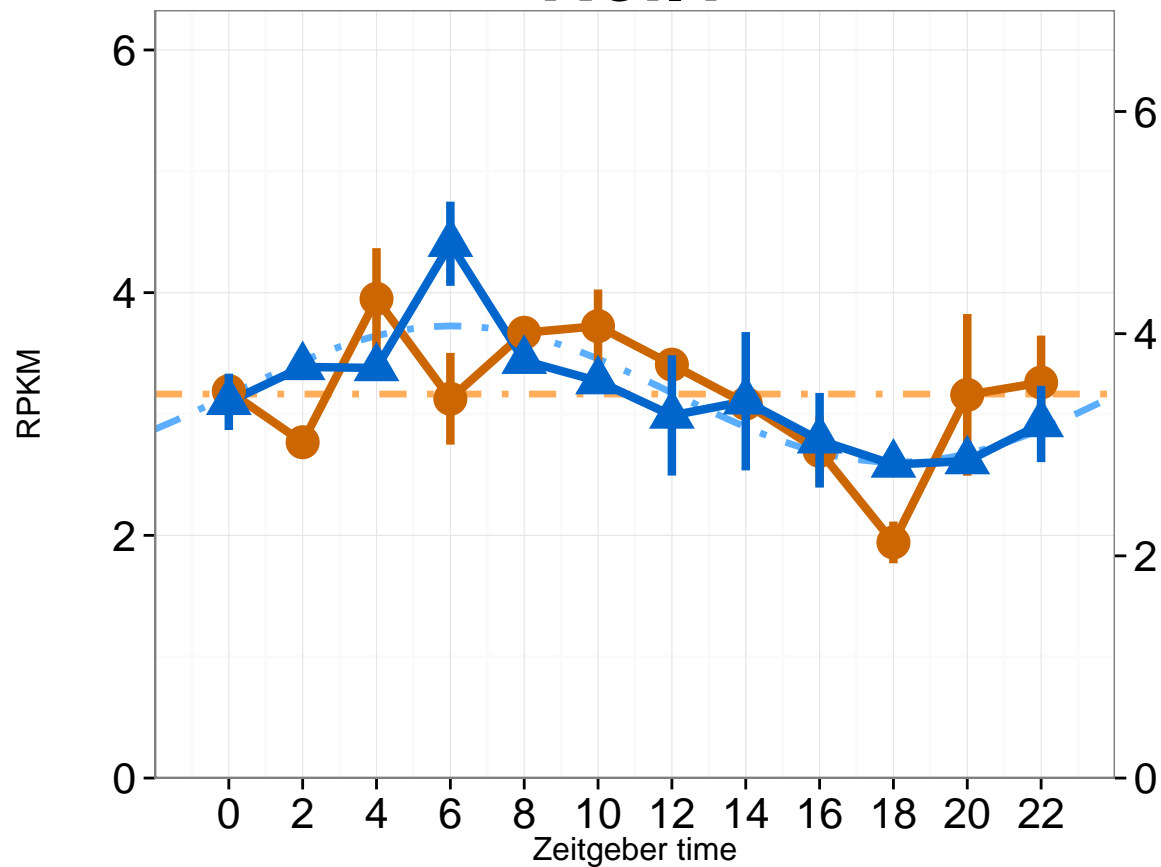

## Neil1

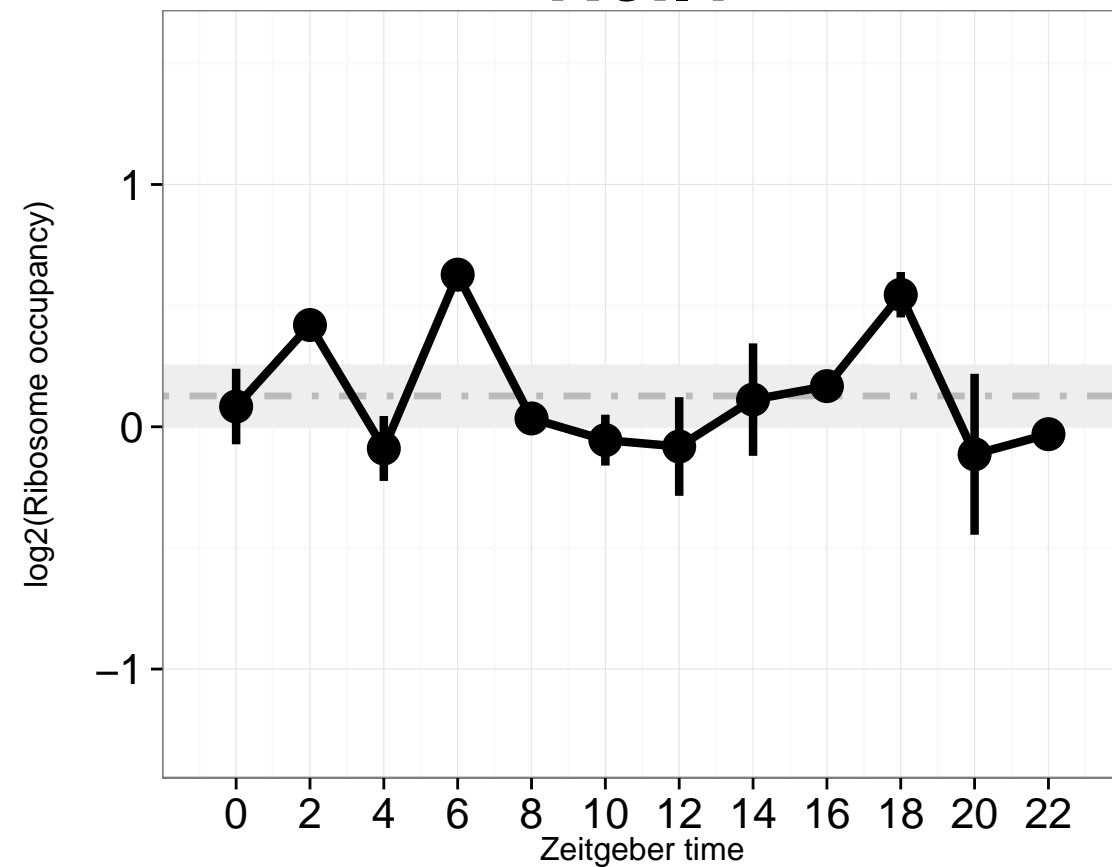

Supplement: Supplementary file 3138 [file 1]

## Sh3gl1

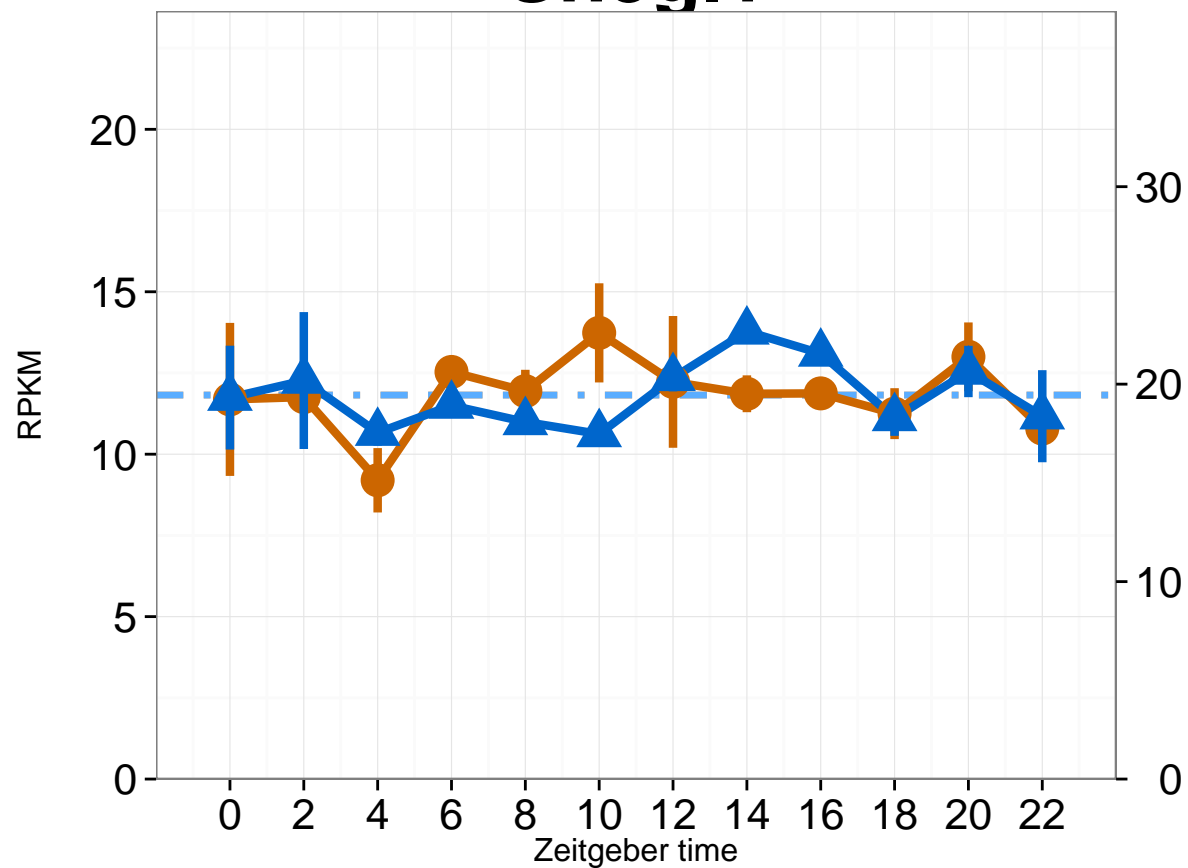

## Sh3gl1

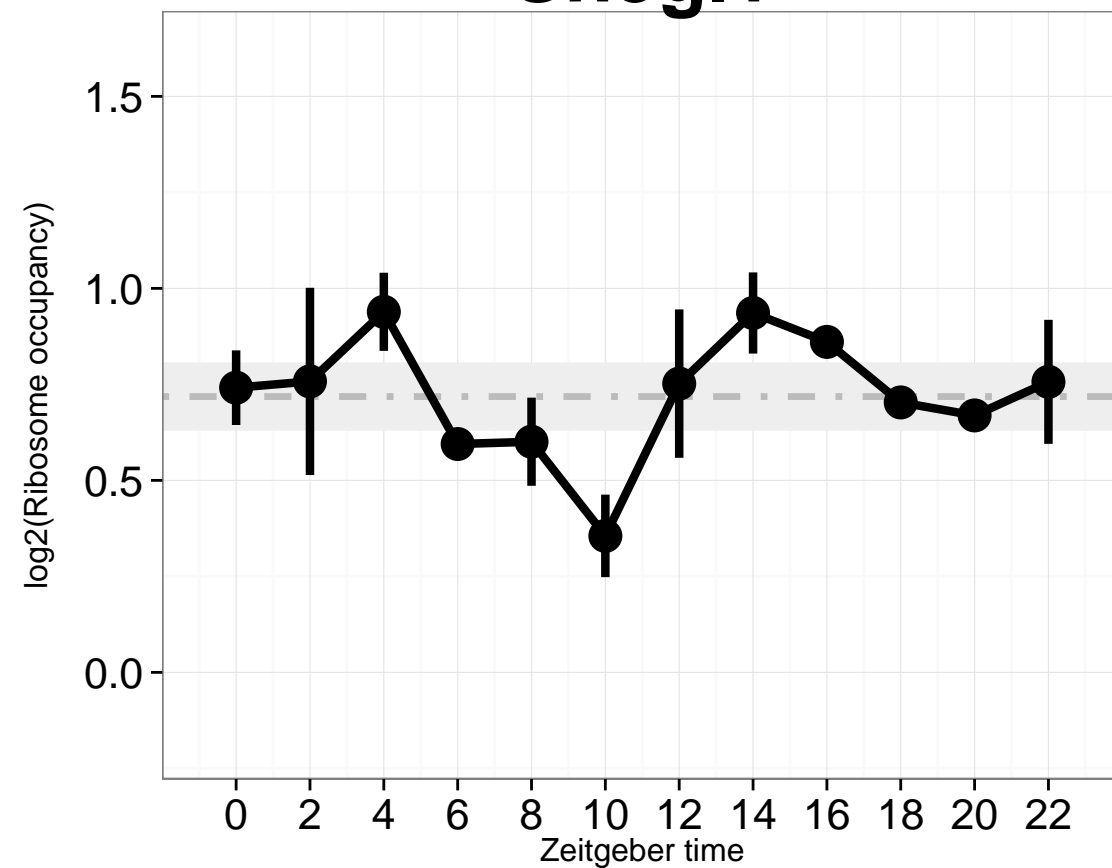

Supplement: Supplementary file 3140 [file 1]

## Wiz

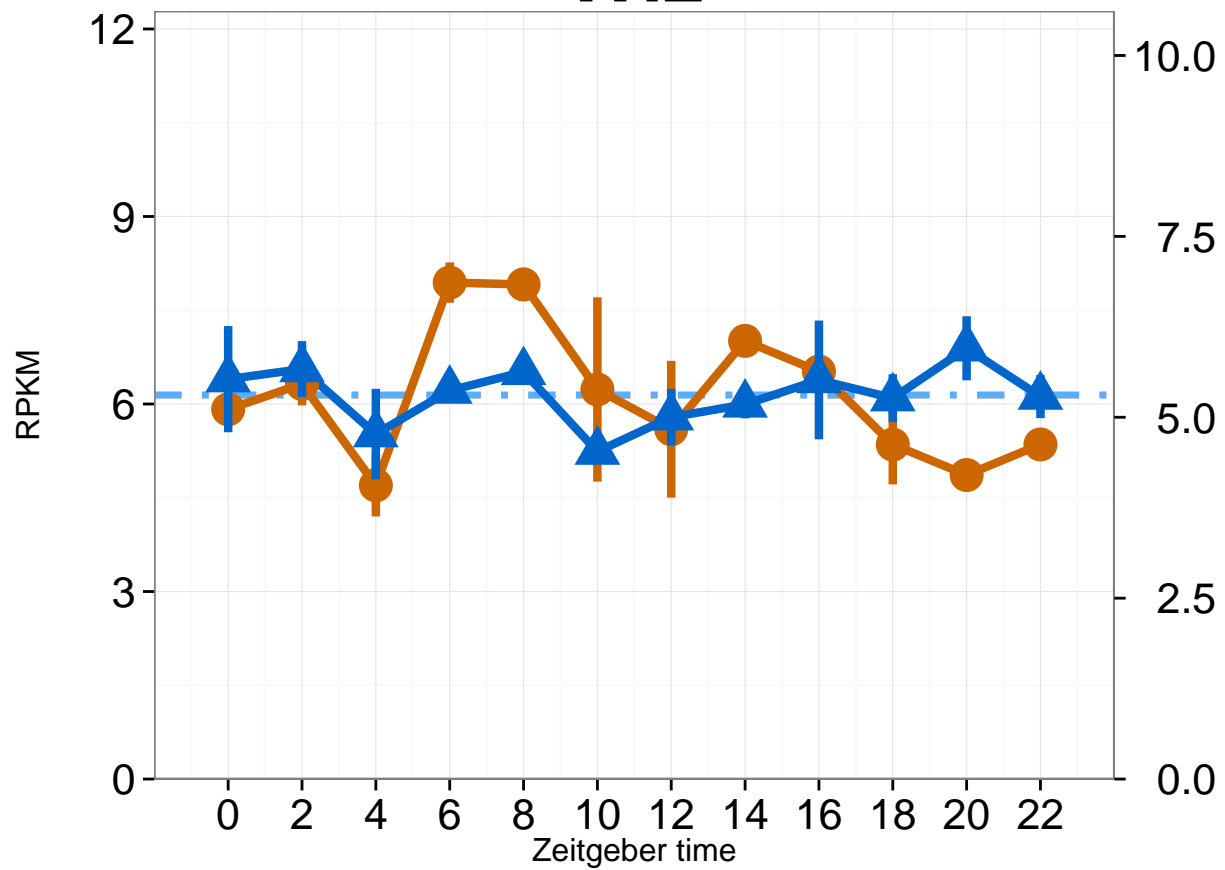

## Wiz

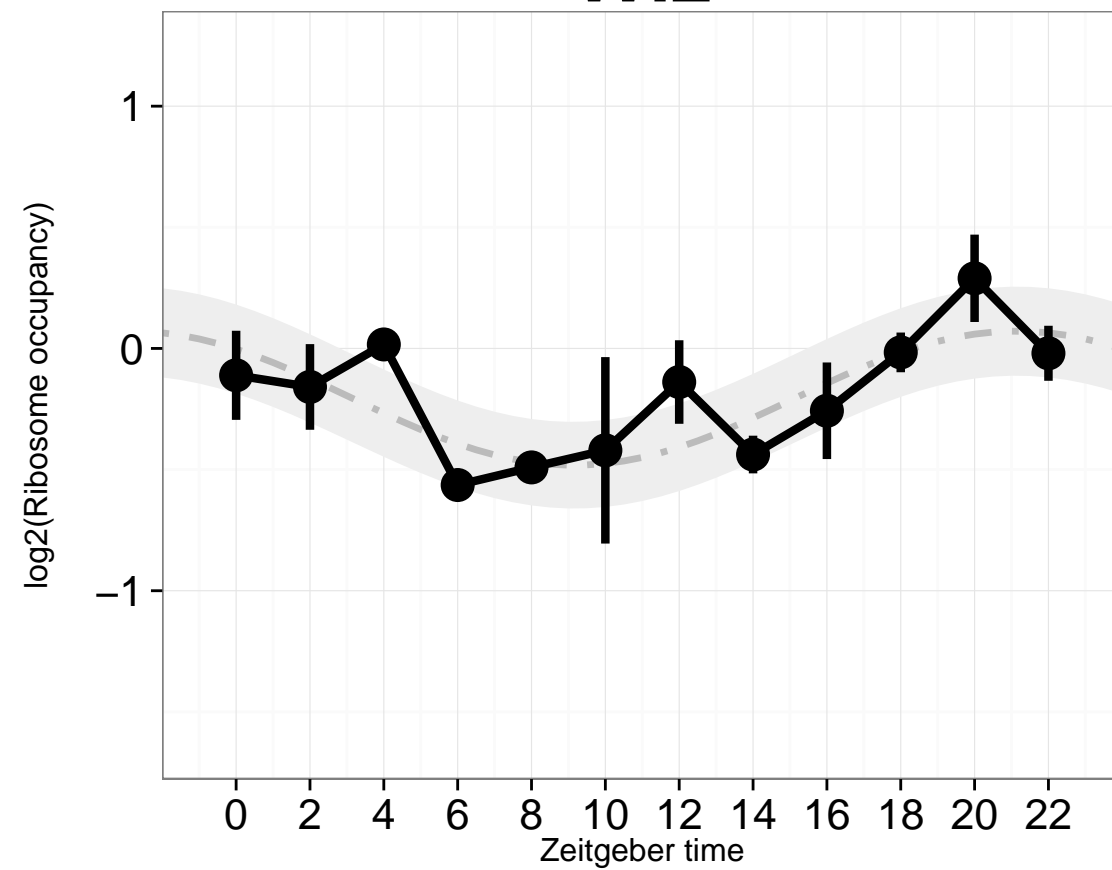

Supplement: Supplementary file 3141 [file 1]

# Stx5a

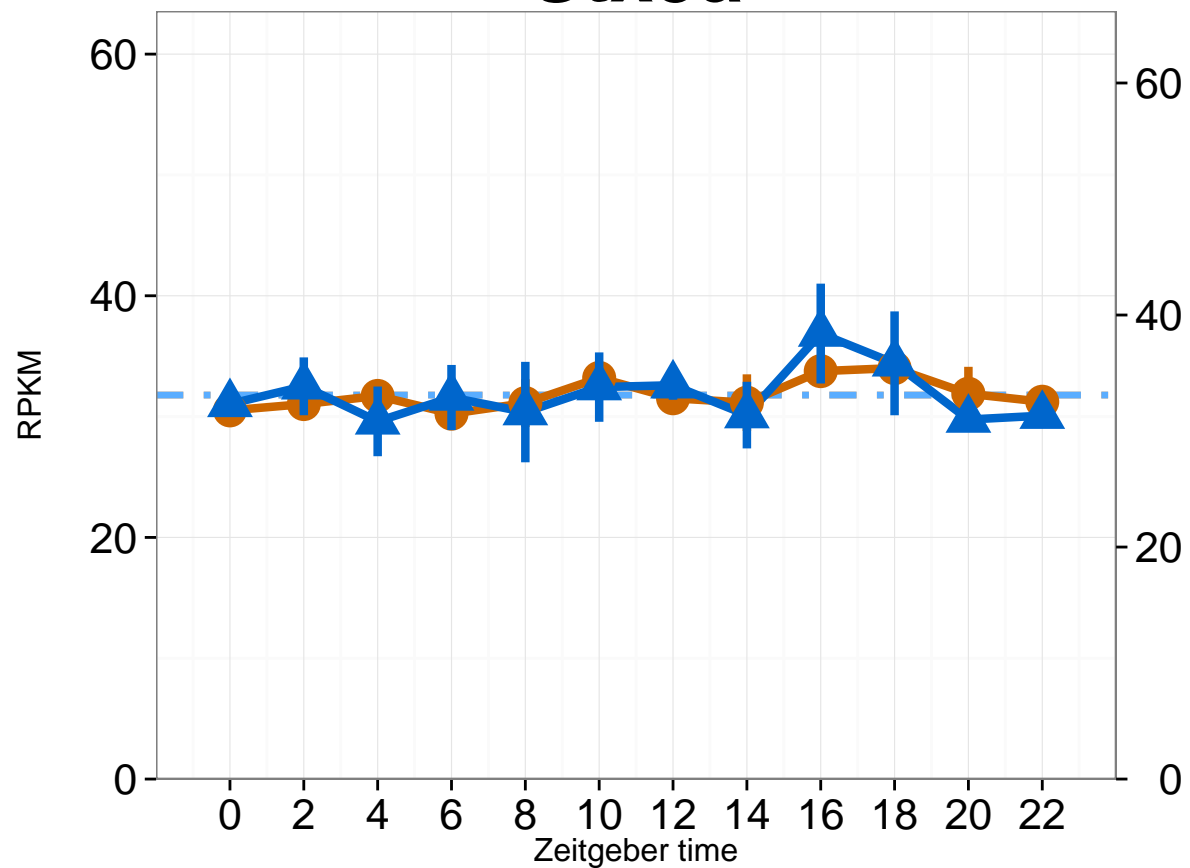

# Stx5a

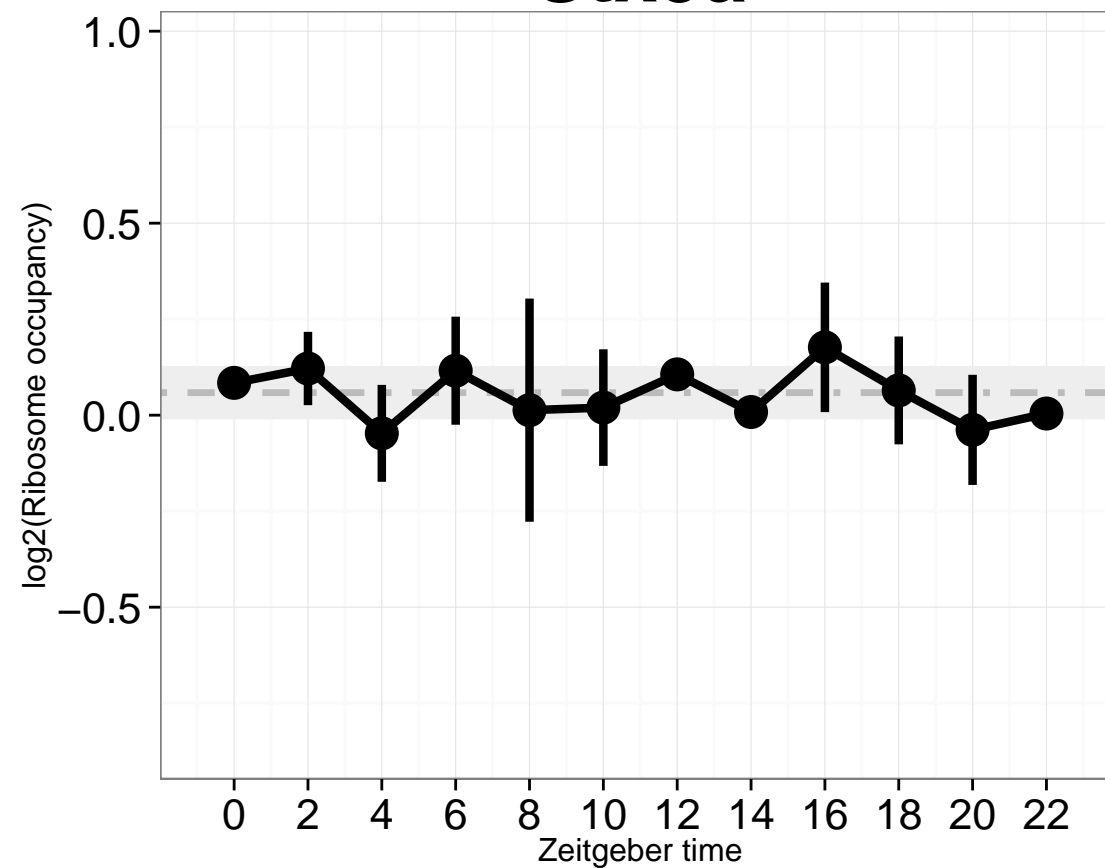

Supplement: Supplementary file 3142 [file 1]

# Plice1

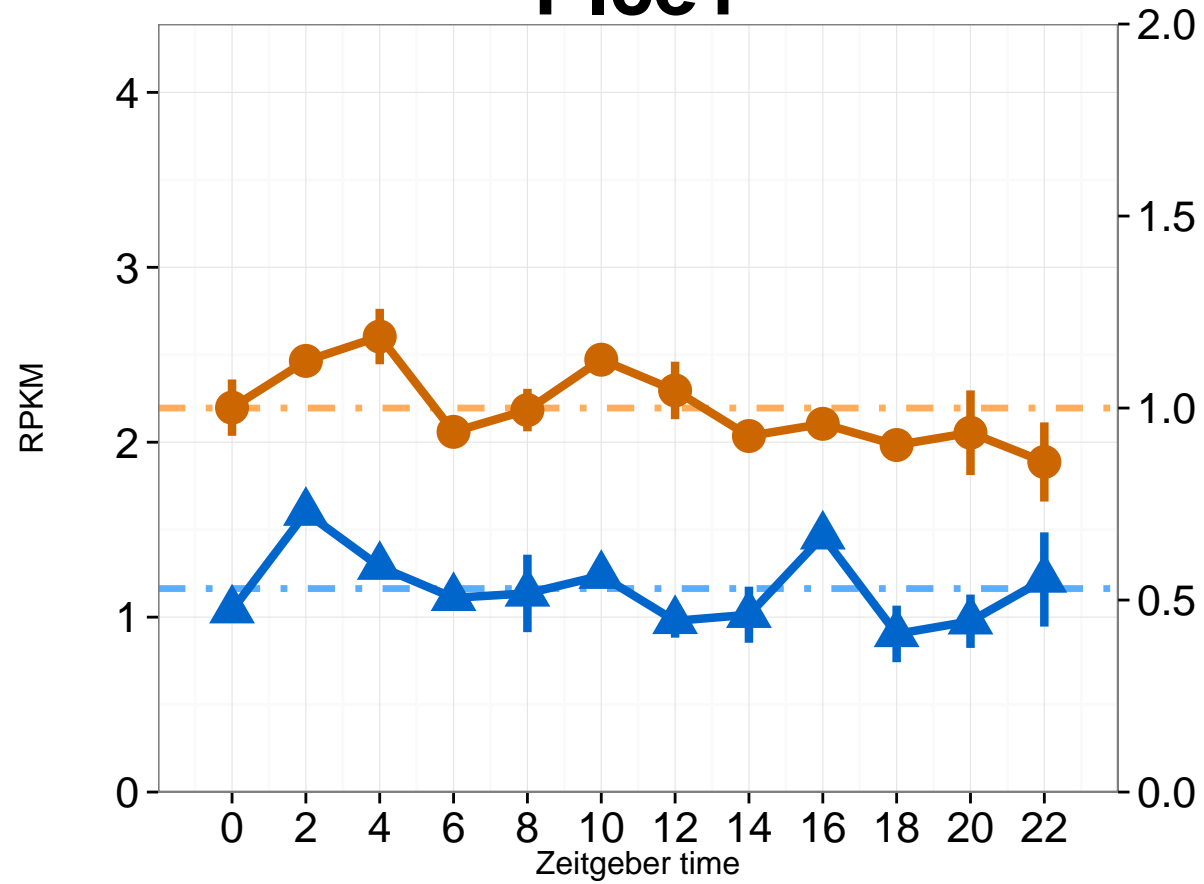

# Plice1

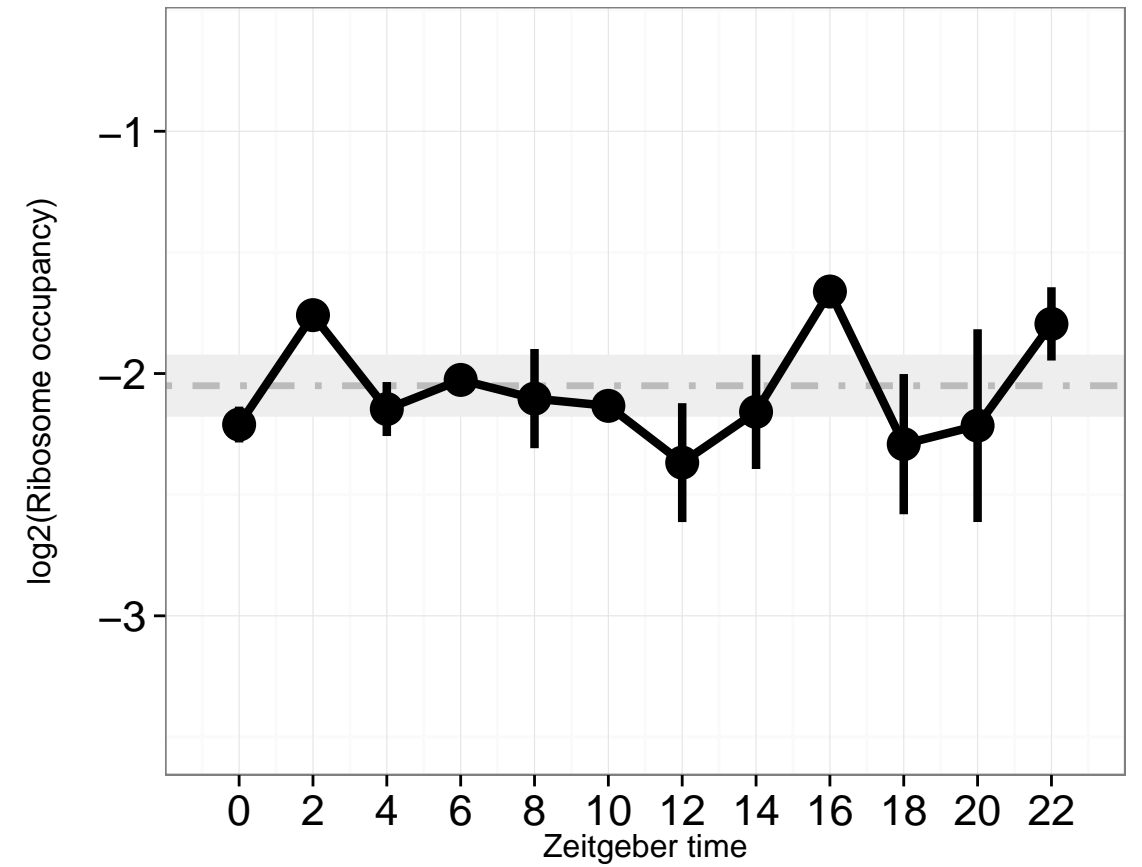

Supplement: Supplementary file 3143 [file 1]

## Tomm7

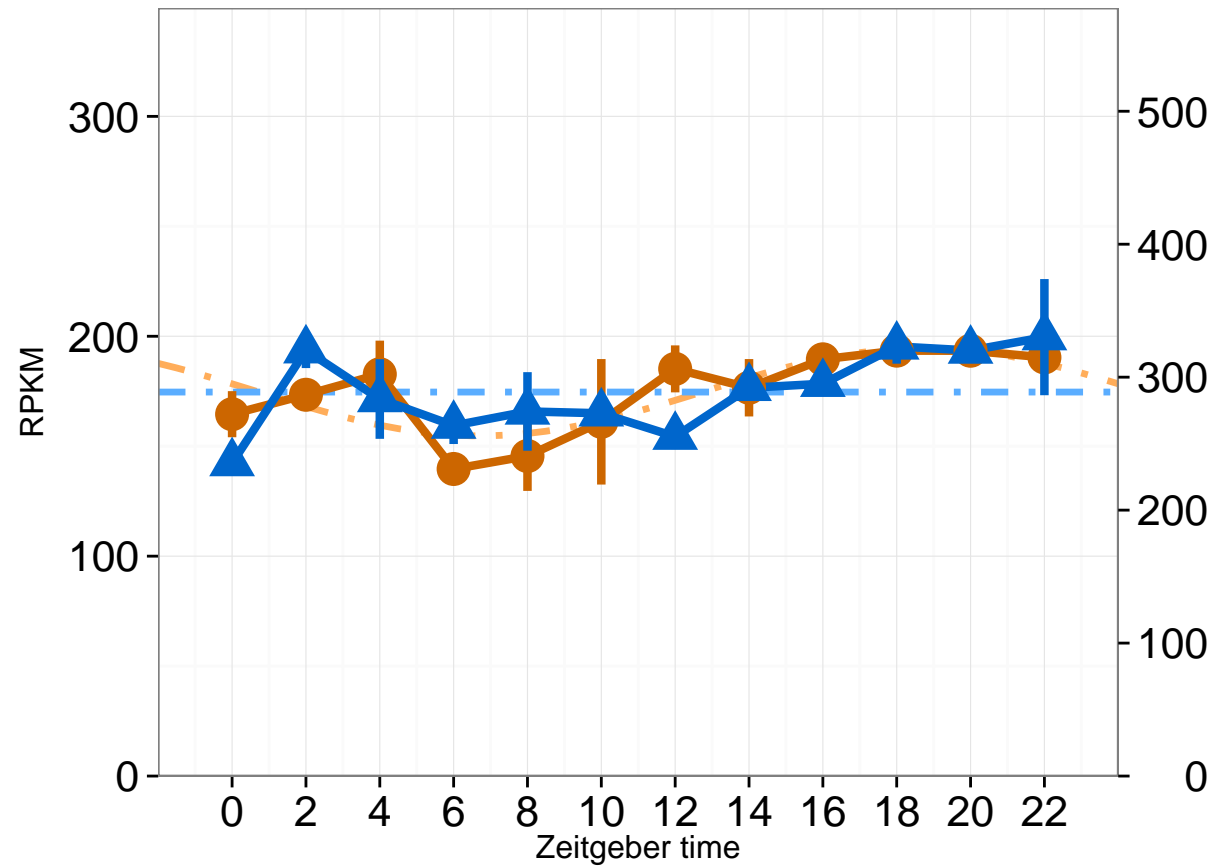

## Tomm7

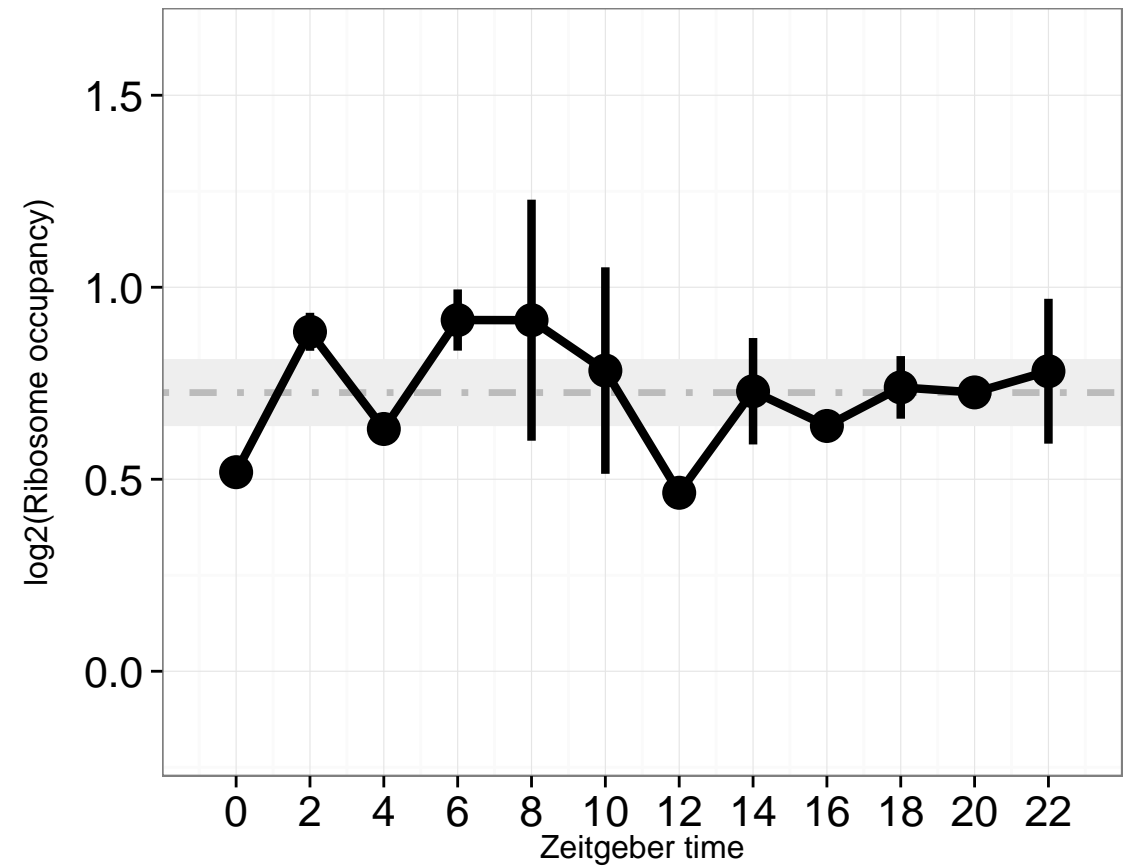

Supplement: Supplementary file 3144 [file 1]

# Pcdhb12

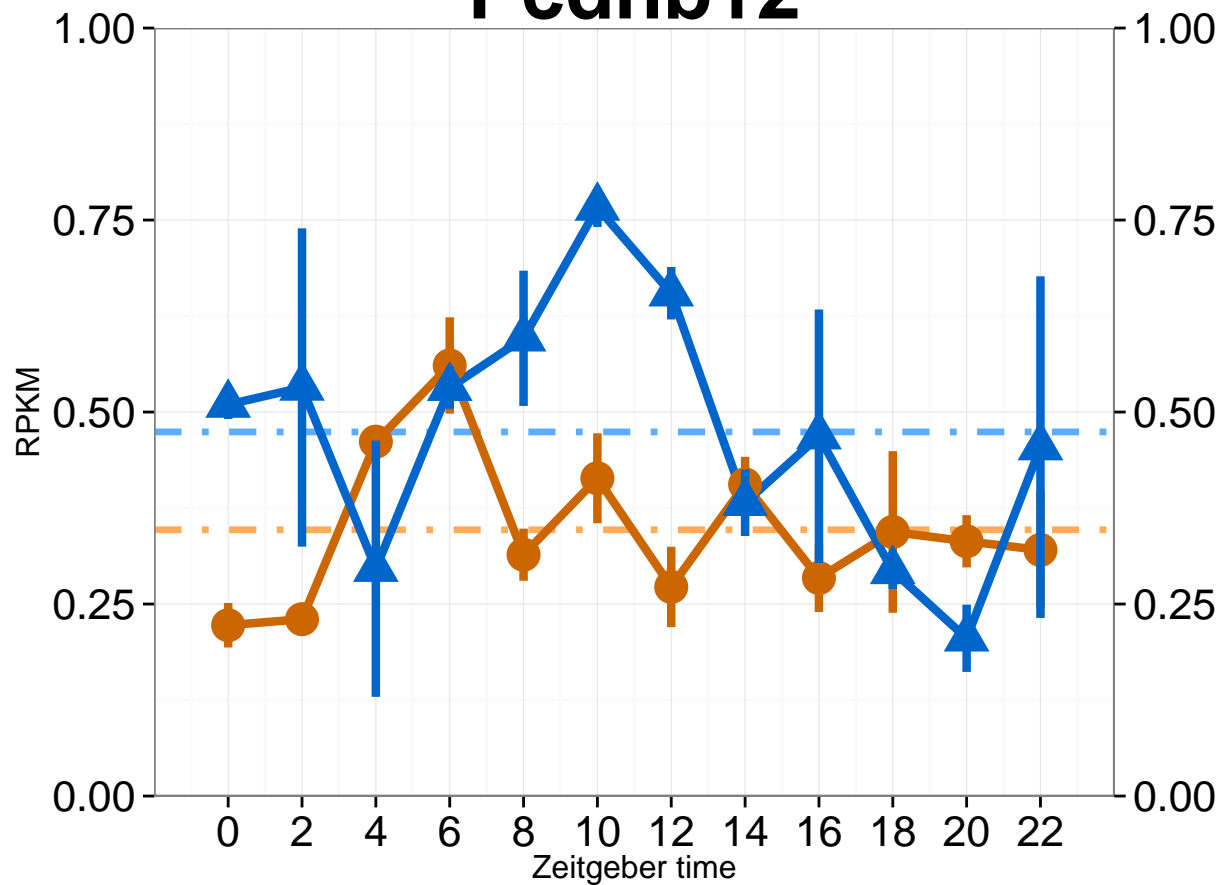

# Pcdhb12

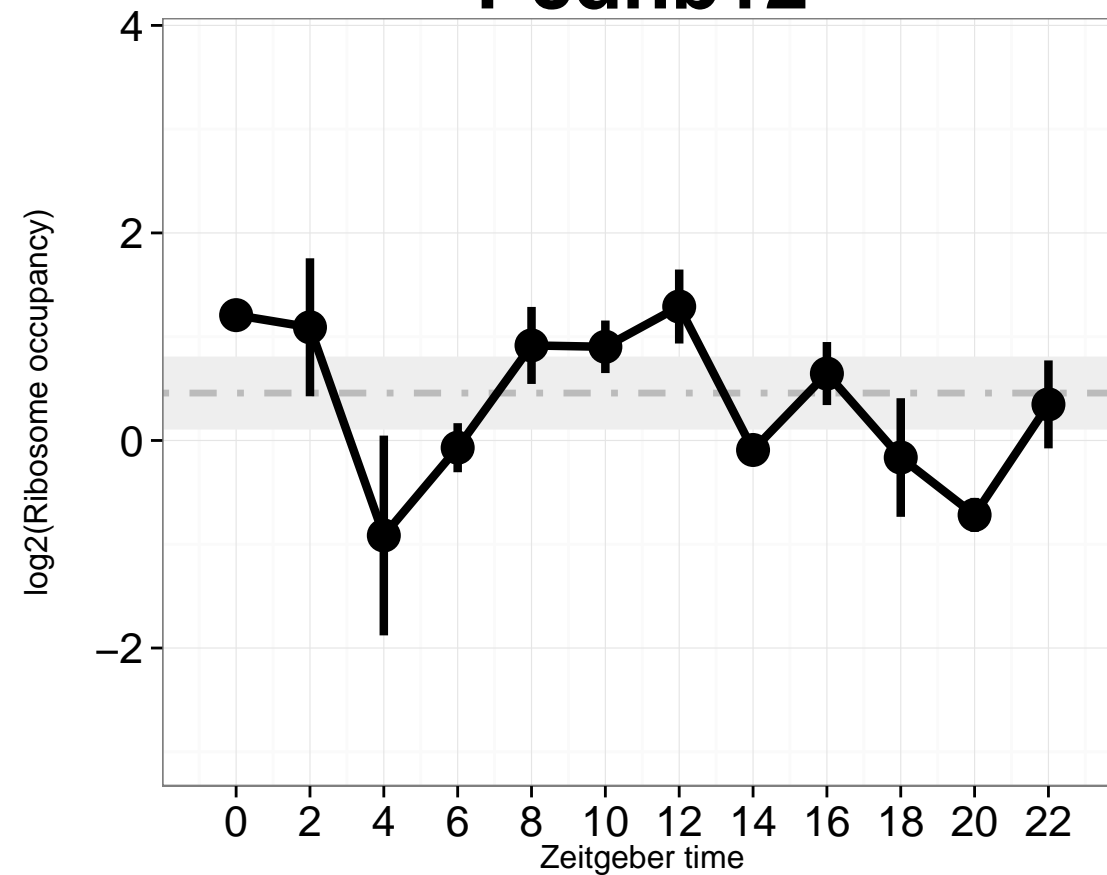

Supplement: Supplementary file 3145 [file 1]

## Smox

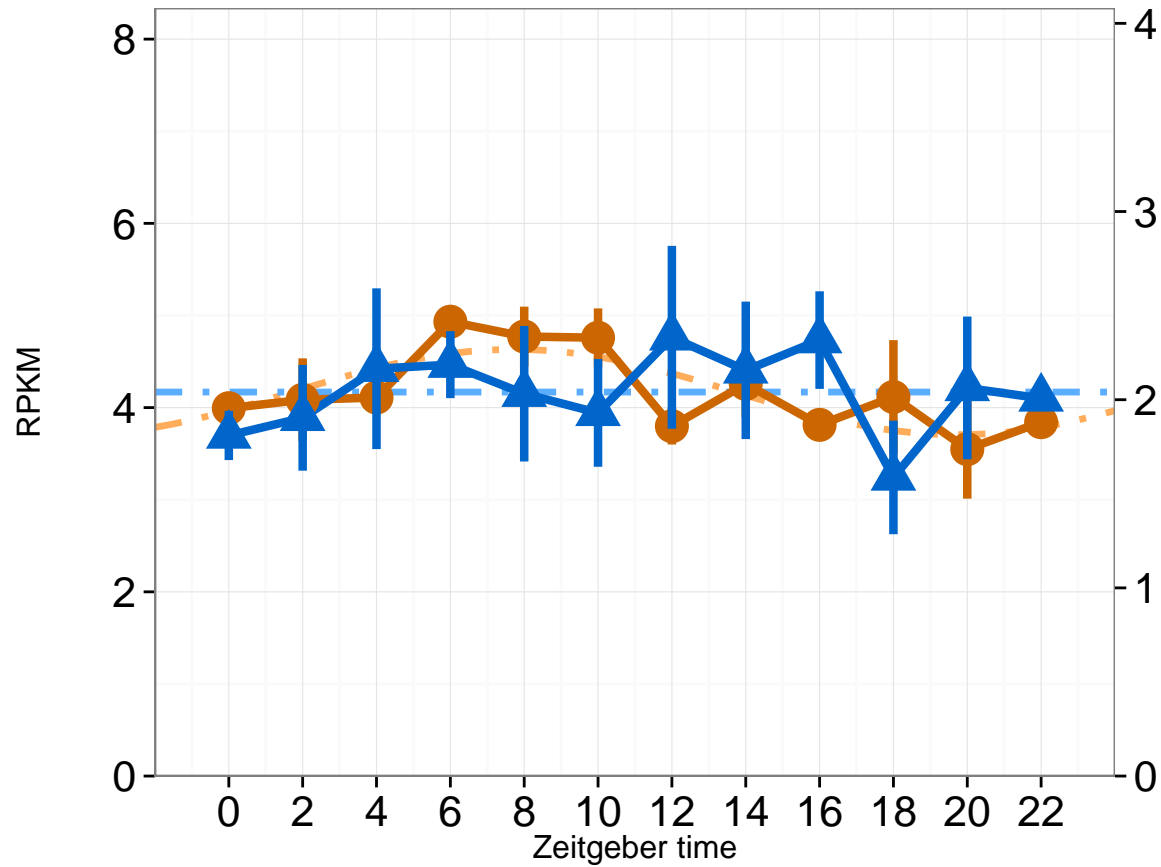

## Smox

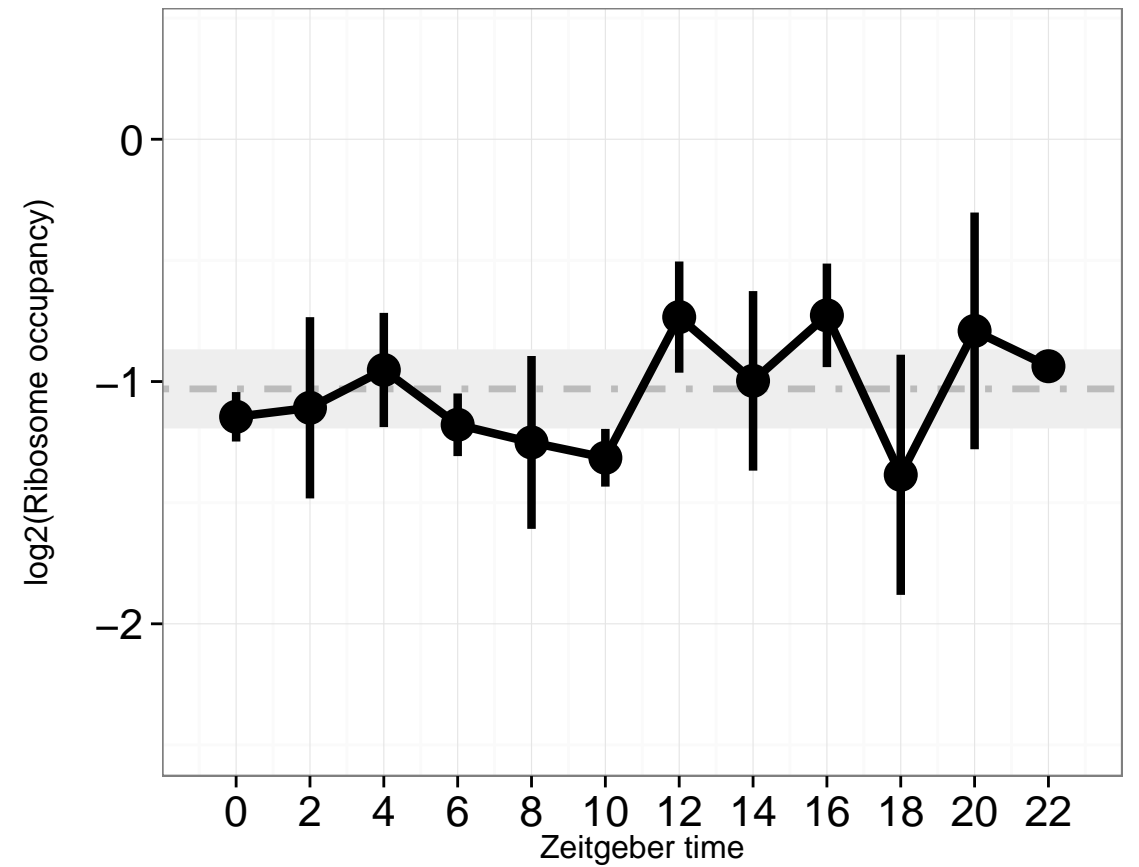

Supplement: Supplementary file 3146 [file 1]

## Zdhhc3

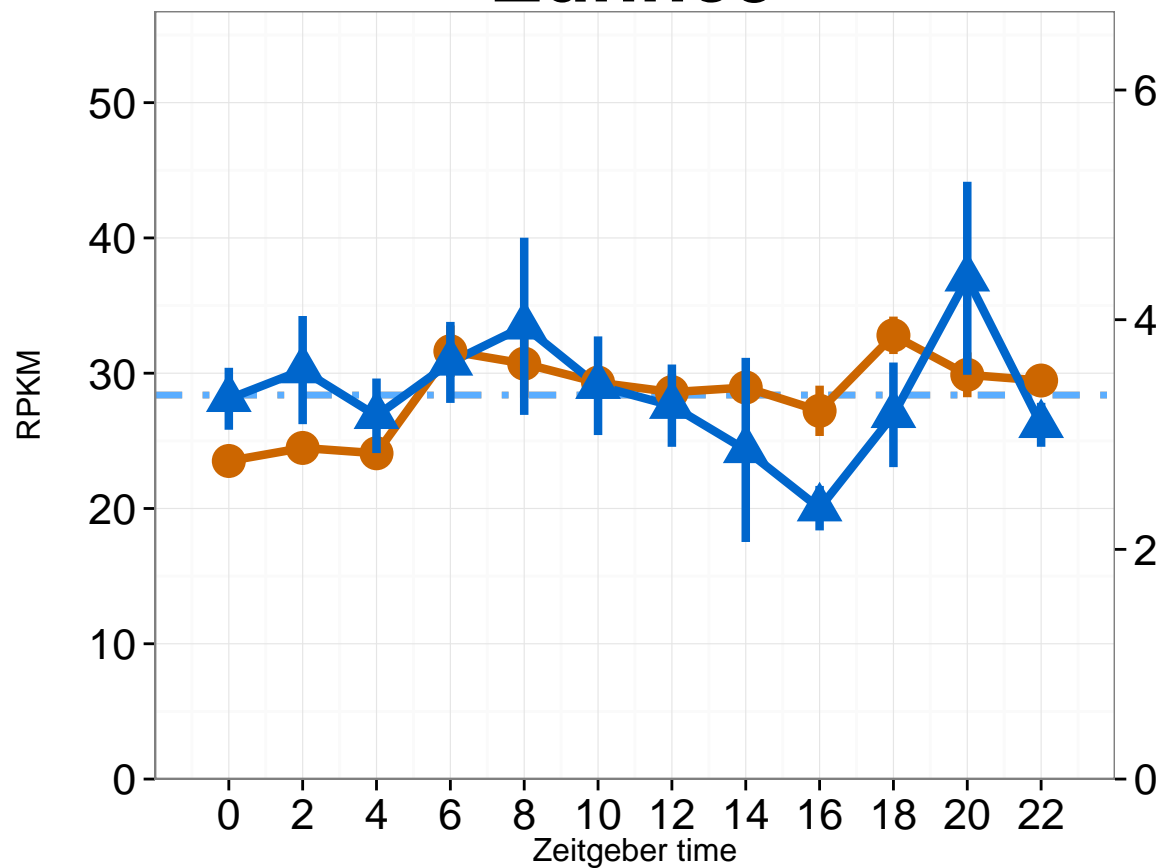

## Zdhhc3

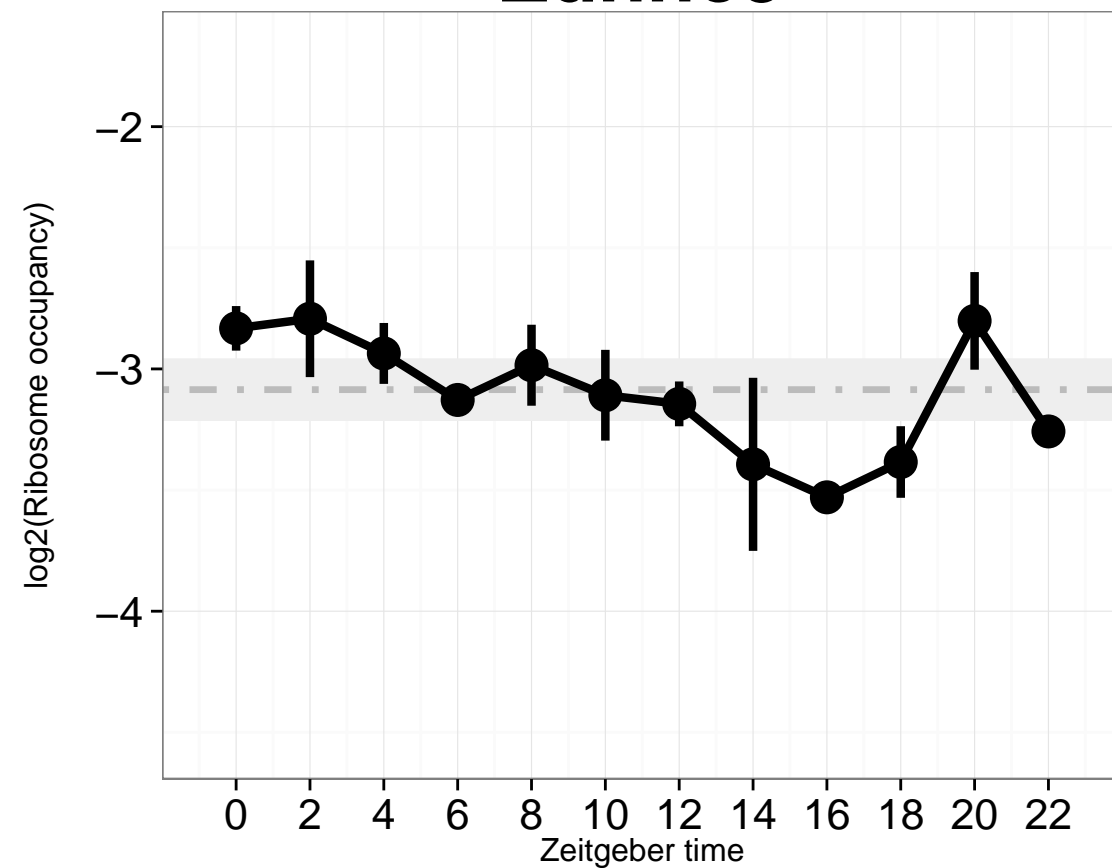

Supplement: Supplementary file 3147 [file 1]

## Ncald

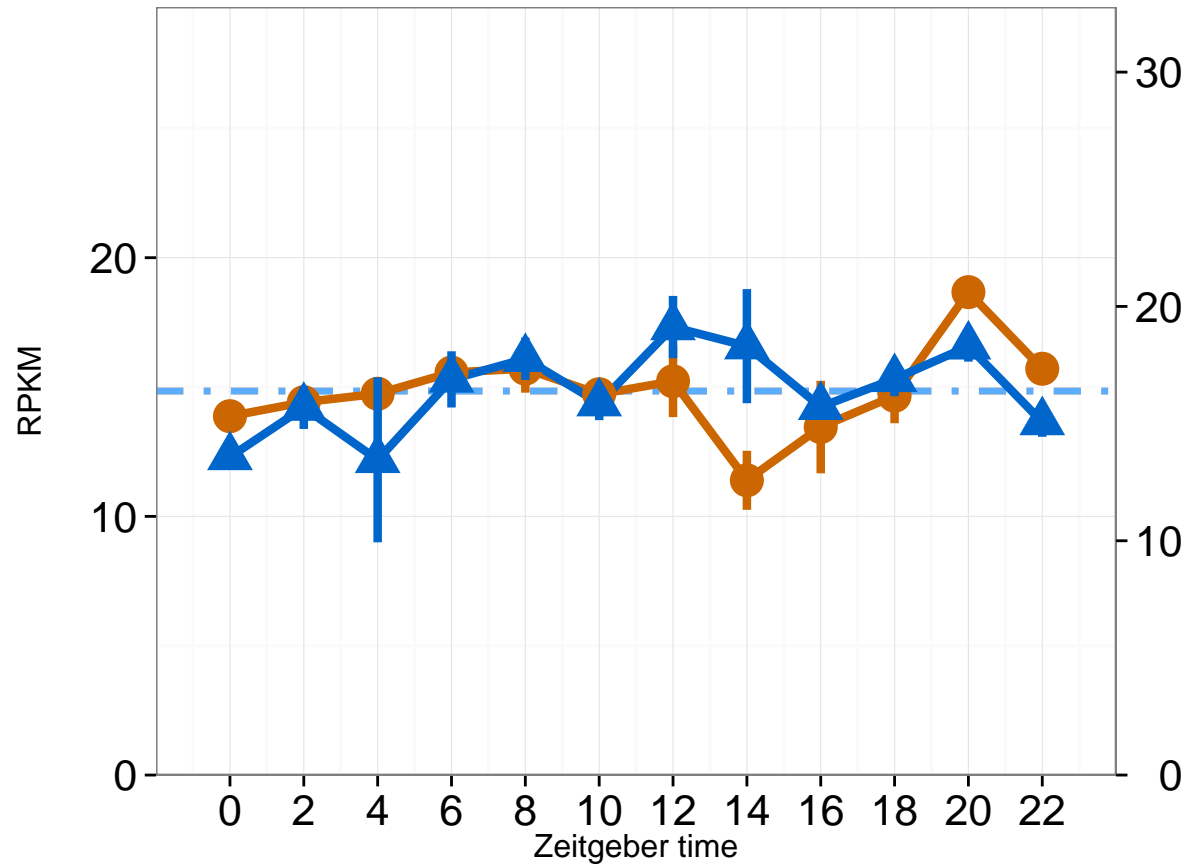

## Ncald

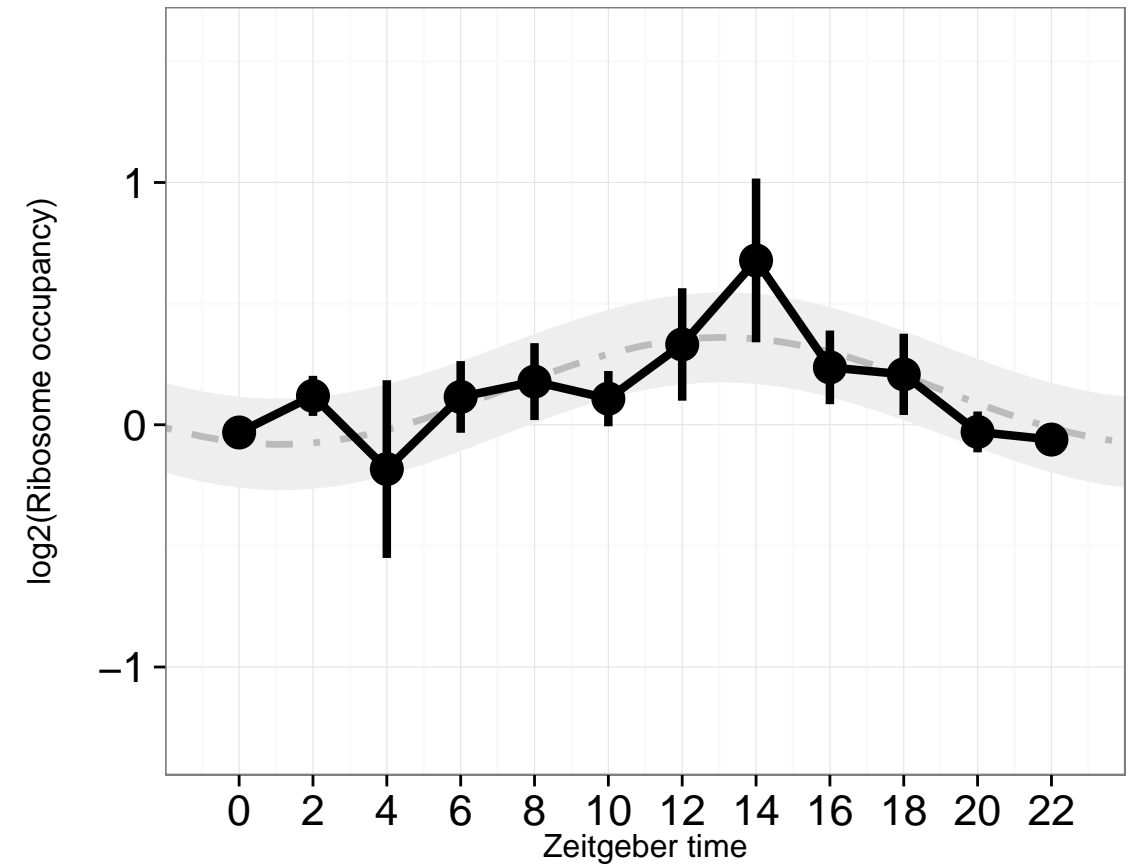

Supplement: Supplementary file 3148 [file 1]

## Smarcd1

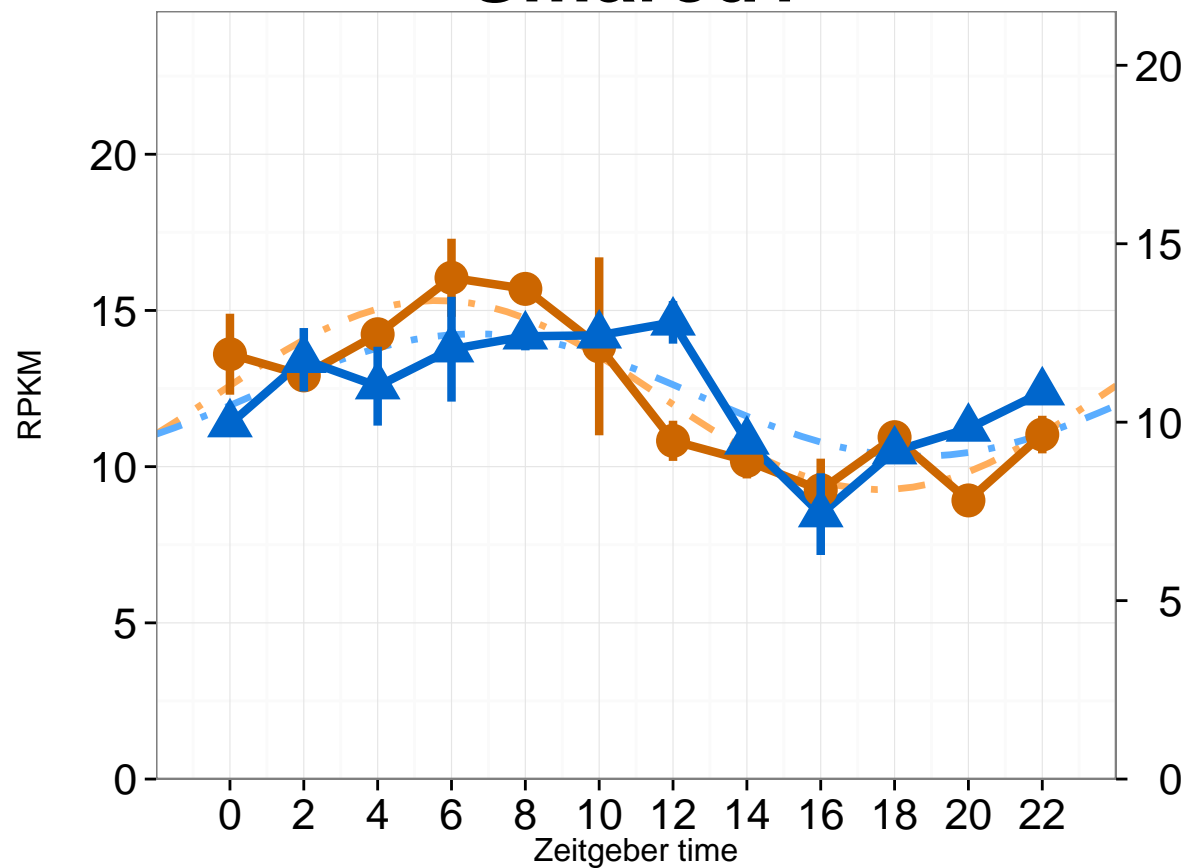

## Smarcd1

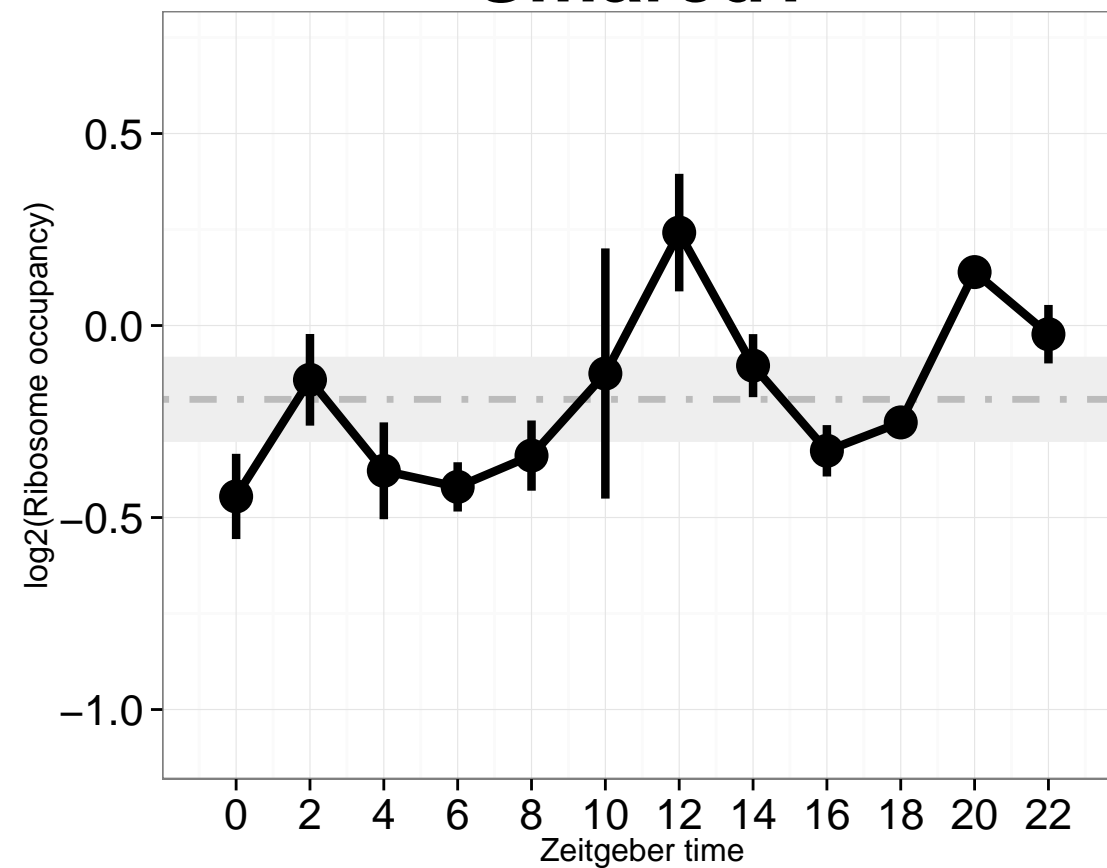

Supplement: Supplementary file 3149 [file 1]

## Napa

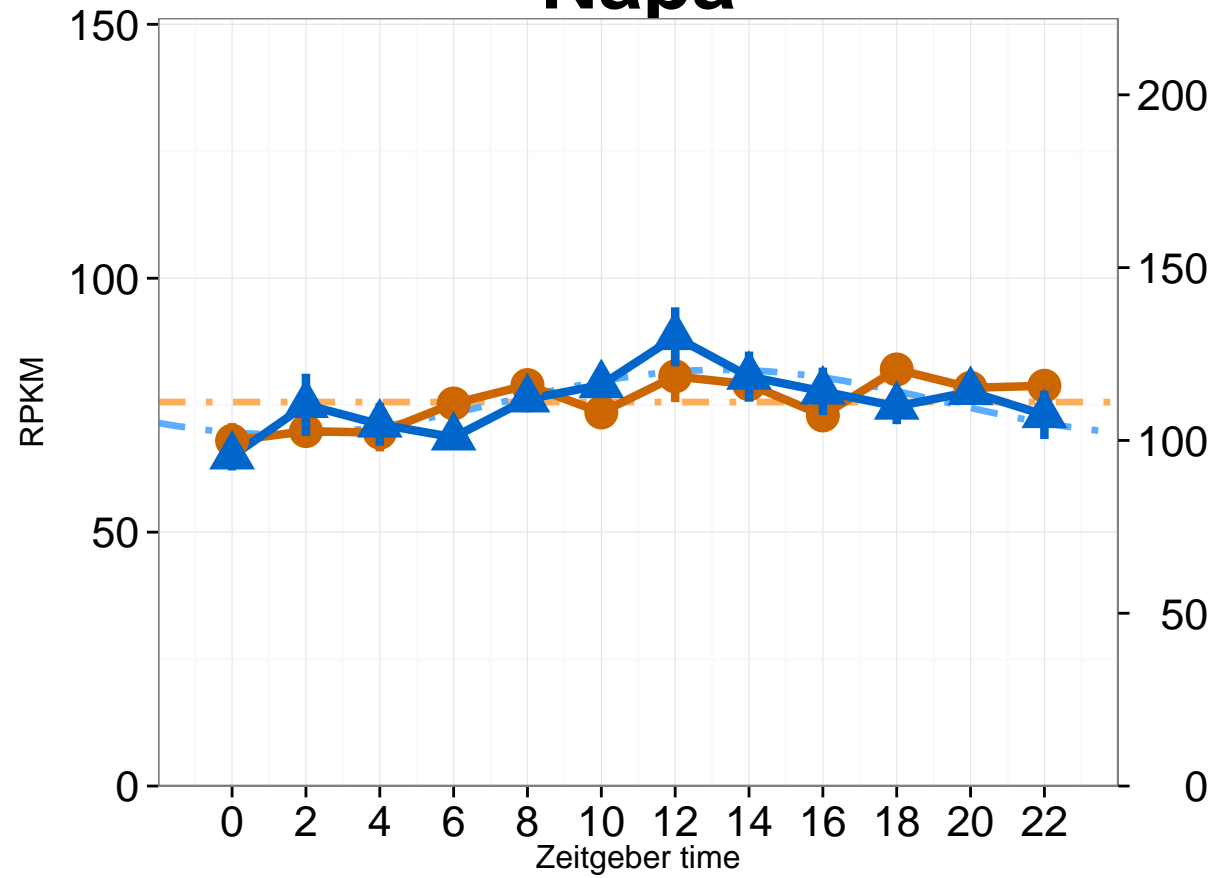

## Napa

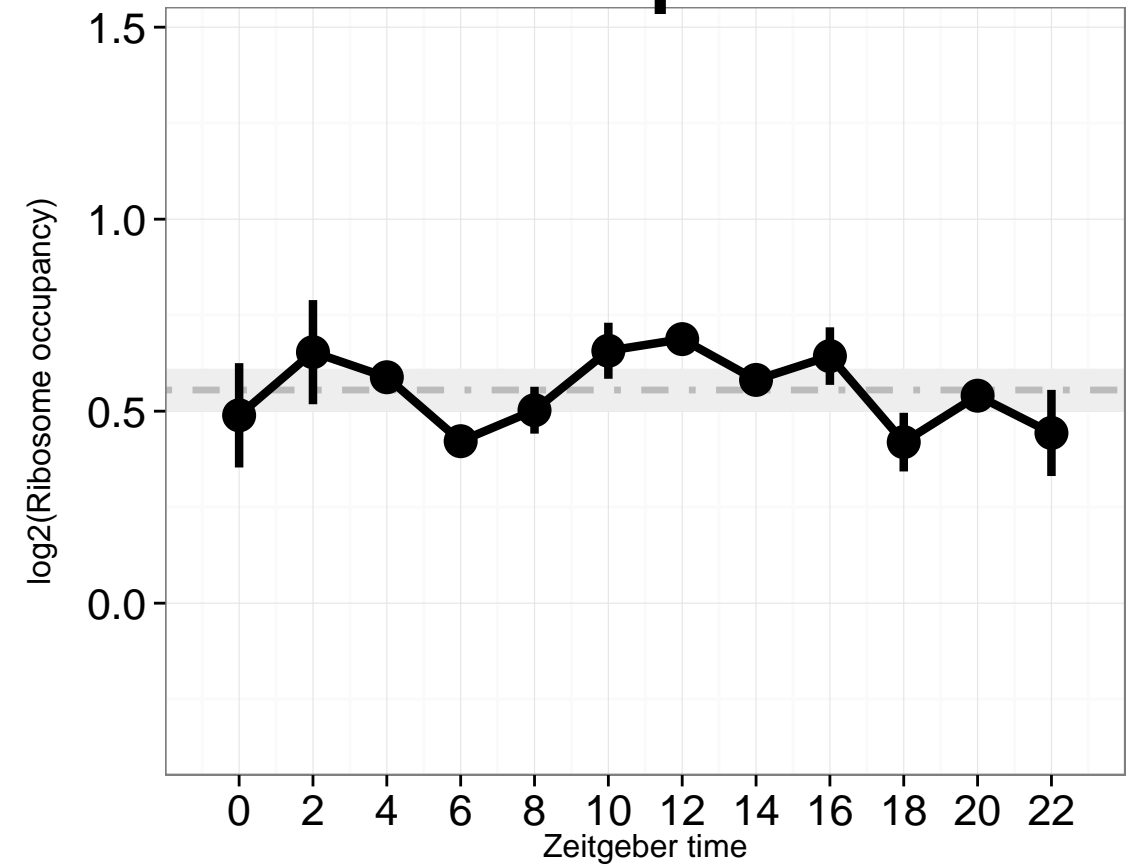

Supplement: Supplementary file 3150 [file 1]

## Pgd

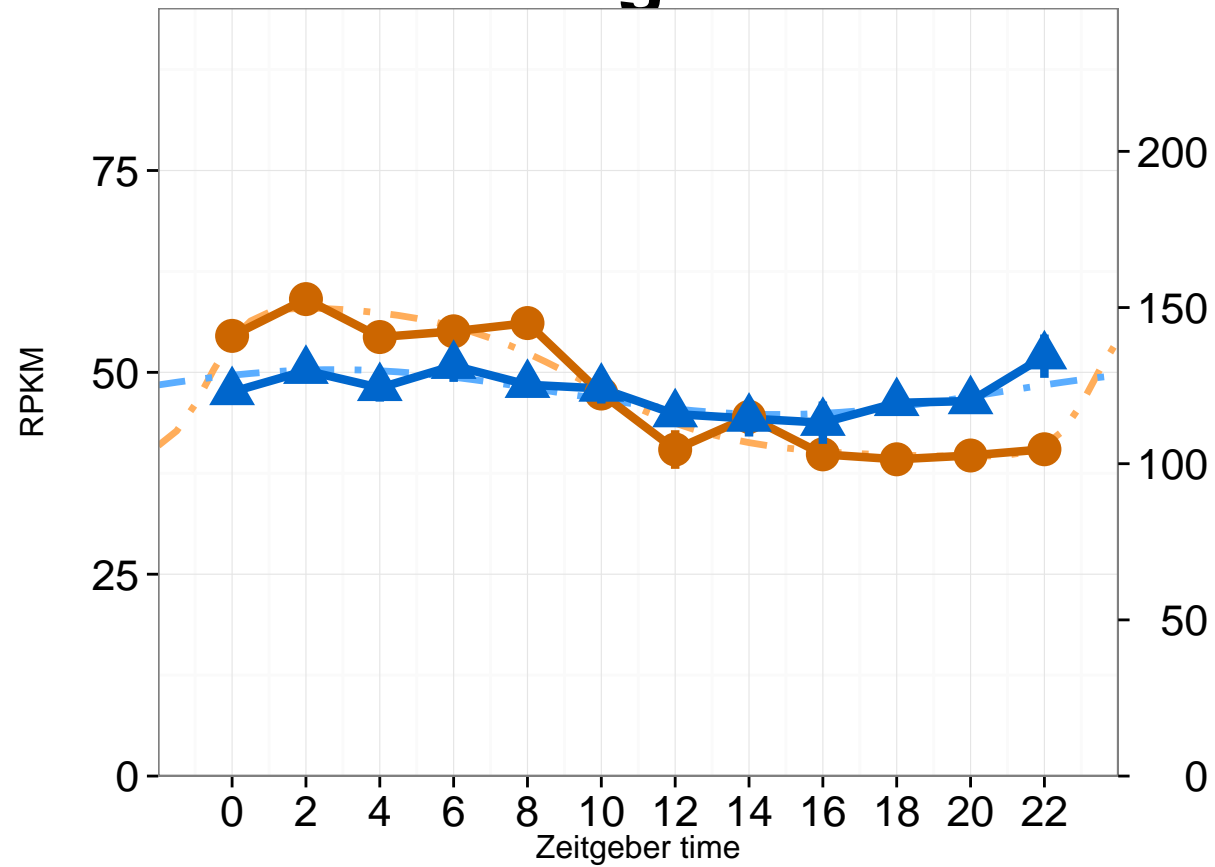

## Pgd

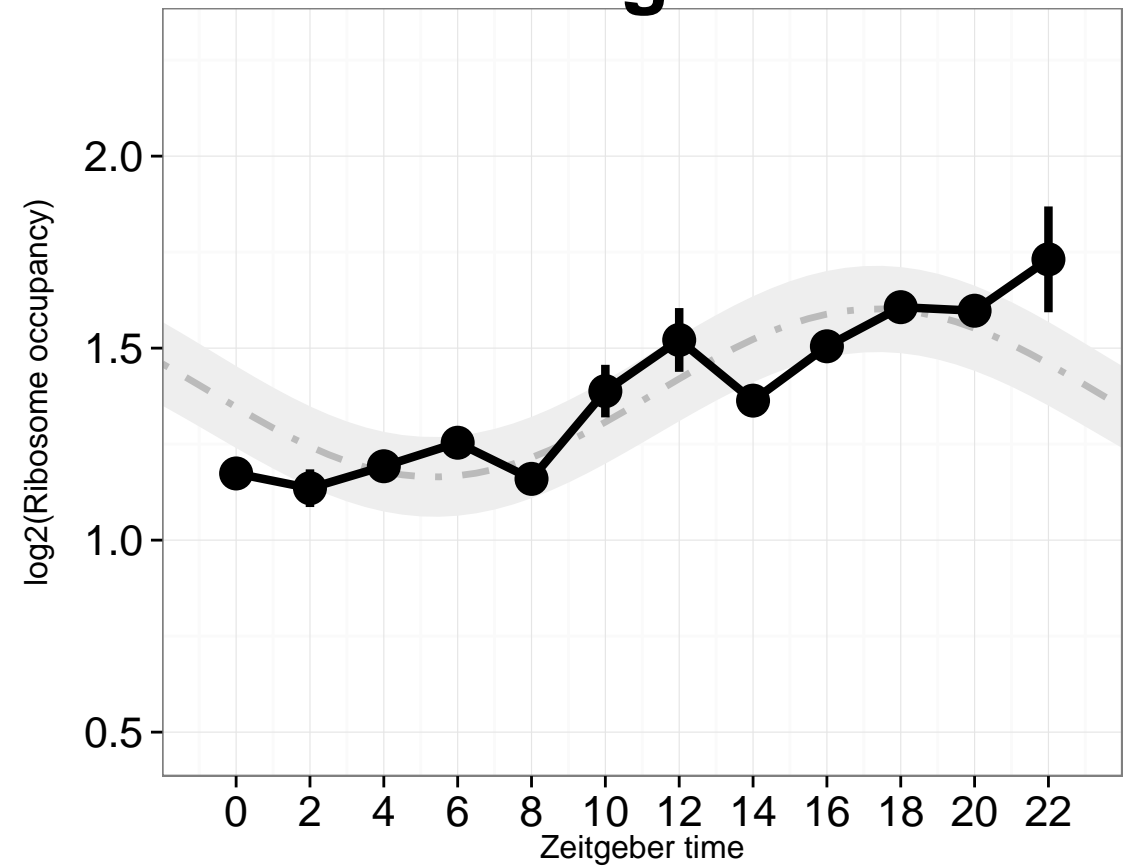

Supplement: Supplementary file 3151 [file 1]

# Sash3

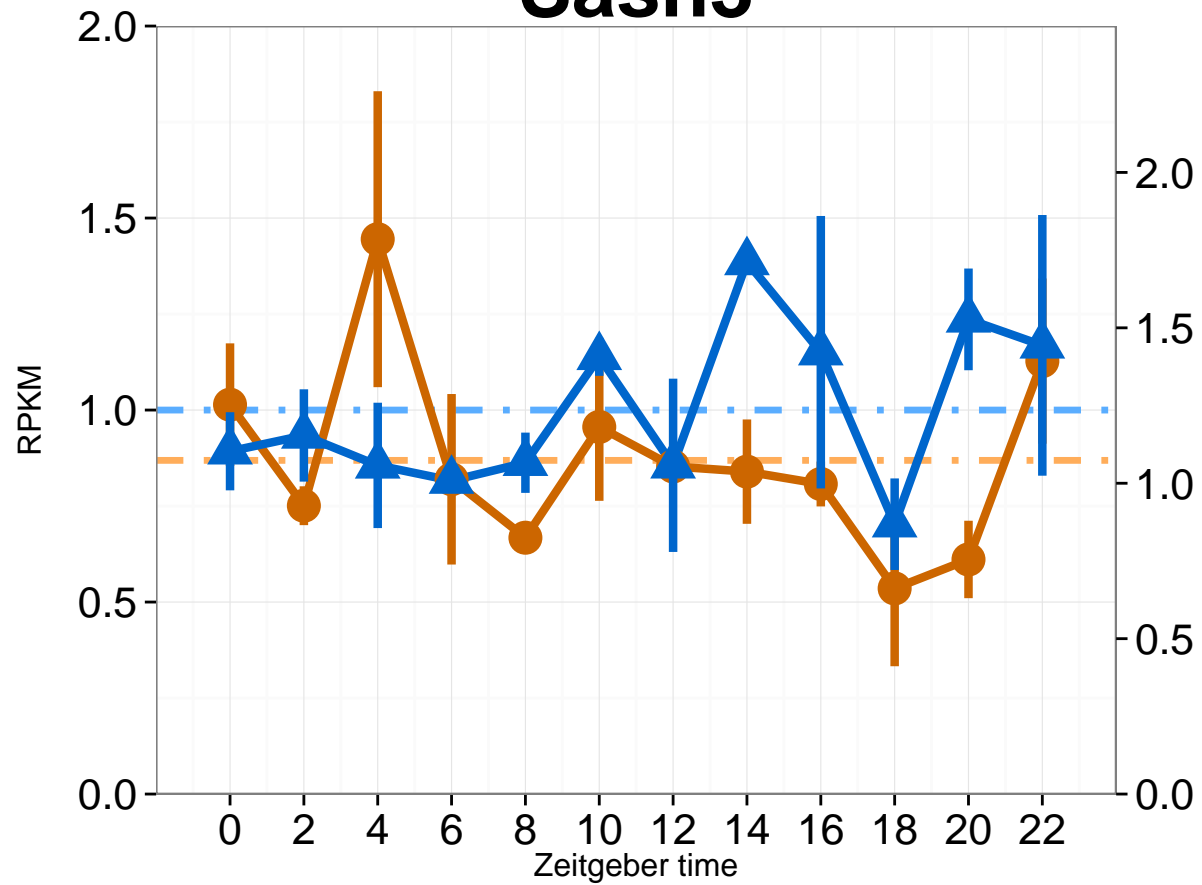

# Sash3

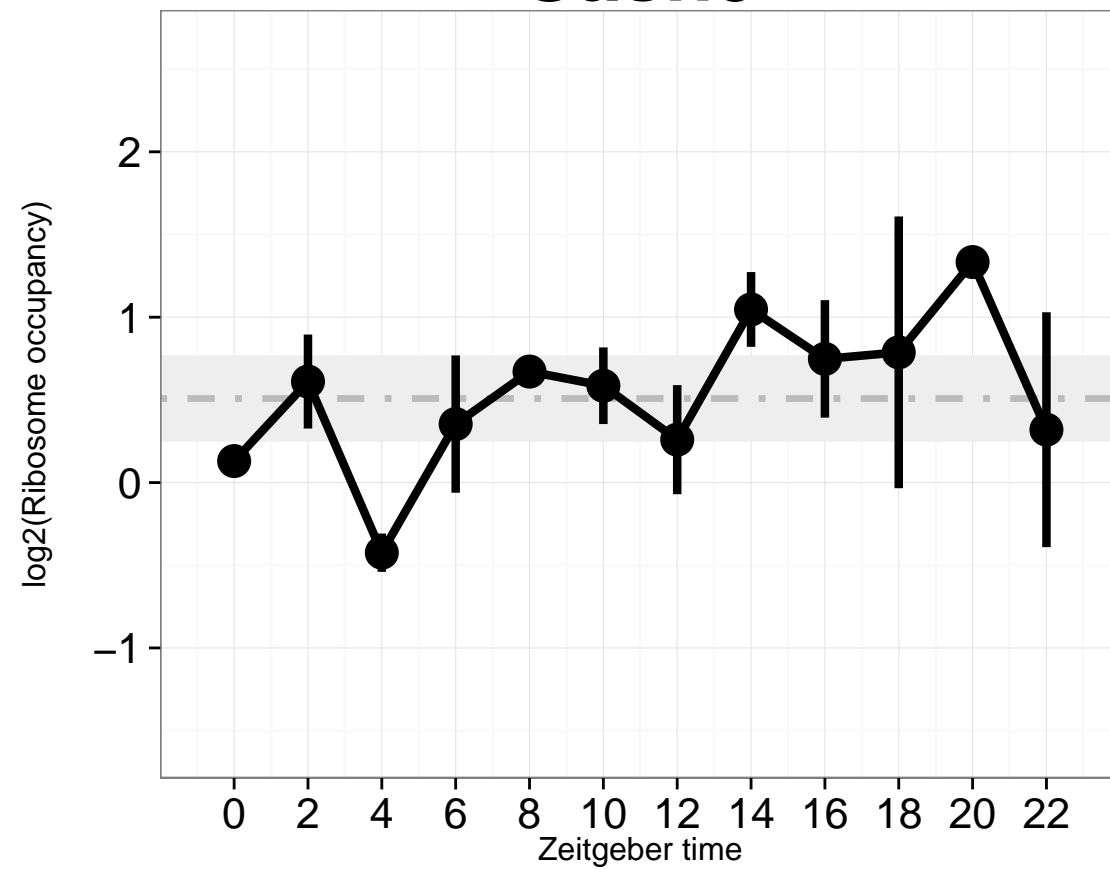

Supplement: Supplementary file 3152 [file 1]

## Fkbp3

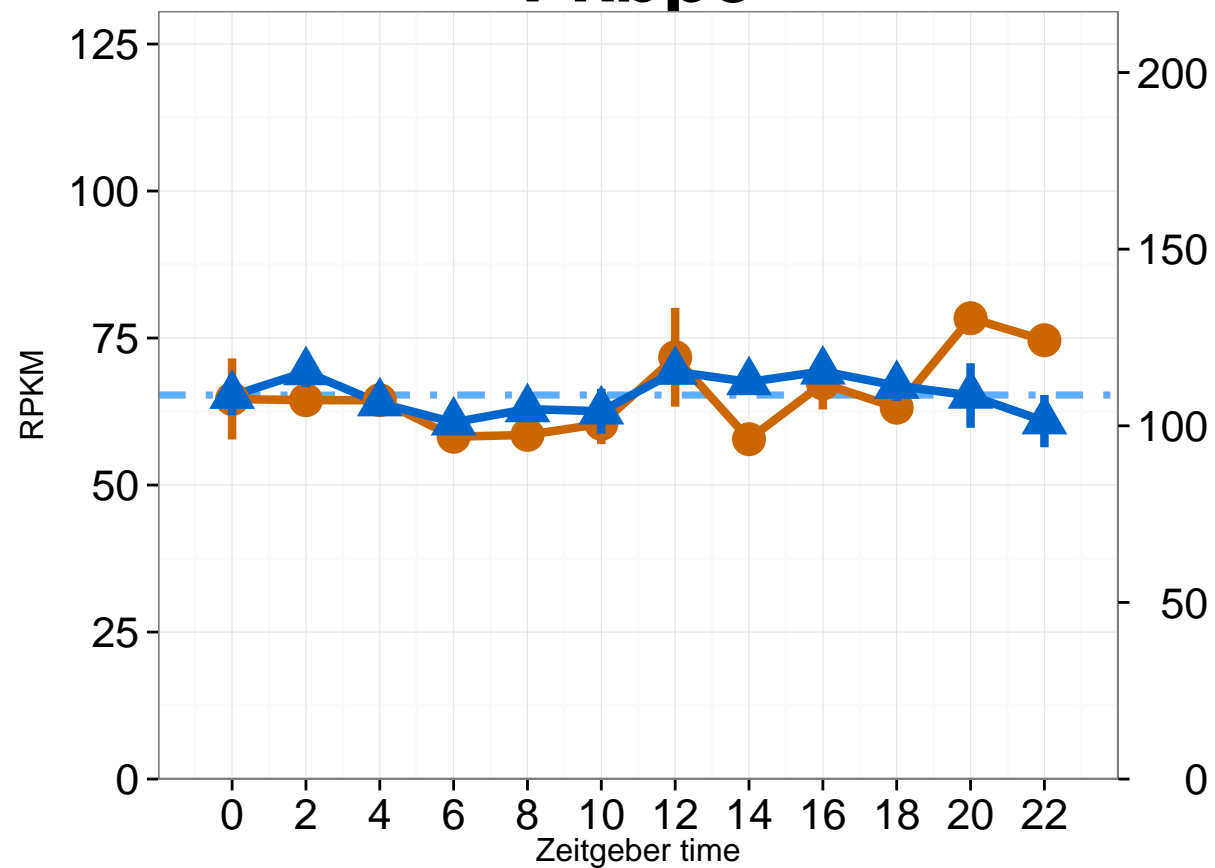

## Fkbp3

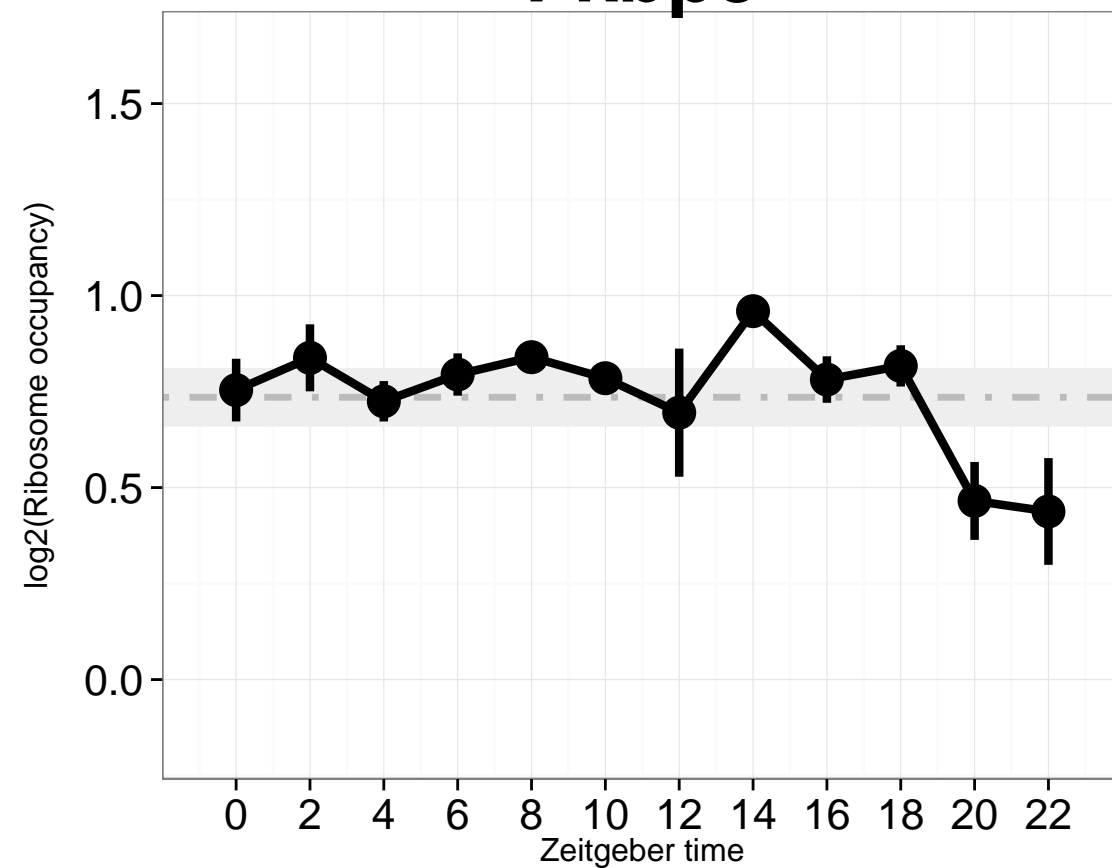

Supplement: Supplementary file 3153 [file 1]

# P2ry14

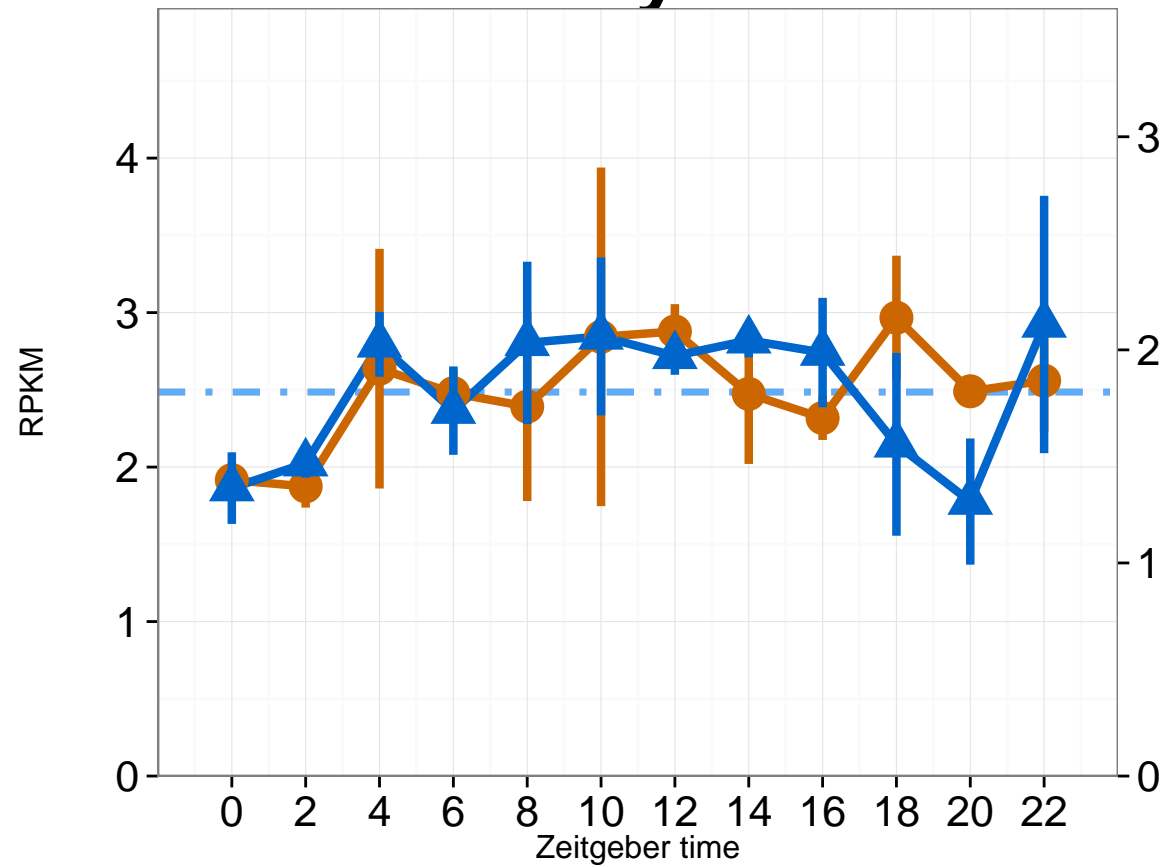

# P2ry14

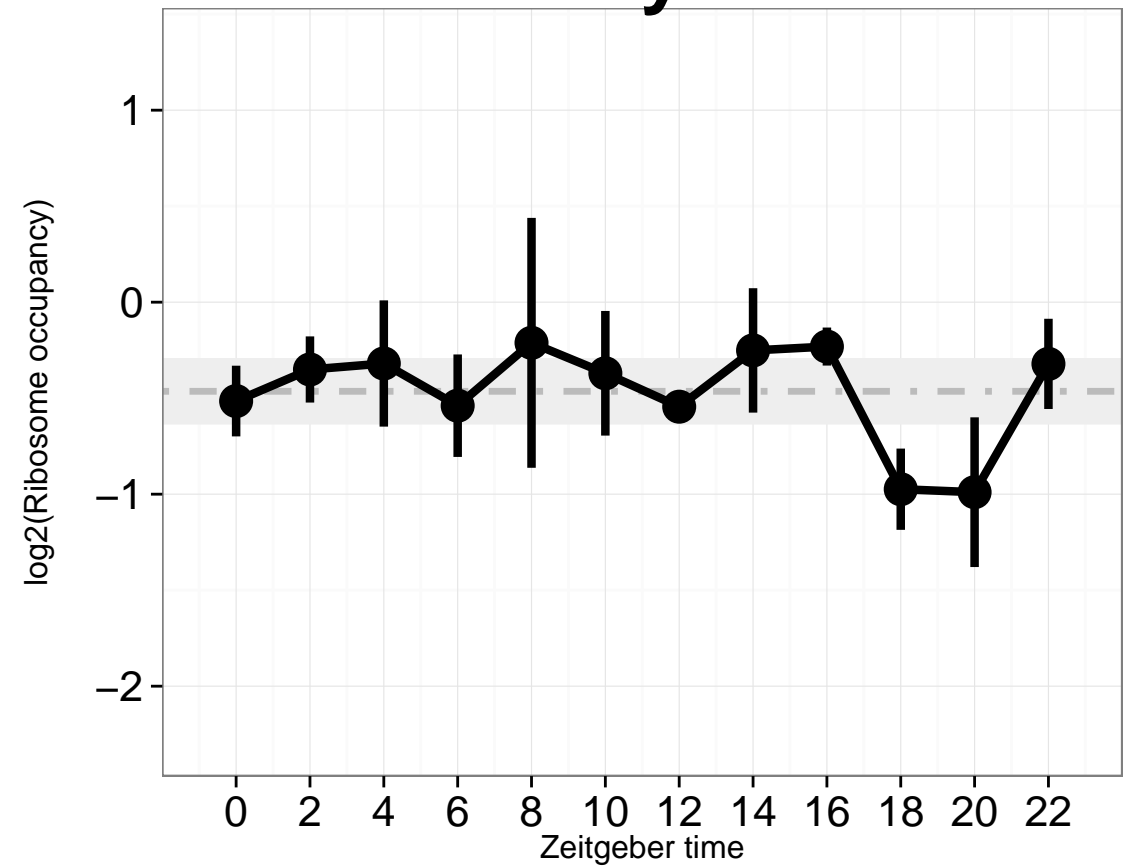

Supplement: Supplementary file 3154 [file 1]

## Wnk2

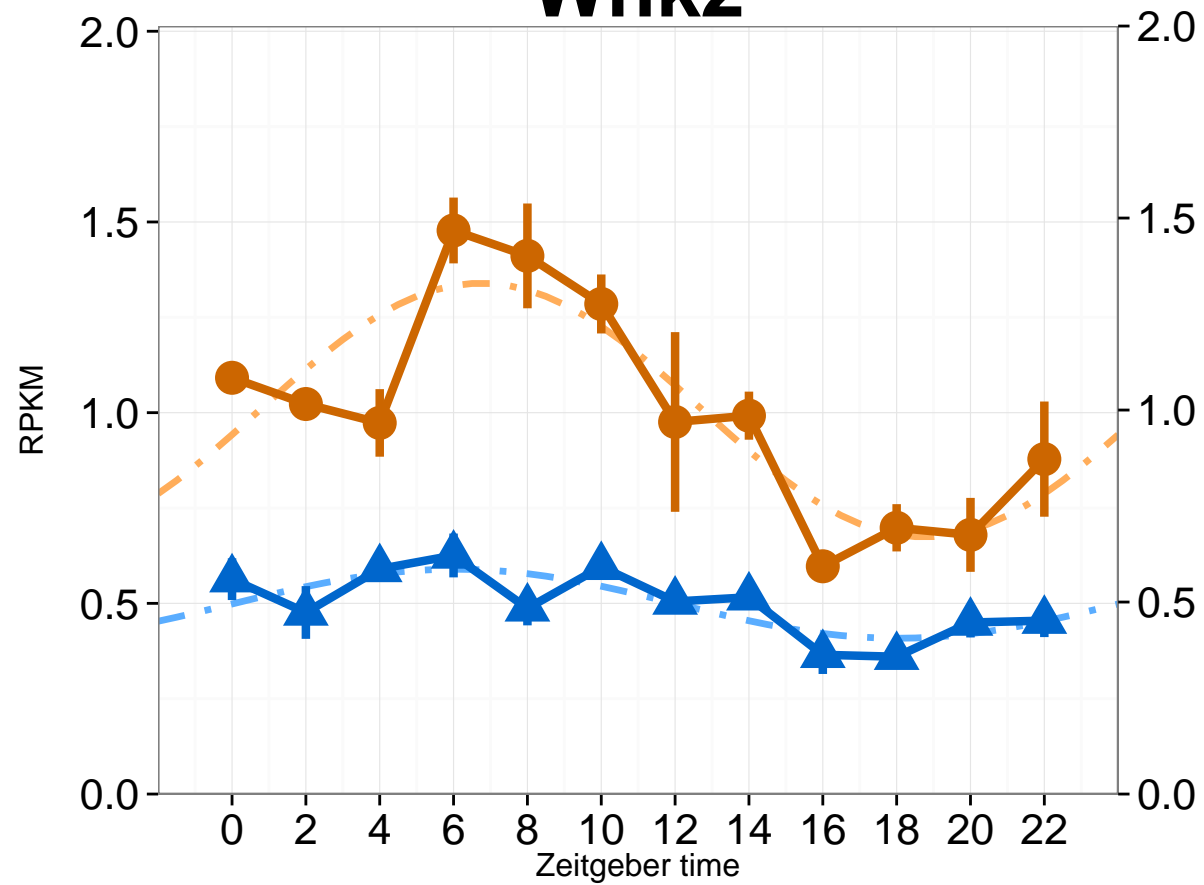

## Wnk2

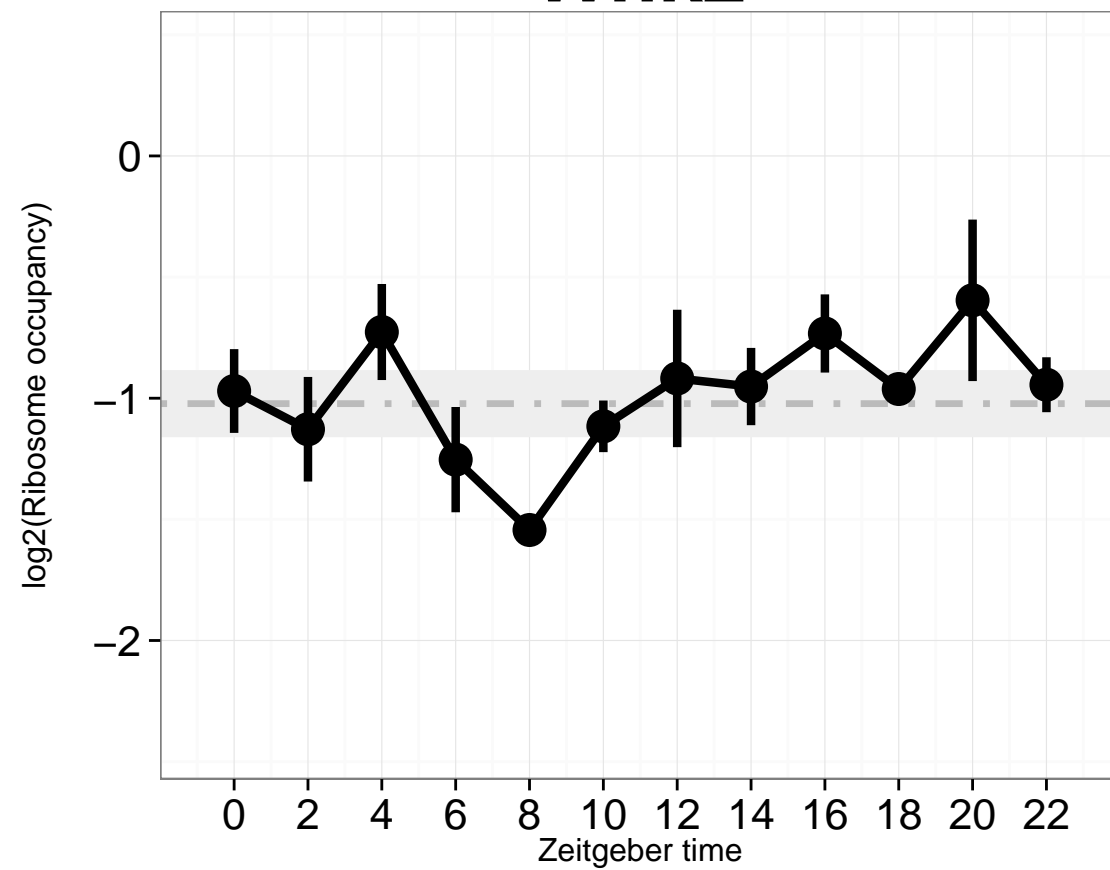

Supplement: Supplementary file 3155 [file 1]

## Nthl1

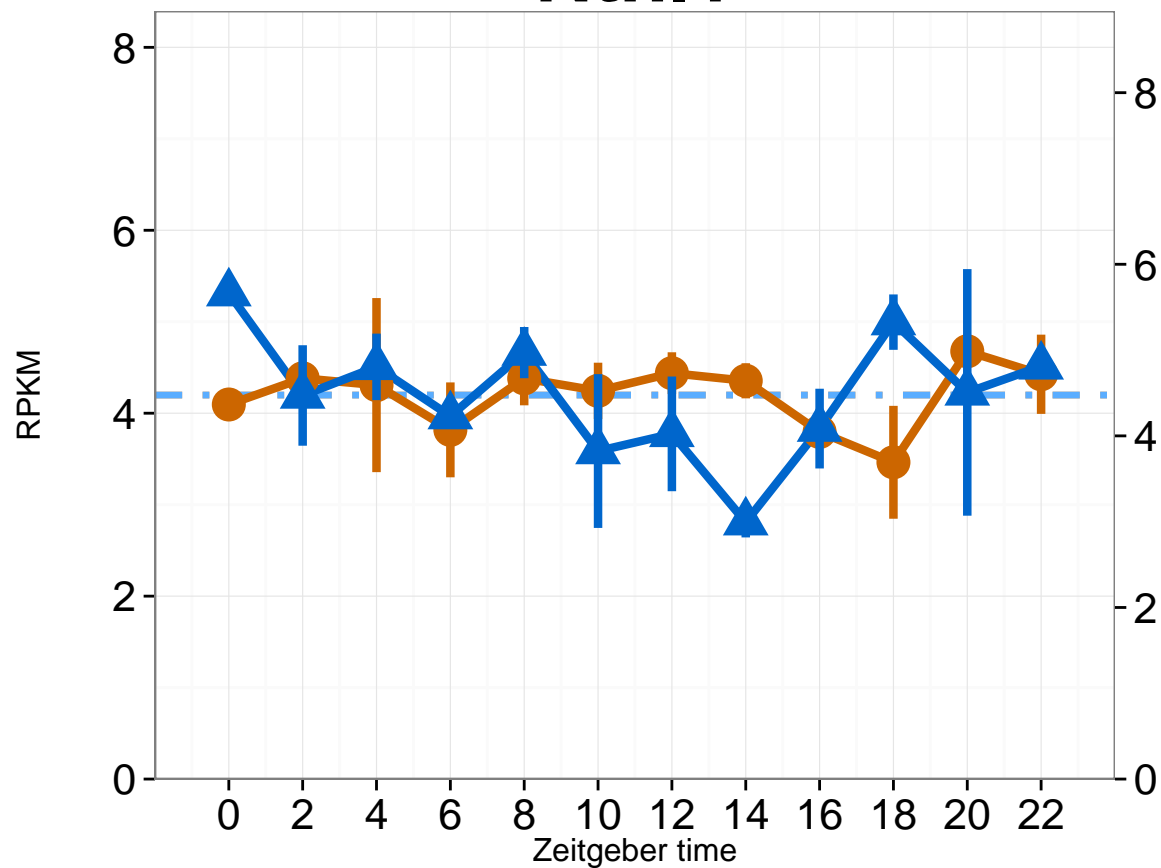

## Nthl1

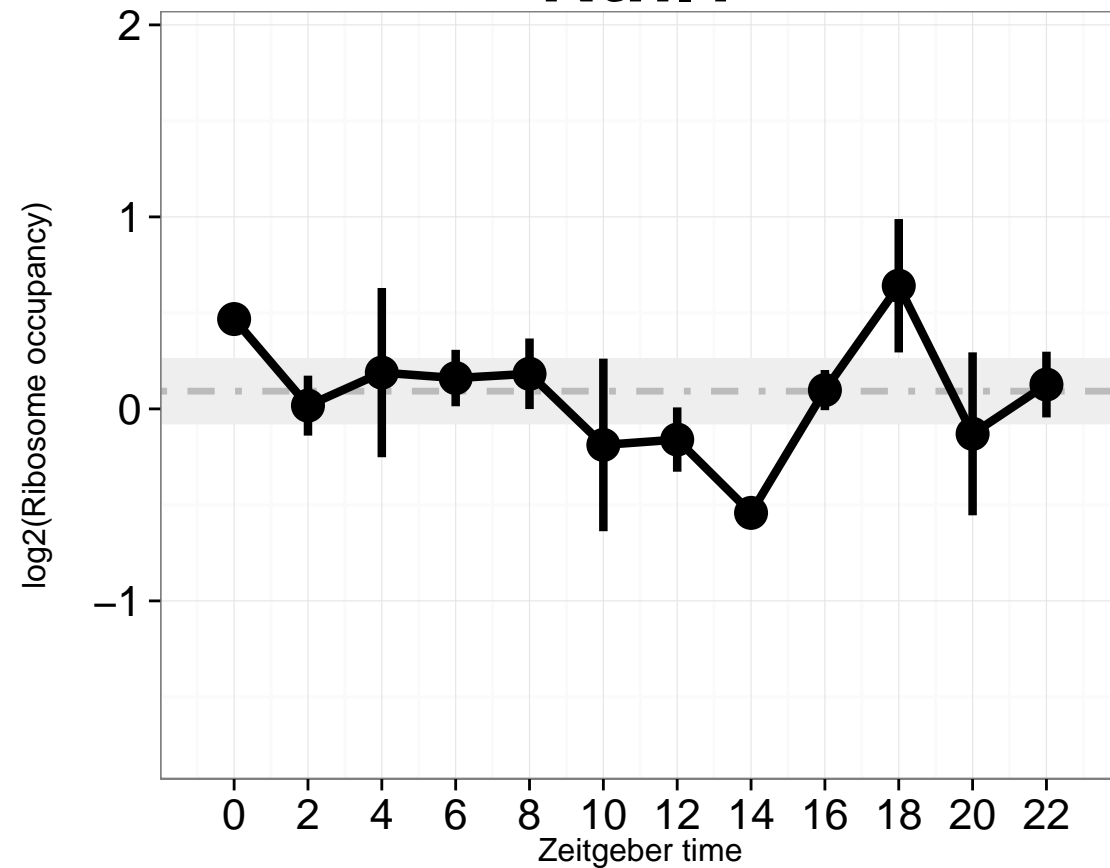

Supplement: Supplementary file 3156 [file 1]

## Ufsp1

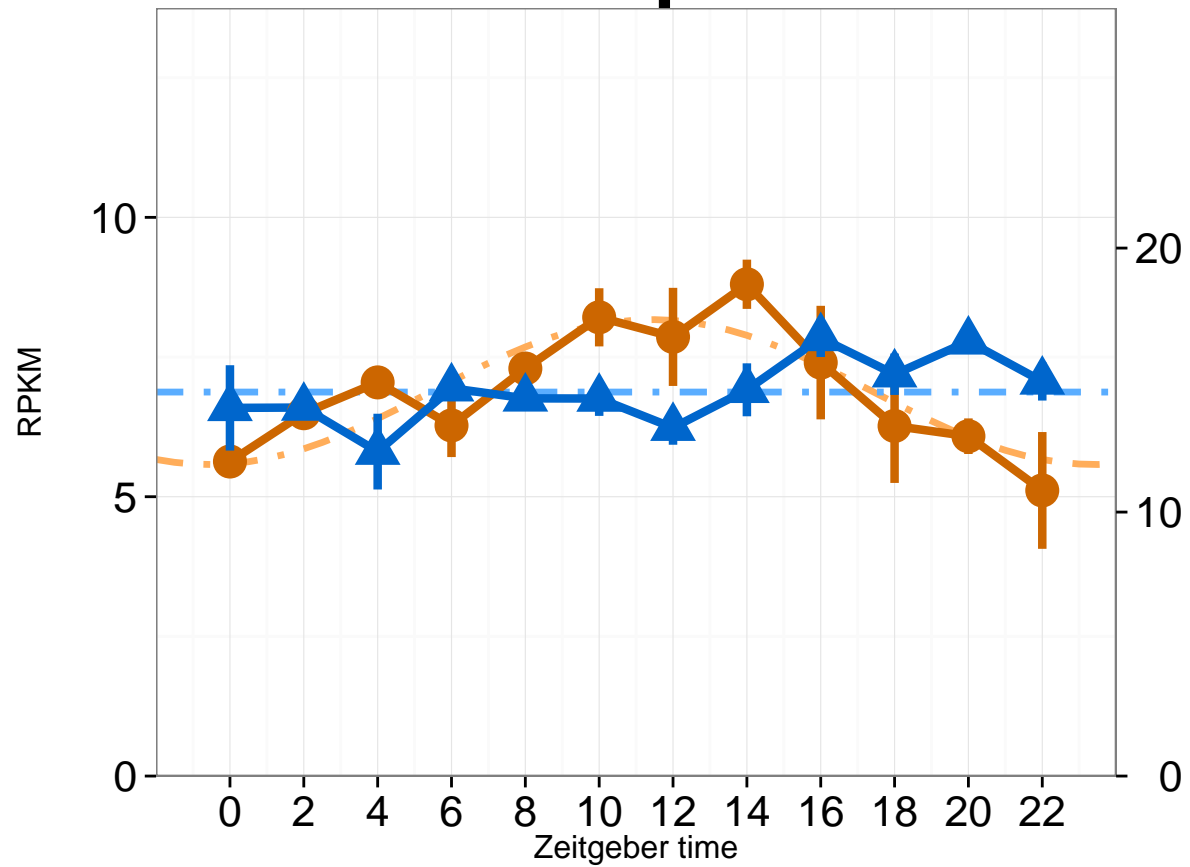

## Ufsp1

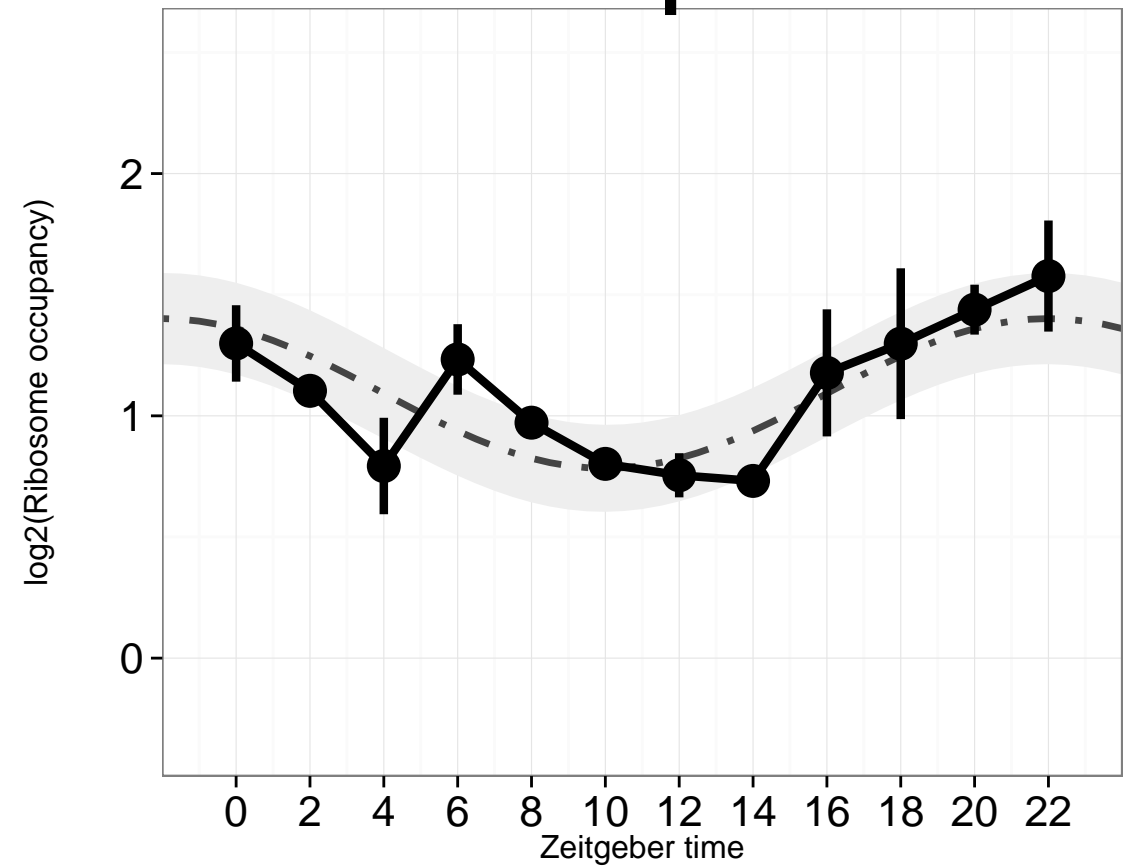

Supplement: Supplementary file 3157 [file 1]

## Cars2

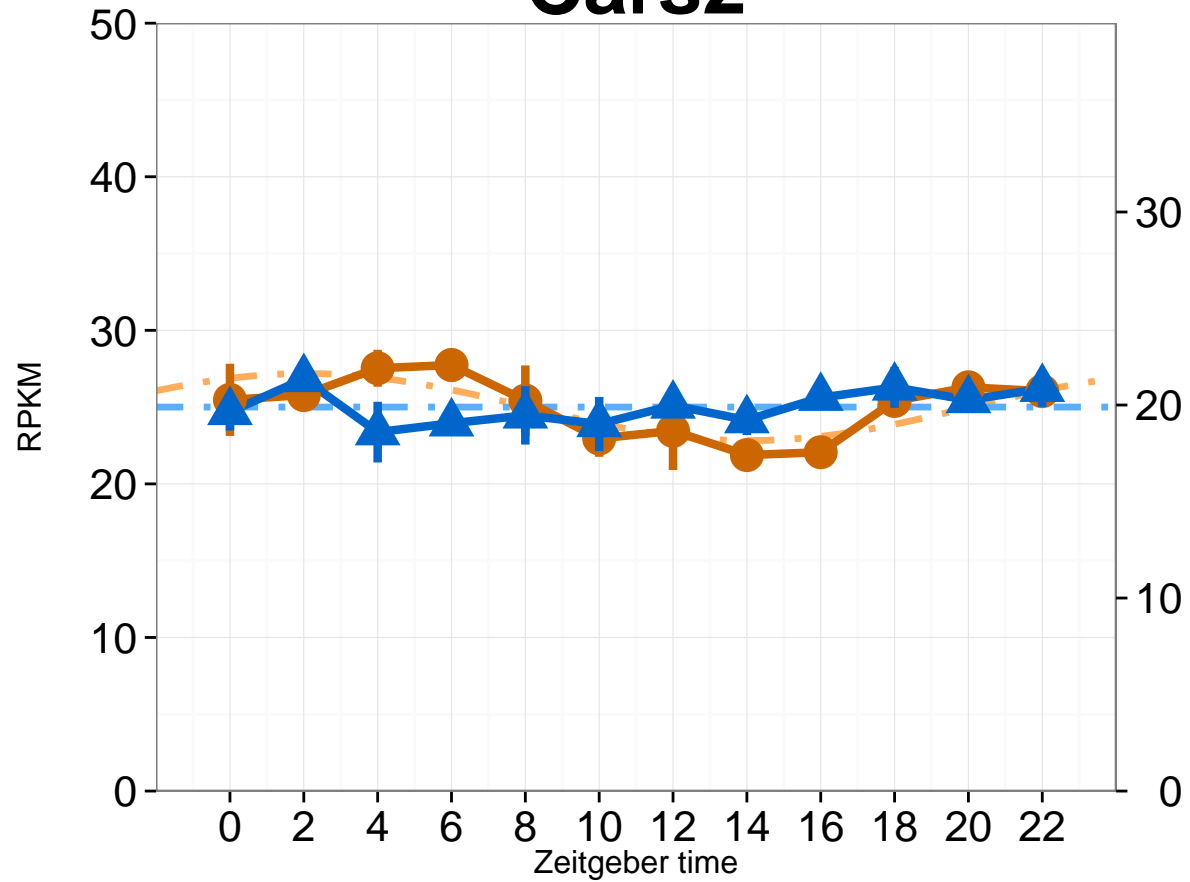

## Cars2

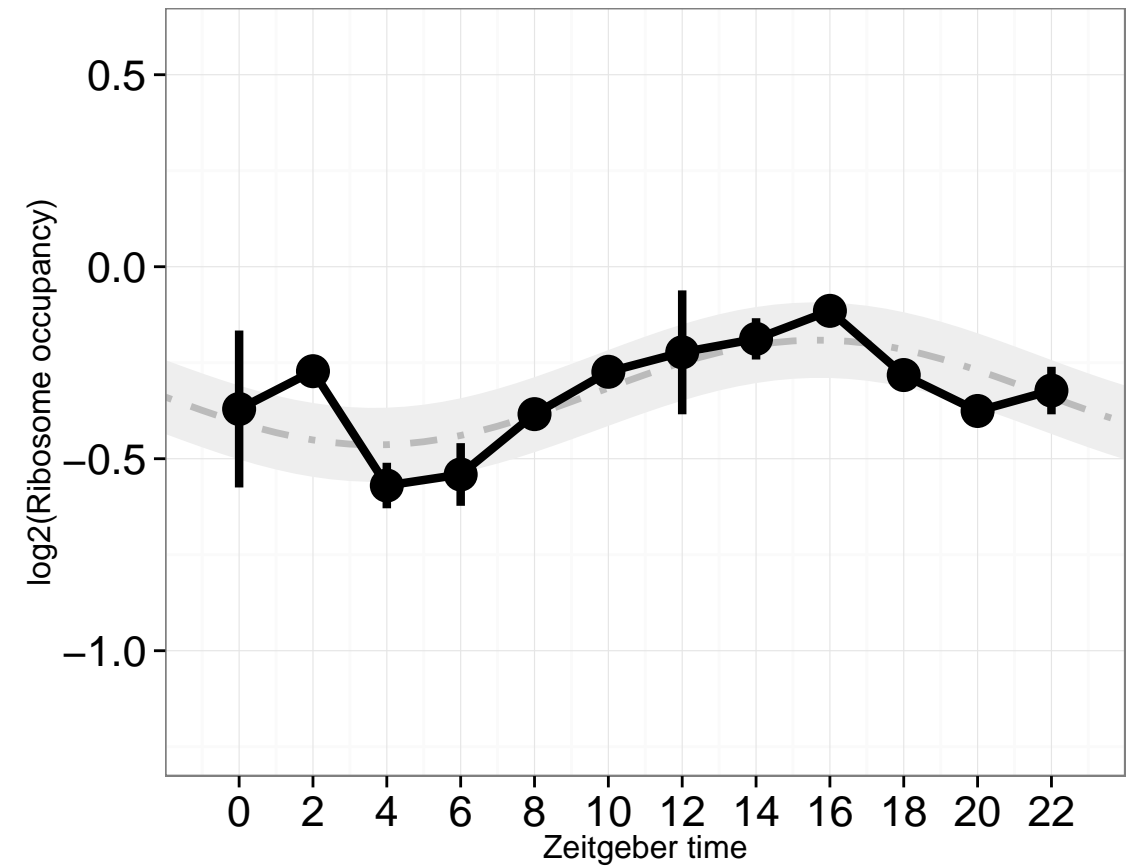

Supplement: Supplementary file 3158 [file 1]

# Clec3b

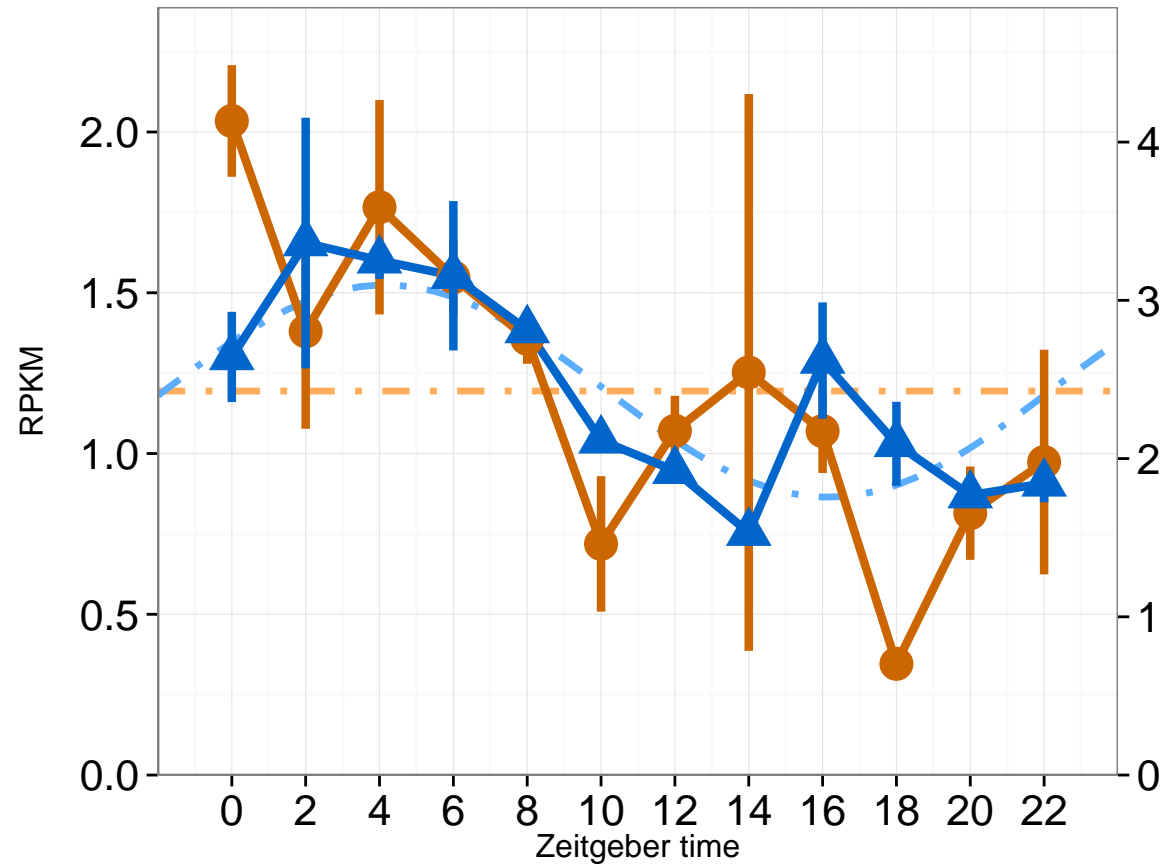

# Clec3b

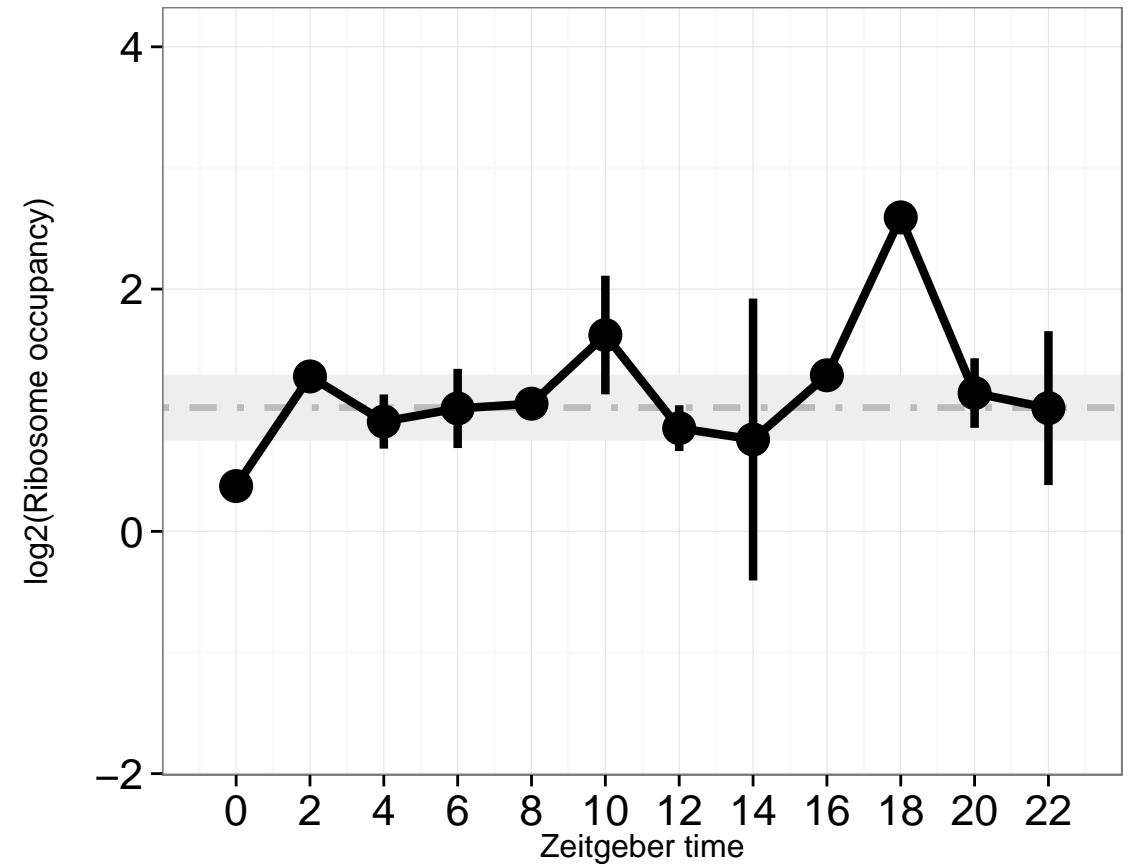

Supplement: Supplementary file 3159 [file 1]

## Ptbp2

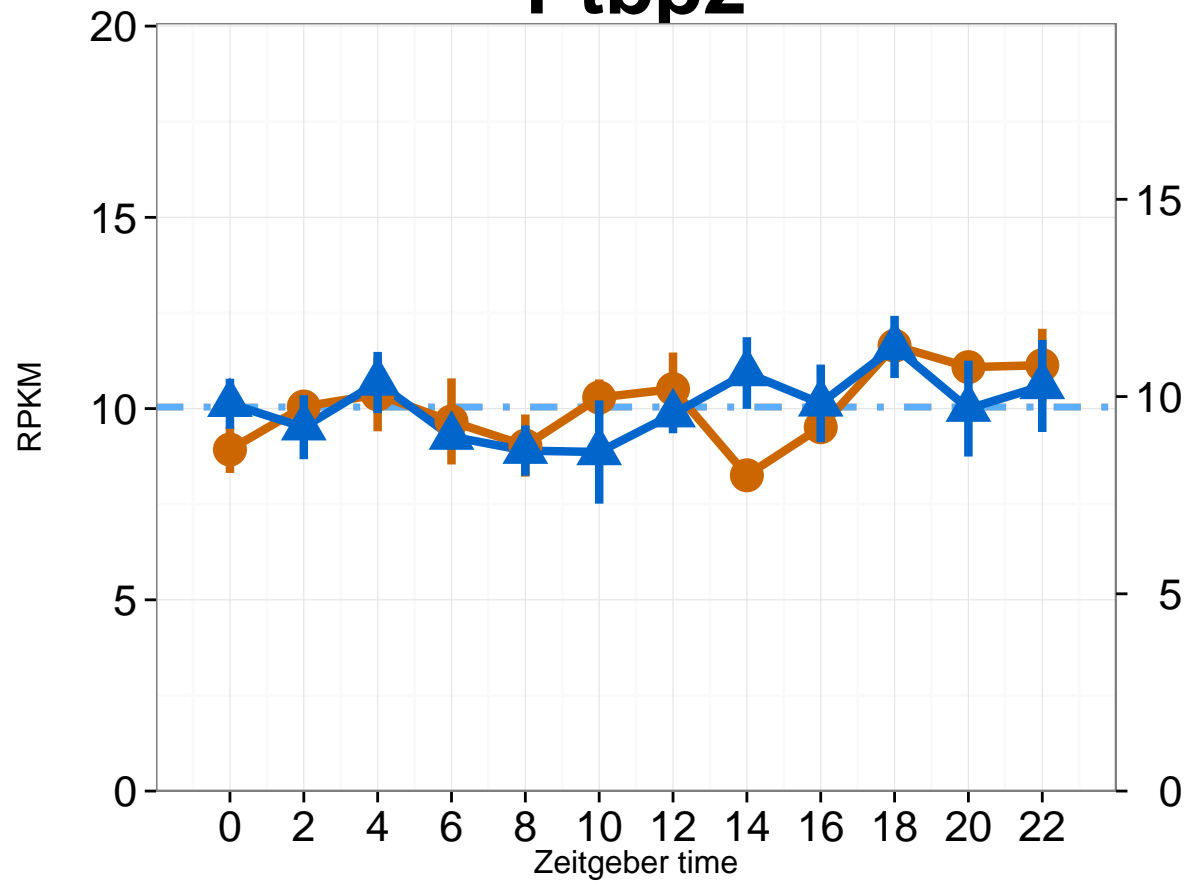

## Ptbp2

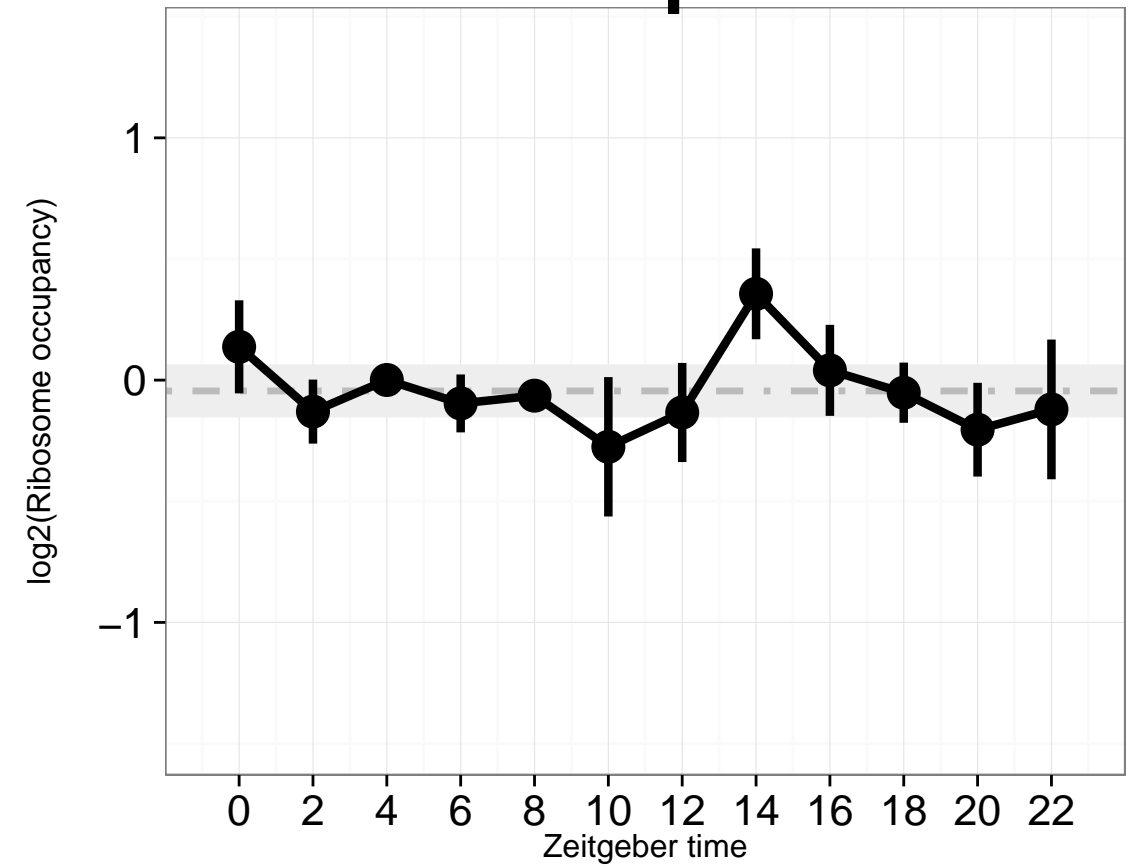

Supplement: Supplementary file 3160 [file 1]

# Mrpl30

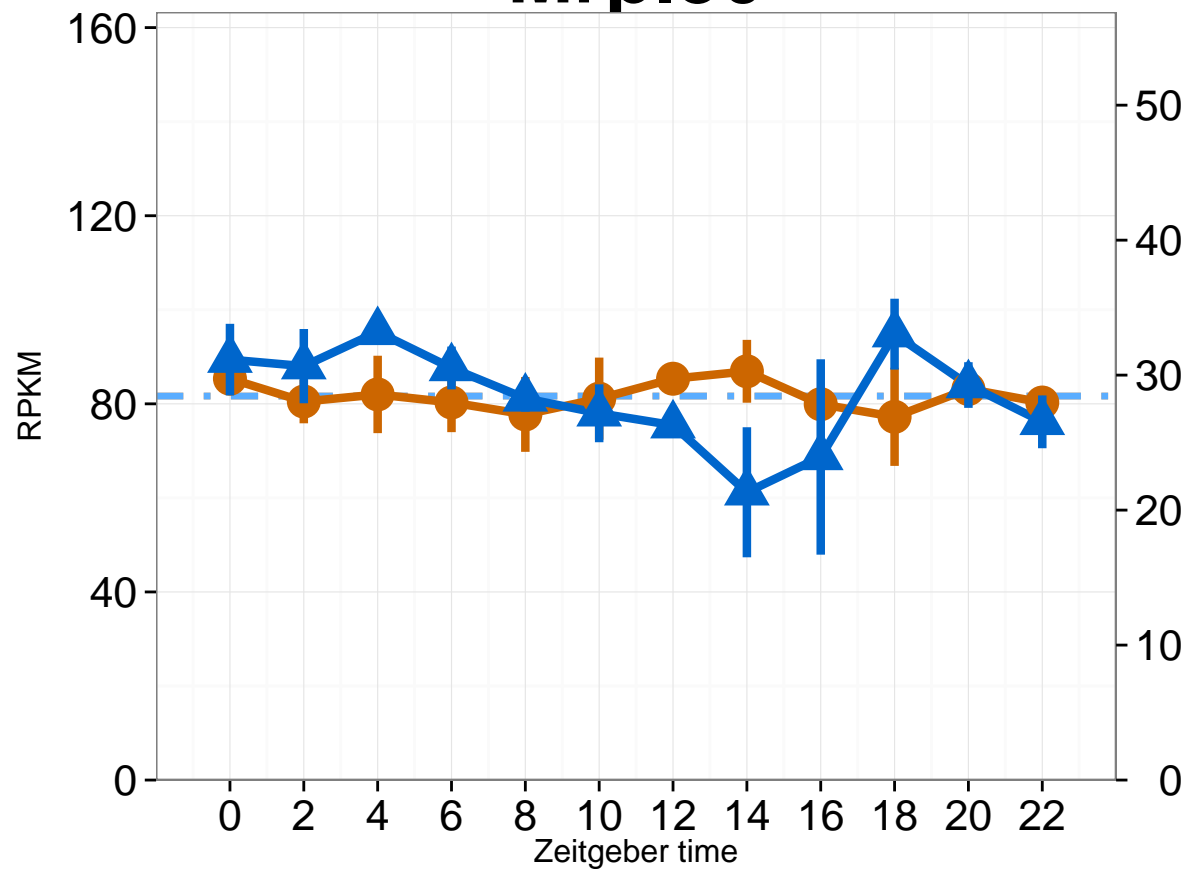

# Mrpl30

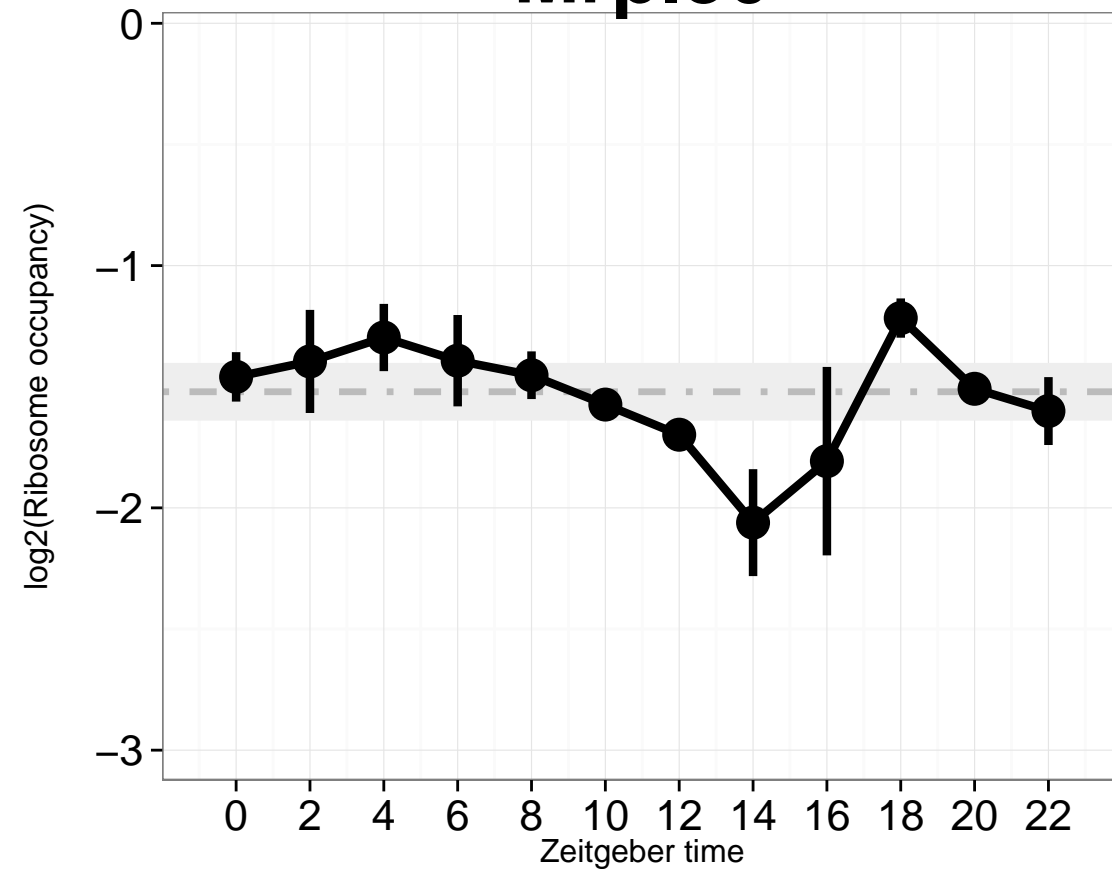

Supplement: Supplementary file 3161 [file 1]

## Ogfod2

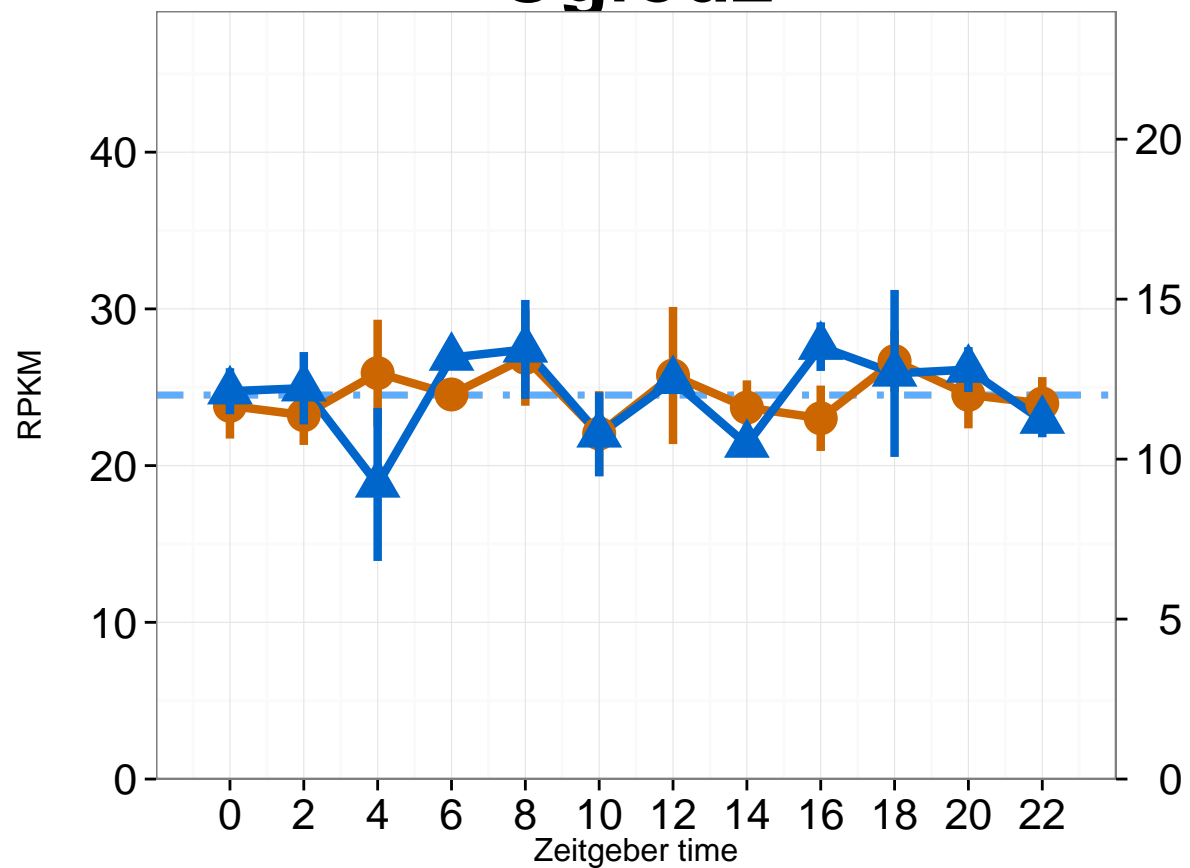

## Ogfod2

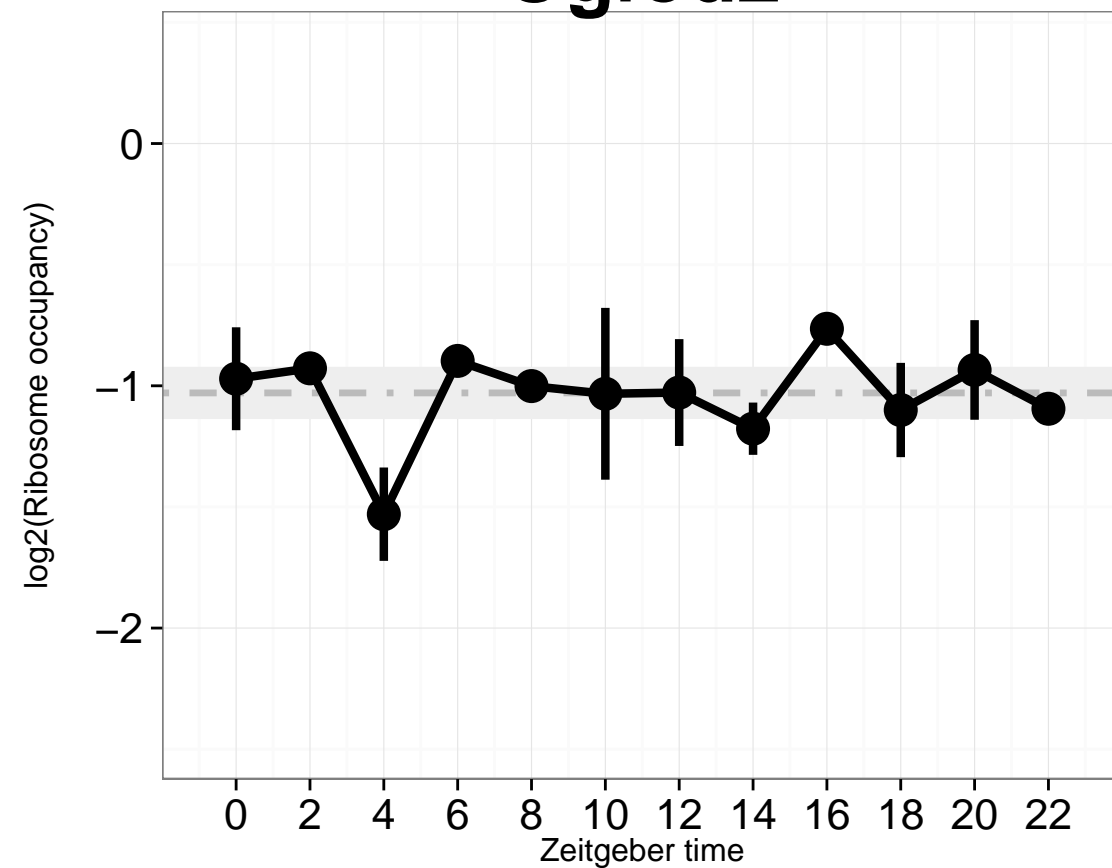

Supplement: Supplementary file 3162 [file 1]

## Rhobtb2

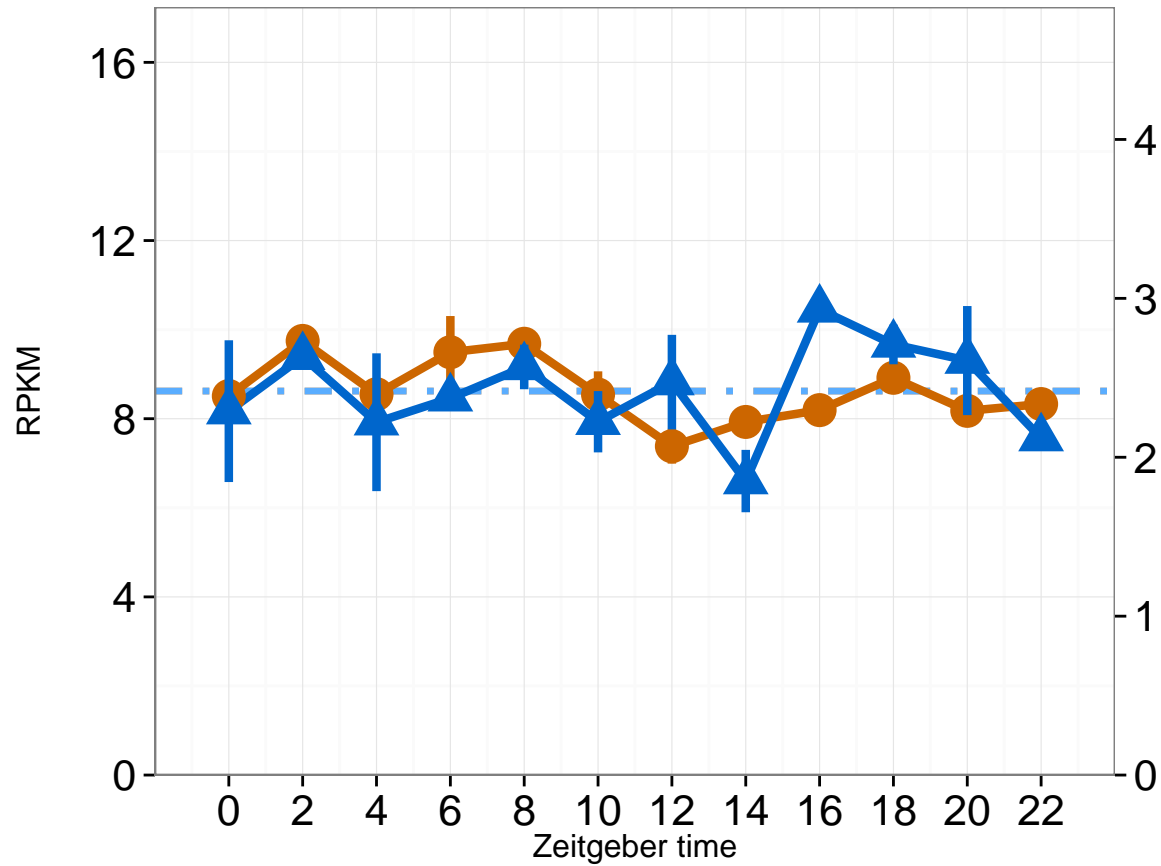

## Rhobtb2

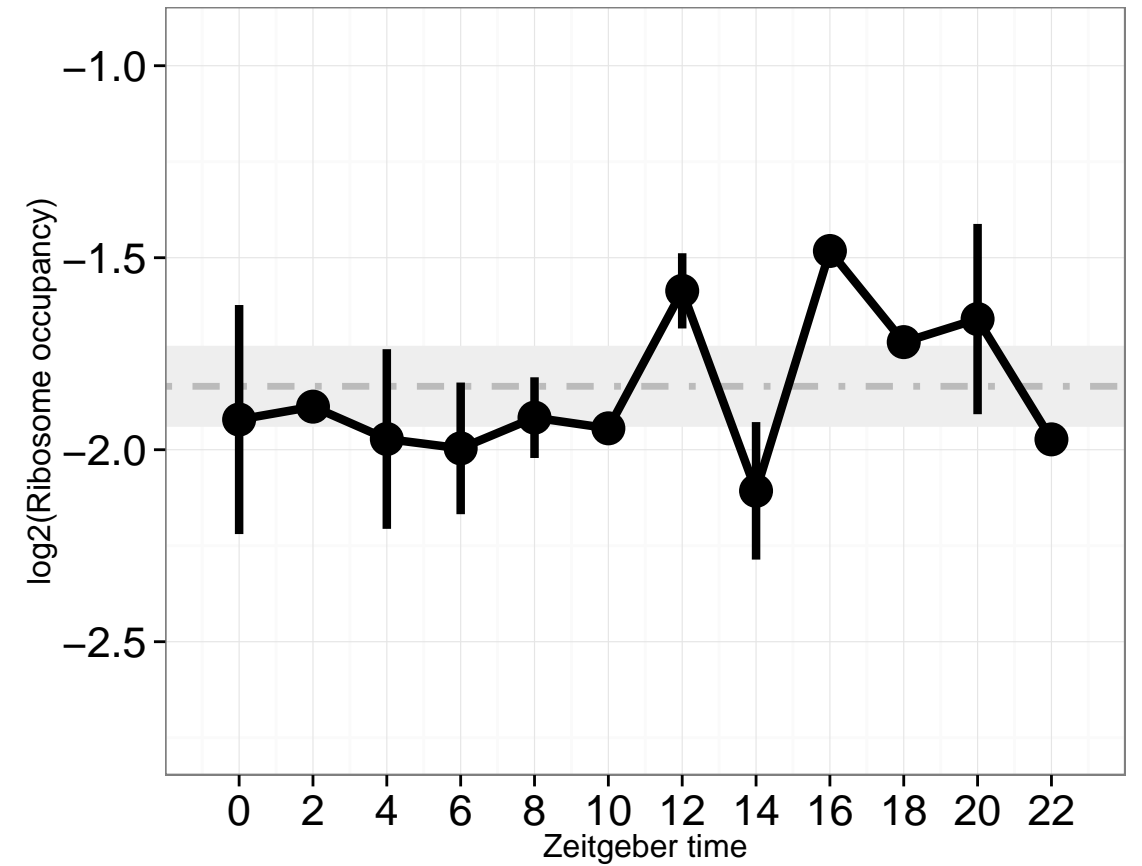

Supplement: Supplementary file 3163 [file 1]

## Peli2

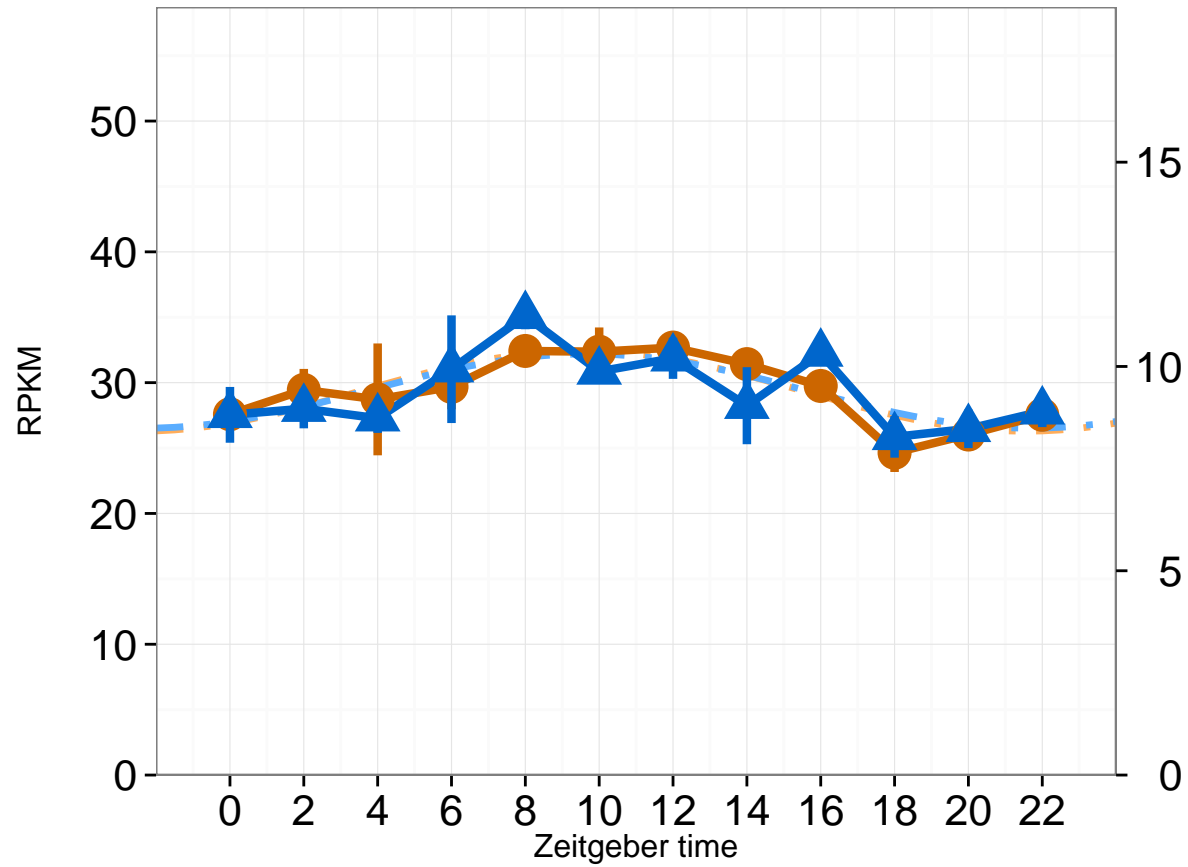

## Peli2

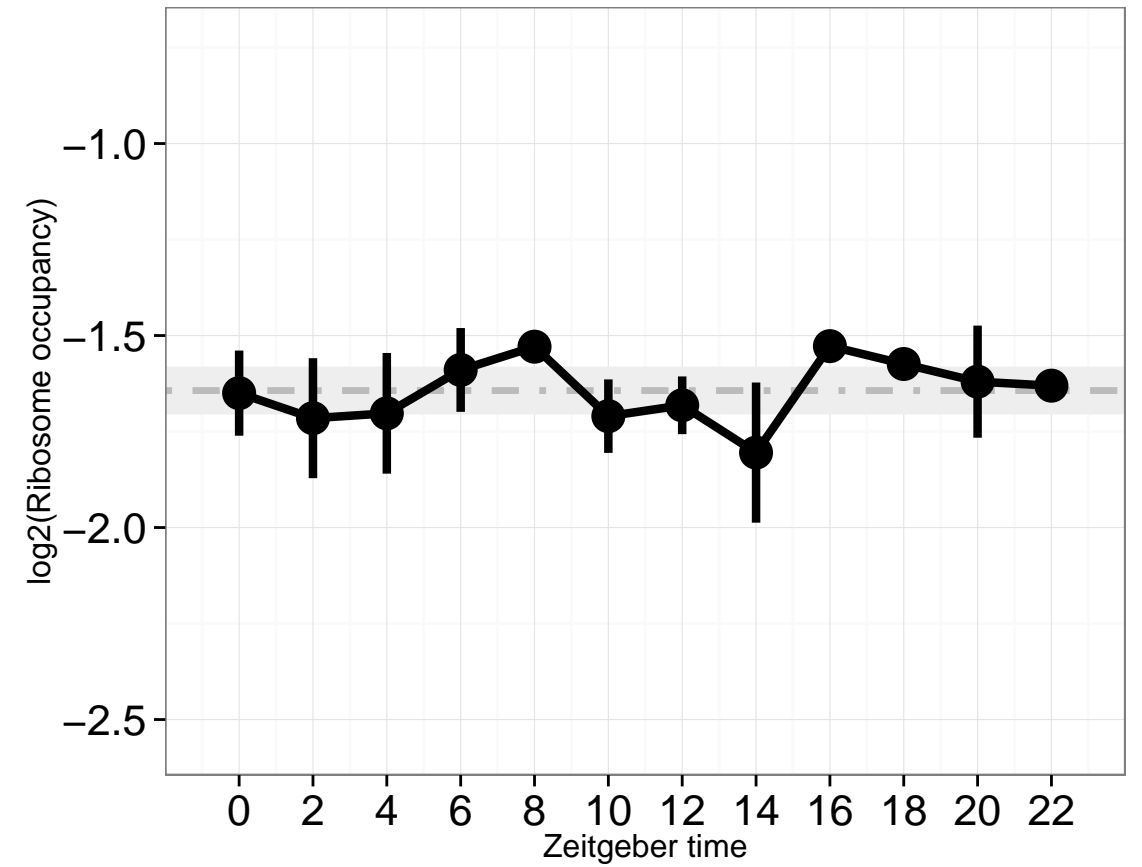

Supplement: Supplementary file 3164 [file 1]

# Art3

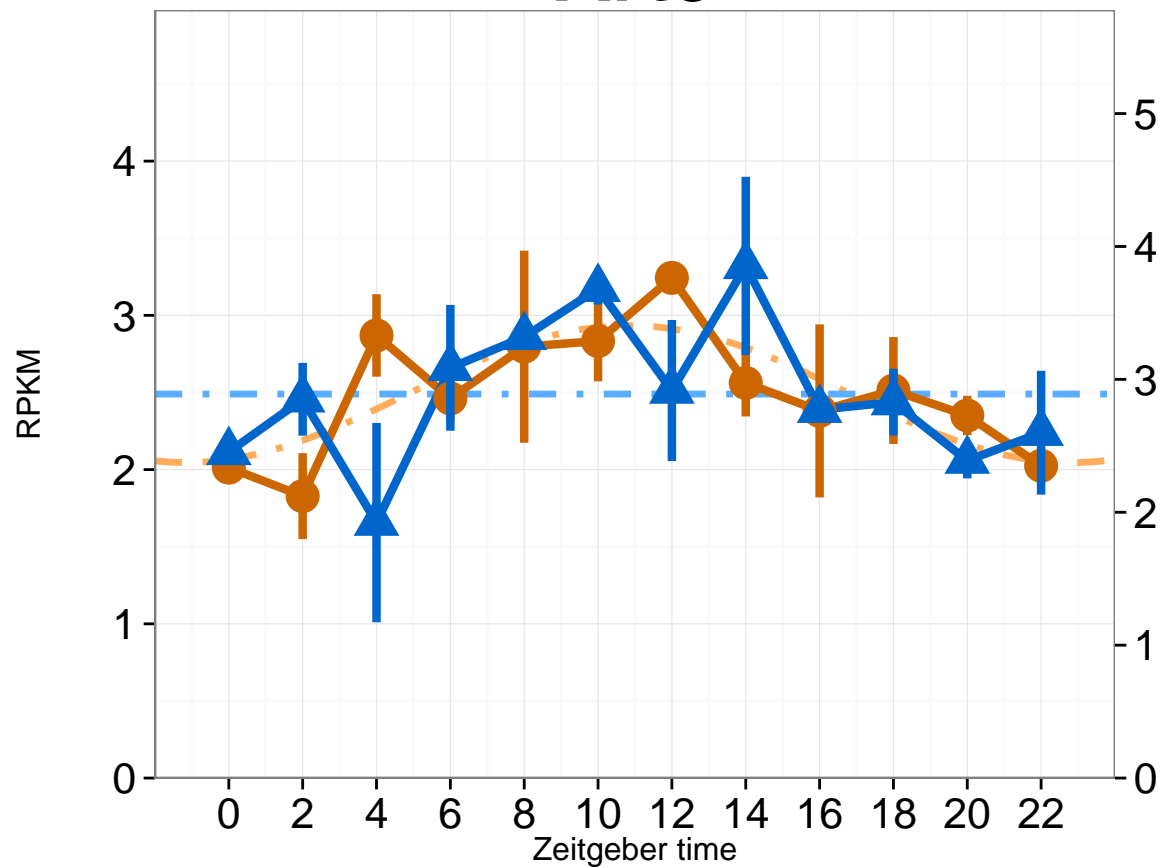

# Art3

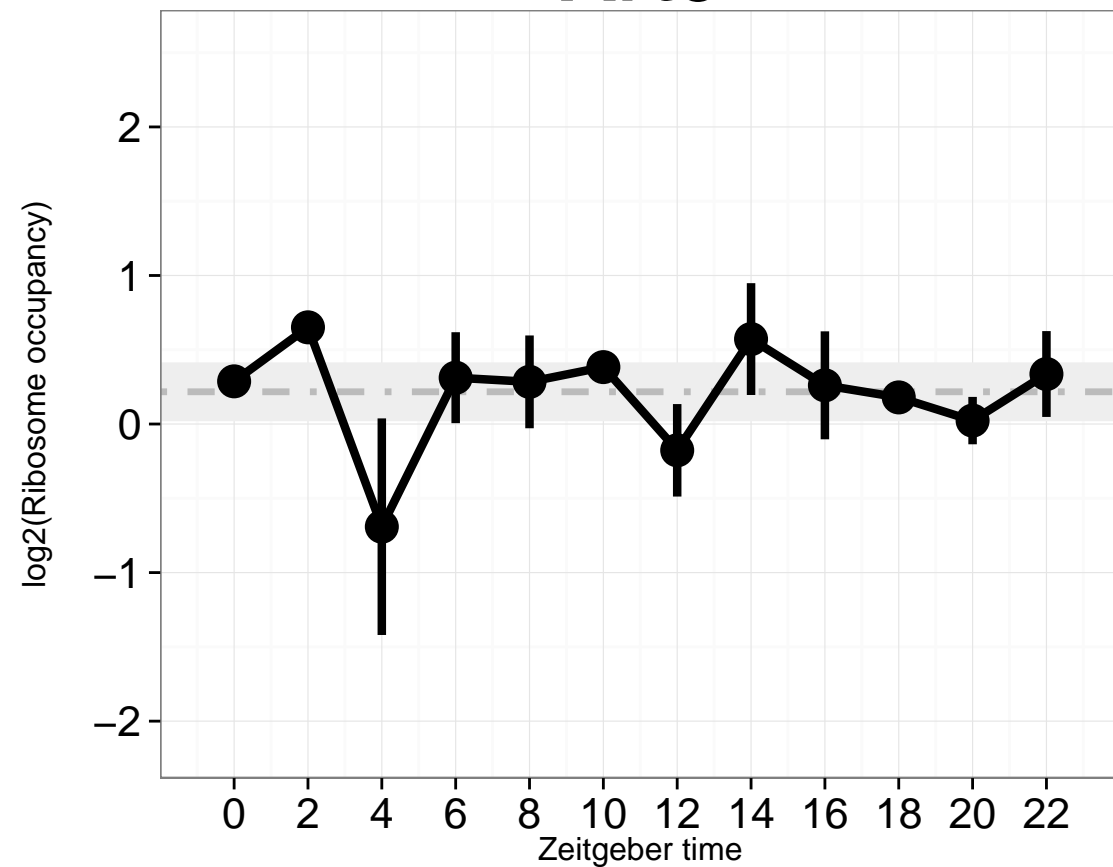

Supplement: Supplementary file 3165 [file 1]

## Slc6a13

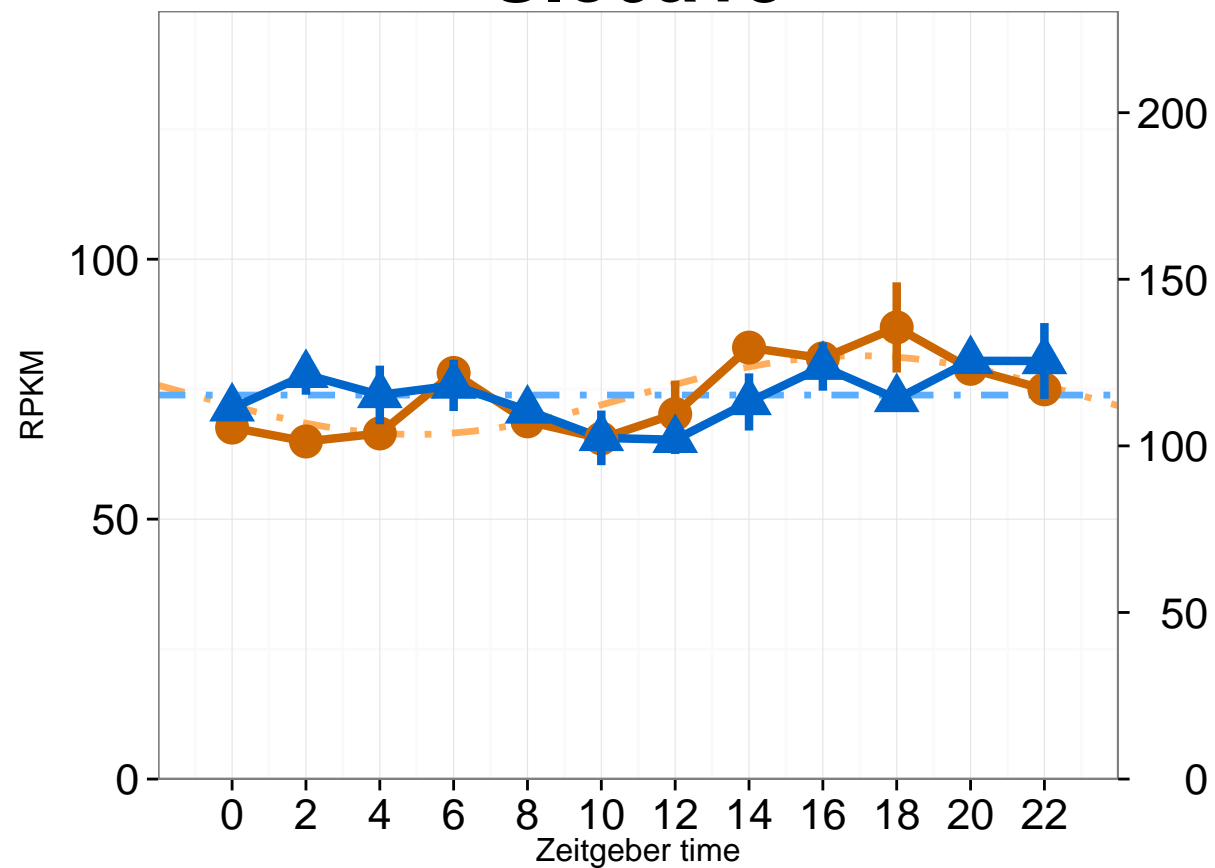

## Slc6a13

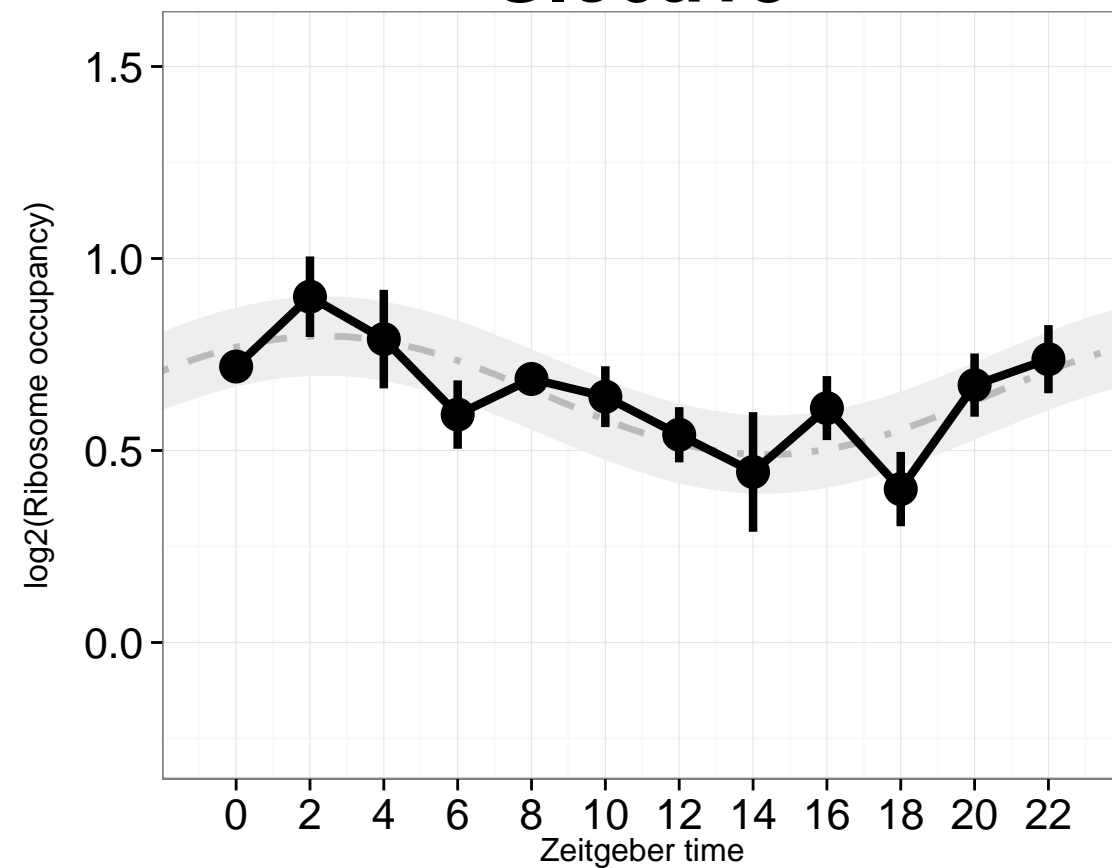

Supplement: Supplementary file 3166 [file 1]

## Nle1

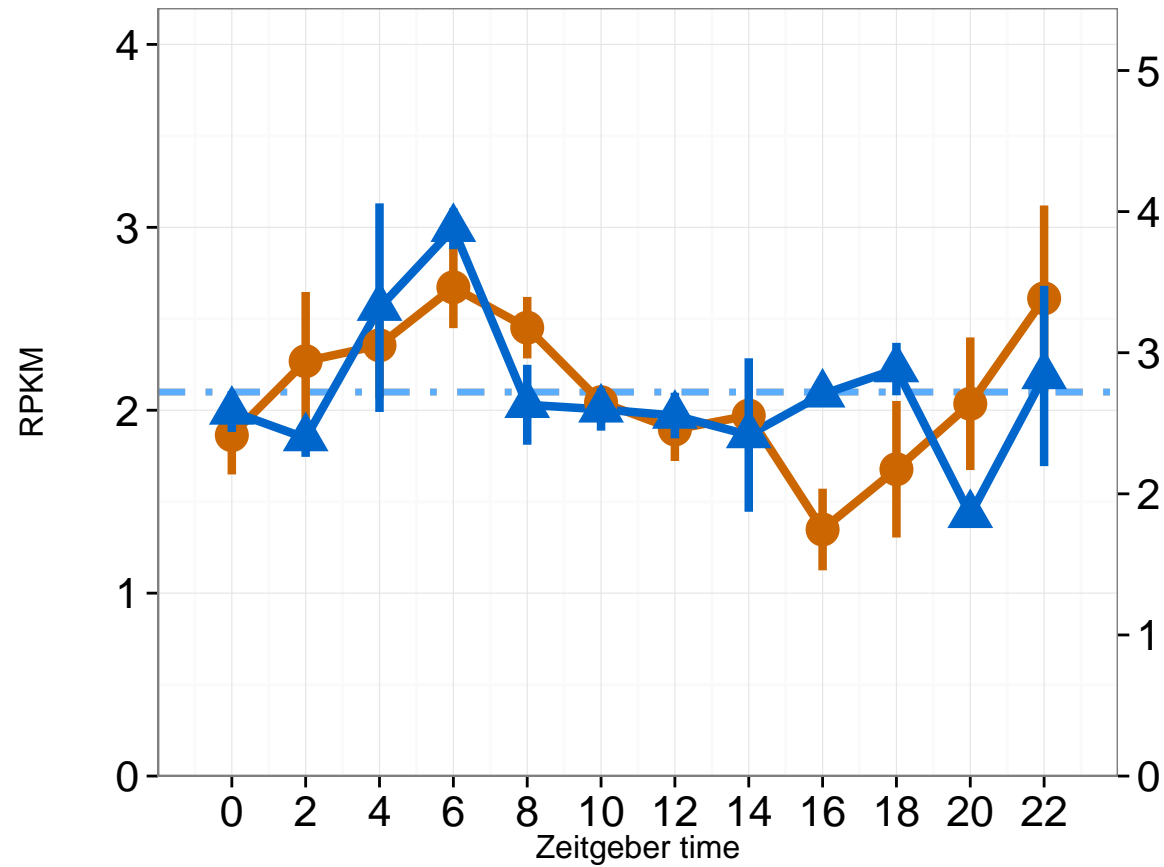

## Nle1

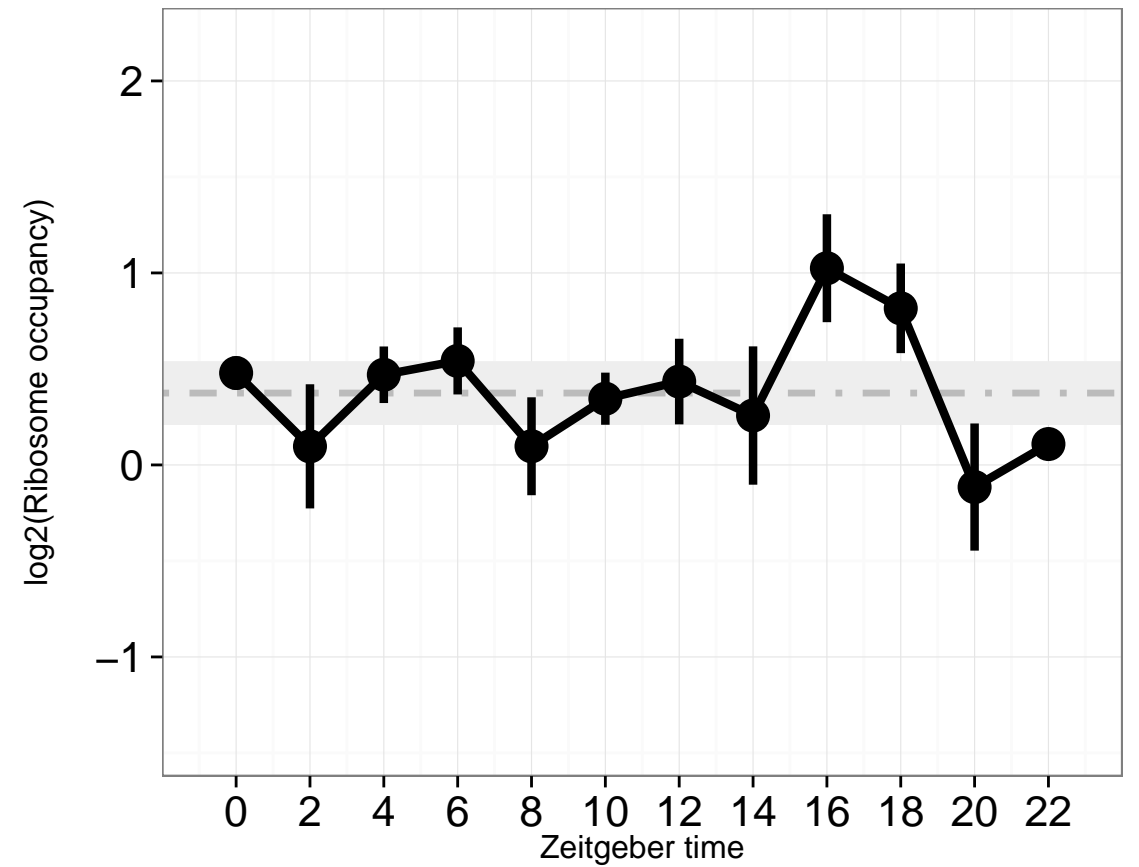

Supplement: Supplementary file 3167 [file 1]

## Cul1

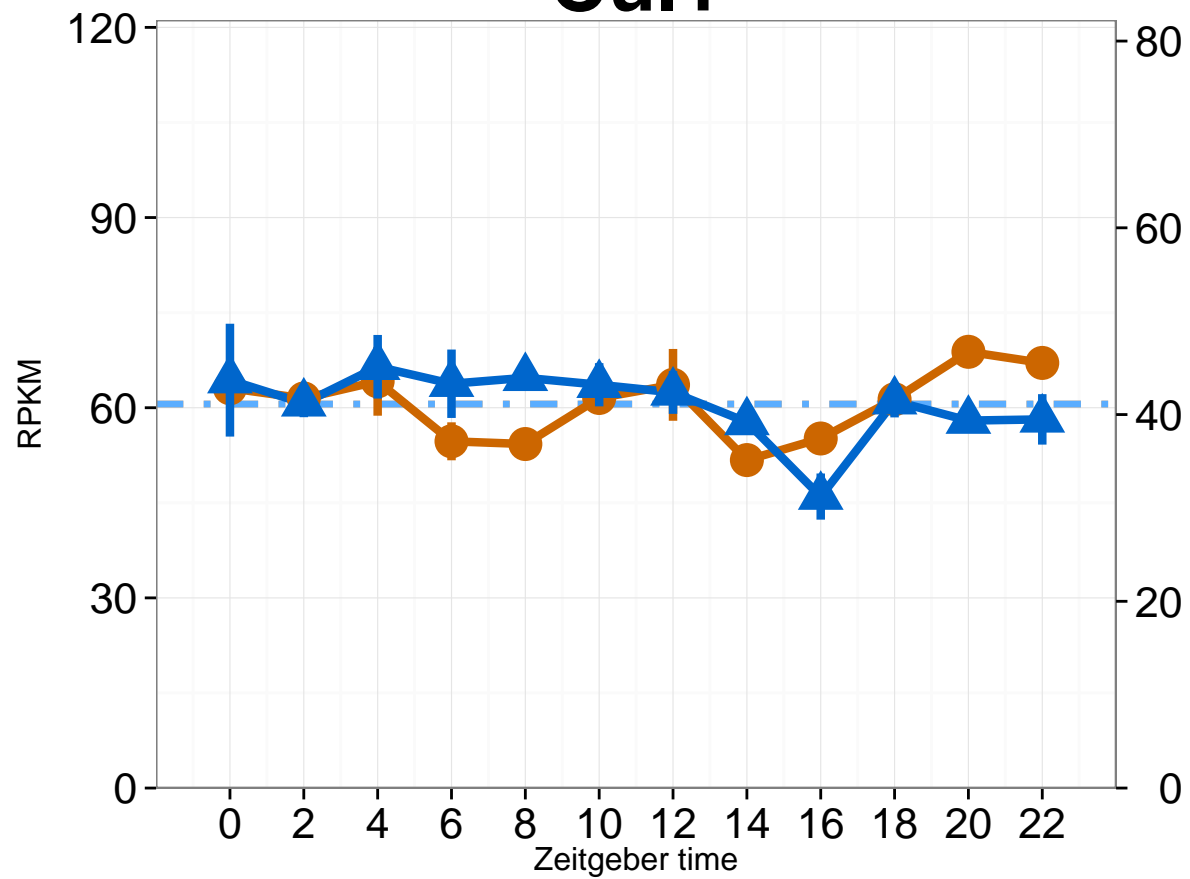

## Cul1

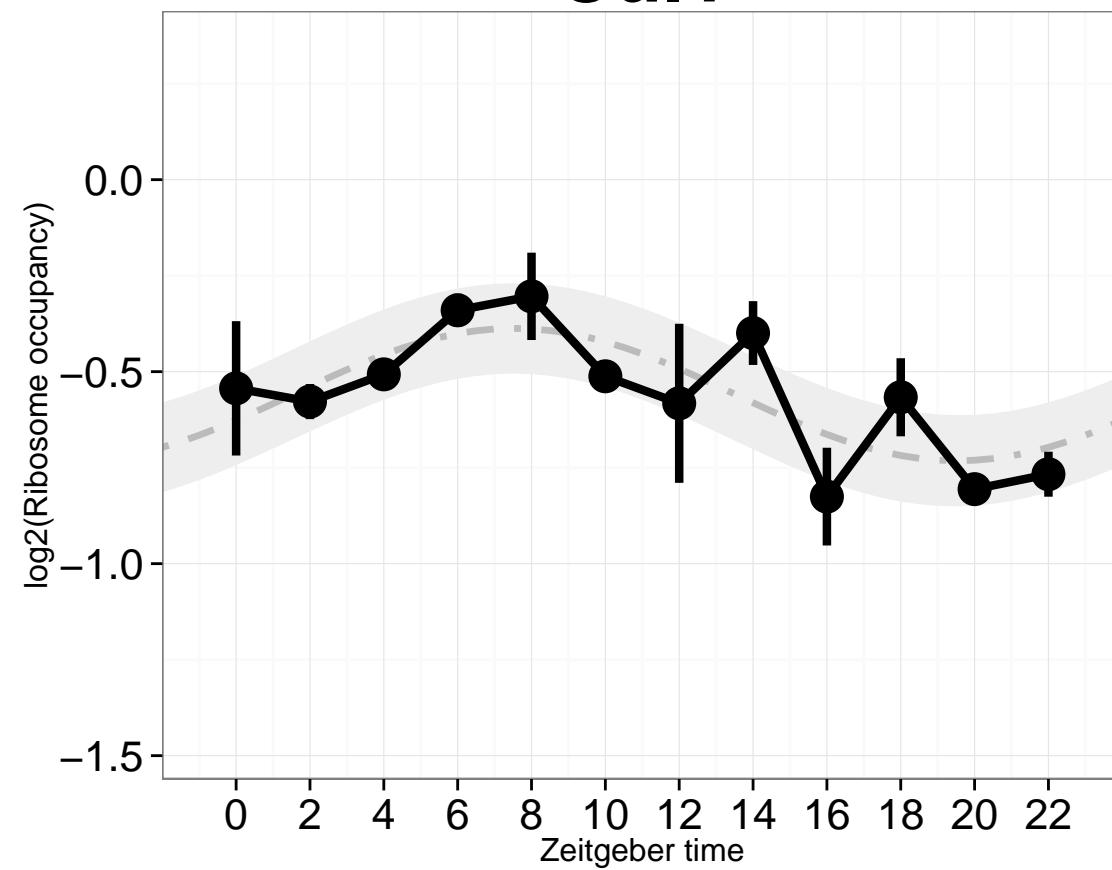

Supplement: Supplementary file 3168 [file 1]

## Pcsk4

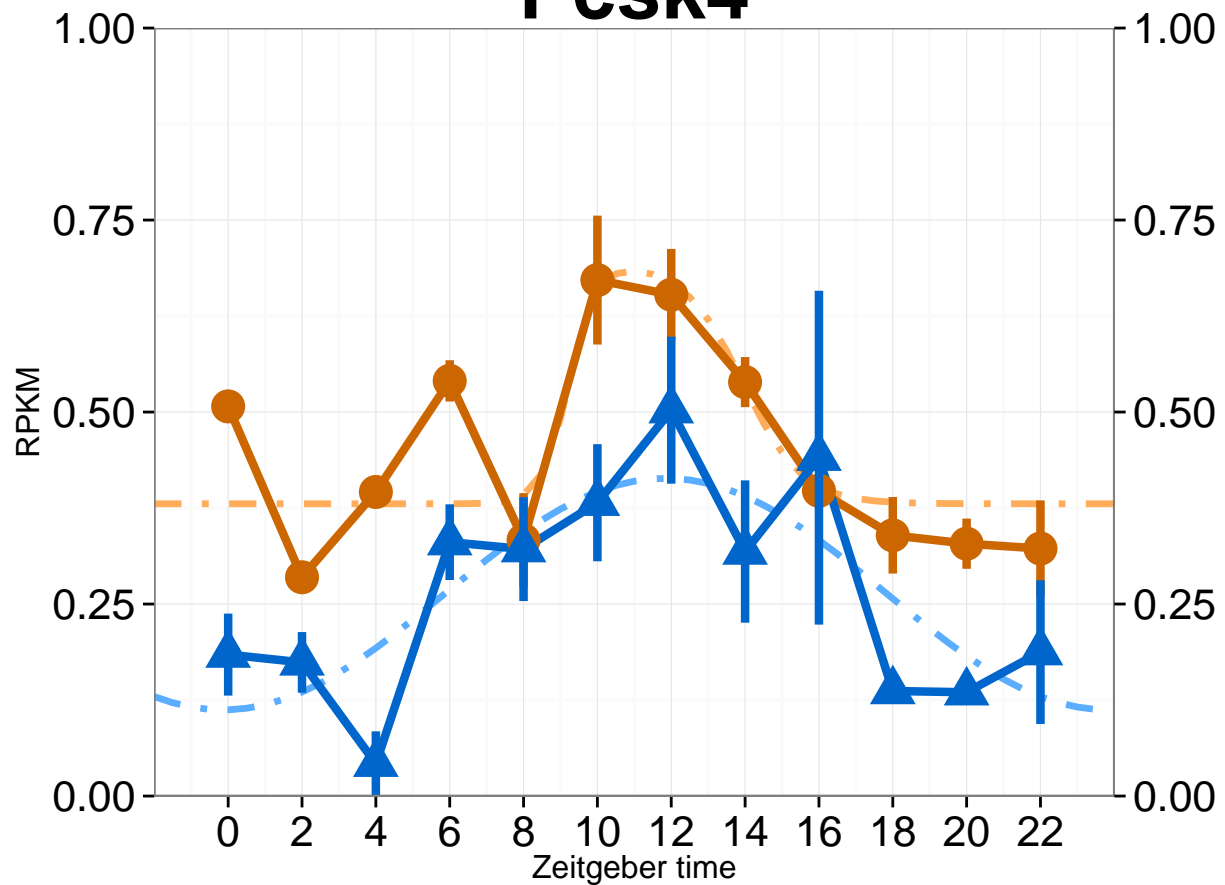

## Pcsk4

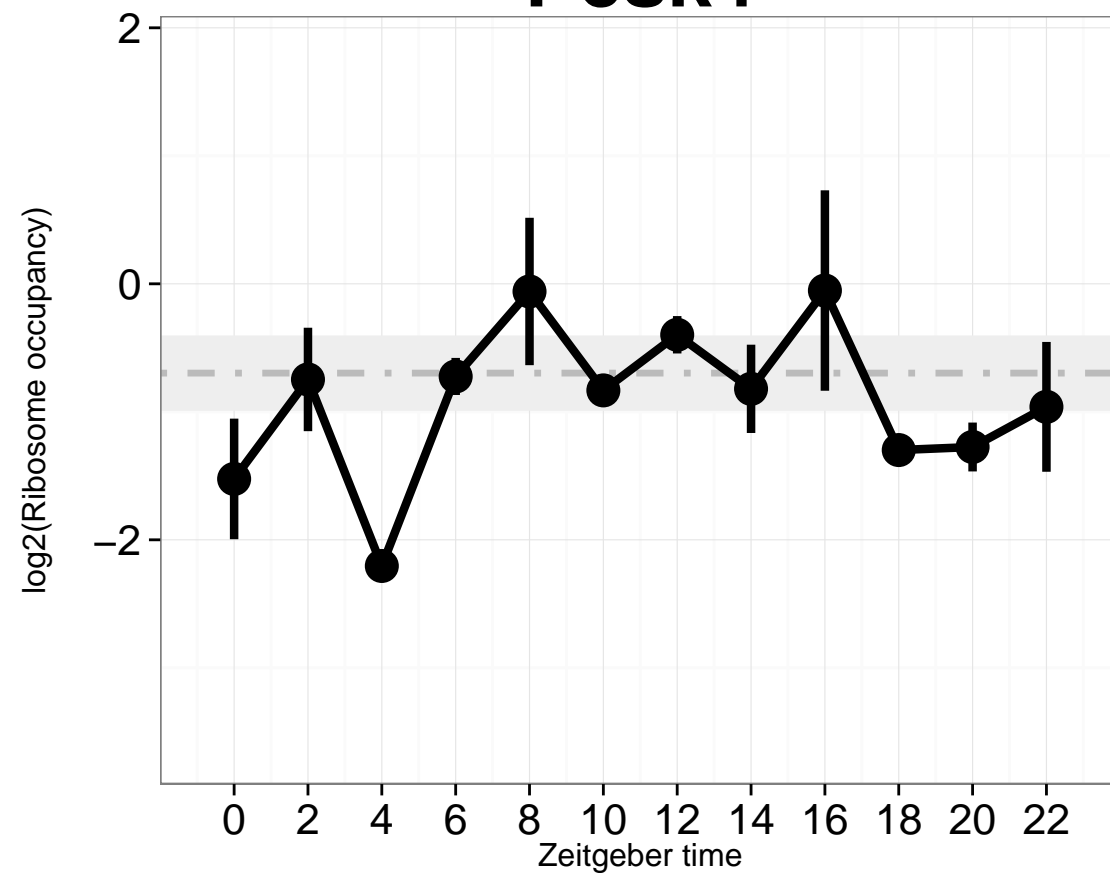

Supplement: Supplementary file 3169 [file 1]

## Anxa2

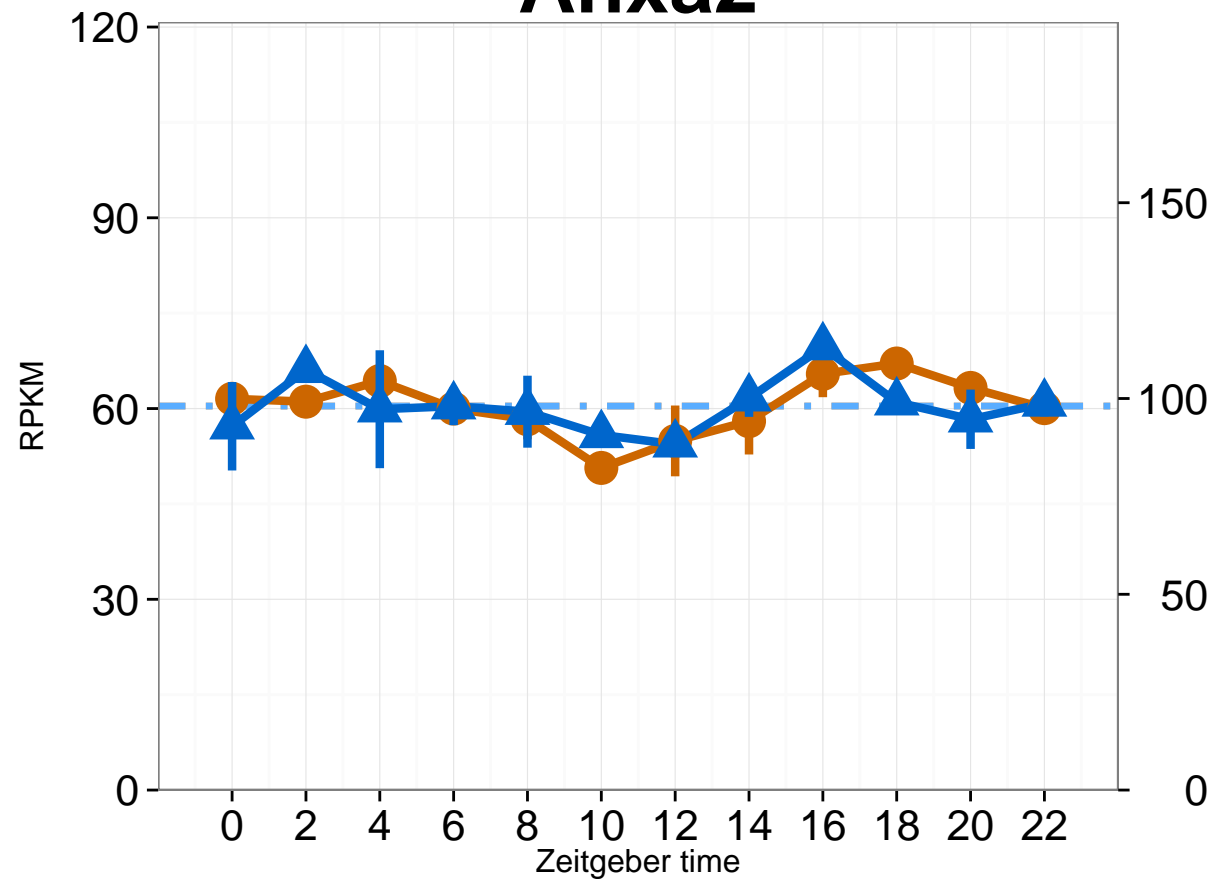

## Anxa2

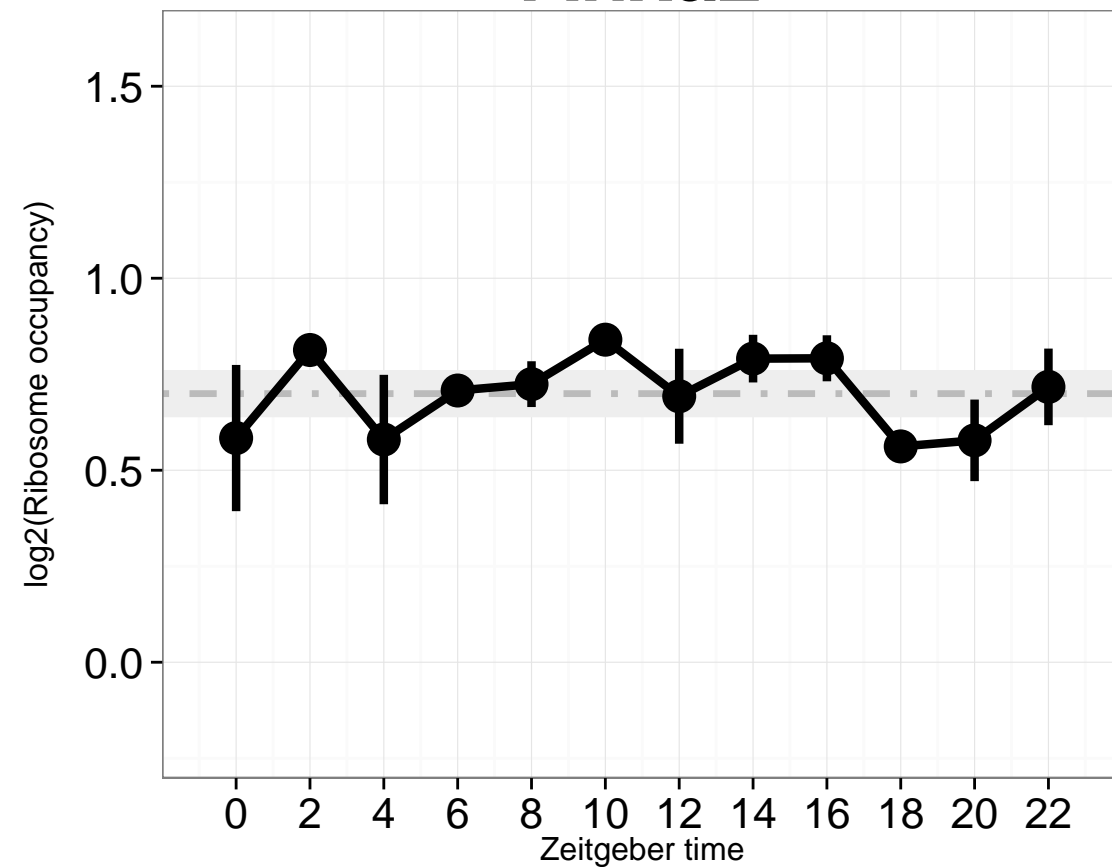

Supplement: Supplementary file 3170 [file 1]

# Dnajc1

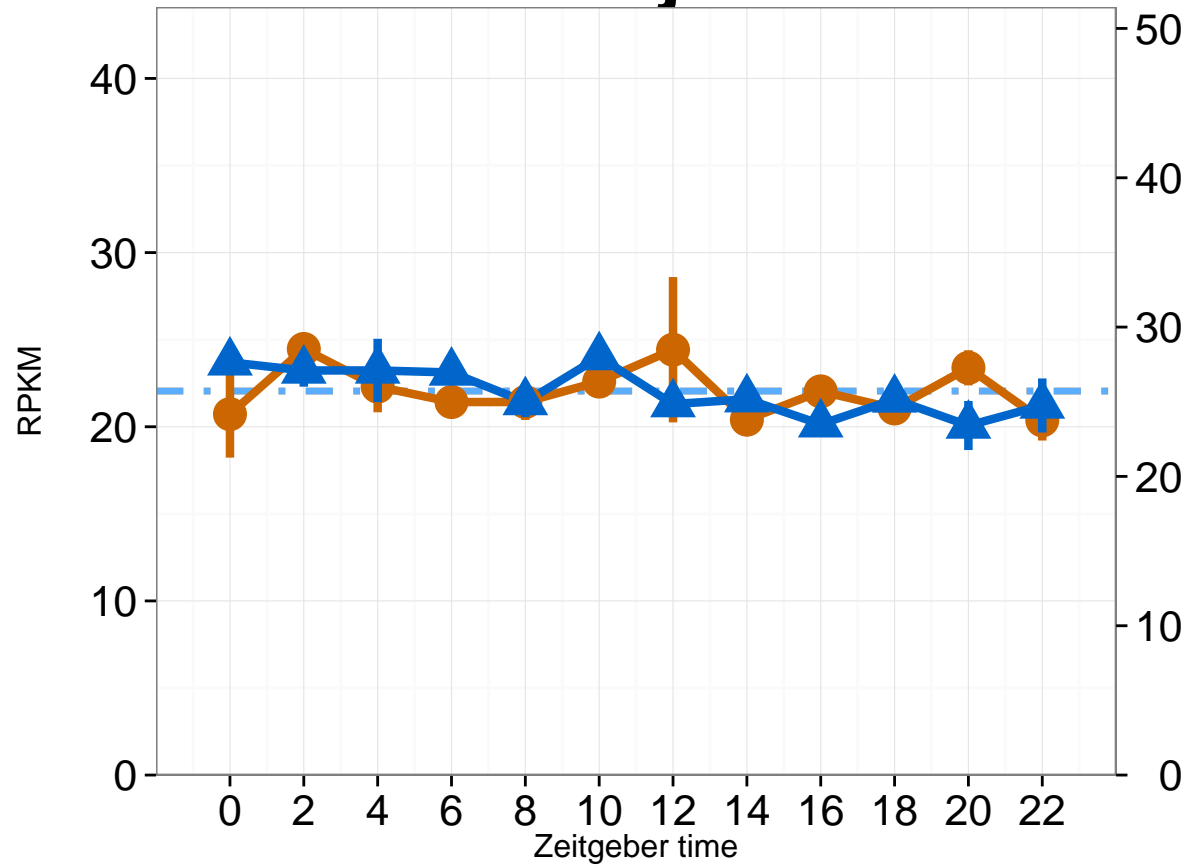

# Dnajc1

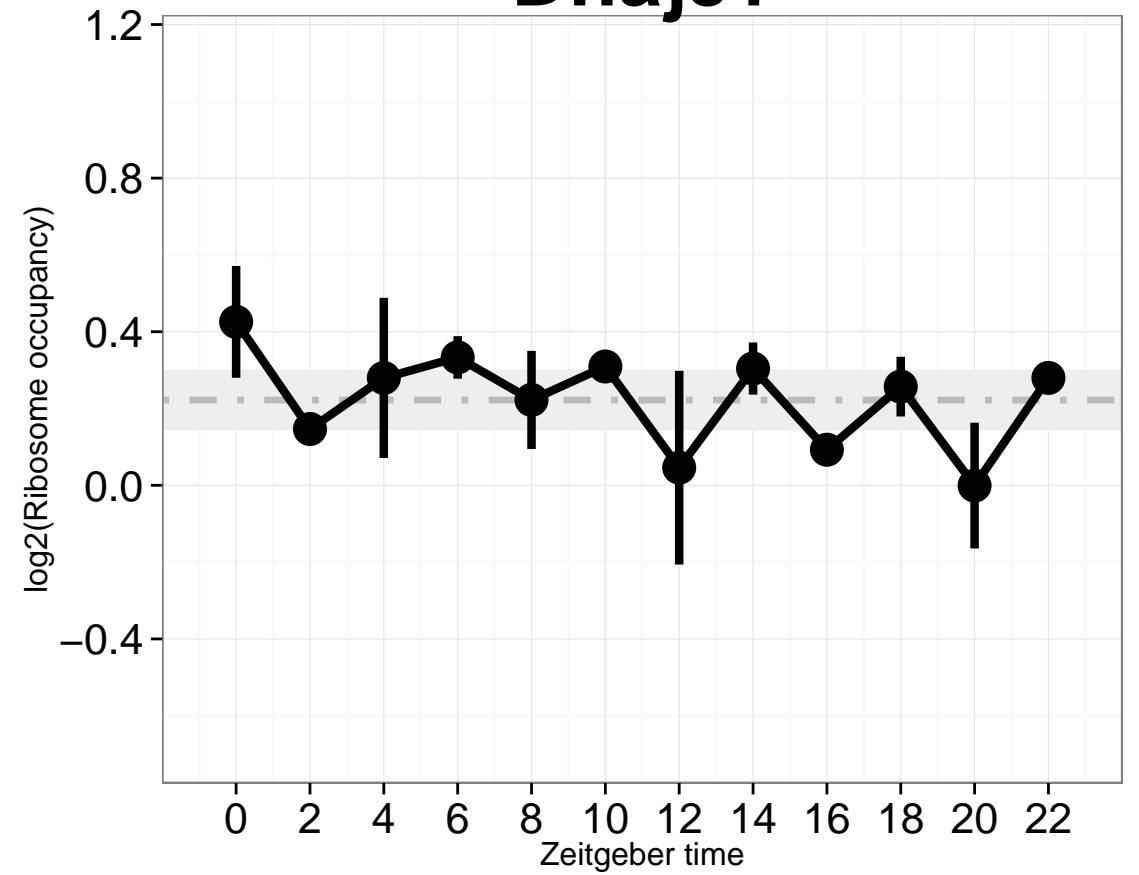

Supplement: Supplementary file 3171 [file 1]

## Fbn1

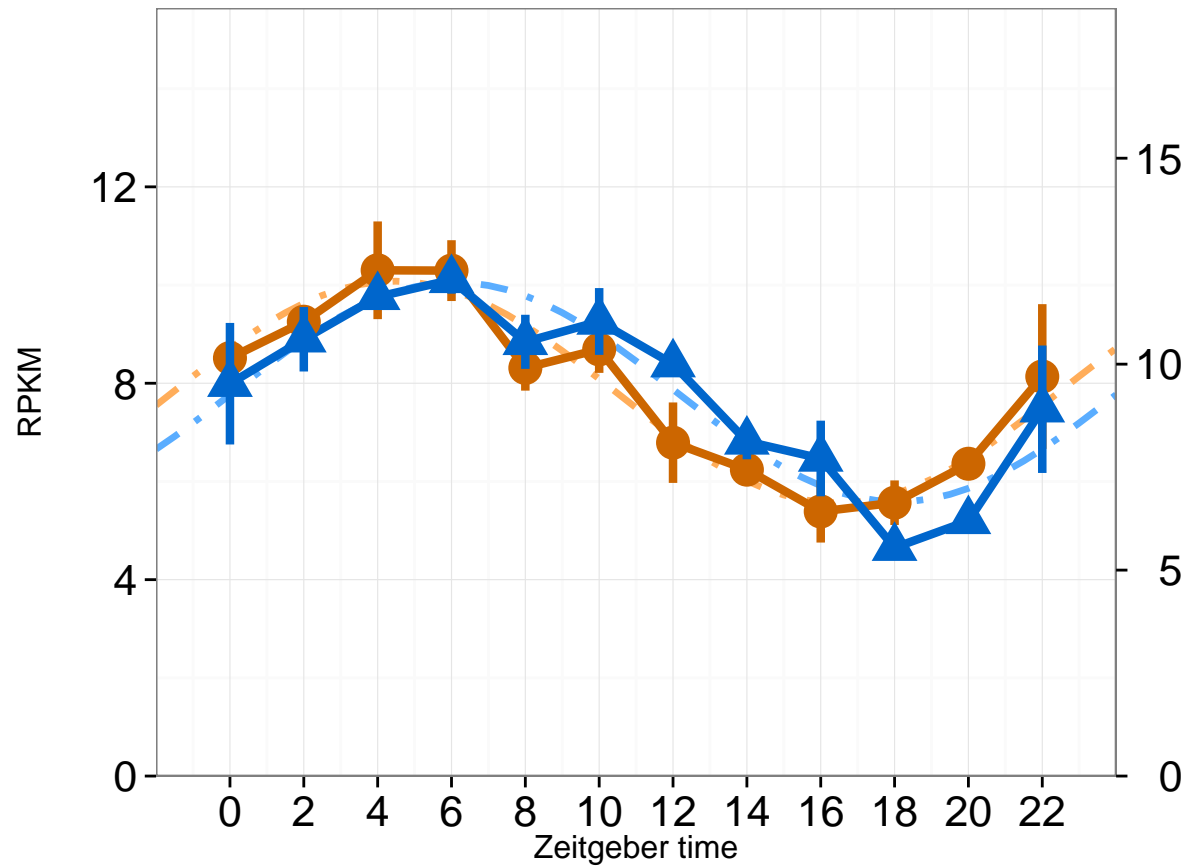

## Fbn1

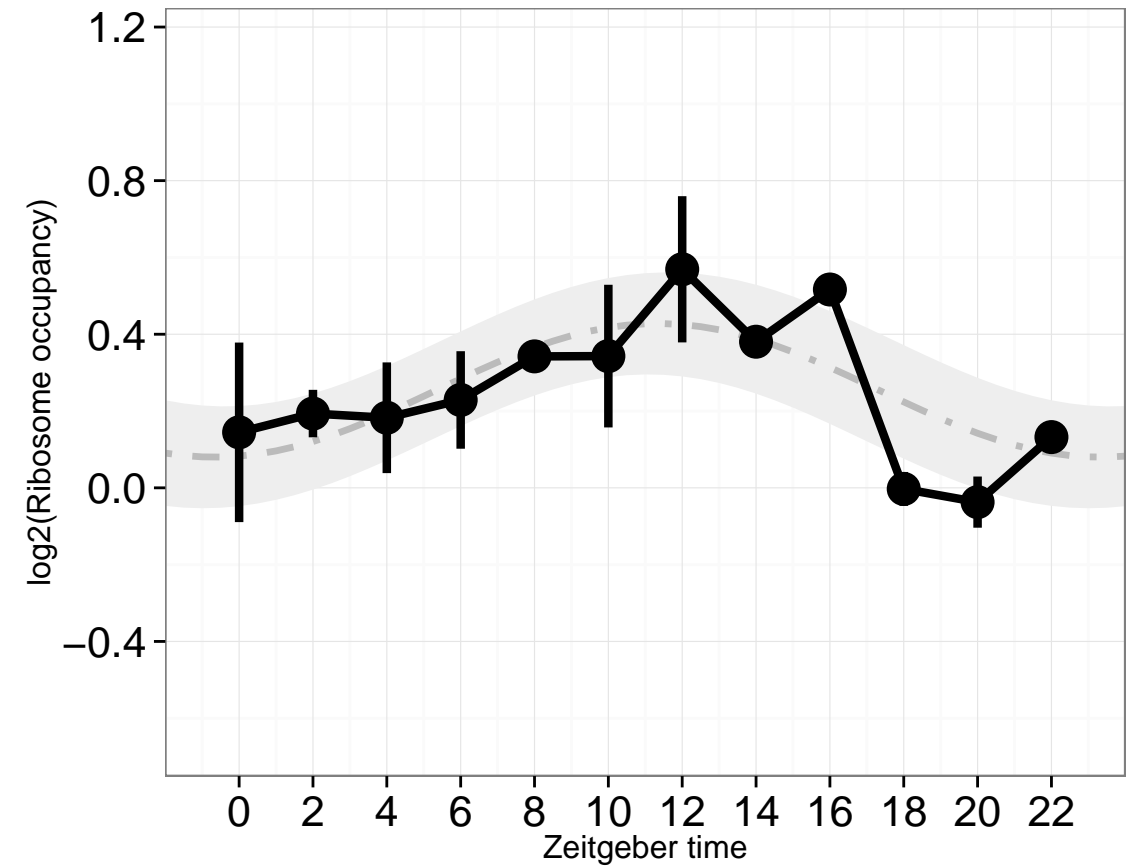

Supplement: Supplementary file 3172 [file 1]

# Lrrn1

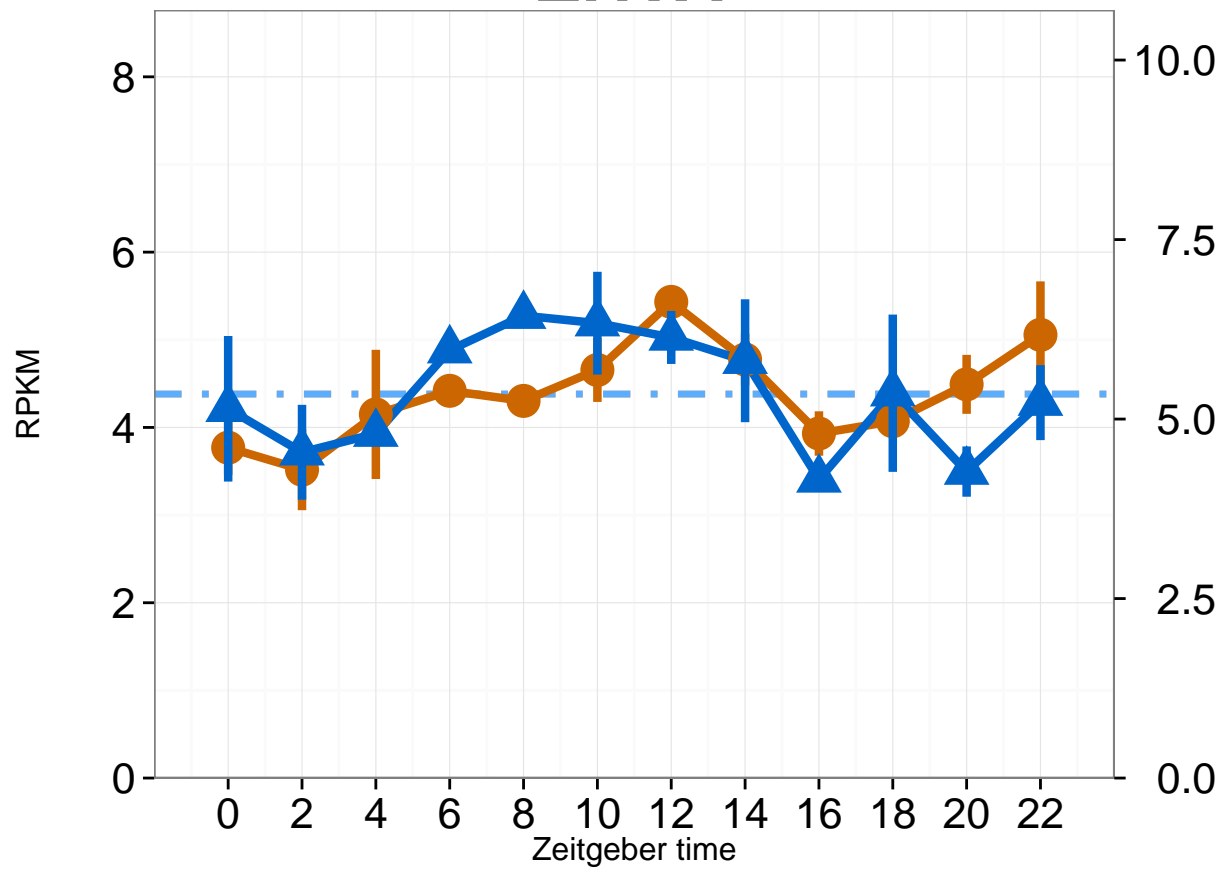

# Lrrn1

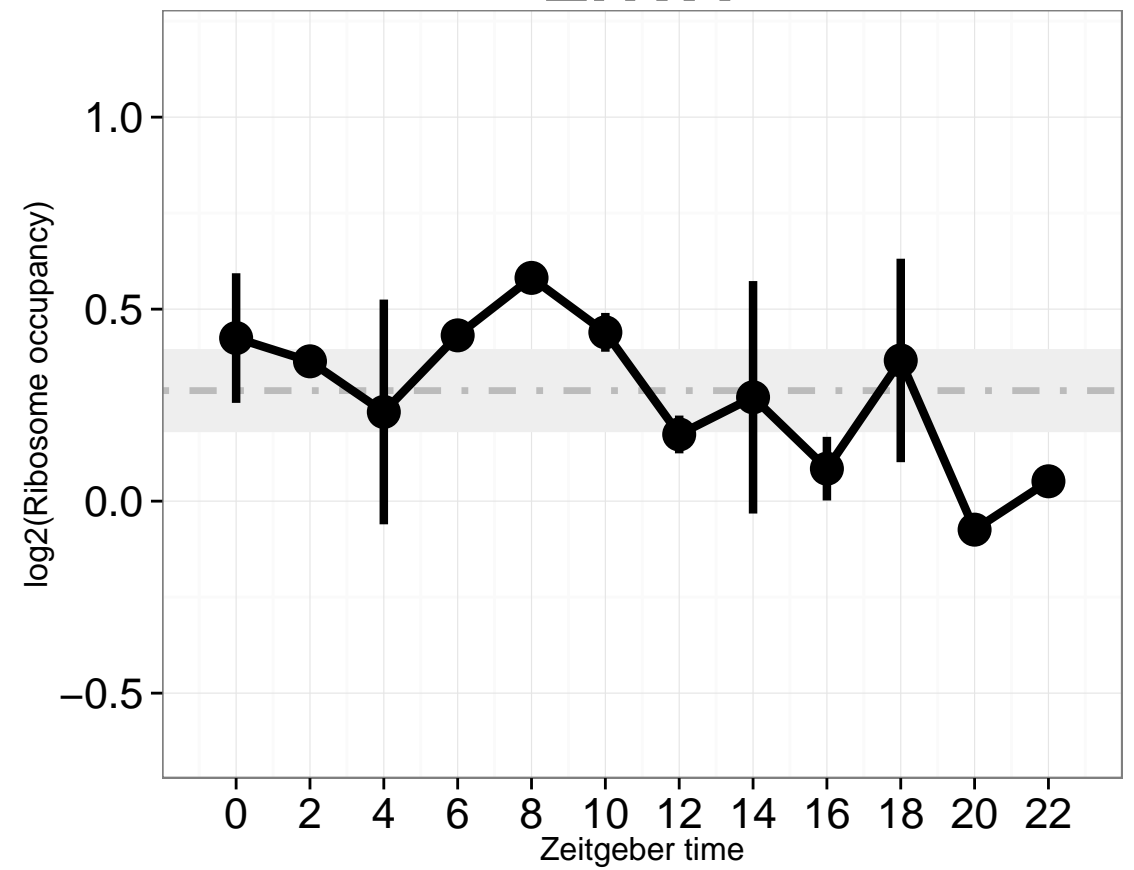

Supplement: Supplementary file 3173 [file 1]

## Ece2

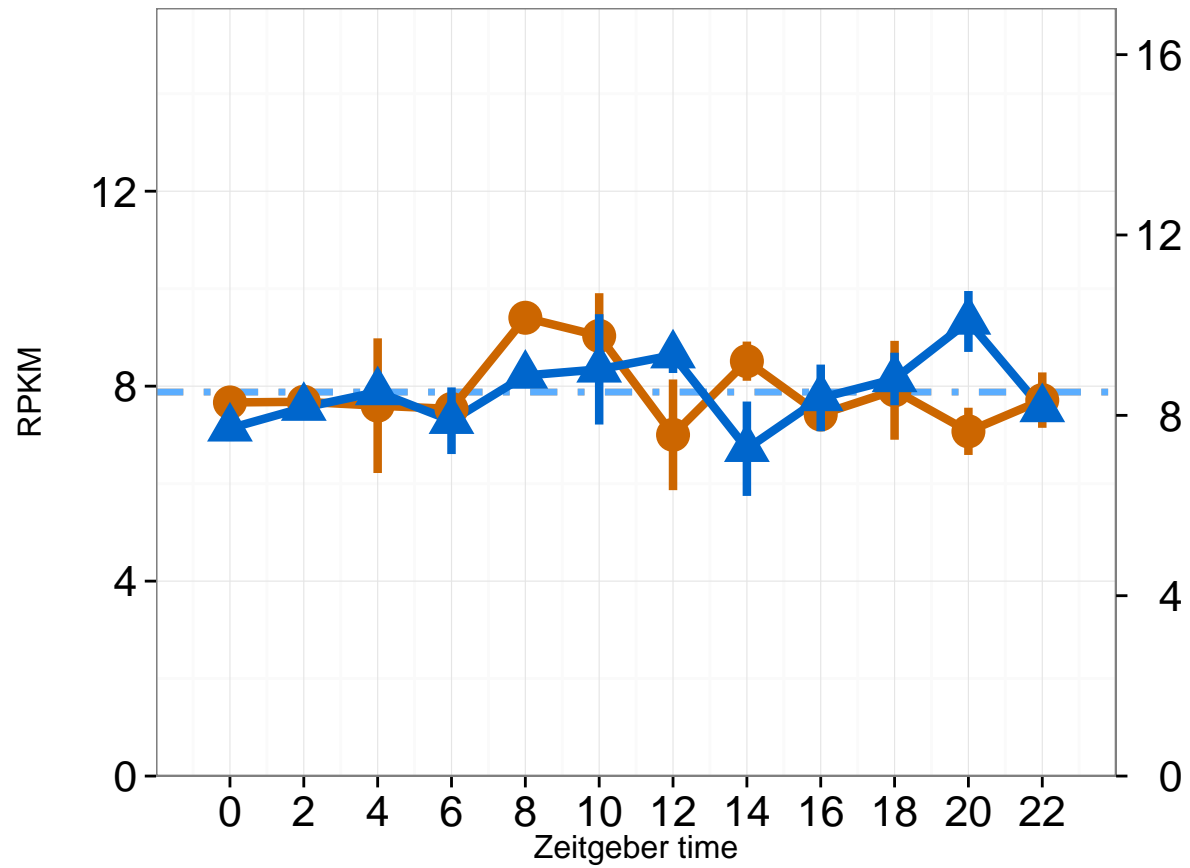

## Ece2

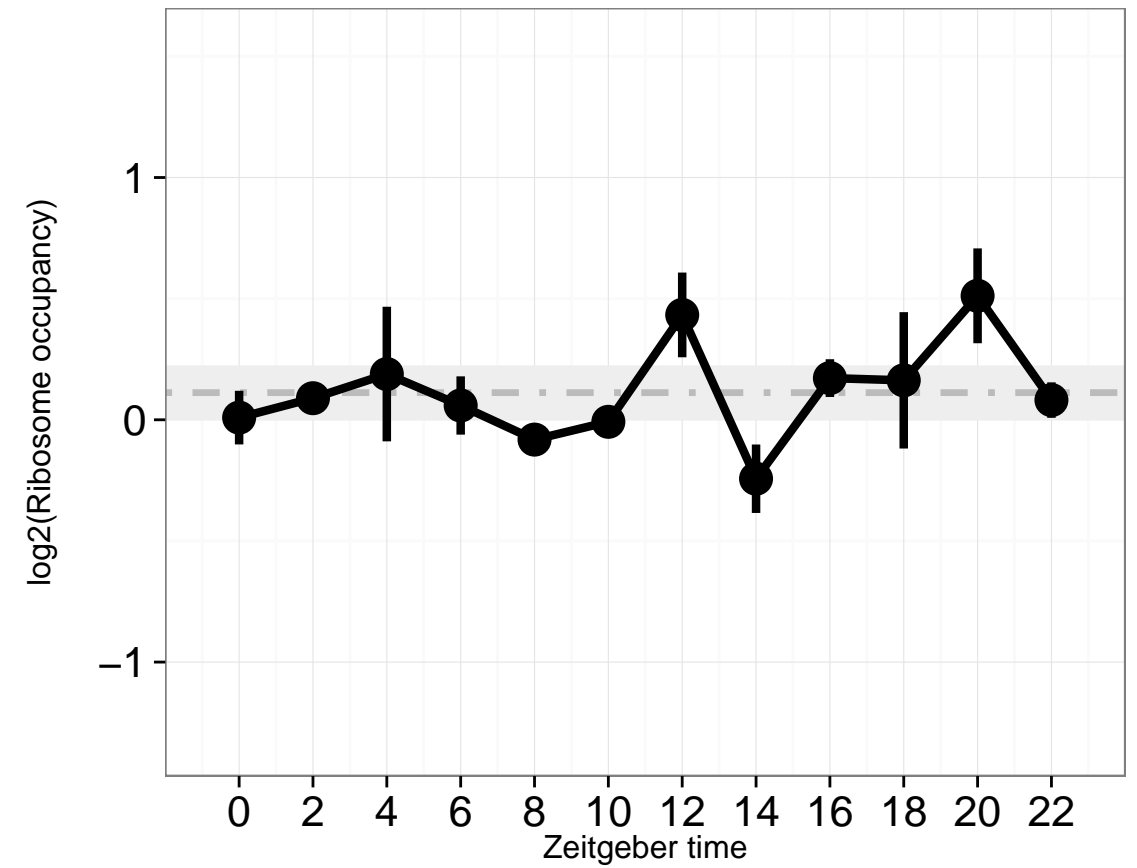

Supplement: Supplementary file 3174 [file 1]

## Tia1

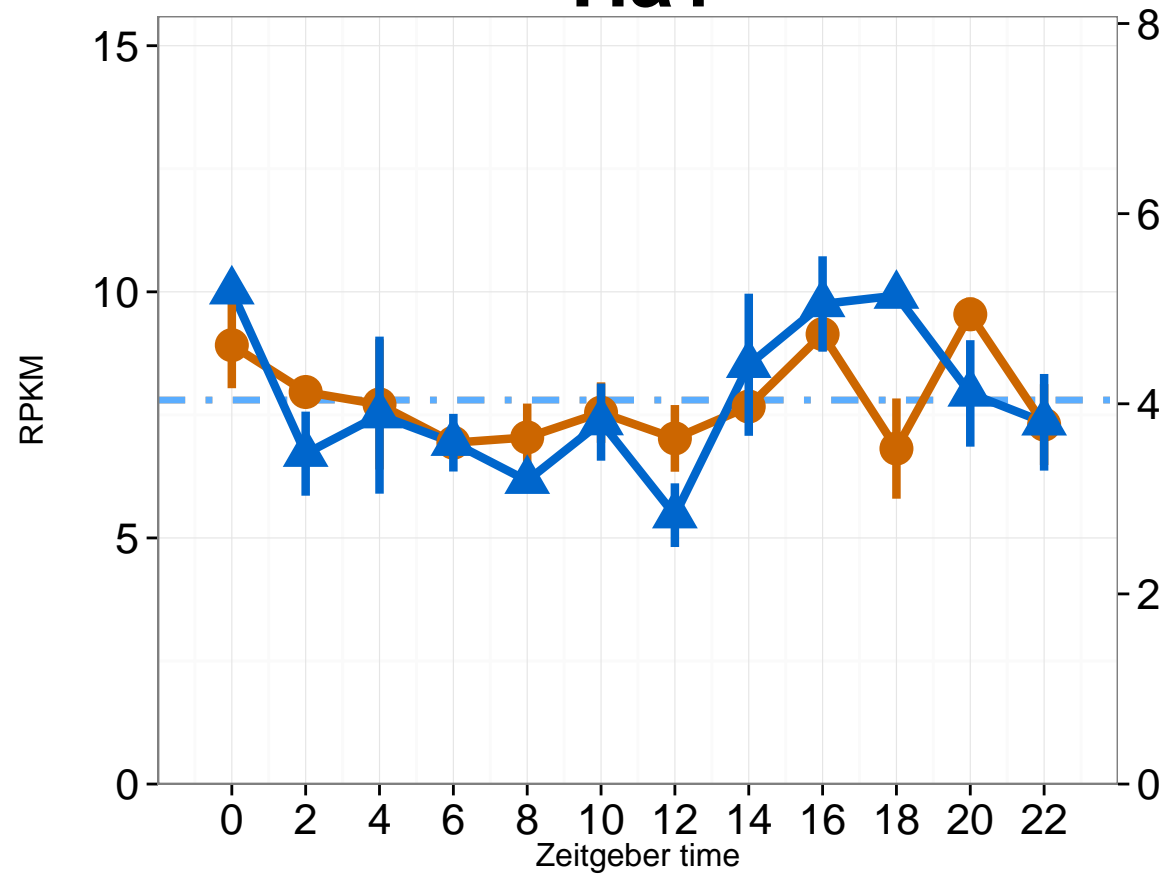

## Tia1

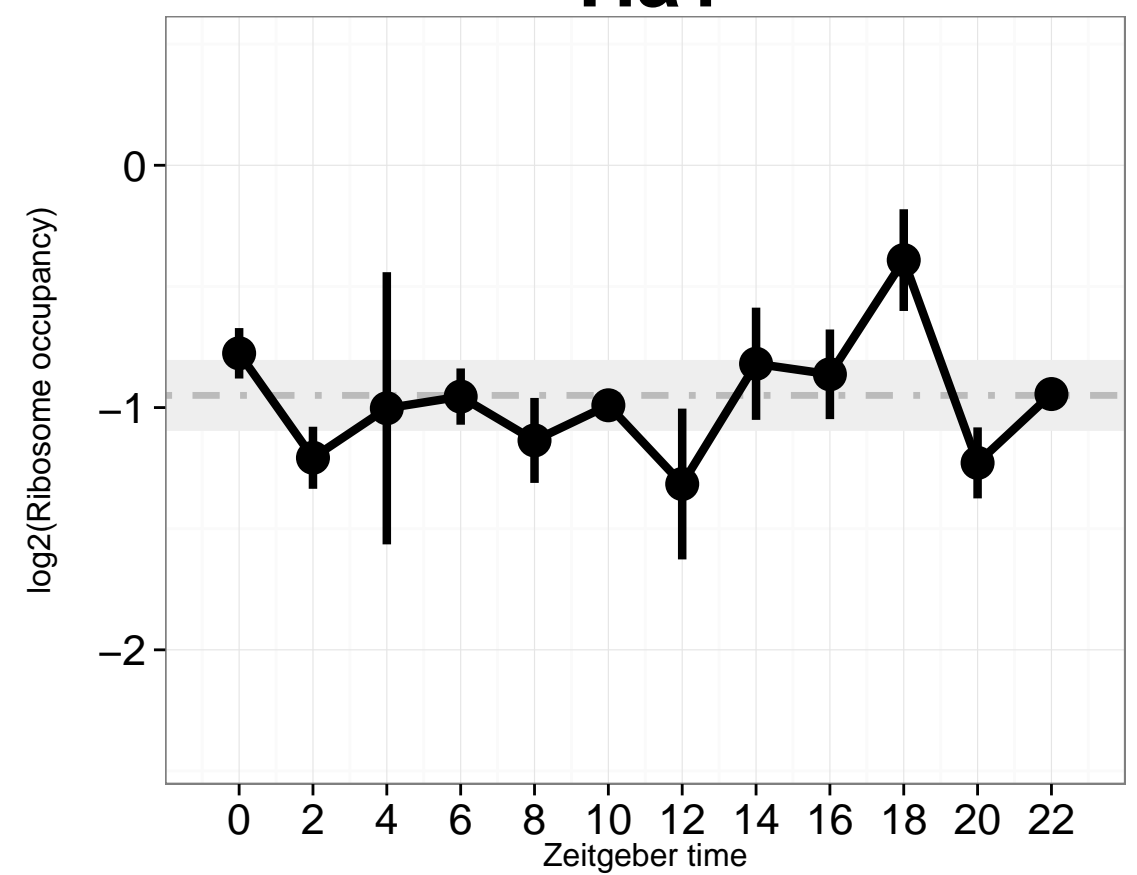

Supplement: Supplementary file 3175 [file 1]

# Ap4m1

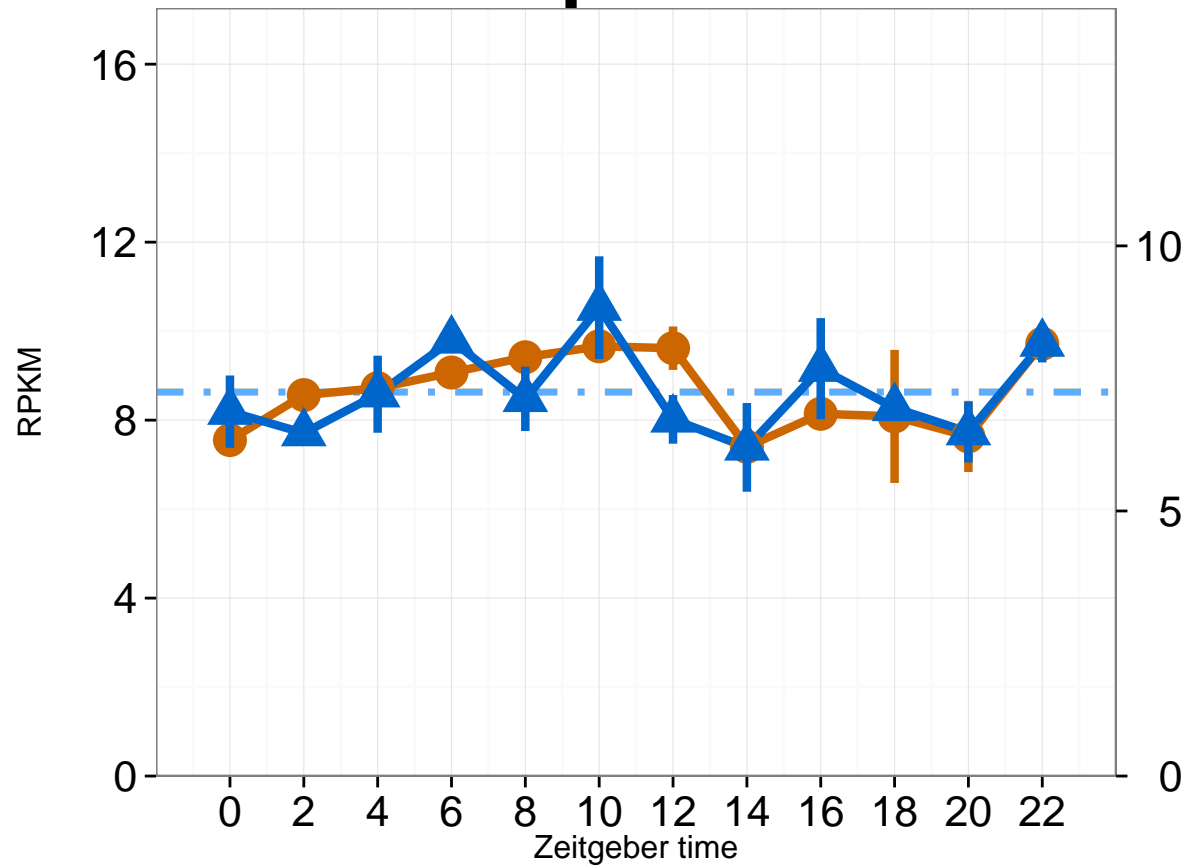

# Ap4m1

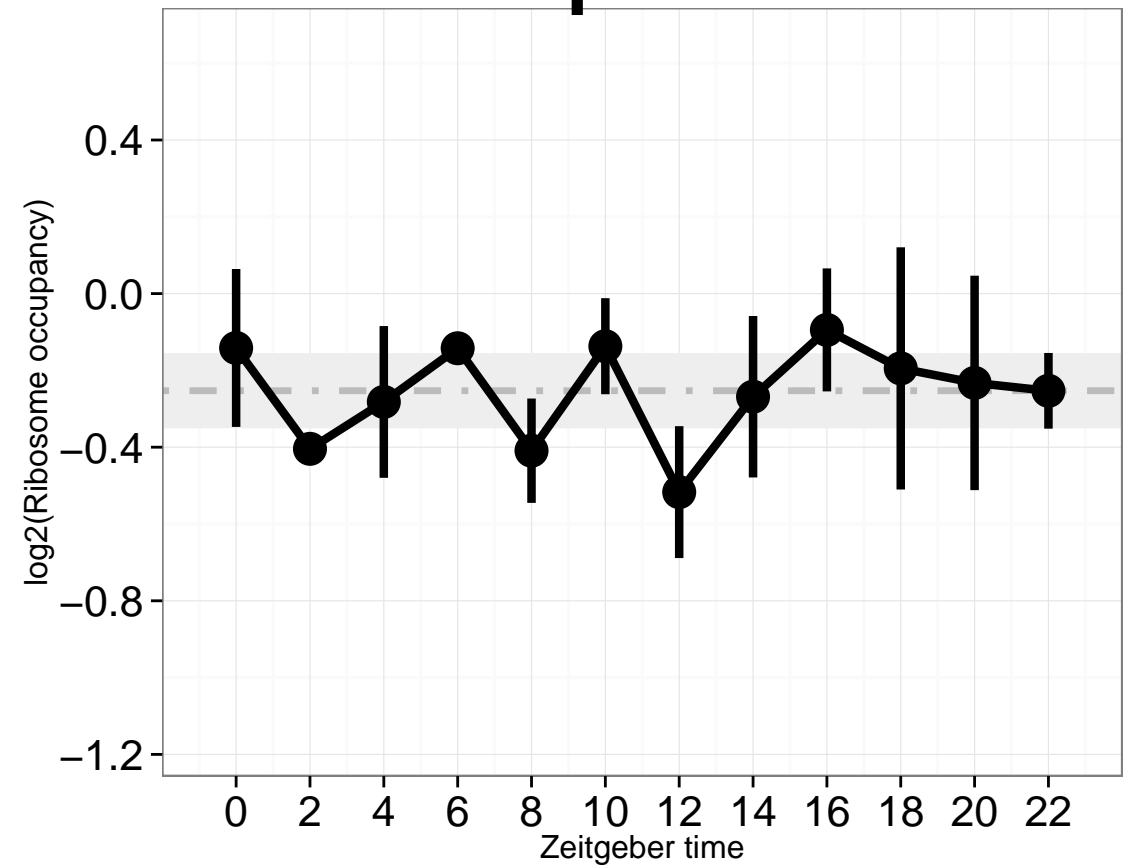

Supplement: Supplementary file 3176 [file 1]

## Tnfaip2

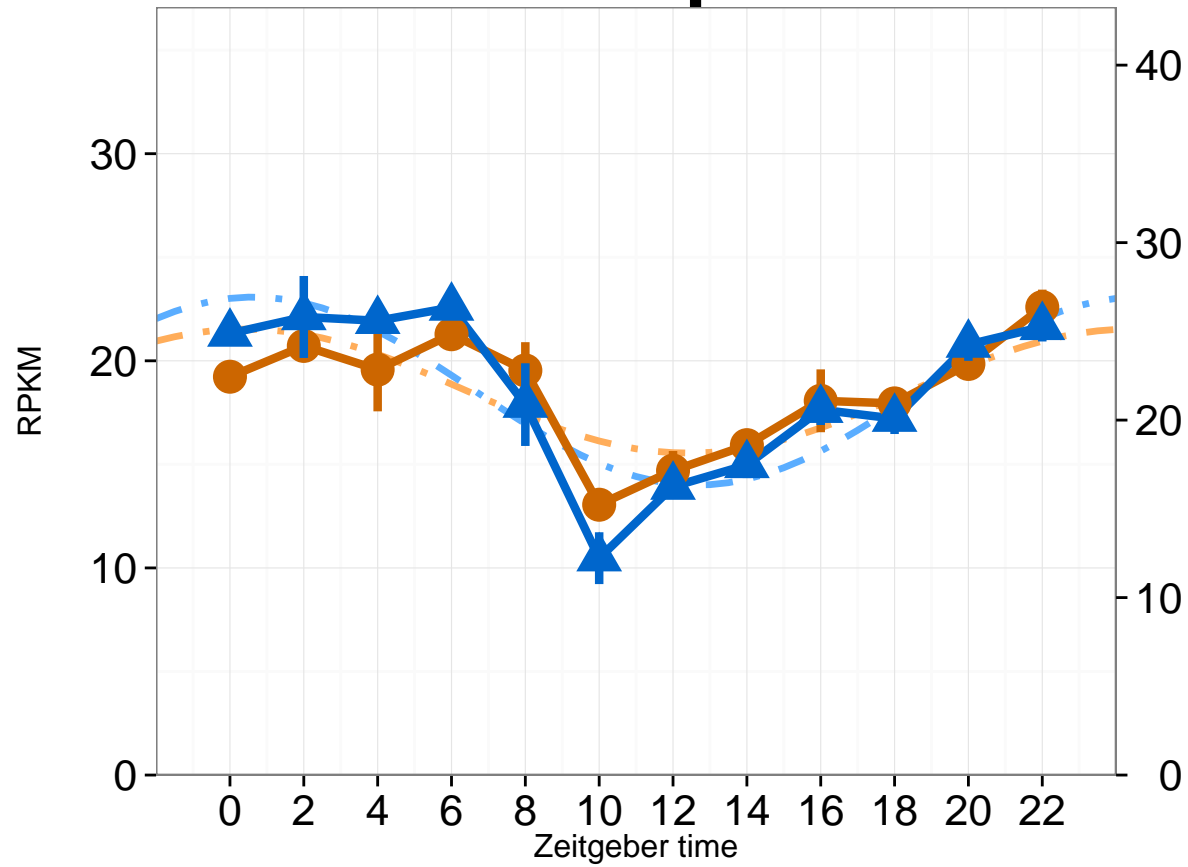

## Tnfaip2

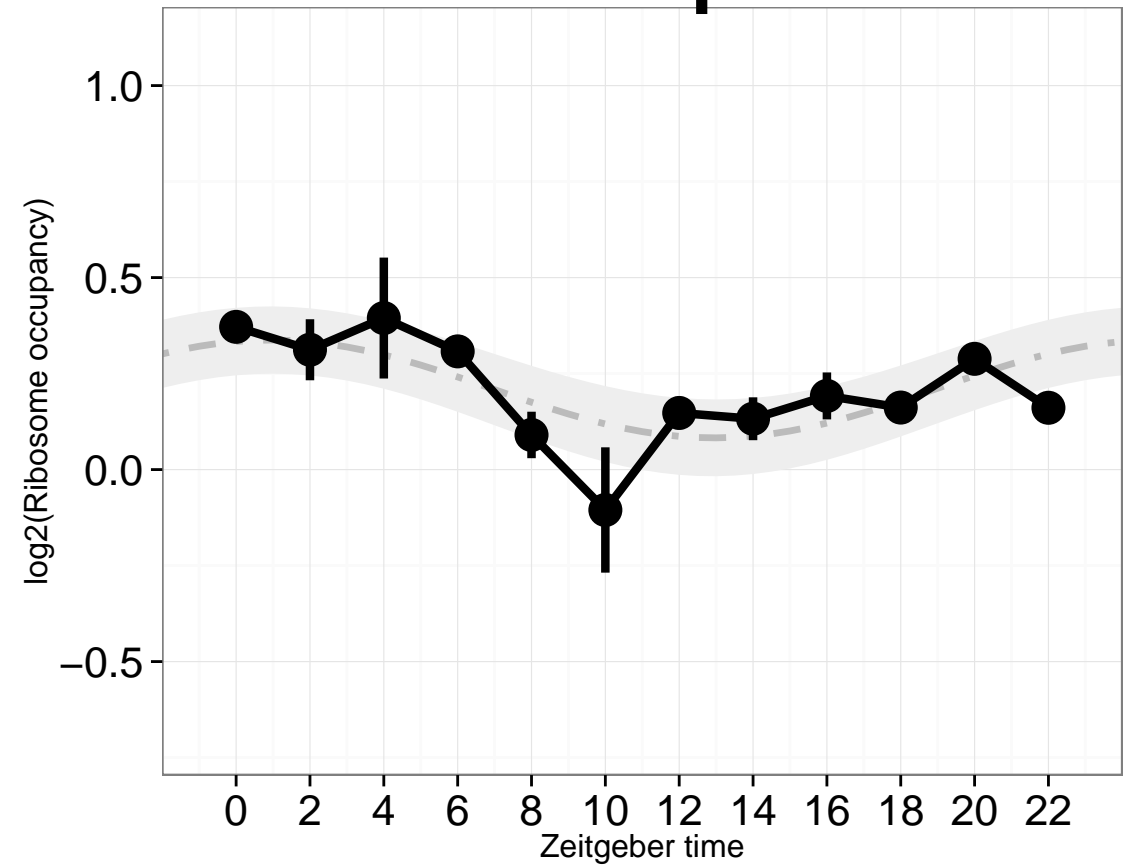

Supplement: Supplementary file 3177 [file 1]

## Rtn3

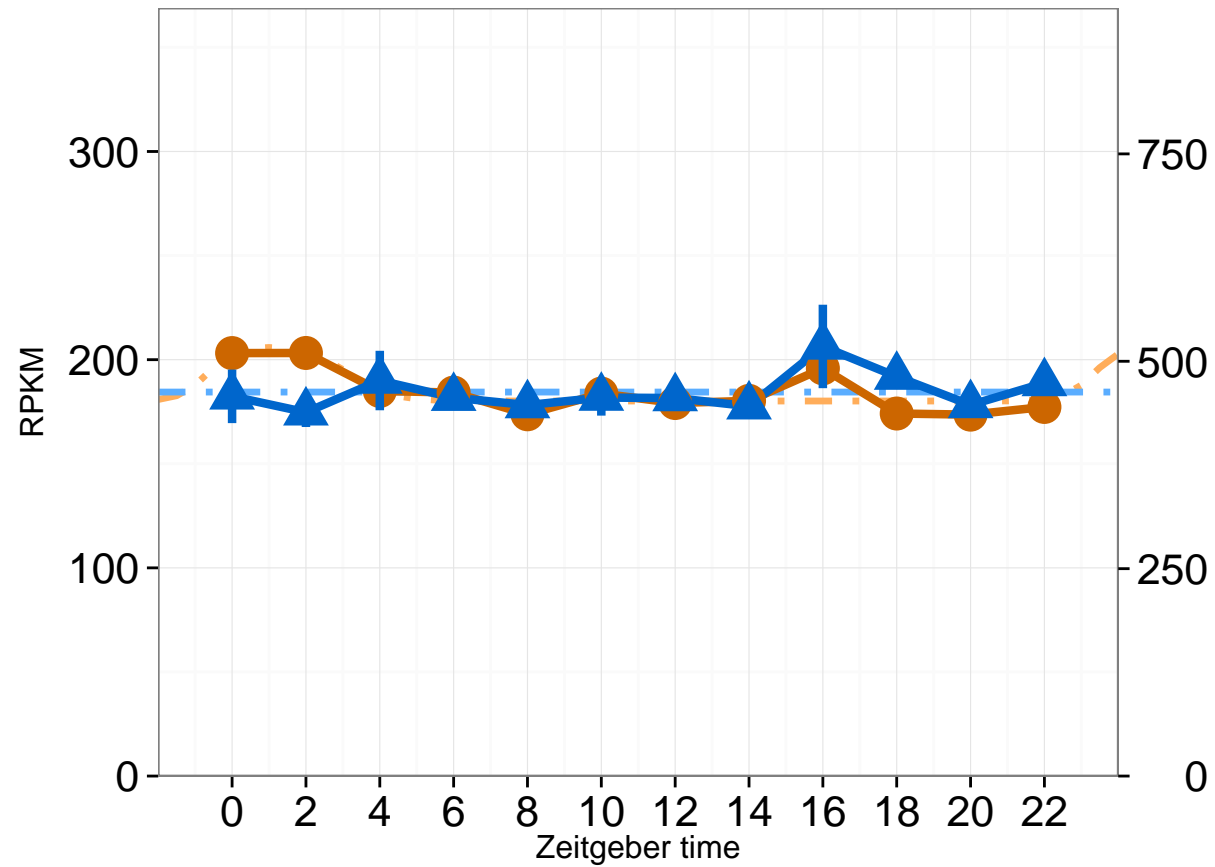

## Rtn3

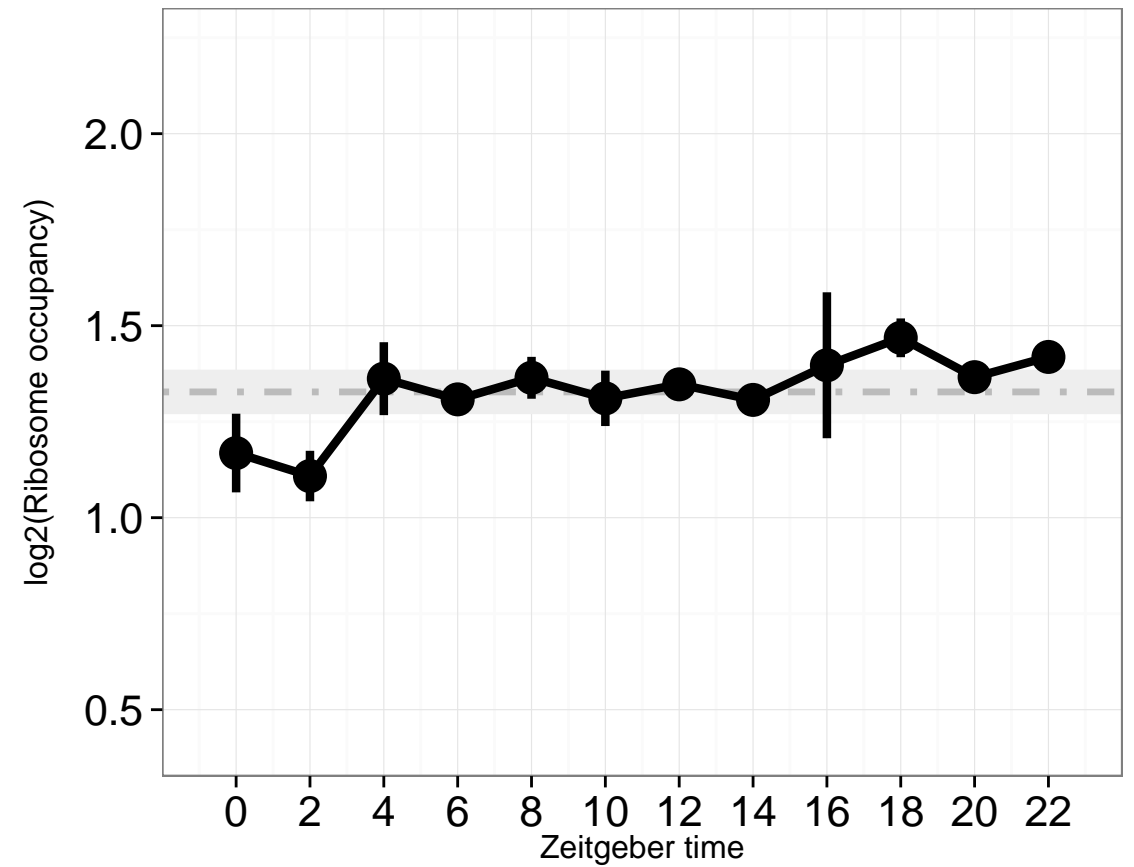

Supplement: Supplementary file 3178 [file 1]

# Tiam2

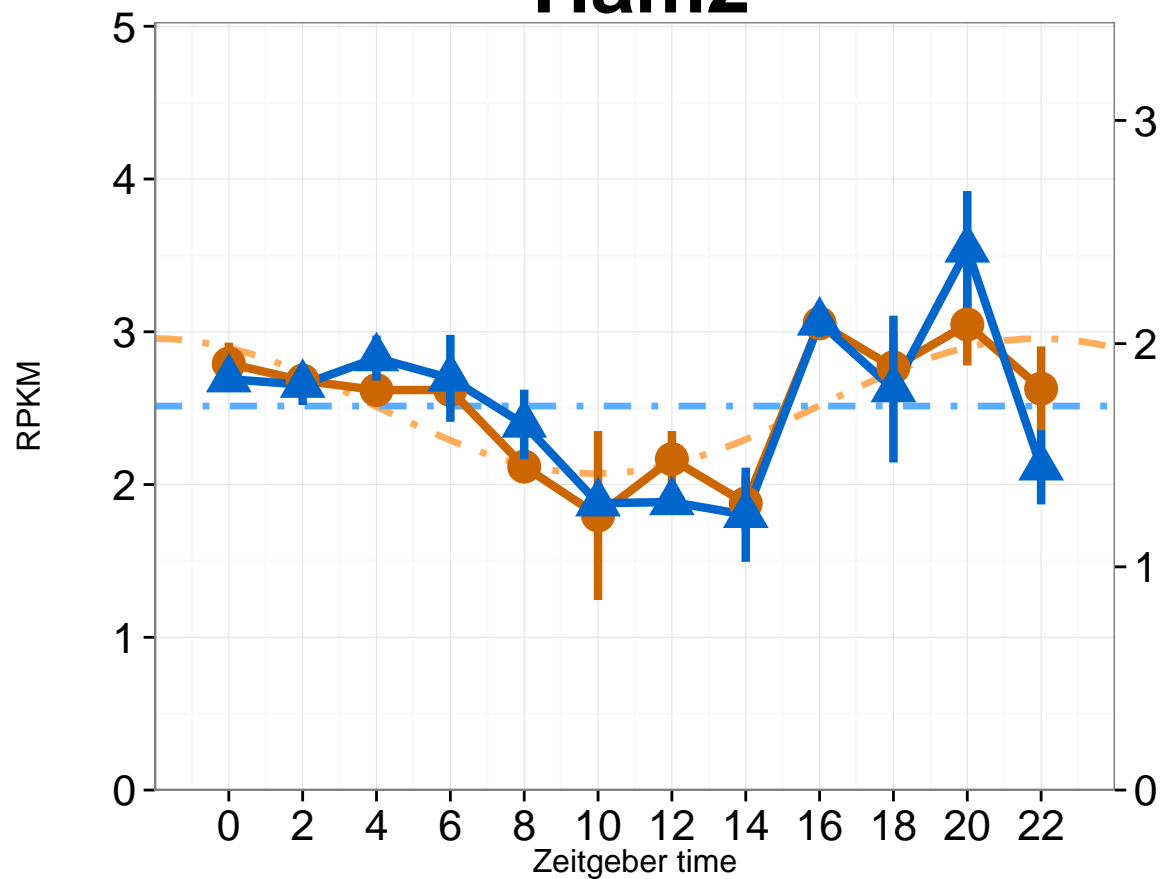

# Tiam2

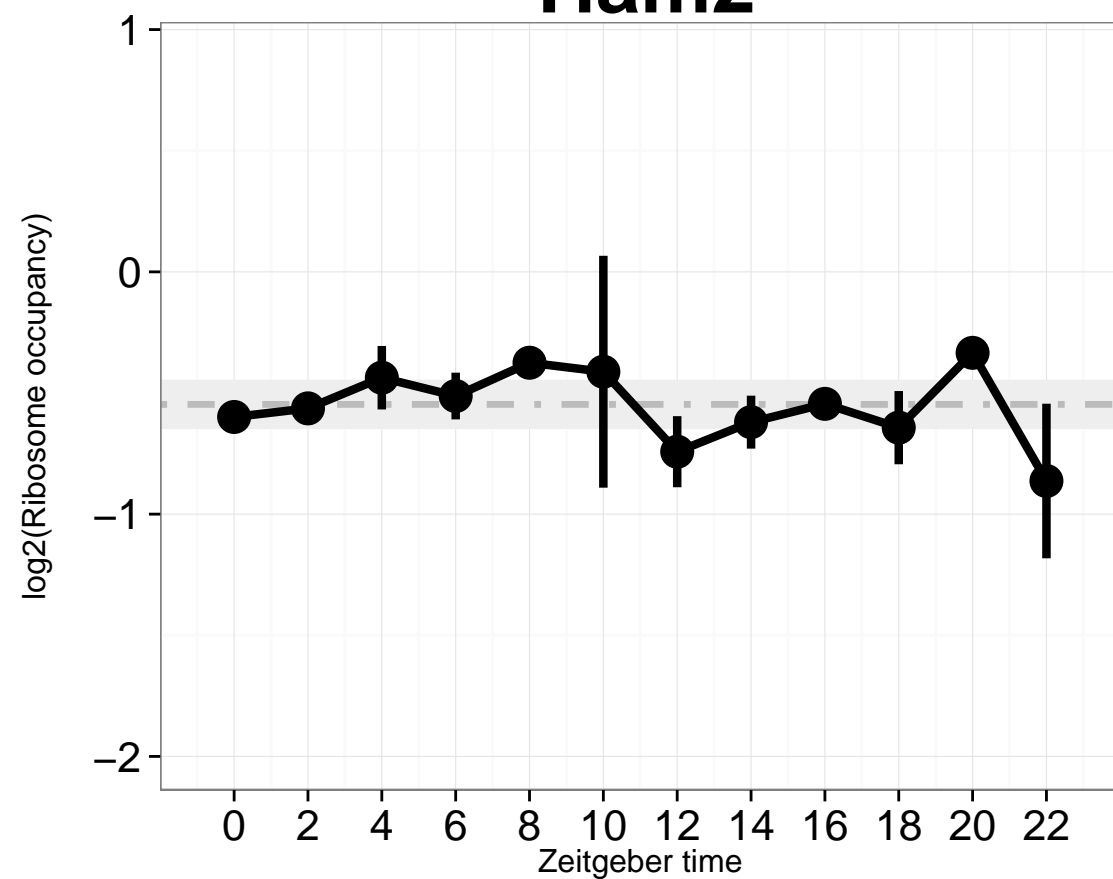

Supplement: Supplementary file 3179 [file 1]

# Dclre1b

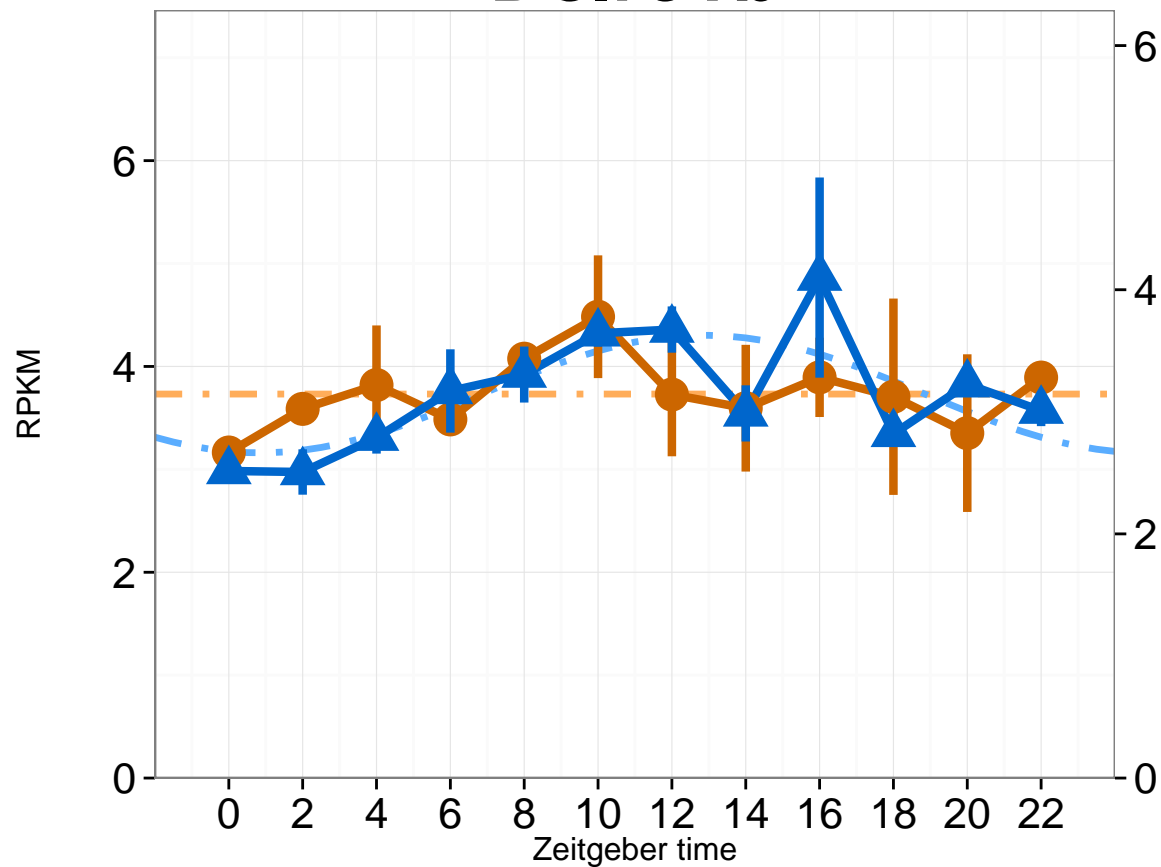

# Dclre1b

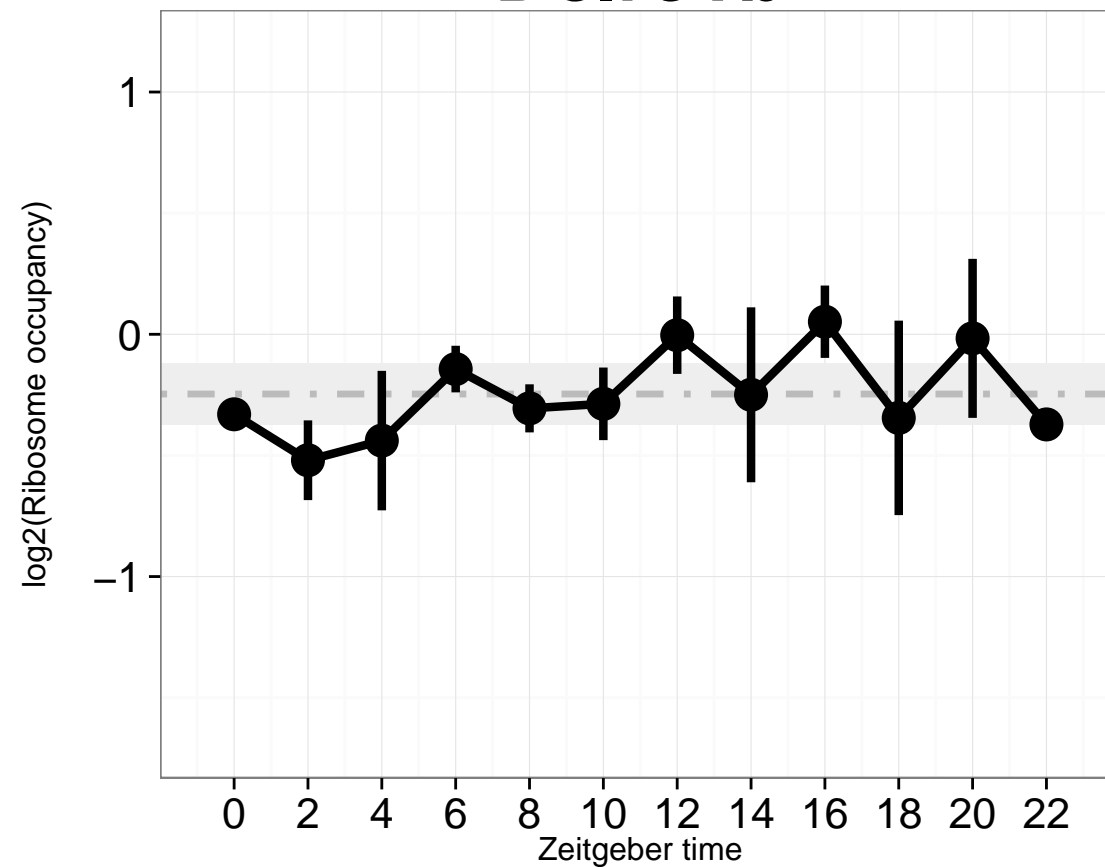

Supplement: Supplementary file 3180 [file 1]

# Hoxd3

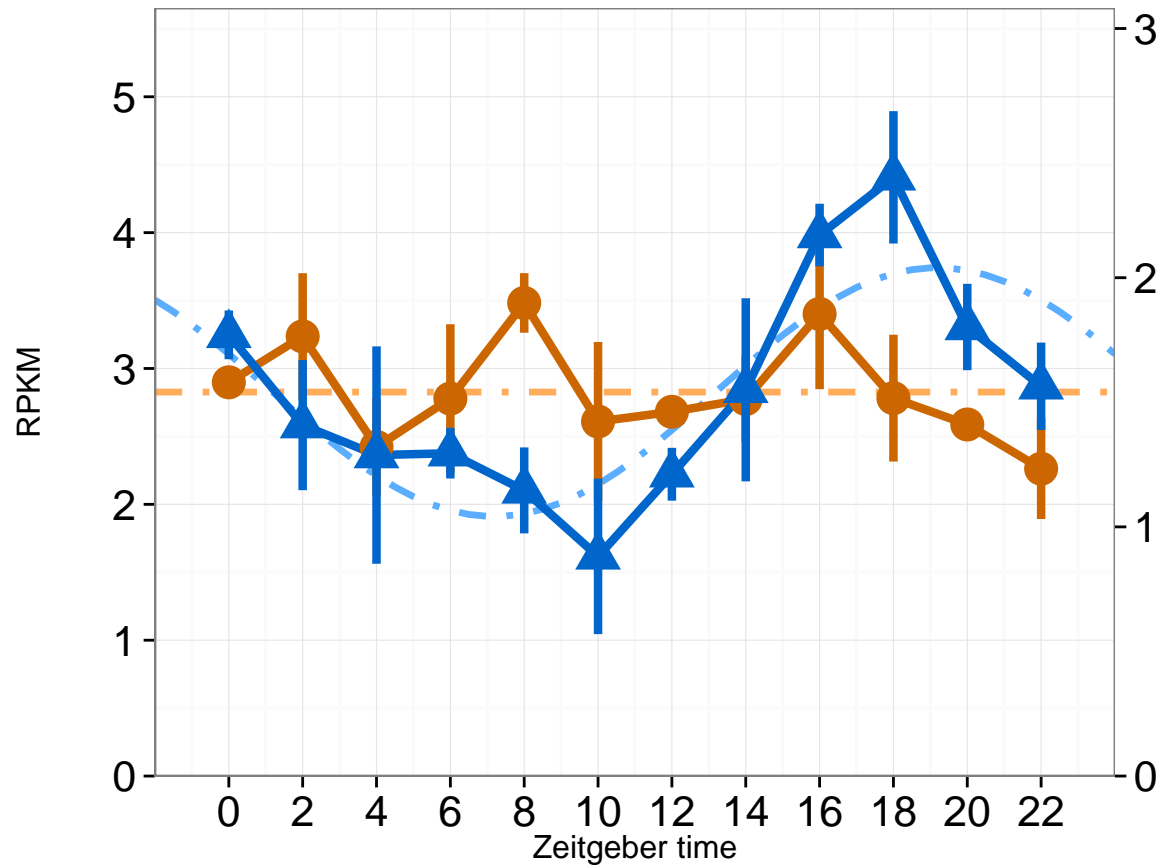

# Hoxd3

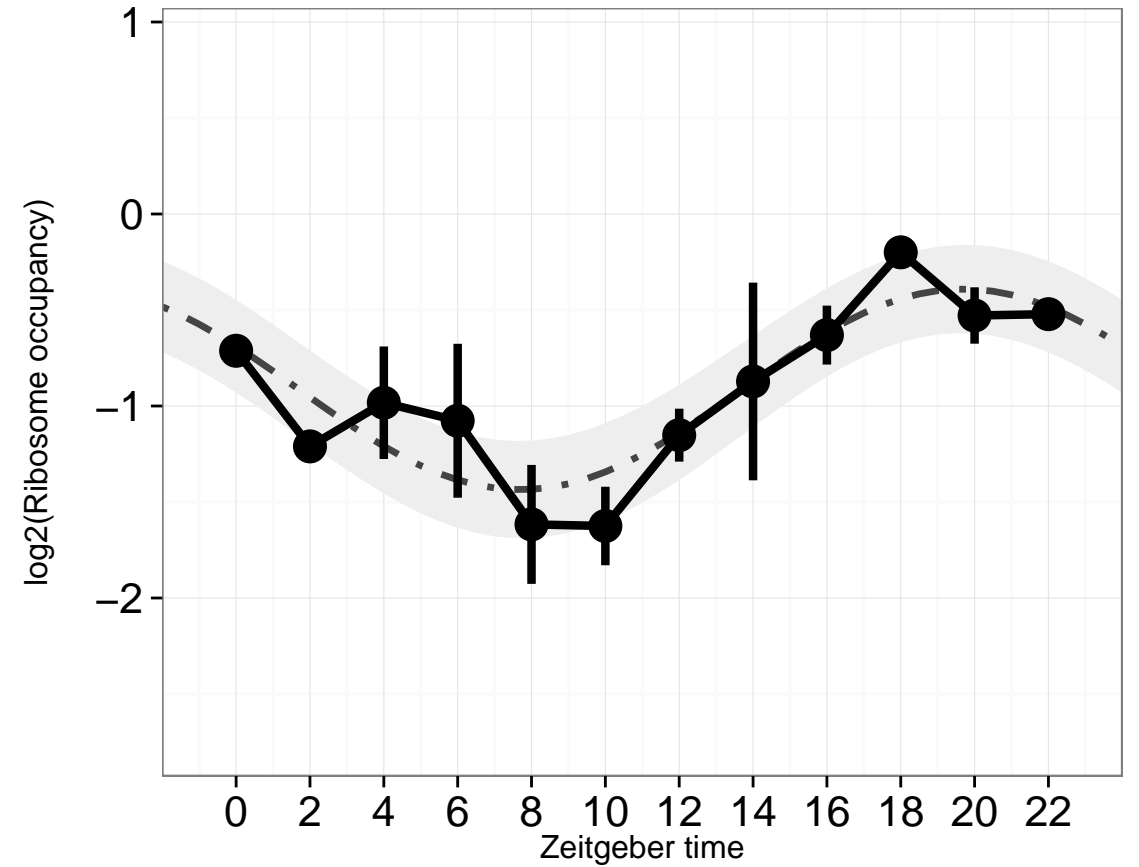

Supplement: Supplementary file 3181 [file 1]

## Uqcrc2

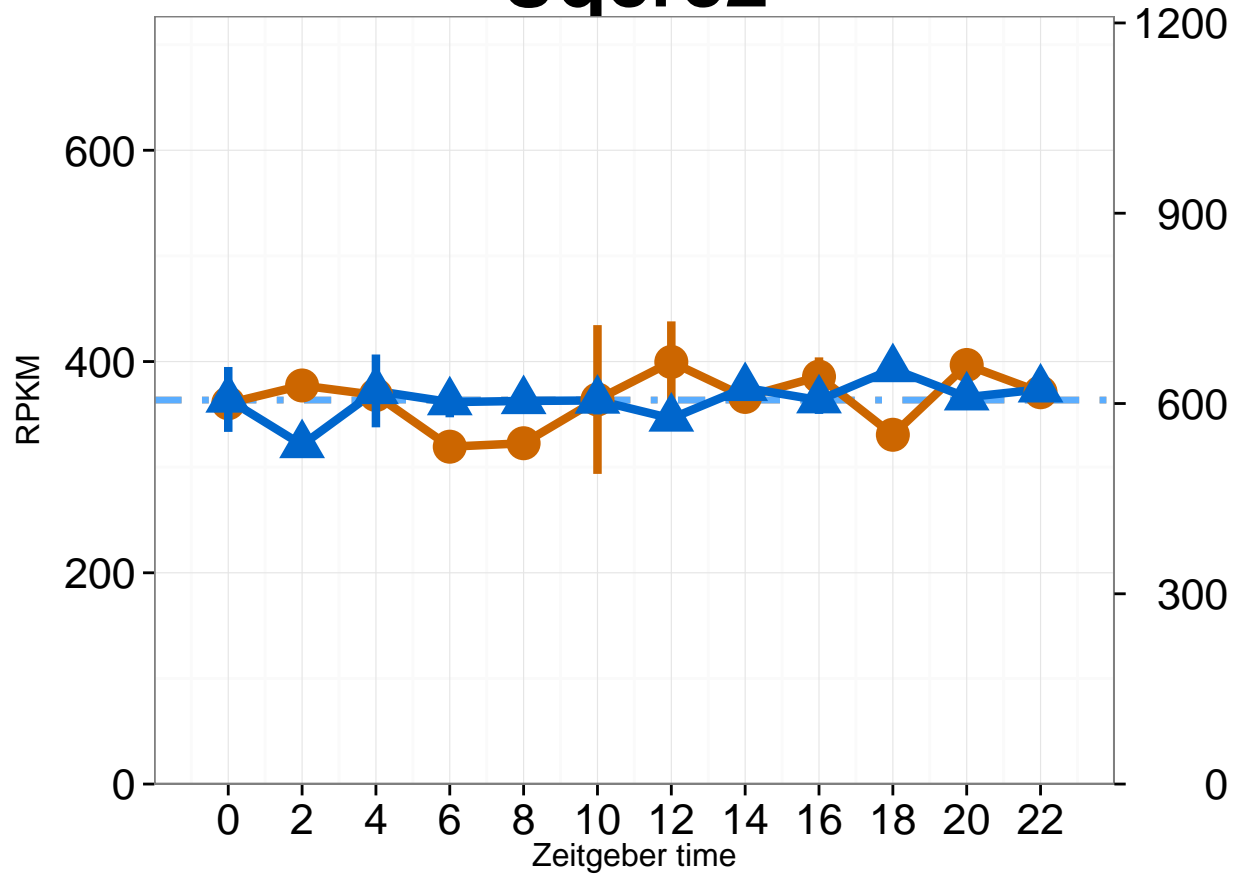

## Uqcrc2

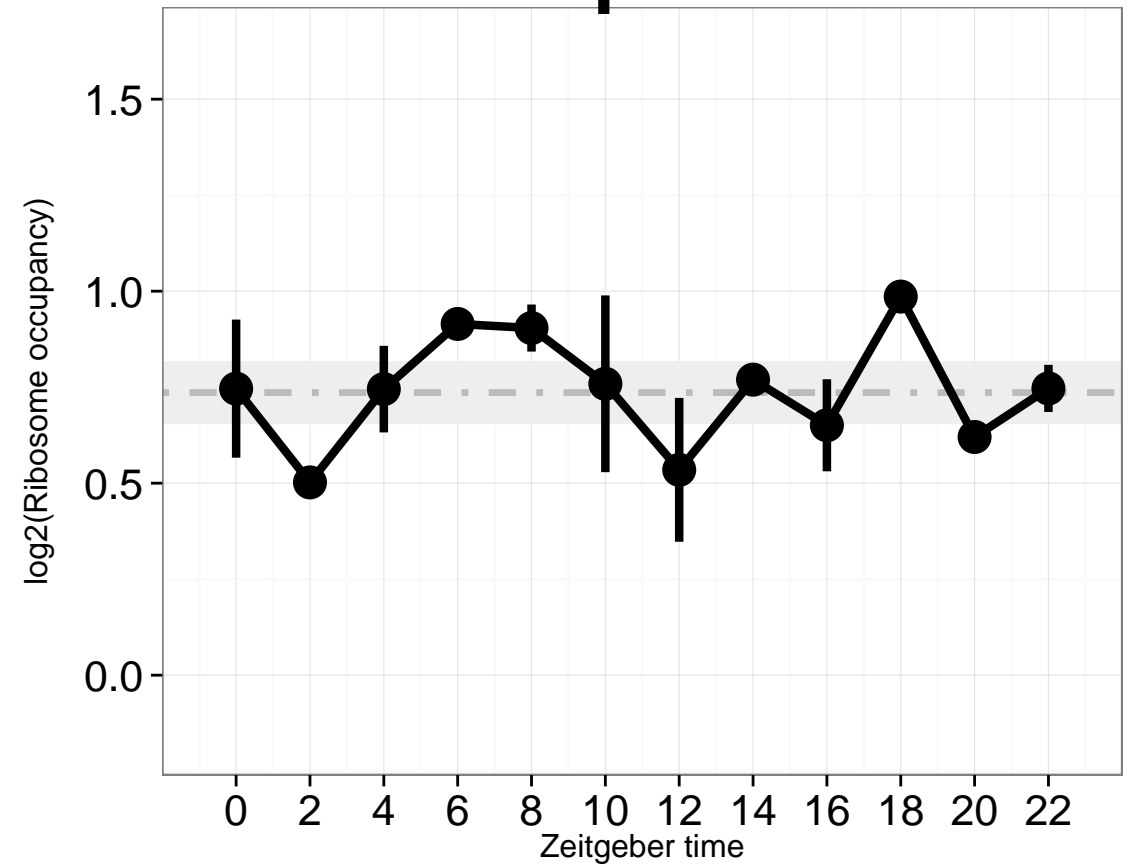

Supplement: Supplementary file 3182 [file 1]

## Crebzf

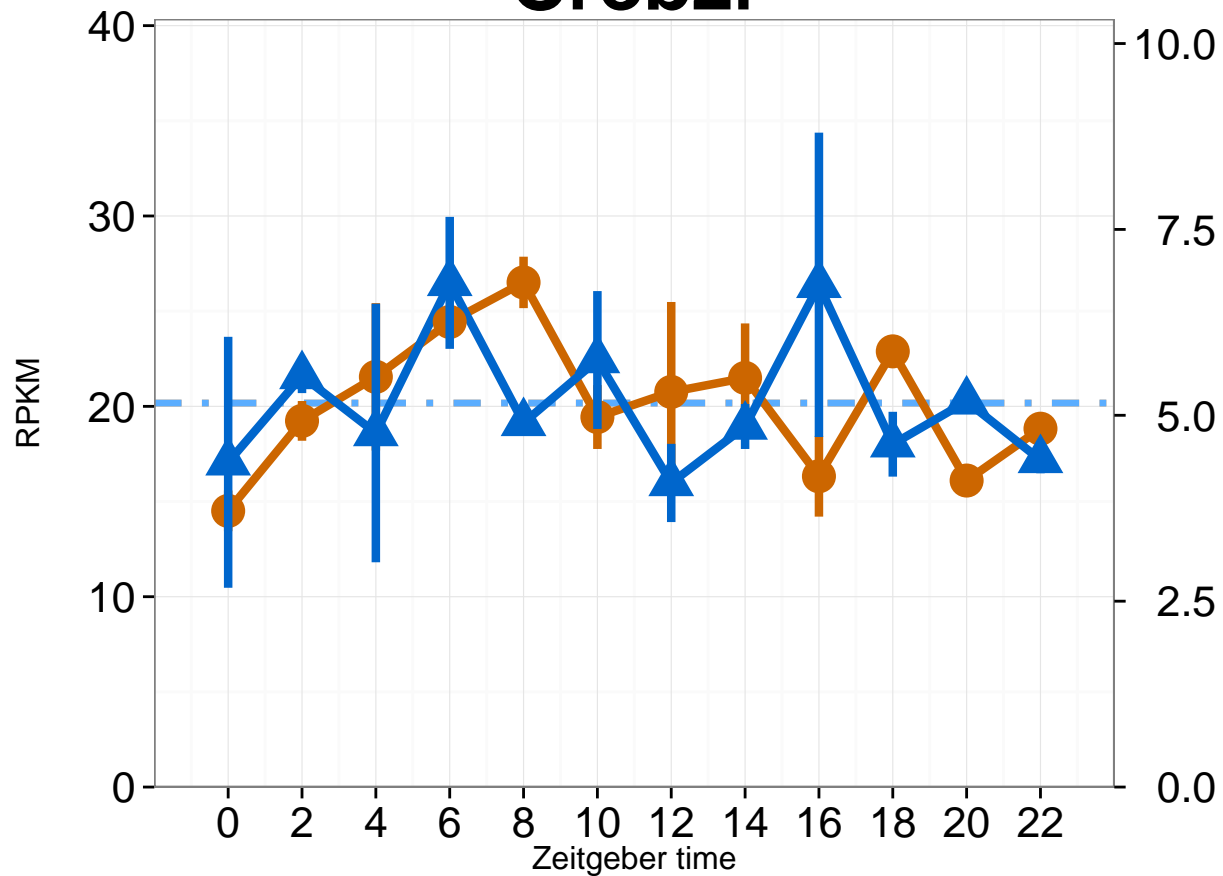

## Crebzf

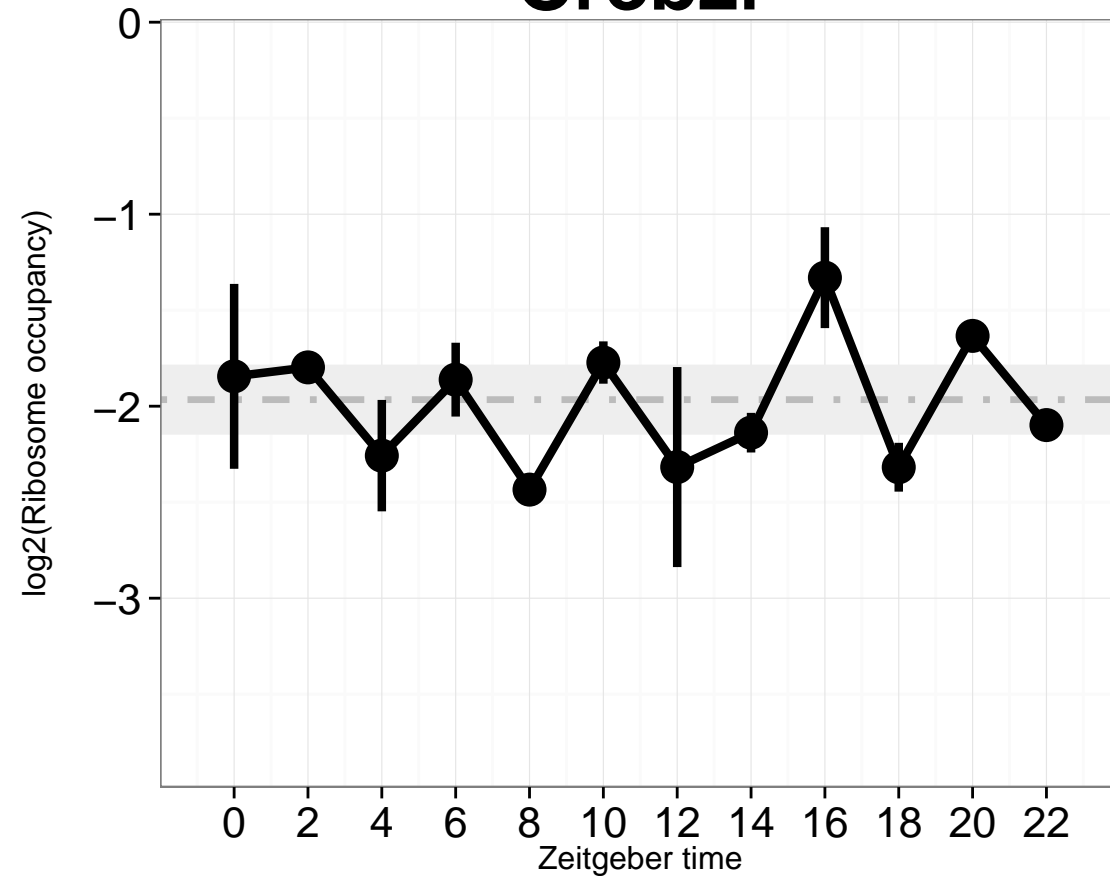

Supplement: Supplementary file 3183 [file 1]

## Mau2

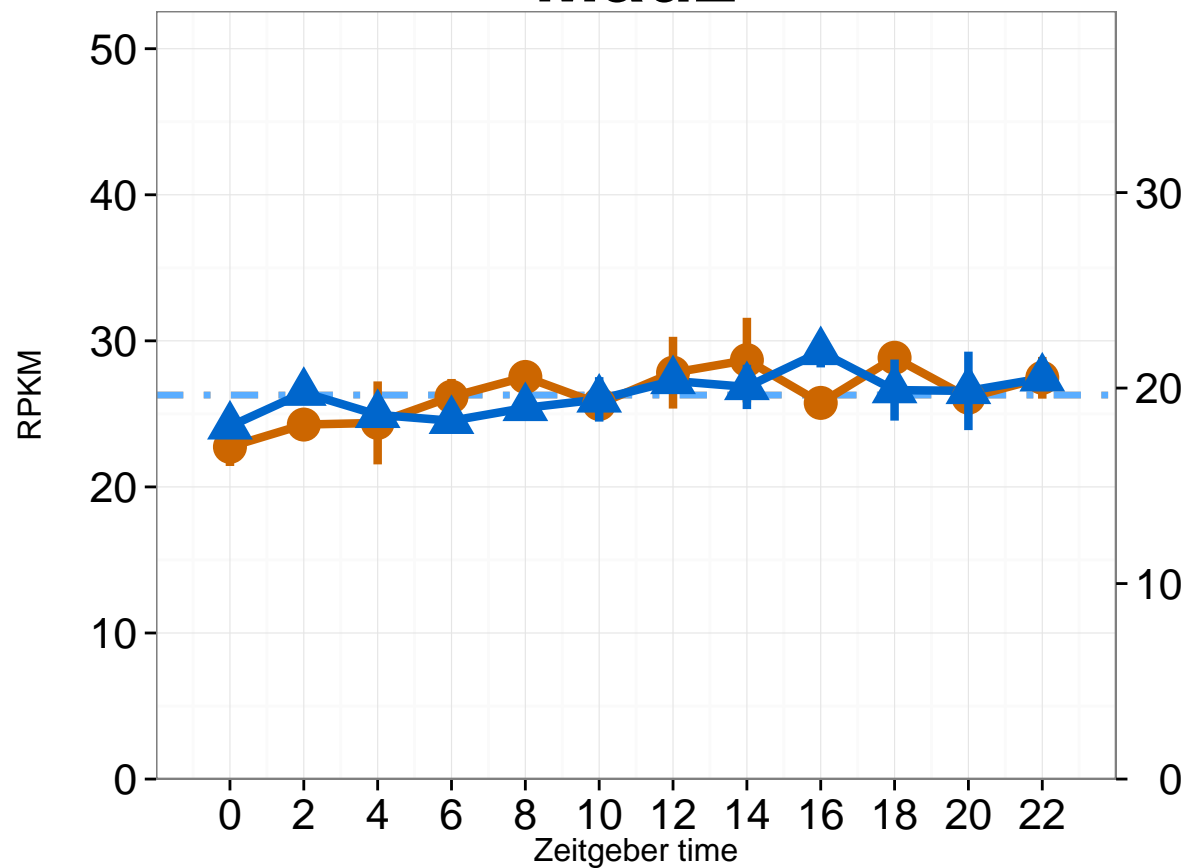

## Mau2

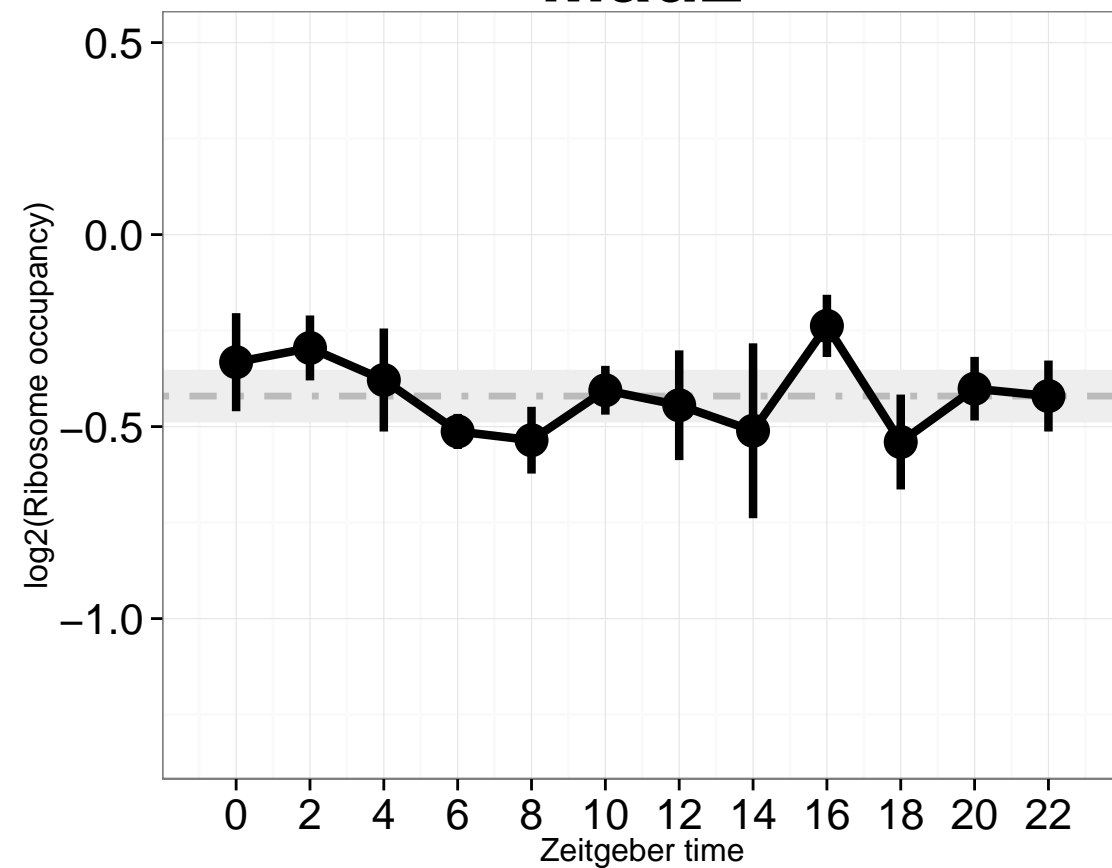

Supplement: Supplementary file 3184 [file 1]

# lfit1

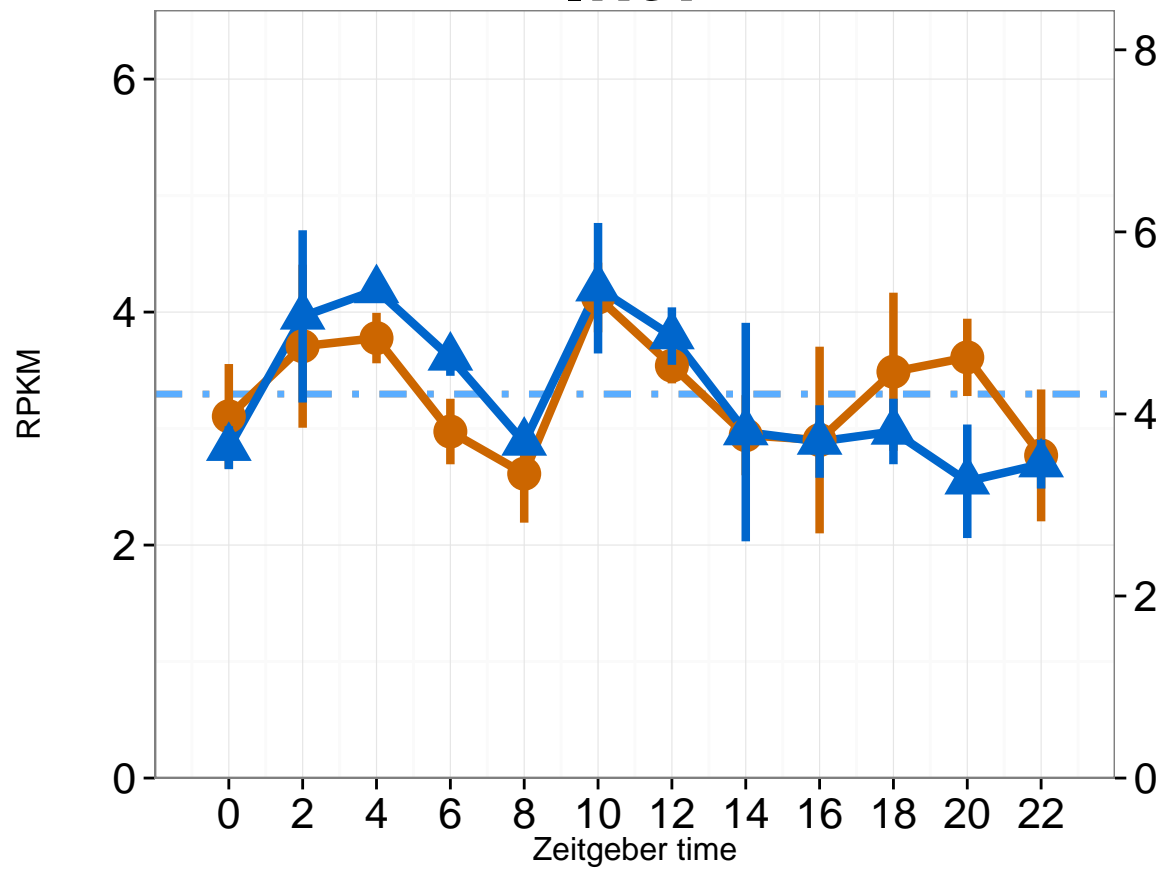

# lfit1

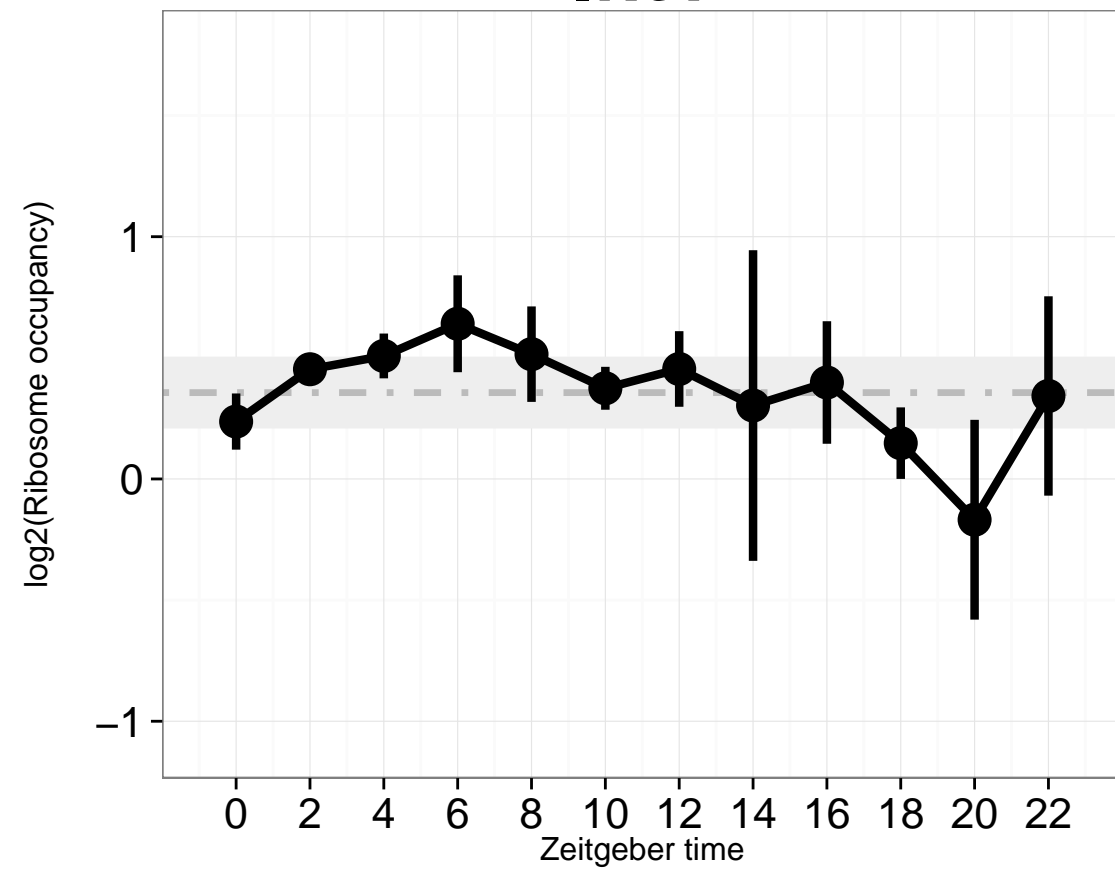

Supplement: Supplementary file 3185 [file 1]

## Rif

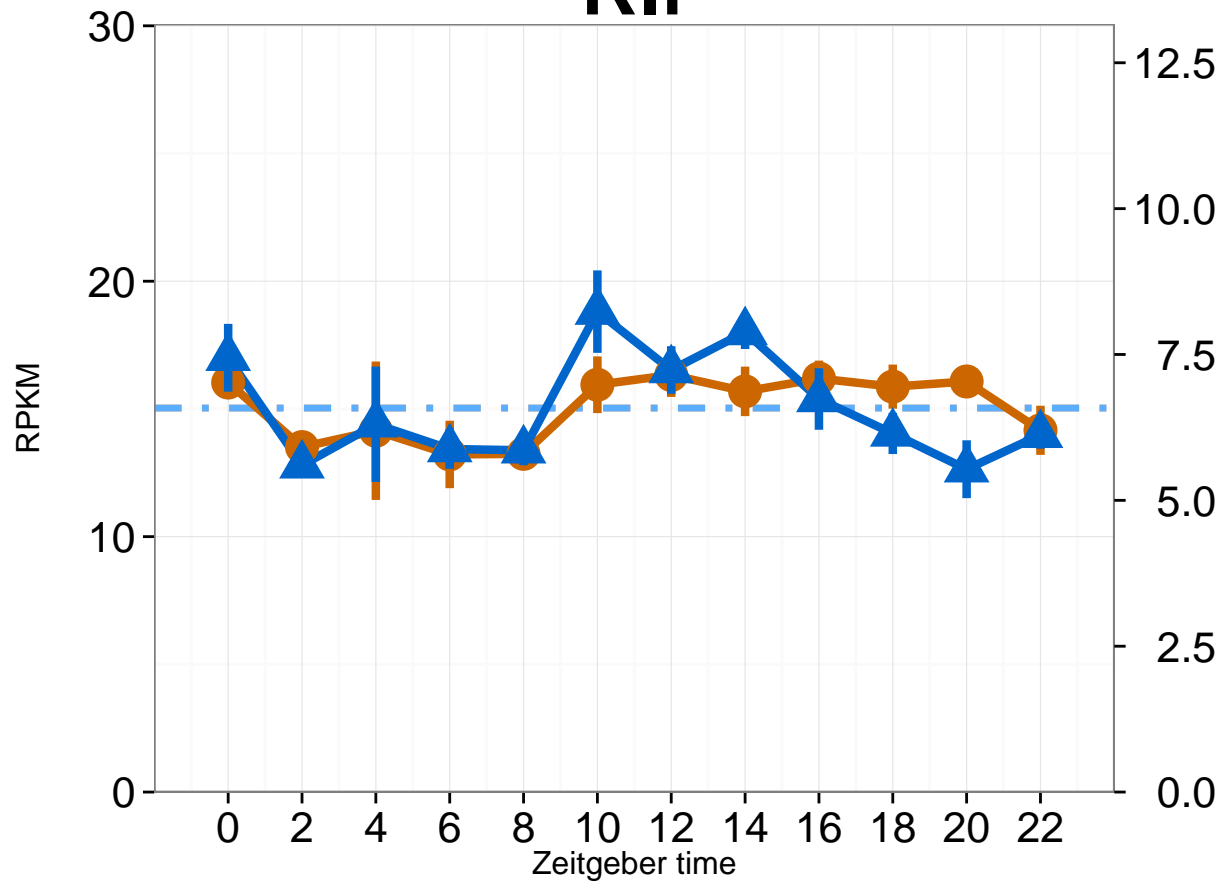

## Rif

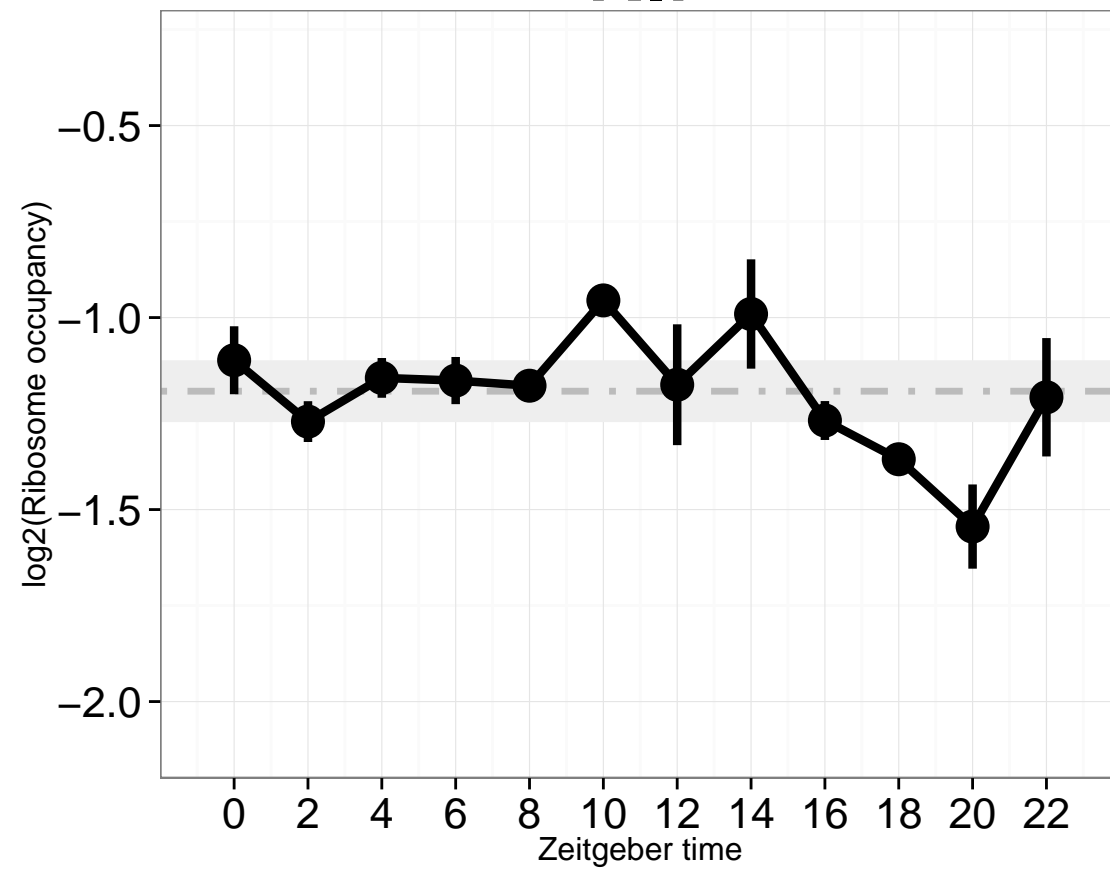

Supplement: Supplementary file 3186 [file 1]

## Nolc1

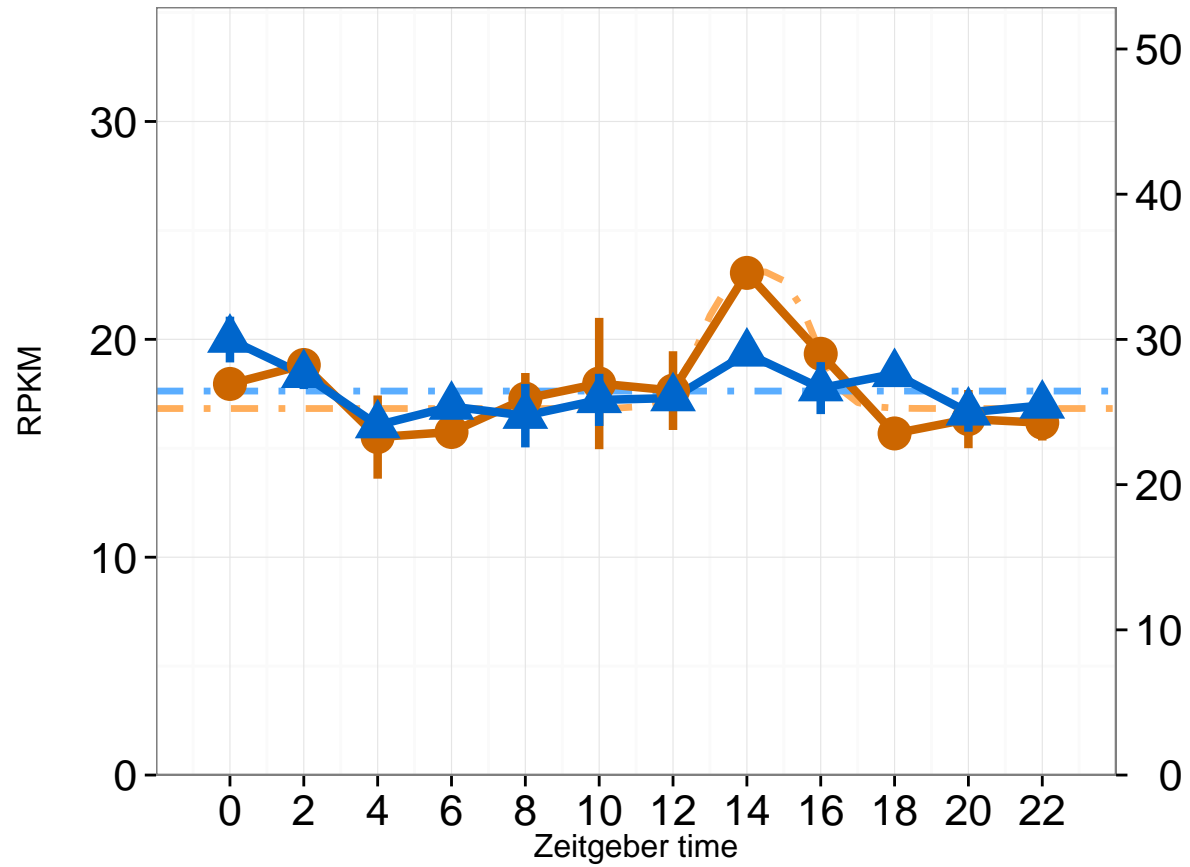

## Nolc1

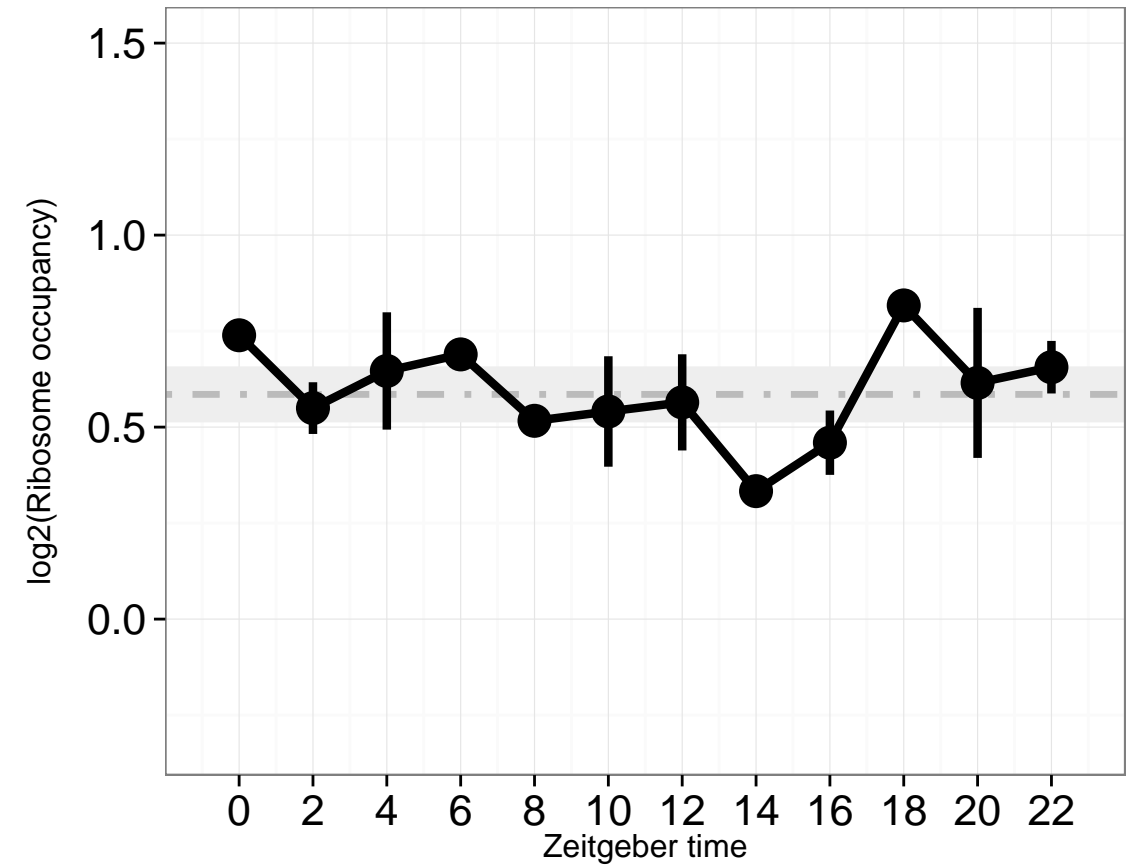

Supplement: Supplementary file 3187 [file 1]

# Ppwd1

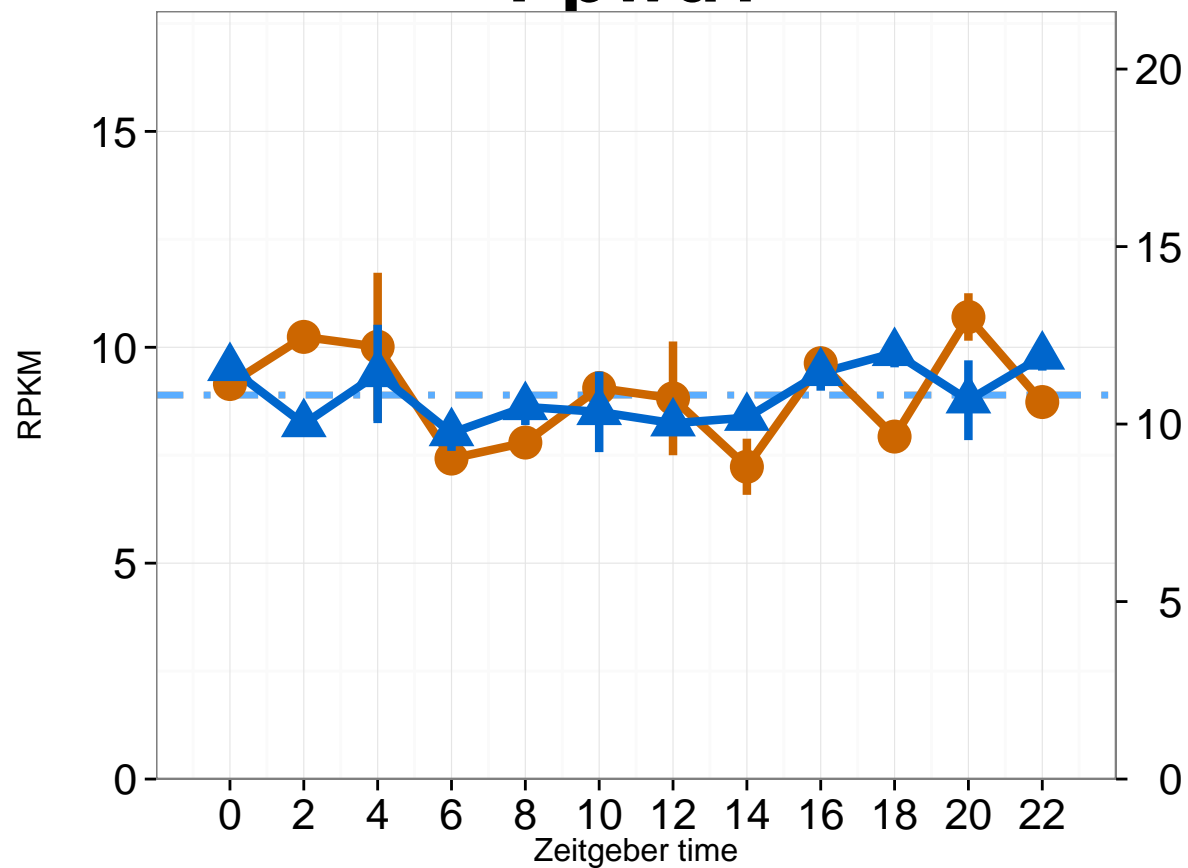

# Ppwd1

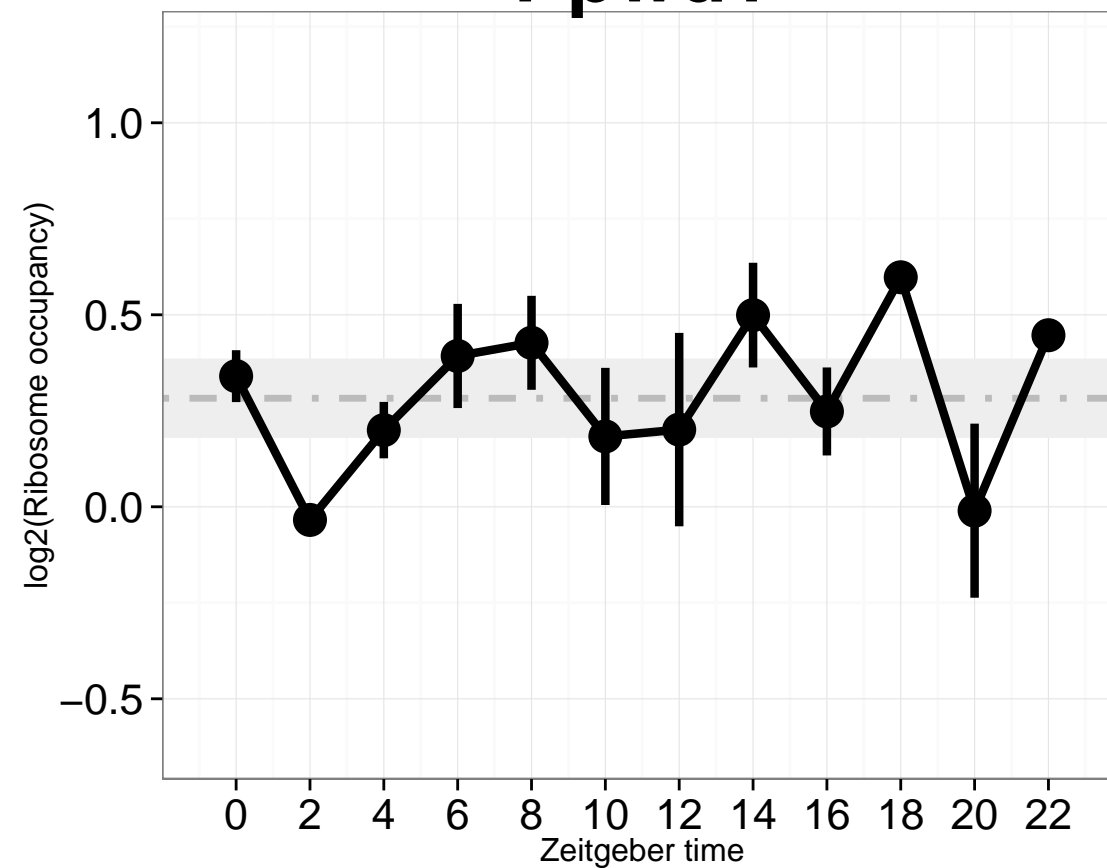

Supplement: Supplementary file 3188 [file 1]

# Dennd2d

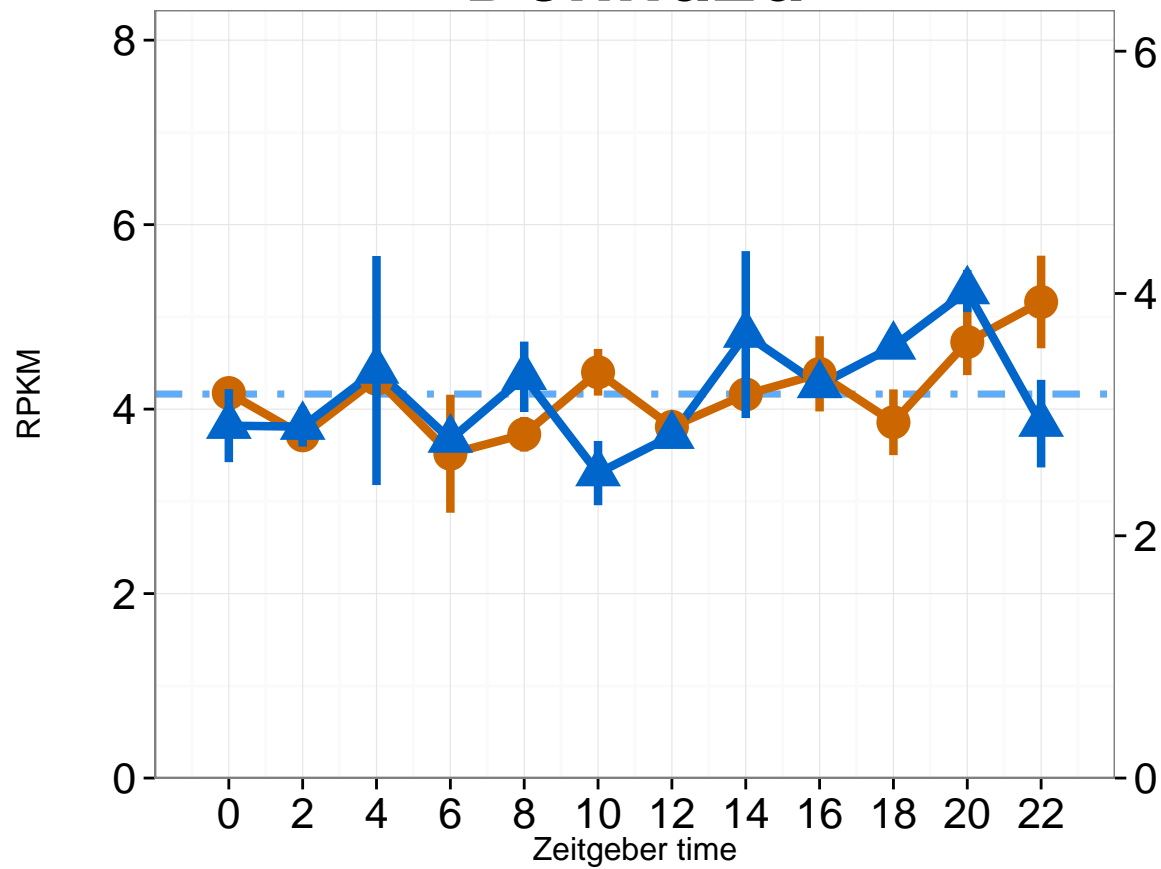

# Dennd2d

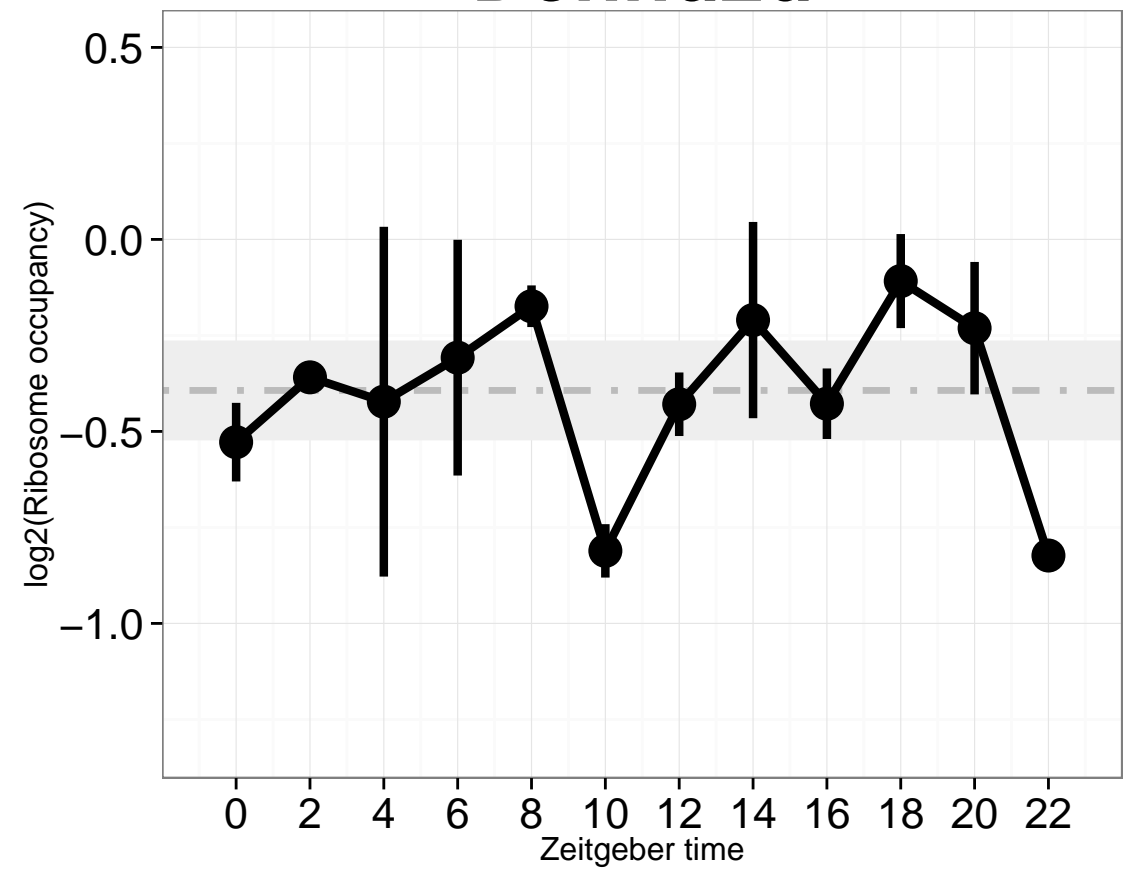

Supplement: Supplementary file 3189 [file 1]

## Bcor

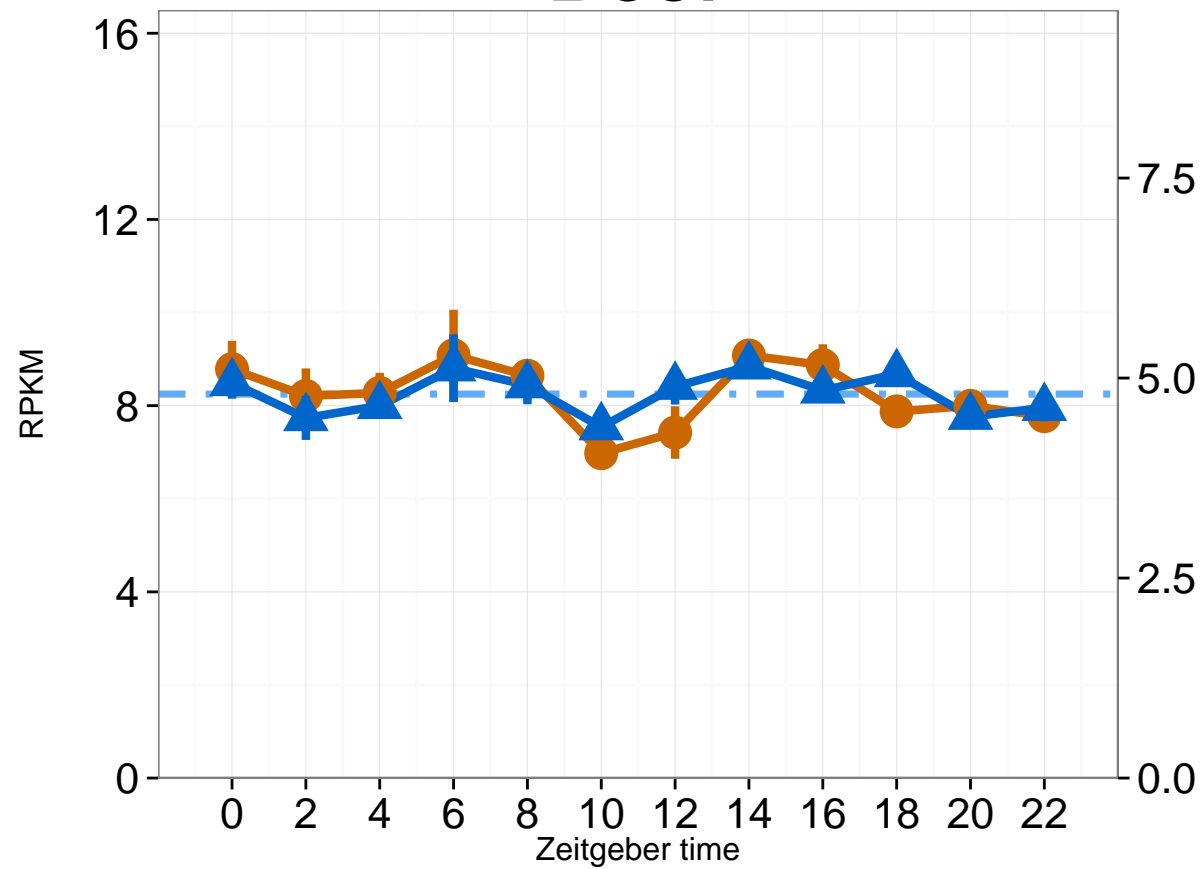

## Bcor

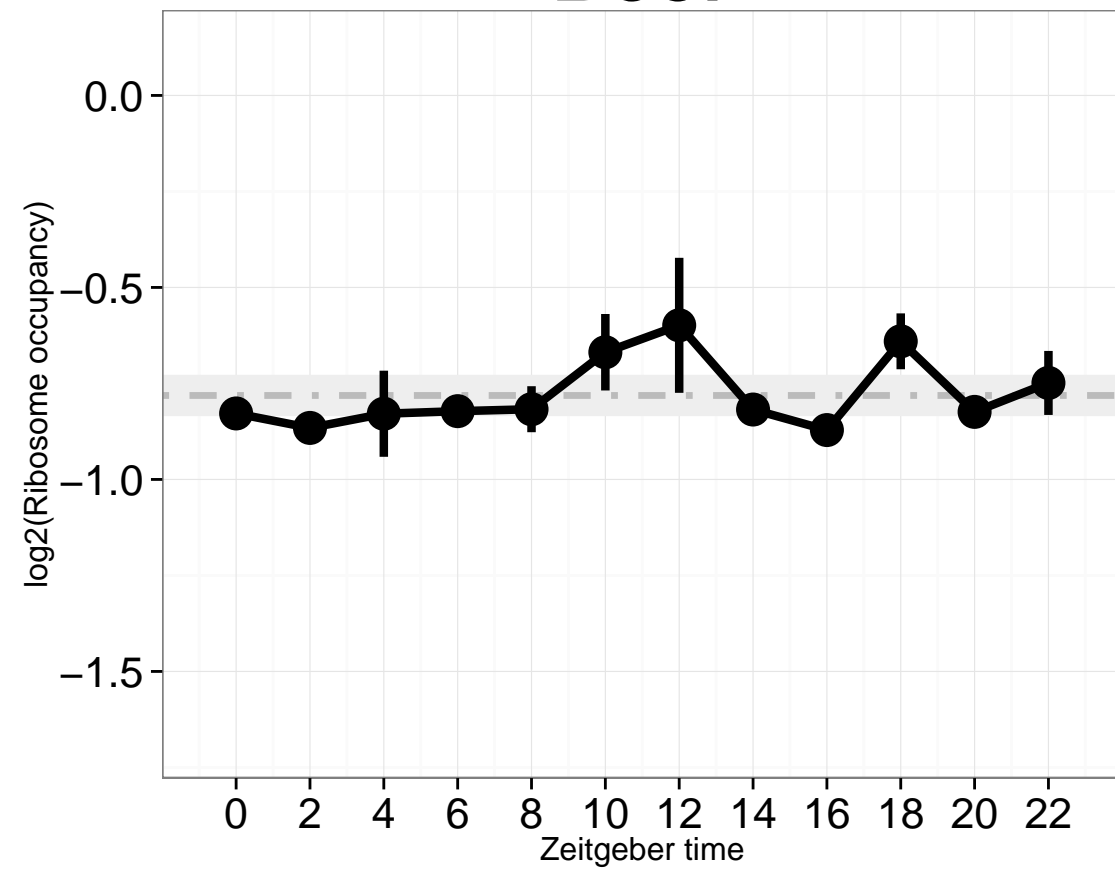

Supplement: Supplementary file 3190 [file 1]

# H2-Ke2

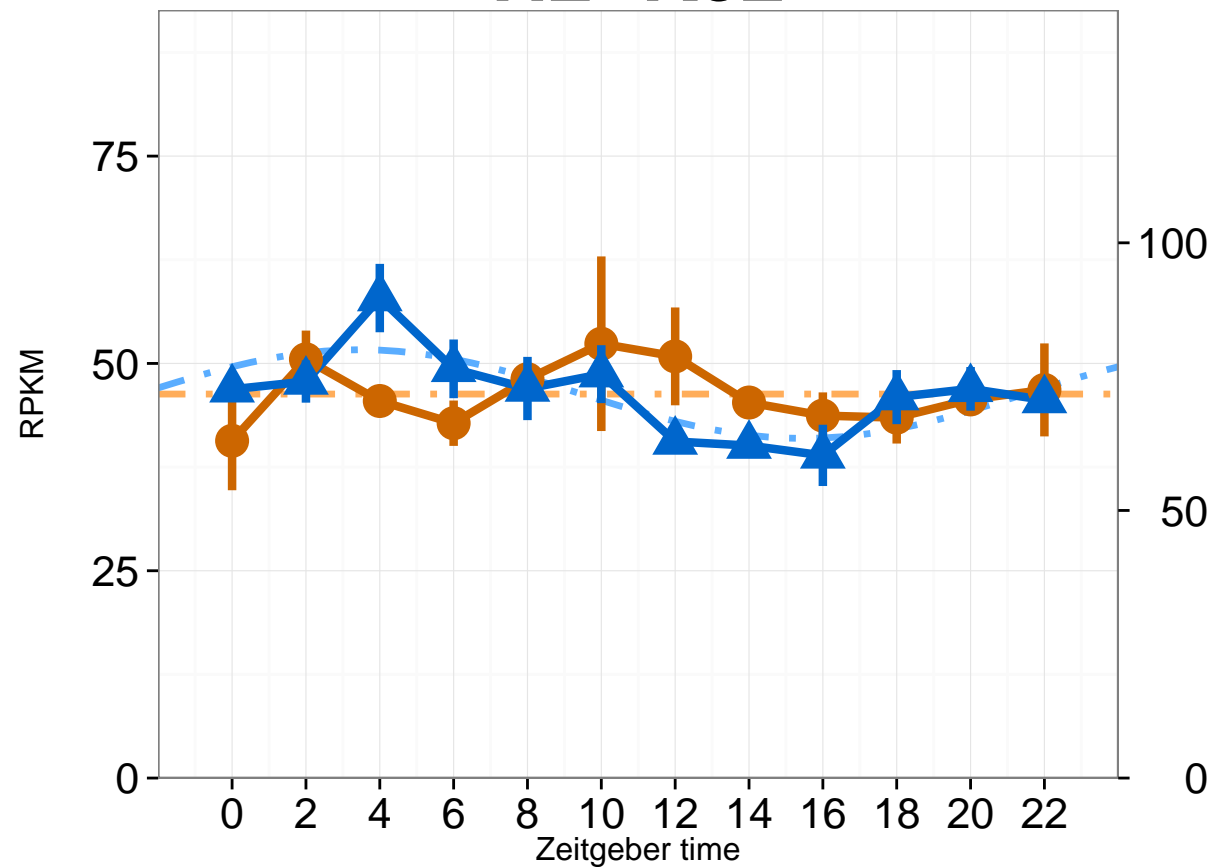

# H2-Ke2

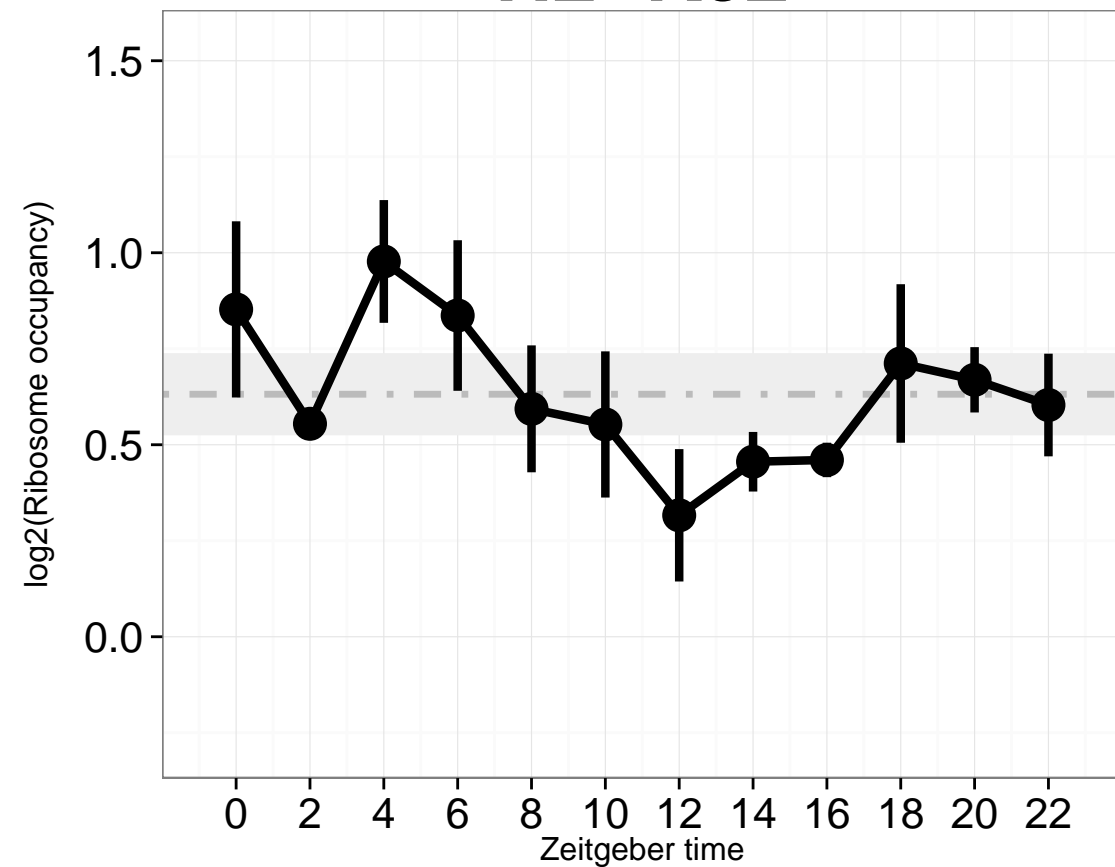

Supplement: Supplementary file 3191 [file 1]

## Sertad2

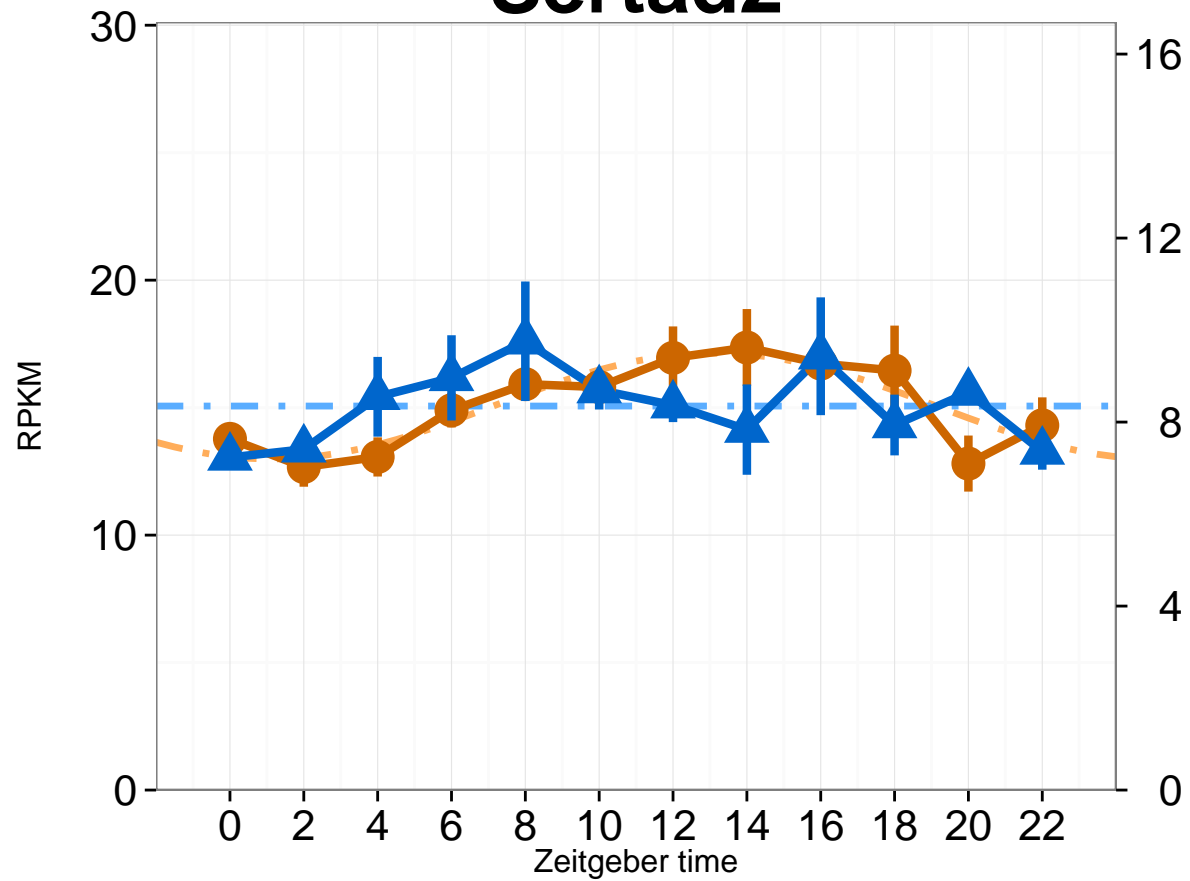

## Sertad2

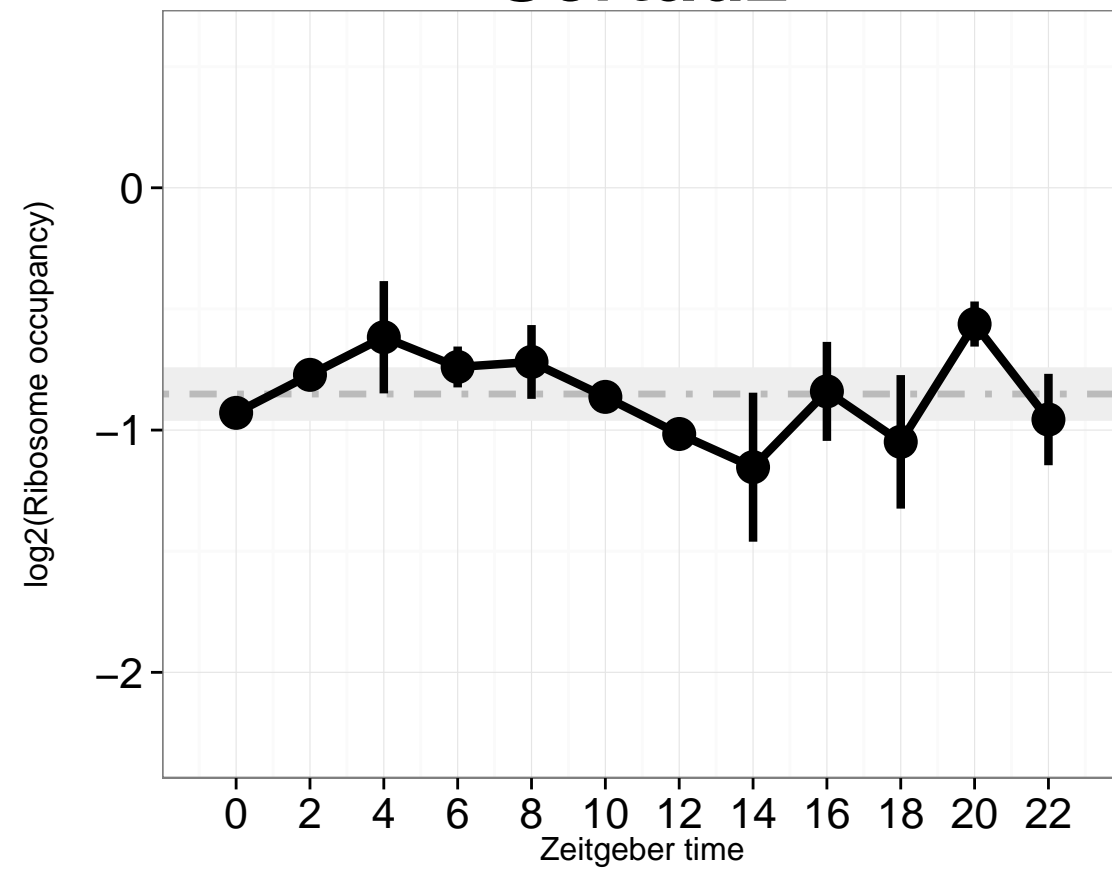

Supplement: Supplementary file 3192 [file 1]

# Mppe1

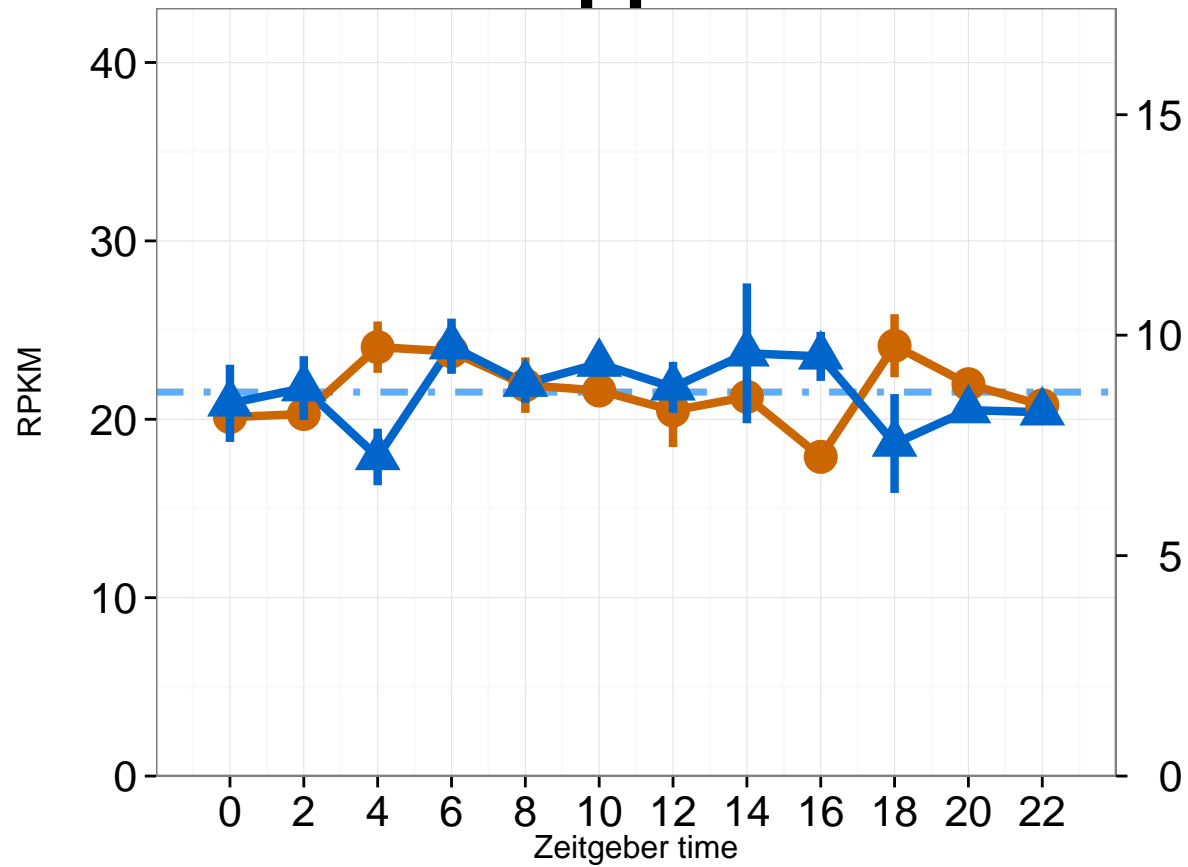

# Mppe1

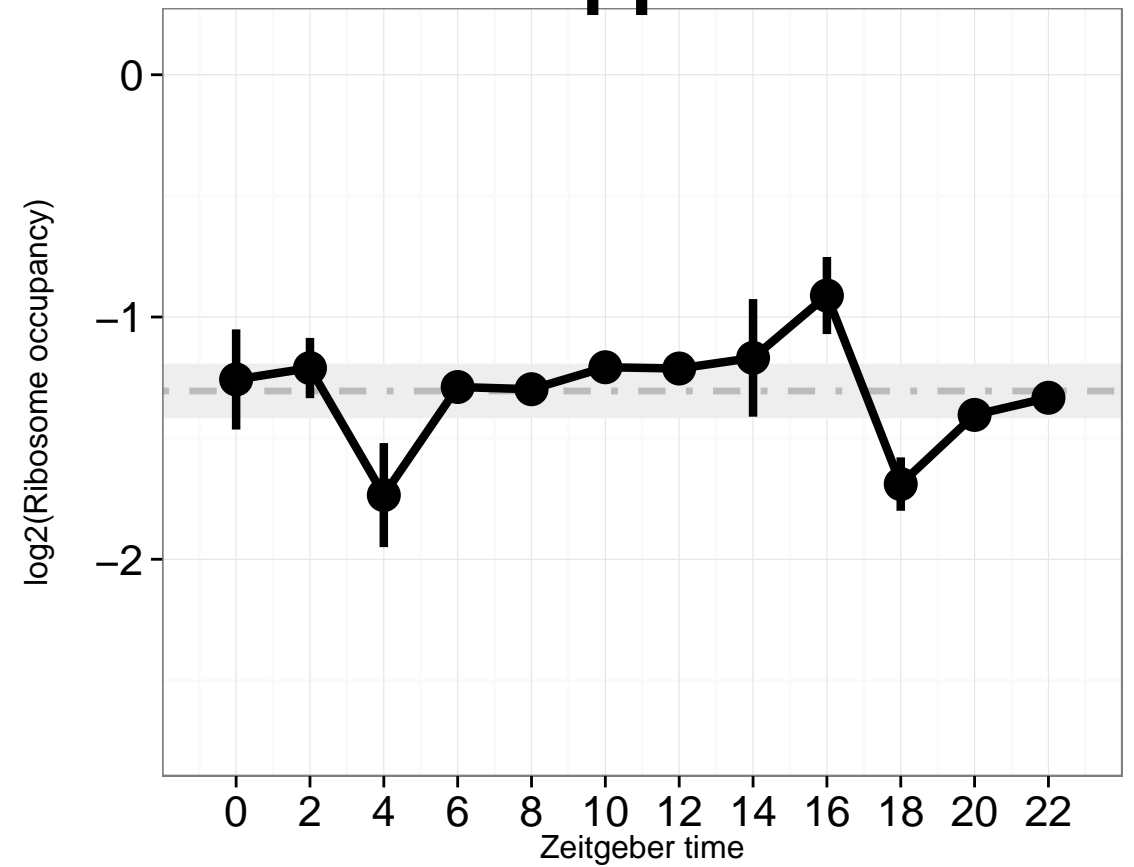

Supplement: Supplementary file 3193 [file 1]

## Tmed3

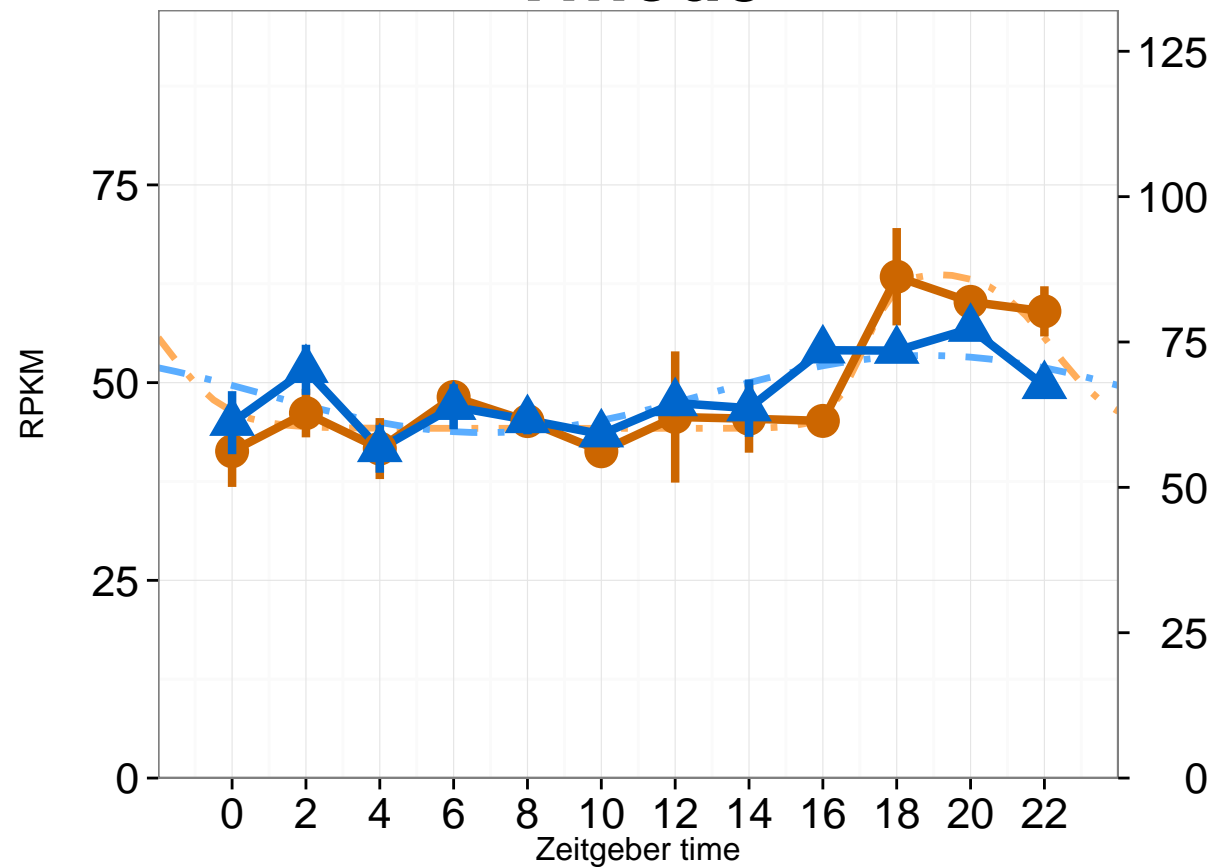

## Tmed3

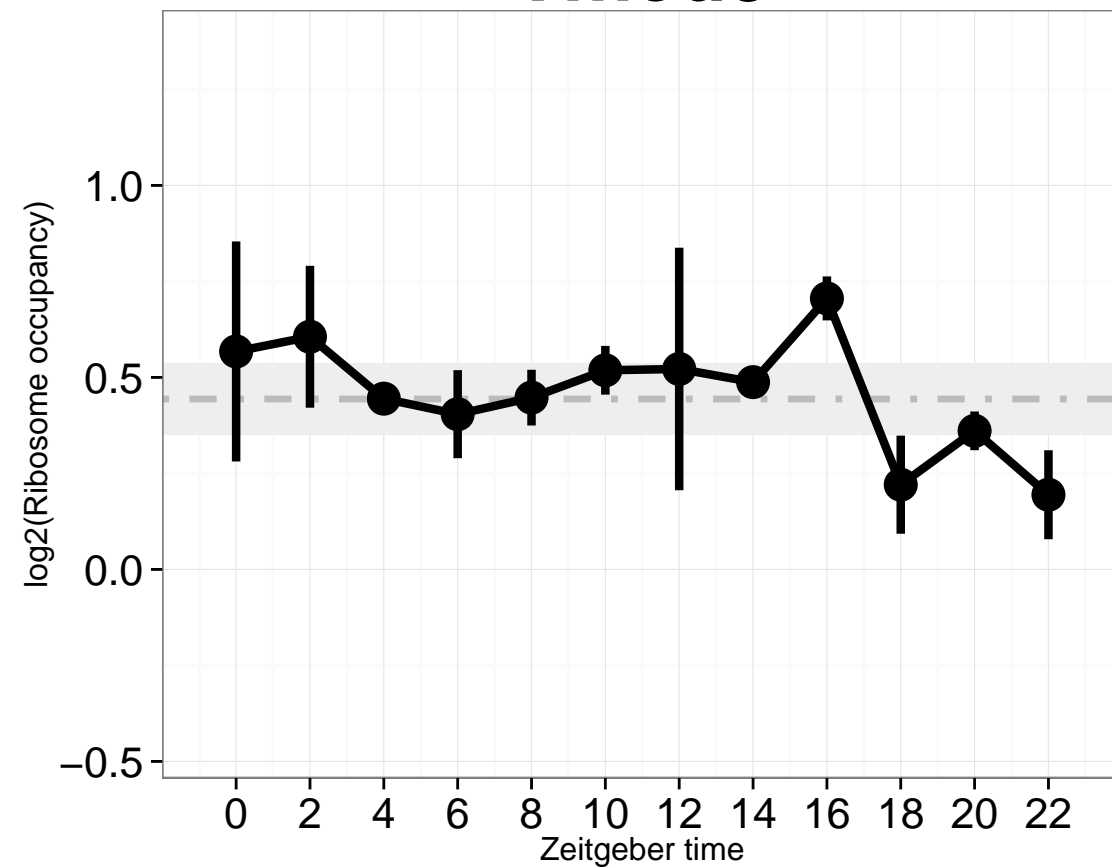

Supplement: Supplementary file 3194 [file 1]

## Sik3

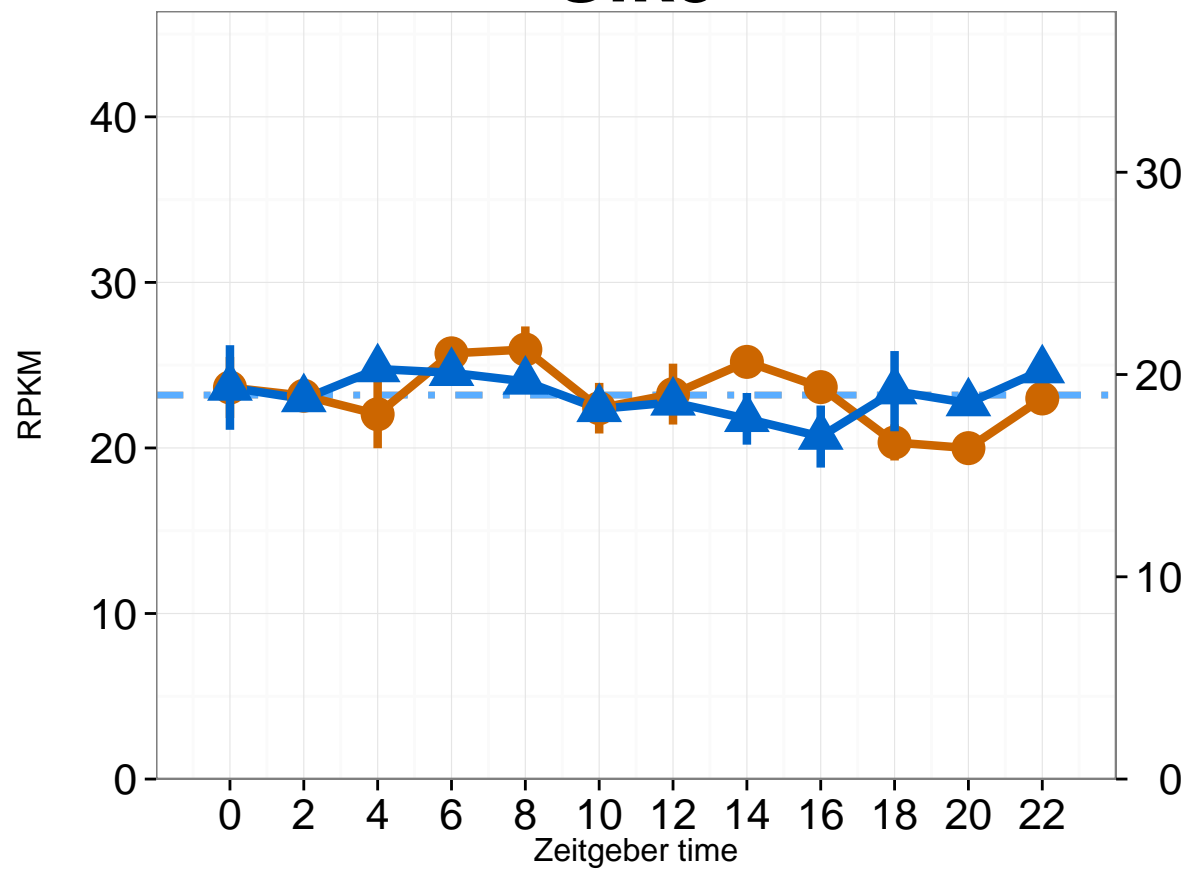

## Sik3

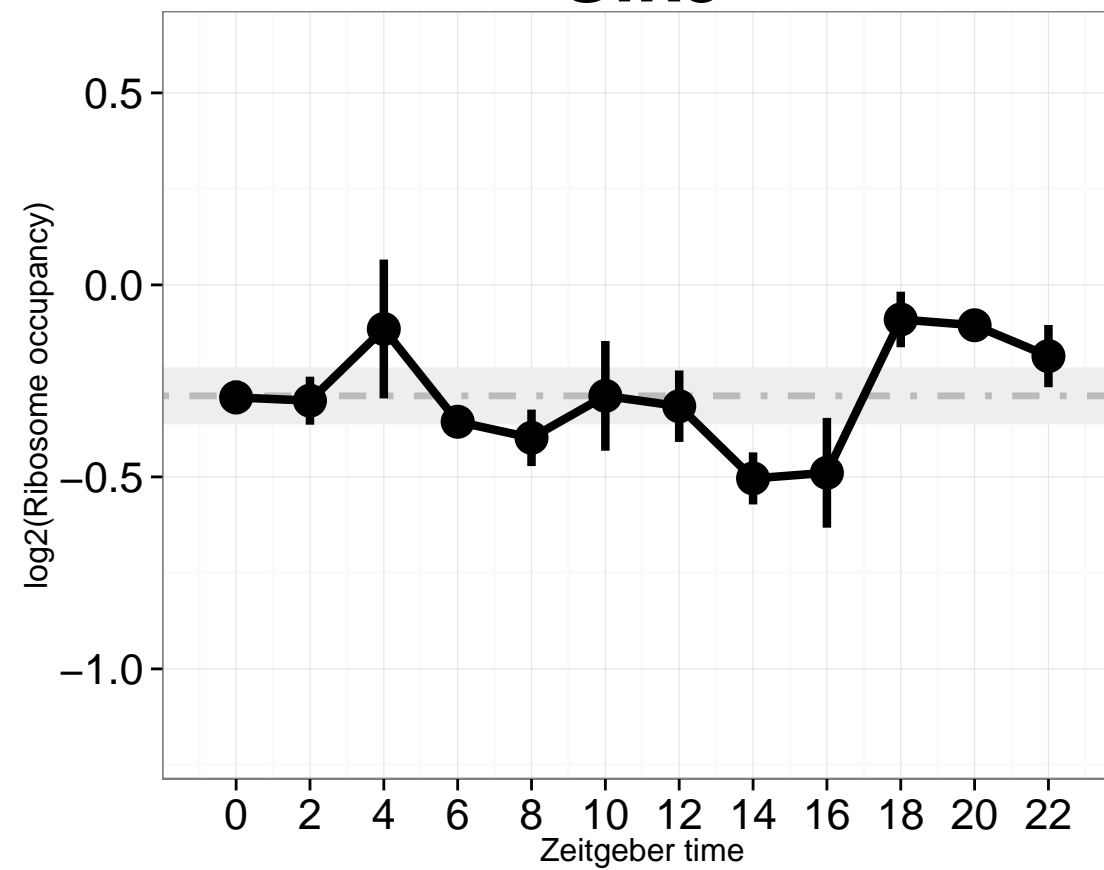

Supplement: Supplementary file 3195 [file 1]

## Rab5c

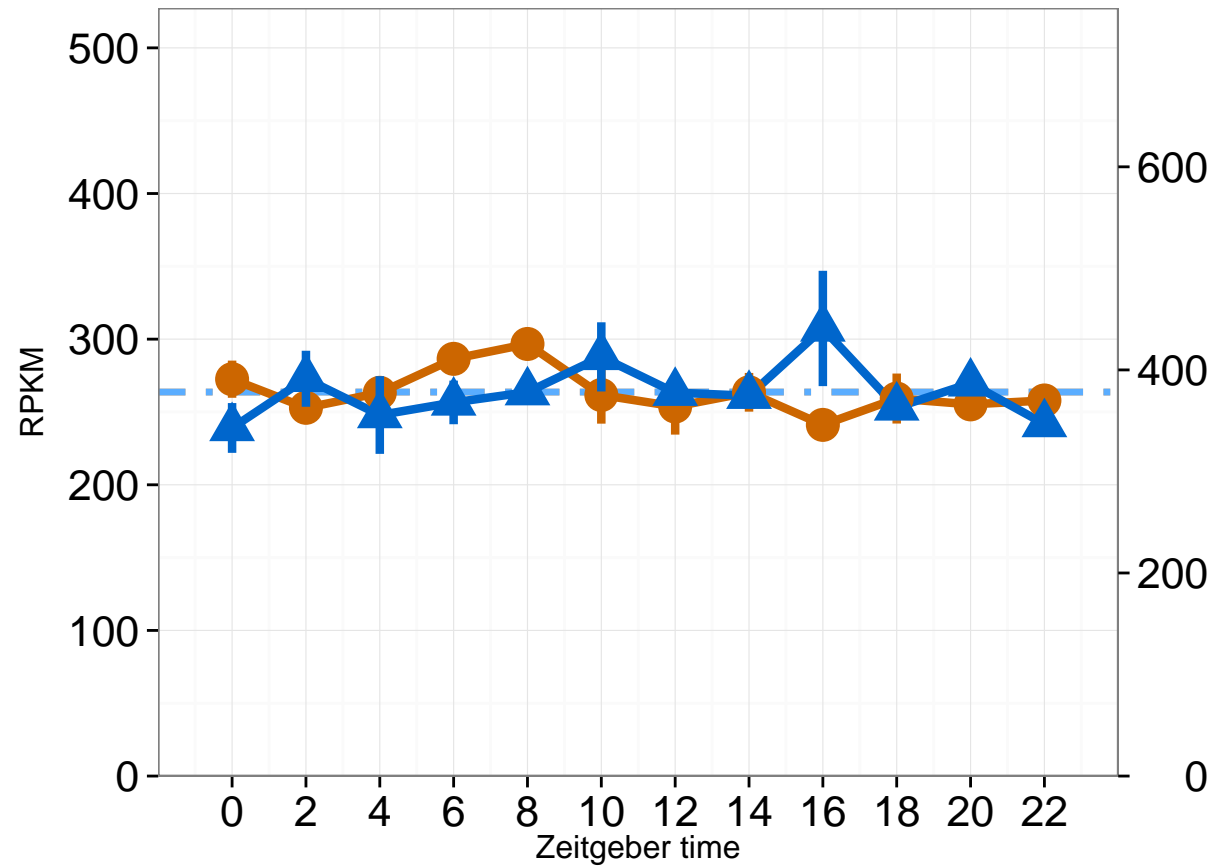

## Rab5c

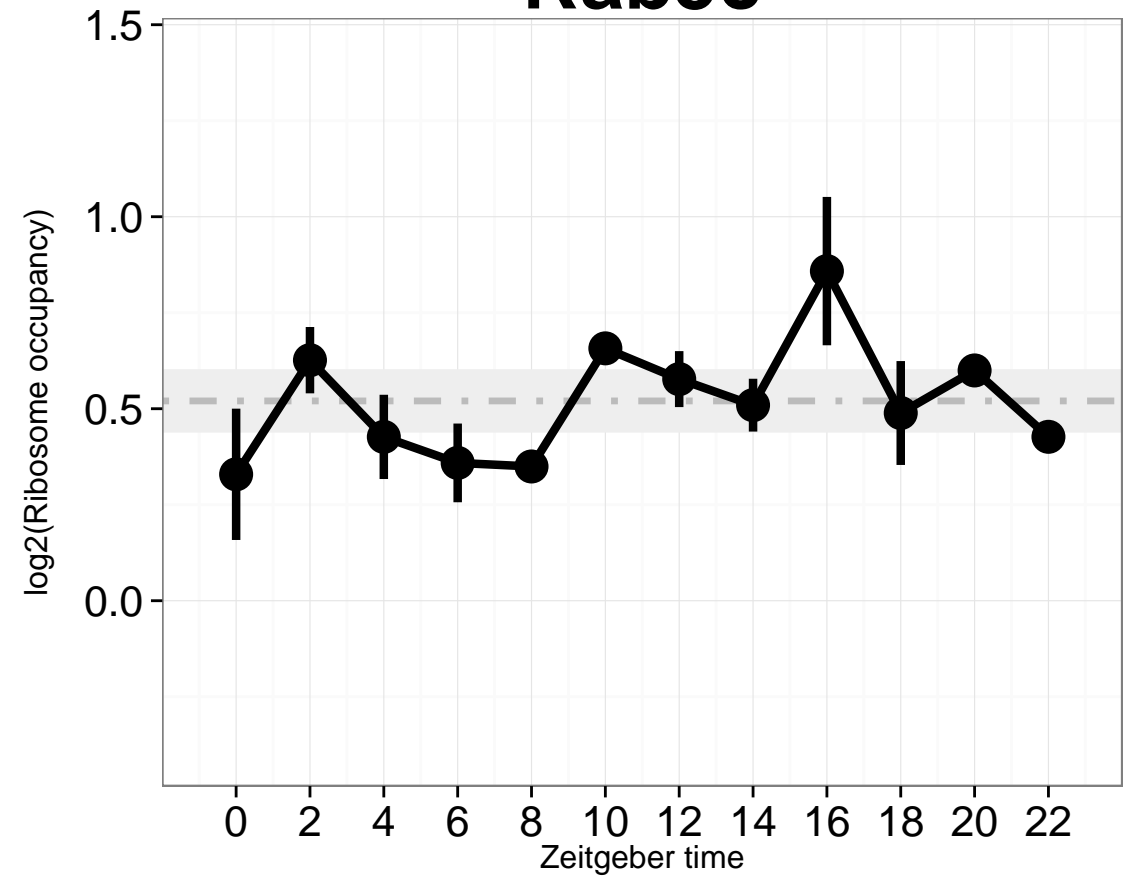

Supplement: Supplementary file 3196 [file 1]

# Paxip1

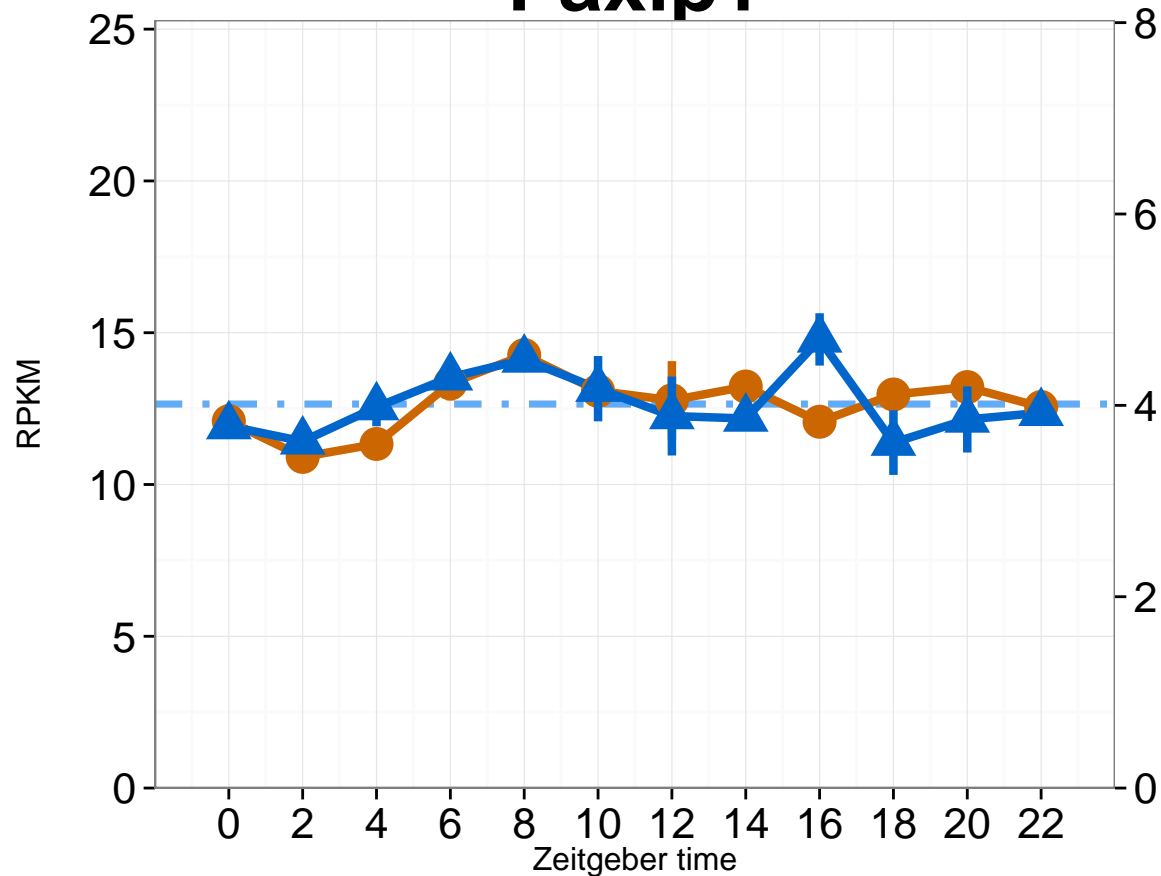

# Paxip1

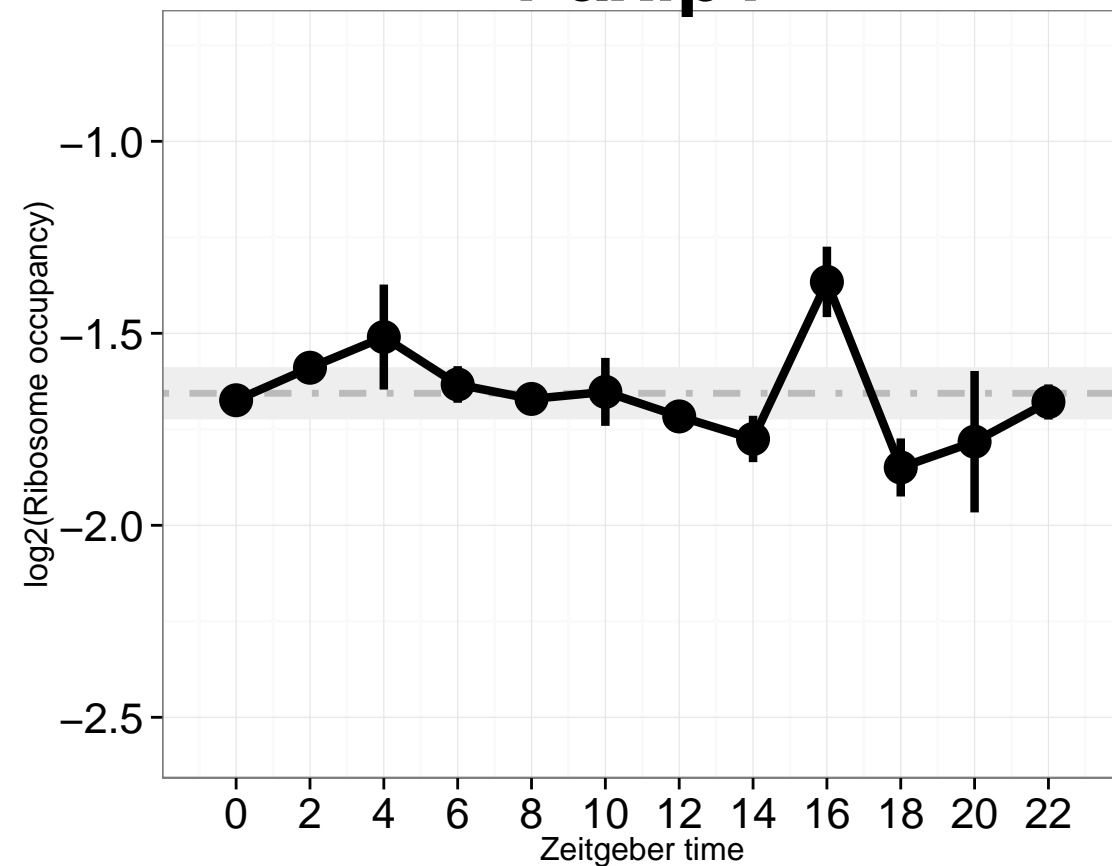

Supplement: Supplementary file 3197 [file 1]

## Mbl2 TR

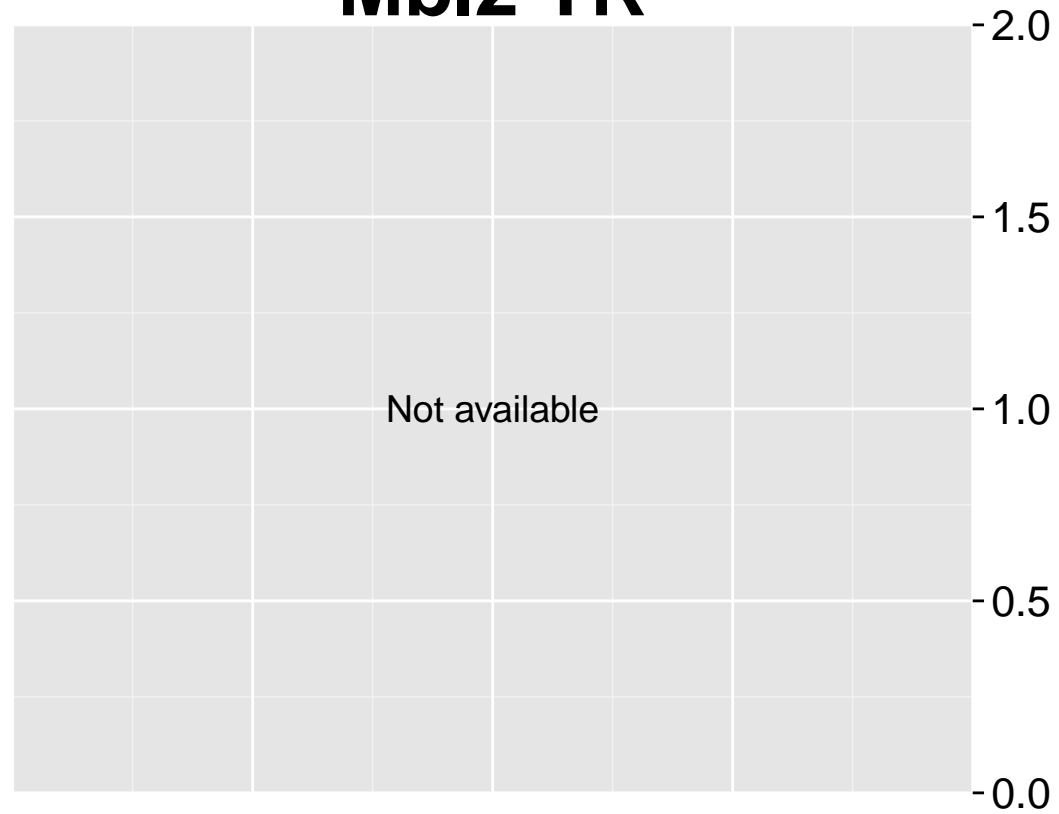

## Mbl2 log2(Ribosome occupancy)

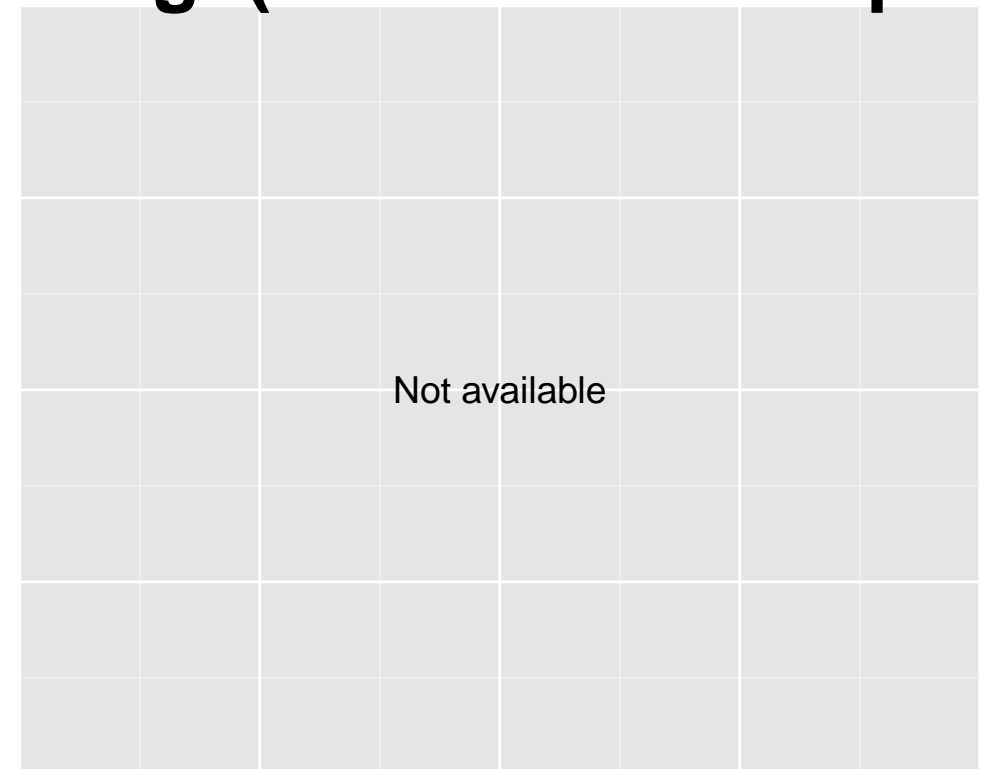

Supplement: Supplementary file 3198 [file 1]

## Epn3

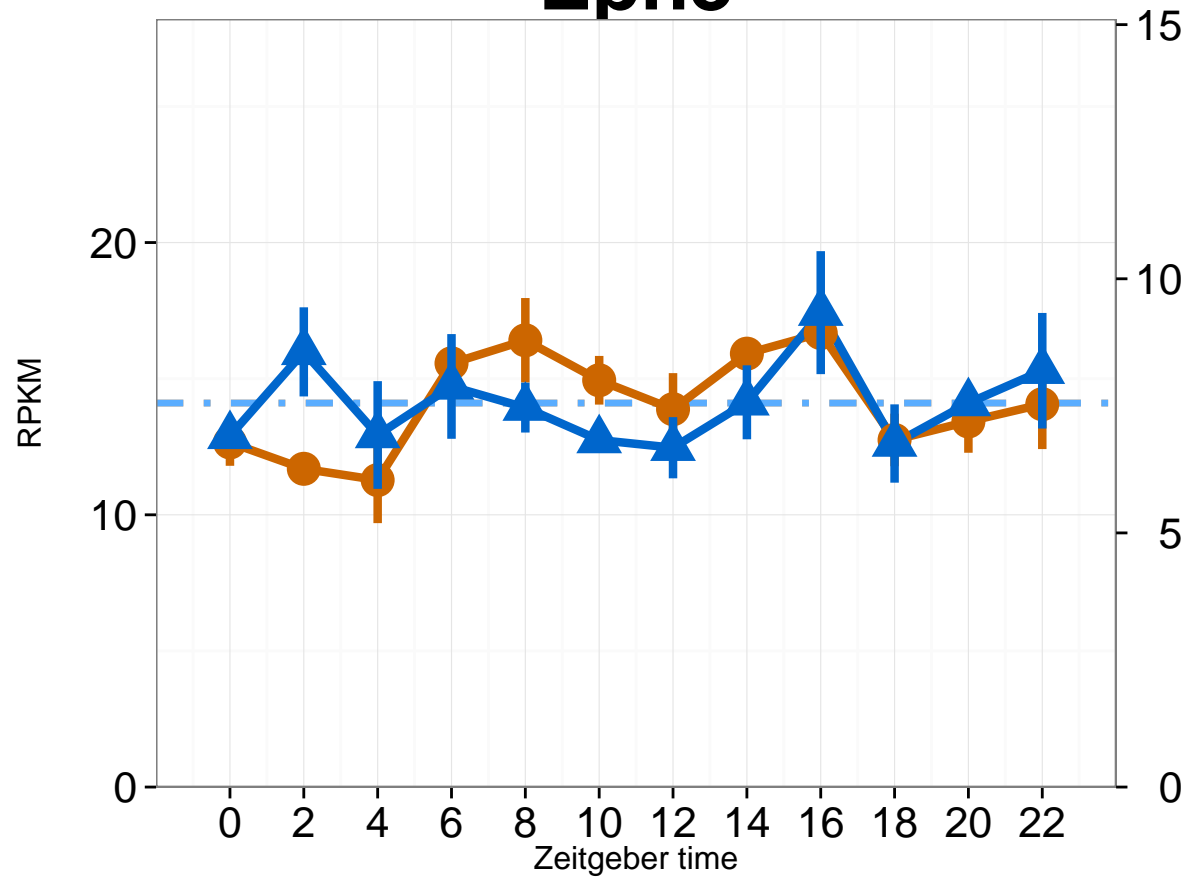

## Epn3

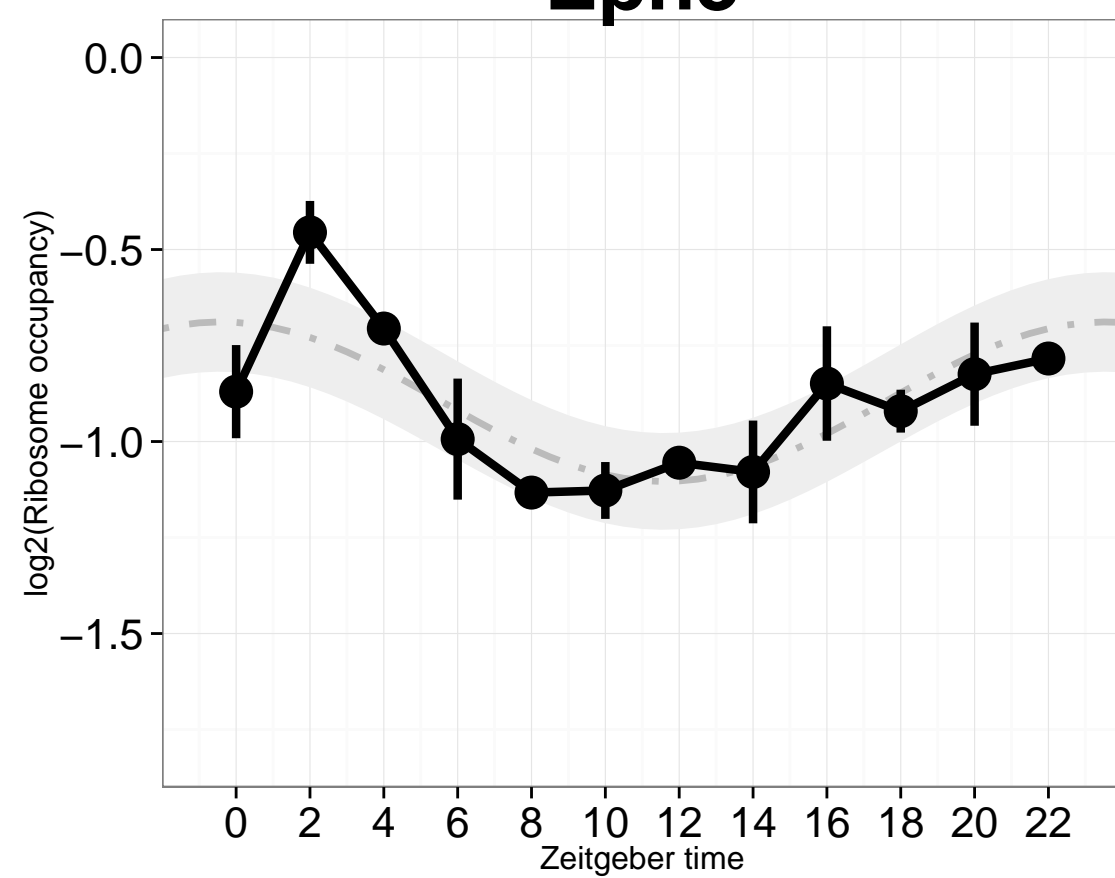

Supplement: Supplementary file 3199 [file 1]

## 5430435G22Rik

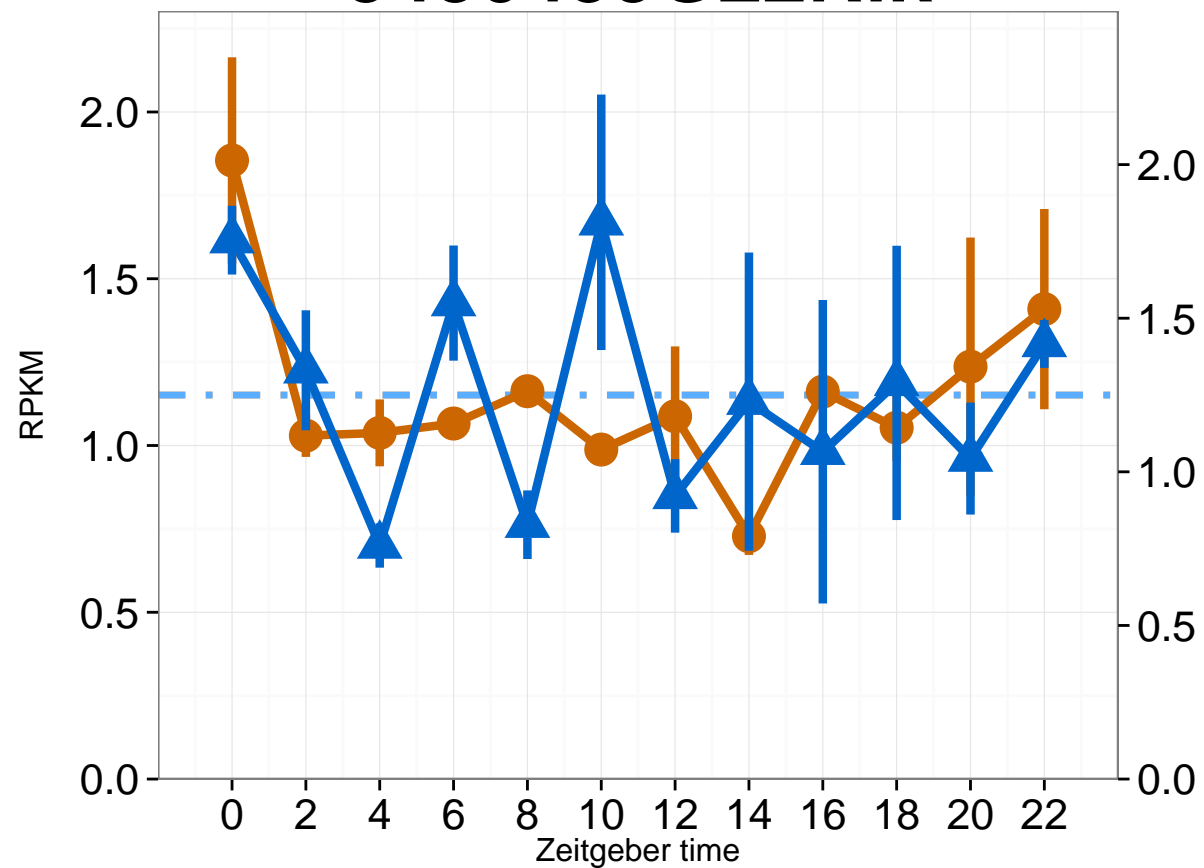

## 5430435G22Rik

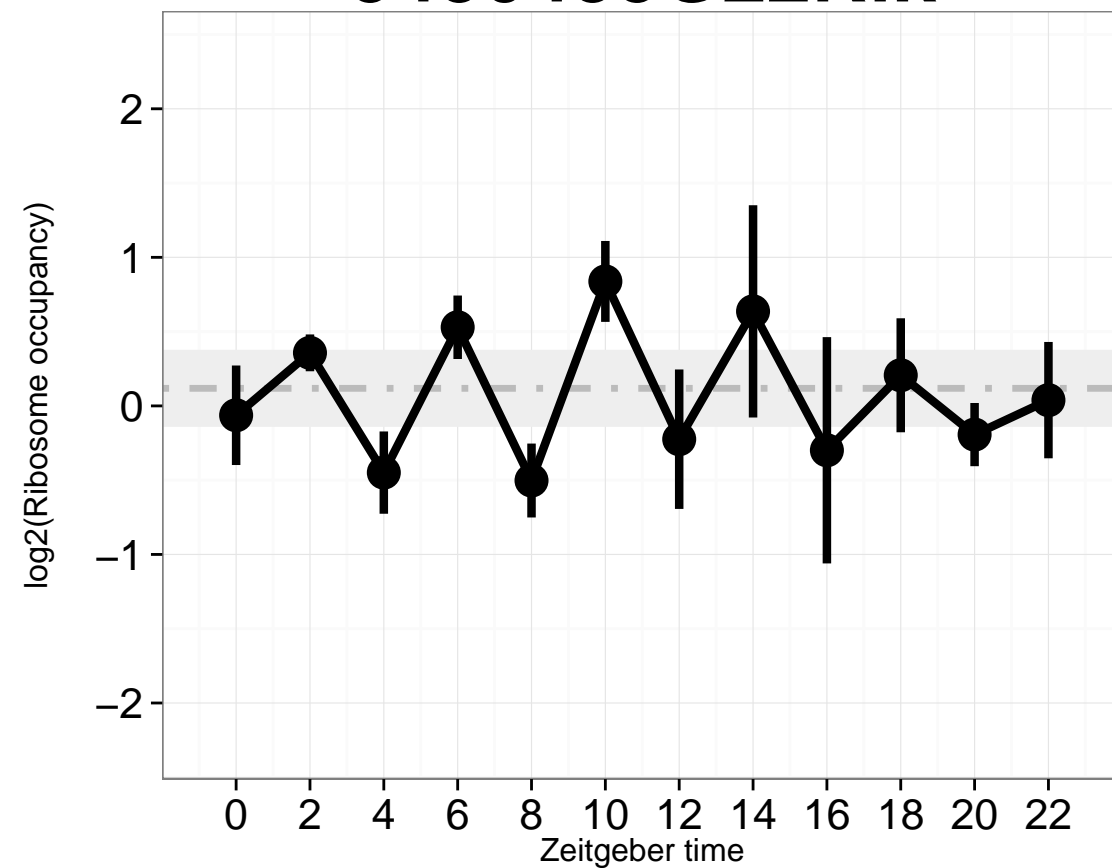

Supplement: Supplementary file 3200 [file 1]

## Gak

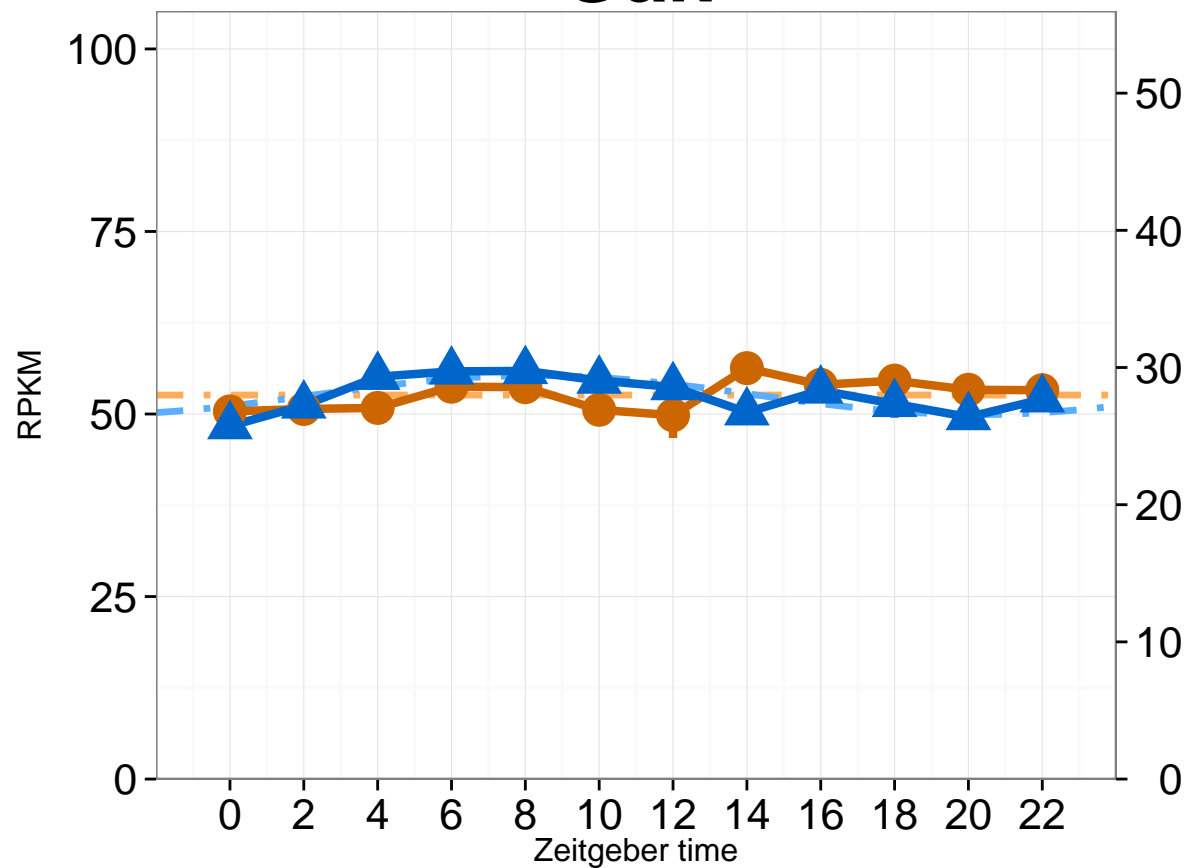

## Gak

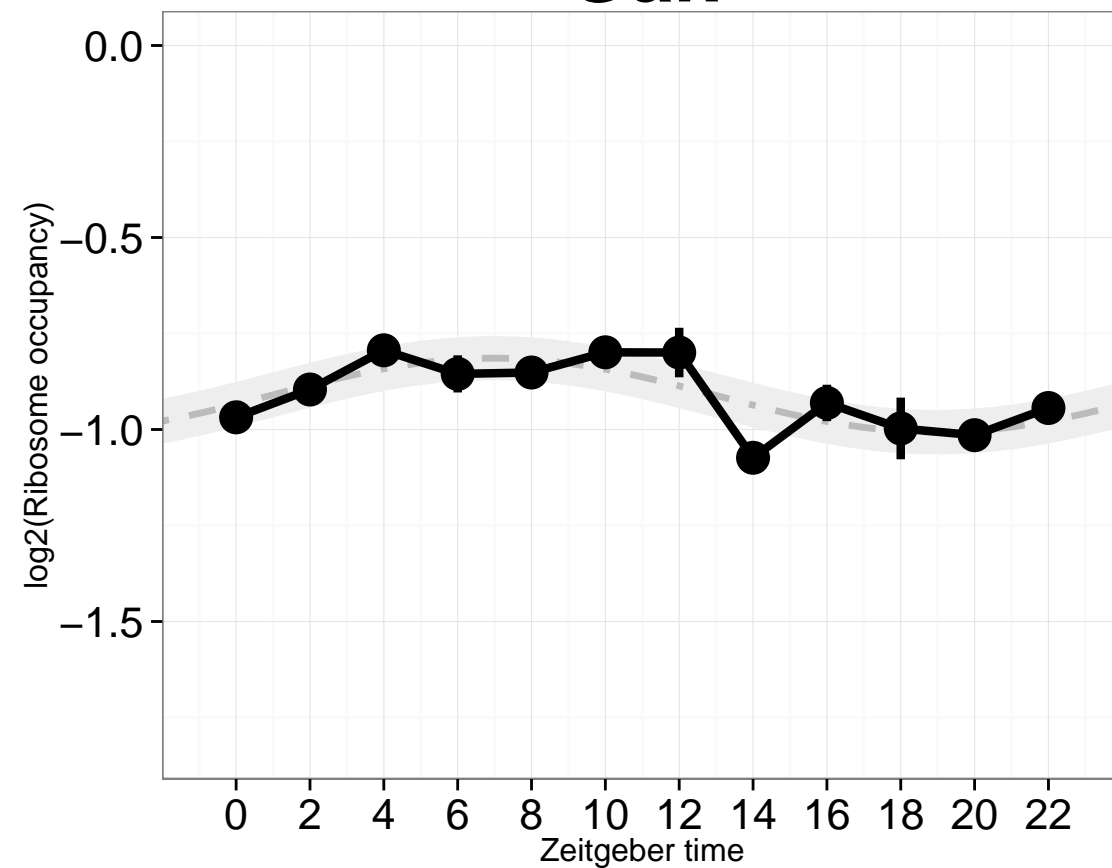

Supplement: Supplementary file 3201 [file 1]

# Pctp

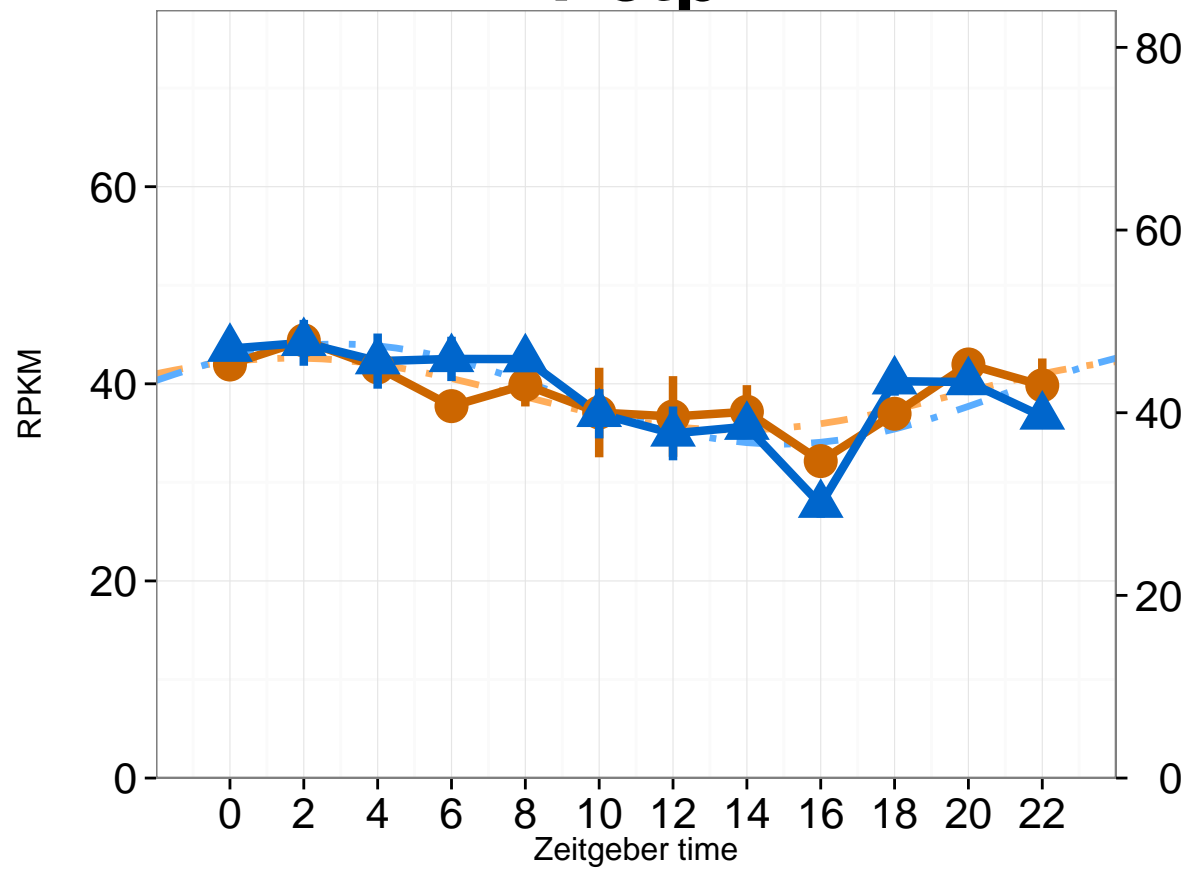

# Pctp

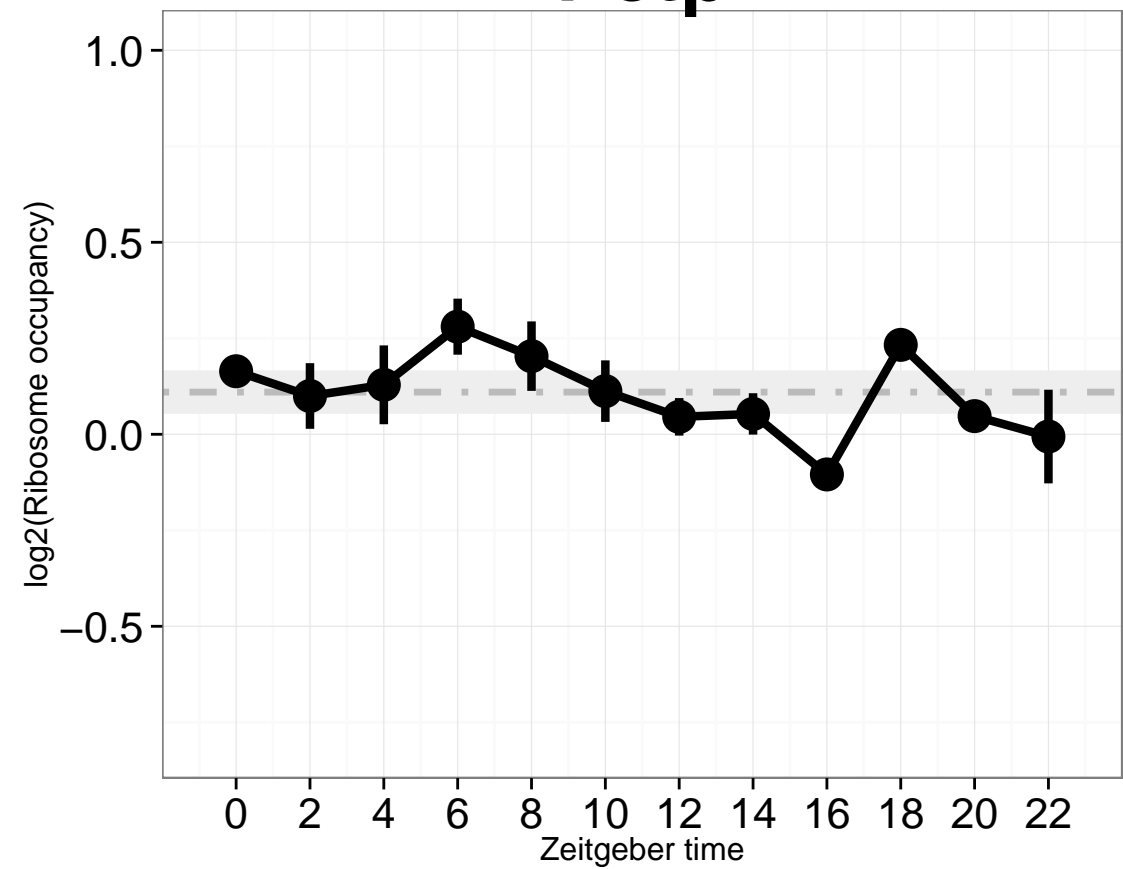

Supplement: Supplementary file 3202 [file 1]

## Klf3

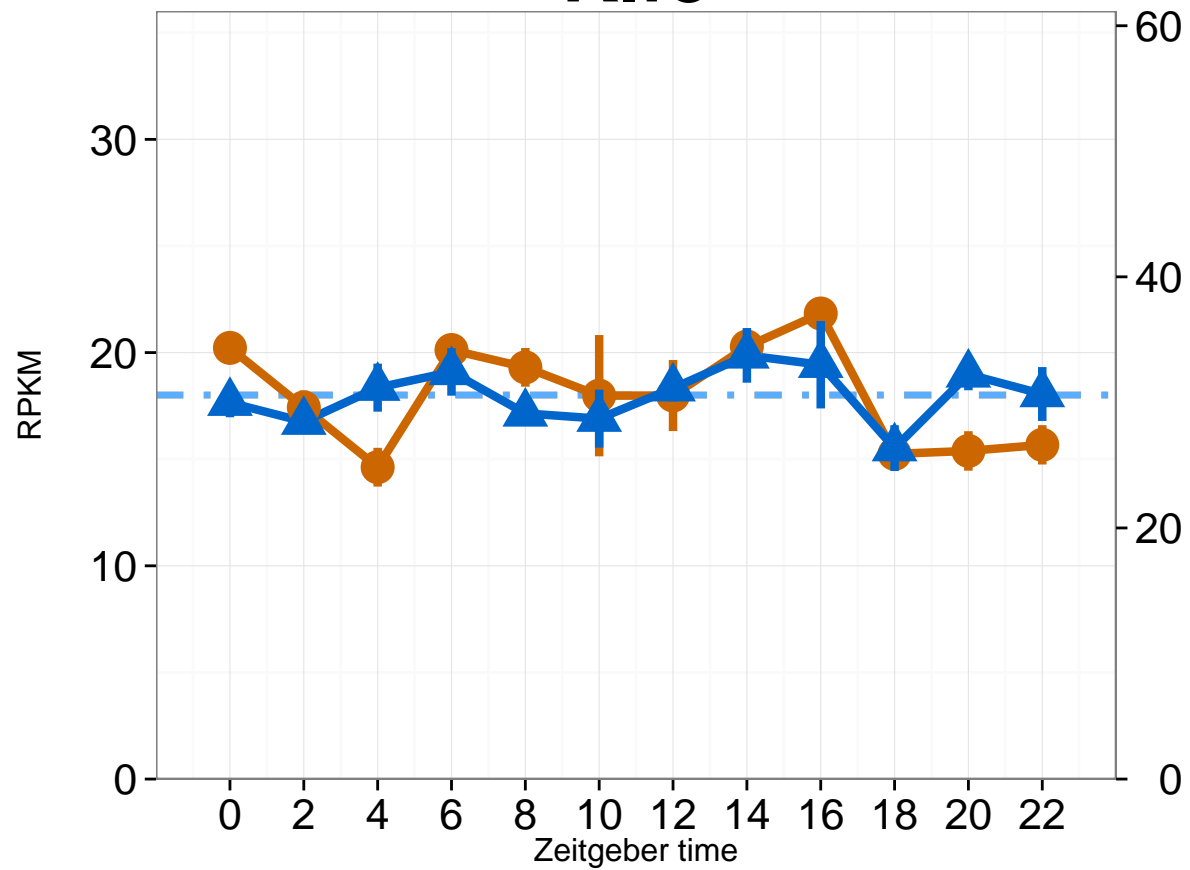

## Klf3

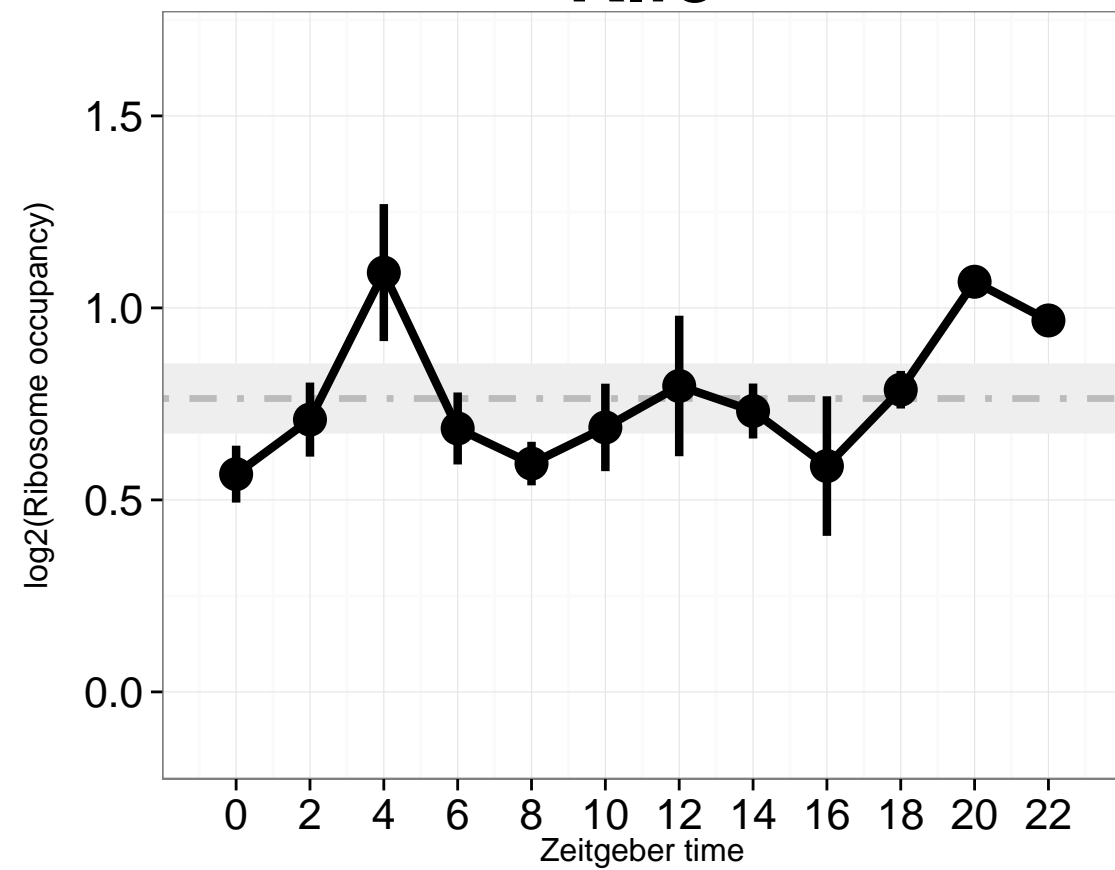

Supplement: Supplementary file 3203 [file 1]

## Vcl

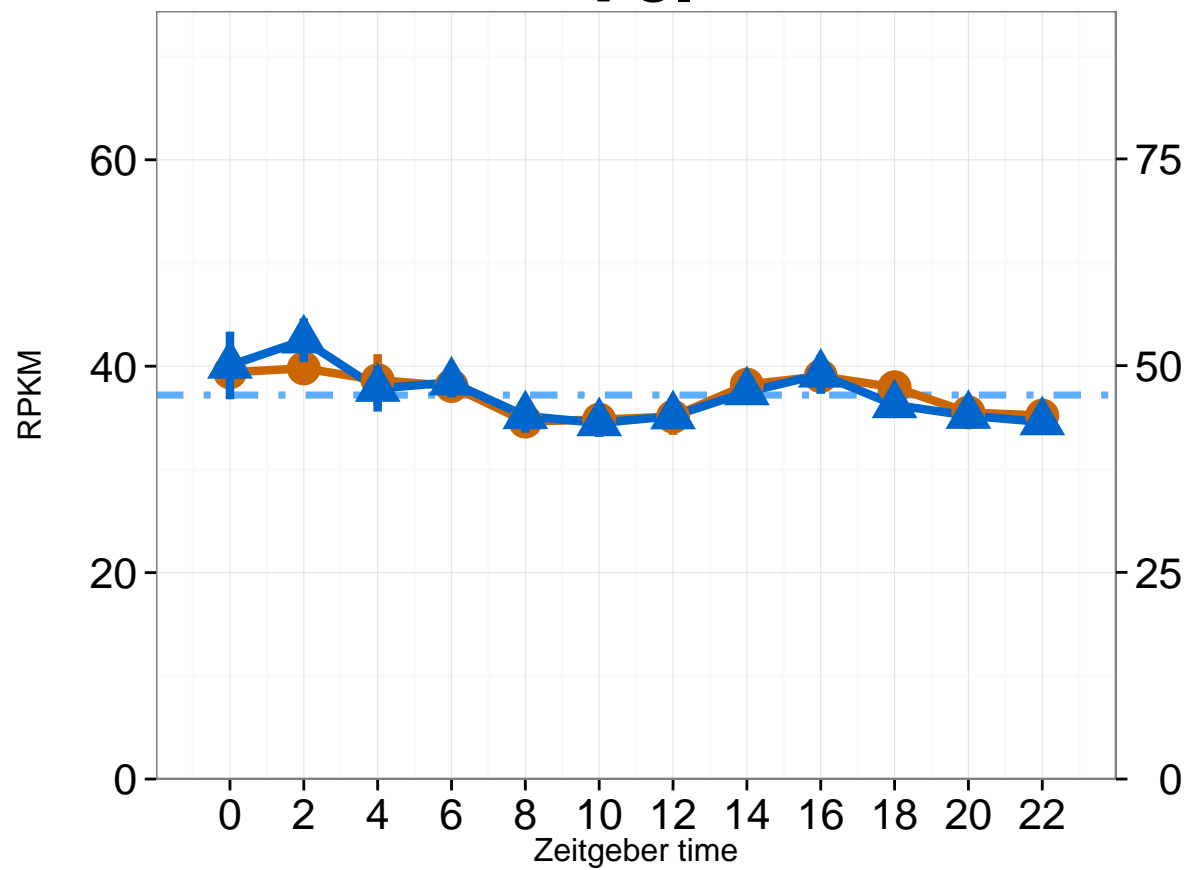

## Vcl

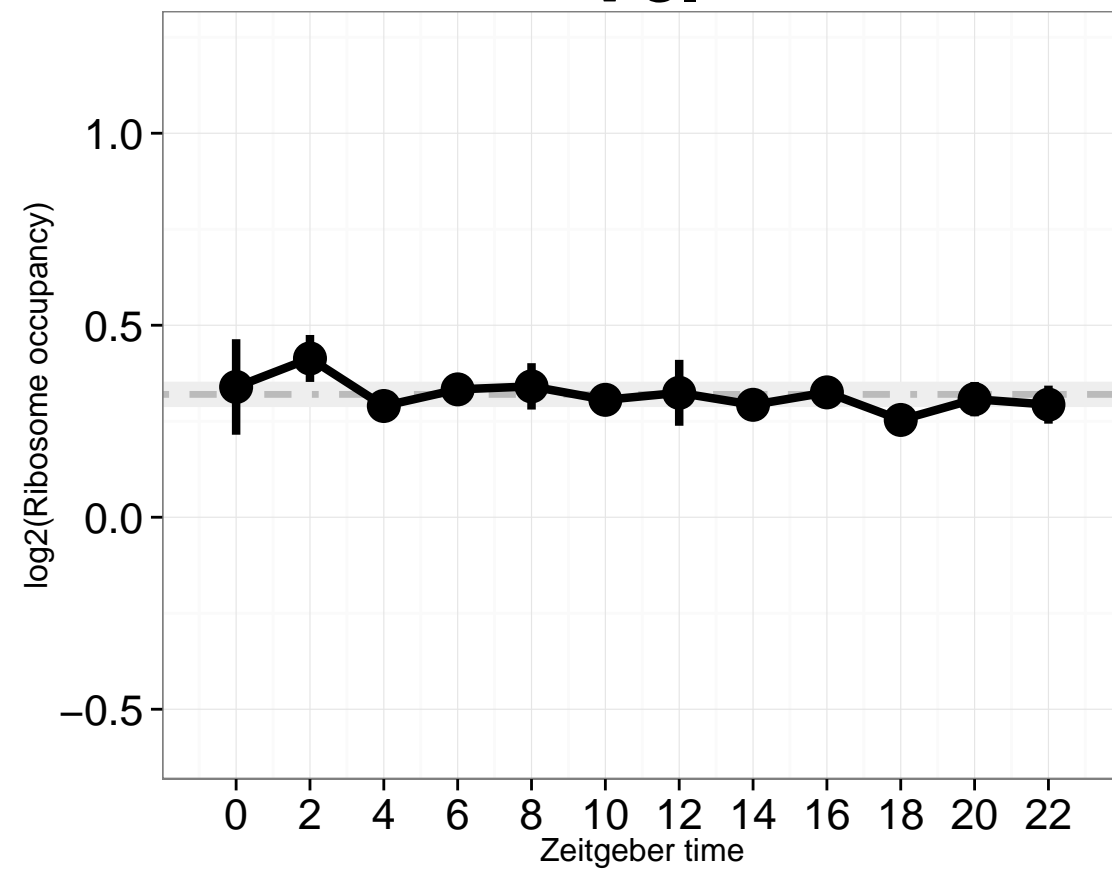

Supplement: Supplementary file 3204 [file 1]

## Mcph1

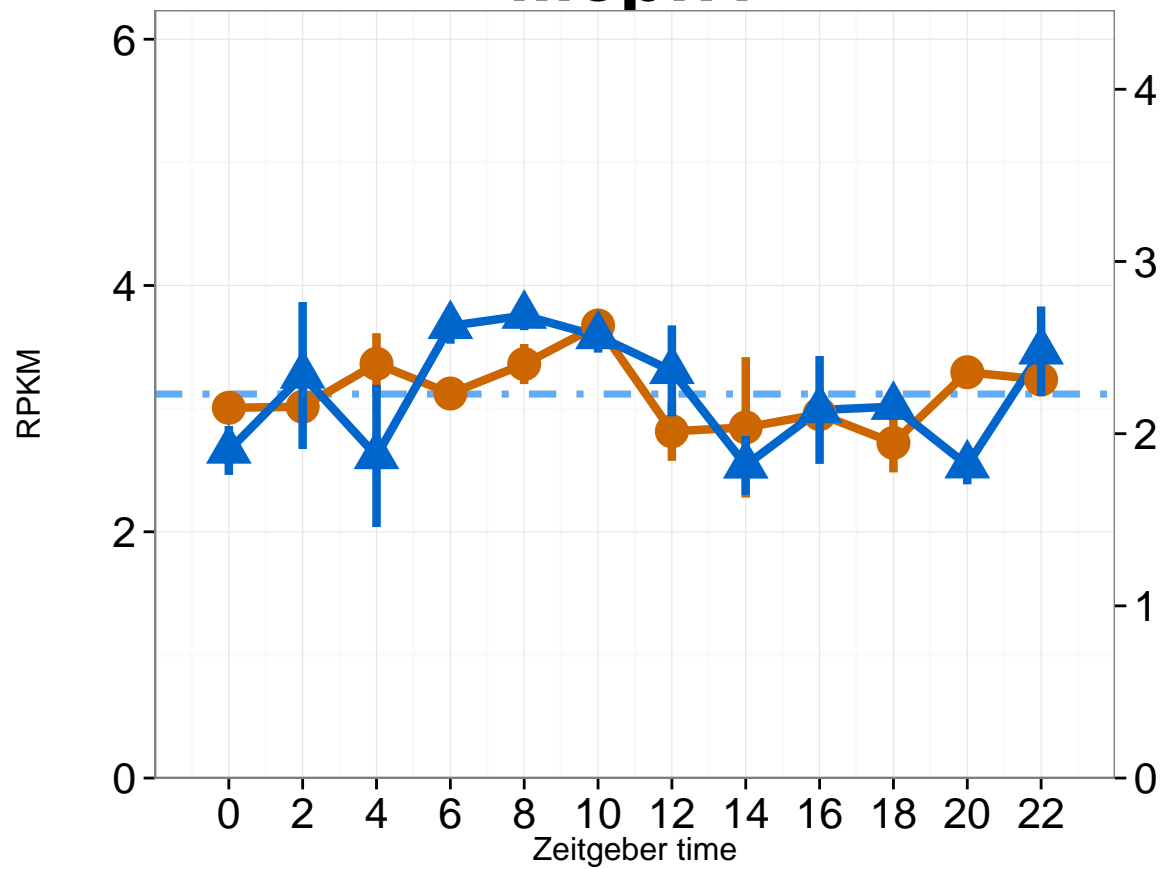

## Mcph1

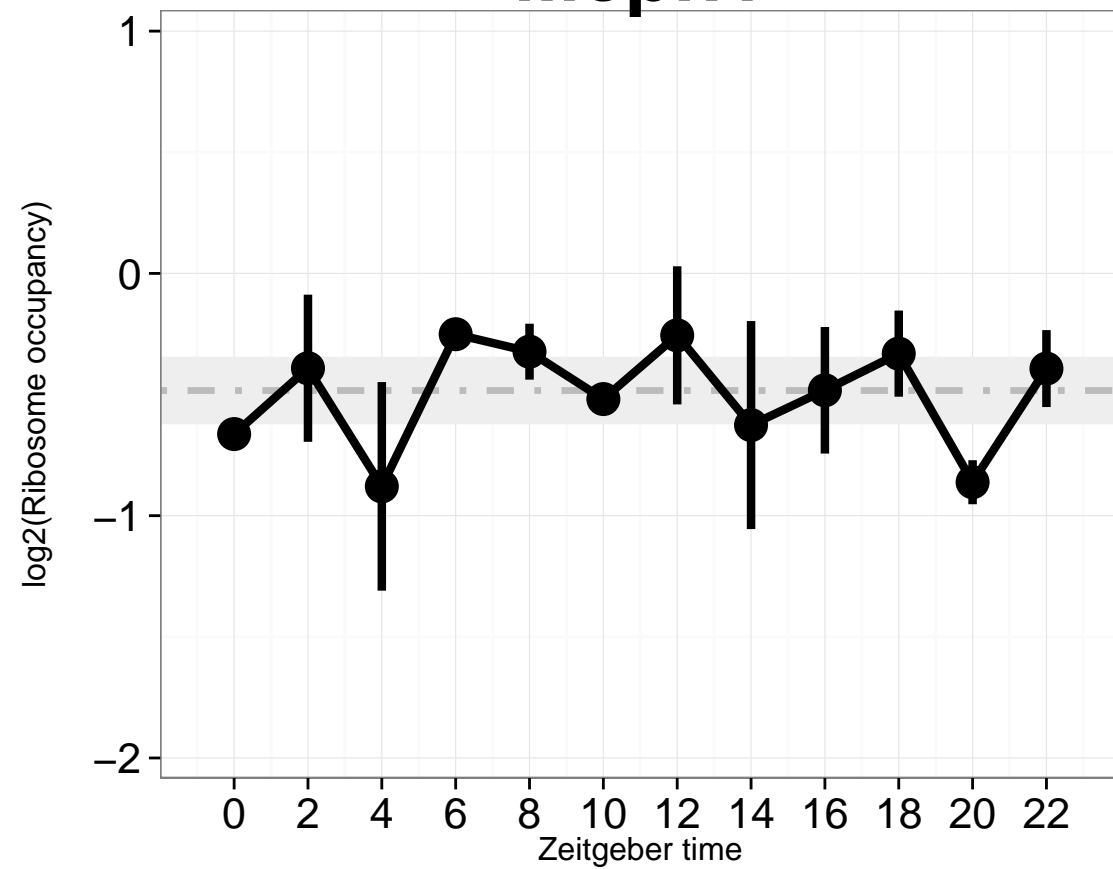

Supplement: Supplementary file 3205 [file 1]

# Scnn1a

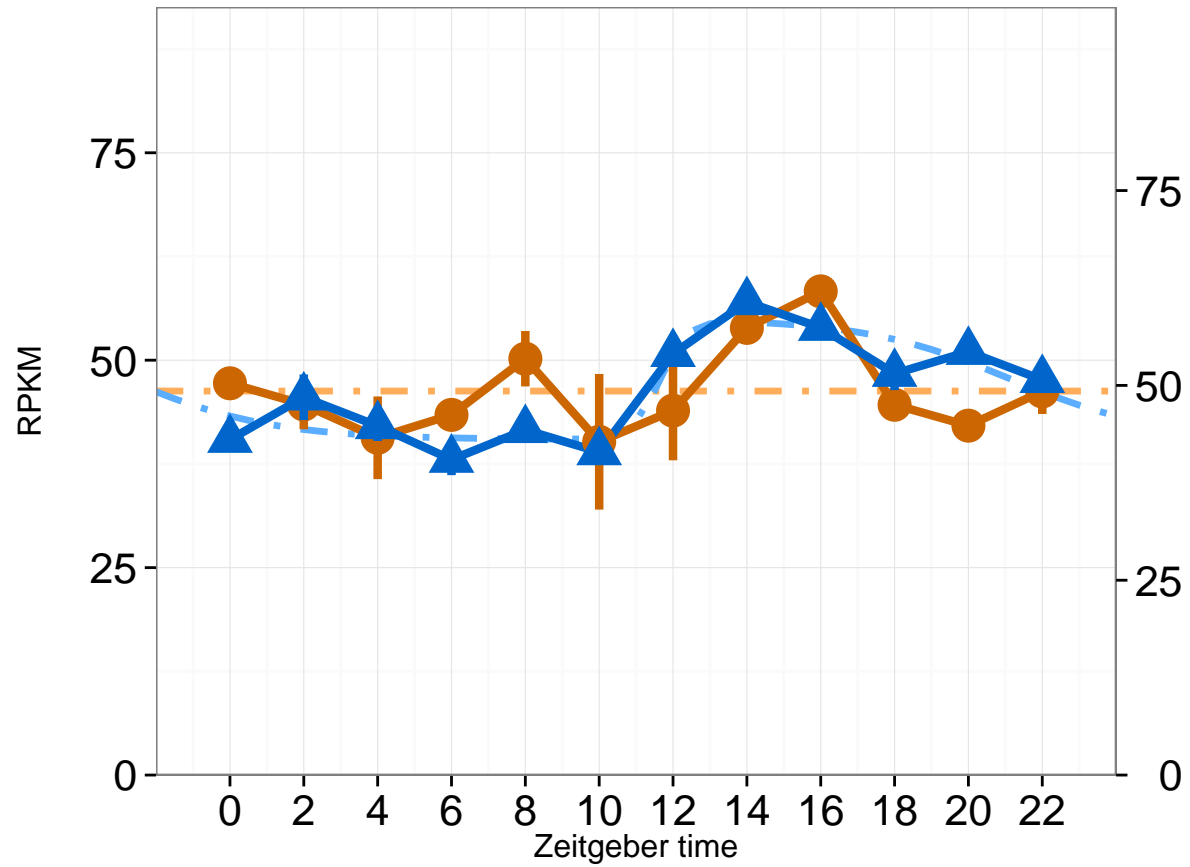

# Scnn1a

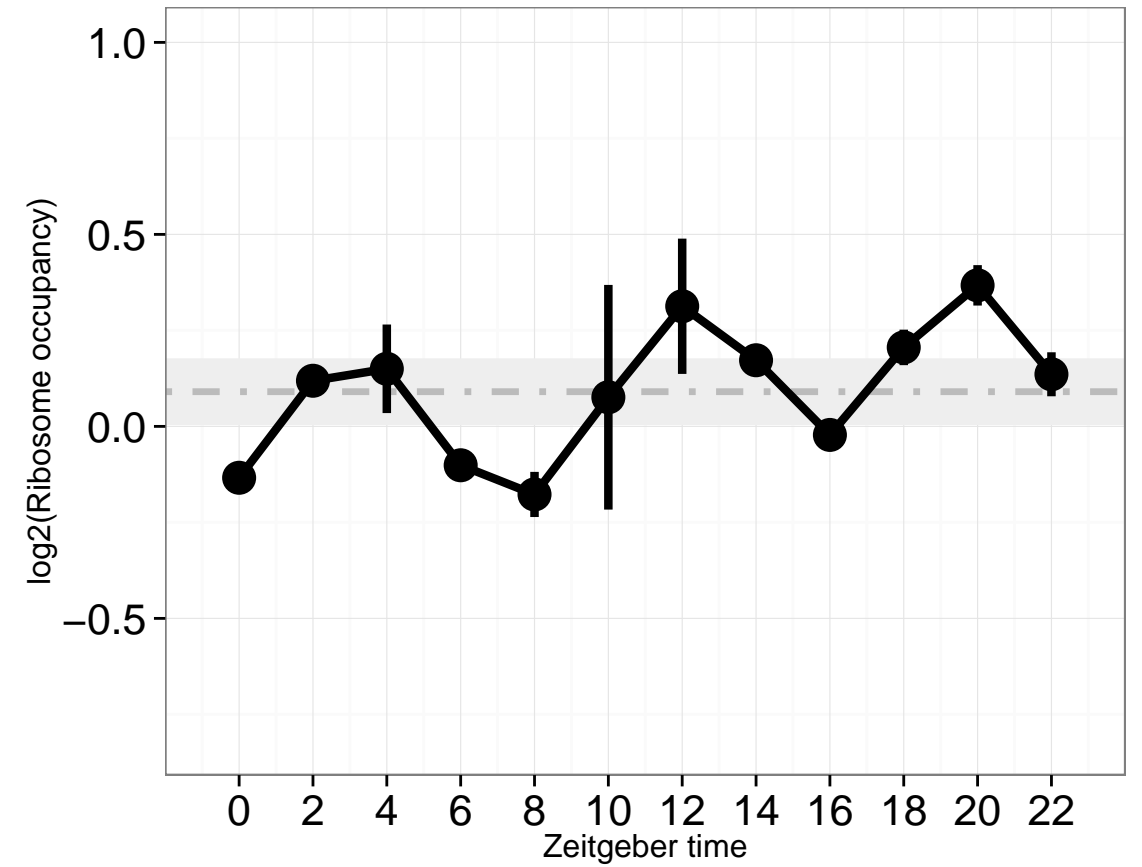

Supplement: Supplementary file 3206 [file 1]

# Lactb

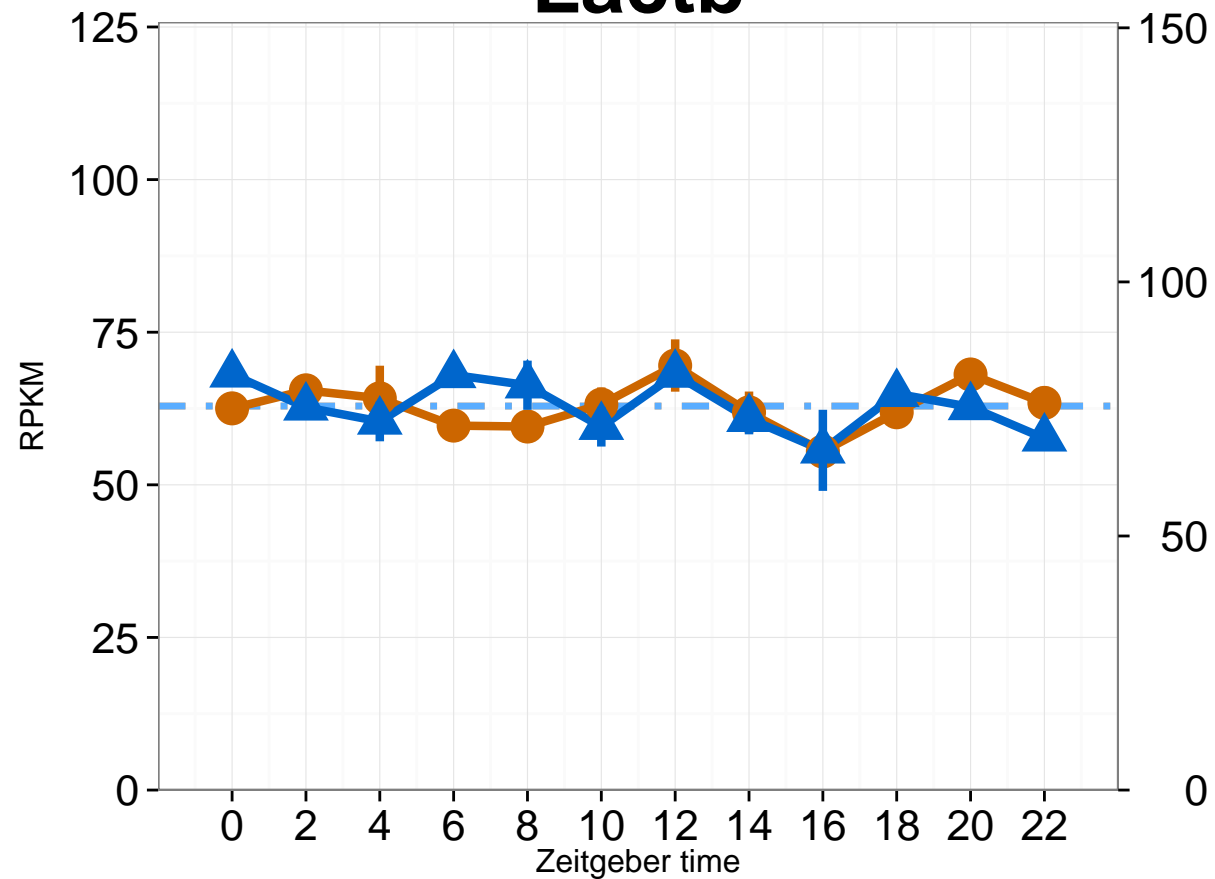

# Lactb

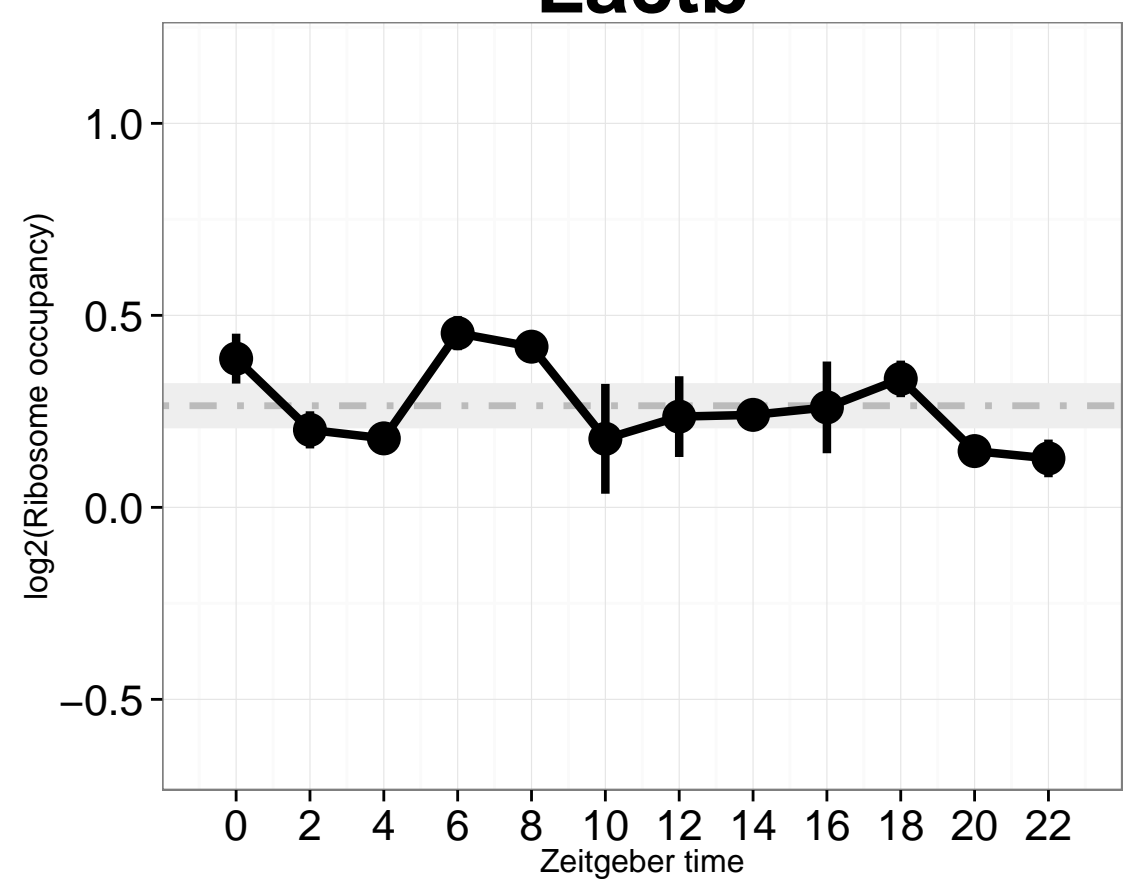

Supplement: Supplementary file 3207 [file 1]

# Tbc1d25

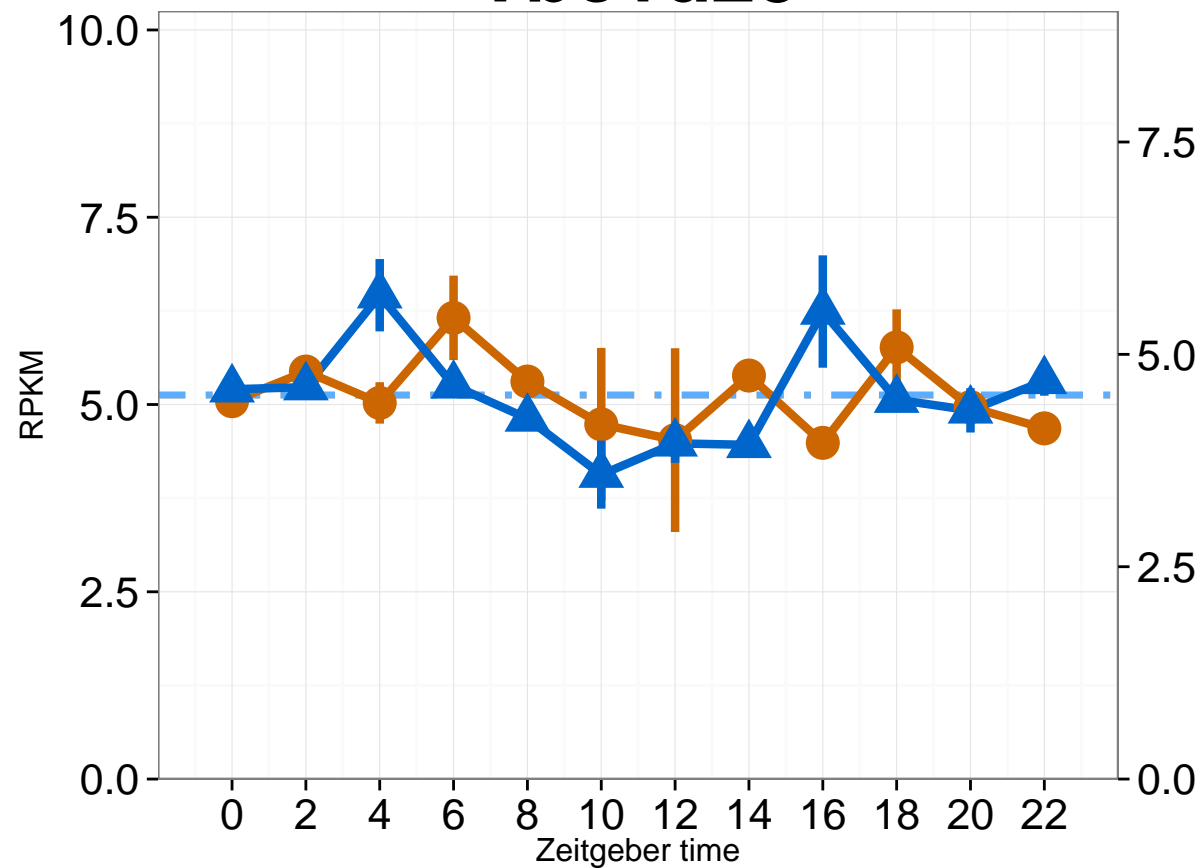

# Tbc1d25

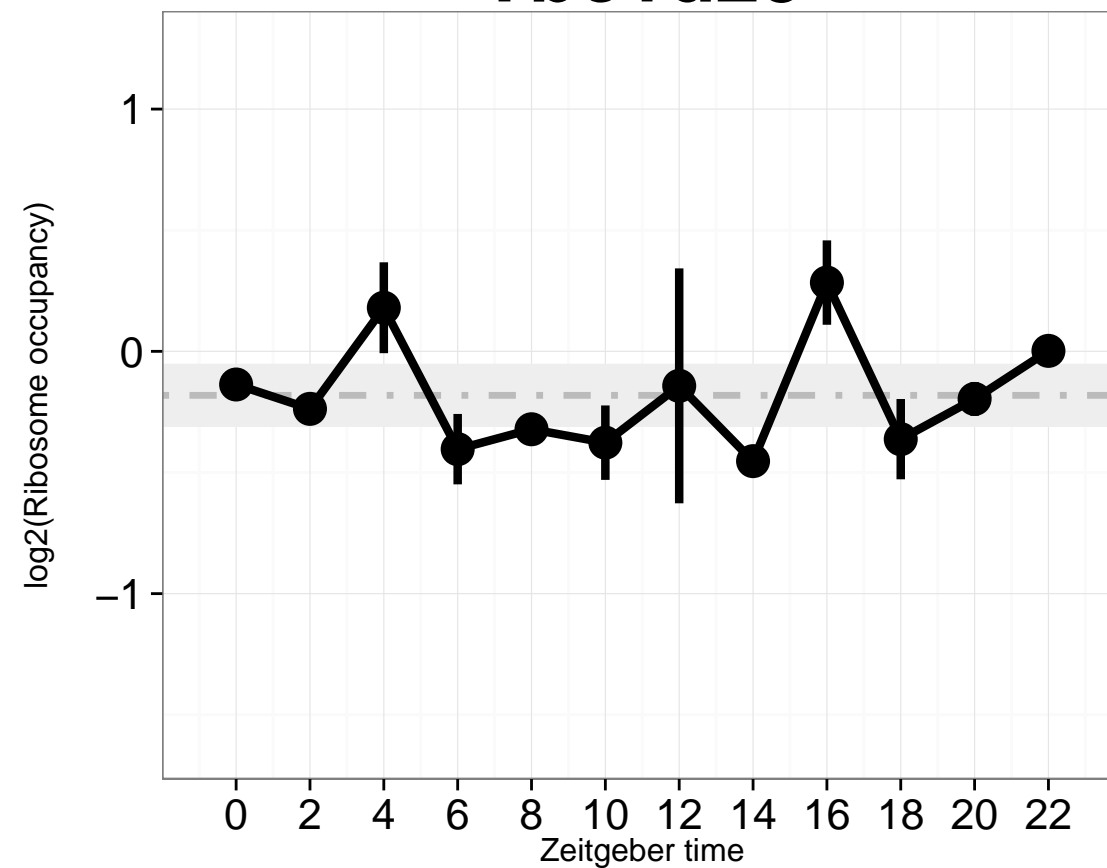

Supplement: Supplementary file 3208 [file 1]

## Rabgef1

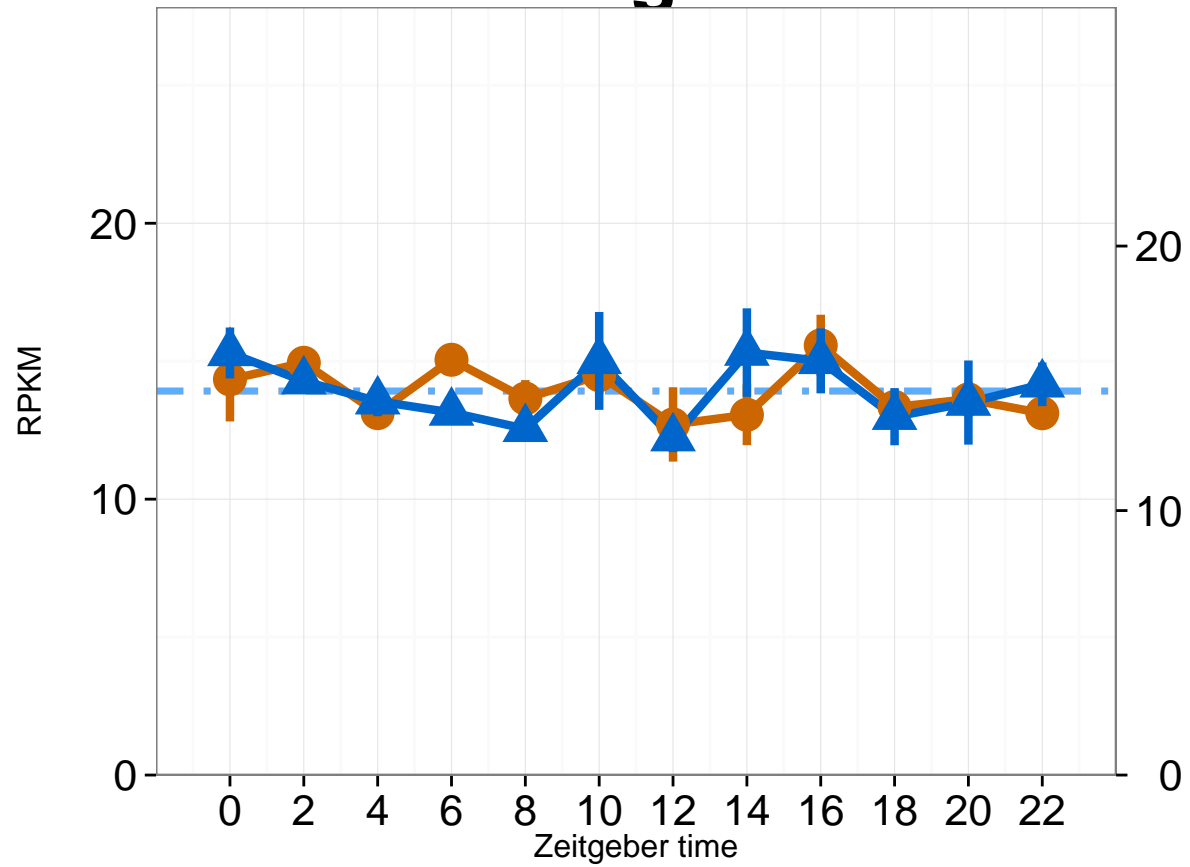

## Rabgef1

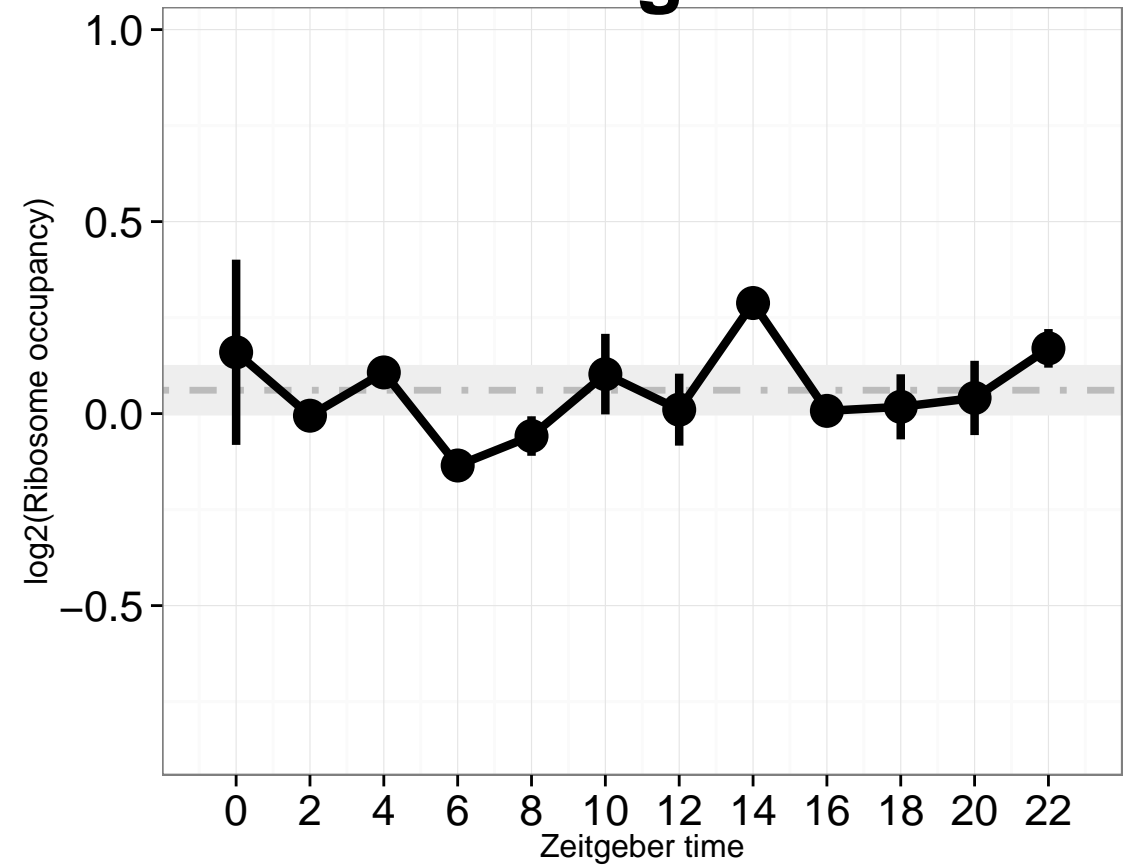

Supplement: Supplementary file 3209 [file 1]

# Pla2g15

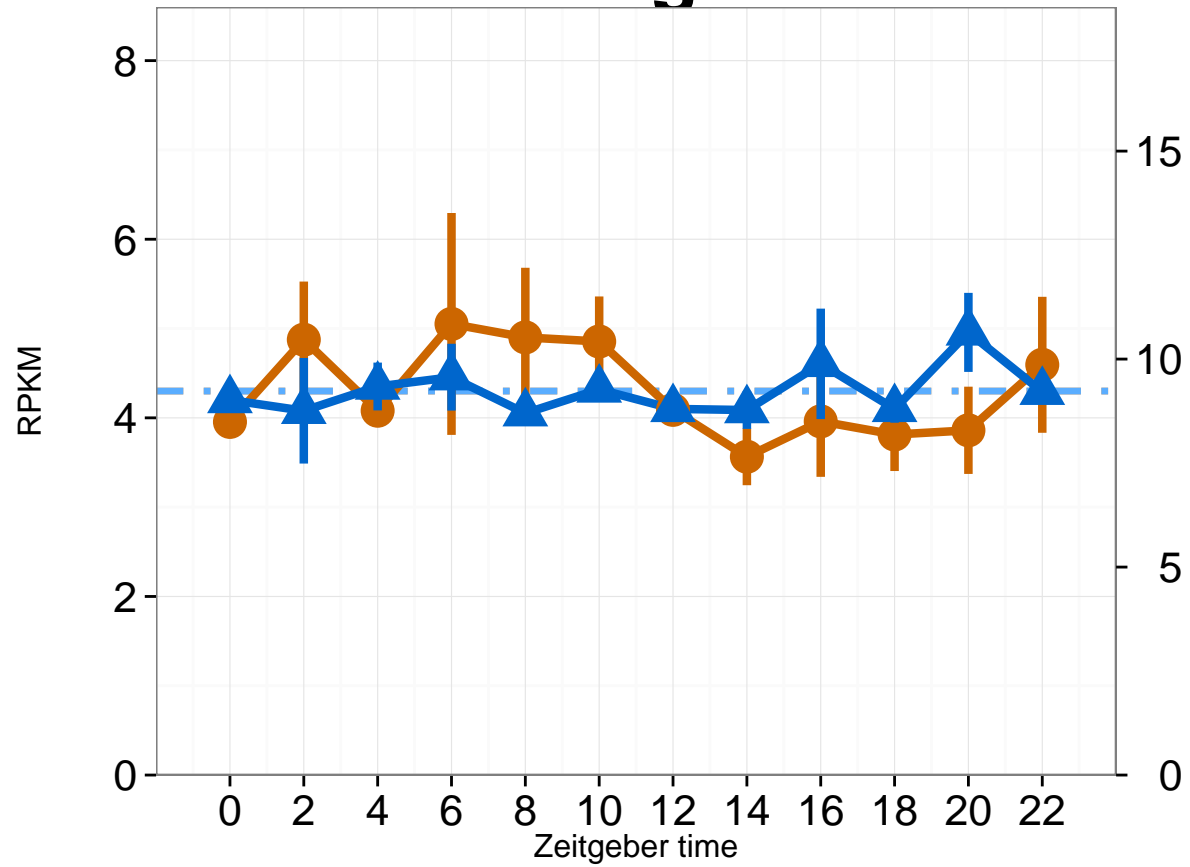

# Pla2g15

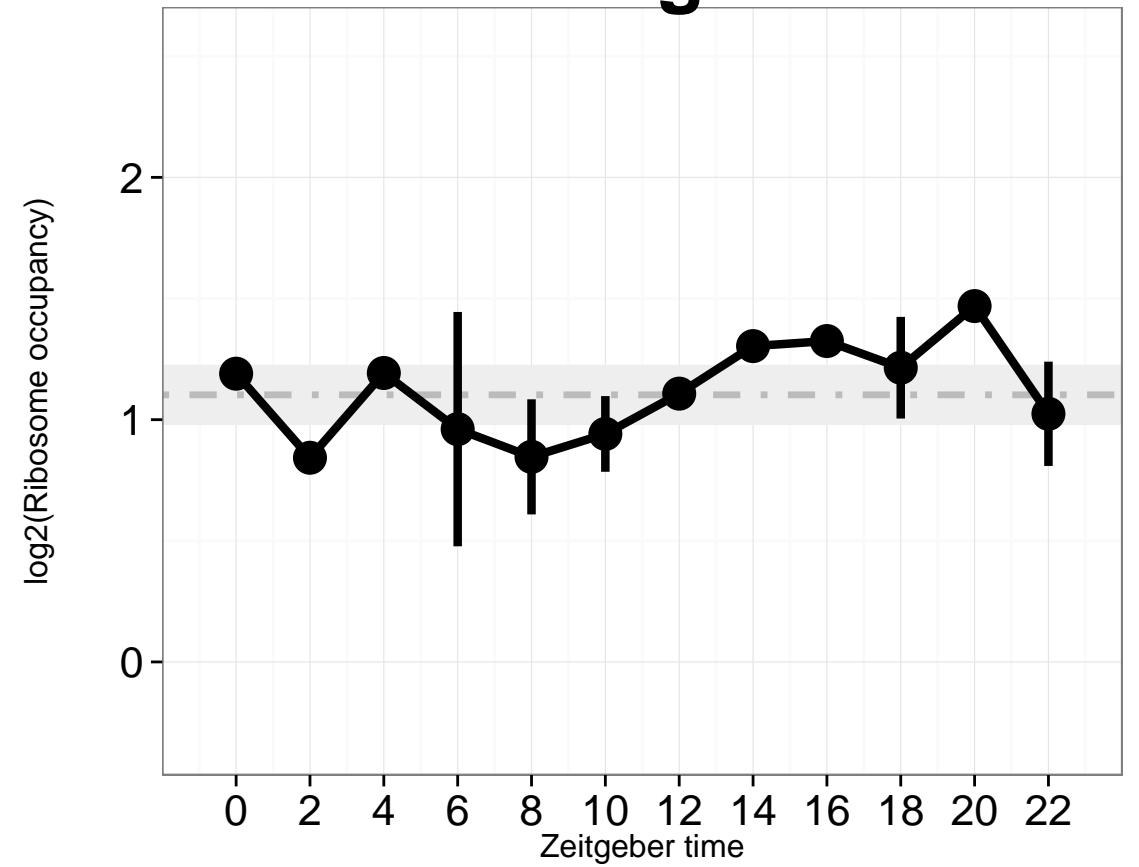

Supplement: Supplementary file 3210 [file 1]

# 1700011H14Rik

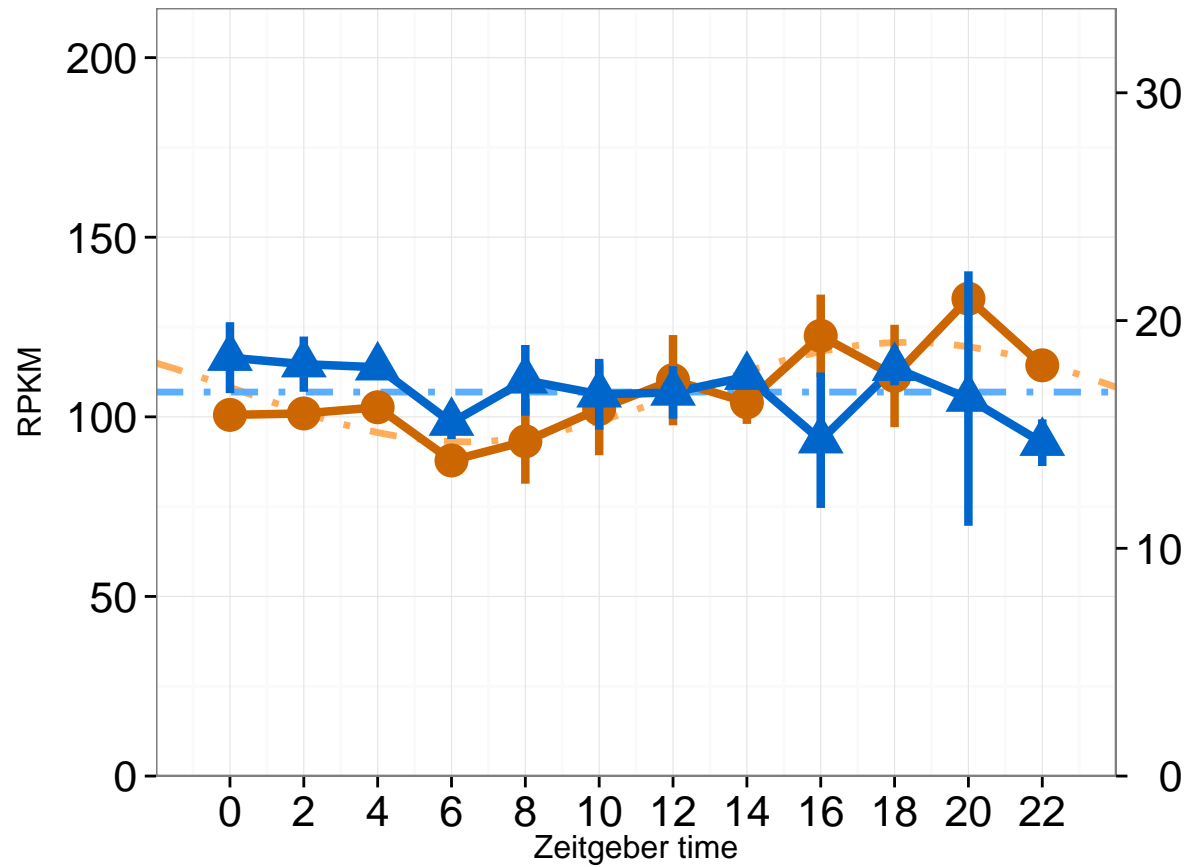

# 1700011H14Rik

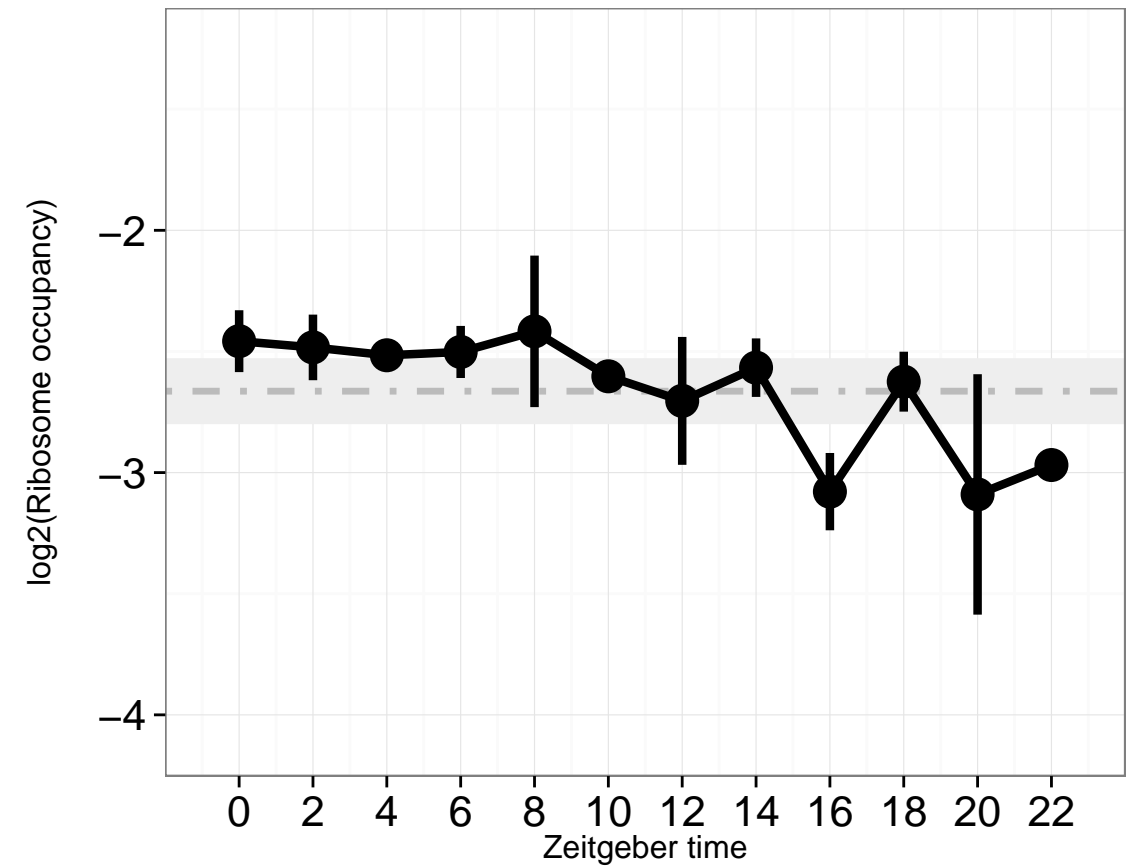

Supplement: Supplementary file 3211 [file 1]
