# Supplementary material (part 33 of 133)
Source: publisher figshare collection journal article supplement (https://springernature.figshare.com/articles/dataset/_/4903193)

# Use1

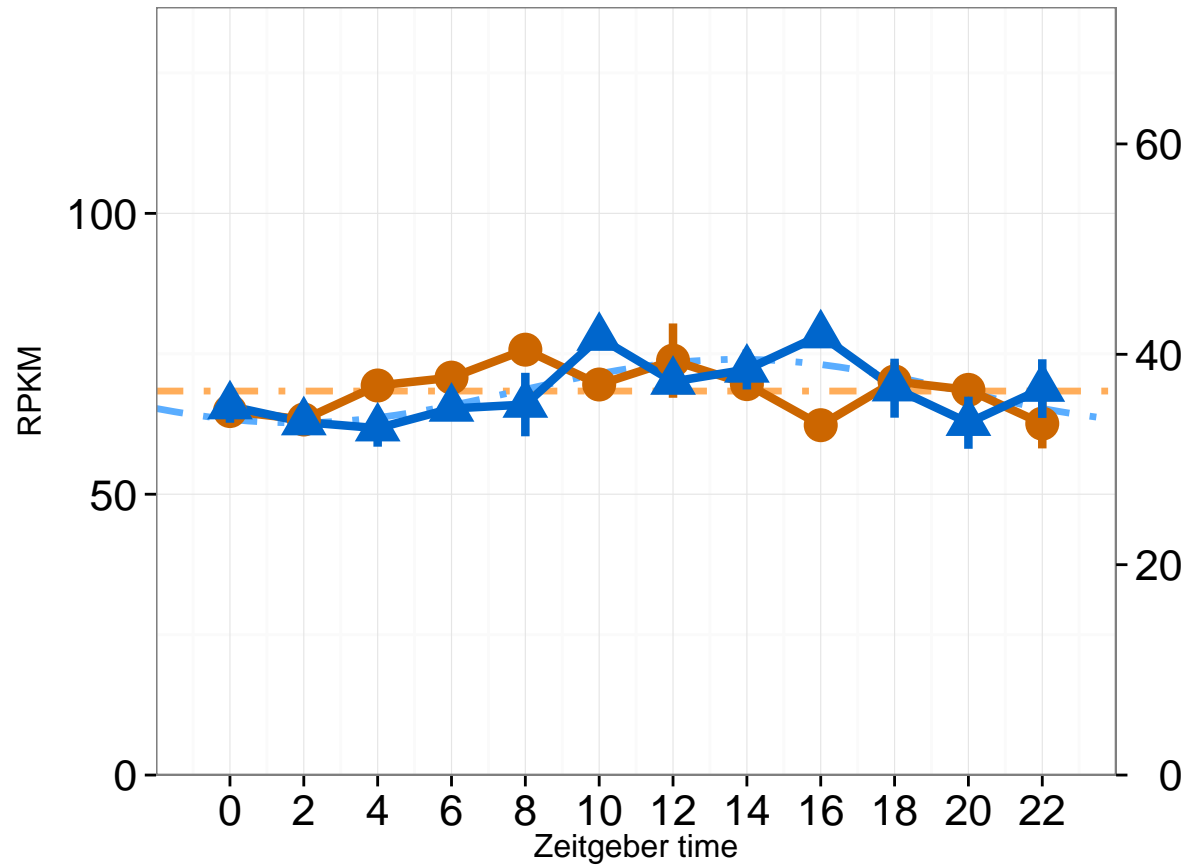

# Use1

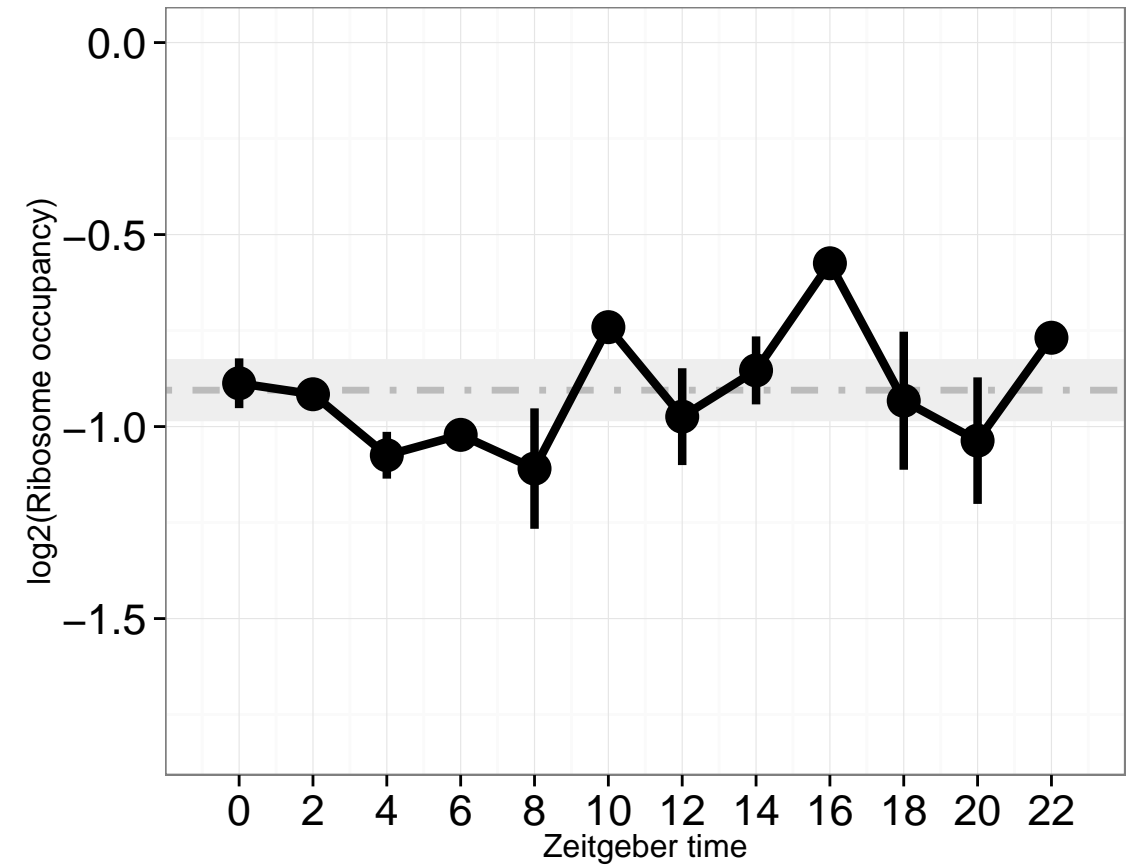

Supplement: Supplementary file 3212 [file 1]

## Aqr

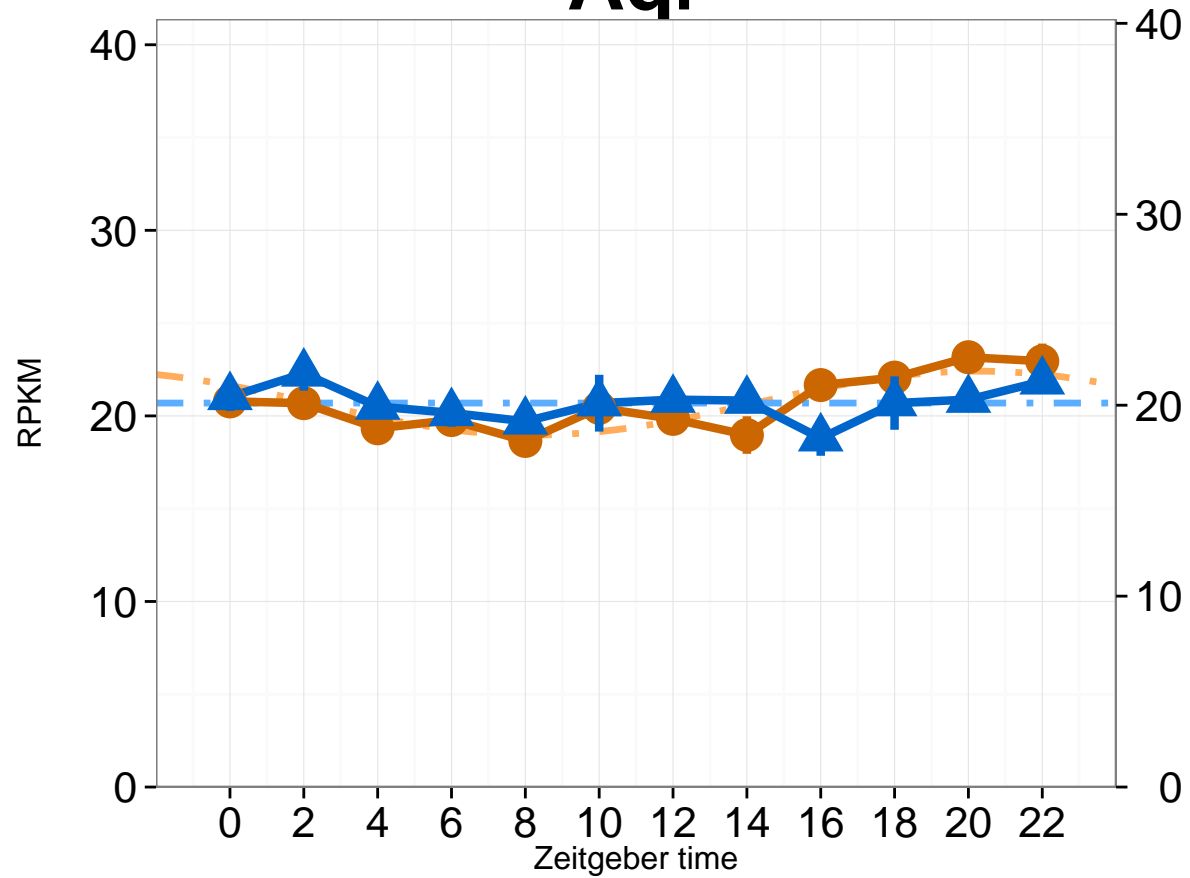

## Aqr

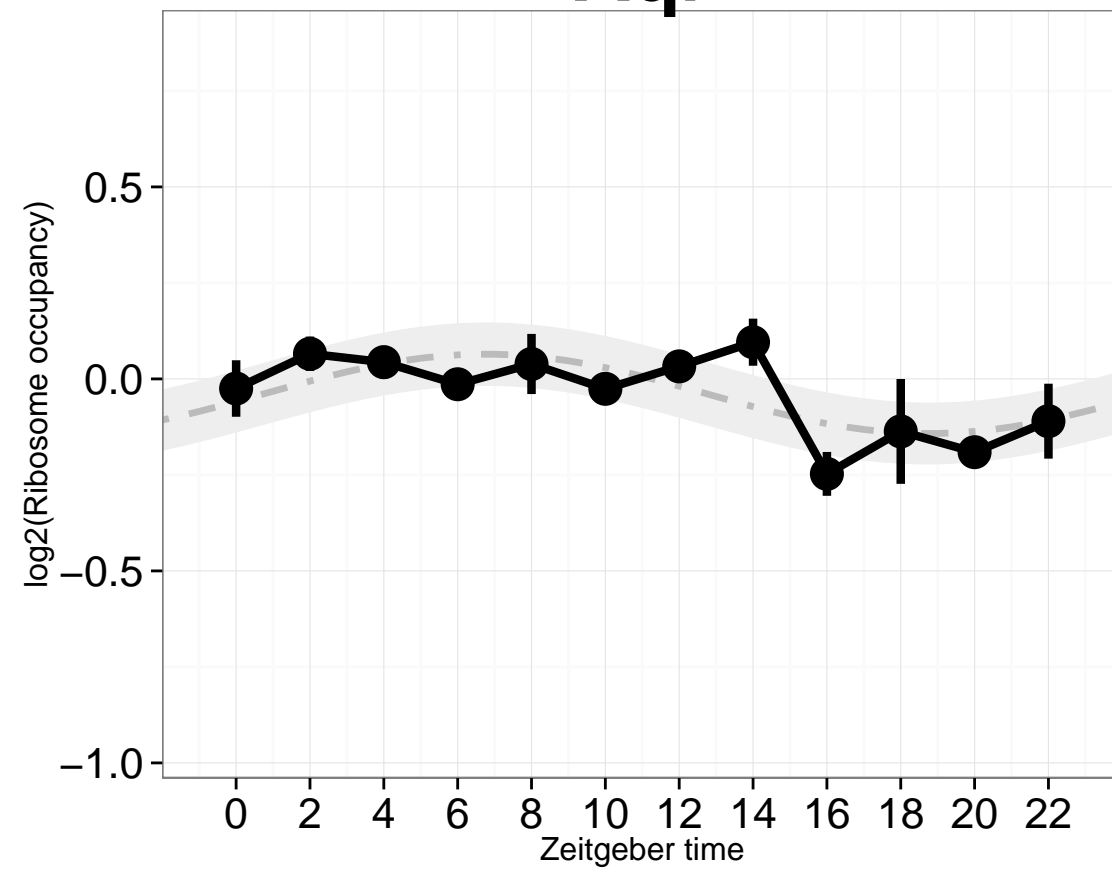

Supplement: Supplementary file 3213 [file 1]

**Asb4 TR**

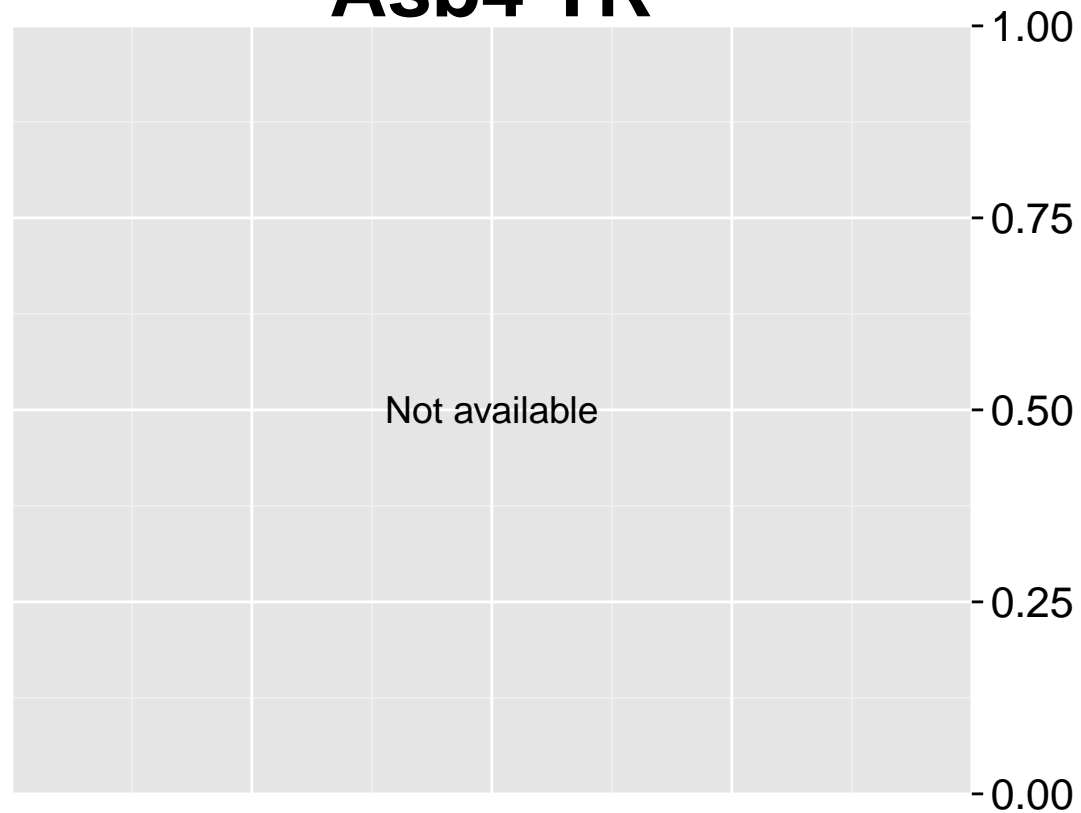

**Asb4 log2(Ribosome occupancy)**

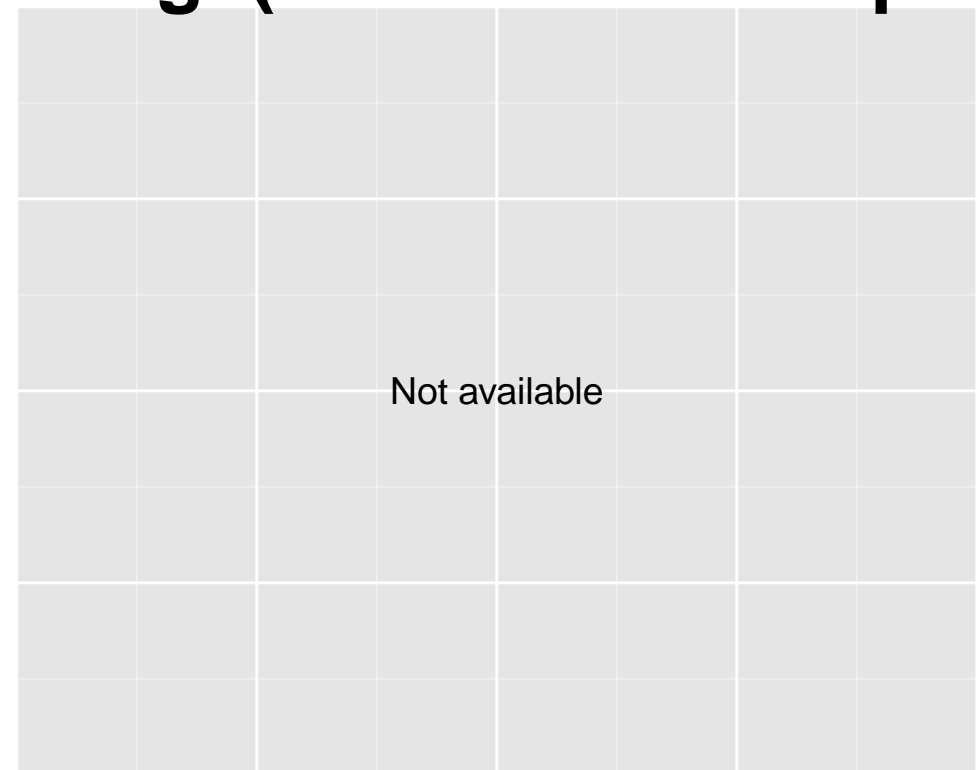

Supplement: Supplementary file 3214 [file 1]

## 9430023L20Rik

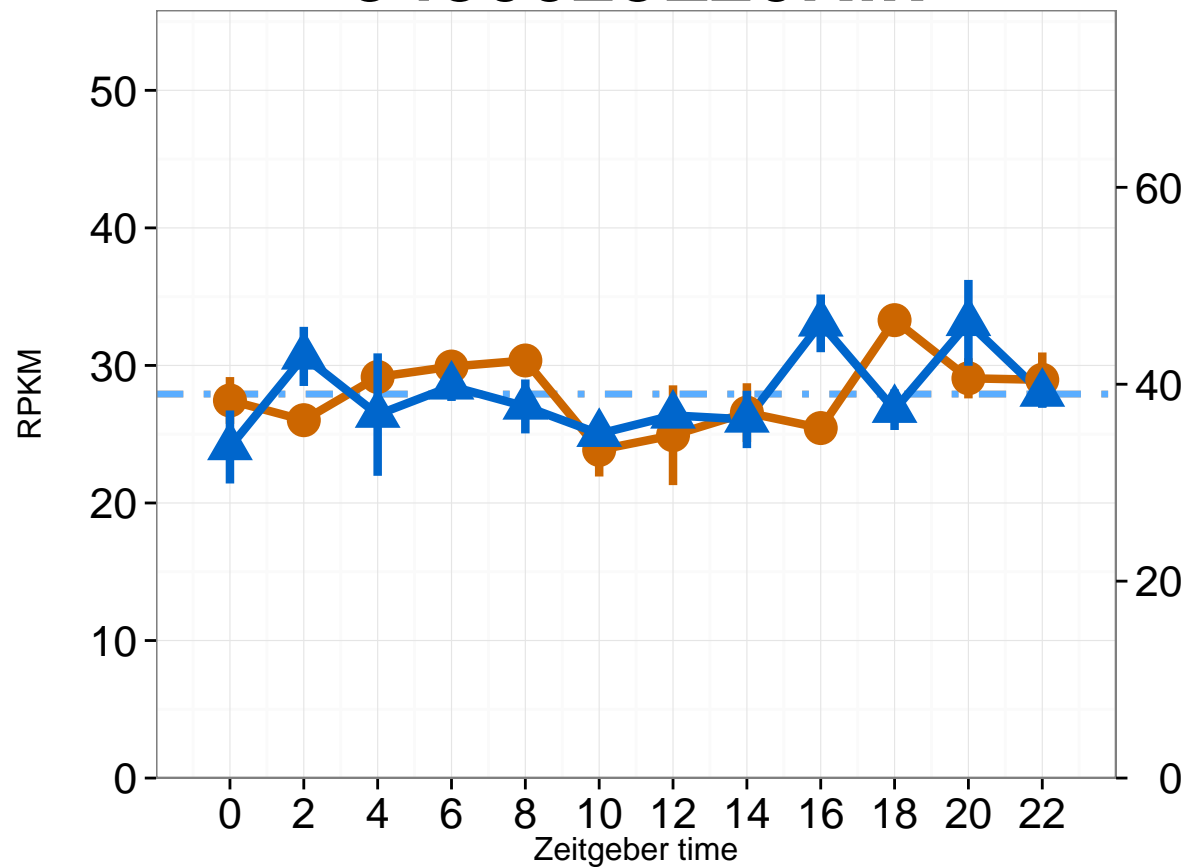

## 9430023L20Rik

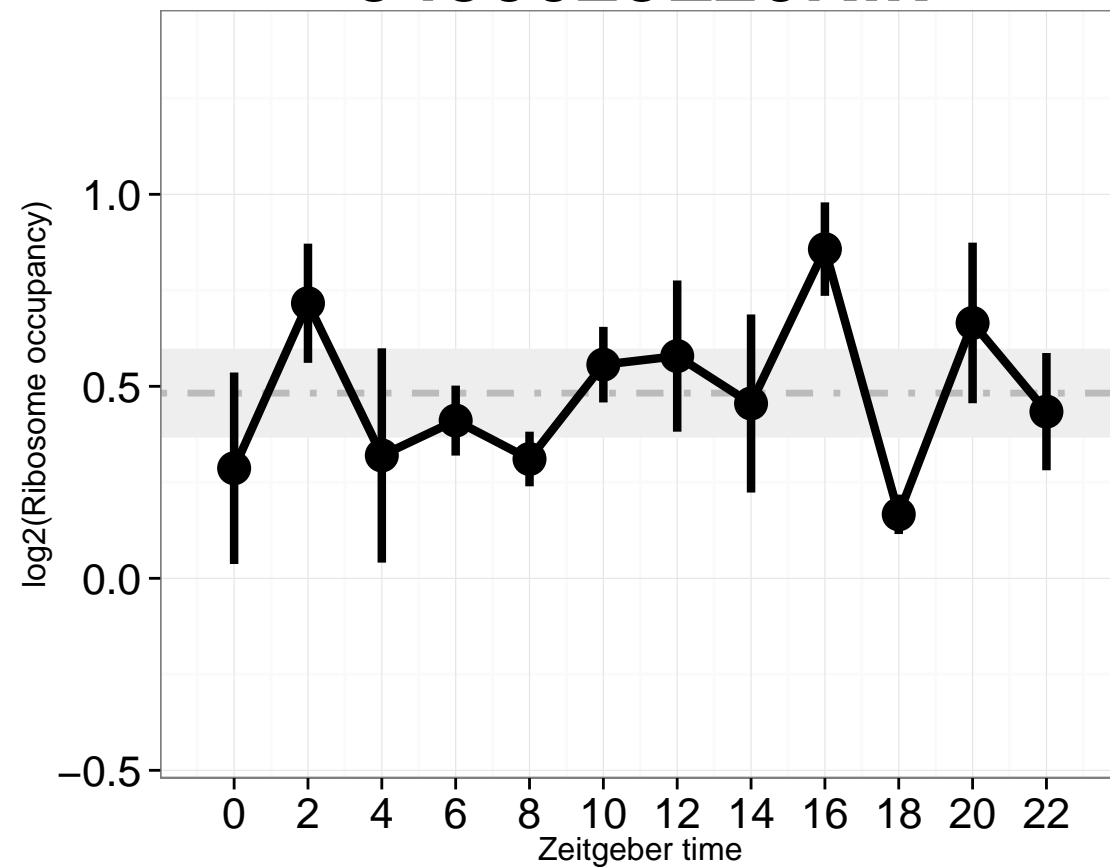

Supplement: Supplementary file 3215 [file 1]

## Zfp52

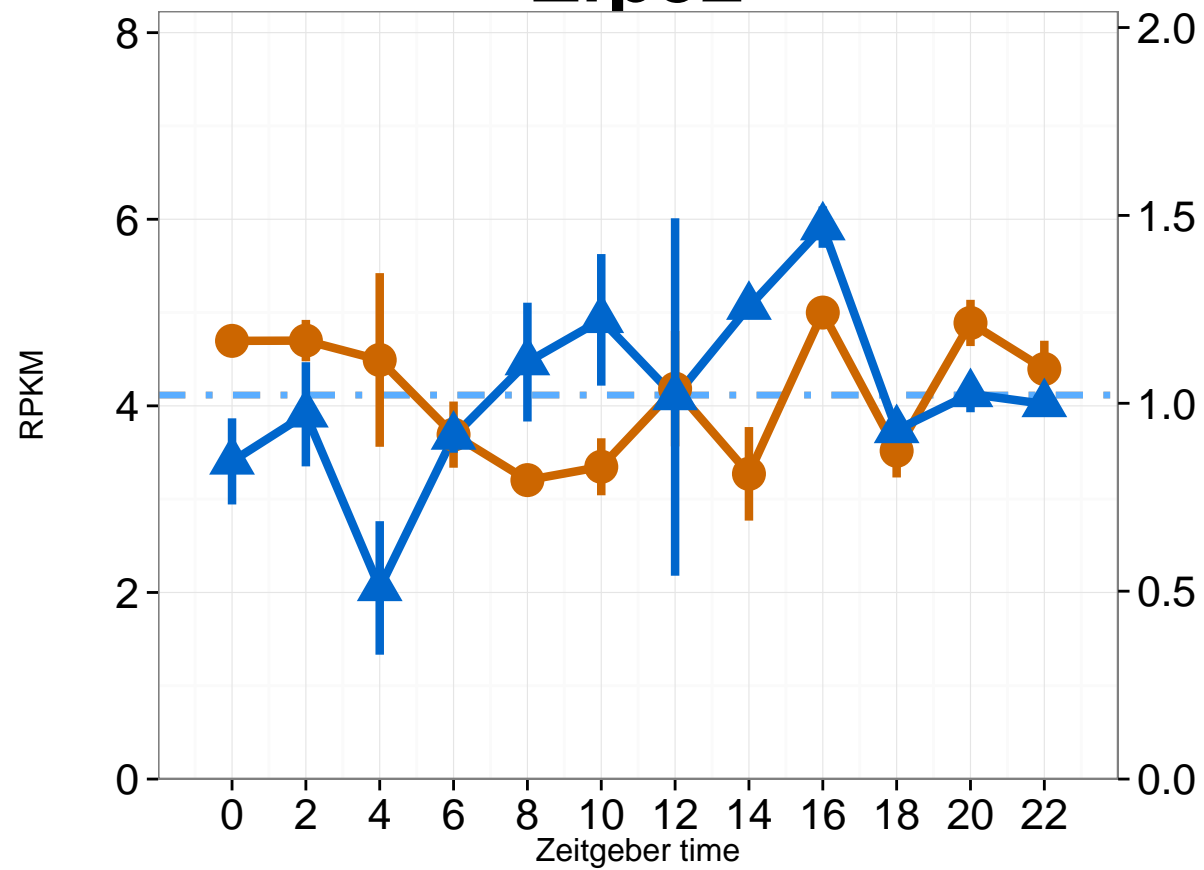

## Zfp52

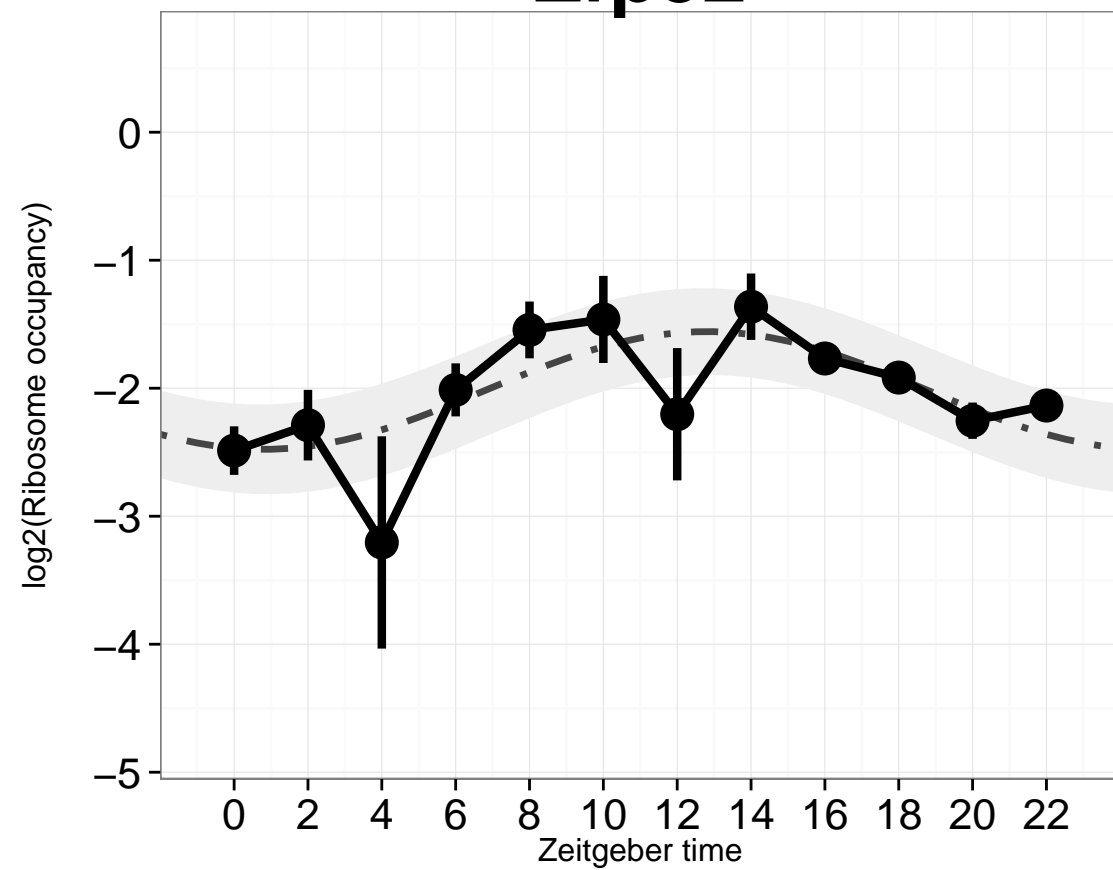

Supplement: Supplementary file 3216 [file 1]

## Herc6

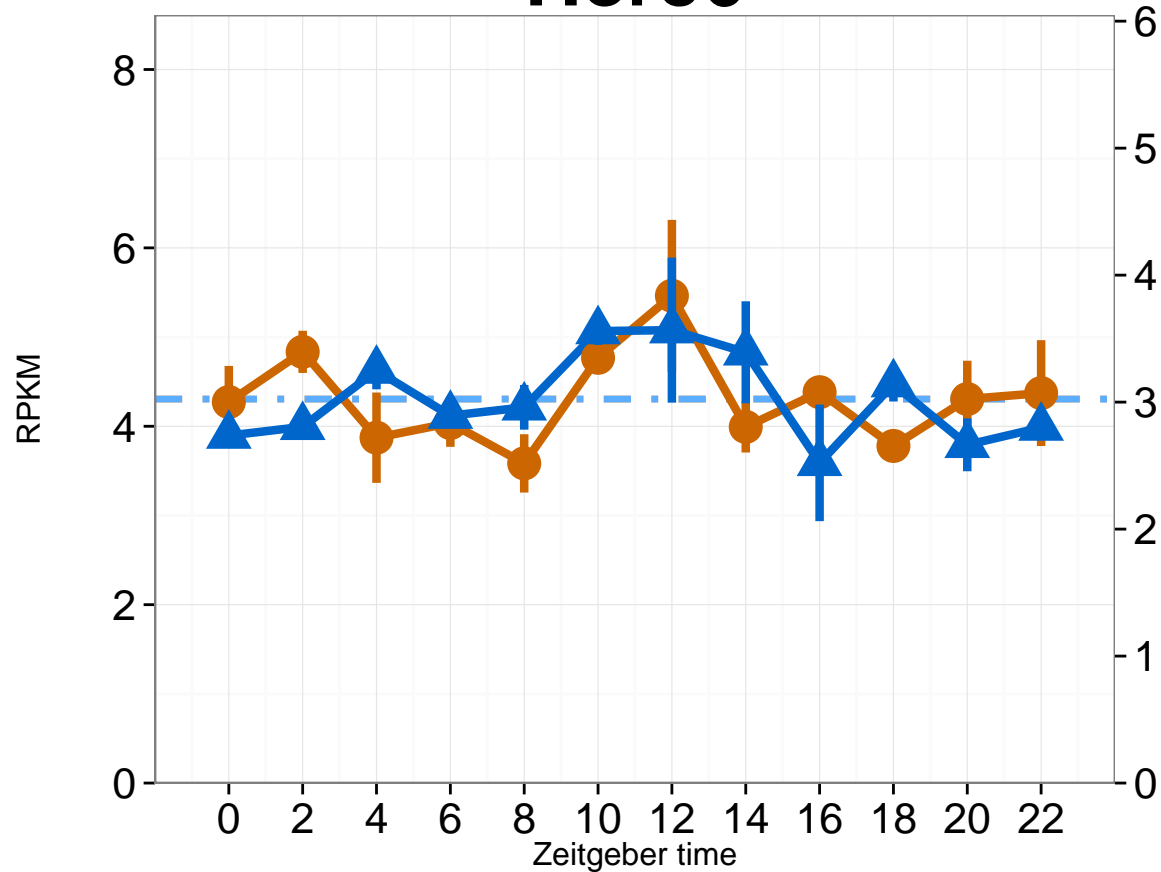

## Herc6

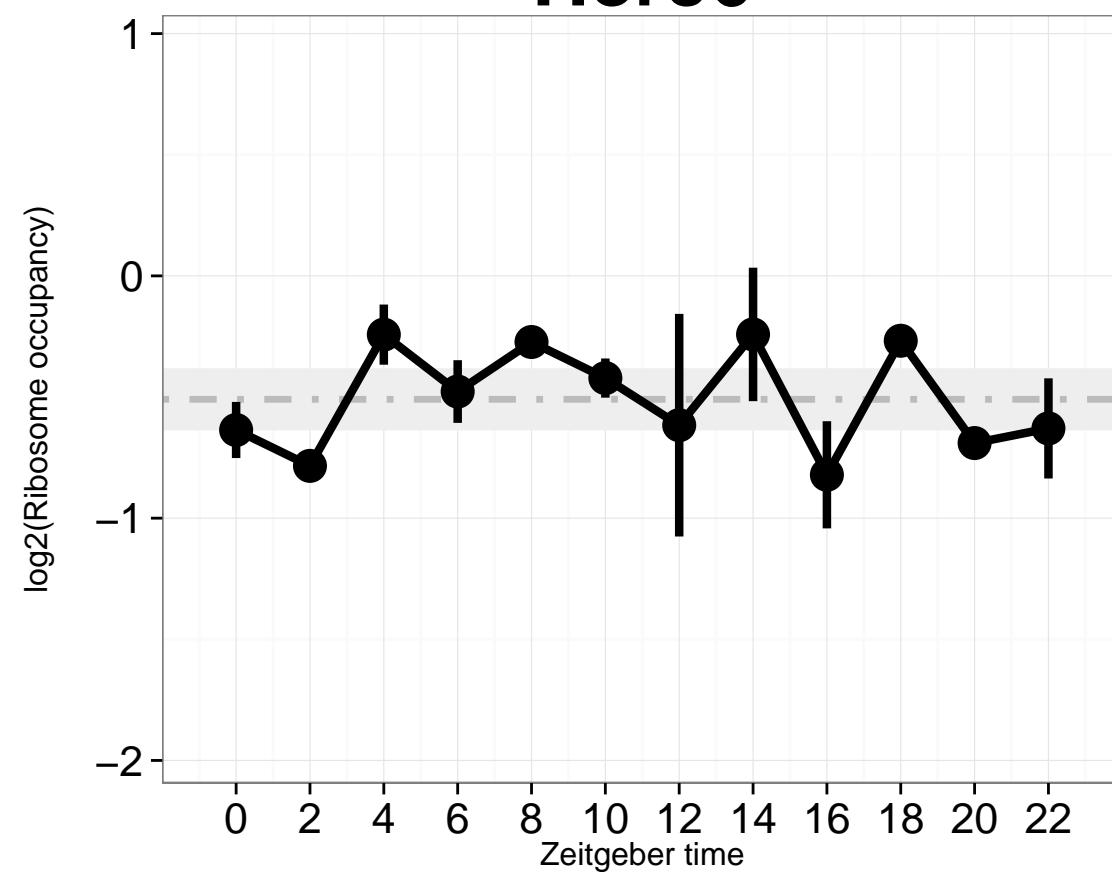

Supplement: Supplementary file 3217 [file 1]

**Mns1 TR**

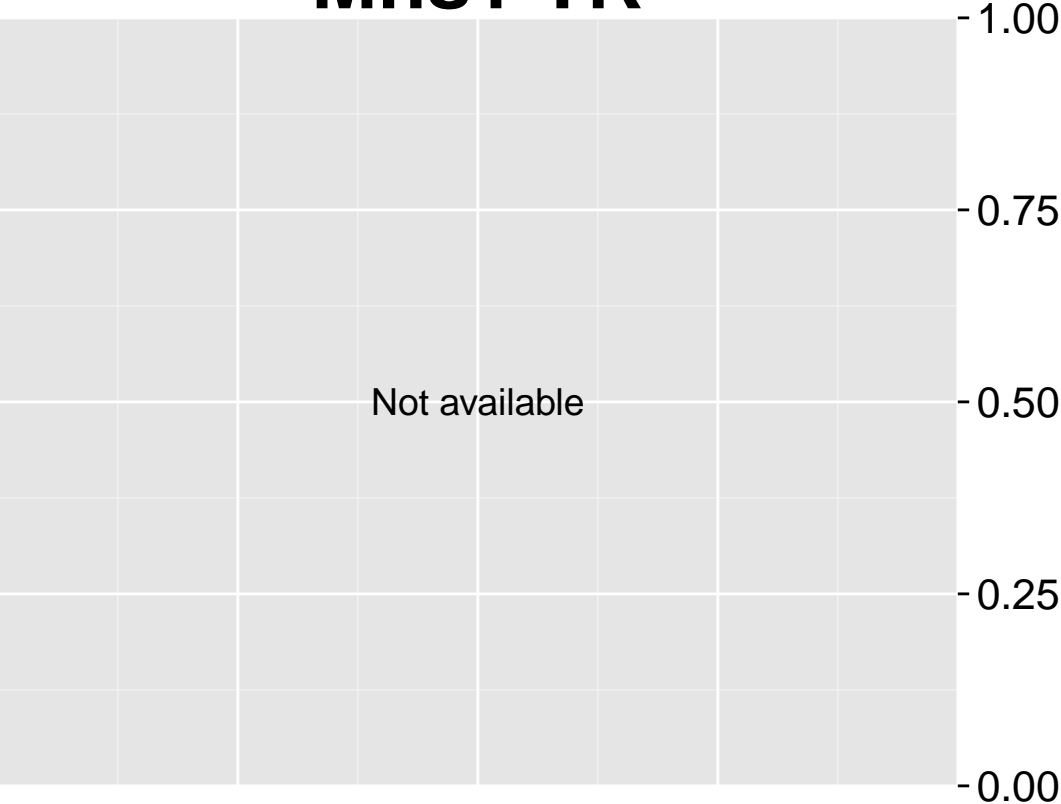

**Mns1 log2(Ribosome occupancy)**

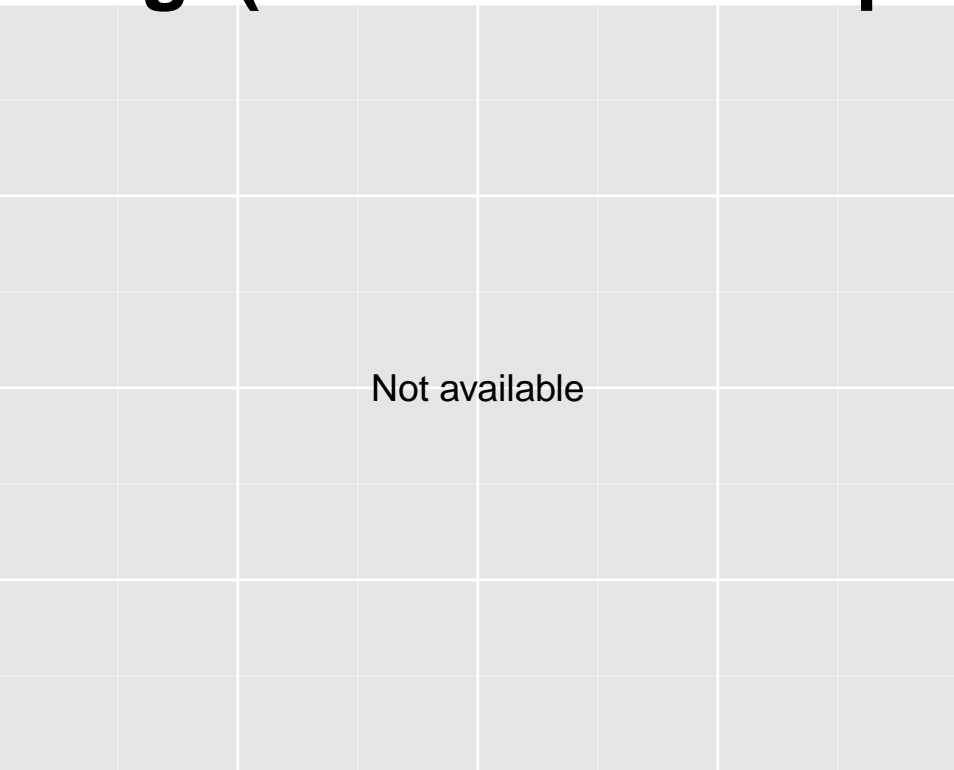

Supplement: Supplementary file 3218 [file 1]

## Ndufs8

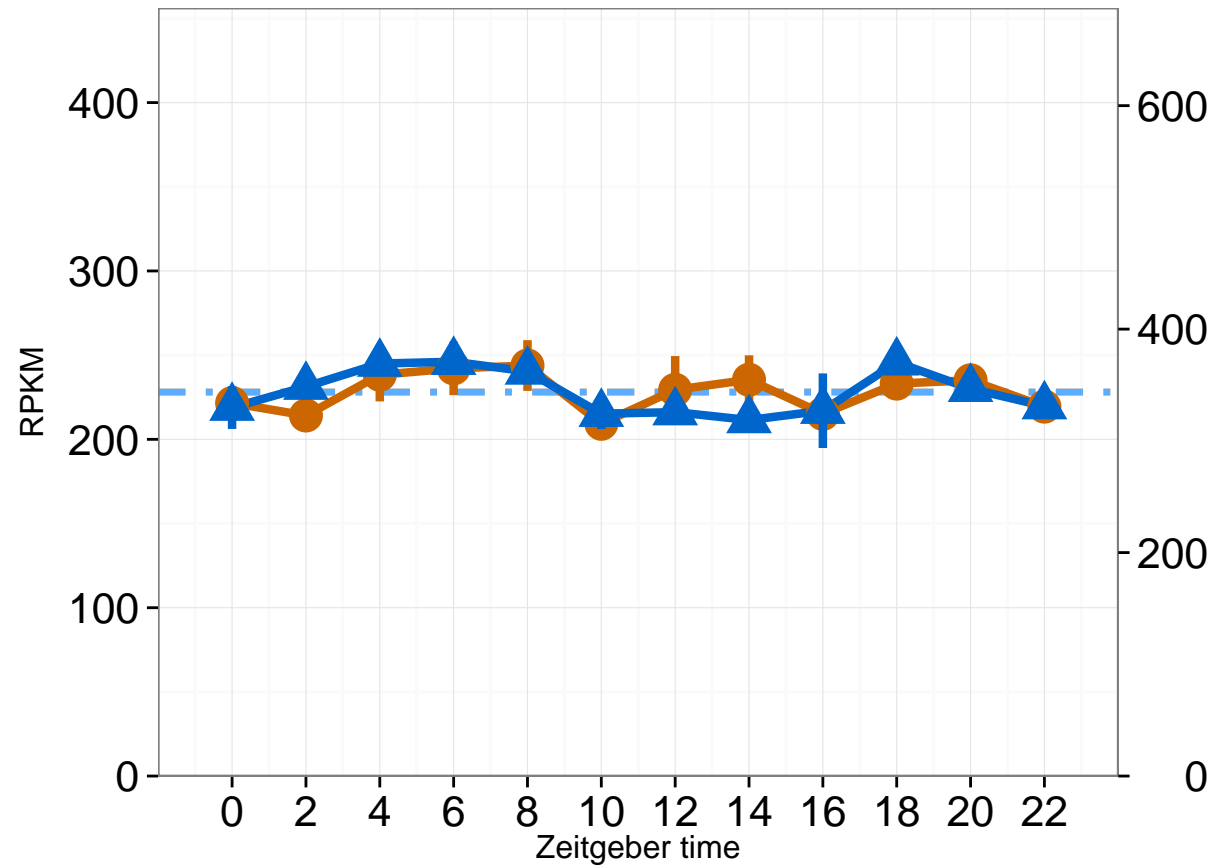

## Ndufs8

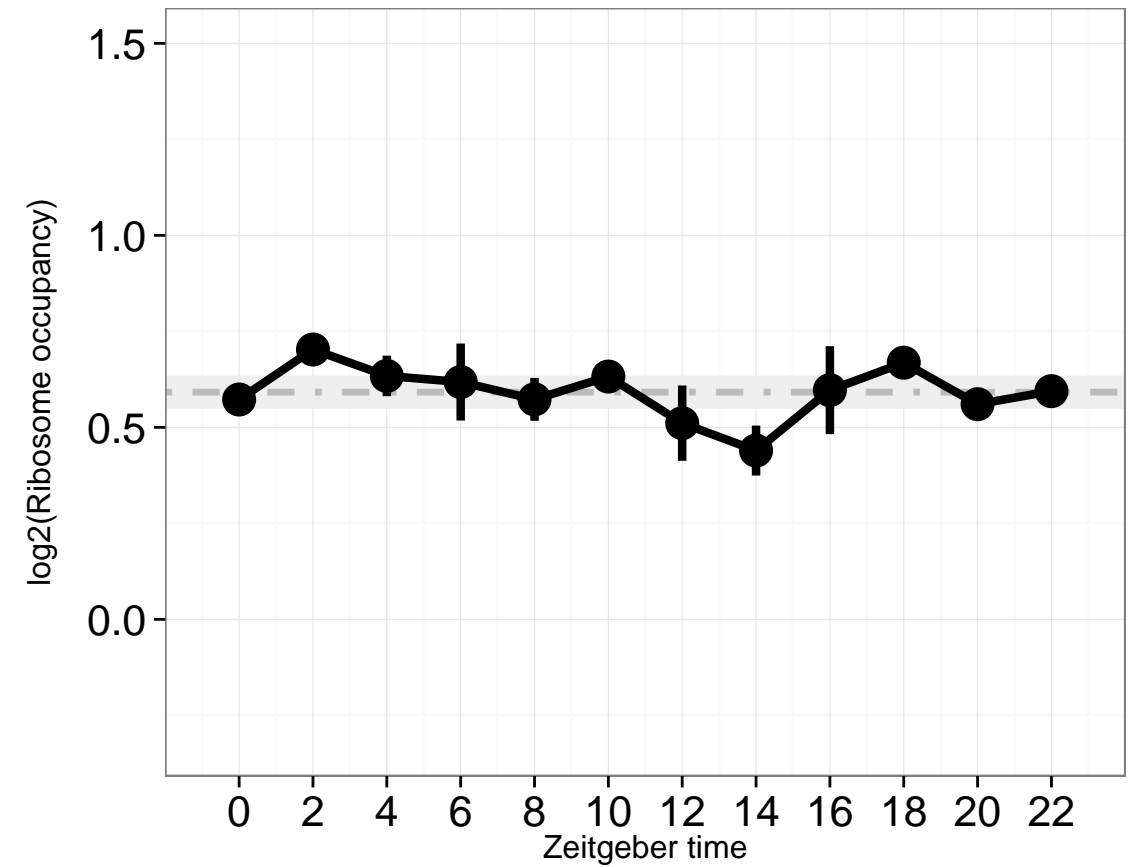

Supplement: Supplementary file 3219 [file 1]

## Pex5

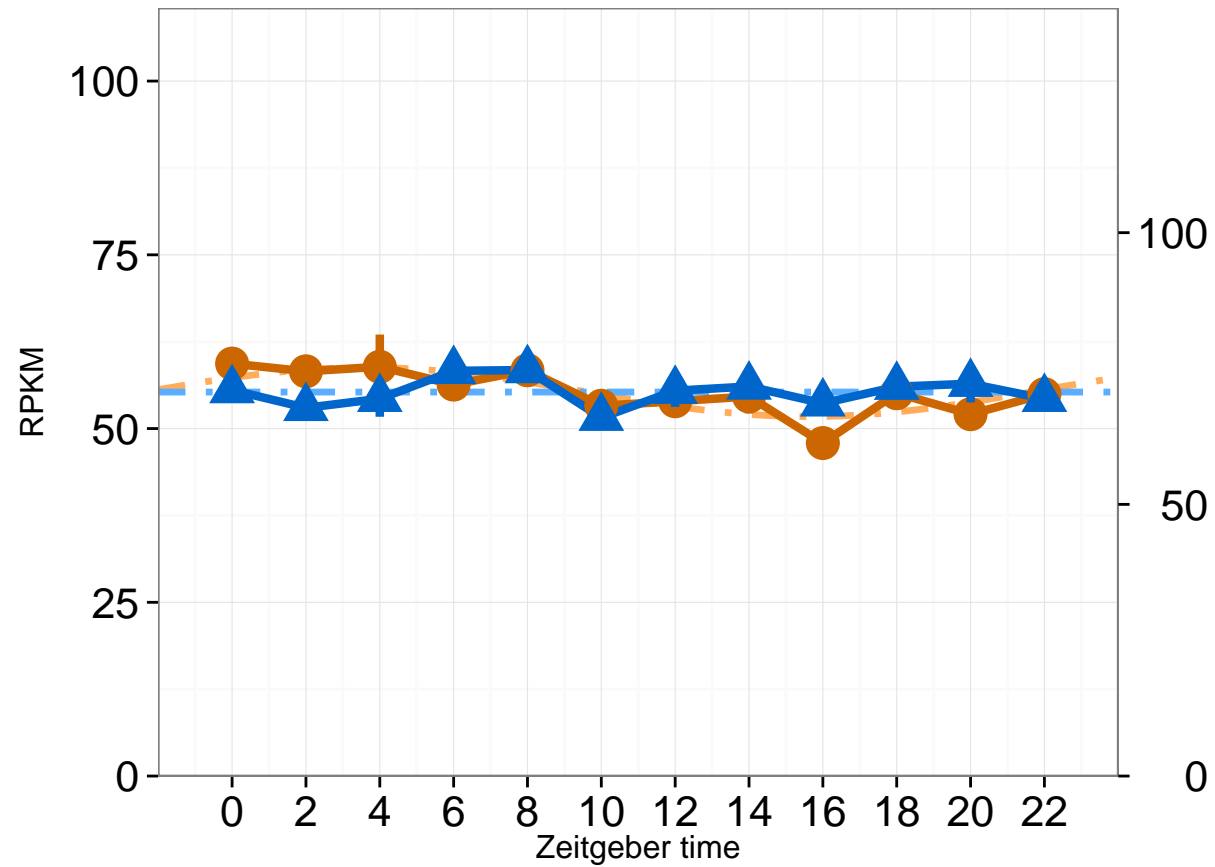

## Pex5

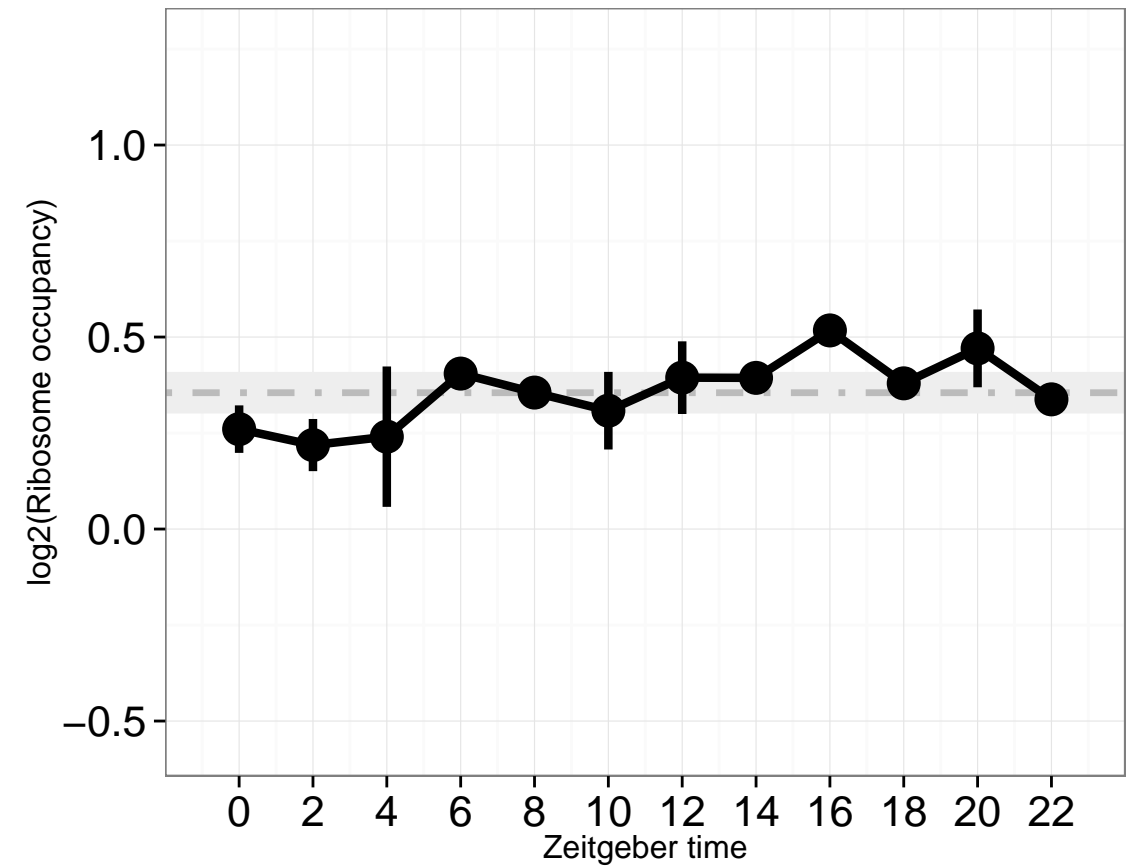

Supplement: Supplementary file 3220 [file 1]

## Musk

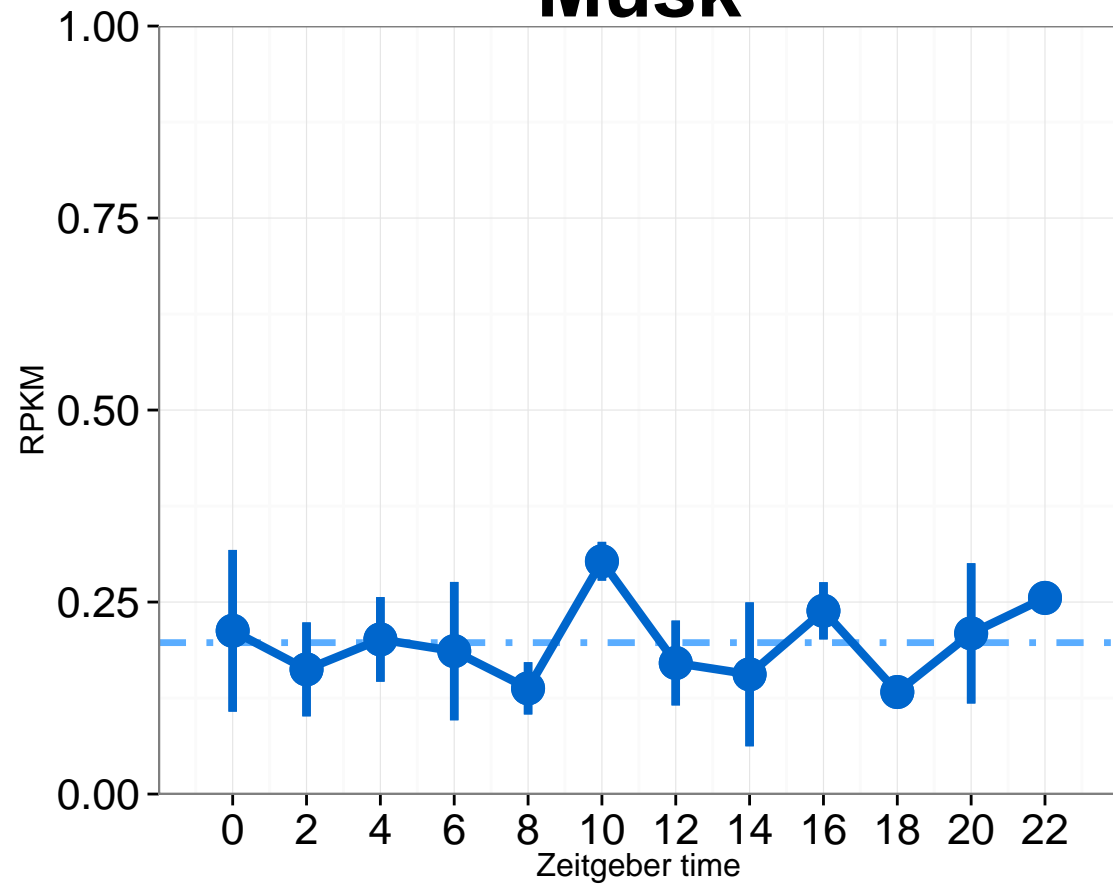

## Musk log2(Ribosome occupancy)

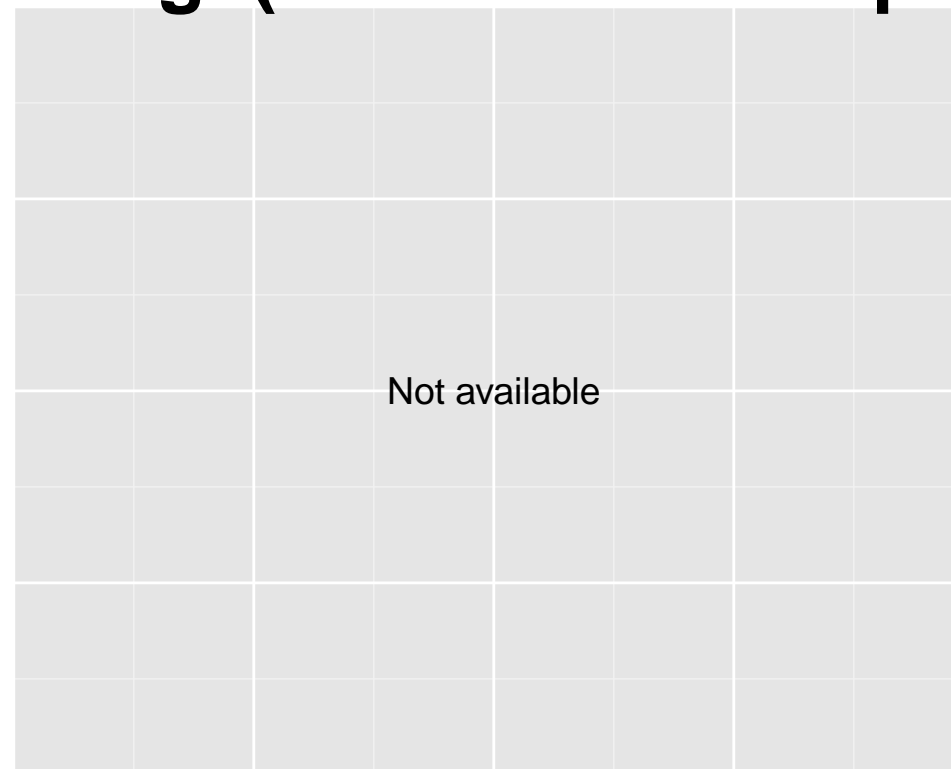

Supplement: Supplementary file 3221 [file 1]

# Zfp354b

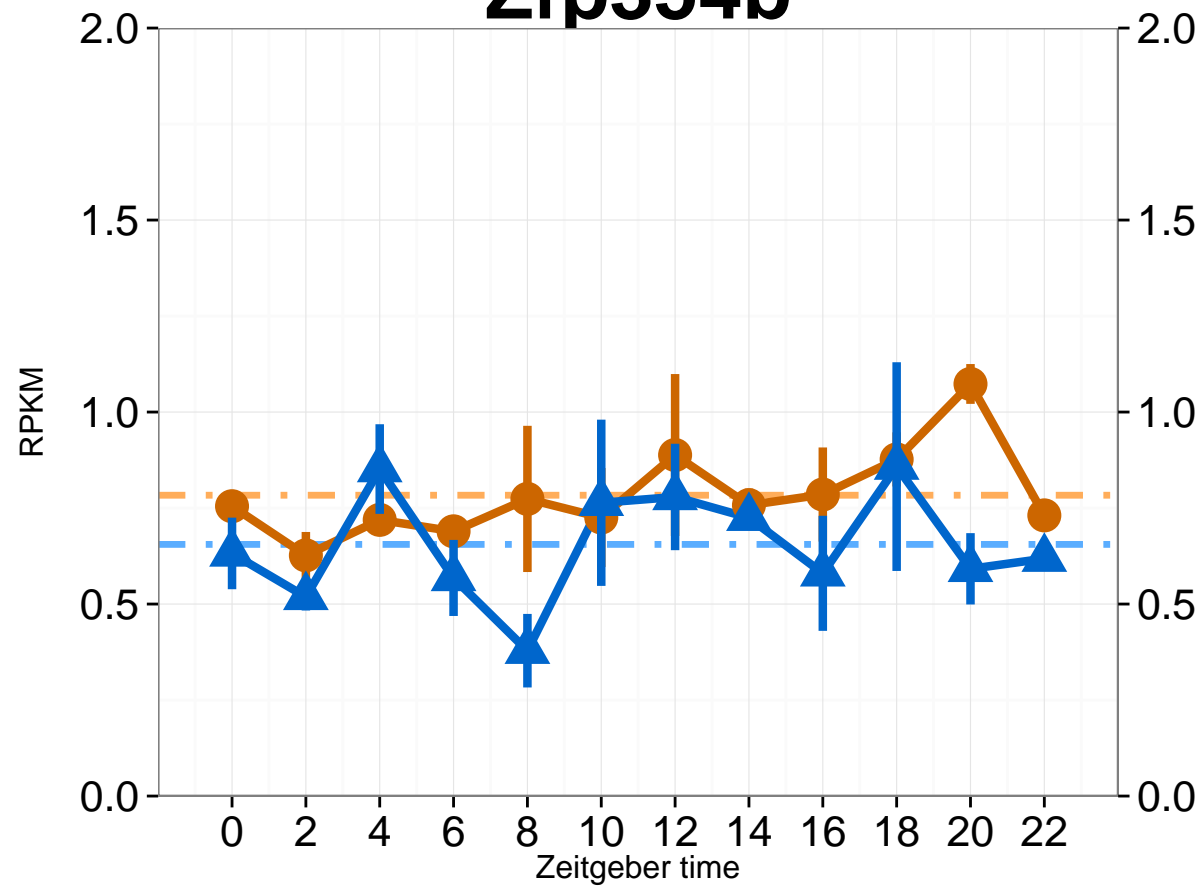

# Zfp354b

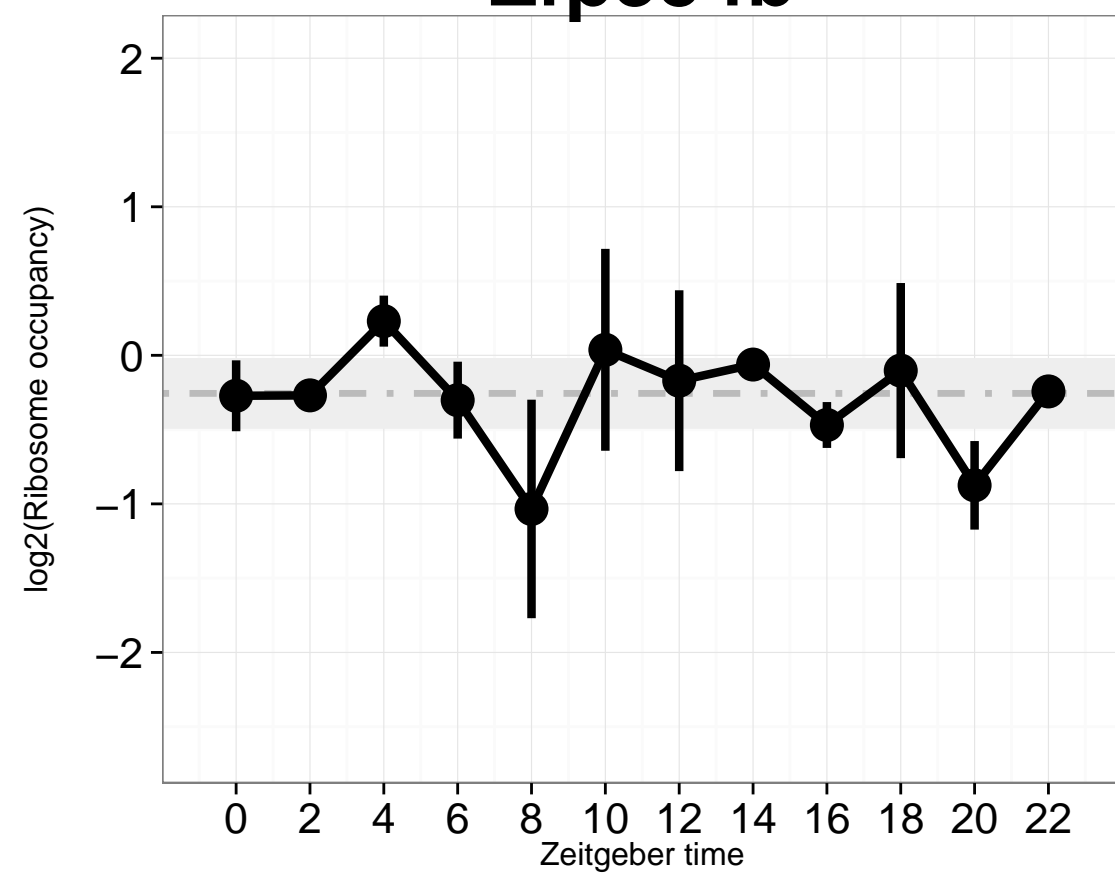

Supplement: Supplementary file 3222 [file 1]

**lqcd**

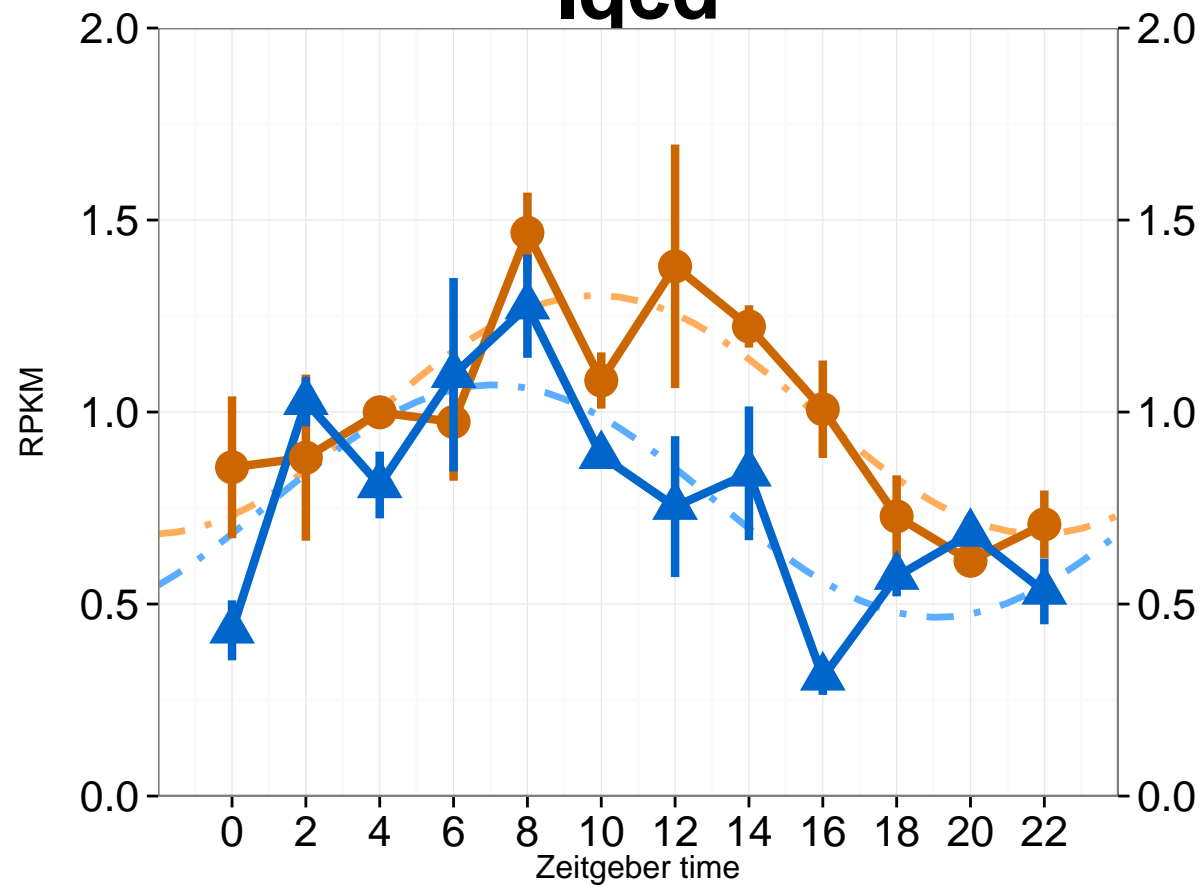

**lqcd**

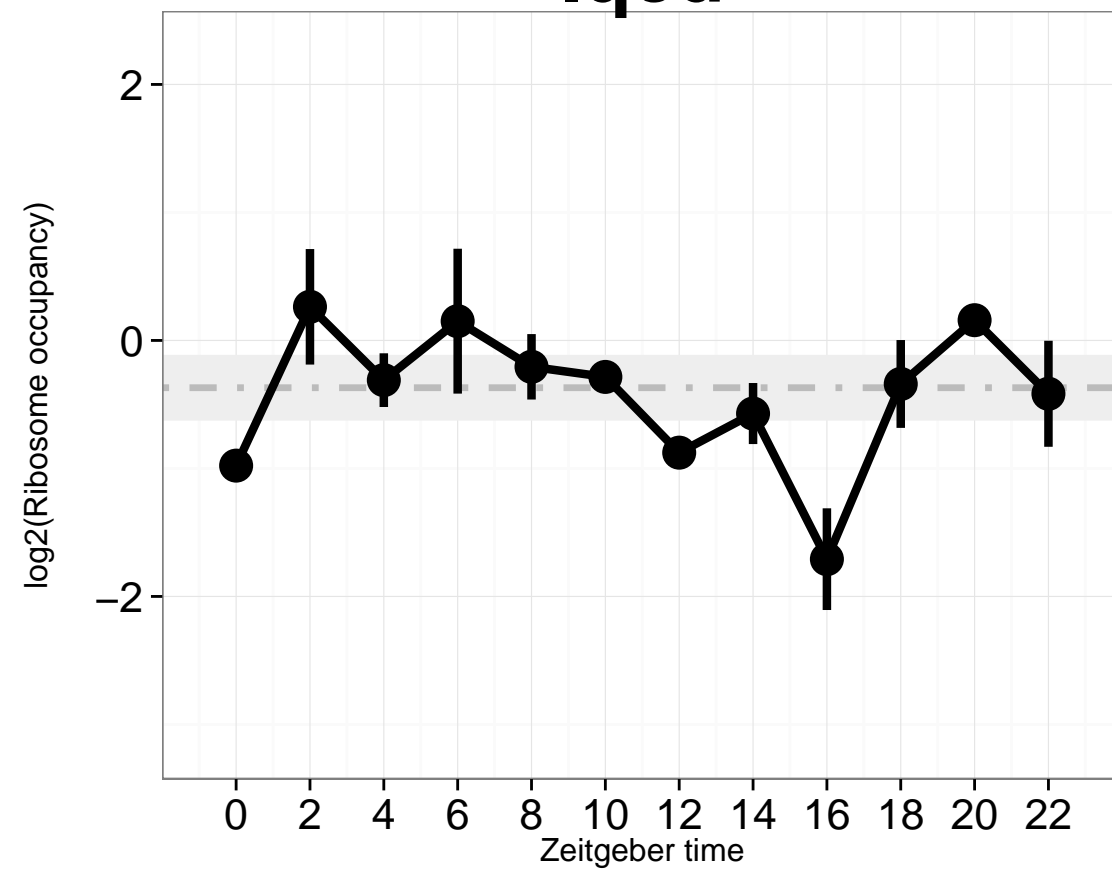

Supplement: Supplementary file 3223 [file 1]

## Spink3

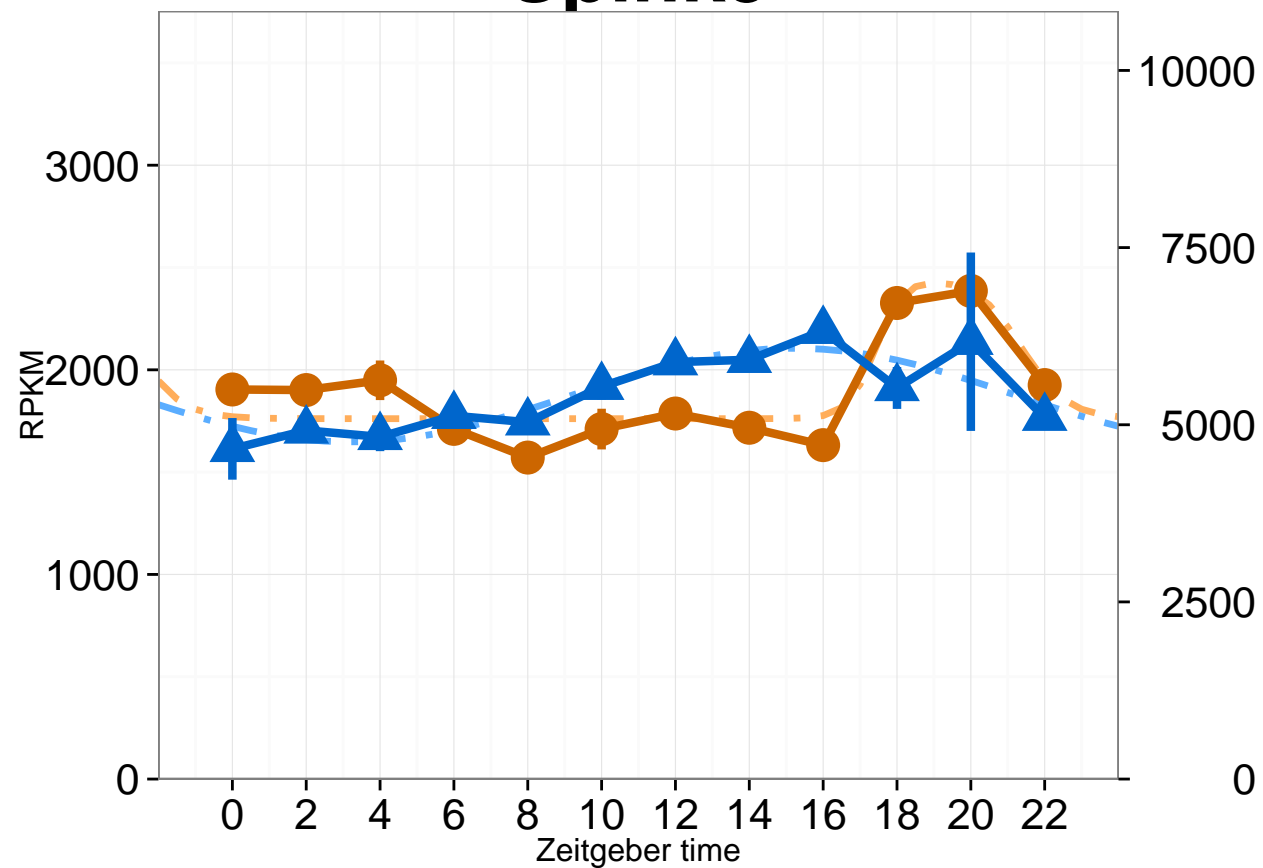

## Spink3

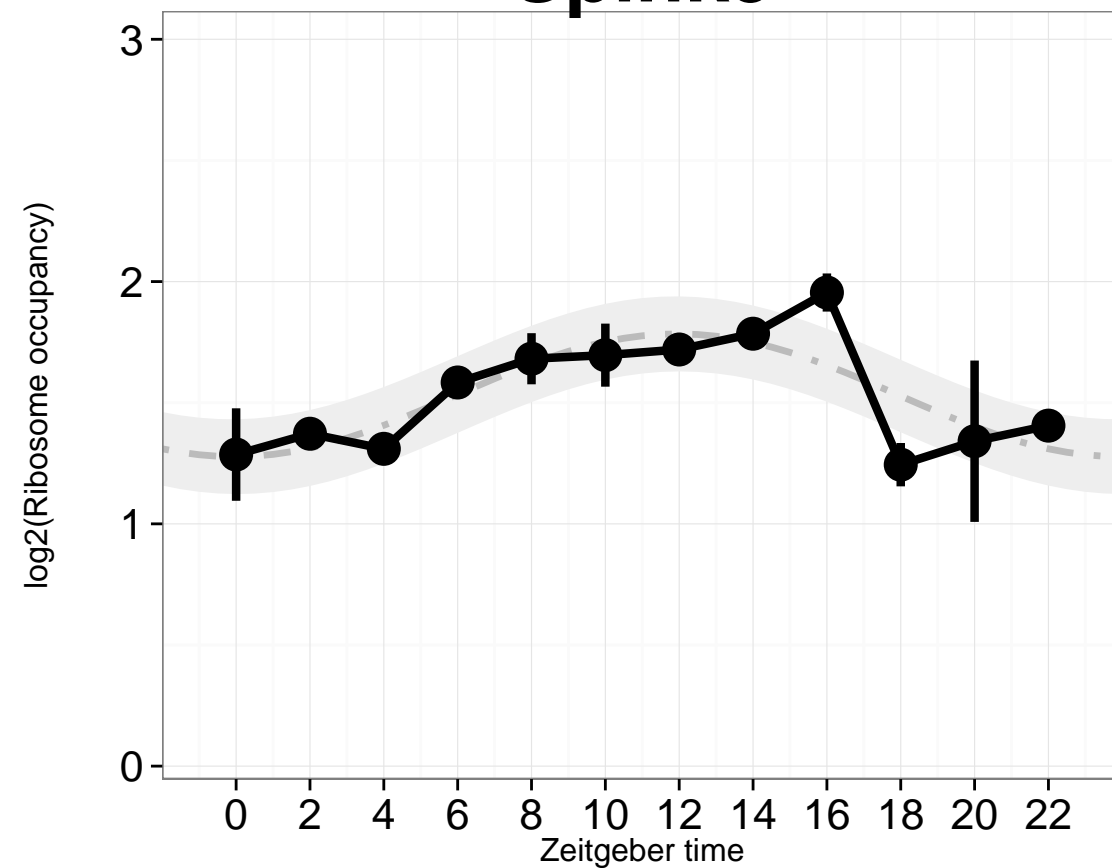

Supplement: Supplementary file 3224 [file 1]

# Rab11fip3

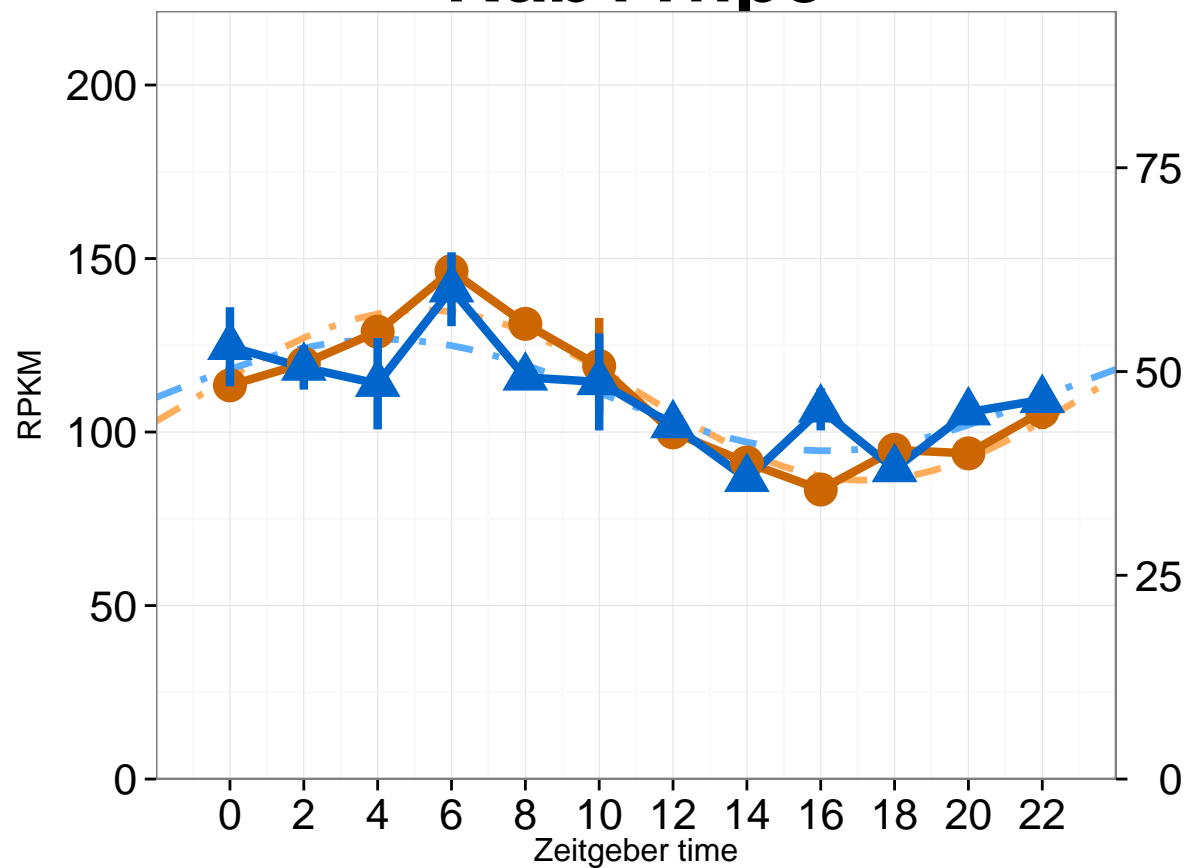

# Rab11fip3

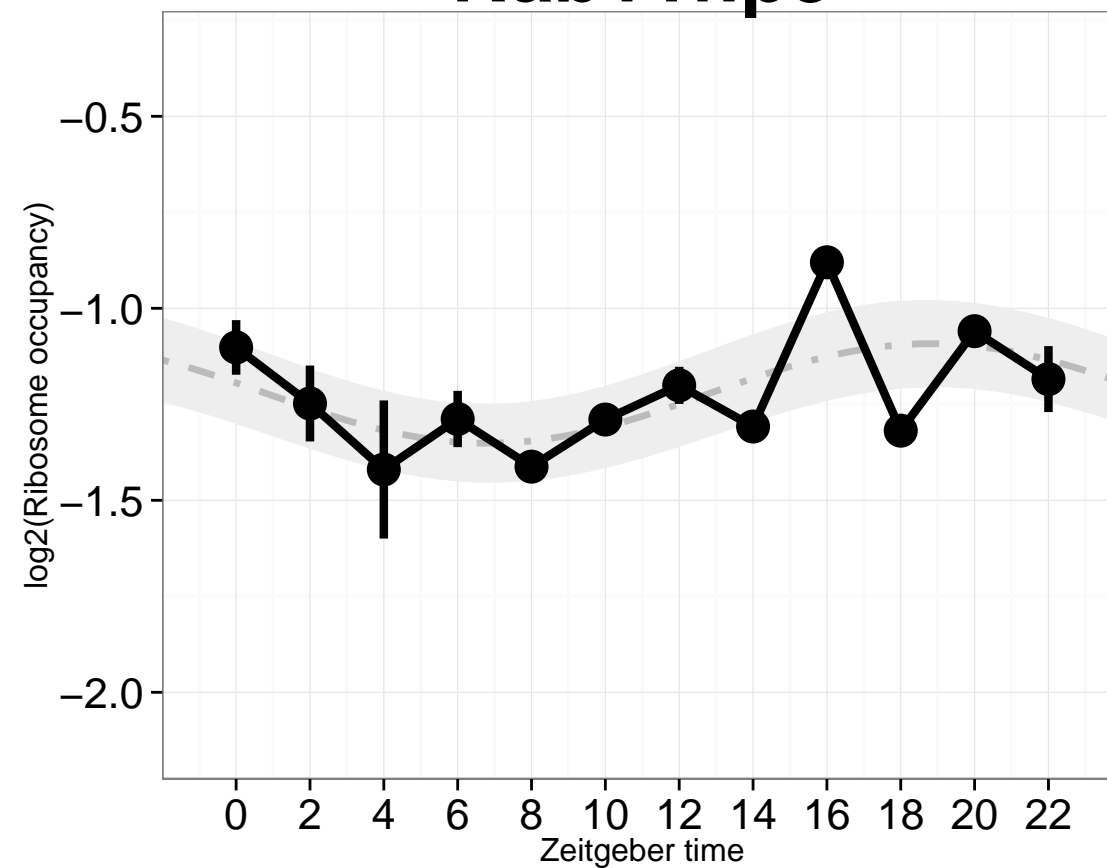

Supplement: Supplementary file 3225 [file 1]

## Gpr85

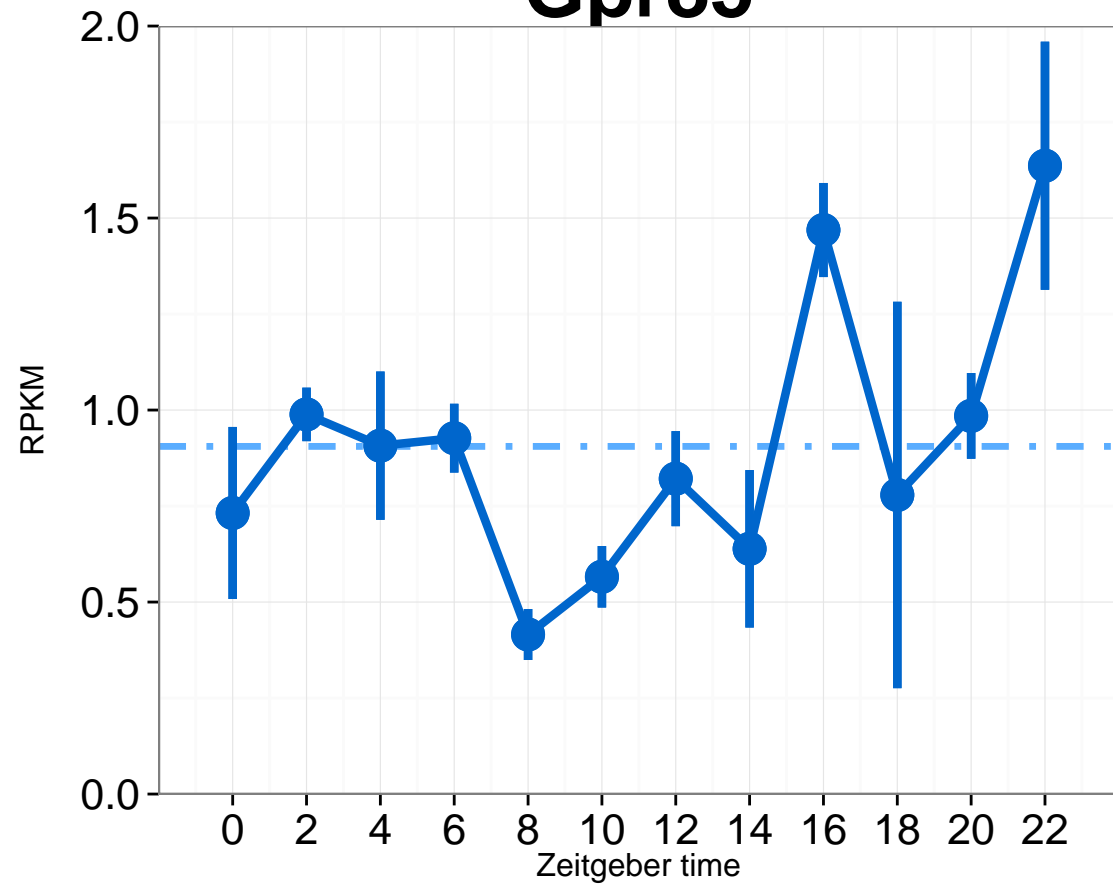

## Gpr85 log2(Ribosome occupancy

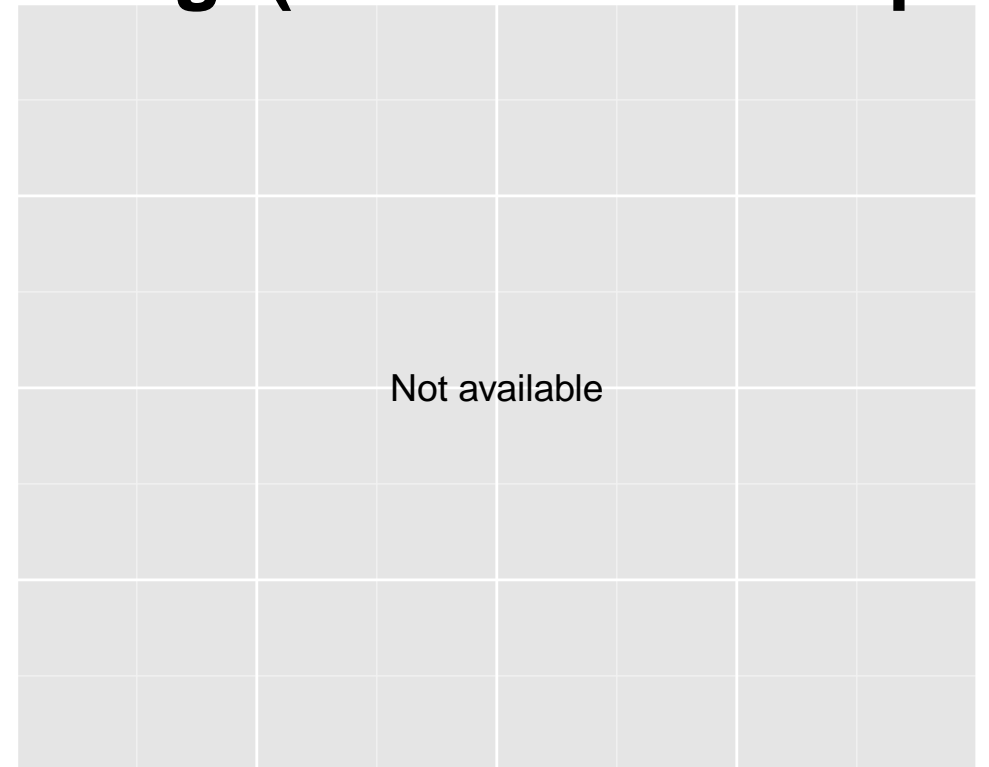

Supplement: Supplementary file 3226 [file 1]

## Ccdc93

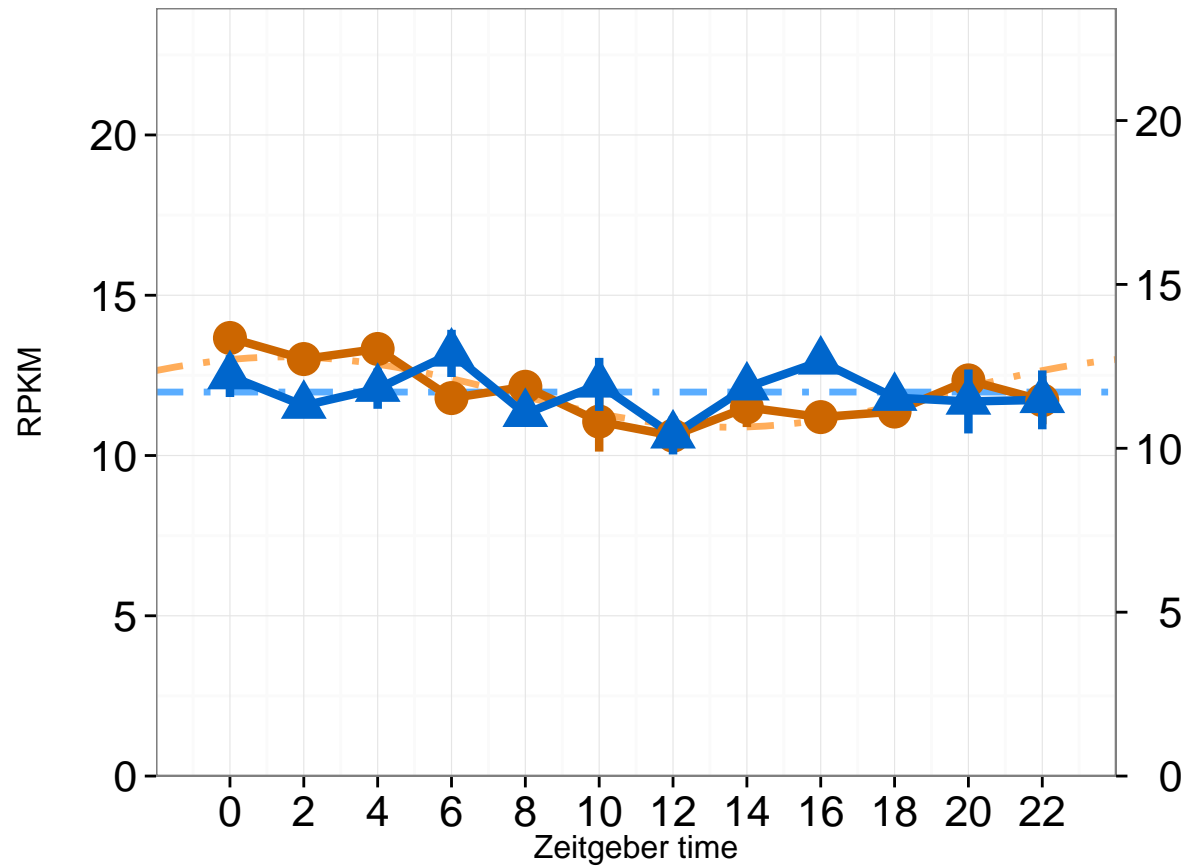

## Ccdc93

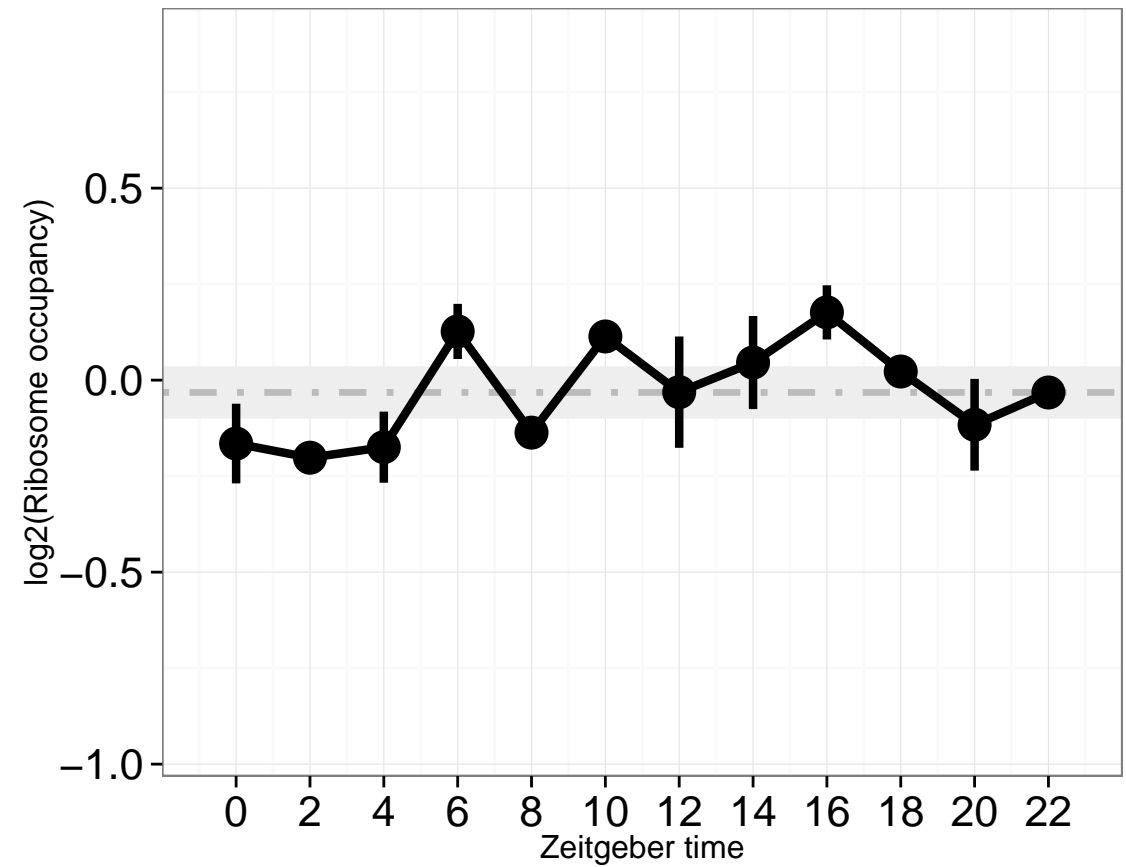

Supplement: Supplementary file 3227 [file 1]

## Ube2a

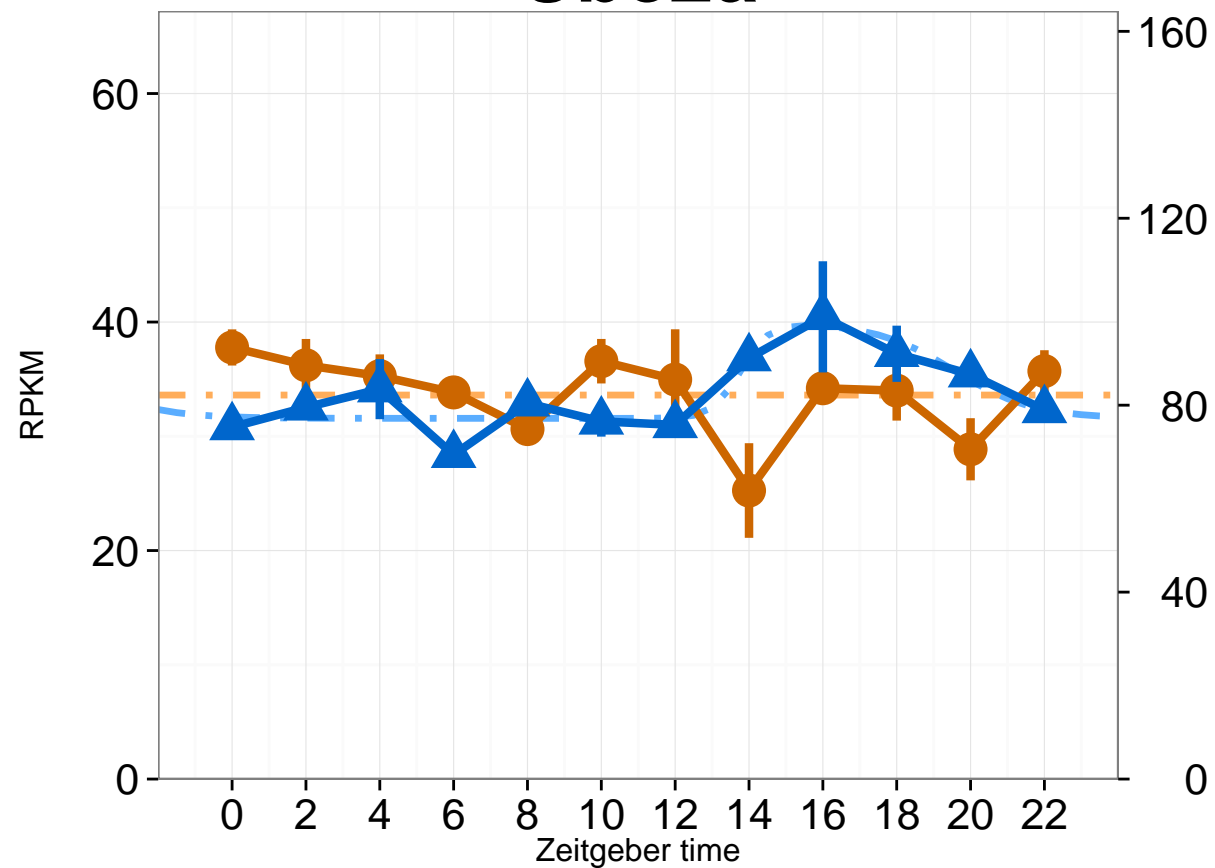

## Ube2a

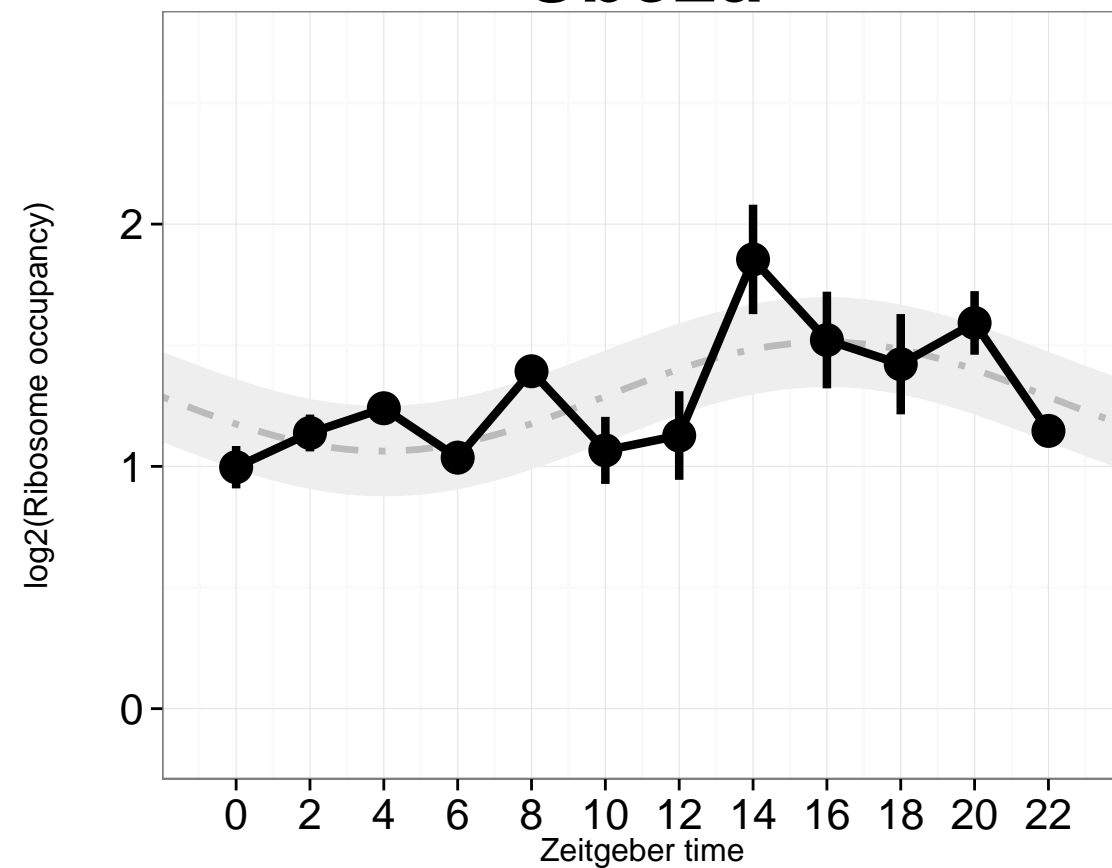

Supplement: Supplementary file 3228 [file 1]

# Zfp259

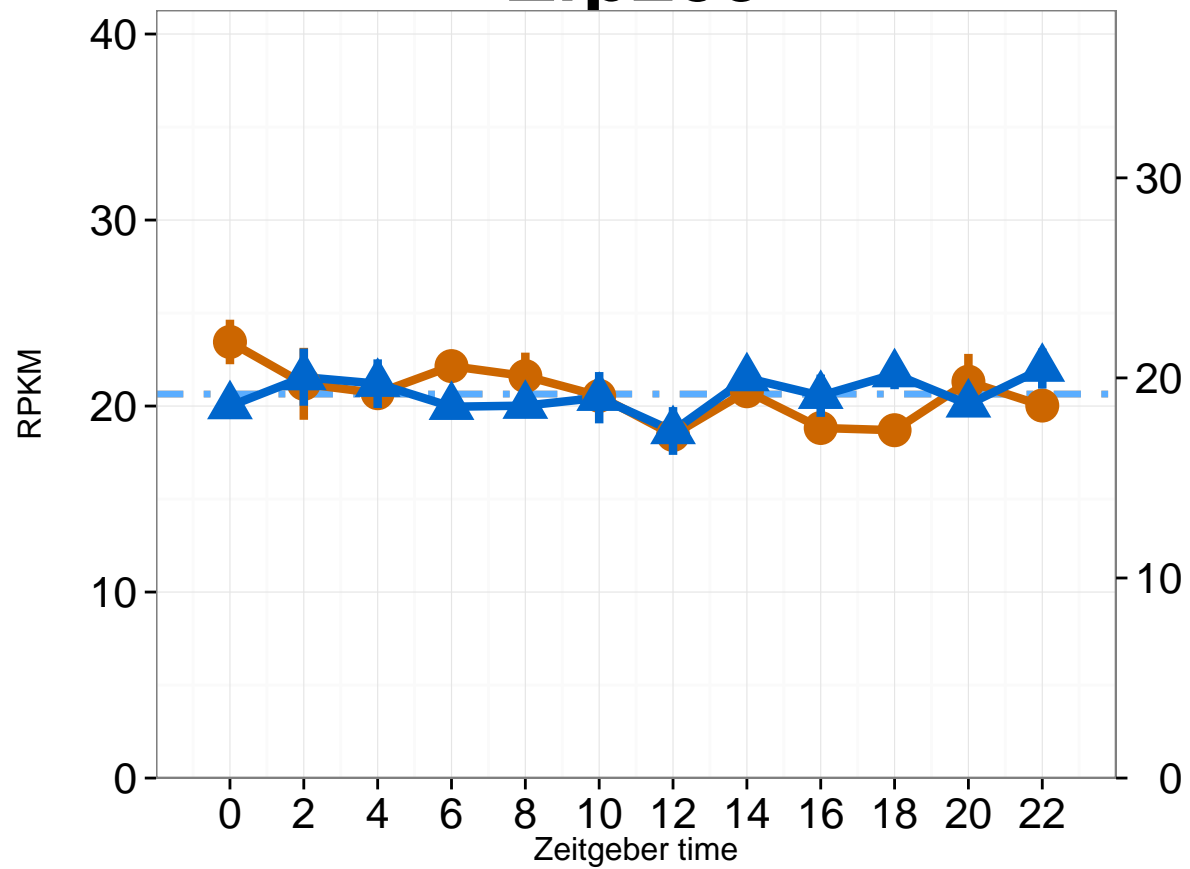

# Zfp259

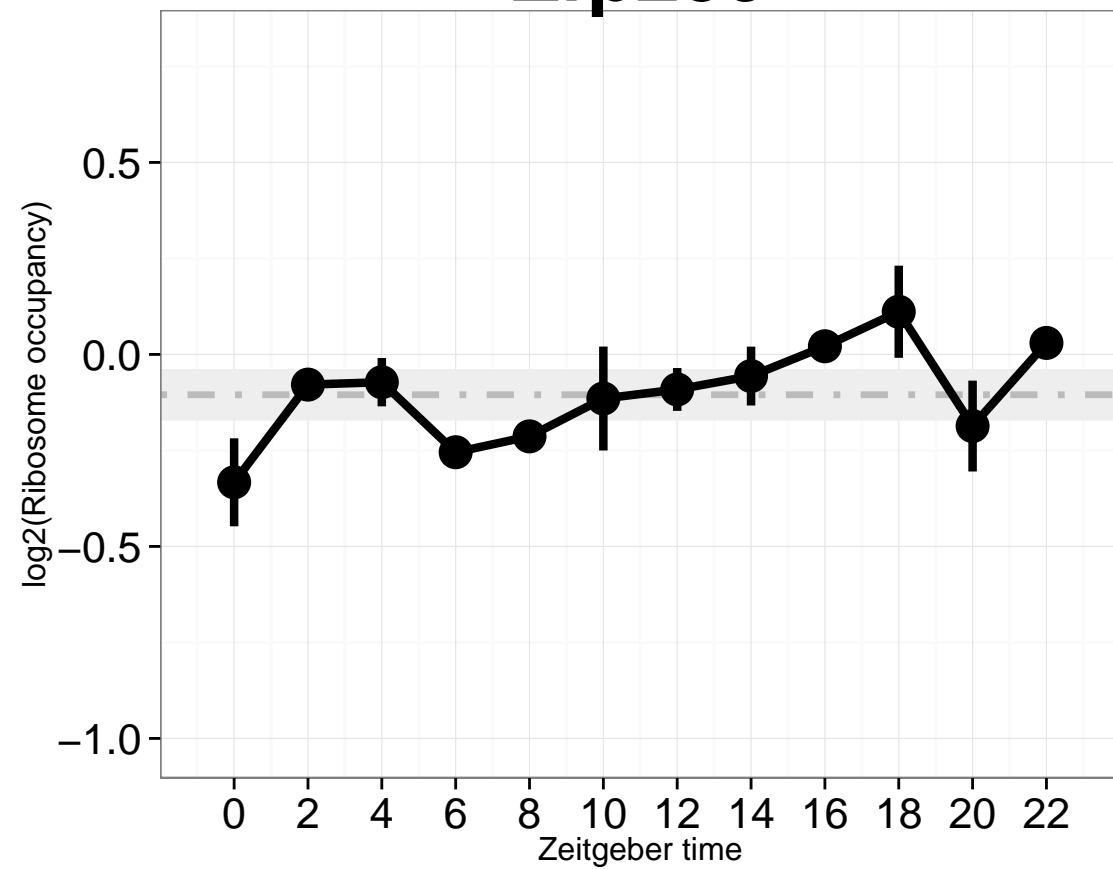

Supplement: Supplementary file 3229 [file 1]

# Fam136a

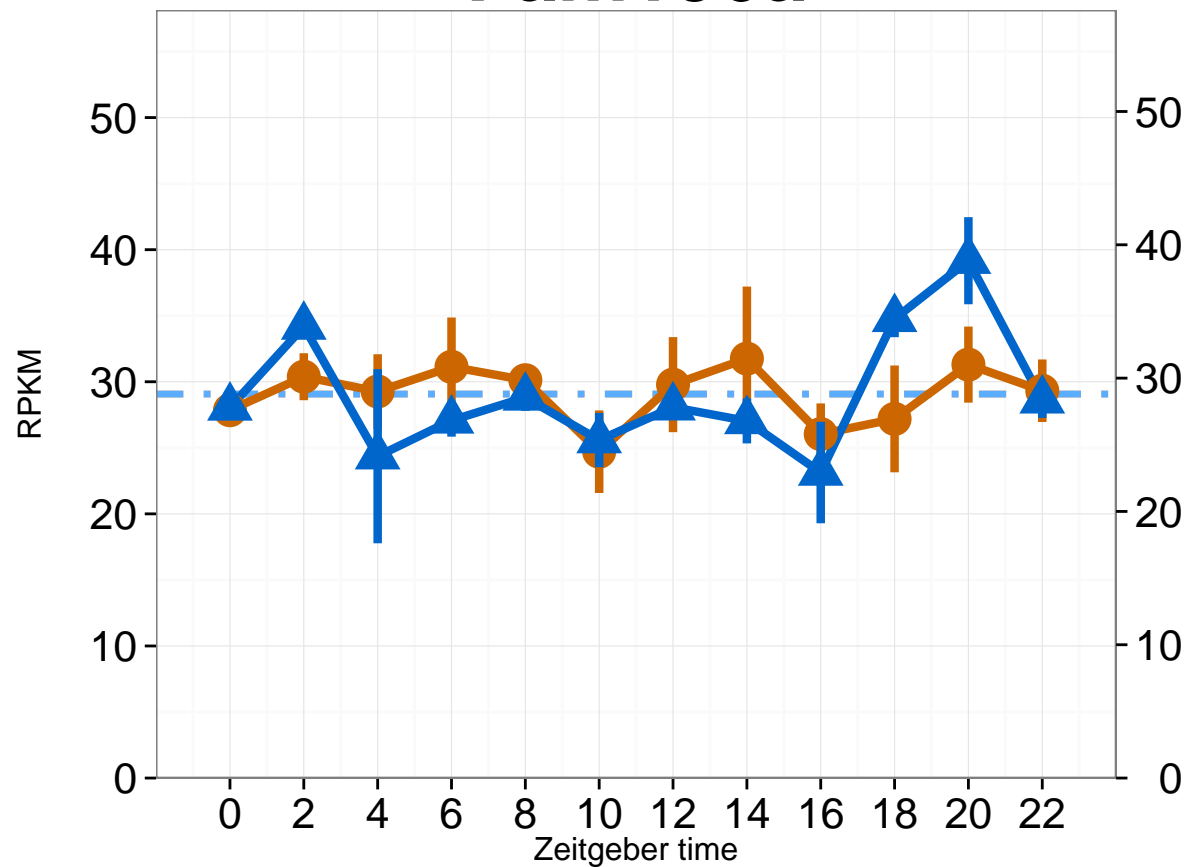

# Fam136a

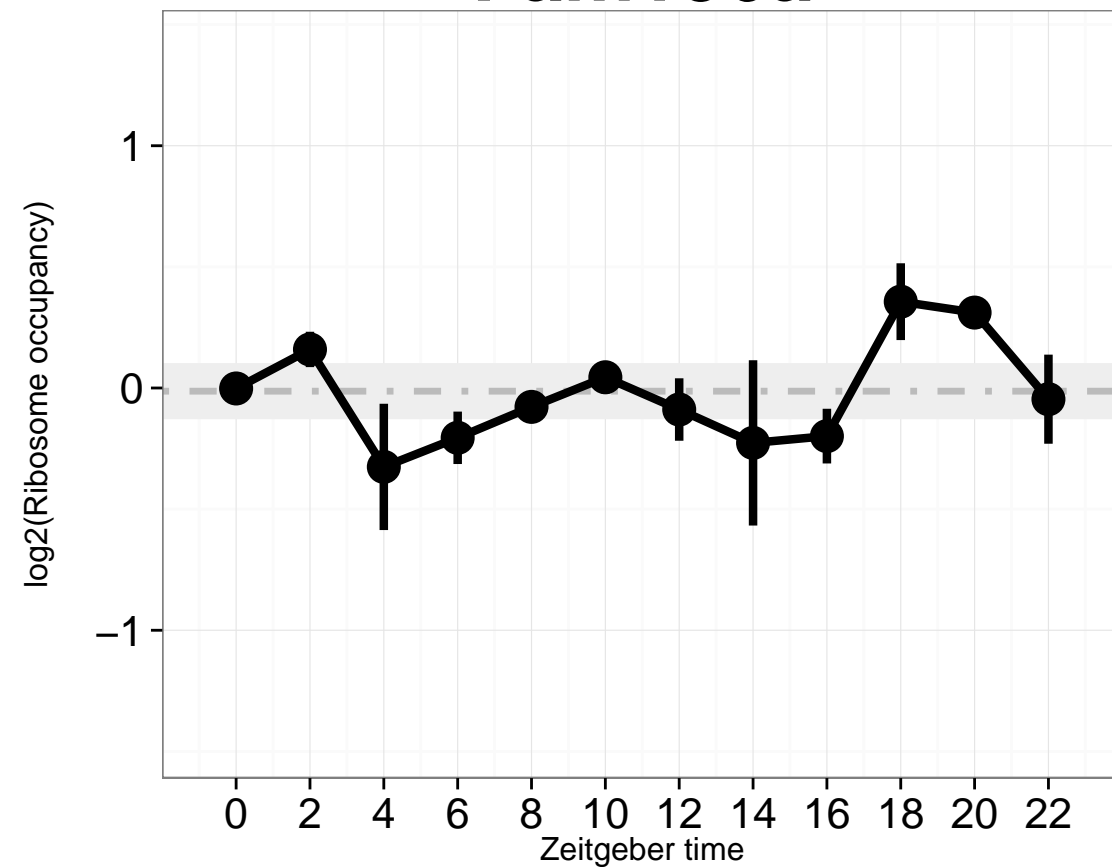

Supplement: Supplementary file 3230 [file 1]

## Birc2

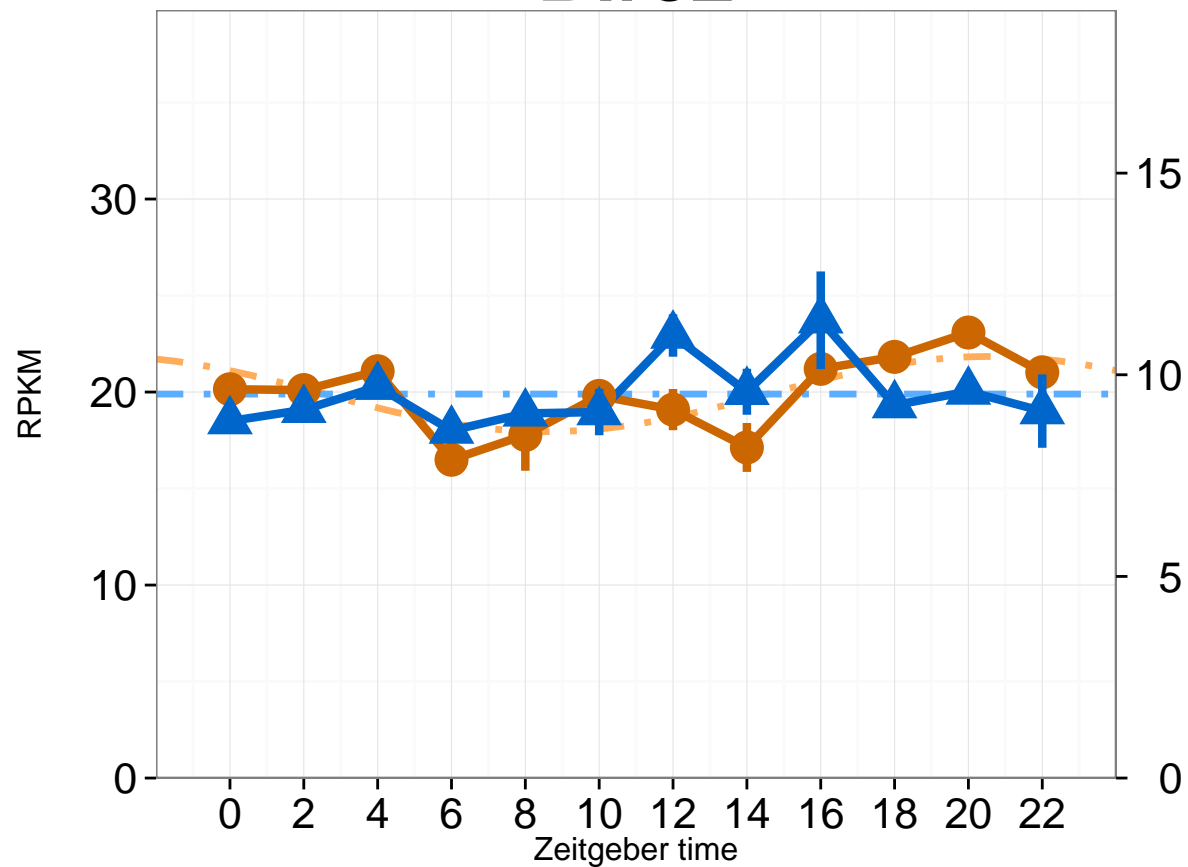

## Birc2

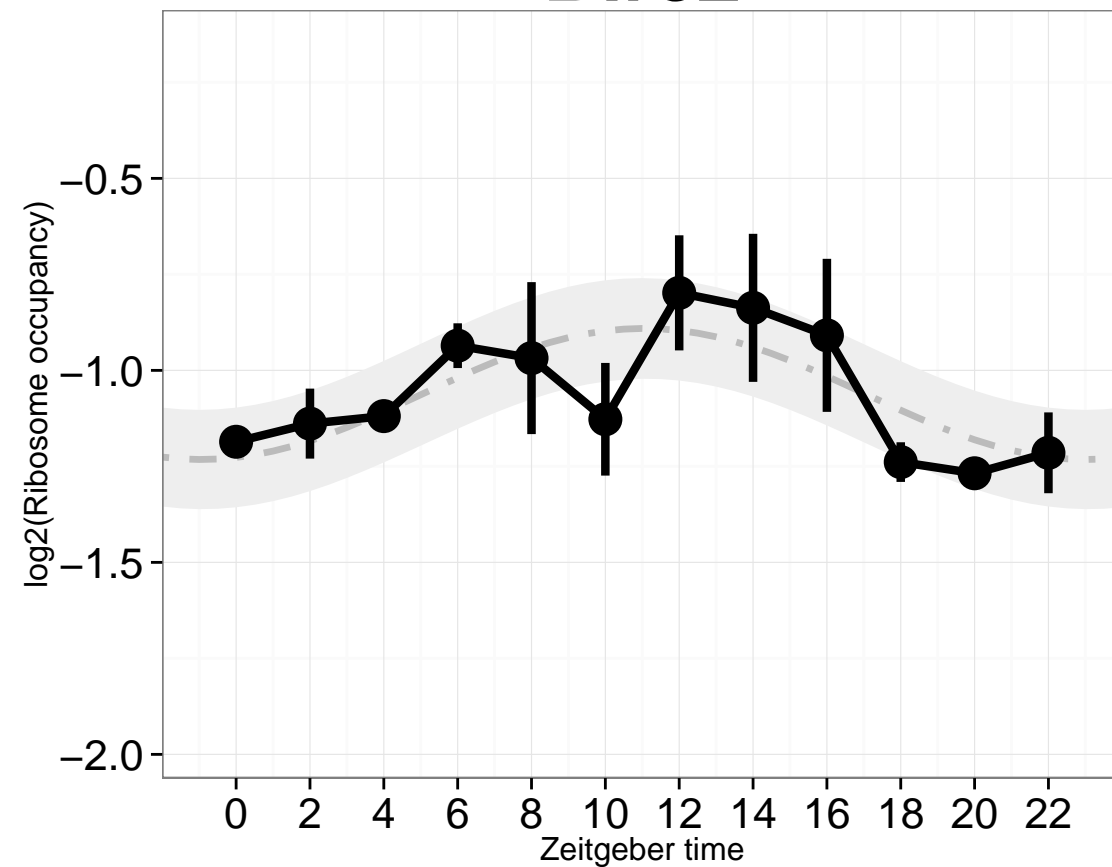

Supplement: Supplementary file 3231 [file 1]

## Snai2

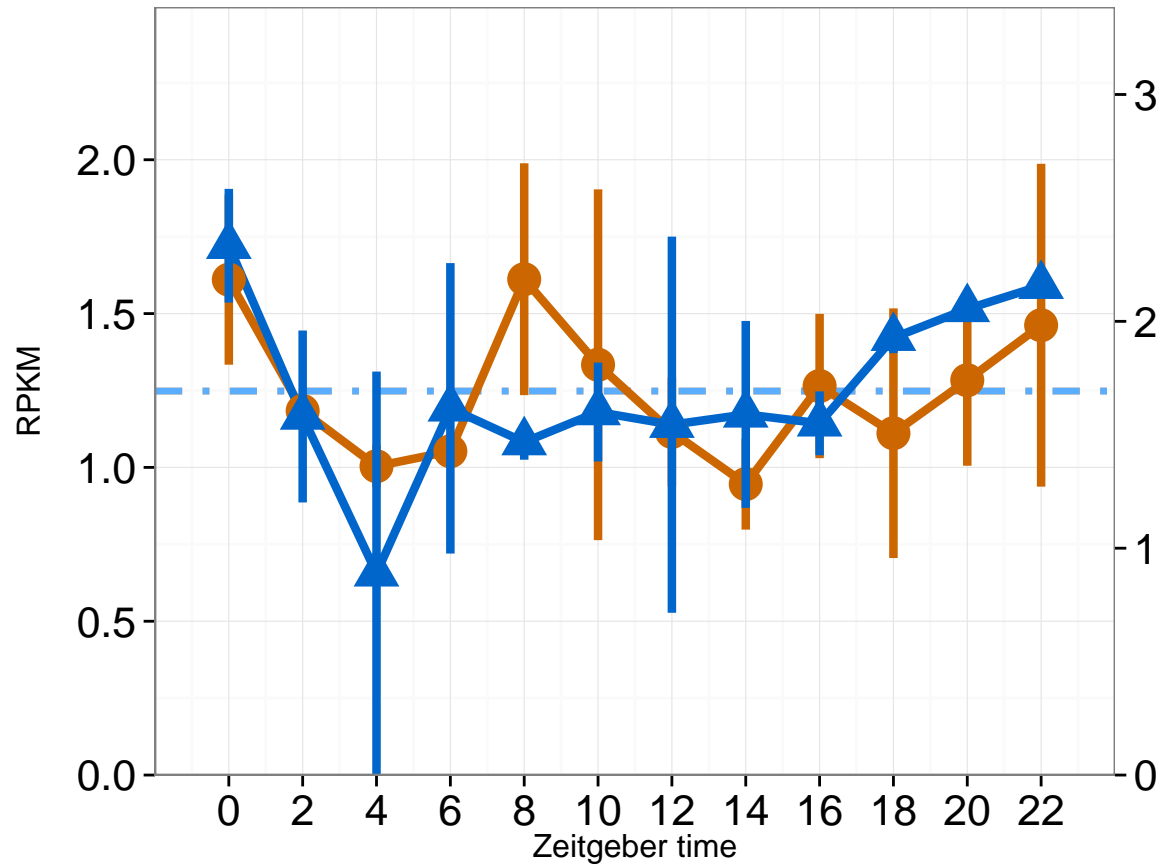

## Snai2

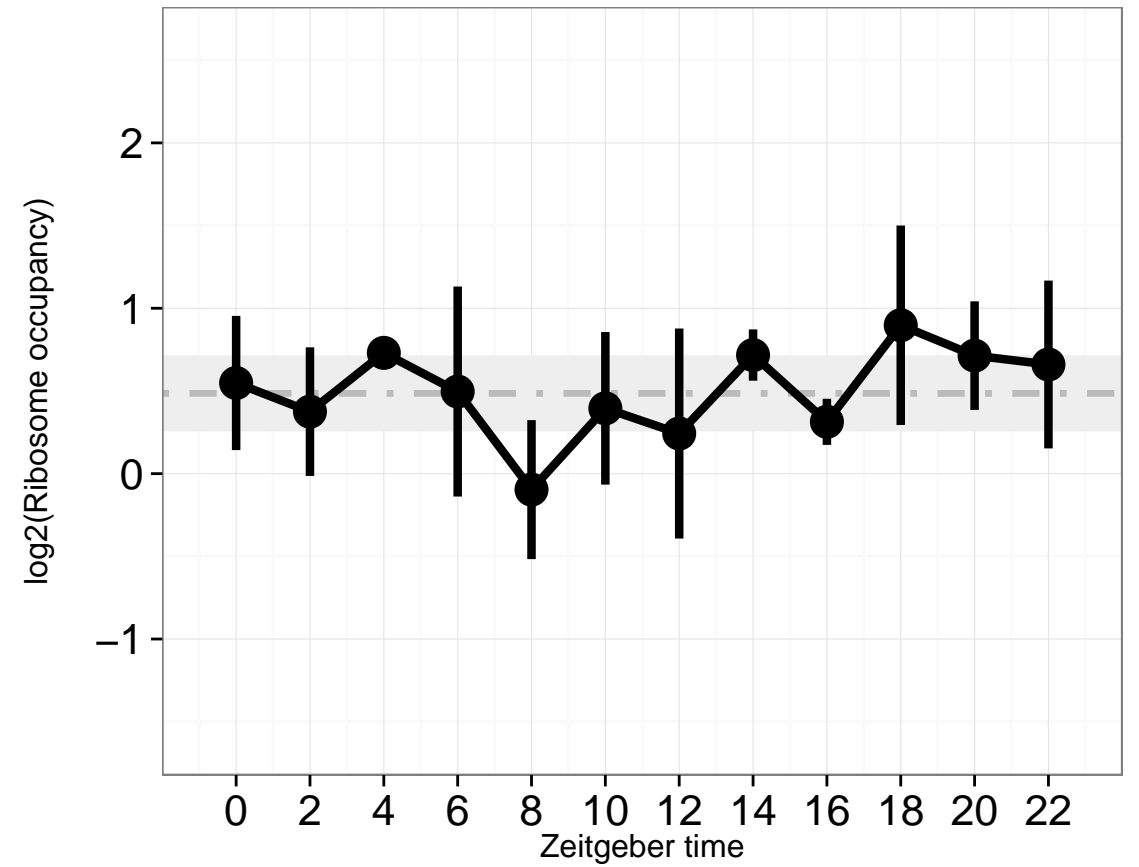

Supplement: Supplementary file 3232 [file 1]

# Naprt1

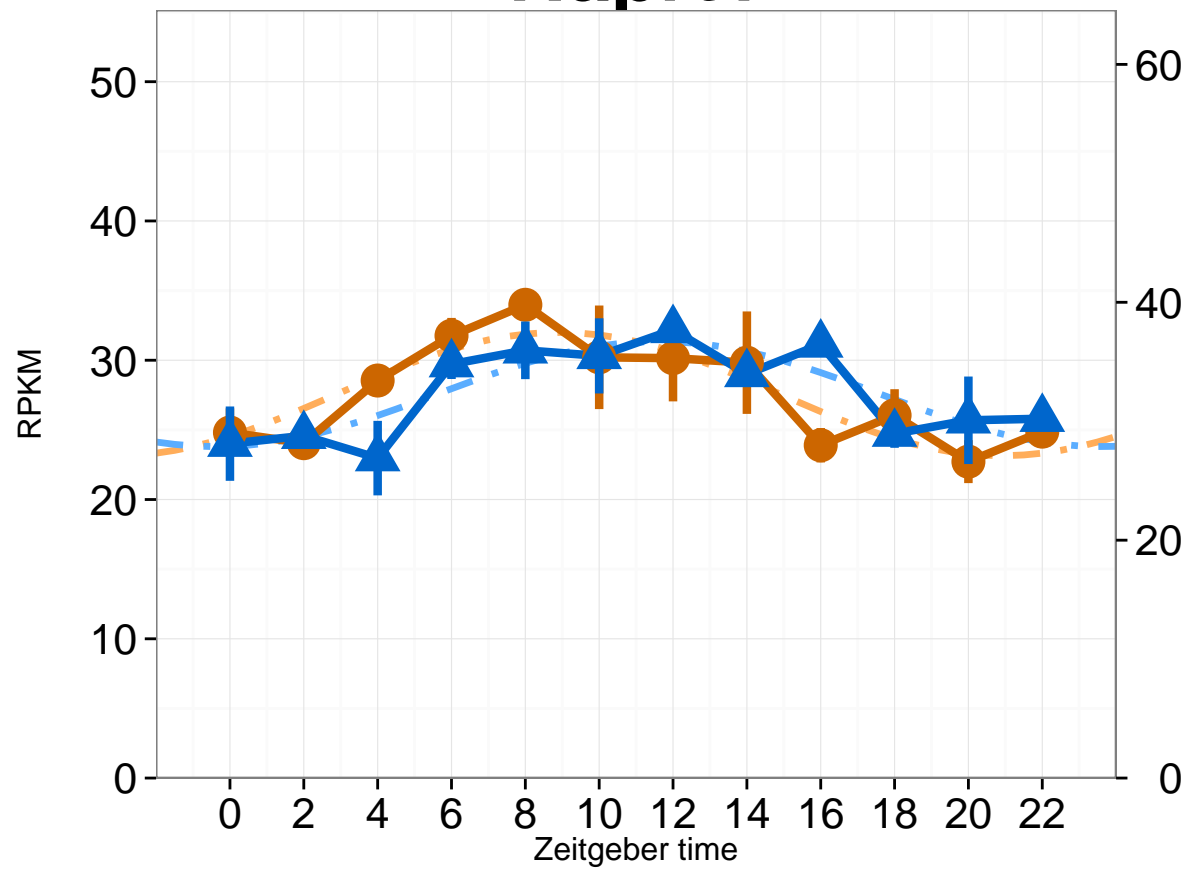

# Naprt1

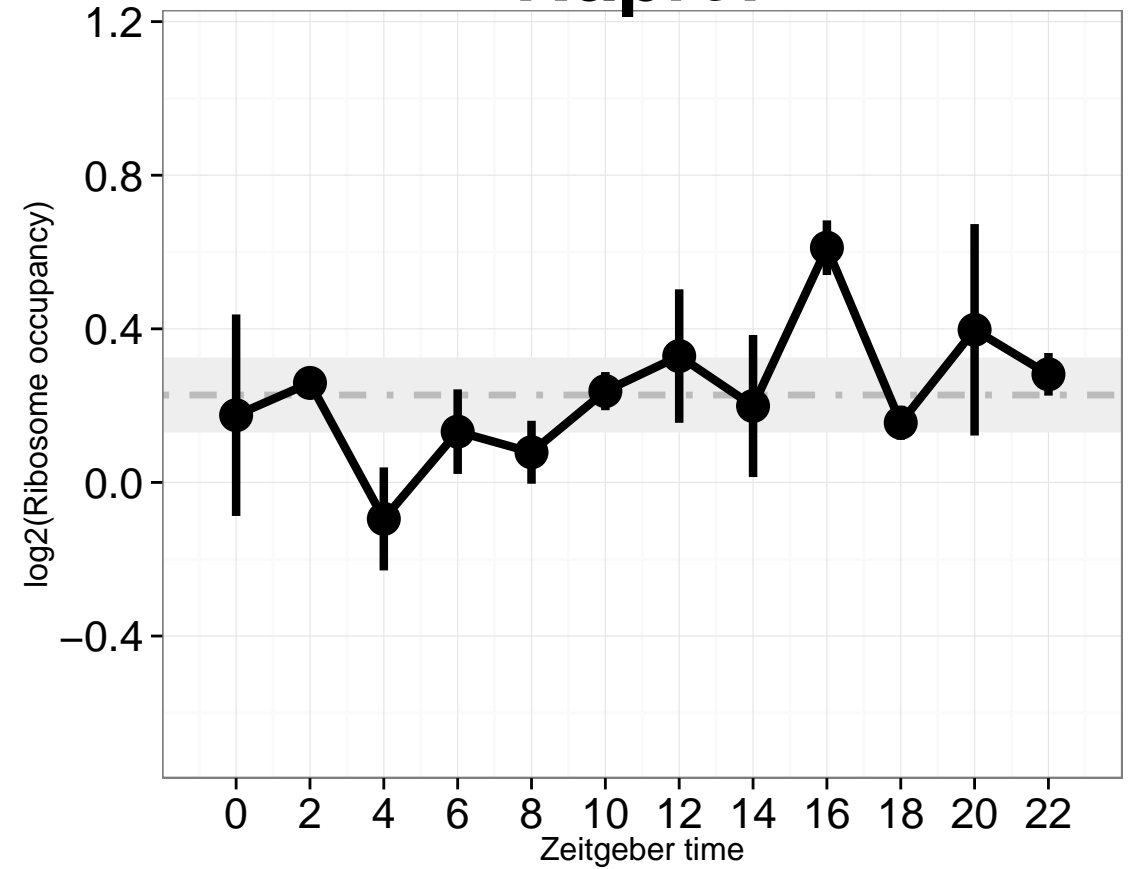

Supplement: Supplementary file 3233 [file 1]

## Sec61a1

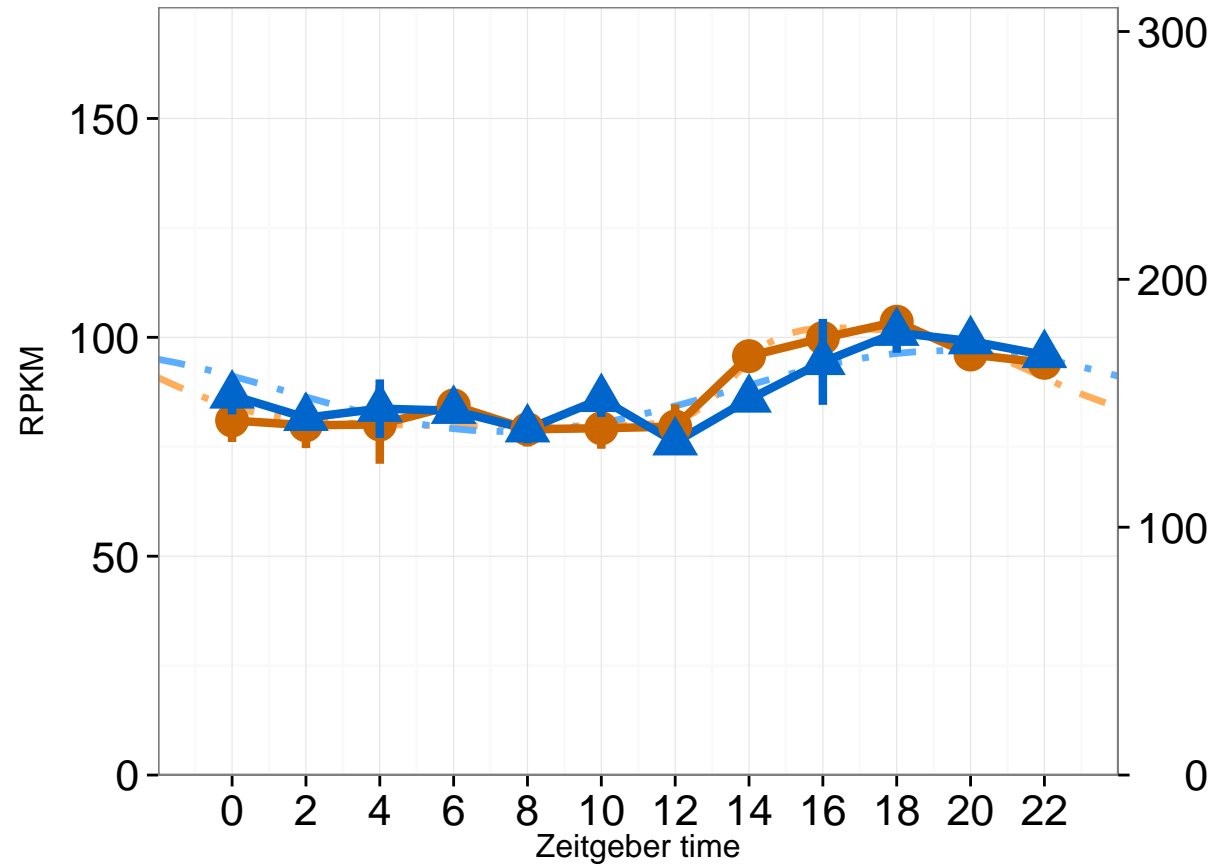

## Sec61a1

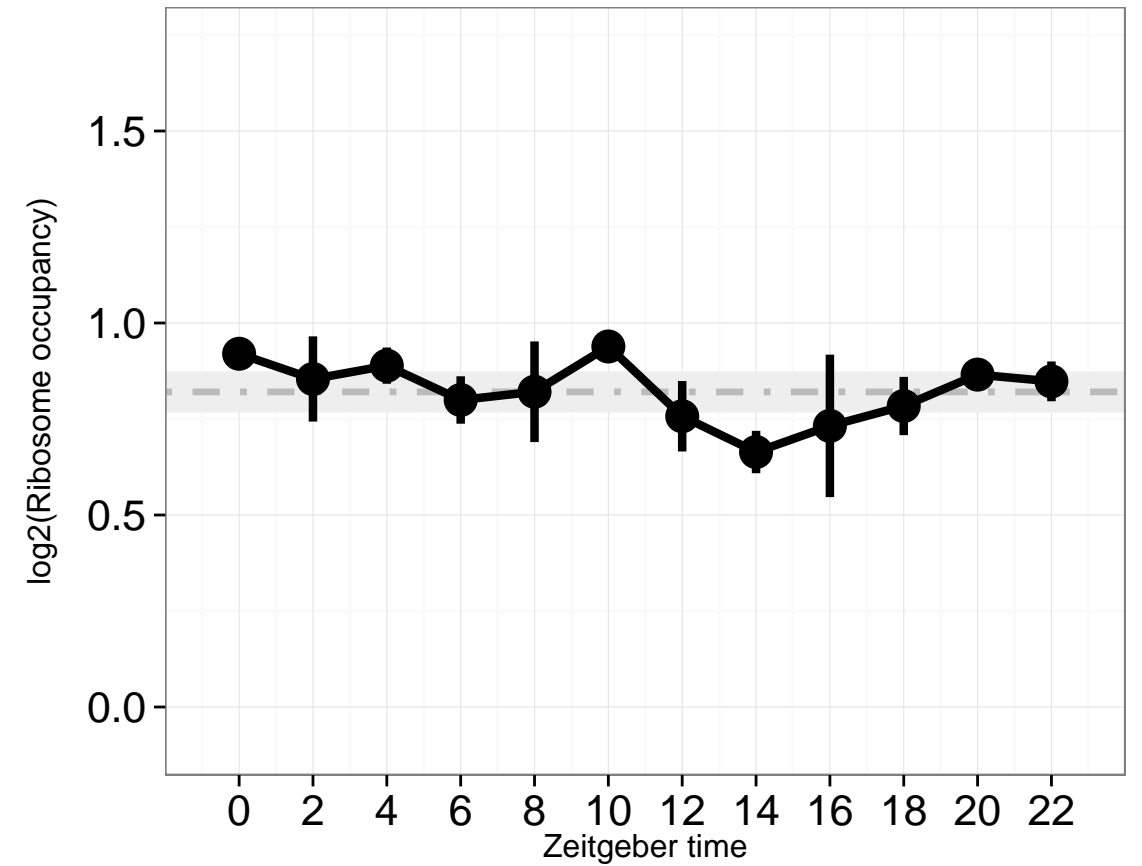

Supplement: Supplementary file 3234 [file 1]

## Defb29

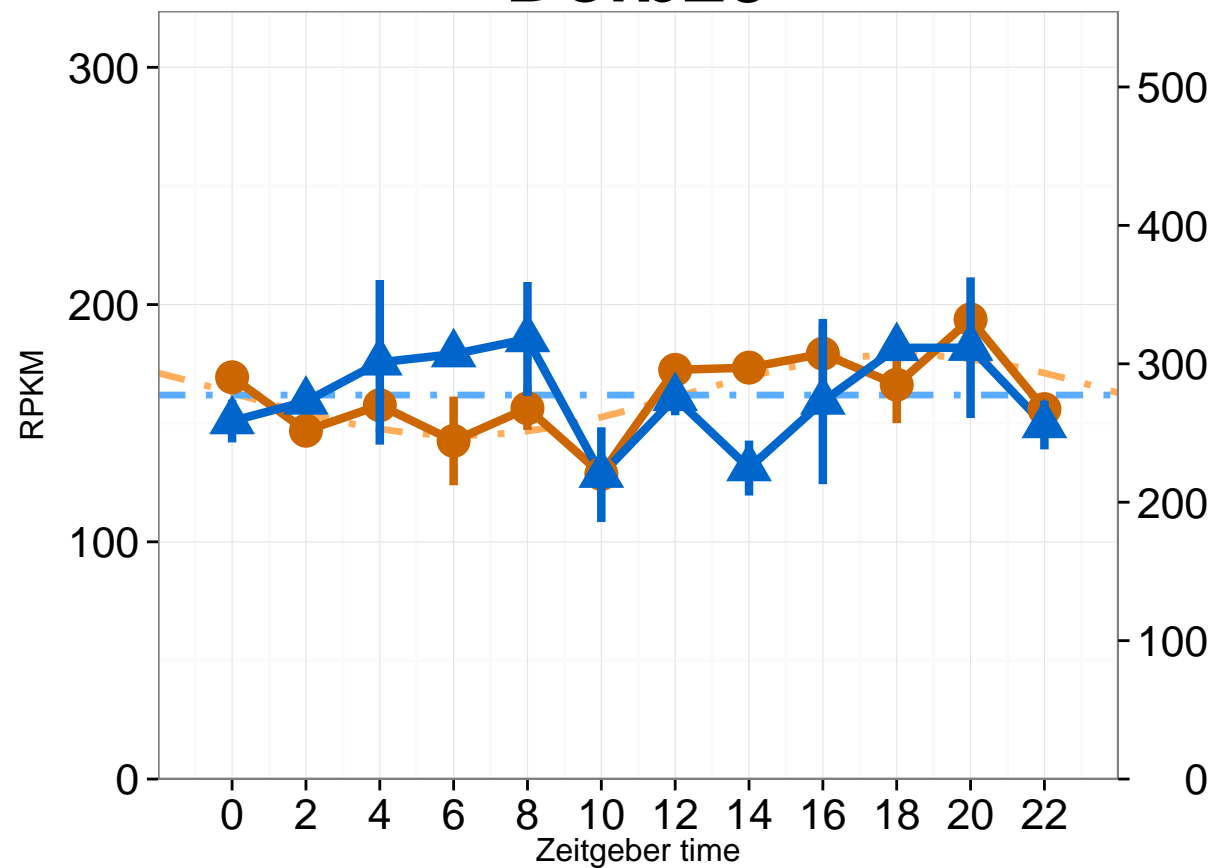

## Defb29

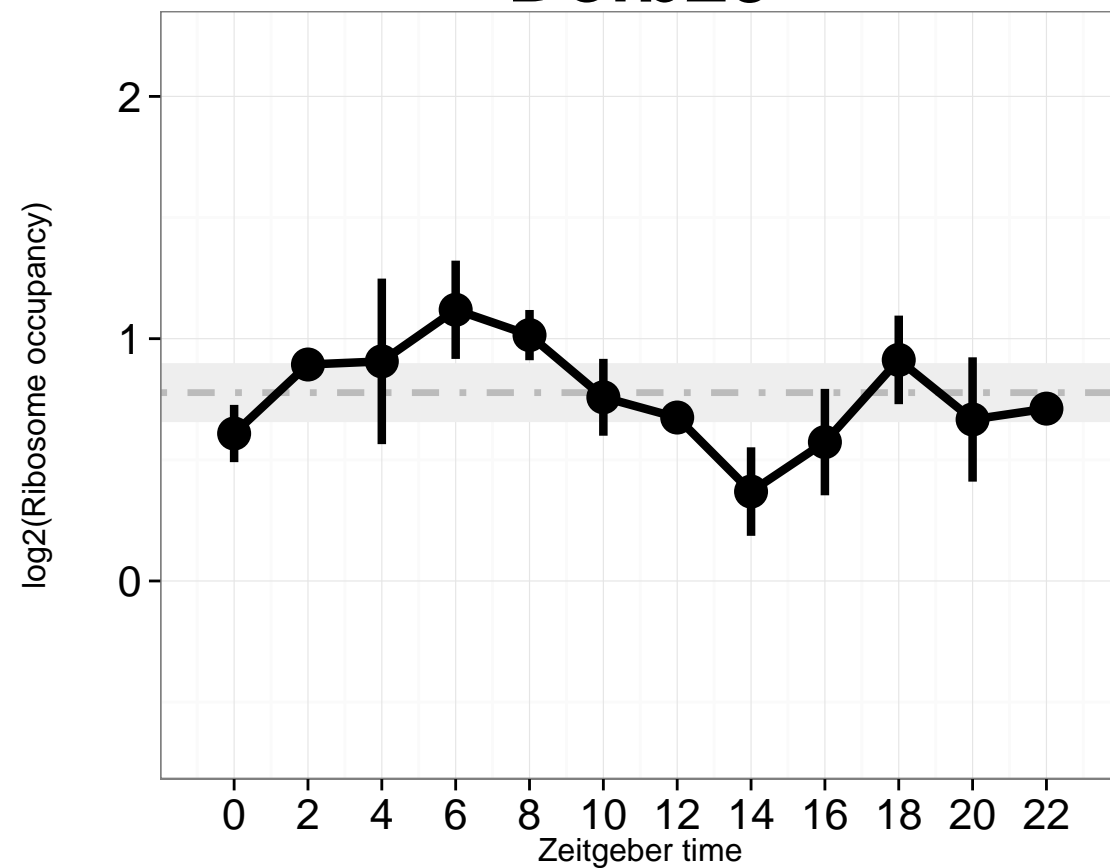

Supplement: Supplementary file 3235 [file 1]

# Arhgdib

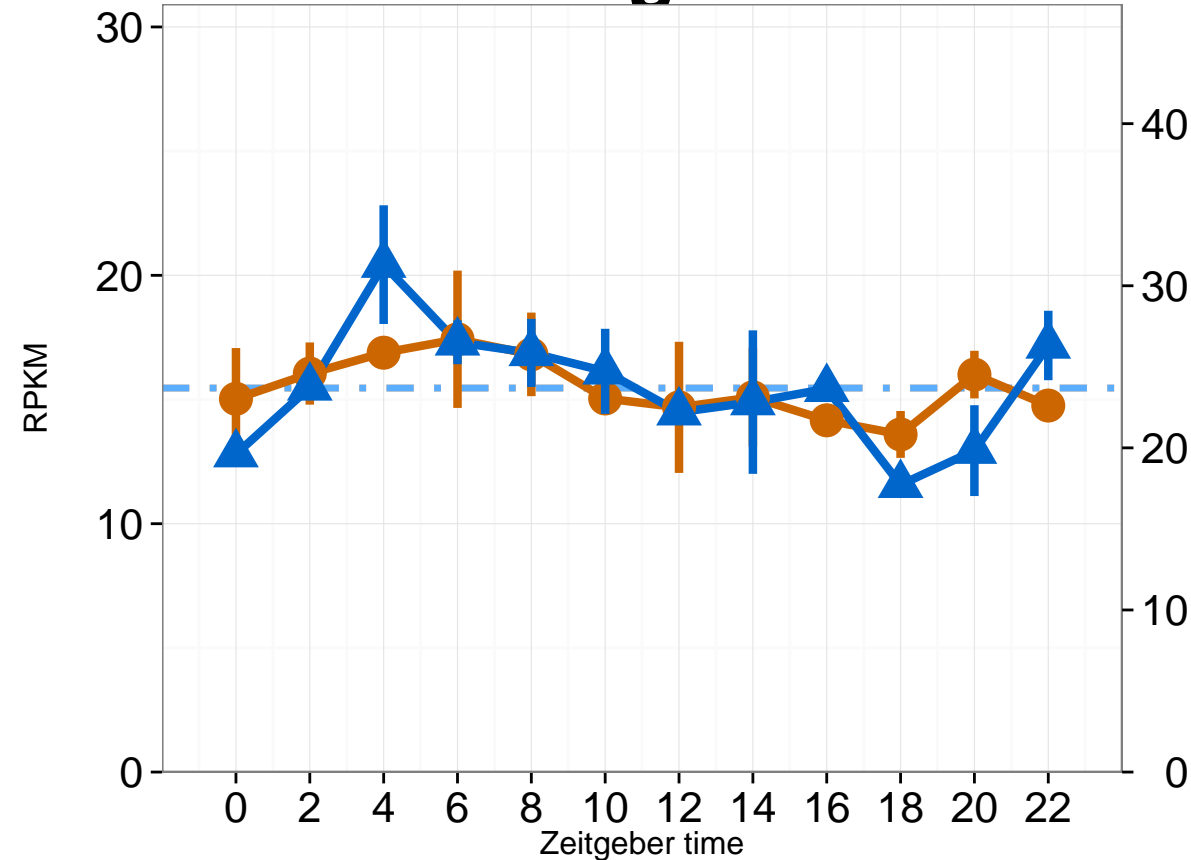

# Arhgdib

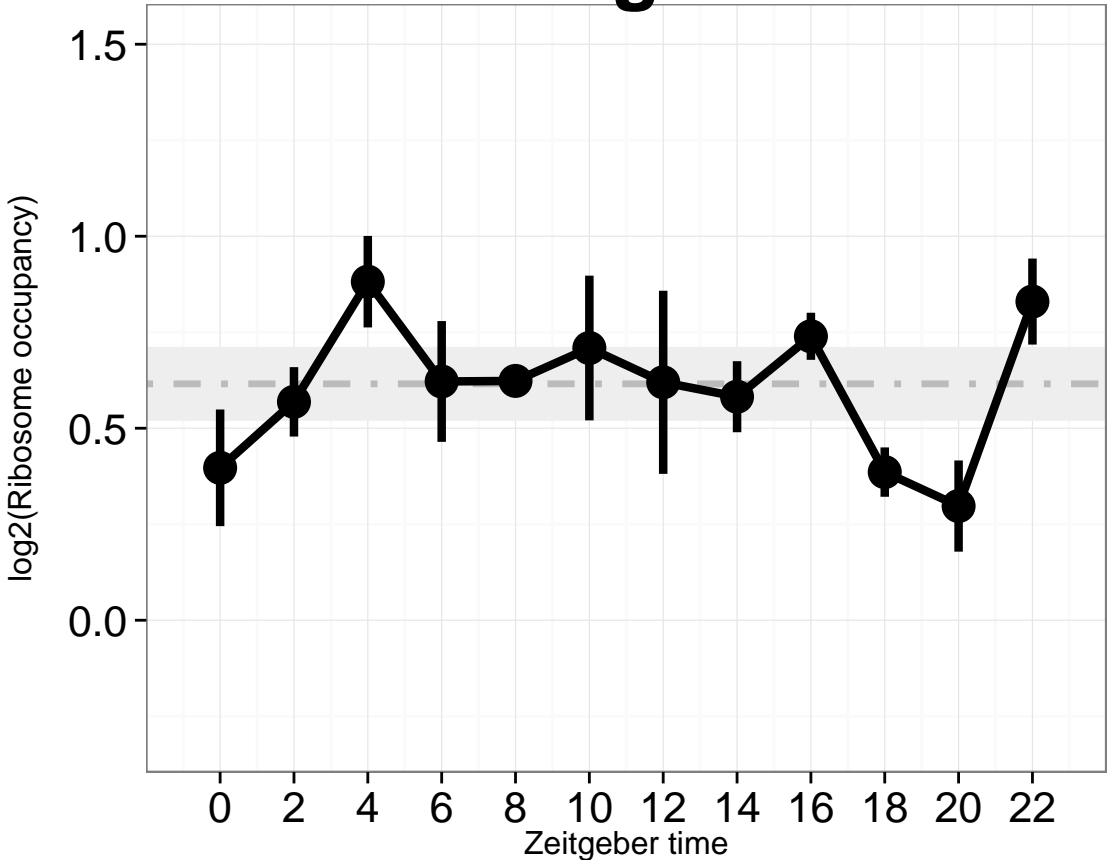

Supplement: Supplementary file 3236 [file 1]

# Hspa1b

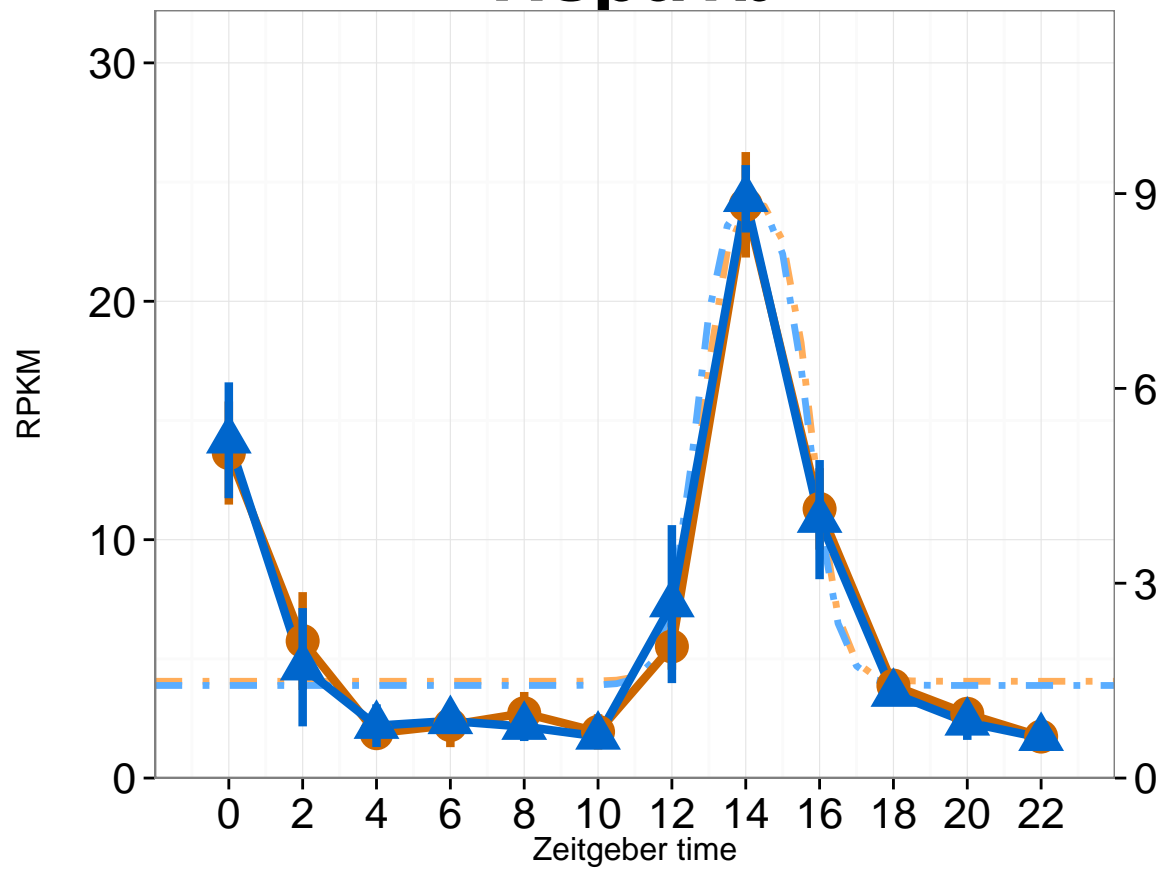

# Hspa1b

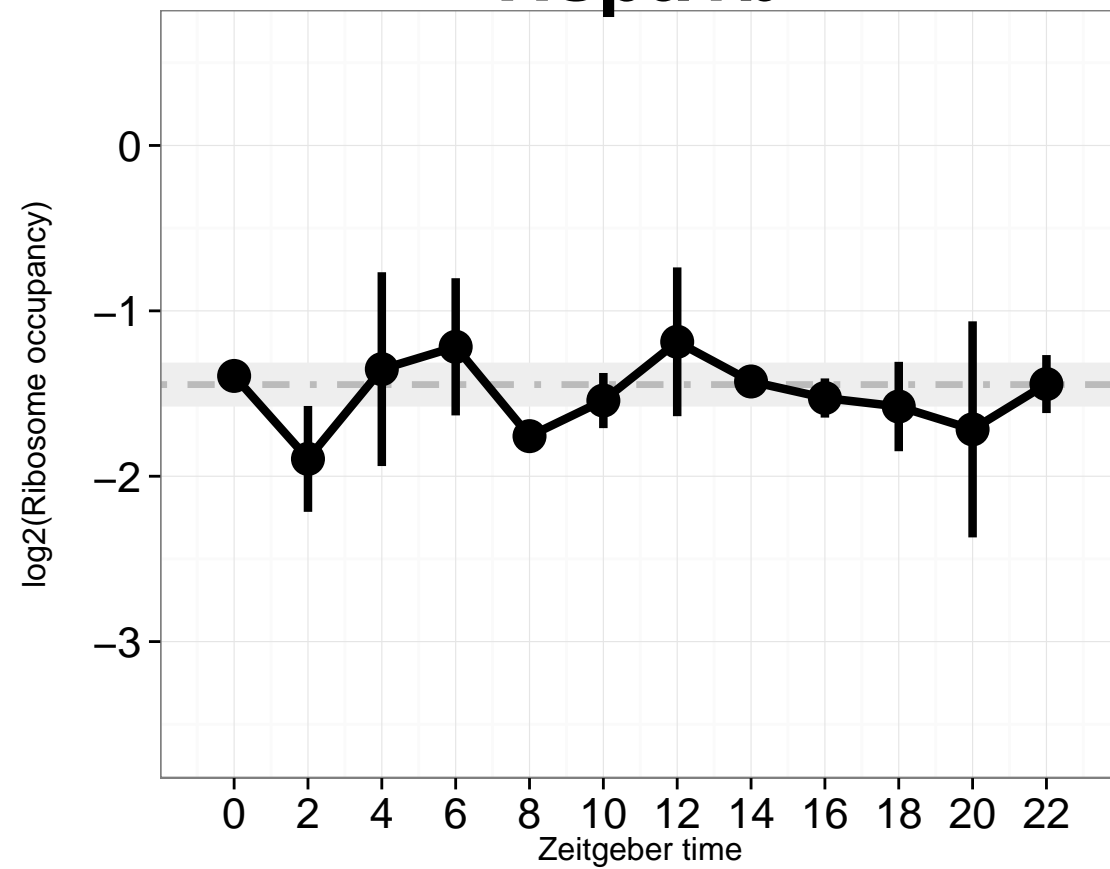

Supplement: Supplementary file 3237 [file 1]

## Rsg1

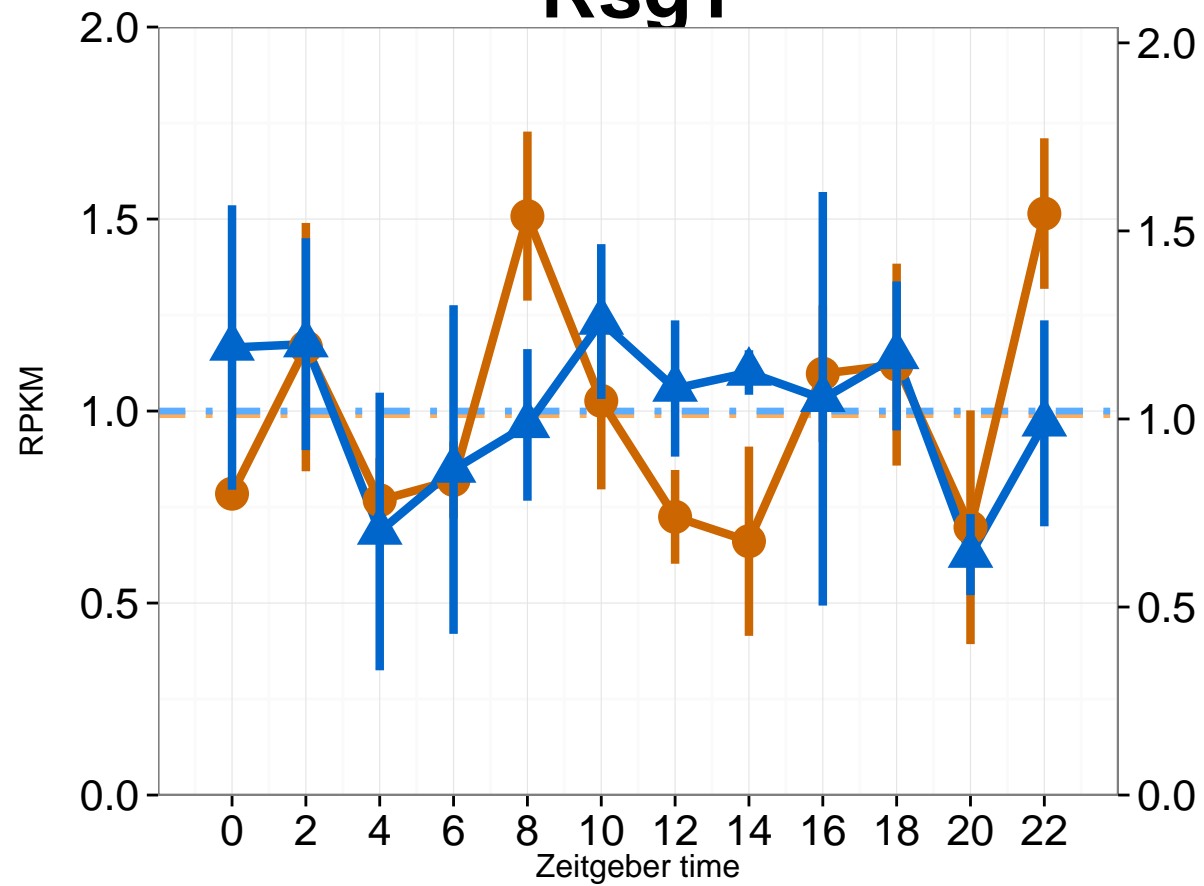

## Rsg1

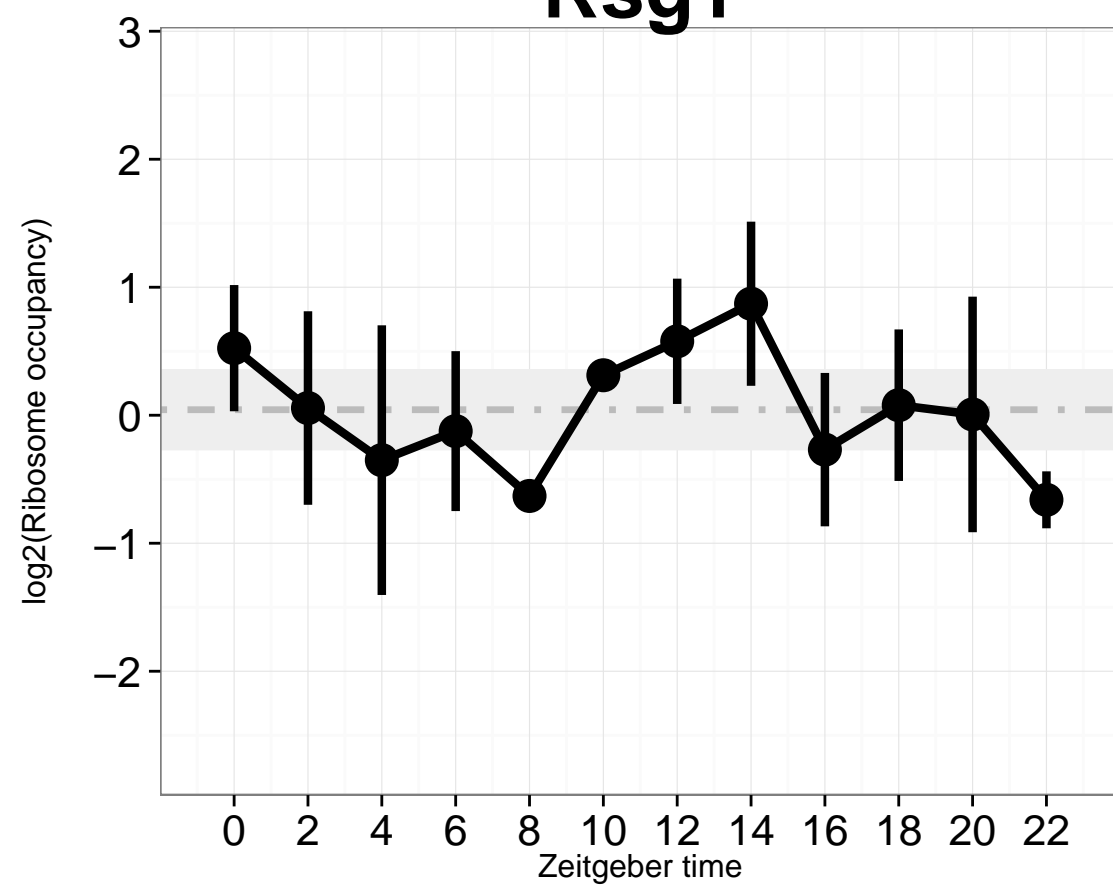

Supplement: Supplementary file 3238 [file 1]

# Nckap1

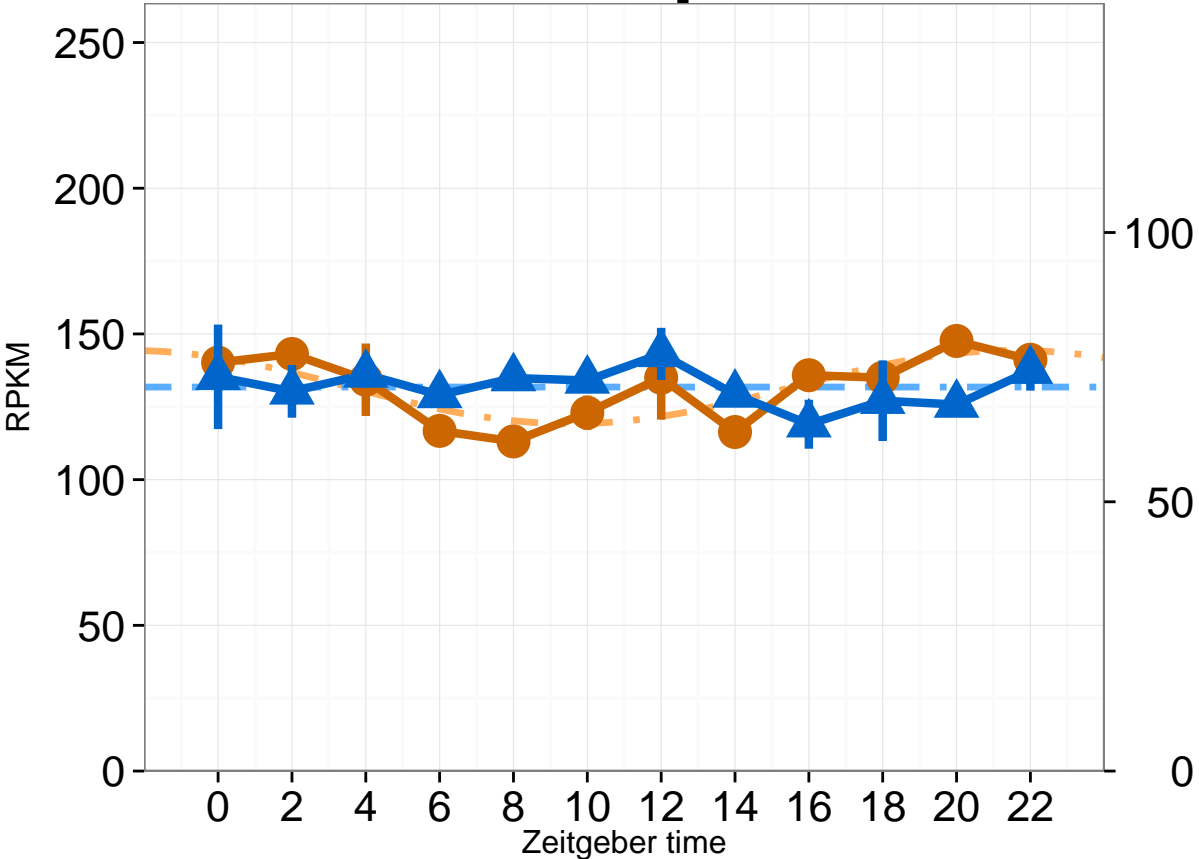

# Nckap1

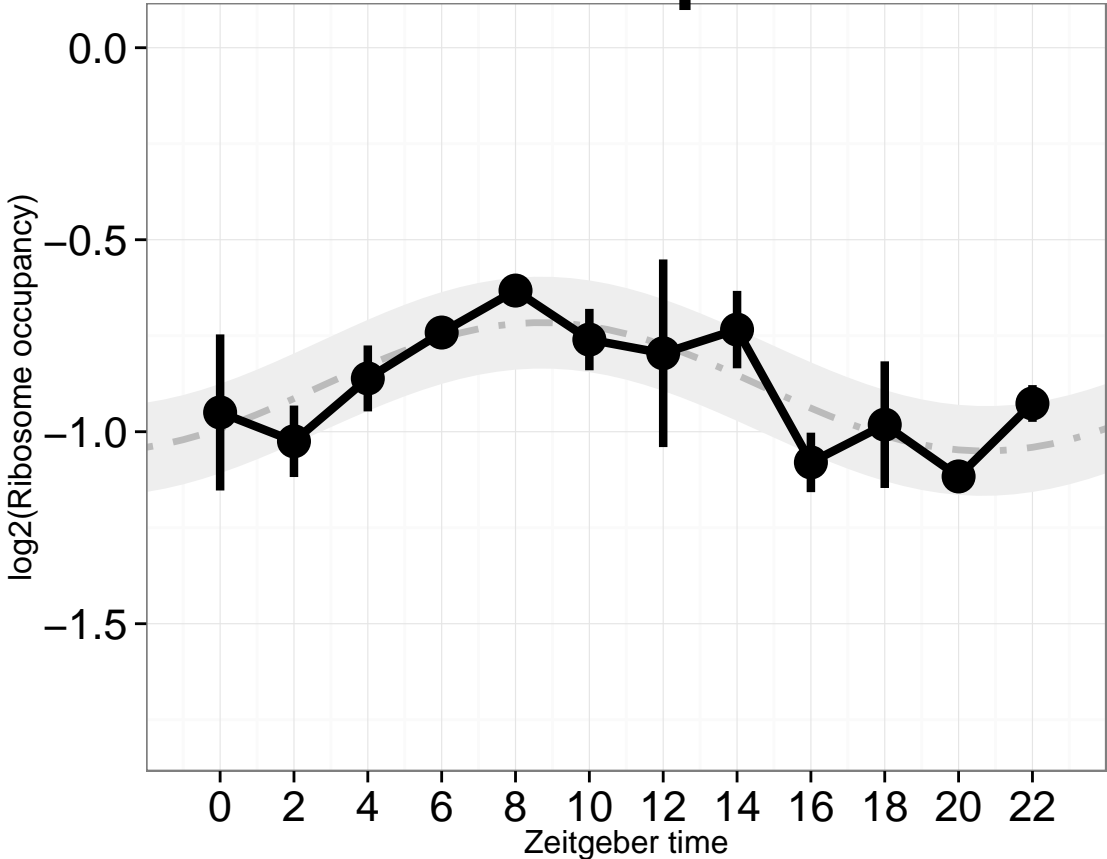

Supplement: Supplementary file 3239 [file 1]

## CryI1

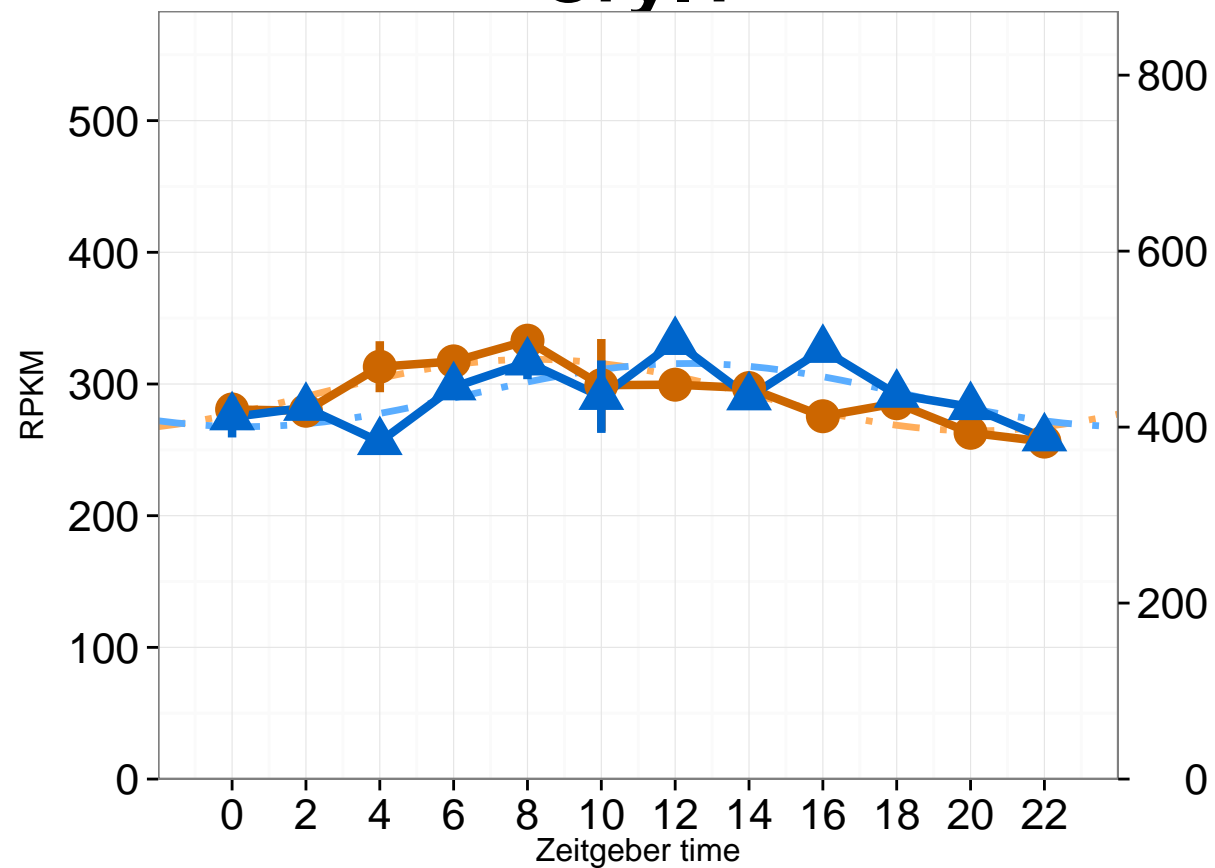

## CryI1

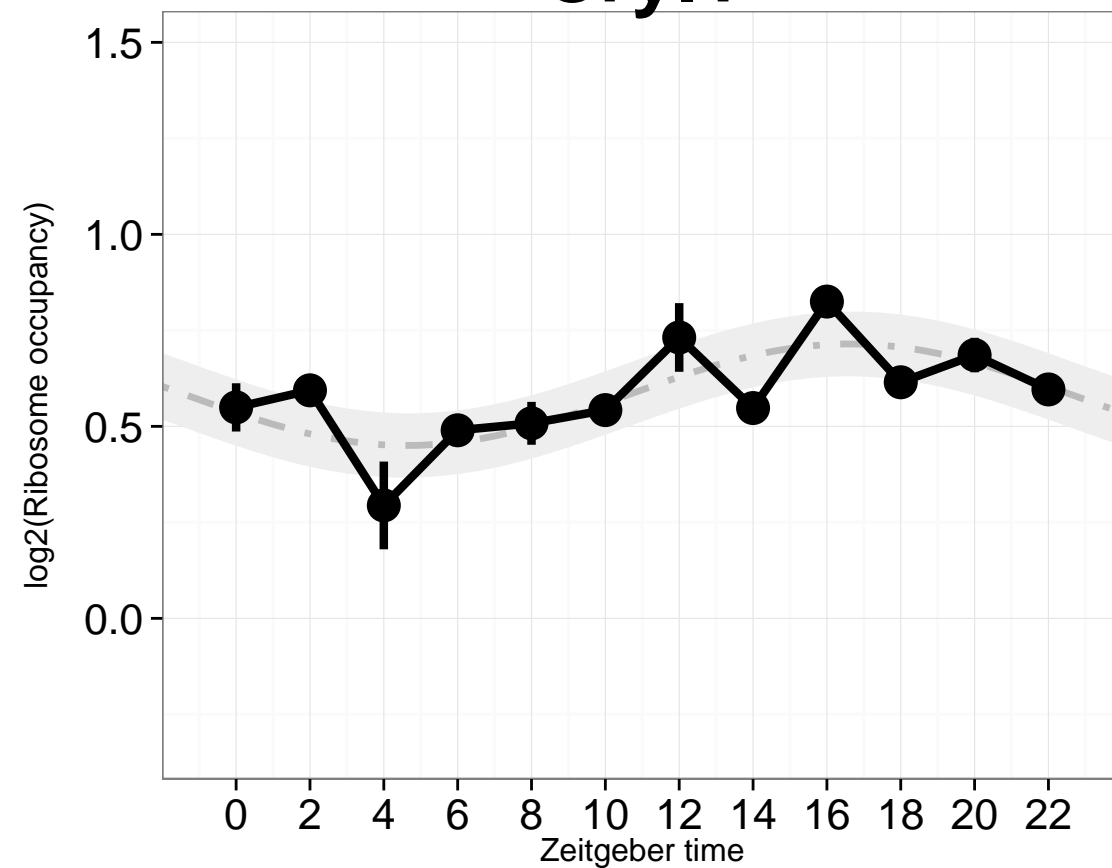

Supplement: Supplementary file 3240 [file 1]

# Kat6a

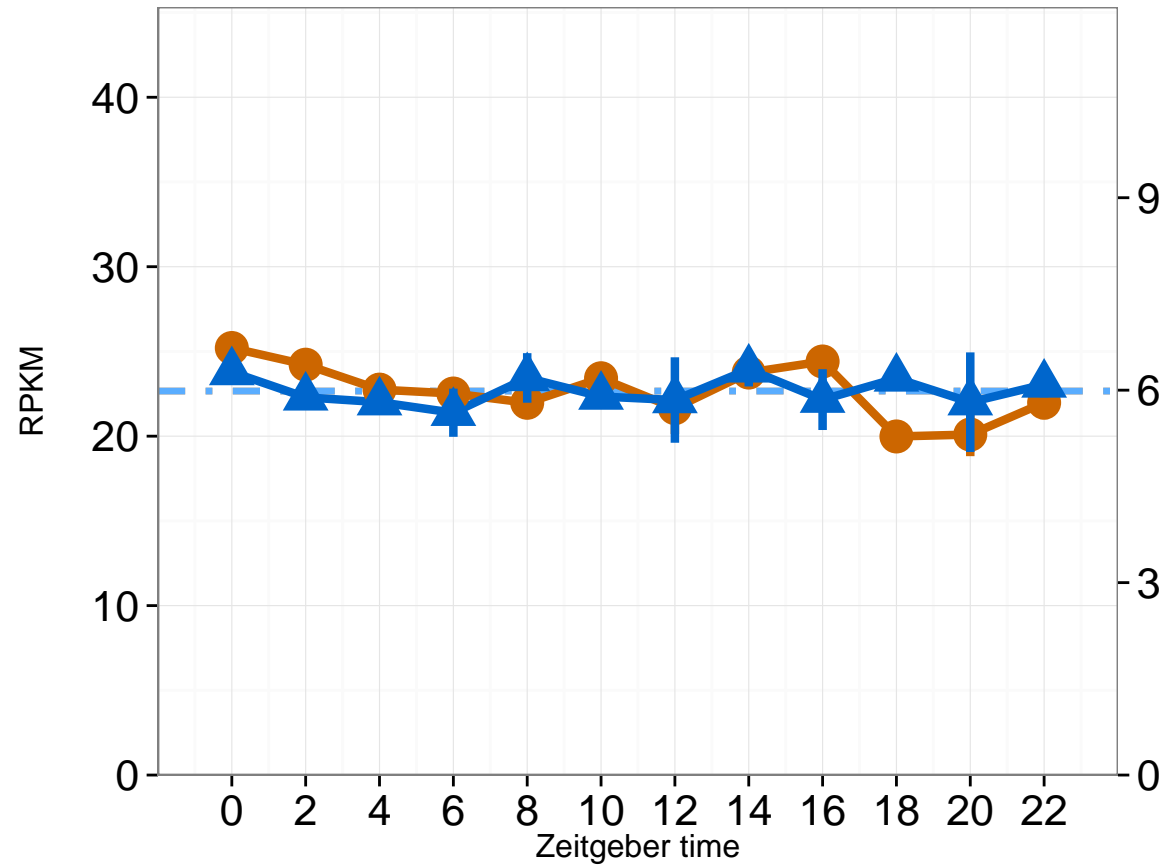

# Kat6a

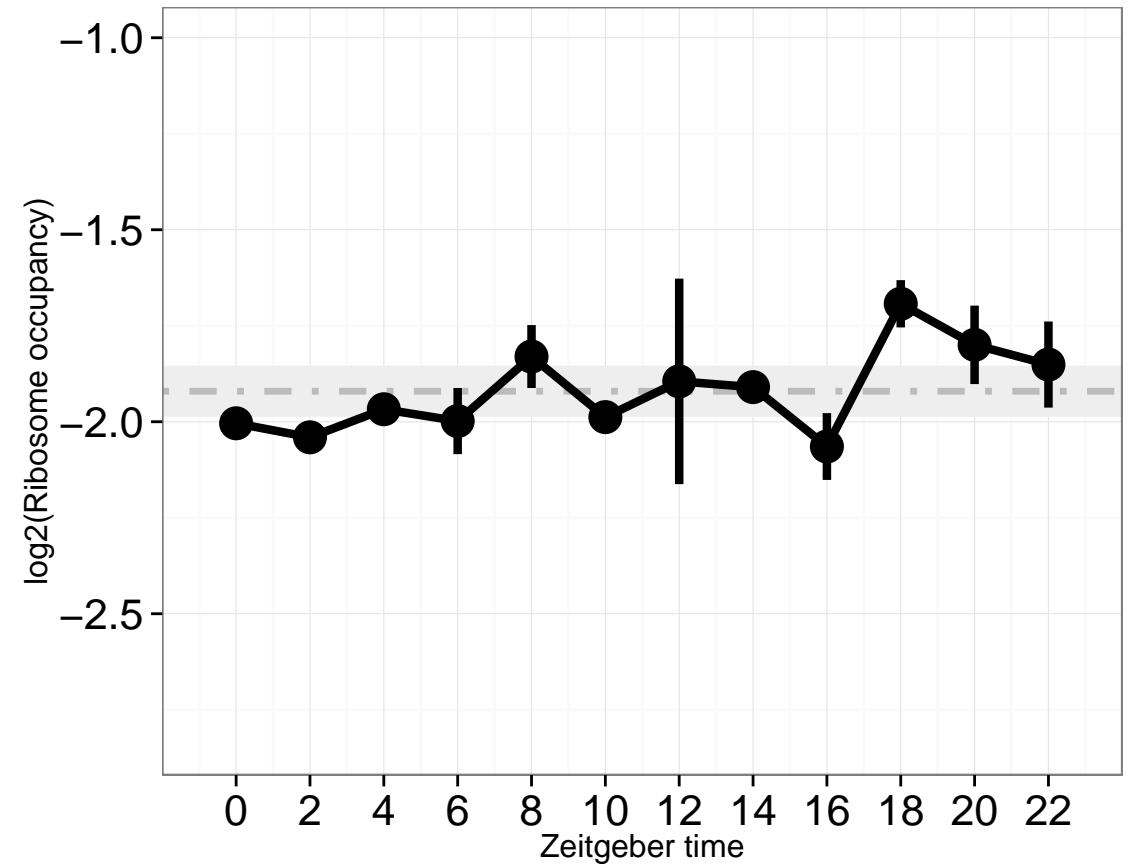

Supplement: Supplementary file 3241 [file 1]

# Snta1

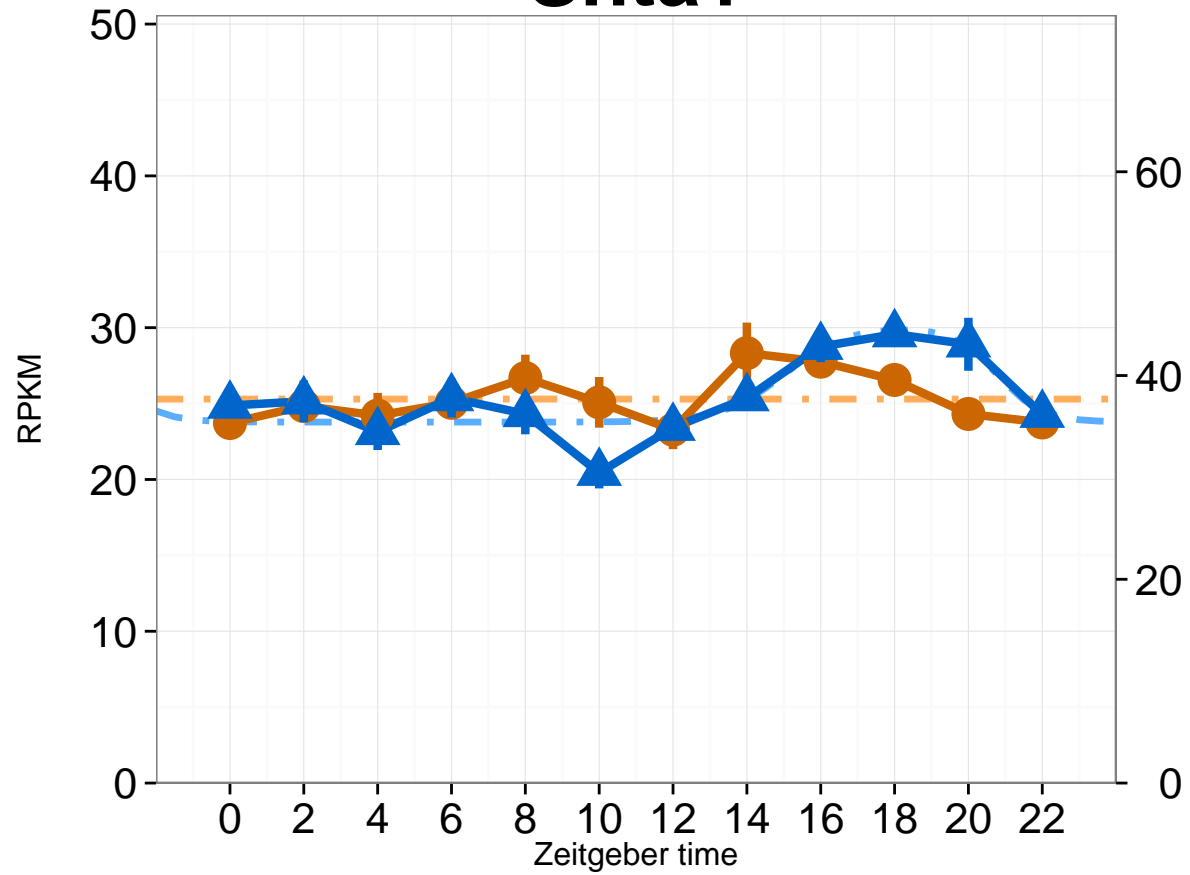

# Snta1

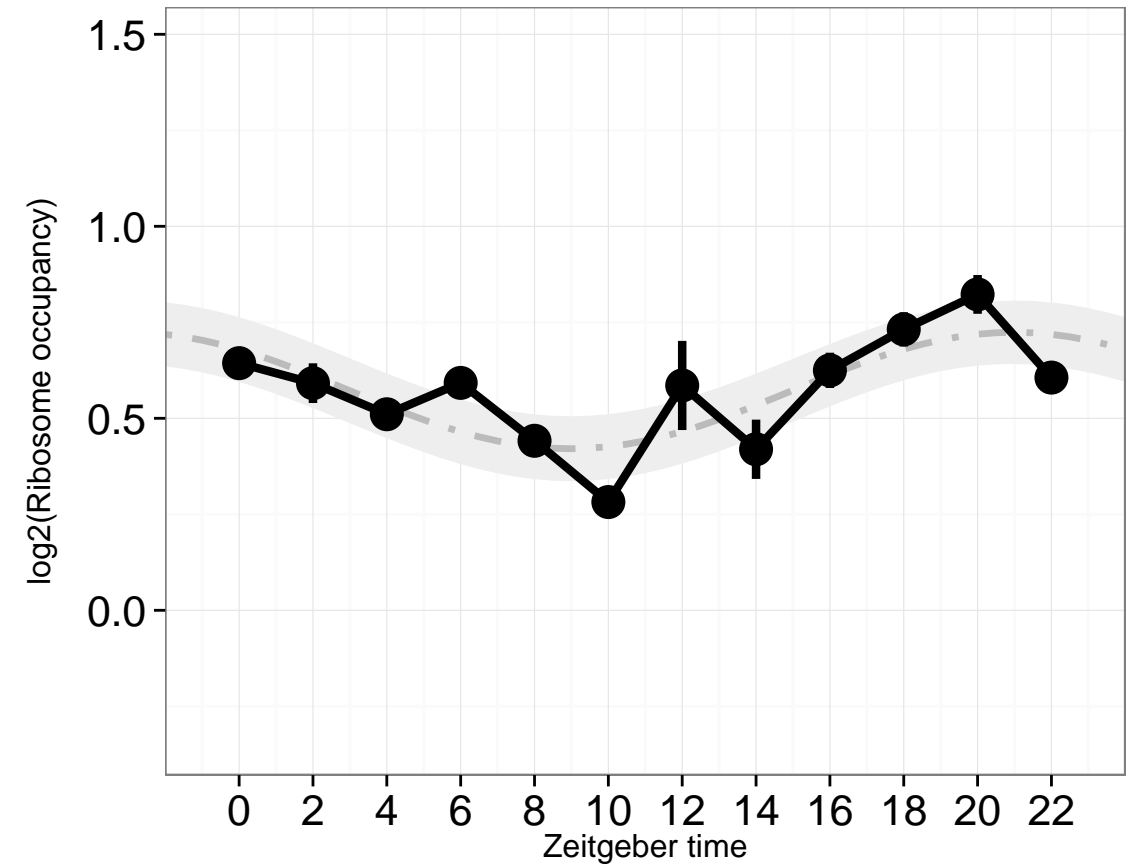

Supplement: Supplementary file 3242 [file 1]

**1110032F04Rik**

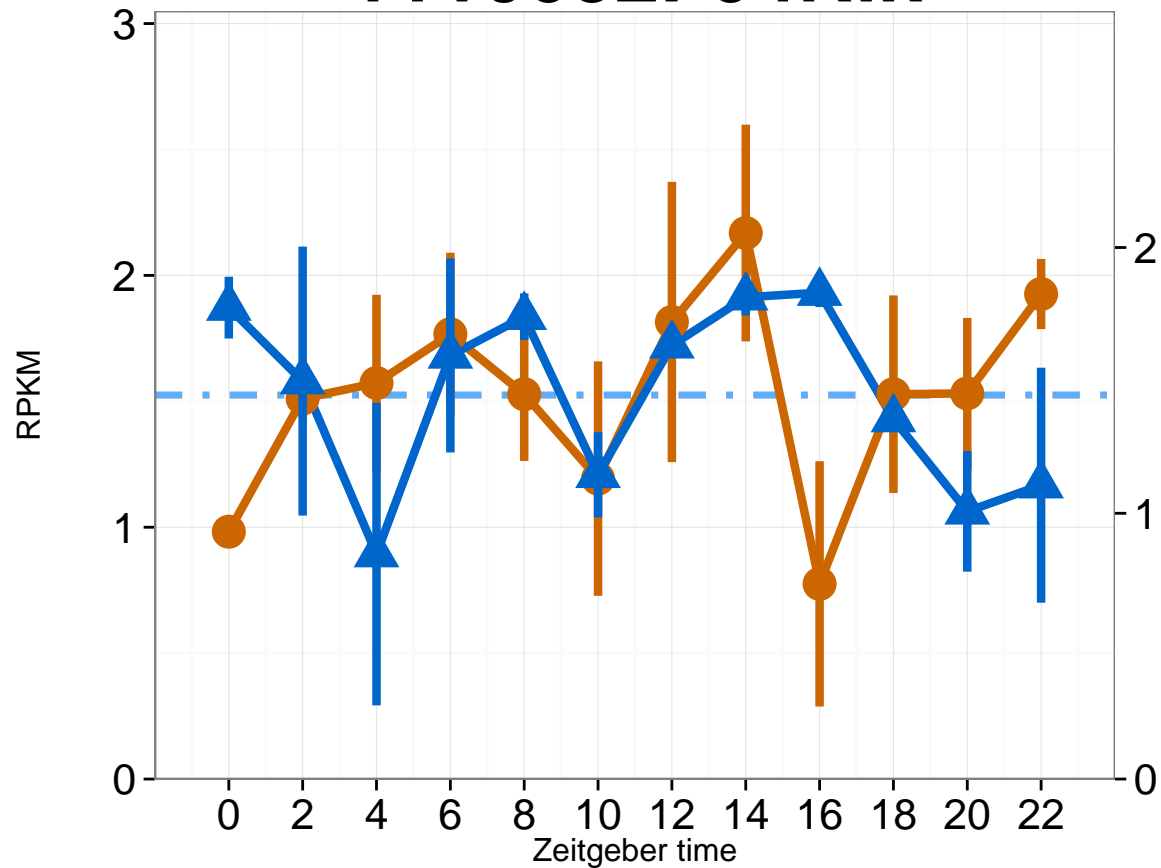

**1110032F04Rik**

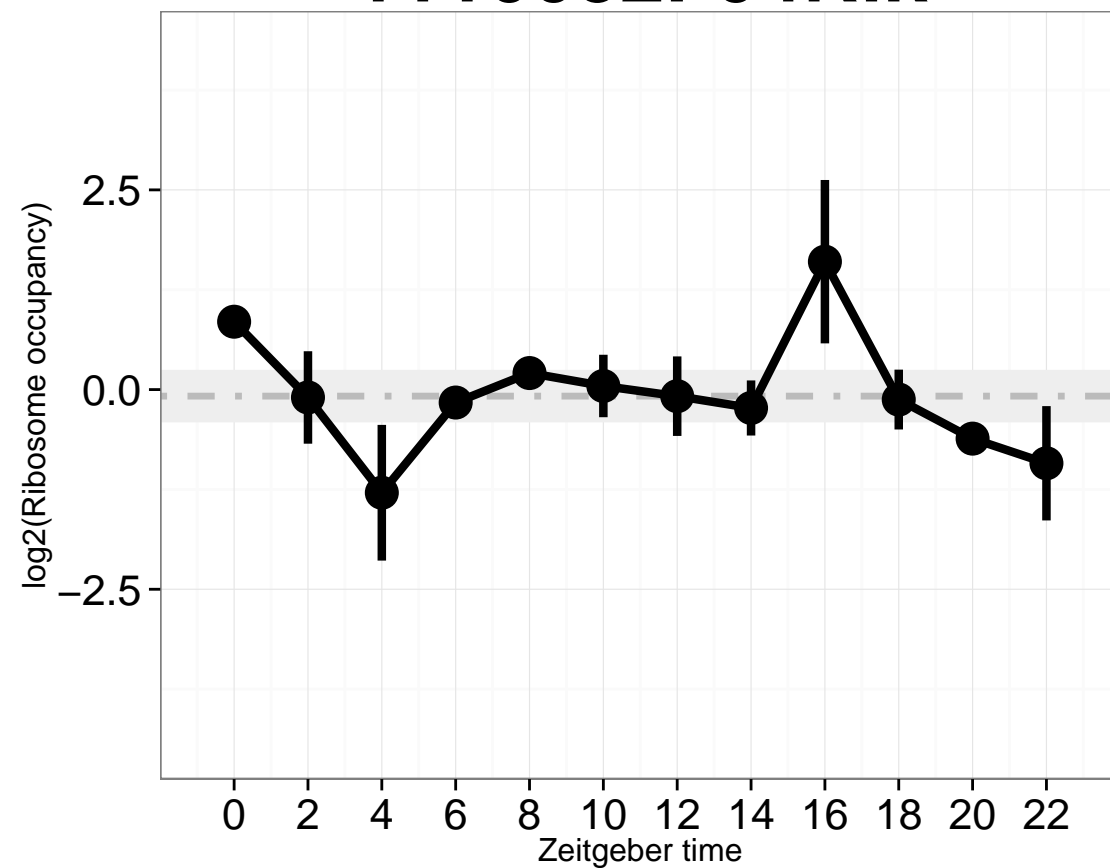

Supplement: Supplementary file 3243 [file 1]

## Kif2a

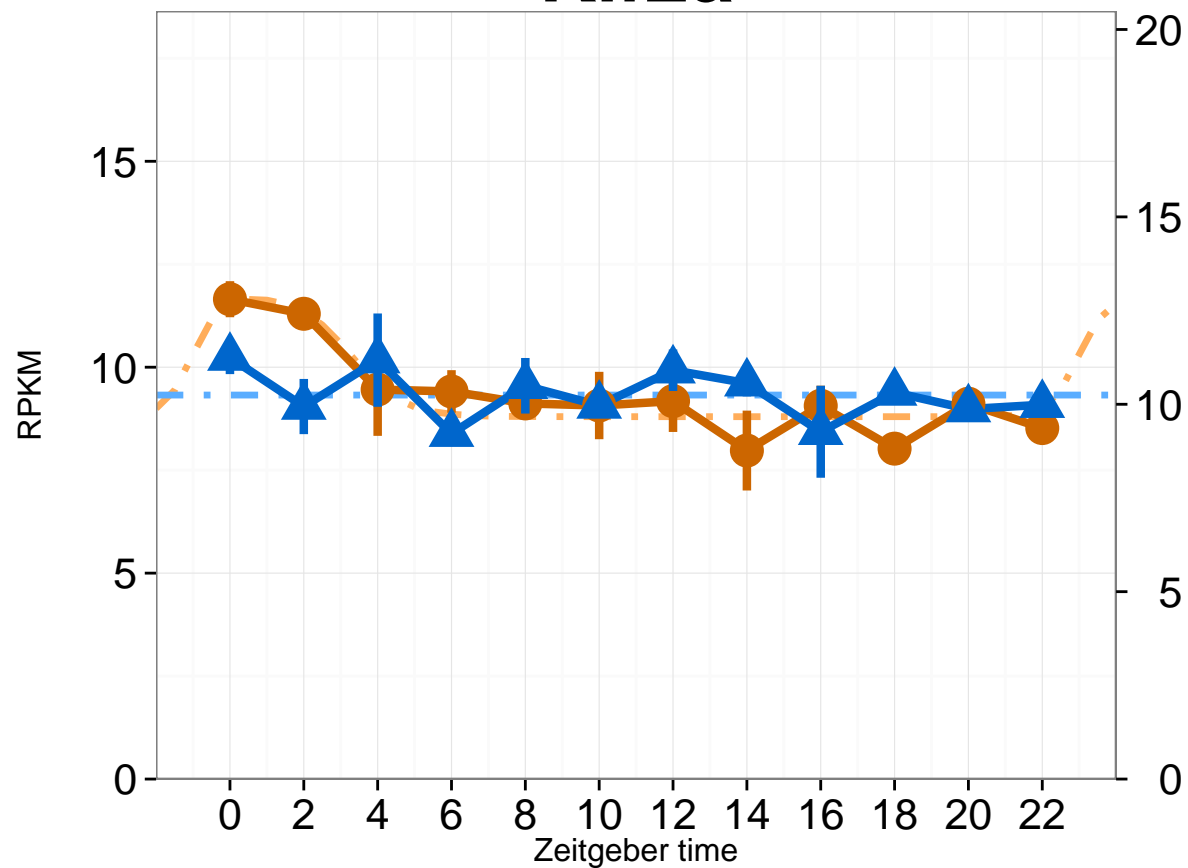

## Kif2a

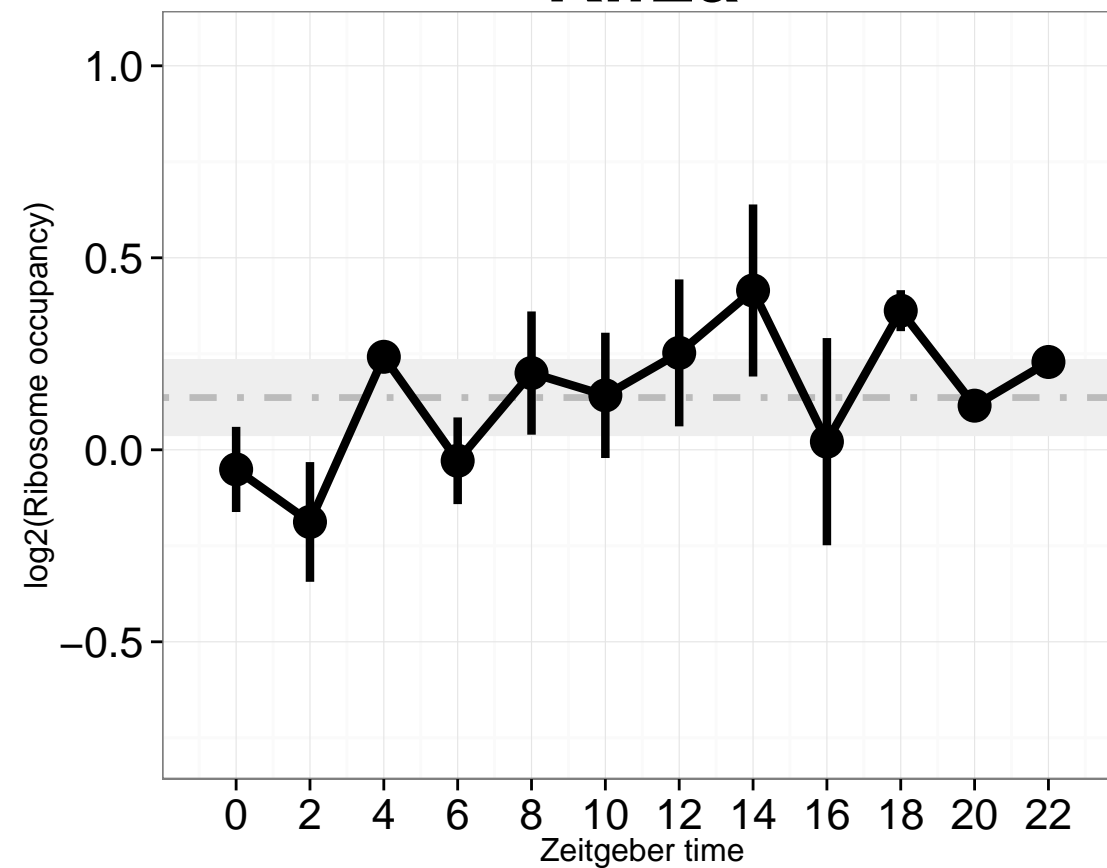

Supplement: Supplementary file 3244 [file 1]

## Gpr27

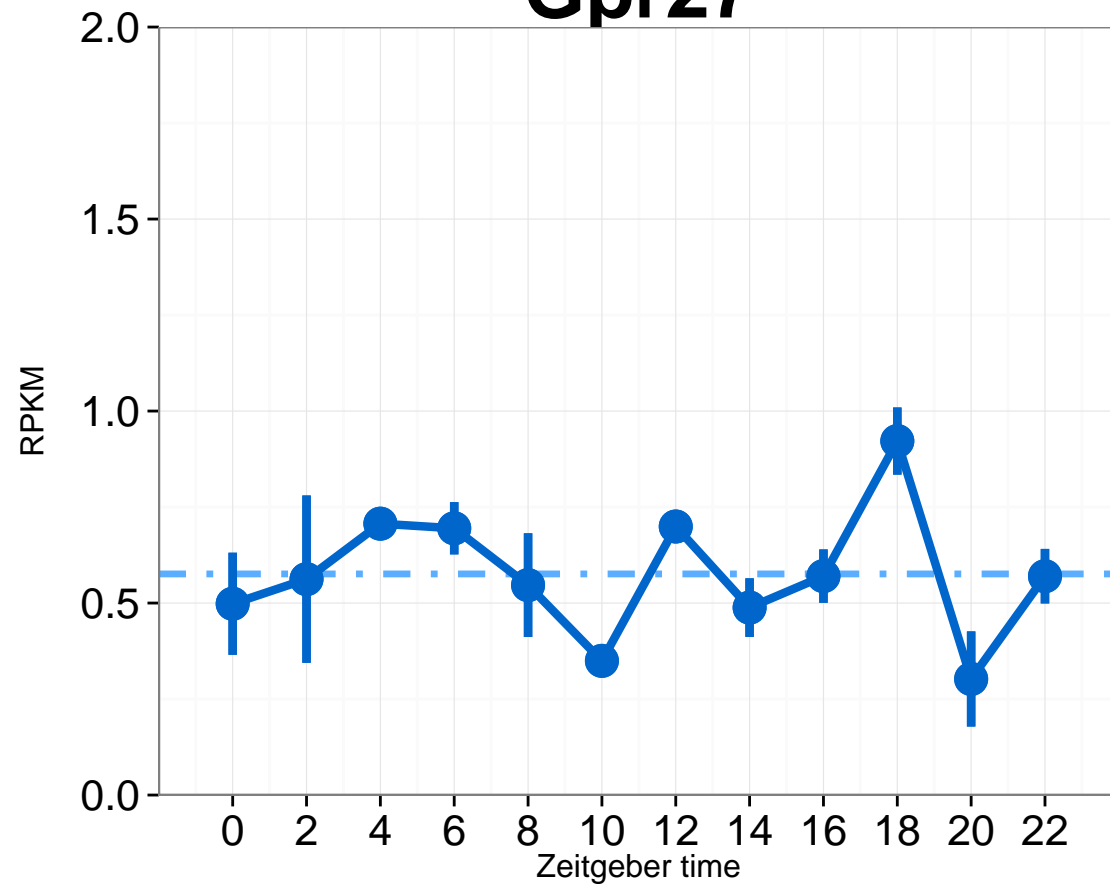

## Gpr27 log2(Ribosome occupancy

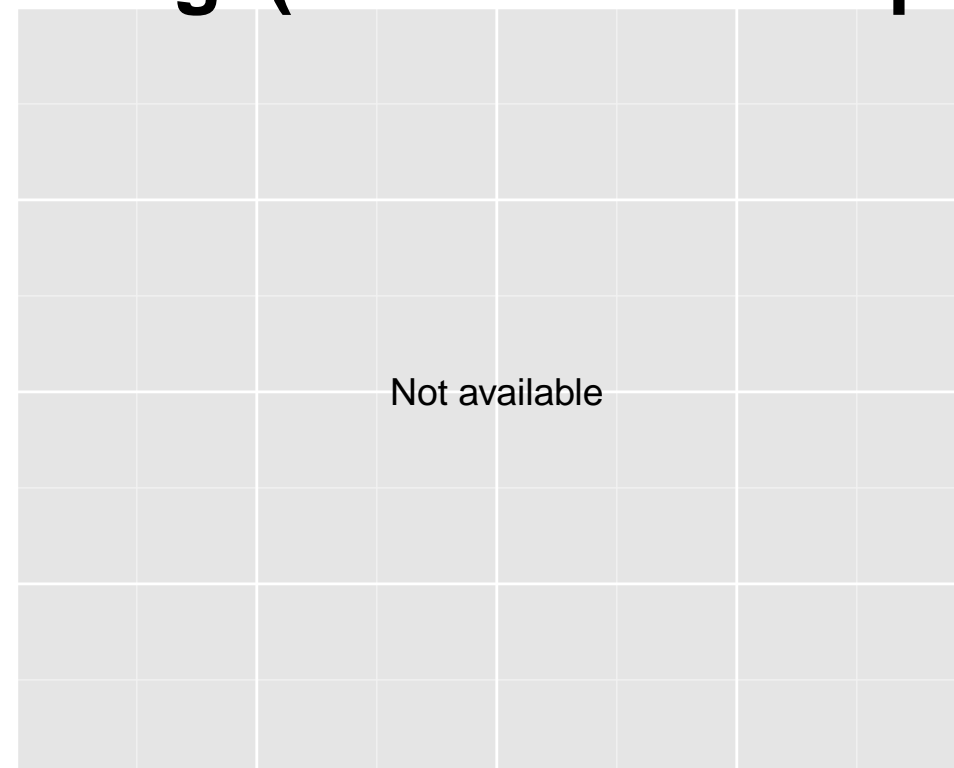

Supplement: Supplementary file 3245 [file 1]

# Tmed7

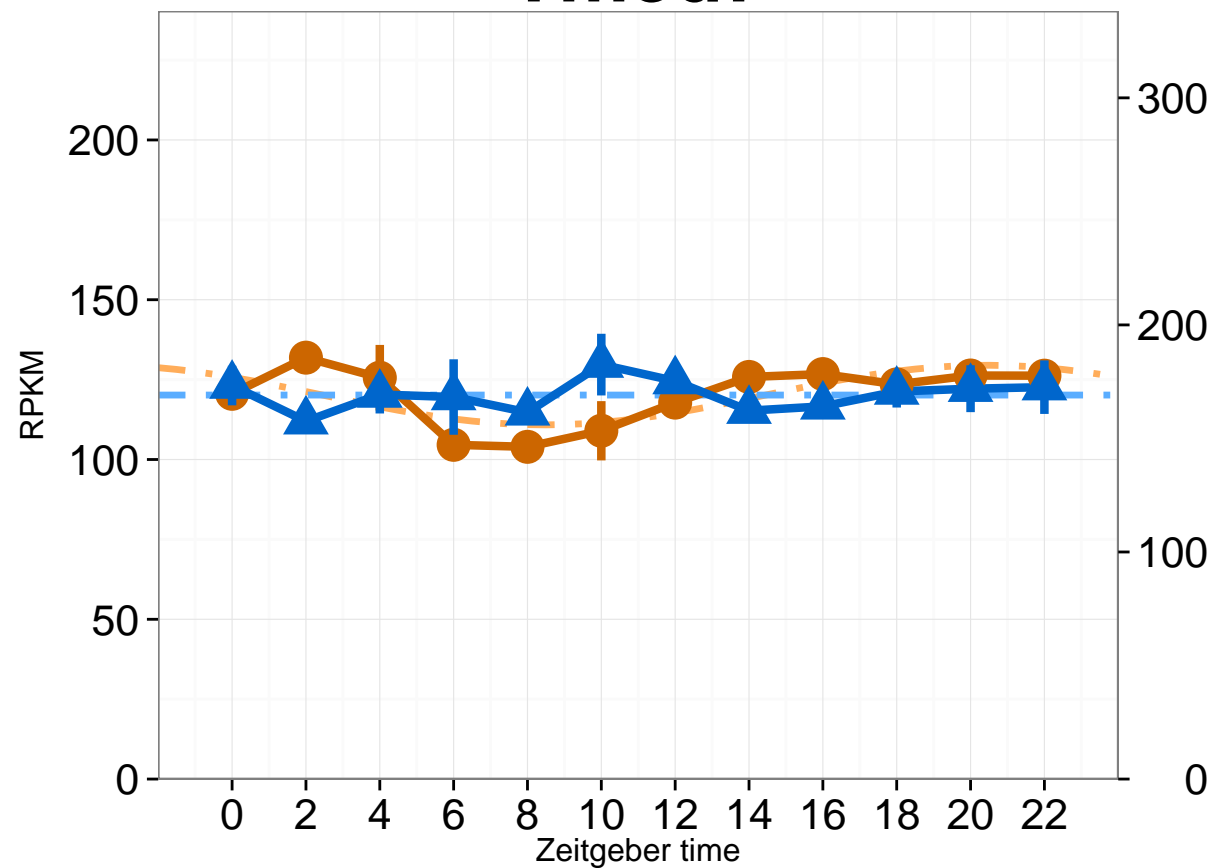

# Tmed7

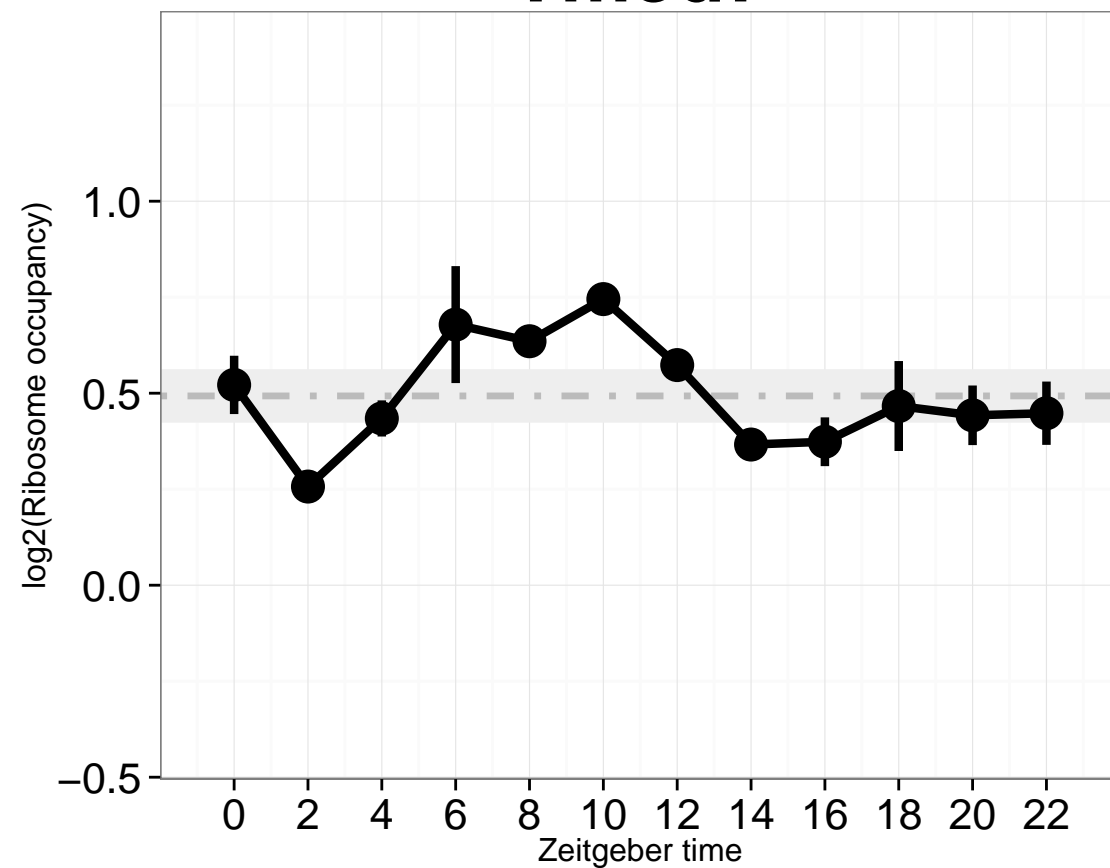

Supplement: Supplementary file 3246 [file 1]

**9130008F23Rik**

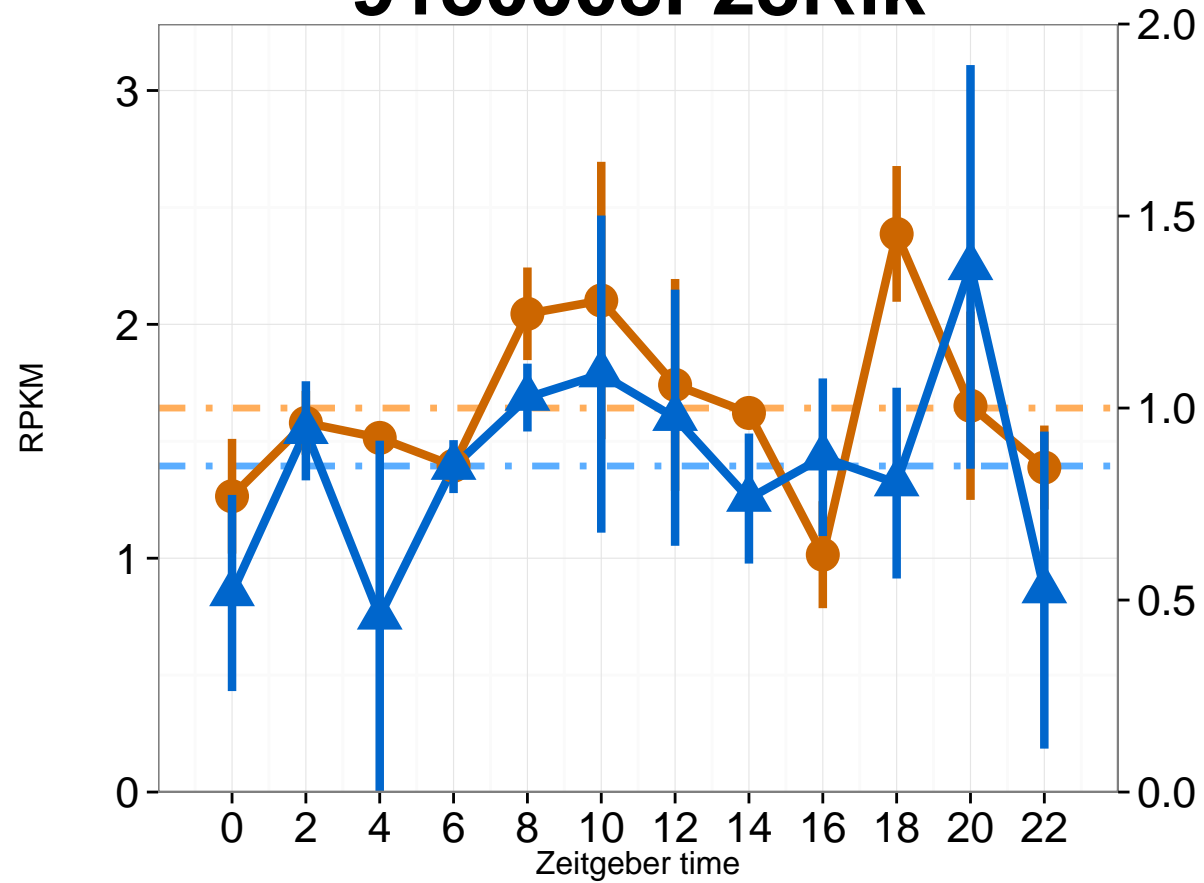

**9130008F23Rik**

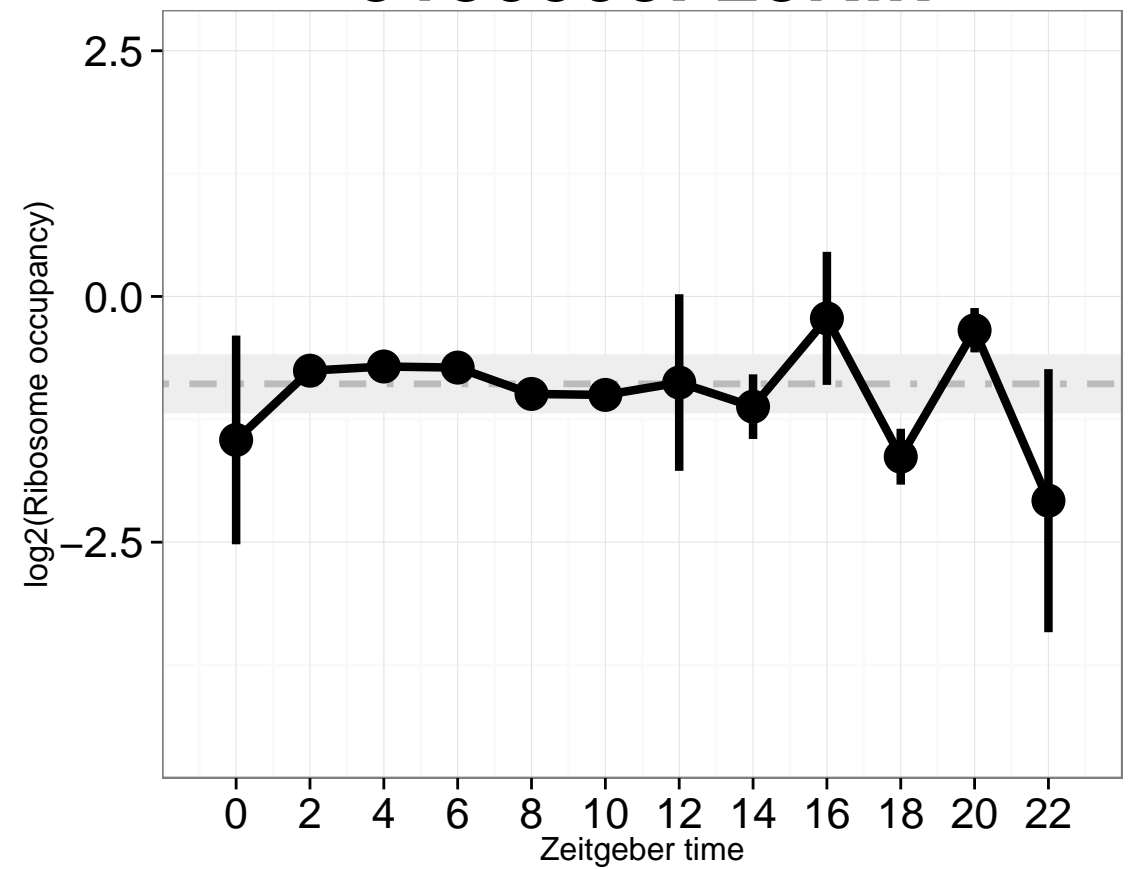

Supplement: Supplementary file 3247 [file 1]

# C1qtnf2

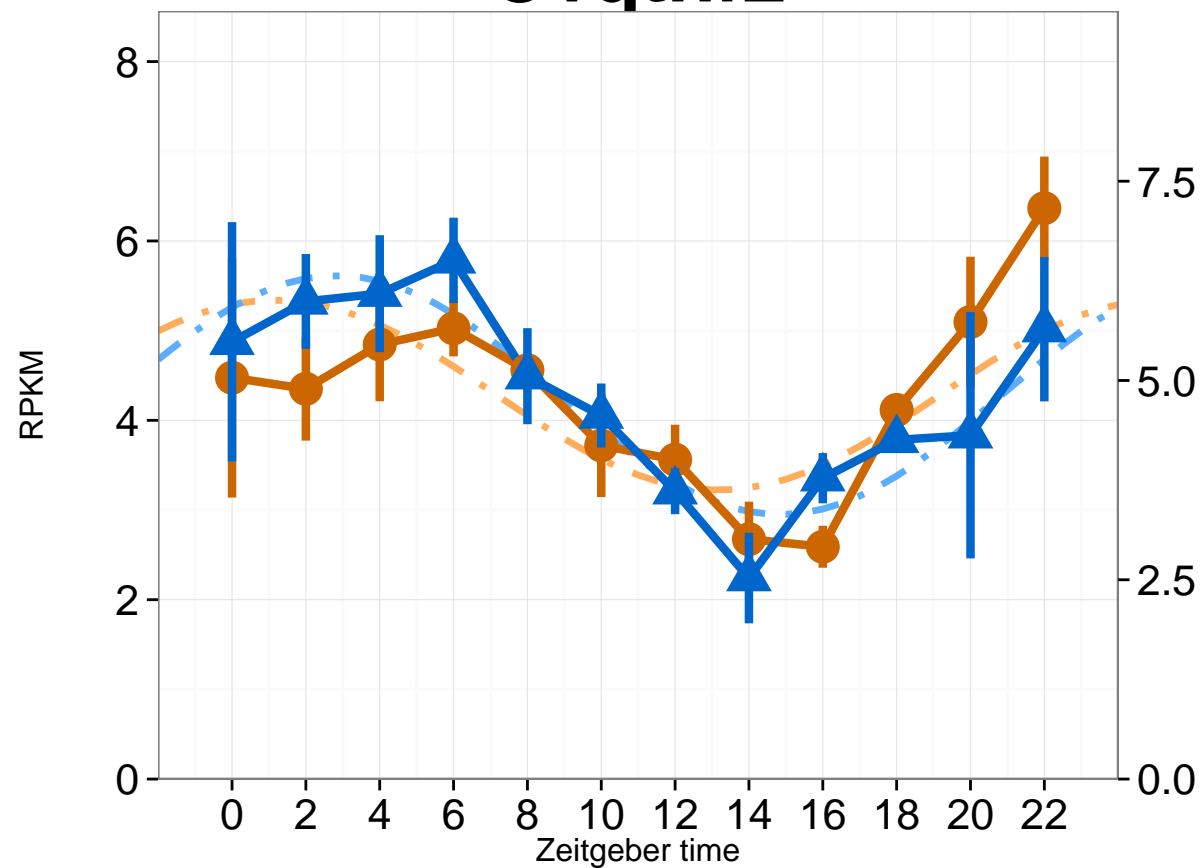

# C1qtnf2

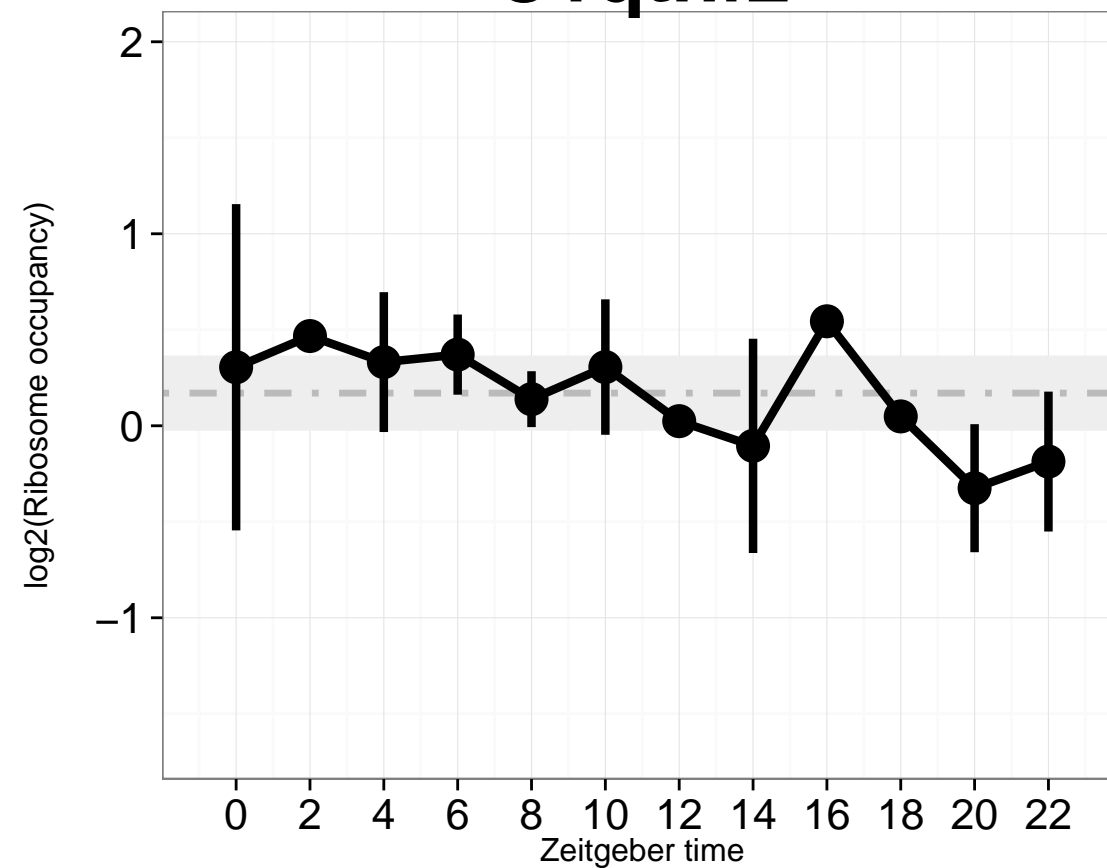

Supplement: Supplementary file 3248 [file 1]

# Igfbp1

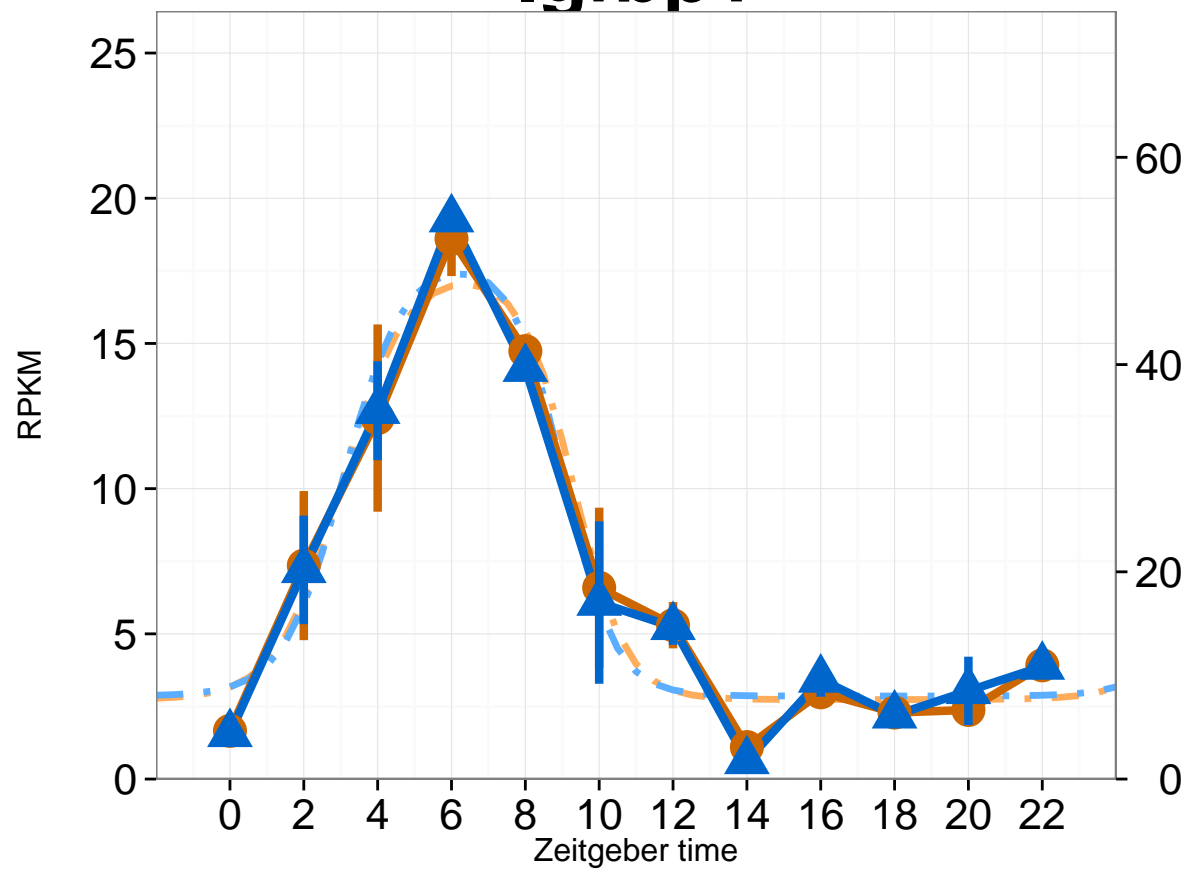

# Igfbp1

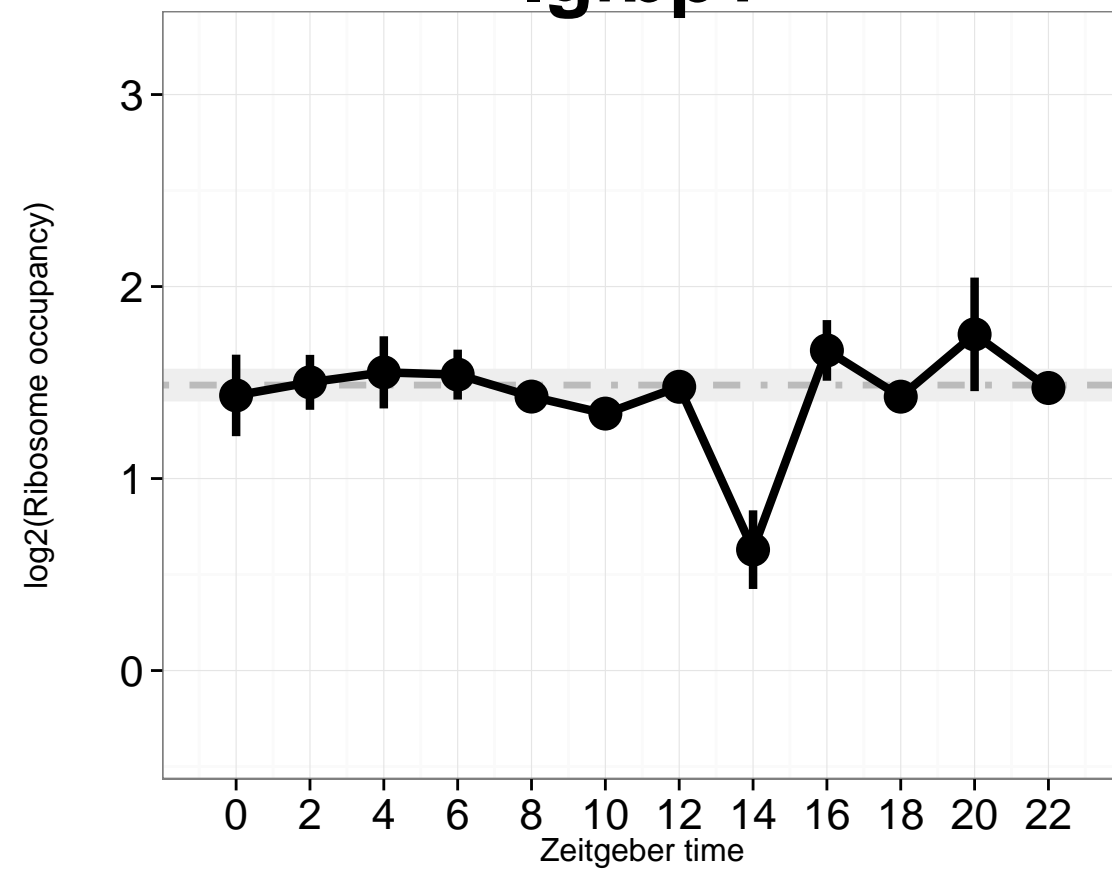

Supplement: Supplementary file 3249 [file 1]

## A630007B06Rik

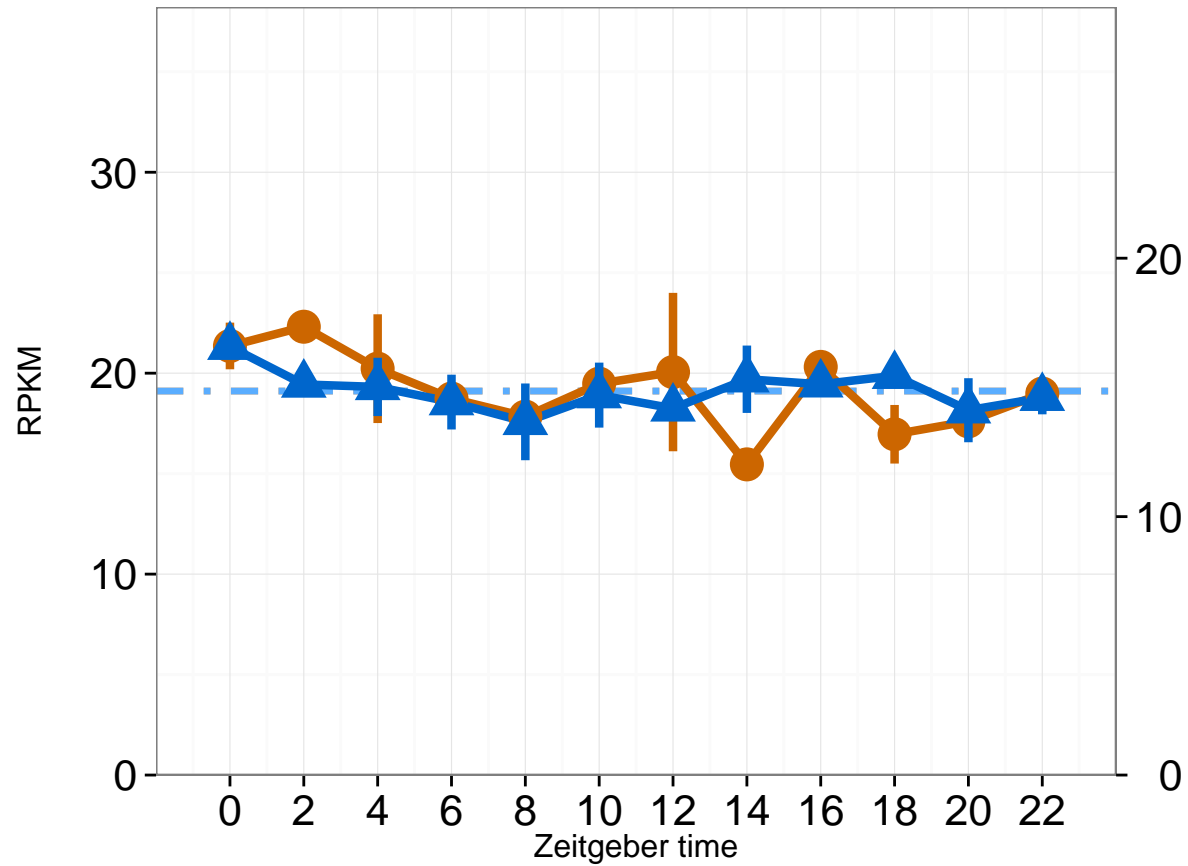

## A630007B06Rik

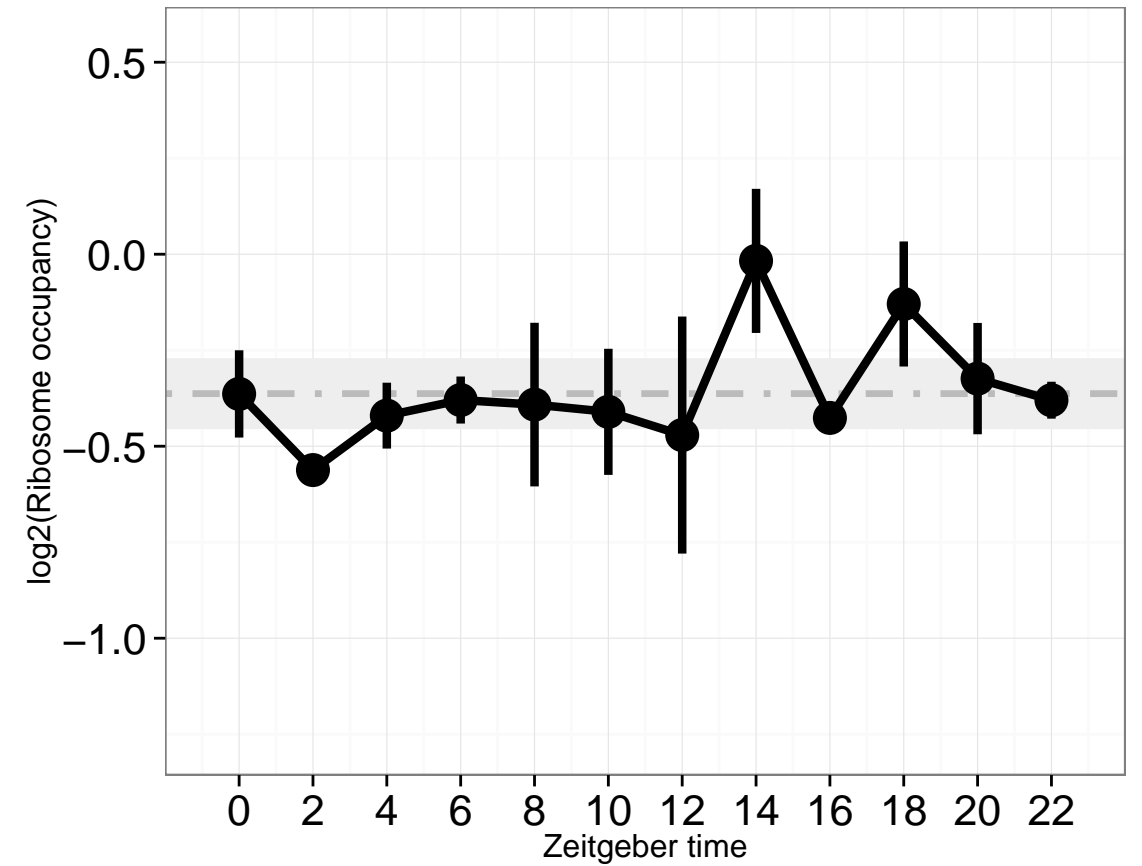

Supplement: Supplementary file 3250 [file 1]

## Lbp

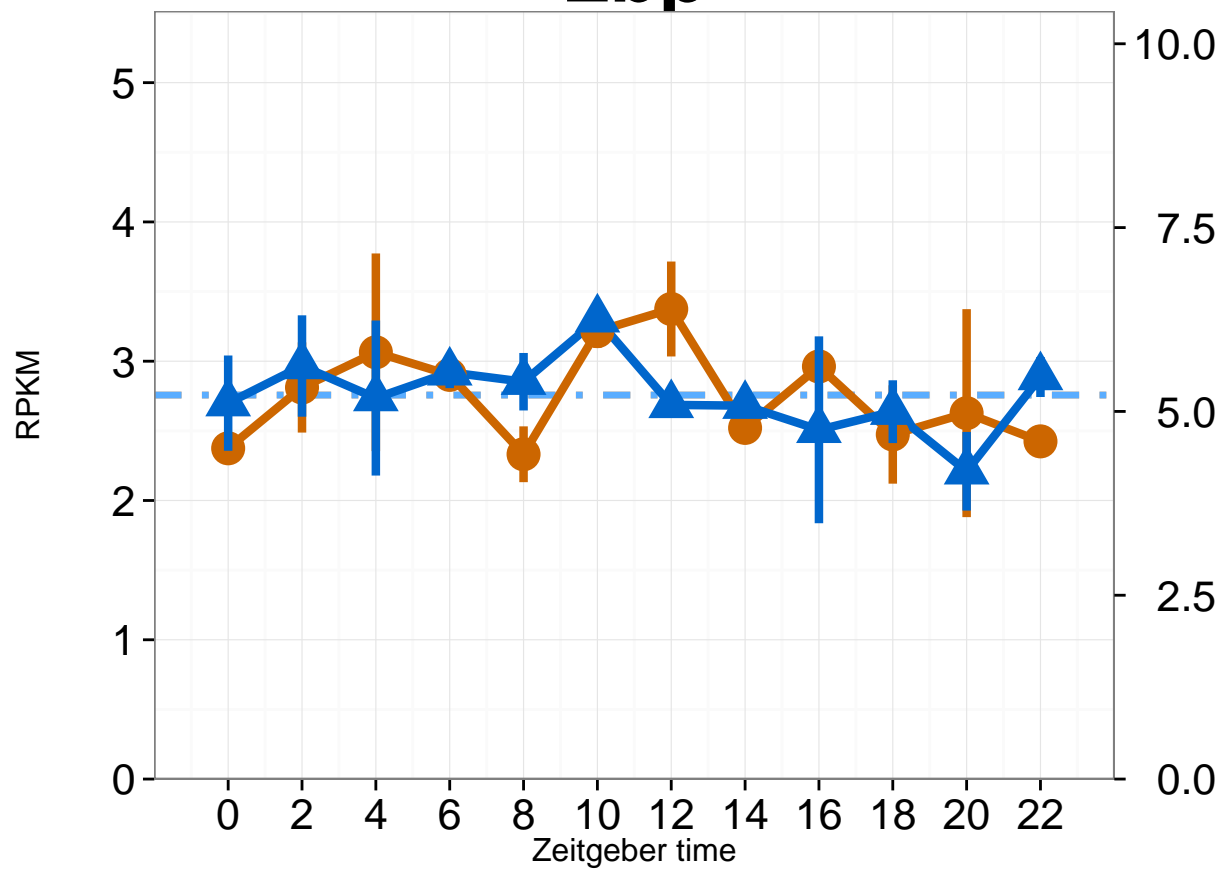

## Lbp

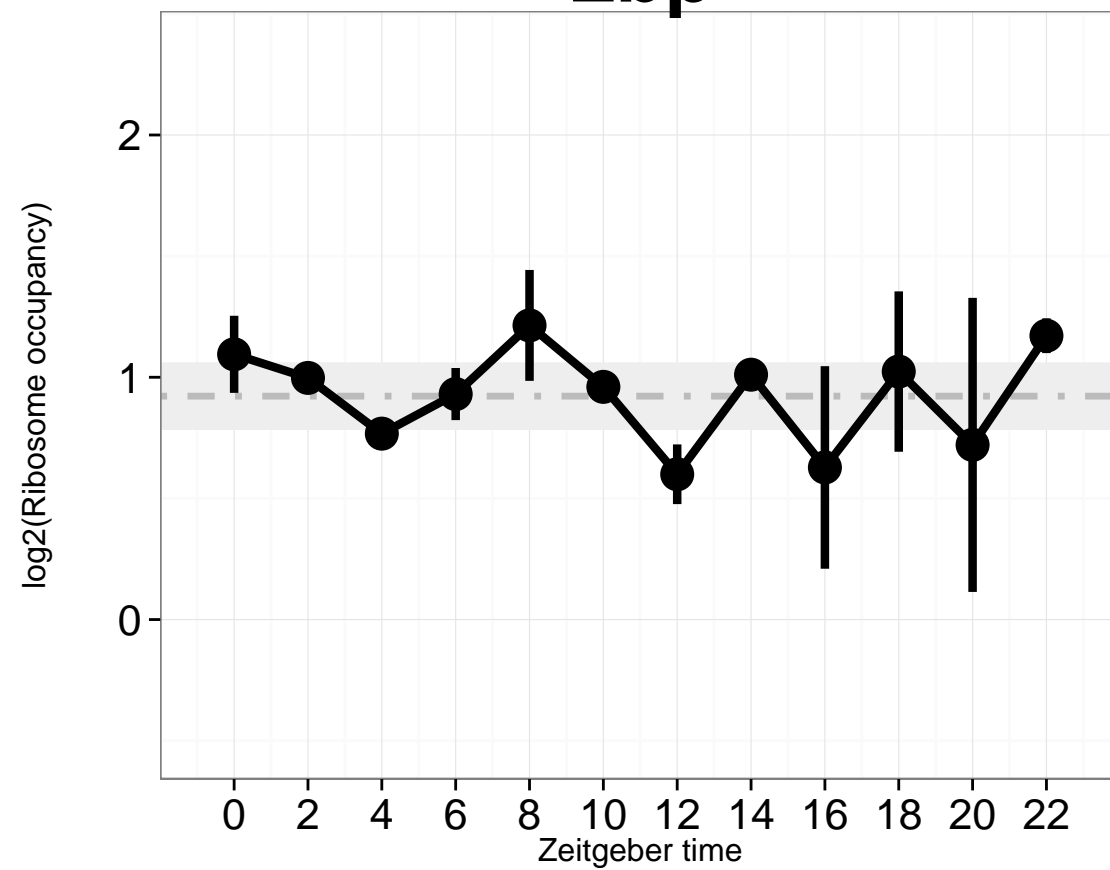

Supplement: Supplementary file 3251 [file 1]

# Srp19

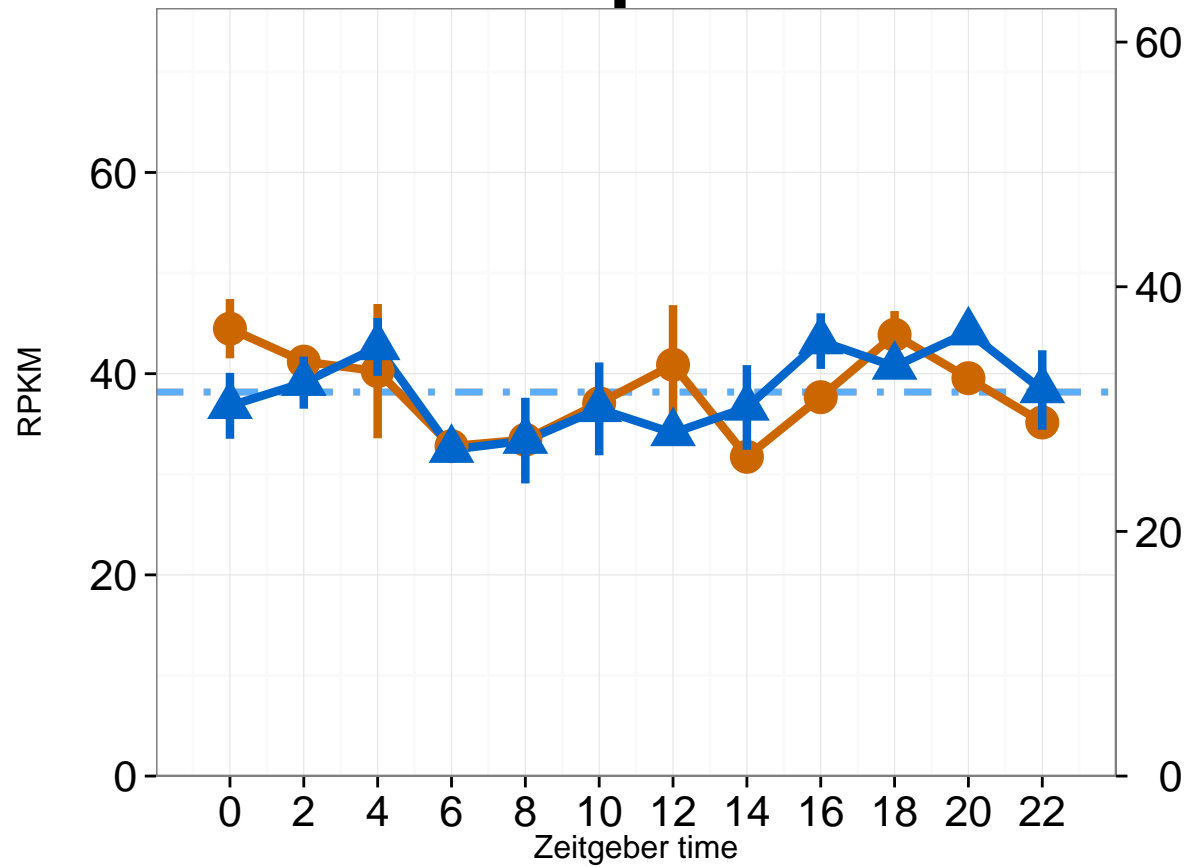

# Srp19

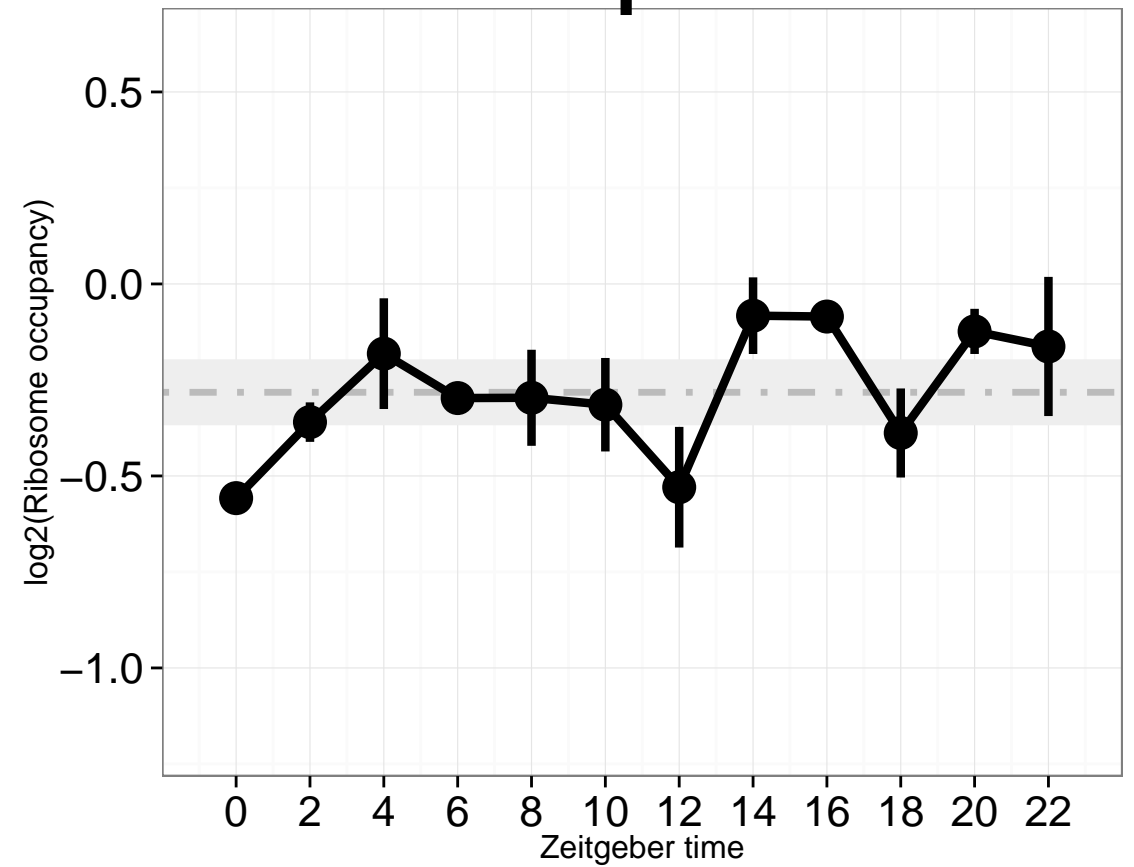

Supplement: Supplementary file 3252 [file 1]

# Hiat1

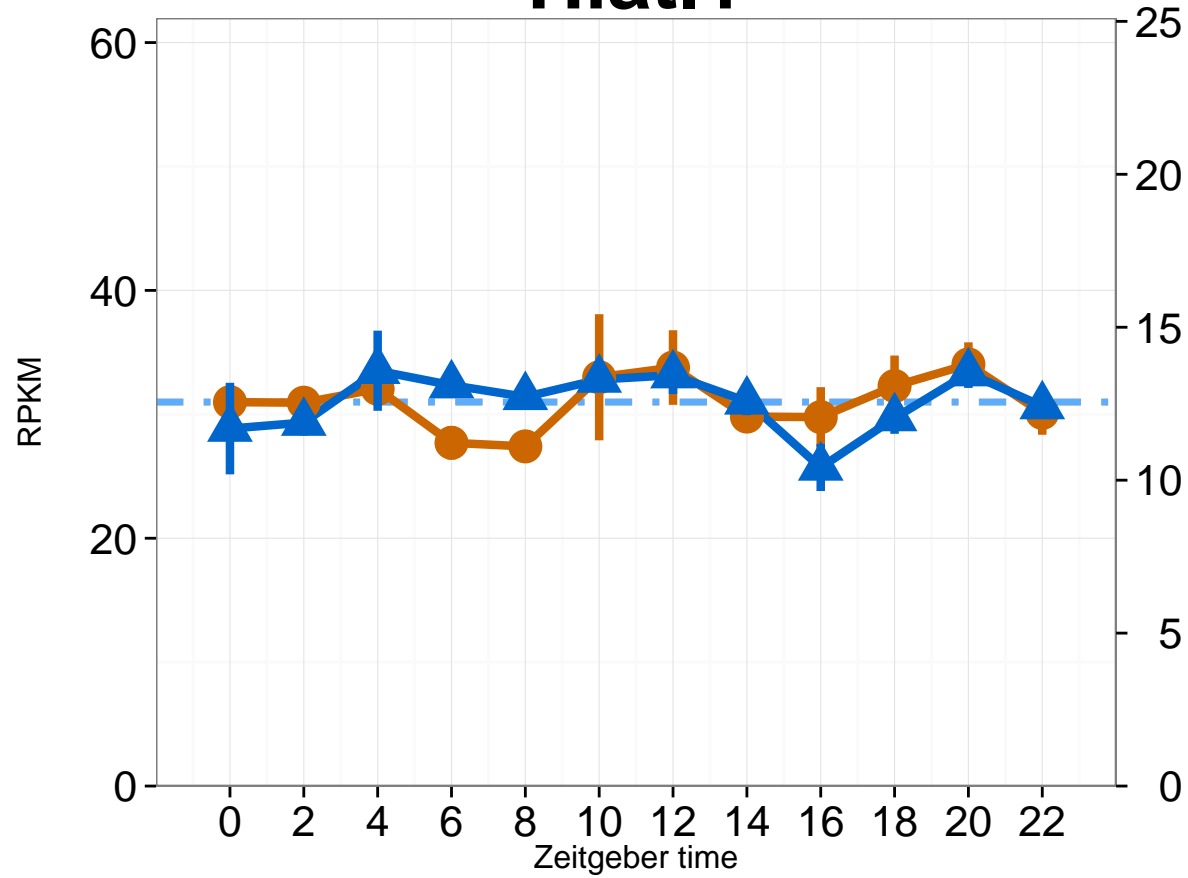

# Hiat1

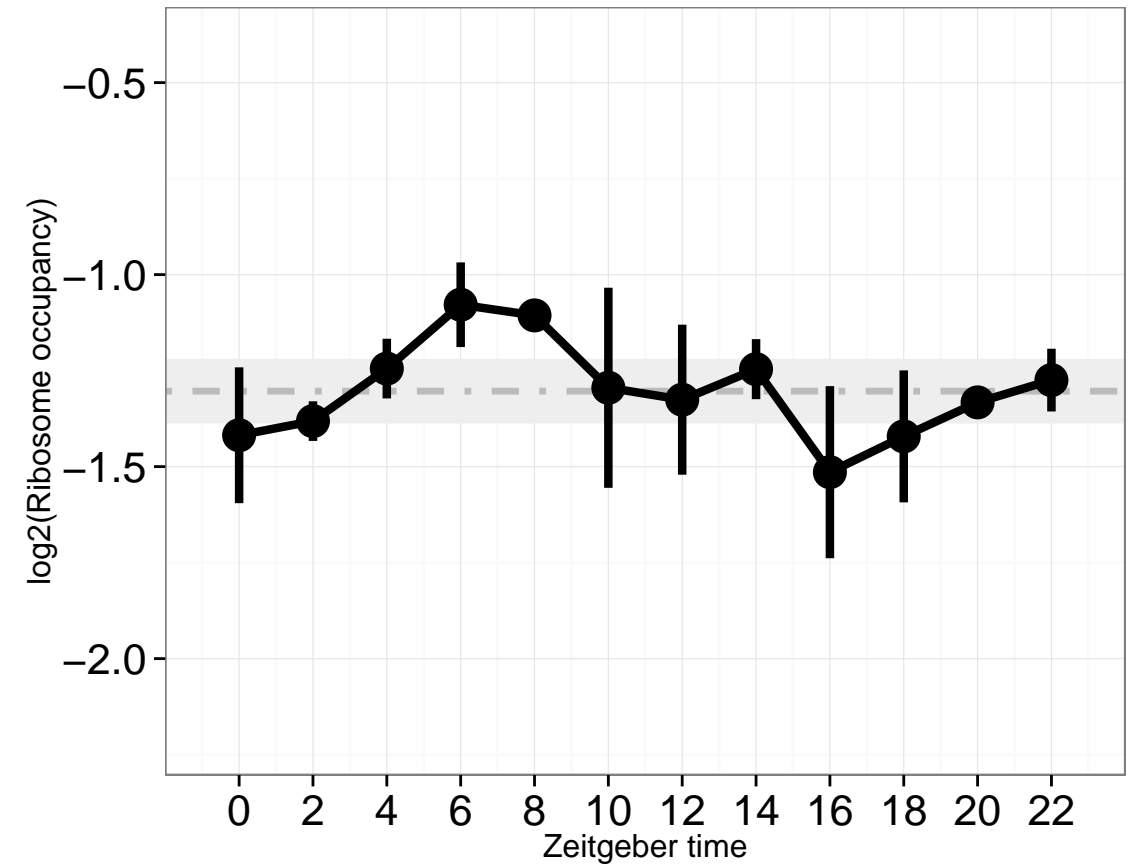

Supplement: Supplementary file 3253 [file 1]

## Adck5

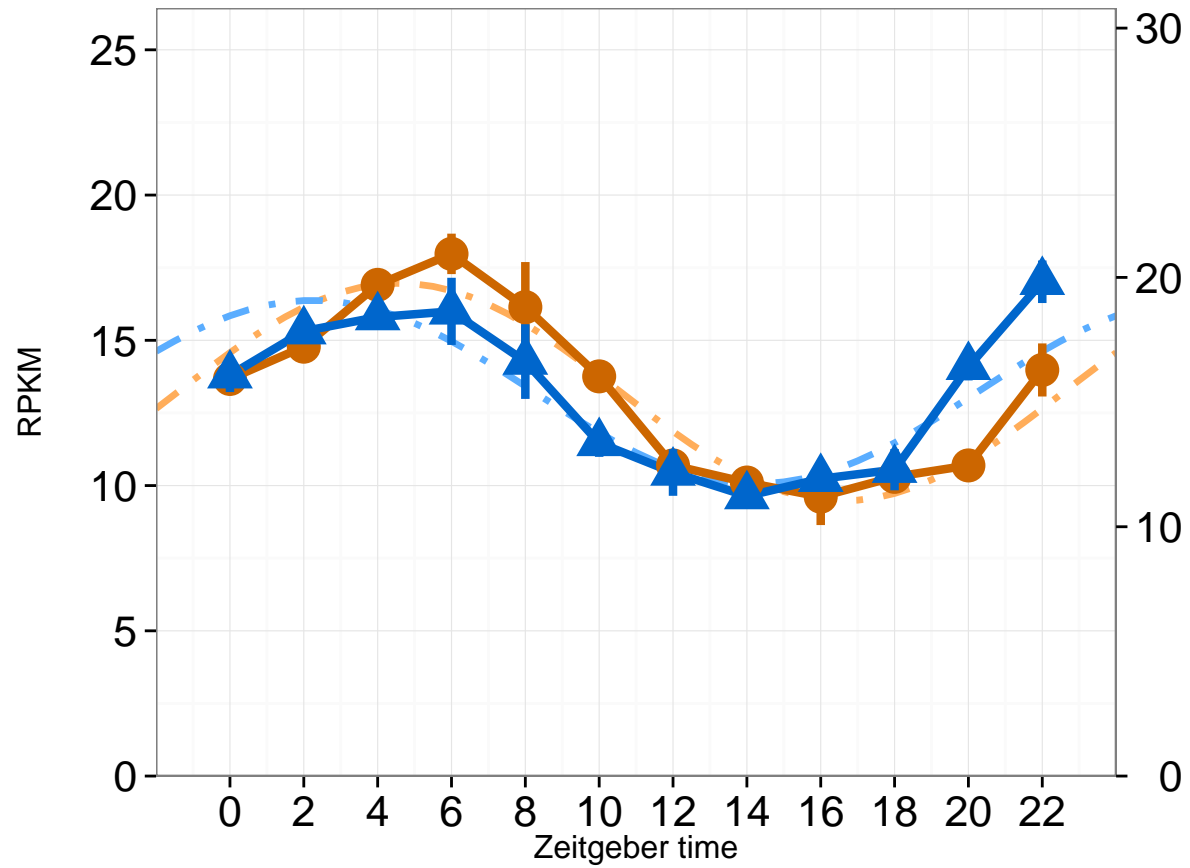

## Adck5

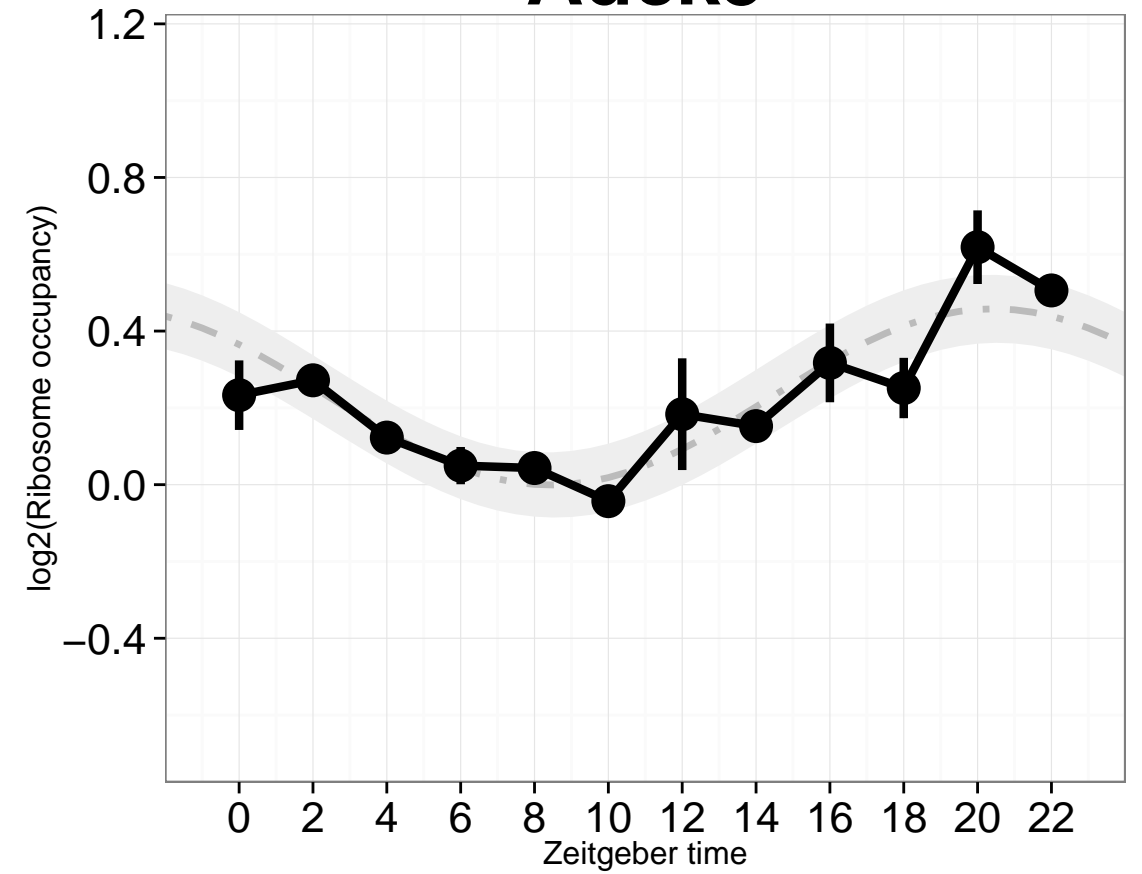

Supplement: Supplementary file 3254 [file 1]

# Akr1d1

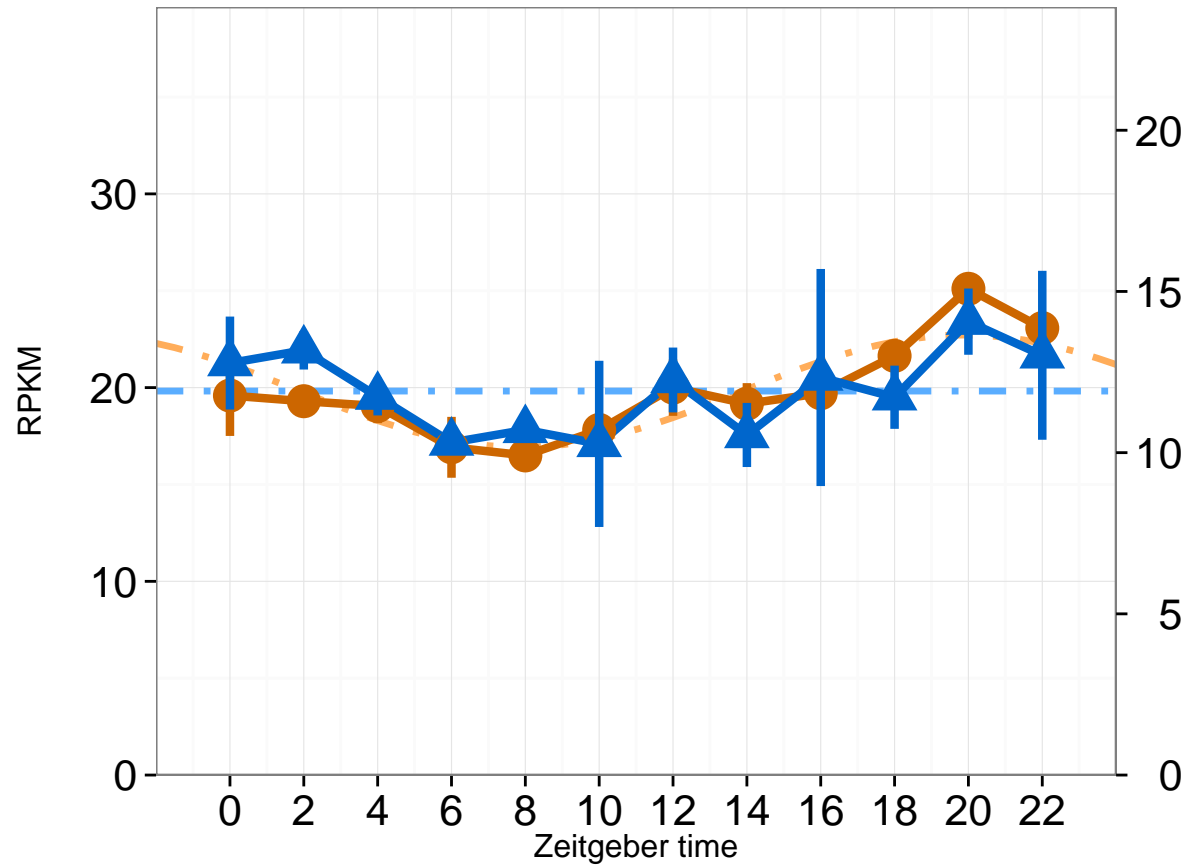

# Akr1d1

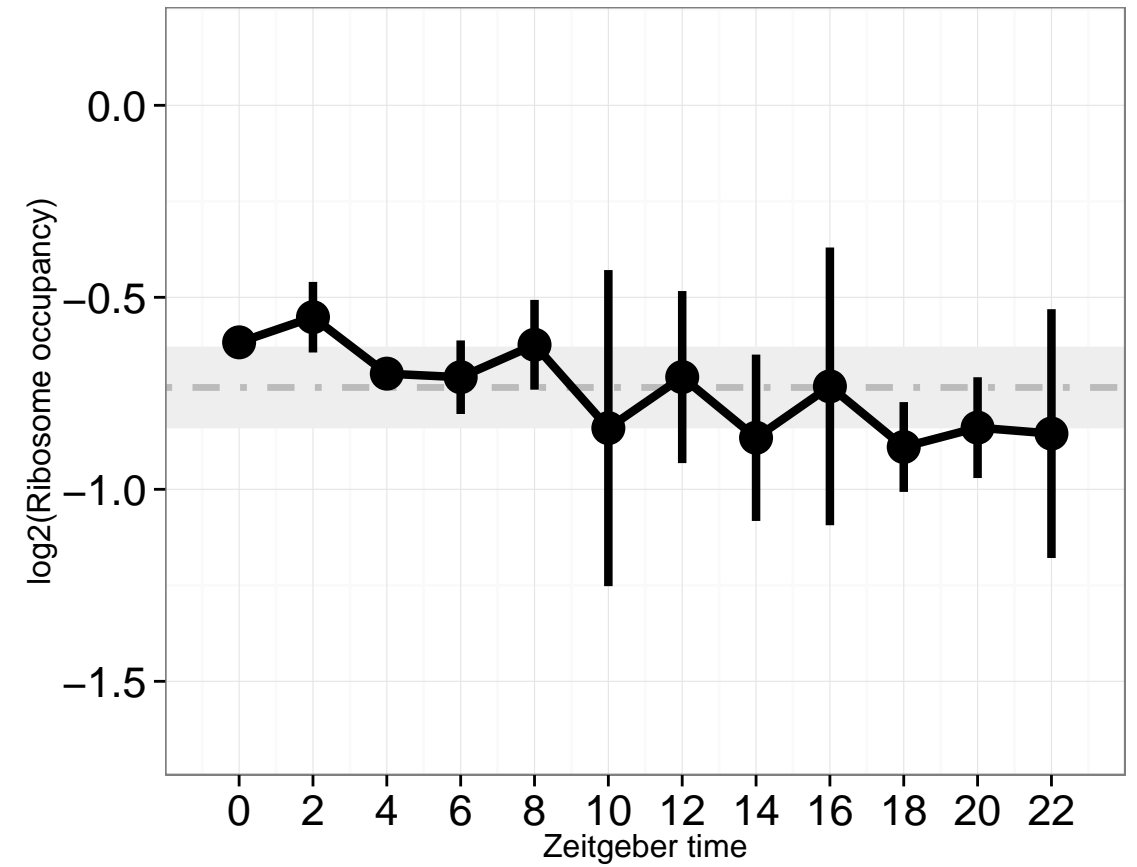

Supplement: Supplementary file 3255 [file 1]

# Trmt12

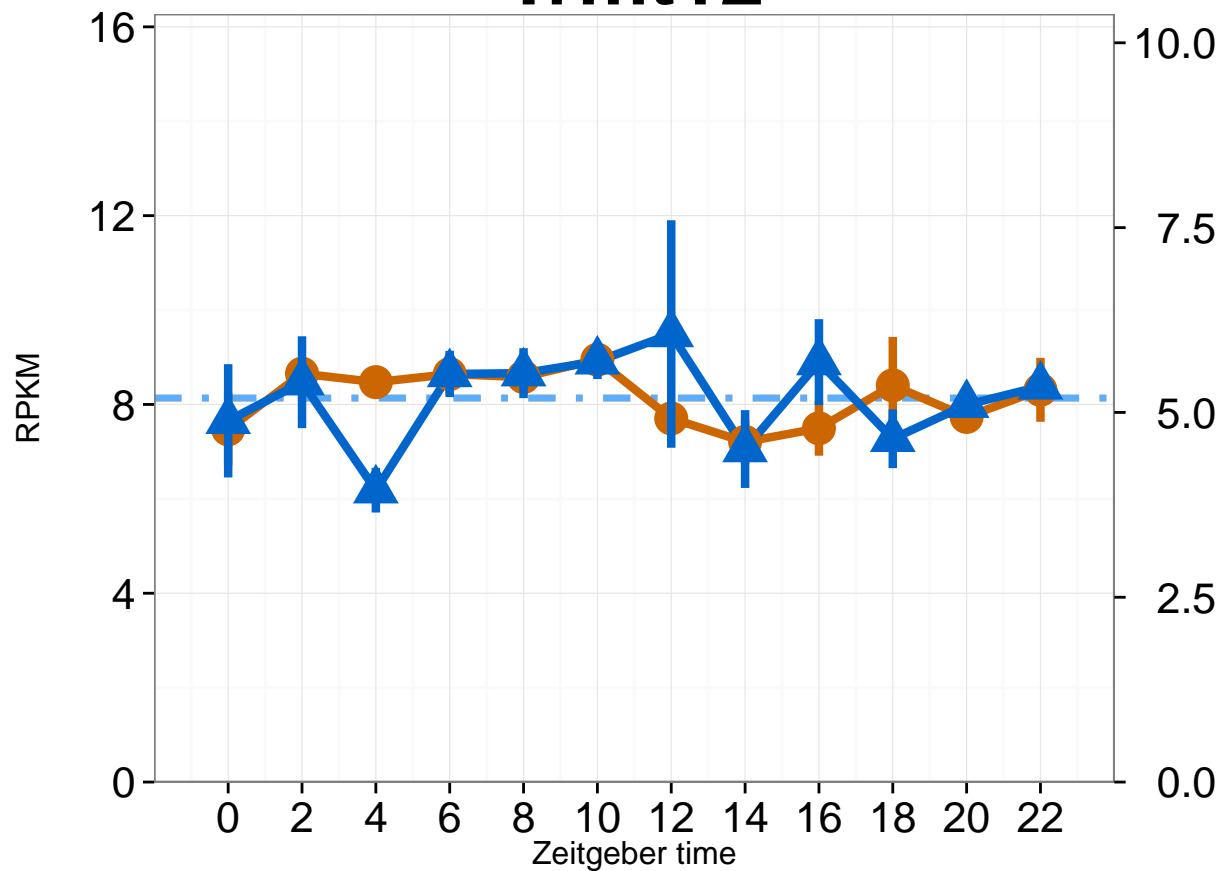

# Trmt12

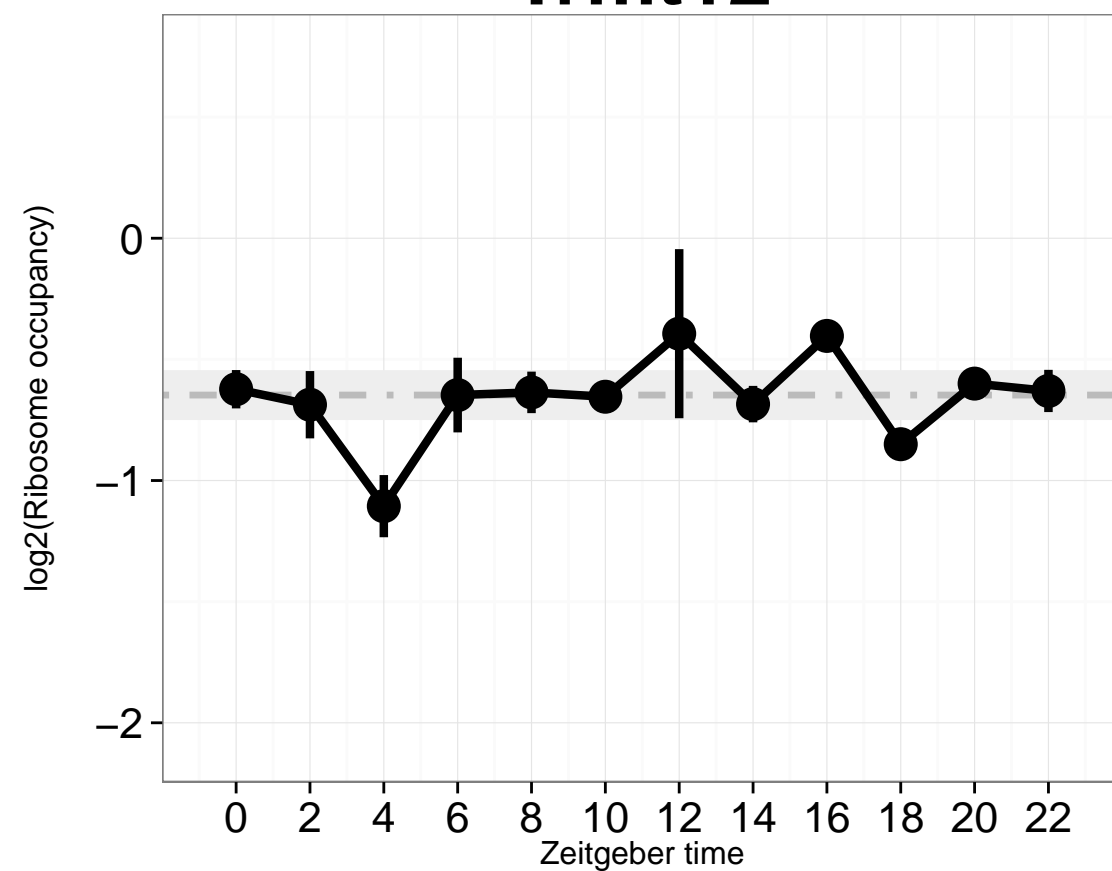

Supplement: Supplementary file 3256 [file 1]

# B9d1

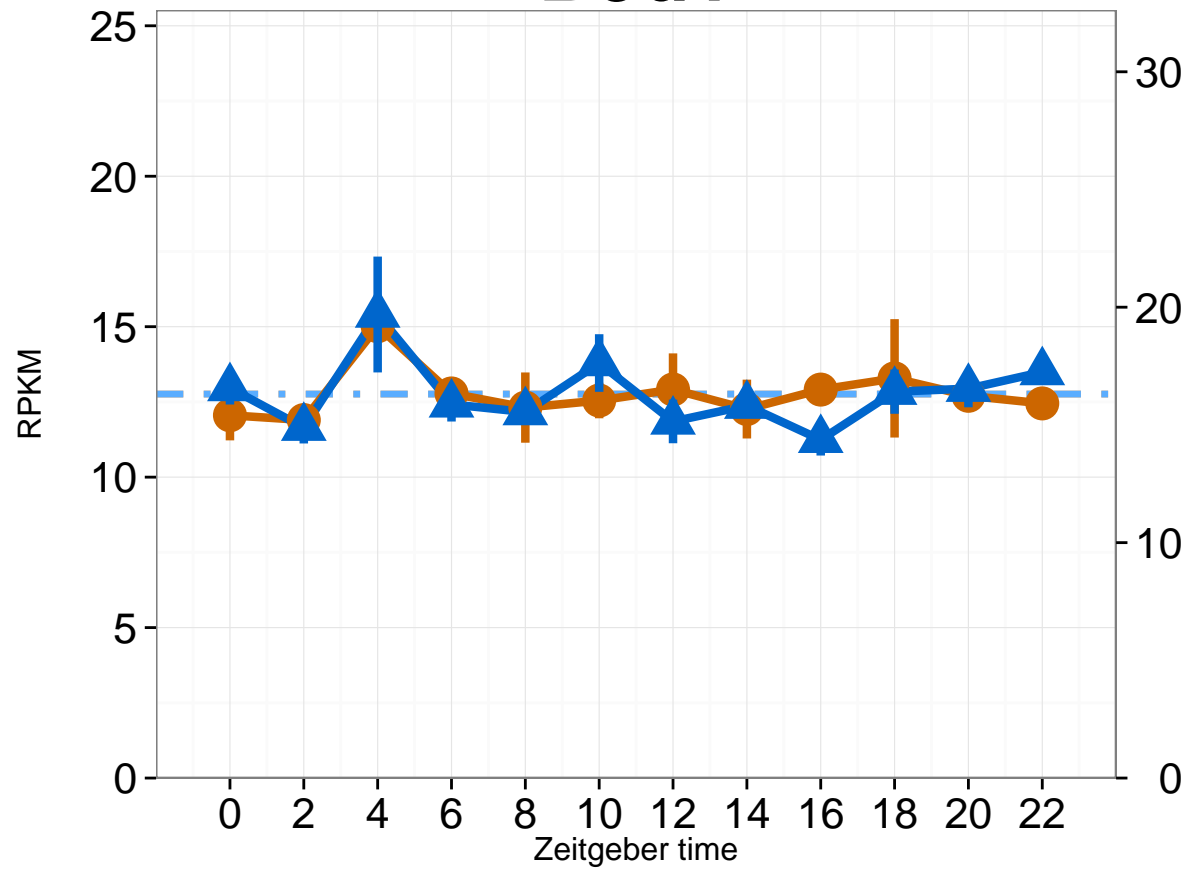

# B9d1

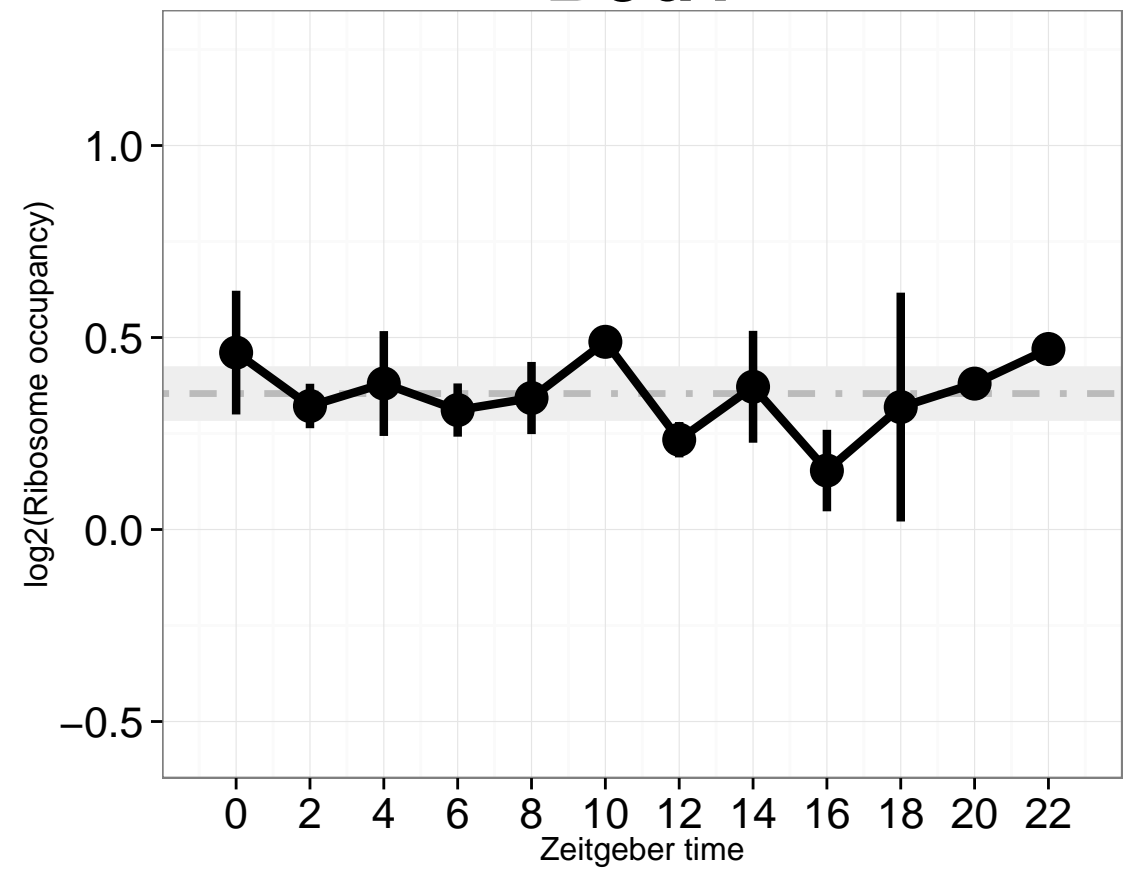

Supplement: Supplementary file 3257 [file 1]

# Coq2

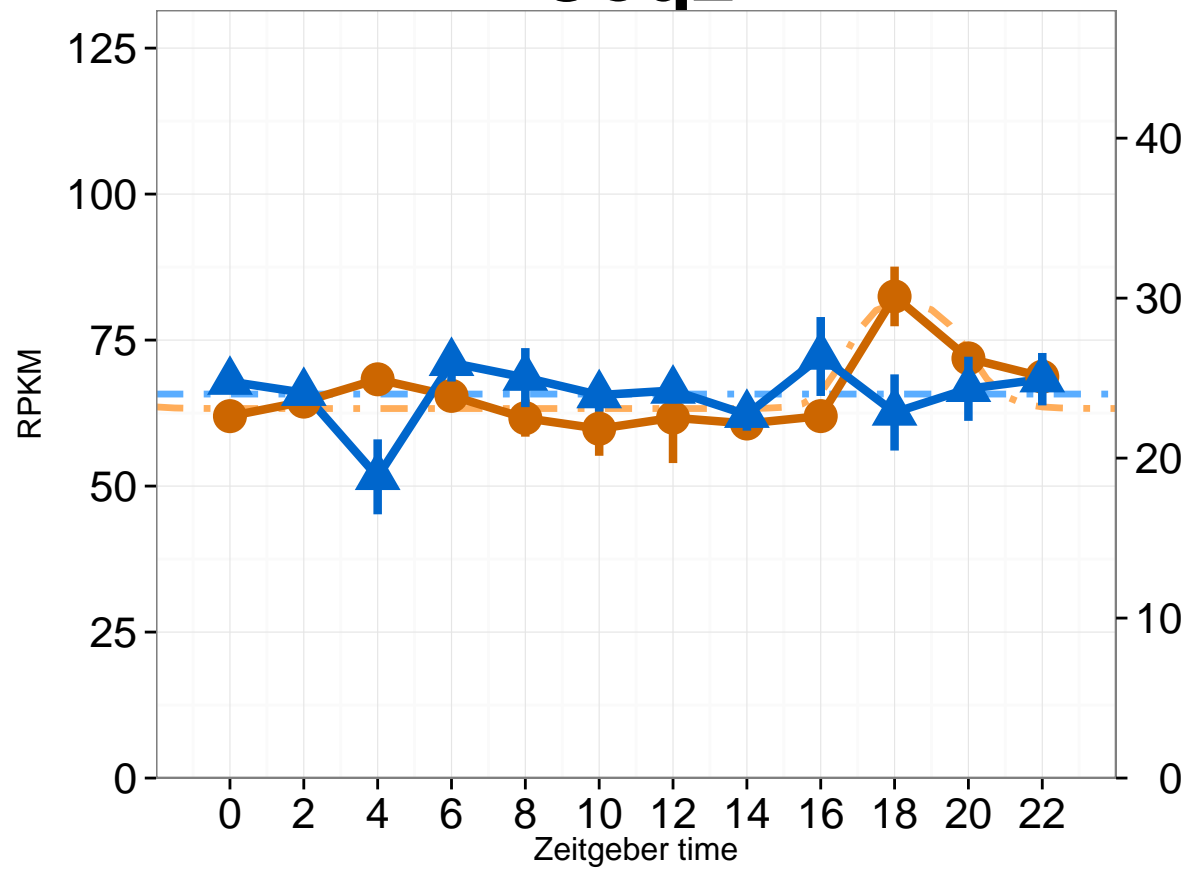

# Coq2

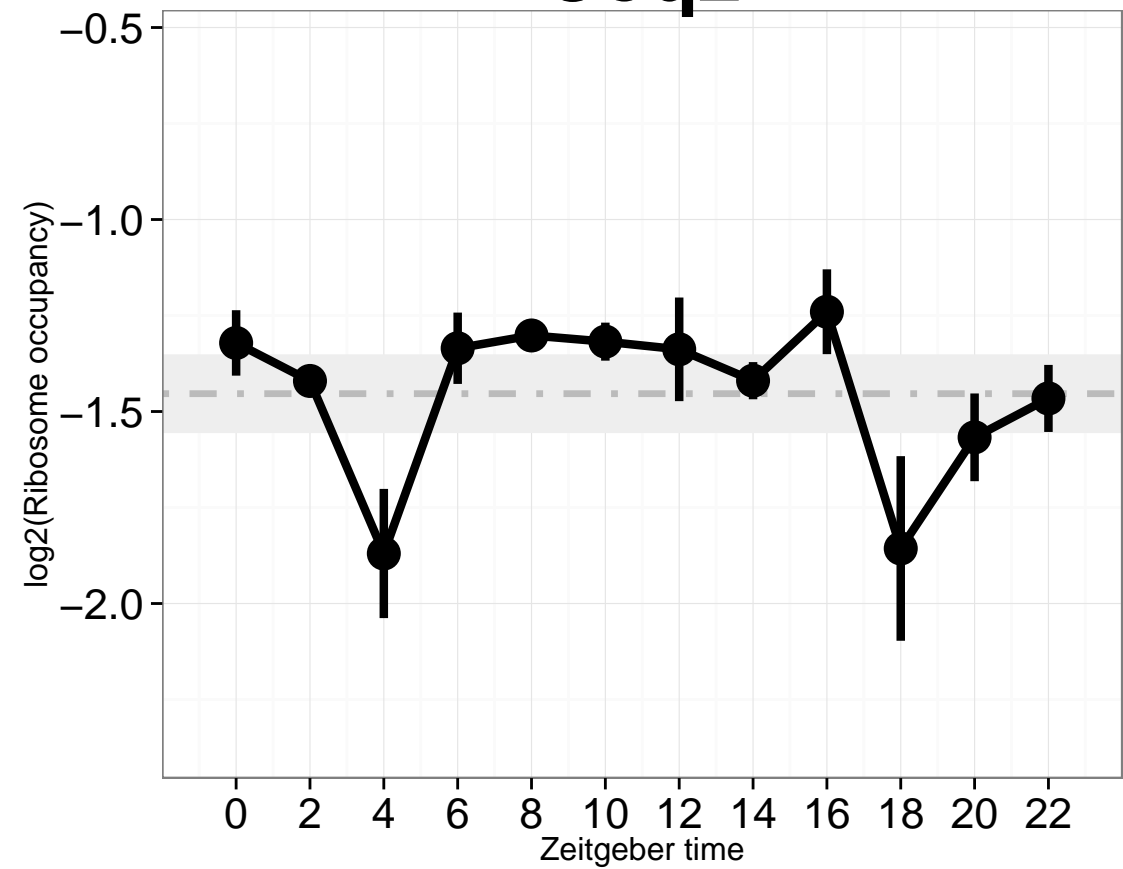

Supplement: Supplementary file 3258 [file 1]

## Fbxo33

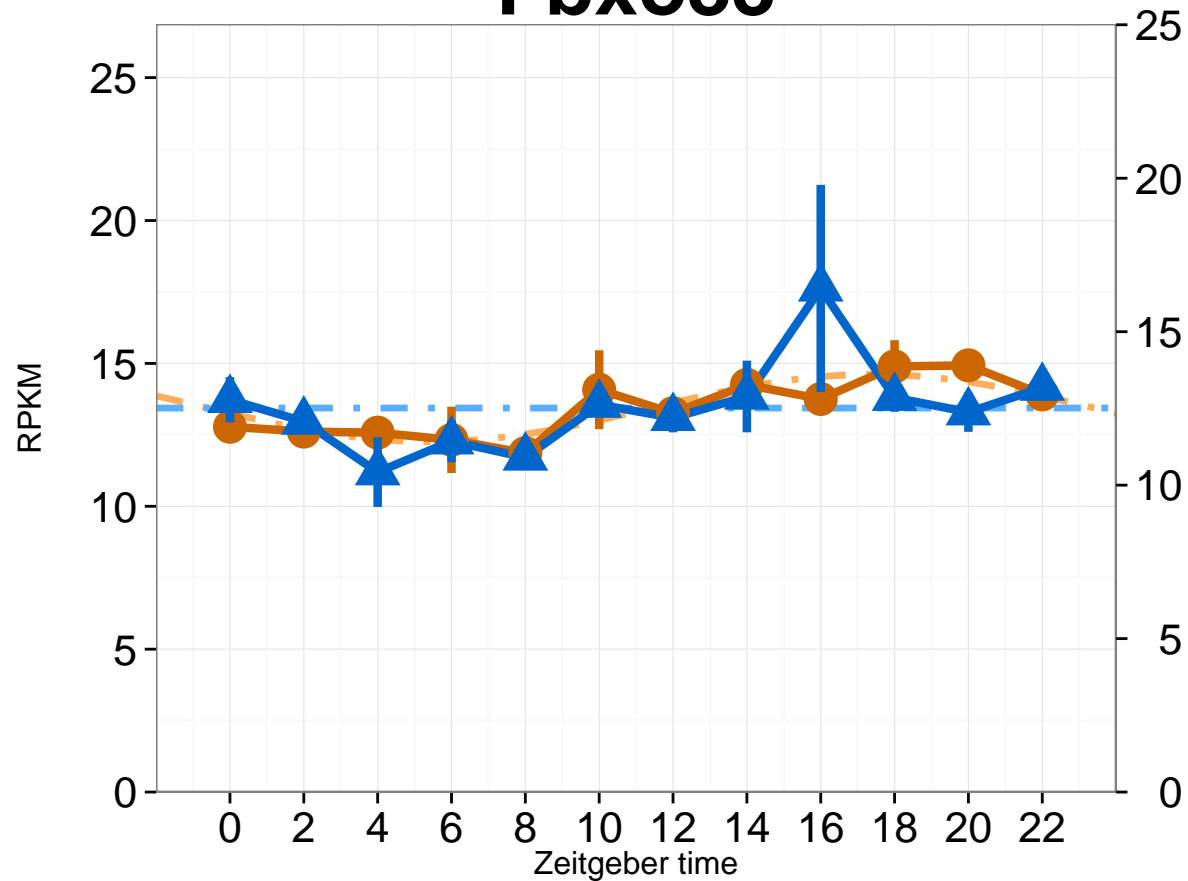

## Fbxo33

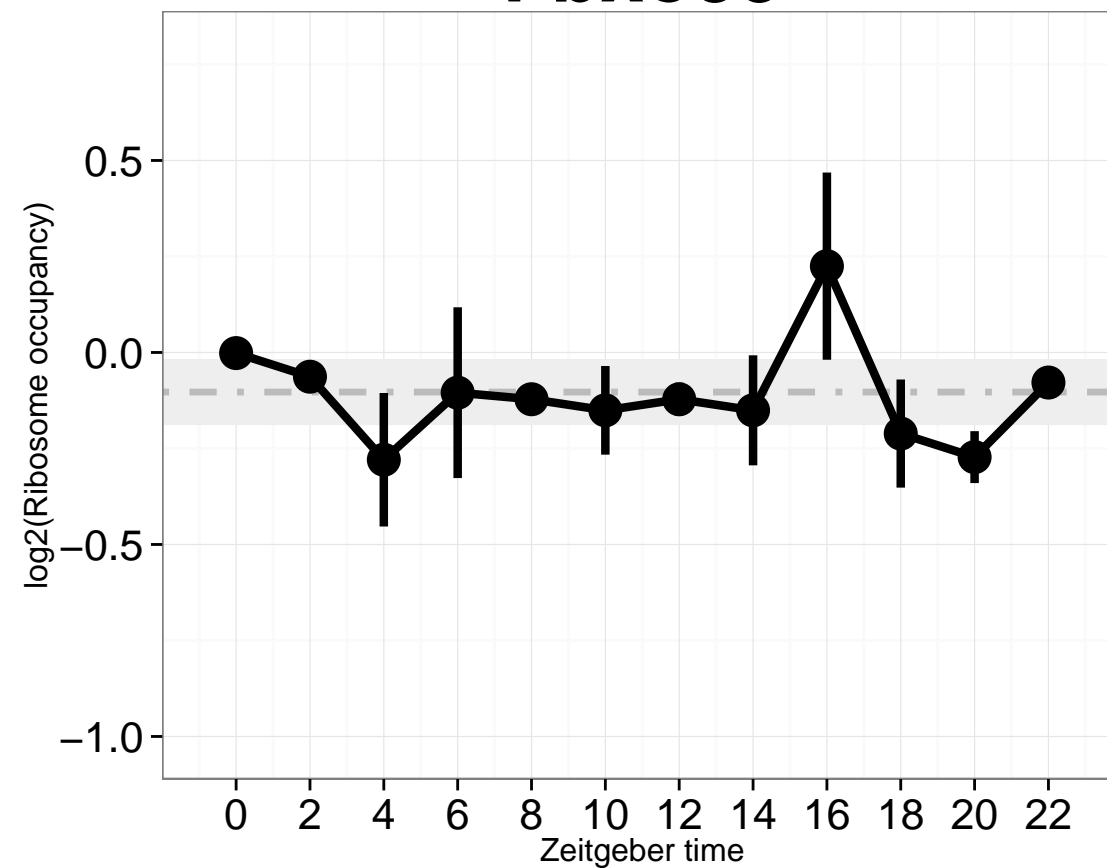

Supplement: Supplementary file 3259 [file 1]

## Aph1b

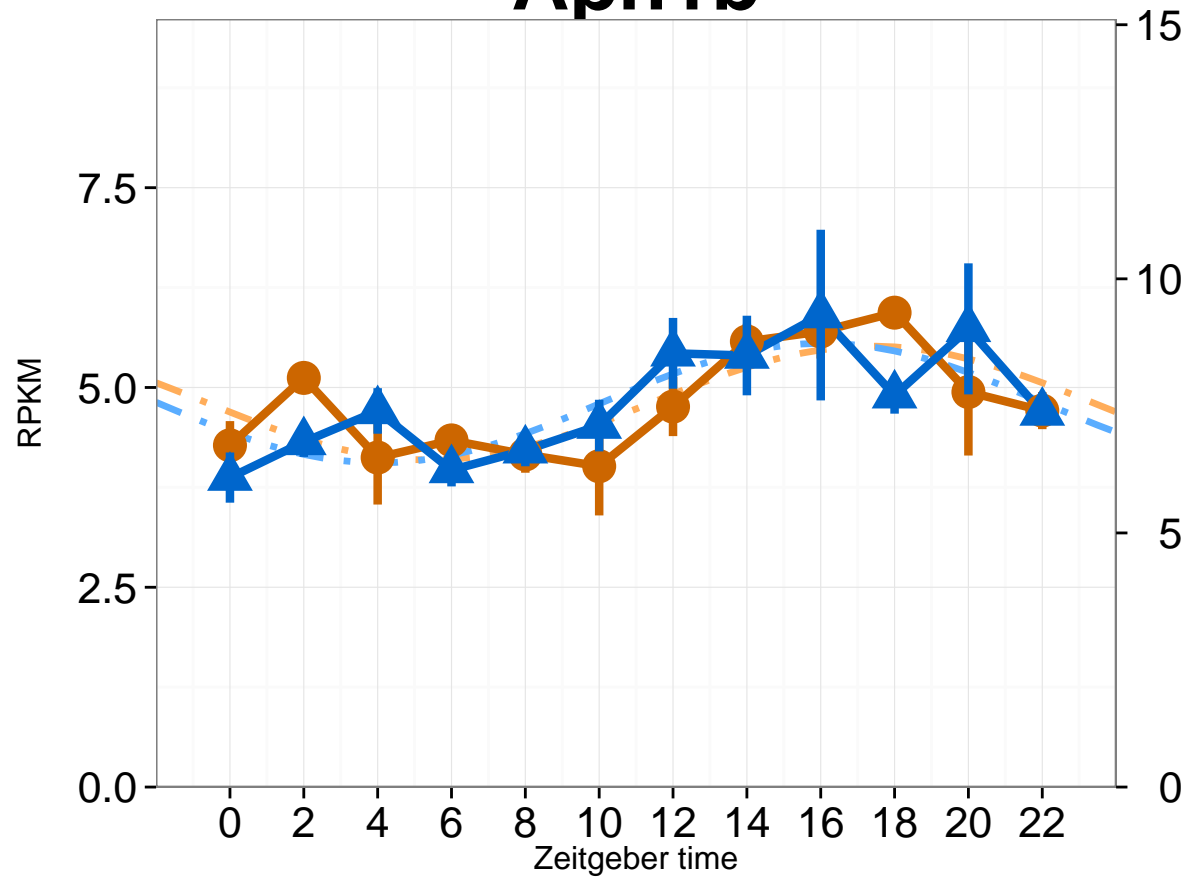

## Aph1b

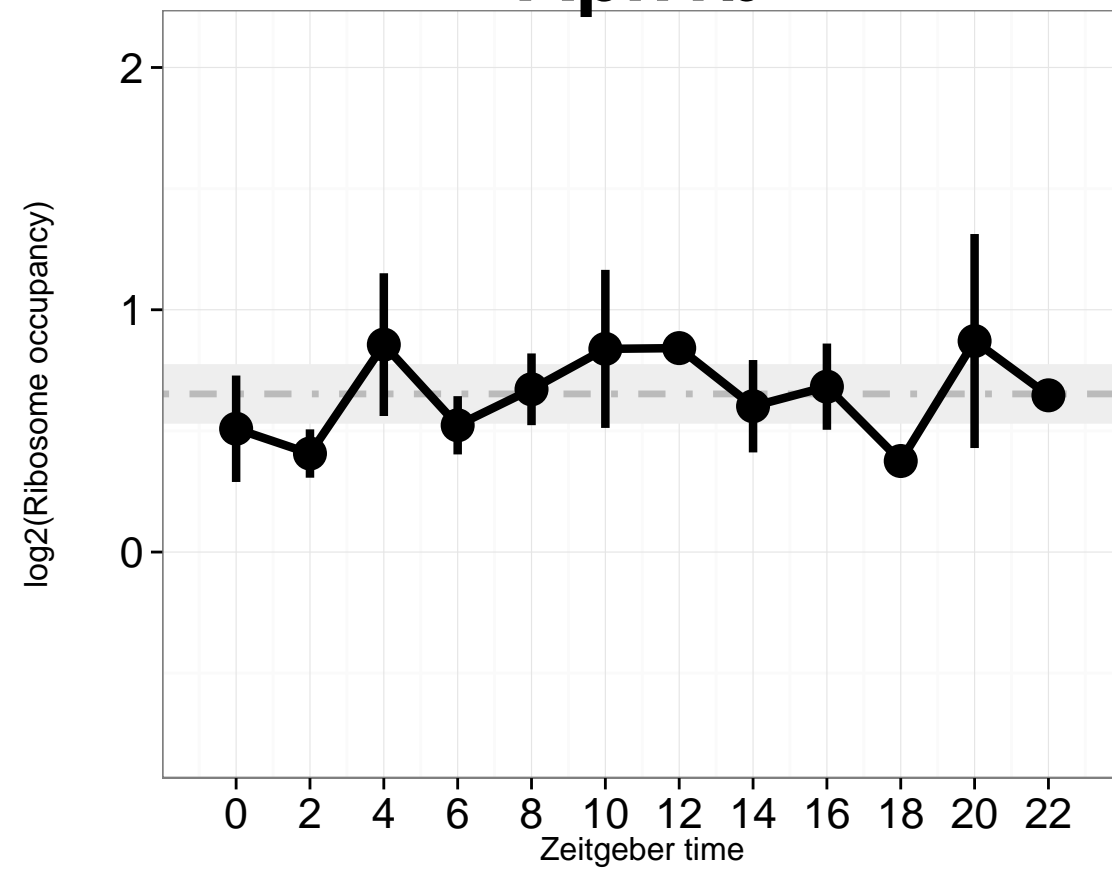

Supplement: Supplementary file 3260 [file 1]

# Cspg4

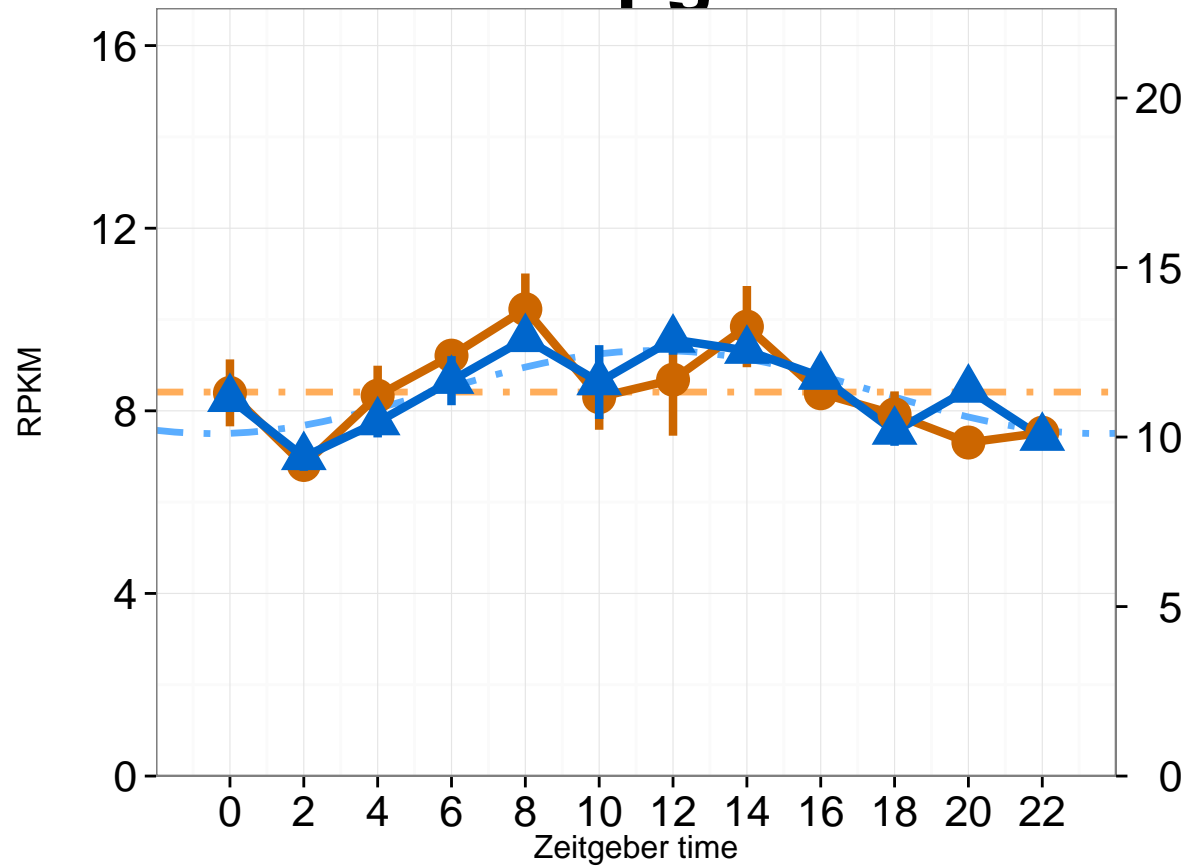

# Cspg4

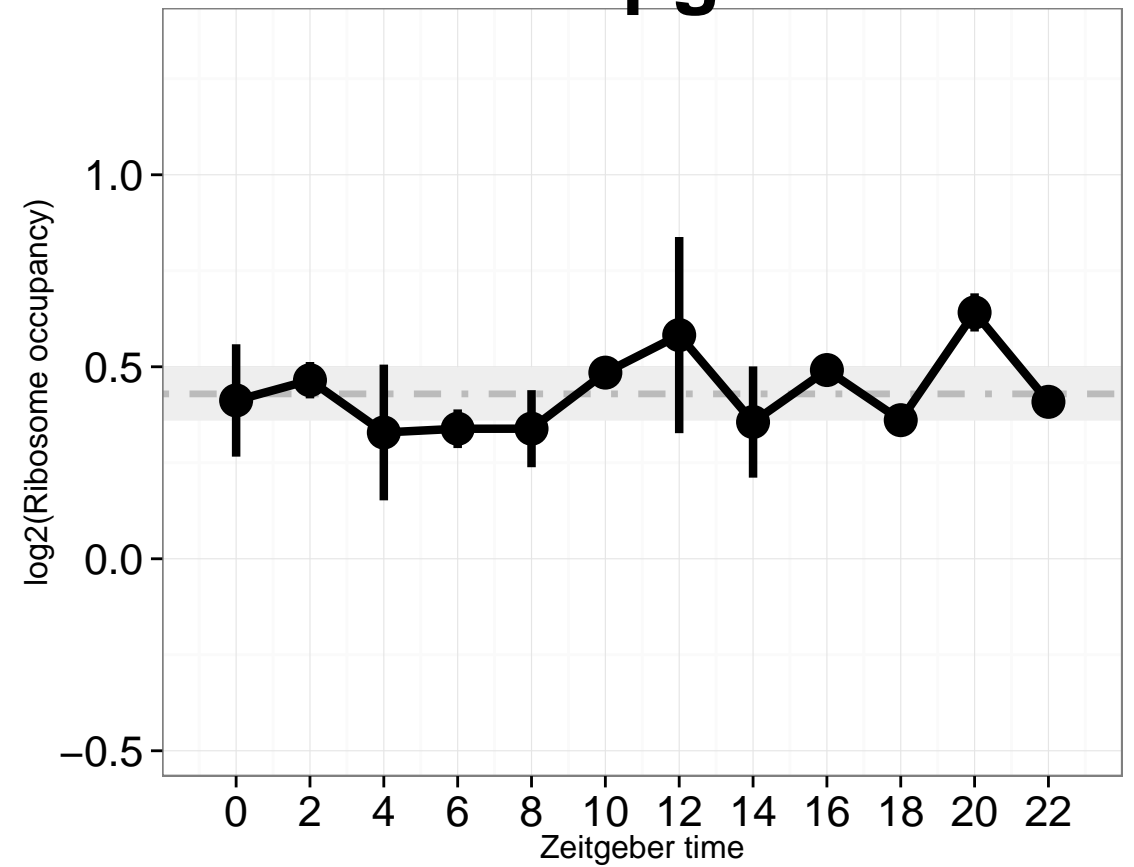

Supplement: Supplementary file 3261 [file 1]

## Yrdc

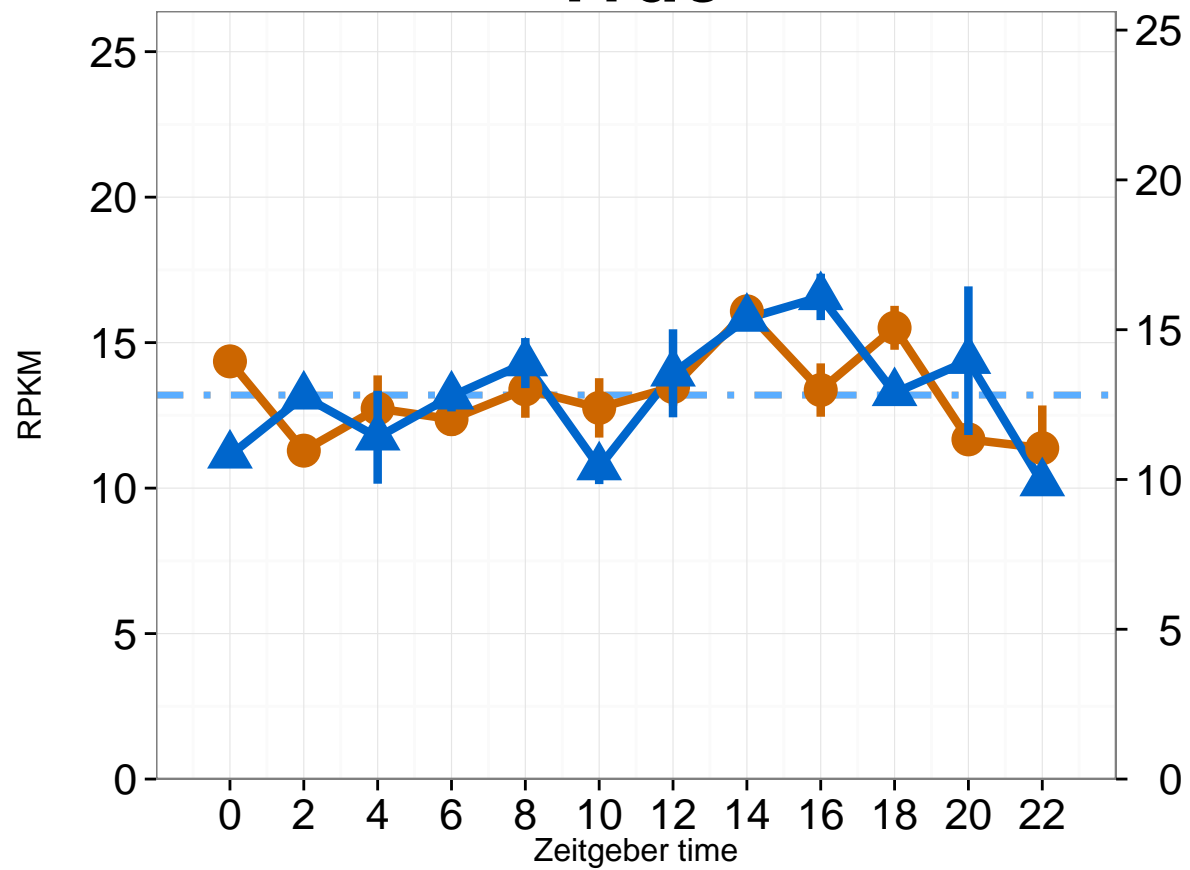

## Yrdc

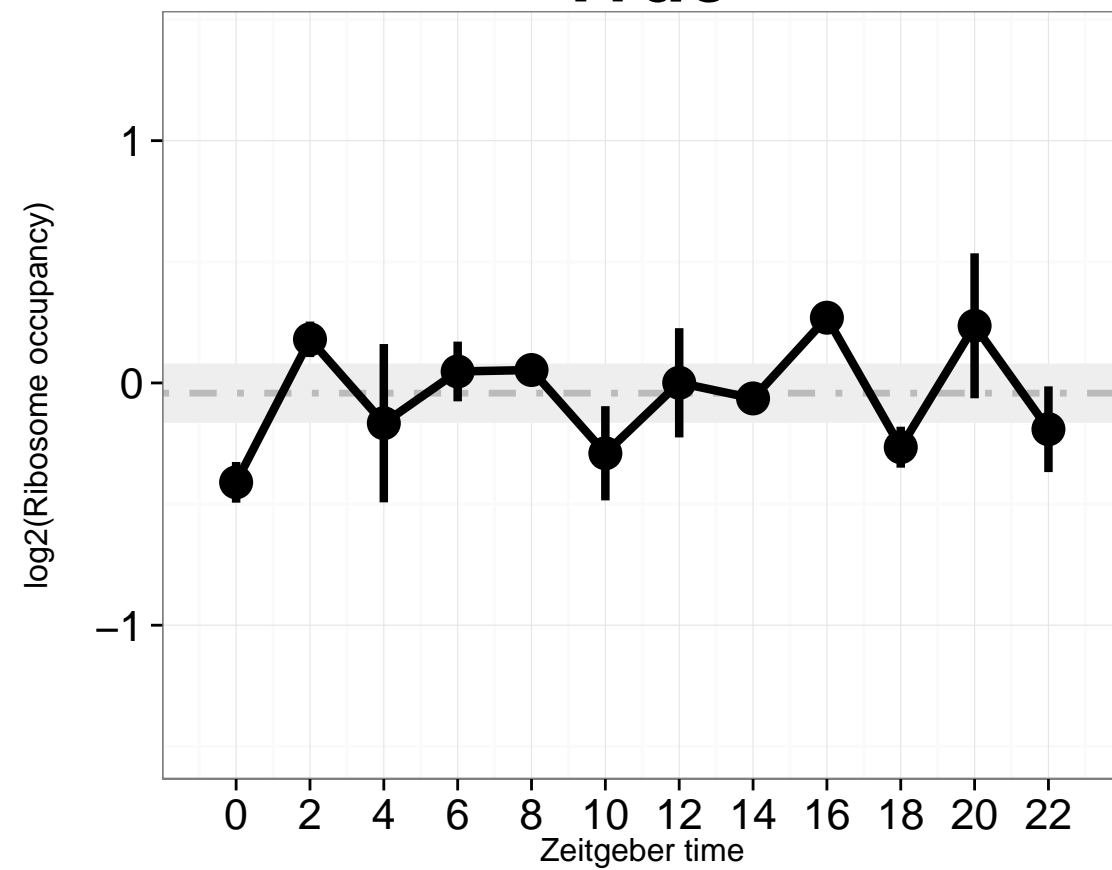

Supplement: Supplementary file 3262 [file 1]

## Acy3

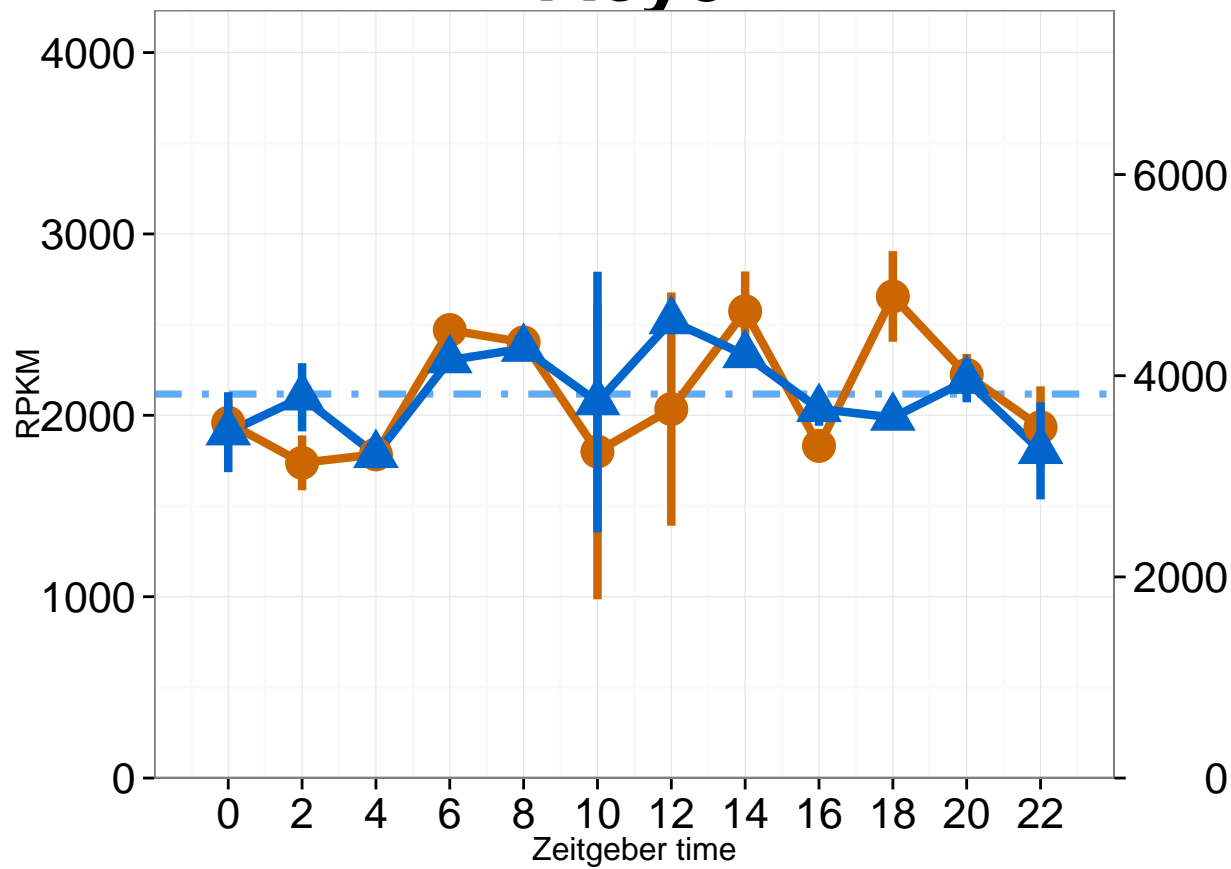

## Acy3

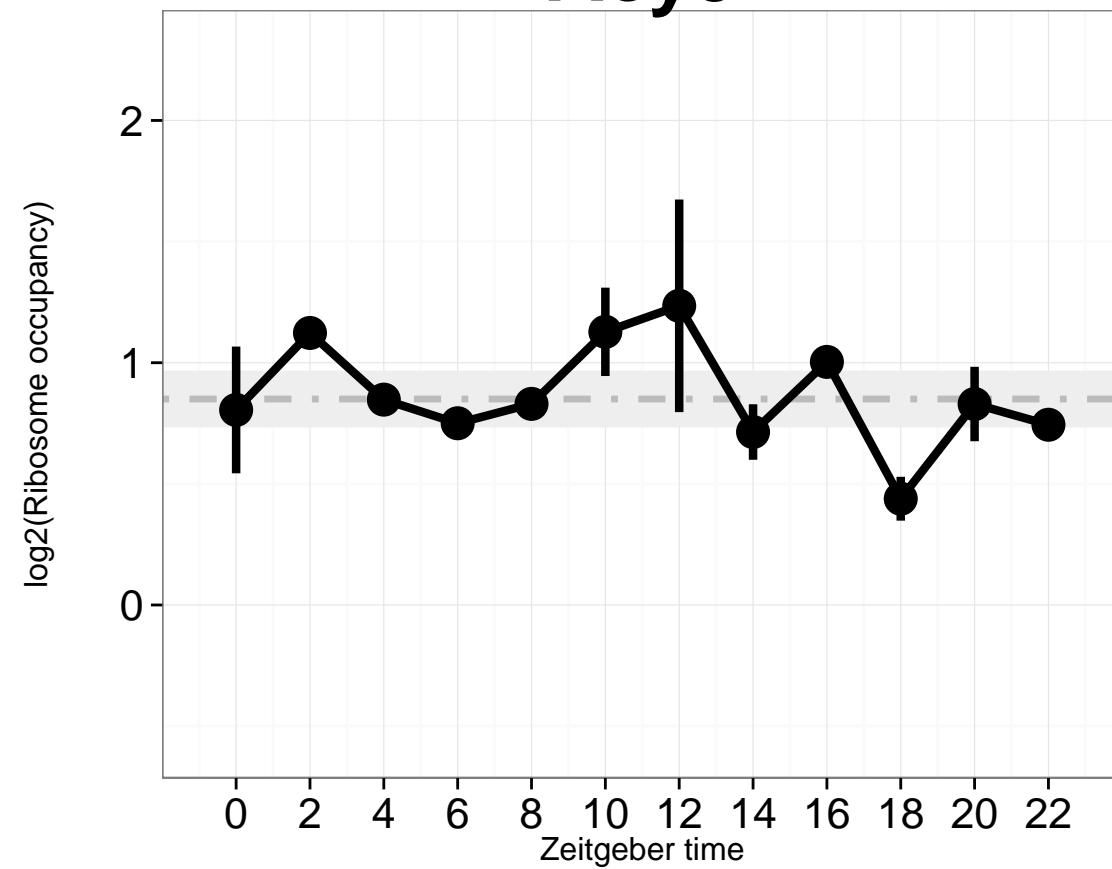

Supplement: Supplementary file 3263 [file 1]

## Rdh14

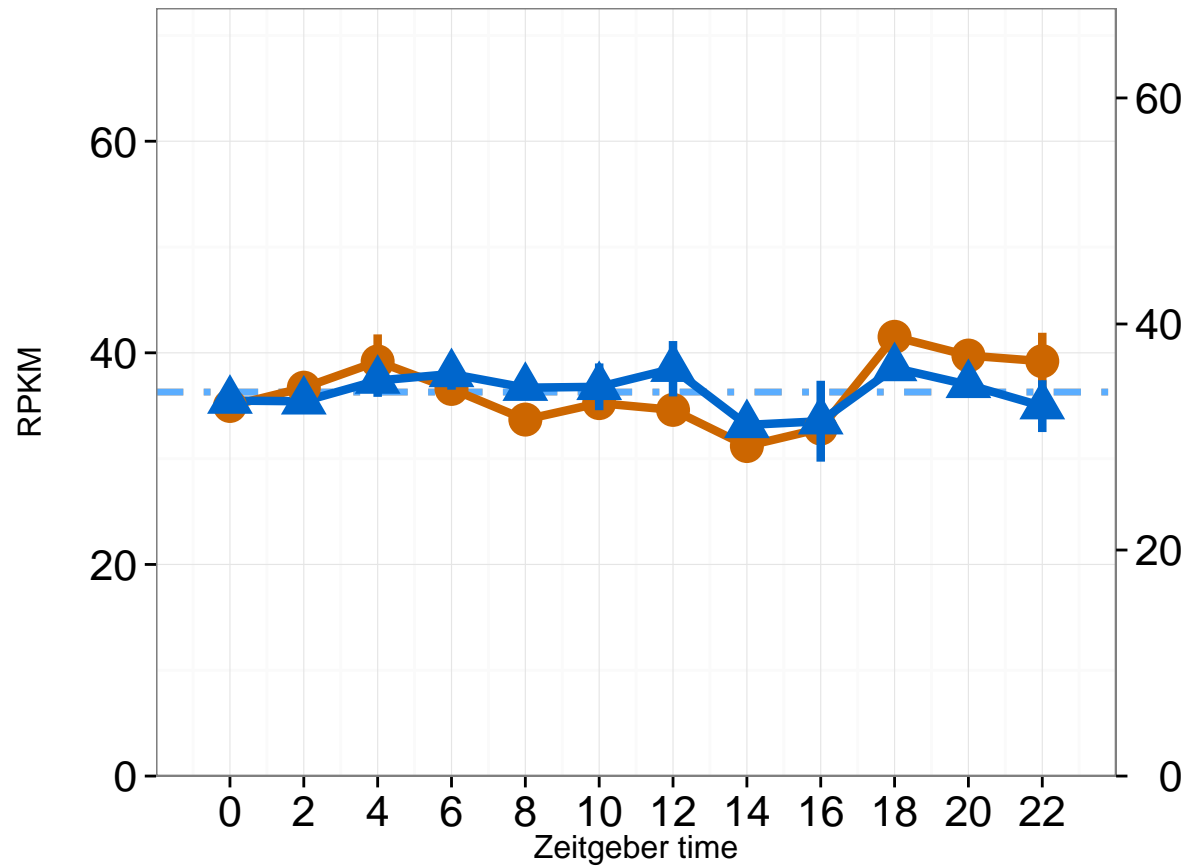

## Rdh14

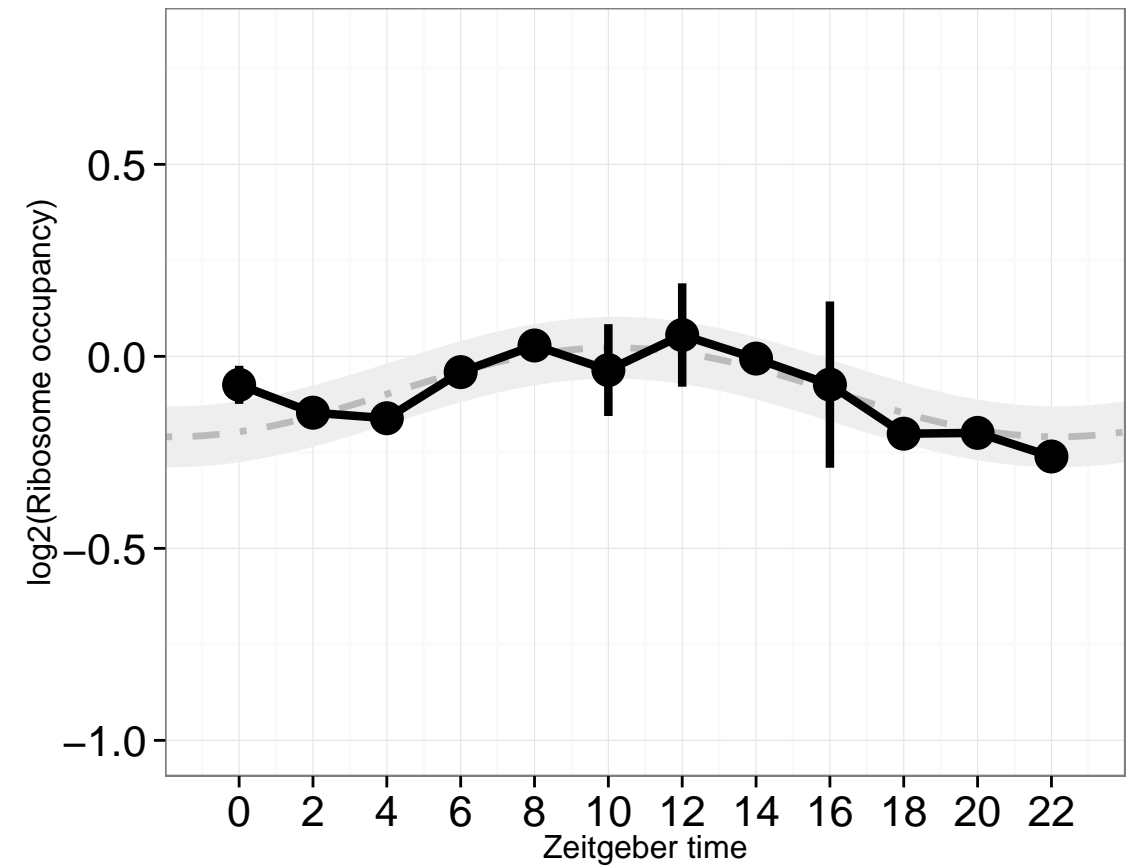

Supplement: Supplementary file 3264 [file 1]

# Mettl10

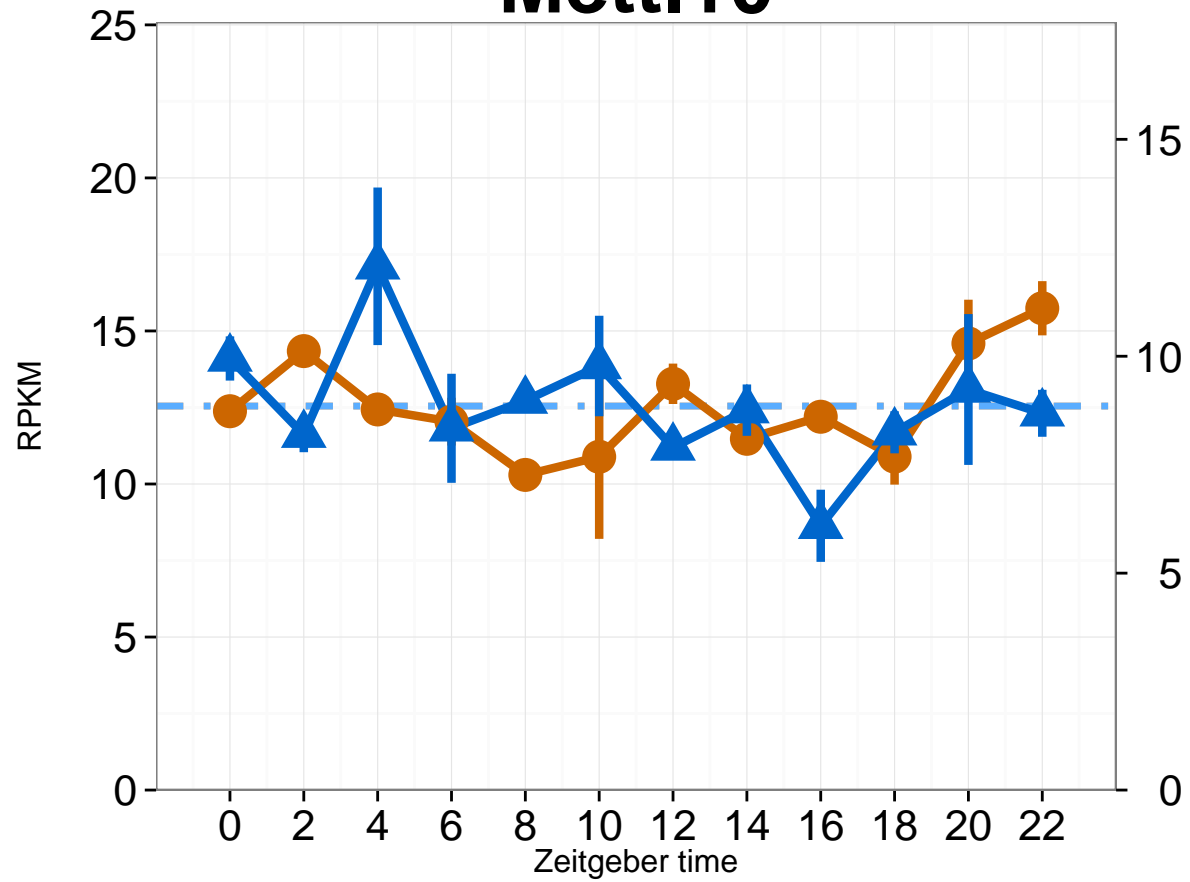

# Mettl10

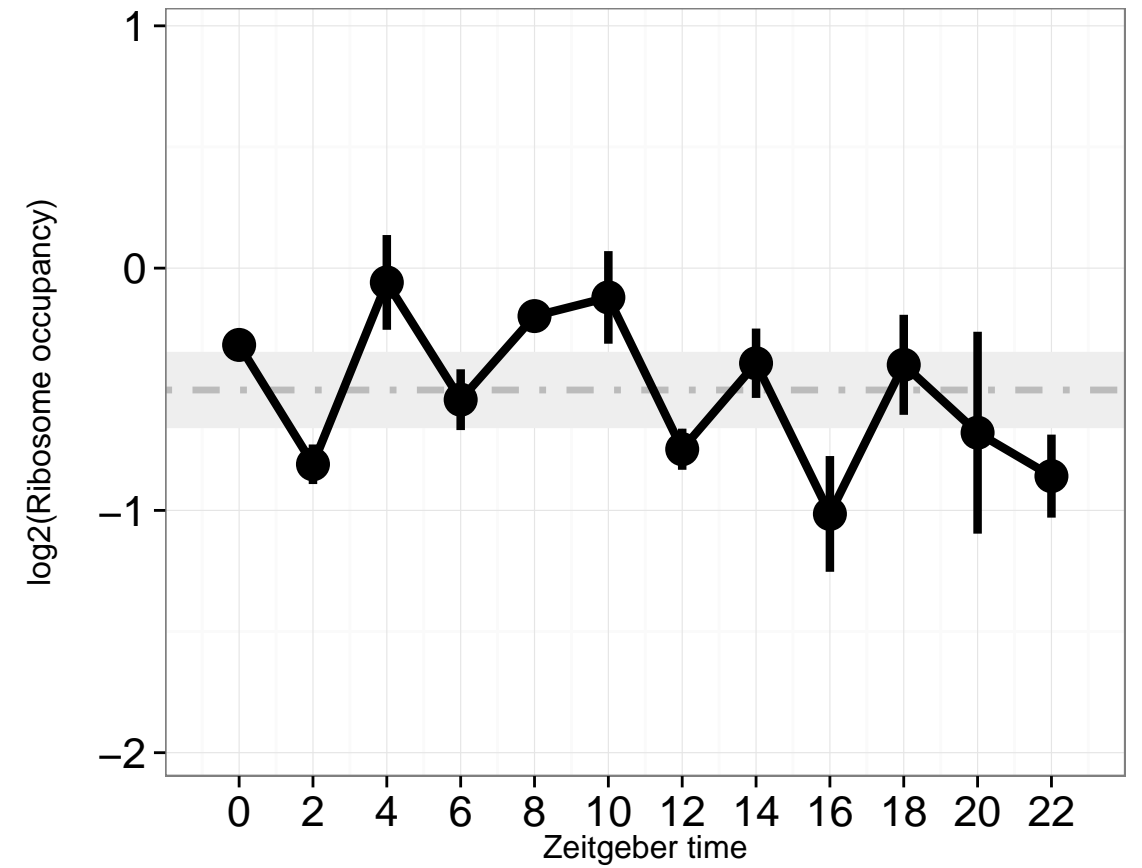

Supplement: Supplementary file 3265 [file 1]

# Gabbr1

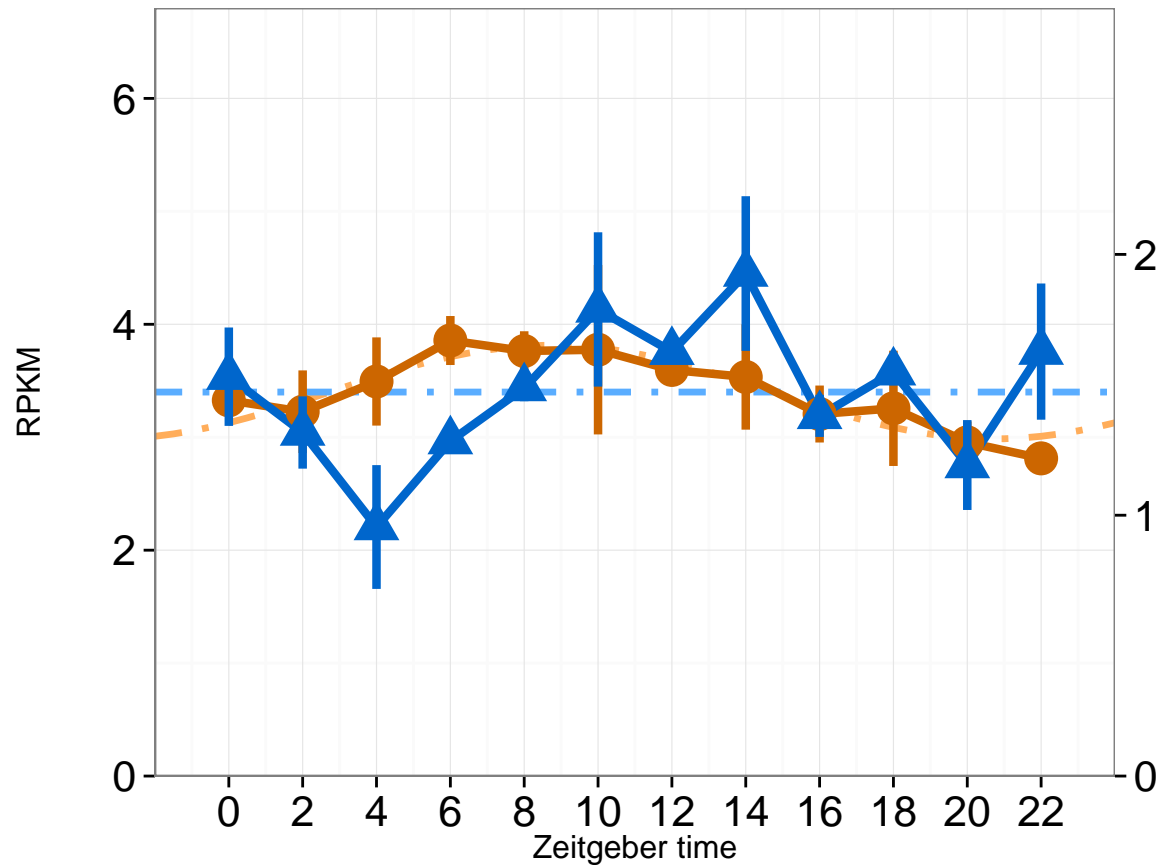

# Gabbr1

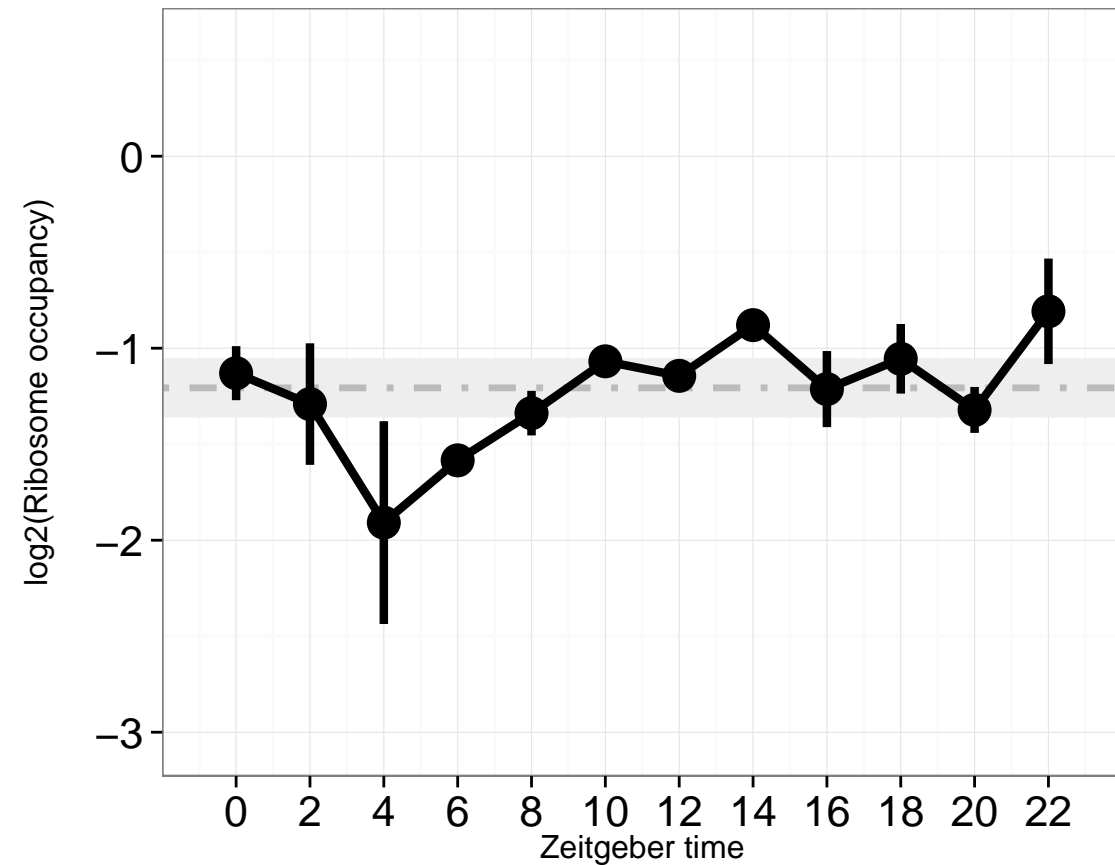

Supplement: Supplementary file 3266 [file 1]

# D330045A20Rik

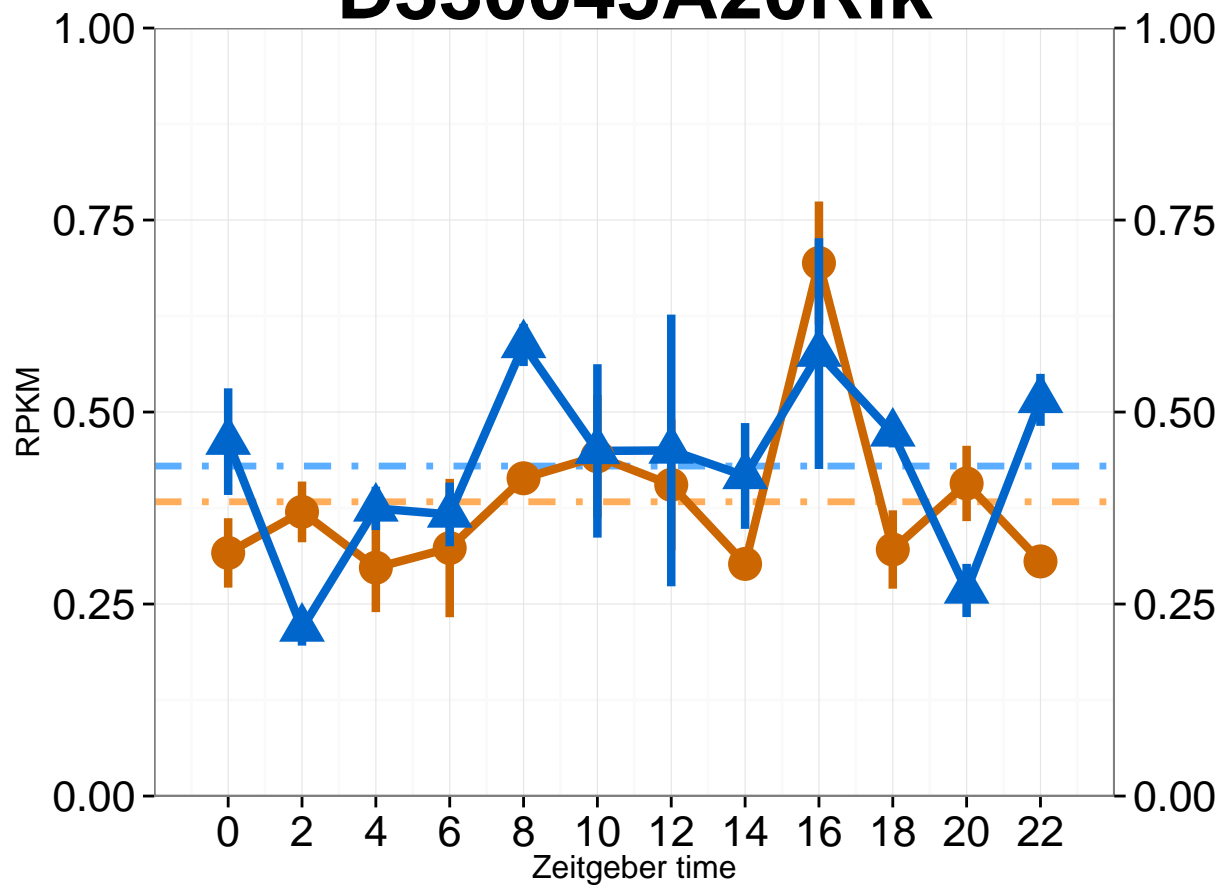

# D330045A20Rik

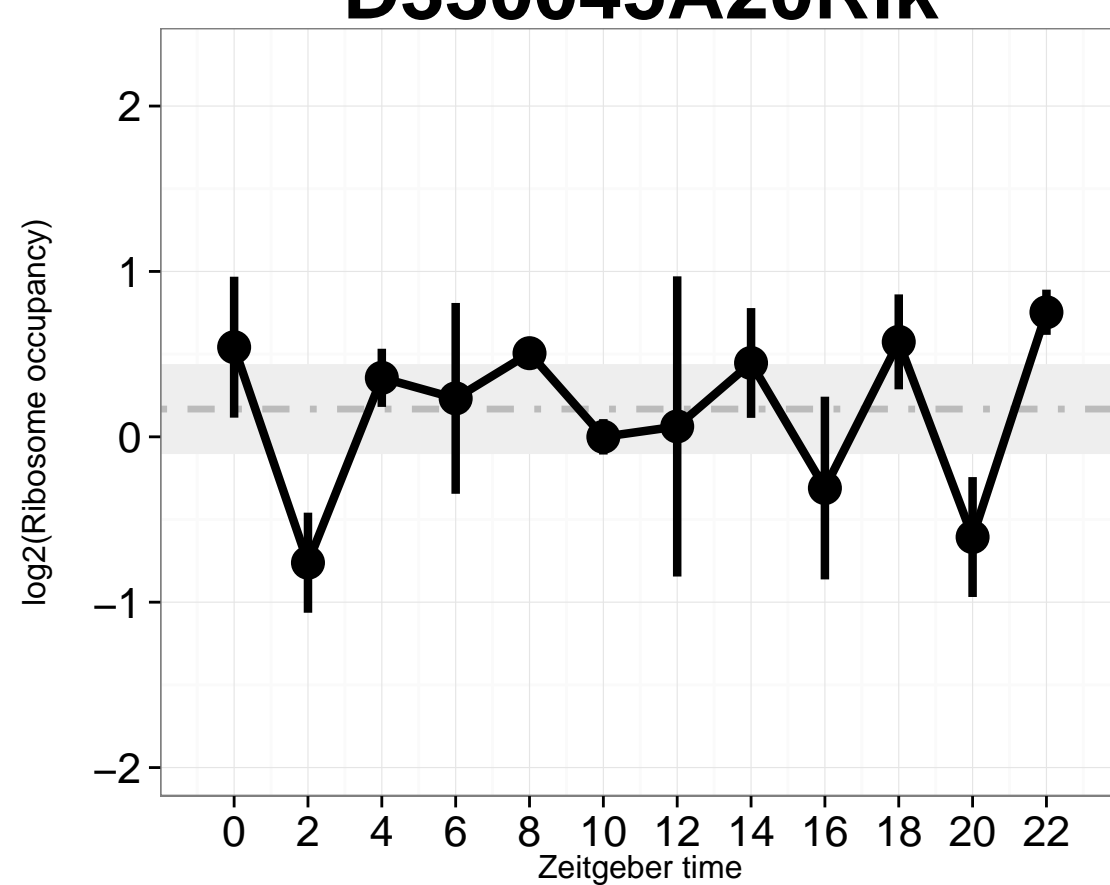

Supplement: Supplementary file 3267 [file 1]

# Lamc3

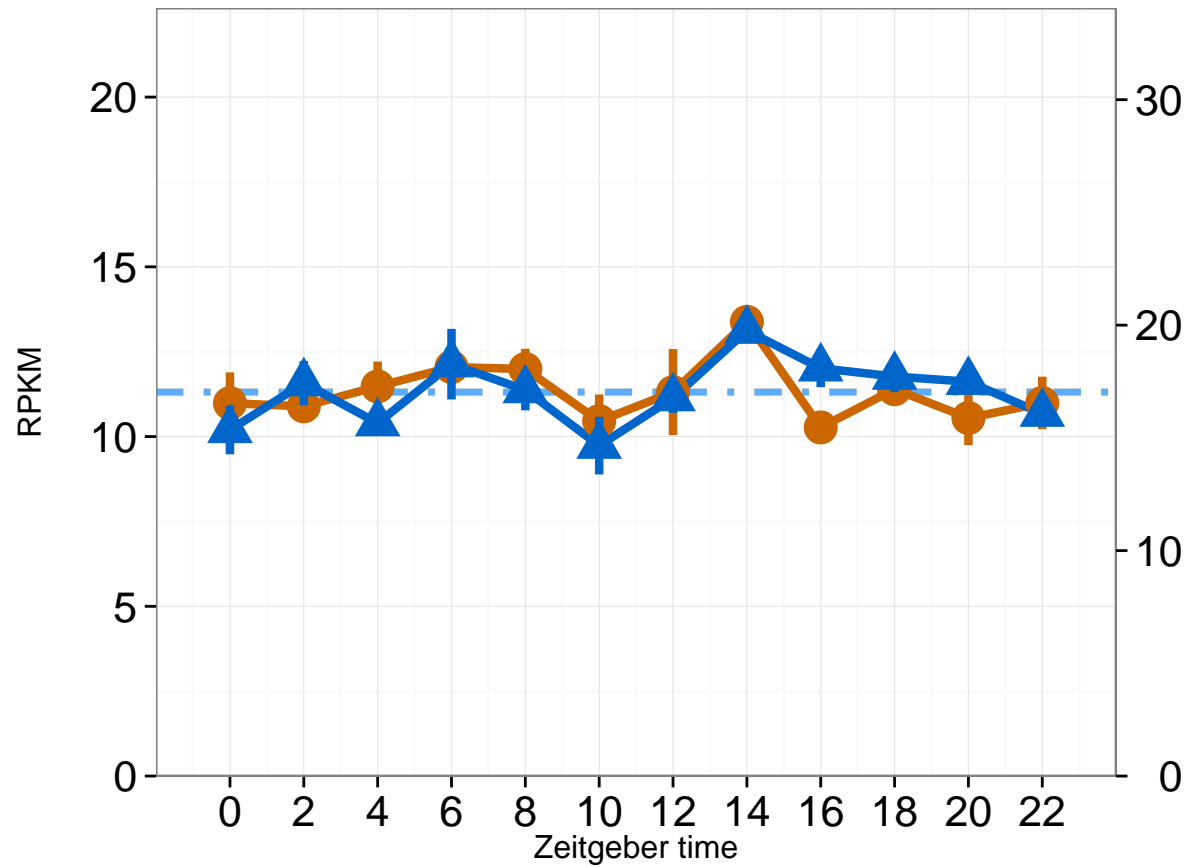

# Lamc3

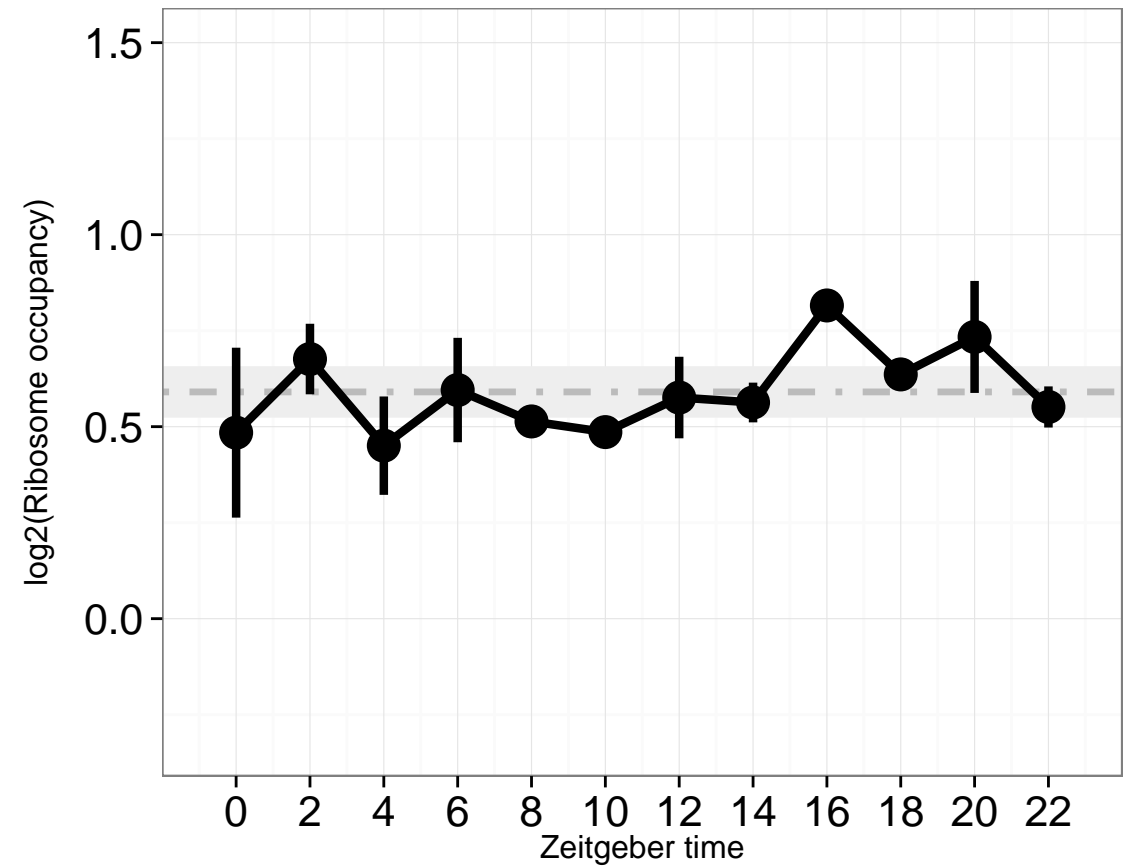

Supplement: Supplementary file 3268 [file 1]

## Xrcc1

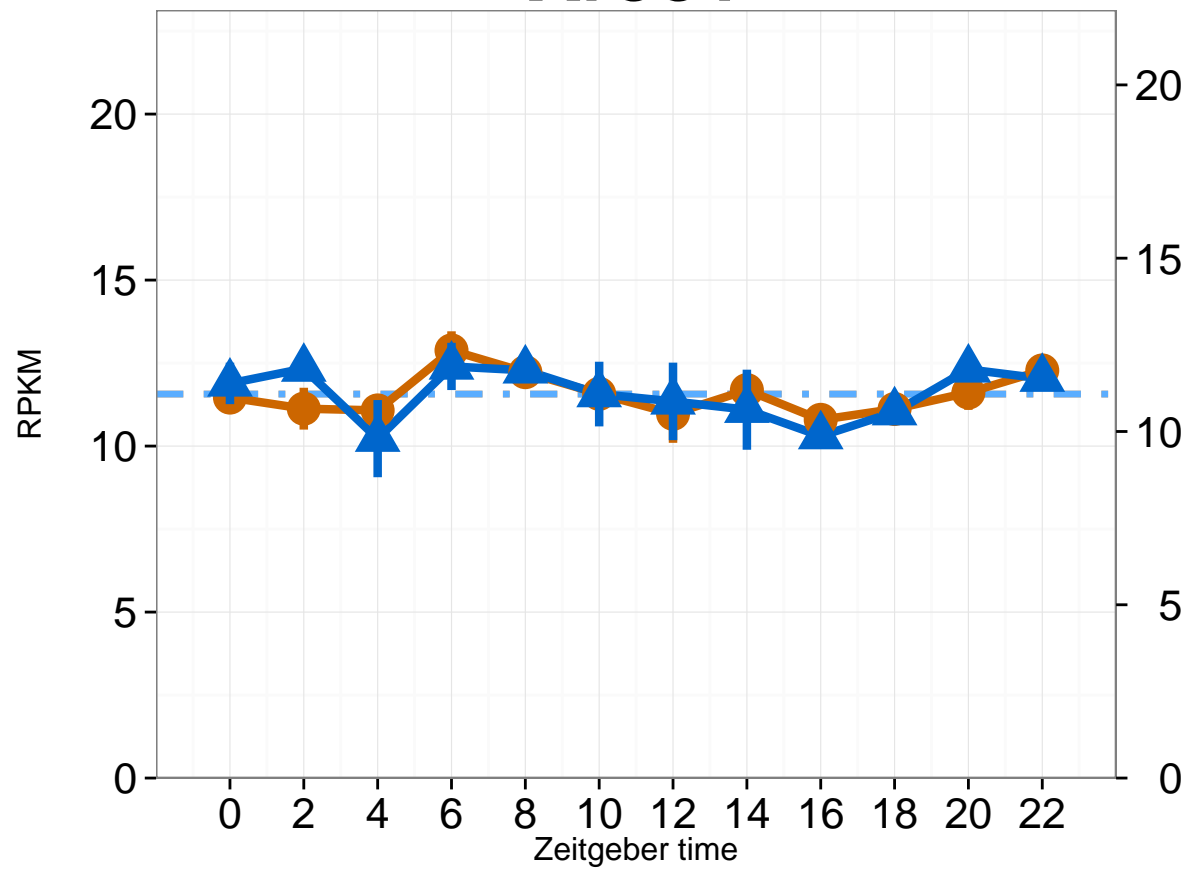

## Xrcc1

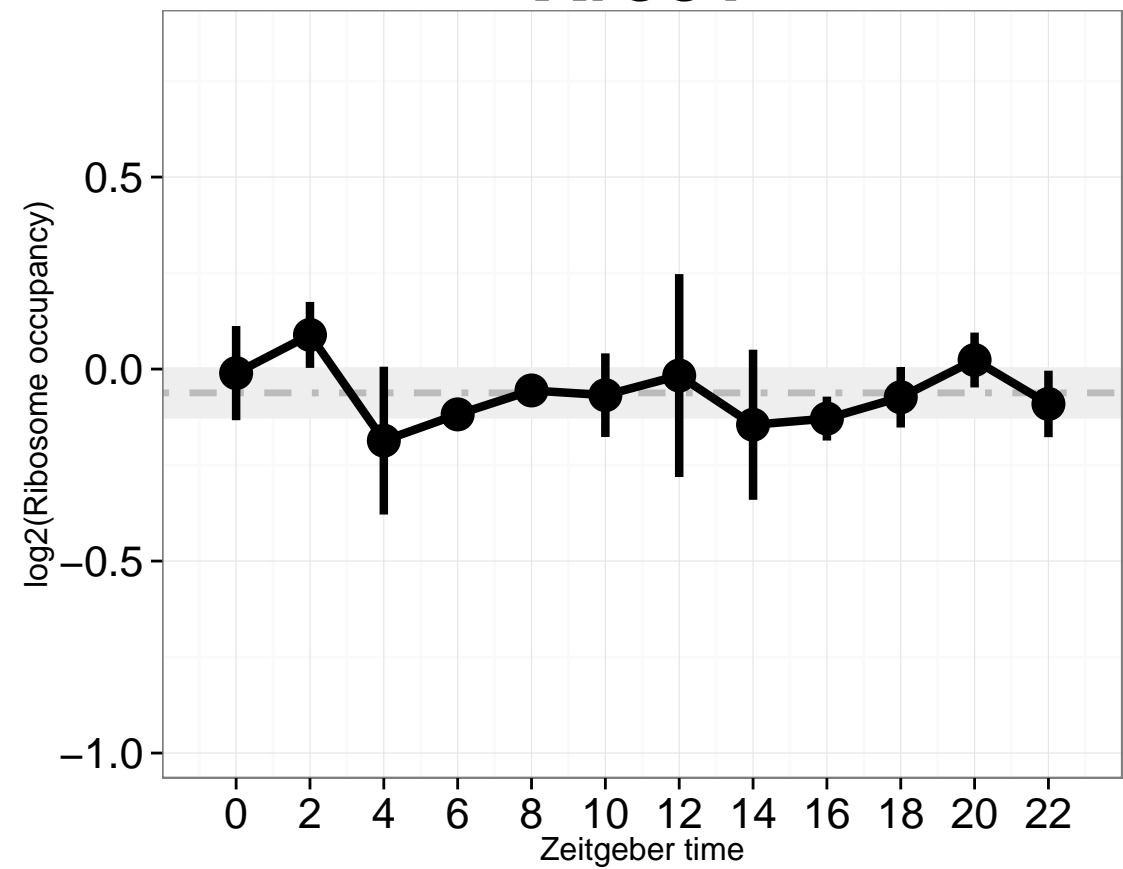

Supplement: Supplementary file 3269 [file 1]

# Zfp738

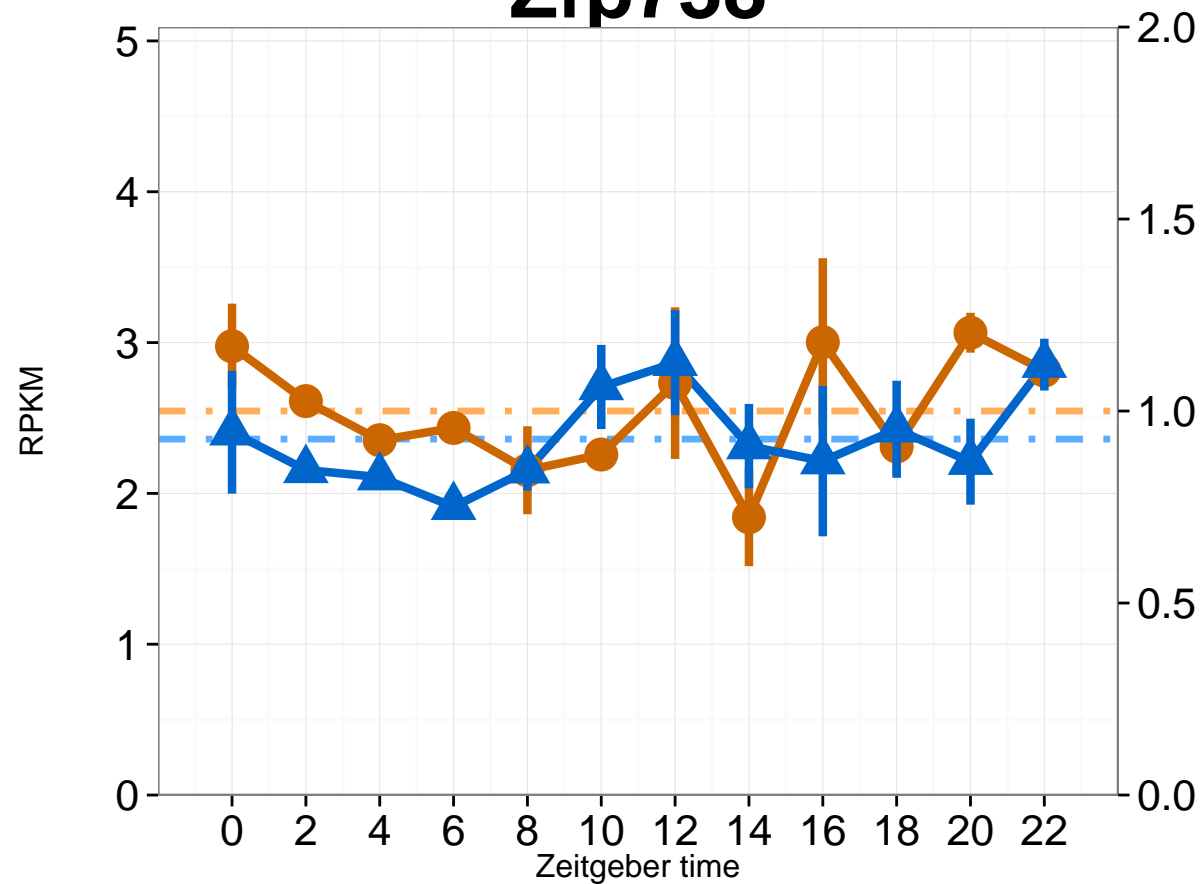

# Zfp738

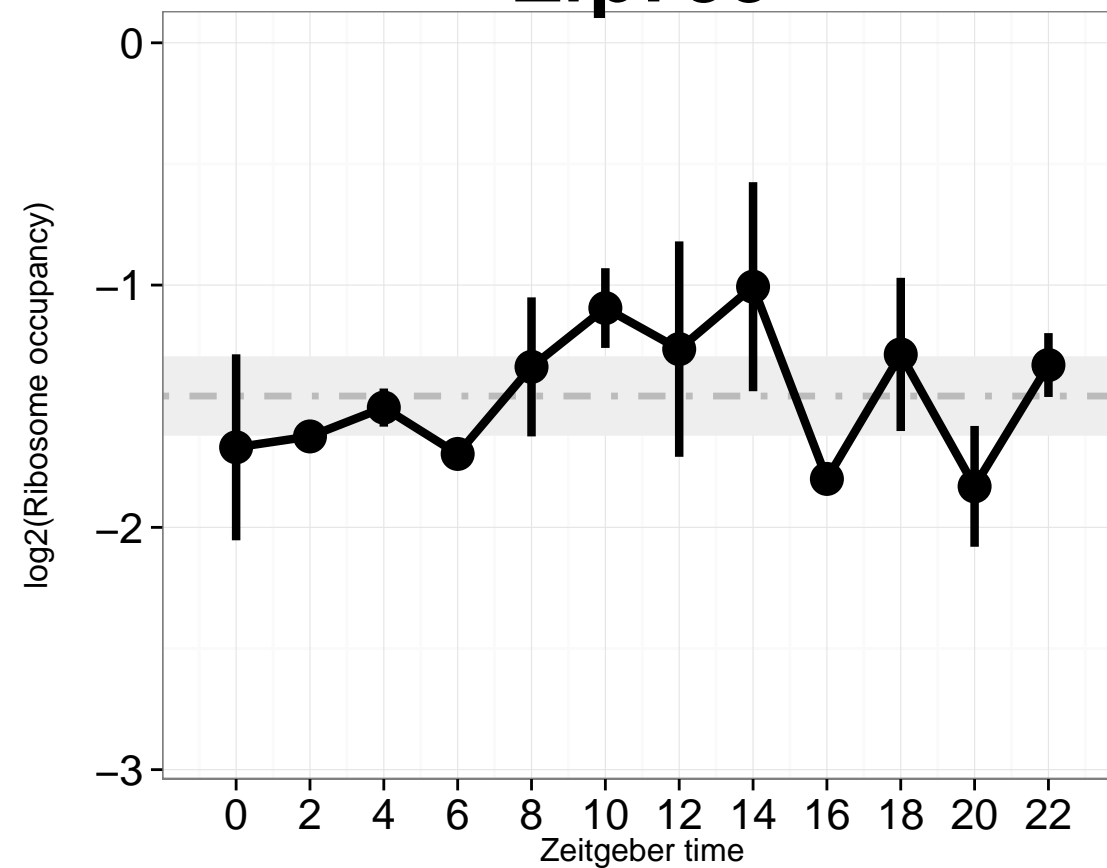

Supplement: Supplementary file 3270 [file 1]

# Lphn1

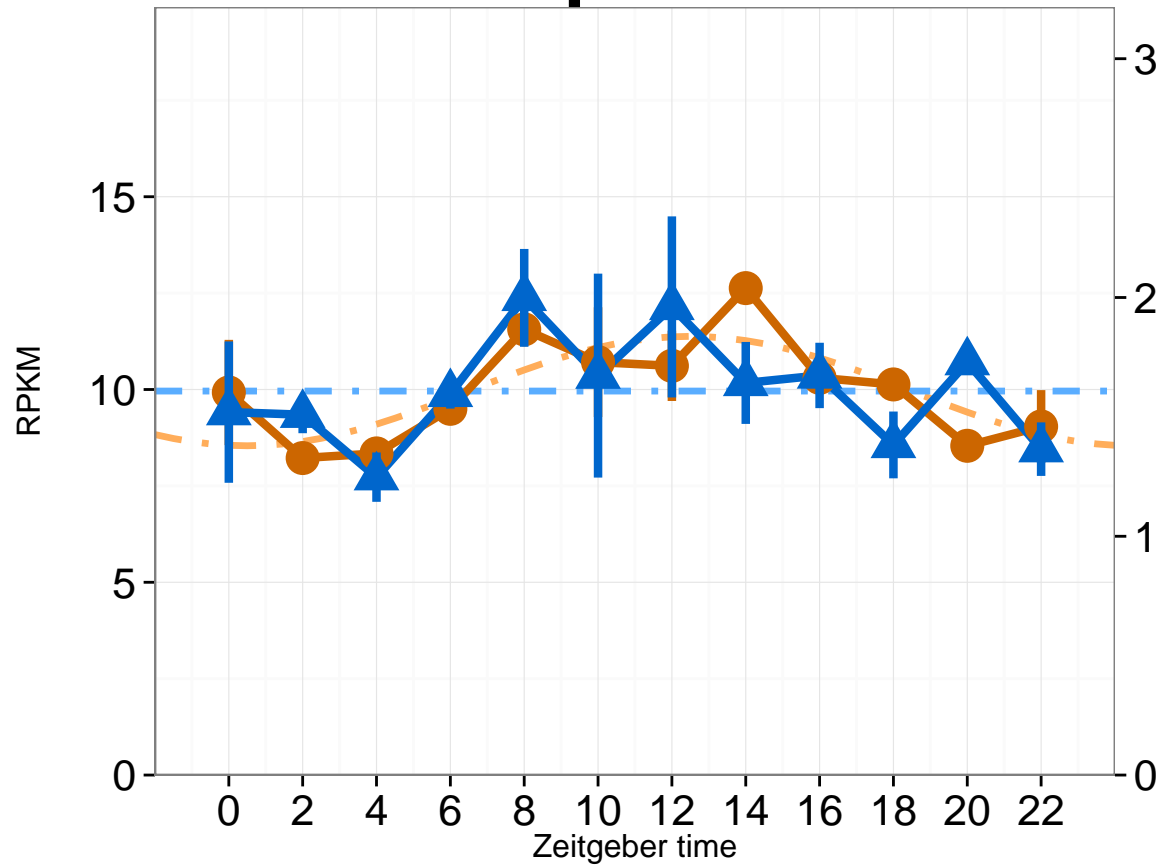

# Lphn1

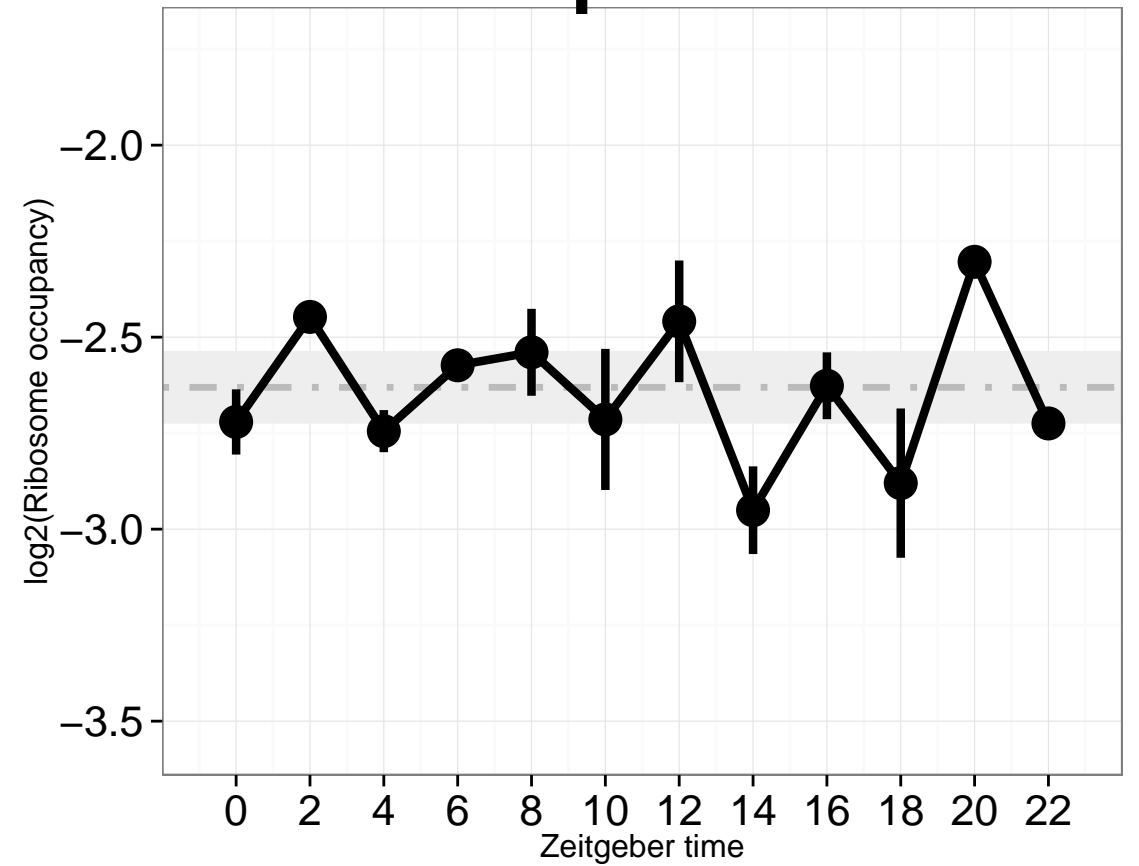

Supplement: Supplementary file 3271 [file 1]

## Gimap4

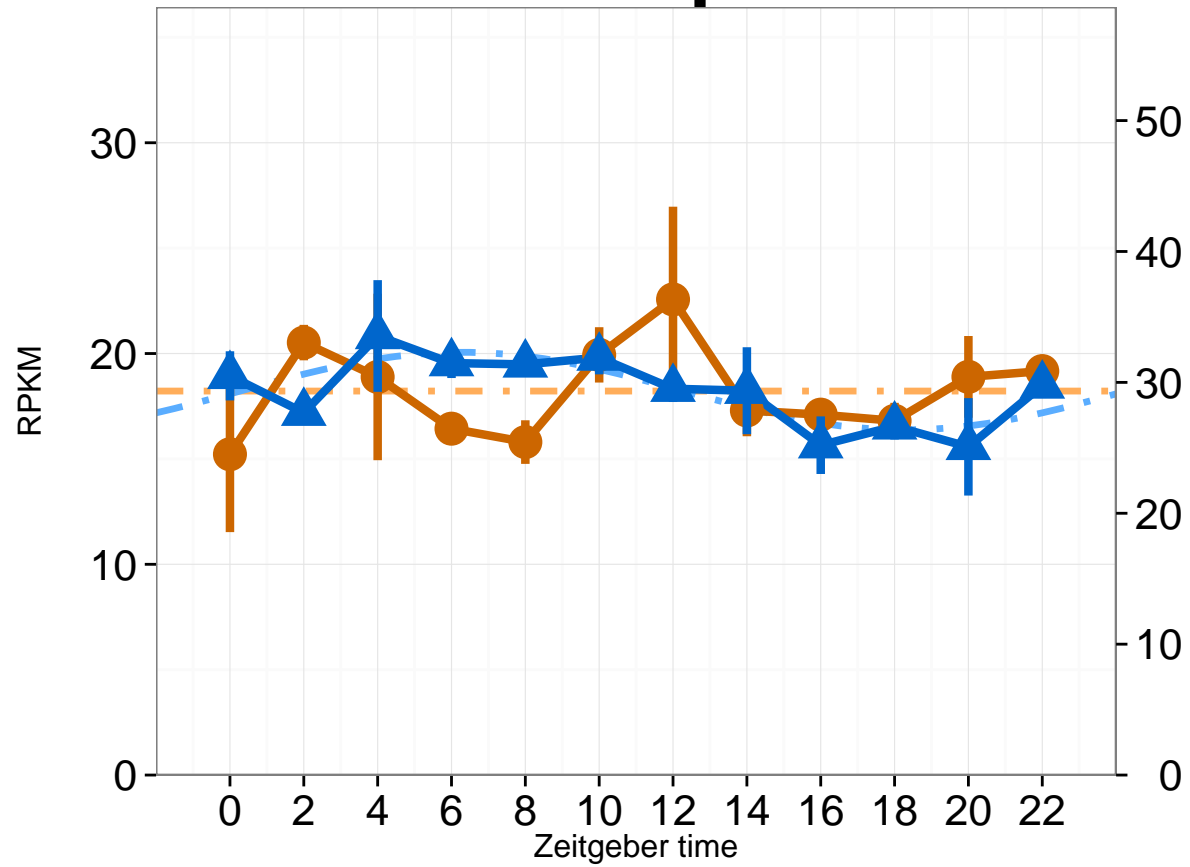

## Gimap4

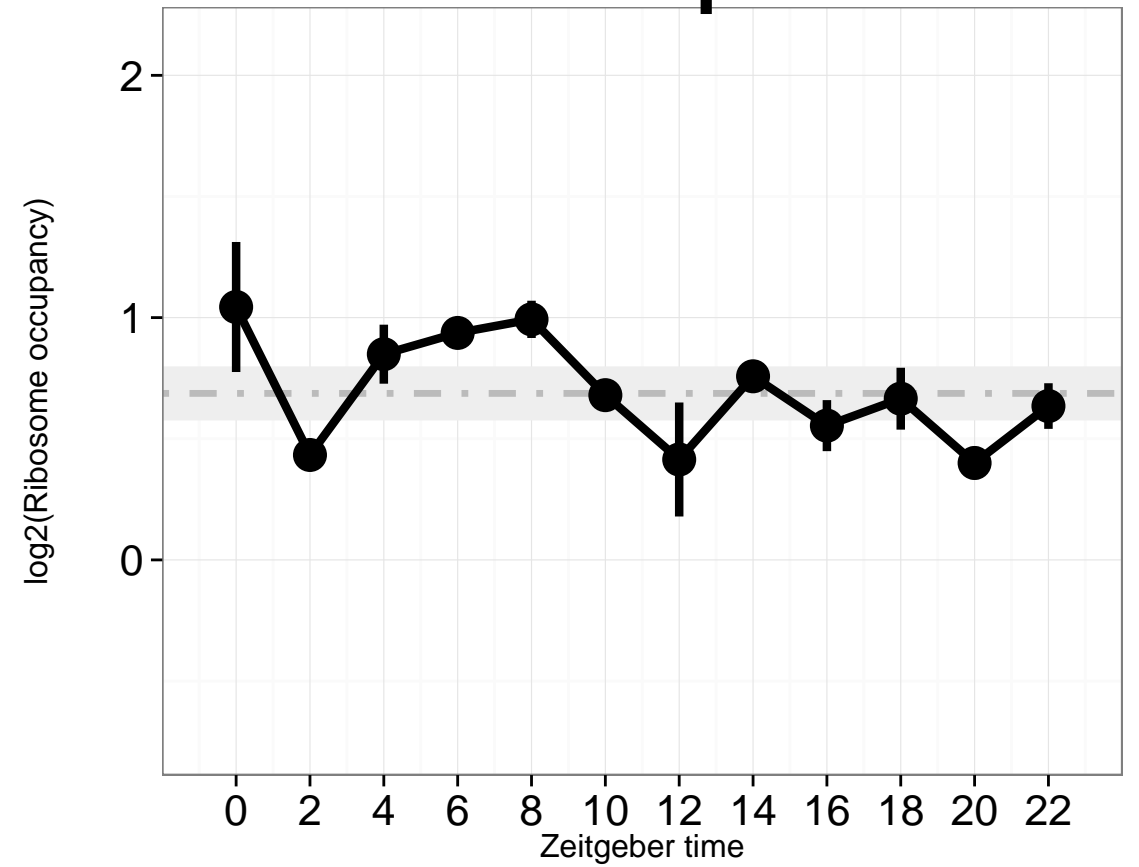

Supplement: Supplementary file 3272 [file 1]

## Slc16a7

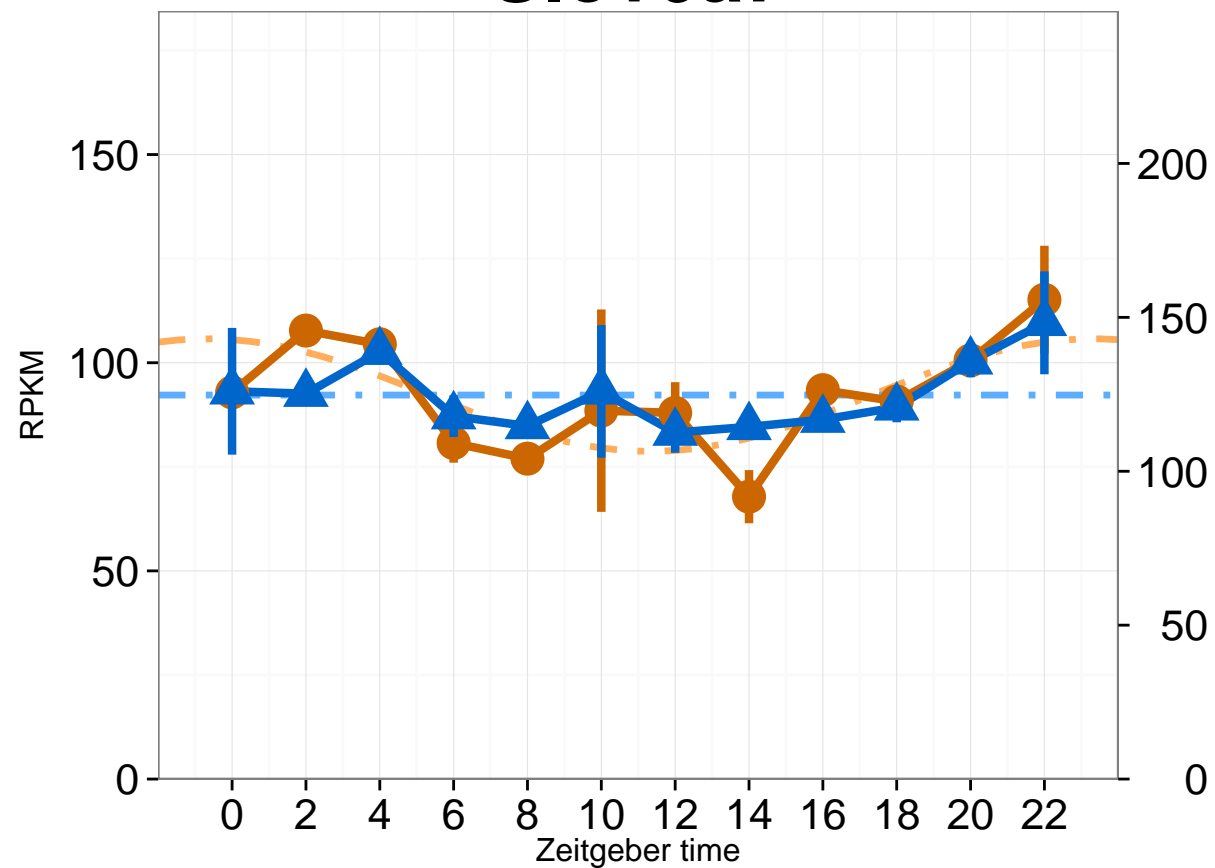

## Slc16a7

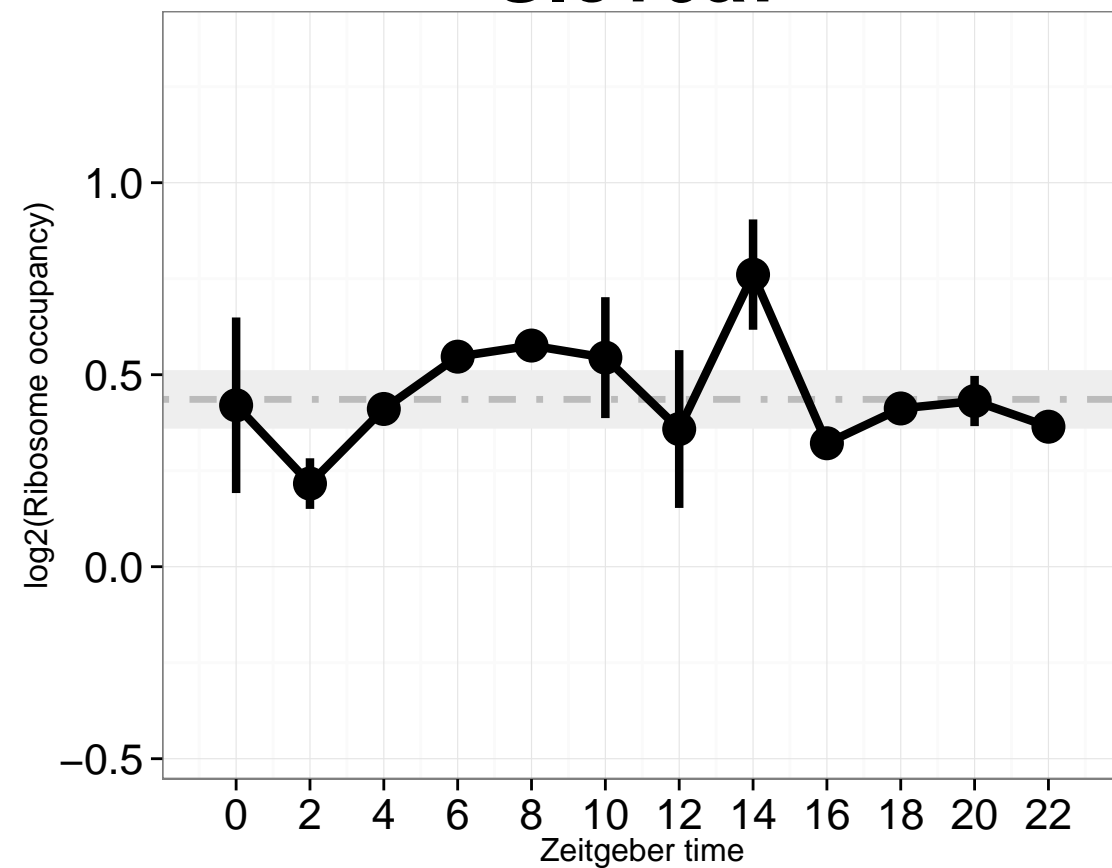

Supplement: Supplementary file 3273 [file 1]

# Rpl27a

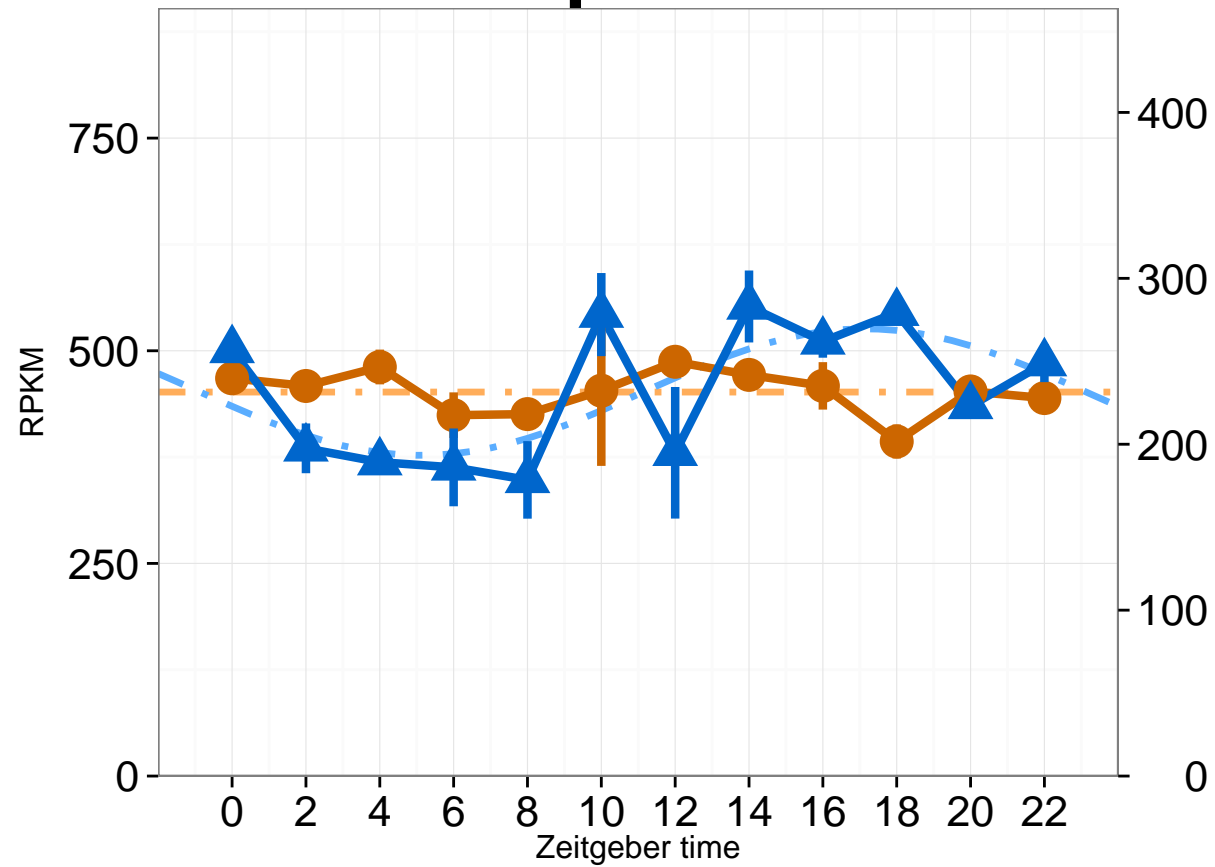

# Rpl27a

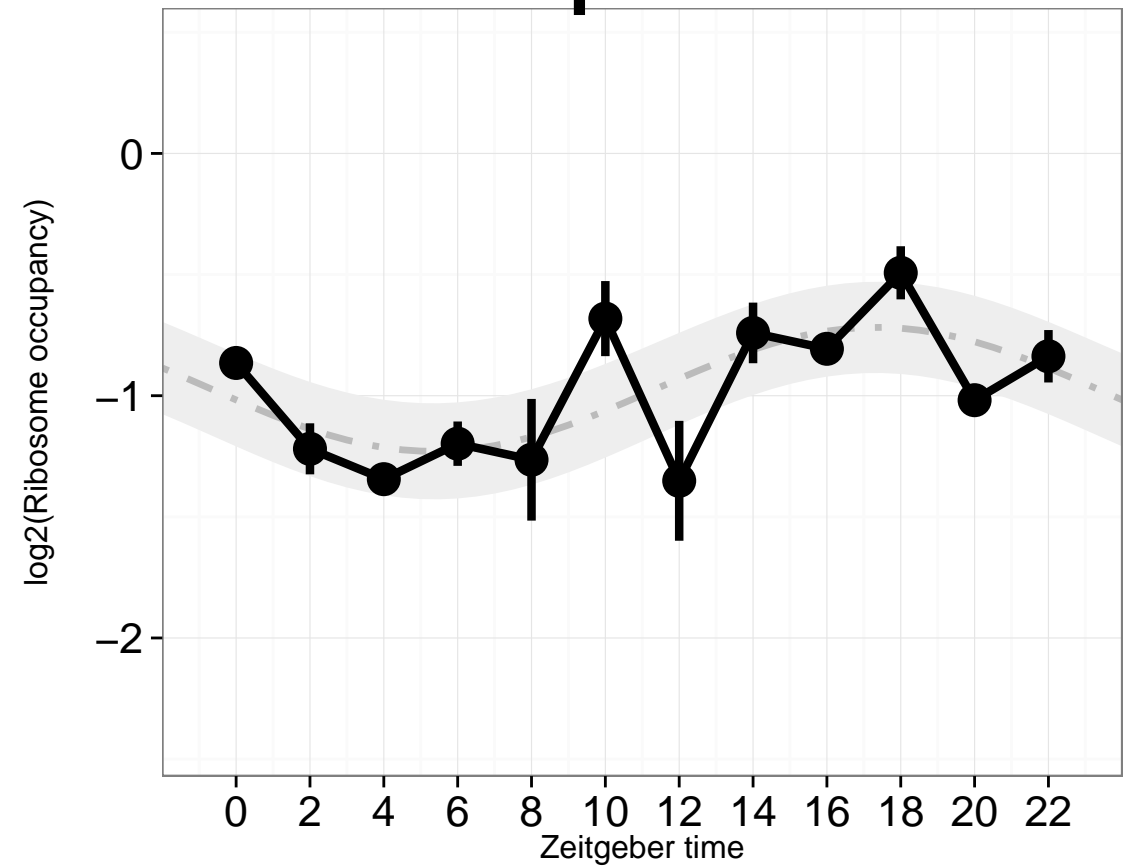

Supplement: Supplementary file 3274 [file 1]

## Ehf

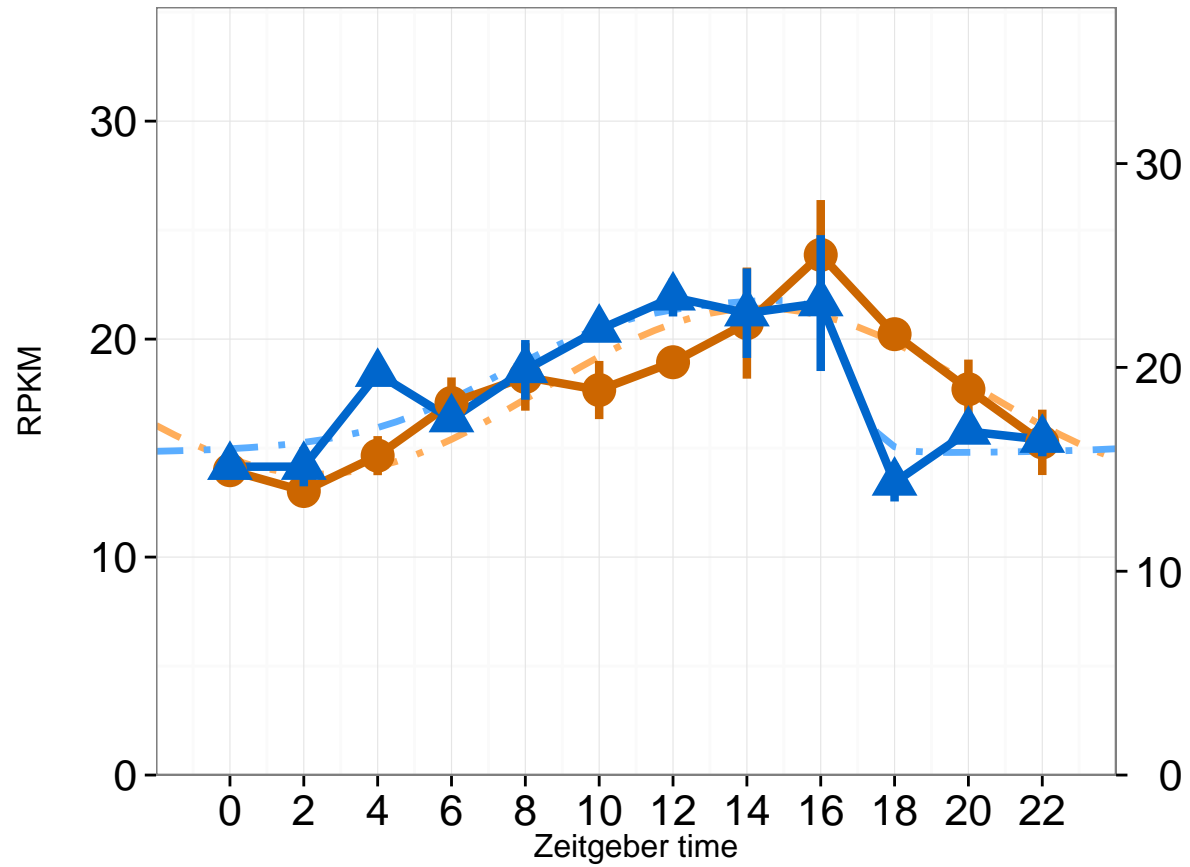

## Ehf

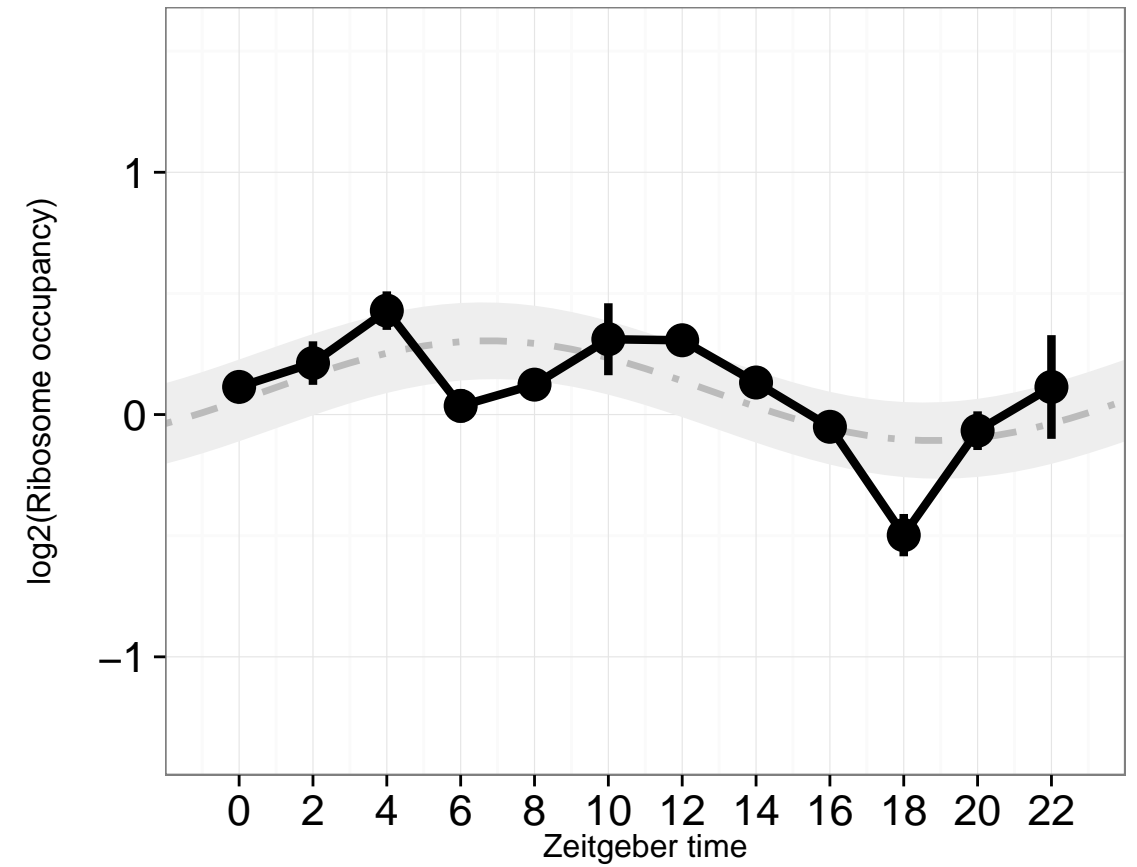

Supplement: Supplementary file 3275 [file 1]

# Trpc3

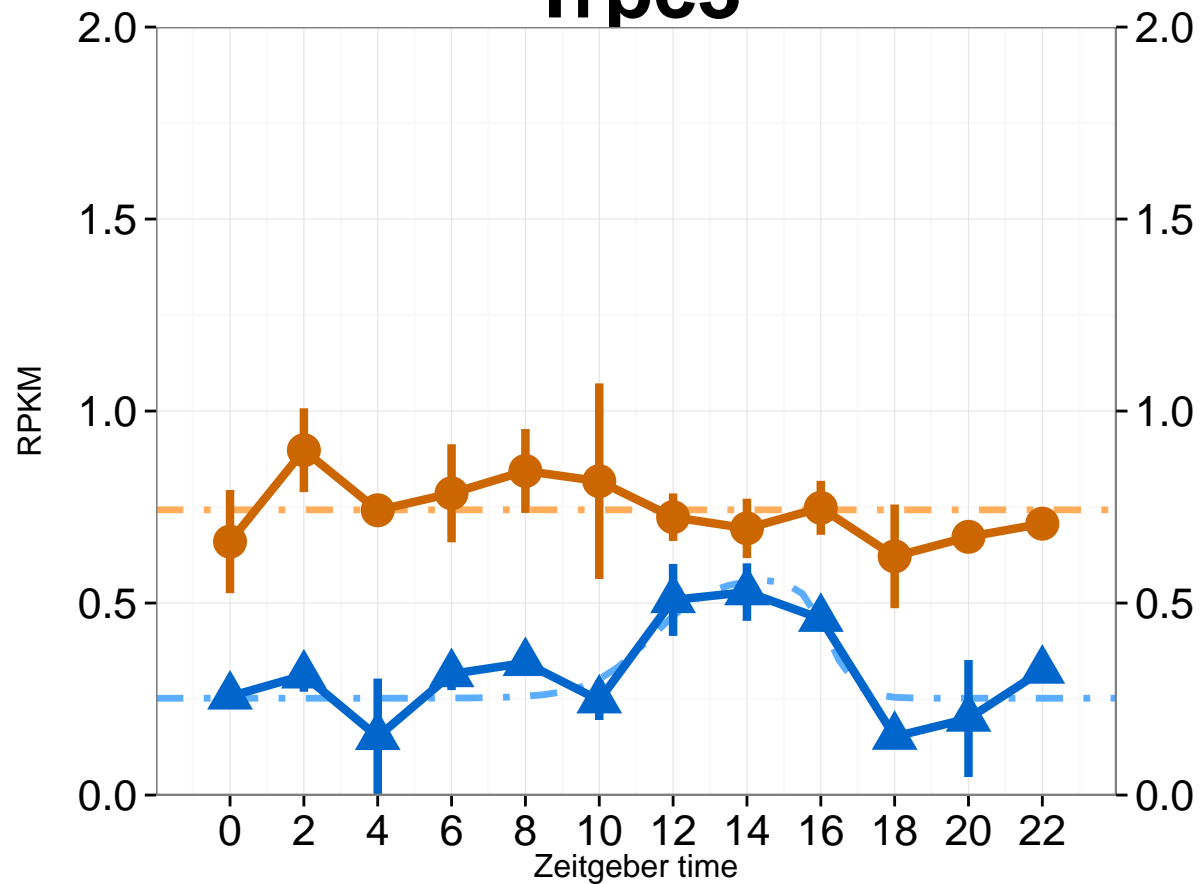

# Trpc3

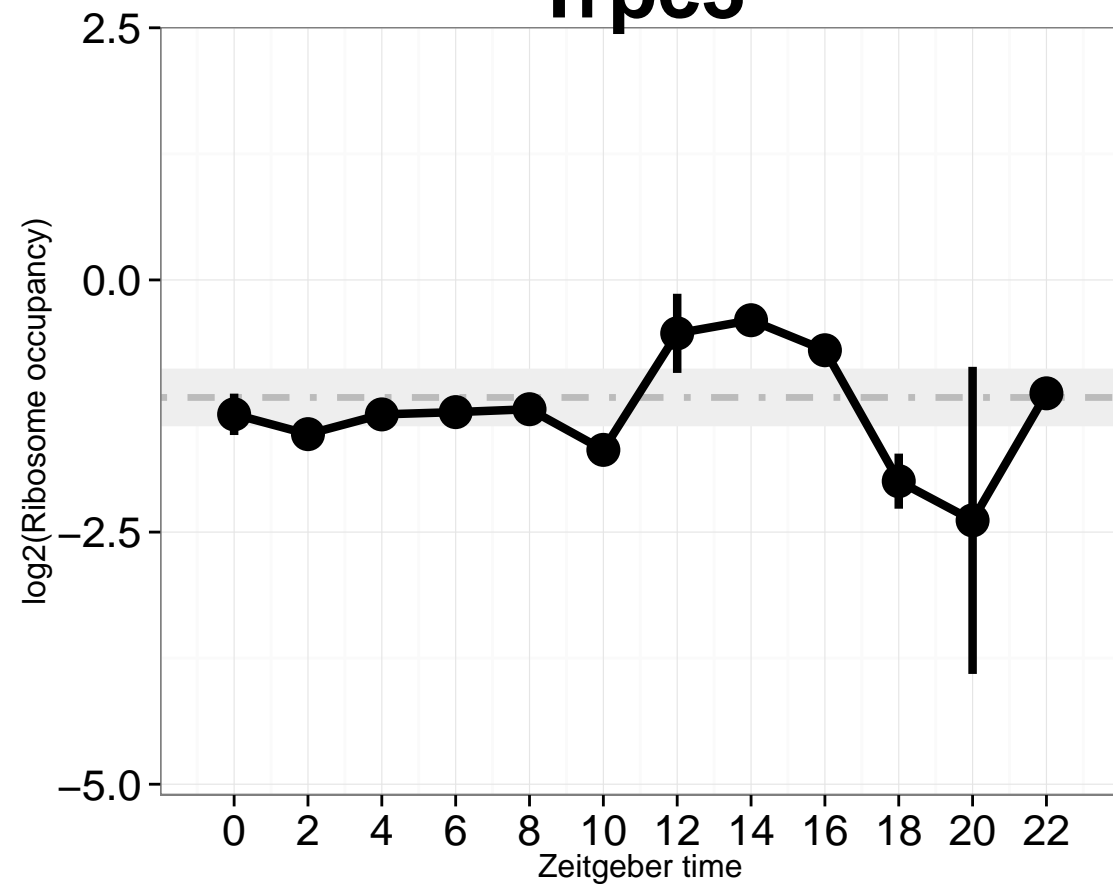

Supplement: Supplementary file 3276 [file 1]

## Cda

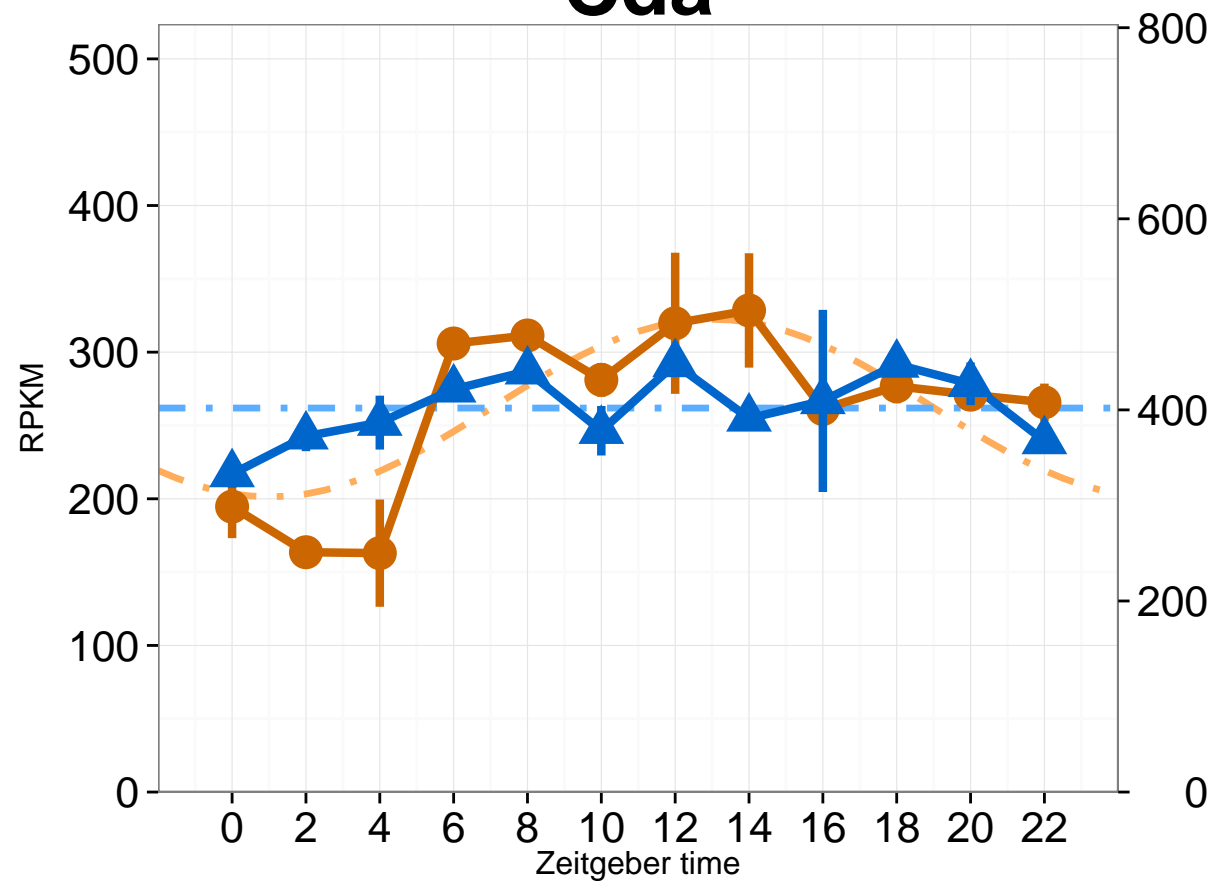

## Cda

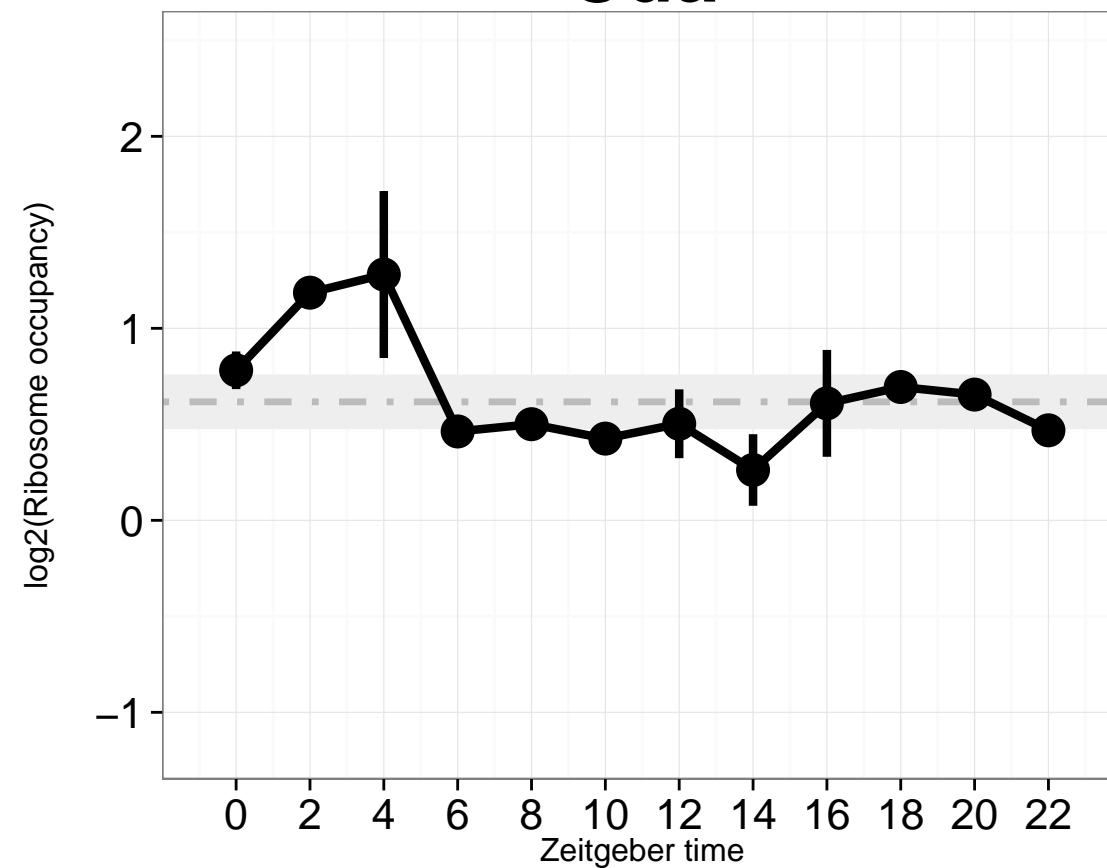

Supplement: Supplementary file 3277 [file 1]

## Clec14a

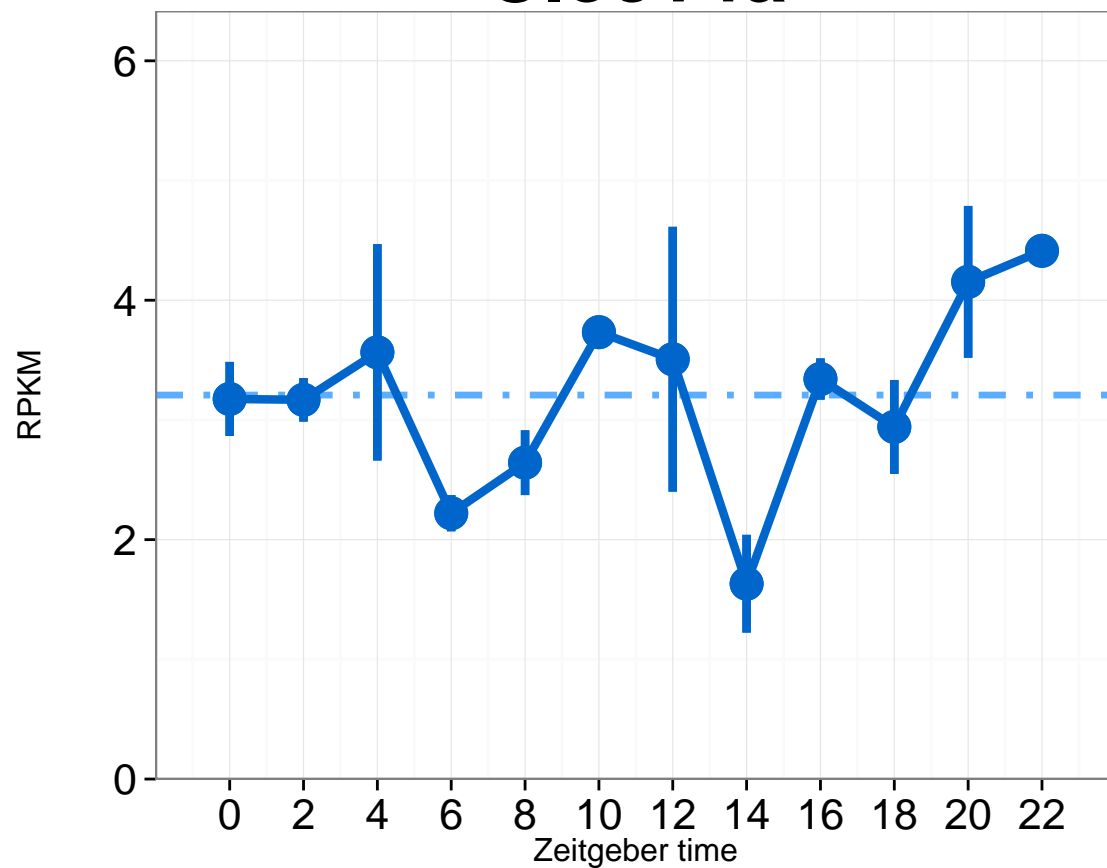

## Clec14a log2(Ribosome occupancy)

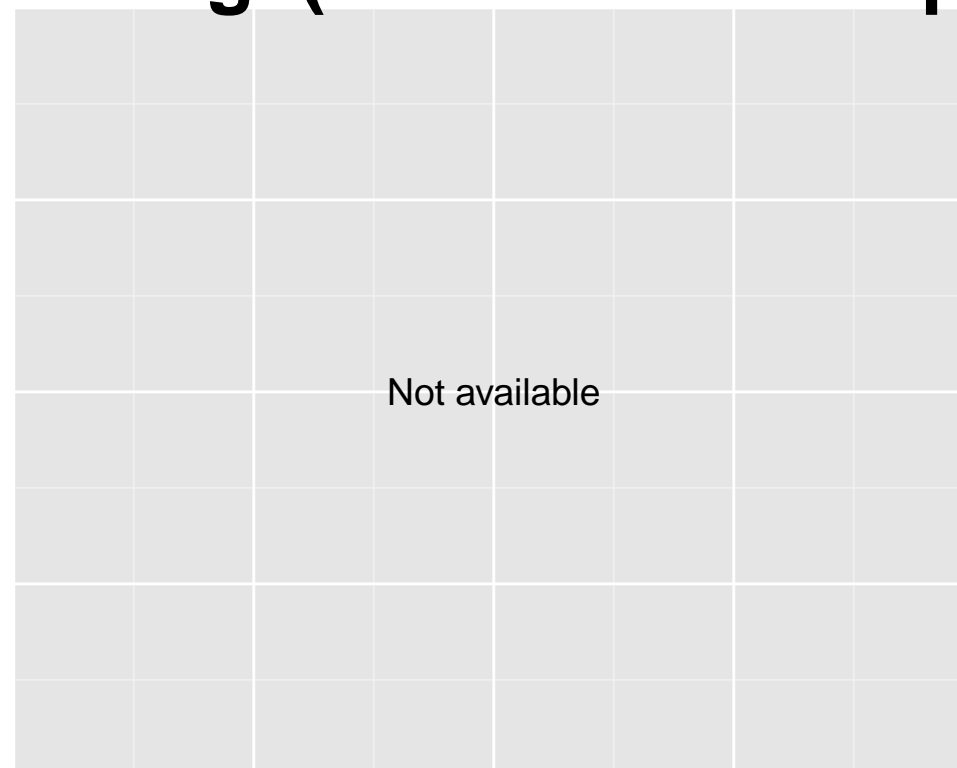

Supplement: Supplementary file 3278 [file 1]

# Tyw3

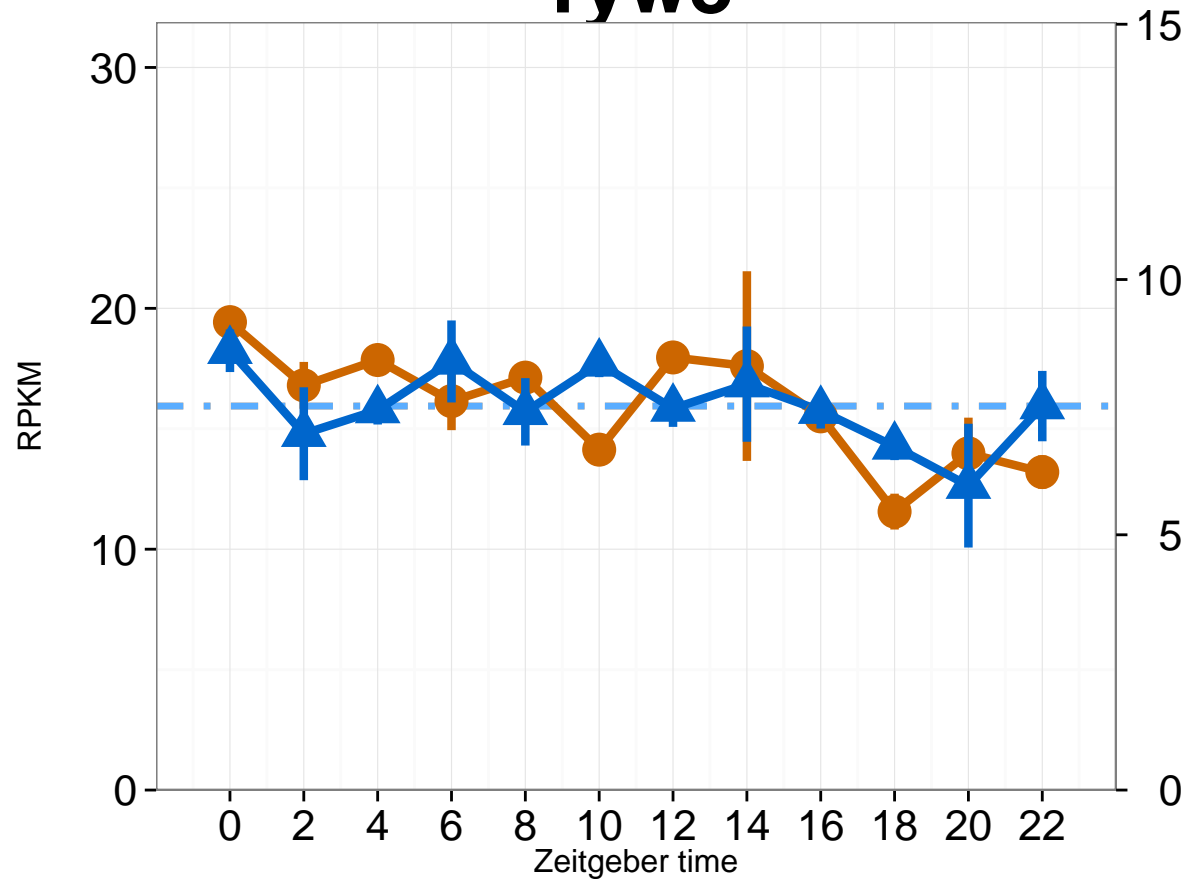

# Tyw3

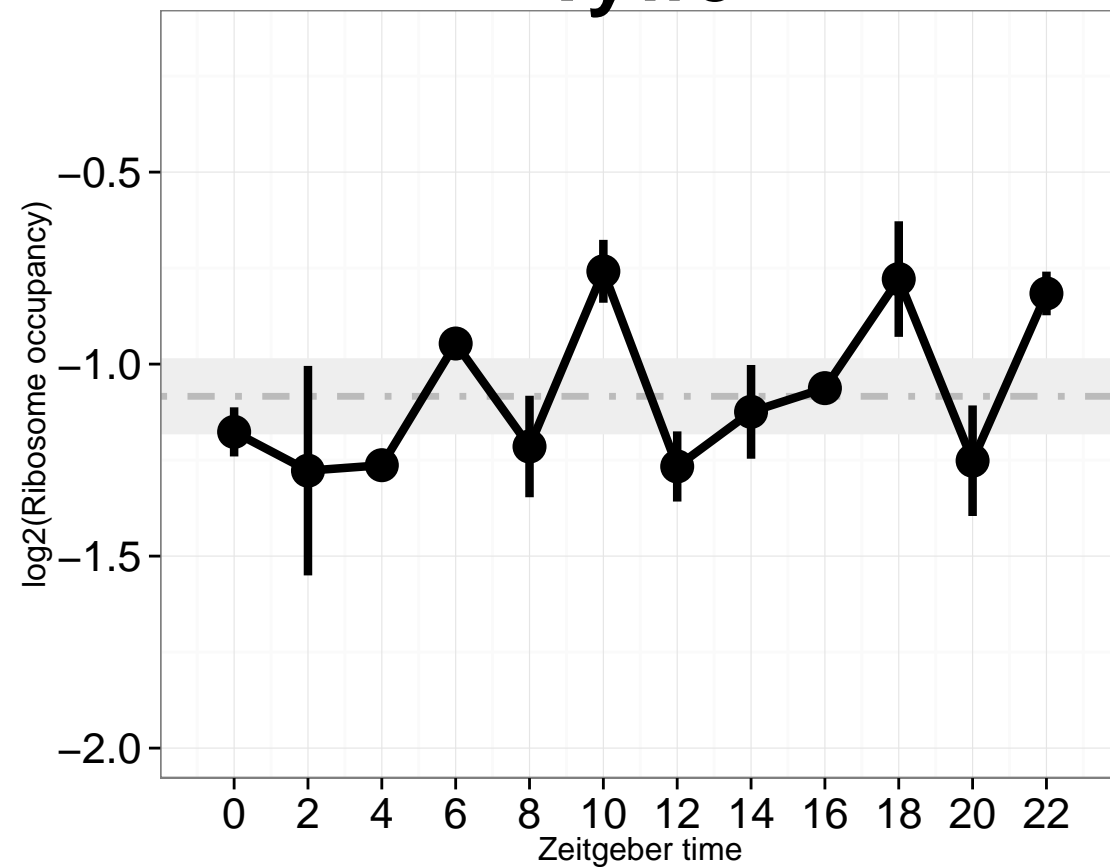

Supplement: Supplementary file 3280 [file 1]

## Slc38a2

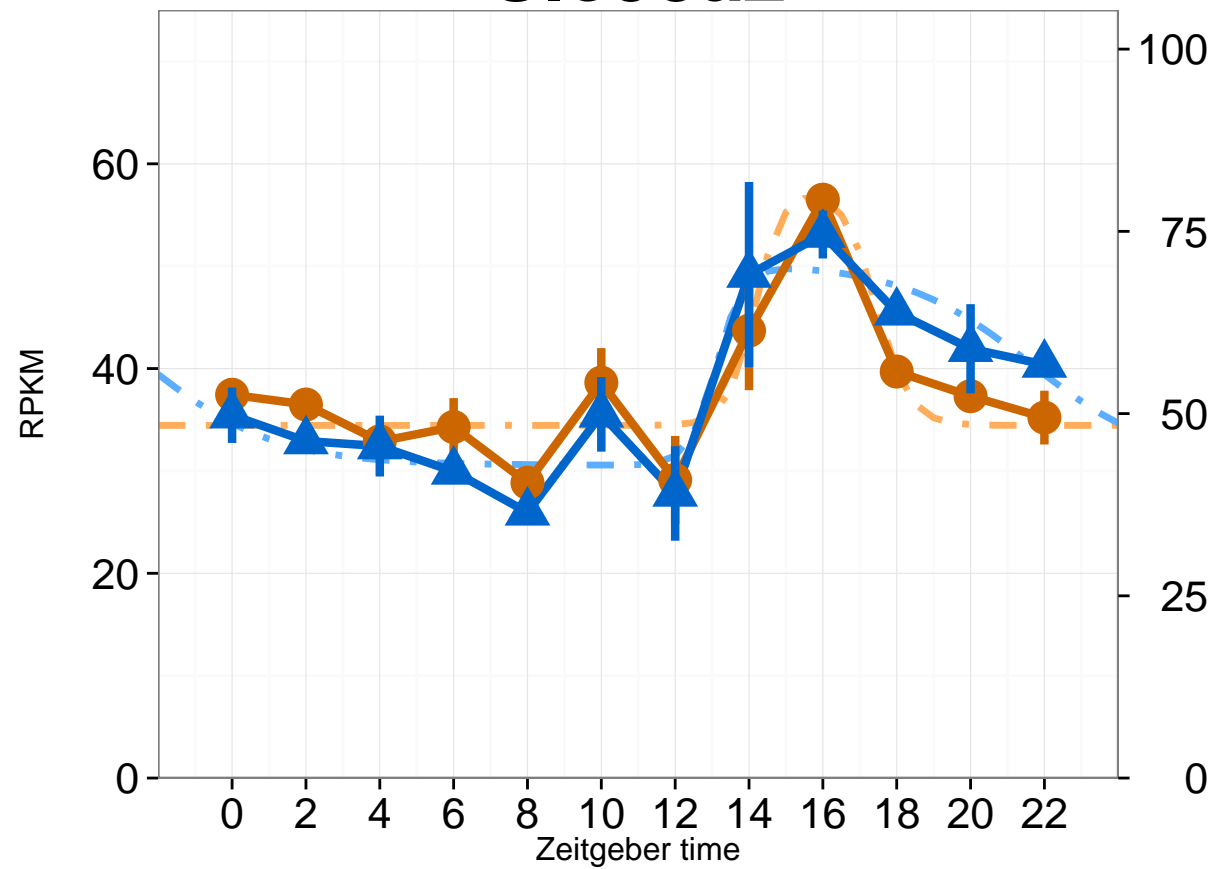

## Slc38a2

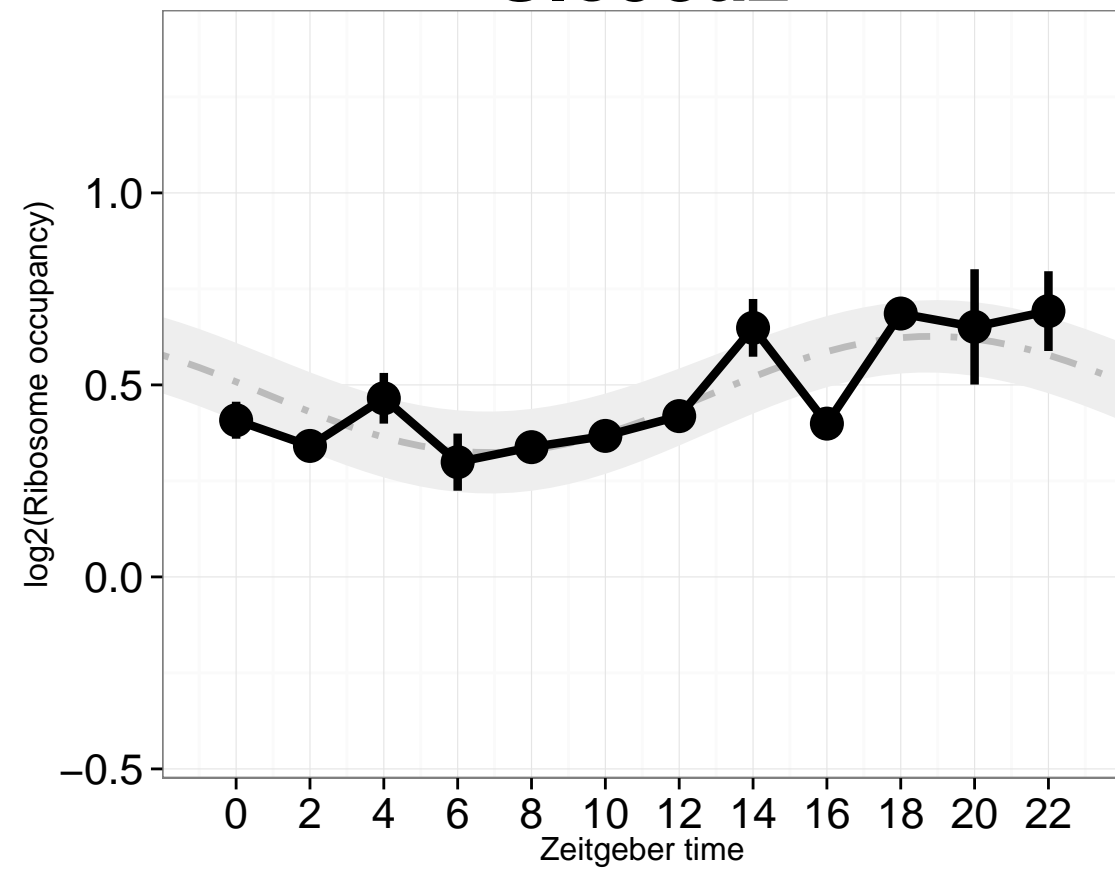

Supplement: Supplementary file 3281 [file 1]

# Tpm4

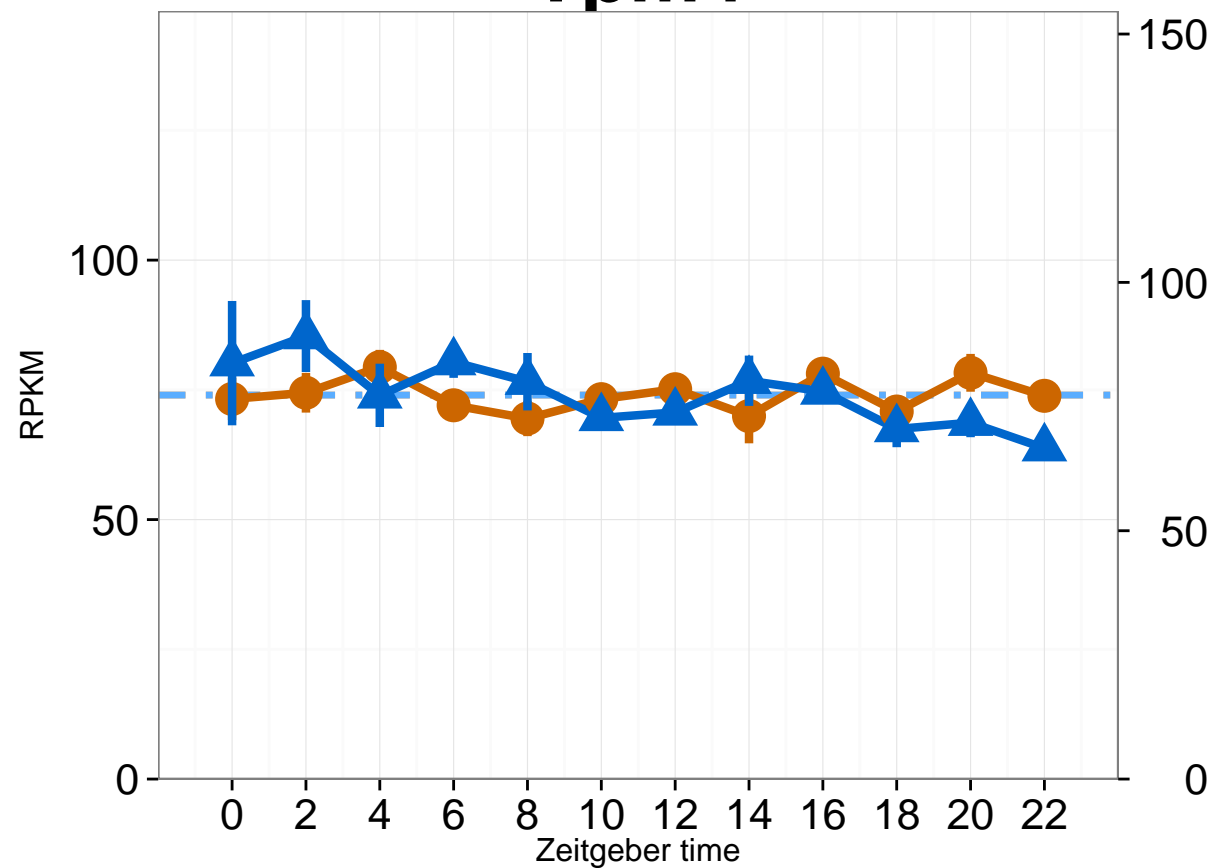

# Tpm4

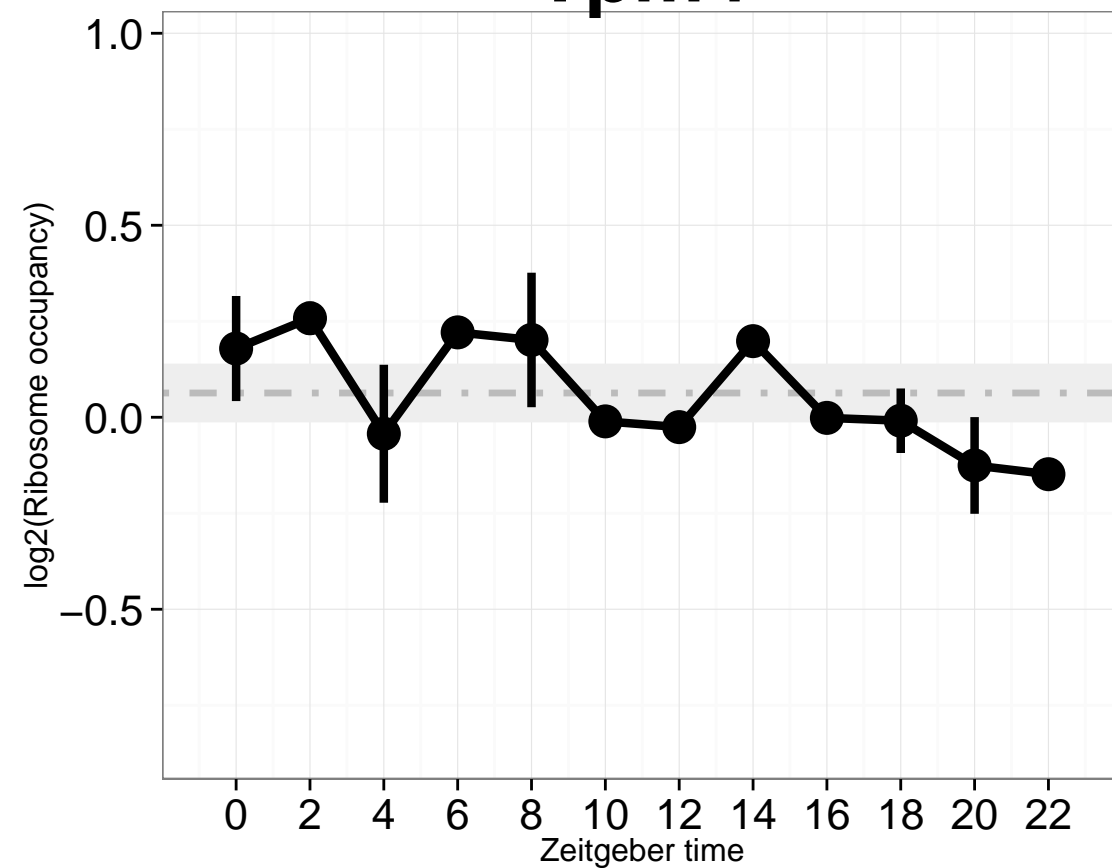

Supplement: Supplementary file 3282 [file 1]

# Zfp947

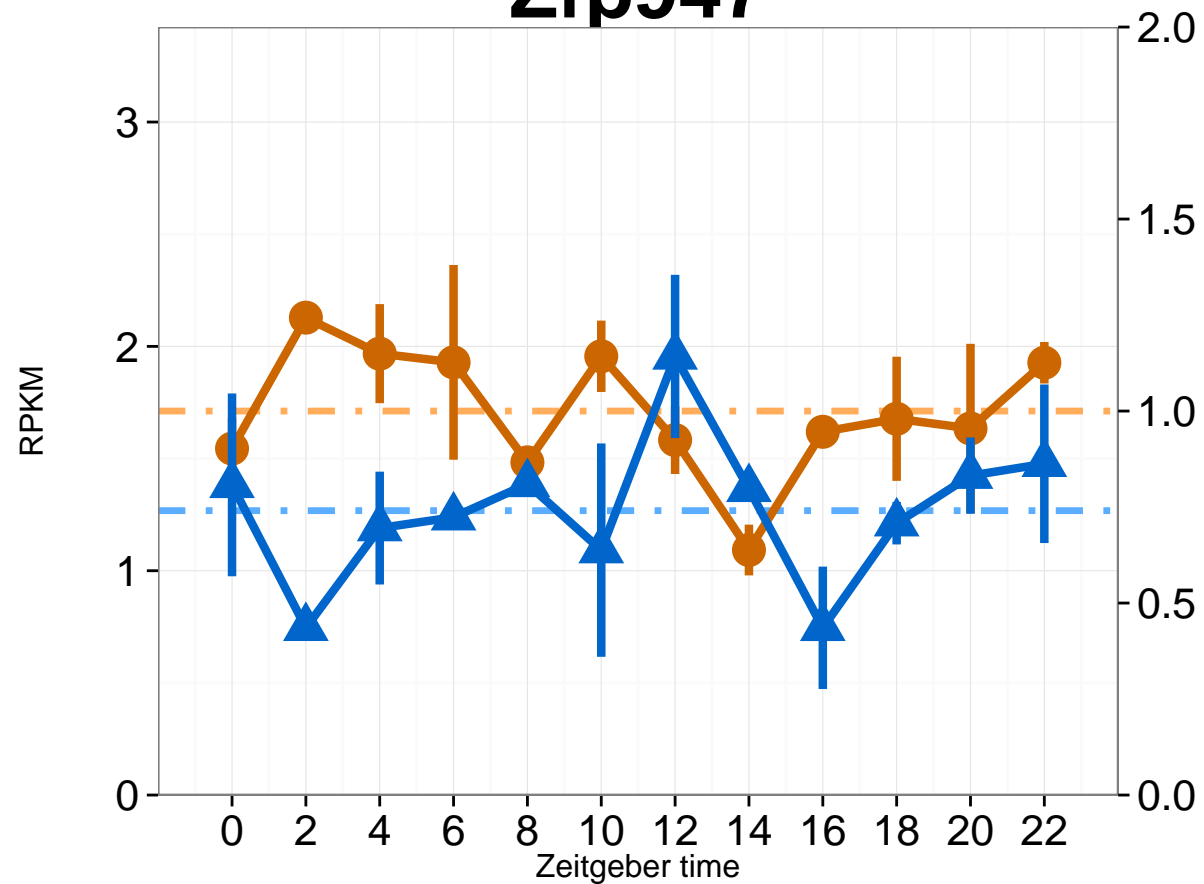

# Zfp947

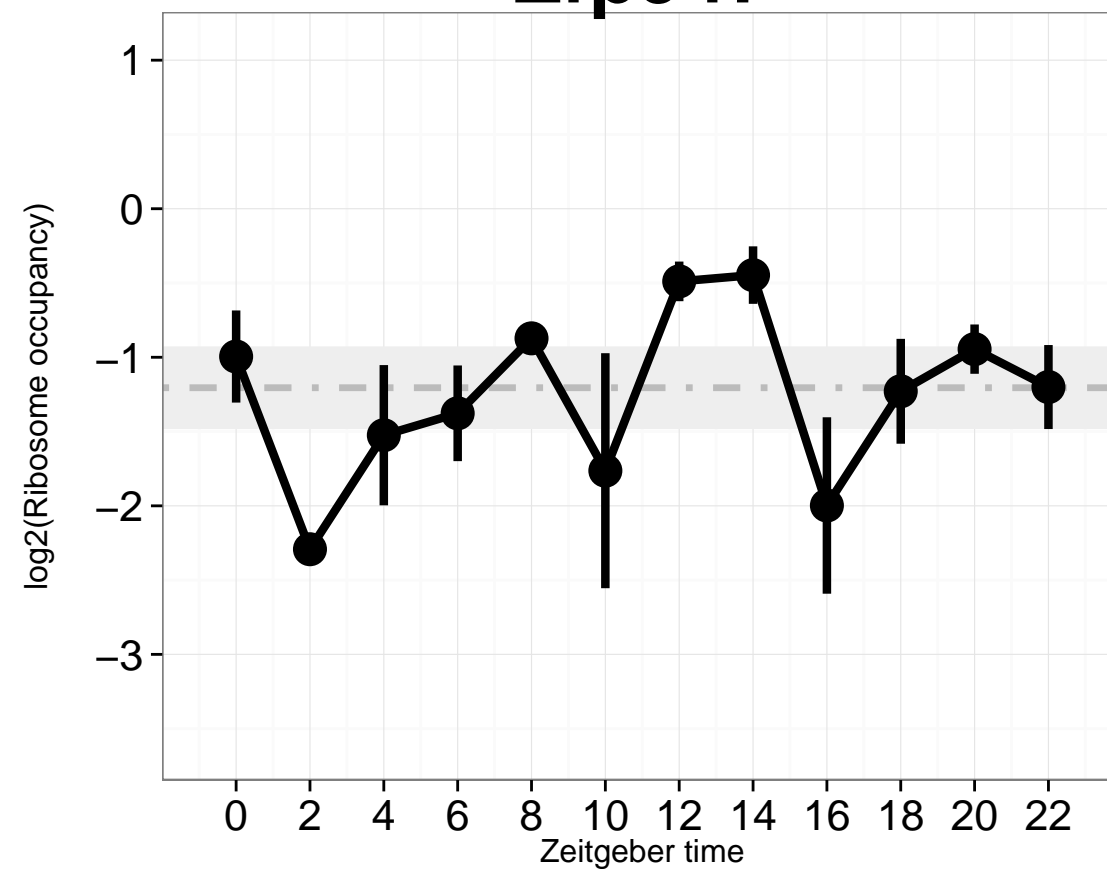

Supplement: Supplementary file 3283 [file 1]

# Ccbe1

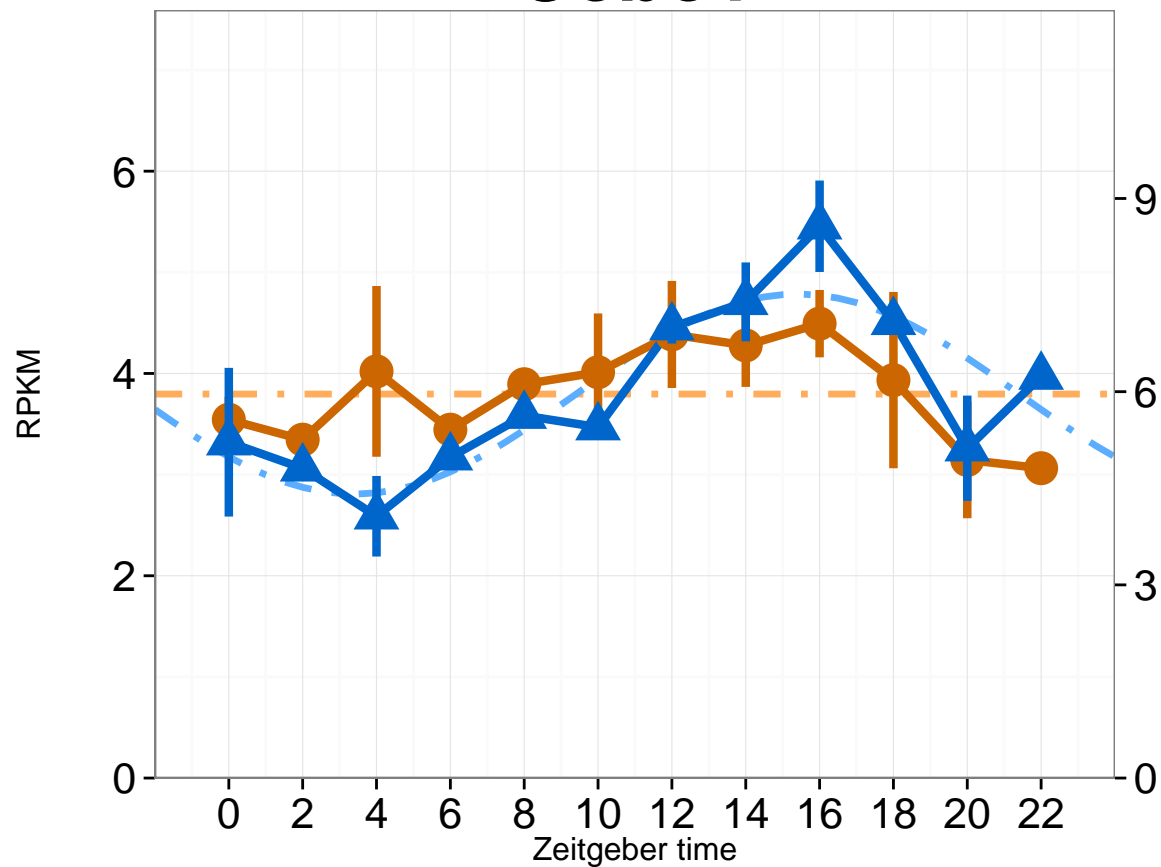

# Ccbe1

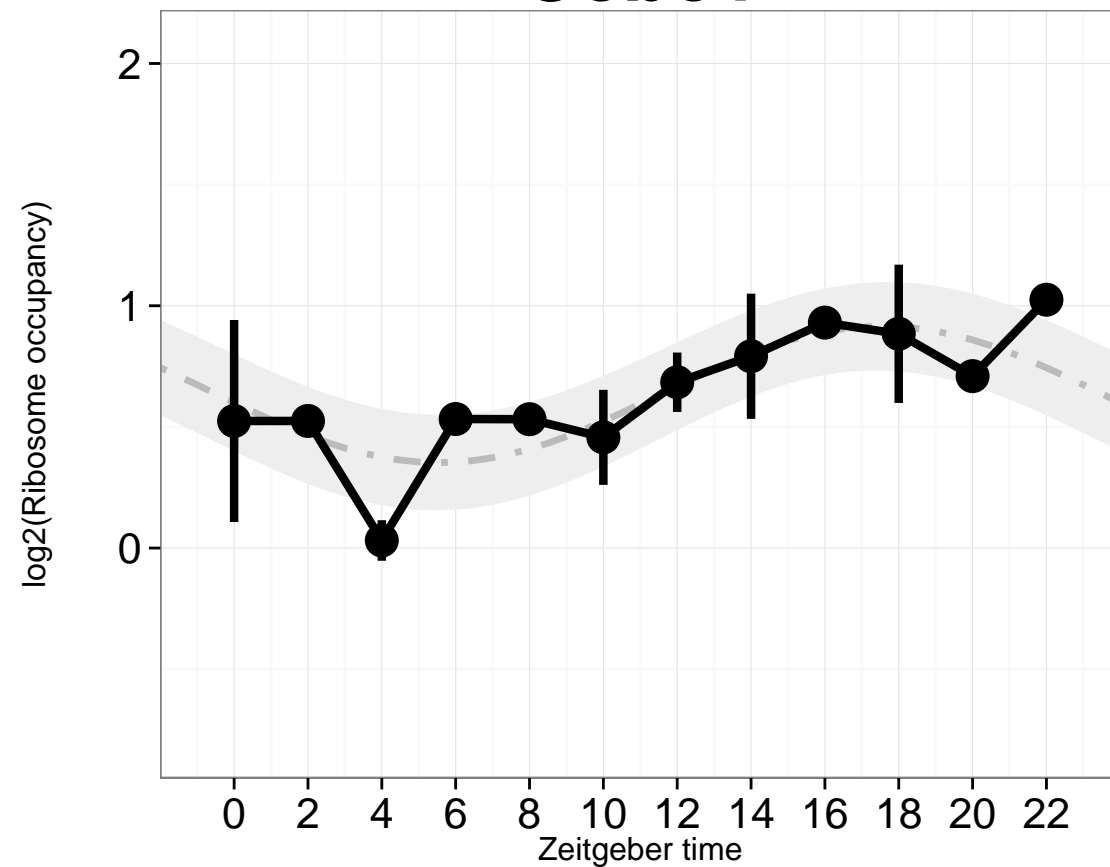

Supplement: Supplementary file 3284 [file 1]

## Axin1

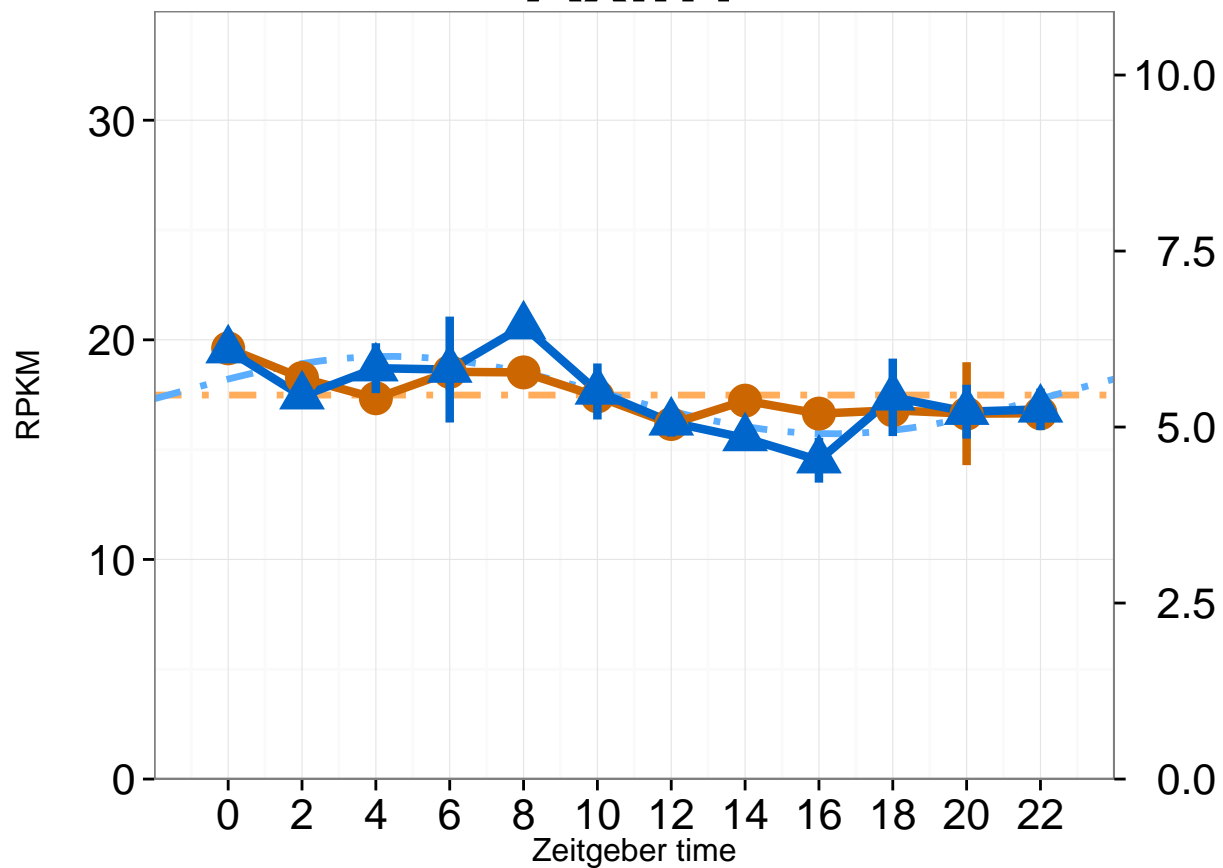

## Axin1

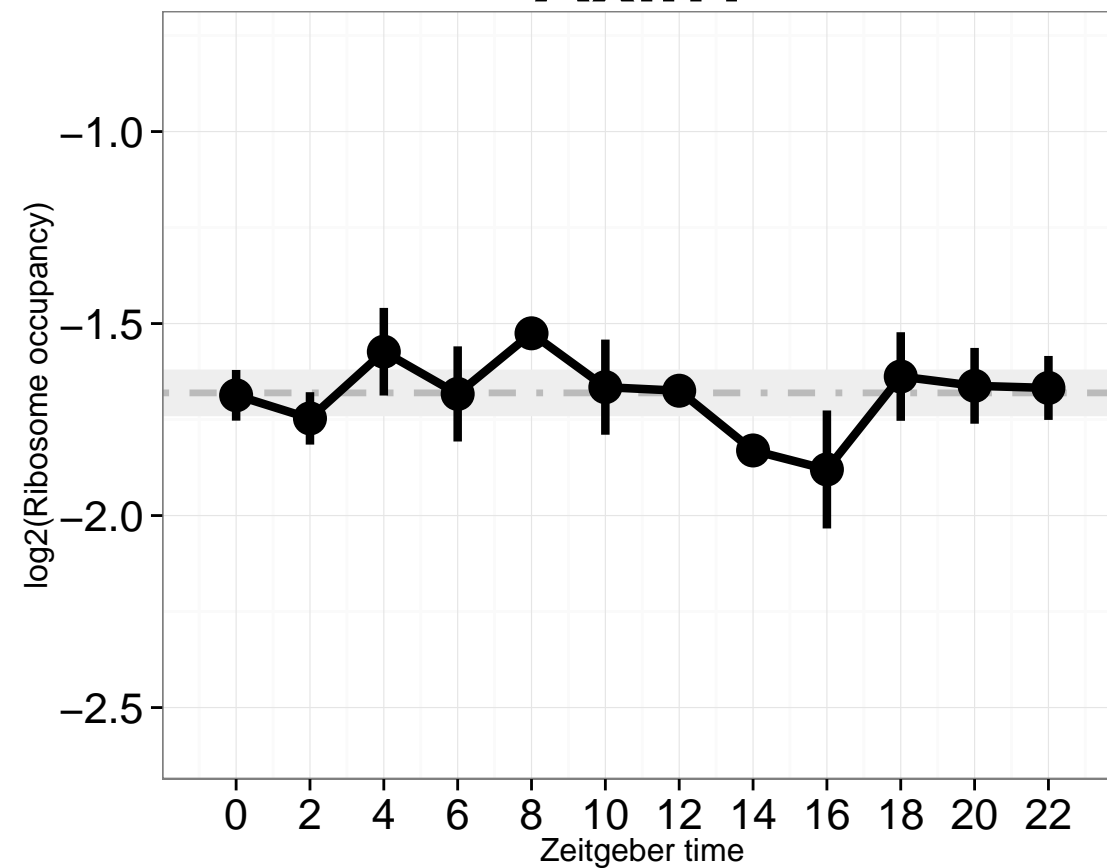

Supplement: Supplementary file 3285 [file 1]

## Naip2

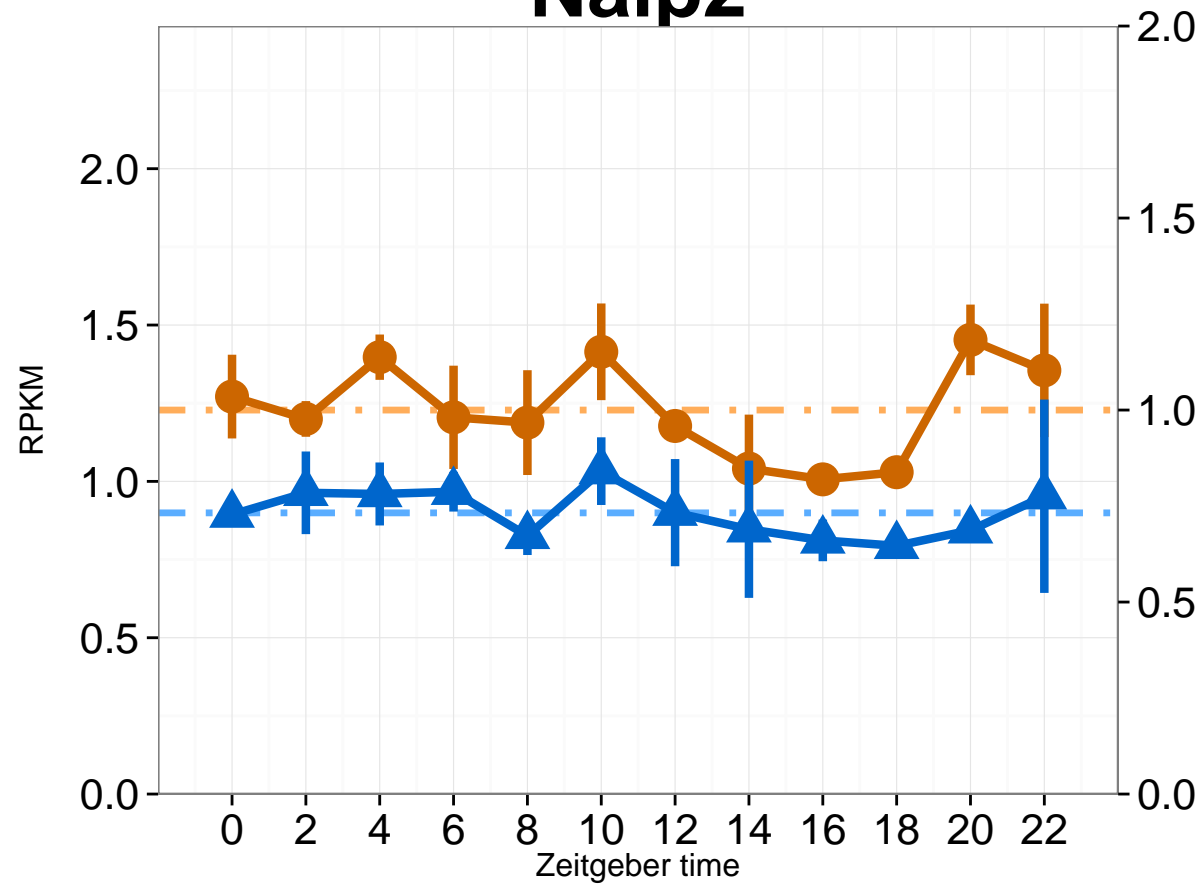

## Naip2

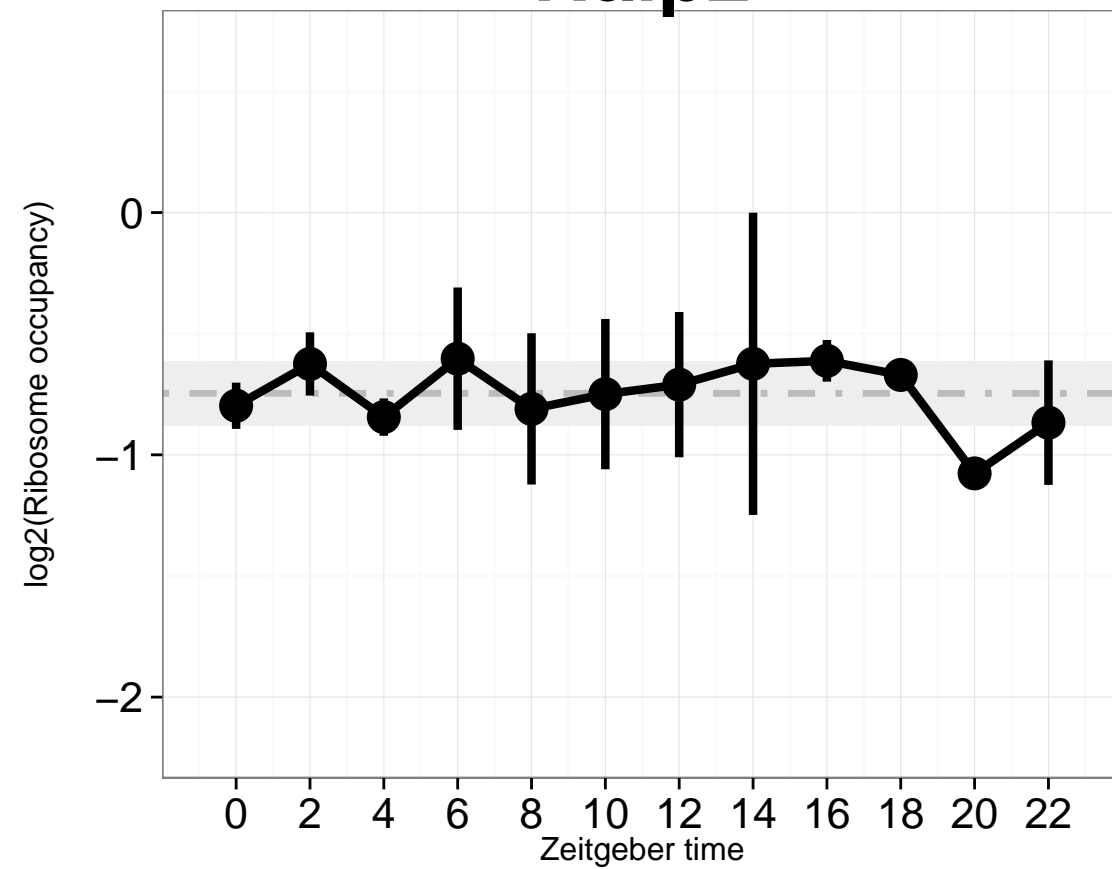

Supplement: Supplementary file 3286 [file 1]

## Usp31

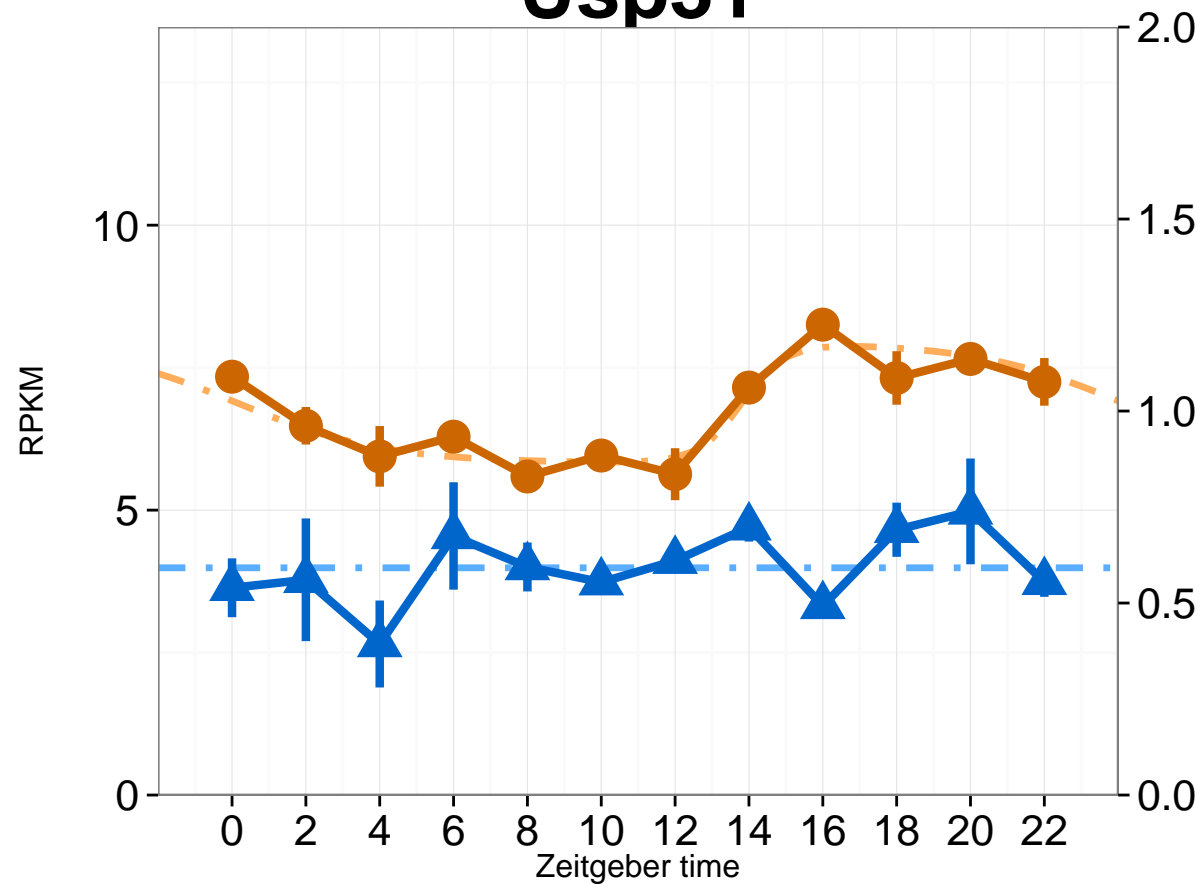

## Usp31

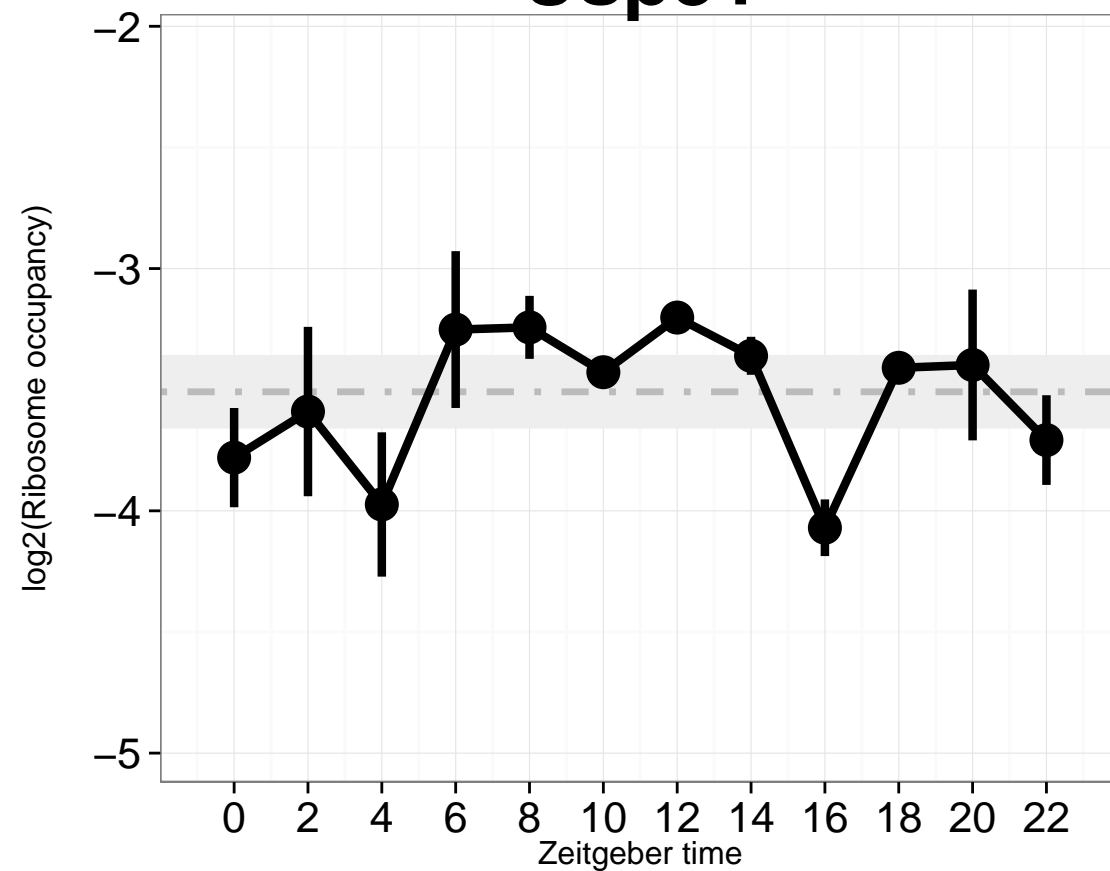

Supplement: Supplementary file 3287 [file 1]

## lqcc

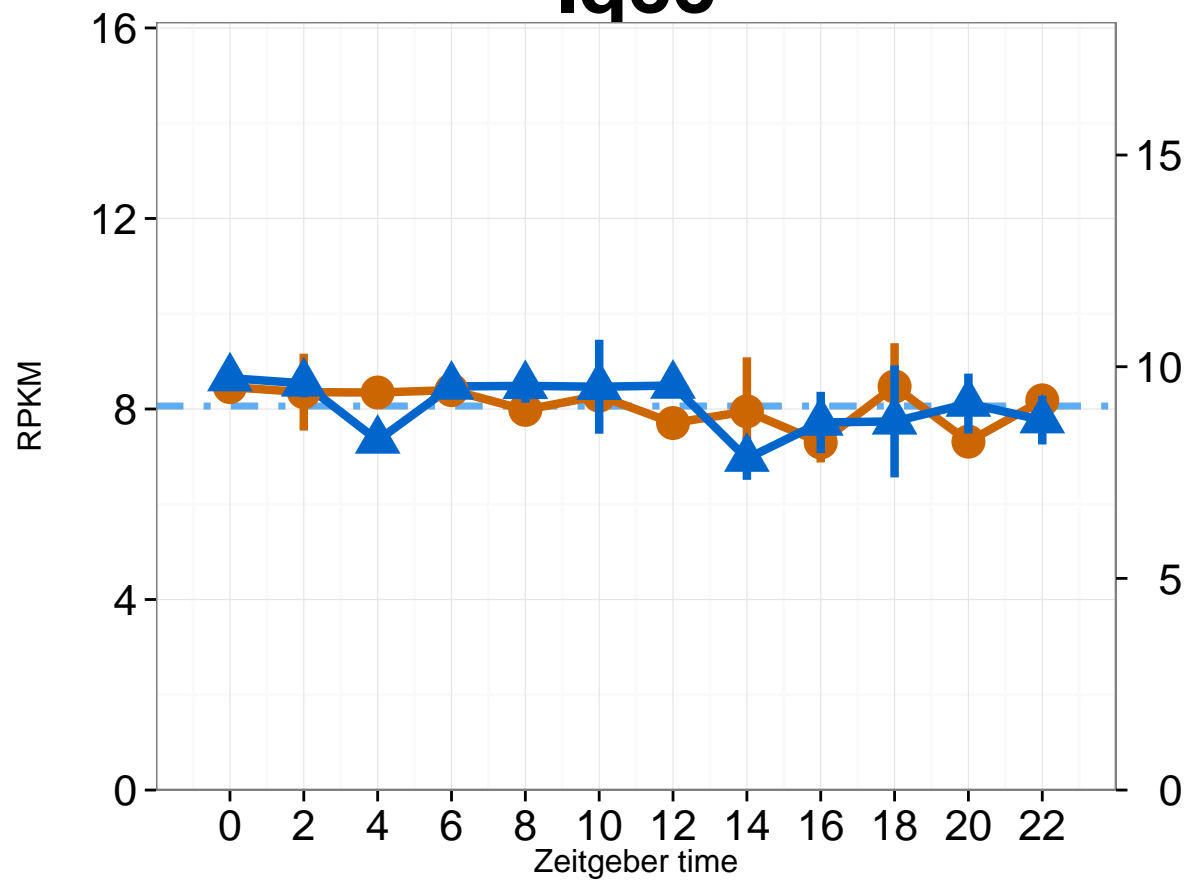

## lqcc

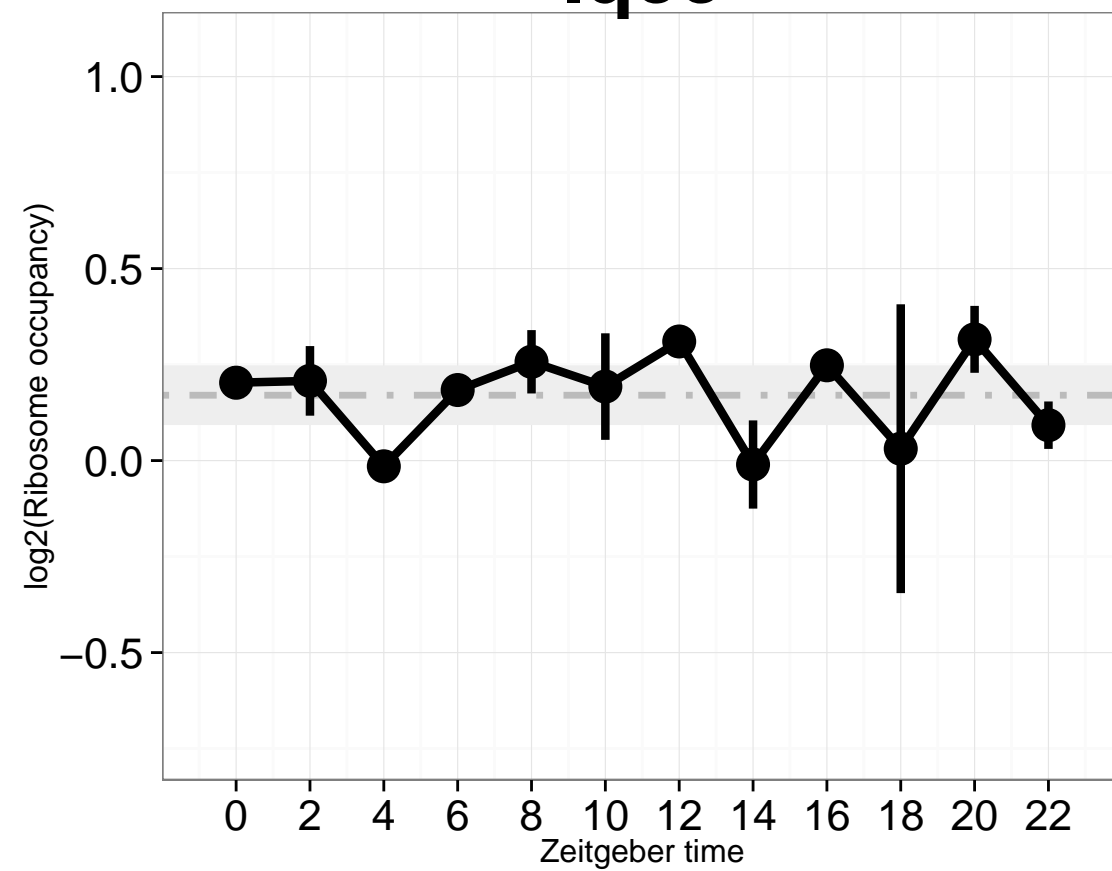

Supplement: Supplementary file 3288 [file 1]

## 4931406C07Rik

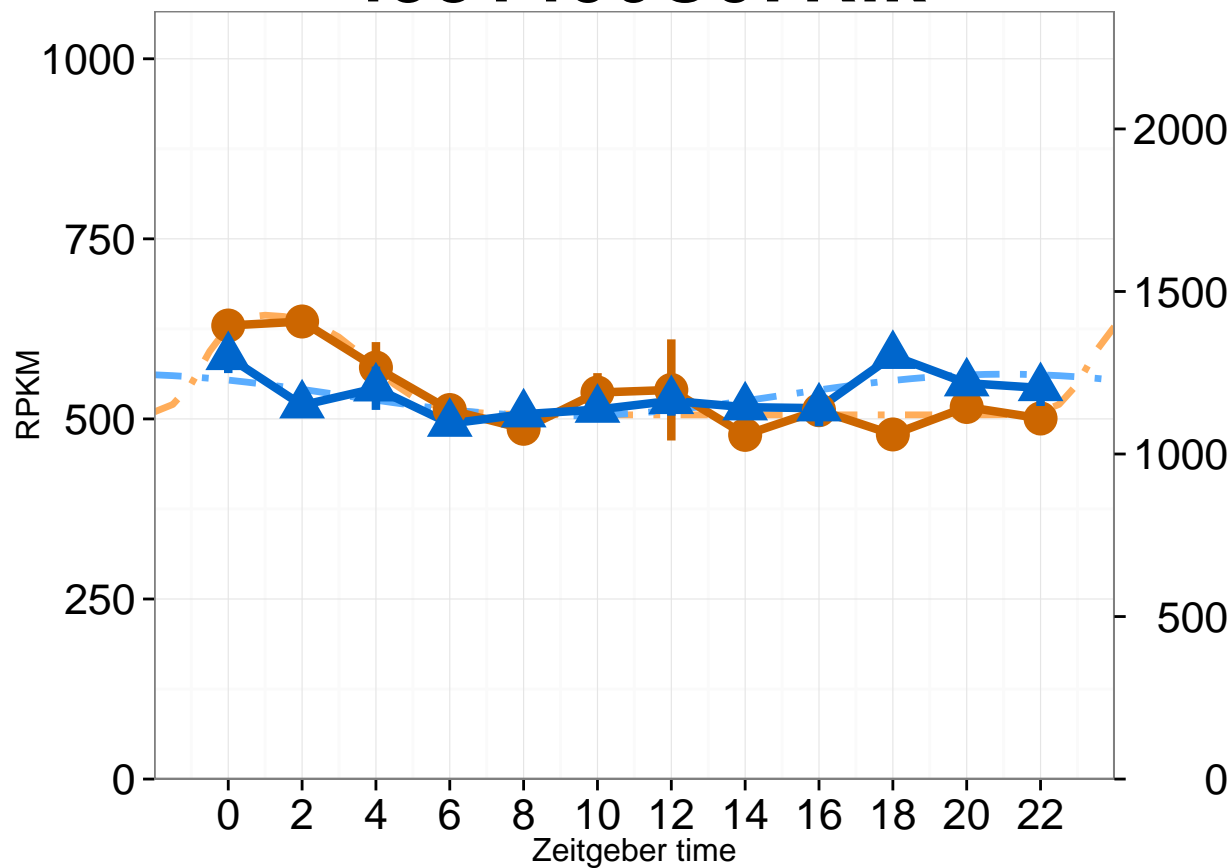

## 4931406C07Rik

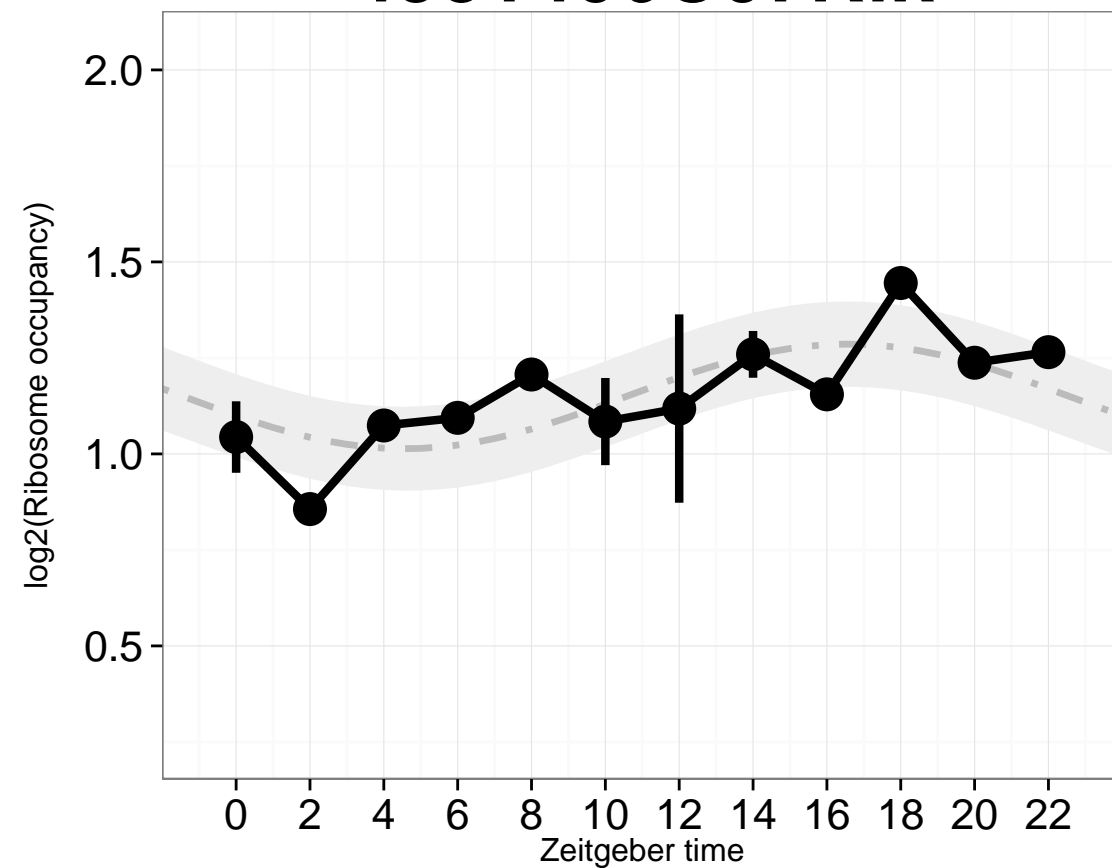

Supplement: Supplementary file 3289 [file 1]

## Slc14a1

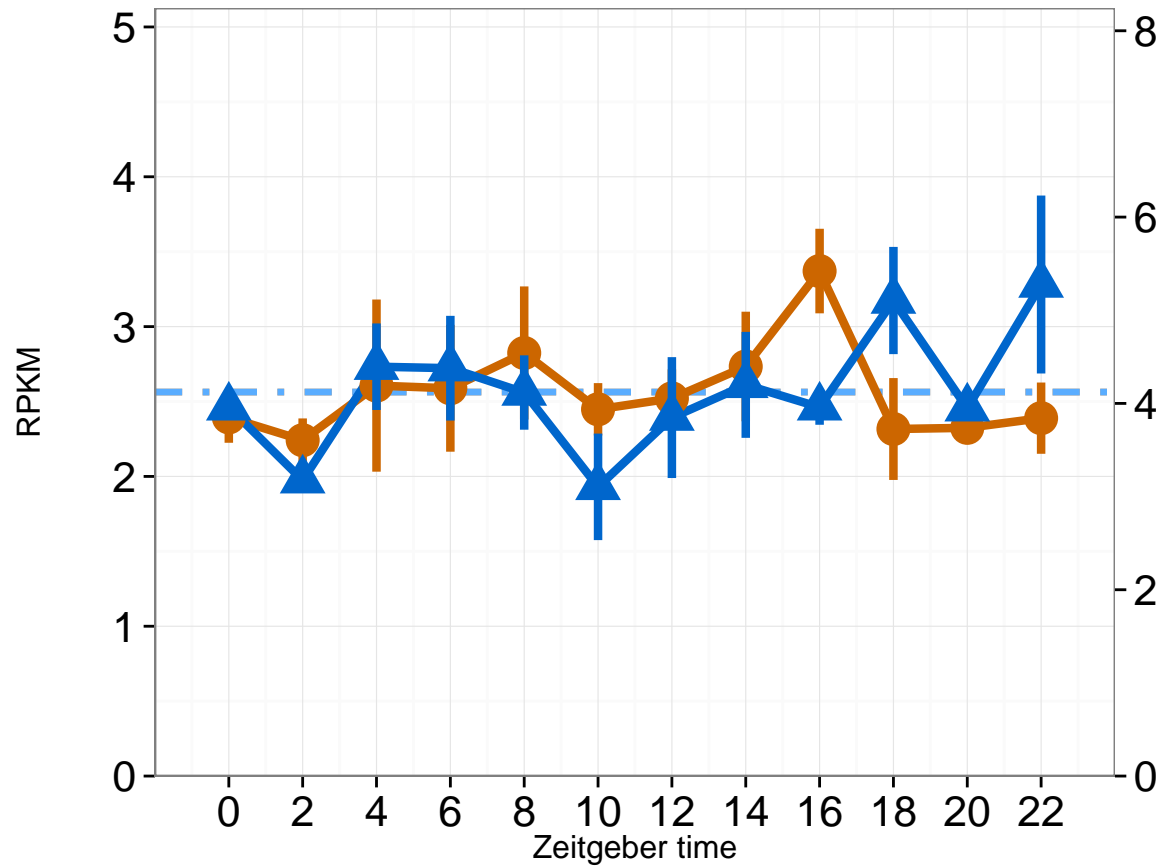

## Slc14a1

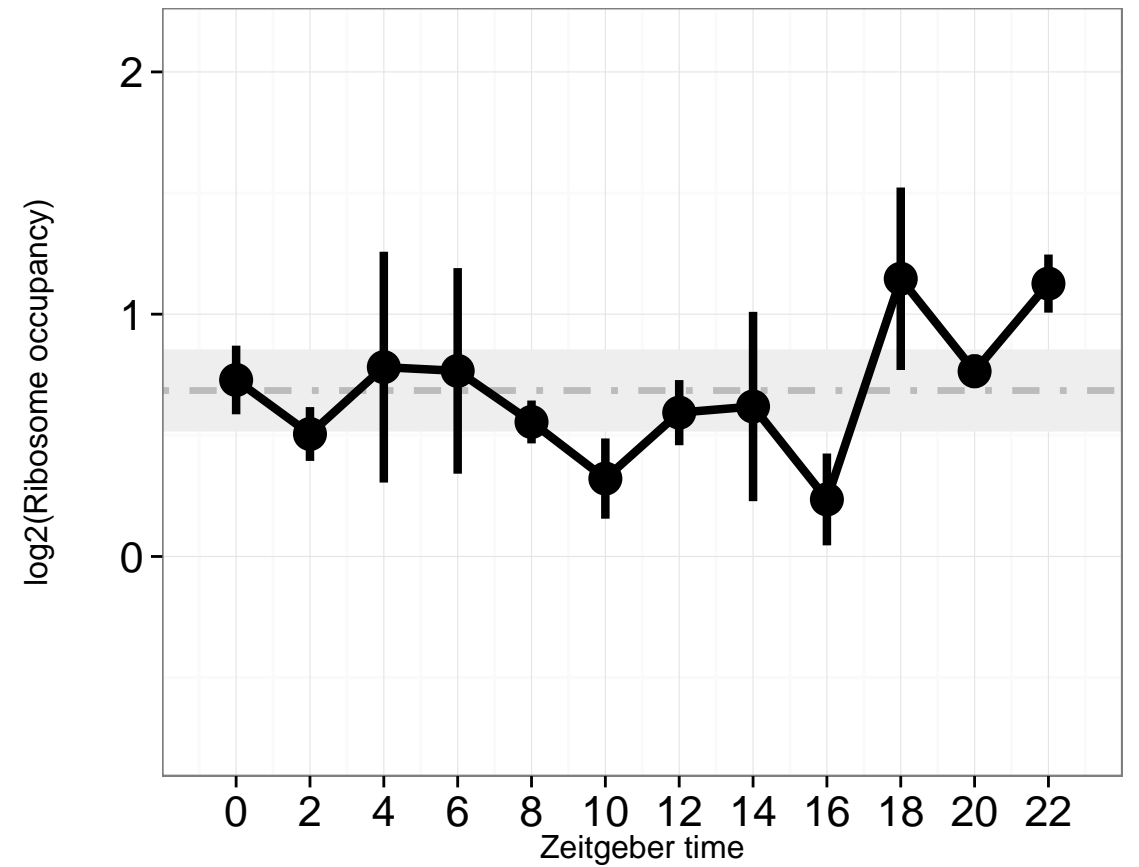

Supplement: Supplementary file 3290 [file 1]

# Serpina3g

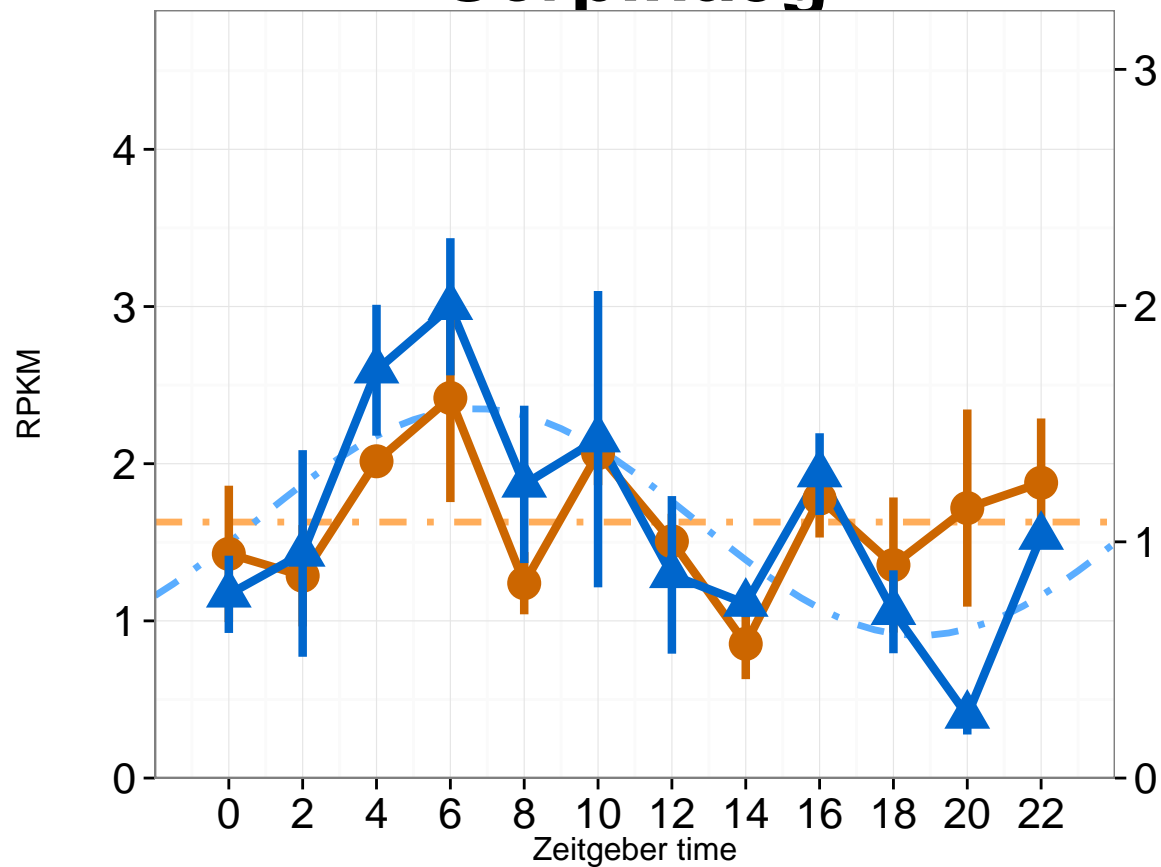

# Serpina3g

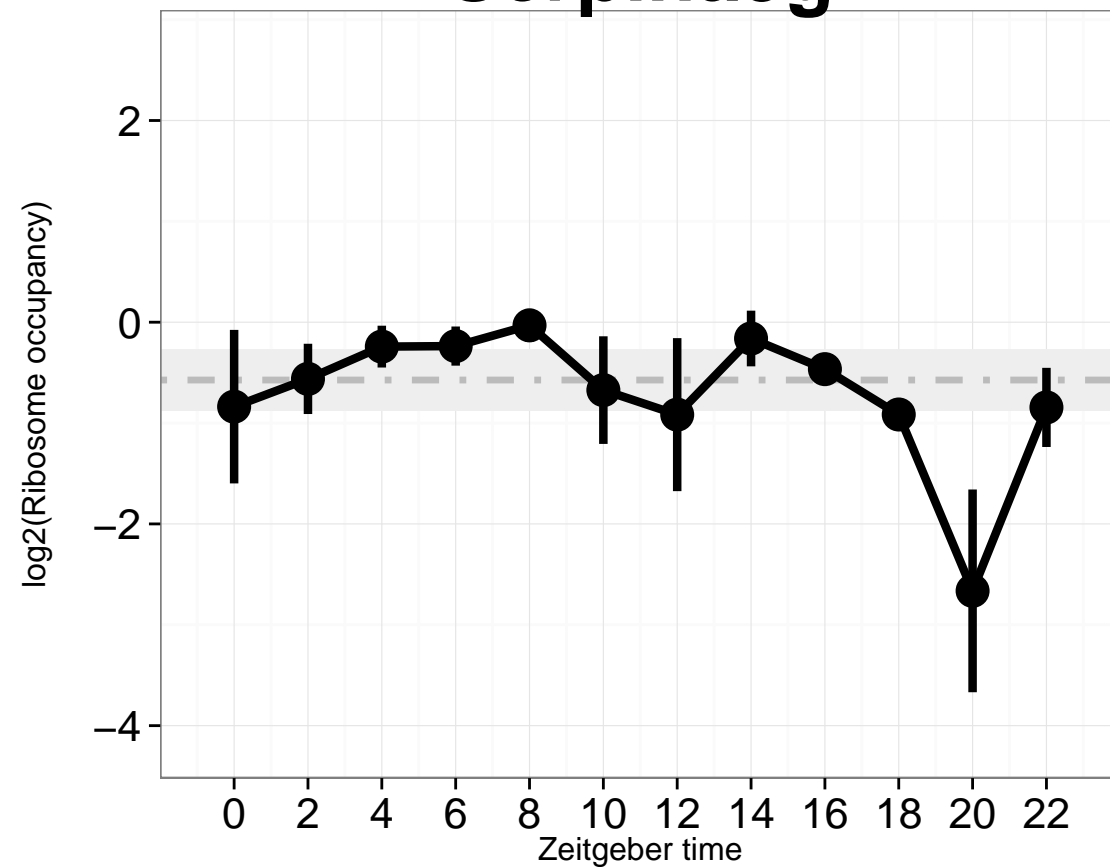

Supplement: Supplementary file 3291 [file 1]

# Gm21955

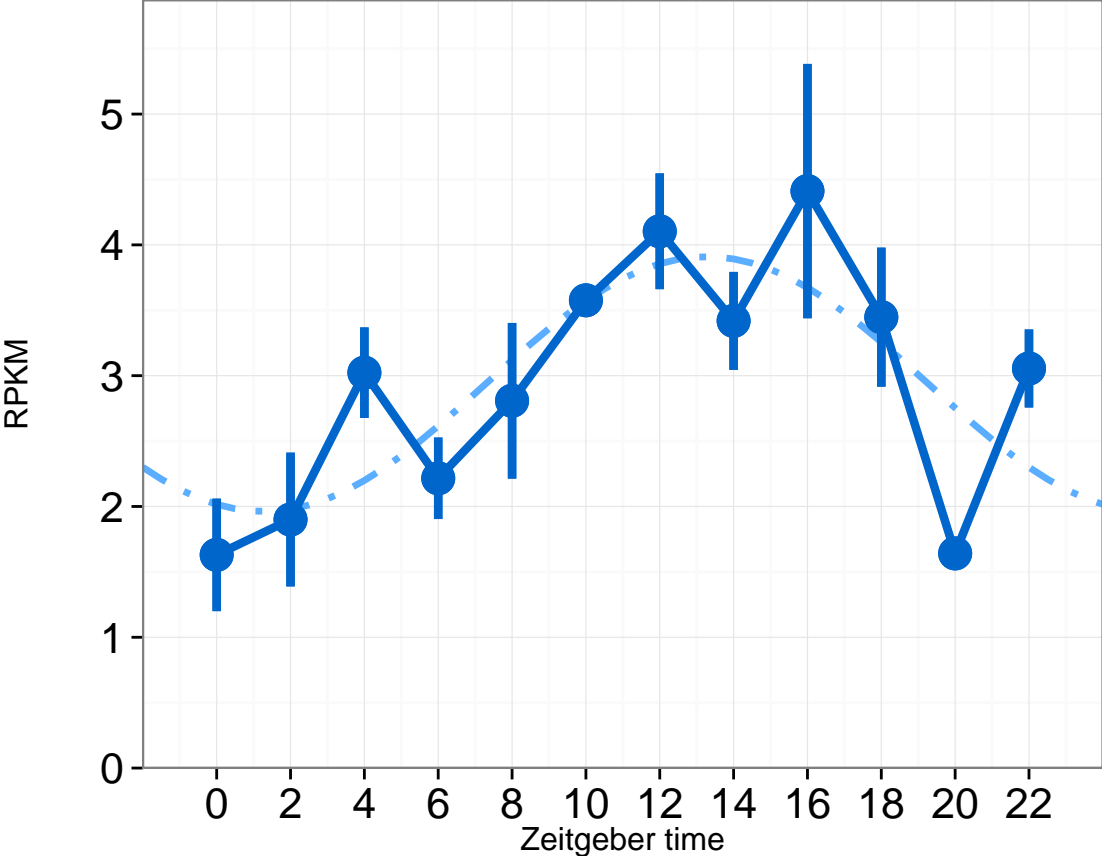

# Gm21955 log2(Ribosome occupanc

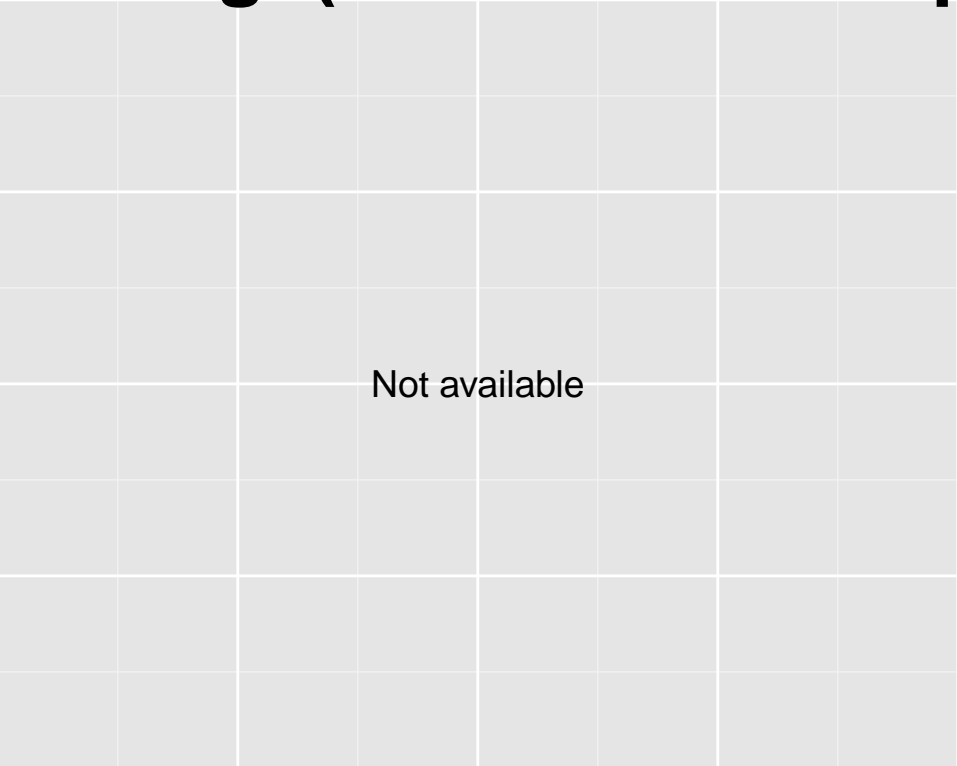

Supplement: Supplementary file 3292 [file 1]

# Lig4

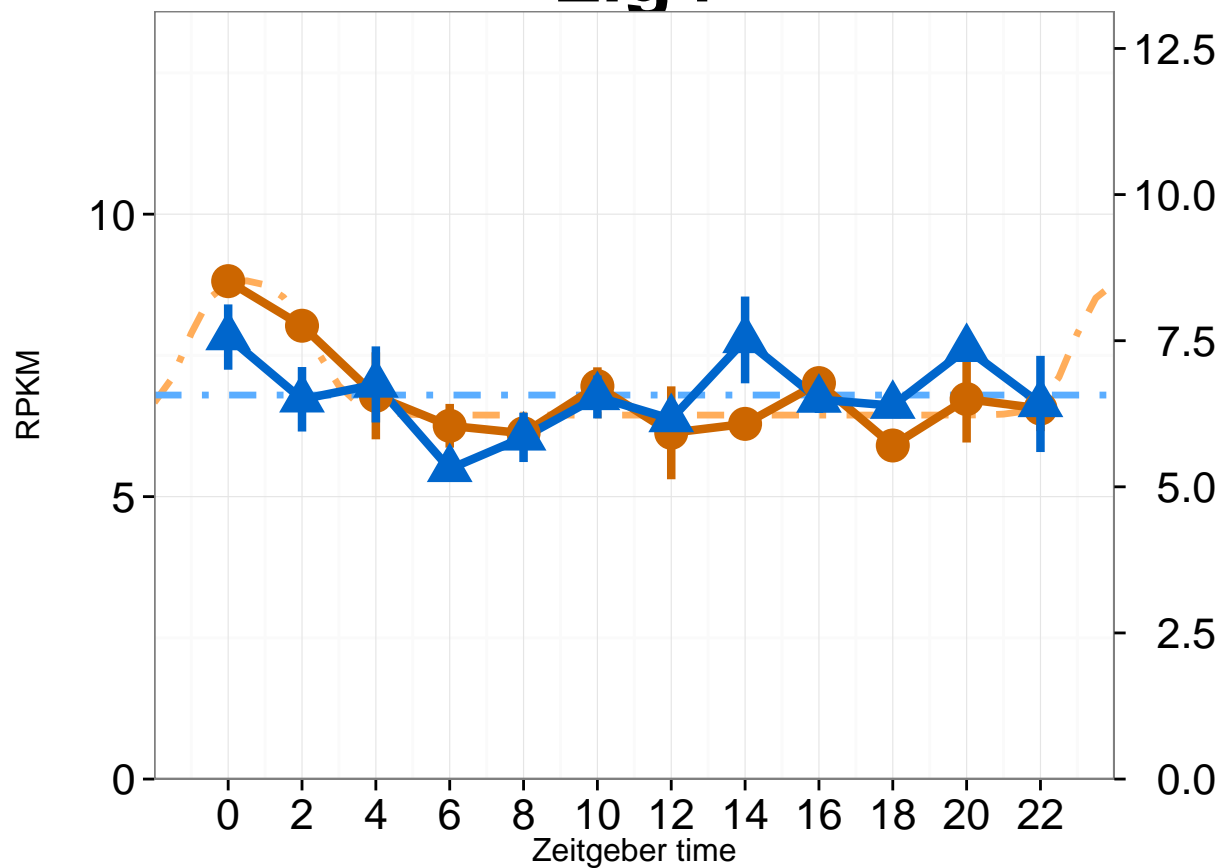

# Lig4

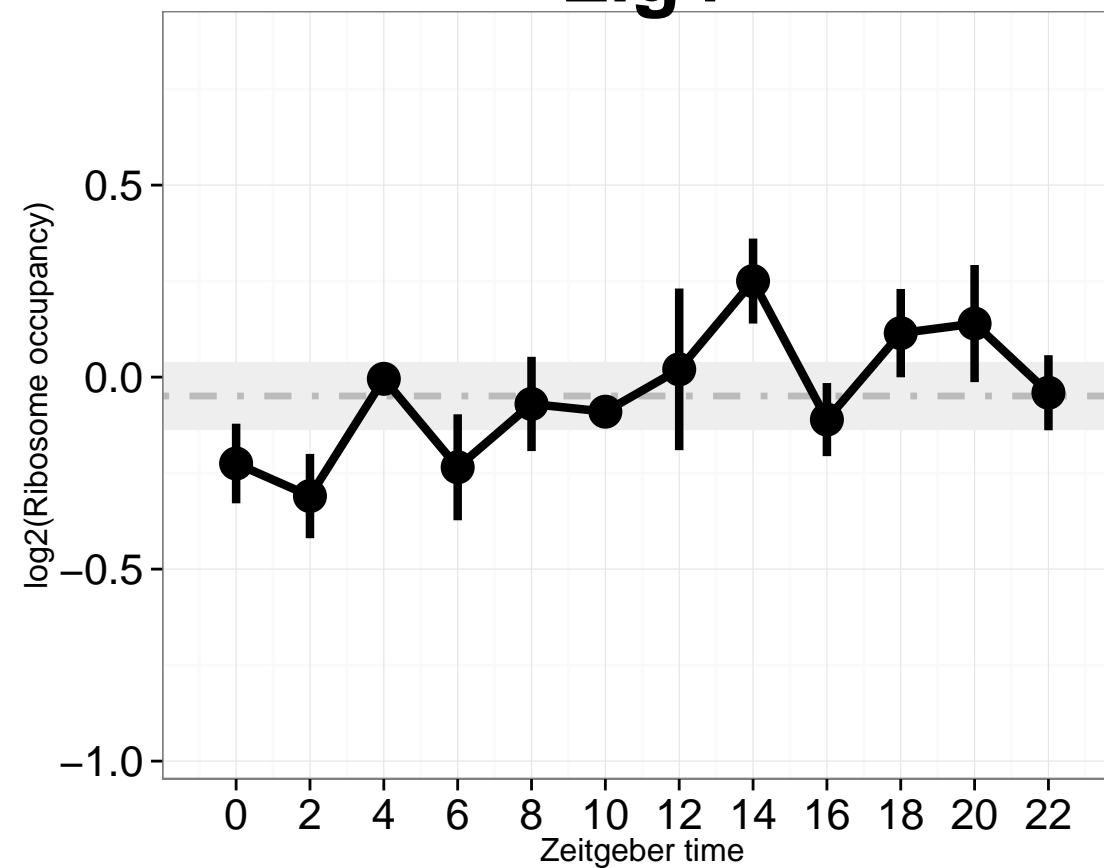

Supplement: Supplementary file 3293 [file 1]

**Sh2d1b1 TR**

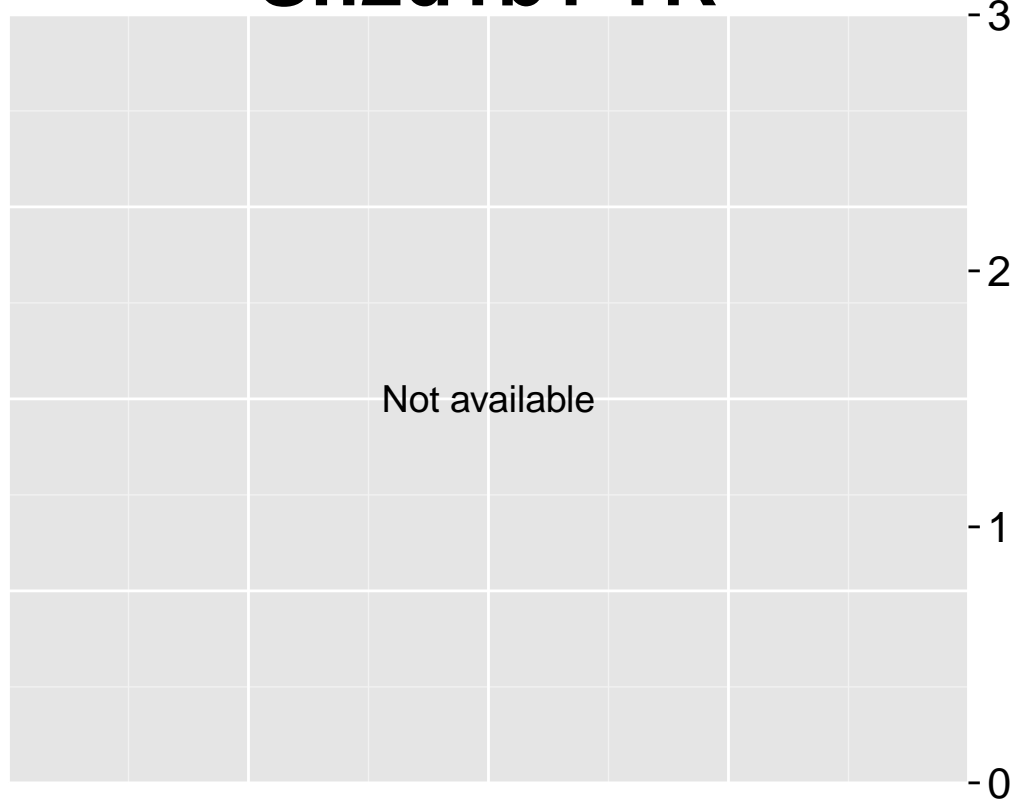

**Sh2d1b1 log2(Ribosome occupanc**

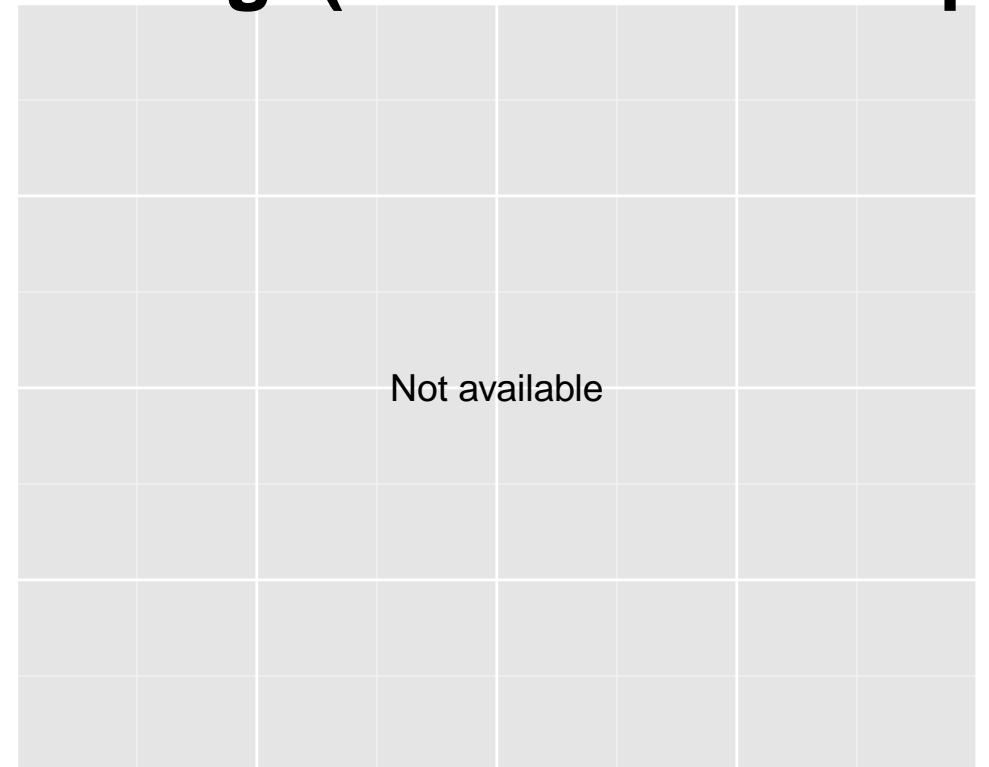

Supplement: Supplementary file 3294 [file 1]

## Recql4

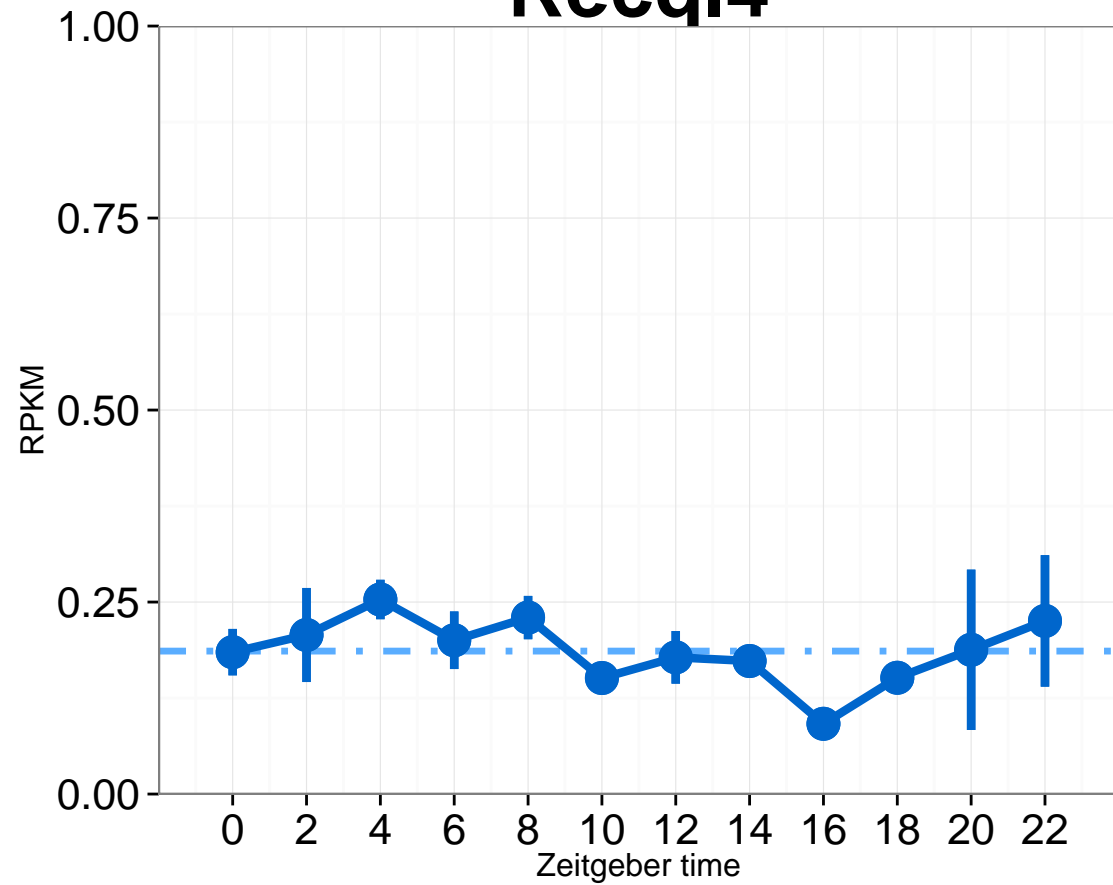

## Recql4 log2(Ribosome occupancy

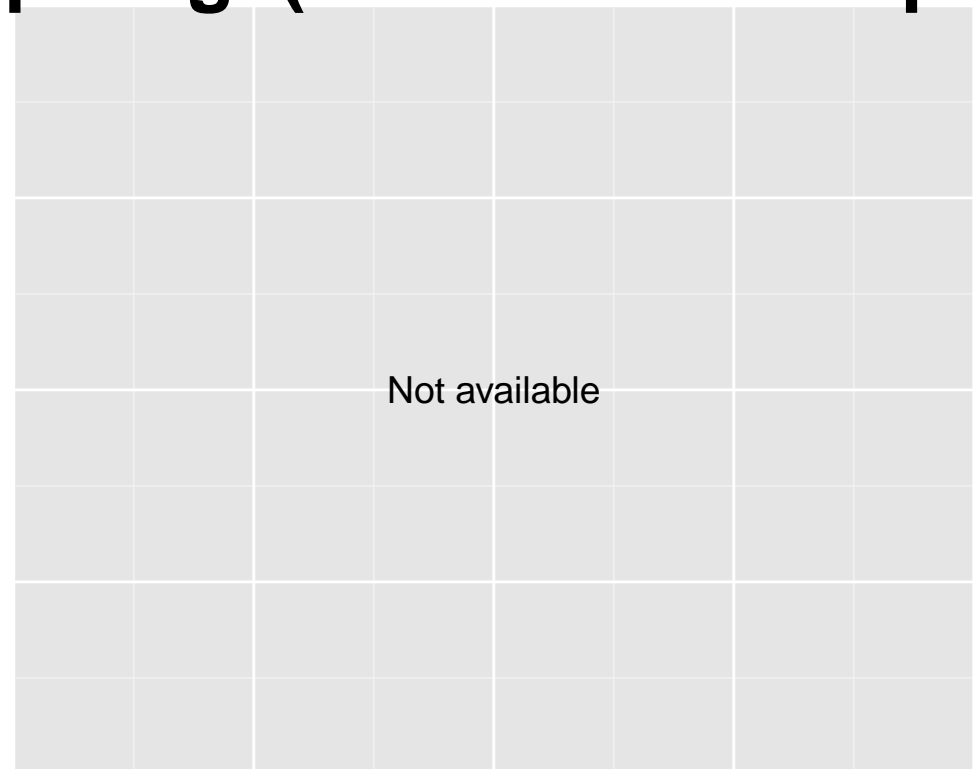

Supplement: Supplementary file 3295 [file 1]

# Rps3a1

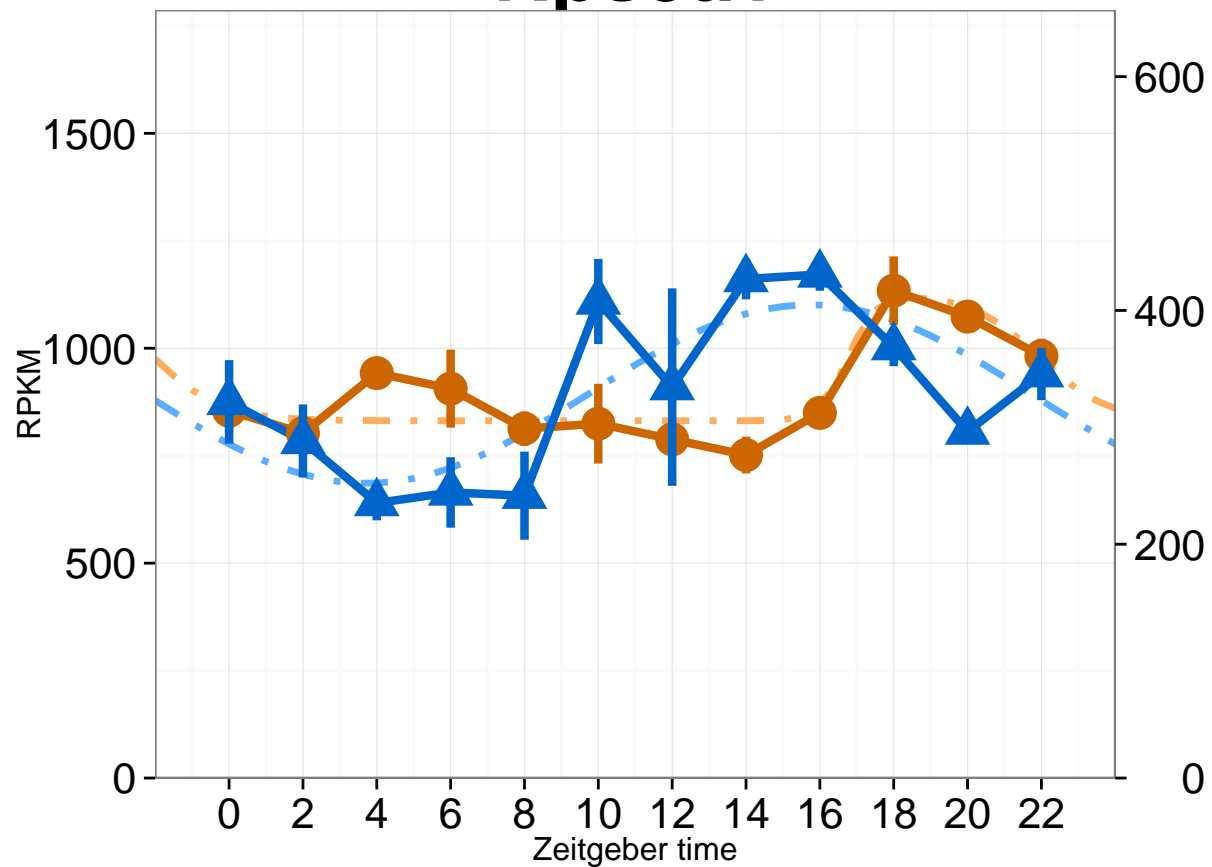

# Rps3a1

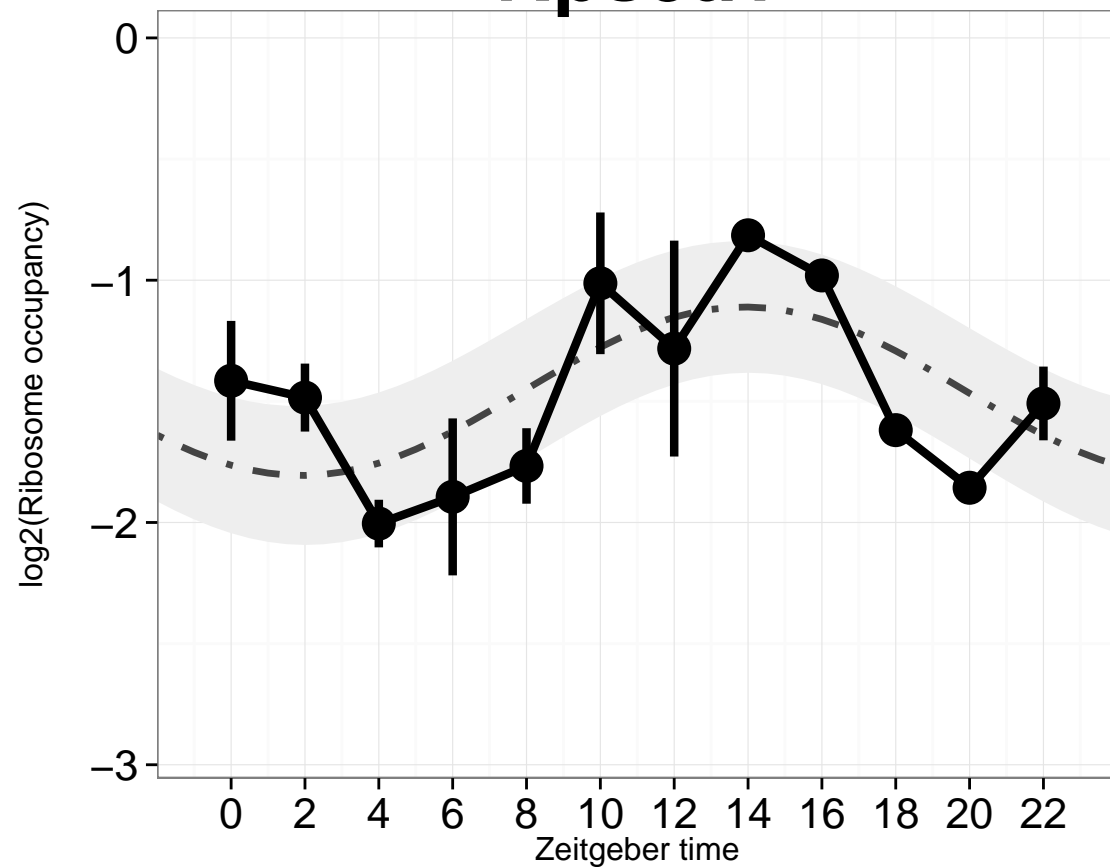

Supplement: Supplementary file 3296 [file 1]

## Snx10

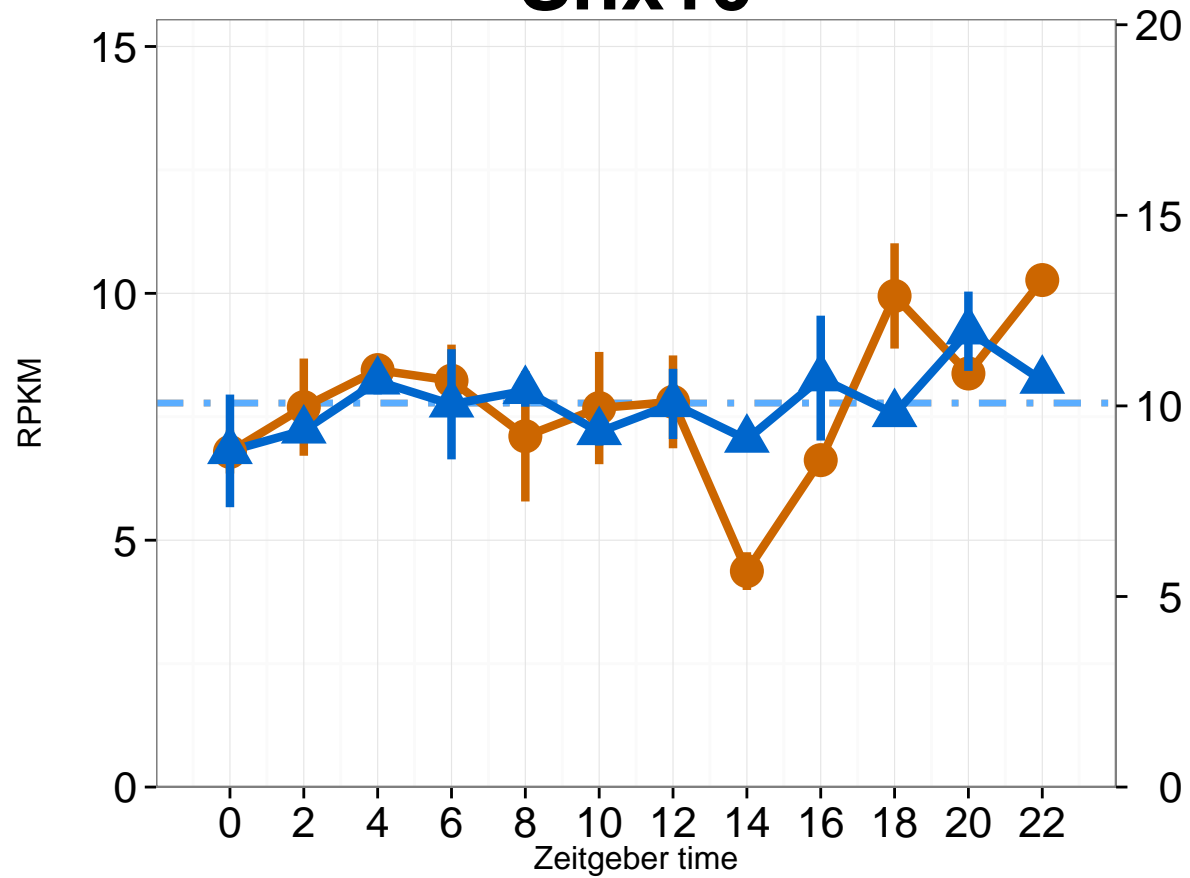

## Snx10

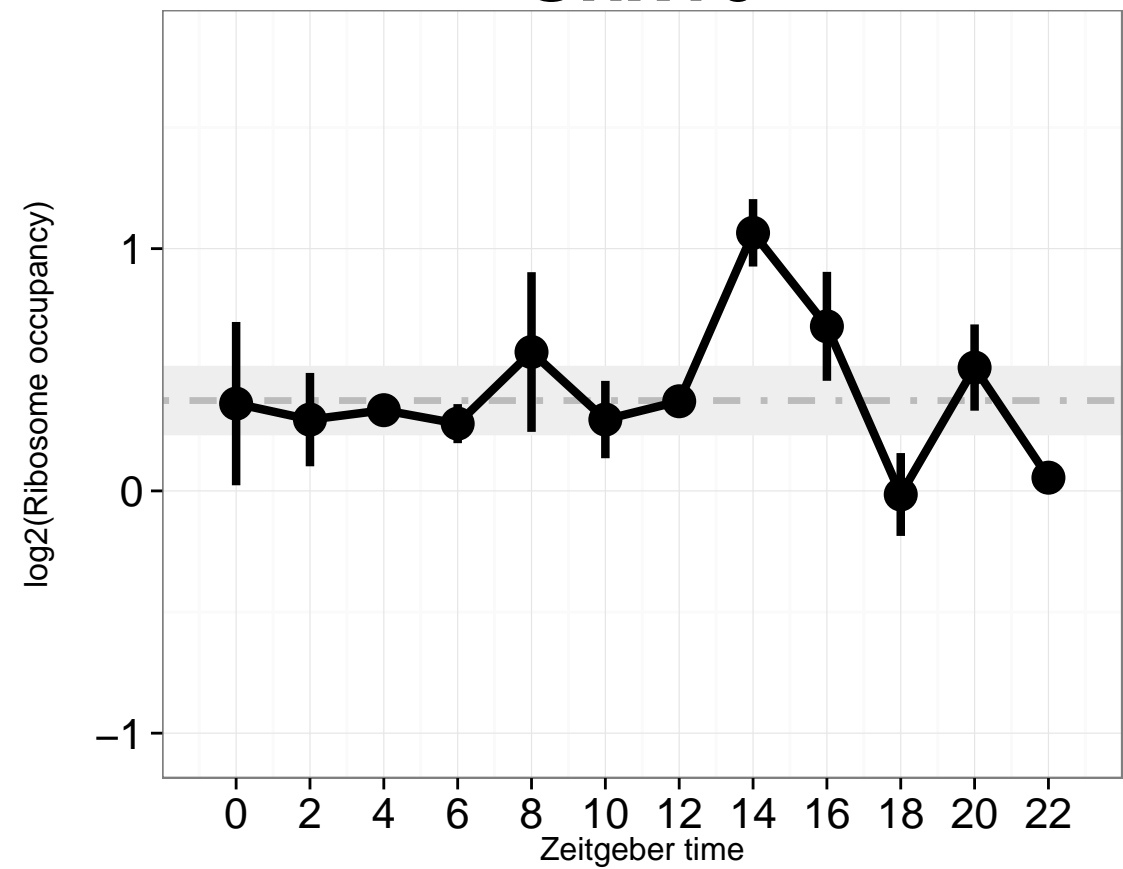

Supplement: Supplementary file 3297 [file 1]

# Pxdc1

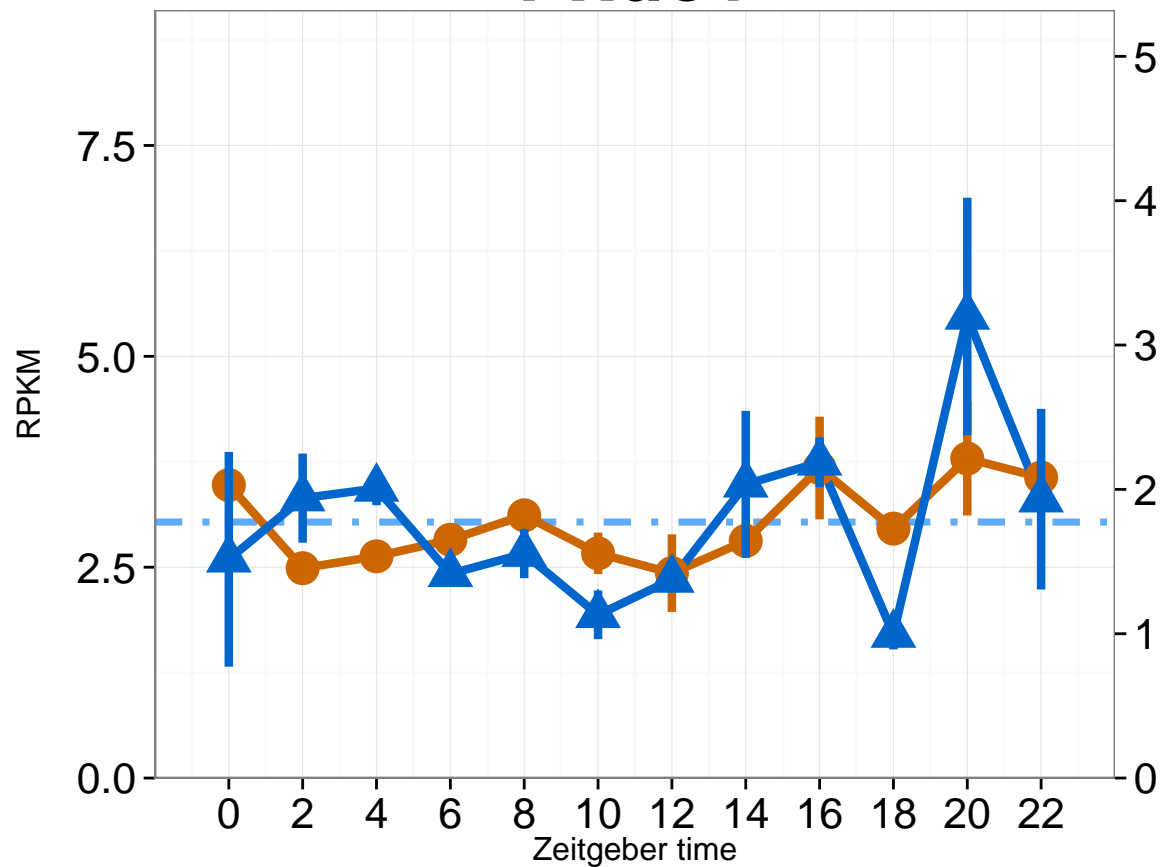

# Pxdc1

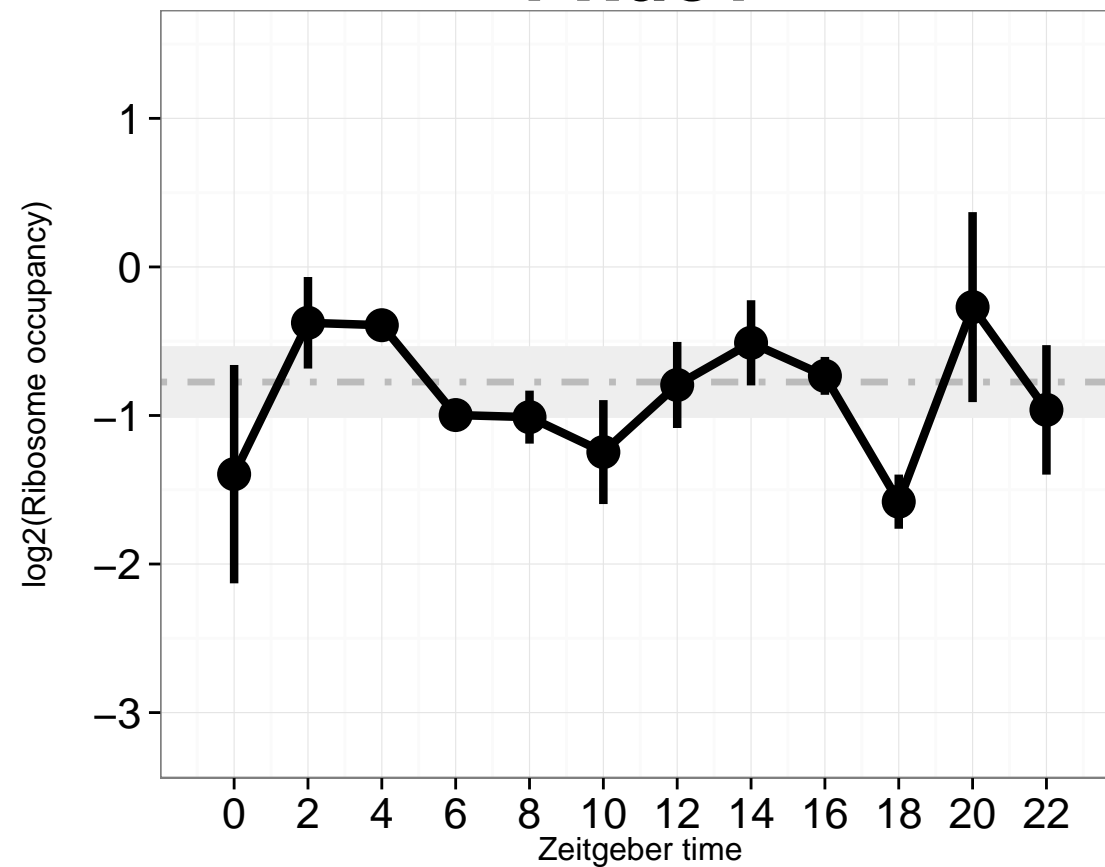

Supplement: Supplementary file 3298 [file 1]

# Cyp2d9

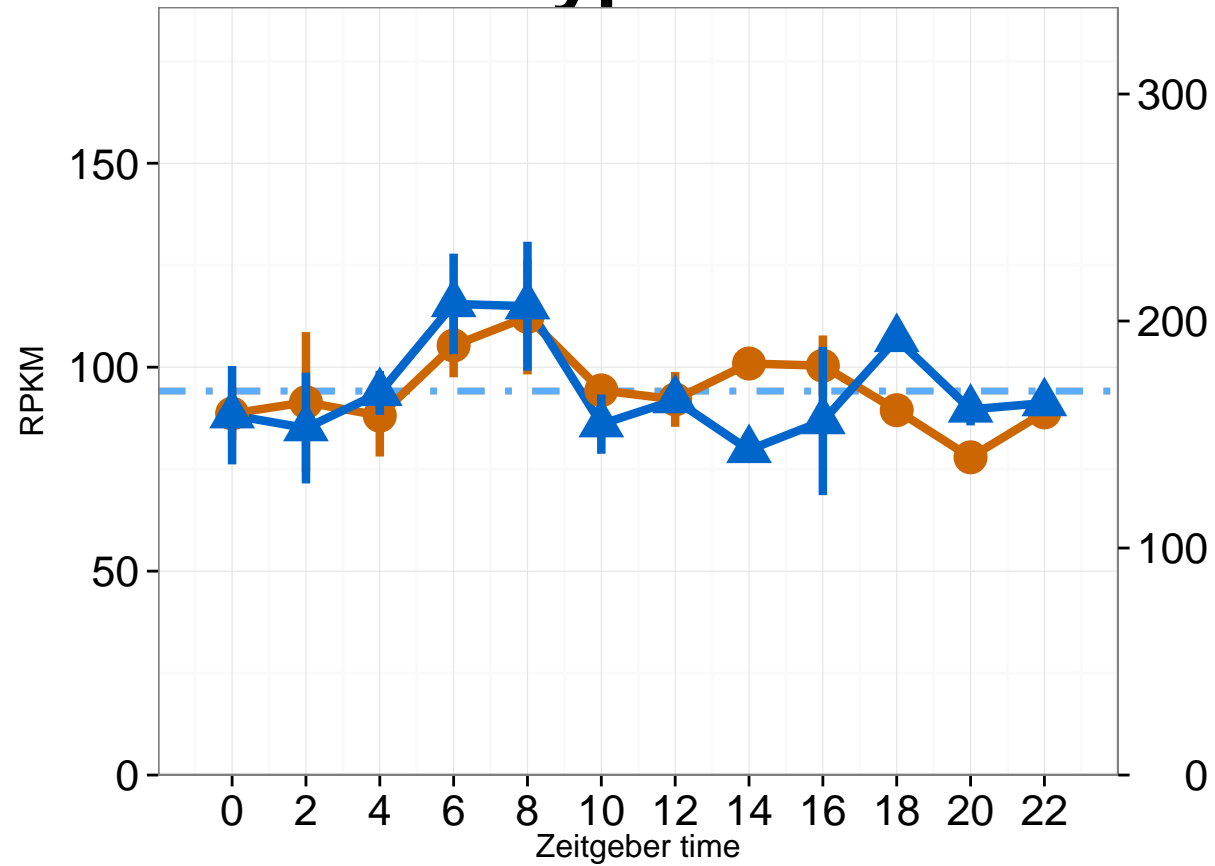

# Cyp2d9

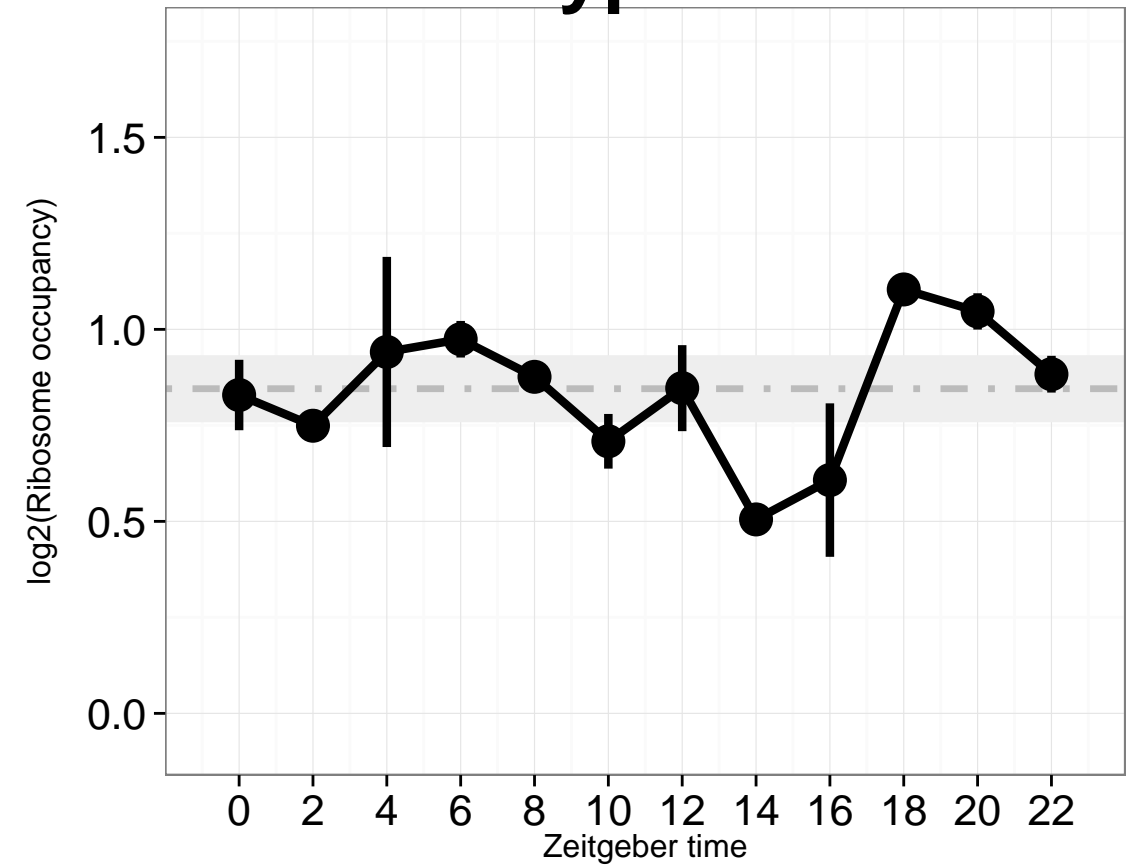

Supplement: Supplementary file 3299 [file 1]

# BC027231

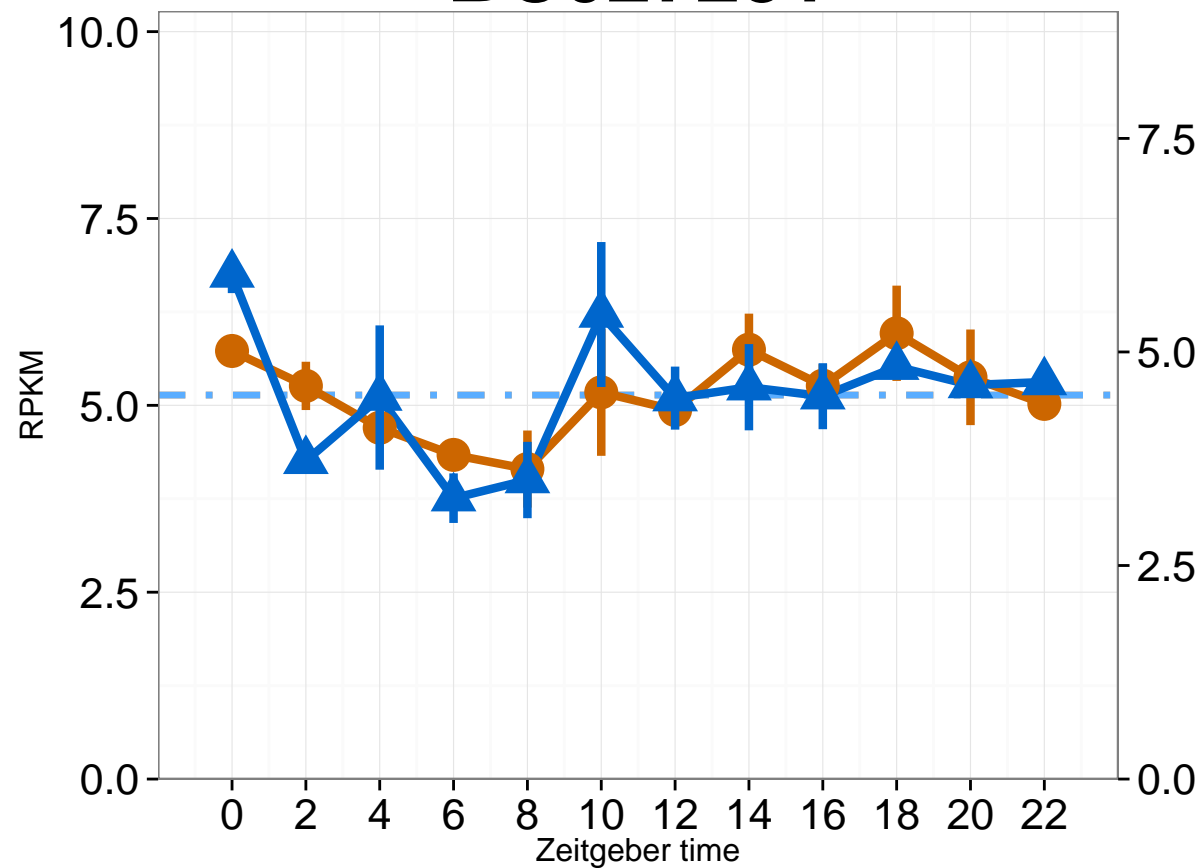

# BC027231

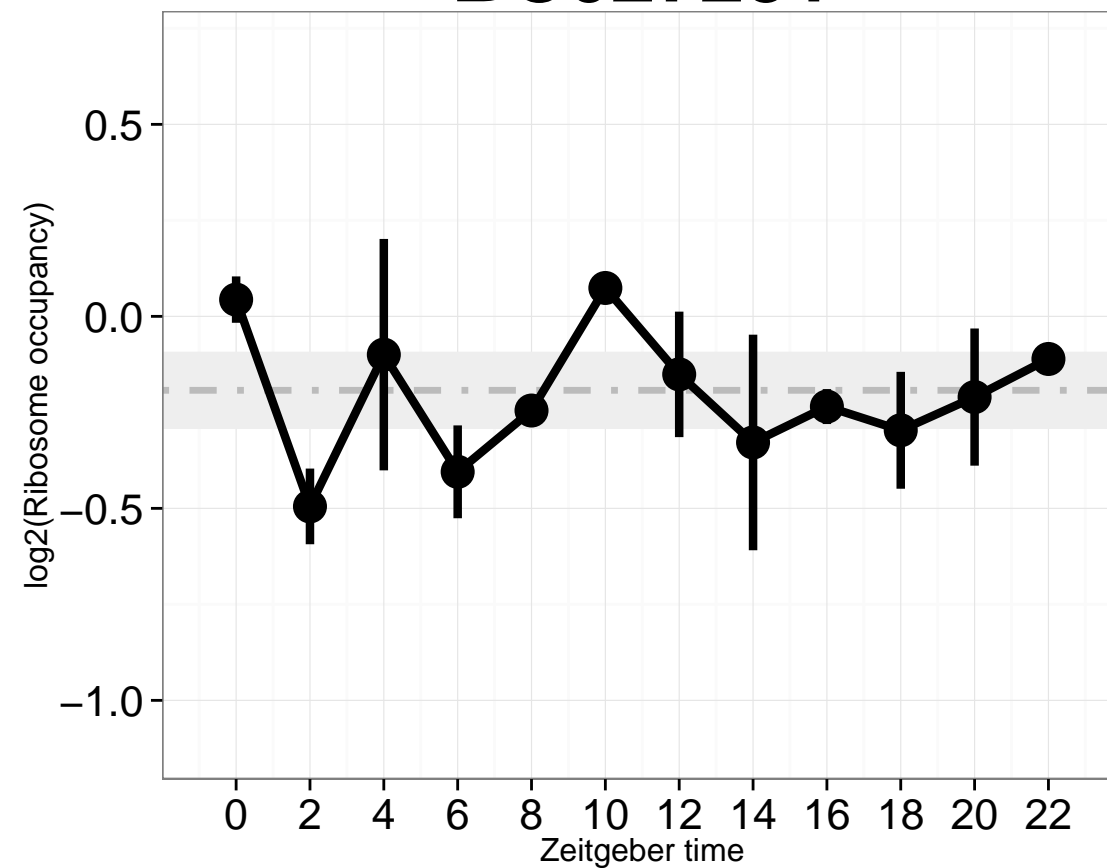

Supplement: Supplementary file 3300 [file 1]

**Retn TR**

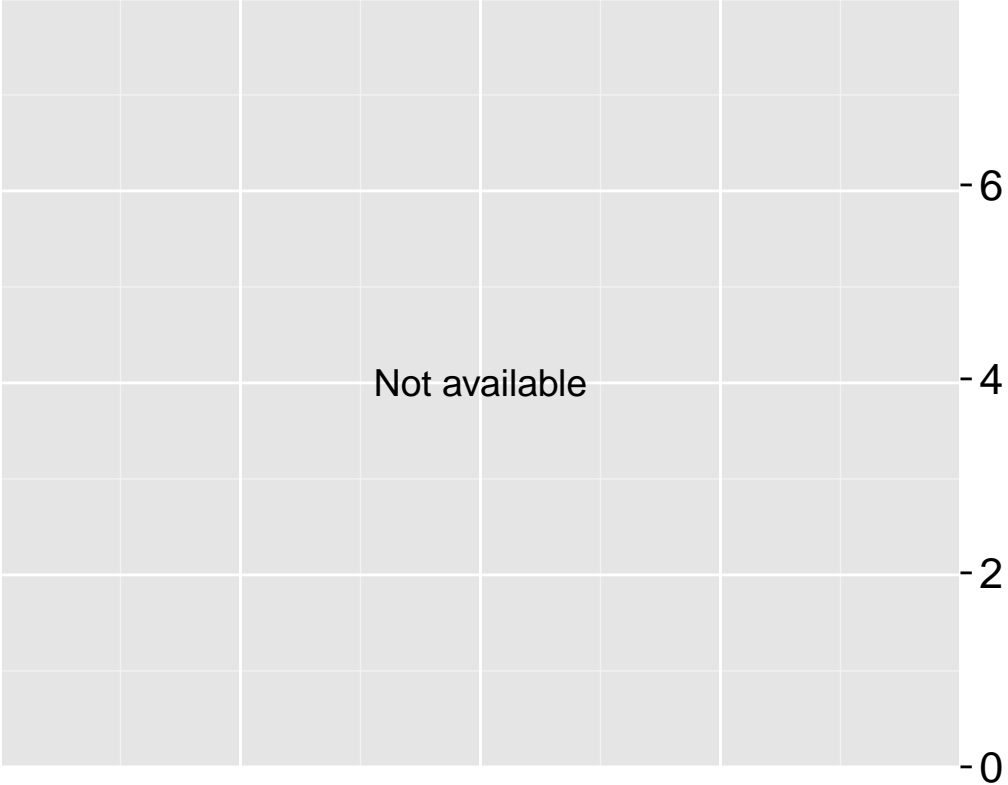

**Retn log2(Ribosome occupancy)**

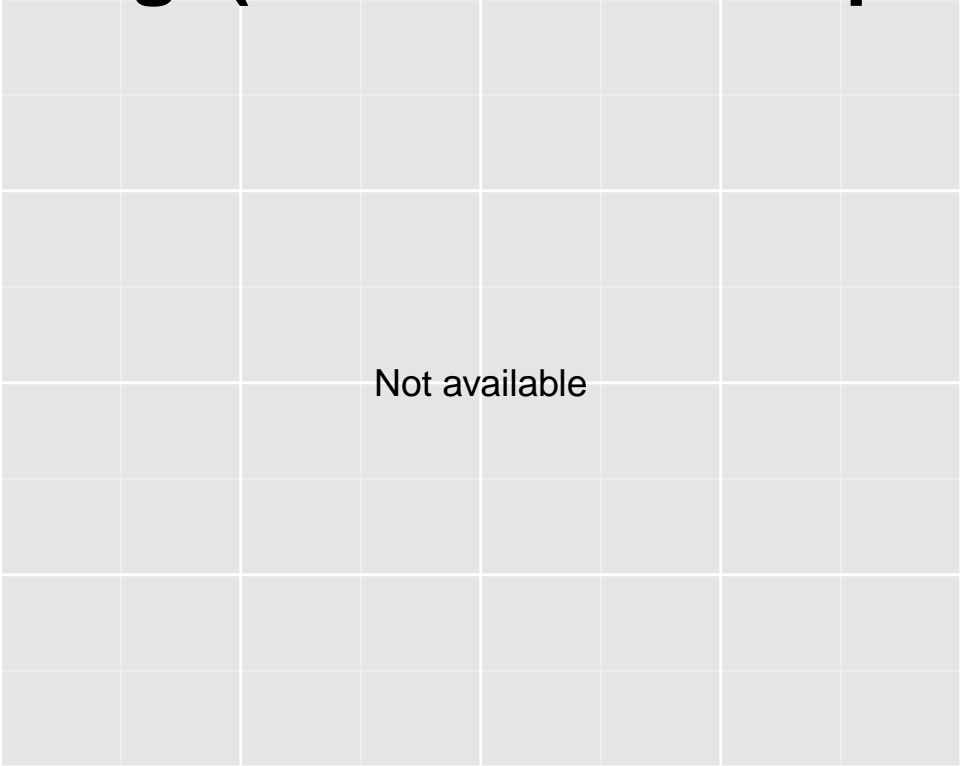

Supplement: Supplementary file 3301 [file 1]

# Hax1

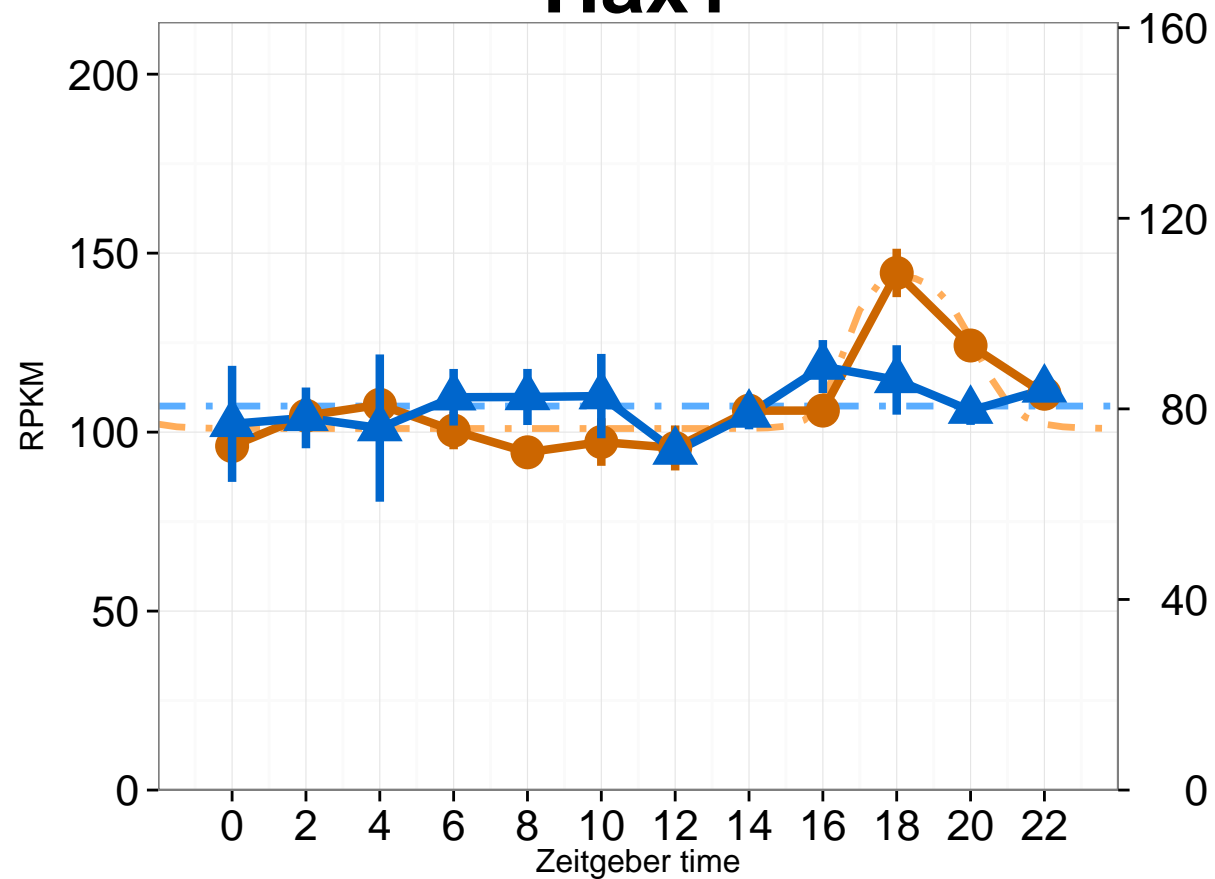

# Hax1

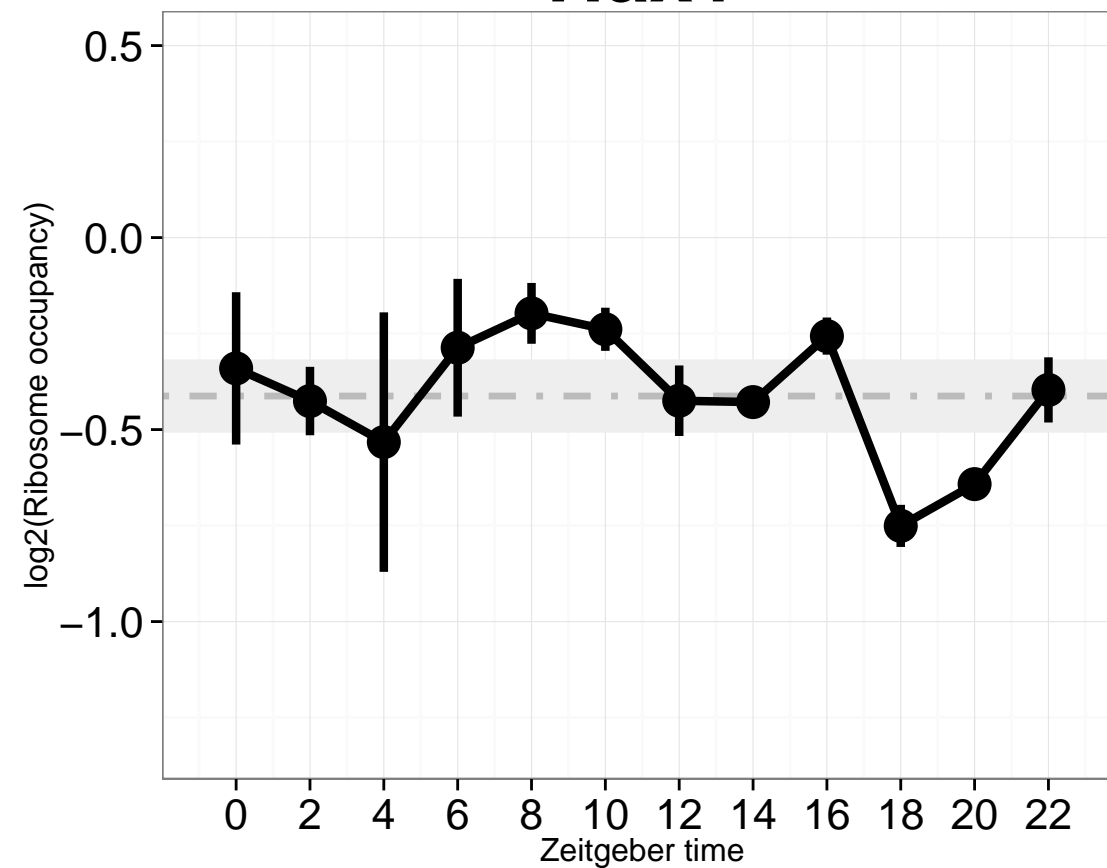

Supplement: Supplementary file 3302 [file 1]

## Acot11

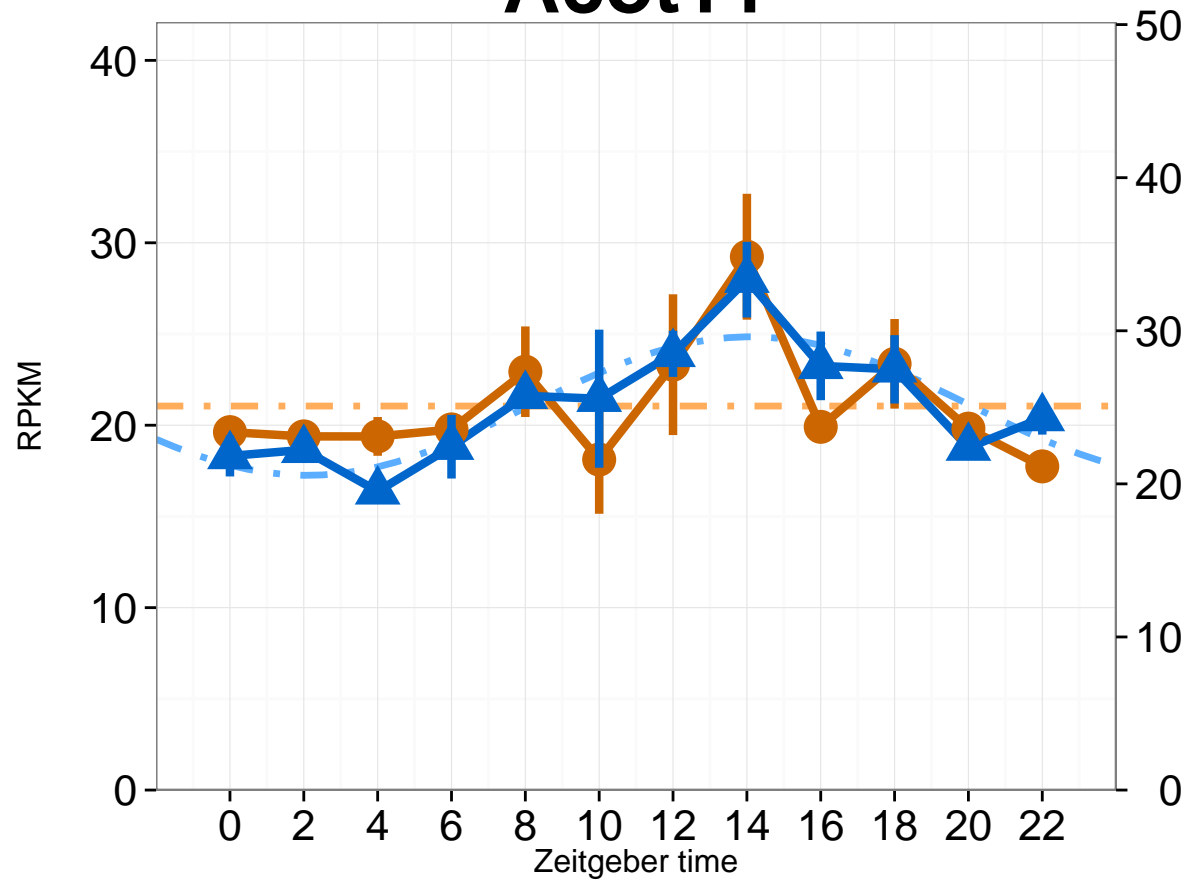

## Acot11

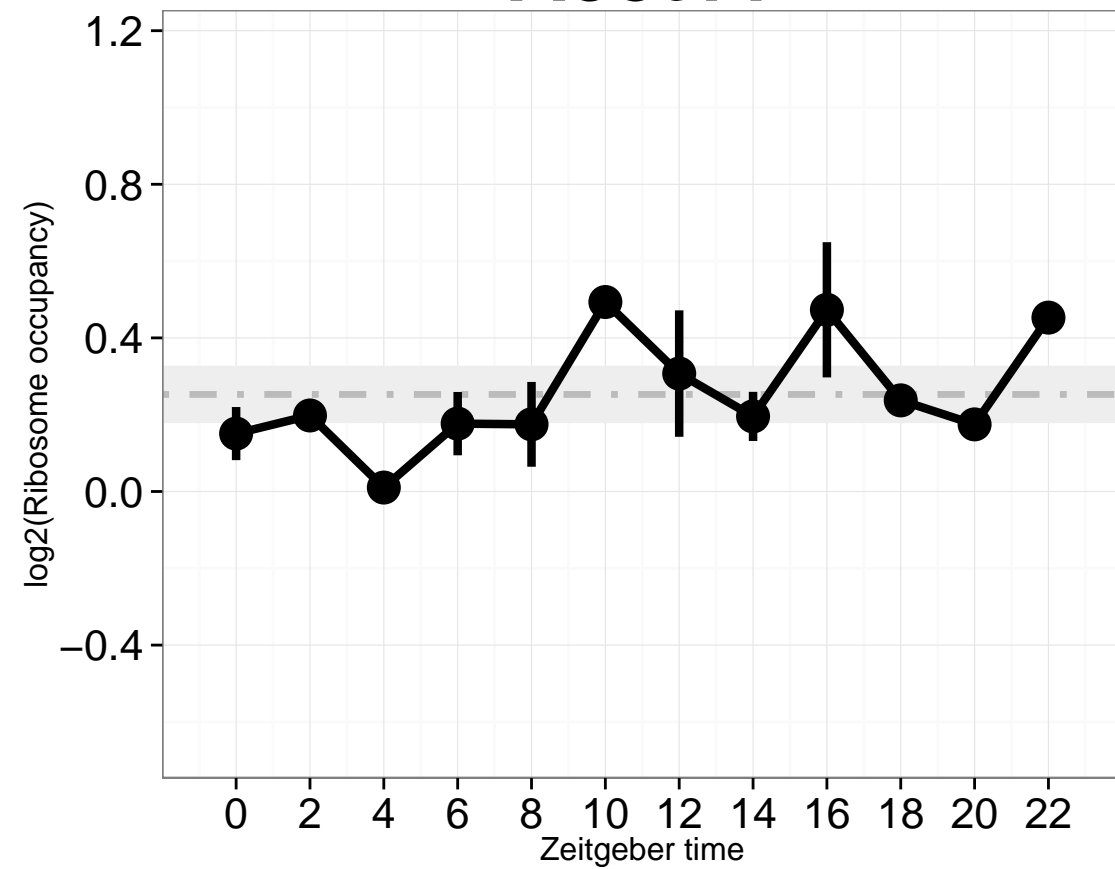

Supplement: Supplementary file 3303 [file 1]

# Mapk1ip1l

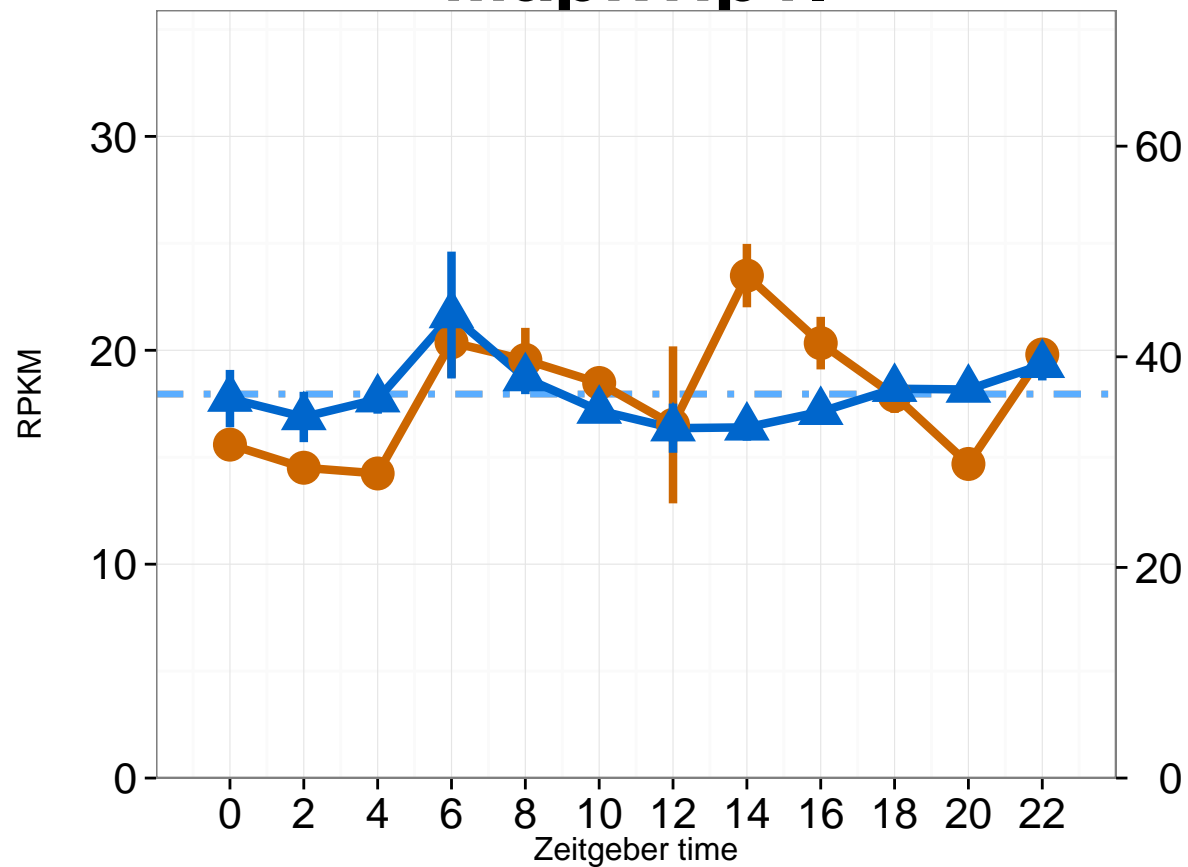

# Mapk1ip1l

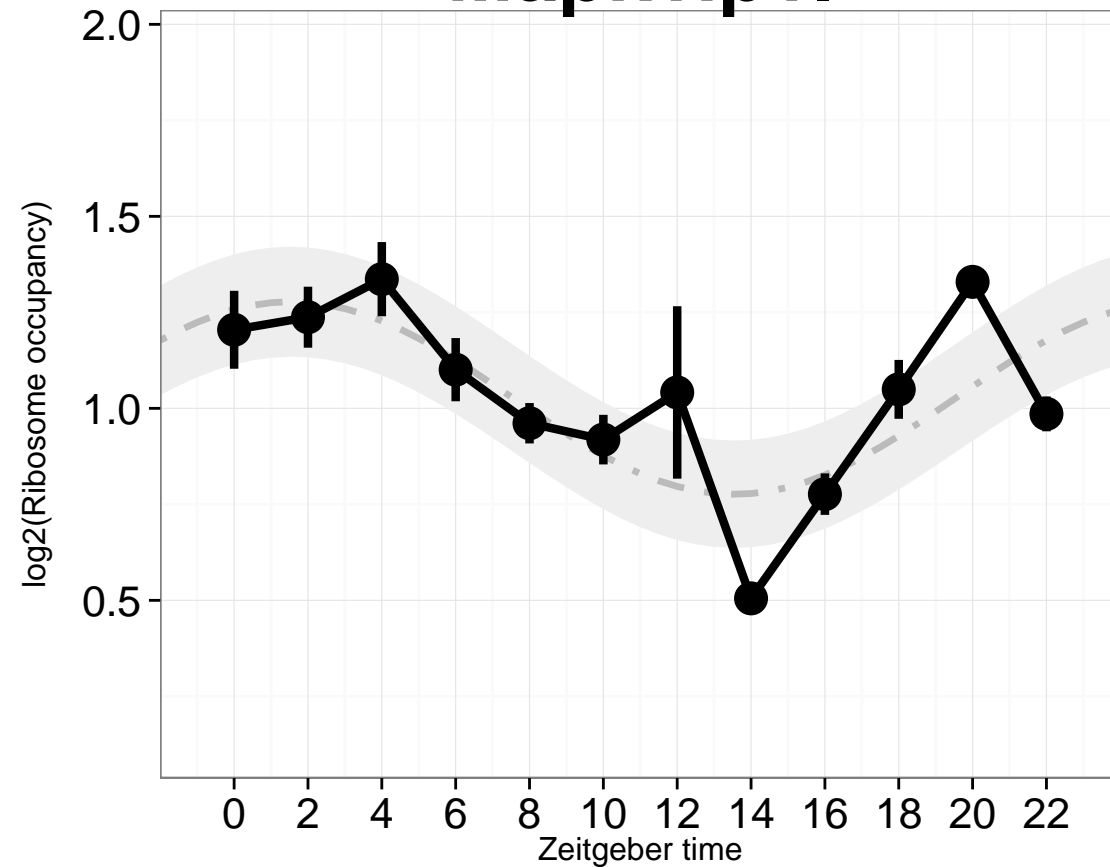

Supplement: Supplementary file 3304 [file 1]

## Ufm1

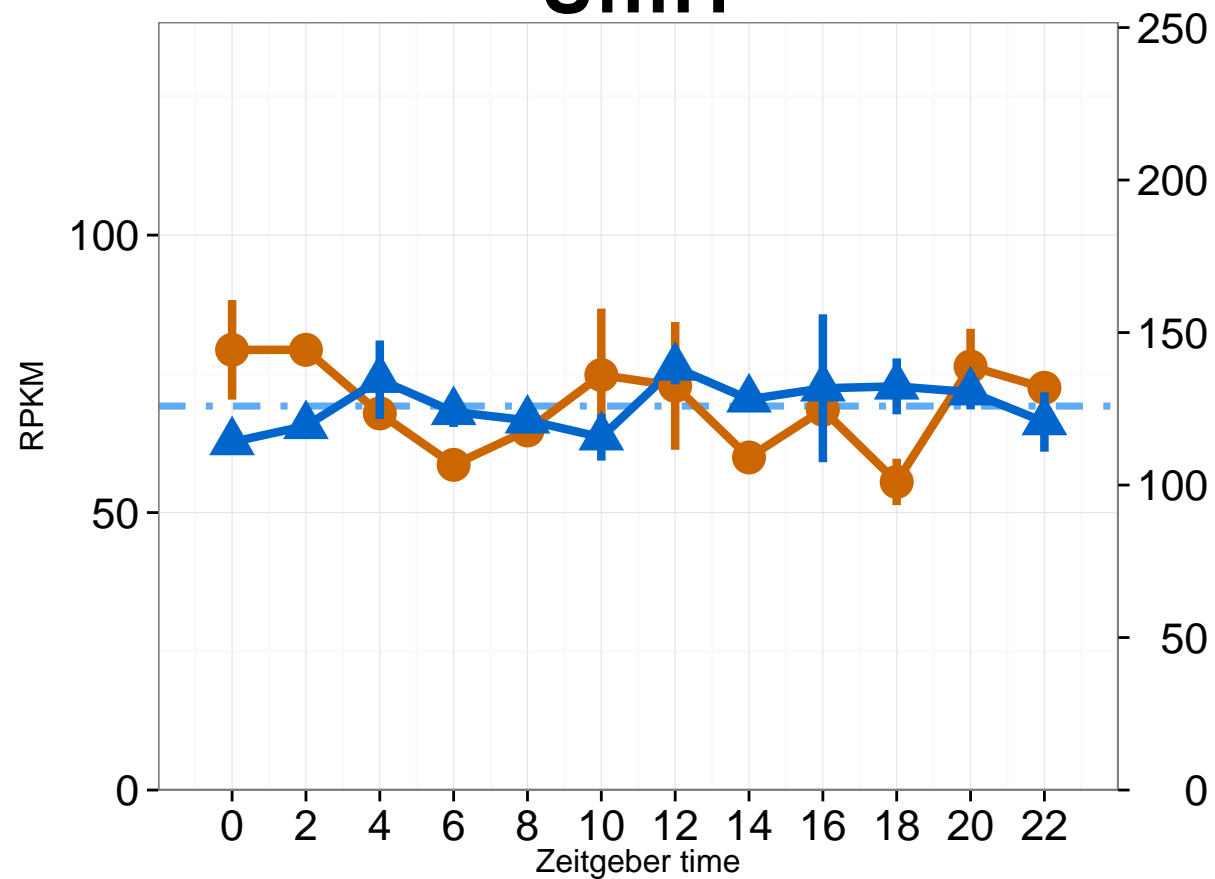

## Ufm1

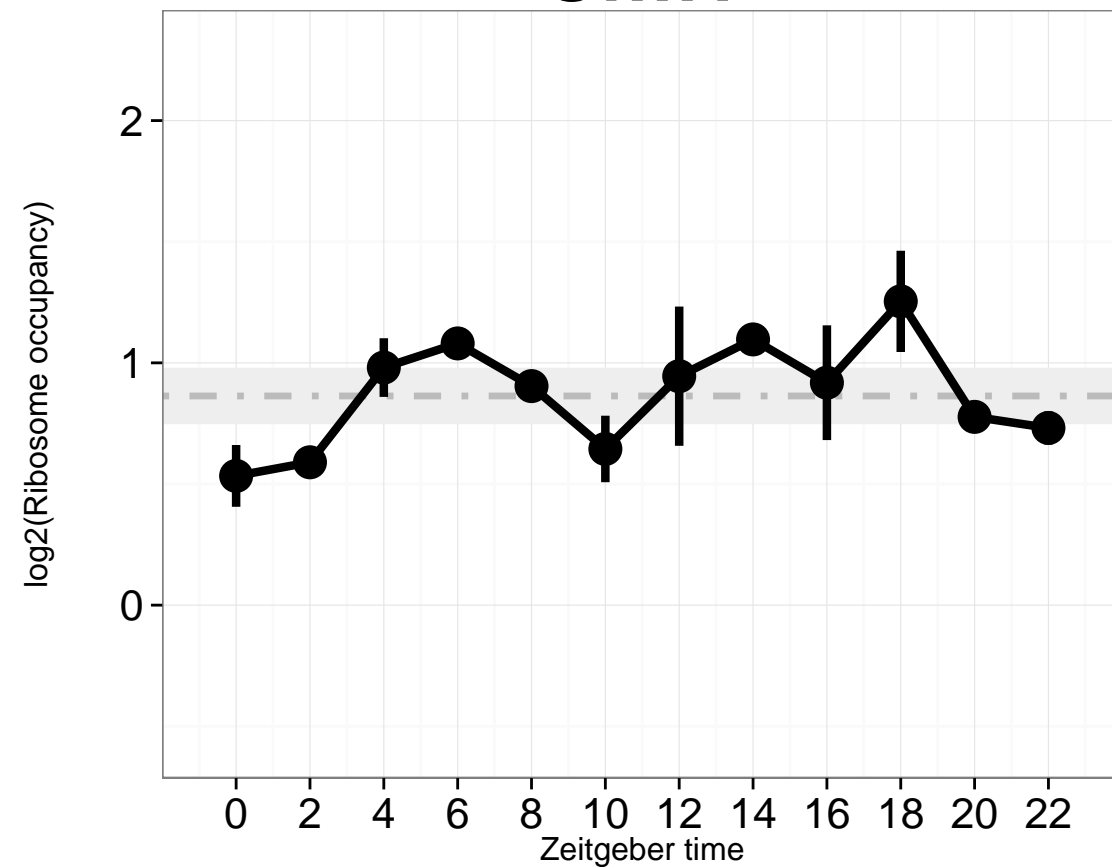

Supplement: Supplementary file 3305 [file 1]

# Ms4a7

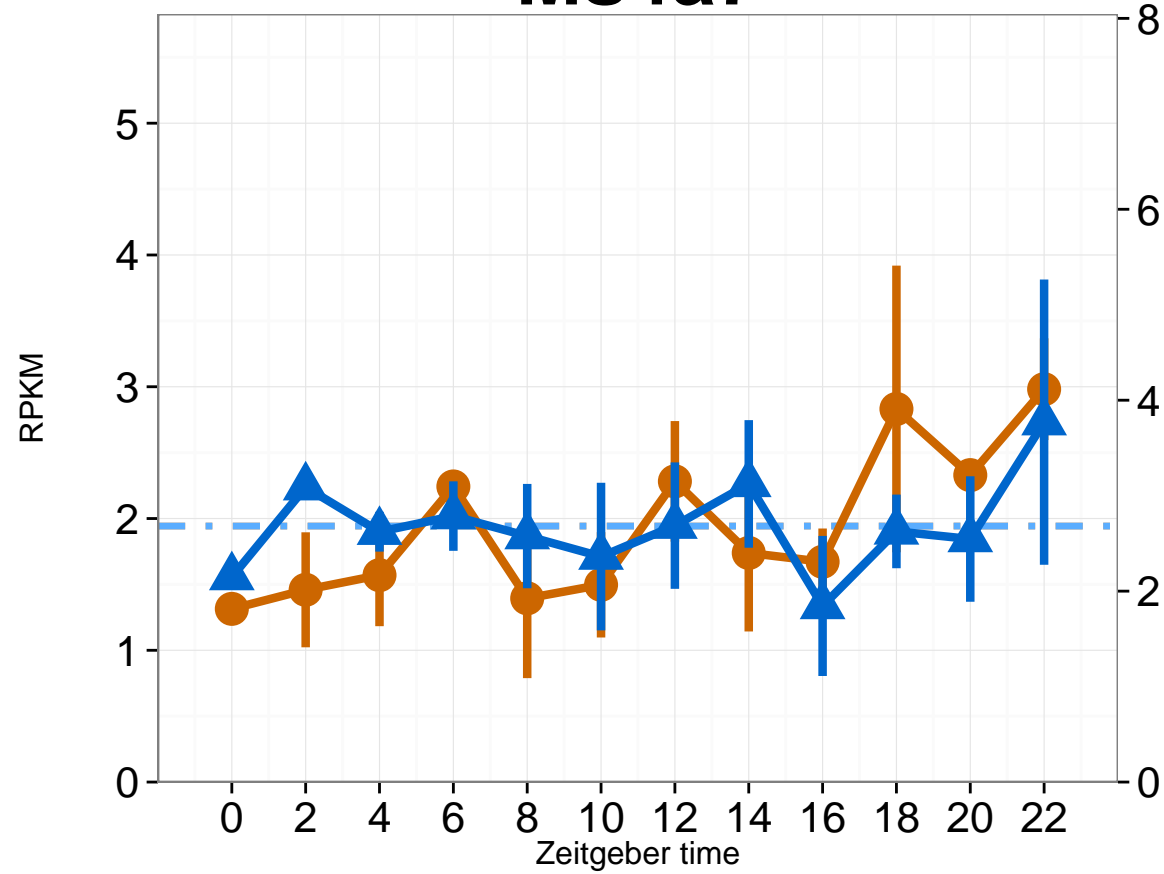

# Ms4a7

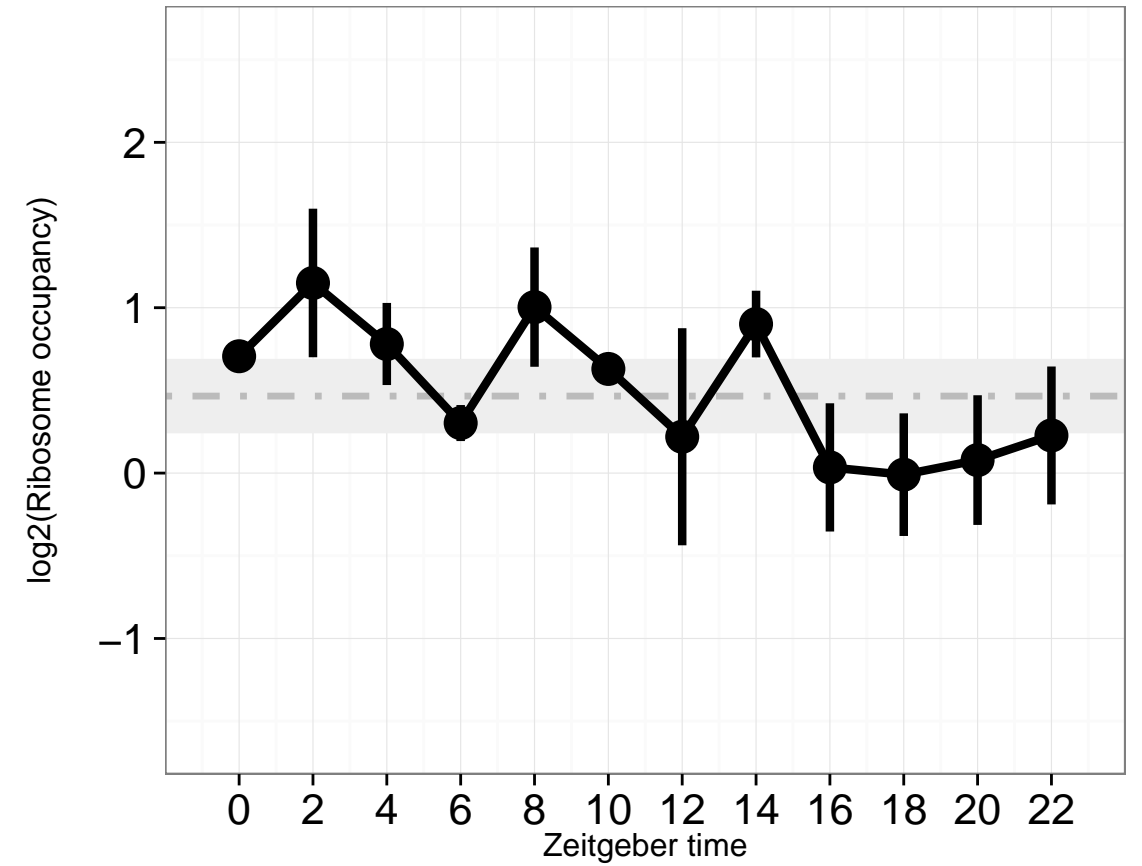

Supplement: Supplementary file 3306 [file 1]

## Ets1

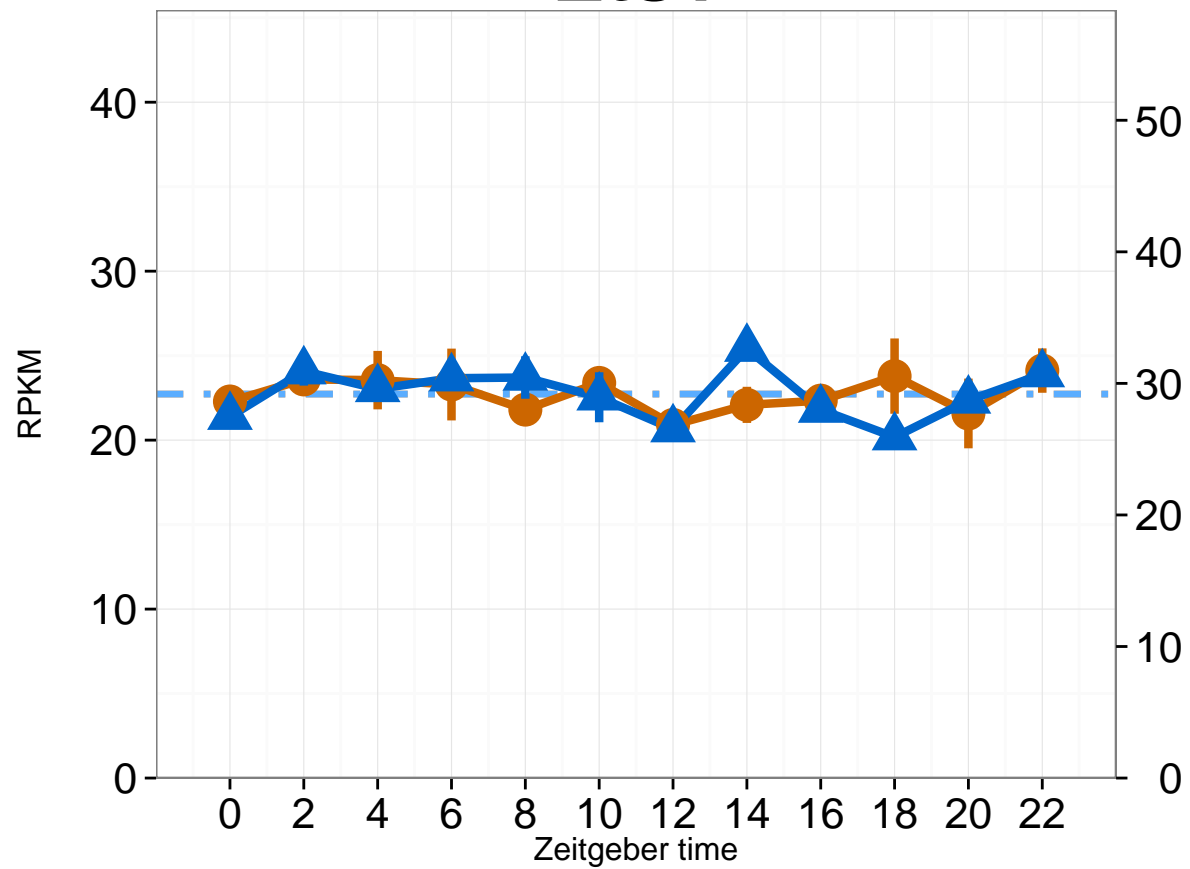

## Ets1

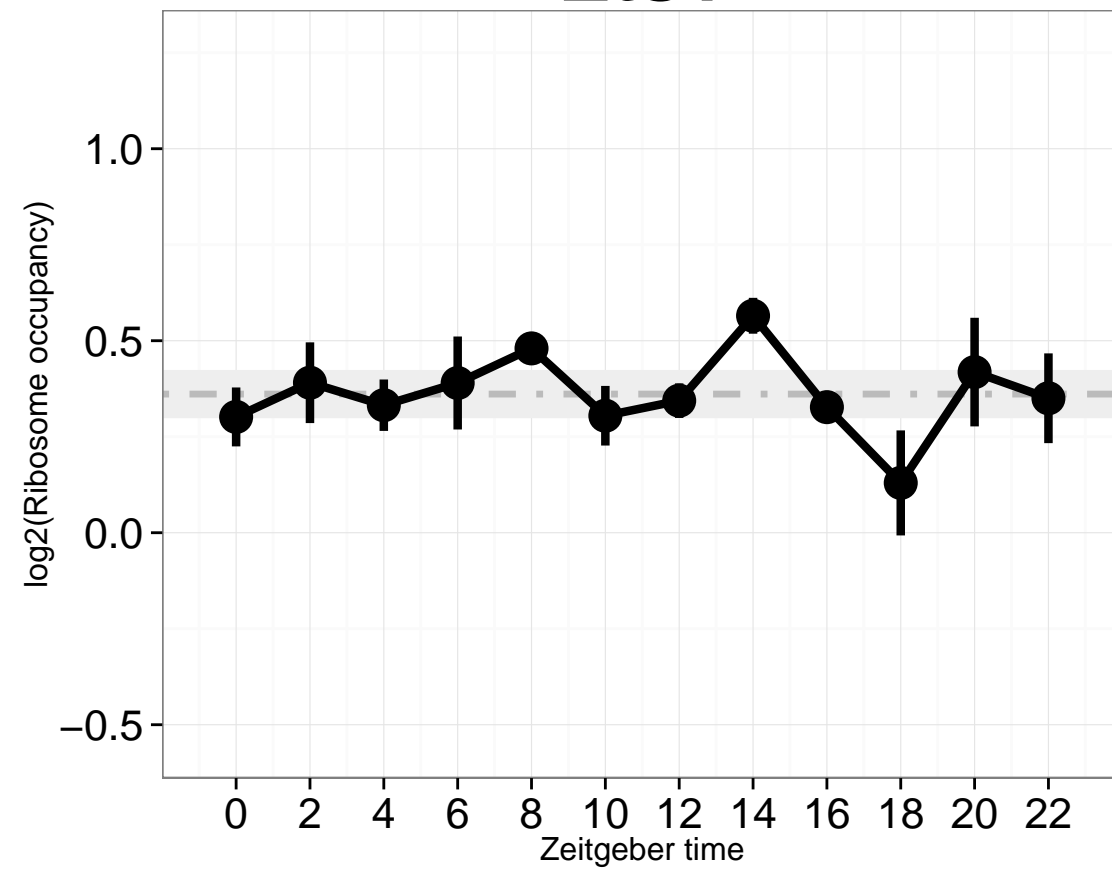

Supplement: Supplementary file 3307 [file 1]

# Emp1

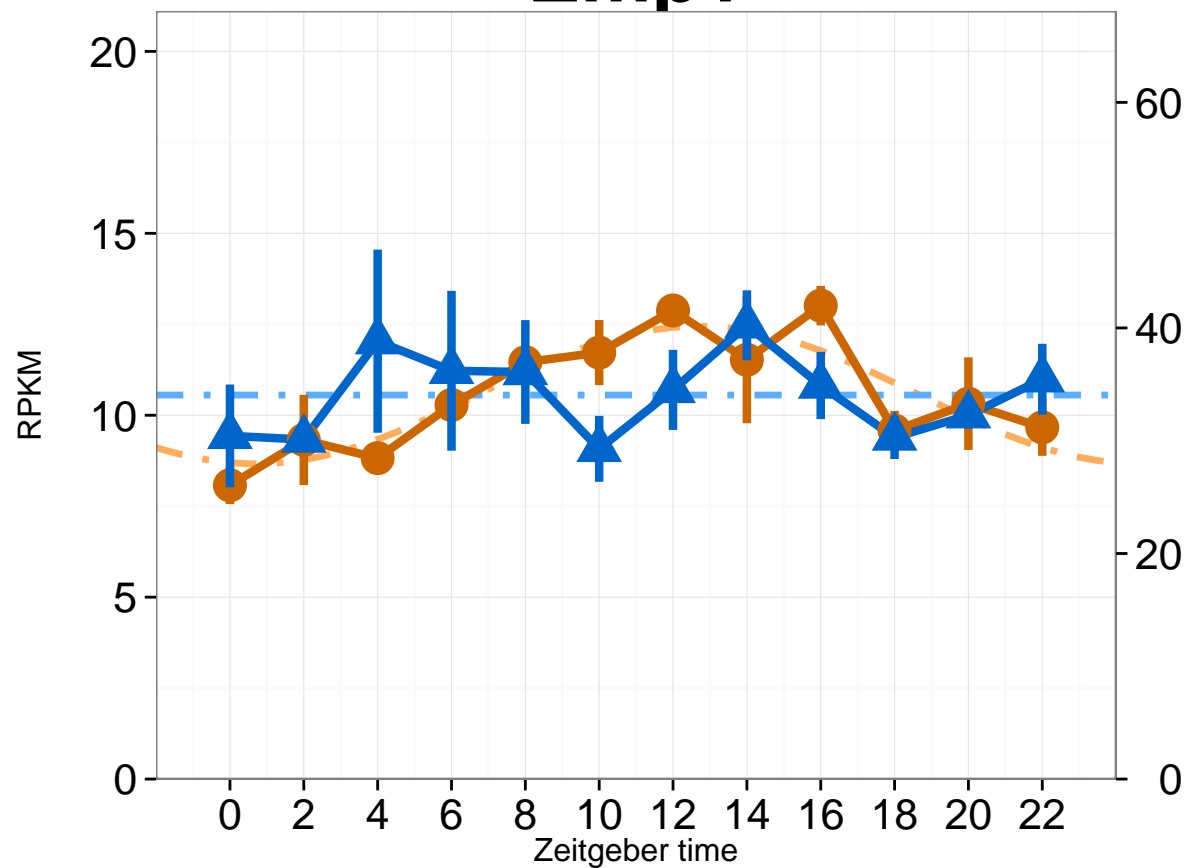

# Emp1

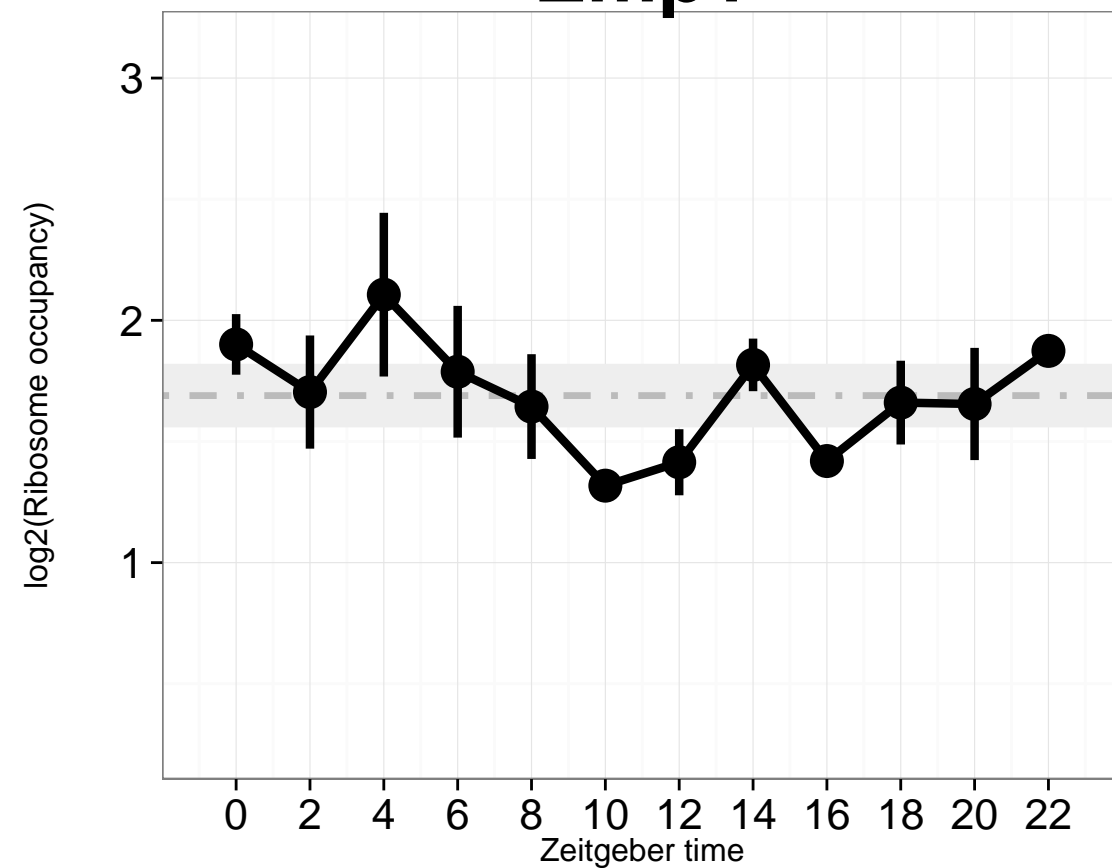

Supplement: Supplementary file 3308 [file 1]

## Tbl1x

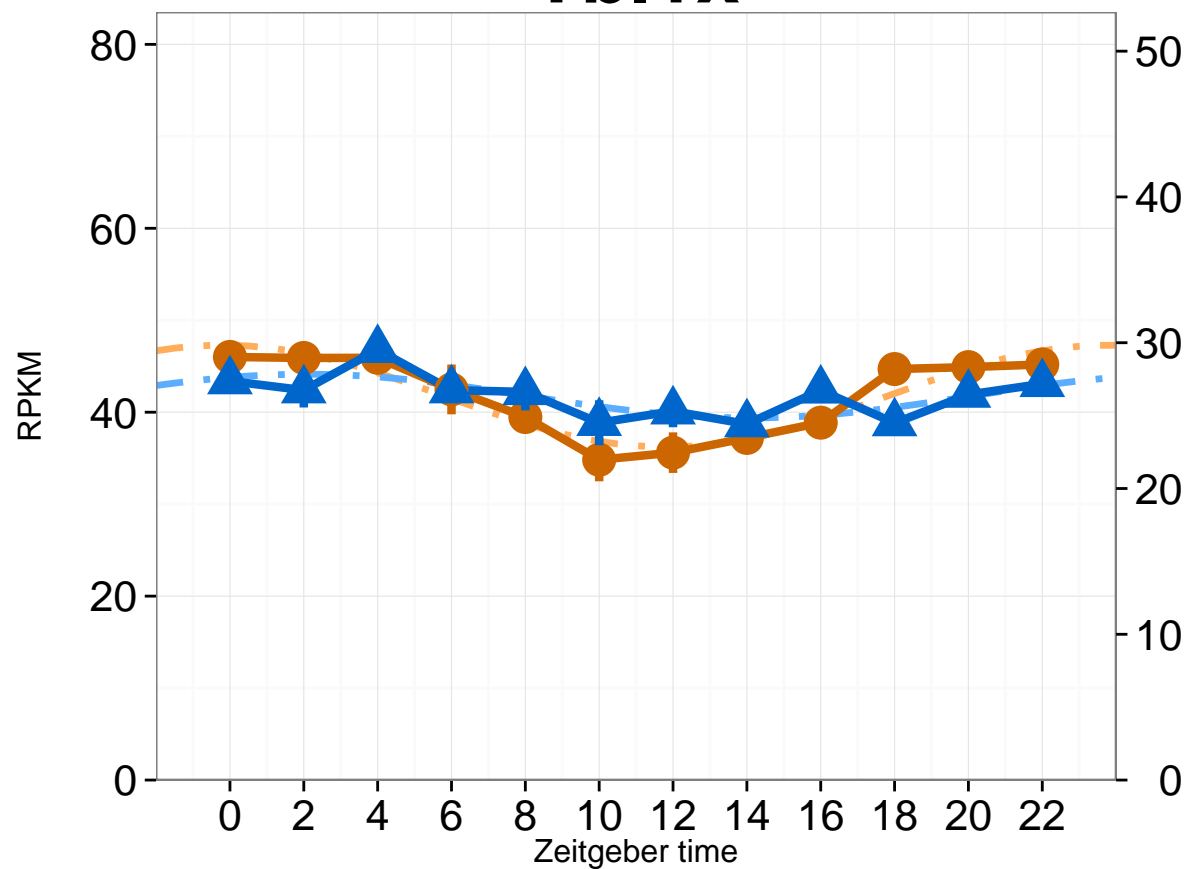

## Tbl1x

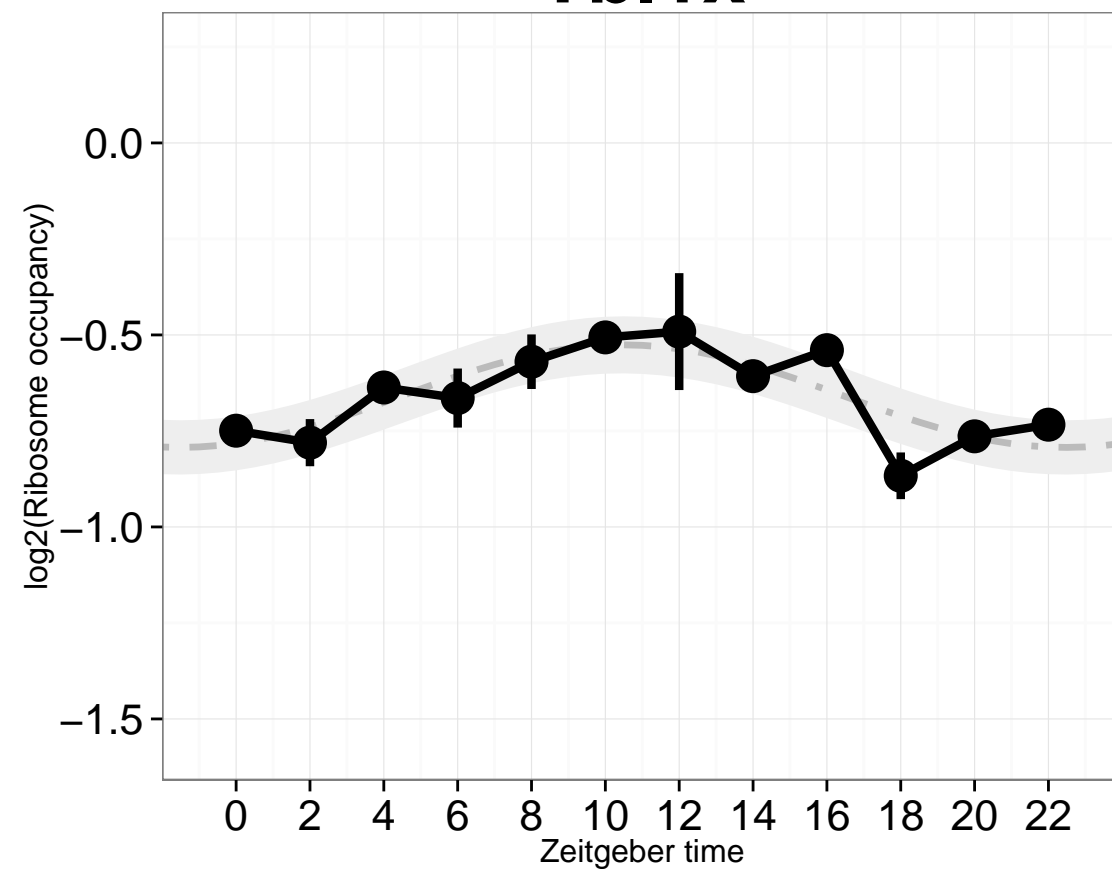

Supplement: Supplementary file 3309 [file 1]

## Pnpla7

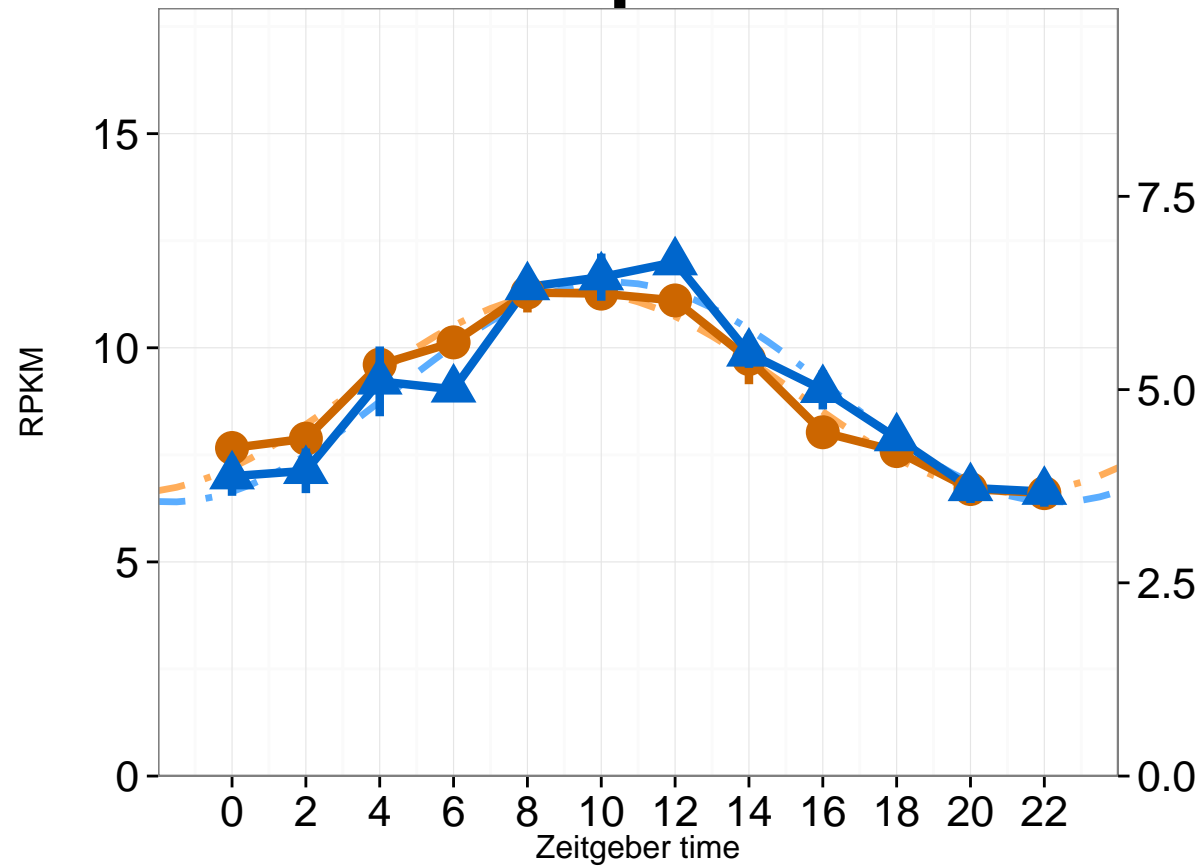

## Pnpla7

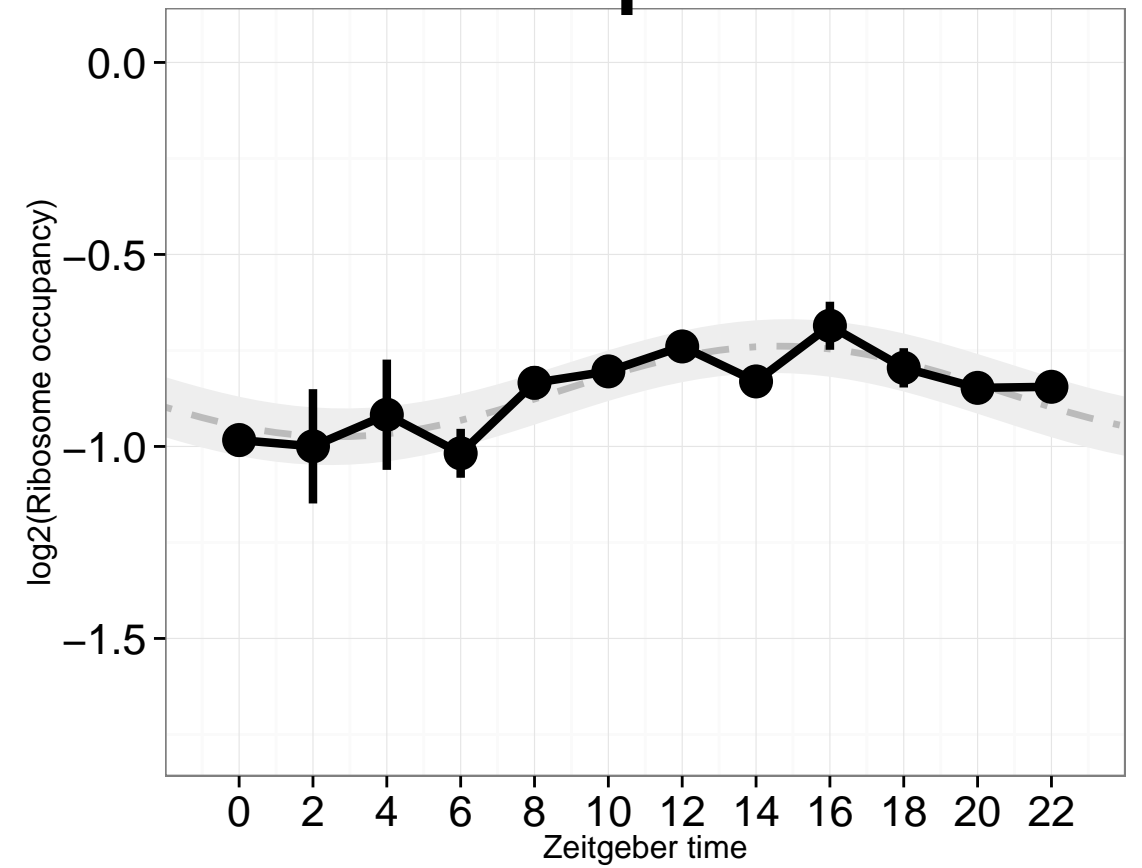

Supplement: Supplementary file 3310 [file 1]

## Gm10217

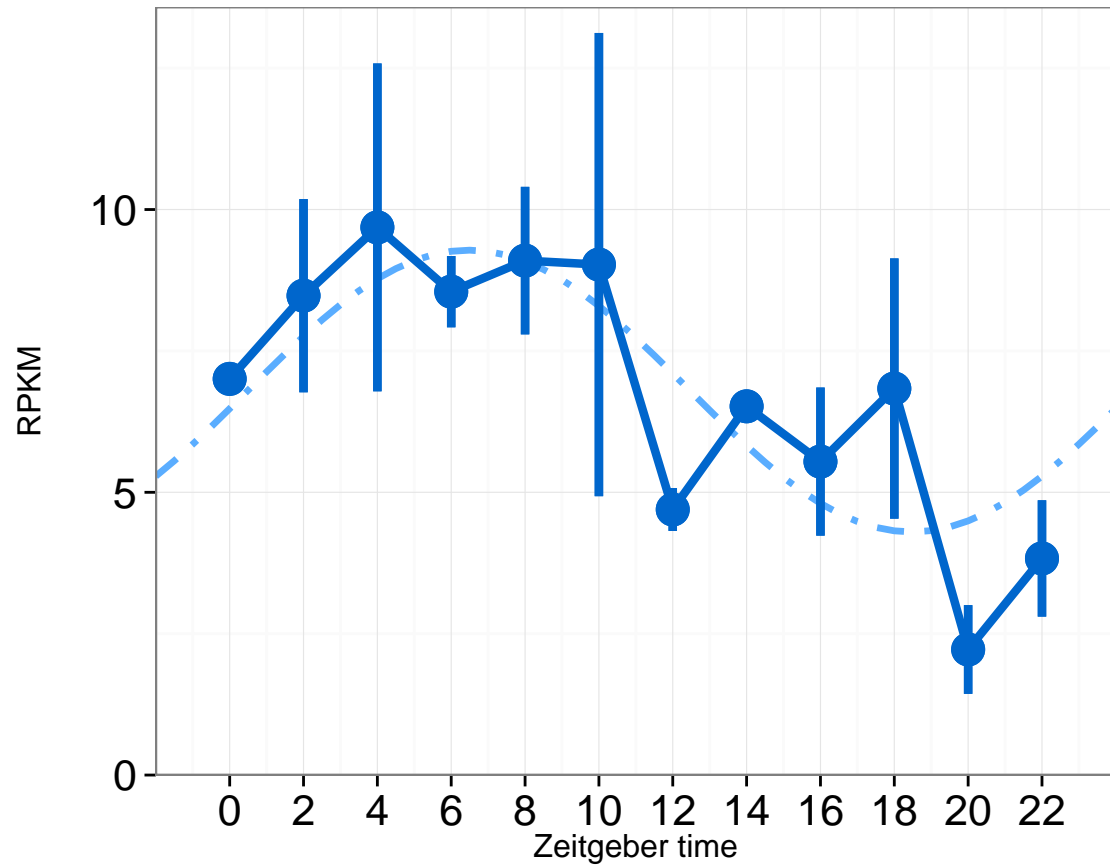

## Gm10217 log2(Ribosome occupanc

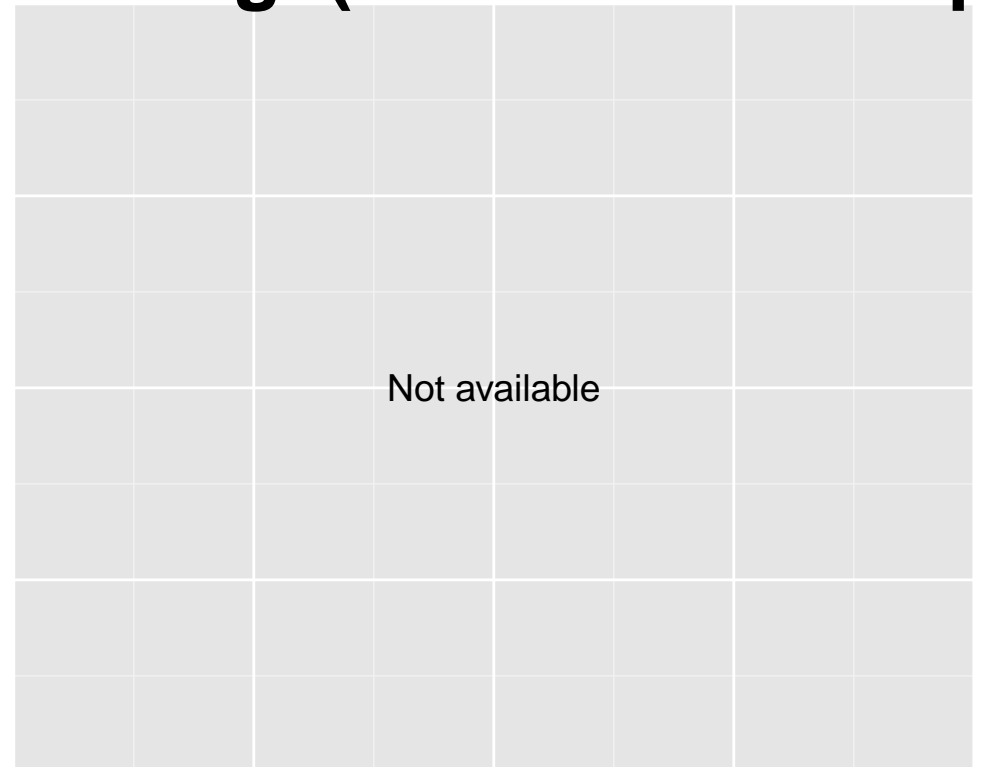

Supplement: Supplementary file 3311 [file 1]

**5830454E08Rik**

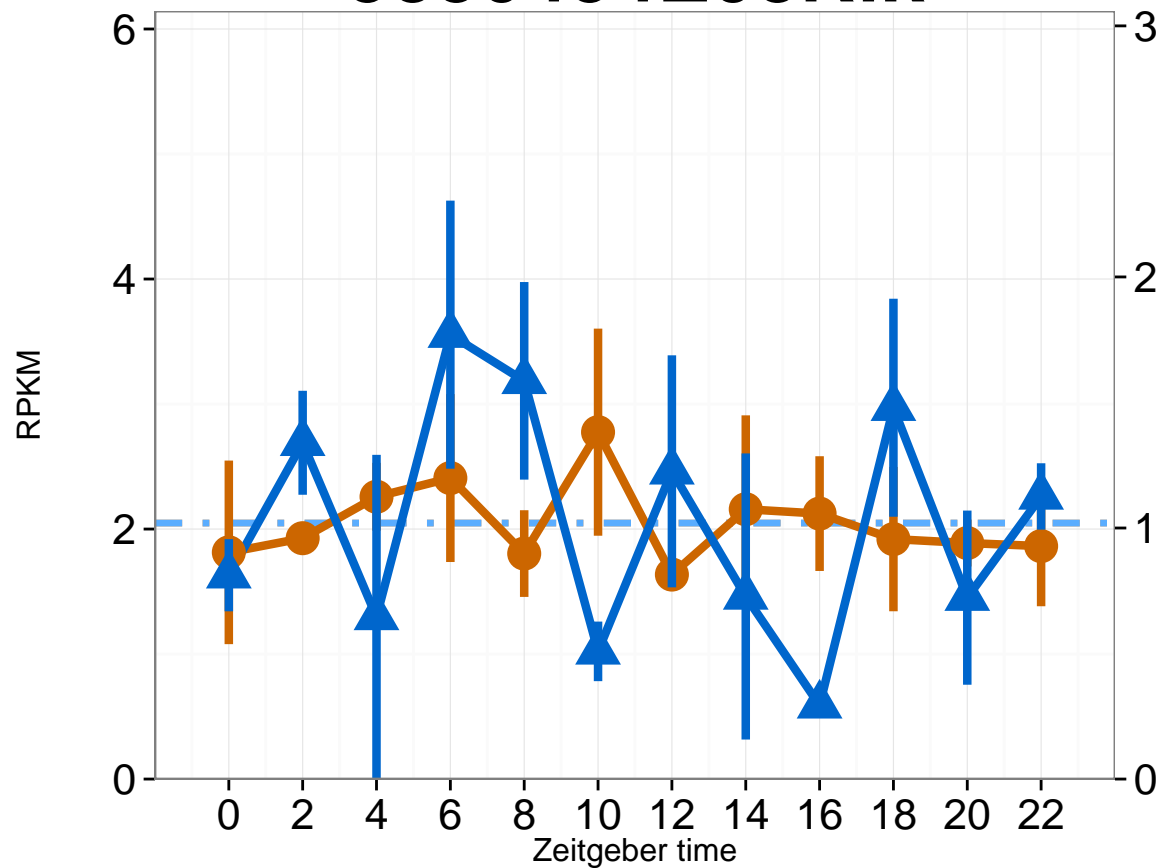

**5830454E08Rik**

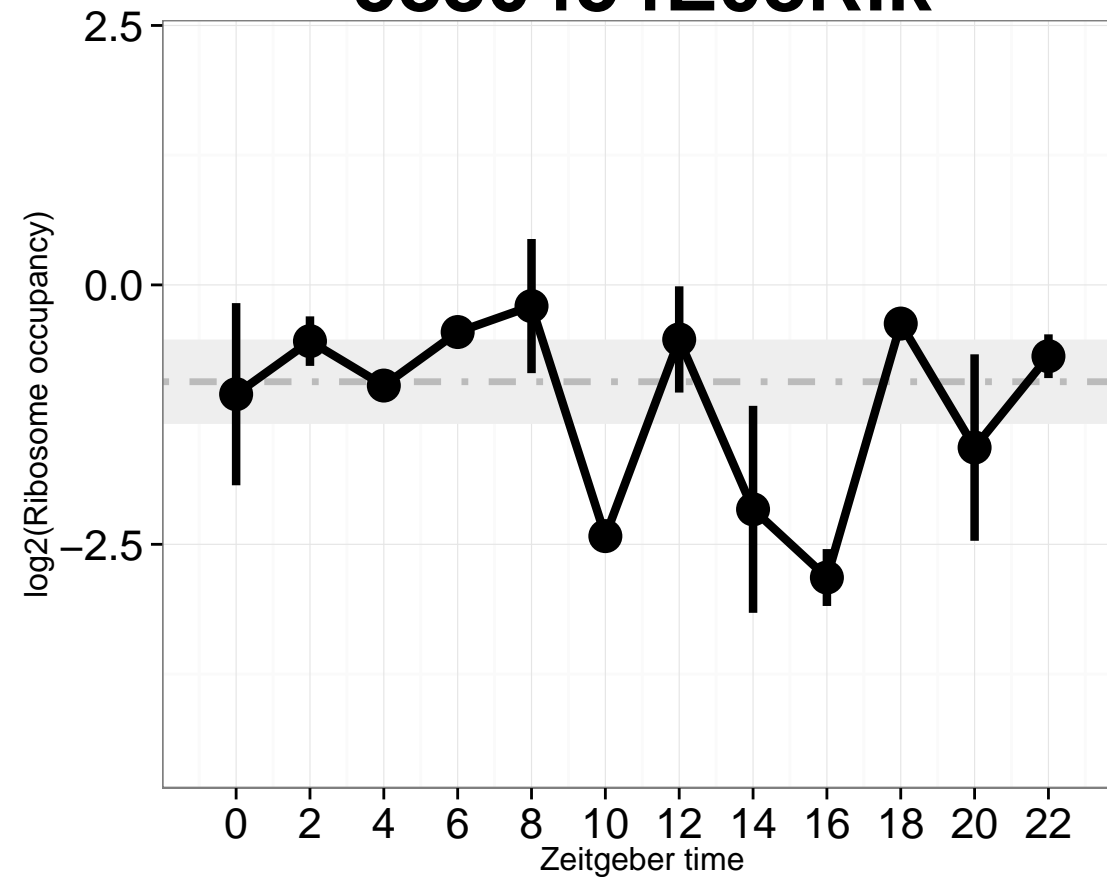

Supplement: Supplementary file 3312 [file 1]
