# Supplementary material (part 34 of 133)
Source: publisher figshare collection journal article supplement (https://springernature.figshare.com/articles/dataset/_/4903193)

# Pank3

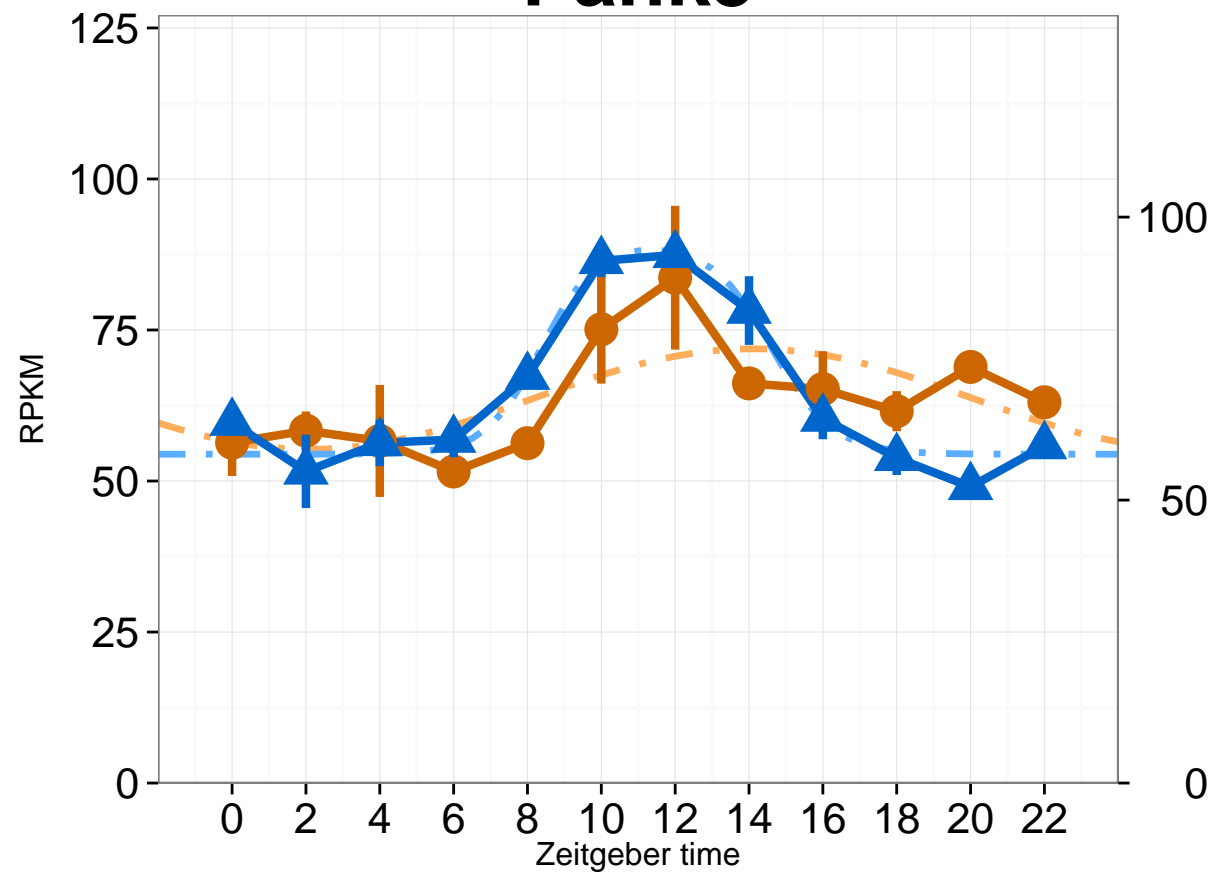

# Pank3

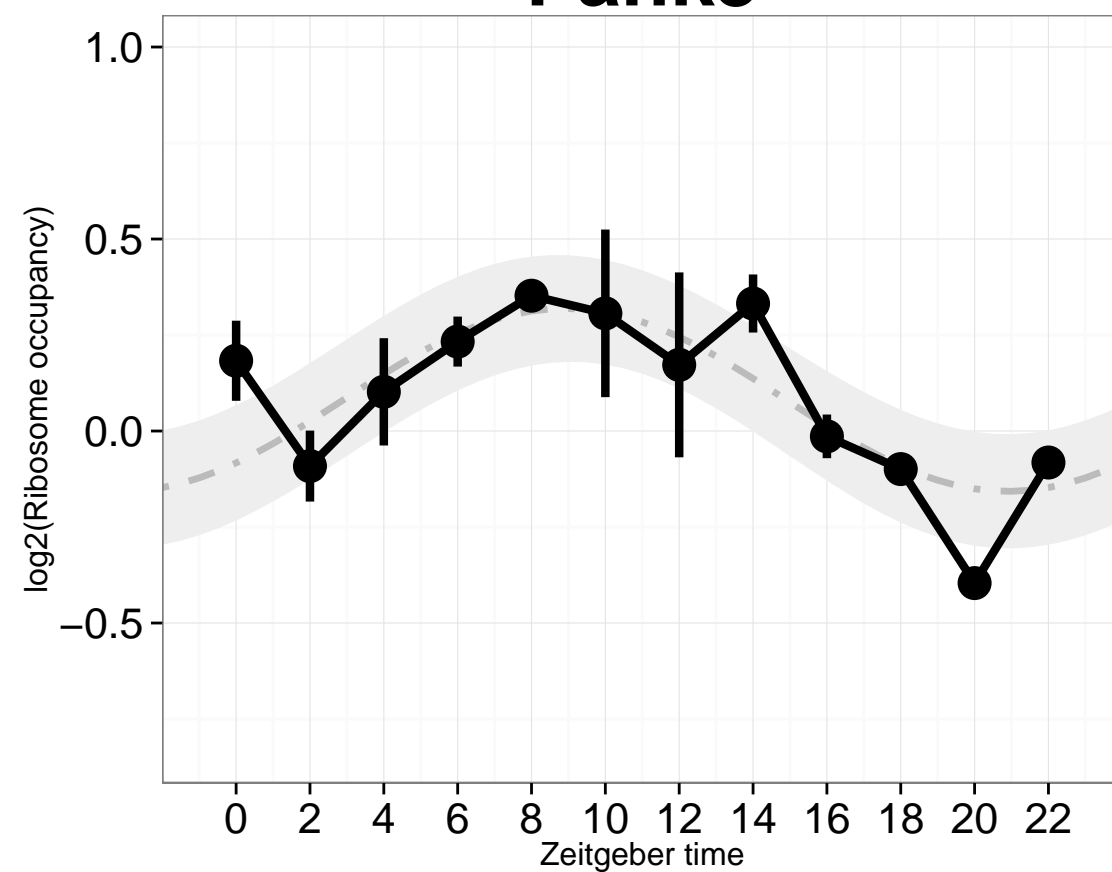

Supplement: Supplementary file 3313 [file 1]

## Ssh1

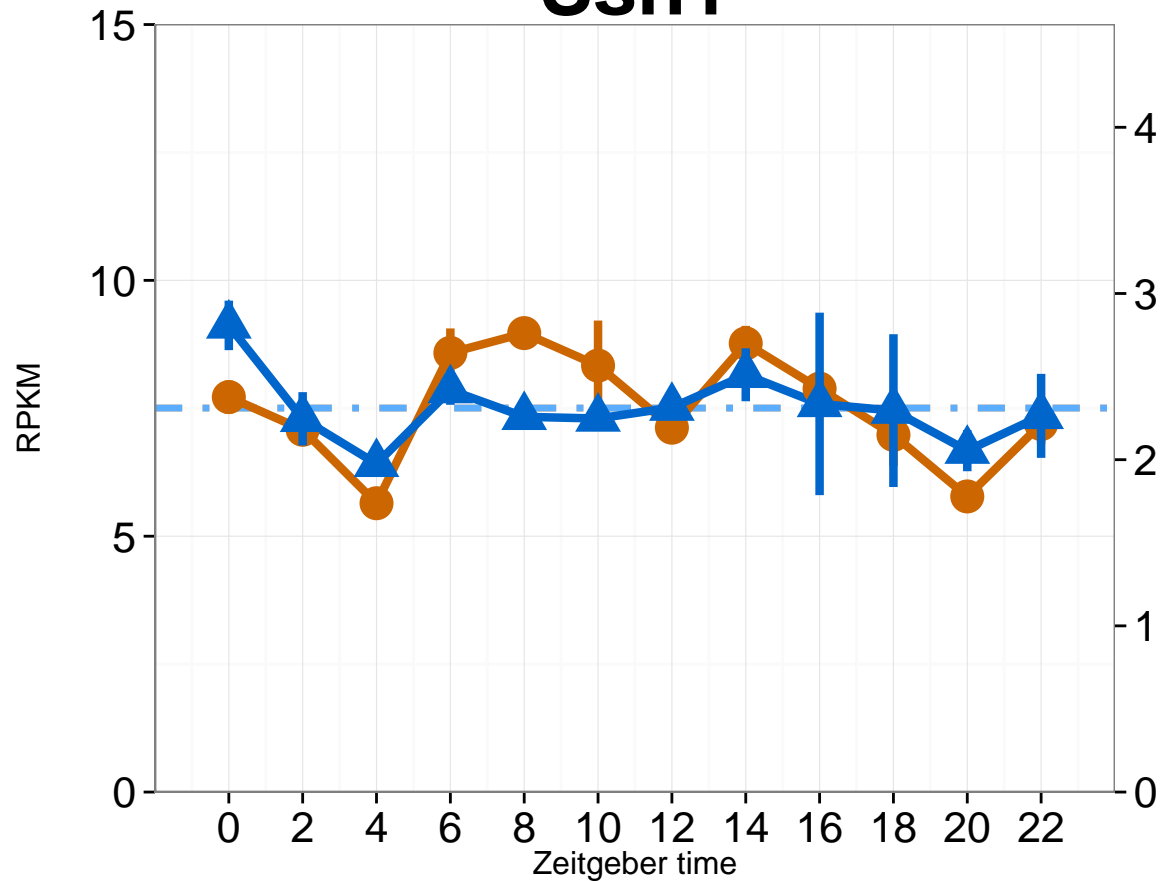

## Ssh1

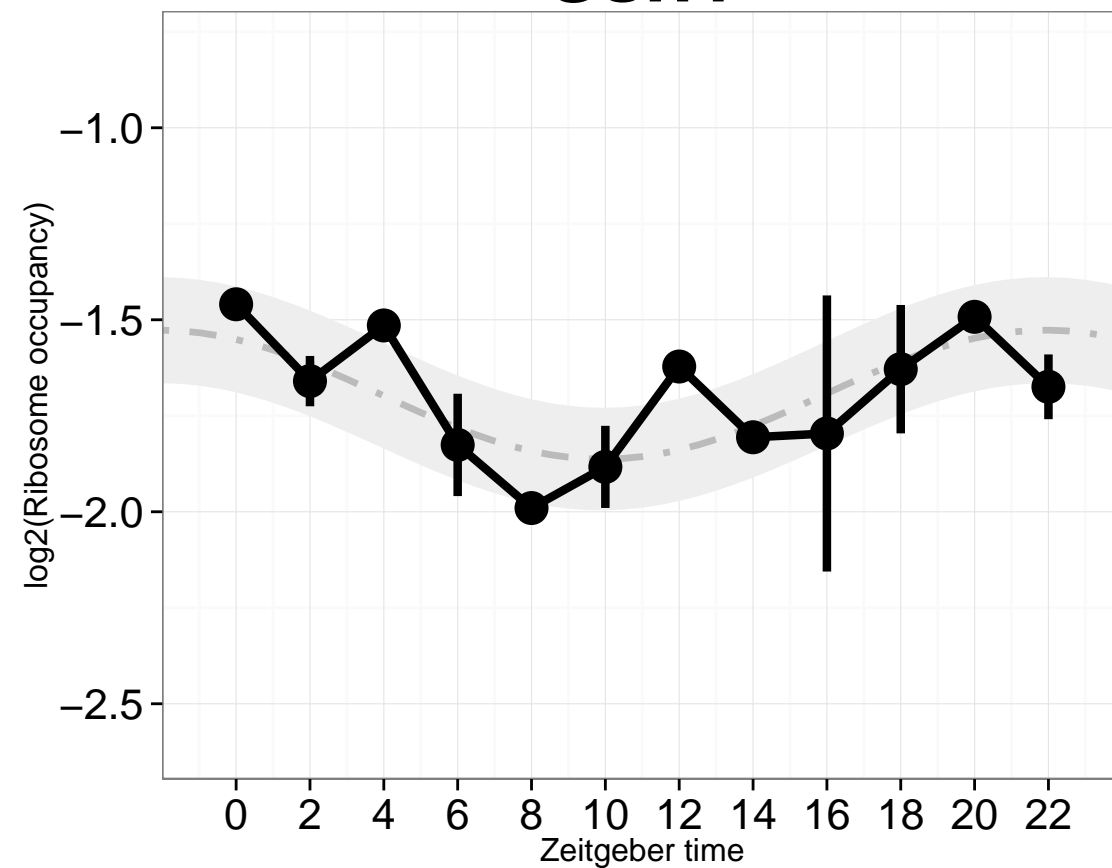

Supplement: Supplementary file 3314 [file 1]

## Kat8

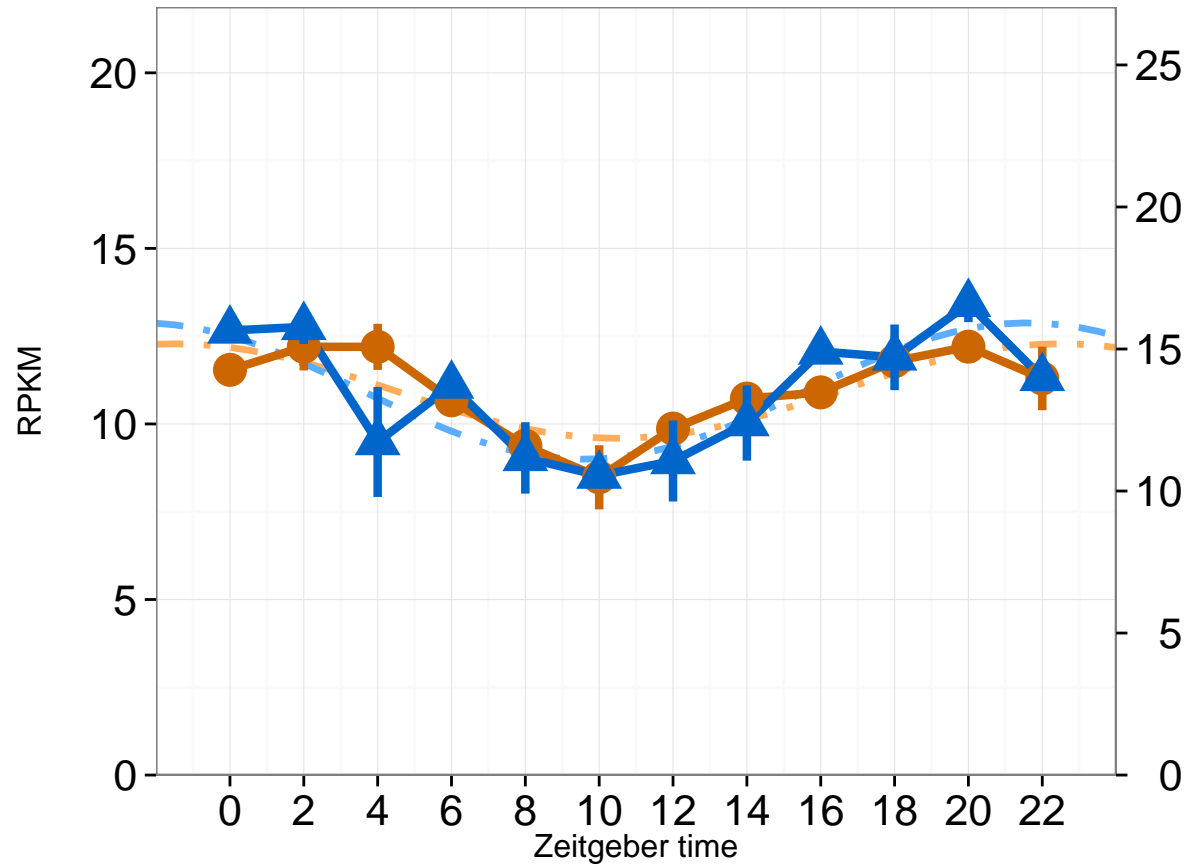

## Kat8

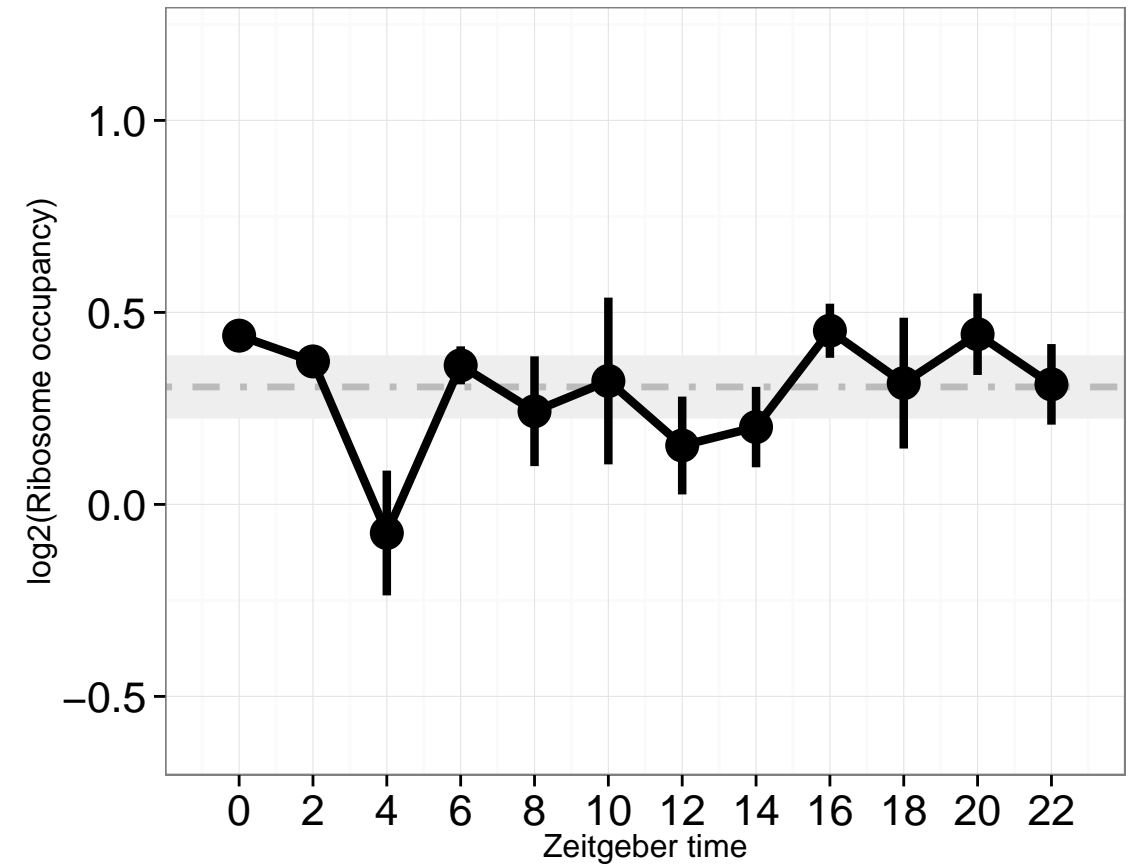

Supplement: Supplementary file 3315 [file 1]

# Mfhas1

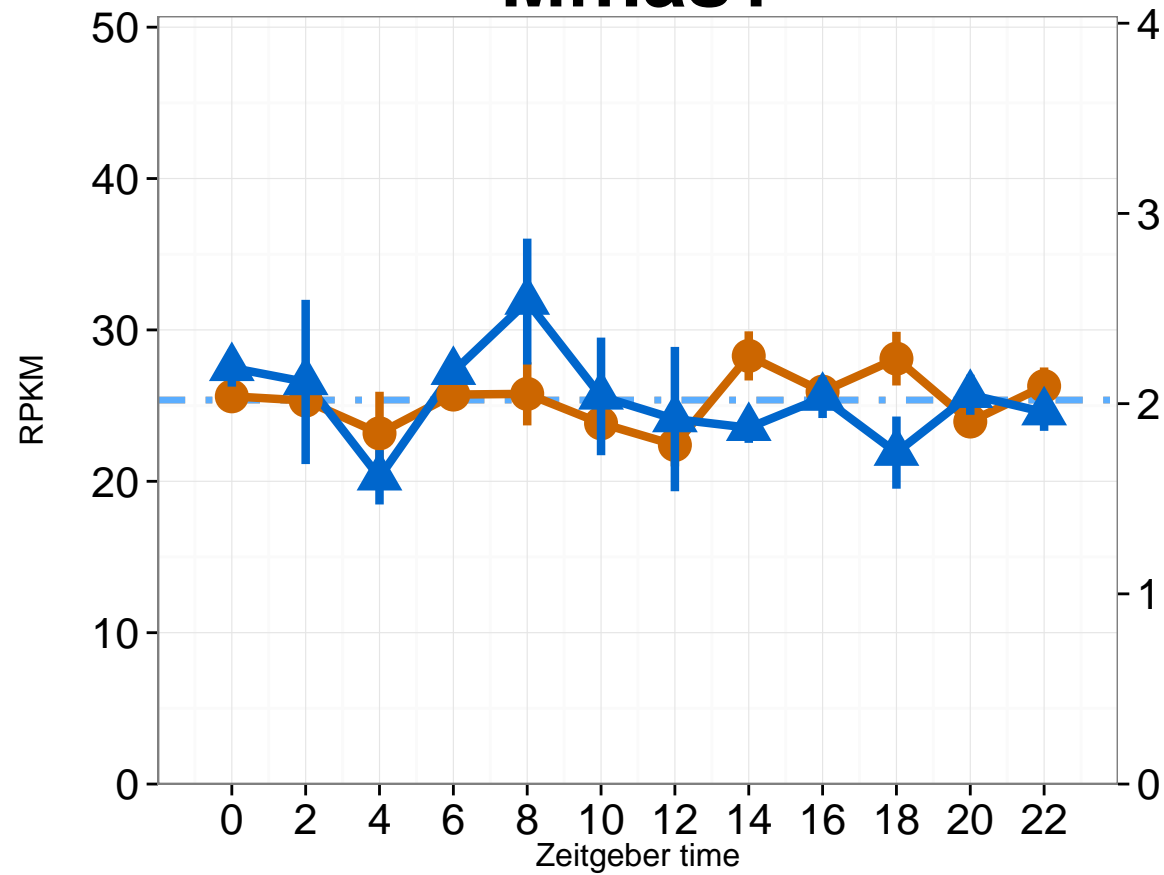

# Mfhas1

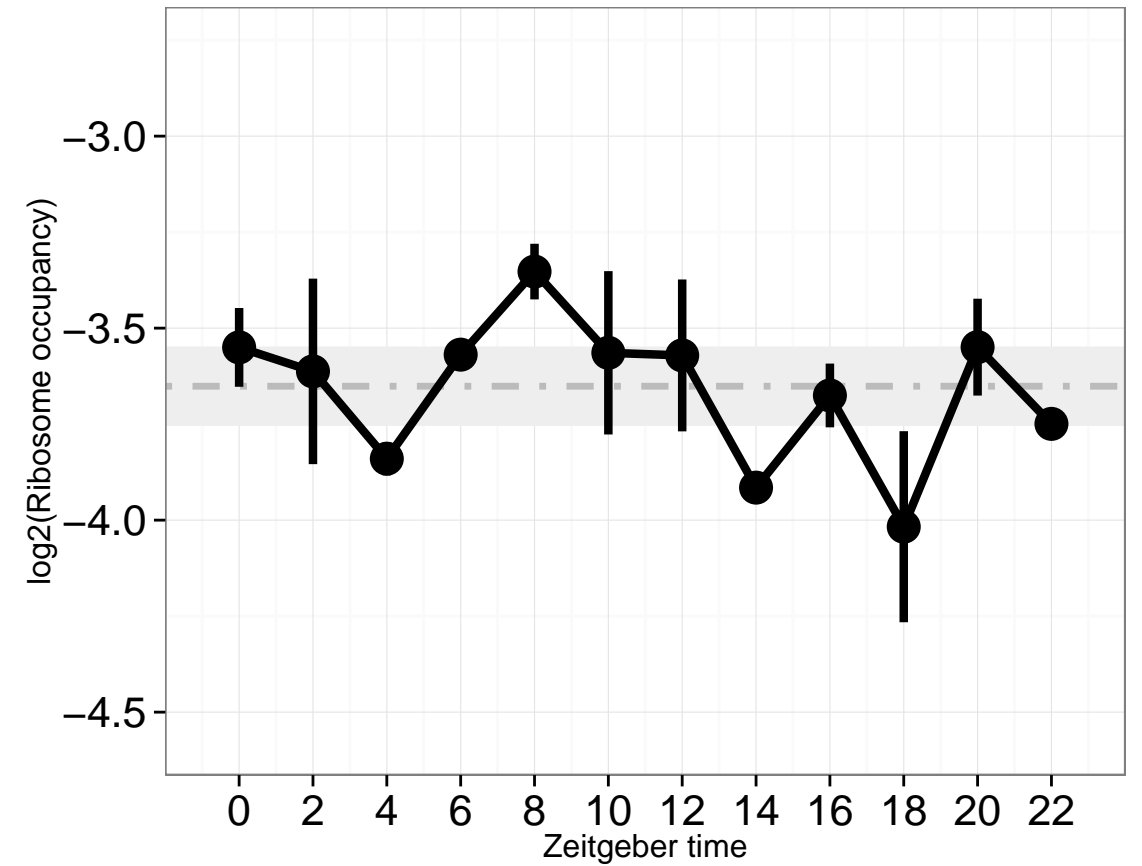

Supplement: Supplementary file 3316 [file 1]

# Bub1b

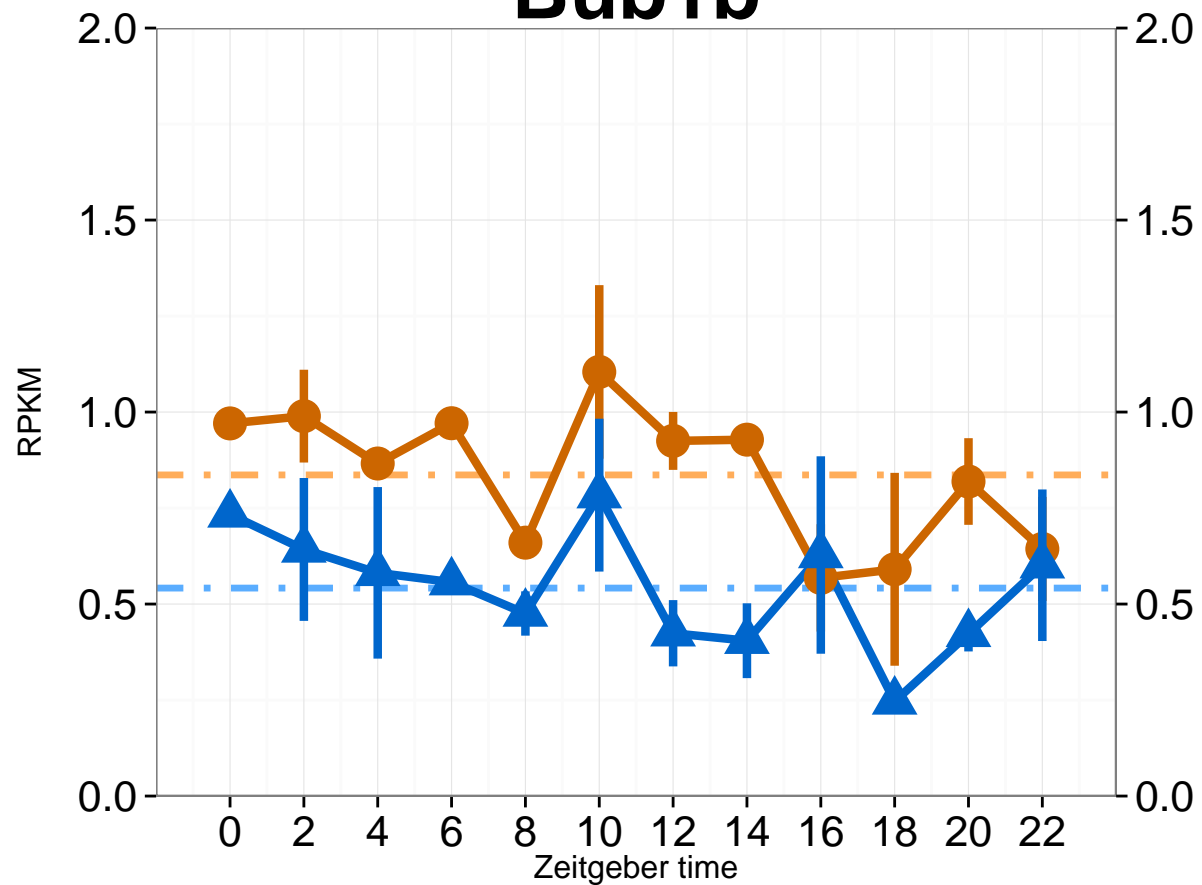

# Bub1b

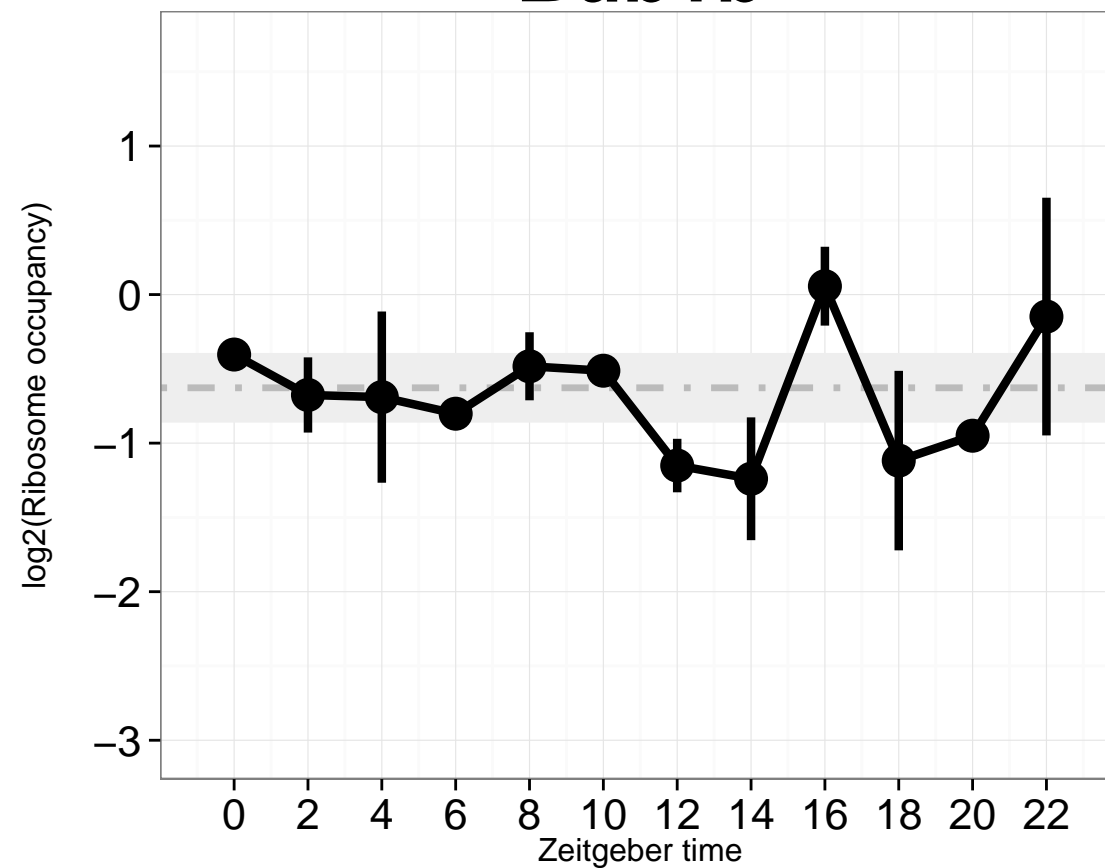

Supplement: Supplementary file 3317 [file 1]

## Lmnb1

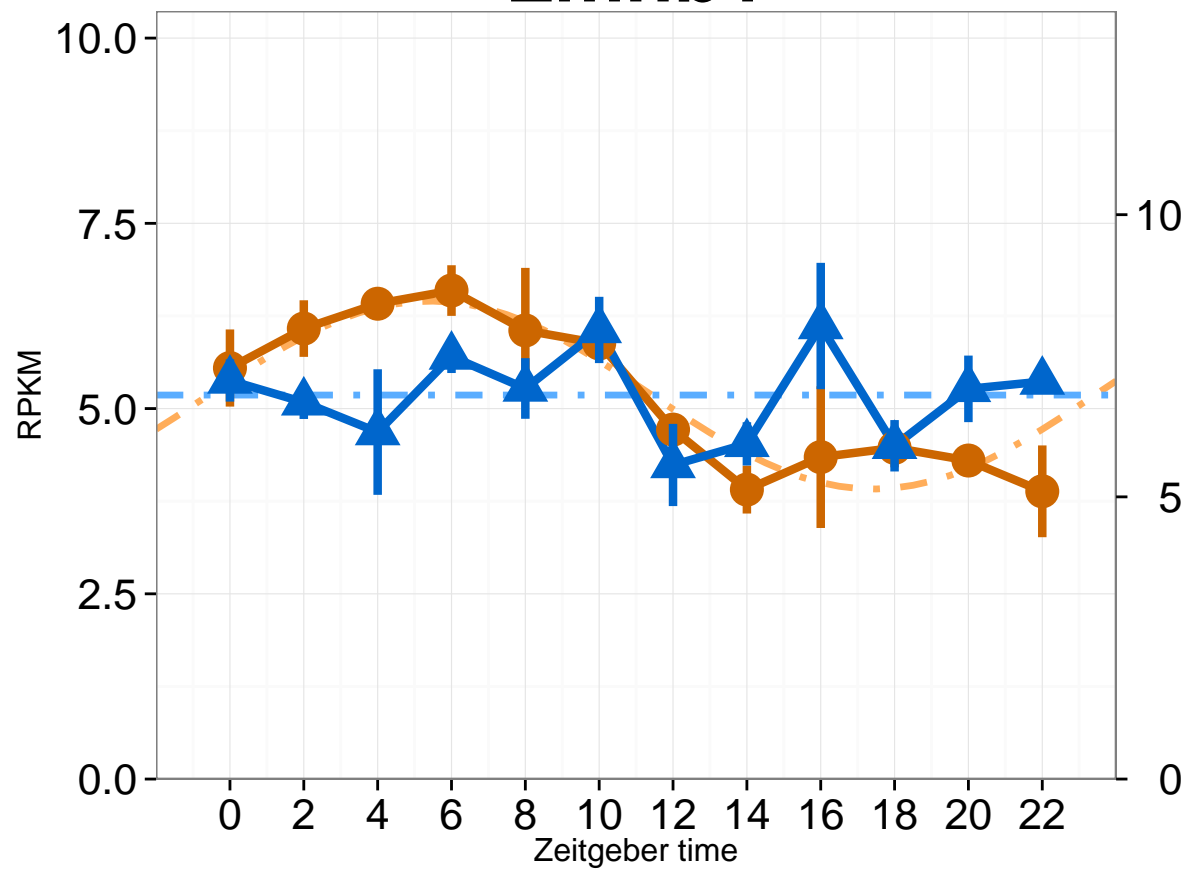

## Lmnb1

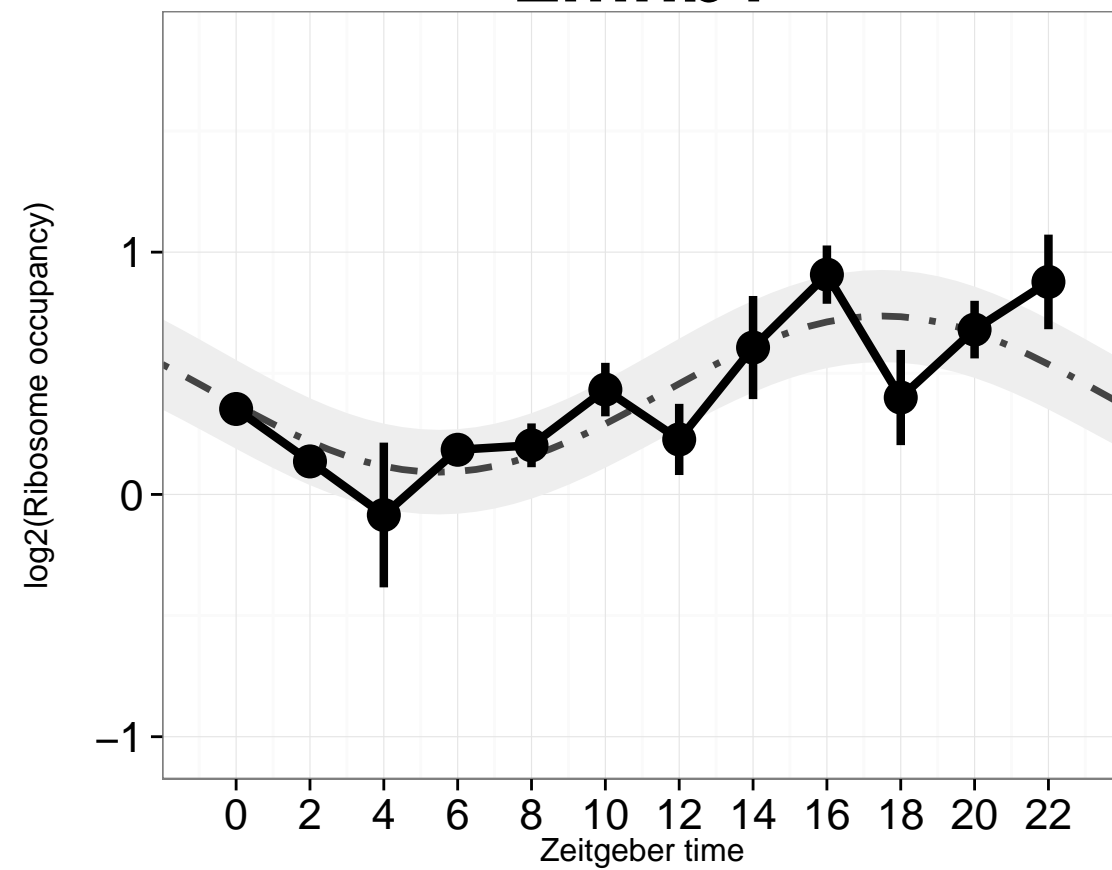

Supplement: Supplementary file 3318 [file 1]

# Acyp1

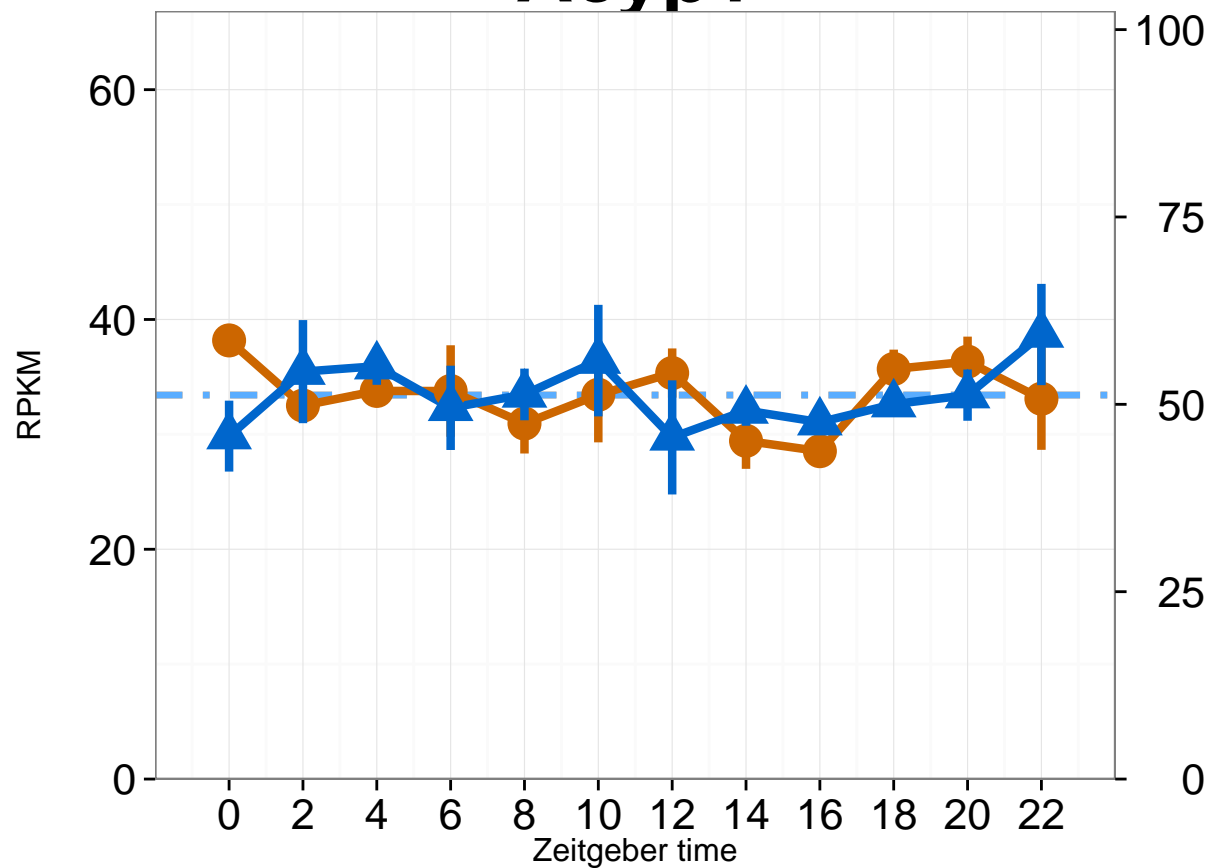

# Acyp1

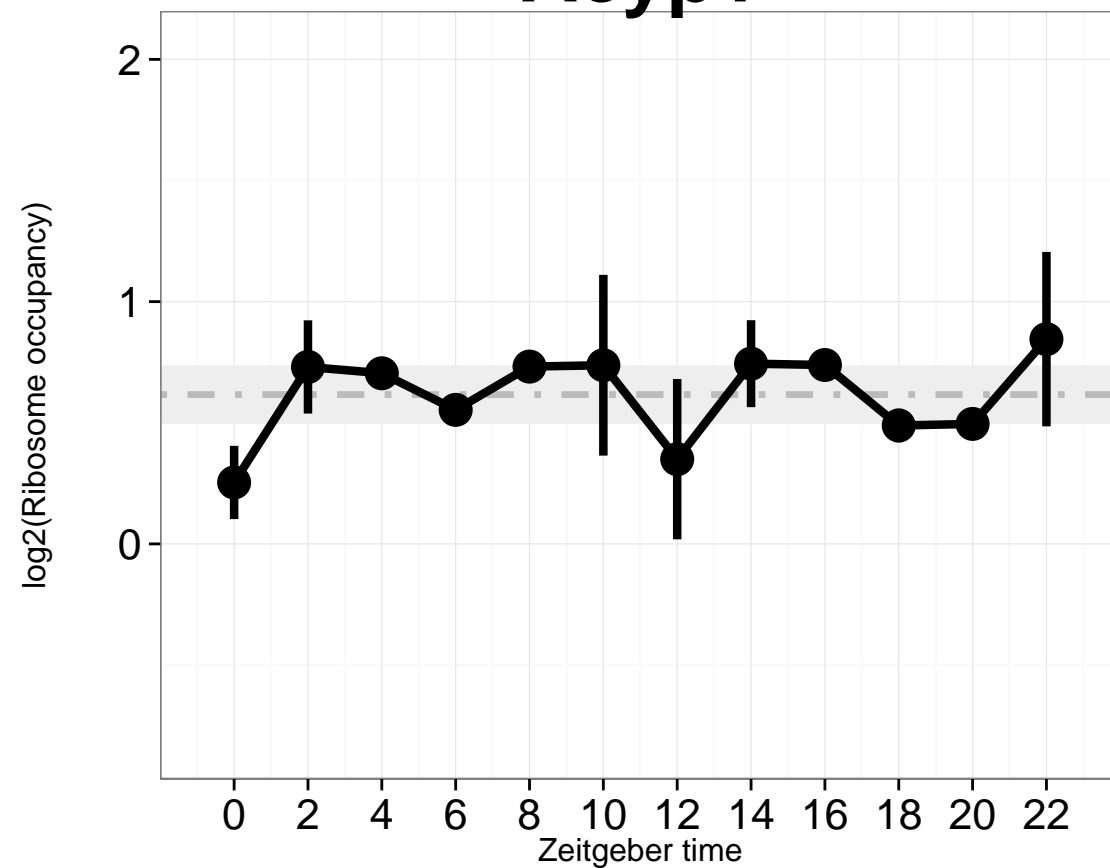

Supplement: Supplementary file 3319 [file 1]

# Heyl

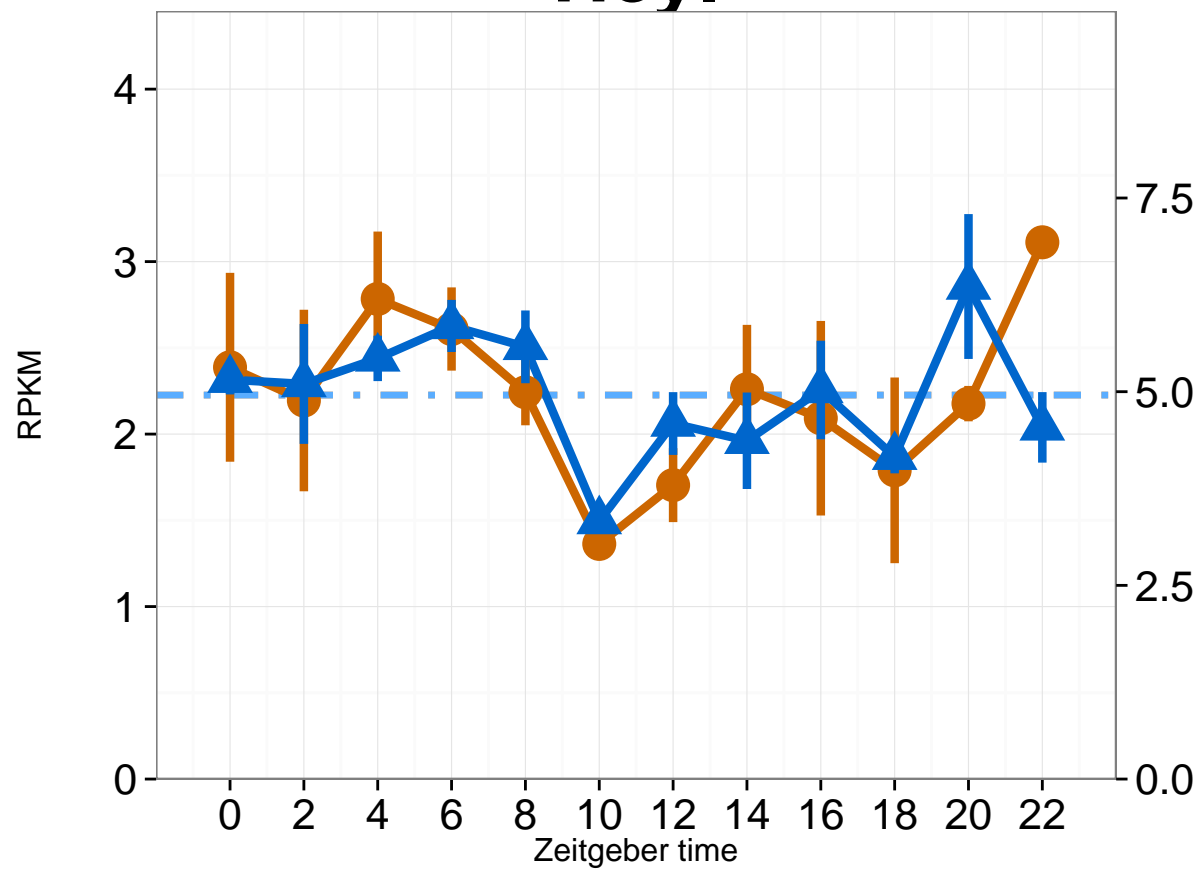

# Heyl

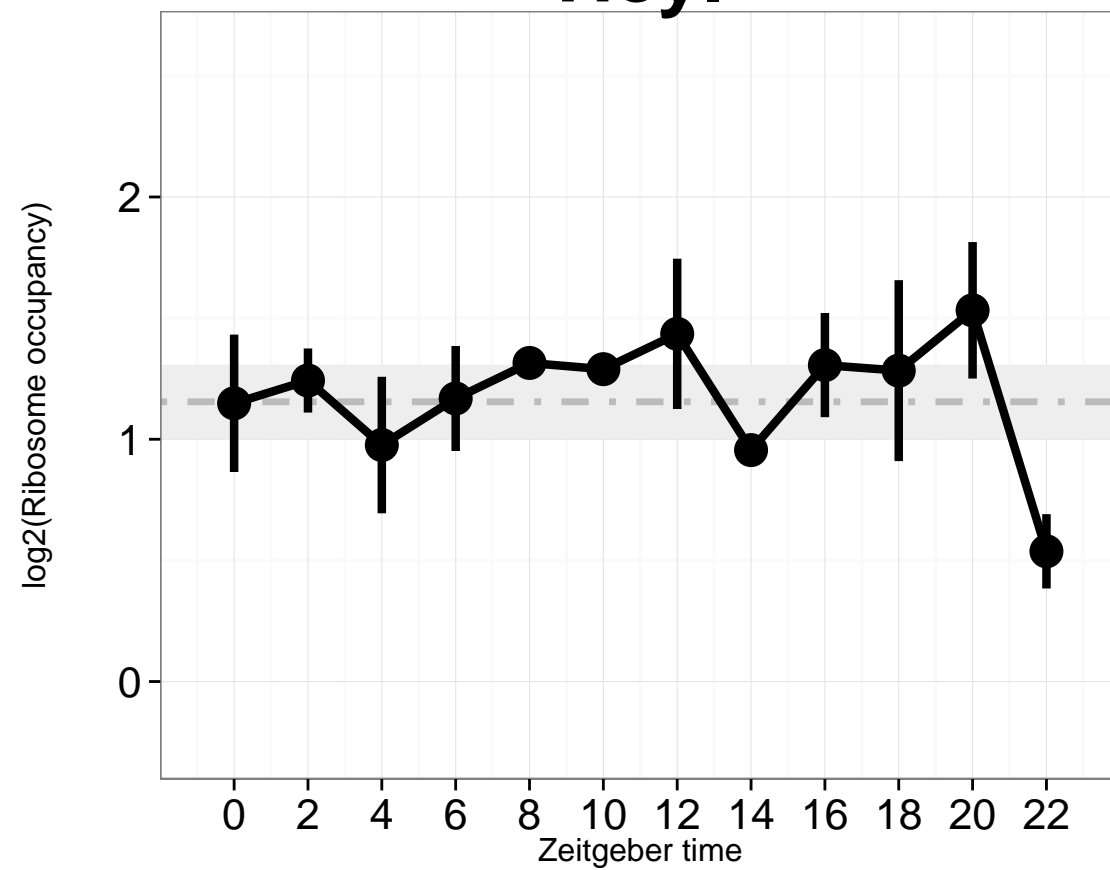

Supplement: Supplementary file 3320 [file 1]

## Samm50

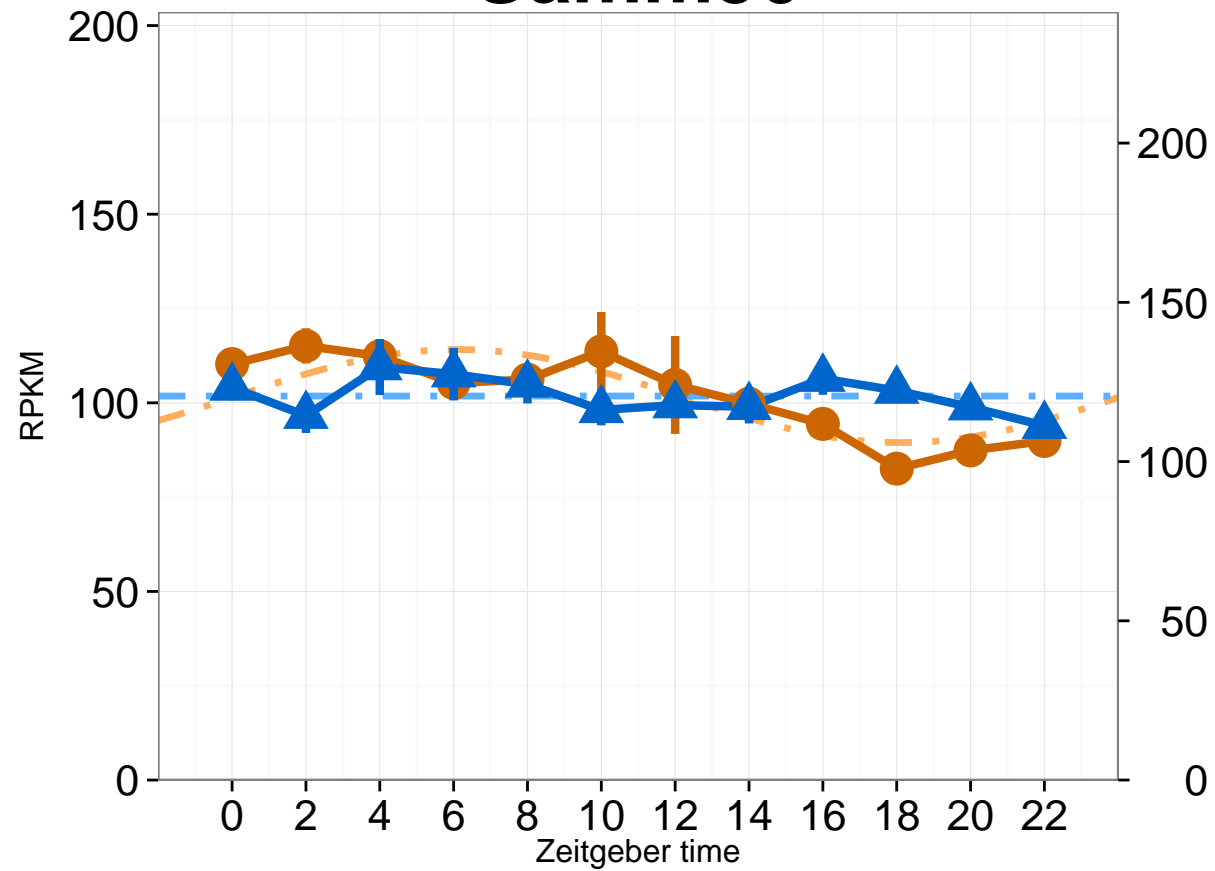

## Samm50

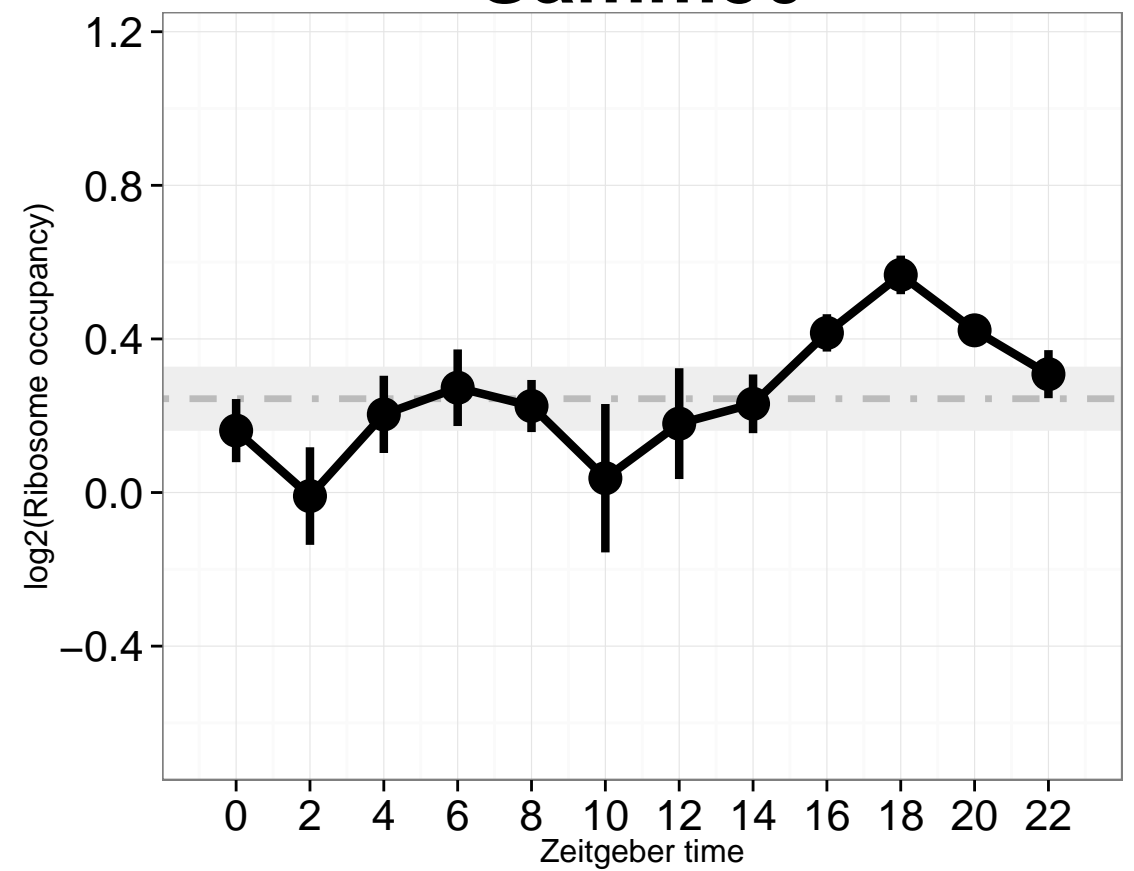

Supplement: Supplementary file 3321 [file 1]

# Pwwp2b

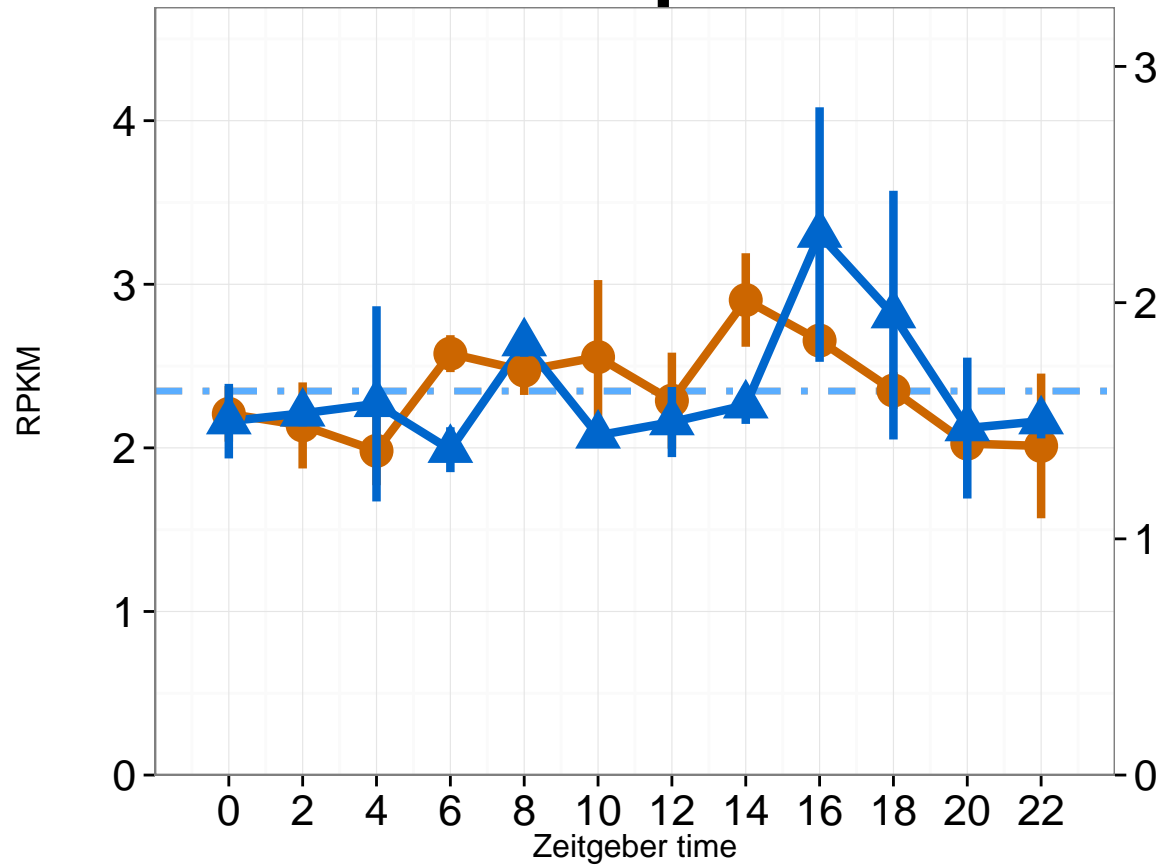

# Pwwp2b

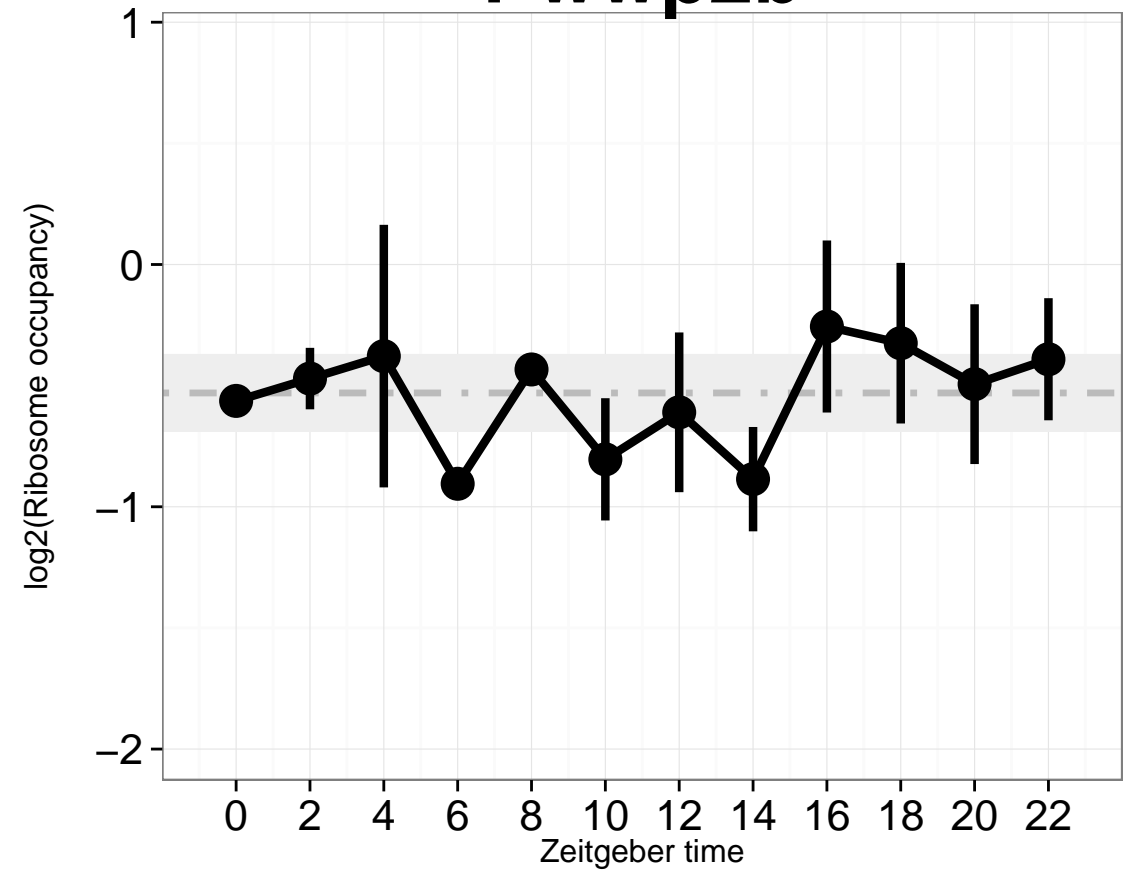

Supplement: Supplementary file 3322 [file 1]

# Hoga1

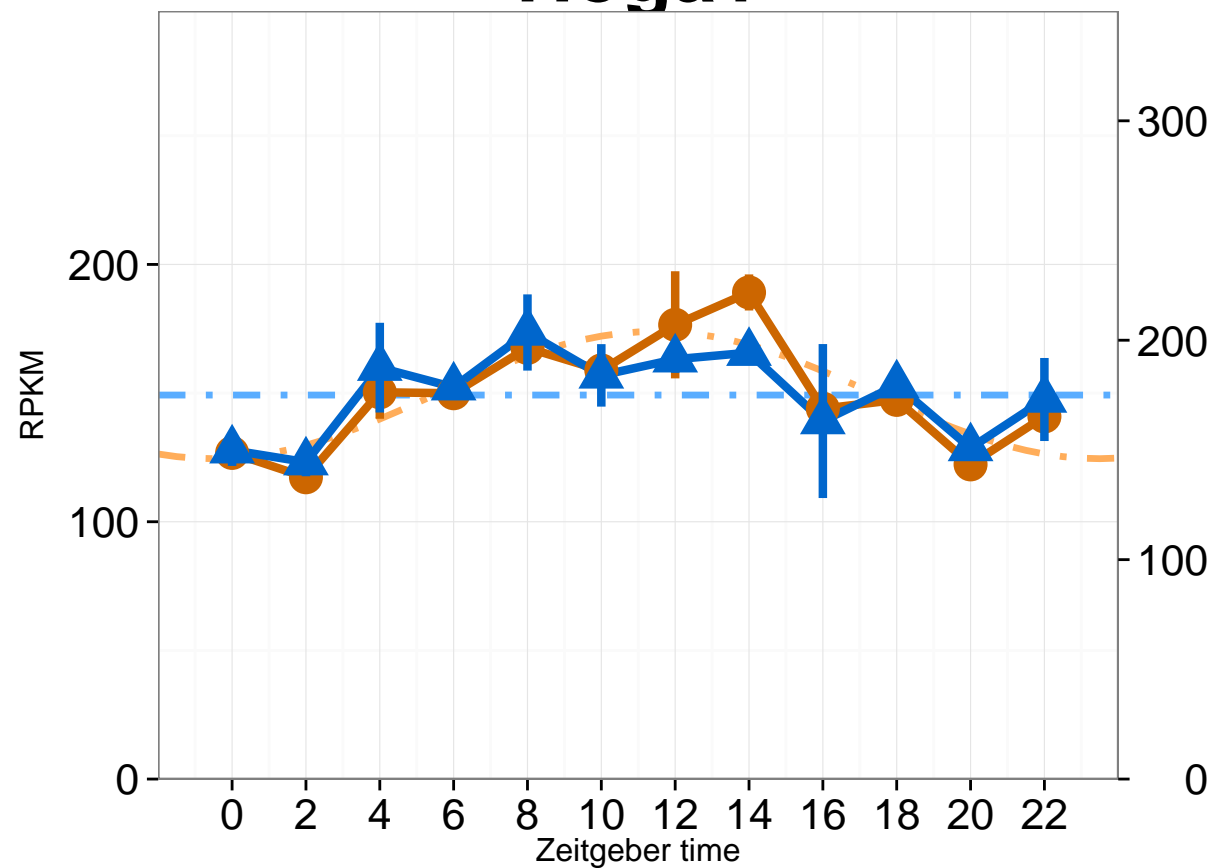

# Hoga1

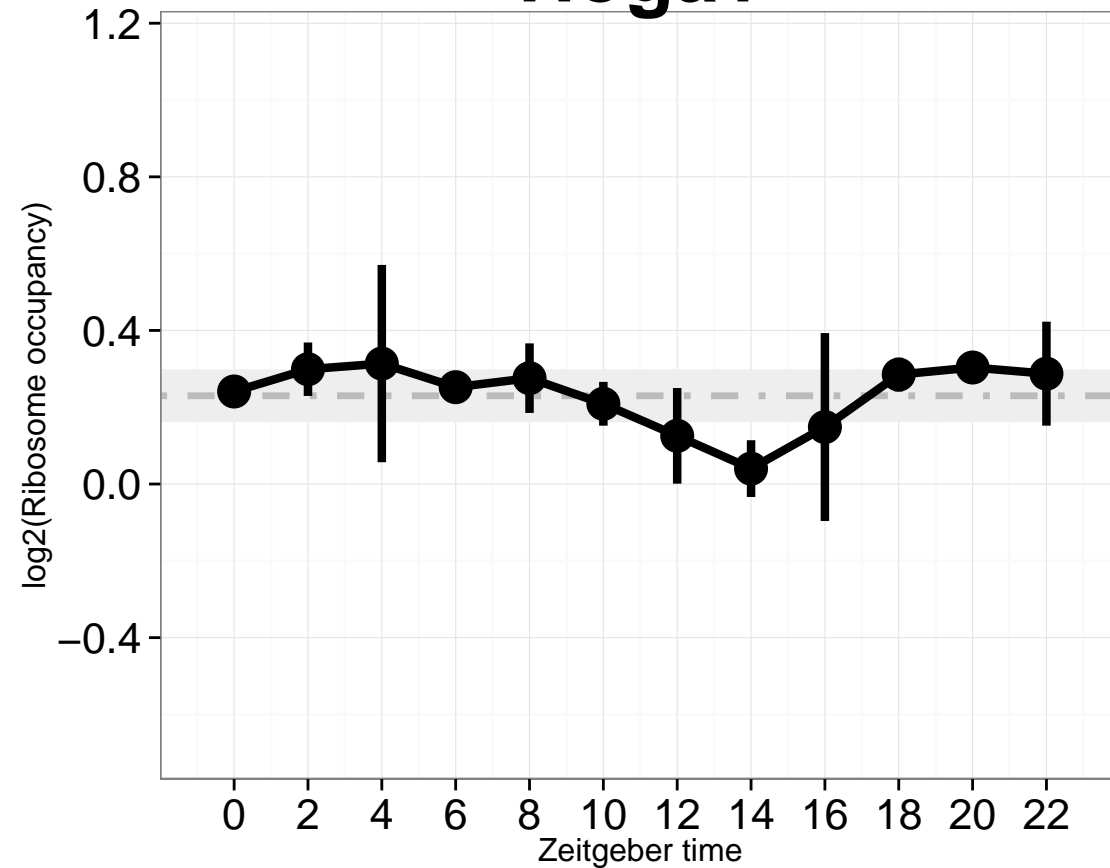

Supplement: Supplementary file 3323 [file 1]

## Myo1e

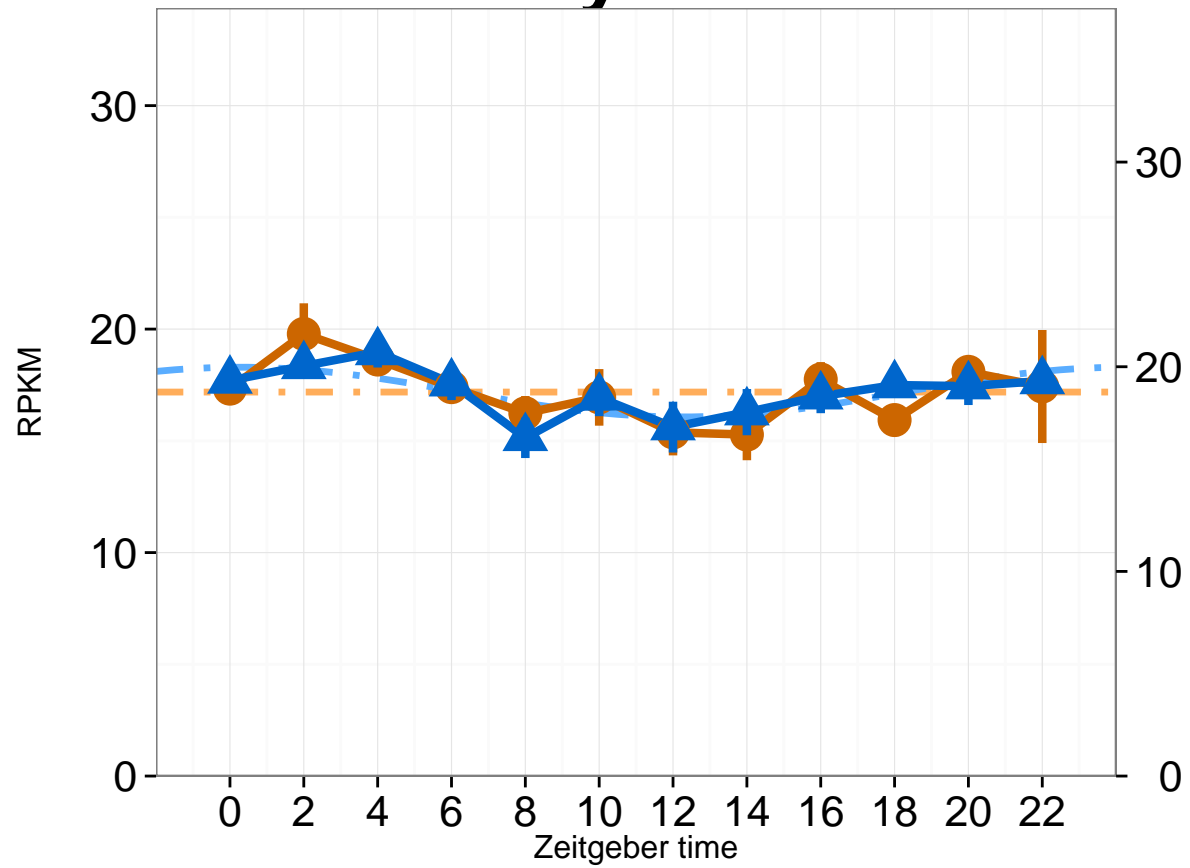

## Myo1e

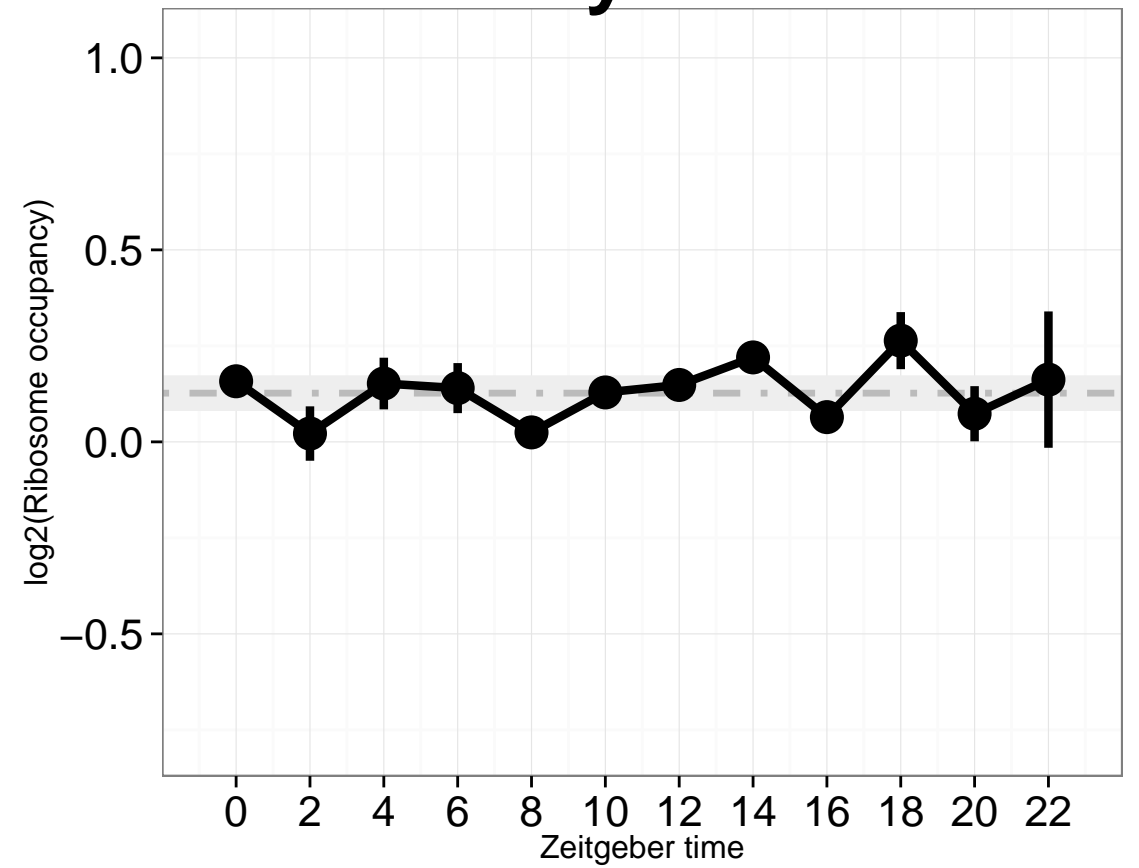

Supplement: Supplementary file 3324 [file 1]

# Zfp105

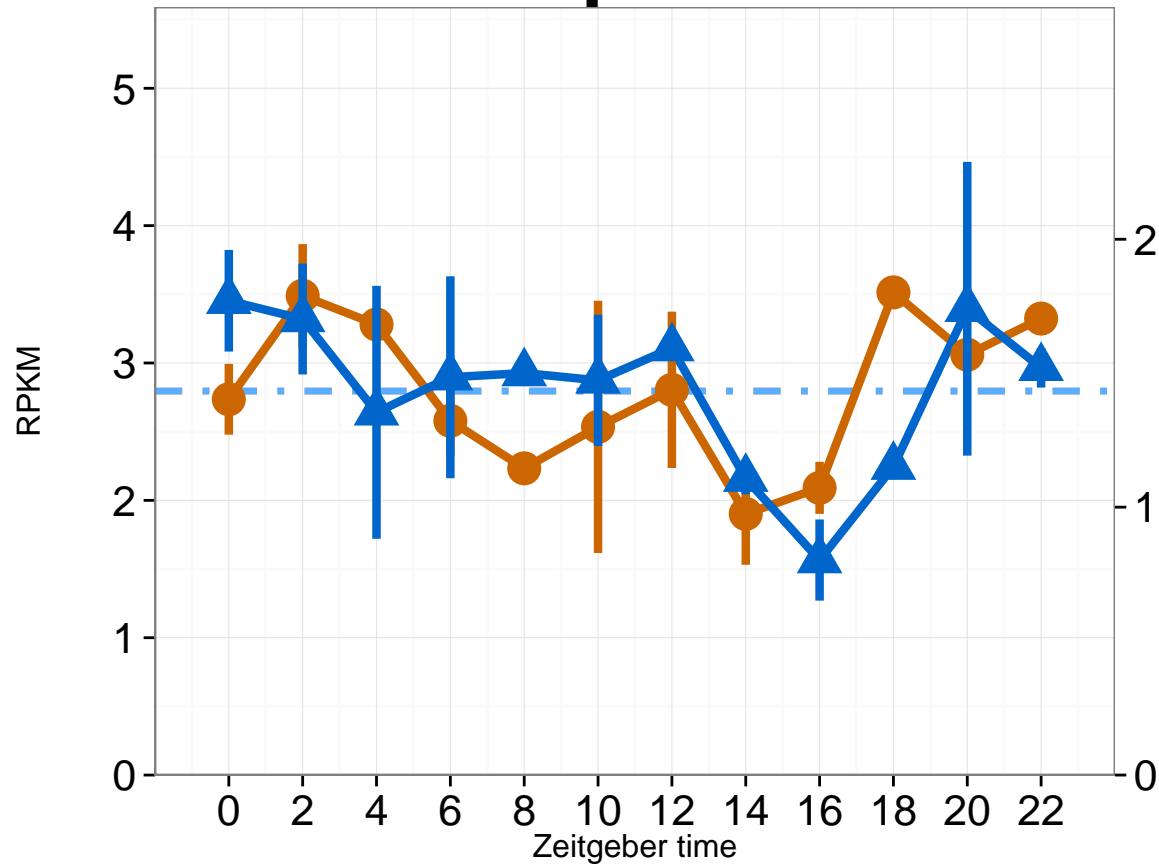

# Zfp105

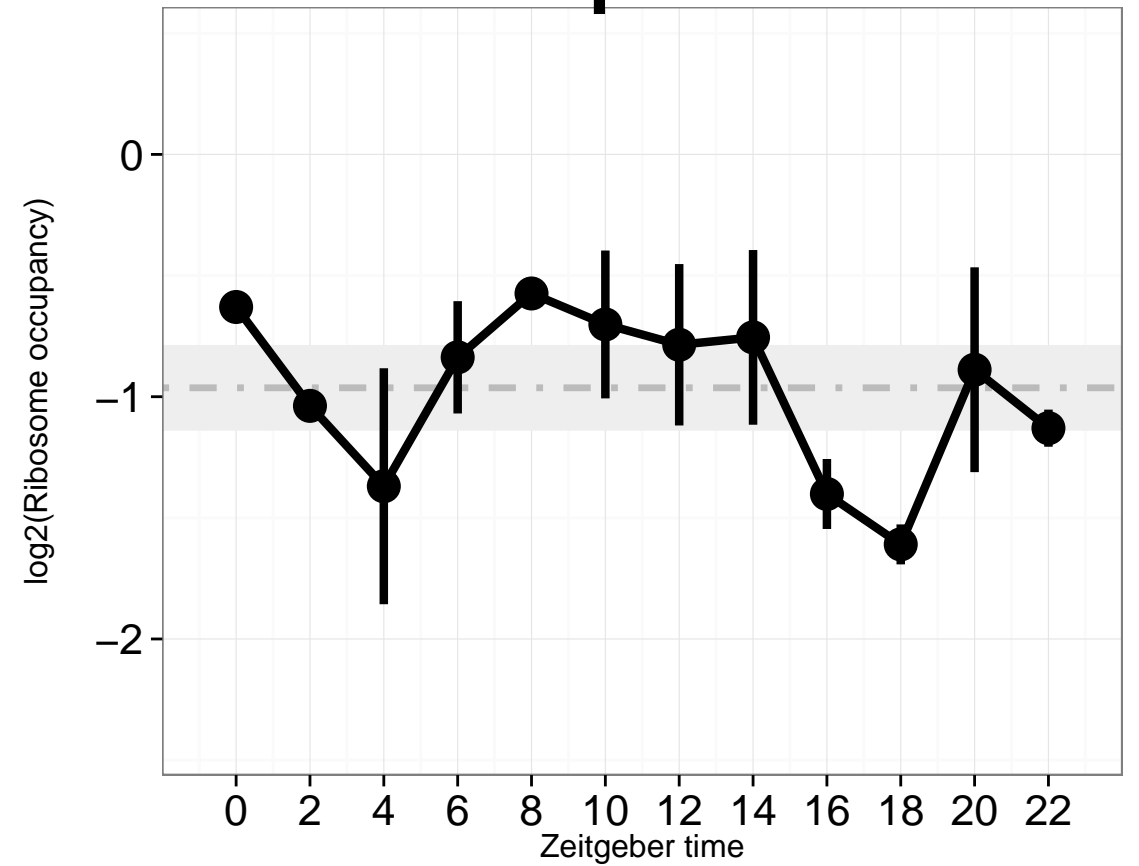

Supplement: Supplementary file 3325 [file 1]

## Clic3

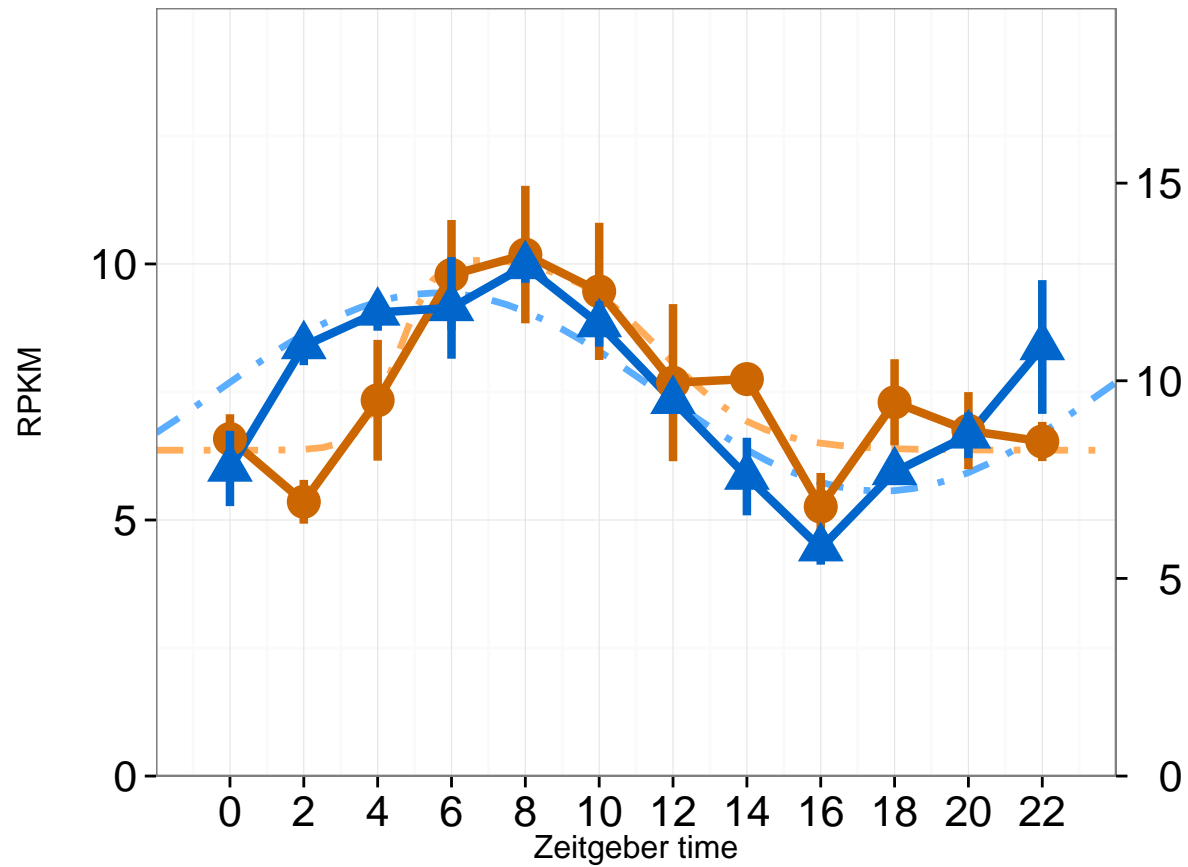

## Clic3

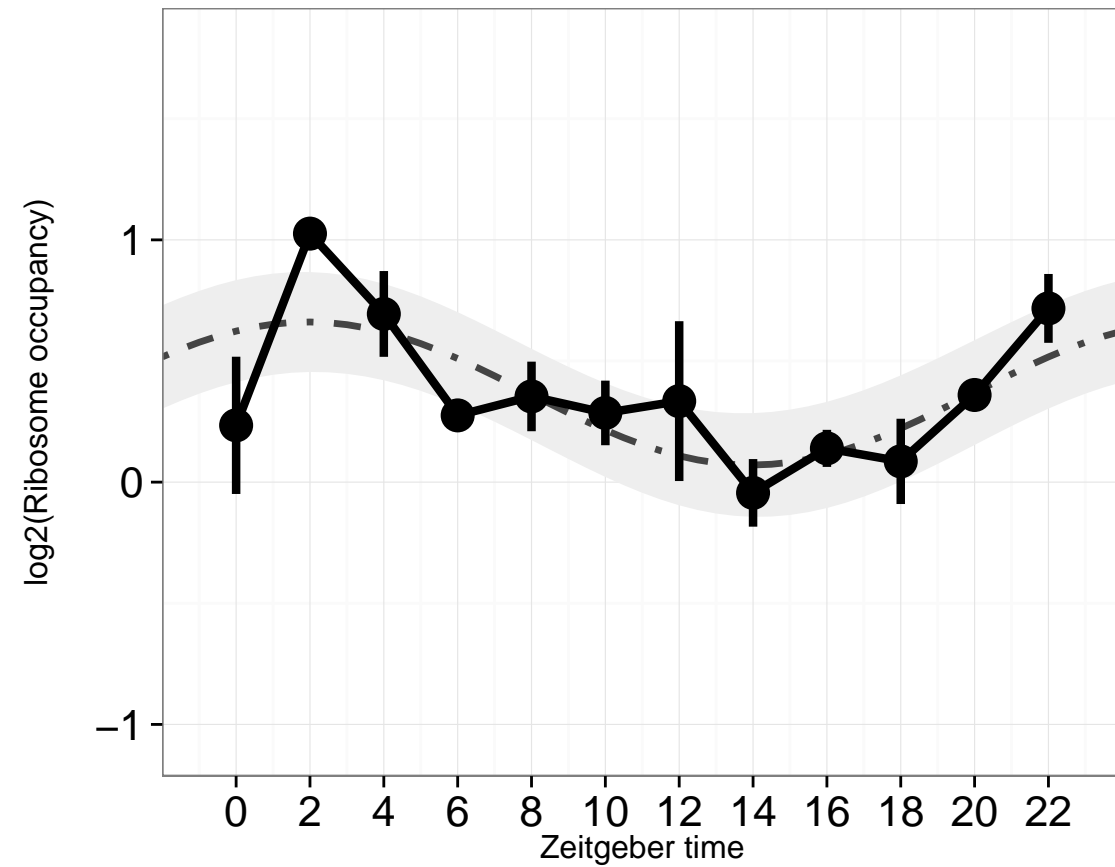

Supplement: Supplementary file 3326 [file 1]

## Fermt1

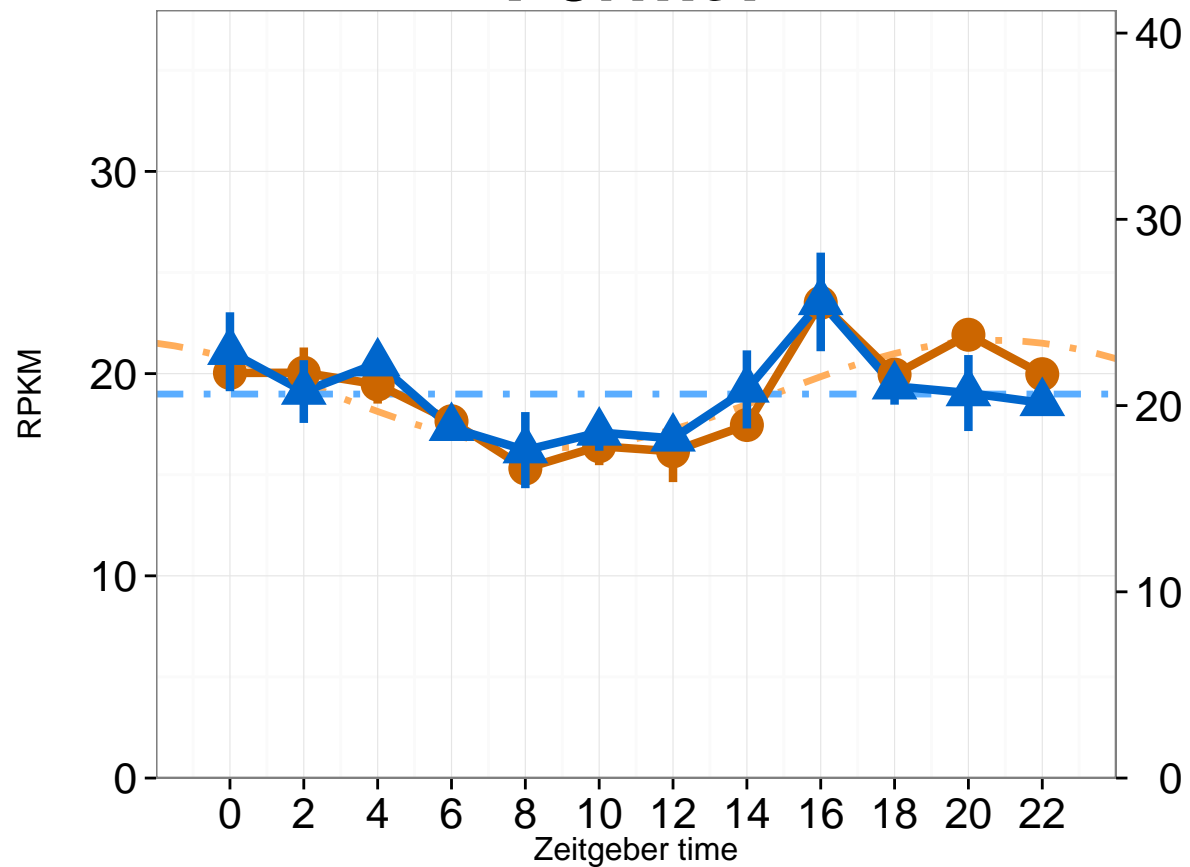

## Fermt1

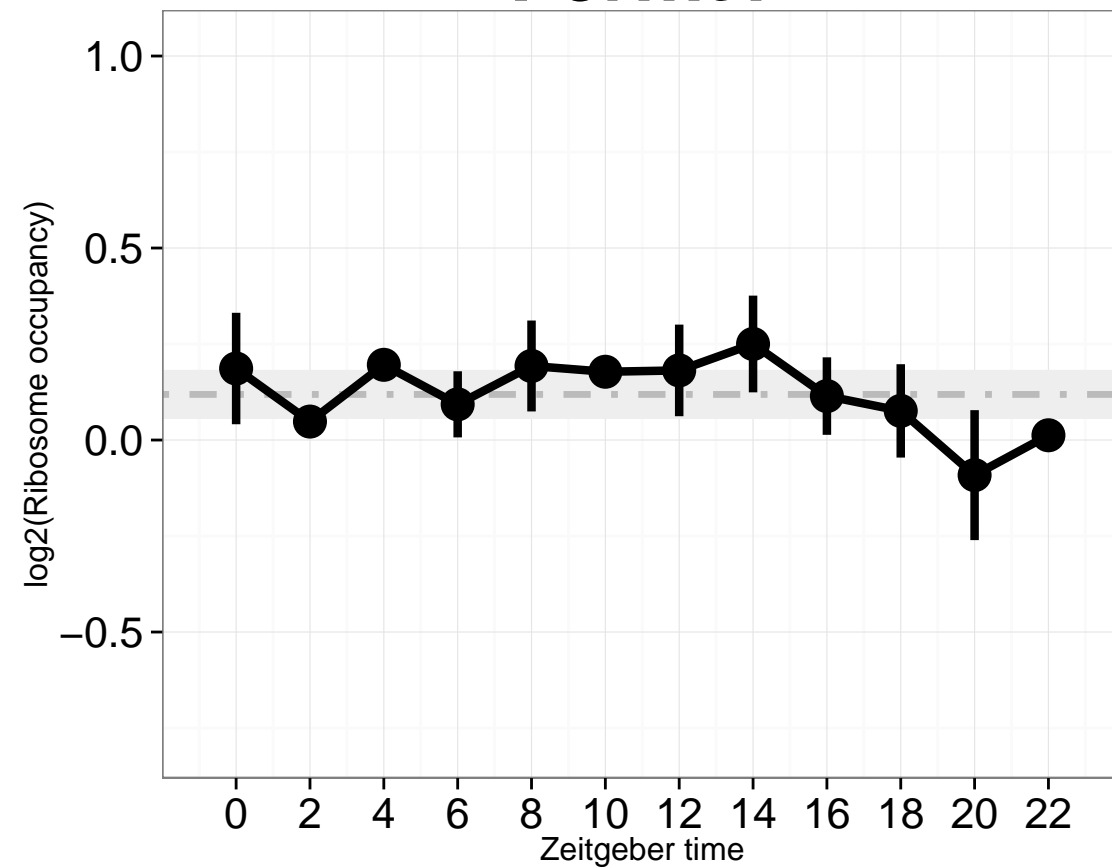

Supplement: Supplementary file 3327 [file 1]

## Gm10330

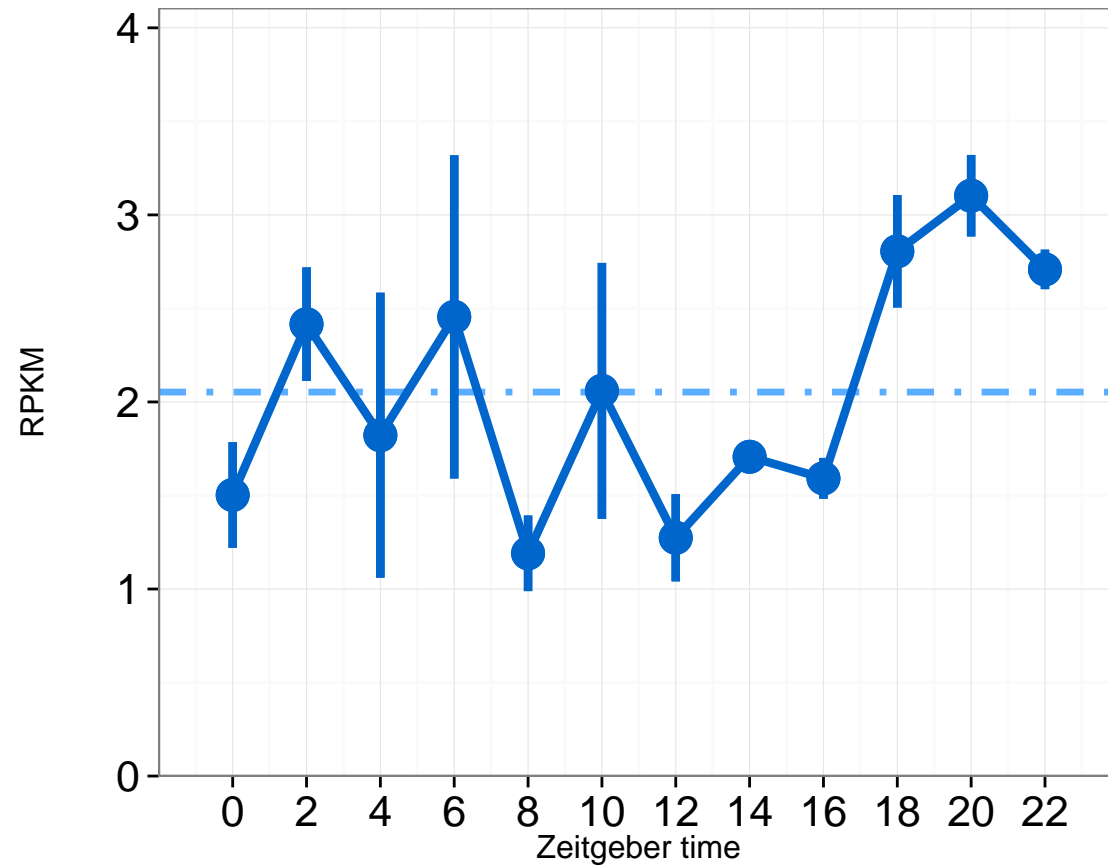

## Gm10330 log2(Ribosome occupanc

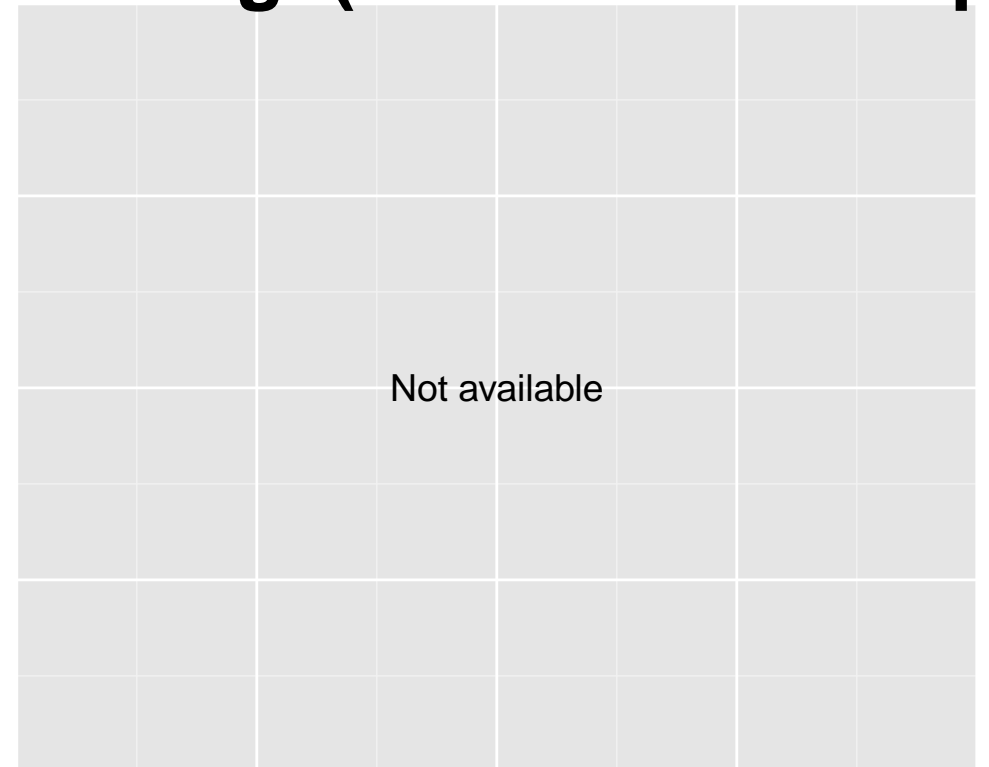

Supplement: Supplementary file 3328 [file 1]

# Rnf125

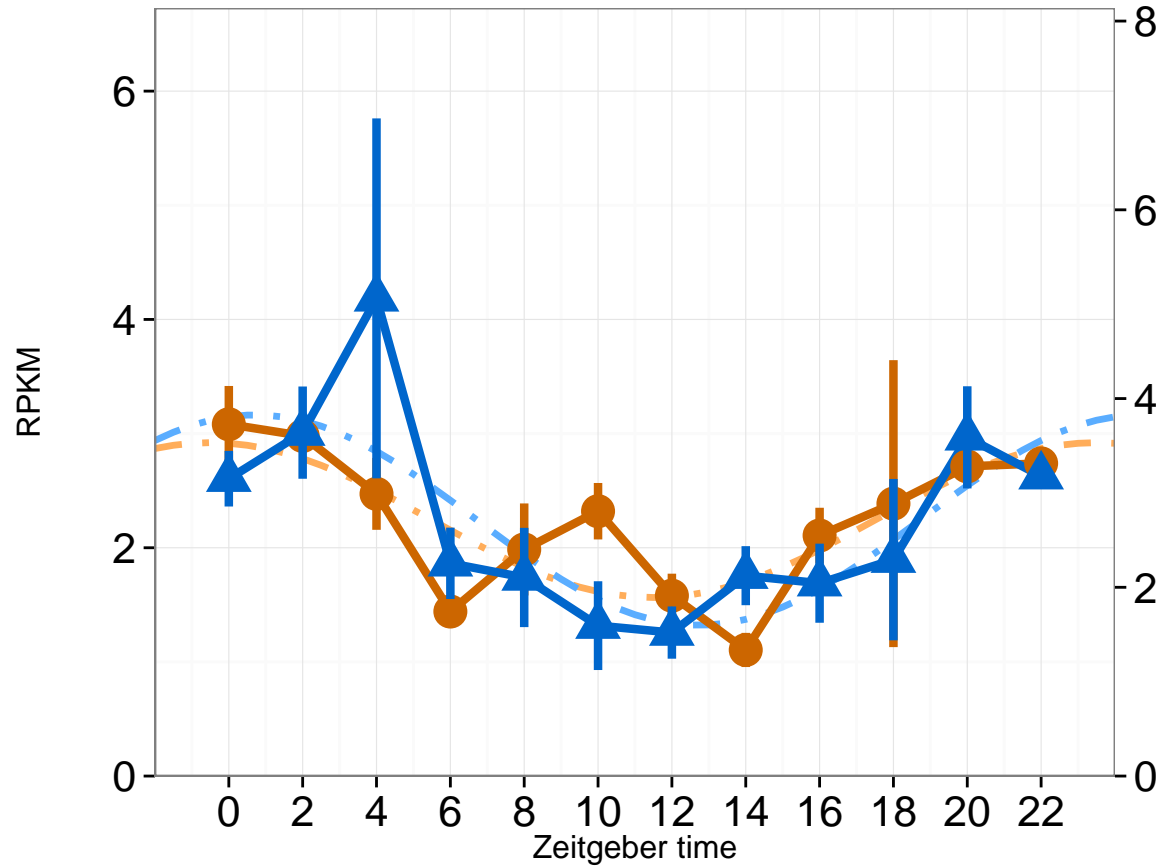

# Rnf125

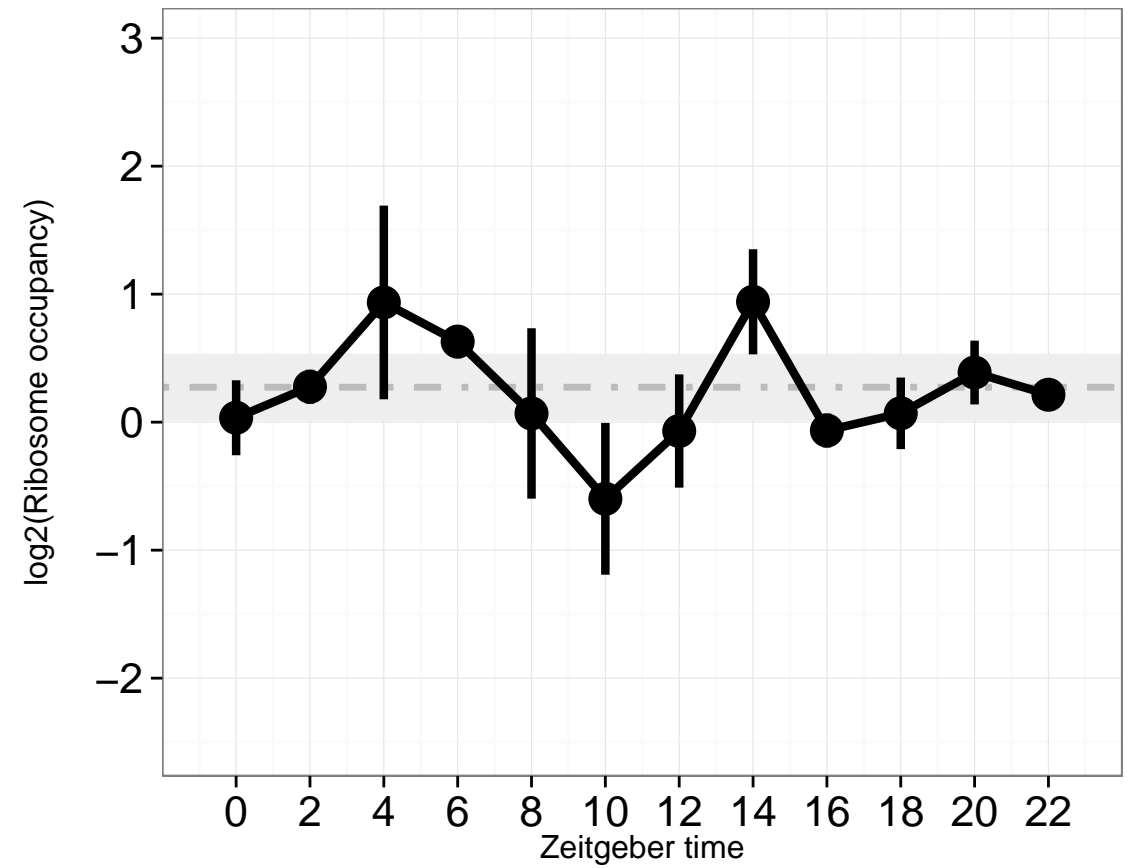

Supplement: Supplementary file 3329 [file 1]

# Tab3

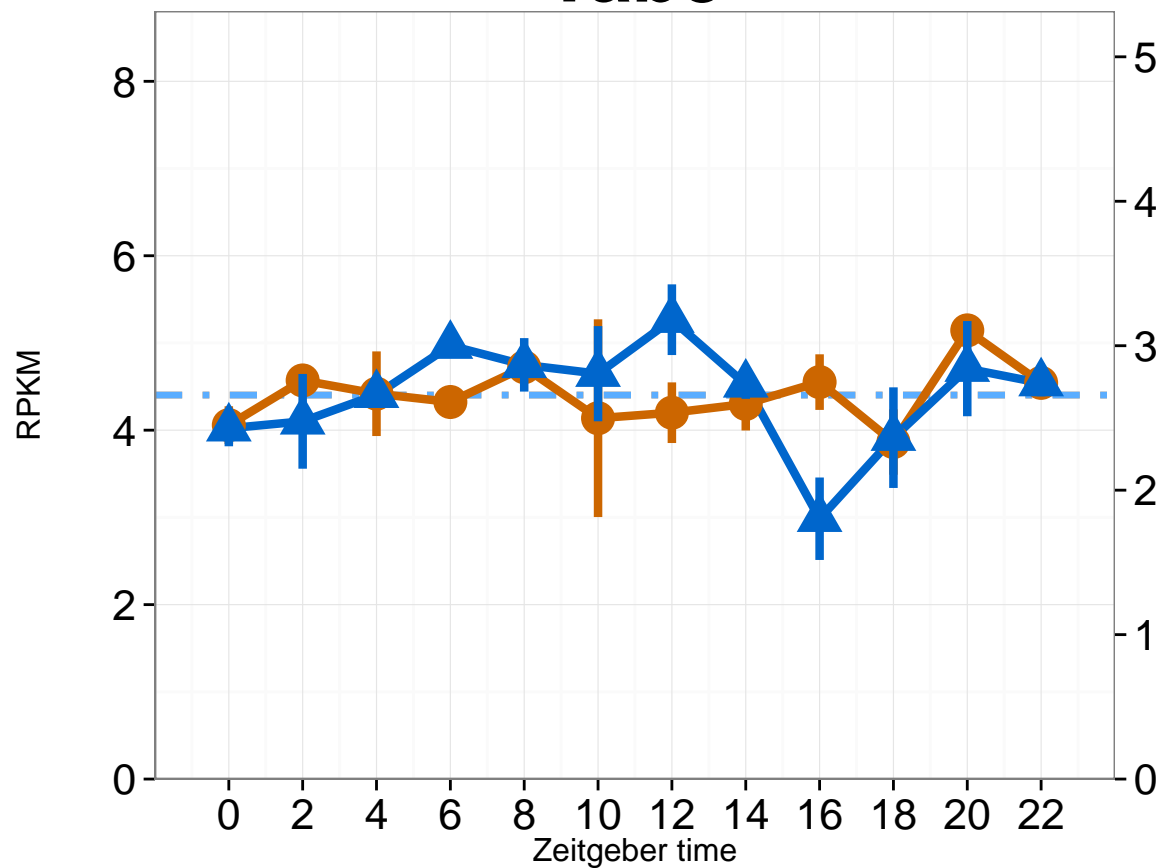

# Tab3

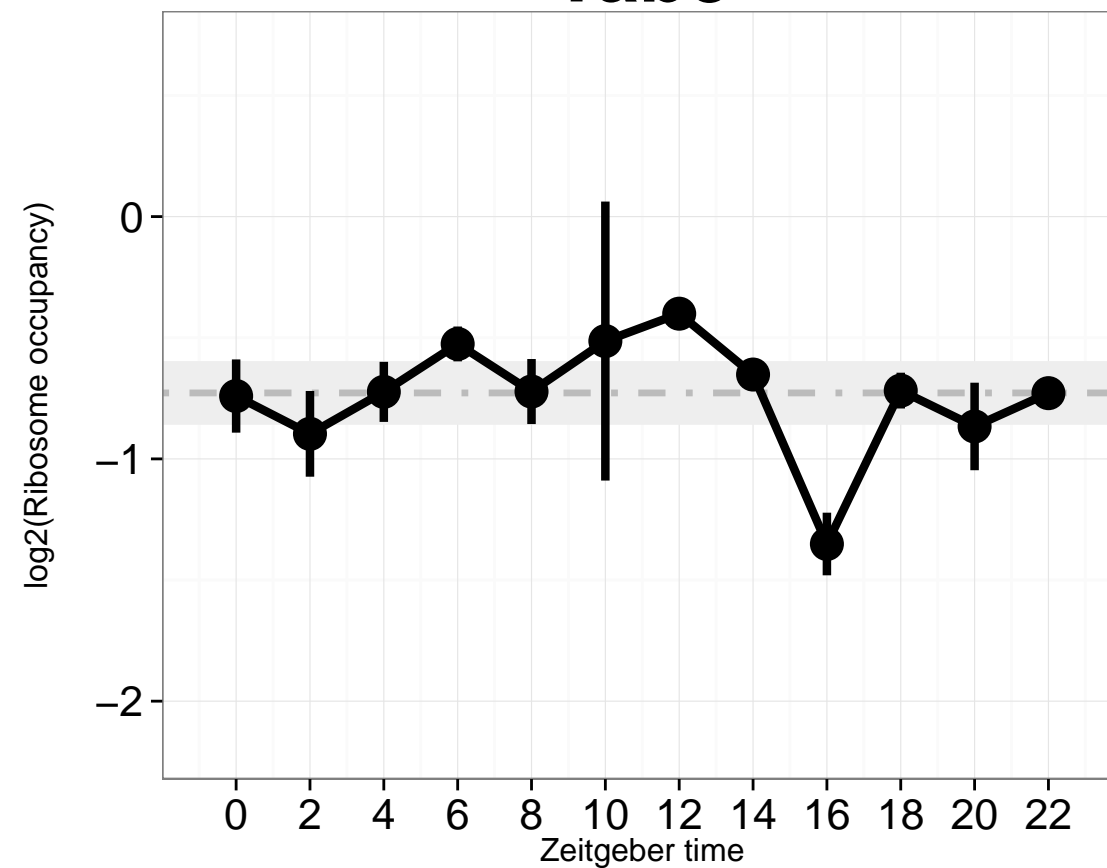

Supplement: Supplementary file 3330 [file 1]

# Fuca1

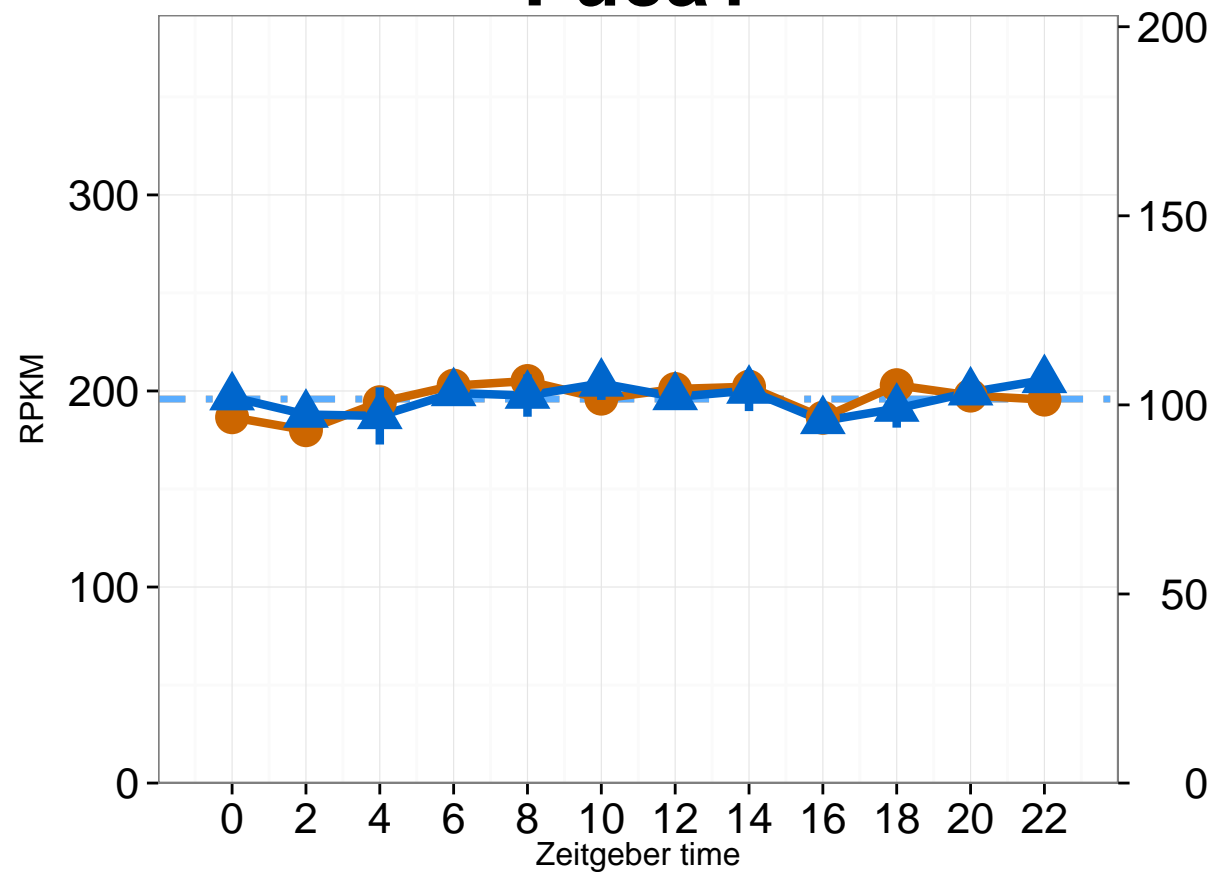

# Fuca1

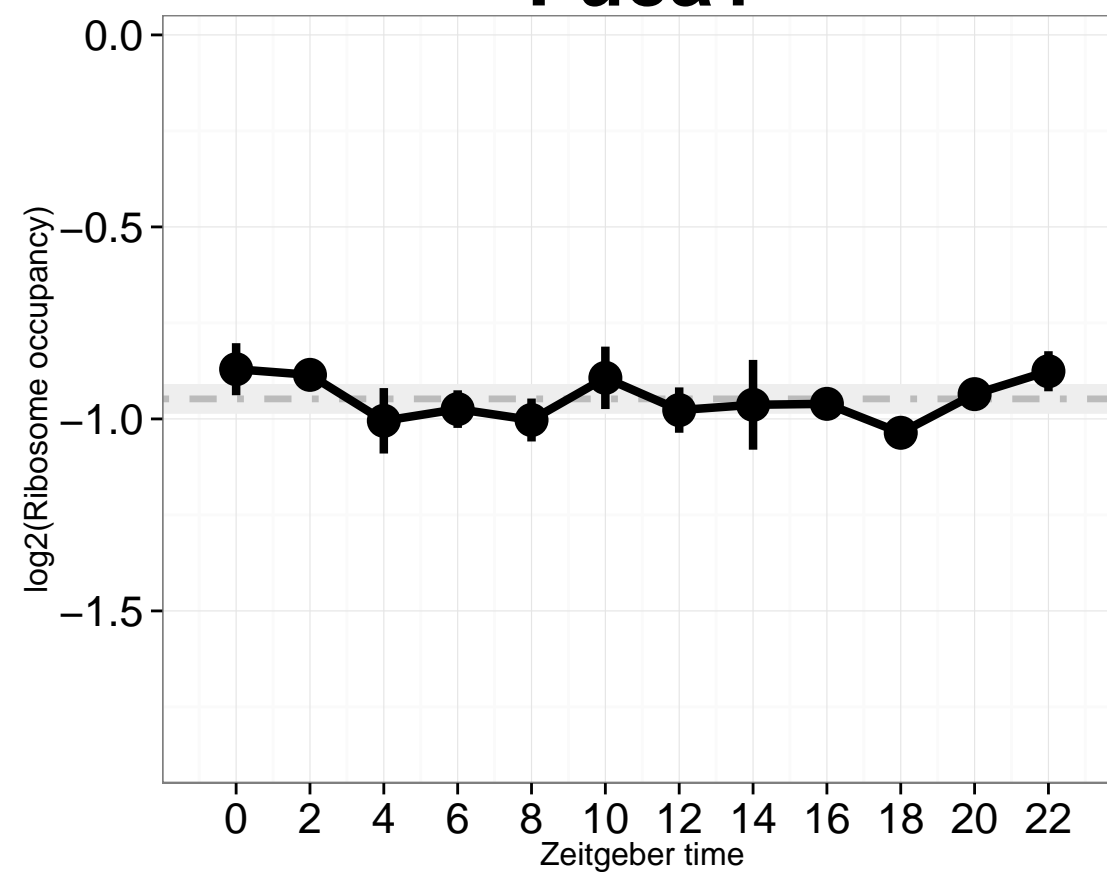

Supplement: Supplementary file 3331 [file 1]

## Polb

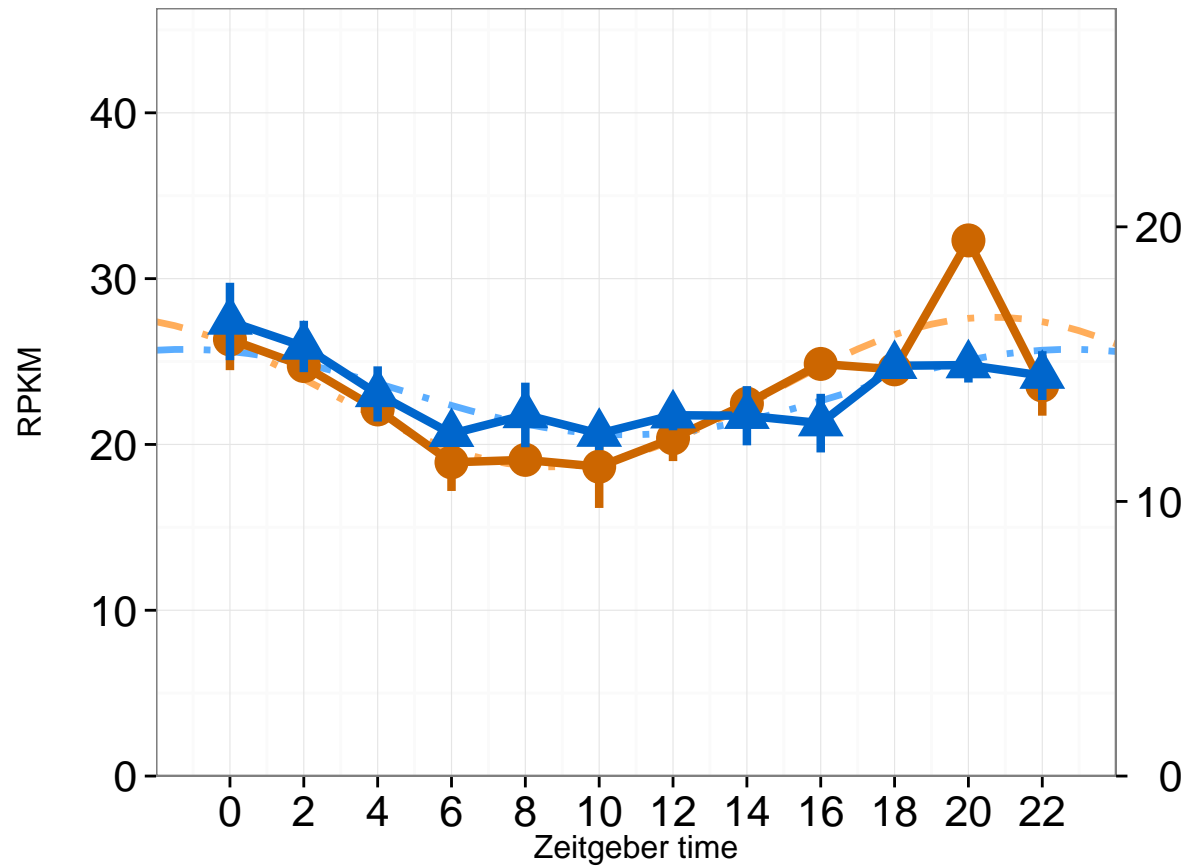

## Polb

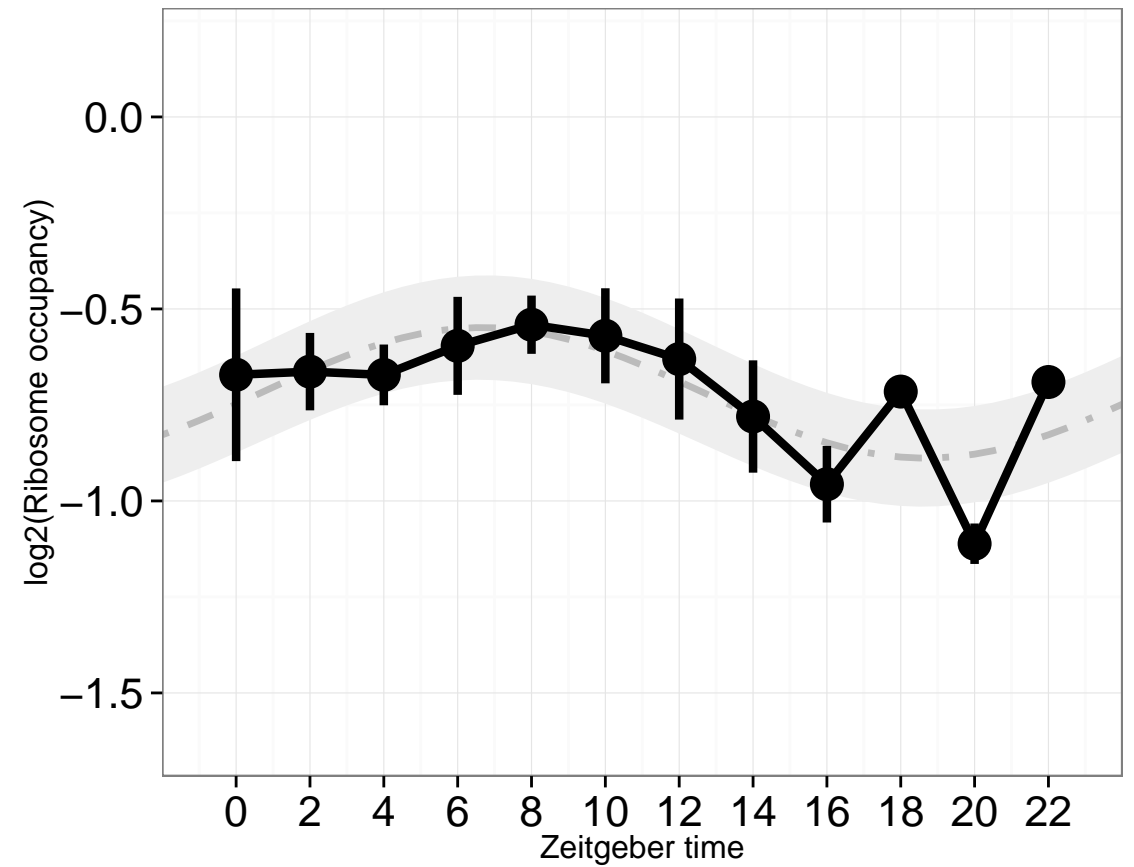

Supplement: Supplementary file 3332 [file 1]

# Hist1h4n

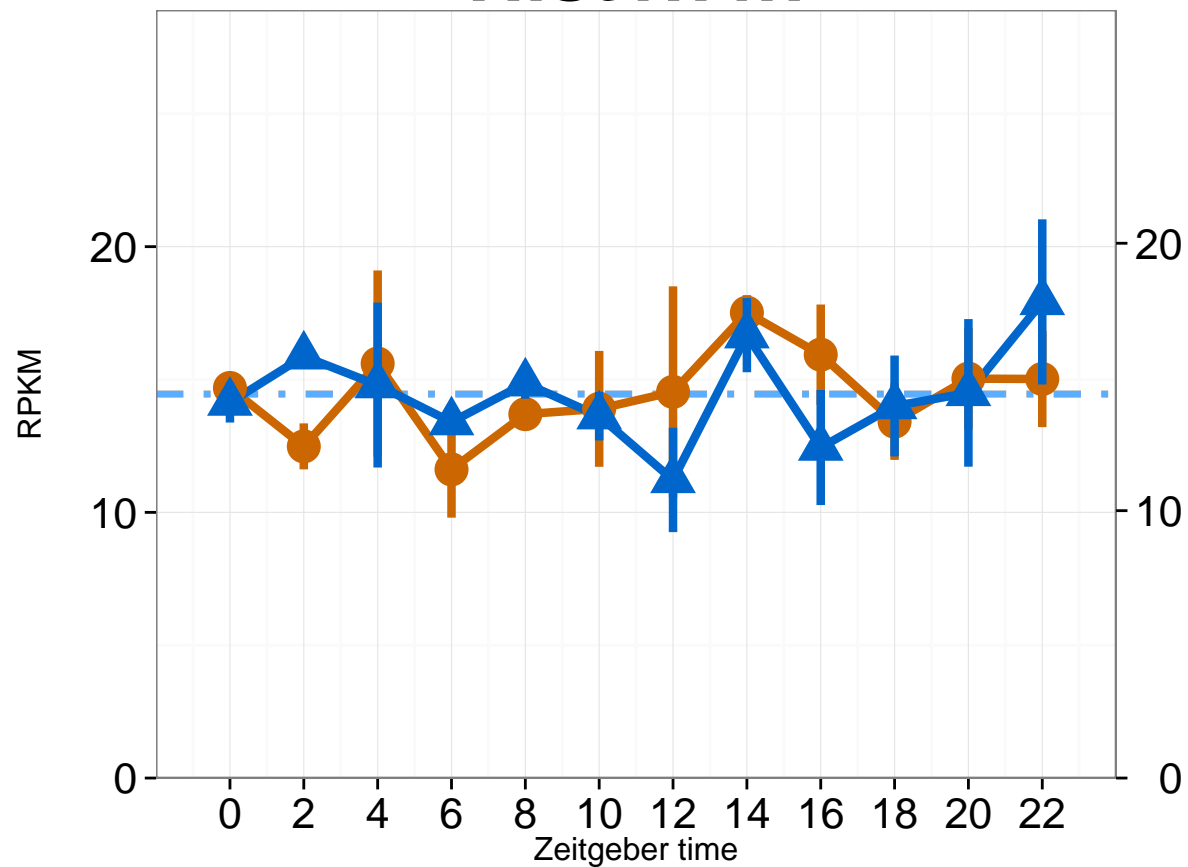

# Hist1h4n

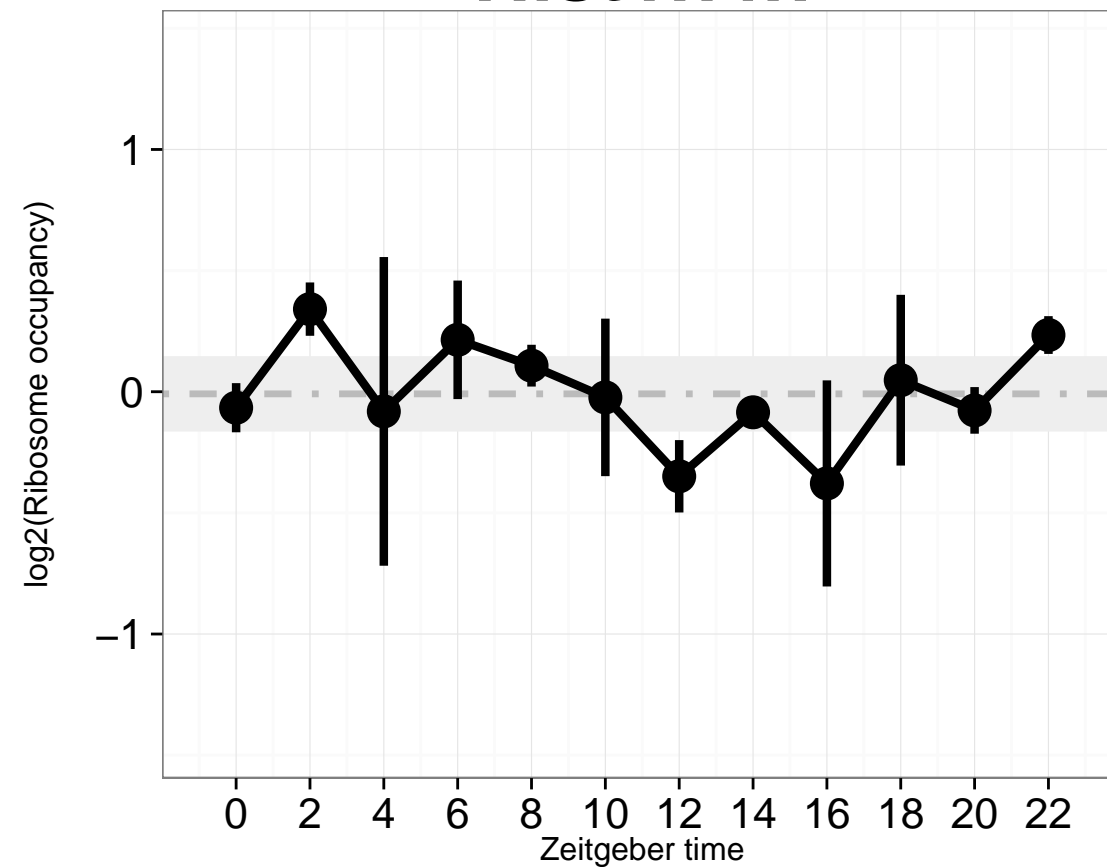

Supplement: Supplementary file 3333 [file 1]

## Acadl

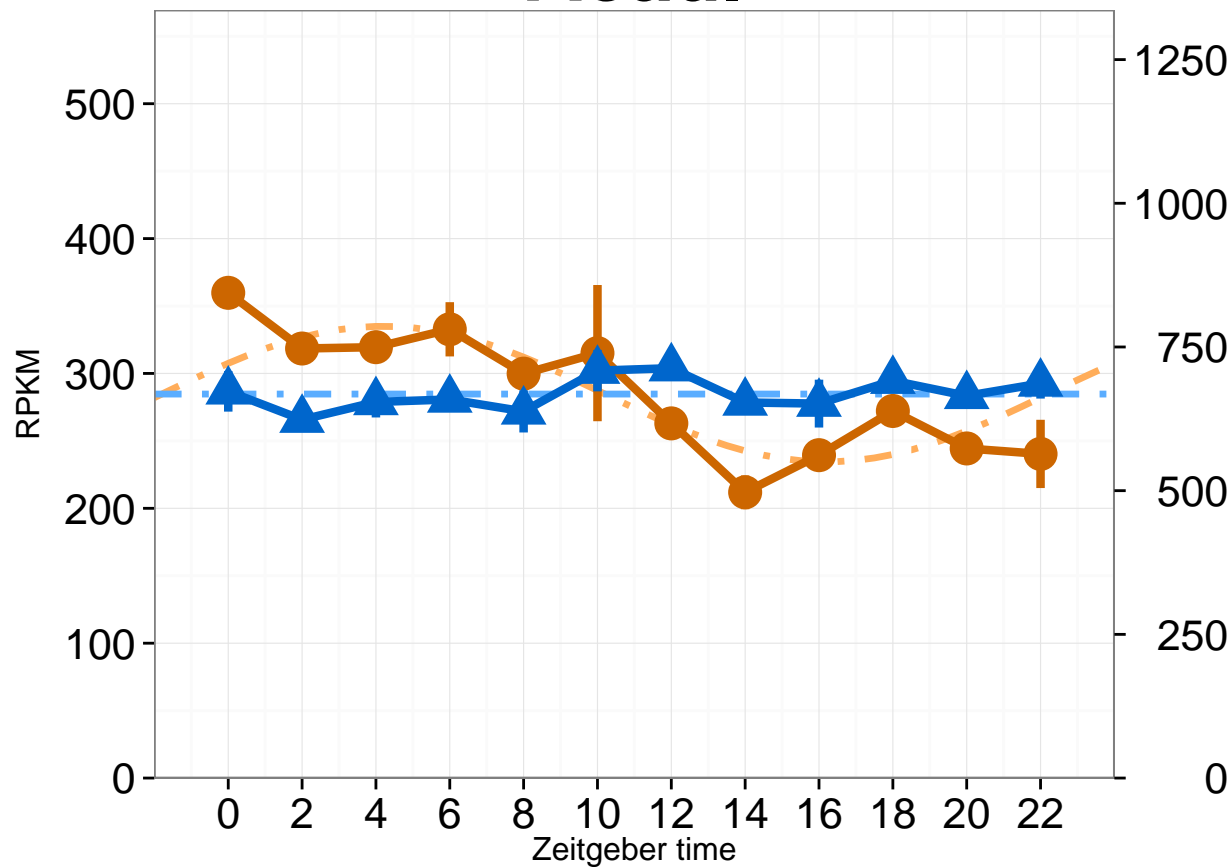

## Acadl

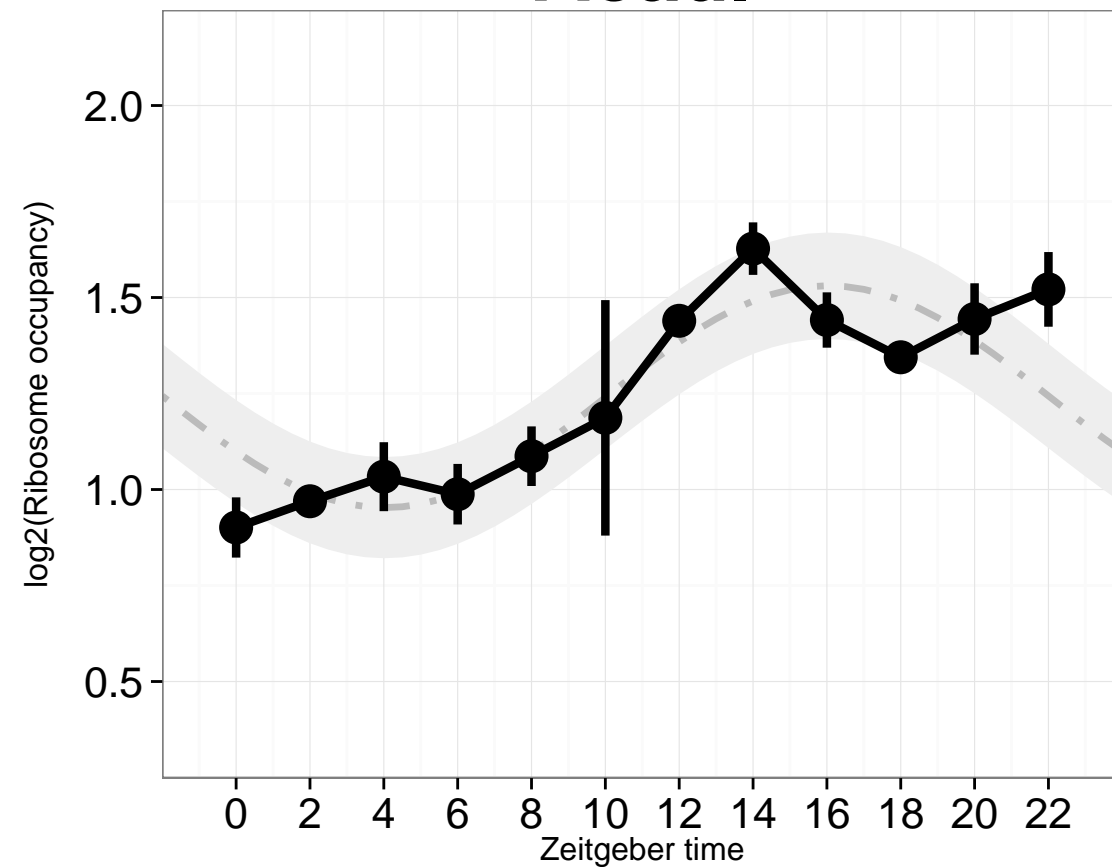

Supplement: Supplementary file 3334 [file 1]

## Dnpep

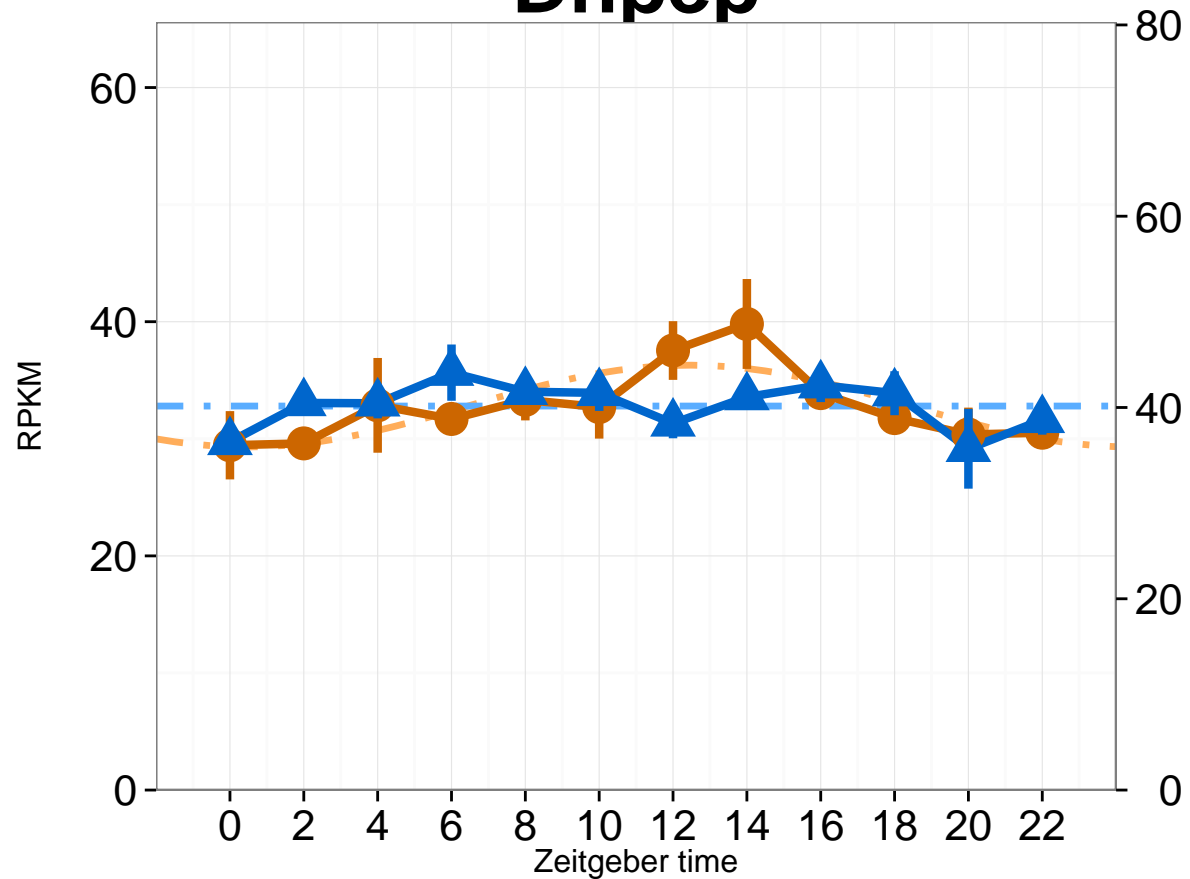

## Dnpep

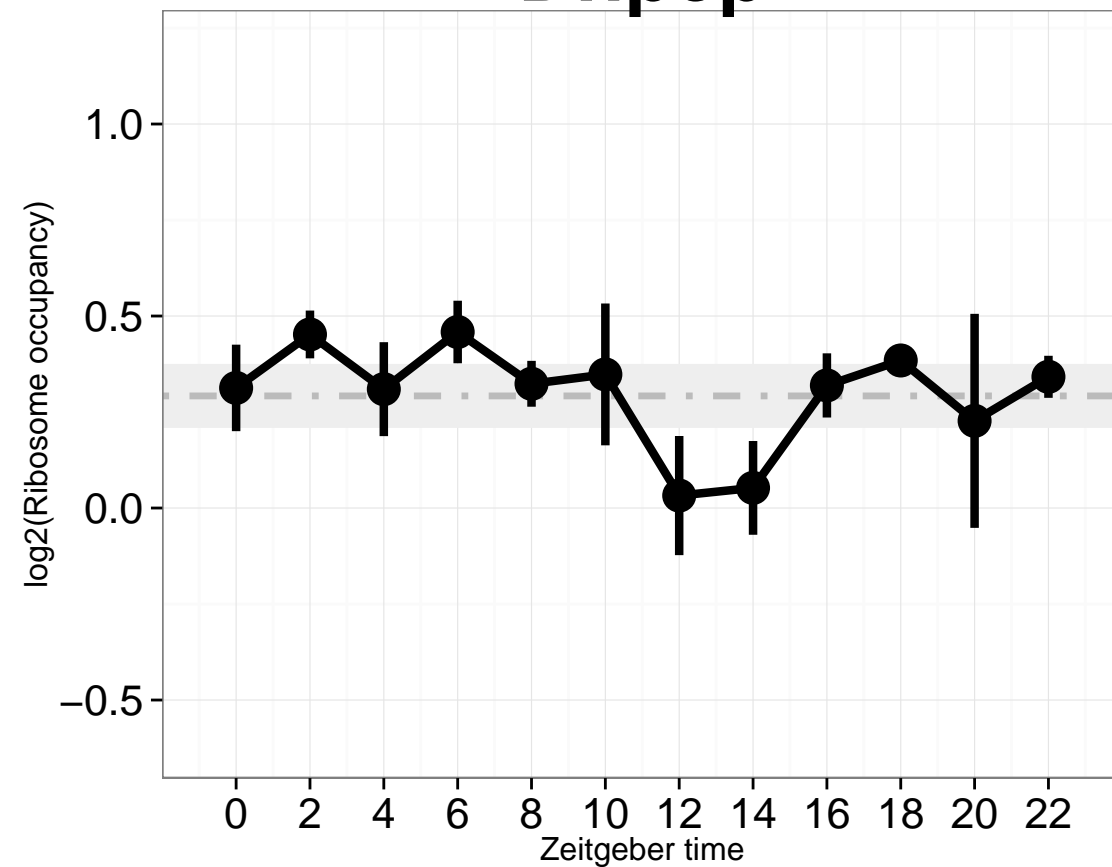

Supplement: Supplementary file 3335 [file 1]

## Zkscan5

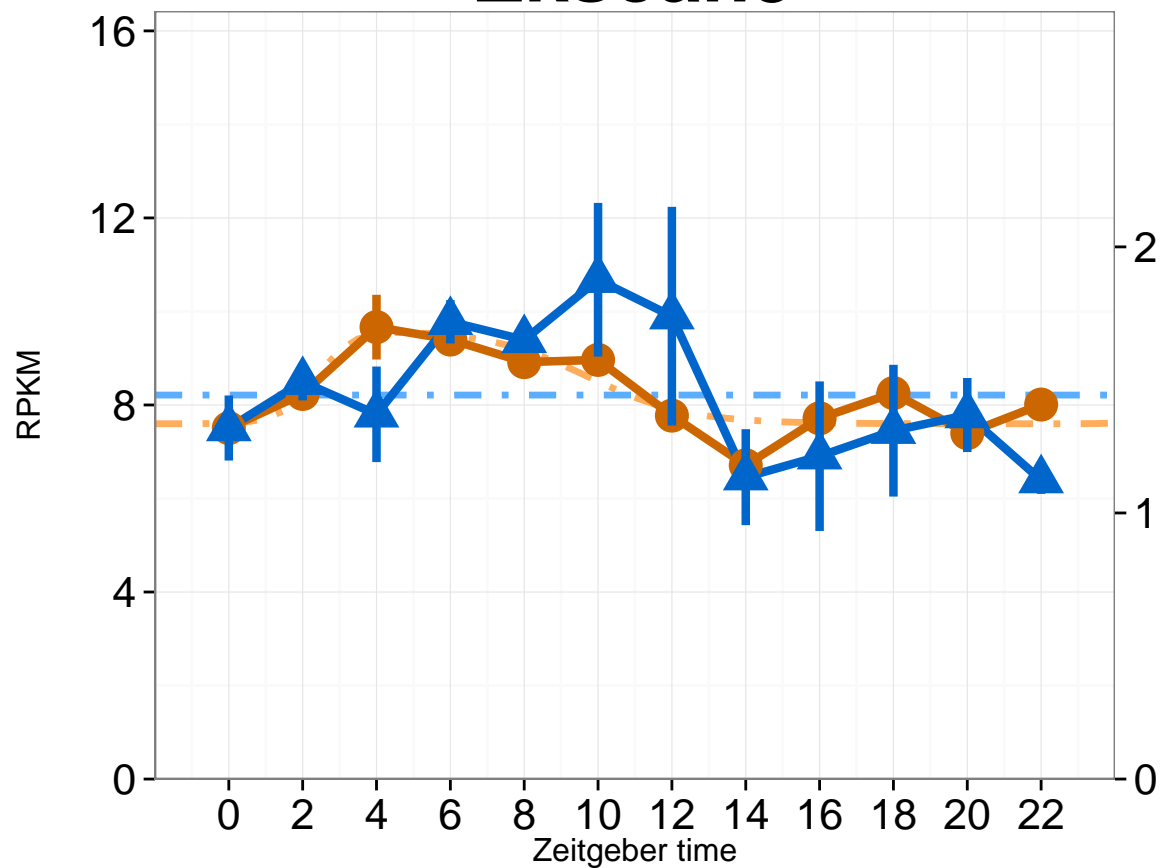

## Zkscan5

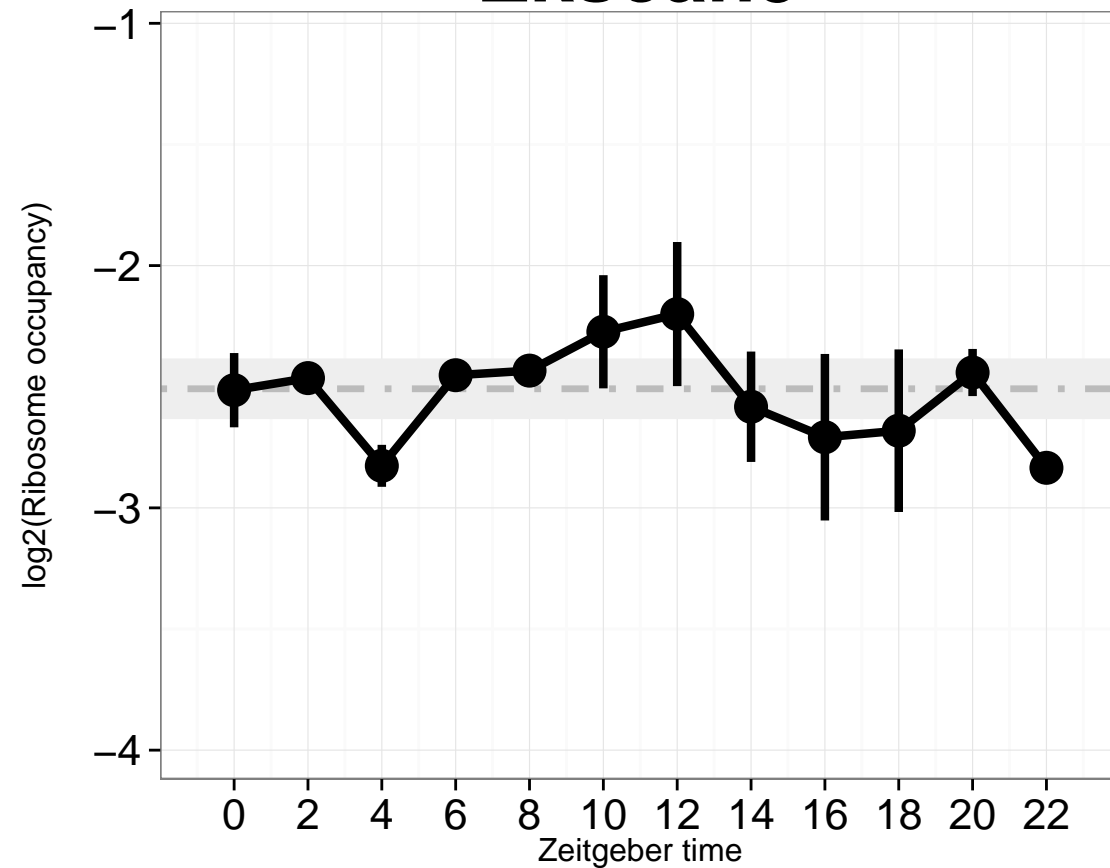

Supplement: Supplementary file 3336 [file 1]

## Mier2

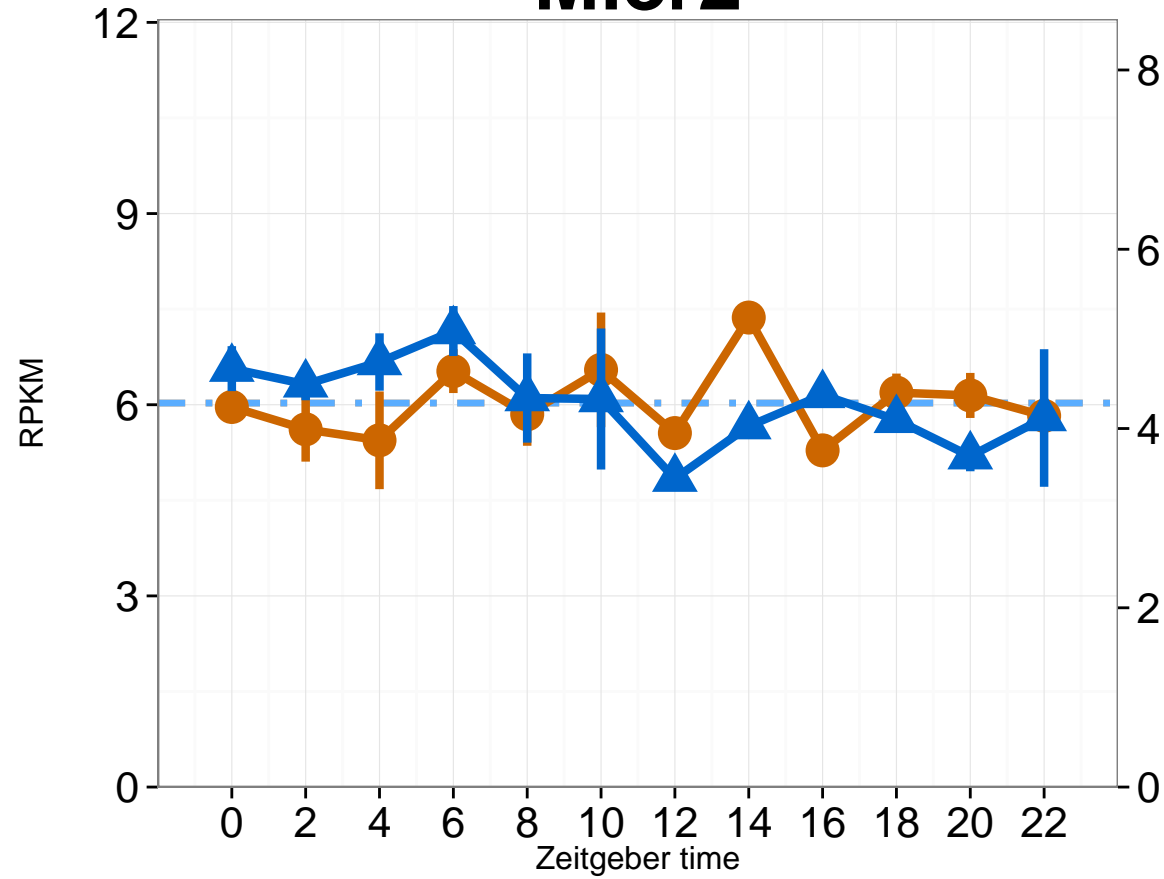

## Mier2

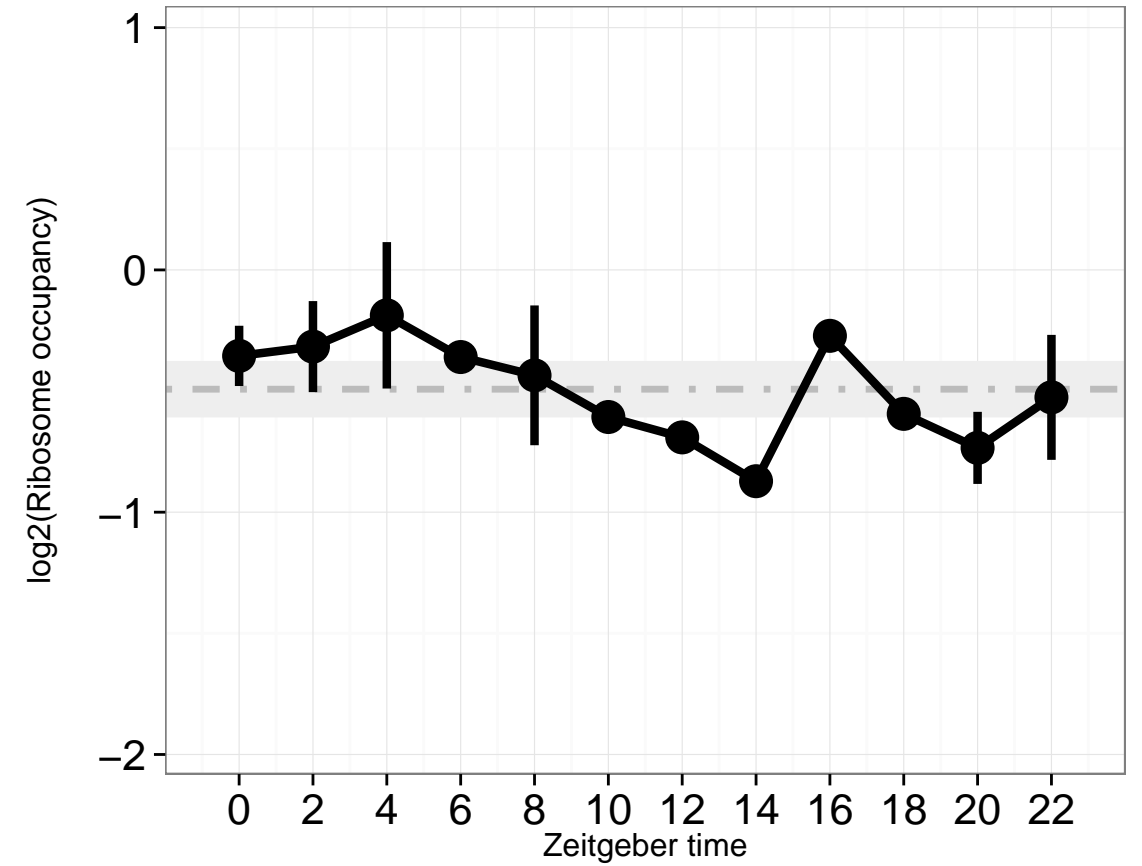

Supplement: Supplementary file 3337 [file 1]

## Zmat2

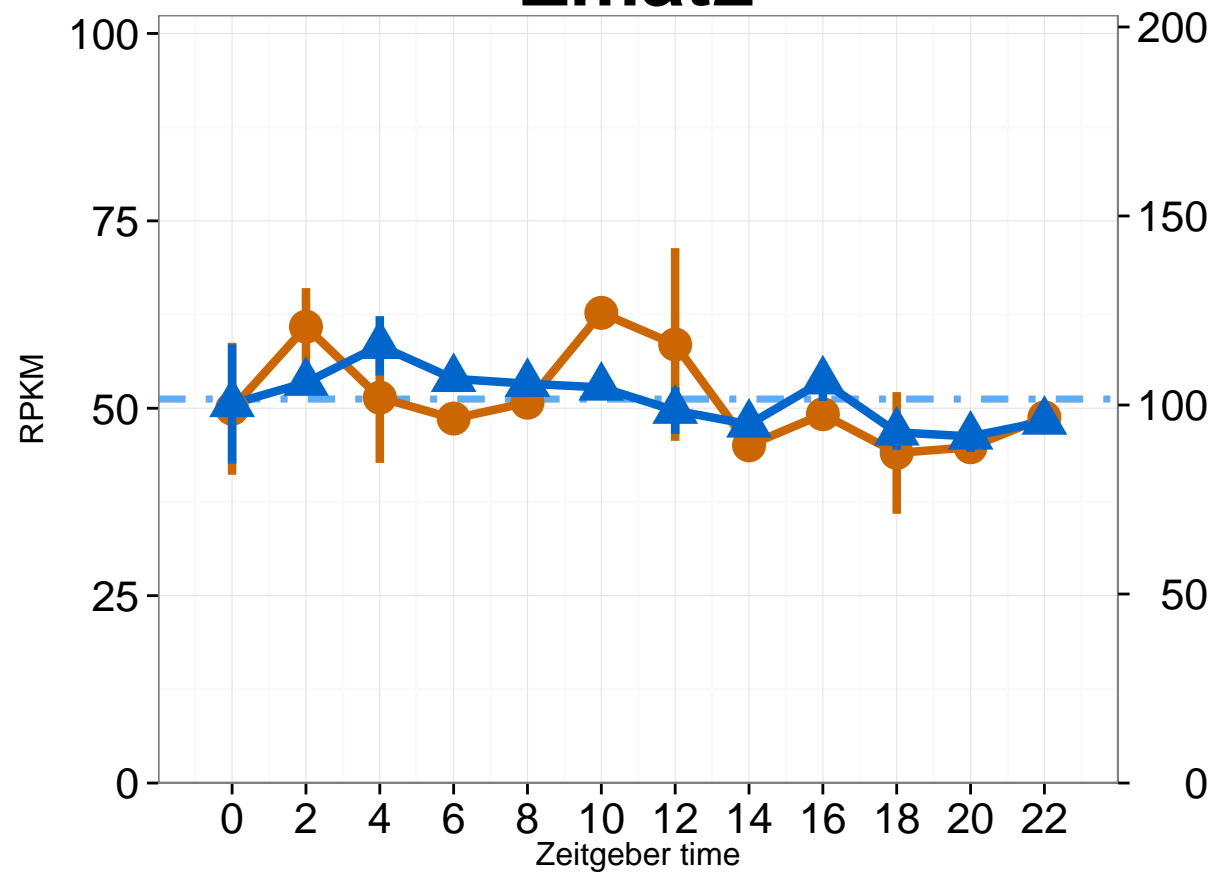

## Zmat2

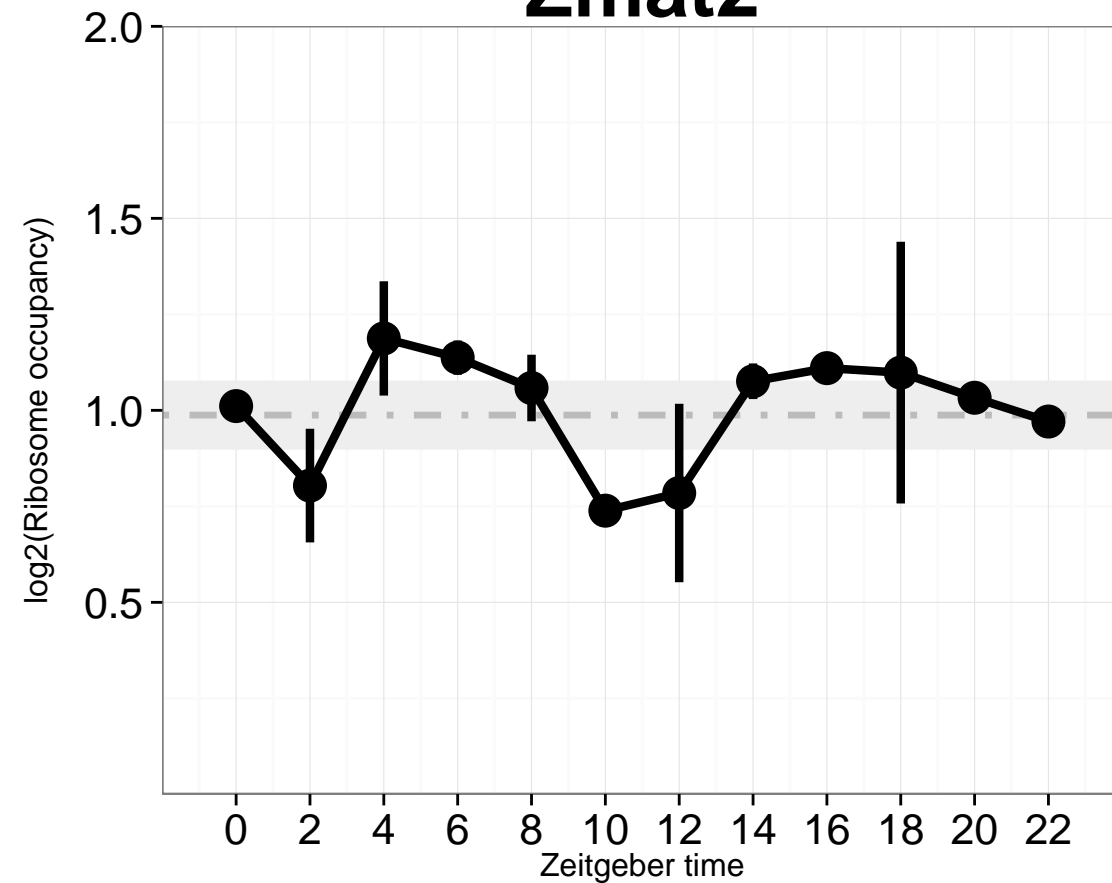

Supplement: Supplementary file 3338 [file 1]

# Tm9sf1

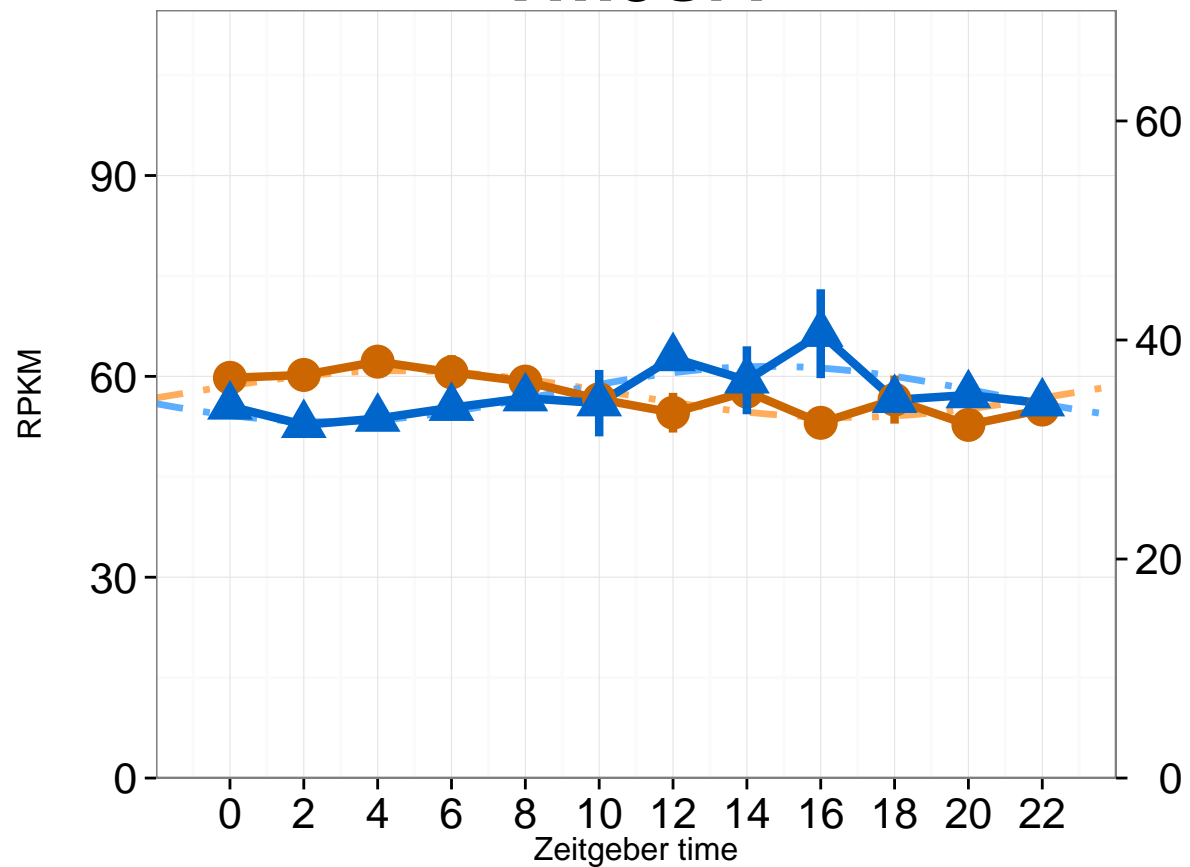

# Tm9sf1

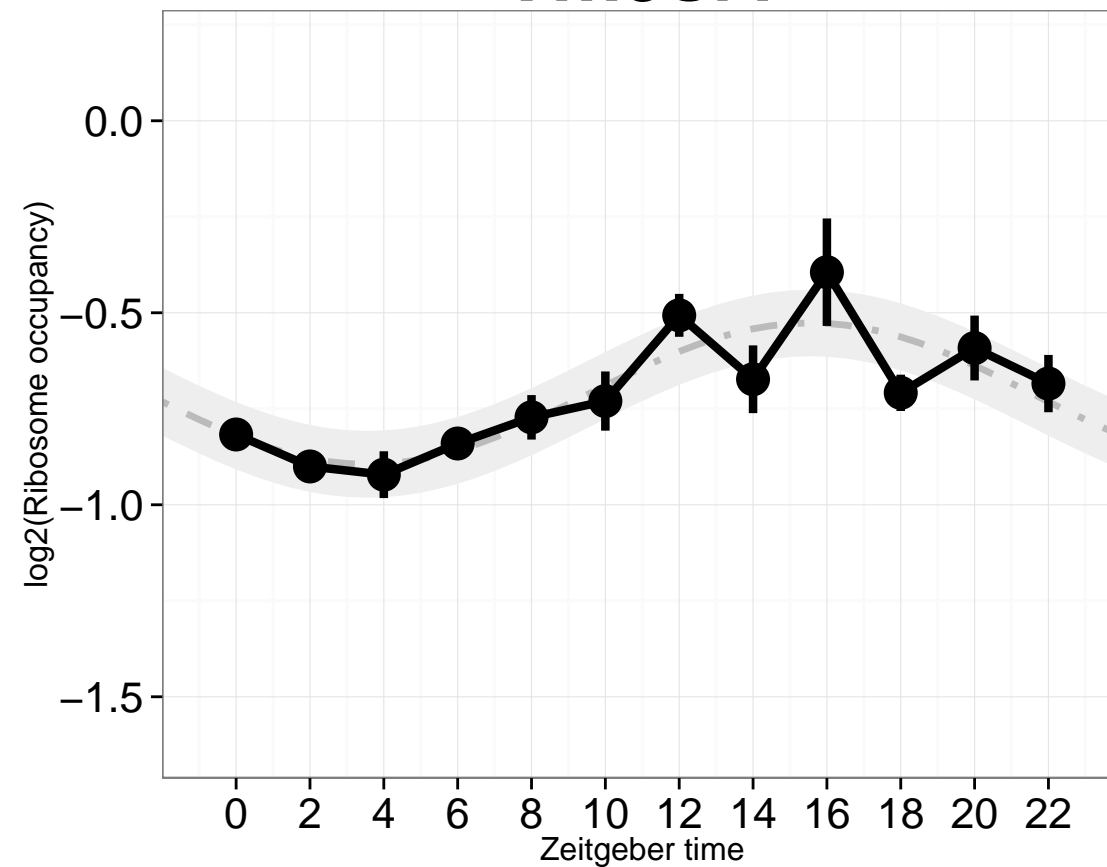

Supplement: Supplementary file 3339 [file 1]

## Ndufa4l2

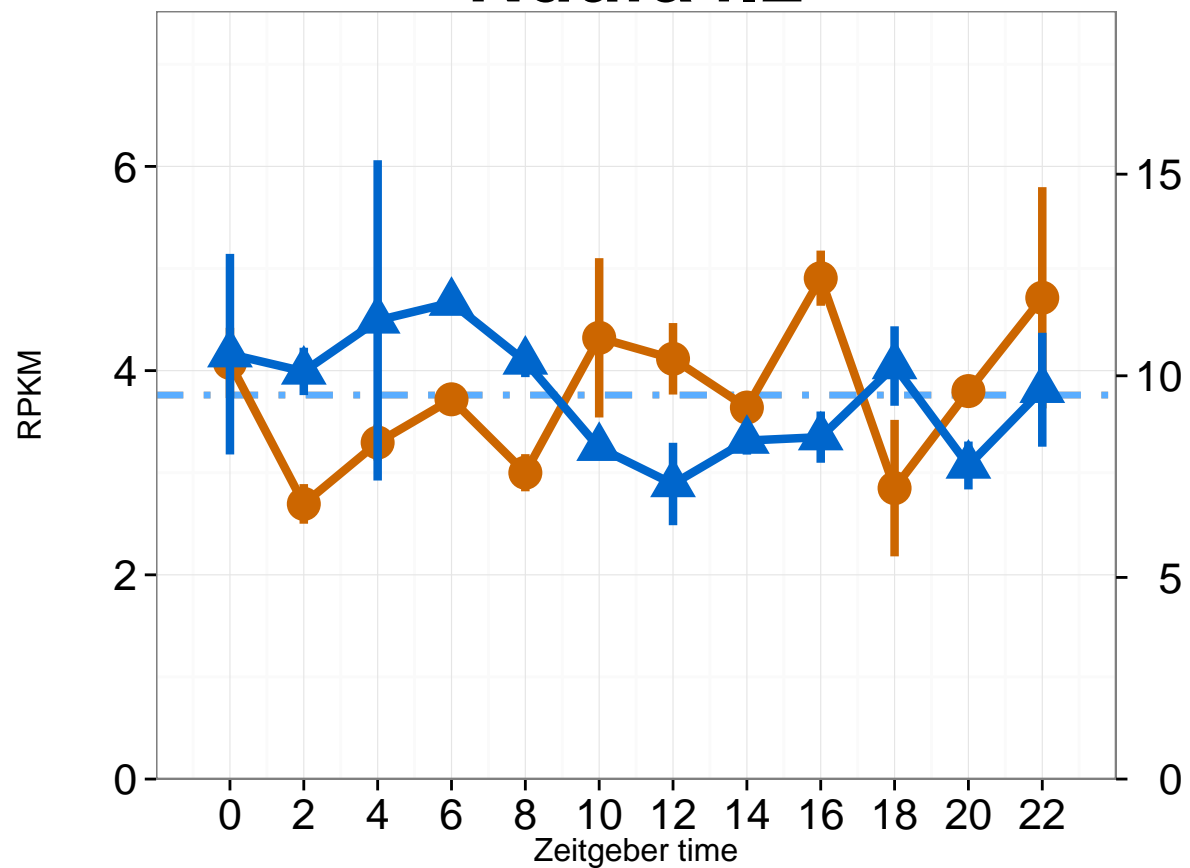

## Ndufa4l2

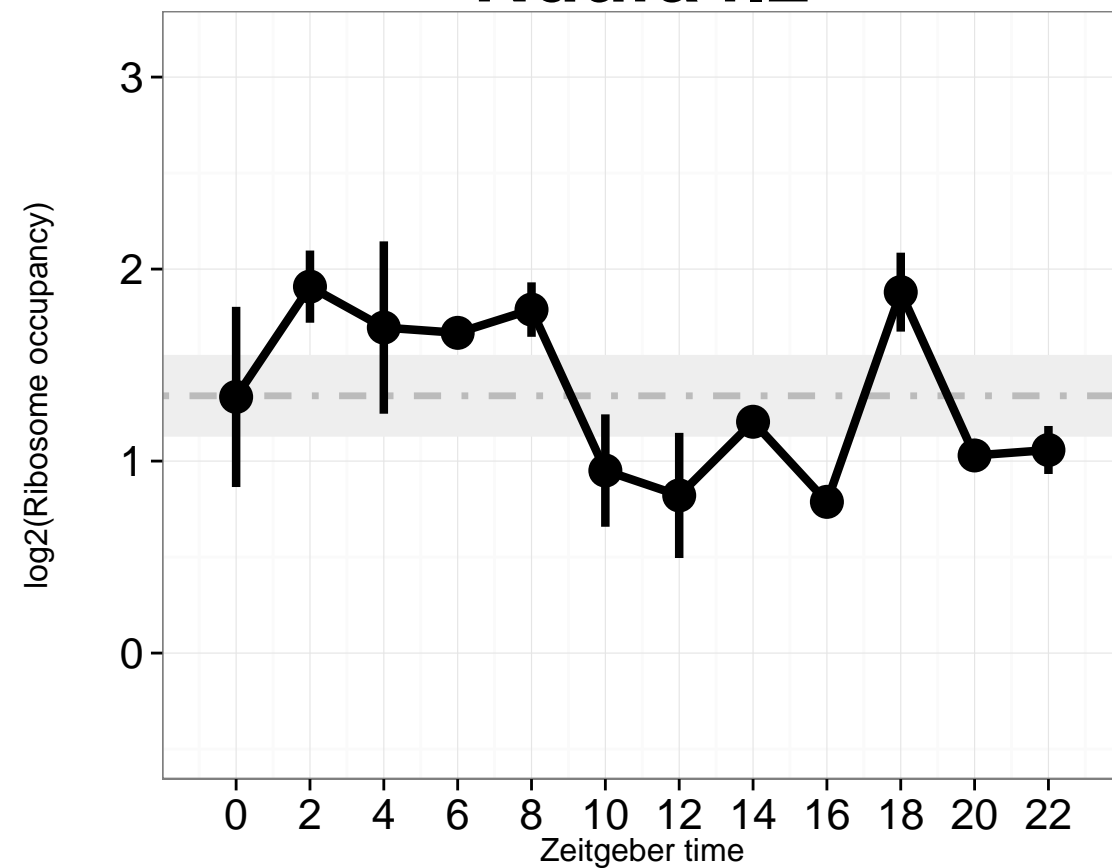

Supplement: Supplementary file 3340 [file 1]

## Irf3

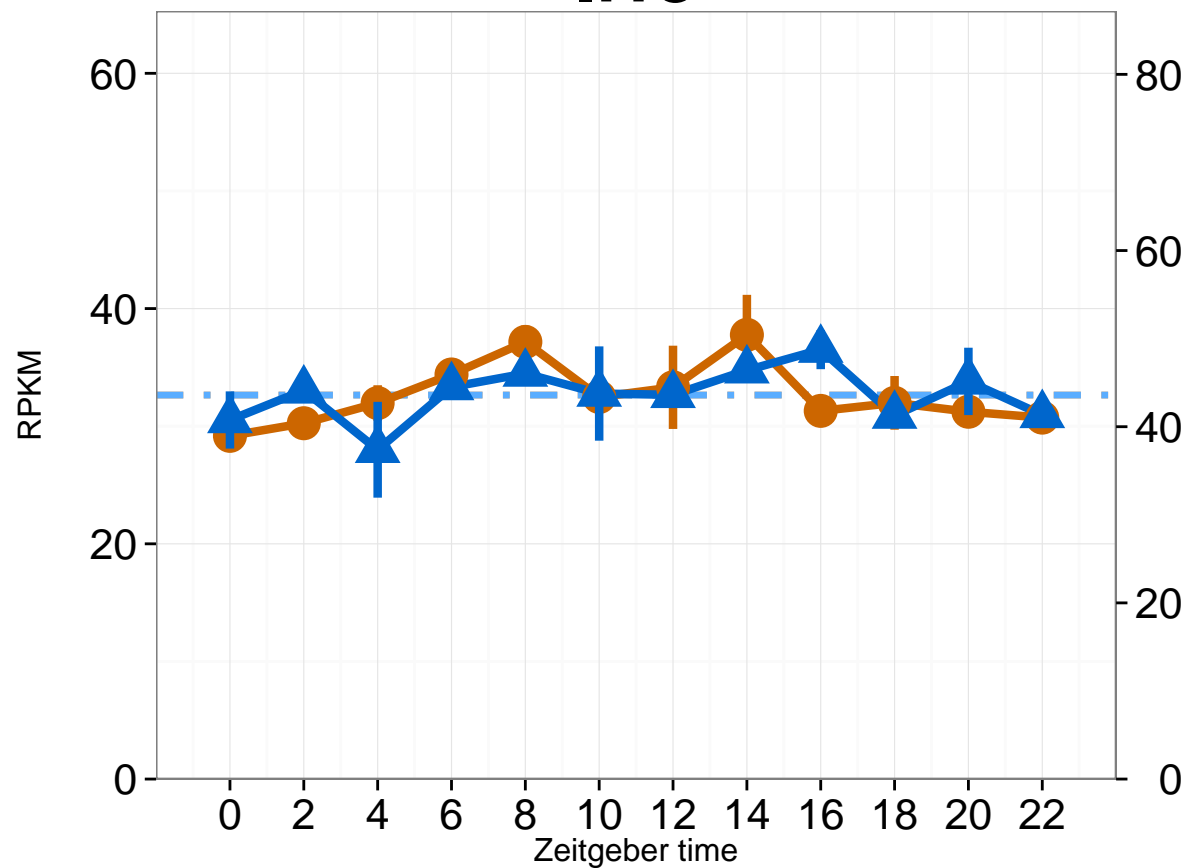

## Irf3

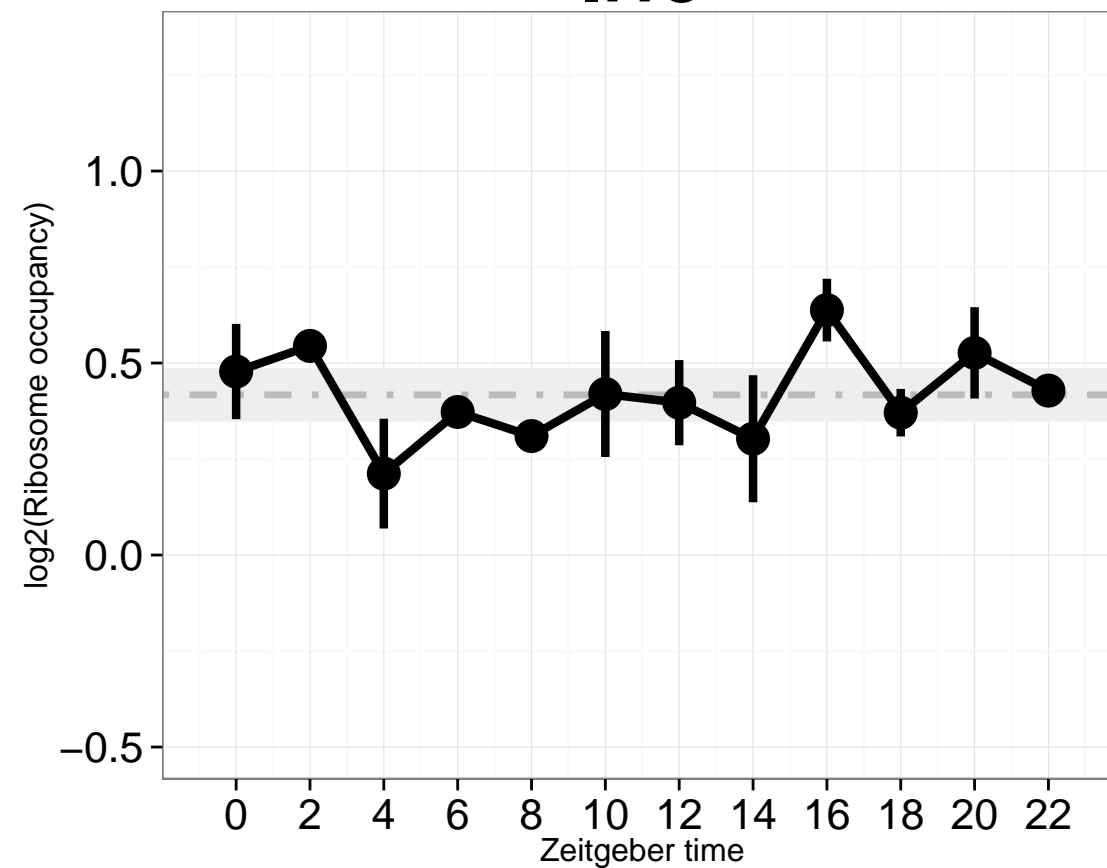

Supplement: Supplementary file 3341 [file 1]

## Grhl1

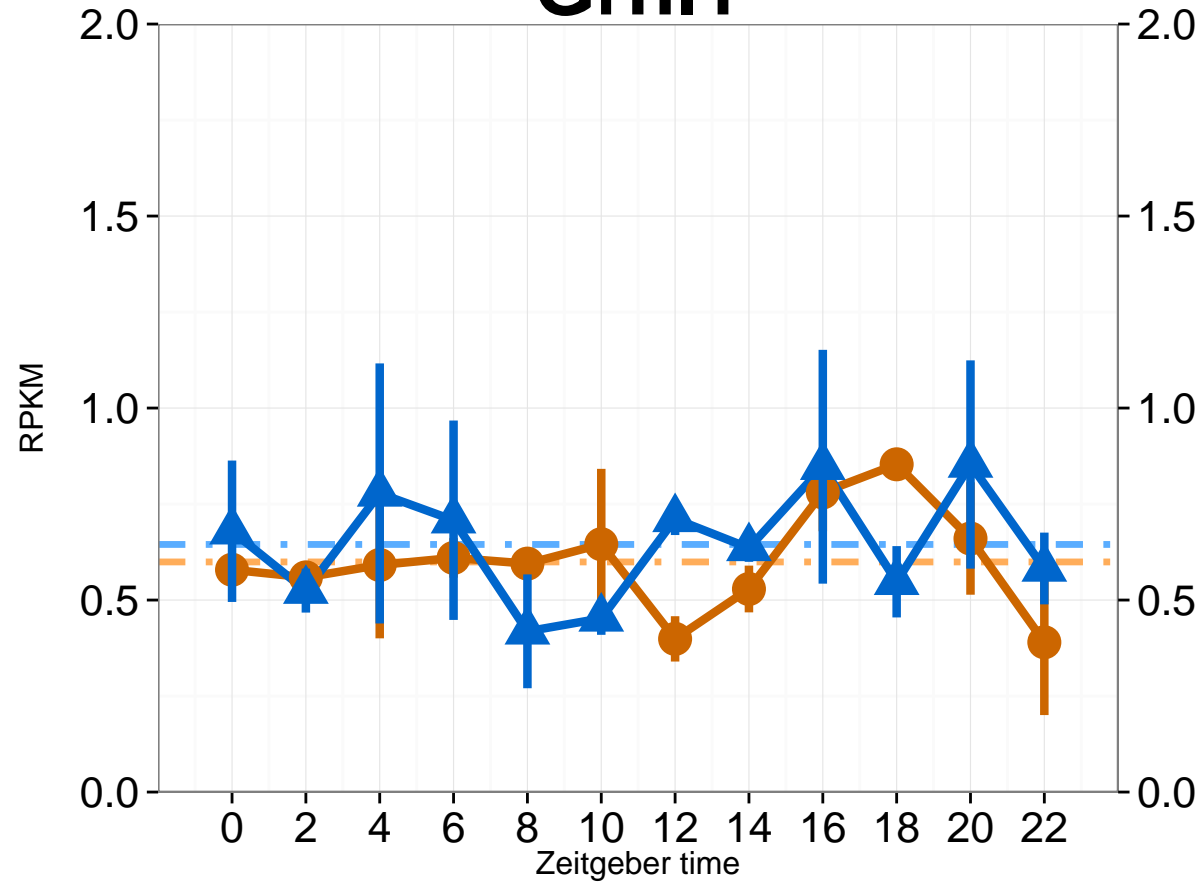

## Grhl1

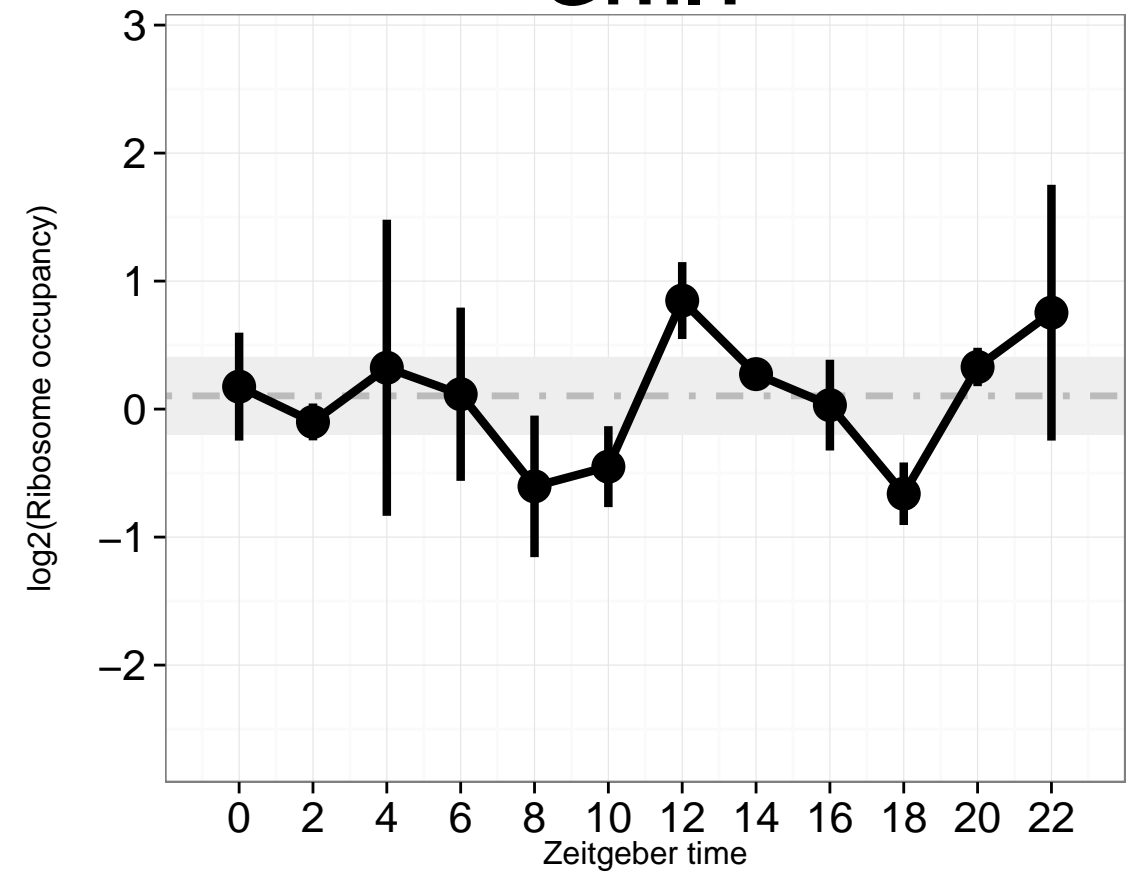

Supplement: Supplementary file 3342 [file 1]

# Cyb561d1

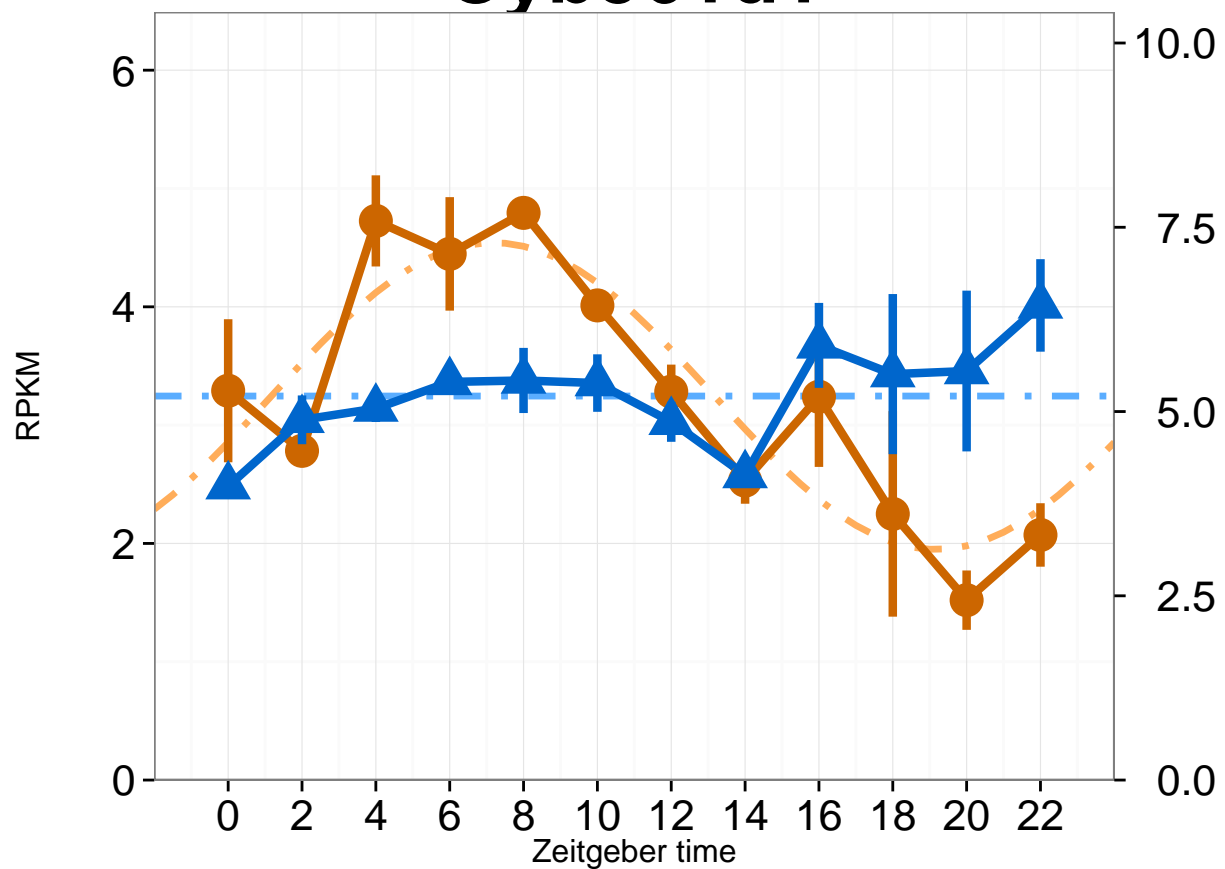

# Cyb561d1

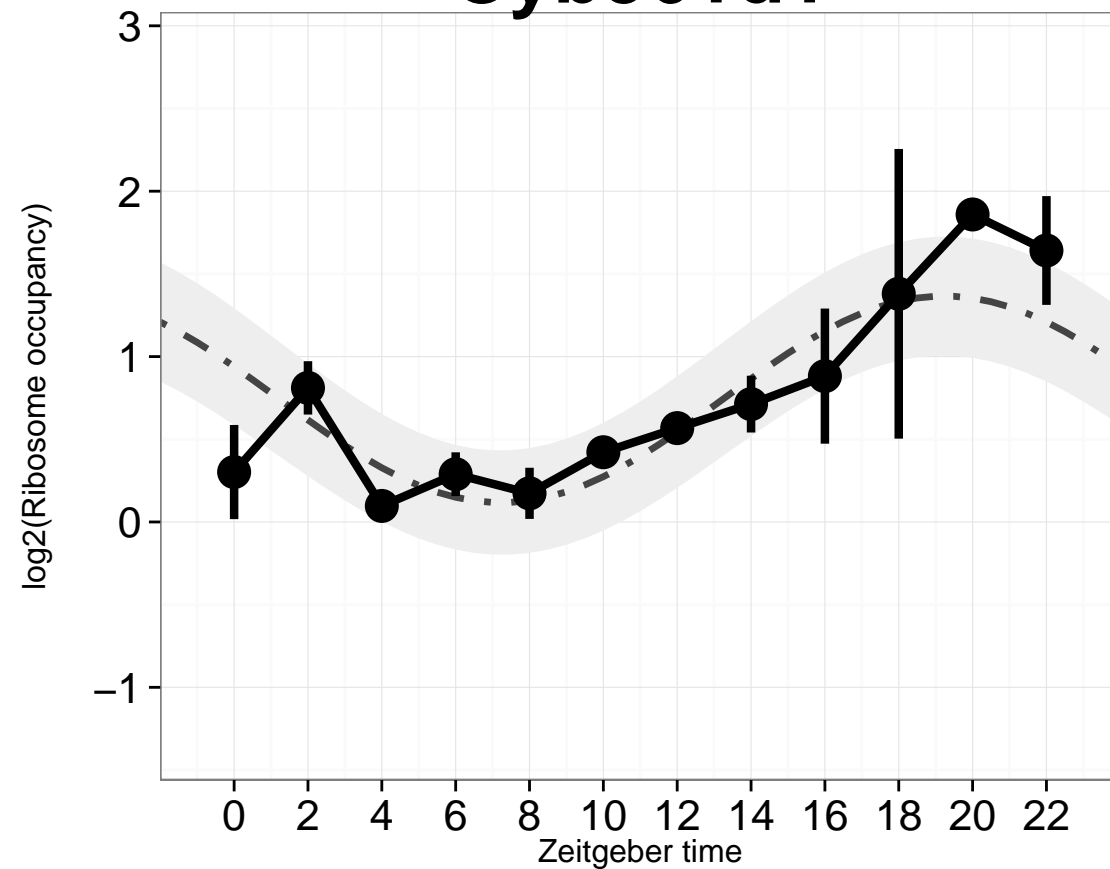

Supplement: Supplementary file 3343 [file 1]

## Erap1

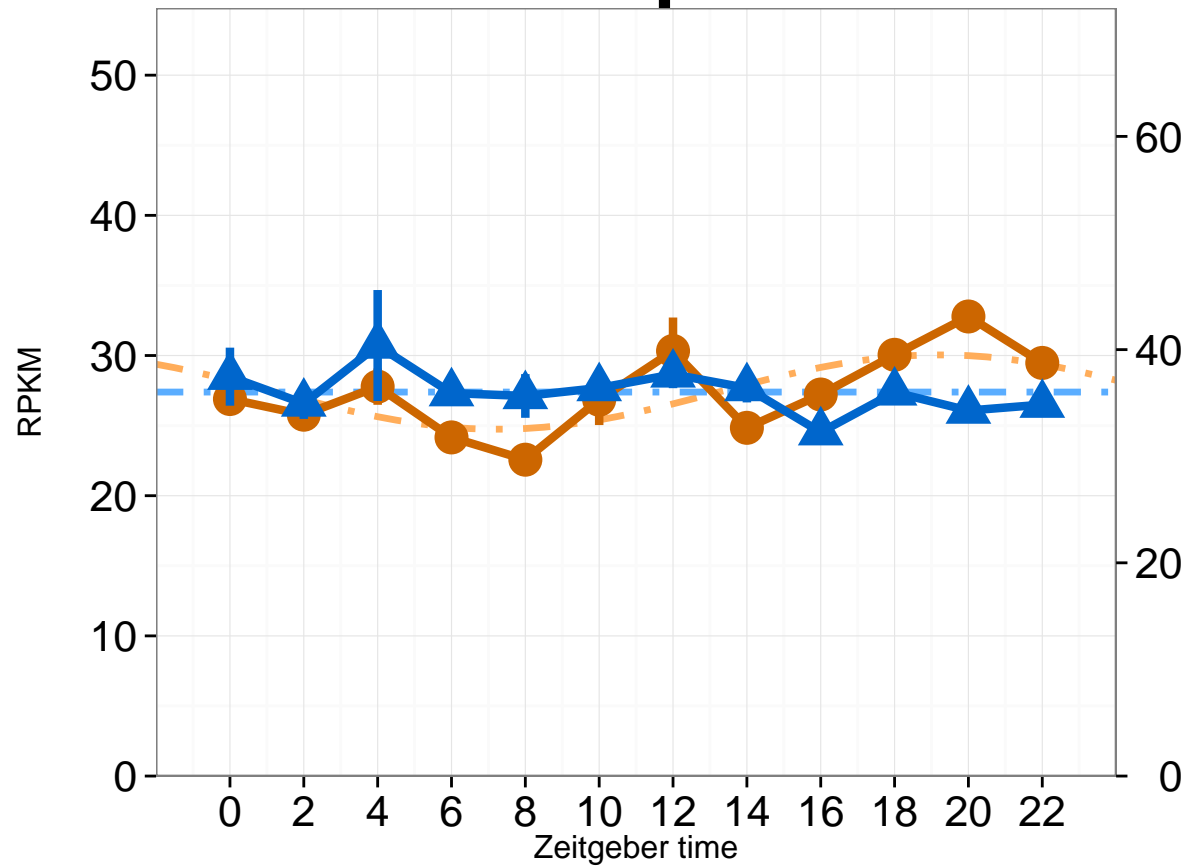

## Erap1

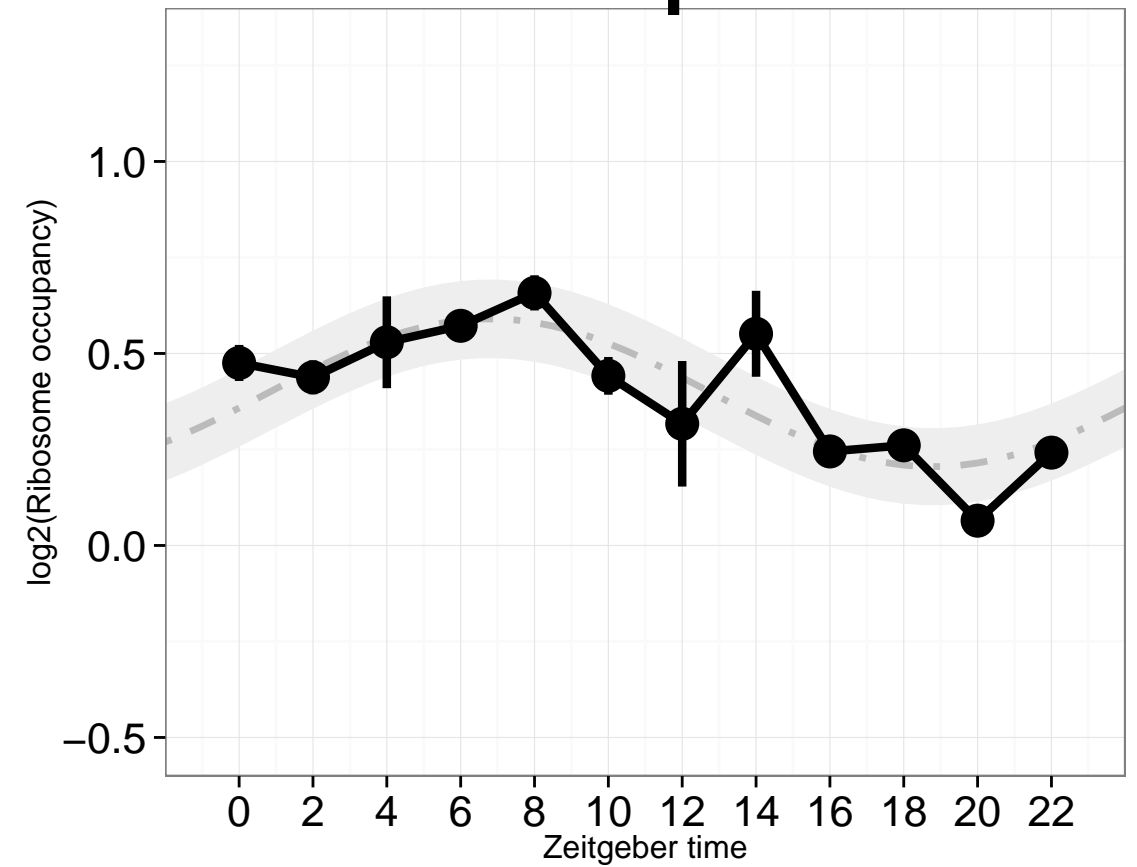

Supplement: Supplementary file 3344 [file 1]

## Mks1

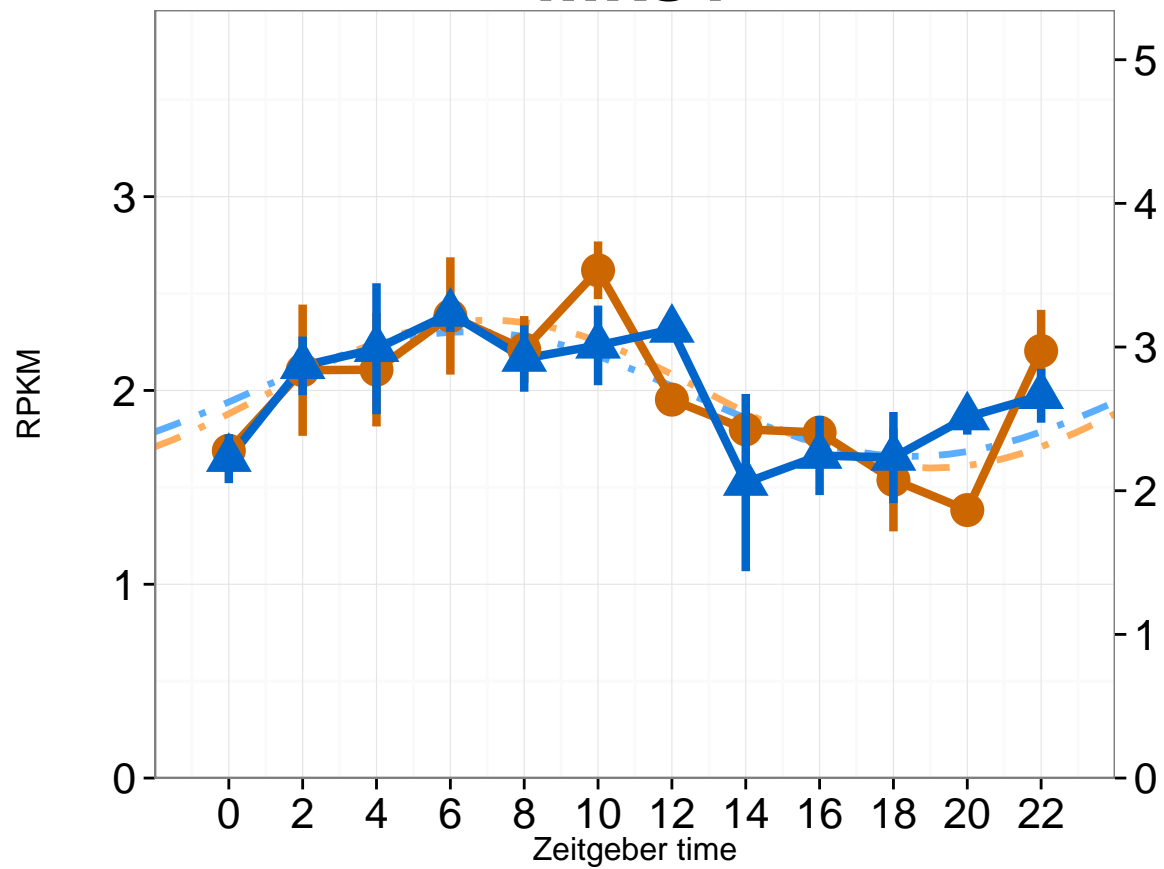

## Mks1

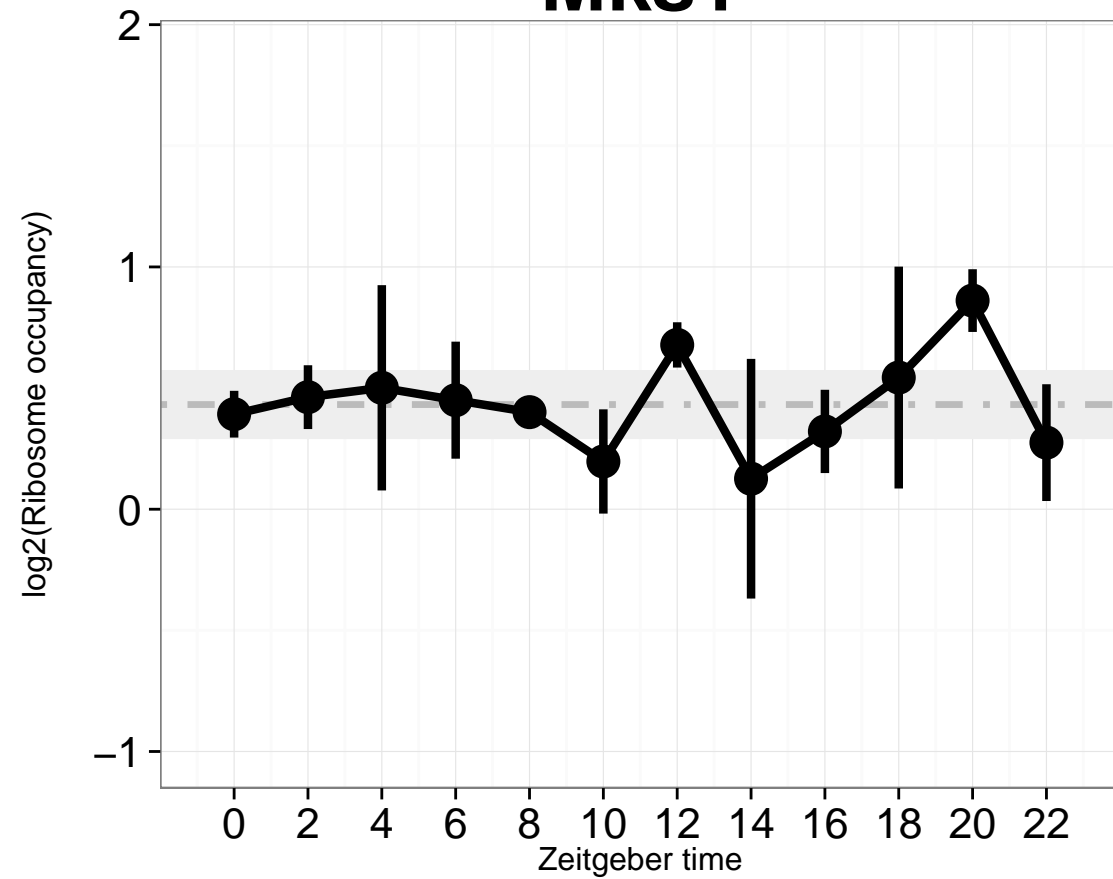

Supplement: Supplementary file 3345 [file 1]

# Zbtb4

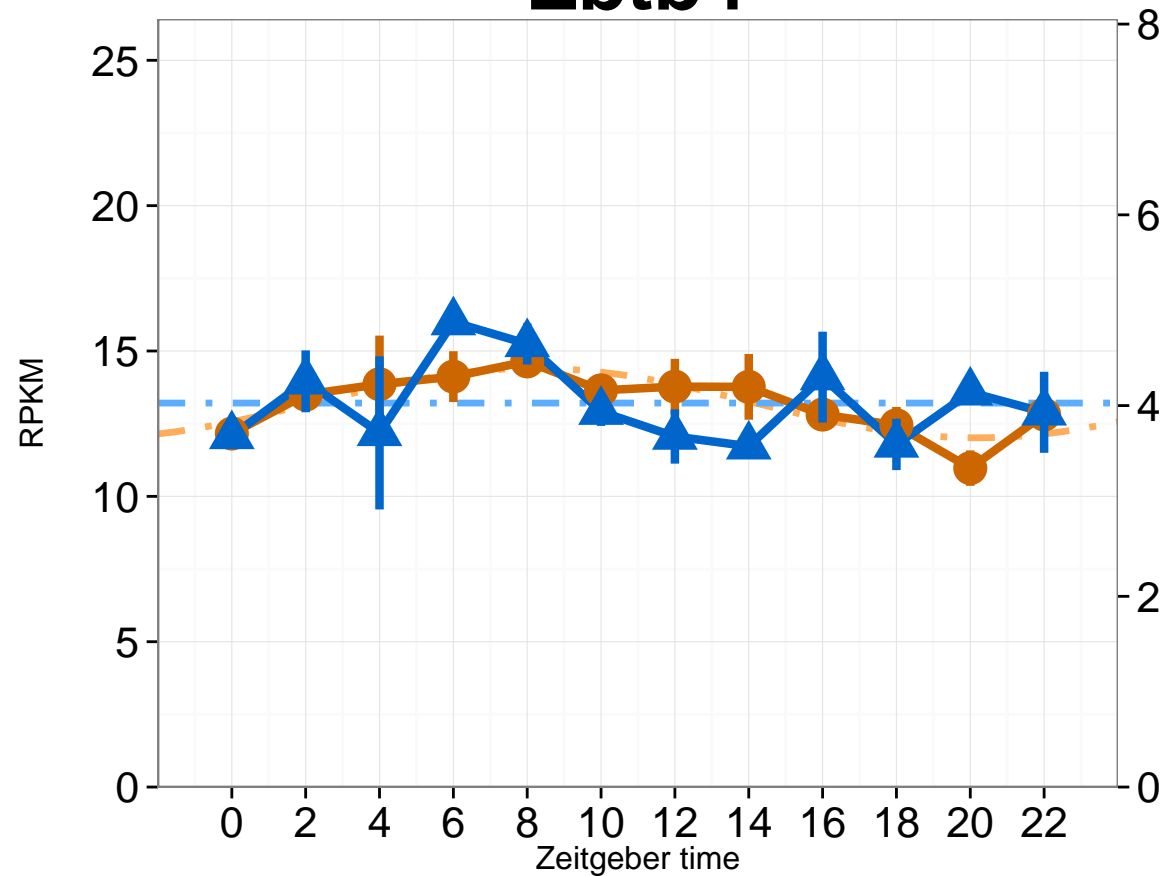

# Zbtb4

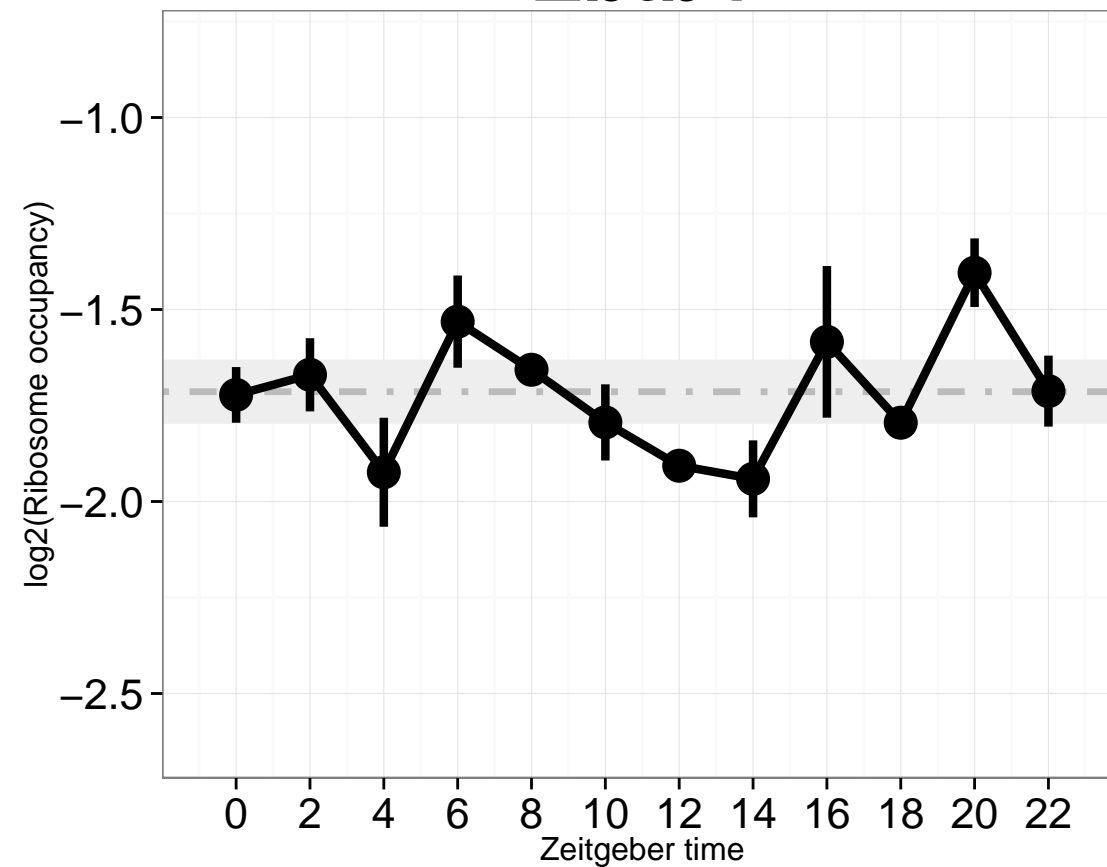

Supplement: Supplementary file 3346 [file 1]

## Adar

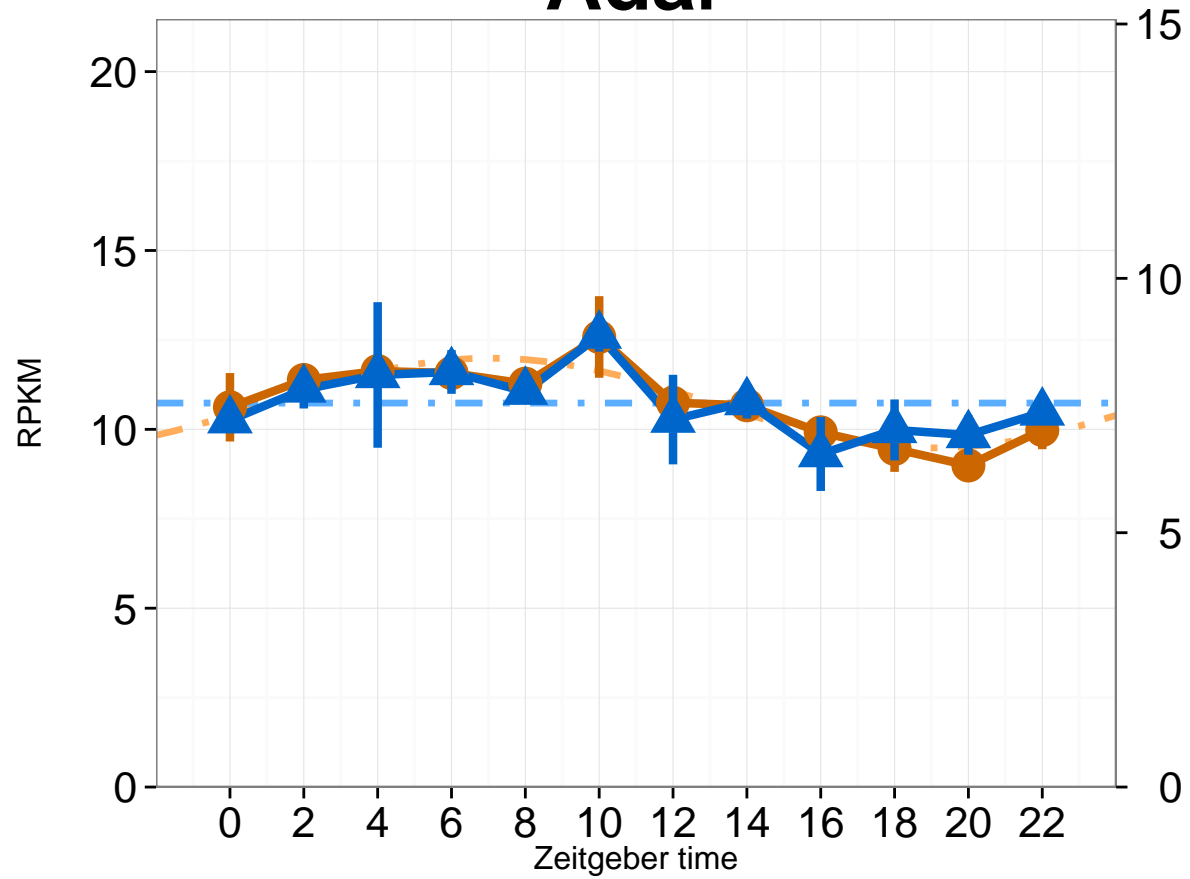

## Adar

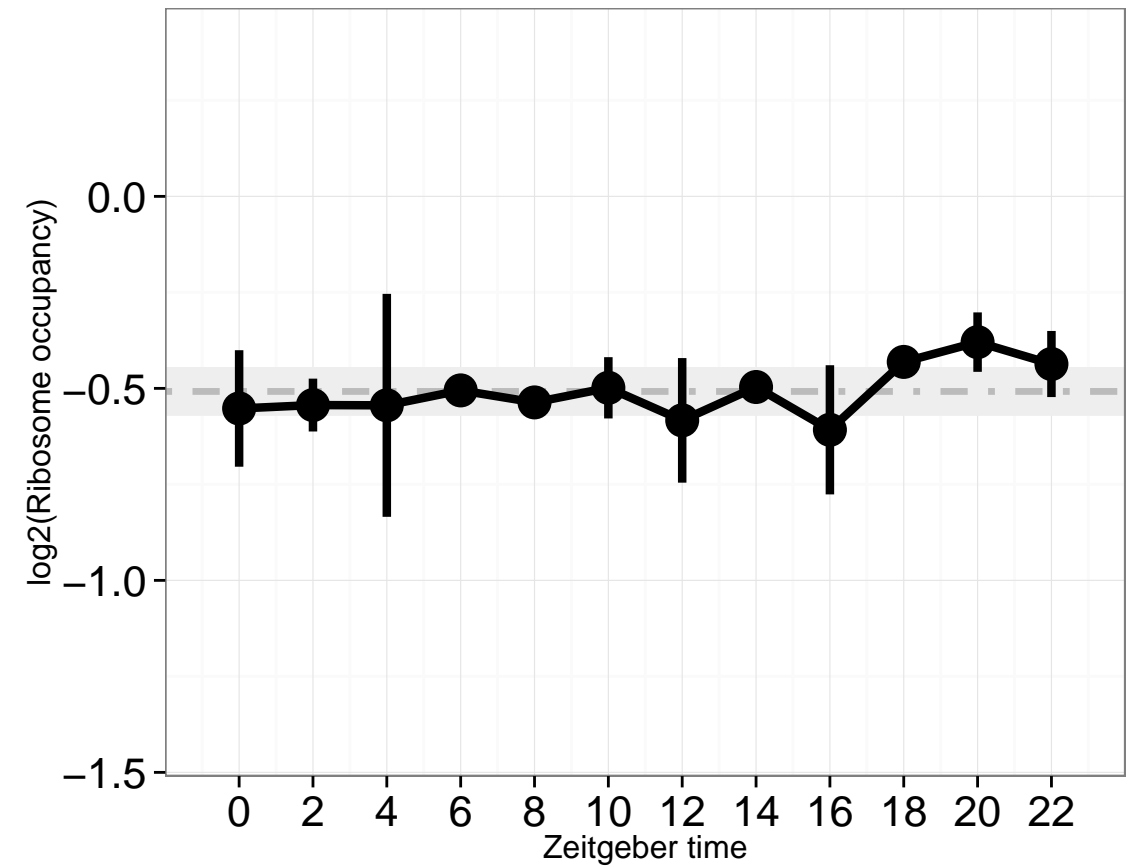

Supplement: Supplementary file 3347 [file 1]

# Setd4

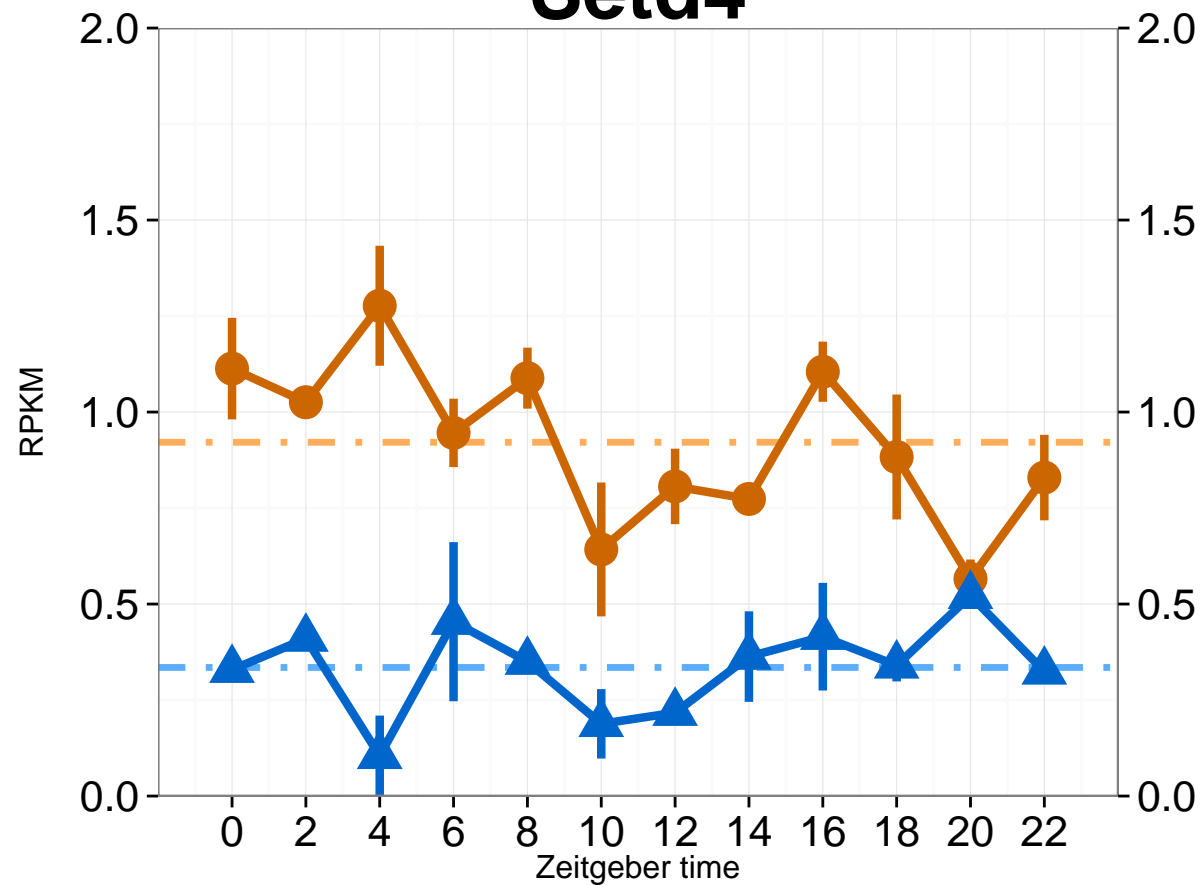

# Setd4

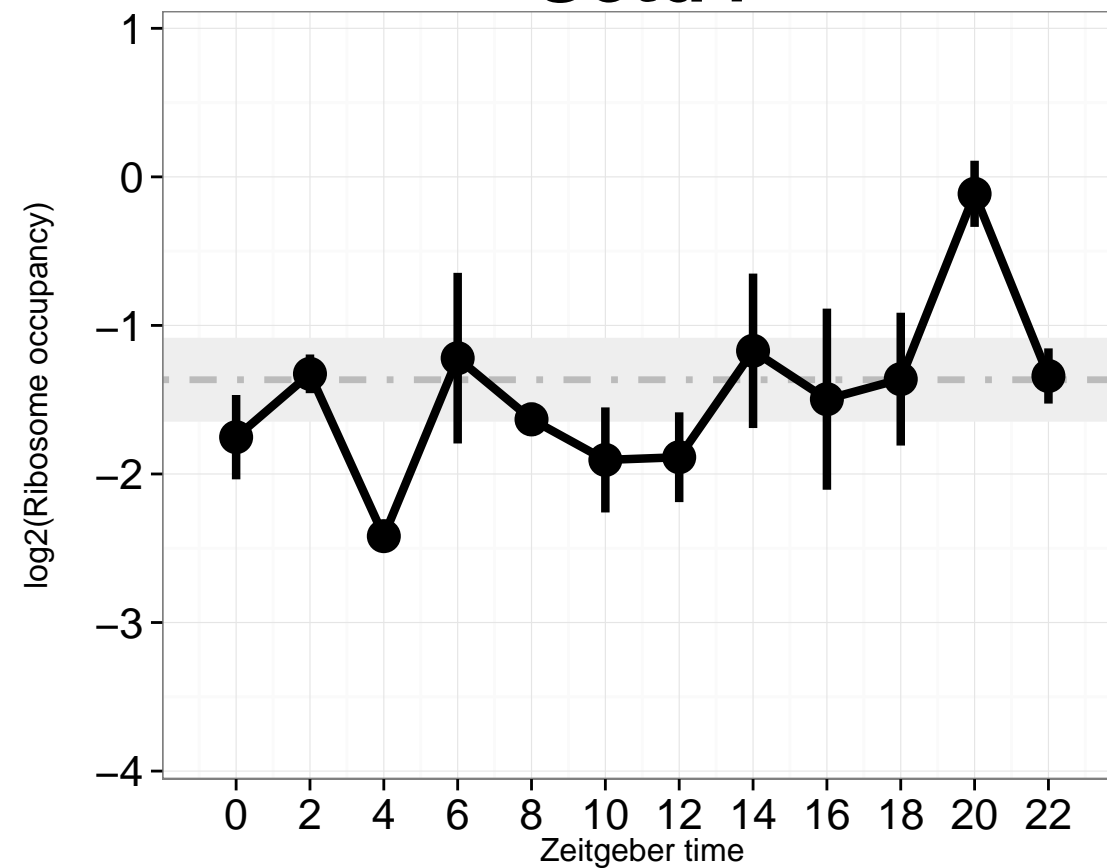

Supplement: Supplementary file 3348 [file 1]

# Tbc1d1

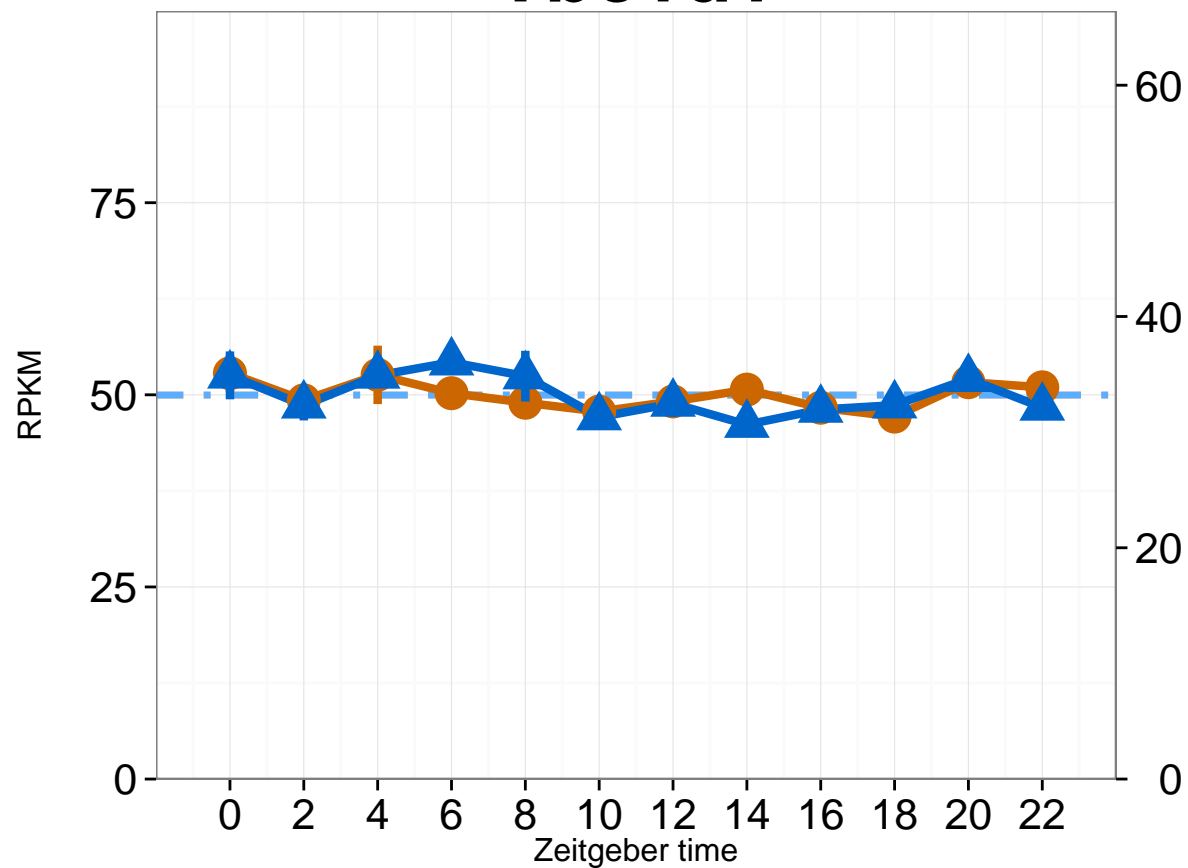

# Tbc1d1

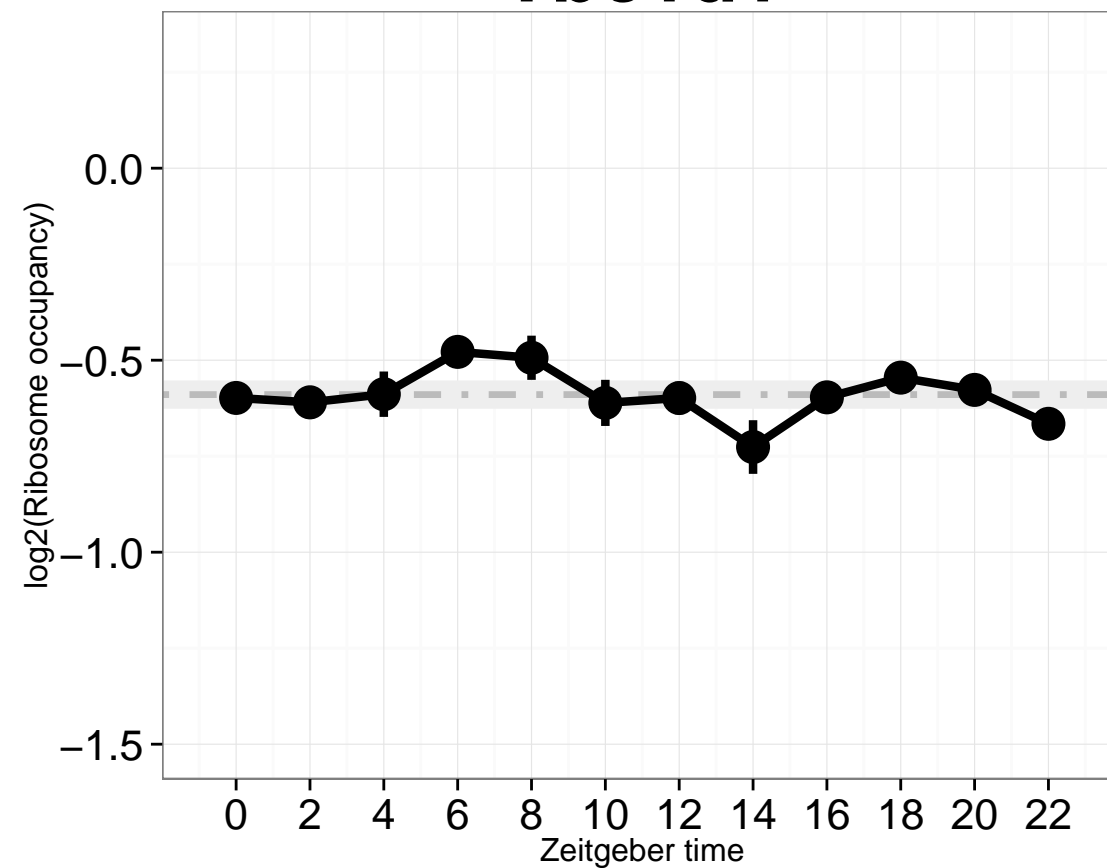

Supplement: Supplementary file 3349 [file 1]

## Rapgef1

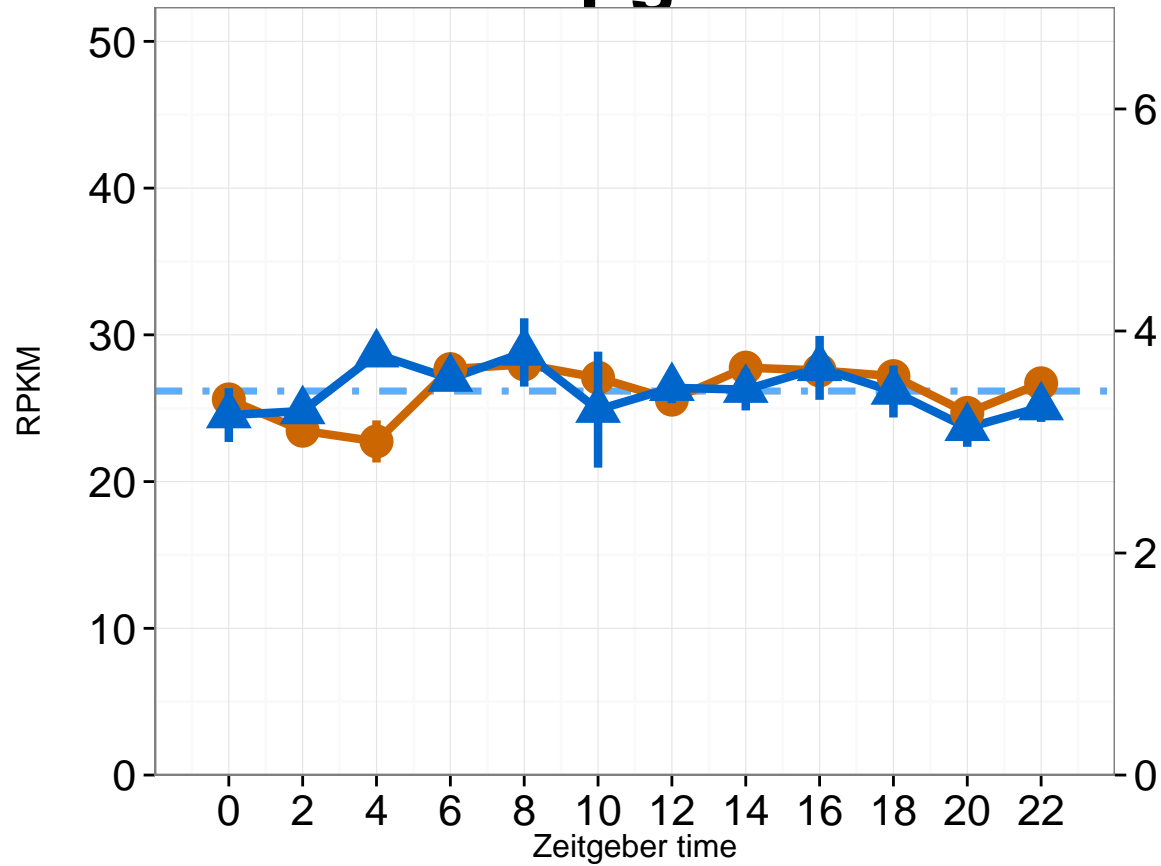

## Rapgef1

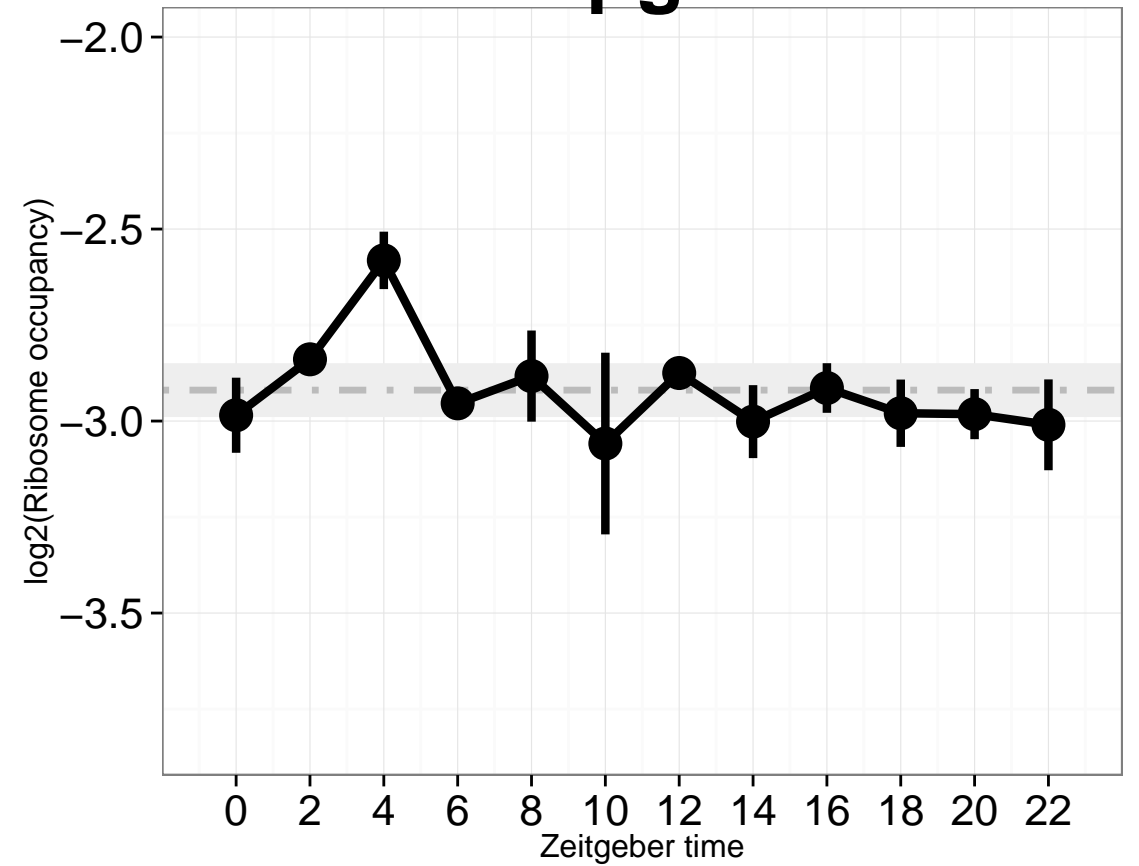

Supplement: Supplementary file 3350 [file 1]

## Palm3

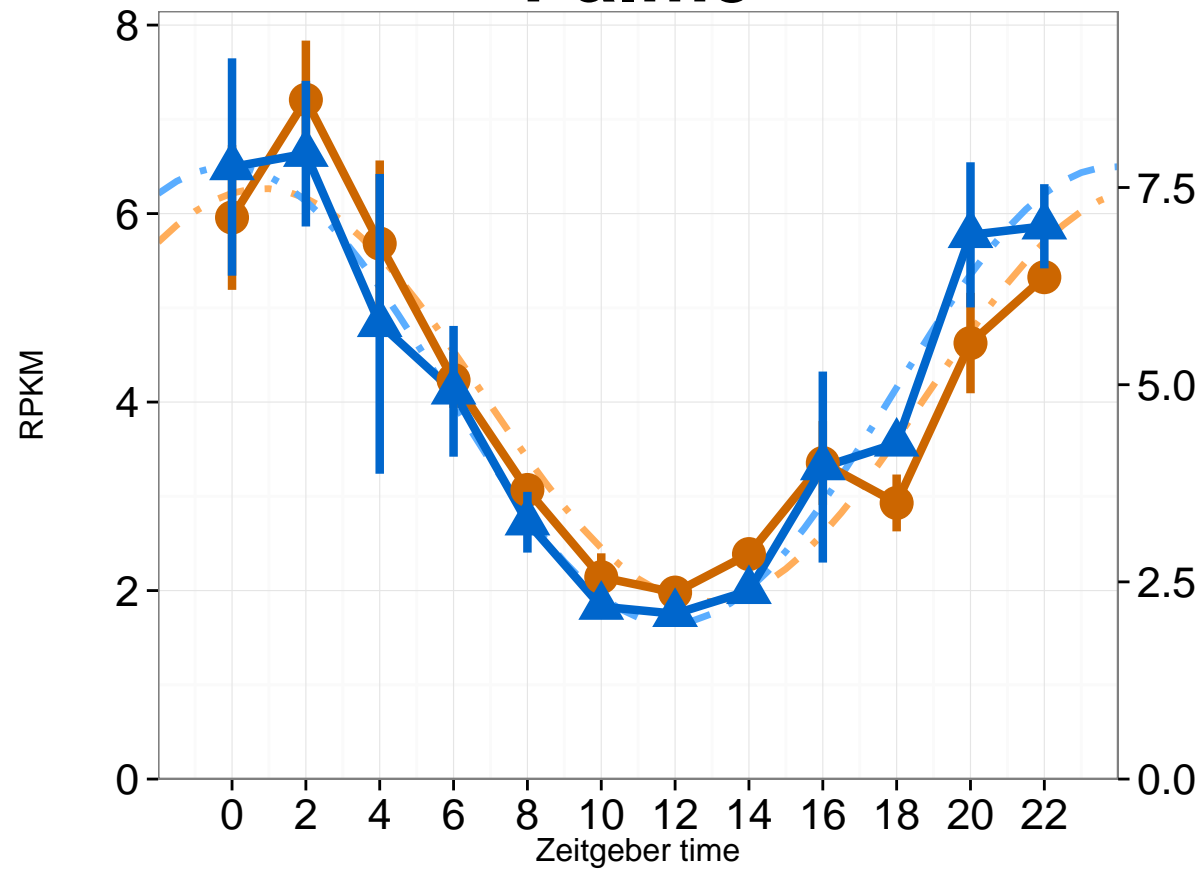

## Palm3

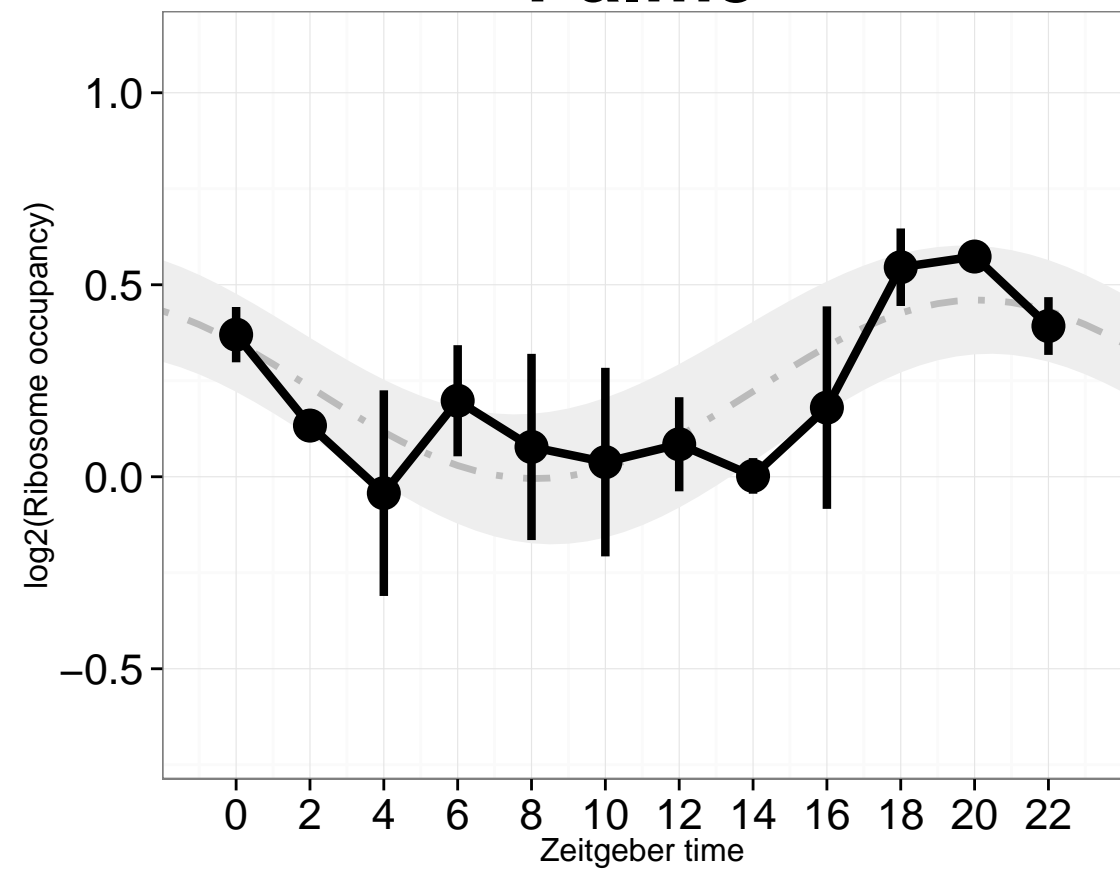

Supplement: Supplementary file 3351 [file 1]

# Efna4

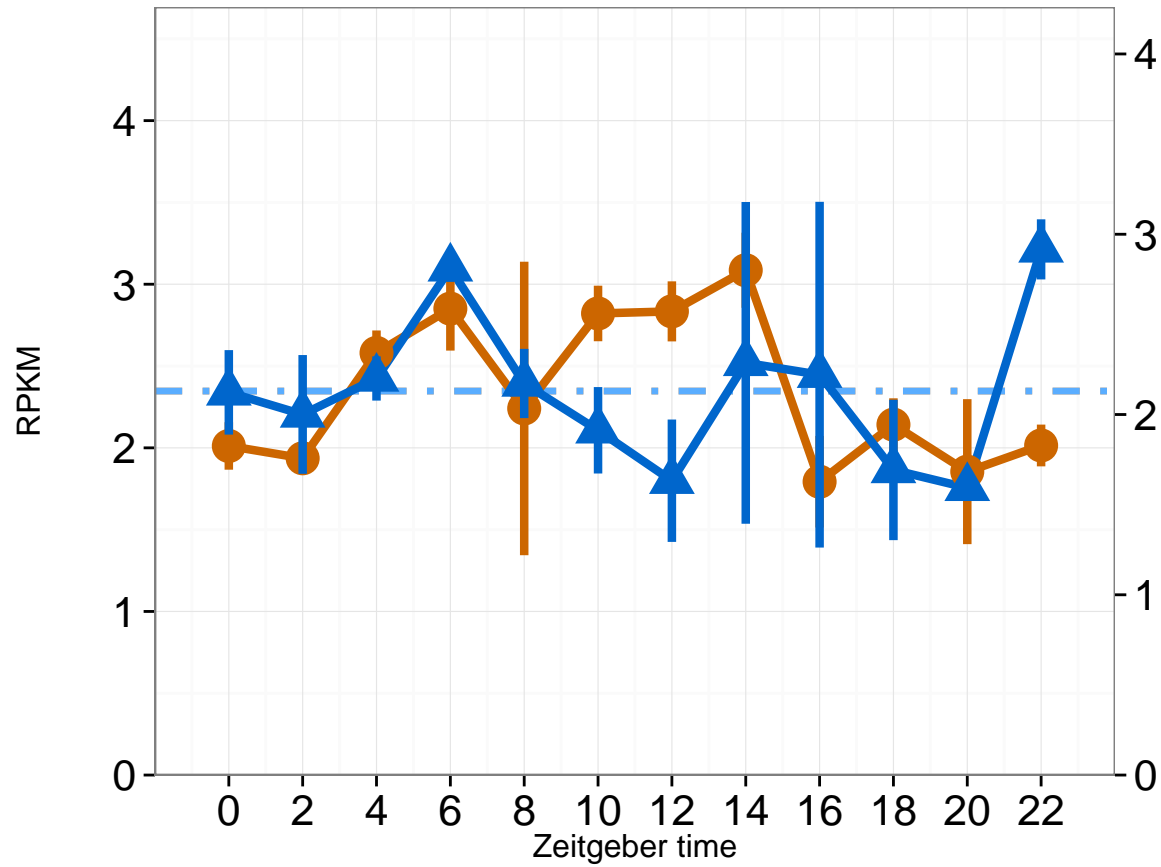

# Efna4

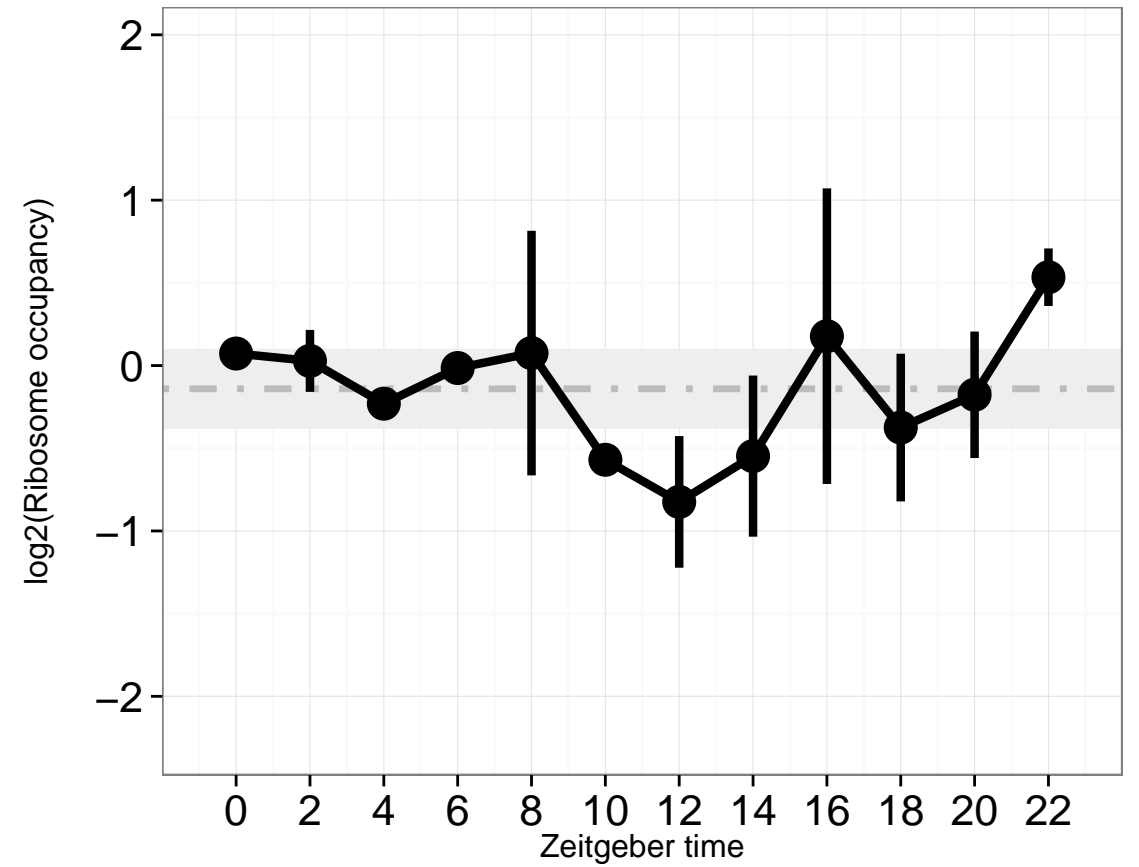

Supplement: Supplementary file 3352 [file 1]

## Wsb2

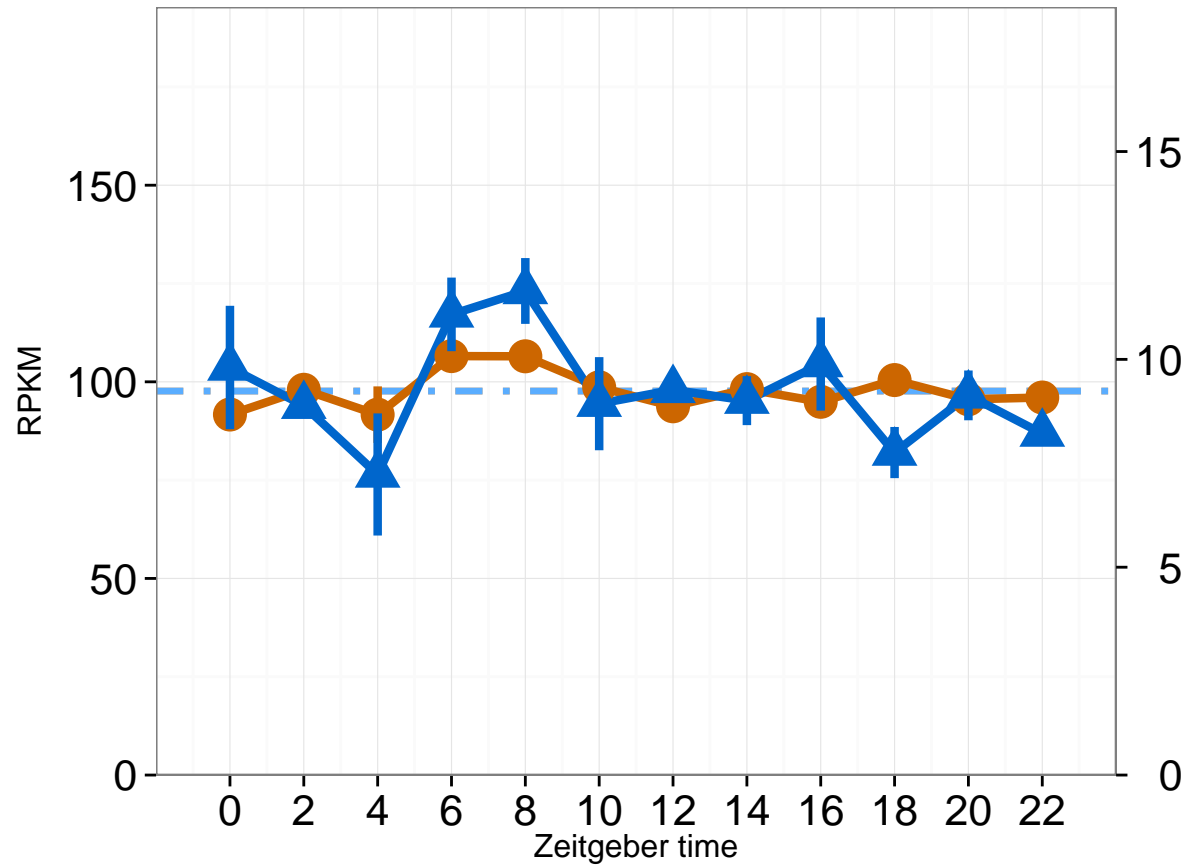

## Wsb2

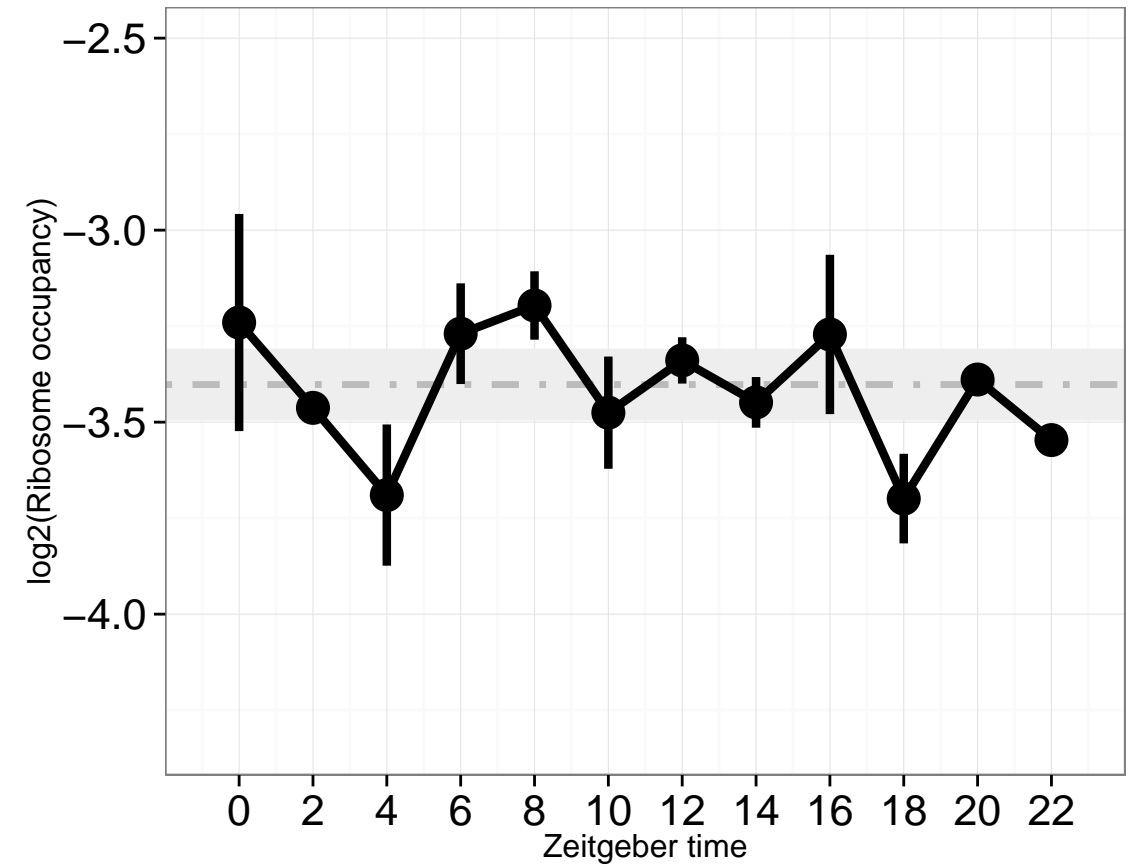

Supplement: Supplementary file 3353 [file 1]

## Rorc

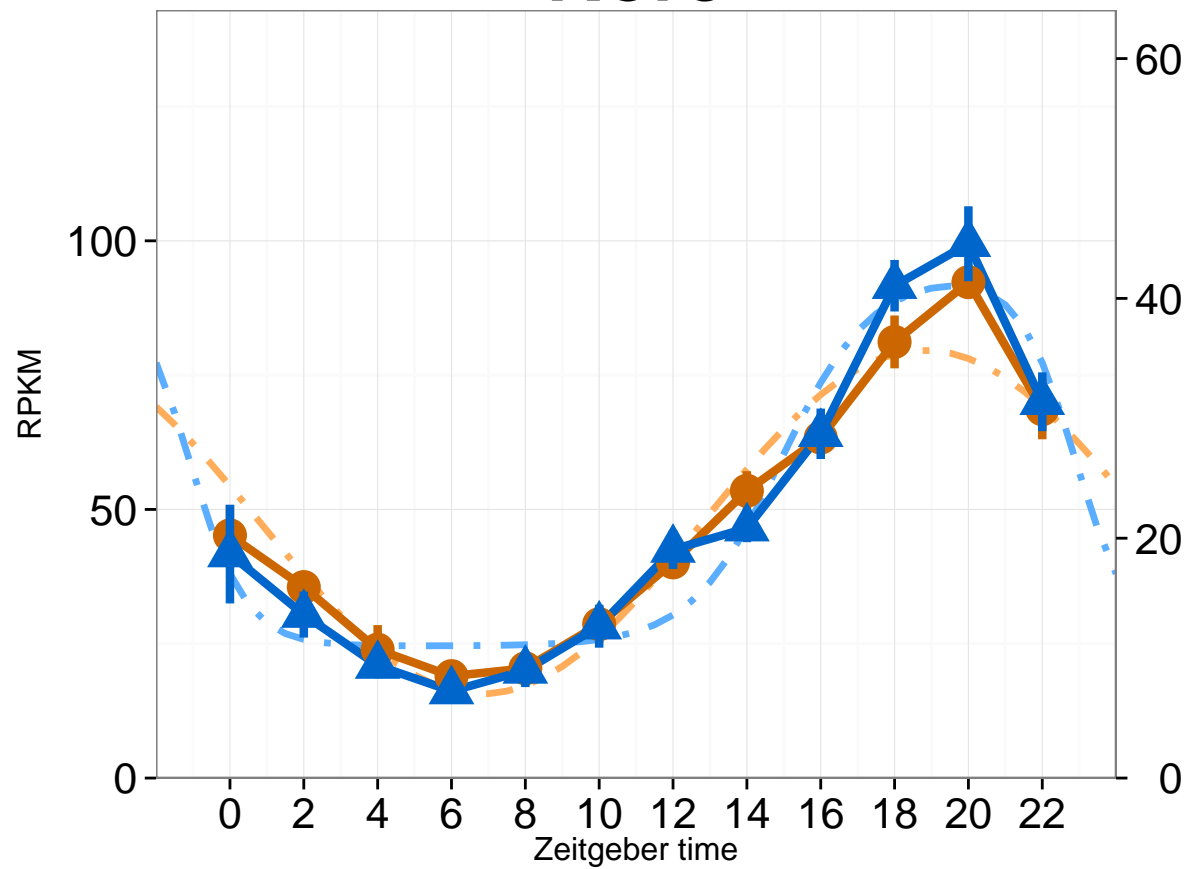

## Rorc

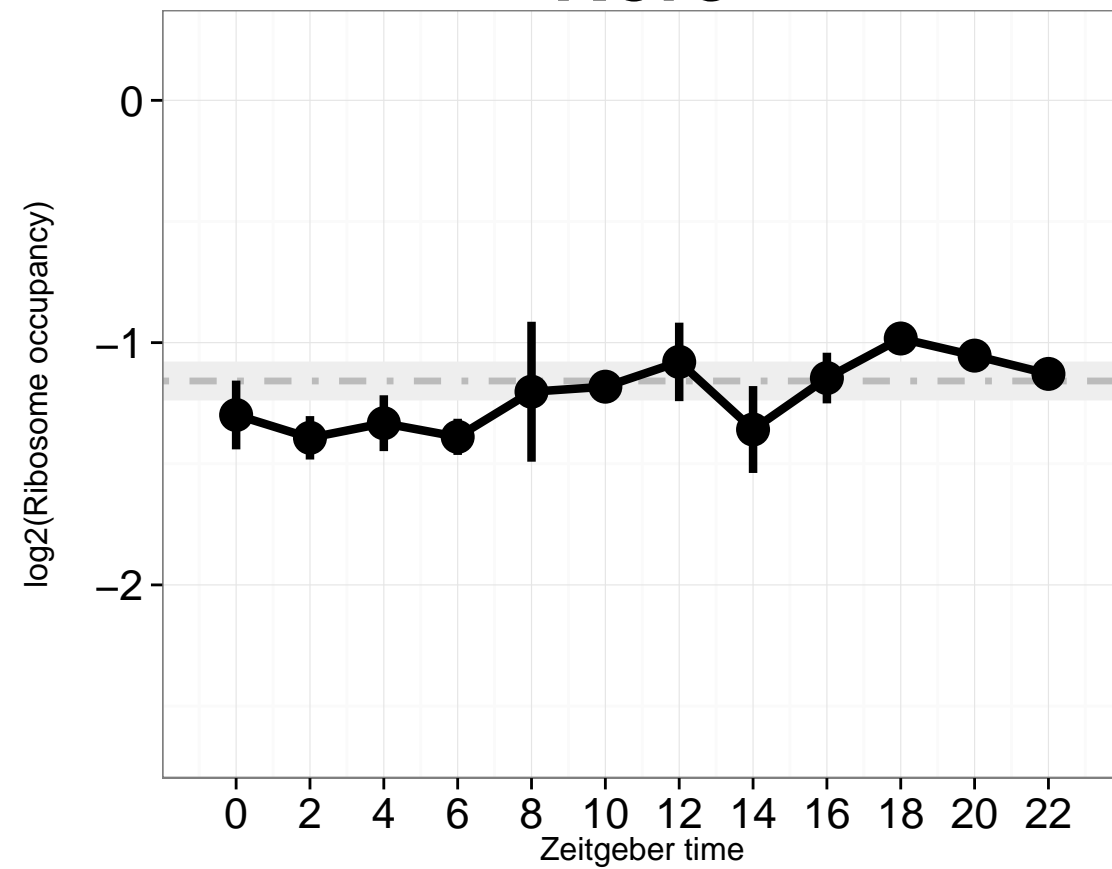

Supplement: Supplementary file 3354 [file 1]

# Zfp467

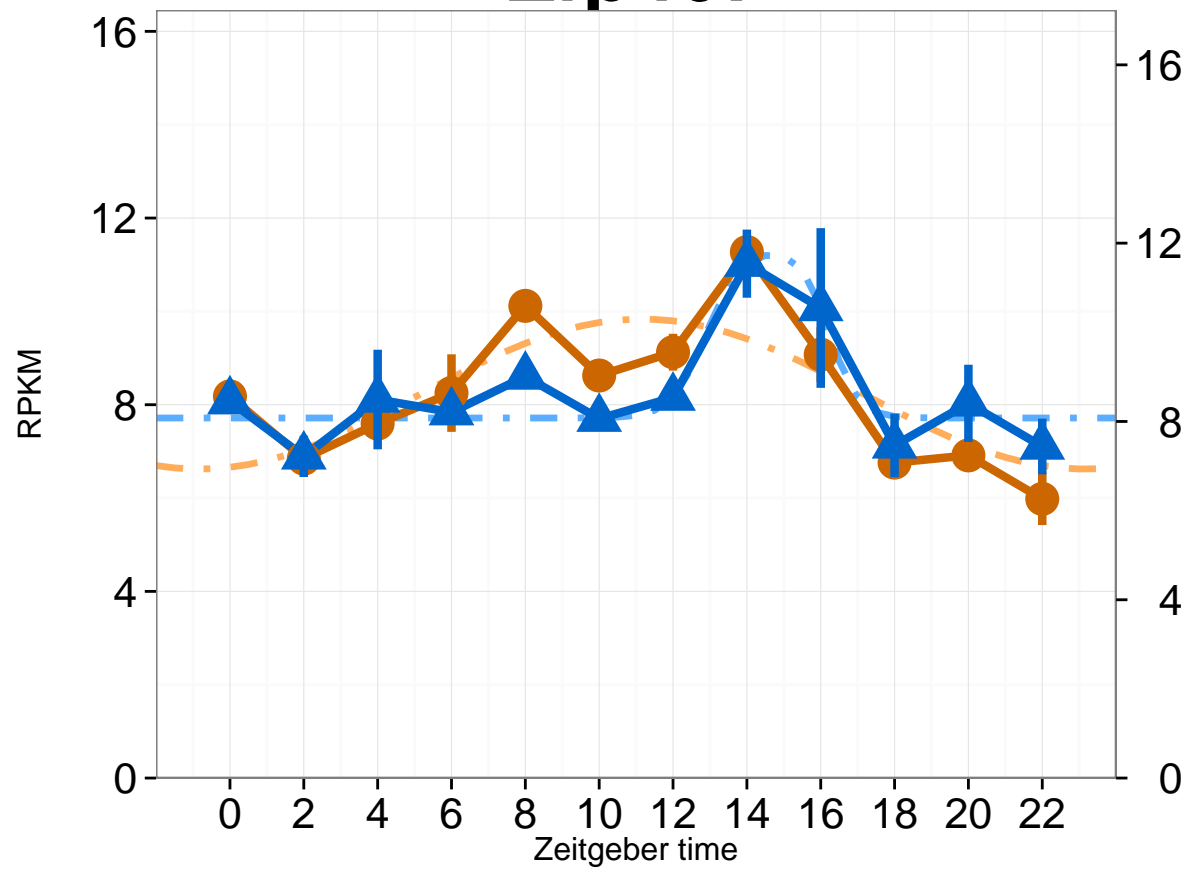

# Zfp467

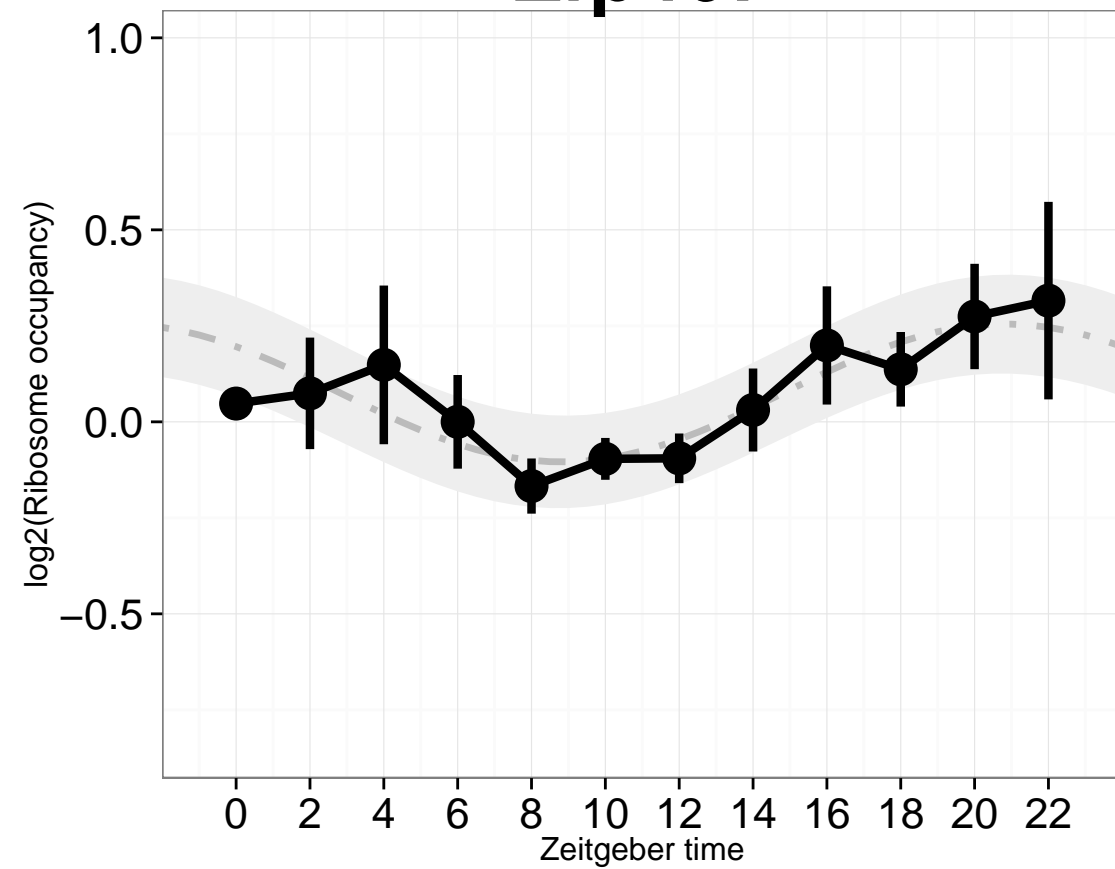

Supplement: Supplementary file 3355 [file 1]

# Ankra2

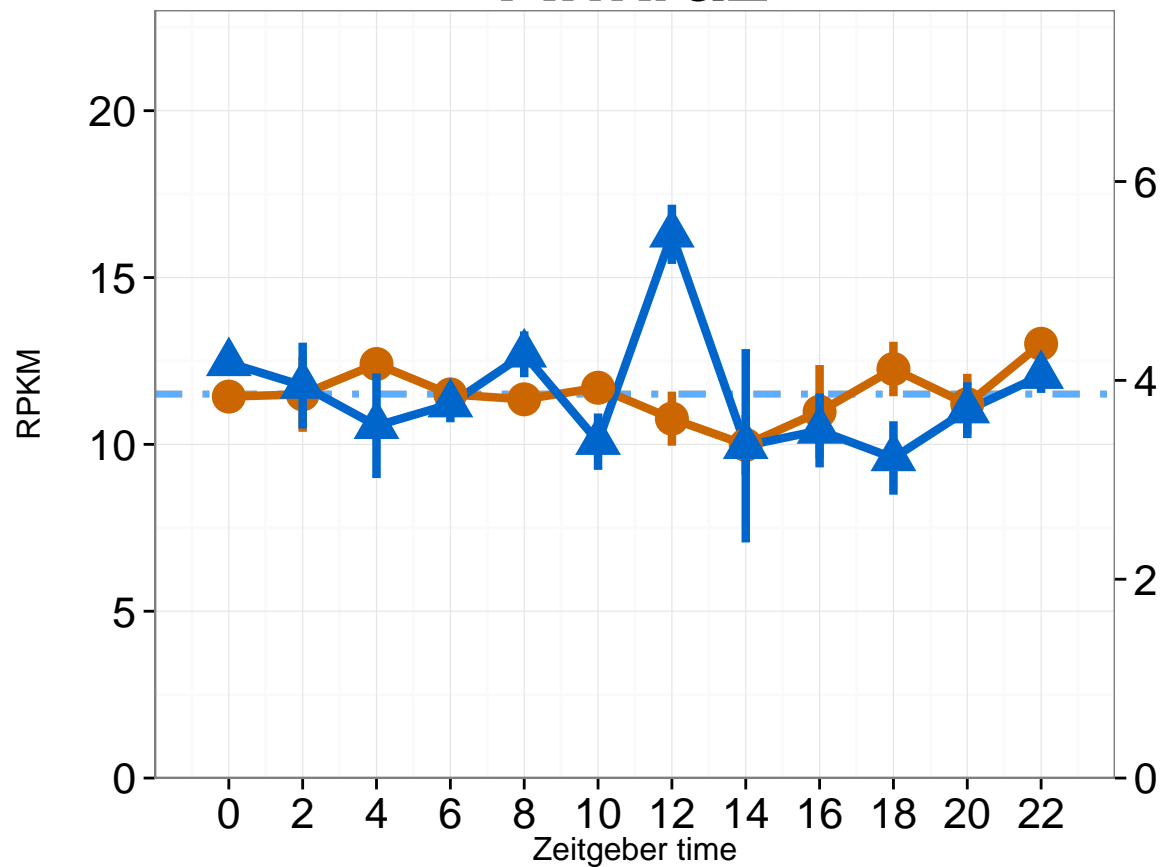

# Ankra2

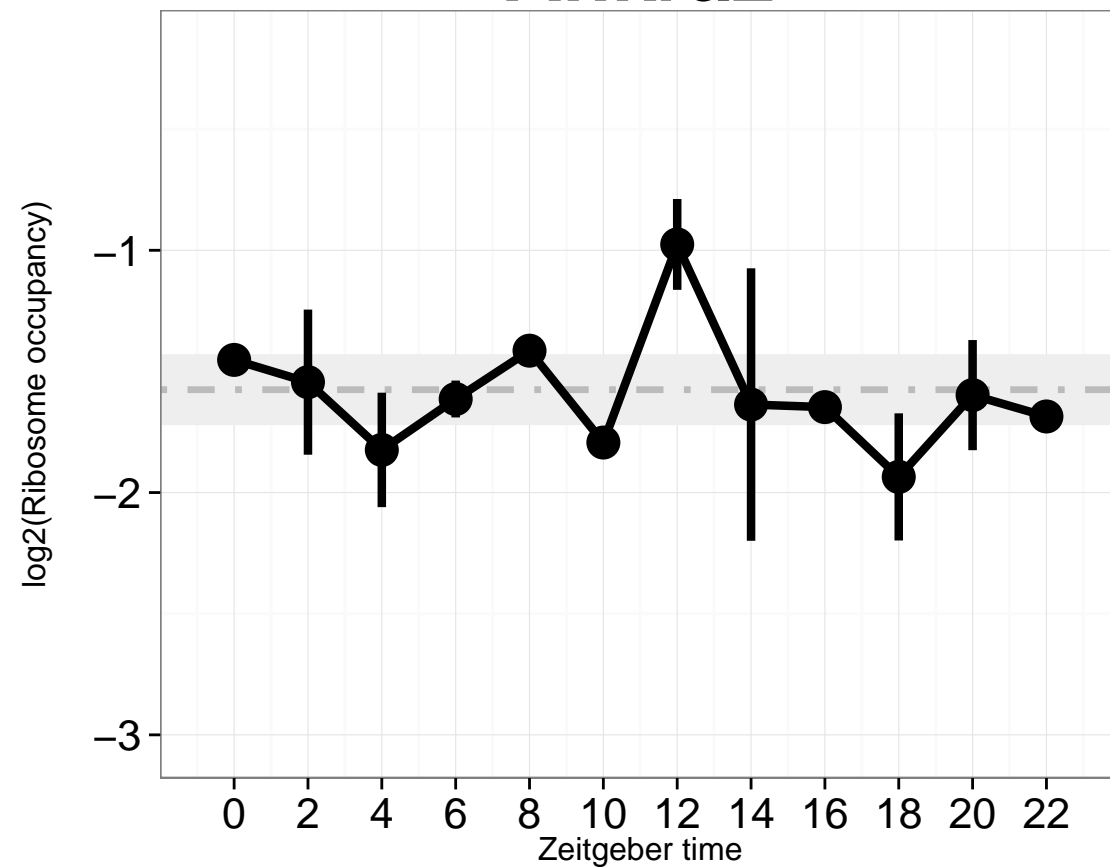

Supplement: Supplementary file 3356 [file 1]

## Rars2

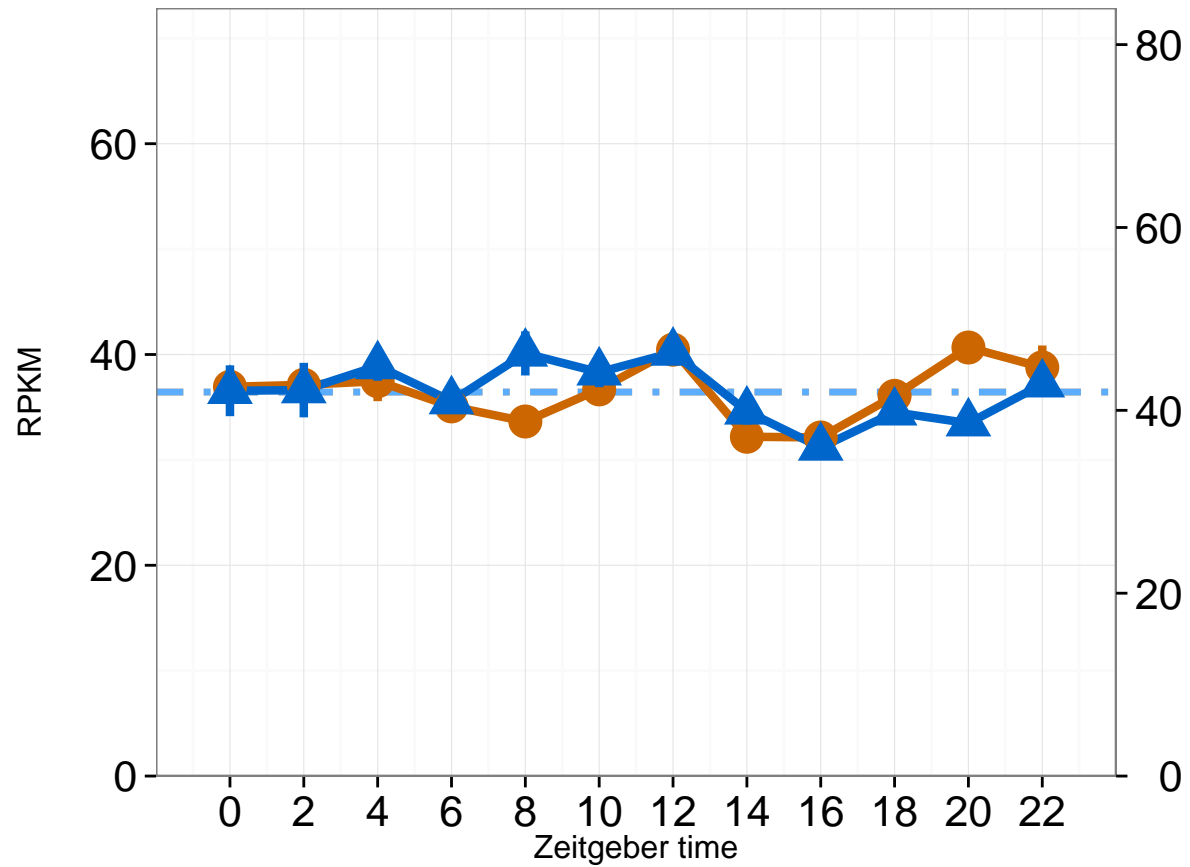

## Rars2

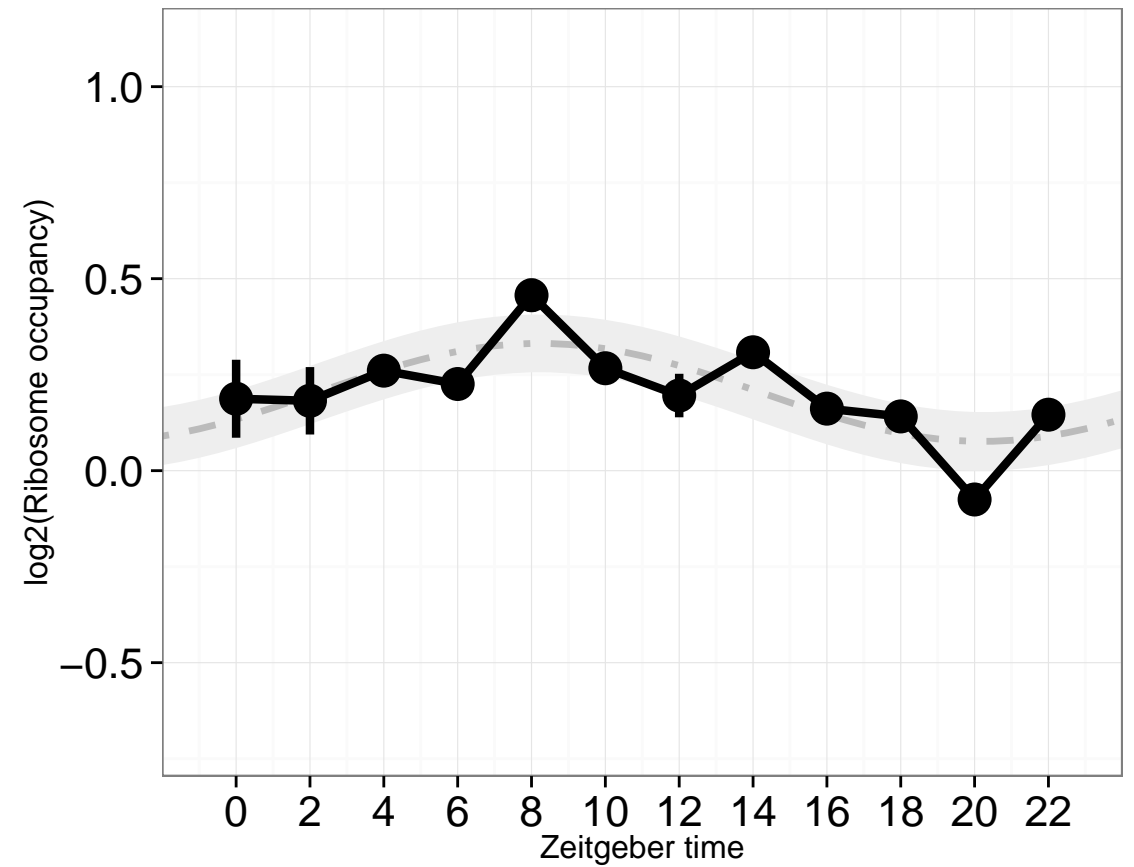

Supplement: Supplementary file 3357 [file 1]

# Ptov1

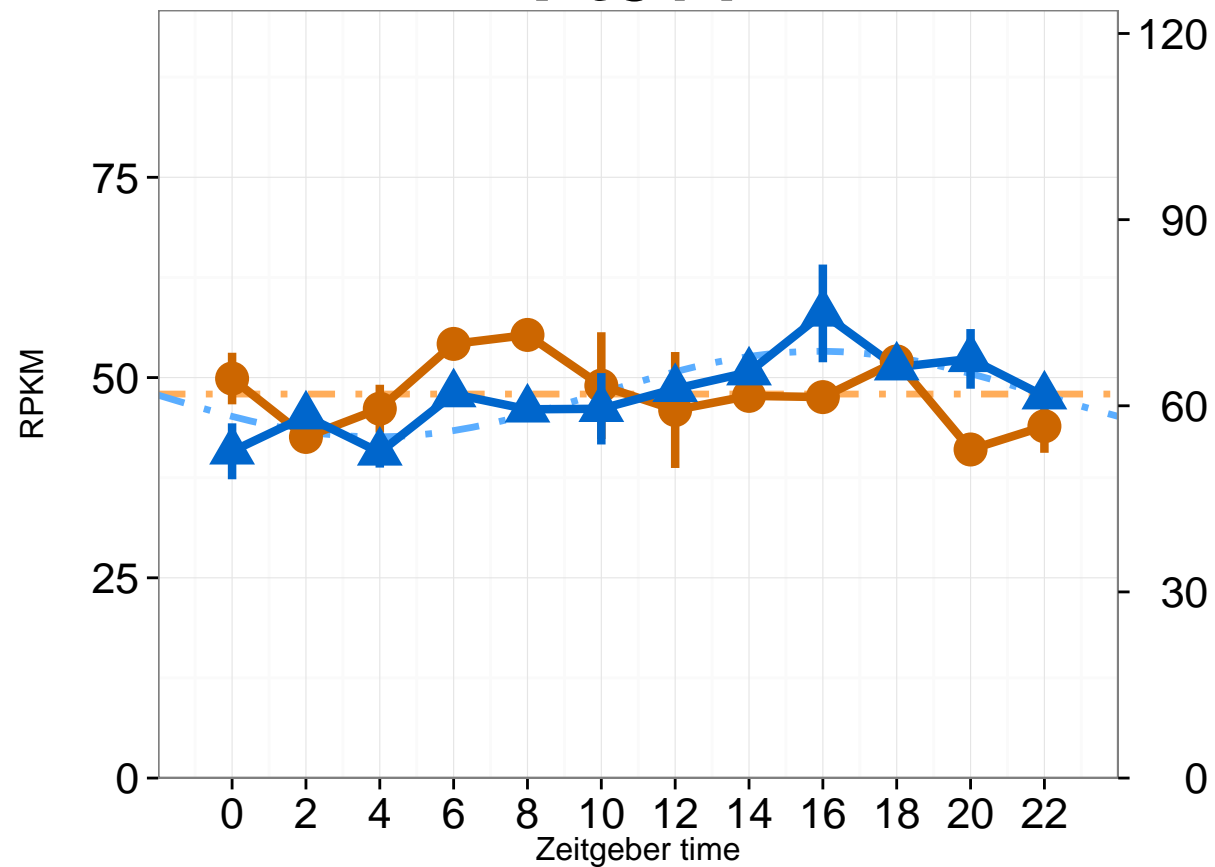

# Ptov1

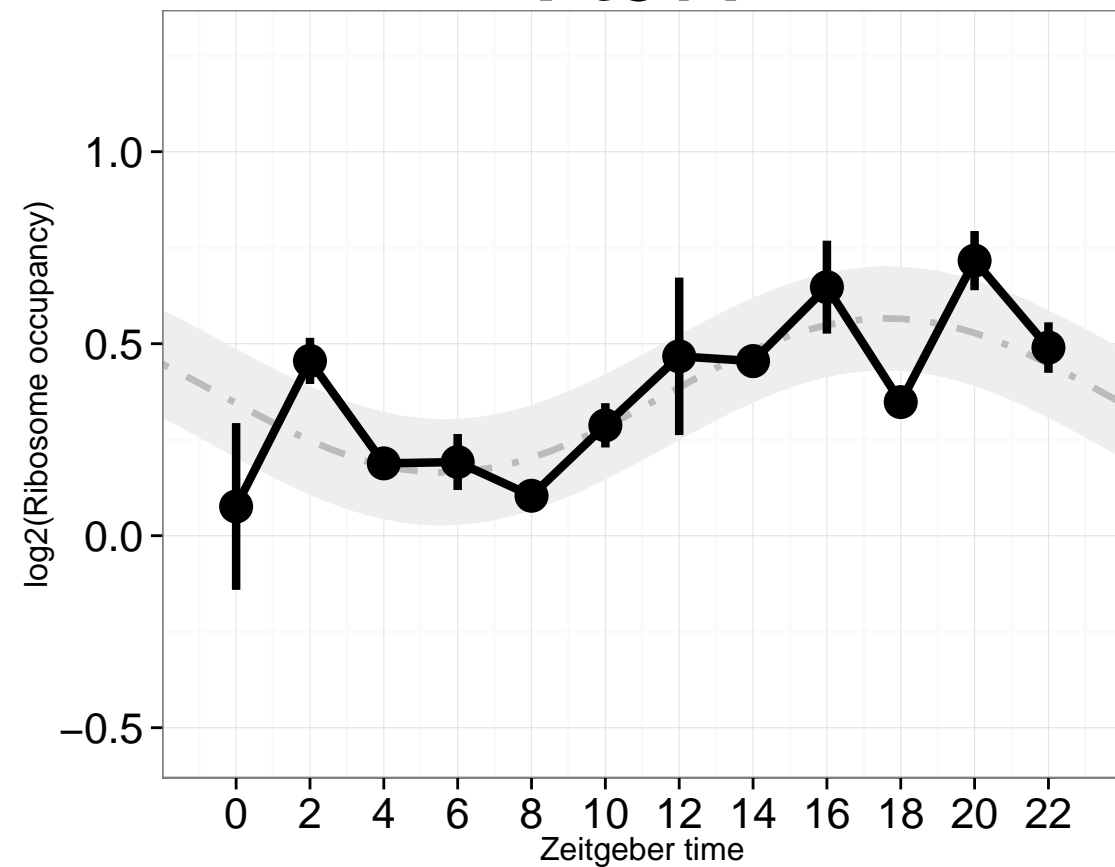

Supplement: Supplementary file 3358 [file 1]

## Luc7l2

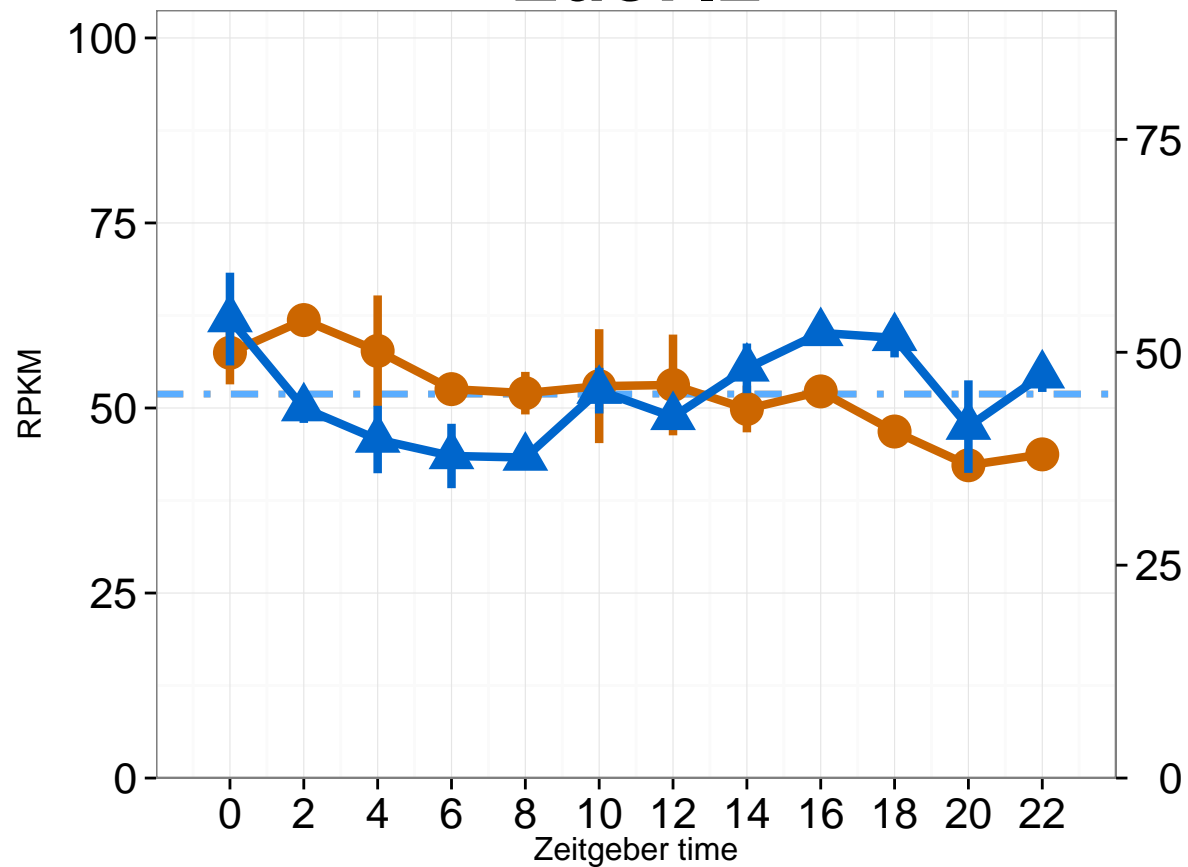

## Luc7l2

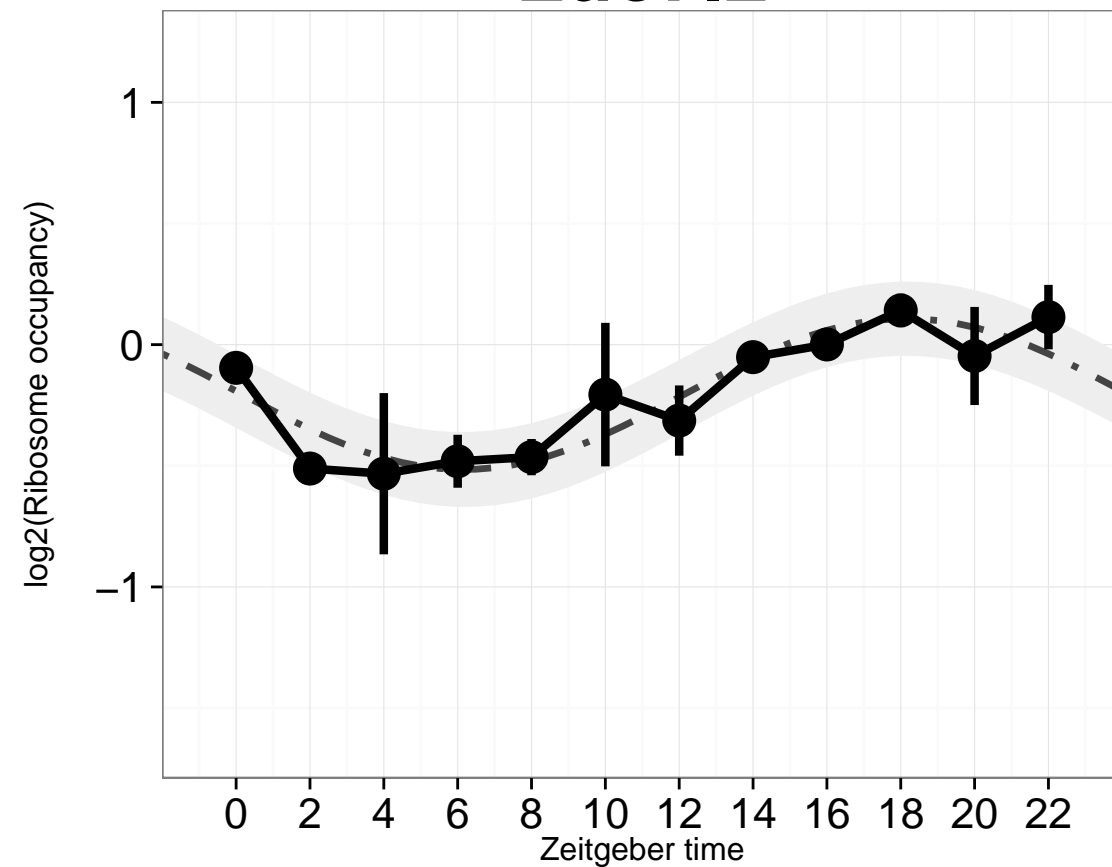

Supplement: Supplementary file 3359 [file 1]

# Fdx1

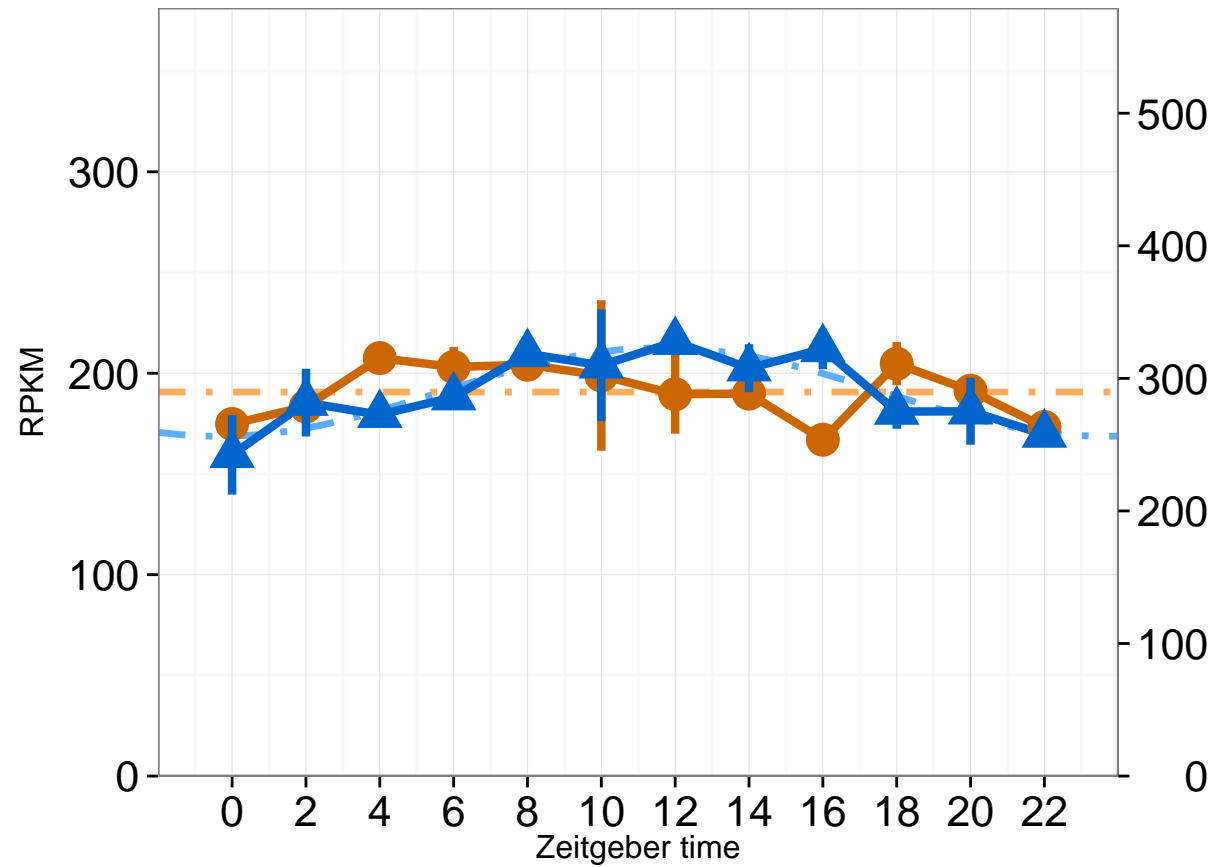

# Fdx1

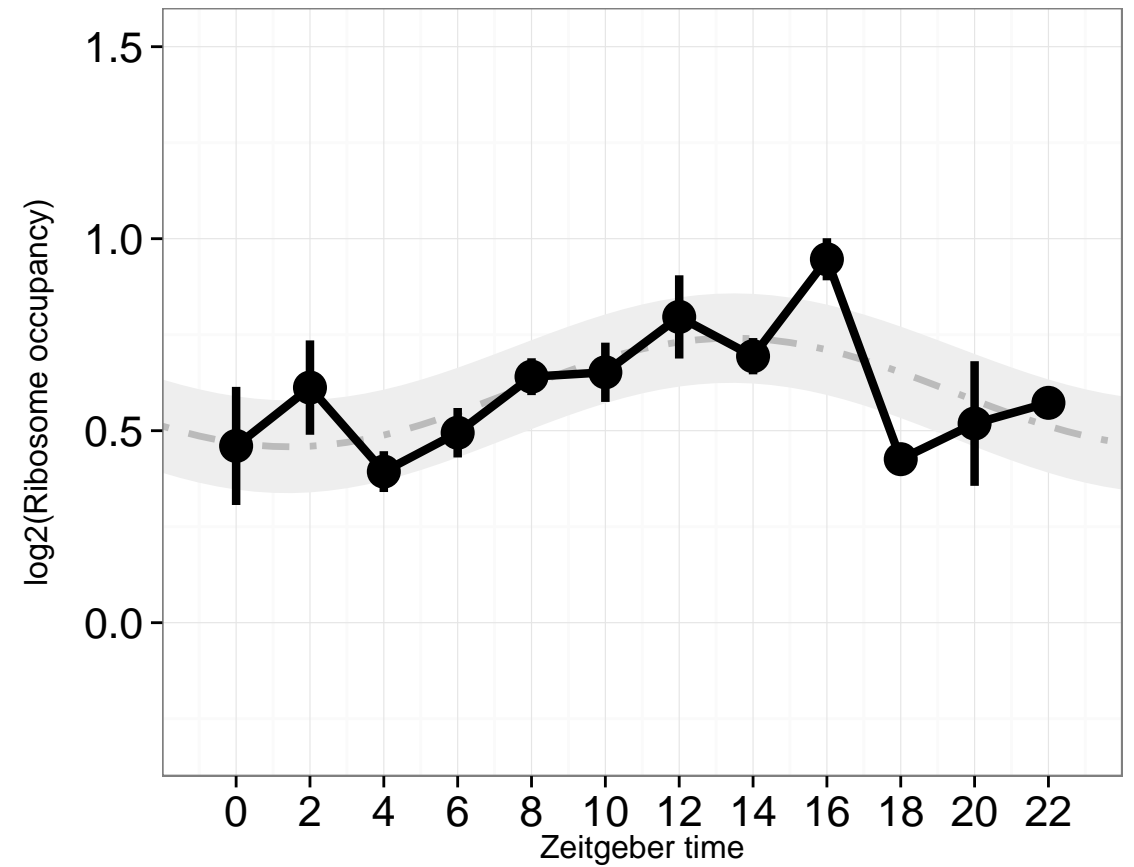

Supplement: Supplementary file 3360 [file 1]

# Rundc1

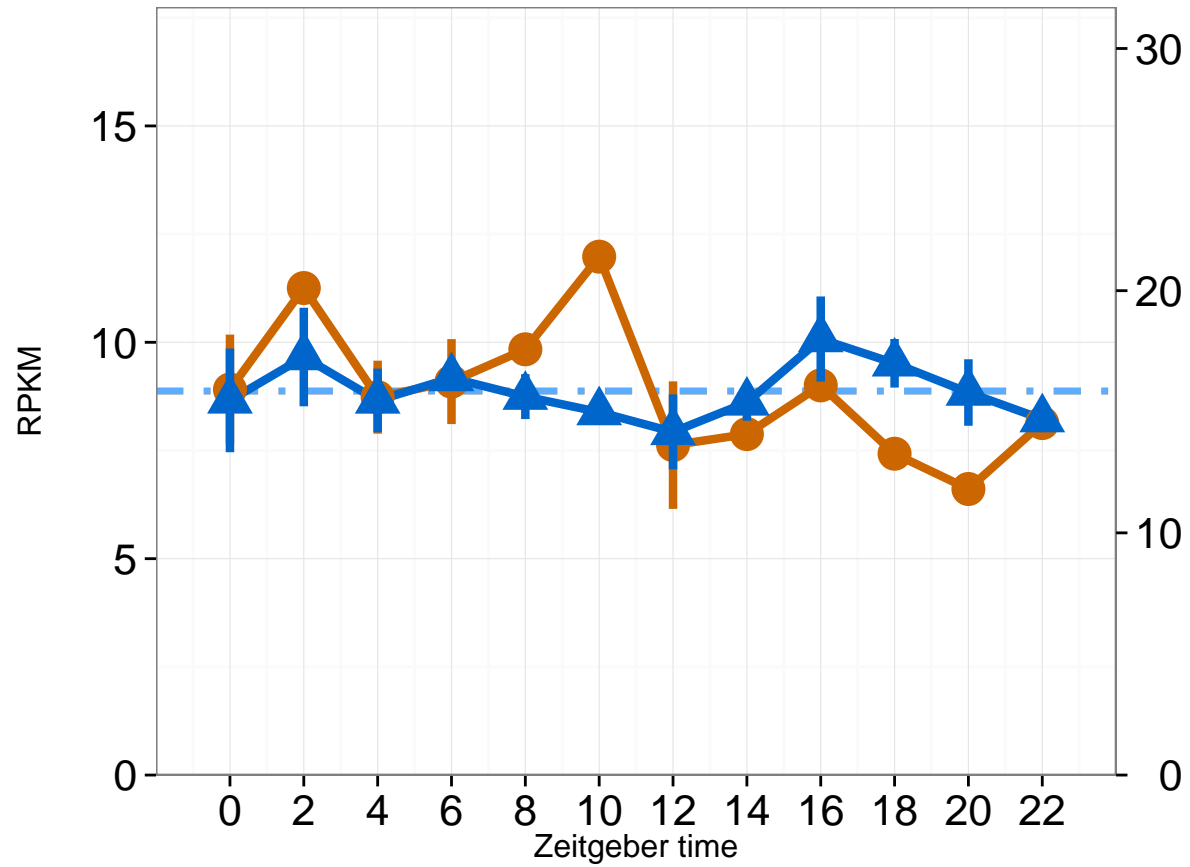

# Rundc1

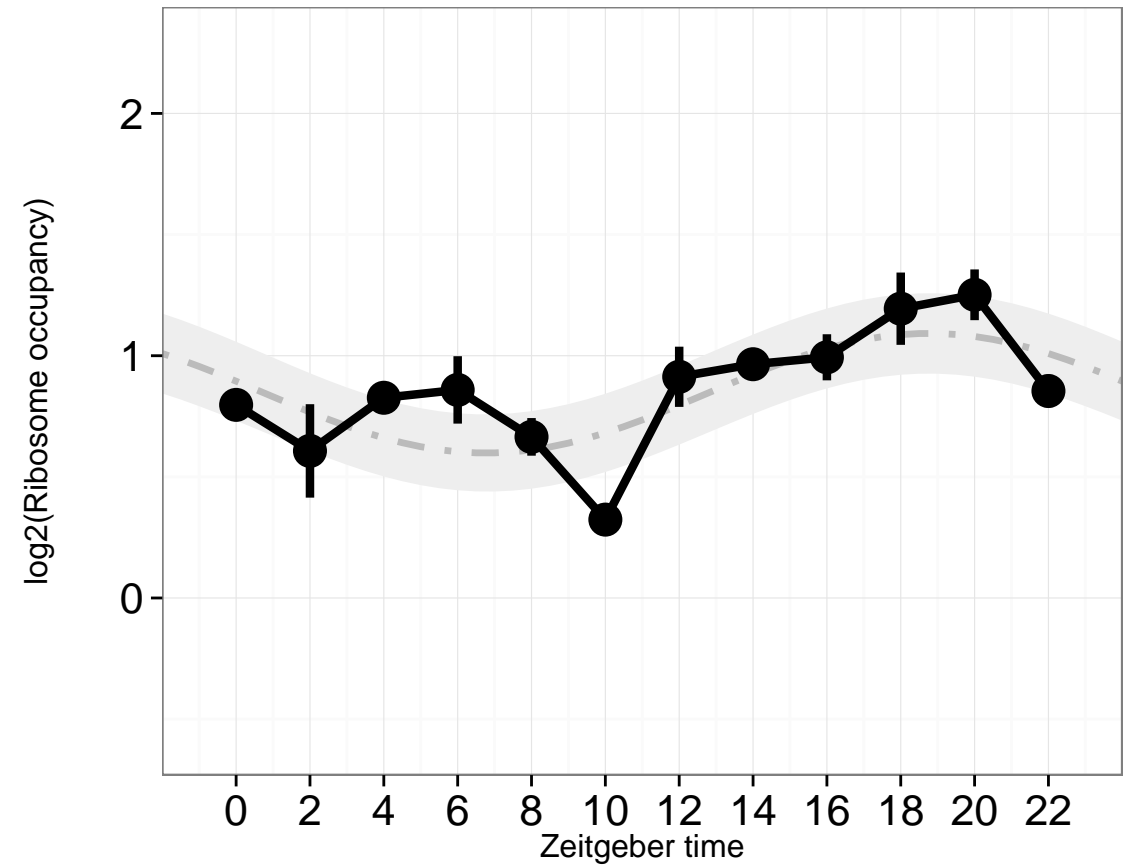

Supplement: Supplementary file 3361 [file 1]

# Efna5

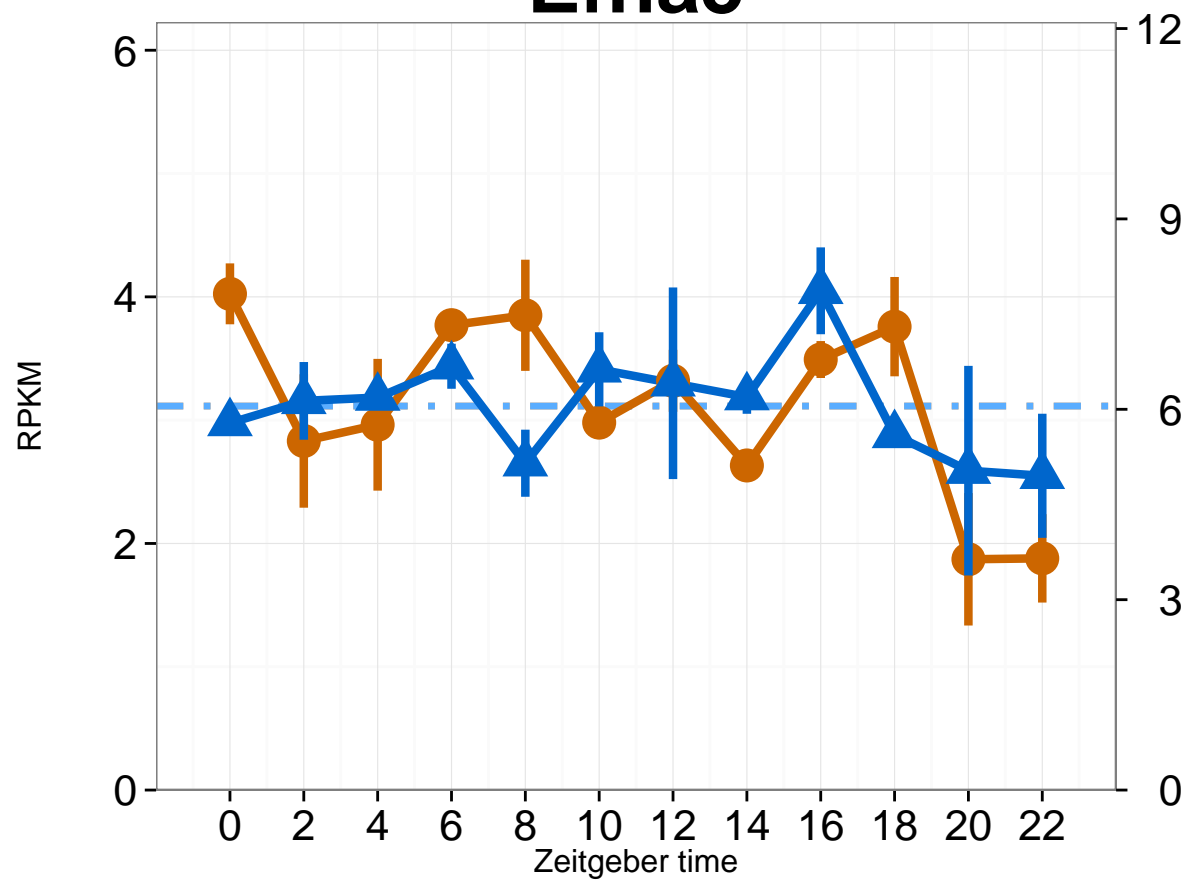

# Efna5

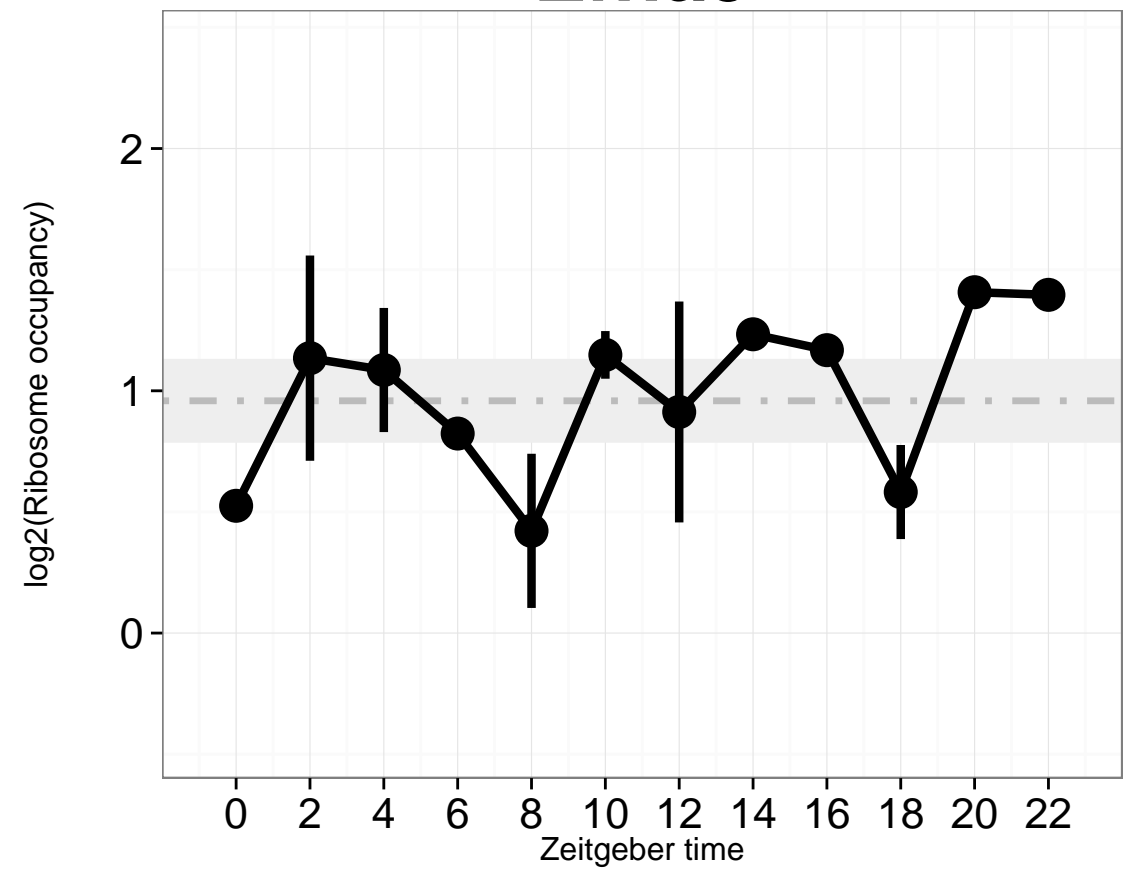

Supplement: Supplementary file 3362 [file 1]

# Asrgl1

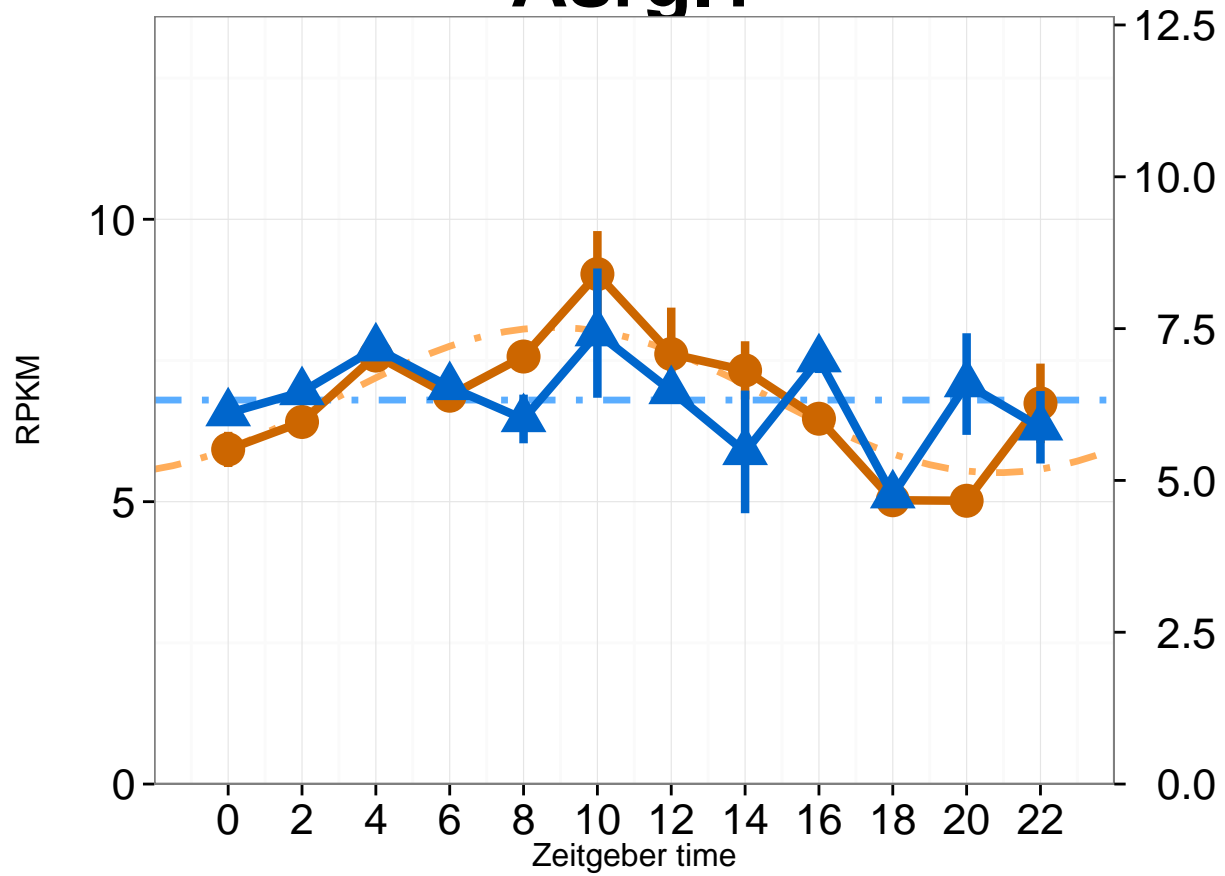

# Asrgl1

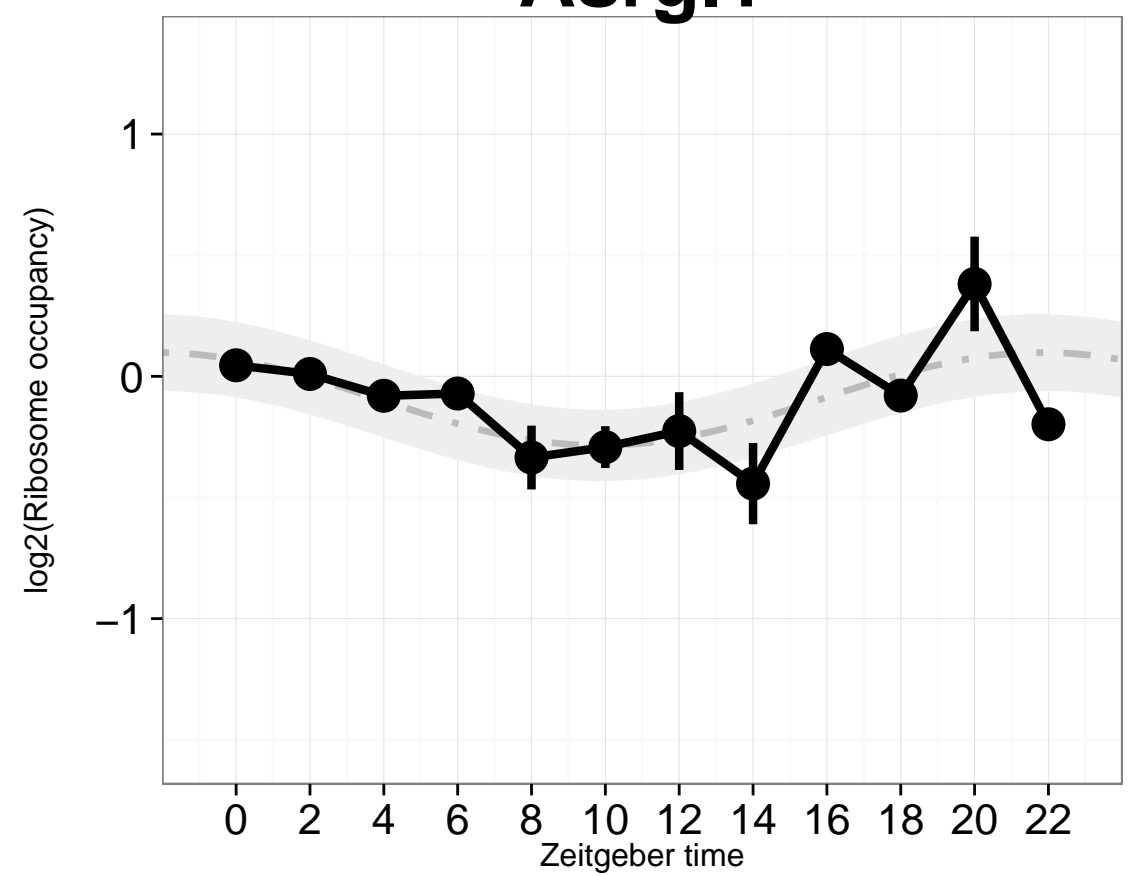

Supplement: Supplementary file 3363 [file 1]

# Prex1

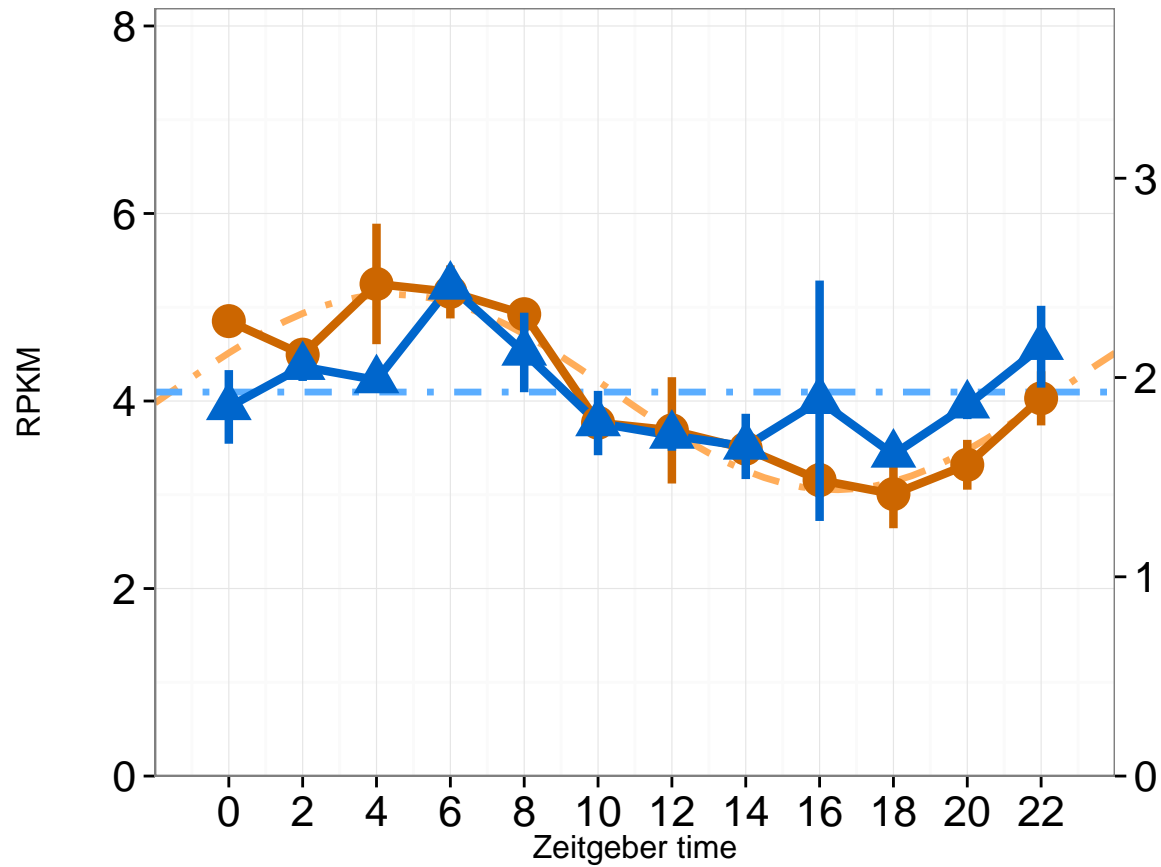

# Prex1

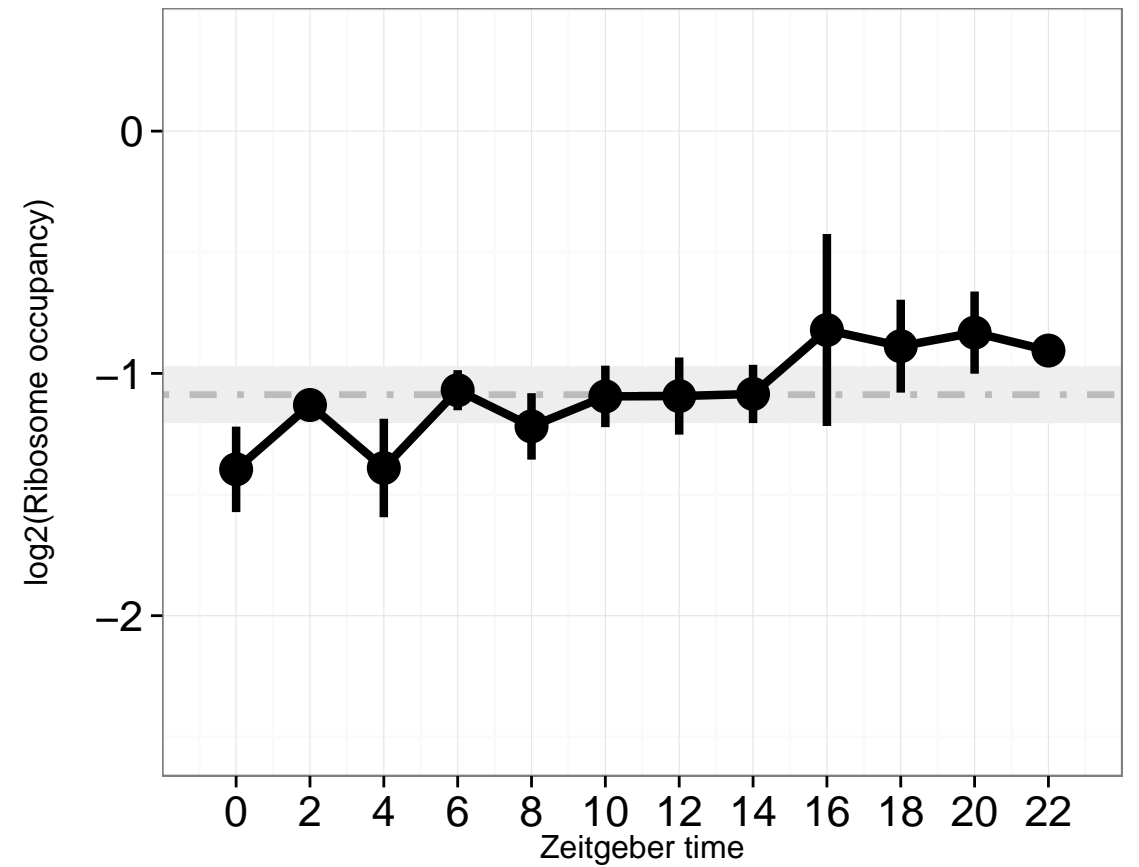

Supplement: Supplementary file 3364 [file 1]

## Ehd1

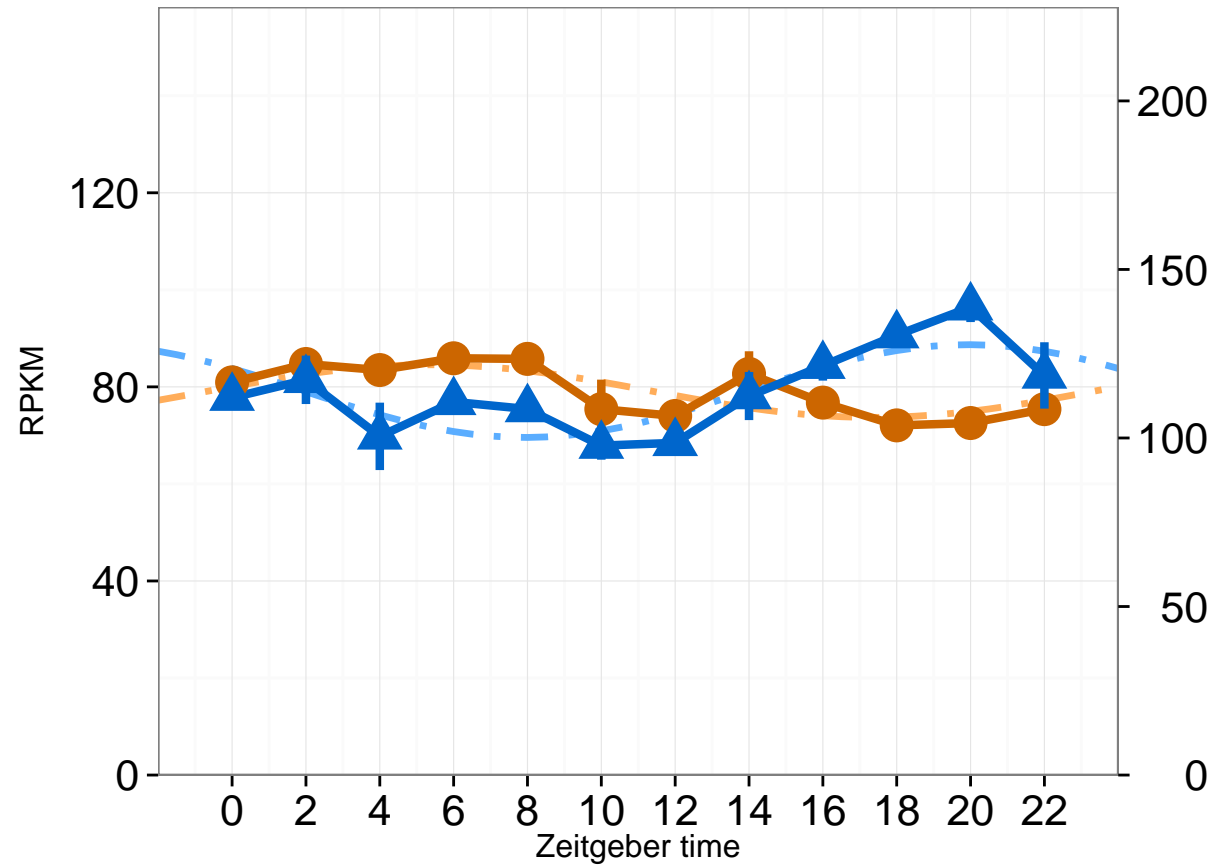

## Ehd1

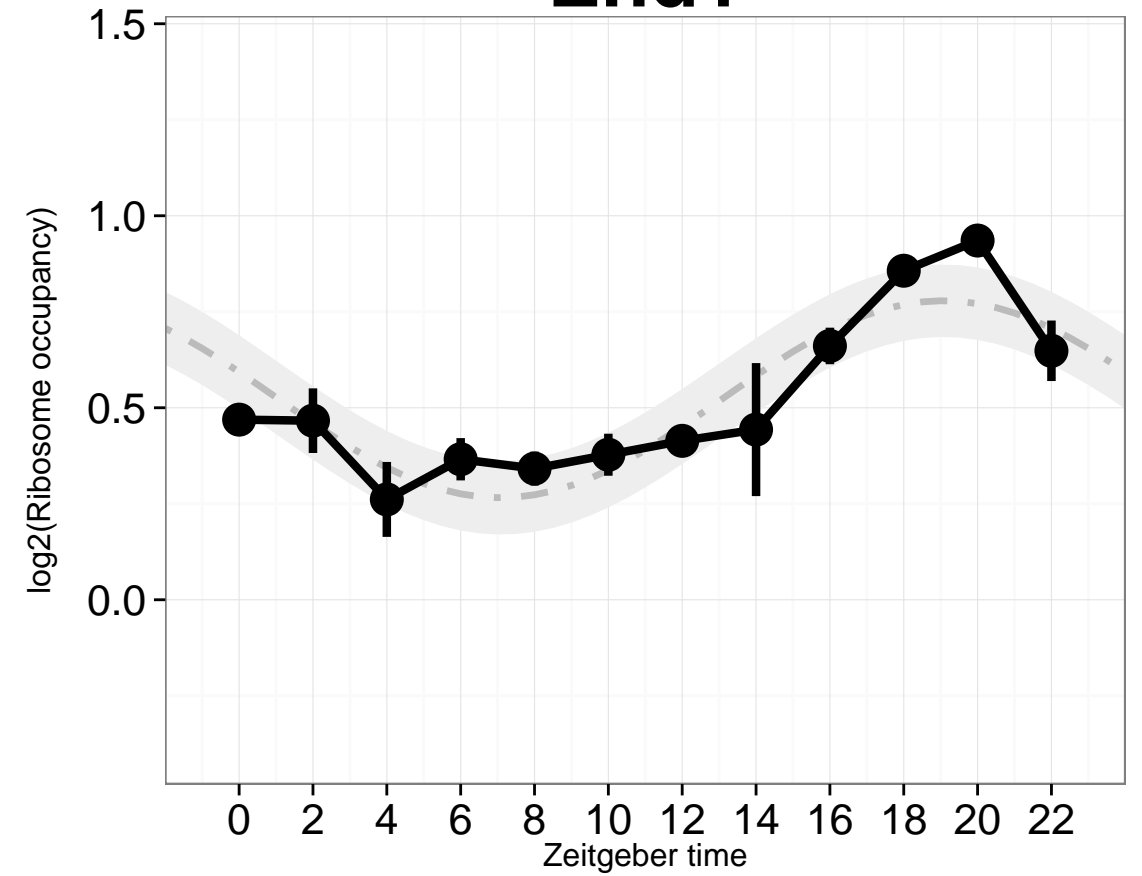

Supplement: Supplementary file 3365 [file 1]

## Ube2e3

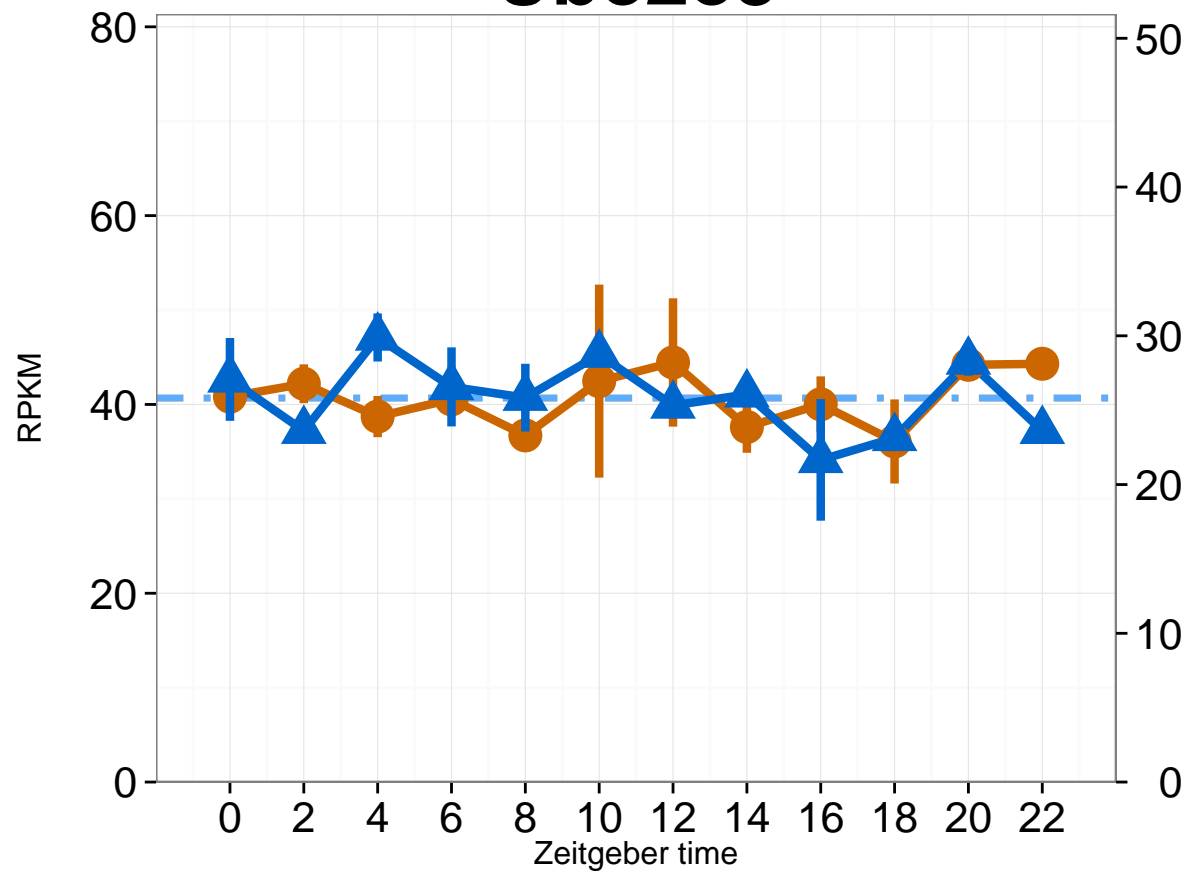

## Ube2e3

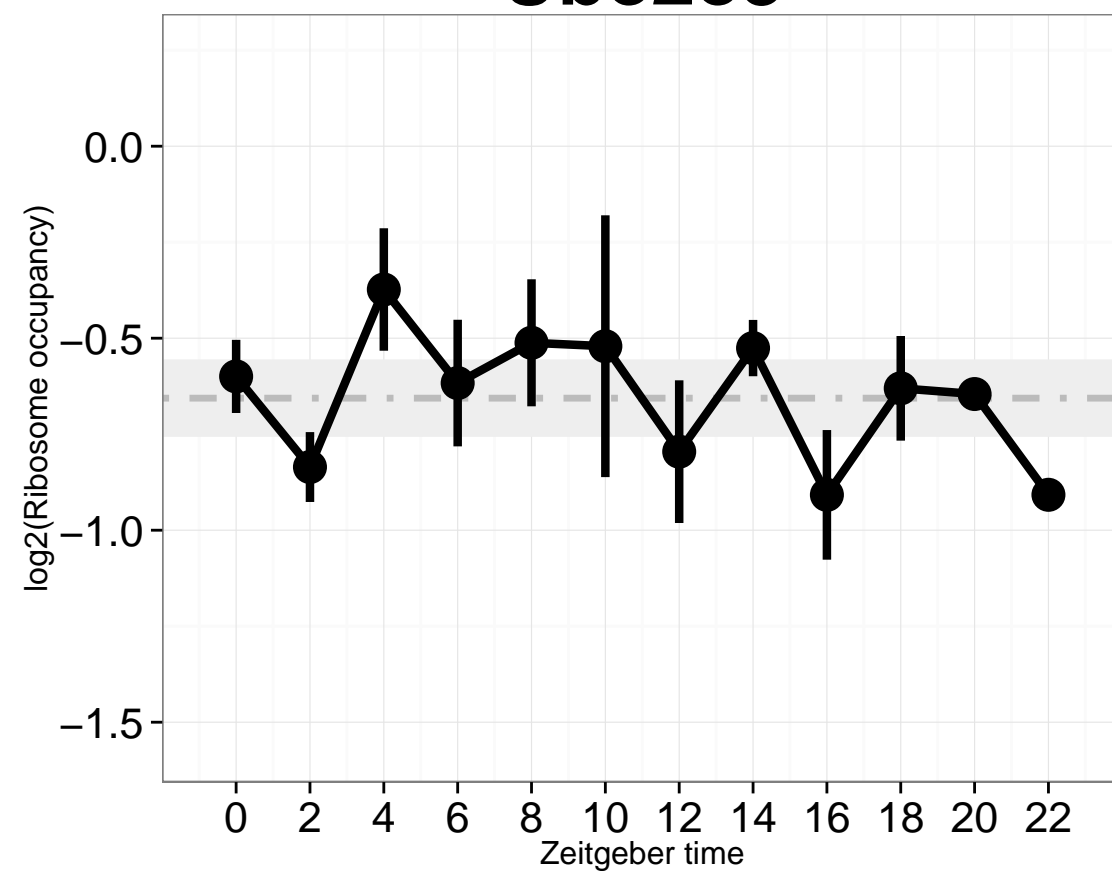

Supplement: Supplementary file 3366 [file 1]

## Optn

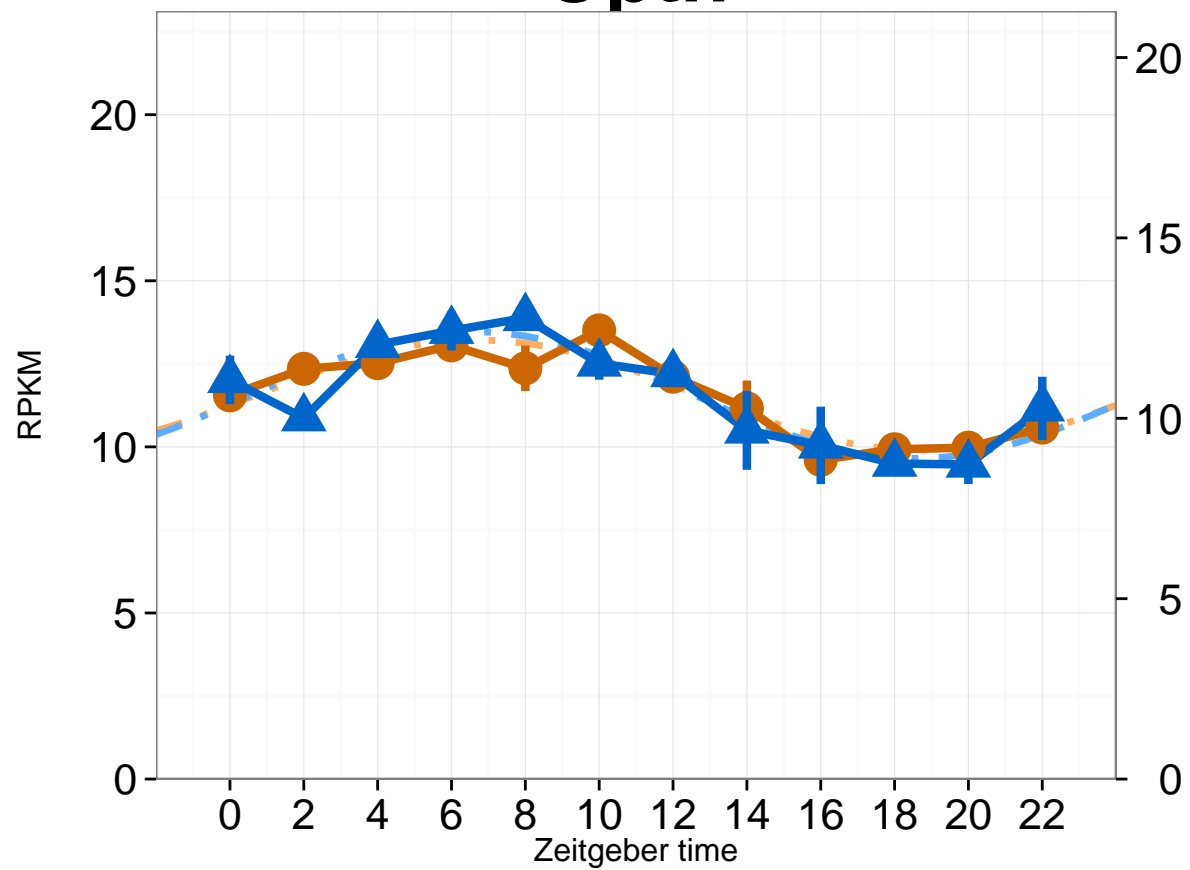

## Optn

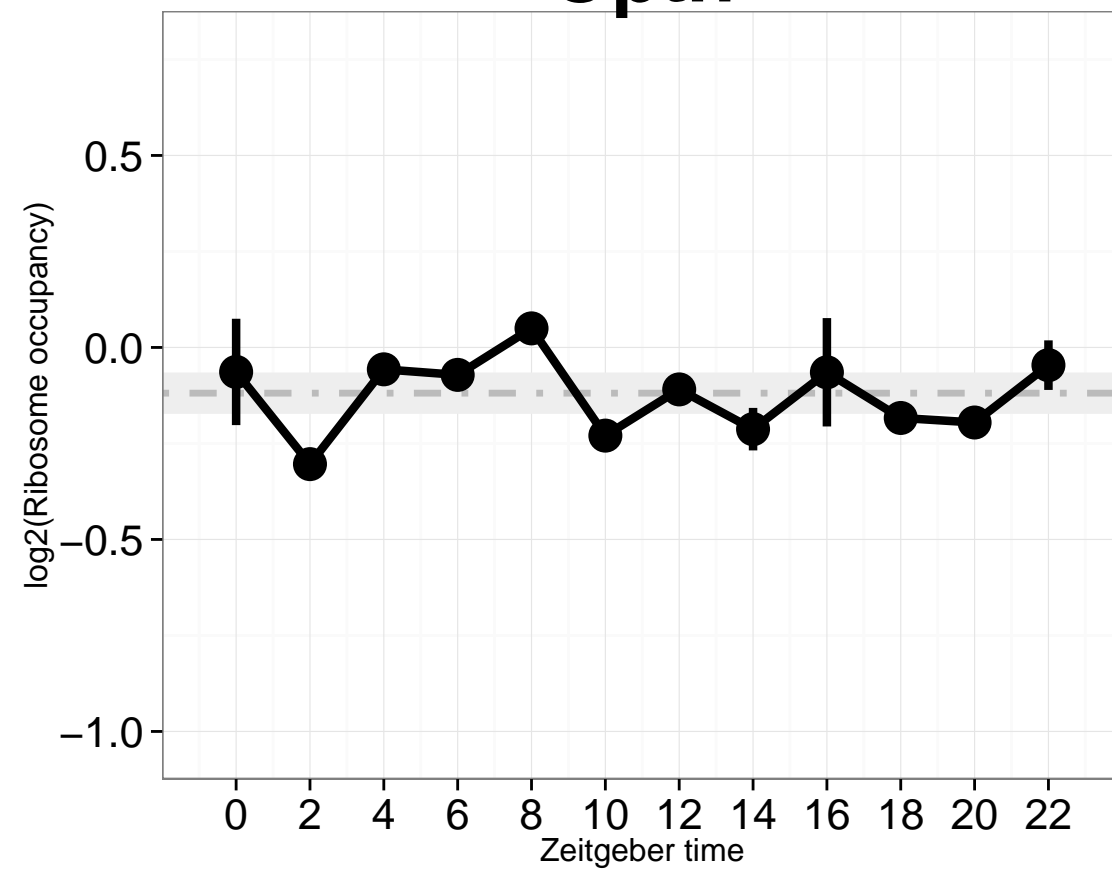

Supplement: Supplementary file 3367 [file 1]

# Azgp1

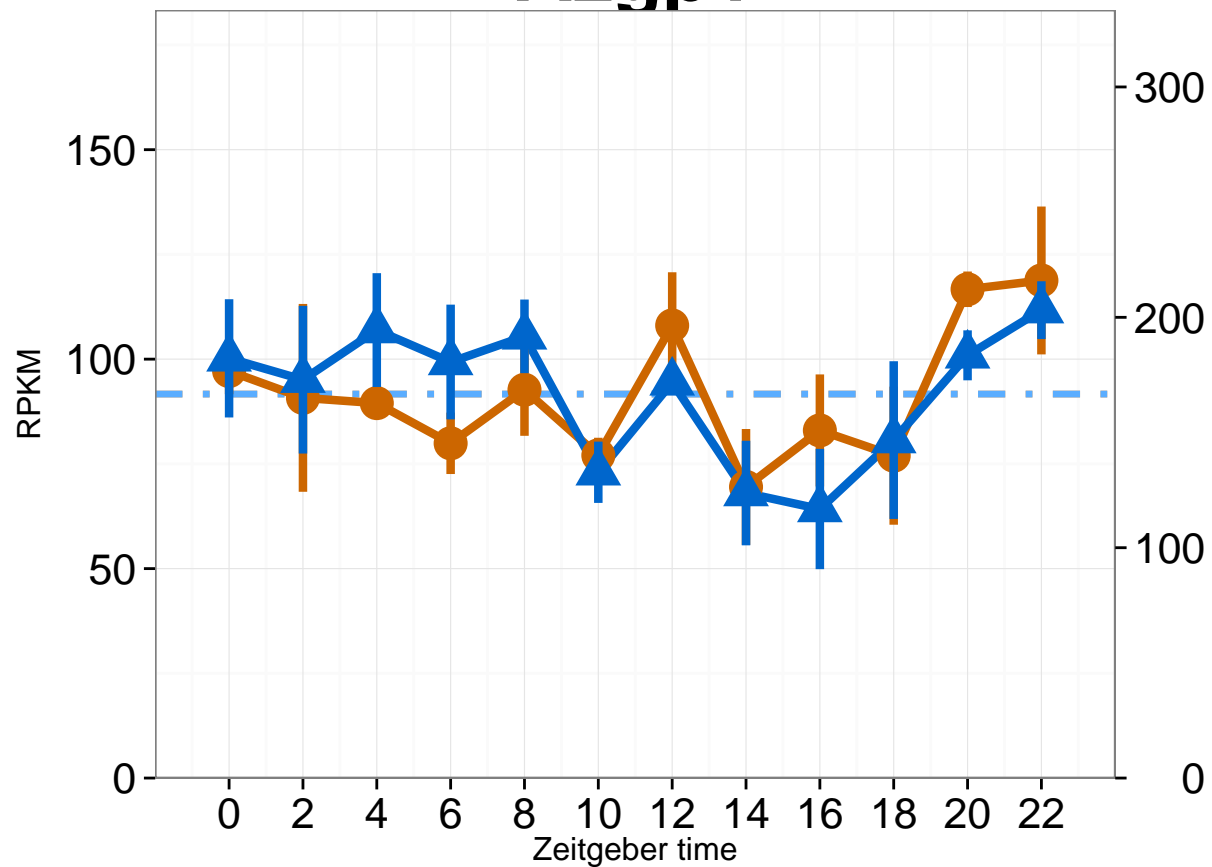

# Azgp1

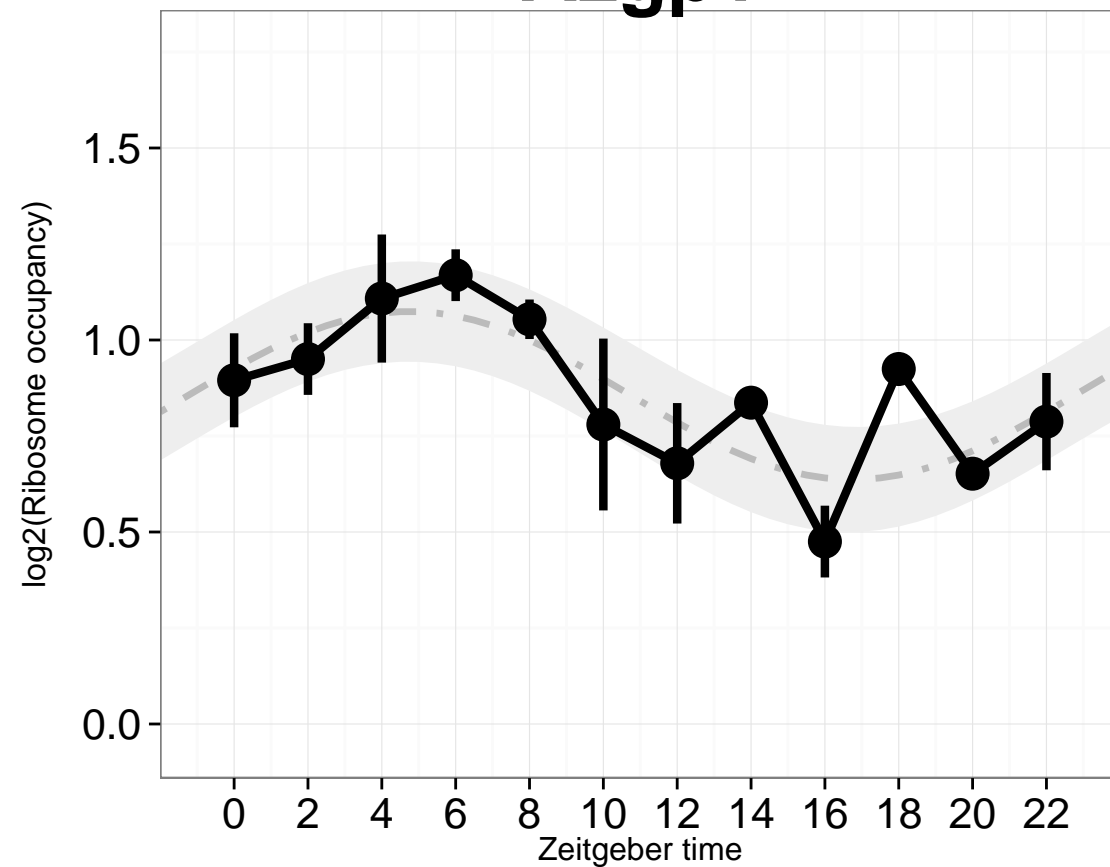

Supplement: Supplementary file 3368 [file 1]

## Fgfr1

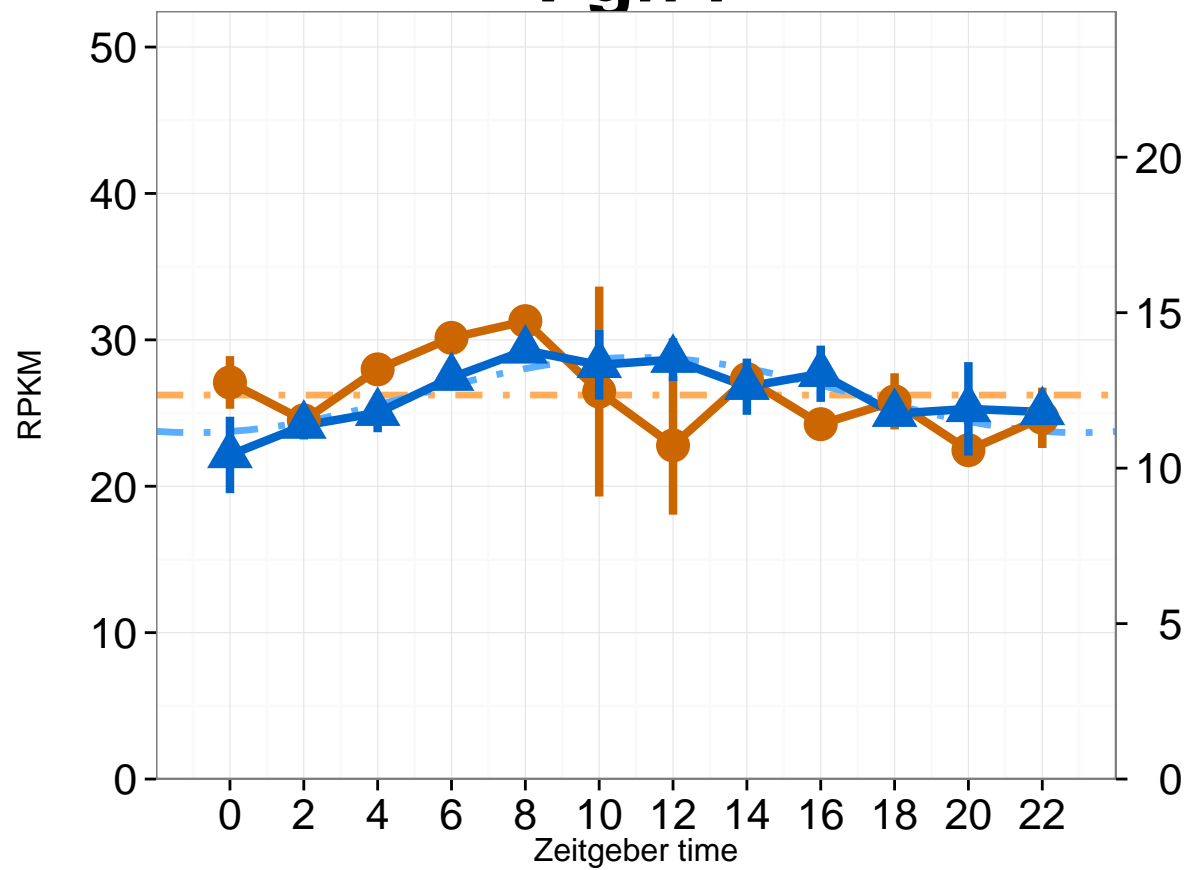

## Fgfr1

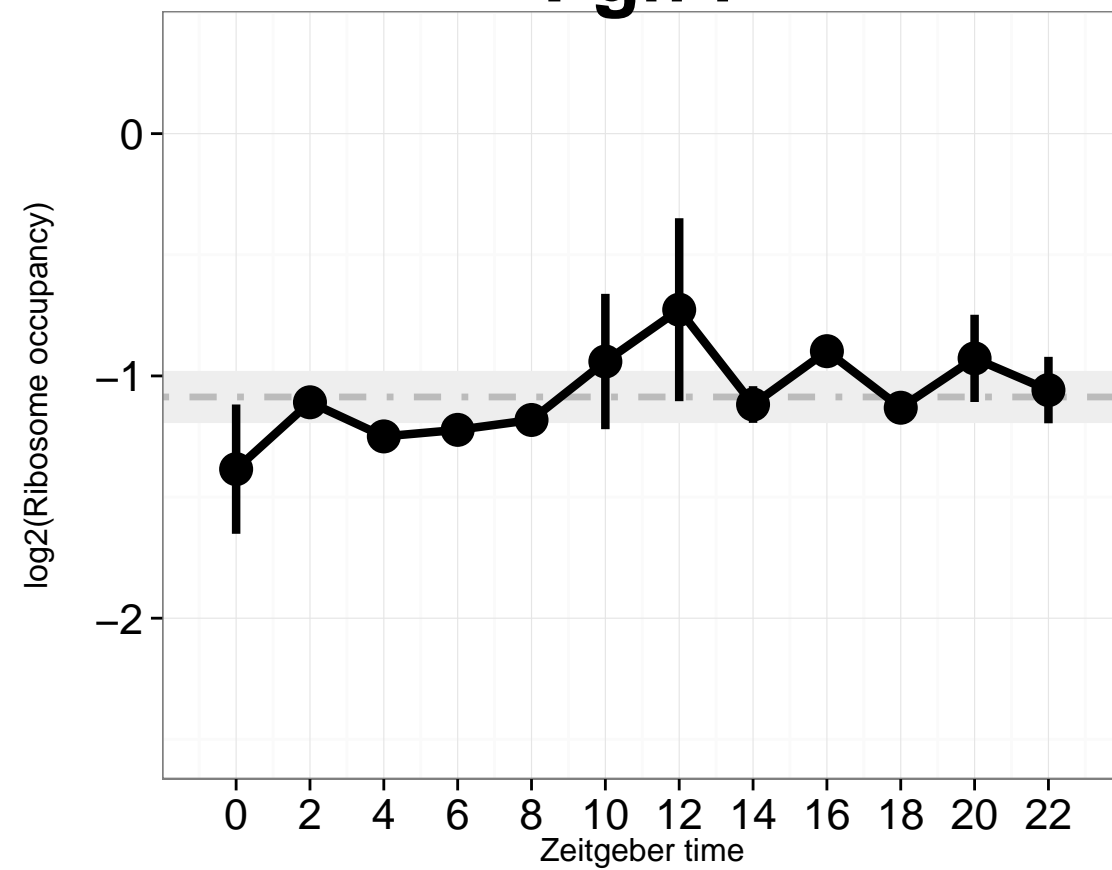

Supplement: Supplementary file 3369 [file 1]

**Tmem253 TR**

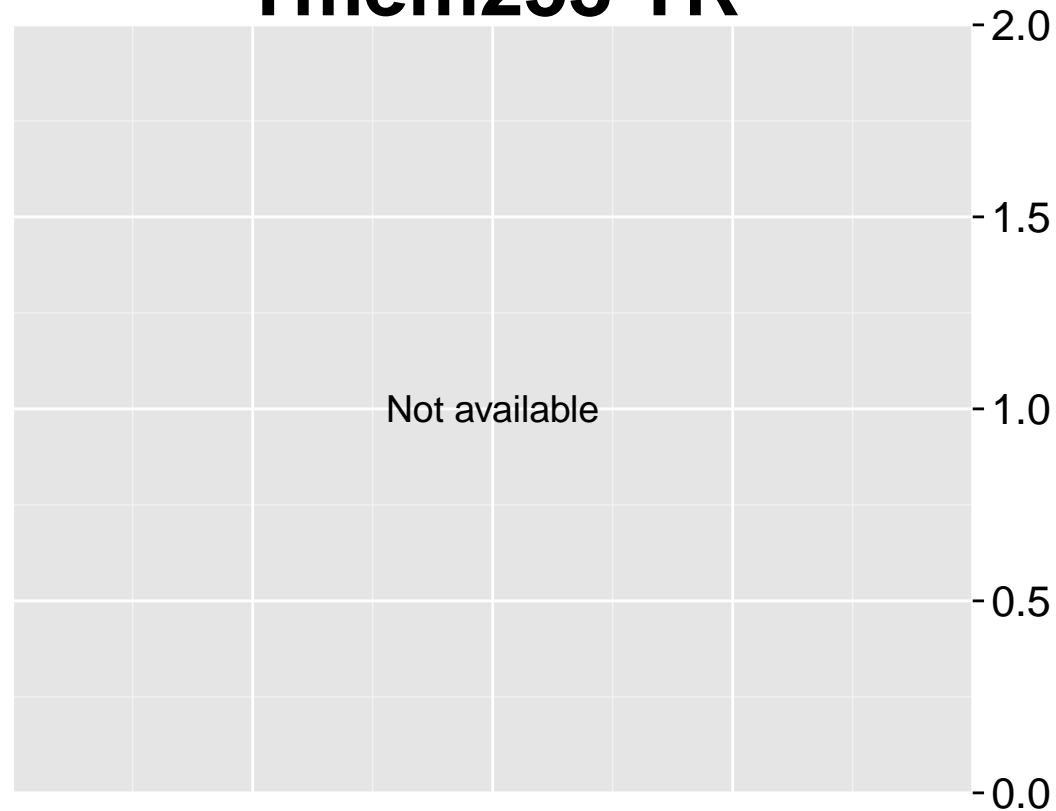

**Tmem253 log2(Ribosome occupancy)**

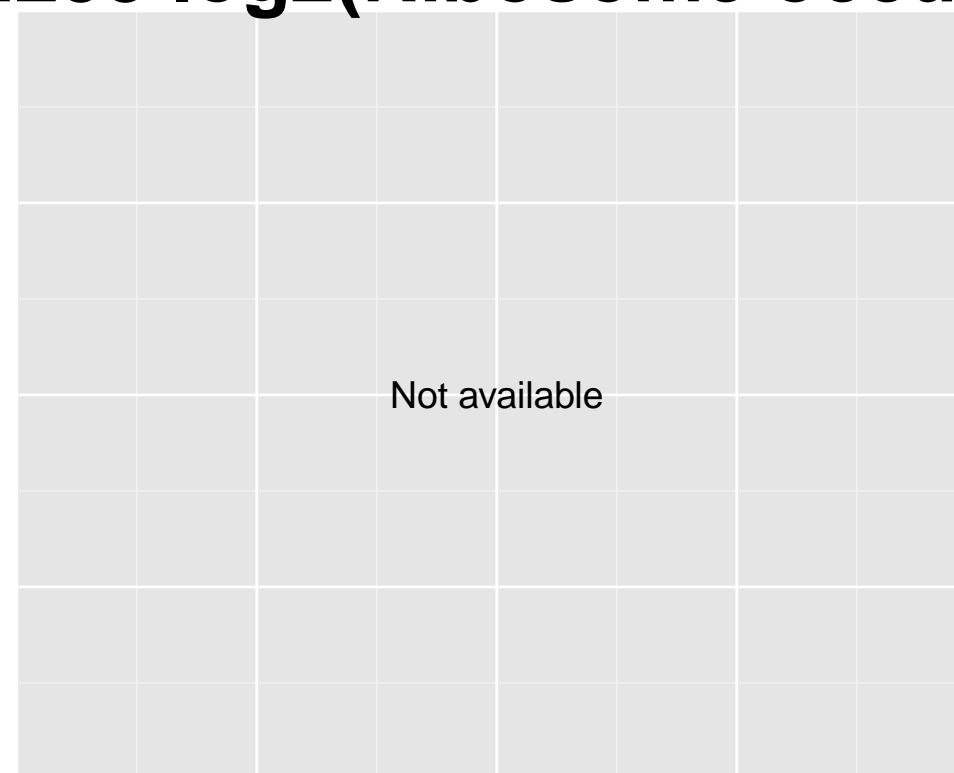

Supplement: Supplementary file 3370 [file 1]

## Azi1

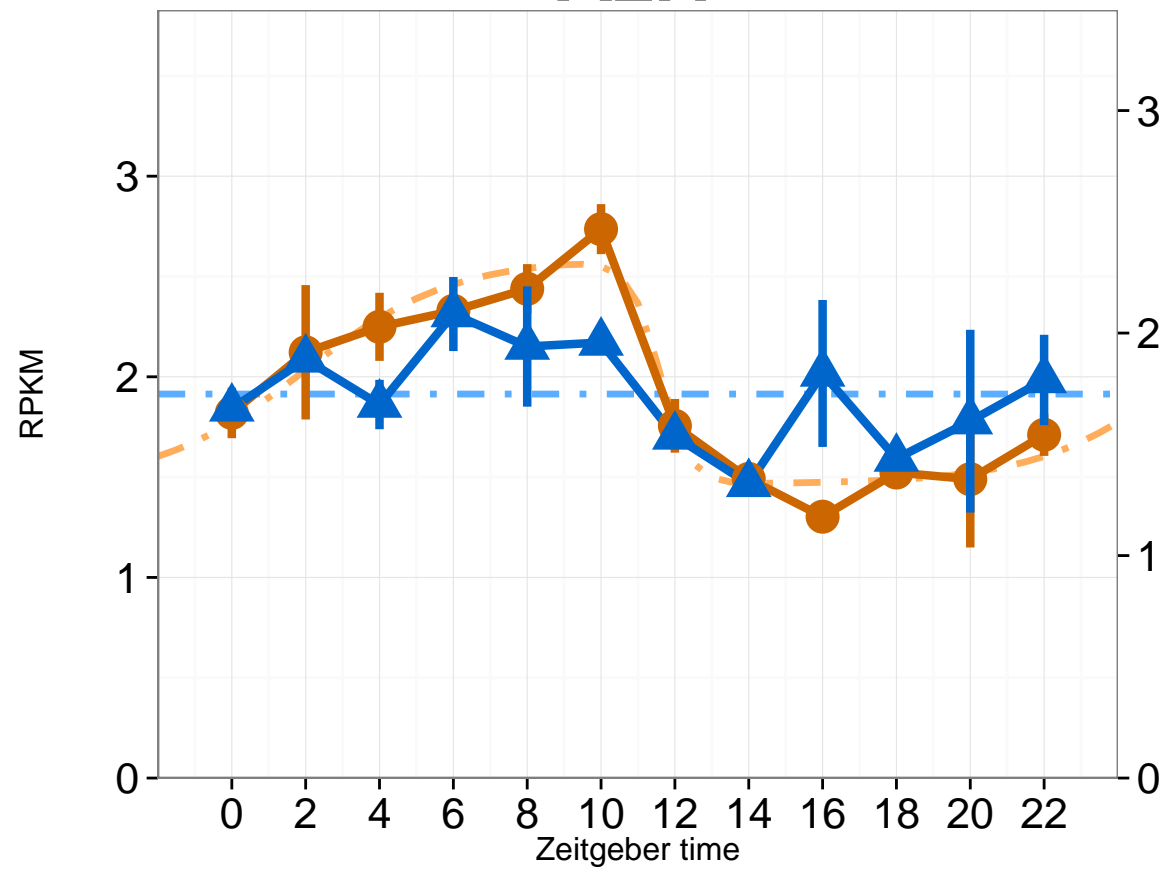

## Azi1

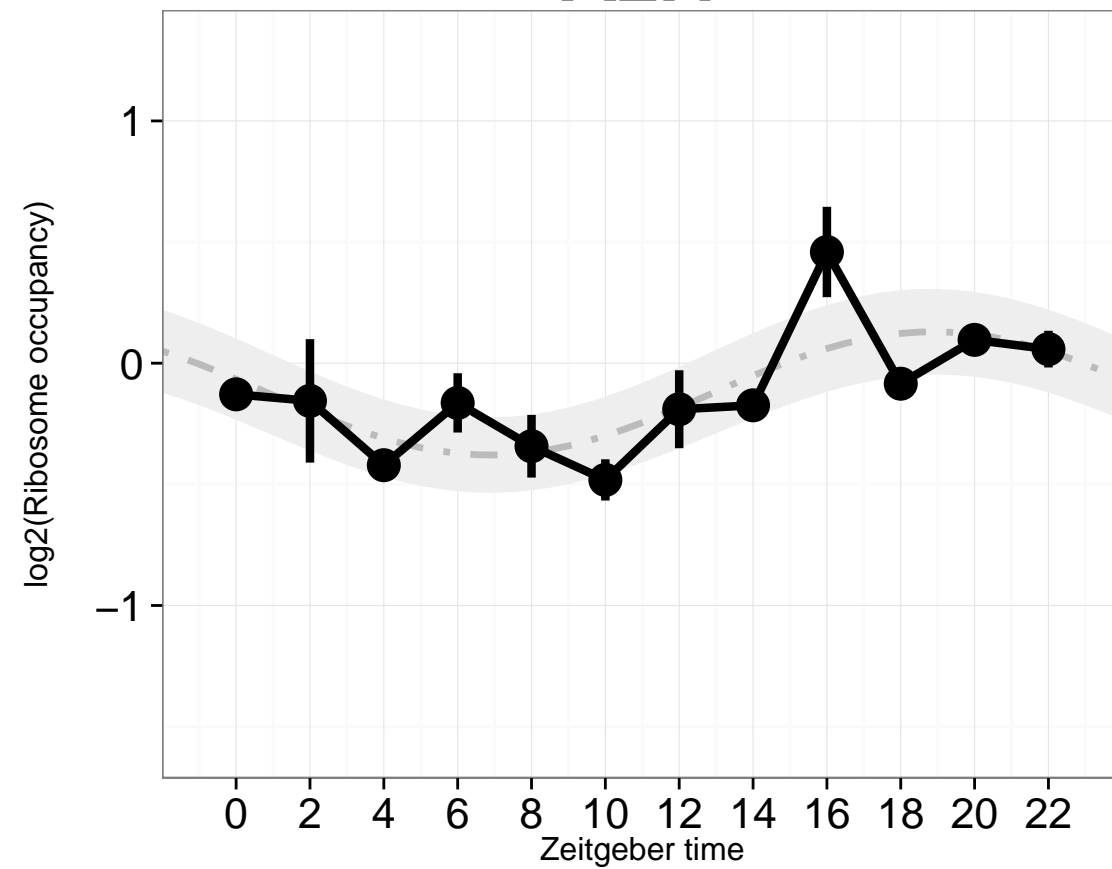

Supplement: Supplementary file 3371 [file 1]

## Saal1

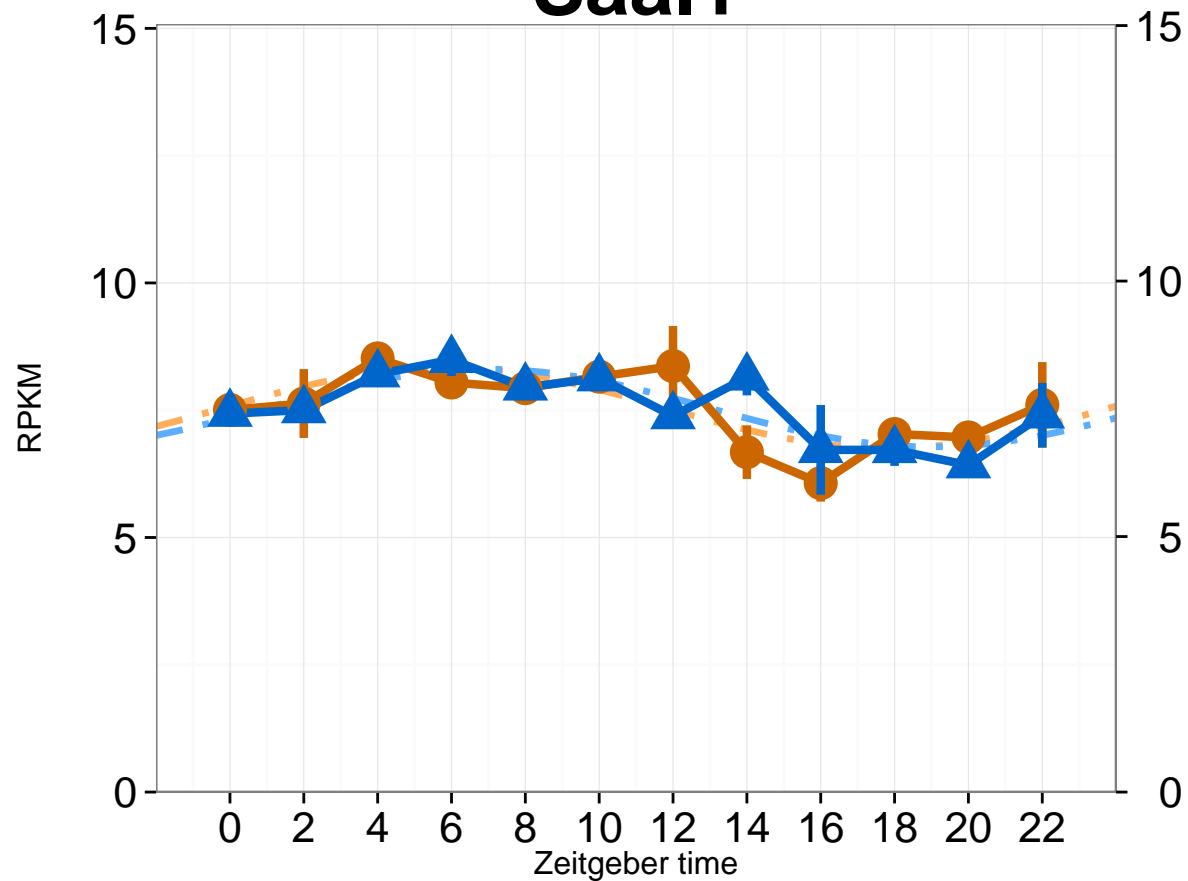

## Saal1

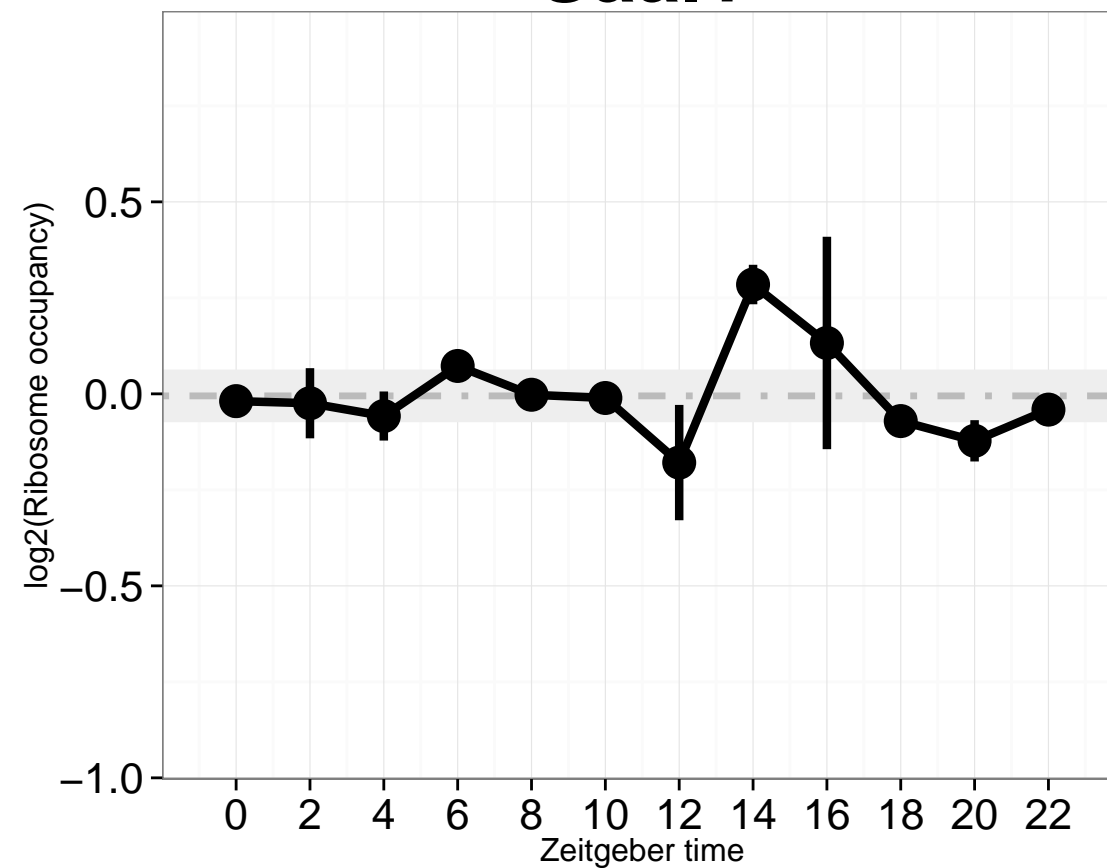

Supplement: Supplementary file 3372 [file 1]

# Ildr1

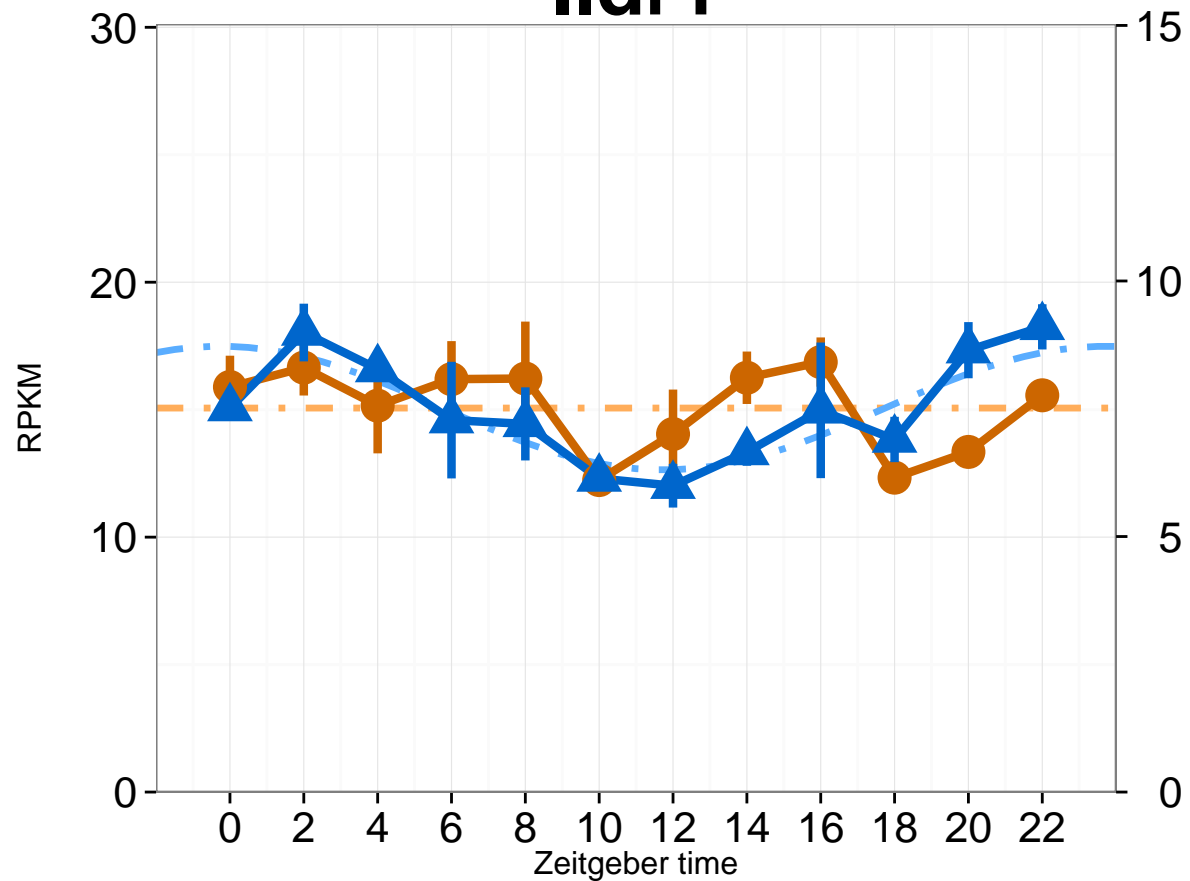

# Ildr1

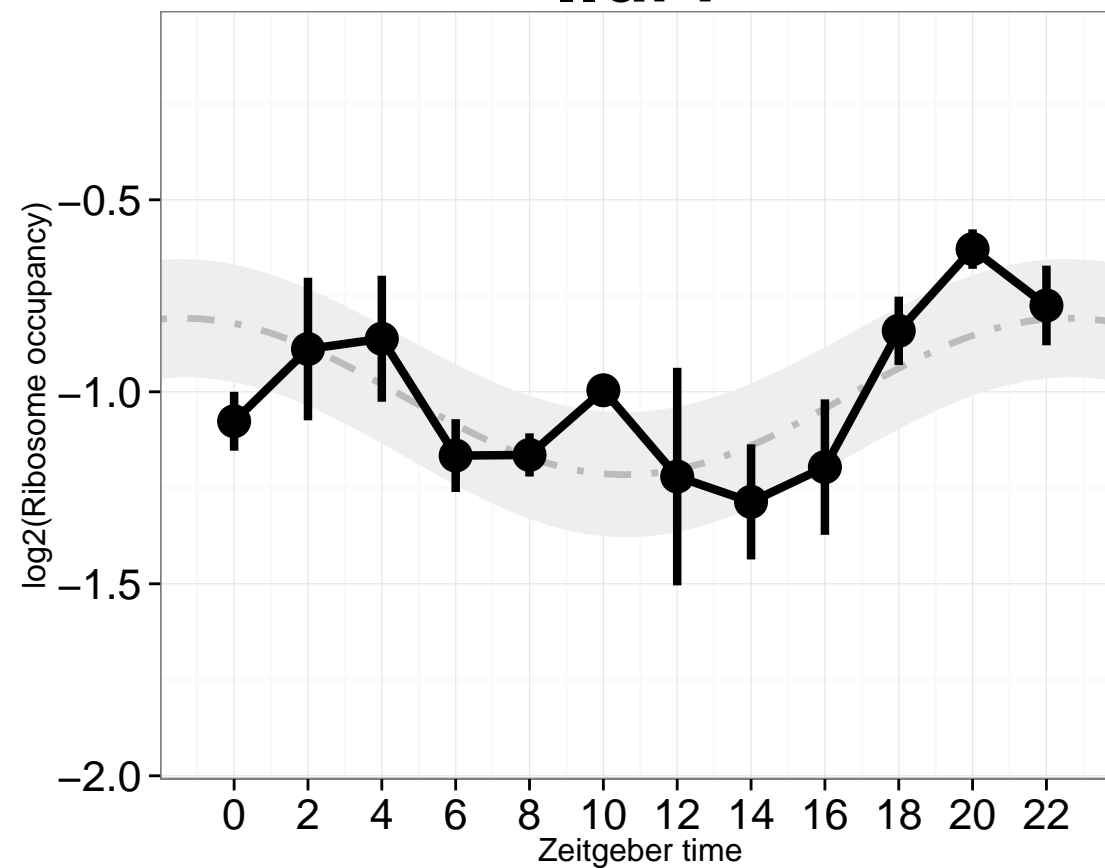

Supplement: Supplementary file 3373 [file 1]

## Pdk2

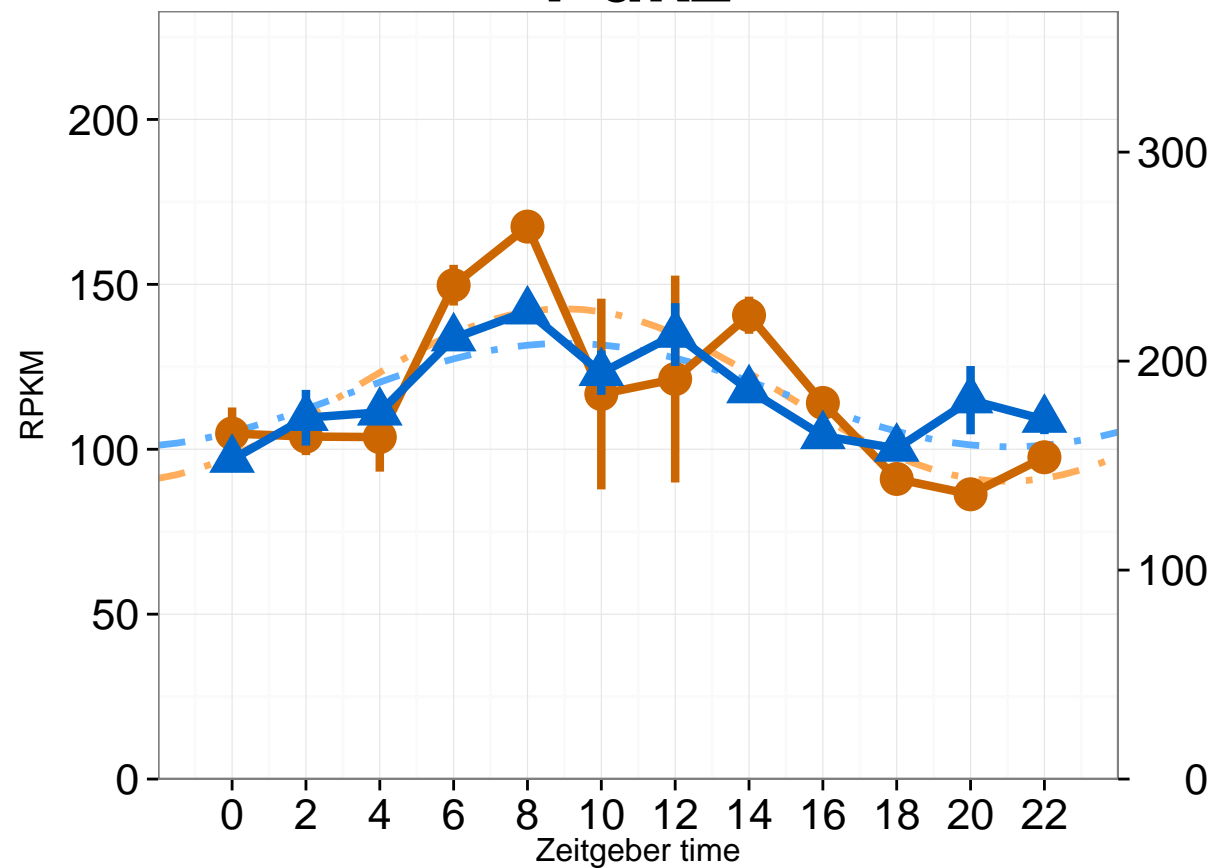

## Pdk2

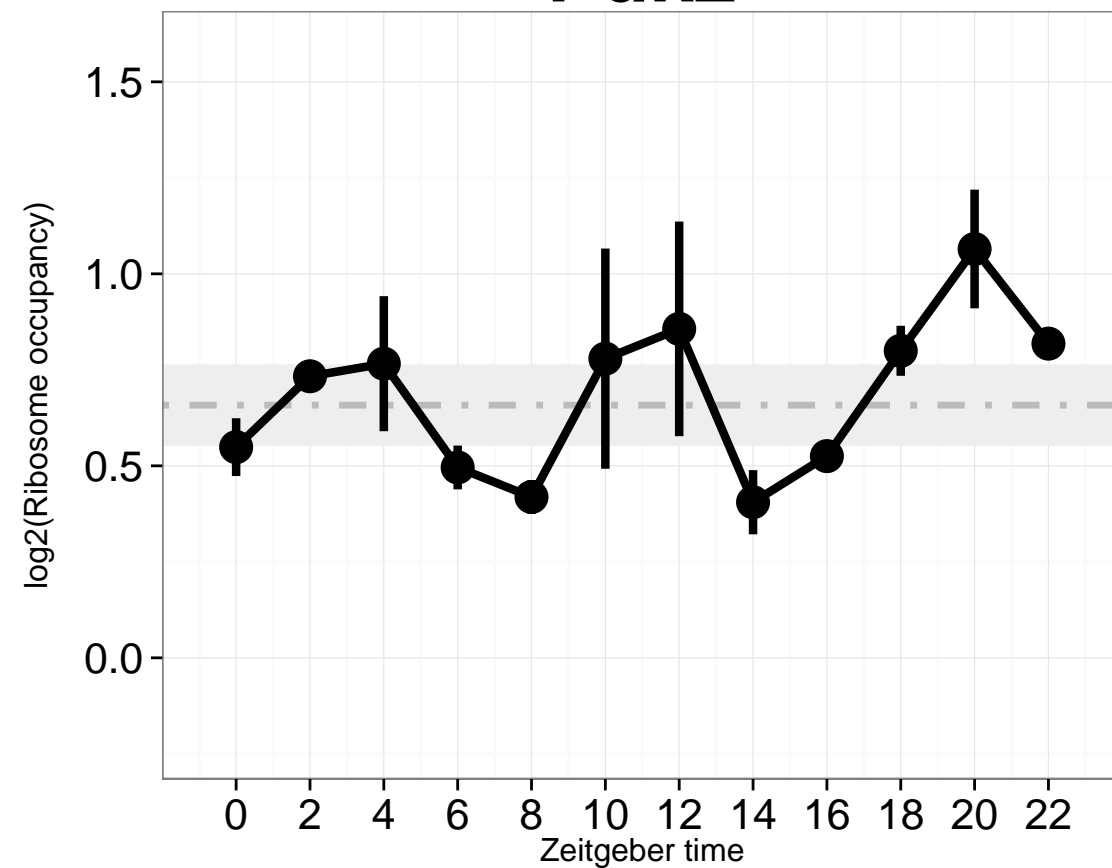

Supplement: Supplementary file 3374 [file 1]

# Med26

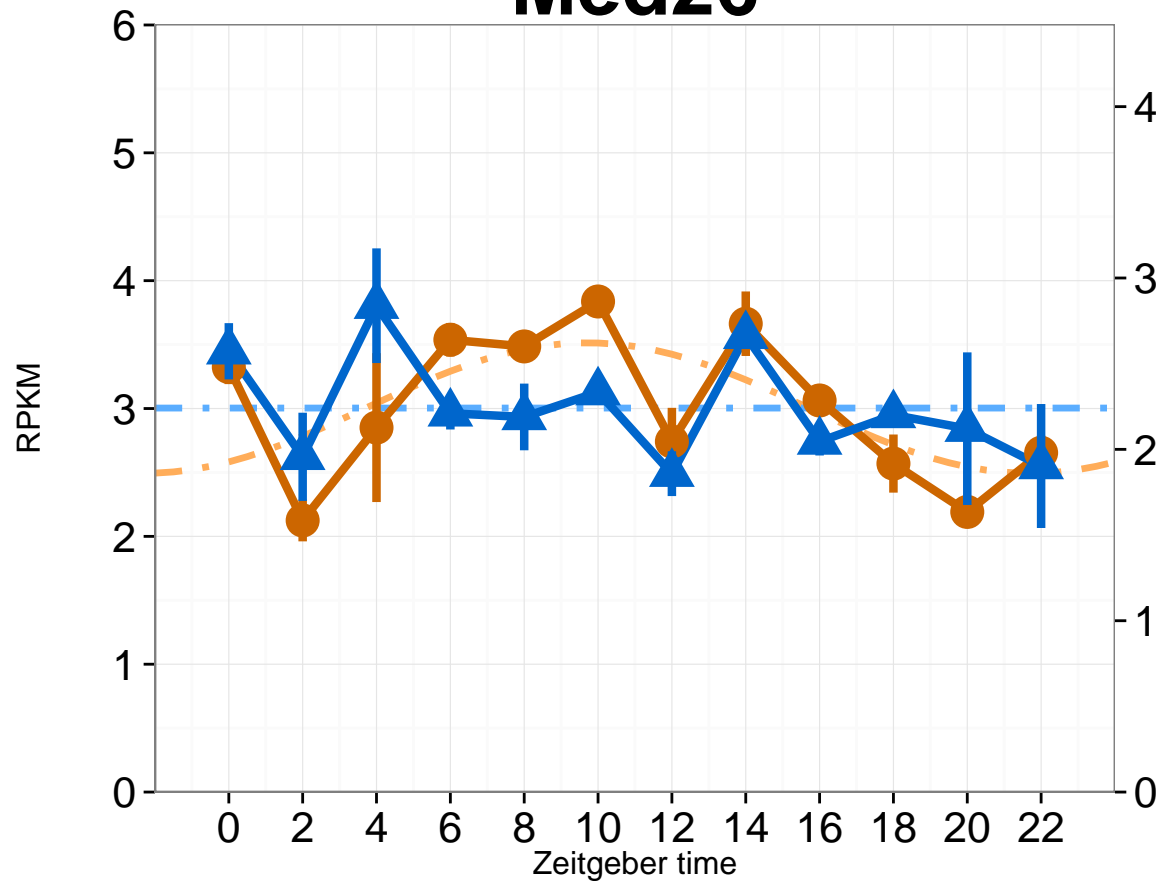

# Med26

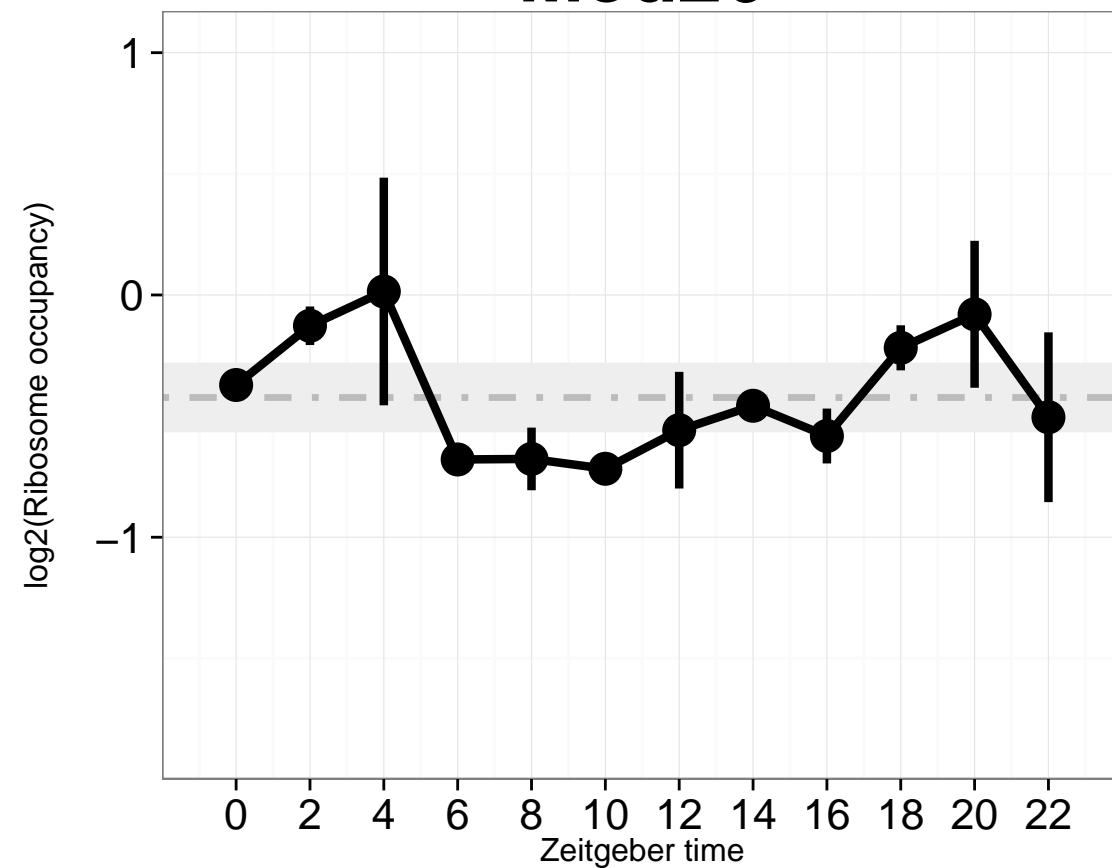

Supplement: Supplementary file 3375 [file 1]

## Arhgef10l

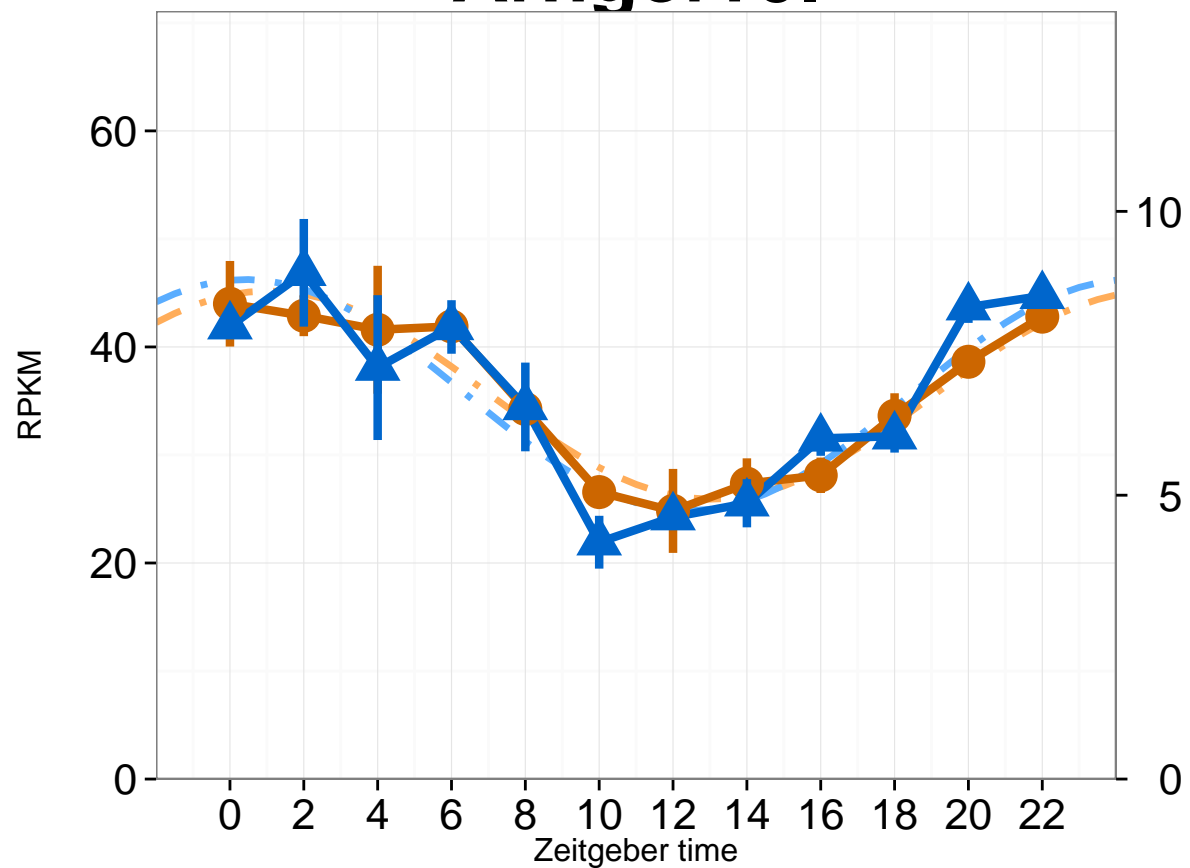

## Arhgef10l

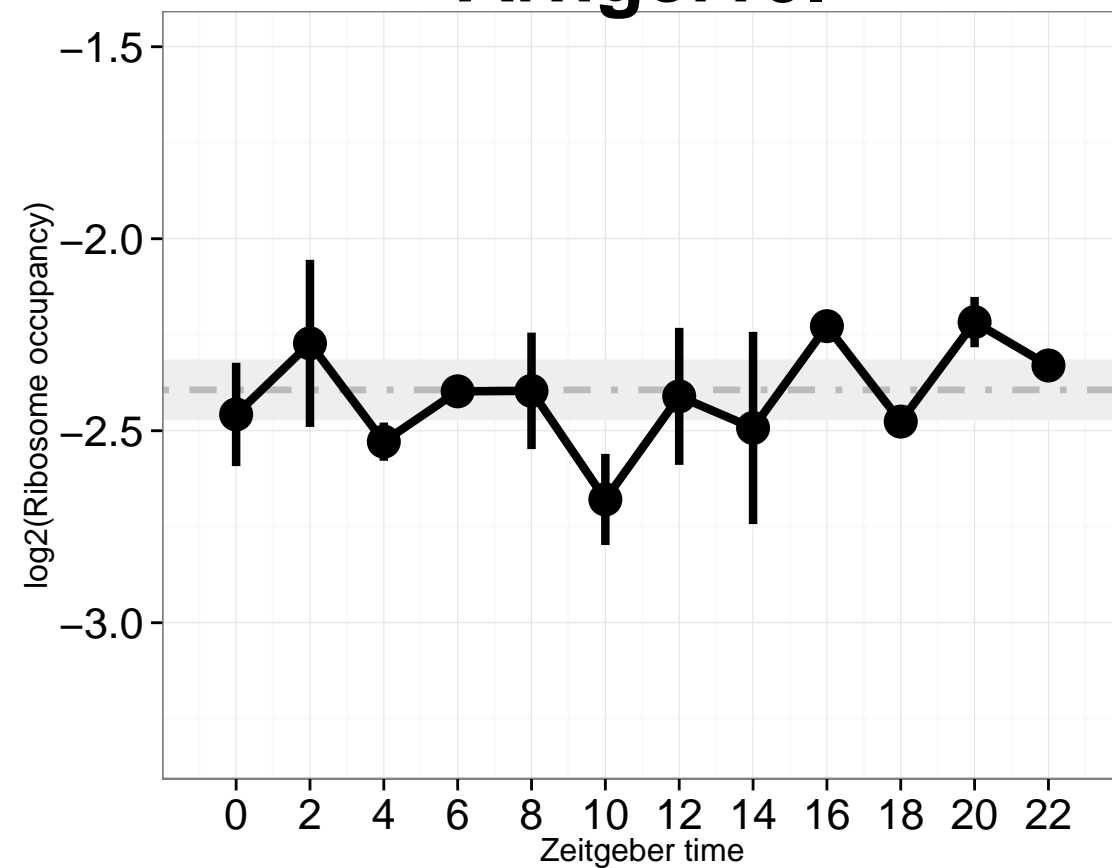

Supplement: Supplementary file 3376 [file 1]

# Ltb4r2

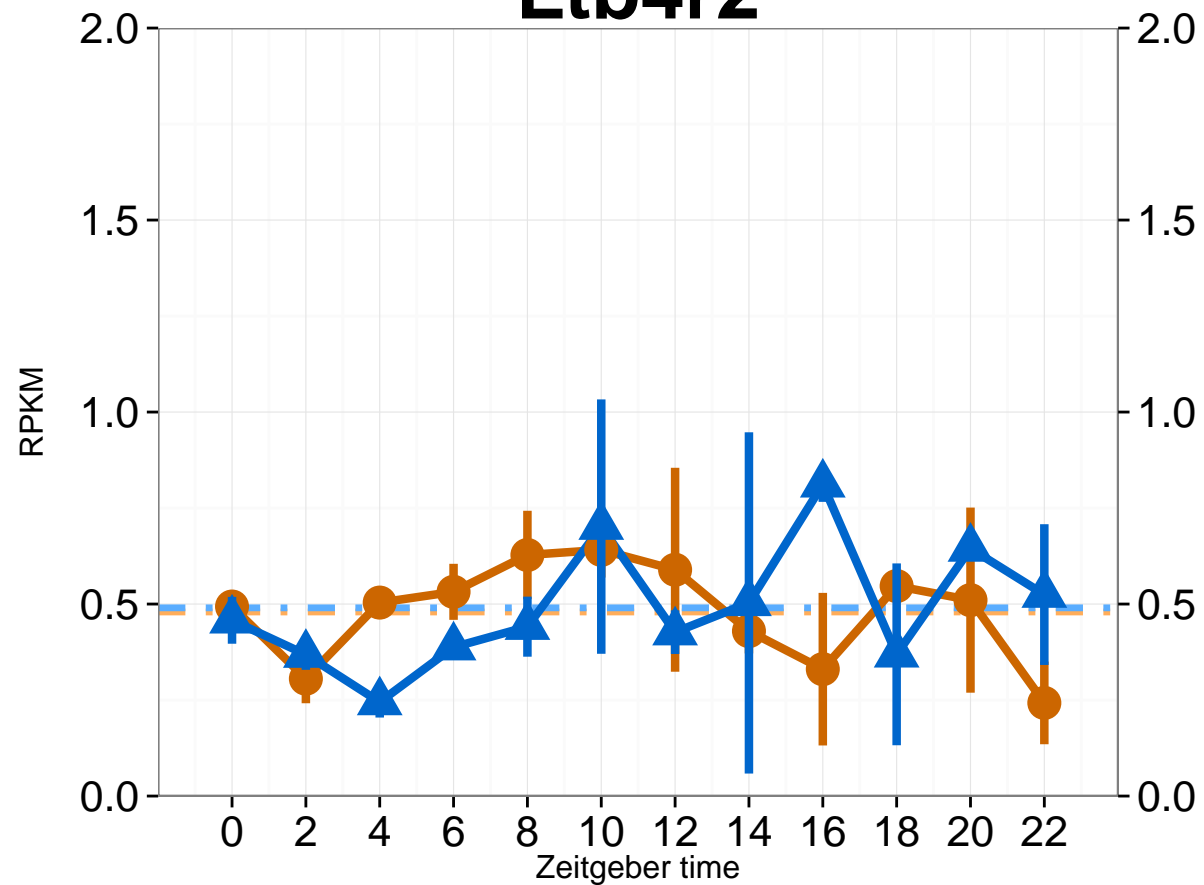

# Ltb4r2

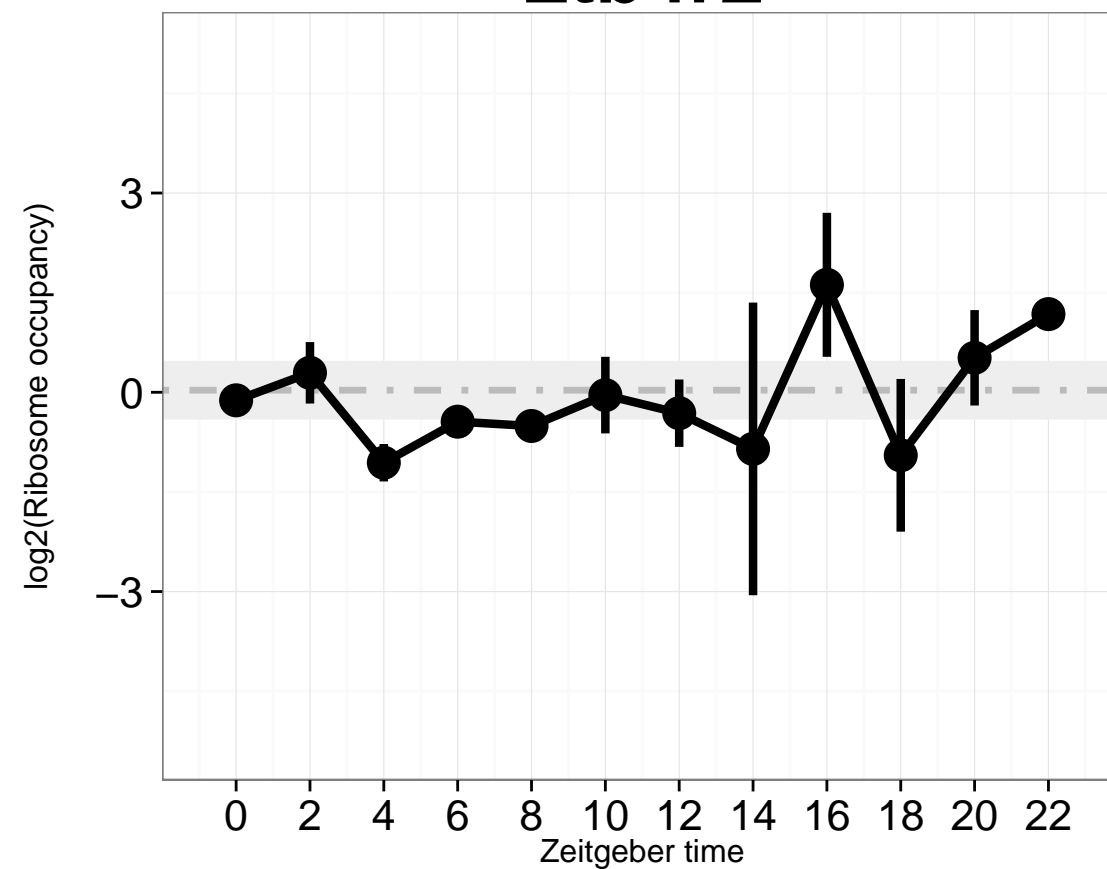

Supplement: Supplementary file 3377 [file 1]

# Arhgef26

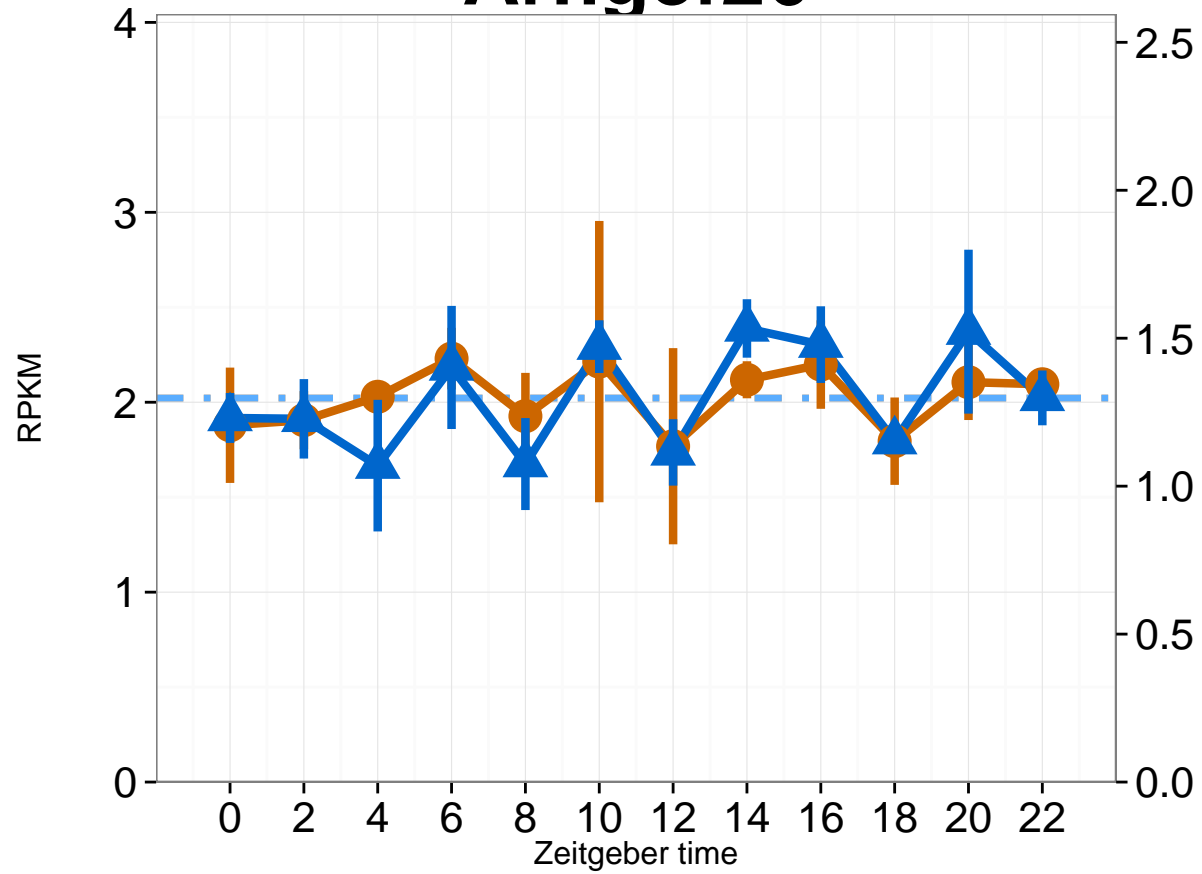

# Arhgef26

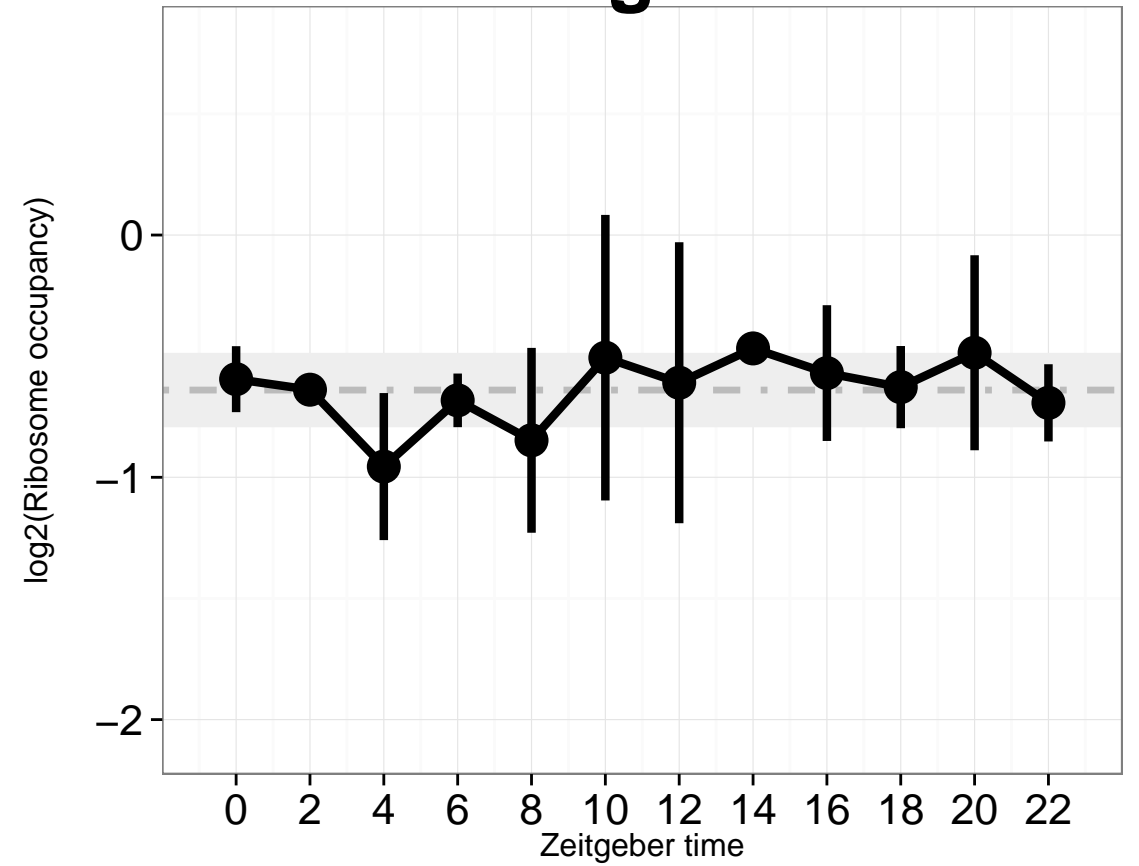

Supplement: Supplementary file 3378 [file 1]

## Wipf1

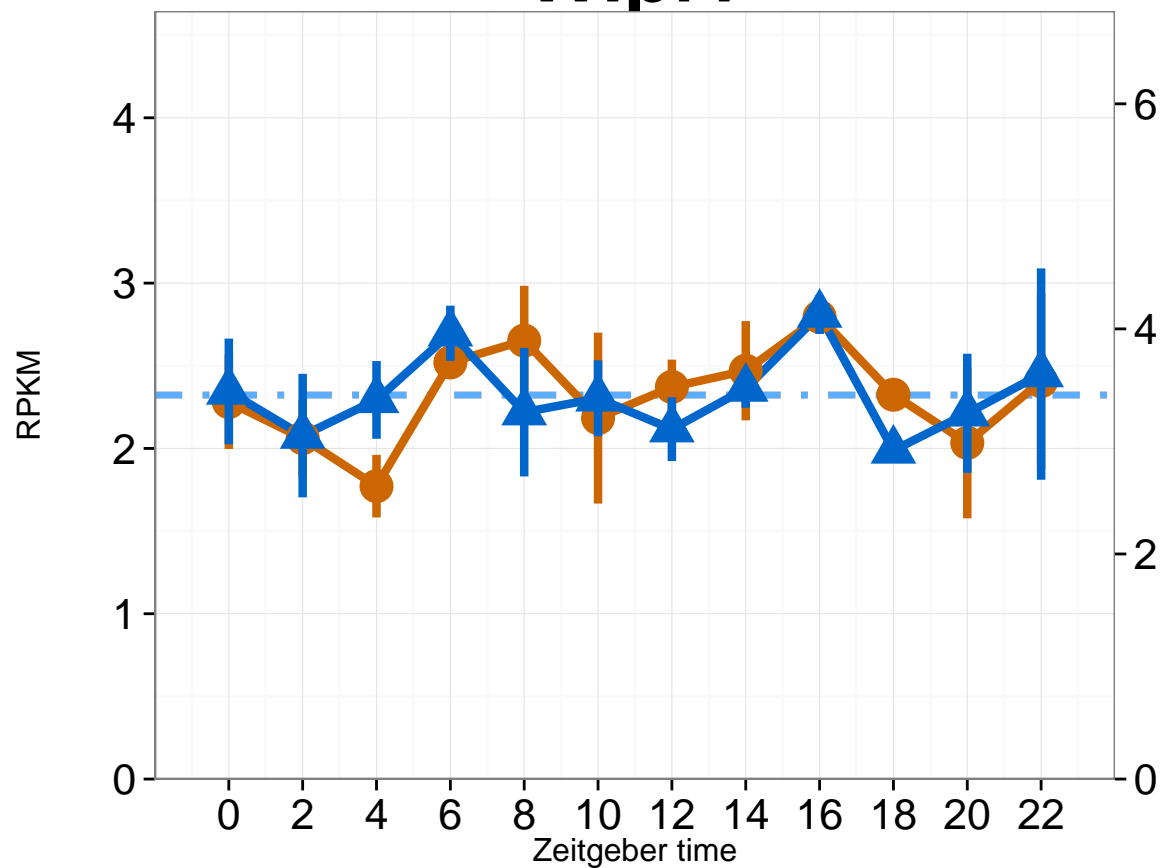

## Wipf1

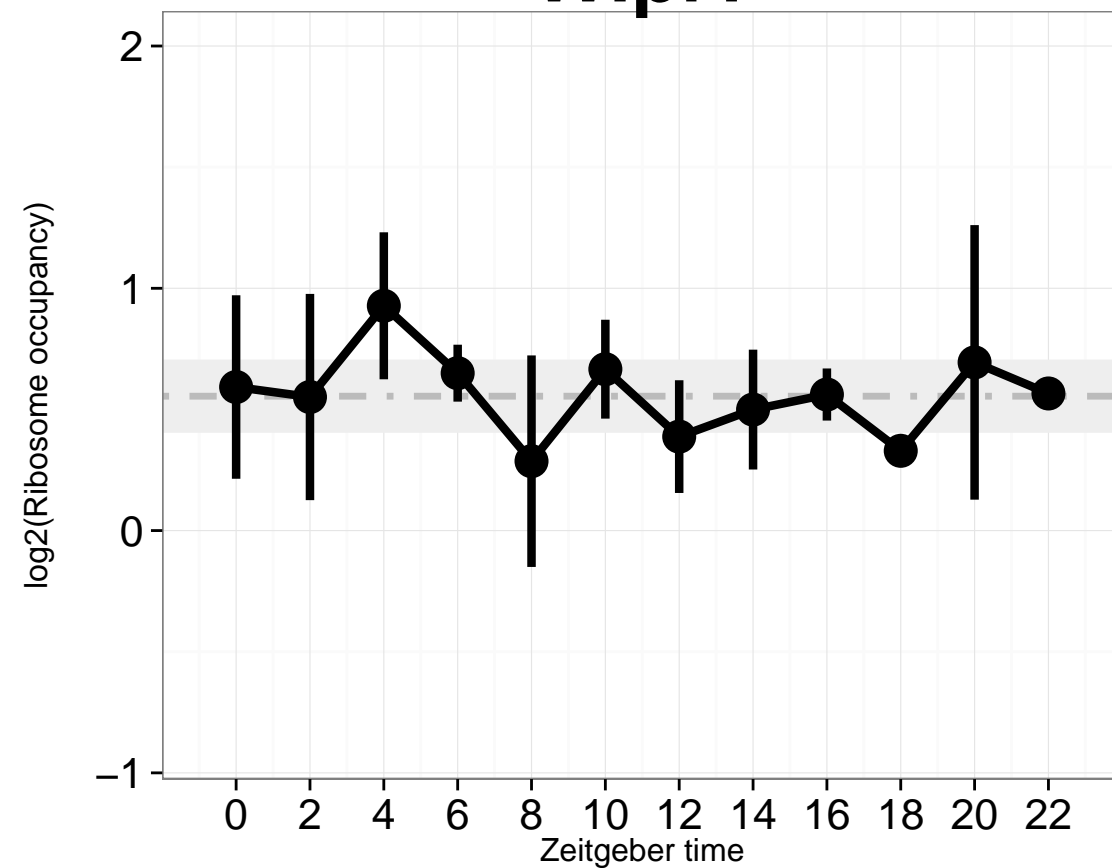

Supplement: Supplementary file 3379 [file 1]

## Ttc4

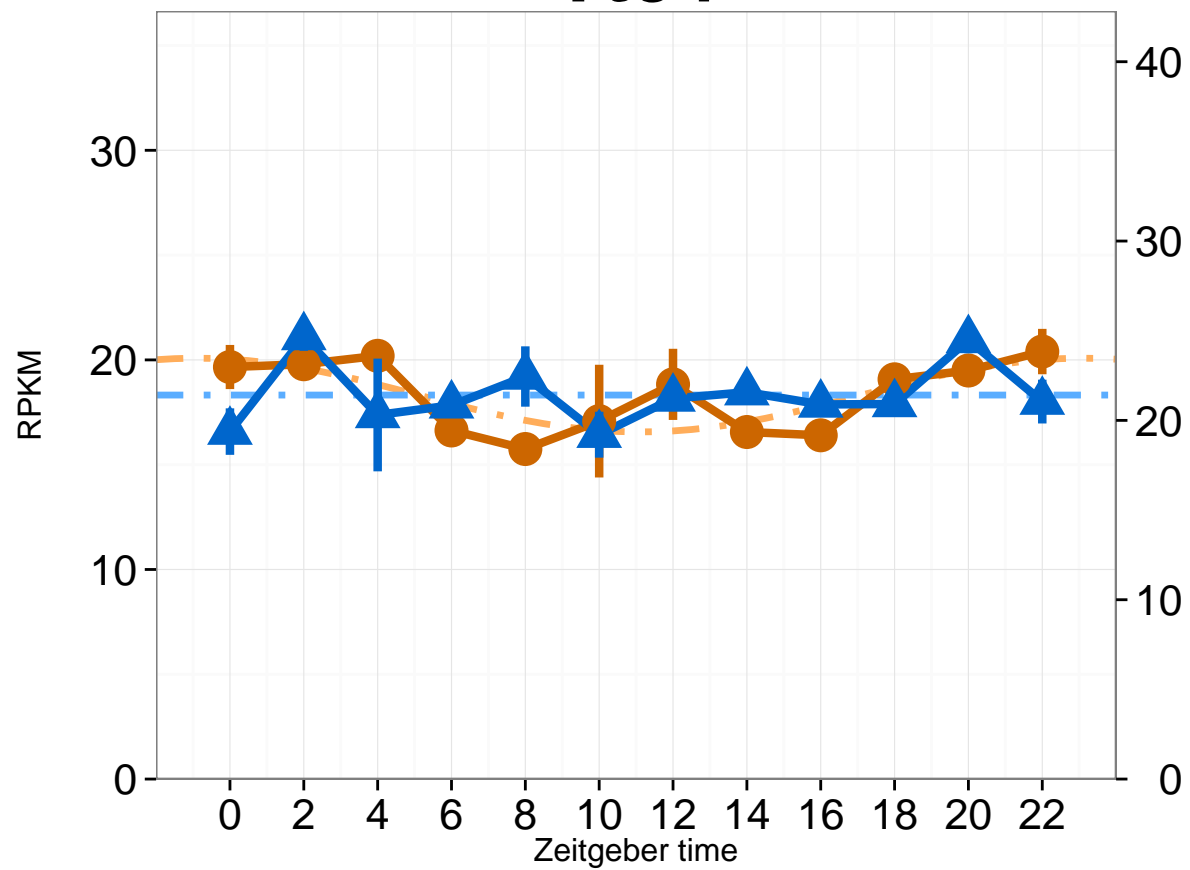

## Ttc4

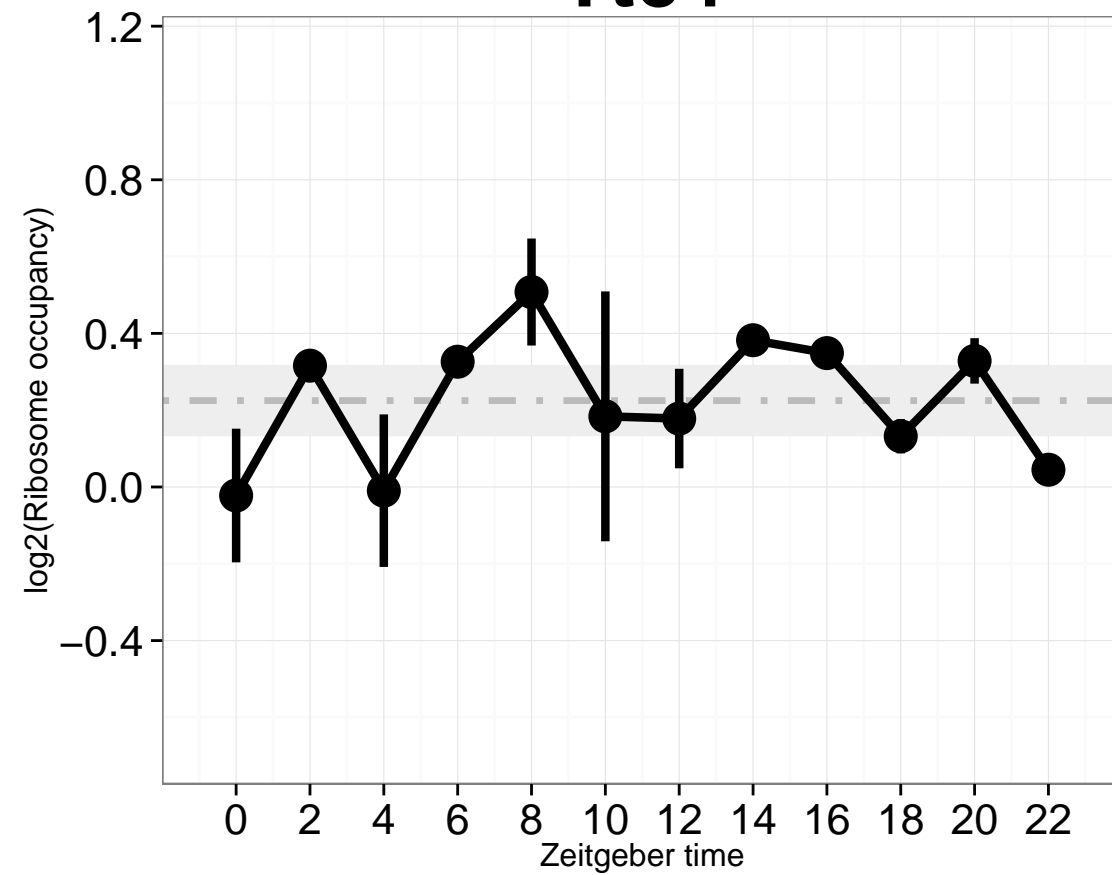

Supplement: Supplementary file 3380 [file 1]

# Lyrm9

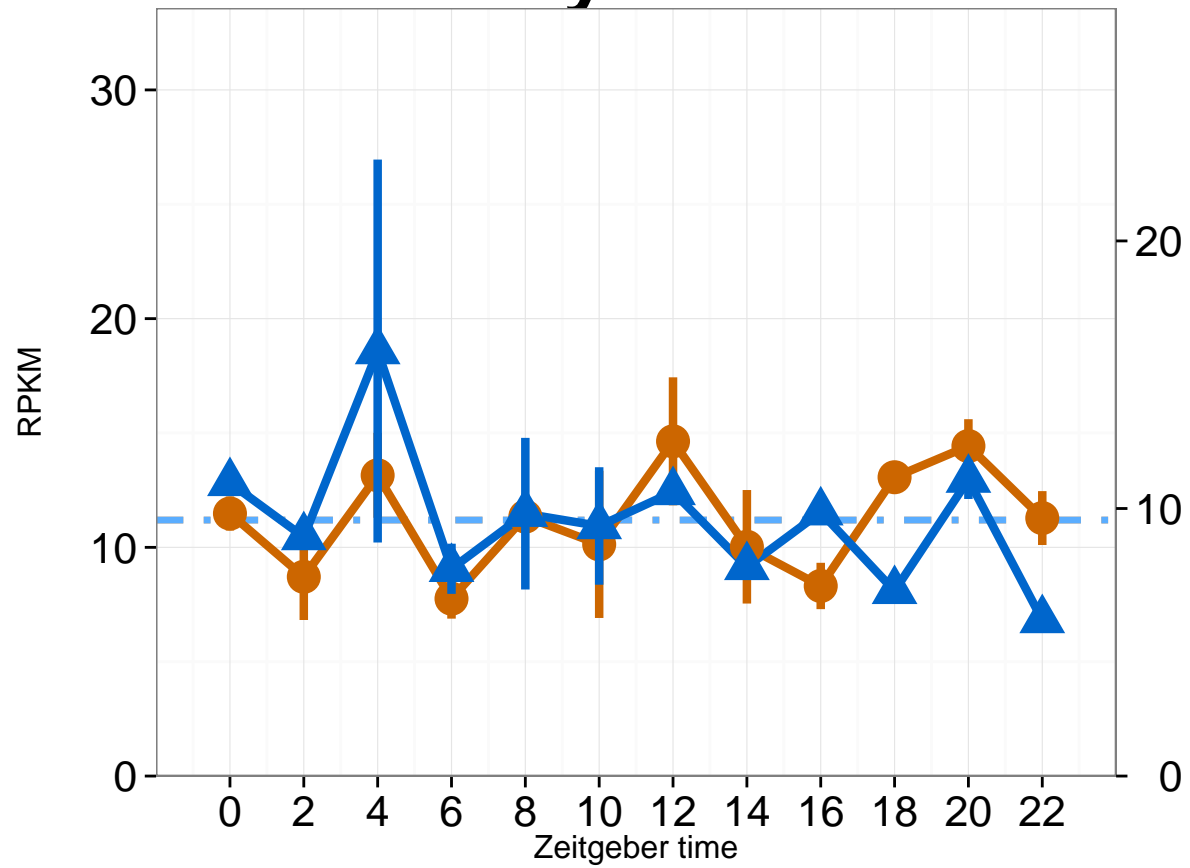

# Lyrm9

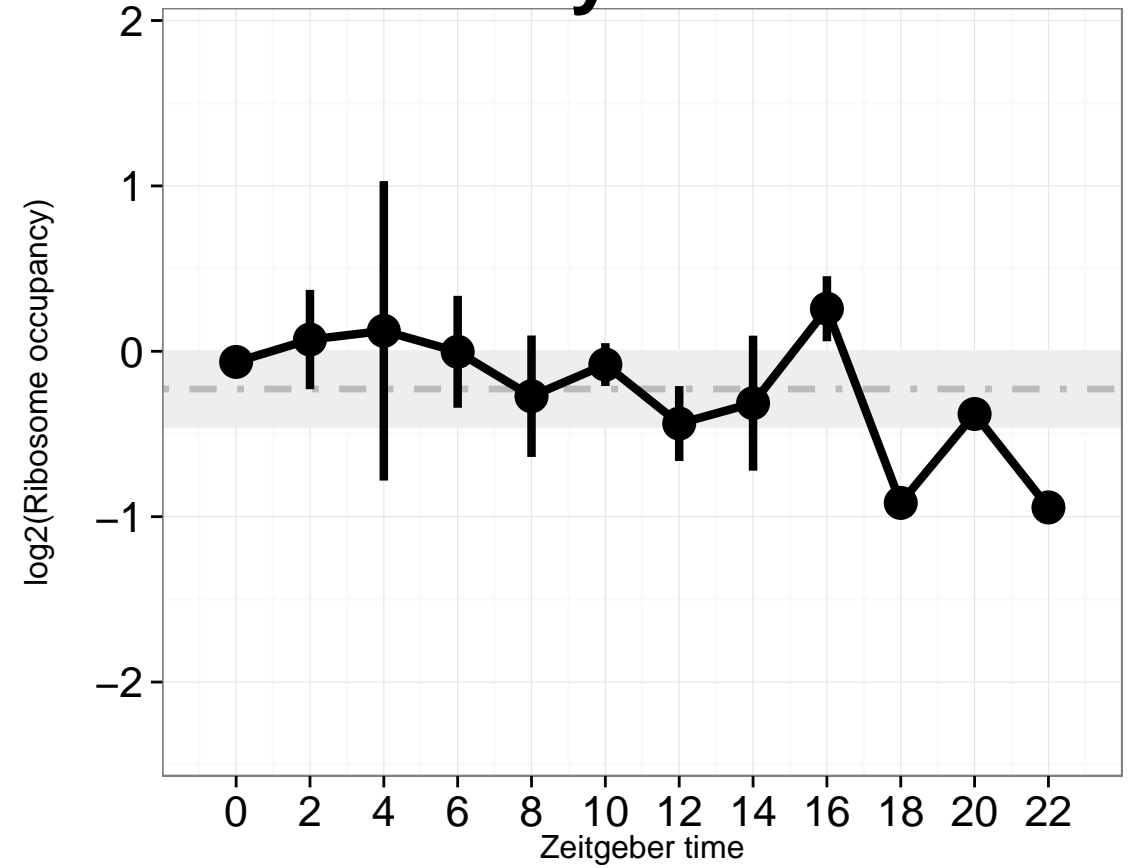

Supplement: Supplementary file 3381 [file 1]

# MarcksI1

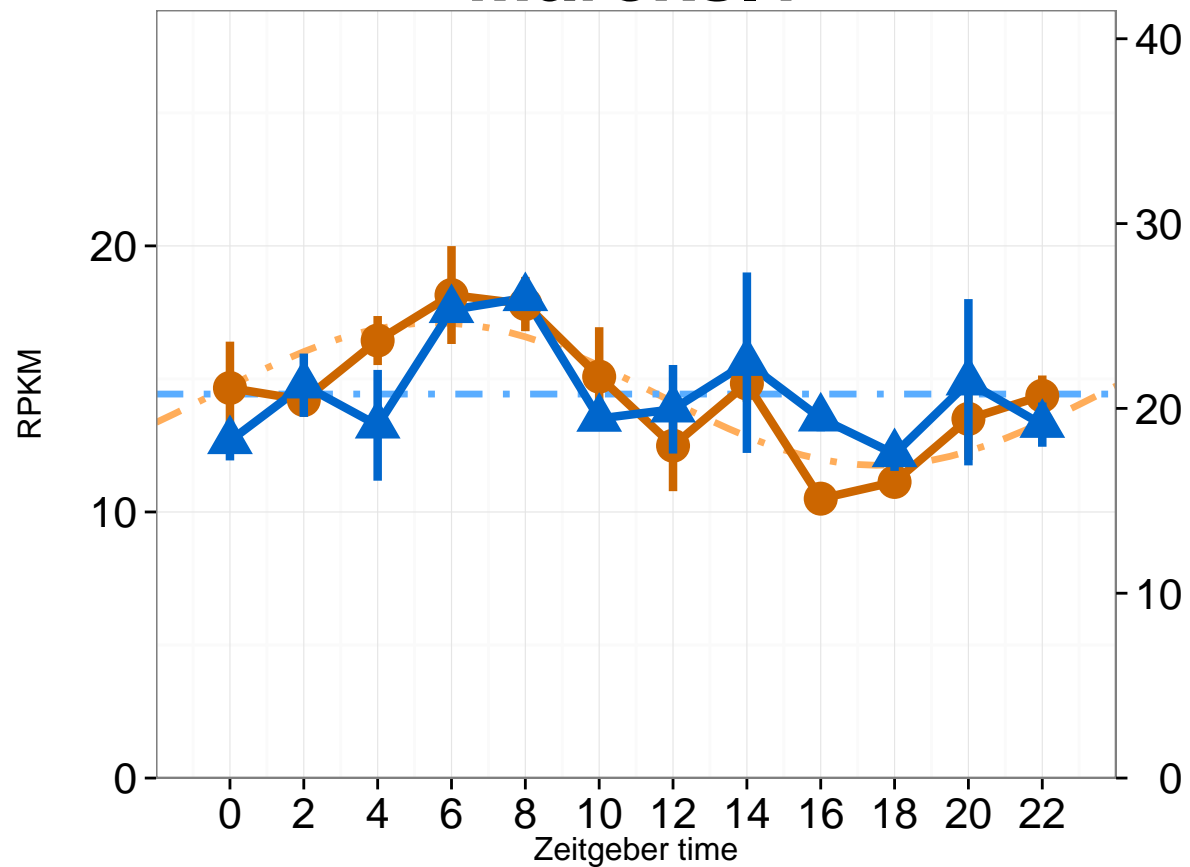

# MarcksI1

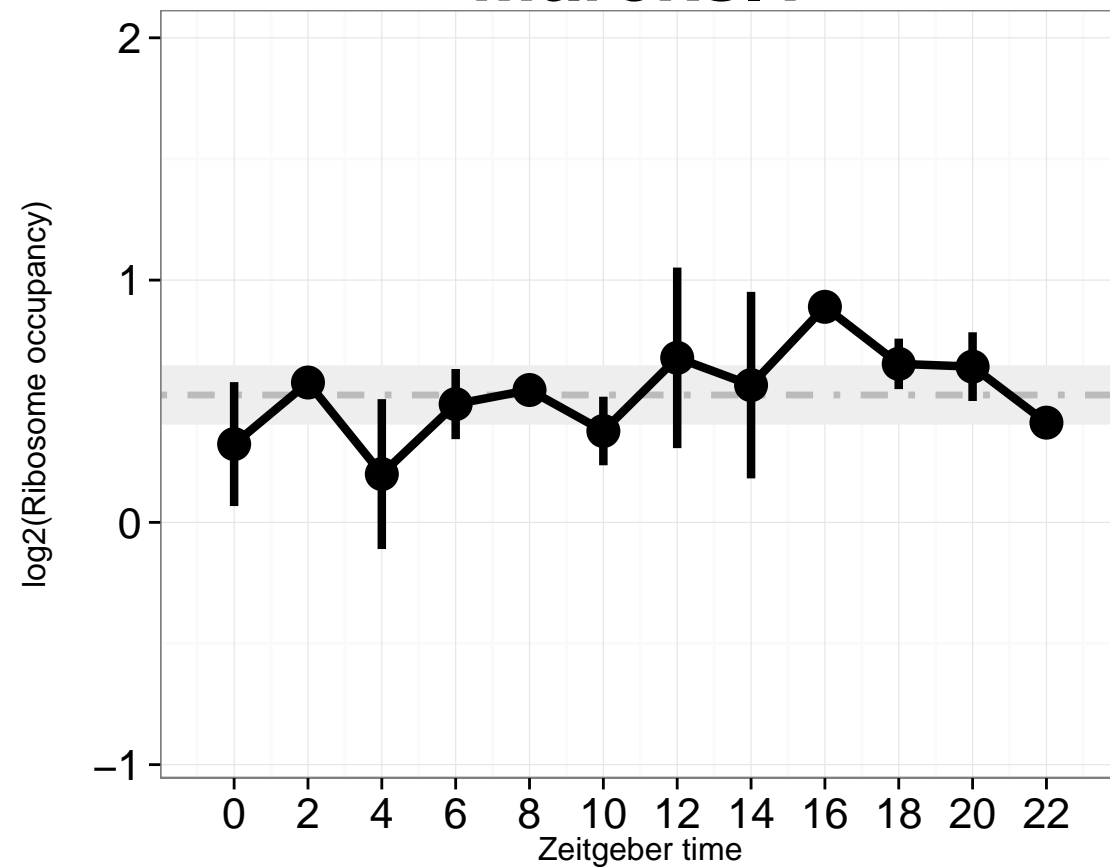

Supplement: Supplementary file 3382 [file 1]

## Pde4dip

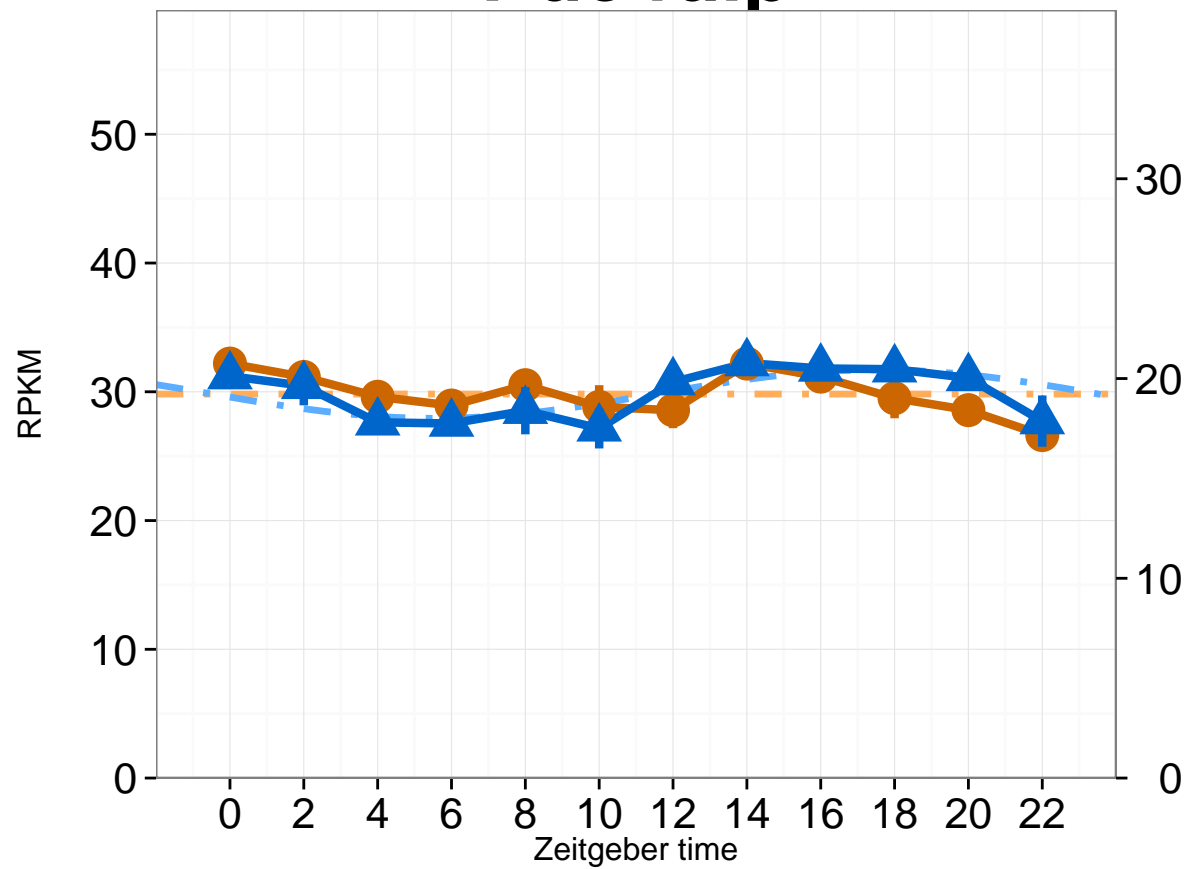

## Pde4dip

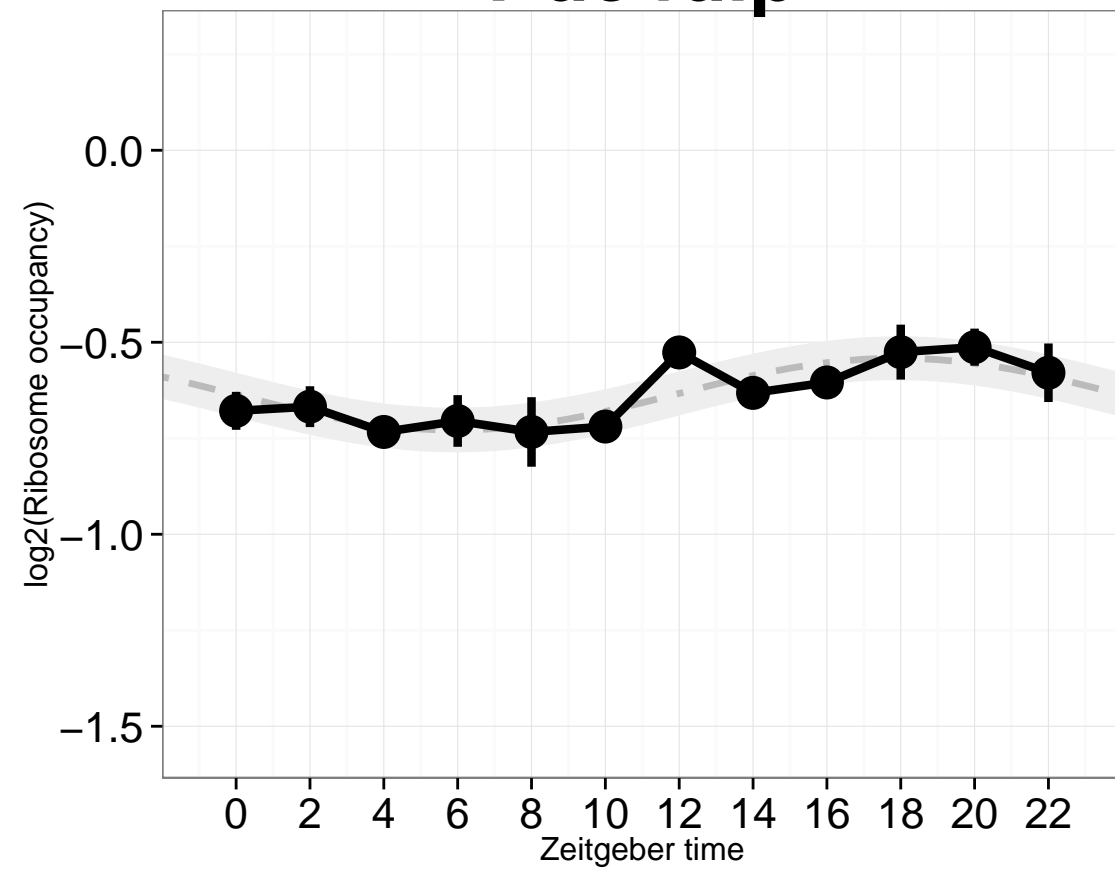

Supplement: Supplementary file 3383 [file 1]

## Cic

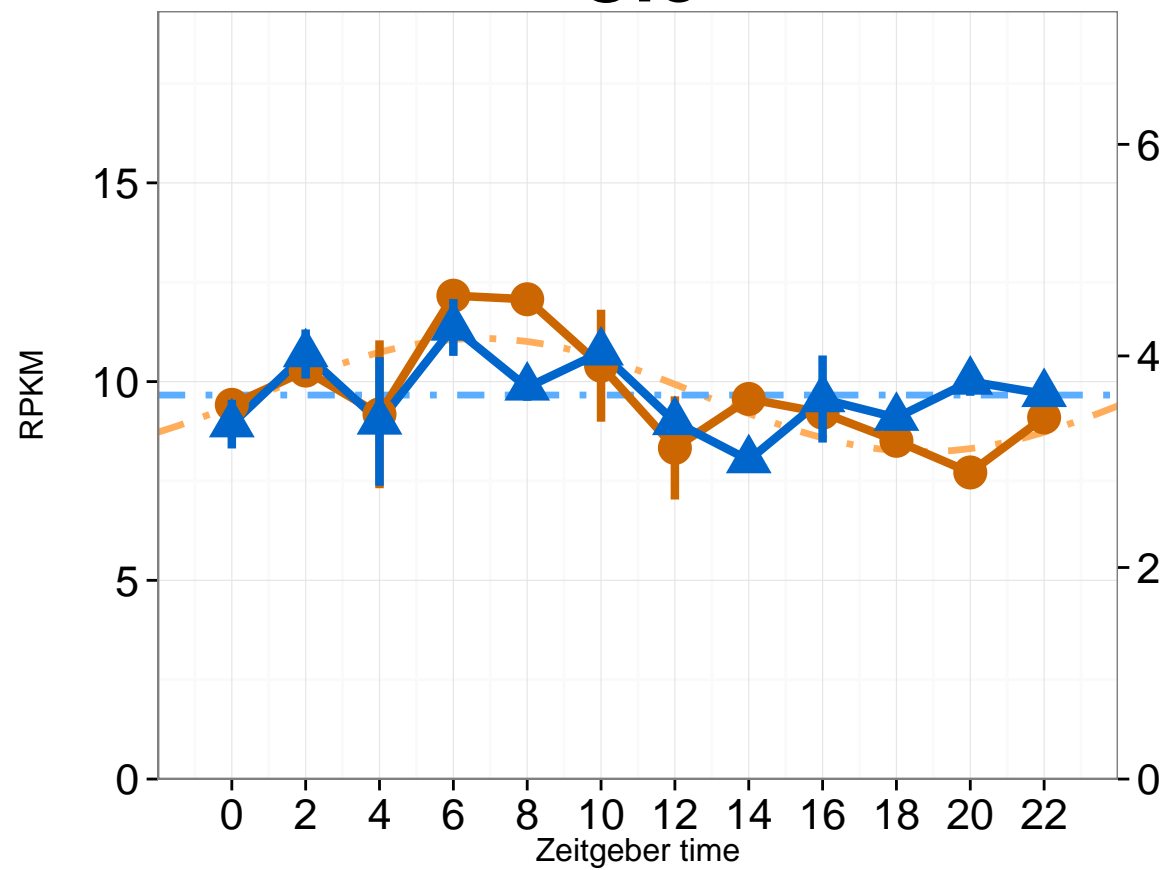

## Cic

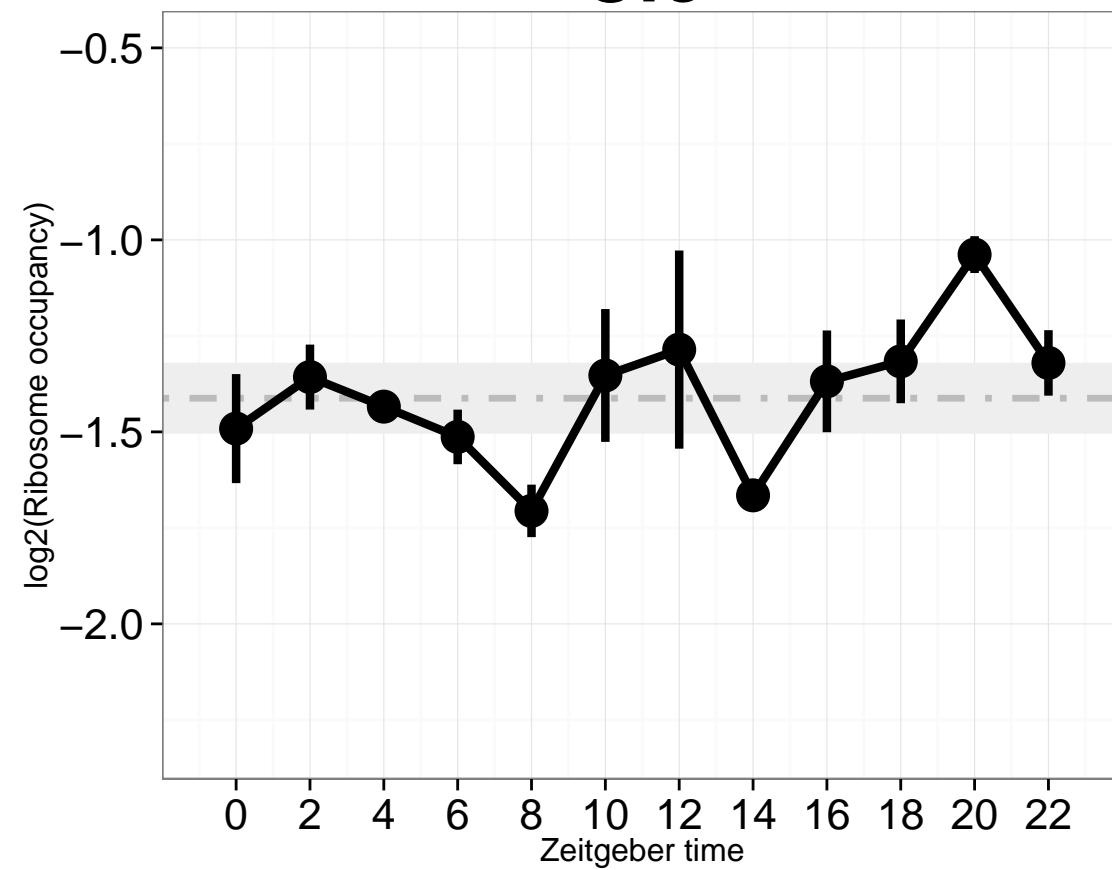

Supplement: Supplementary file 3384 [file 1]

## Ephb6

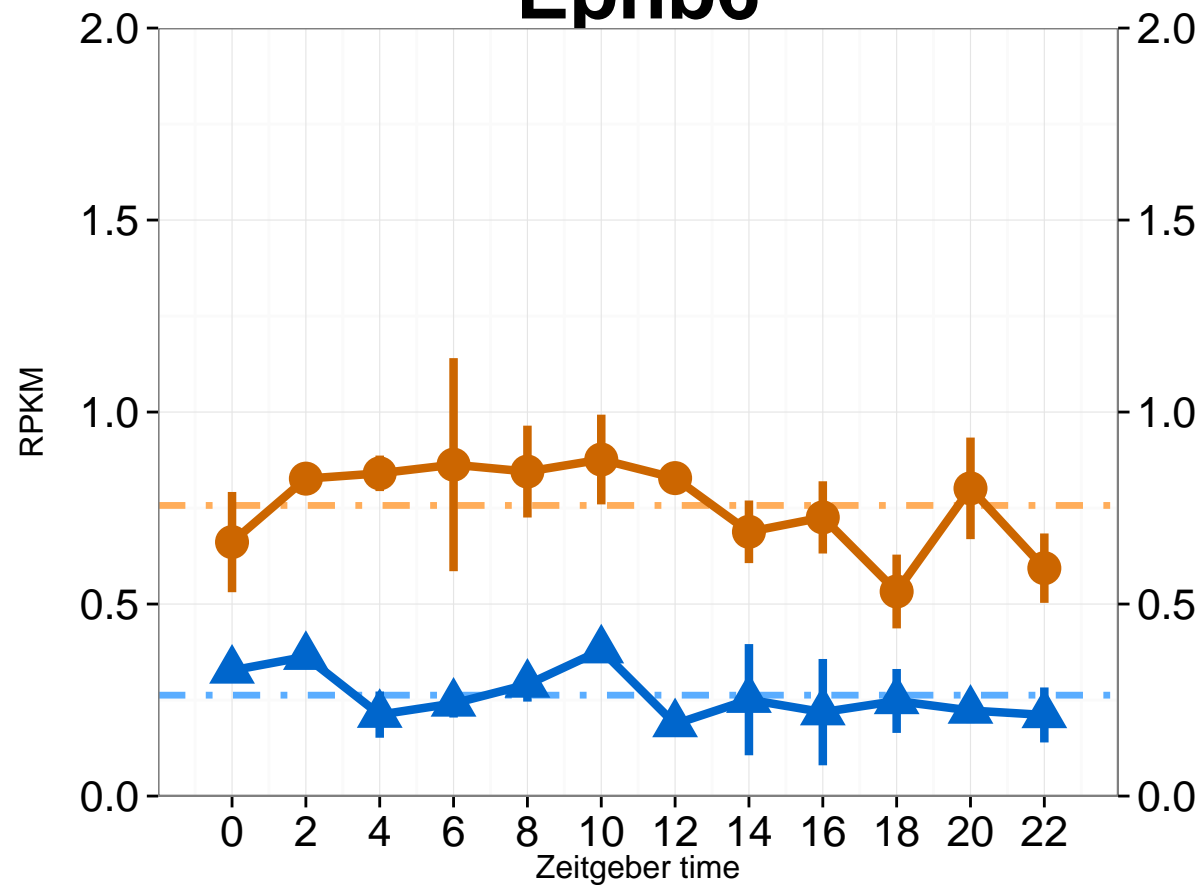

## Ephb6

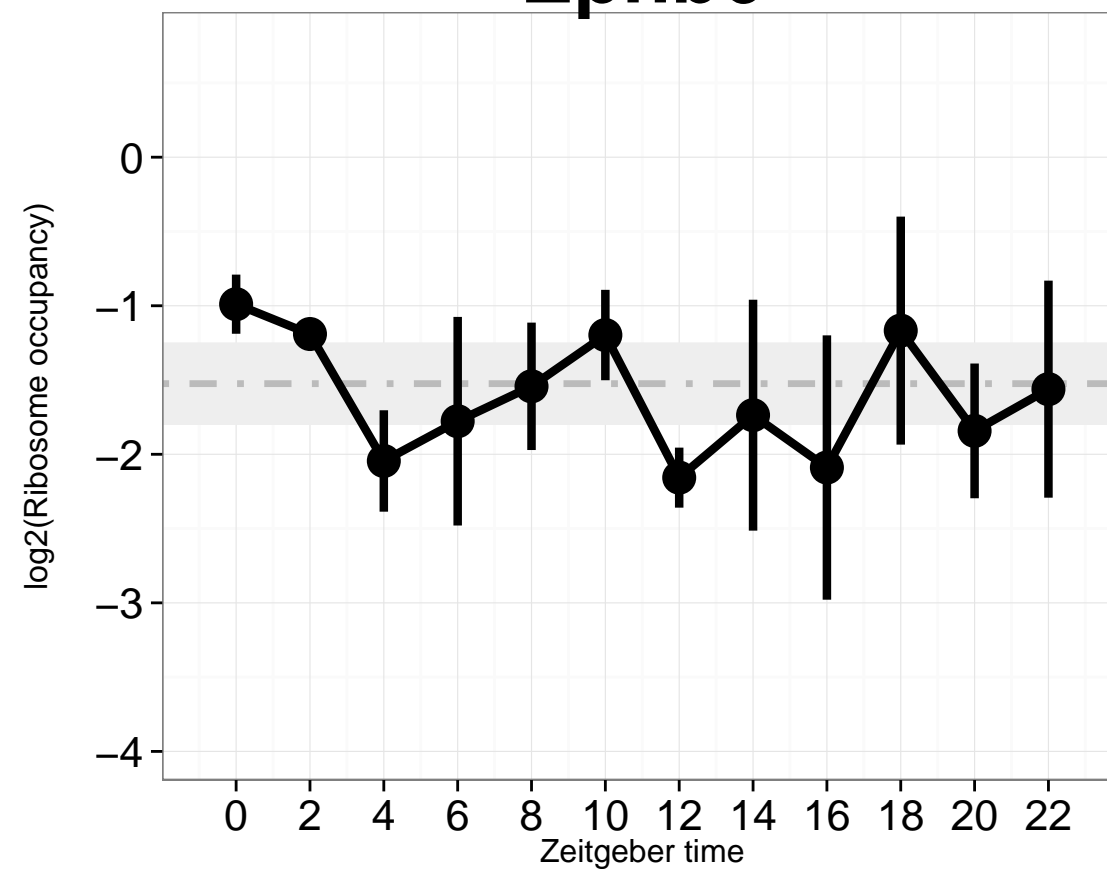

Supplement: Supplementary file 3385 [file 1]

## Gas2l1

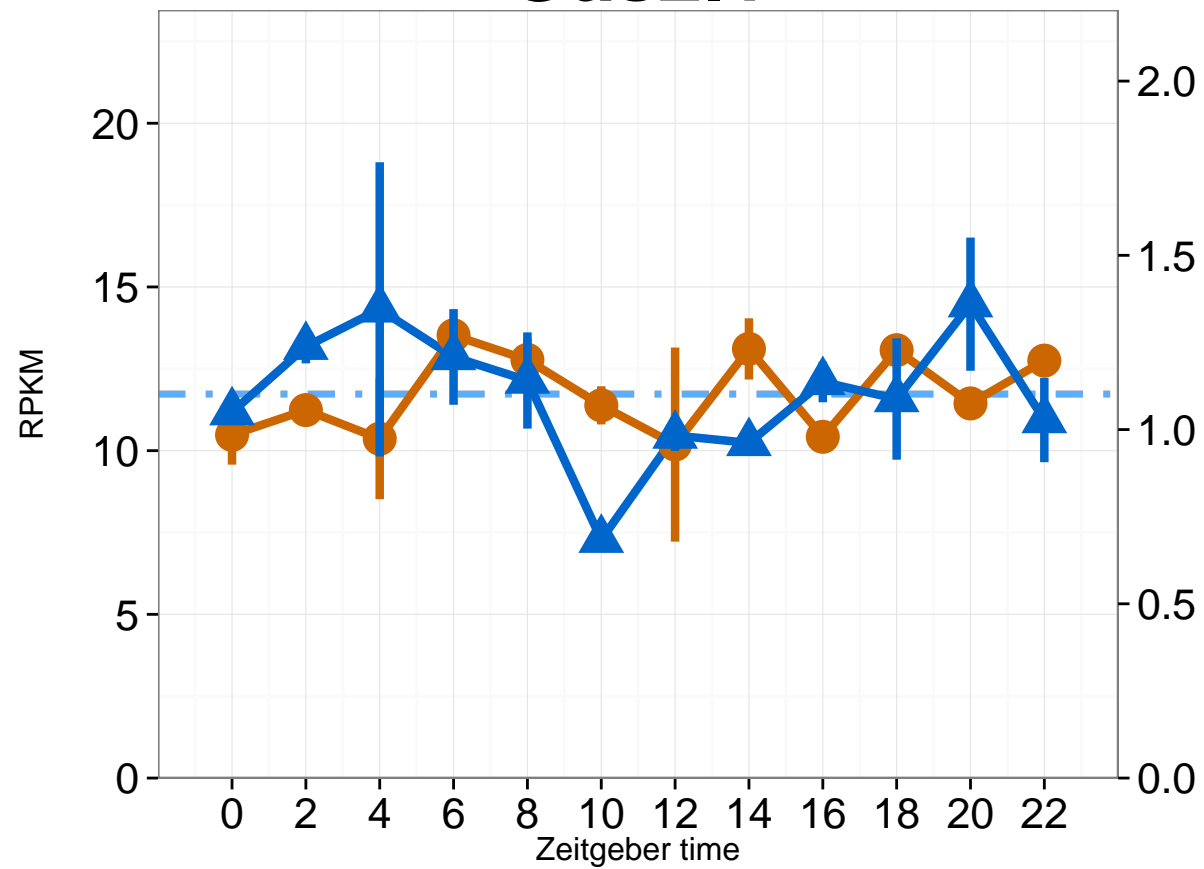

## Gas2l1

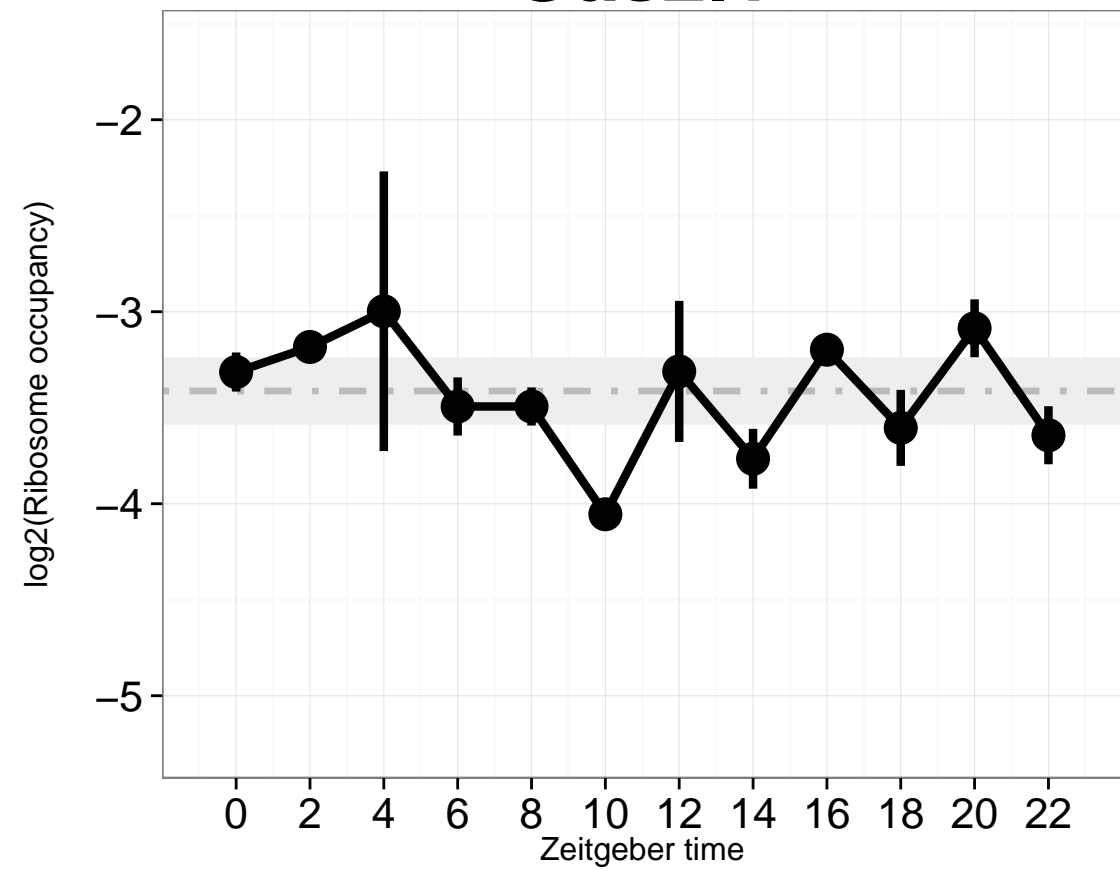

Supplement: Supplementary file 3386 [file 1]

# 1700025G04Rik

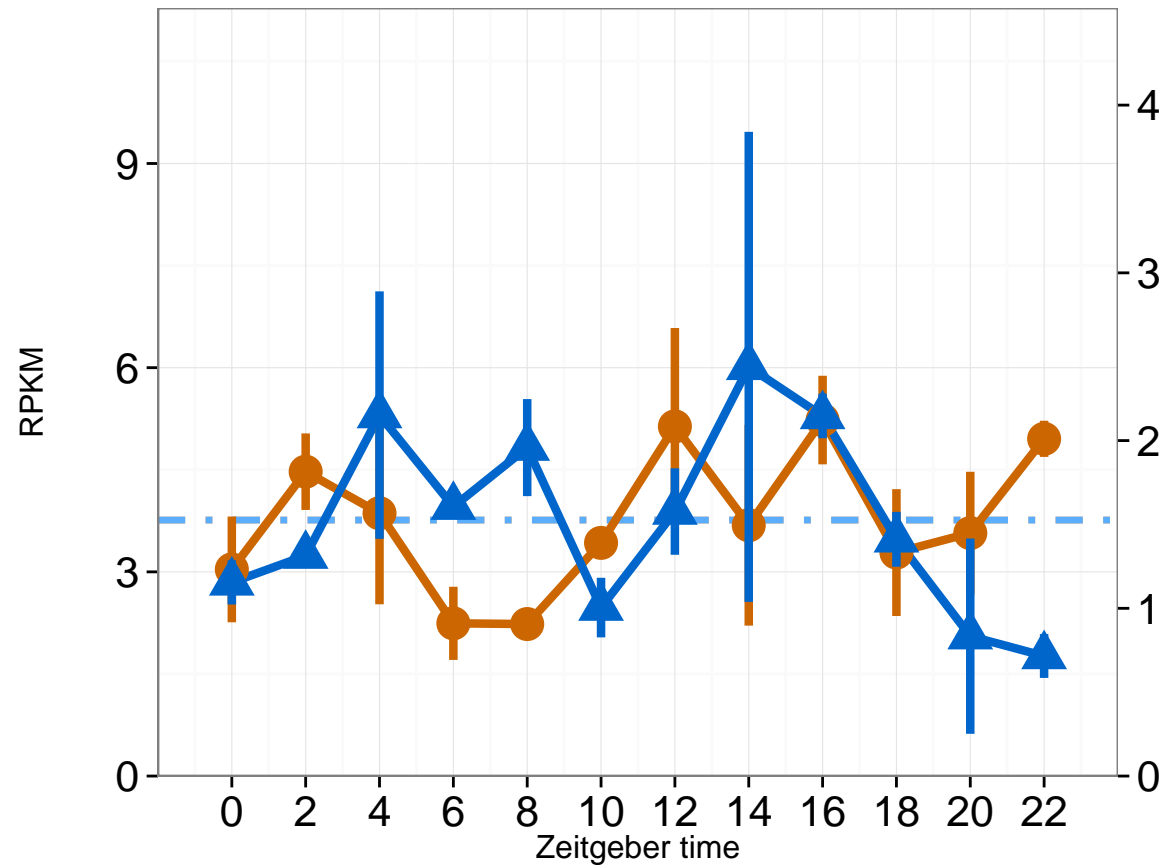

# 1700025G04Rik

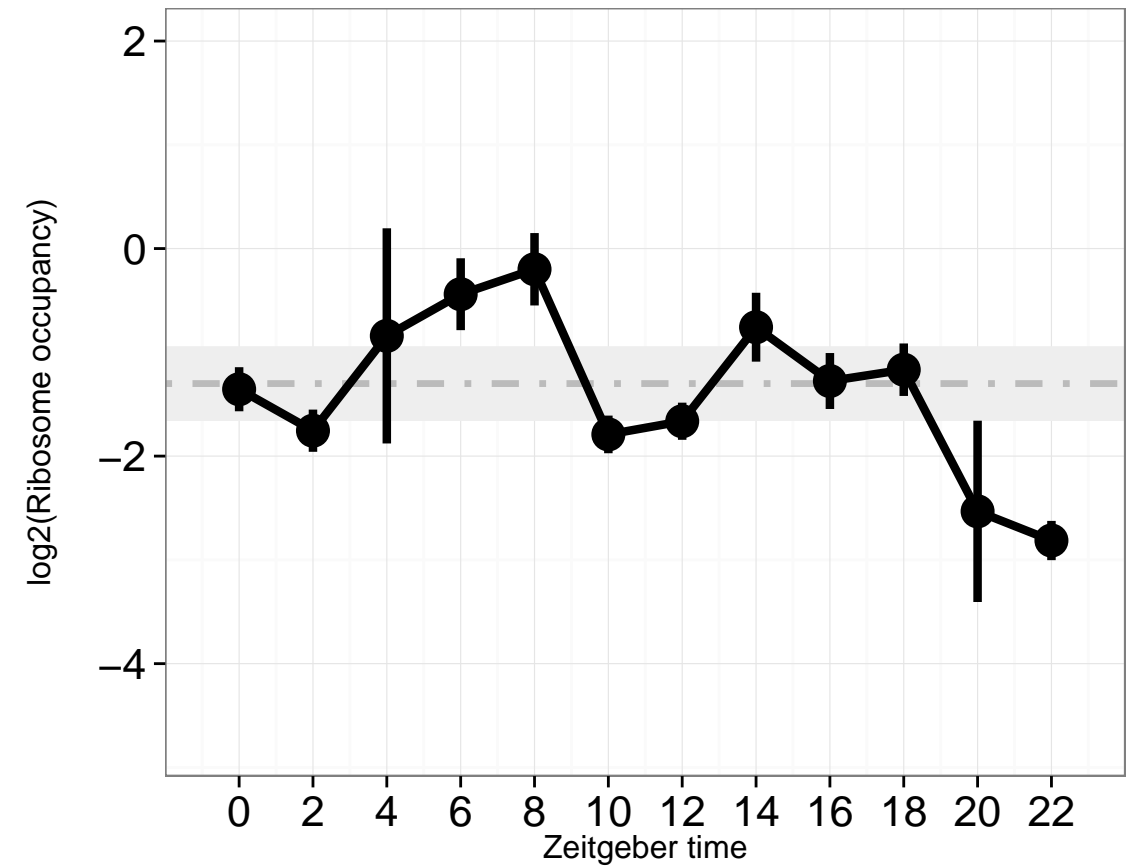

Supplement: Supplementary file 3387 [file 1]

# Papss1

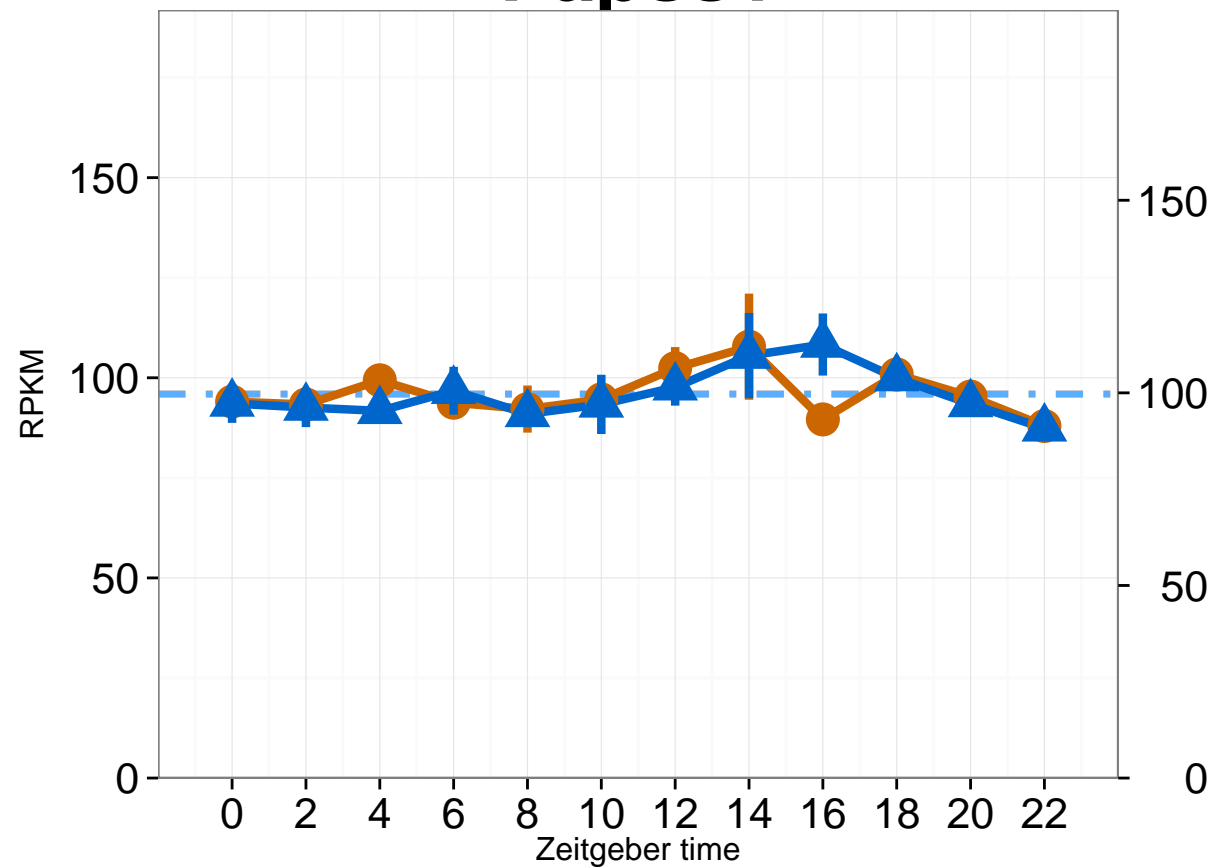

# Papss1

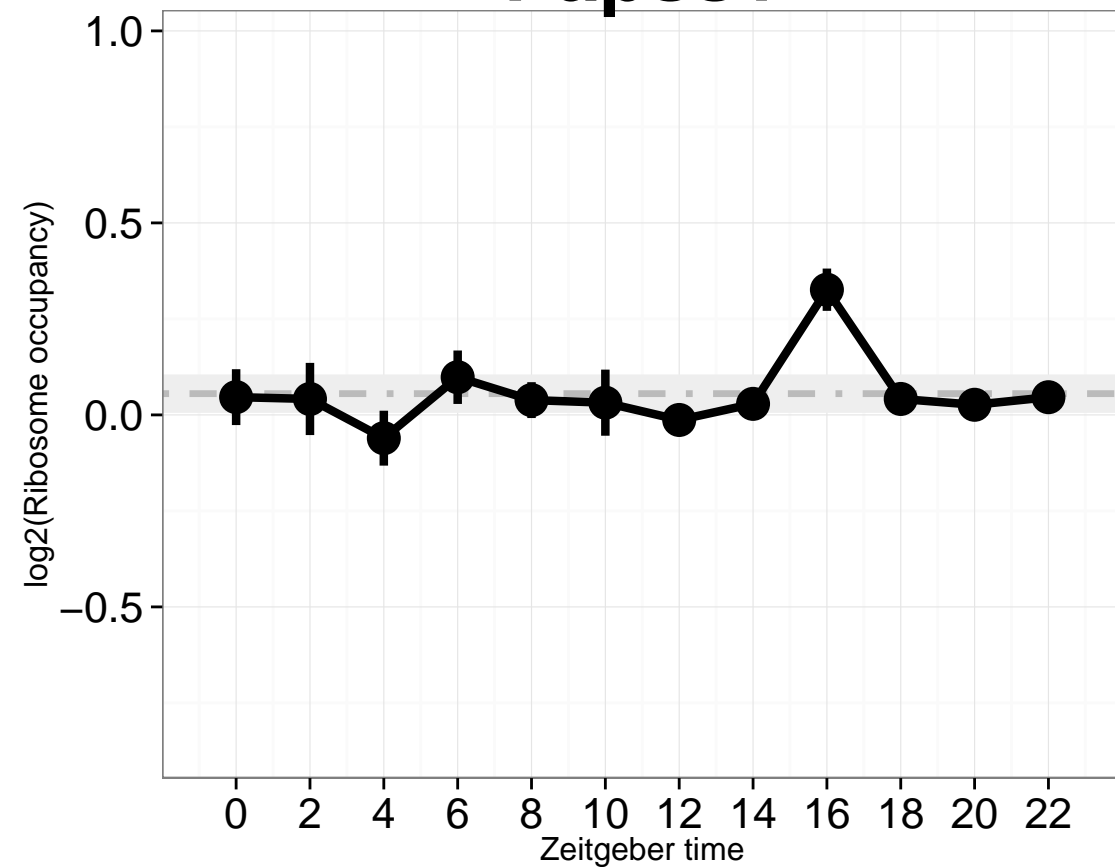

Supplement: Supplementary file 3388 [file 1]

# Ap3b1

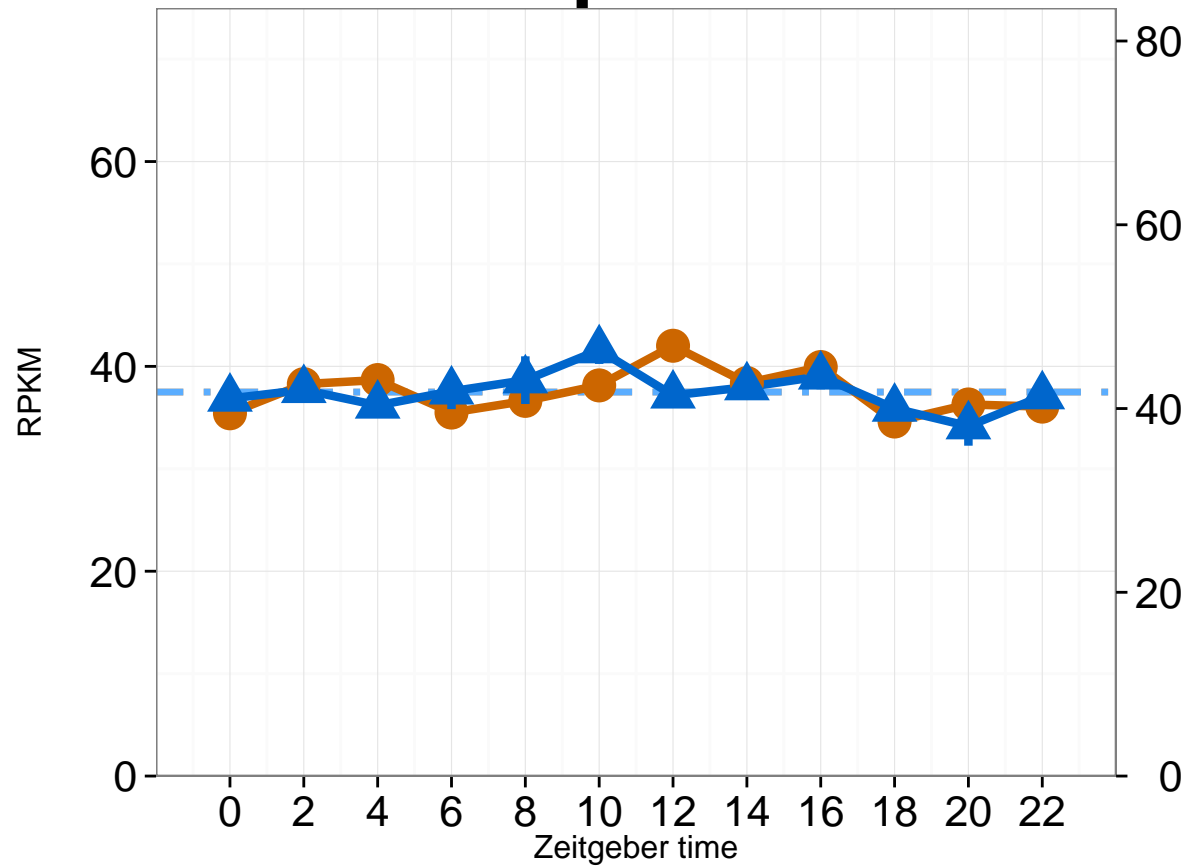

# Ap3b1

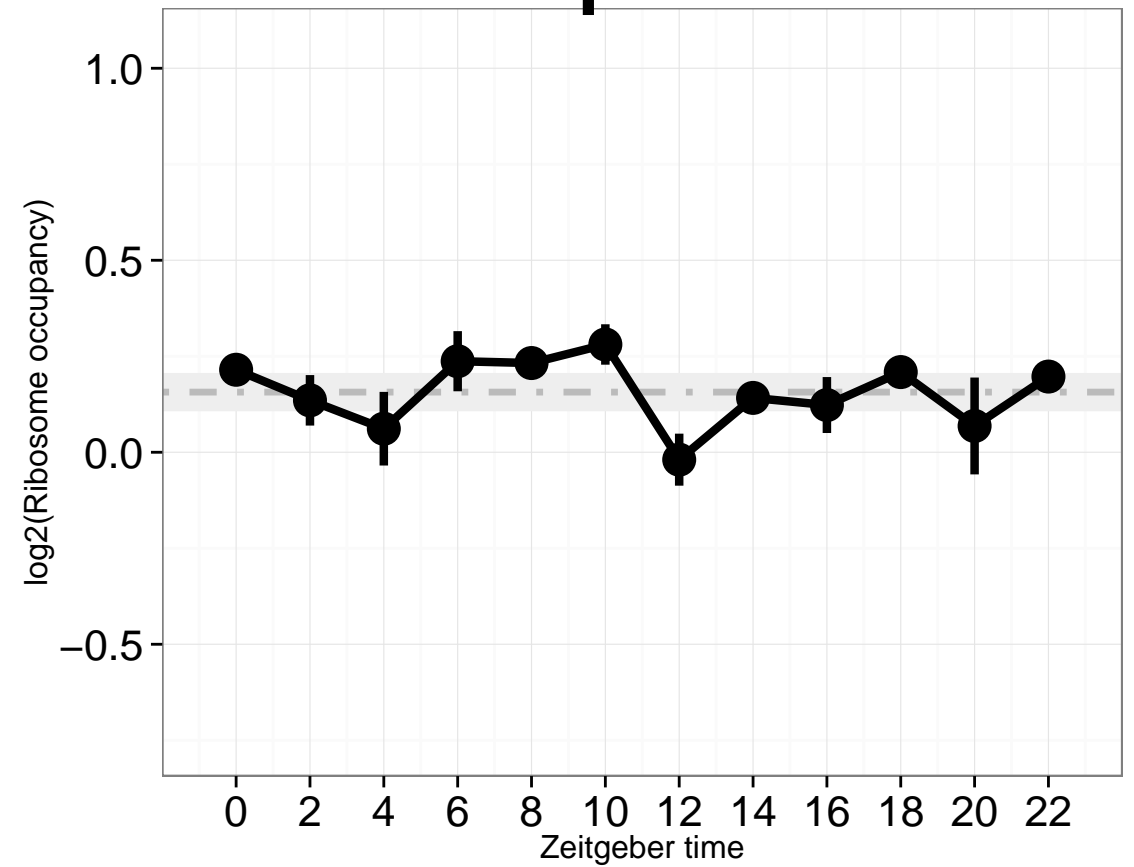

Supplement: Supplementary file 3389 [file 1]

## Nox4

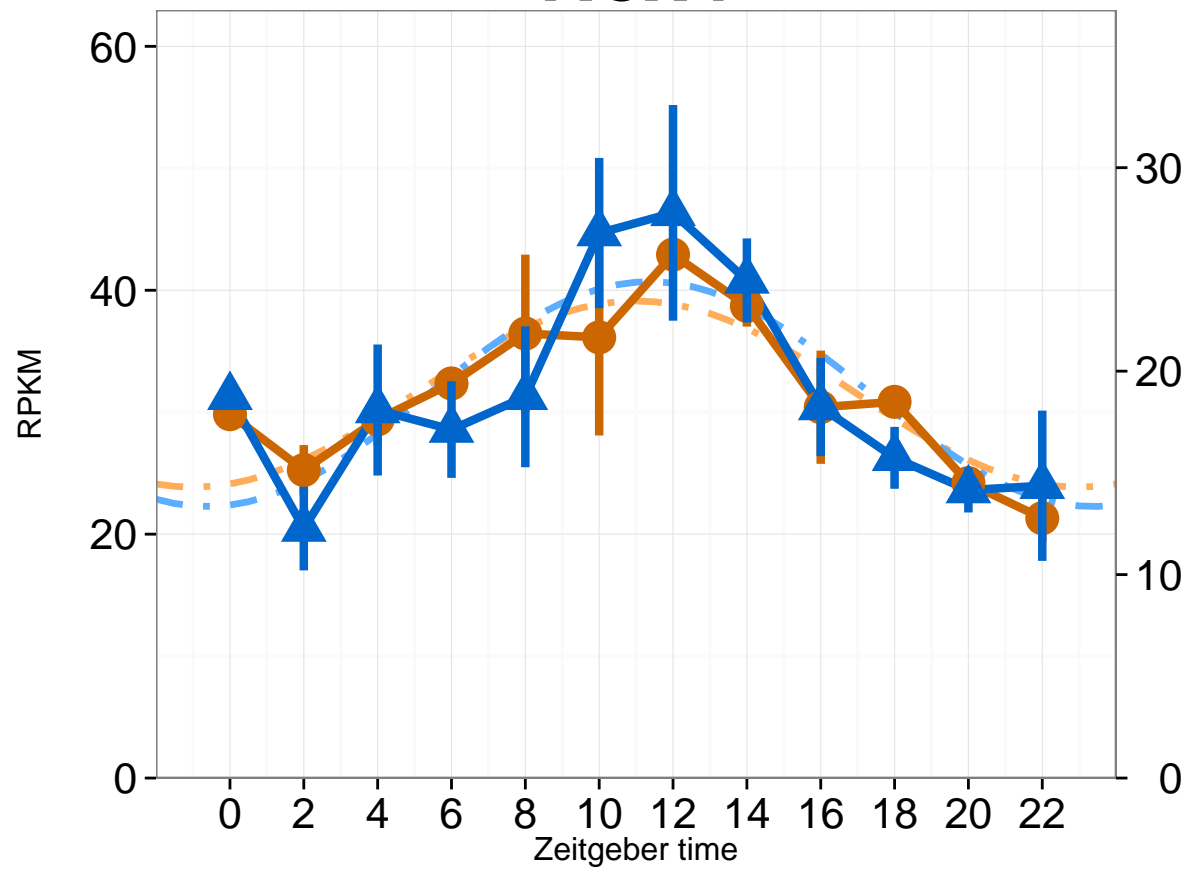

## Nox4

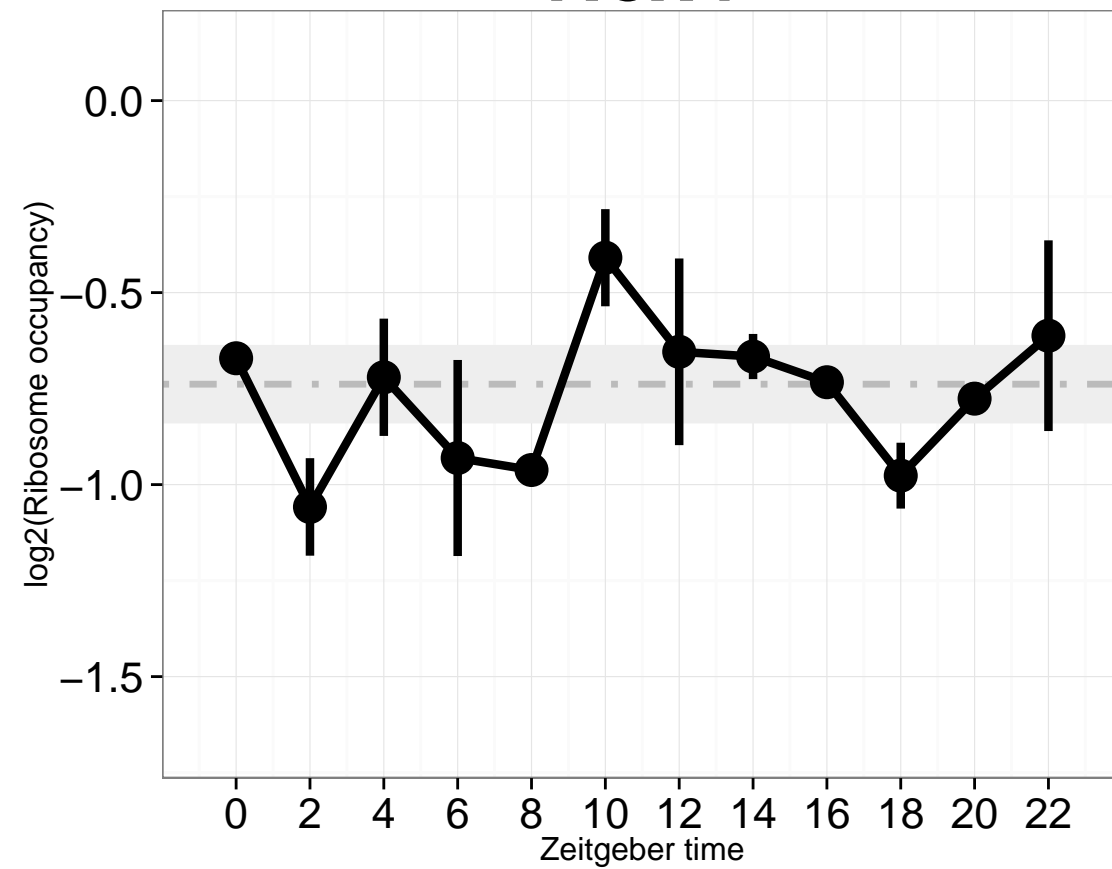

Supplement: Supplementary file 3390 [file 1]

# Ptpn4

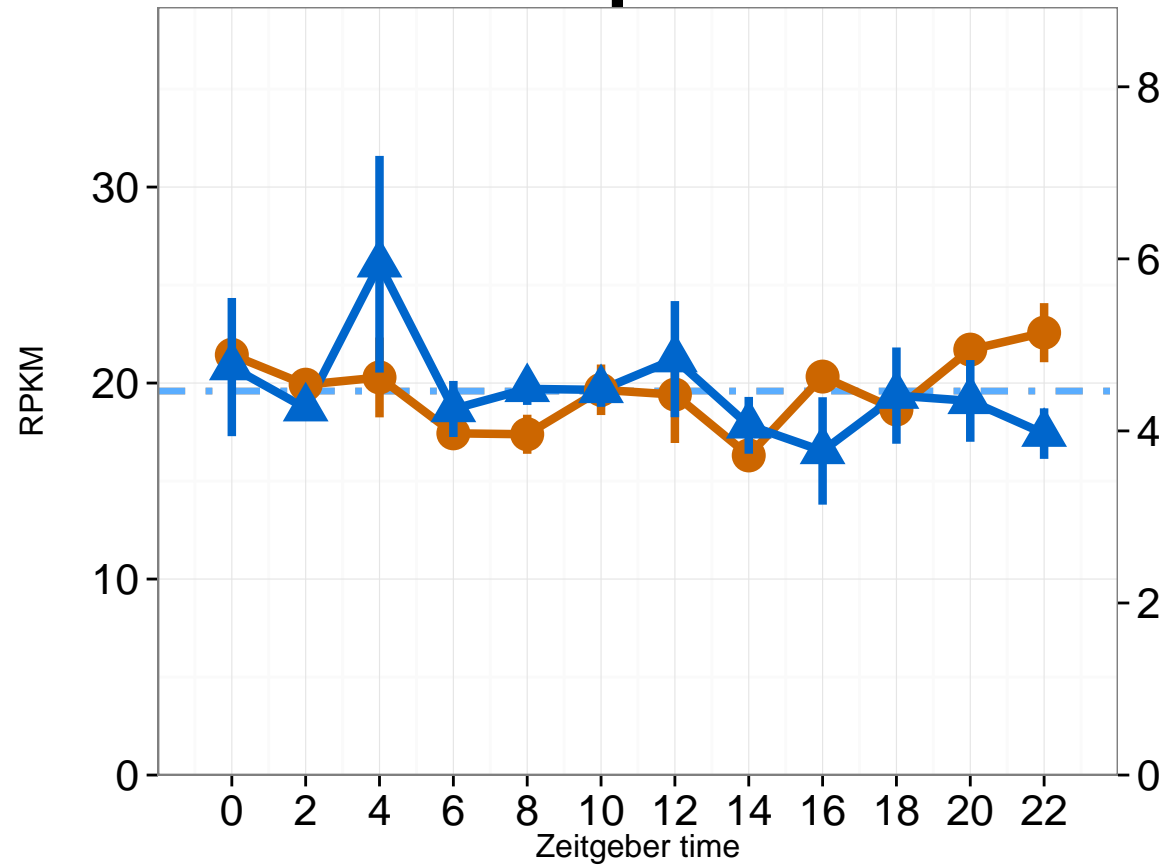

# Ptpn4

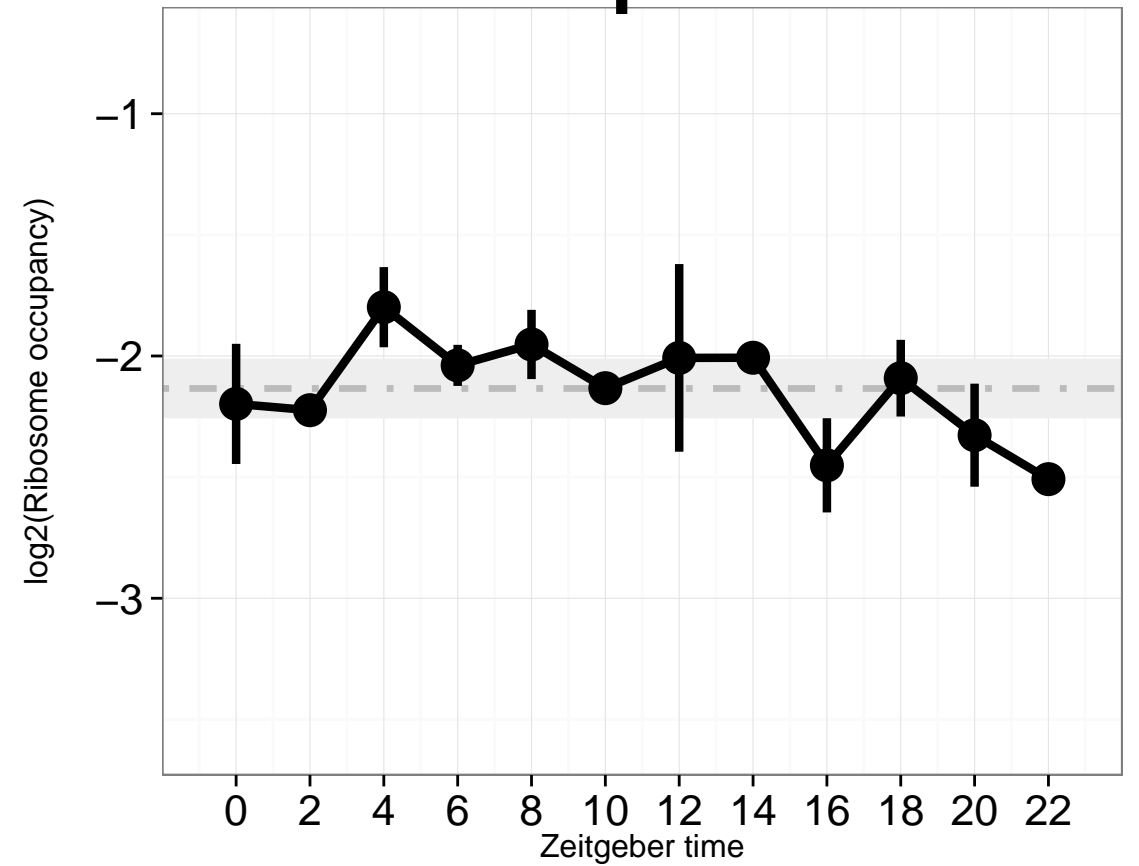

Supplement: Supplementary file 3391 [file 1]

## Synj2

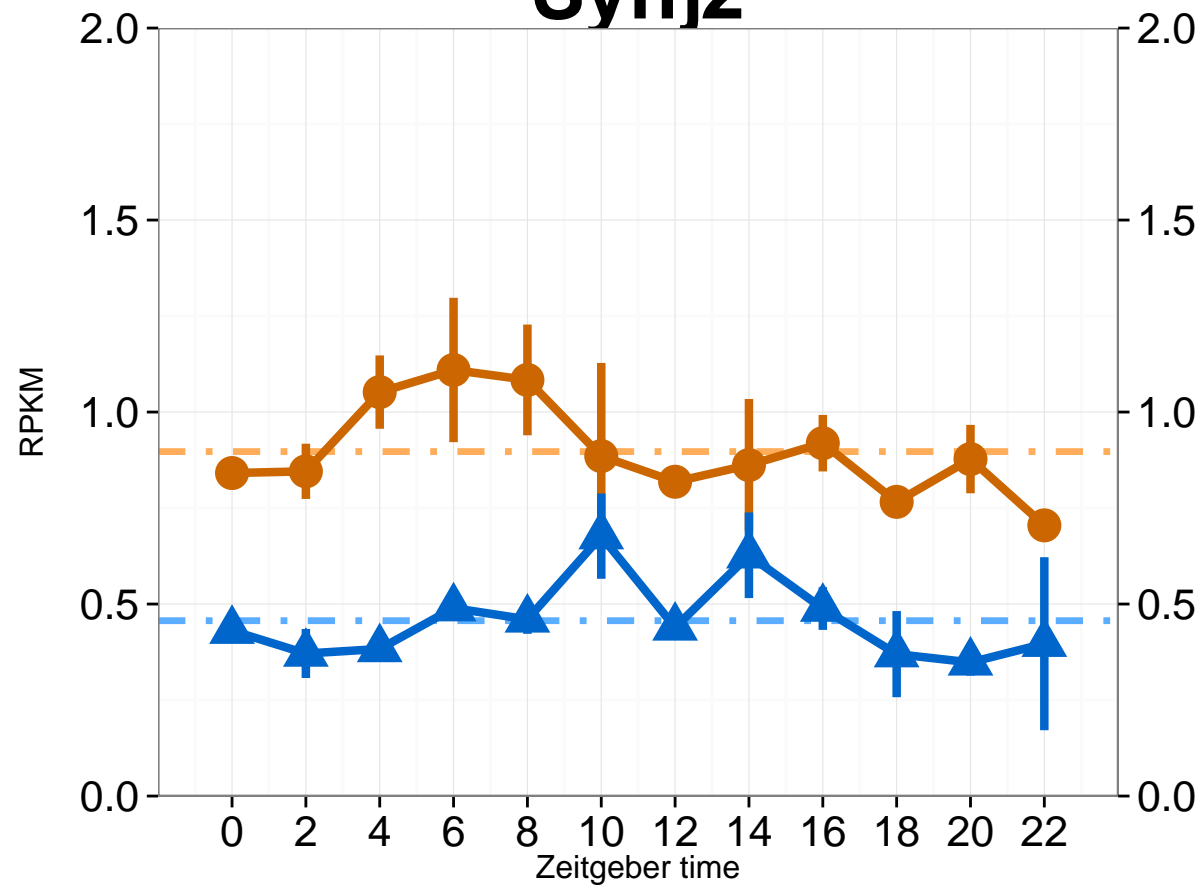

## Synj2

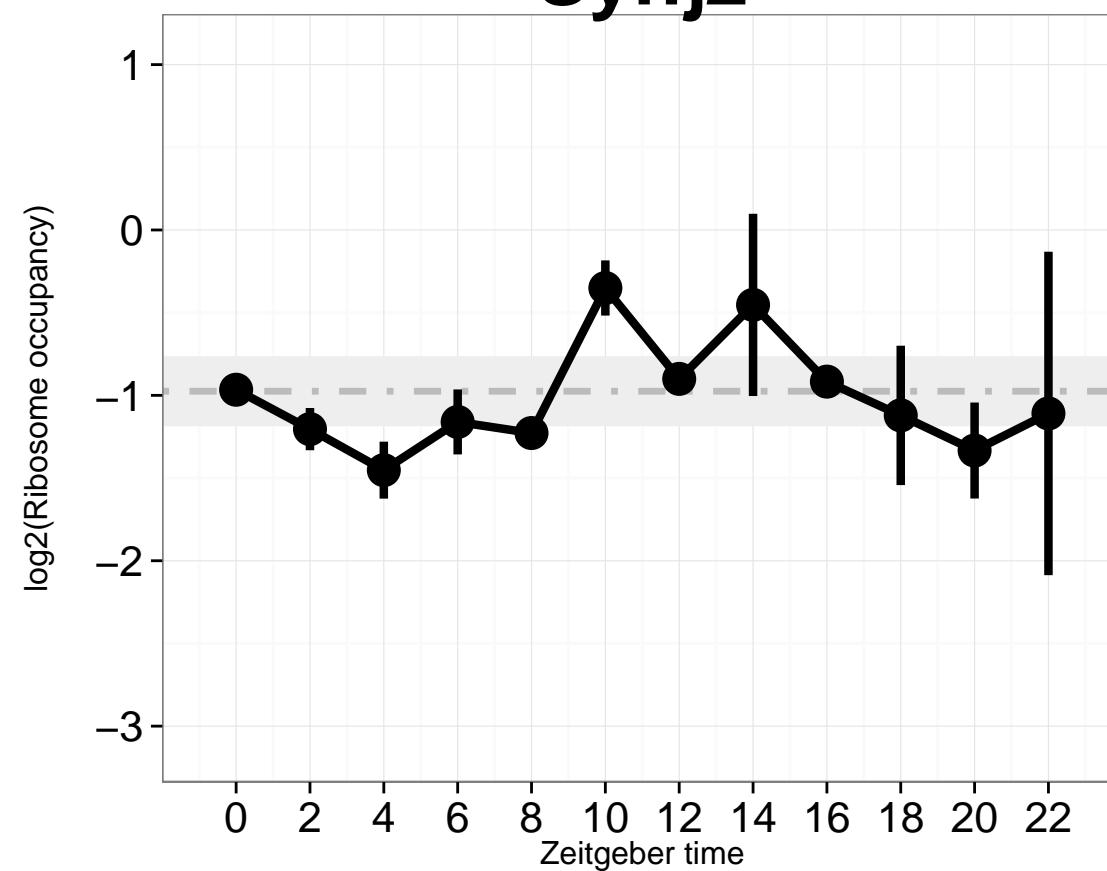

Supplement: Supplementary file 3392 [file 1]

## Inip

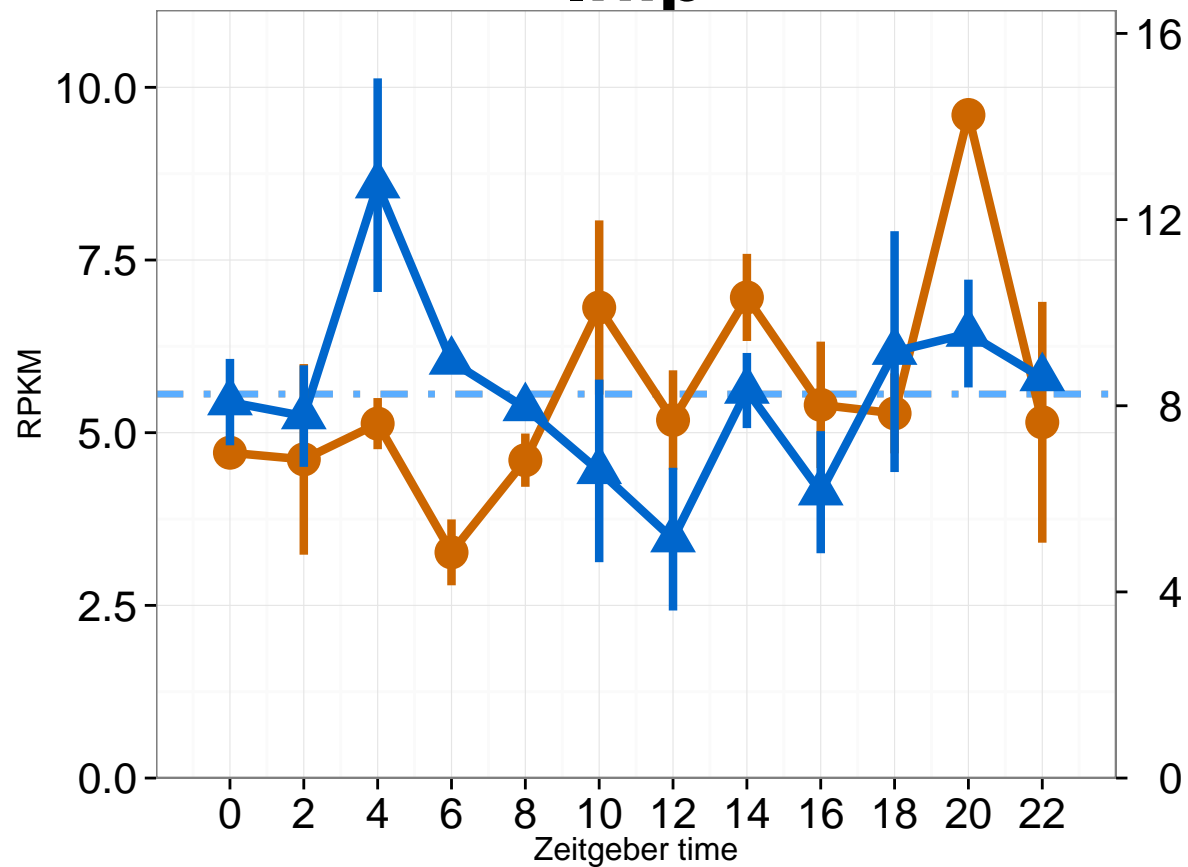

## Inip

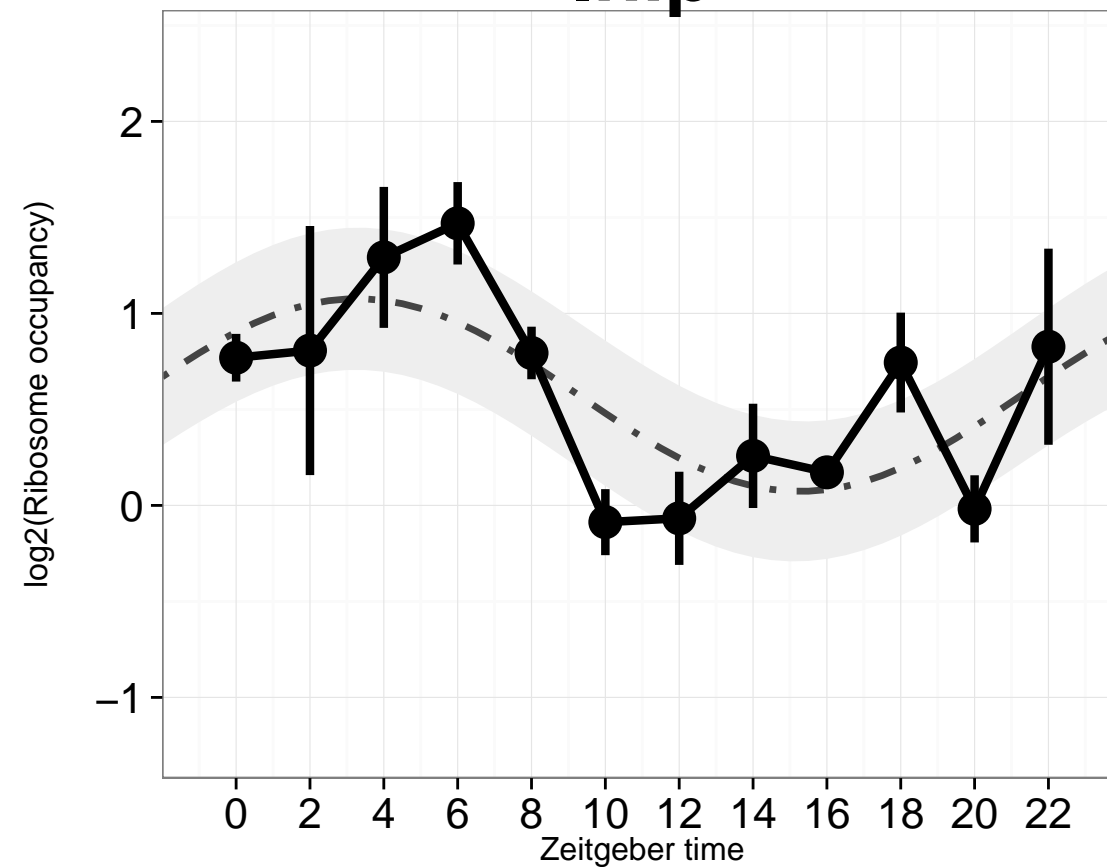

Supplement: Supplementary file 3393 [file 1]

## Prox2

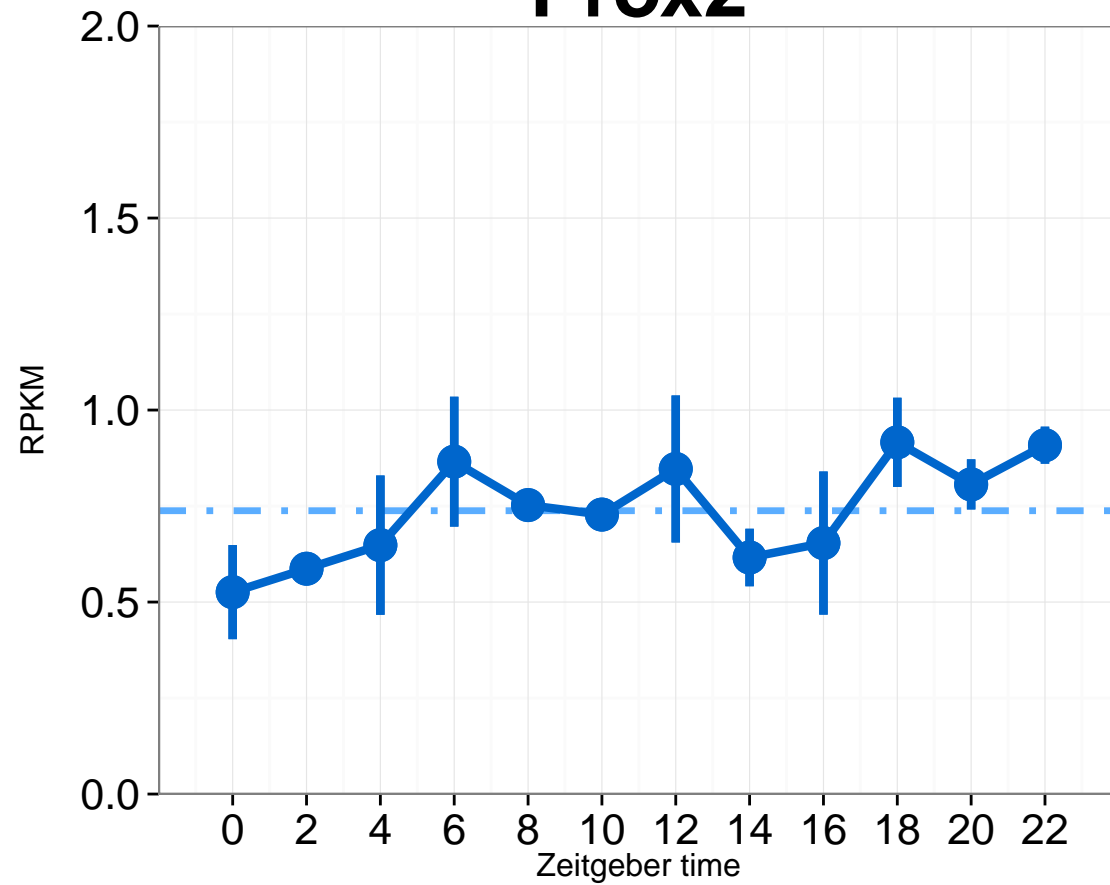

## Prox2 log2(Ribosome occupancy)

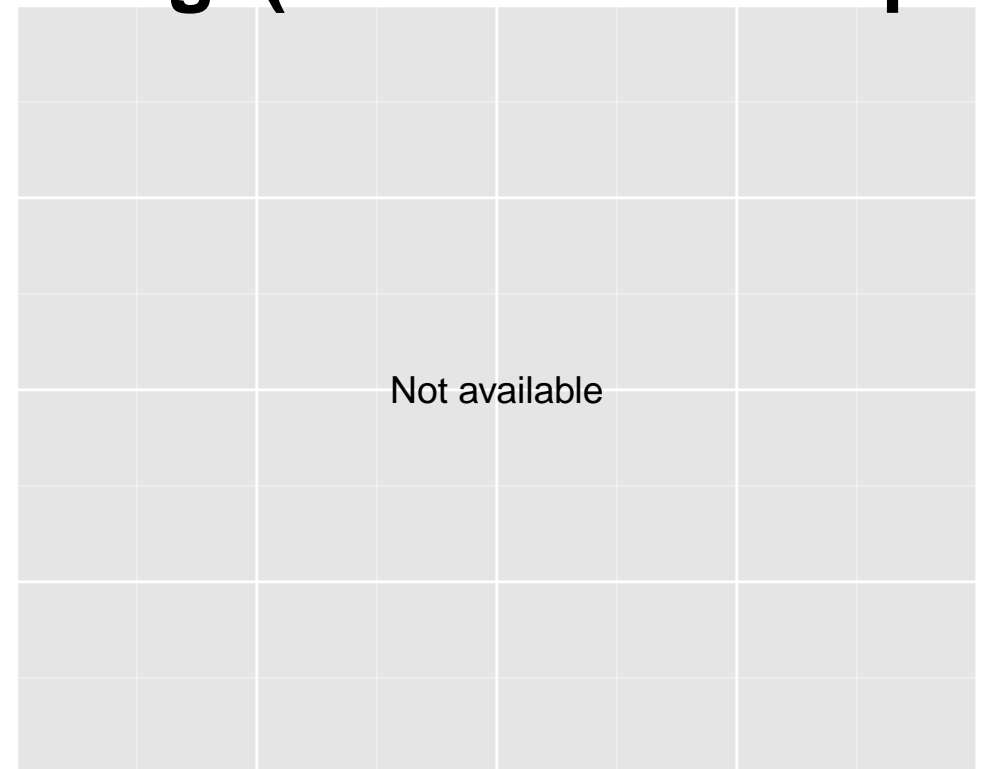

Supplement: Supplementary file 3394 [file 1]

# Zgpat

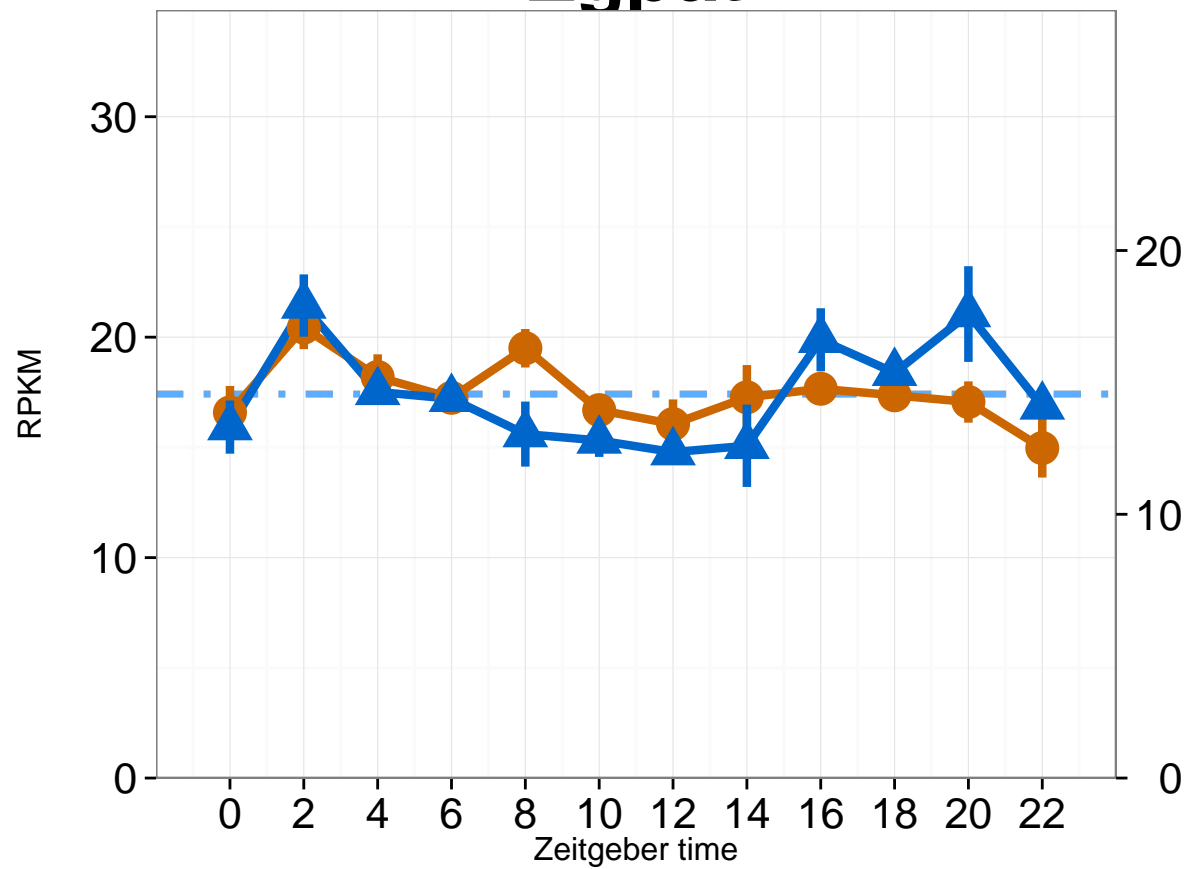

# Zgpat

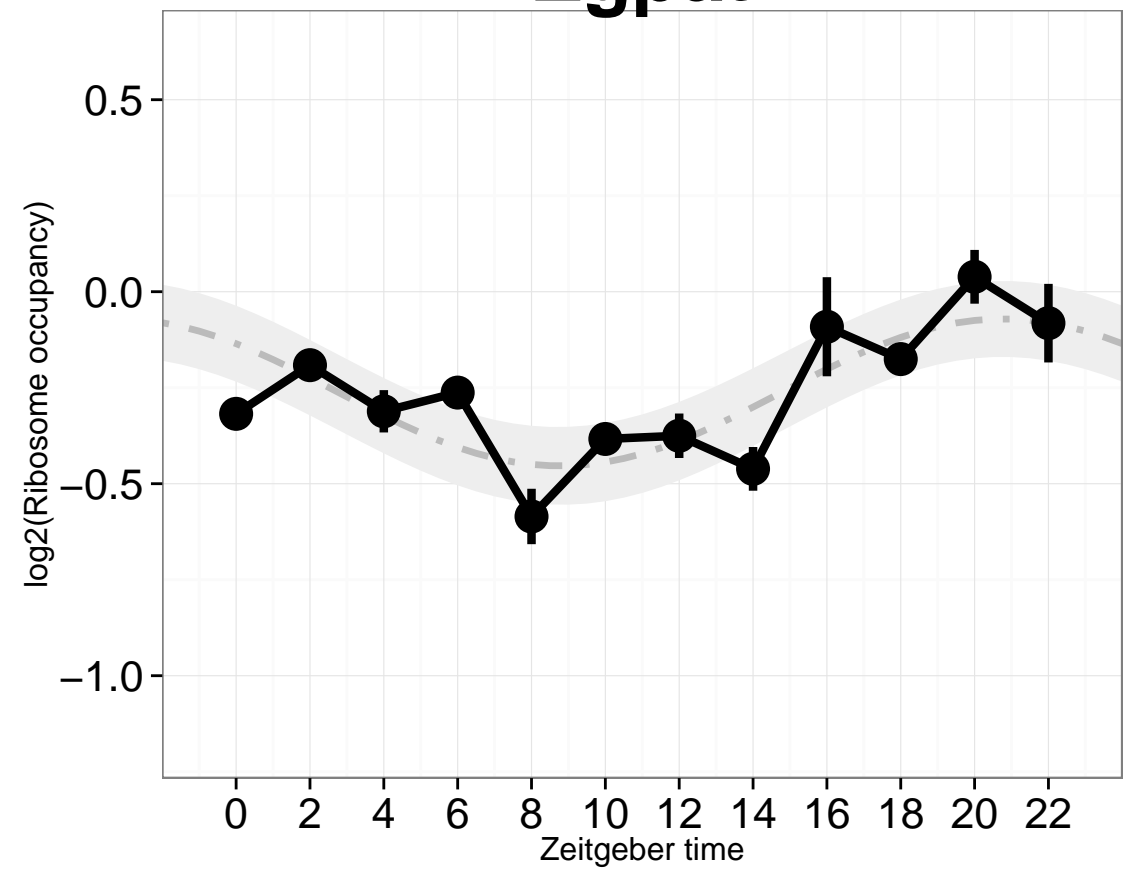

Supplement: Supplementary file 3395 [file 1]

## Las1l

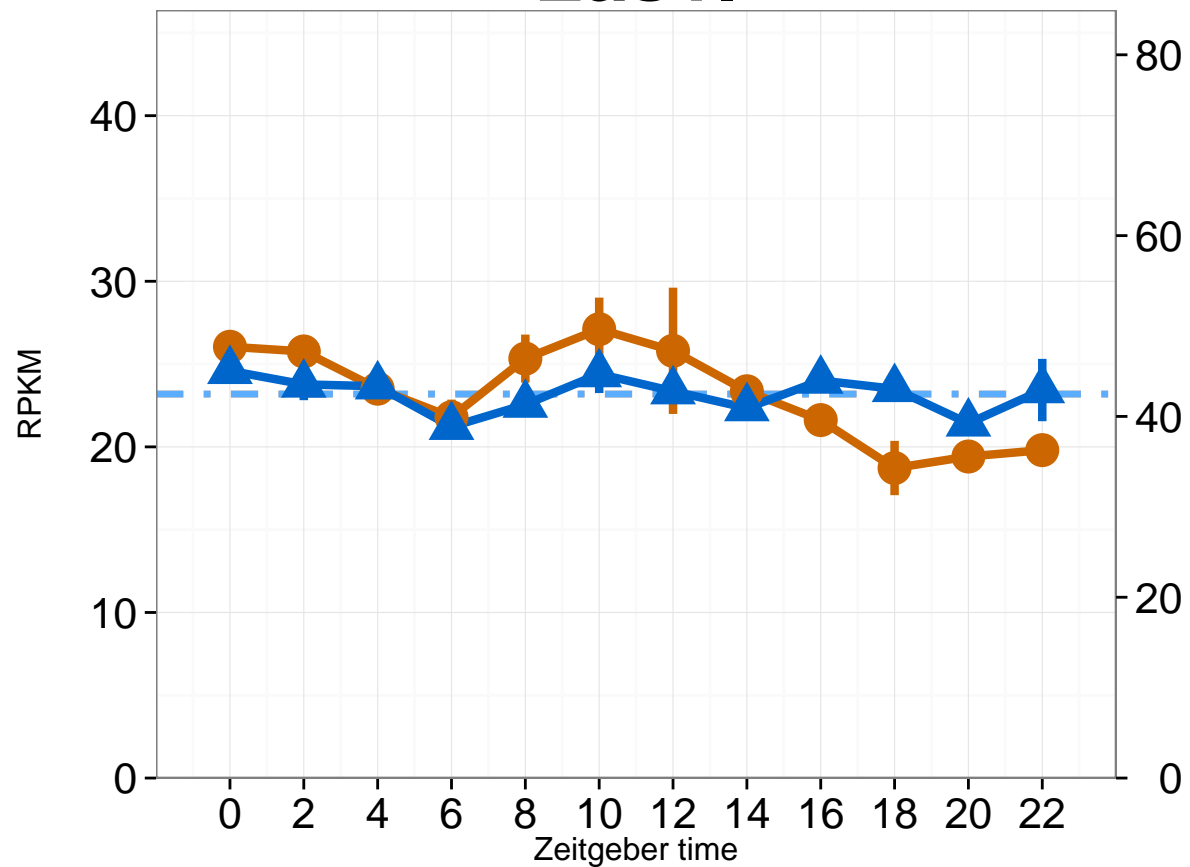

## Las1l

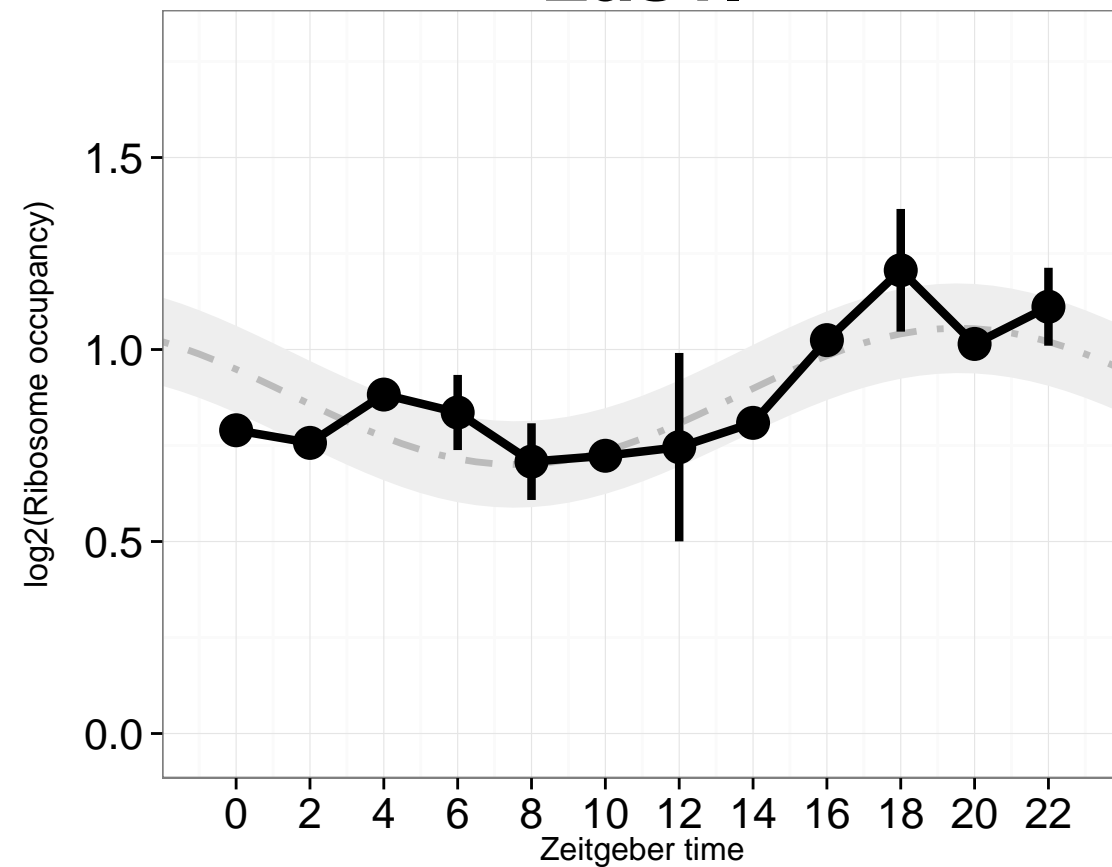

Supplement: Supplementary file 3396 [file 1]

## Map3k3

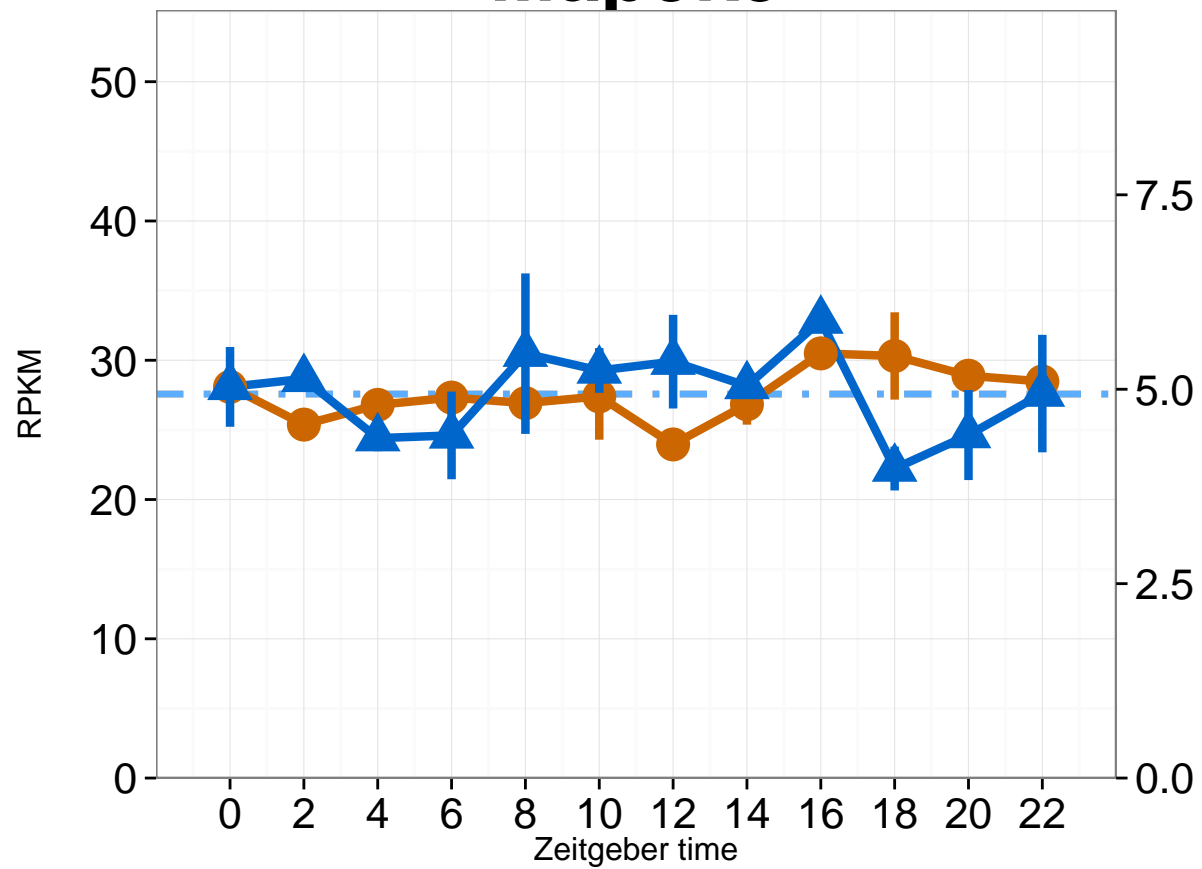

## Map3k3

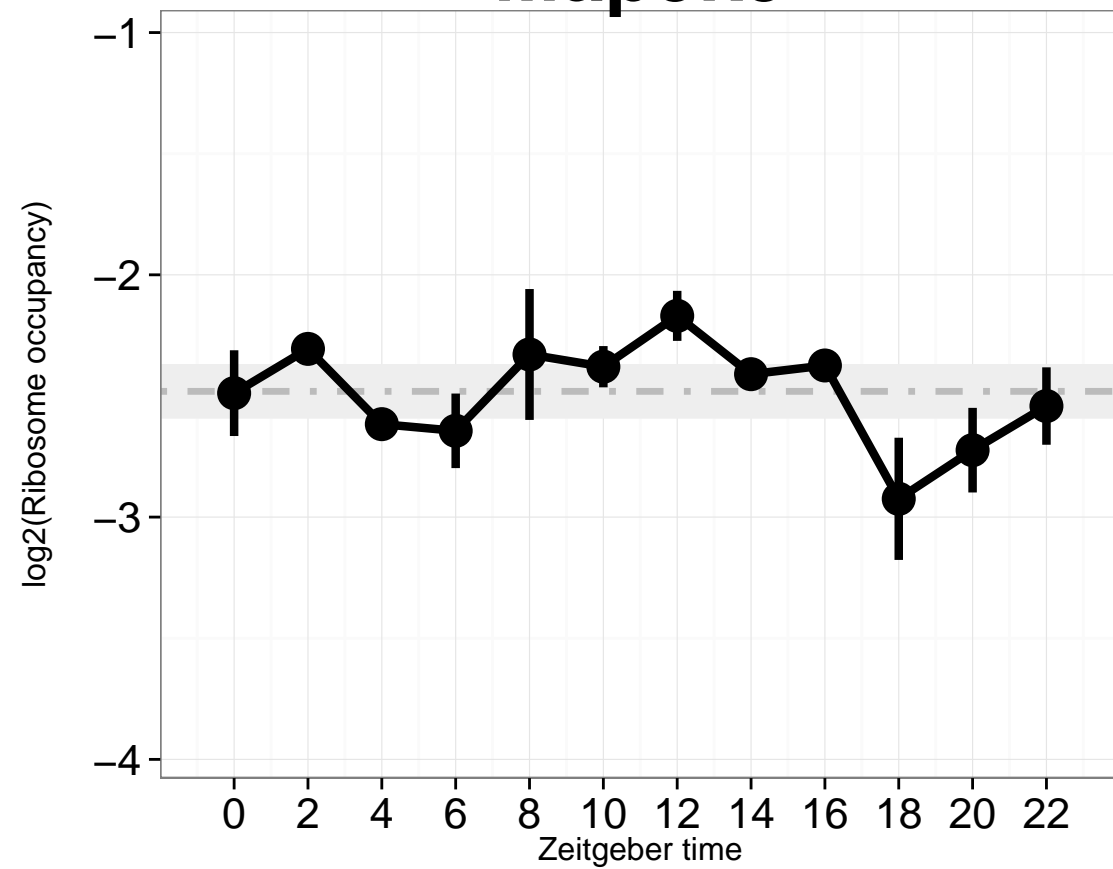

Supplement: Supplementary file 3397 [file 1]

# Pold1

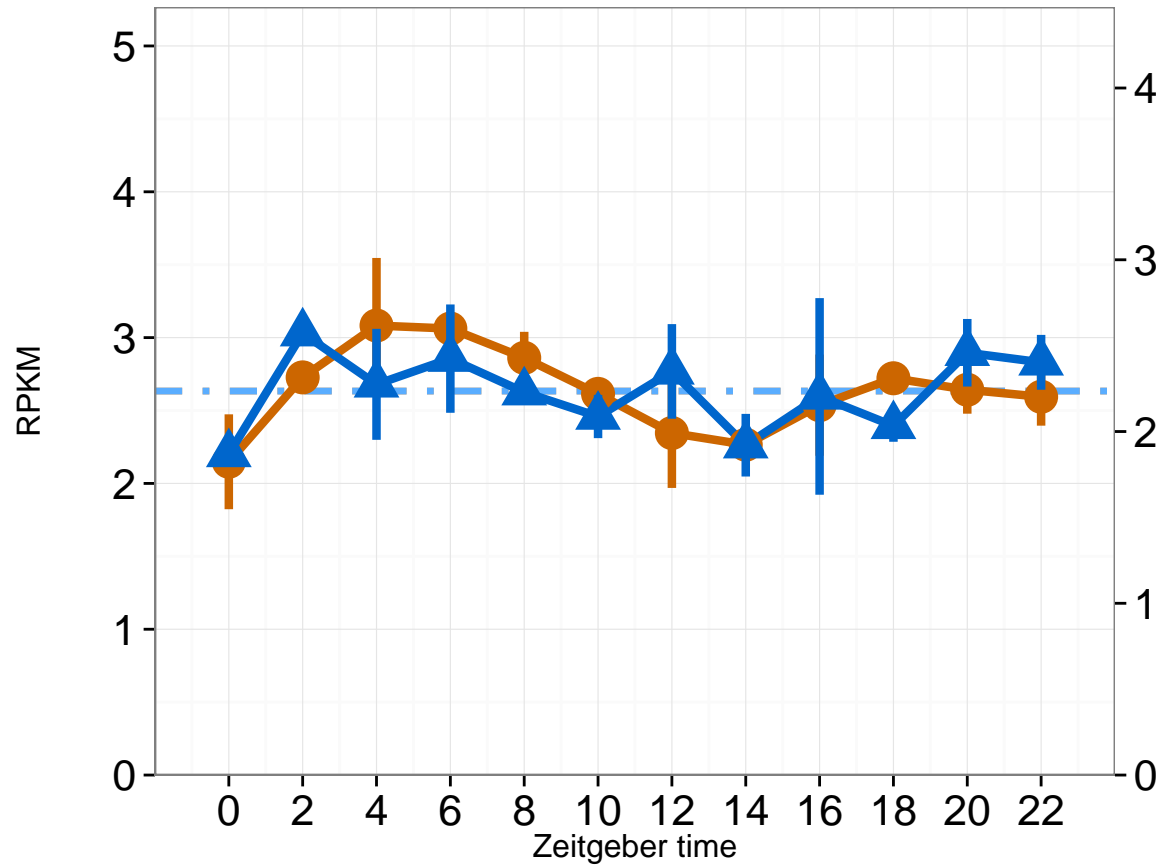

# Pold1

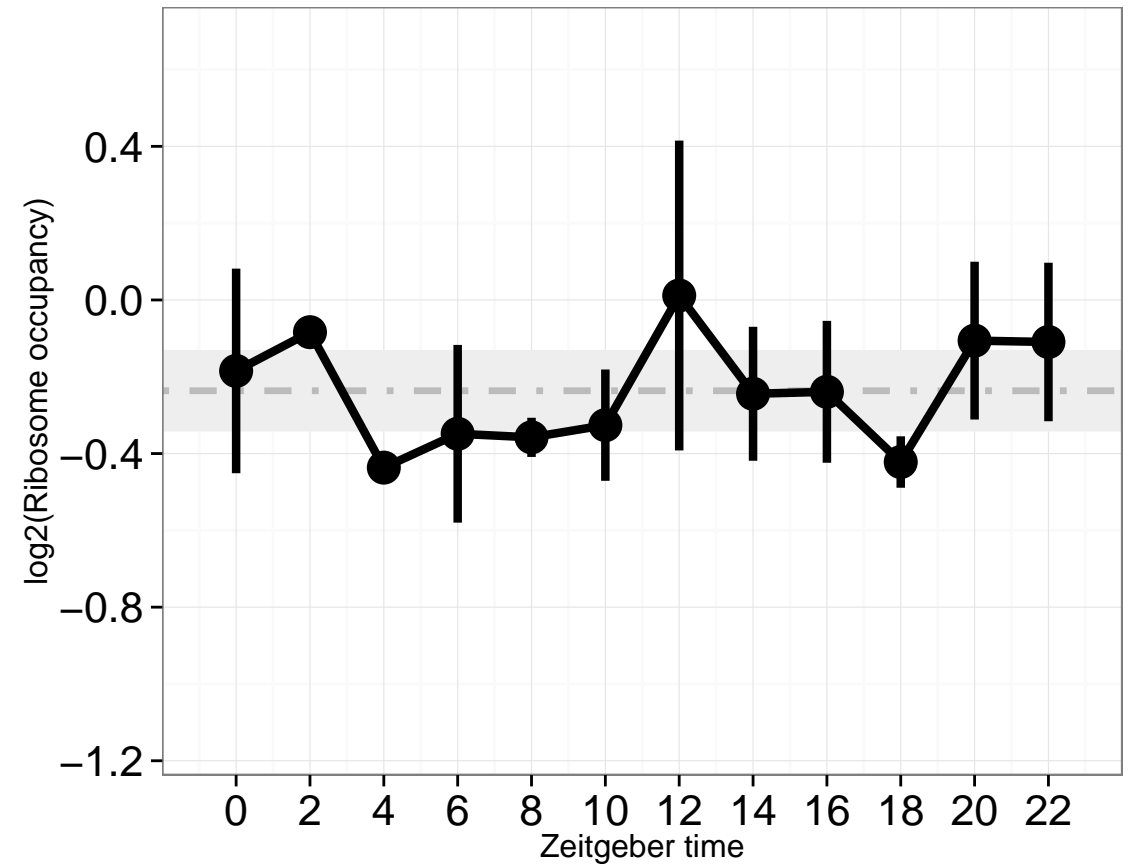

Supplement: Supplementary file 3398 [file 1]

## Usp43

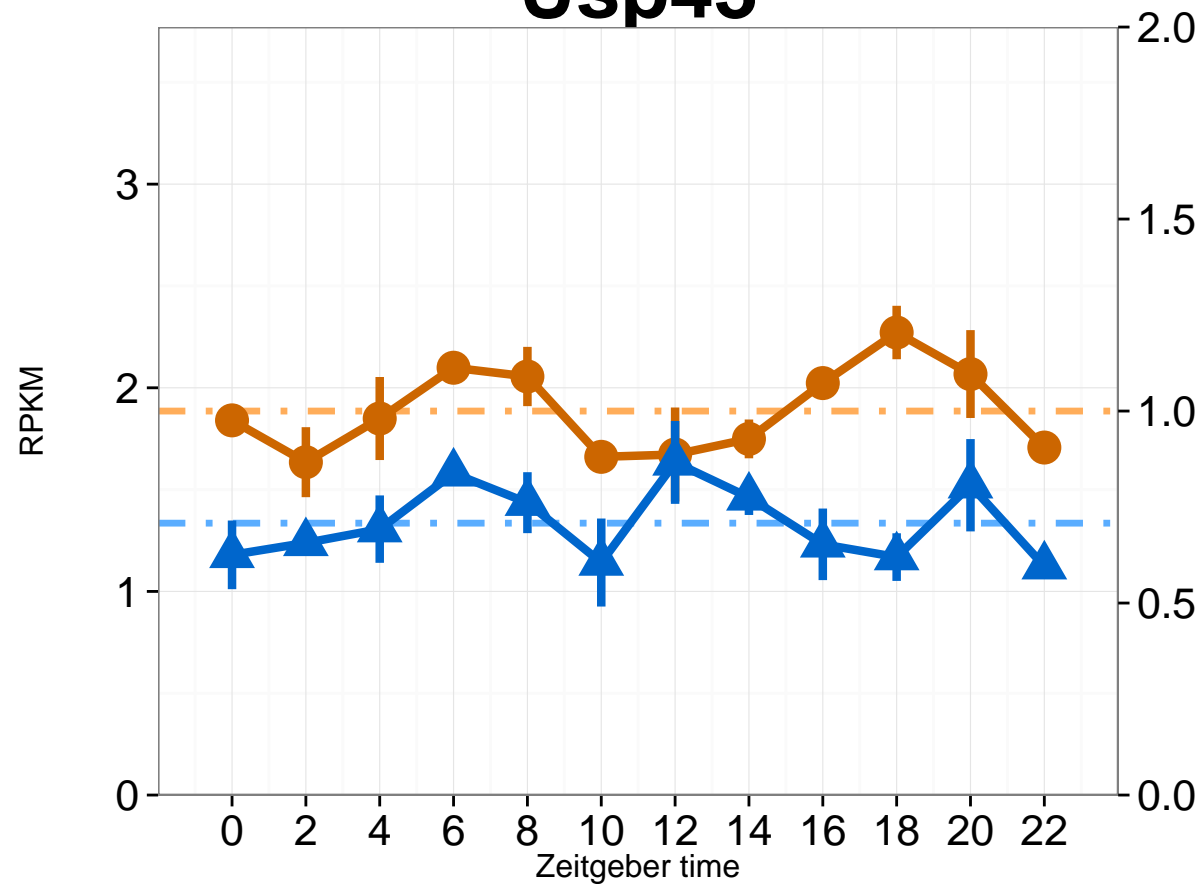

## Usp43

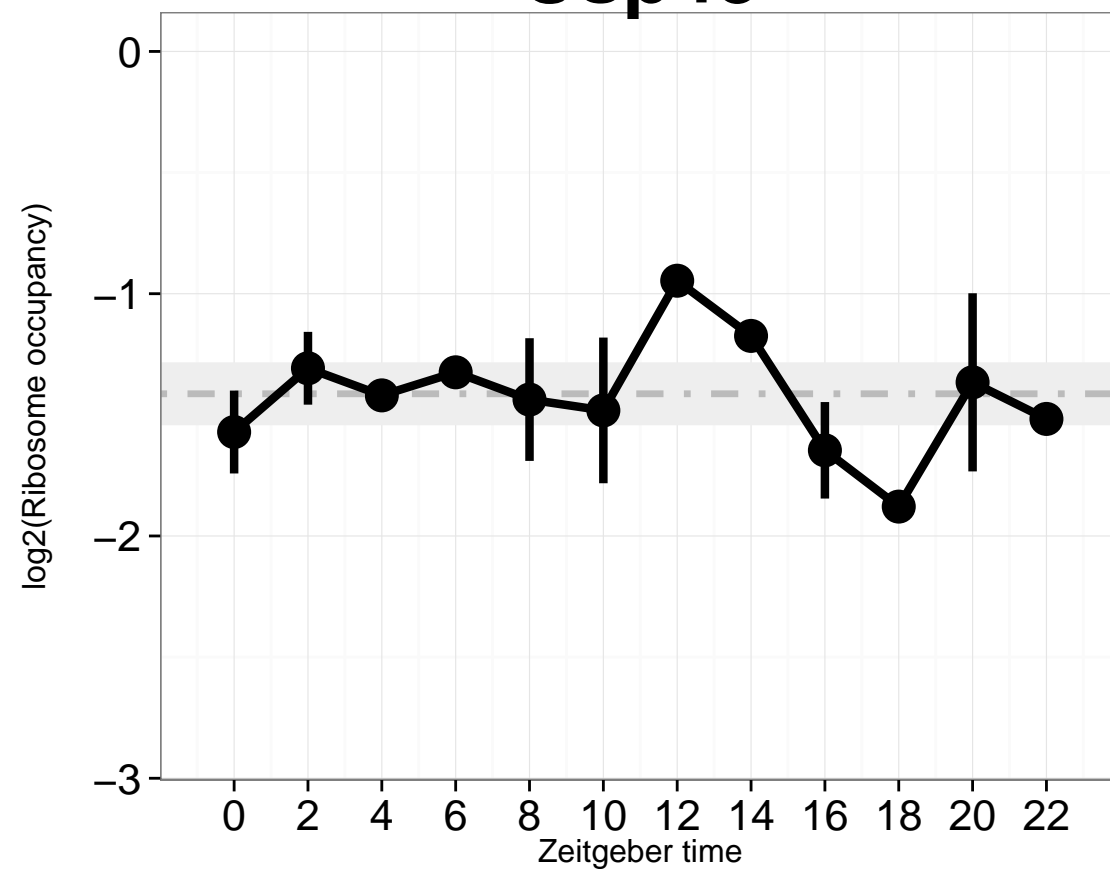

Supplement: Supplementary file 3399 [file 1]

## Scp2

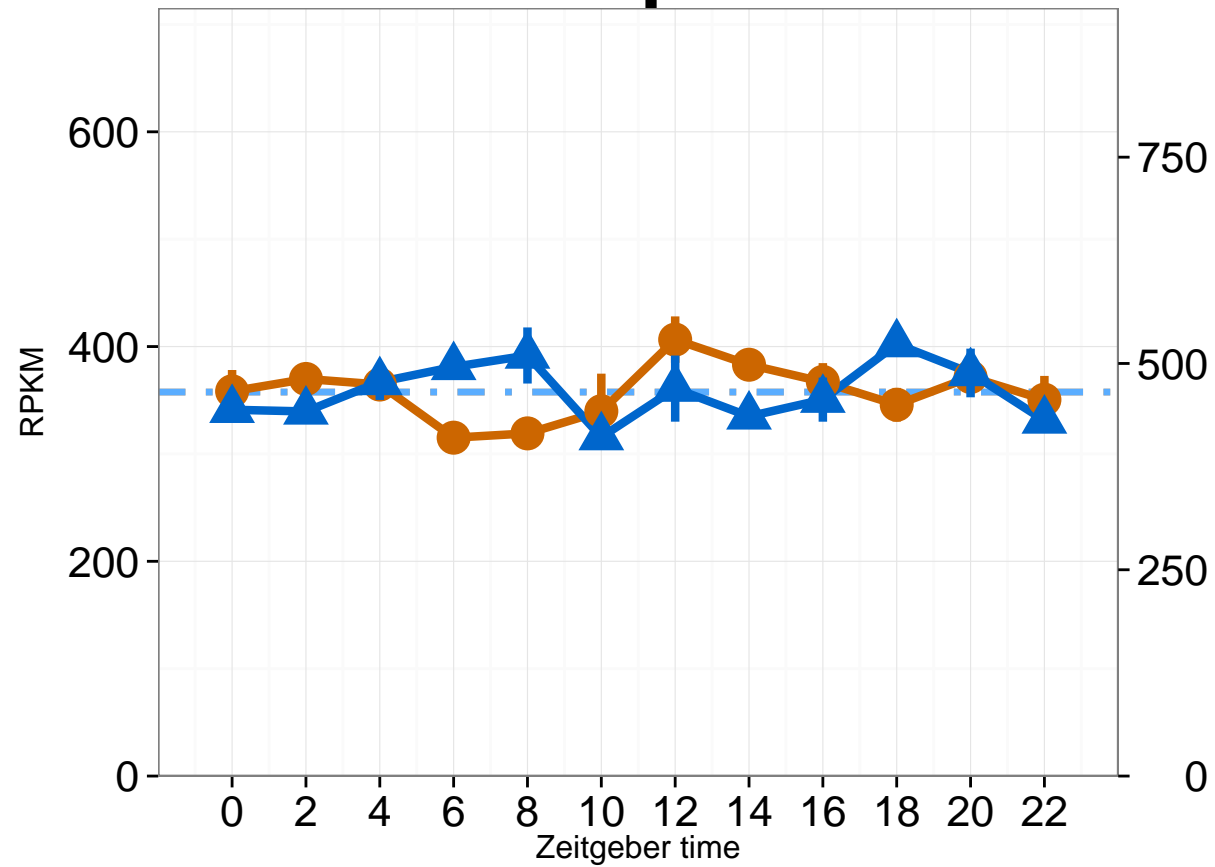

## Scp2

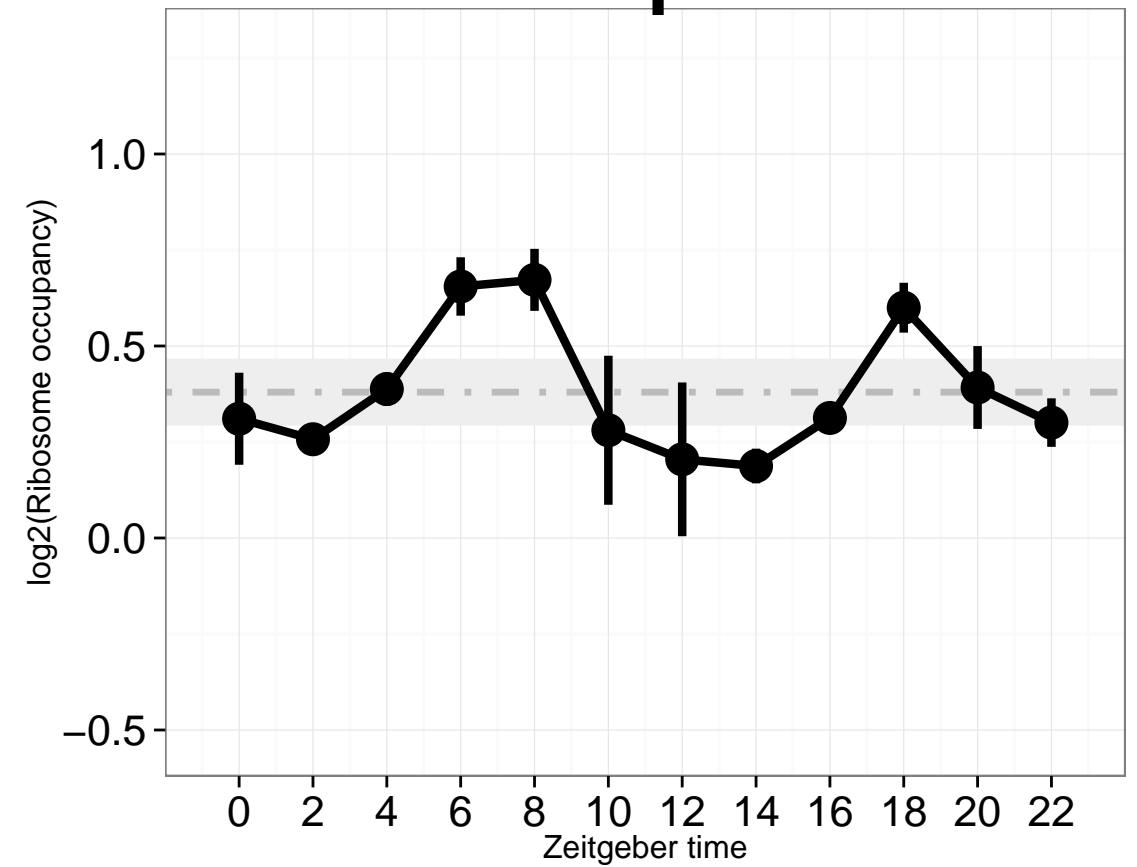

Supplement: Supplementary file 3400 [file 1]

## Galt

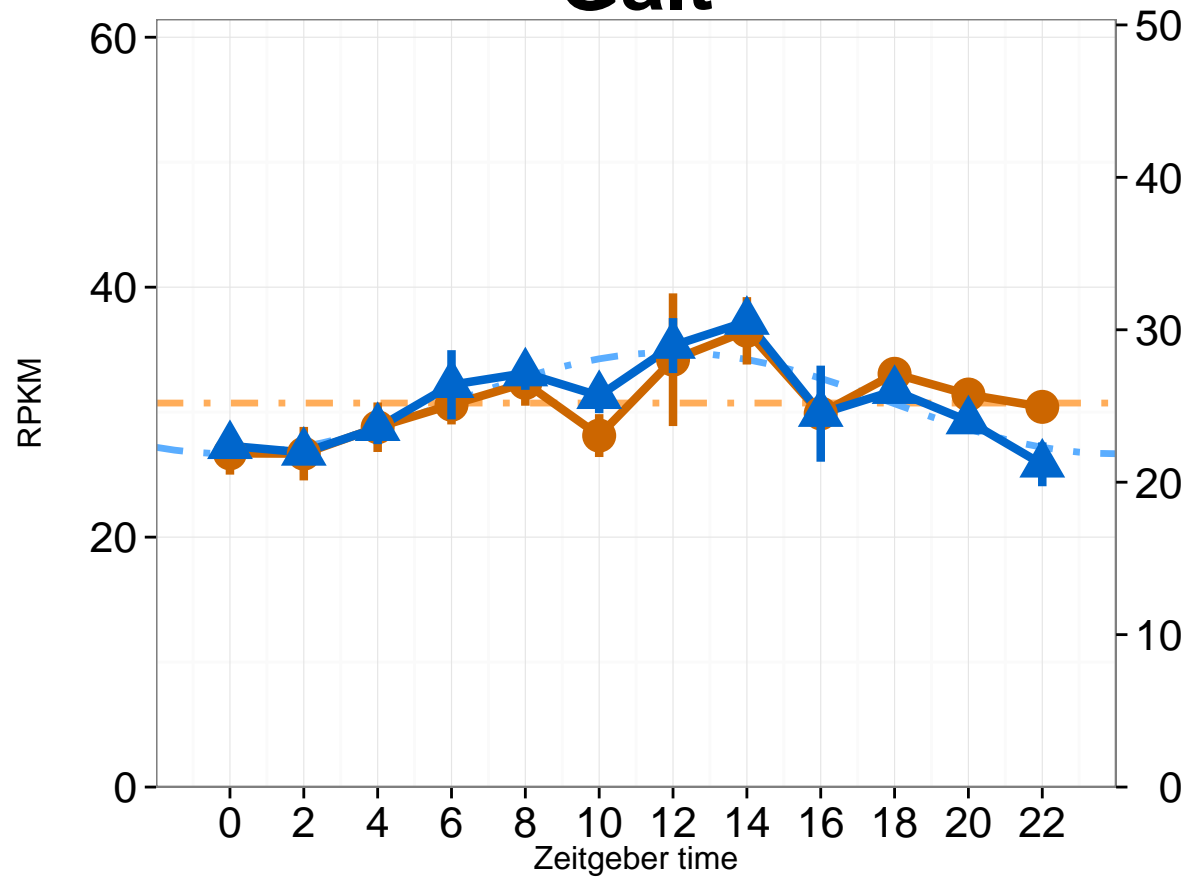

## Galt

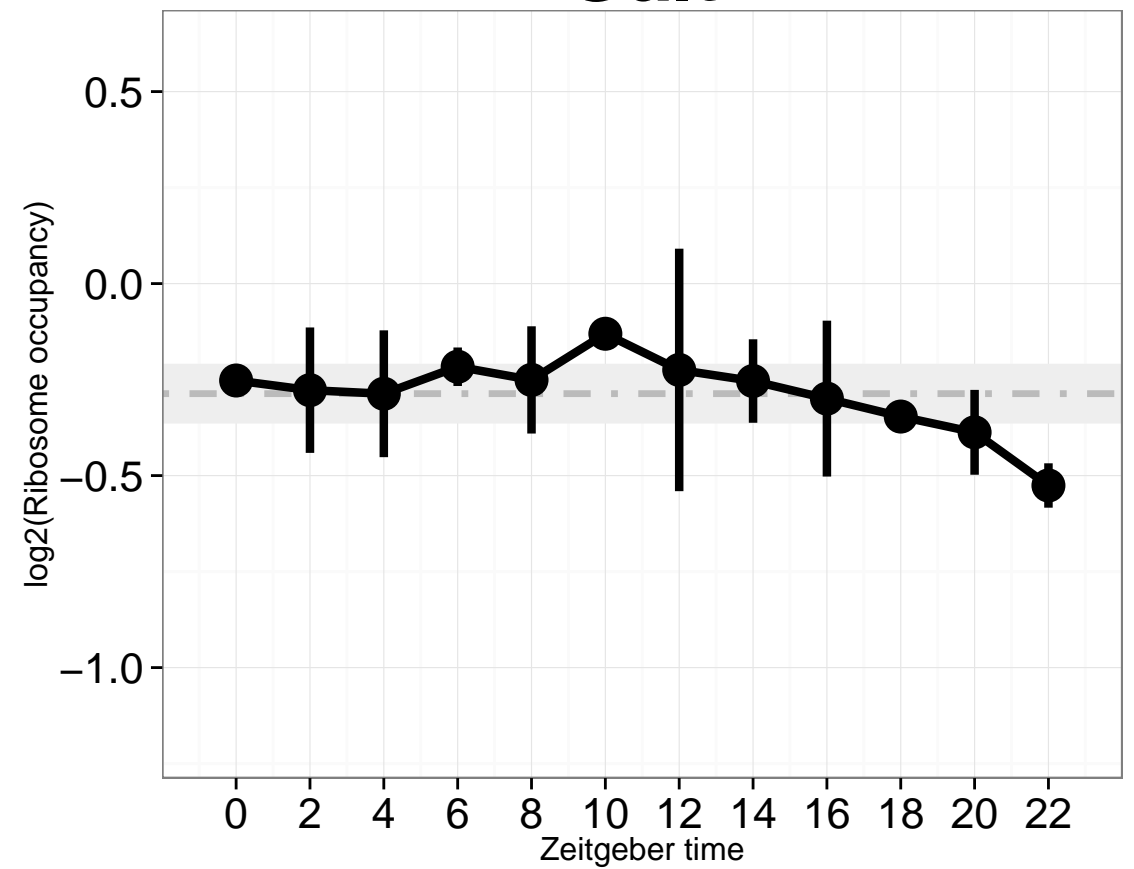

Supplement: Supplementary file 3401 [file 1]

## Scube3

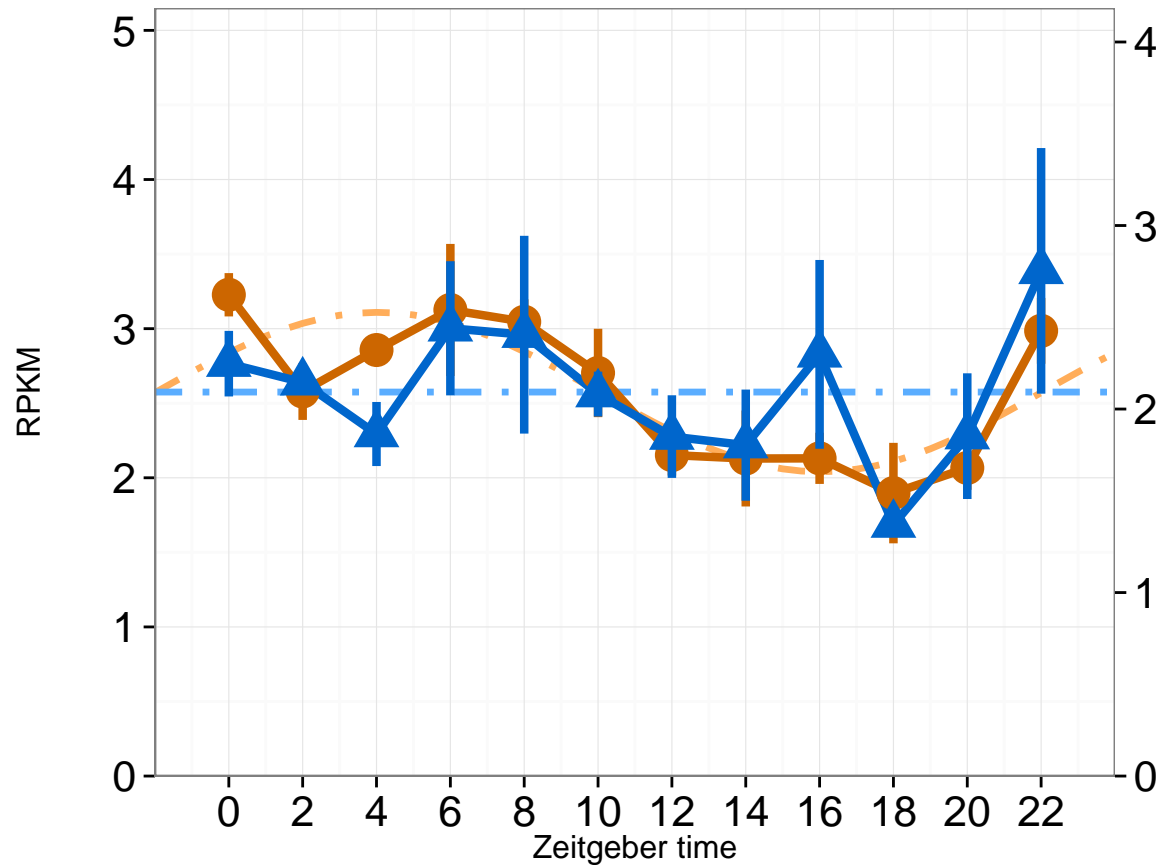

## Scube3

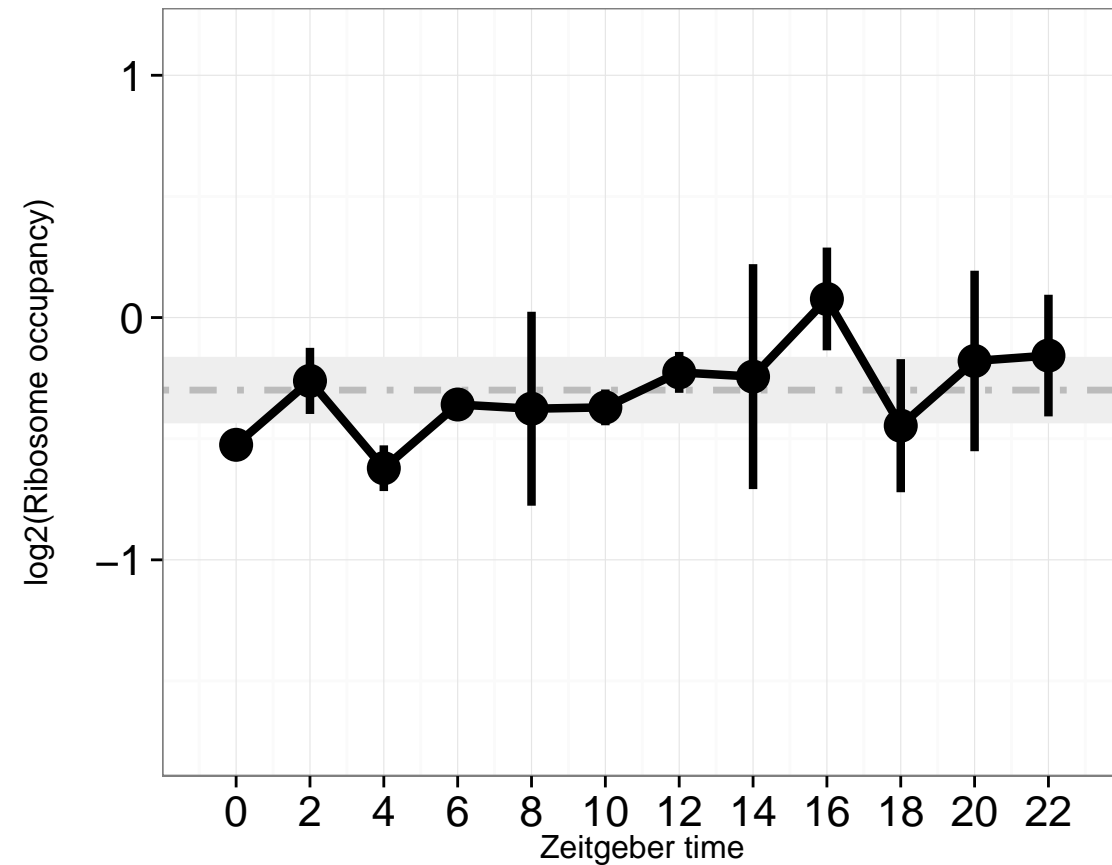

Supplement: Supplementary file 3402 [file 1]

# Fbxo16

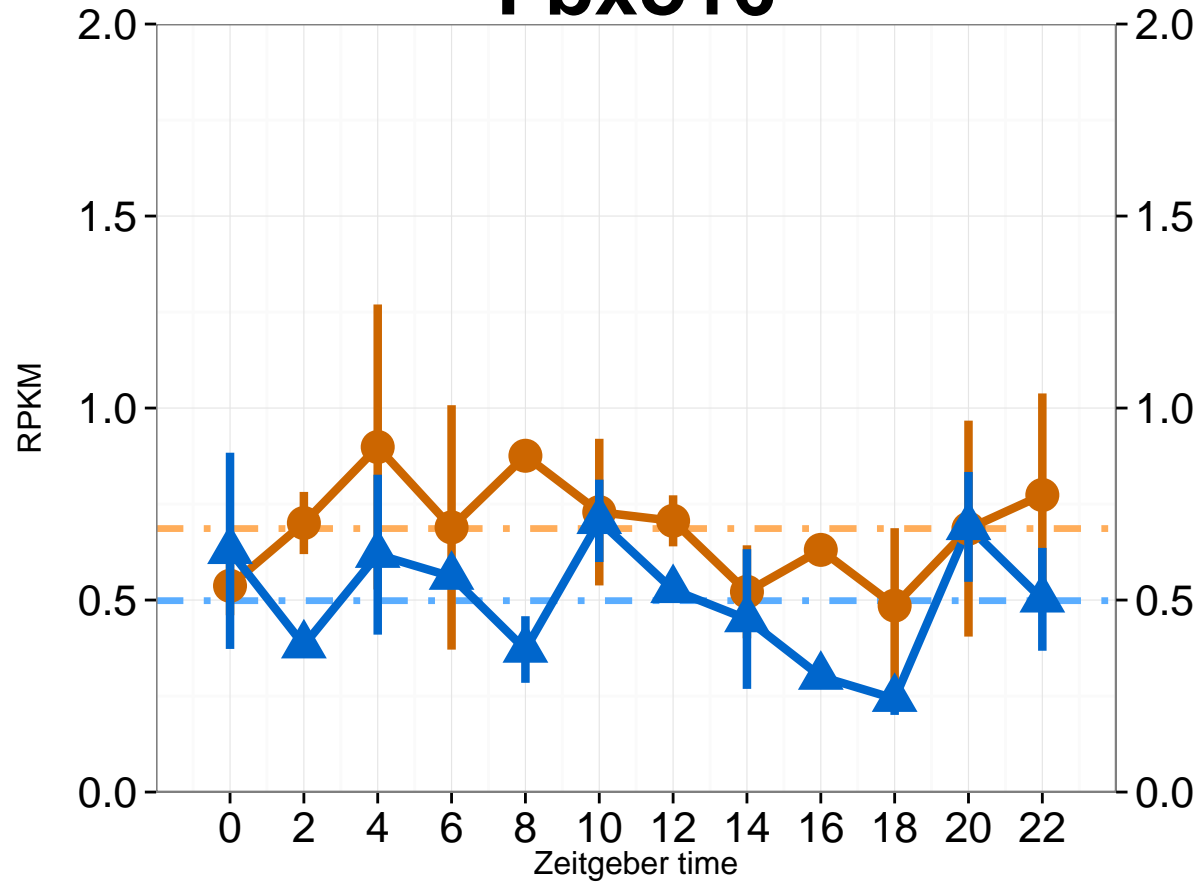

# Fbxo16

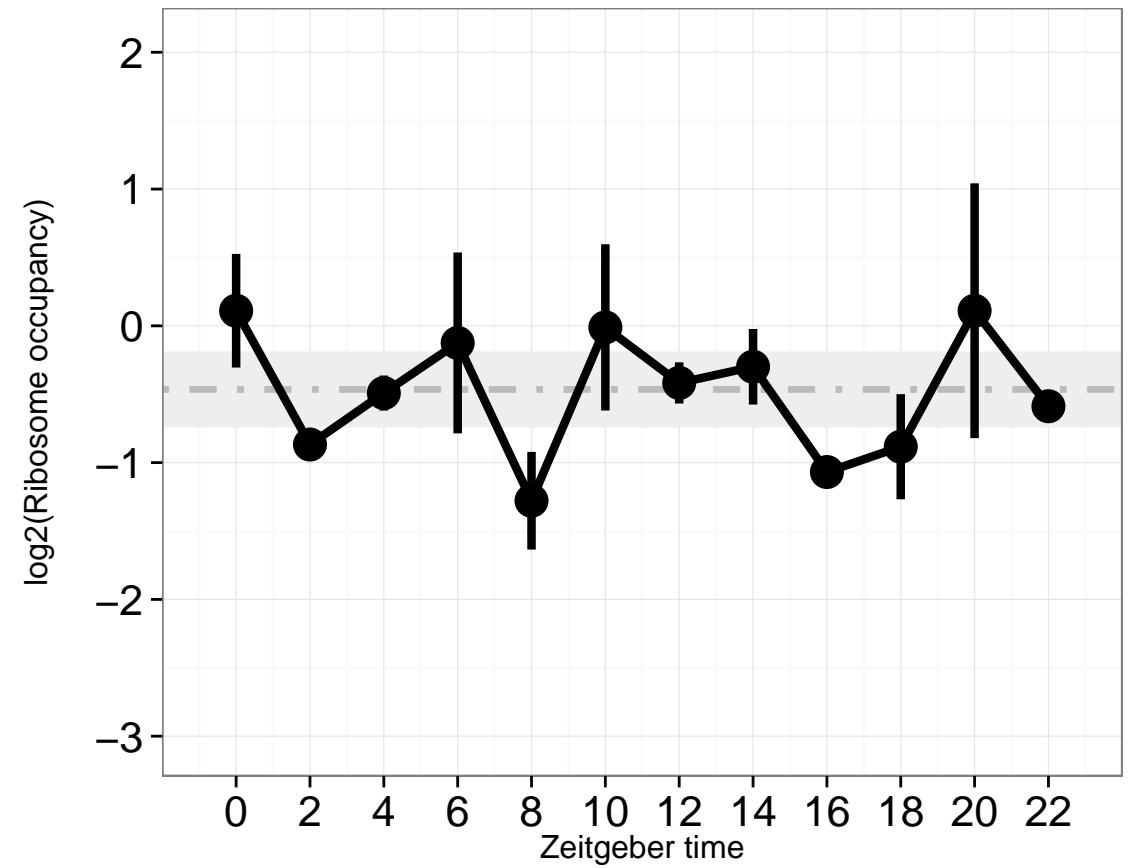

Supplement: Supplementary file 3403 [file 1]

# Zbtb8a

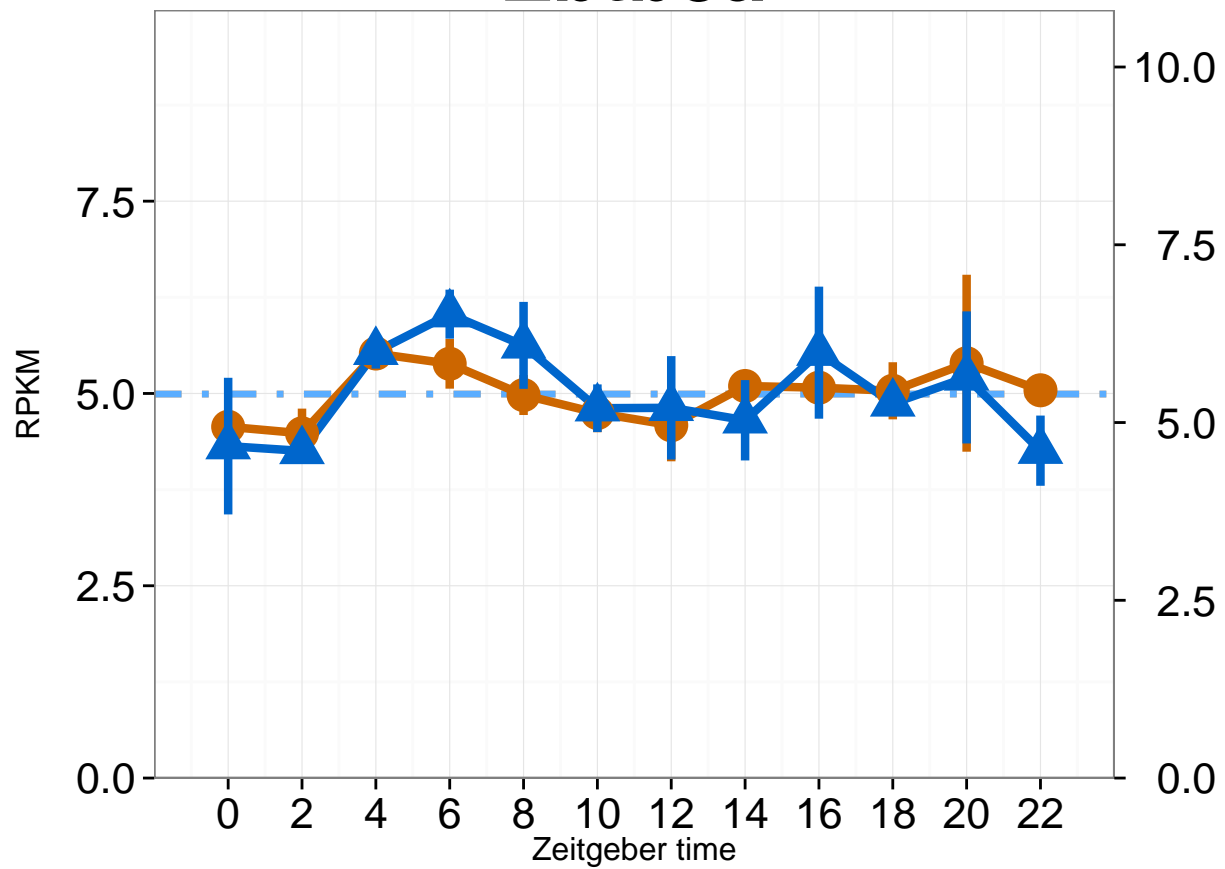

# Zbtb8a

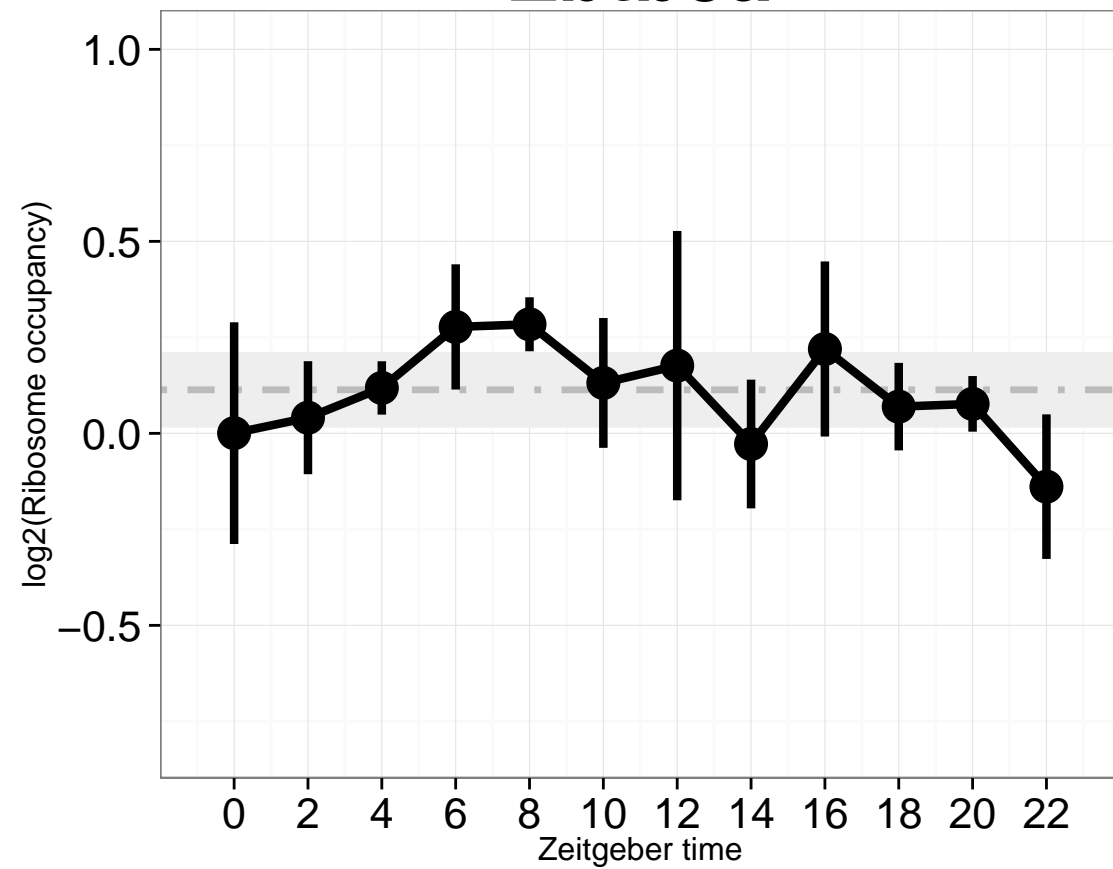

Supplement: Supplementary file 3404 [file 1]

# 1190007I07Rik

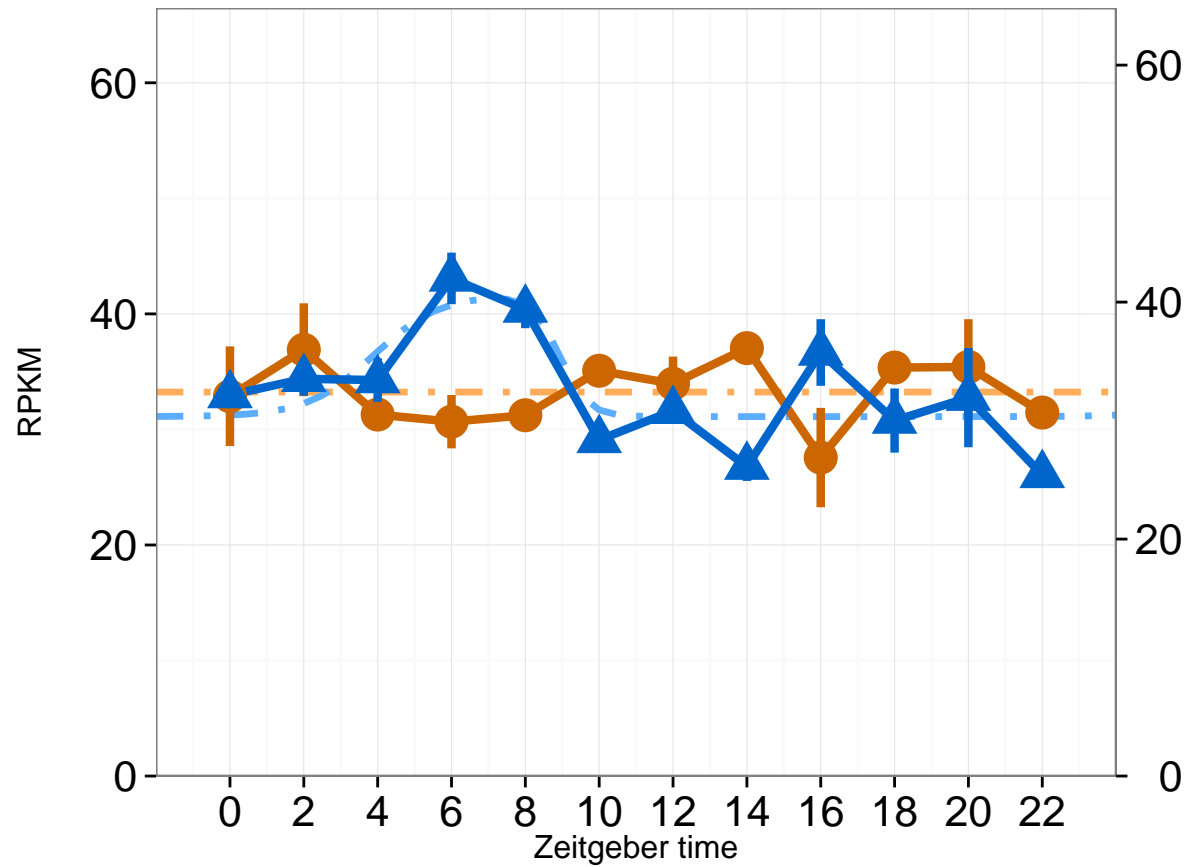

# 1190007I07Rik

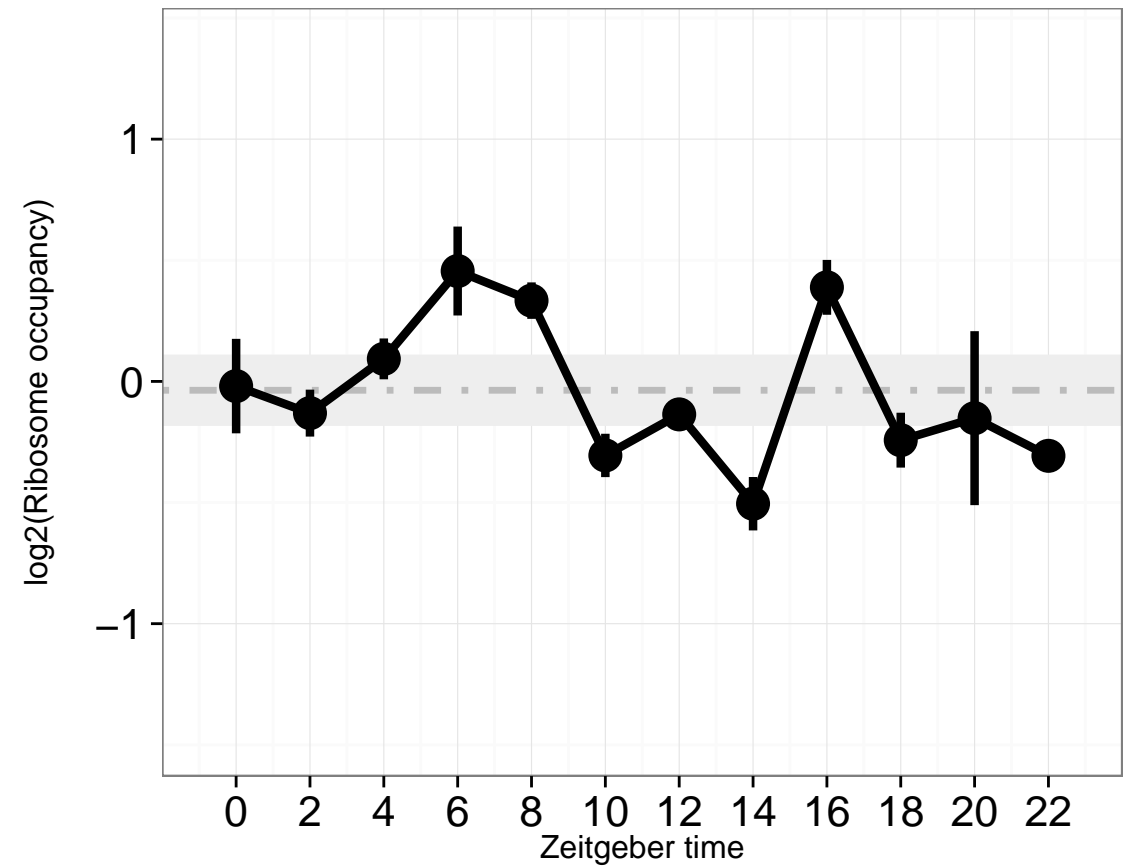

Supplement: Supplementary file 3405 [file 1]

## Actr8

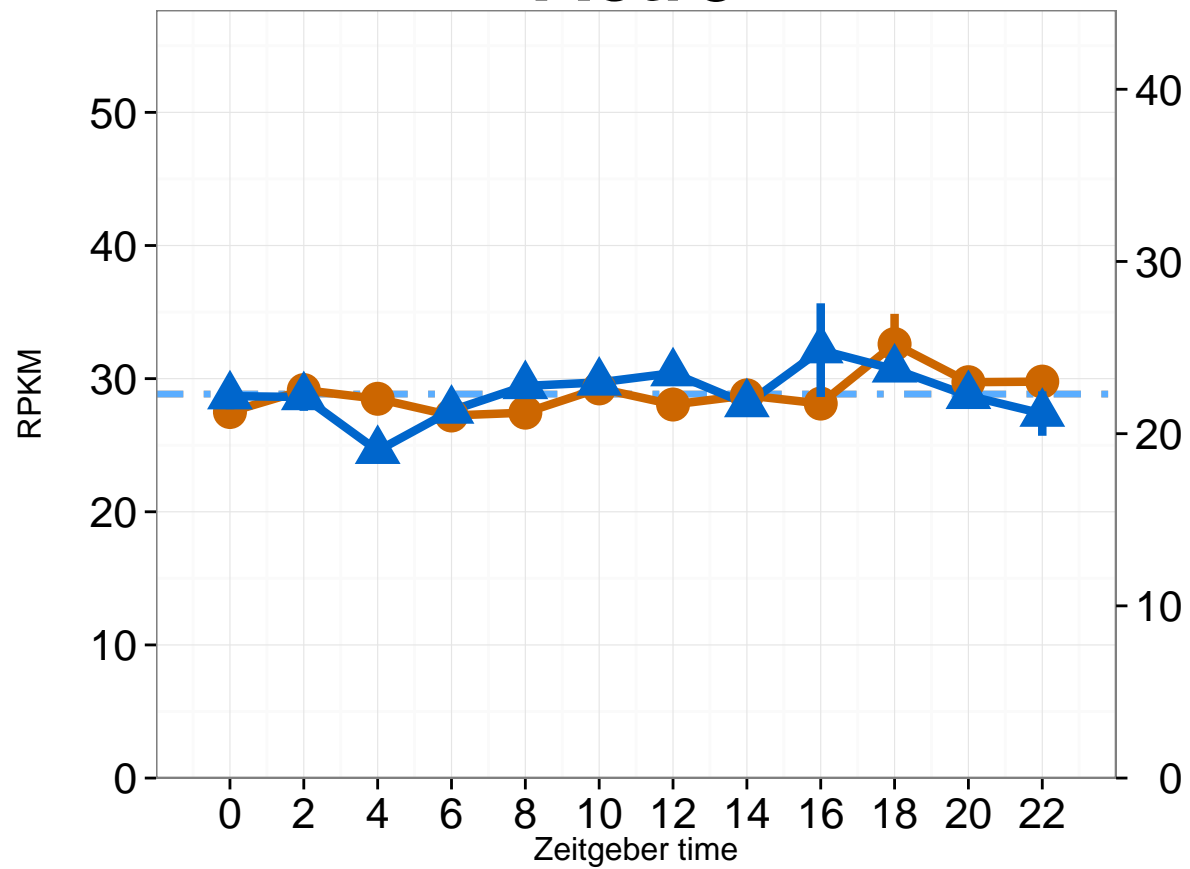

## Actr8

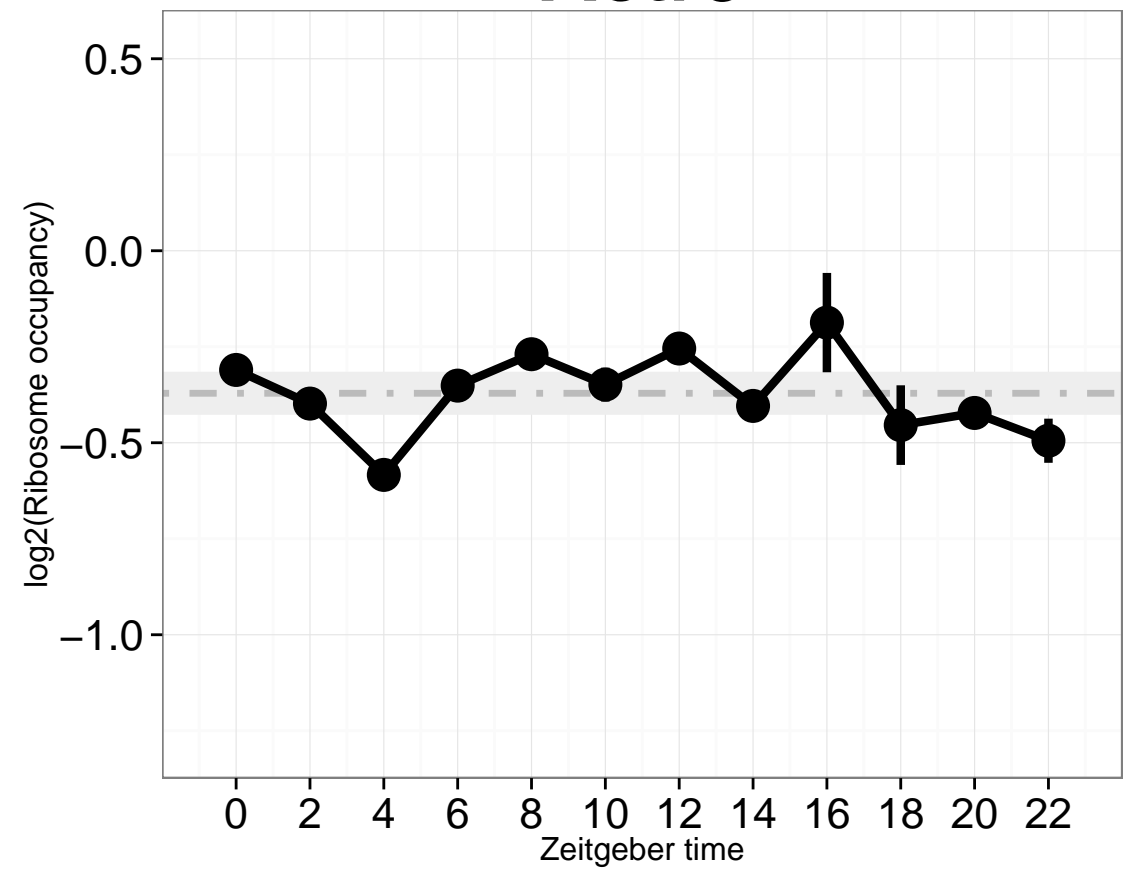

Supplement: Supplementary file 3406 [file 1]

# S100a6

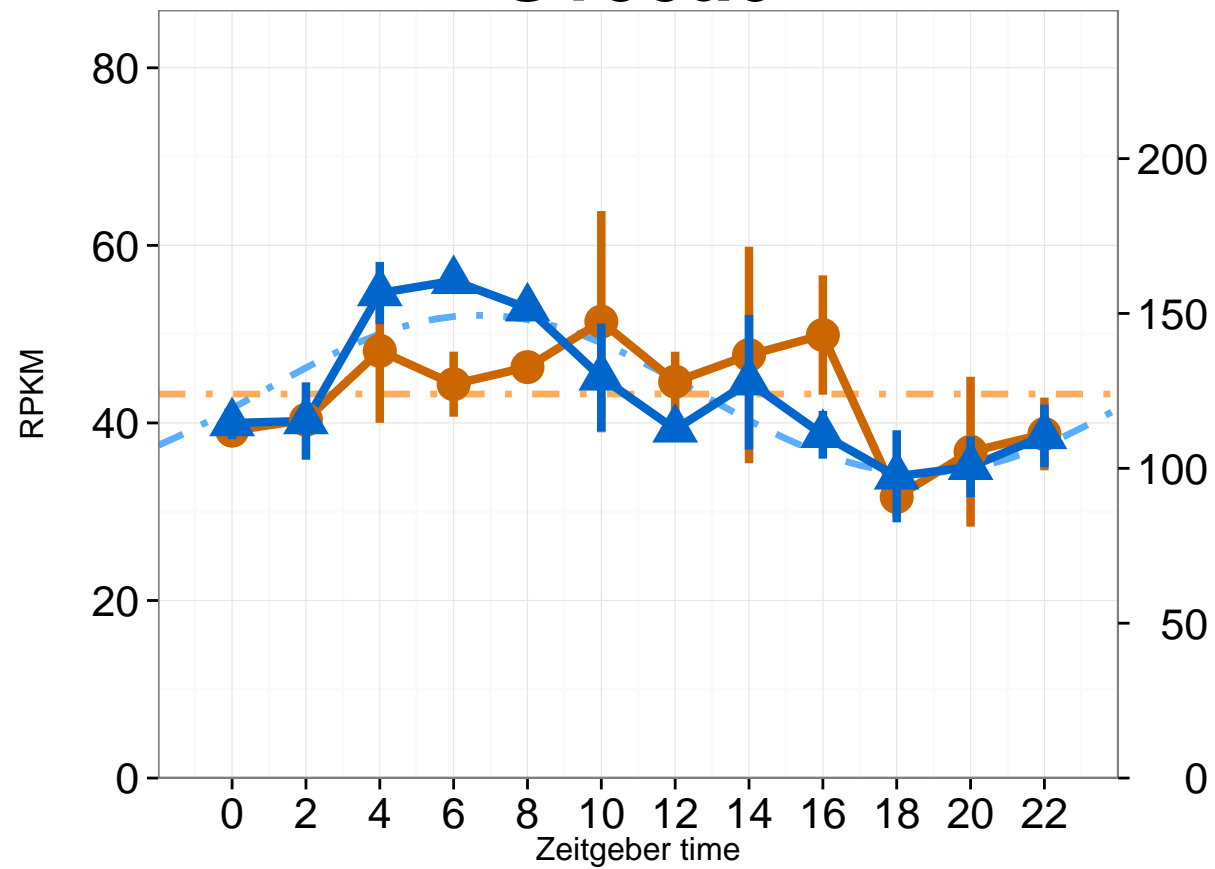

# S100a6

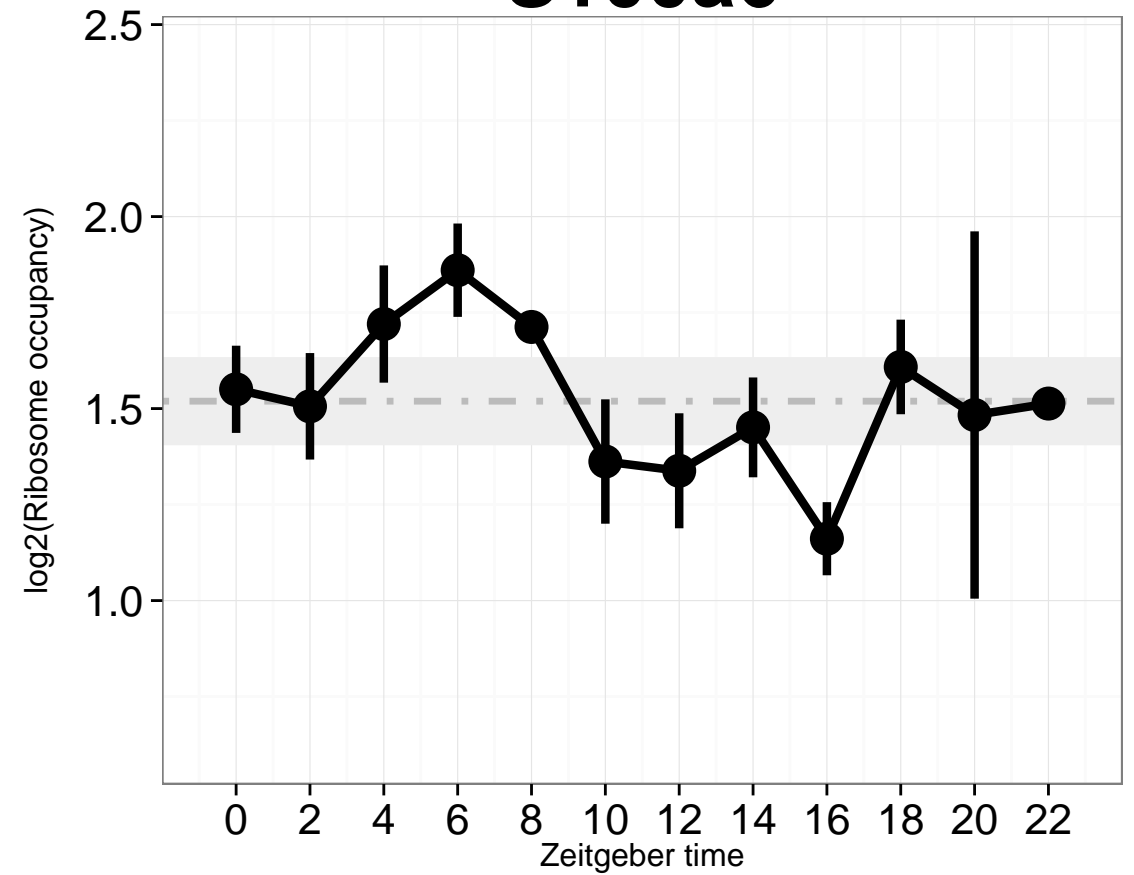

Supplement: Supplementary file 3407 [file 1]

## Epor

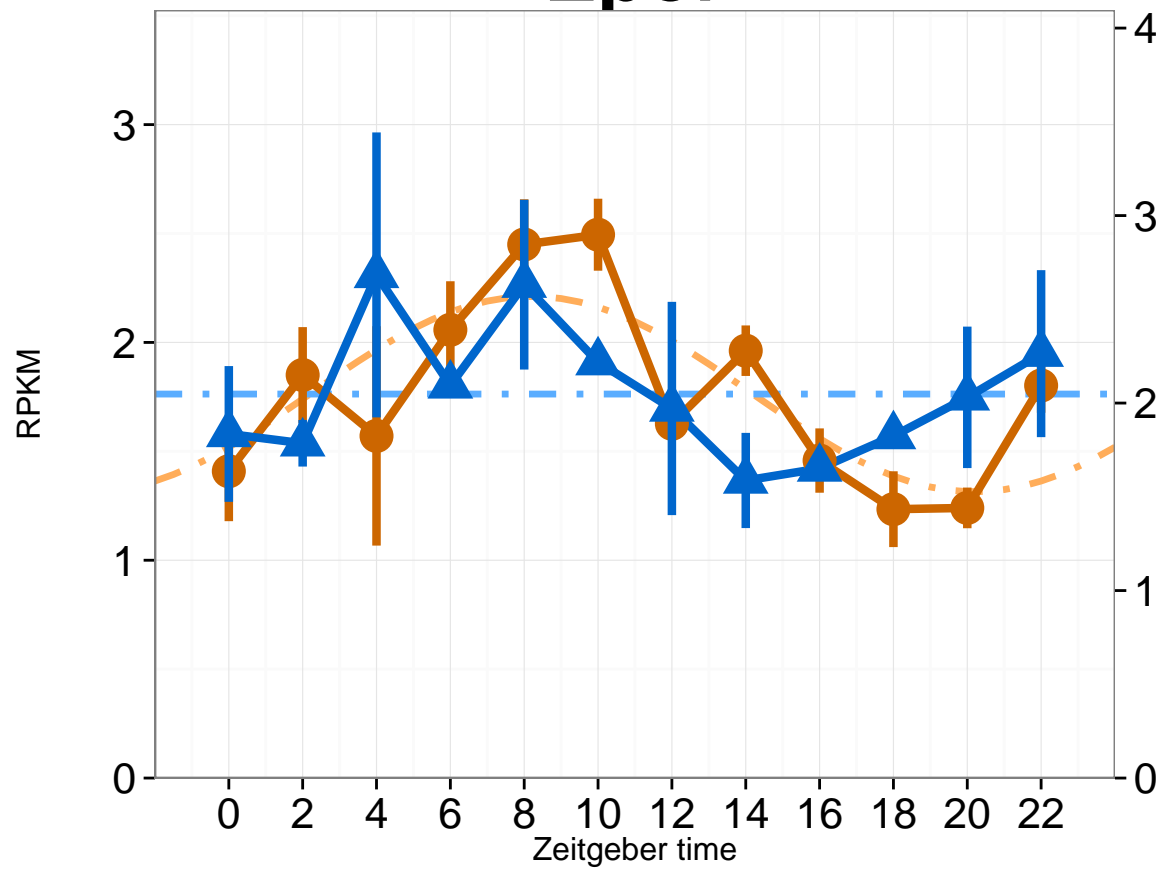

## Epor

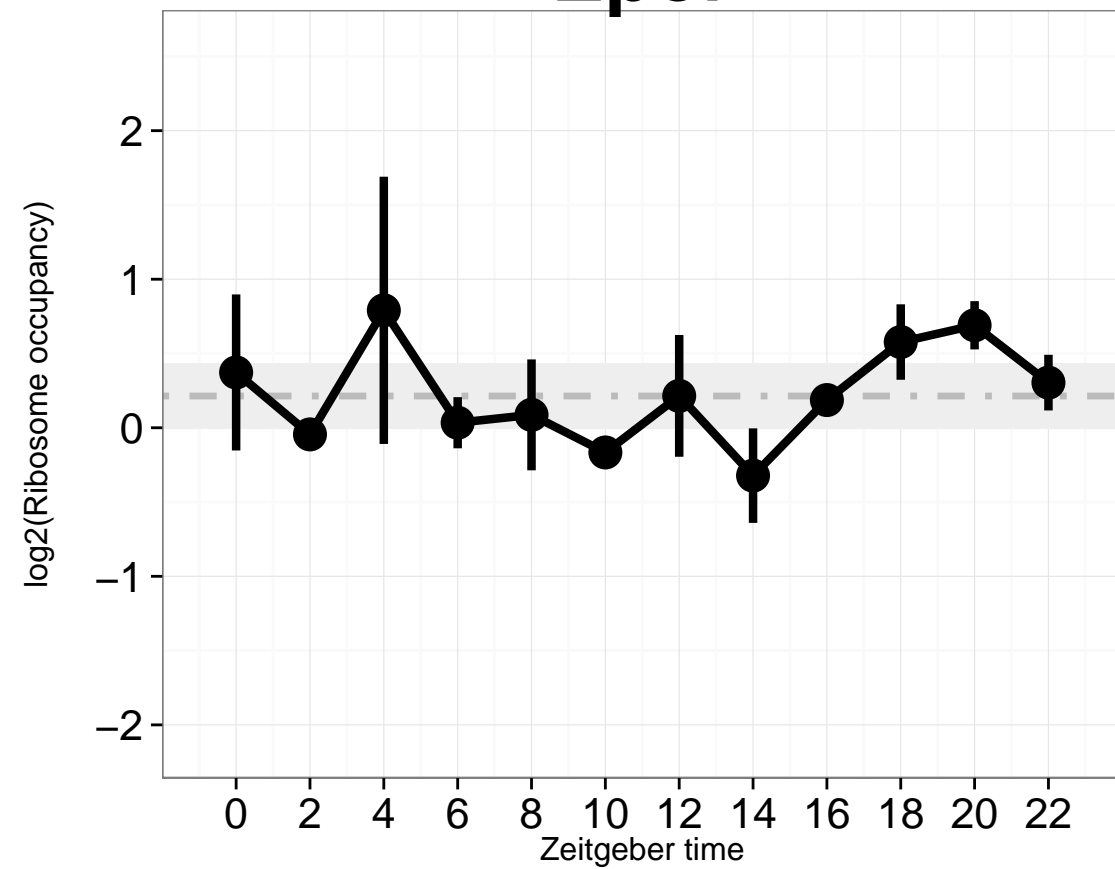

Supplement: Supplementary file 3408 [file 1]

# Dennd4b

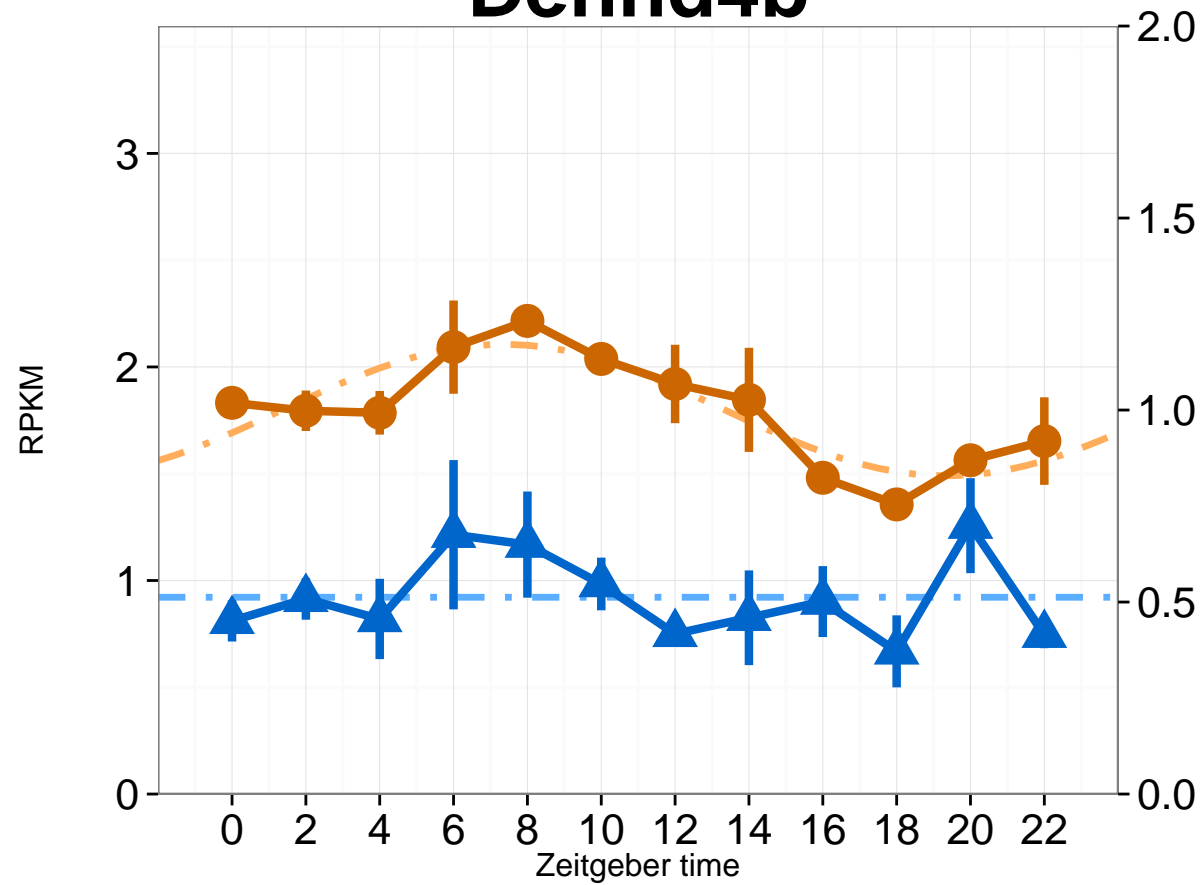

# Dennd4b

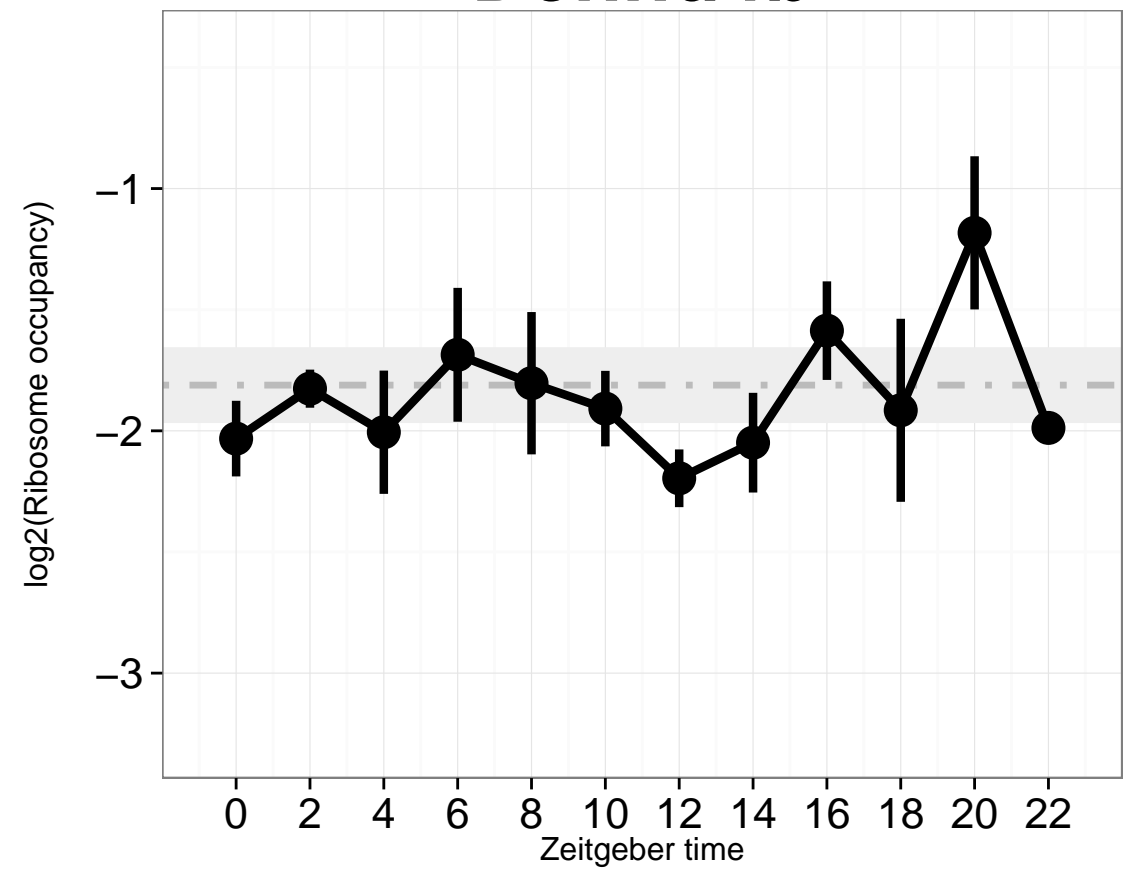

Supplement: Supplementary file 3409 [file 1]

# Mlycd

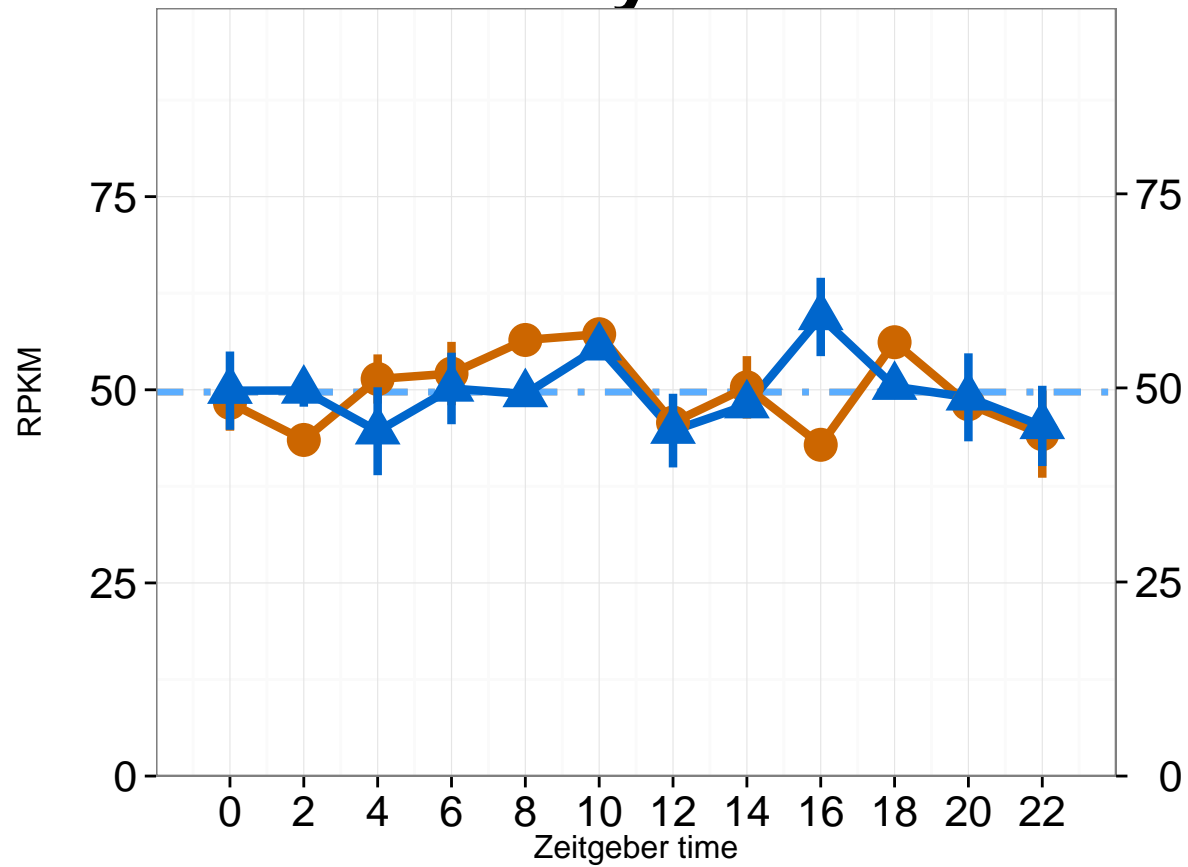

# Mlycd

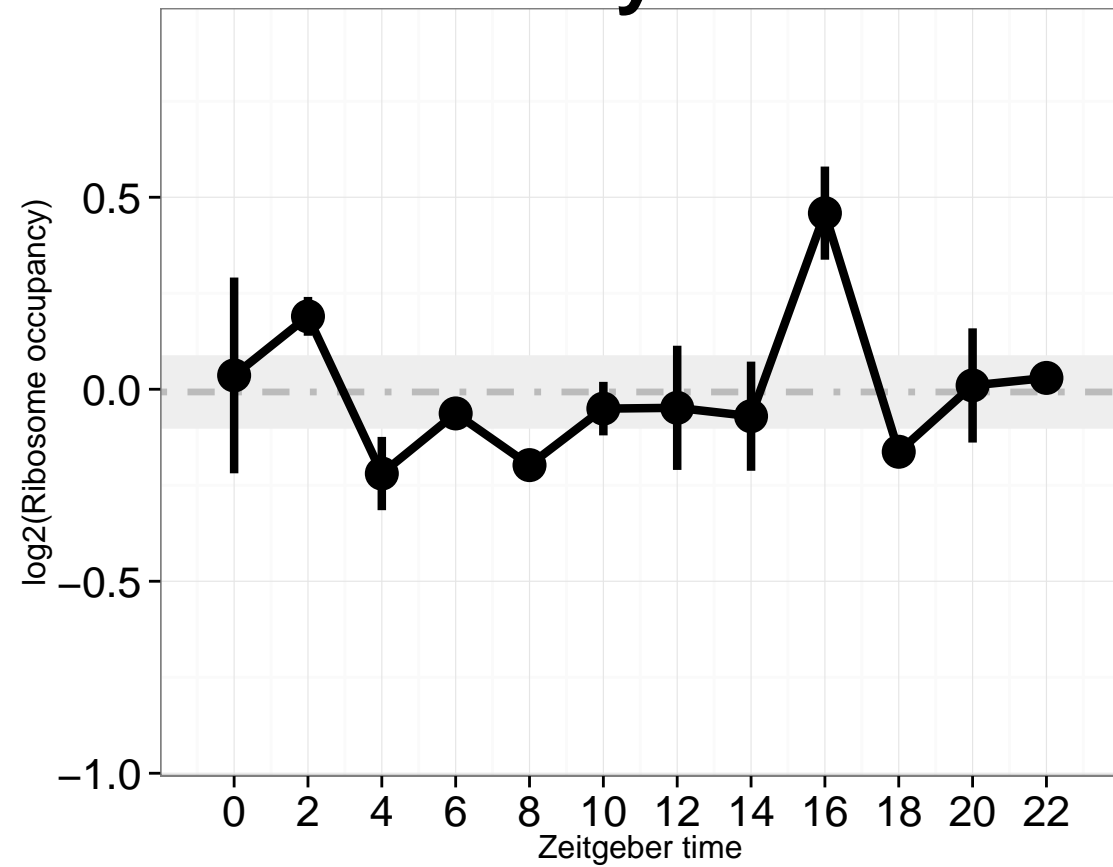

Supplement: Supplementary file 3410 [file 1]

# Heatr1

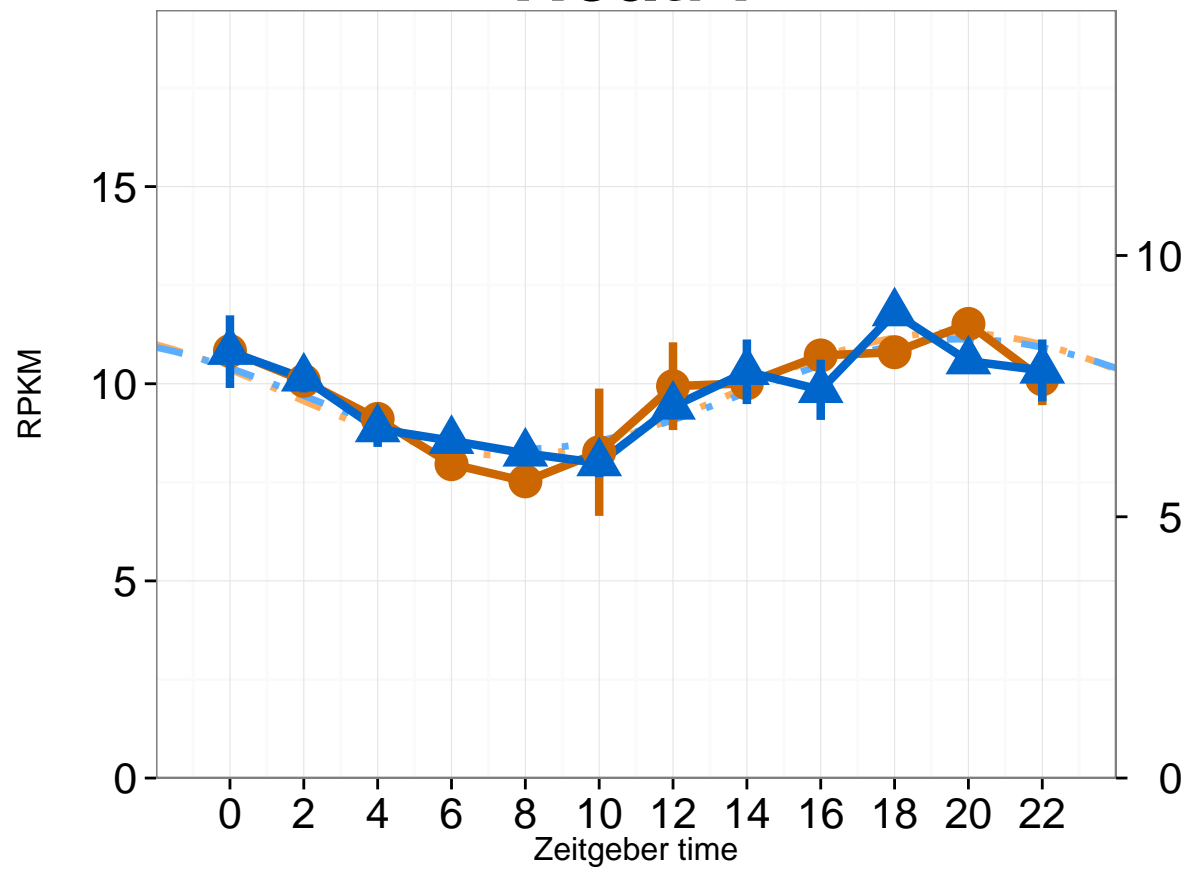

# Heatr1

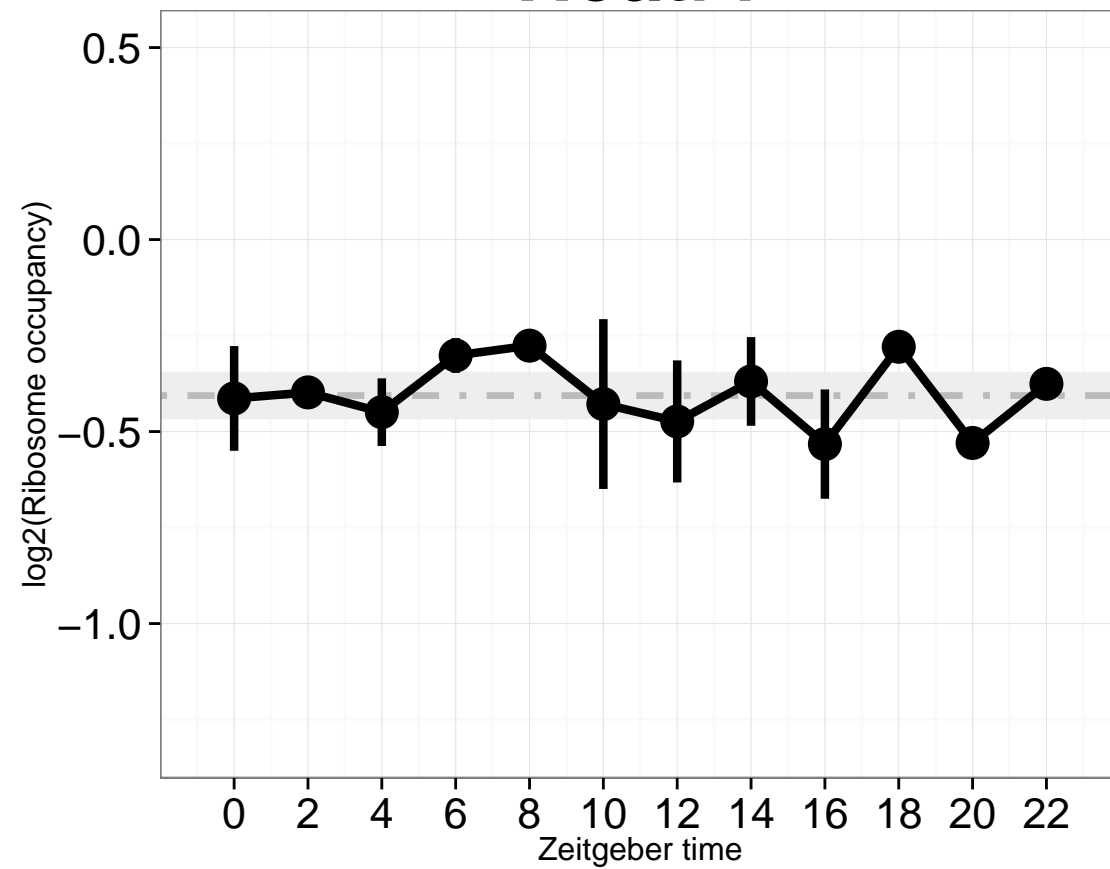

Supplement: Supplementary file 3411 [file 1]

## ErbB2ip

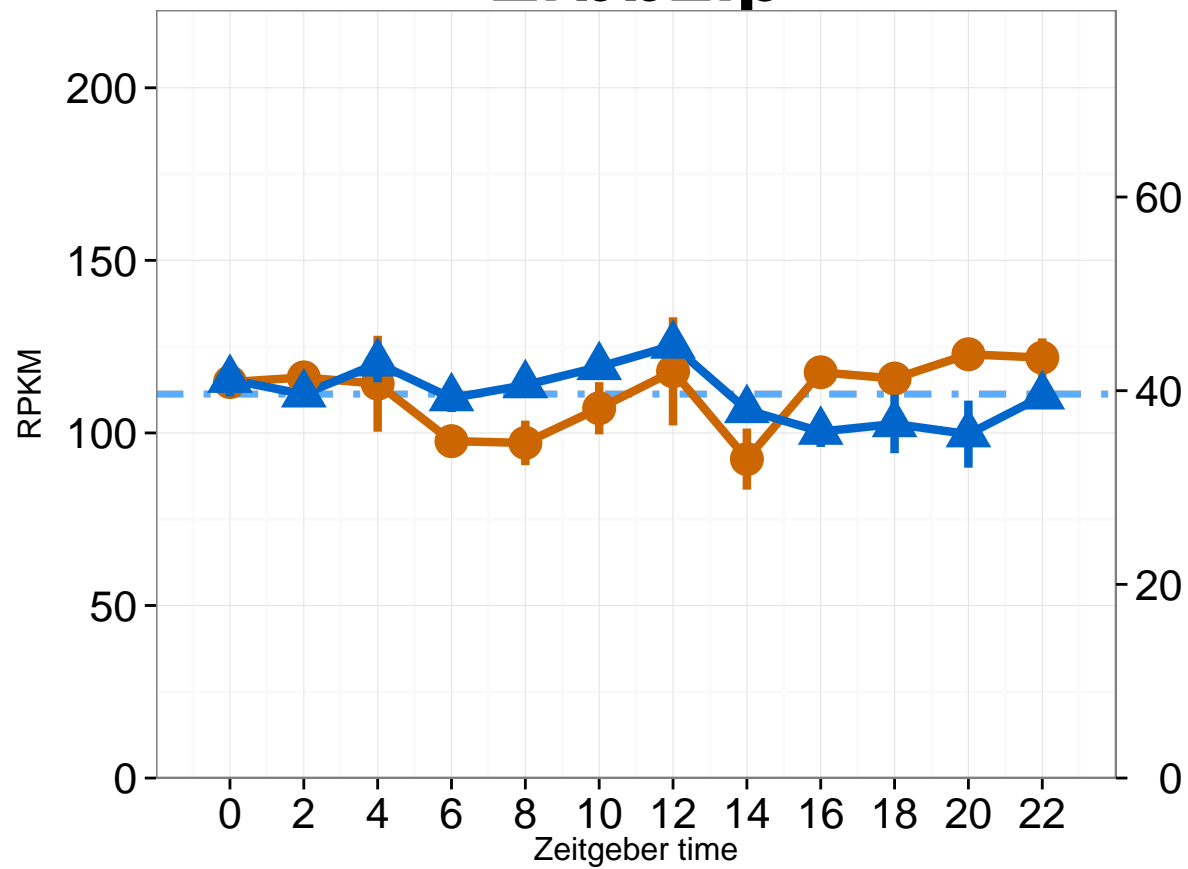

## ErbB2ip

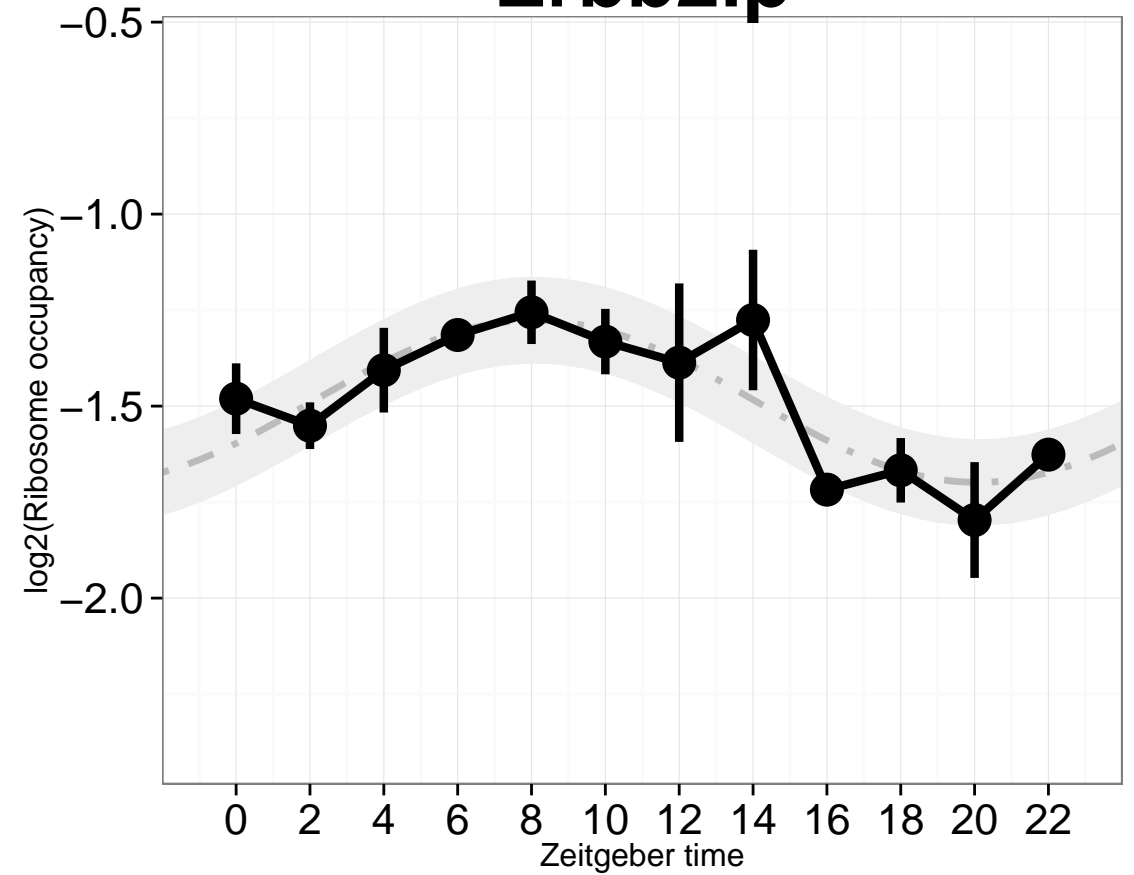

Supplement: Supplementary file 3412 [file 1]
