# Supplementary material (part 35 of 133)
Source: publisher figshare collection journal article supplement (https://springernature.figshare.com/articles/dataset/_/4903193)

# Fam151b

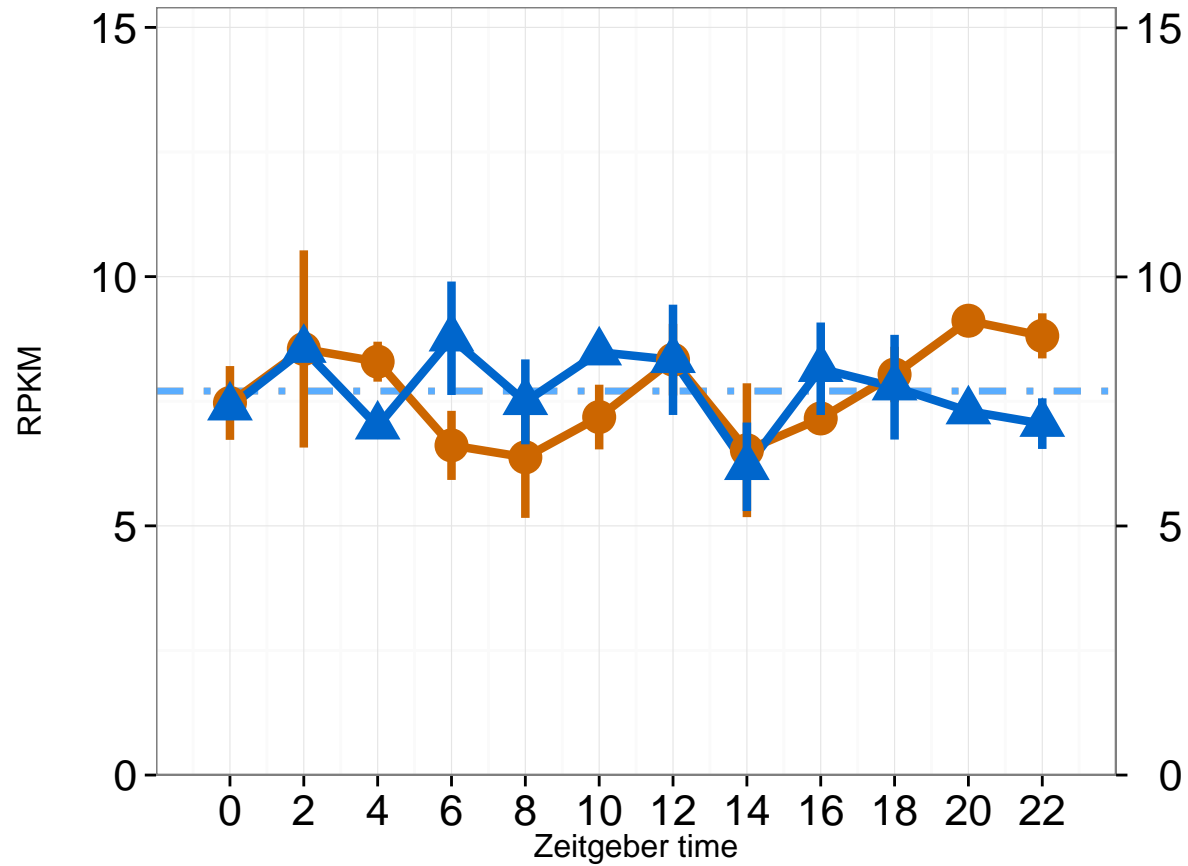

# Fam151b

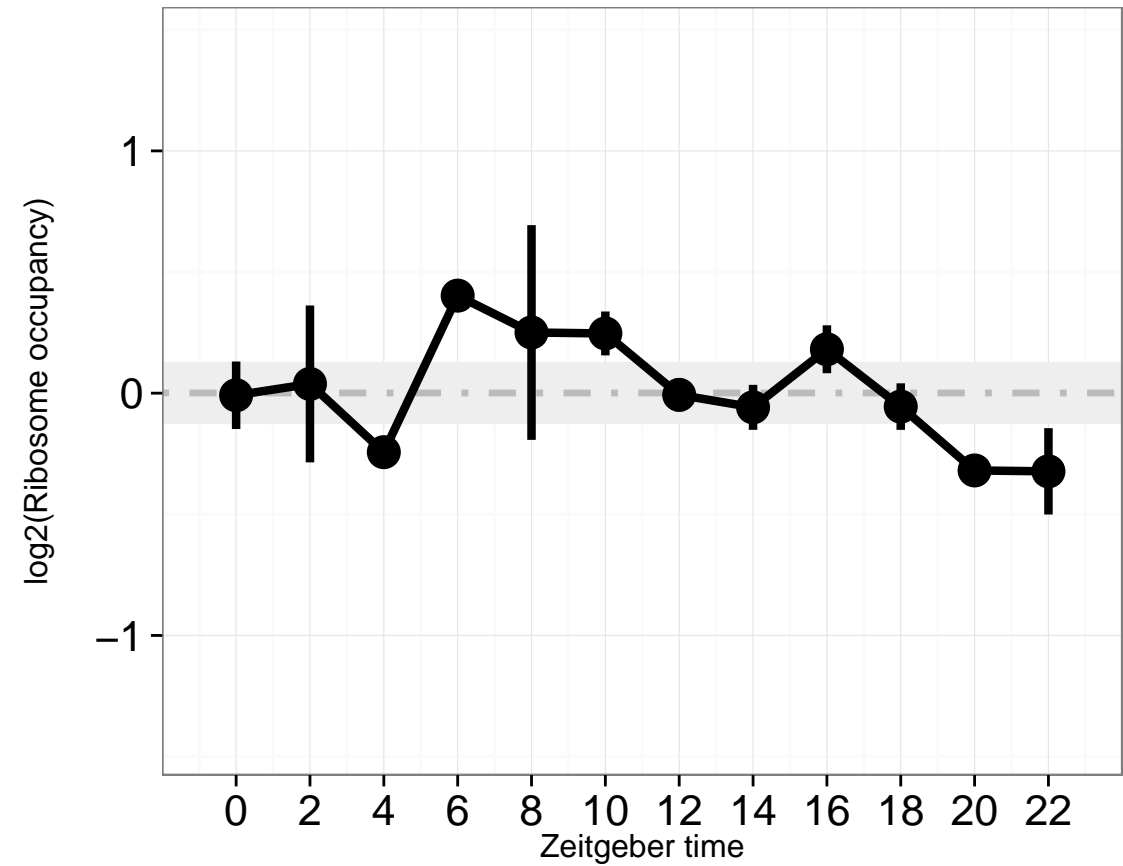

Supplement: Supplementary file 3413 [file 1]

# Sdr42e1

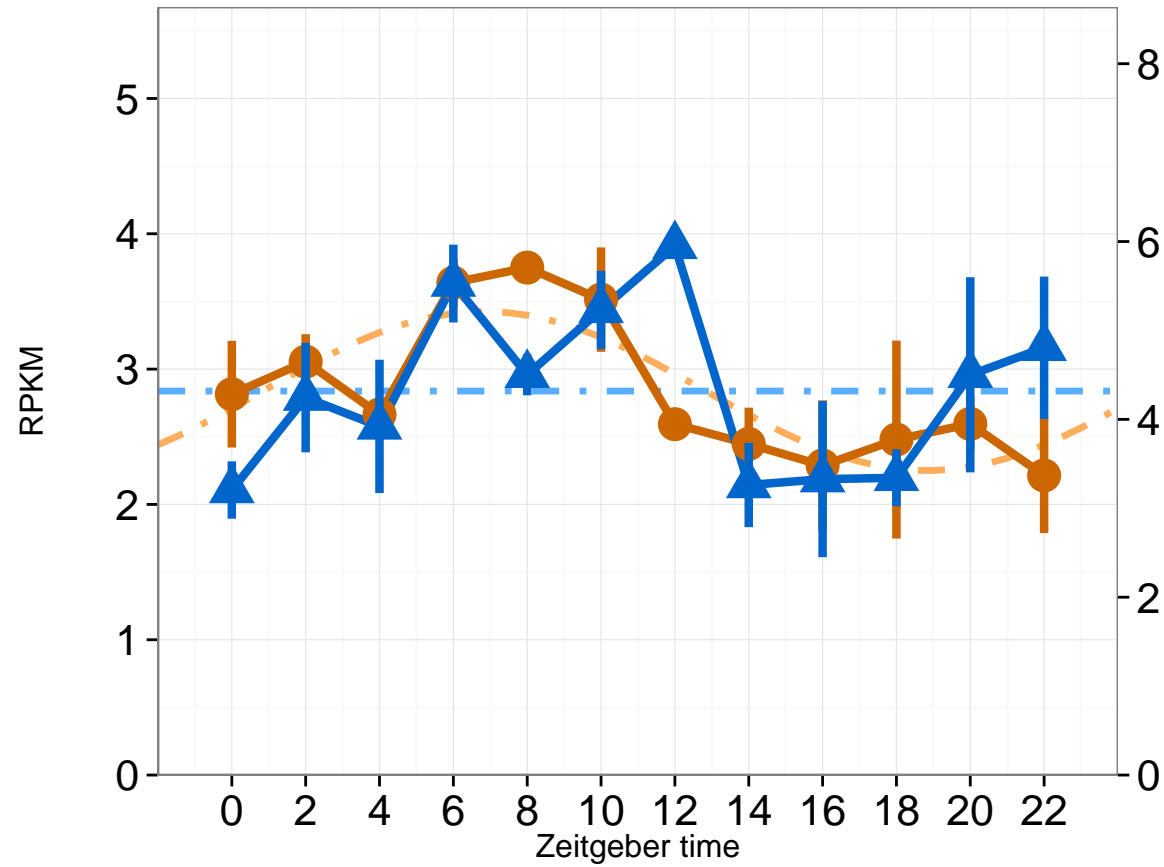

# Sdr42e1

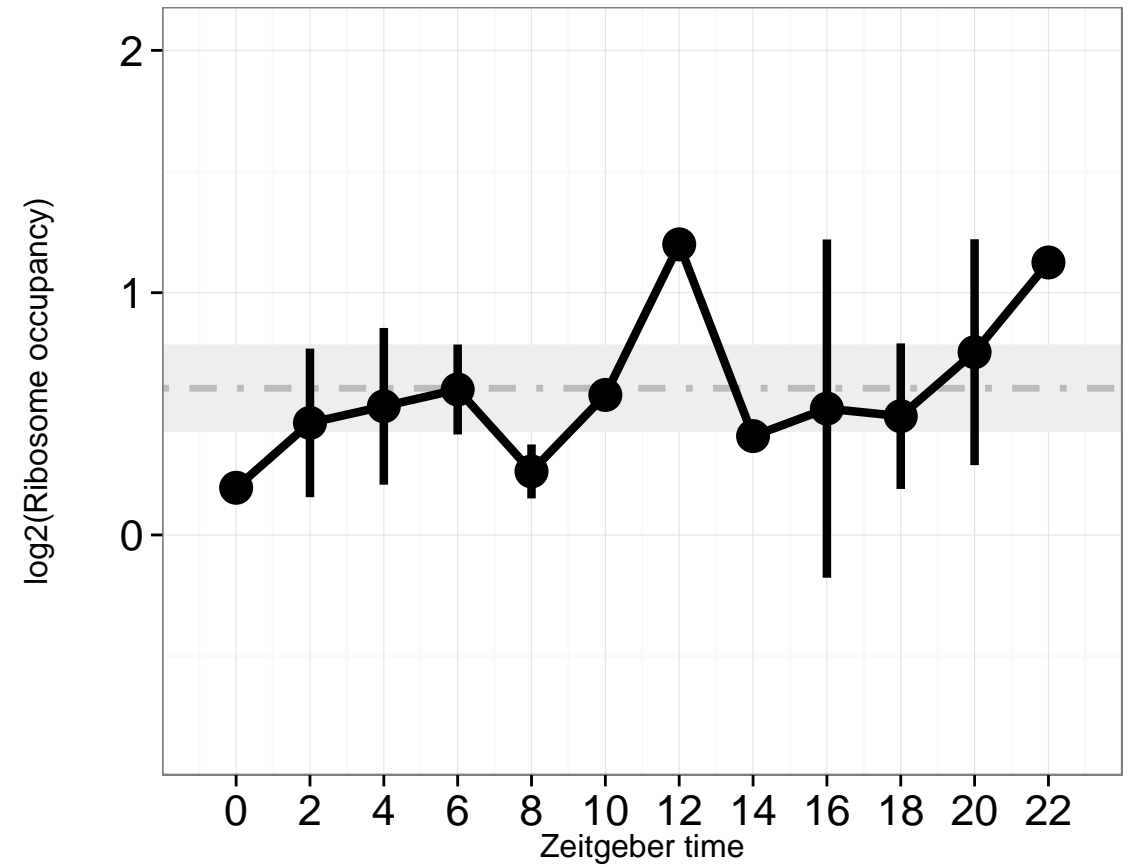

Supplement: Supplementary file 3414 [file 1]

## Cks2

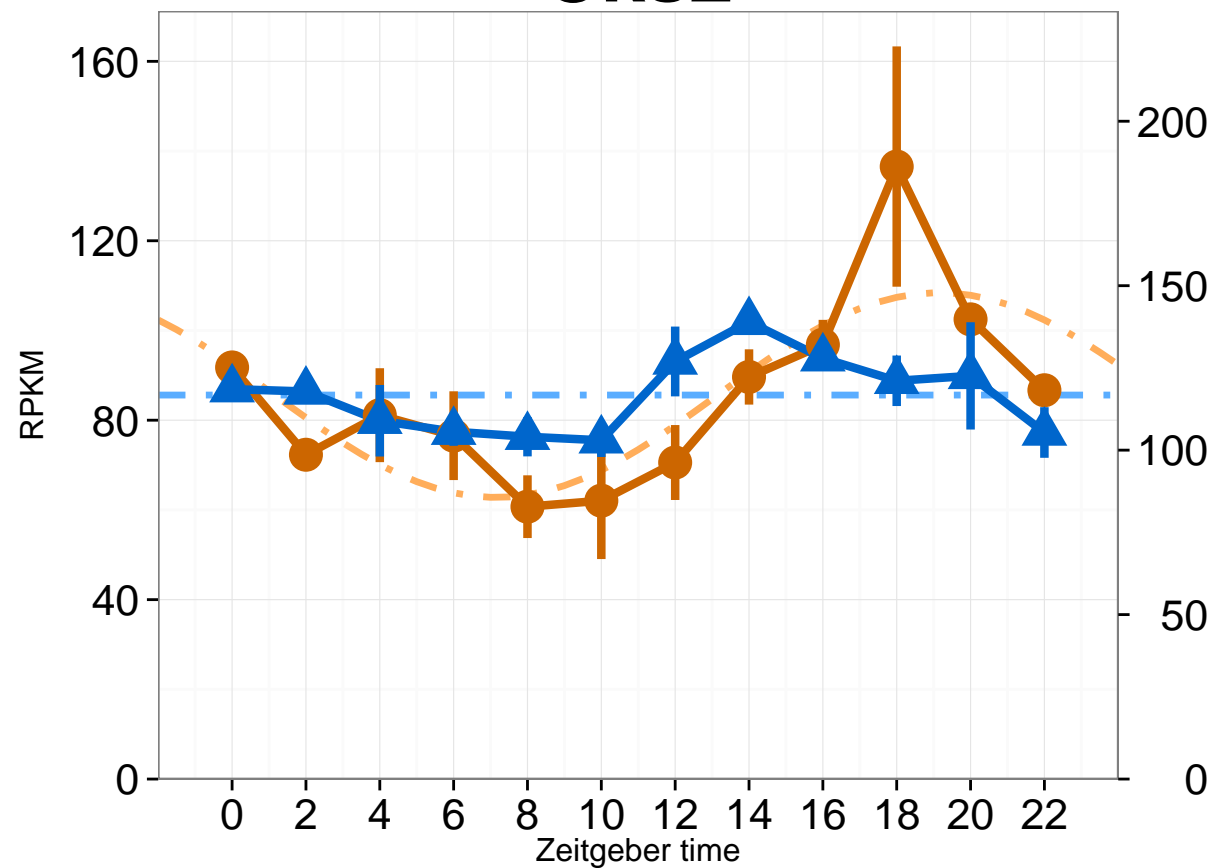

## Cks2

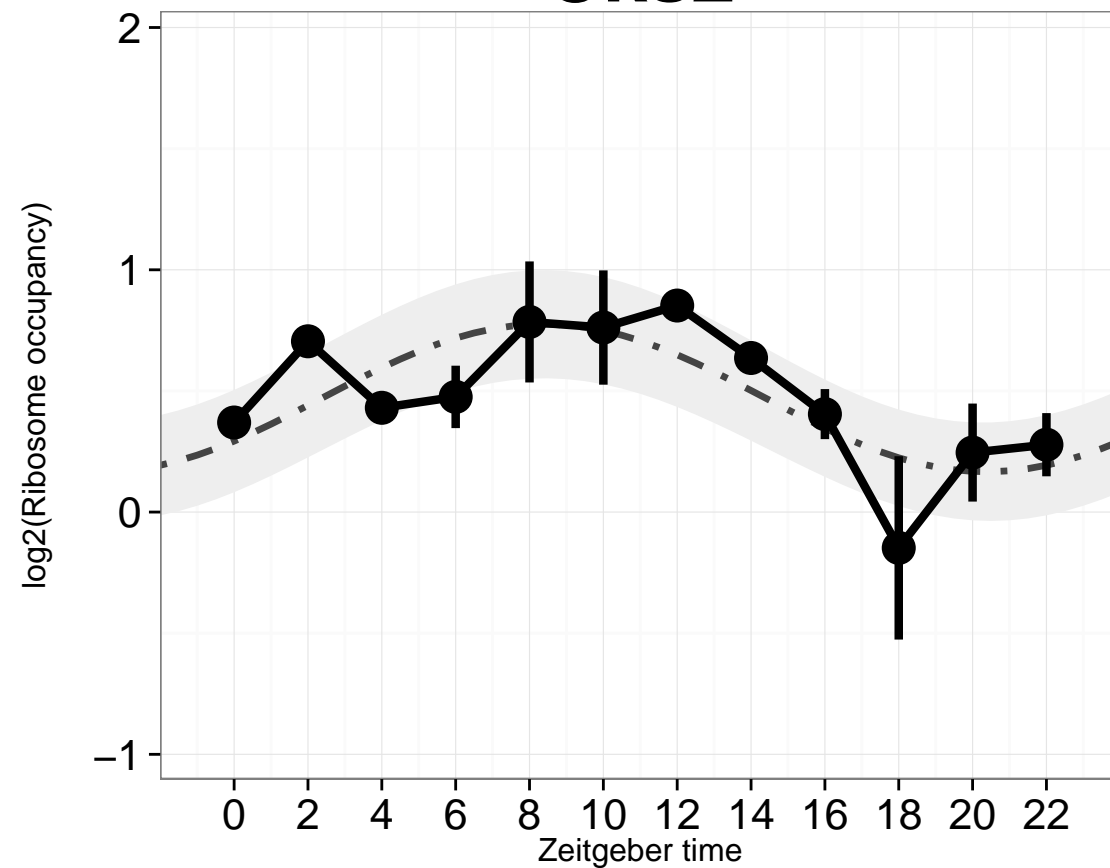

Supplement: Supplementary file 3415 [file 1]

## Mtss1

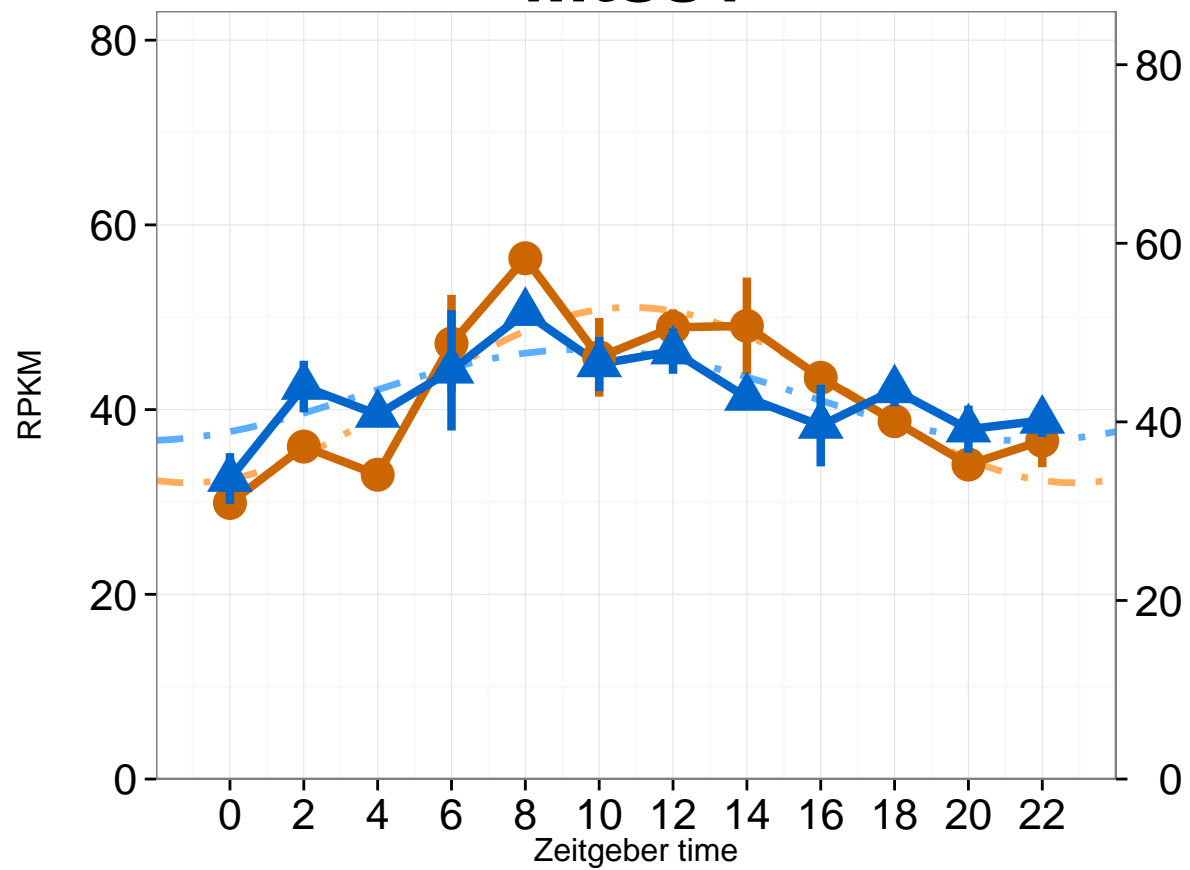

## Mtss1

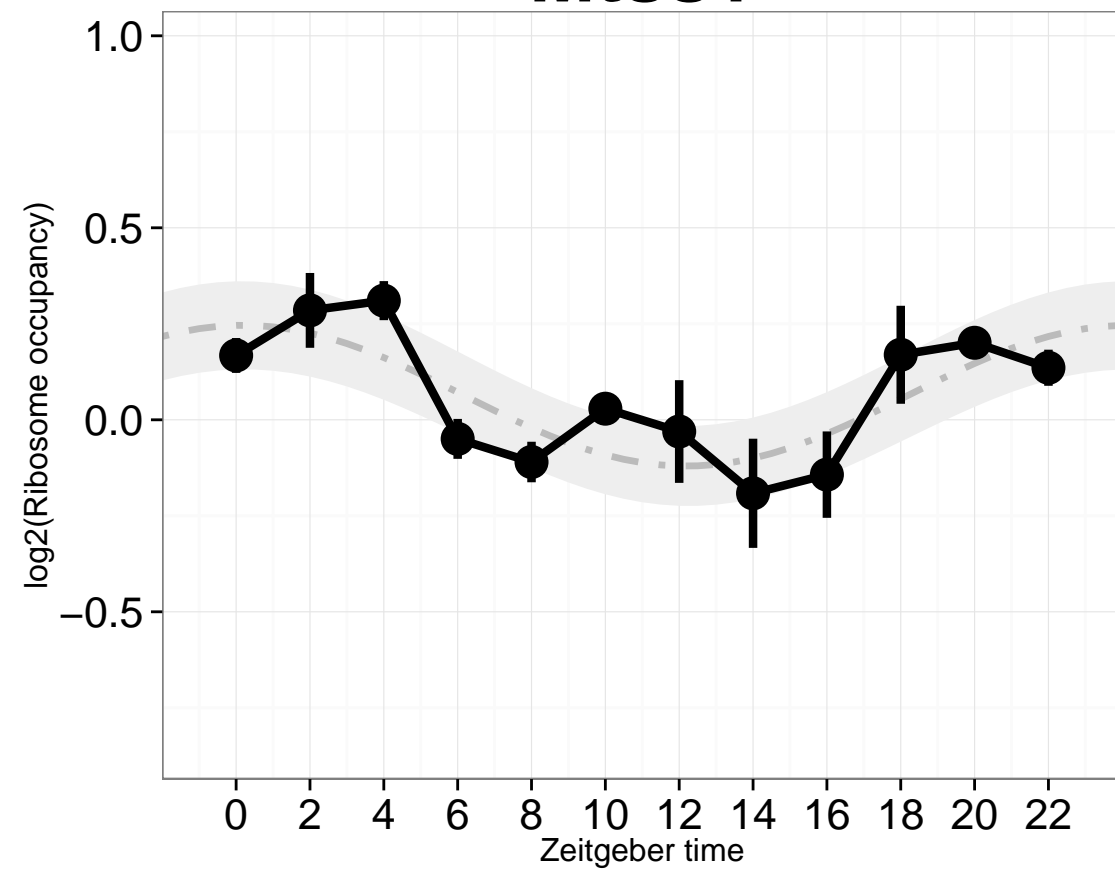

Supplement: Supplementary file 3416 [file 1]

## Gm11011

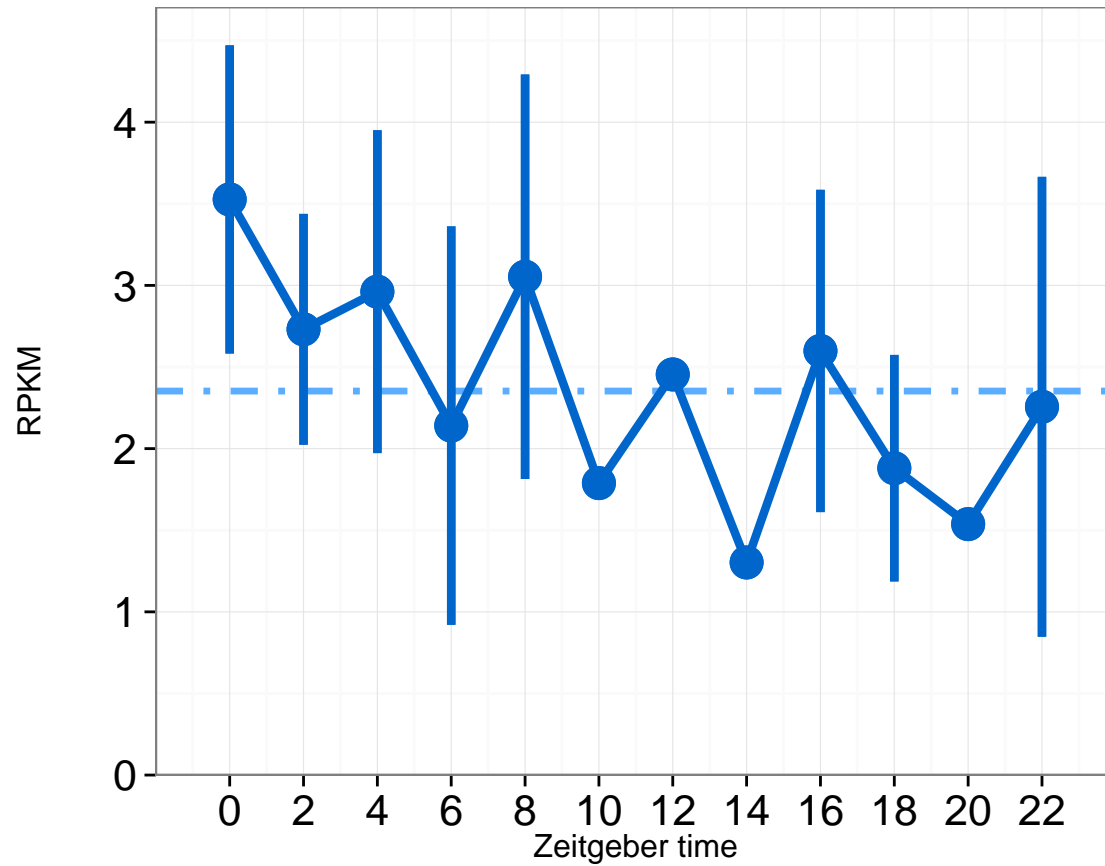

## Gm11011 log2(Ribosome occupanc

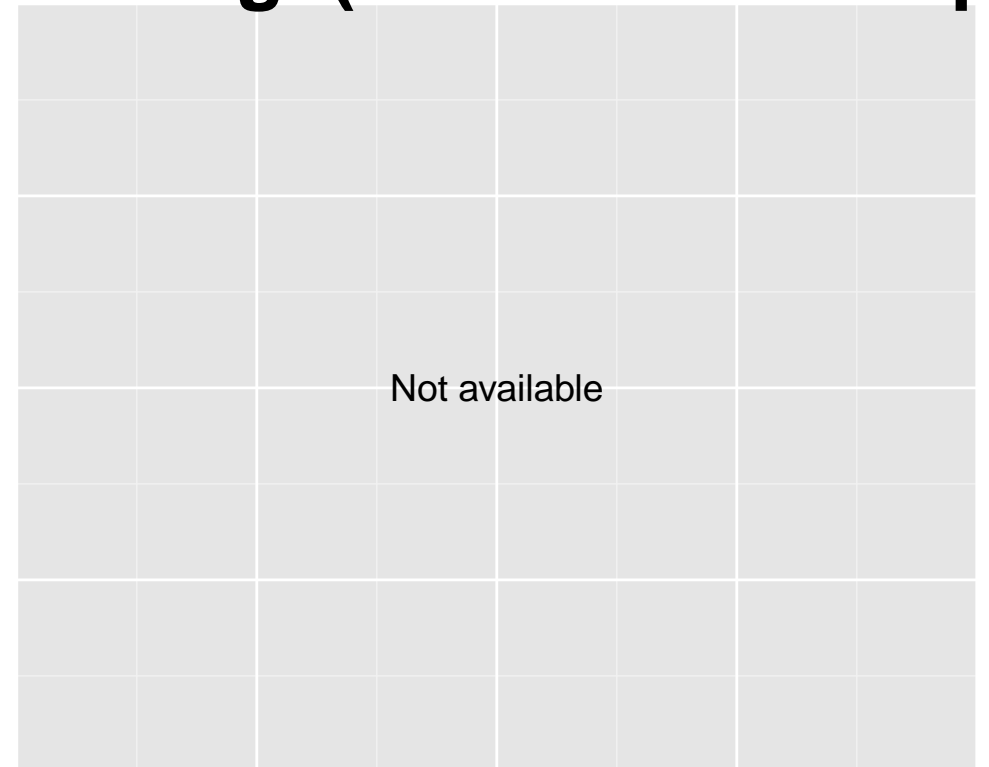

Supplement: Supplementary file 3417 [file 1]

## Zzz3

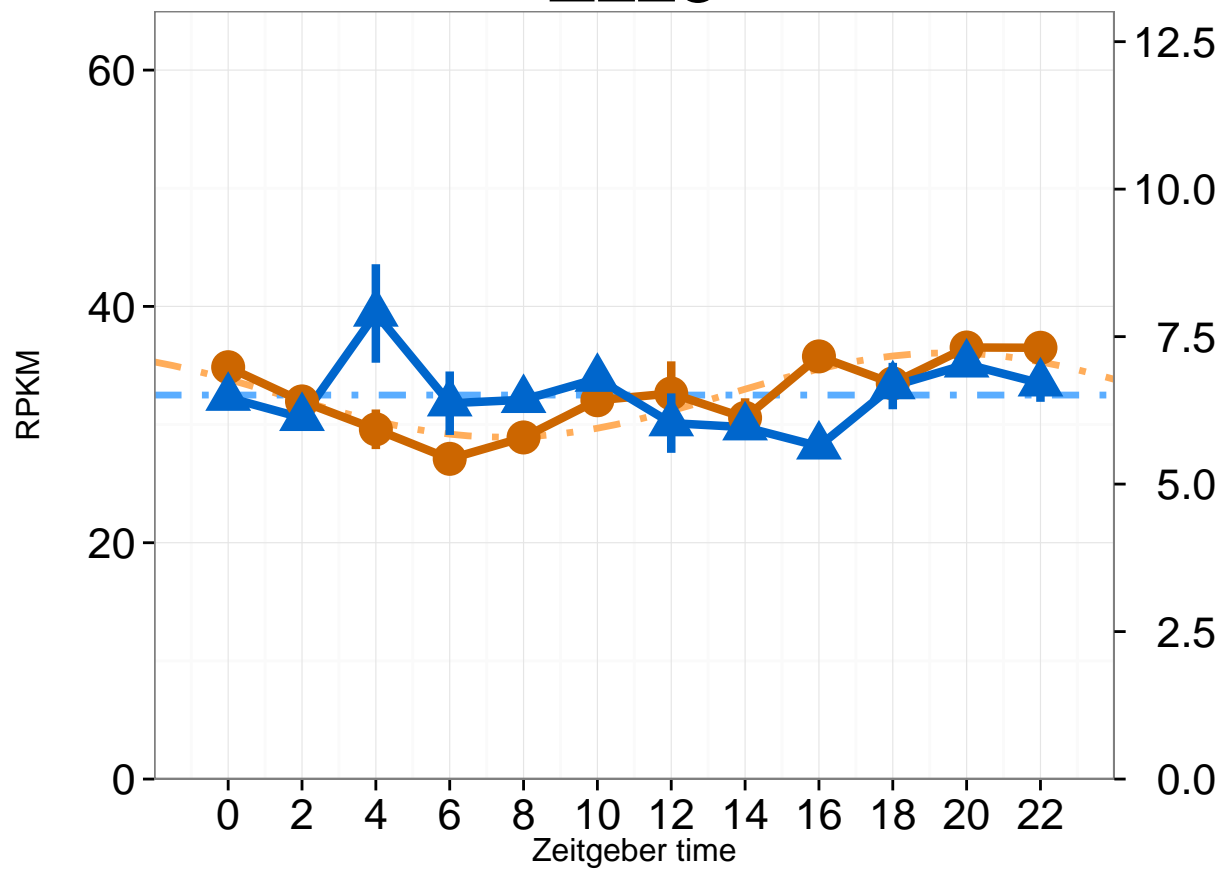

## Zzz3

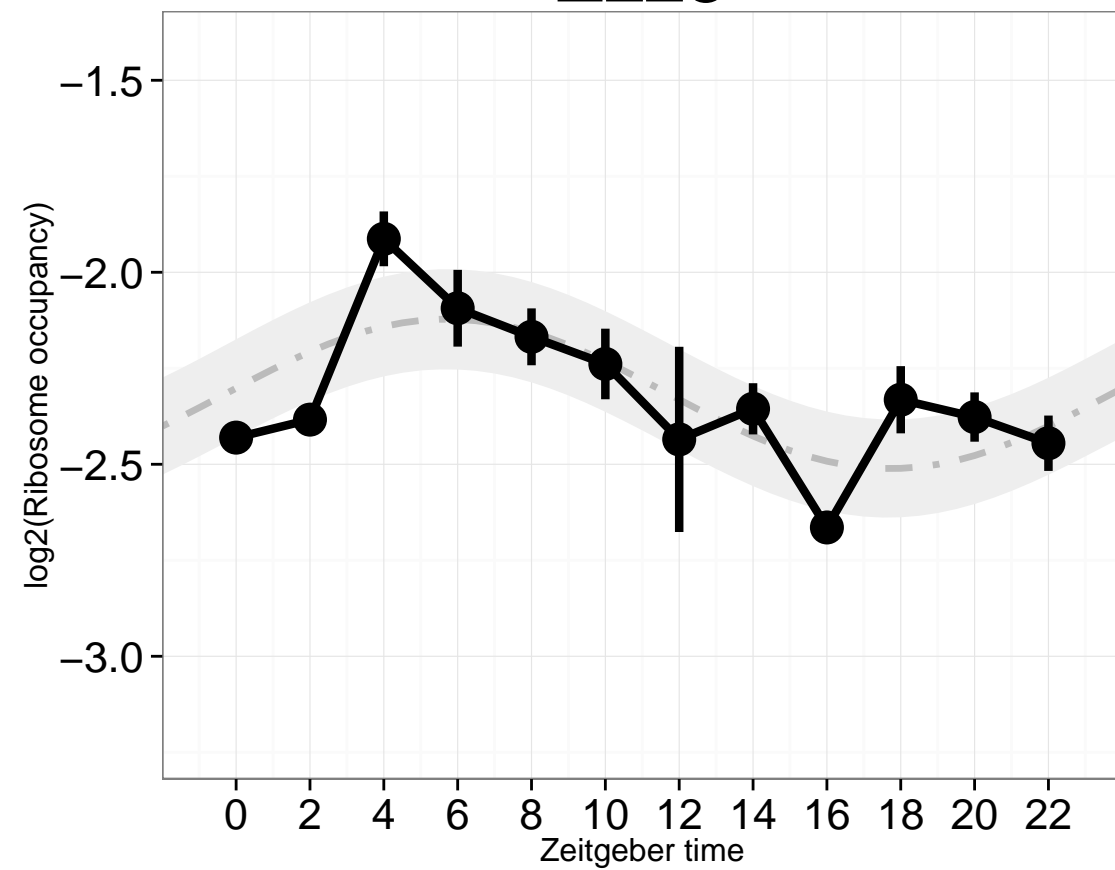

Supplement: Supplementary file 3418 [file 1]

# Supt20

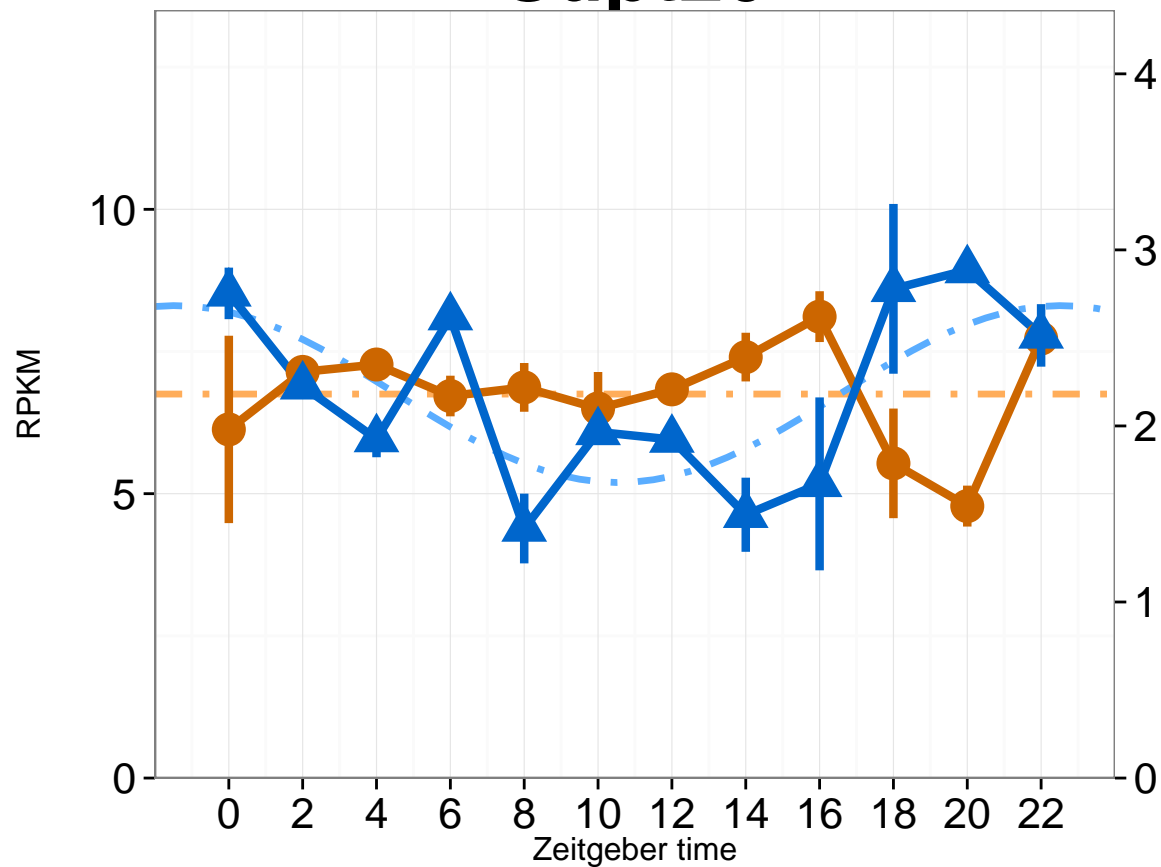

# Supt20

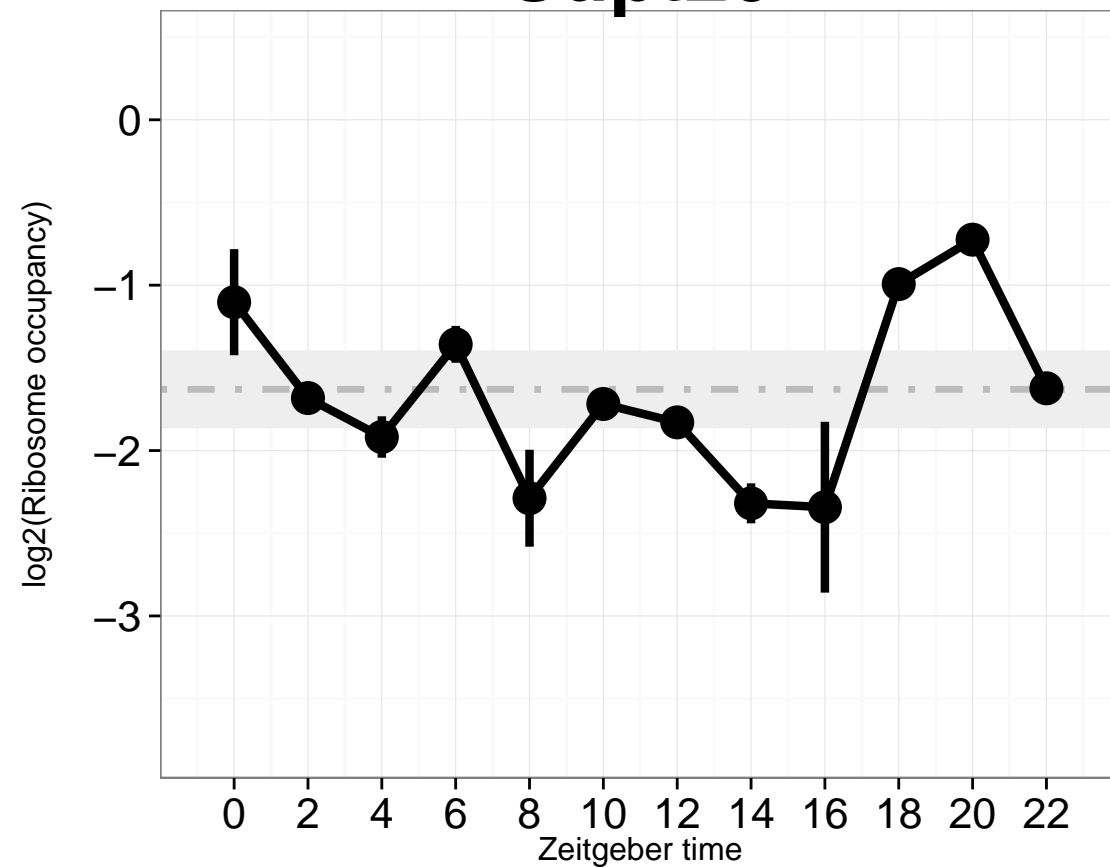

Supplement: Supplementary file 3419 [file 1]

## Proc

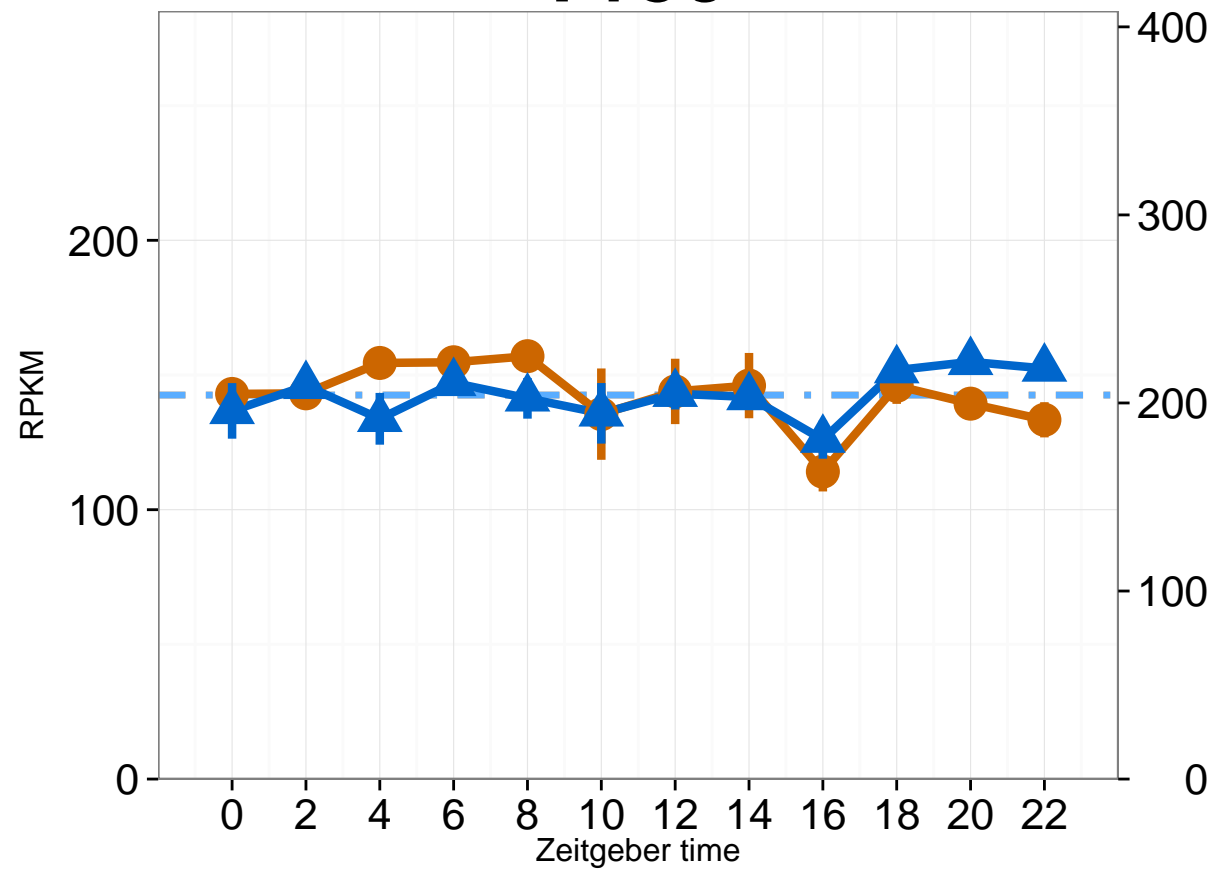

## Proc

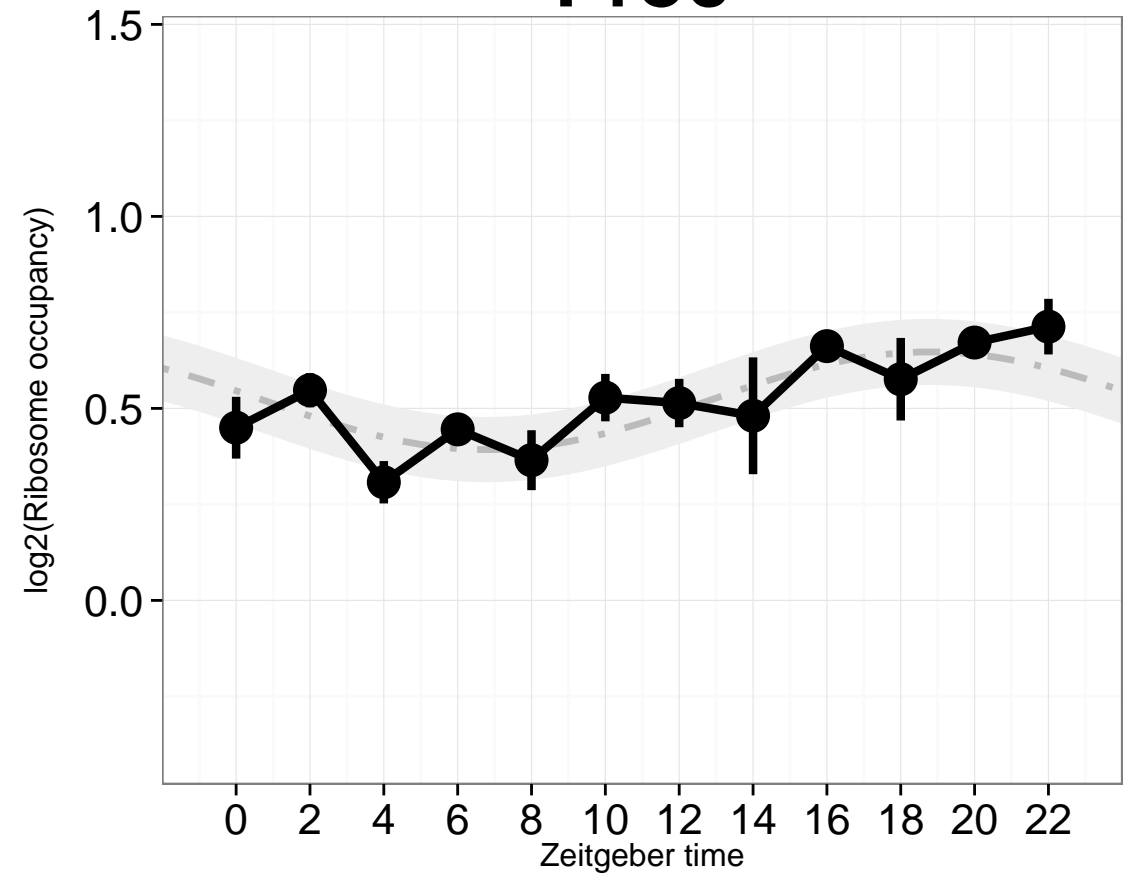

Supplement: Supplementary file 3420 [file 1]

# Fam32a

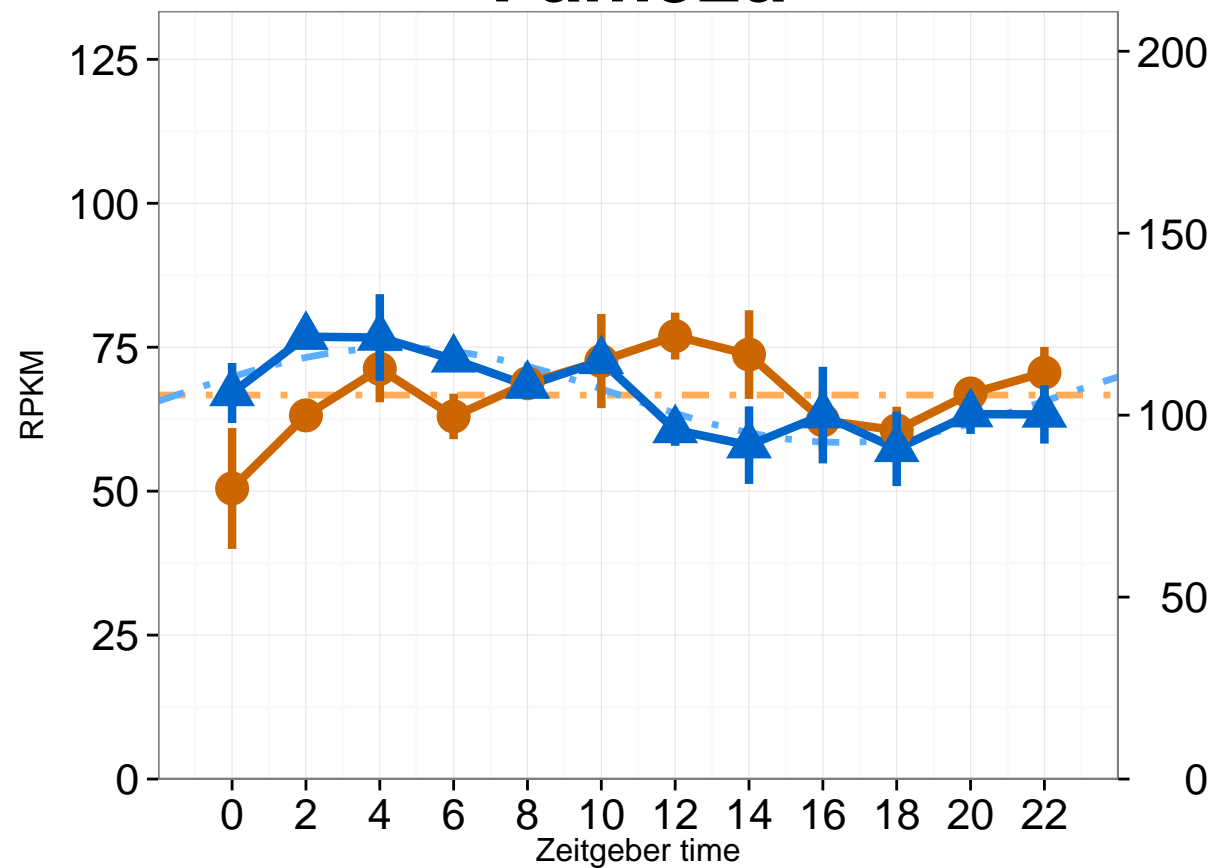

# Fam32a

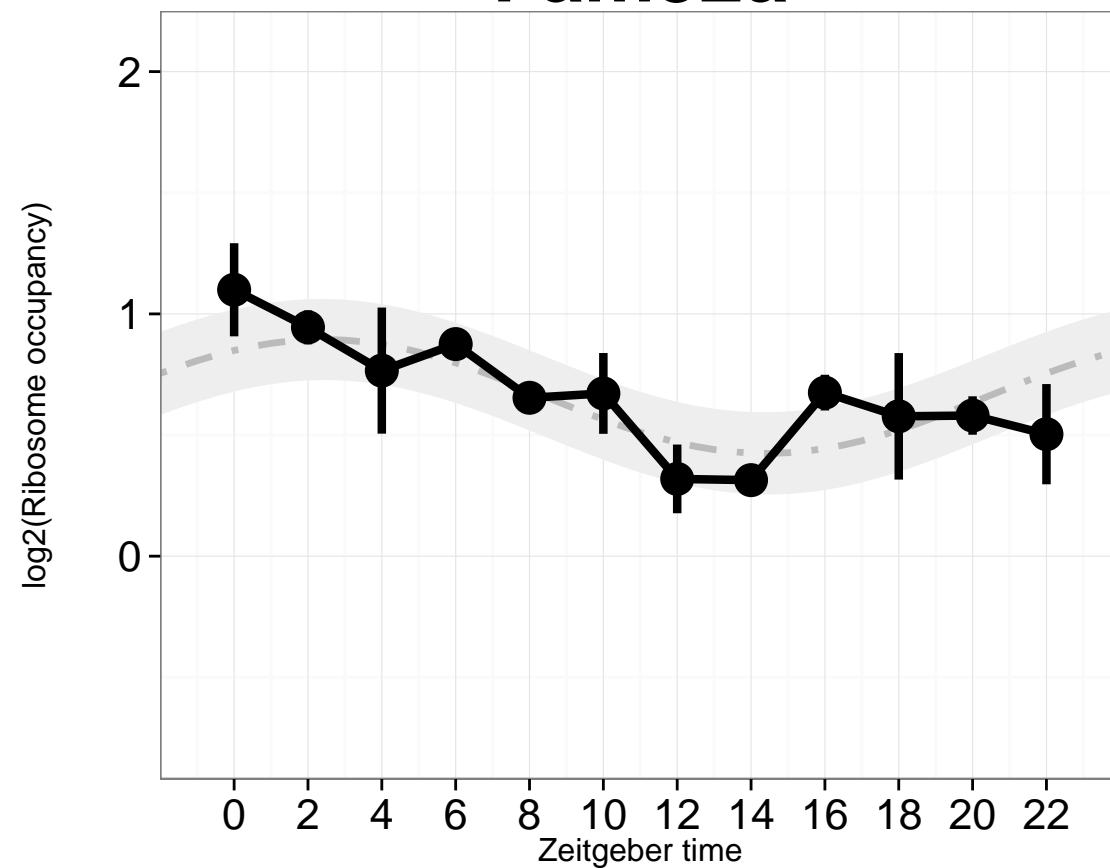

Supplement: Supplementary file 3421 [file 1]

## Gm10134

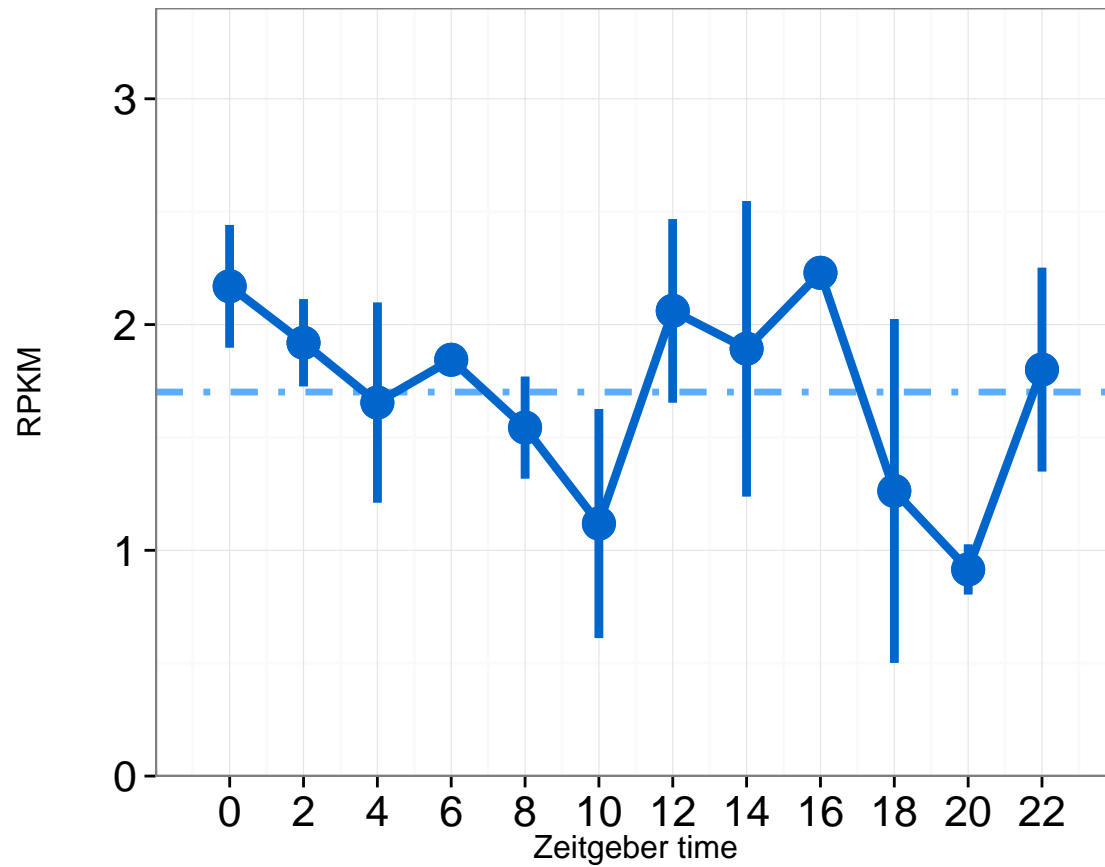

## Gm10134 log2(Ribosome occupanc

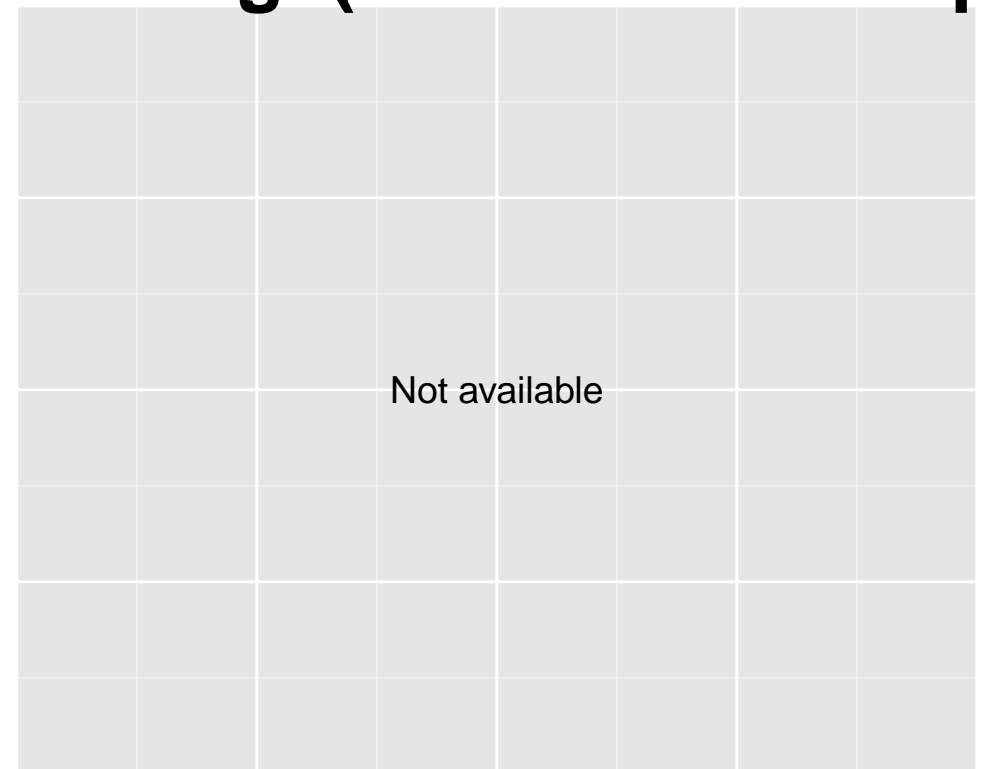

Supplement: Supplementary file 3422 [file 1]

## Wwp1

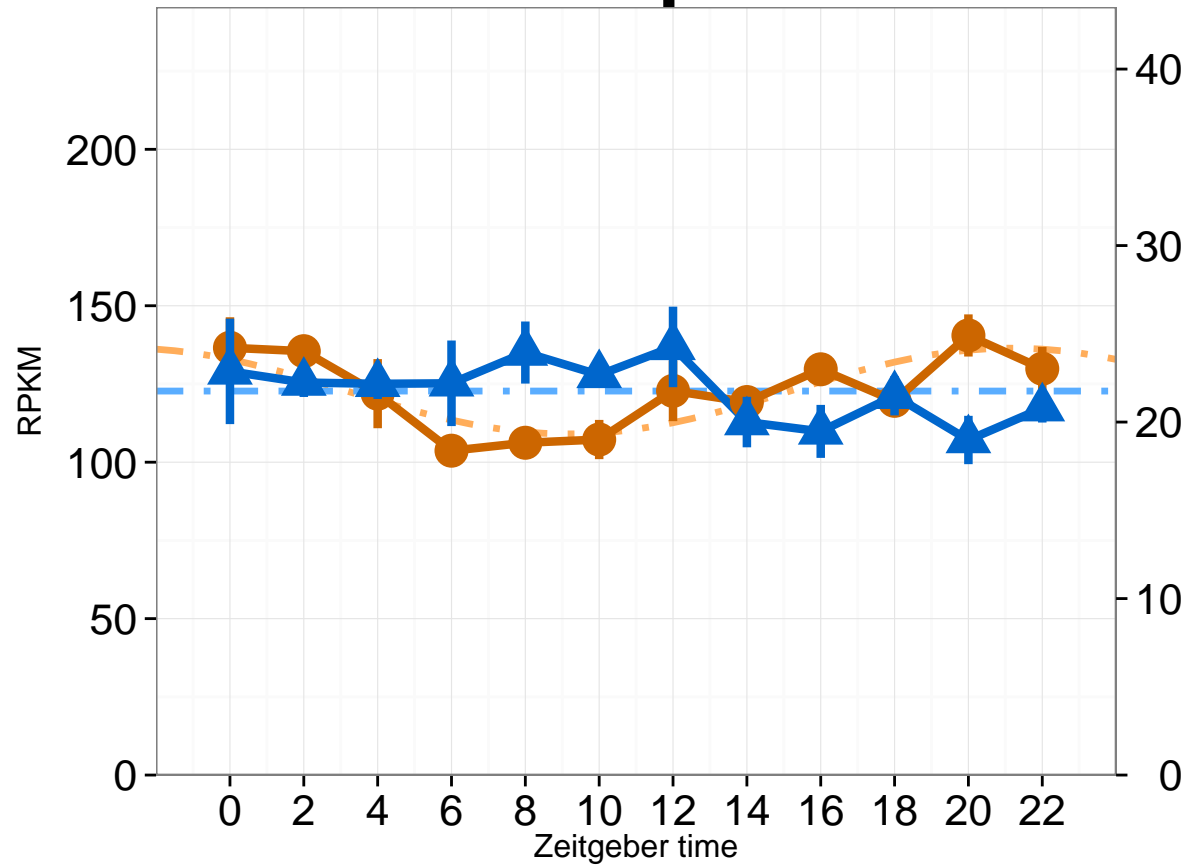

## Wwp1

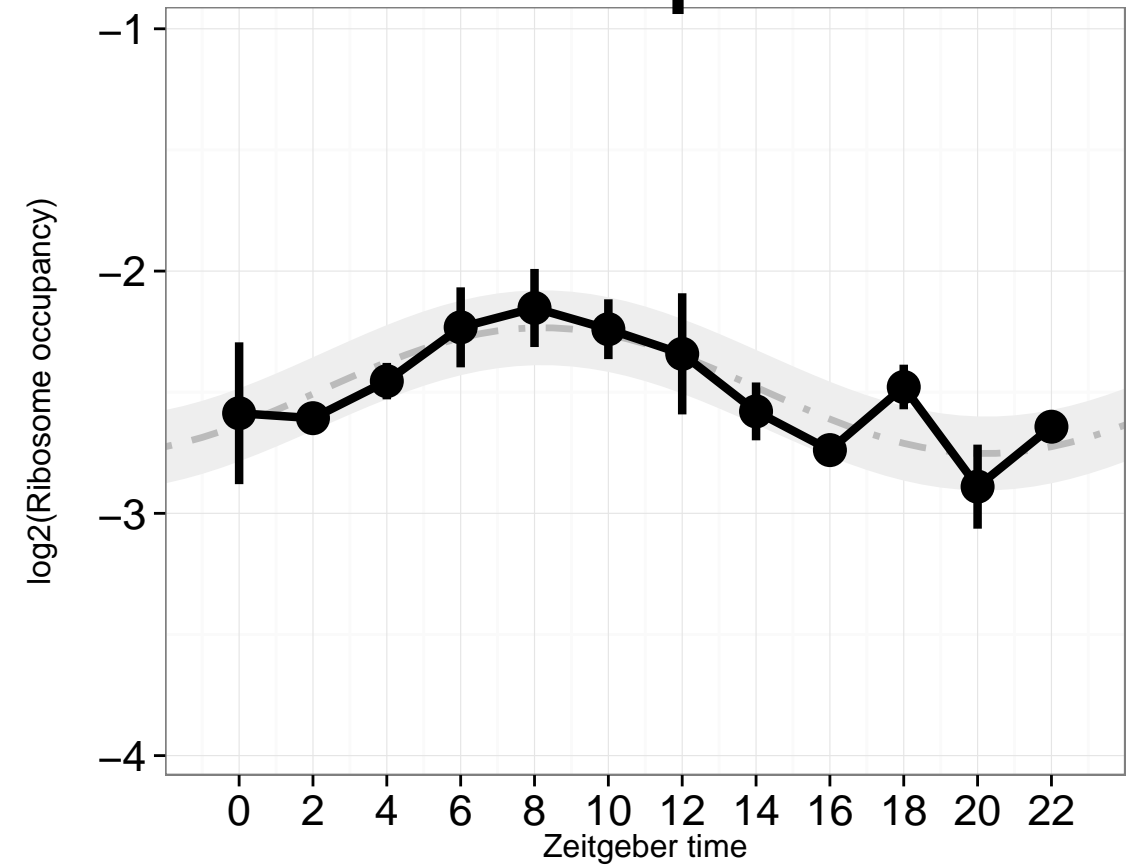

Supplement: Supplementary file 3423 [file 1]

**Nkd2 TR**

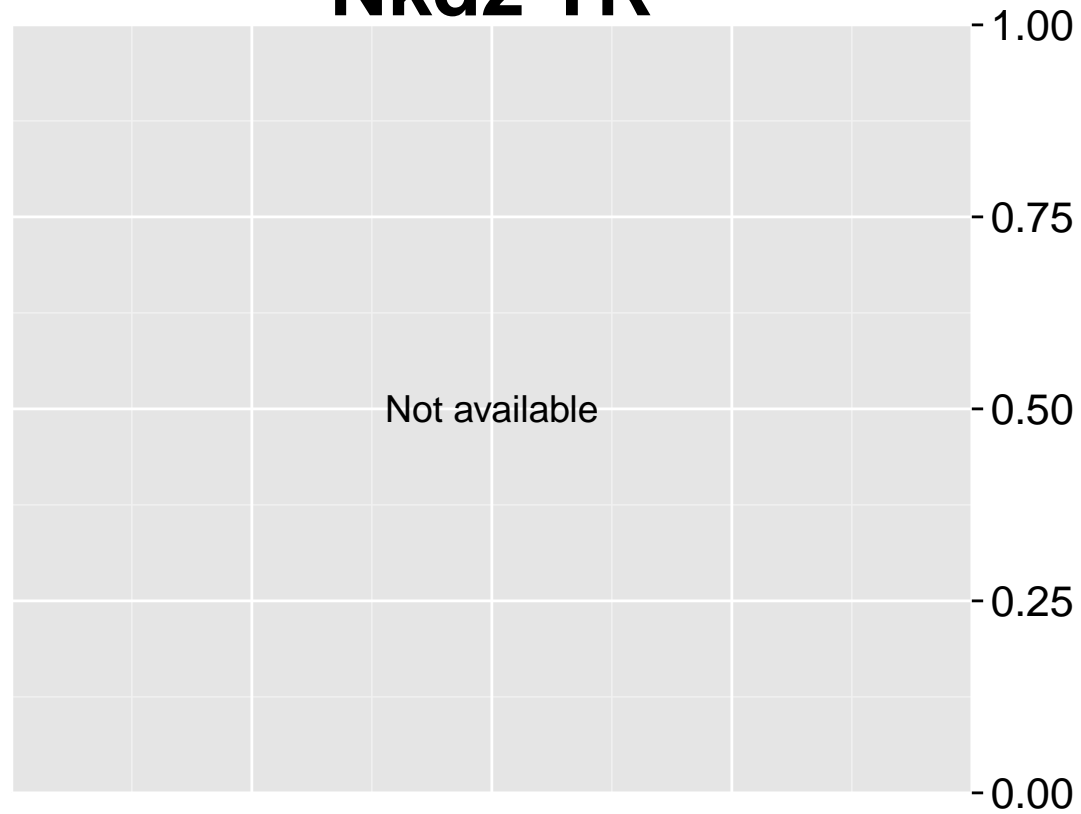

**Nkd2 log2(Ribosome occupancy)**

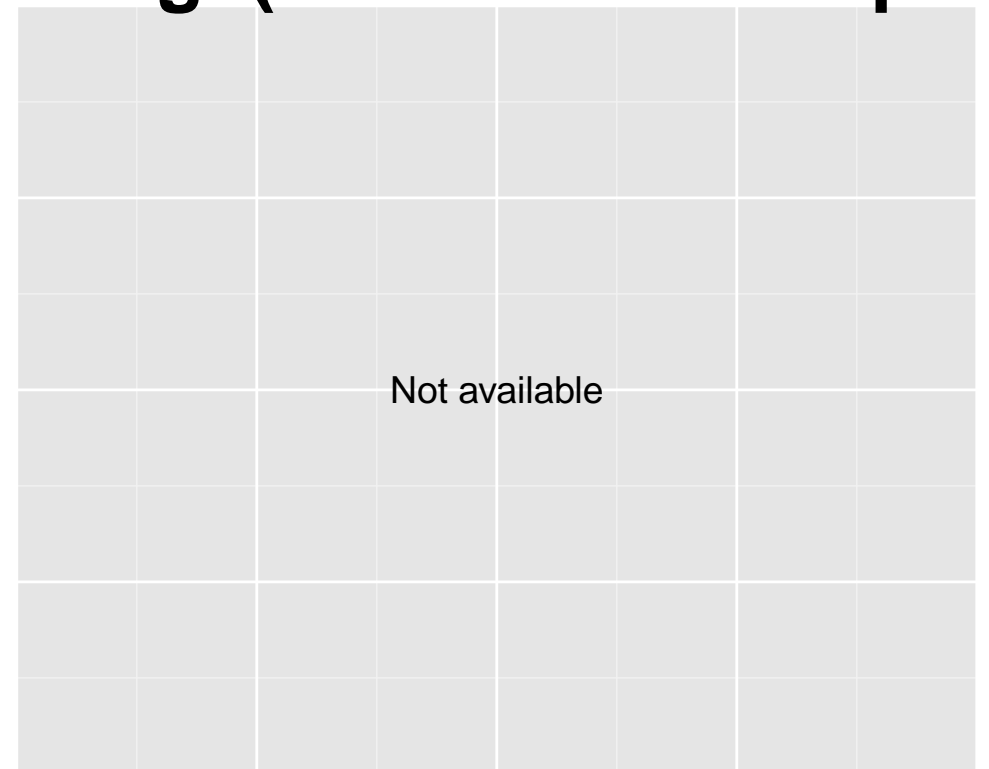

Supplement: Supplementary file 3424 [file 1]

## Usp8

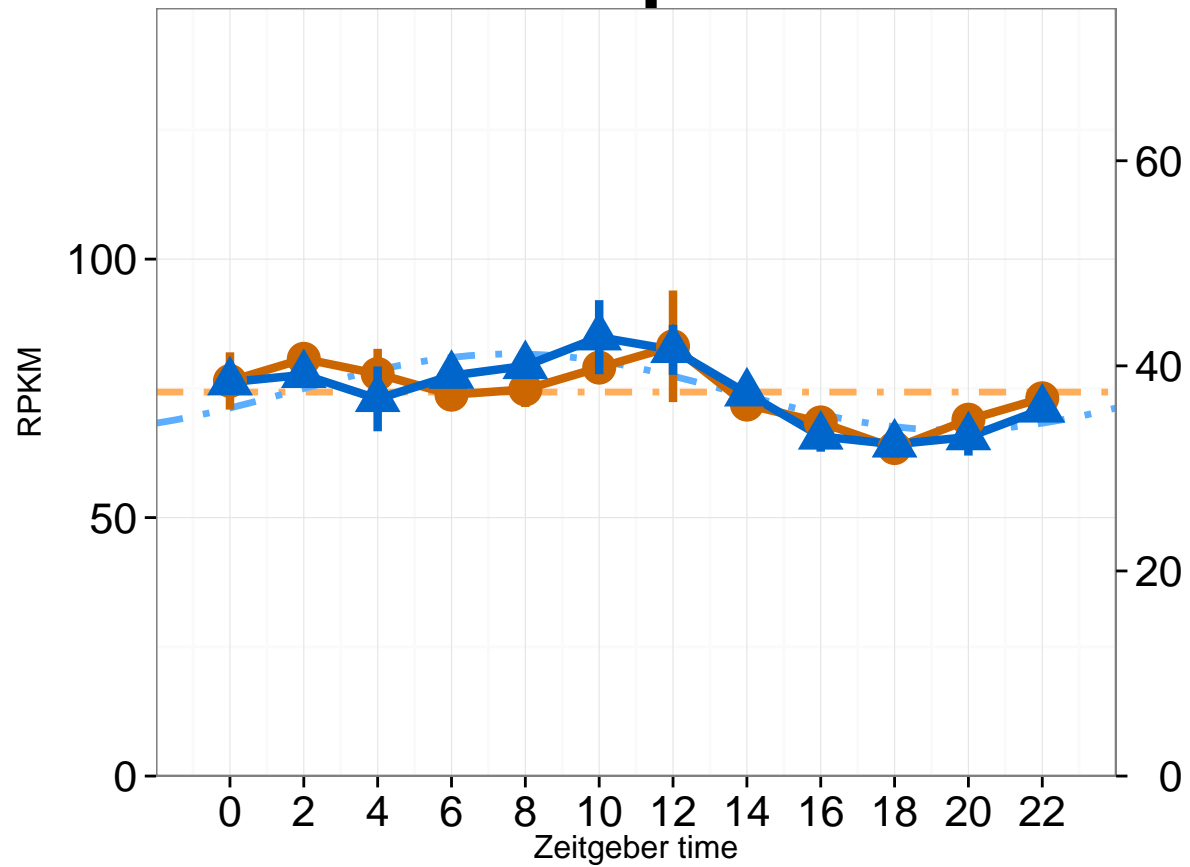

## Usp8

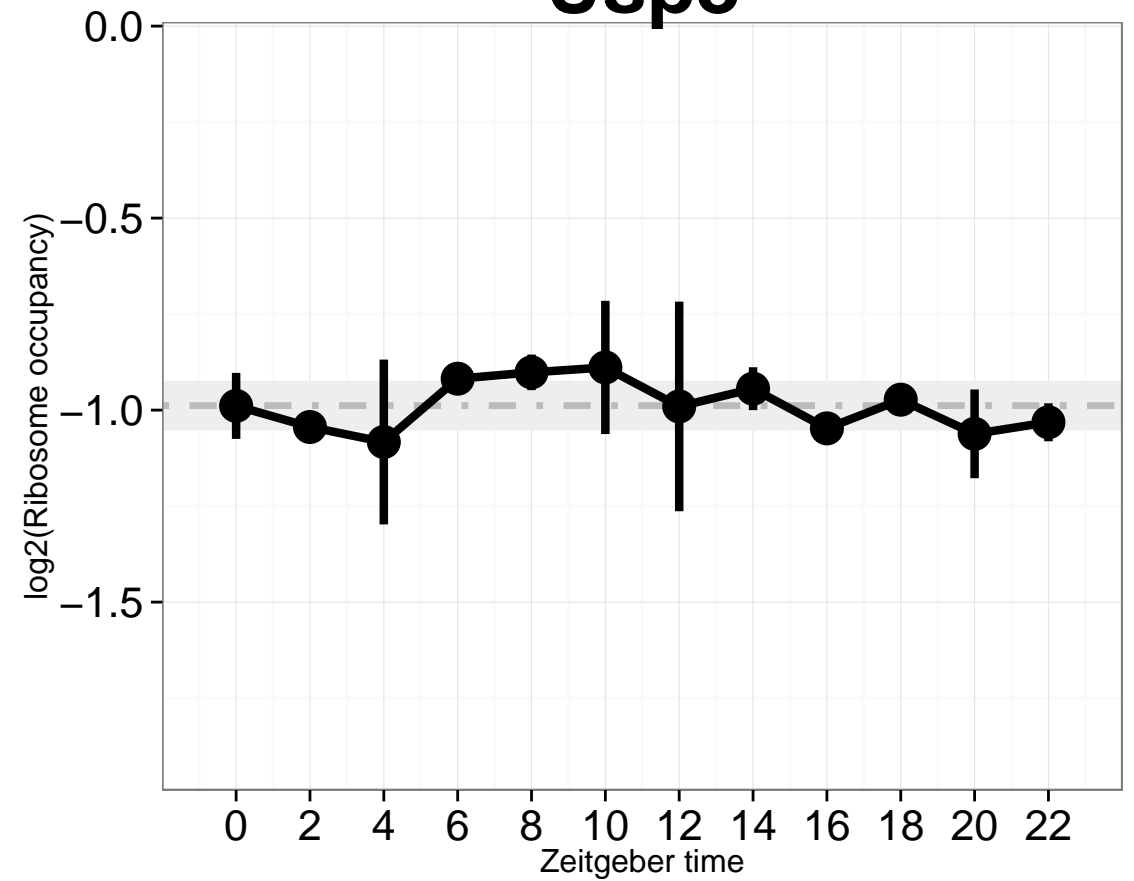

Supplement: Supplementary file 3425 [file 1]

## Slc45a3

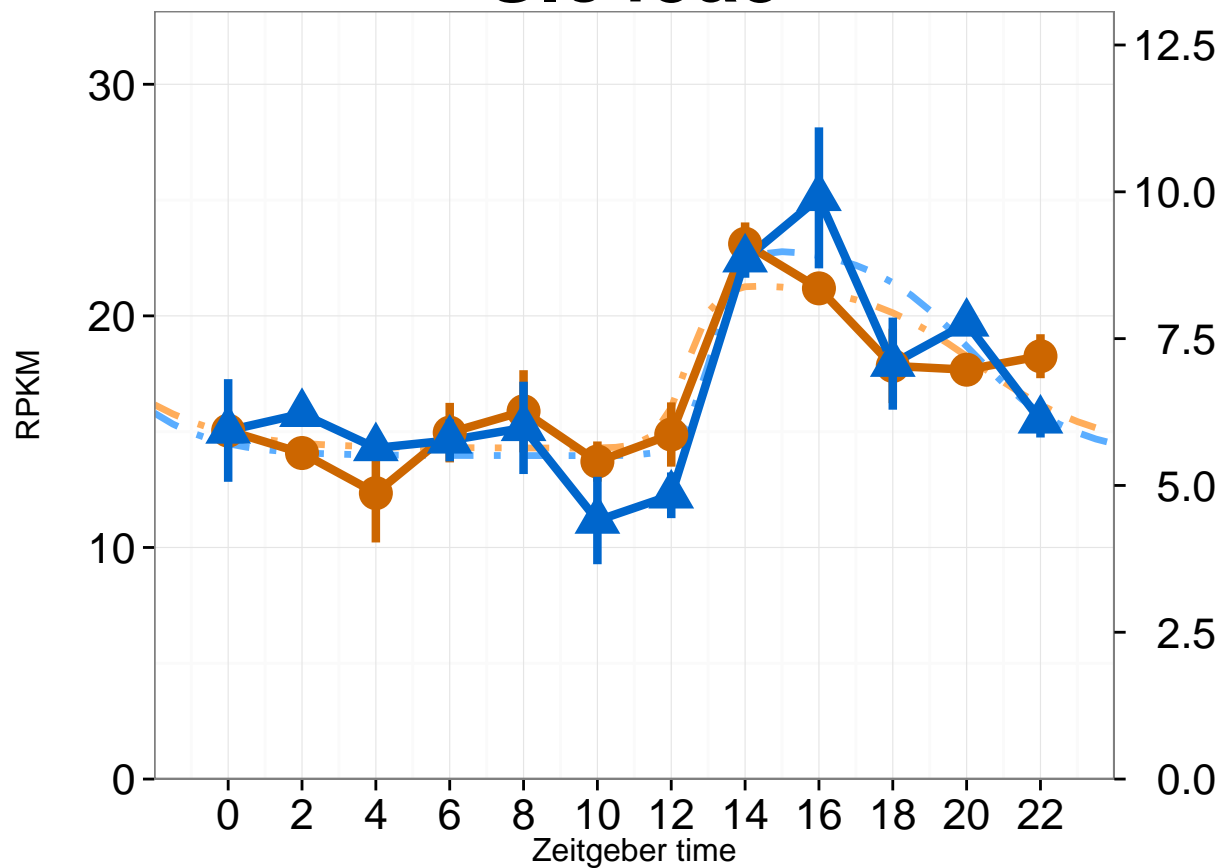

## Slc45a3

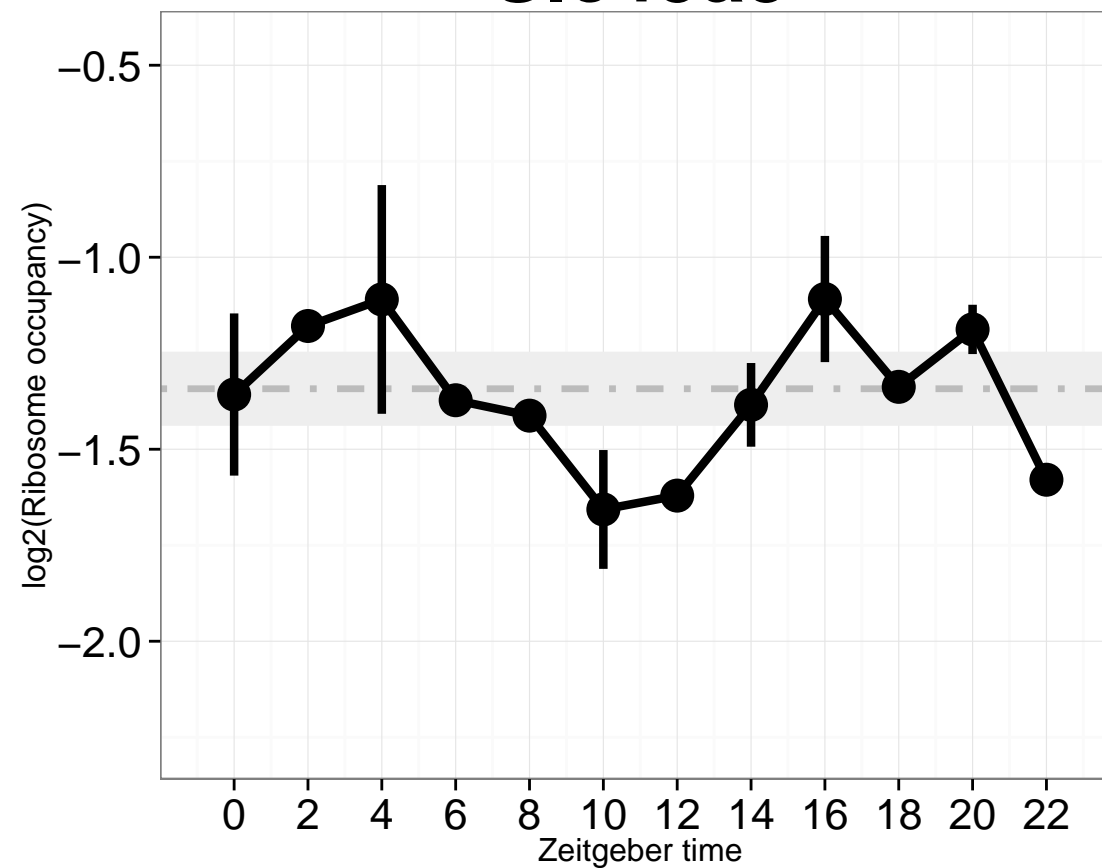

Supplement: Supplementary file 3426 [file 1]

# Cspp1

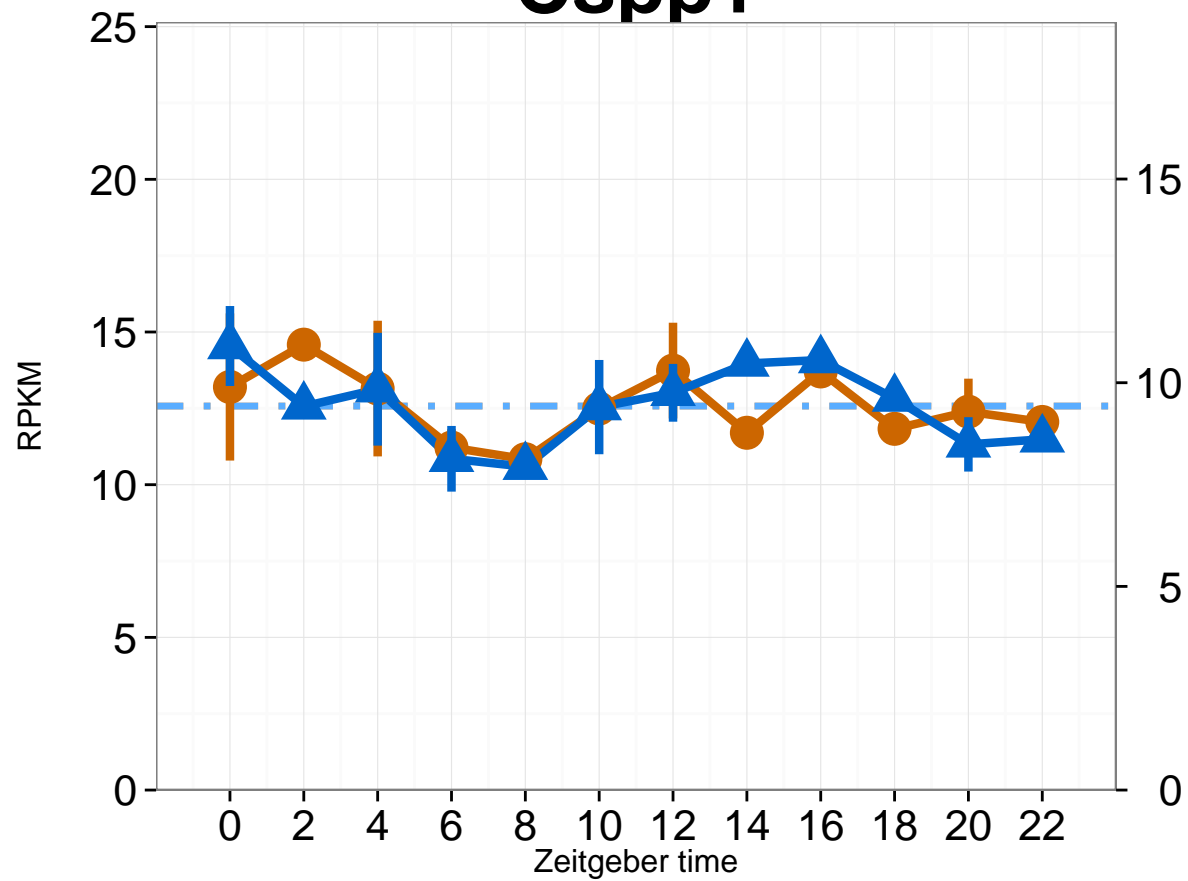

# Cspp1

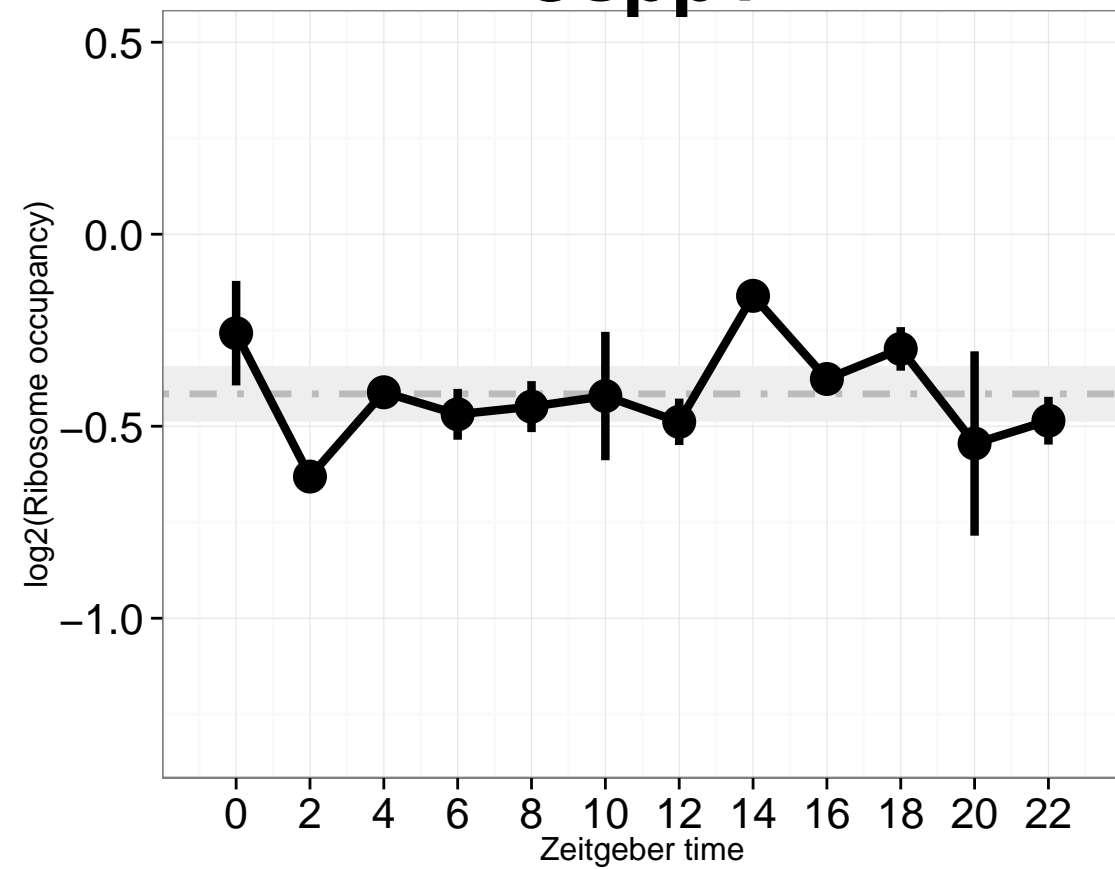

Supplement: Supplementary file 3427 [file 1]

# Hist2h2bb

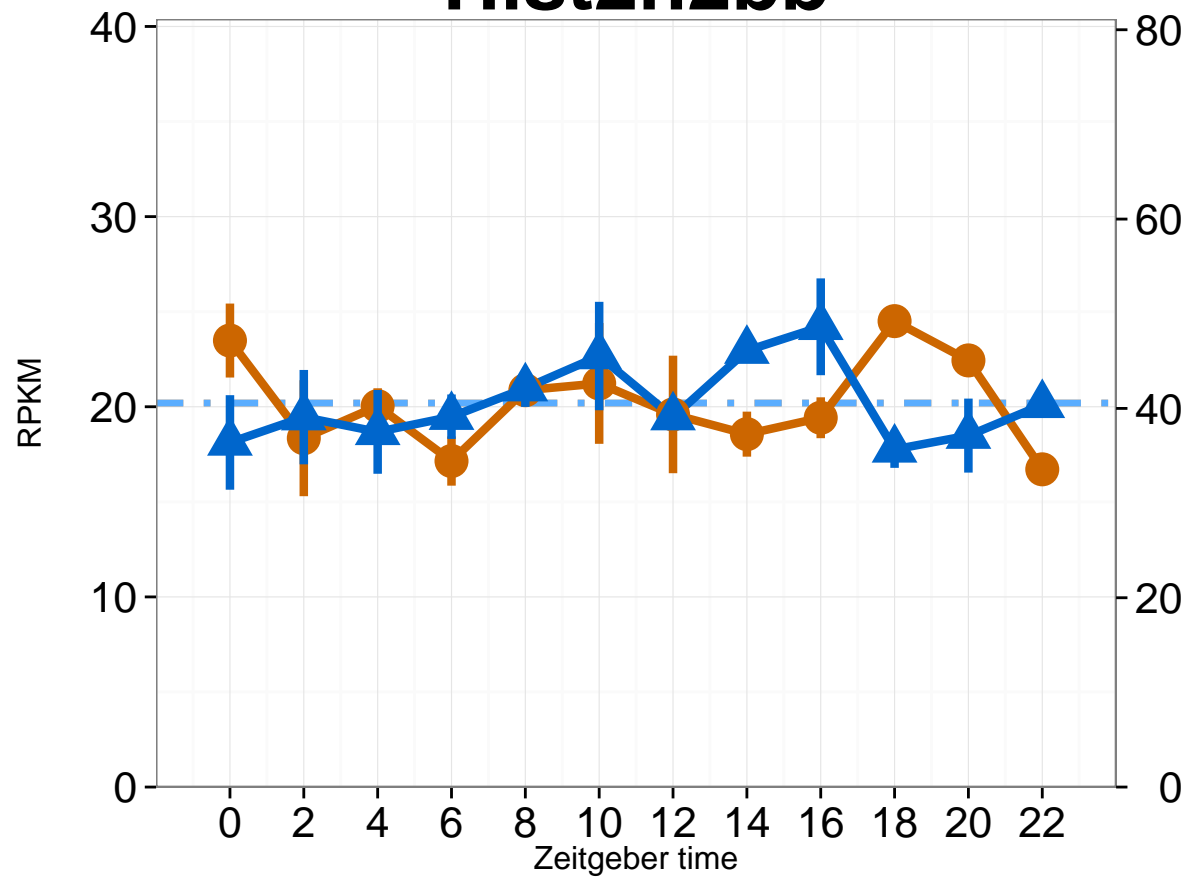

# Hist2h2bb

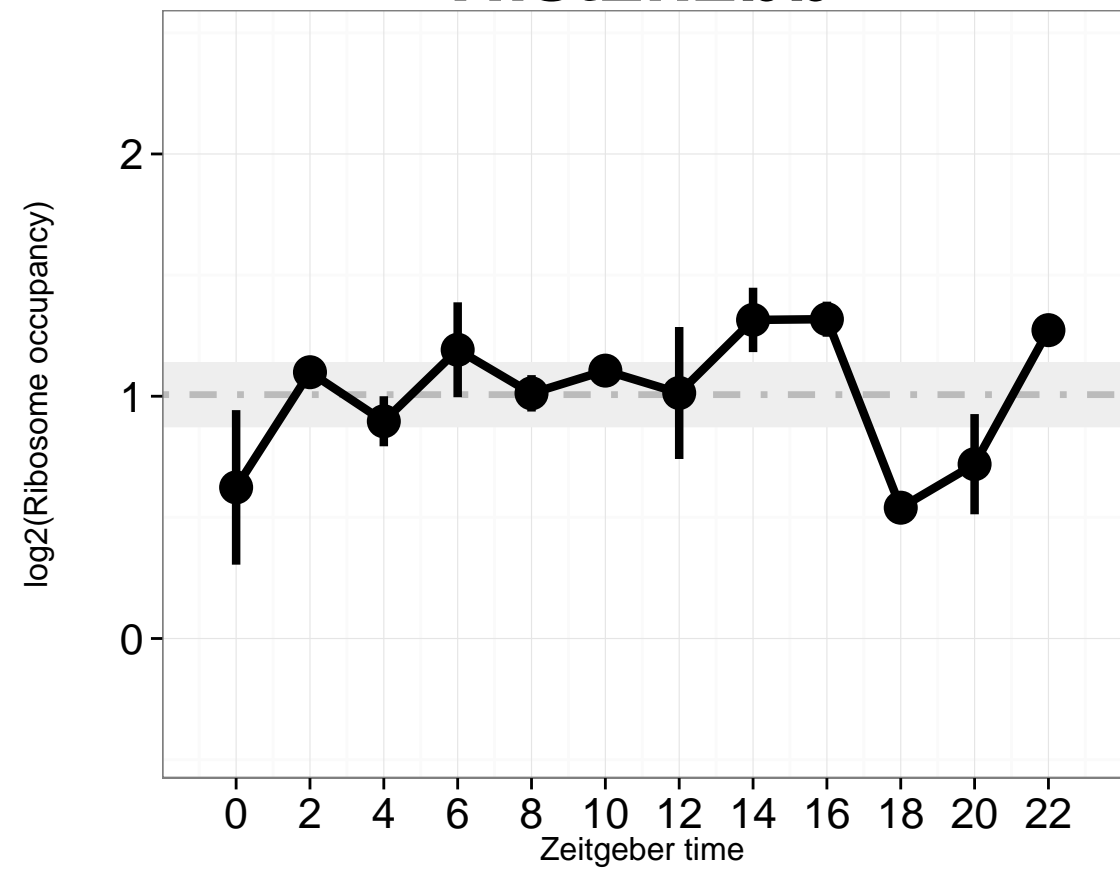

Supplement: Supplementary file 3428 [file 1]

# Echdc2

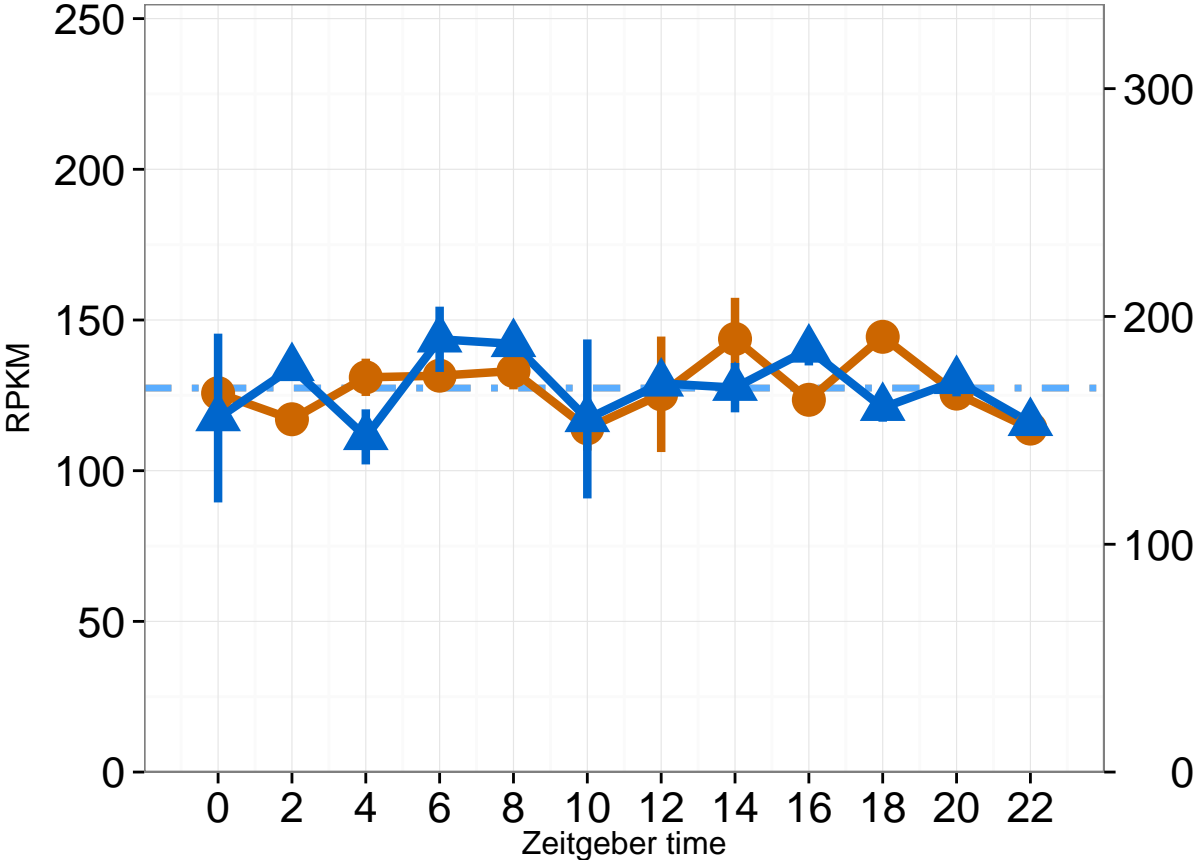

# Echdc2

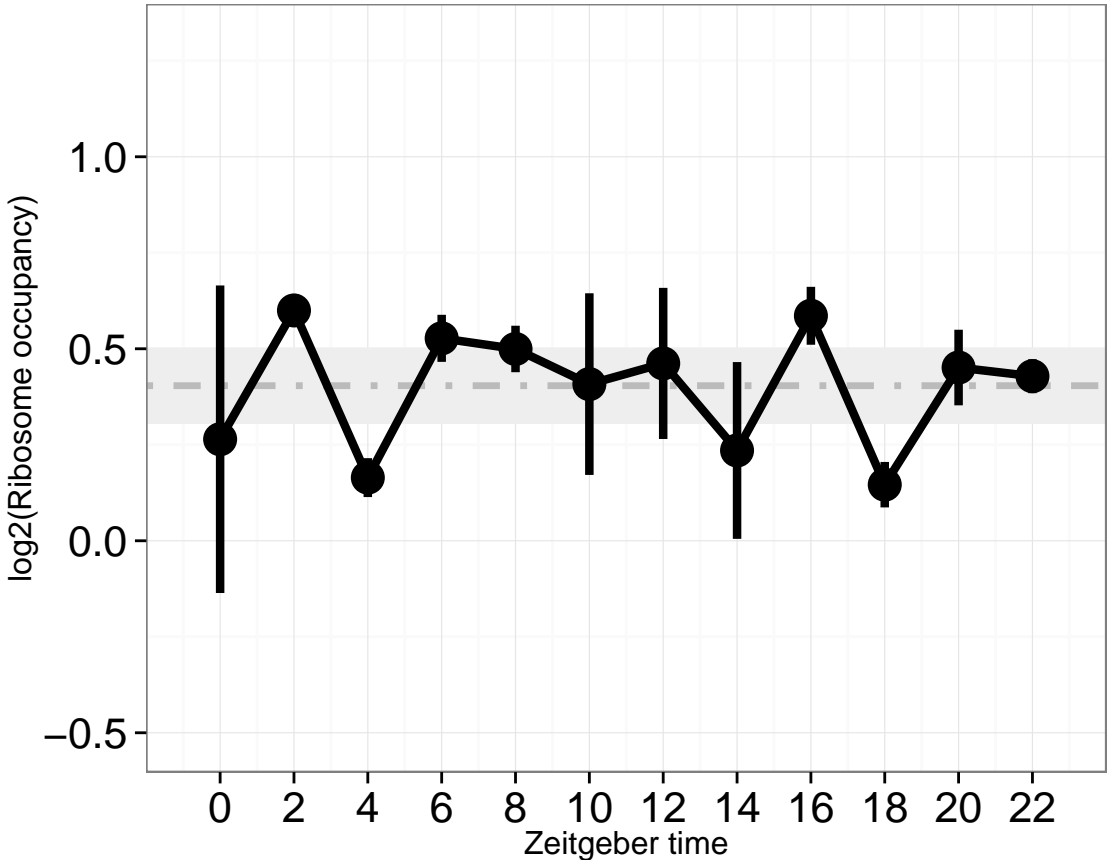

Supplement: Supplementary file 3429 [file 1]

# Pop7

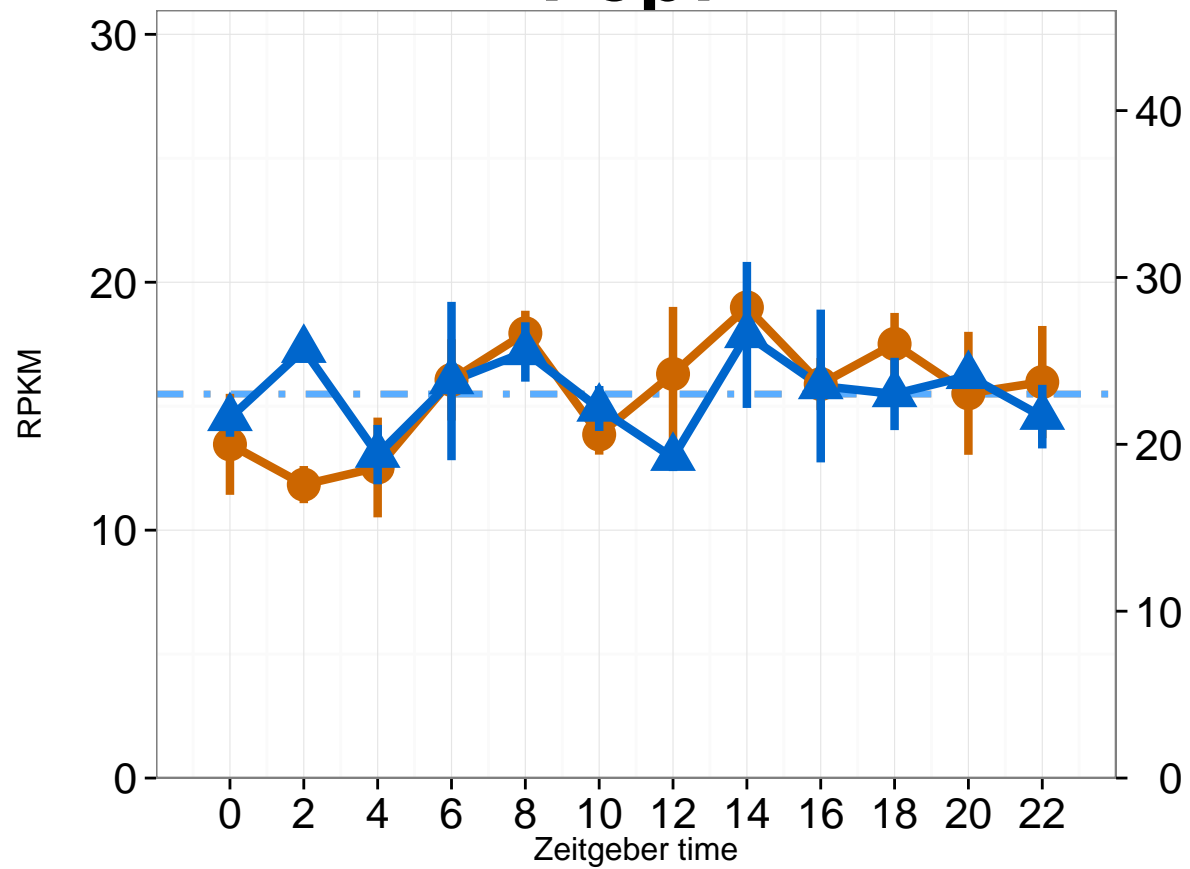

# Pop7

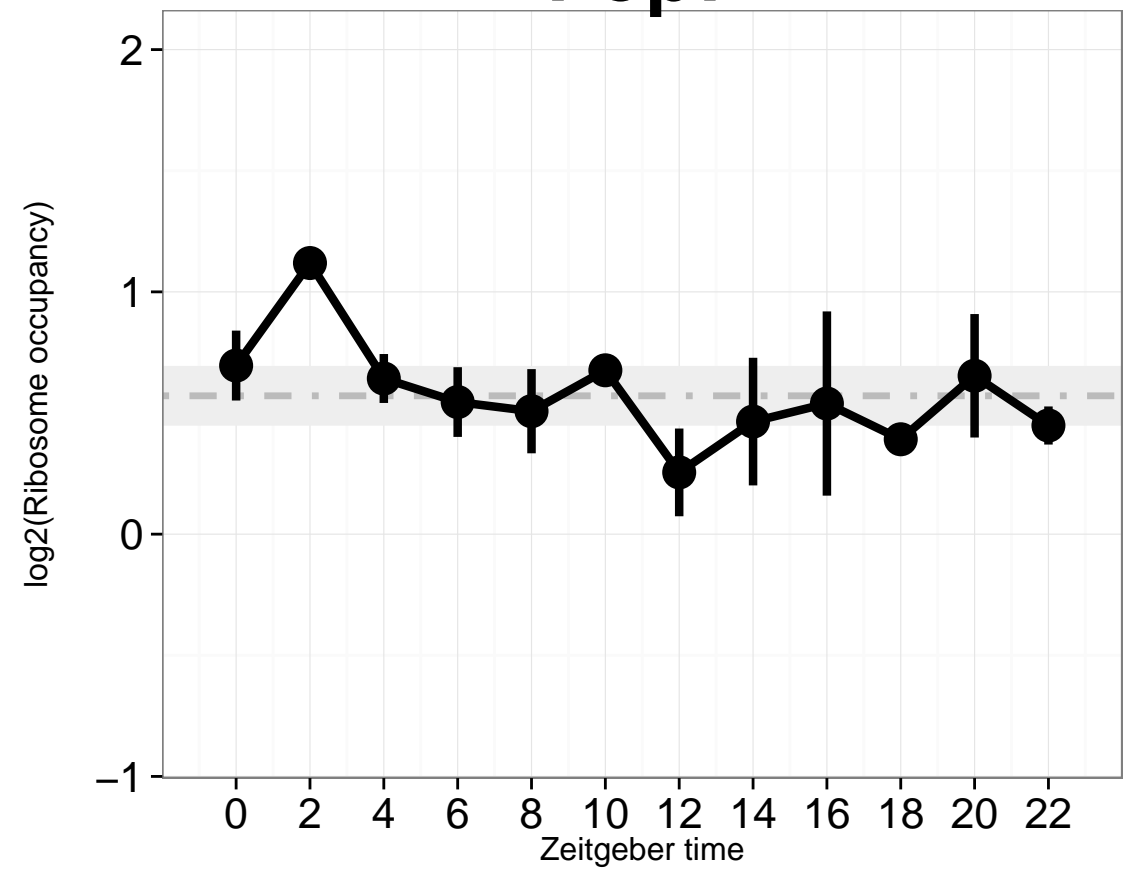

Supplement: Supplementary file 3430 [file 1]

# Armxc1

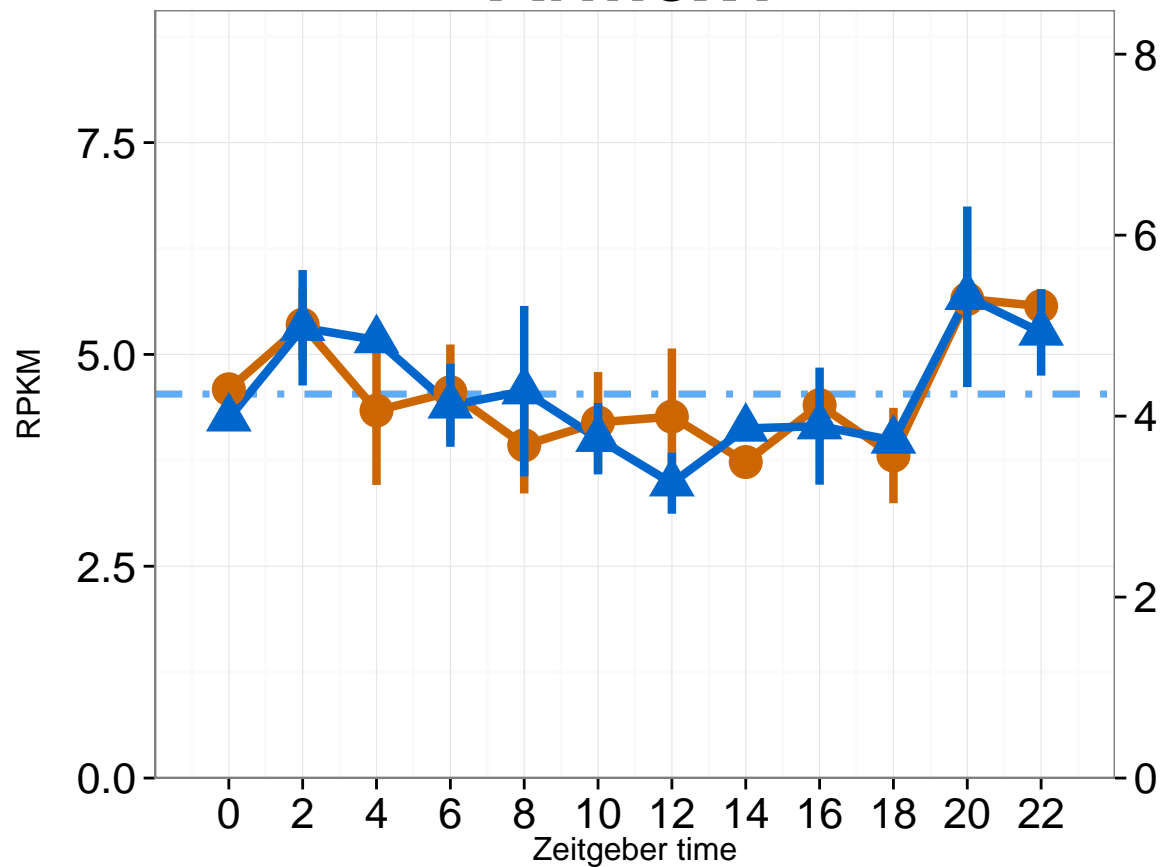

# Armxc1

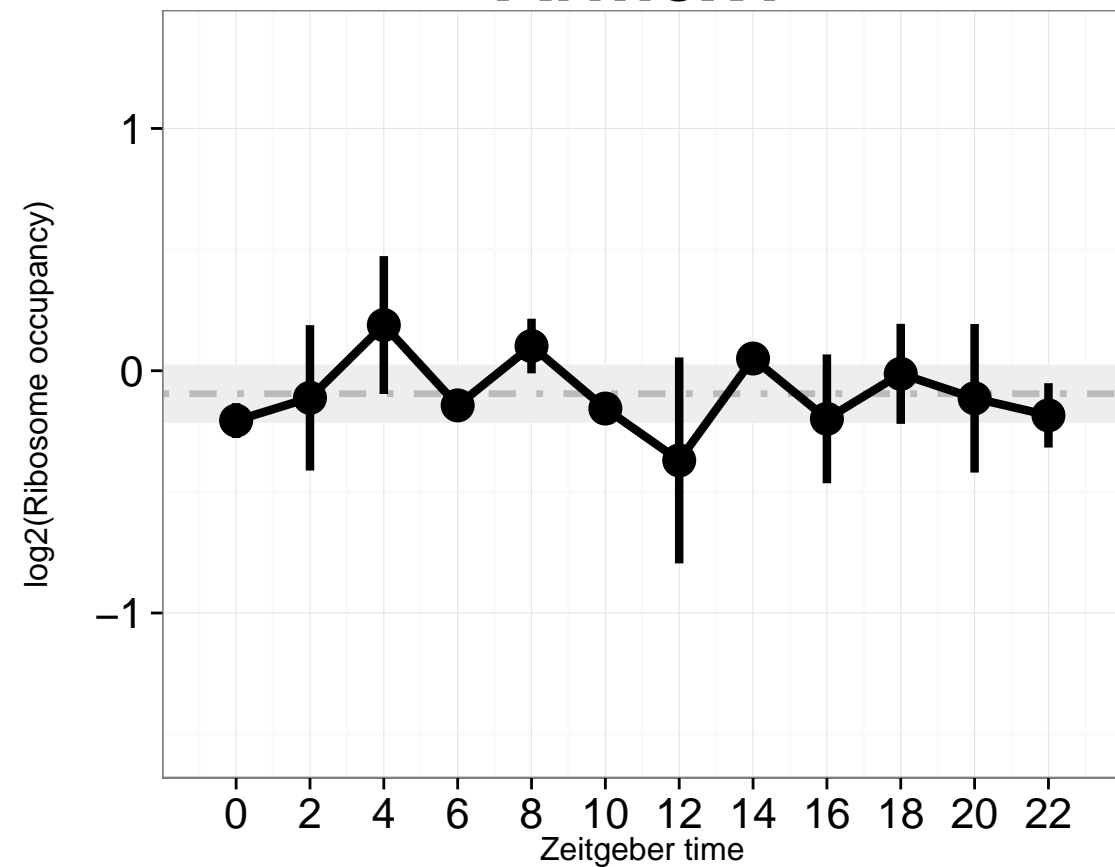

Supplement: Supplementary file 3431 [file 1]

## Irx5

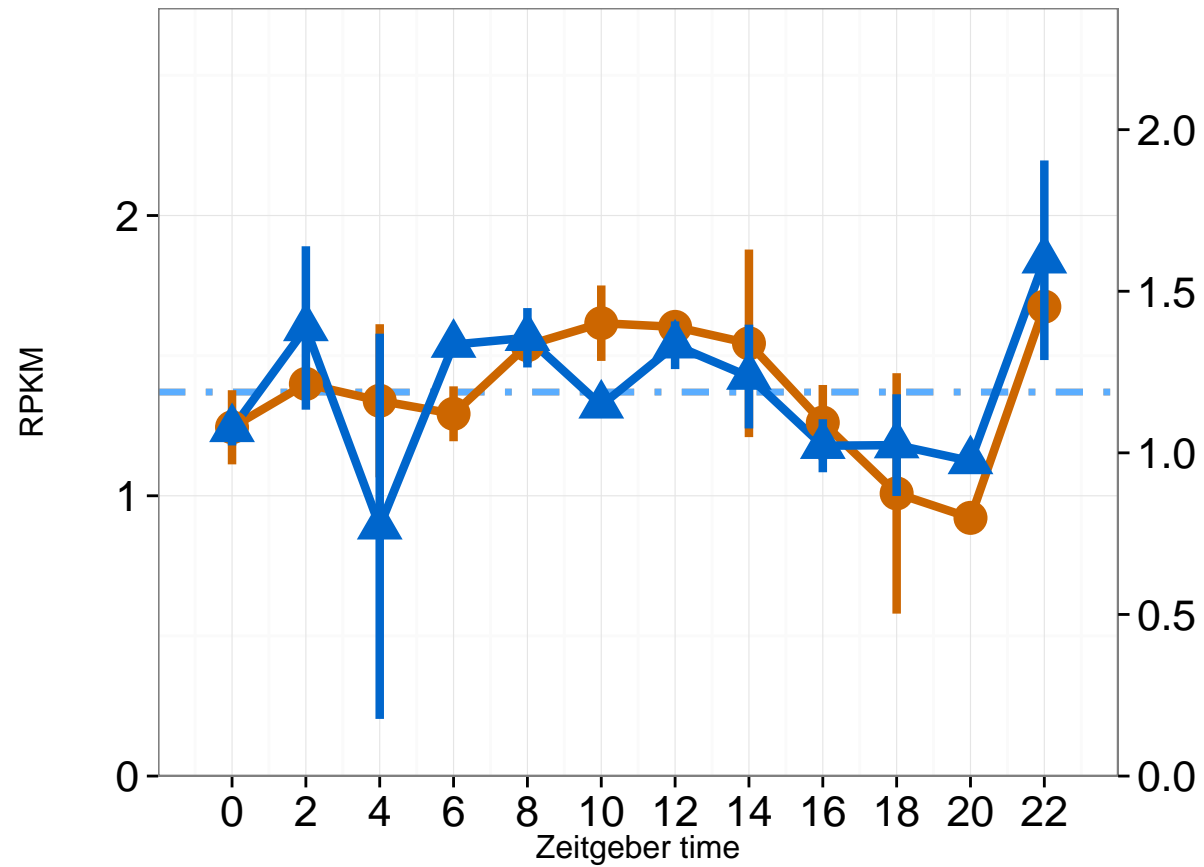

## Irx5

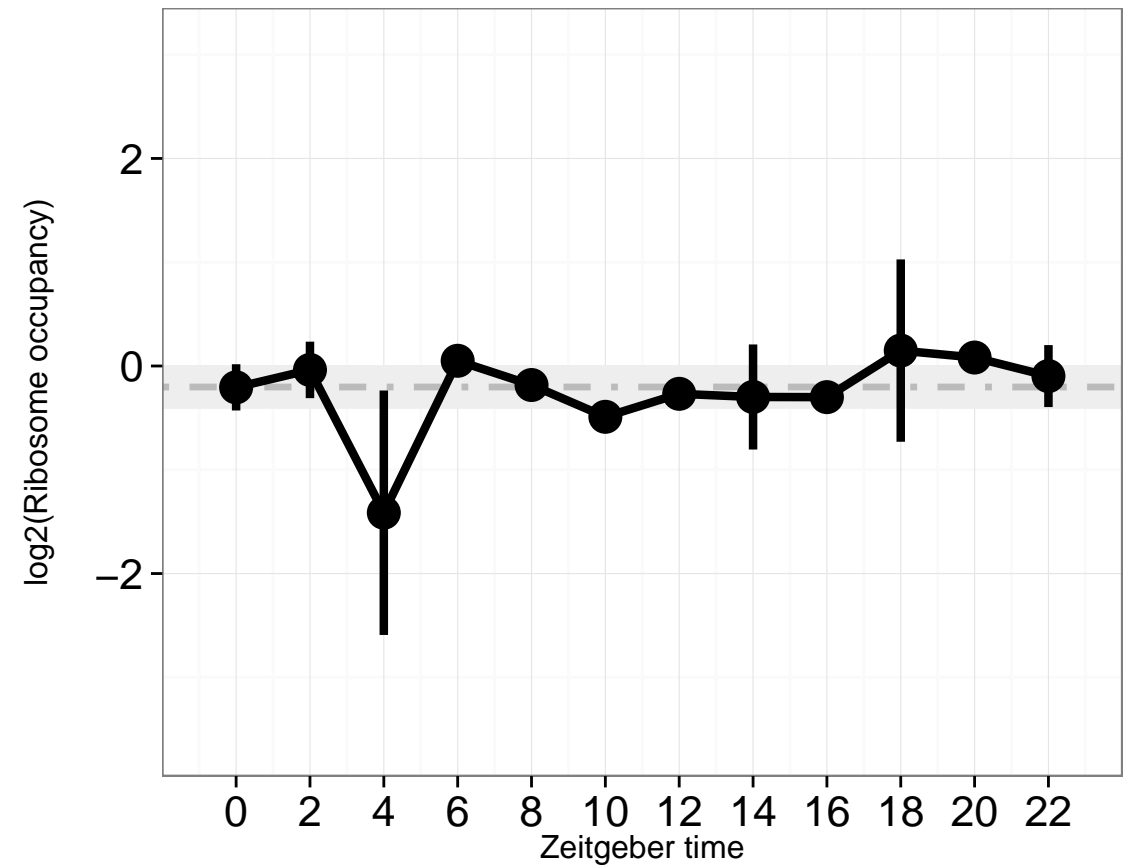

Supplement: Supplementary file 3432 [file 1]

# D17H6S53E

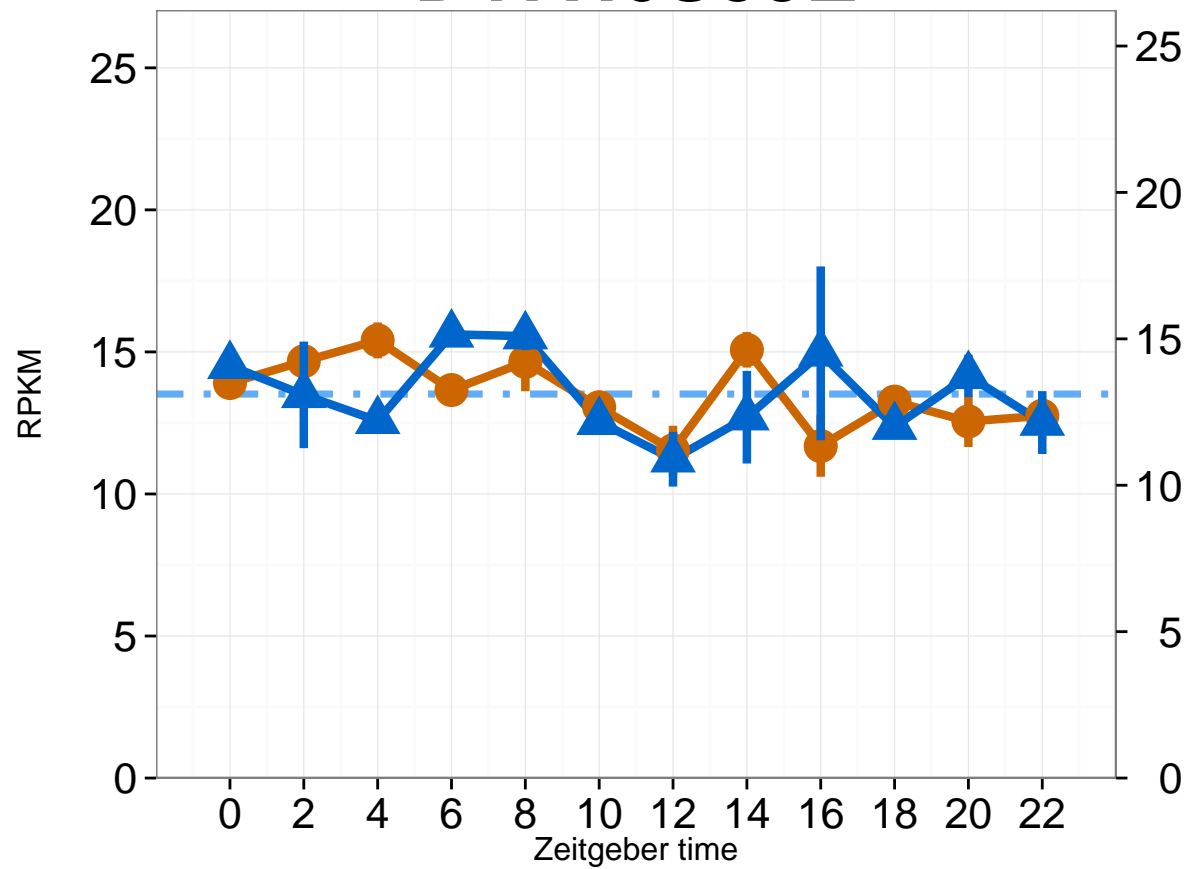

# D17H6S53E

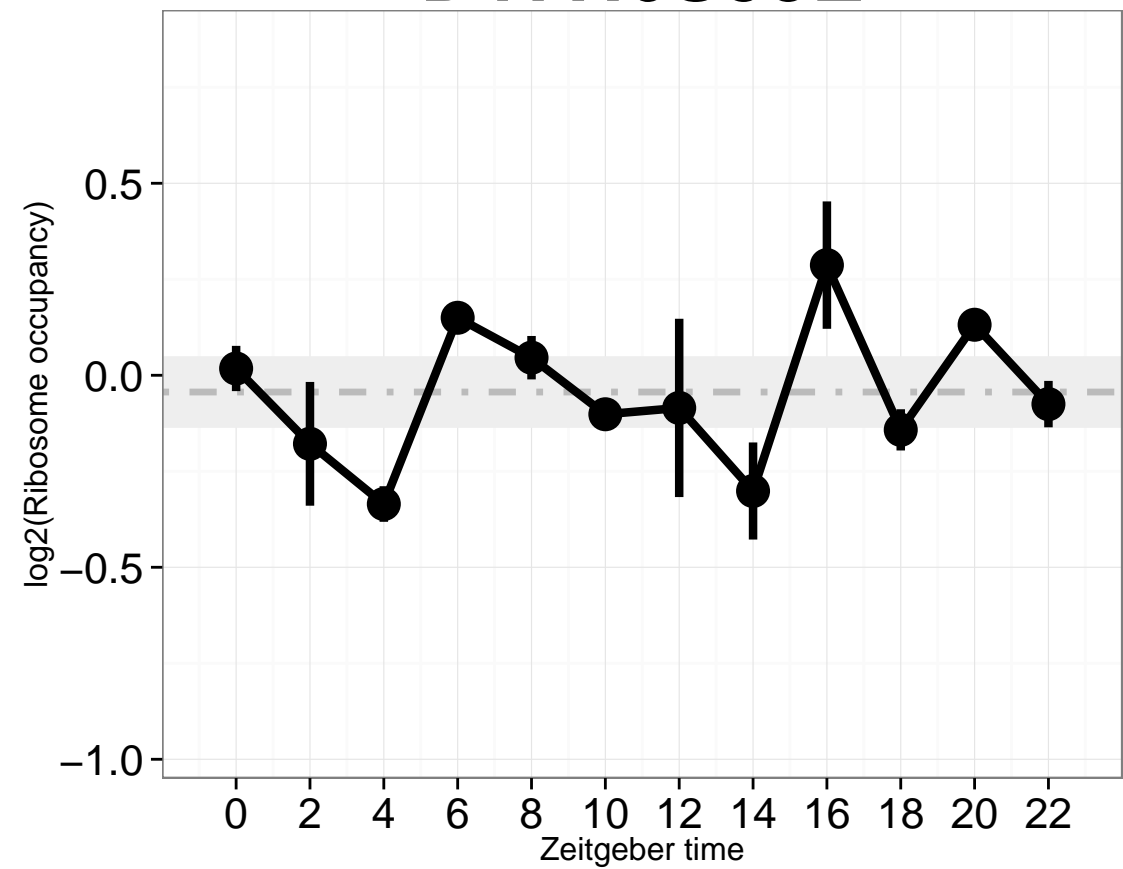

Supplement: Supplementary file 3433 [file 1]

## Ddc

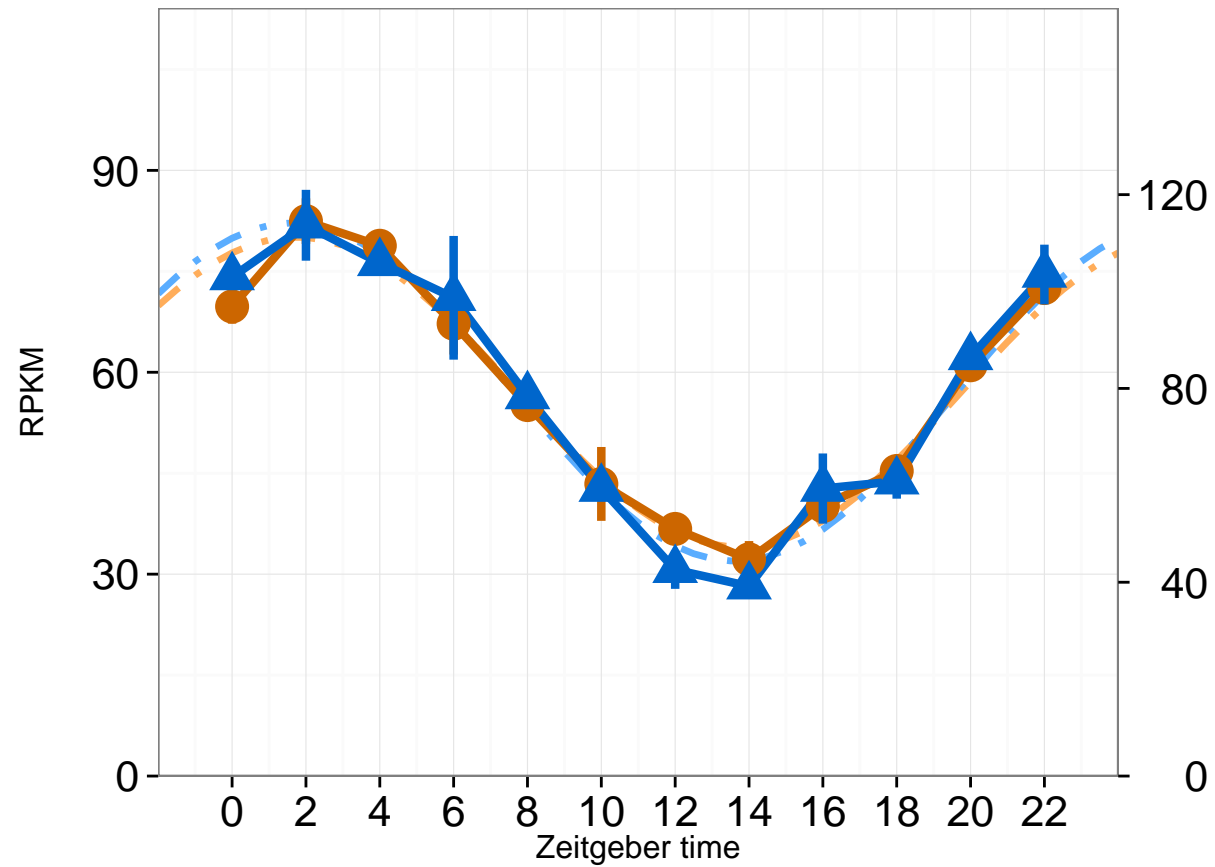

## Ddc

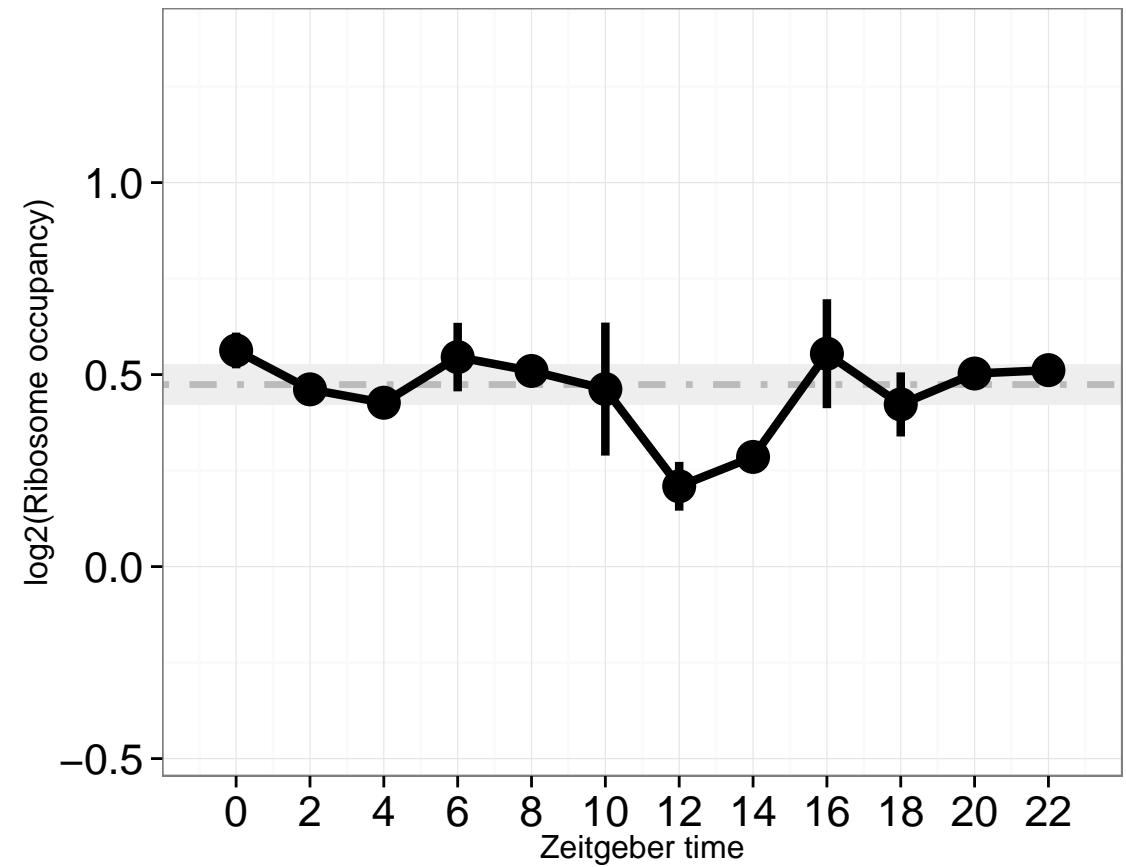

Supplement: Supplementary file 3434 [file 1]

## Syn2

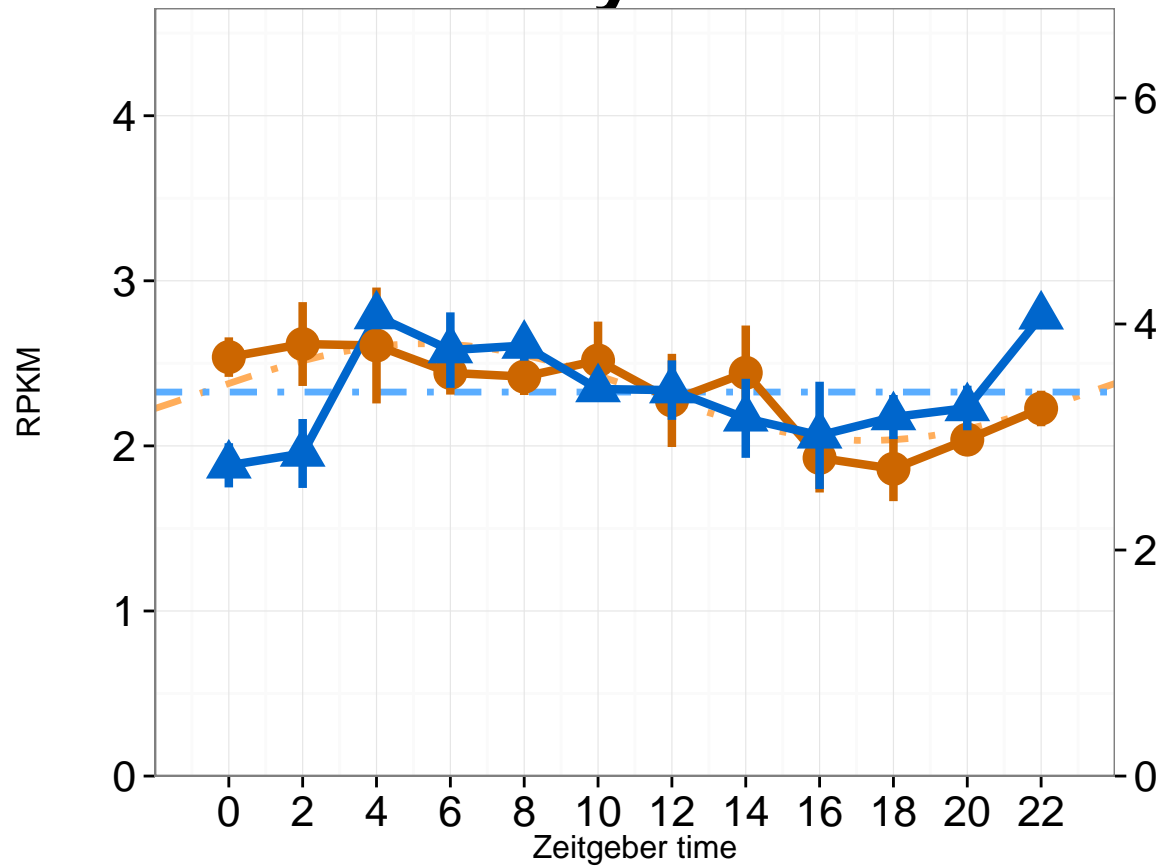

## Syn2

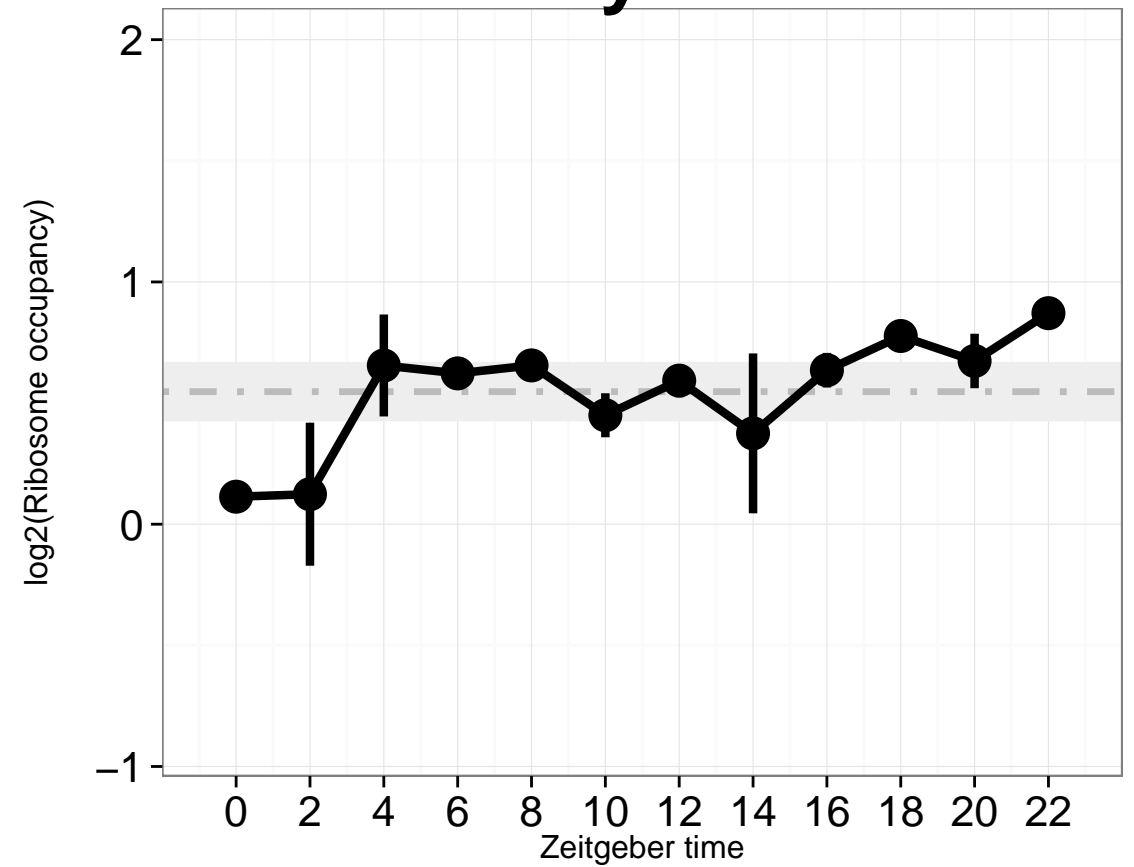

Supplement: Supplementary file 3435 [file 1]

## Gcc2

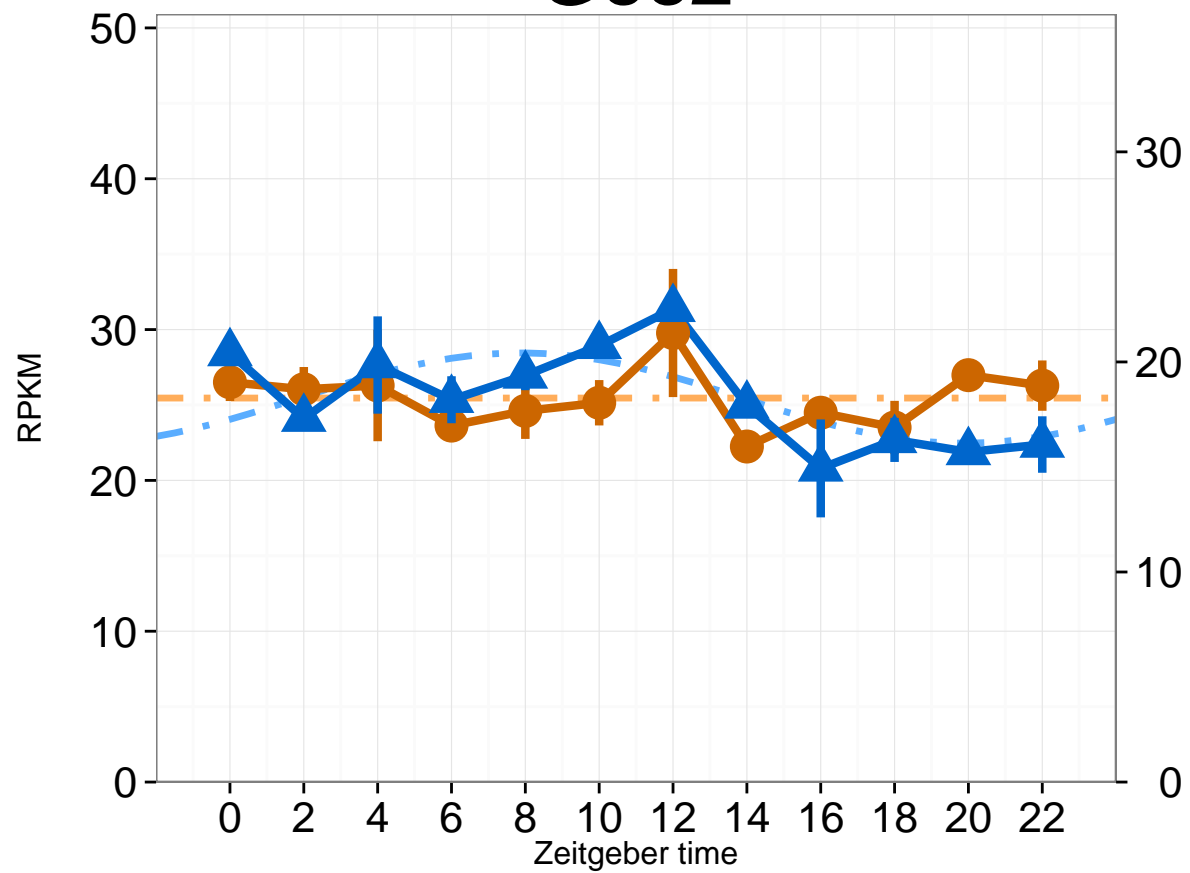

## Gcc2

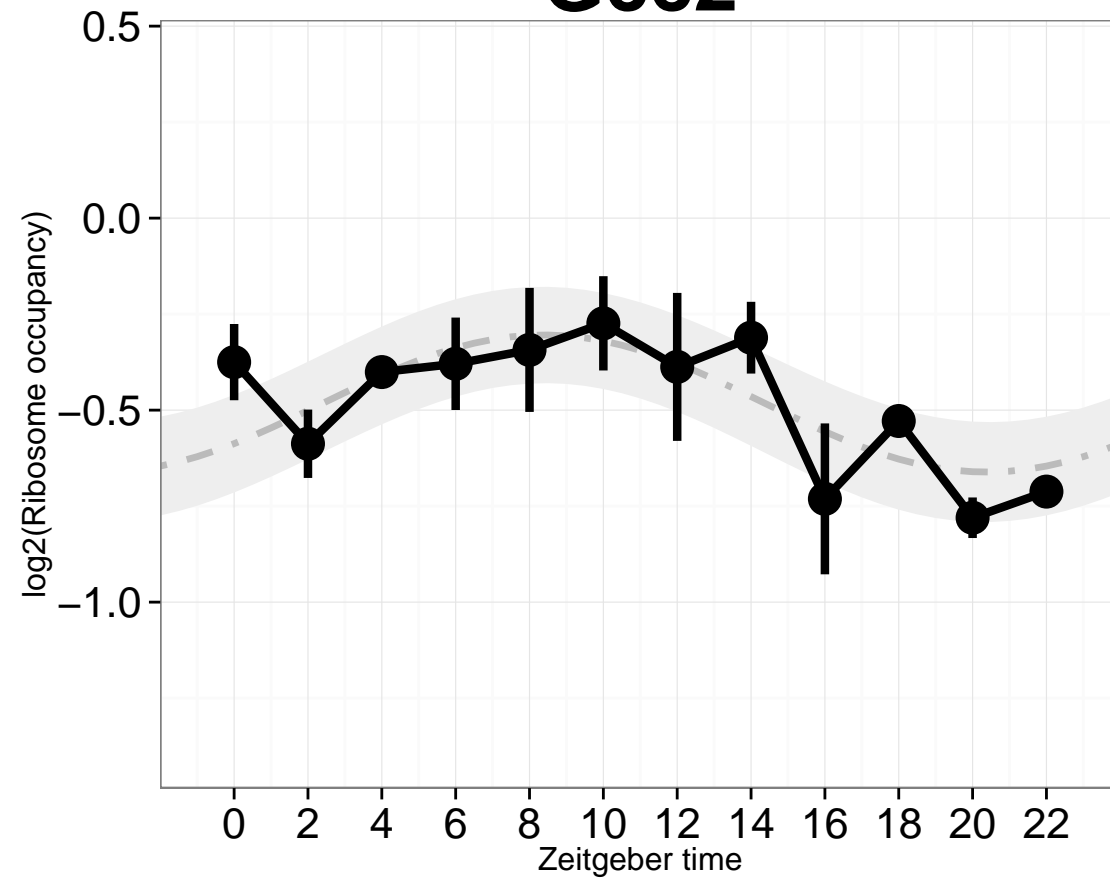

Supplement: Supplementary file 3436 [file 1]

# Mtmt6

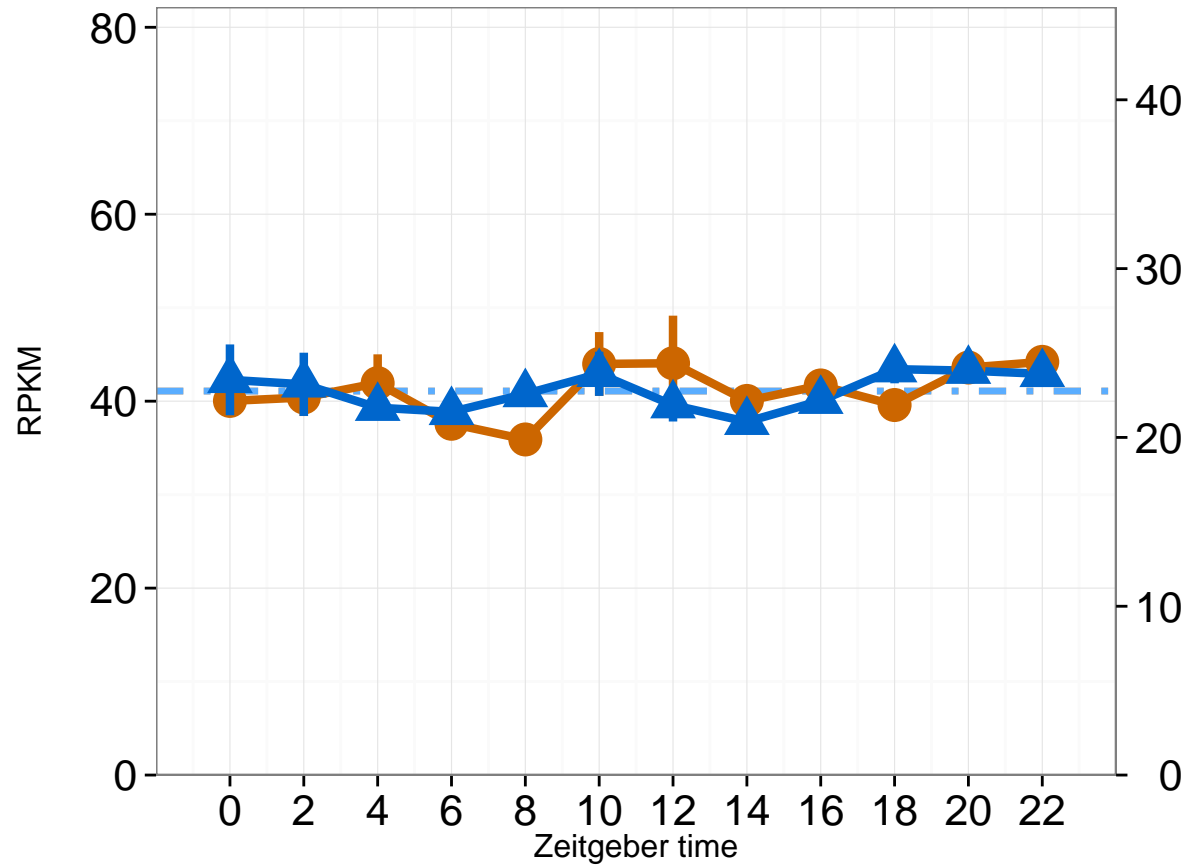

# Mtmt6

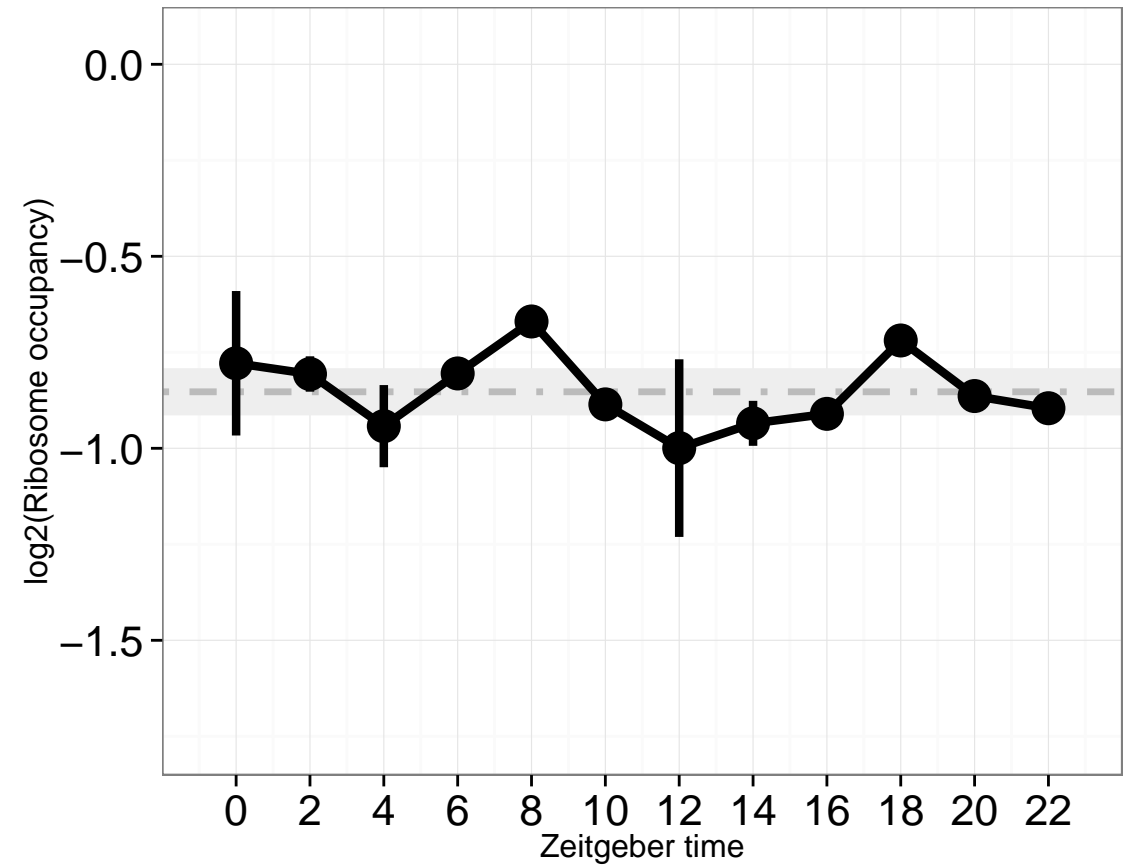

Supplement: Supplementary file 3437 [file 1]

# Tspan17

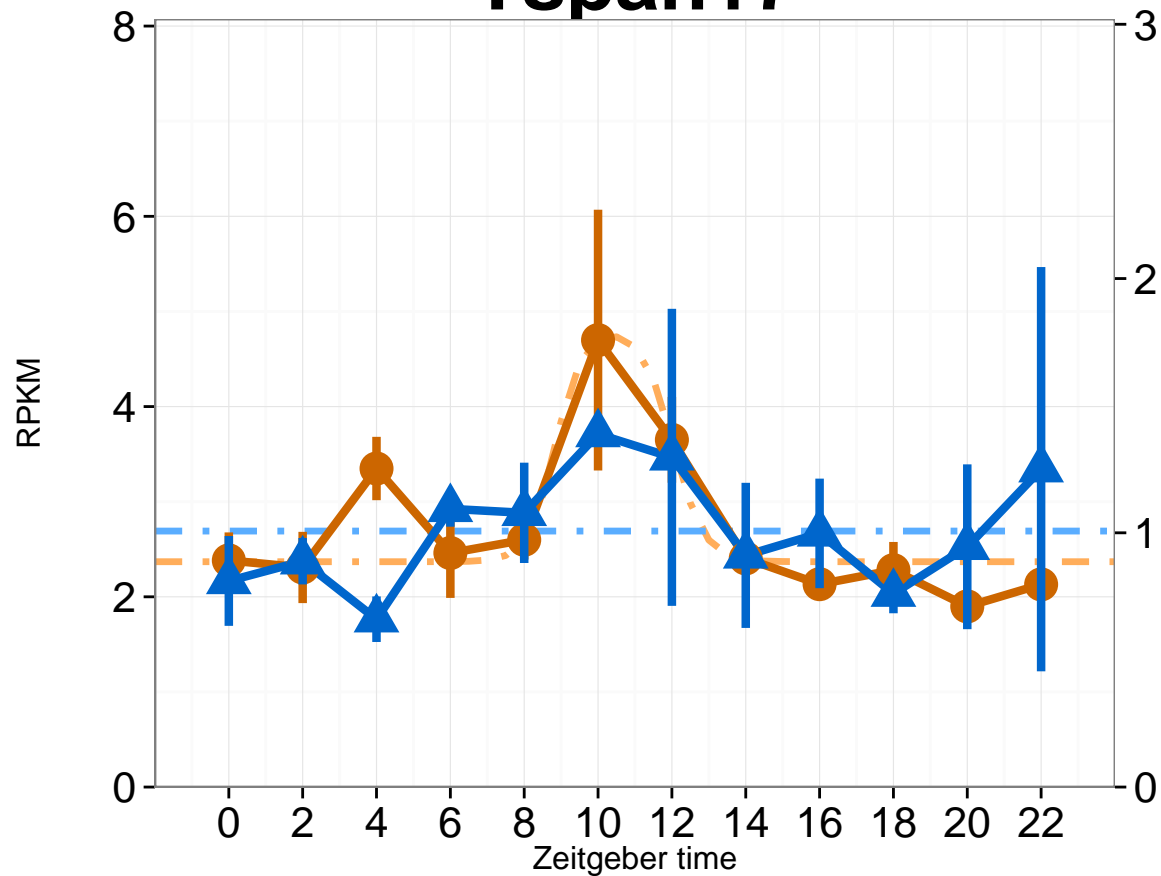

# Tspan17

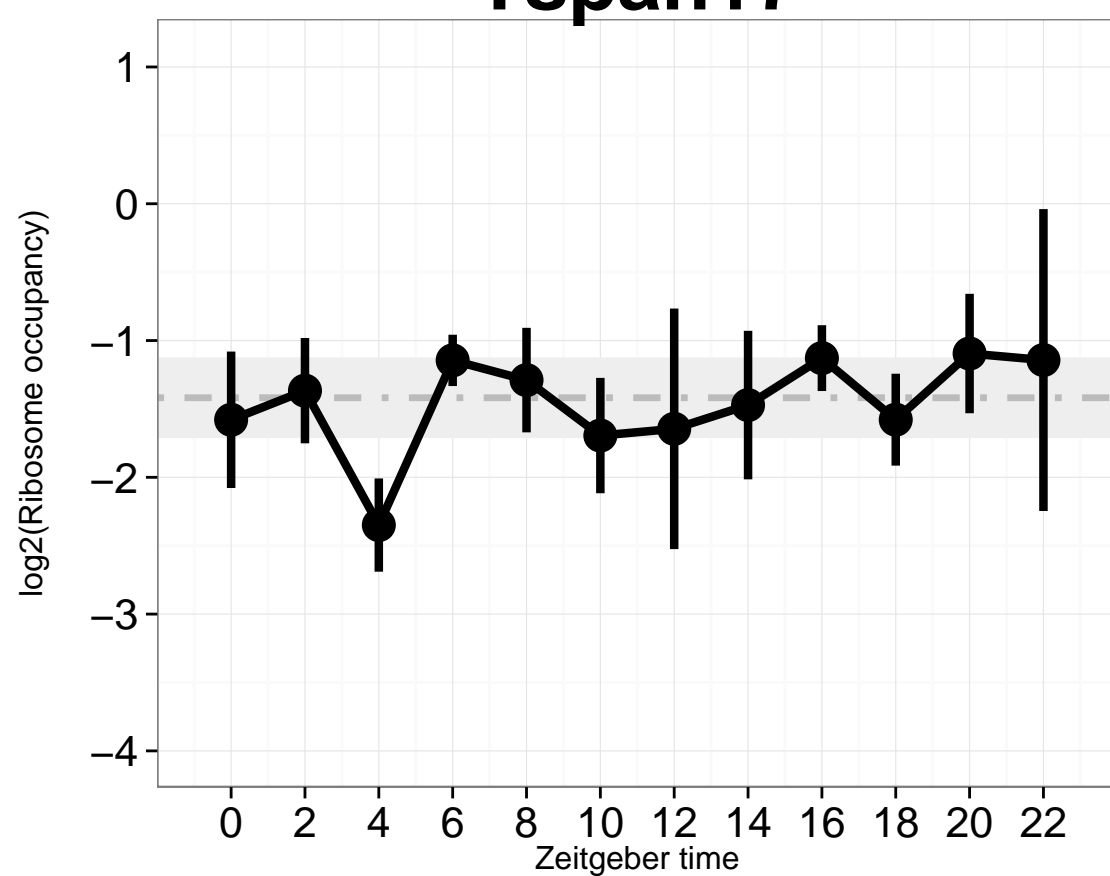

Supplement: Supplementary file 3438 [file 1]

## Sf3b3

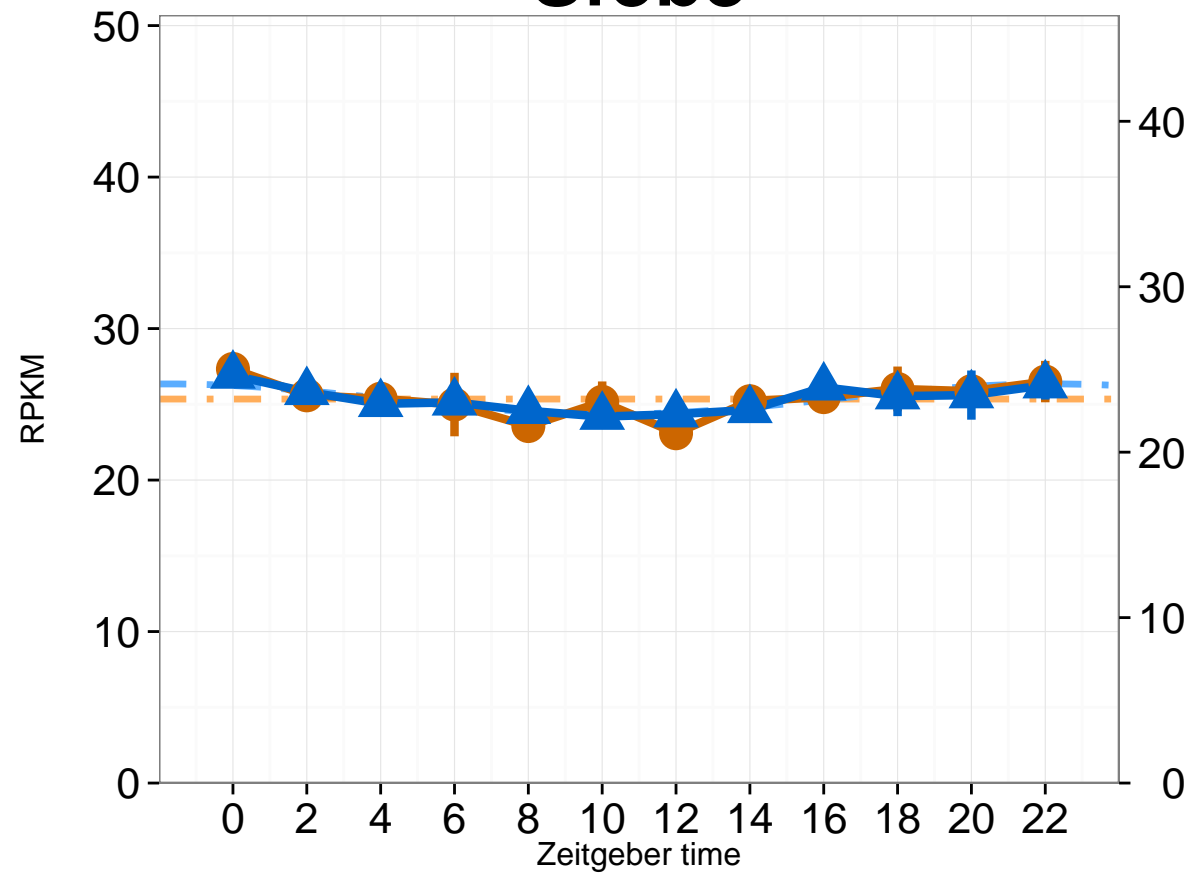

## Sf3b3

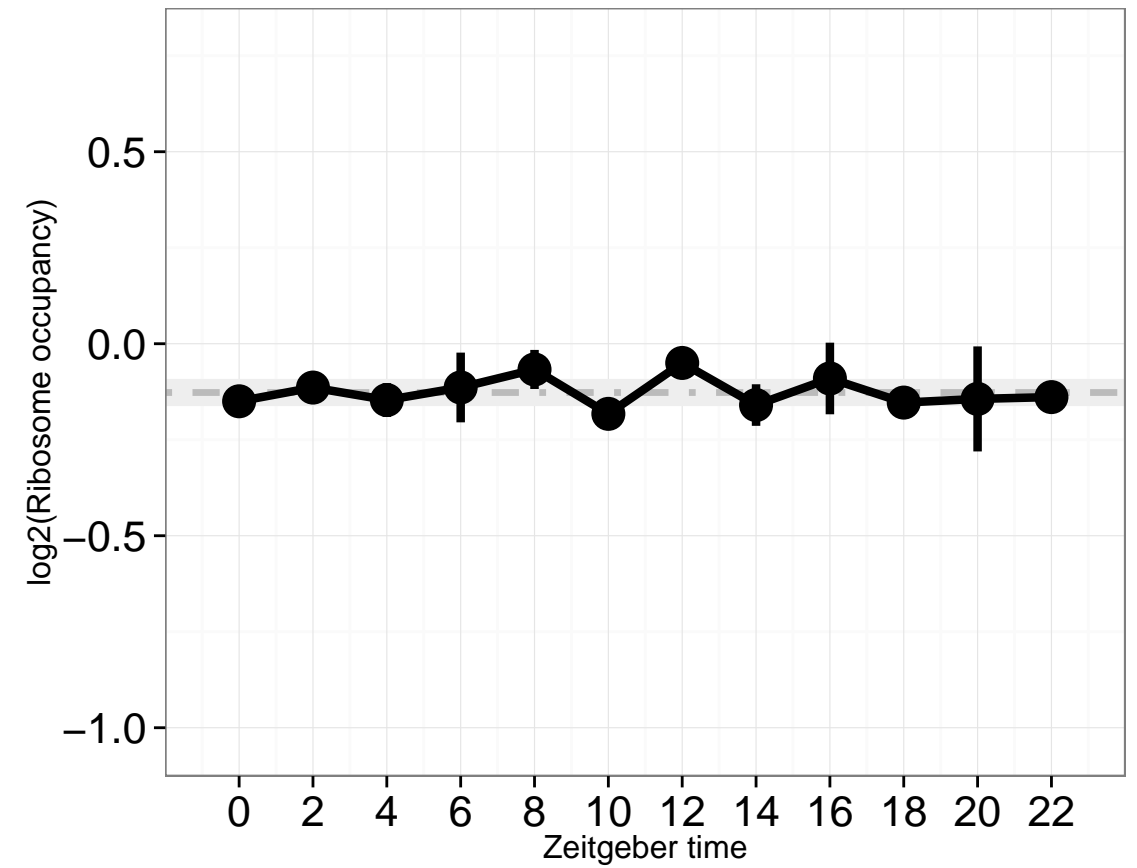

Supplement: Supplementary file 3439 [file 1]

# Tor2a

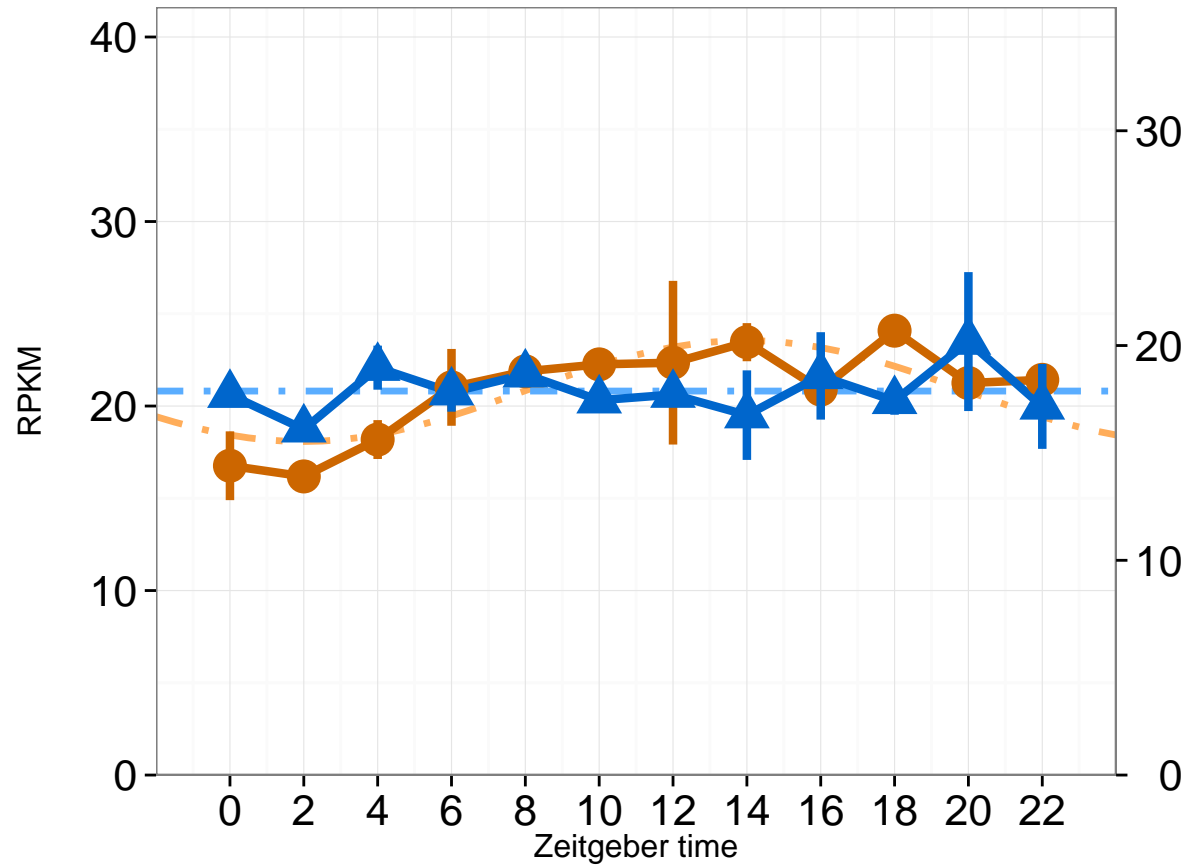

# Tor2a

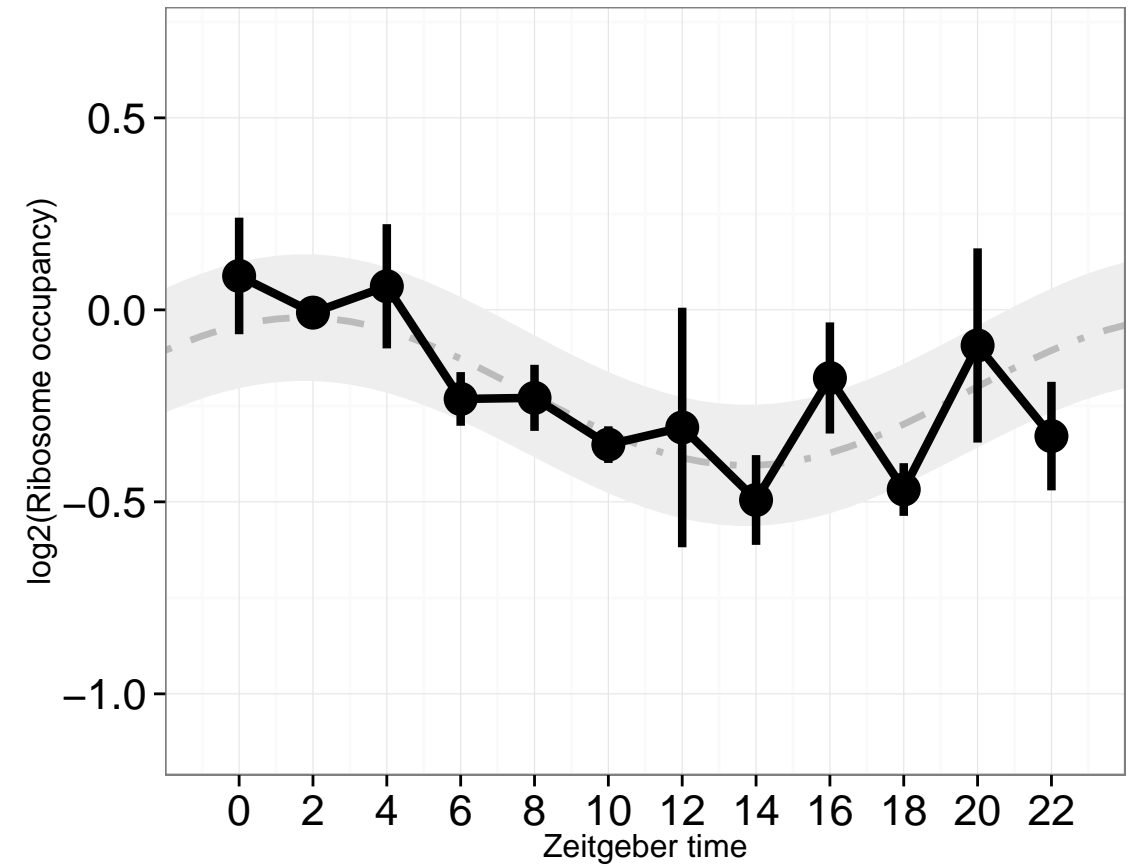

Supplement: Supplementary file 3440 [file 1]

## Plekha8

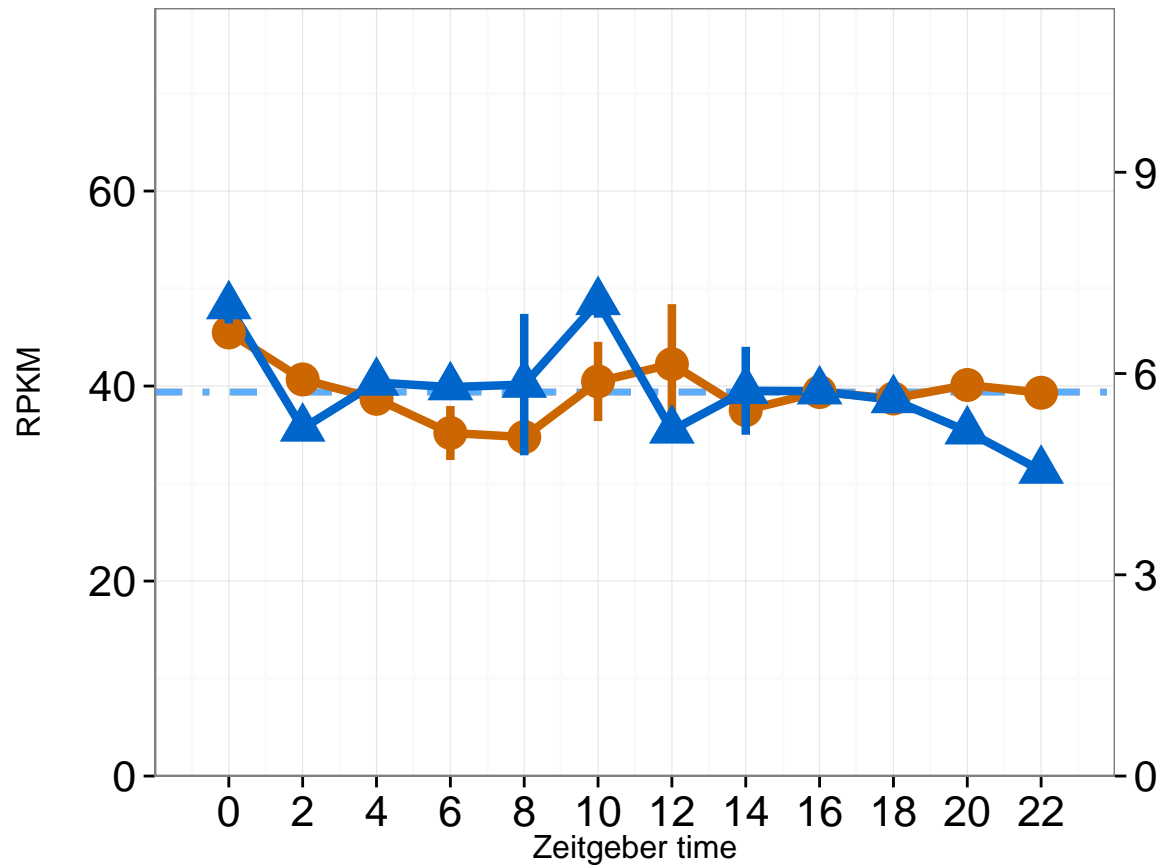

## Plekha8

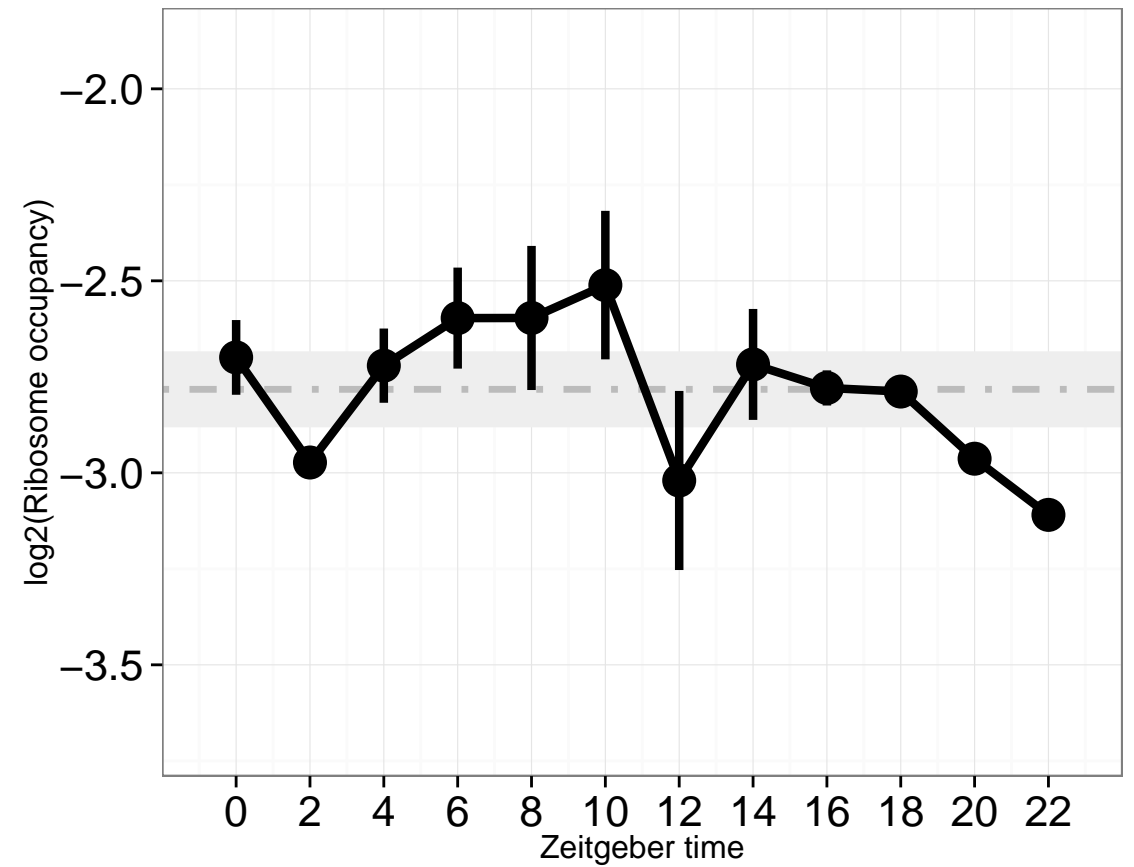

Supplement: Supplementary file 3441 [file 1]

# Hba-a1

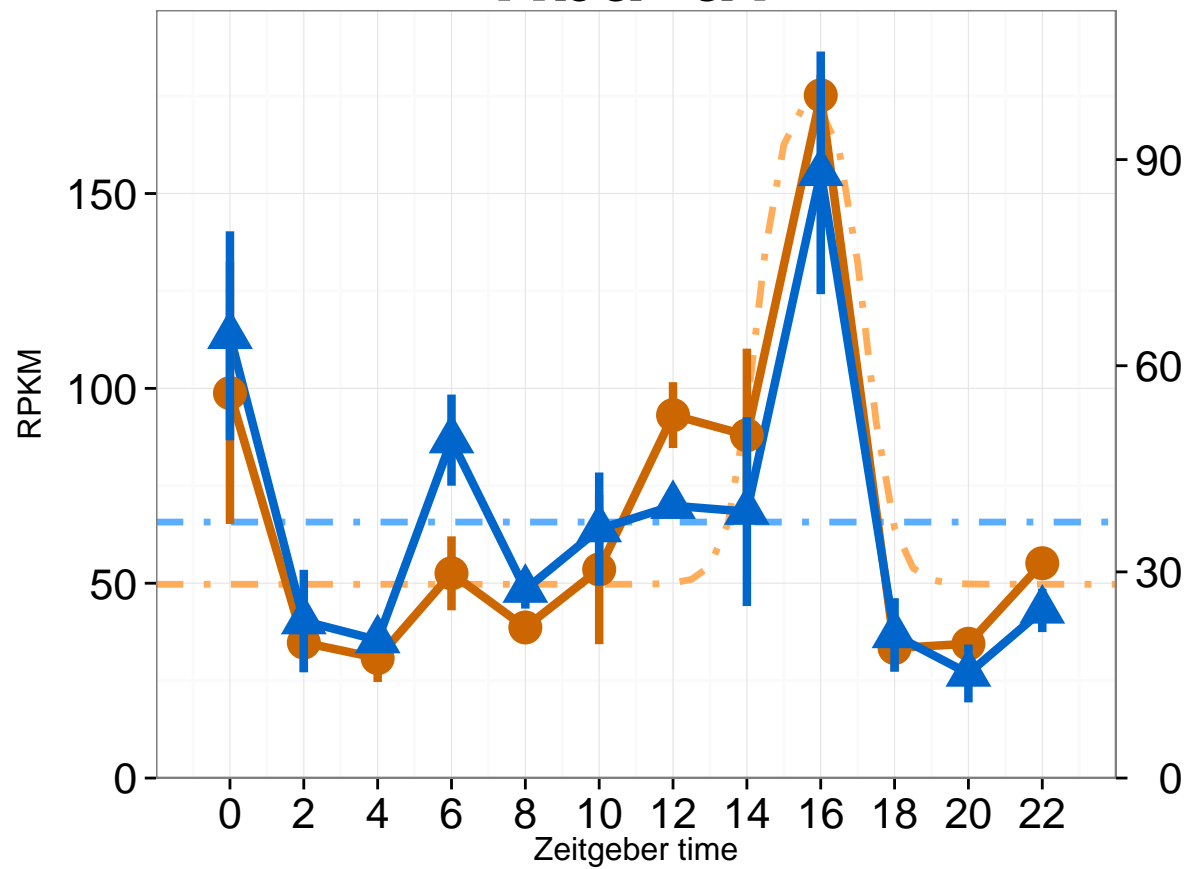

# Hba-a1

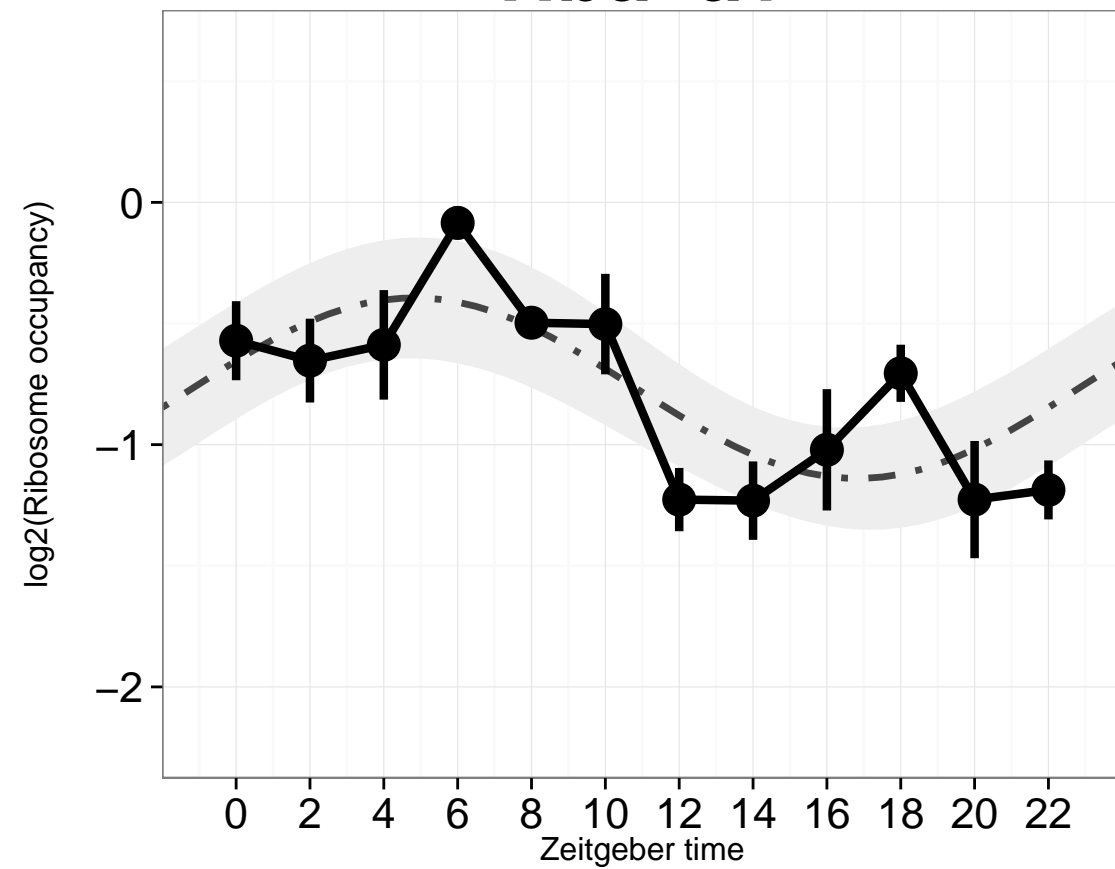

Supplement: Supplementary file 3442 [file 1]

# Slc22a7

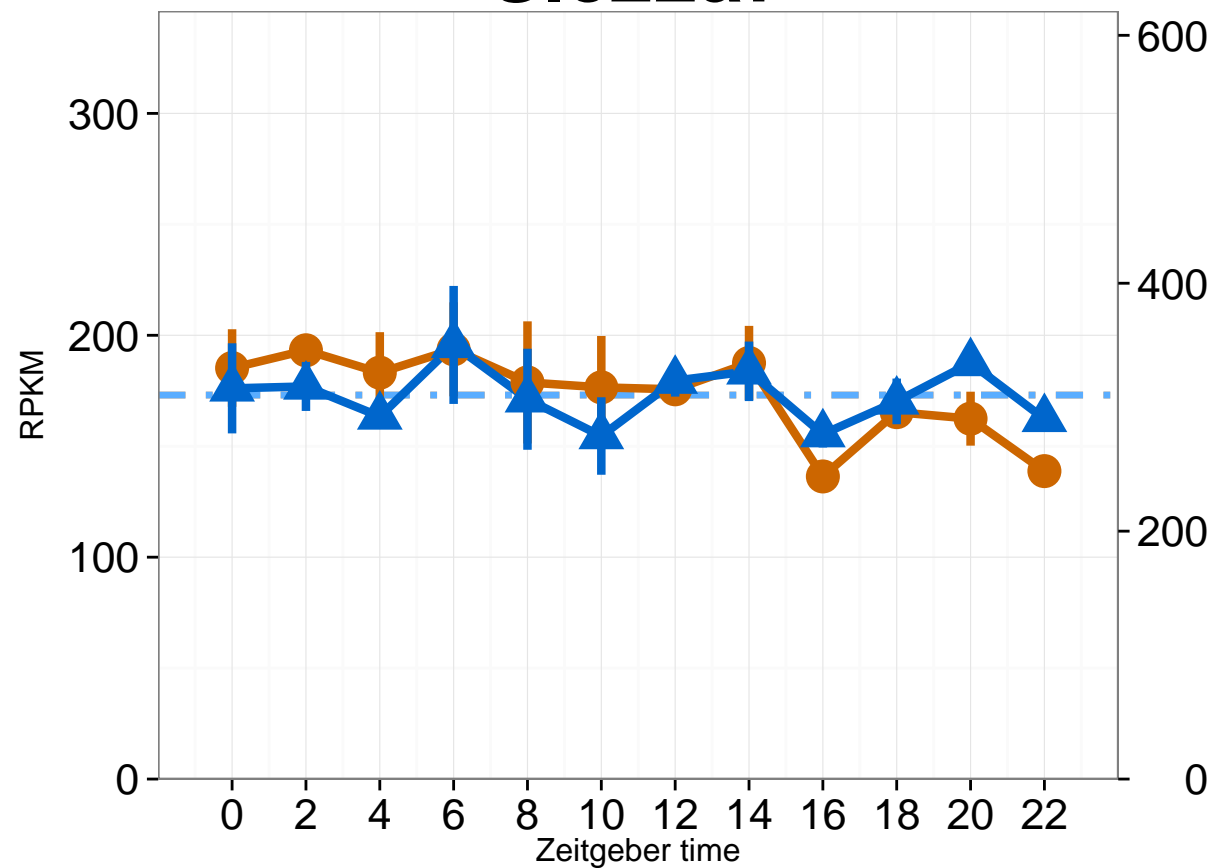

# Slc22a7

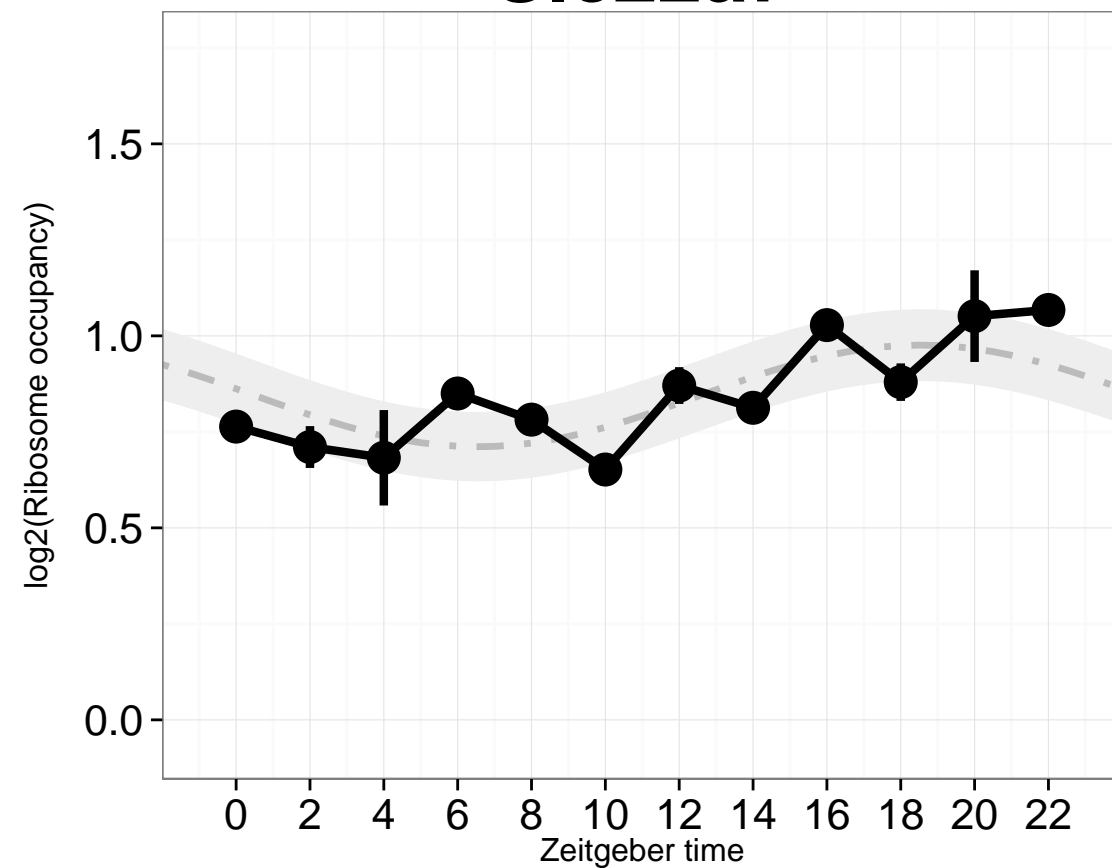

Supplement: Supplementary file 3443 [file 1]

## Pter

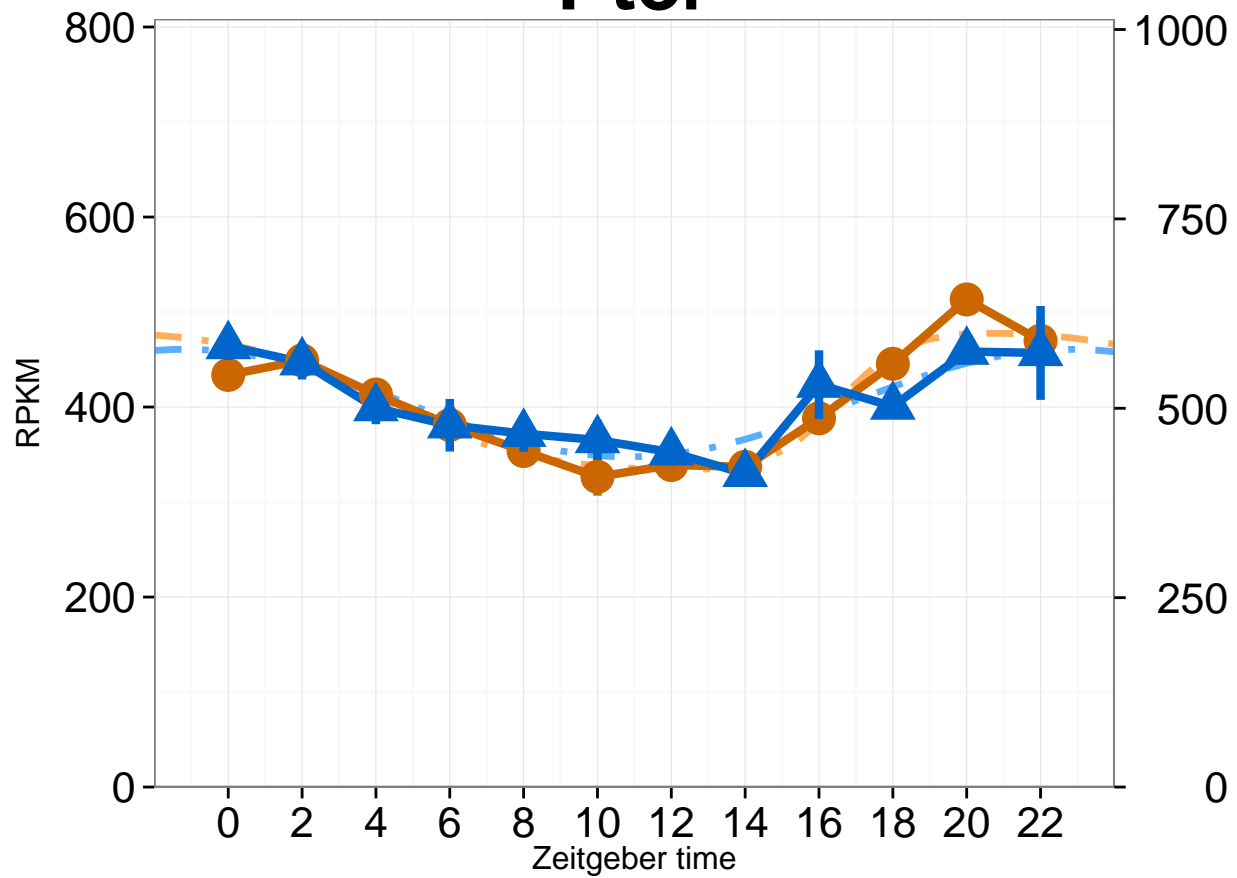

## Pter

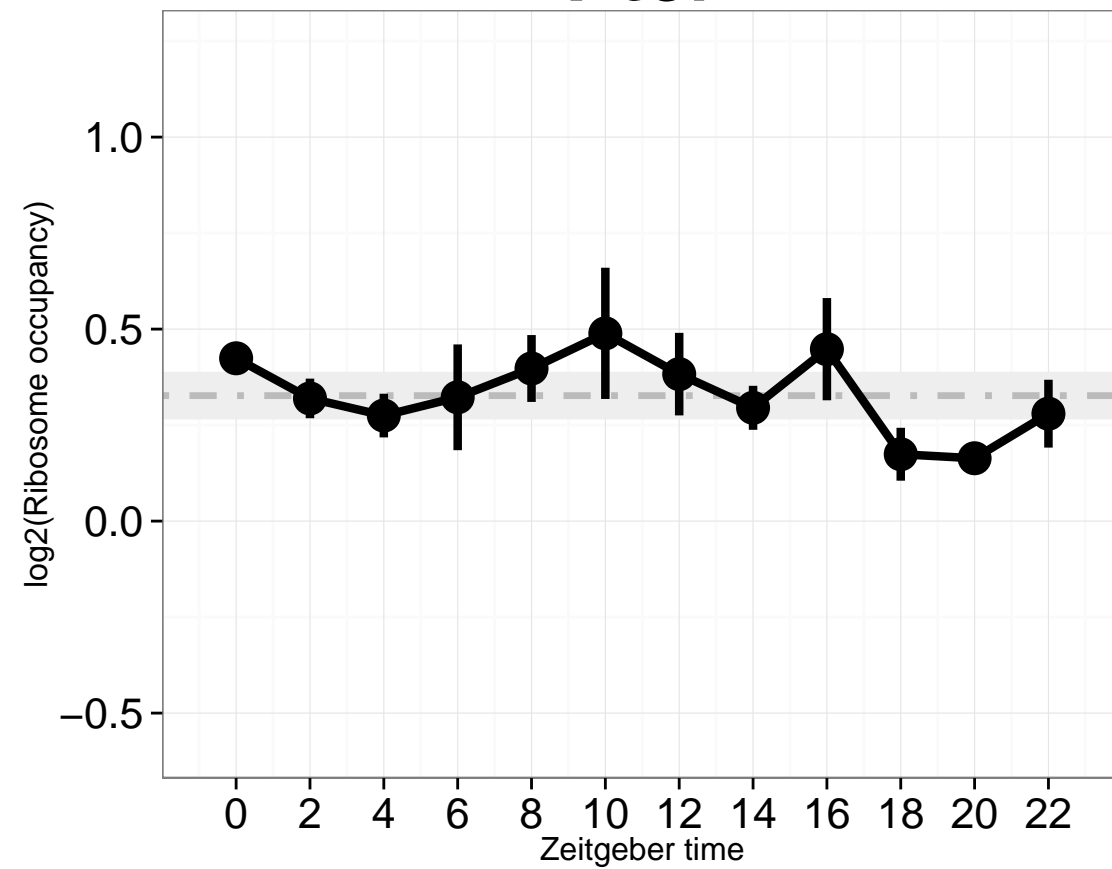

Supplement: Supplementary file 3444 [file 1]

# Zfp111

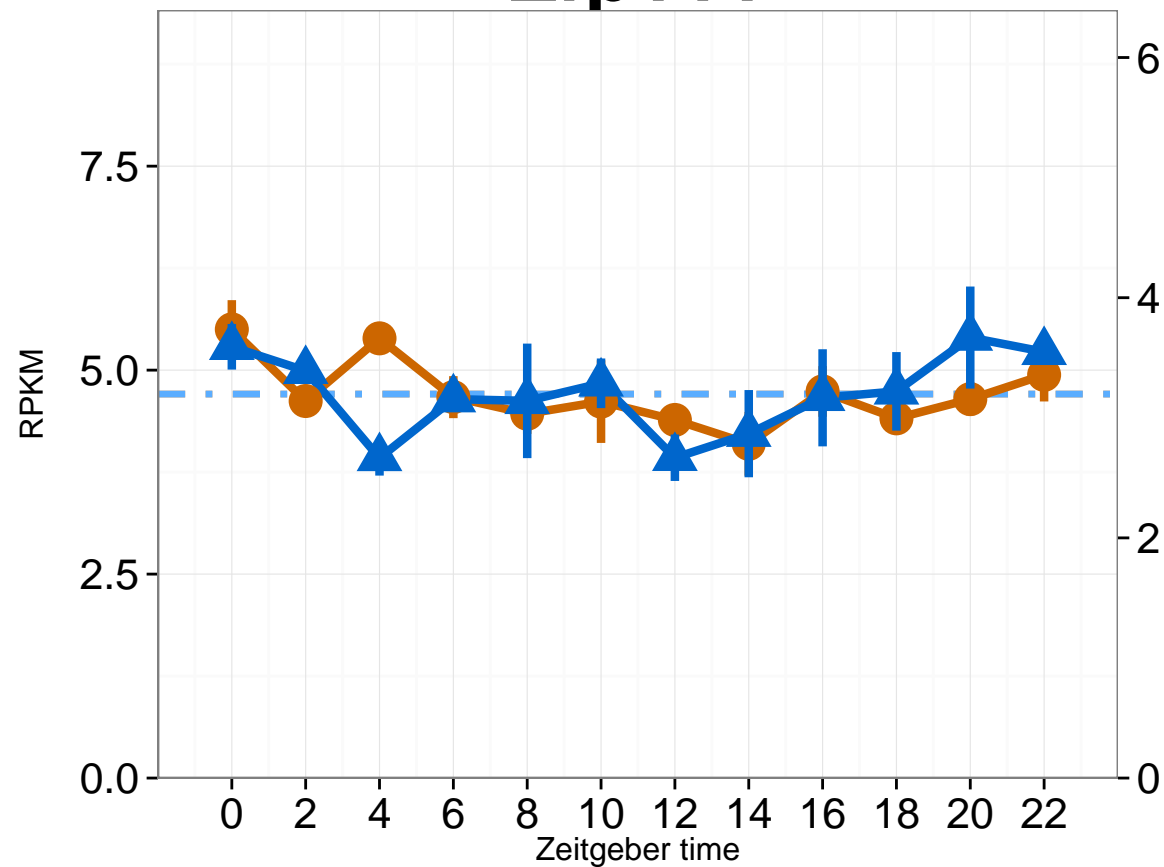

# Zfp111

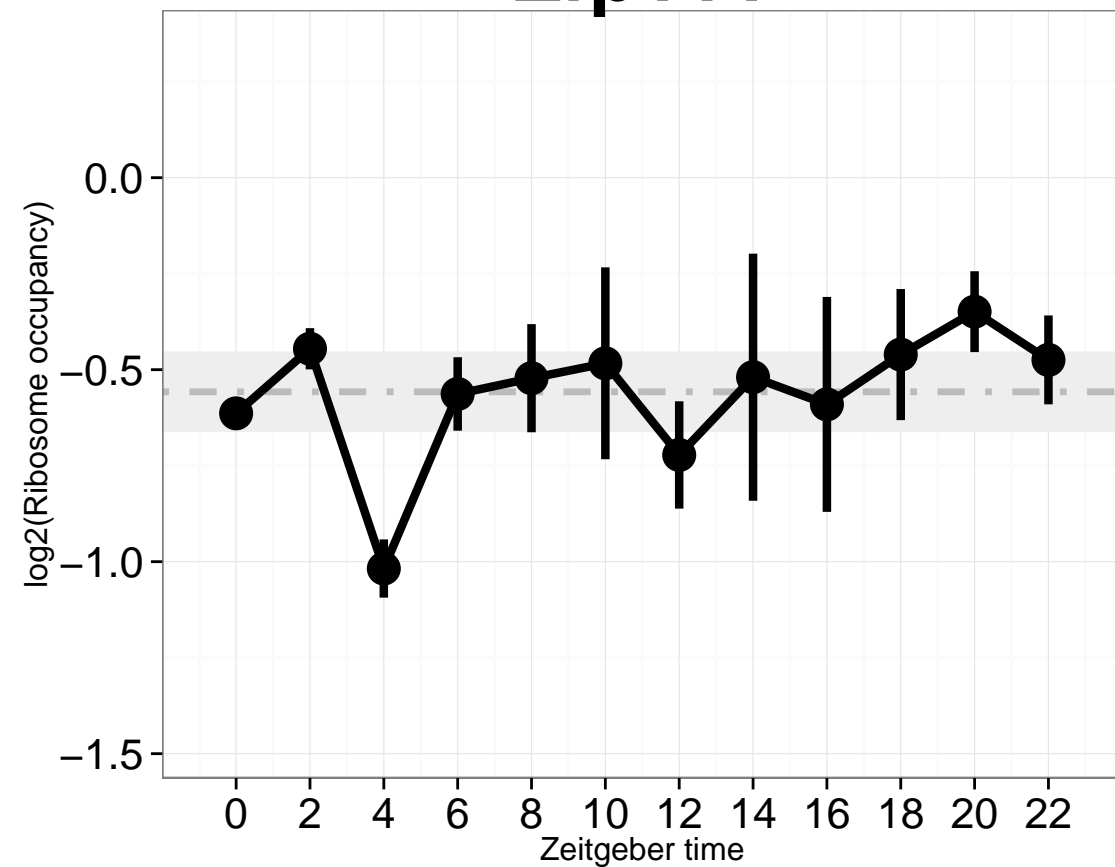

Supplement: Supplementary file 3445 [file 1]

# Mxd1

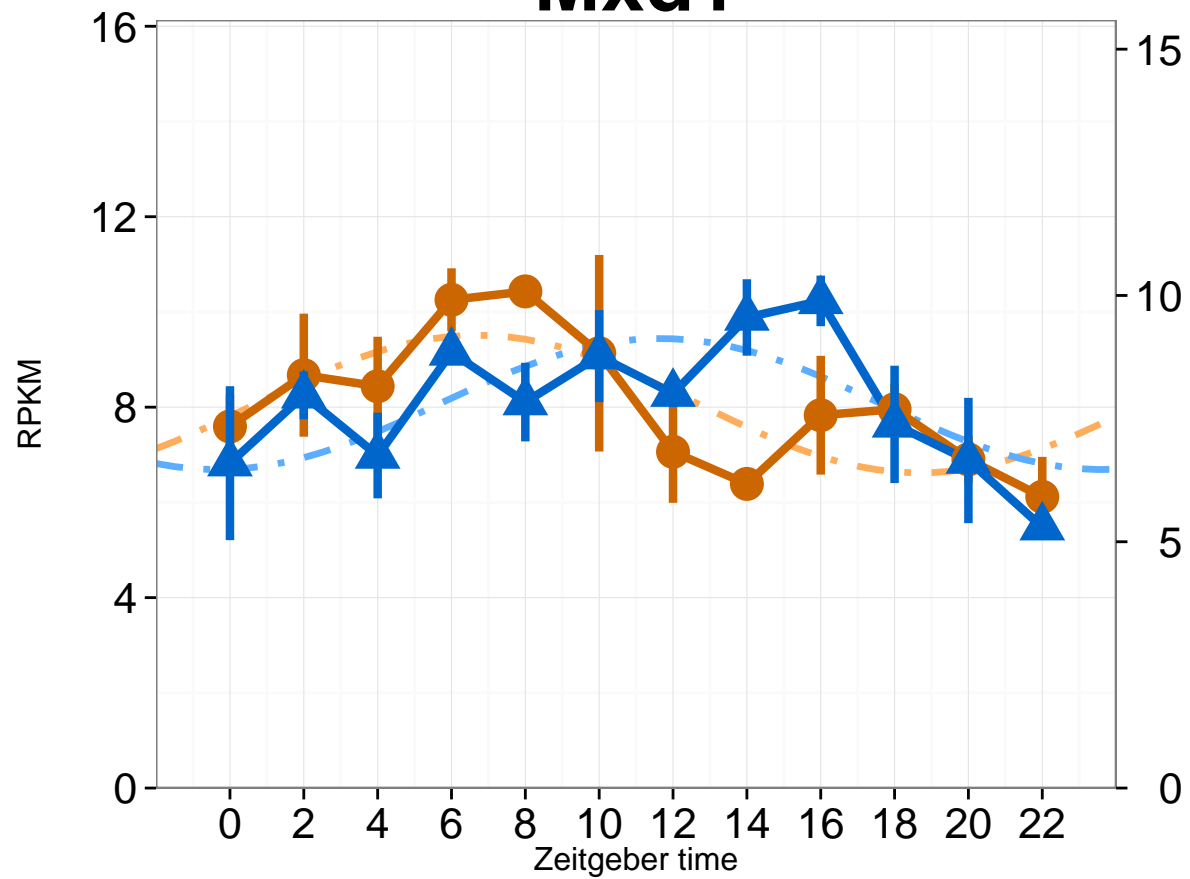

# Mxd1

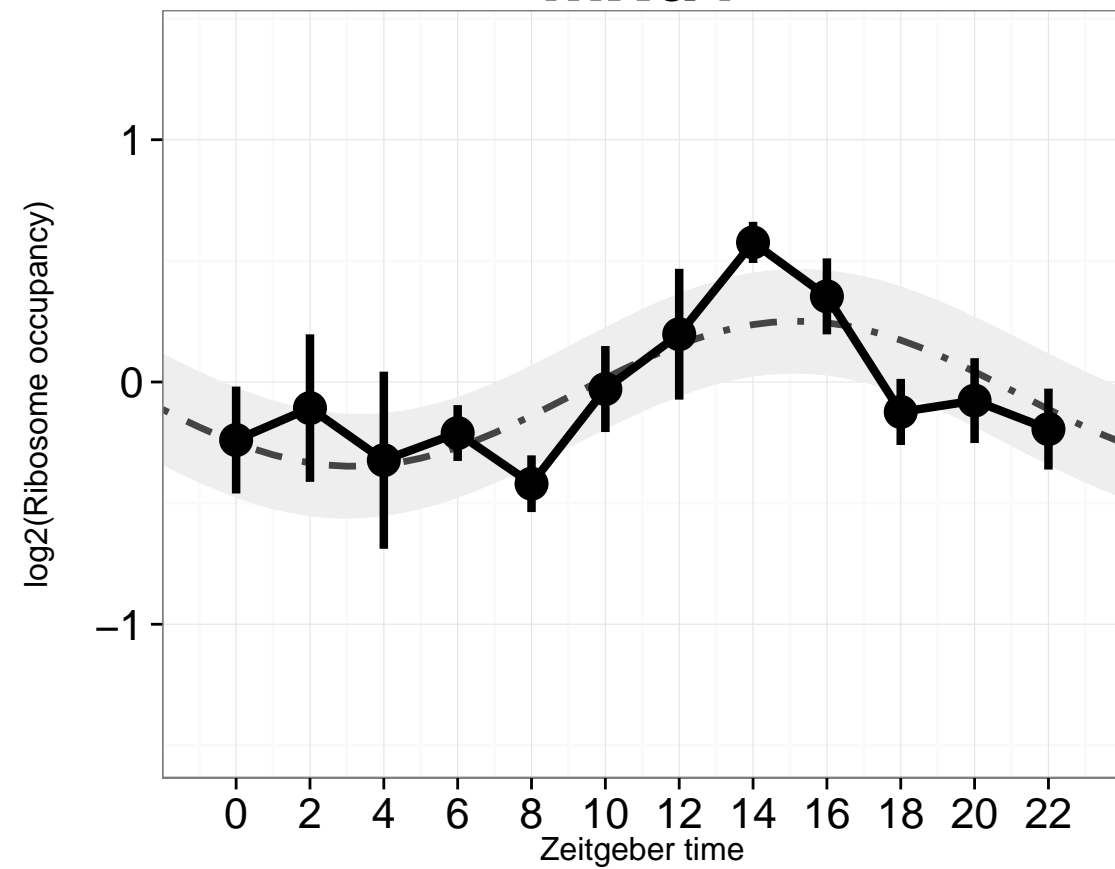

Supplement: Supplementary file 3446 [file 1]

# Zfp777

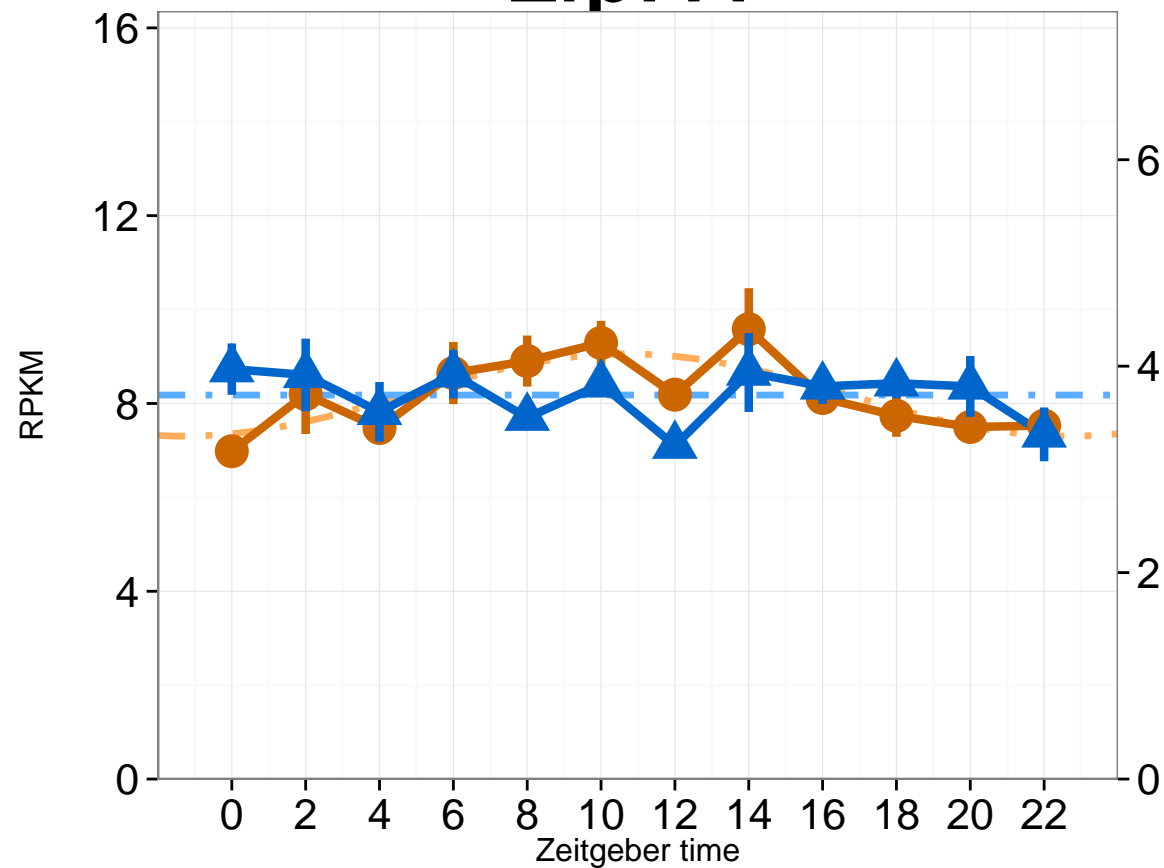

# Zfp777

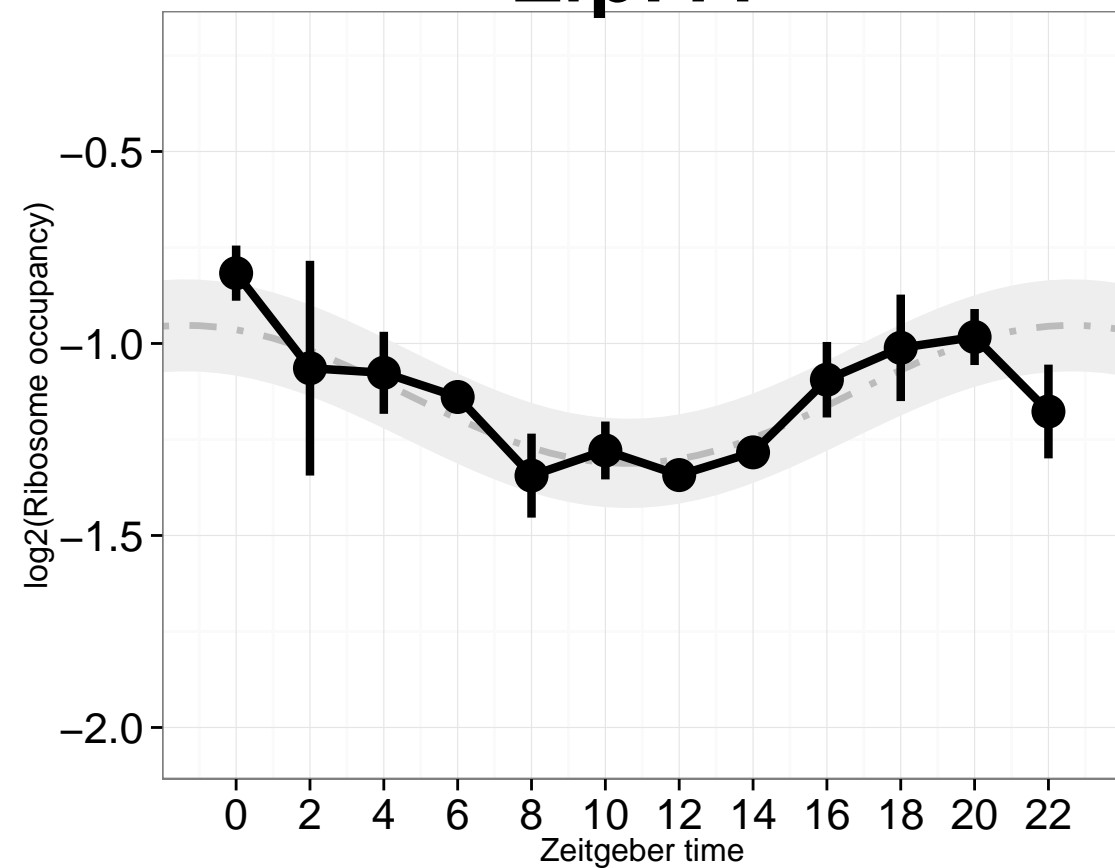

Supplement: Supplementary file 3447 [file 1]

# Ttc30a1

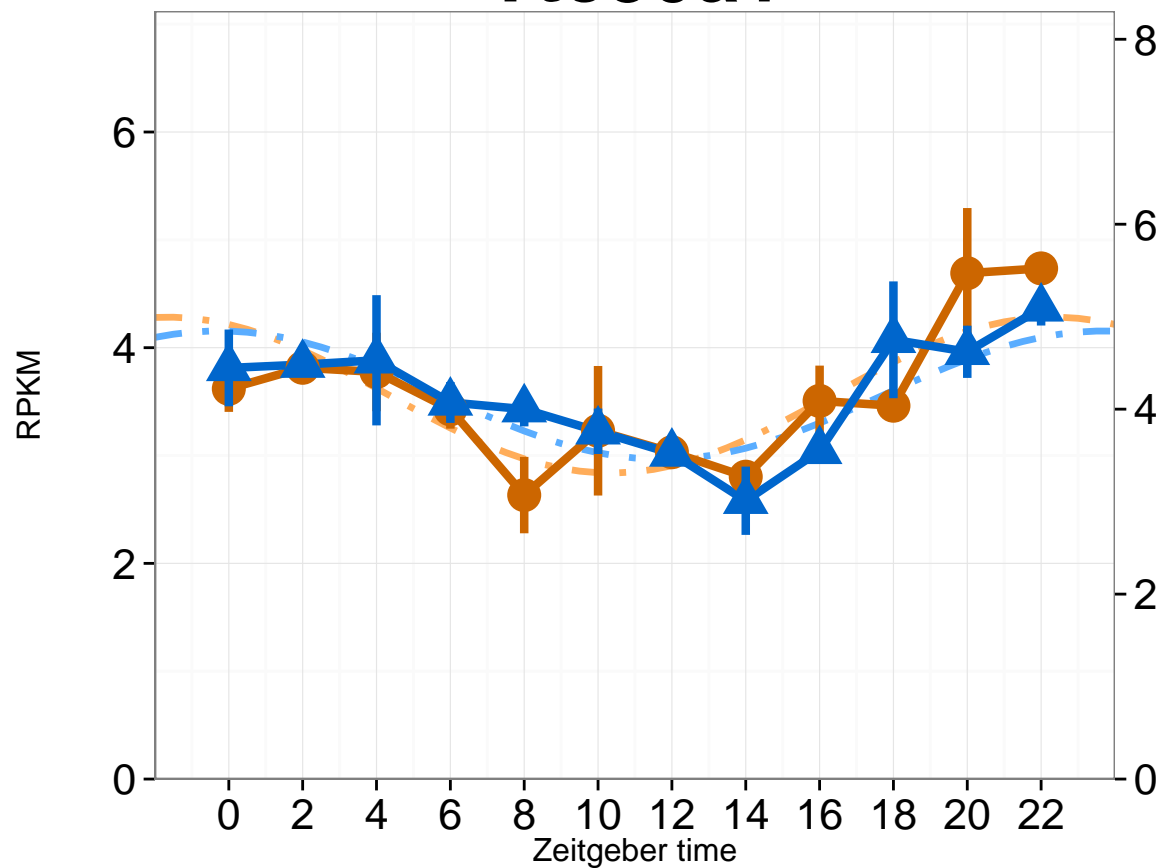

# Ttc30a1

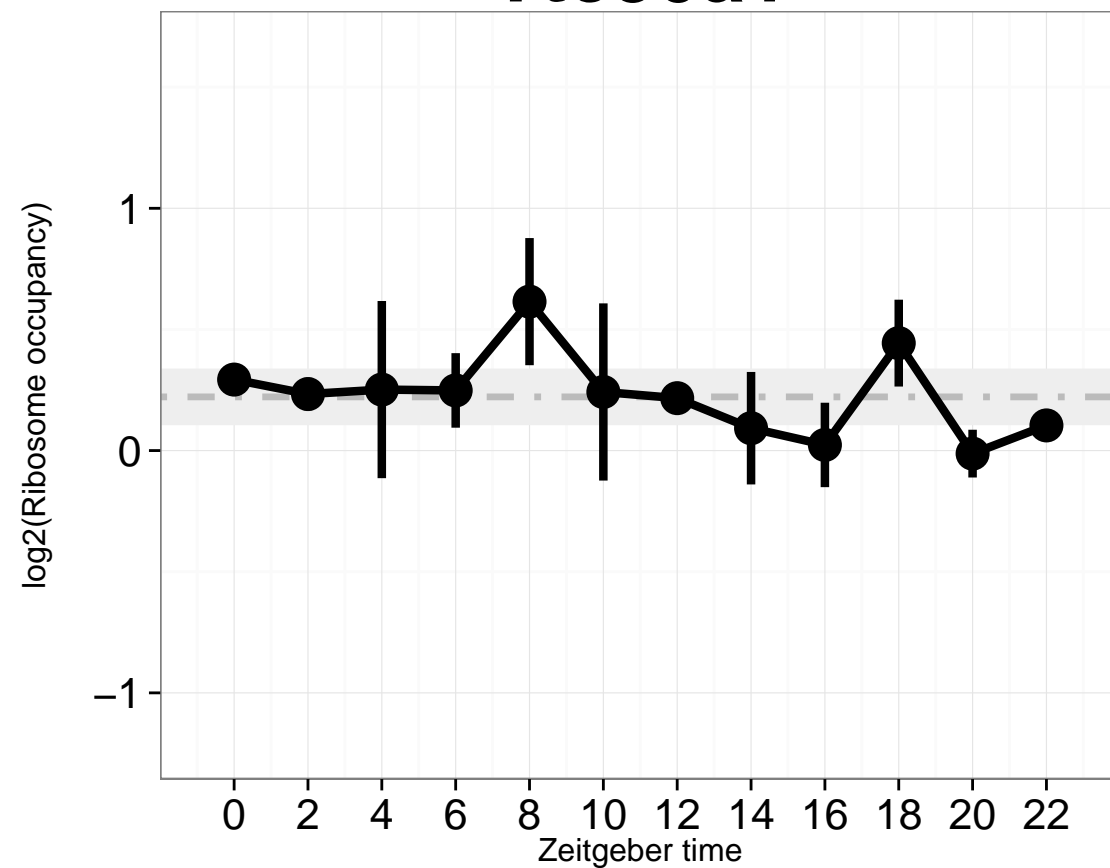

Supplement: Supplementary file 3448 [file 1]

# Toe1

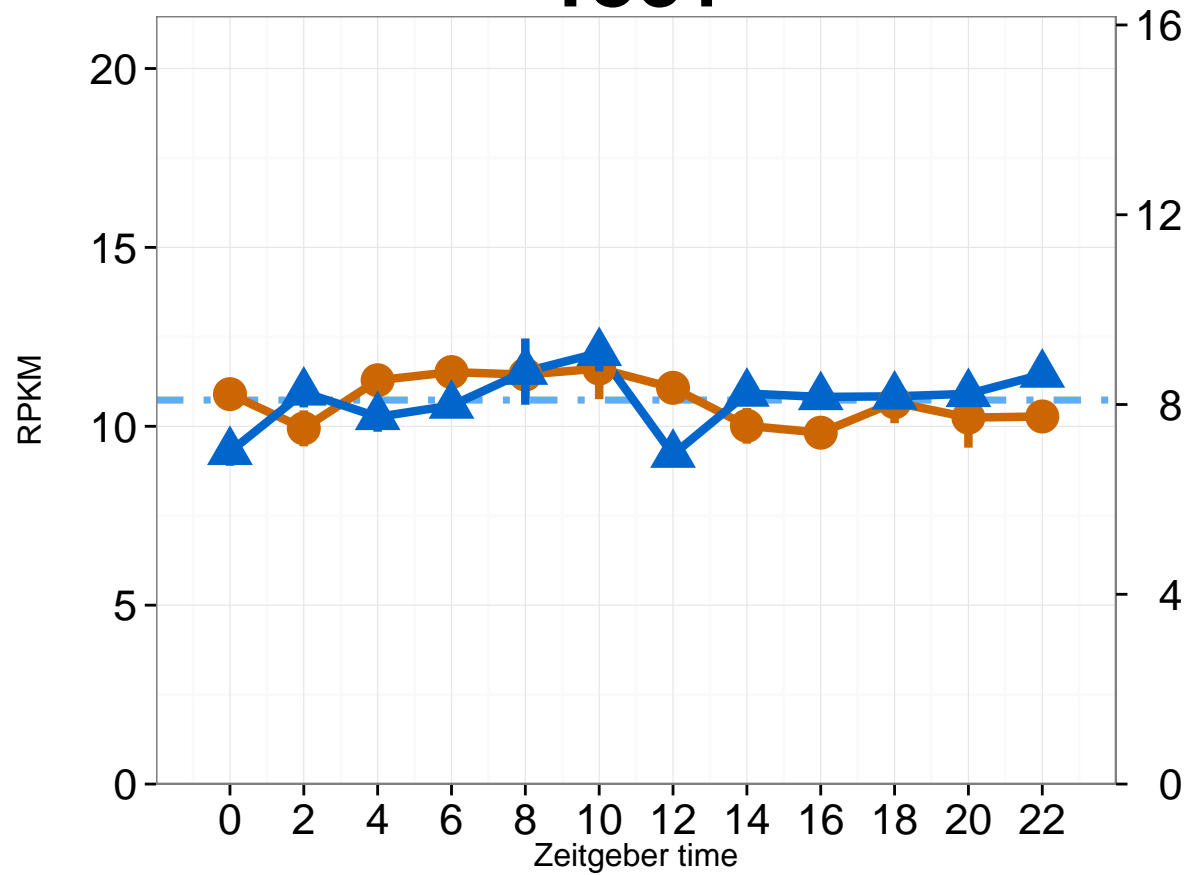

# Toe1

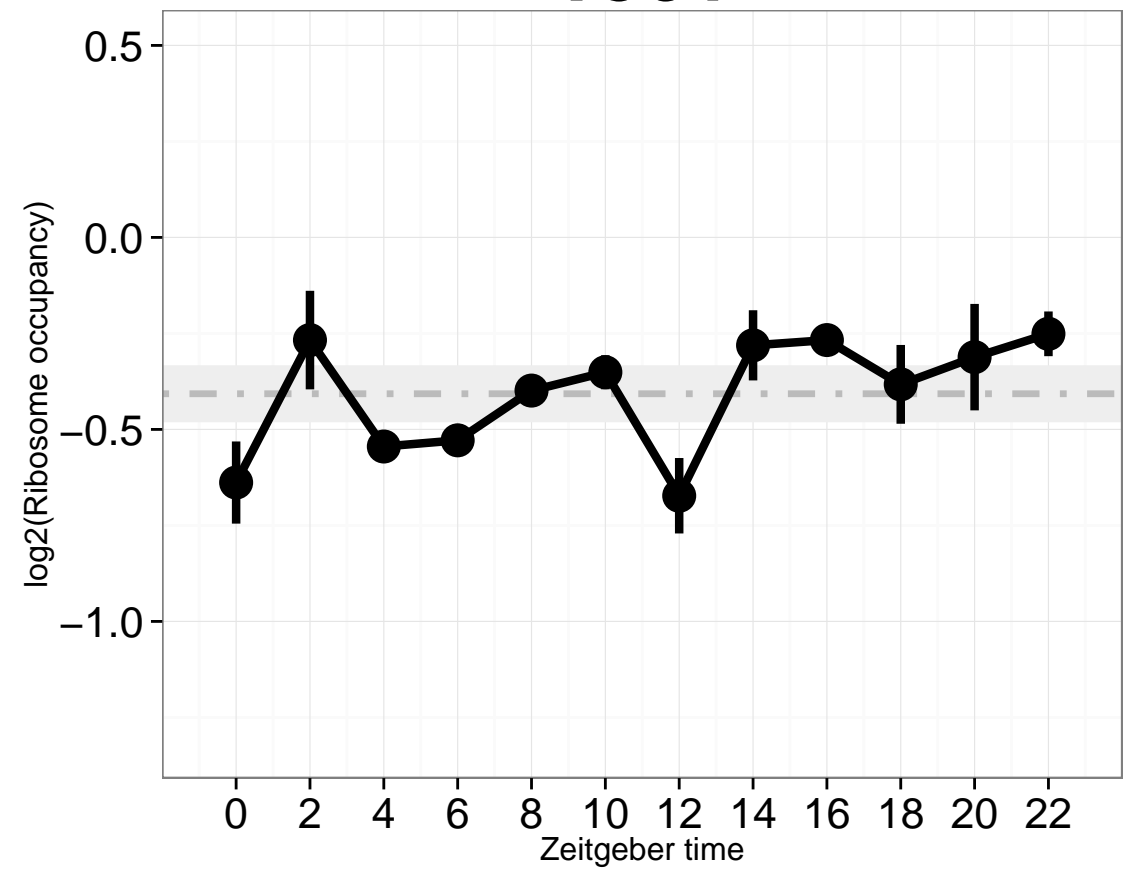

Supplement: Supplementary file 3449 [file 1]

# Tmem184c

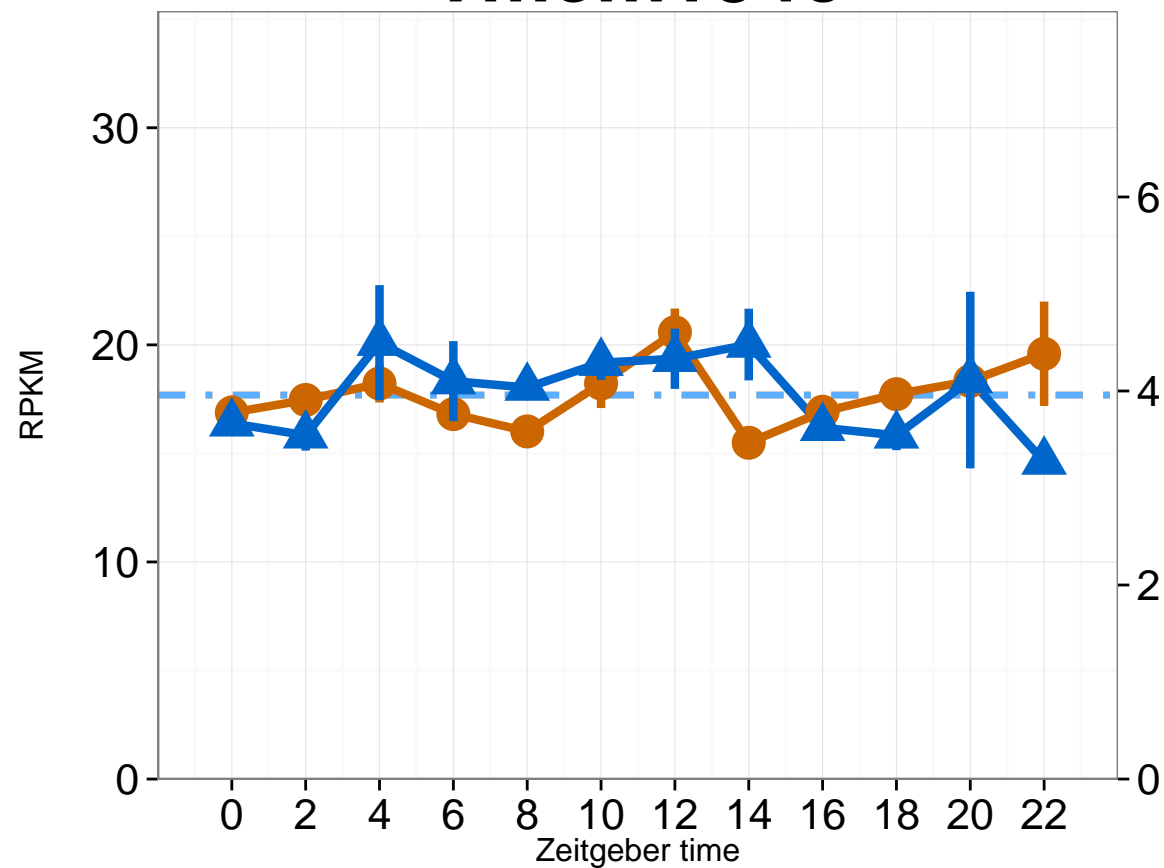

# Tmem184c

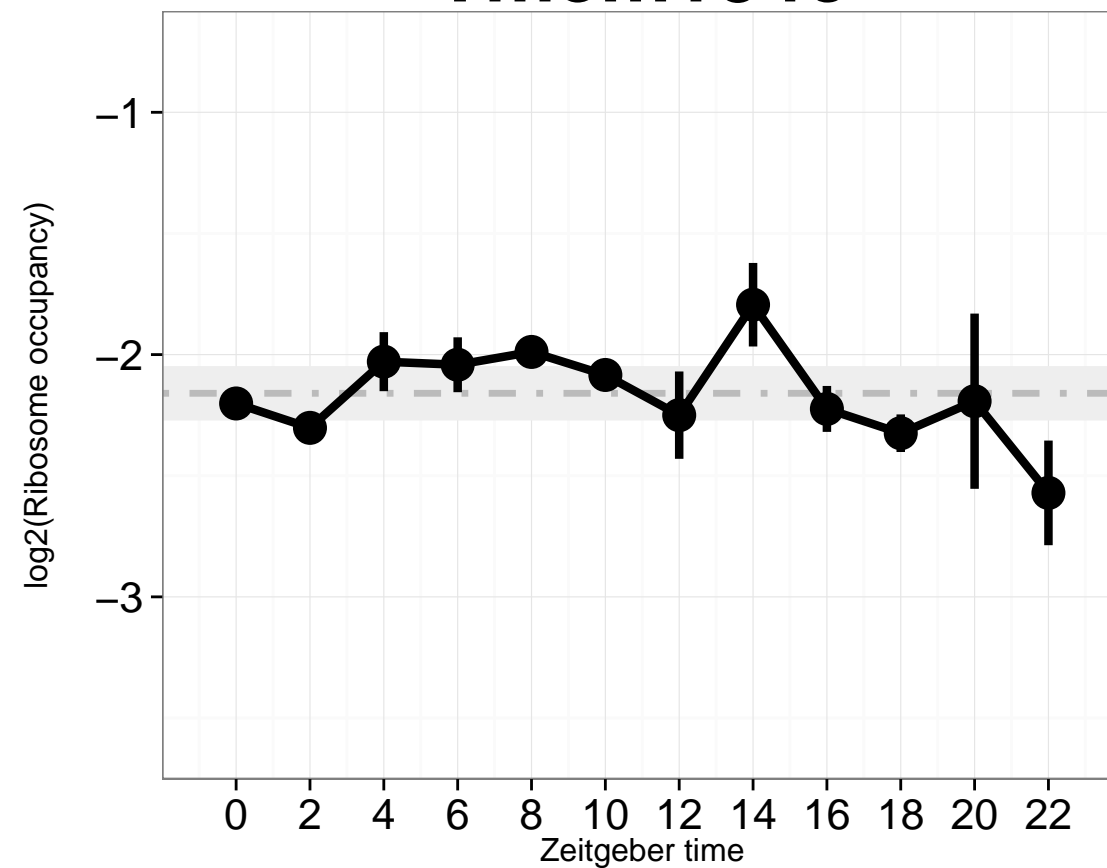

Supplement: Supplementary file 3450 [file 1]

# Xaf1

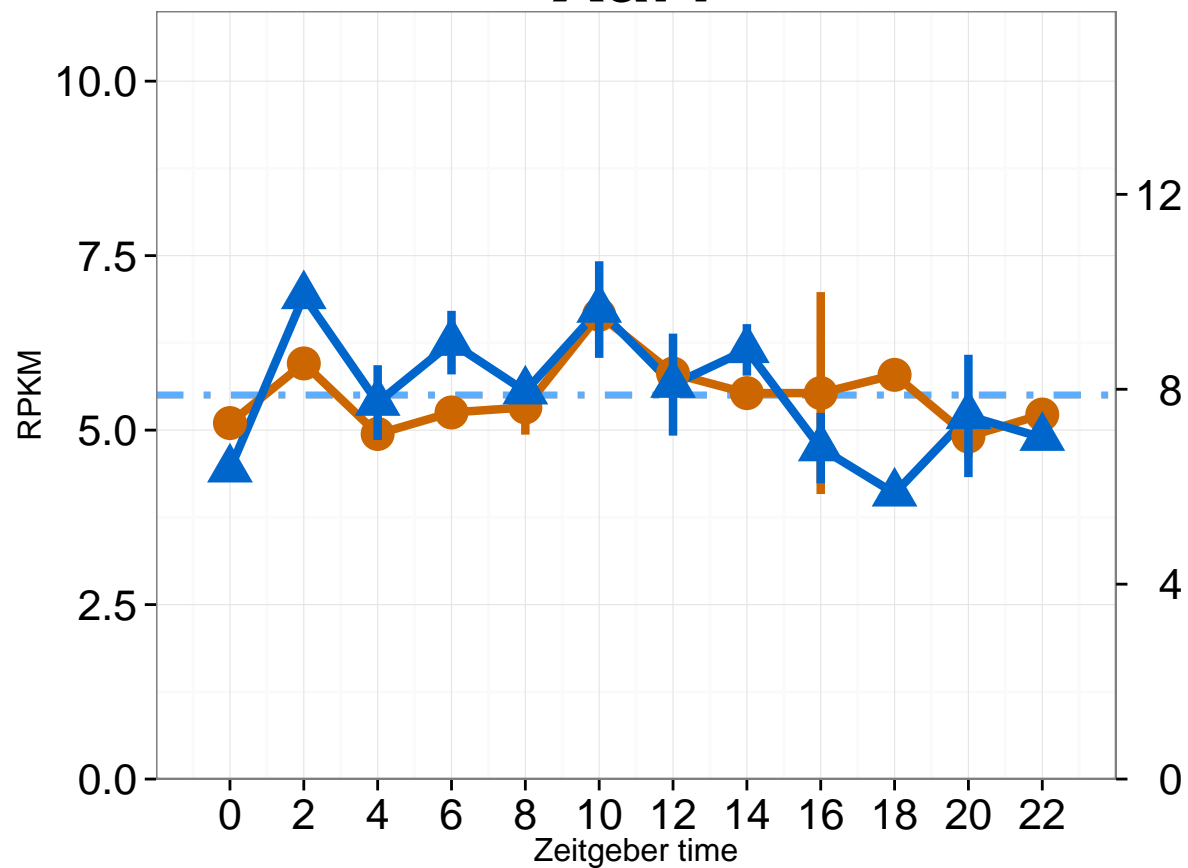

# Xaf1

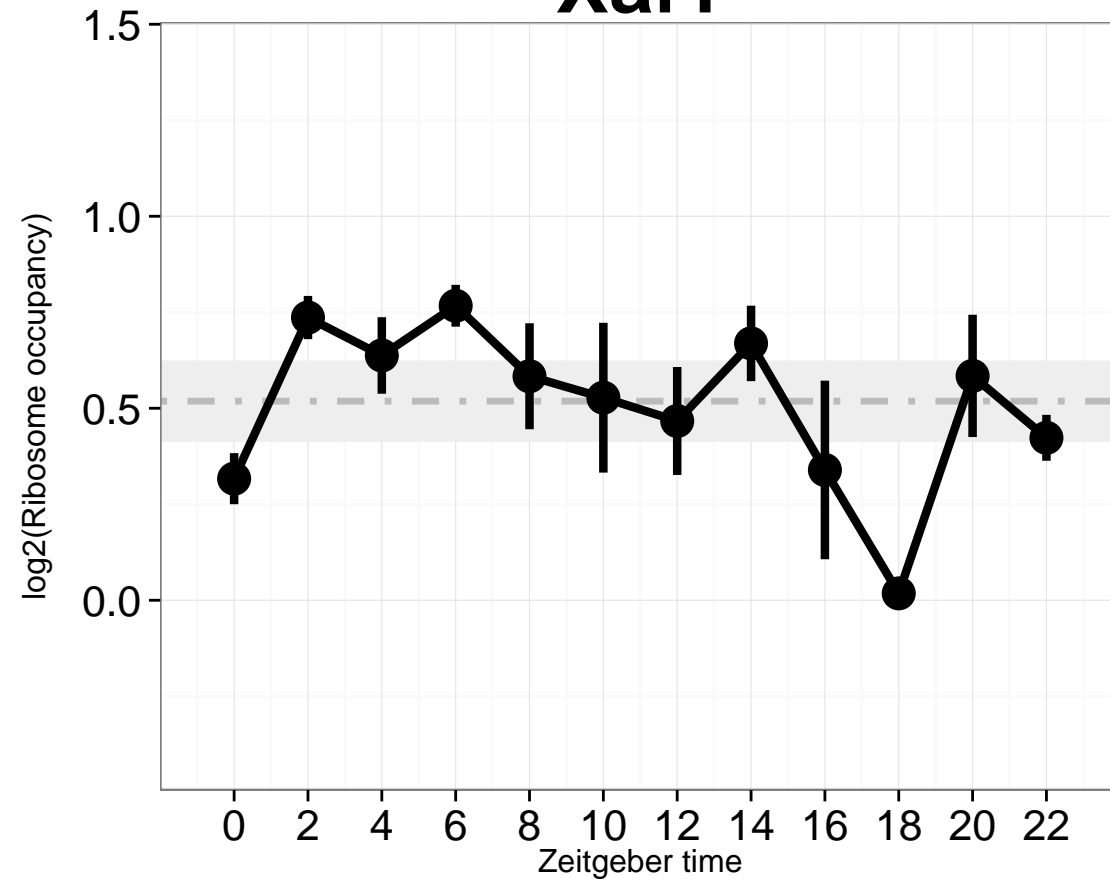

Supplement: Supplementary file 3451 [file 1]

## Acn9

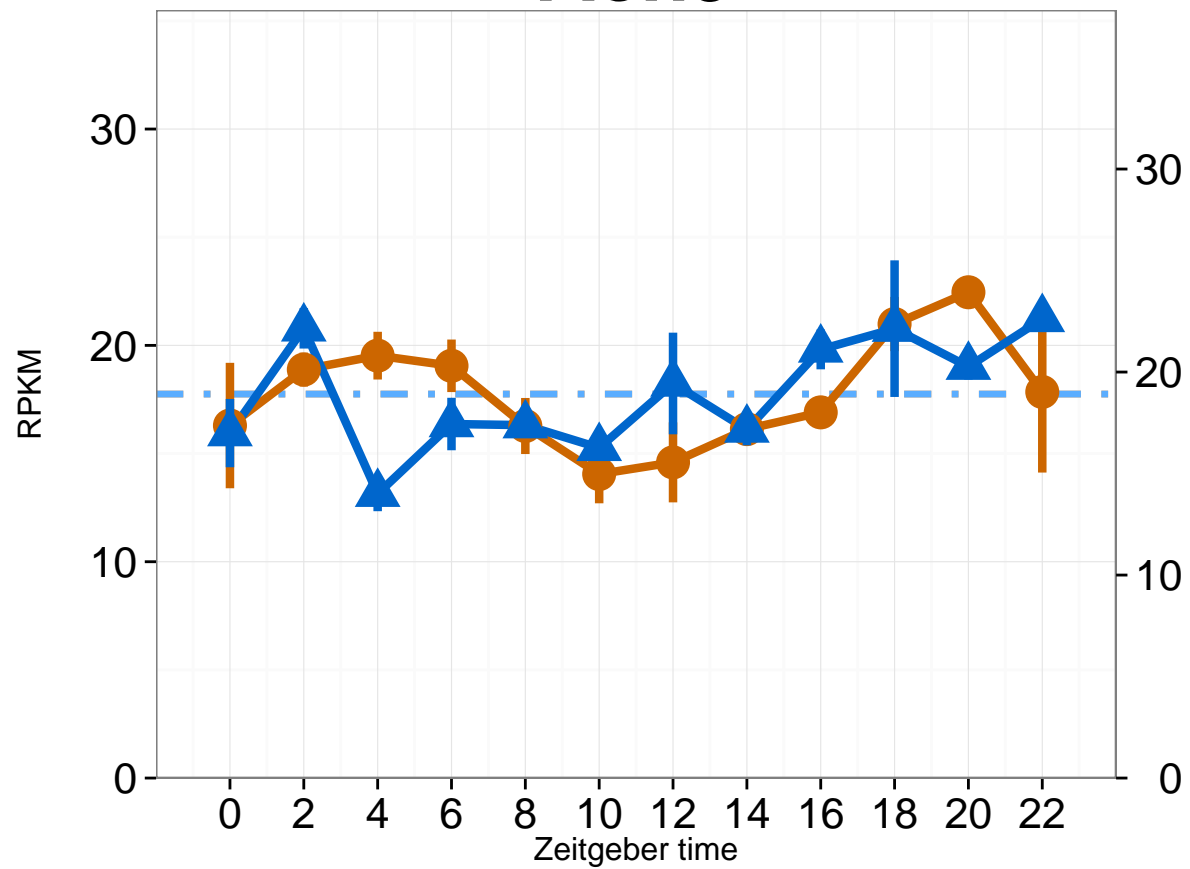

## Acn9

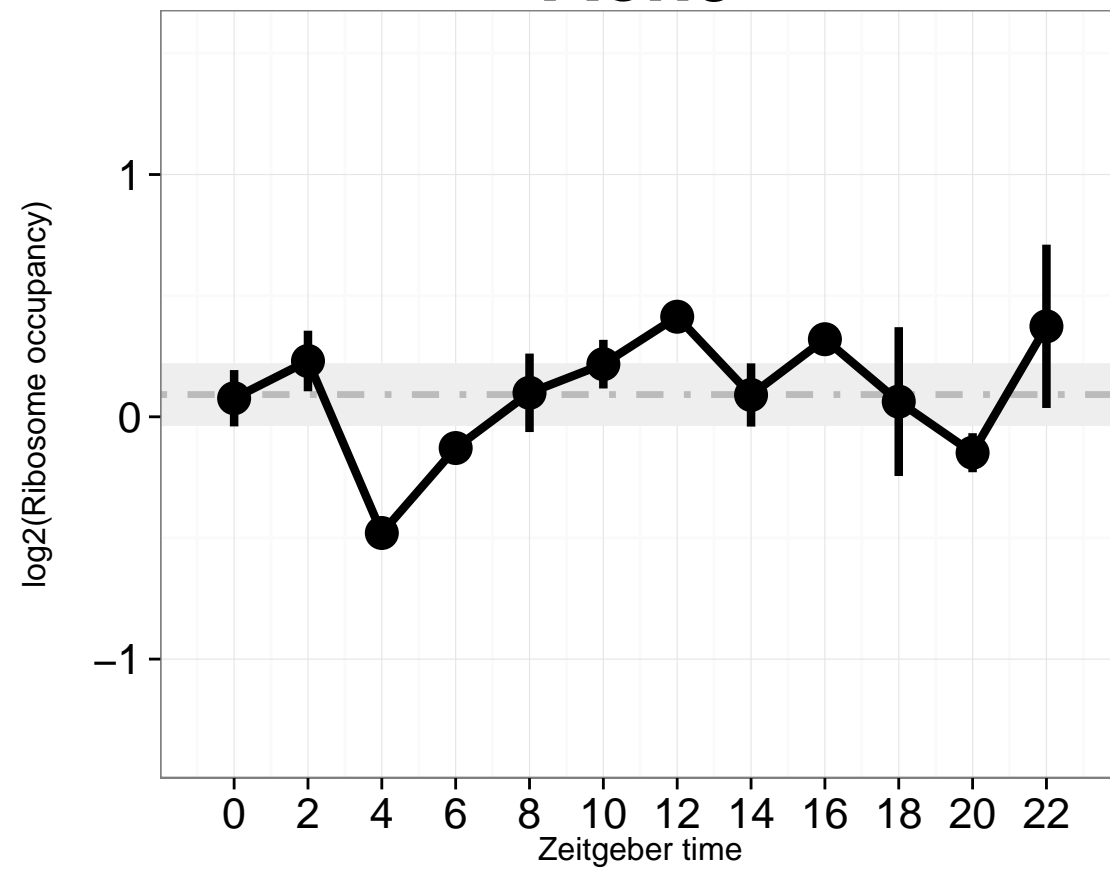

Supplement: Supplementary file 3452 [file 1]

# Gstm1

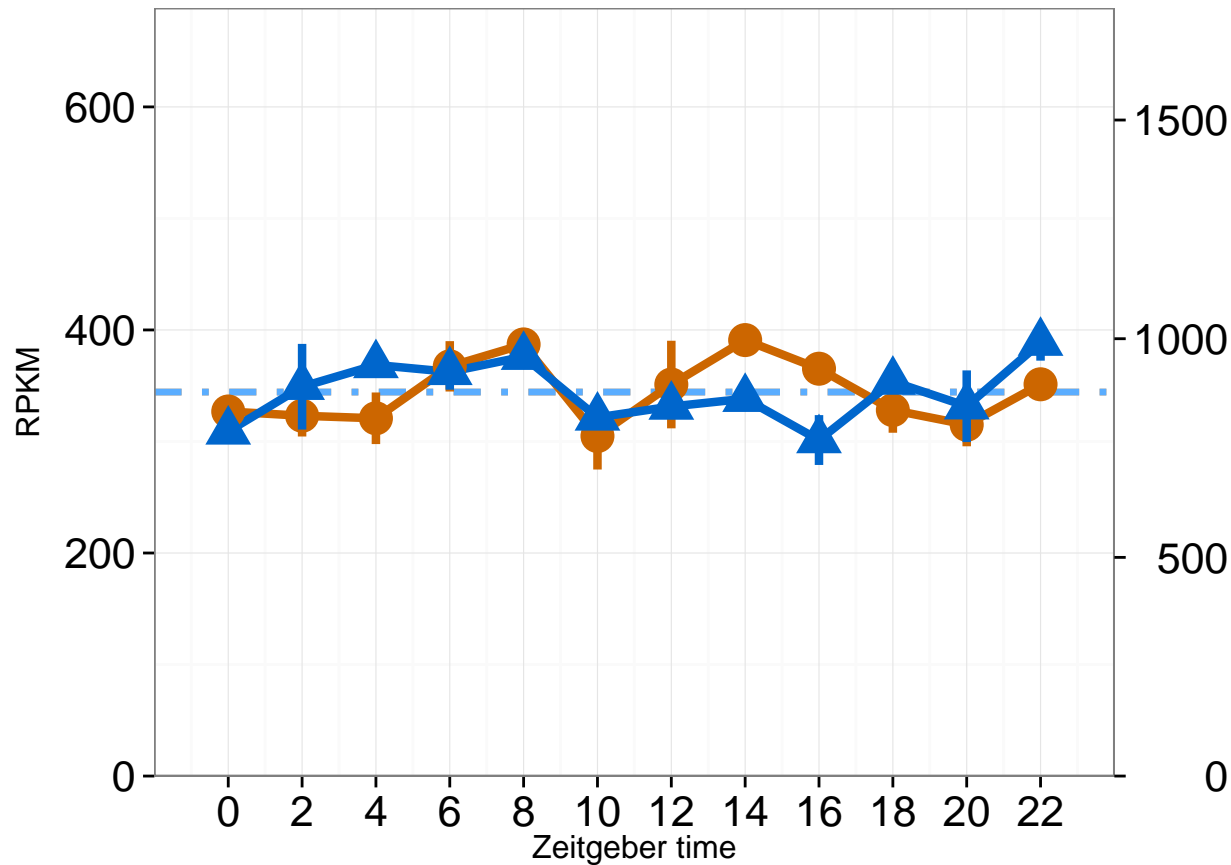

# Gstm1

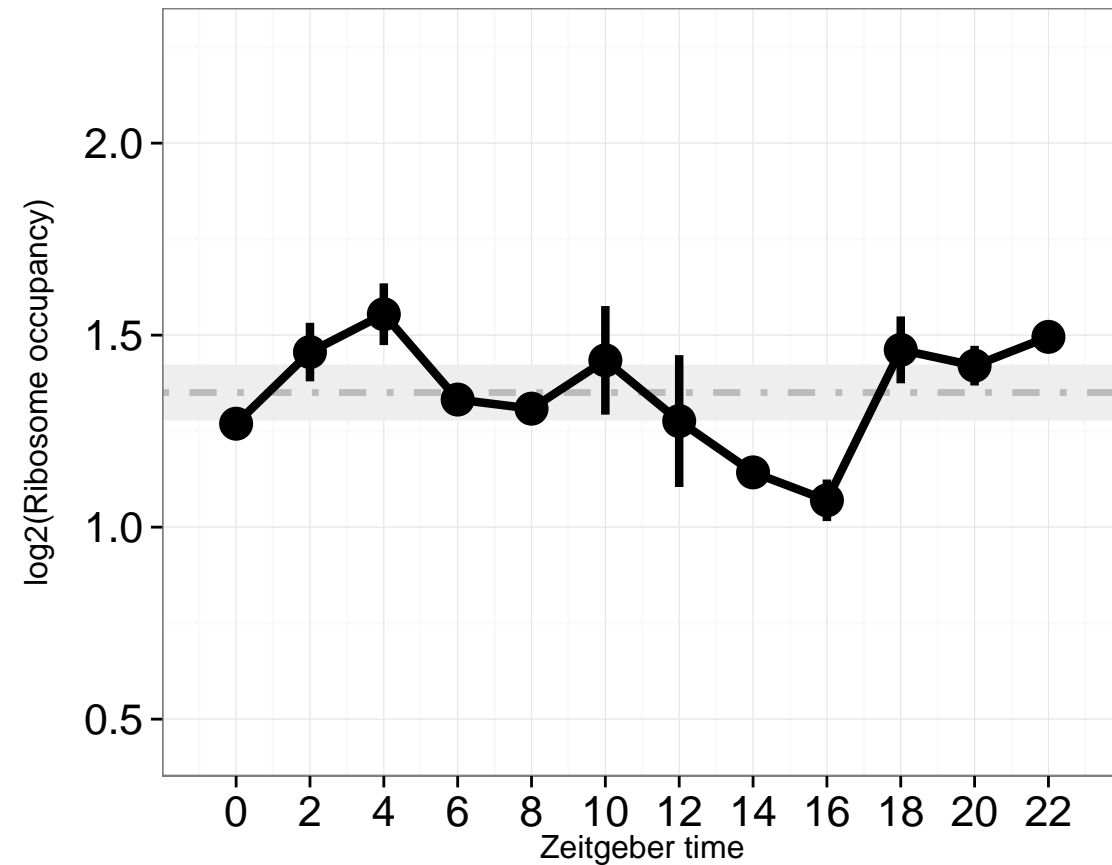

Supplement: Supplementary file 3453 [file 1]

## Shmt1

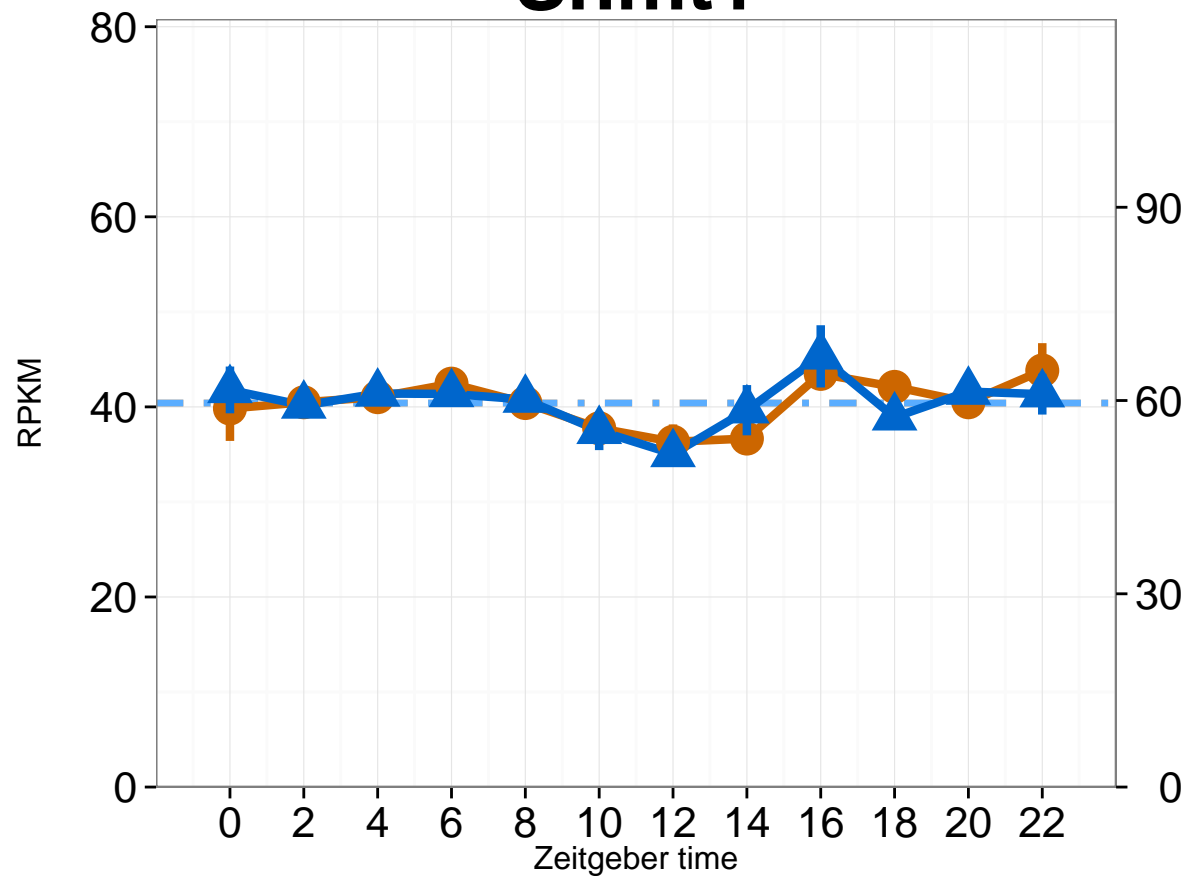

## Shmt1

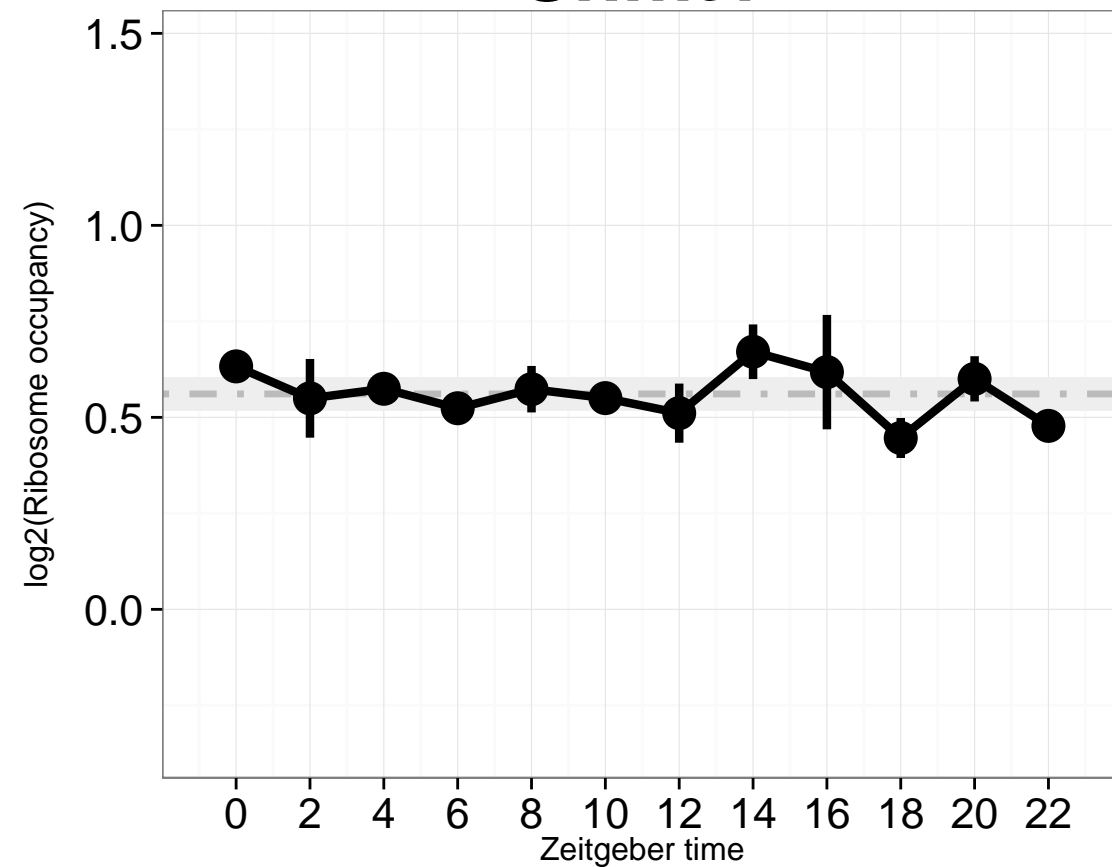

Supplement: Supplementary file 3454 [file 1]

# Hsp90b1

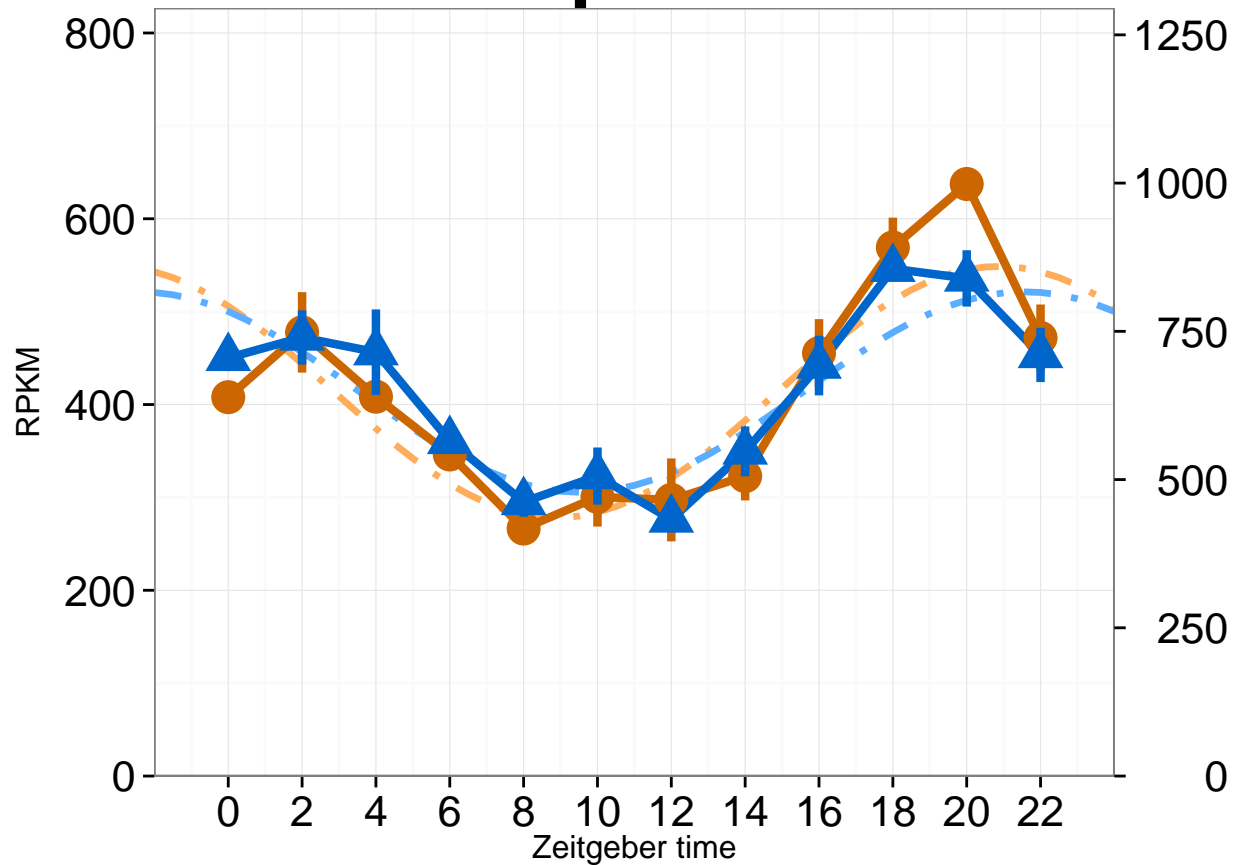

# Hsp90b1

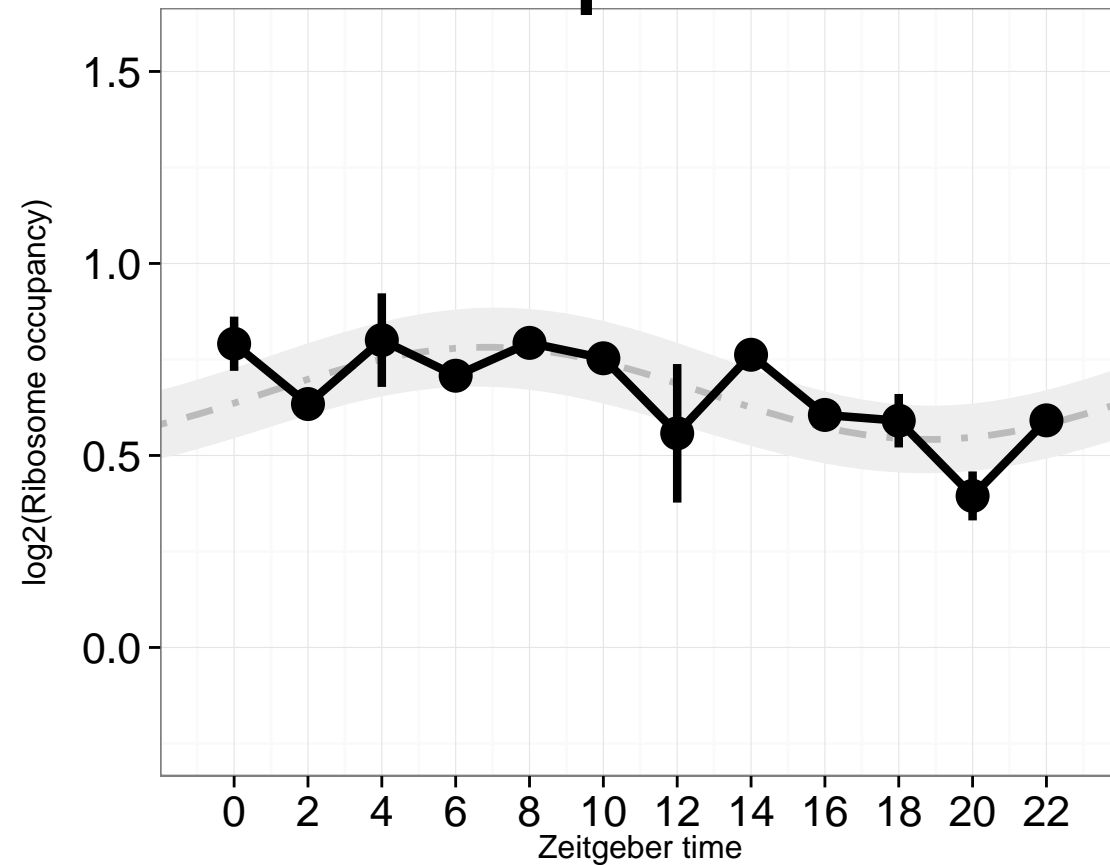

Supplement: Supplementary file 3455 [file 1]

## Fus

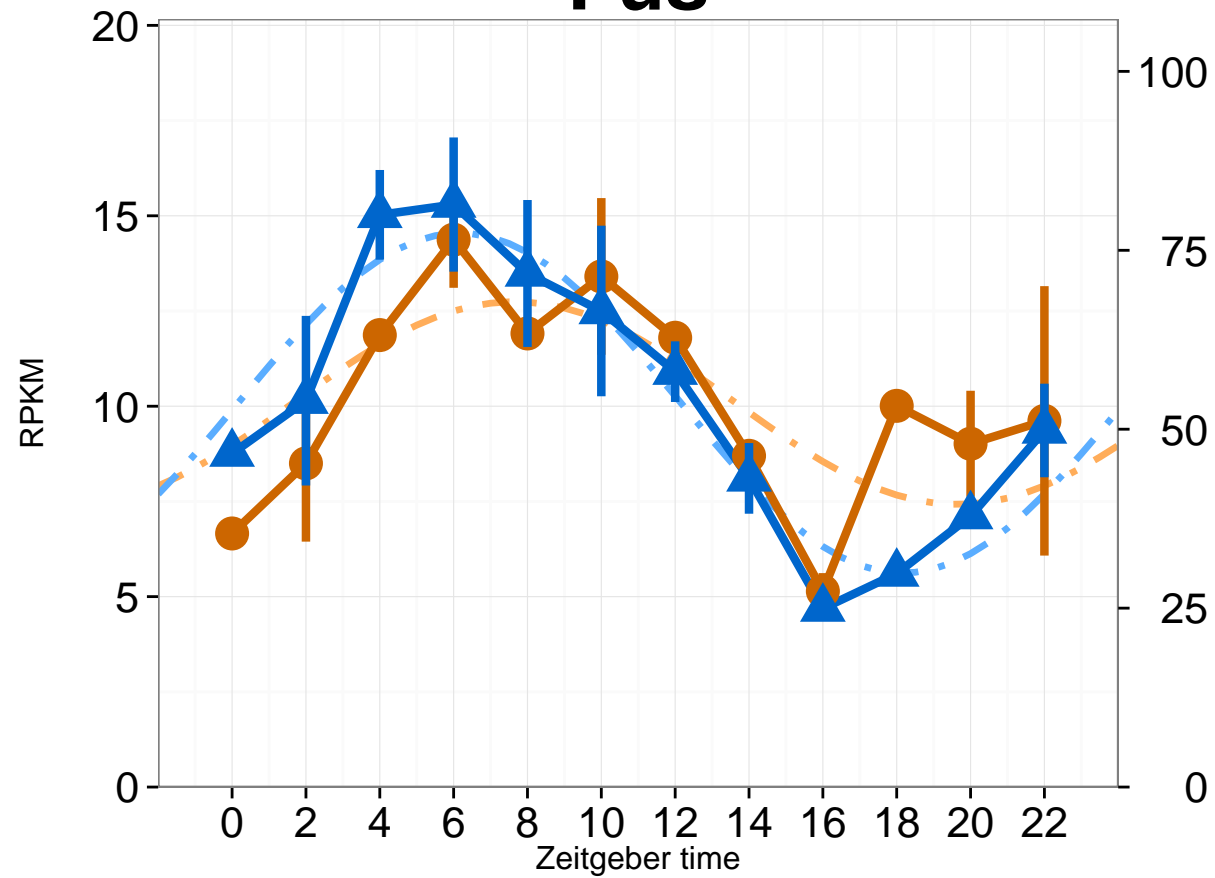

## Fus

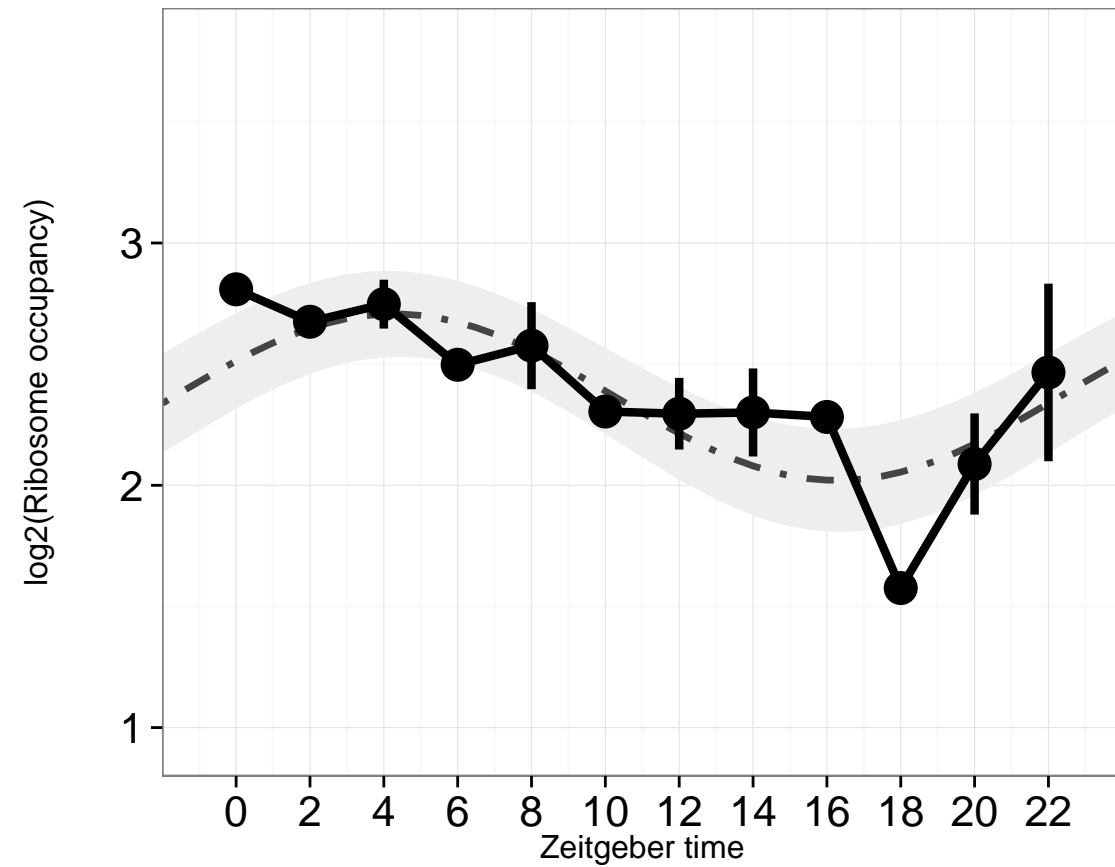

Supplement: Supplementary file 3456 [file 1]

## Slc19a3

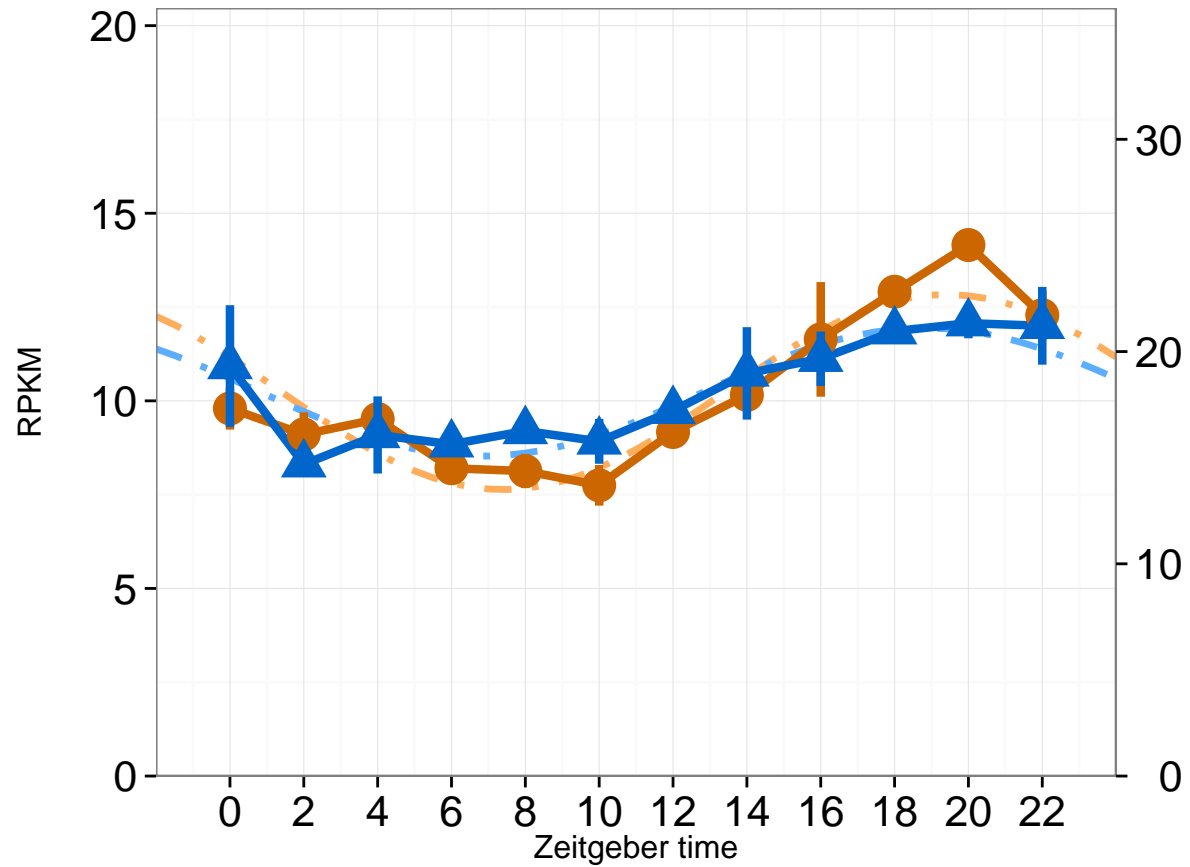

## Slc19a3

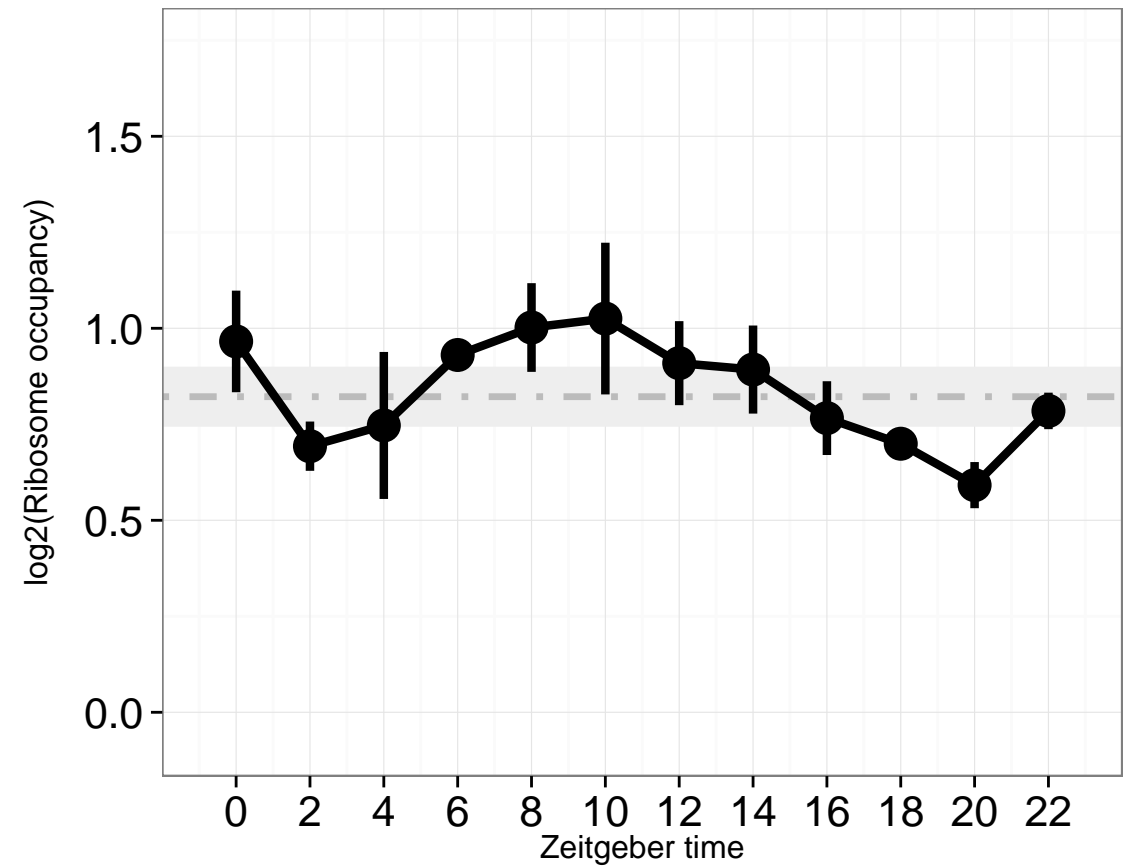

Supplement: Supplementary file 3457 [file 1]

**Gpr31b TR**

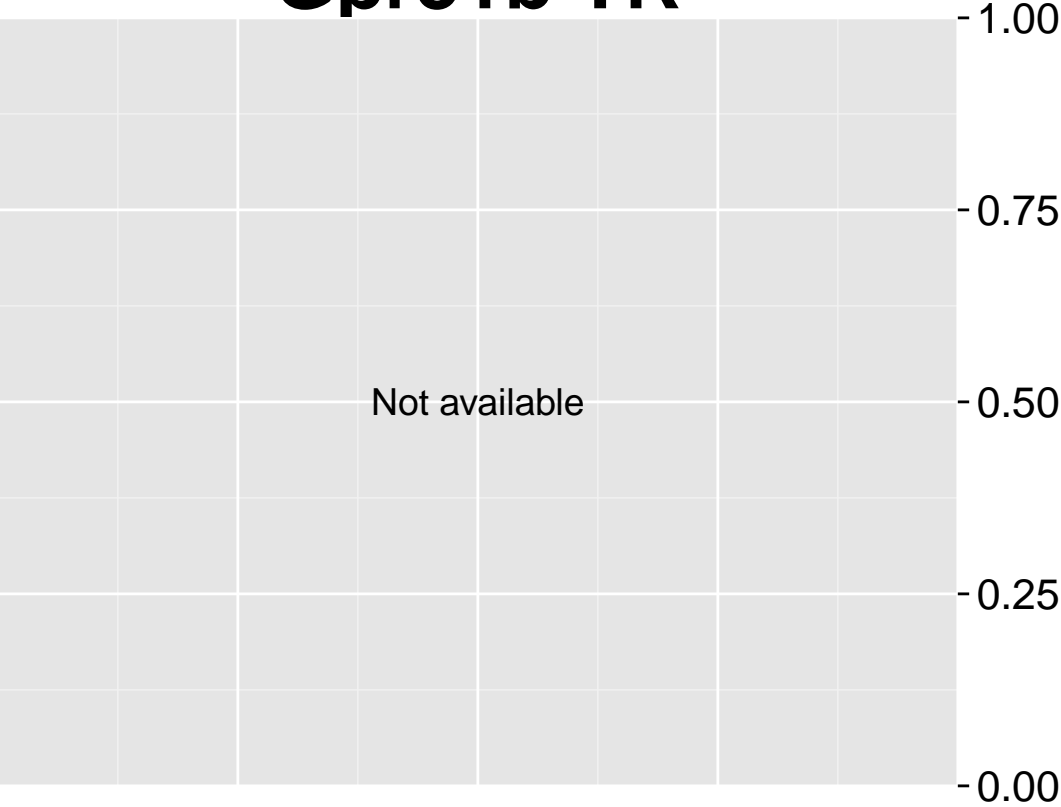

**Gpr31b log2(Ribosome occupancy**

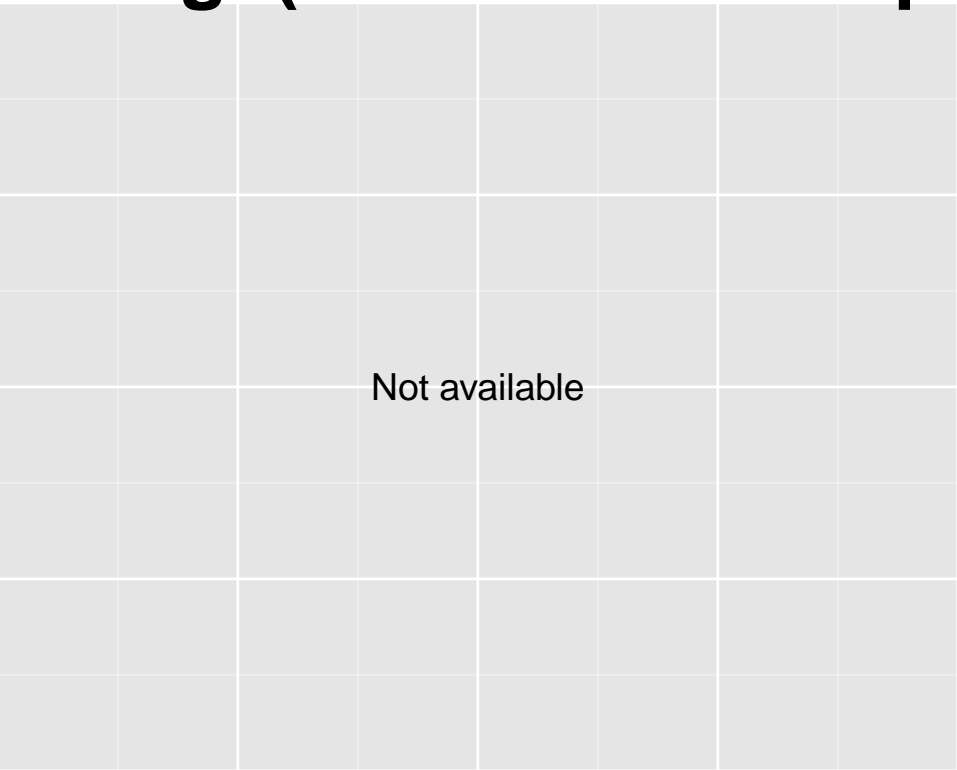

Supplement: Supplementary file 3458 [file 1]

# Hist1h4h

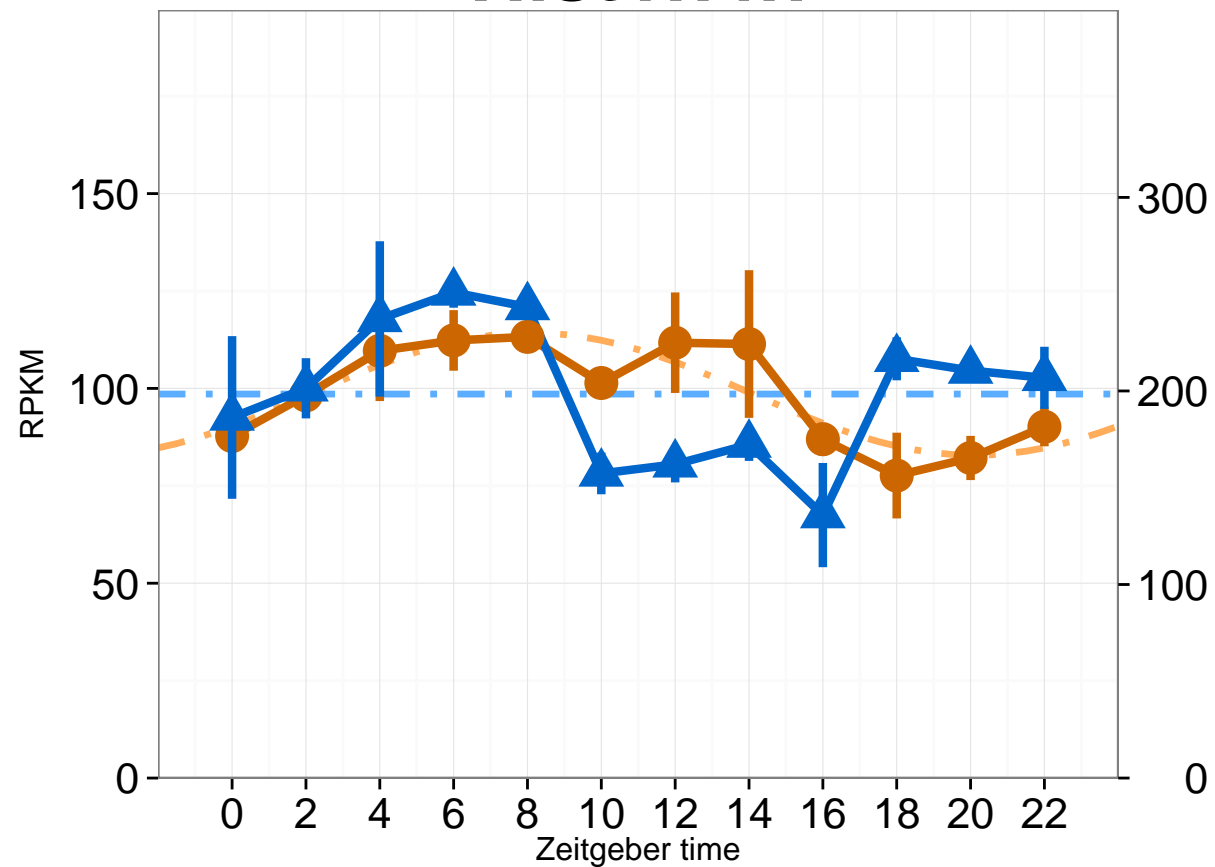

# Hist1h4h

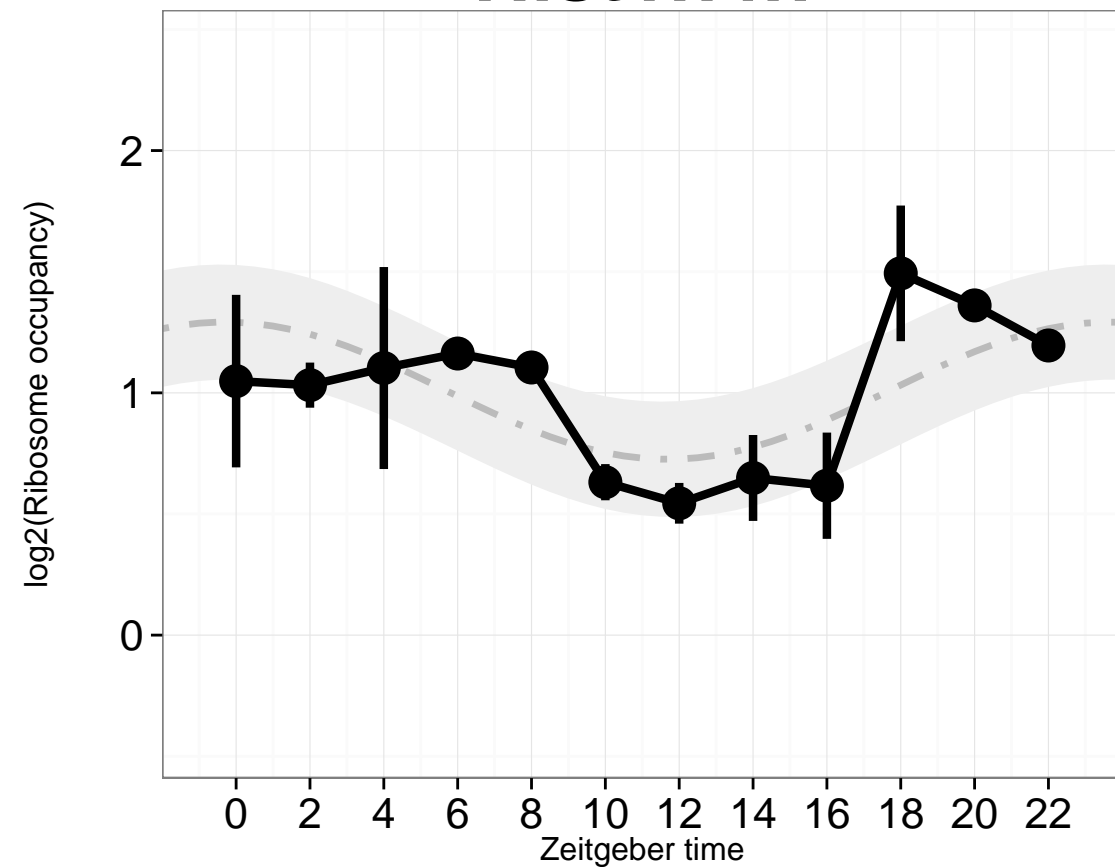

Supplement: Supplementary file 3459 [file 1]

## Ano1

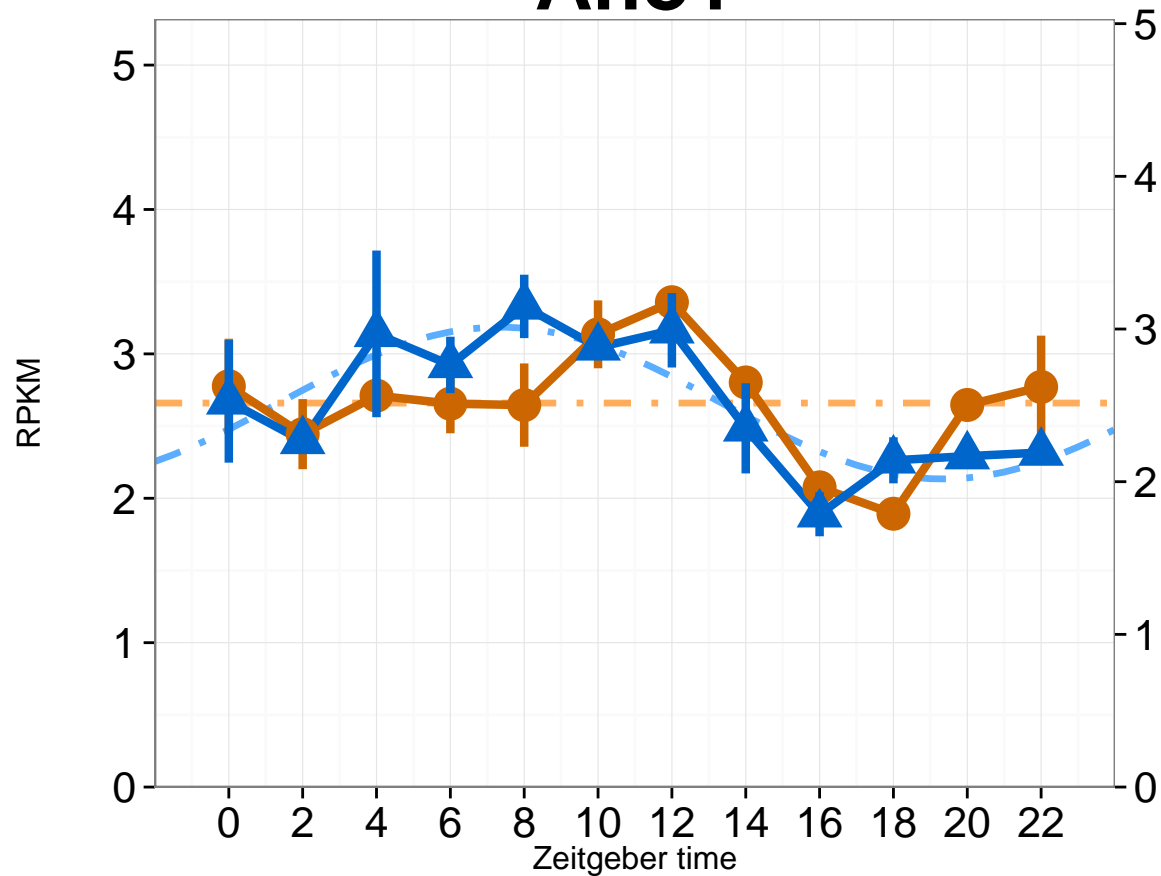

## Ano1

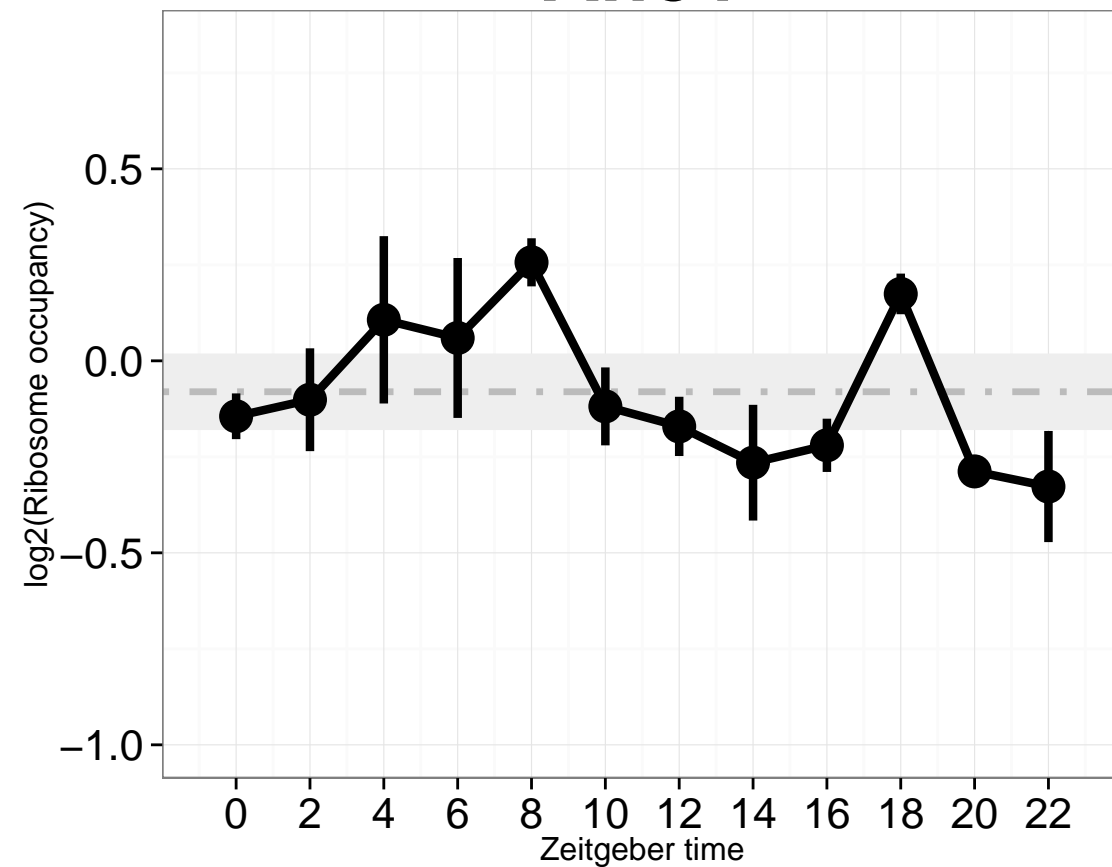

Supplement: Supplementary file 3460 [file 1]

## Fkbp15

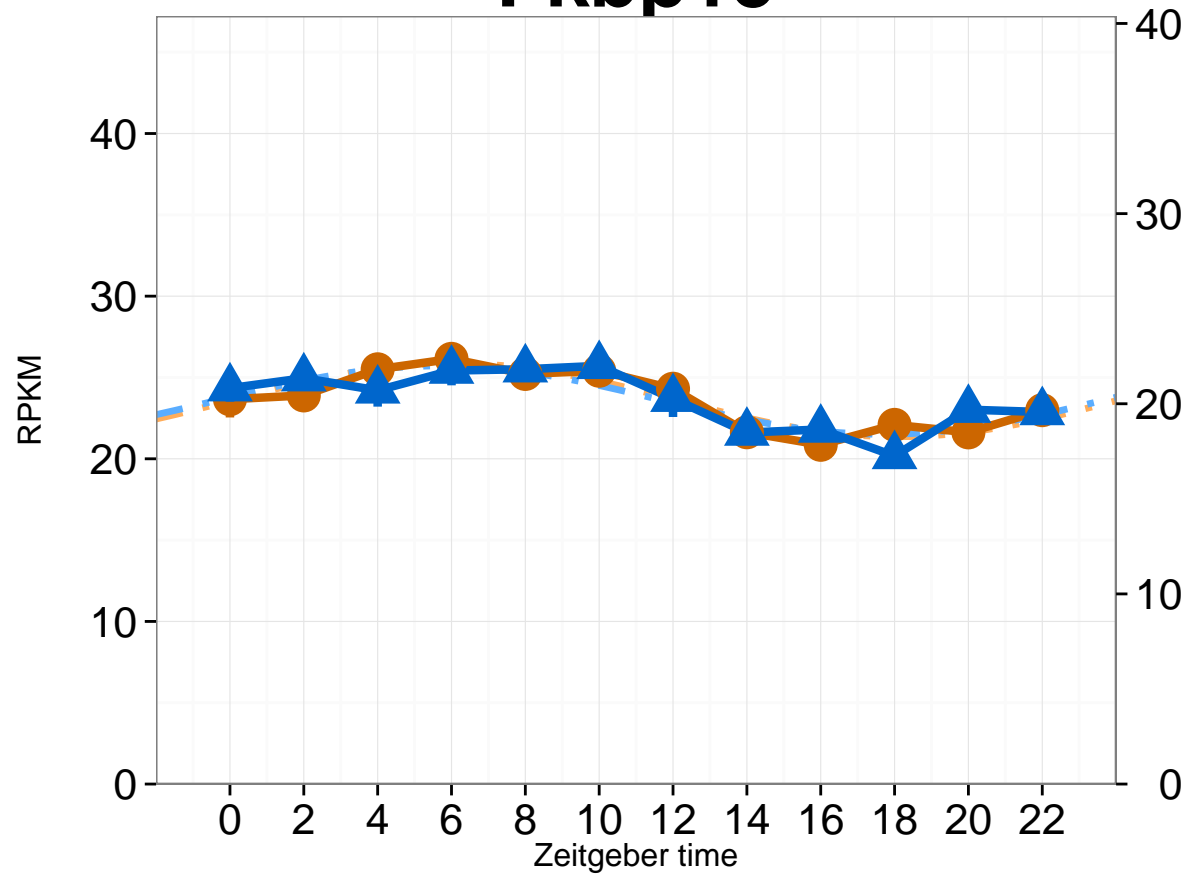

## Fkbp15

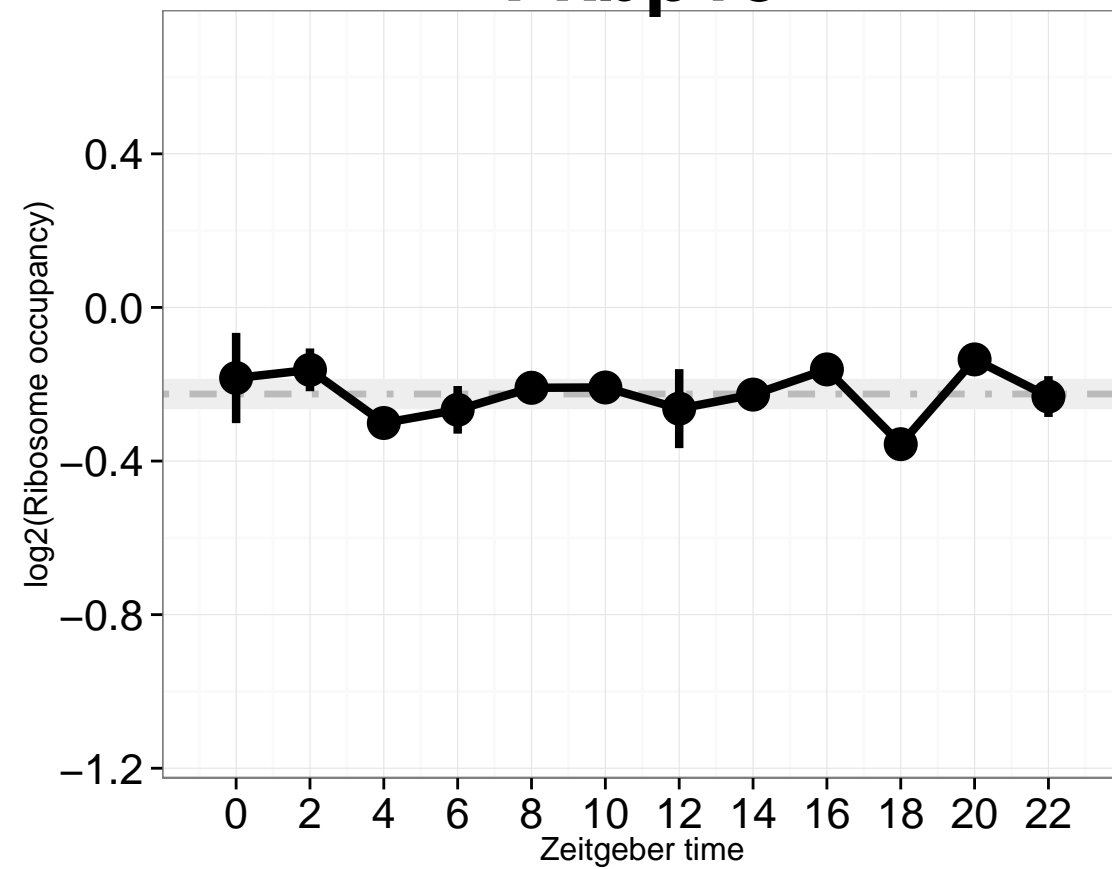

Supplement: Supplementary file 3461 [file 1]

## Ssbp1

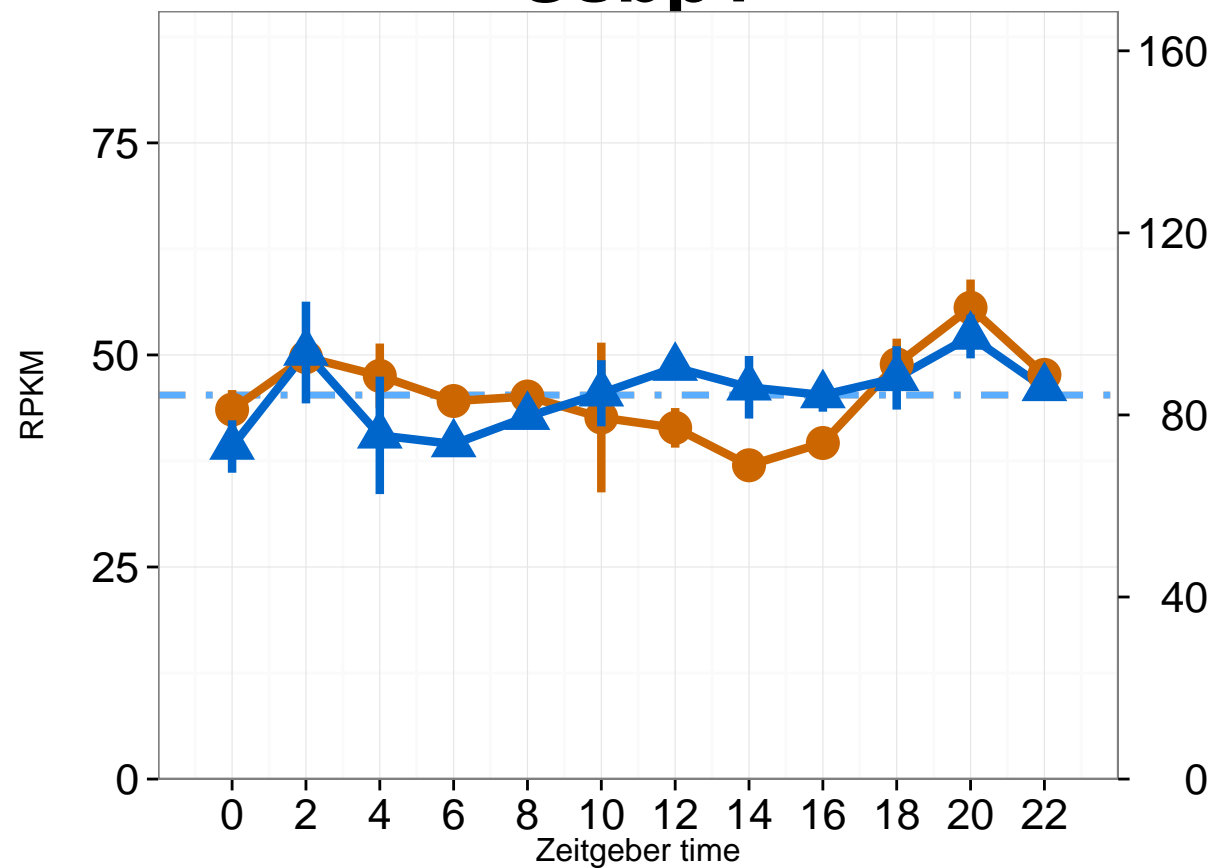

## Ssbp1

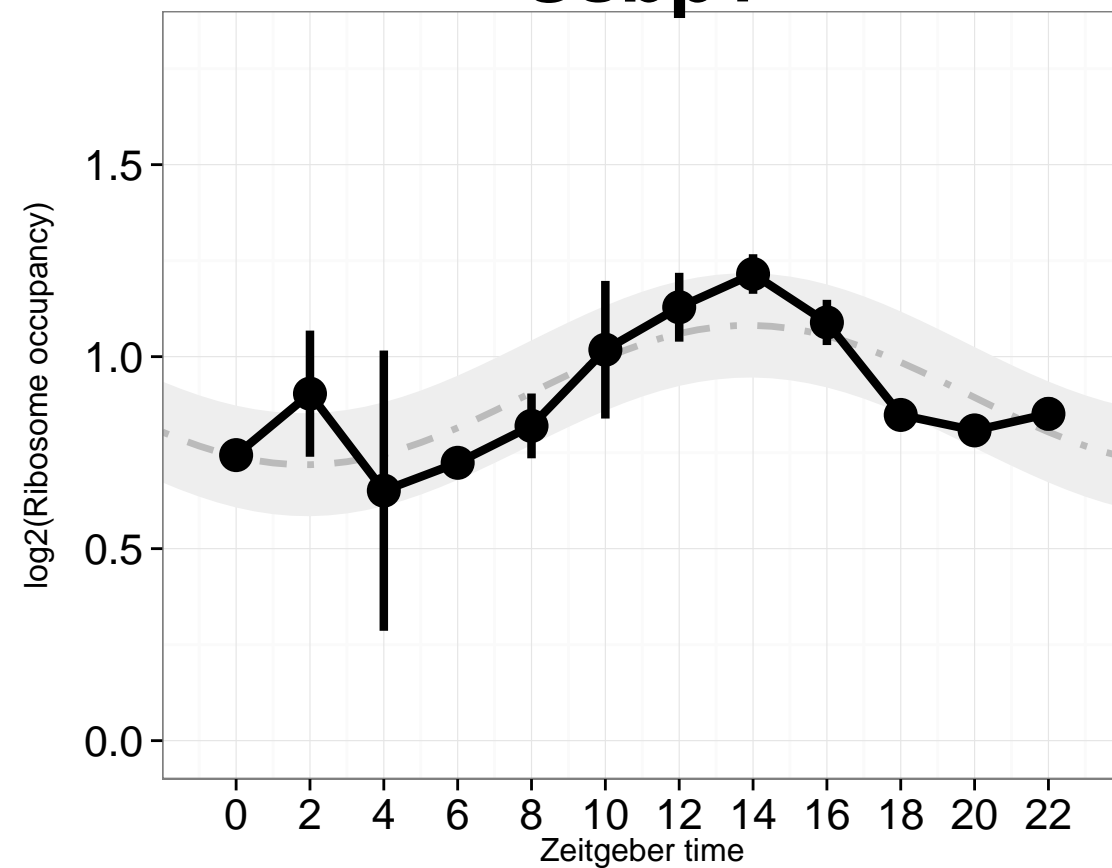

Supplement: Supplementary file 3462 [file 1]

# Dennd4a

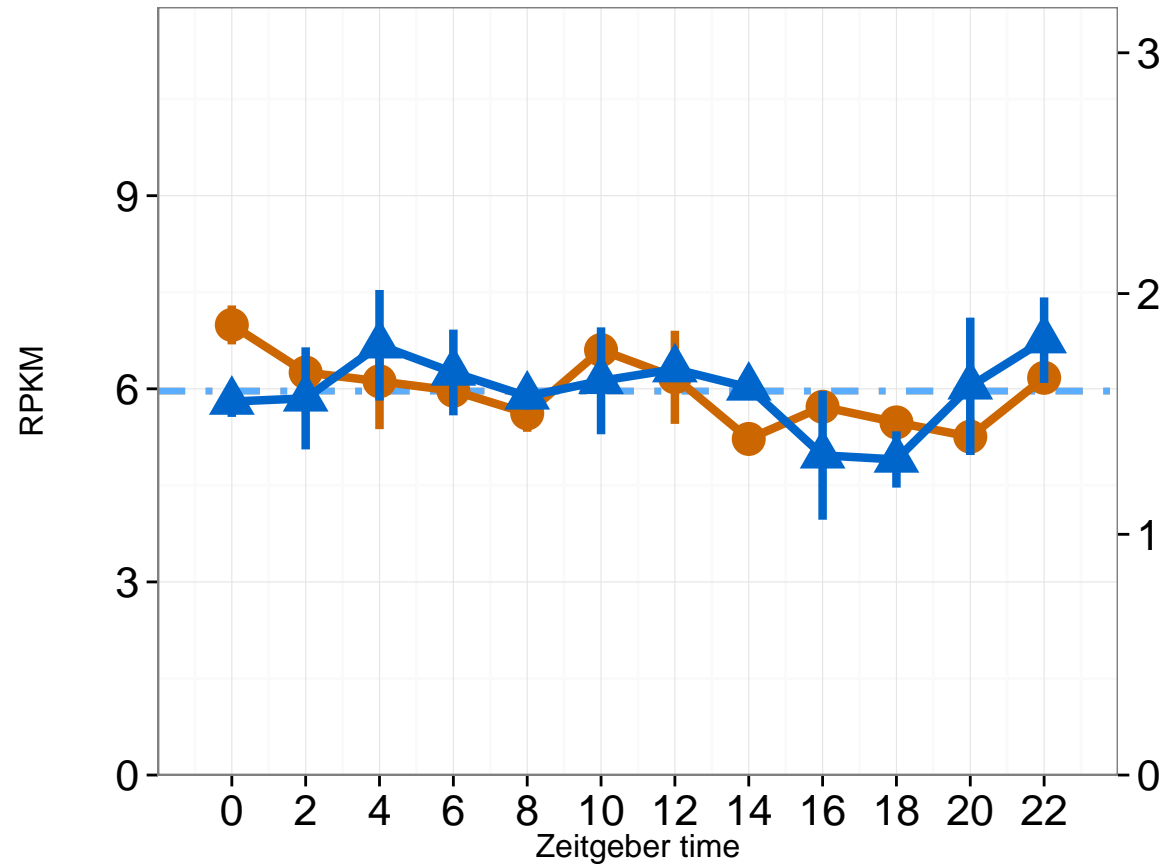

# Dennd4a

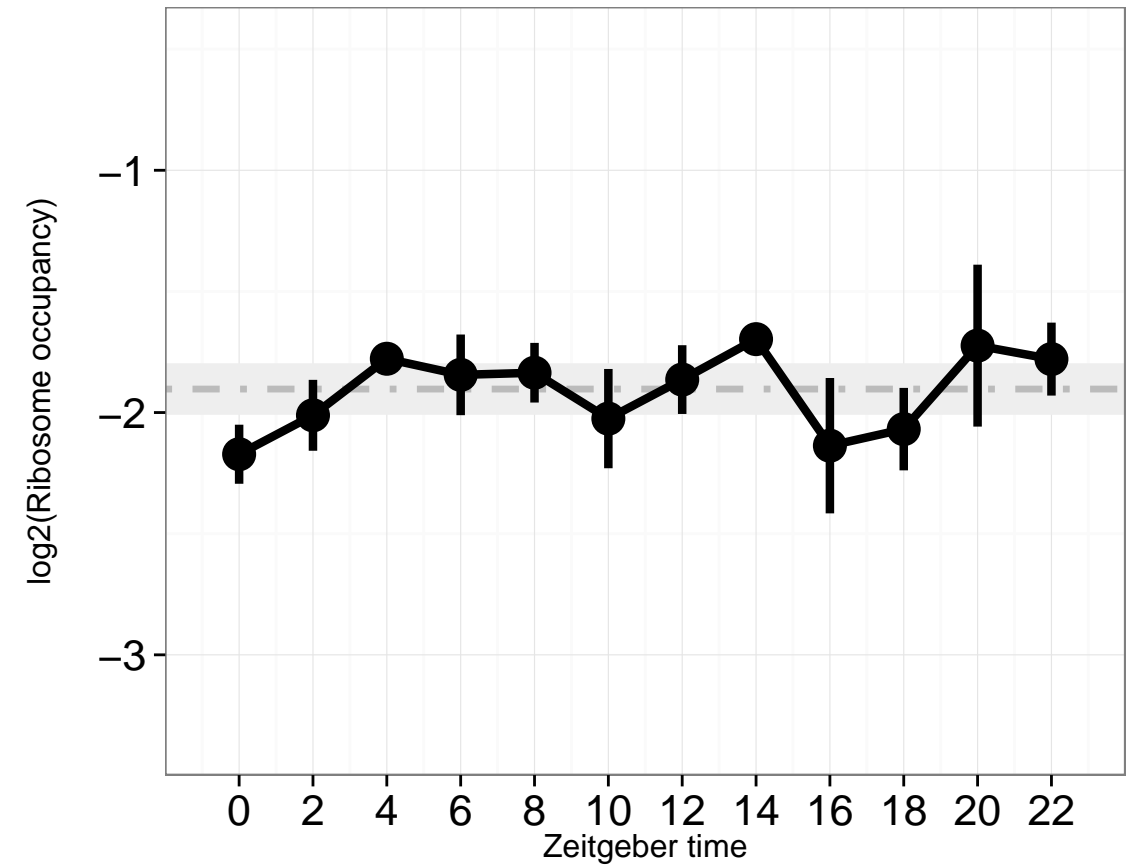

Supplement: Supplementary file 3463 [file 1]

## Pcnp

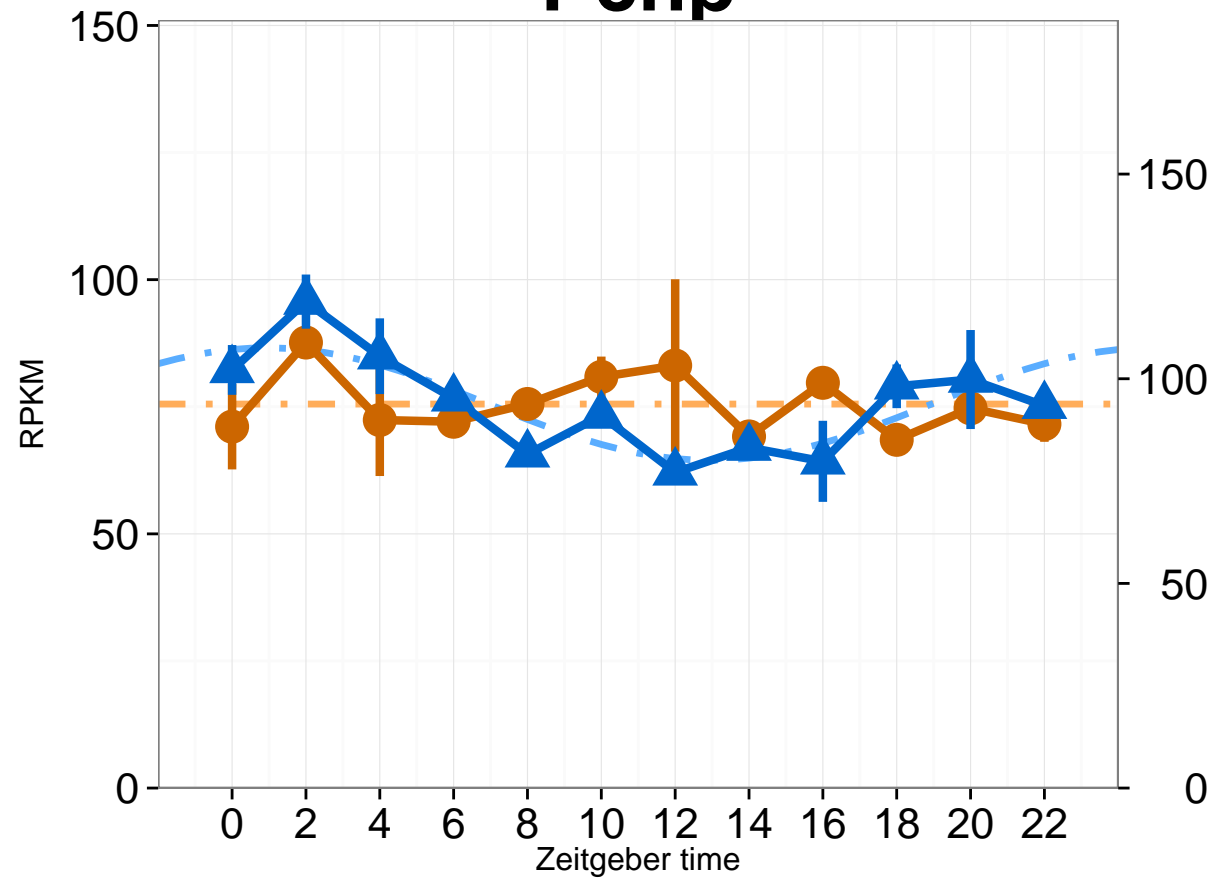

## Pcnp

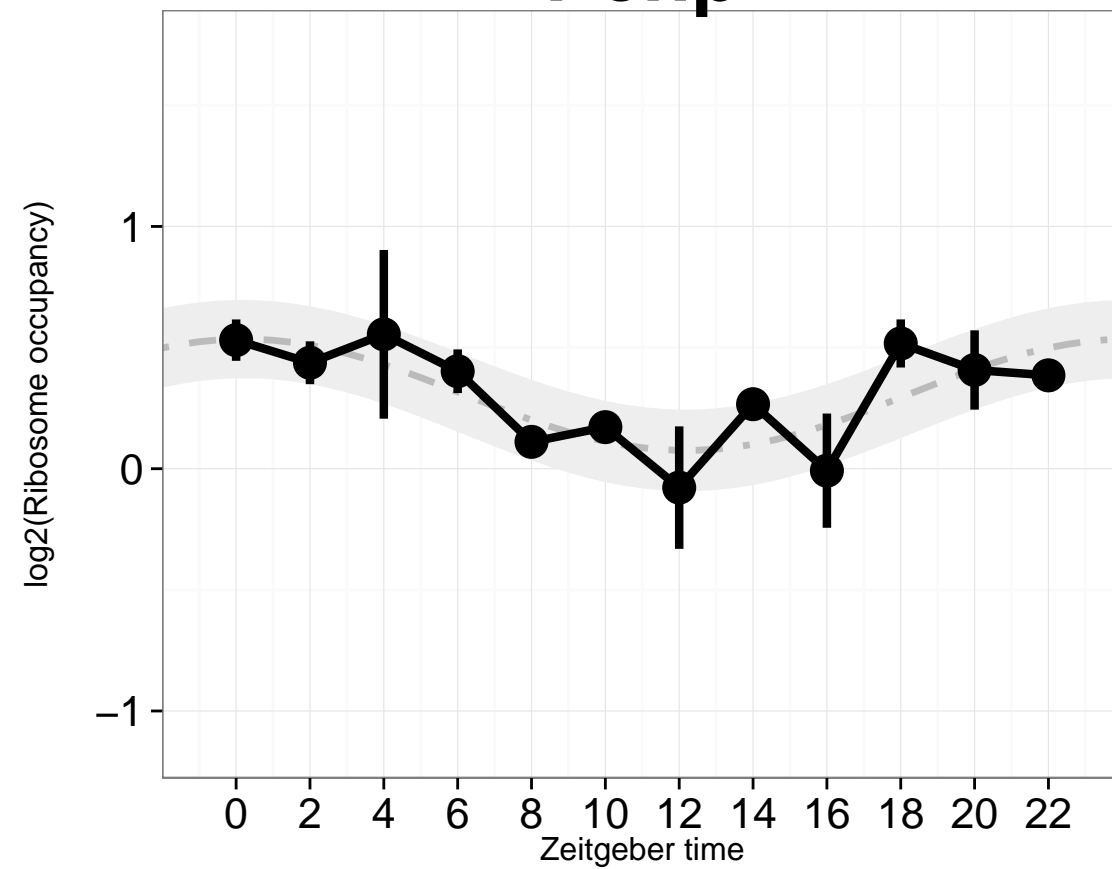

Supplement: Supplementary file 3464 [file 1]

## Tmem173

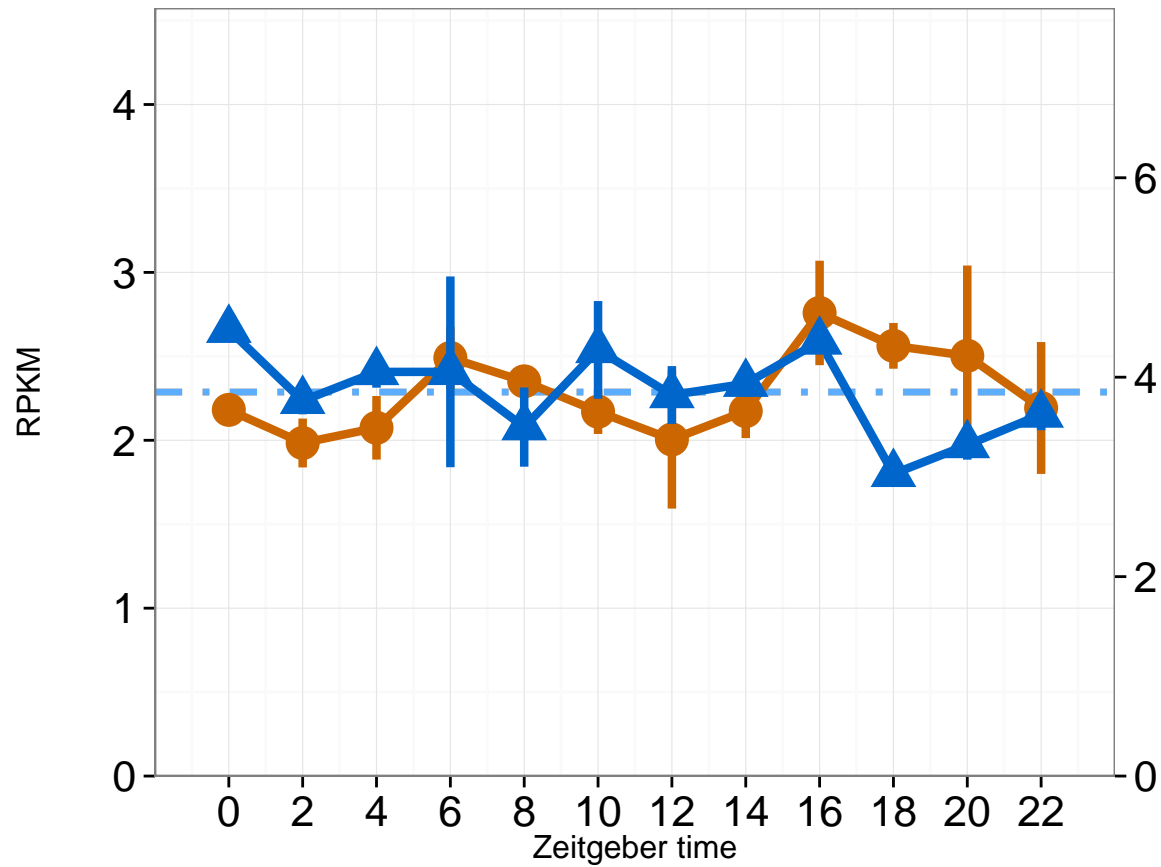

## Tmem173

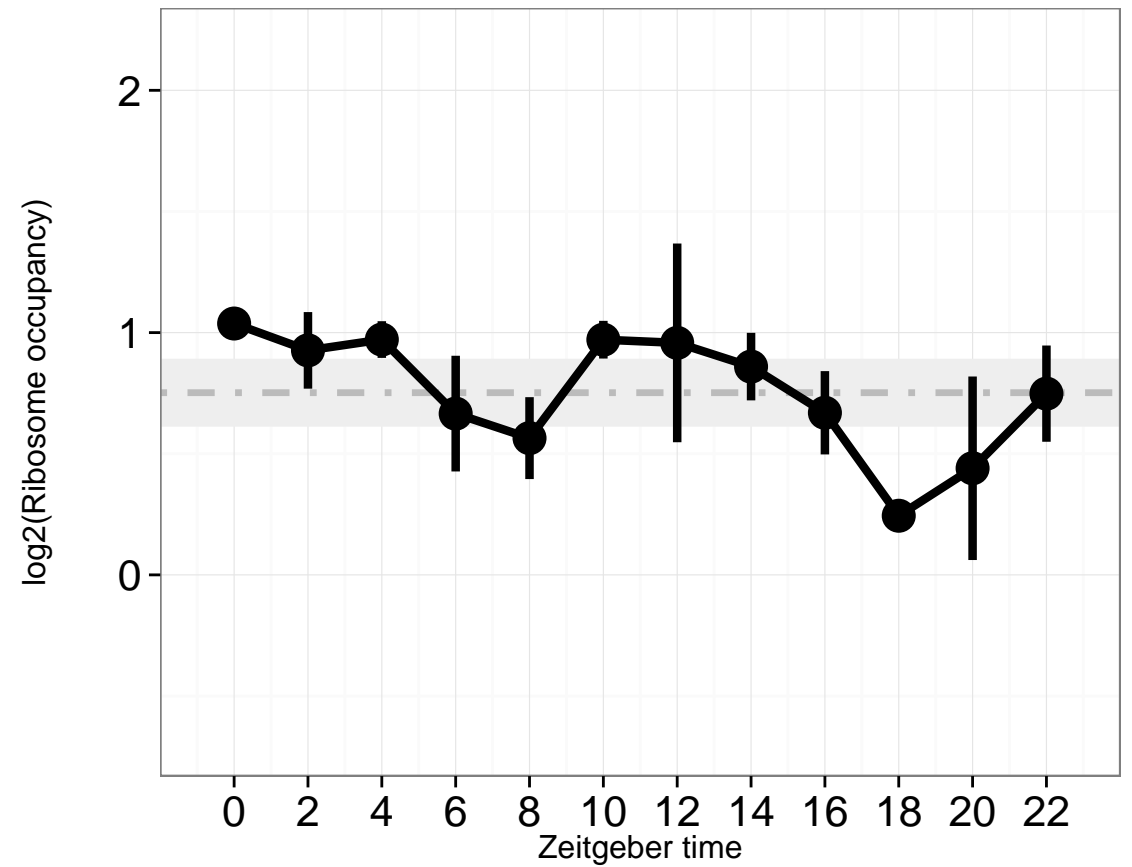

Supplement: Supplementary file 3465 [file 1]

# 6030458C11Rik

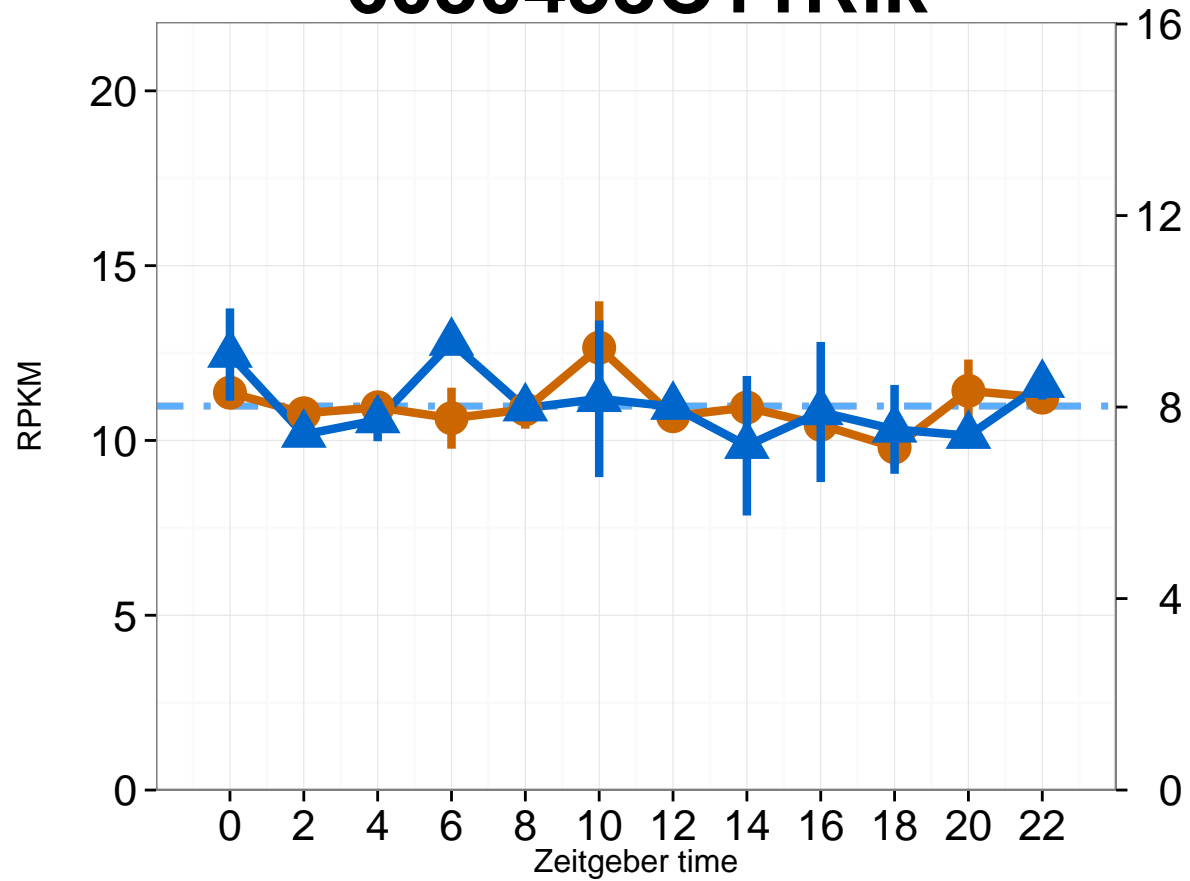

# 6030458C11Rik

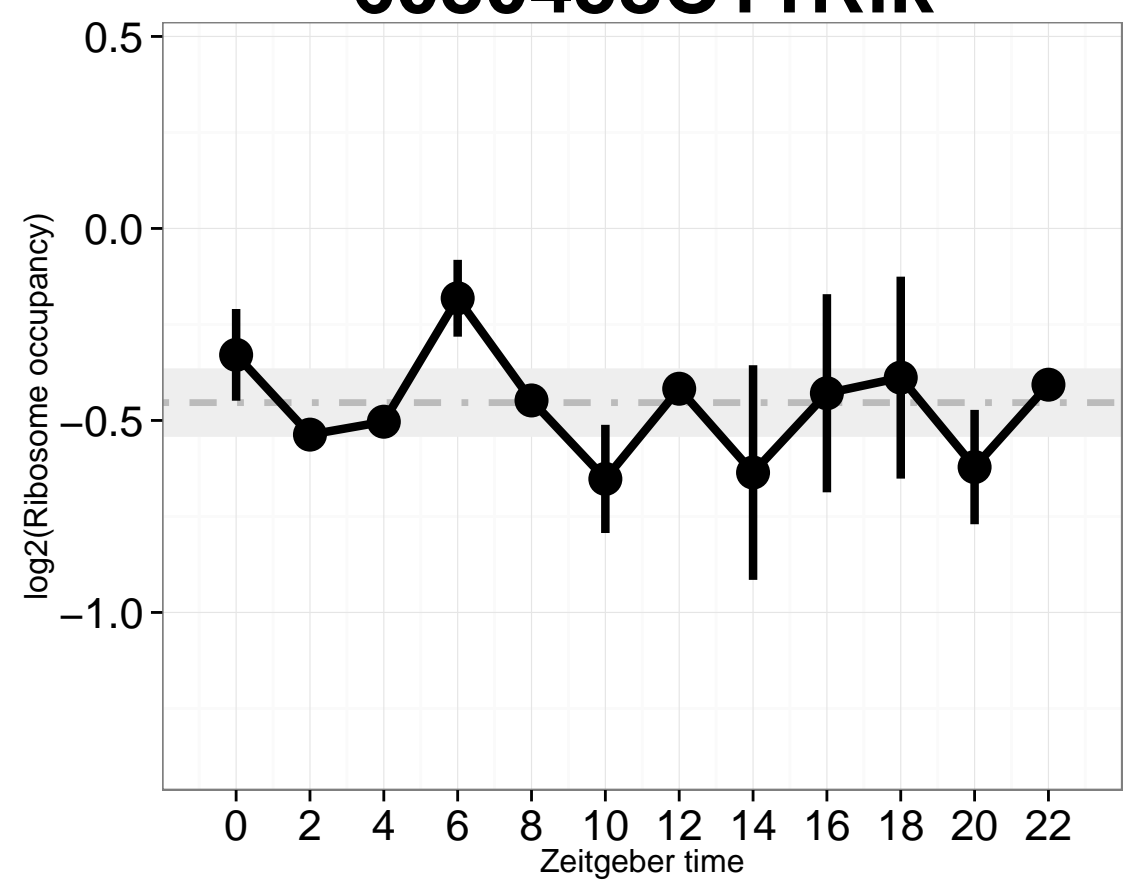

Supplement: Supplementary file 3466 [file 1]

# E430025E21Rik

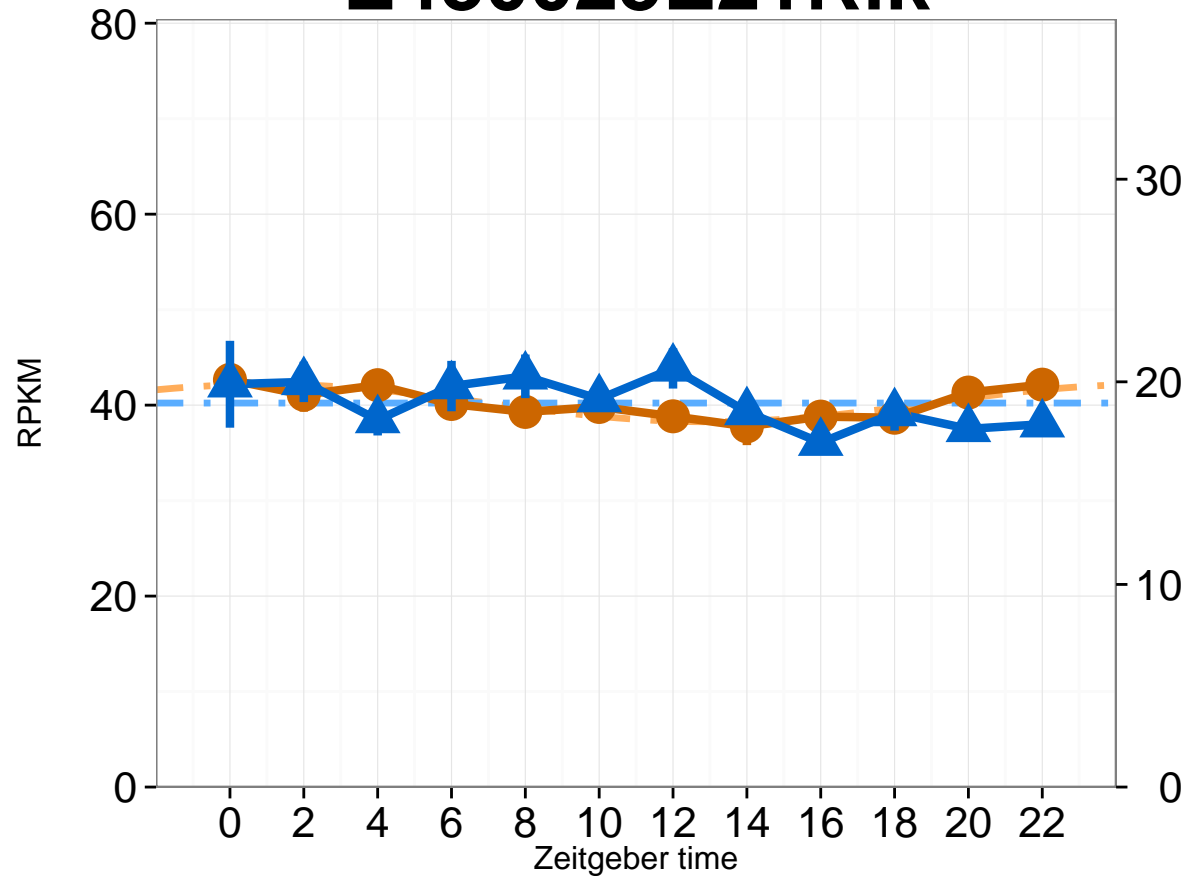

# E430025E21Rik

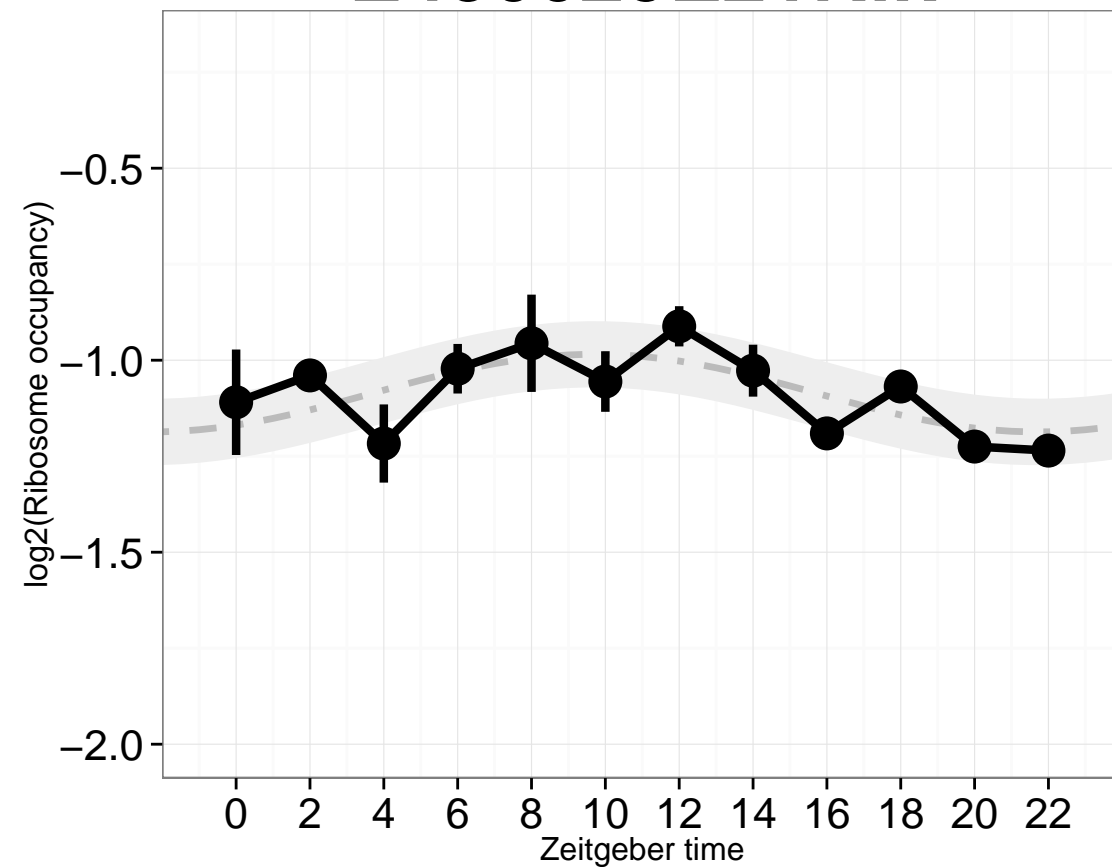

Supplement: Supplementary file 3467 [file 1]

## Slc35e4

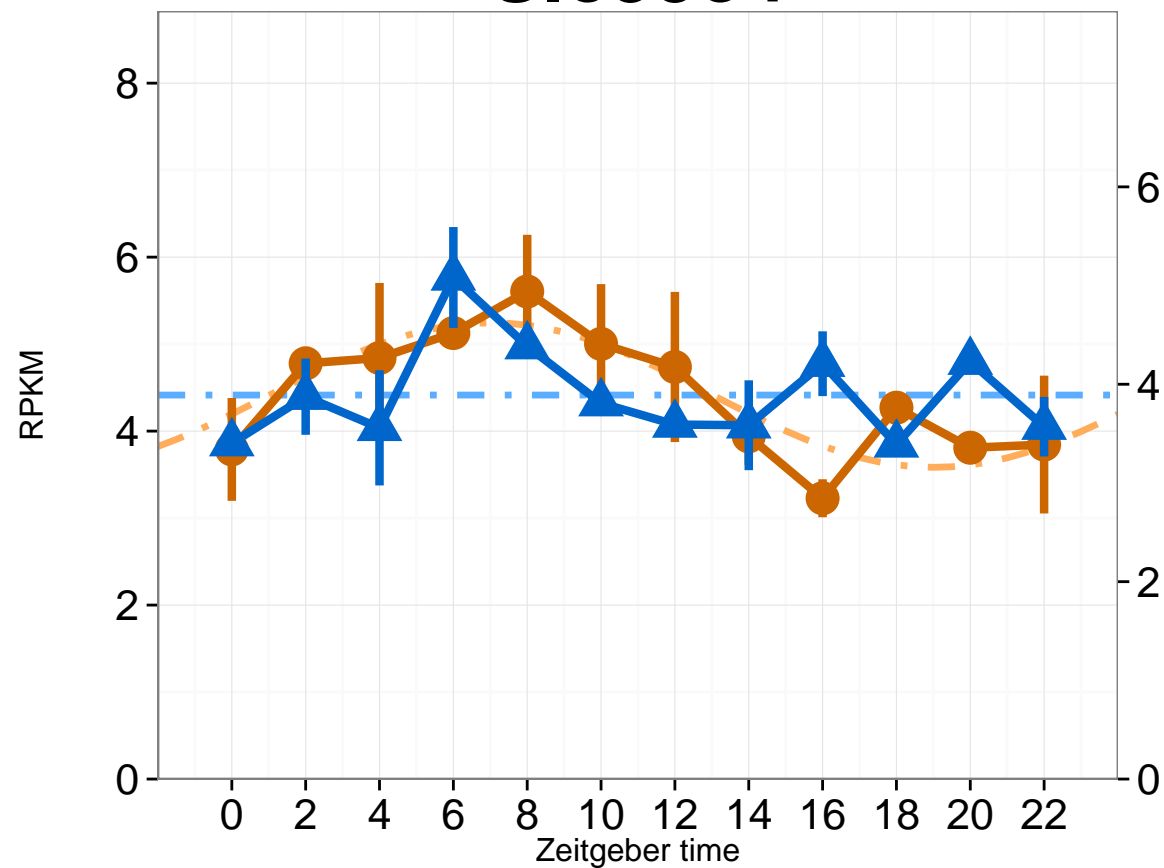

## Slc35e4

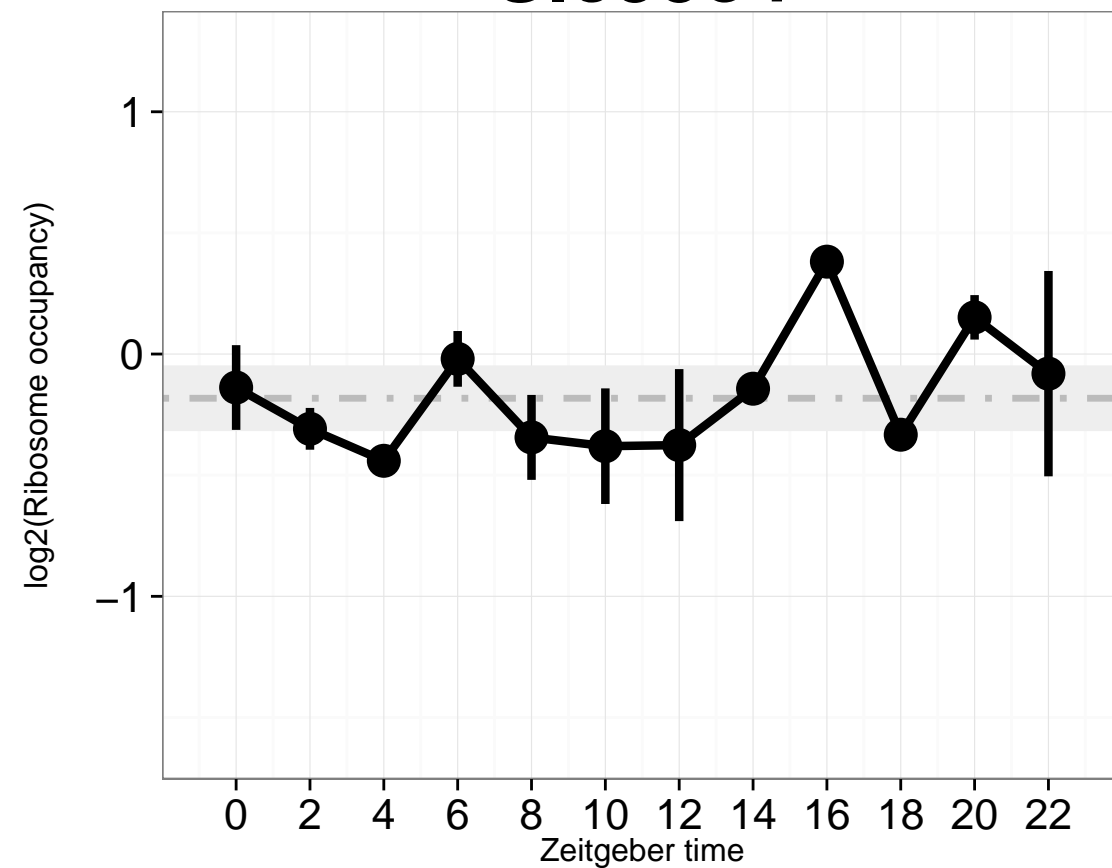

Supplement: Supplementary file 3468 [file 1]

# Tomm22

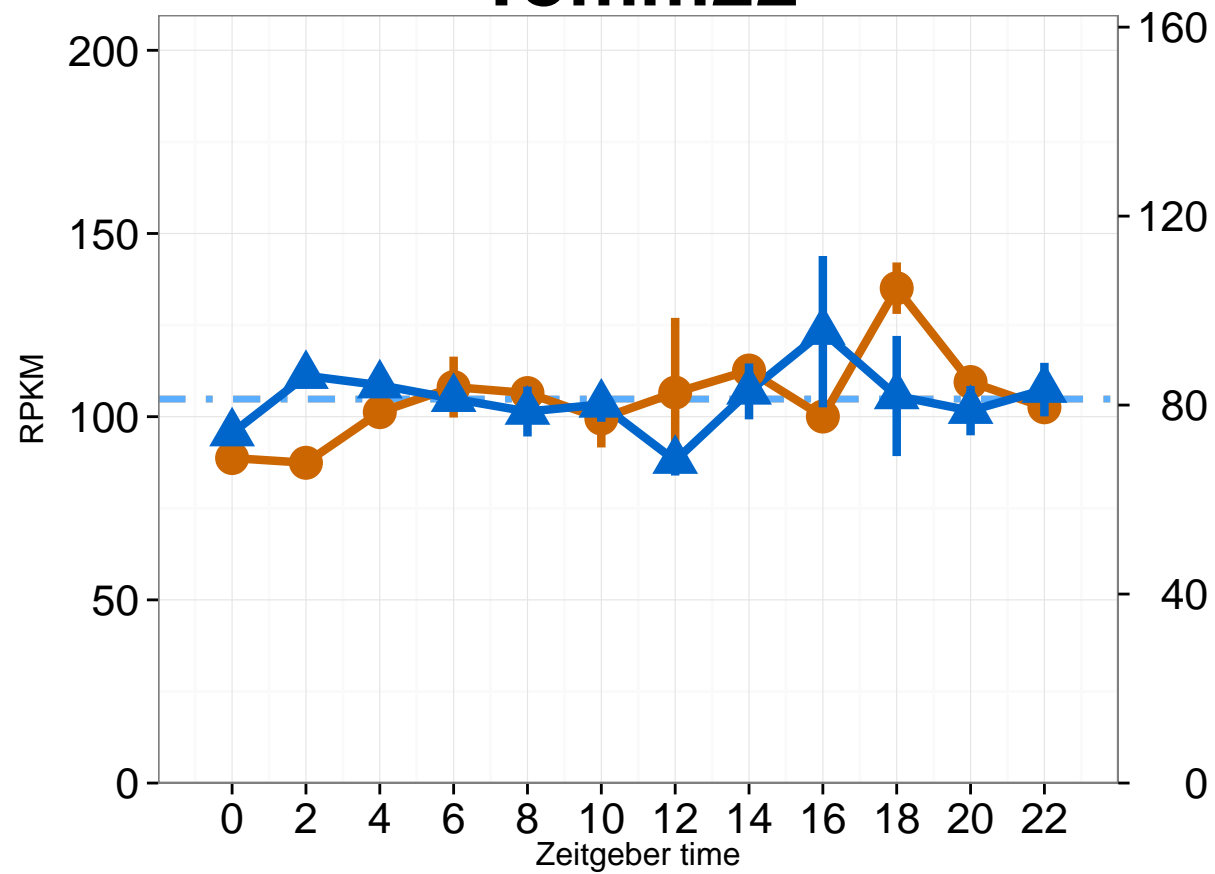

# Tomm22

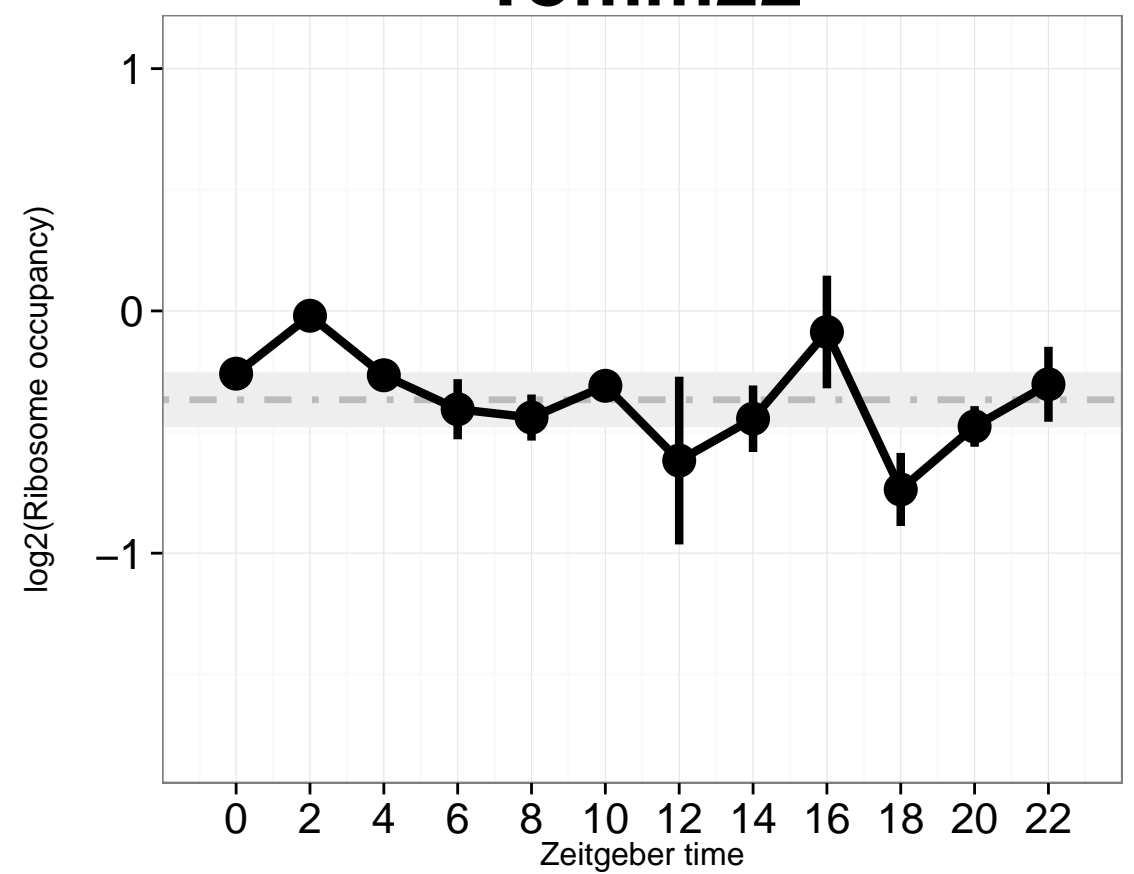

Supplement: Supplementary file 3469 [file 1]

D430019H16Rik TR

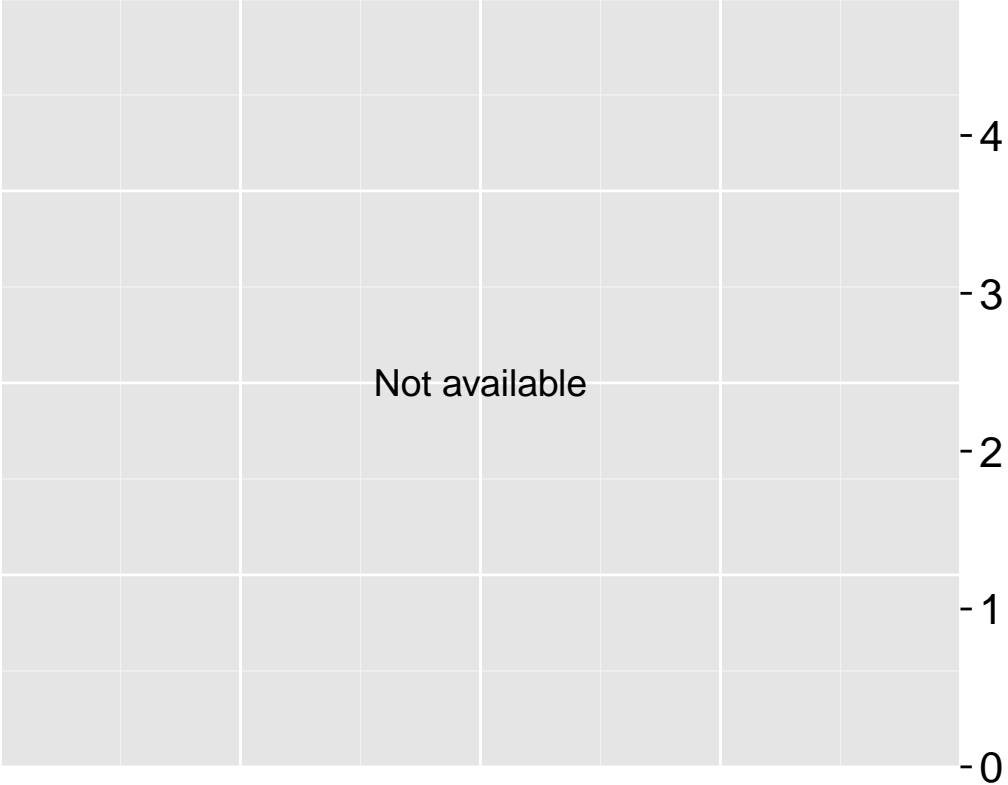

D430019H16Rik log2(Ribosome occup

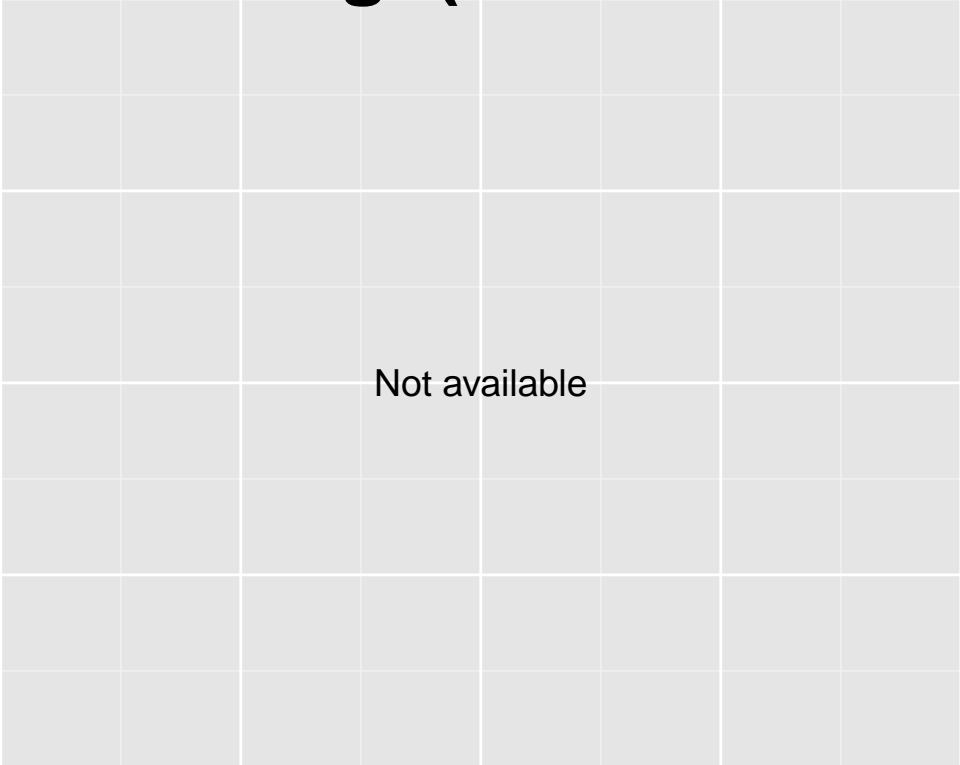

Supplement: Supplementary file 3470 [file 1]

## Mterfd3

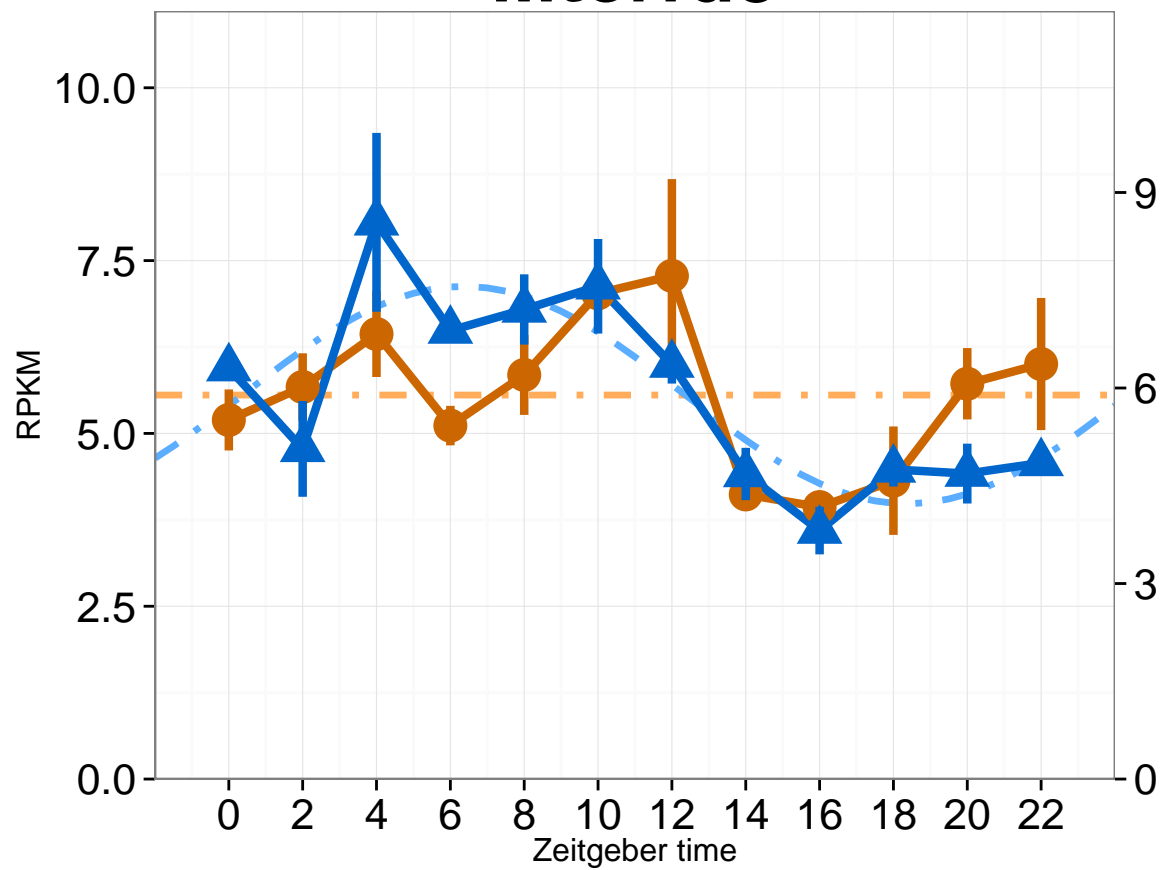

## Mterfd3

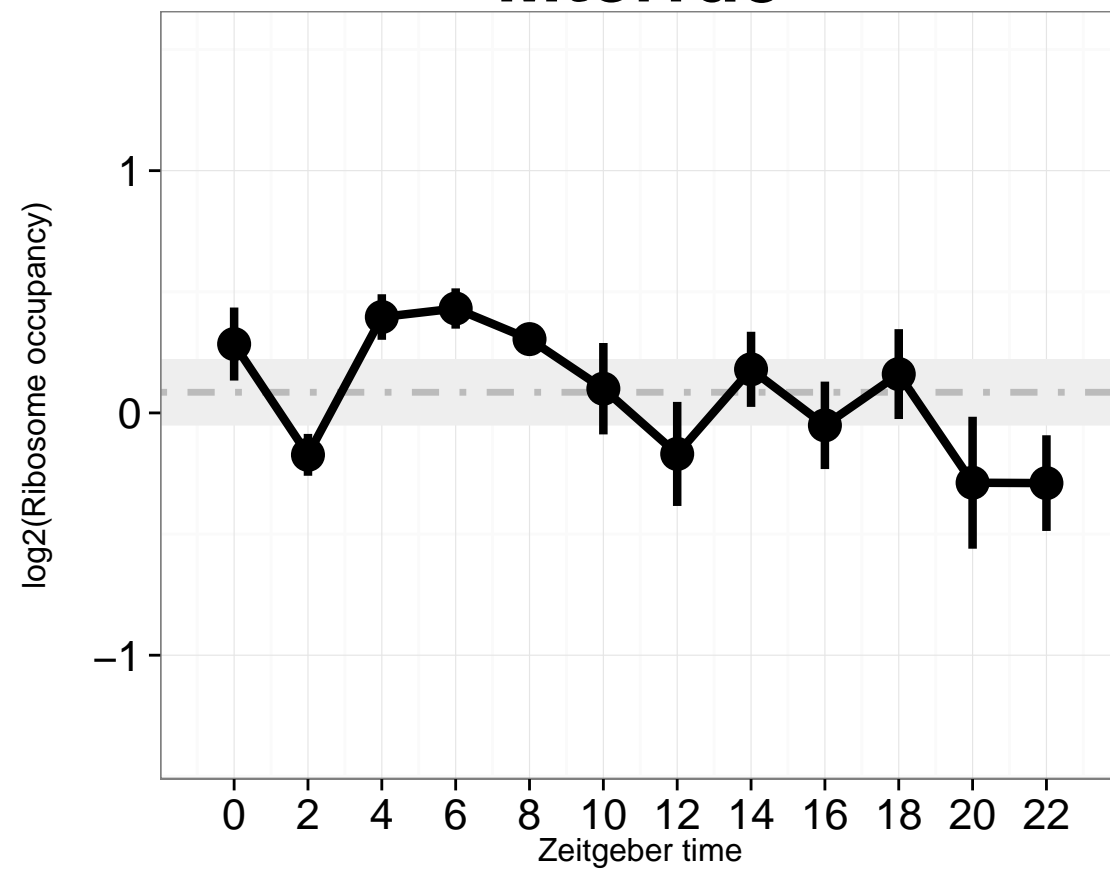

Supplement: Supplementary file 3471 [file 1]

## Mfsd10

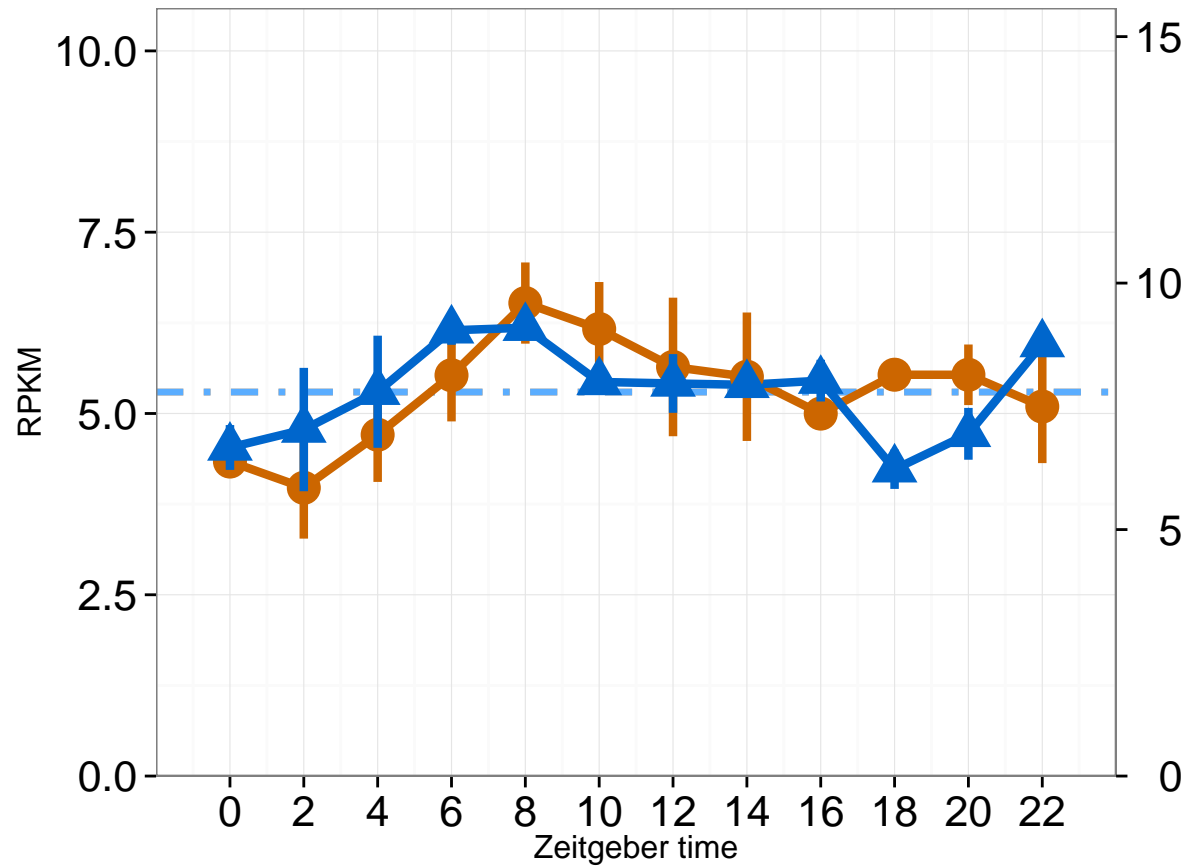

## Mfsd10

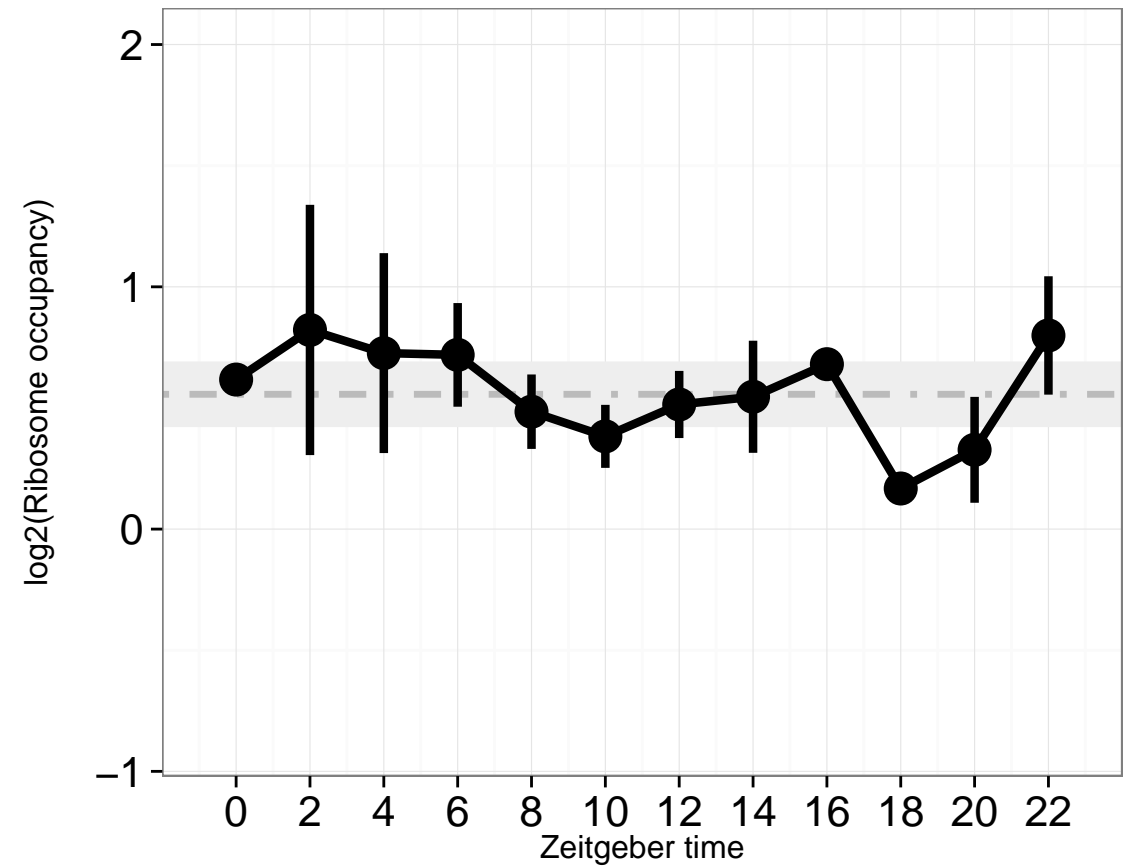

Supplement: Supplementary file 3472 [file 1]

# Ifitm2

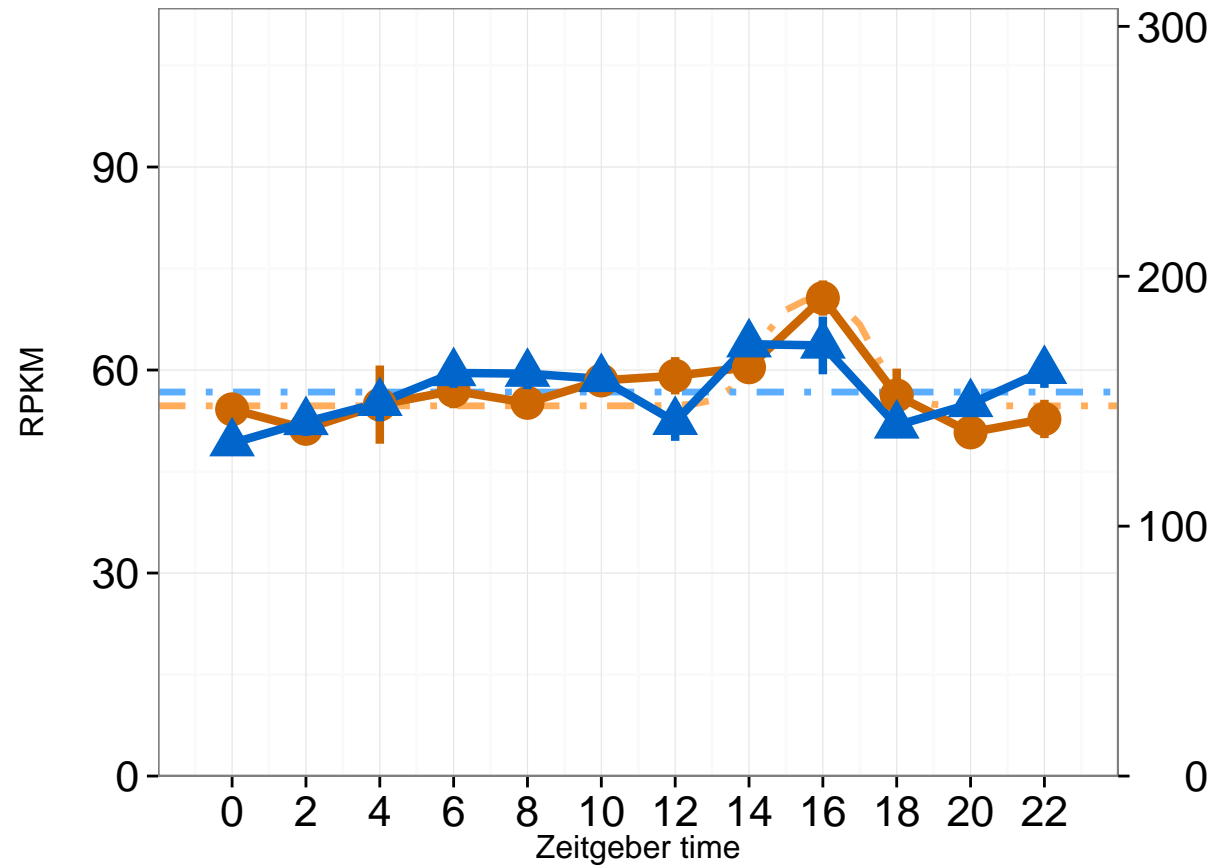

# Ifitm2

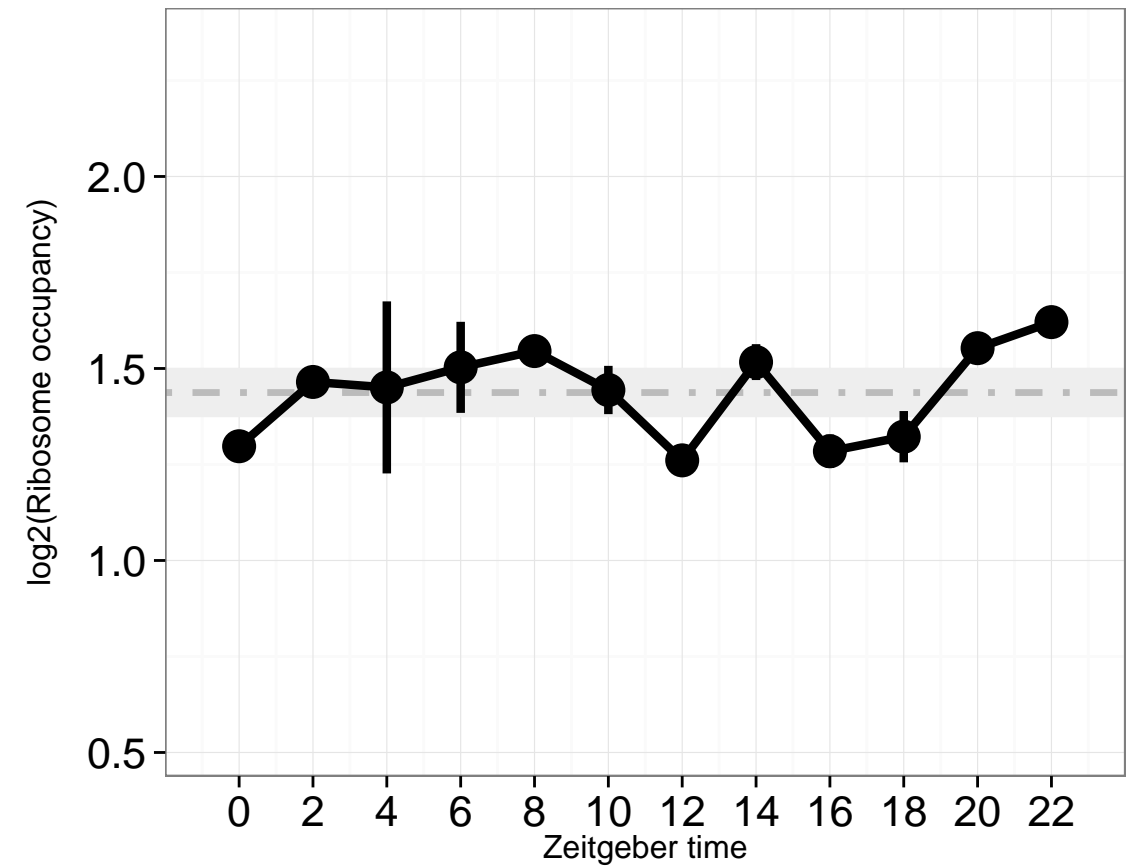

Supplement: Supplementary file 3473 [file 1]

# Grk6

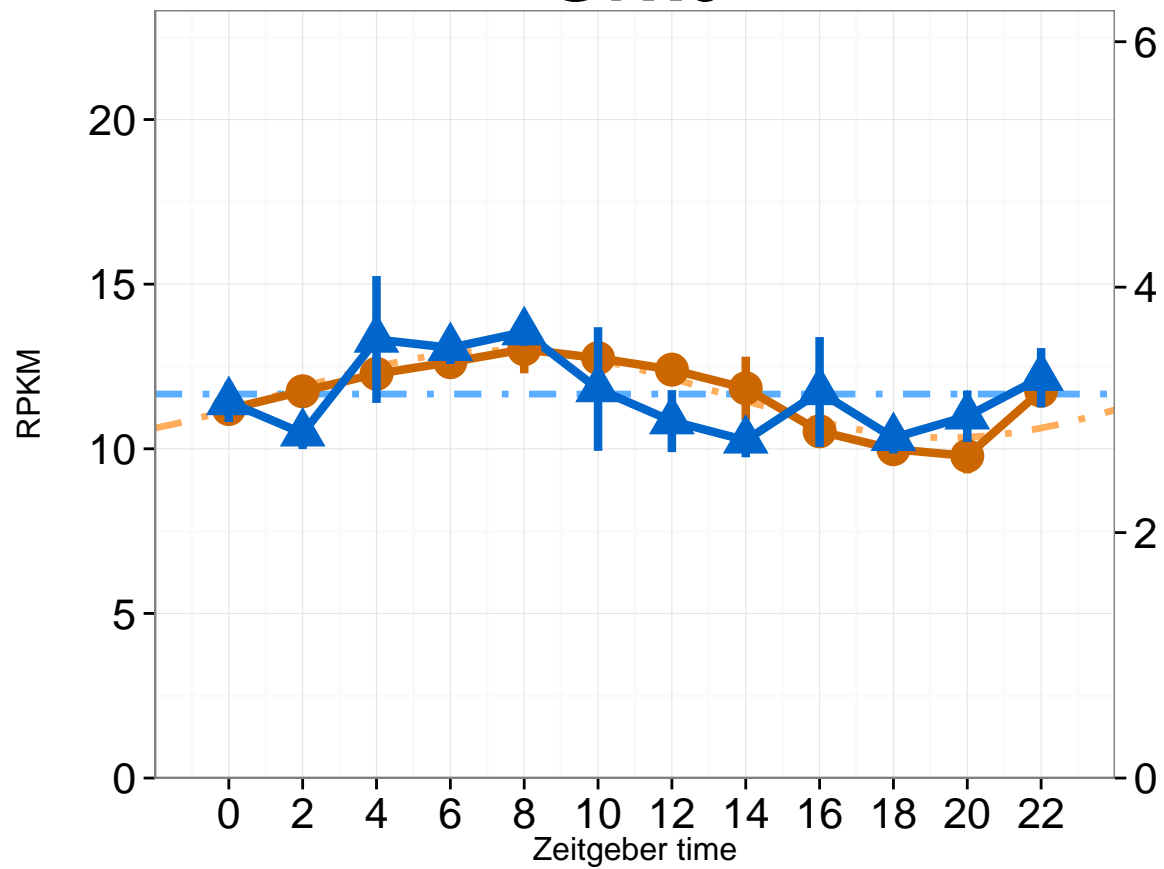

# Grk6

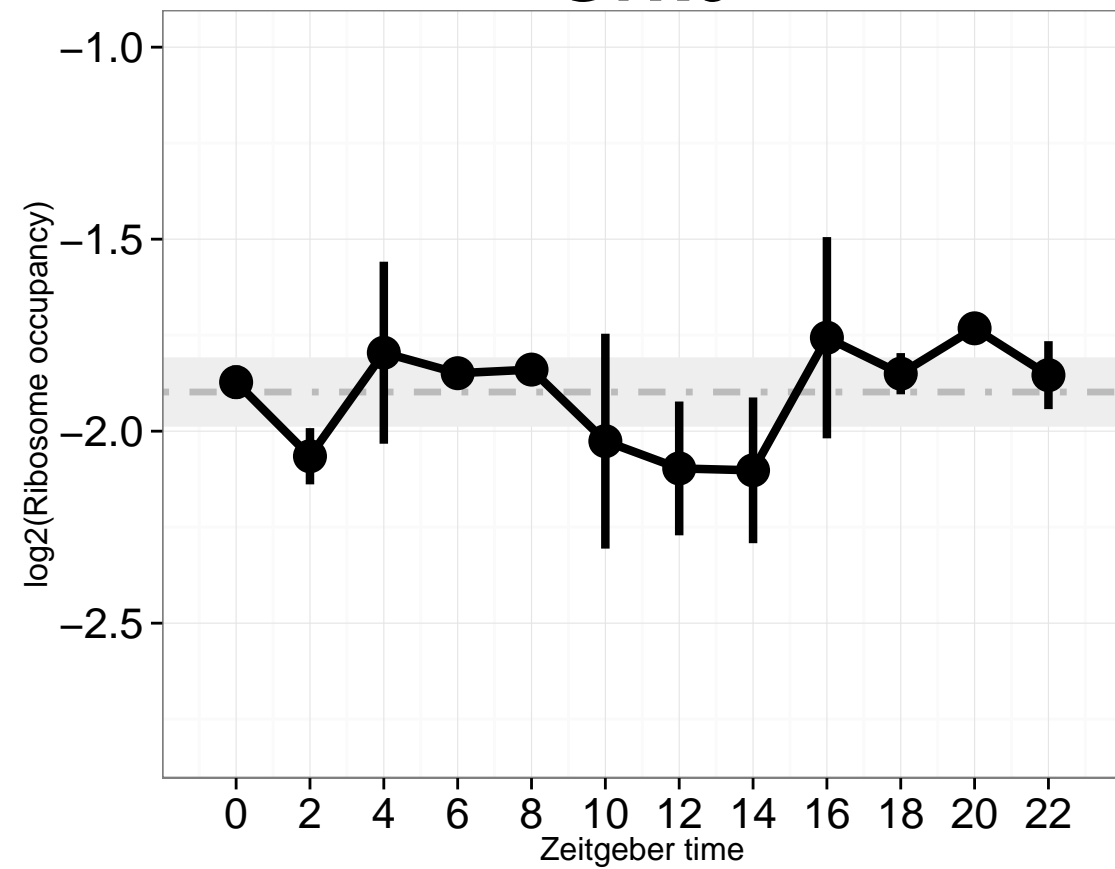

Supplement: Supplementary file 3474 [file 1]

Ccdc114

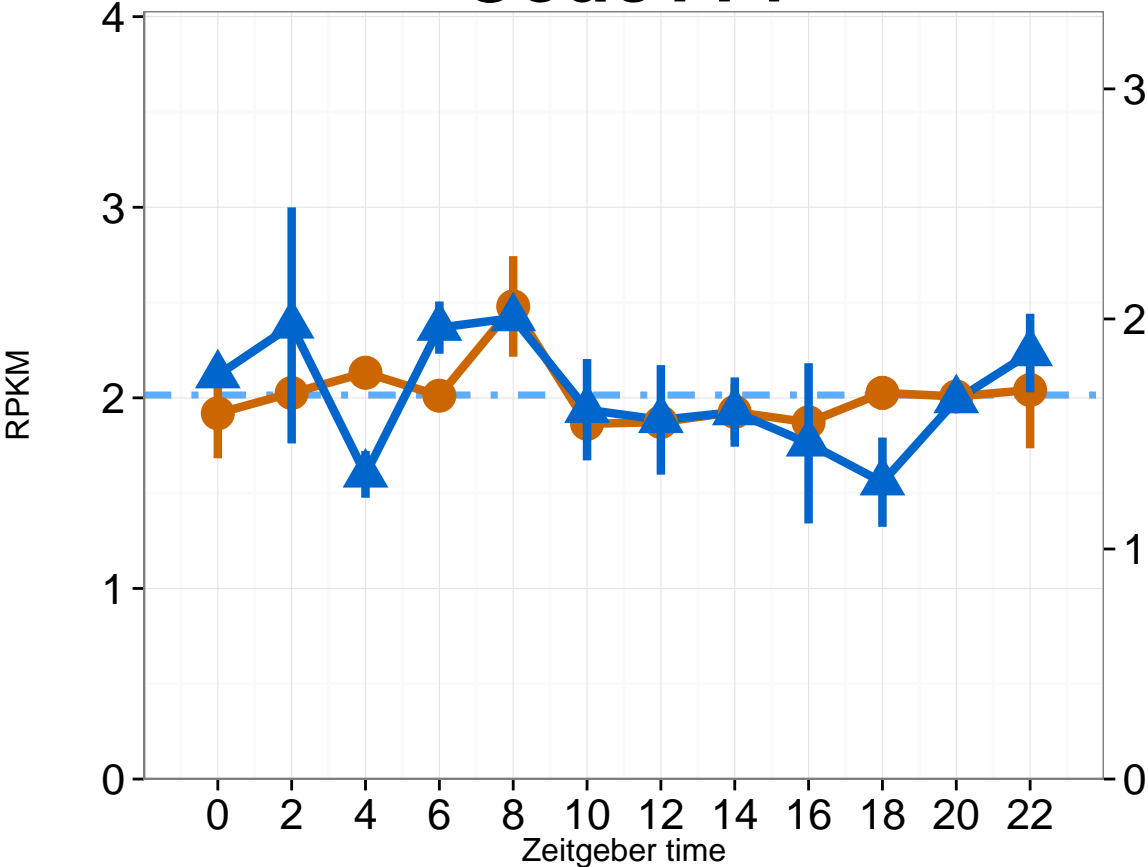

Ccdc114

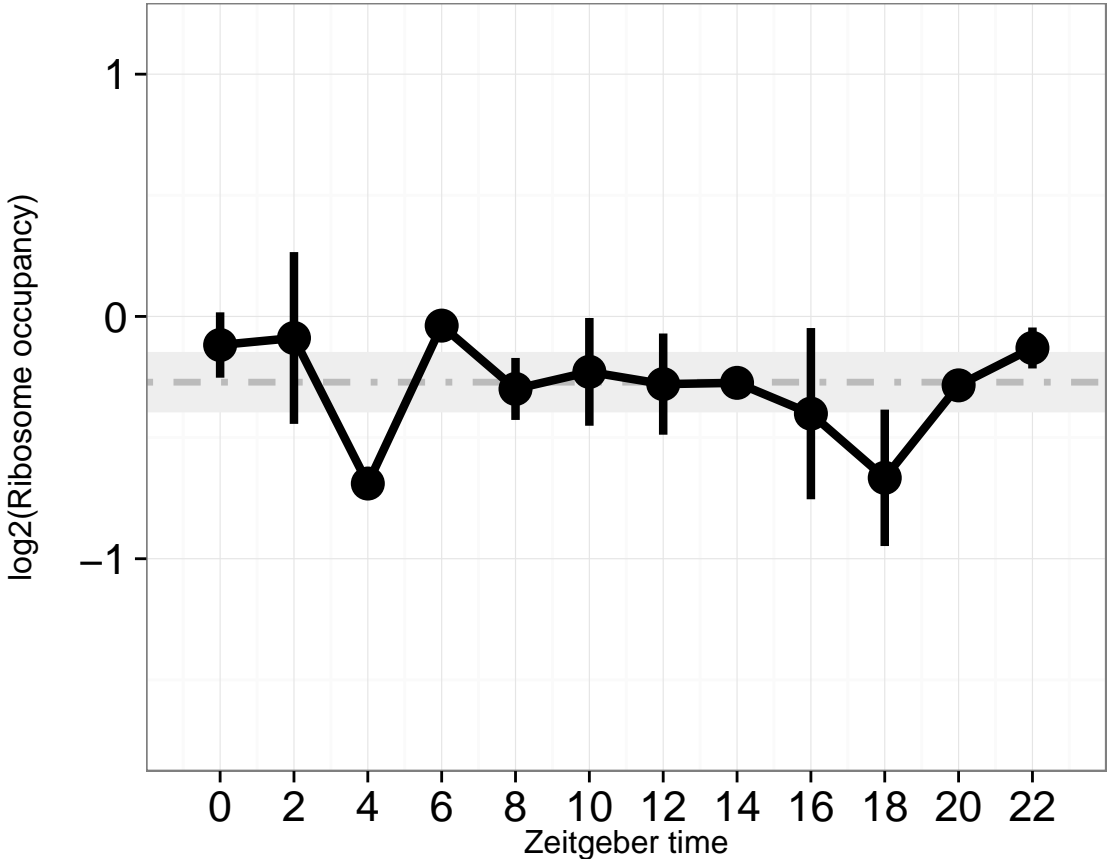

Supplement: Supplementary file 3475 [file 1]

# Polr1a

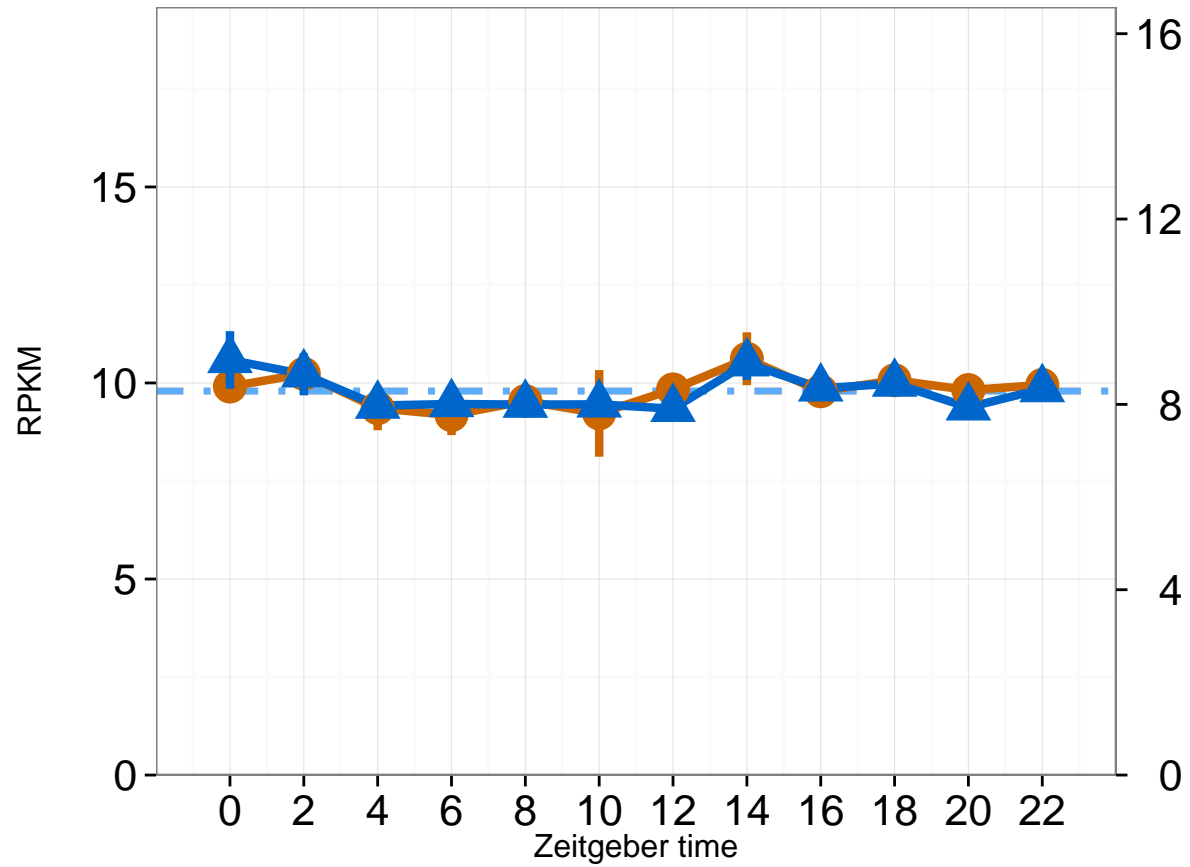

# Polr1a

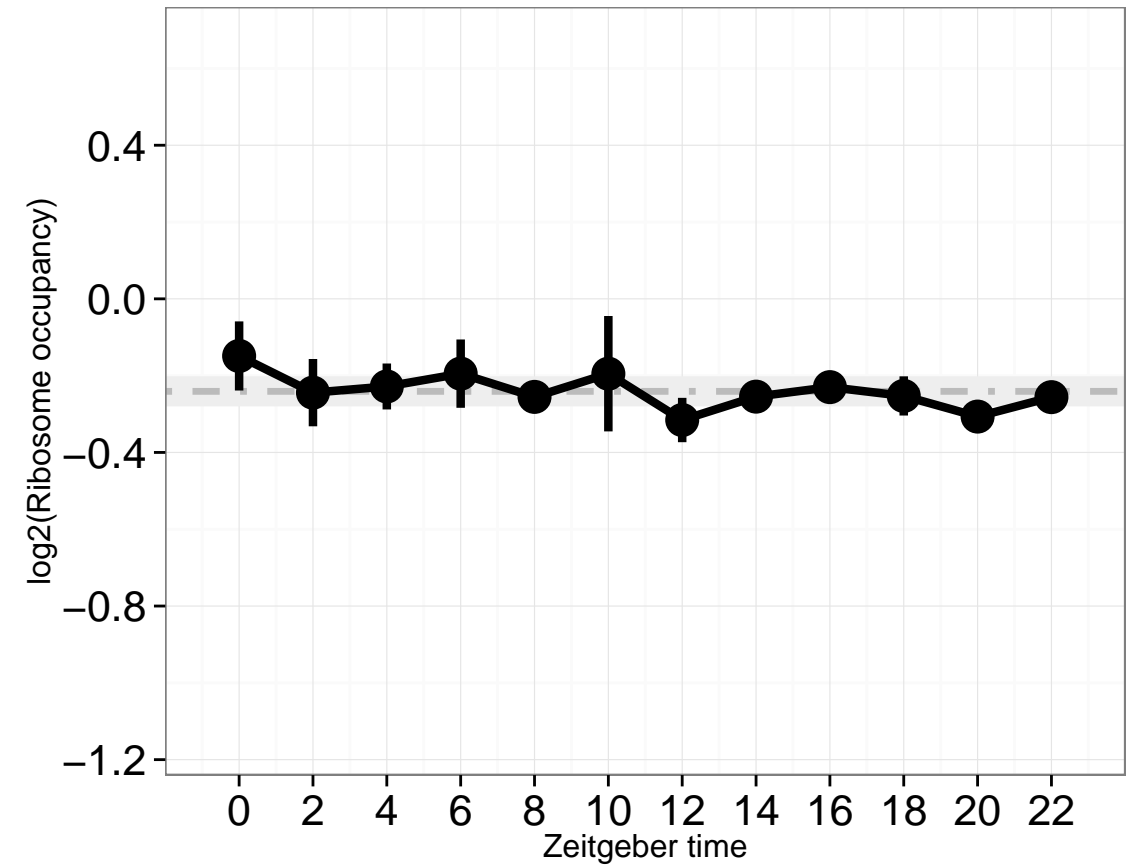

Supplement: Supplementary file 3476 [file 1]

## Sell

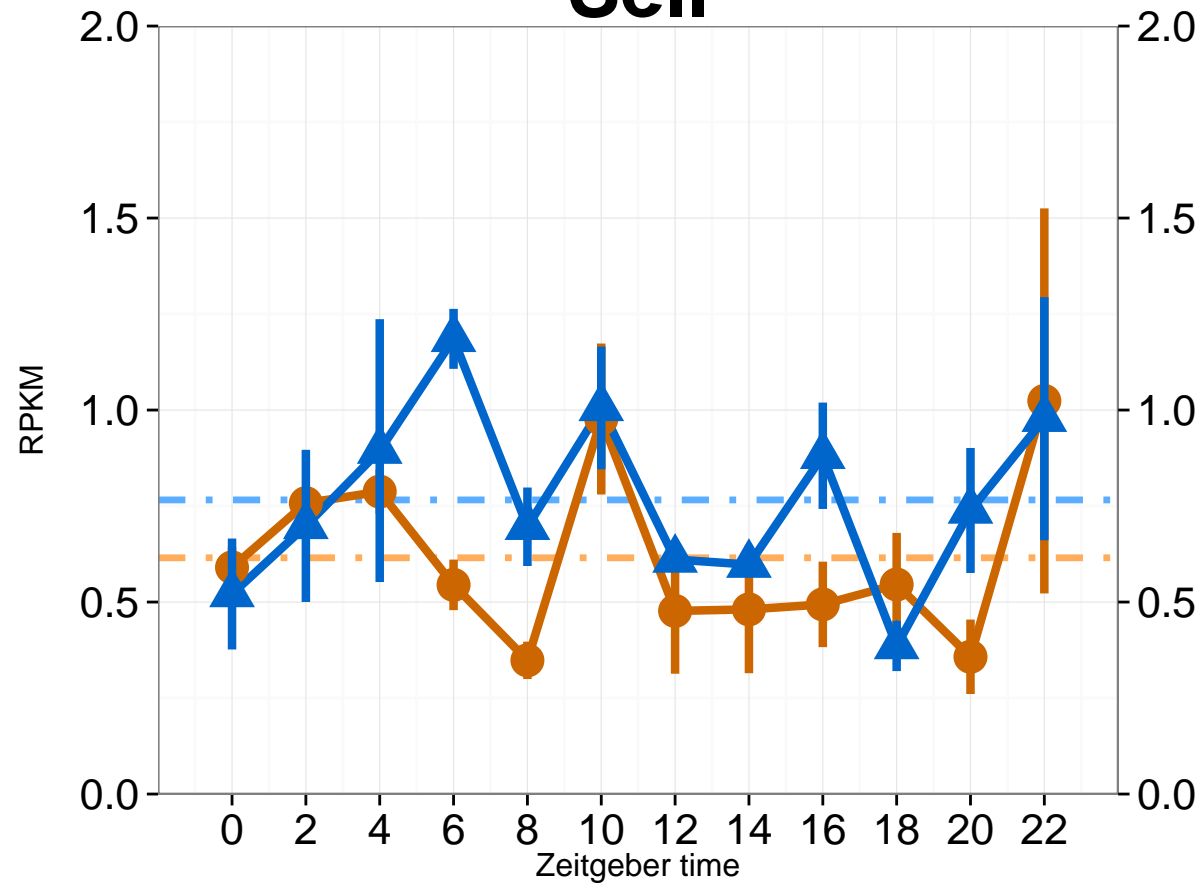

## Sell

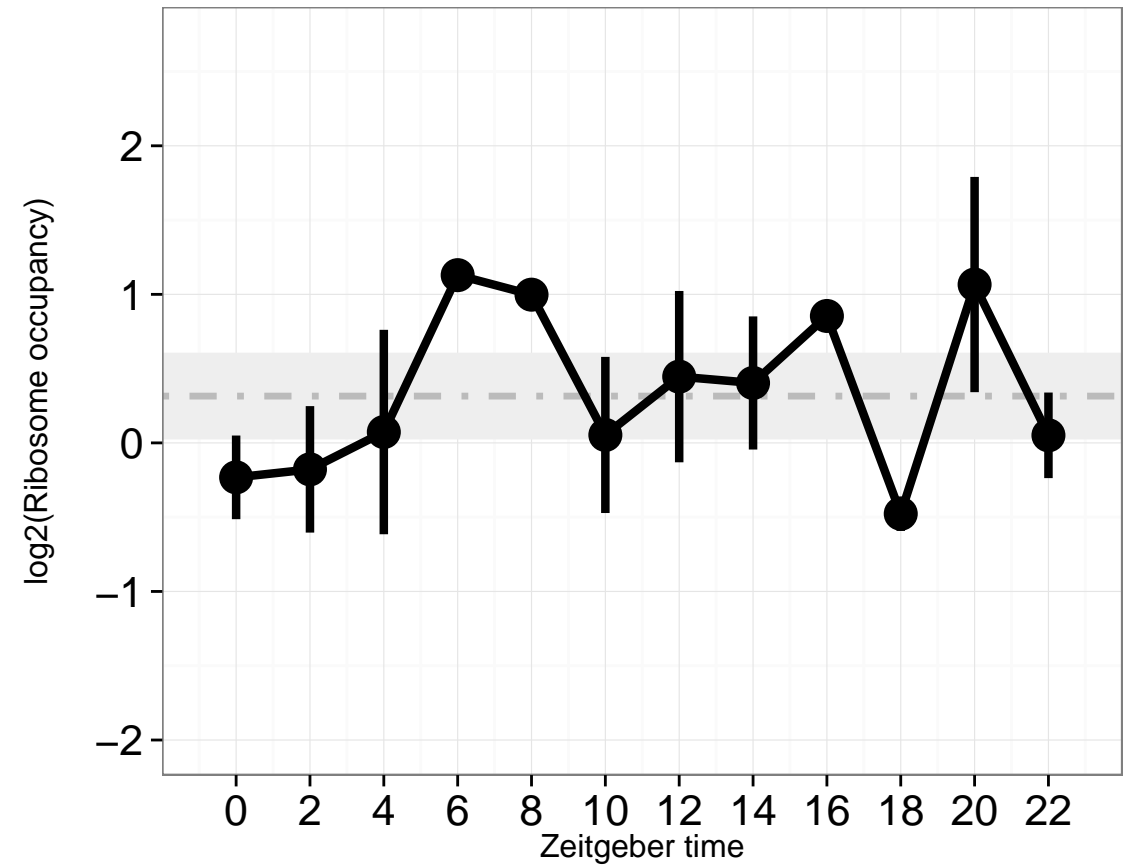

Supplement: Supplementary file 3477 [file 1]

# Zbtb18

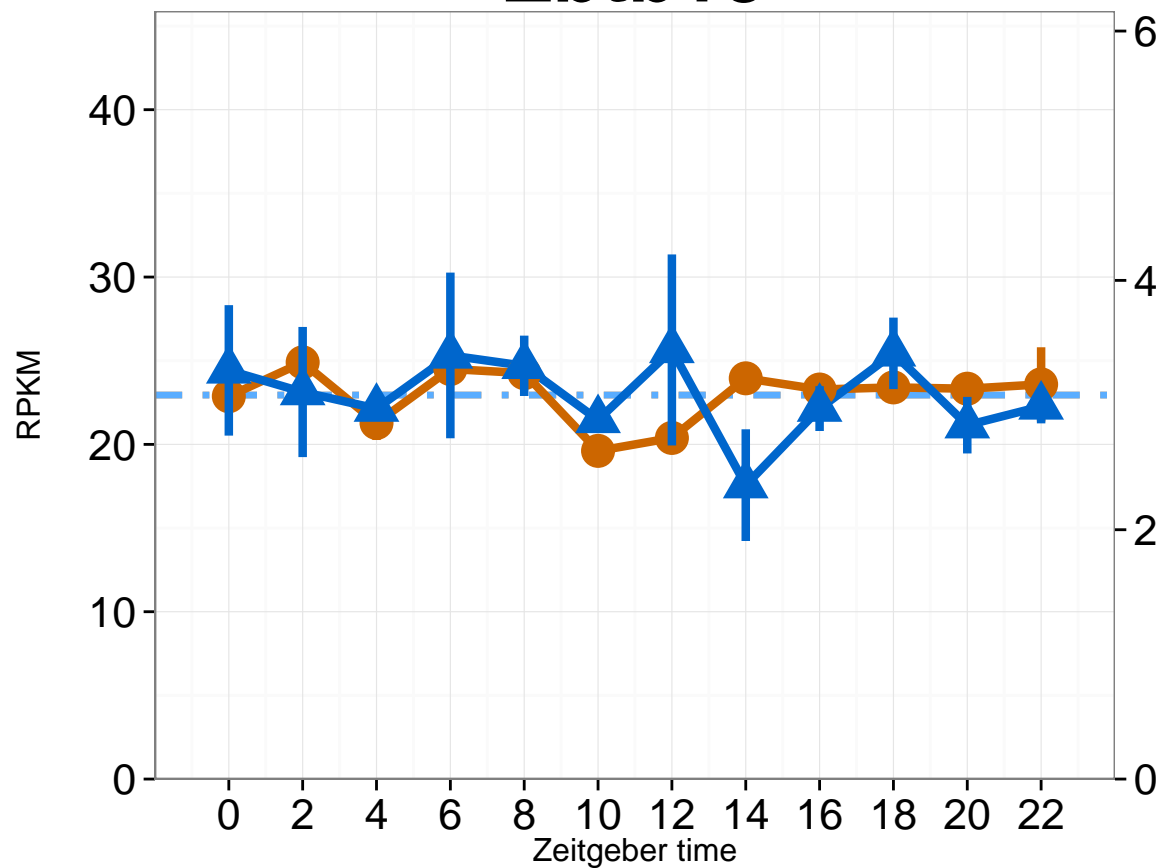

# Zbtb18

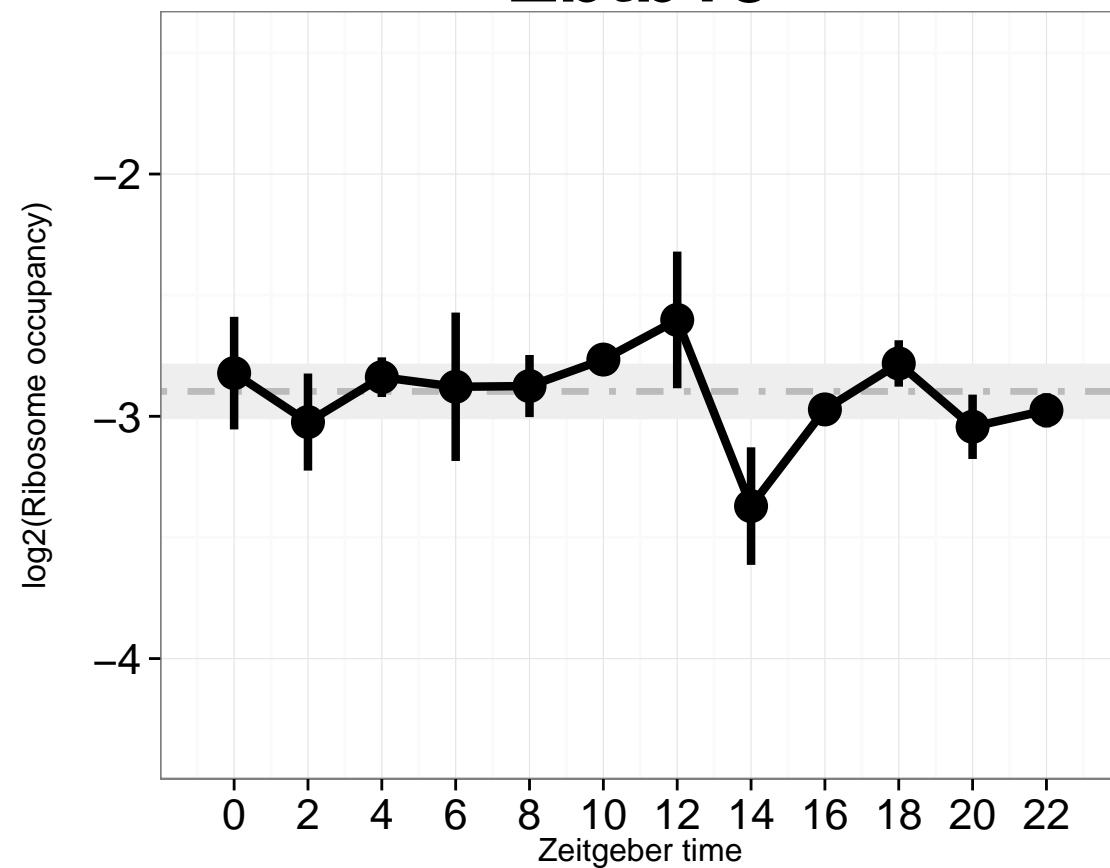

Supplement: Supplementary file 3478 [file 1]

## Cdk12

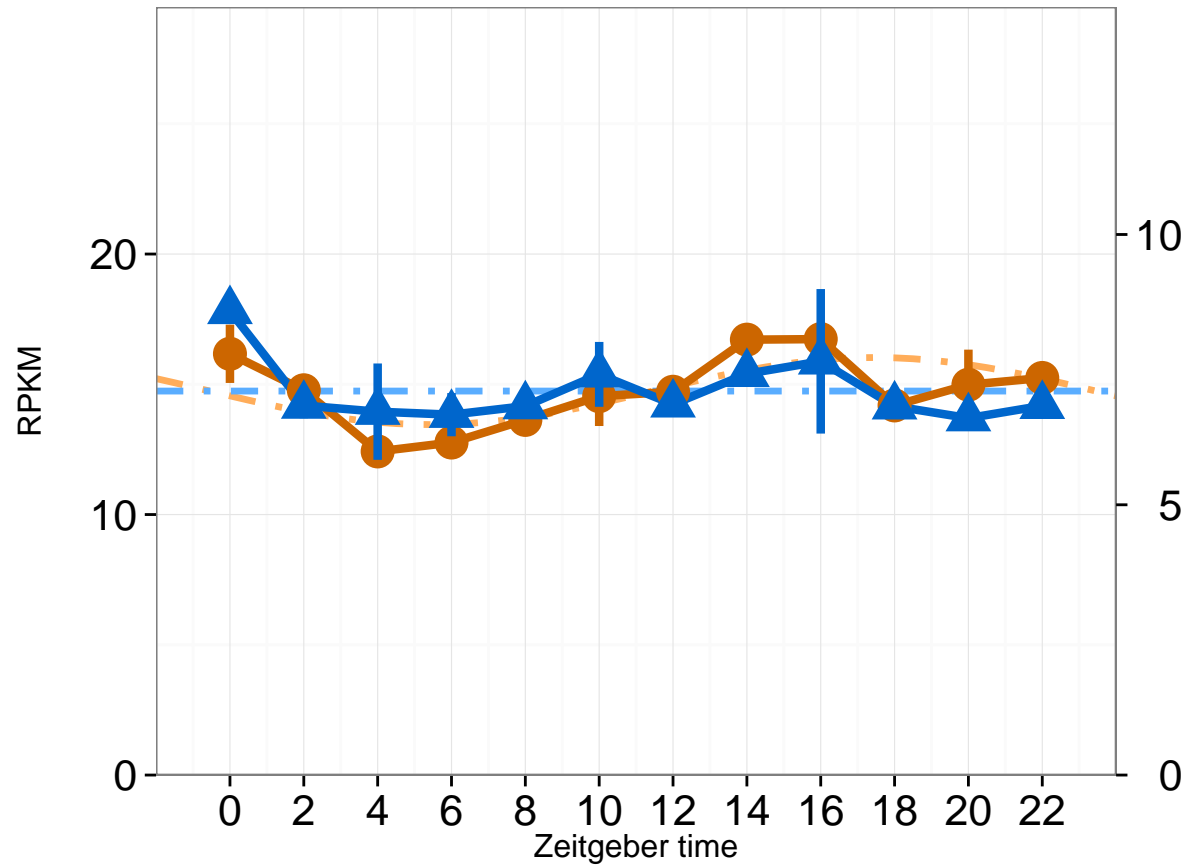

## Cdk12

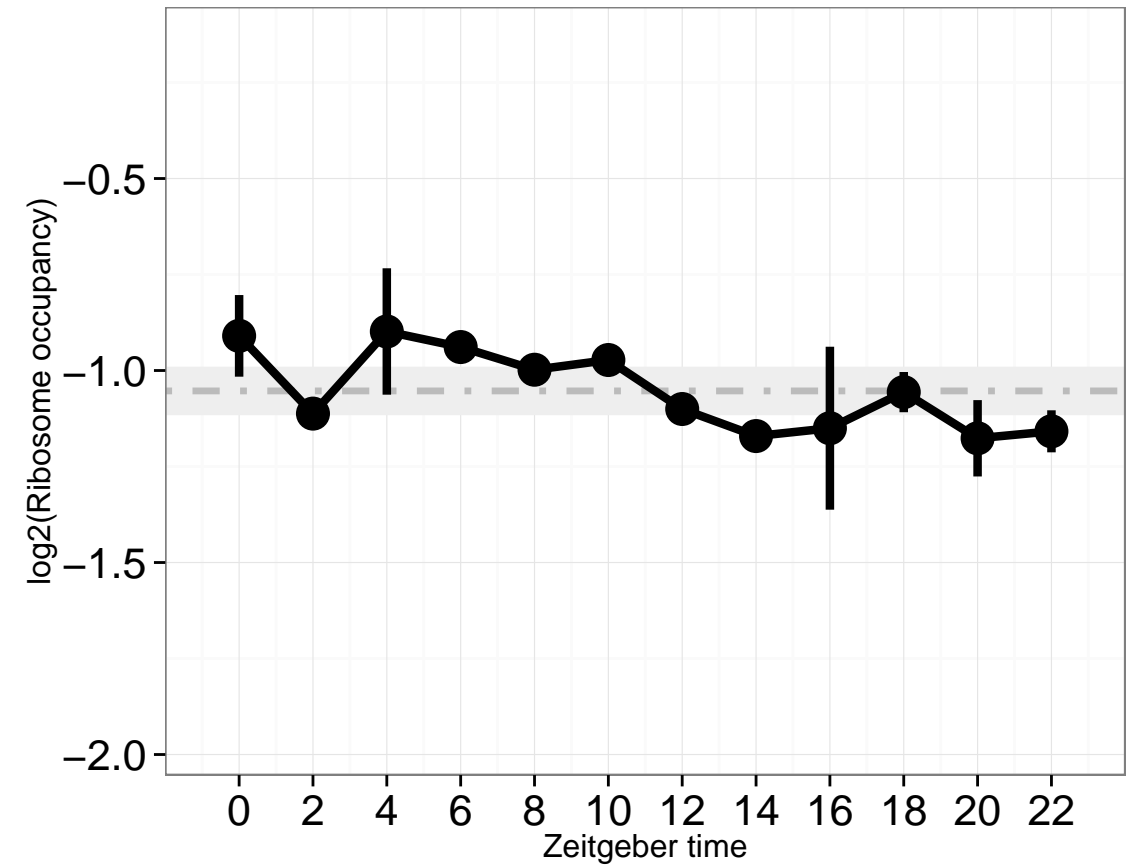

Supplement: Supplementary file 3479 [file 1]

# Gm9846

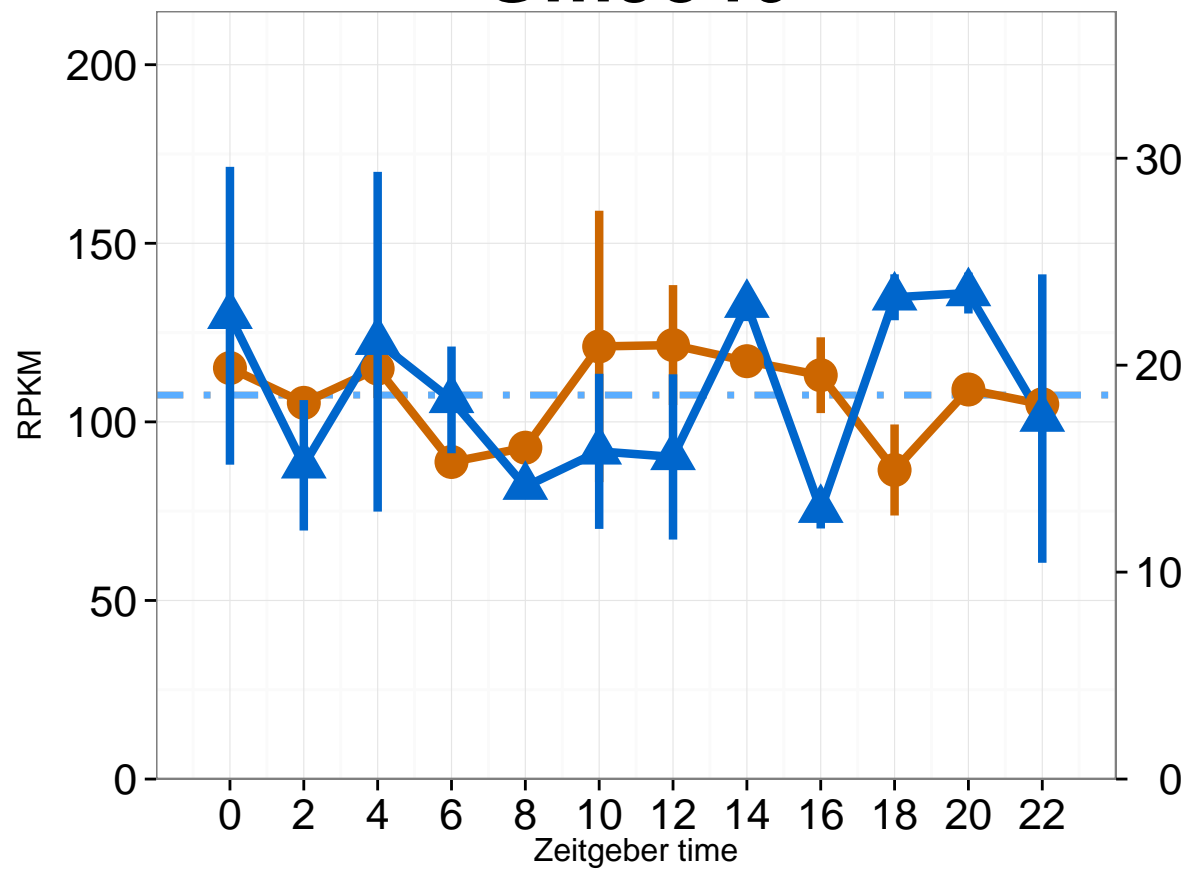

# Gm9846

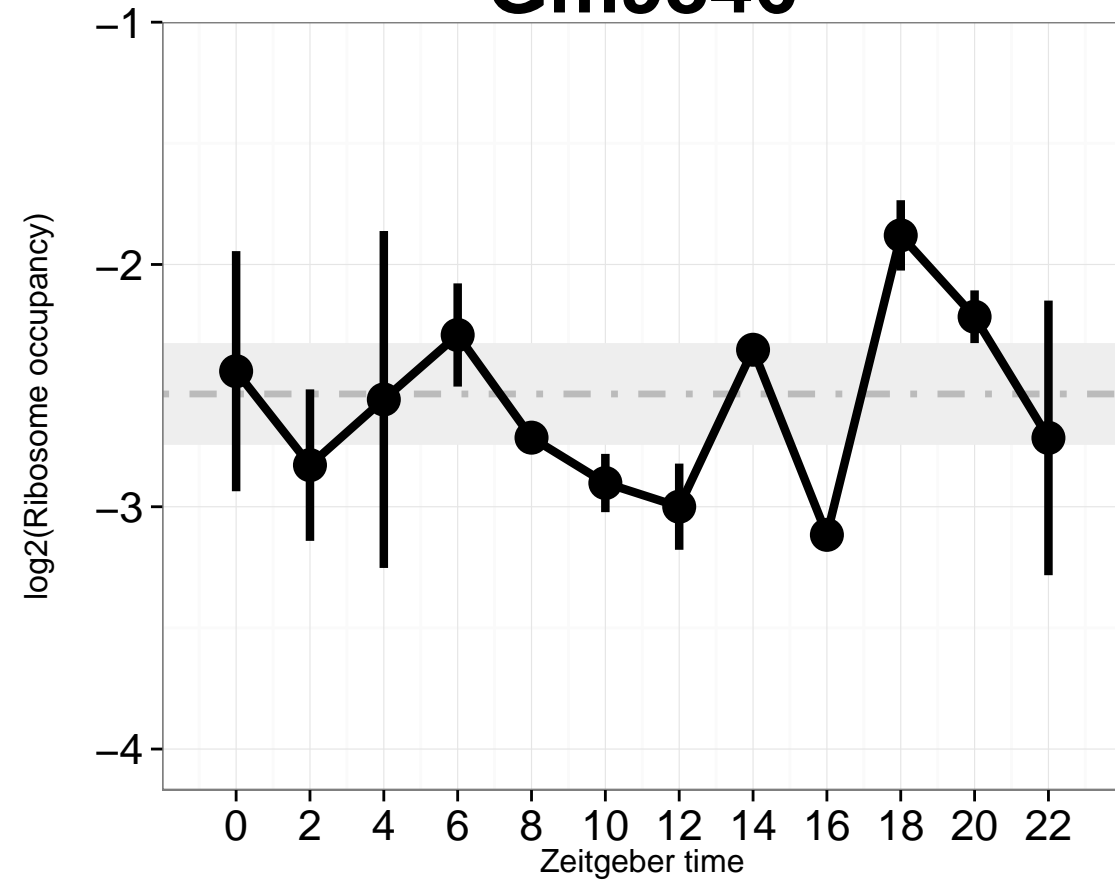

Supplement: Supplementary file 3480 [file 1]

# Mgat4a

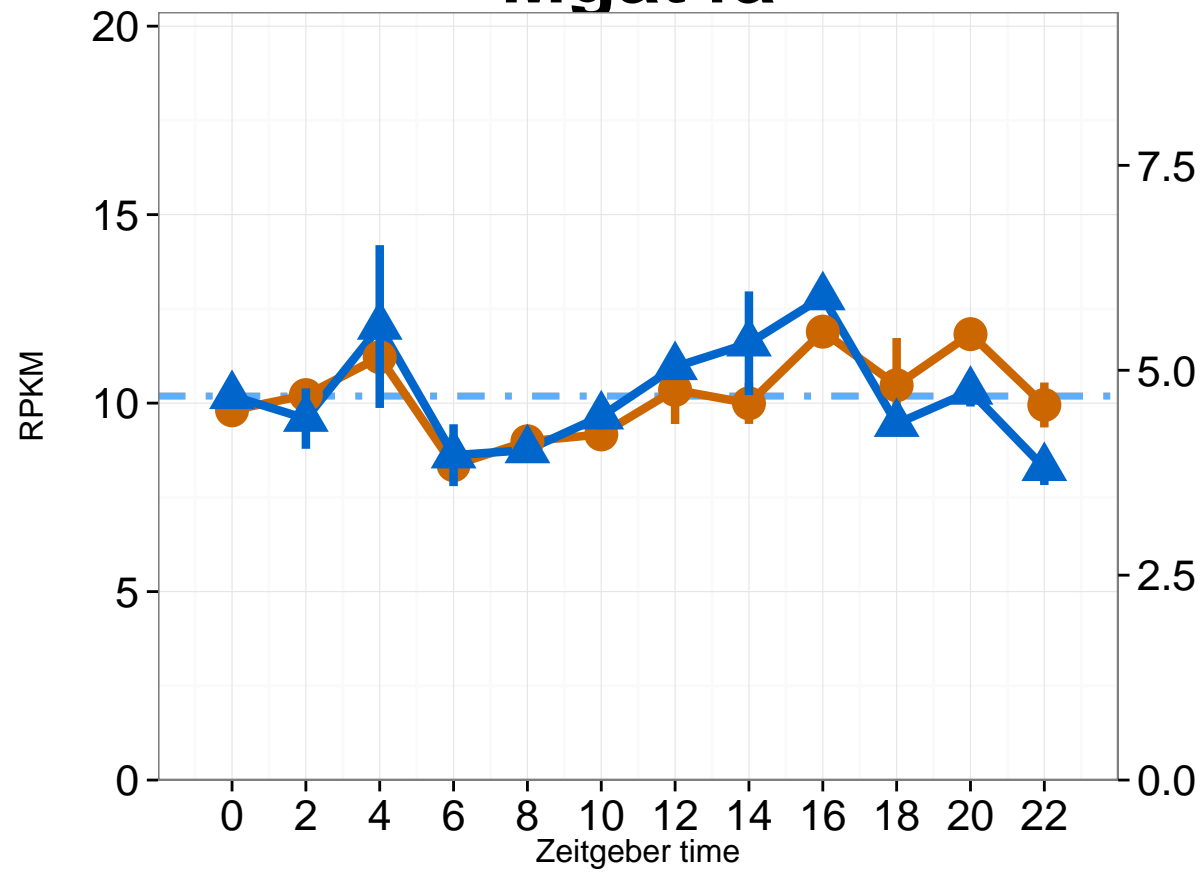

# Mgat4a

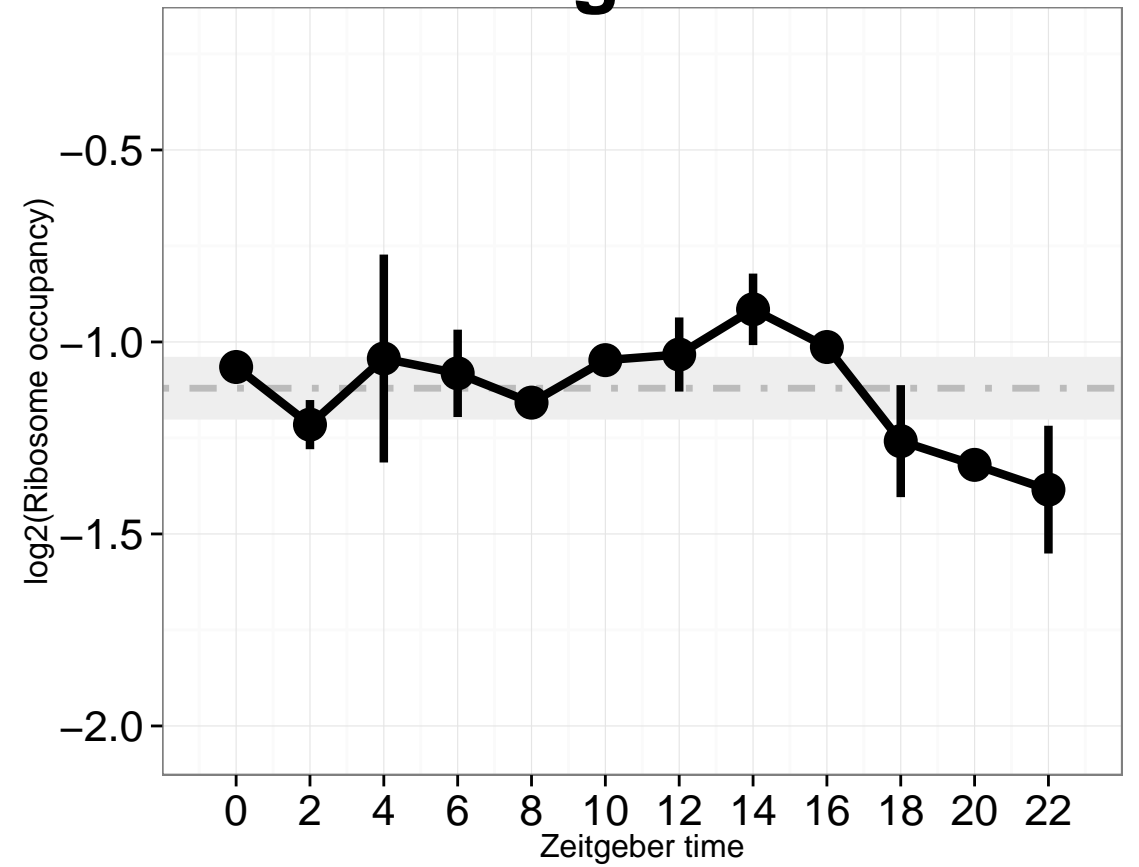

Supplement: Supplementary file 3481 [file 1]

# Fam107a

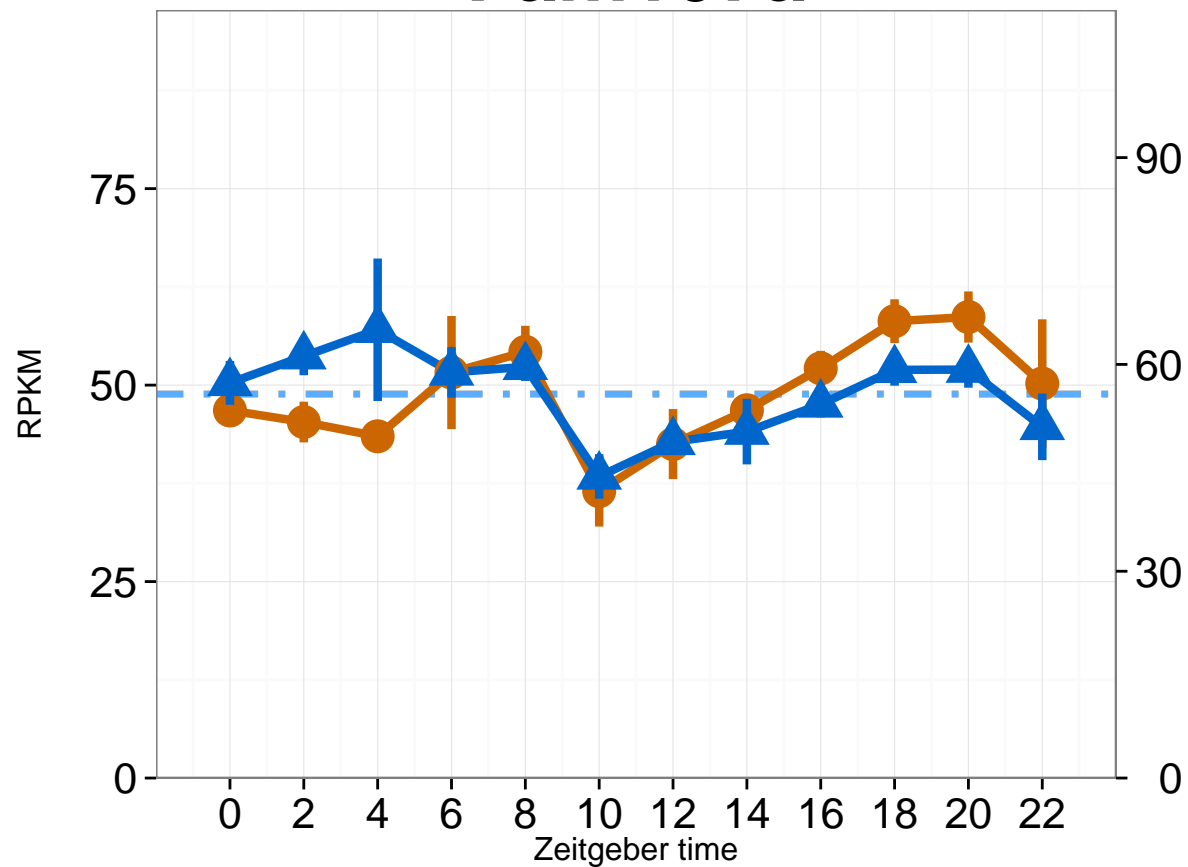

# Fam107a

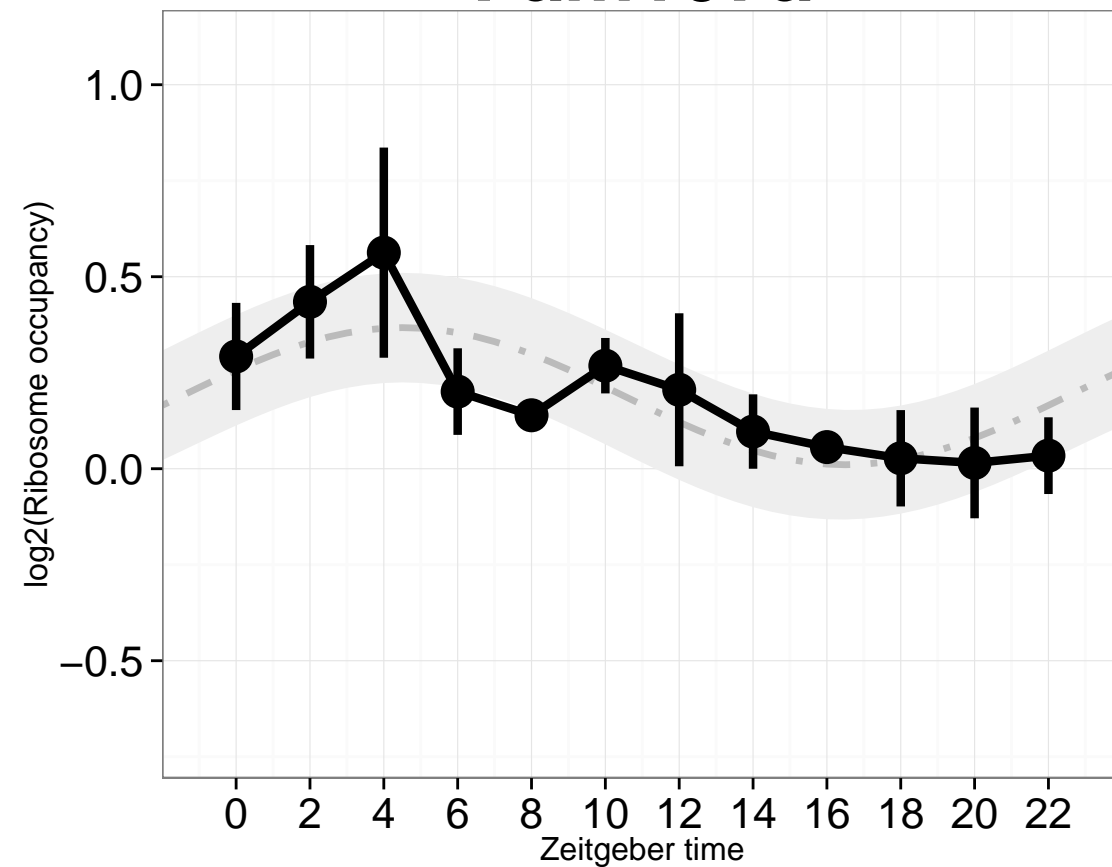

Supplement: Supplementary file 3482 [file 1]

# Dctpp1

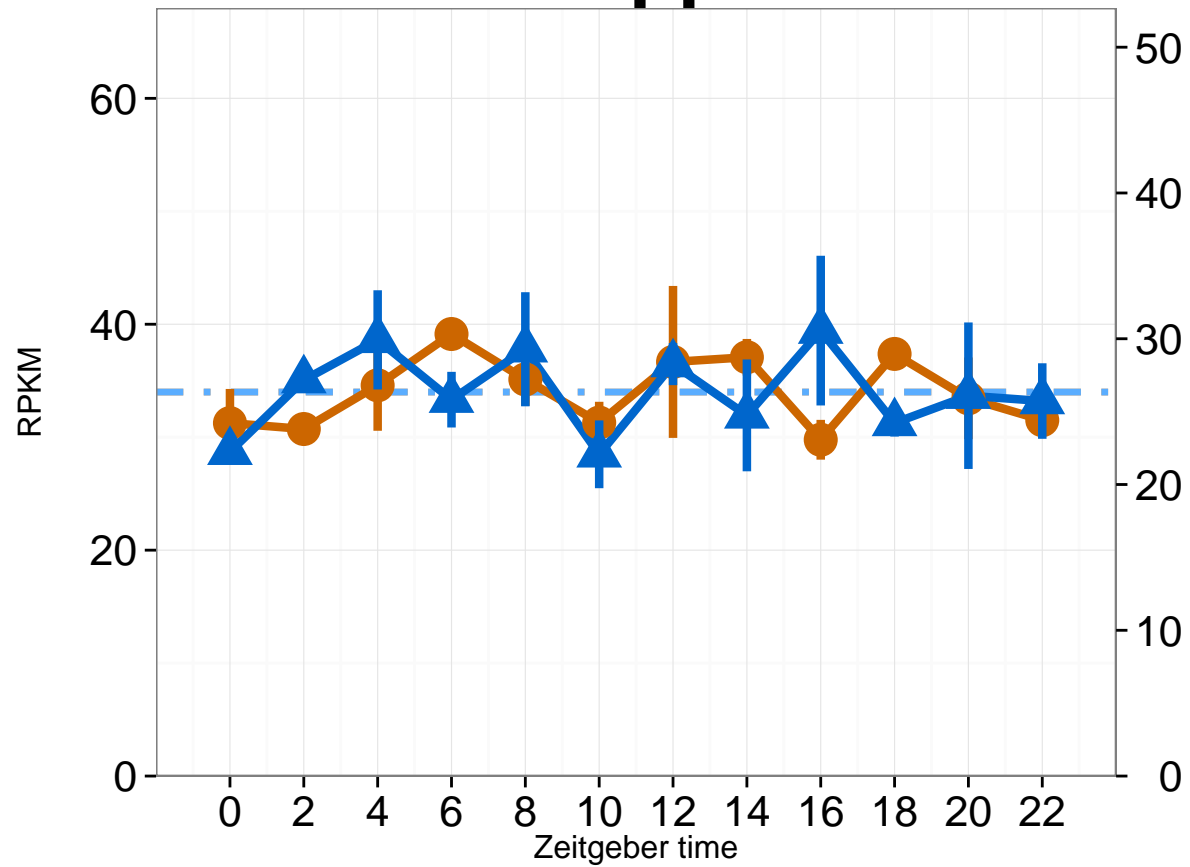

# Dctpp1

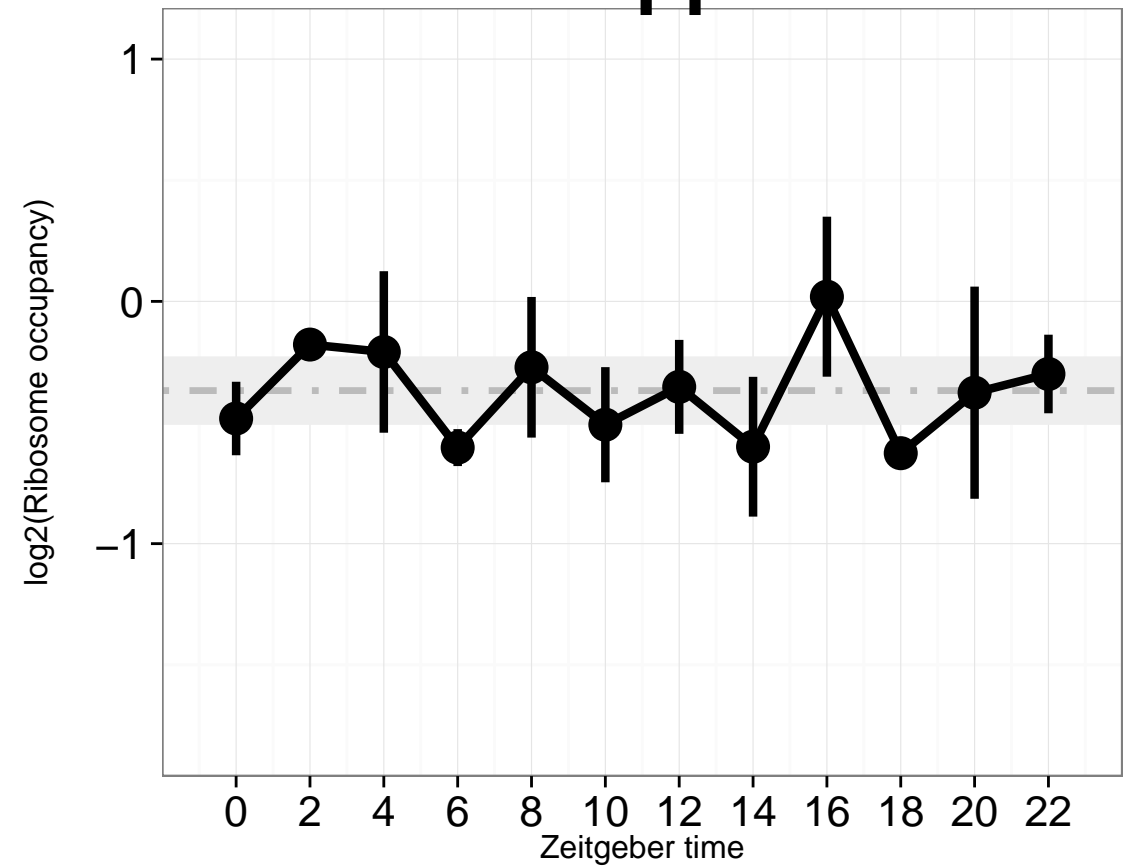

Supplement: Supplementary file 3483 [file 1]

# Zfp780b

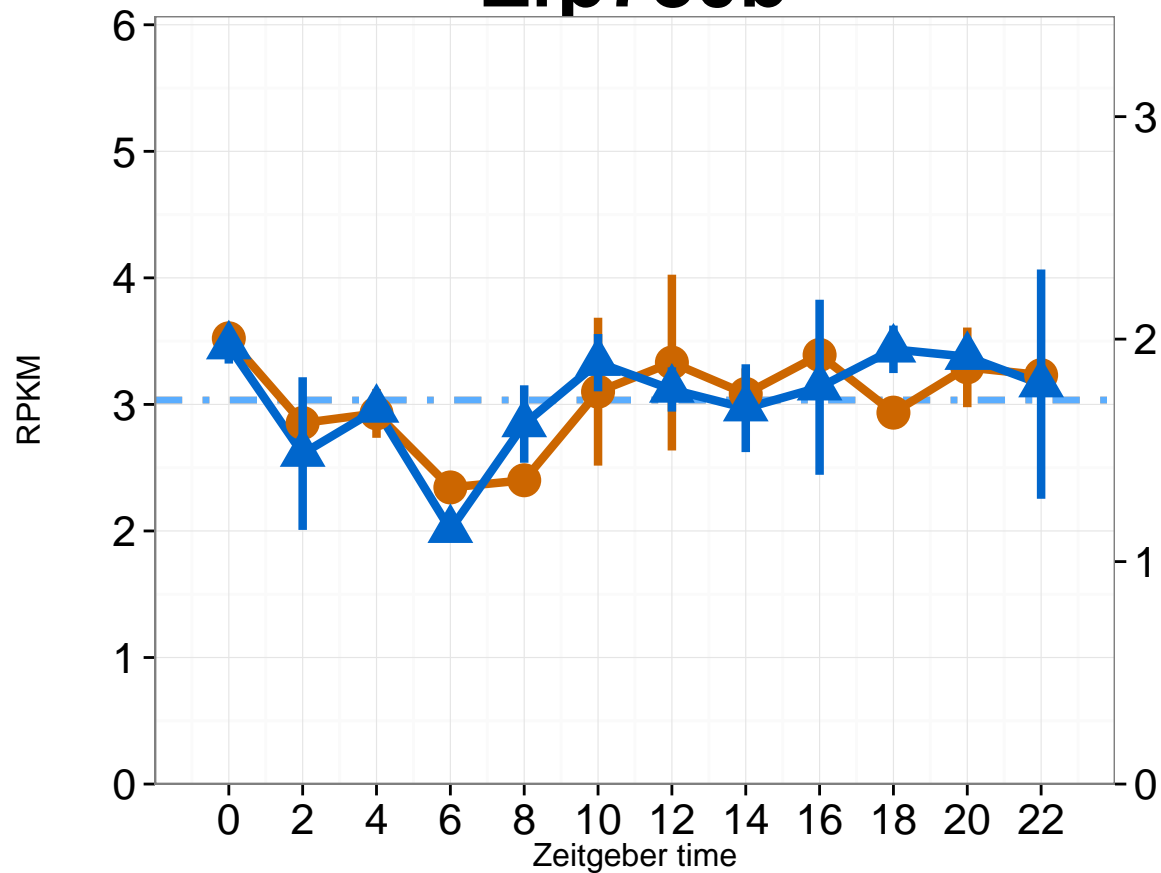

# Zfp780b

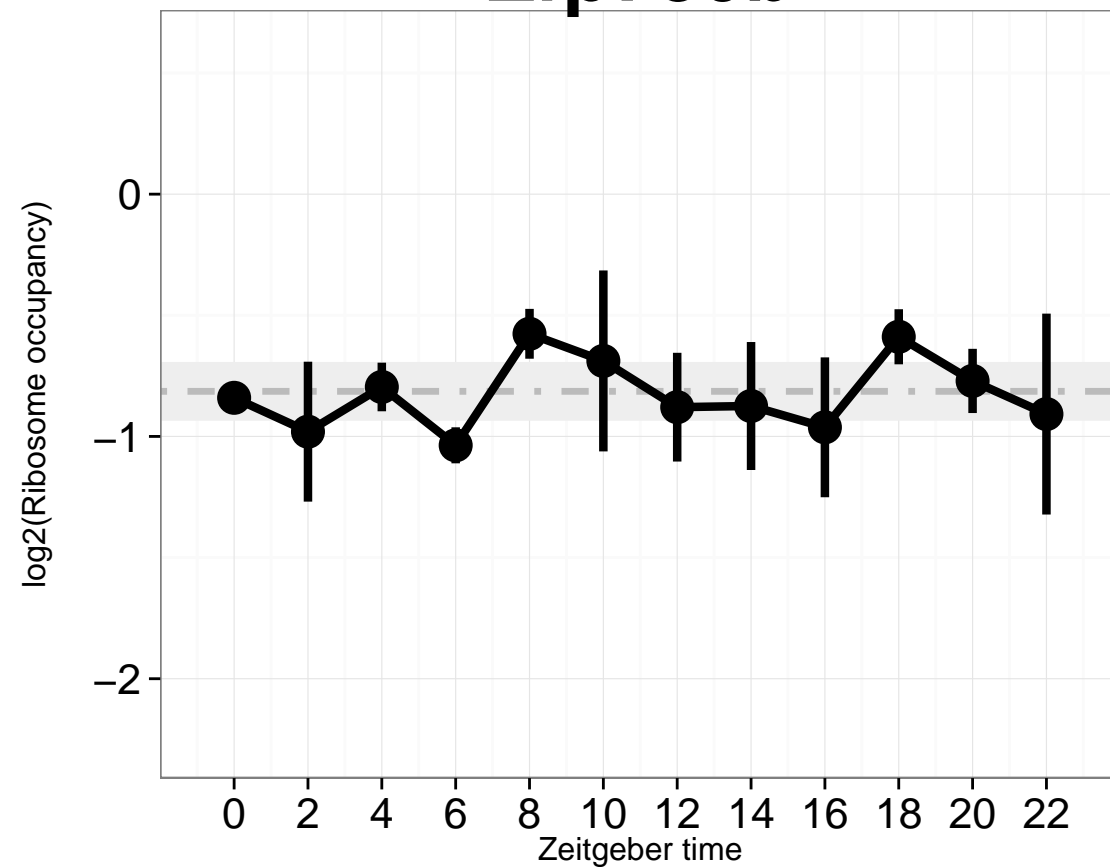

Supplement: Supplementary file 3484 [file 1]

## Cdc20

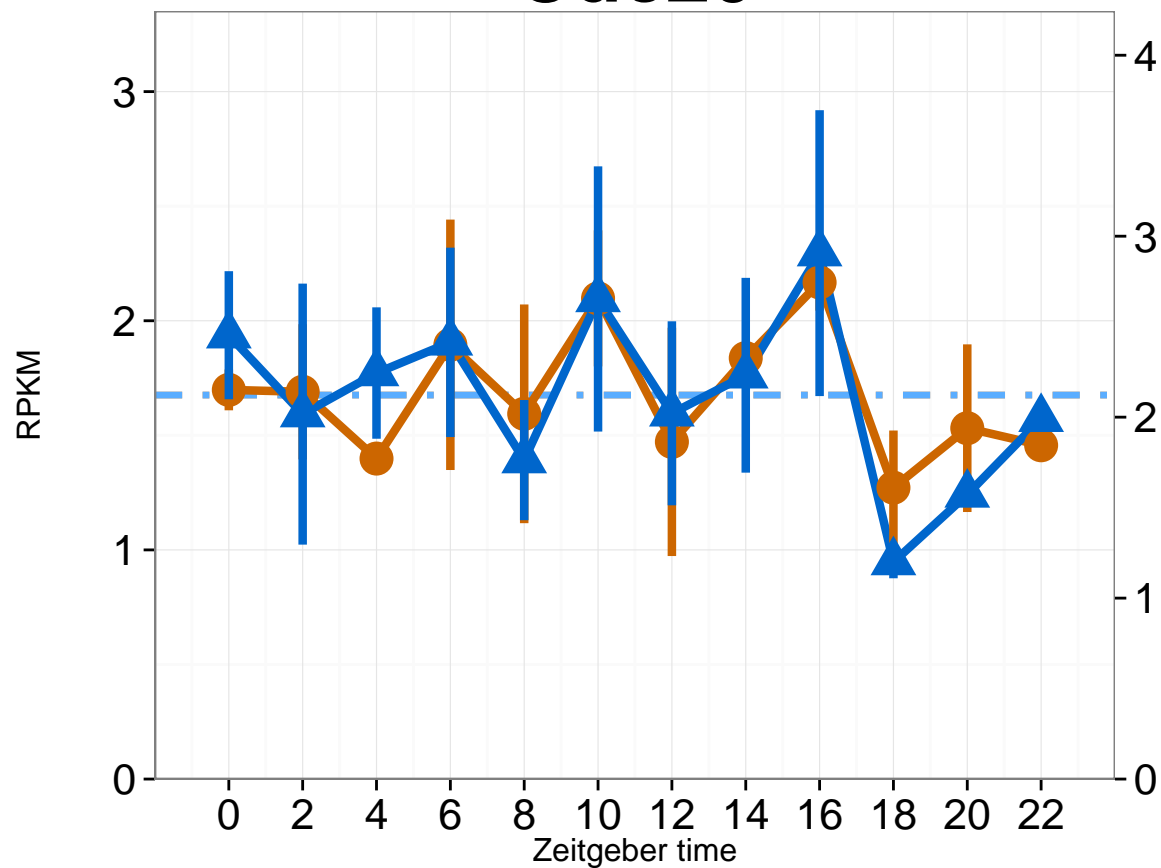

## Cdc20

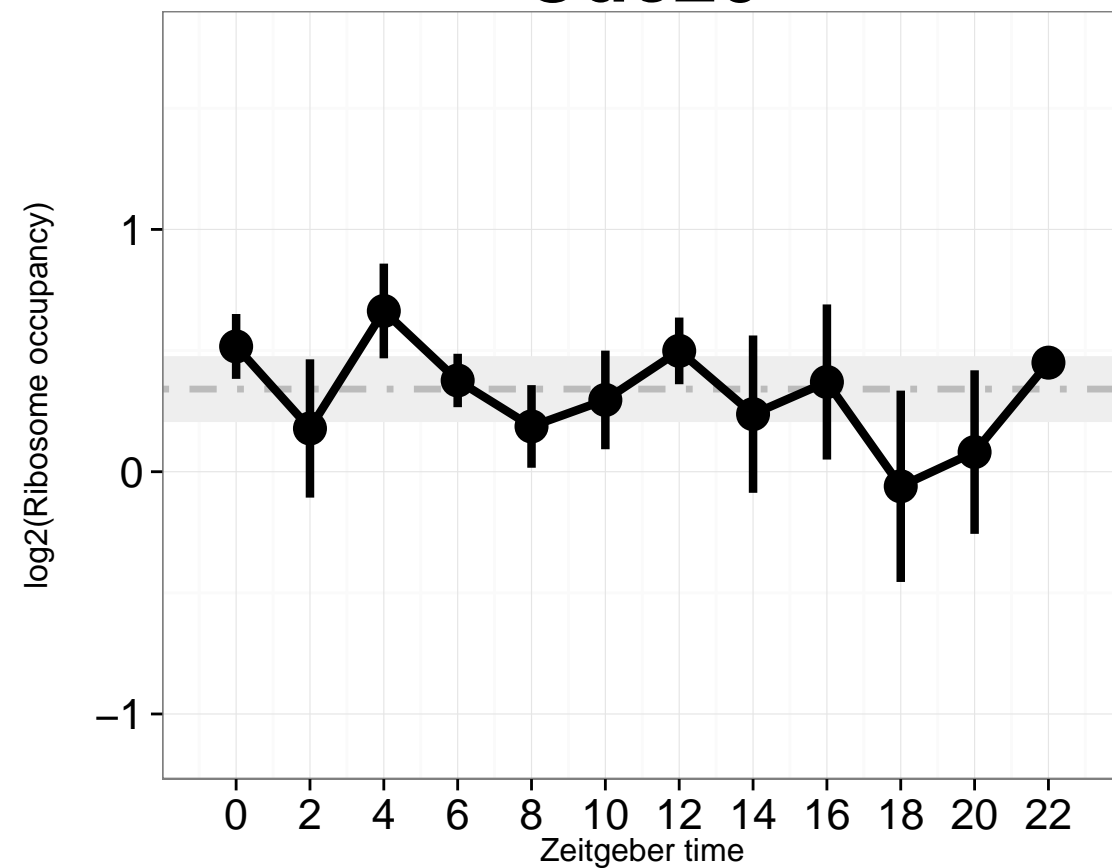

Supplement: Supplementary file 3485 [file 1]

## Cdh13

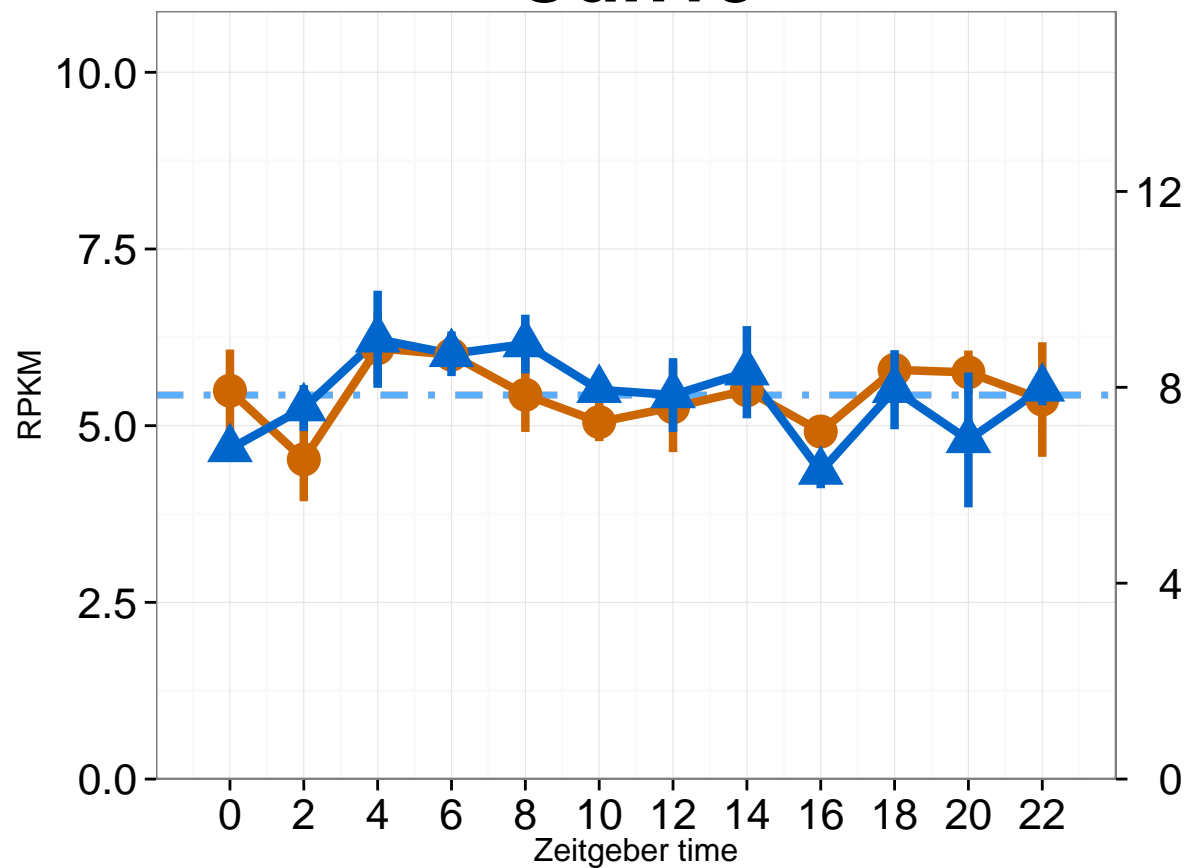

## Cdh13

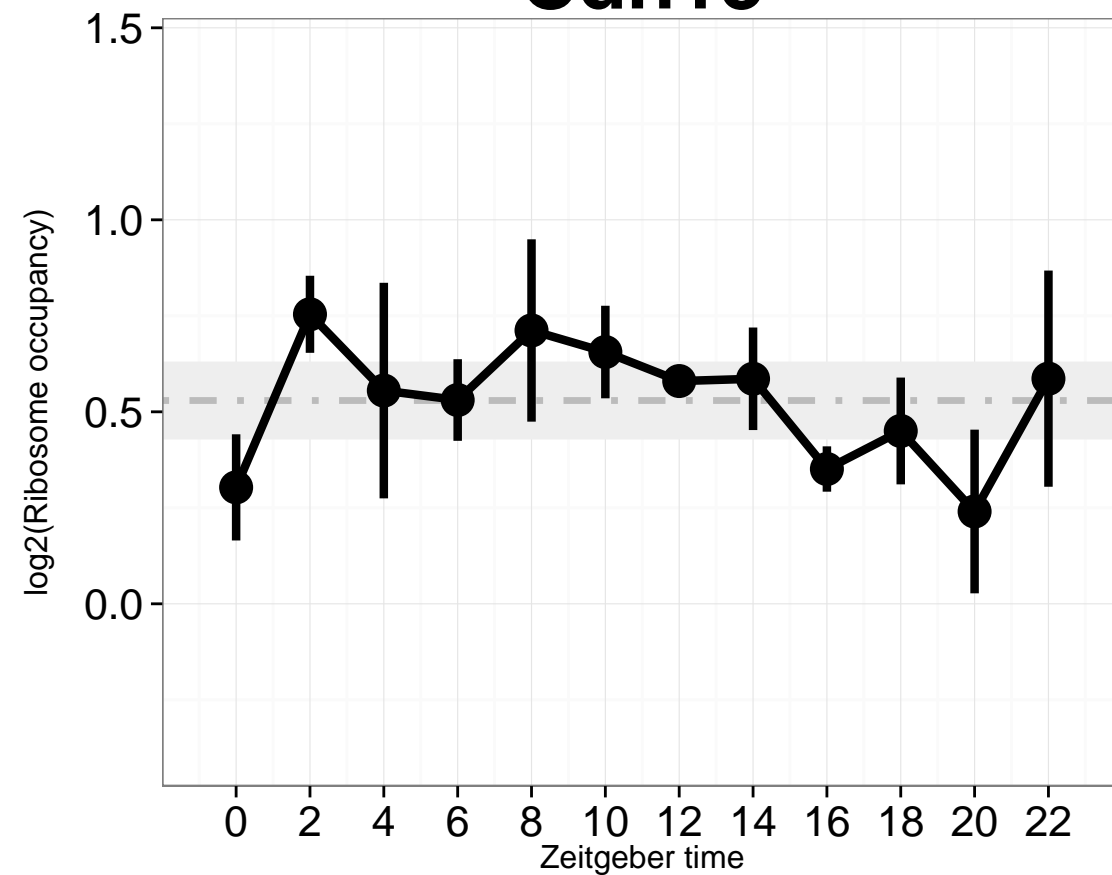

Supplement: Supplementary file 3486 [file 1]

## Vapb

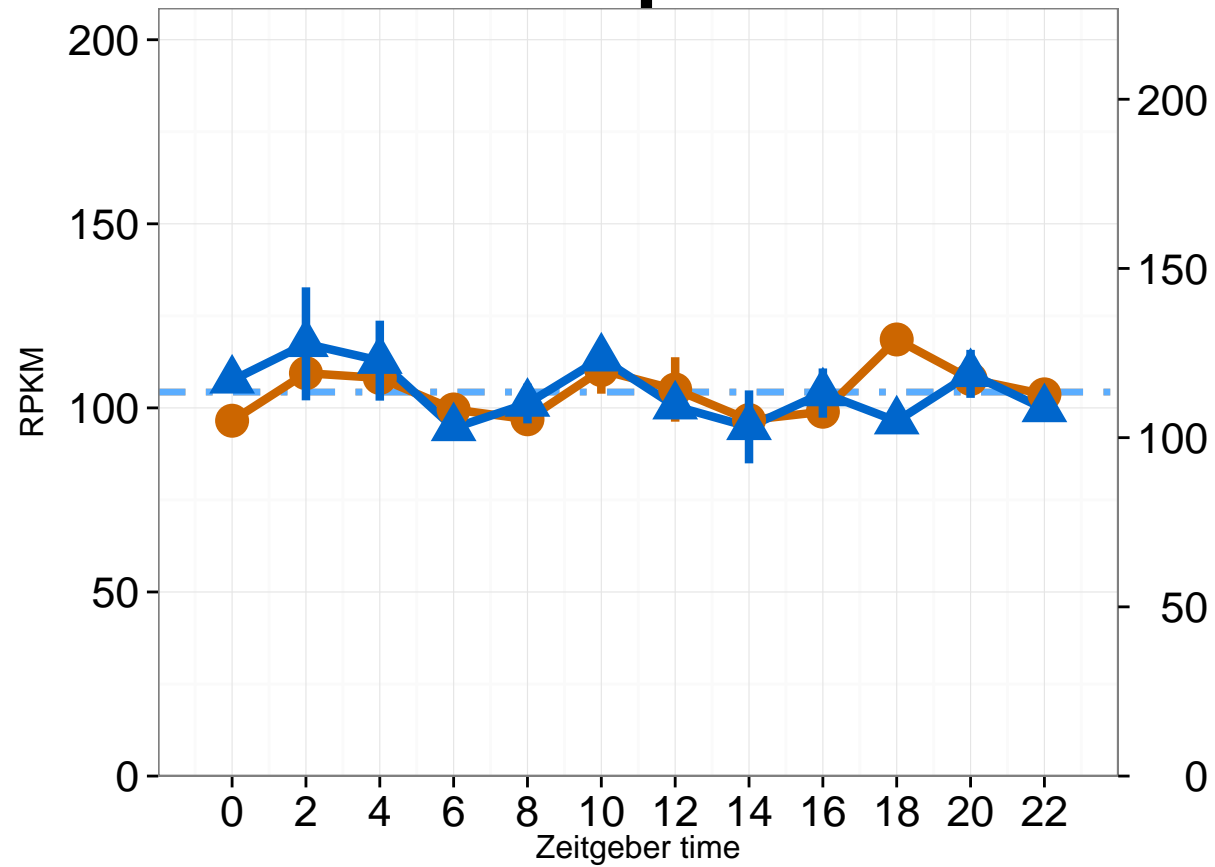

## Vapb

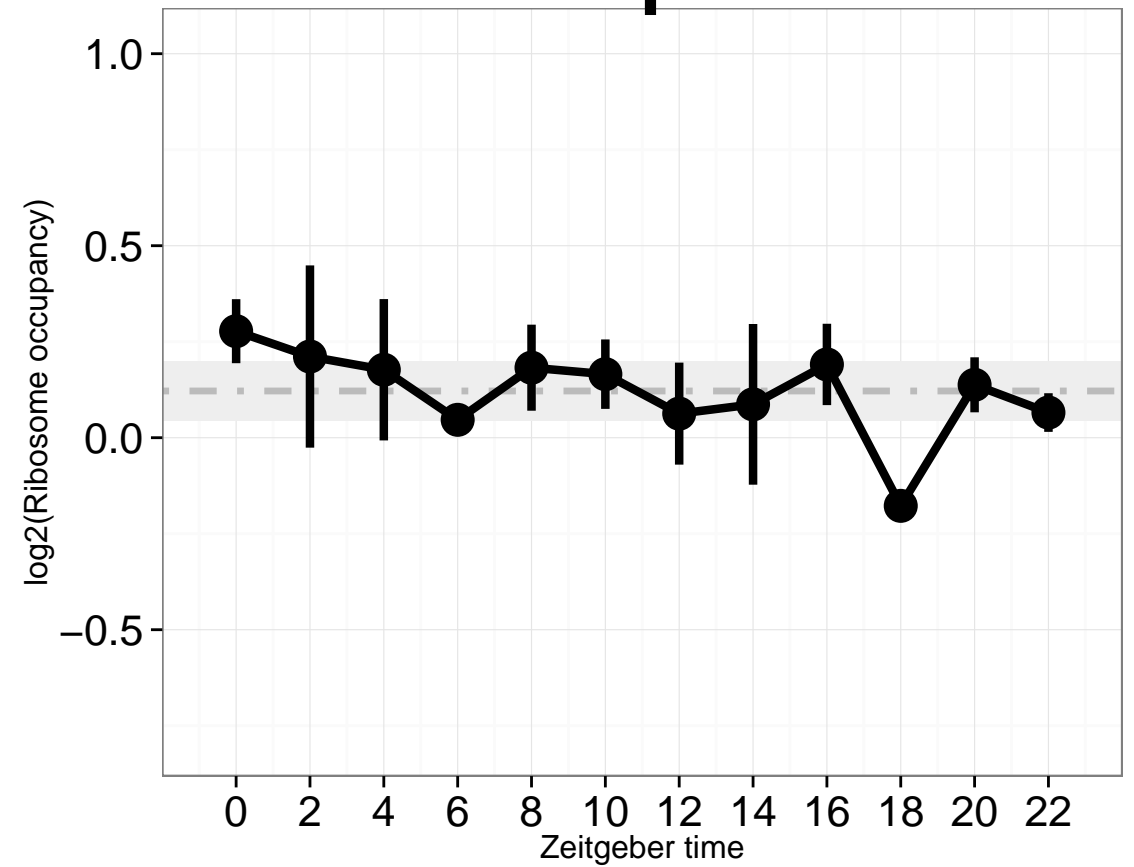

Supplement: Supplementary file 3487 [file 1]

## Topors

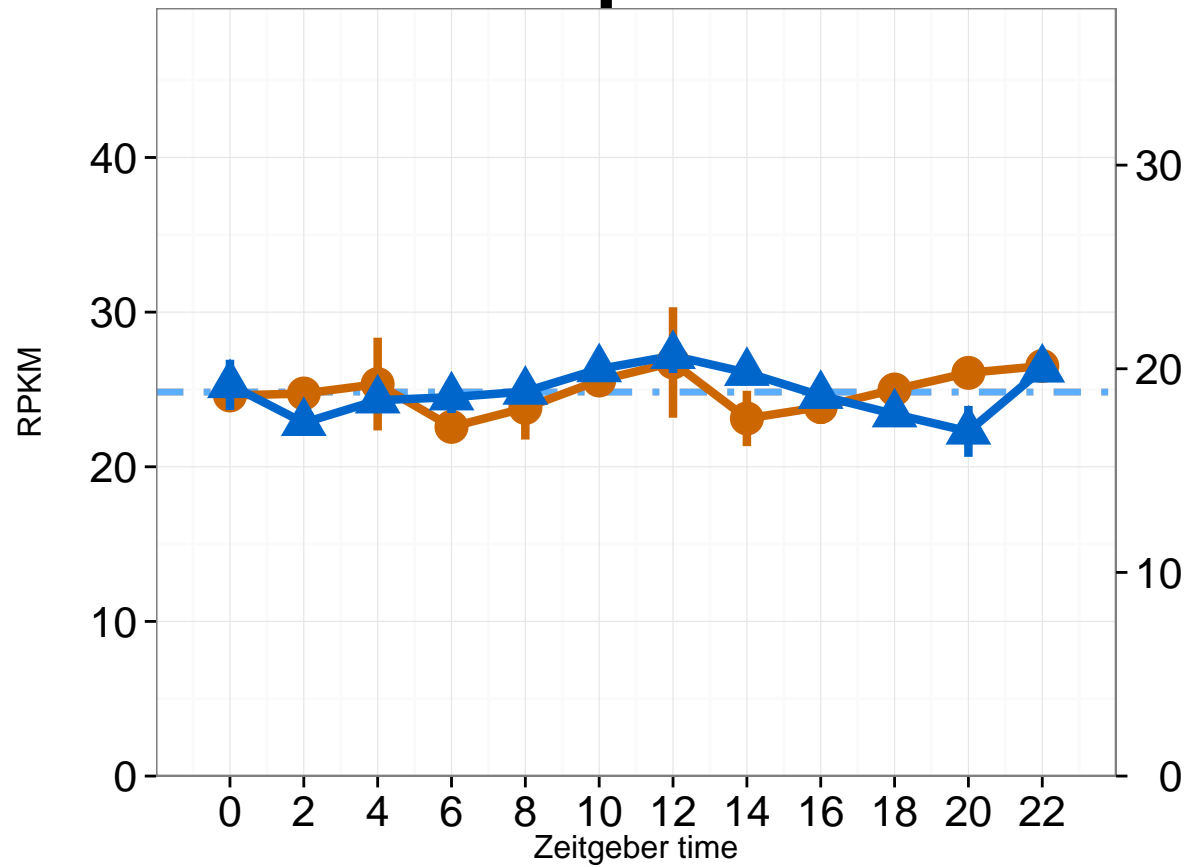

## Topors

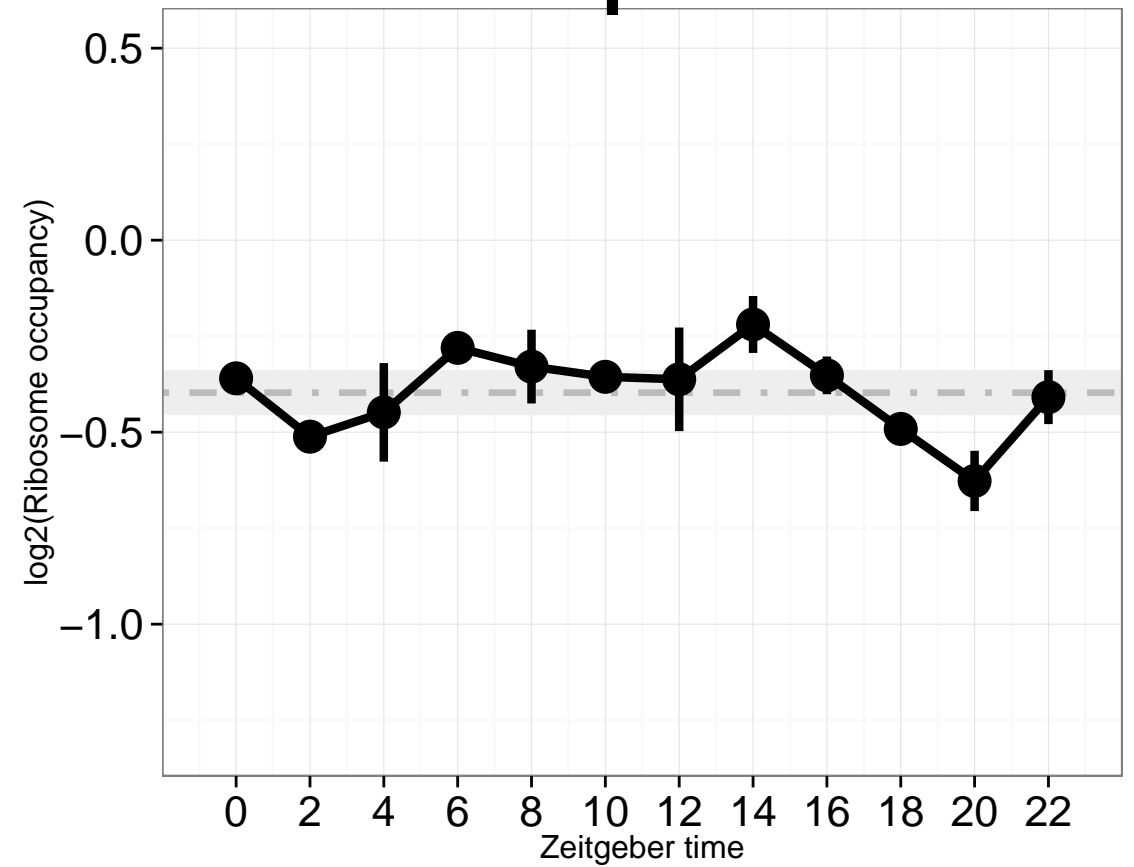

Supplement: Supplementary file 3488 [file 1]

# Rps6ka5

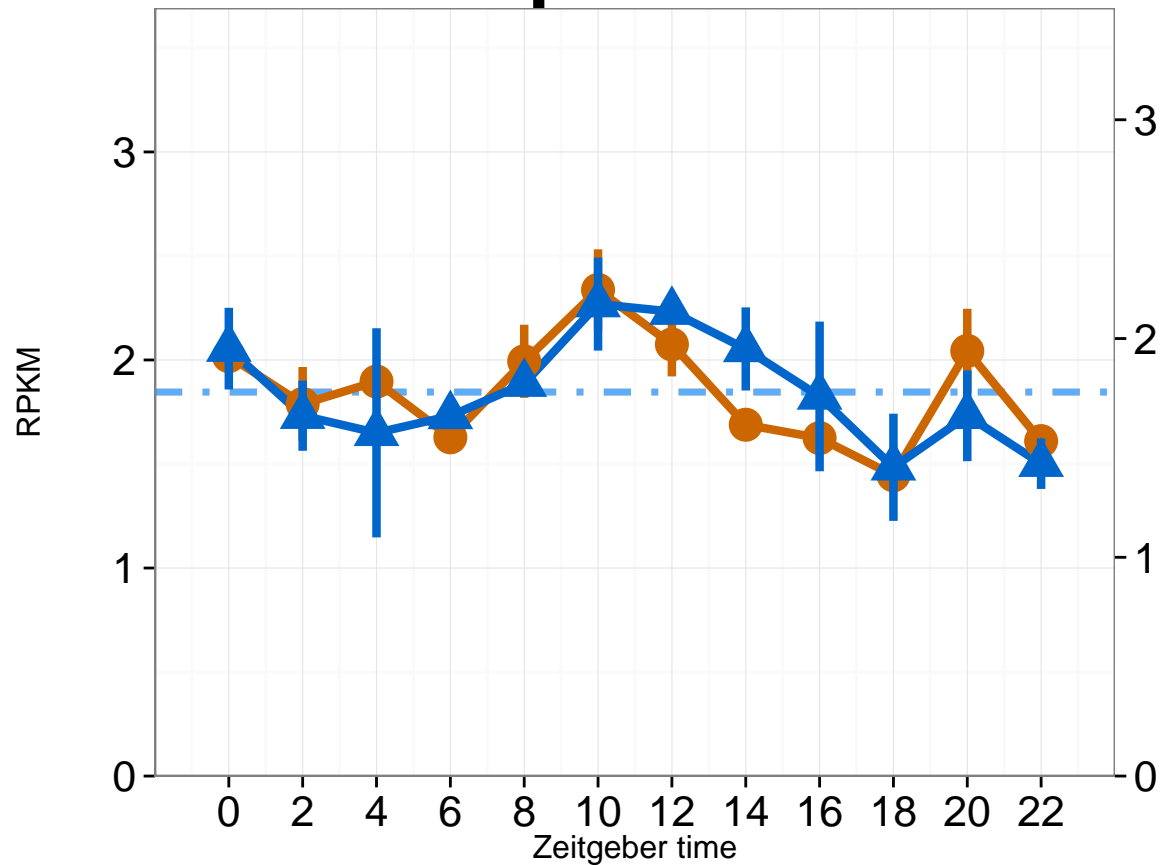

# Rps6ka5

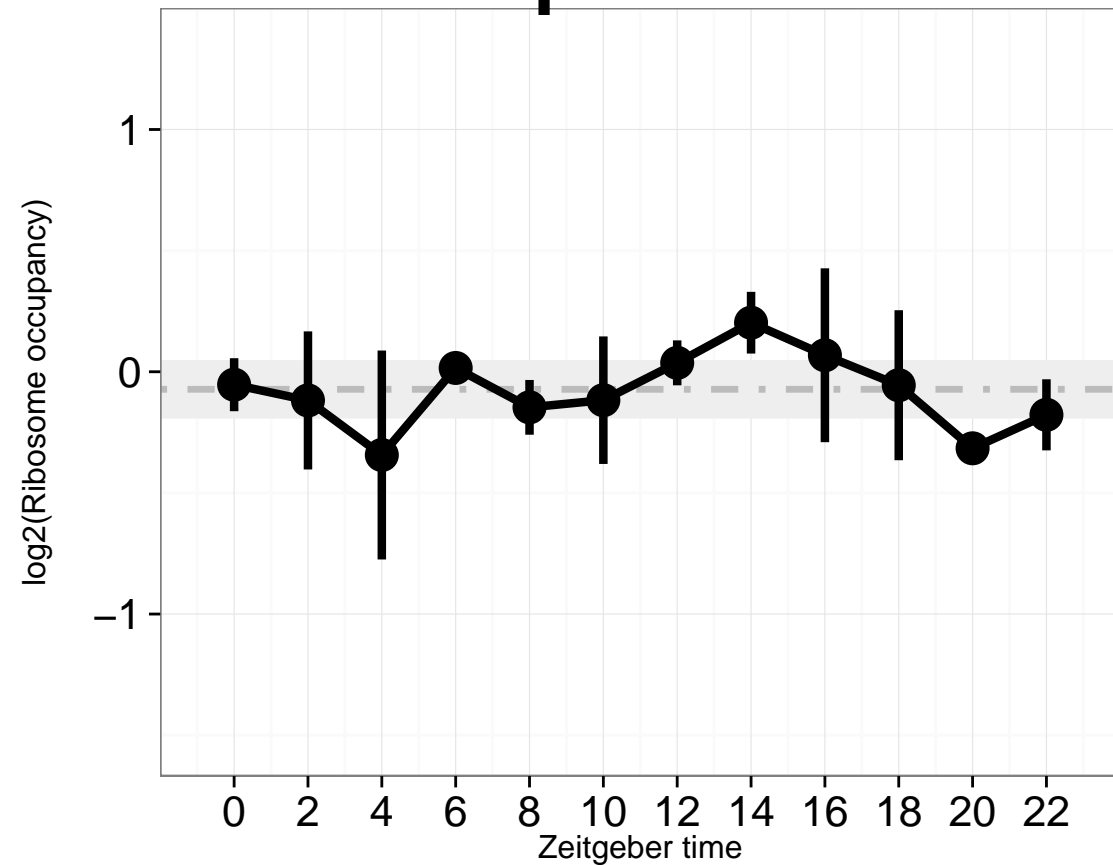

Supplement: Supplementary file 3489 [file 1]

## Vta1

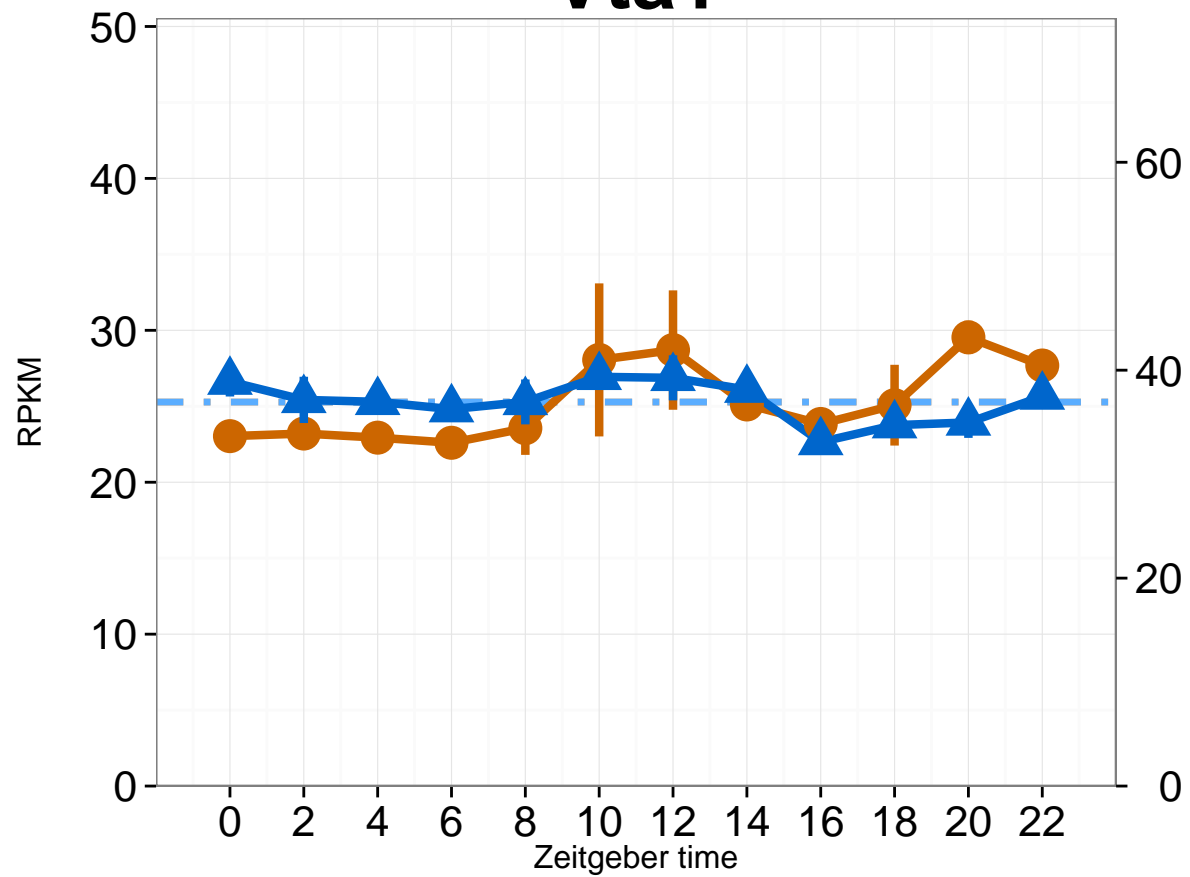

## Vta1

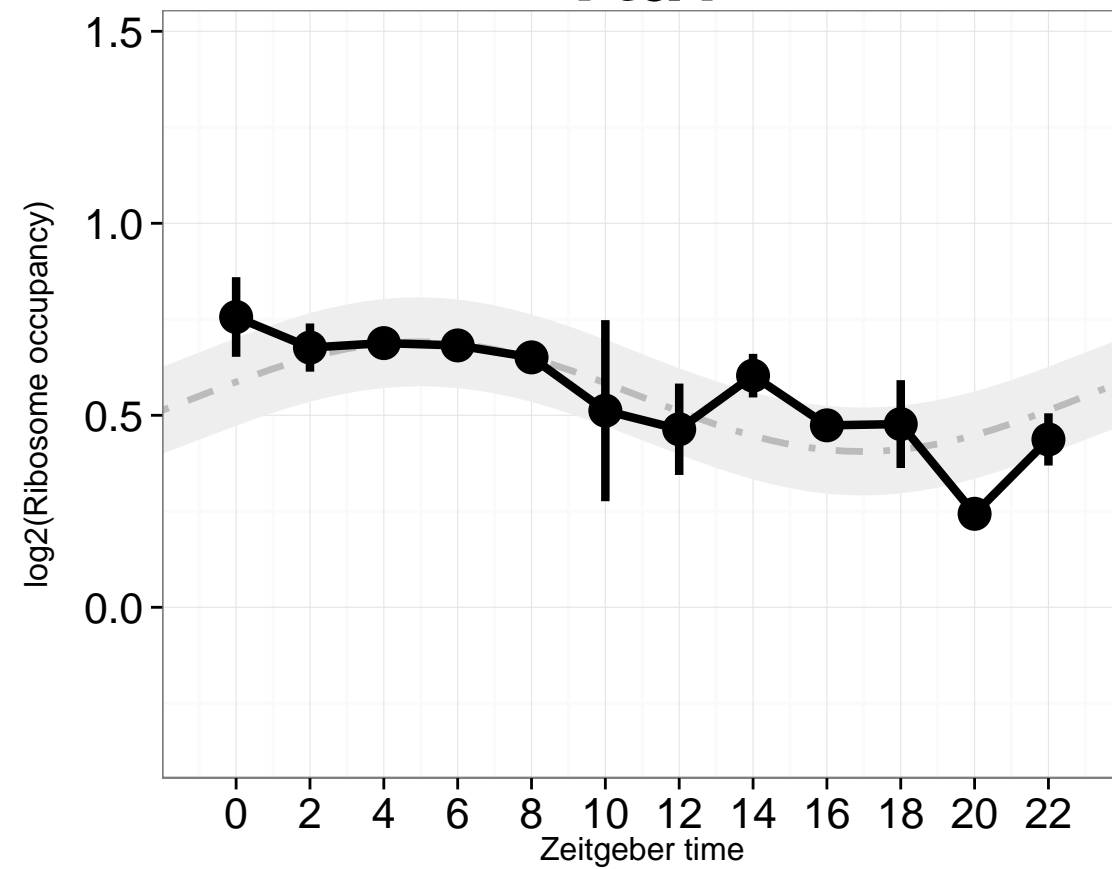

Supplement: Supplementary file 3490 [file 1]

## Slc52a2

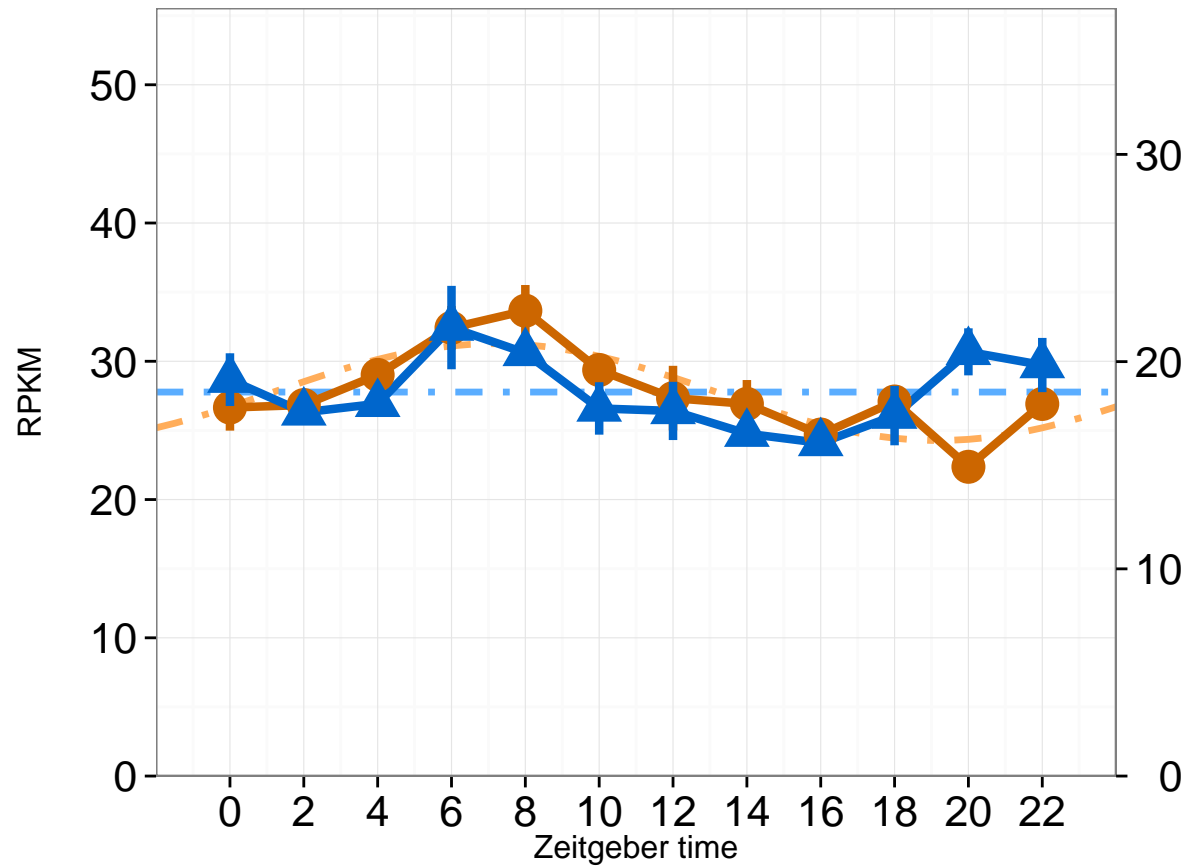

## Slc52a2

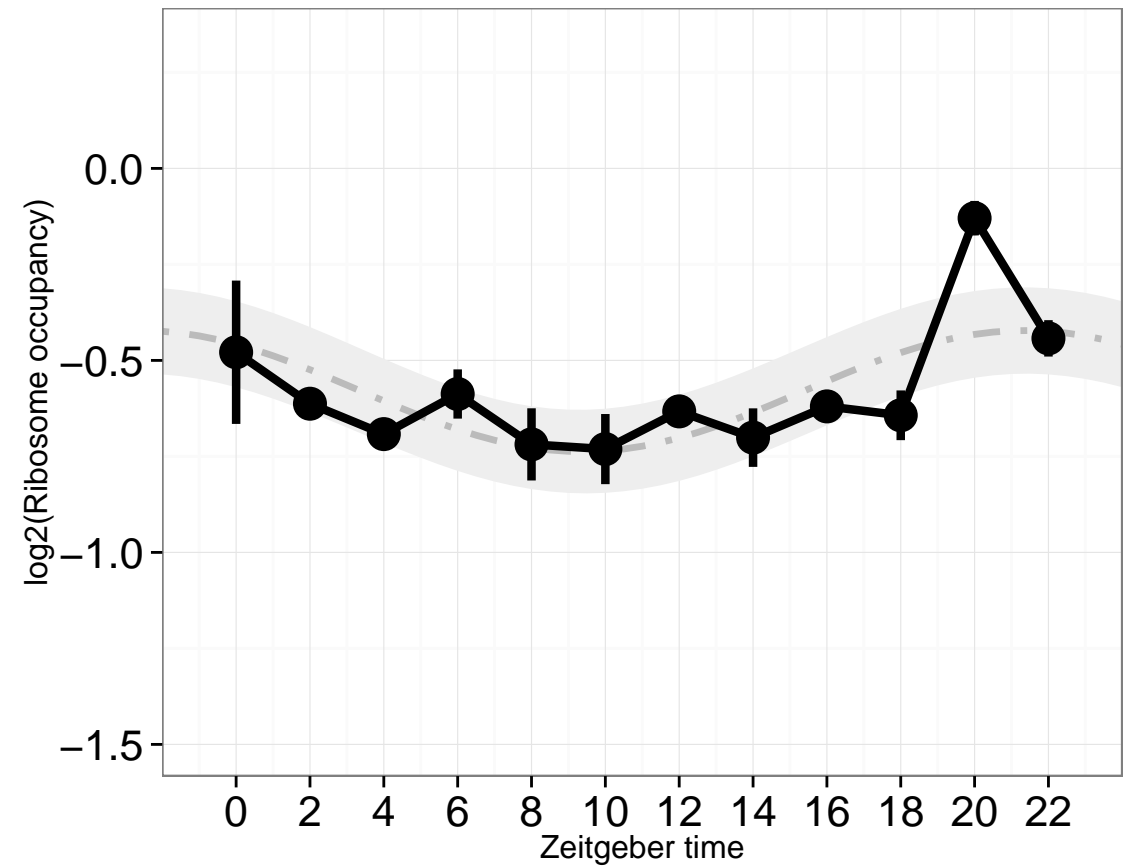

Supplement: Supplementary file 3491 [file 1]

## Ggcx

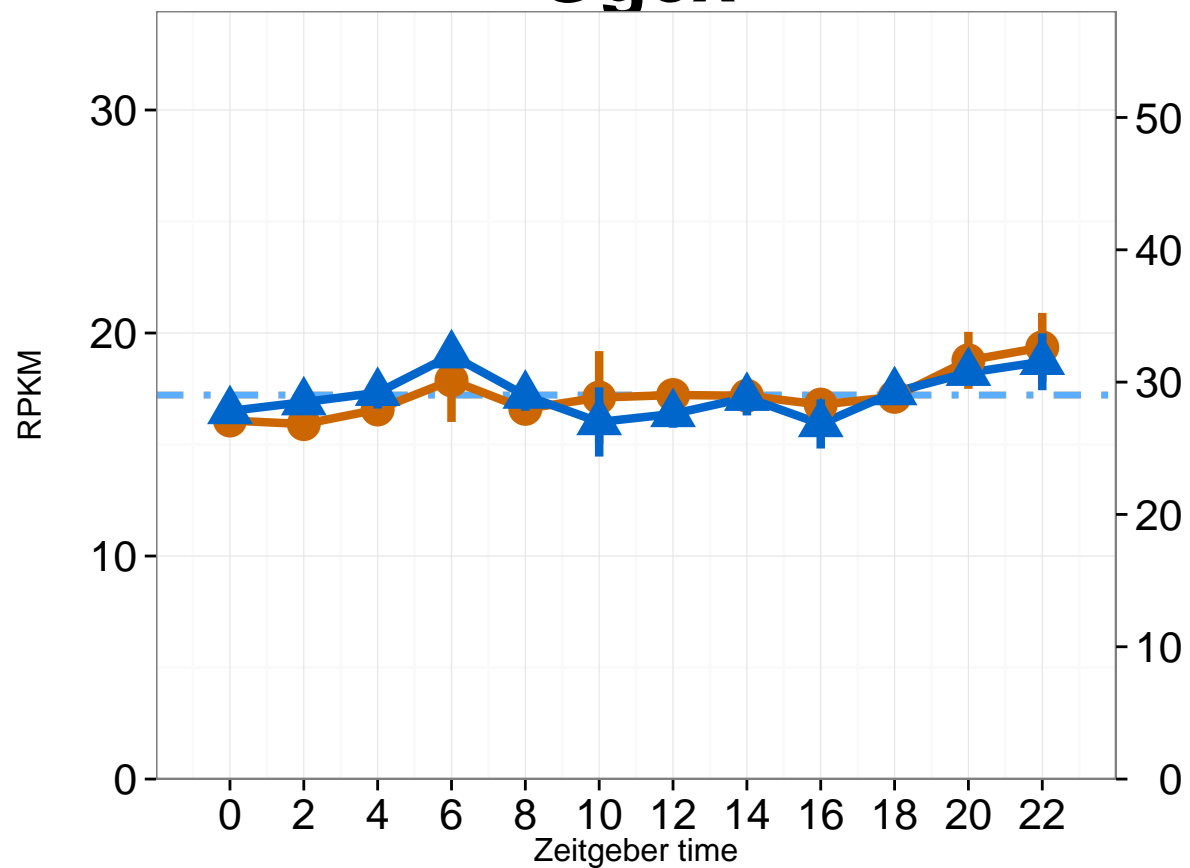

## Ggcx

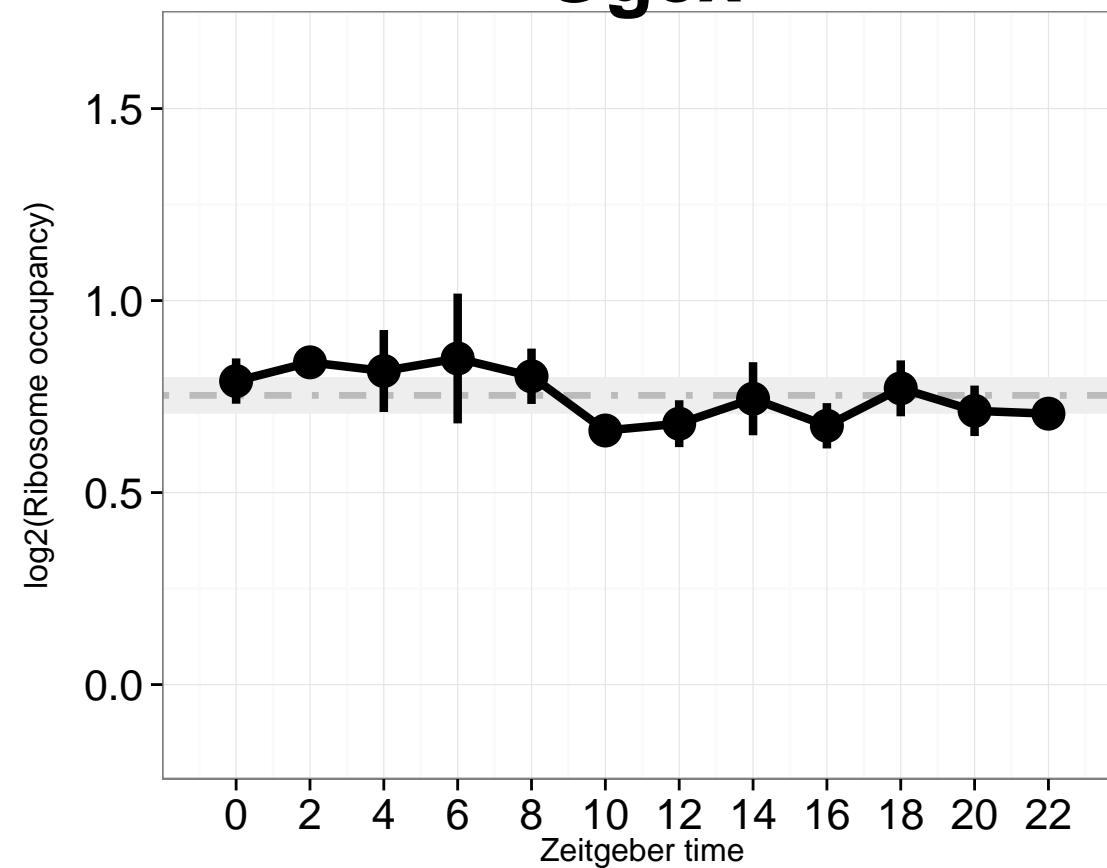

Supplement: Supplementary file 3492 [file 1]

## Zfp7

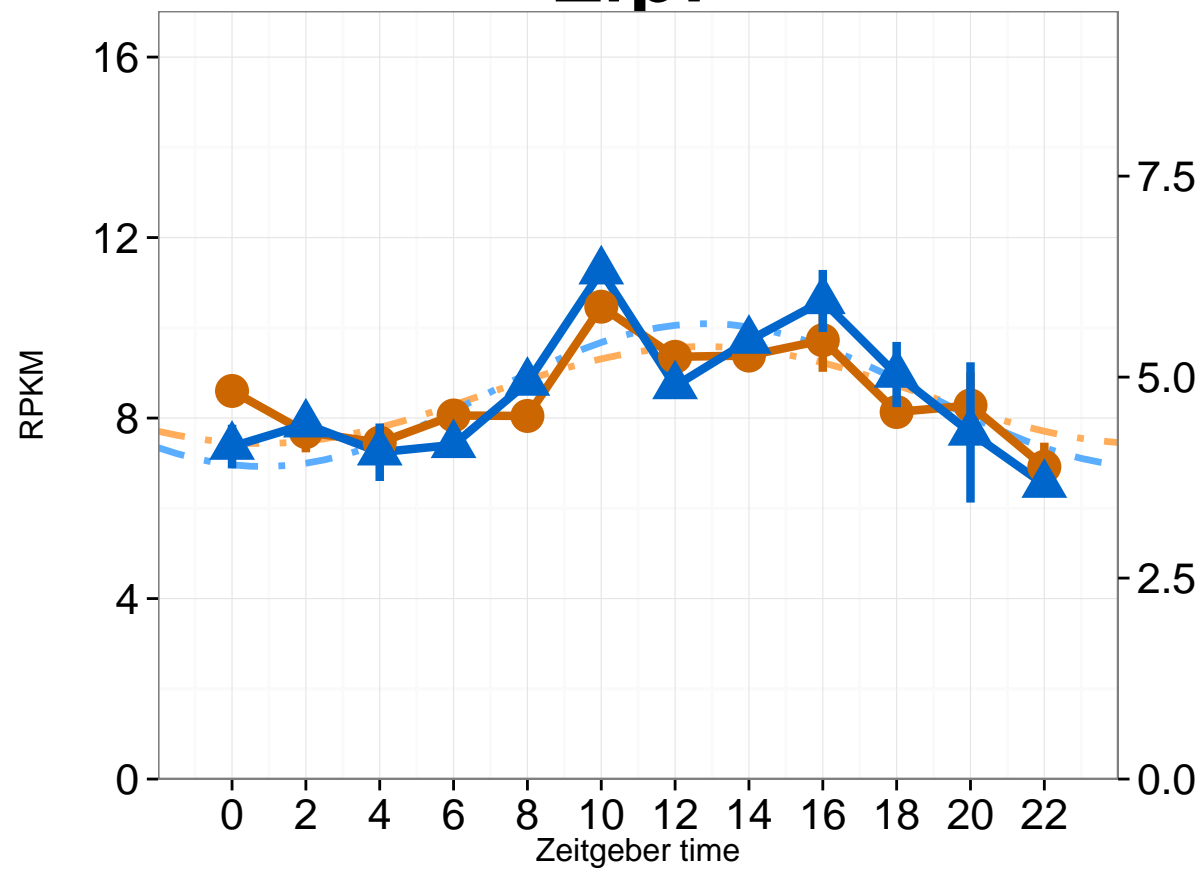

## Zfp7

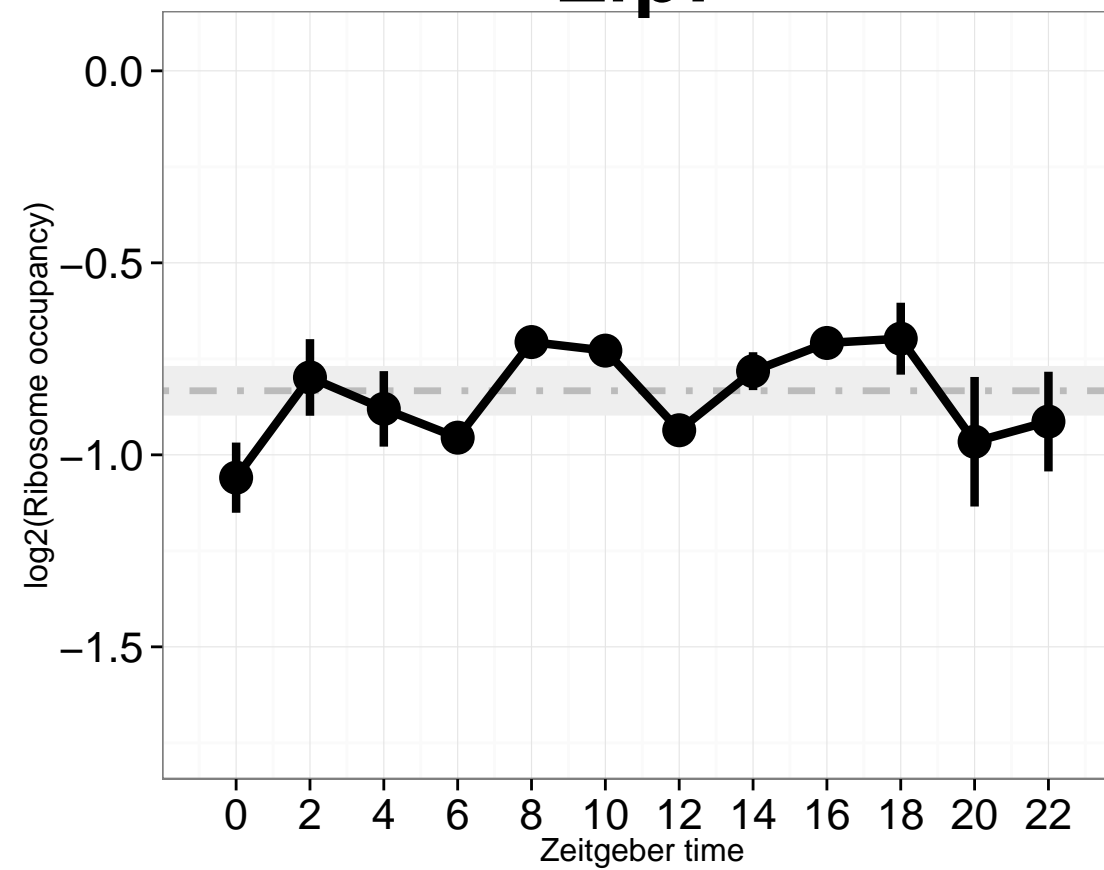

Supplement: Supplementary file 3493 [file 1]

## Setdb1

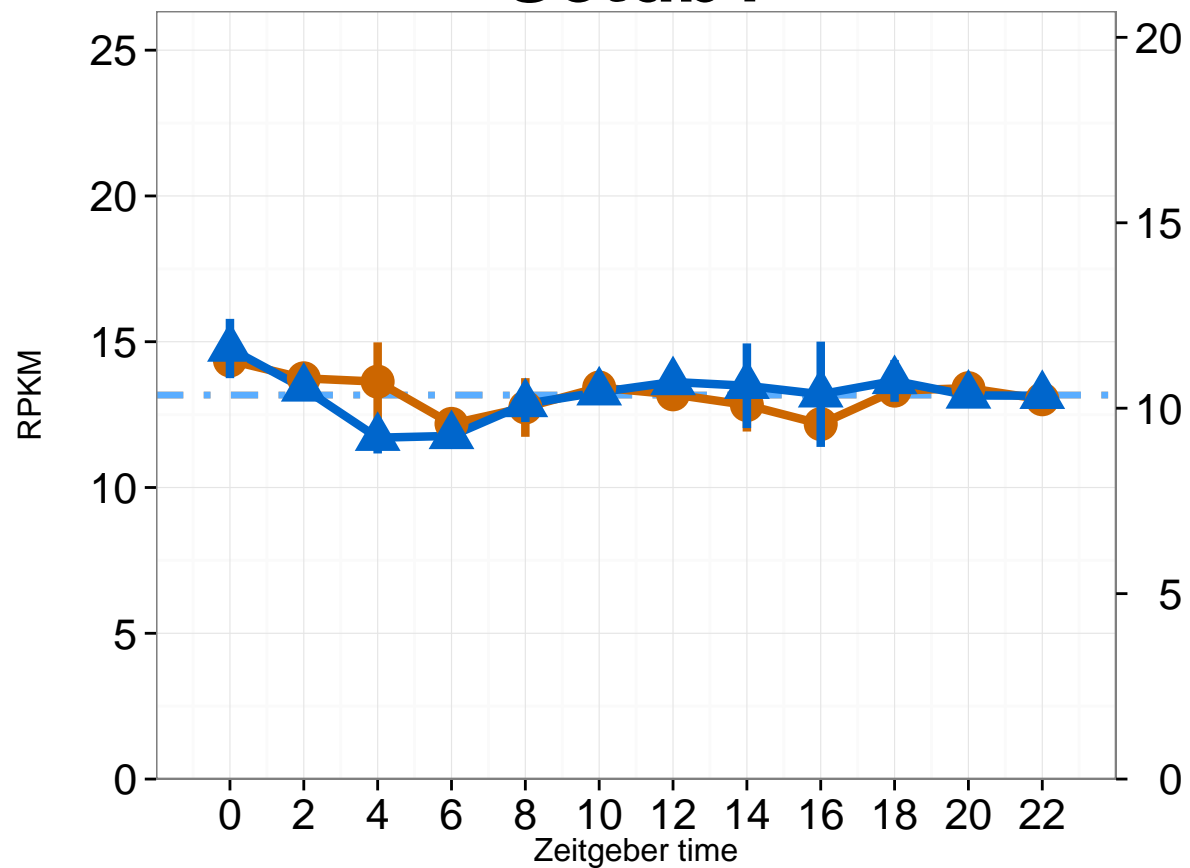

## Setdb1

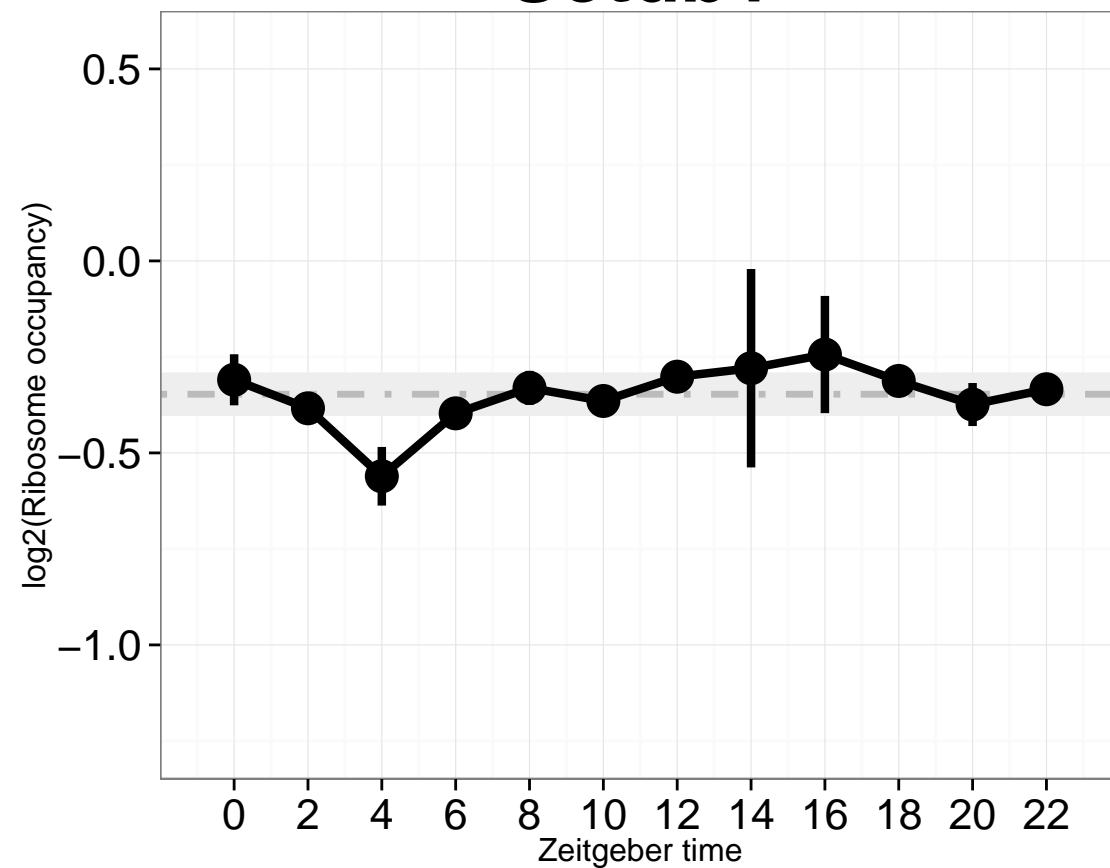

Supplement: Supplementary file 3494 [file 1]

## Lynx1

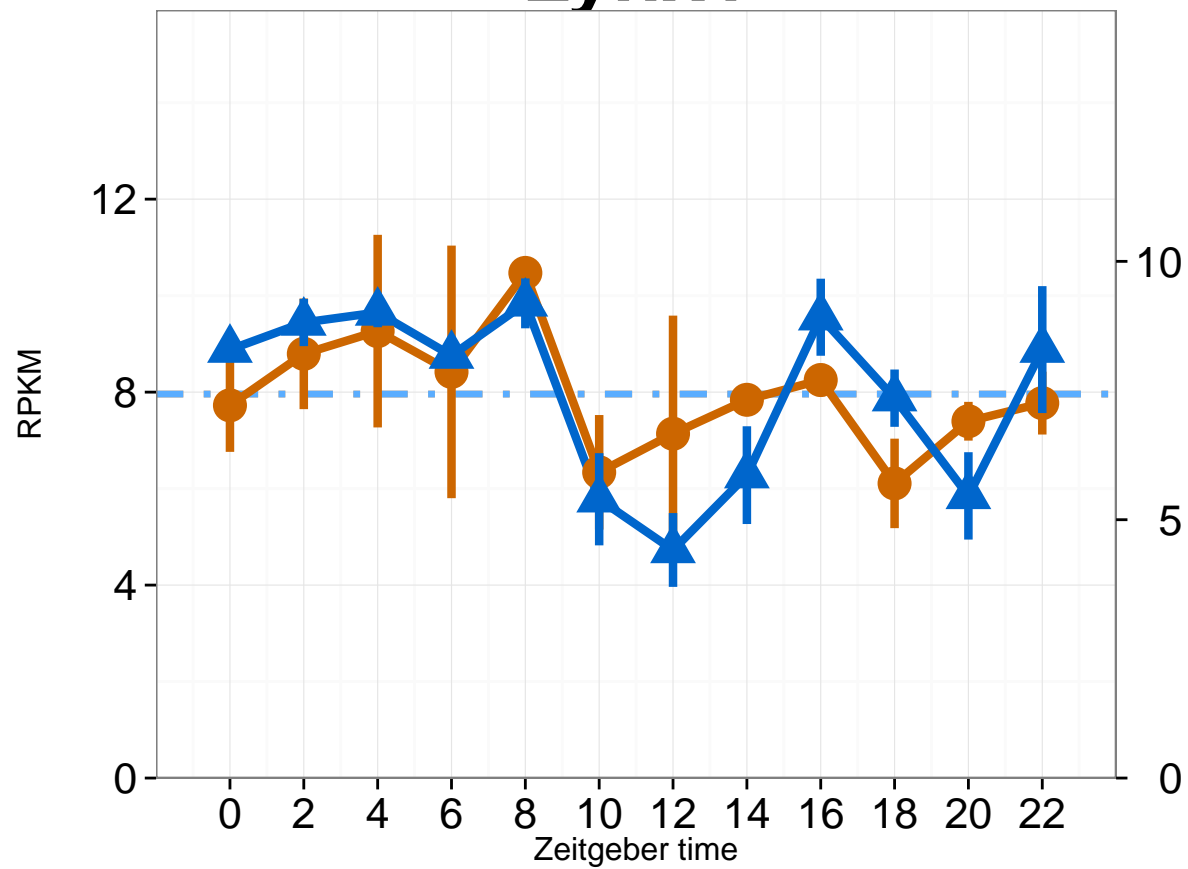

## Lynx1

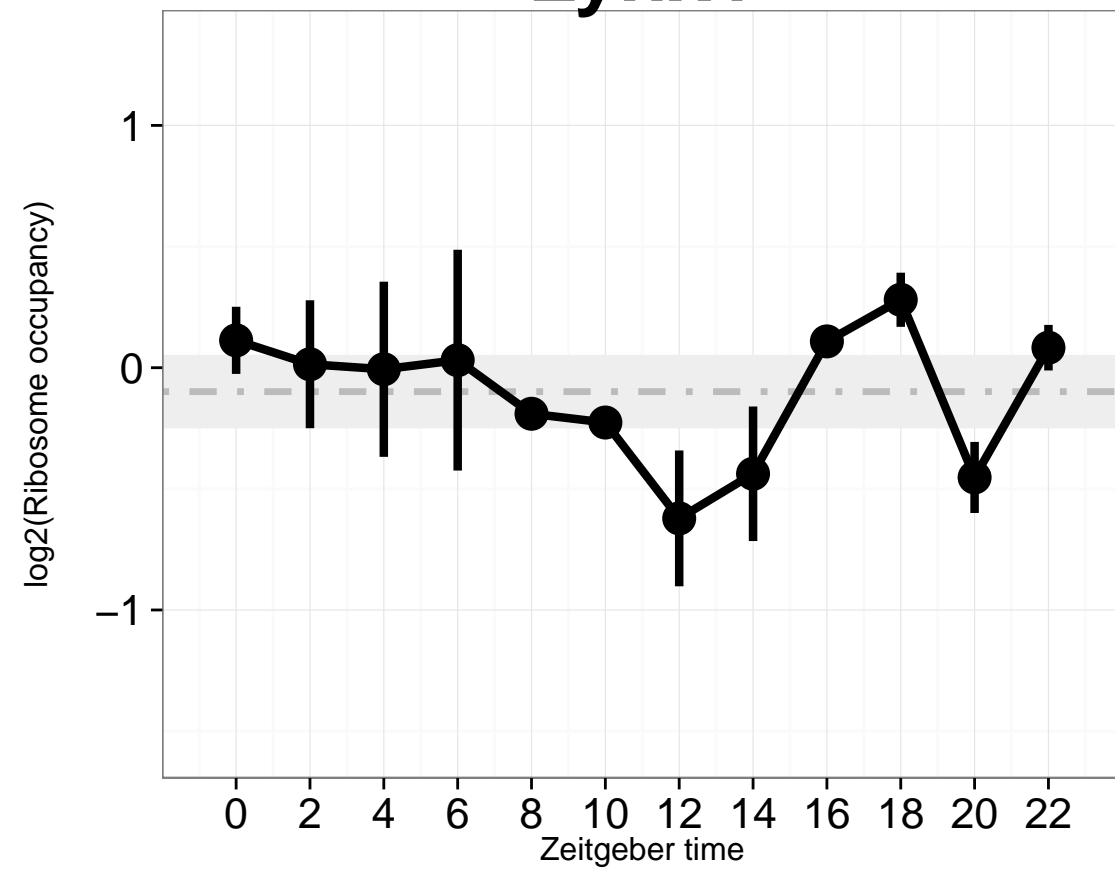

Supplement: Supplementary file 3495 [file 1]

## Fibin

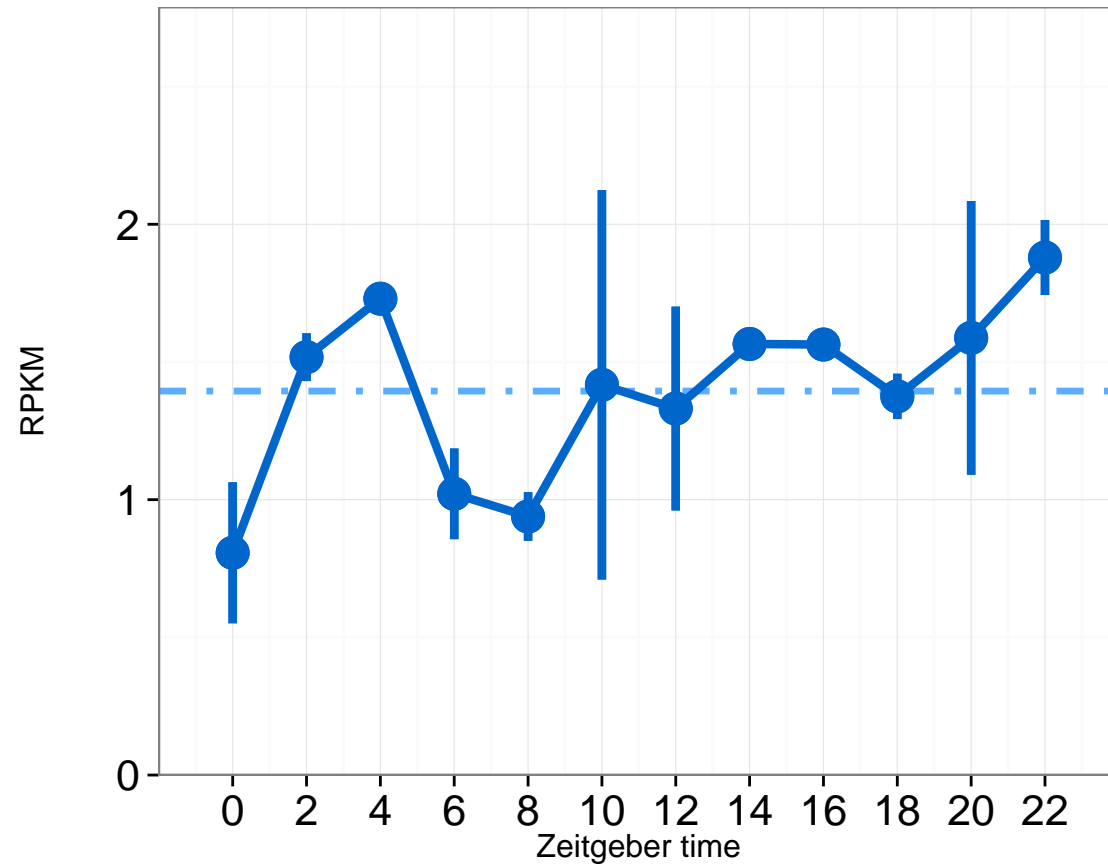

## Fibin log2(Ribosome occupancy)

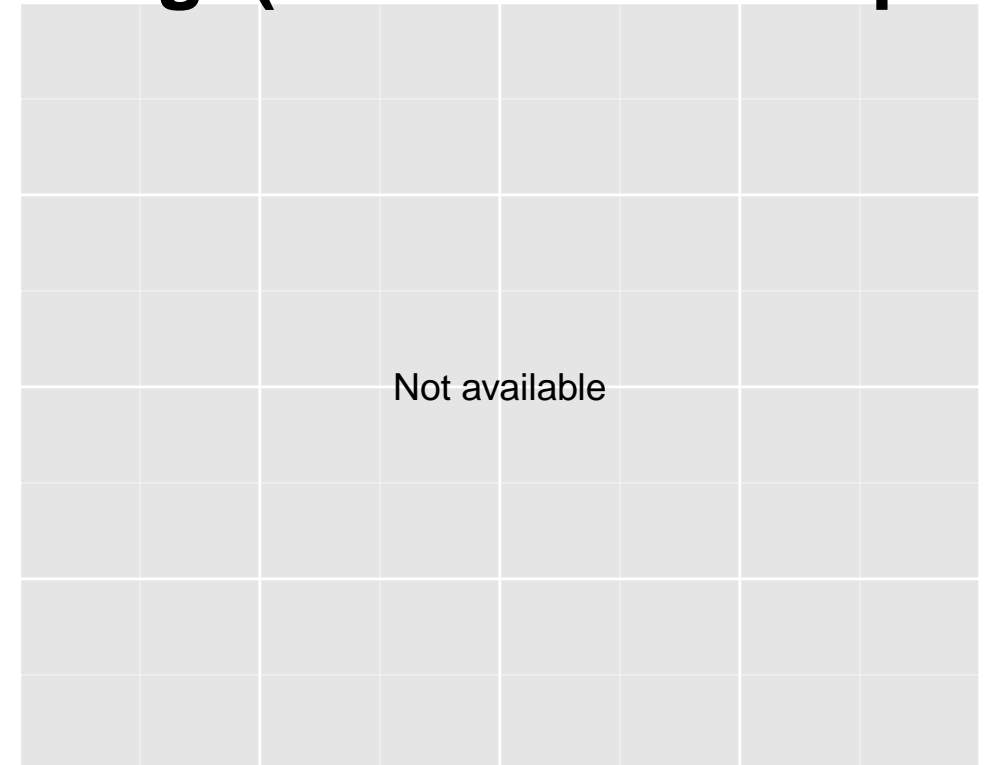

Supplement: Supplementary file 3496 [file 1]

# Itgal

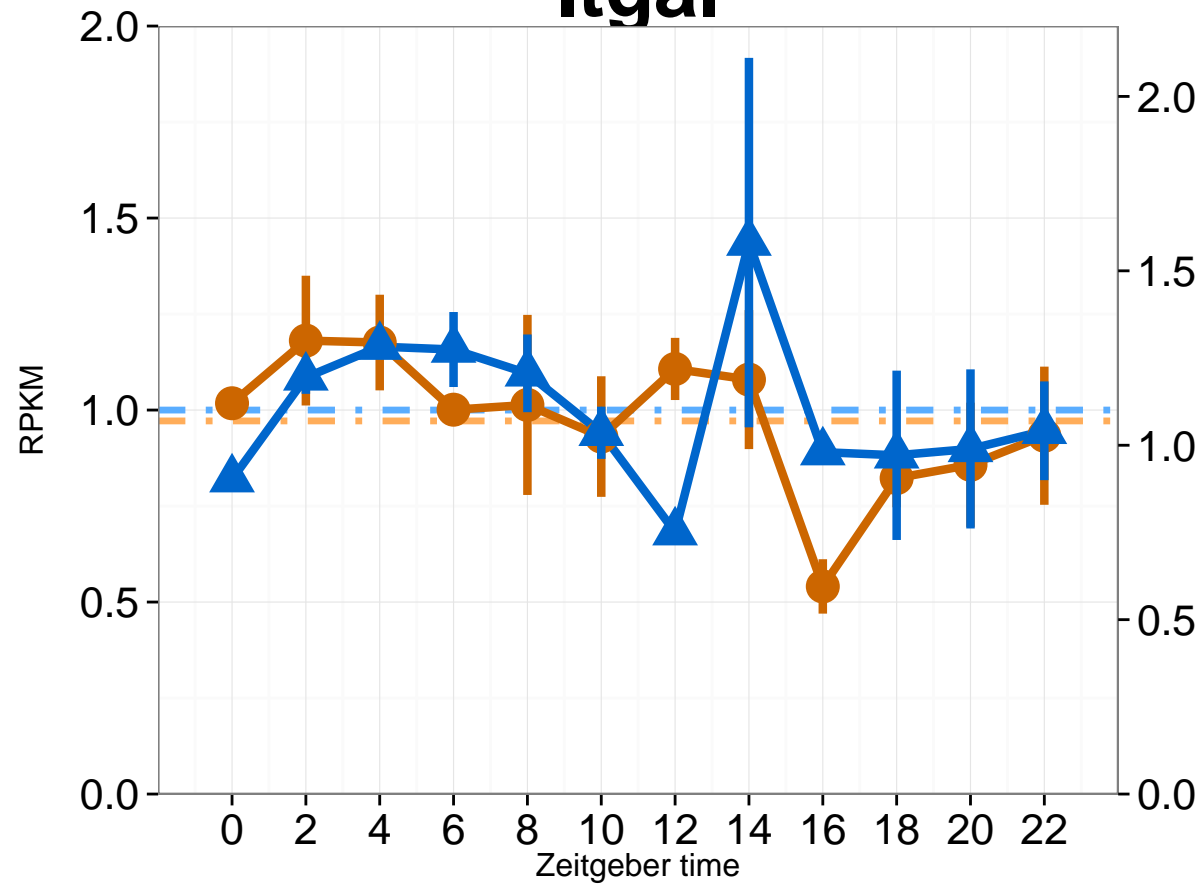

# Itgal

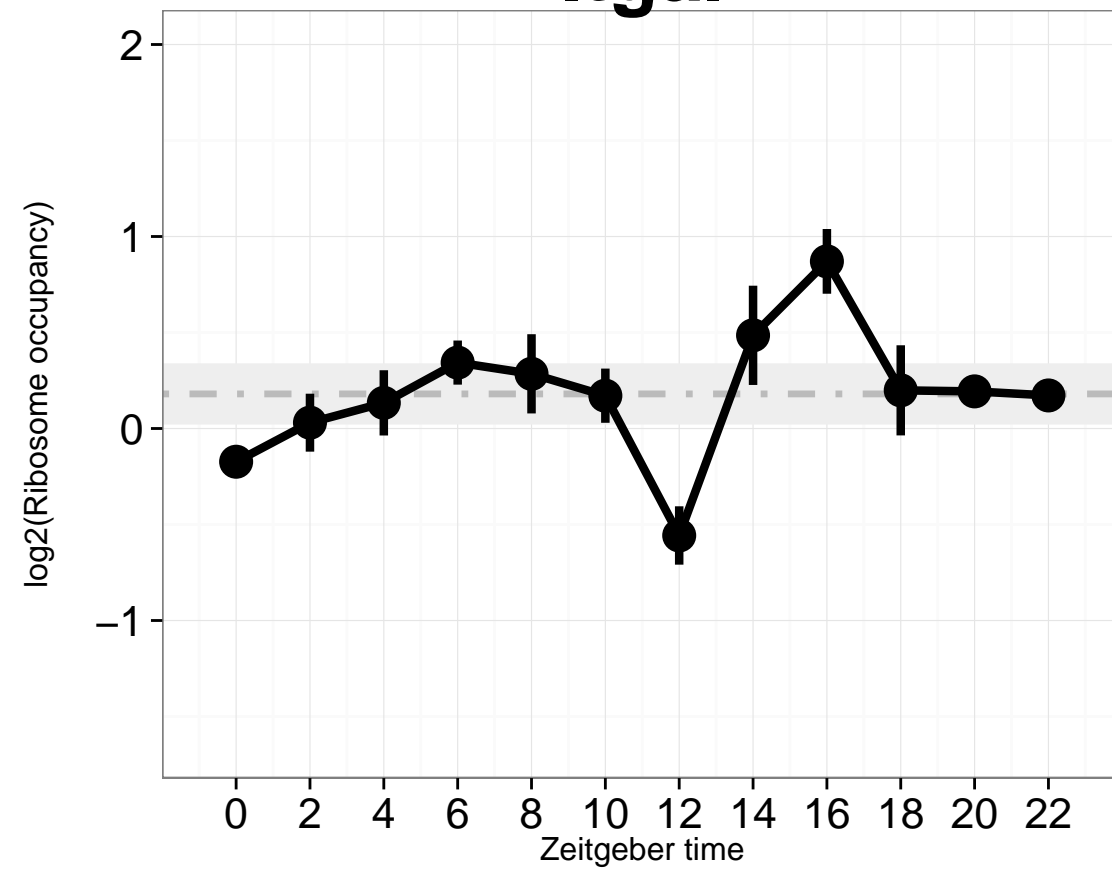

Supplement: Supplementary file 3497 [file 1]

## Cav1

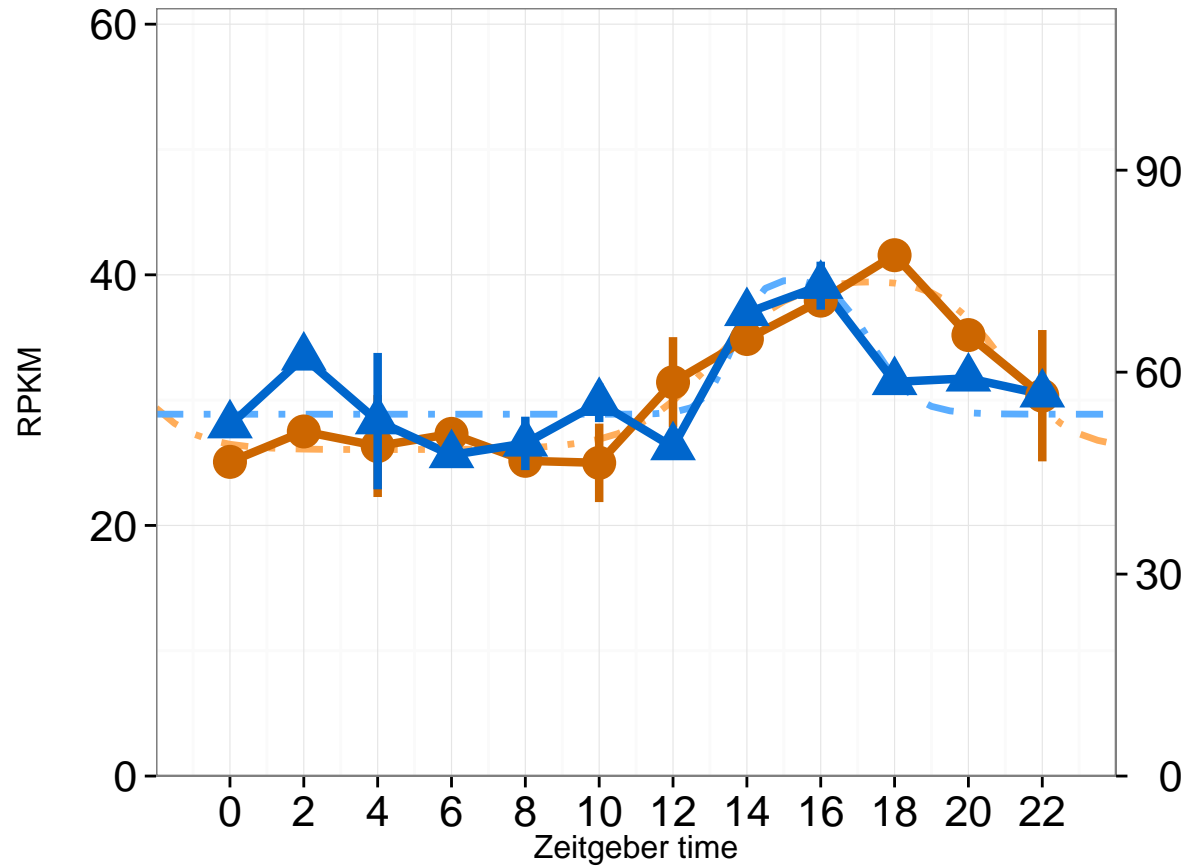

## Cav1

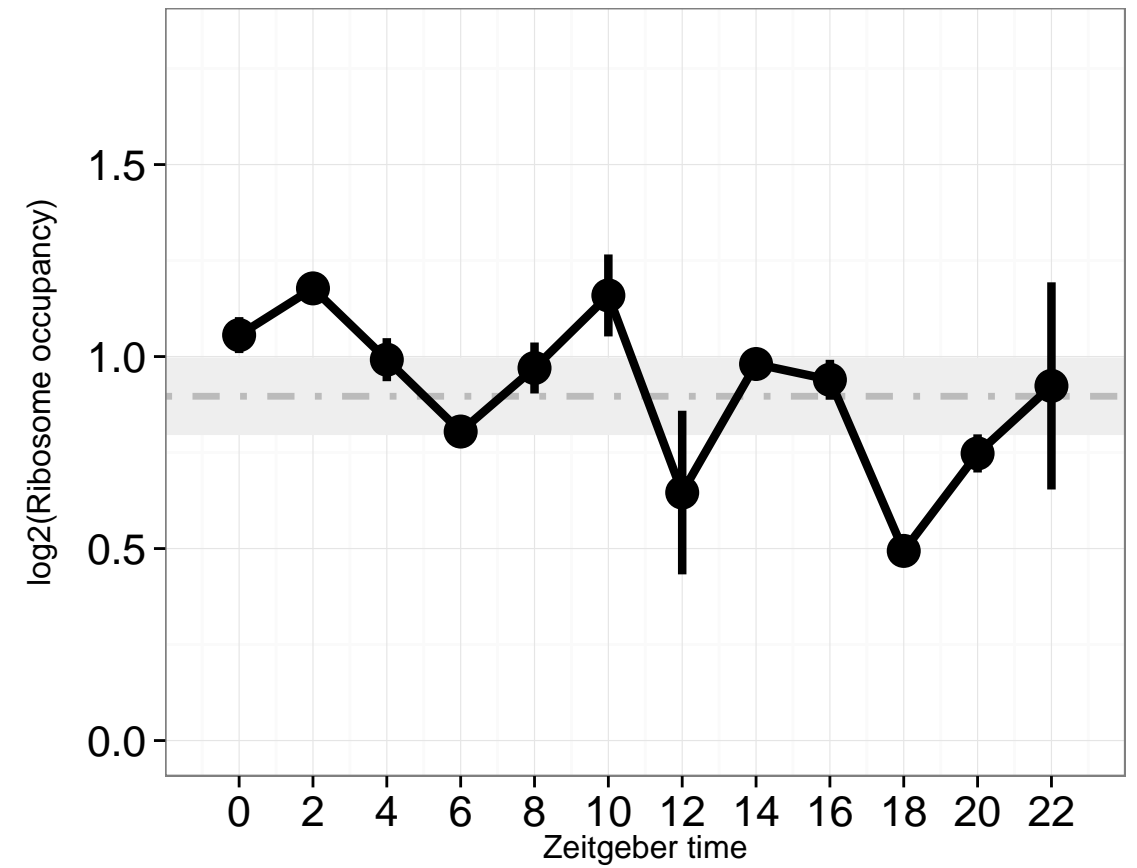

Supplement: Supplementary file 3498 [file 1]

## Cdipt

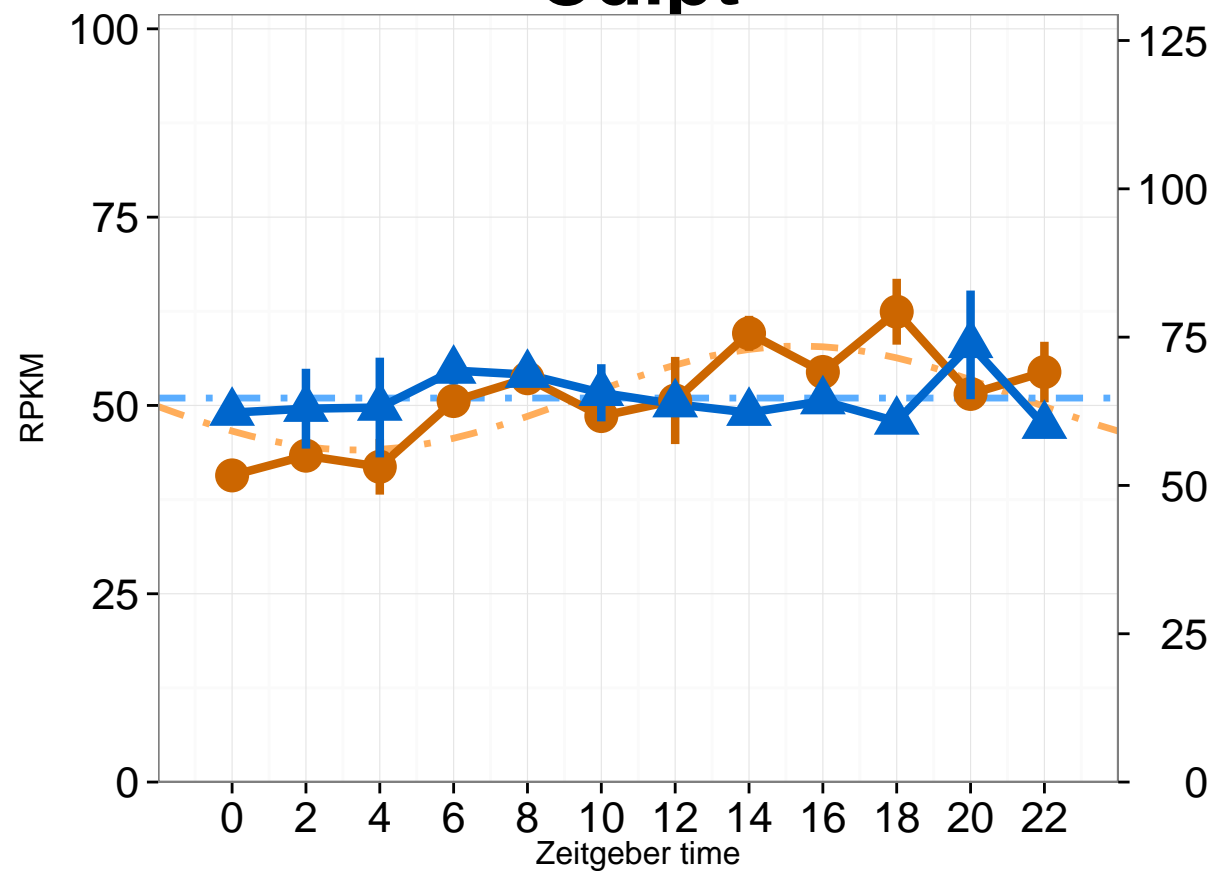

## Cdipt

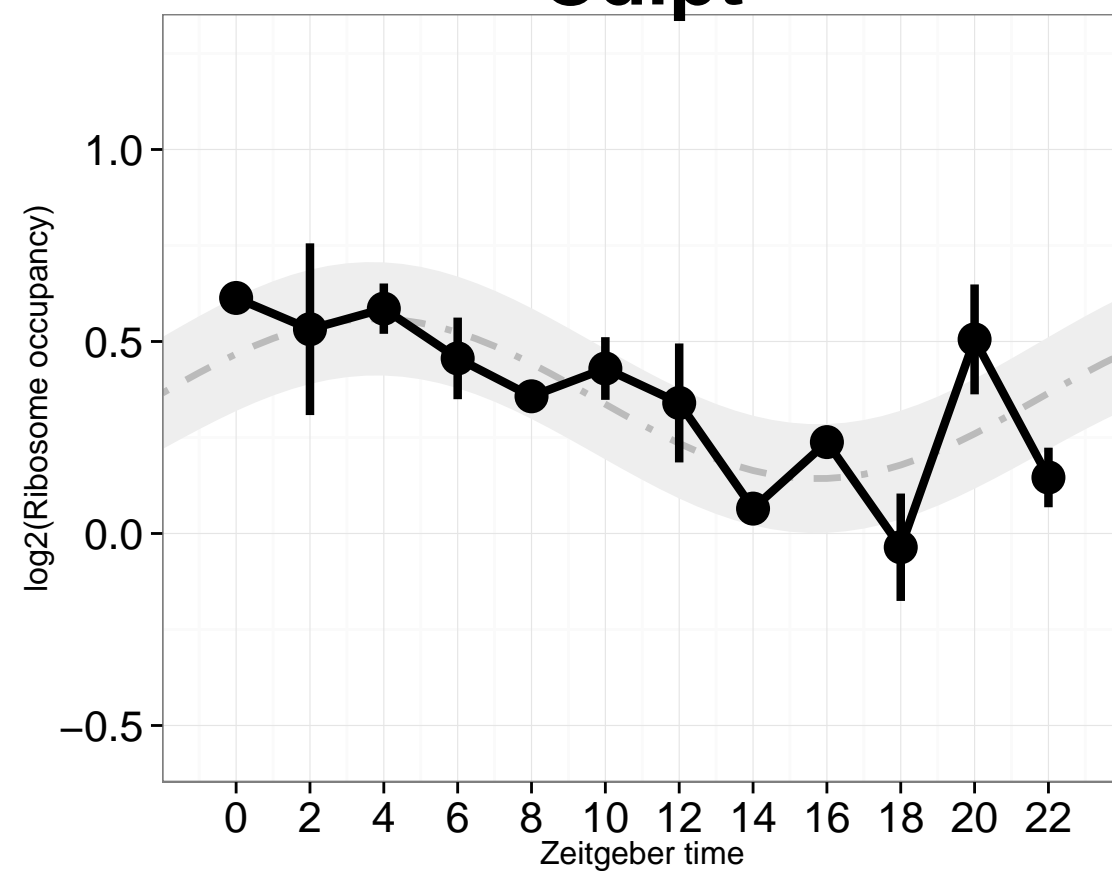

Supplement: Supplementary file 3499 [file 1]

# Tomm70a

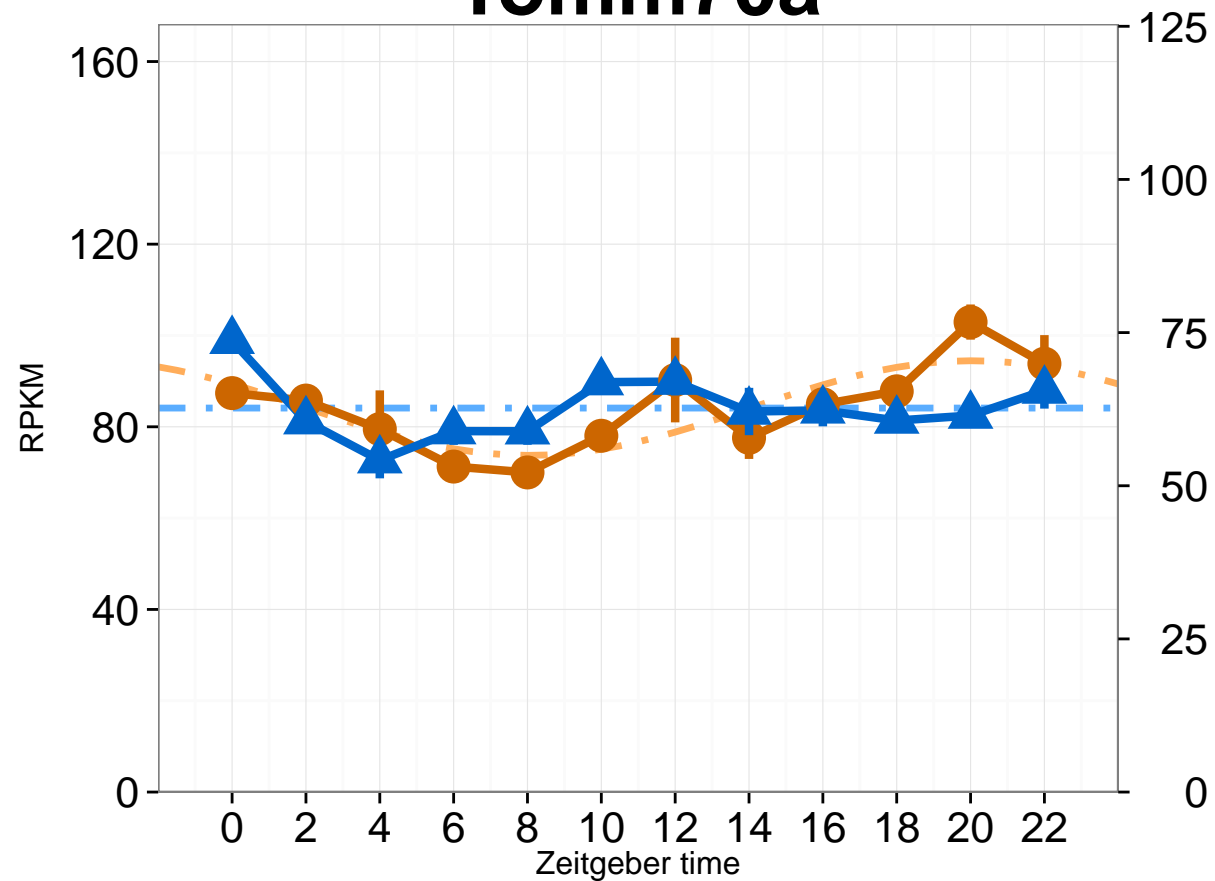

# Tomm70a

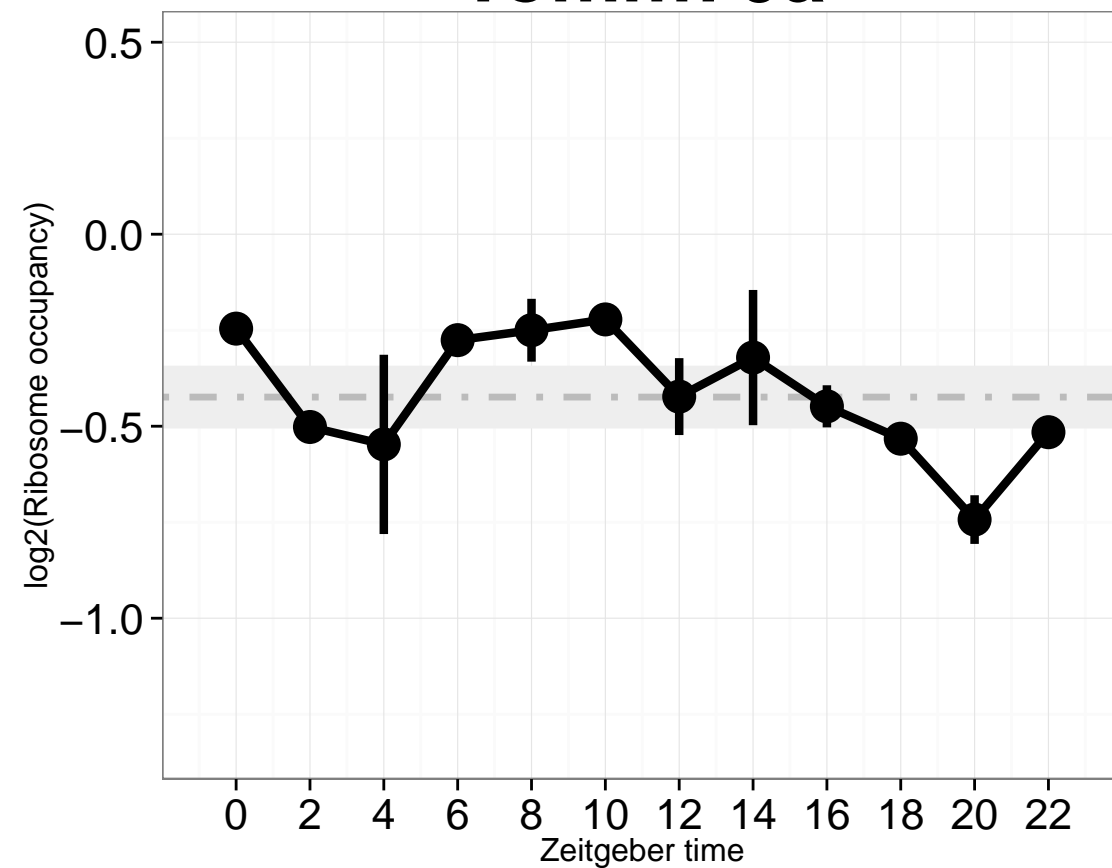

Supplement: Supplementary file 3500 [file 1]

## Fst

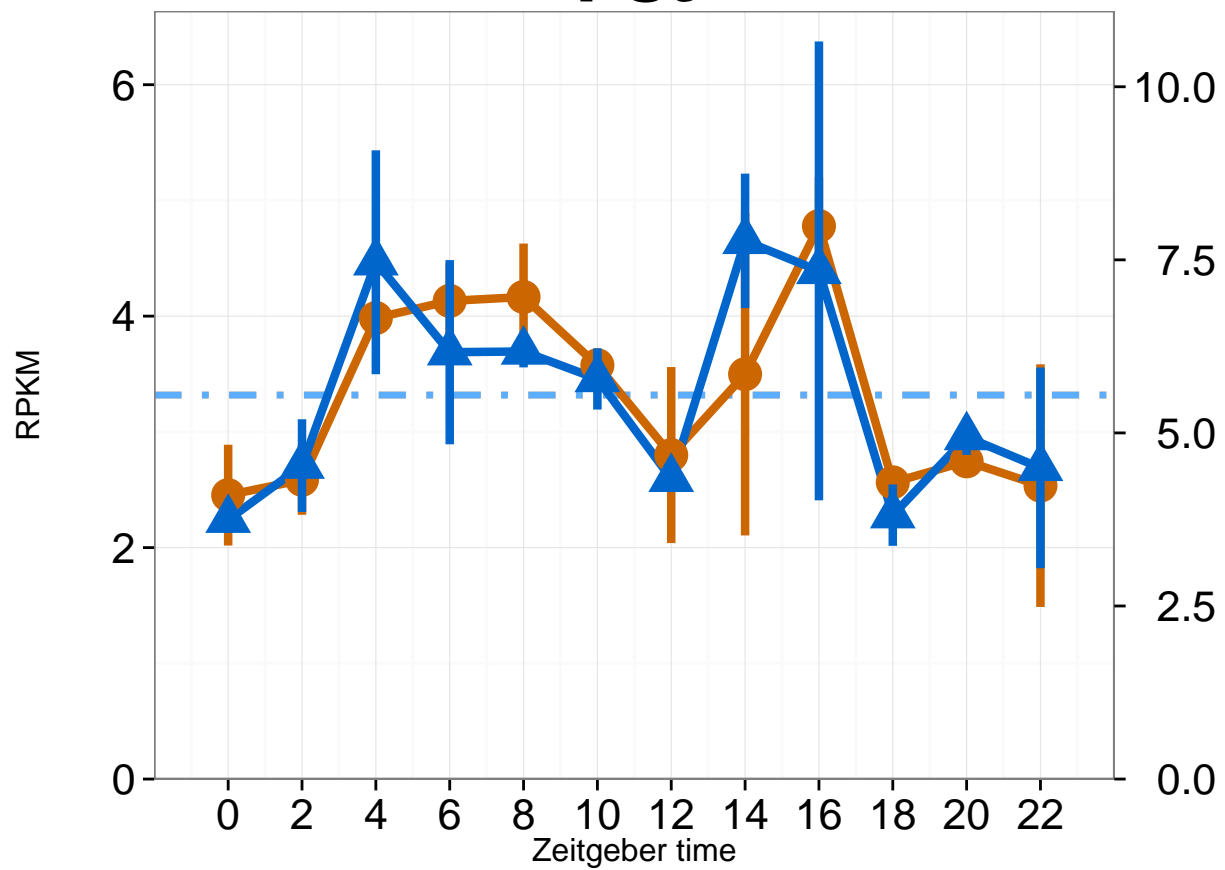

## Fst

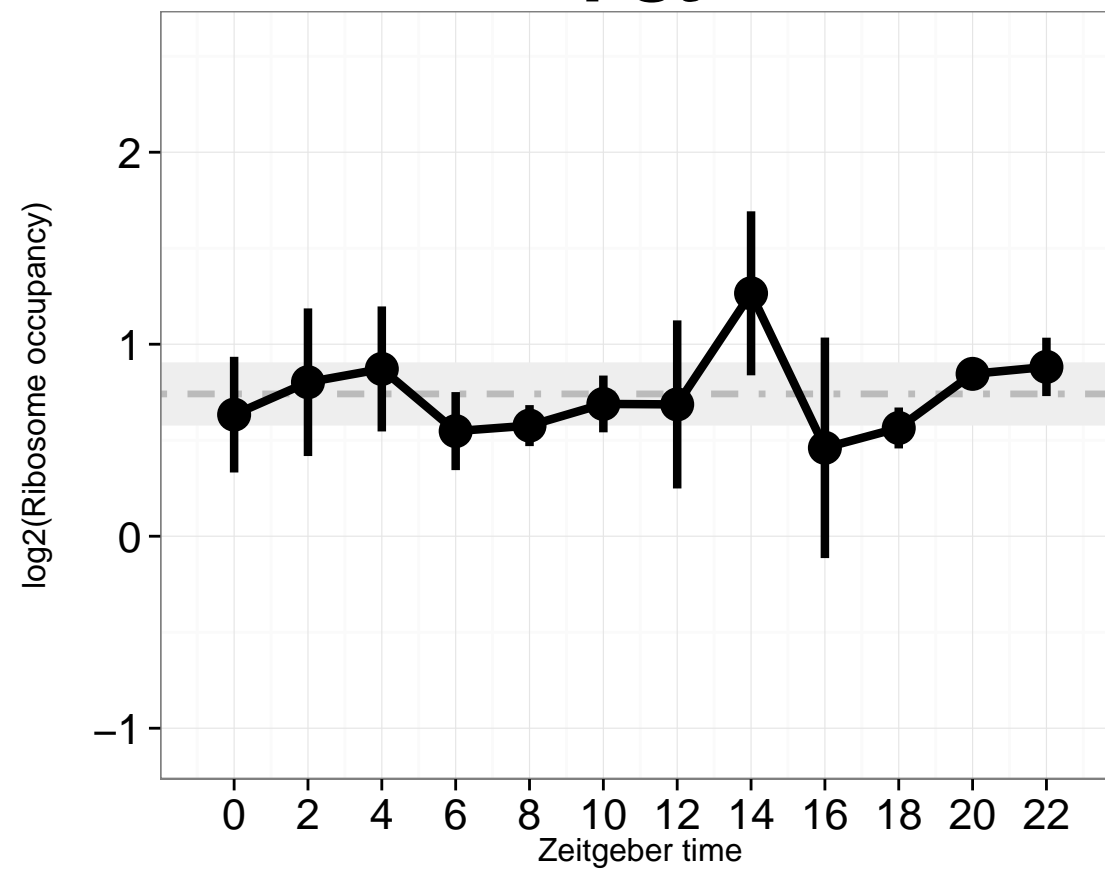

Supplement: Supplementary file 3501 [file 1]

## OxId1

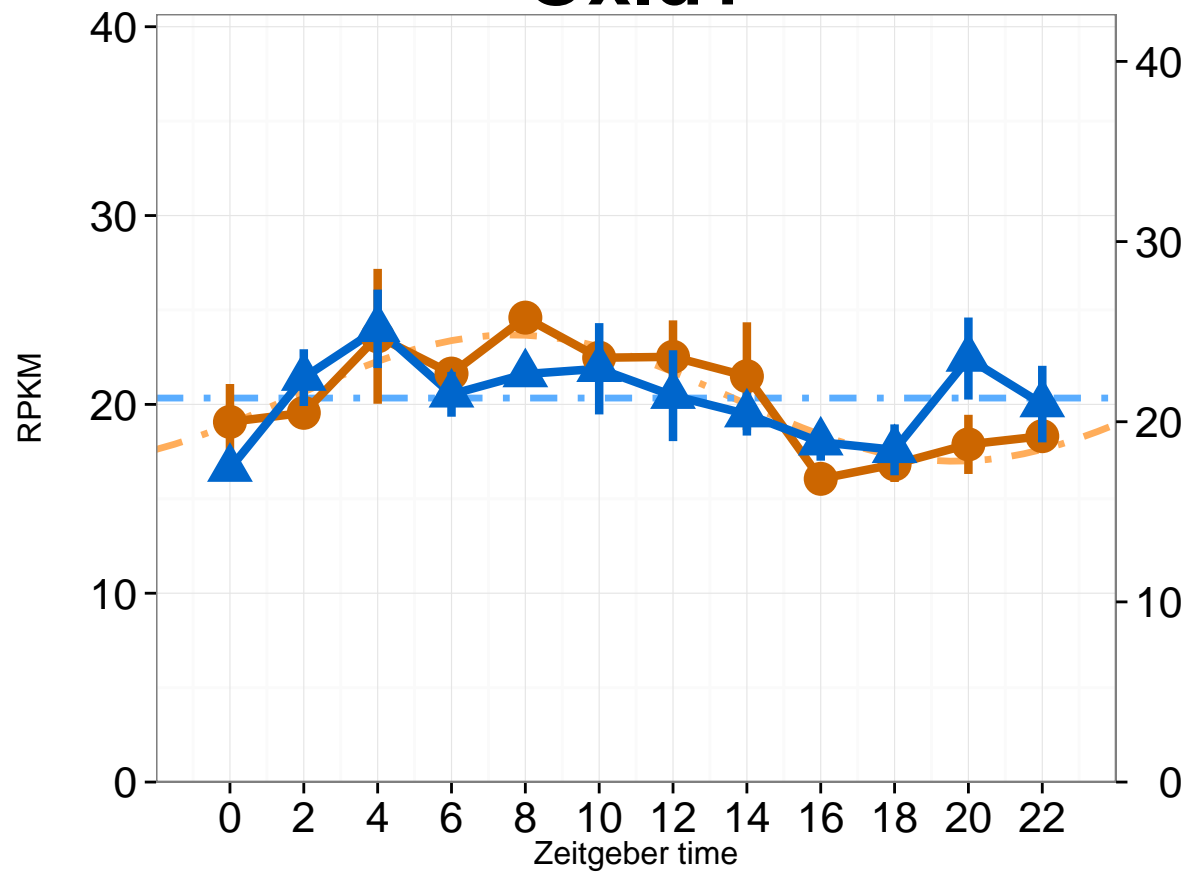

## OxId1

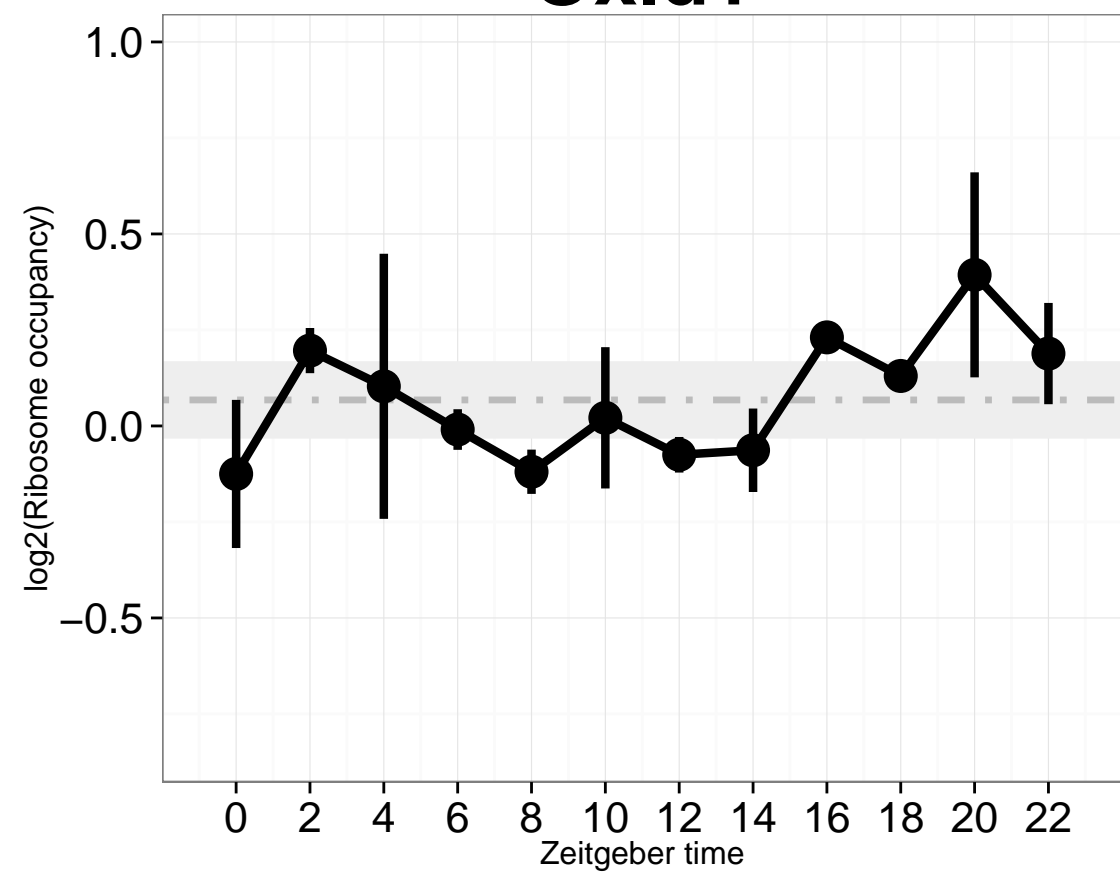

Supplement: Supplementary file 3502 [file 1]

## Gria3

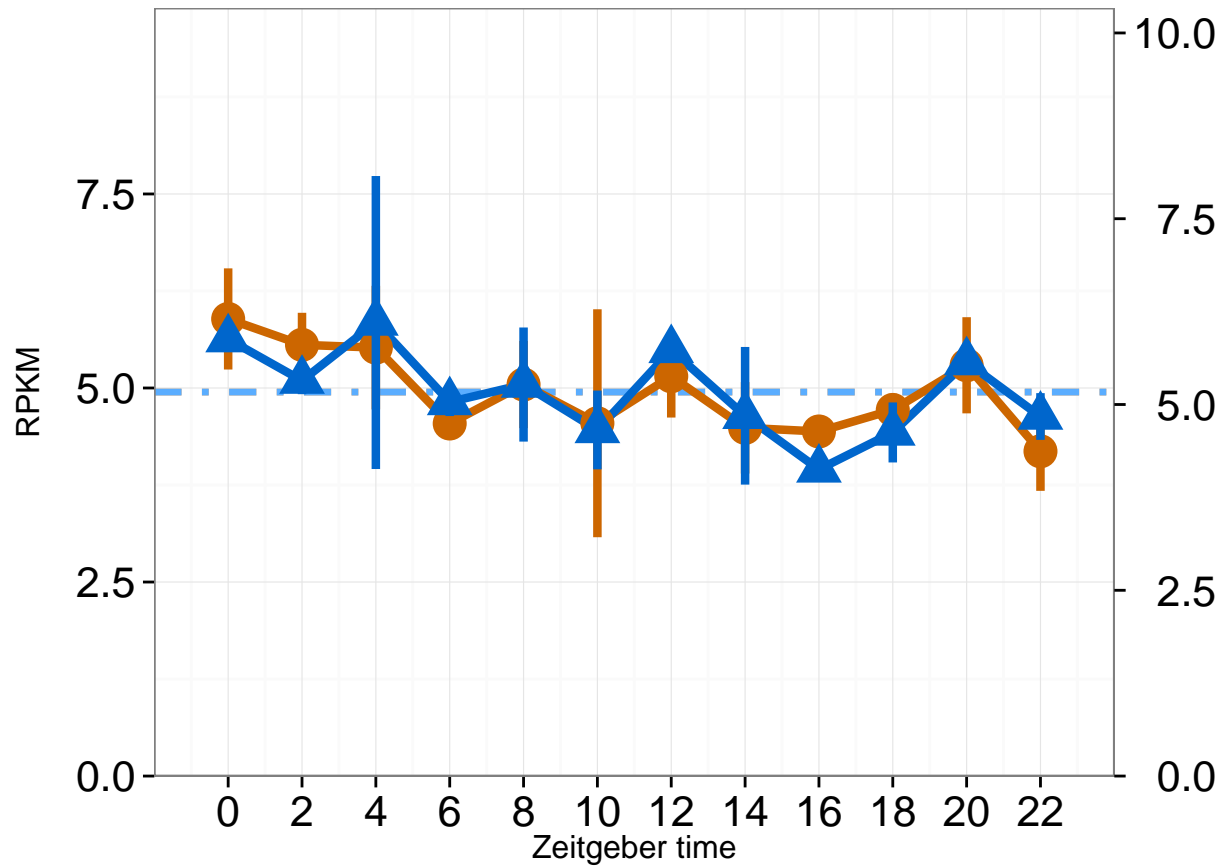

## Gria3

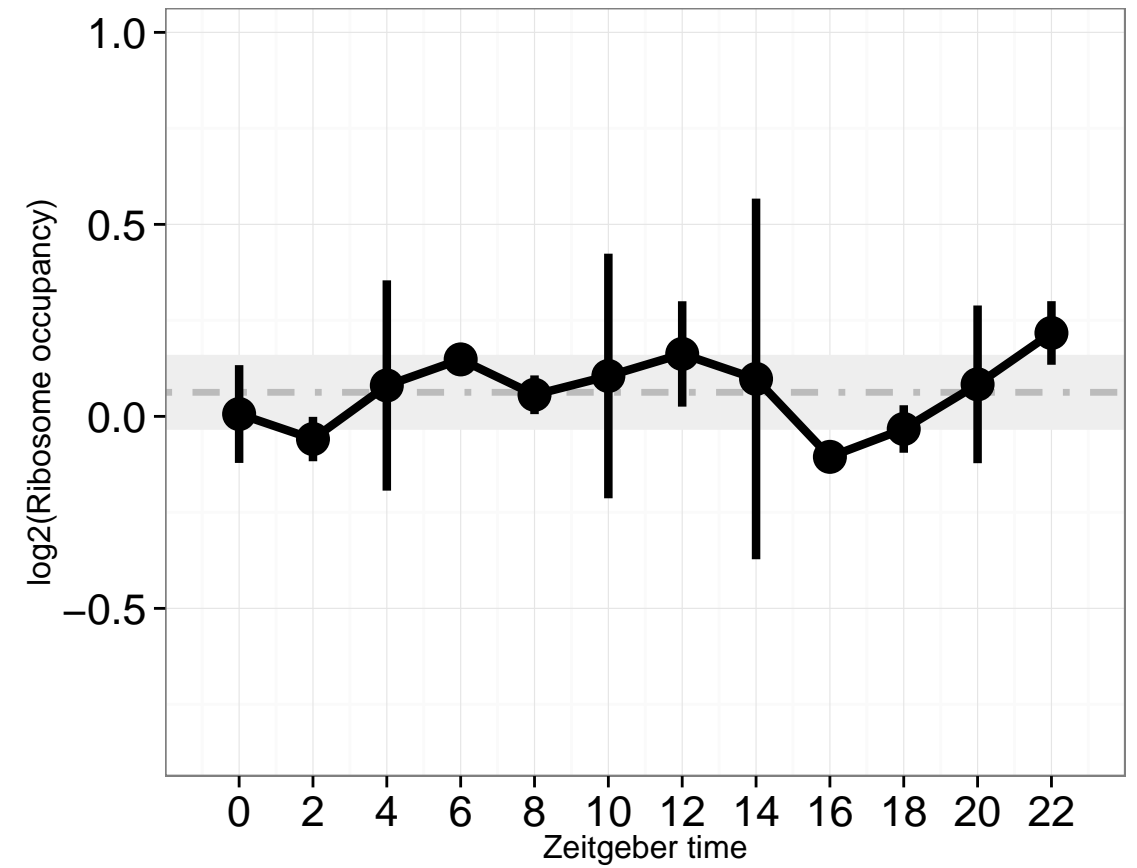

Supplement: Supplementary file 3503 [file 1]

## Crocc

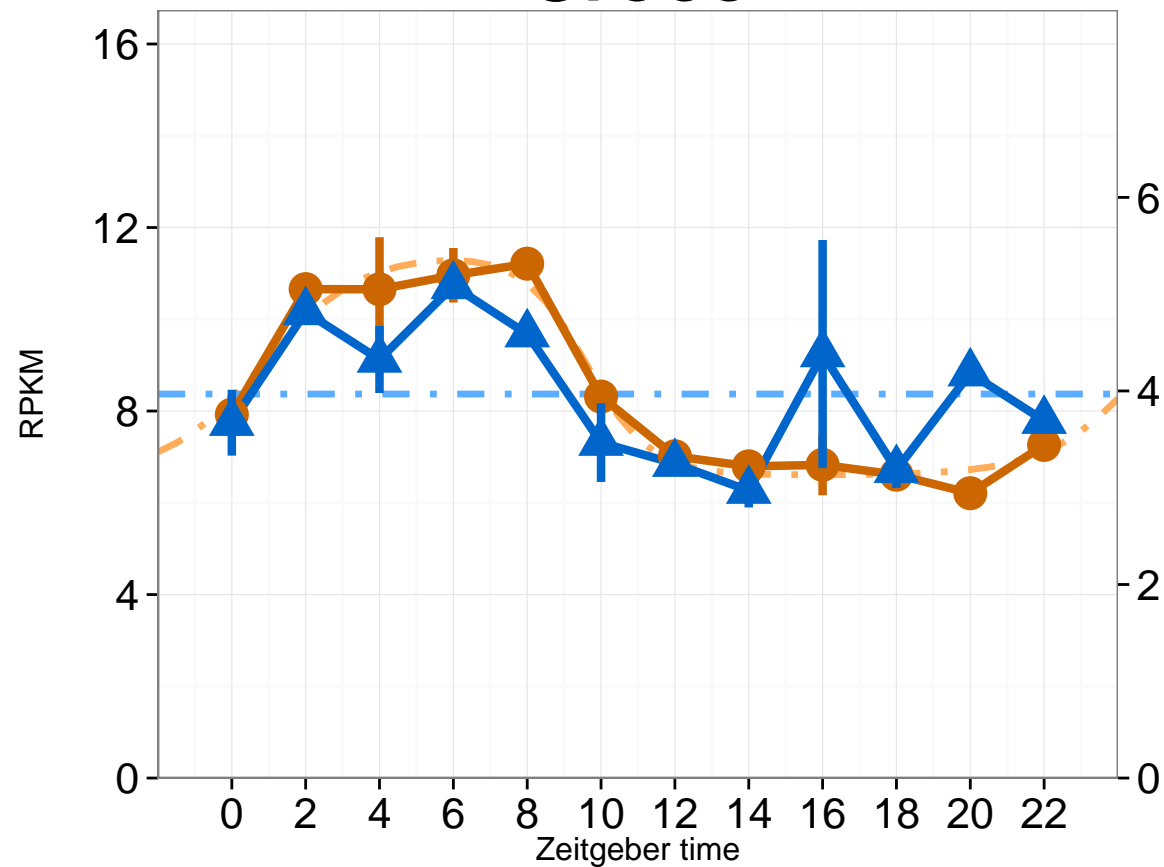

## Crocc

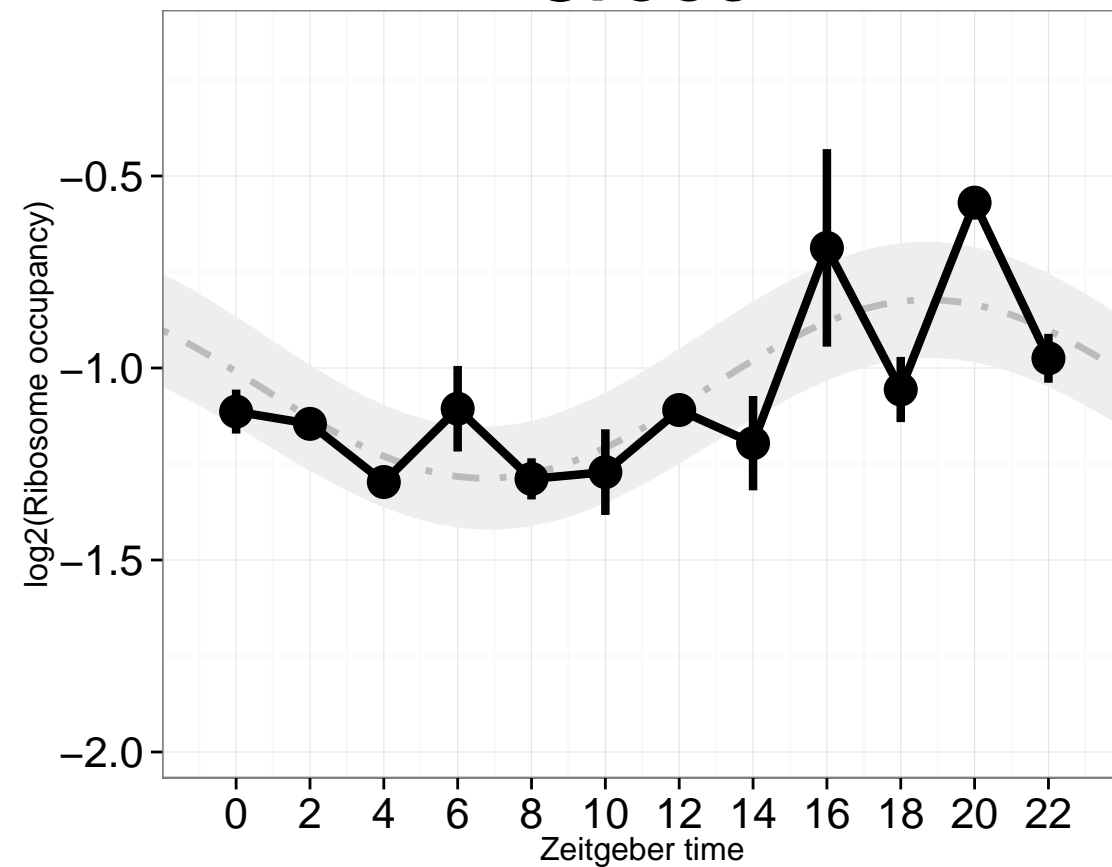

Supplement: Supplementary file 3505 [file 1]

# Gm10845

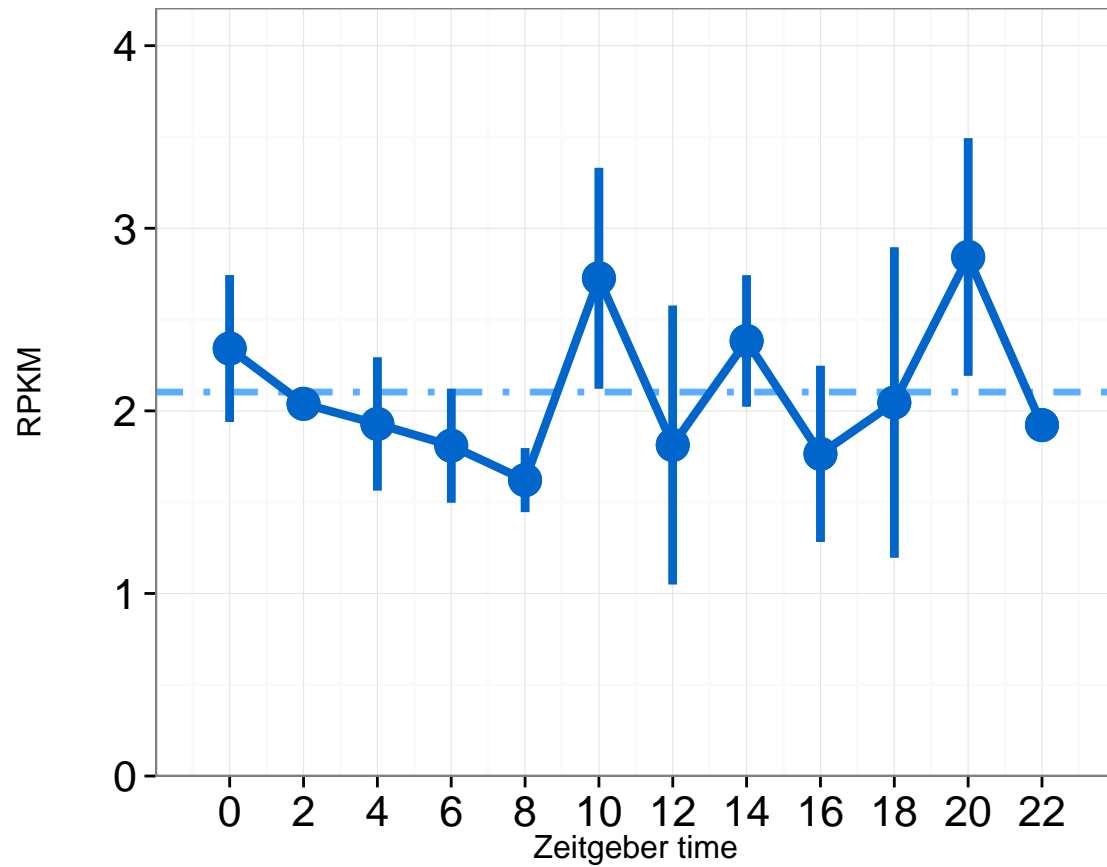

# Gm10845 log2(Ribosome occupanc

Supplement: Supplementary file 3506 [file 1]

# Spag1

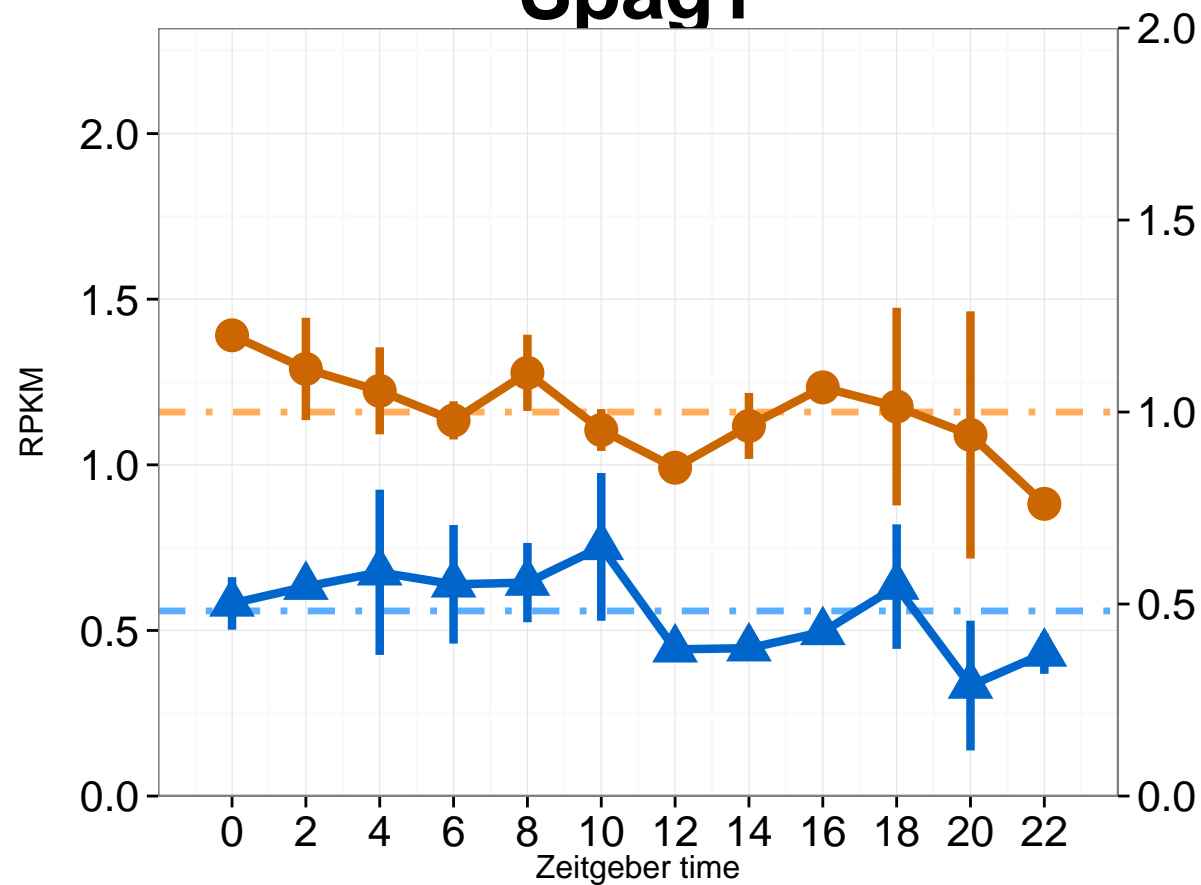

# Spag1

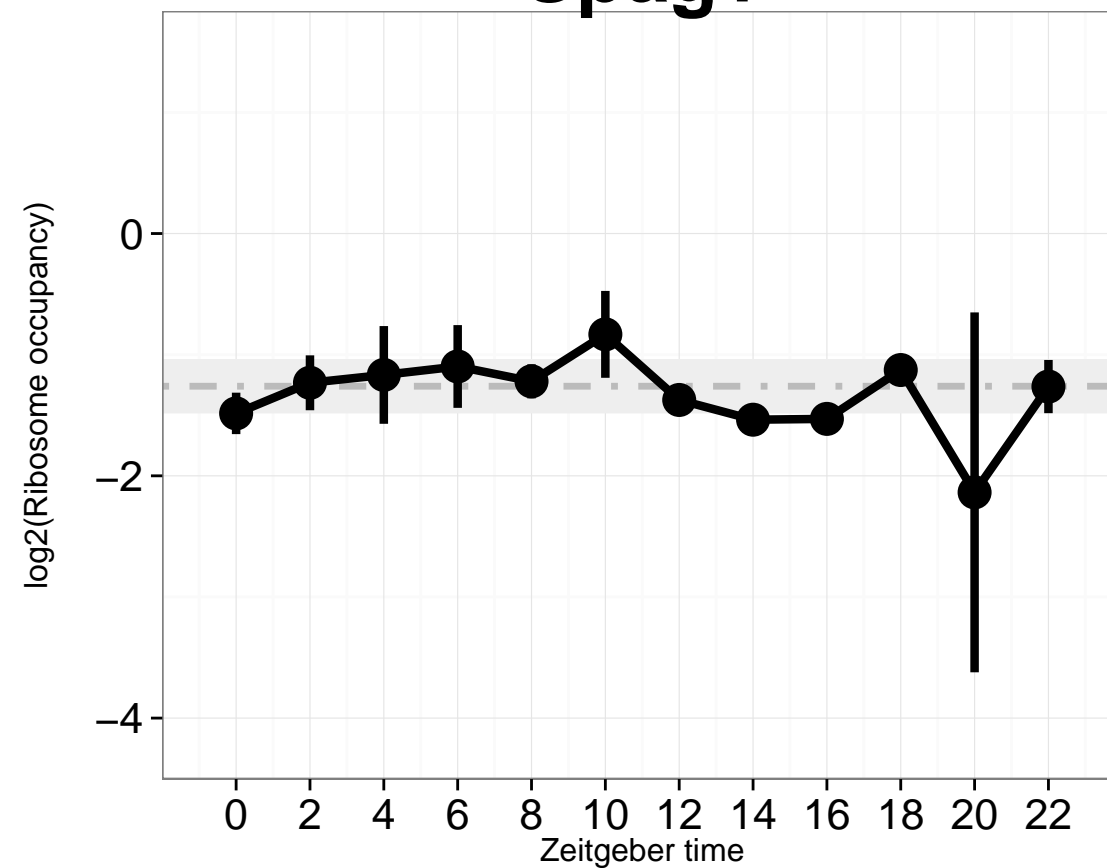

Supplement: Supplementary file 3507 [file 1]

## Fcgrt

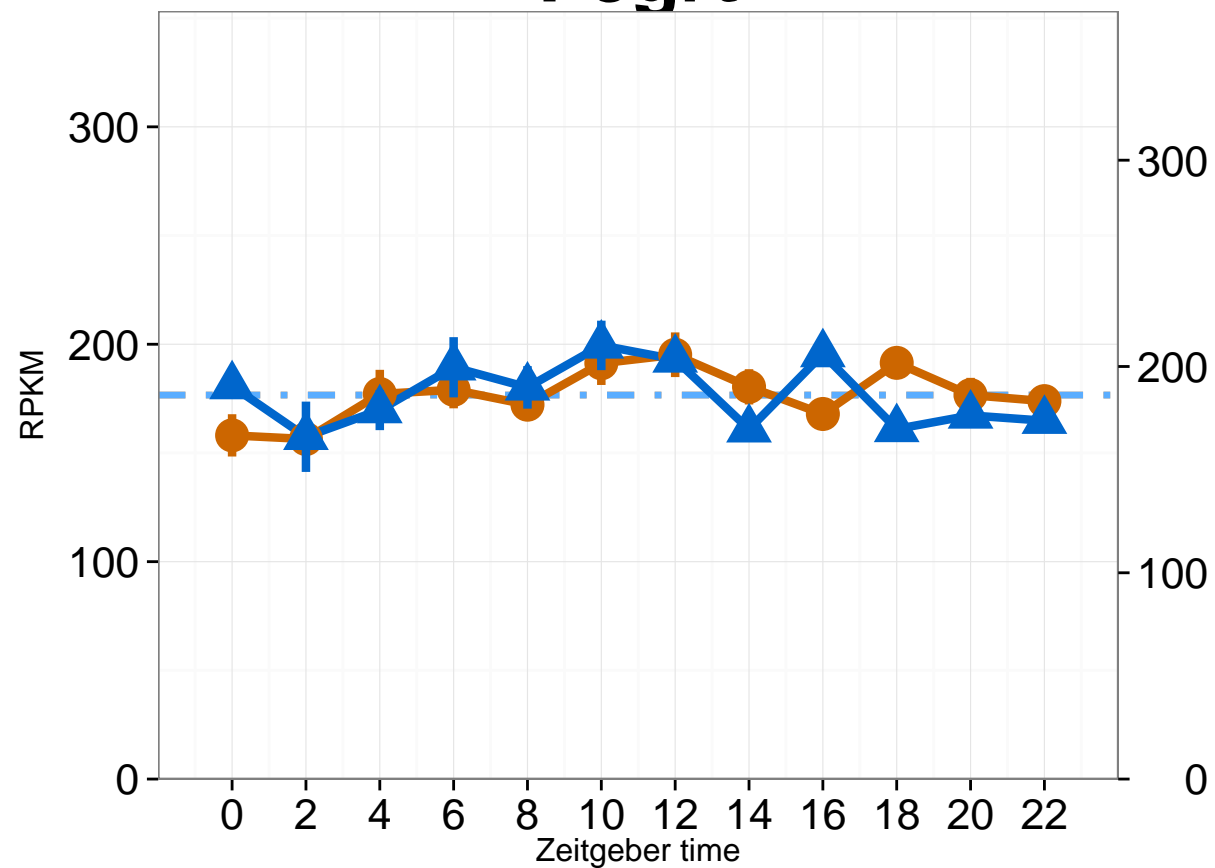

## Fcgrt

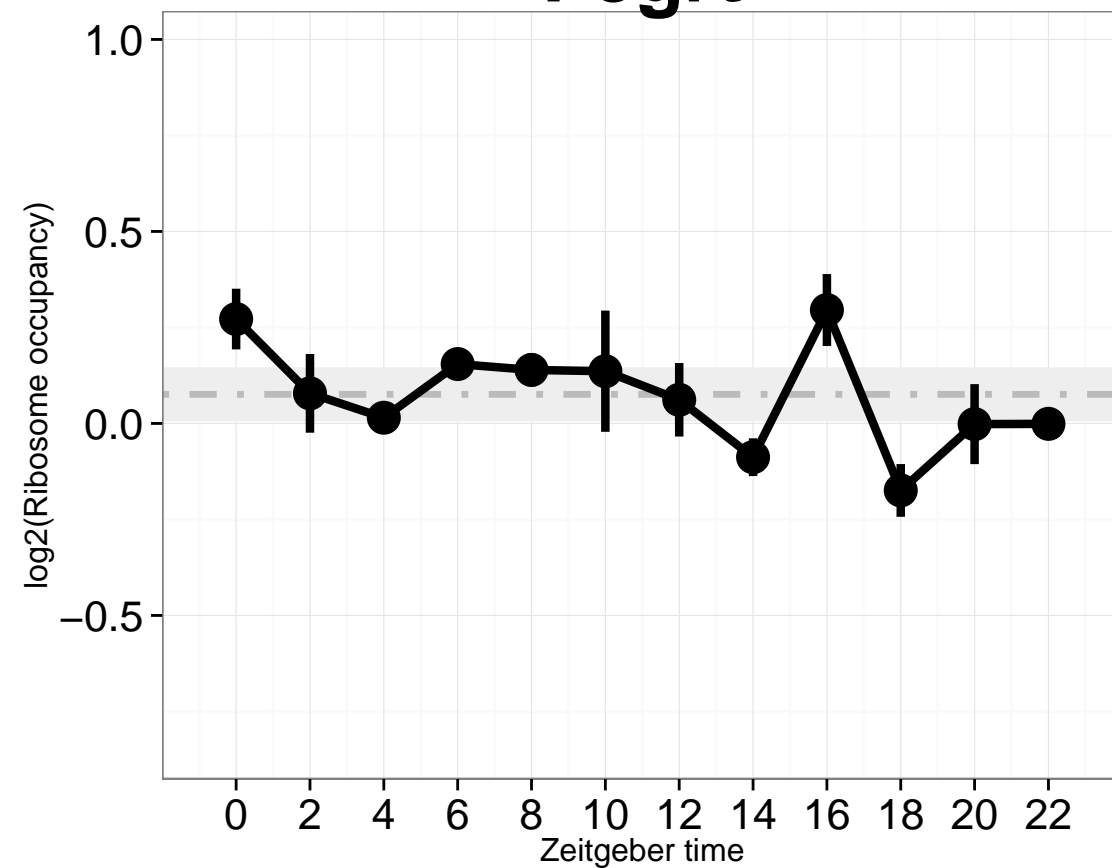

Supplement: Supplementary file 3508 [file 1]

# Cdkn2aipnl

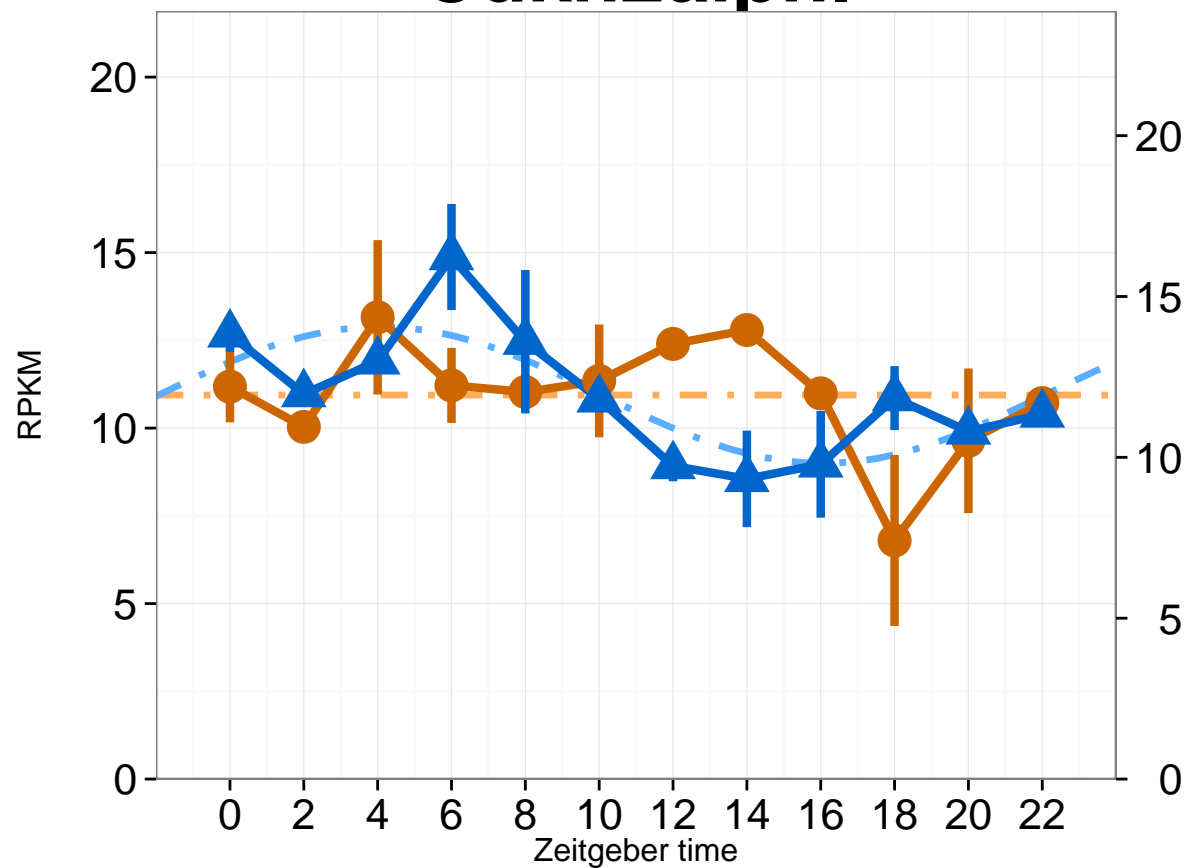

# Cdkn2aipnl

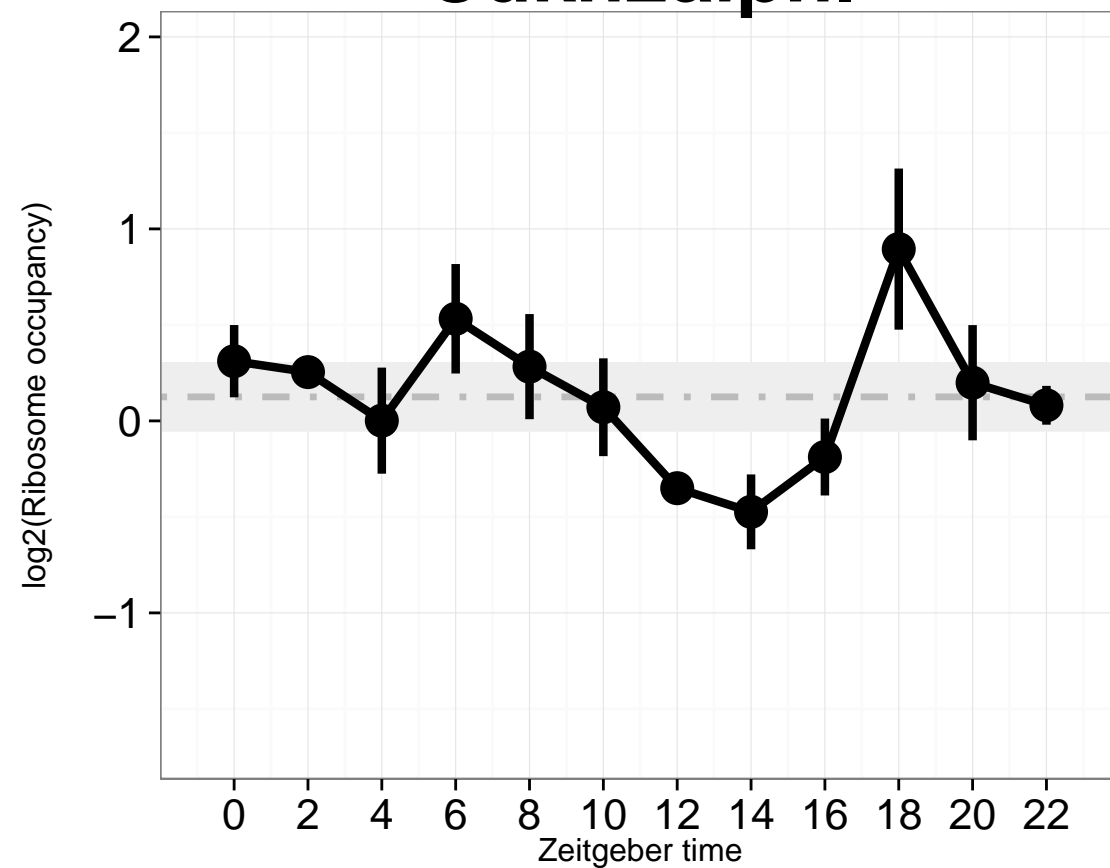

Supplement: Supplementary file 3509 [file 1]

# Slc39a13

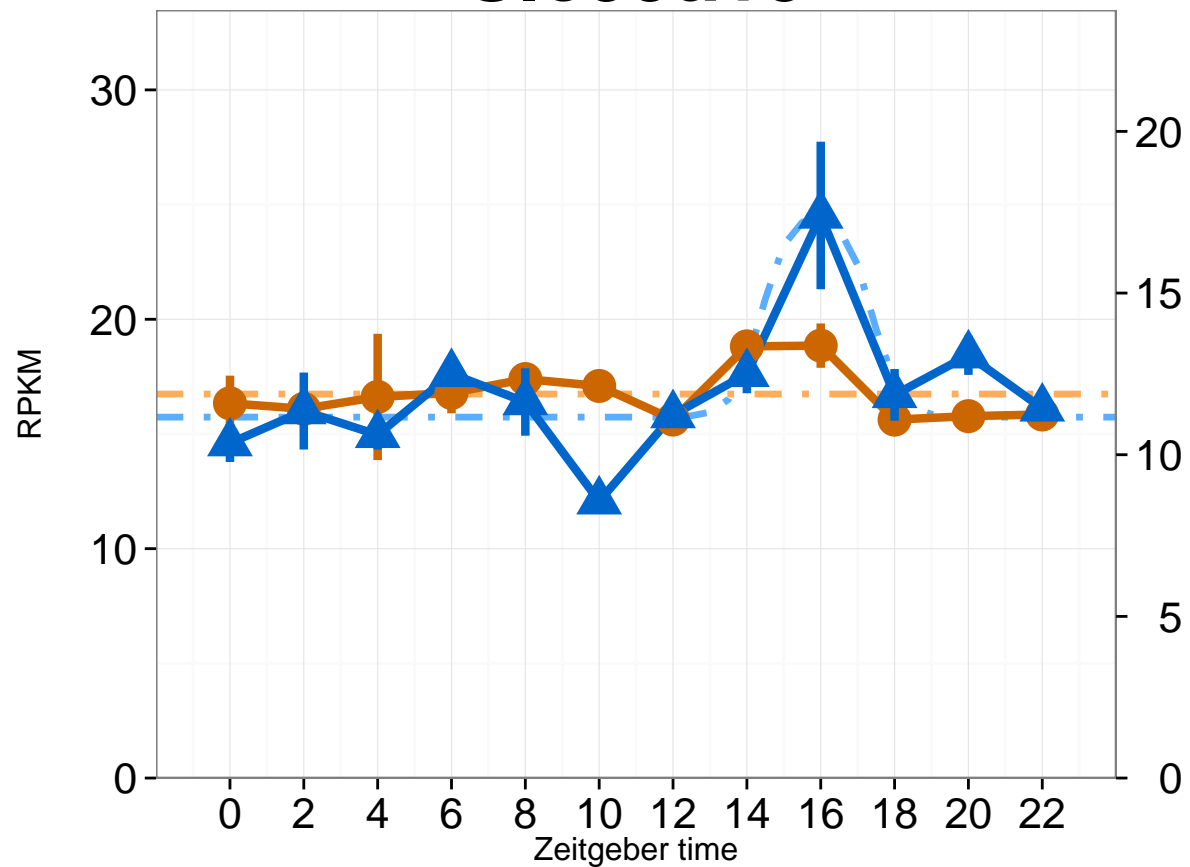

# Slc39a13

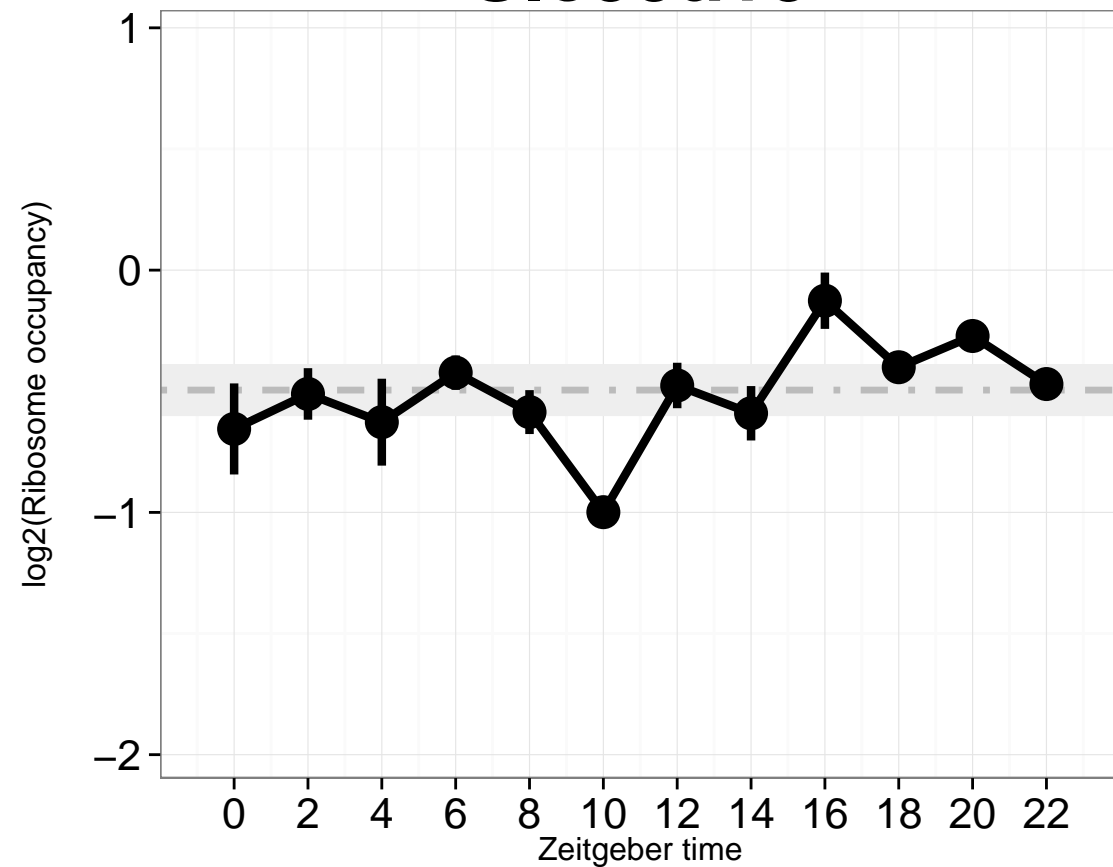

Supplement: Supplementary file 3510 [file 1]

## Ak4

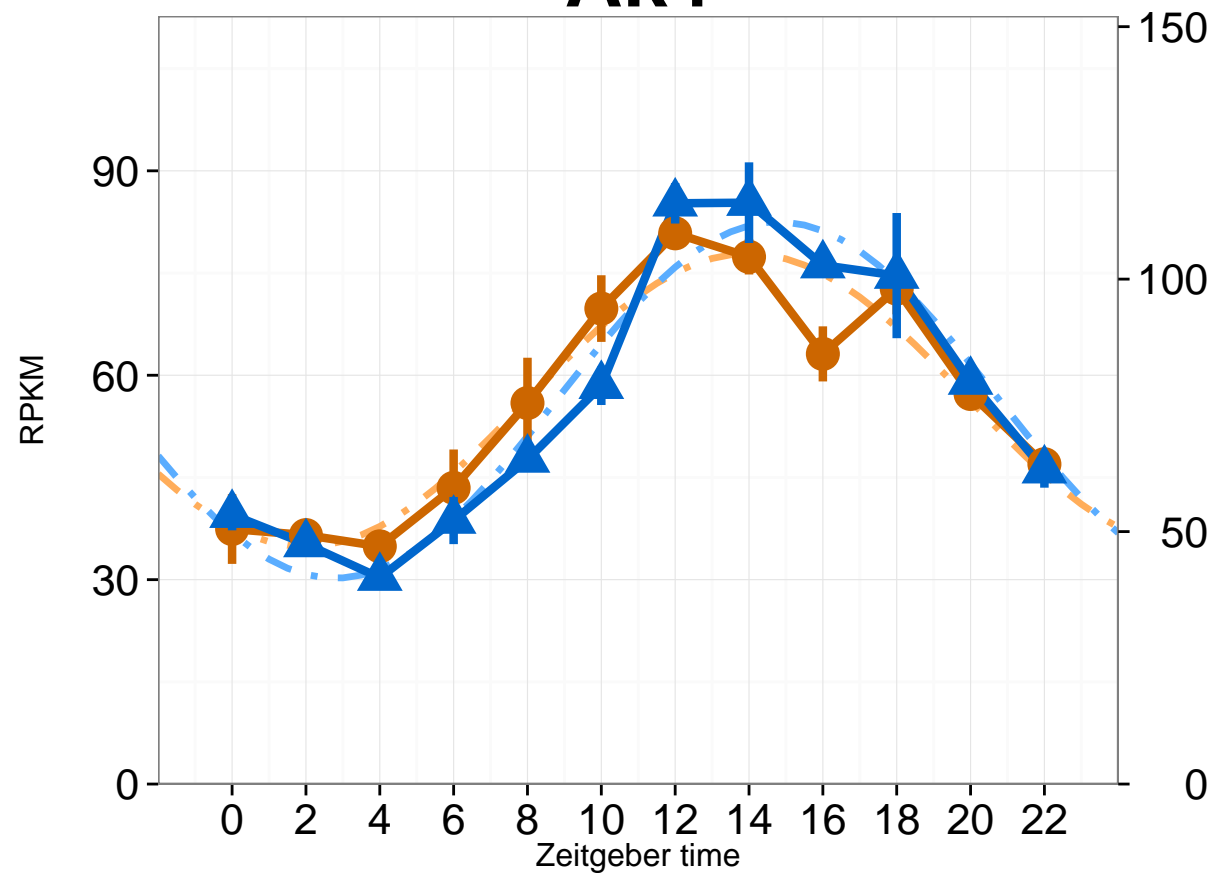

## Ak4

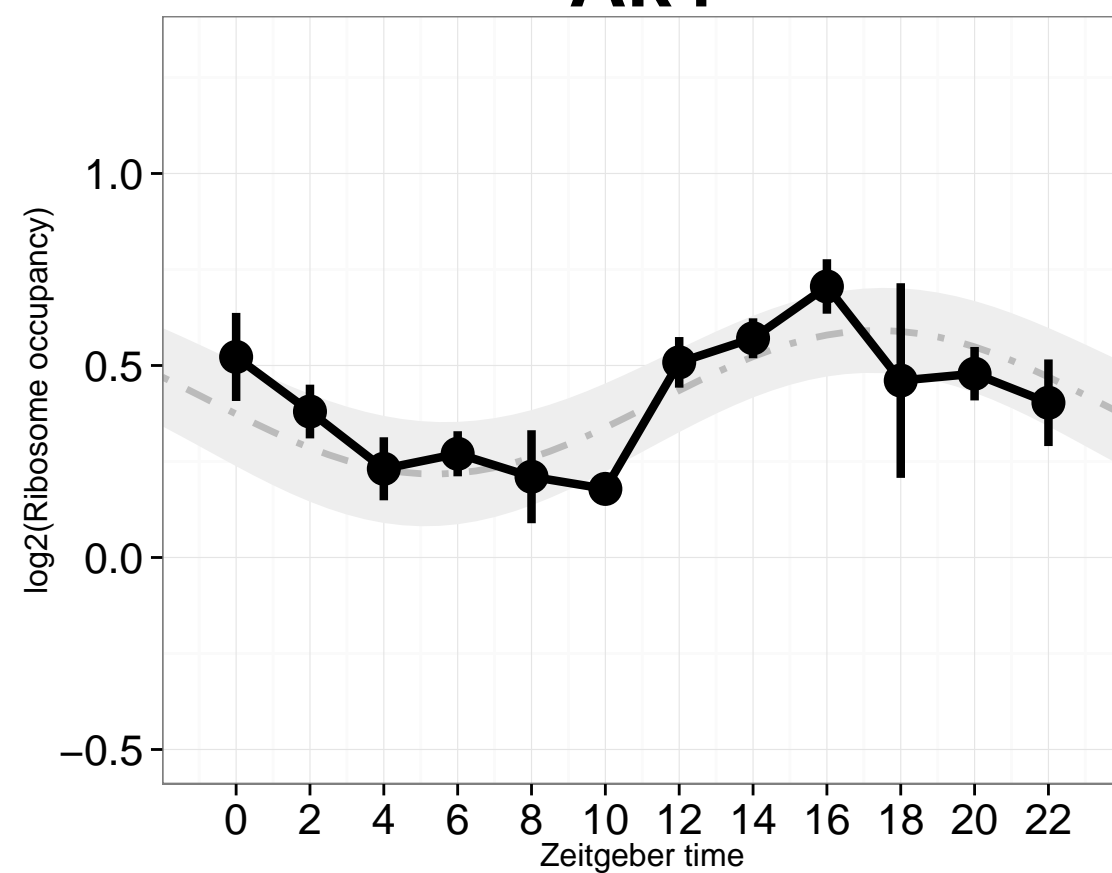

Supplement: Supplementary file 3511 [file 1]

# Timm8a1

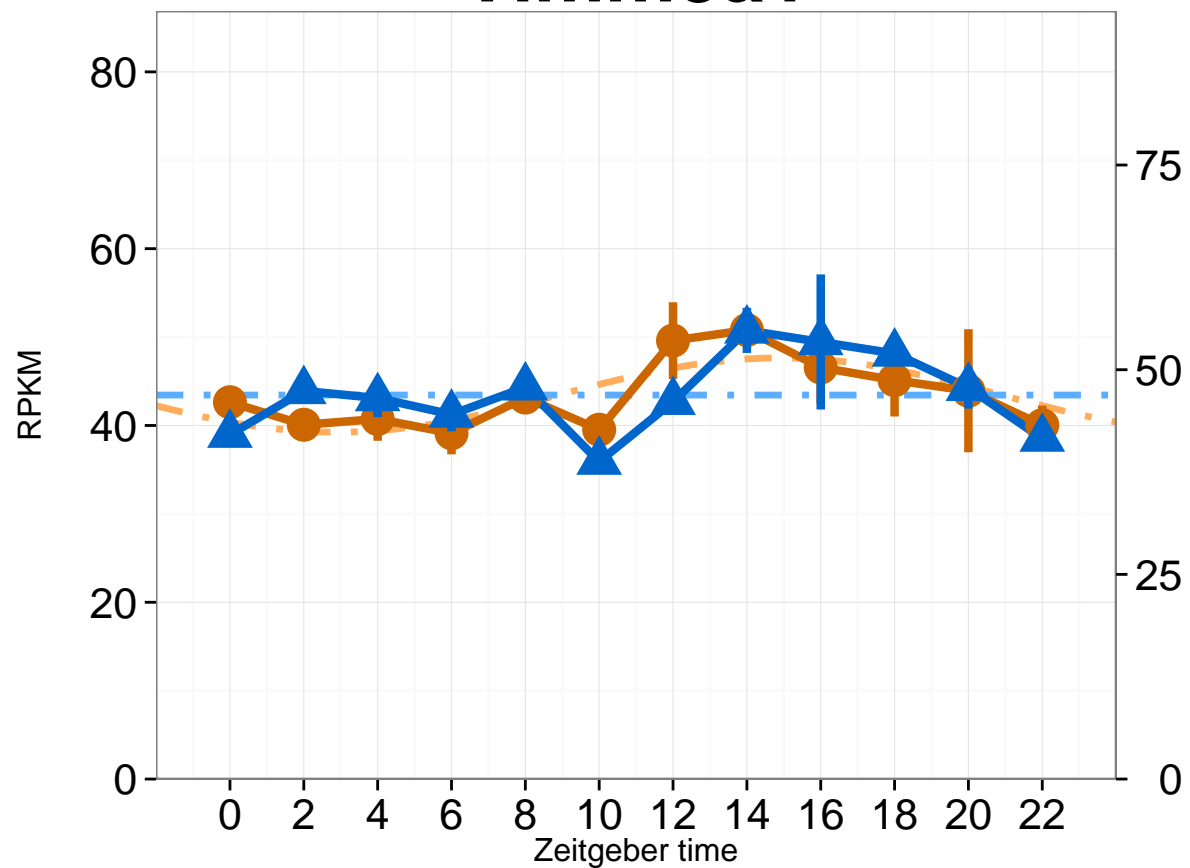

# Timm8a1

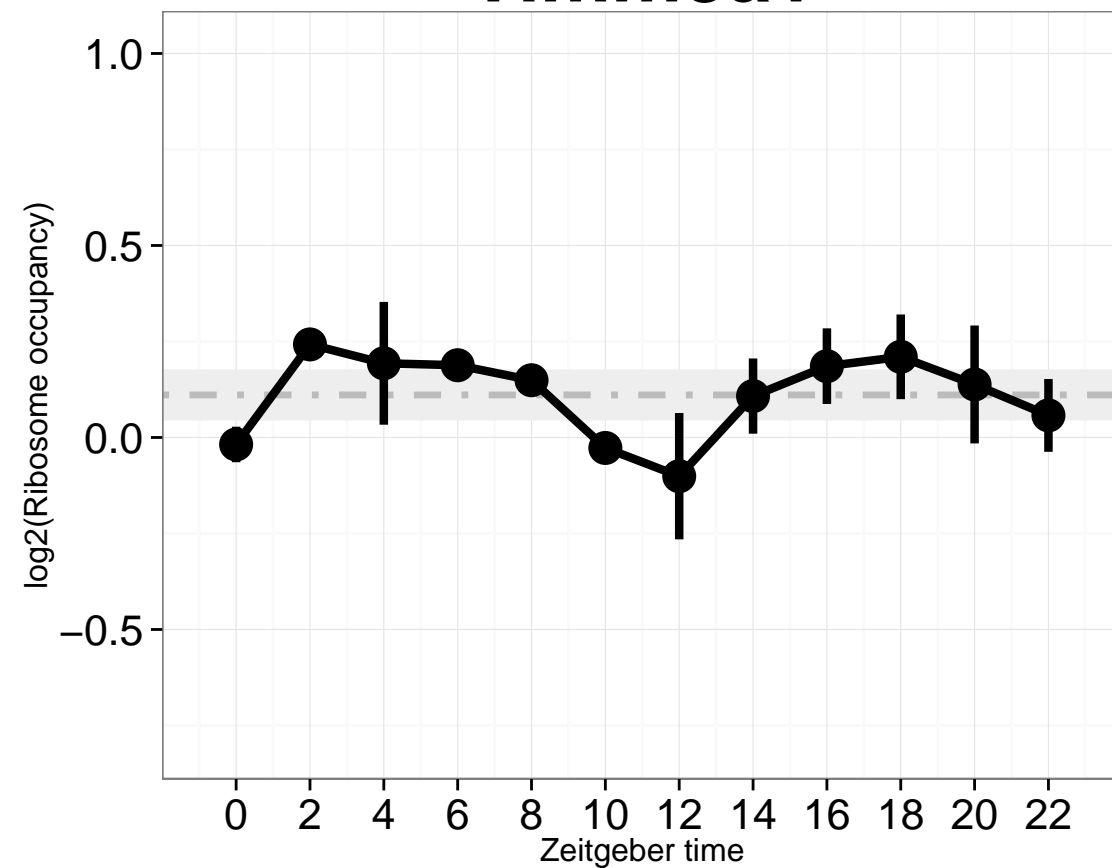

Supplement: Supplementary file 3512 [file 1]

# Ncs1

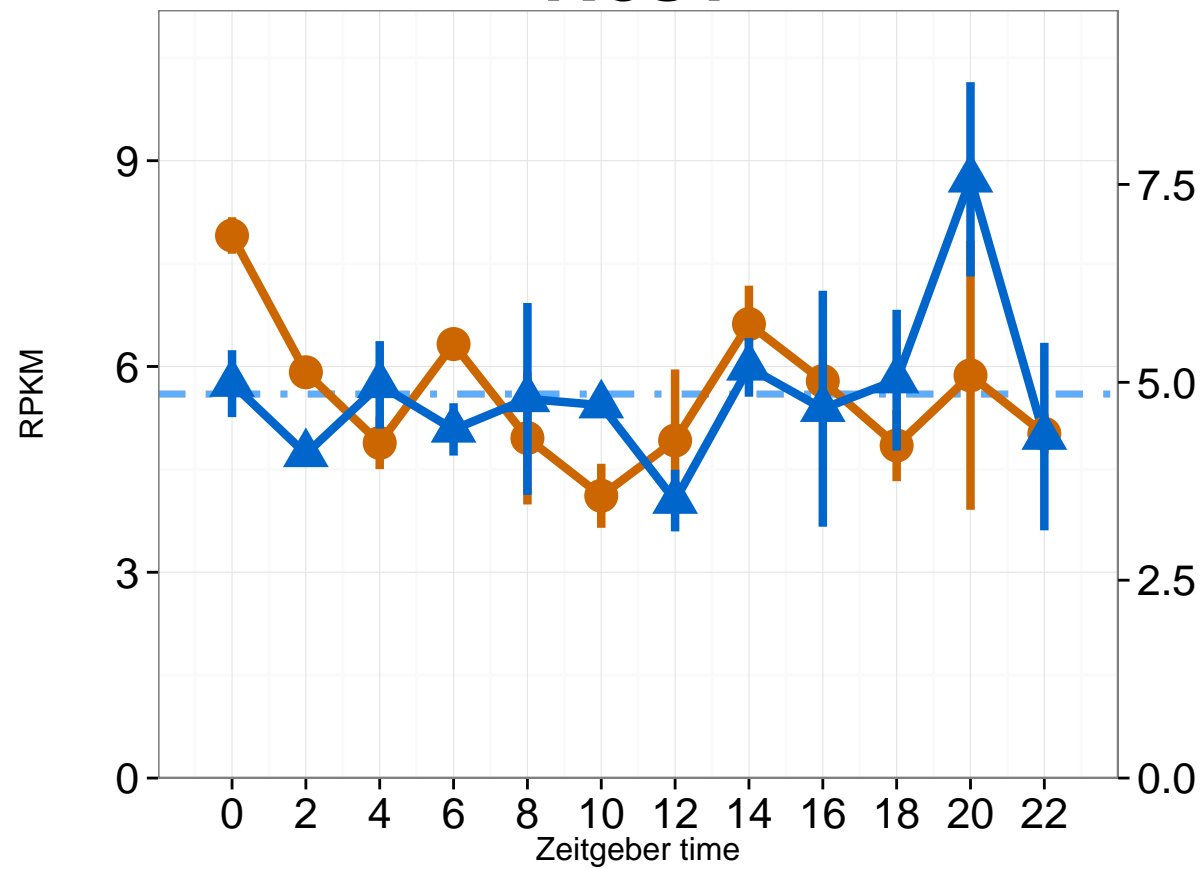

# Ncs1

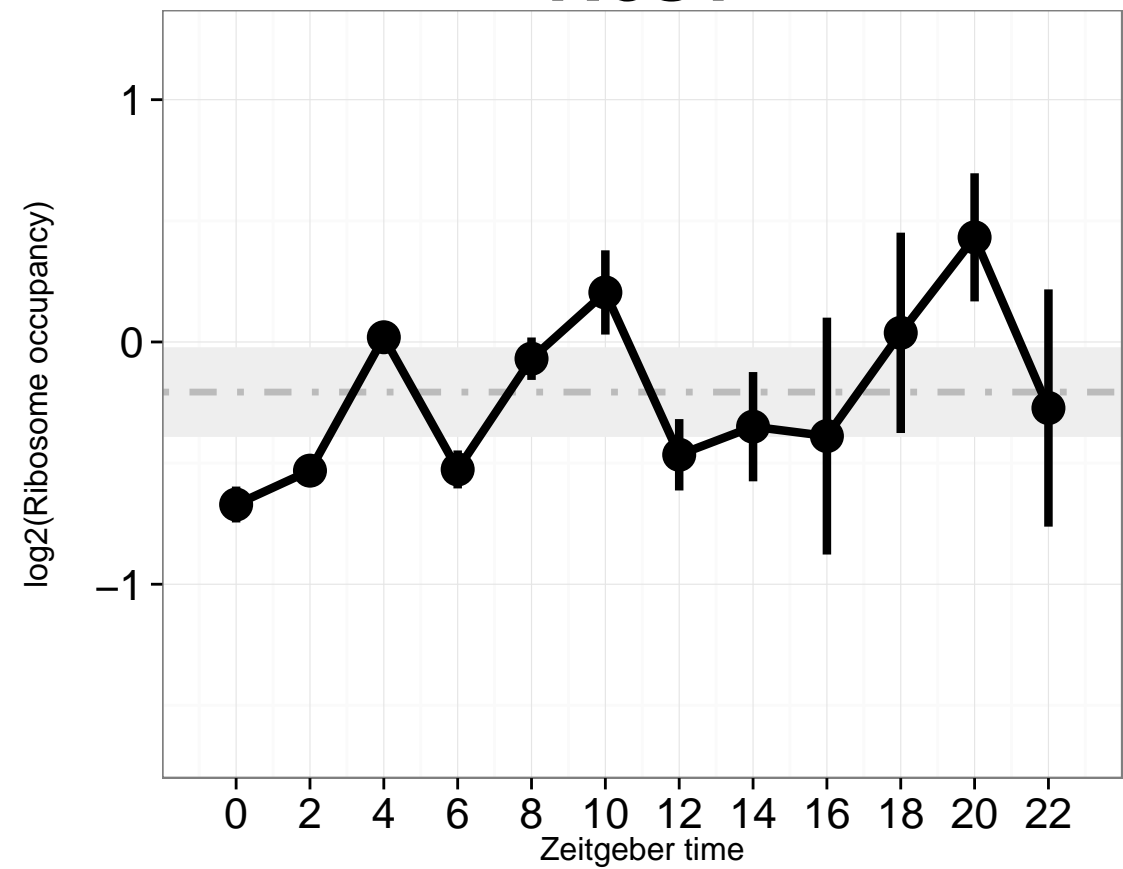

Supplement: Supplementary file 3513 [file 1]
