# Supplementary material (part 36 of 133)
Source: publisher figshare collection journal article supplement (https://springernature.figshare.com/articles/dataset/_/4903193)

# Sh2b2

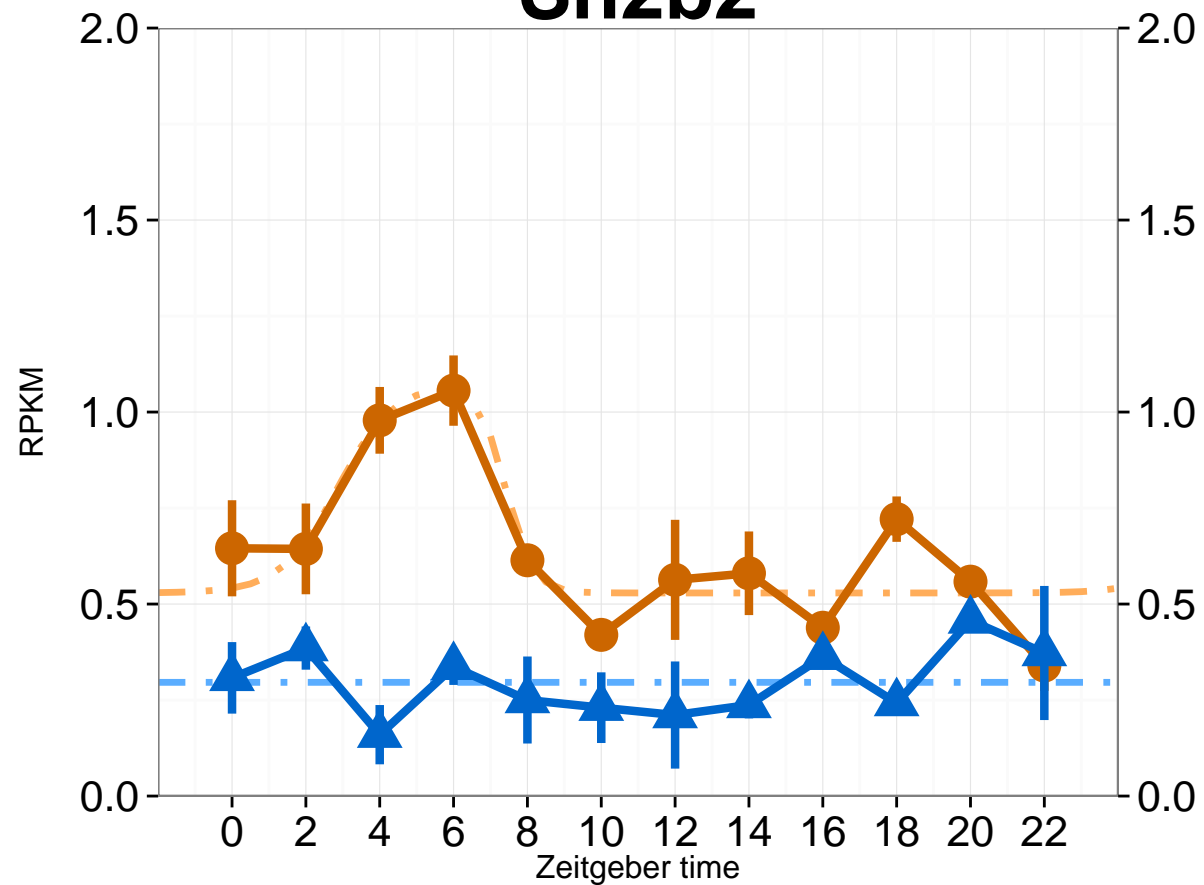

# Sh2b2

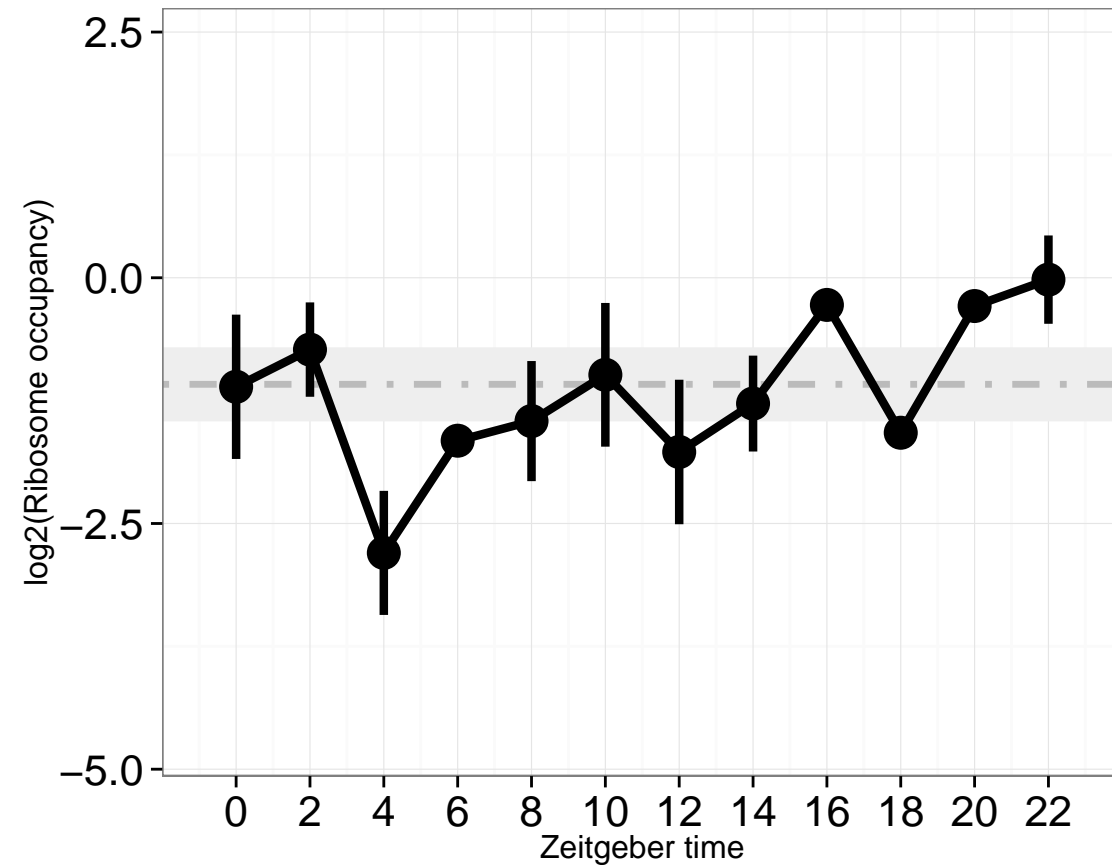

Supplement: Supplementary file 3514 [file 1]

# Rnf31

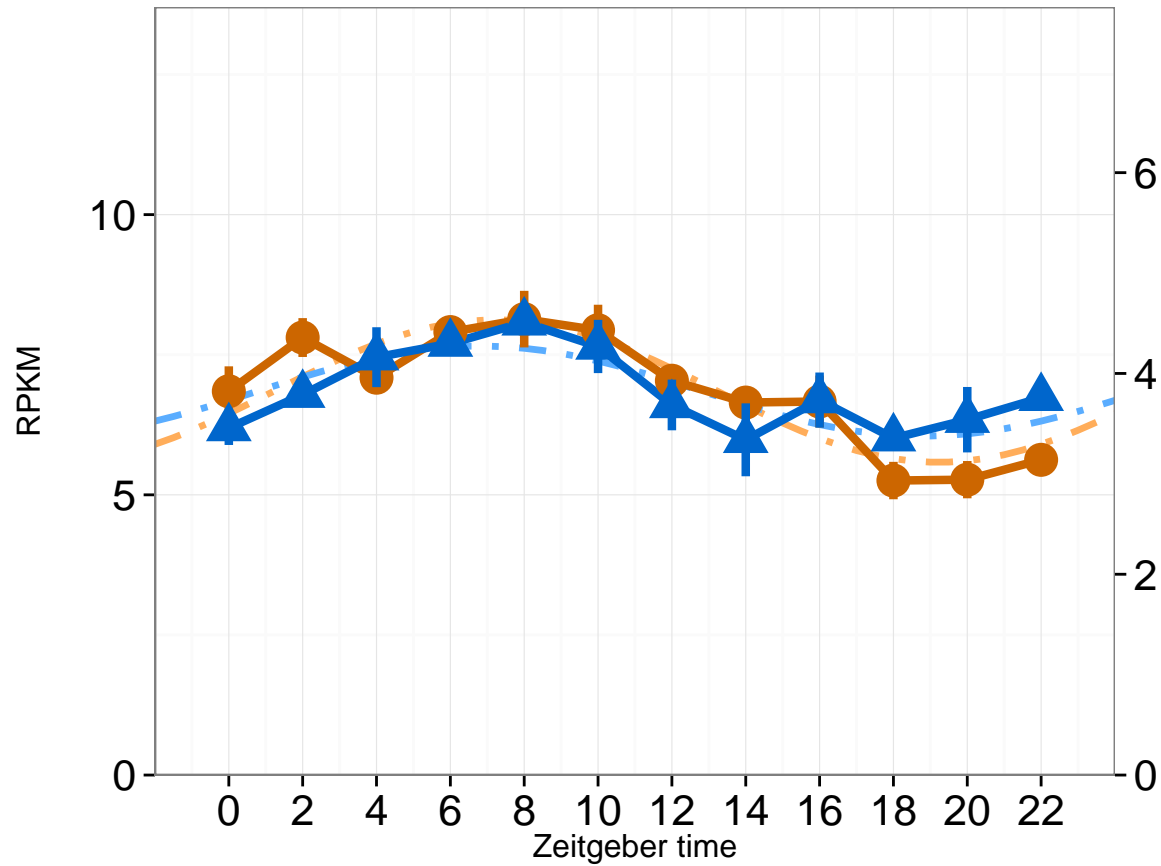

# Rnf31

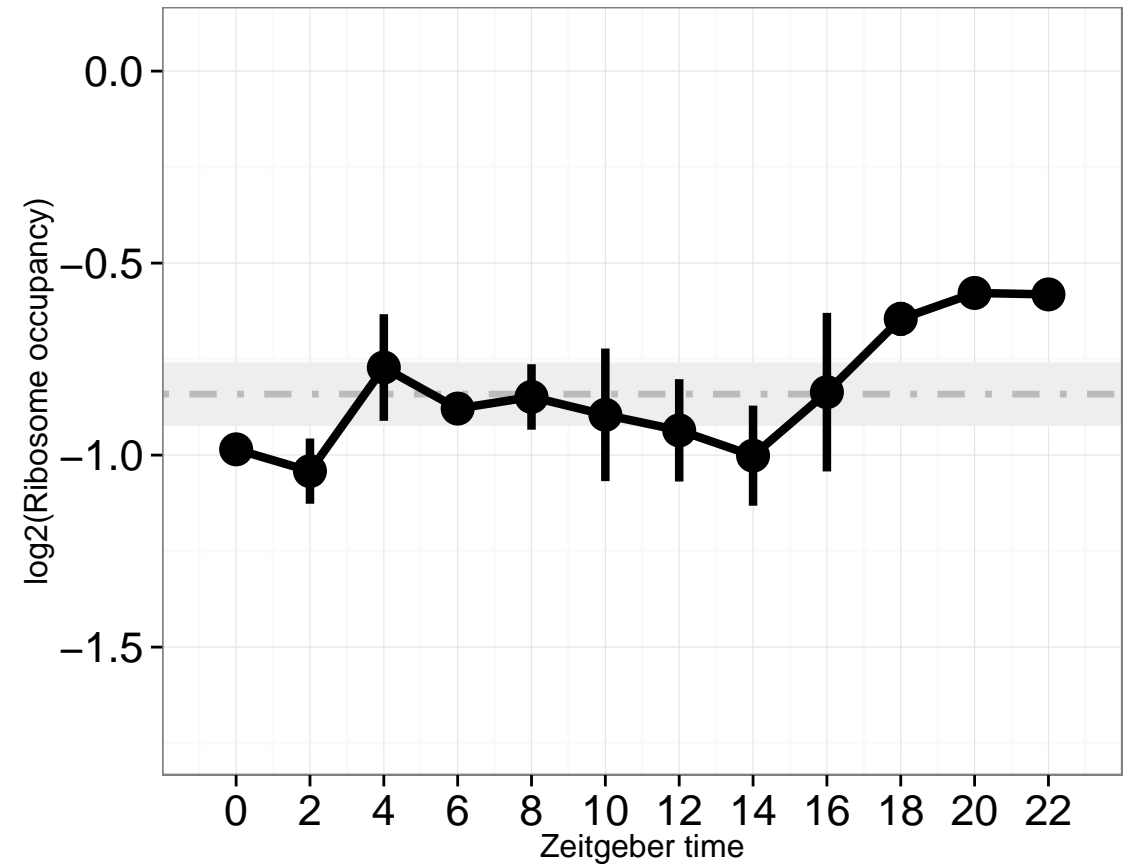

Supplement: Supplementary file 3515 [file 1]

# Anapc5

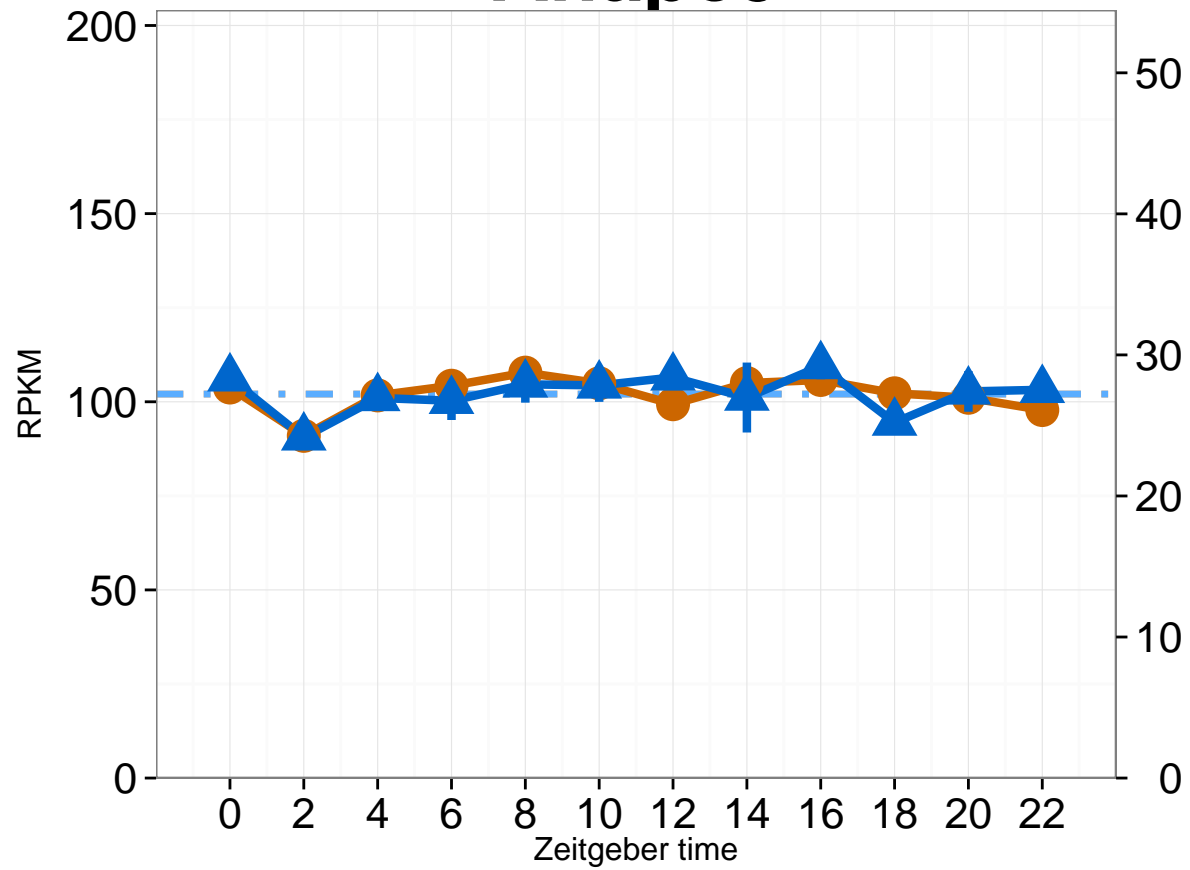

# Anapc5

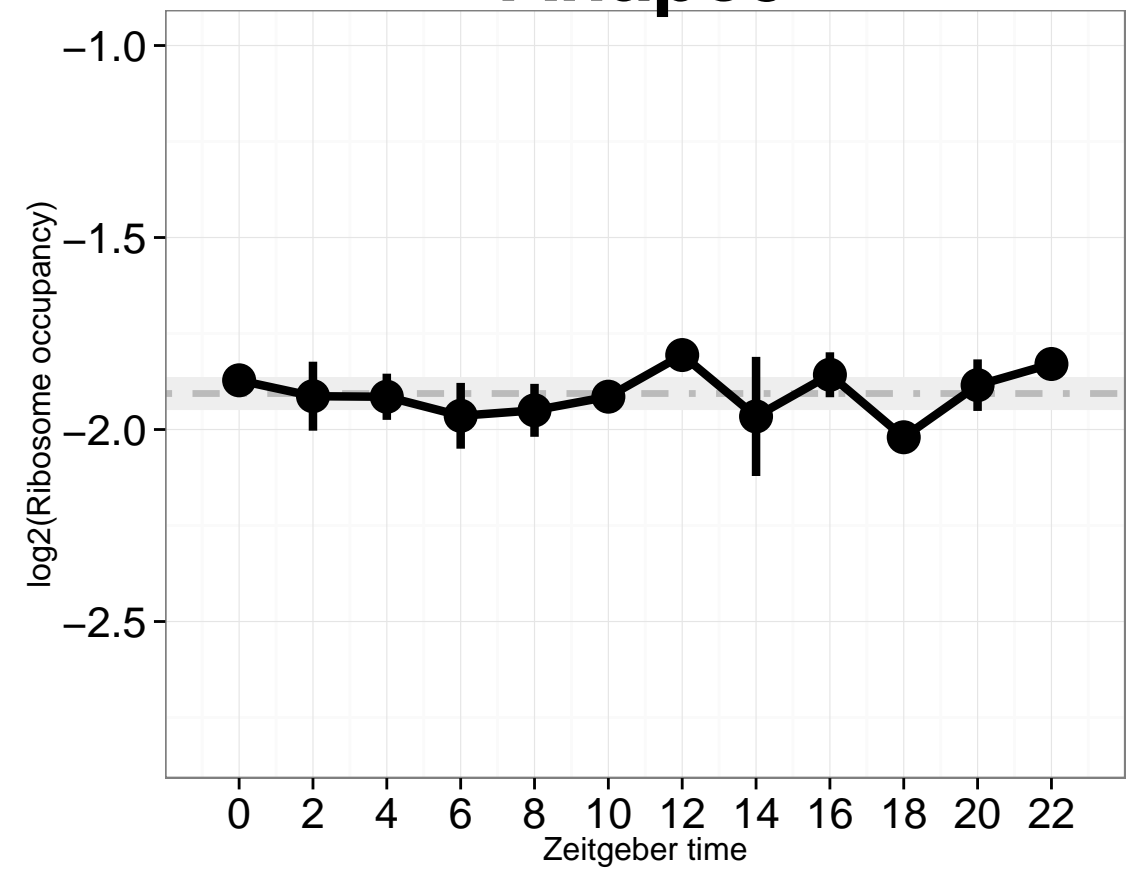

Supplement: Supplementary file 3516 [file 1]

## Garem

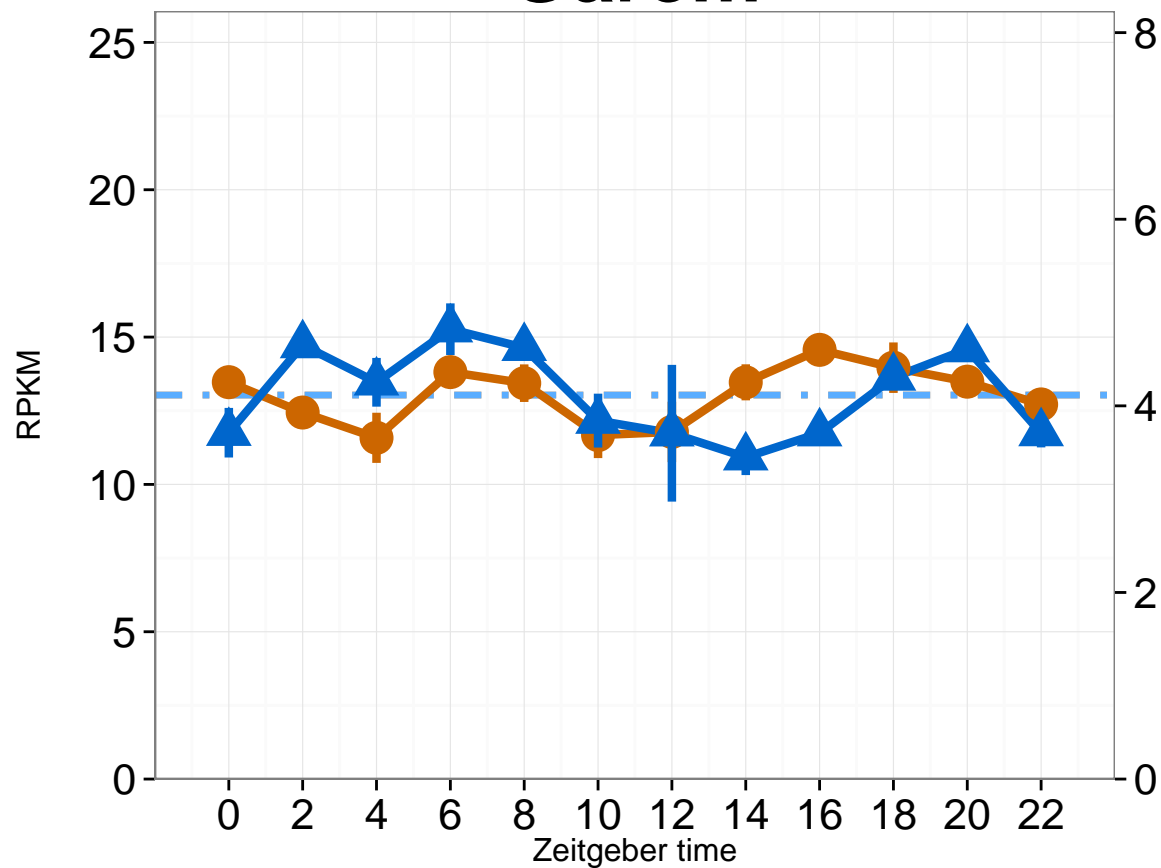

## Garem

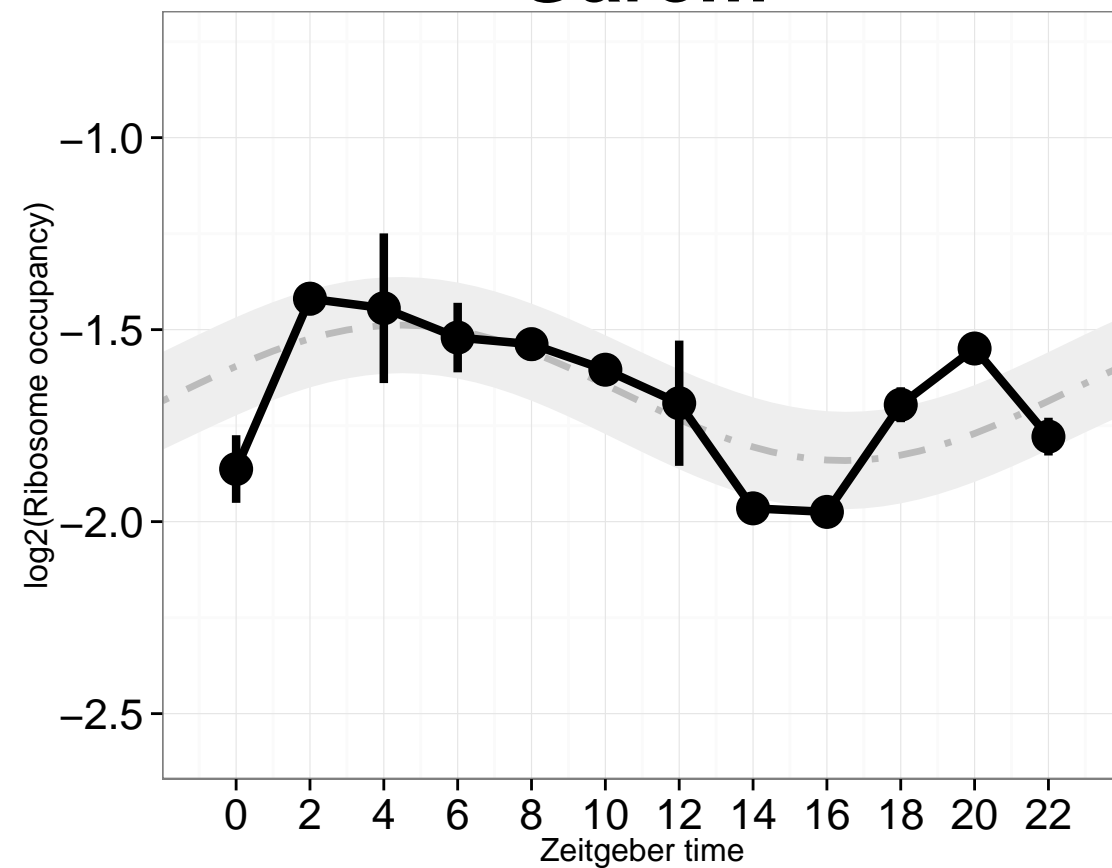

Supplement: Supplementary file 3517 [file 1]

# Art4

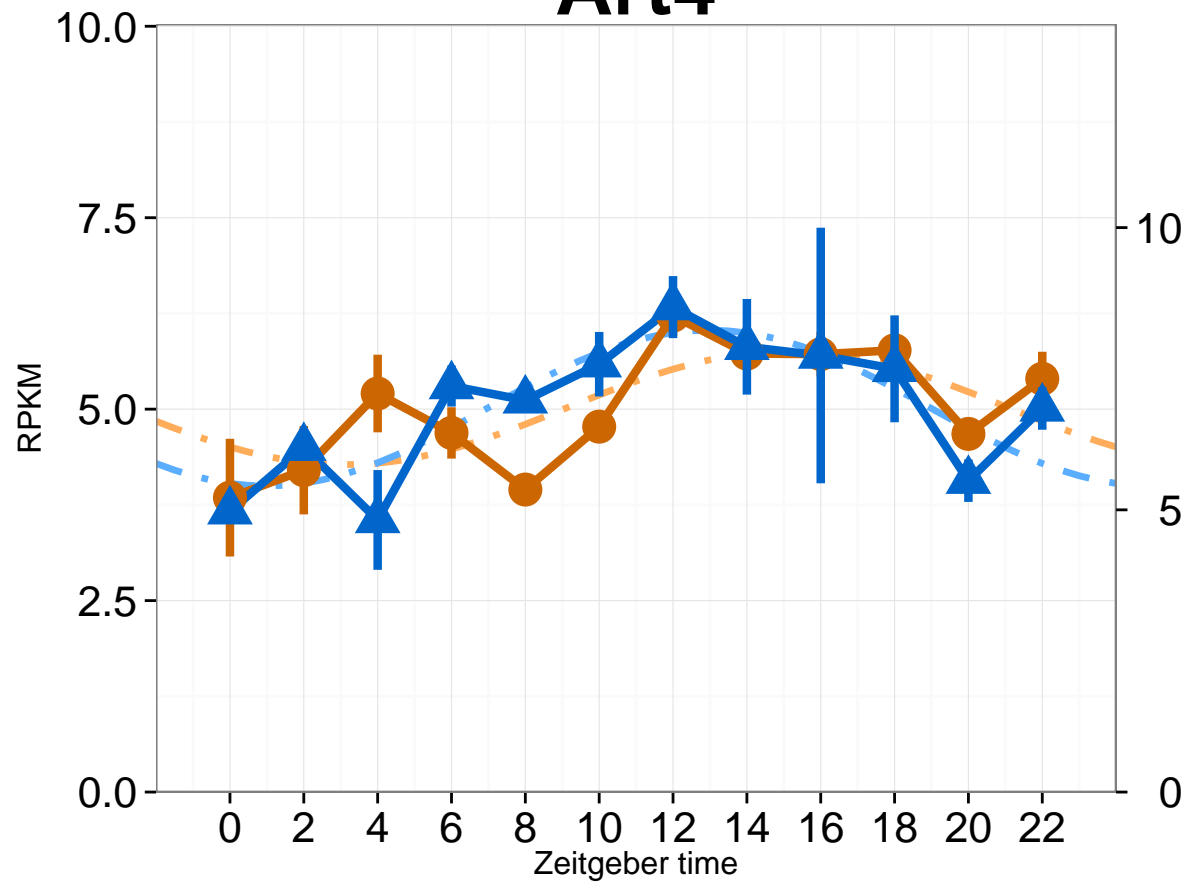

# Art4

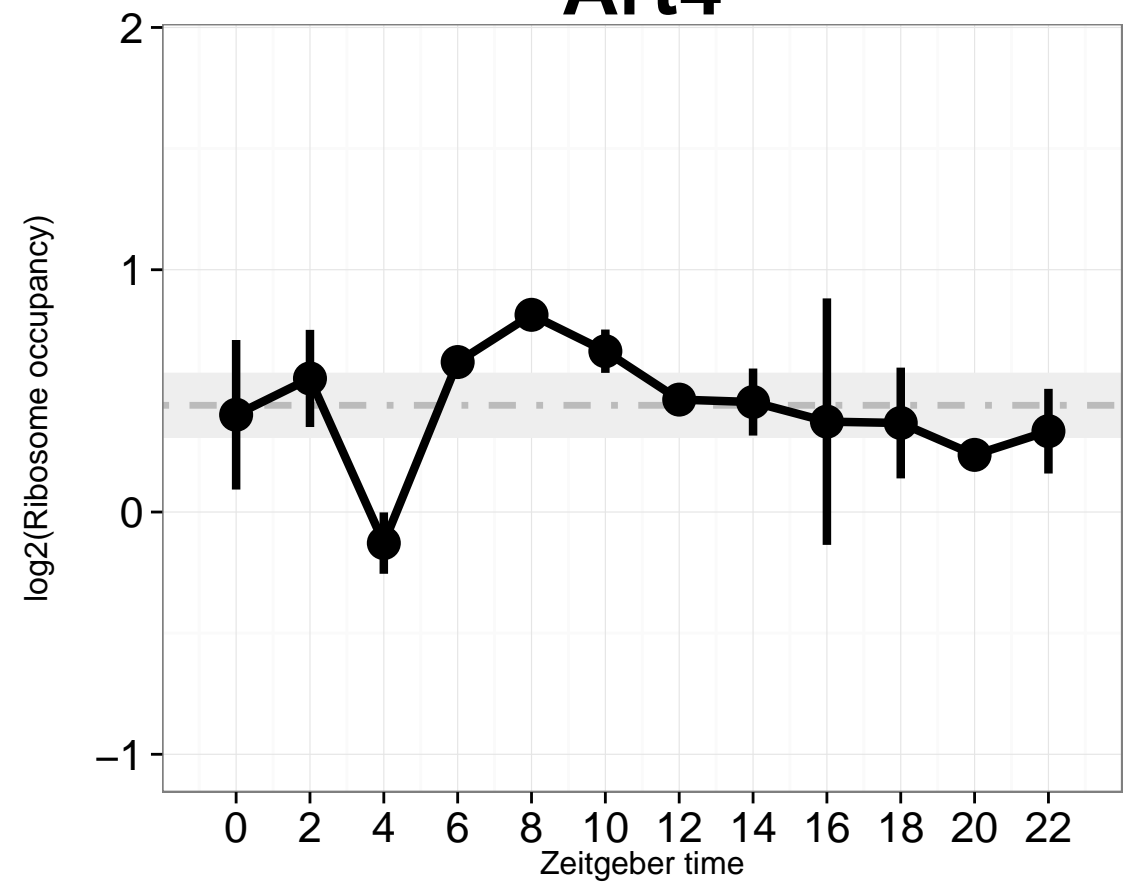

Supplement: Supplementary file 3518 [file 1]

## Mynn

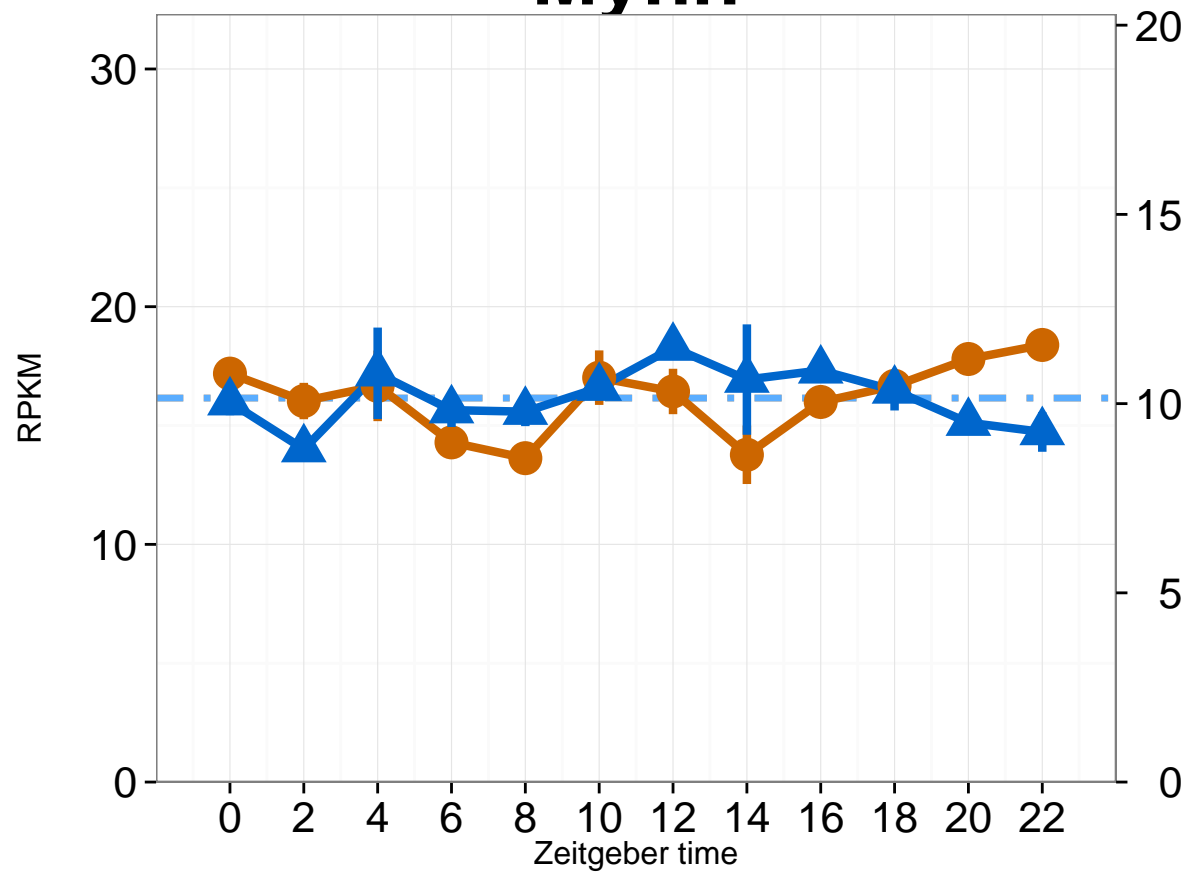

## Mynn

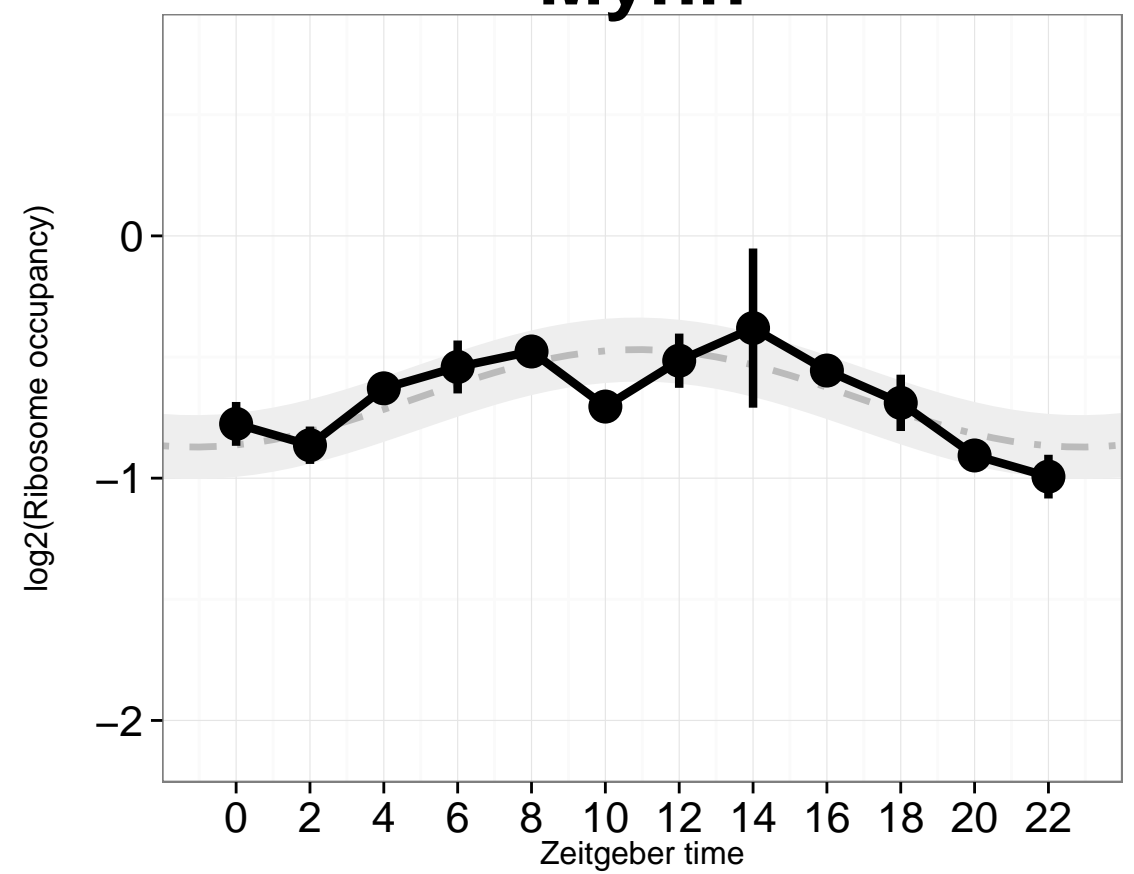

Supplement: Supplementary file 3519 [file 1]

# Dhrs13

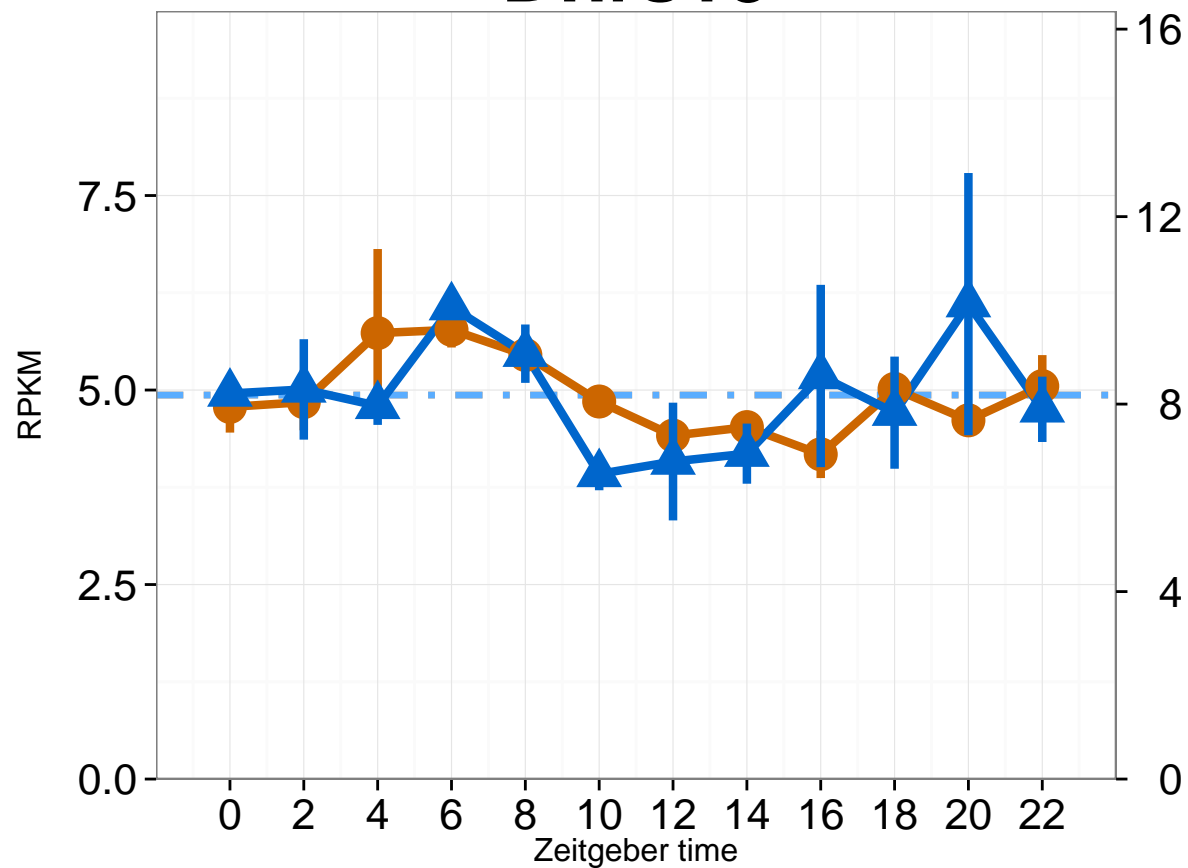

# Dhrs13

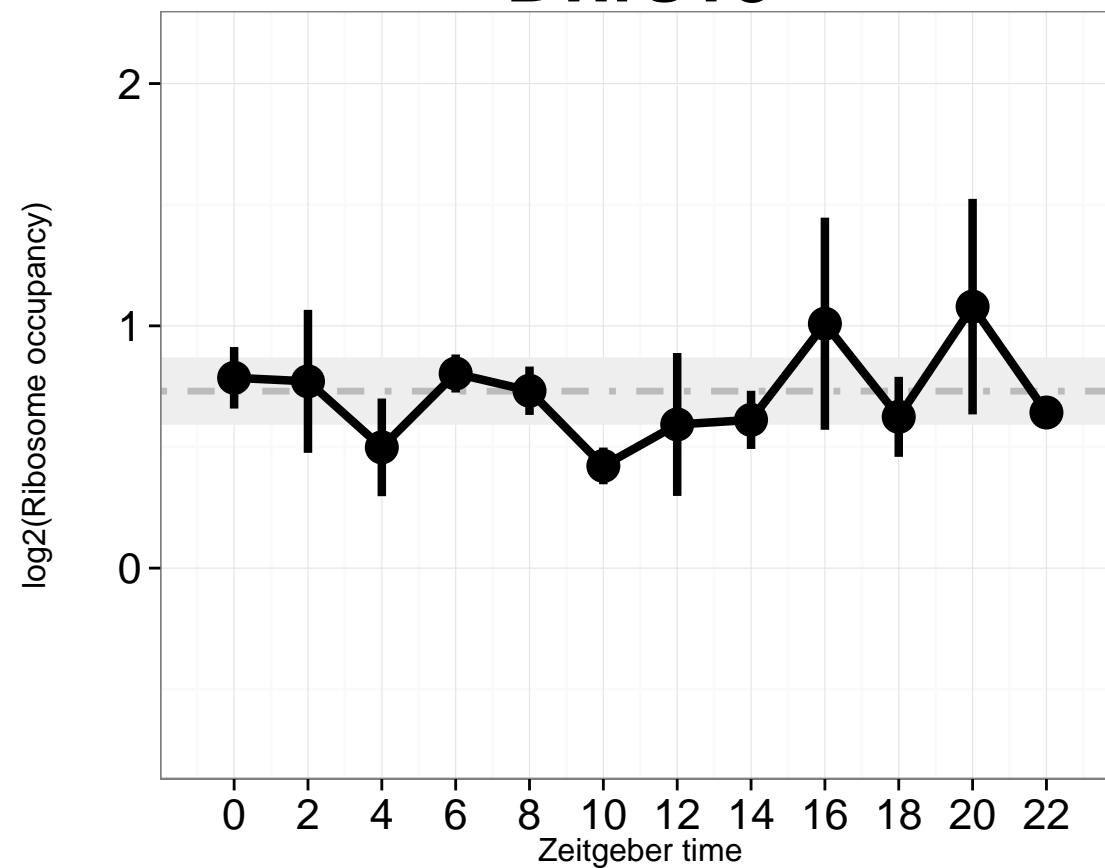

Supplement: Supplementary file 3520 [file 1]

# Tbc1d16

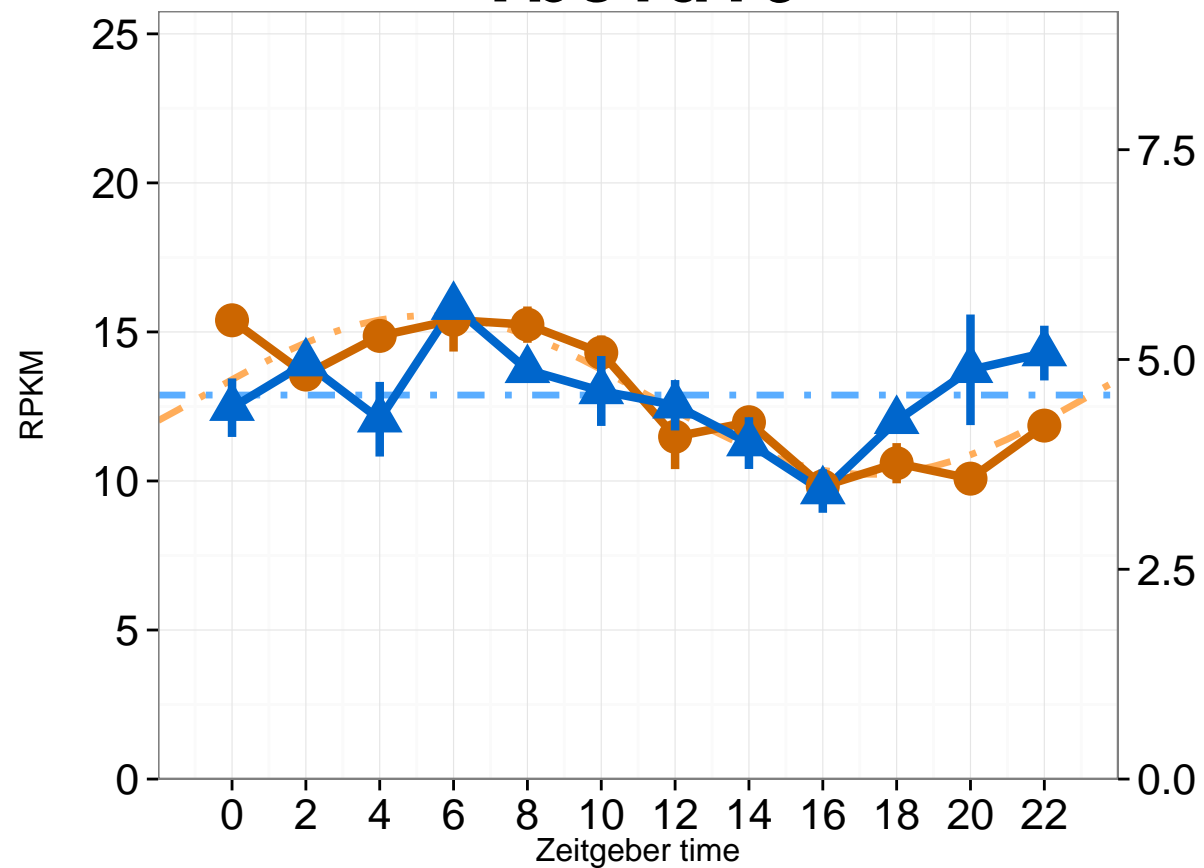

# Tbc1d16

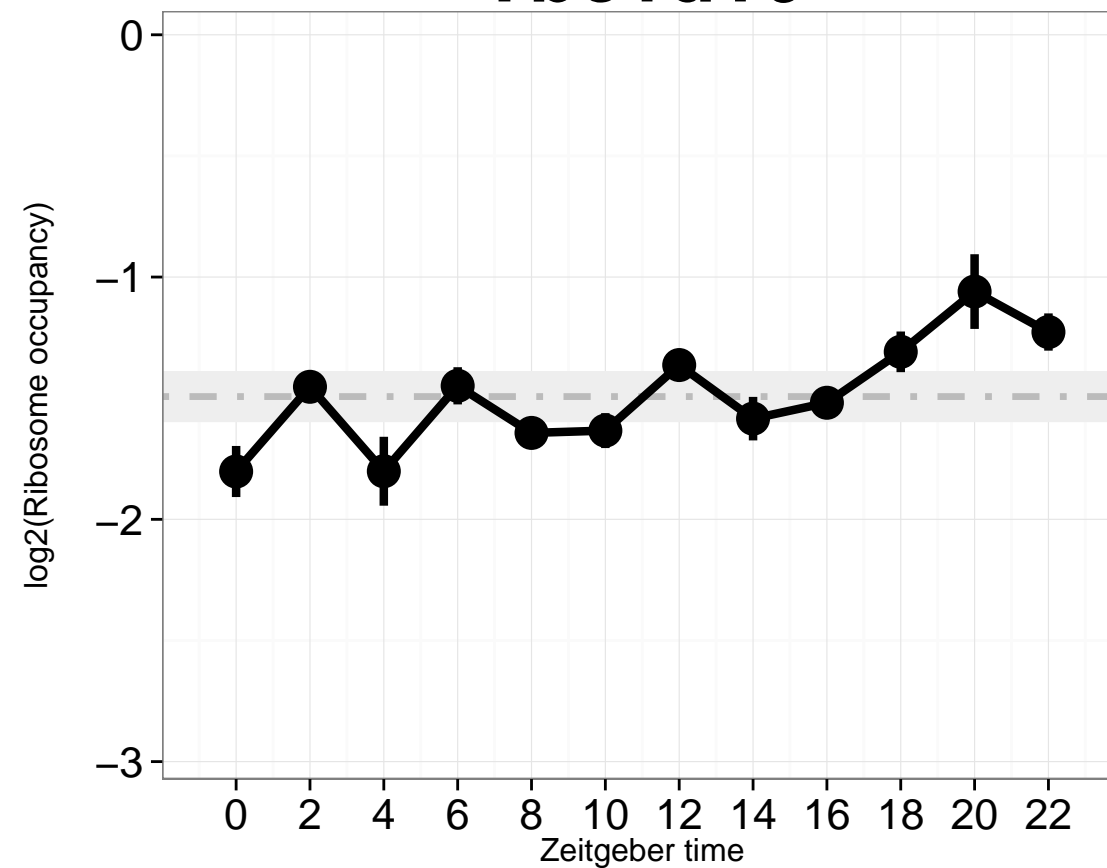

Supplement: Supplementary file 3521 [file 1]

## Daam2

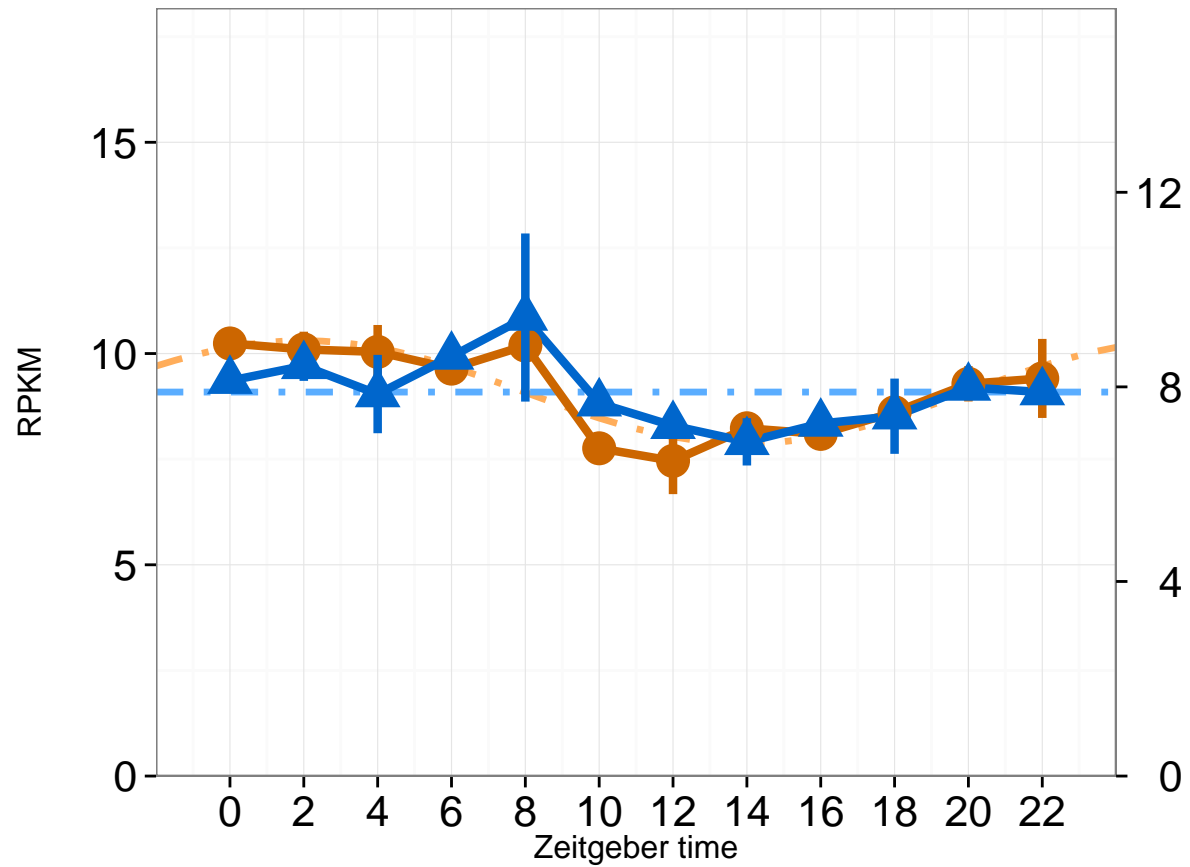

## Daam2

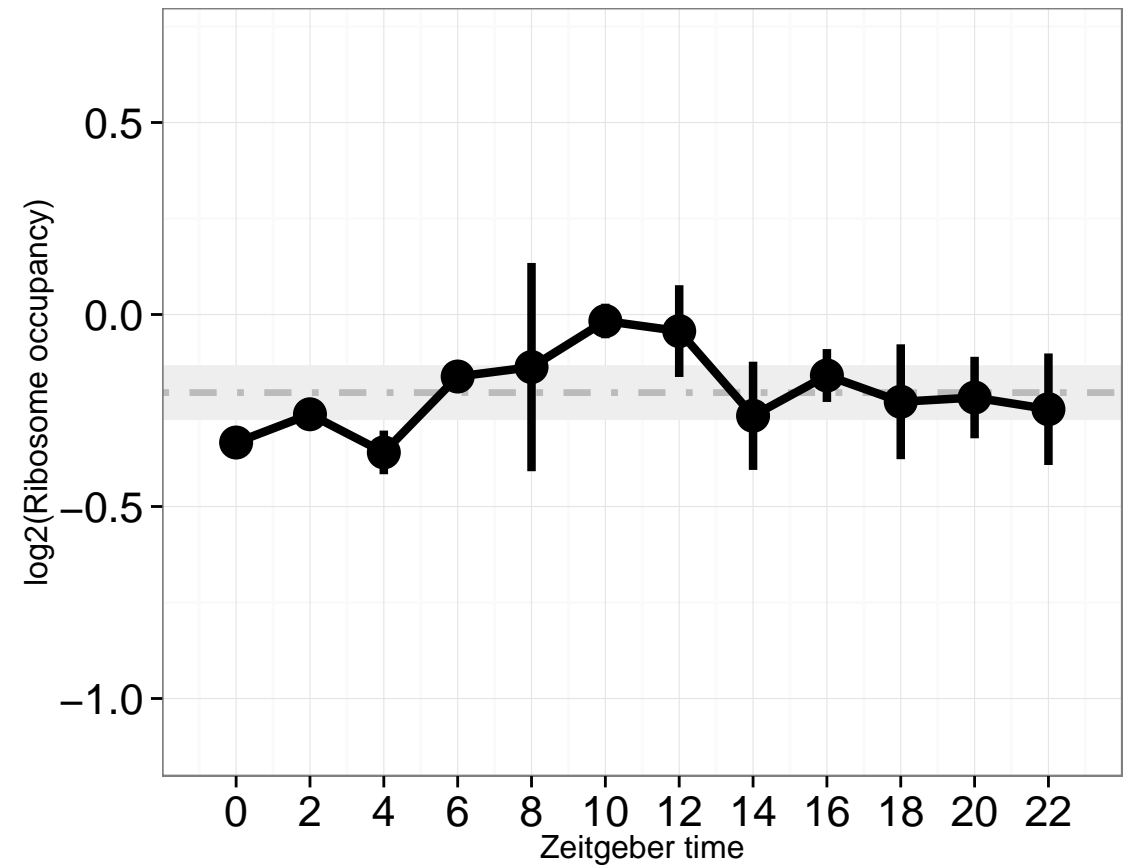

Supplement: Supplementary file 3522 [file 1]

# Ttc7b

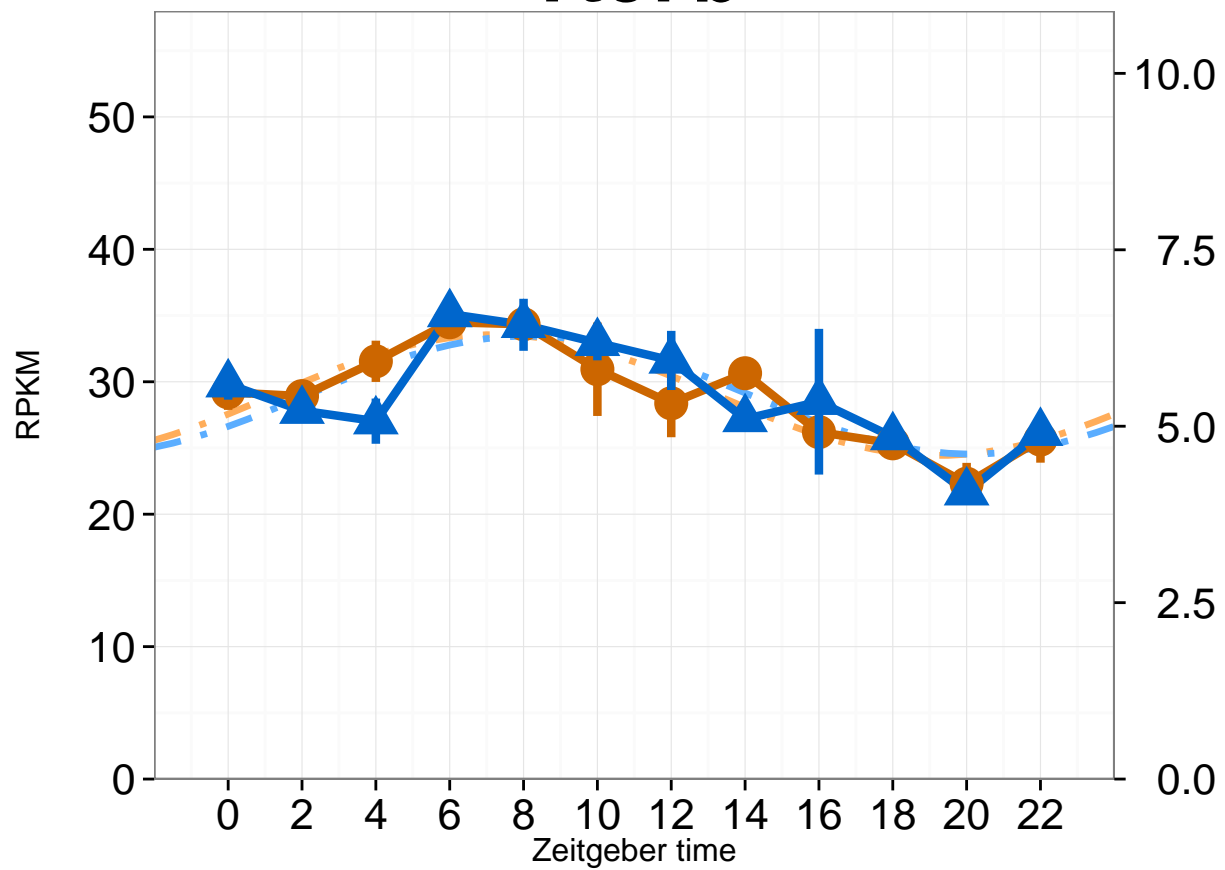

# Ttc7b

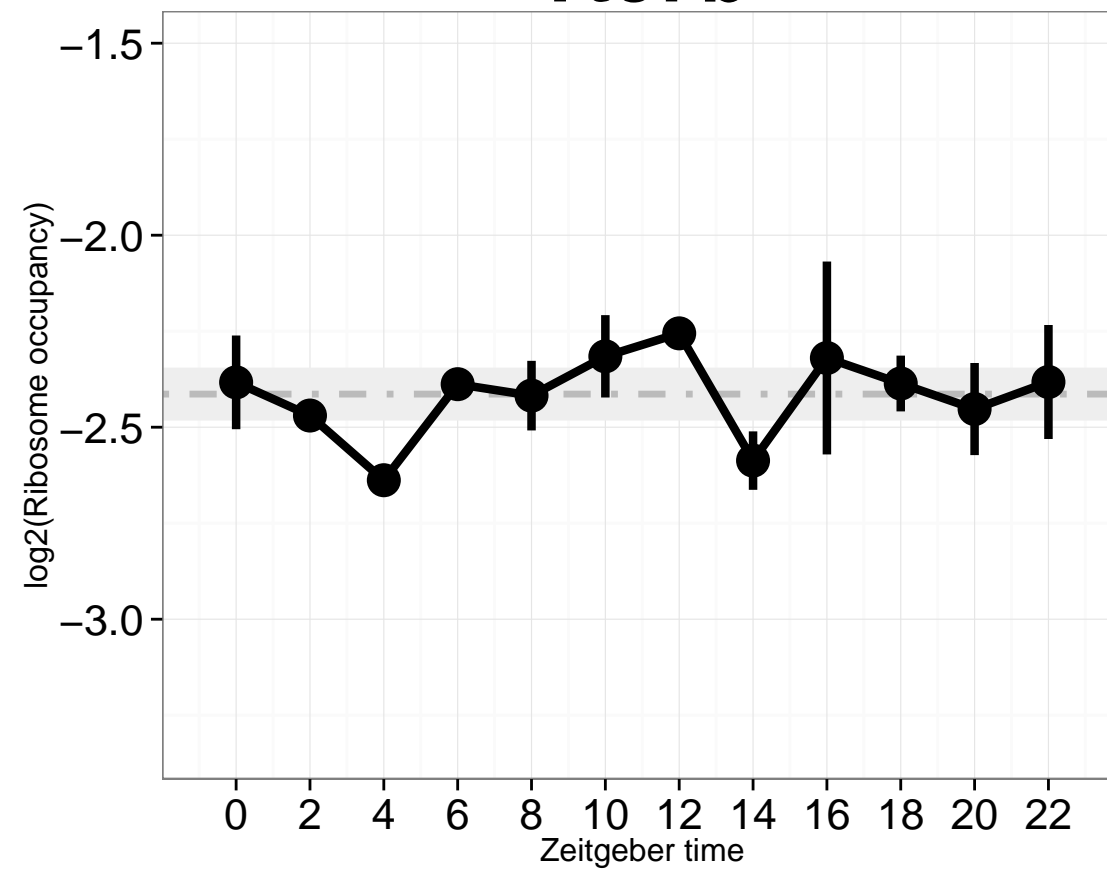

Supplement: Supplementary file 3523 [file 1]

# Dennd6b

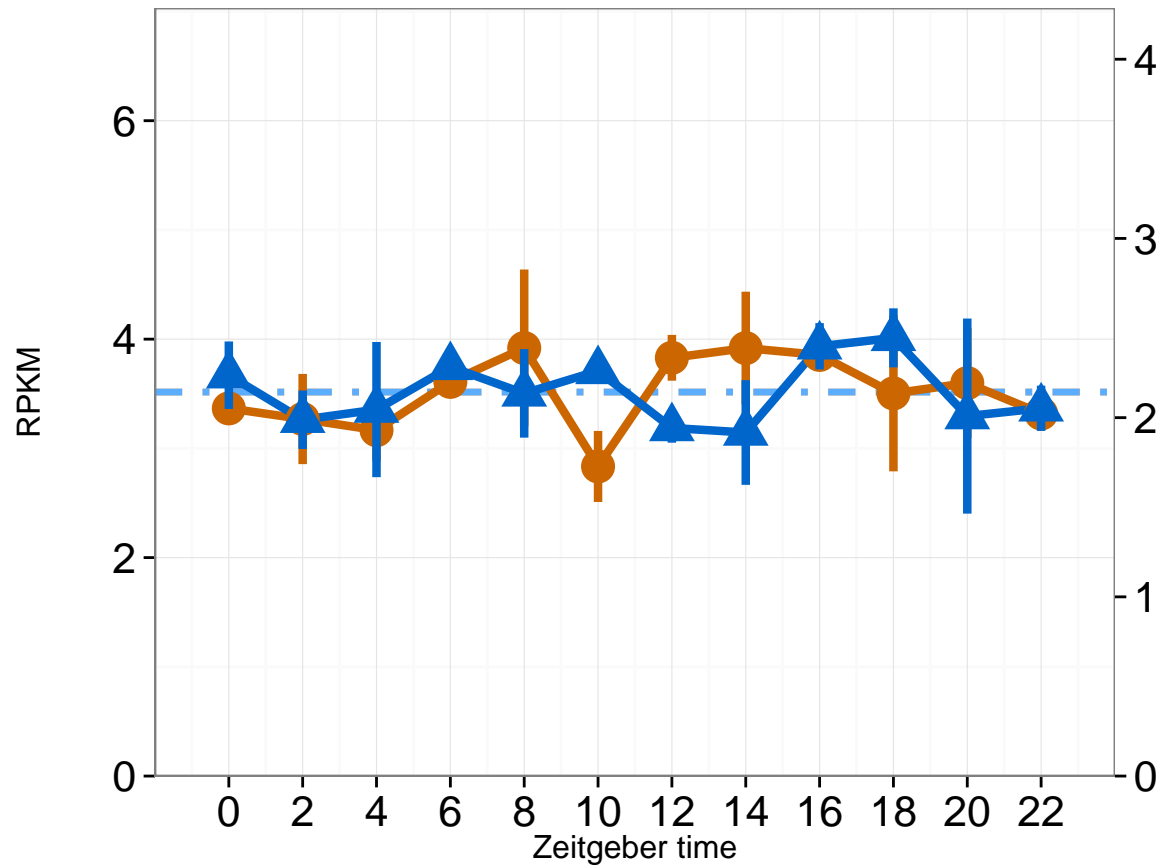

# Dennd6b

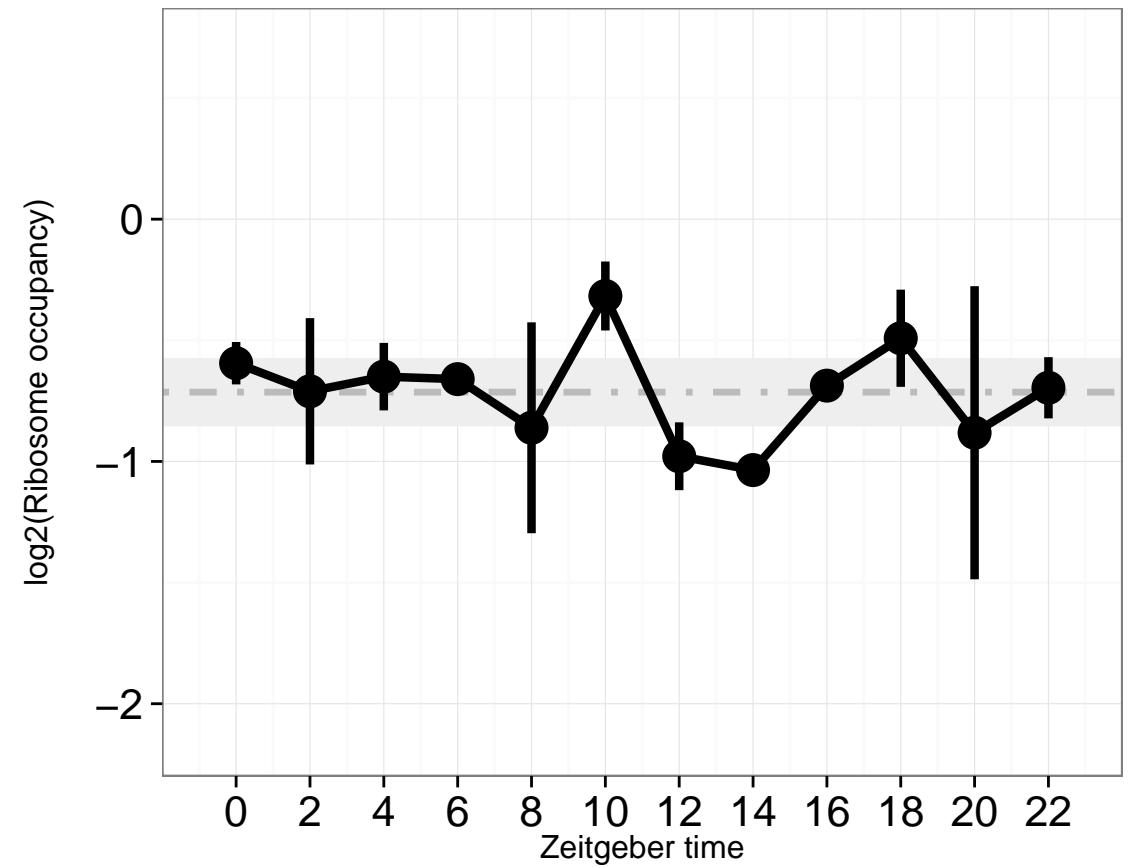

Supplement: Supplementary file 3524 [file 1]

# AI597468

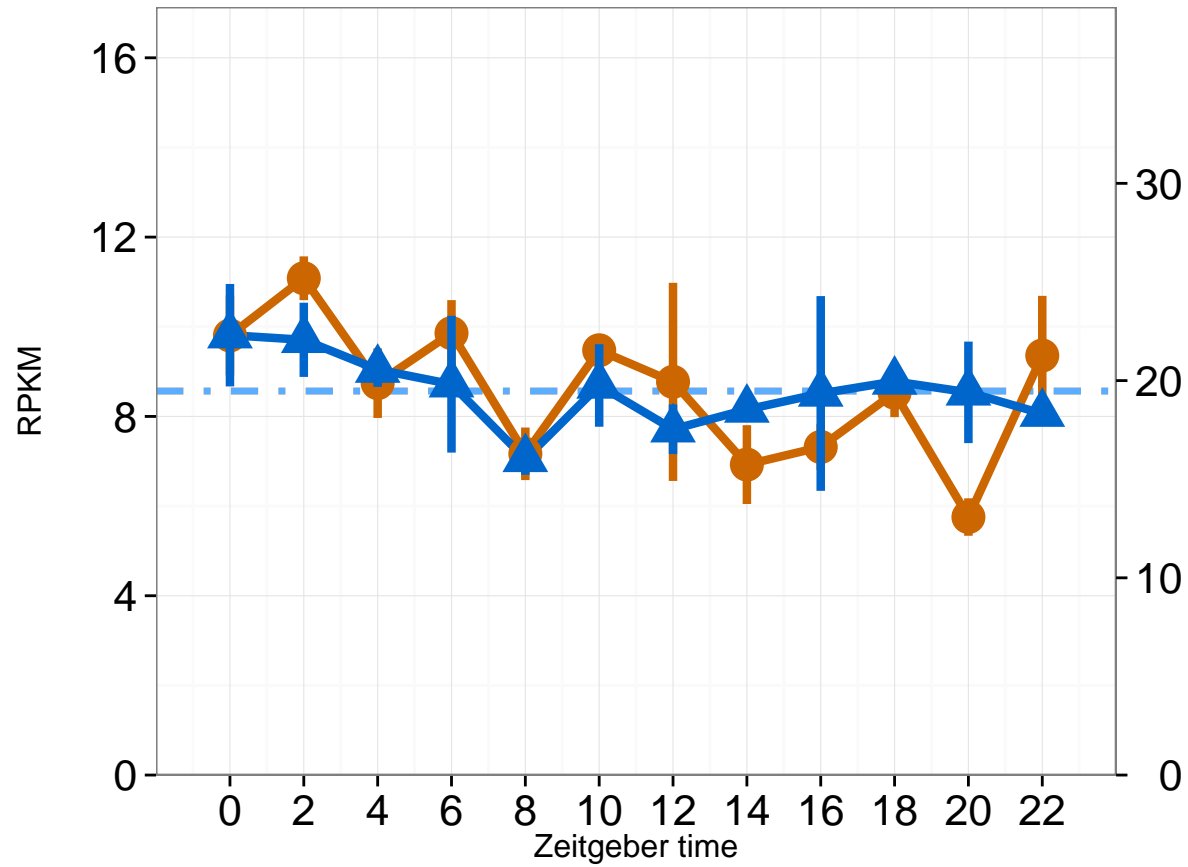

# AI597468

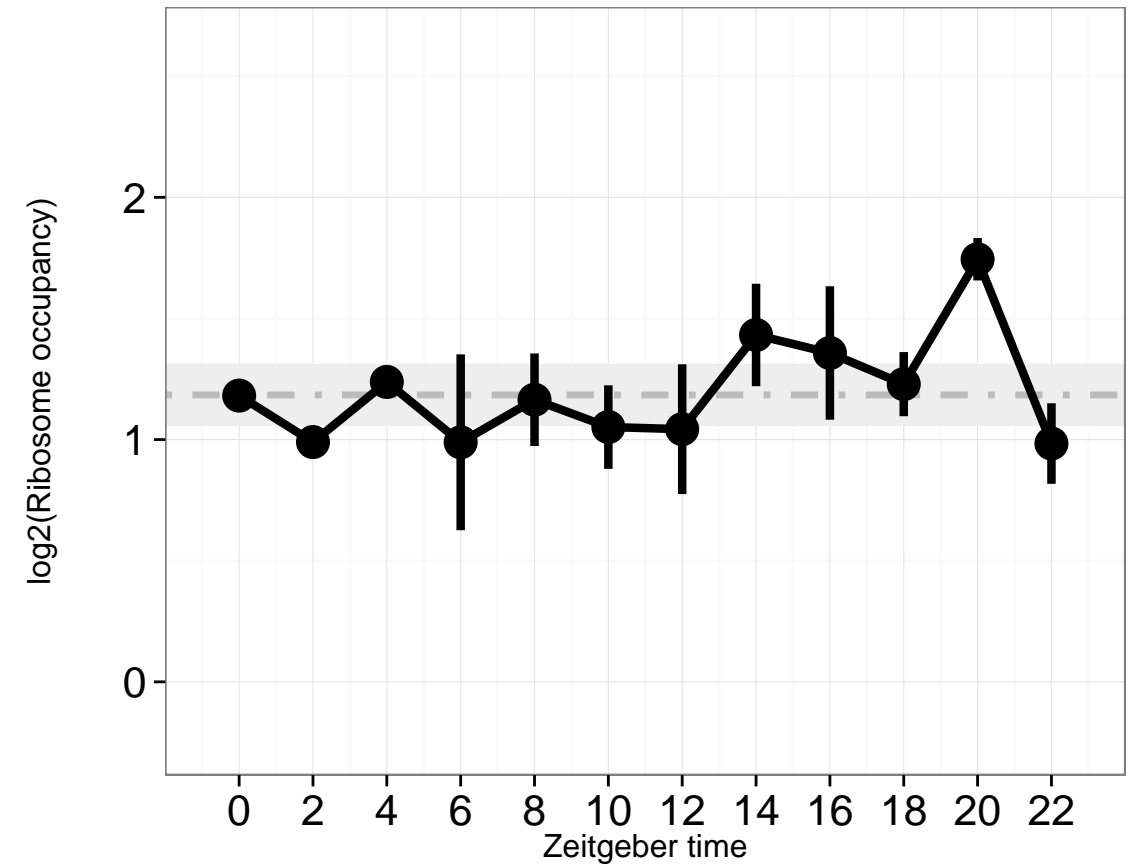

Supplement: Supplementary file 3525 [file 1]

## Rsph1

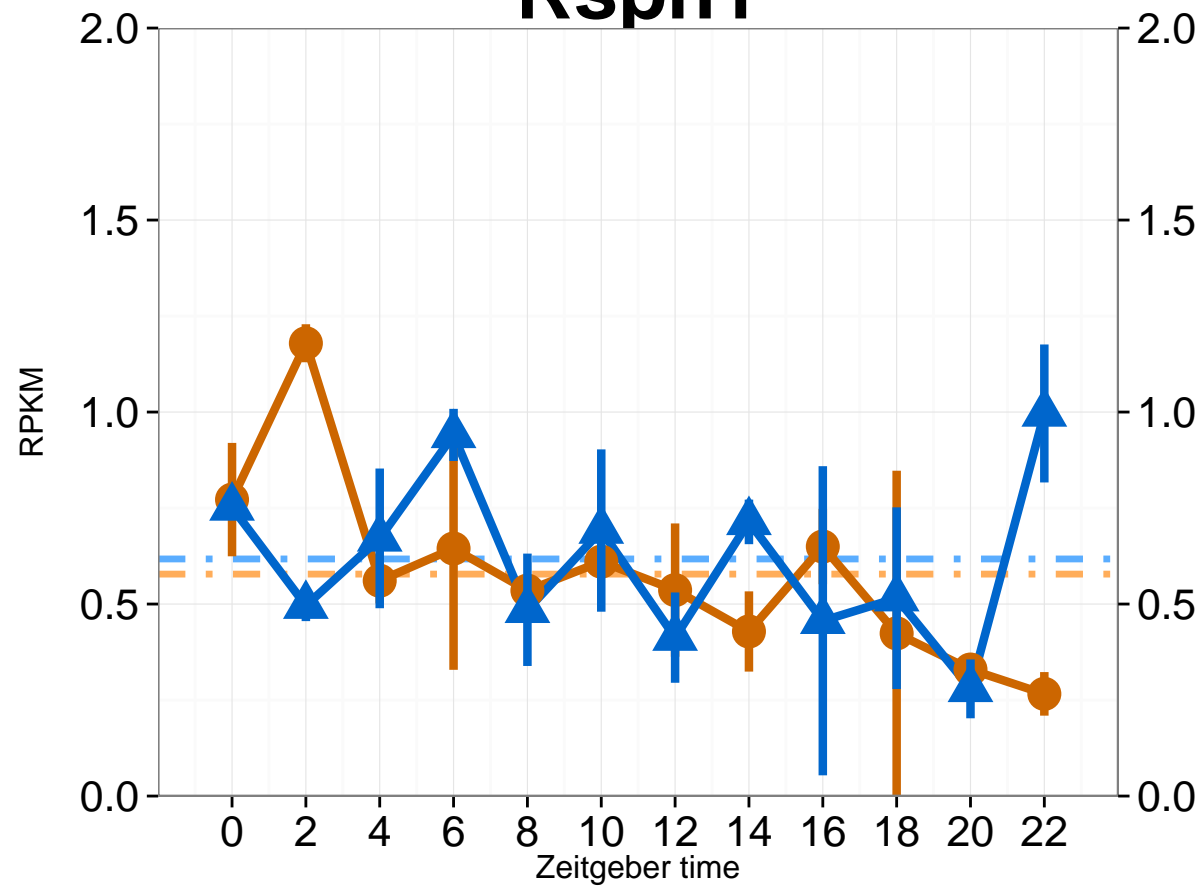

## Rsph1

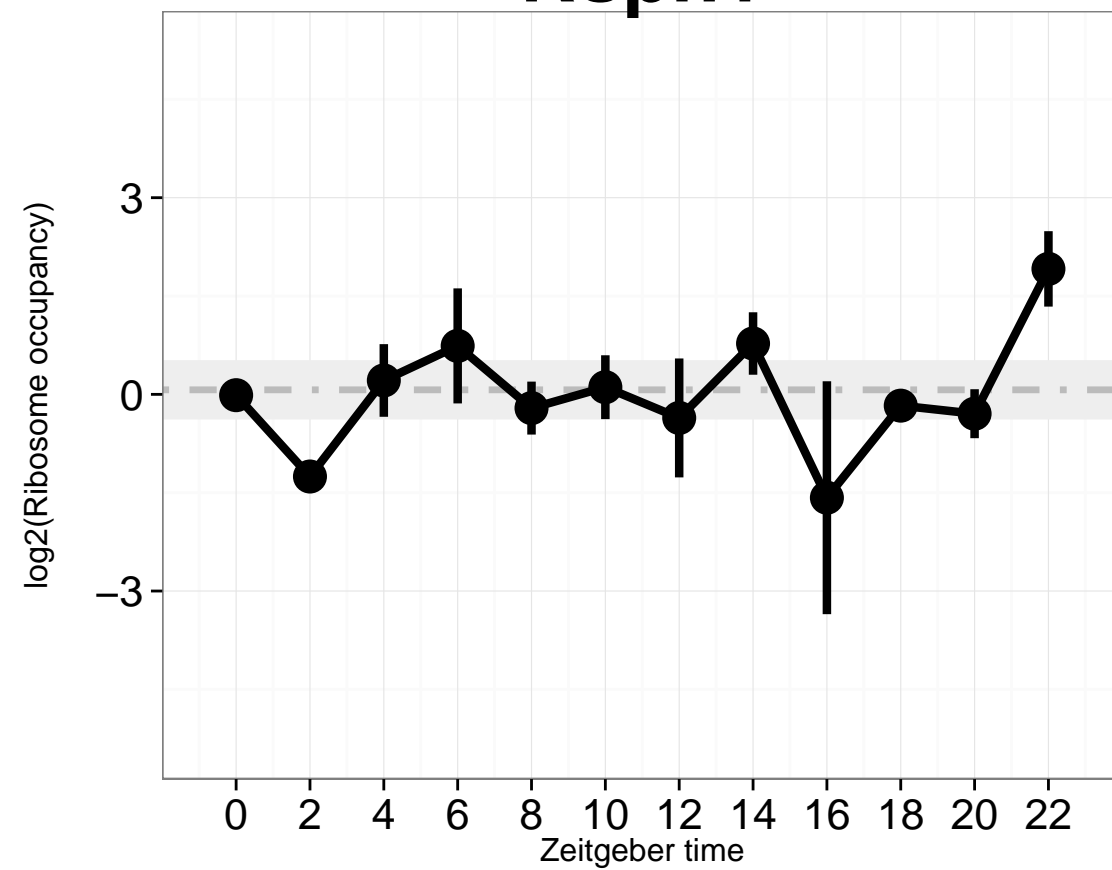

Supplement: Supplementary file 3526 [file 1]

## Rai14

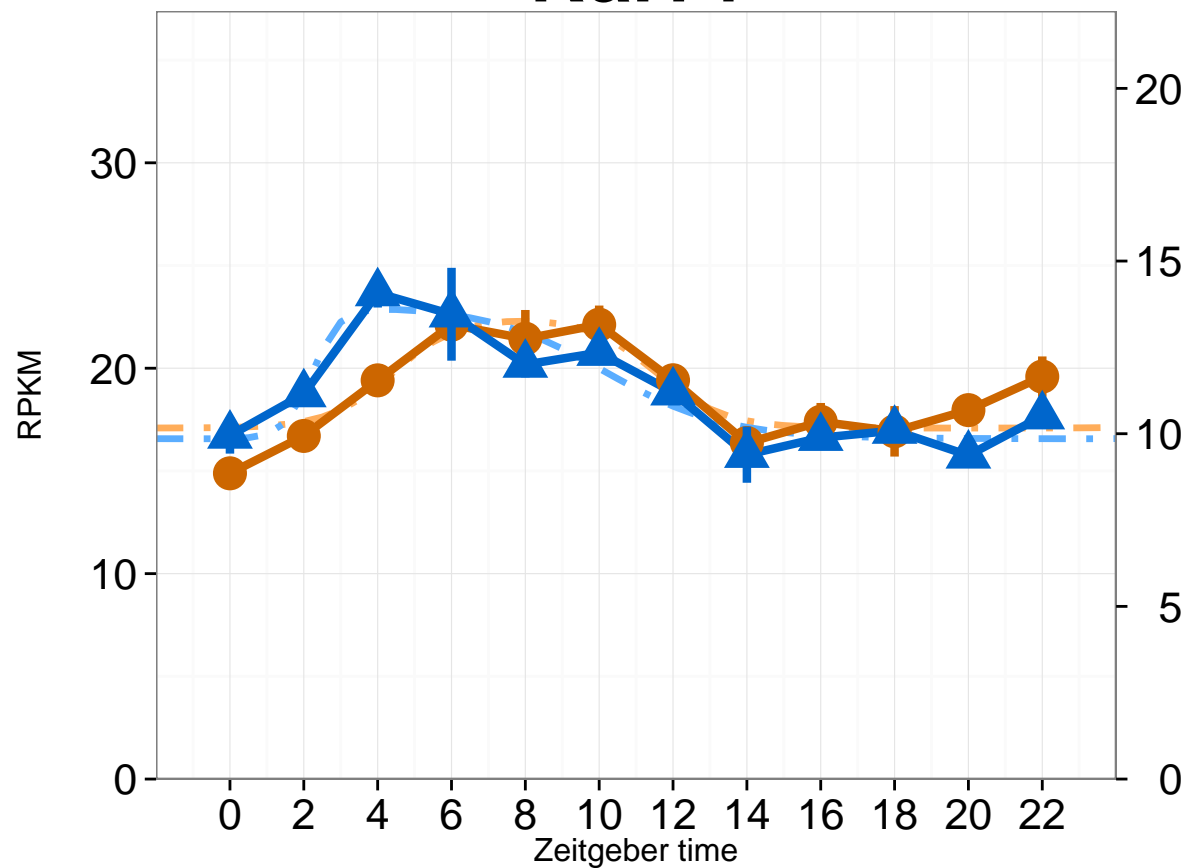

## Rai14

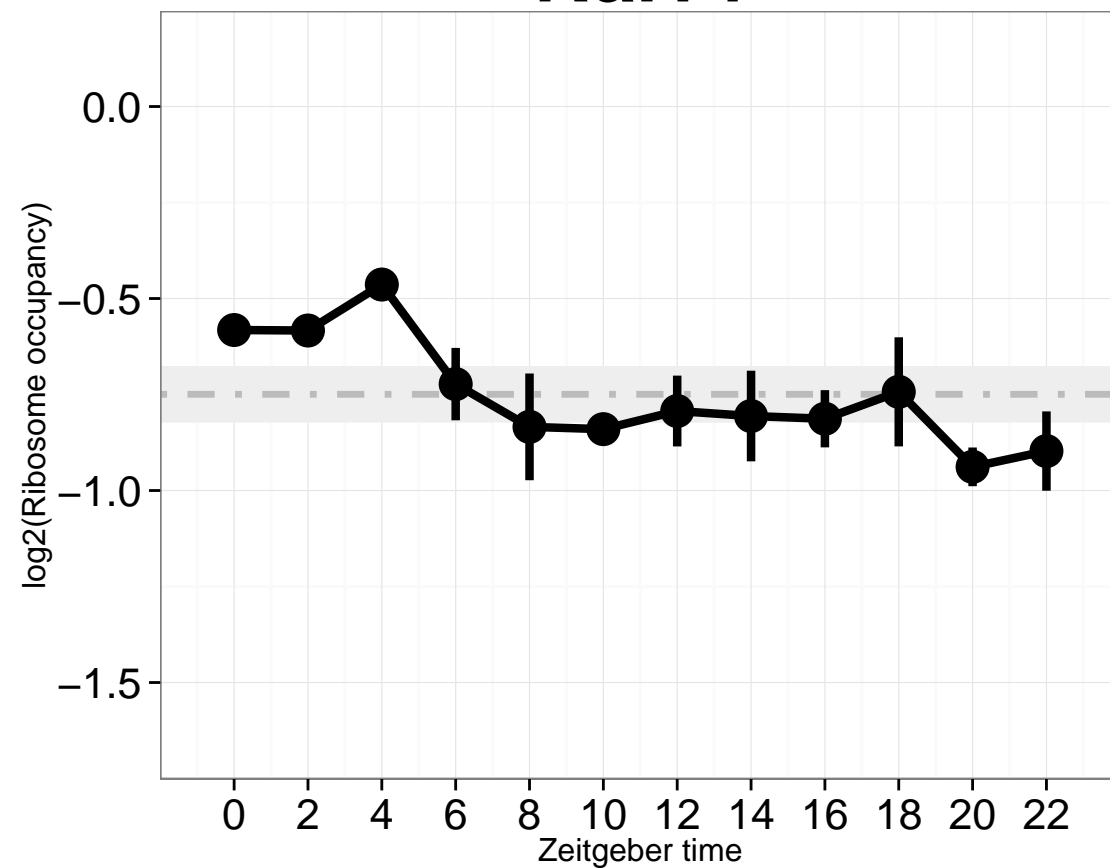

Supplement: Supplementary file 3527 [file 1]

## Dtx2

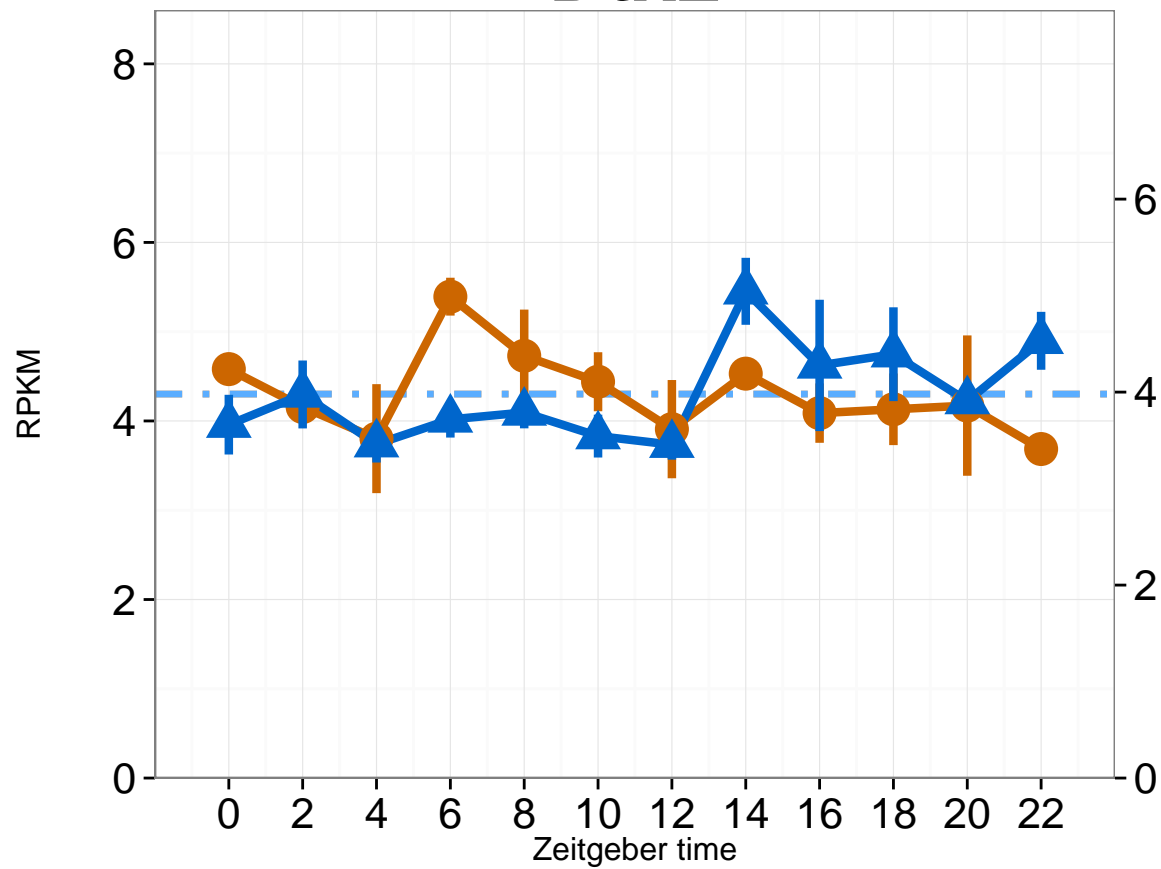

## Dtx2

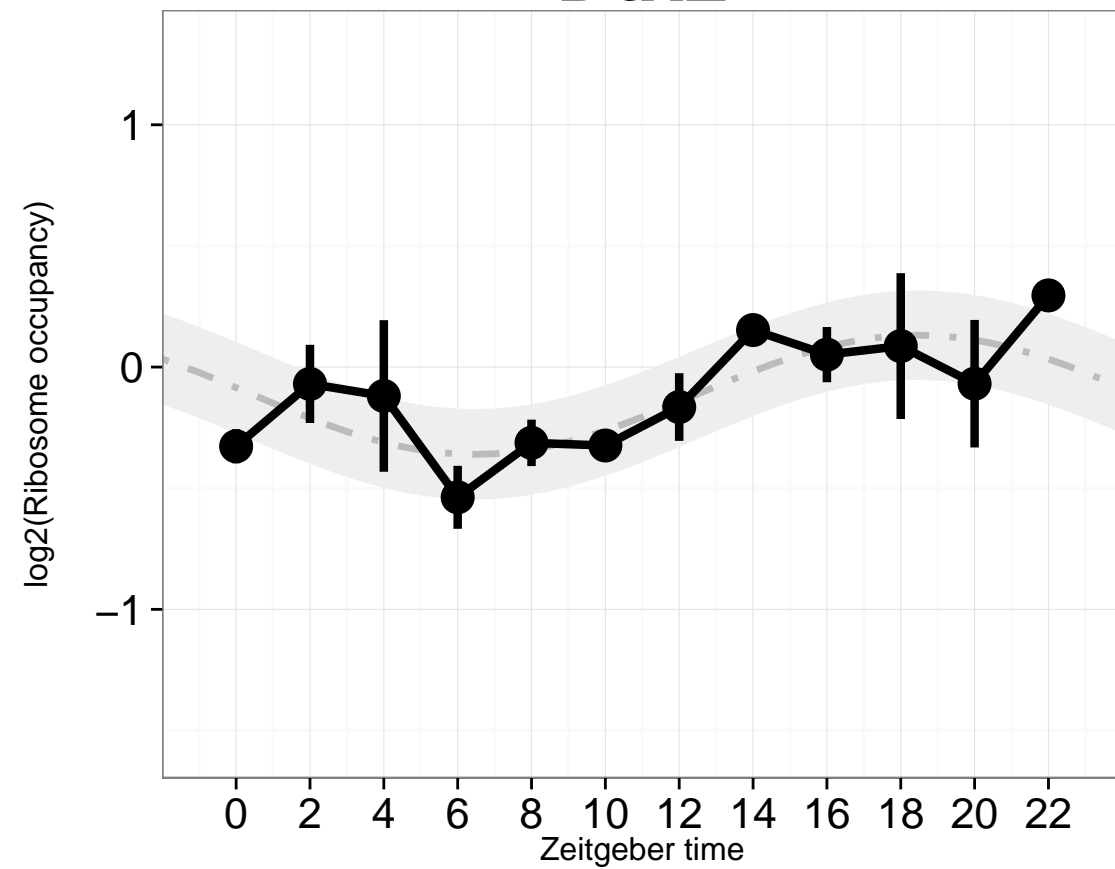

Supplement: Supplementary file 3528 [file 1]

## Pomgnt2

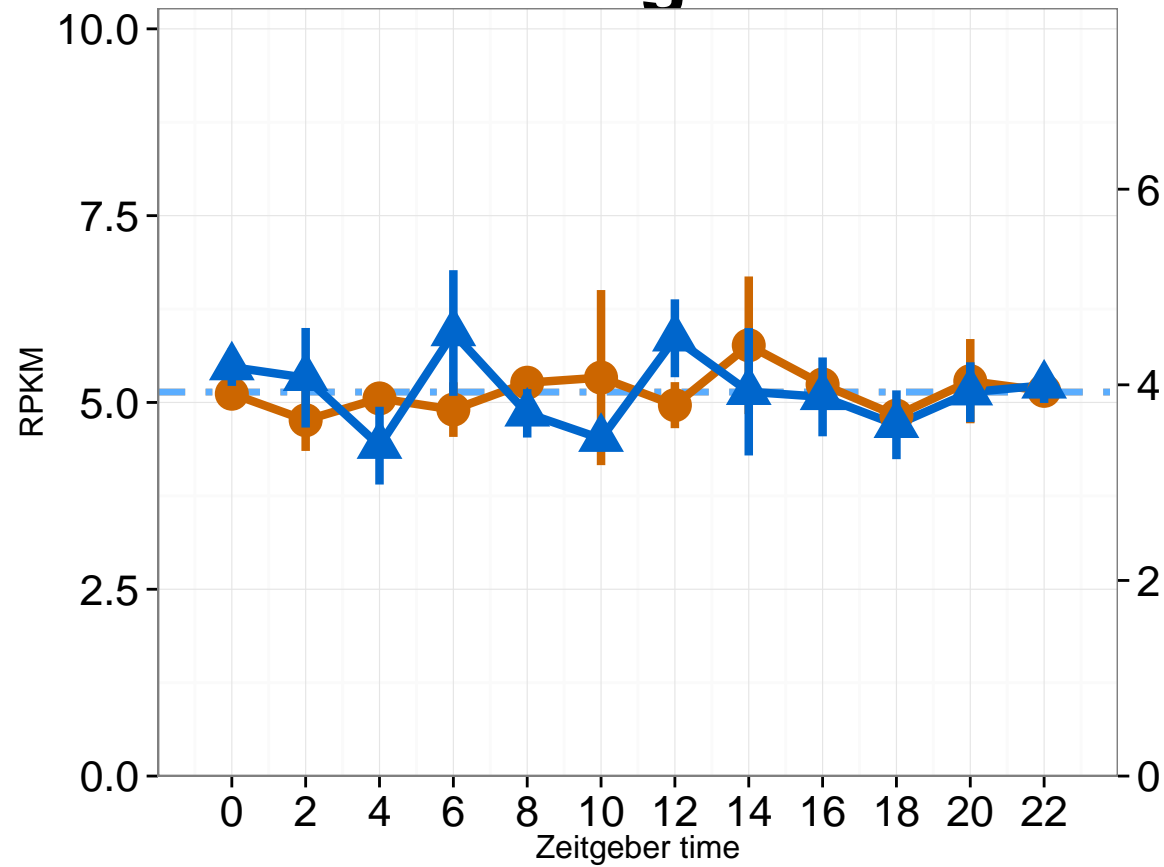

## Pomgnt2

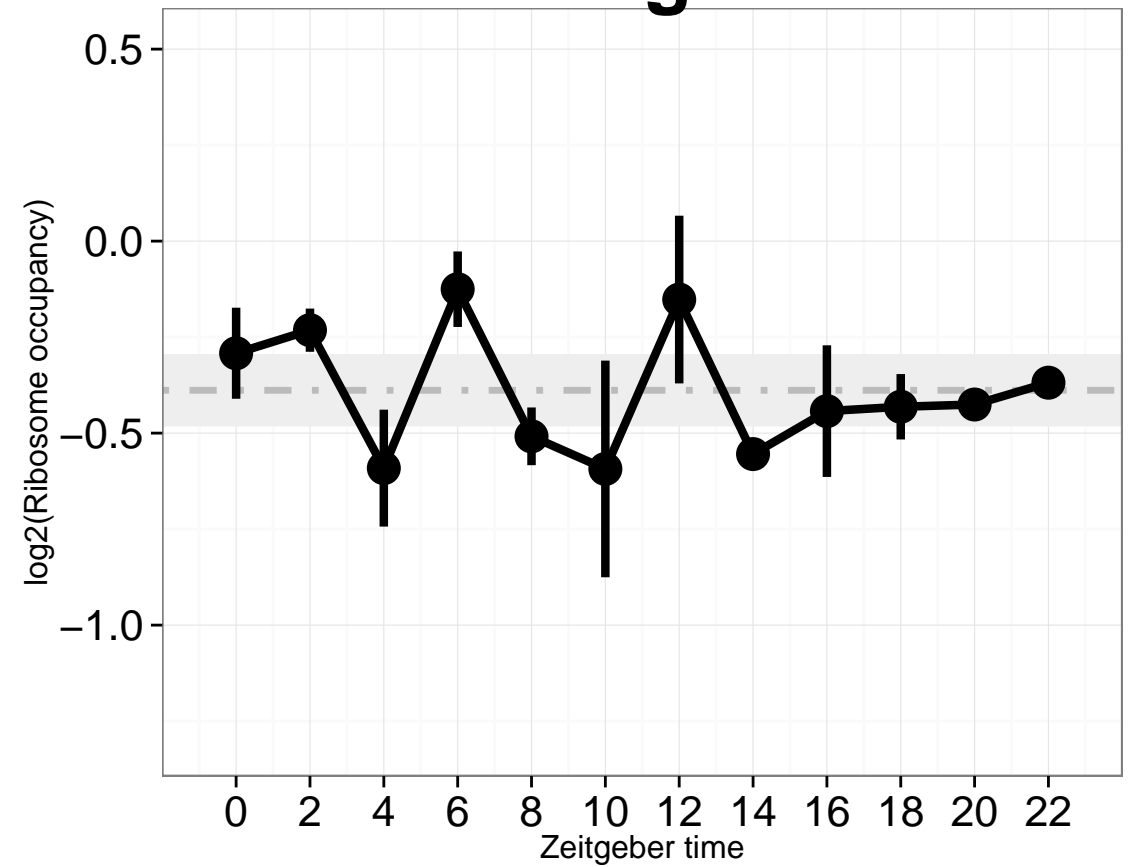

Supplement: Supplementary file 3529 [file 1]

# Cnot1

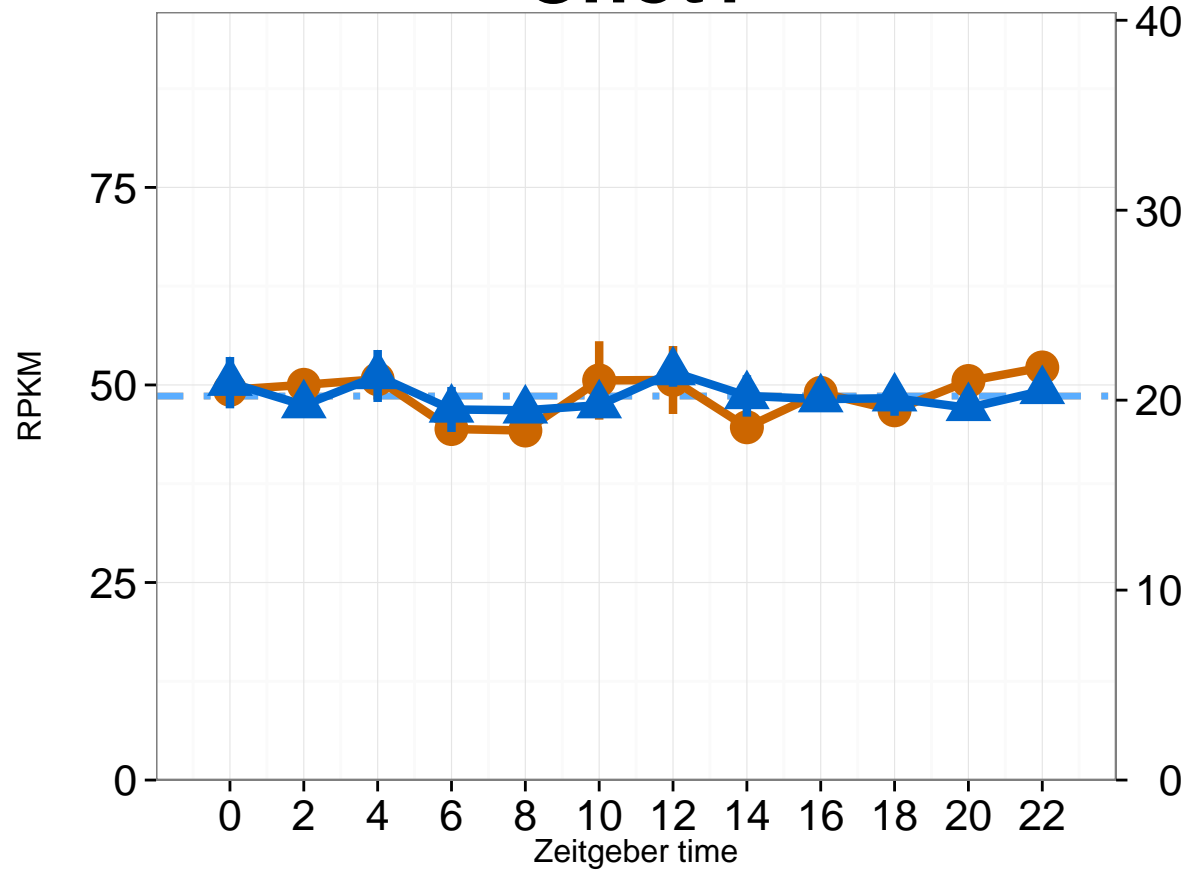

# Cnot1

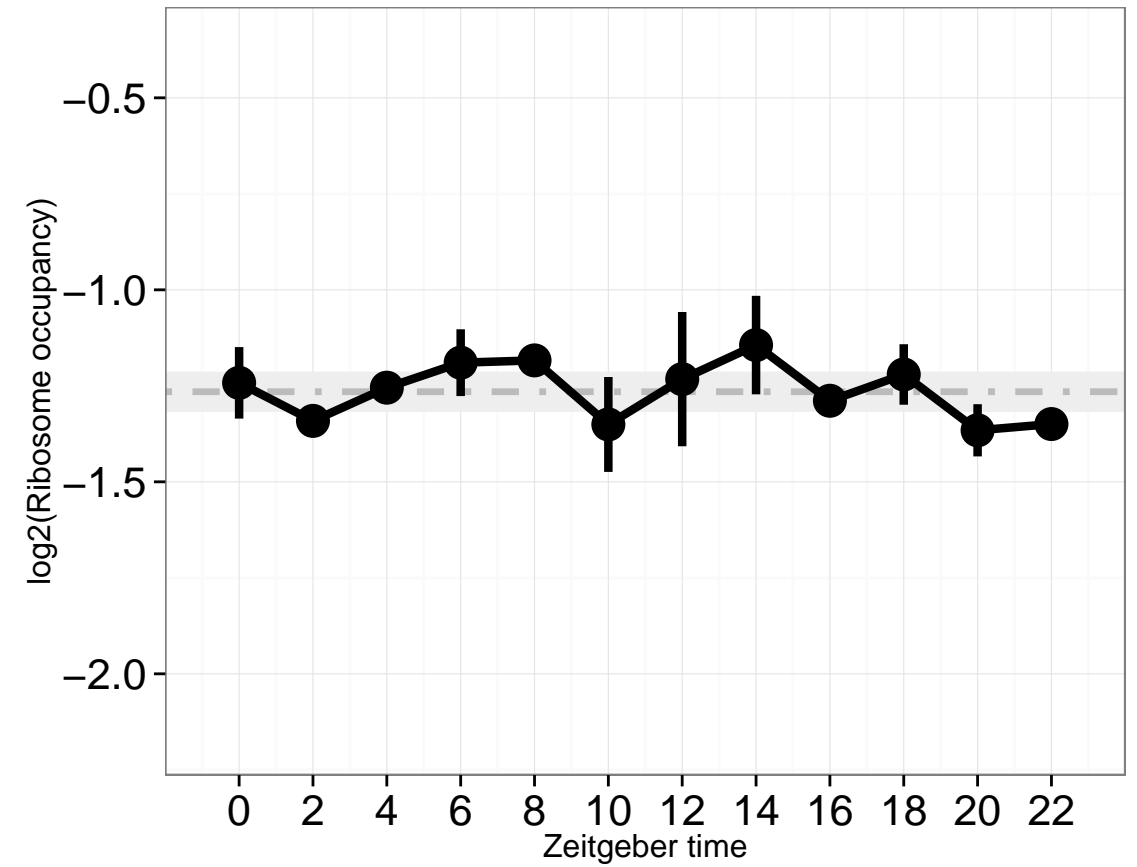

Supplement: Supplementary file 3530 [file 1]

## Rabggta

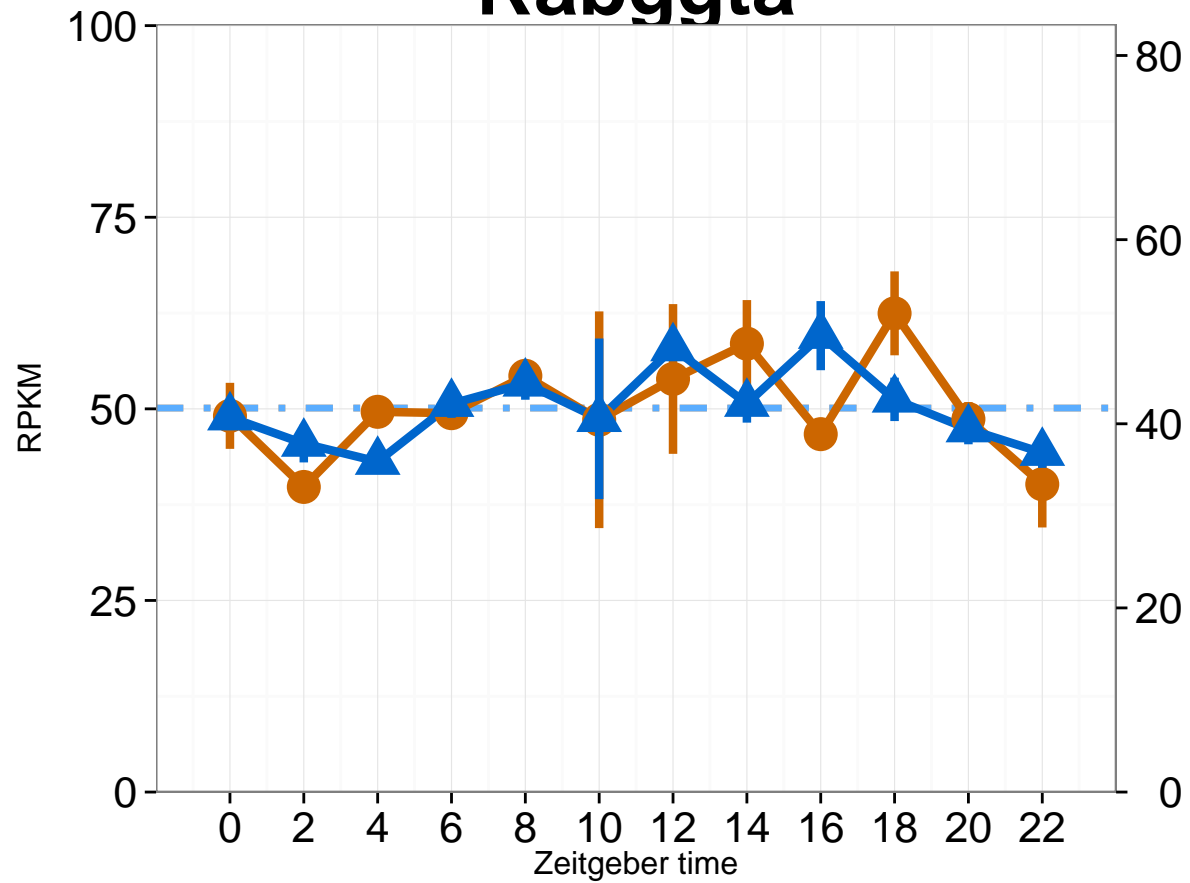

## Rabggta

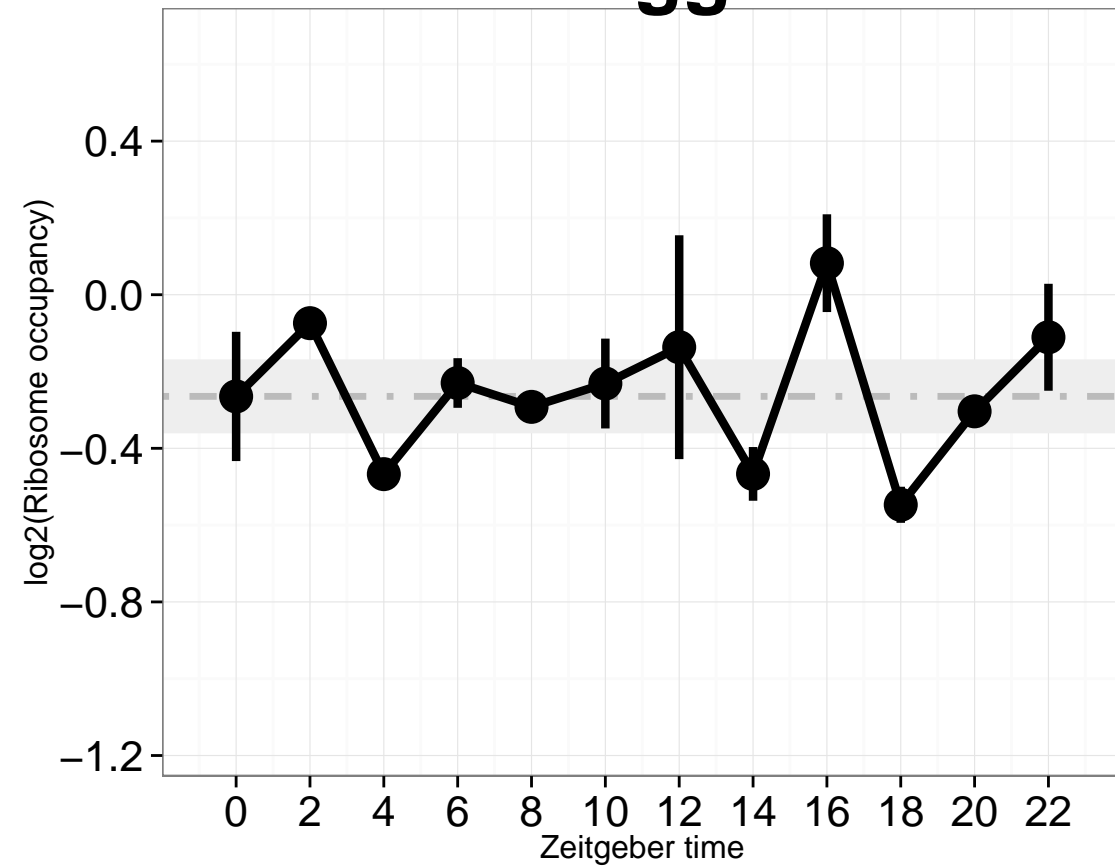

Supplement: Supplementary file 3531 [file 1]

## Krcc1

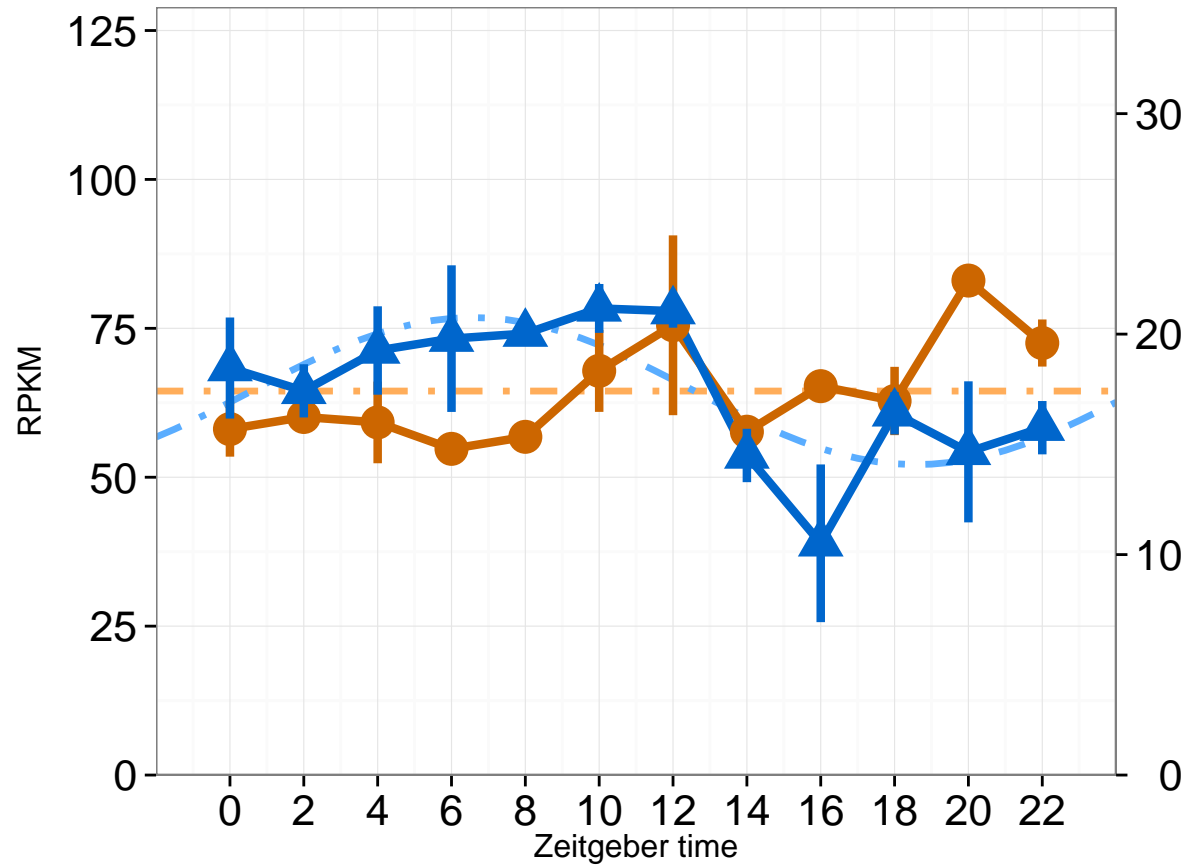

## Krcc1

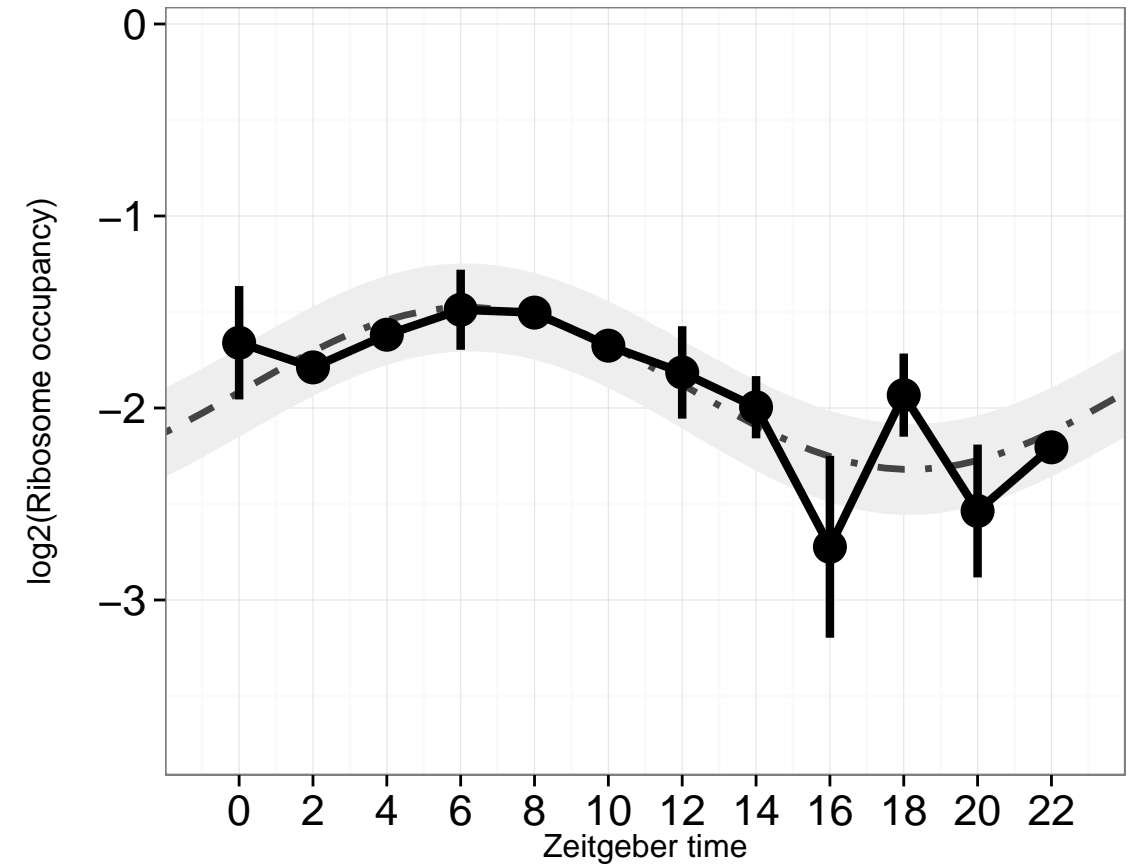

Supplement: Supplementary file 3532 [file 1]

# Zfp275

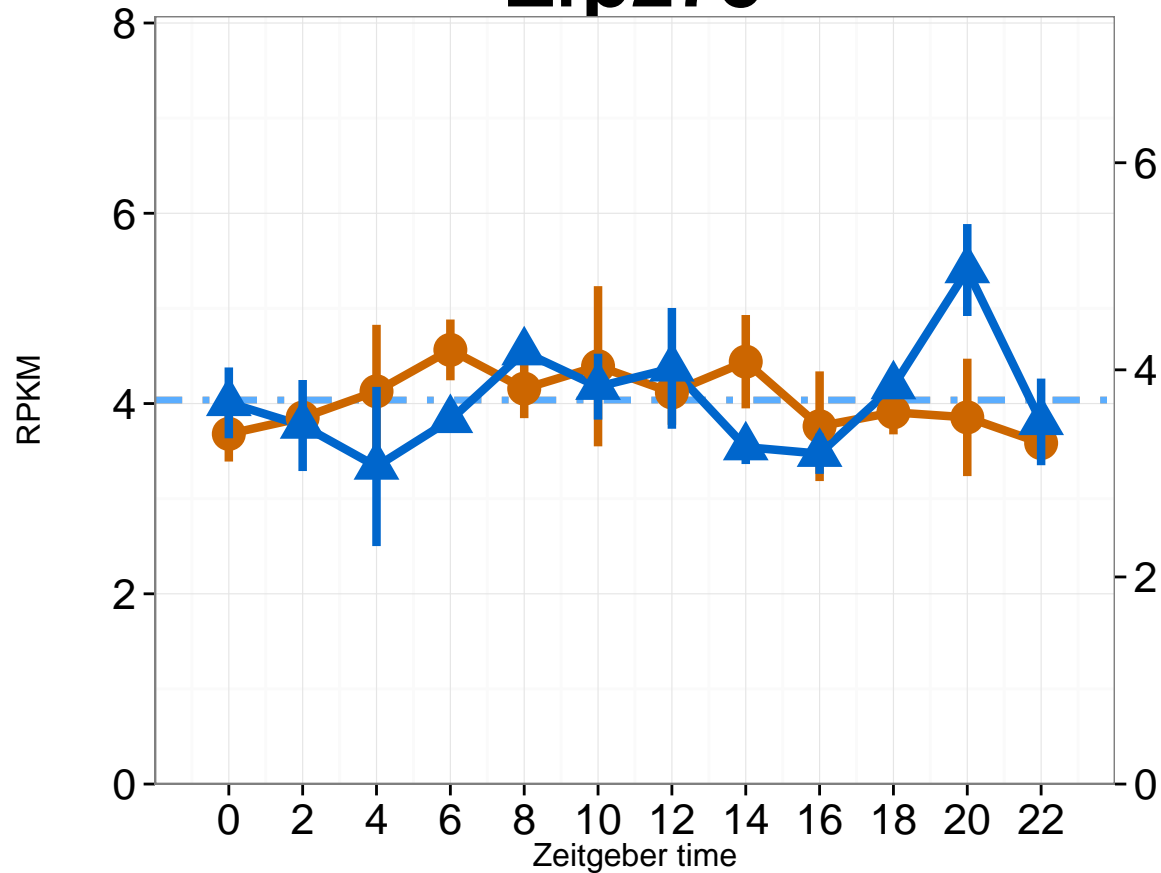

# Zfp275

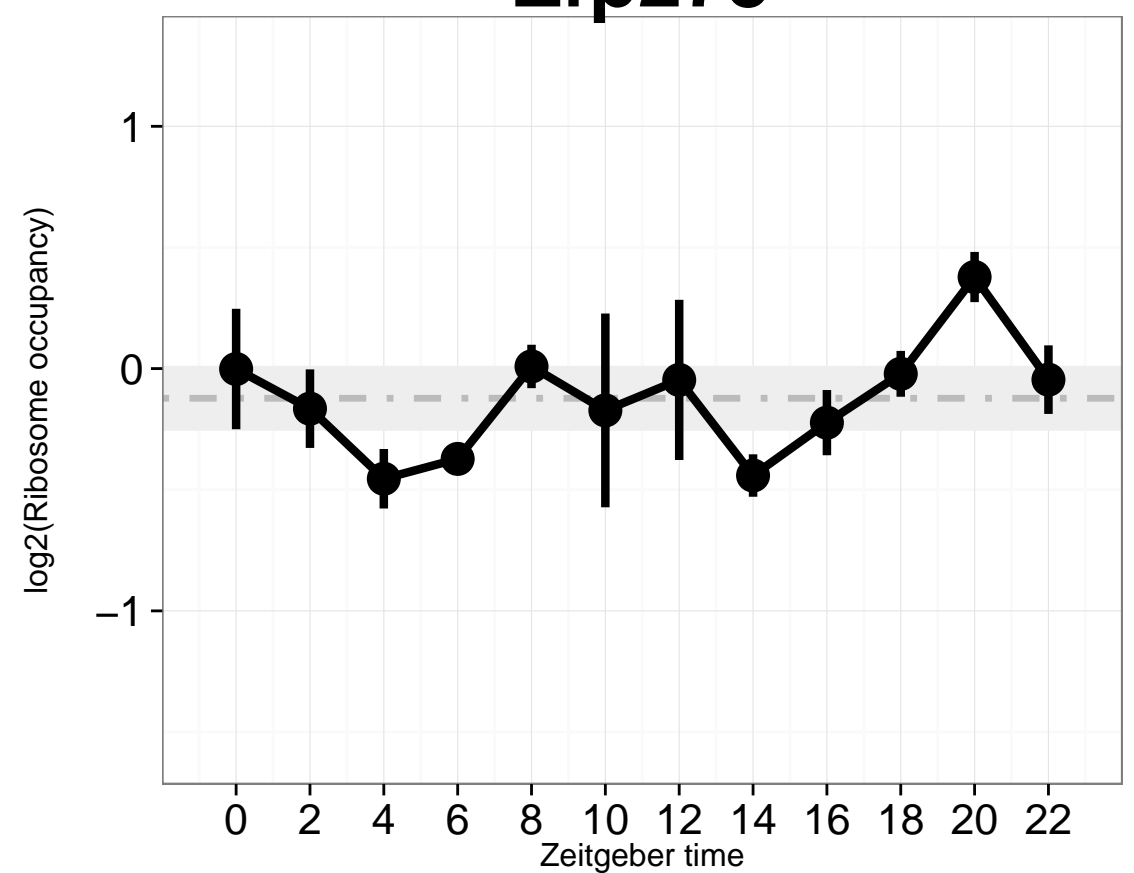

Supplement: Supplementary file 3533 [file 1]

# Zfp846

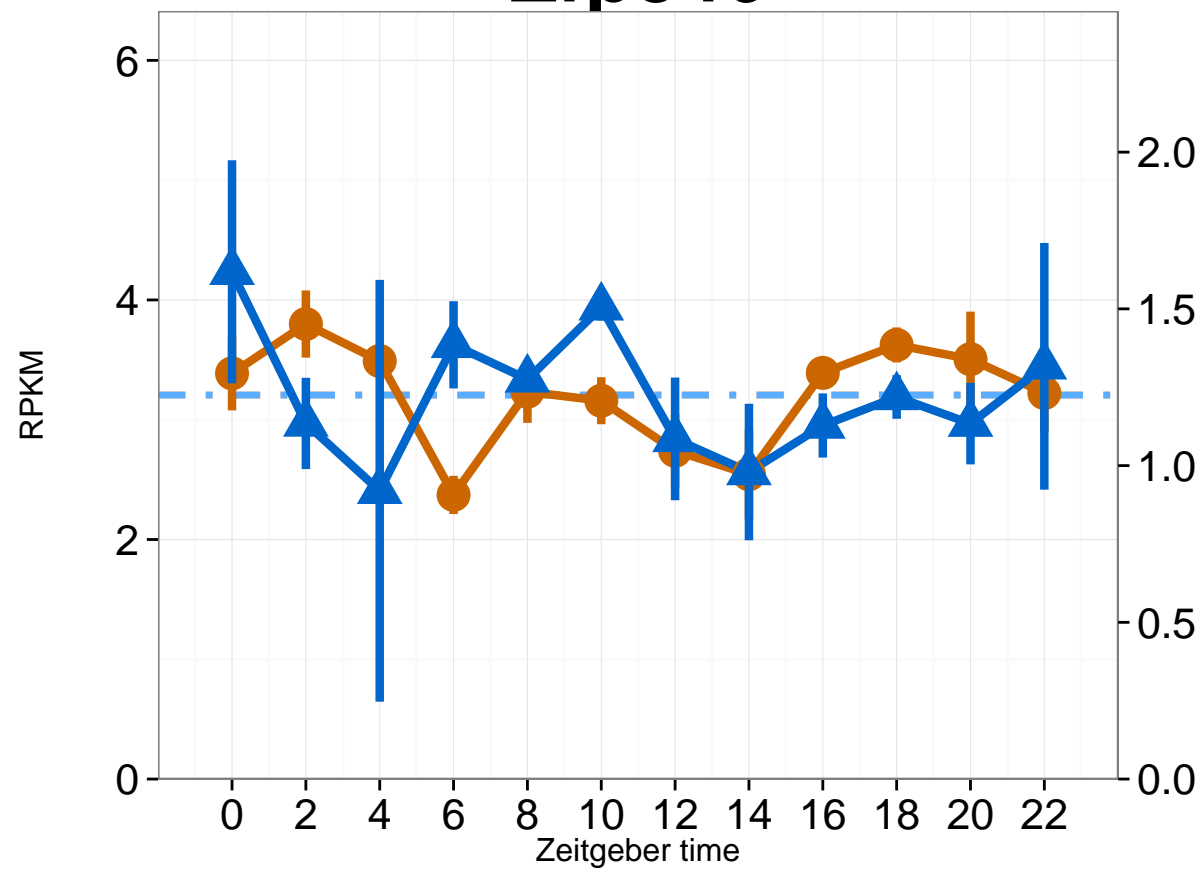

# Zfp846

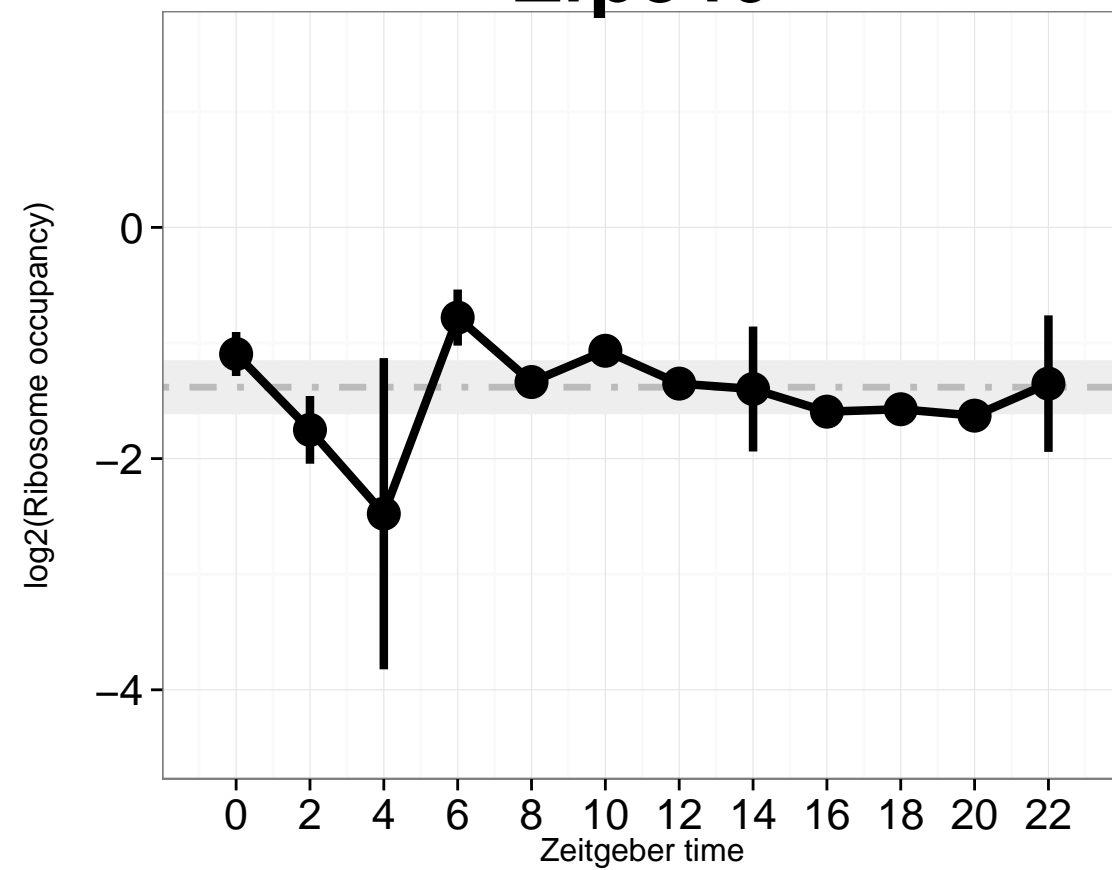

Supplement: Supplementary file 3534 [file 1]

# Cabin1

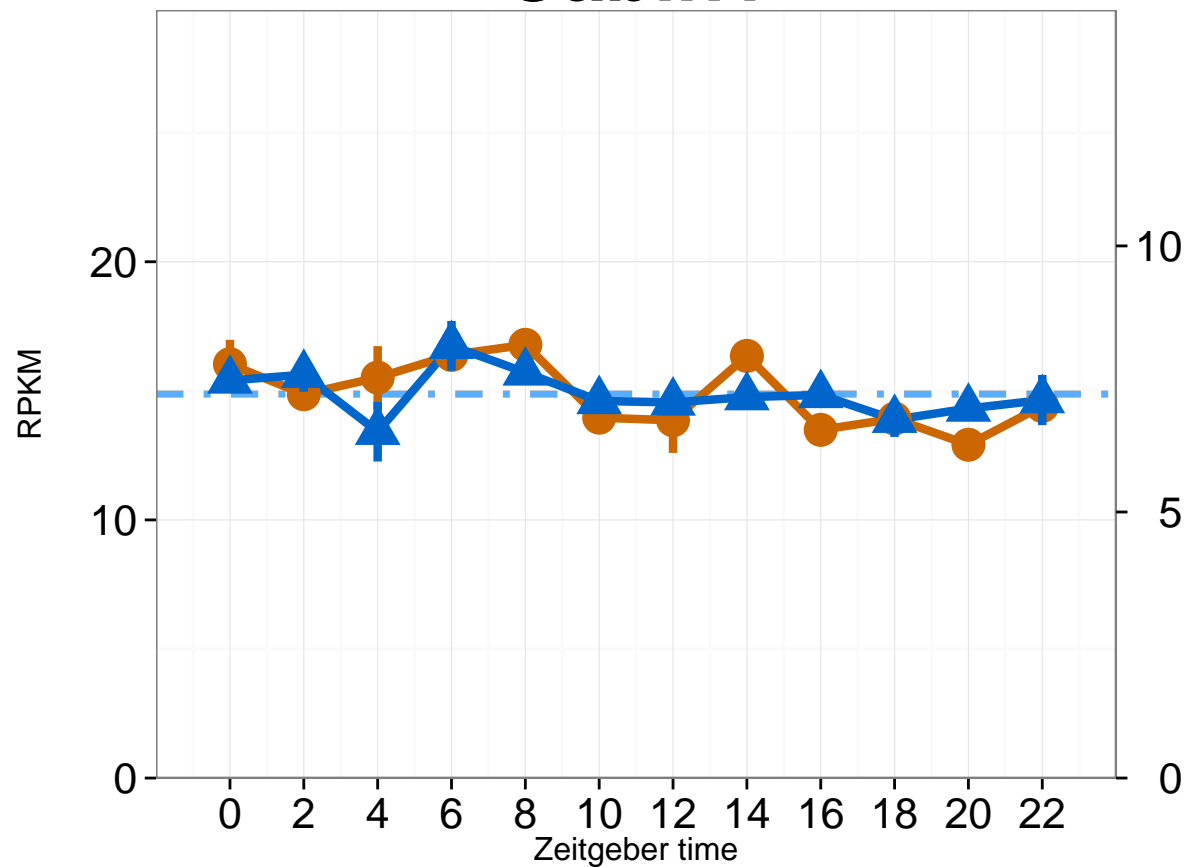

# Cabin1

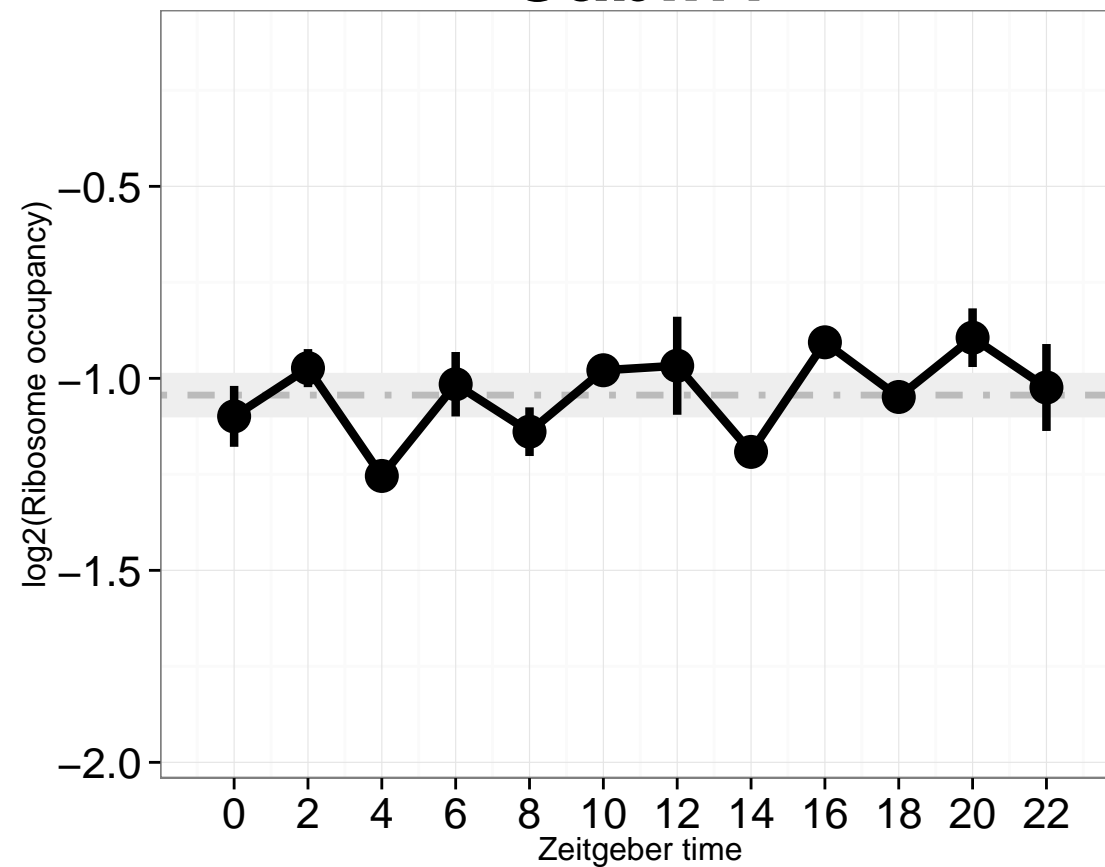

Supplement: Supplementary file 3535 [file 1]

## Clrn3

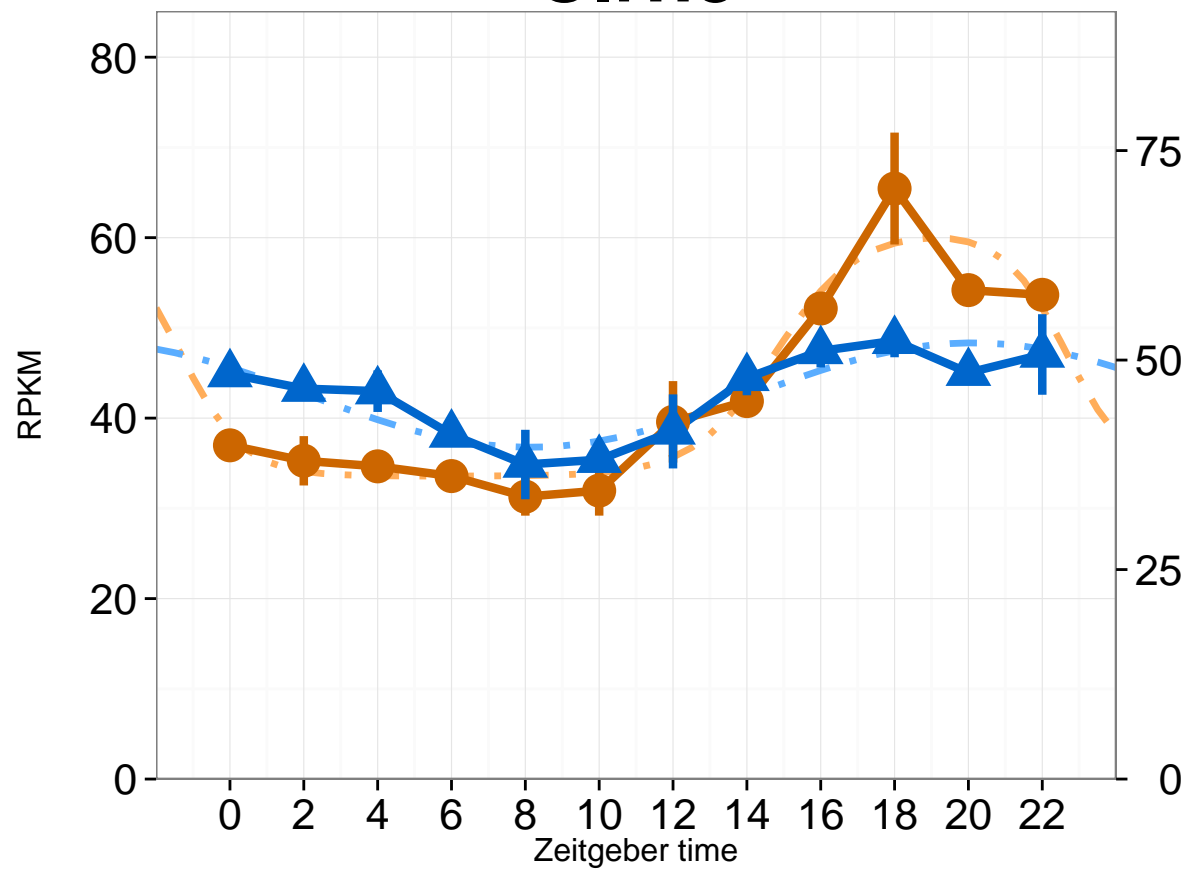

## Clrn3

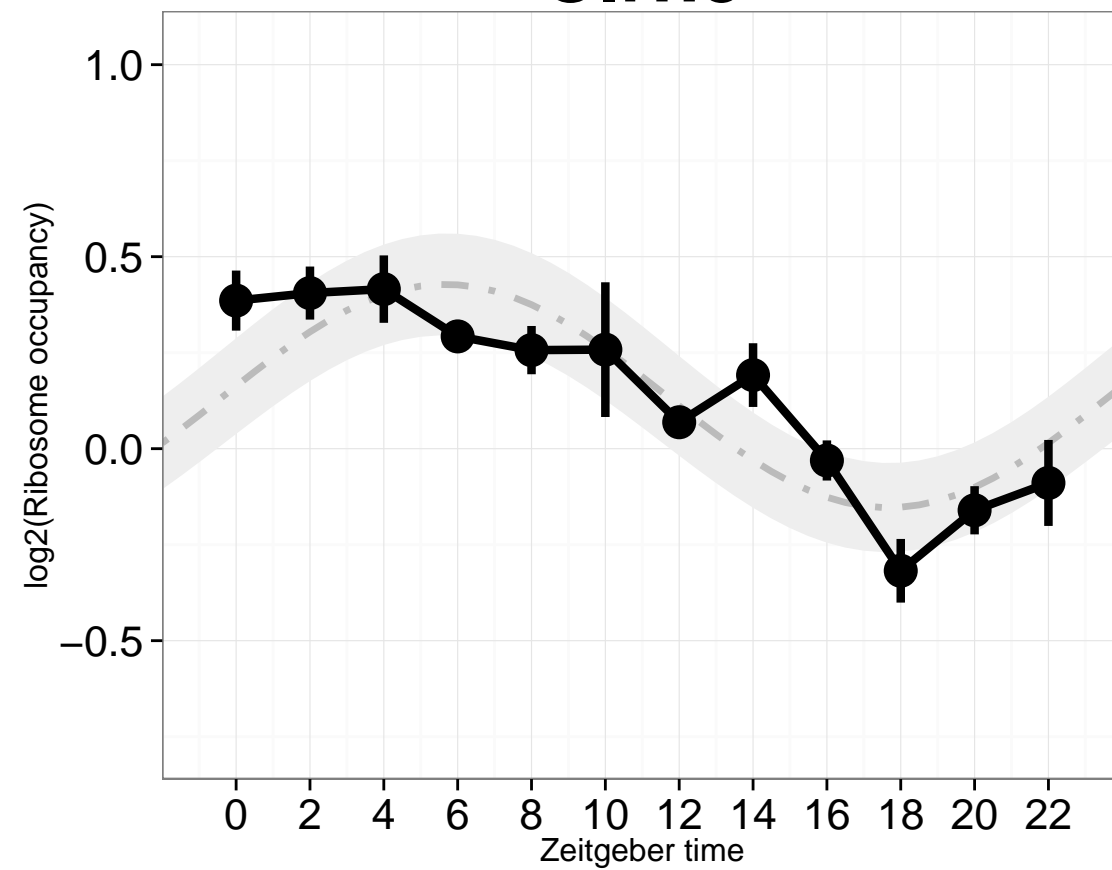

Supplement: Supplementary file 3536 [file 1]

## lrx3

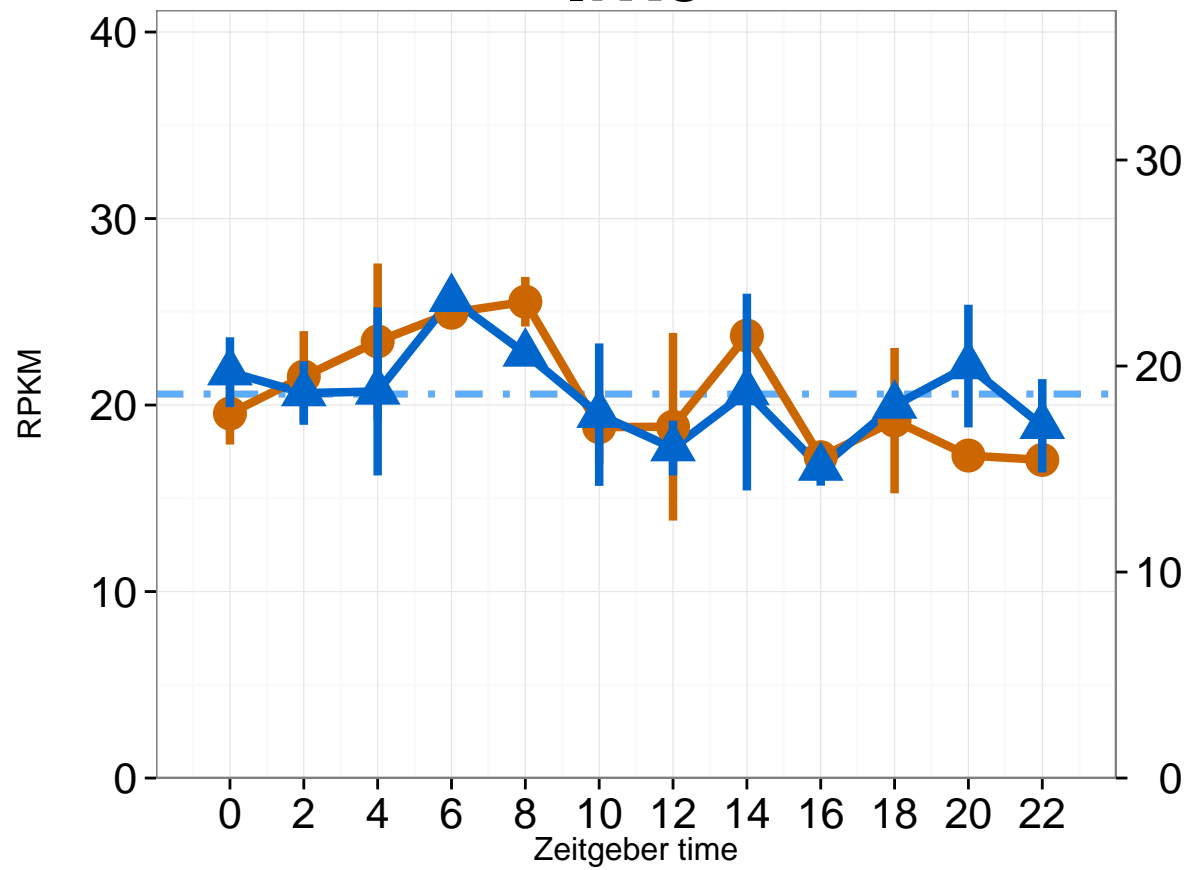

## lrx3

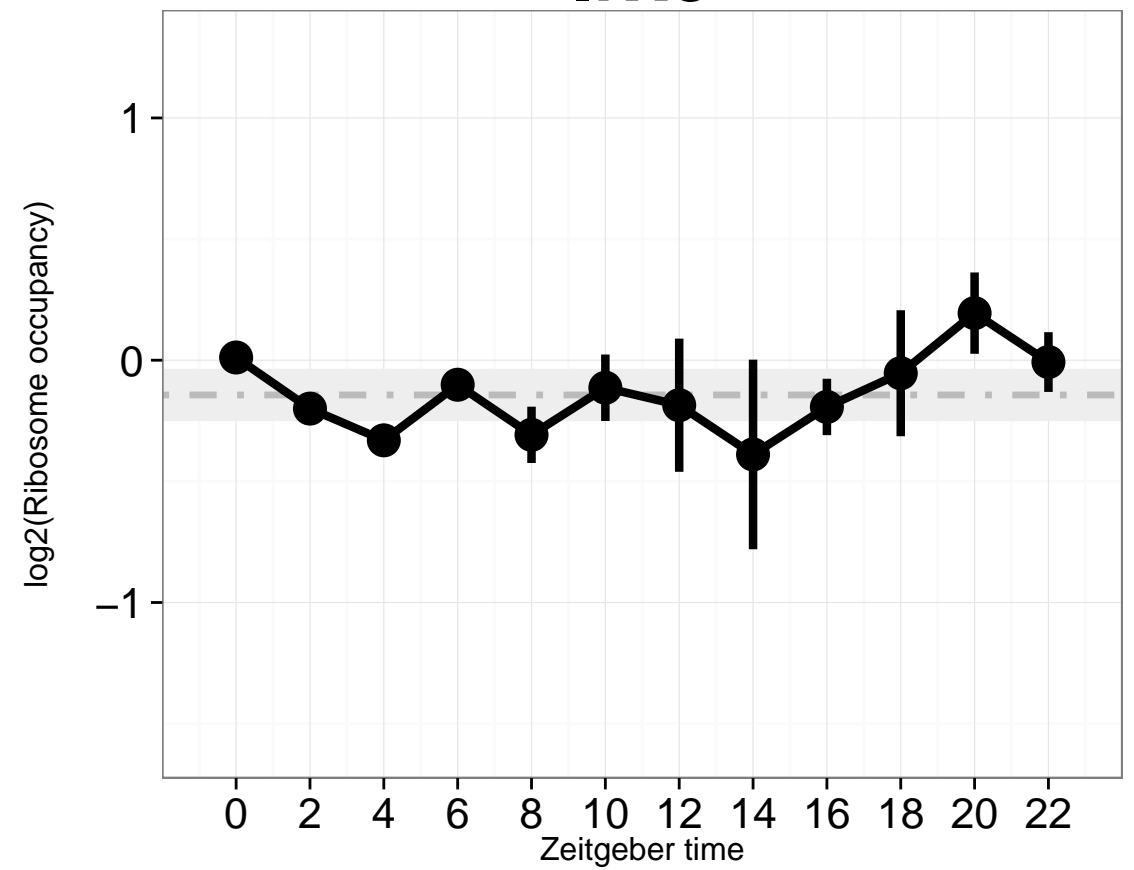

Supplement: Supplementary file 3537 [file 1]

## Osbp17

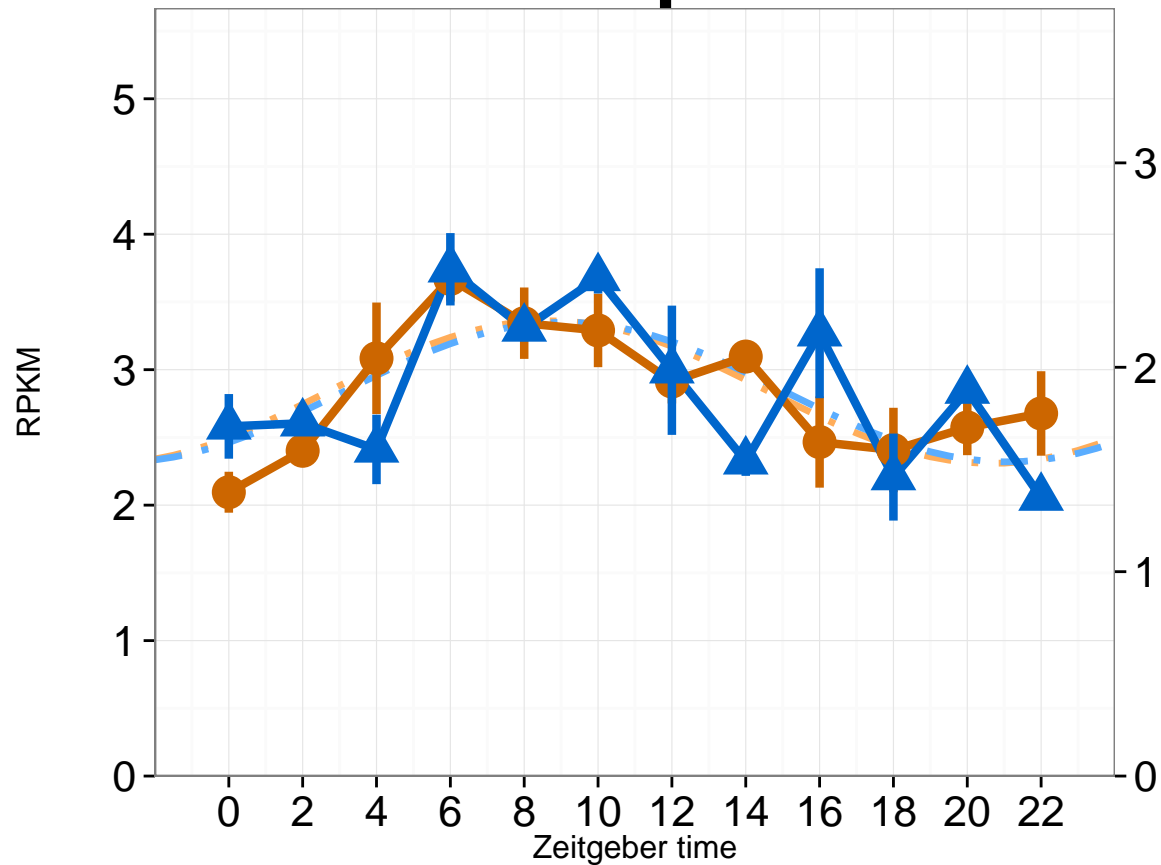

## Osbp17

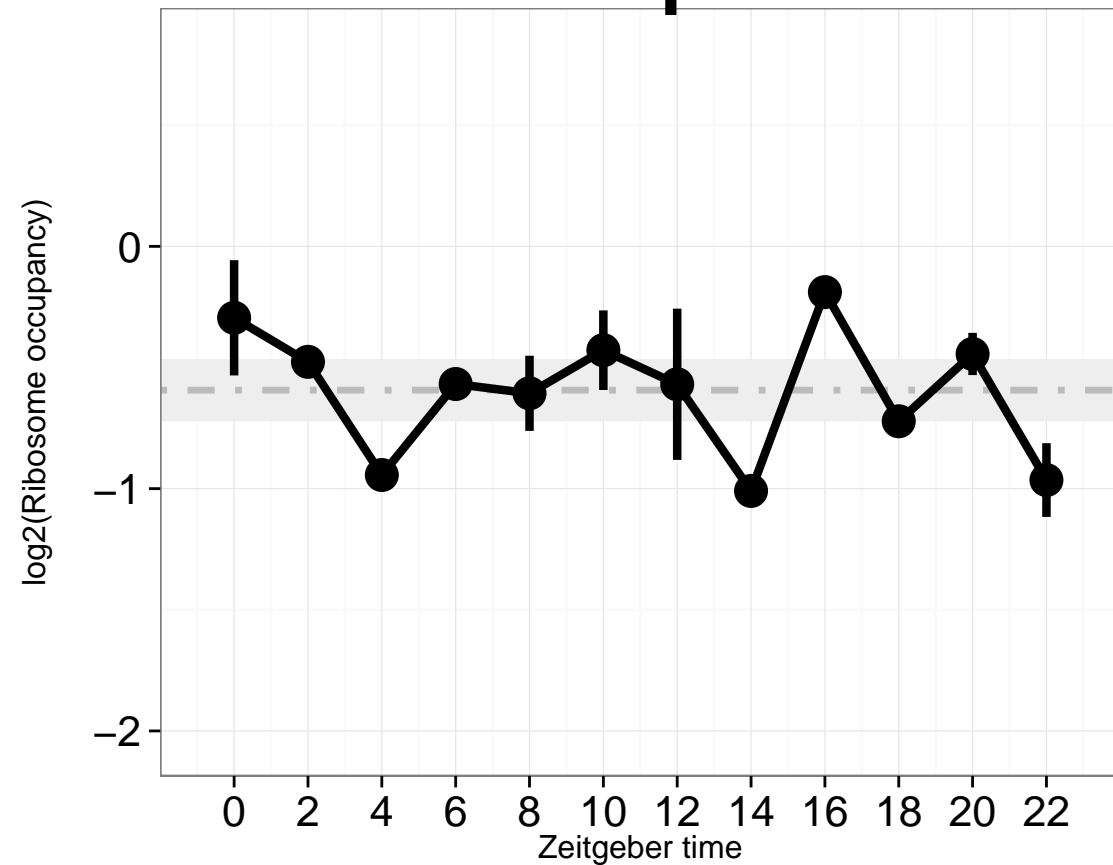

Supplement: Supplementary file 3538 [file 1]

## Snx15

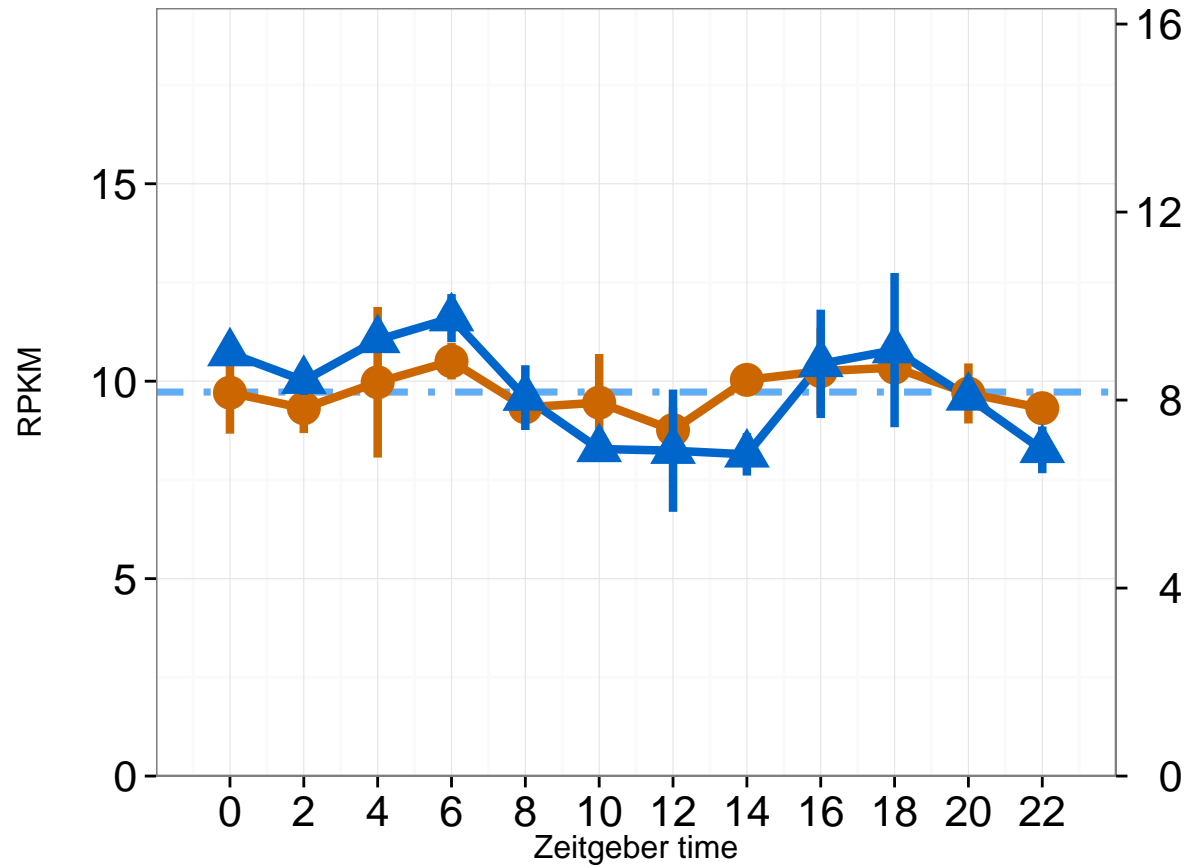

## Snx15

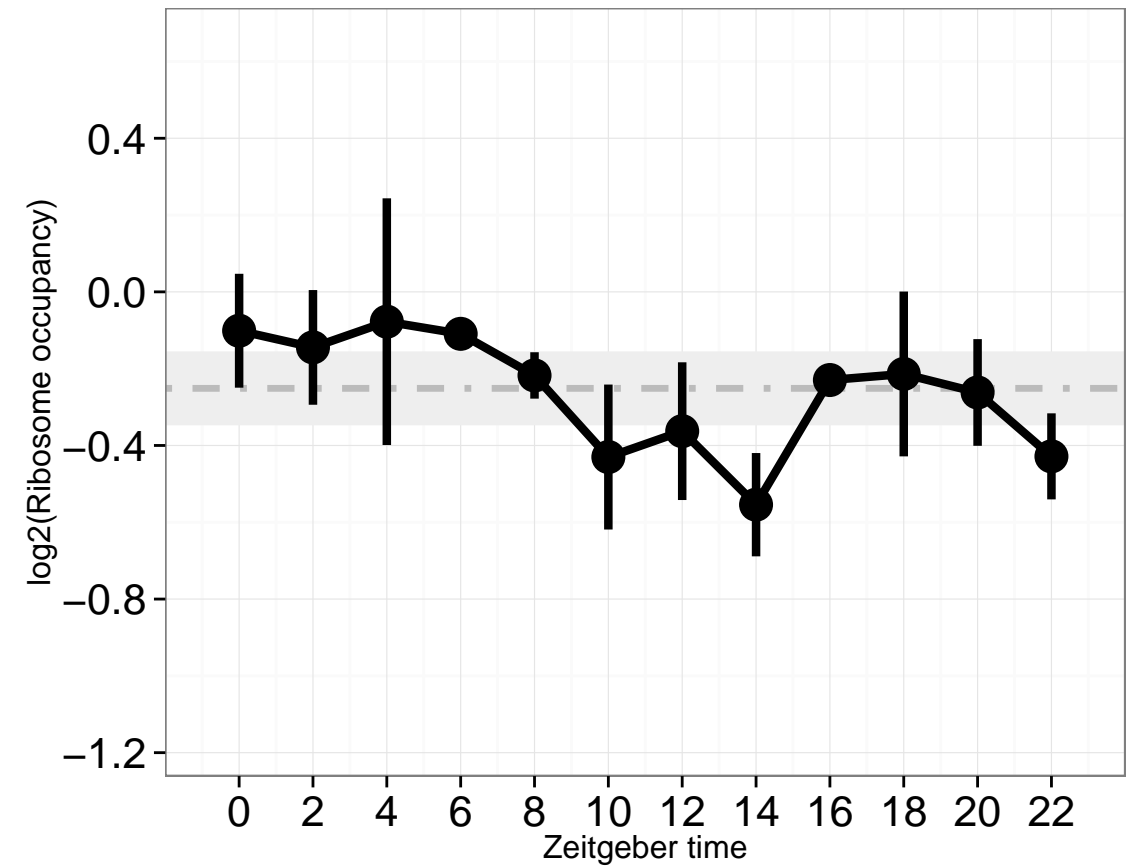

Supplement: Supplementary file 3539 [file 1]

# Tmem231

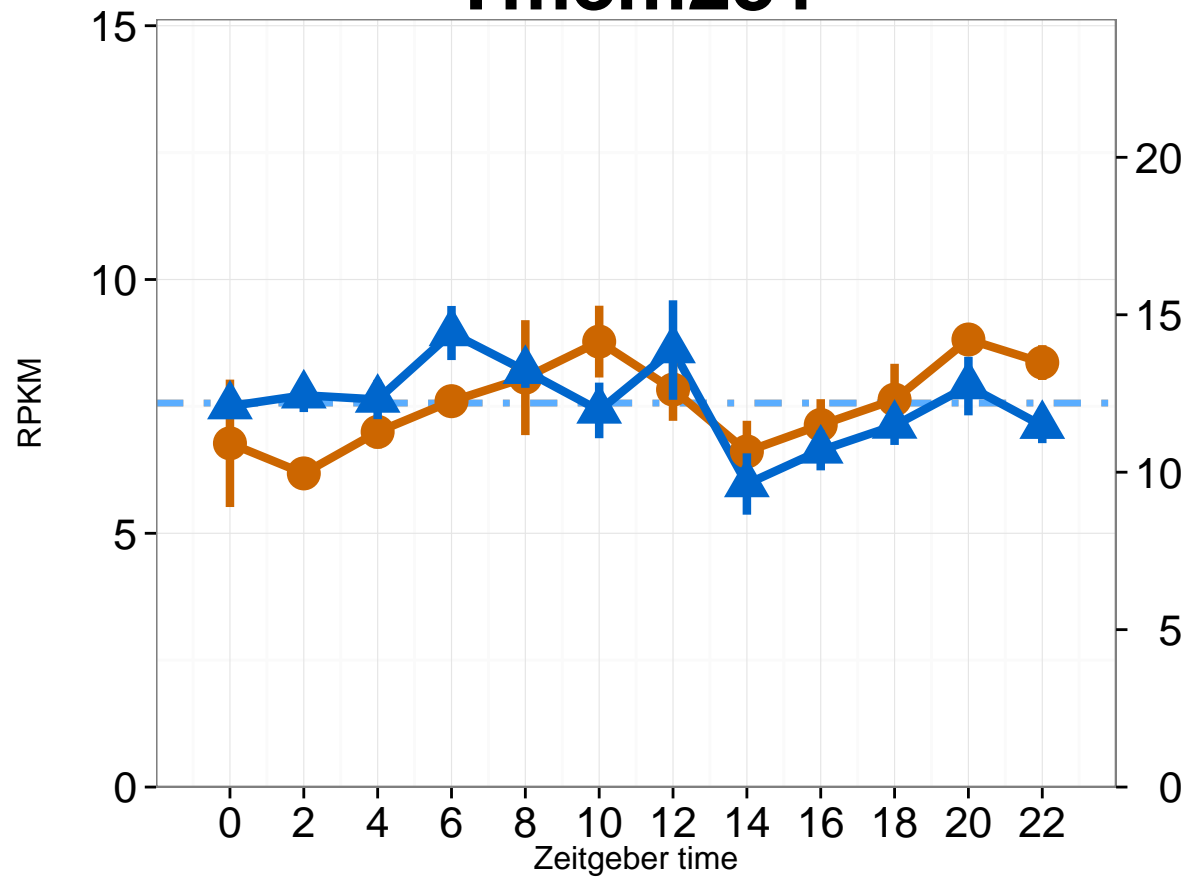

# Tmem231

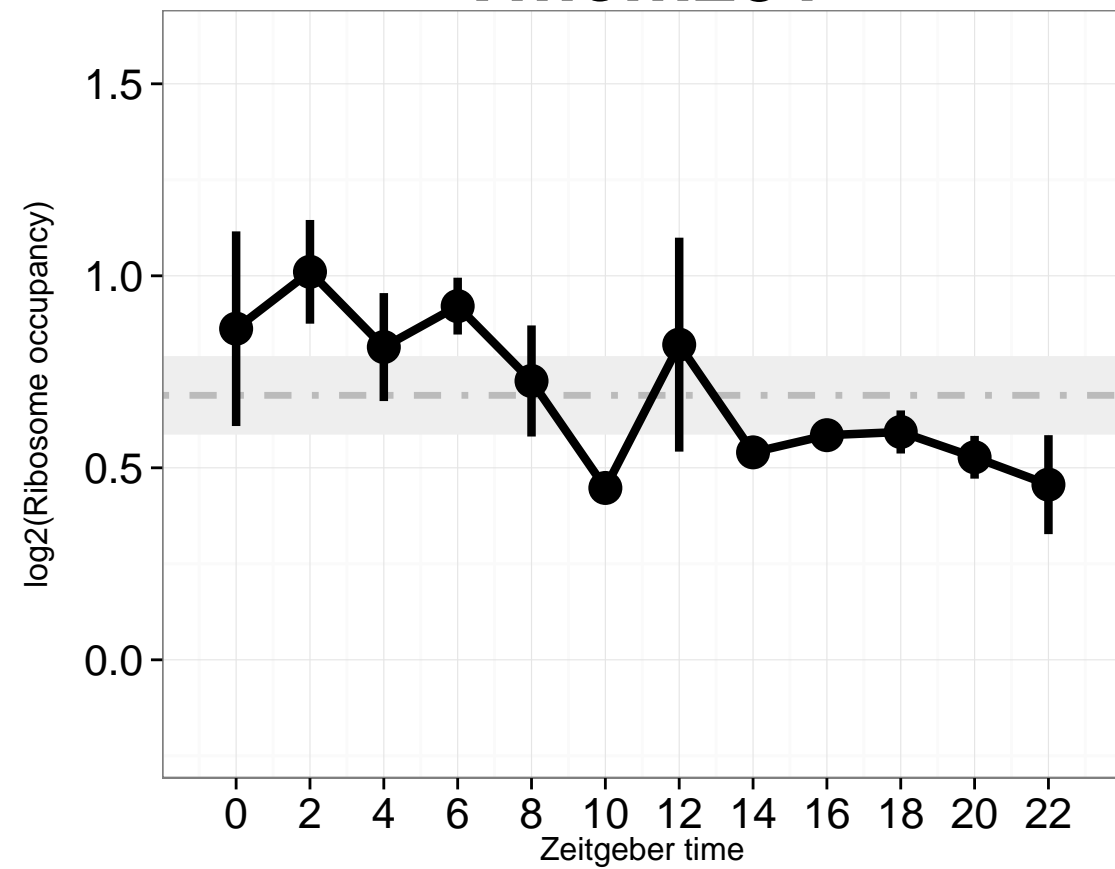

Supplement: Supplementary file 3540 [file 1]

## Dpp7

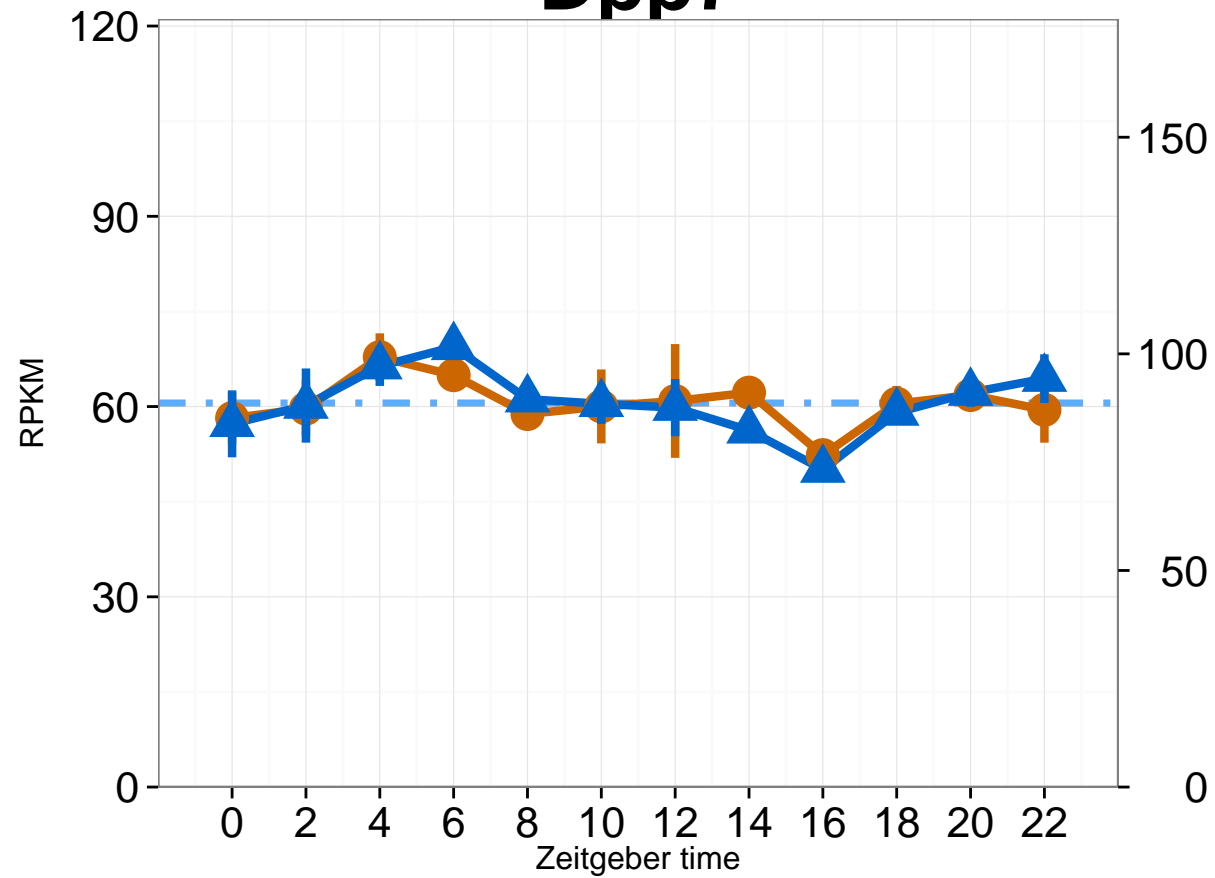

## Dpp7

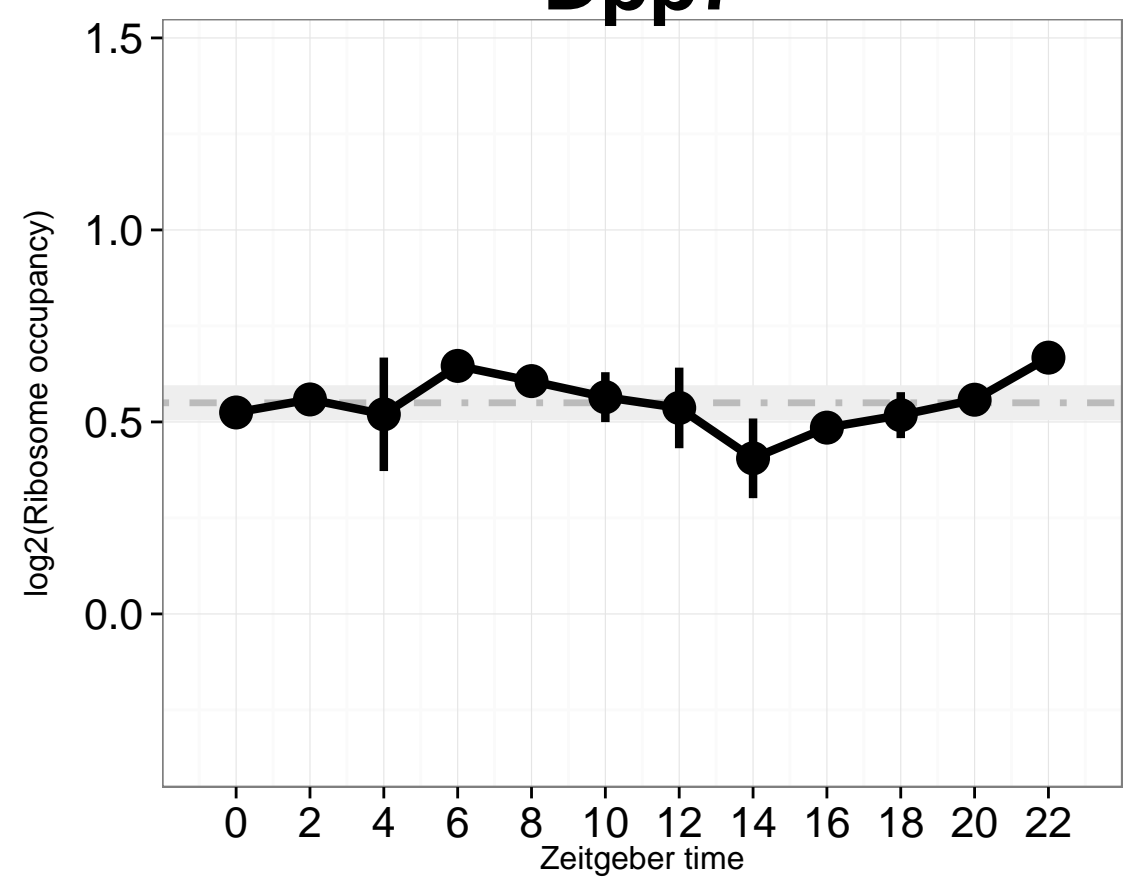

Supplement: Supplementary file 3541 [file 1]

# Dcaf13

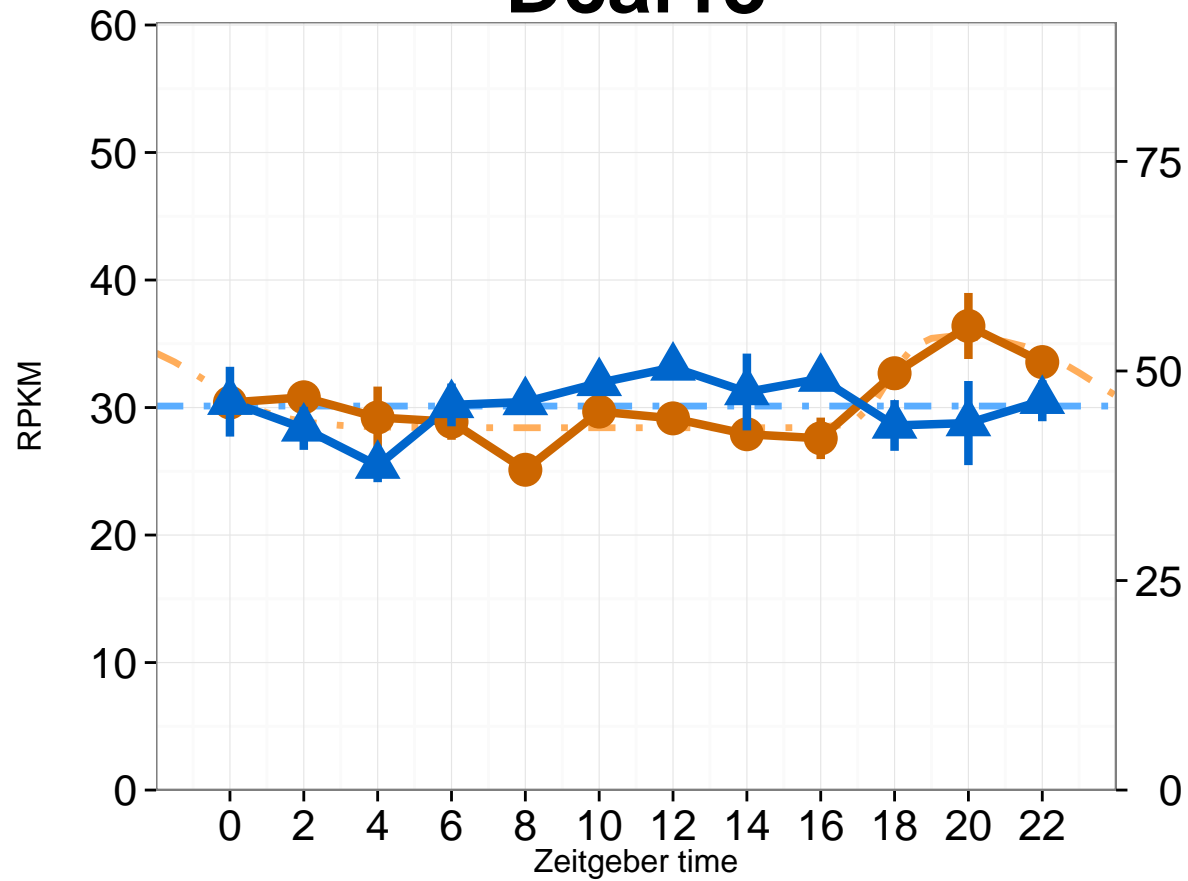

# Dcaf13

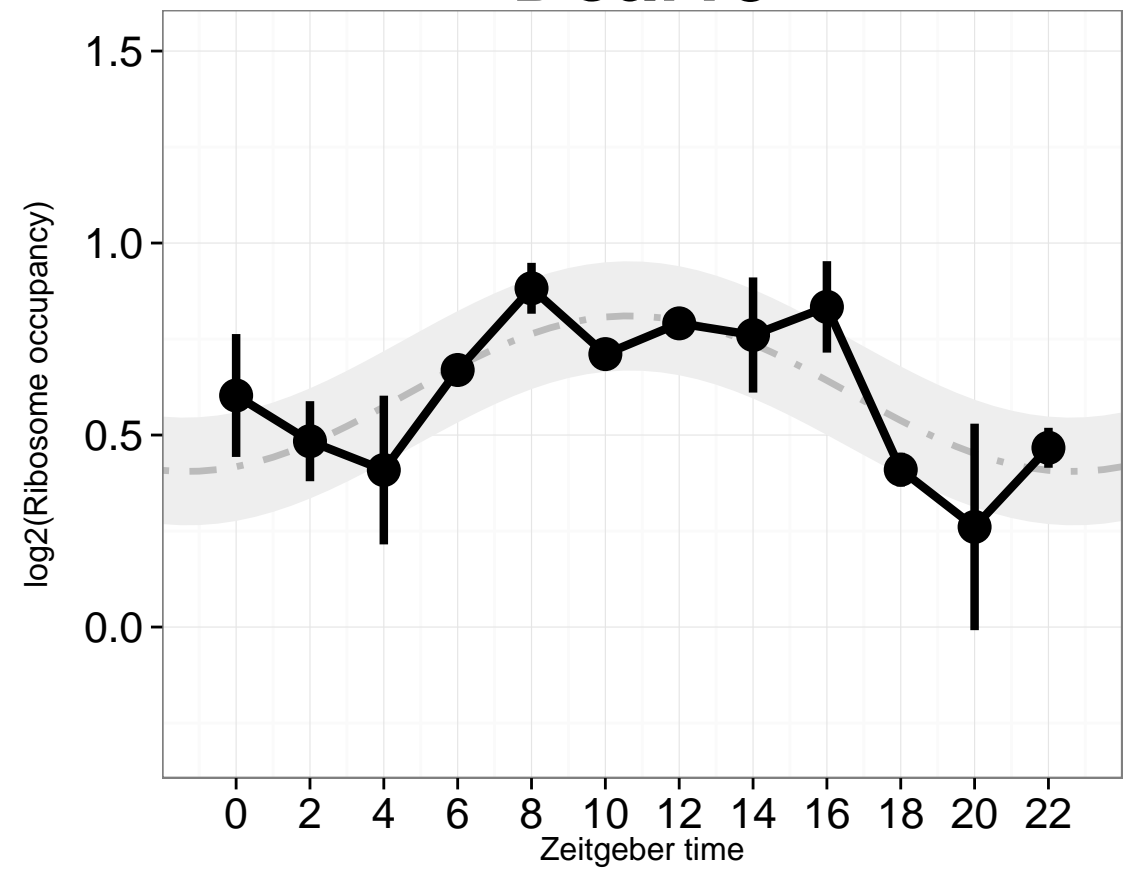

Supplement: Supplementary file 3542 [file 1]

## Atg12

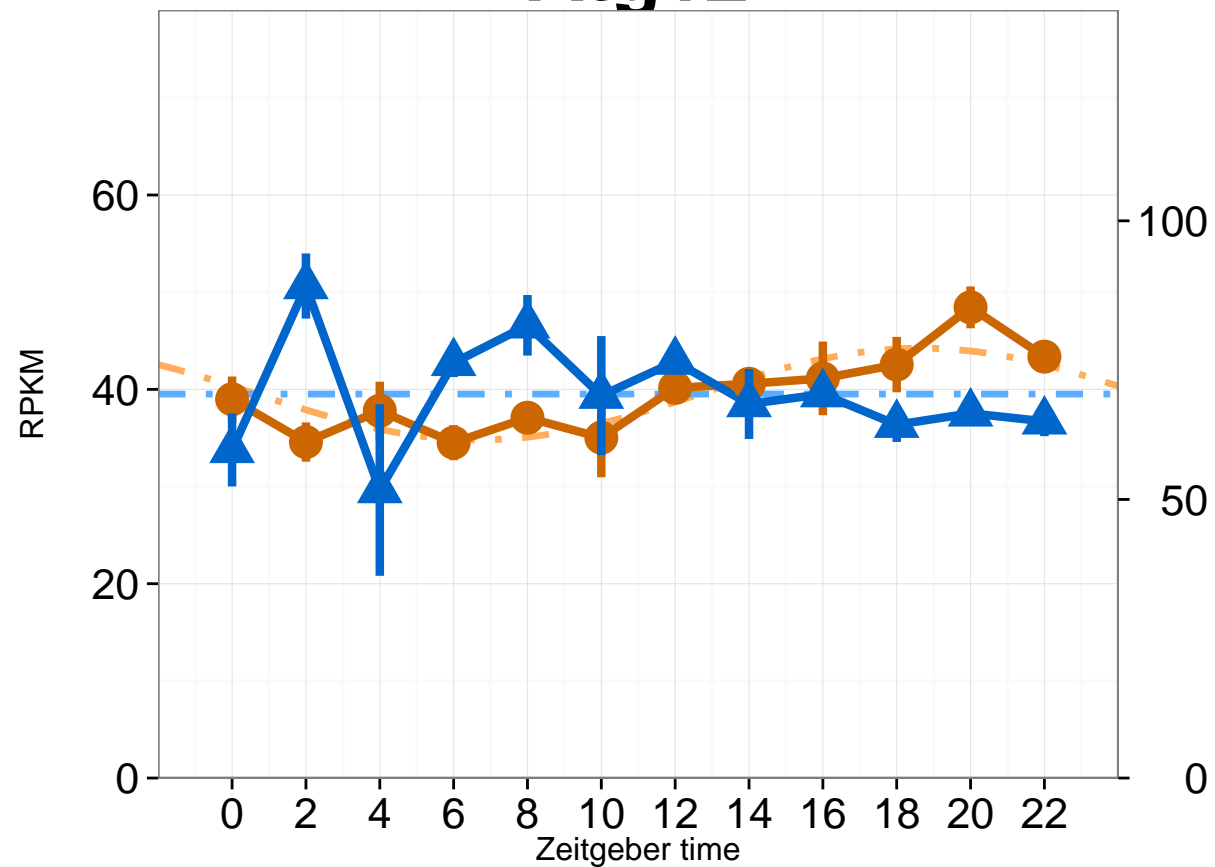

## Atg12

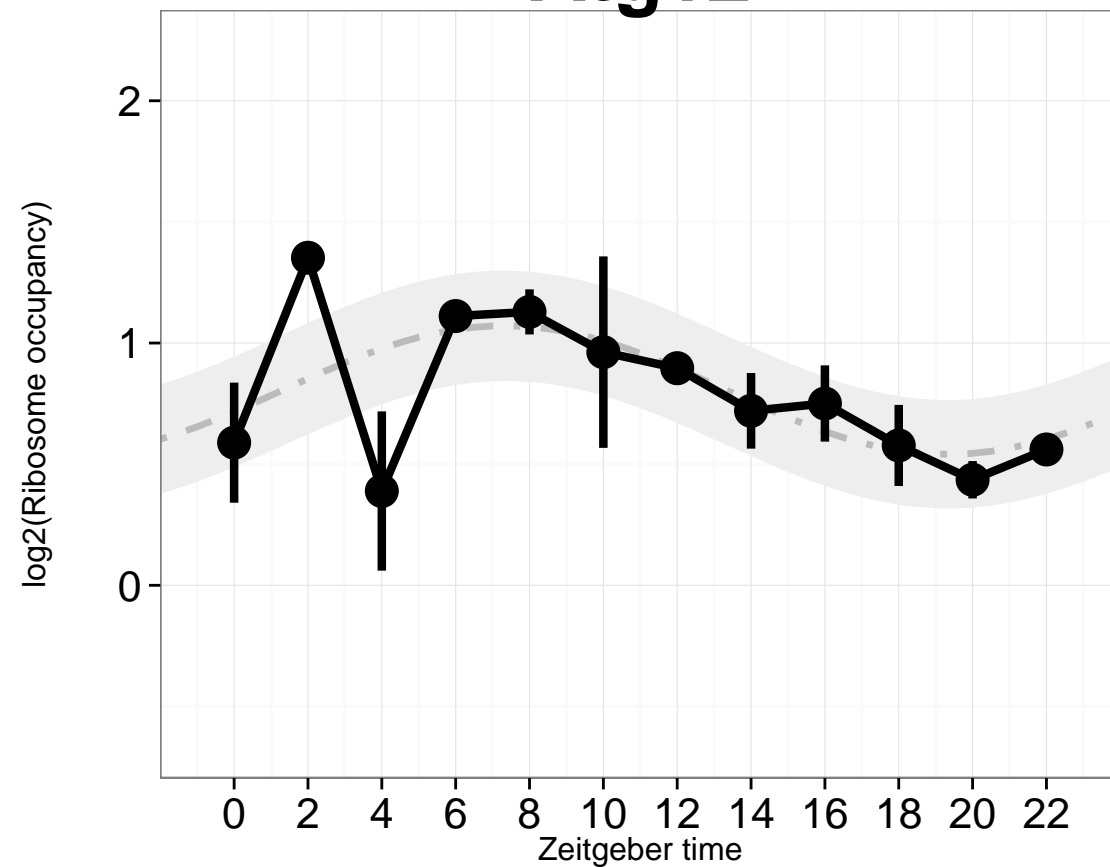

Supplement: Supplementary file 3543 [file 1]

## Madd

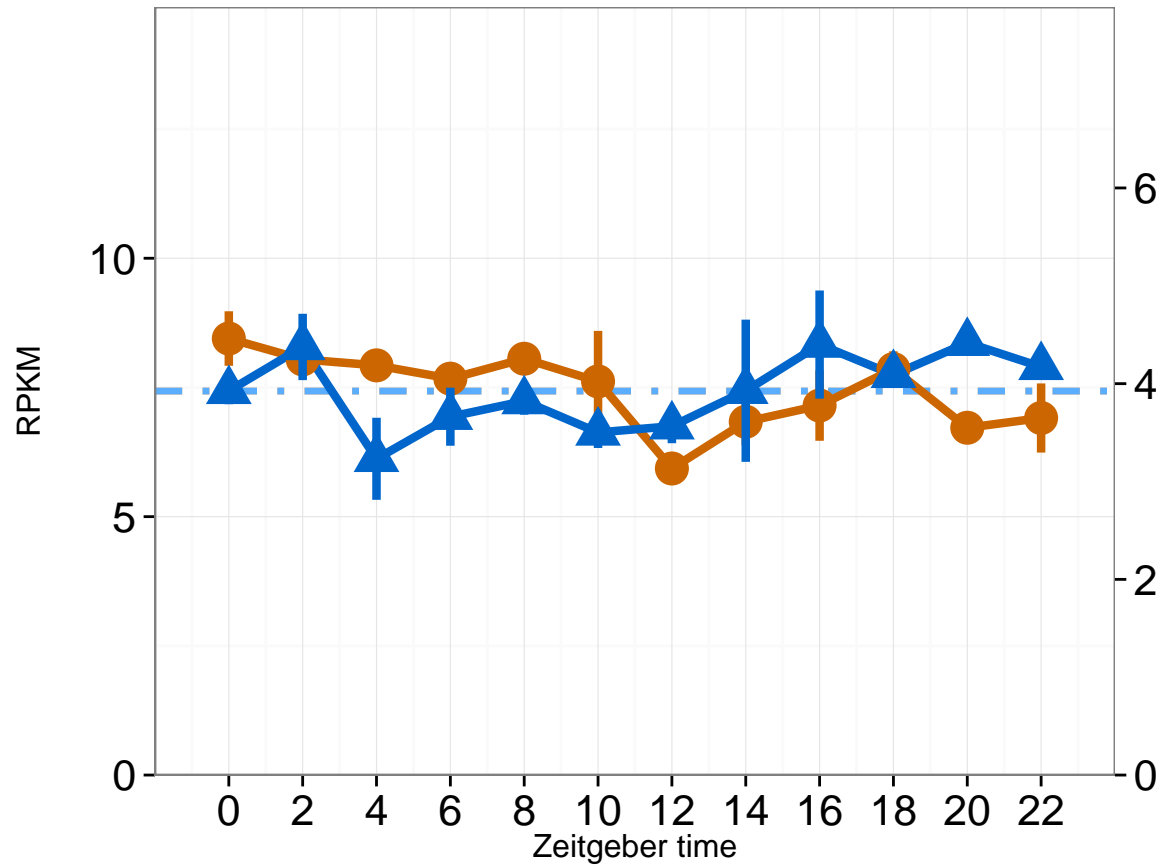

## Madd

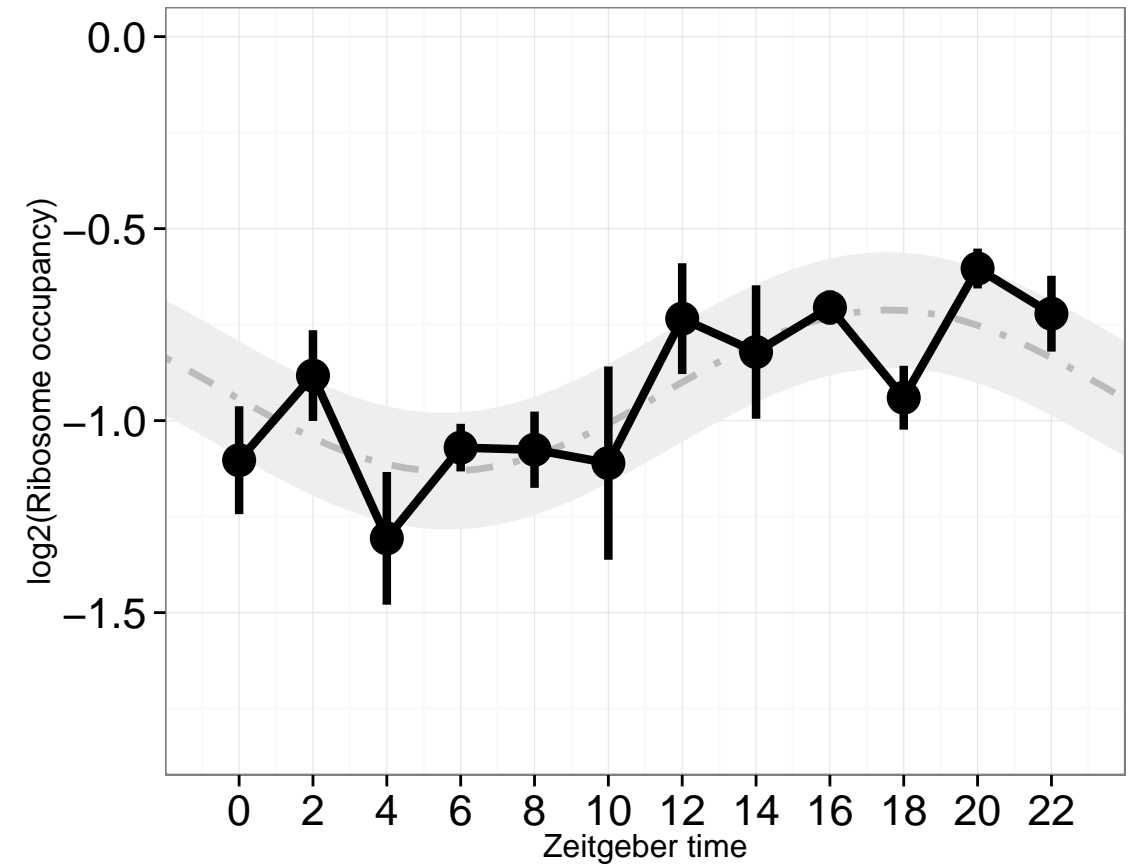

Supplement: Supplementary file 3544 [file 1]

# 5730508B09Rik

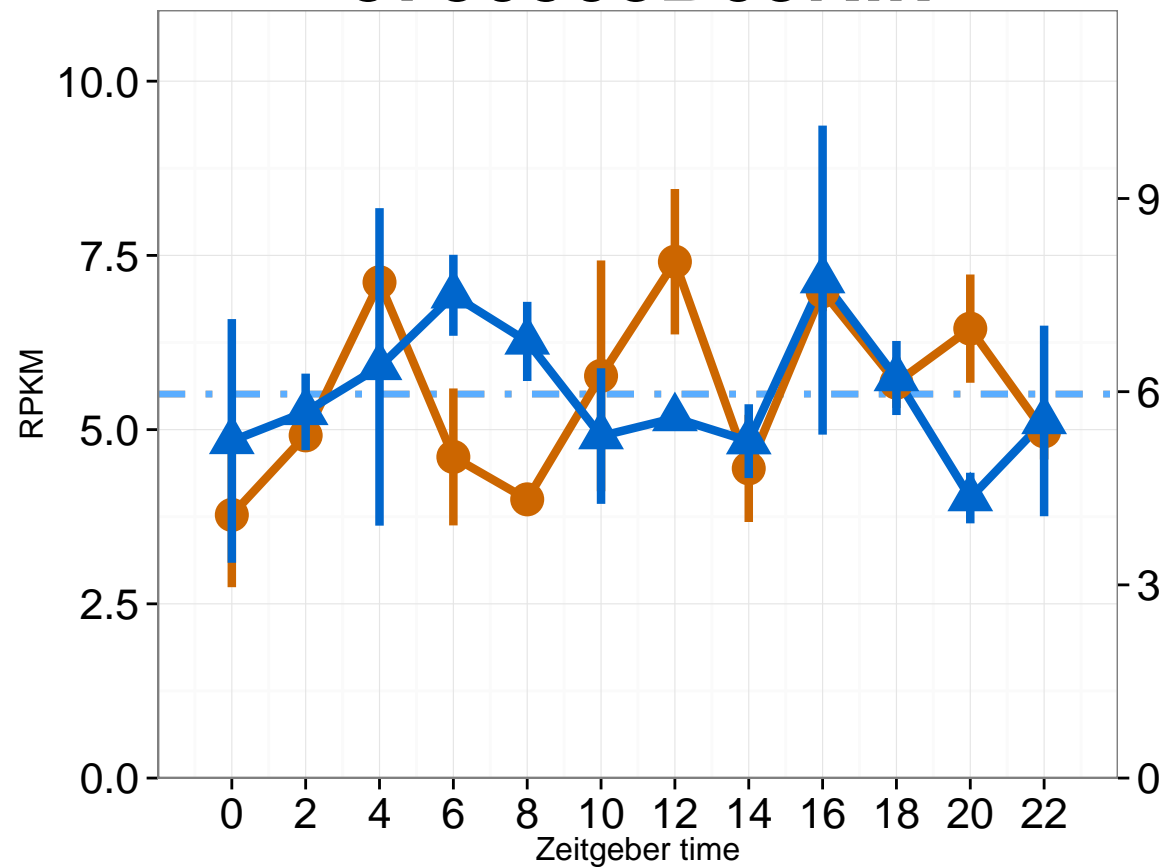

# 5730508B09Rik

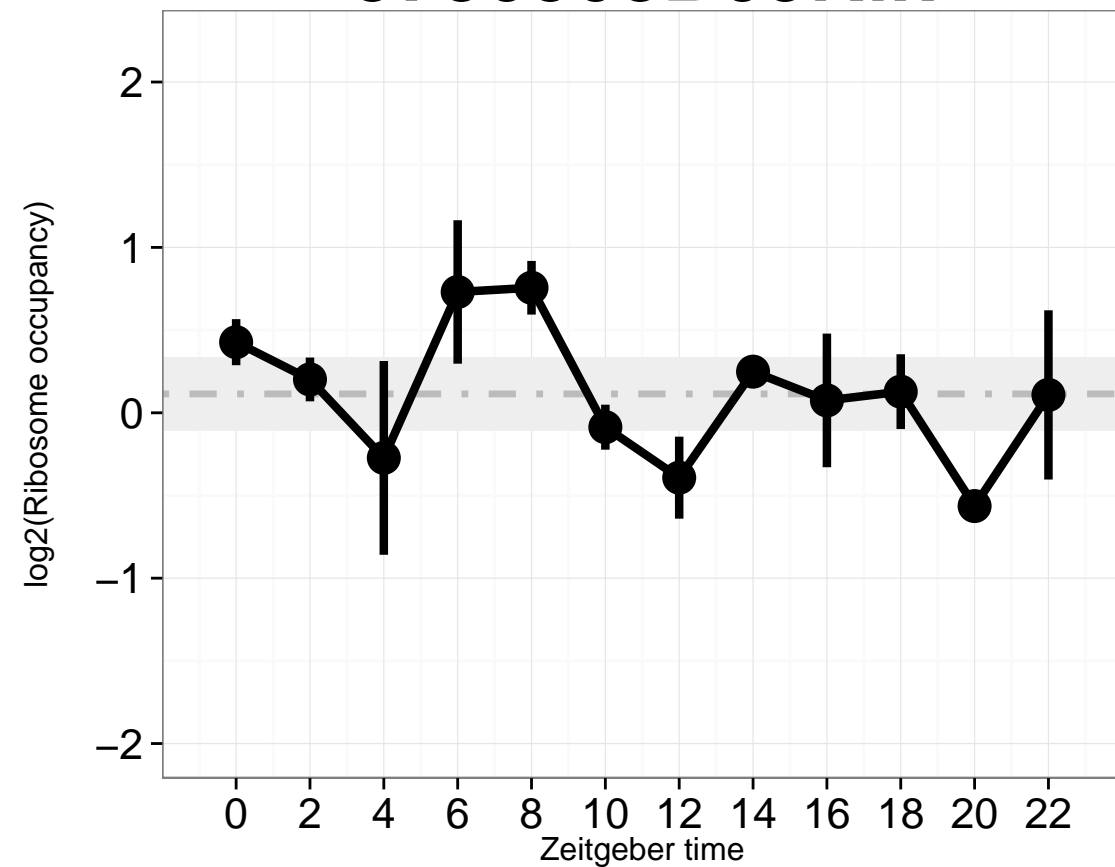

Supplement: Supplementary file 3545 [file 1]

## Cdh11

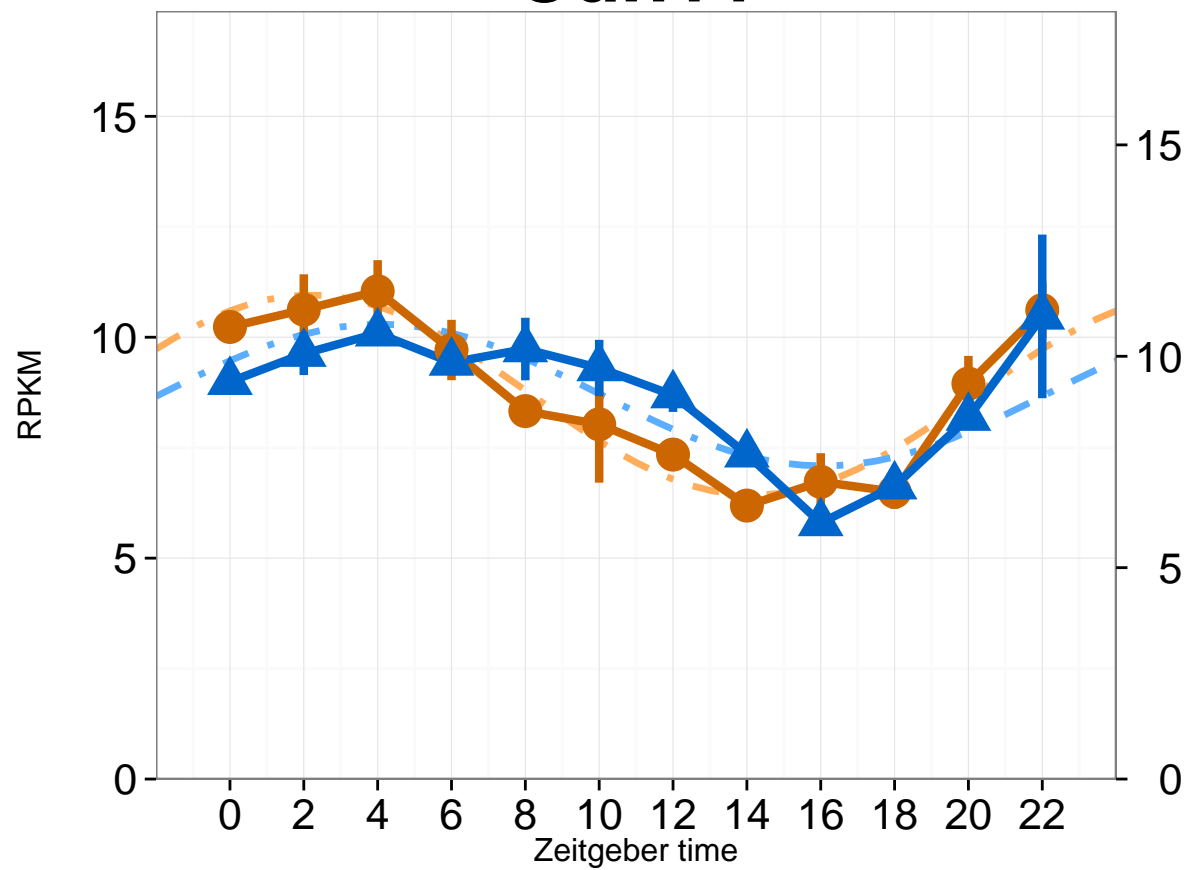

## Cdh11

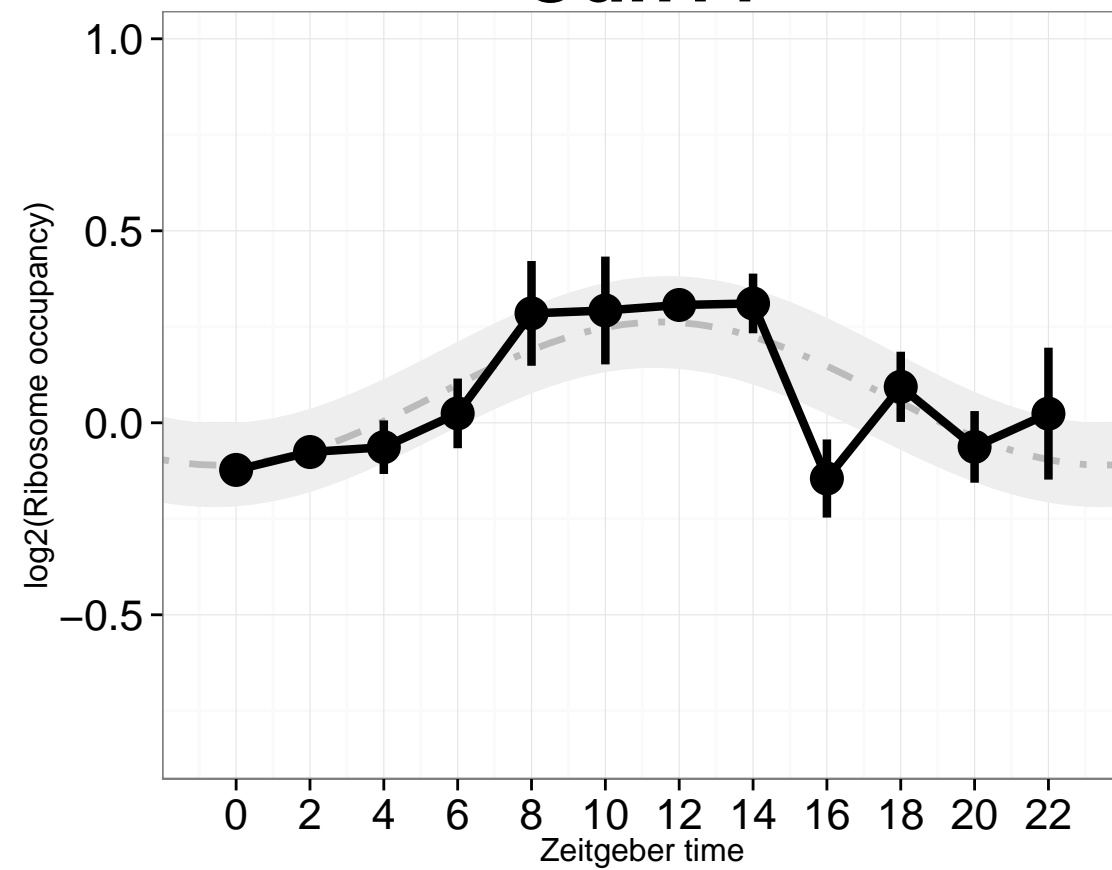

Supplement: Supplementary file 3546 [file 1]

## Wdr46

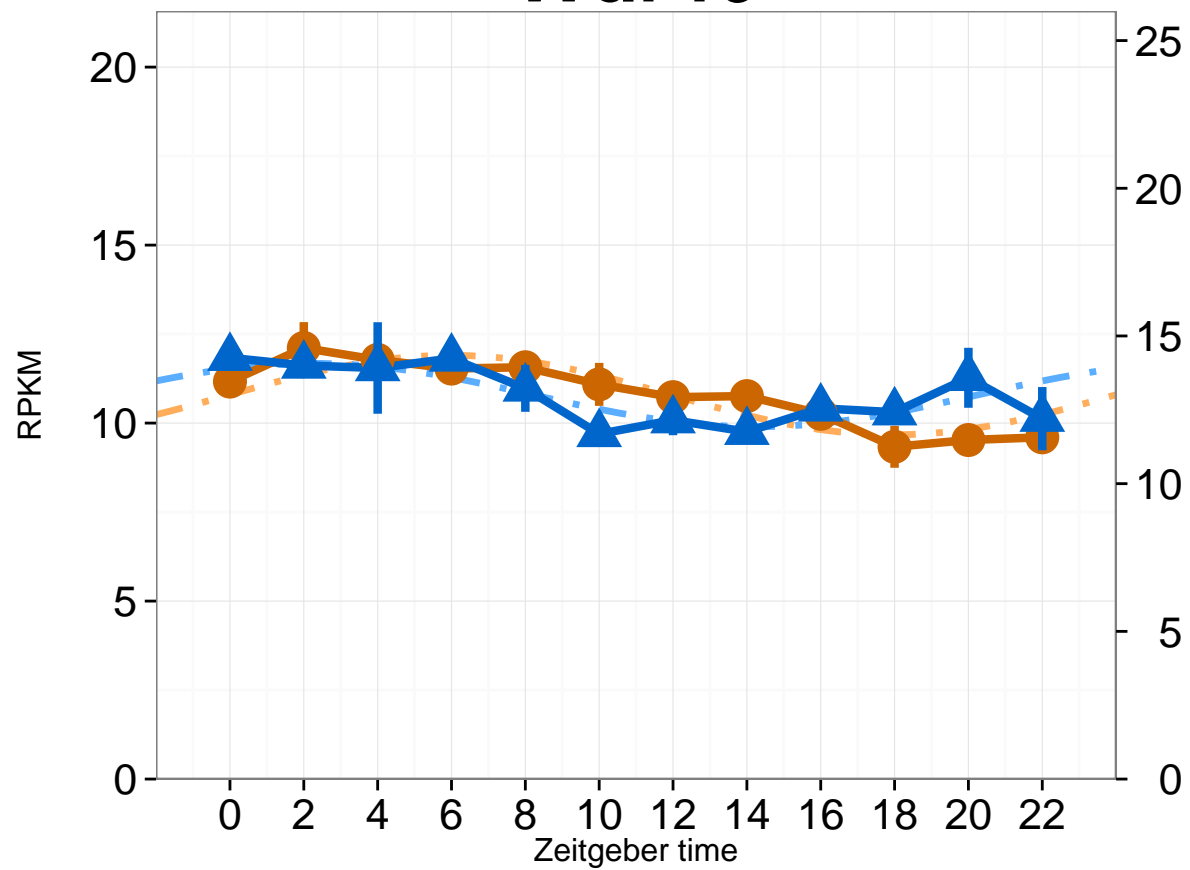

## Wdr46

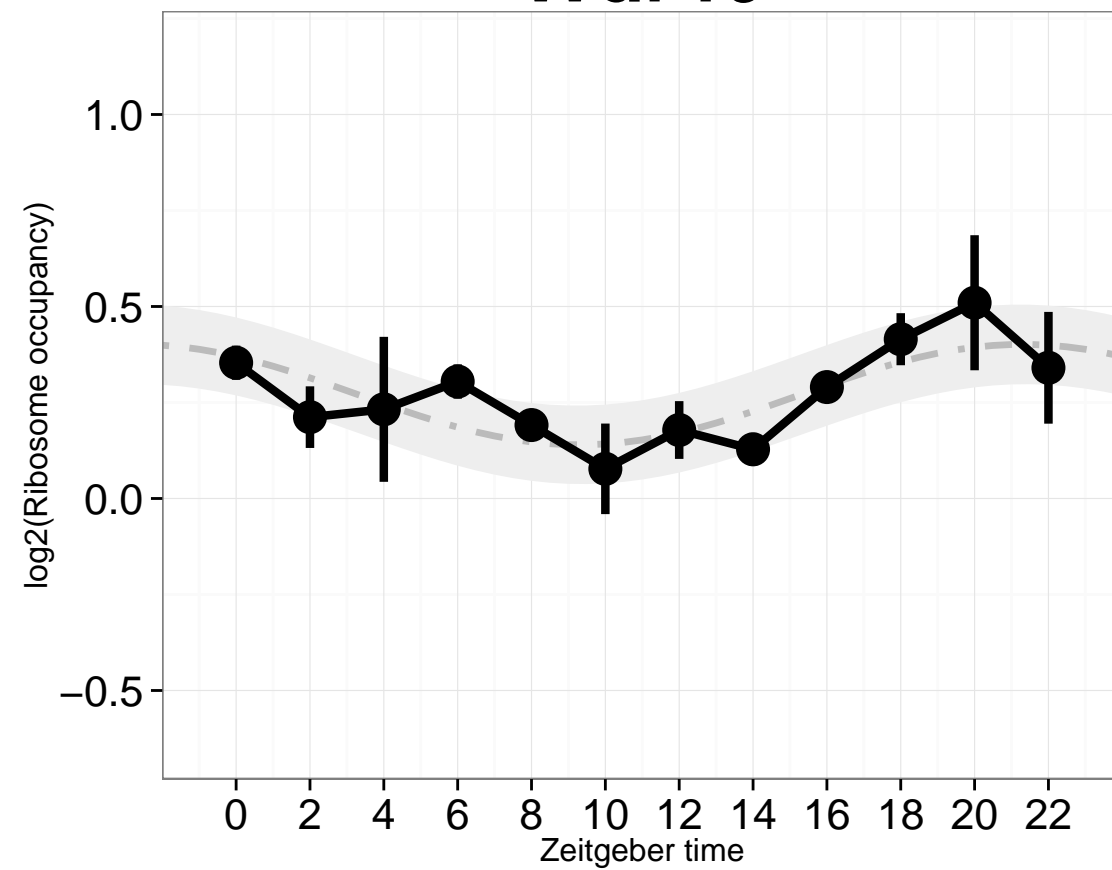

Supplement: Supplementary file 3547 [file 1]

# Smg6

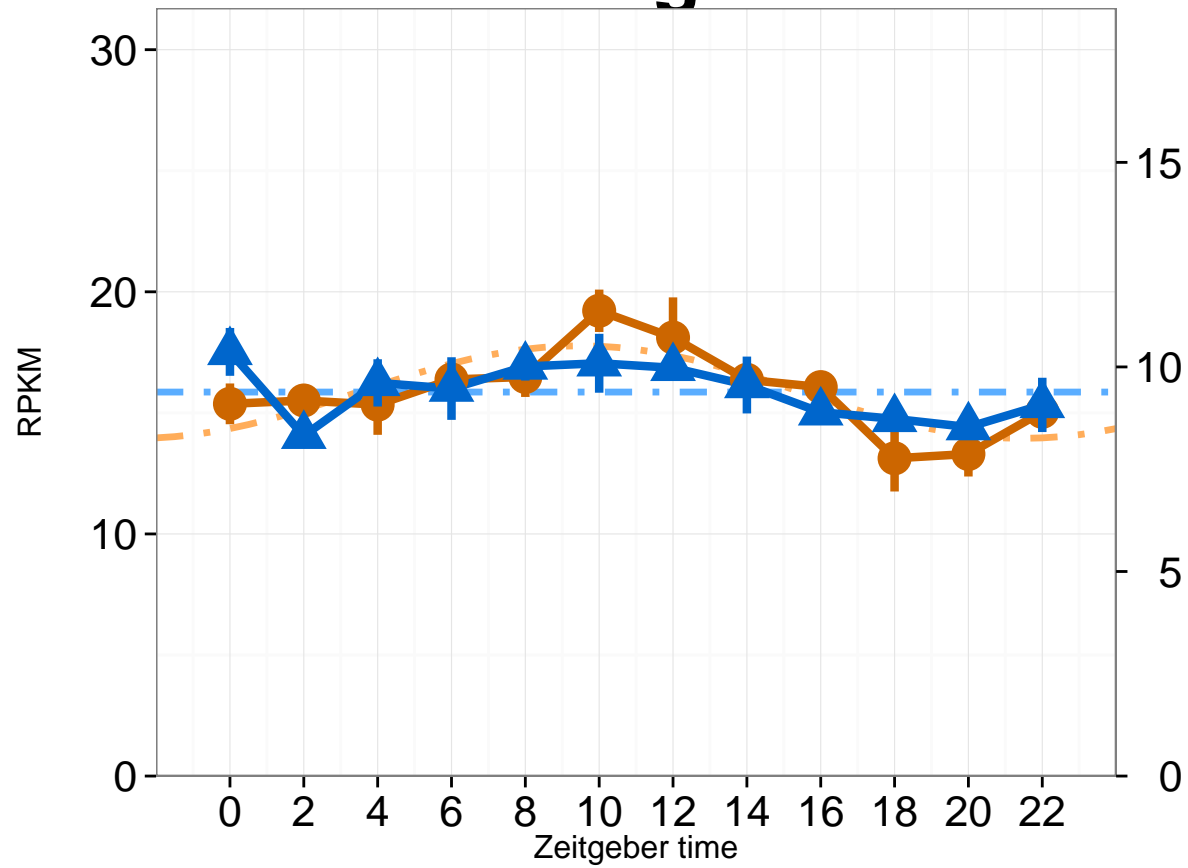

# Smg6

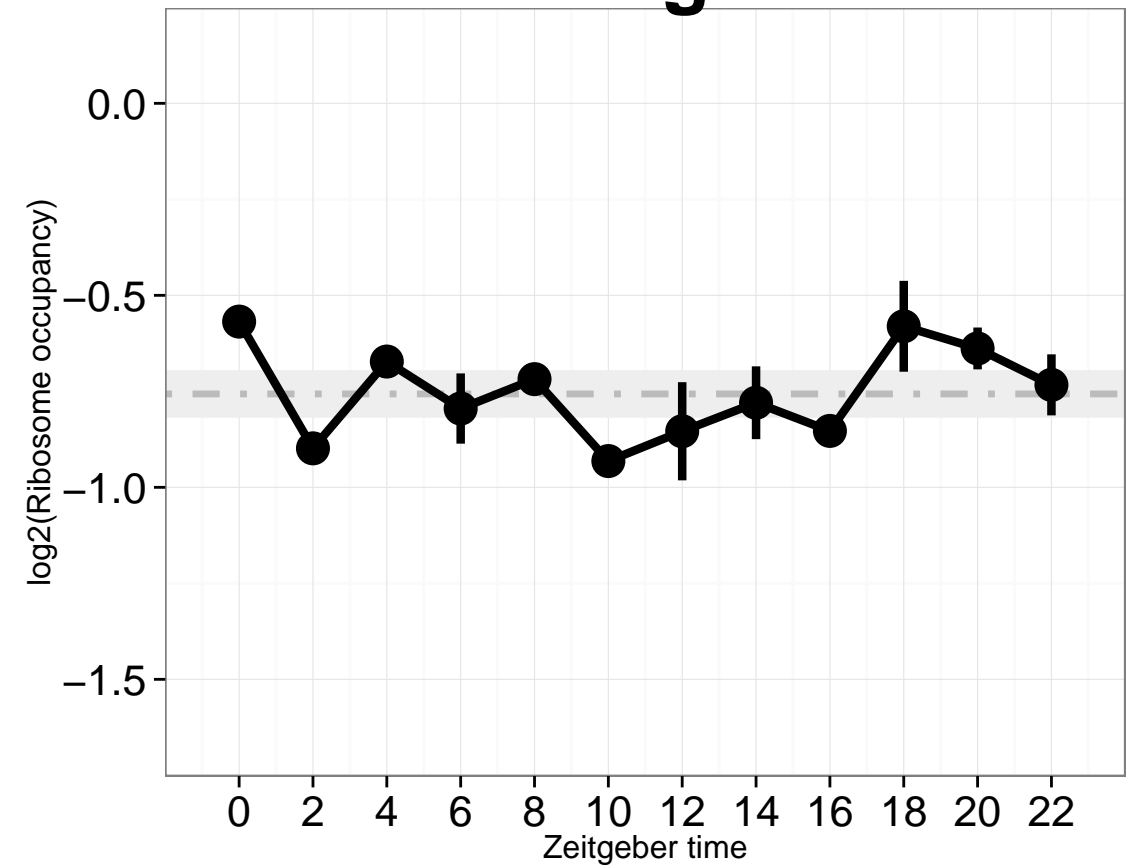

Supplement: Supplementary file 3548 [file 1]

## Lonp2

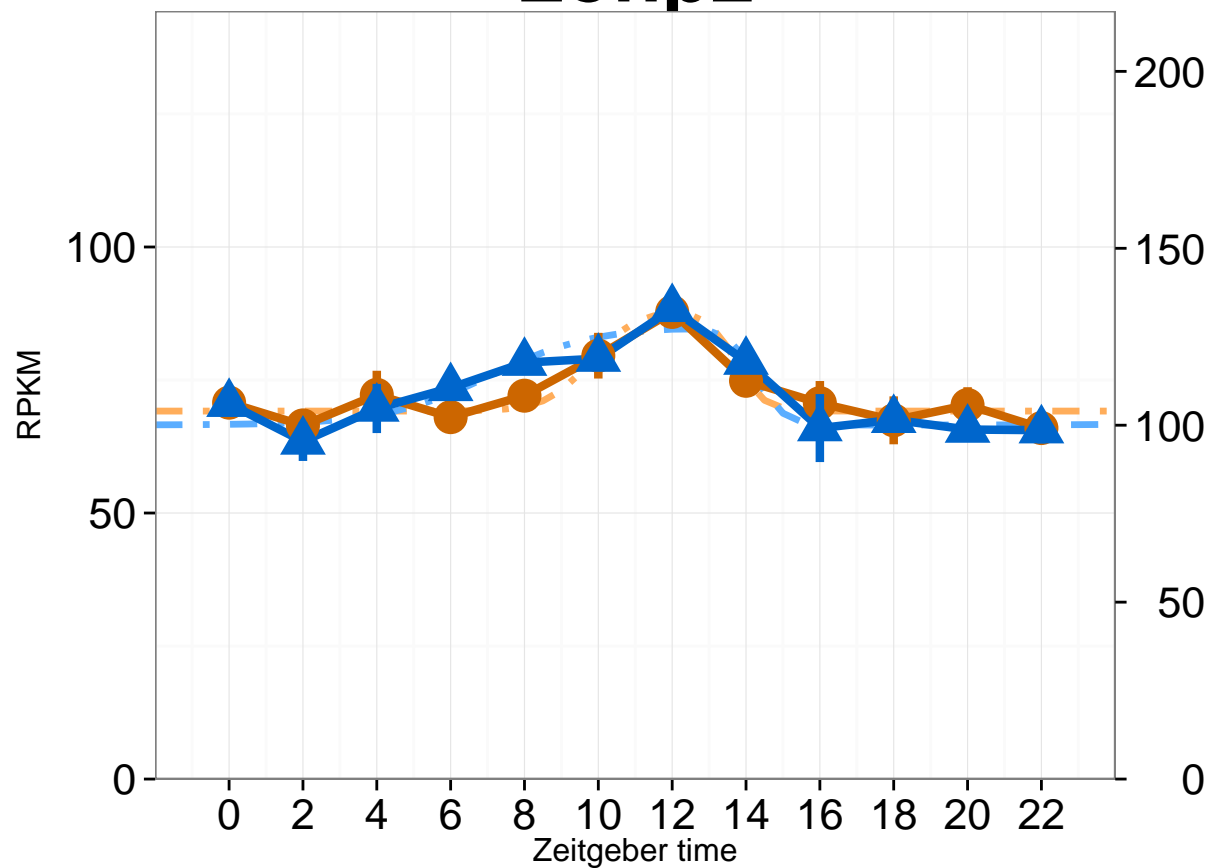

## Lonp2

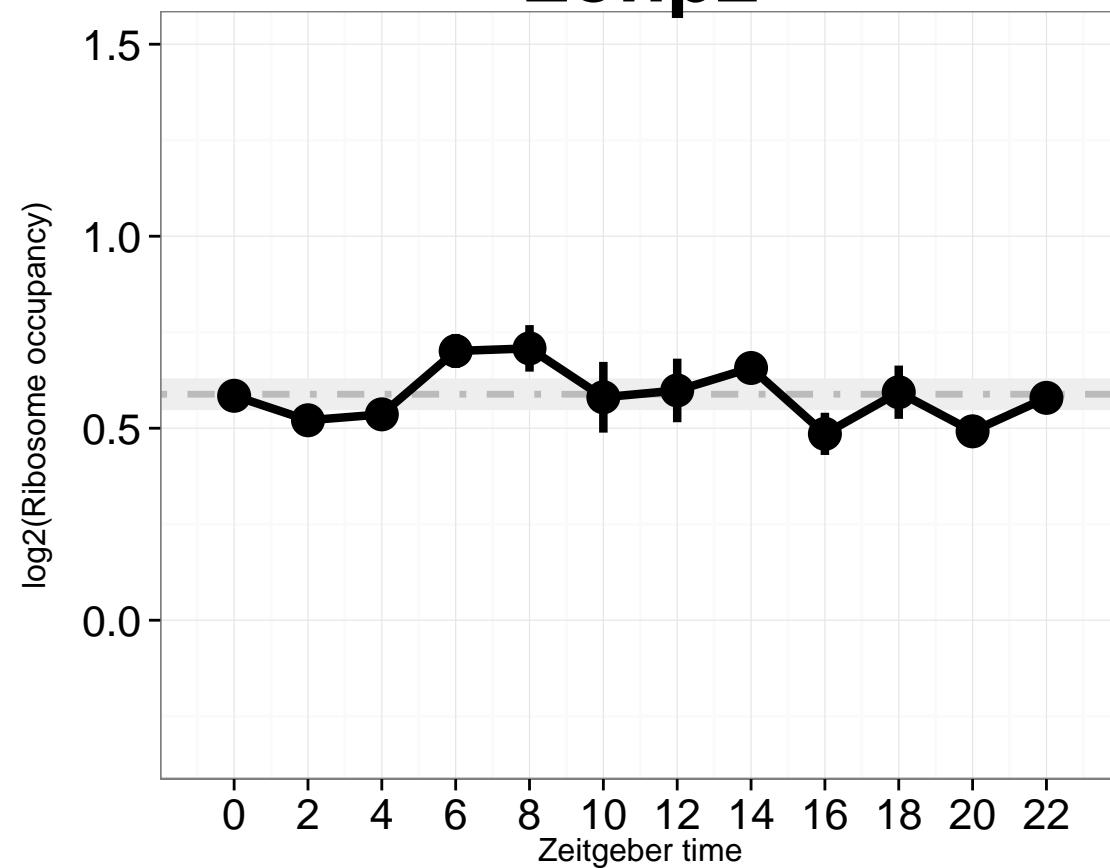

Supplement: Supplementary file 3549 [file 1]

# Cep70

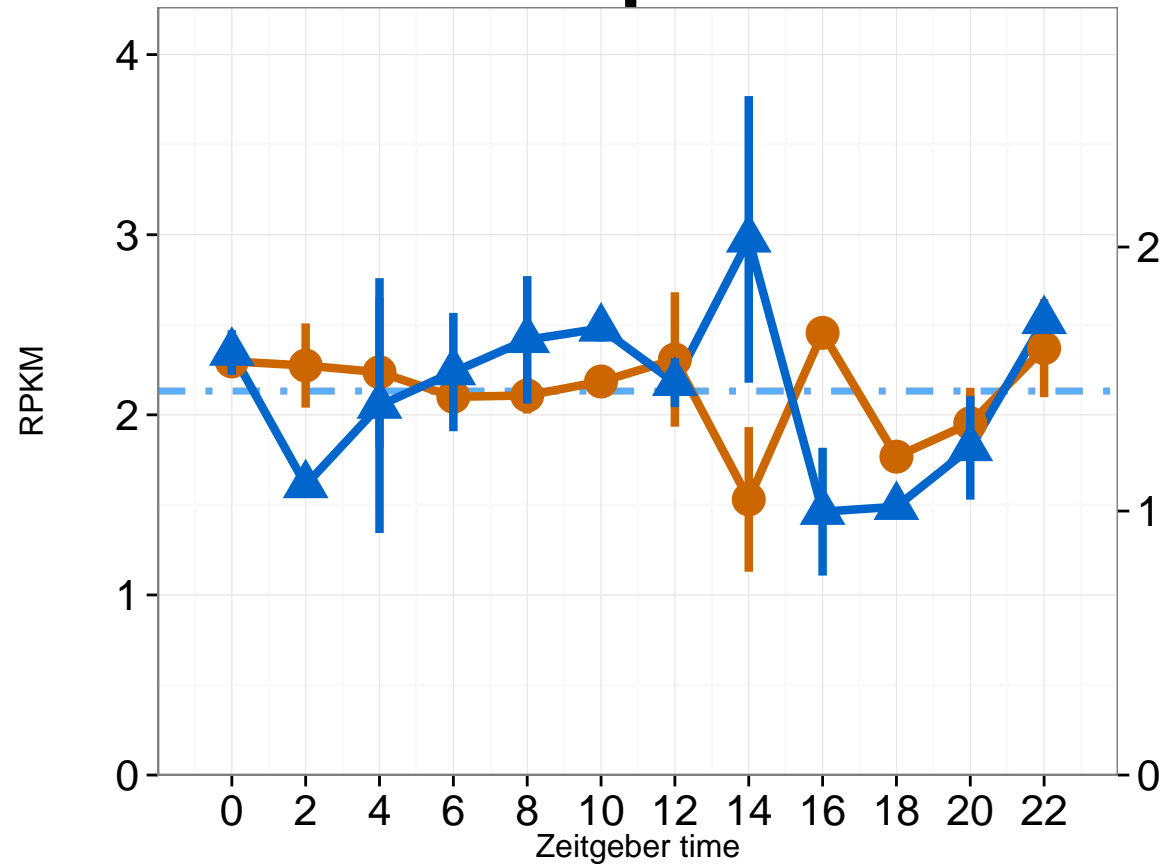

# Cep70

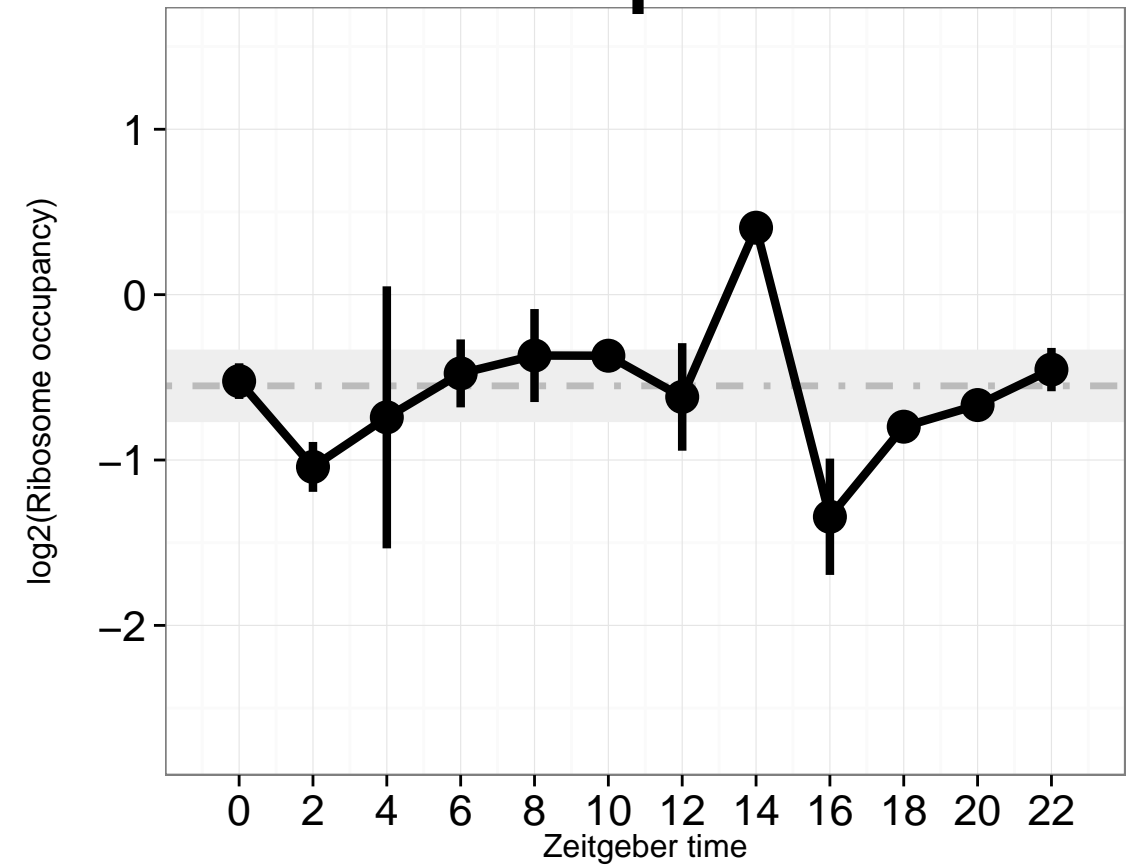

Supplement: Supplementary file 3550 [file 1]

## Lhpp

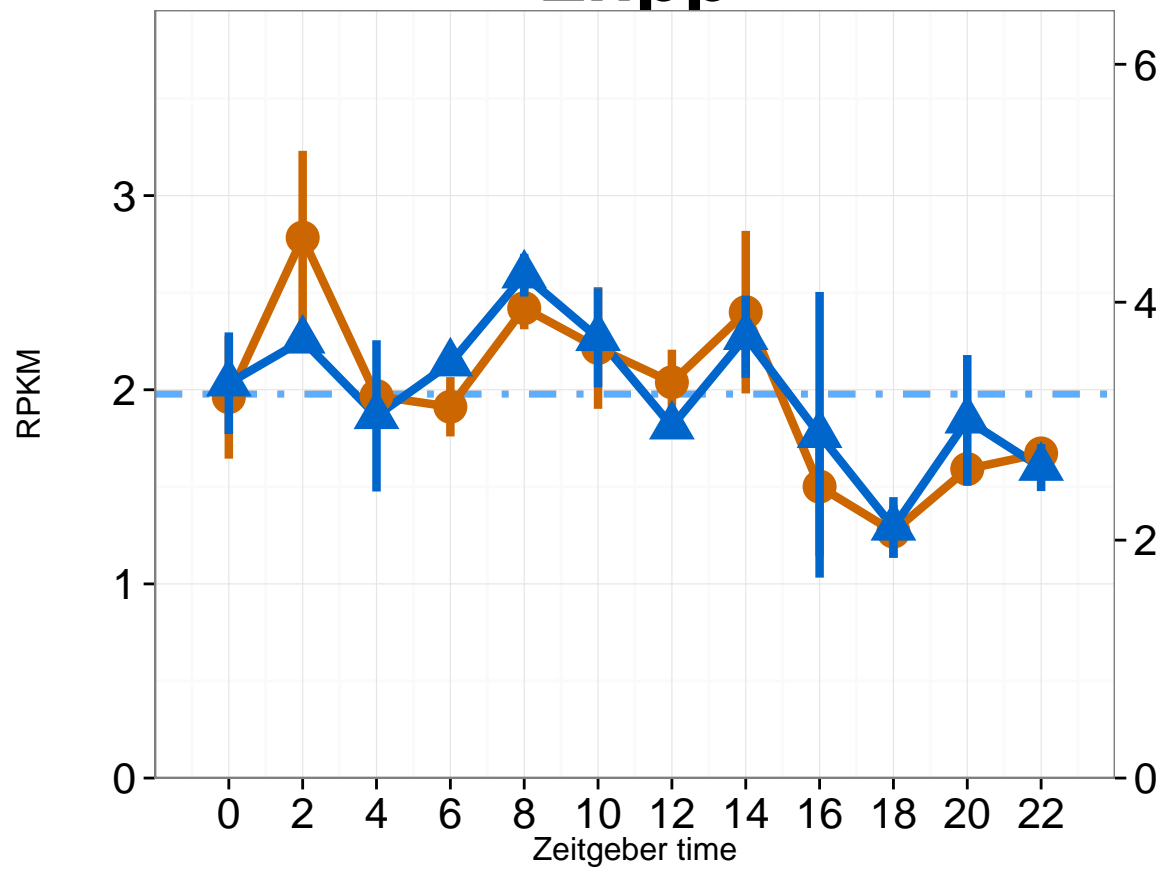

## Lhpp

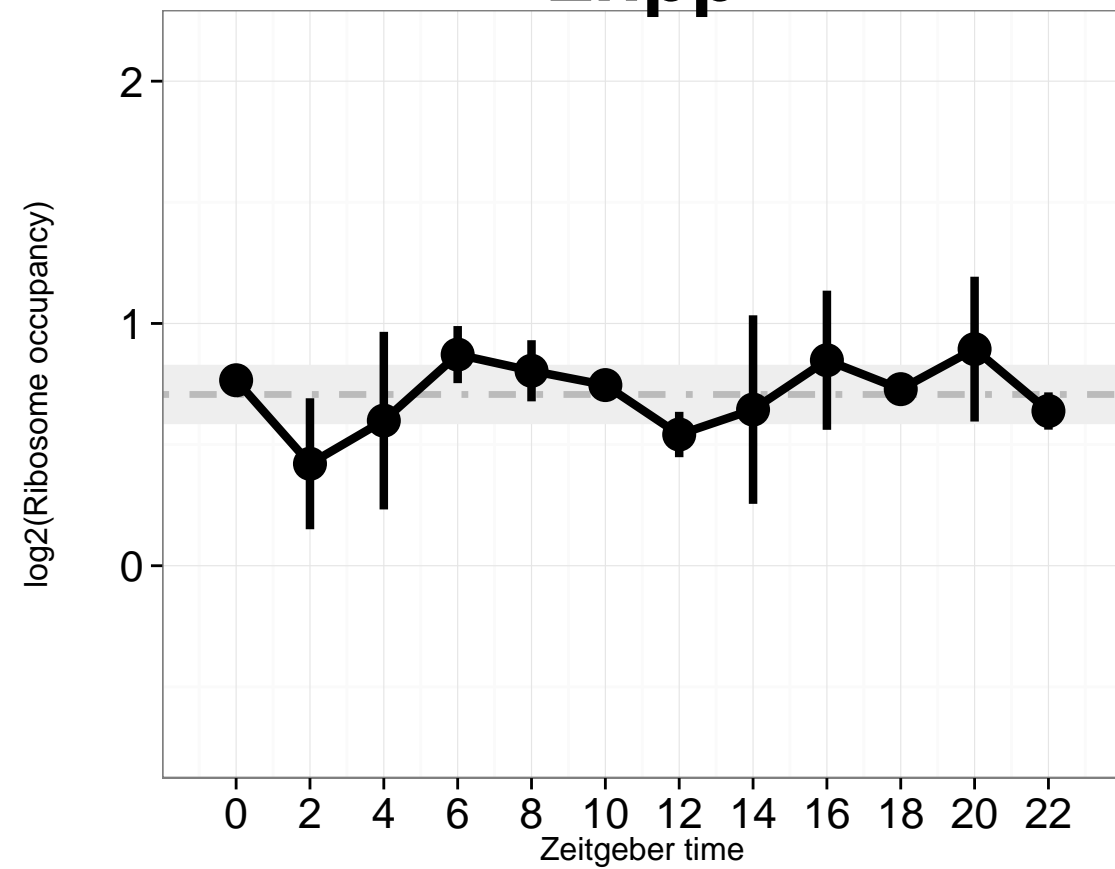

Supplement: Supplementary file 3551 [file 1]

## Nat2

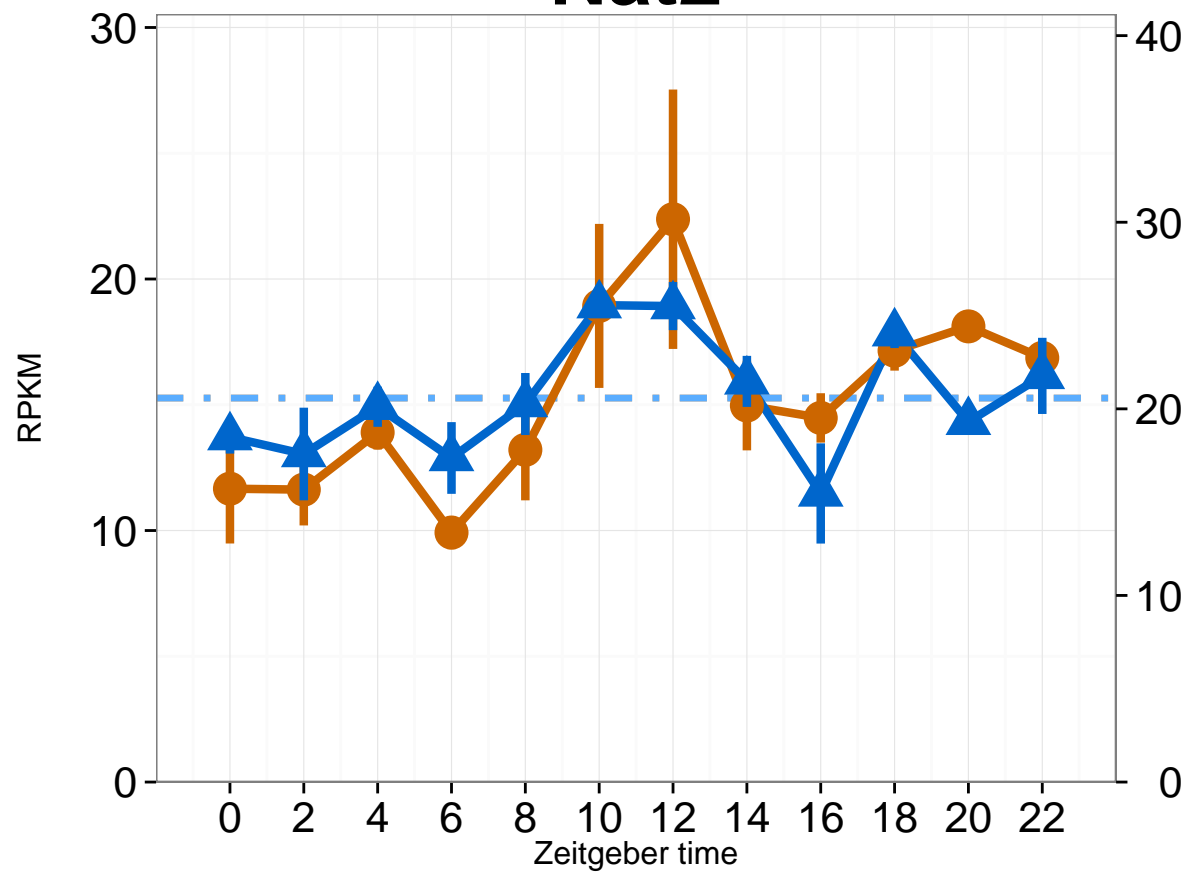

## Nat2

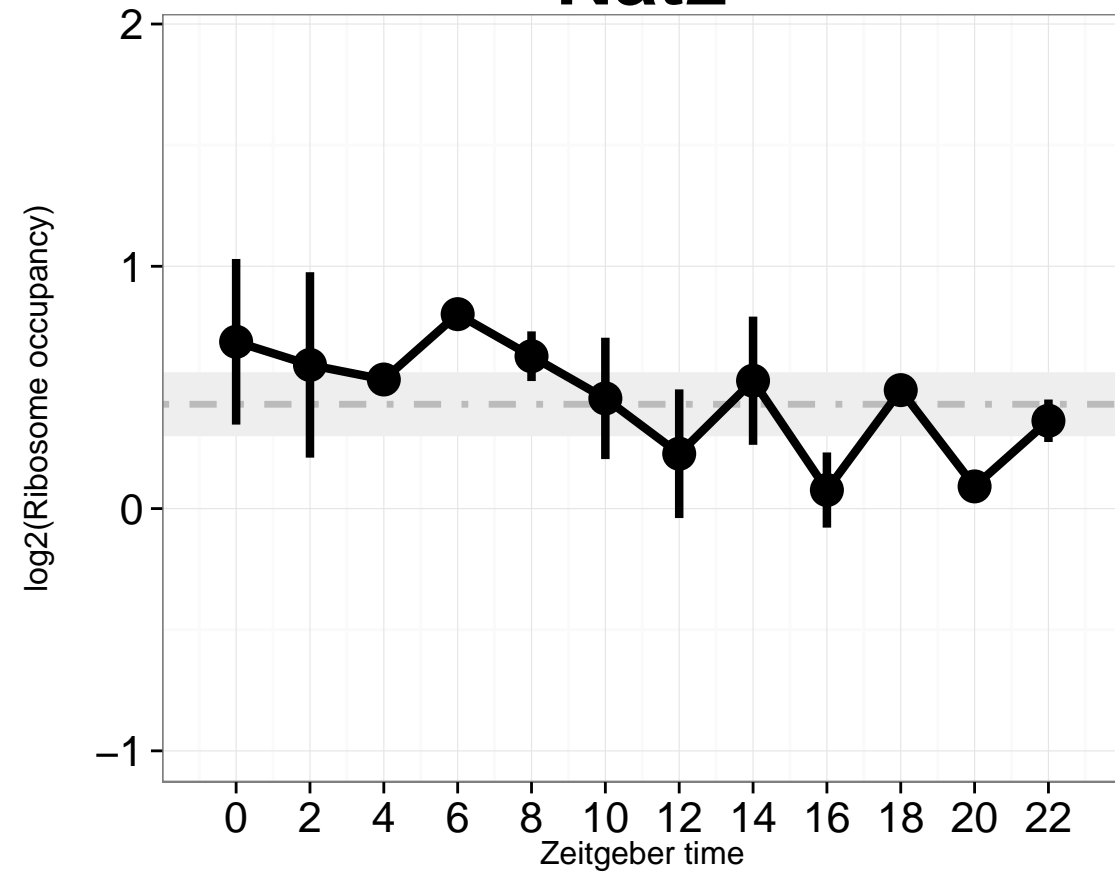

Supplement: Supplementary file 3552 [file 1]

## Epb4.1I1

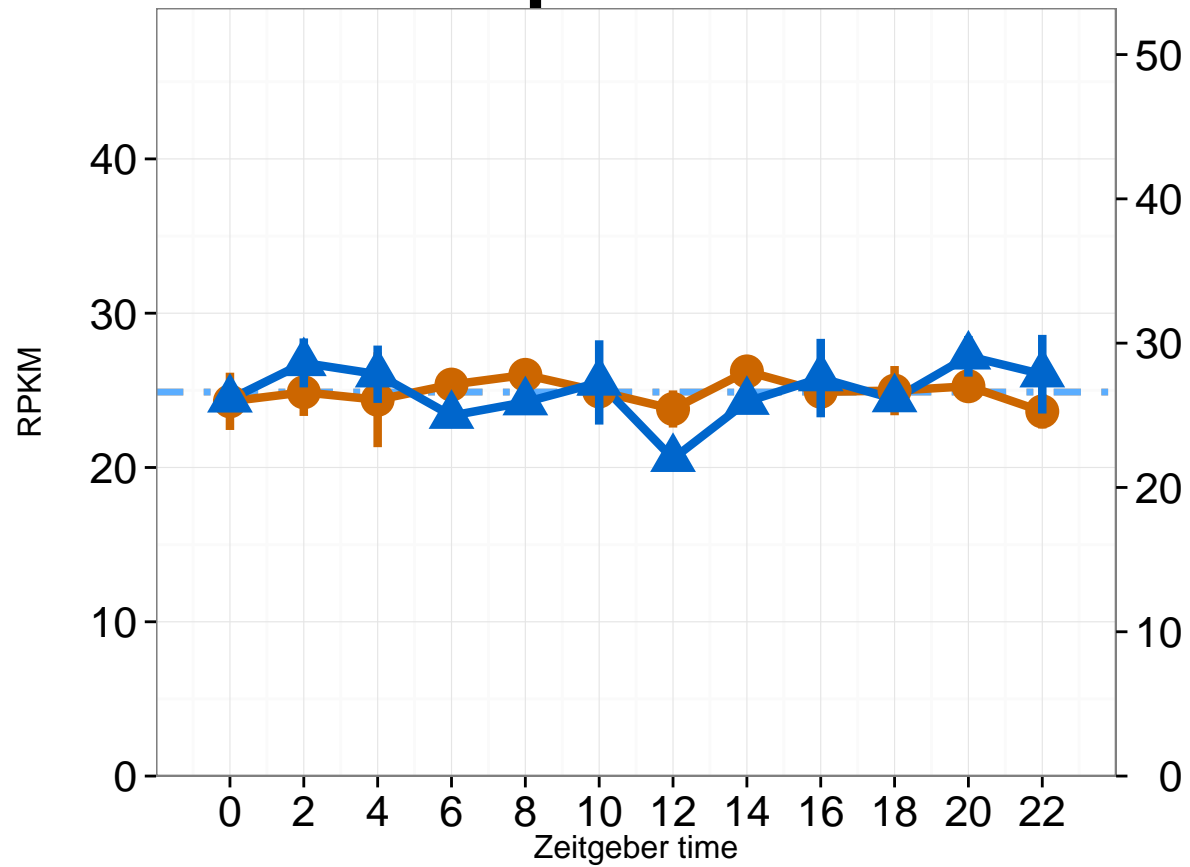

## Epb4.1I1

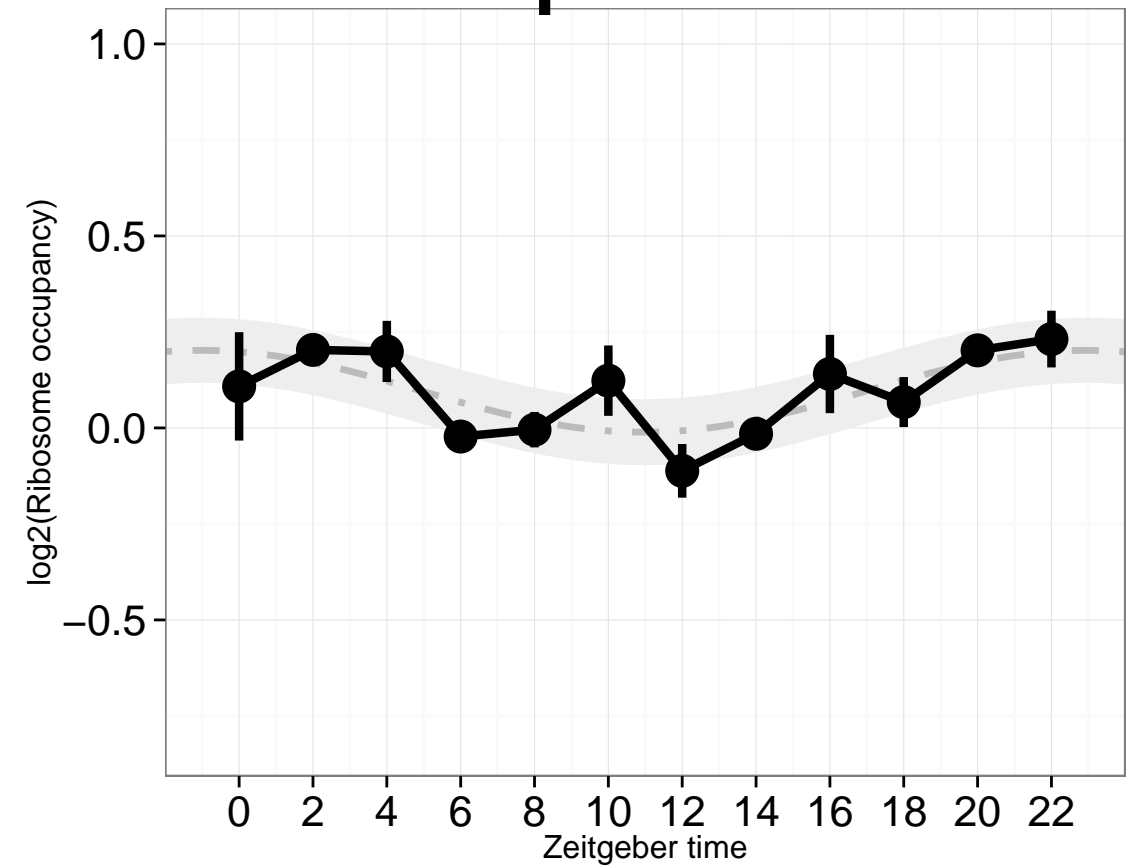

Supplement: Supplementary file 3553 [file 1]

# Pamr1

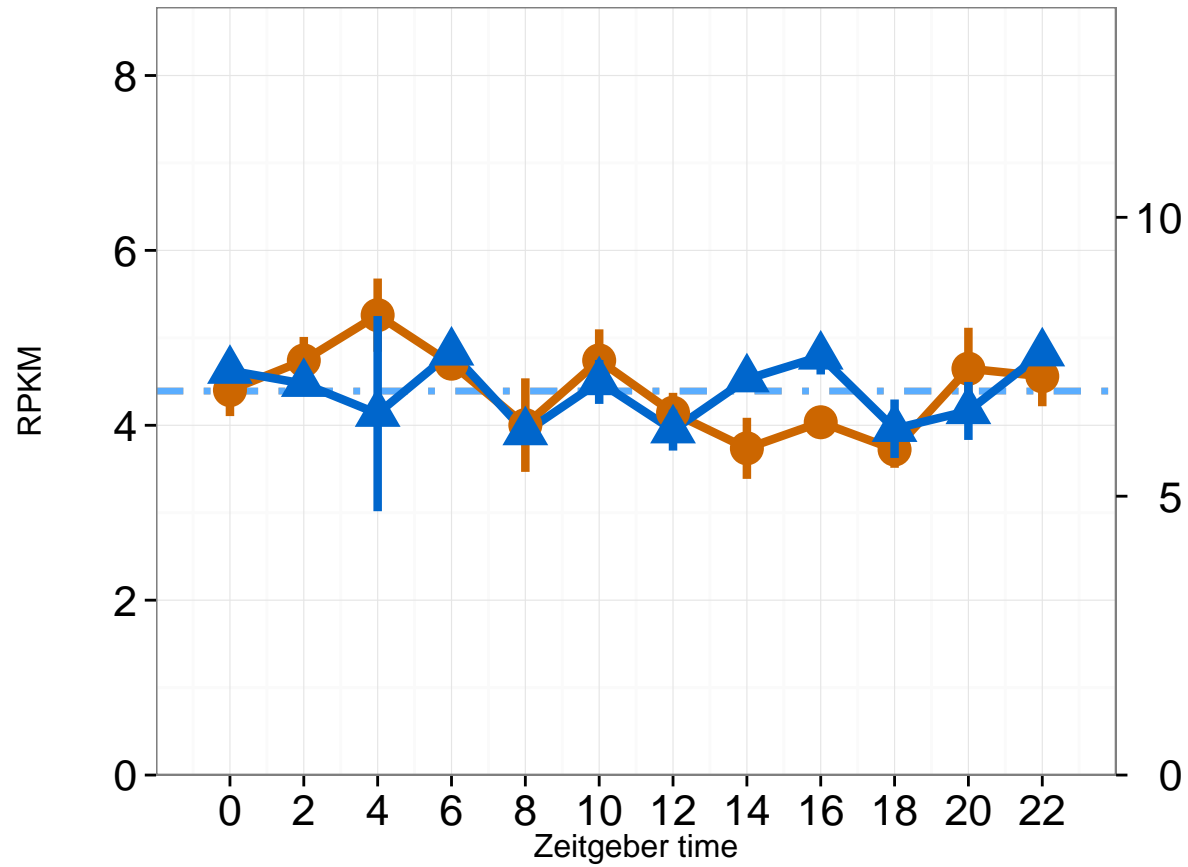

# Pamr1

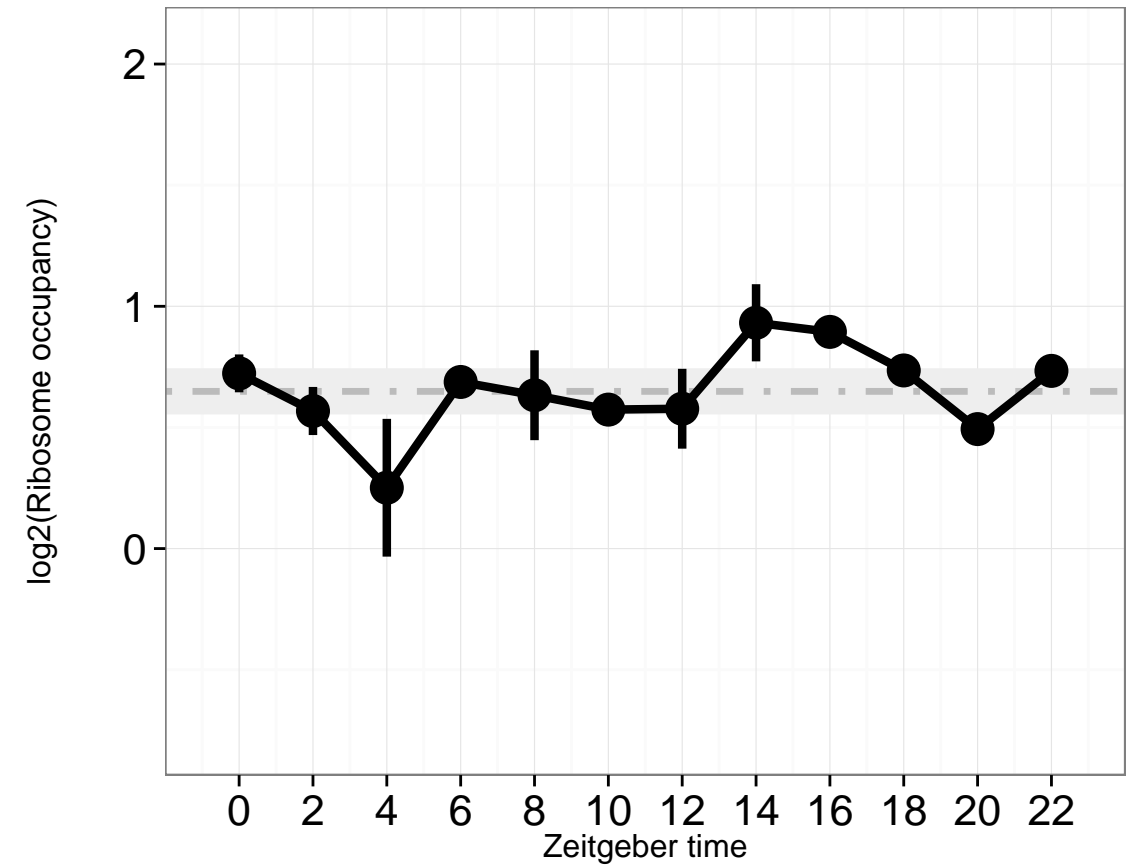

Supplement: Supplementary file 3554 [file 1]

## Eln

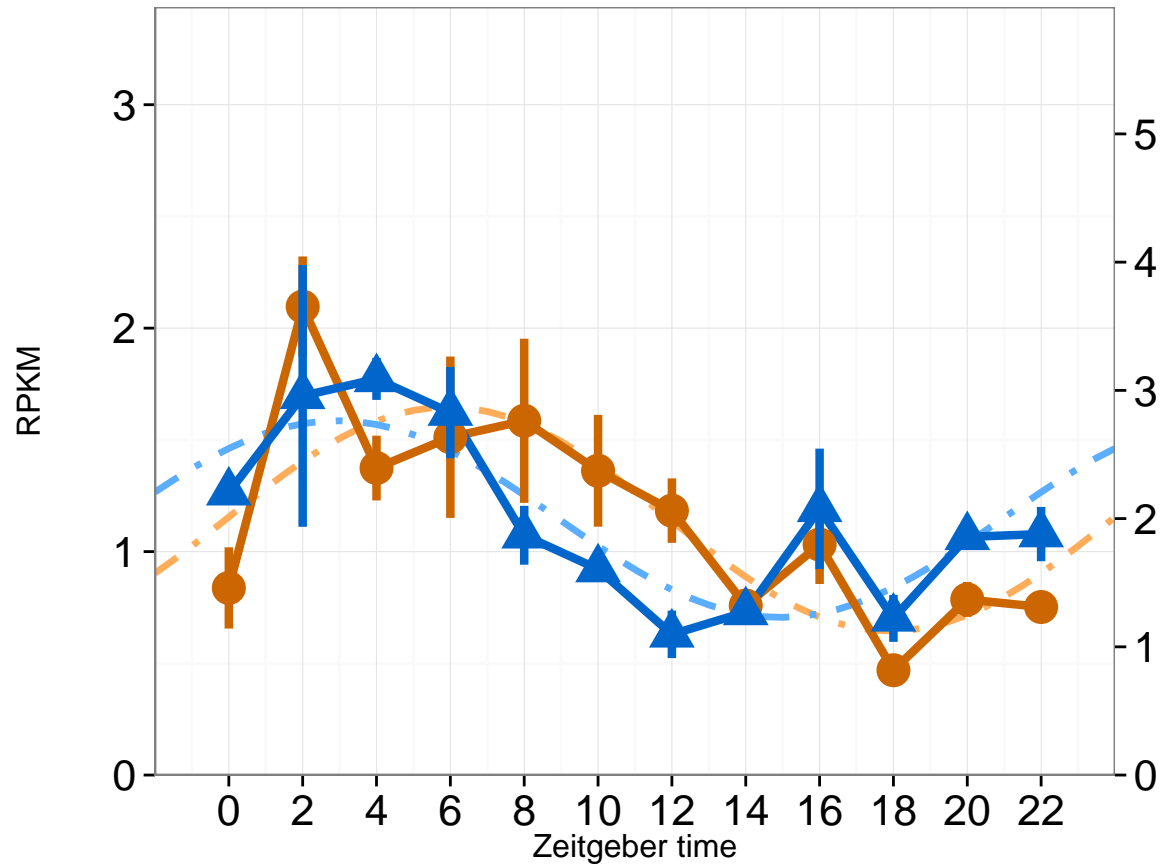

## Eln

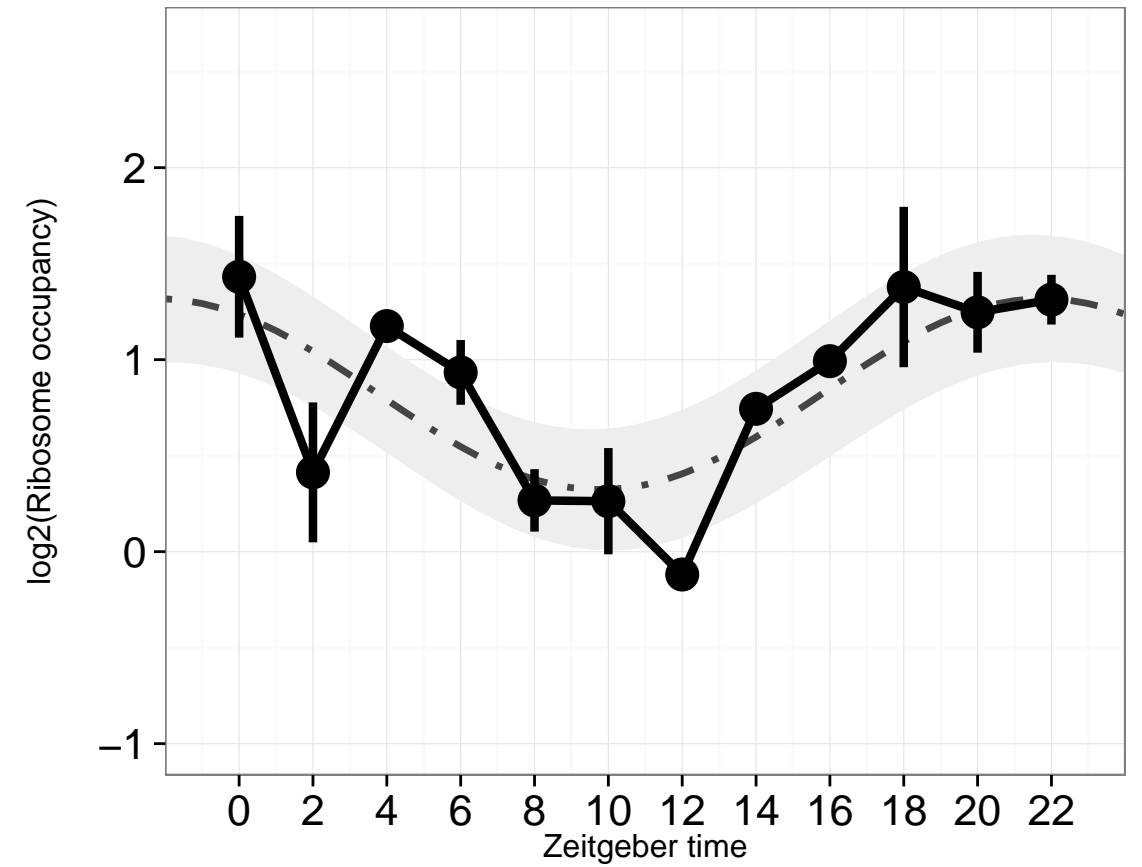

Supplement: Supplementary file 3555 [file 1]

## ATF7

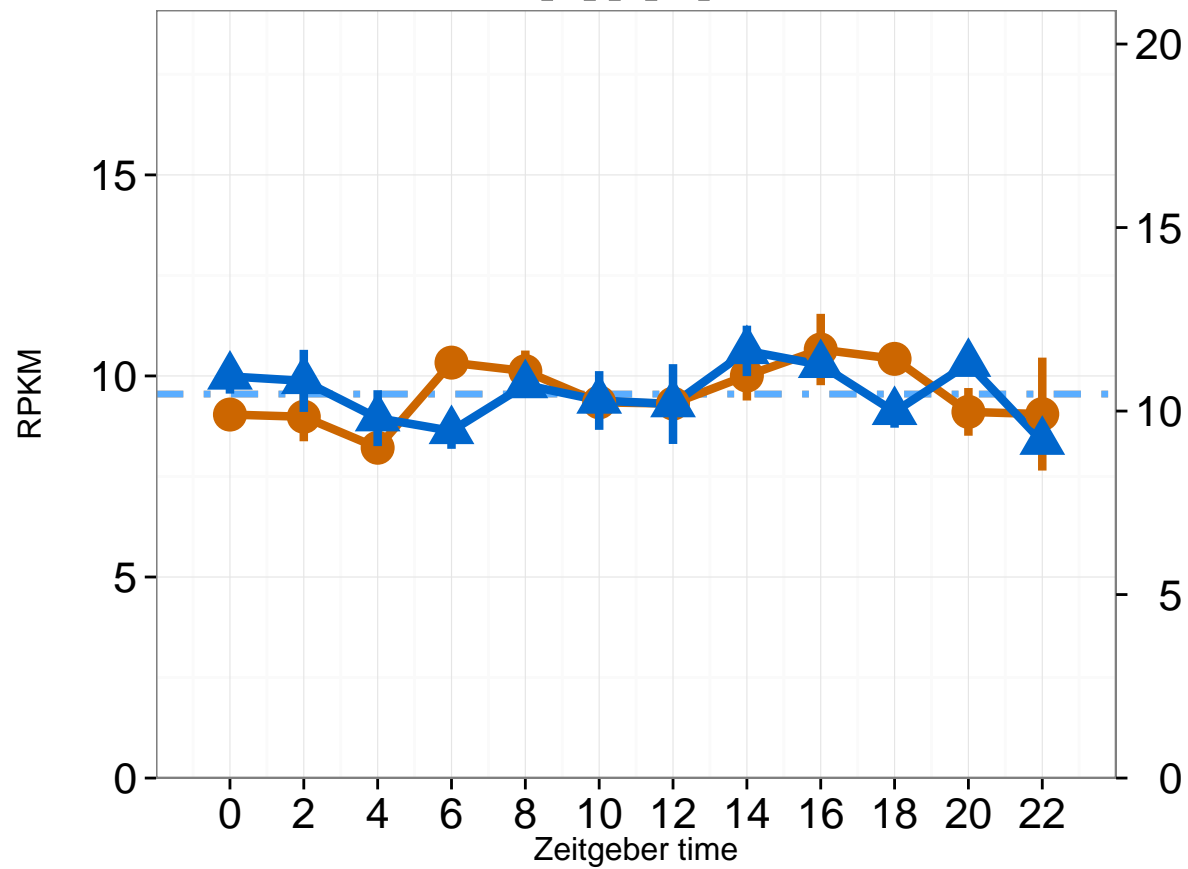

## ATF7

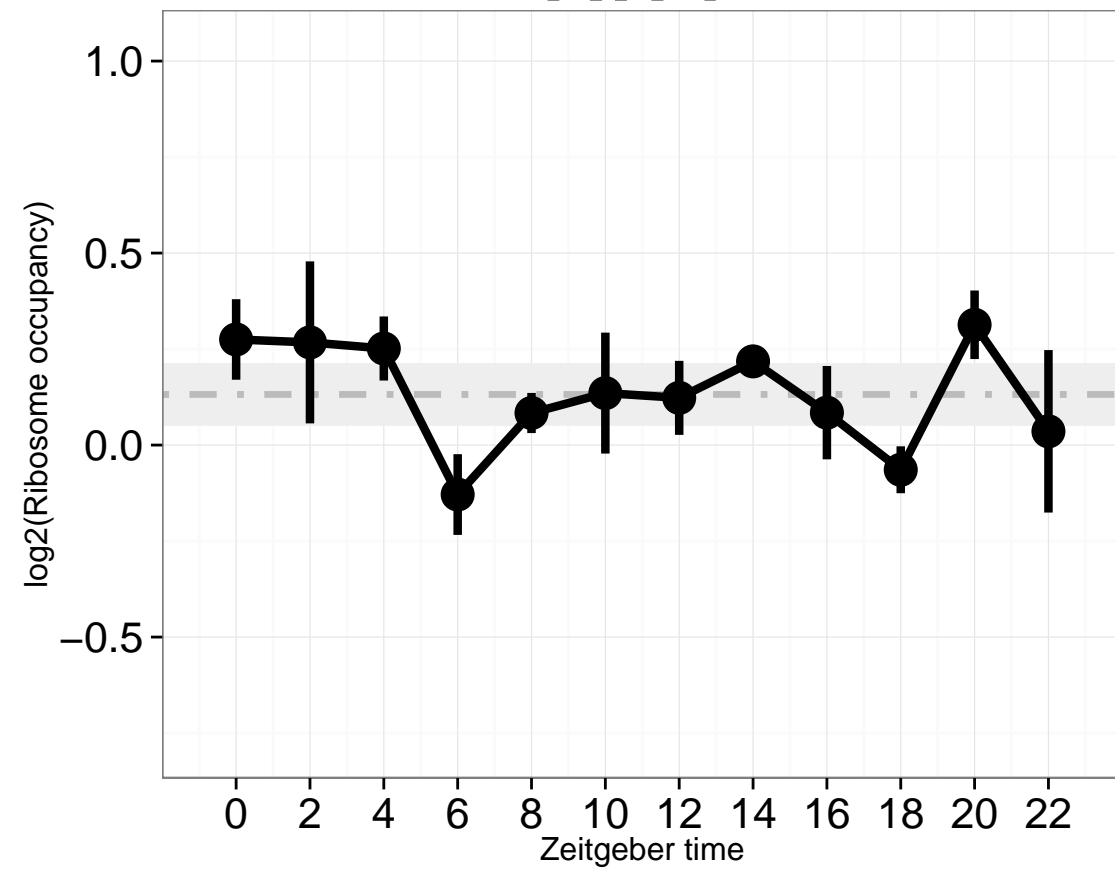

Supplement: Supplementary file 3556 [file 1]

## Dcbld2

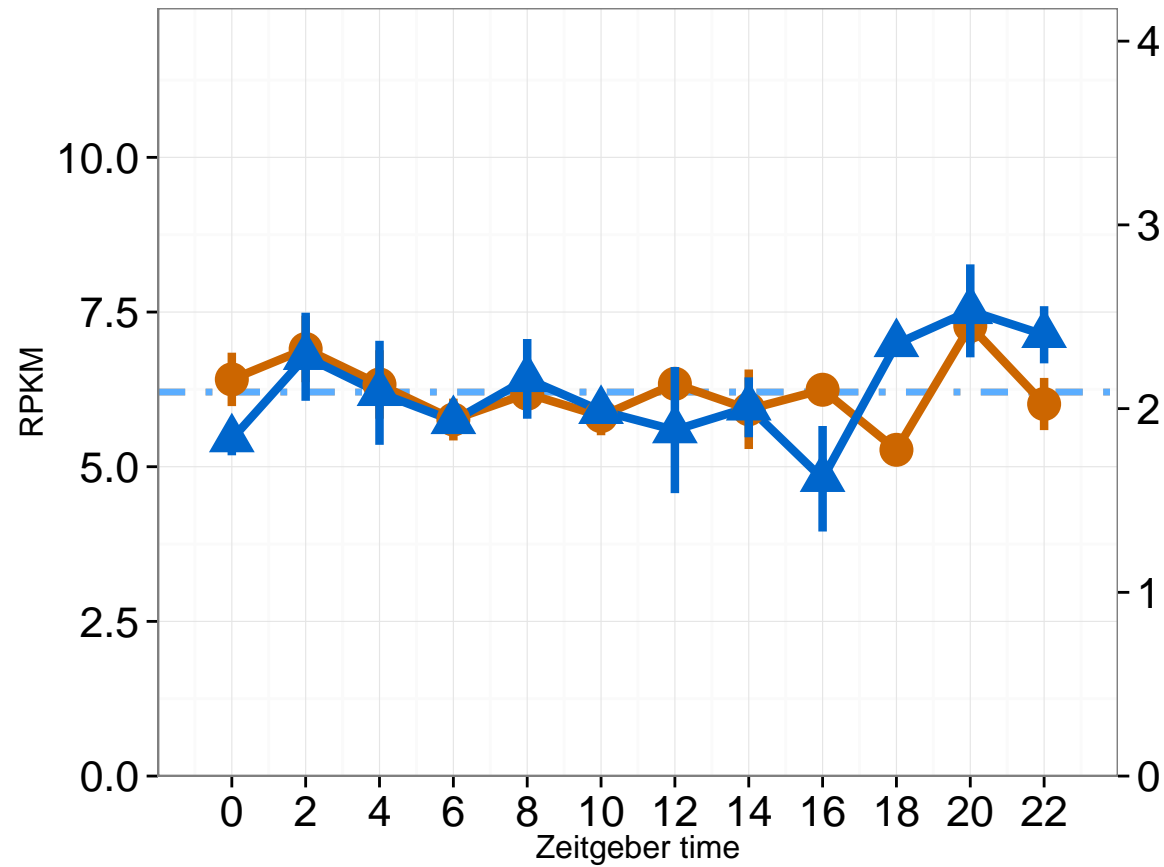

## Dcbld2

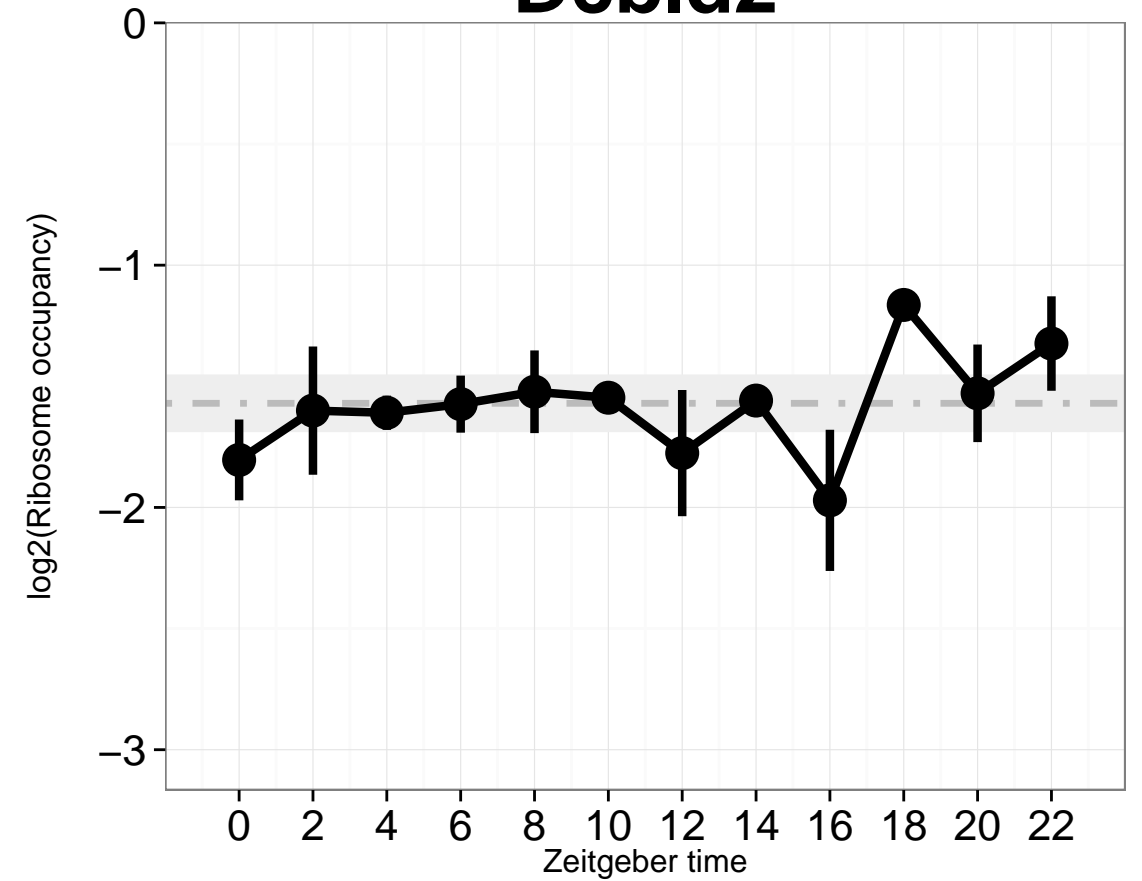

Supplement: Supplementary file 3557 [file 1]

## Zpbp

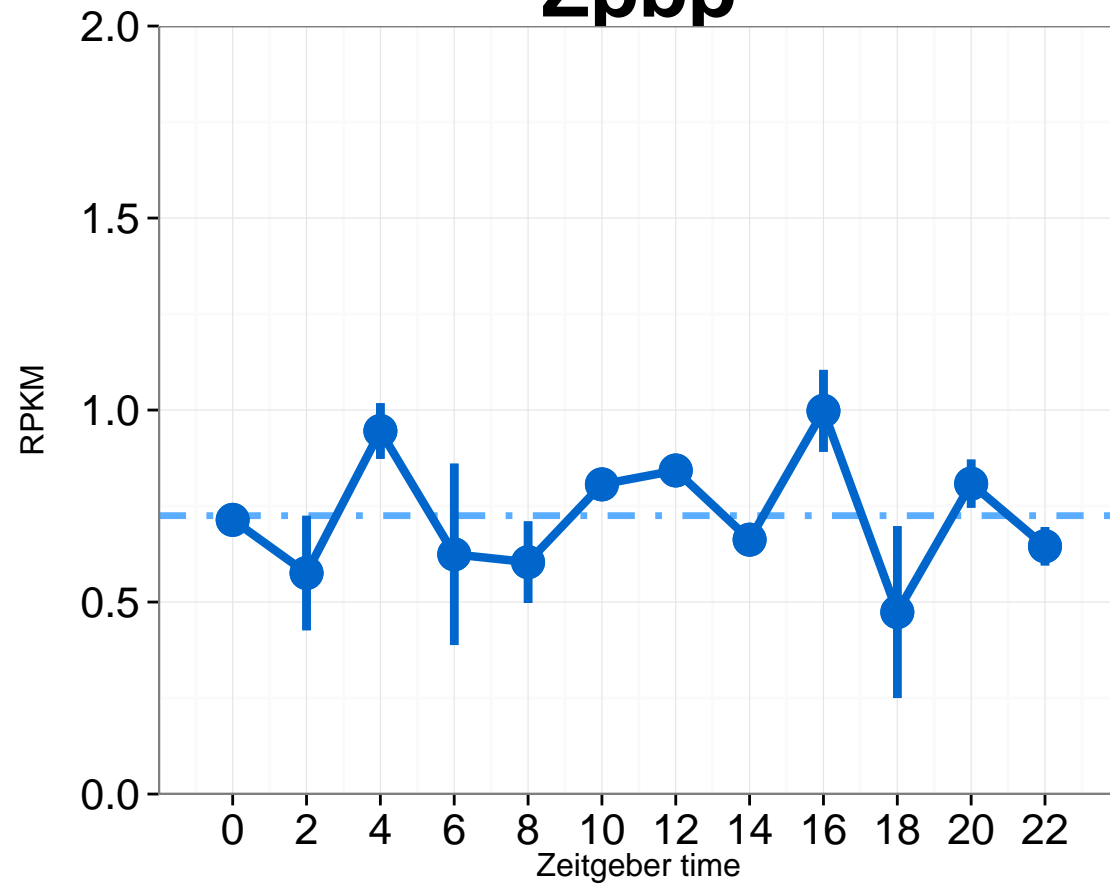

## Zpbp log2(Ribosome occupancy)

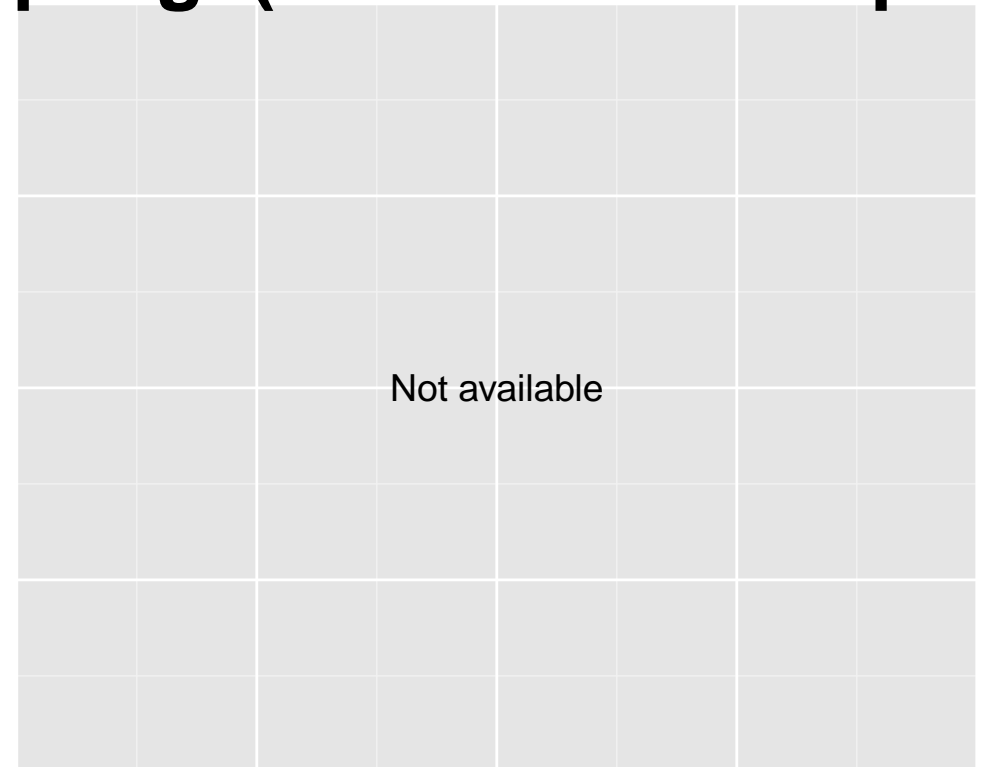

Supplement: Supplementary file 3558 [file 1]

## Tmem67

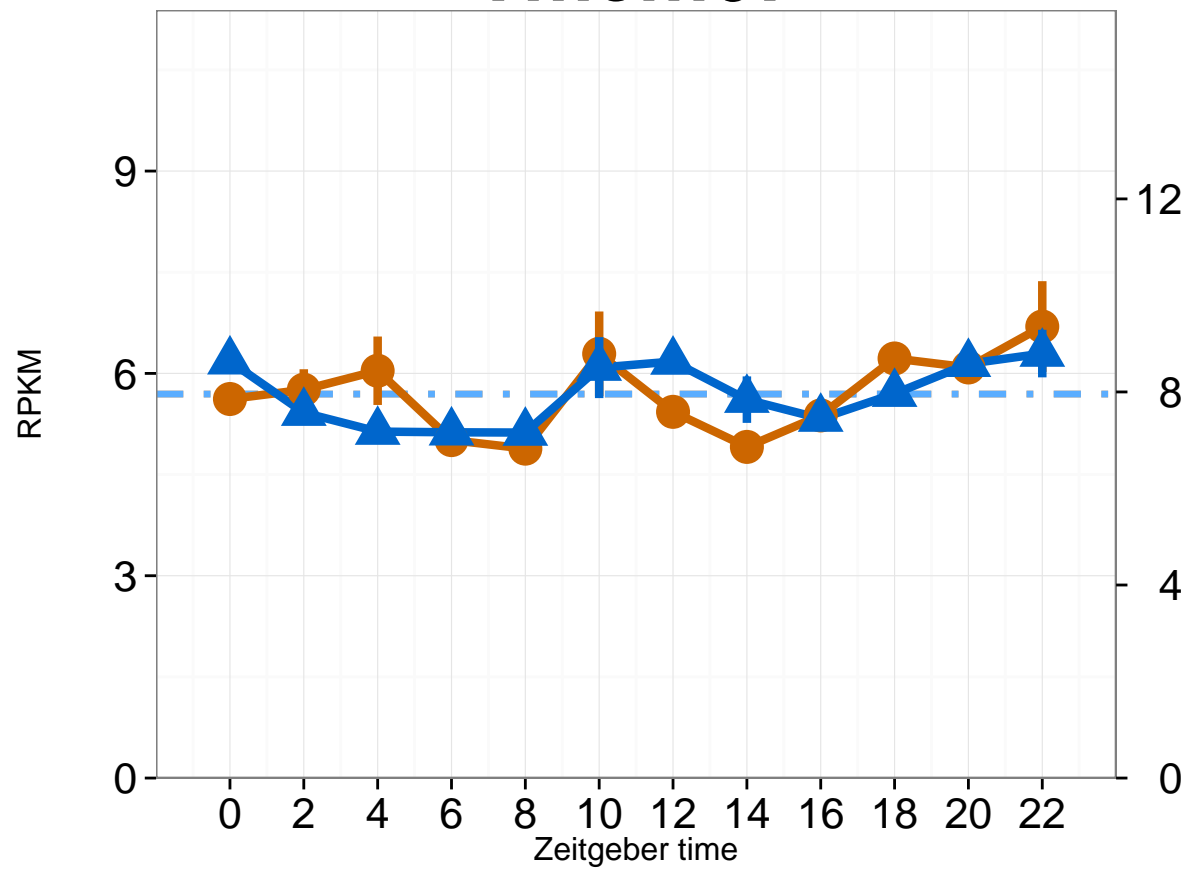

## Tmem67

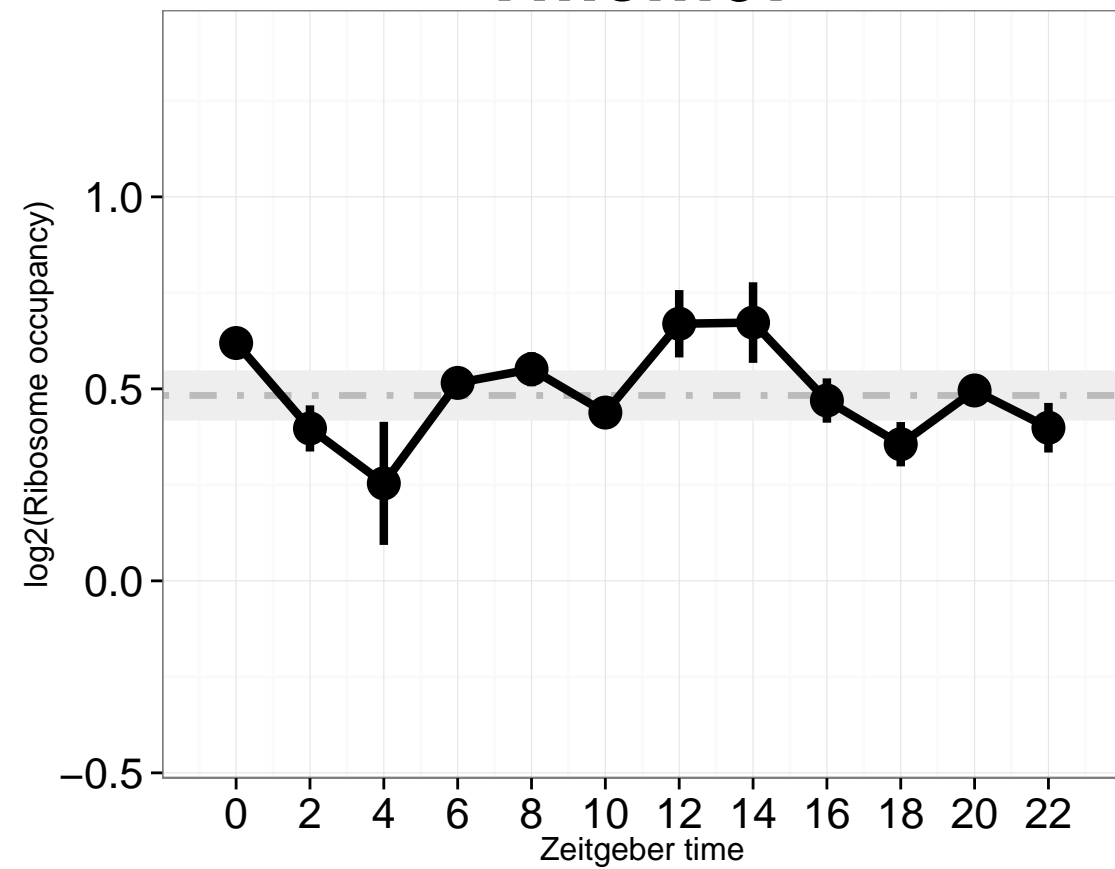

Supplement: Supplementary file 3559 [file 1]

## Stk38

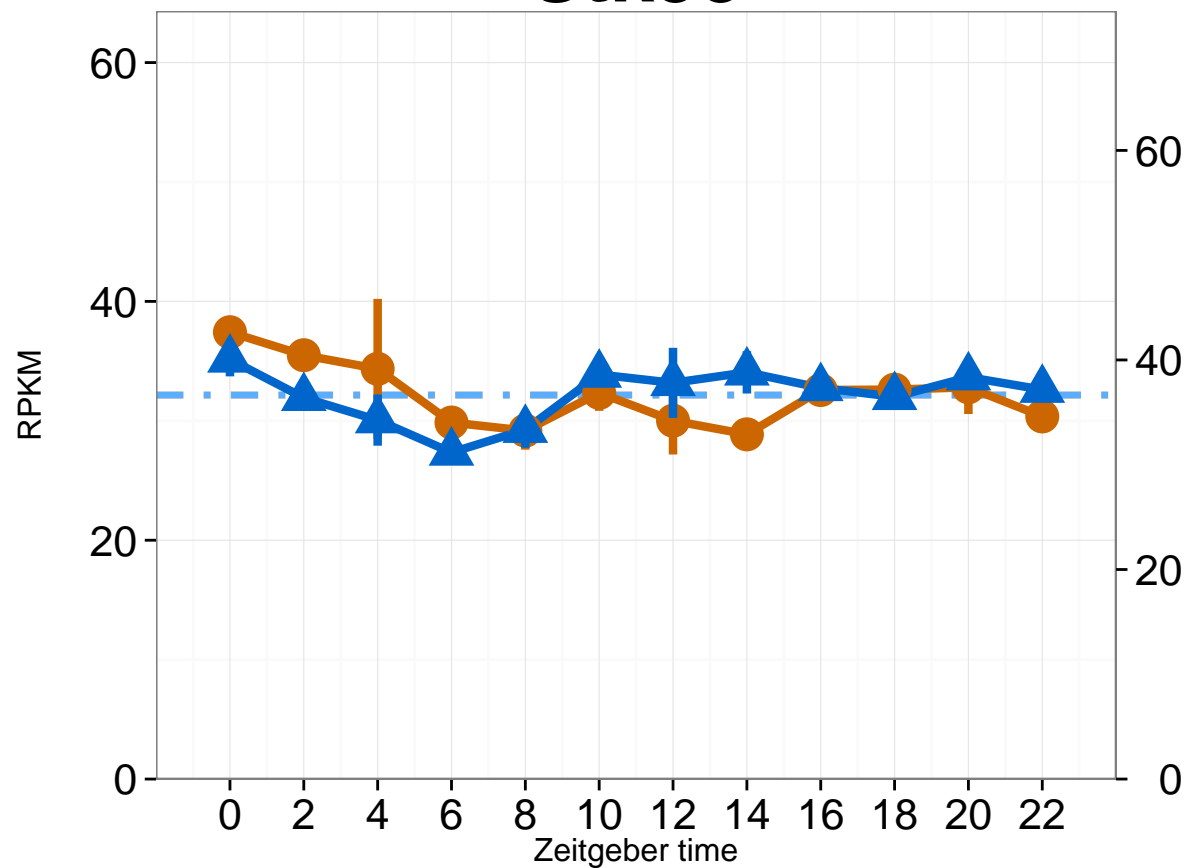

## Stk38

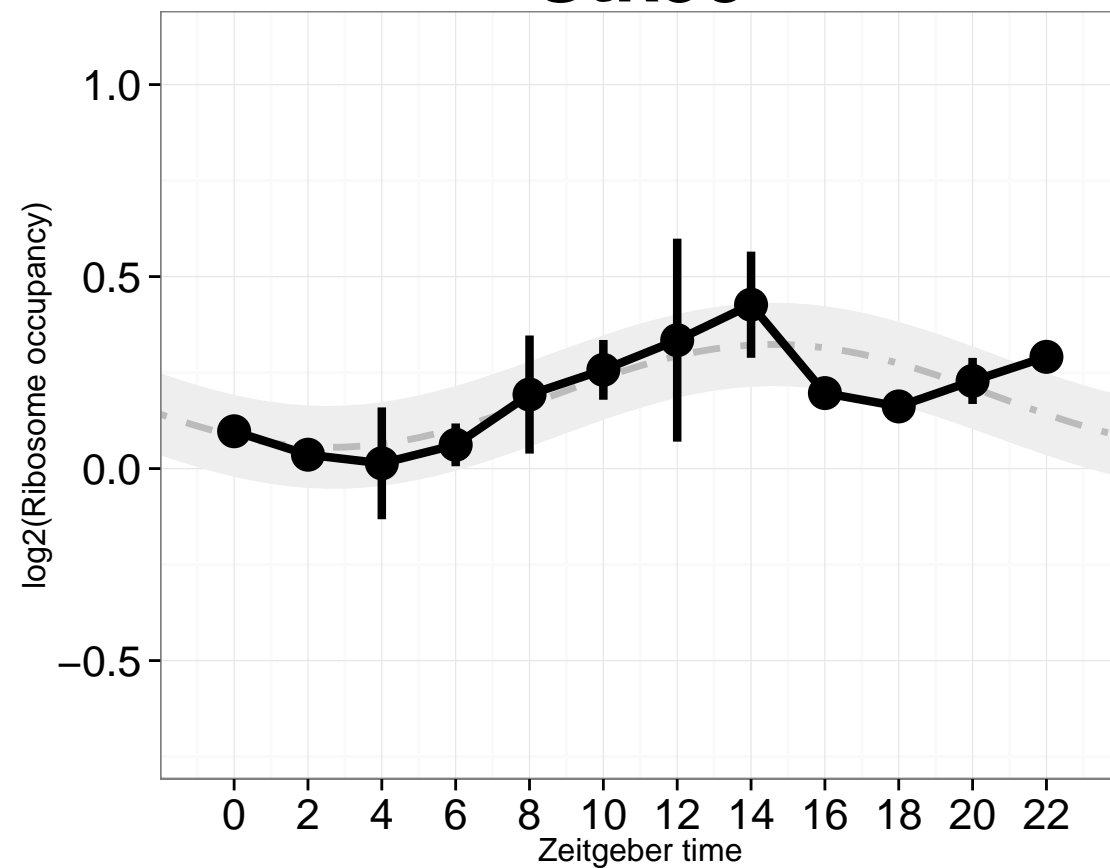

Supplement: Supplementary file 3560 [file 1]

# 8030462N17Rik

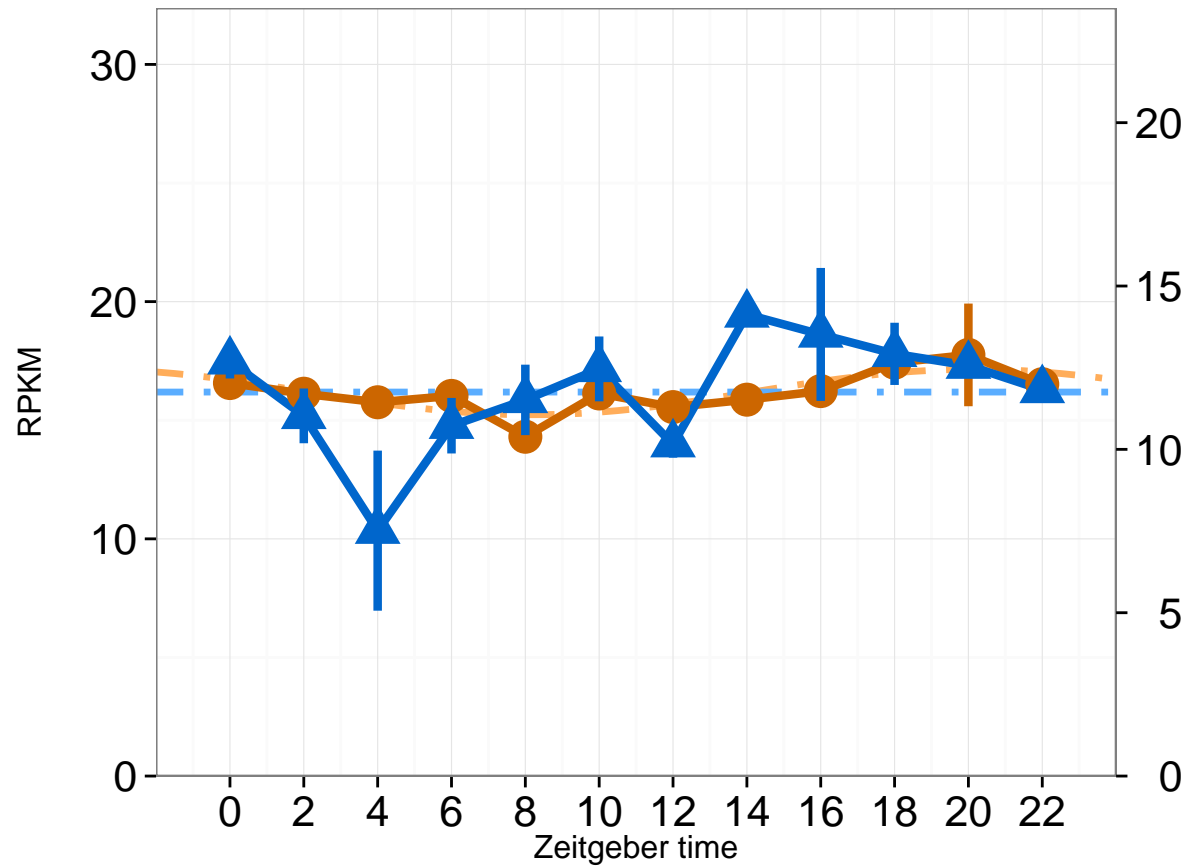

# 8030462N17Rik

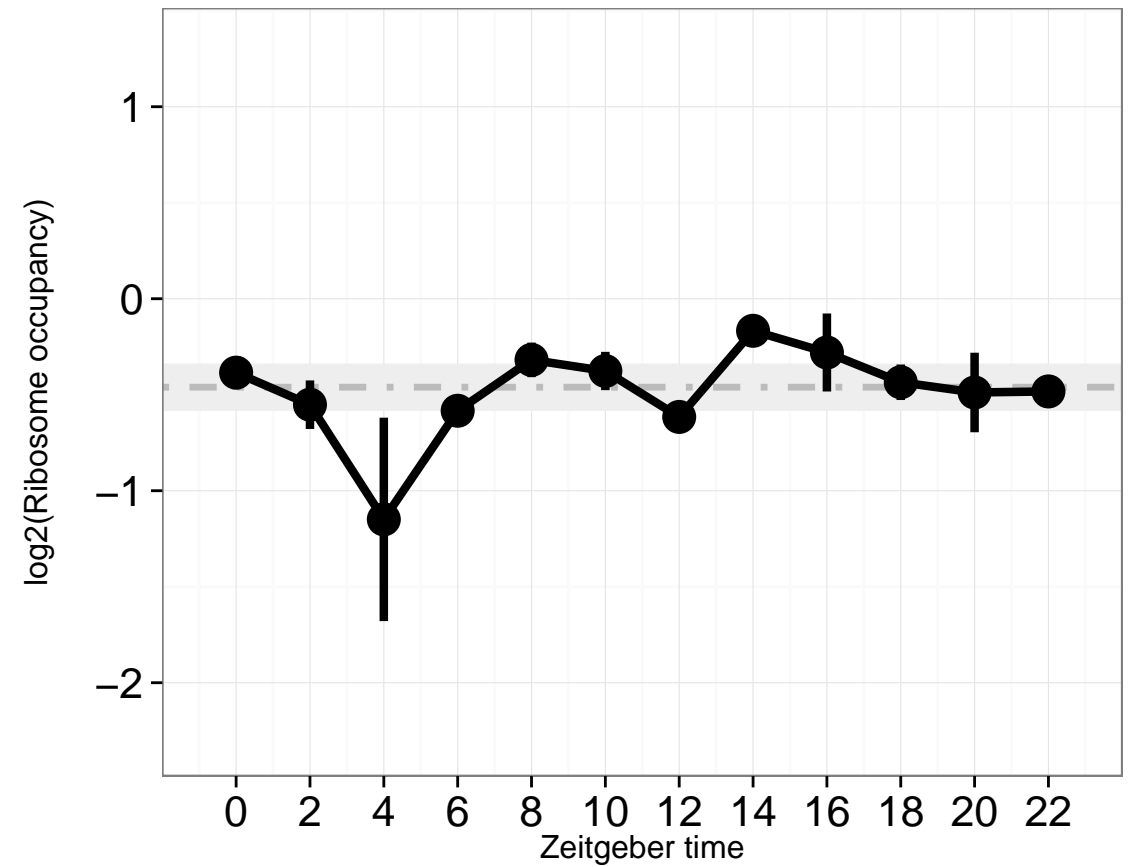

Supplement: Supplementary file 3561 [file 1]

## 5830418K08Rik

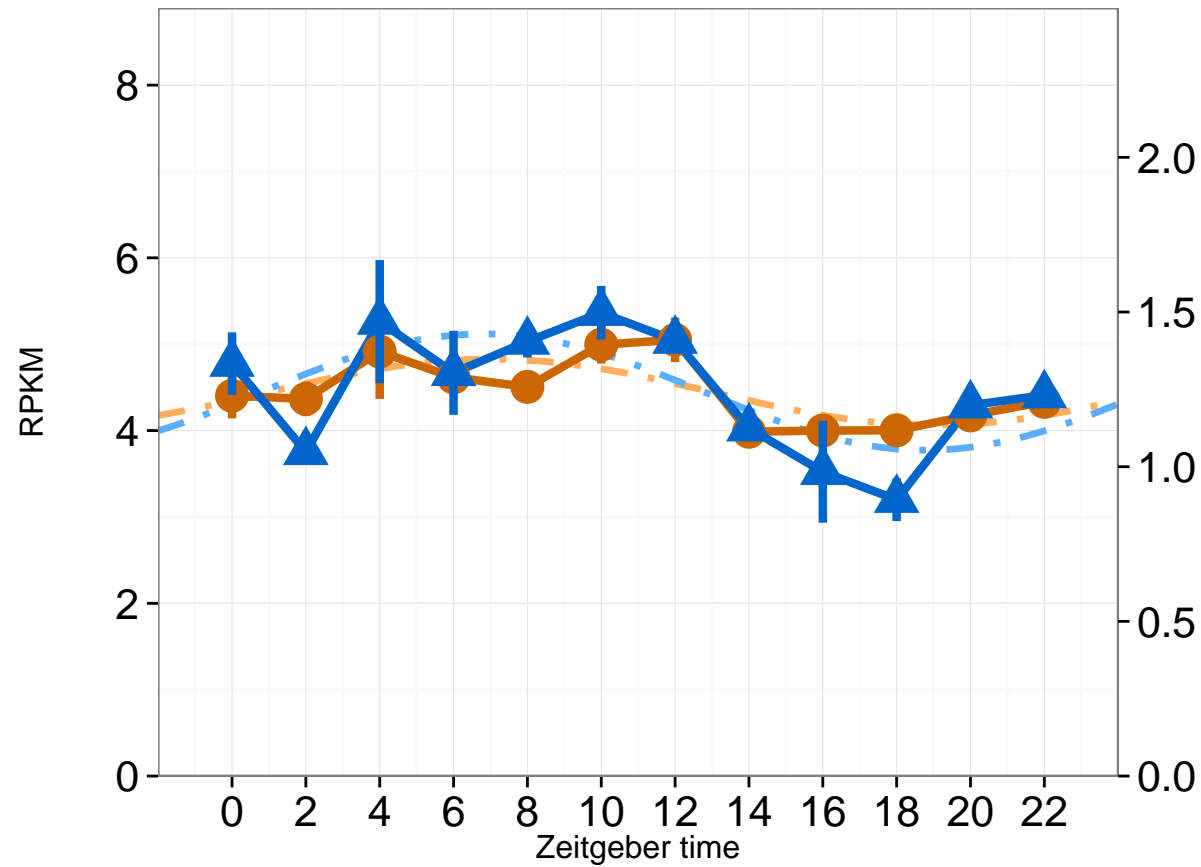

## 5830418K08Rik

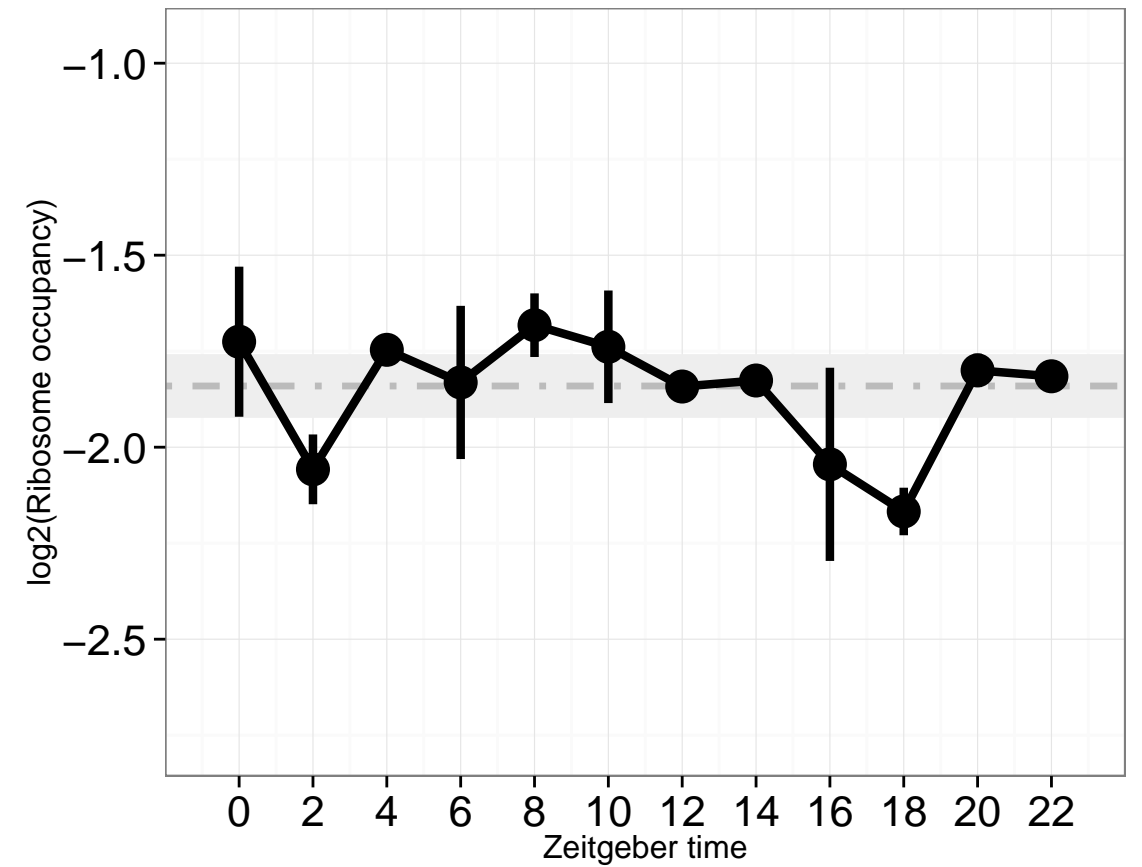

Supplement: Supplementary file 3562 [file 1]

# Mzt1

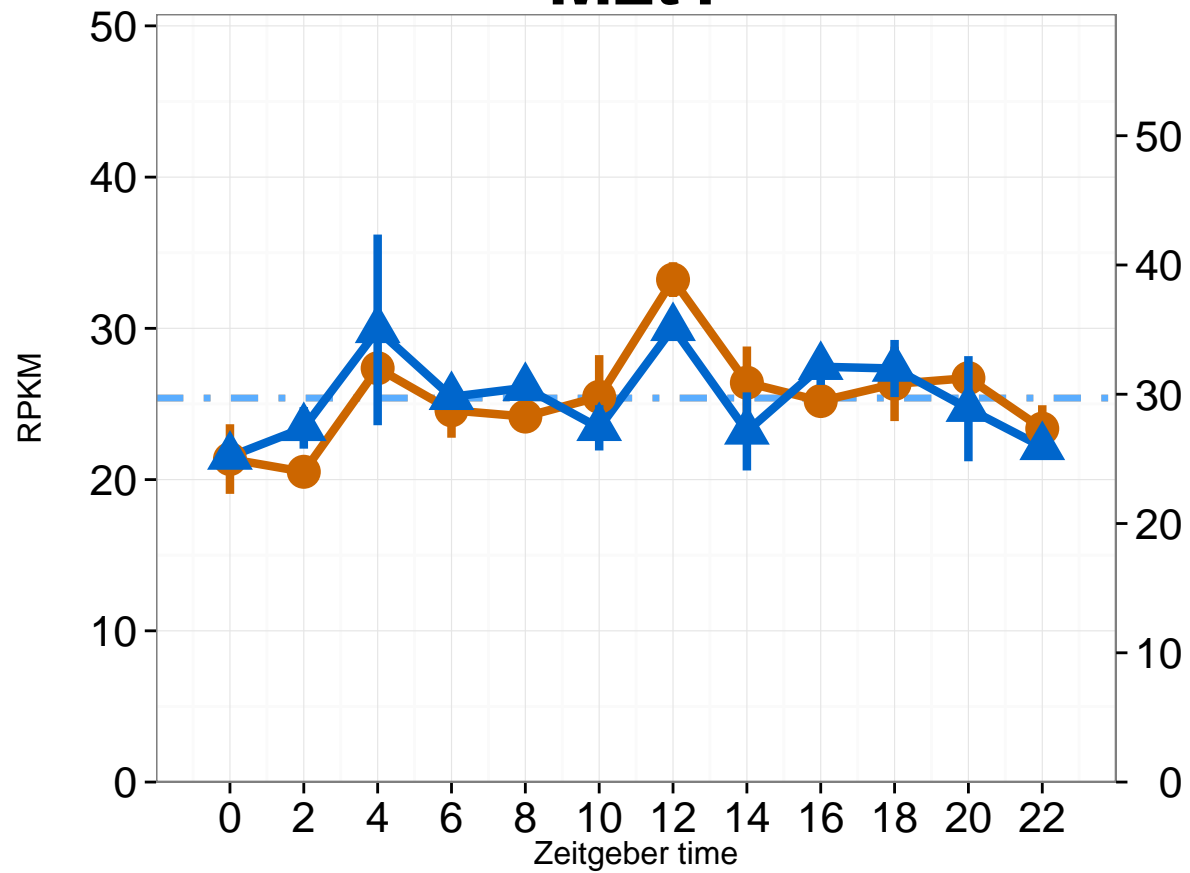

# Mzt1

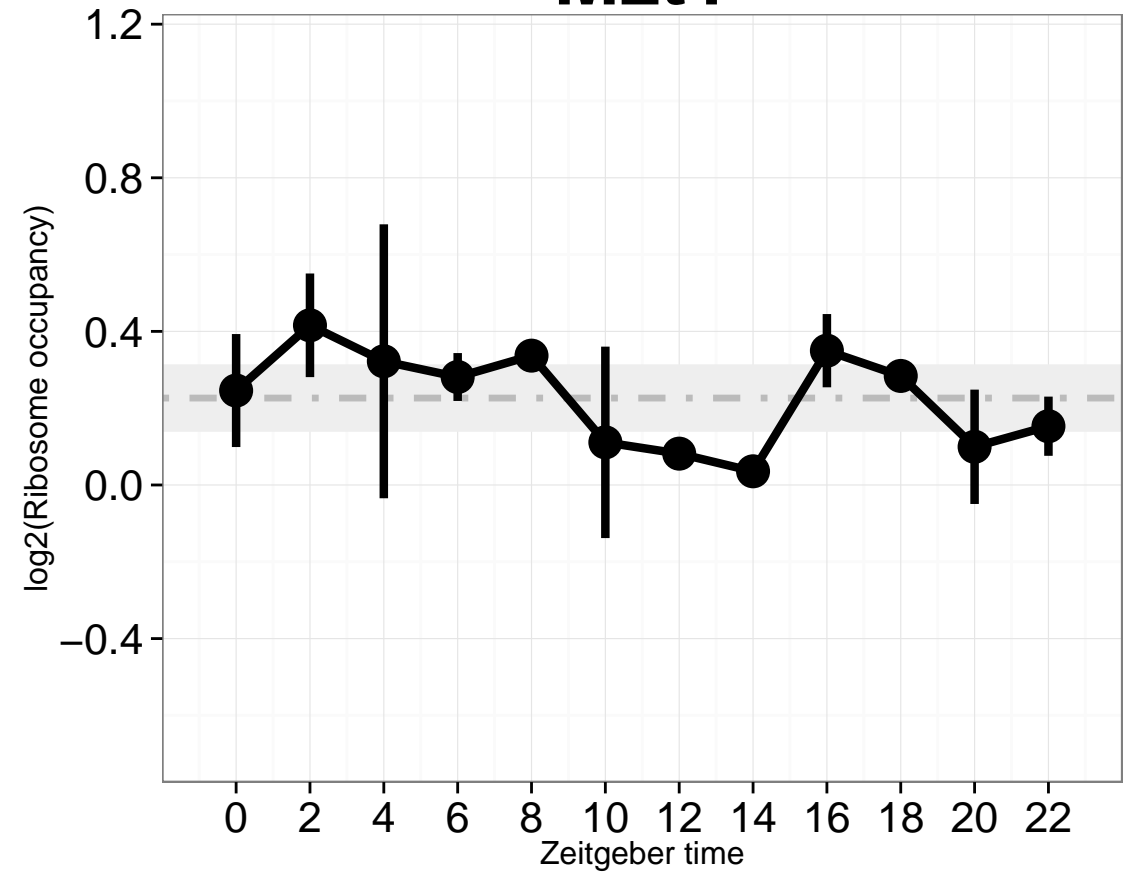

Supplement: Supplementary file 3563 [file 1]

## C330018D20Rik

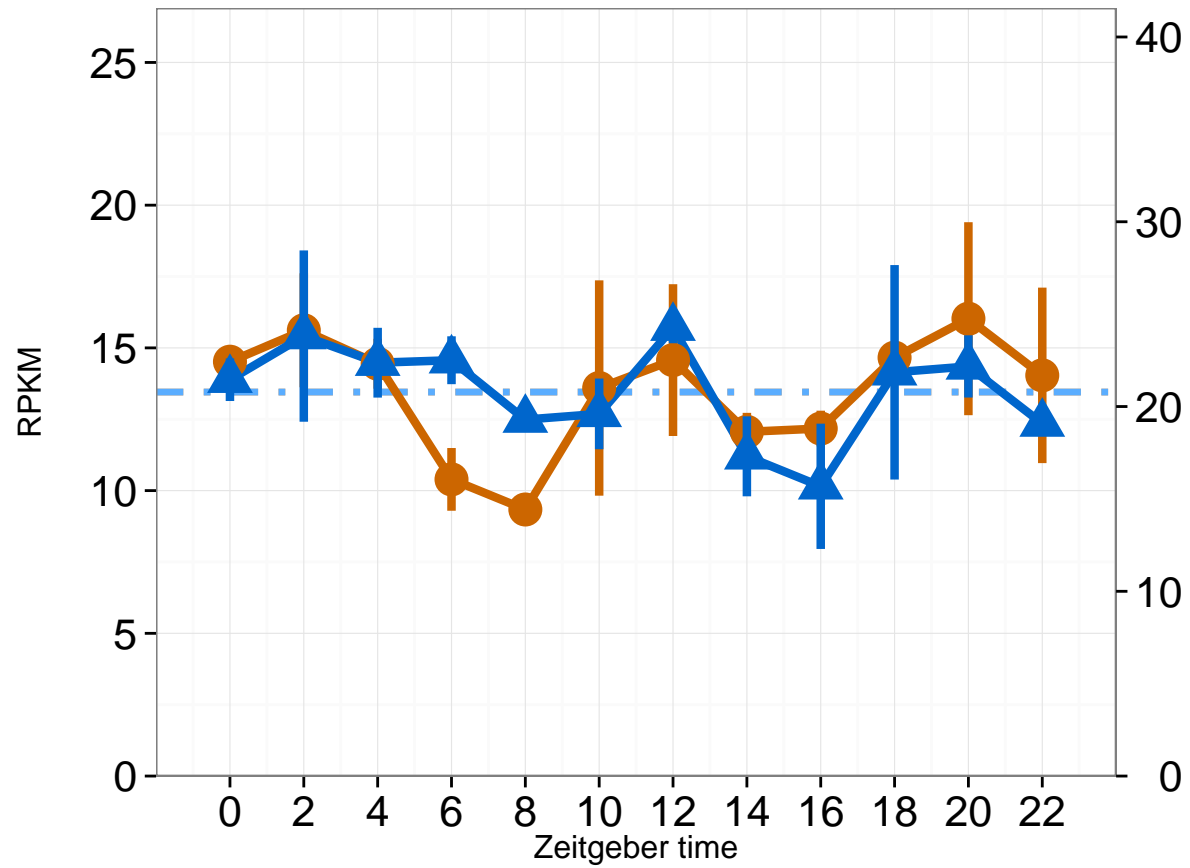

## C330018D20Rik

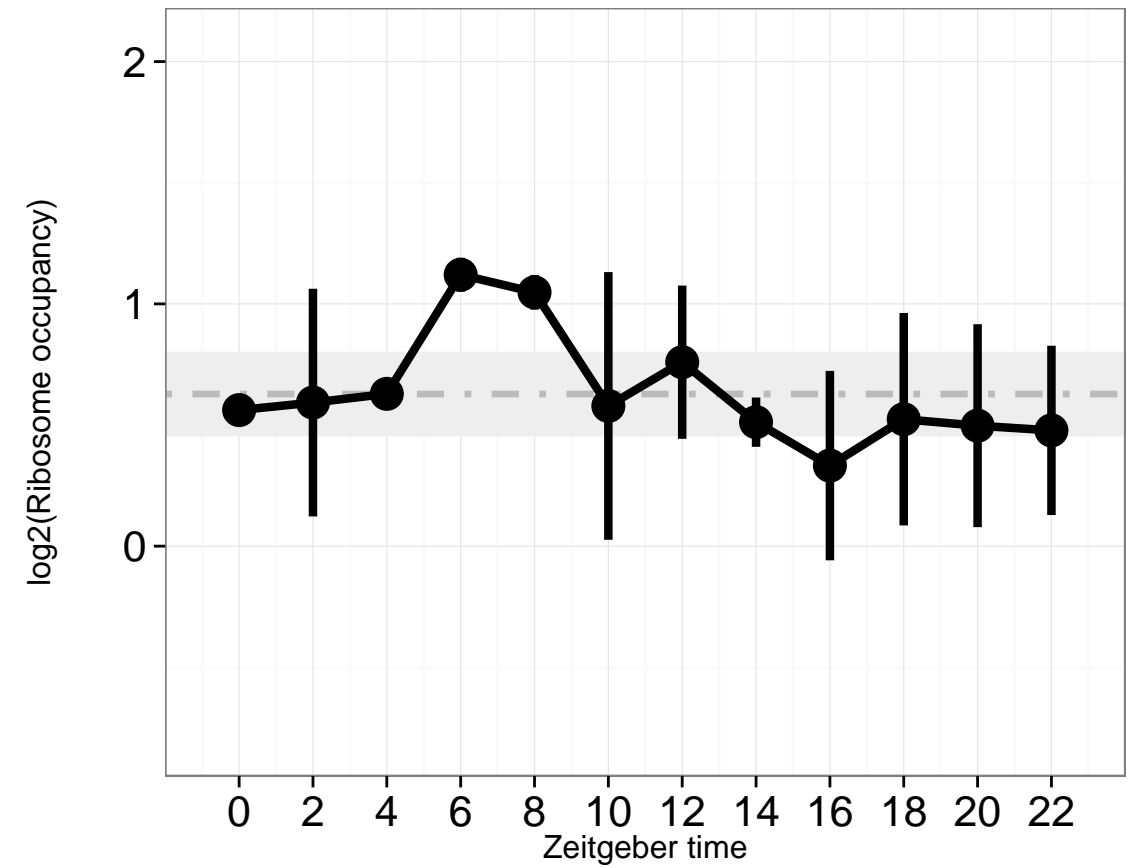

Supplement: Supplementary file 3564 [file 1]

# Bhlhe40

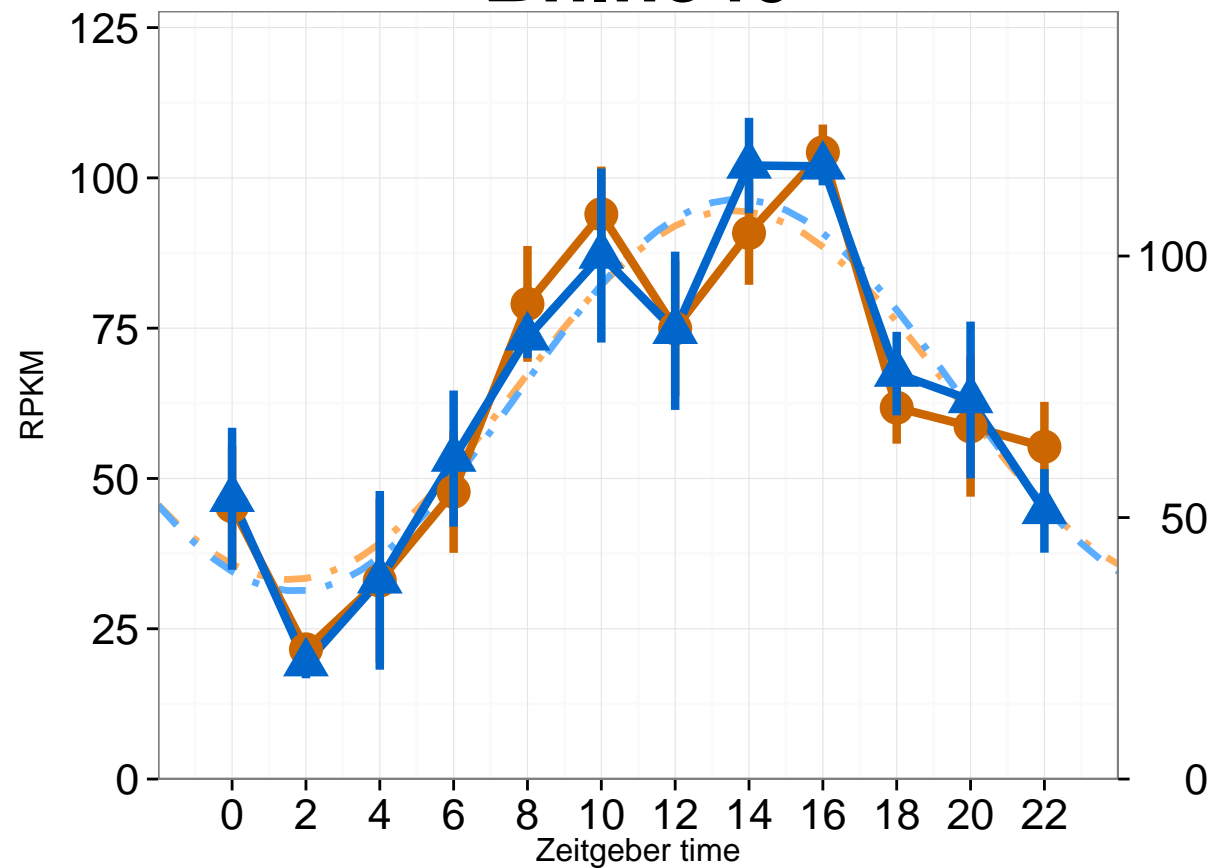

# Bhlhe40

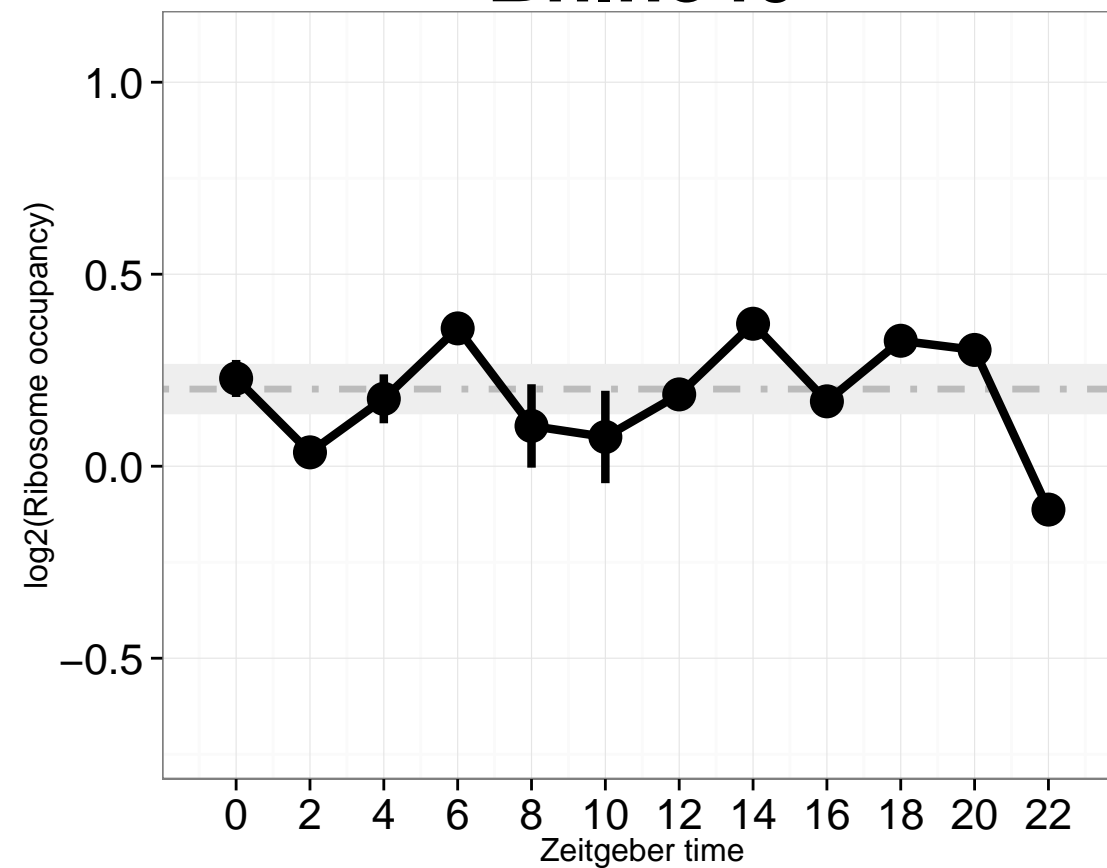

Supplement: Supplementary file 3565 [file 1]

**Cidea TR**

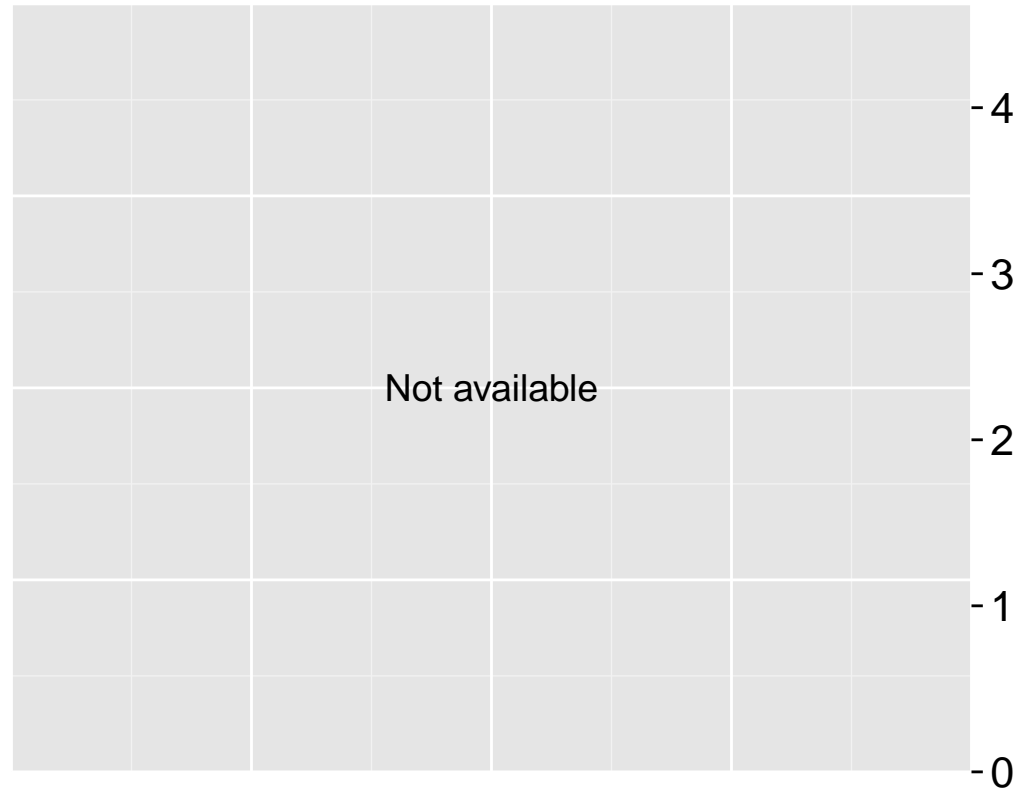

**Cidea log2(Ribosome occupancy)**

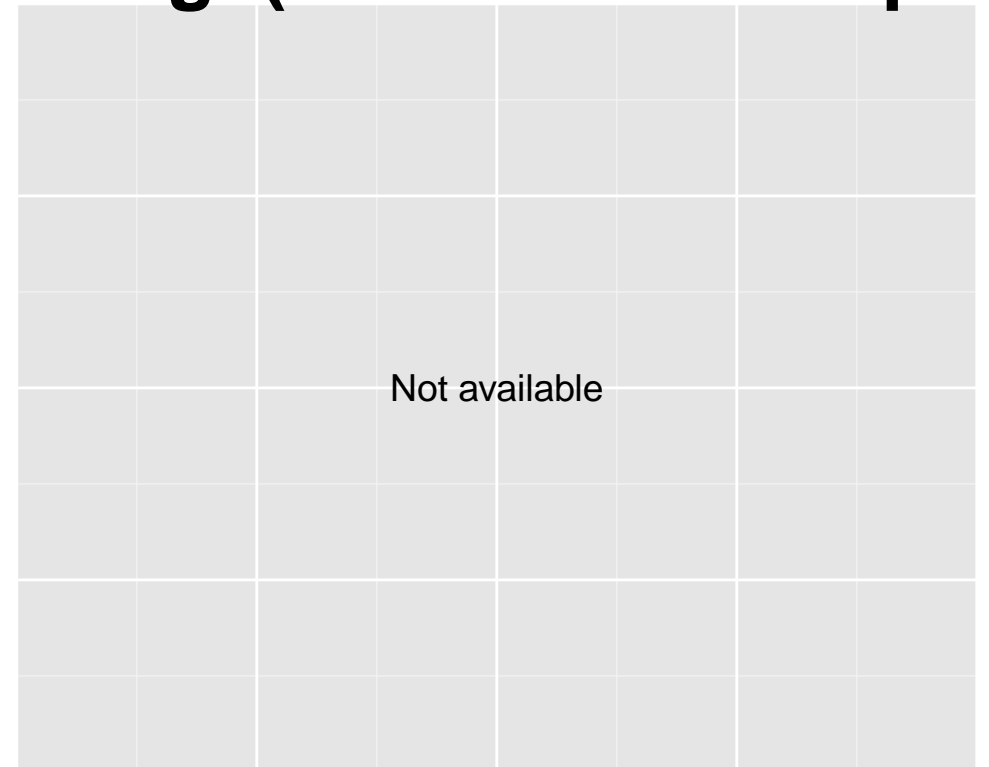

Supplement: Supplementary file 3566 [file 1]

## Ubb

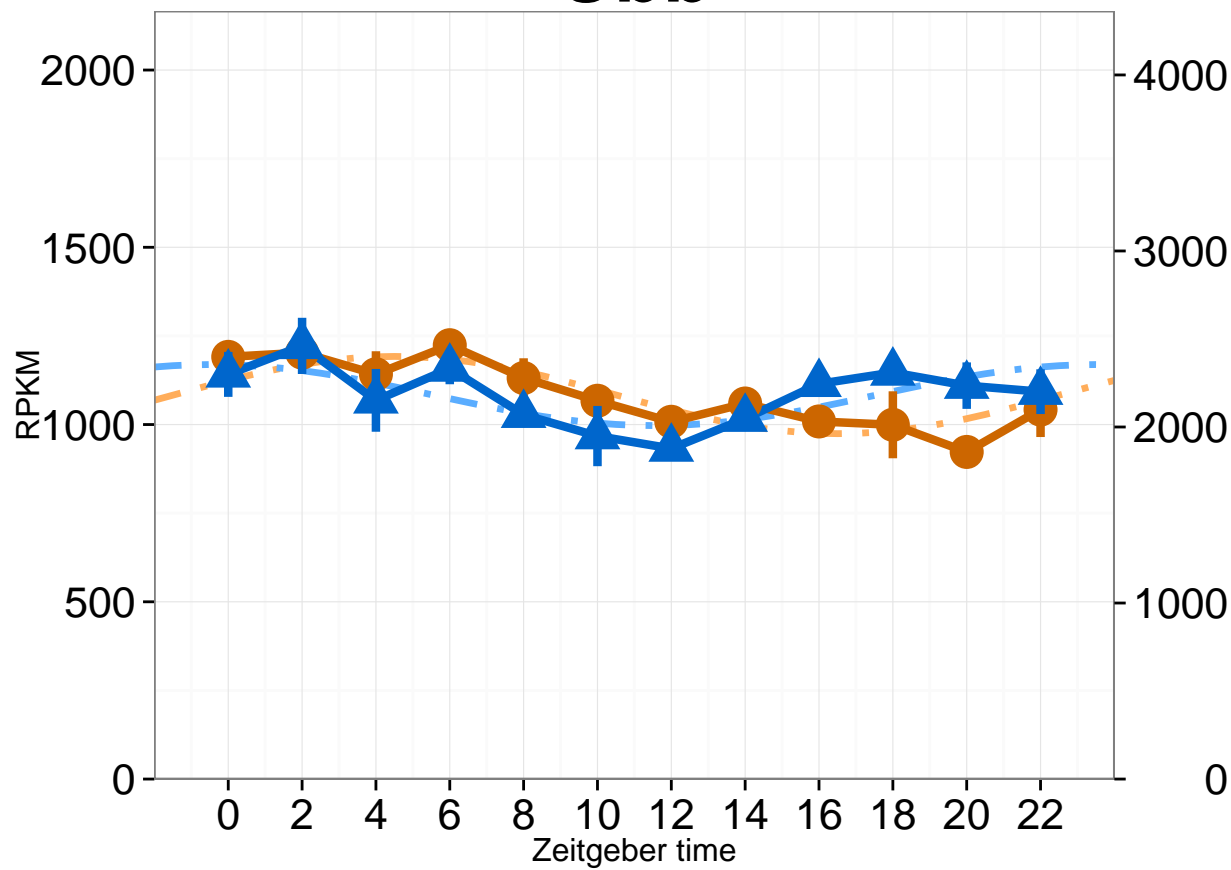

## Ubb

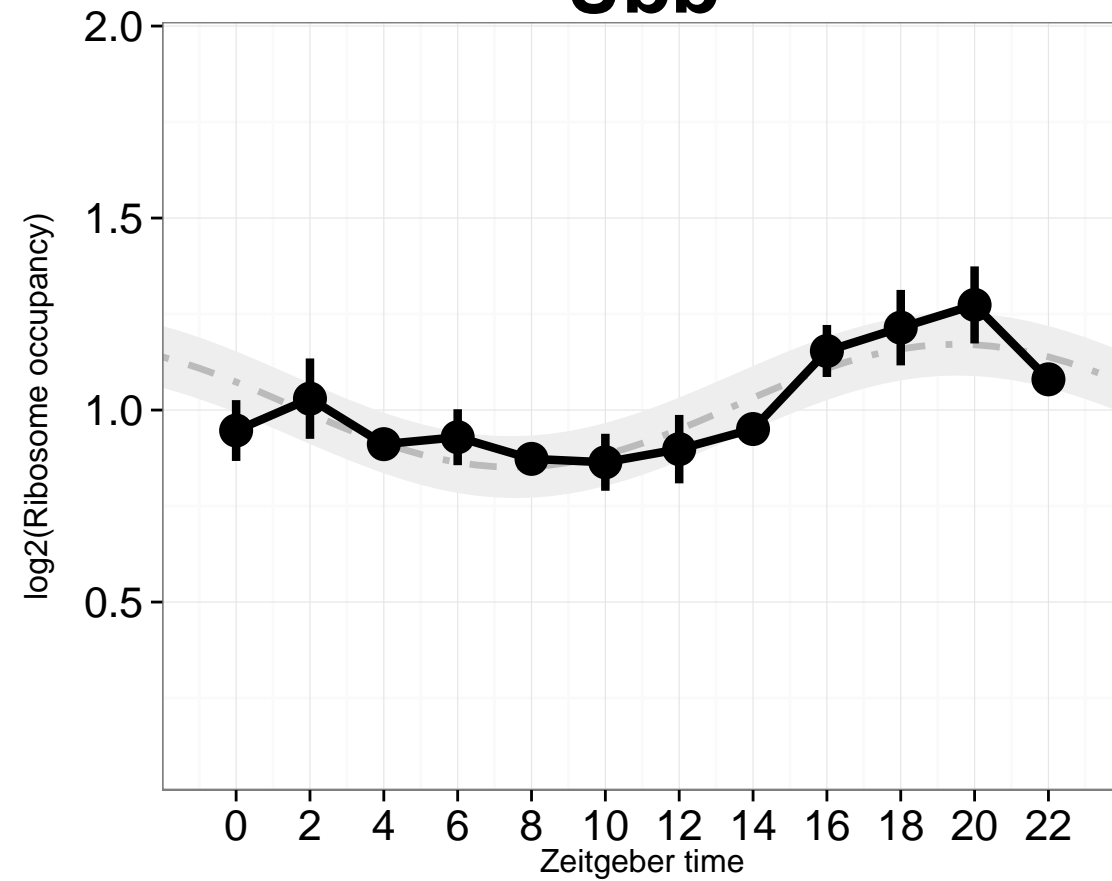

Supplement: Supplementary file 3567 [file 1]

# Ppp2r2a

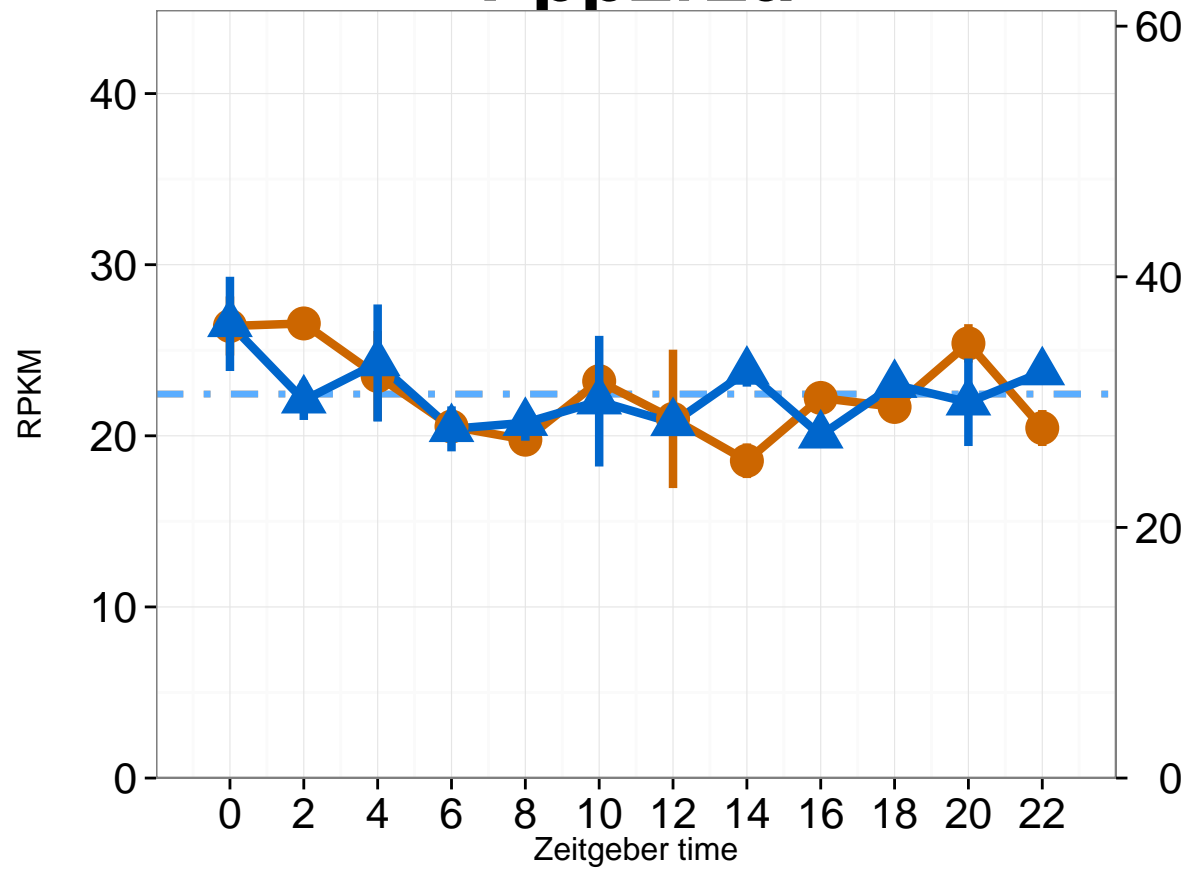

# Ppp2r2a

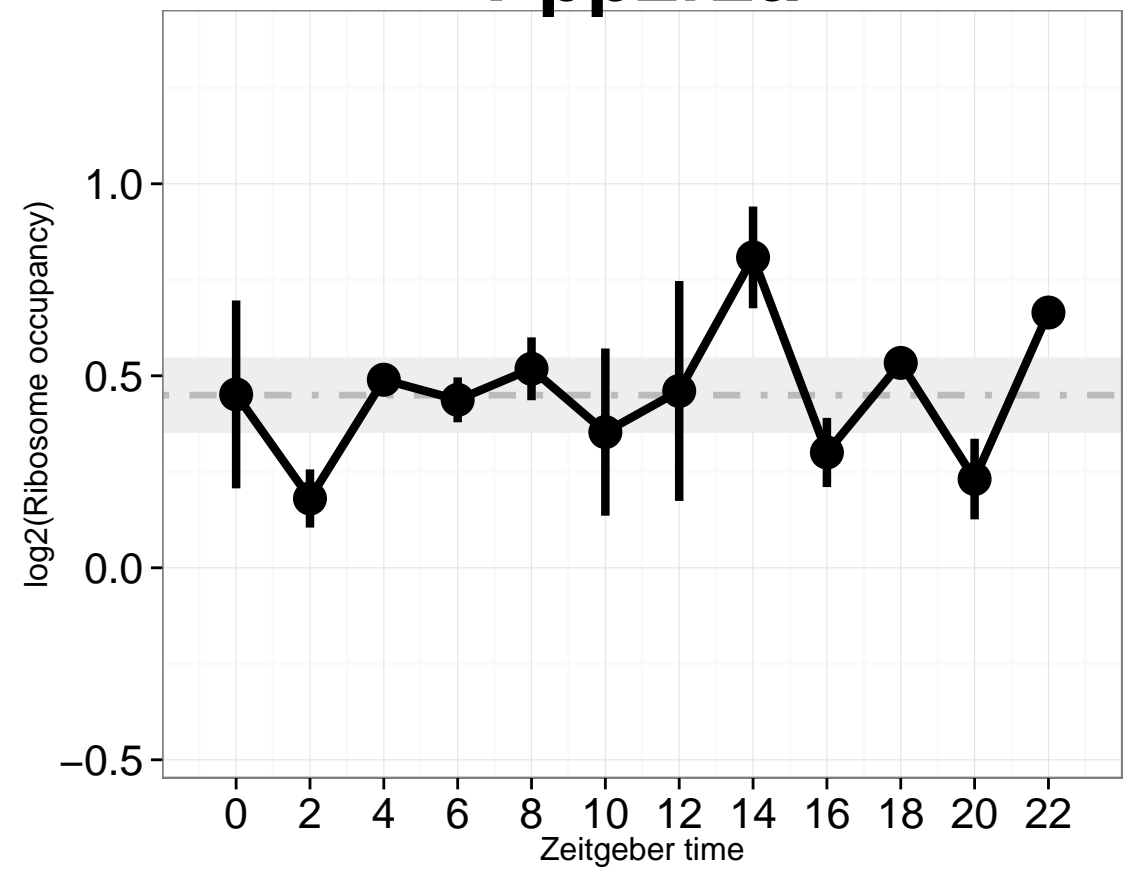

Supplement: Supplementary file 3568 [file 1]

## Uroc1

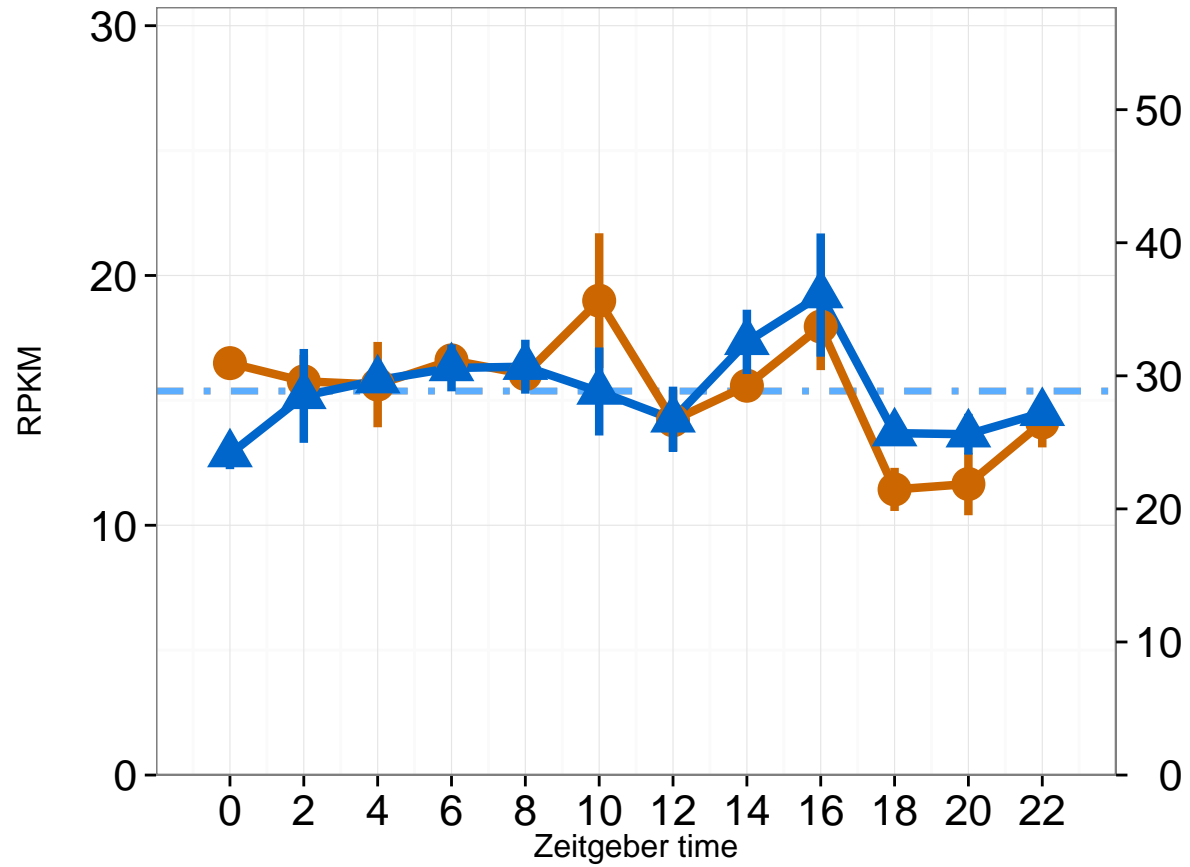

## Uroc1

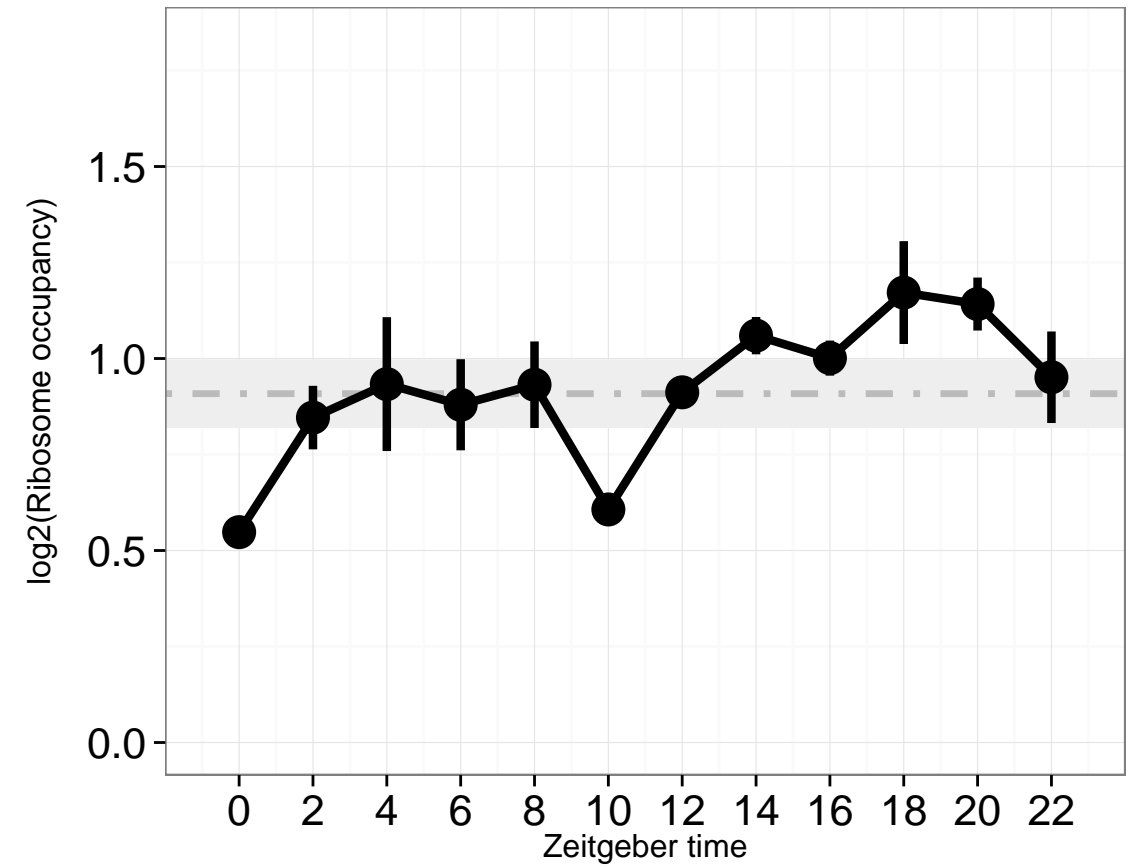

Supplement: Supplementary file 3569 [file 1]

# R3hdm4

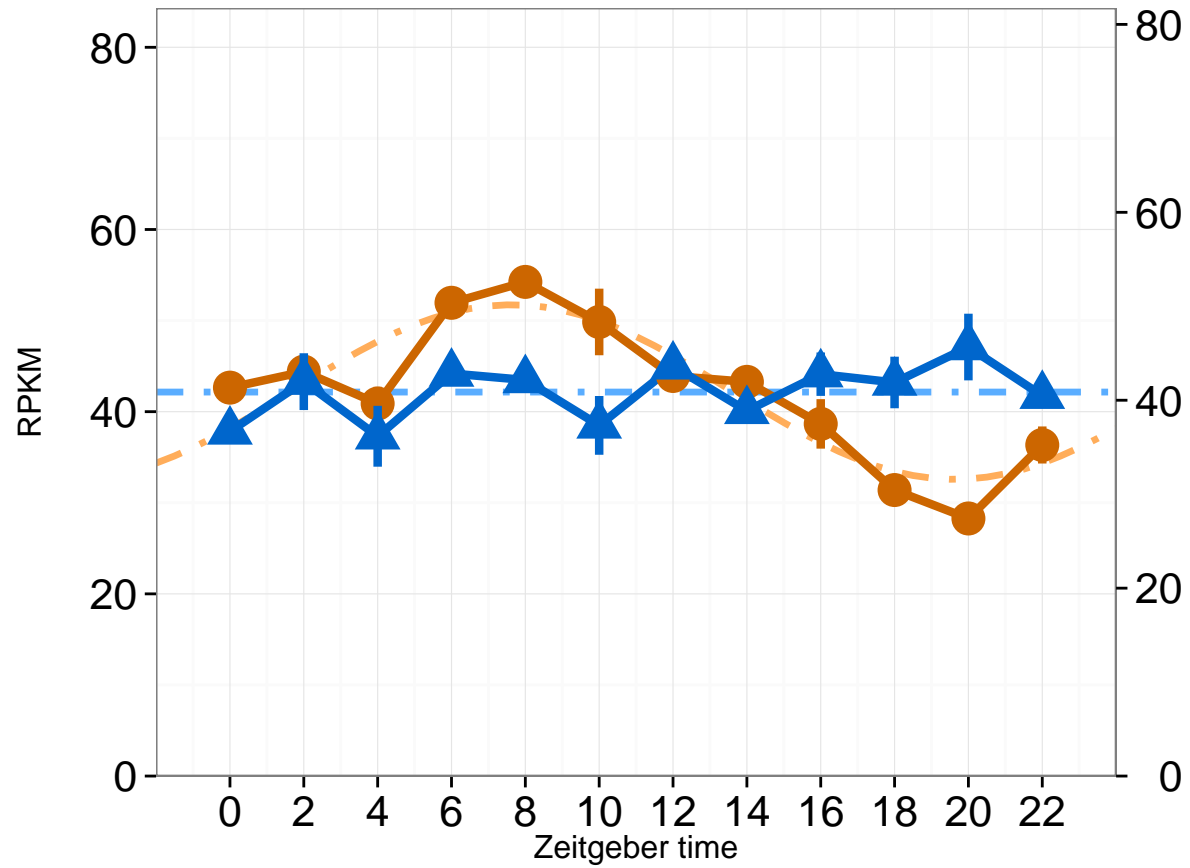

# R3hdm4

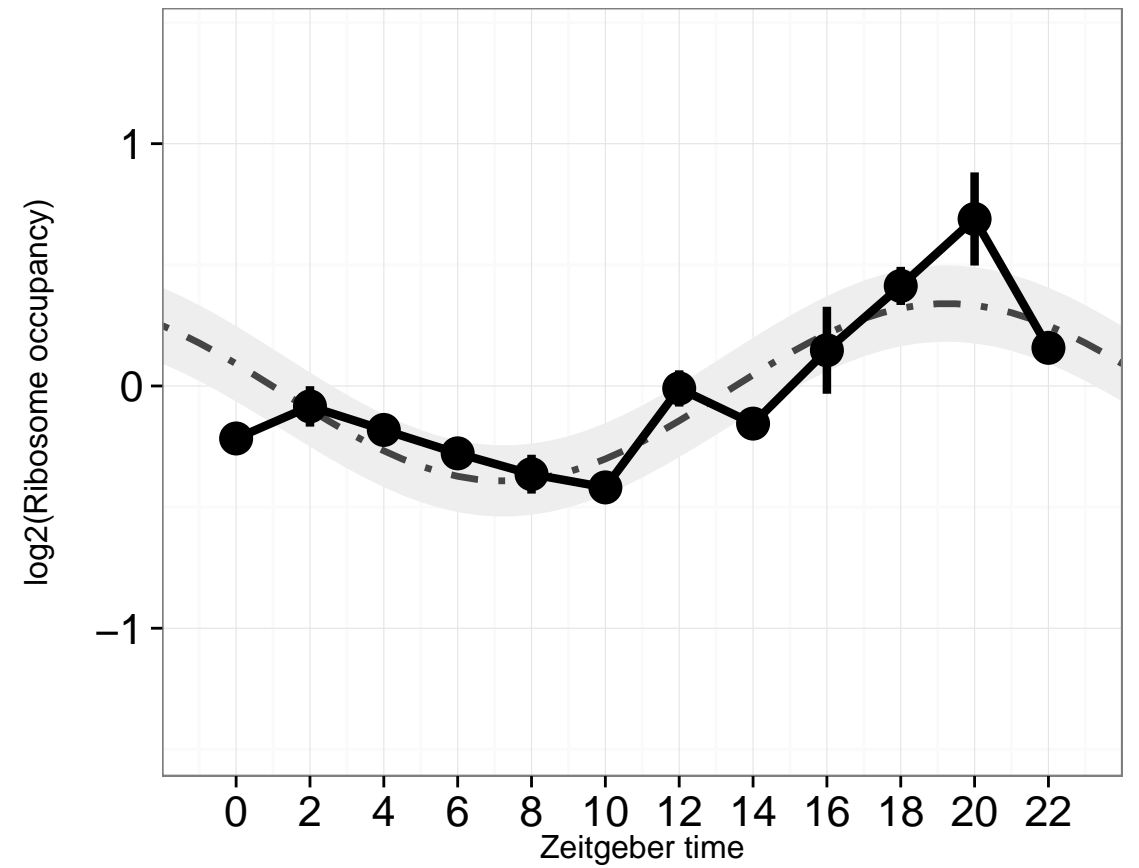

Supplement: Supplementary file 3570 [file 1]

## Fus

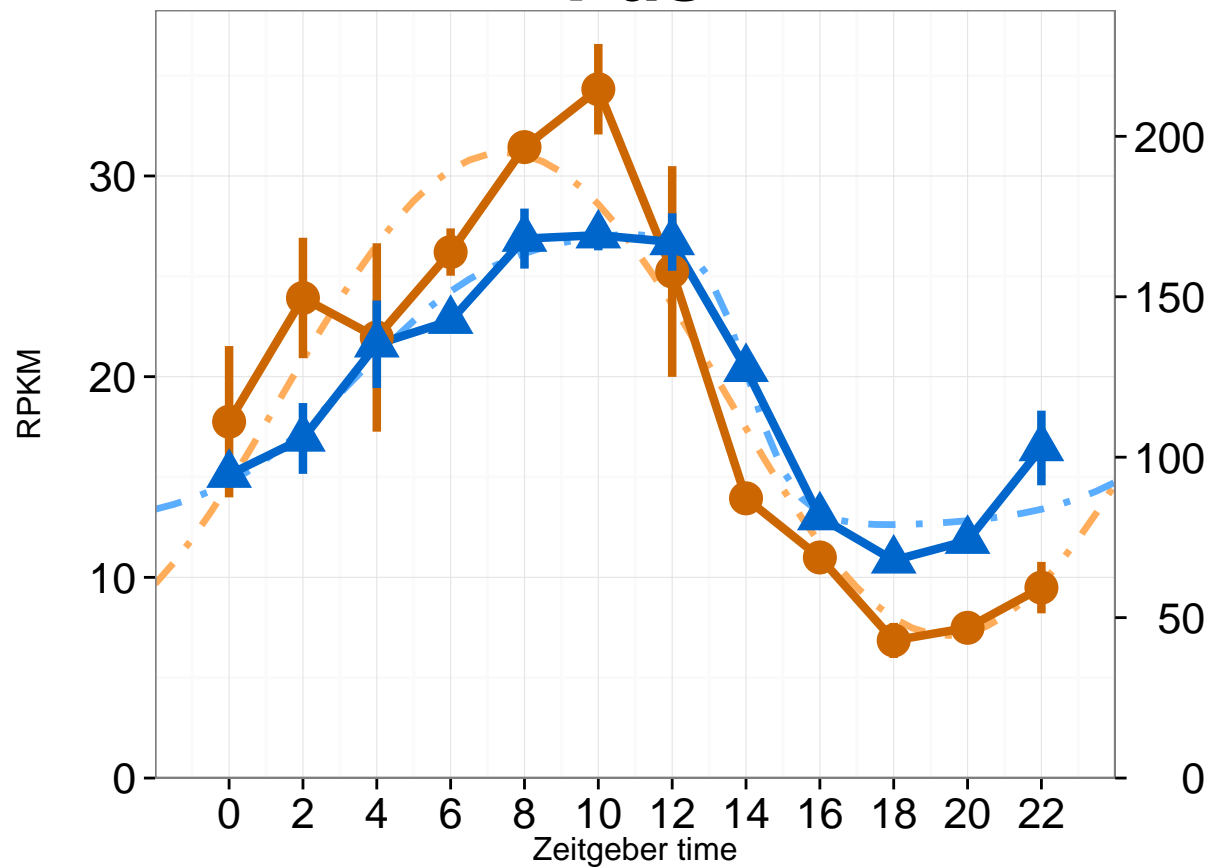

## Fus

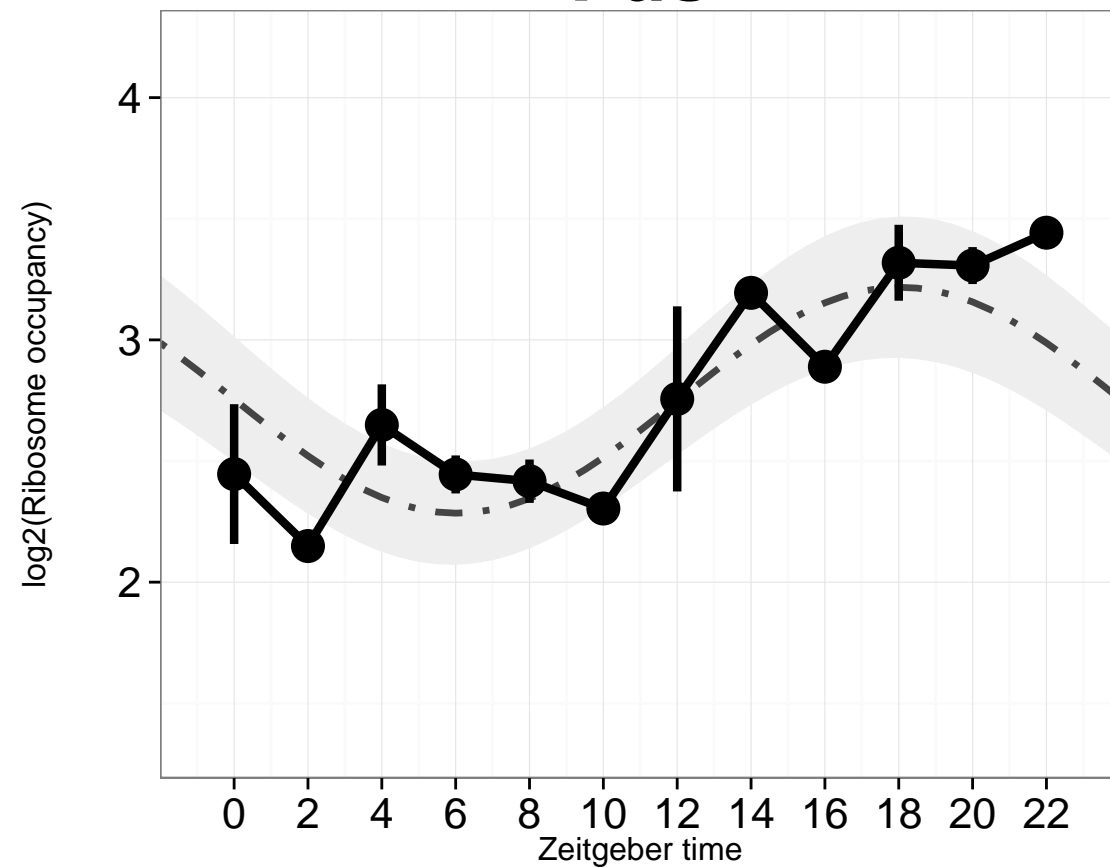

Supplement: Supplementary file 3571 [file 1]

# Kcnh2

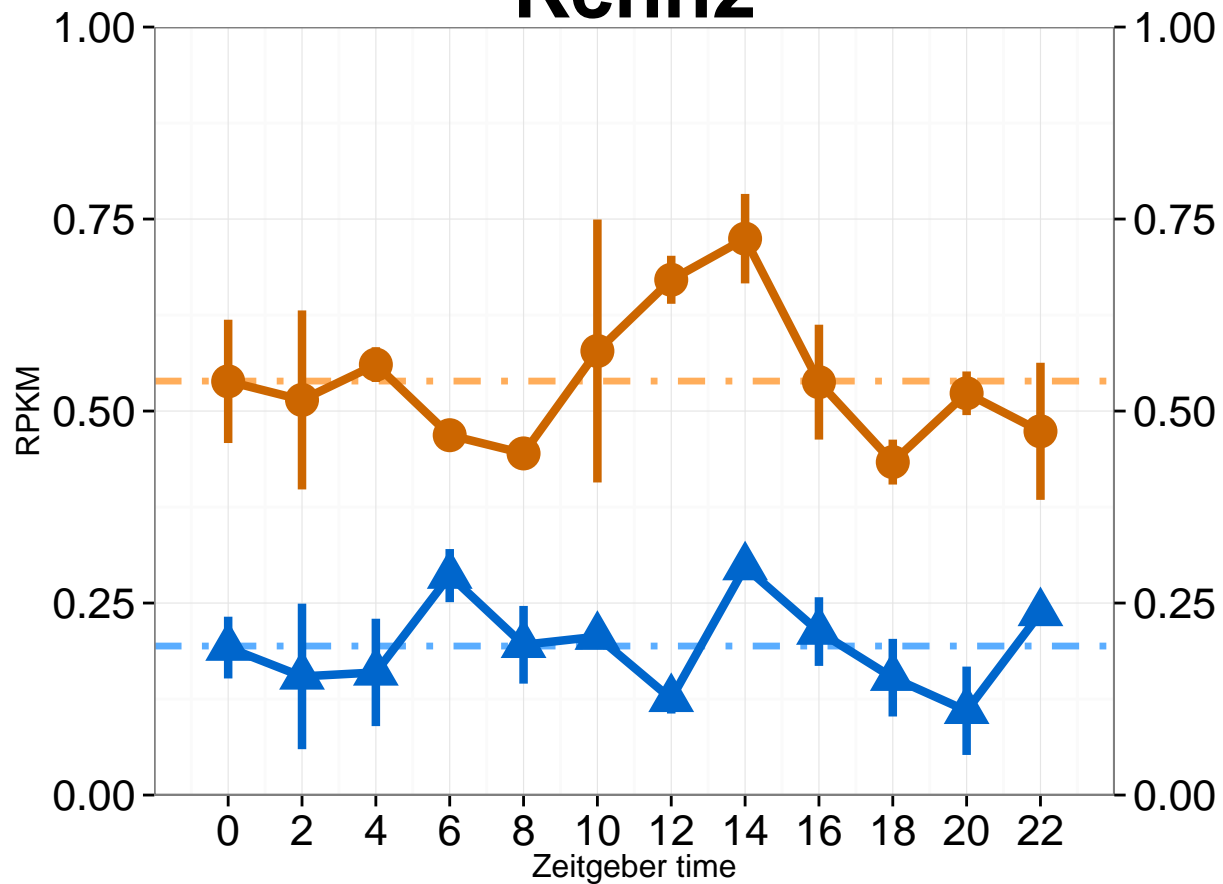

# Kcnh2

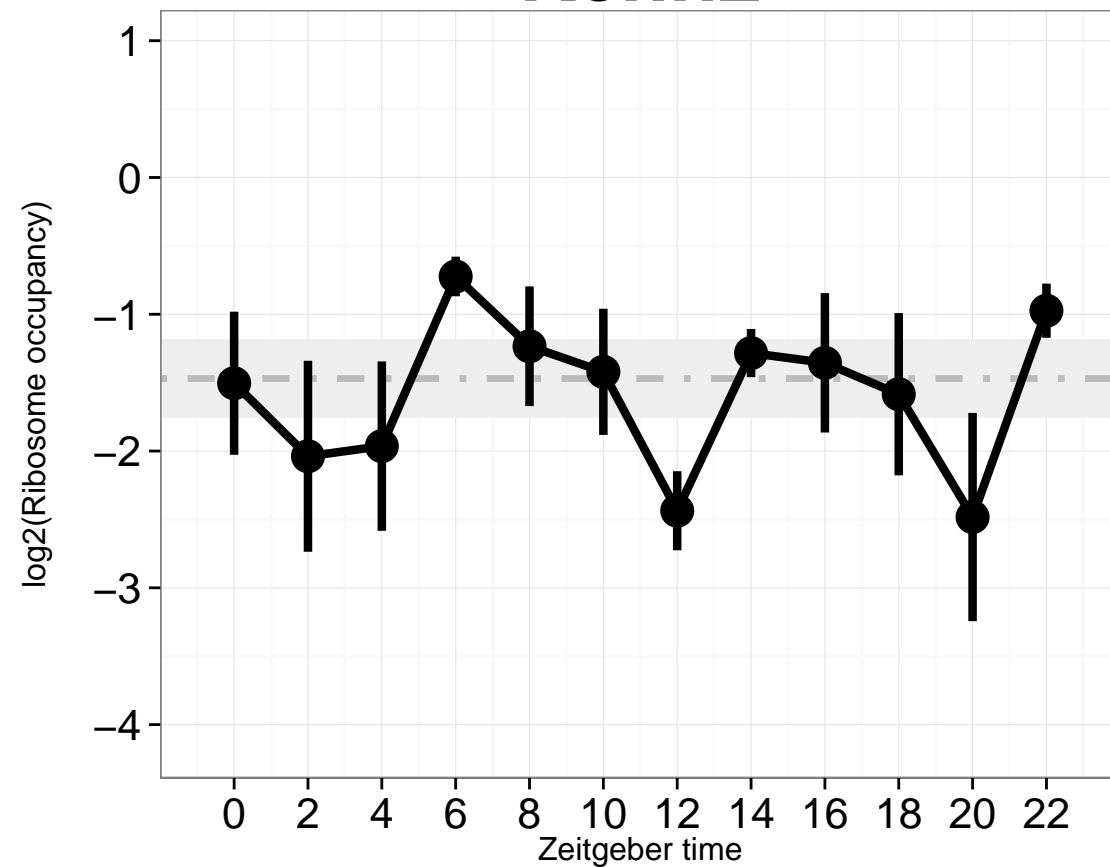

Supplement: Supplementary file 3572 [file 1]

# Rassf5

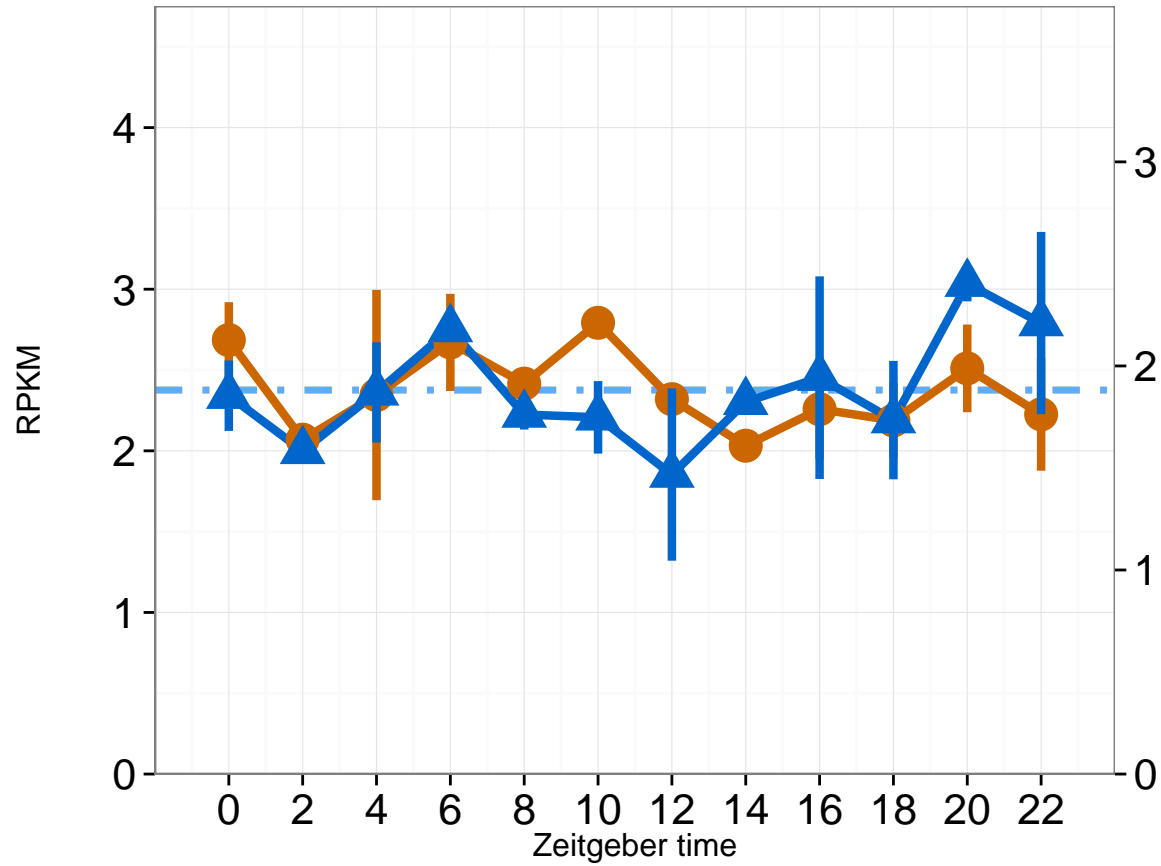

# Rassf5

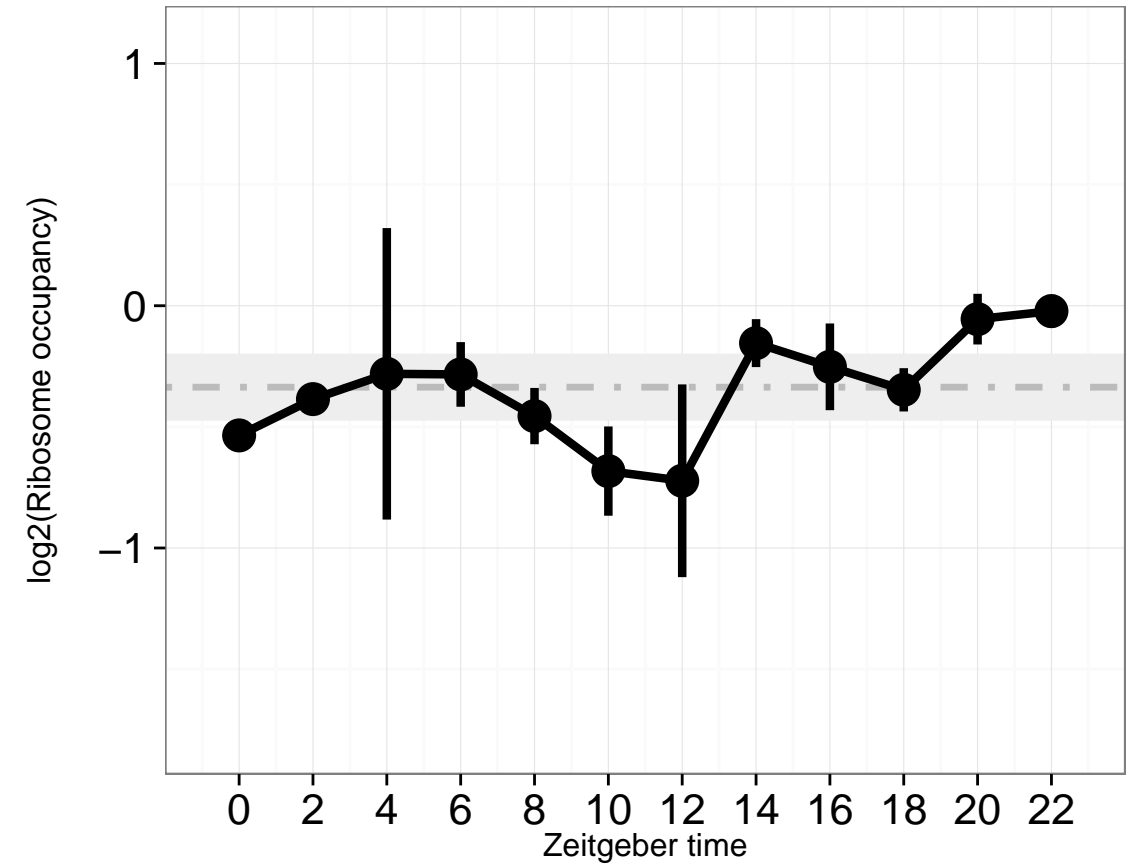

Supplement: Supplementary file 3573 [file 1]

## Ndor1

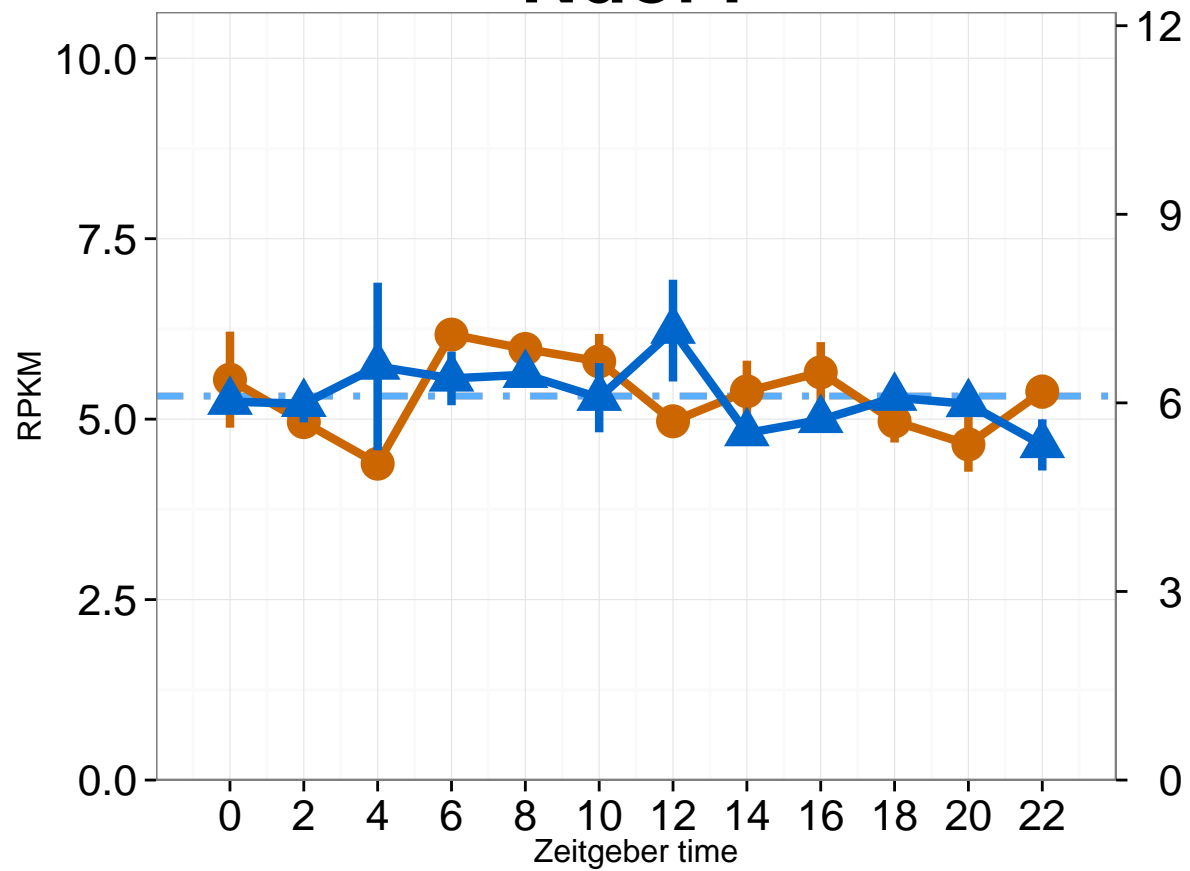

## Ndor1

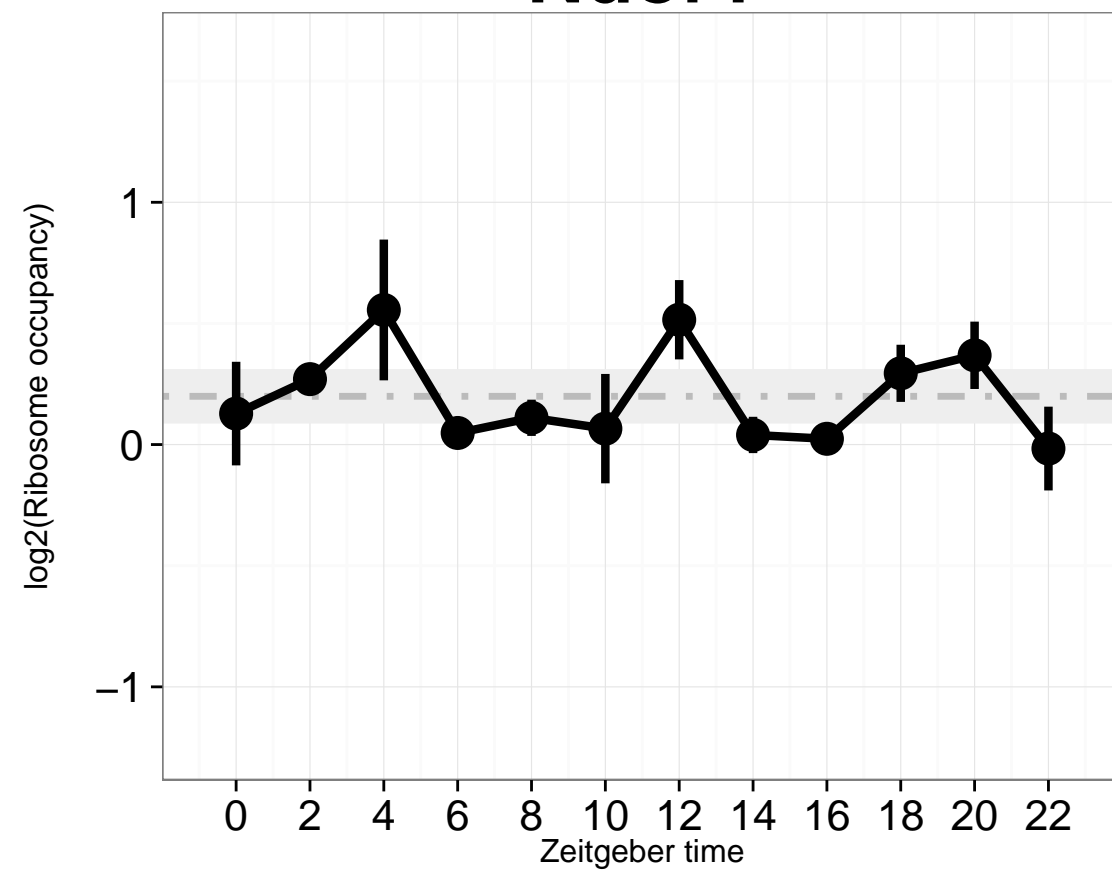

Supplement: Supplementary file 3574 [file 1]

# Zc3hav1l

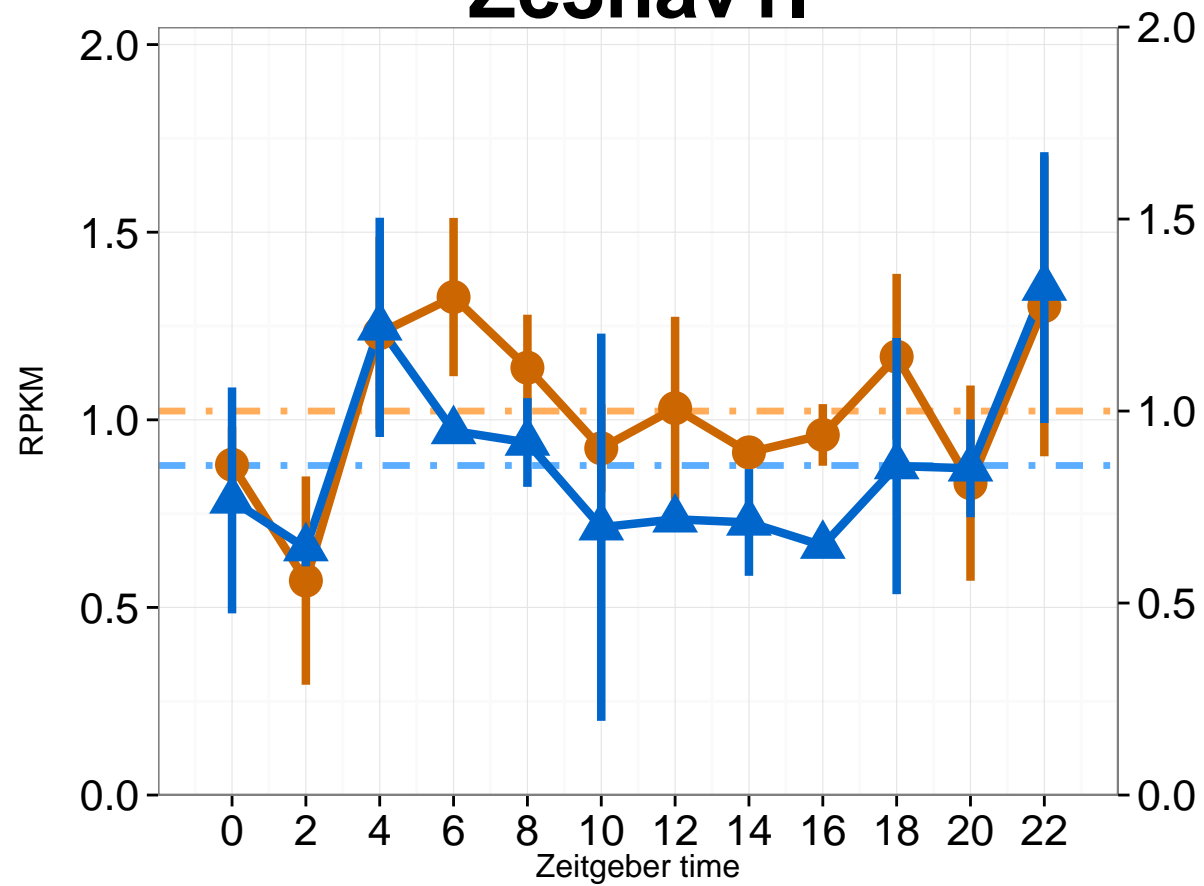

# Zc3hav1l

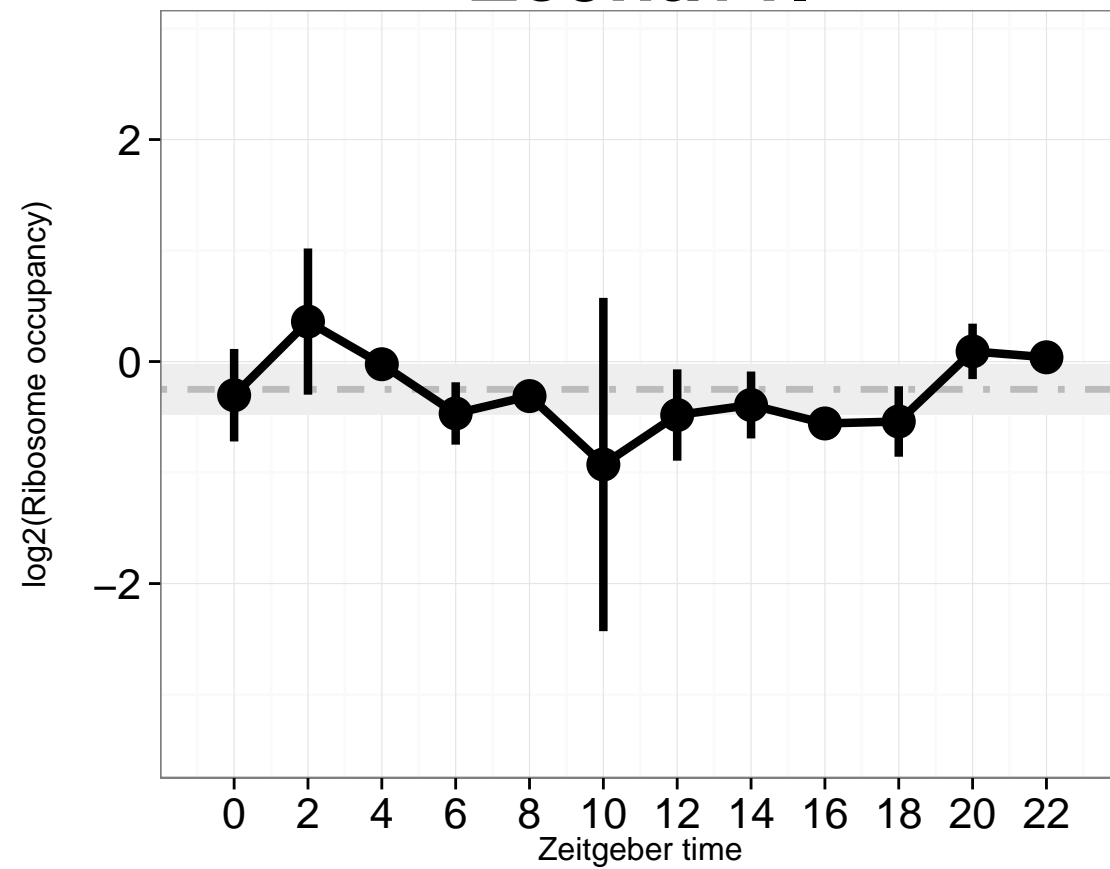

Supplement: Supplementary file 3575 [file 1]

## Cops3

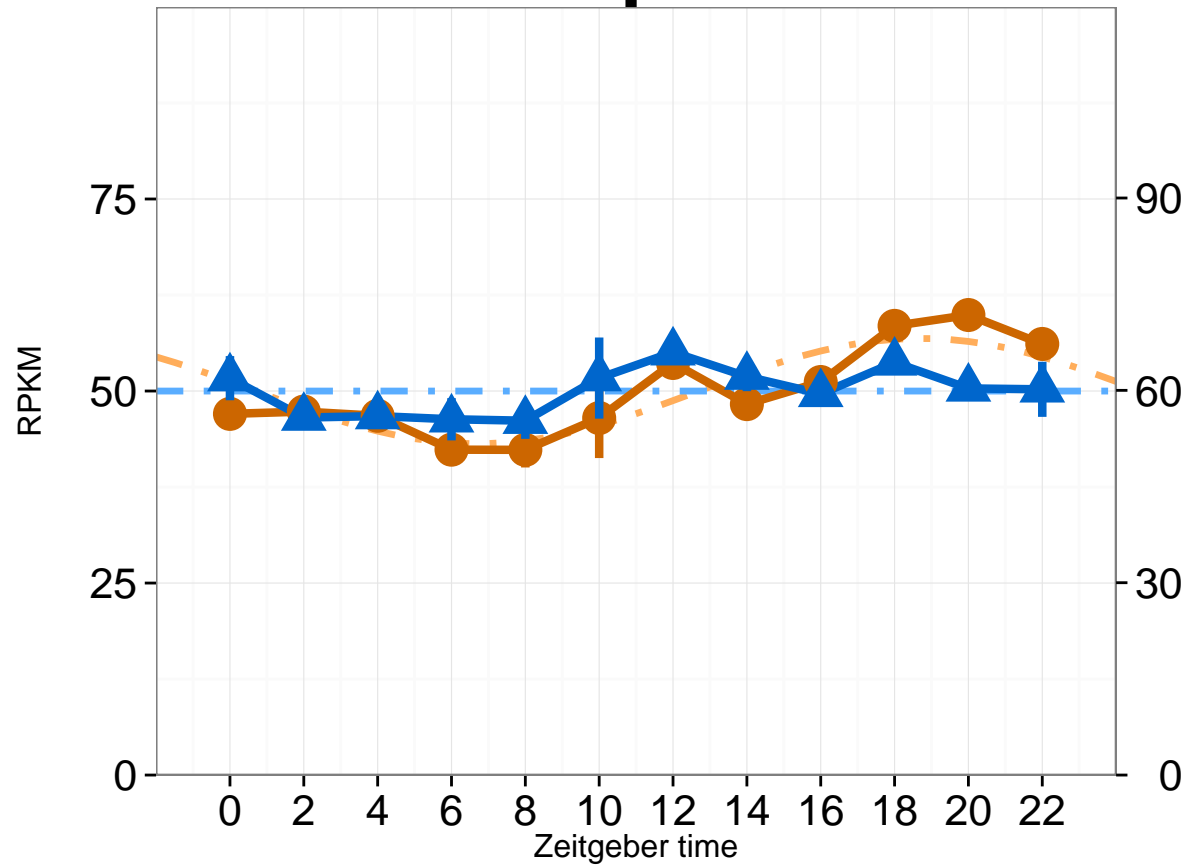

## Cops3

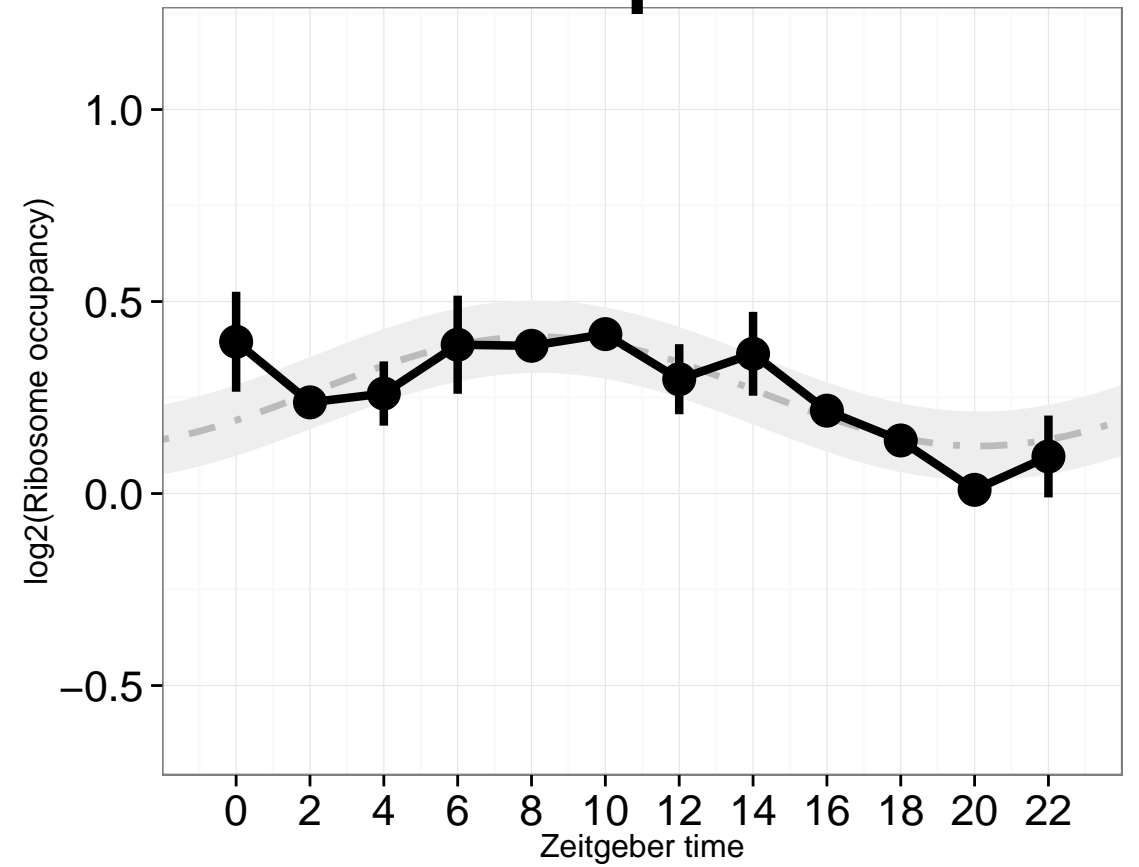

Supplement: Supplementary file 3576 [file 1]

## Cdk13

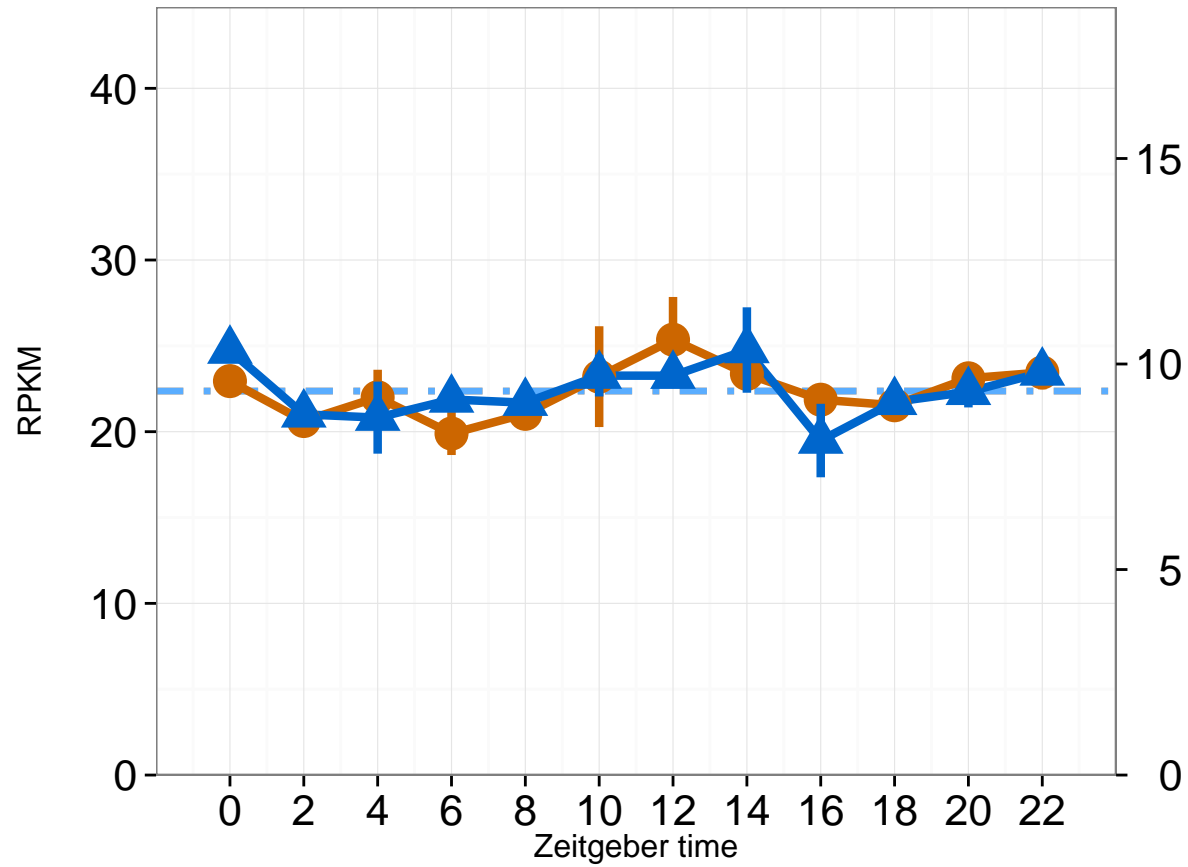

## Cdk13

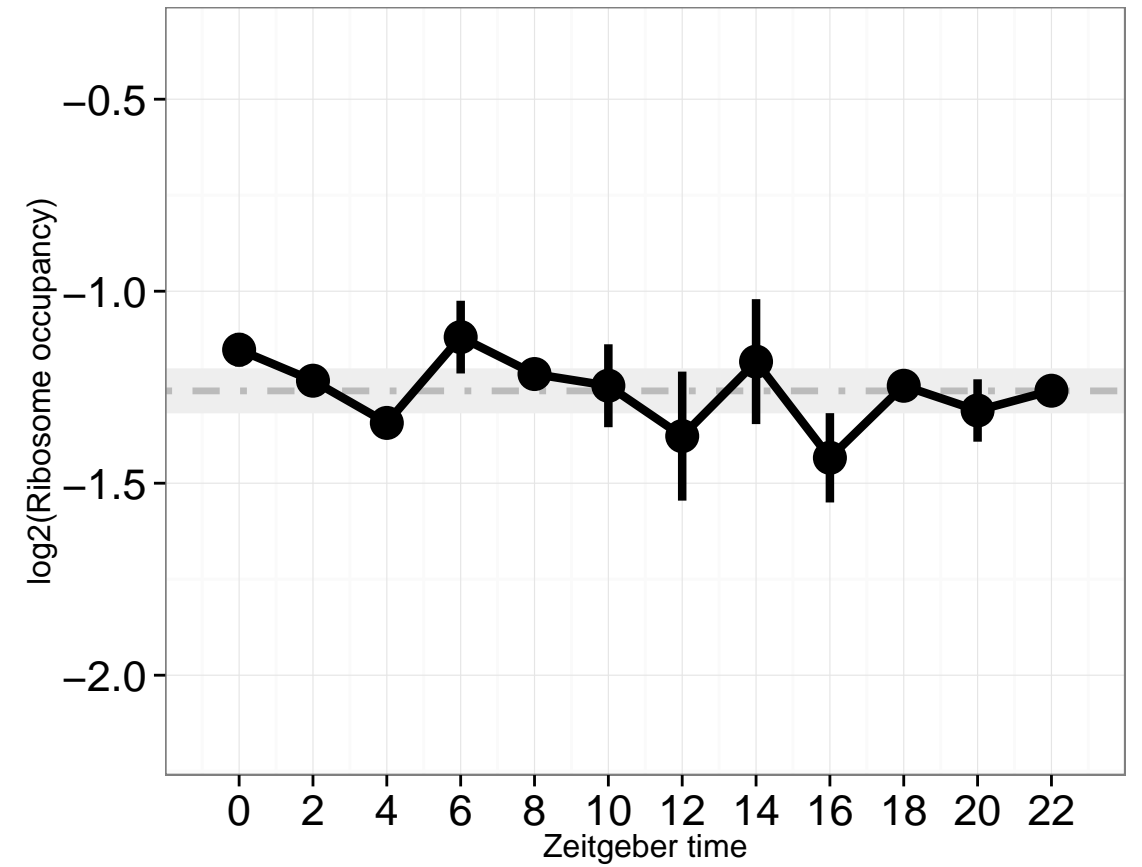

Supplement: Supplementary file 3577 [file 1]

# Slc5a6

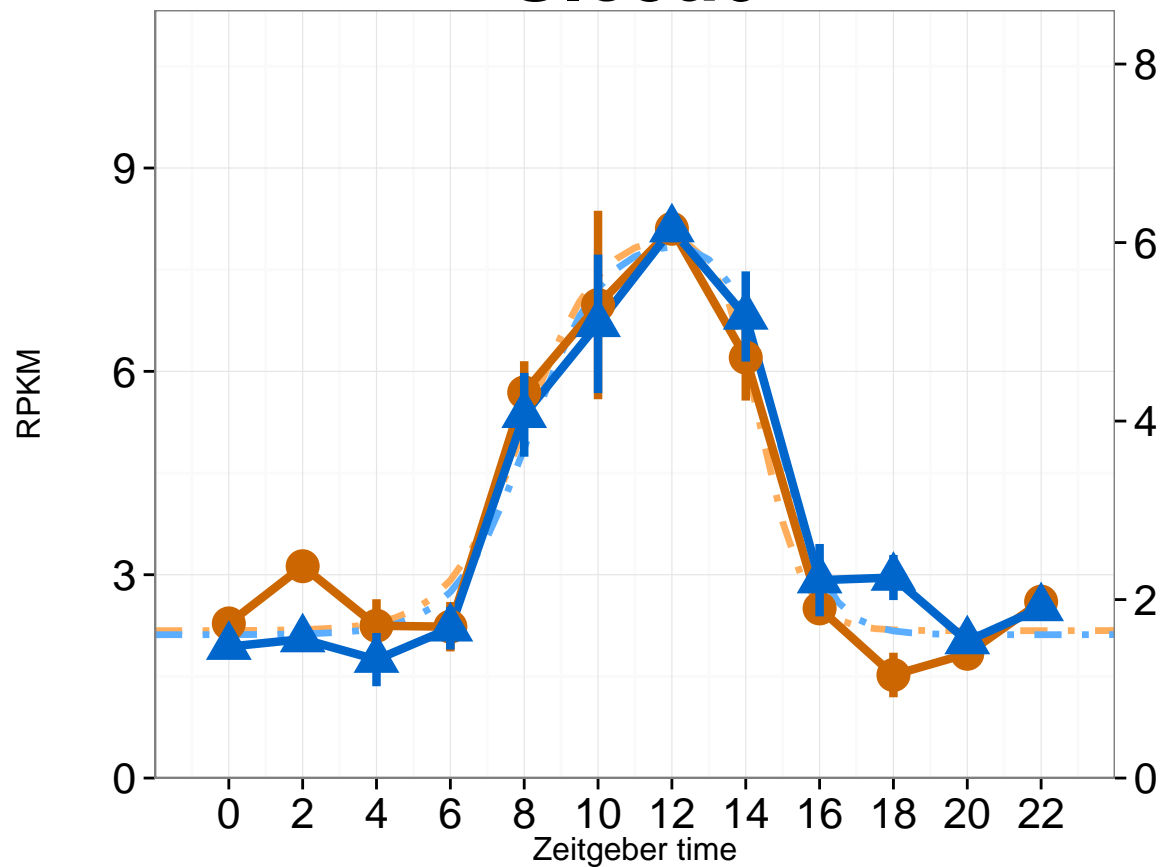

# Slc5a6

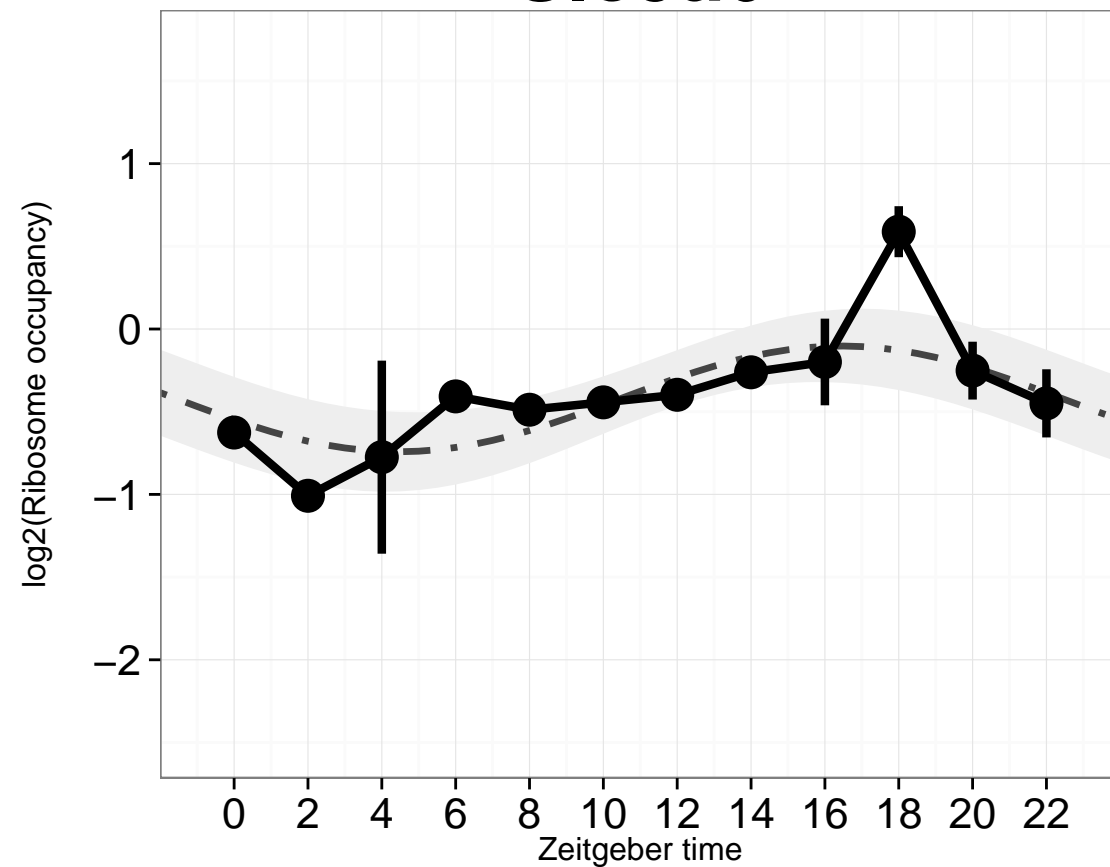

Supplement: Supplementary file 3578 [file 1]

# Tbc1d9

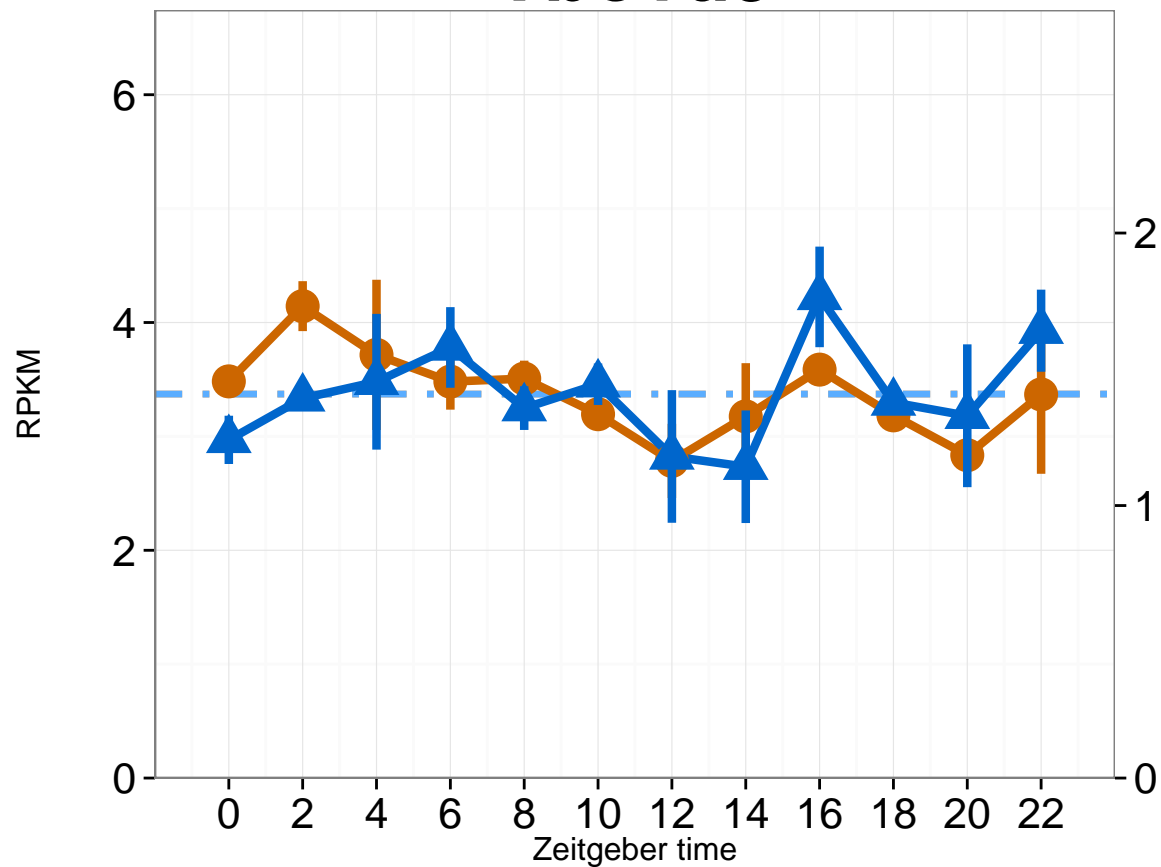

# Tbc1d9

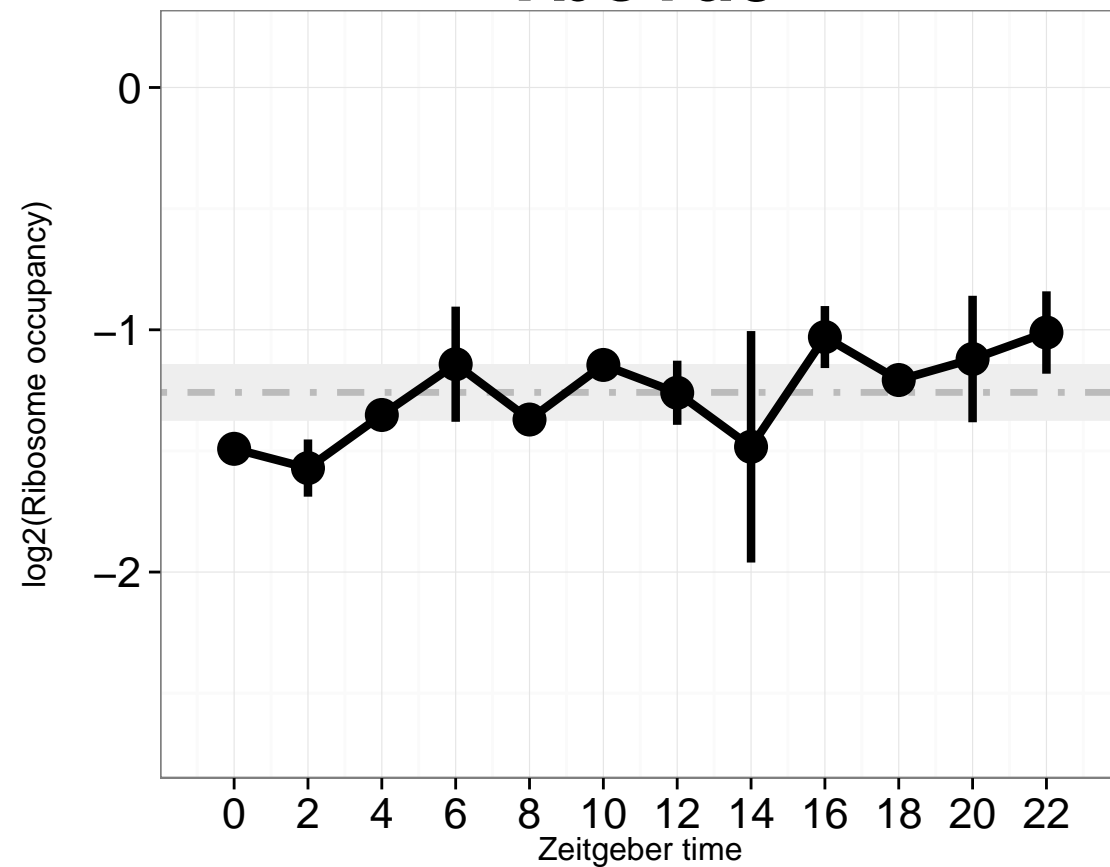

Supplement: Supplementary file 3579 [file 1]

# Rpl36a

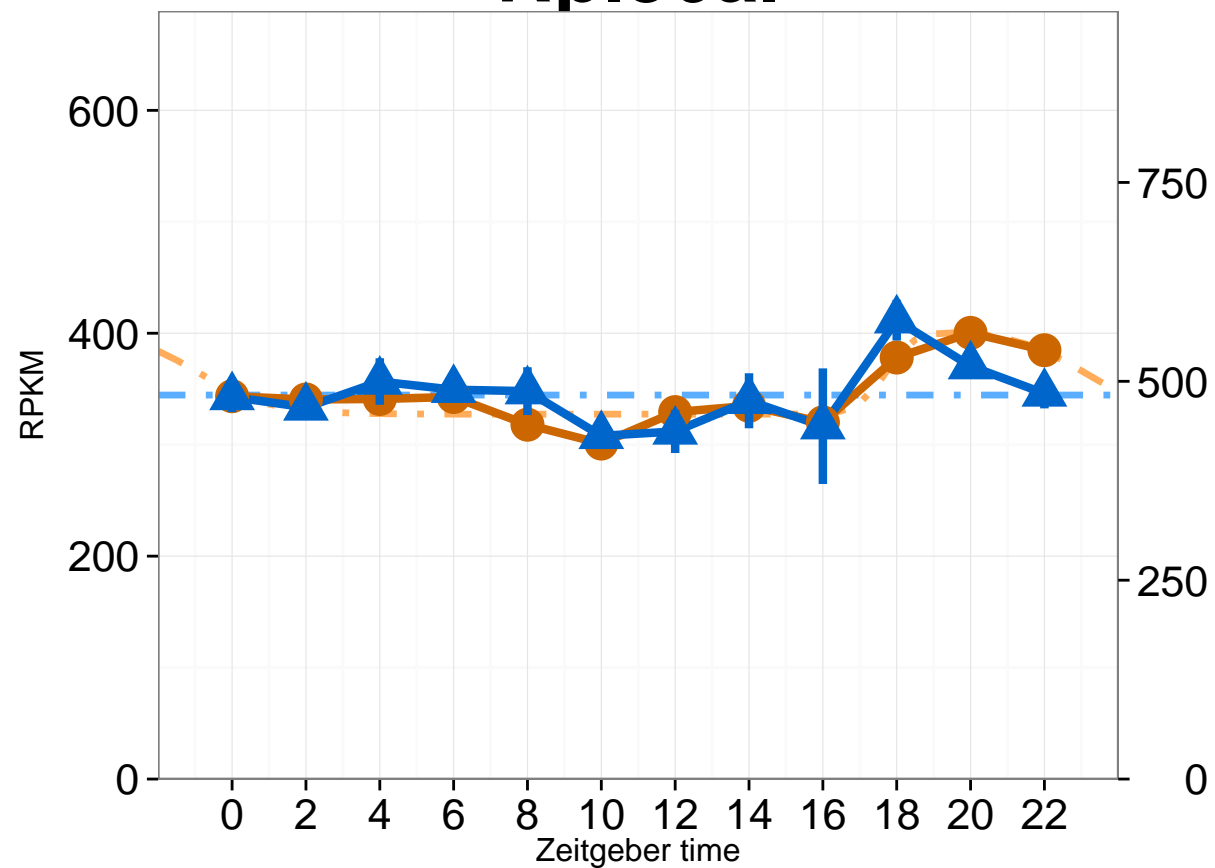

# Rpl36a

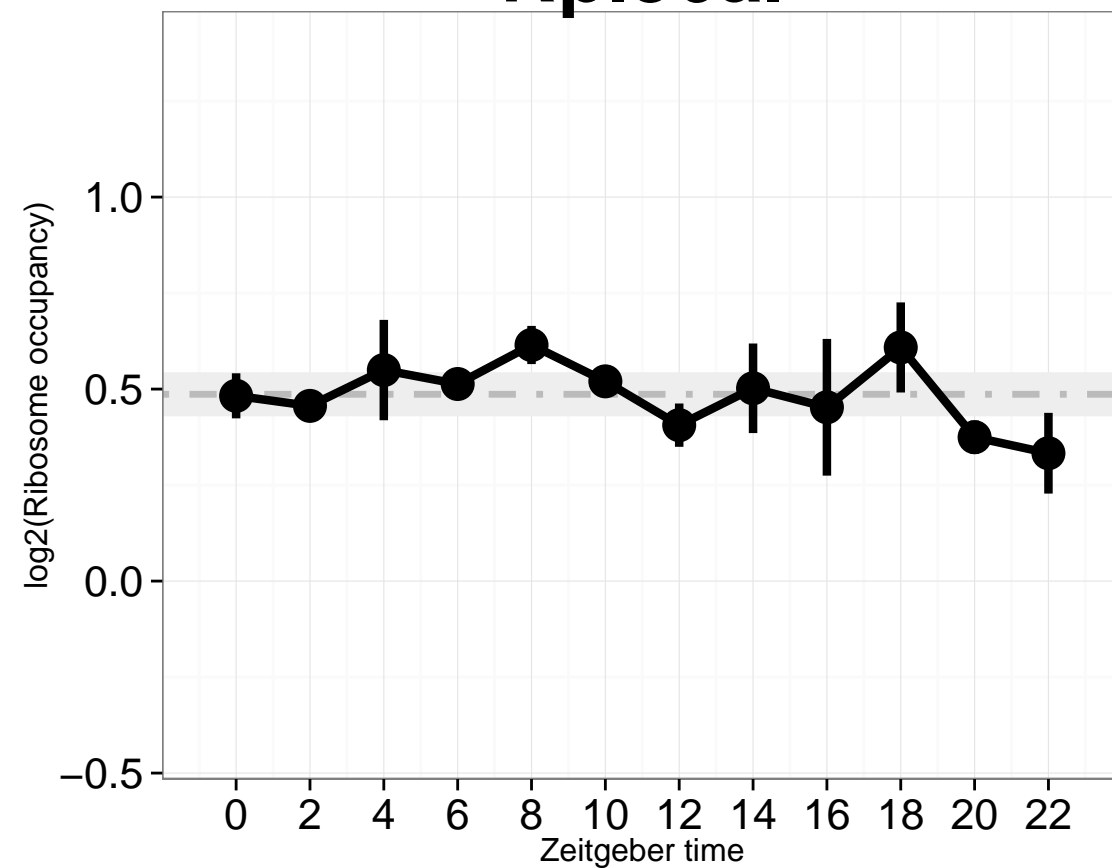

Supplement: Supplementary file 3580 [file 1]

## Lims1

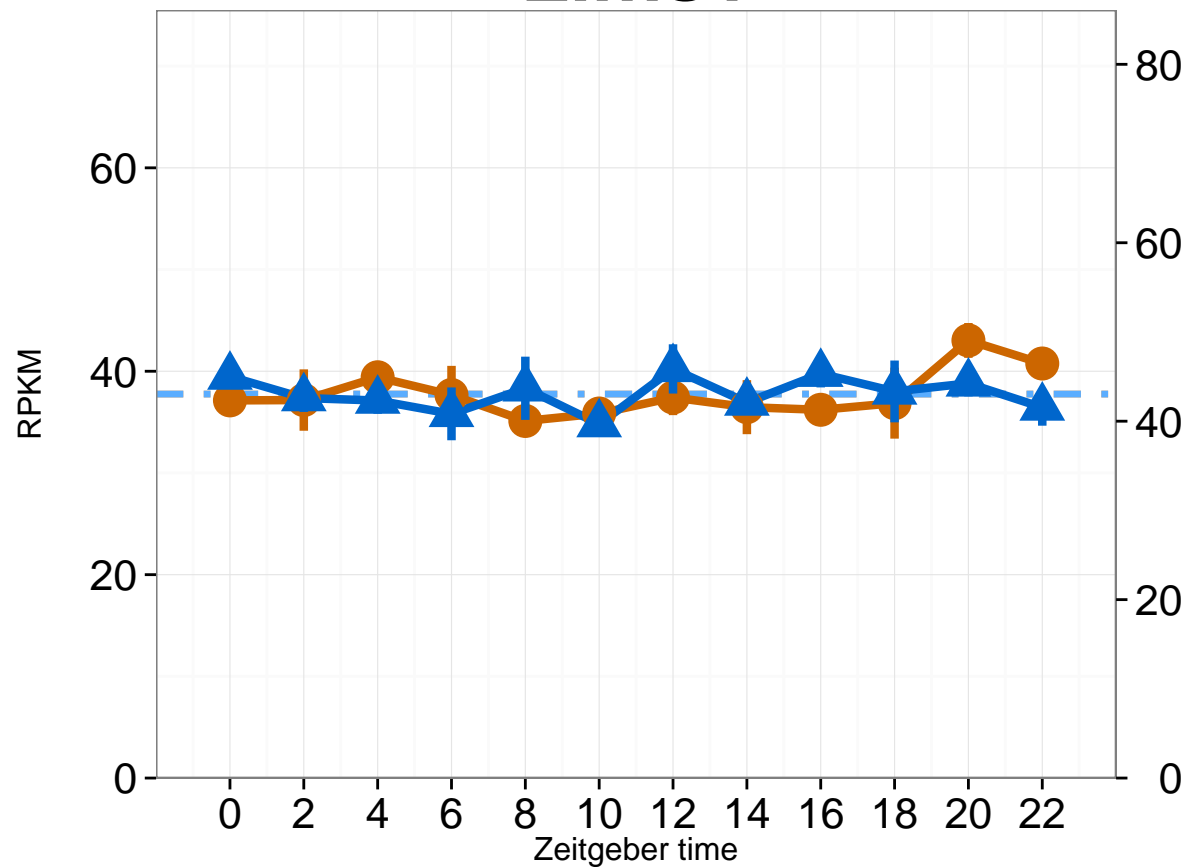

## Lims1

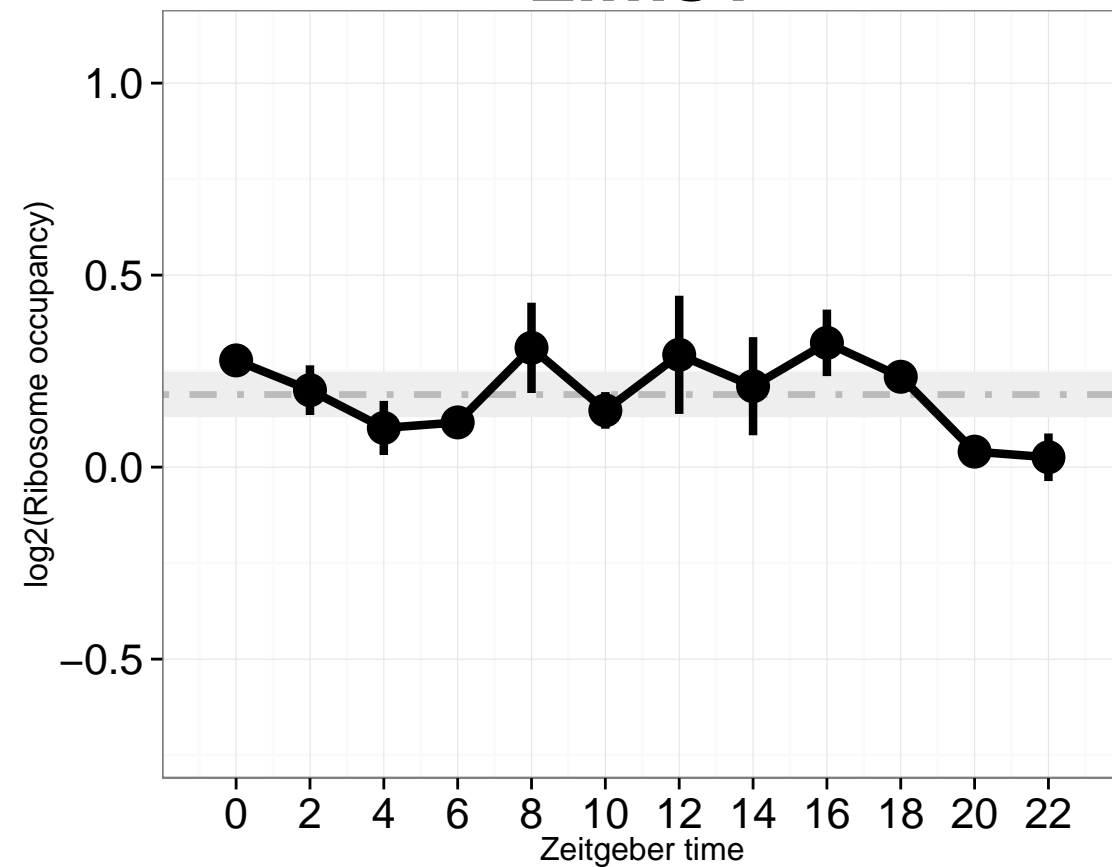

Supplement: Supplementary file 3581 [file 1]

## Gm16515

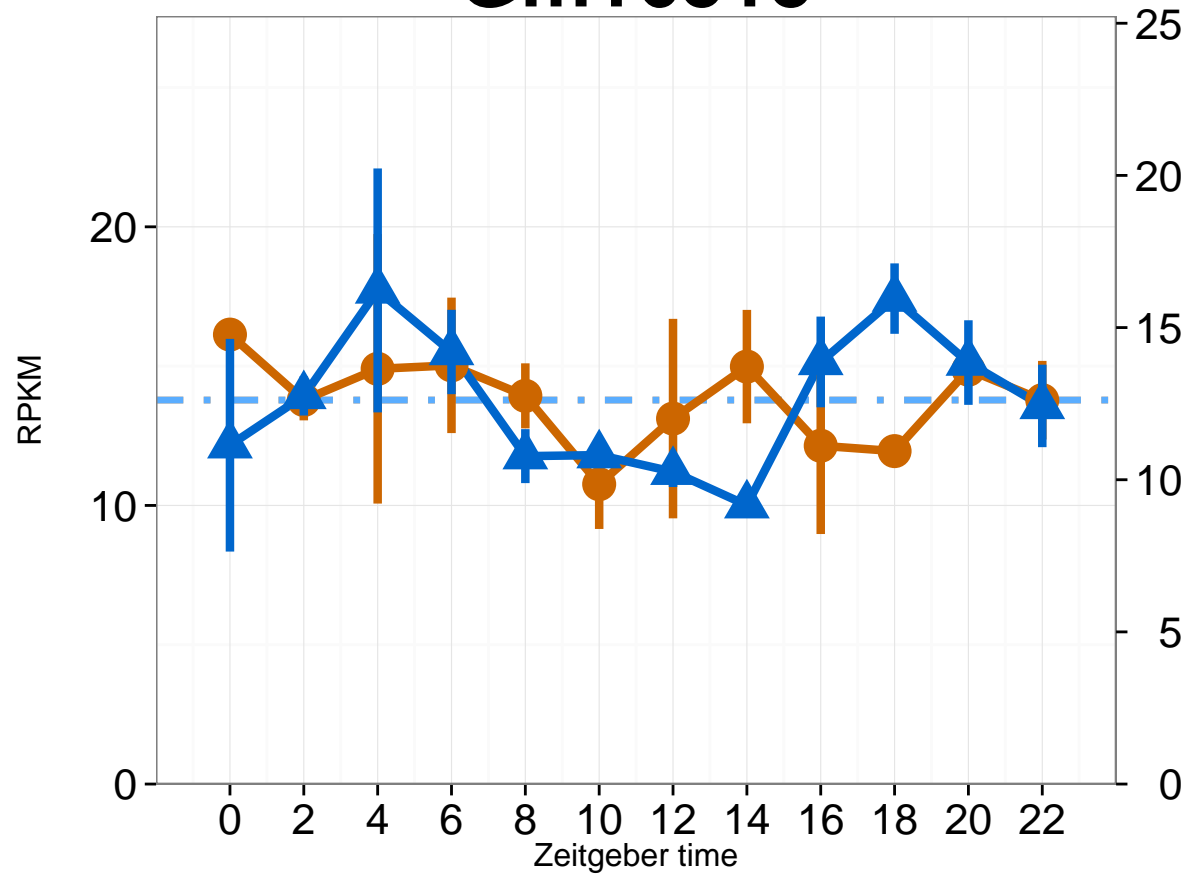

## Gm16515

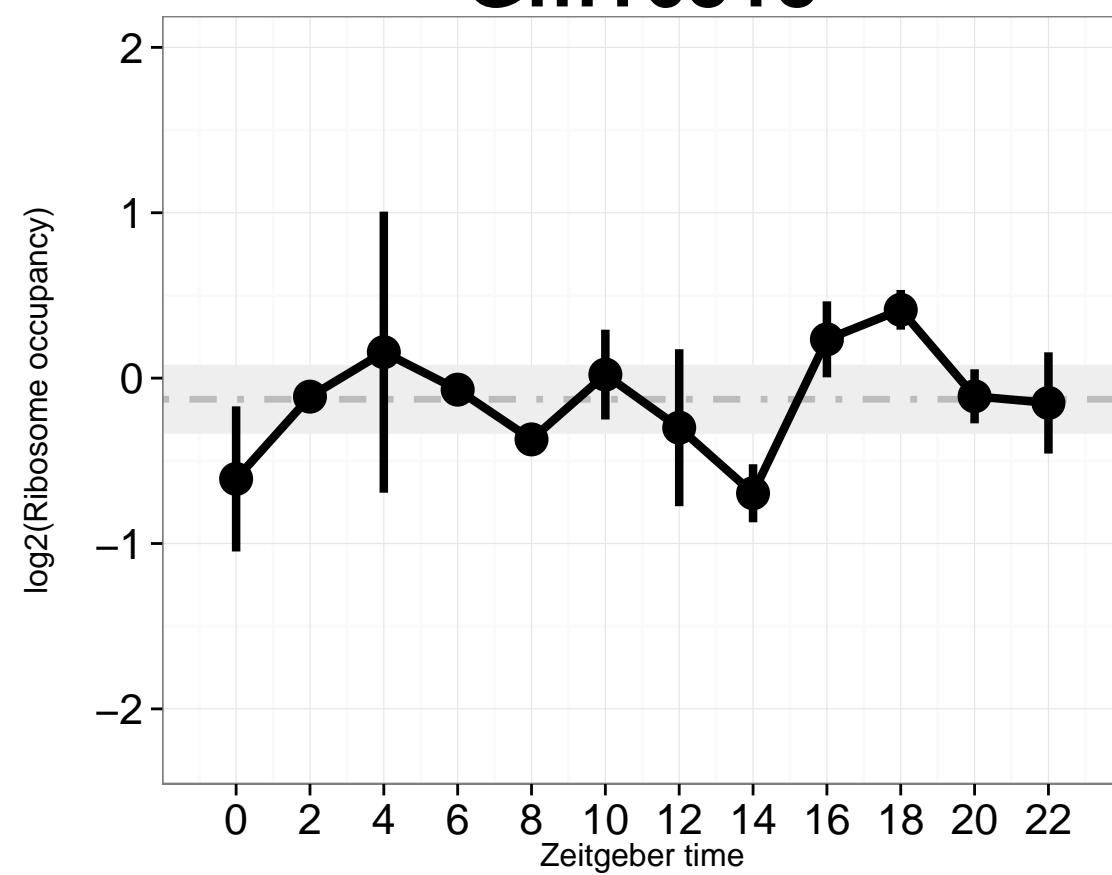

Supplement: Supplementary file 3582 [file 1]

# St3gal3

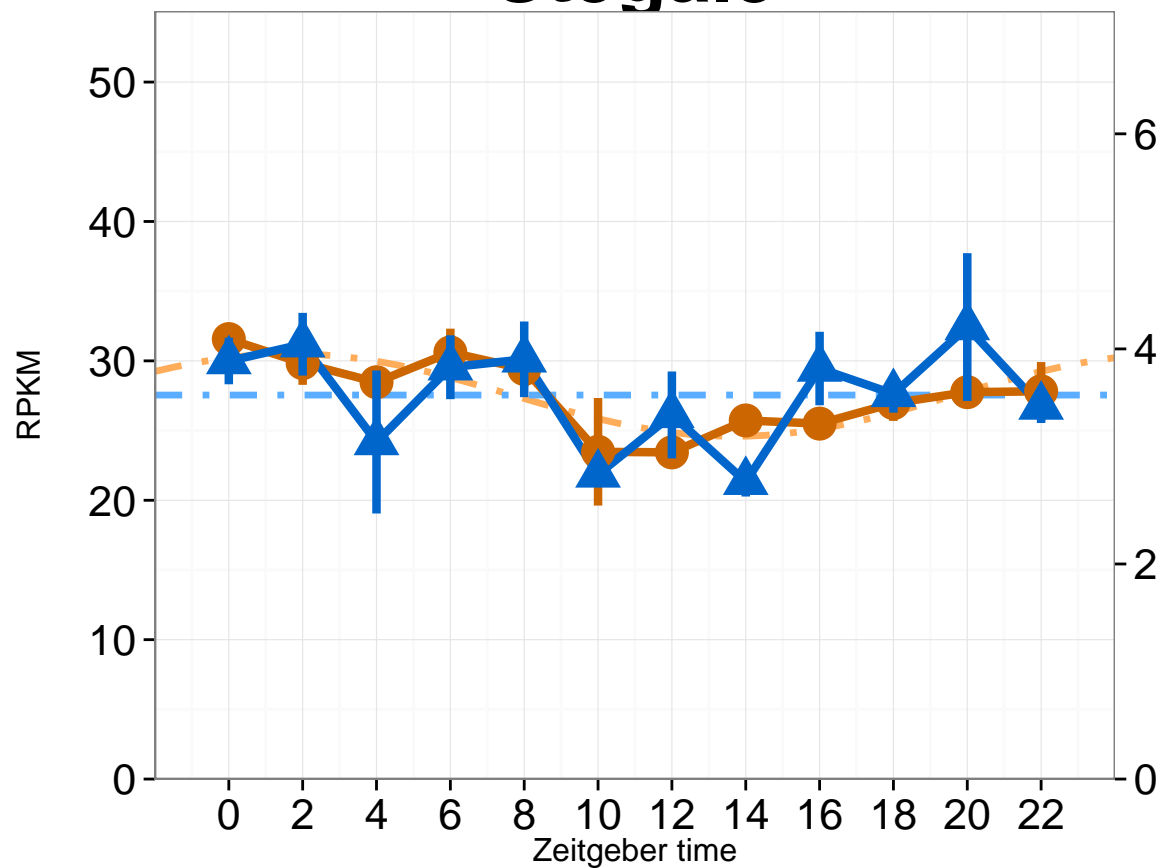

# St3gal3

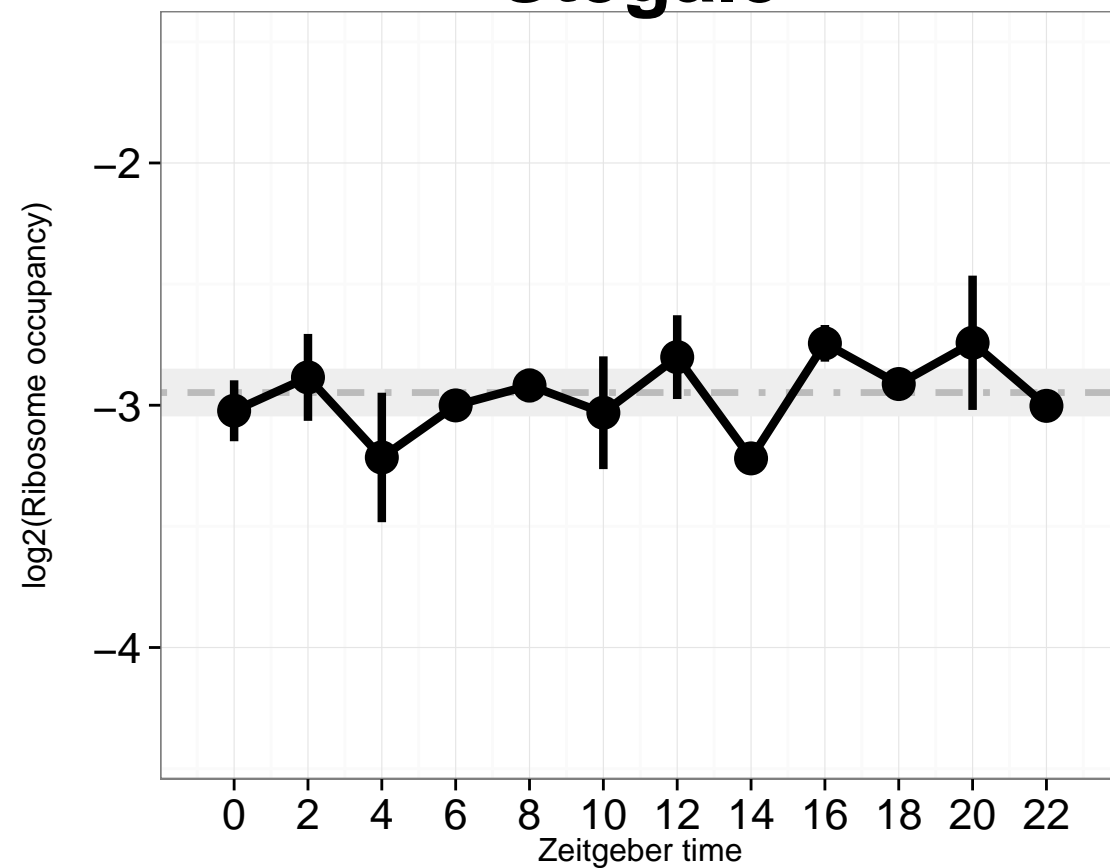

Supplement: Supplementary file 3583 [file 1]

# Usp54

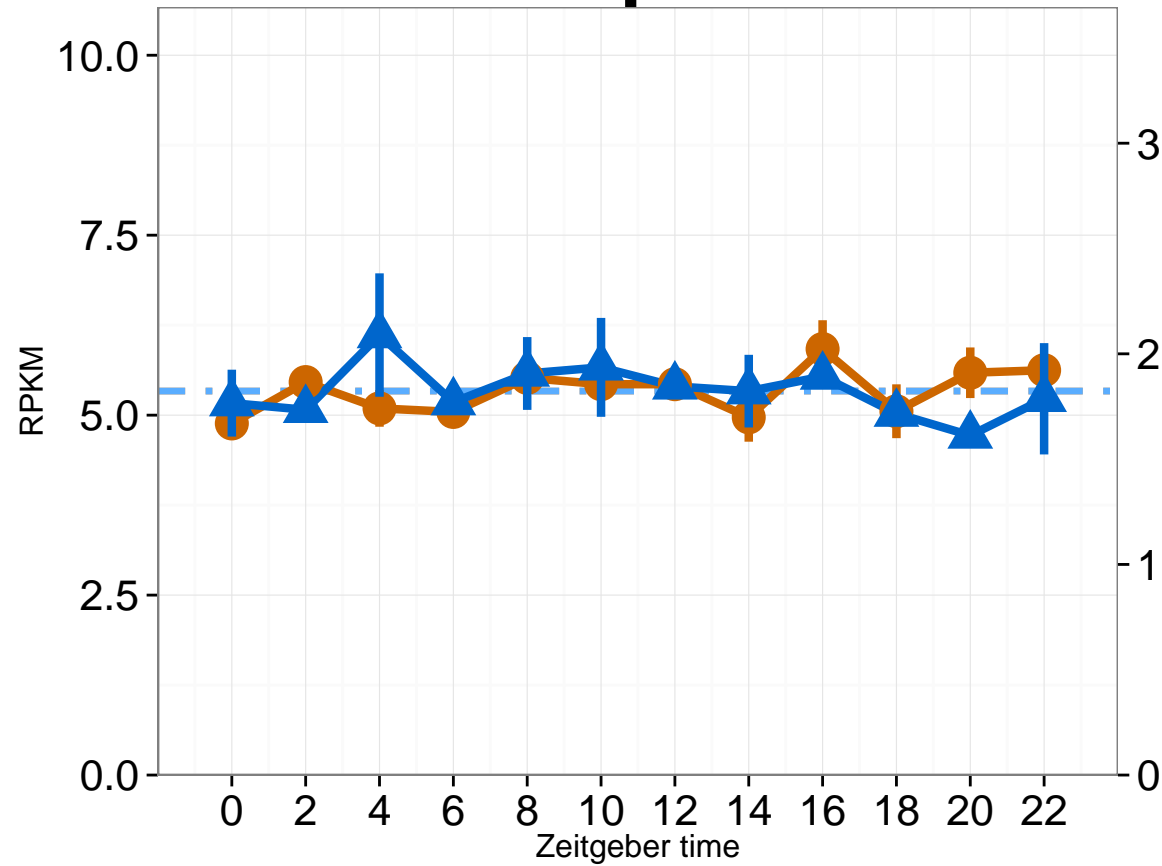

# Usp54

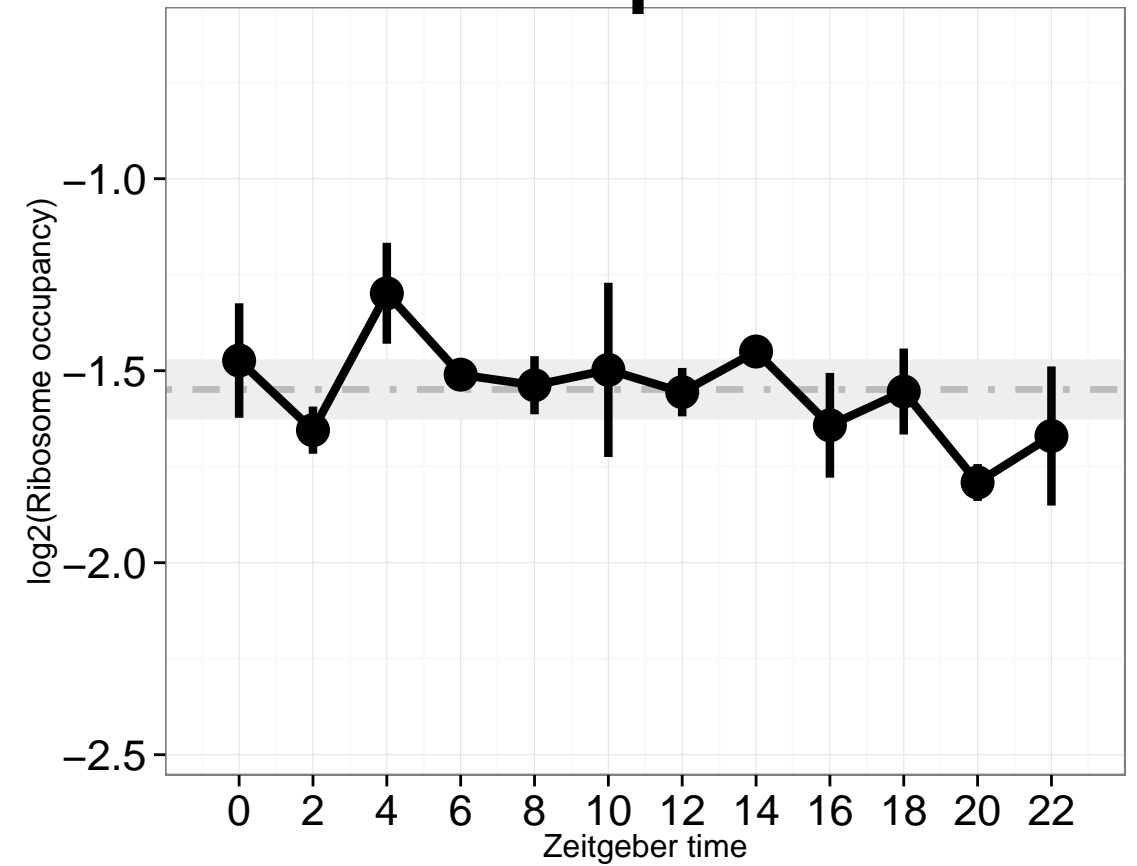

Supplement: Supplementary file 3584 [file 1]

## Zfp9

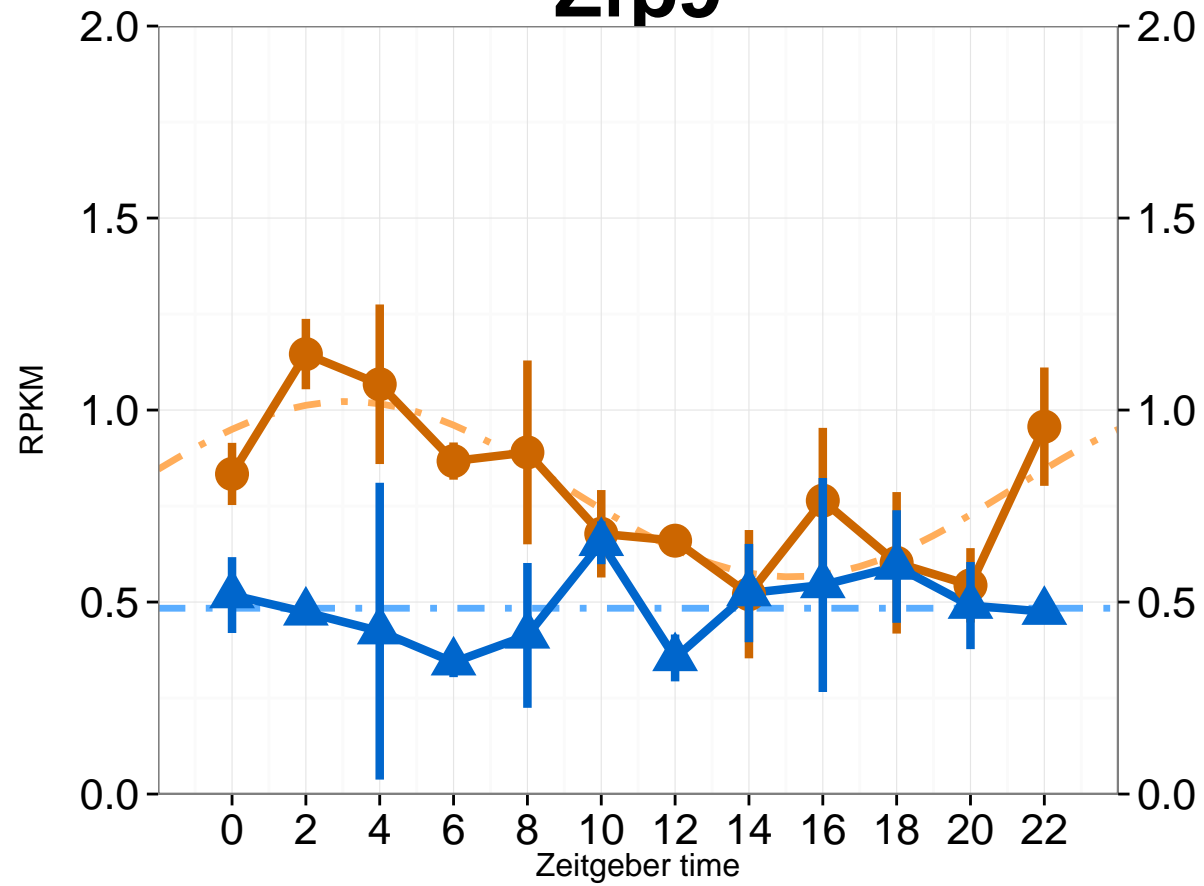

## Zfp9

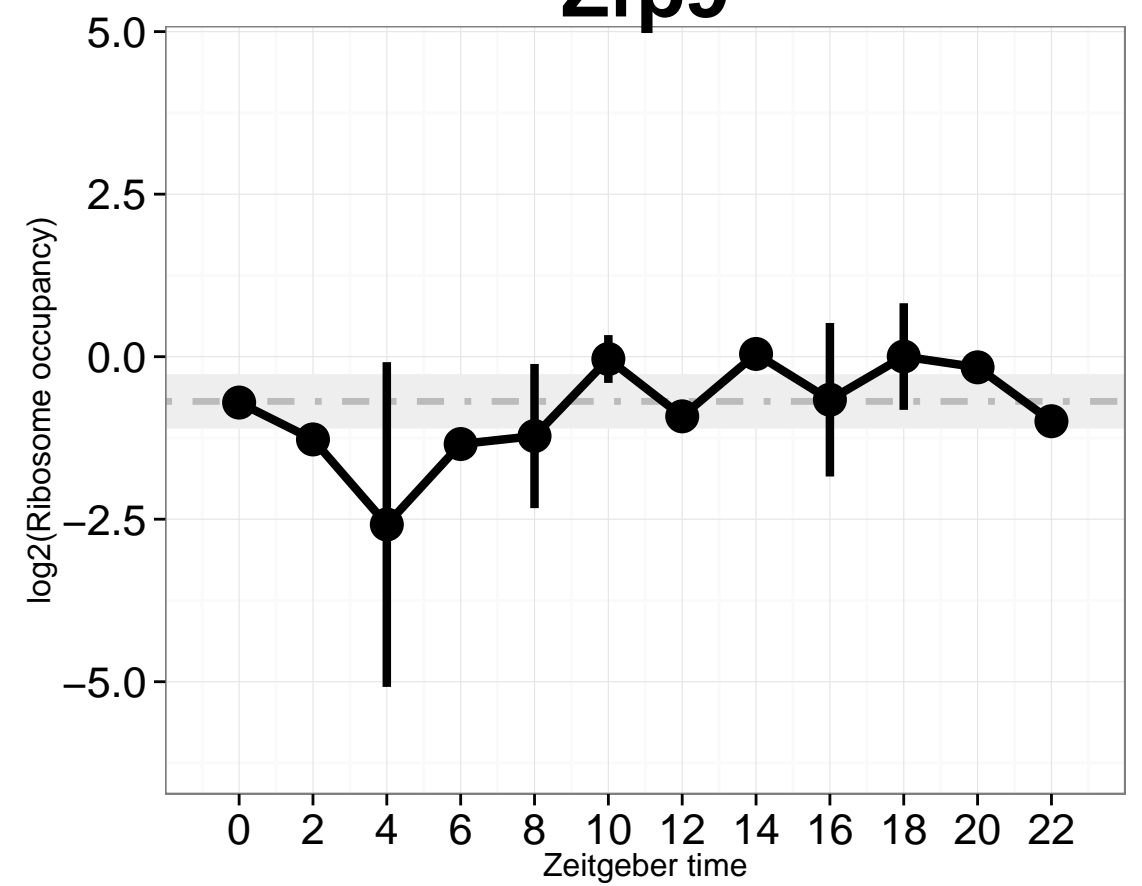

Supplement: Supplementary file 3585 [file 1]

2010111I01Rik

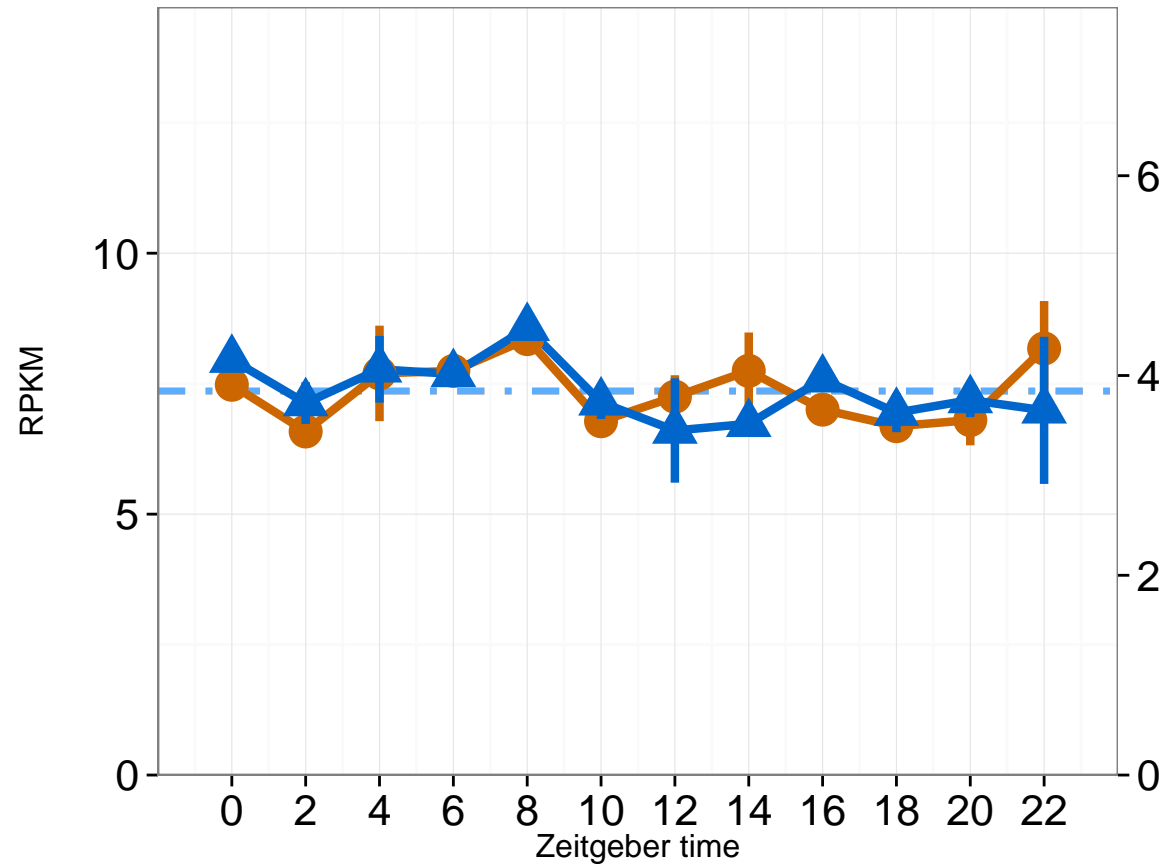

2010111I01Rik

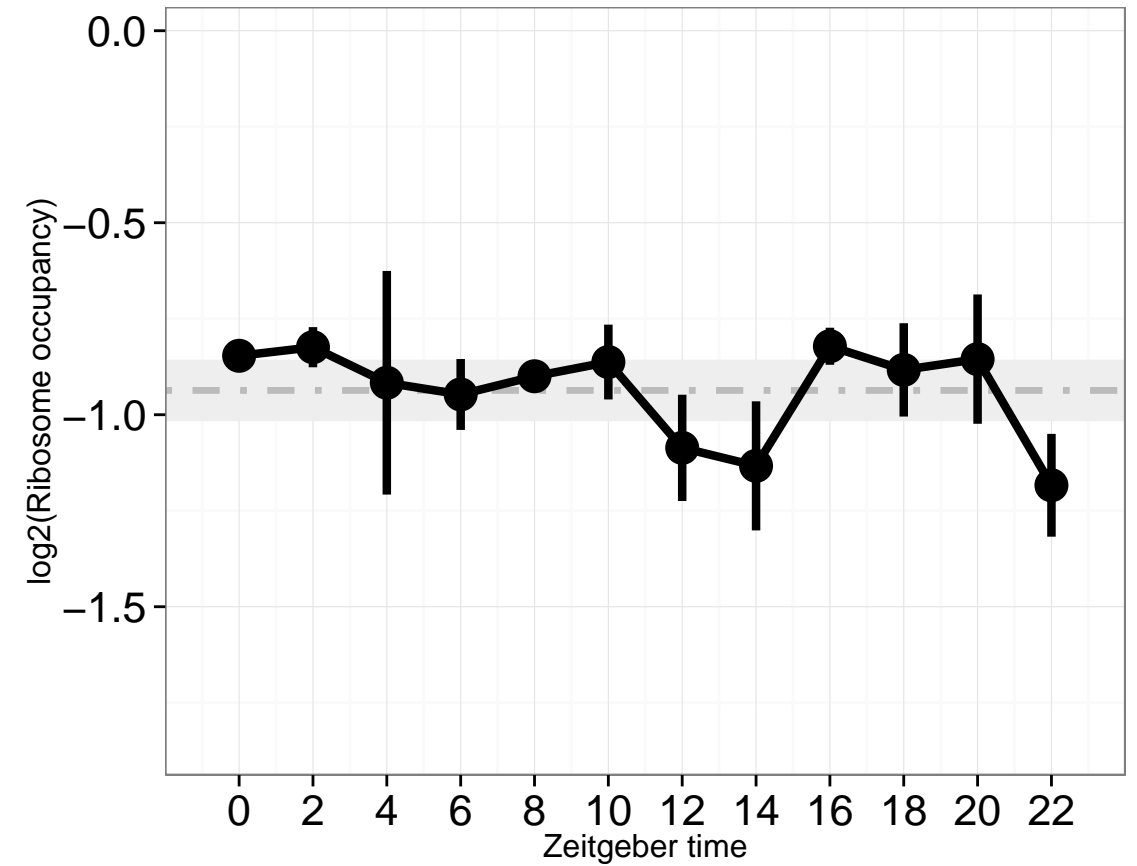

Supplement: Supplementary file 3586 [file 1]

# Rasef

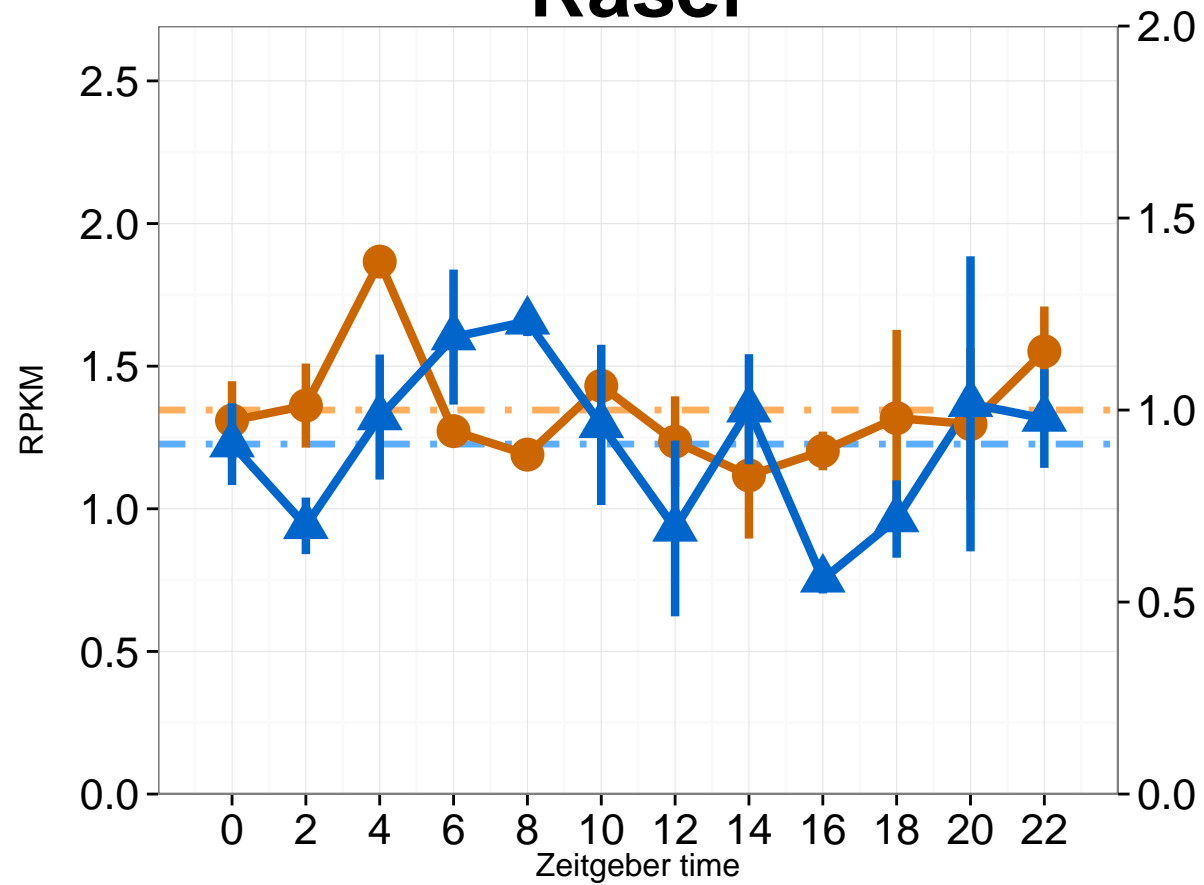

# Rasef

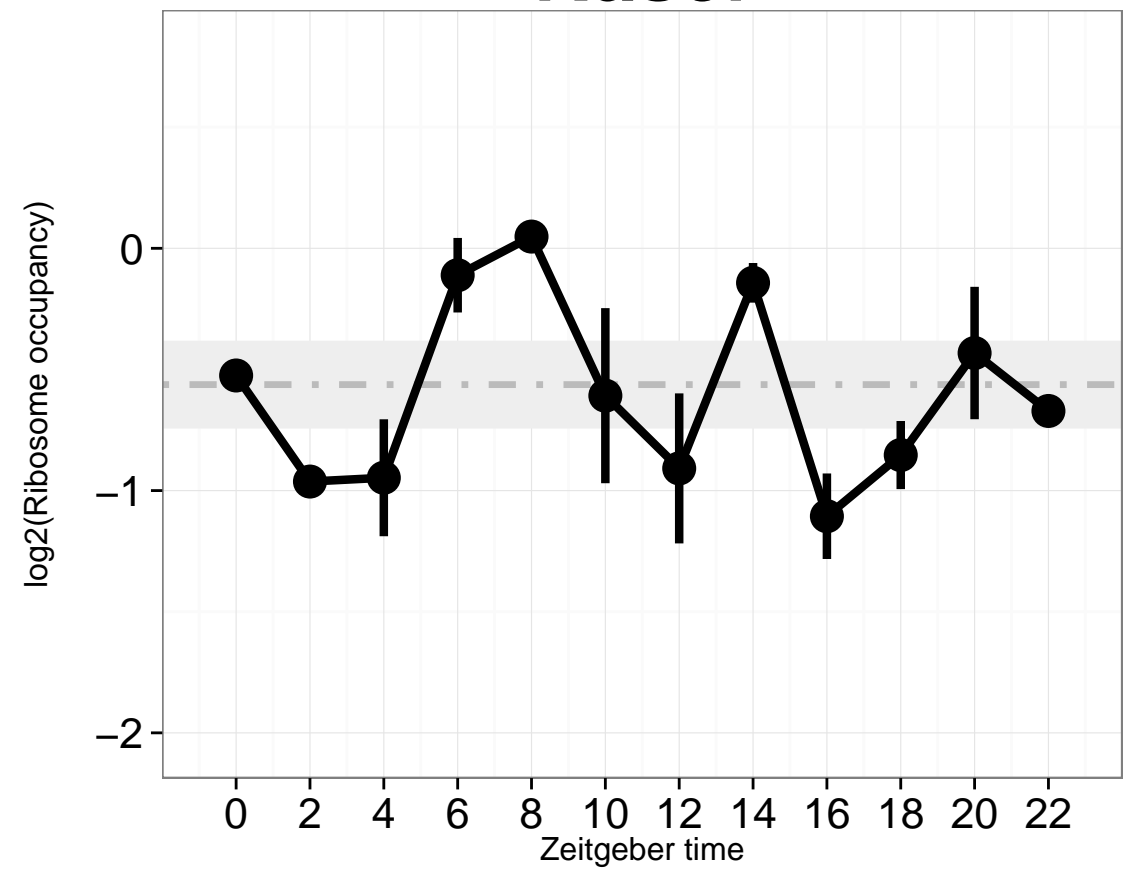

Supplement: Supplementary file 3587 [file 1]

## Sltm

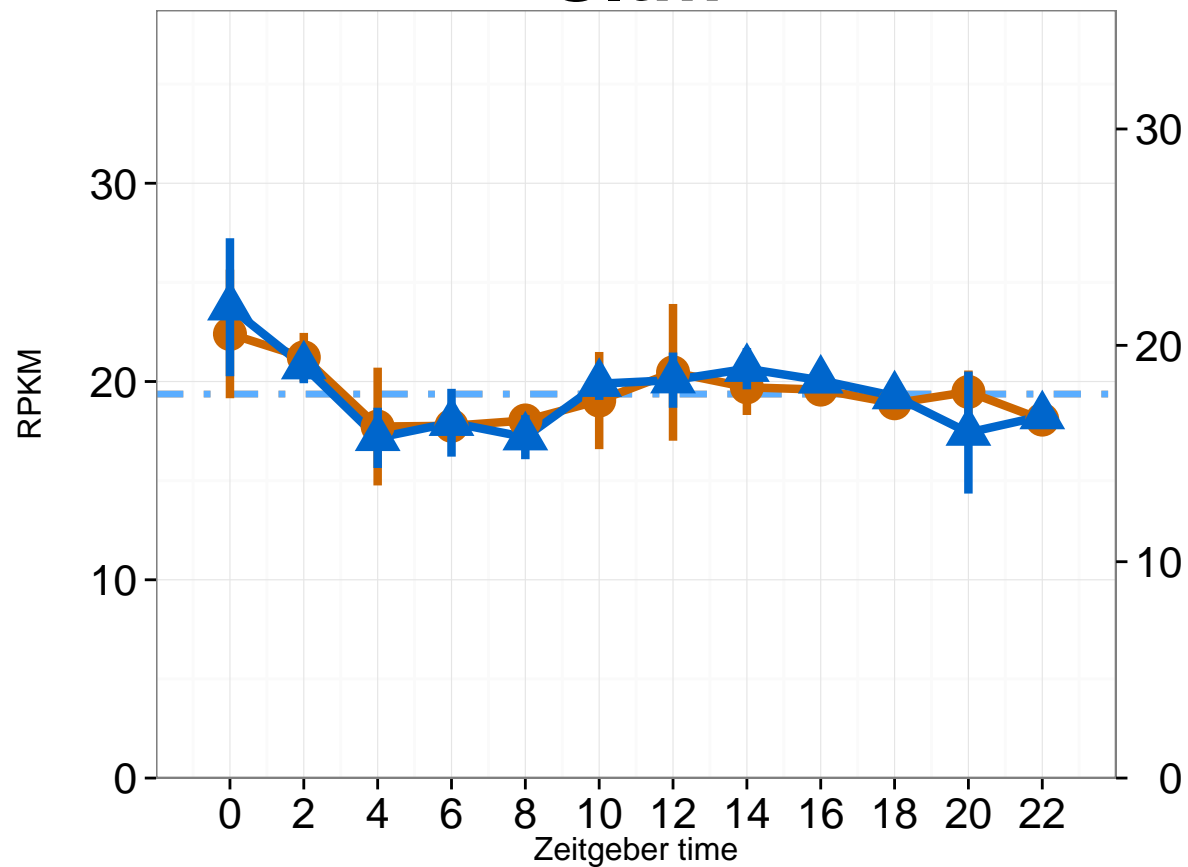

## Sltm

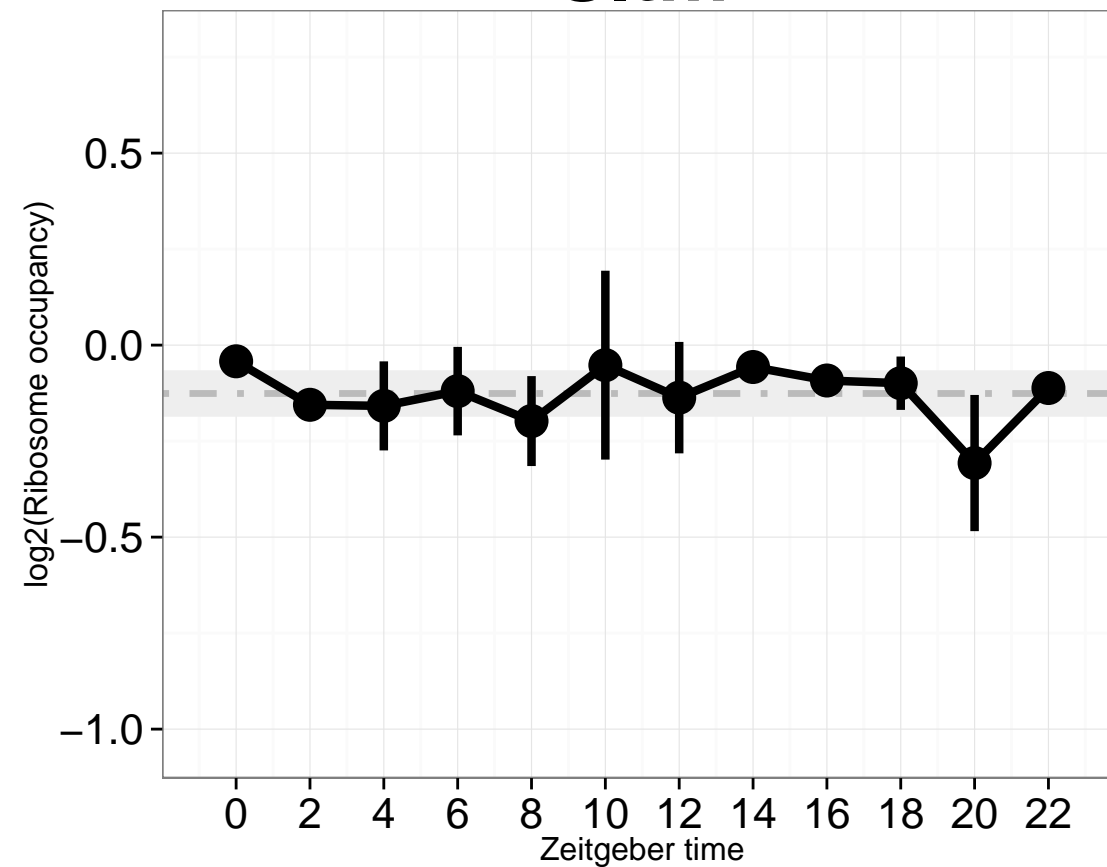

Supplement: Supplementary file 3588 [file 1]

# Rdh16

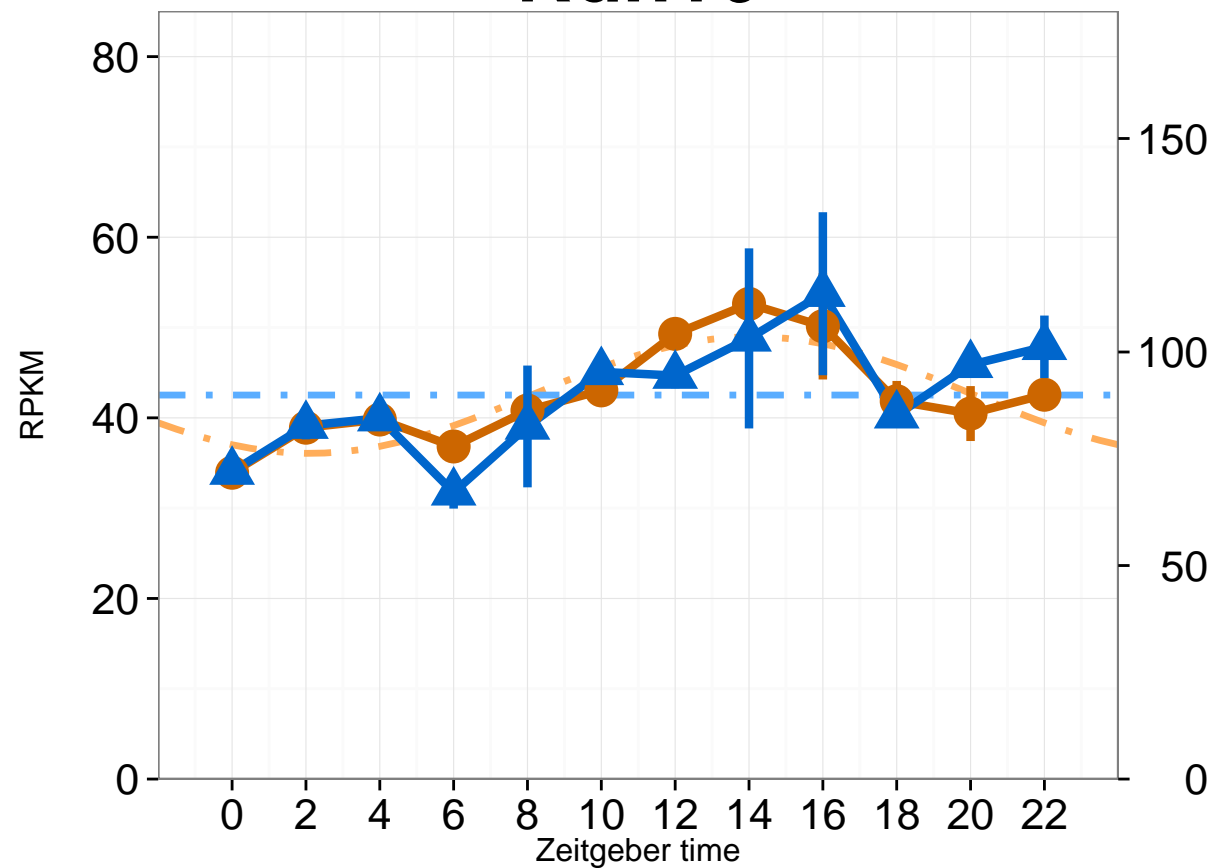

# Rdh16

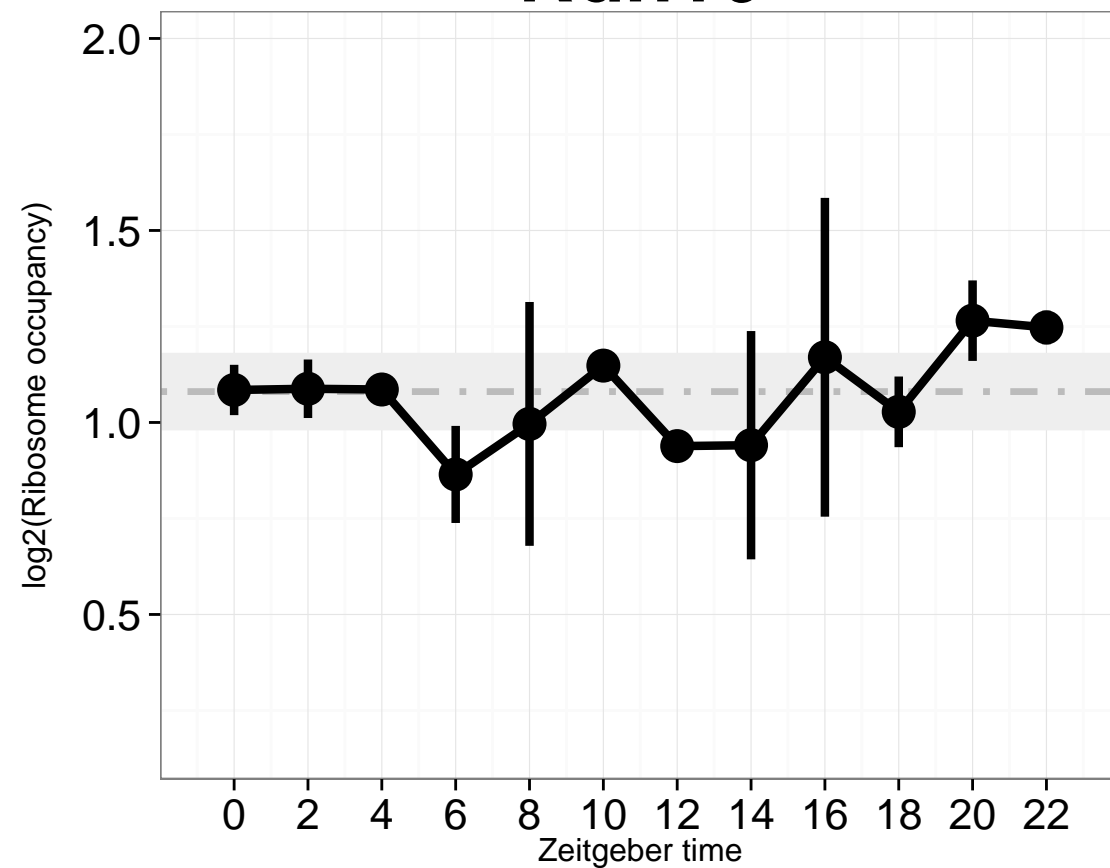

Supplement: Supplementary file 3589 [file 1]

# Alg11

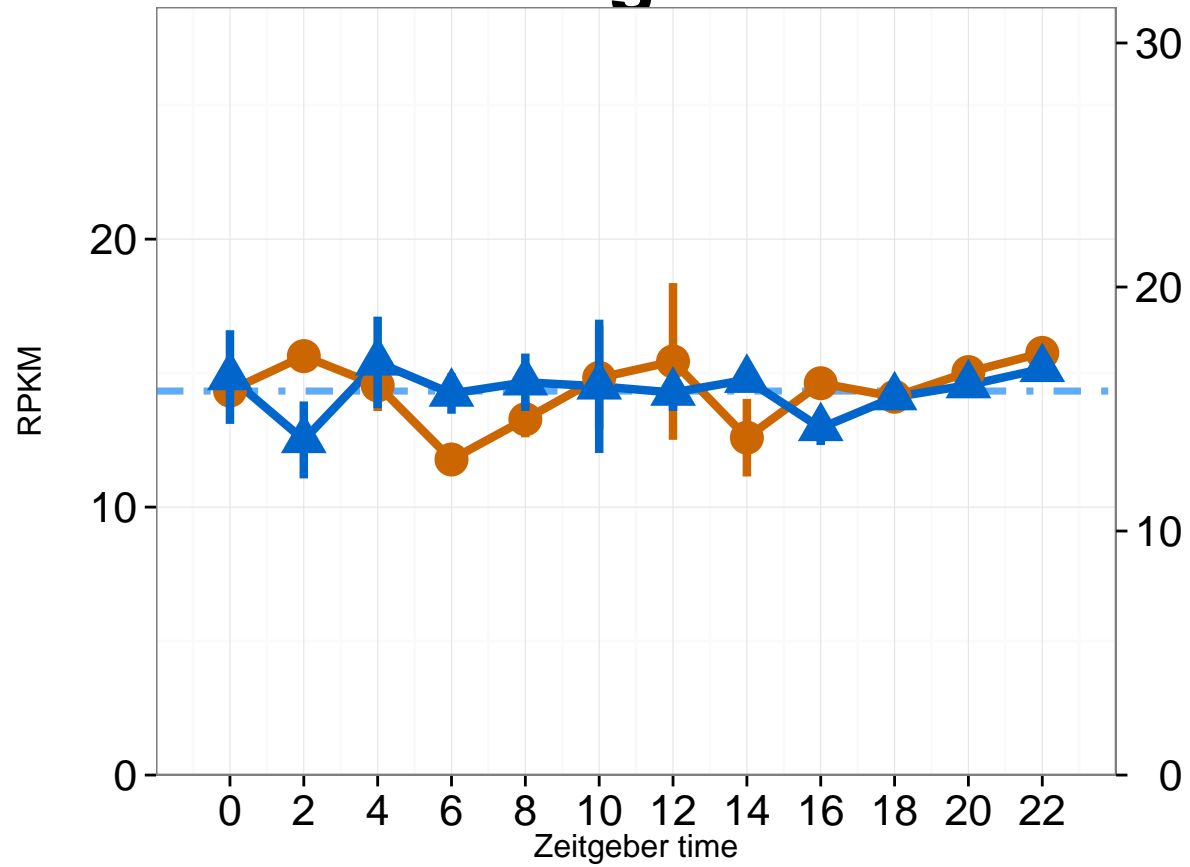

# Alg11

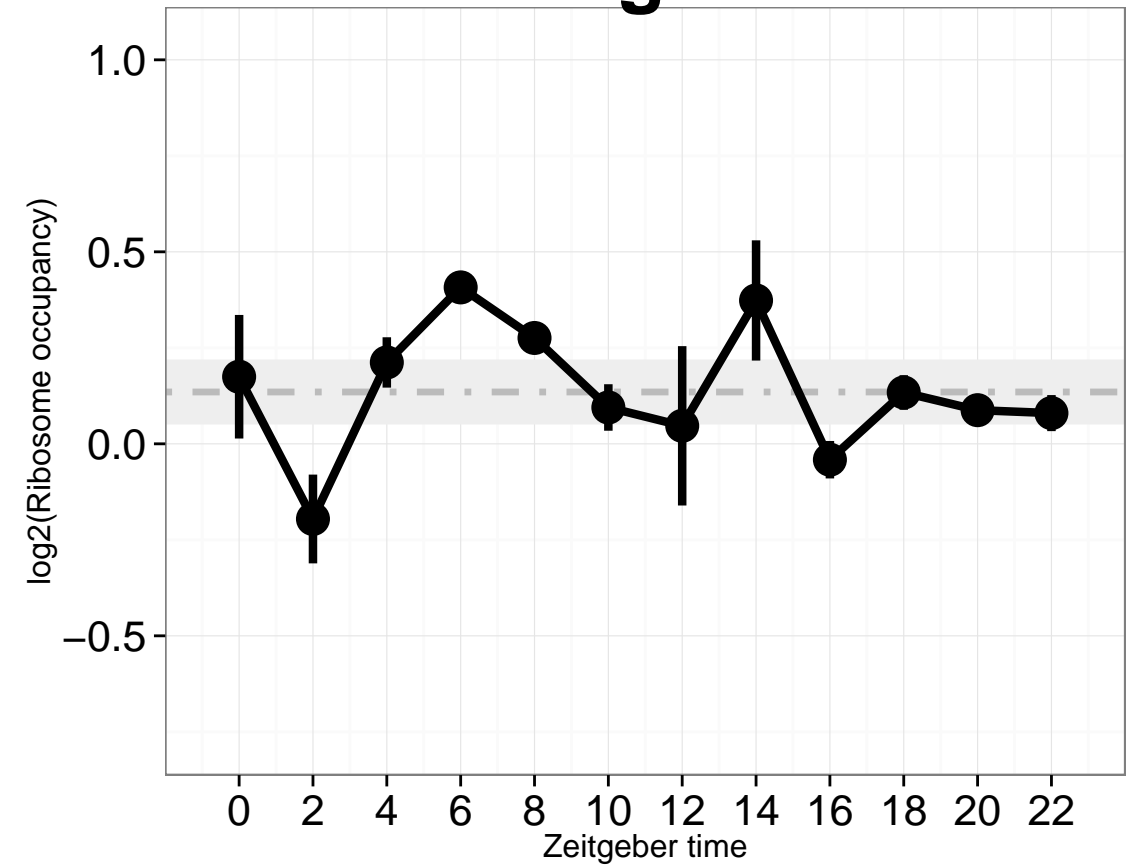

Supplement: Supplementary file 3590 [file 1]

# Metap1d

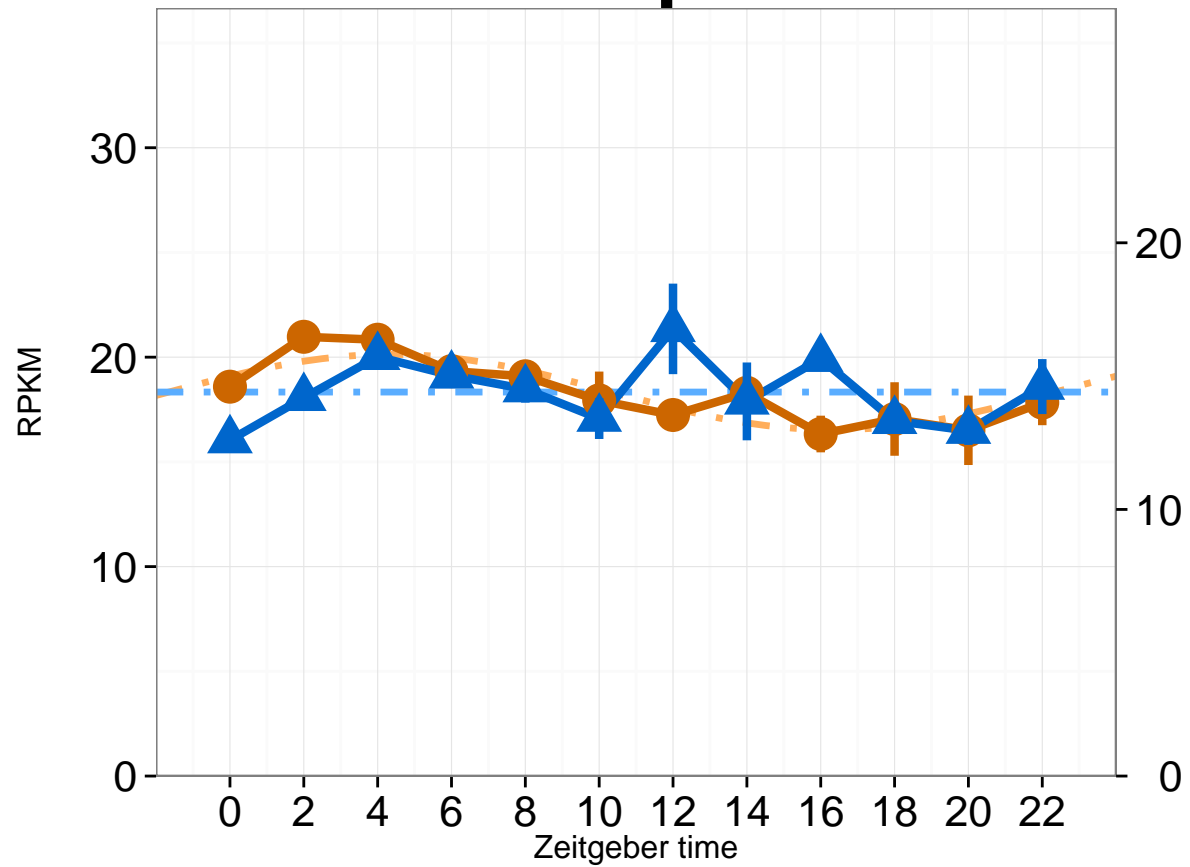

# Metap1d

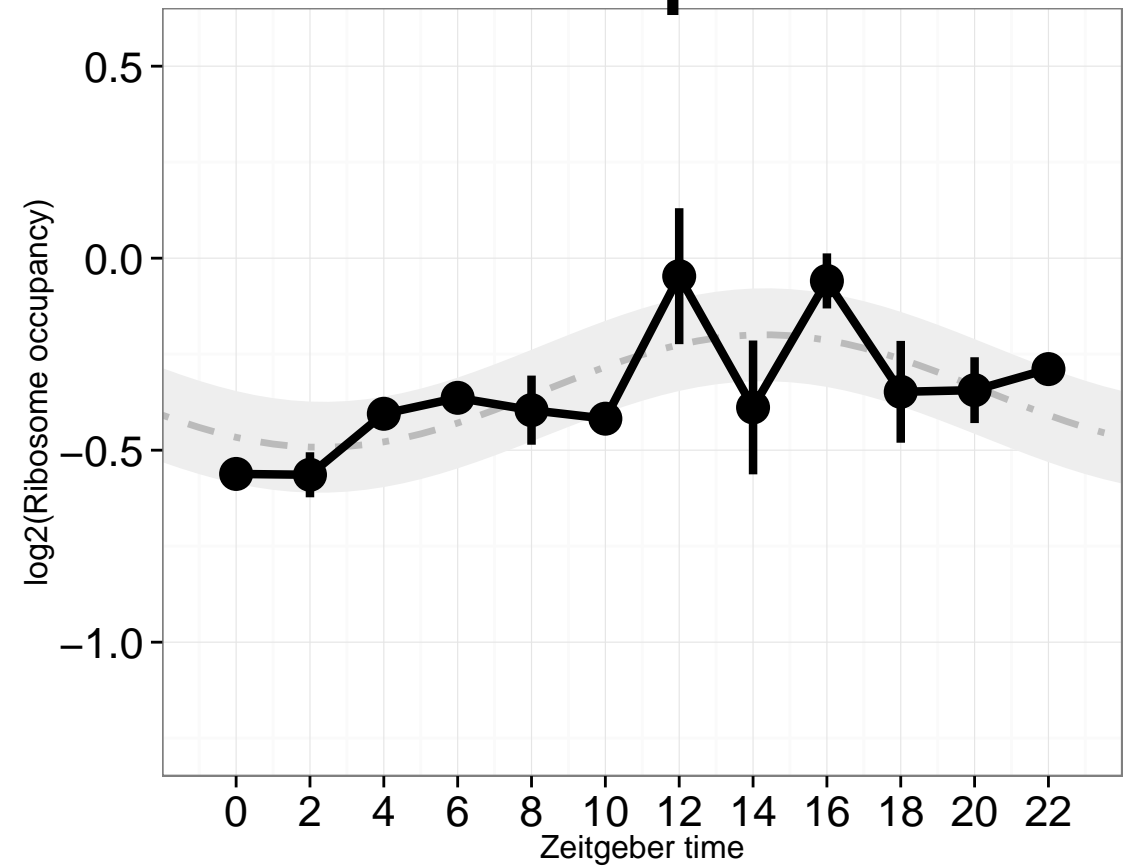

Supplement: Supplementary file 3591 [file 1]

# Bloc1s3

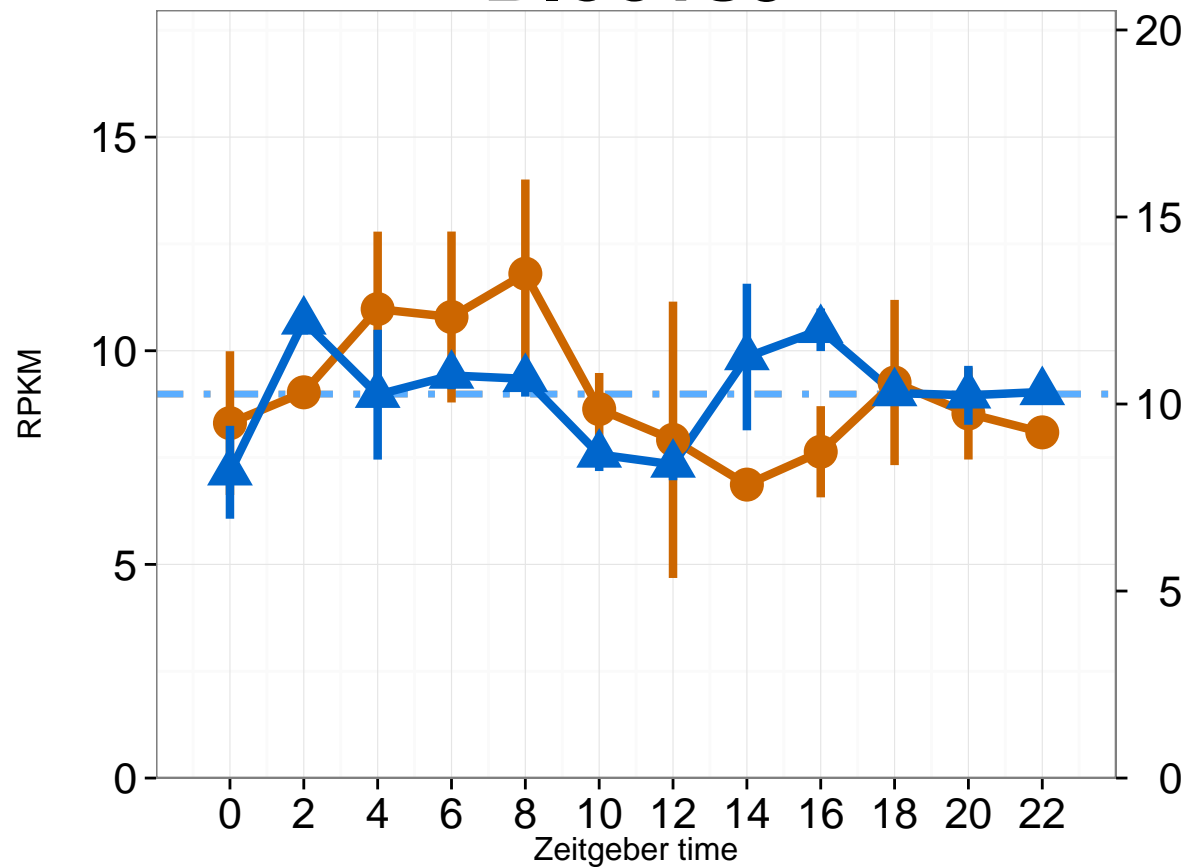

# Bloc1s3

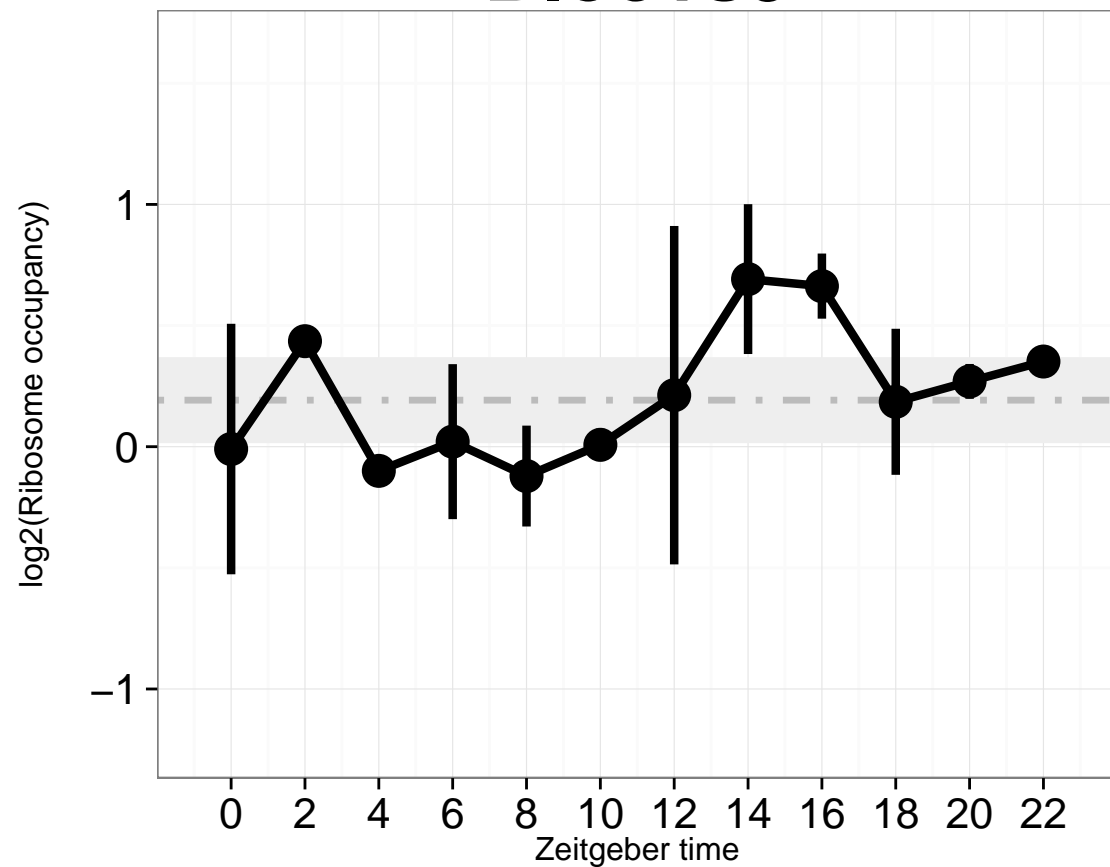

Supplement: Supplementary file 3592 [file 1]

# Racgap1

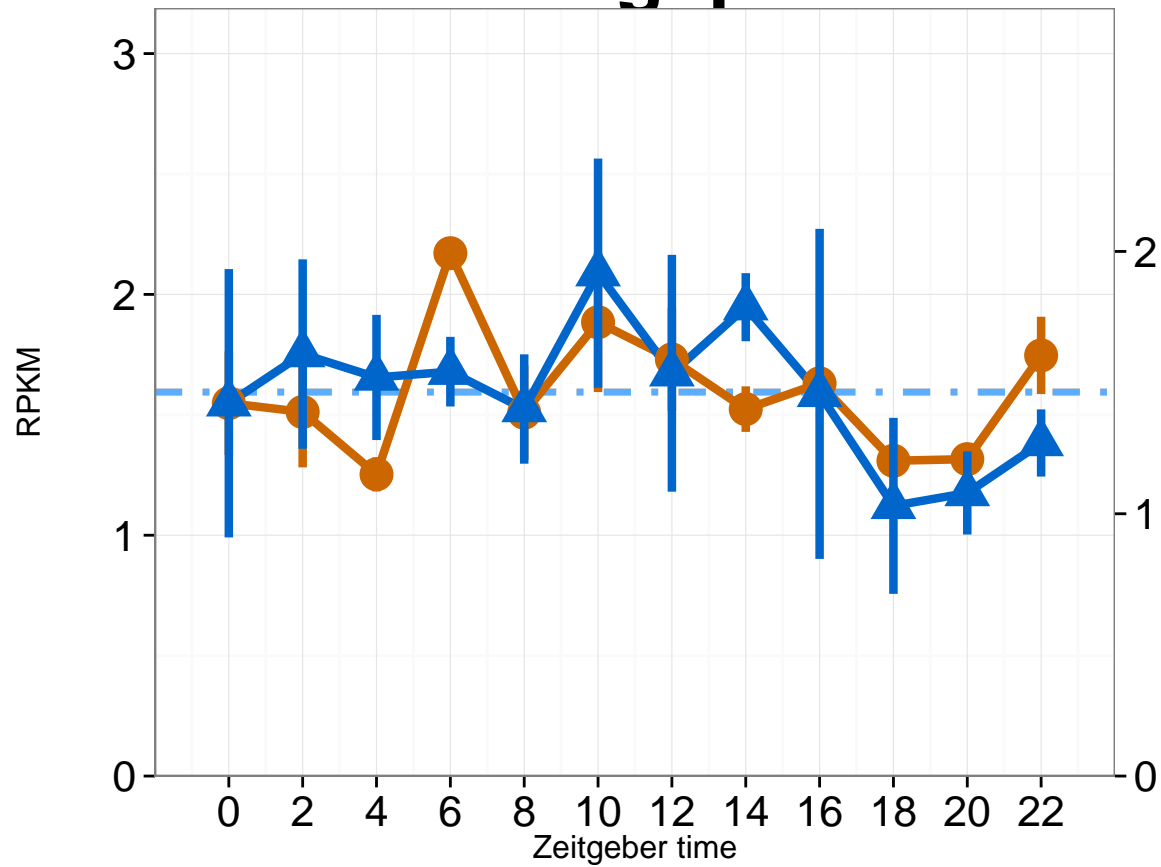

# Racgap1

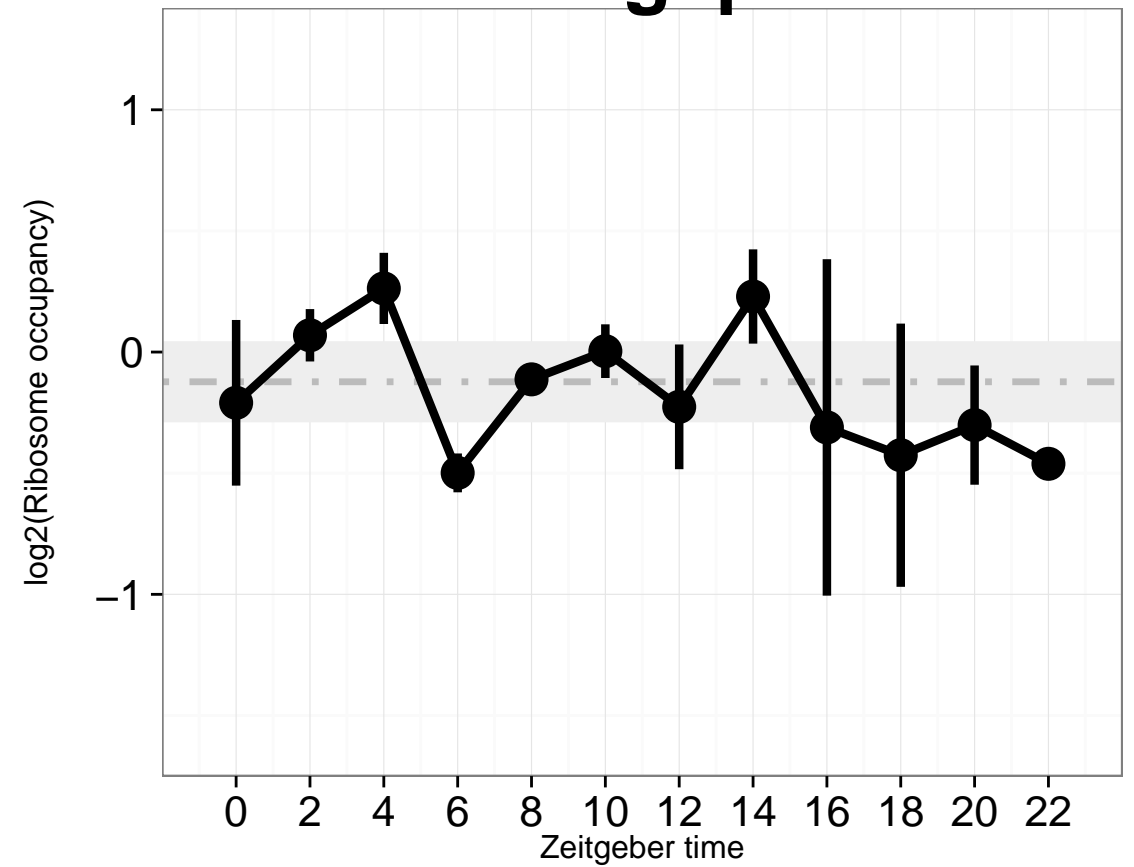

Supplement: Supplementary file 3593 [file 1]

# Tubb2a

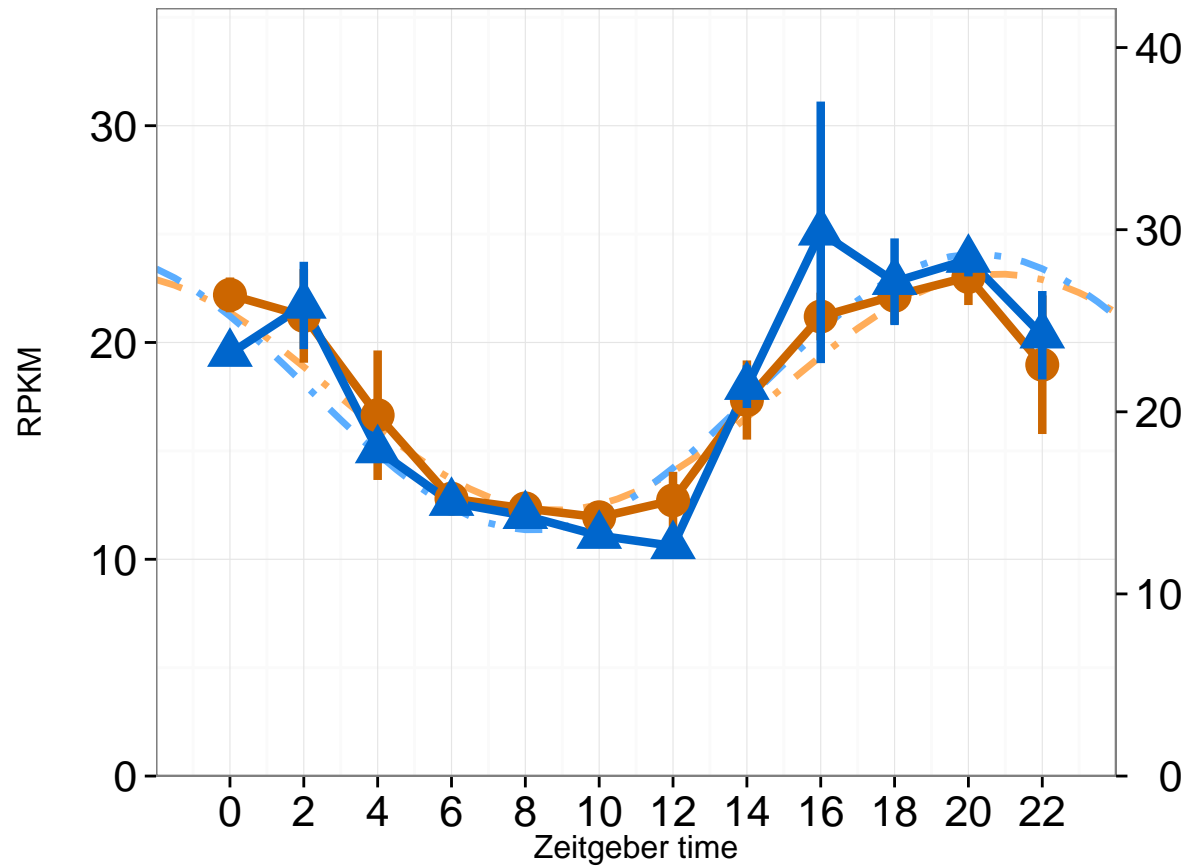

# Tubb2a

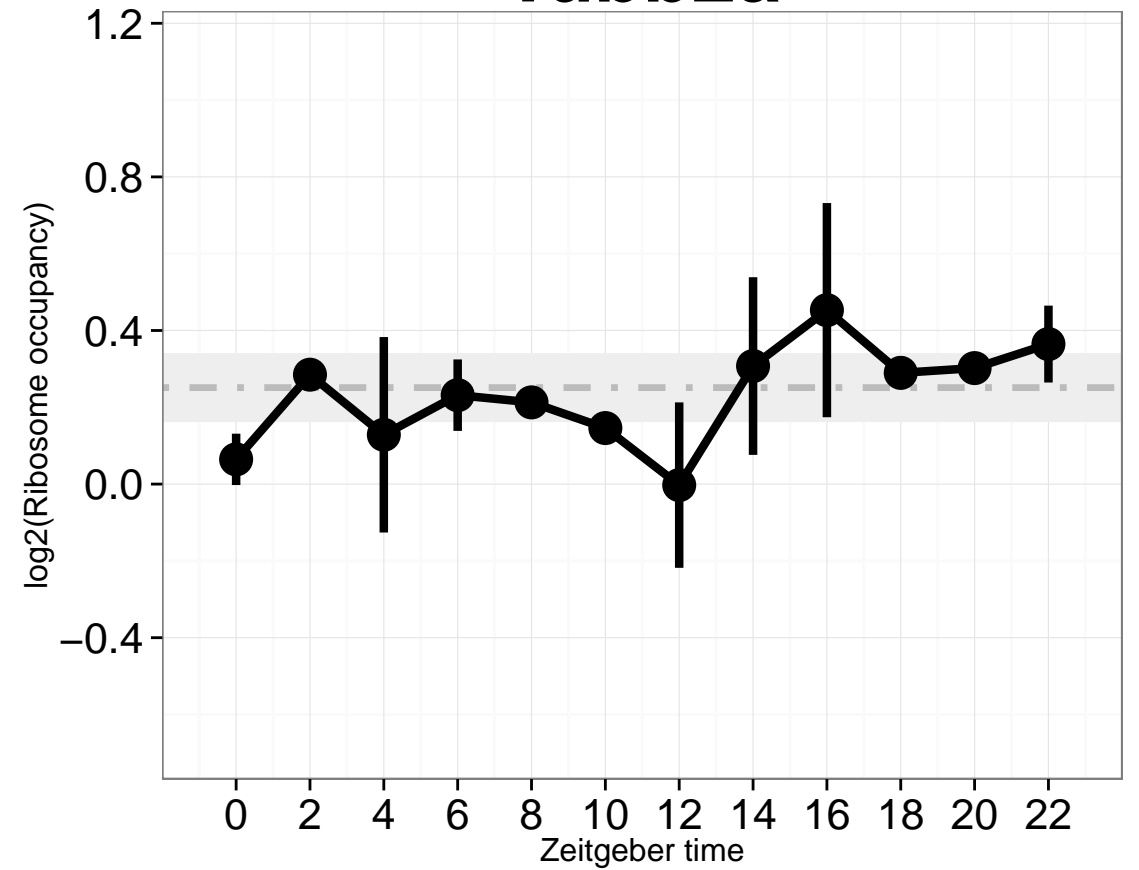

Supplement: Supplementary file 3594 [file 1]

## Far1

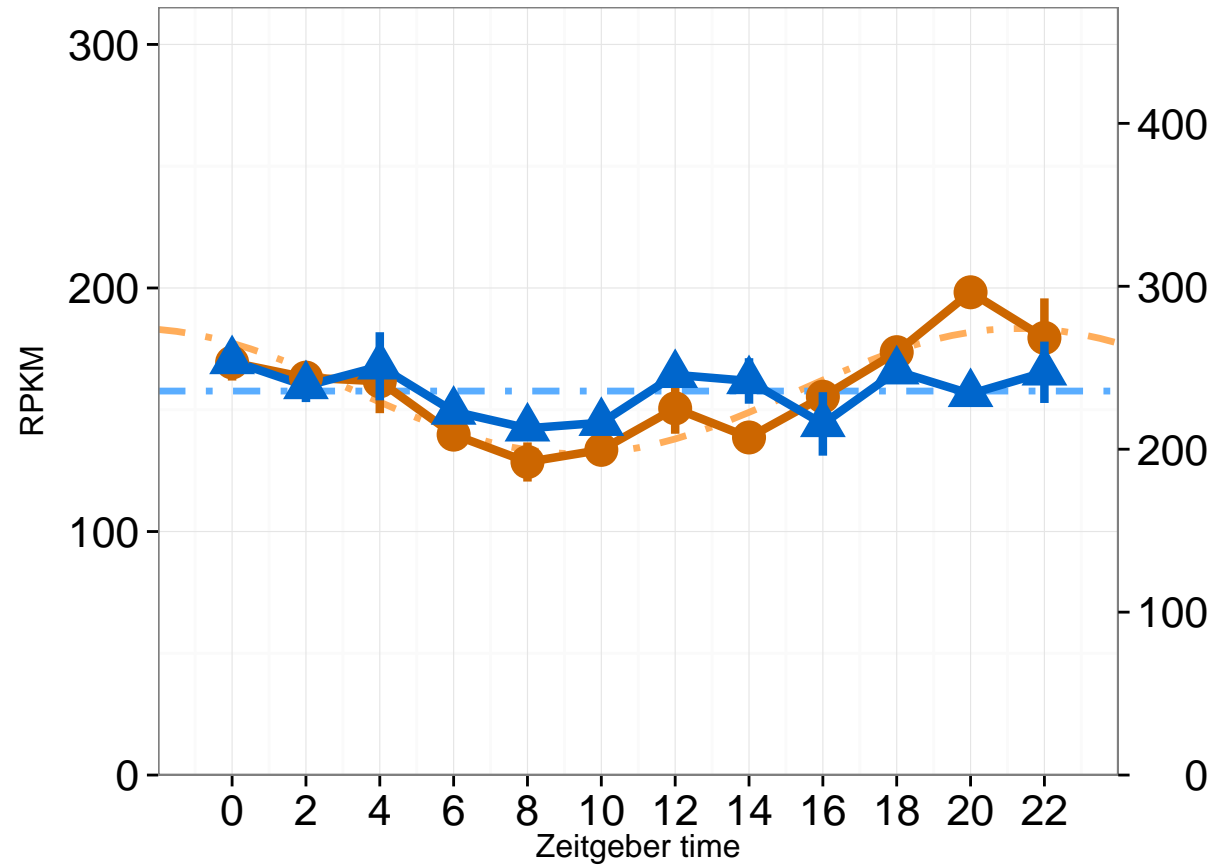

## Far1

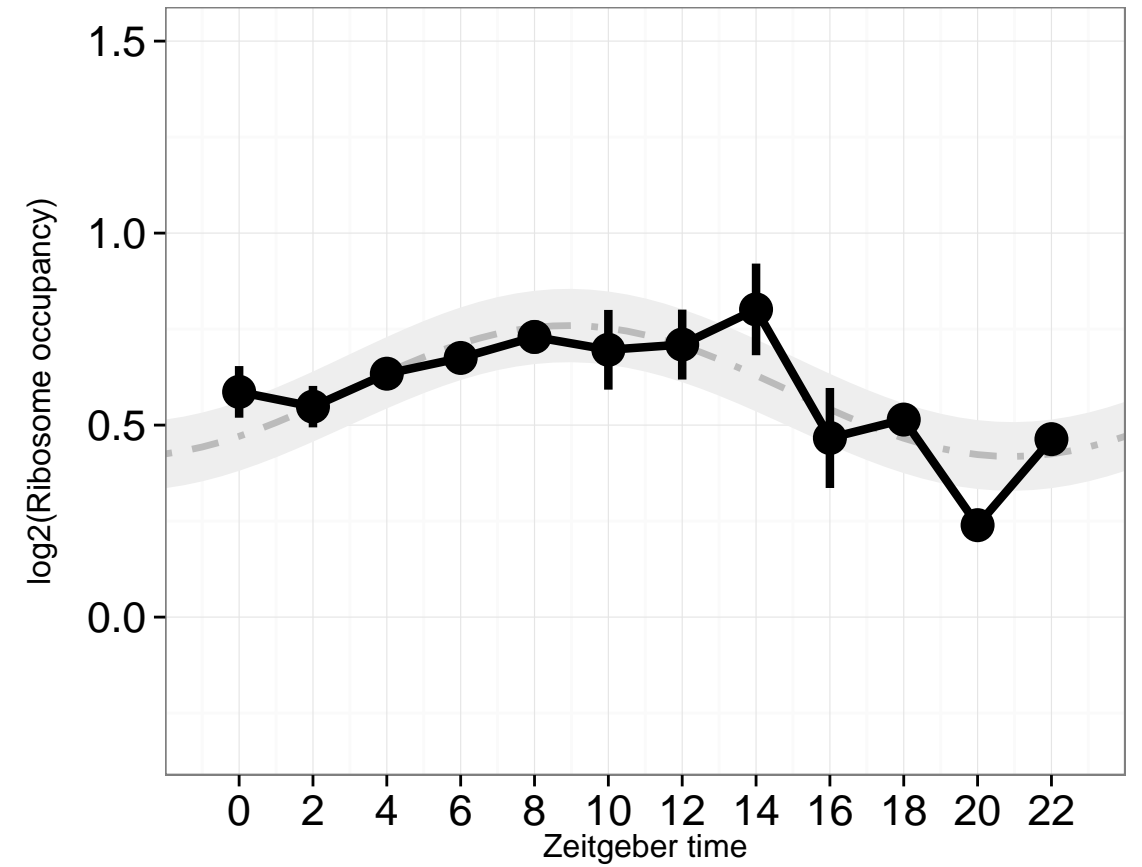

Supplement: Supplementary file 3595 [file 1]

# End

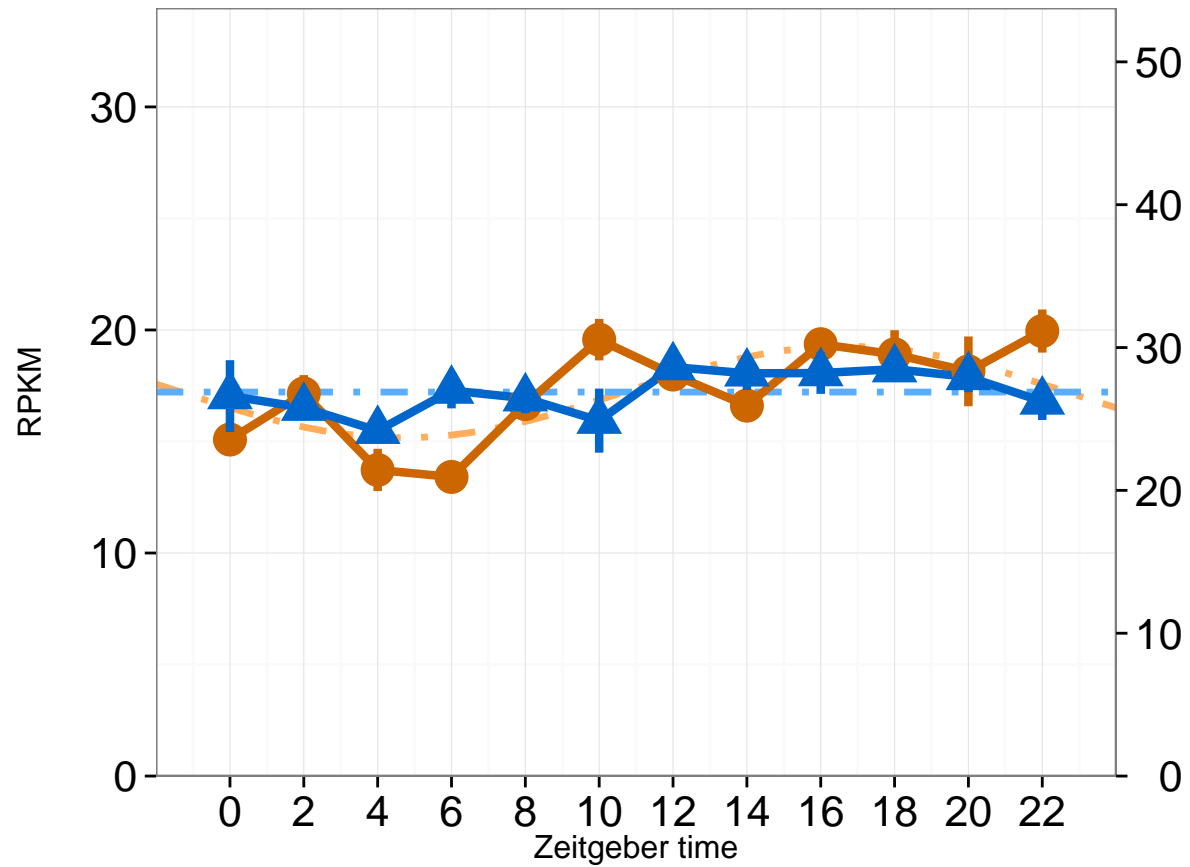

# End

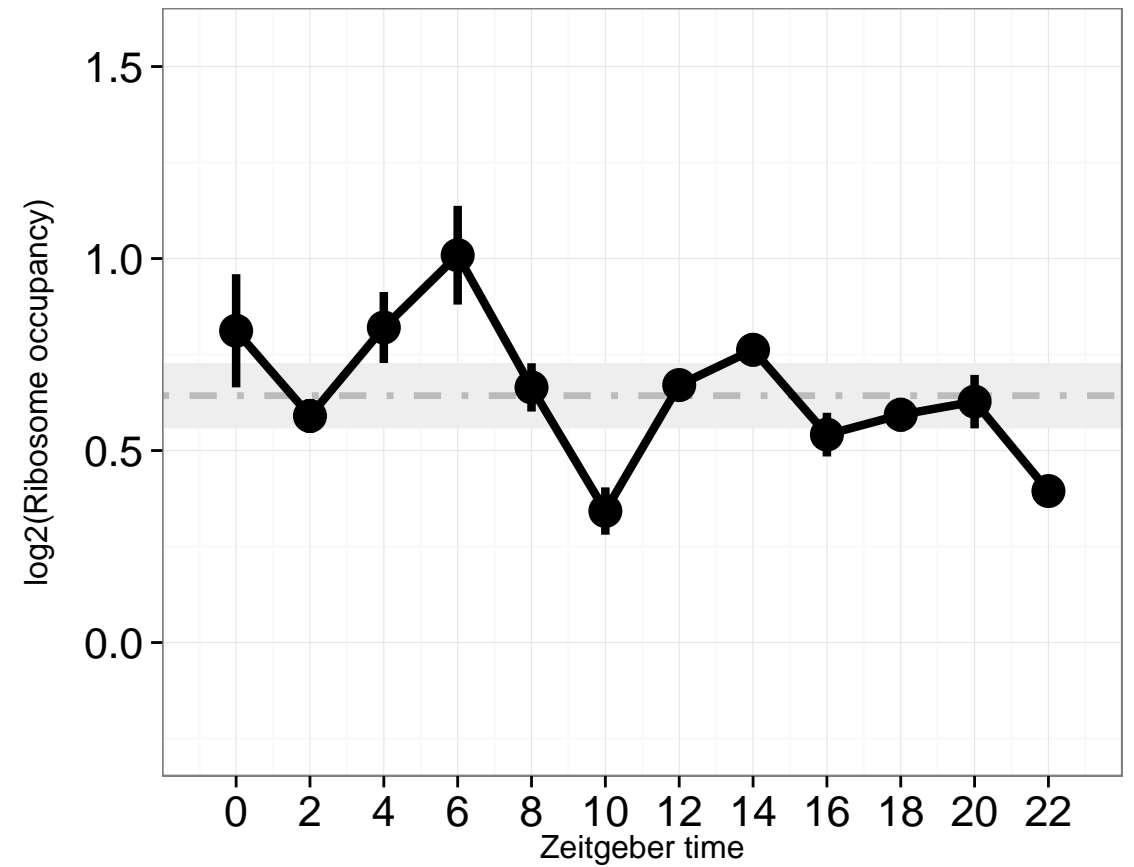

Supplement: Supplementary file 3596 [file 1]

## Angpt2

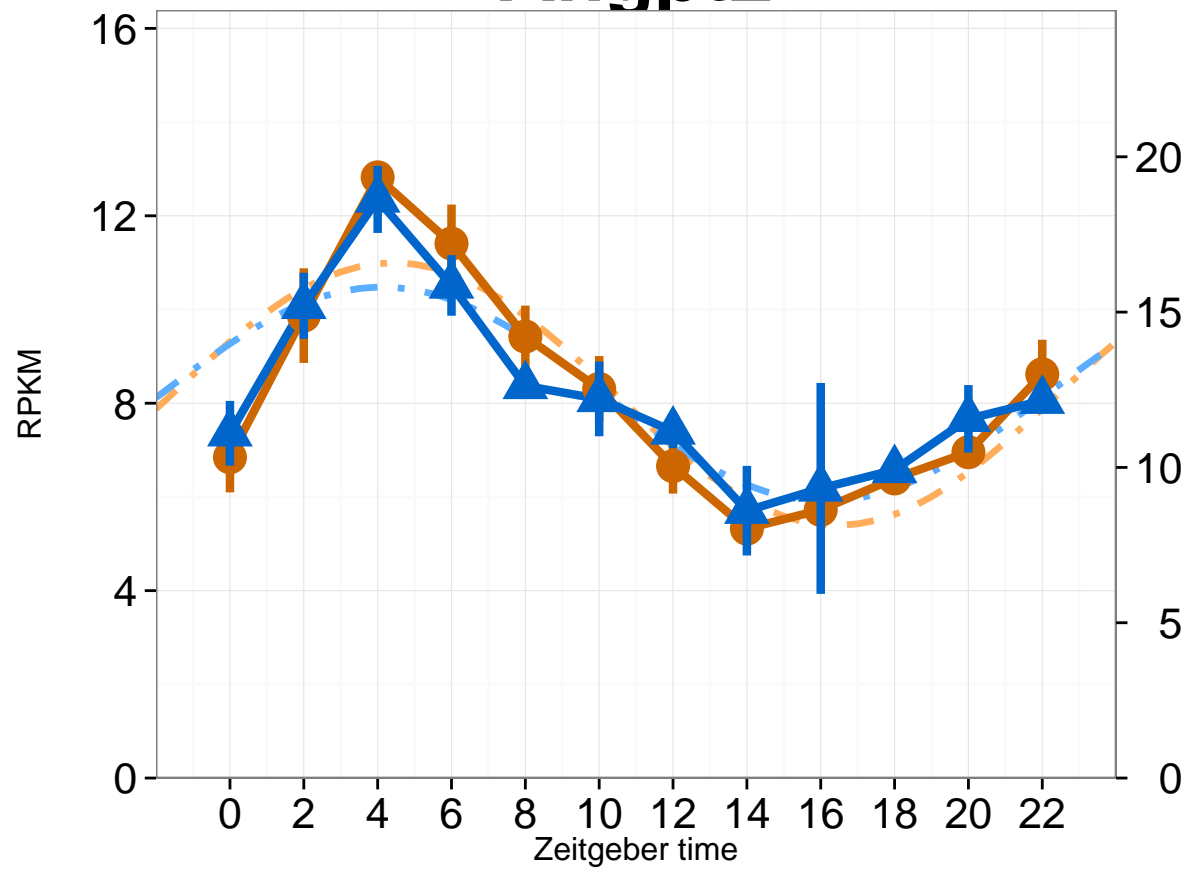

## Angpt2

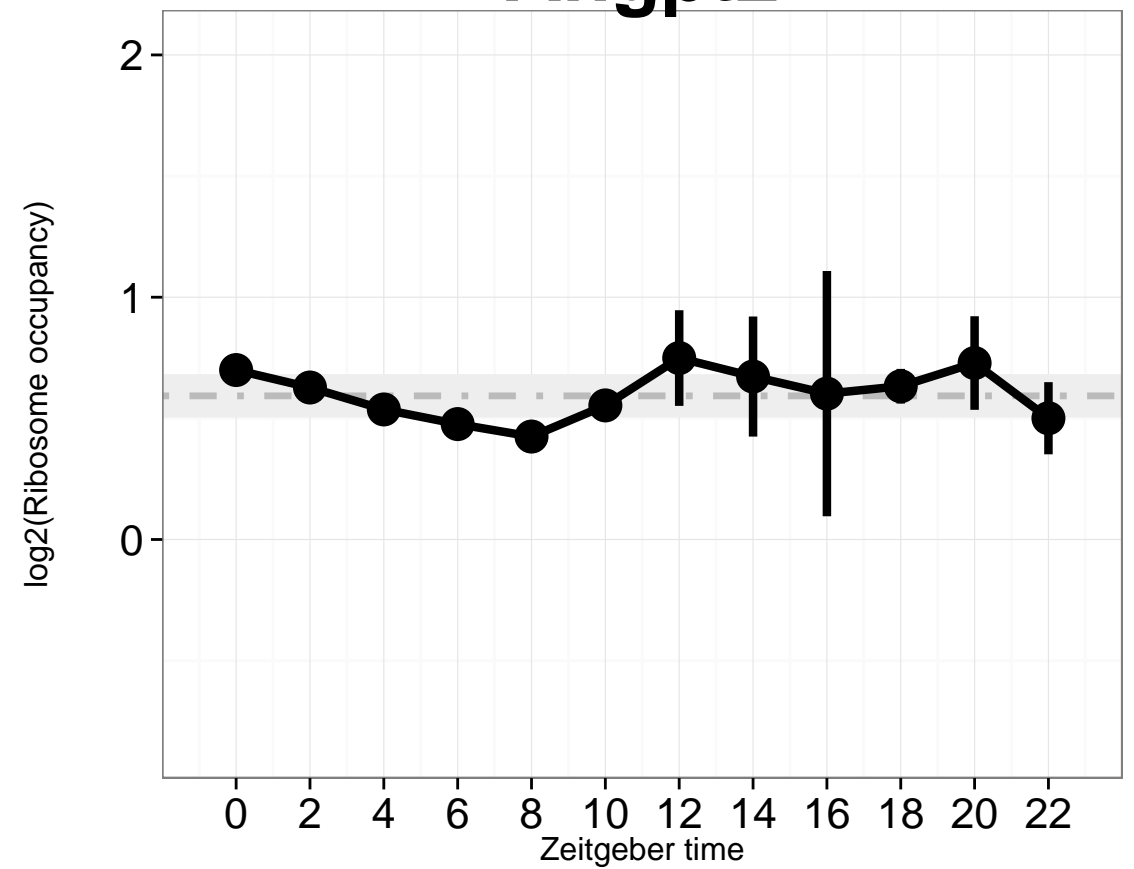

Supplement: Supplementary file 3597 [file 1]

## Itm2c

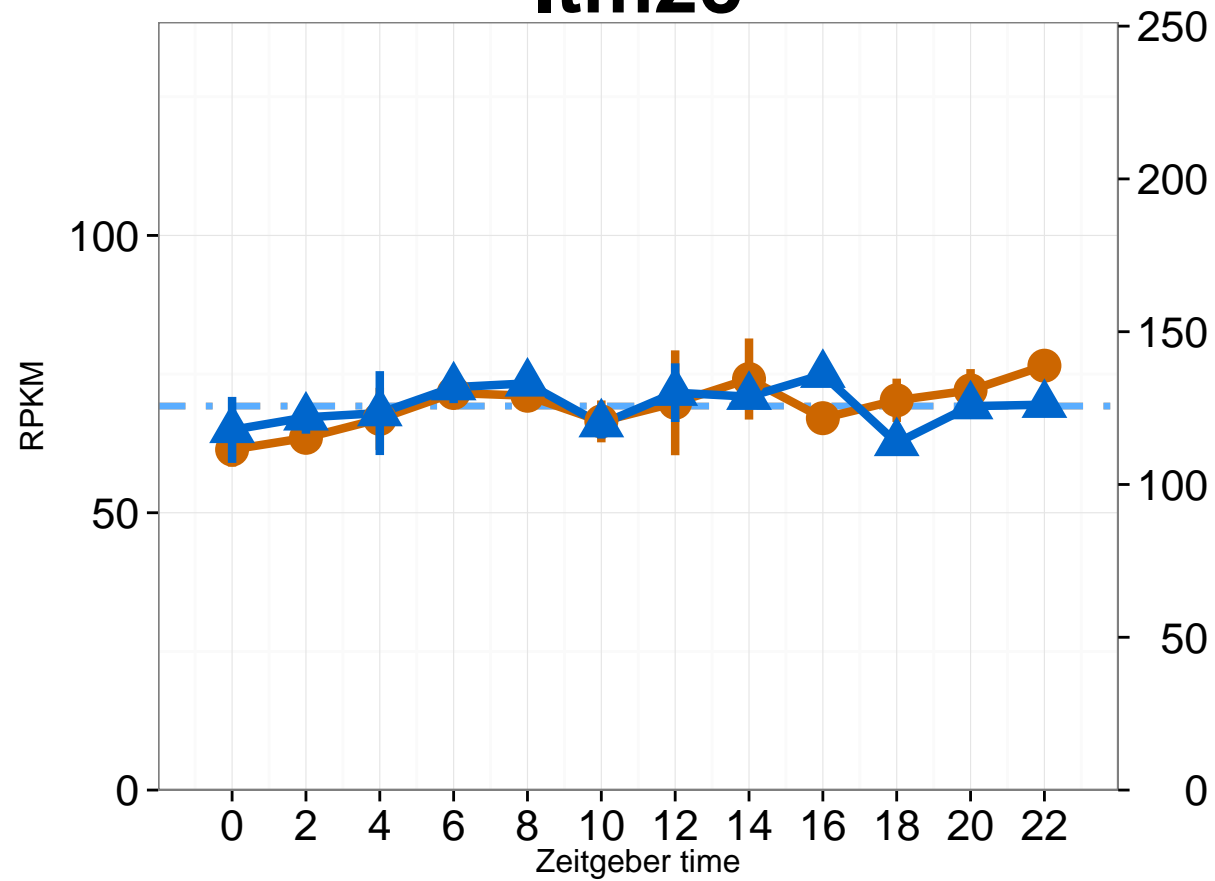

## Itm2c

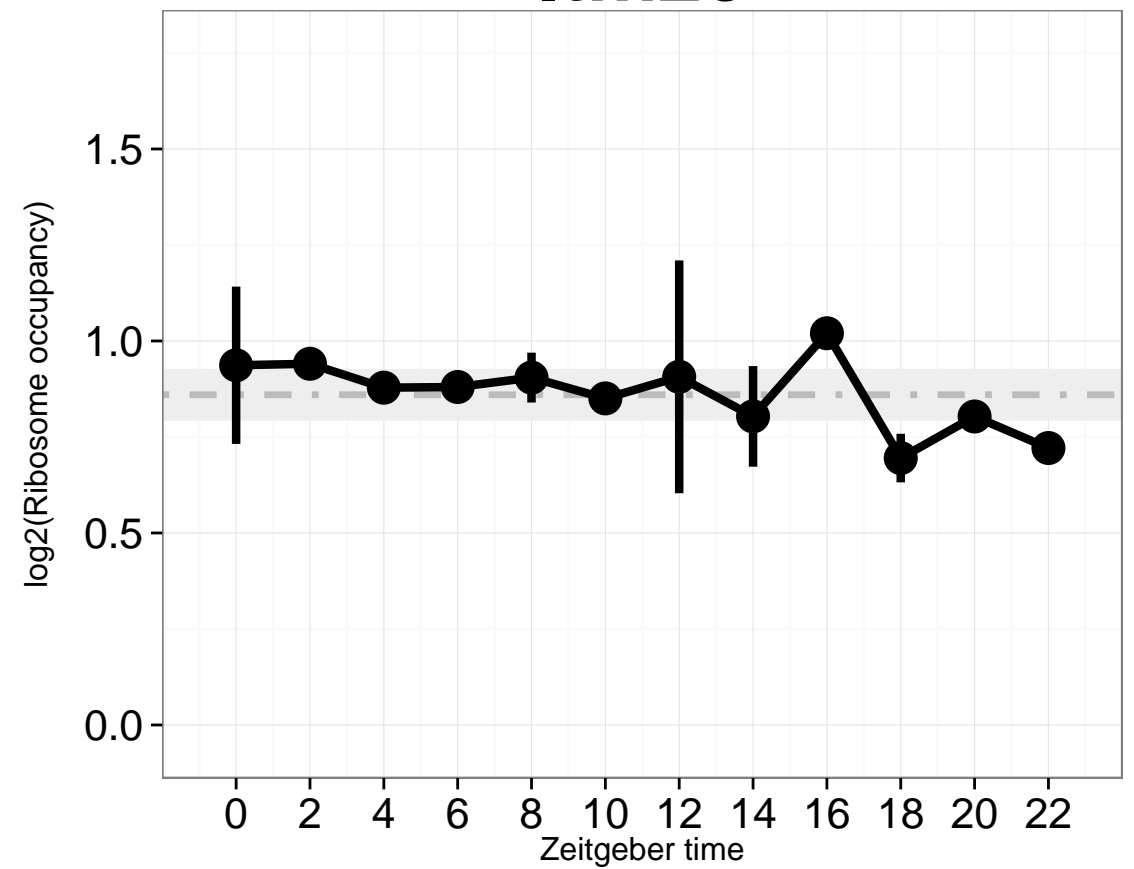

Supplement: Supplementary file 3598 [file 1]

## Eya2

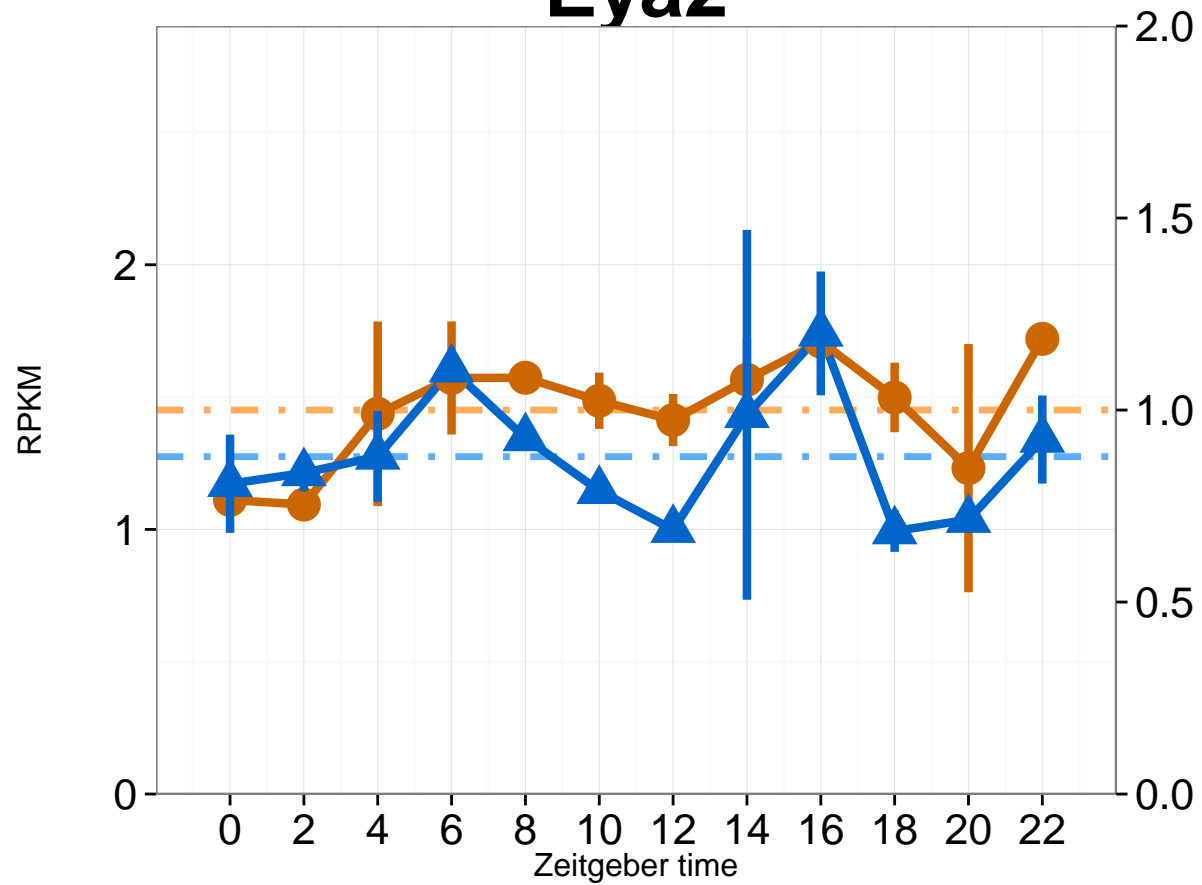

## Eya2

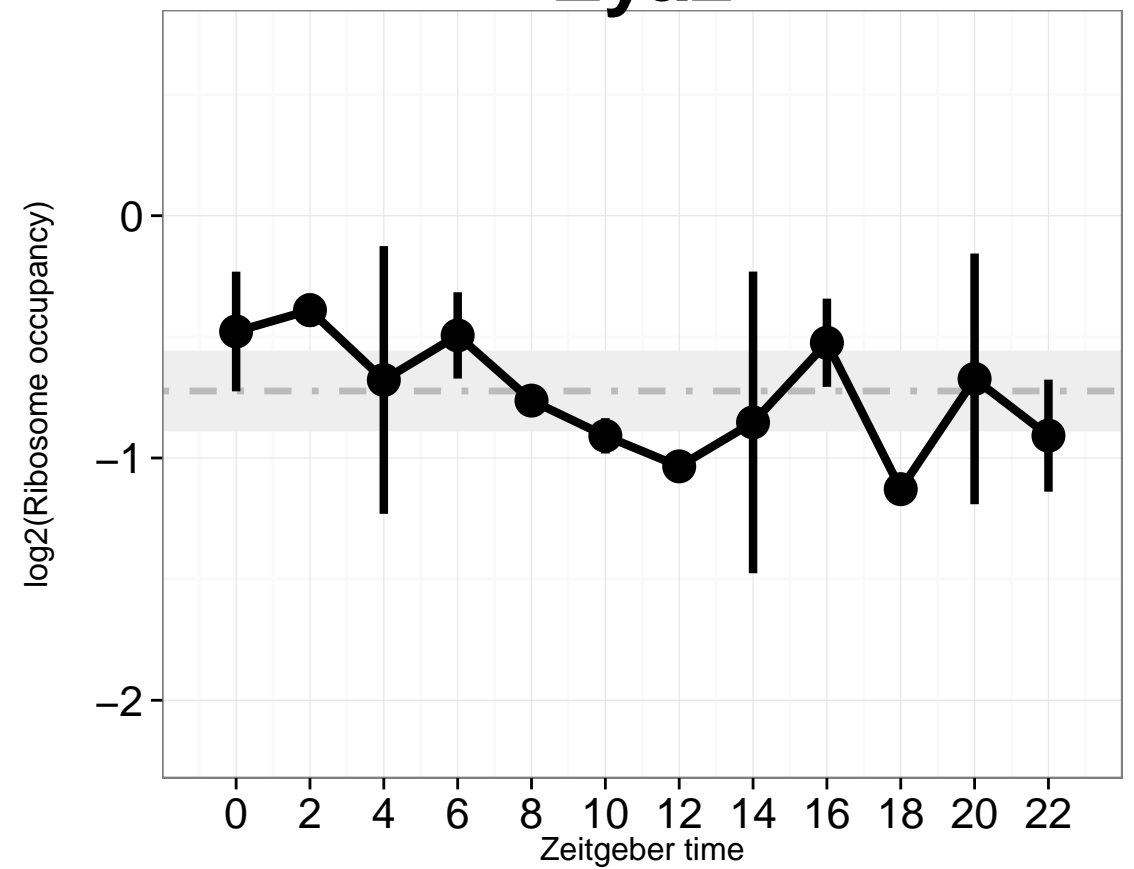

Supplement: Supplementary file 3599 [file 1]

# Hoxd10

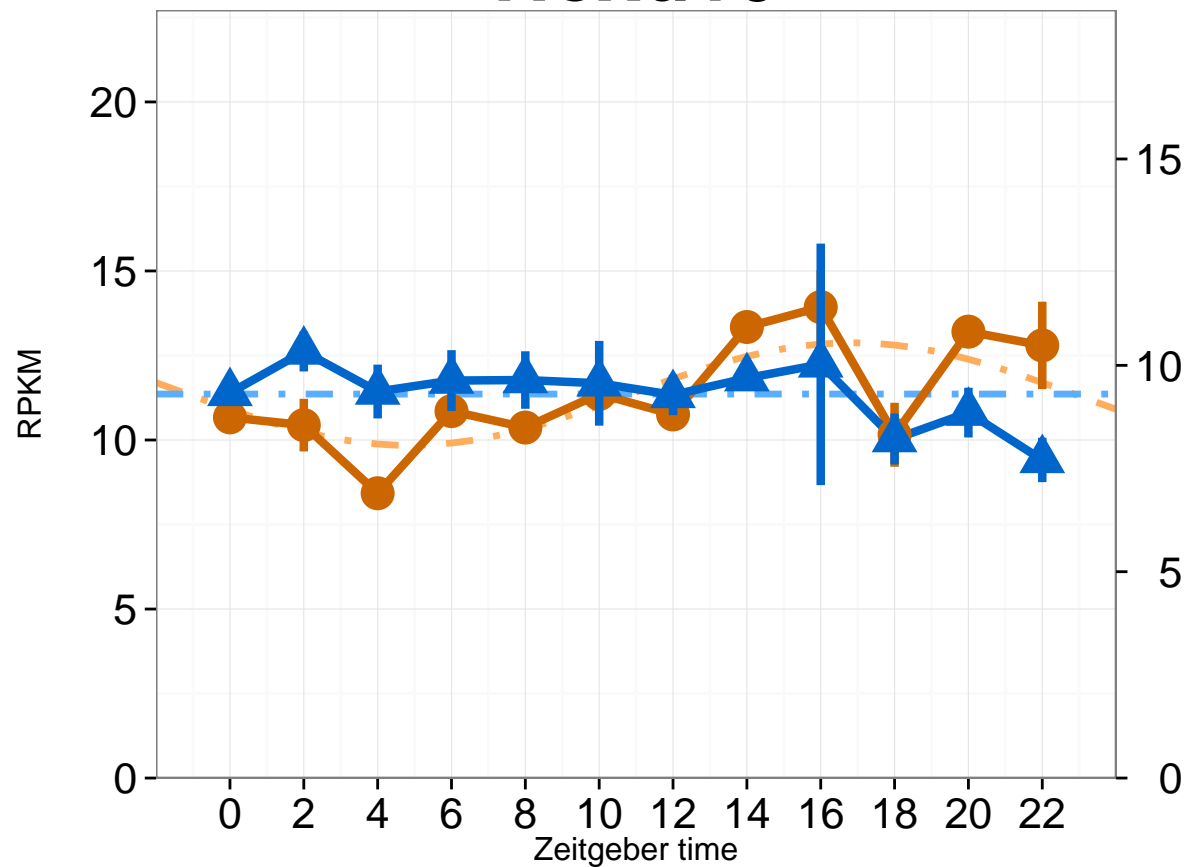

# Hoxd10

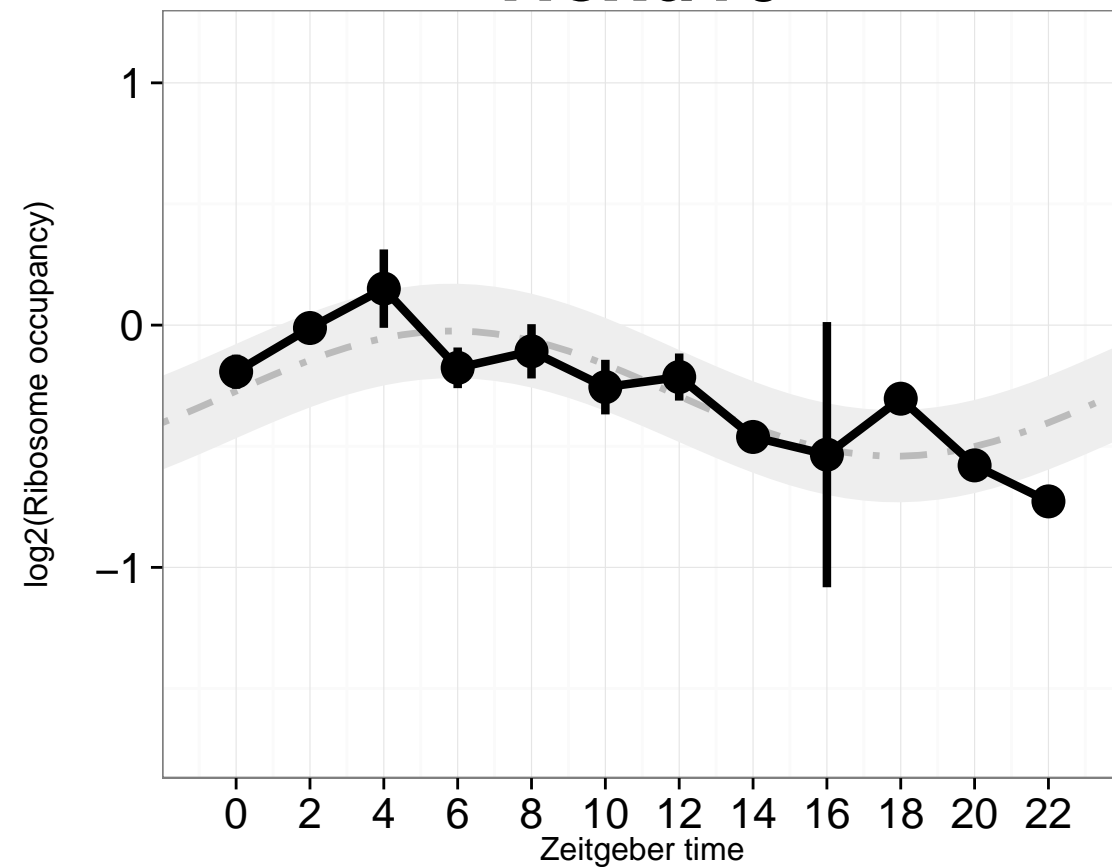

Supplement: Supplementary file 3600 [file 1]

# Tgm1

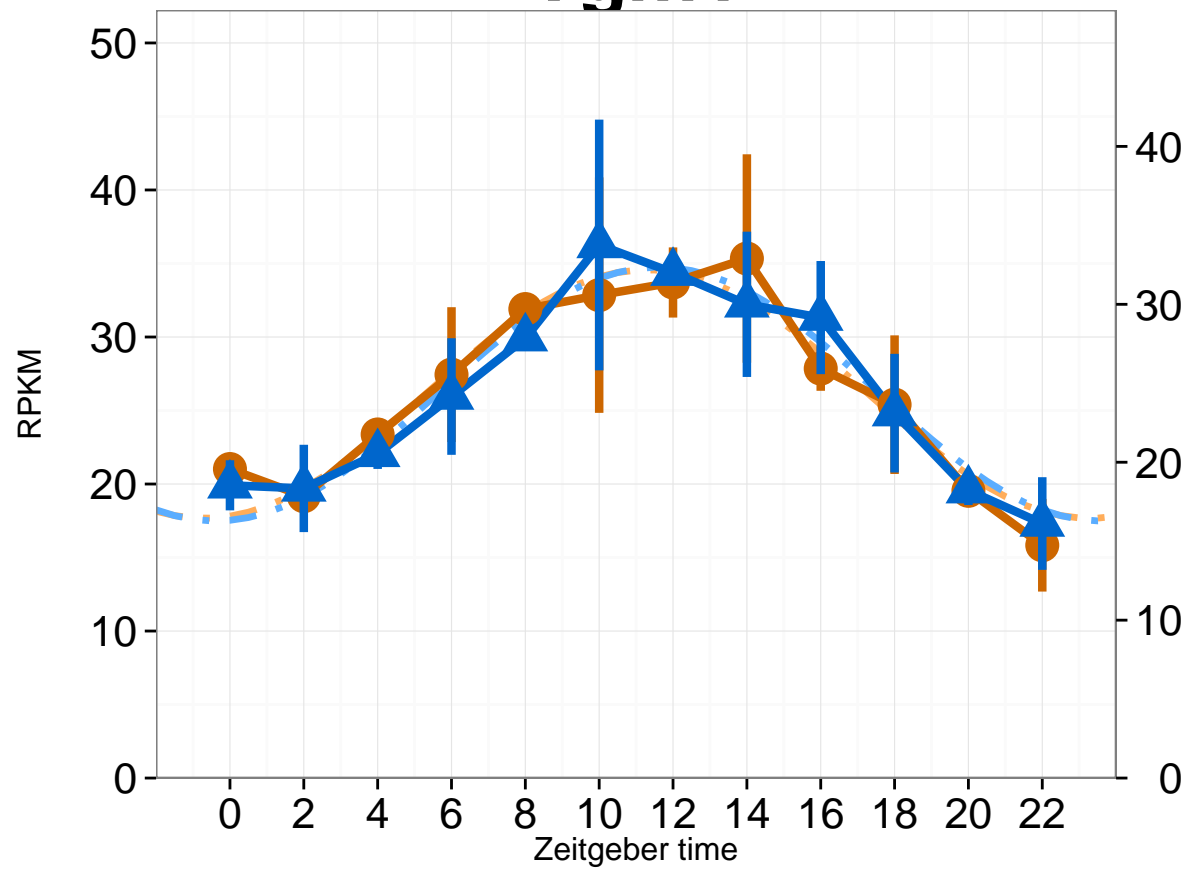

# Tgm1

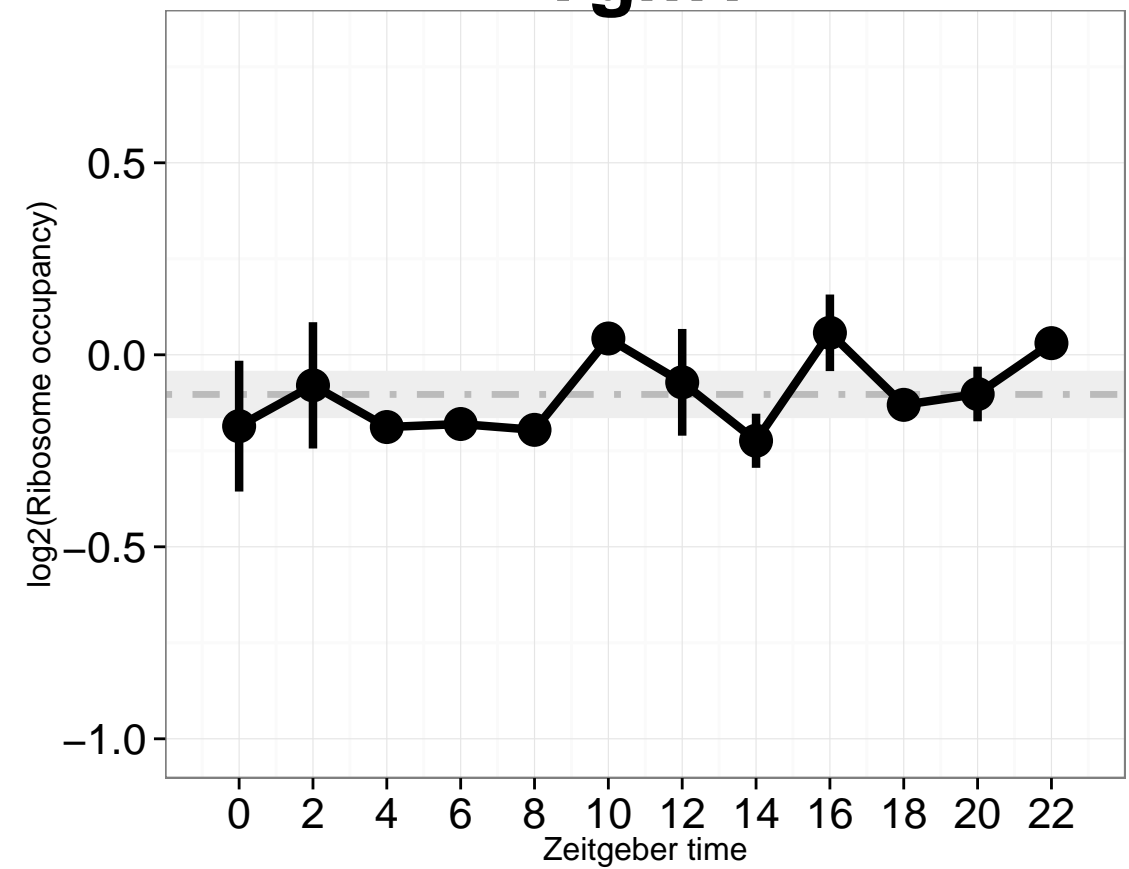

Supplement: Supplementary file 3601 [file 1]

## Wdr90

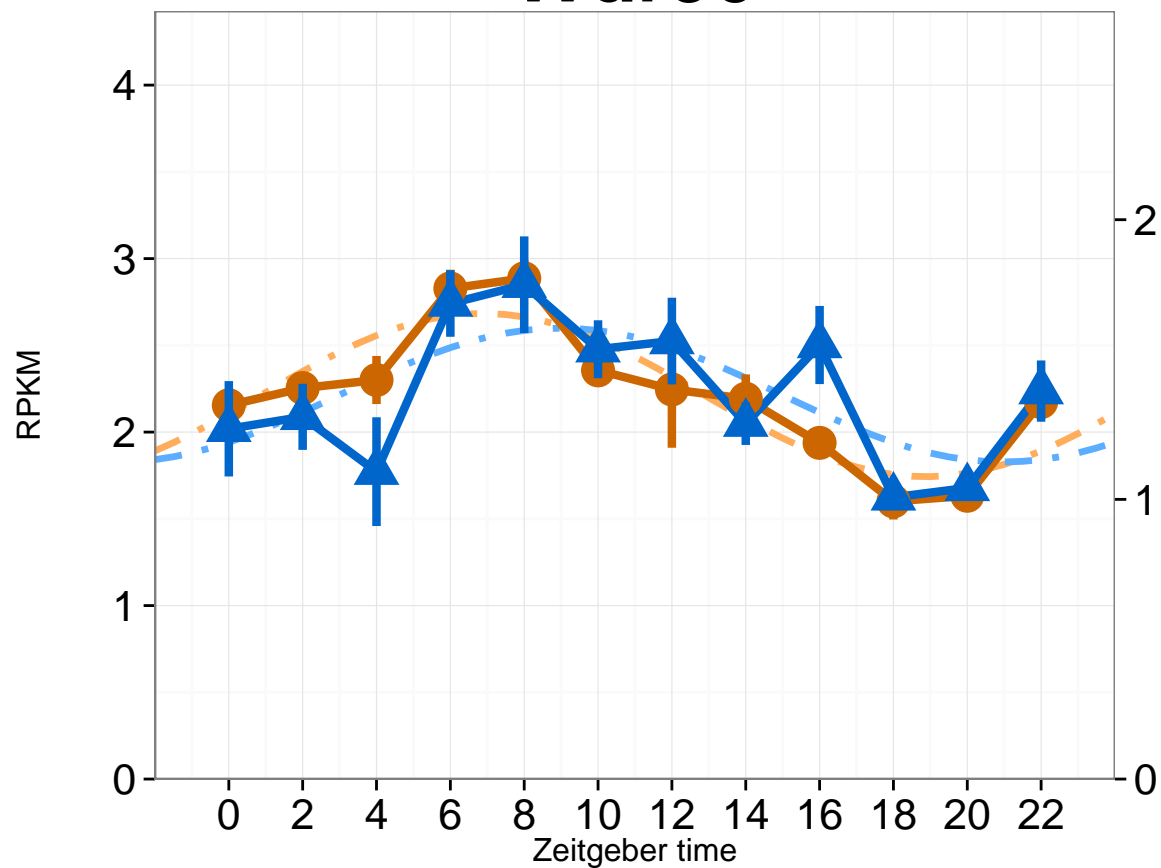

## Wdr90

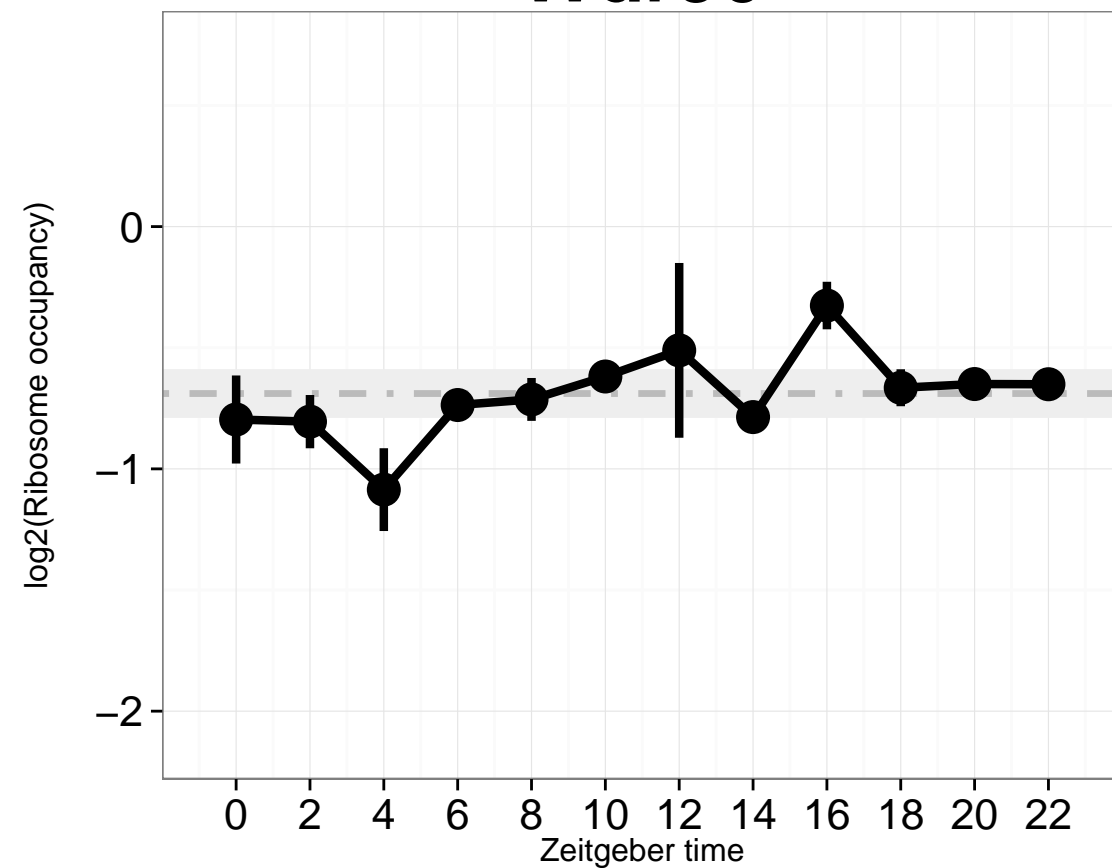

Supplement: Supplementary file 3602 [file 1]

## AK129341

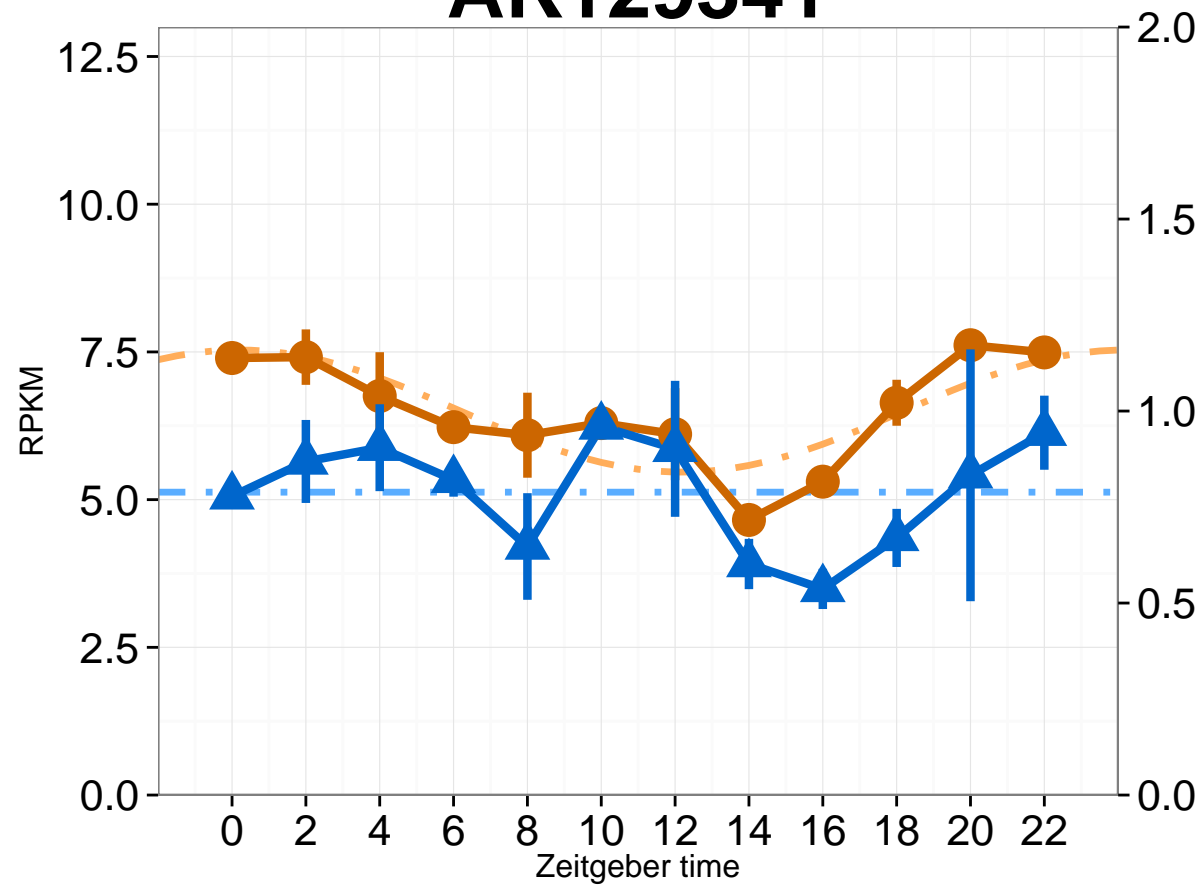

## AK129341

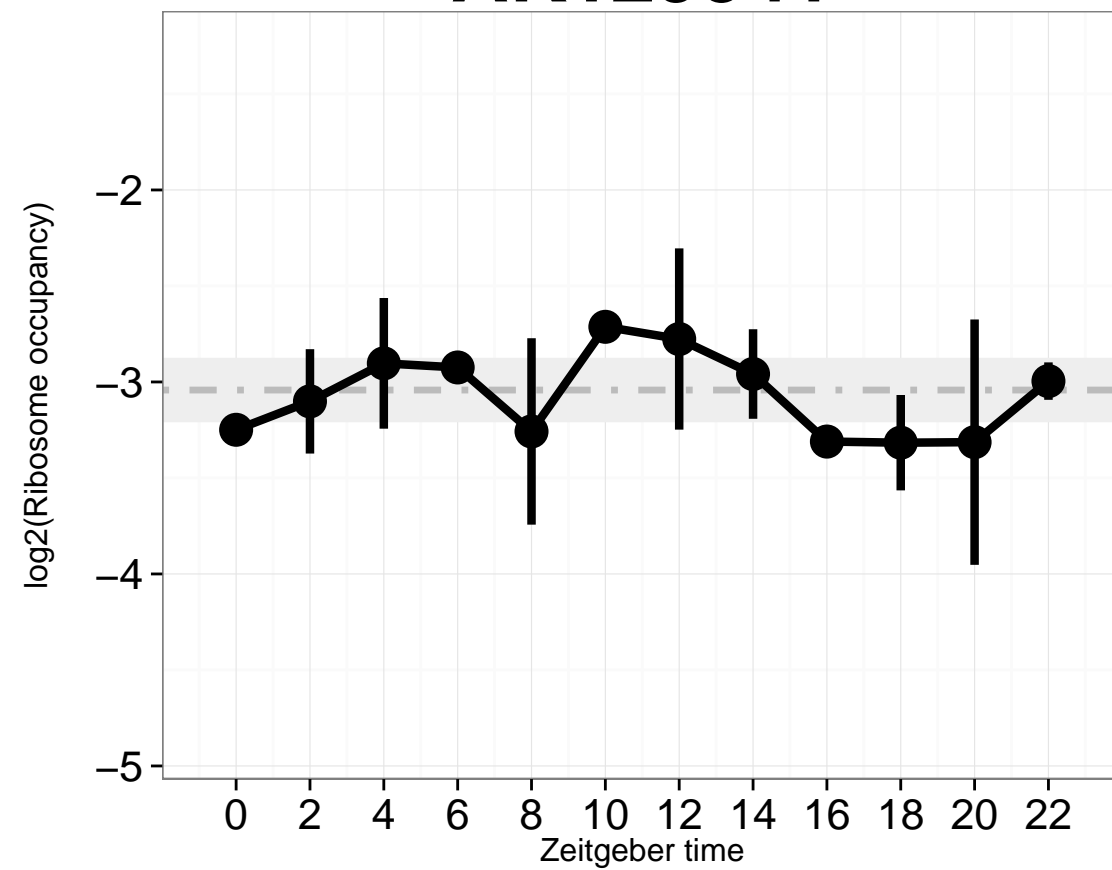

Supplement: Supplementary file 3603 [file 1]

## Cish

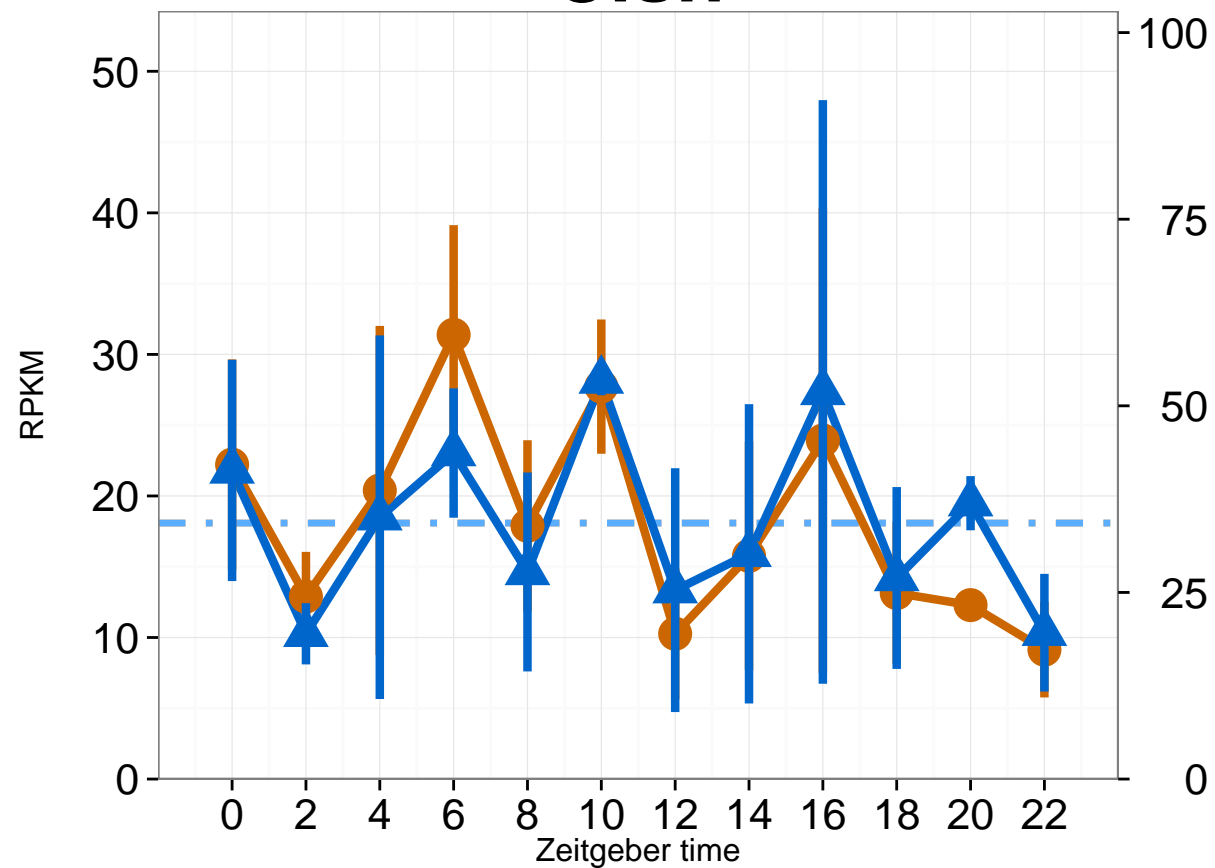

## Cish

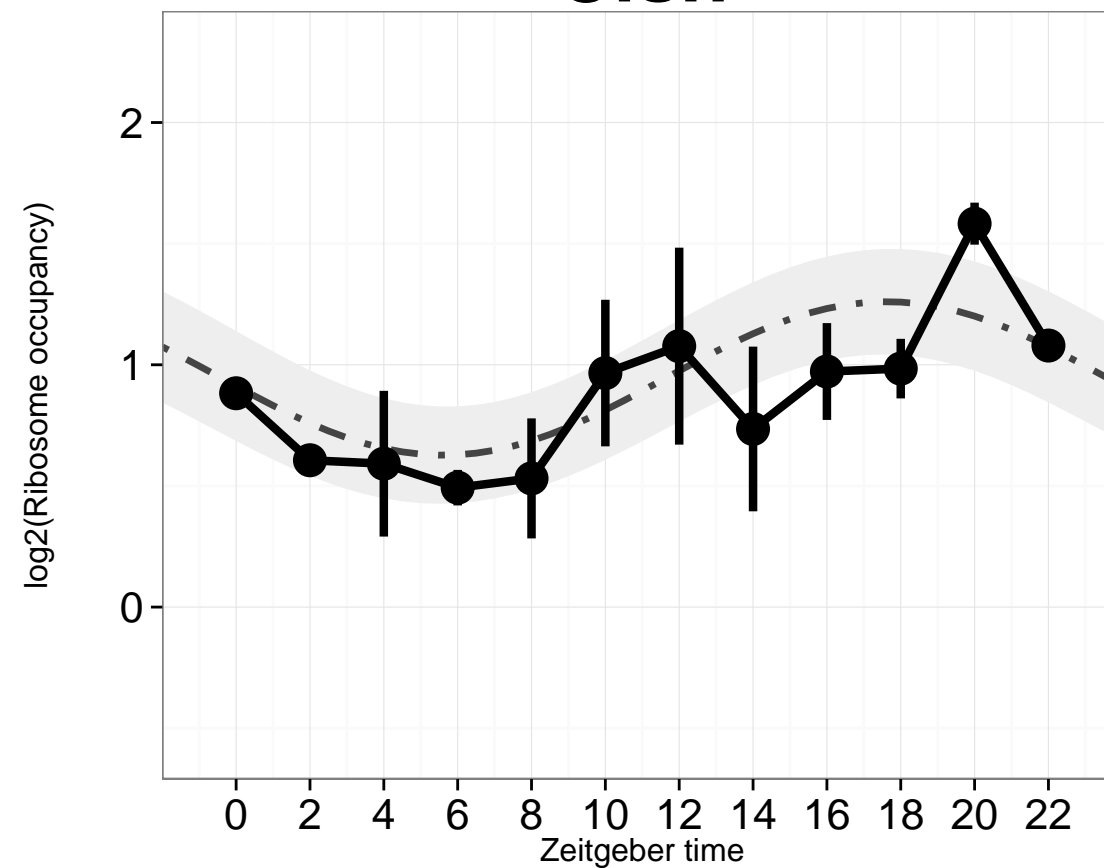

Supplement: Supplementary file 3604 [file 1]

# Adcyap1r1

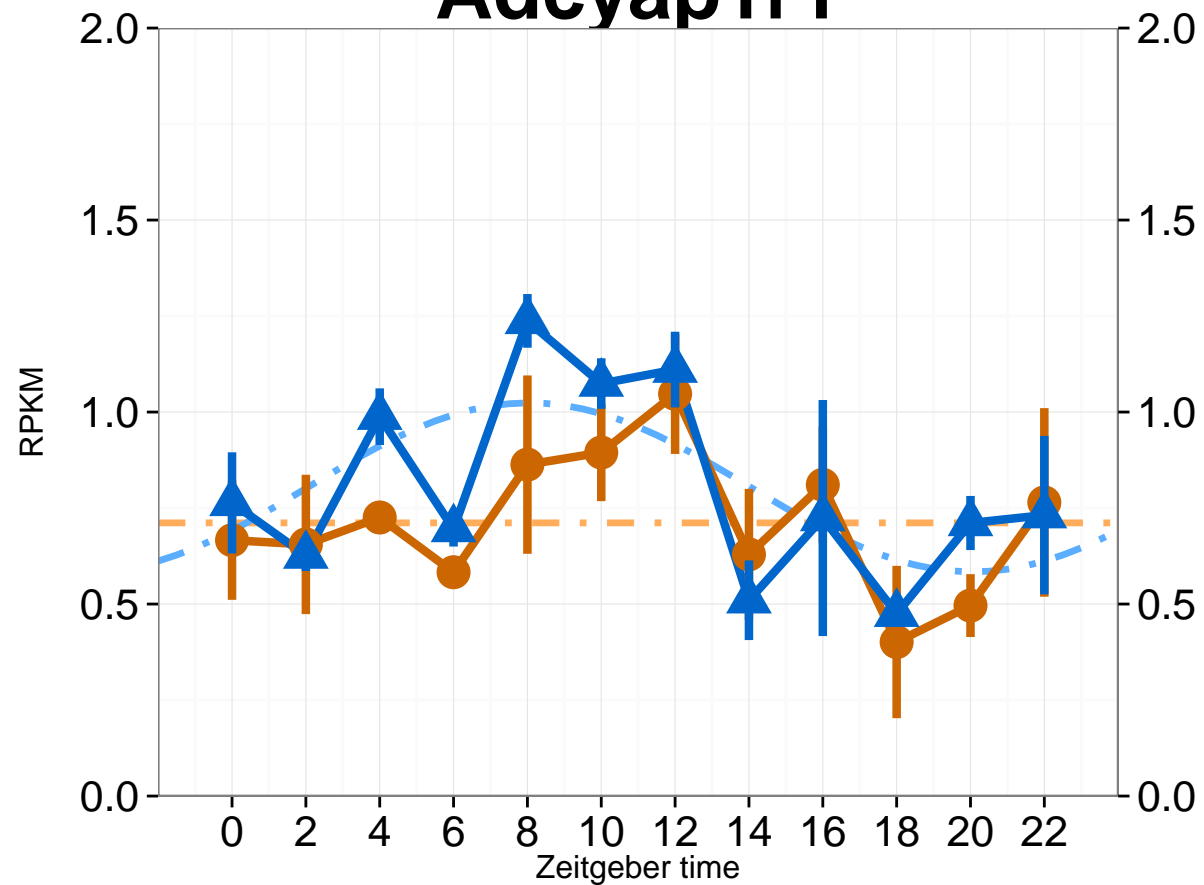

# Adcyap1r1

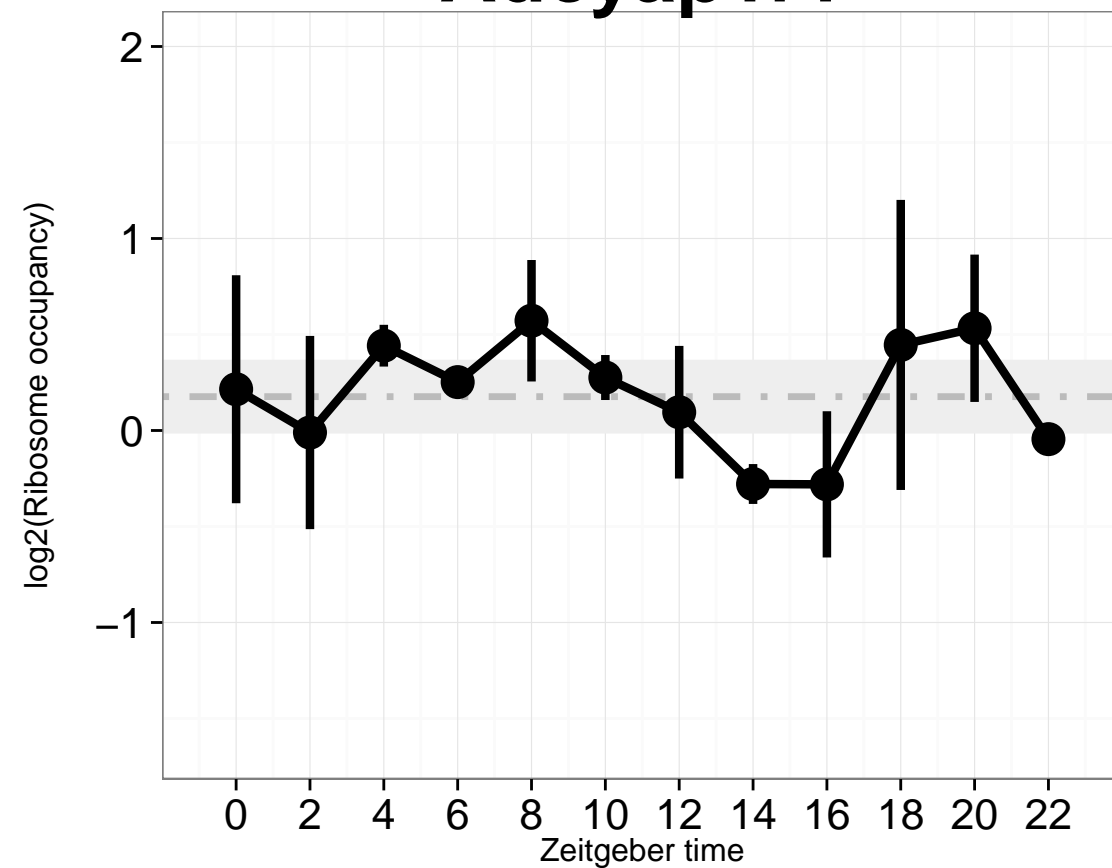

Supplement: Supplementary file 3605 [file 1]

## Apobec3

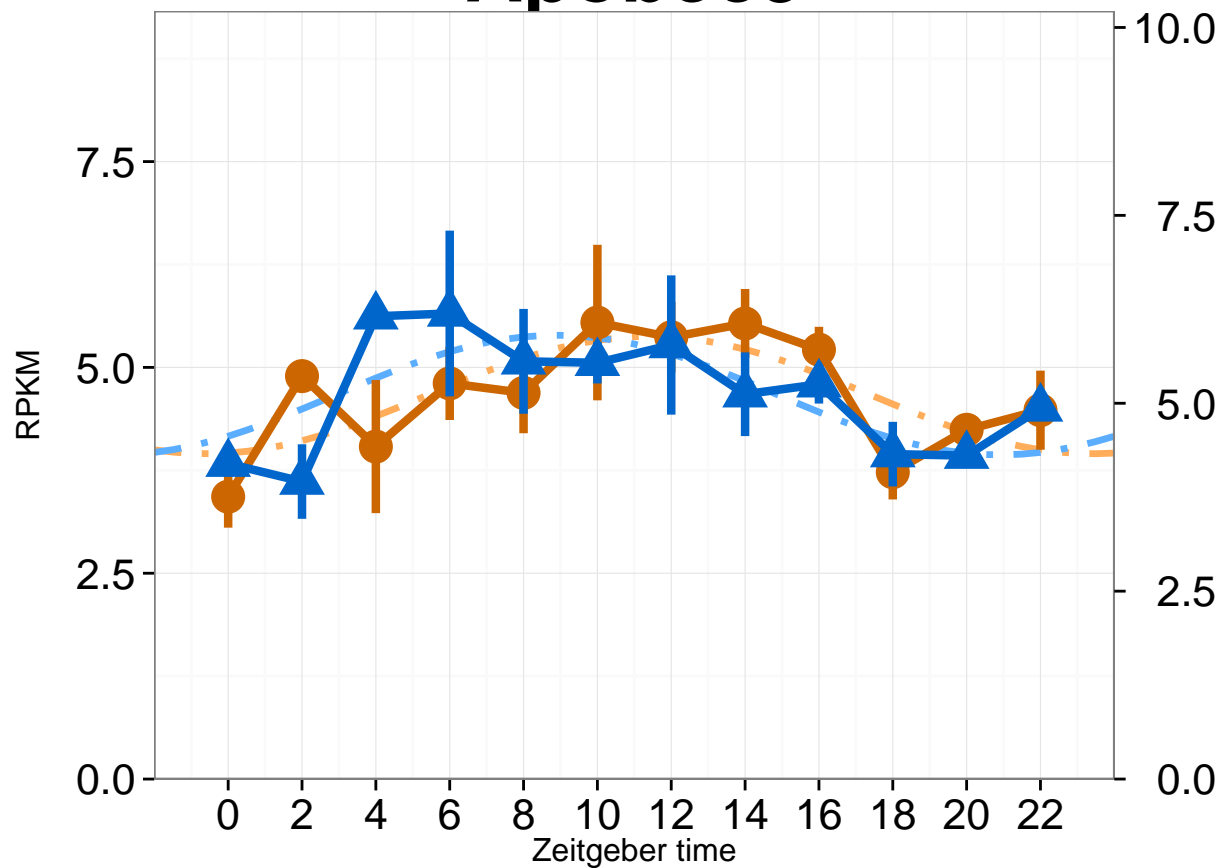

## Apobec3

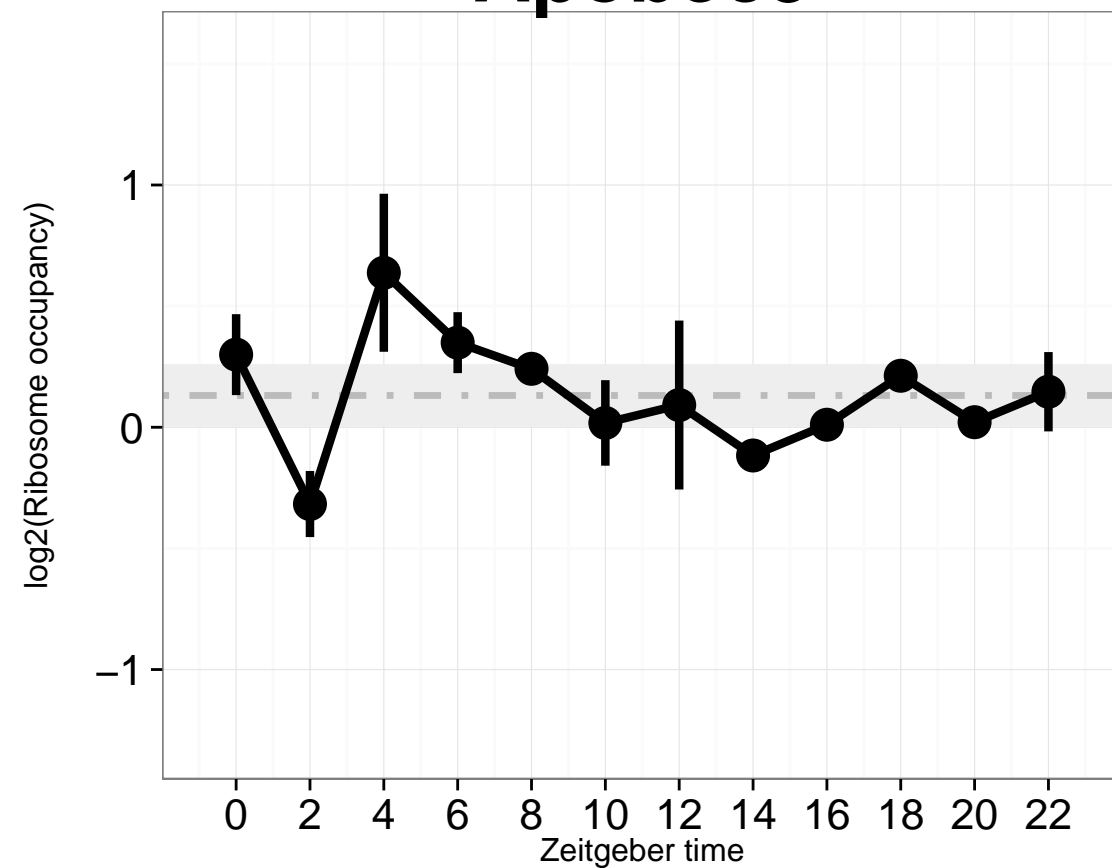

Supplement: Supplementary file 3606 [file 1]

# Slc44a3

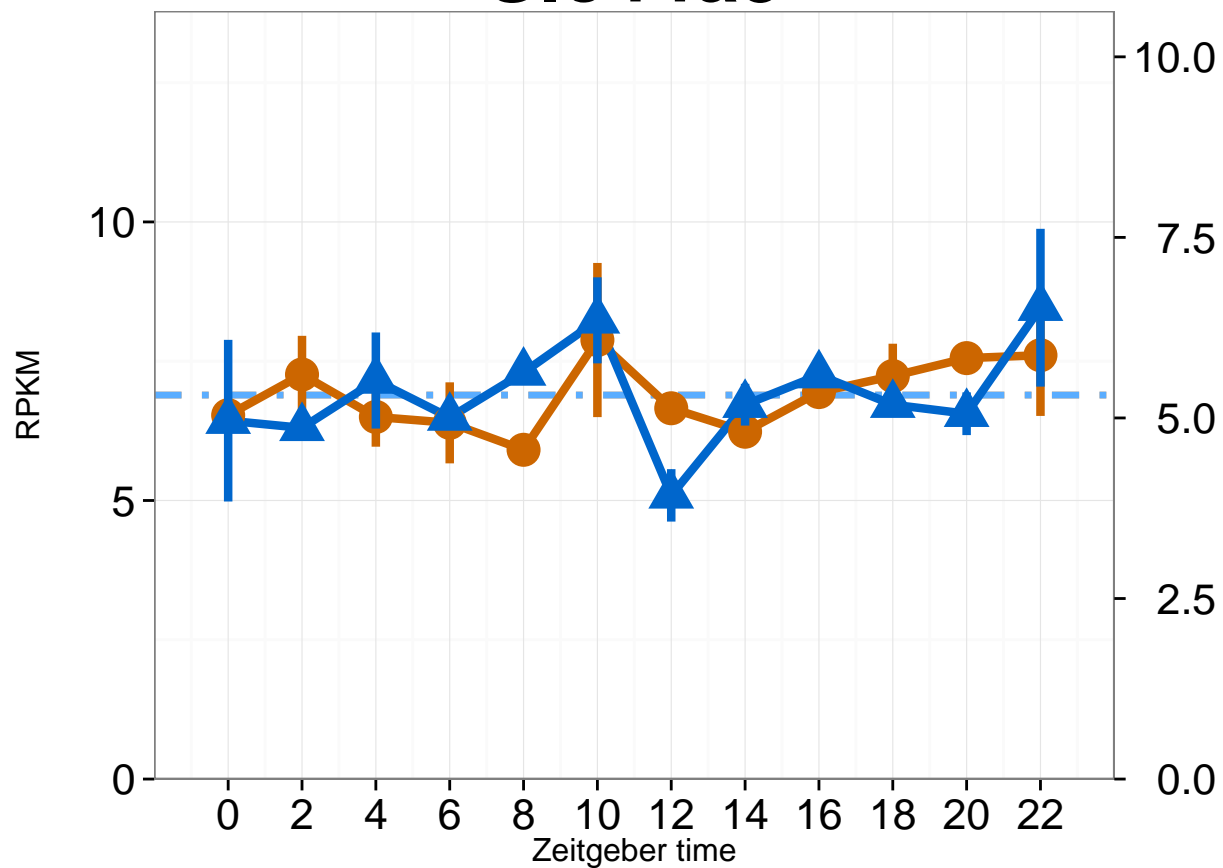

# Slc44a3

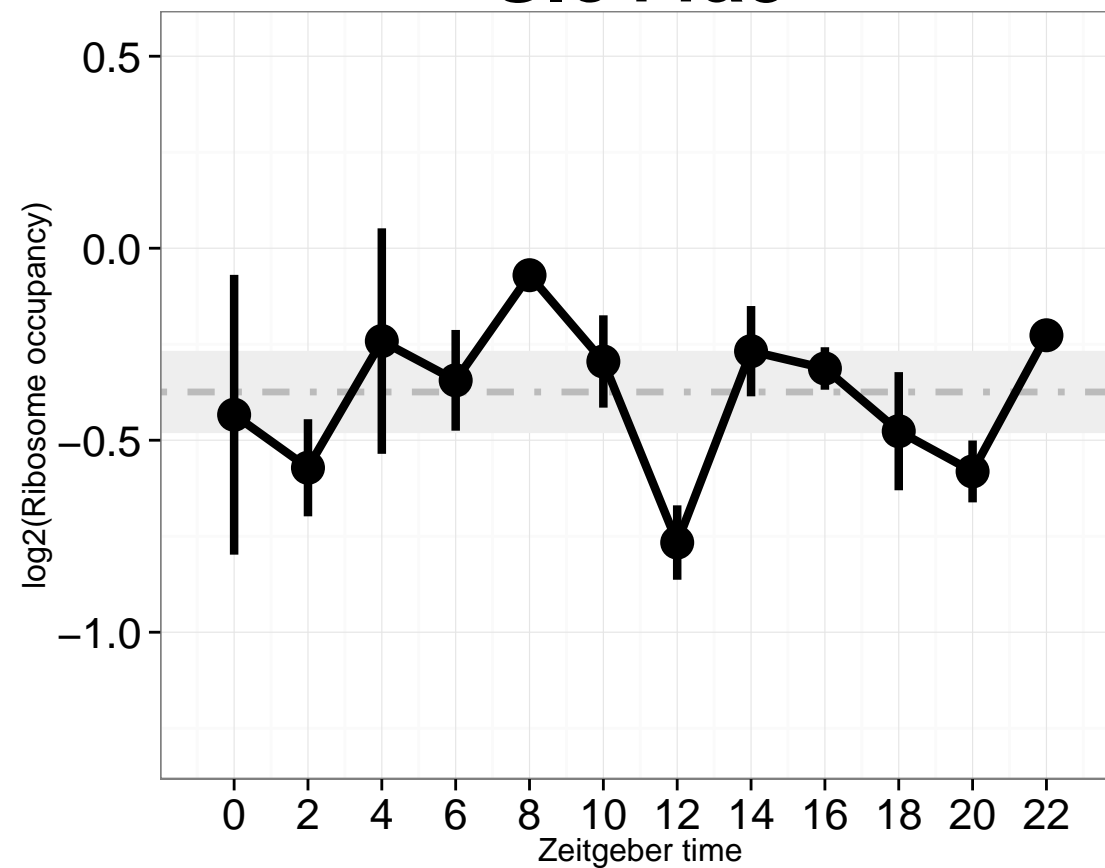

Supplement: Supplementary file 3607 [file 1]

## Crebl2

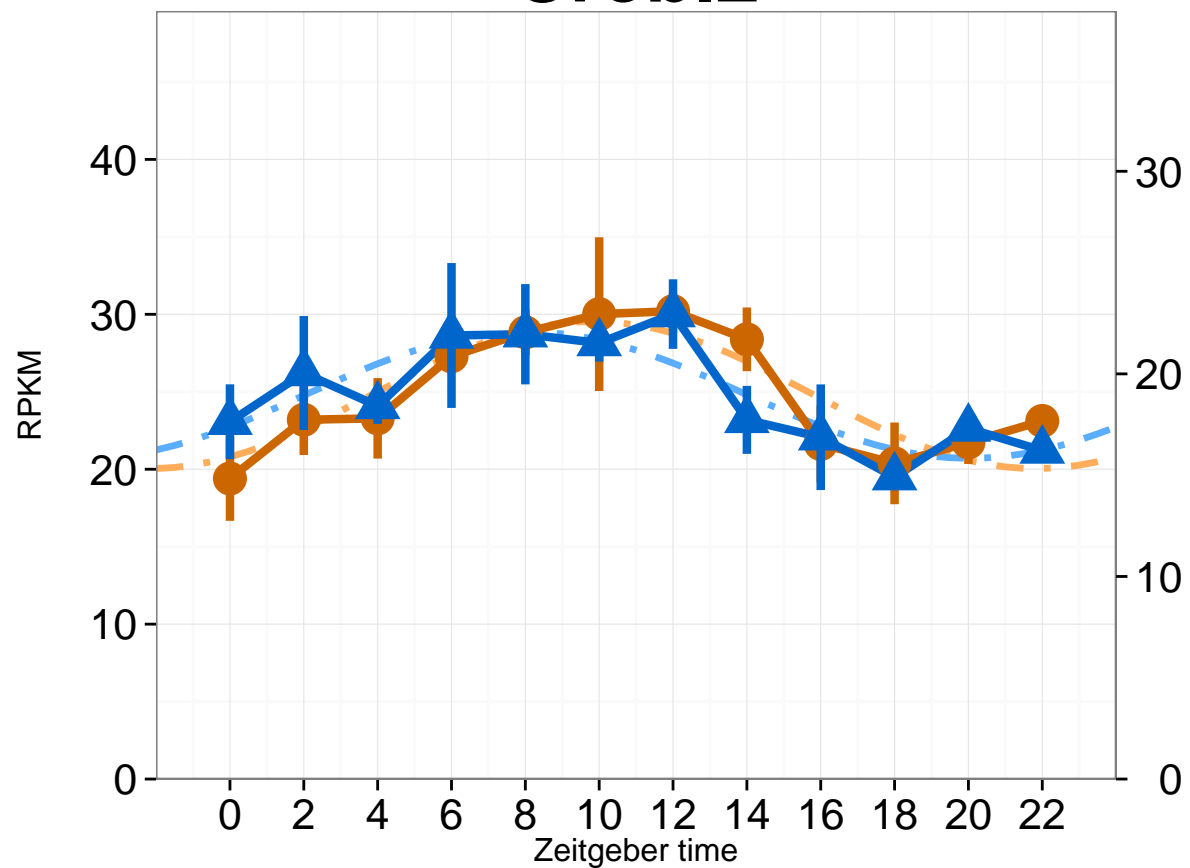

## Crebl2

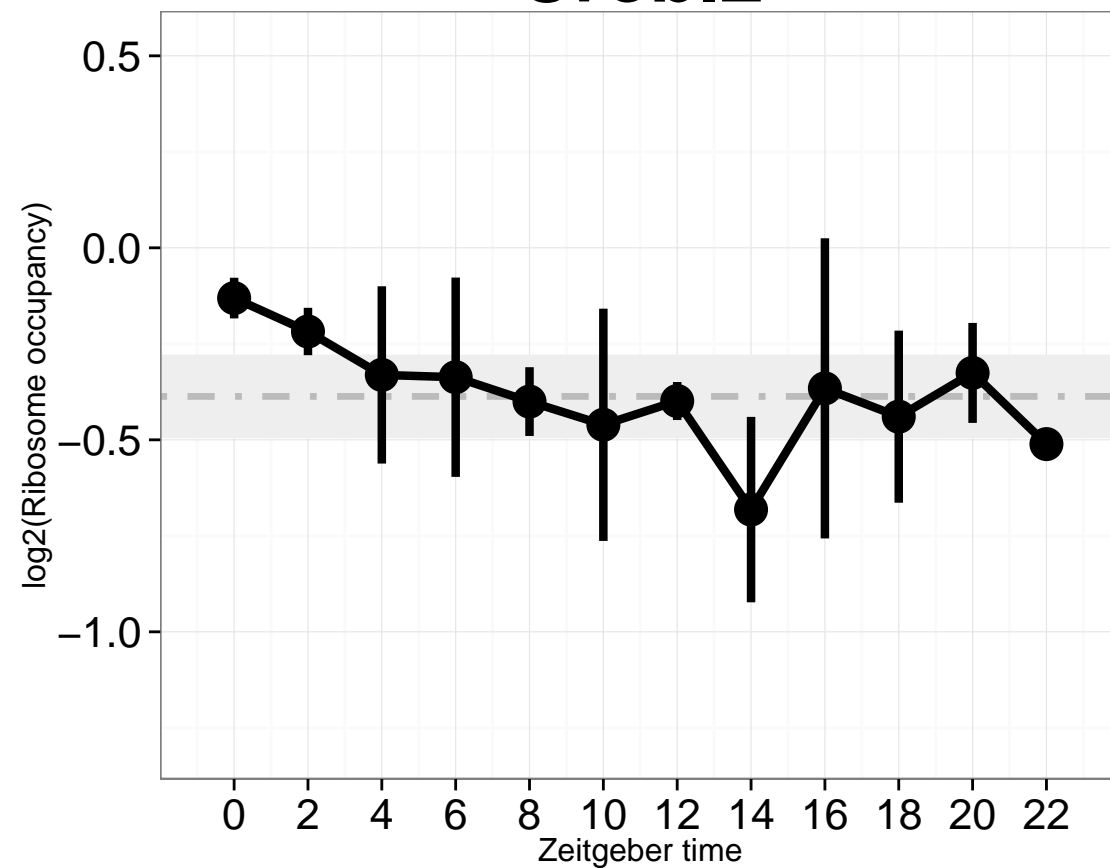

Supplement: Supplementary file 3608 [file 1]

## Rab38

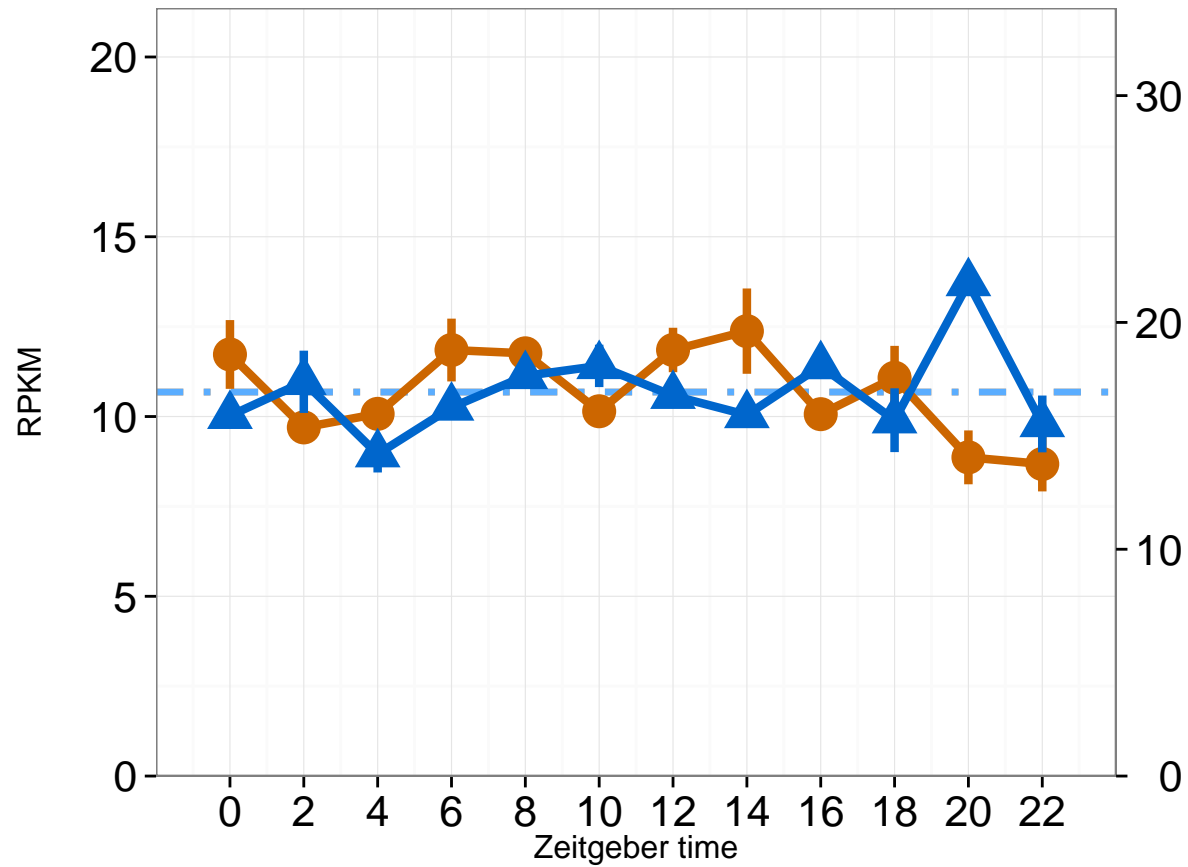

## Rab38

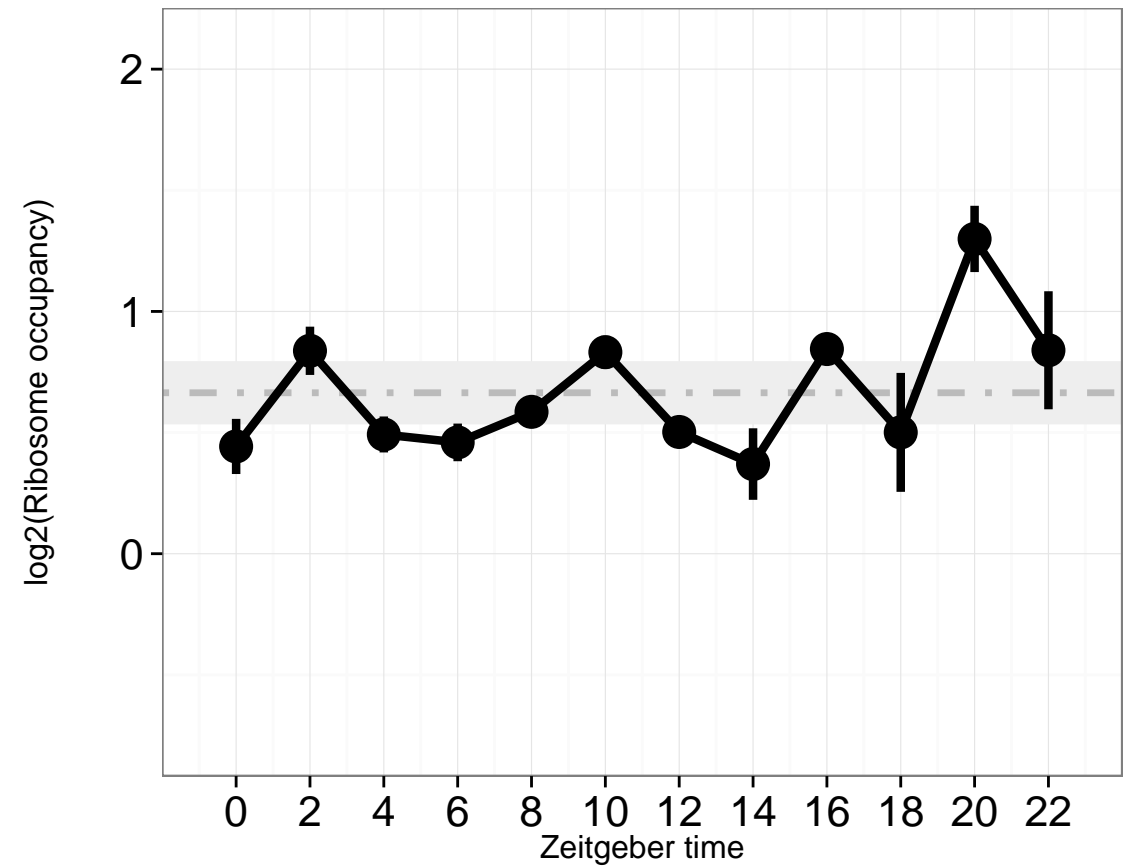

Supplement: Supplementary file 3609 [file 1]

# MuI1

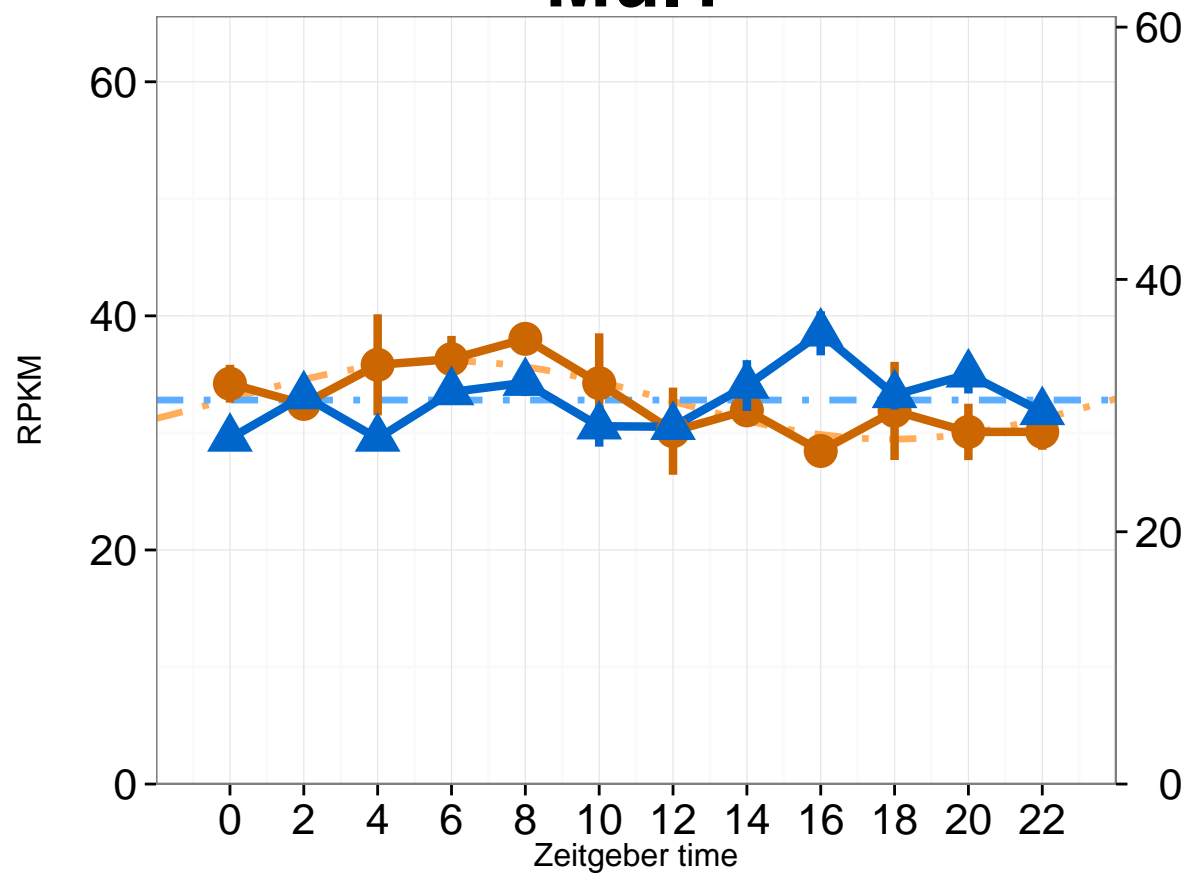

# MuI1

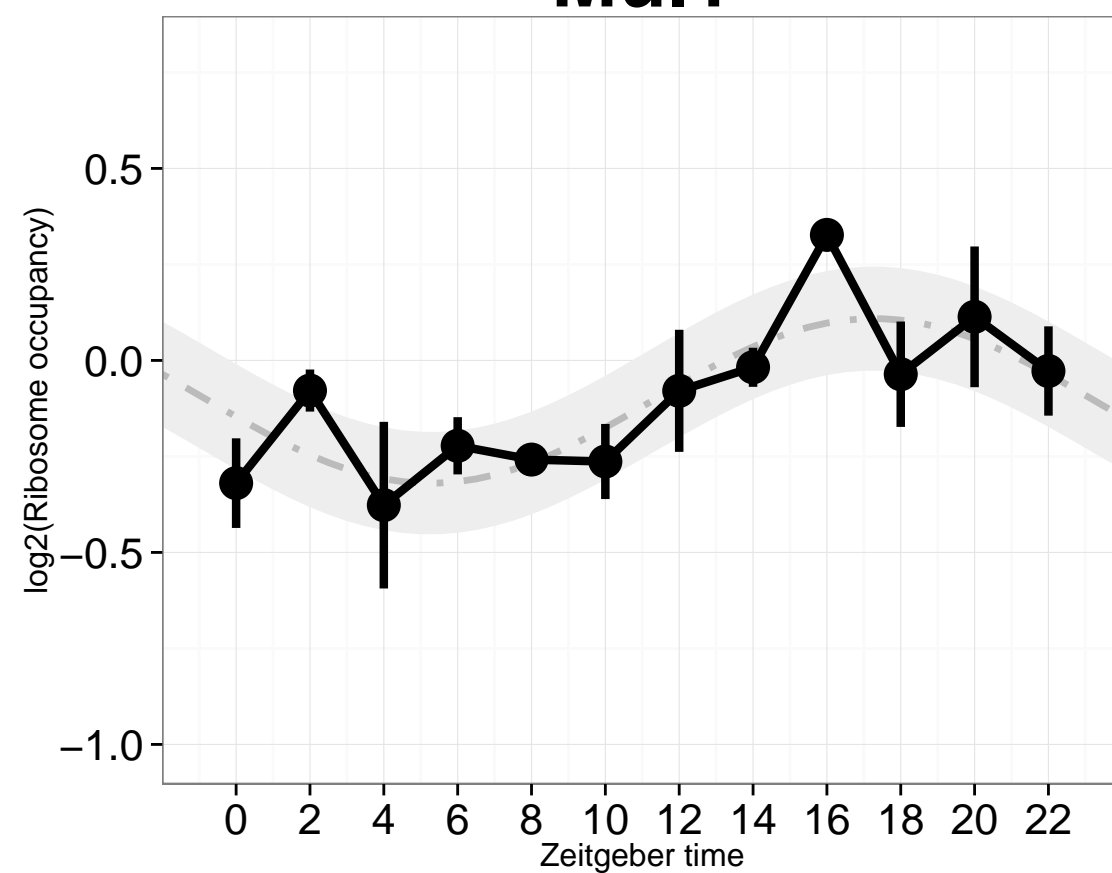

Supplement: Supplementary file 3610 [file 1]

## Krt7

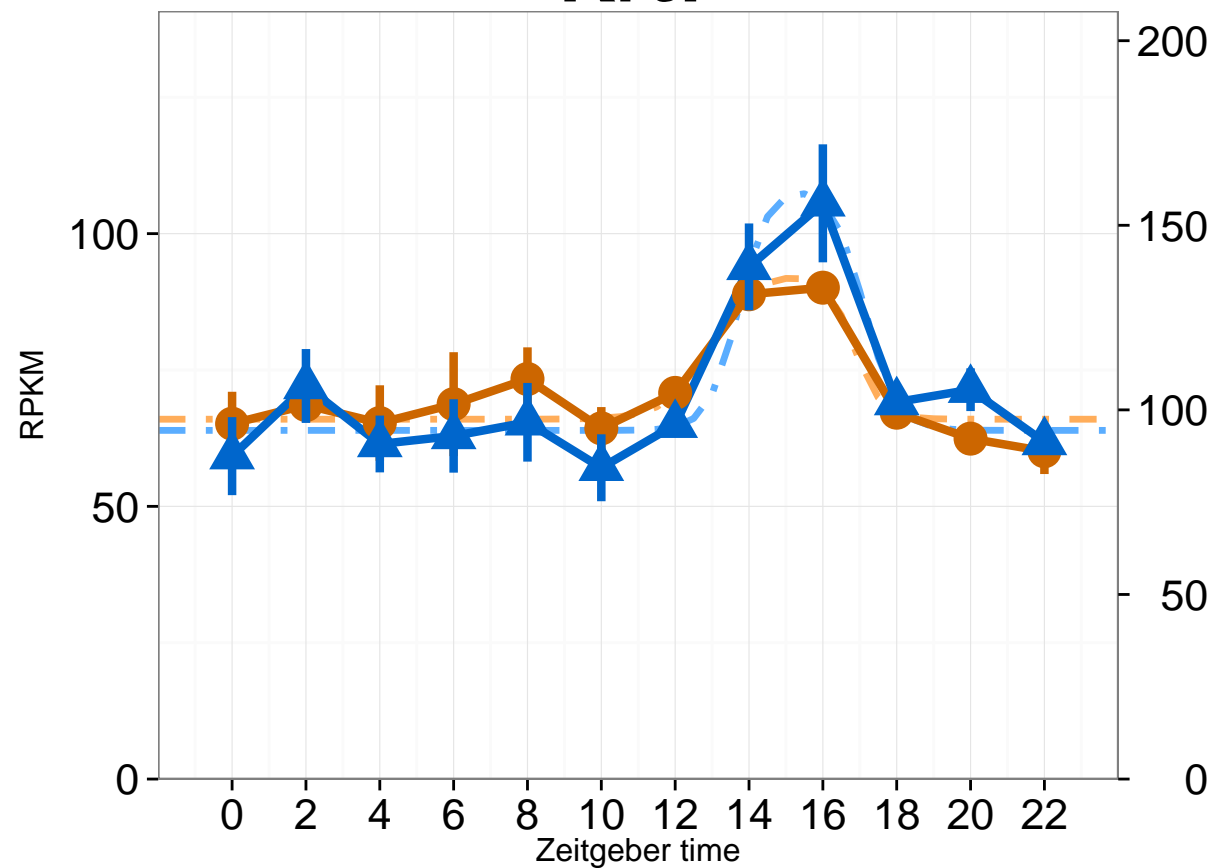

## Krt7

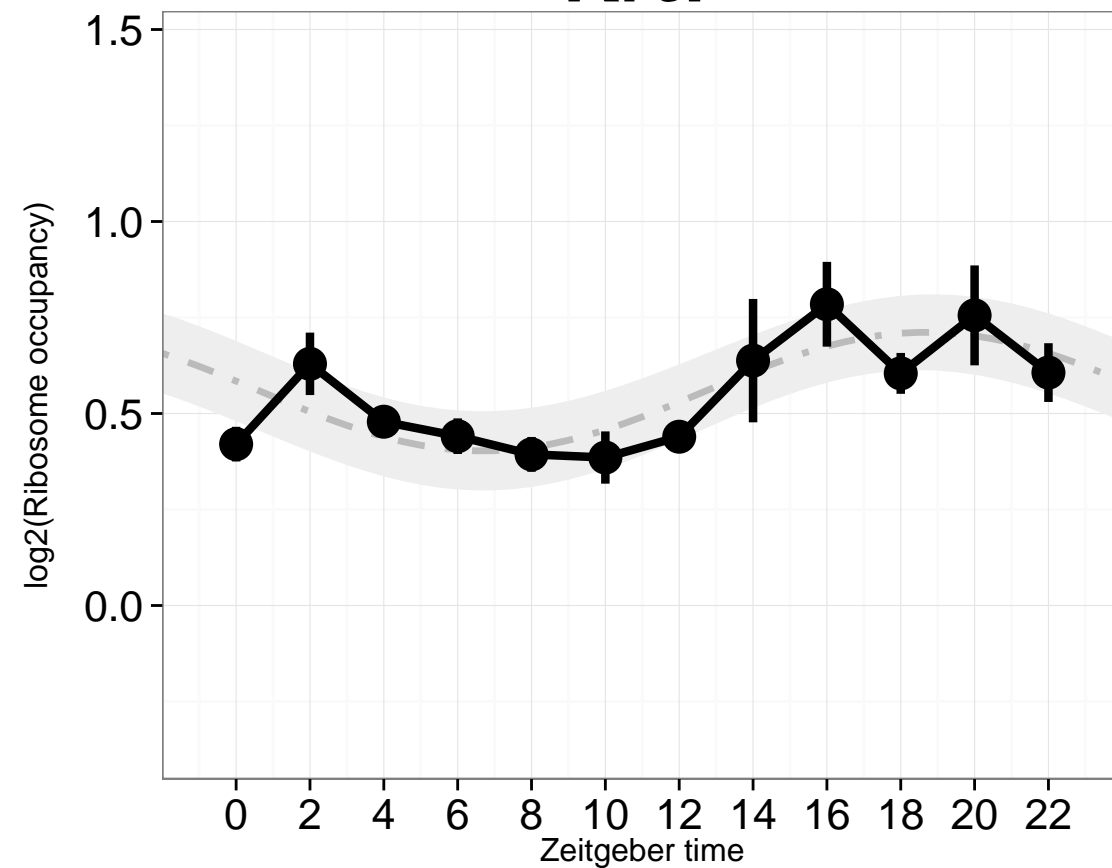

Supplement: Supplementary file 3611 [file 1]

## Nfkbia

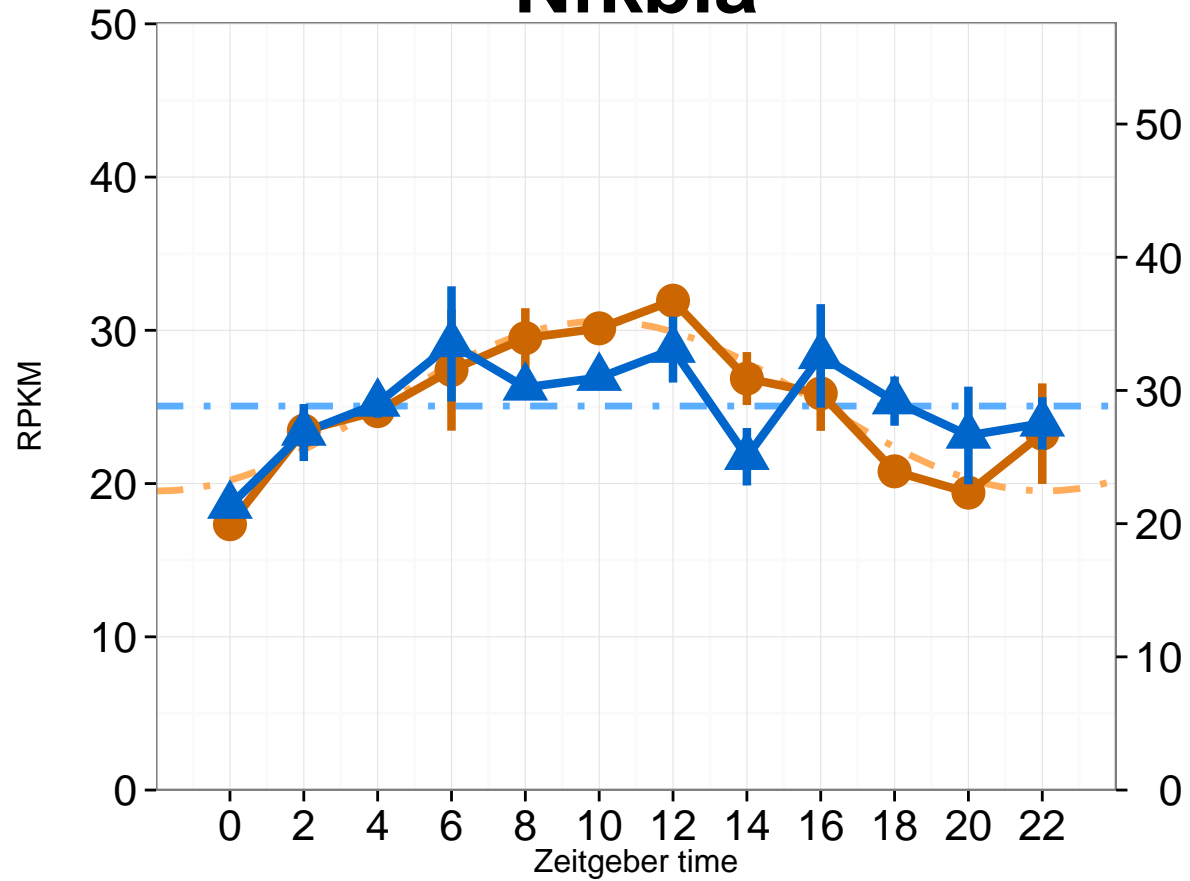

## Nfkbia

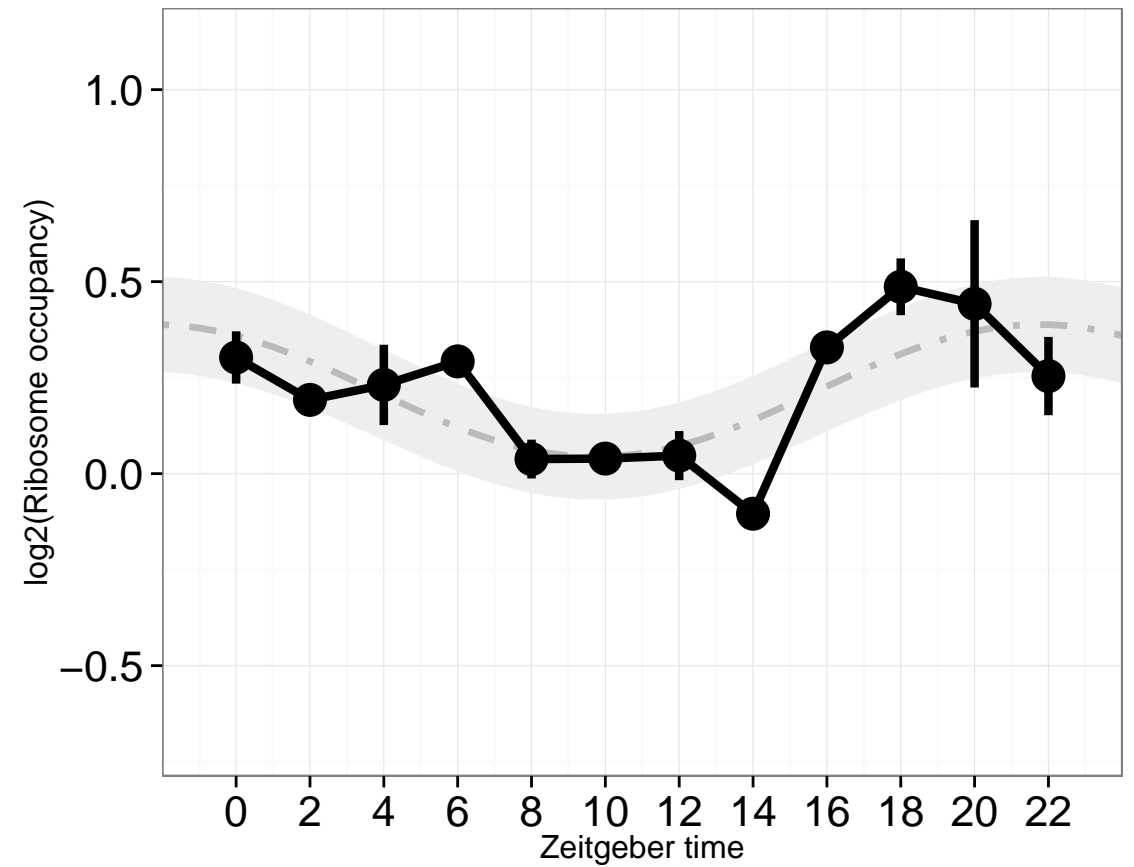

Supplement: Supplementary file 3612 [file 1]

**Klk1b27 TR**

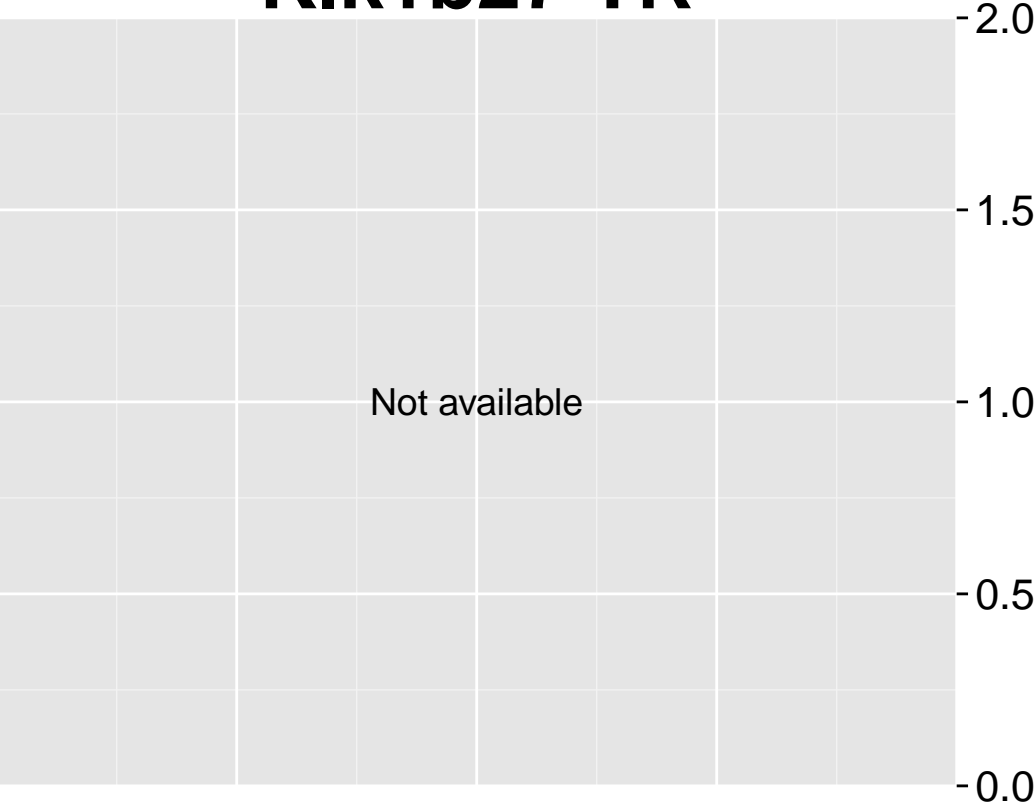

**Klk1b27 log2(Ribosome occupancy)**

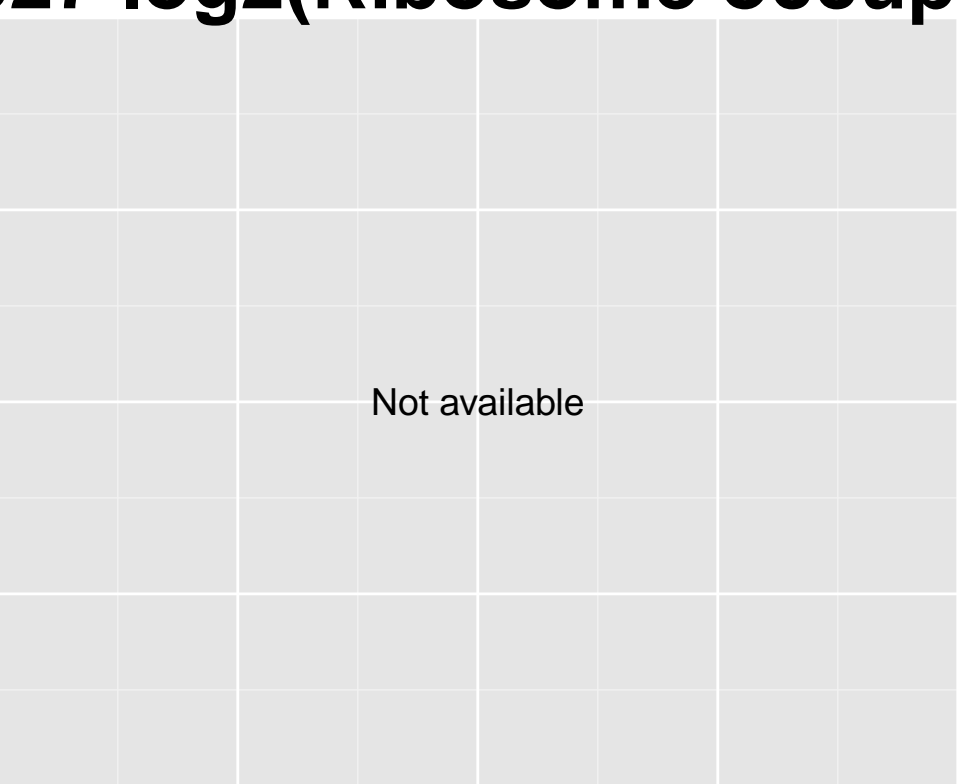

Supplement: Supplementary file 3613 [file 1]
