# Supplementary material (part 37 of 133)
Source: publisher figshare collection journal article supplement (https://springernature.figshare.com/articles/dataset/_/4903193)

## Strada

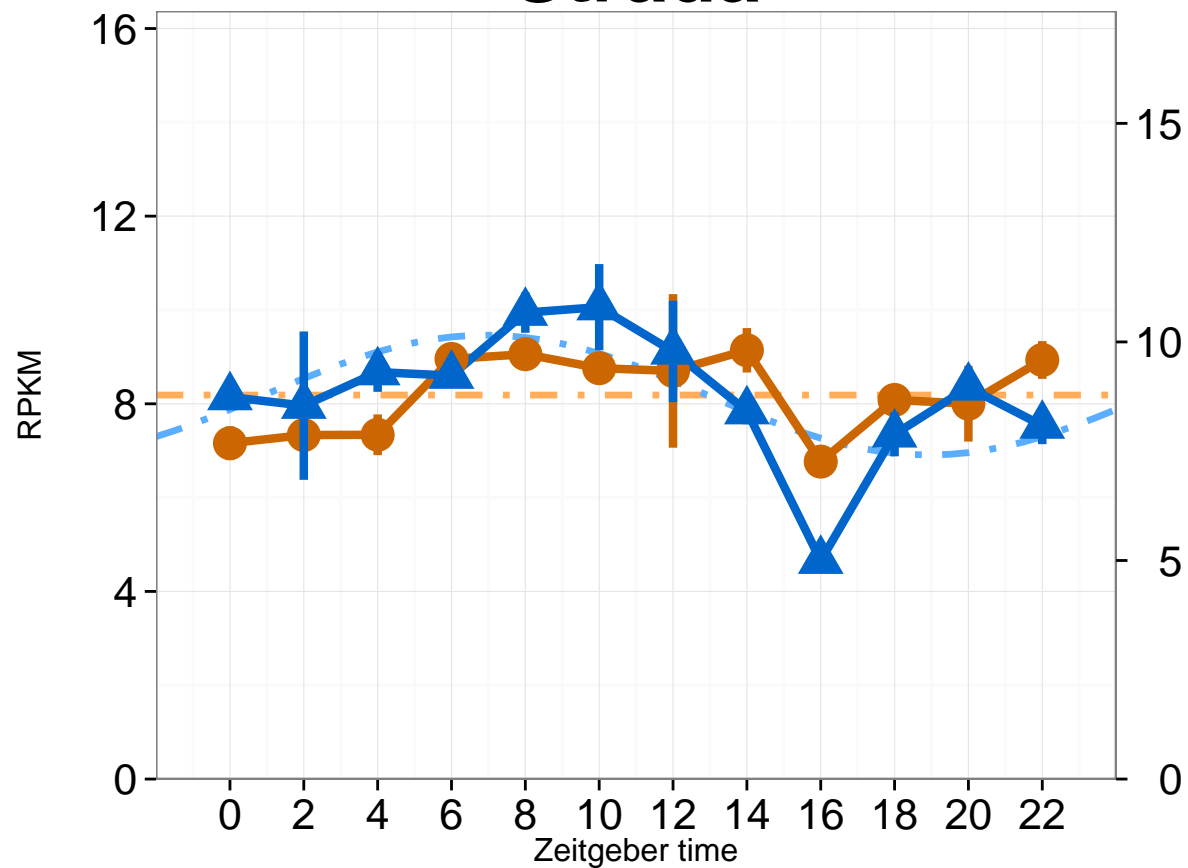

## Strada

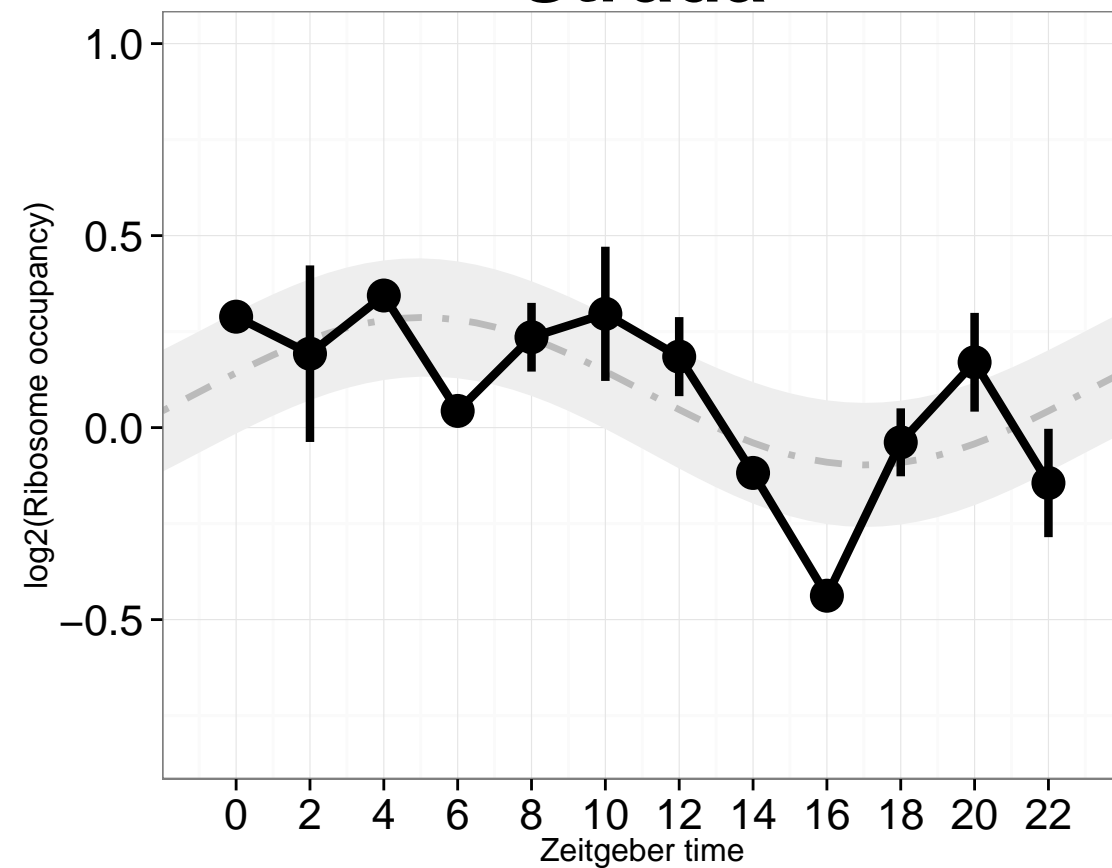

Supplement: Supplementary file 3614 [file 1]

# Prdx6

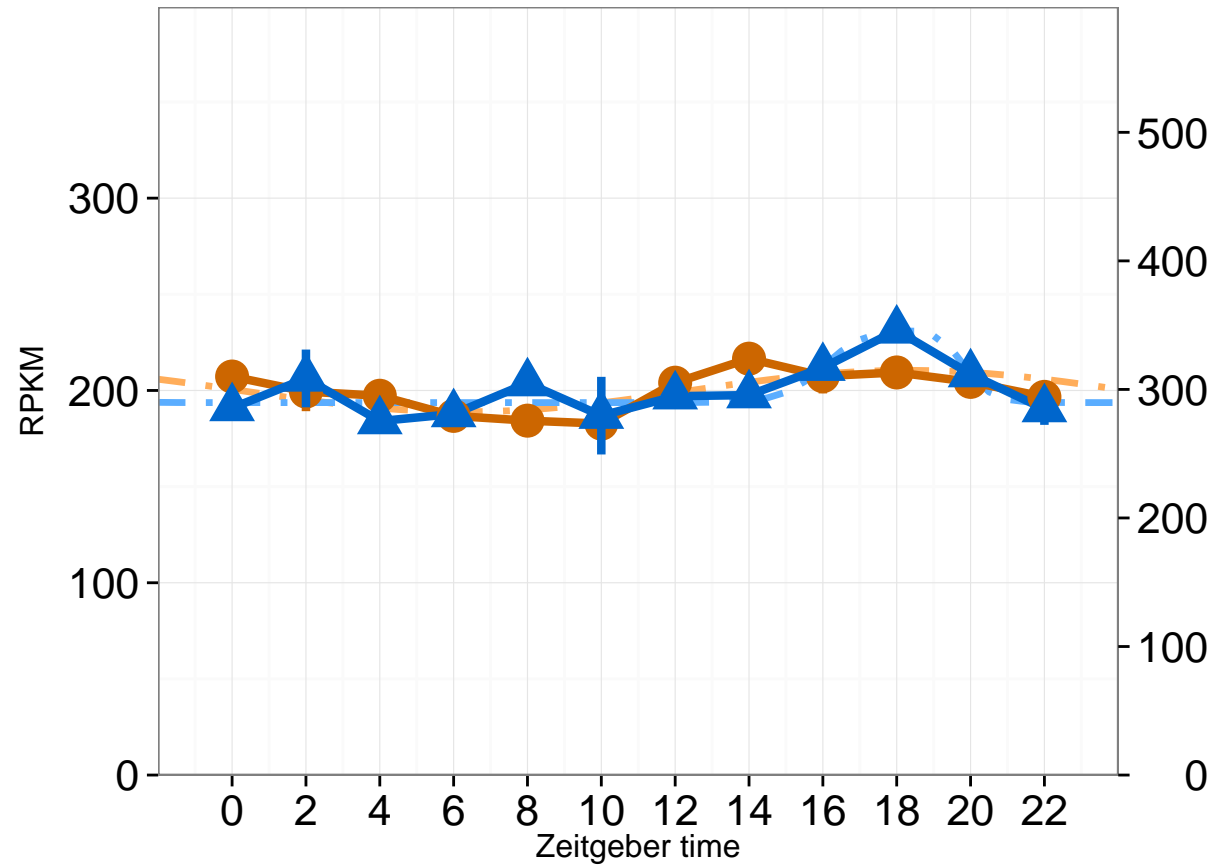

# Prdx6

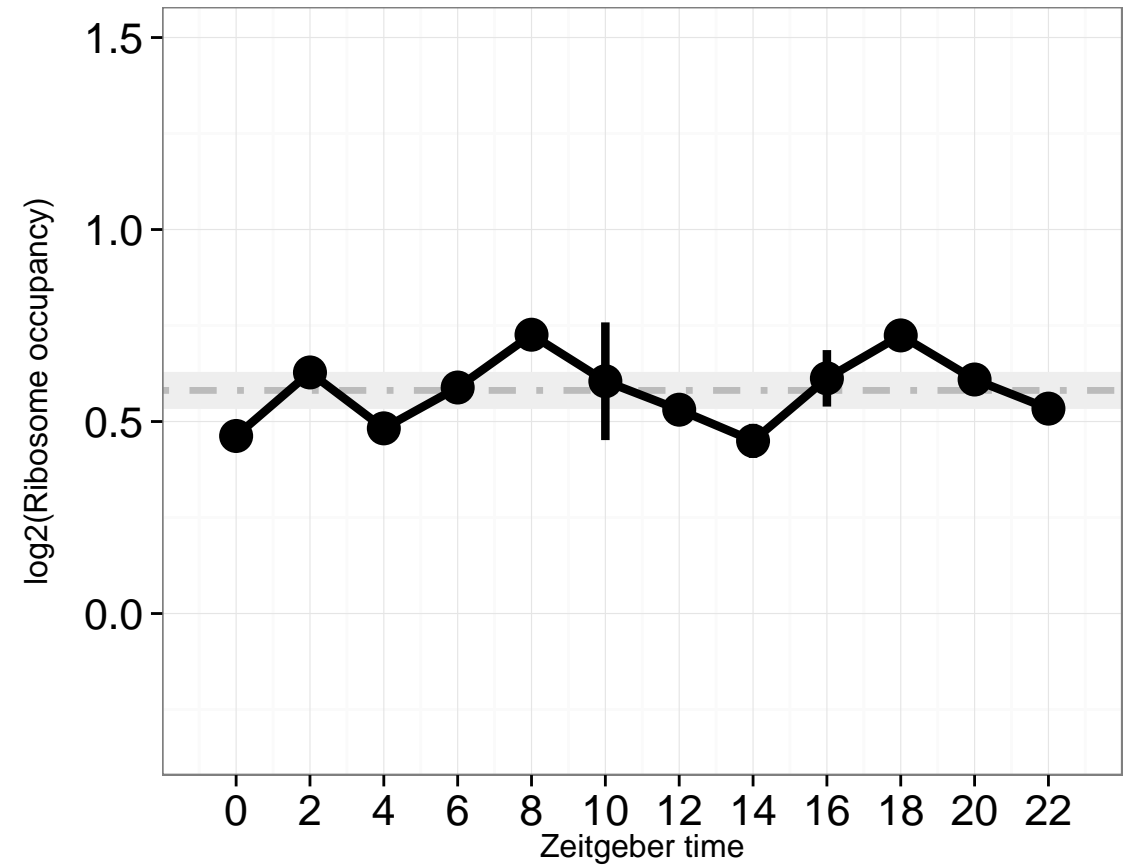

Supplement: Supplementary file 3615 [file 1]

## Pkd2l2

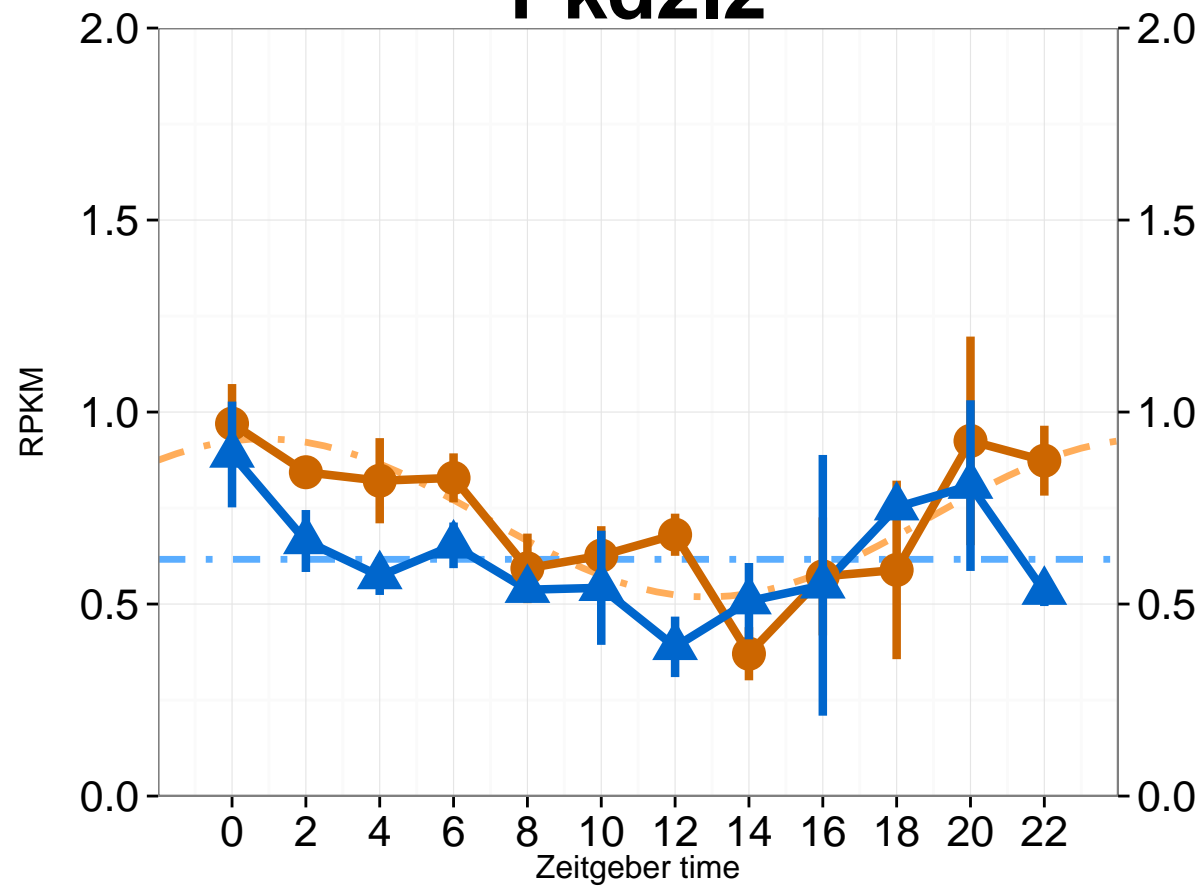

## Pkd2l2

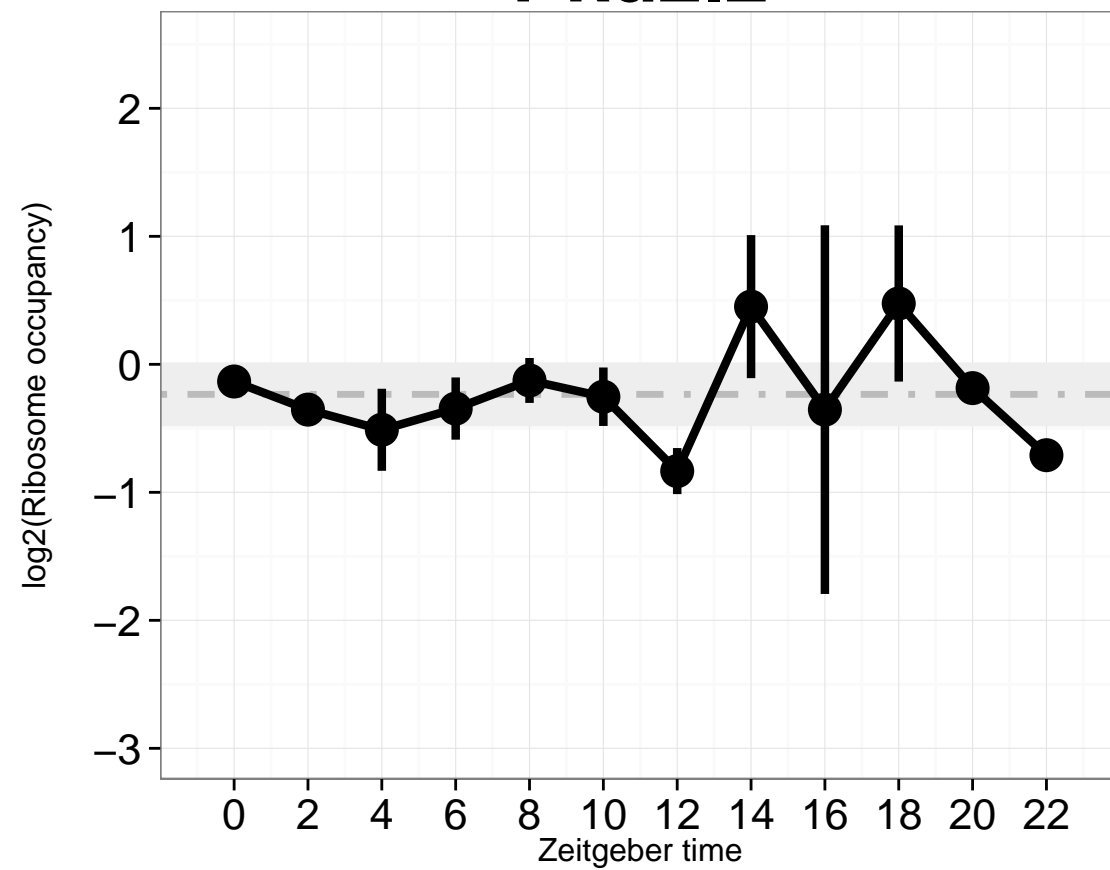

Supplement: Supplementary file 3616 [file 1]

# Cept1

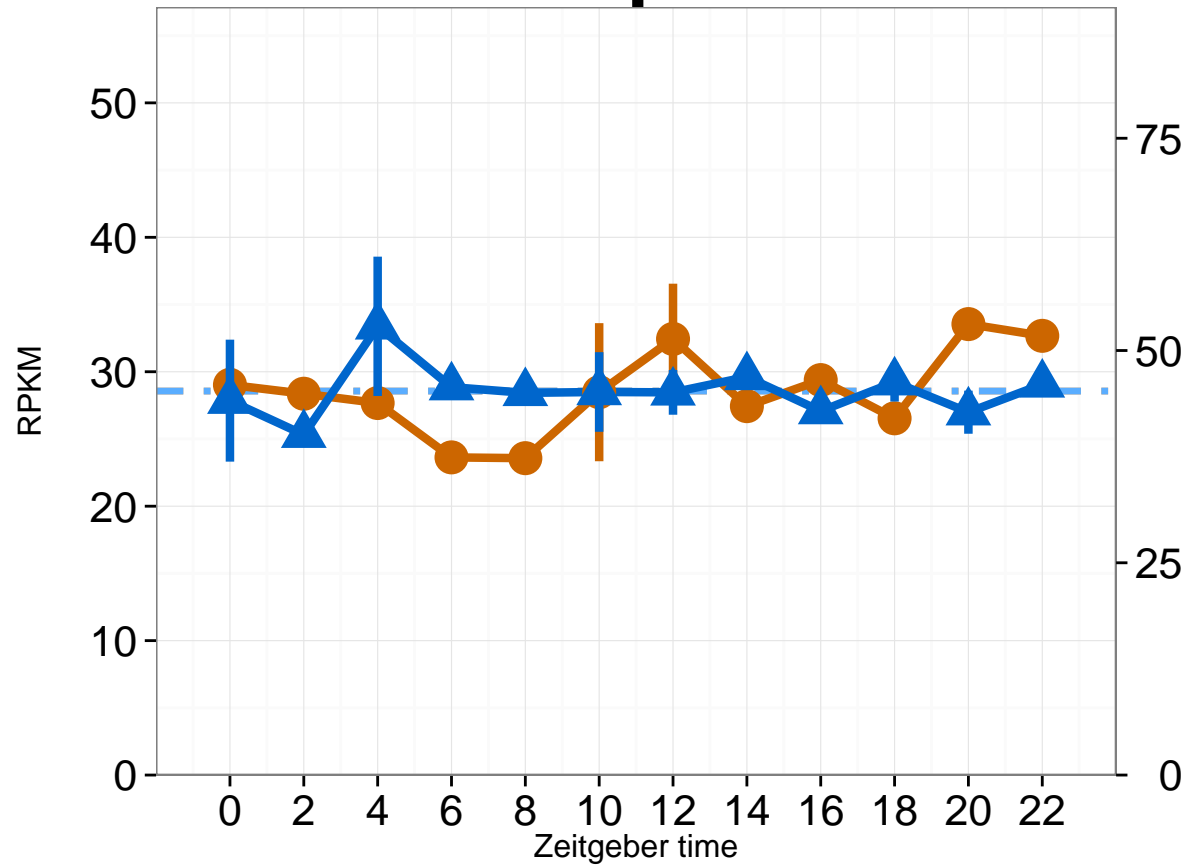

# Cept1

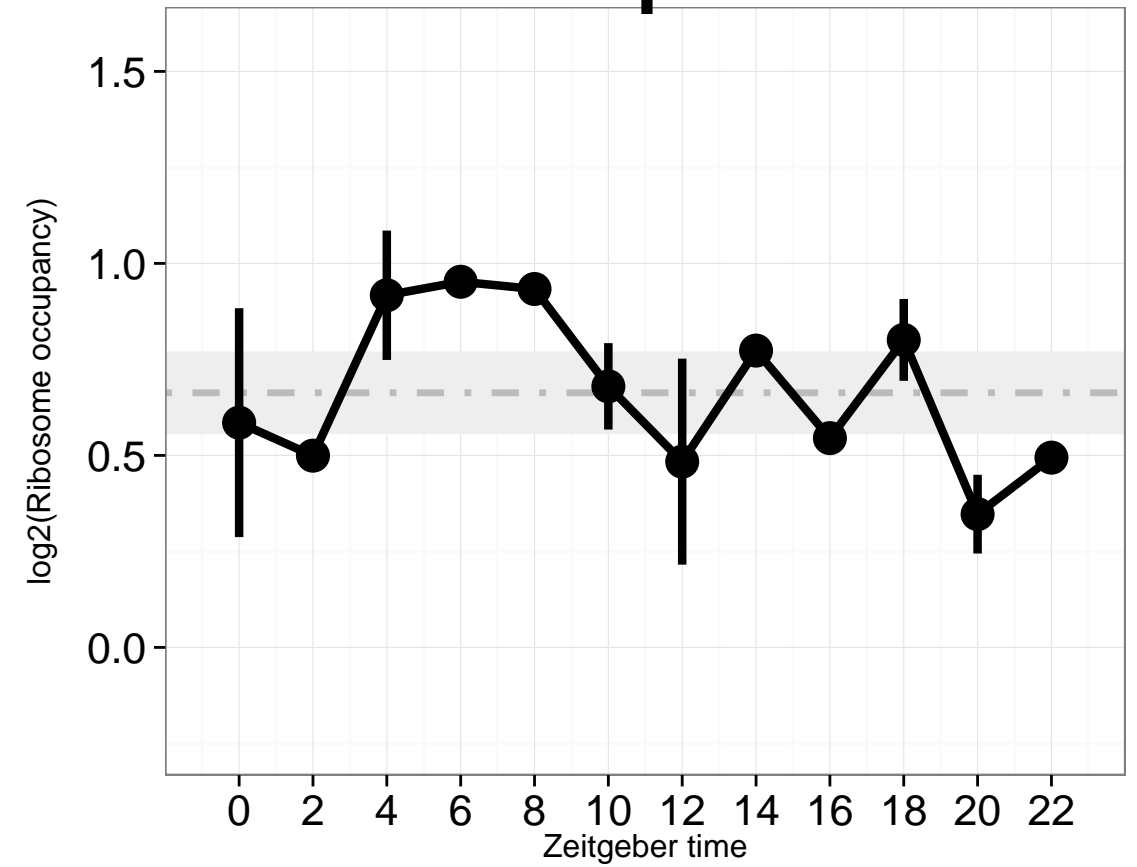

Supplement: Supplementary file 3617 [file 1]

# Gnpat

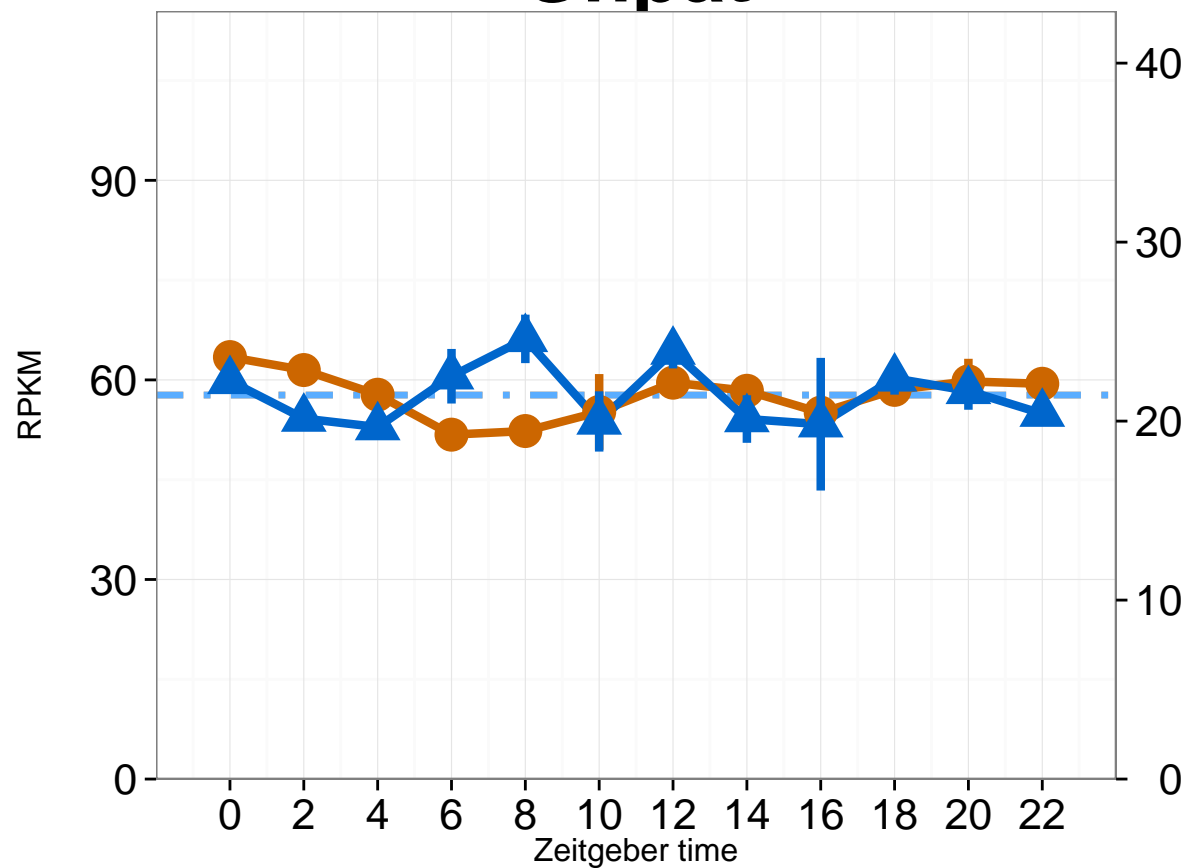

# Gnpat

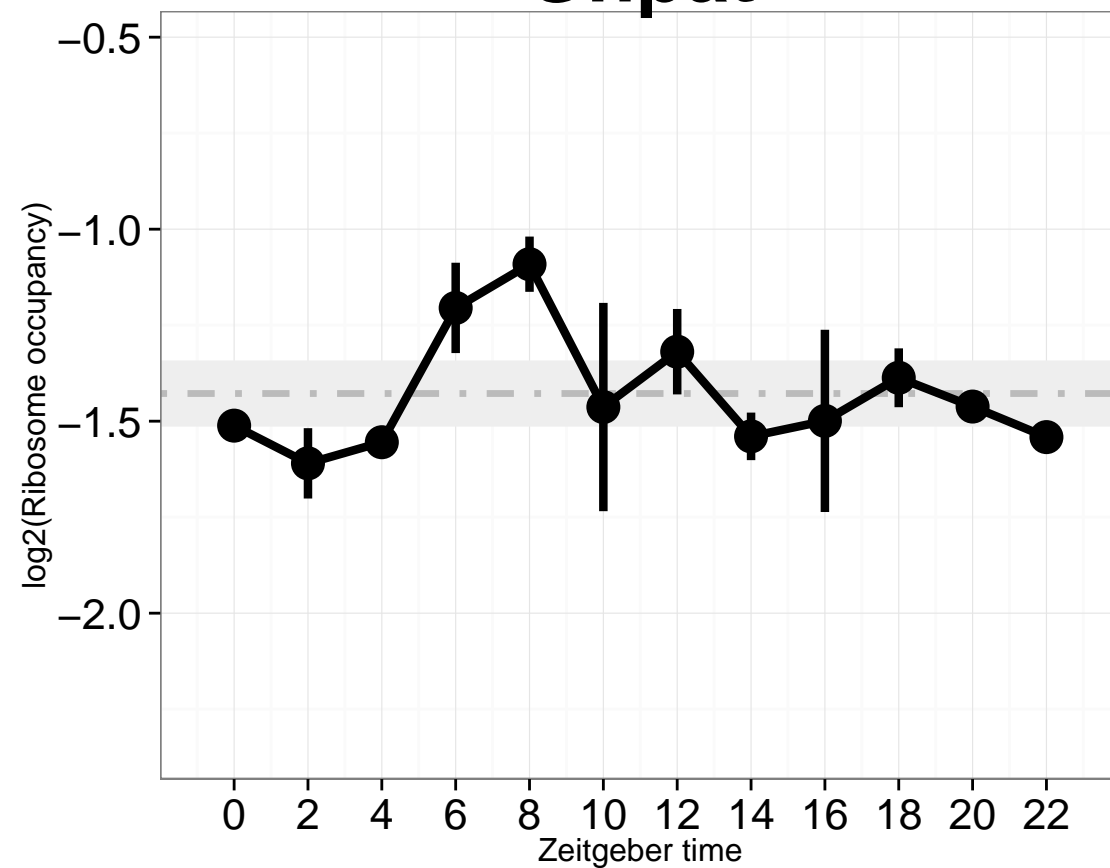

Supplement: Supplementary file 3618 [file 1]

# Srebf1

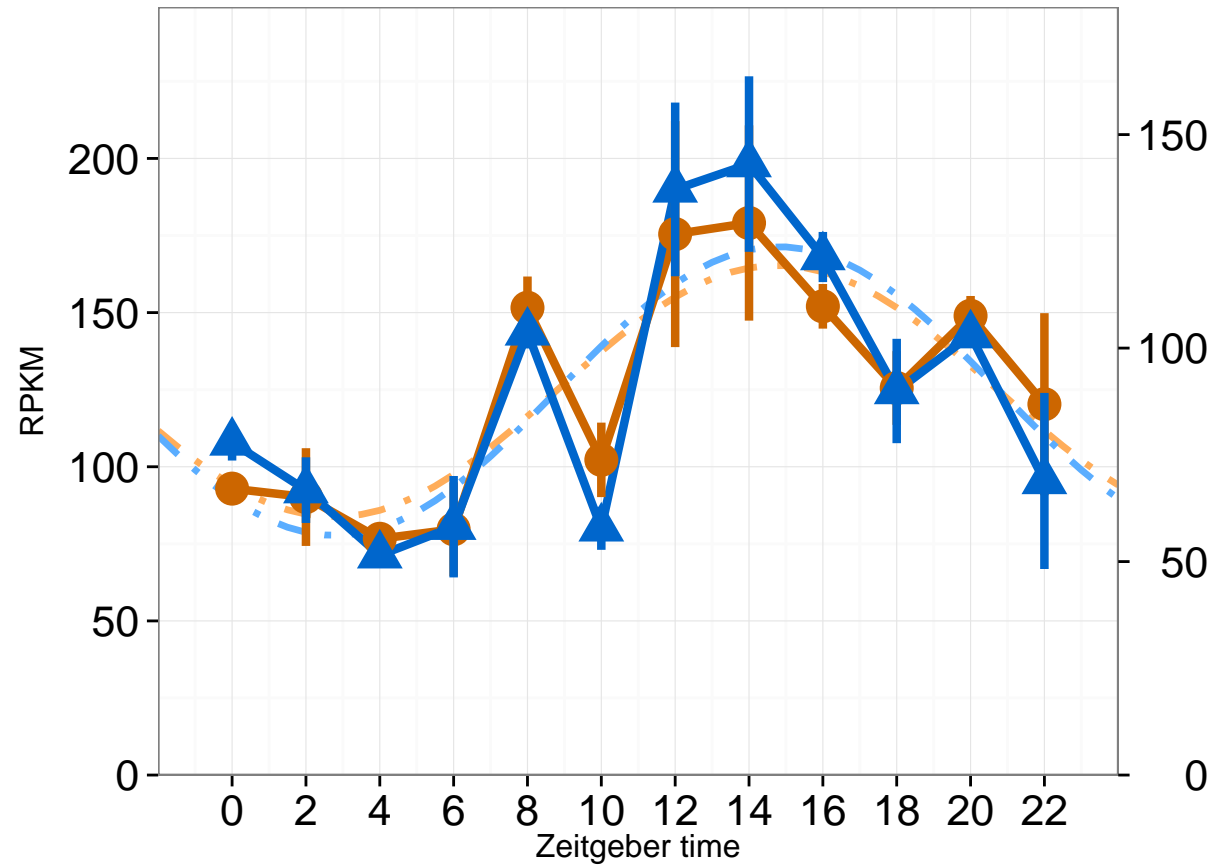

# Srebf1

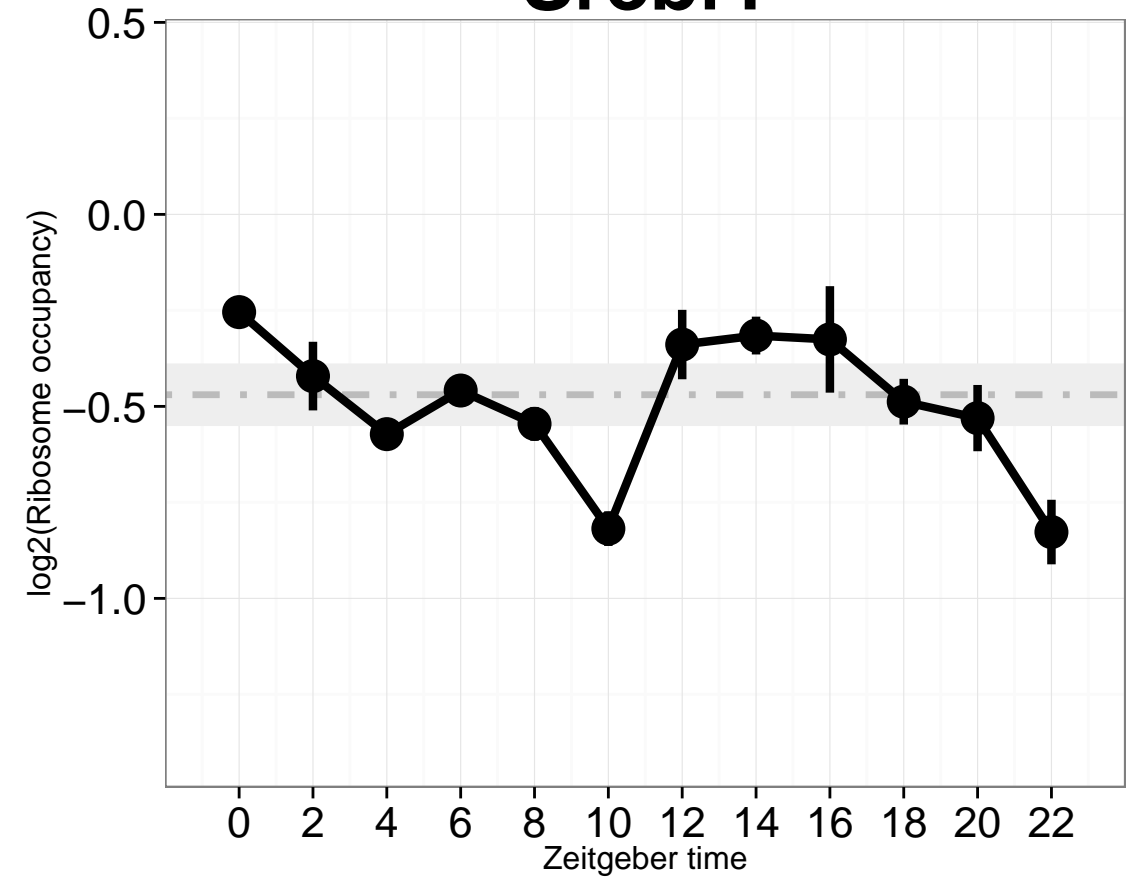

Supplement: Supplementary file 3619 [file 1]

## Il17ra

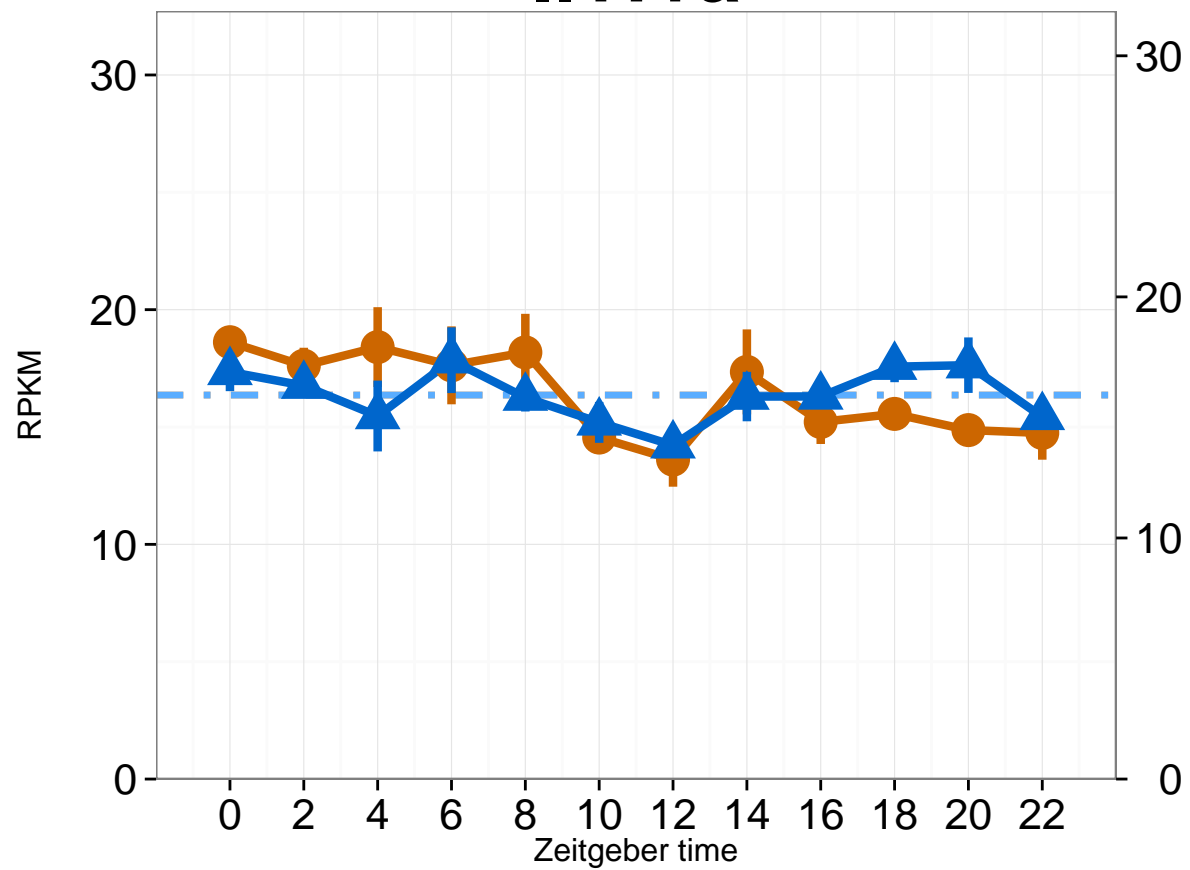

## Il17ra

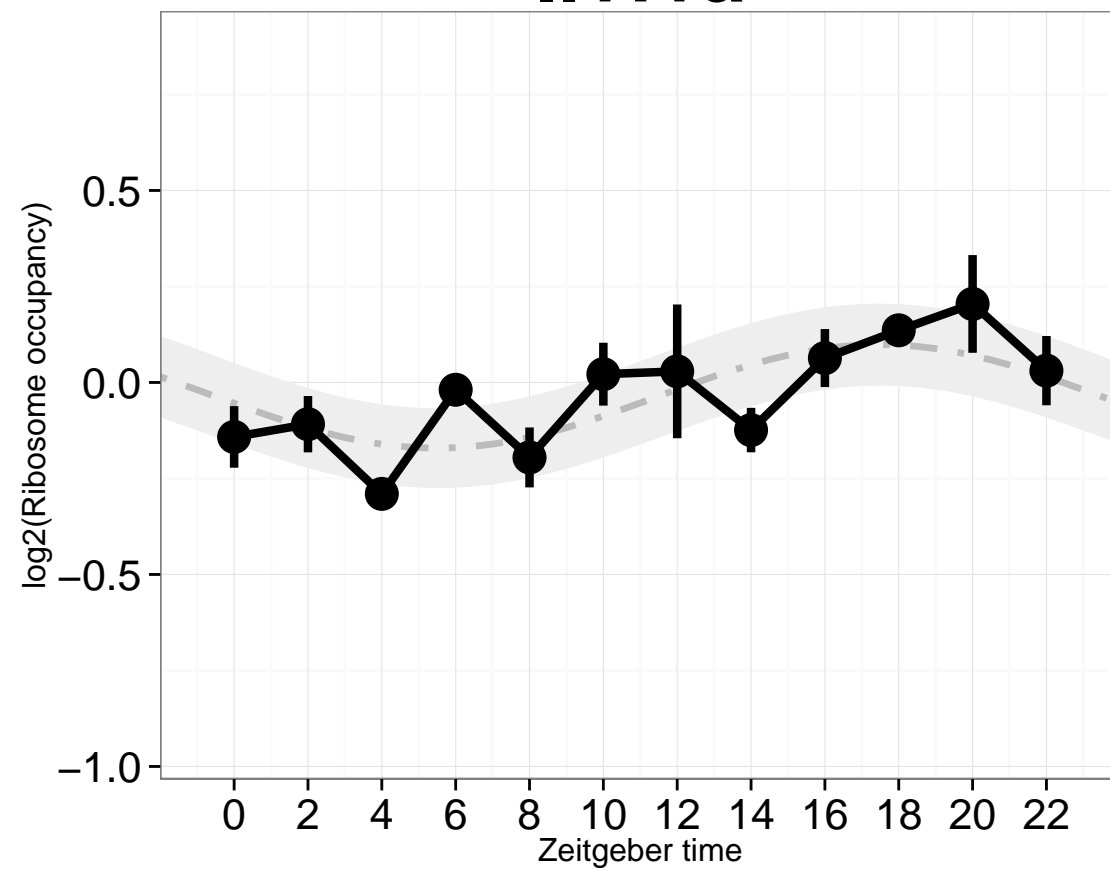

Supplement: Supplementary file 3620 [file 1]

## Pde4d

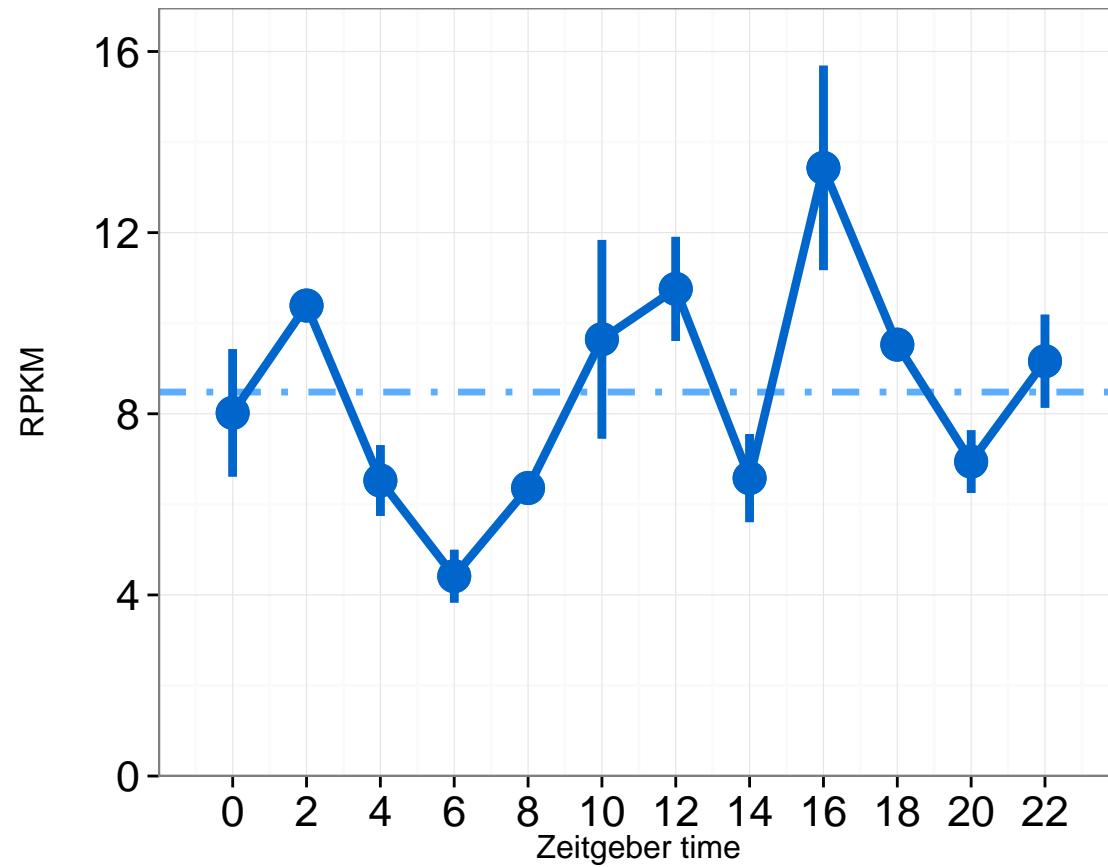

## Pde4d log2(Ribosome occupancy

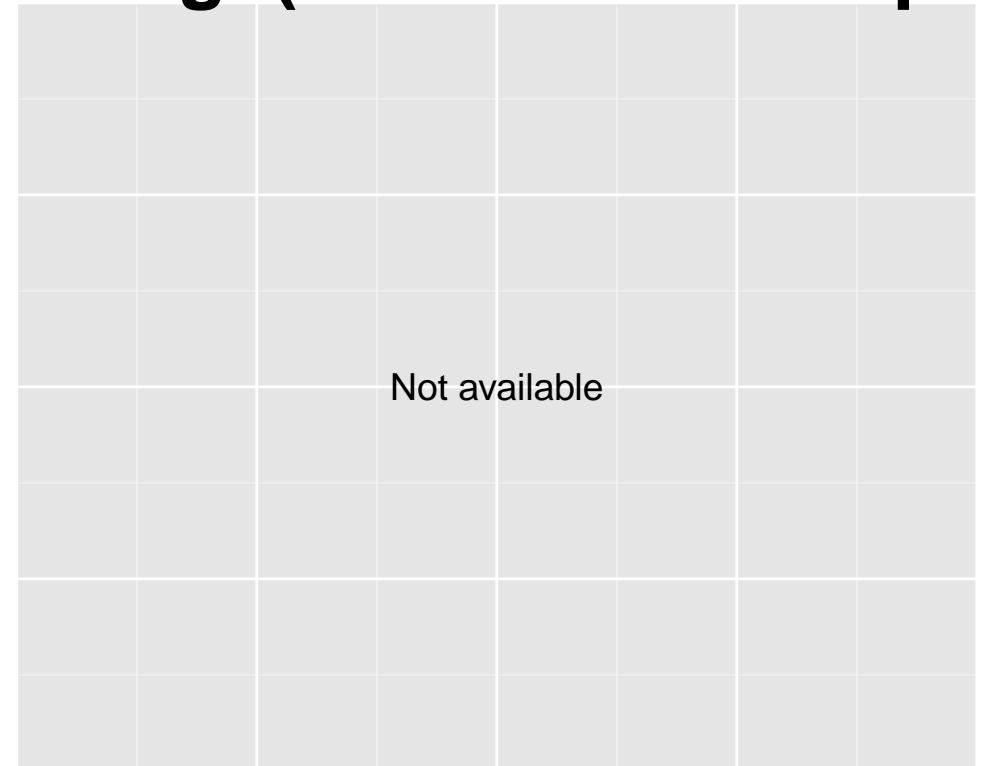

Supplement: Supplementary file 3621 [file 1]

# Klhdc1

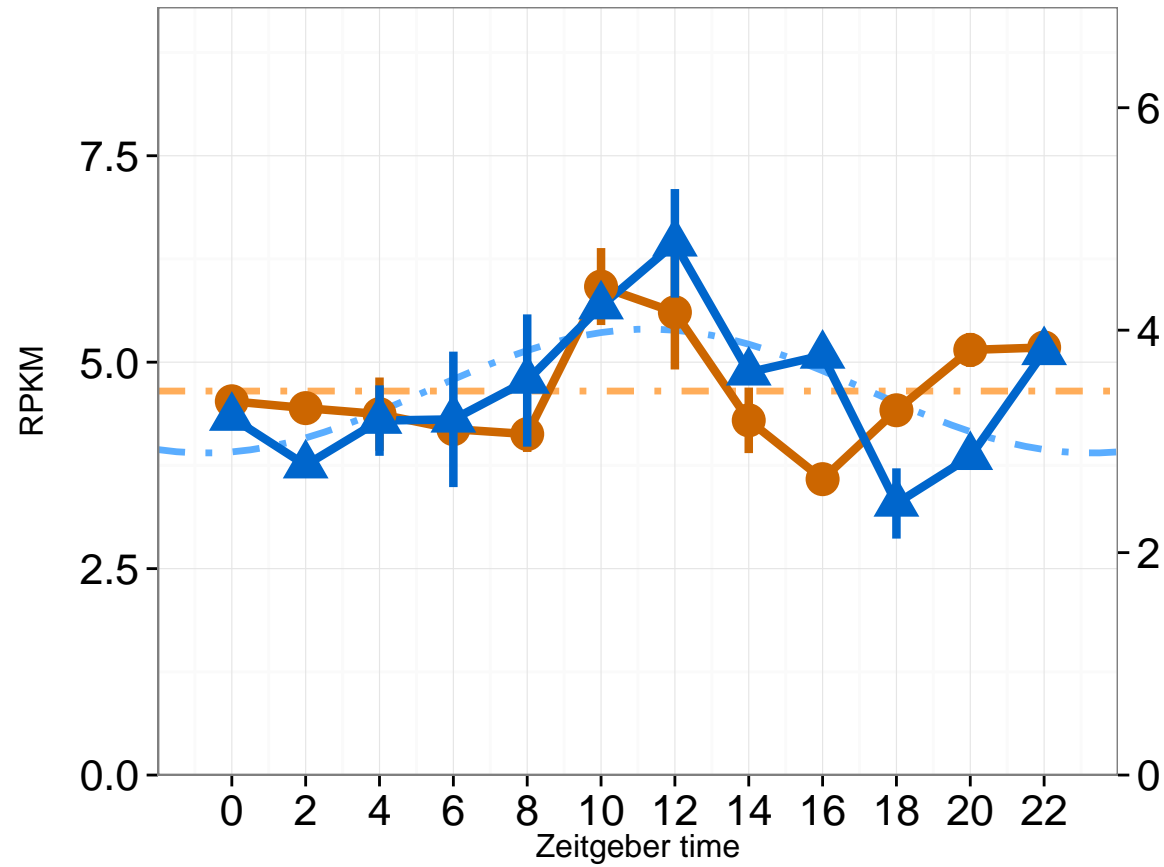

# Klhdc1

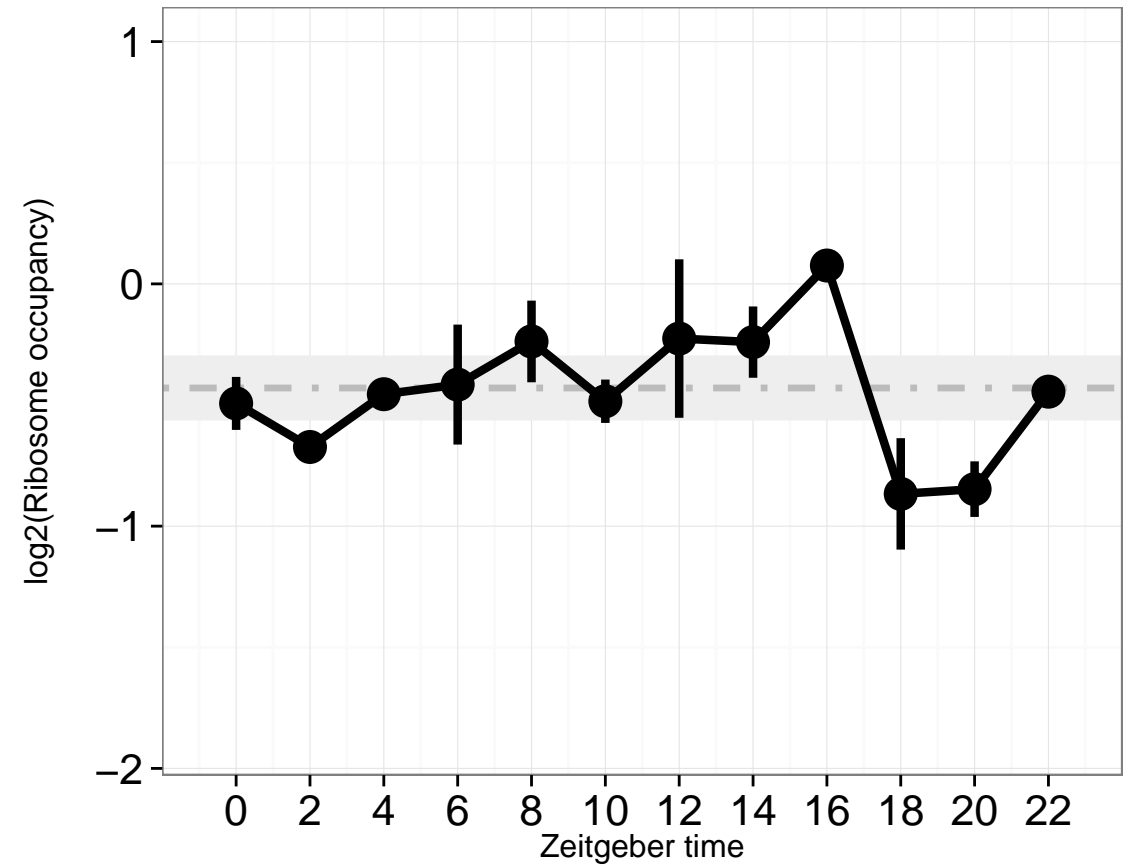

Supplement: Supplementary file 3622 [file 1]

# Hspa1b

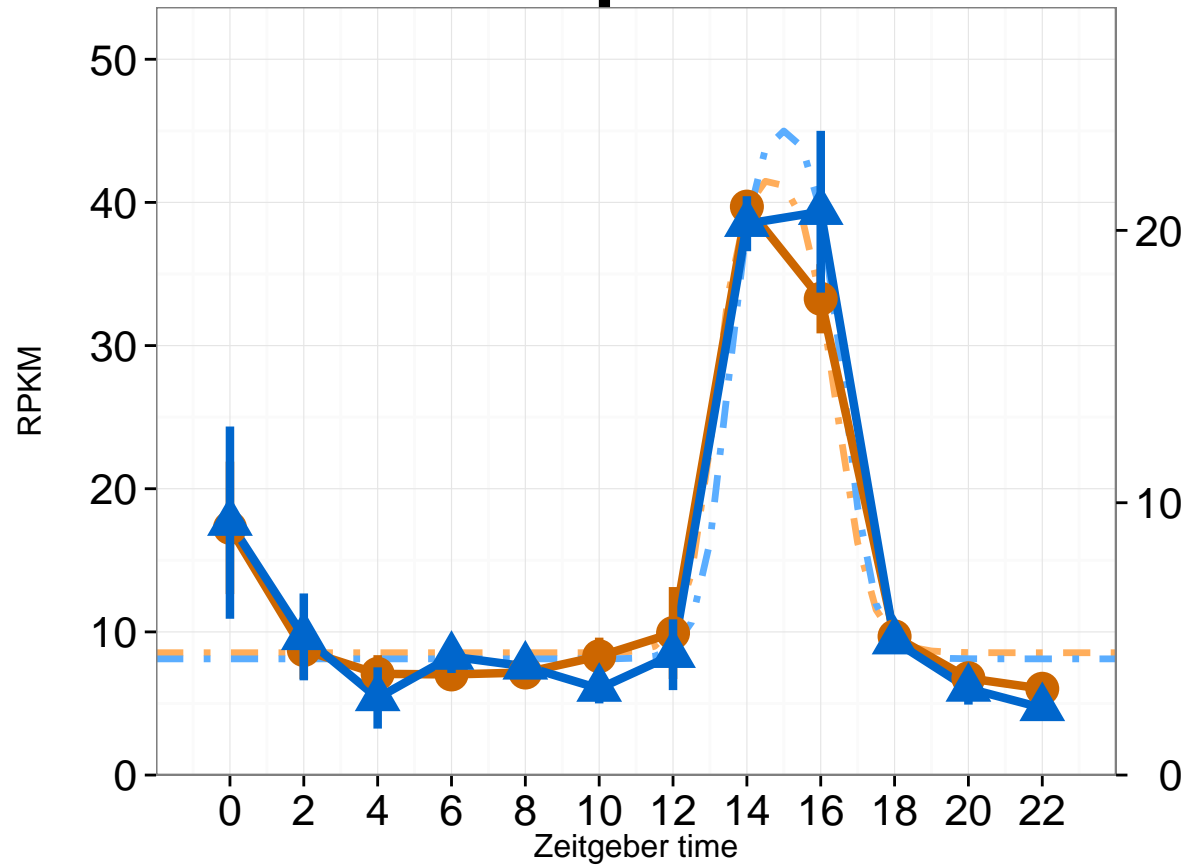

# Hspa1b

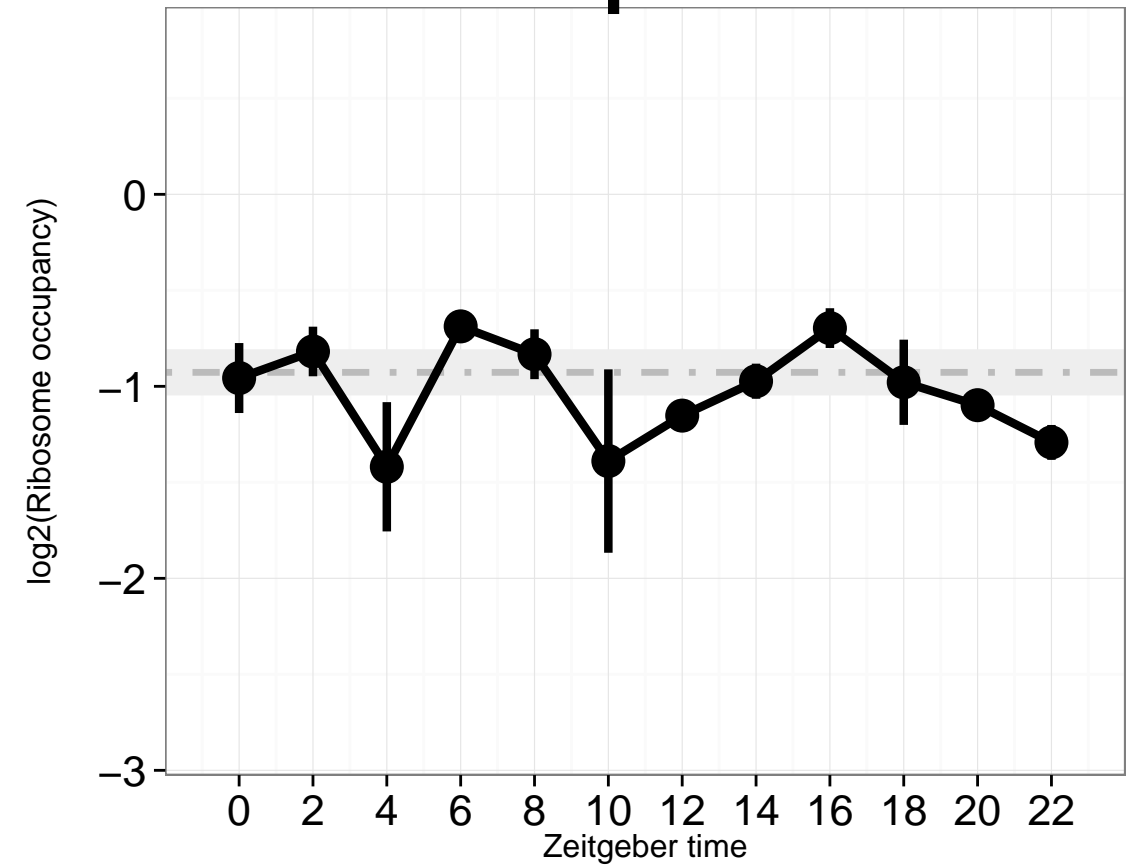

Supplement: Supplementary file 3623 [file 1]

# Strat6

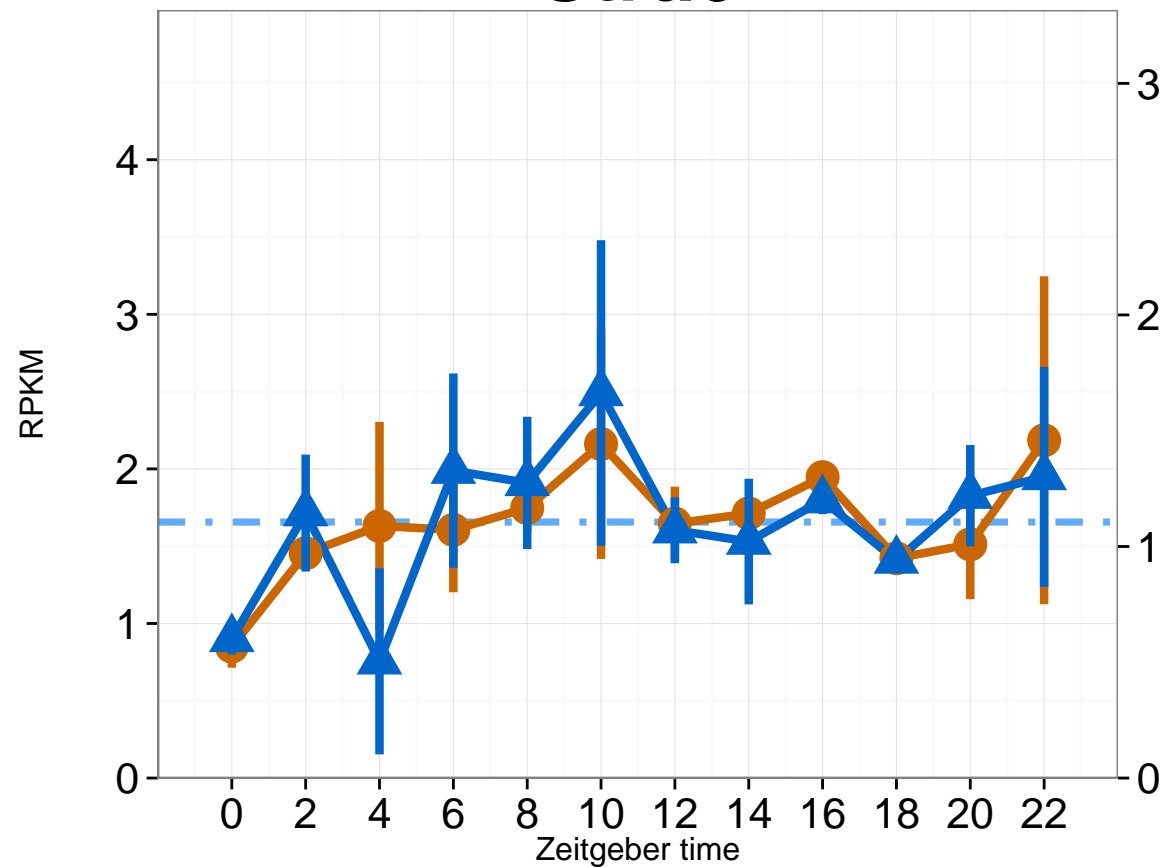

# Strat6

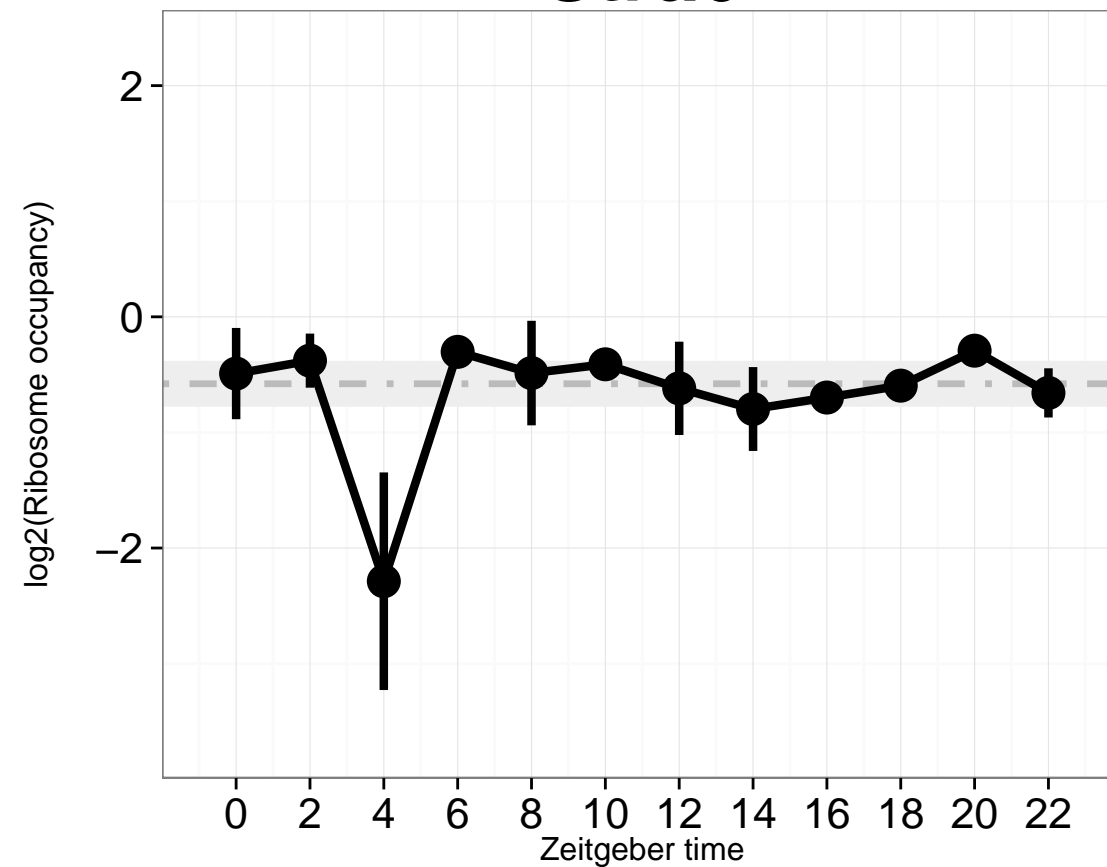

Supplement: Supplementary file 3624 [file 1]

## Gatsl3

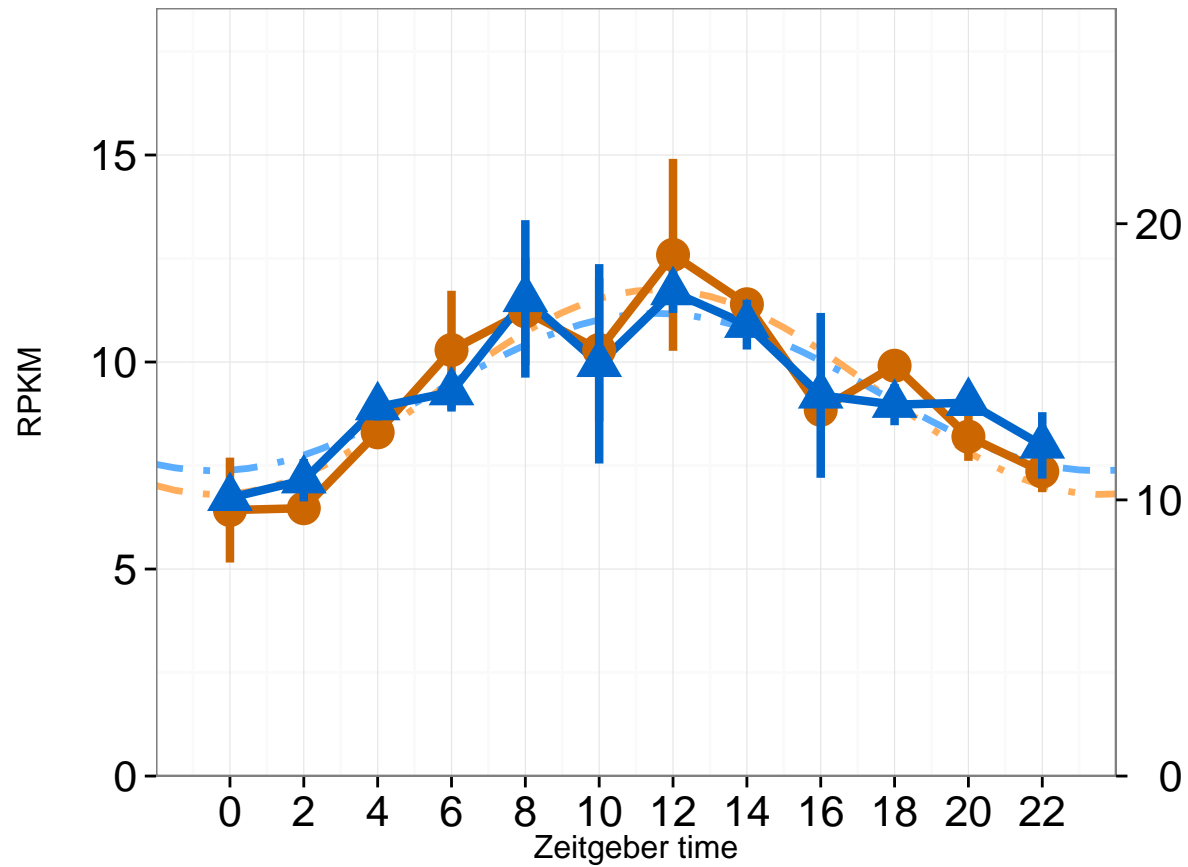

## Gatsl3

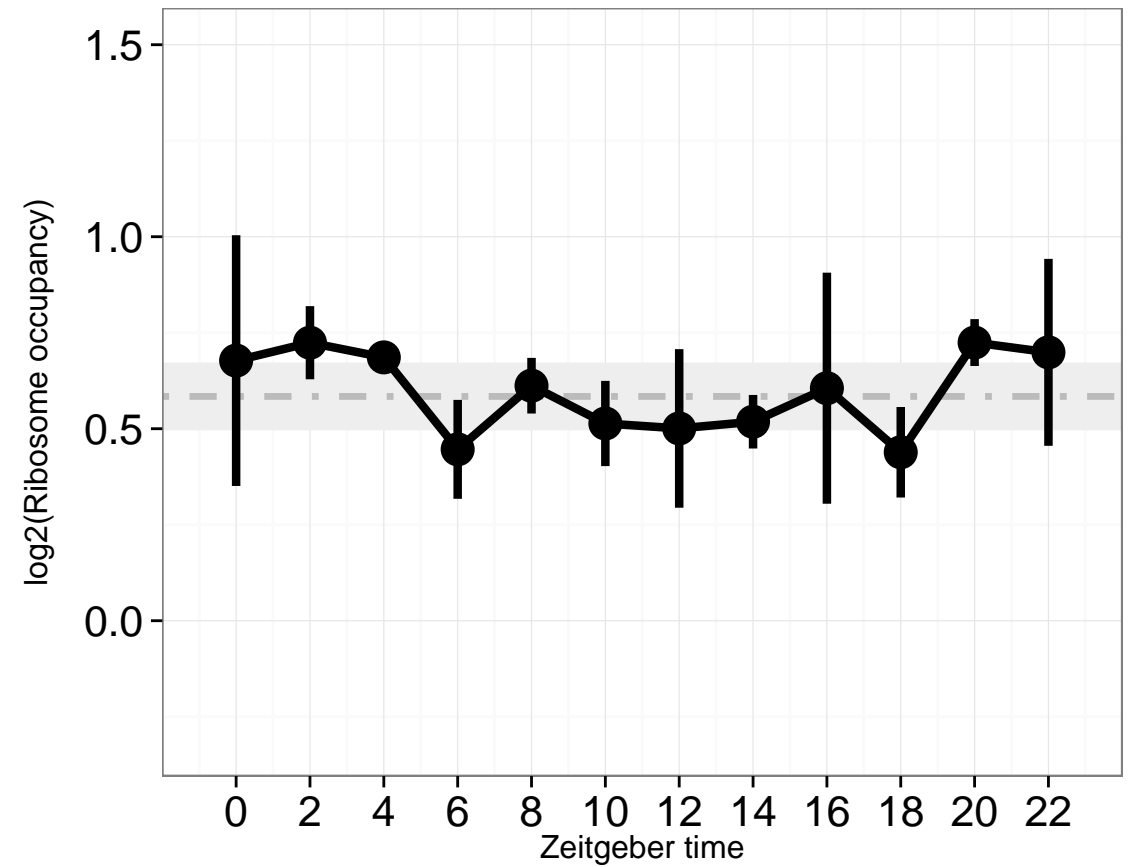

Supplement: Supplementary file 3625 [file 1]

## Ppp5c

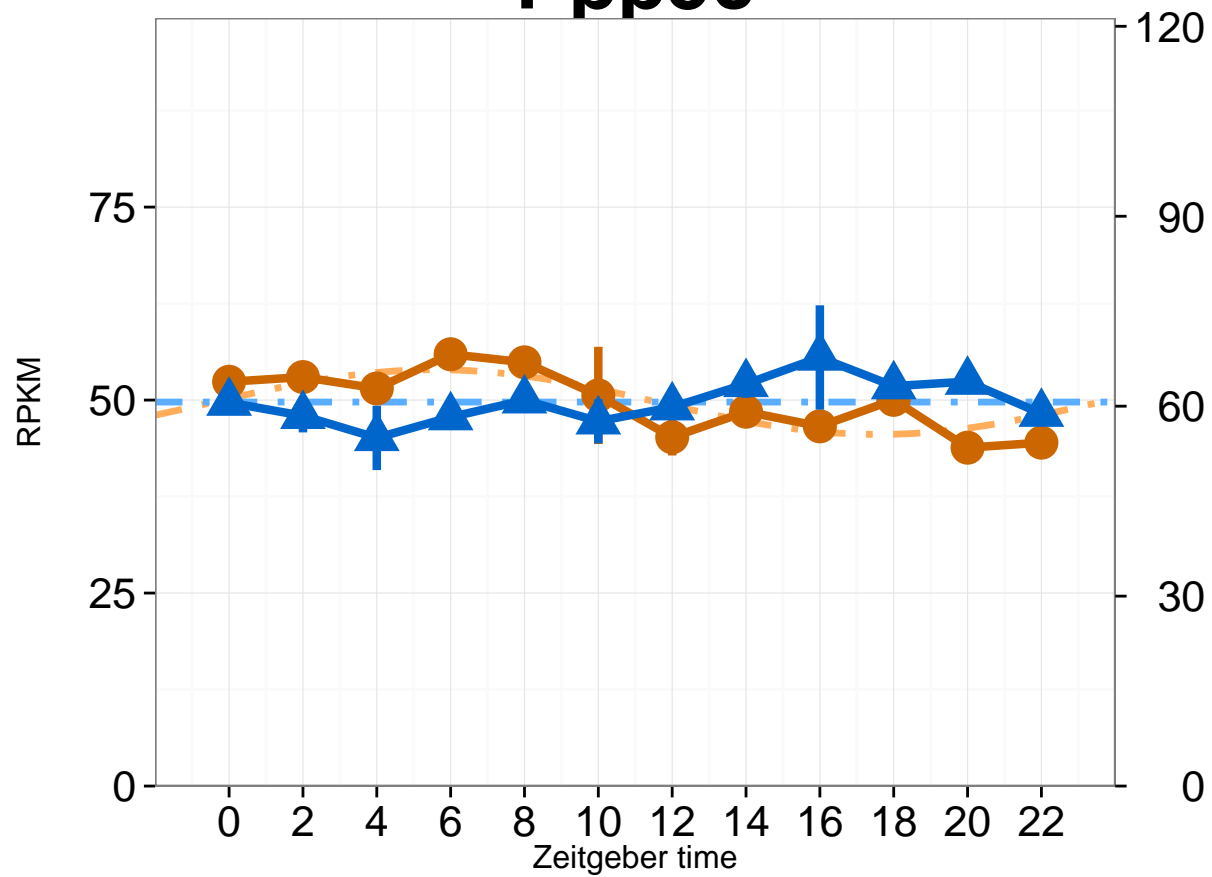

## Ppp5c

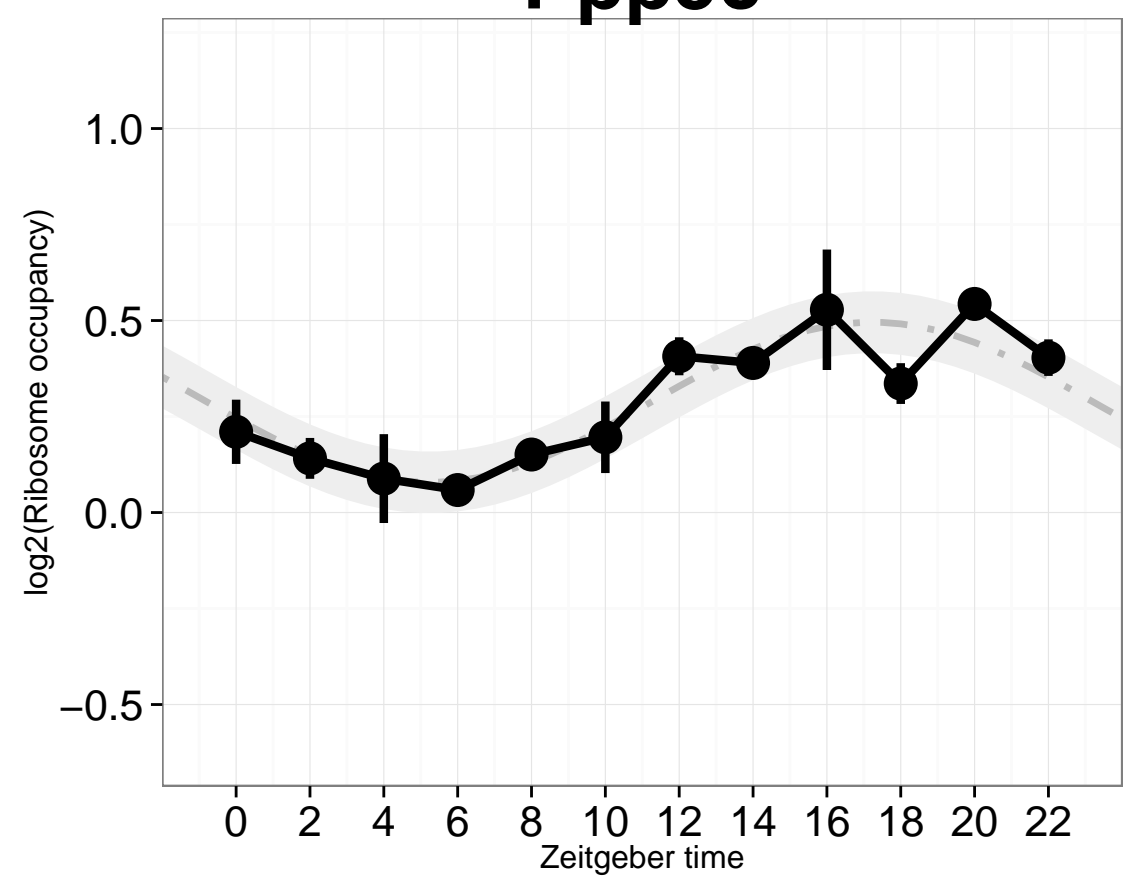

Supplement: Supplementary file 3626 [file 1]

## Fus

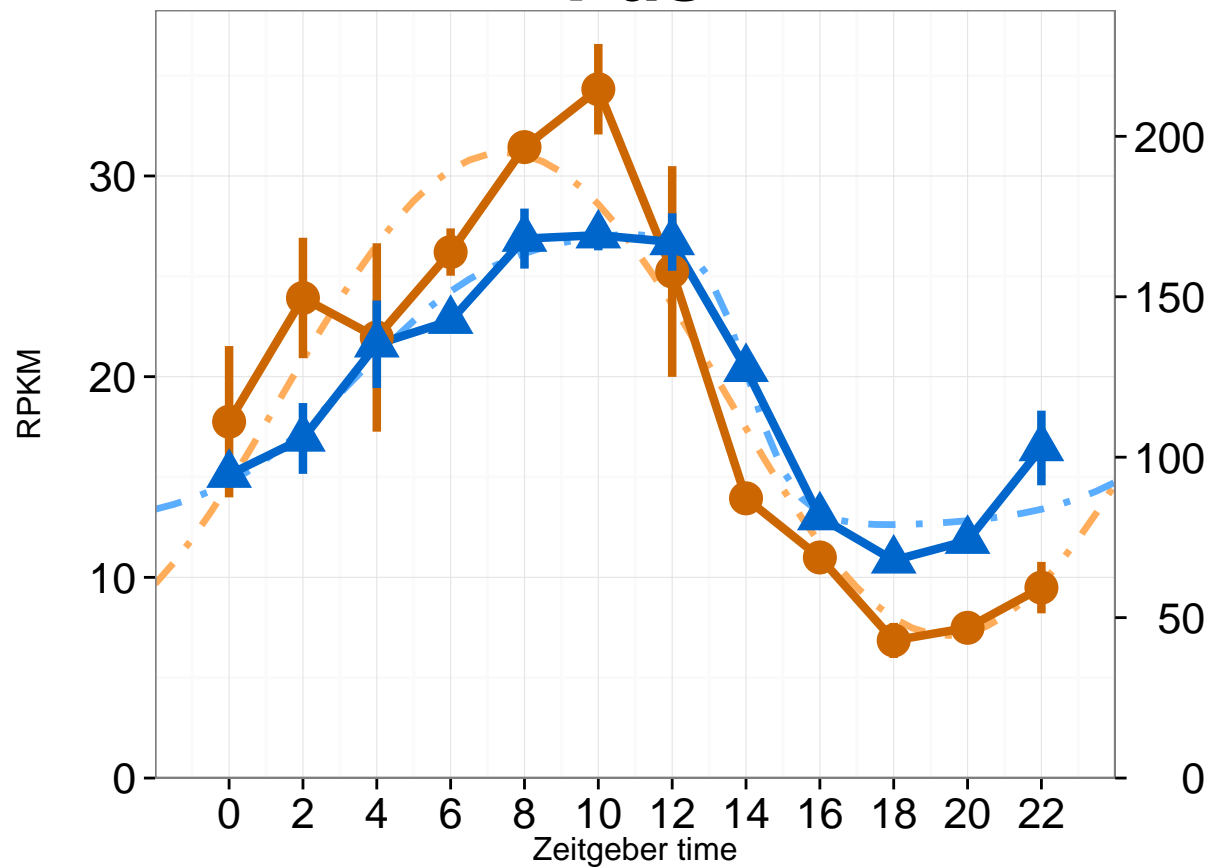

## Fus

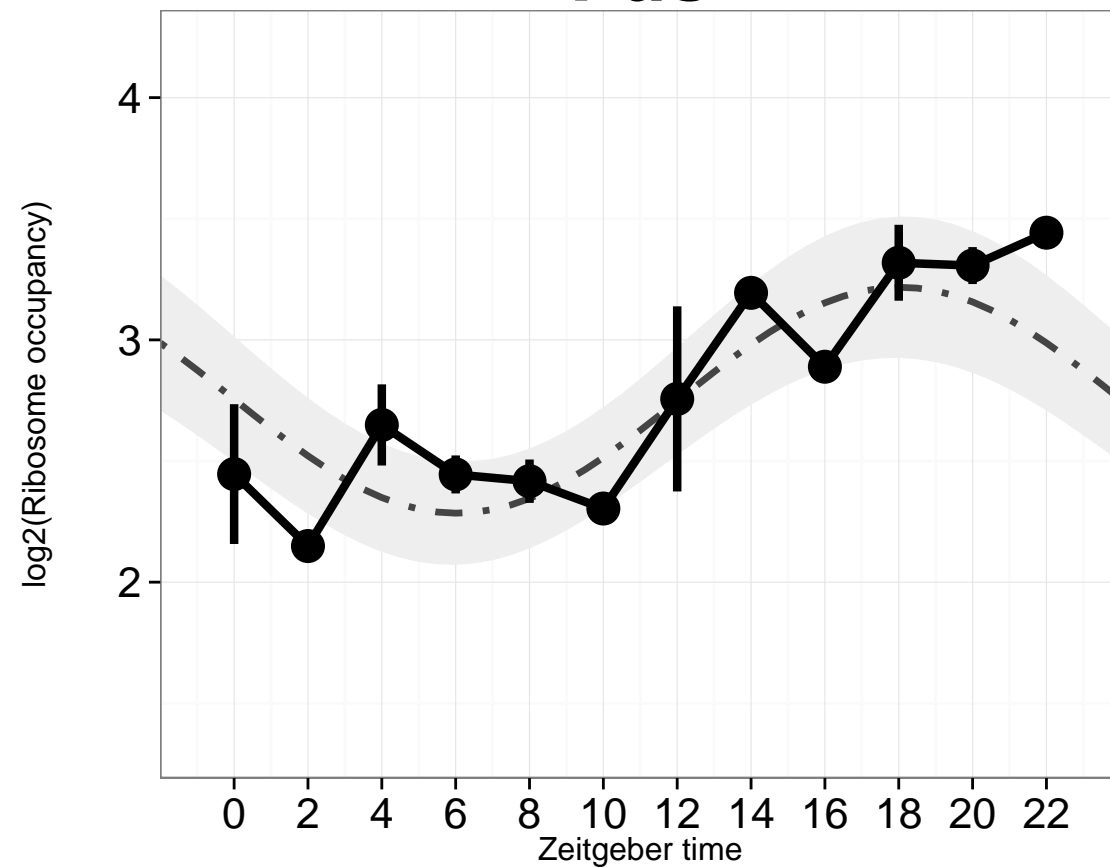

Supplement: Supplementary file 3627 [file 1]

# Poc1b

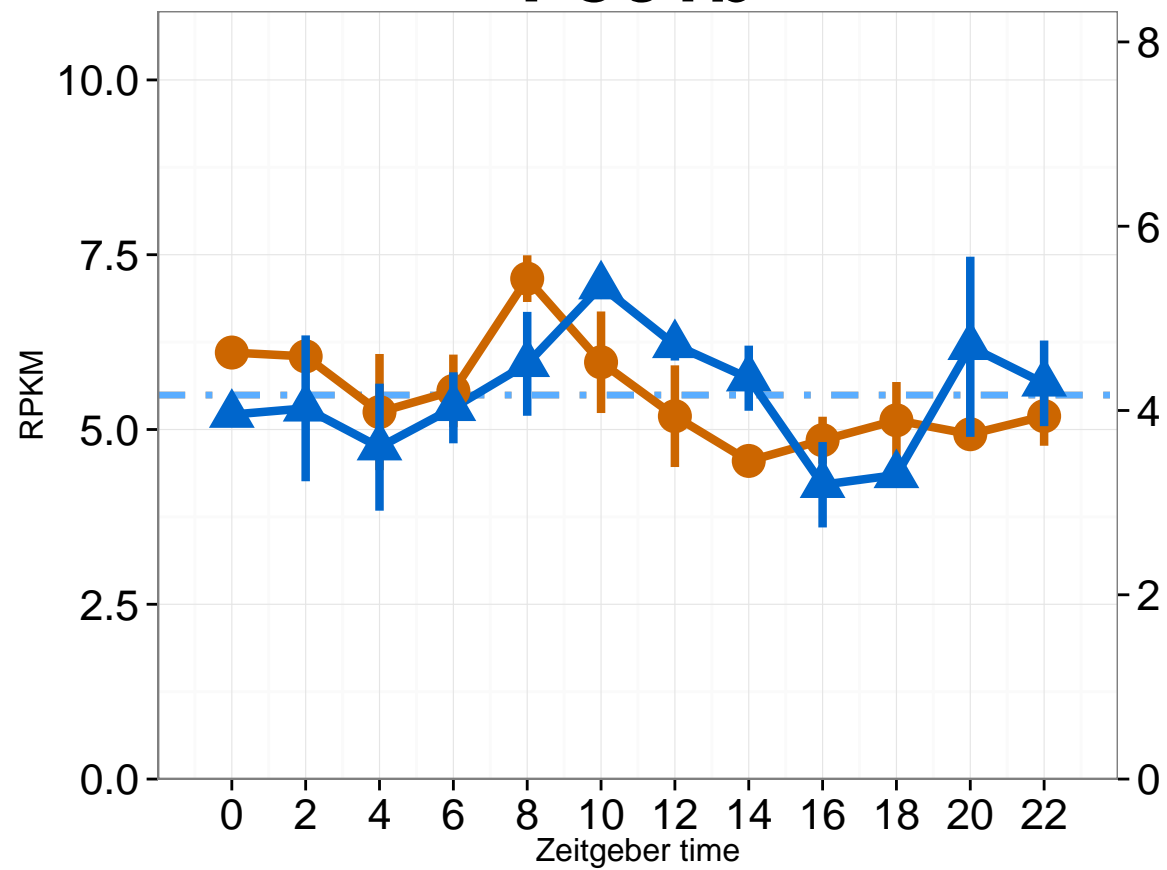

# Poc1b

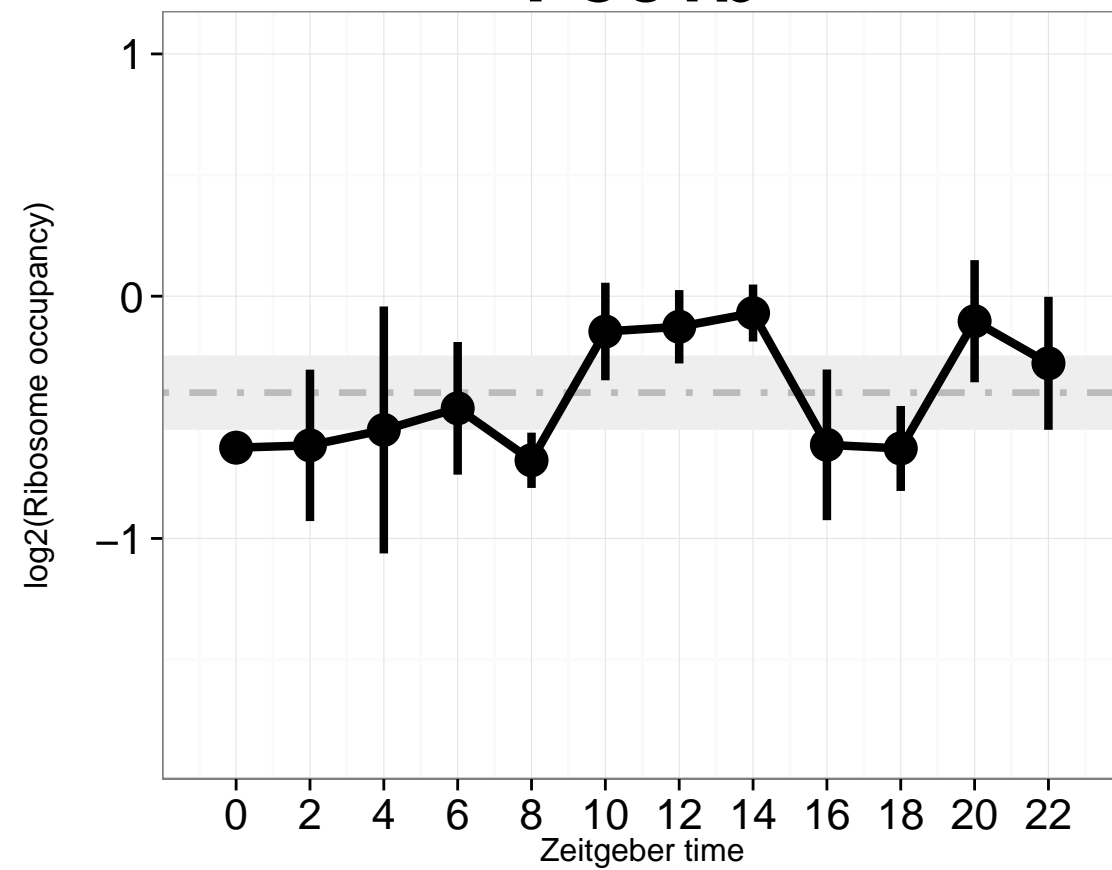

Supplement: Supplementary file 3628 [file 1]

# Zfp35

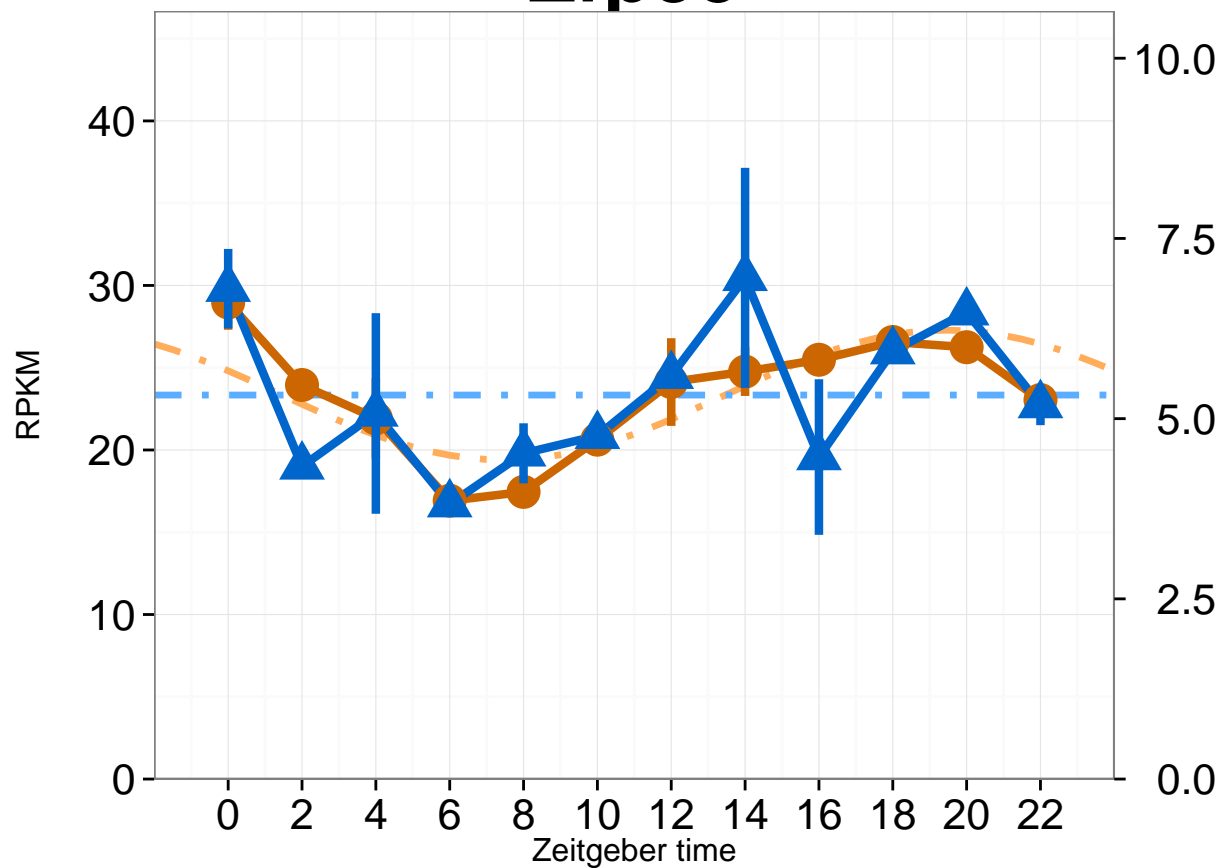

# Zfp35

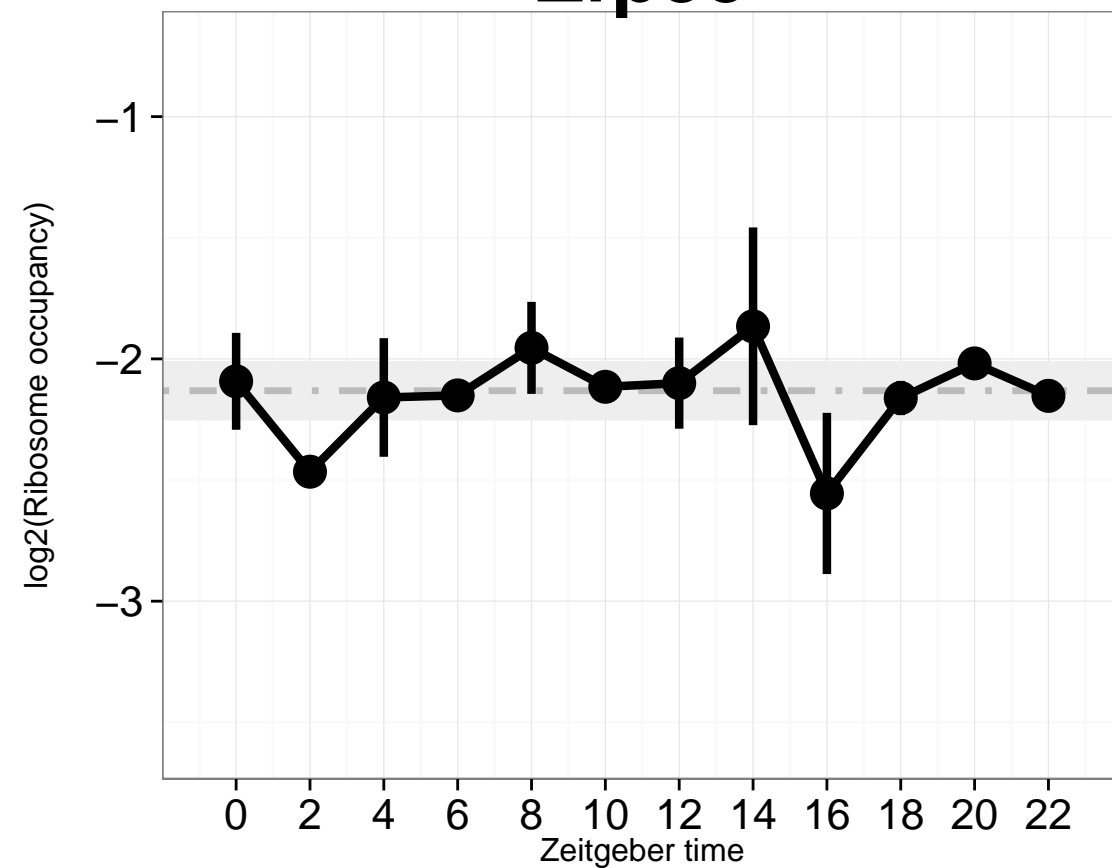

Supplement: Supplementary file 3629 [file 1]

# Zfp827

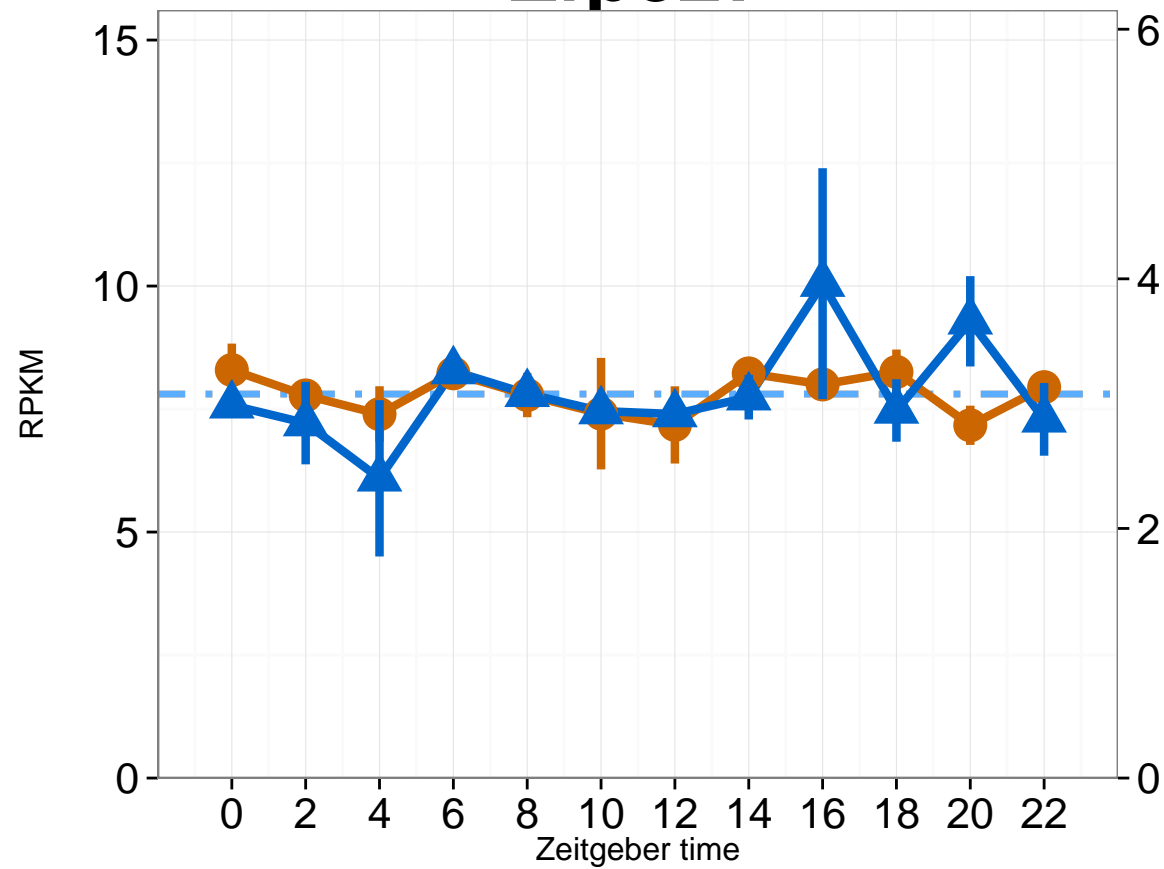

# Zfp827

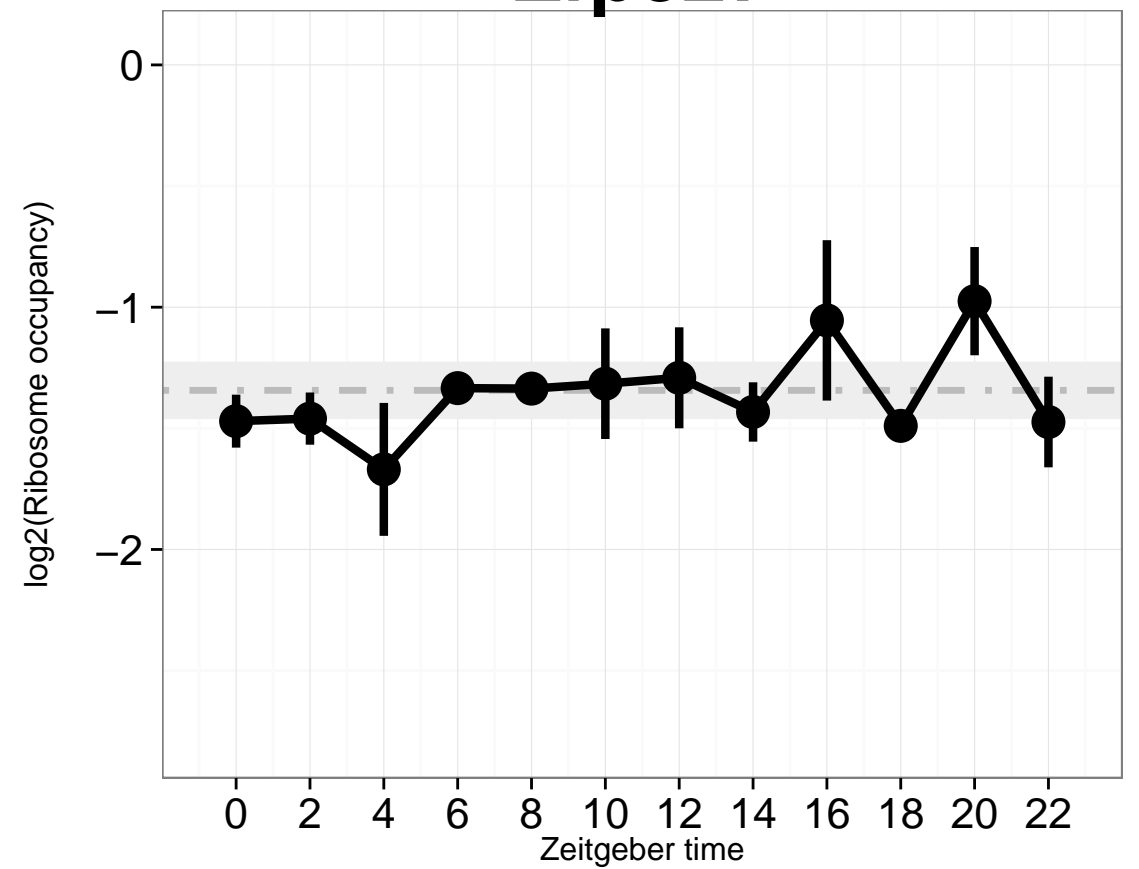

Supplement: Supplementary file 3630 [file 1]

# Adrm1

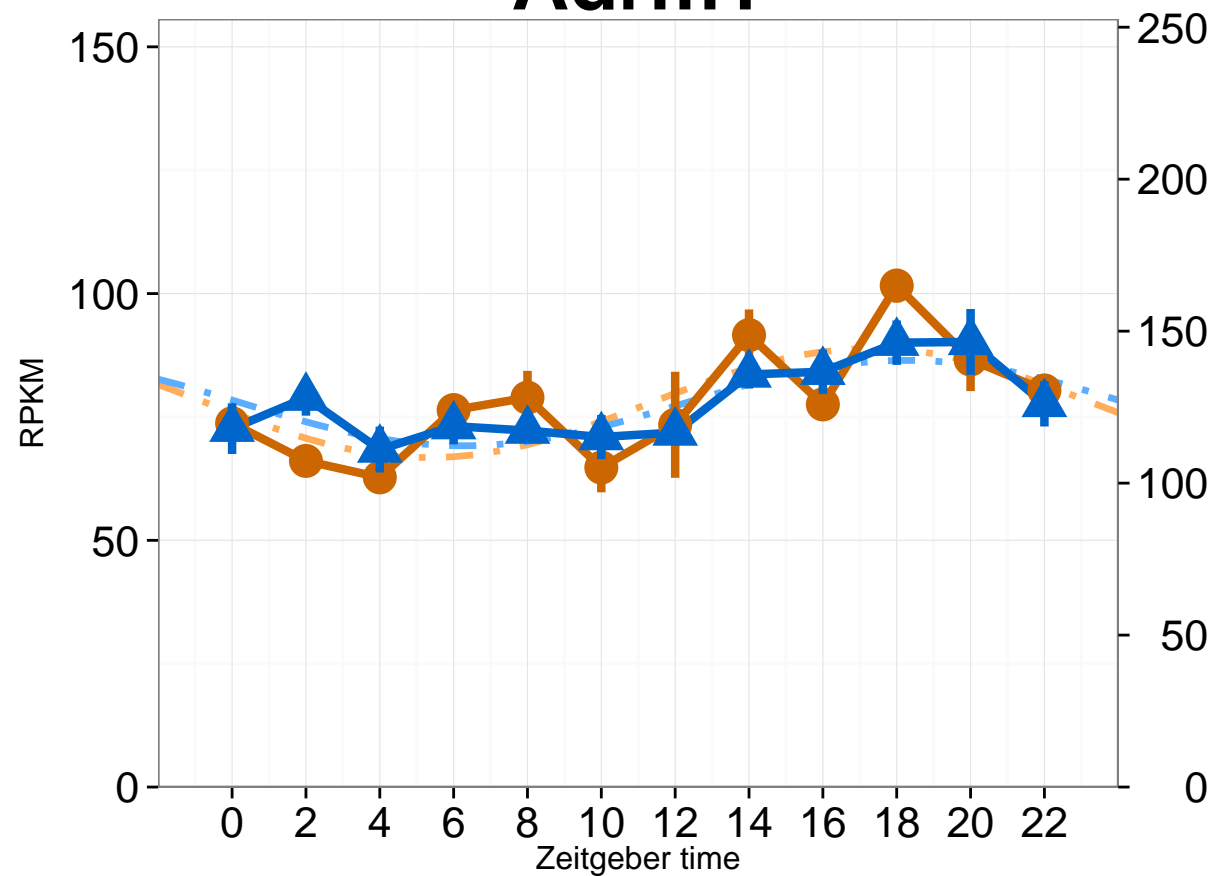

# Adrm1

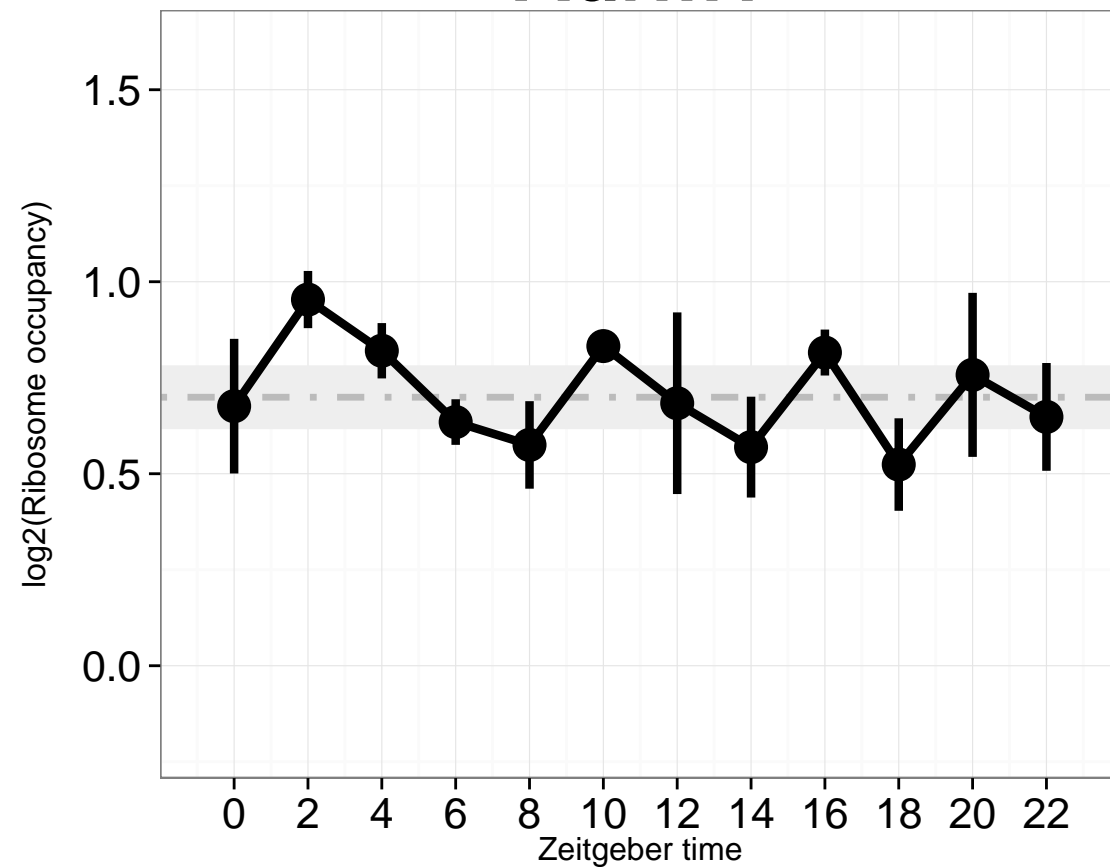

Supplement: Supplementary file 3631 [file 1]

## Fads2

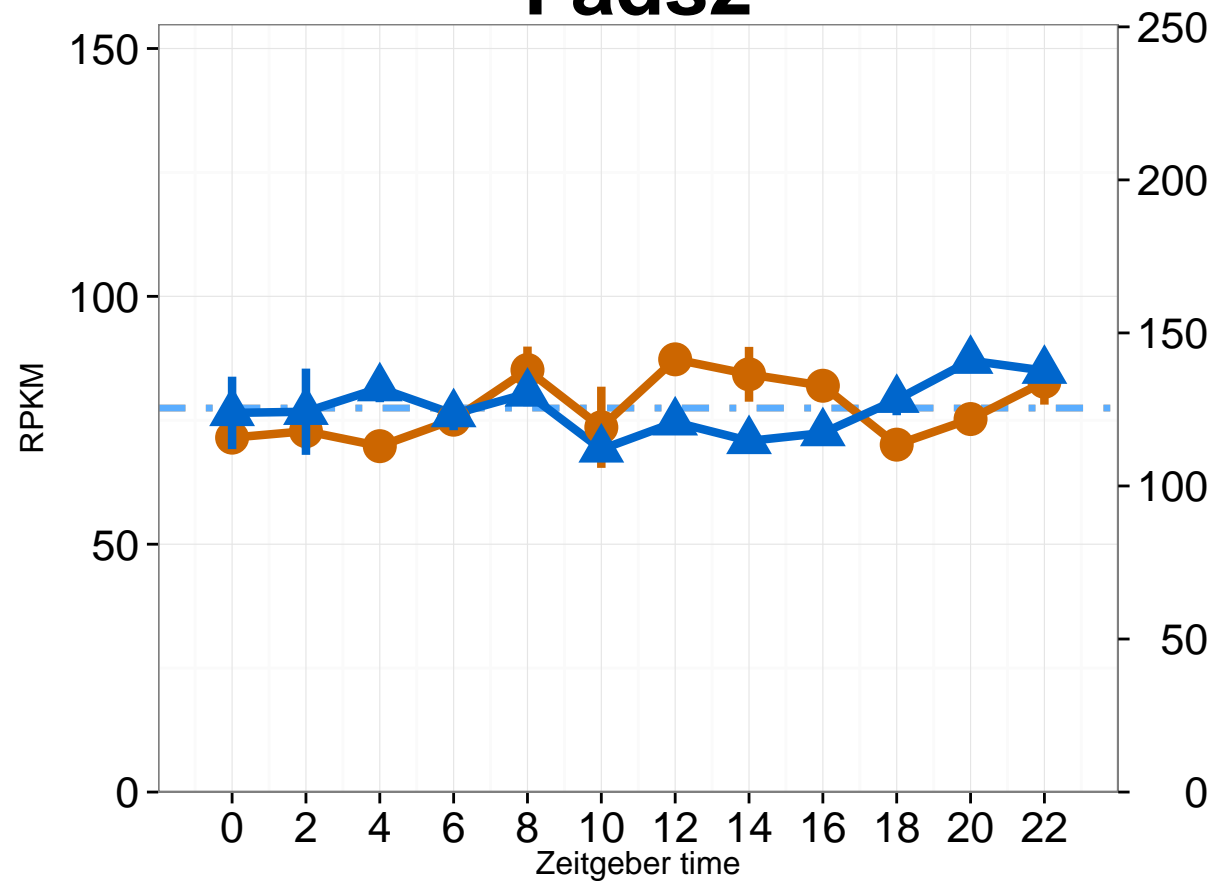

## Fads2

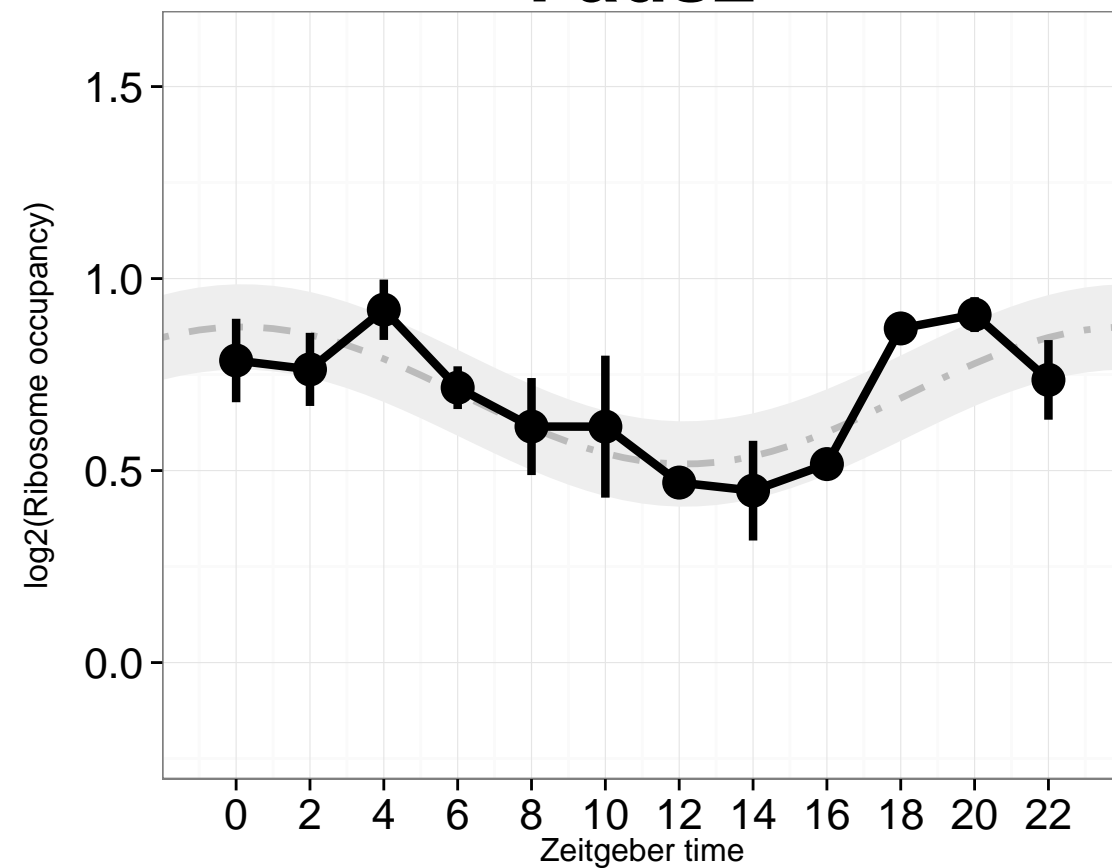

Supplement: Supplementary file 3632 [file 1]

# Pomgnt1

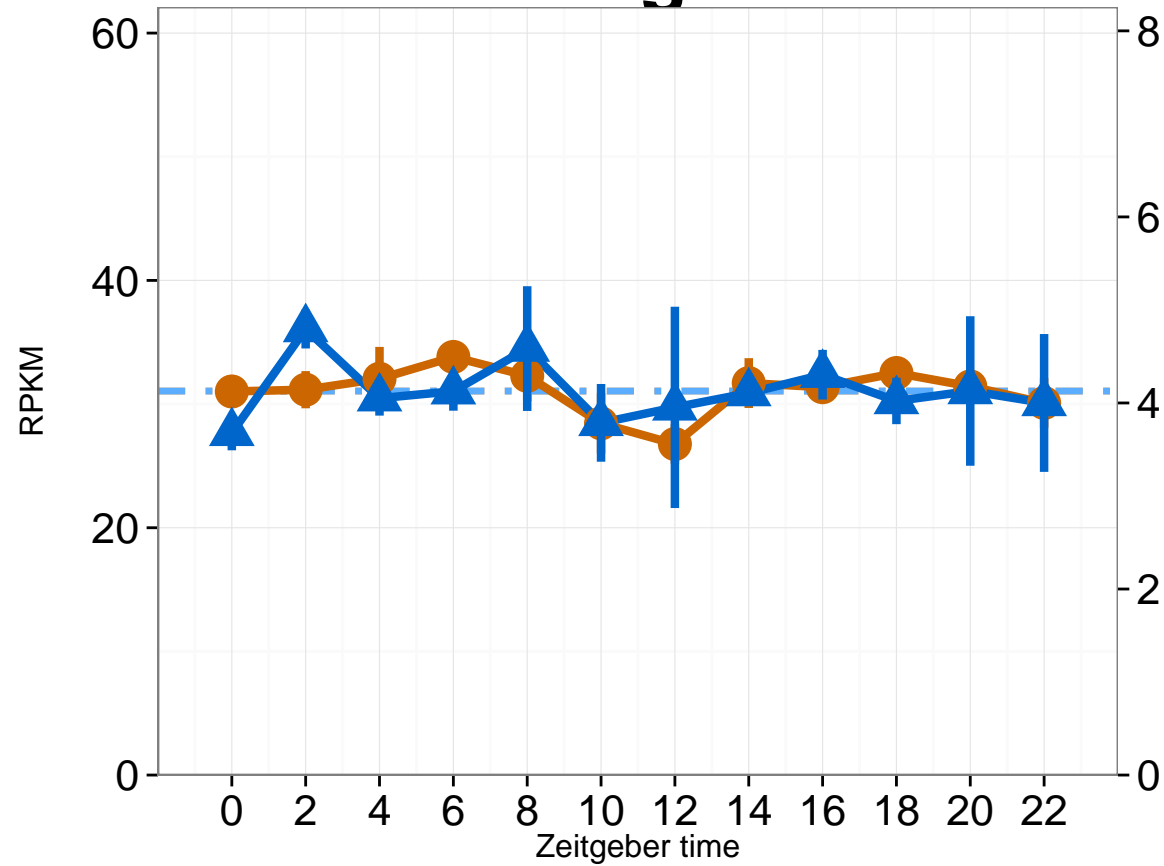

# Pomgnt1

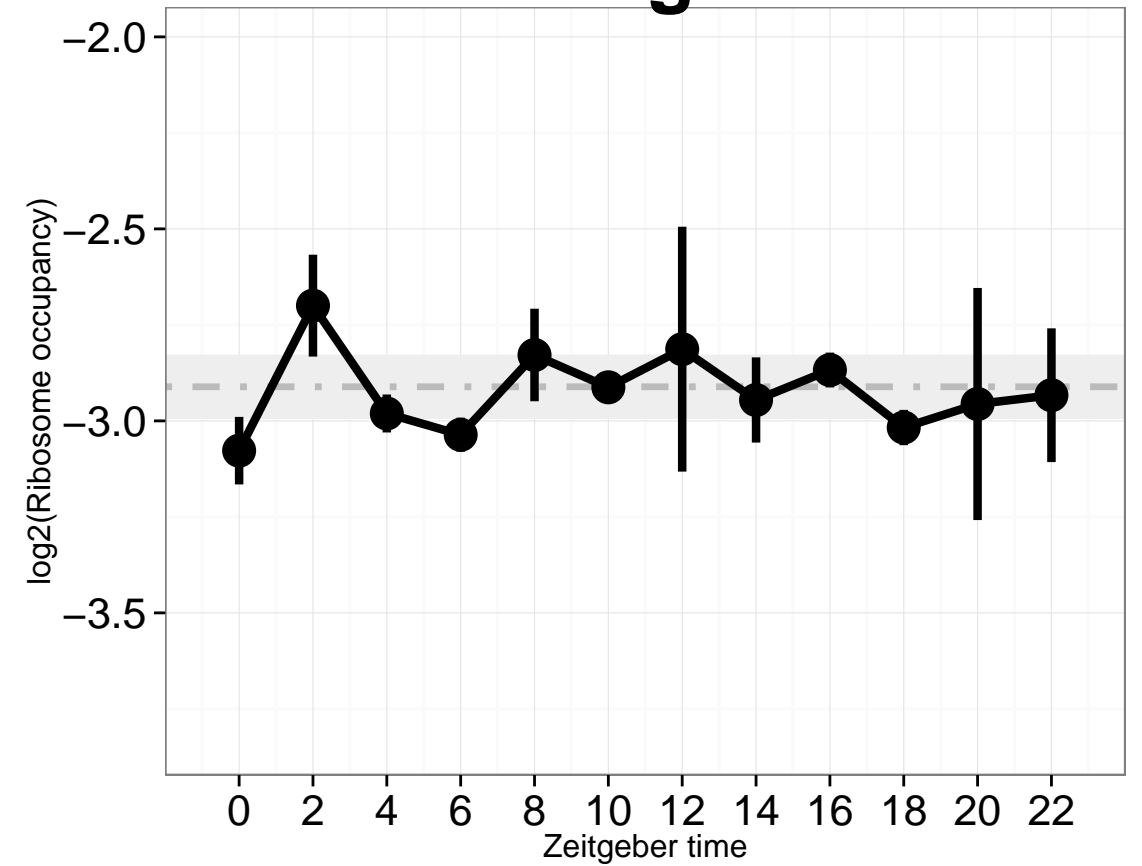

Supplement: Supplementary file 3633 [file 1]

## Tnfrsf14

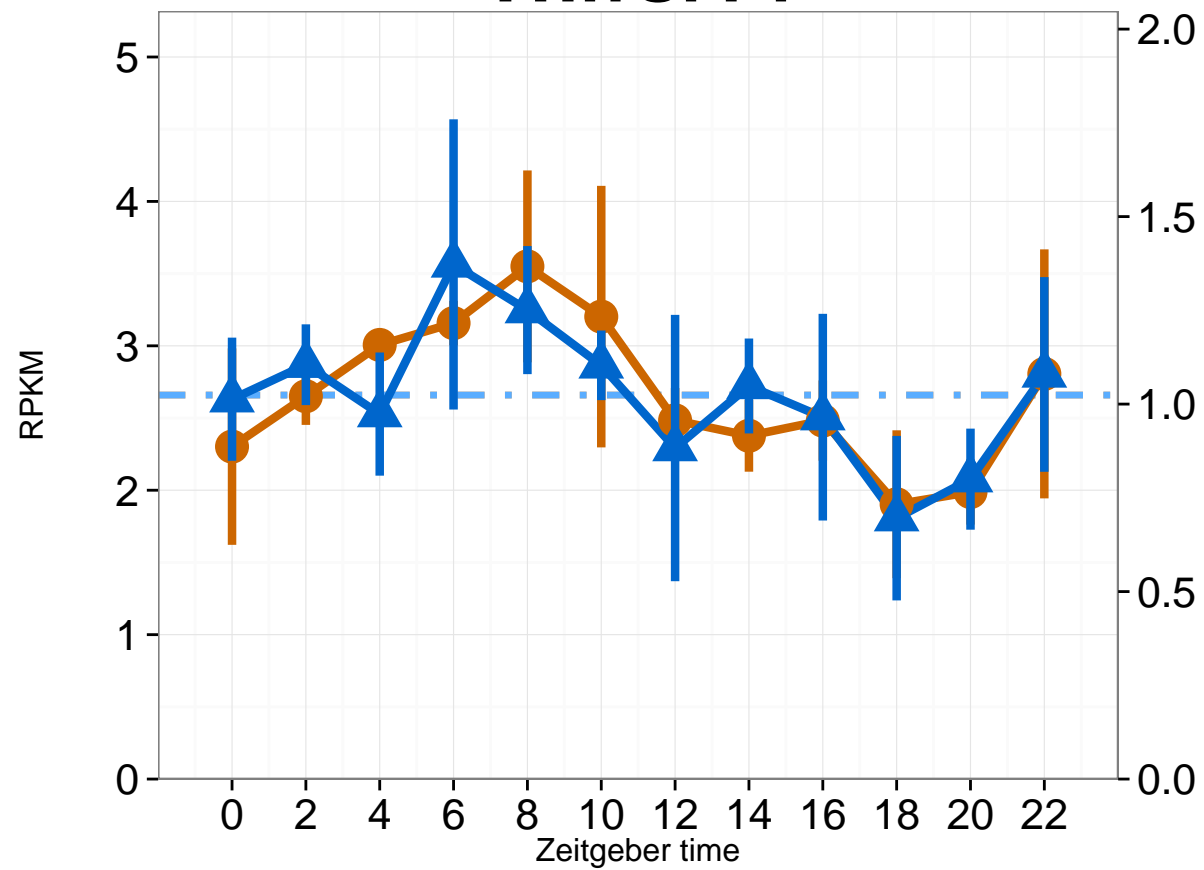

## Tnfrsf14

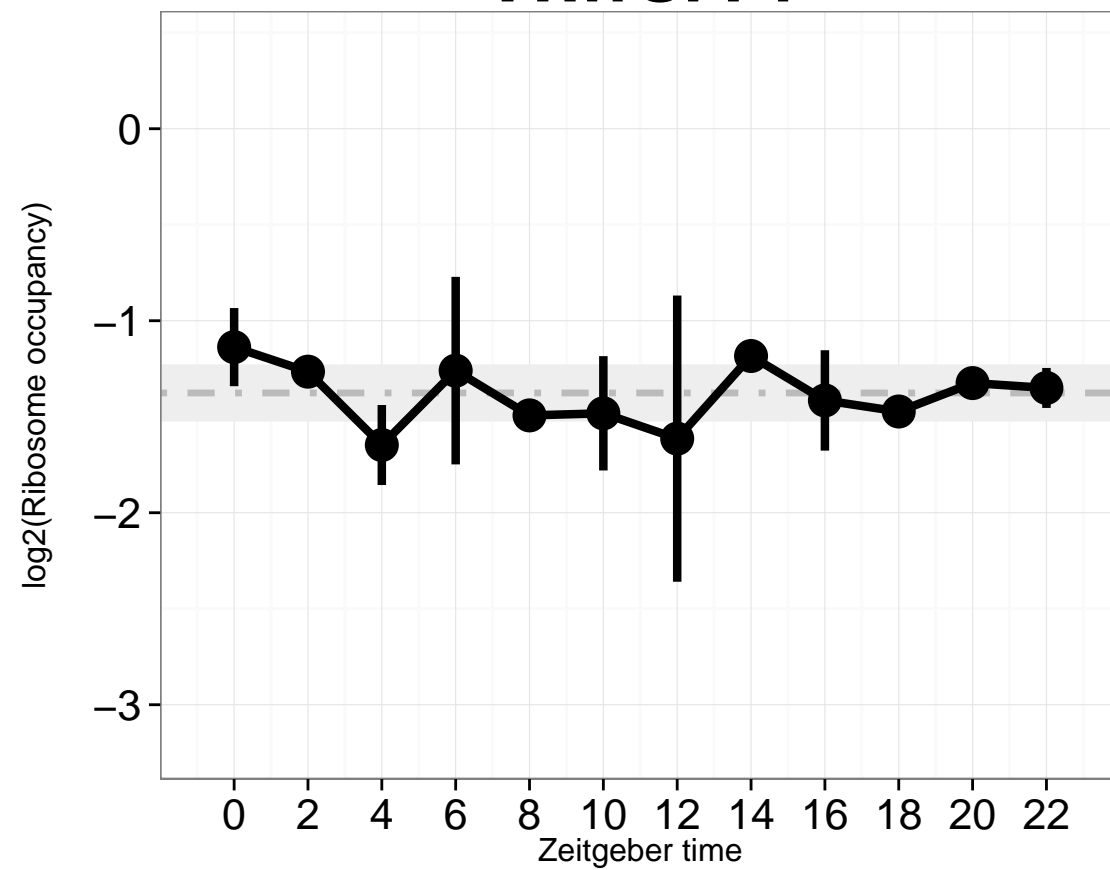

Supplement: Supplementary file 3634 [file 1]

## Napb

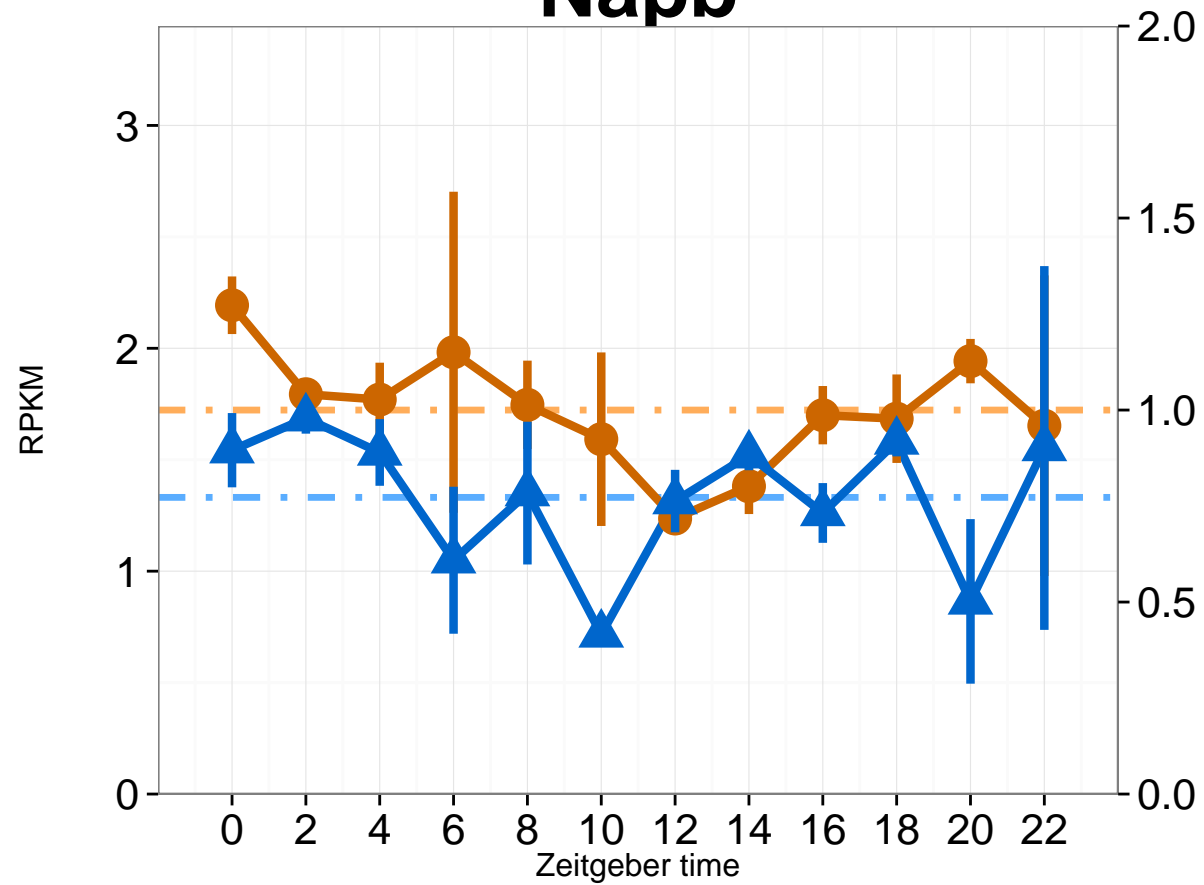

## Napb

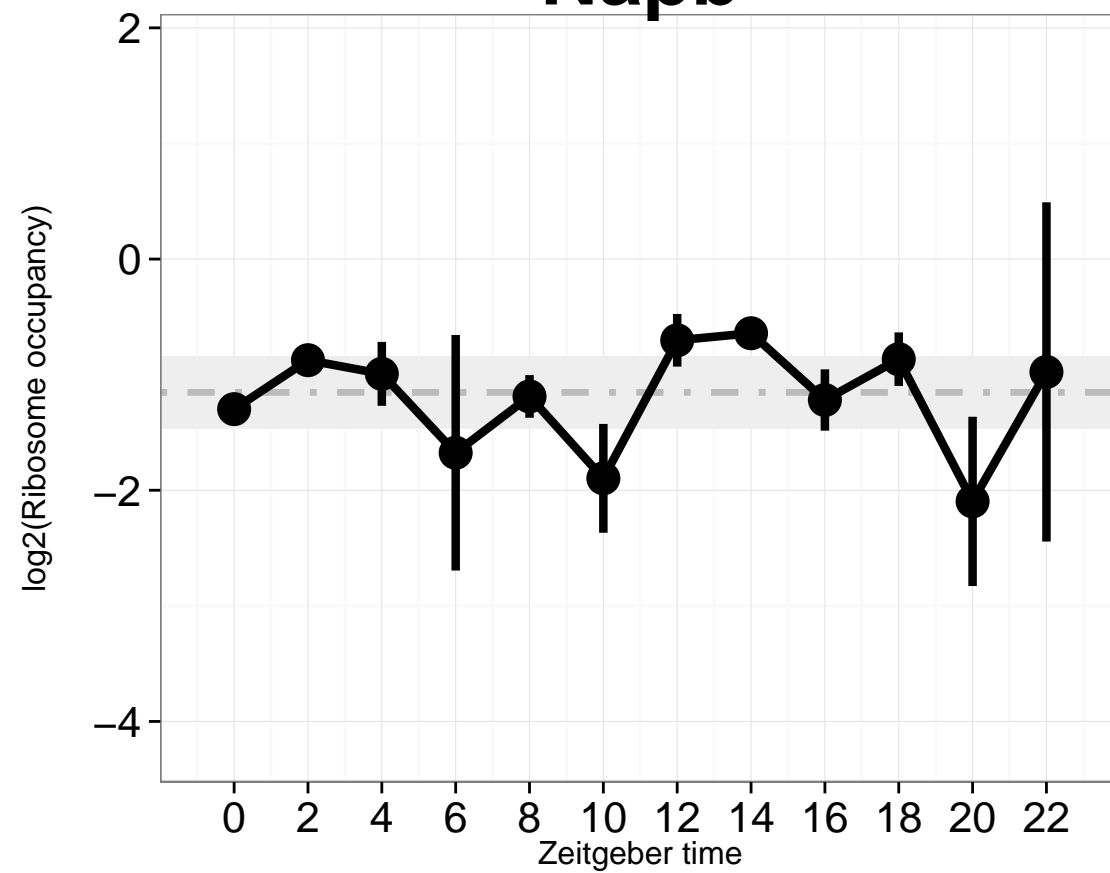

Supplement: Supplementary file 3635 [file 1]

## Ssb

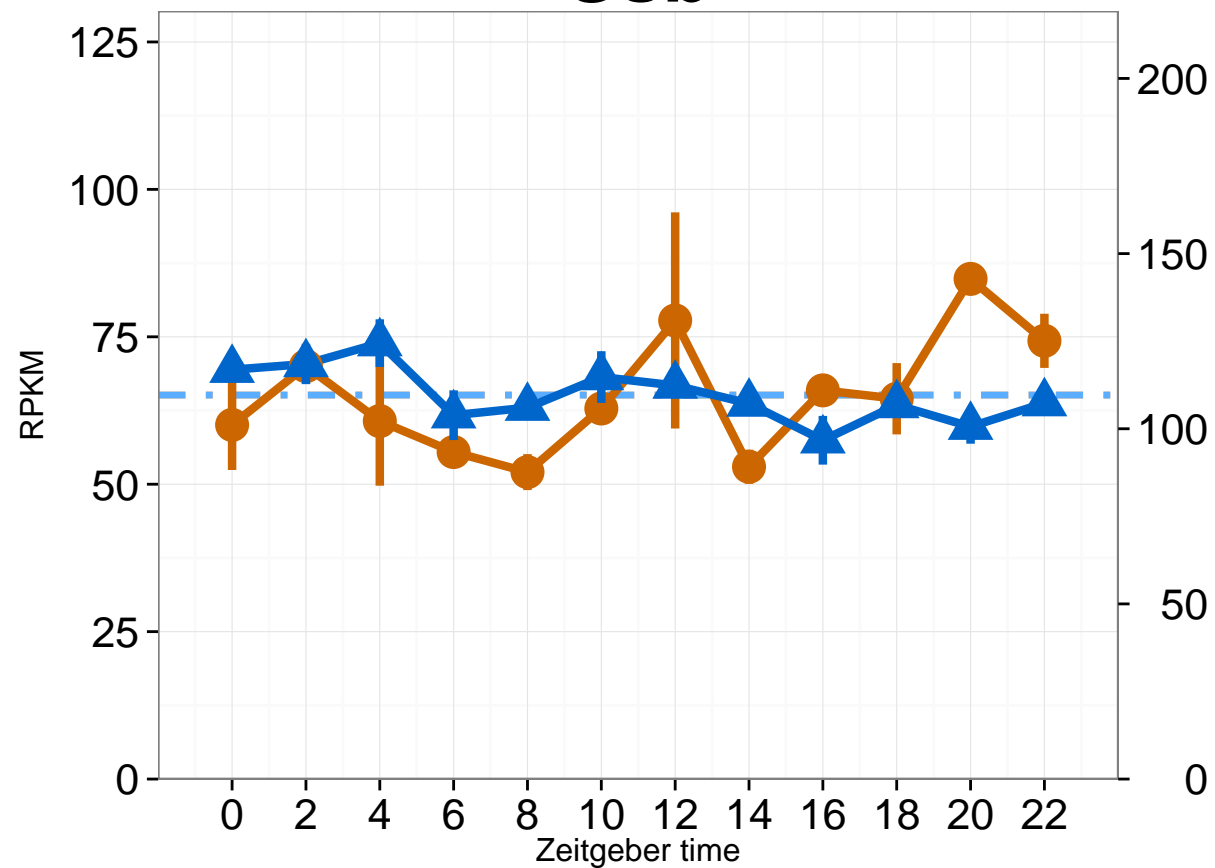

## Ssb

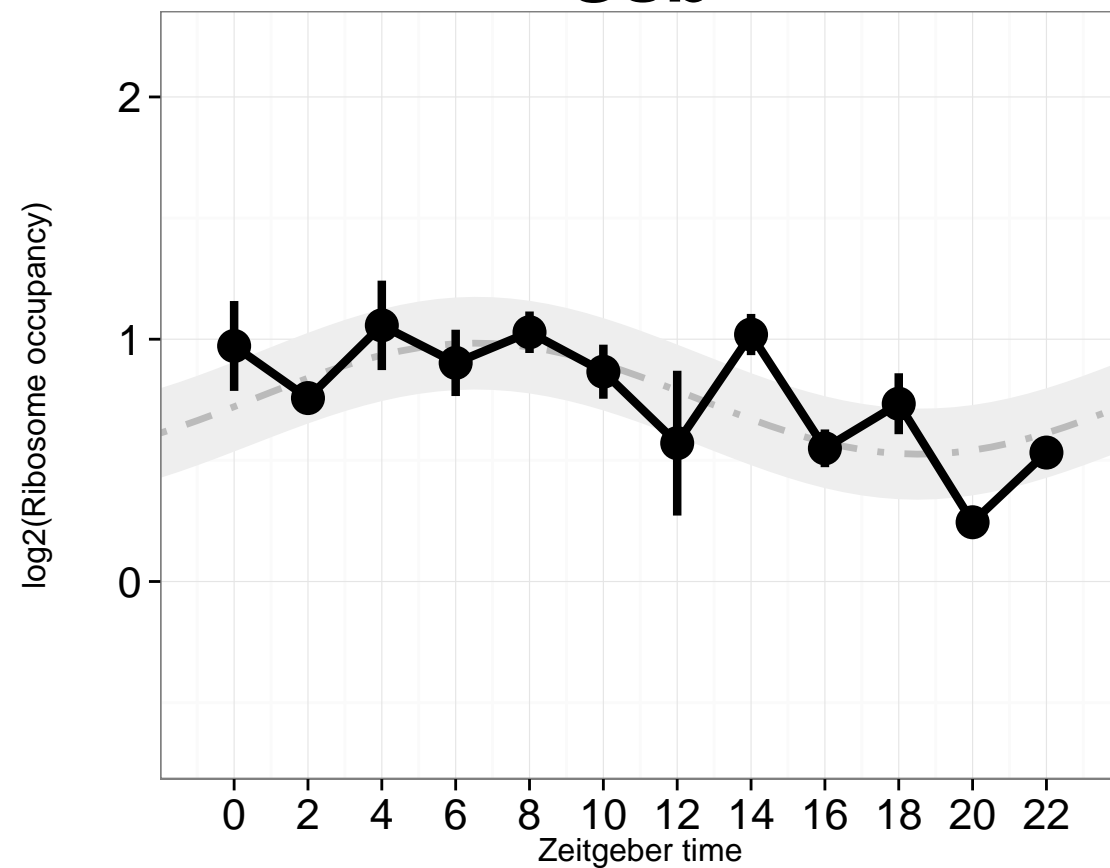

Supplement: Supplementary file 3636 [file 1]

## Aatk

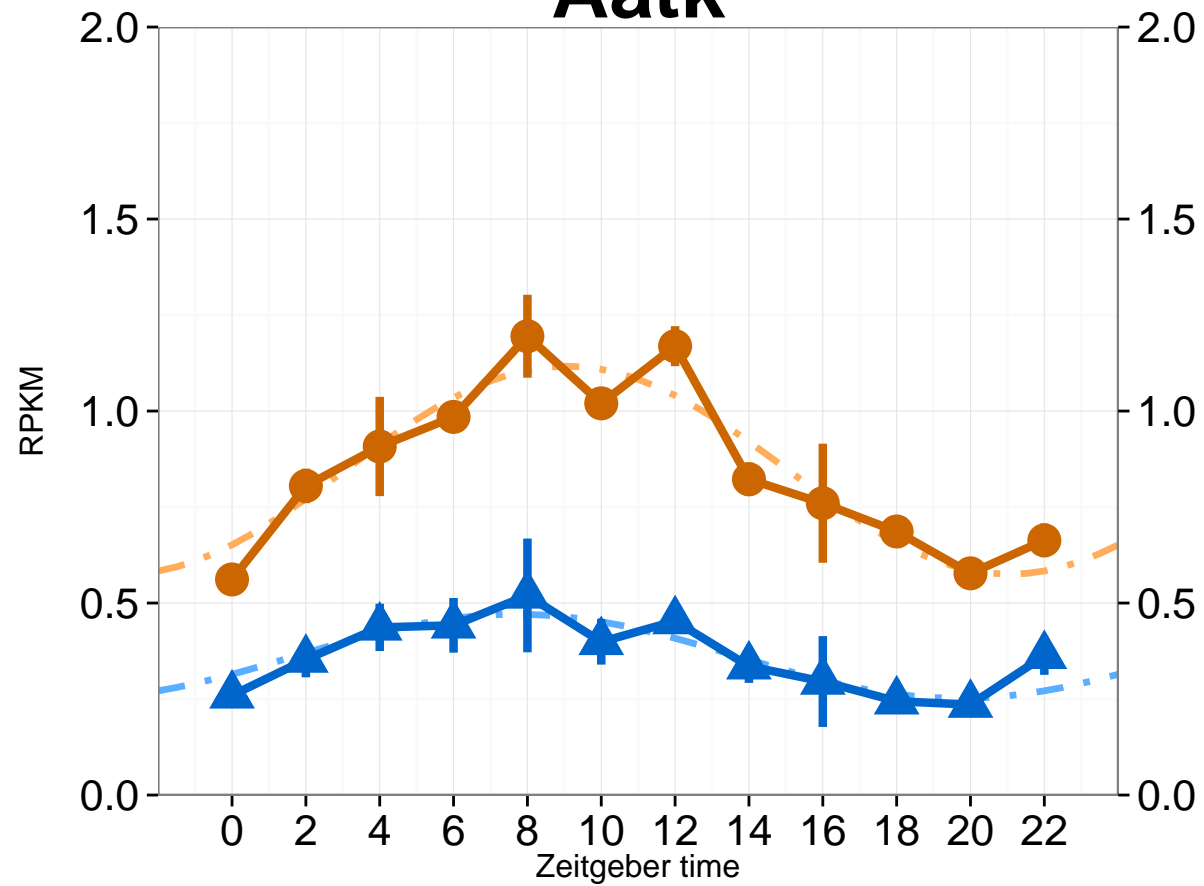

## Aatk

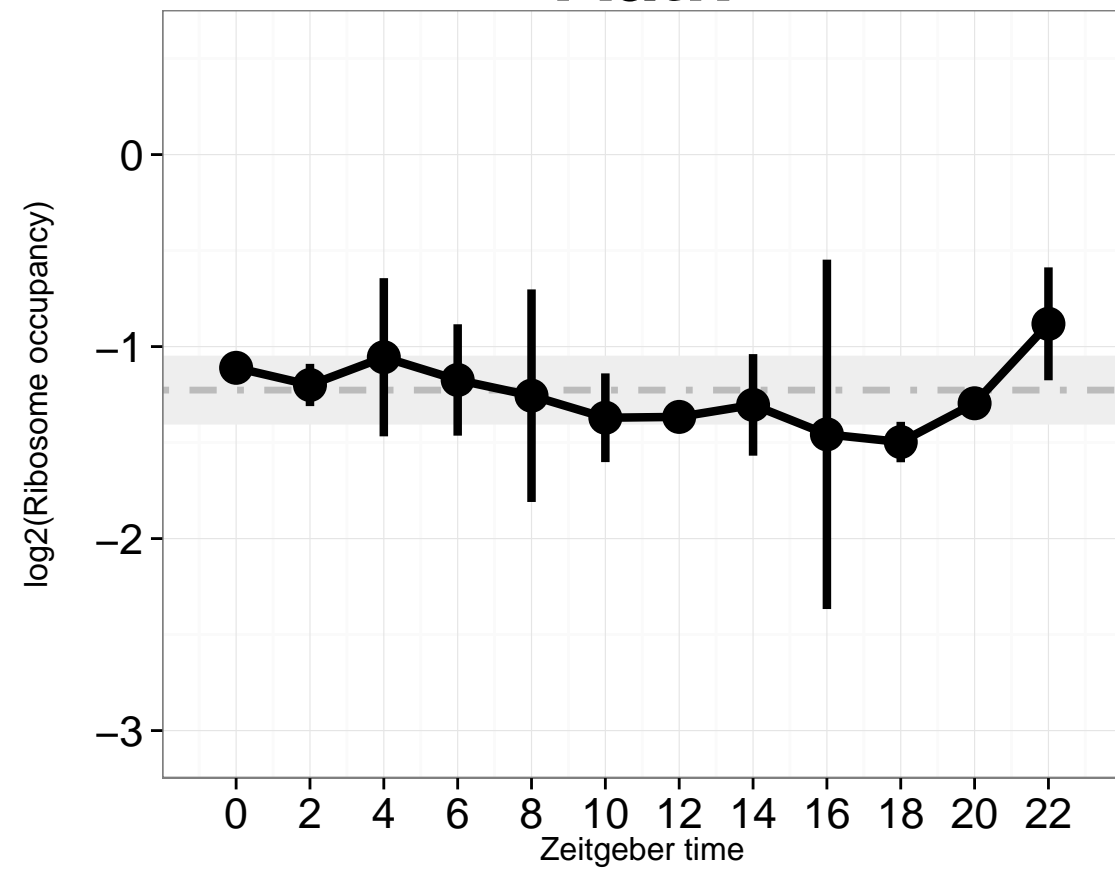

Supplement: Supplementary file 3637 [file 1]

# Pnpla2

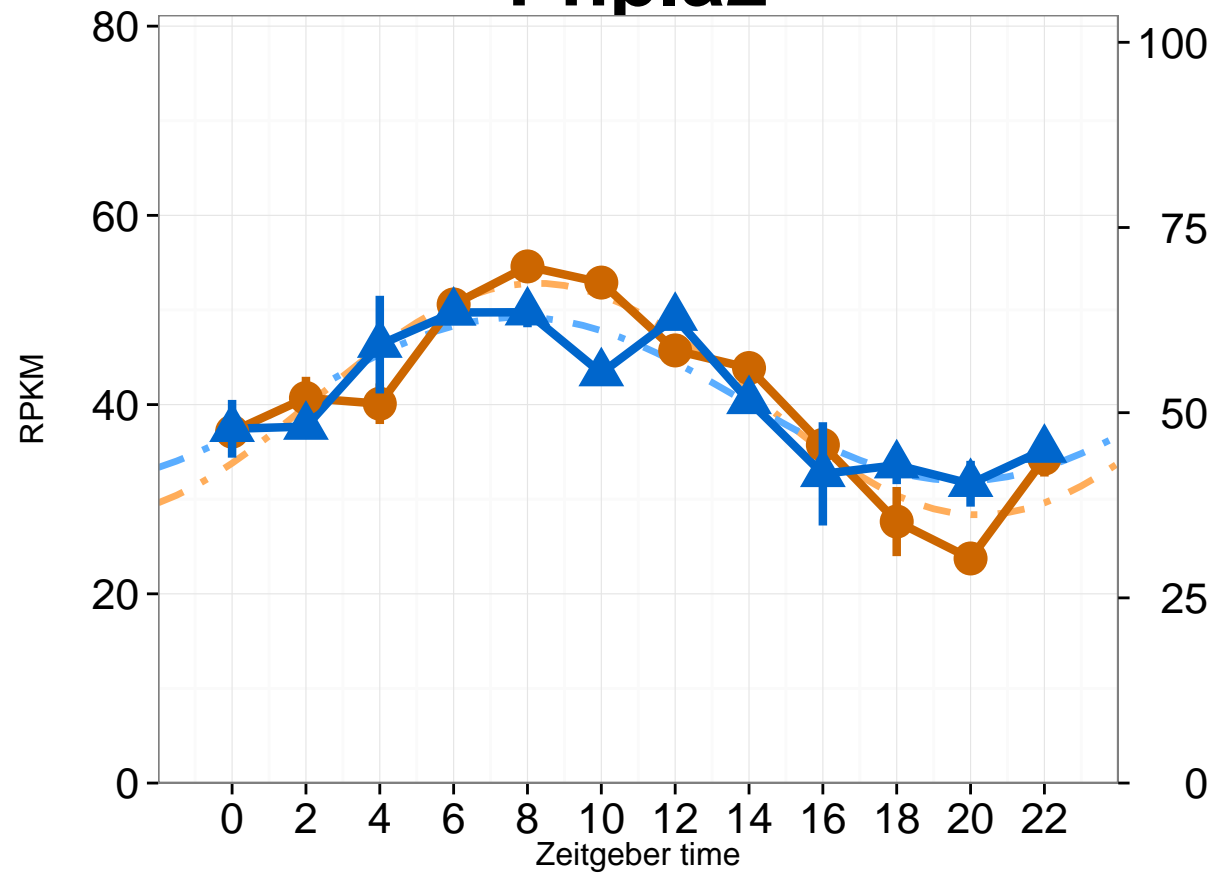

# Pnpla2

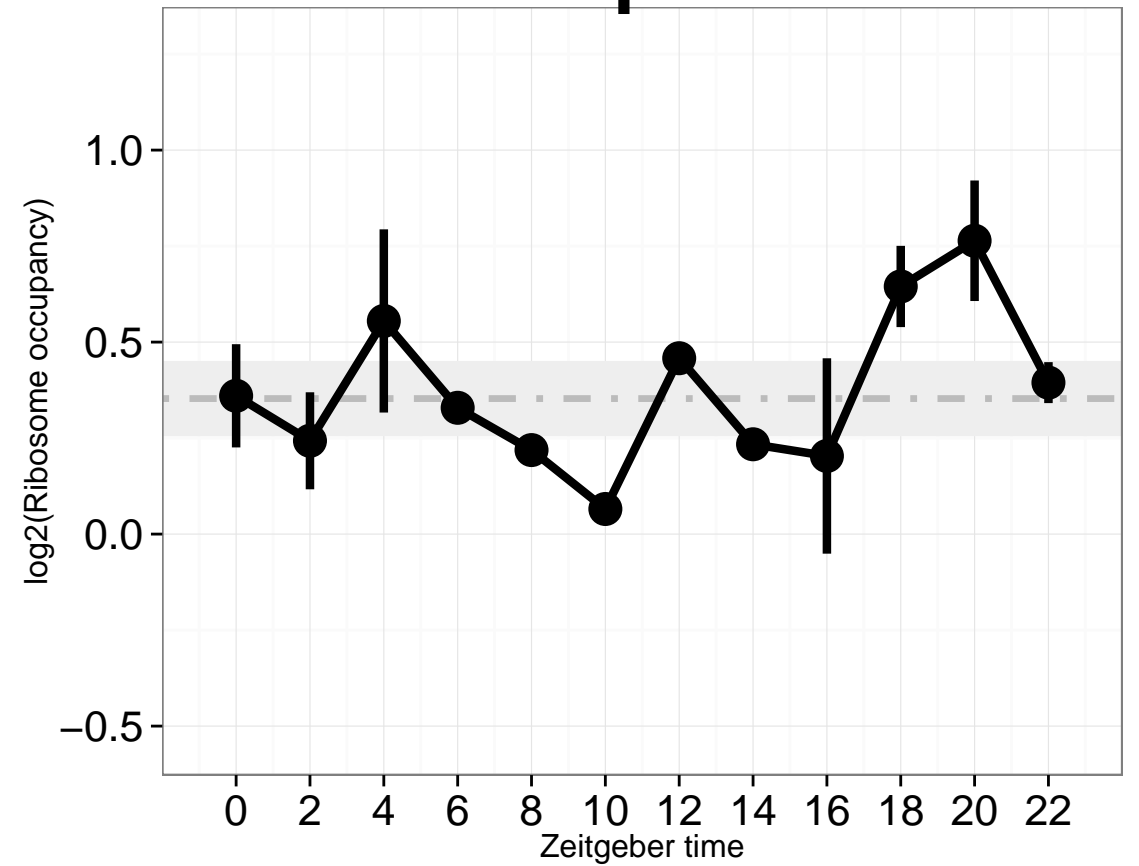

Supplement: Supplementary file 3638 [file 1]

# Ctdspl2

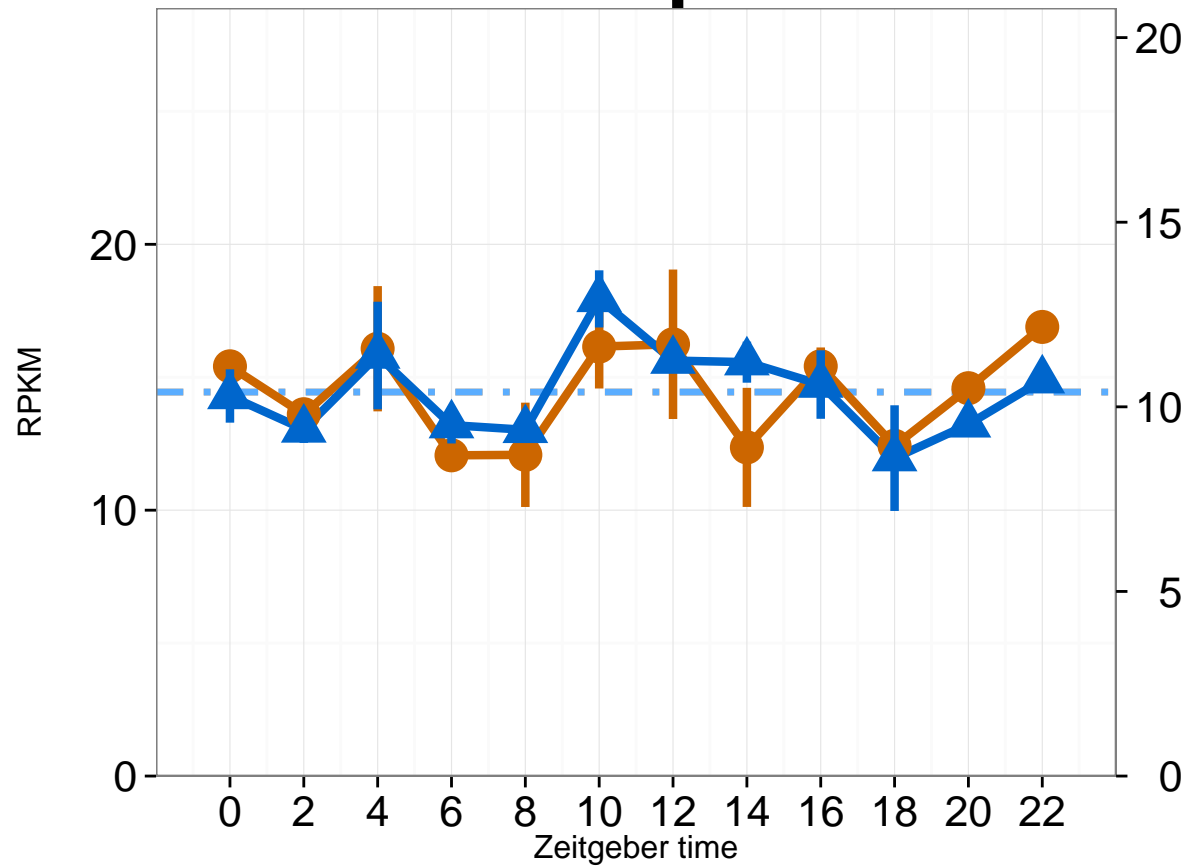

# Ctdspl2

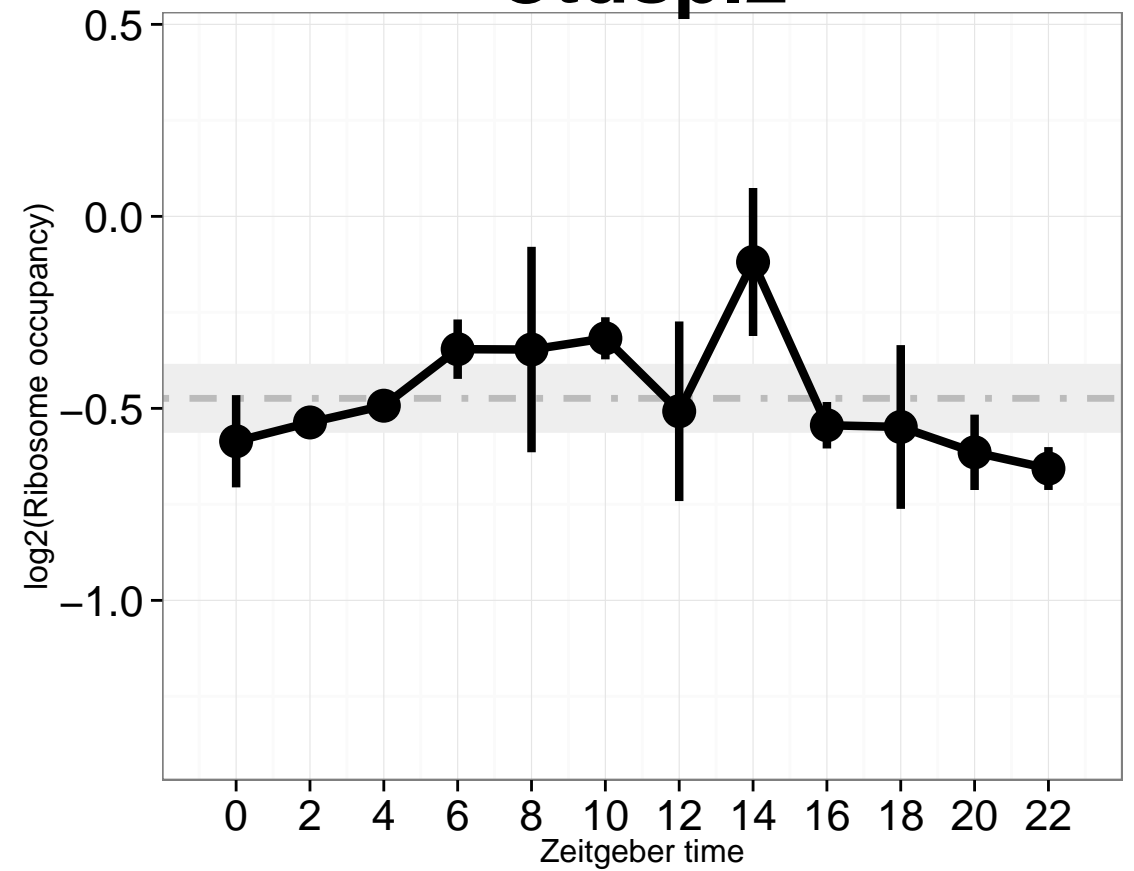

Supplement: Supplementary file 3639 [file 1]

## Snx4

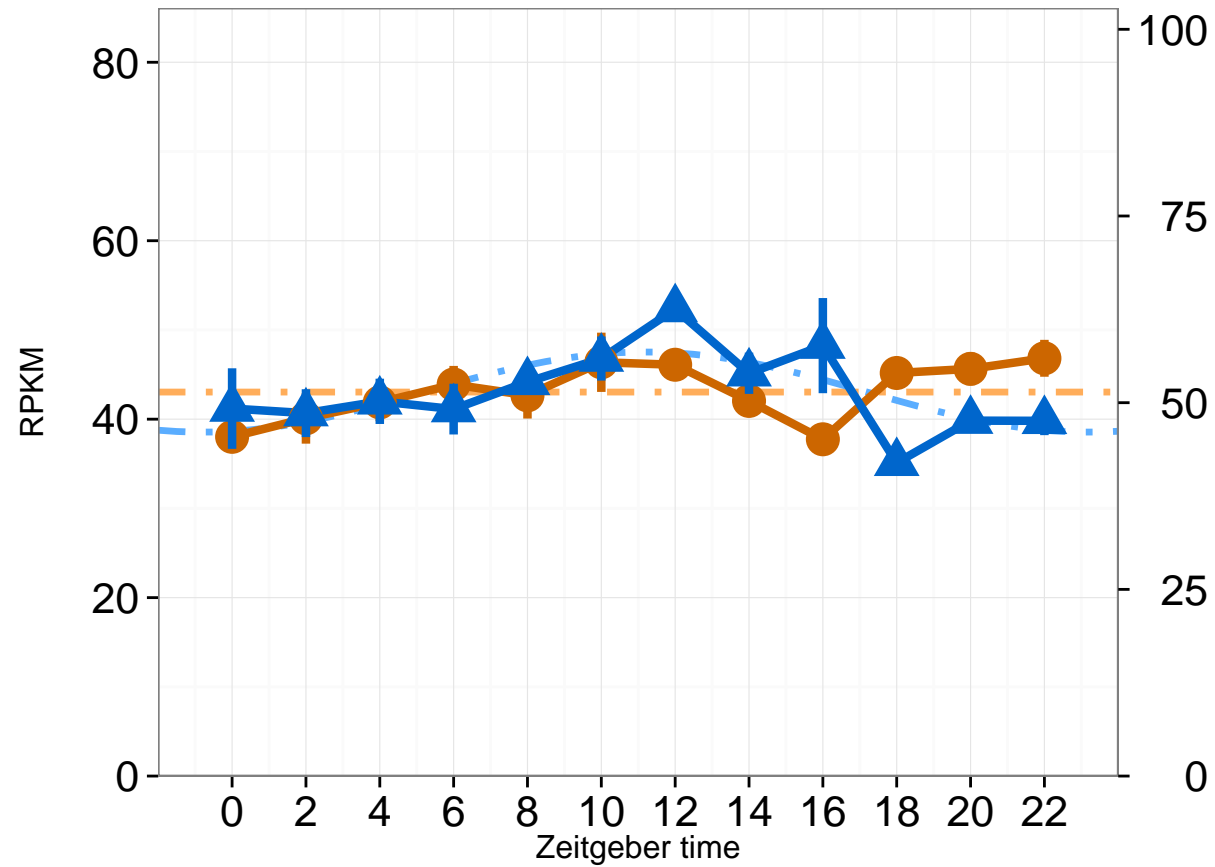

## Snx4

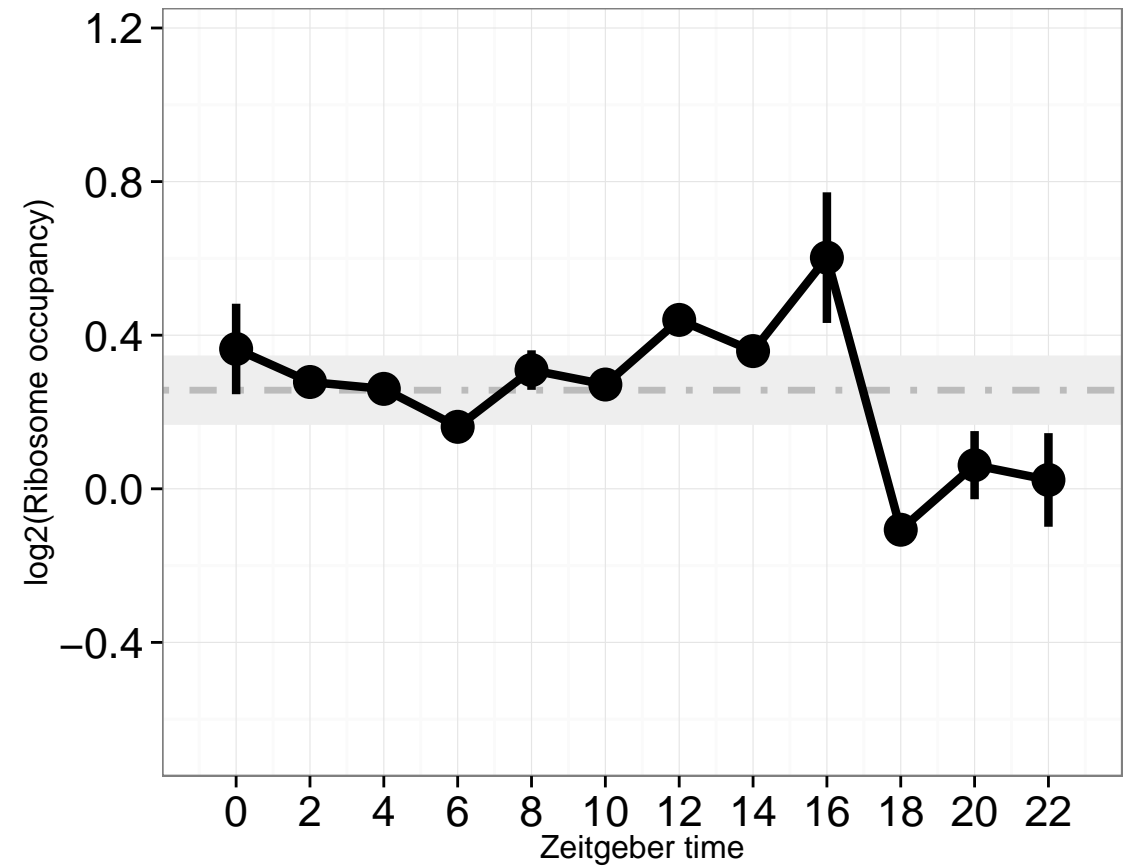

Supplement: Supplementary file 3640 [file 1]

## Cd81

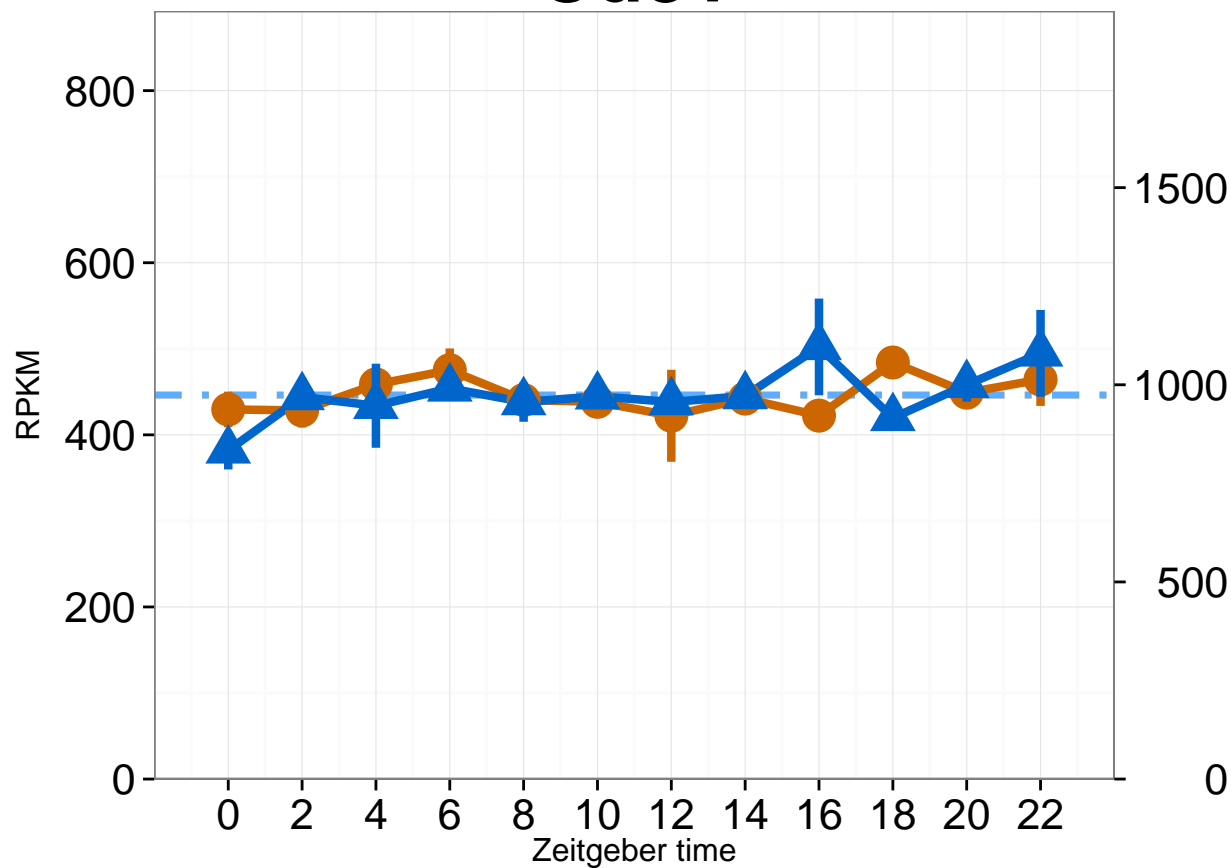

## Cd81

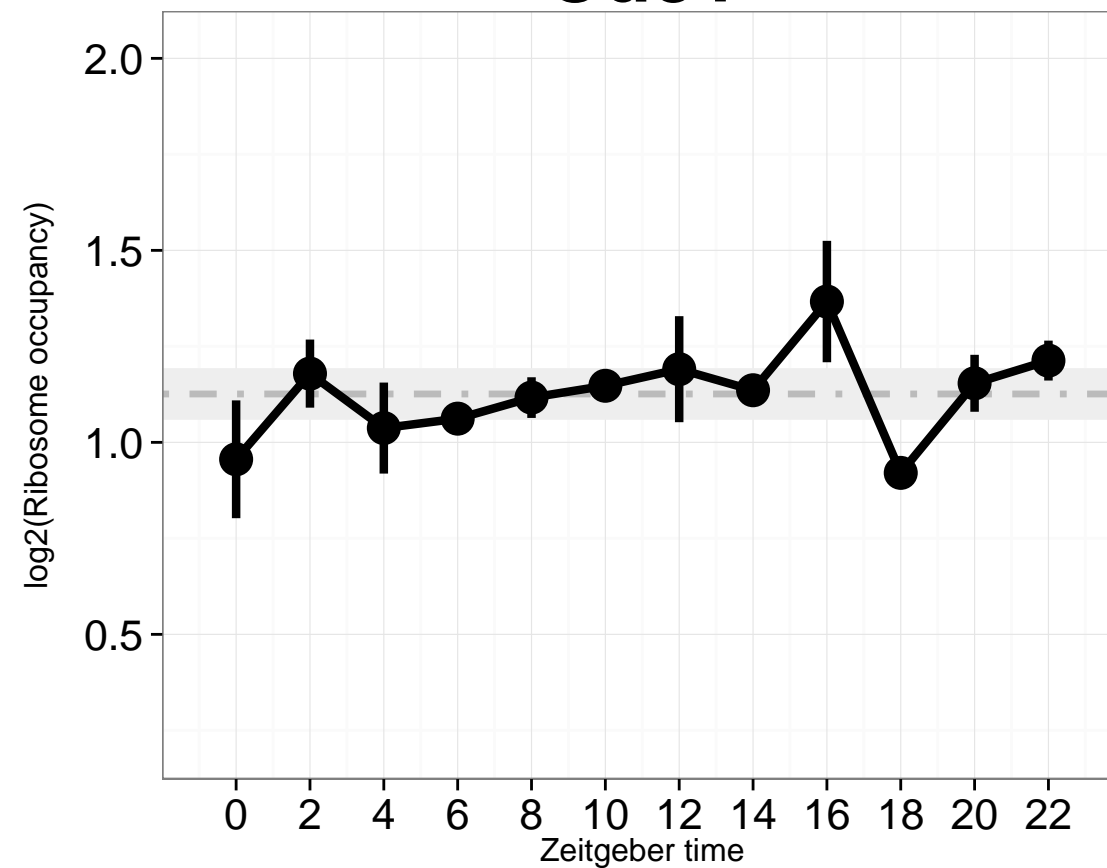

Supplement: Supplementary file 3641 [file 1]

## Srsf6

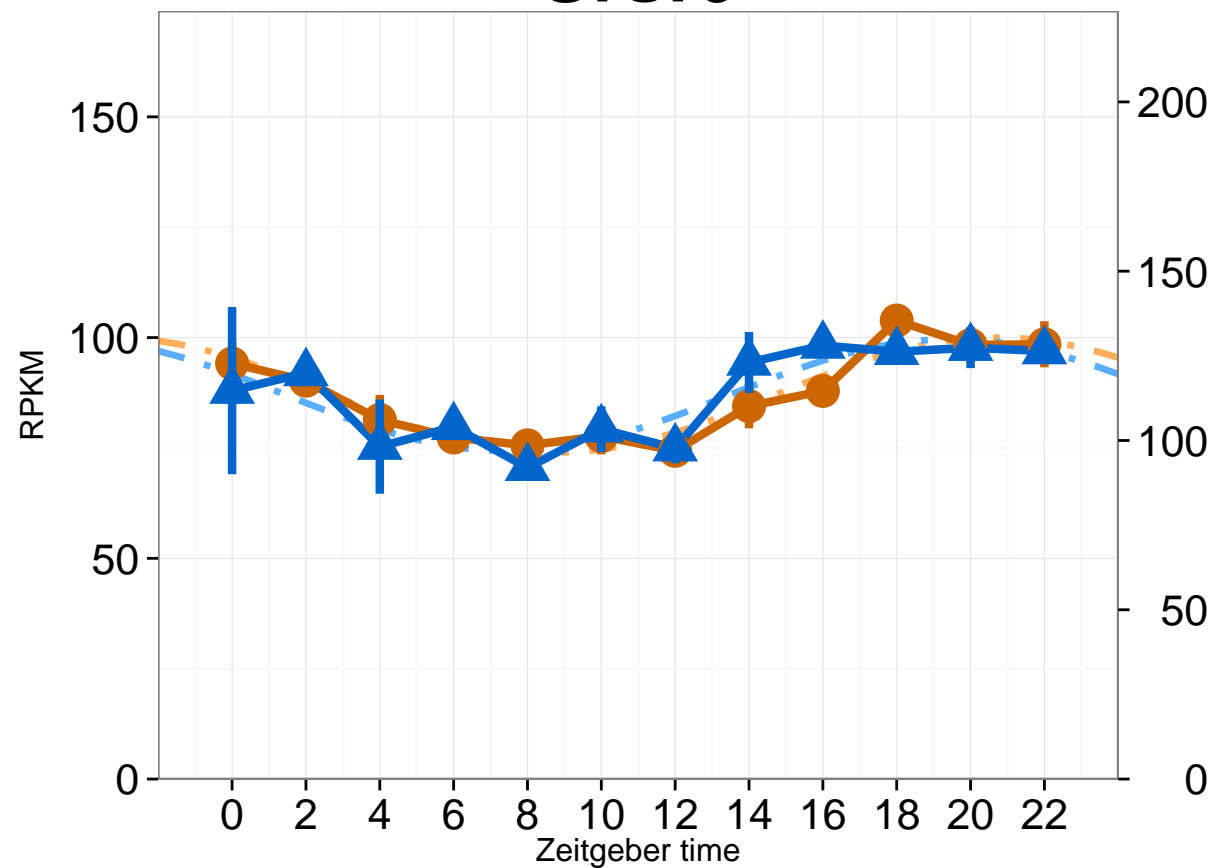

## Srsf6

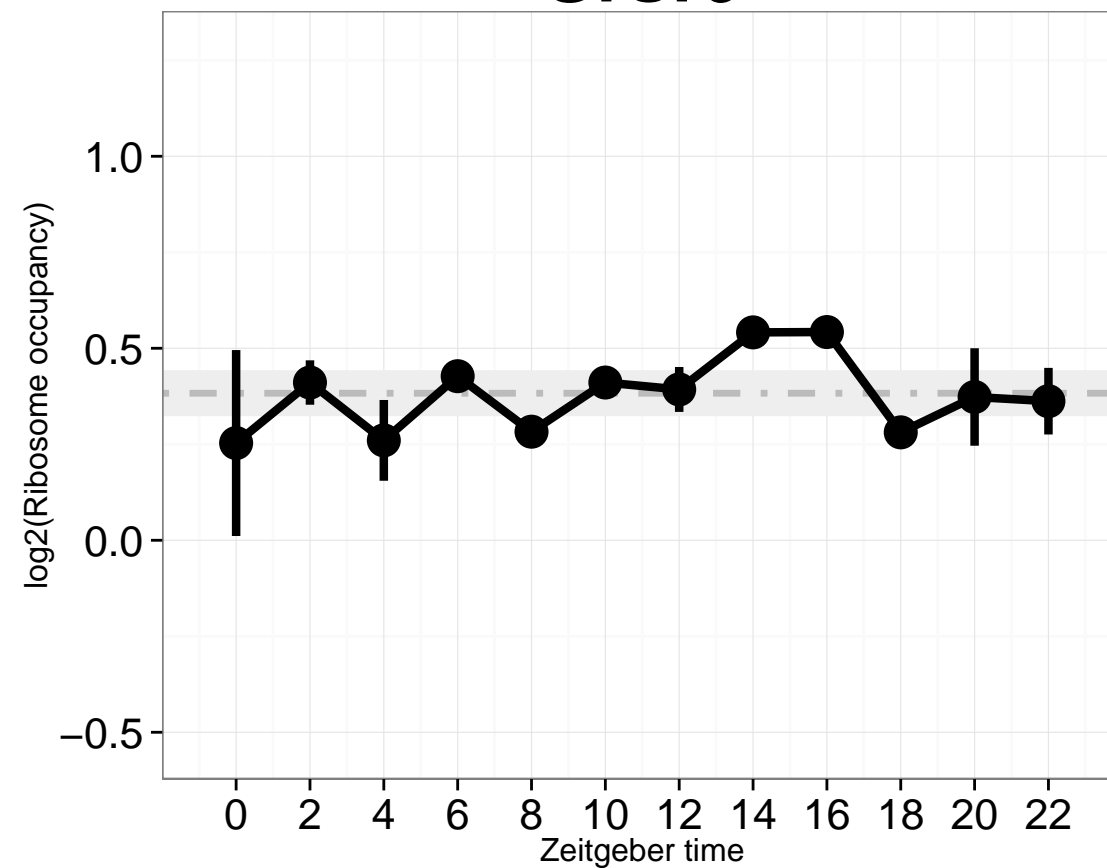

Supplement: Supplementary file 3642 [file 1]

## Ltc4s

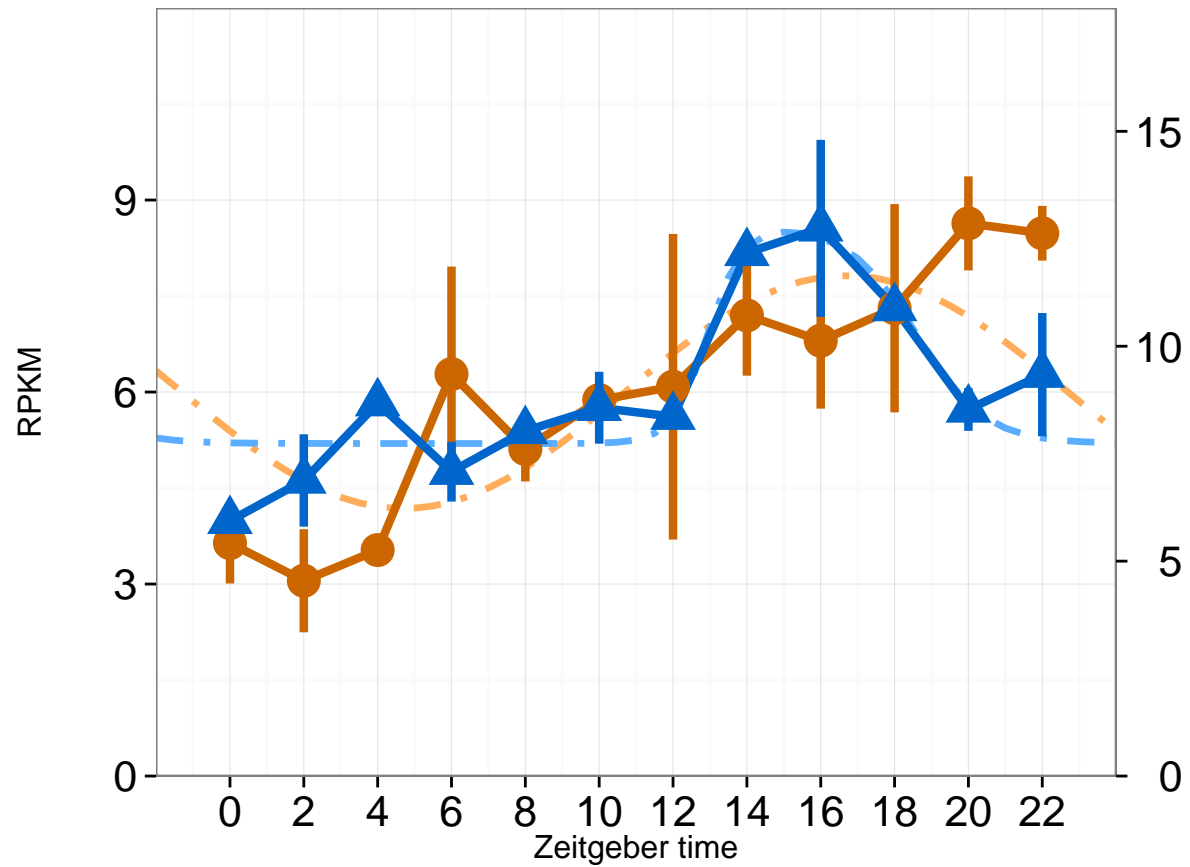

## Ltc4s

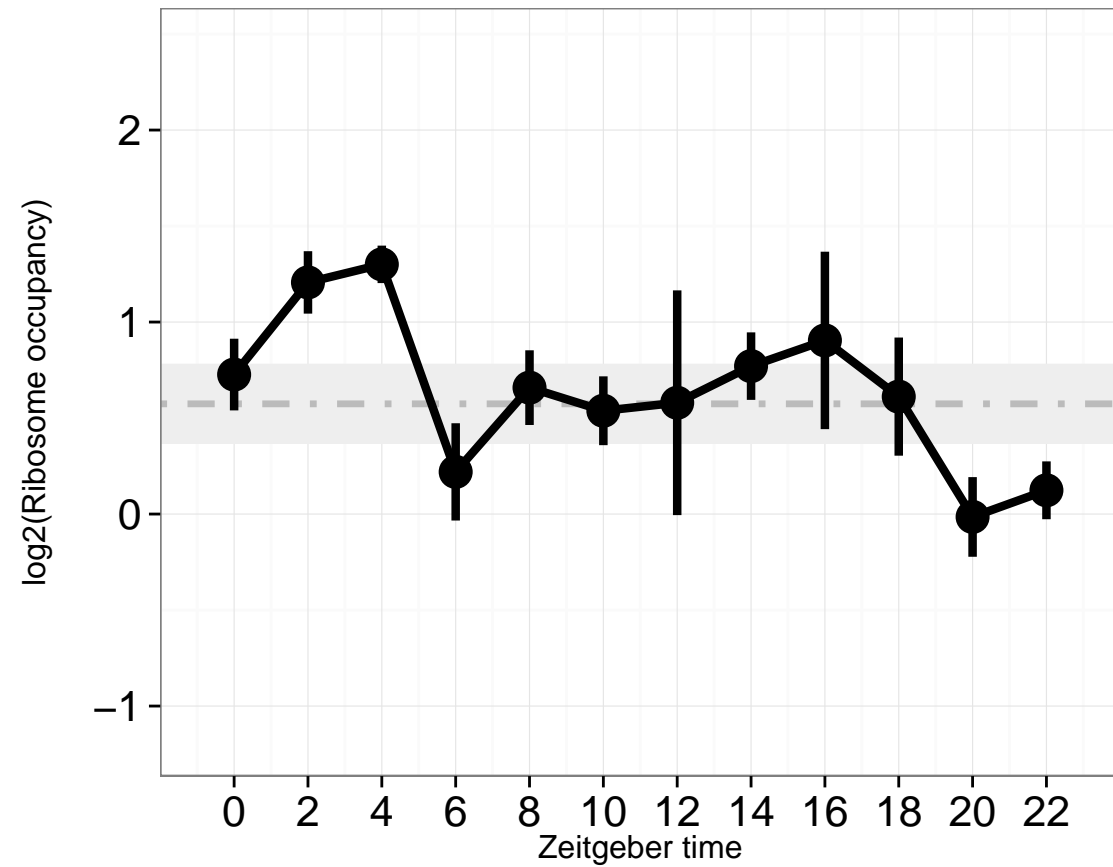

Supplement: Supplementary file 3643 [file 1]

## Crip1

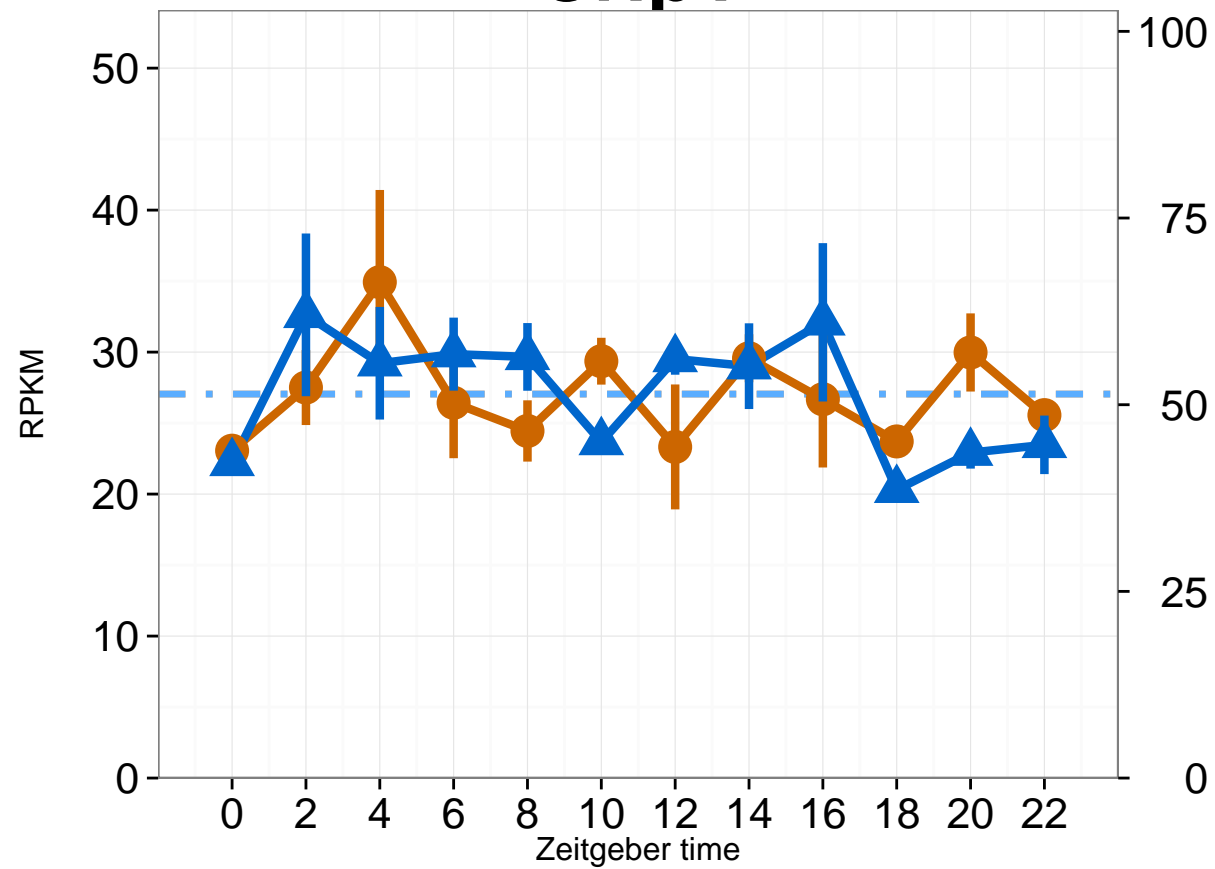

## Crip1

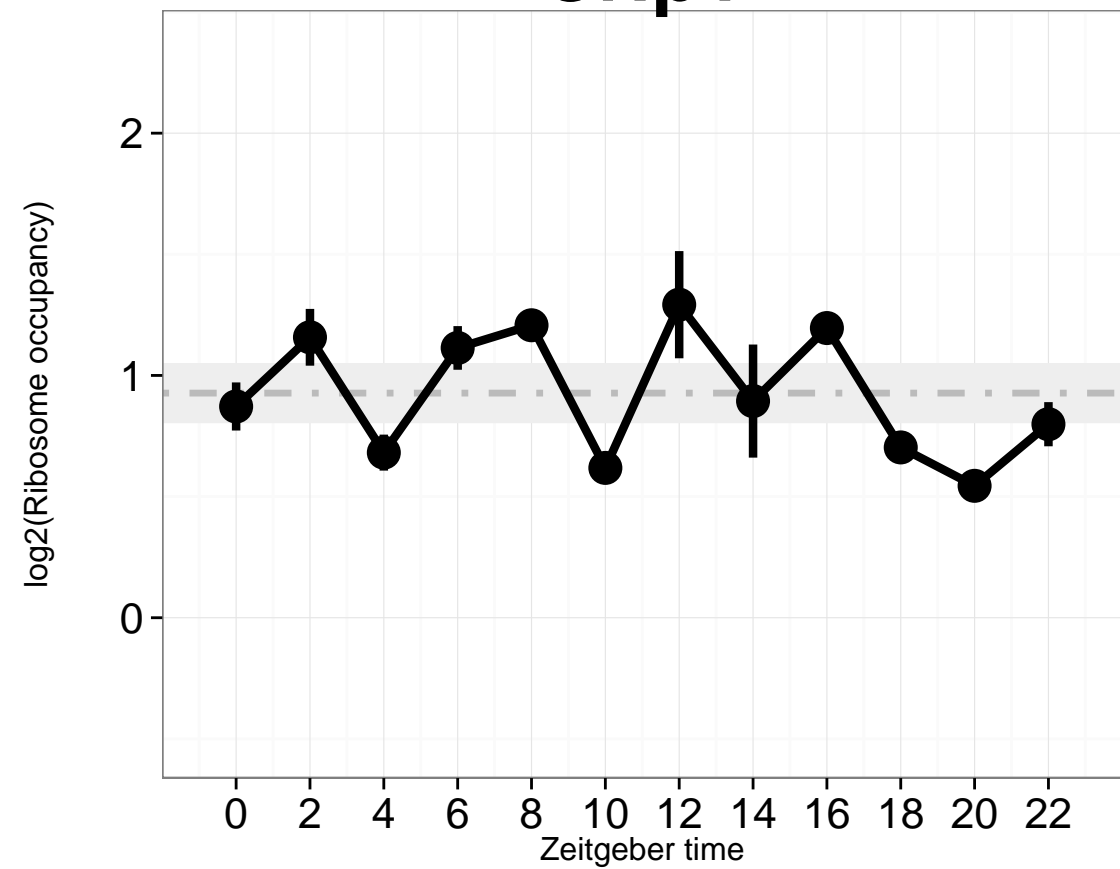

Supplement: Supplementary file 3644 [file 1]

## Nrp1

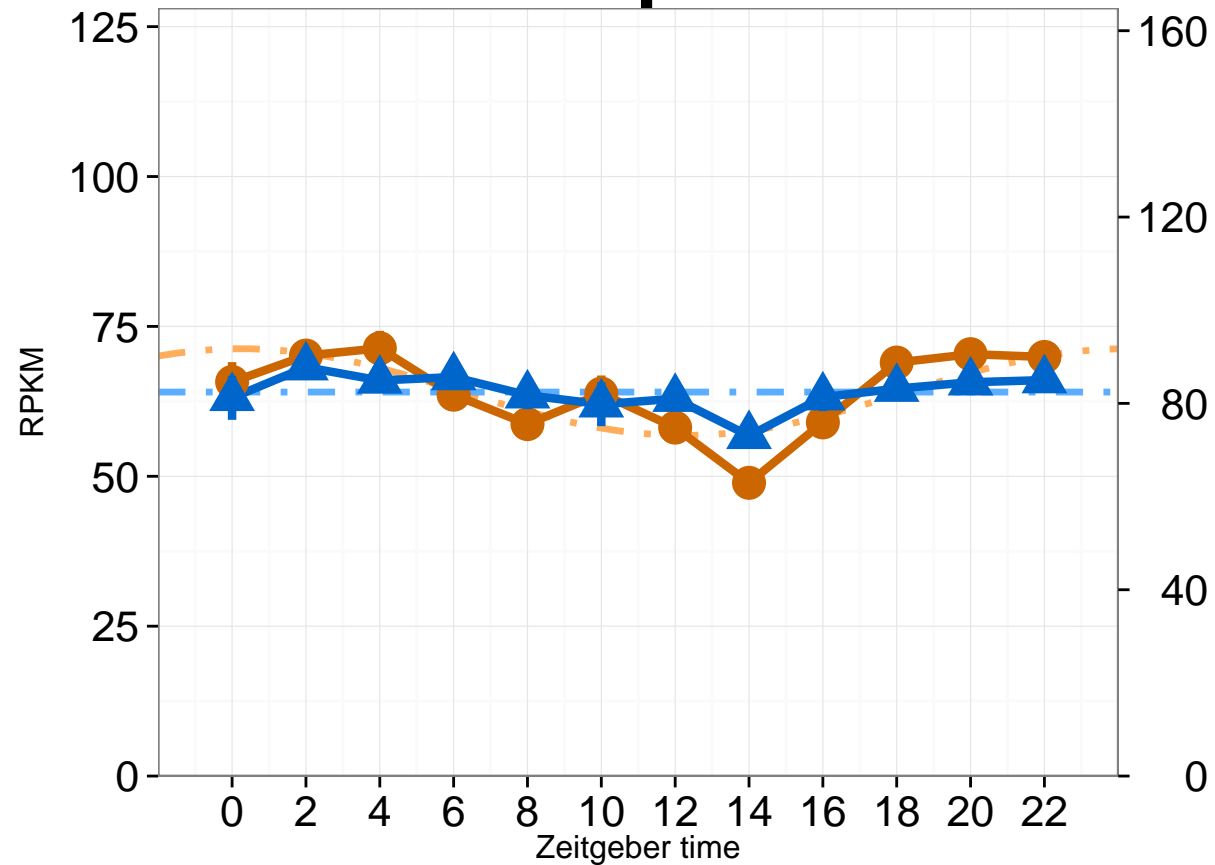

## Nrp1

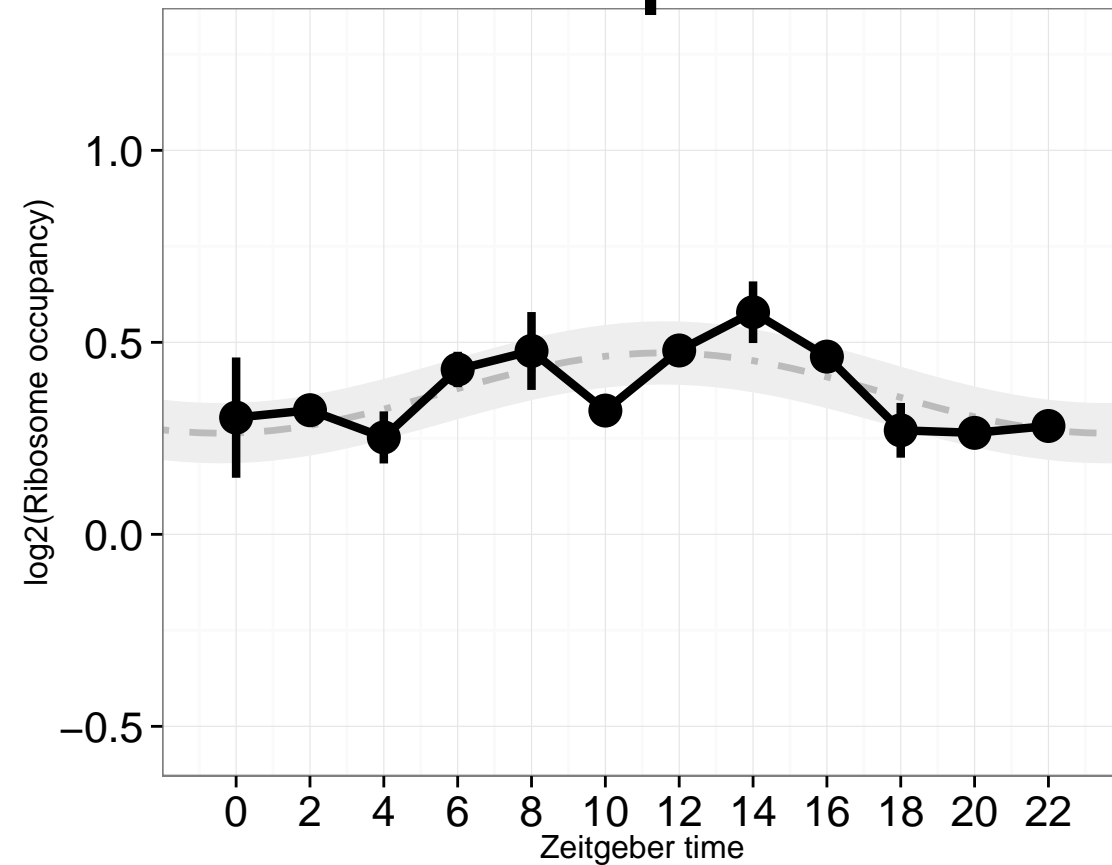

Supplement: Supplementary file 3645 [file 1]

## Immp1l

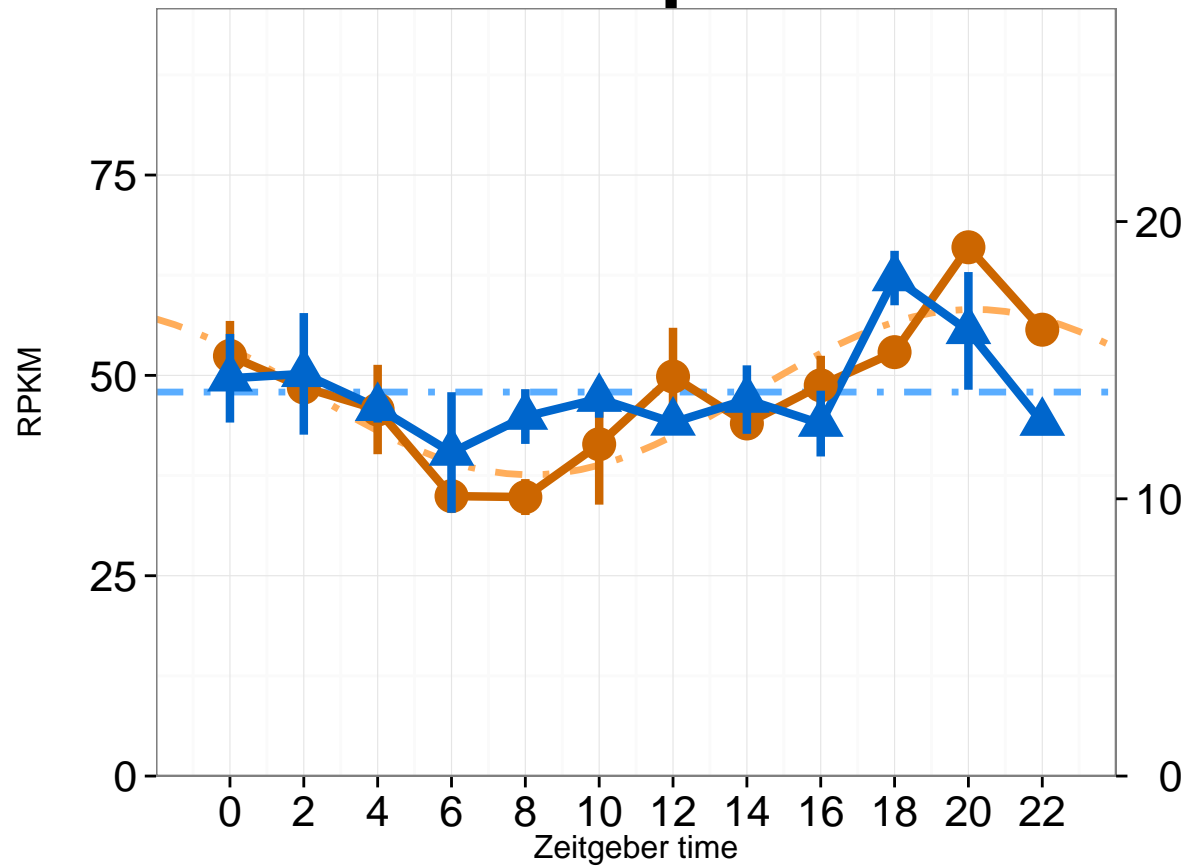

## Immp1l

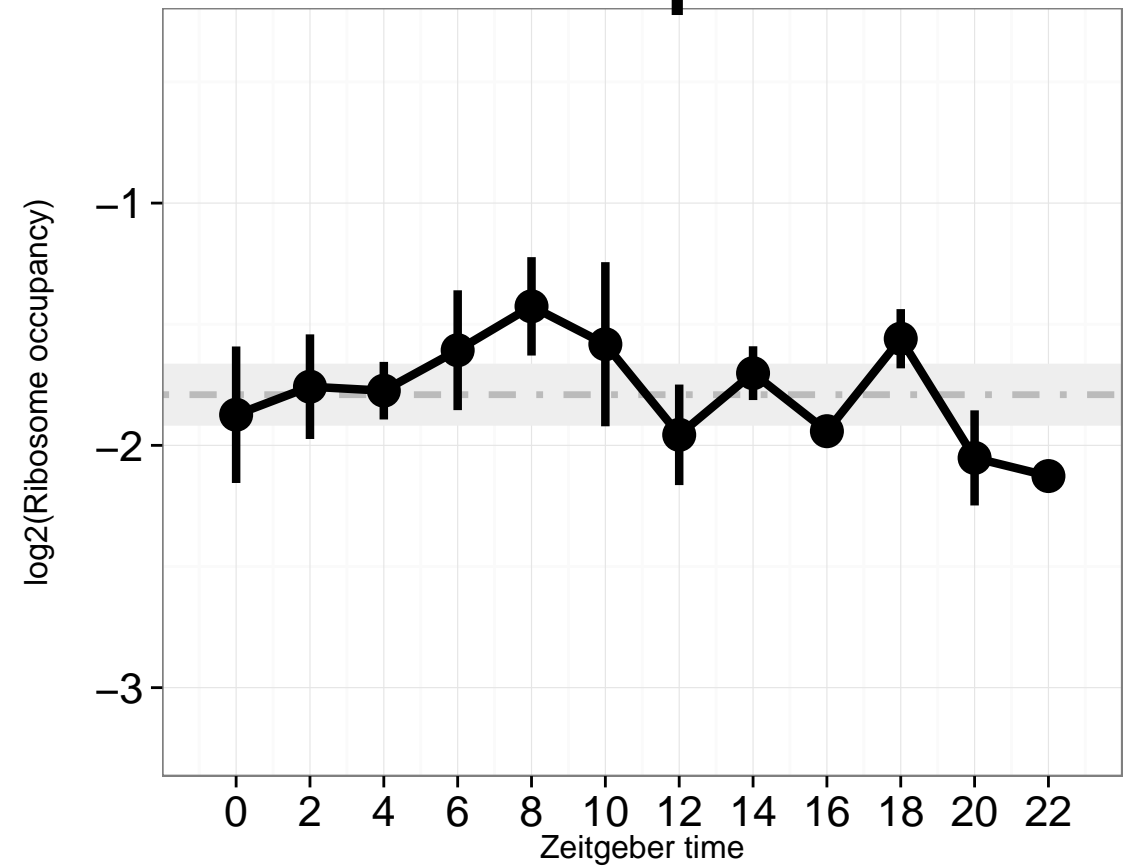

Supplement: Supplementary file 3646 [file 1]

## Mettl15

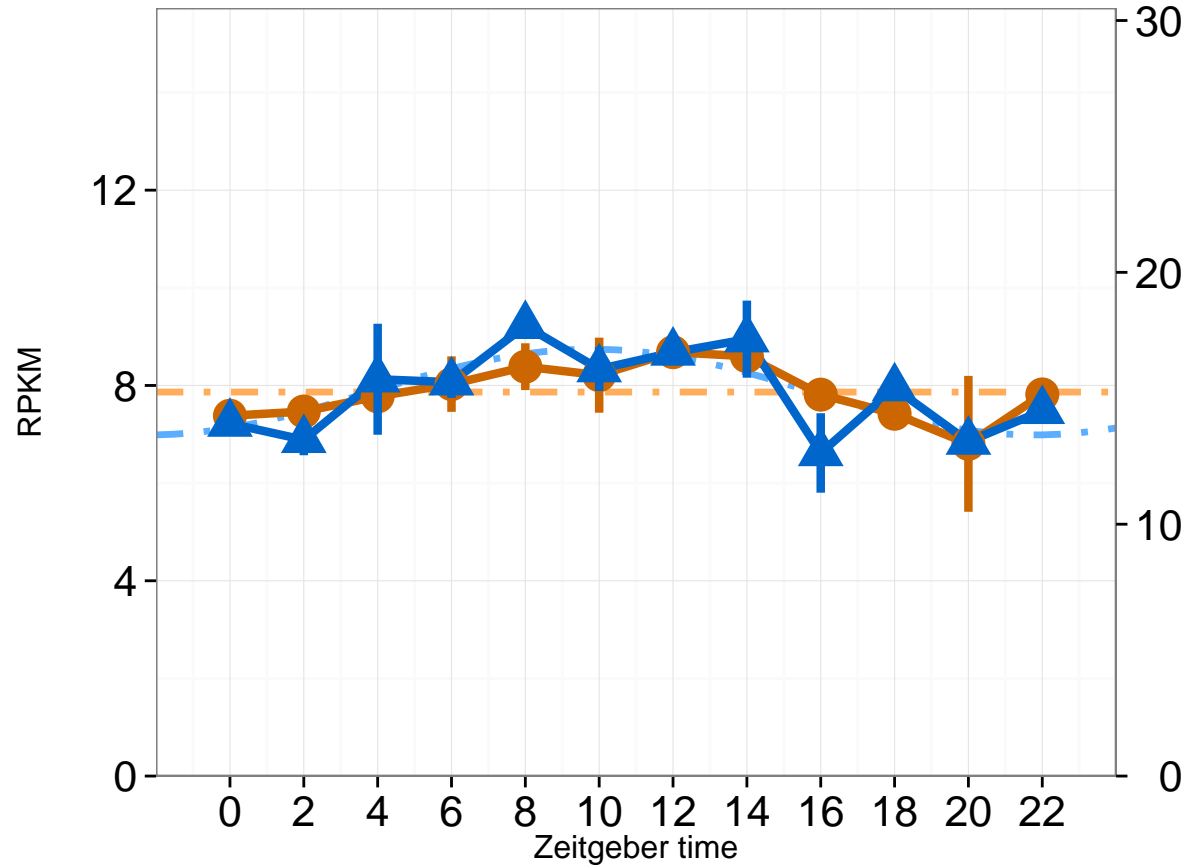

## Mettl15

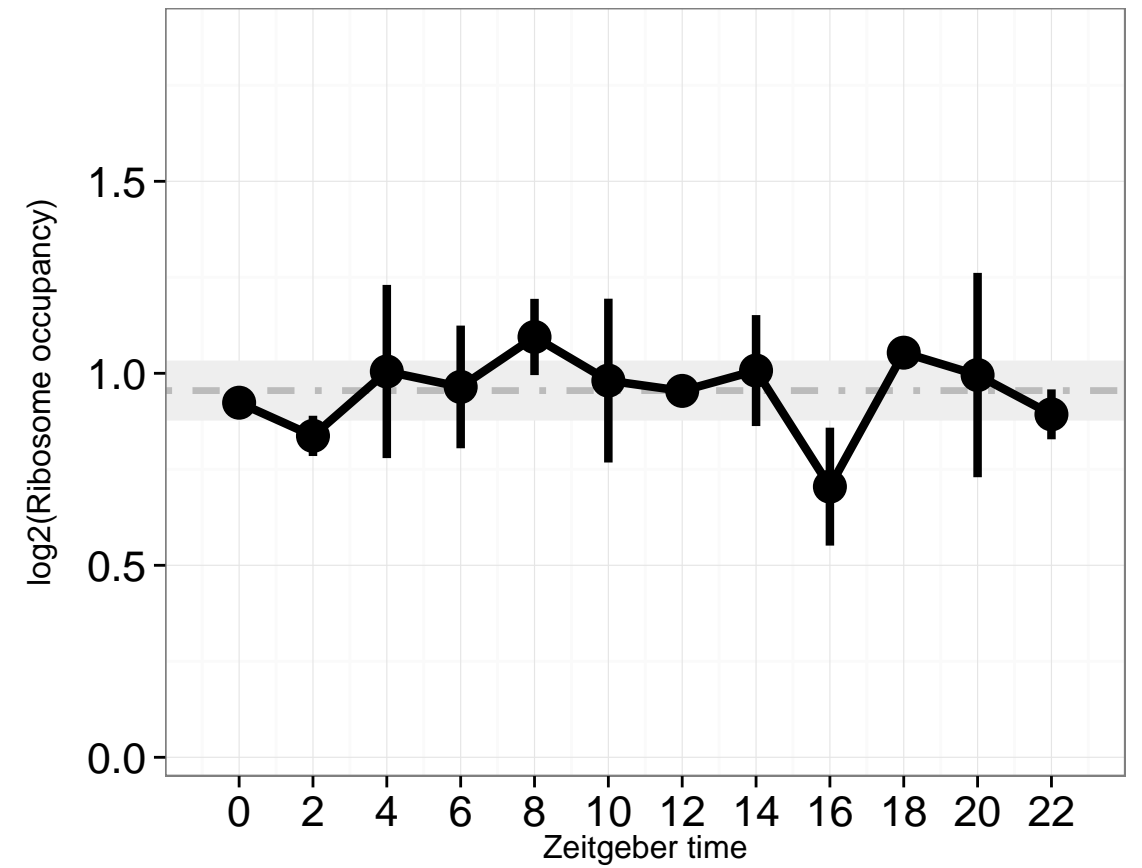

Supplement: Supplementary file 3647 [file 1]

## Acpp

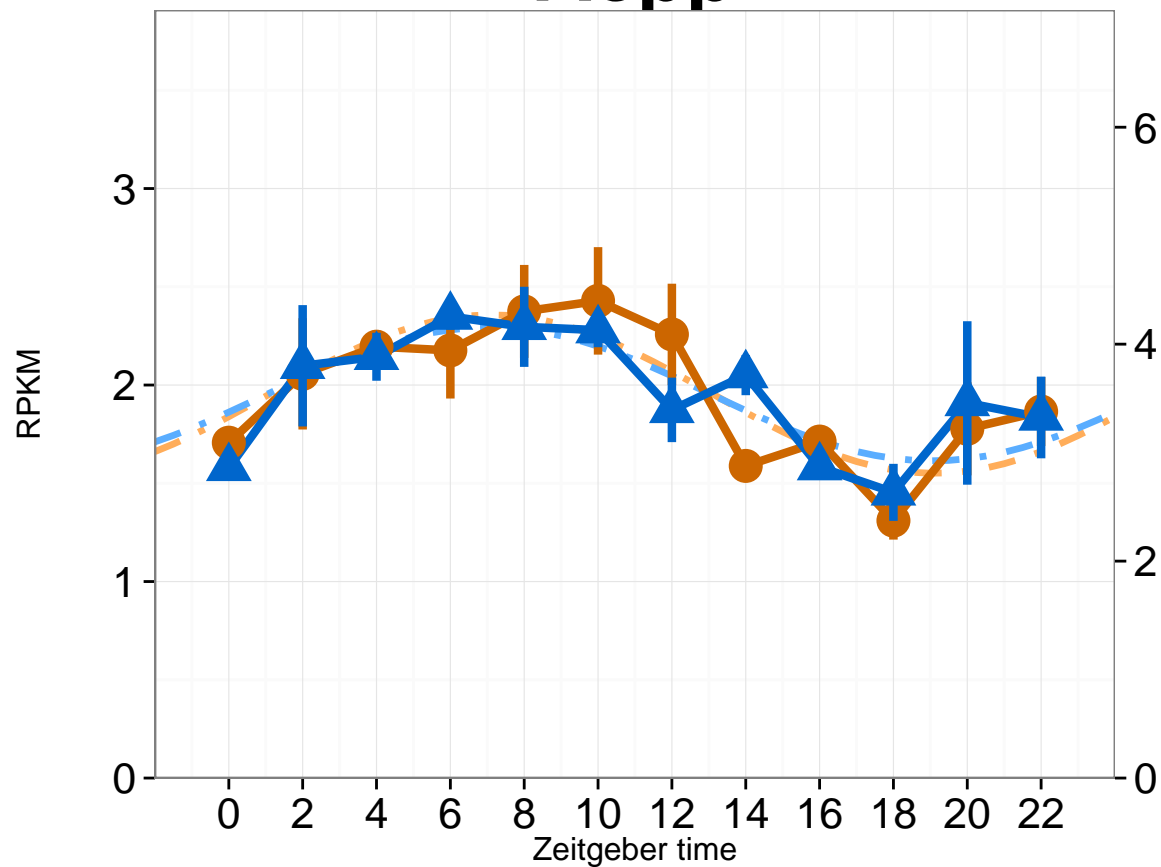

## Acpp

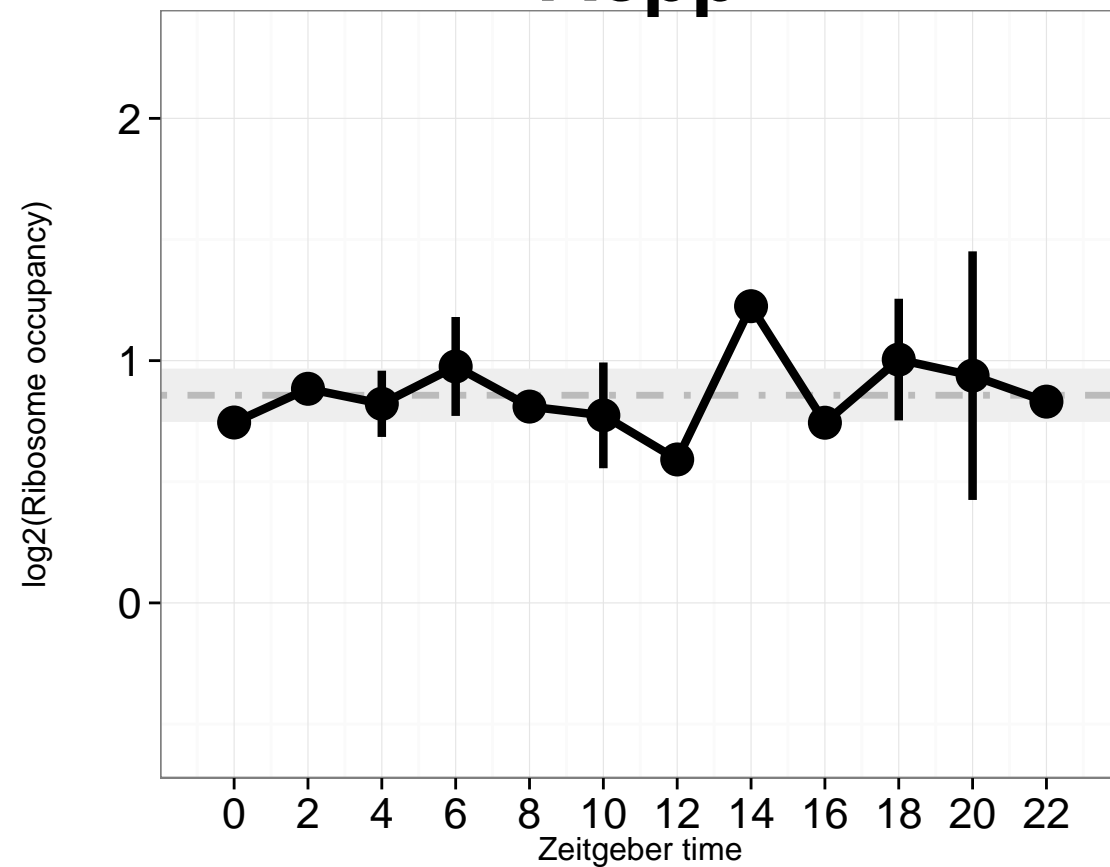

Supplement: Supplementary file 3648 [file 1]

# Ccdc88a

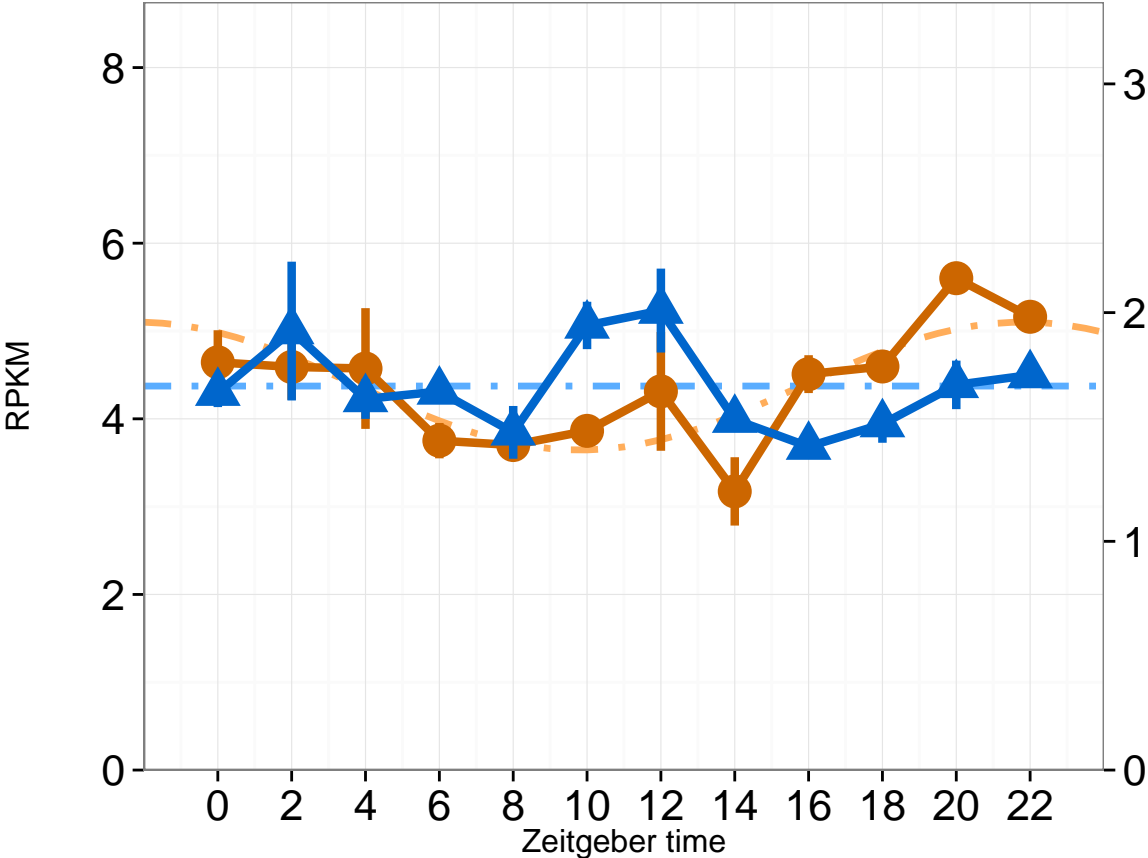

# Ccdc88a

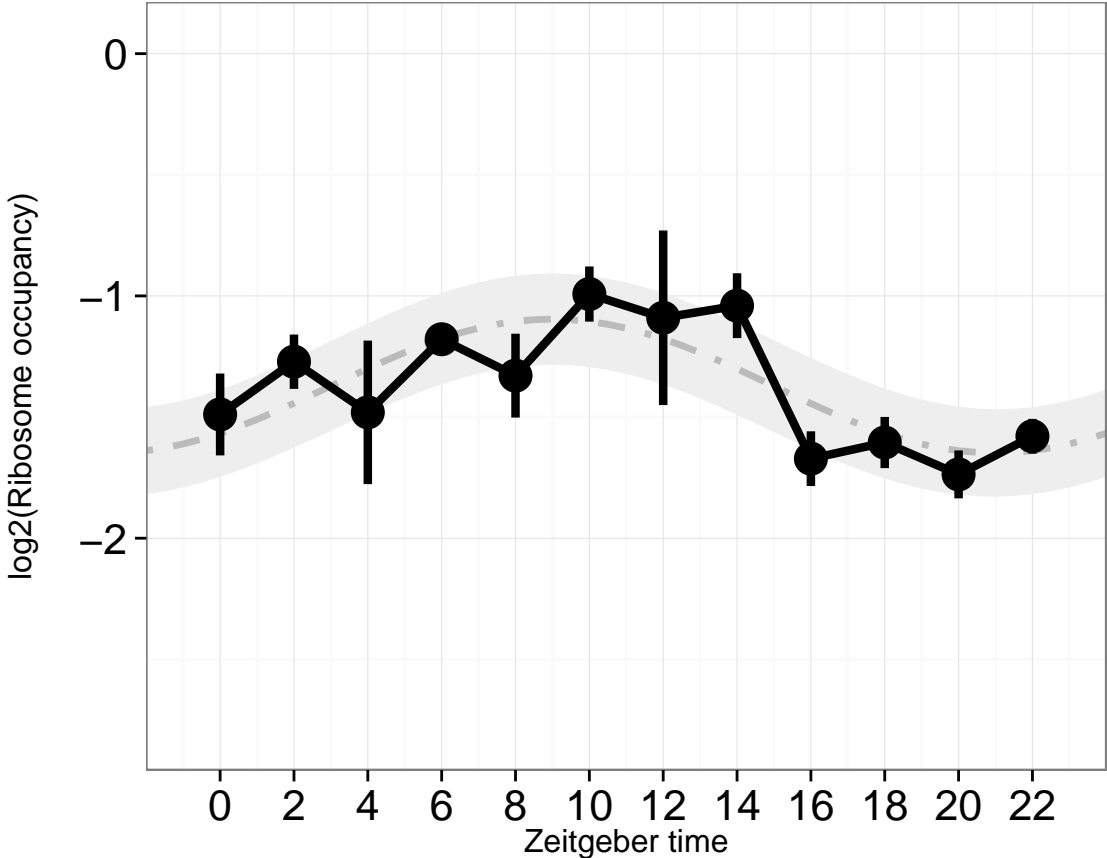

Supplement: Supplementary file 3649 [file 1]

## Rbp4

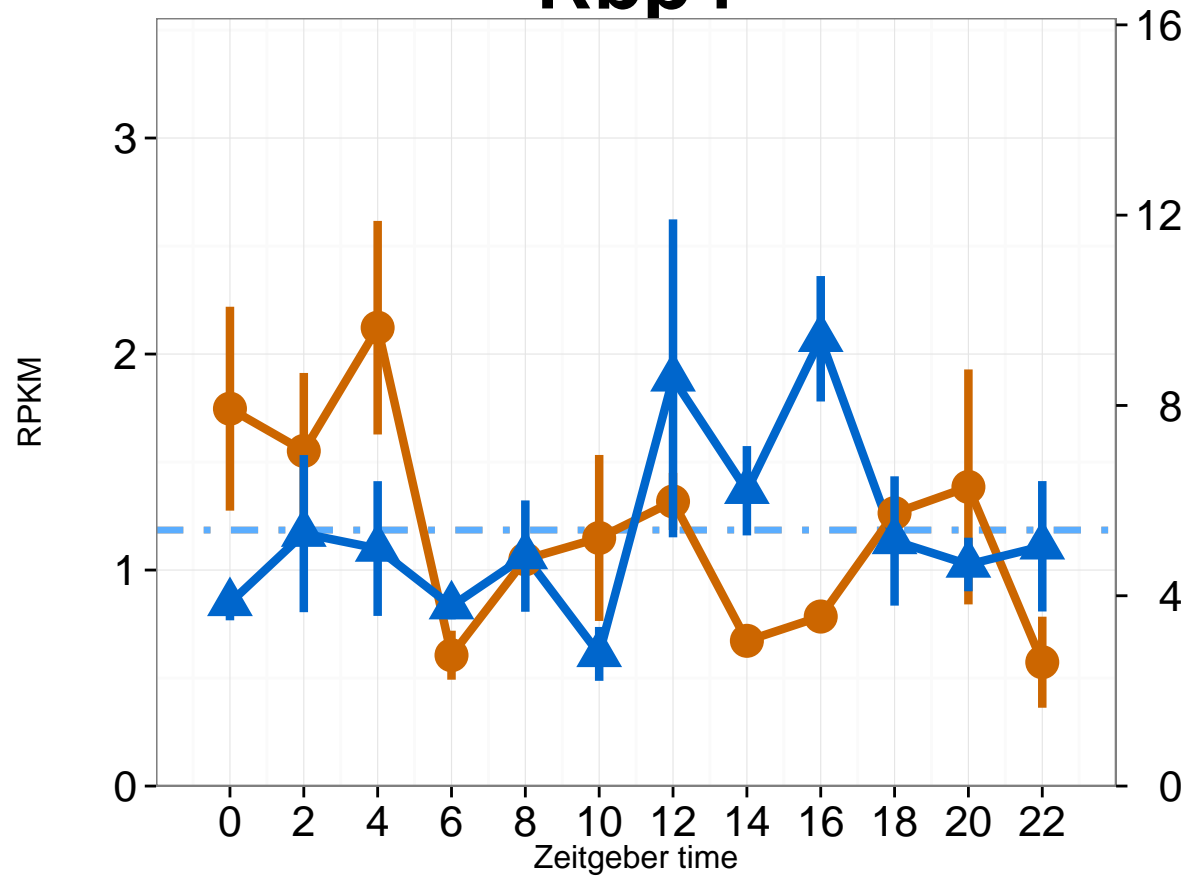

## Rbp4

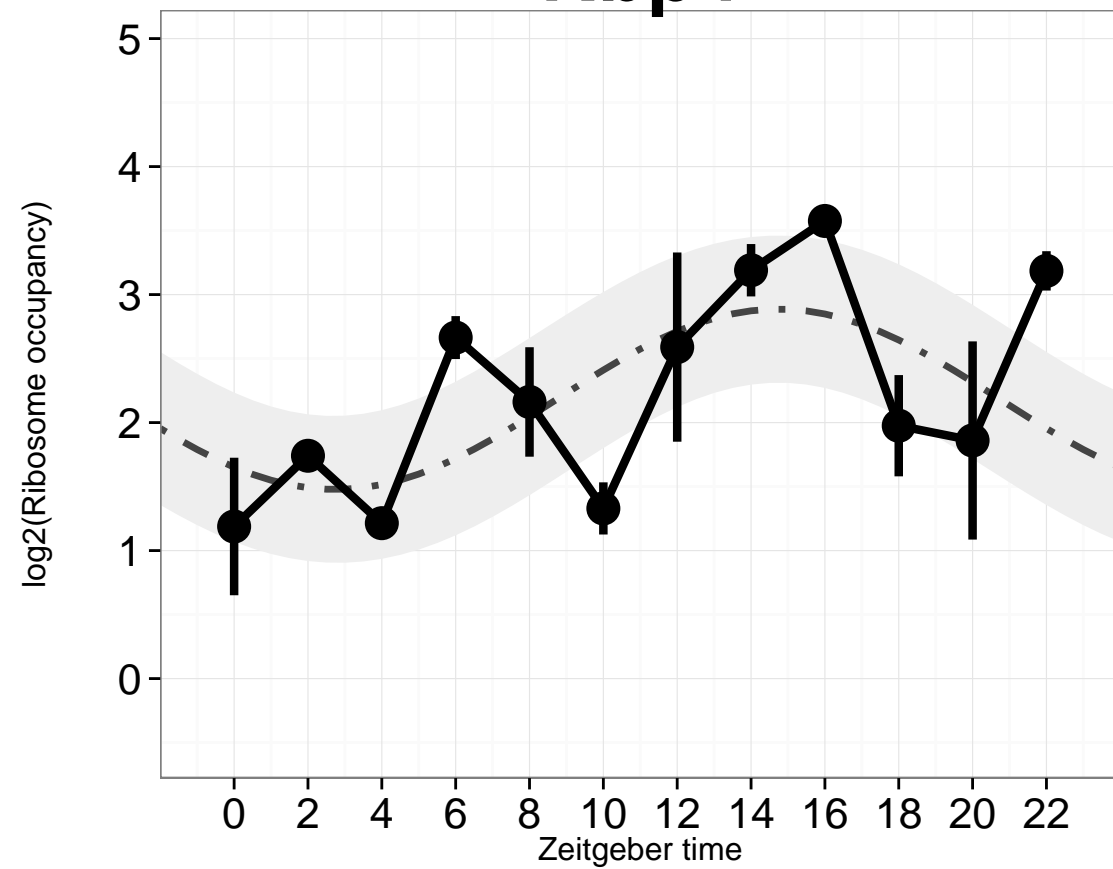

Supplement: Supplementary file 3650 [file 1]

## Mtmr2

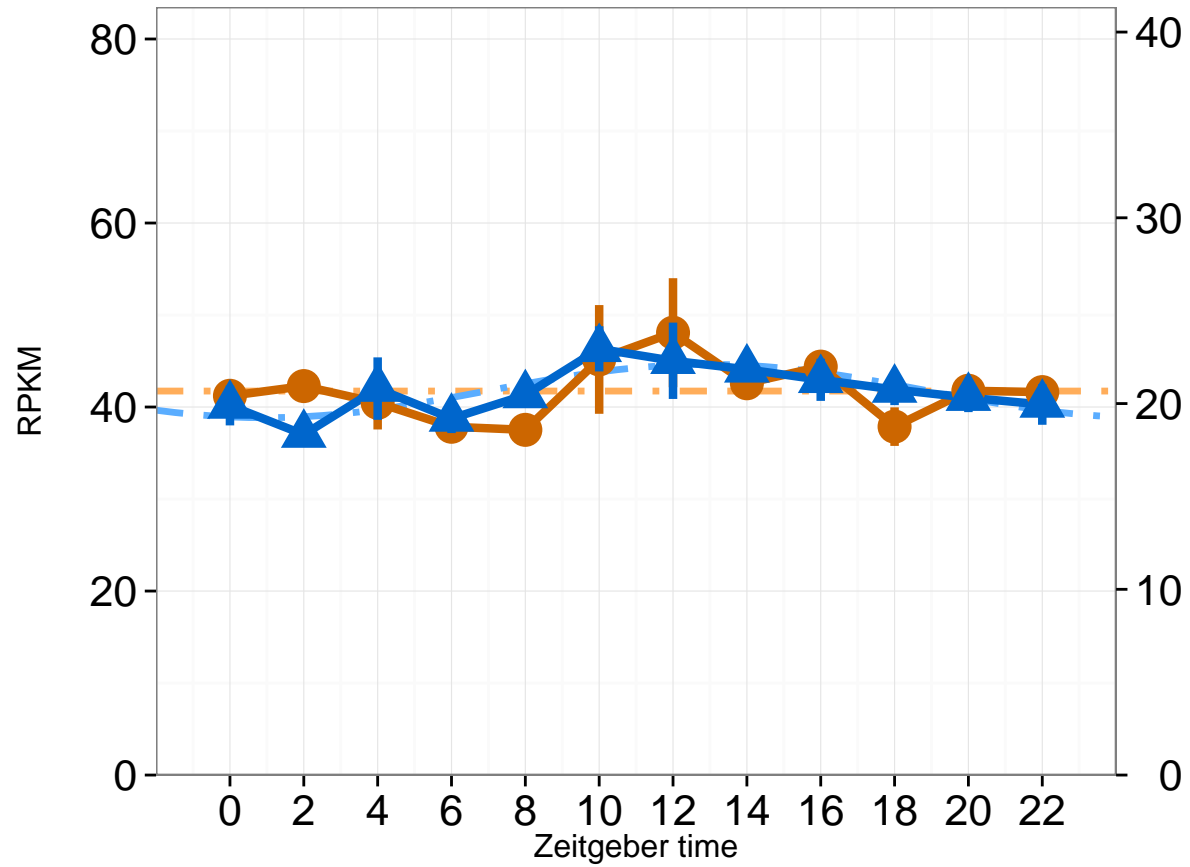

## Mtmr2

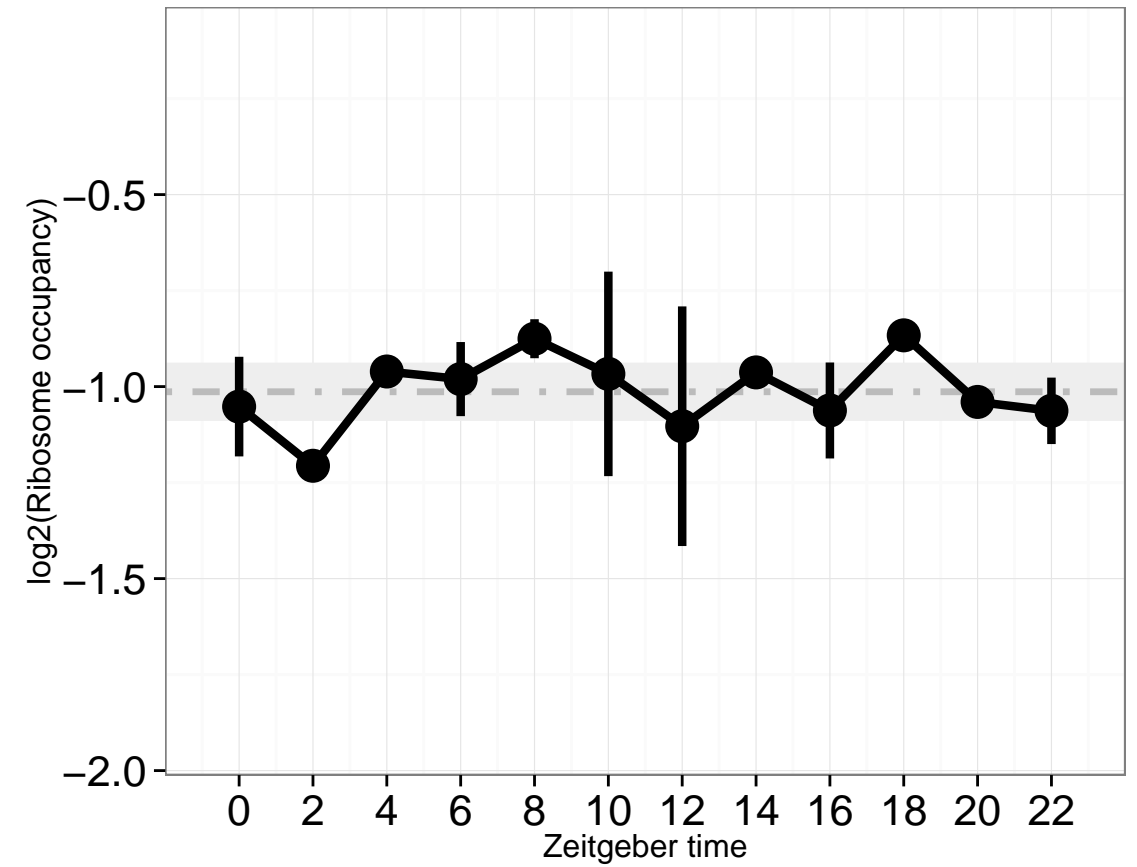

Supplement: Supplementary file 3651 [file 1]

# Pear1

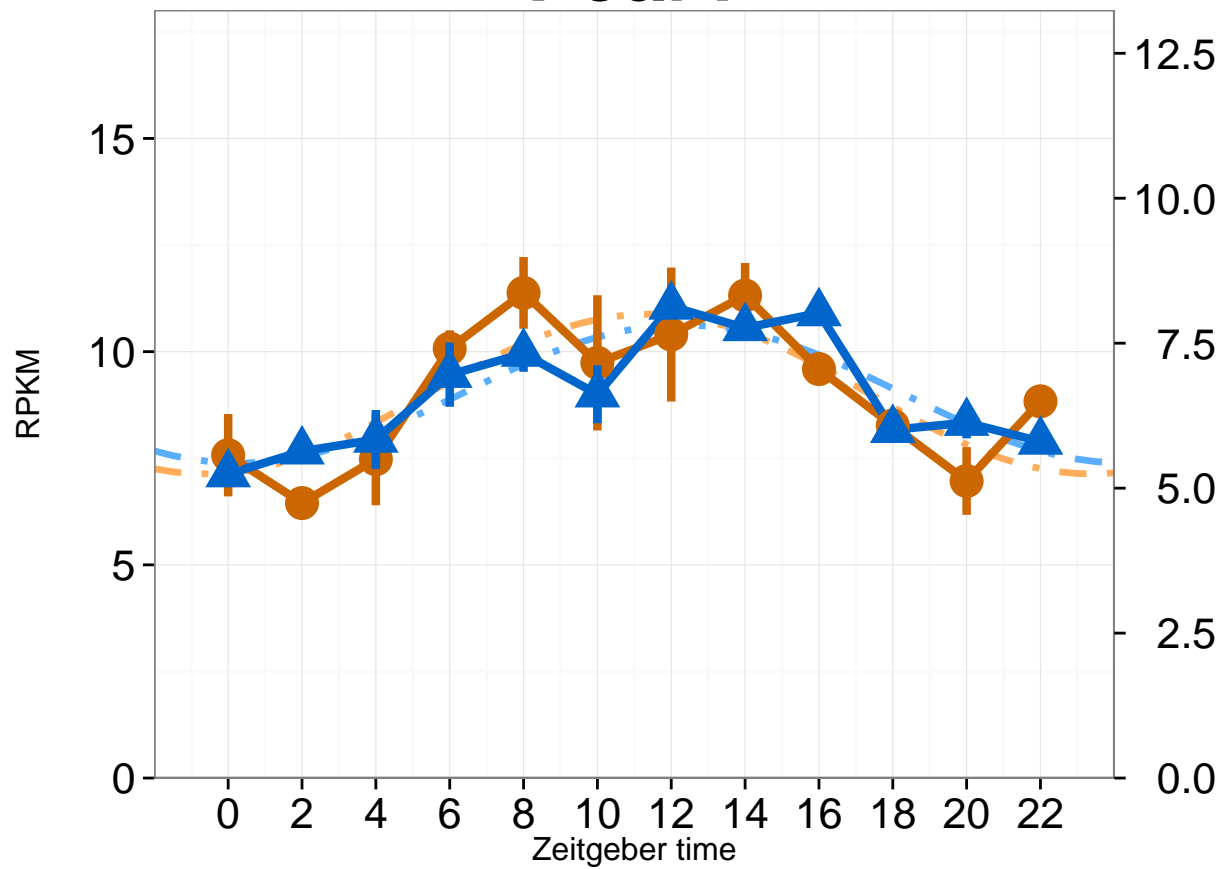

# Pear1

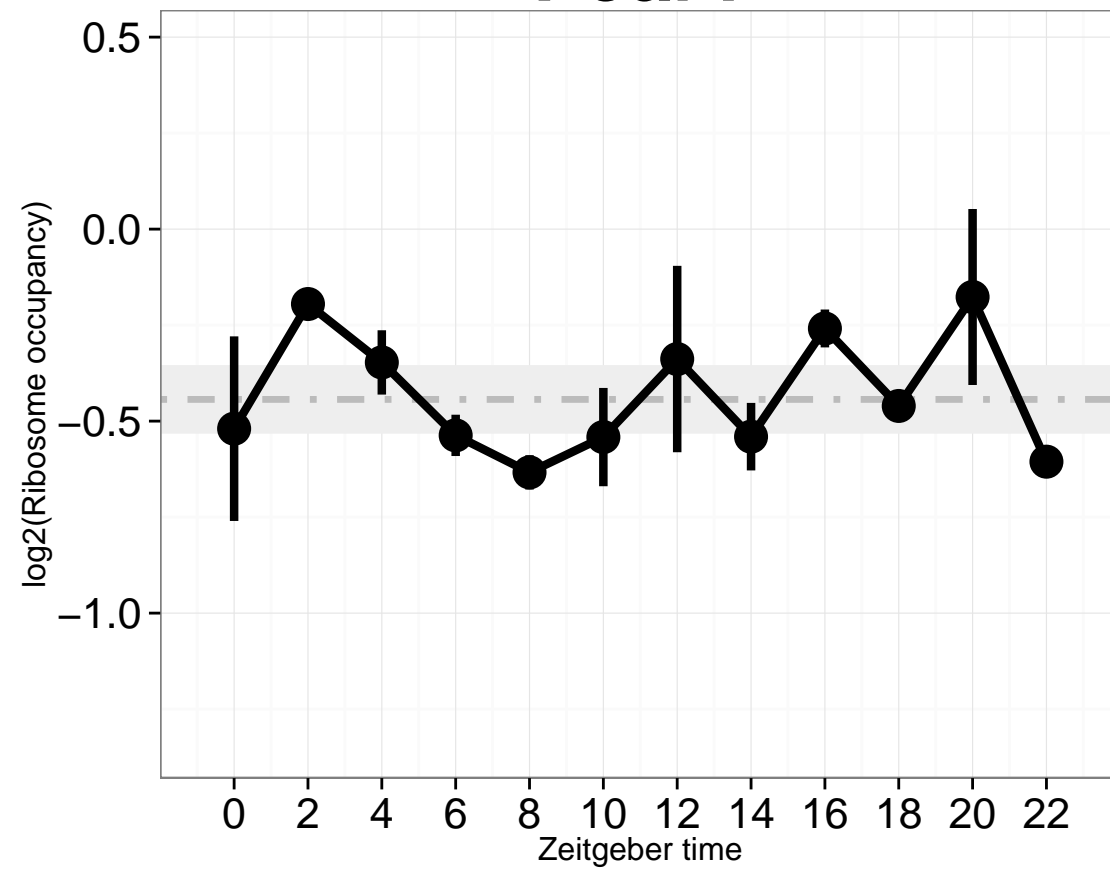

Supplement: Supplementary file 3652 [file 1]

# Armcox5

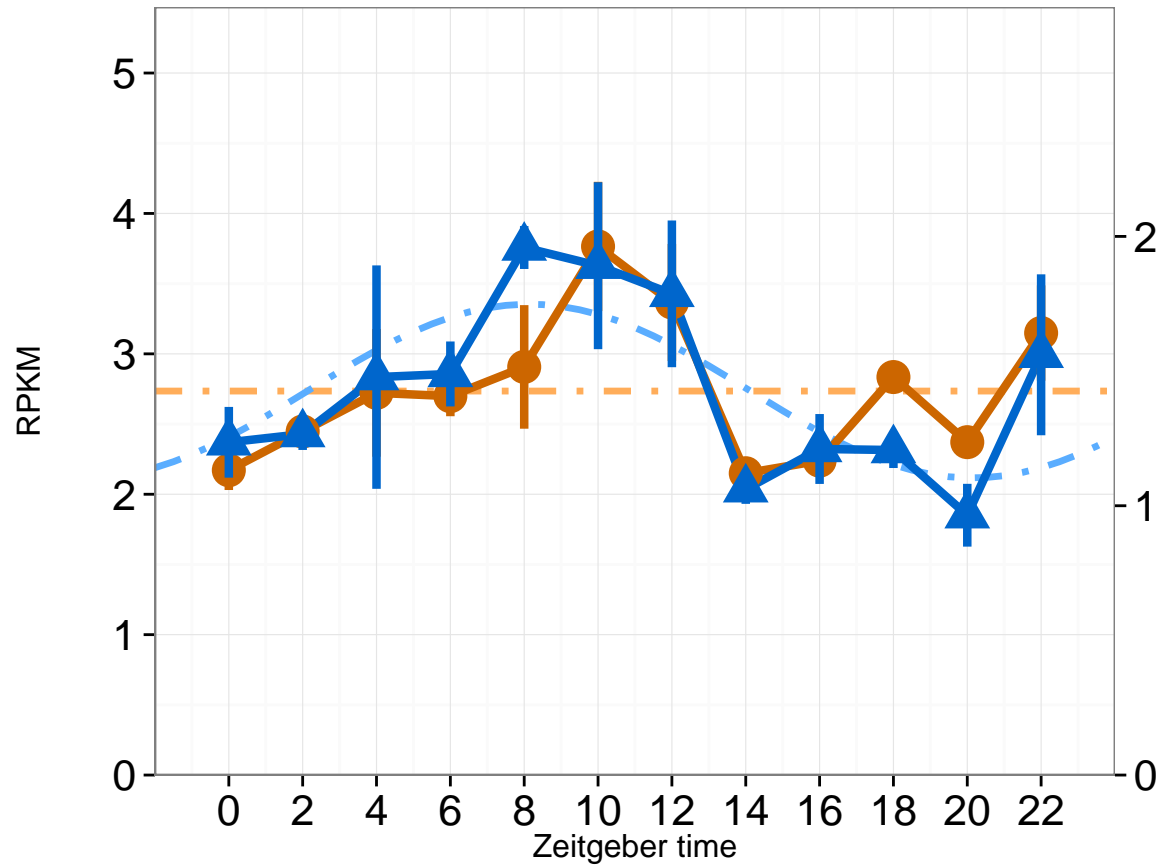

# Armcox5

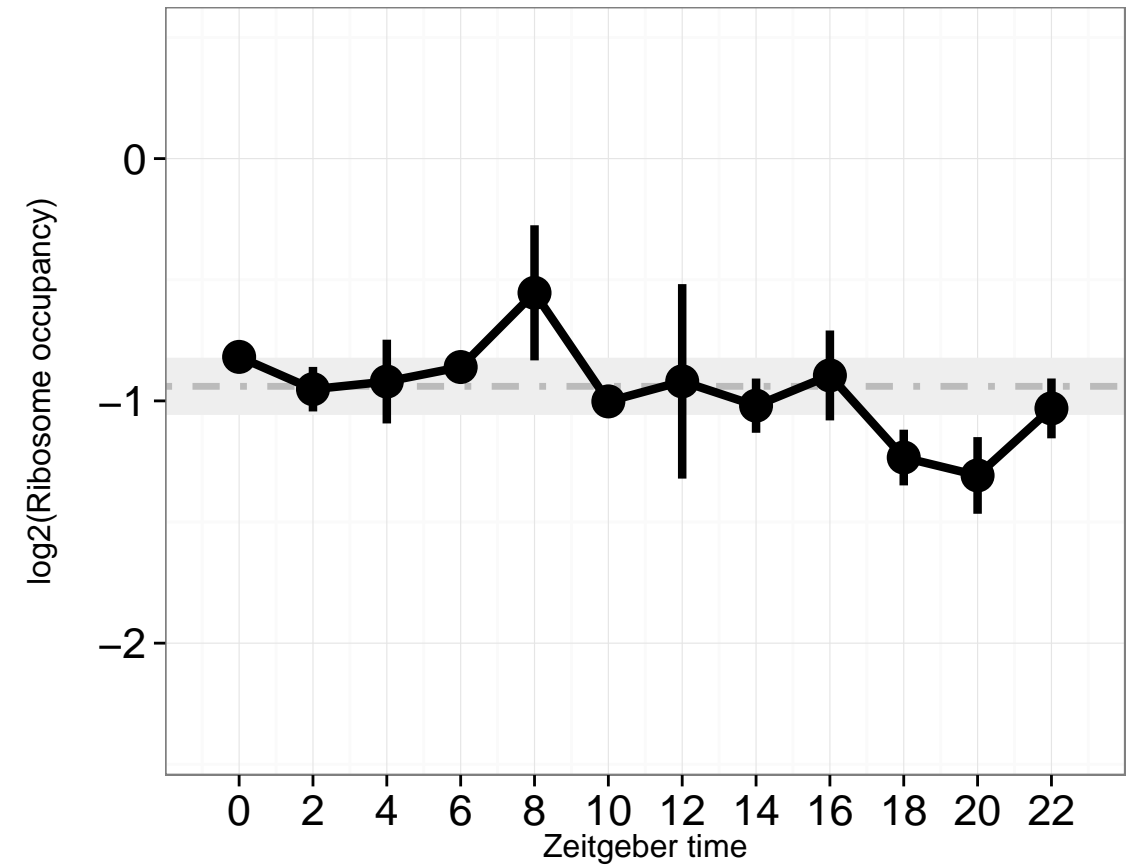

Supplement: Supplementary file 3653 [file 1]

## Alkbh2

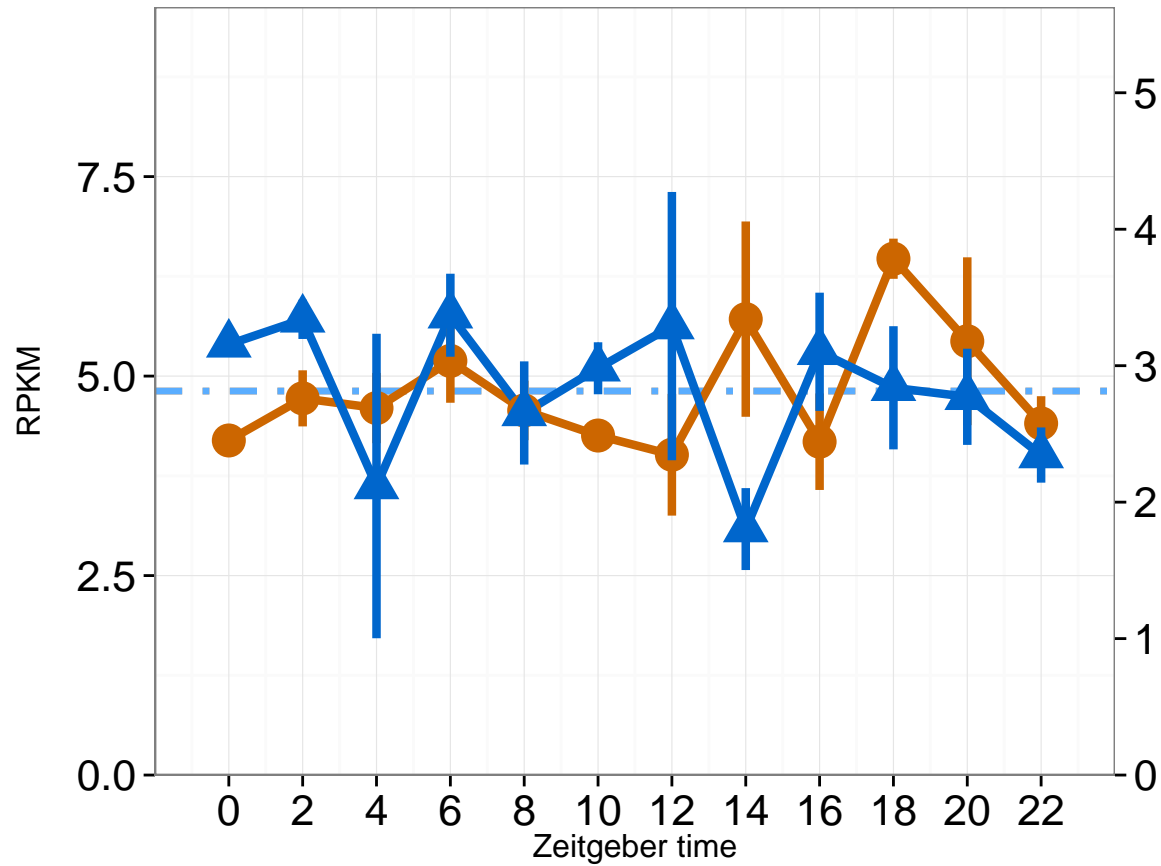

## Alkbh2

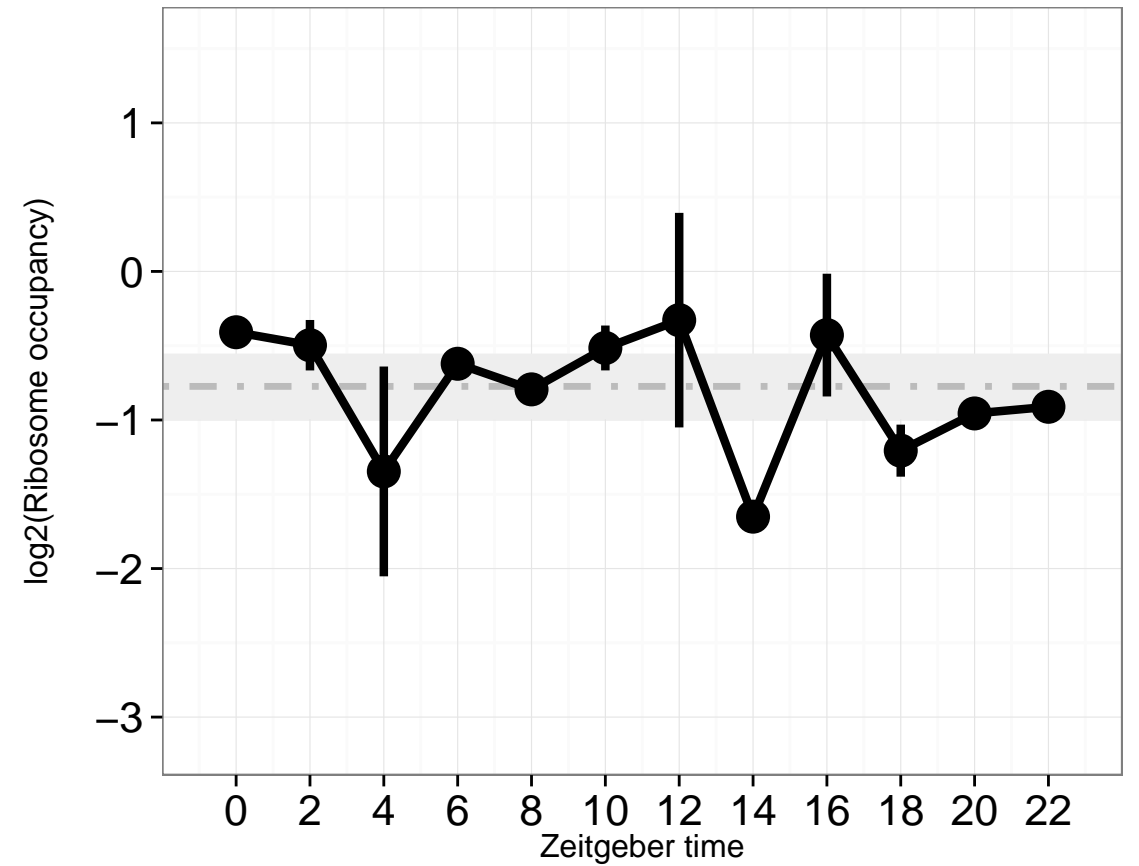

Supplement: Supplementary file 3654 [file 1]

## Foxred2

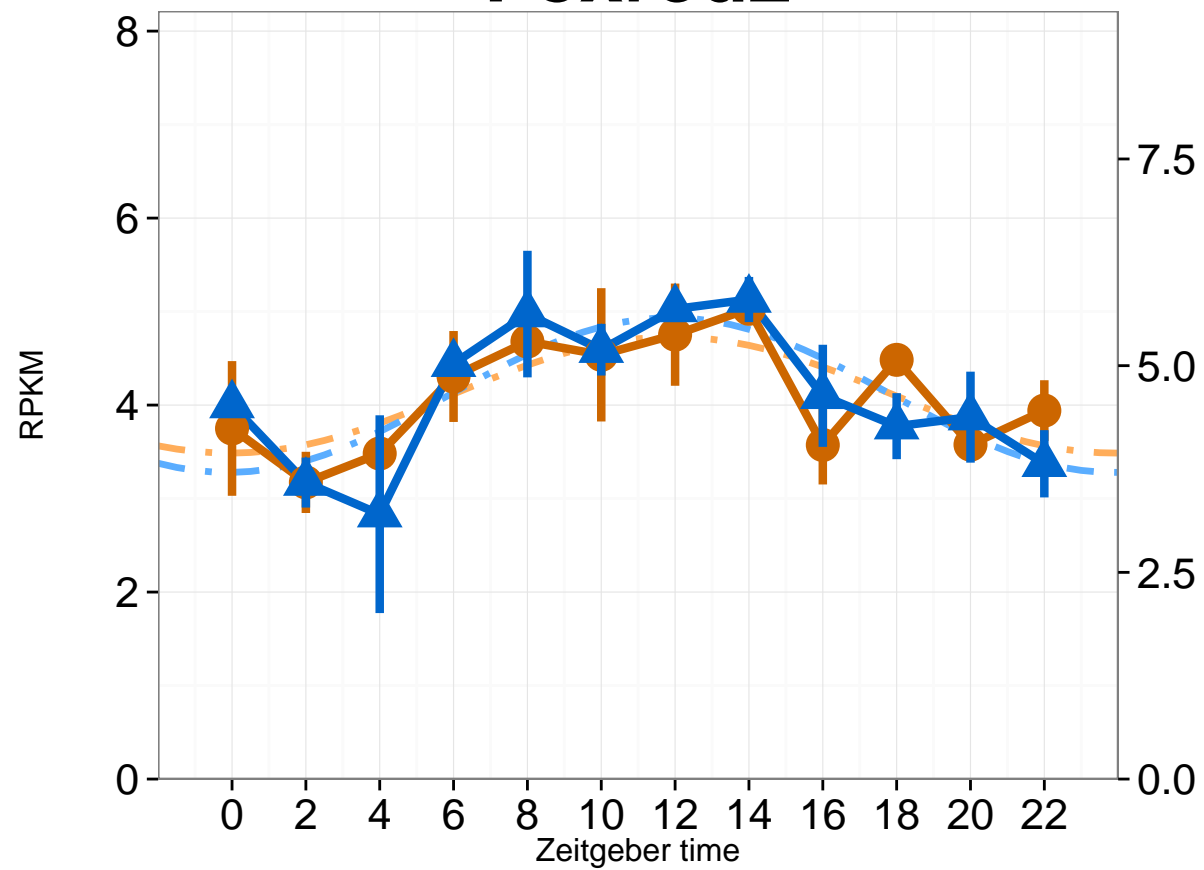

## Foxred2

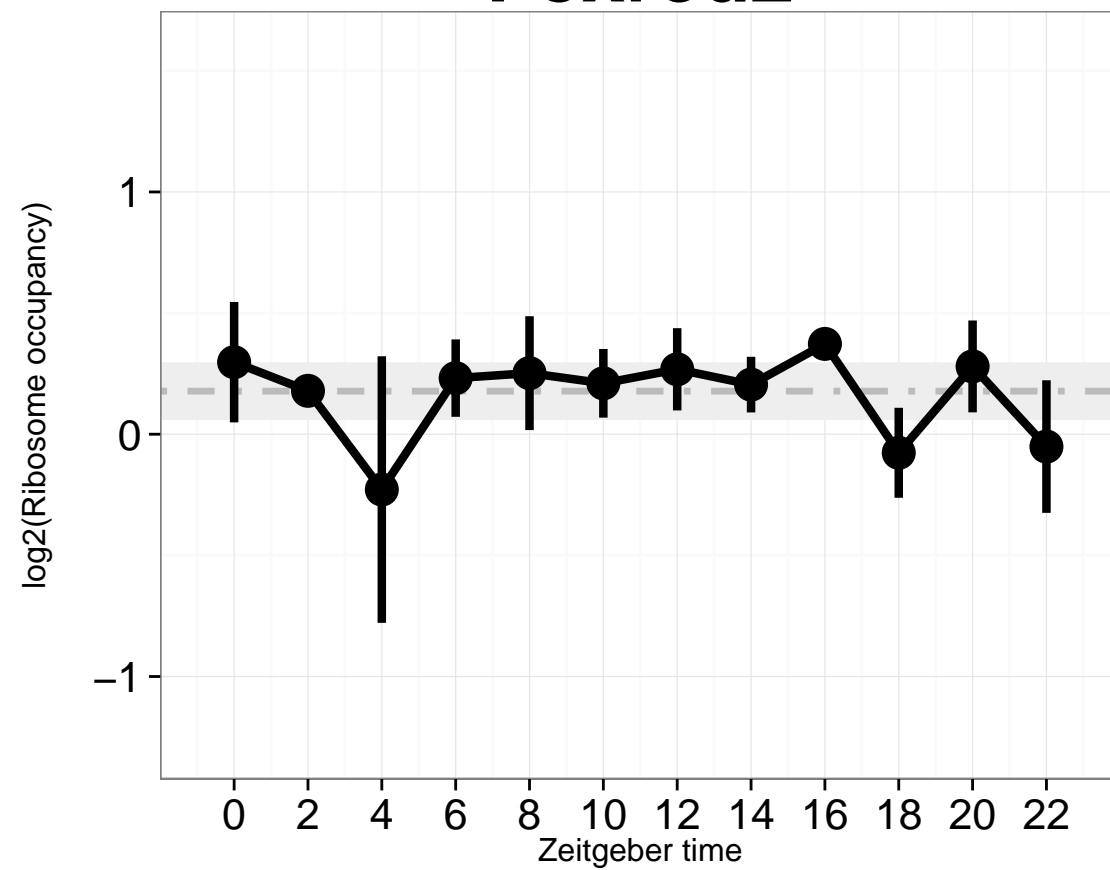

Supplement: Supplementary file 3655 [file 1]

## Pigw

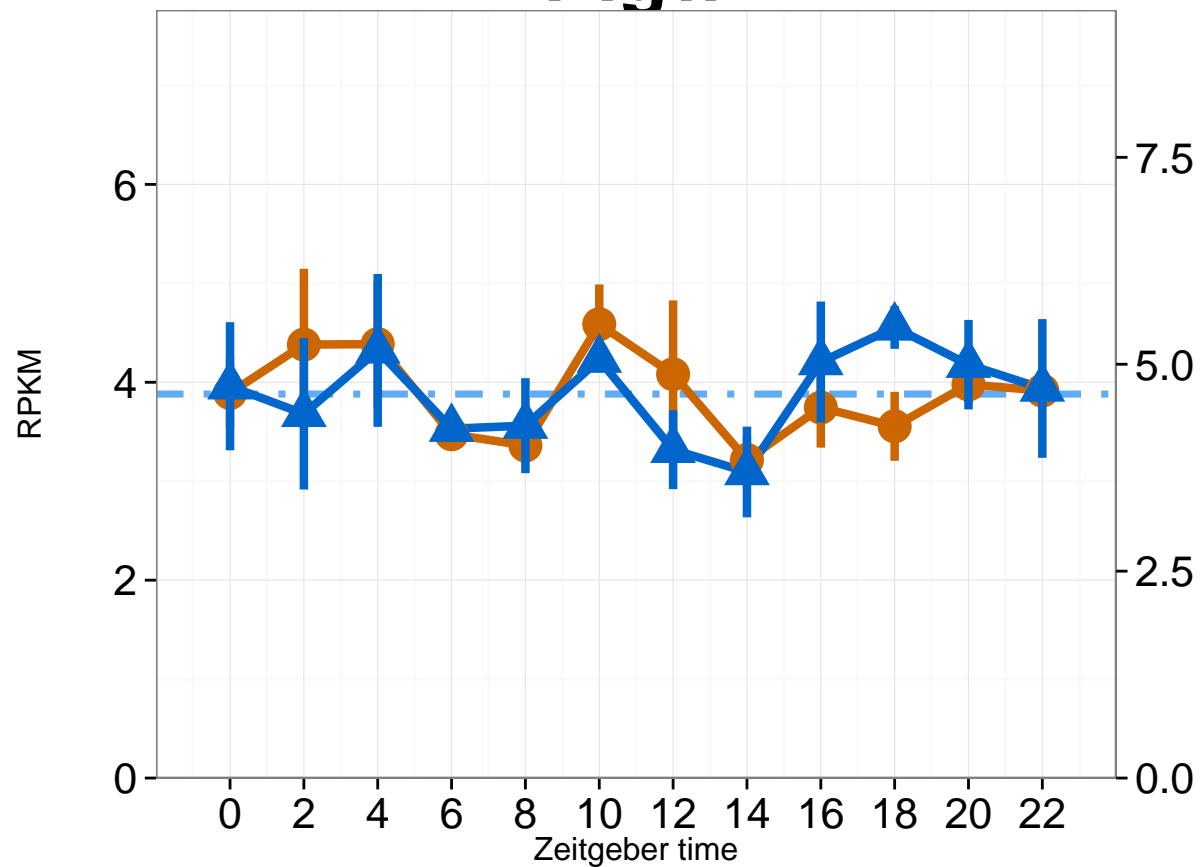

## Pigw

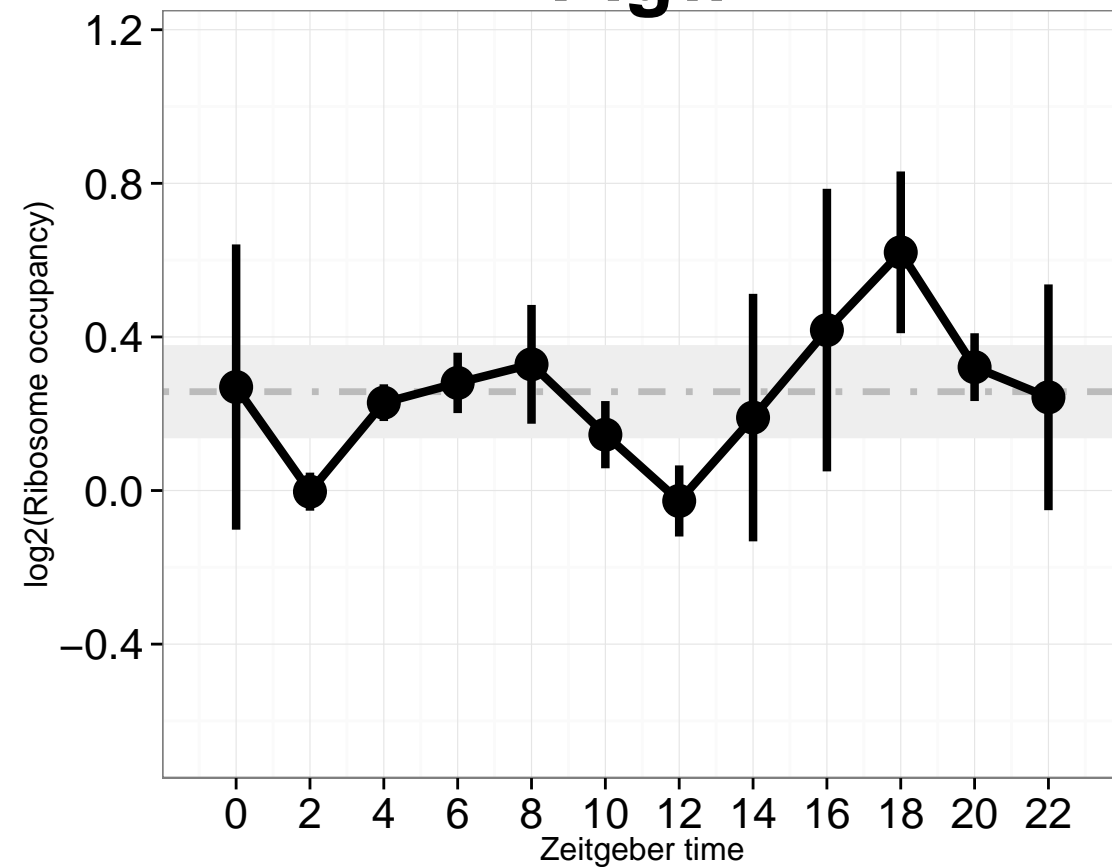

Supplement: Supplementary file 3656 [file 1]

## Plekho2

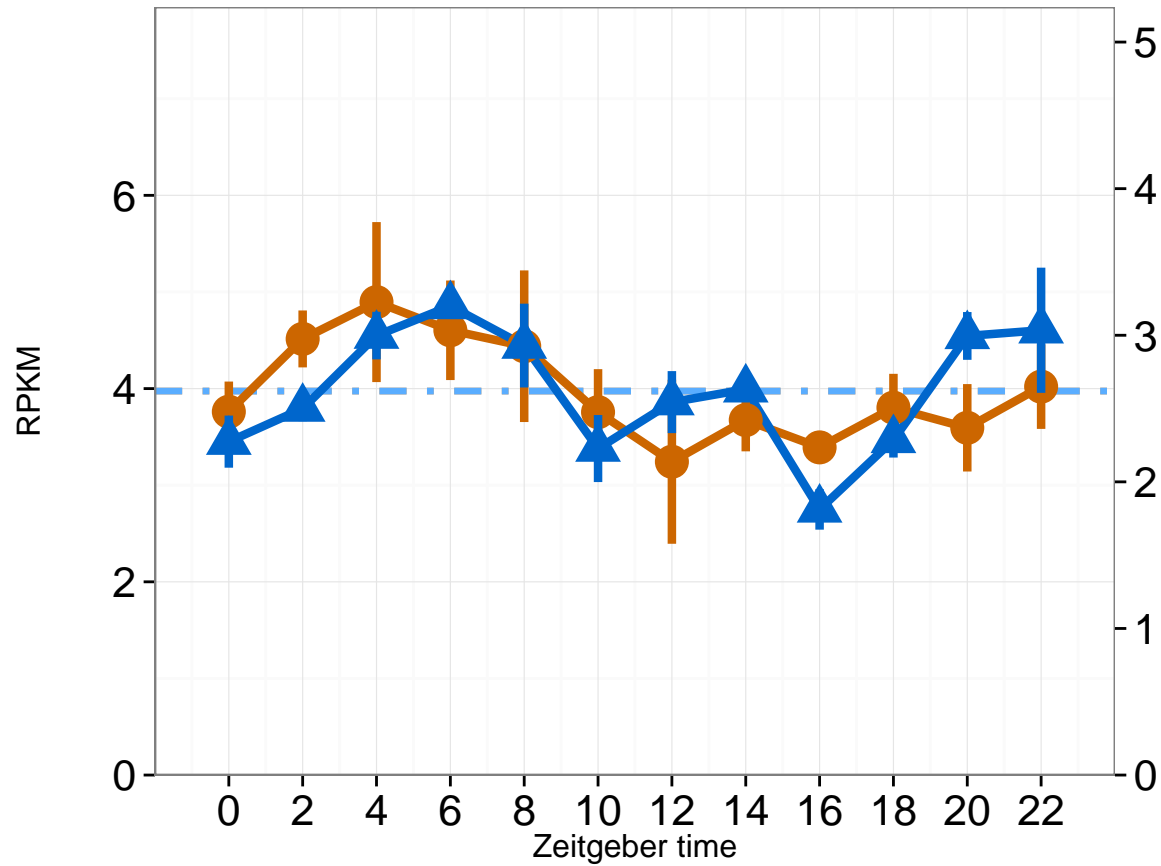

## Plekho2

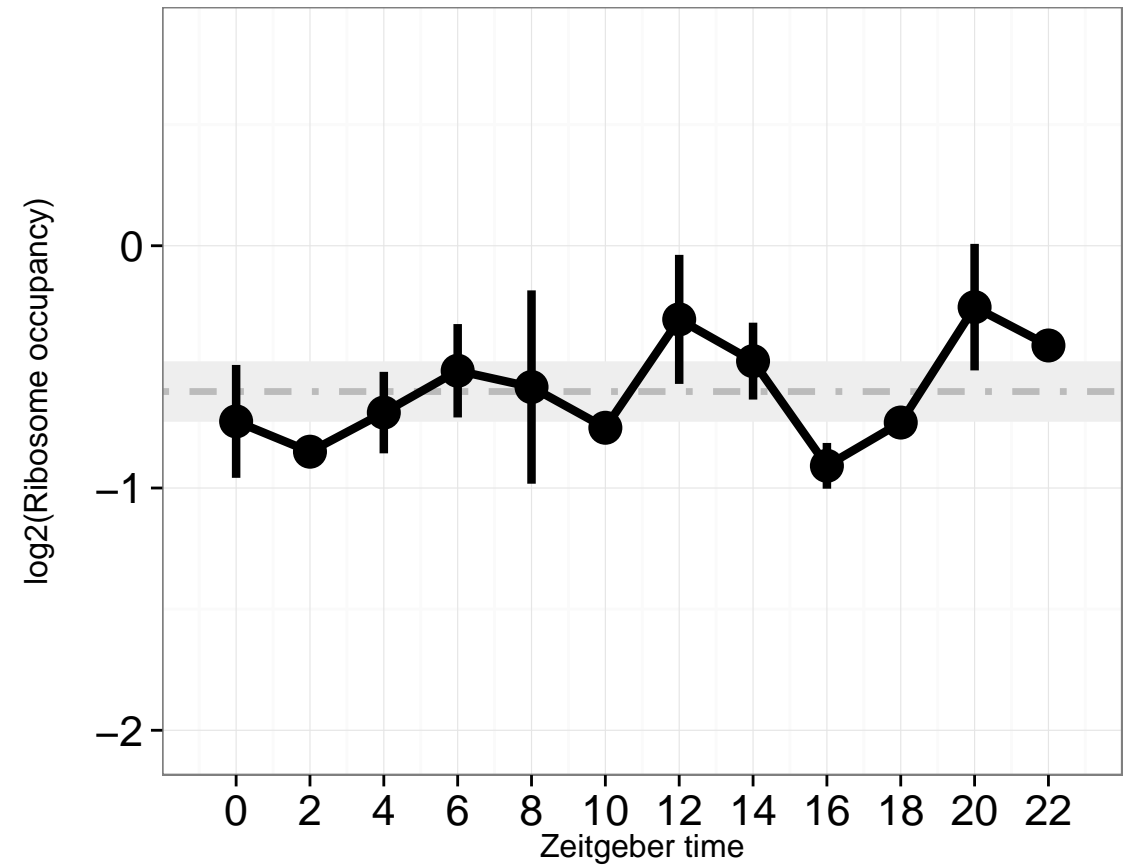

Supplement: Supplementary file 3657 [file 1]

# Cep192

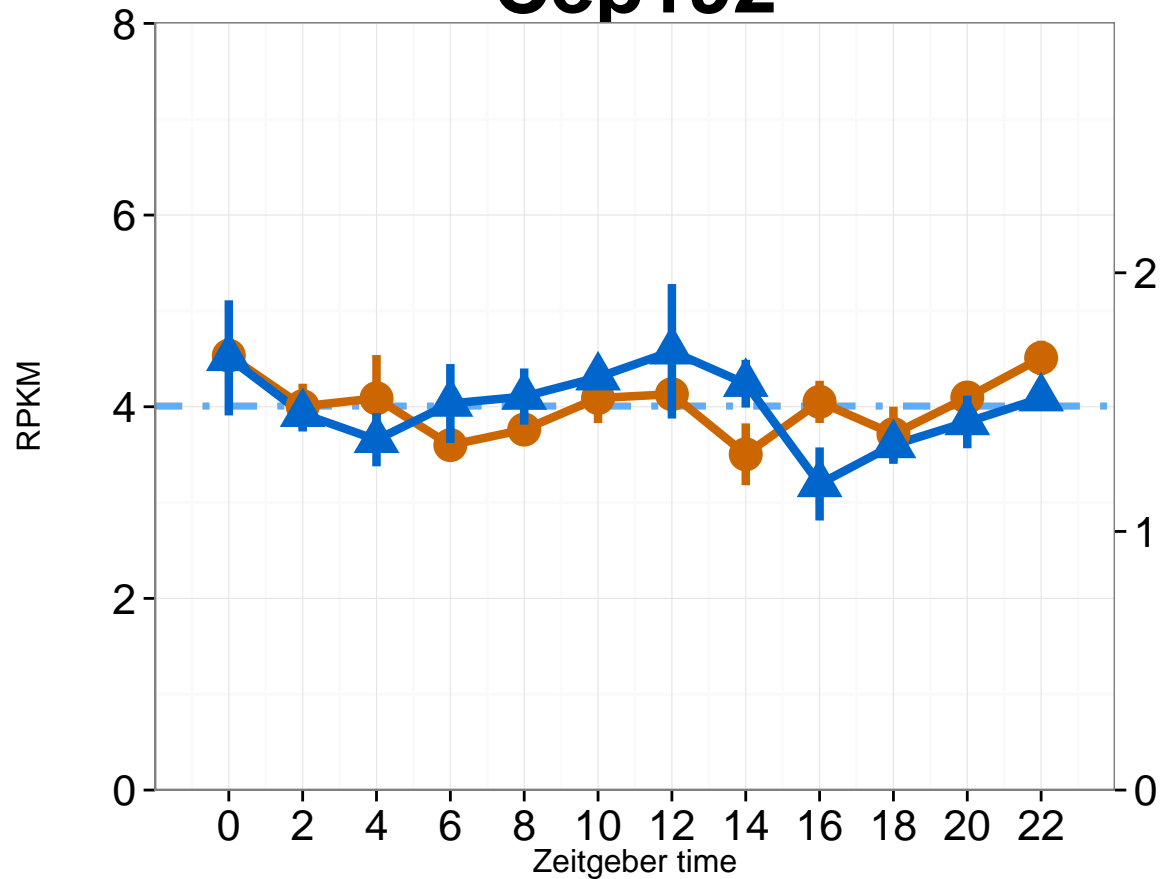

# Cep192

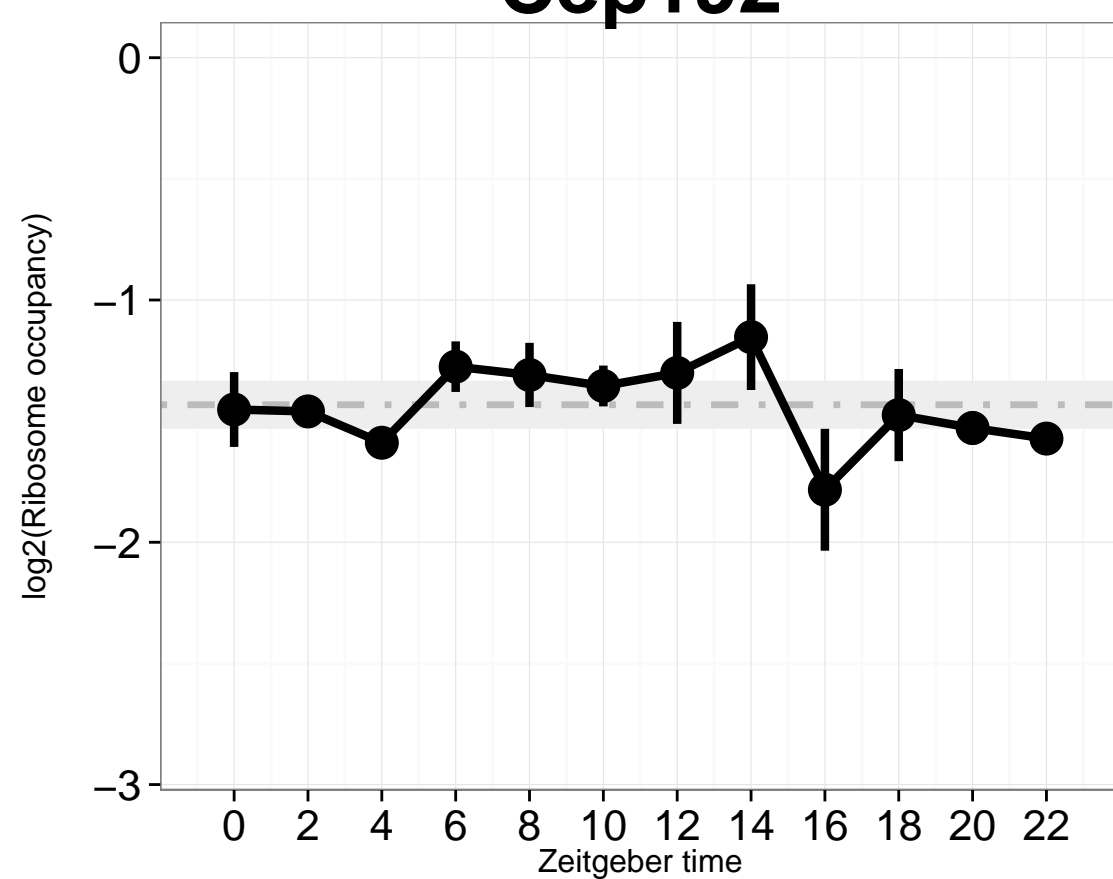

Supplement: Supplementary file 3658 [file 1]

## Cops2

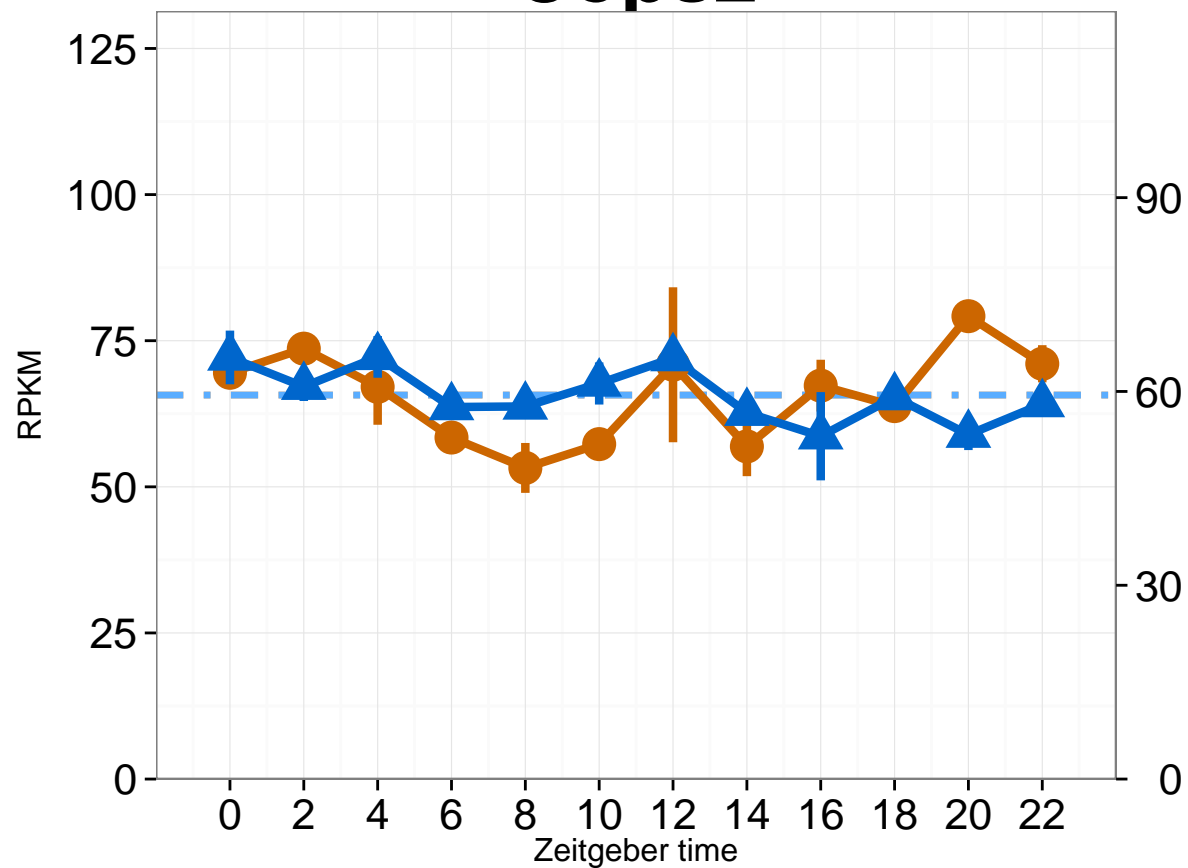

## Cops2

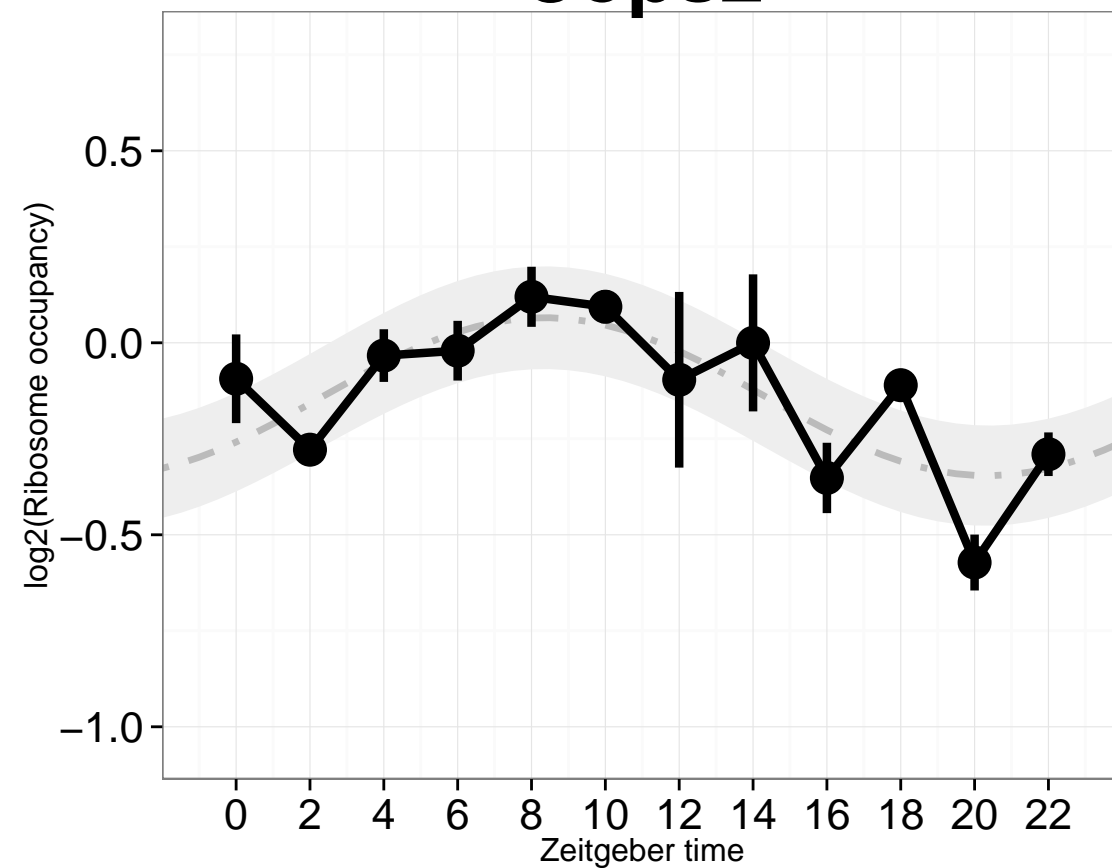

Supplement: Supplementary file 3659 [file 1]

## Rnf25

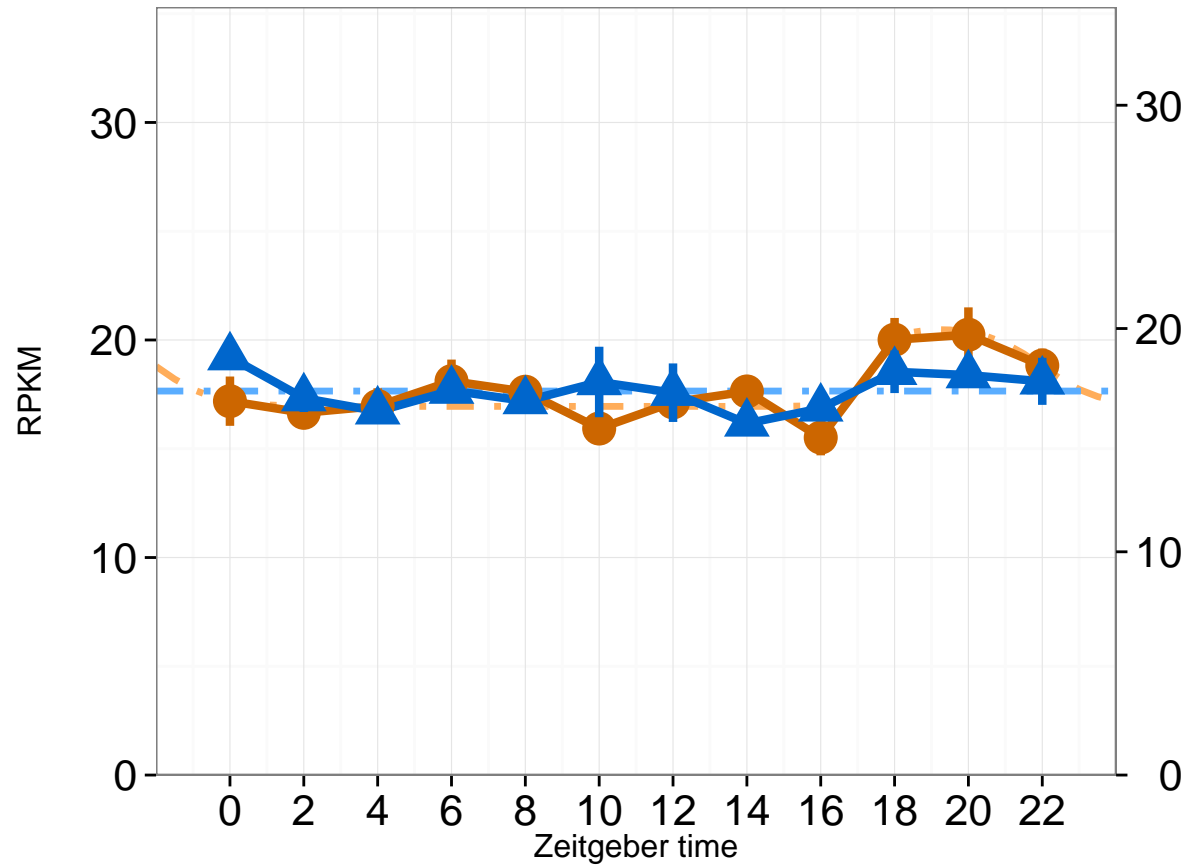

## Rnf25

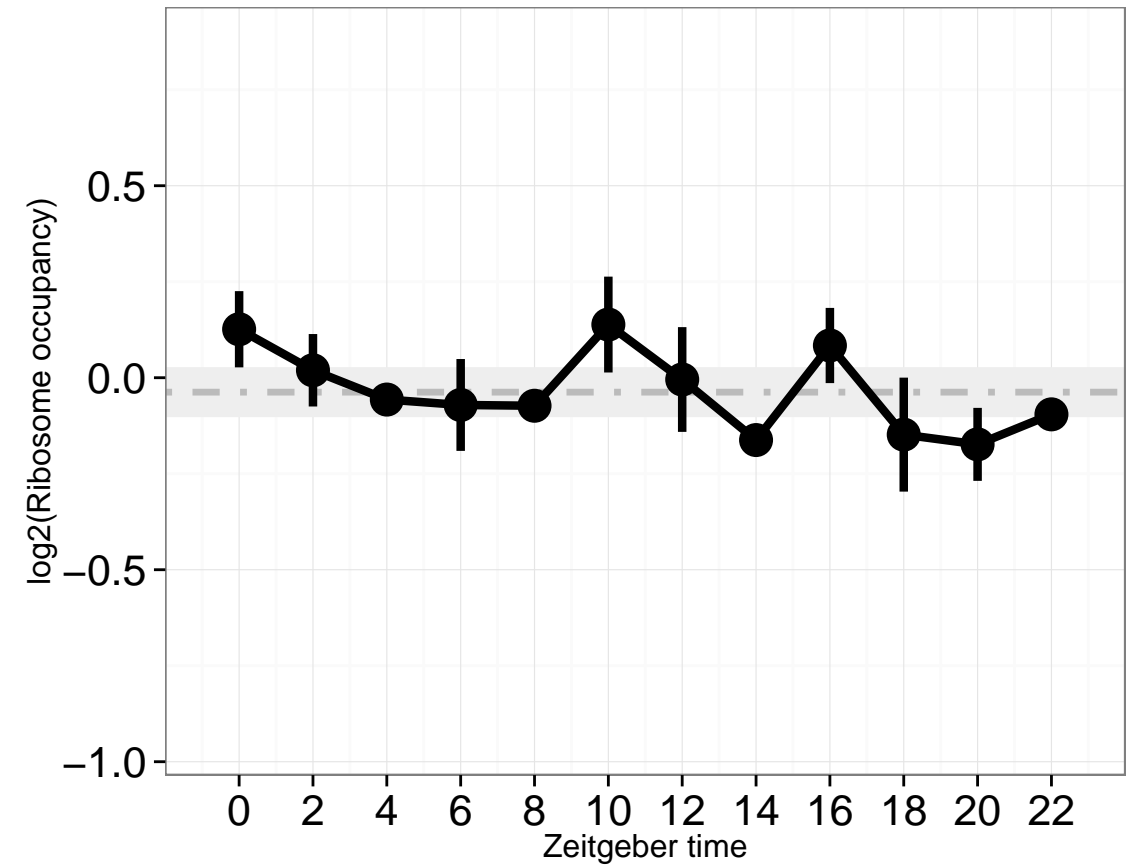

Supplement: Supplementary file 3660 [file 1]

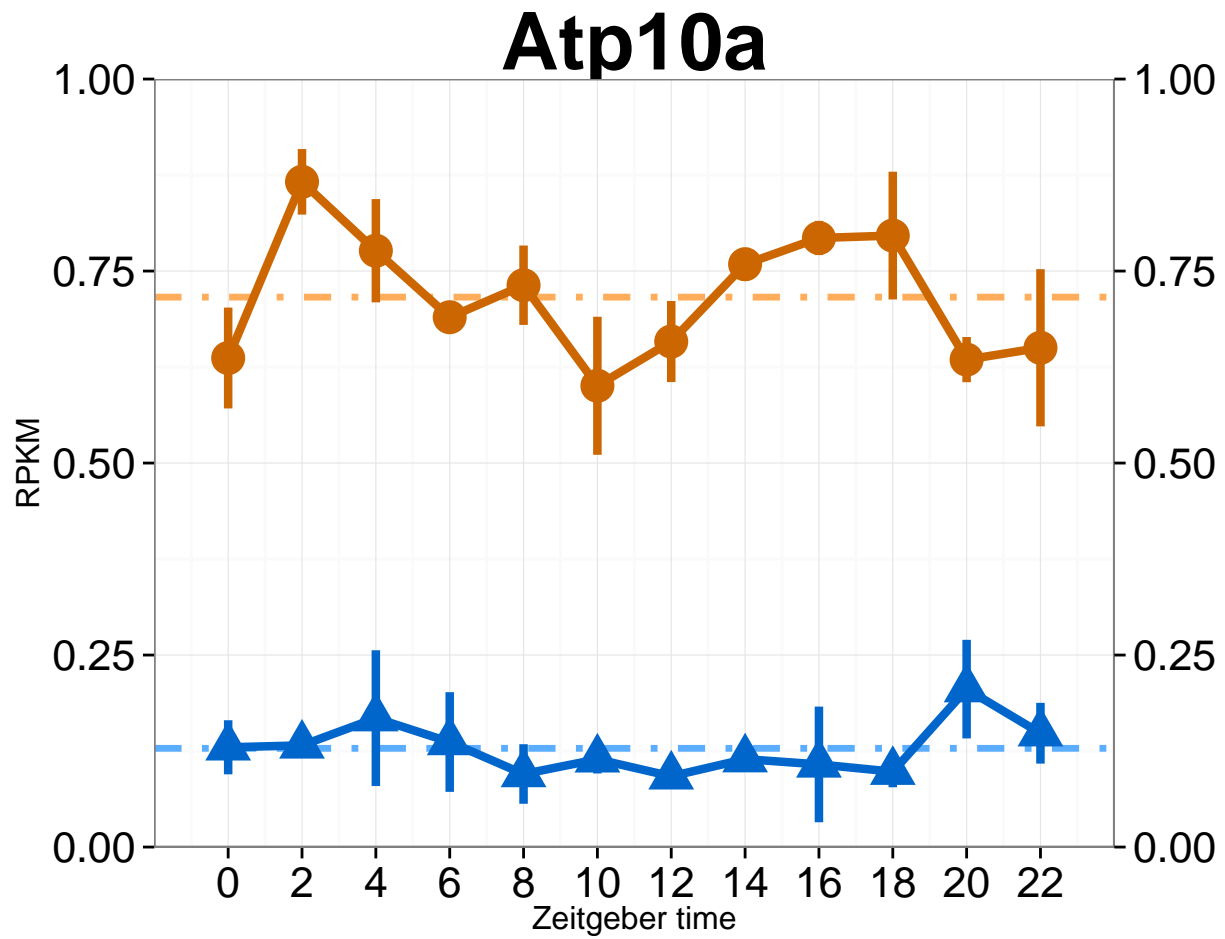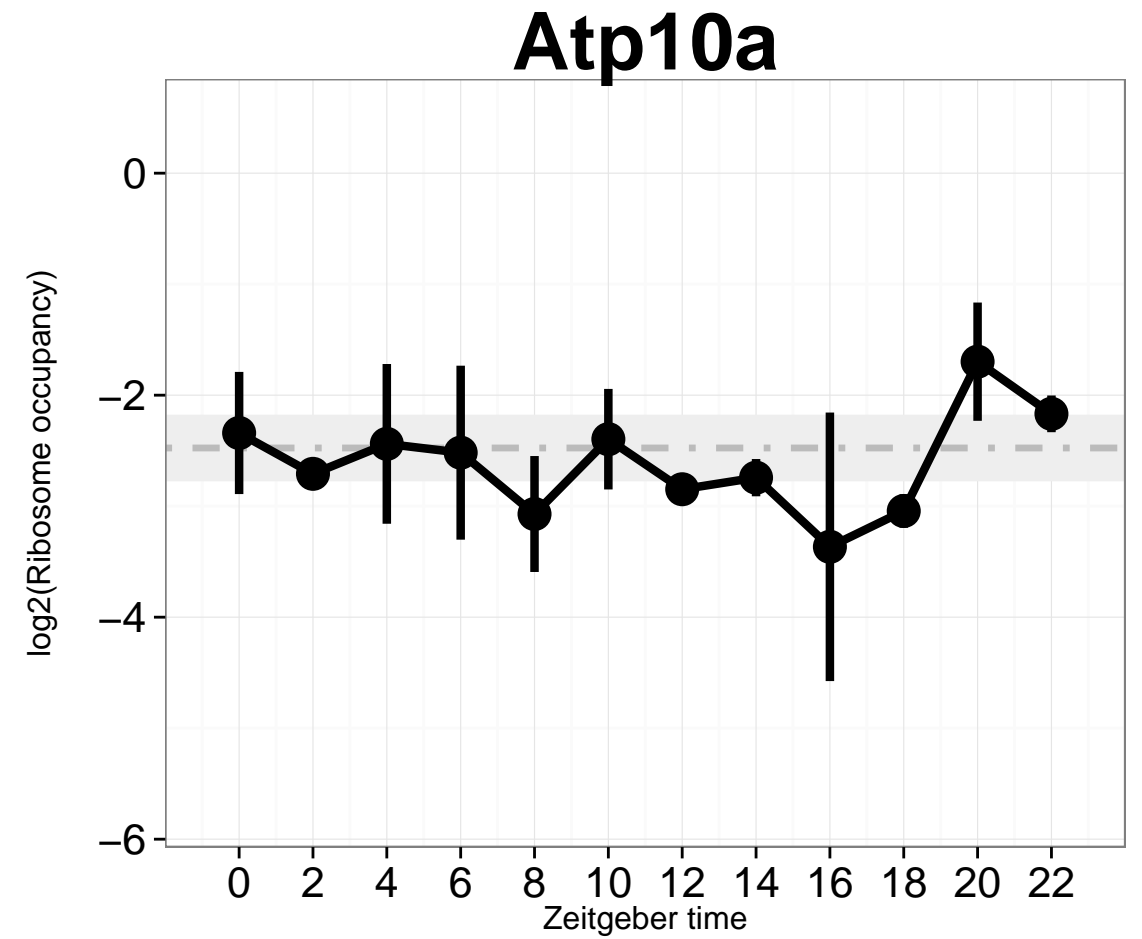

Supplement: Supplementary file 3661 [file 1]

# AtI1

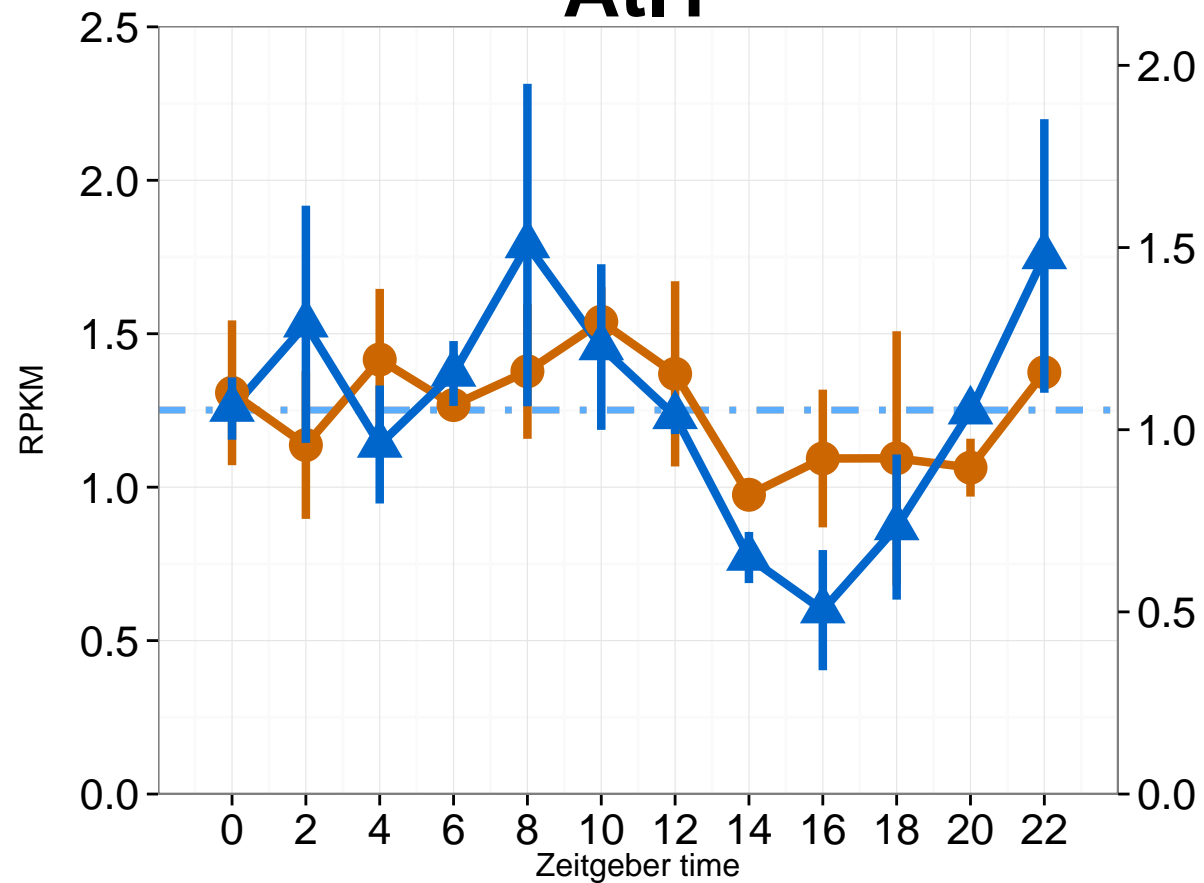

# AtI1

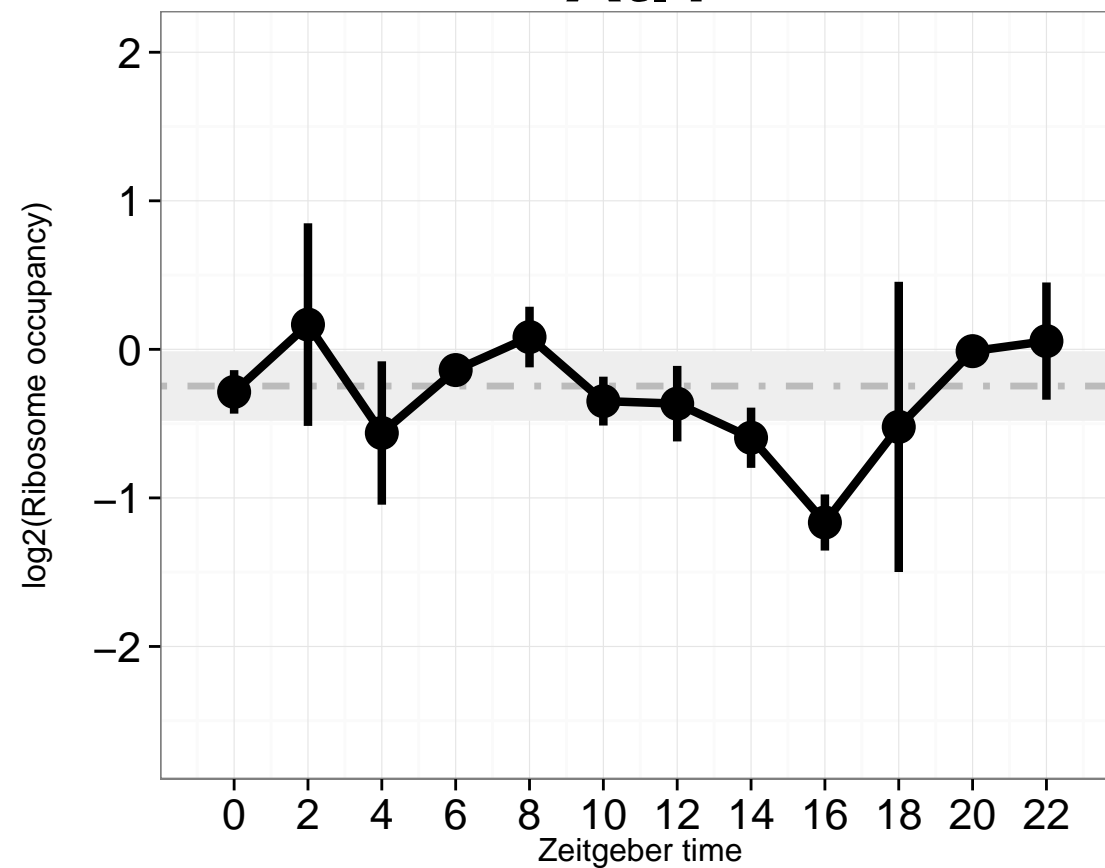

Supplement: Supplementary file 3662 [file 1]

## CytI1 TR

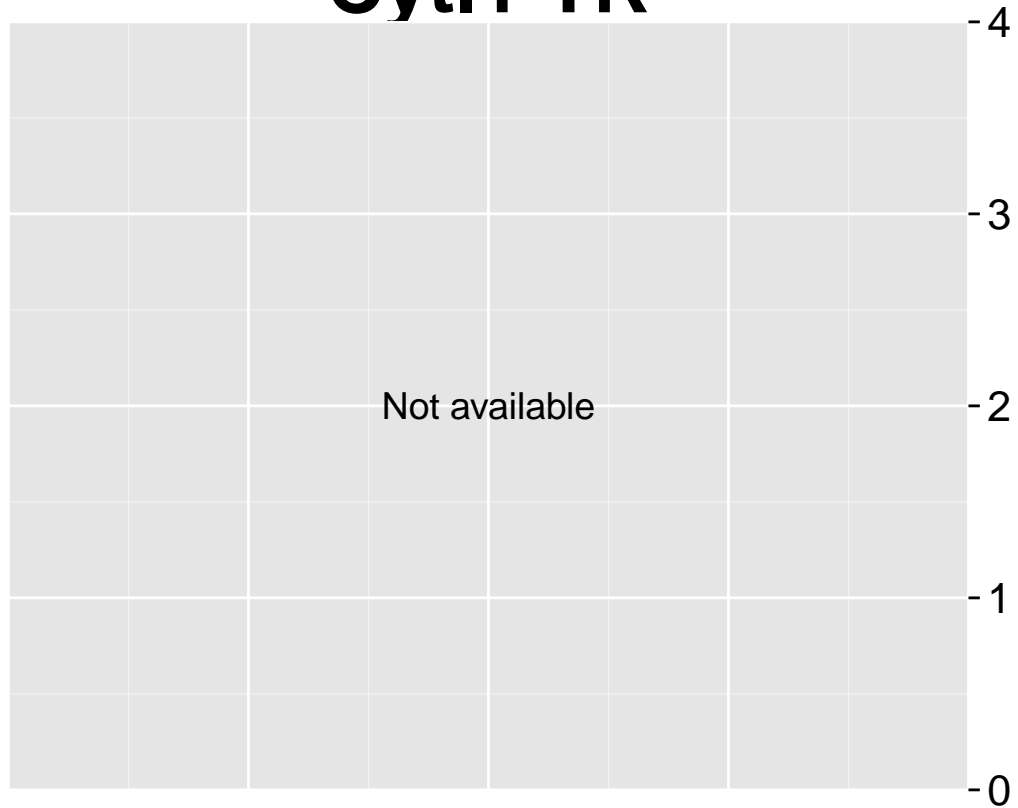

## CytI1 log<sub>2</sub>(Ribosome occupancy)

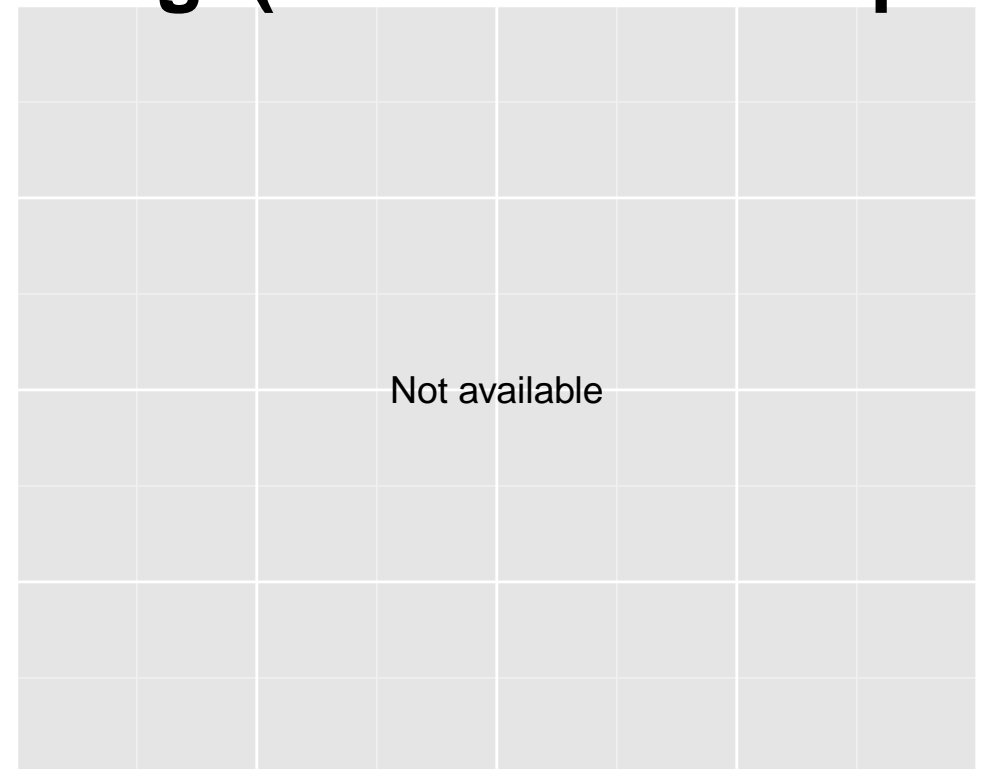

Supplement: Supplementary file 3663 [file 1]

## Ncapd2

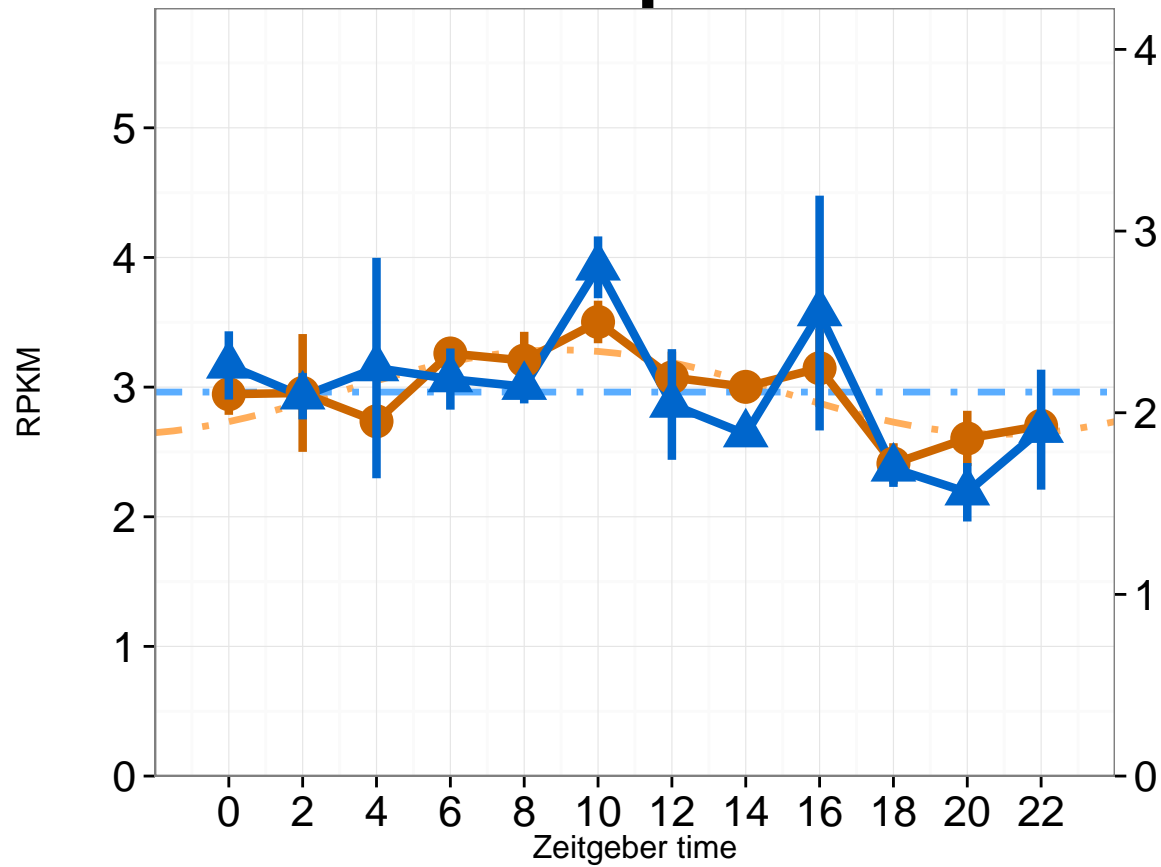

## Ncapd2

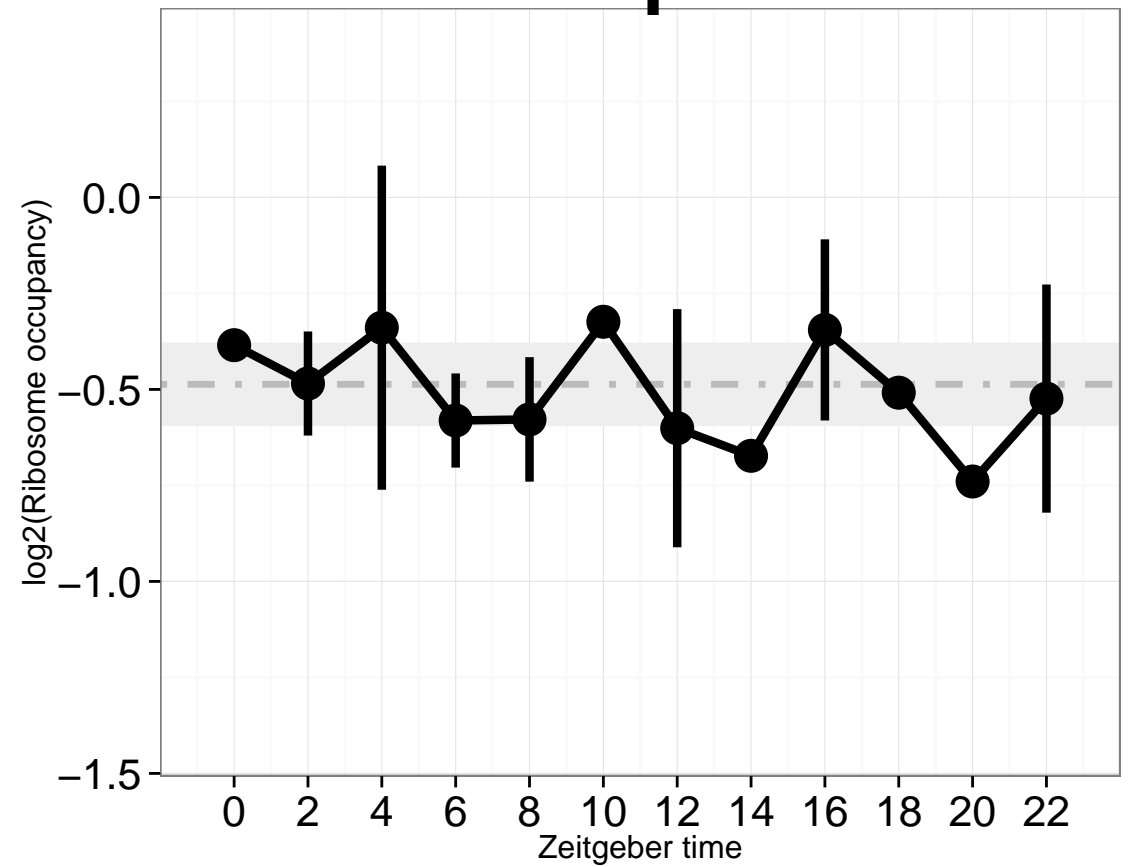

Supplement: Supplementary file 3664 [file 1]

## Gm14399

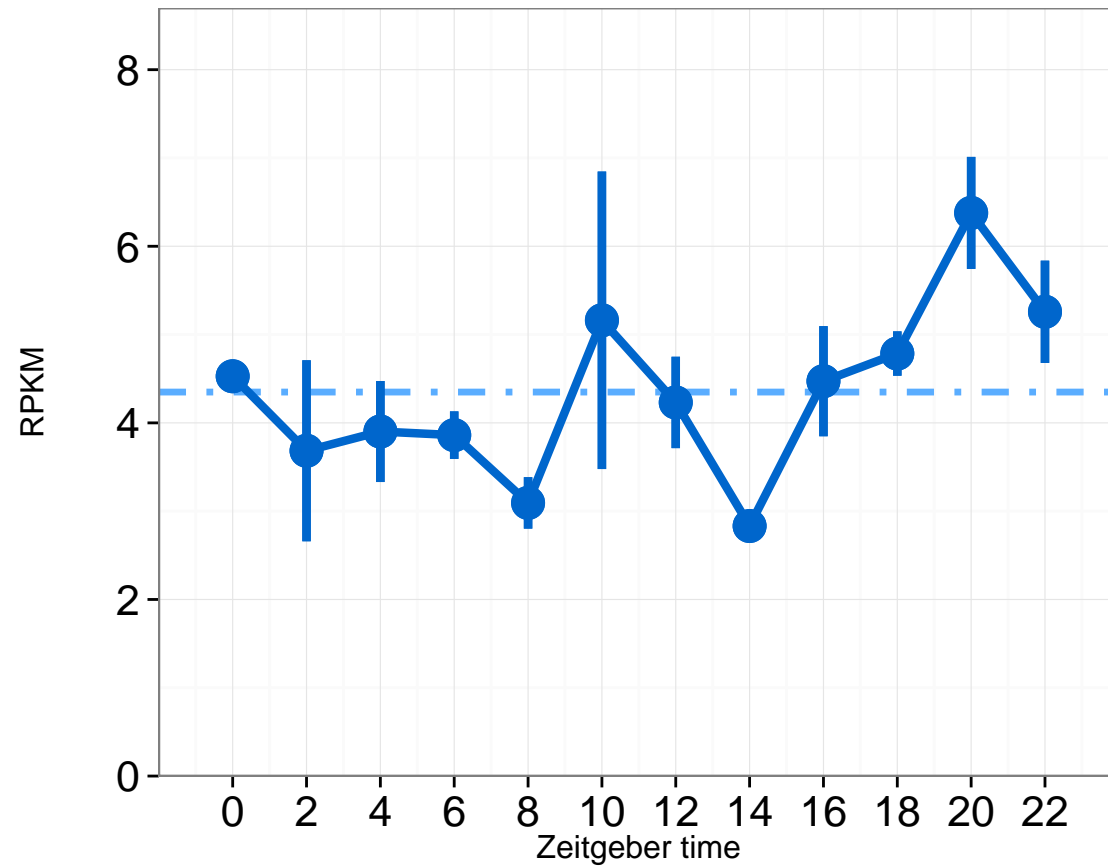

## Gm14399 log2(Ribosome occupanc

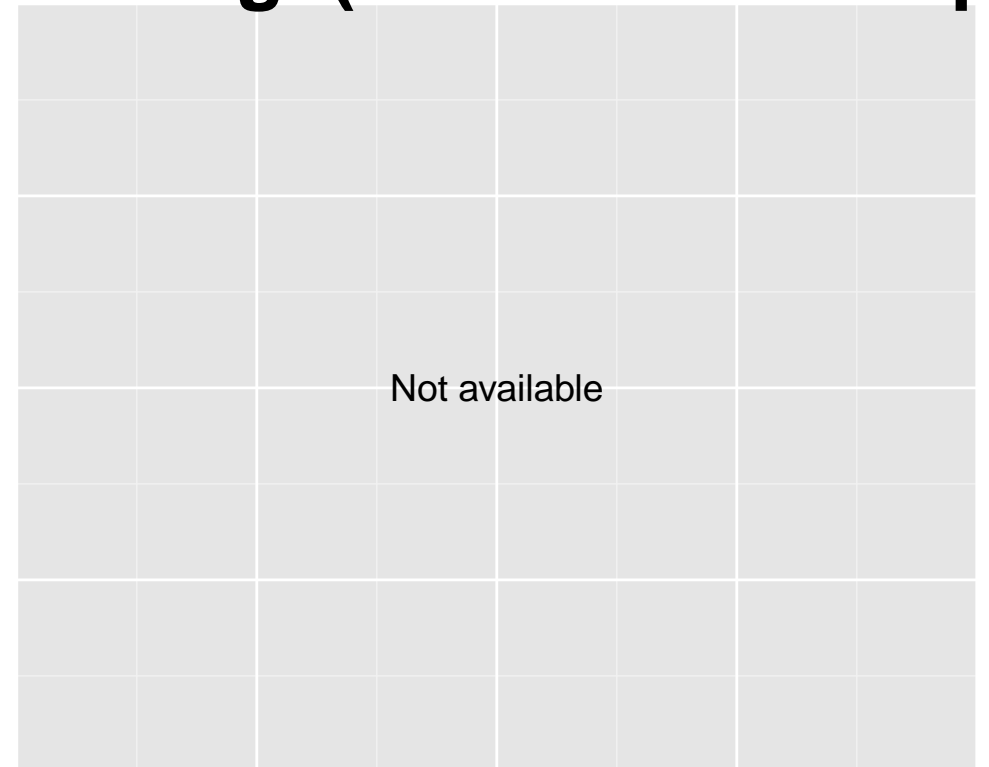

Supplement: Supplementary file 3665 [file 1]

# Tmem39a

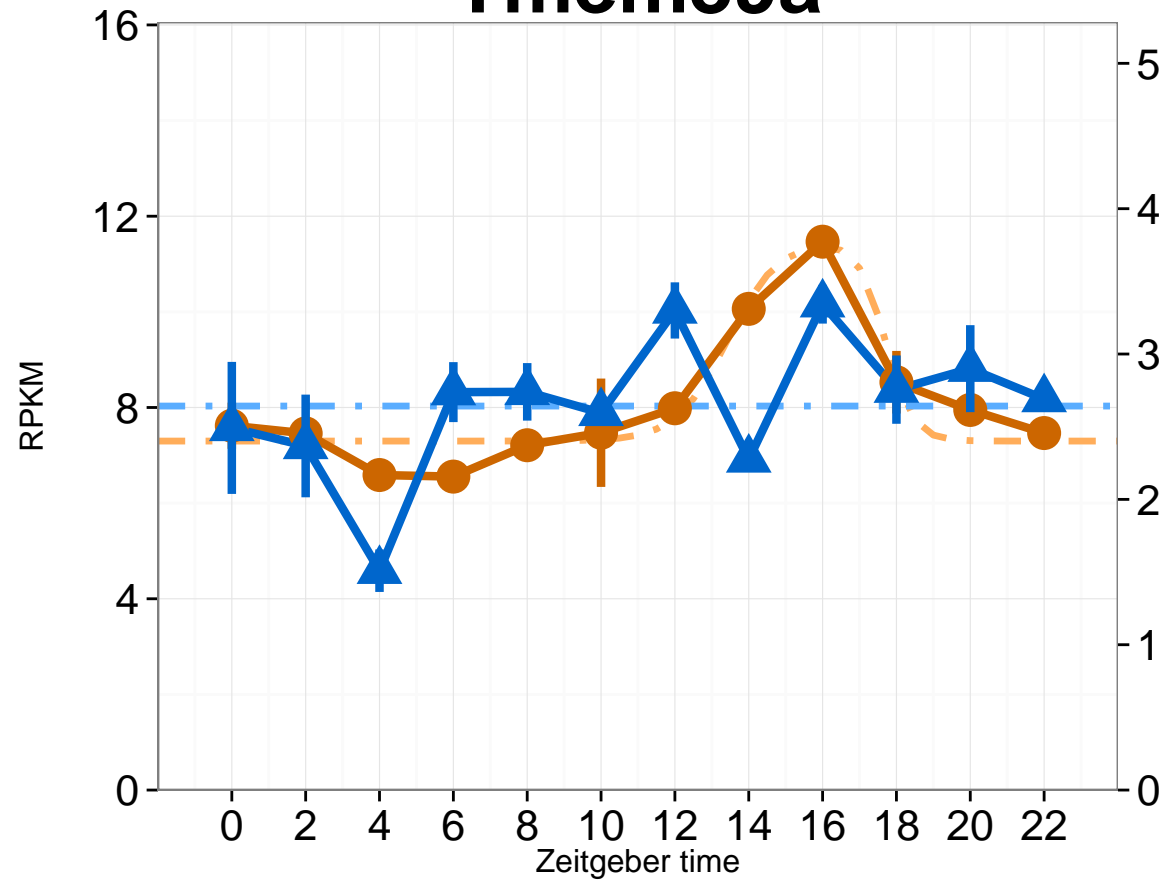

# Tmem39a

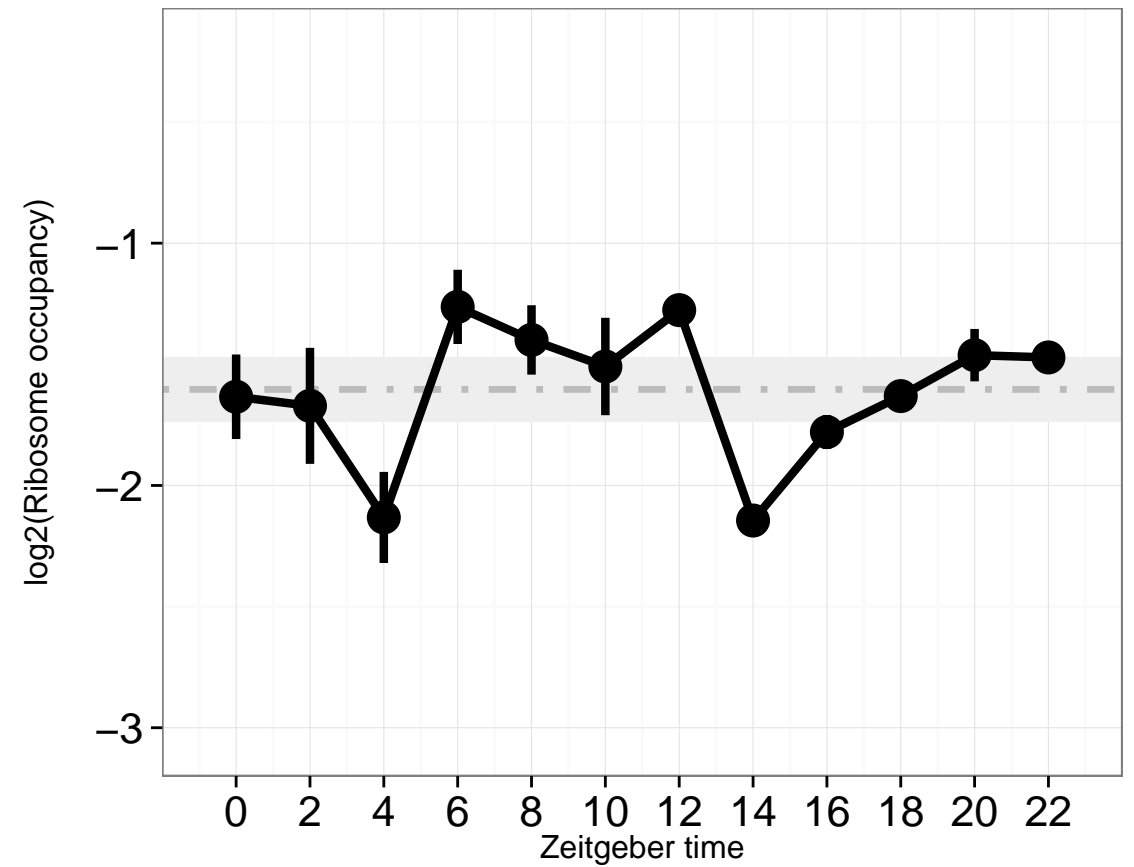

Supplement: Supplementary file 3666 [file 1]

## Gps1

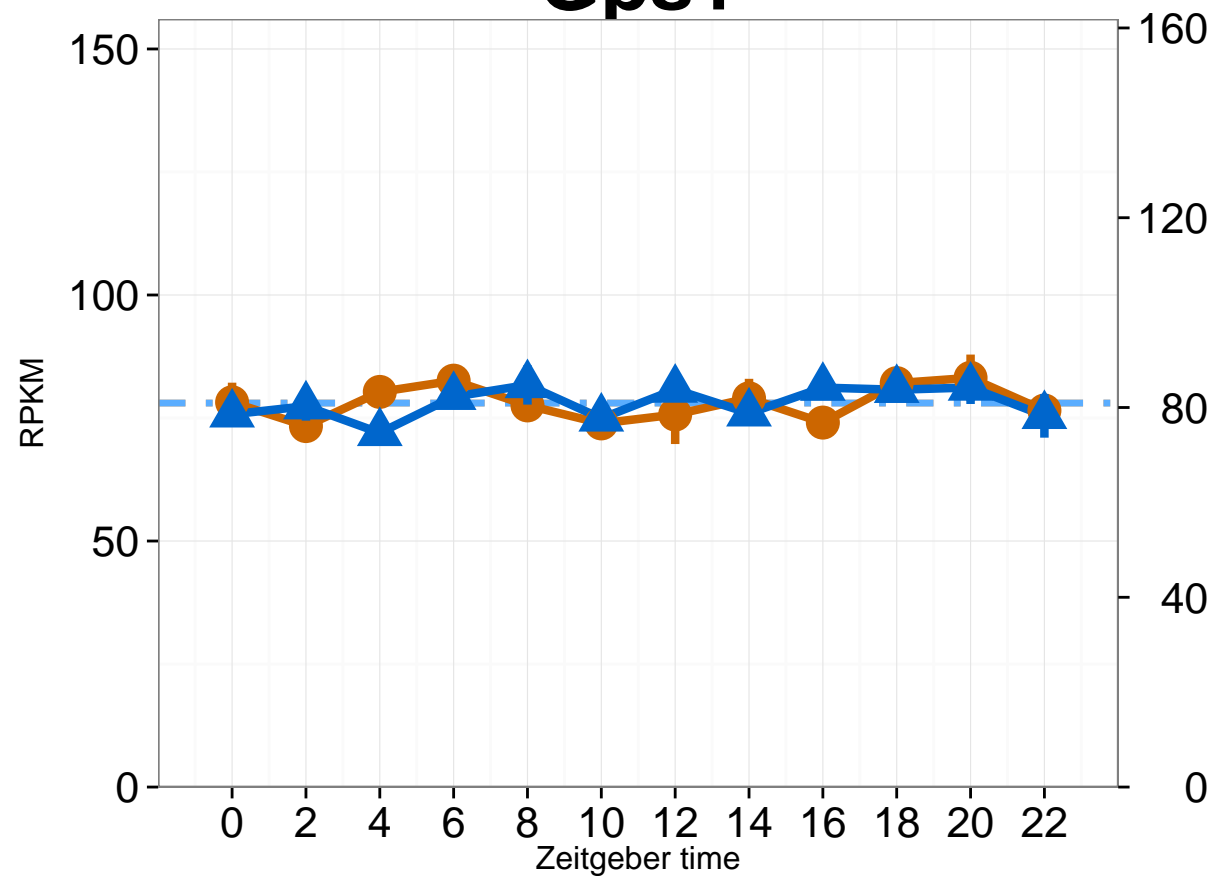

## Gps1

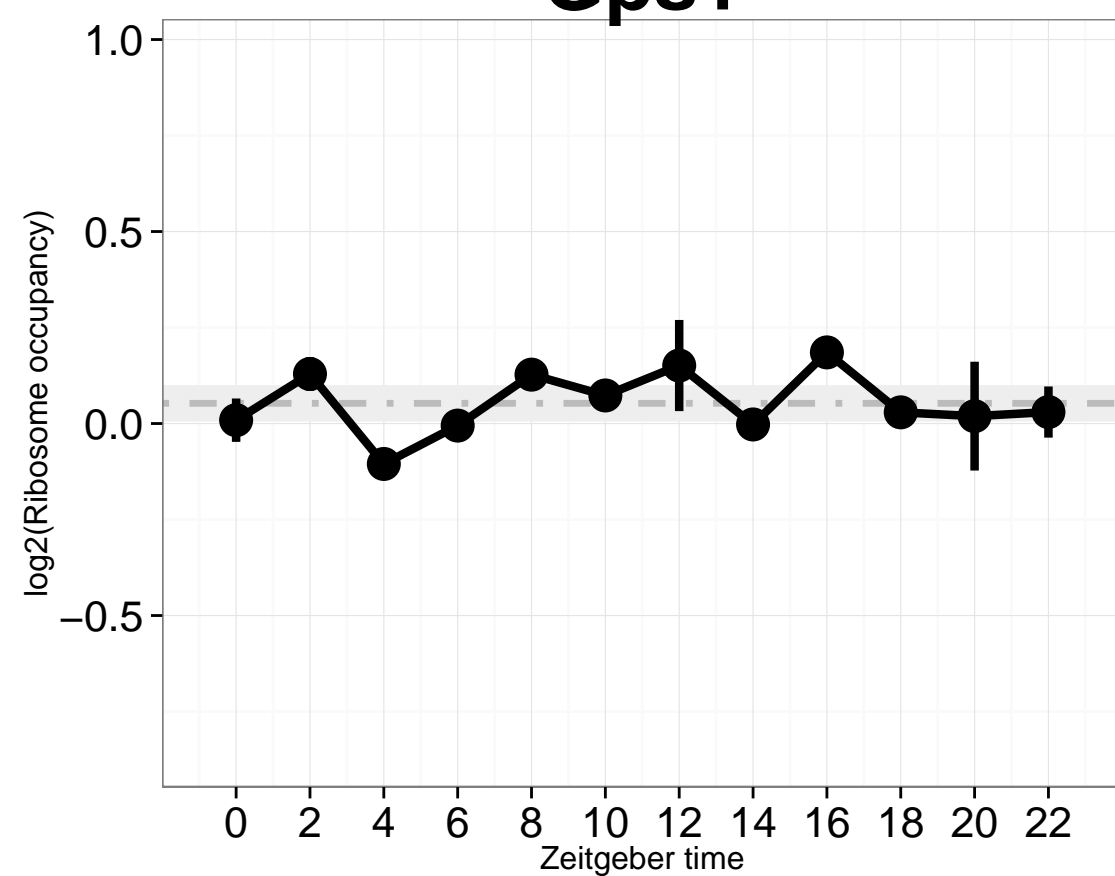

Supplement: Supplementary file 3667 [file 1]

# Ifitm3

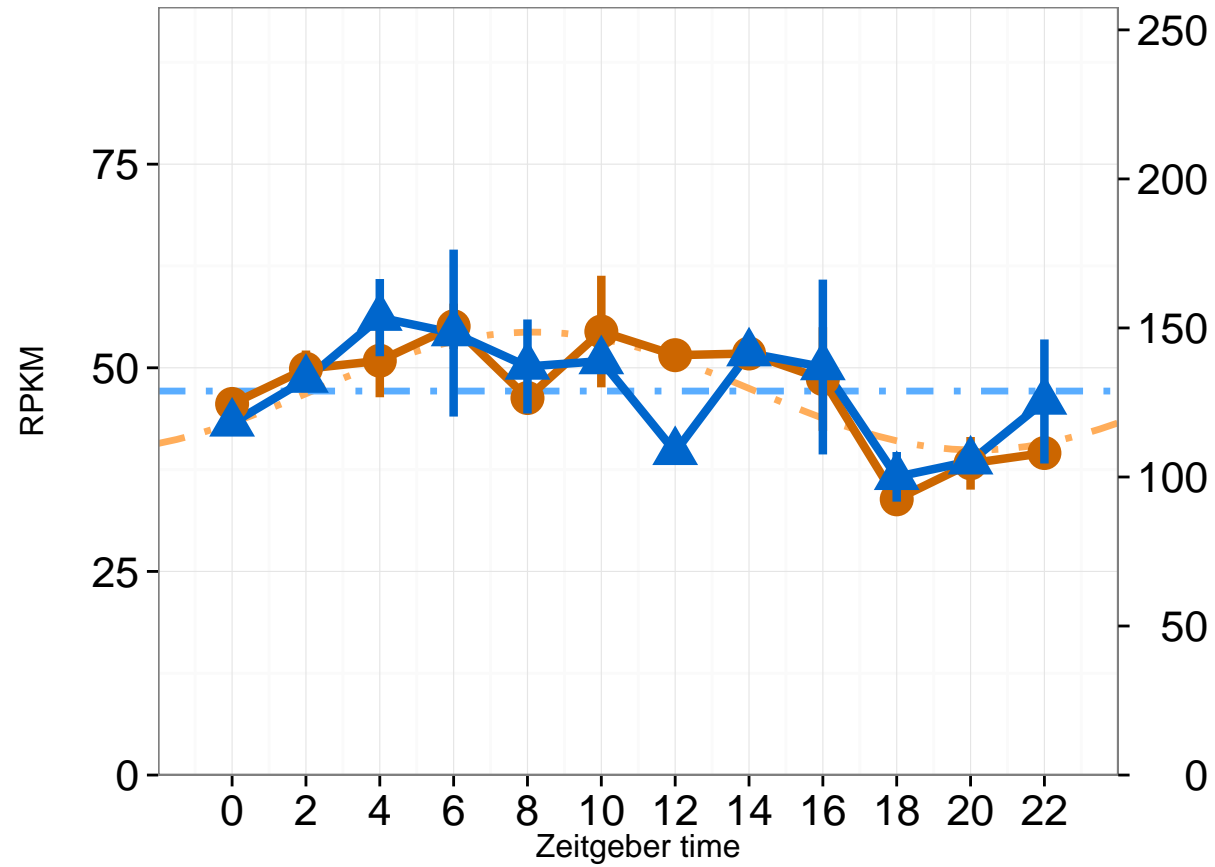

# Ifitm3

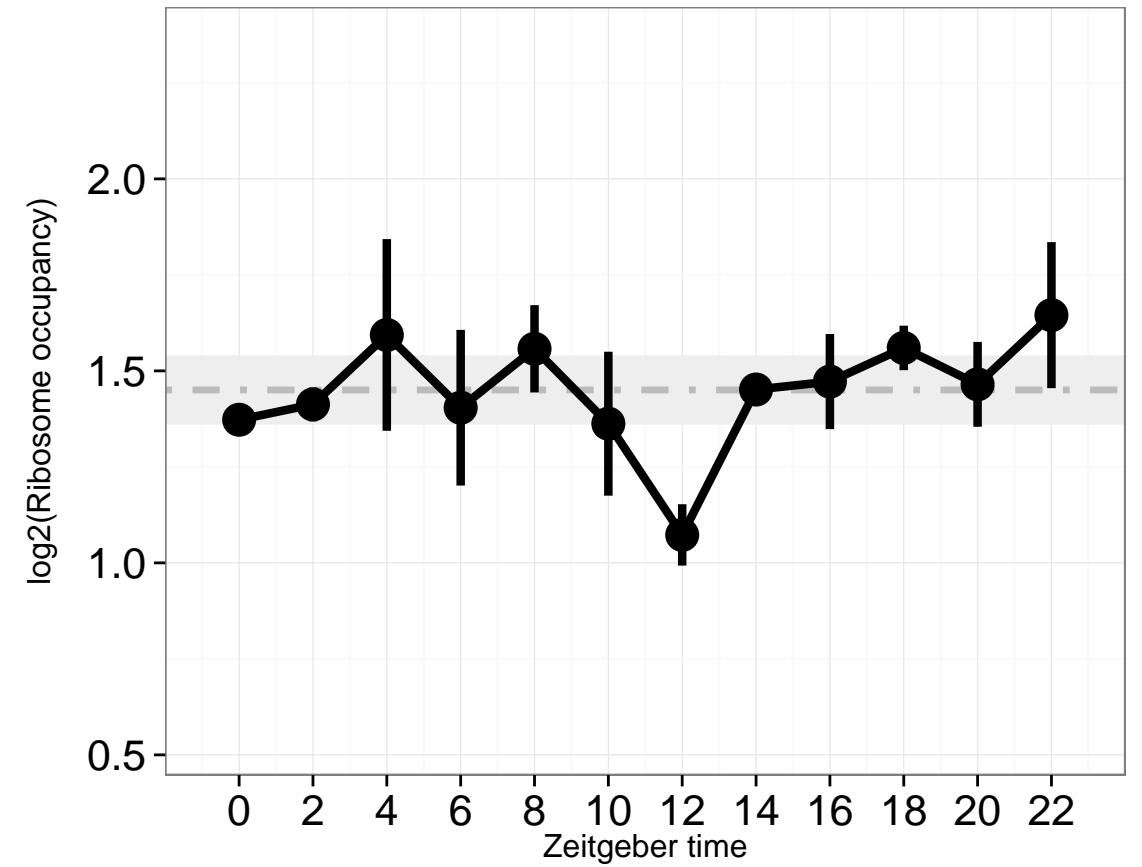

Supplement: Supplementary file 3668 [file 1]

# Ndufb10

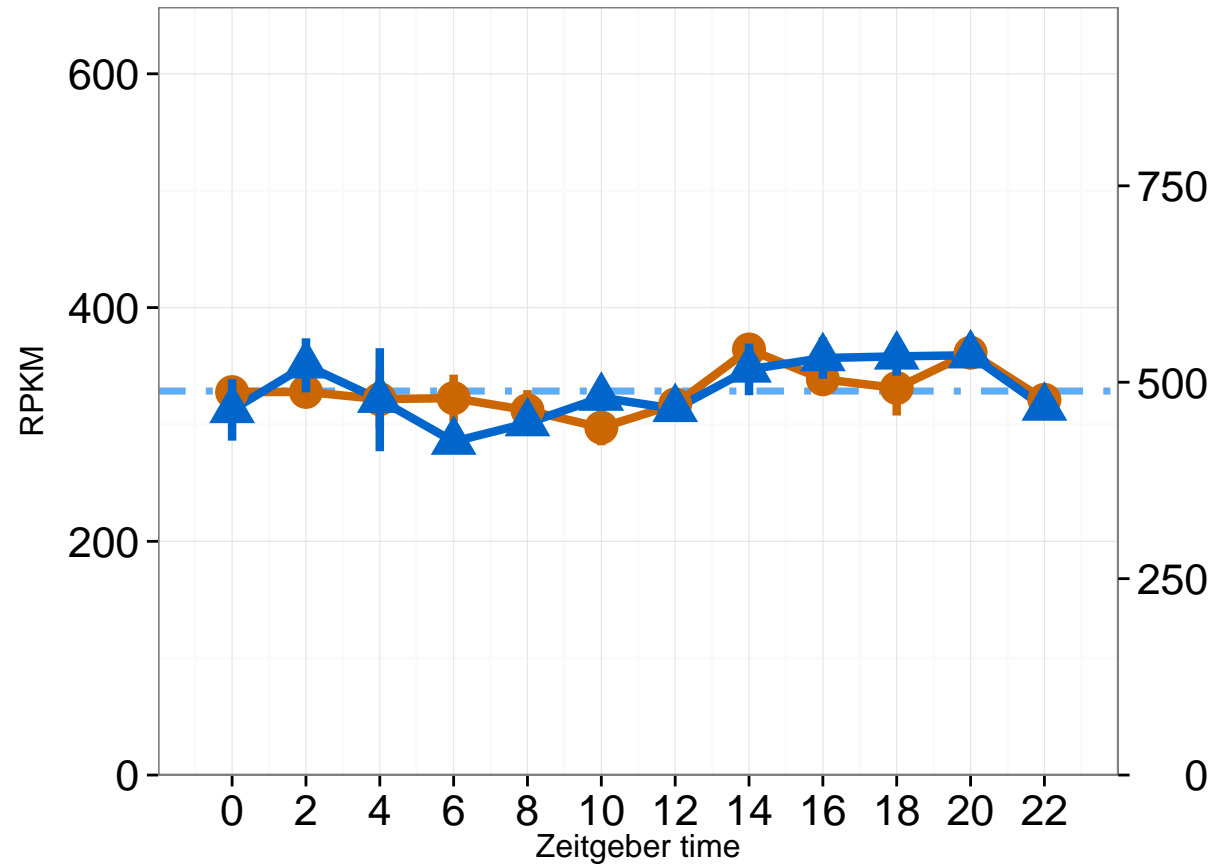

# Ndufb10

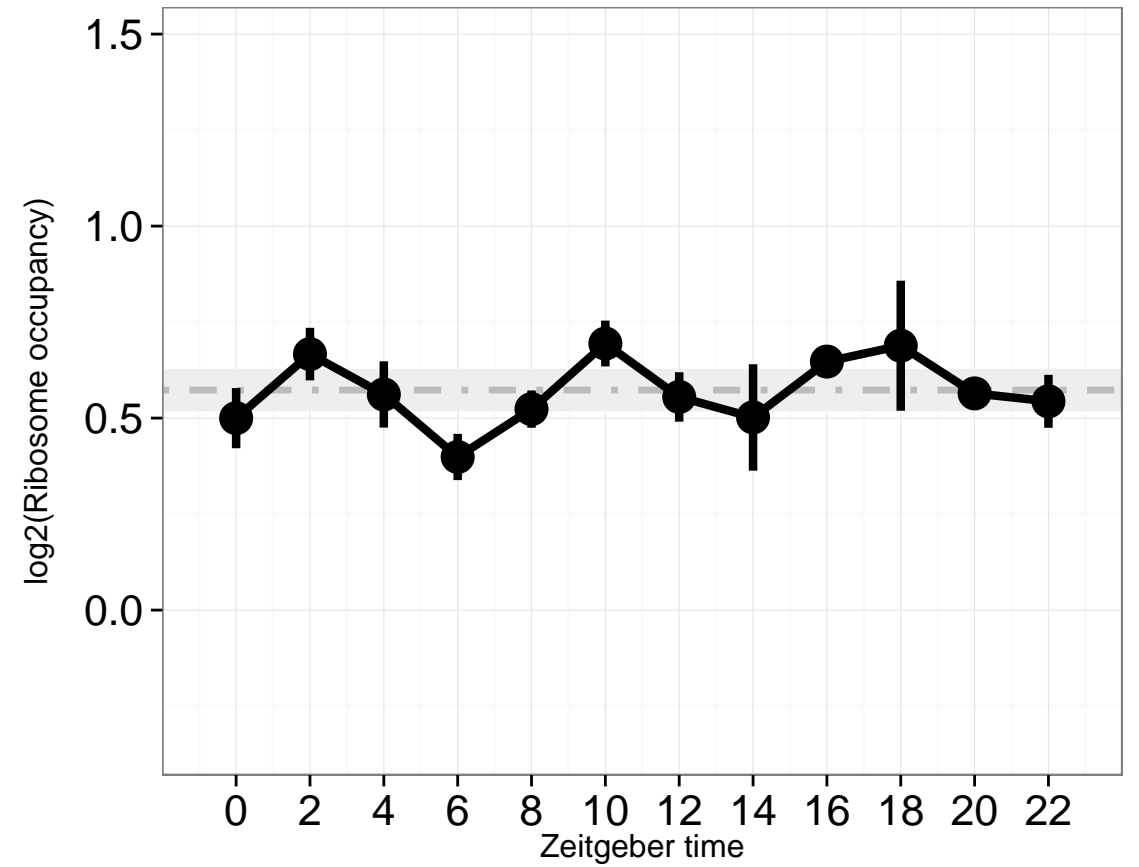

Supplement: Supplementary file 3669 [file 1]

## Gsk3b

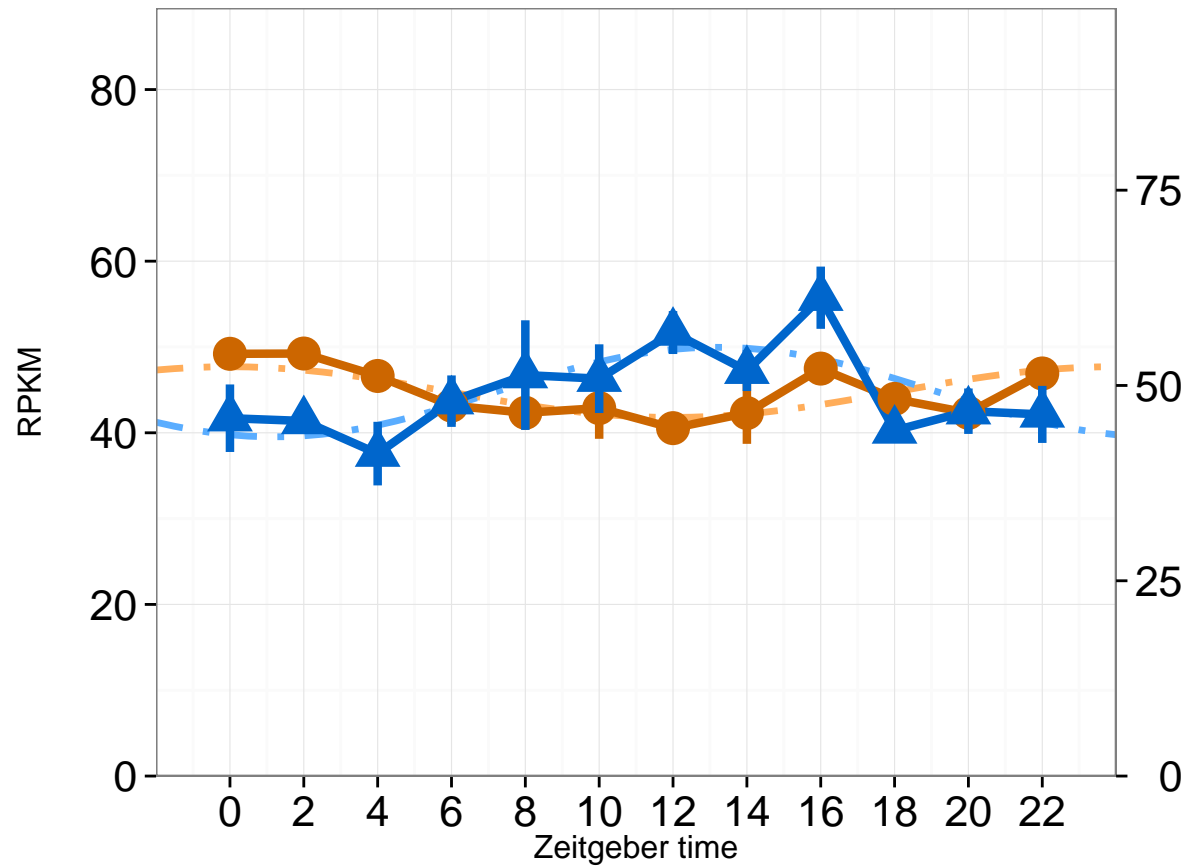

## Gsk3b

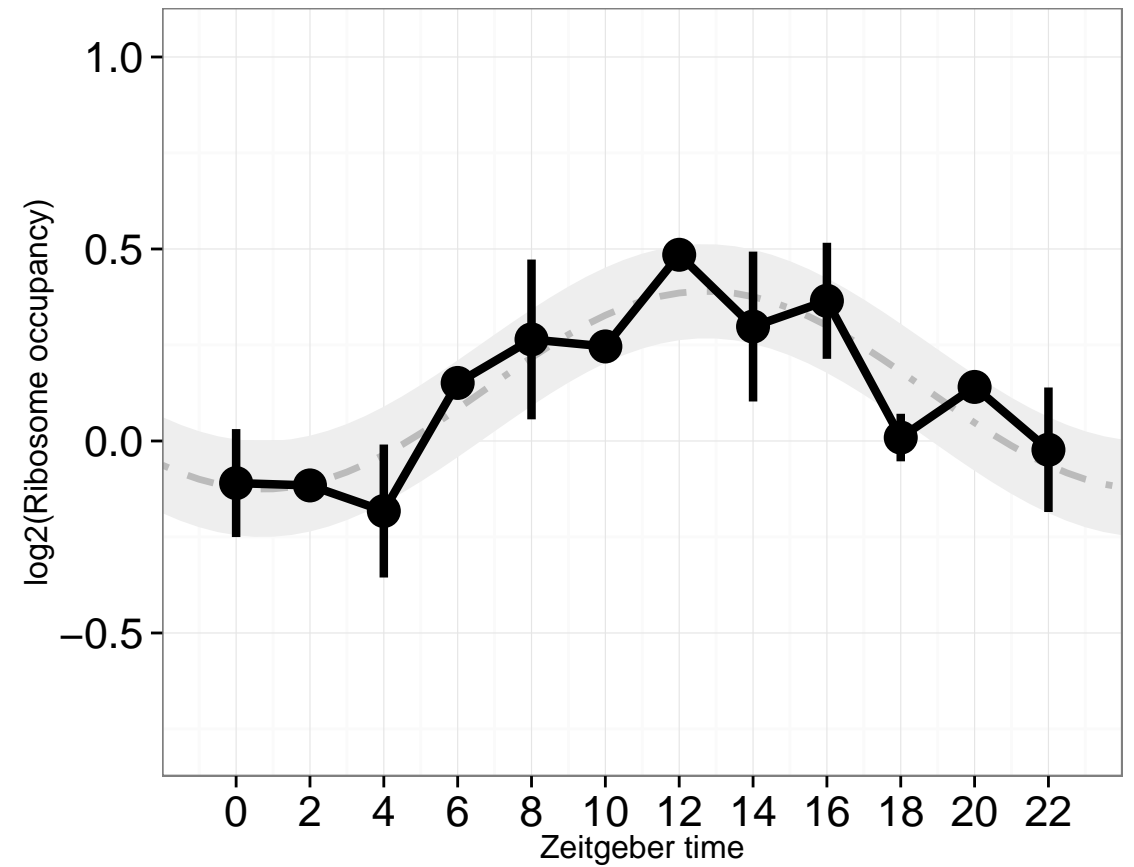

Supplement: Supplementary file 3670 [file 1]

# Ddx19b

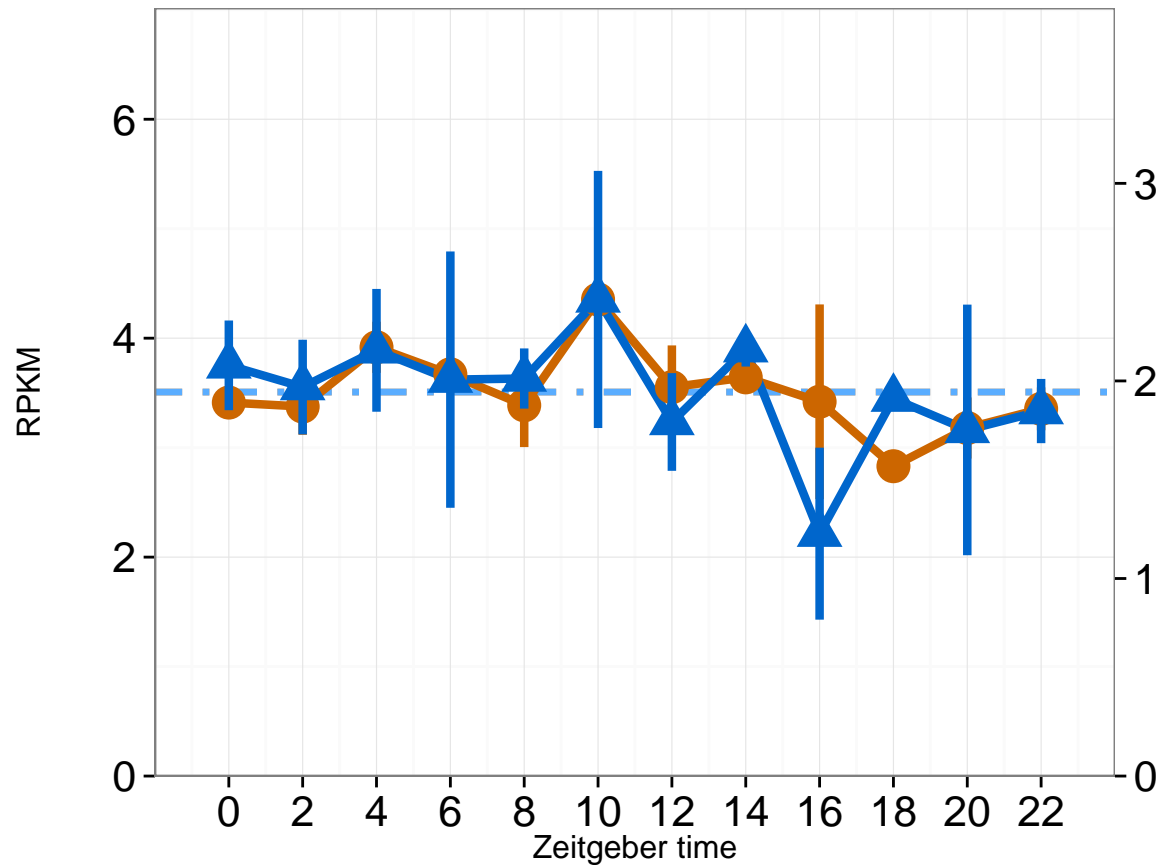

# Ddx19b

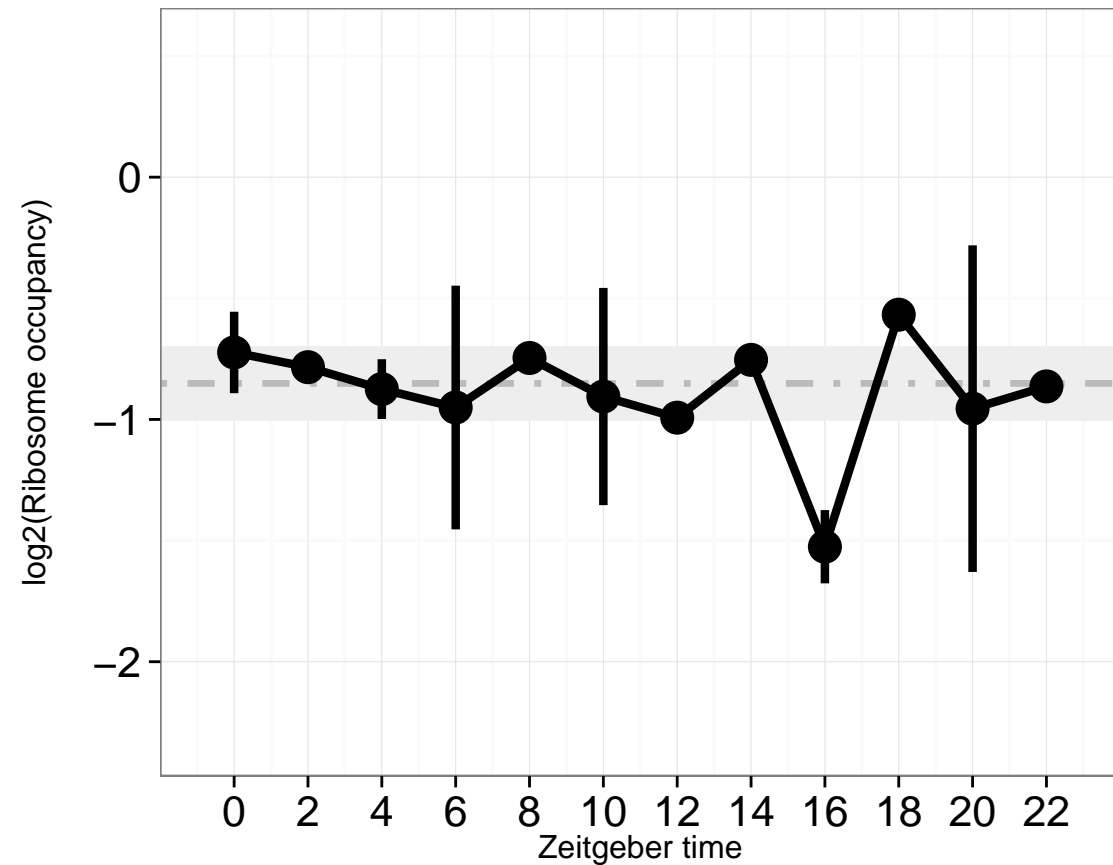

Supplement: Supplementary file 3671 [file 1]

# Wnt11

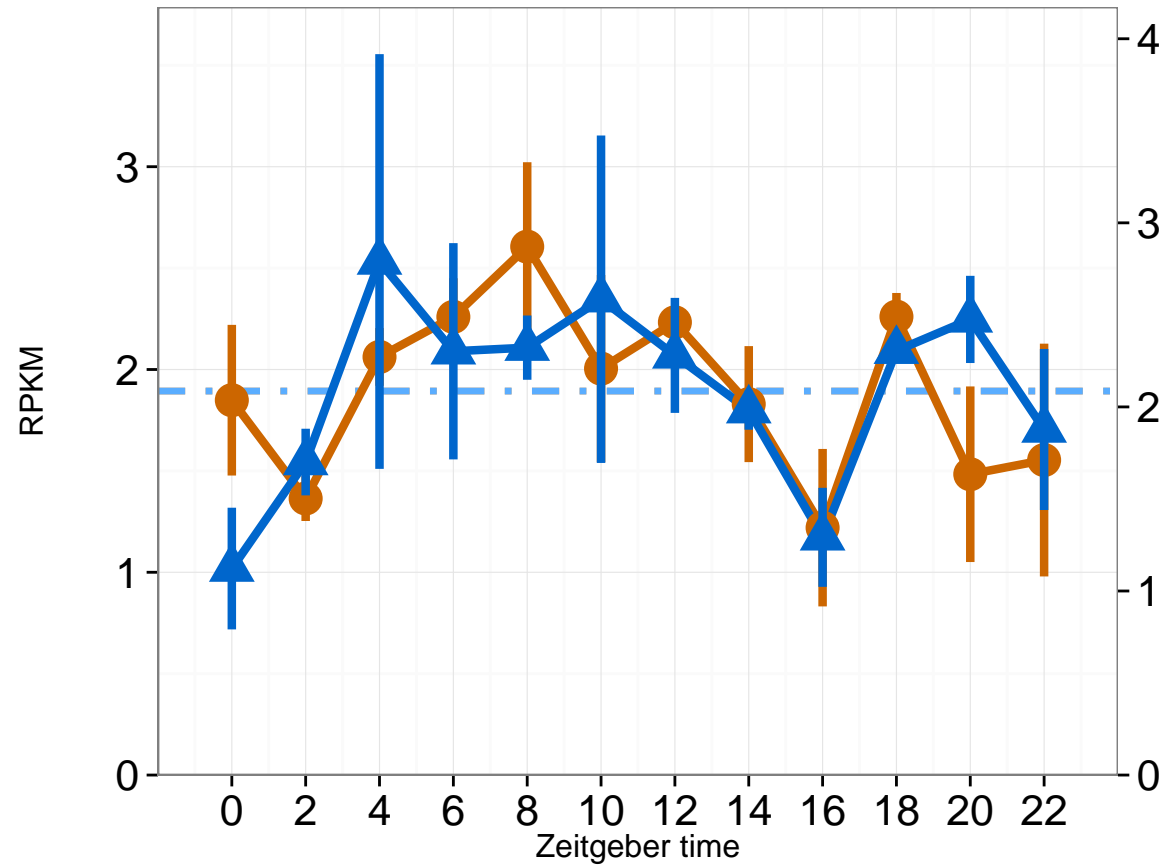

# Wnt11

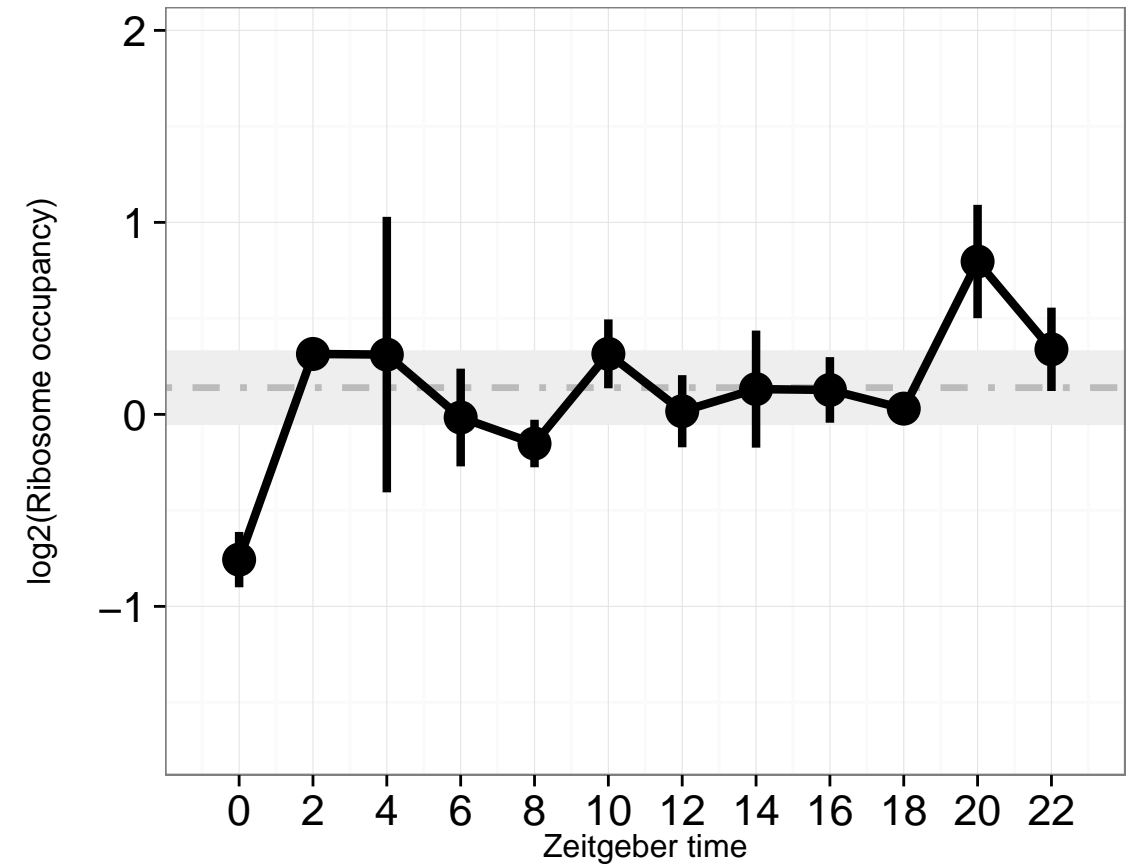

Supplement: Supplementary file 3672 [file 1]

## Rpp21

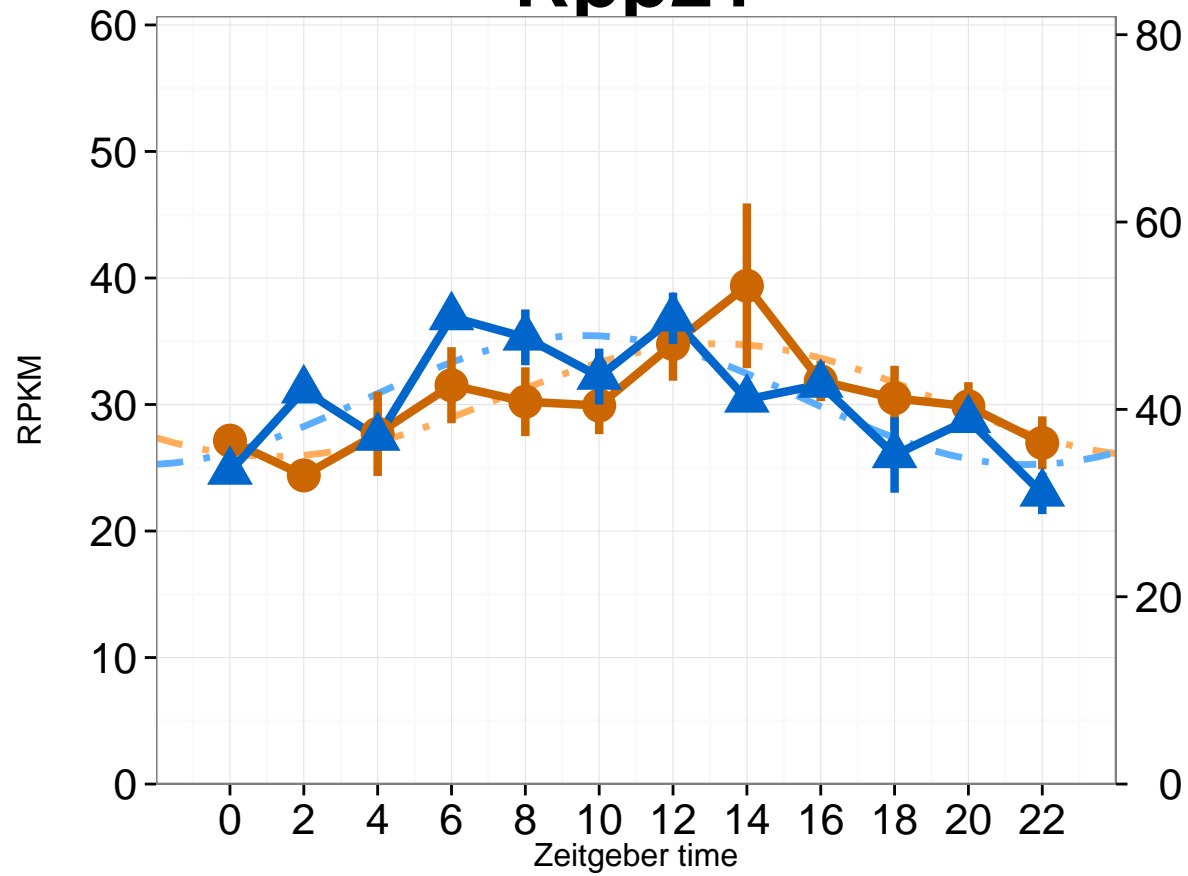

## Rpp21

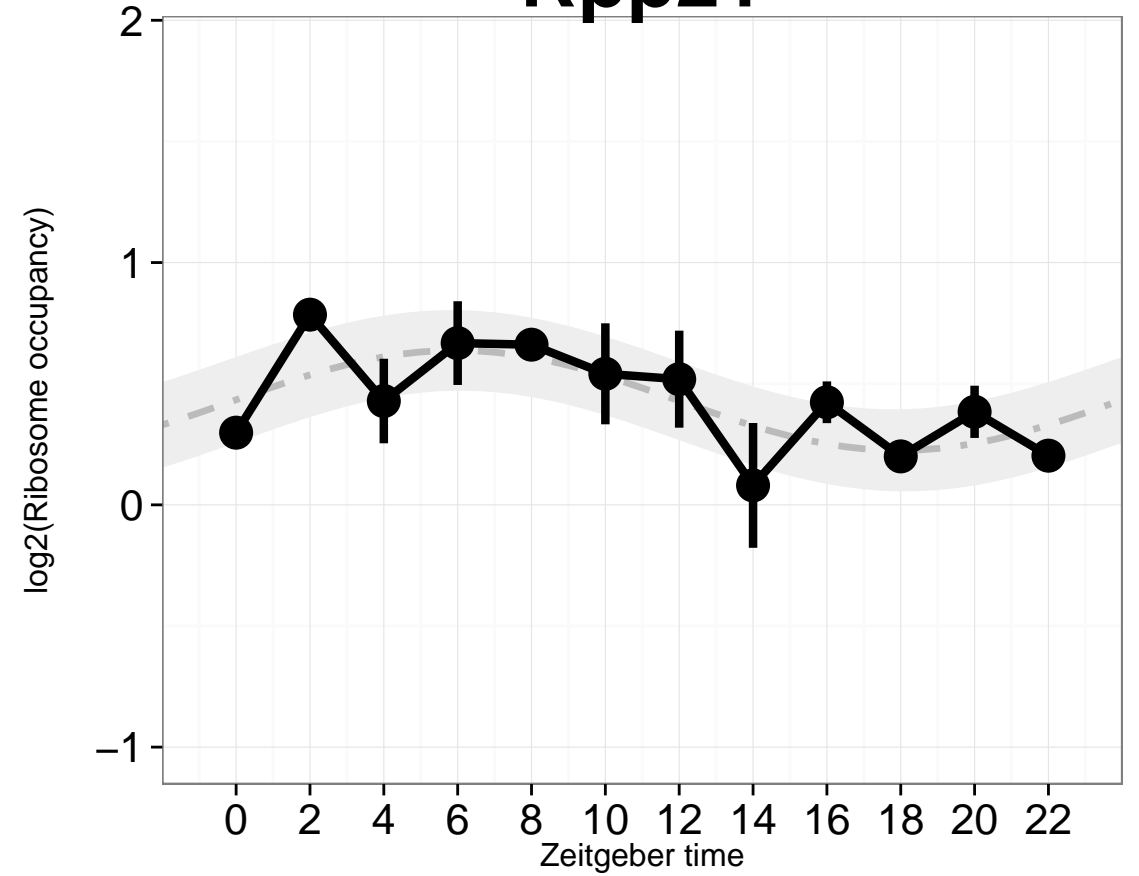

Supplement: Supplementary file 3673 [file 1]

# Pcgf5

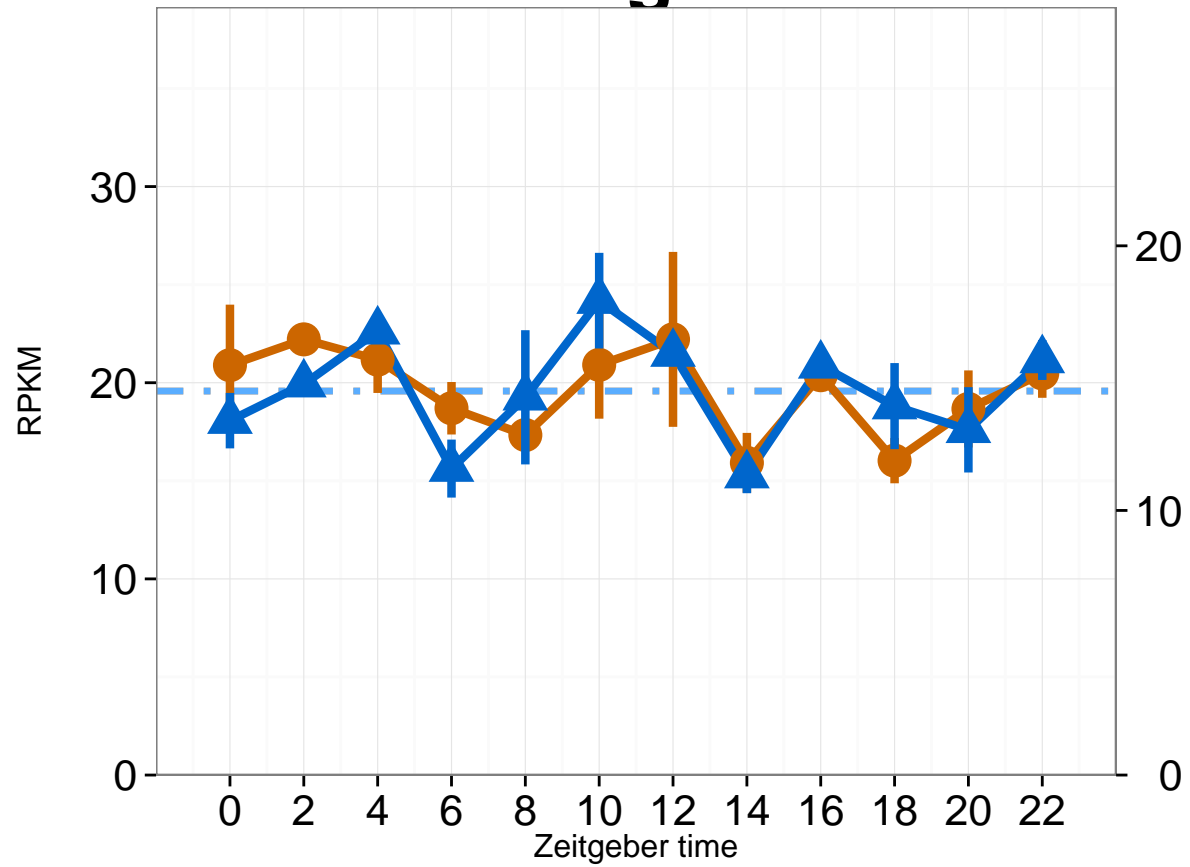

# Pcgf5

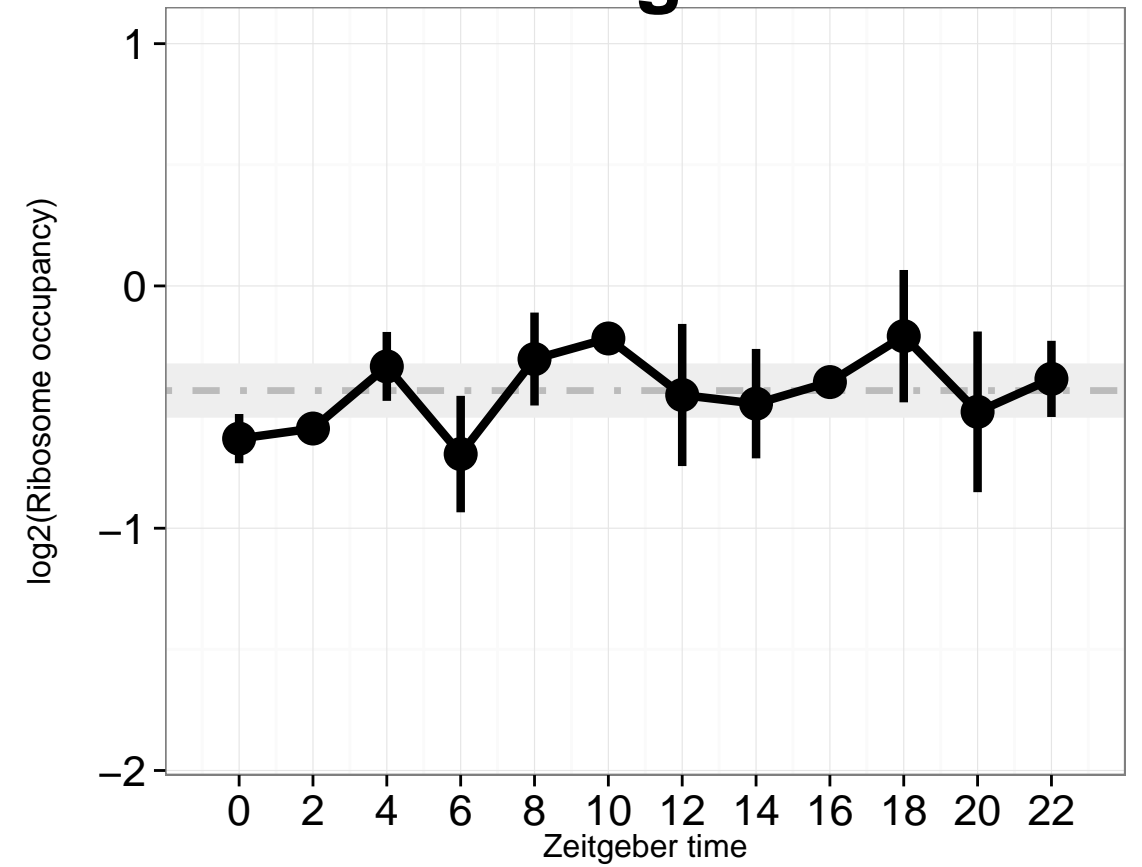

Supplement: Supplementary file 3674 [file 1]

## Rsph9

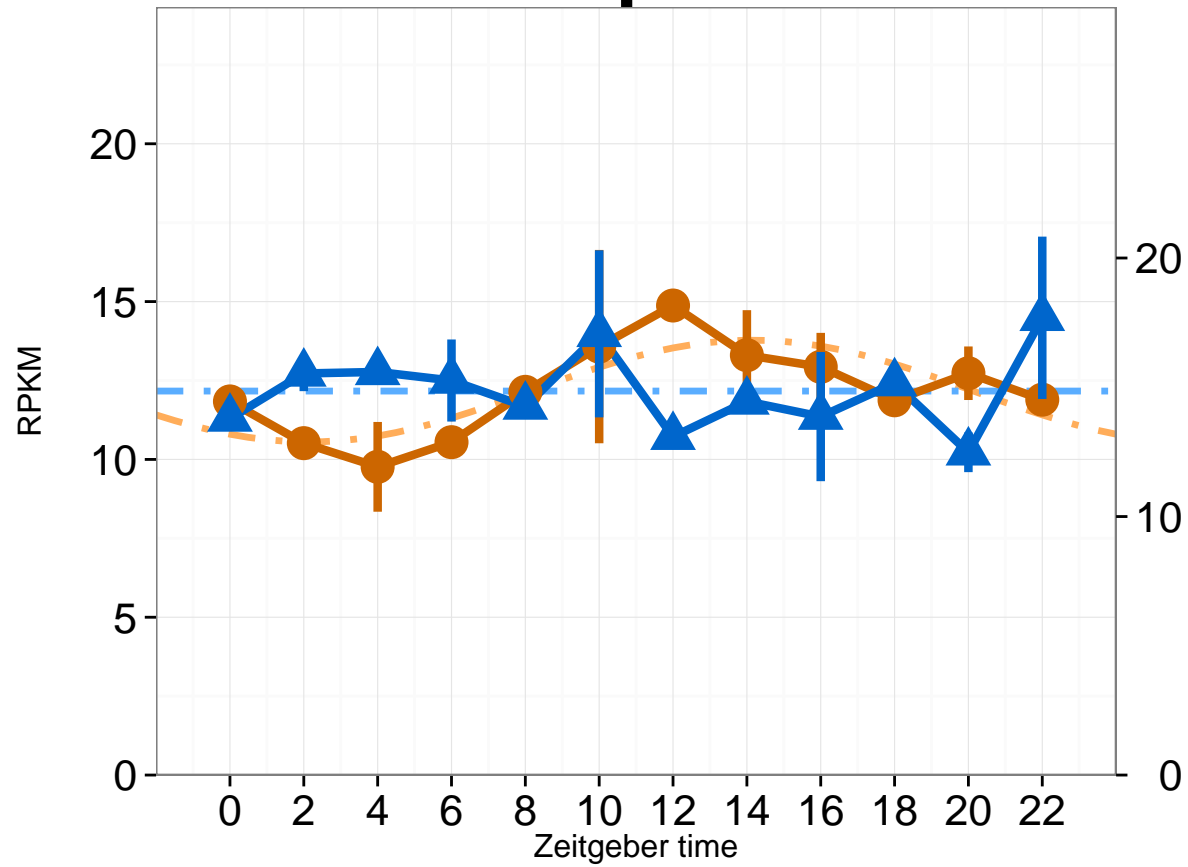

## Rsph9

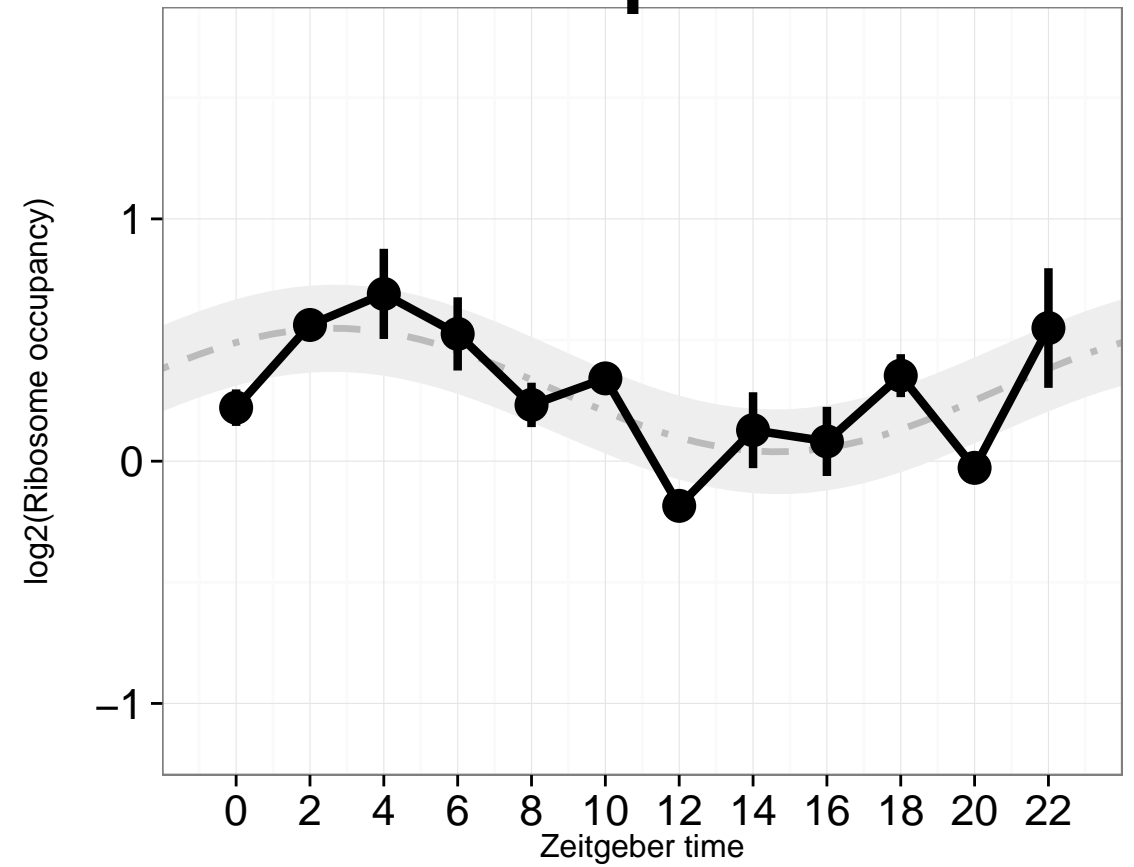

Supplement: Supplementary file 3675 [file 1]

## Ranbp9

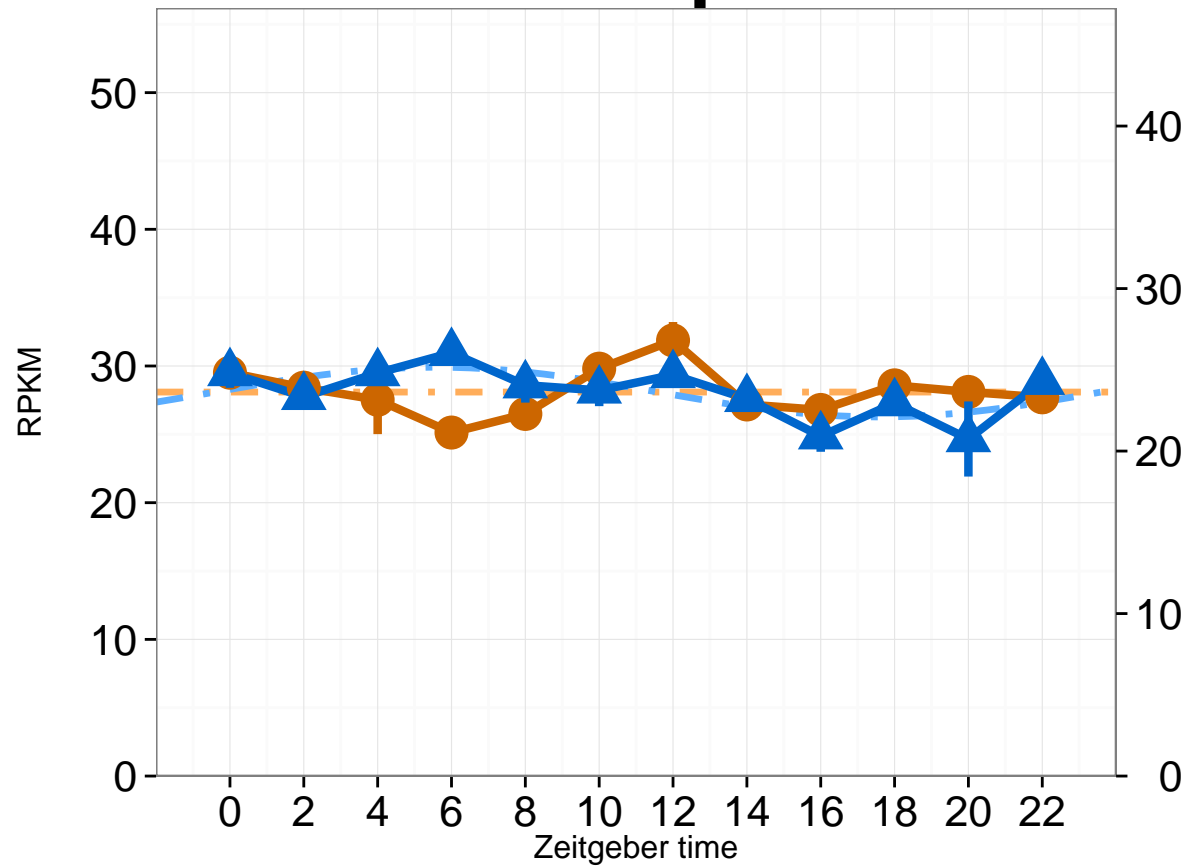

## Ranbp9

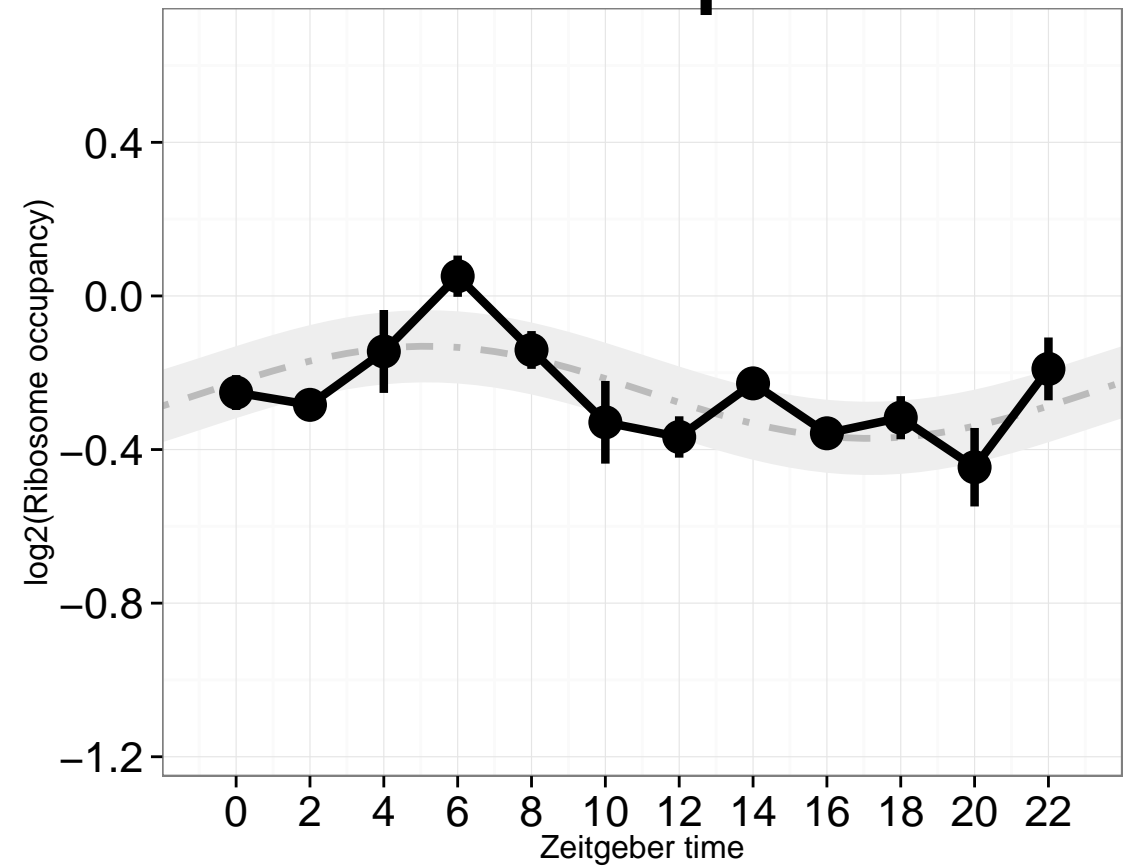

Supplement: Supplementary file 3676 [file 1]

# Kdm3a

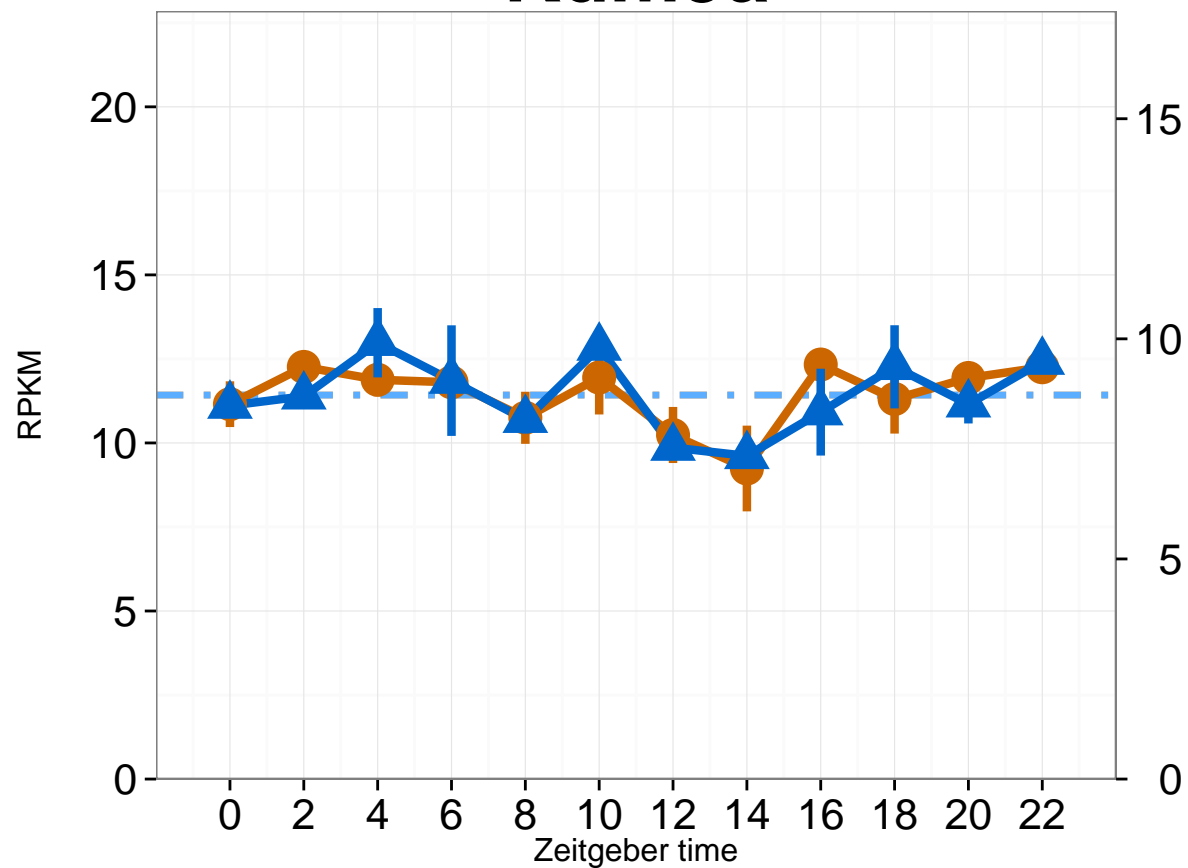

# Kdm3a

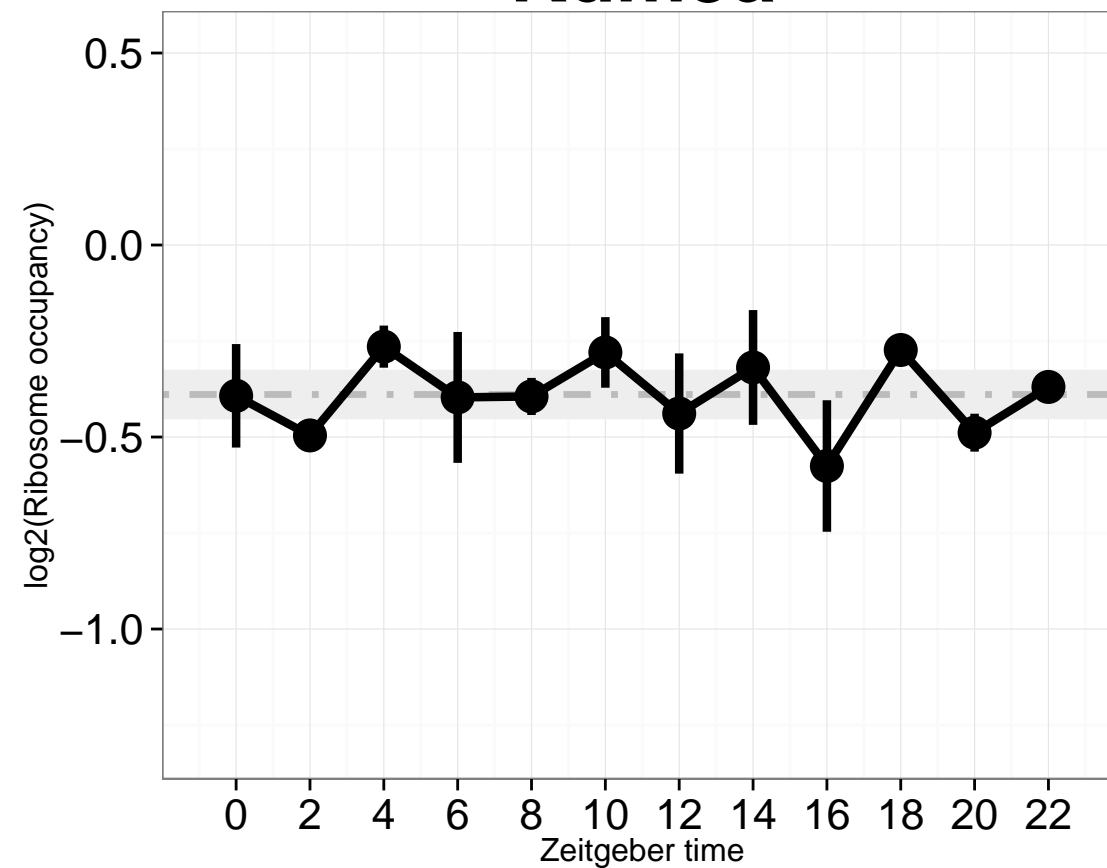

Supplement: Supplementary file 3677 [file 1]

## Ywhae

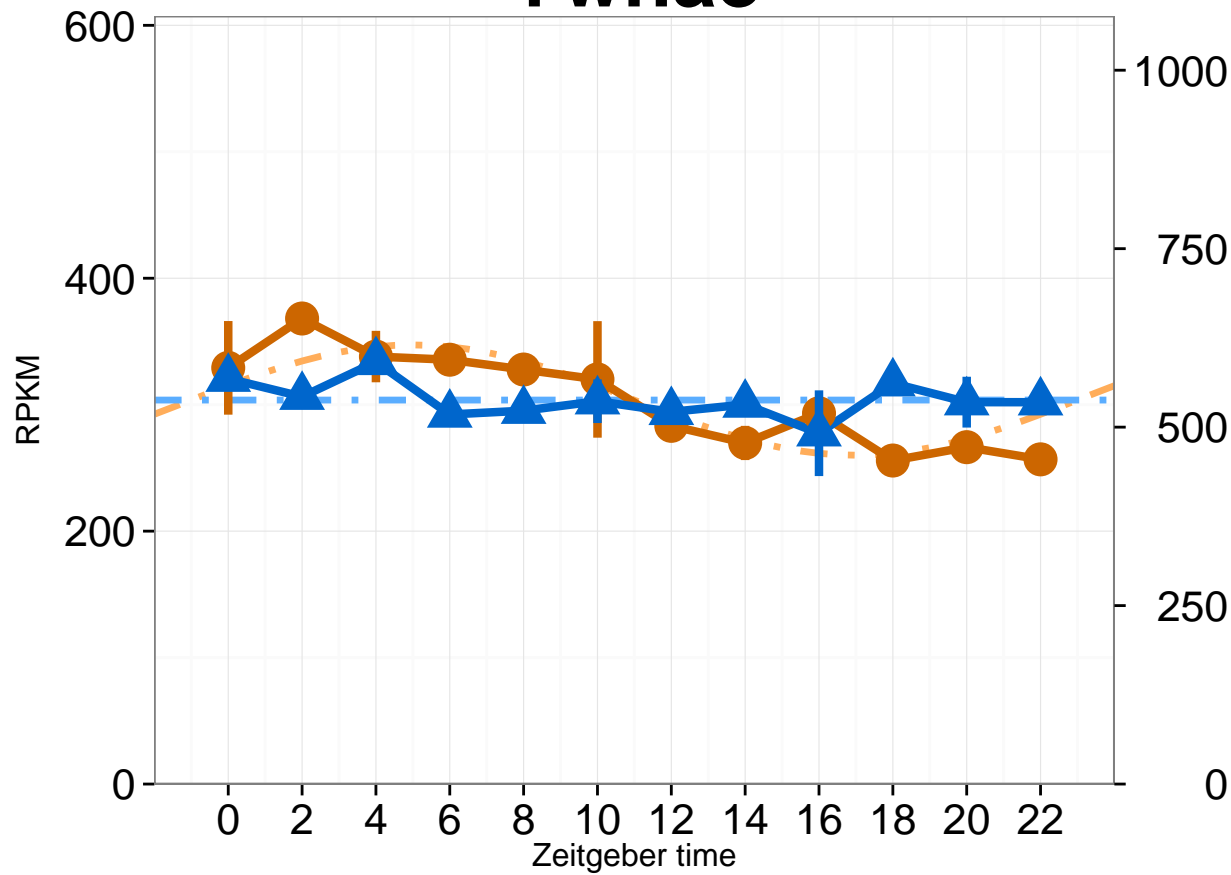

## Ywhae

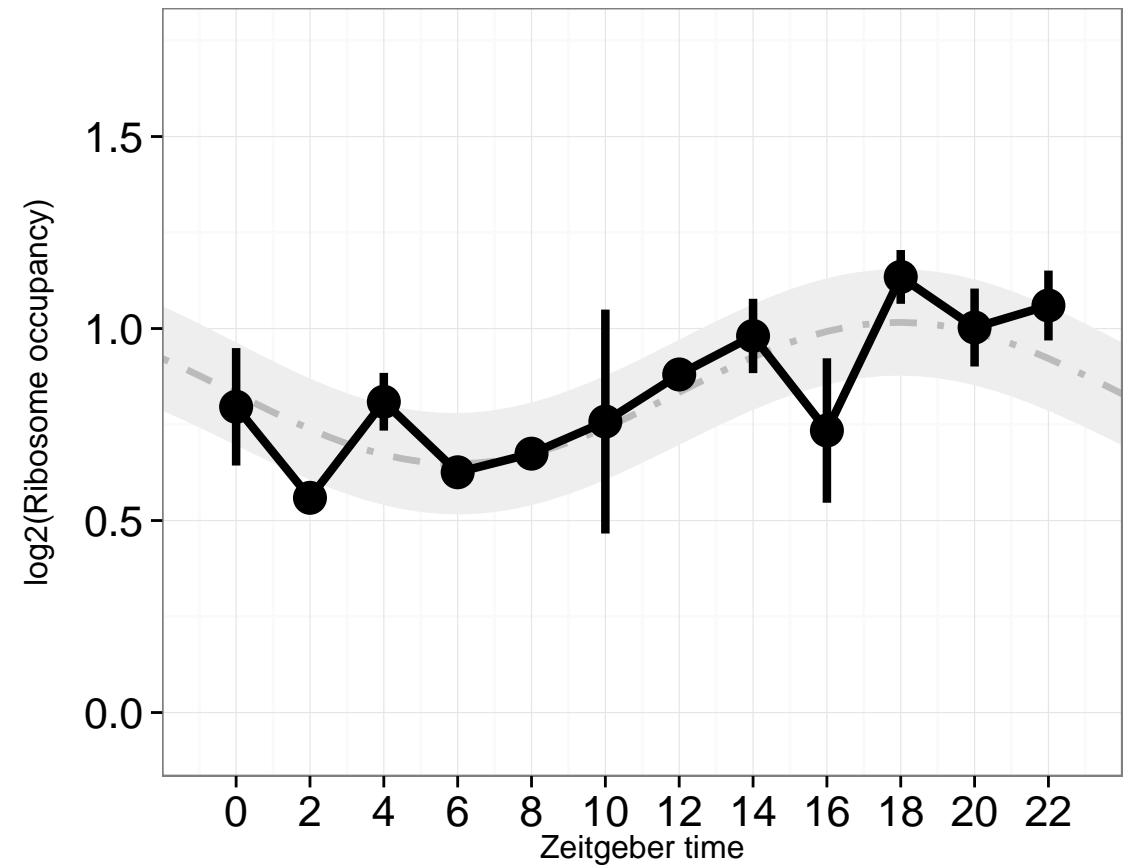

Supplement: Supplementary file 3678 [file 1]

## Clspn

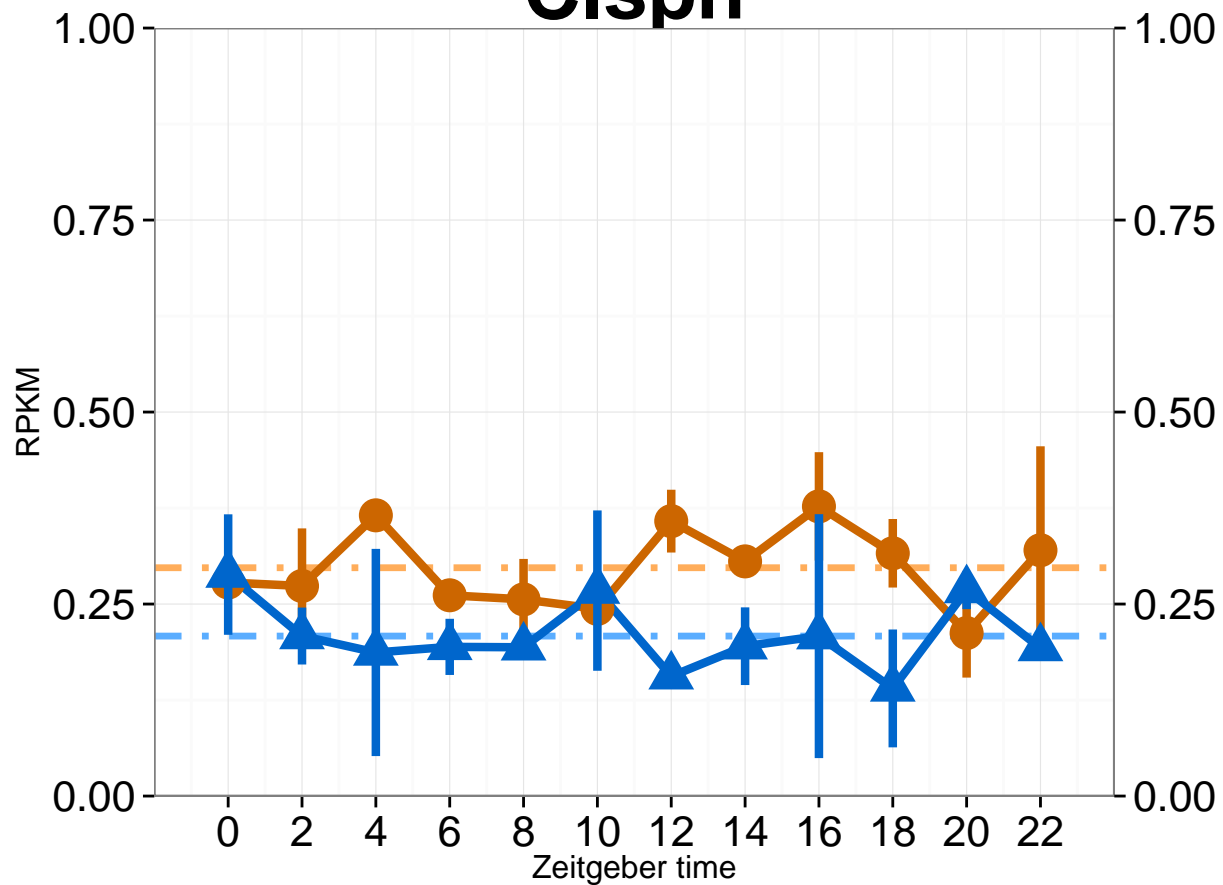

## Clspn

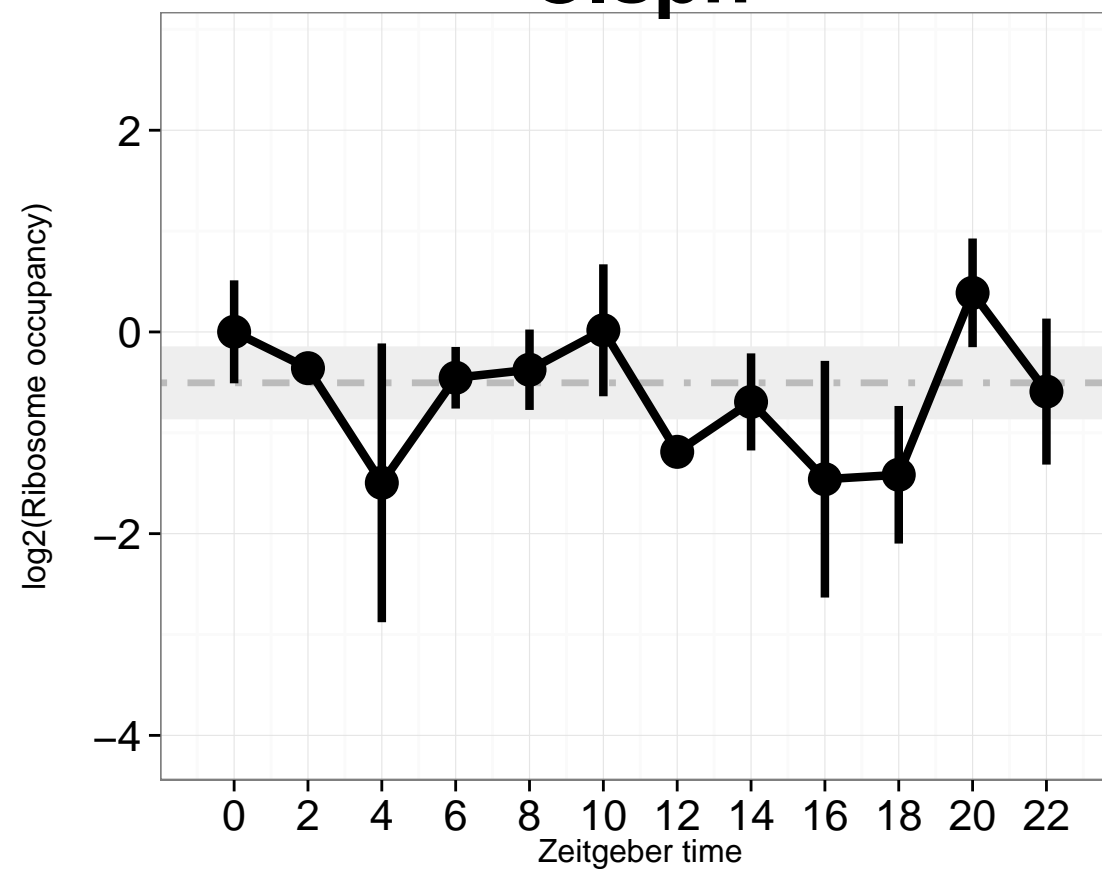

Supplement: Supplementary file 3679 [file 1]

# Csnk1a1

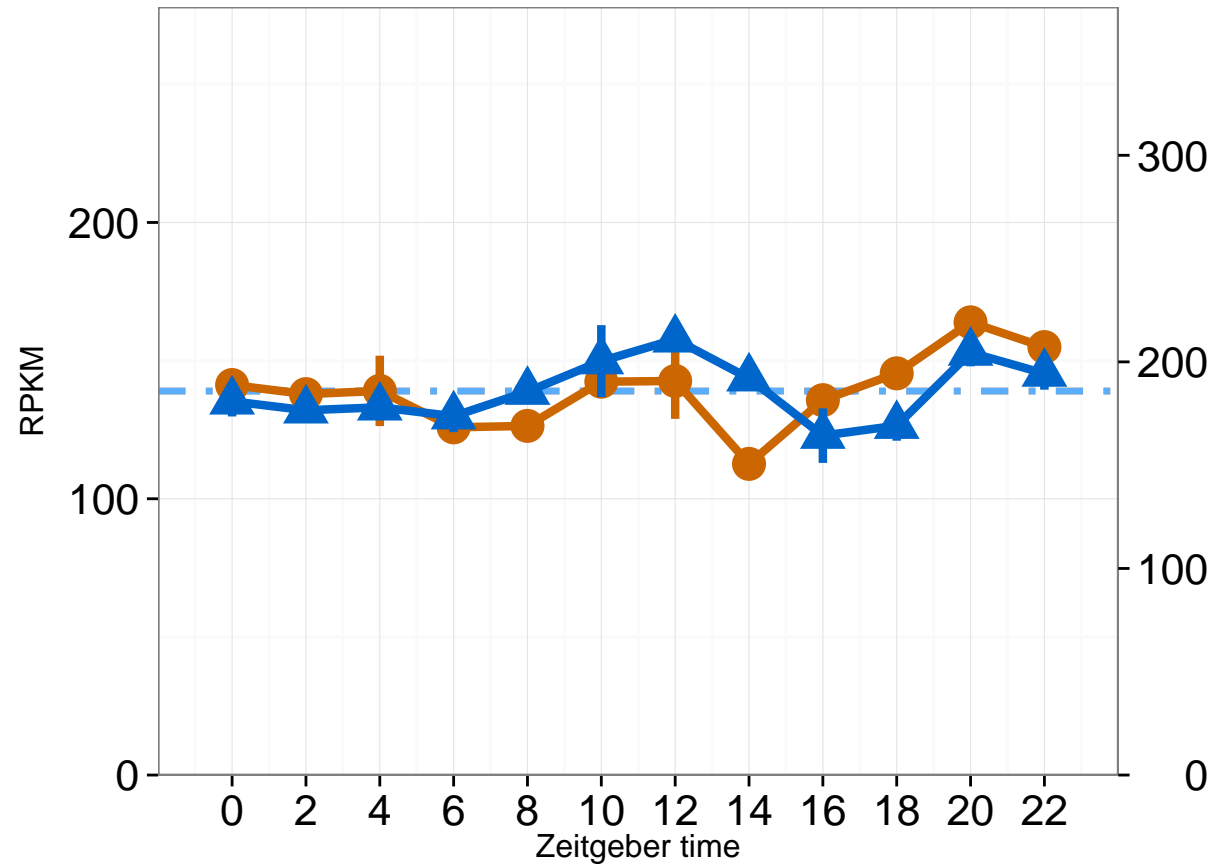

# Csnk1a1

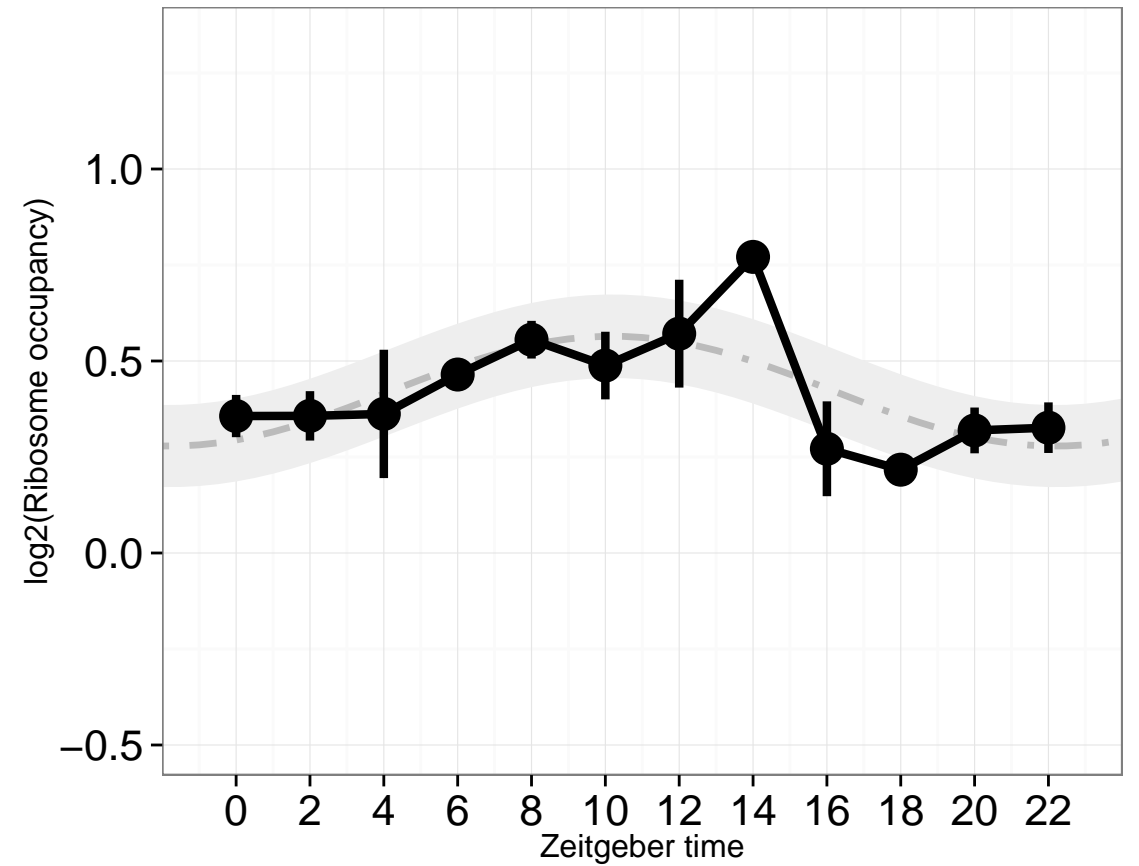

Supplement: Supplementary file 3680 [file 1]

# Ptpro

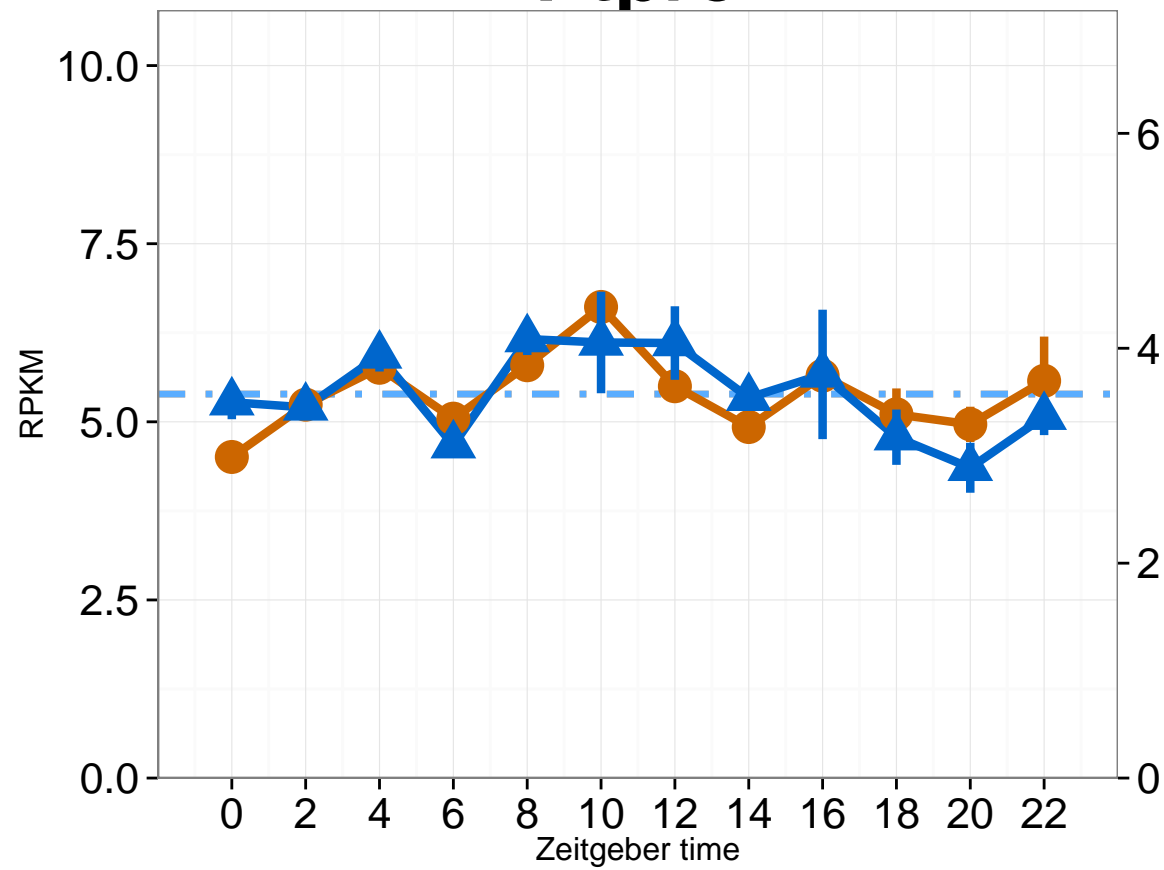

# Ptpro

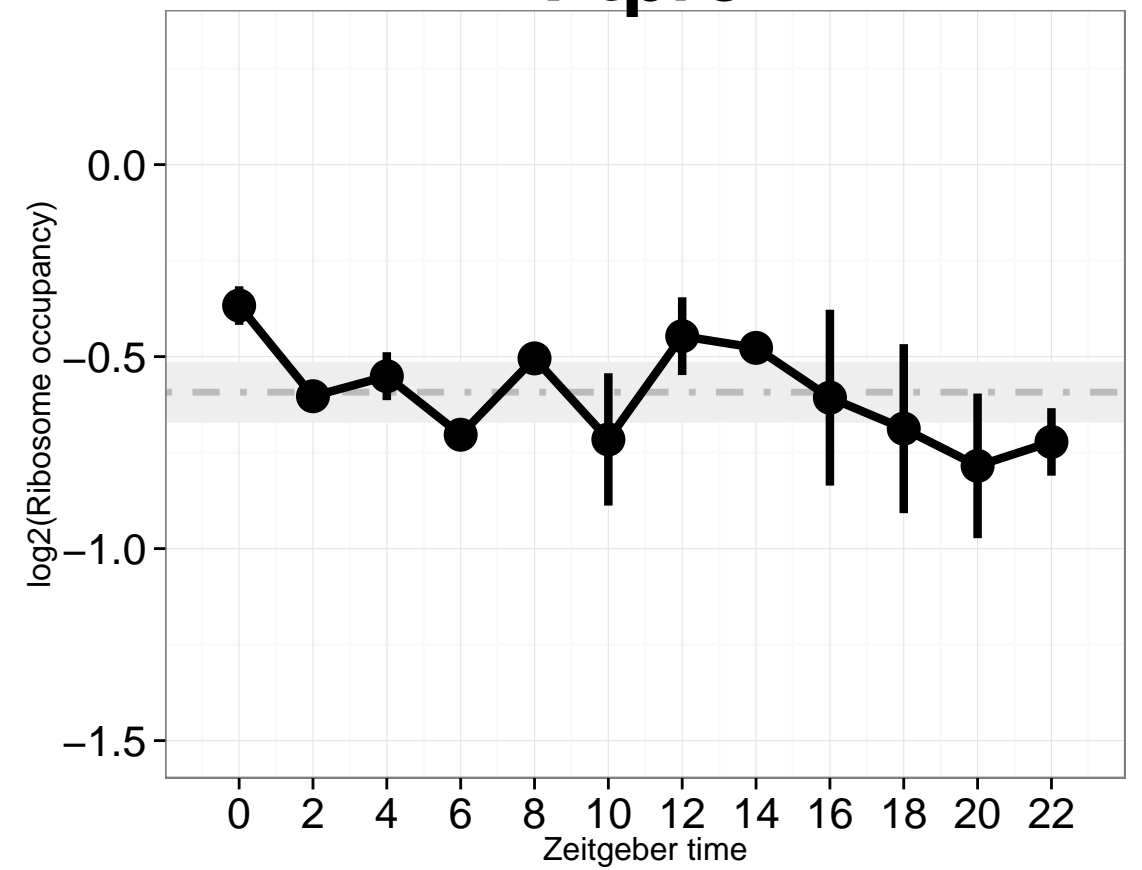

Supplement: Supplementary file 3681 [file 1]

## Nfx1

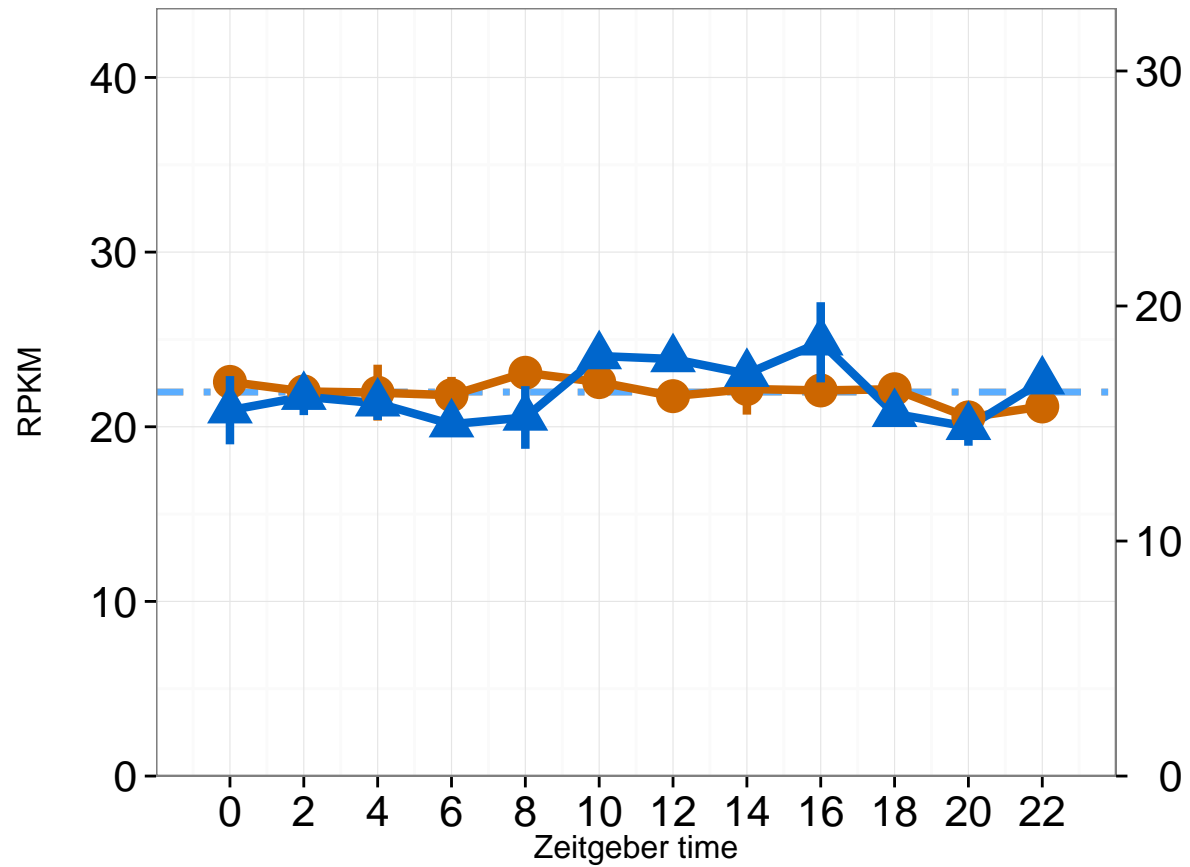

## Nfx1

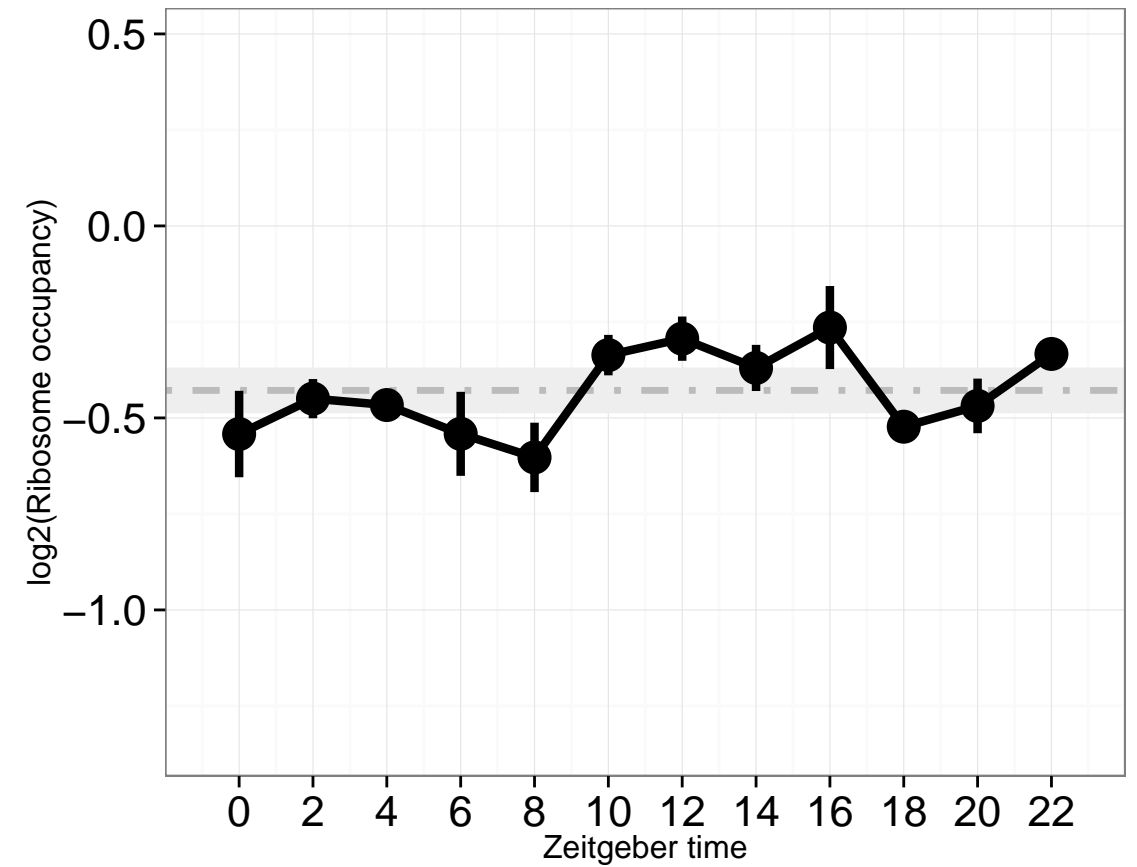

Supplement: Supplementary file 3682 [file 1]

## Elp5

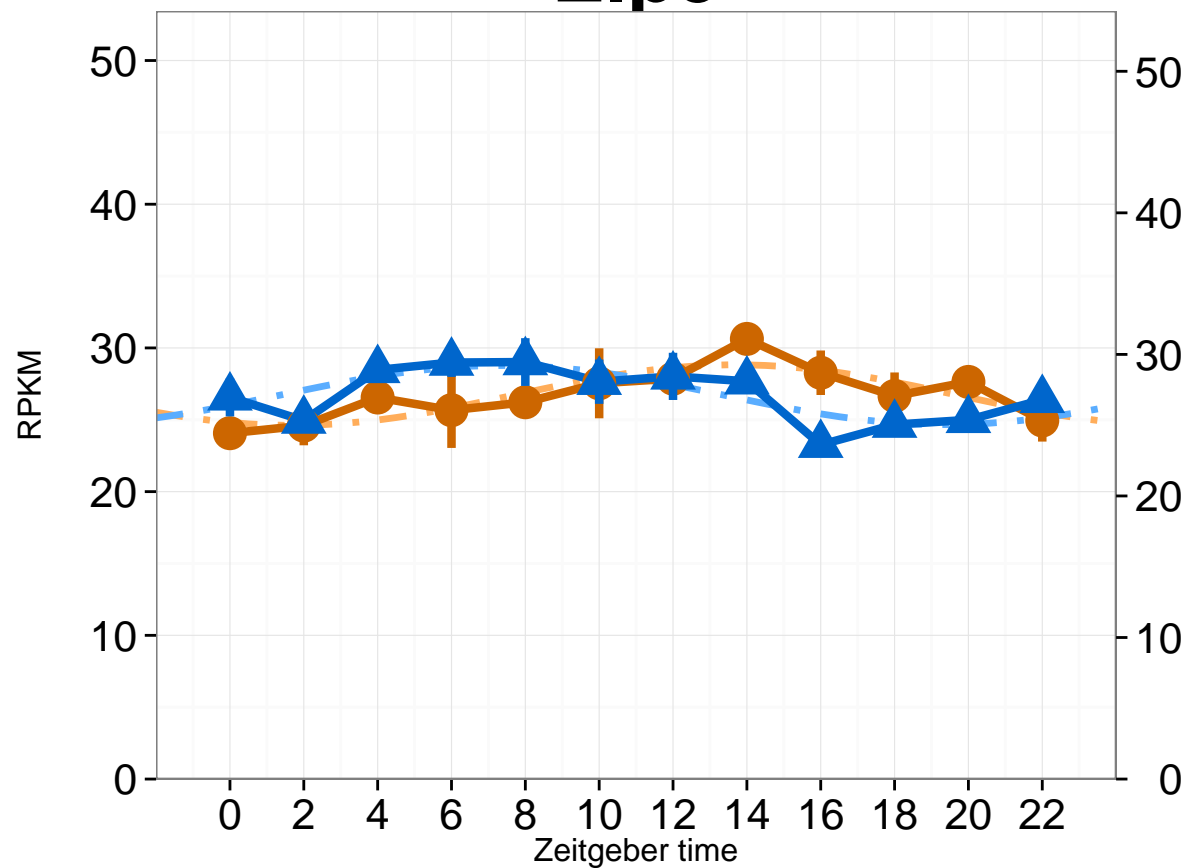

## Elp5

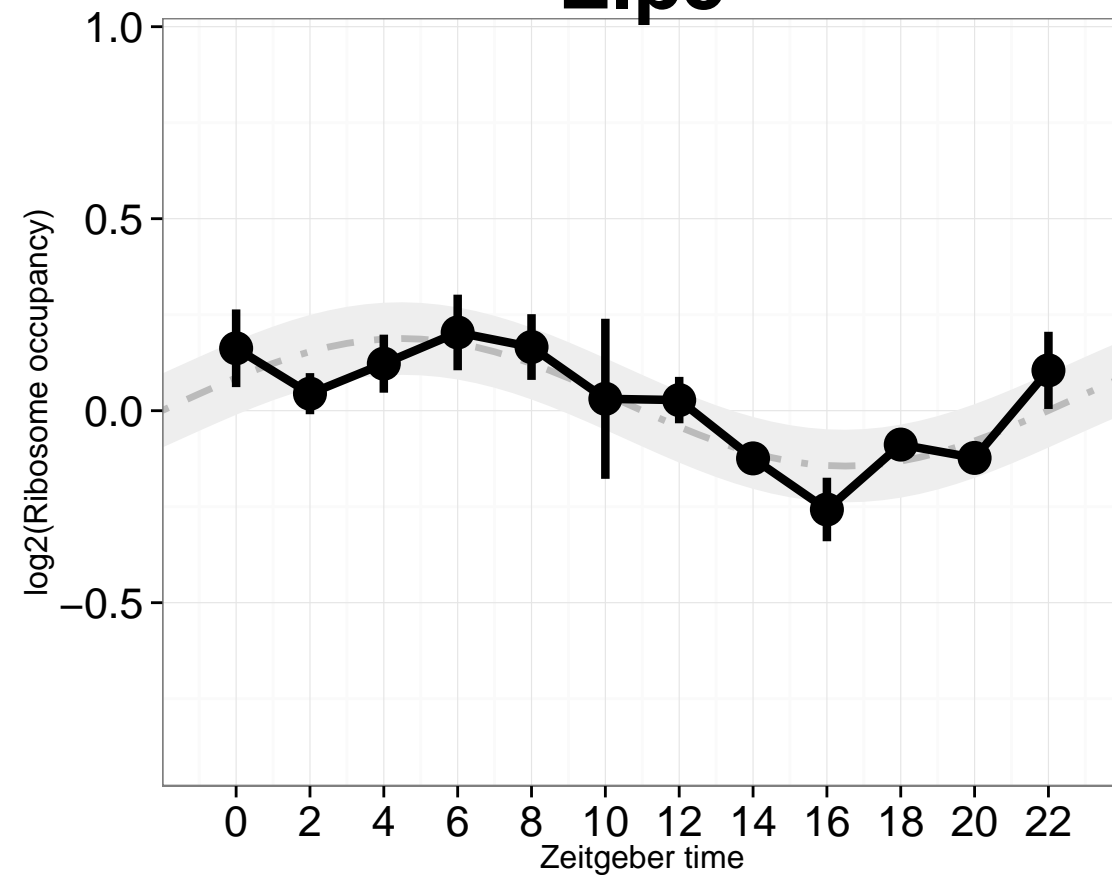

Supplement: Supplementary file 3683 [file 1]

## Vps35

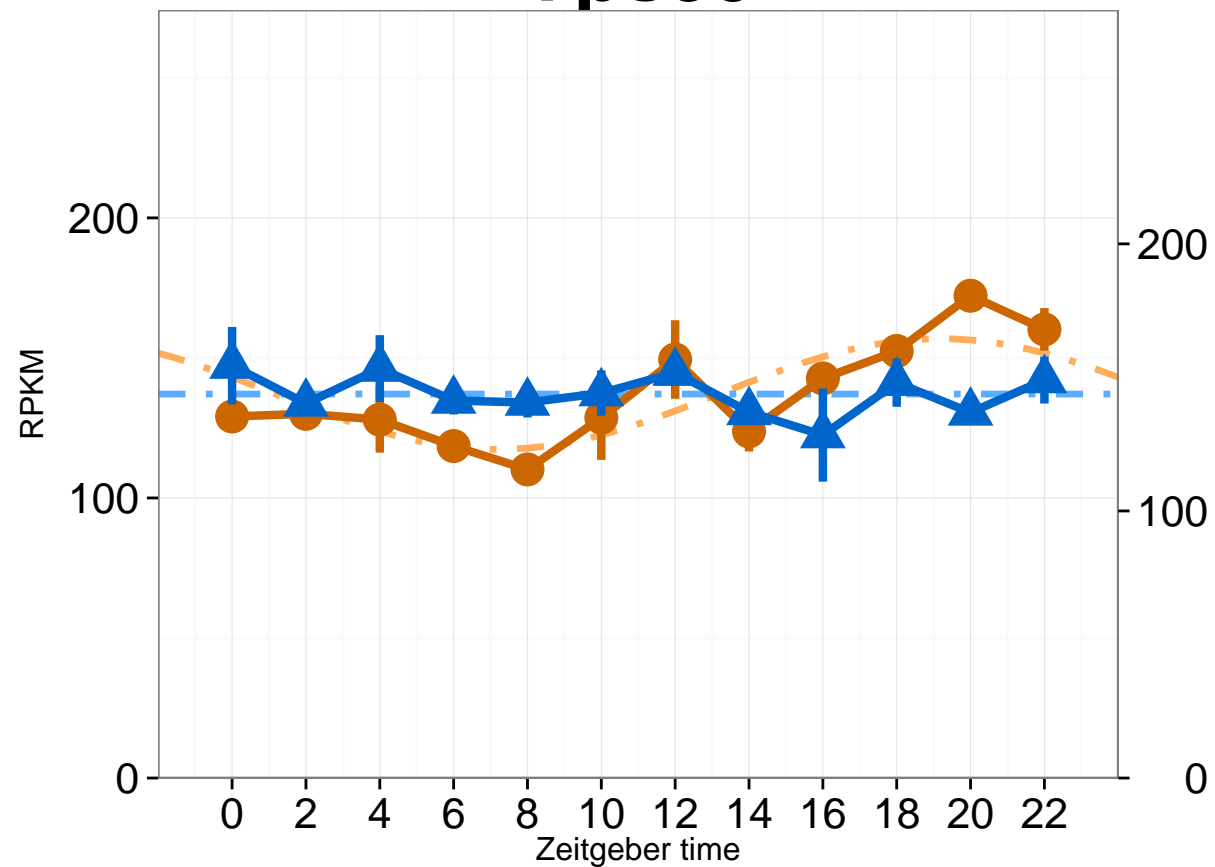

## Vps35

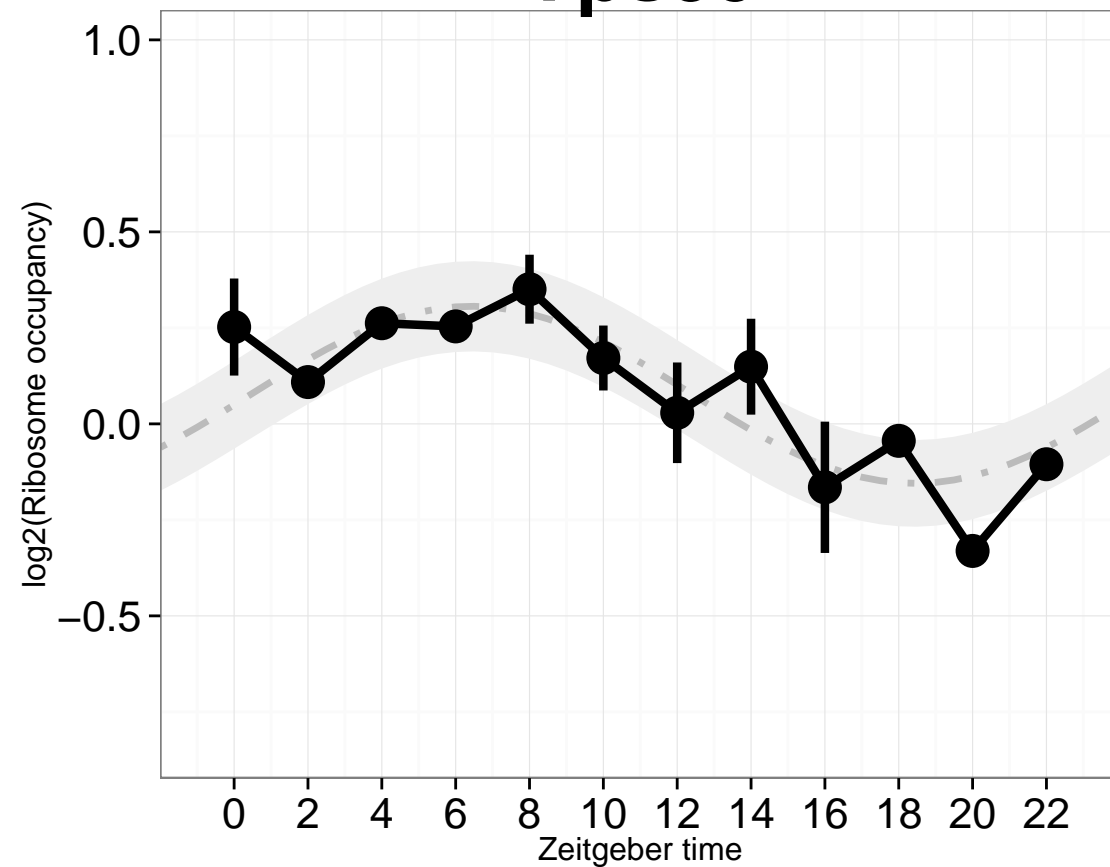

Supplement: Supplementary file 3684 [file 1]

## Foxo1

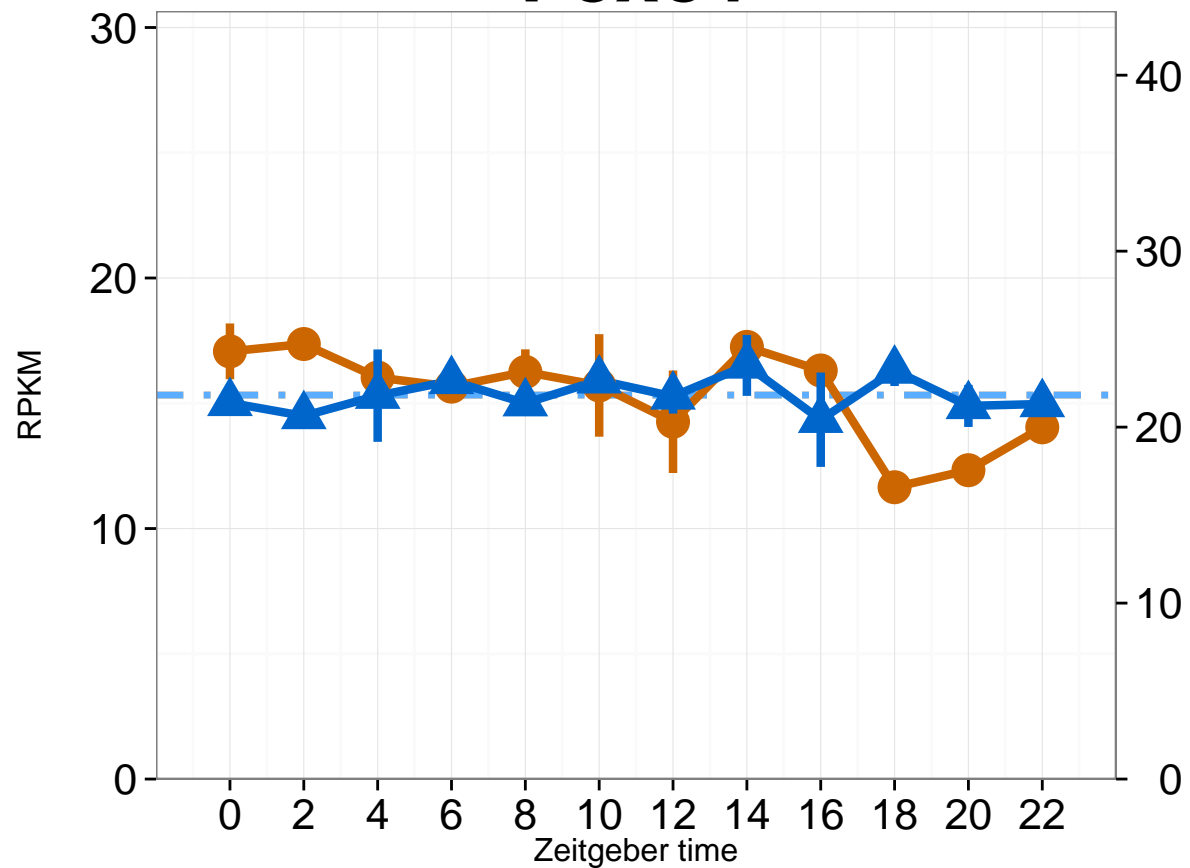

## Foxo1

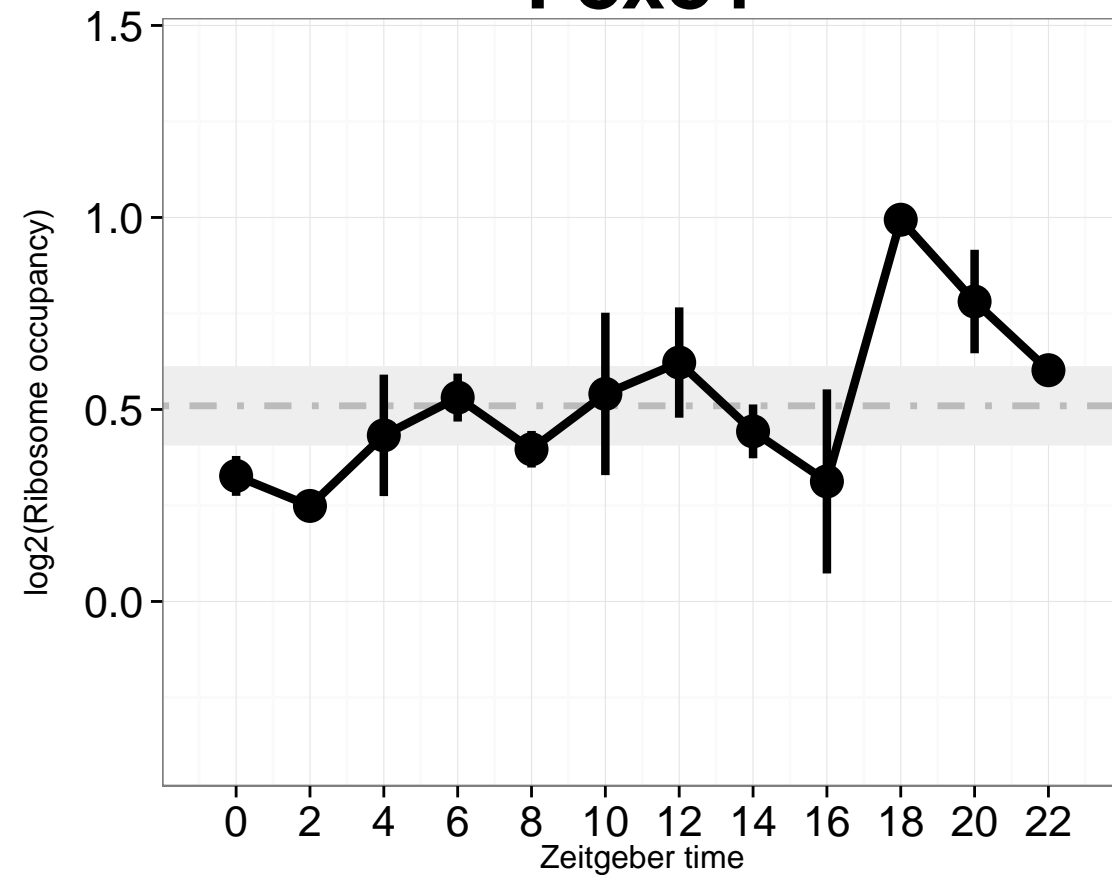

Supplement: Supplementary file 3685 [file 1]

# Kif20b

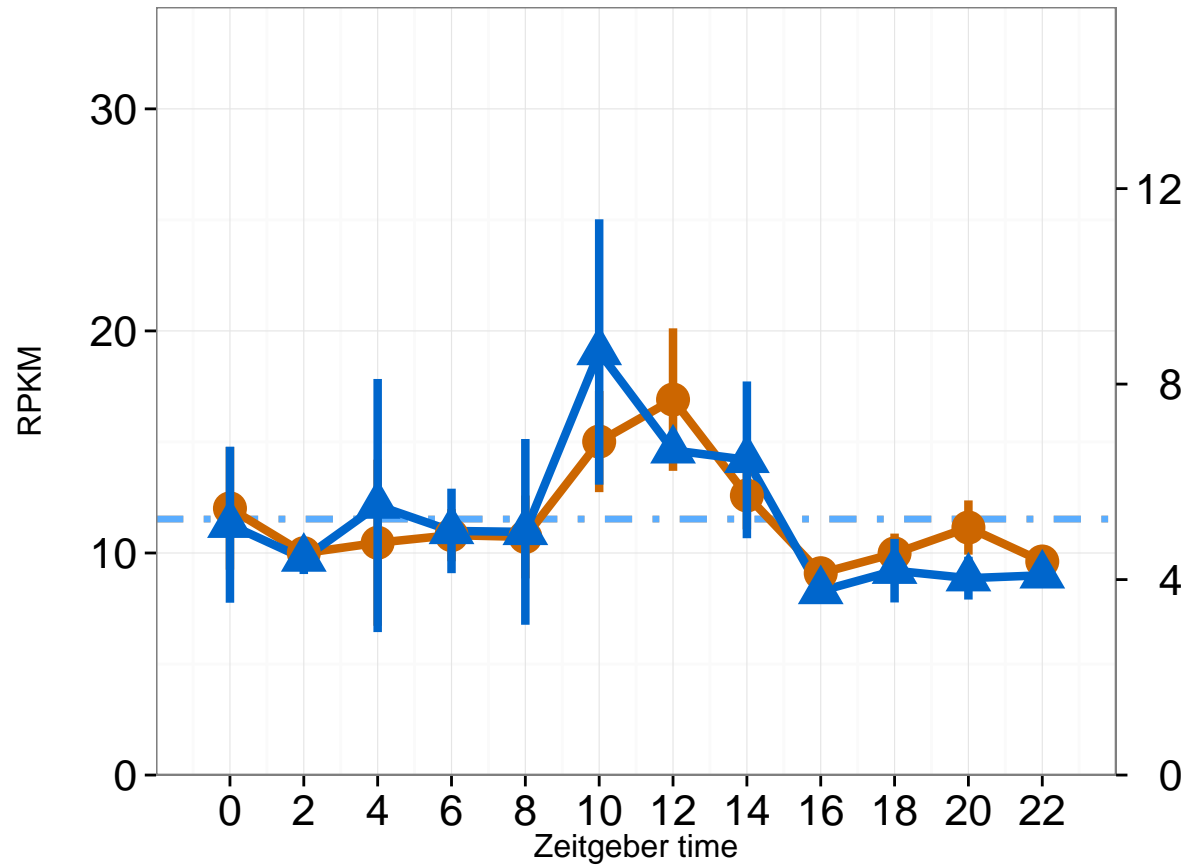

# Kif20b

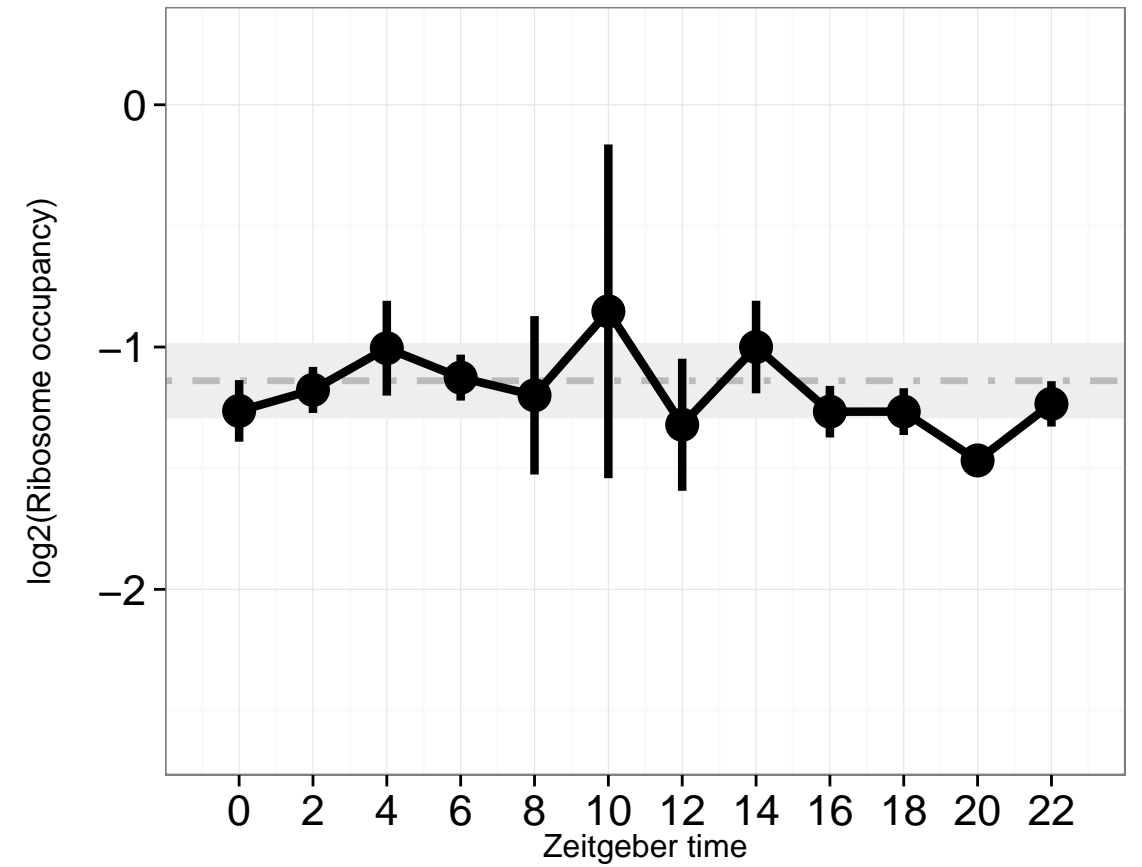

Supplement: Supplementary file 3686 [file 1]

## Nop9

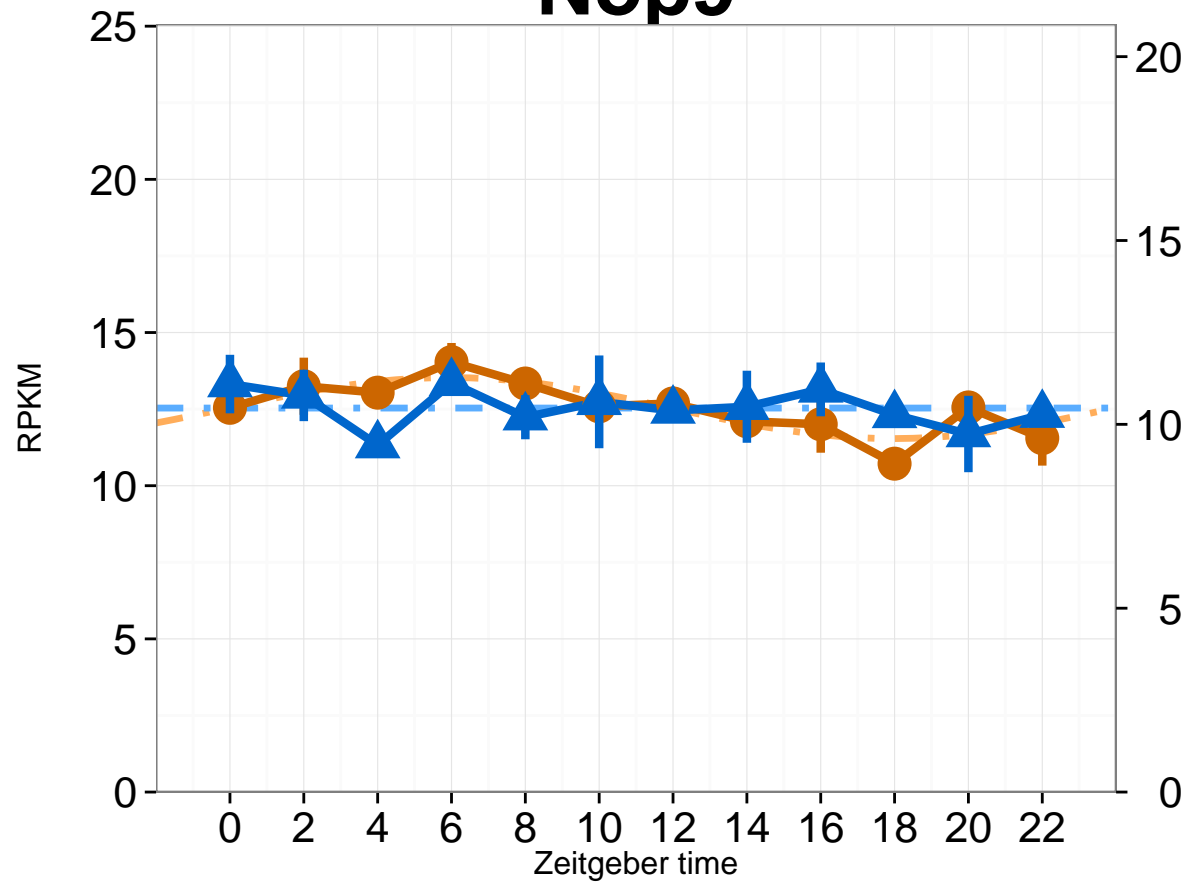

## Nop9

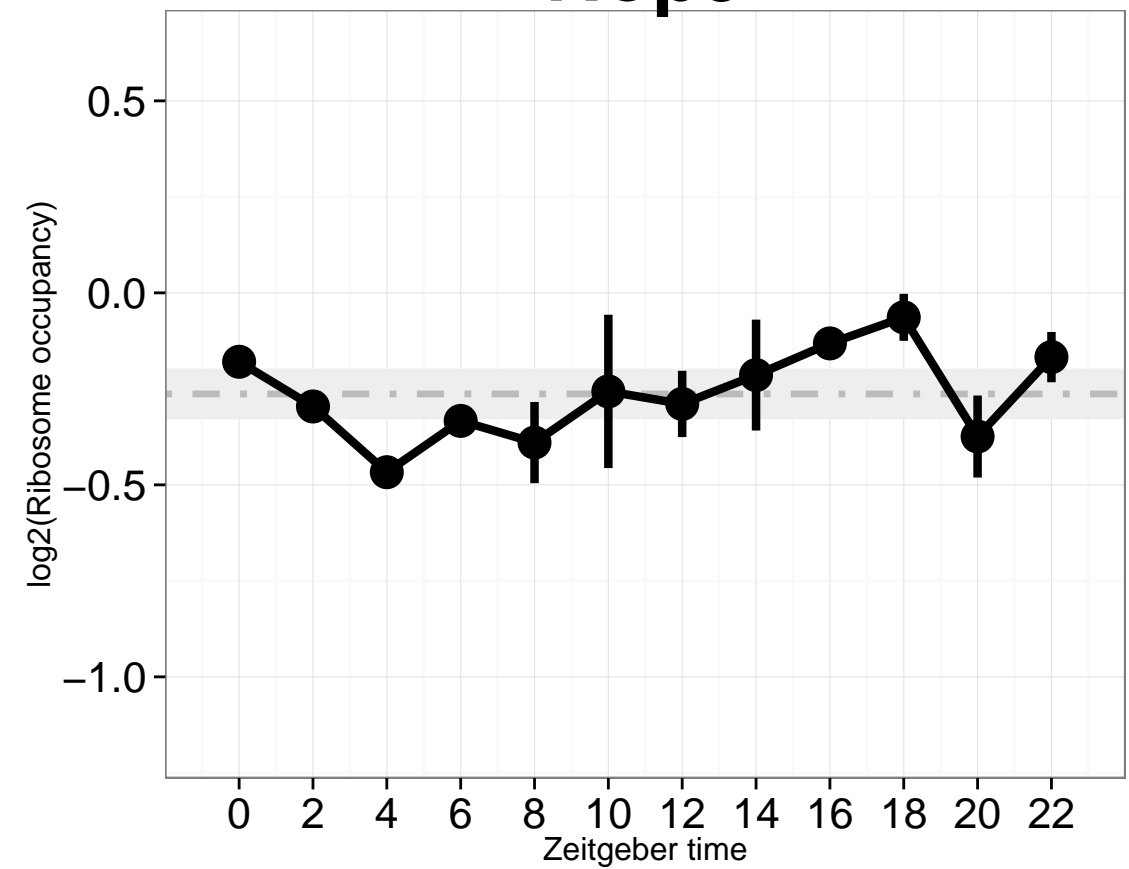

Supplement: Supplementary file 3687 [file 1]

## Srrt

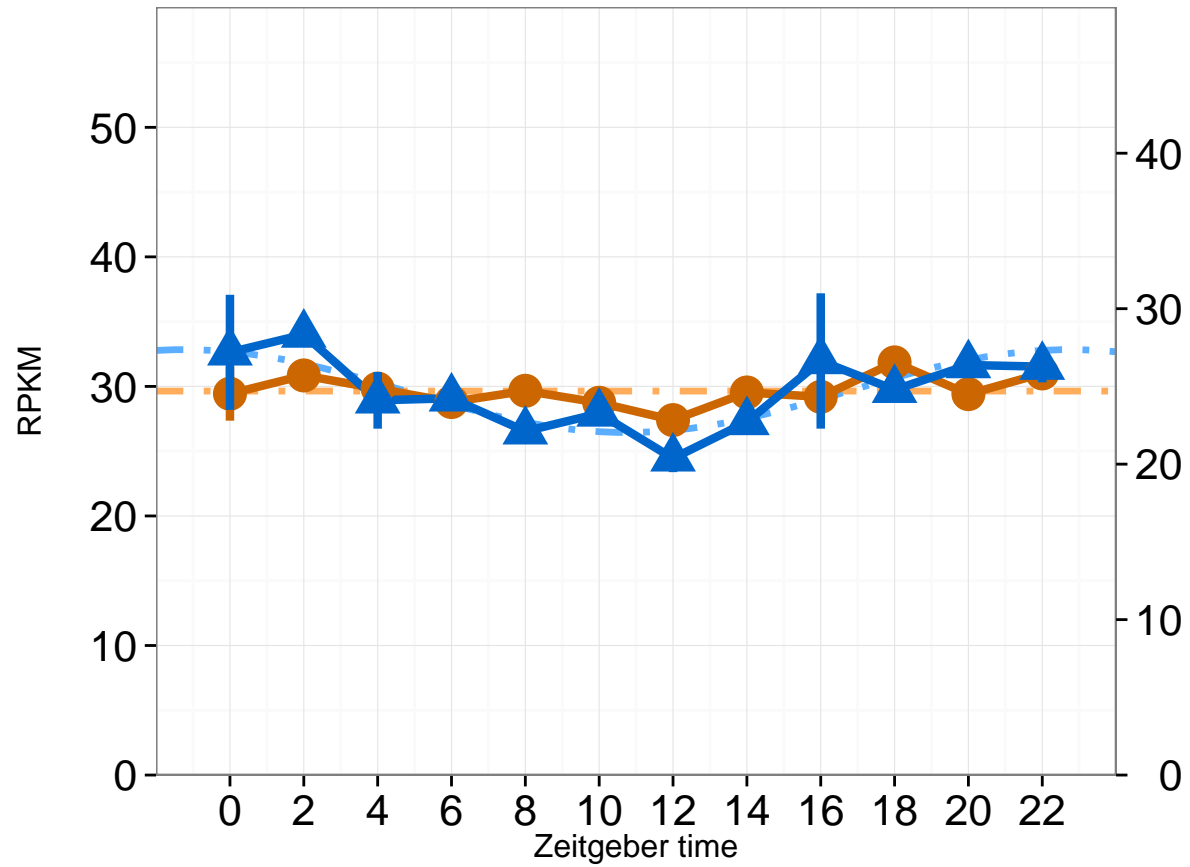

## Srrt

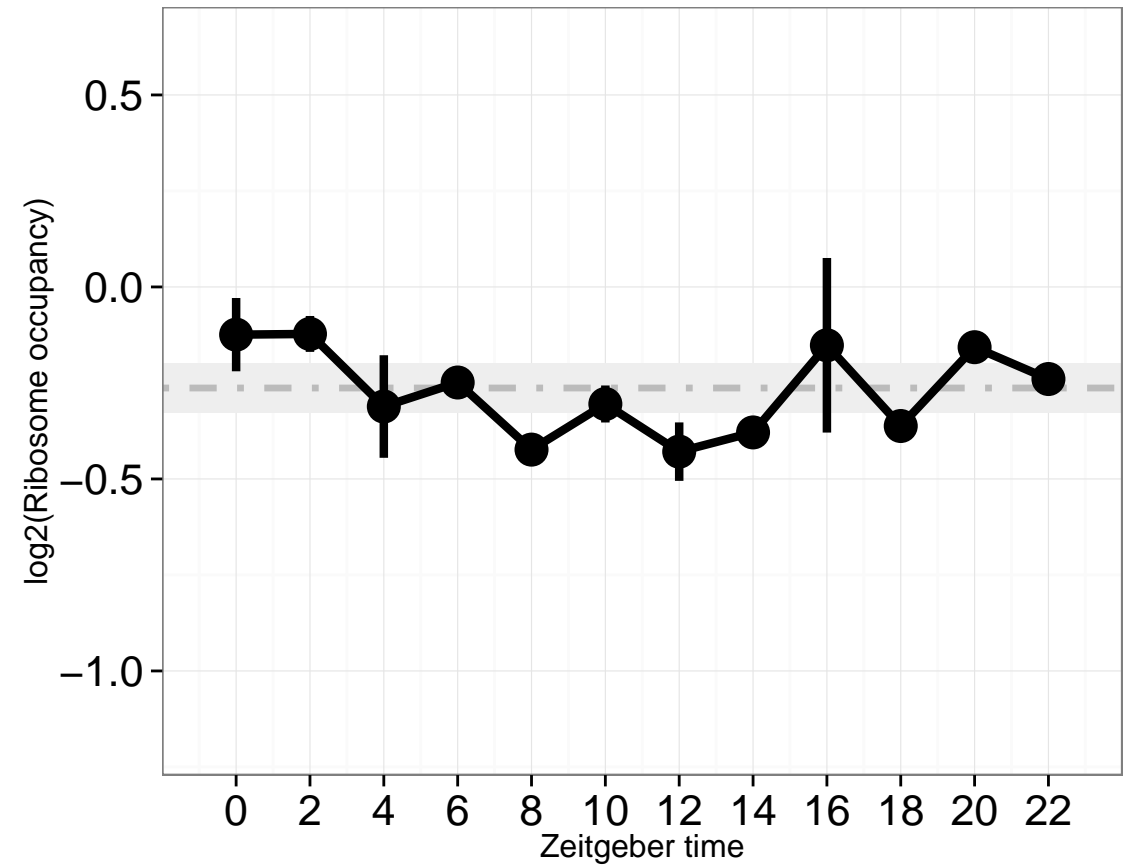

Supplement: Supplementary file 3688 [file 1]

## Il18bp

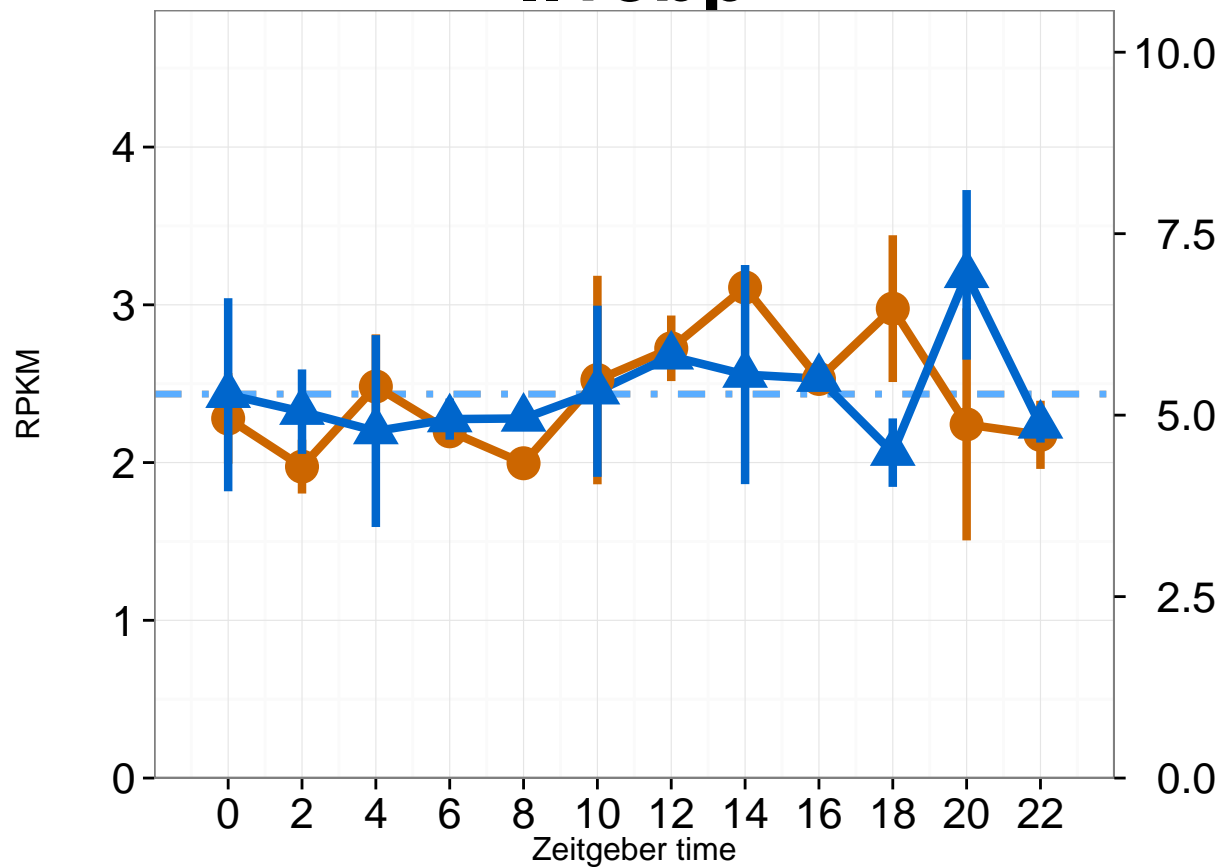

## Il18bp

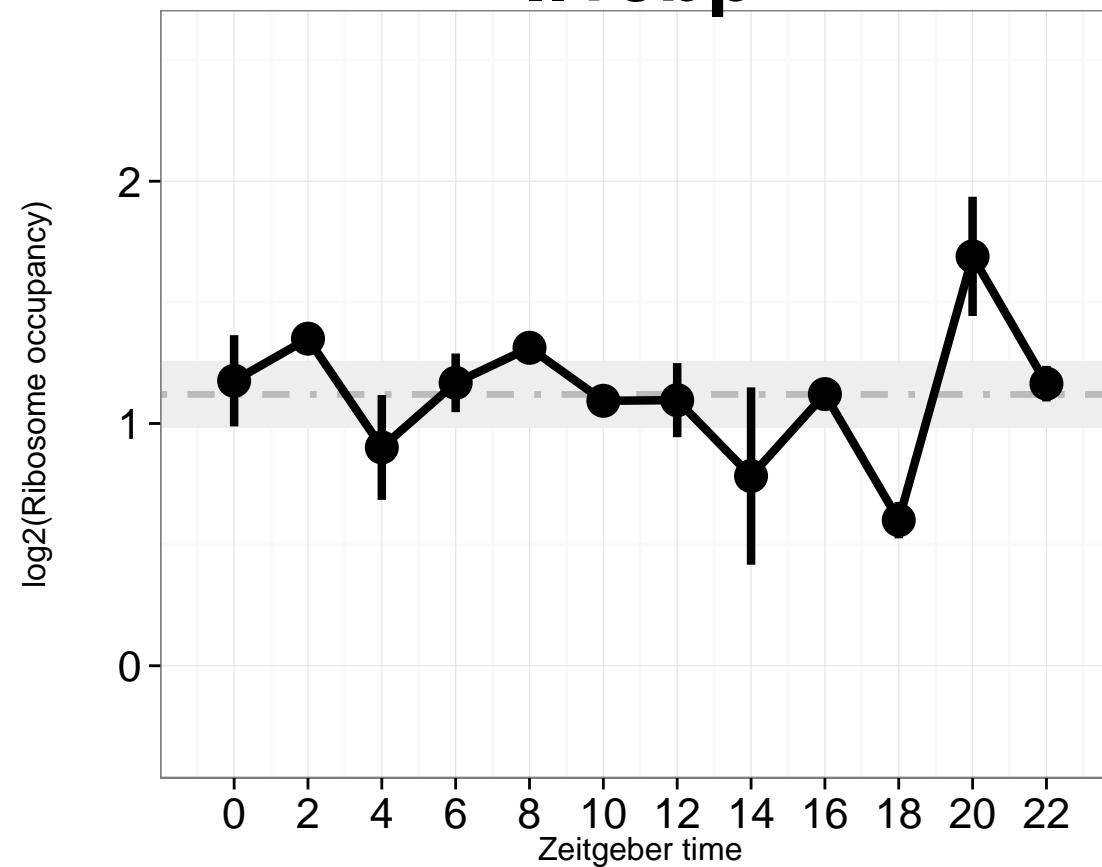

Supplement: Supplementary file 3689 [file 1]

## Ubr7

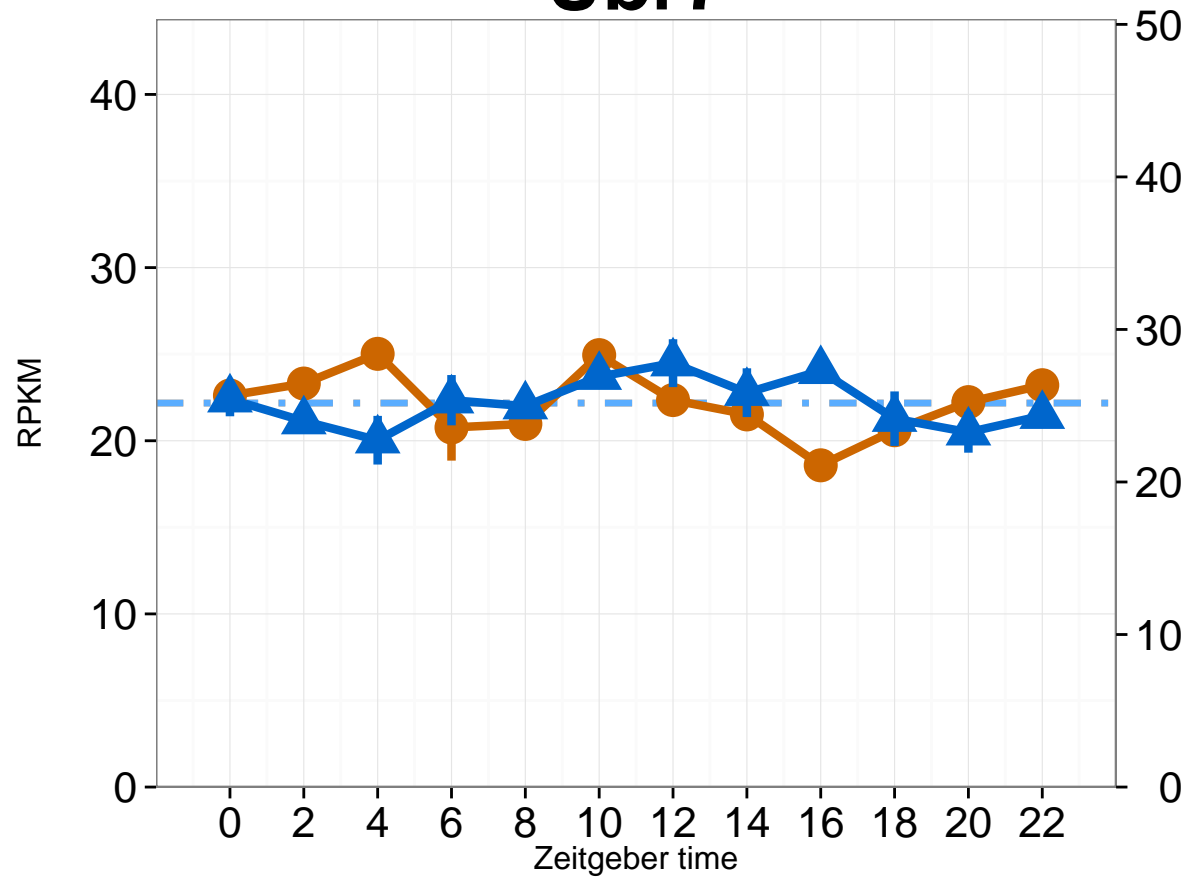

## Ubr7

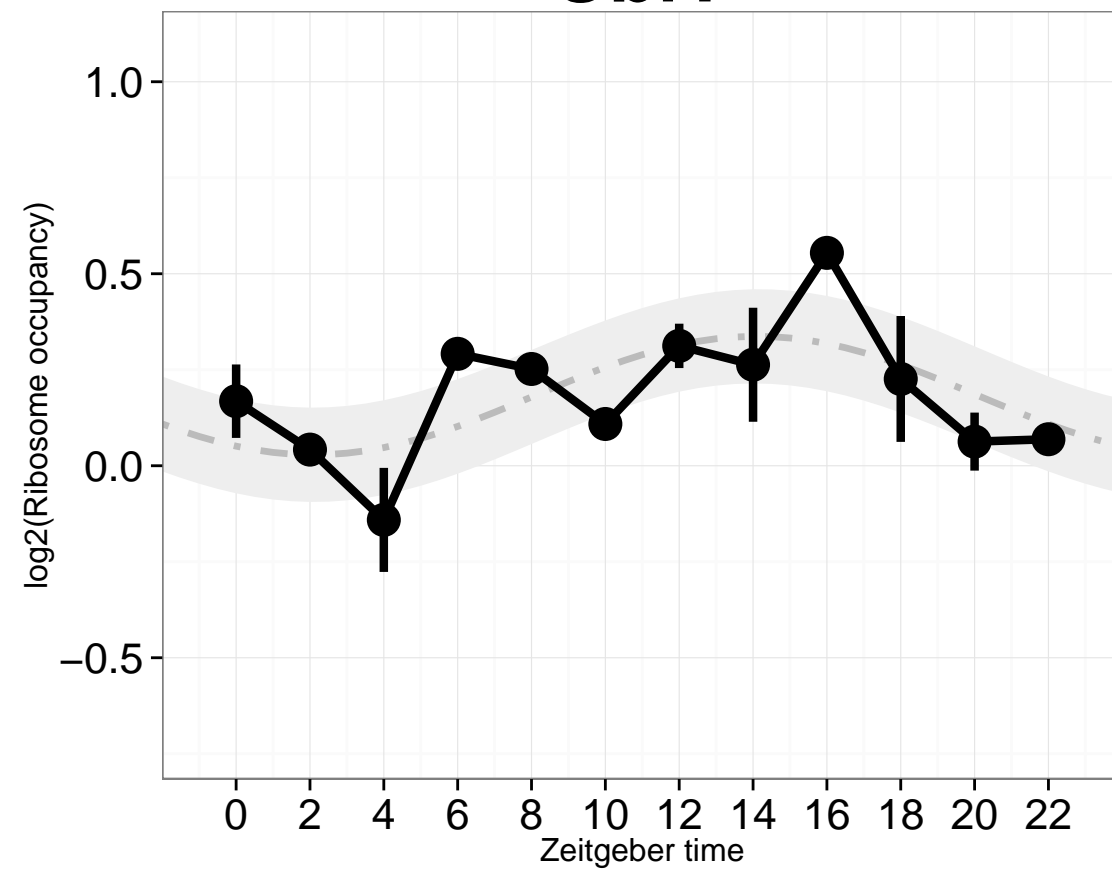

Supplement: Supplementary file 3690 [file 1]

## Lipo2

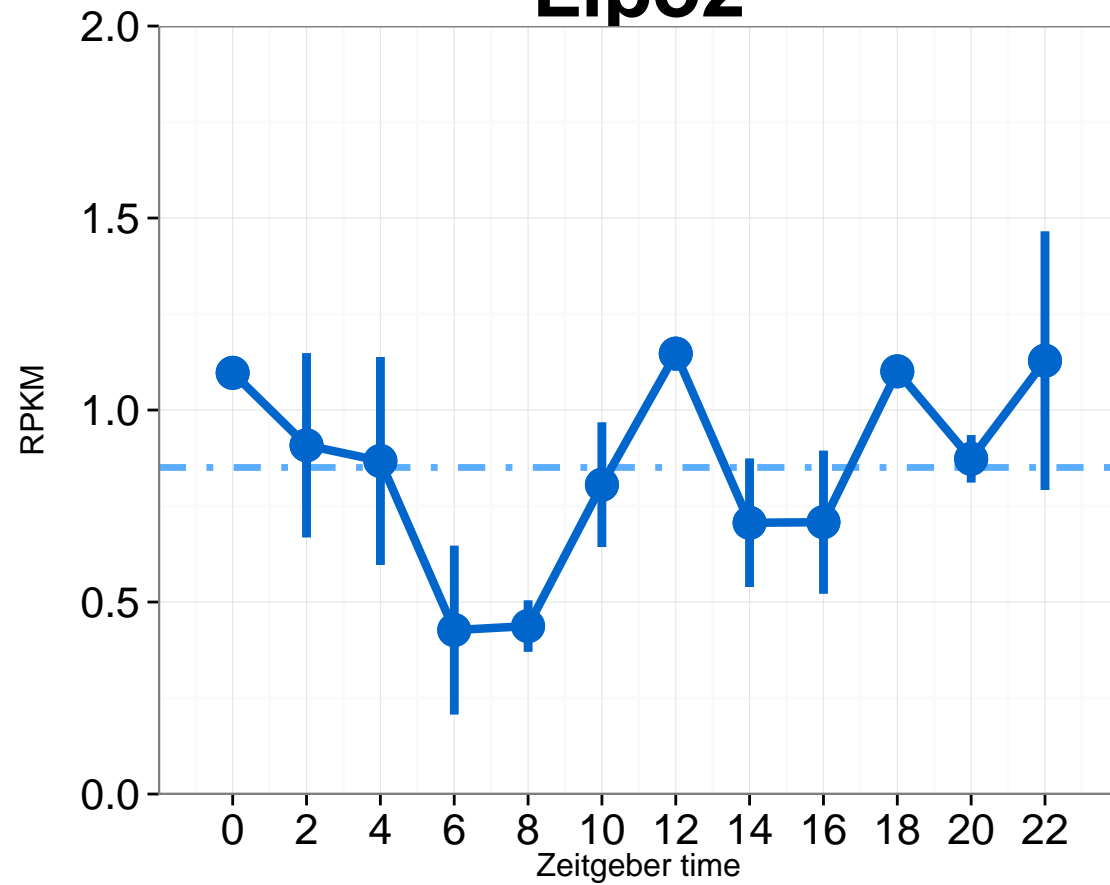

## Lipo2 log2(Ribosome occupancy)

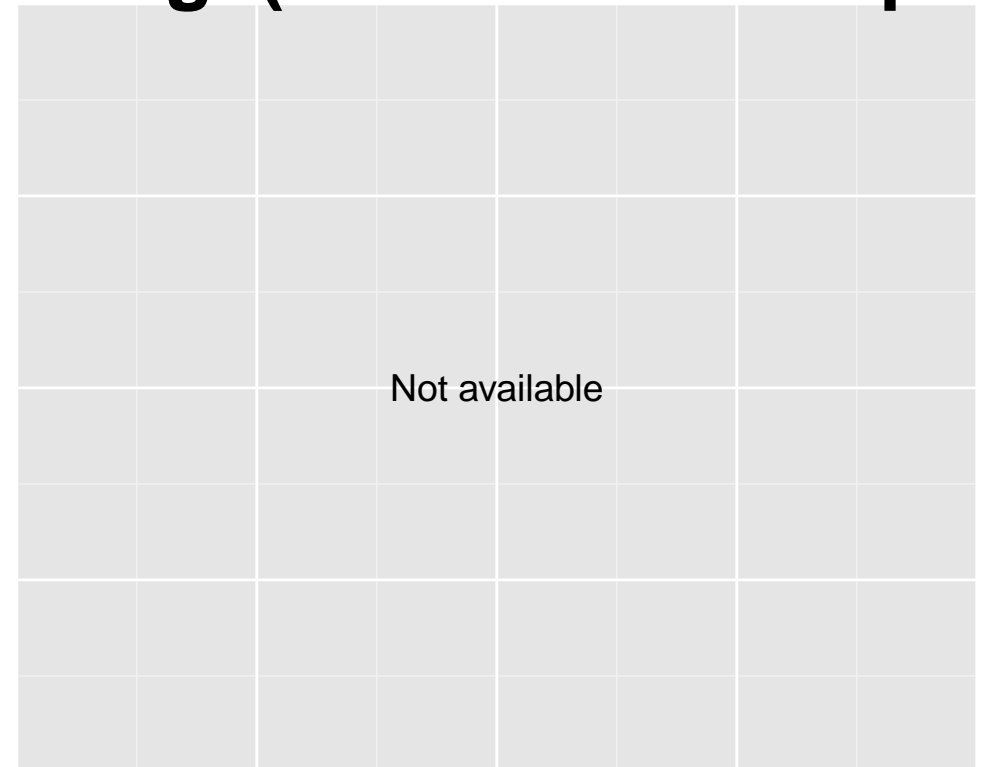

Supplement: Supplementary file 3691 [file 1]

# Zfp87

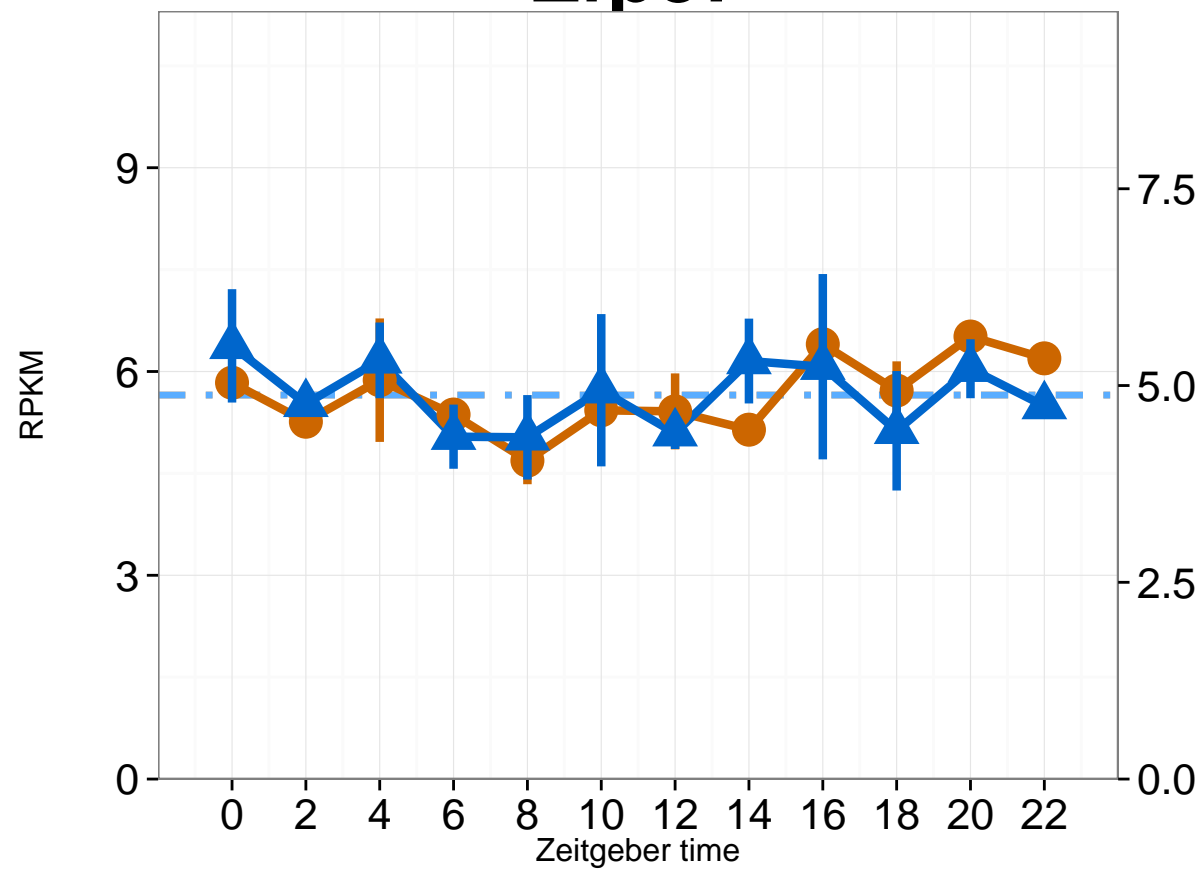

# Zfp87

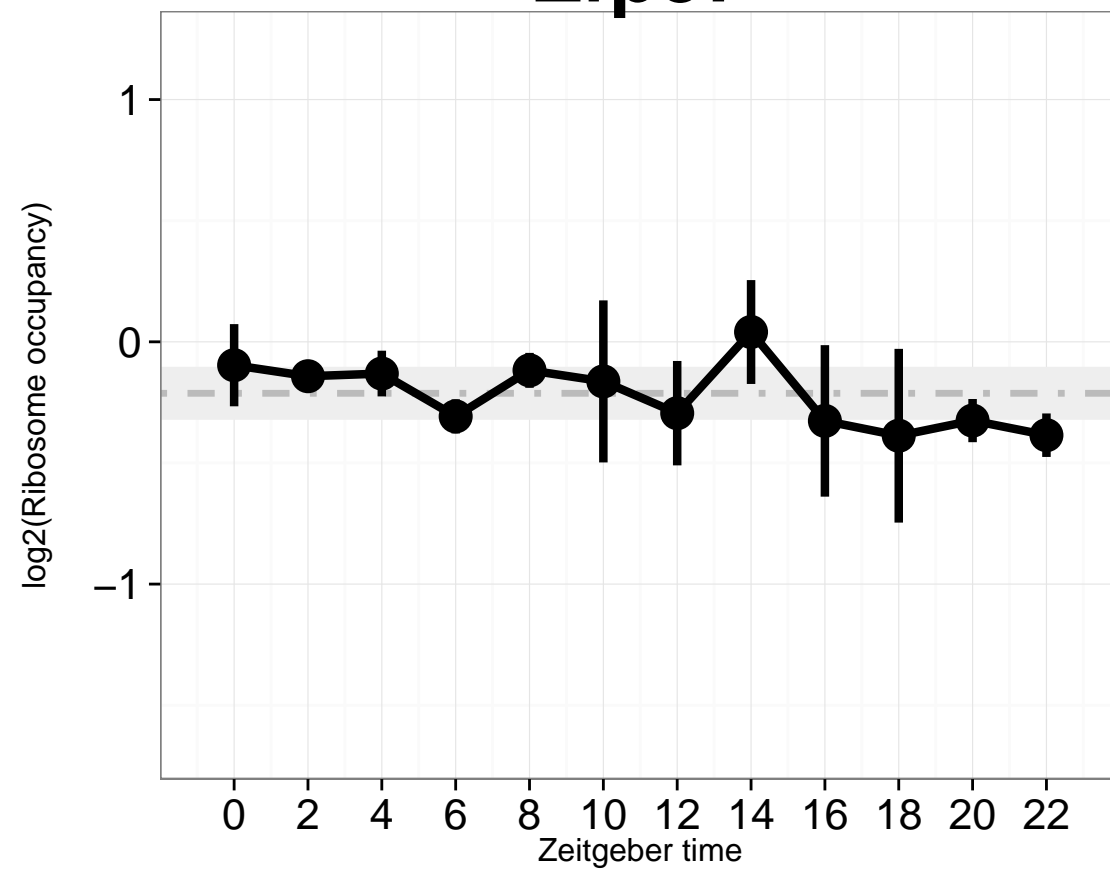

Supplement: Supplementary file 3692 [file 1]

## Plscr1

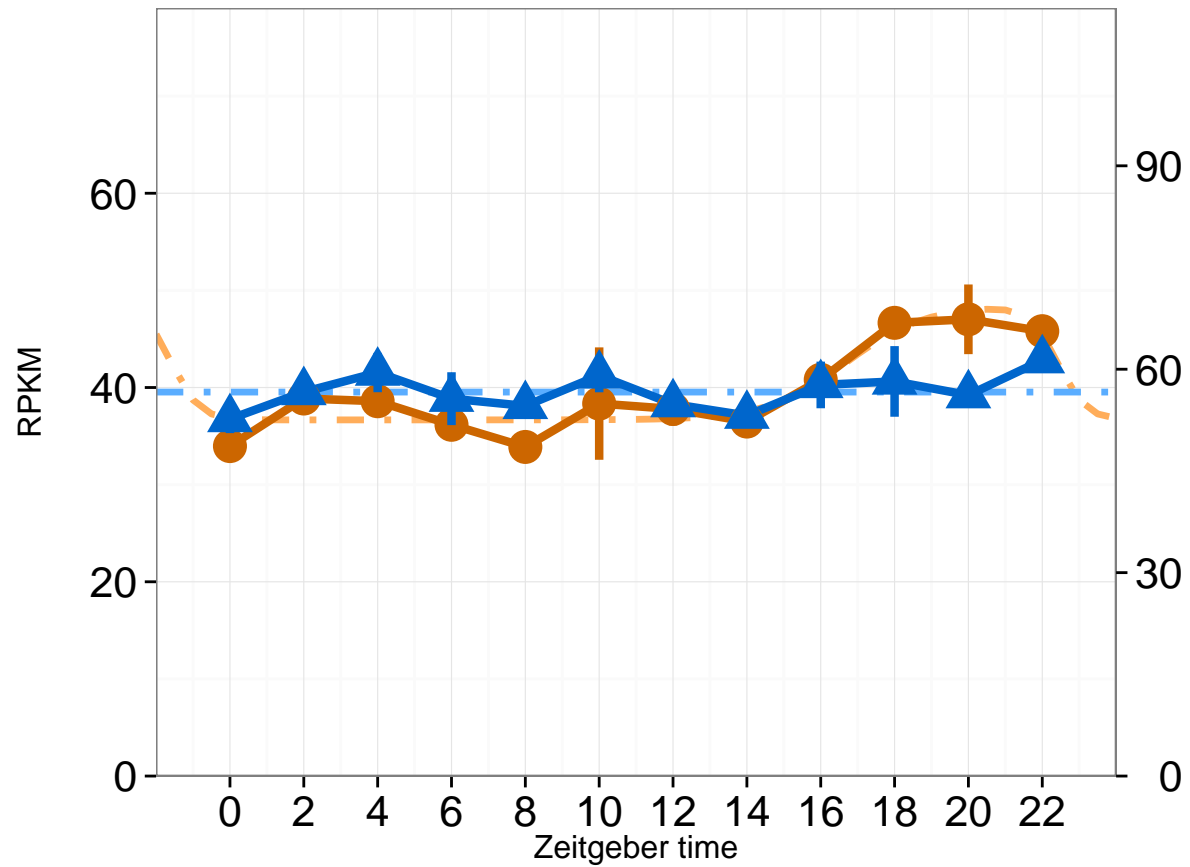

## Plscr1

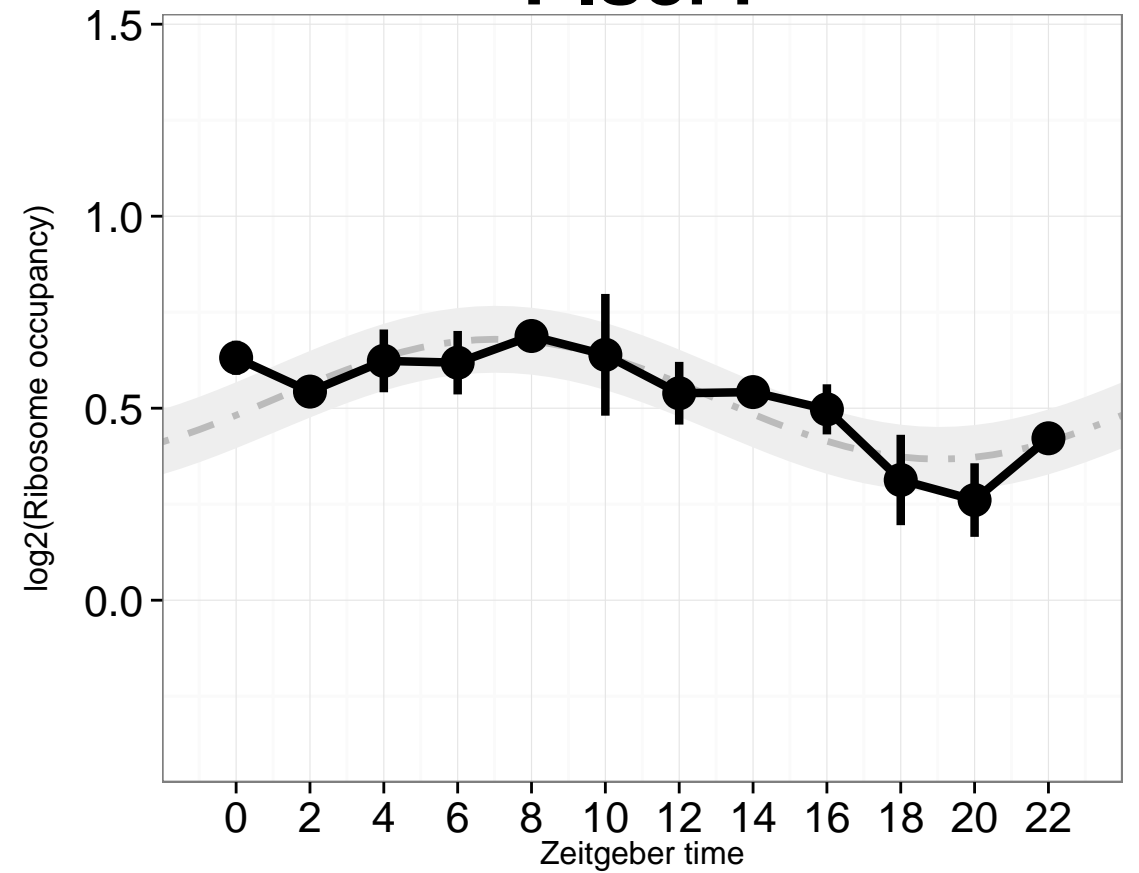

Supplement: Supplementary file 3693 [file 1]

## Pilra

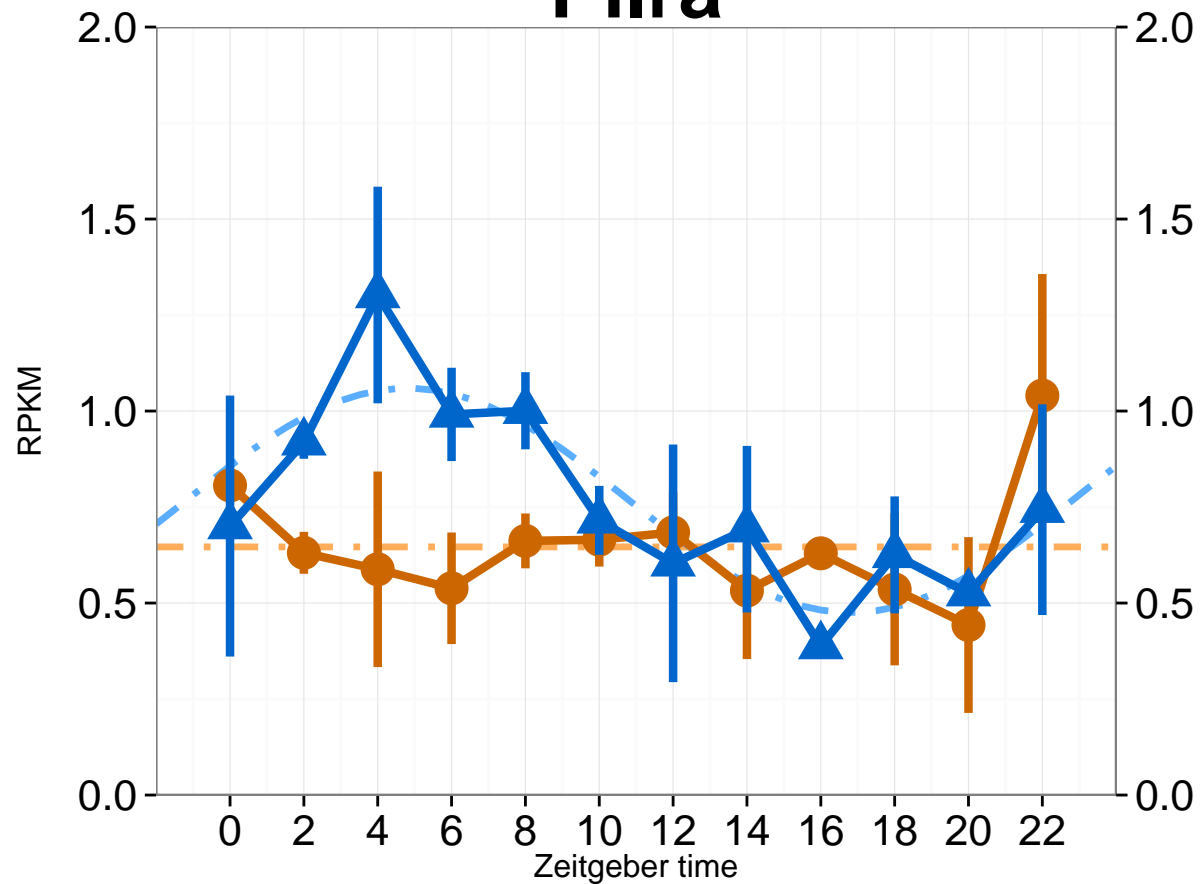

## Pilra

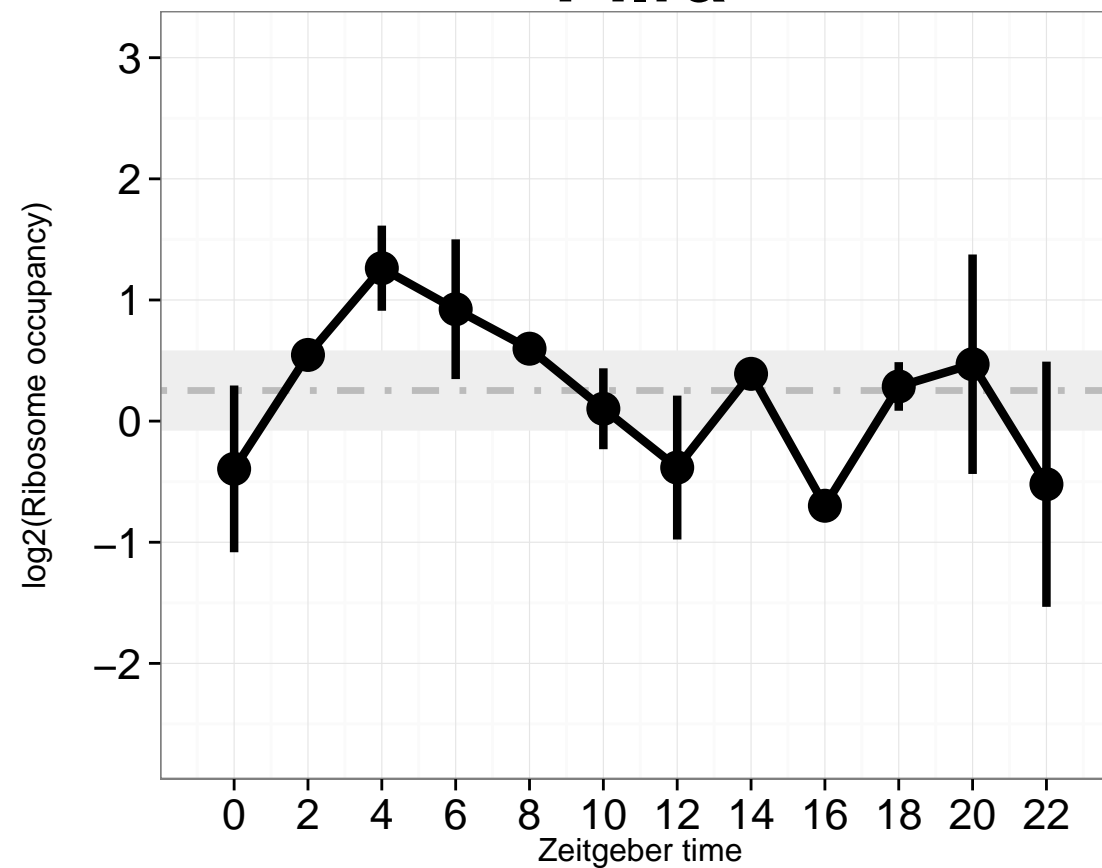

Supplement: Supplementary file 3694 [file 1]

## Gpt

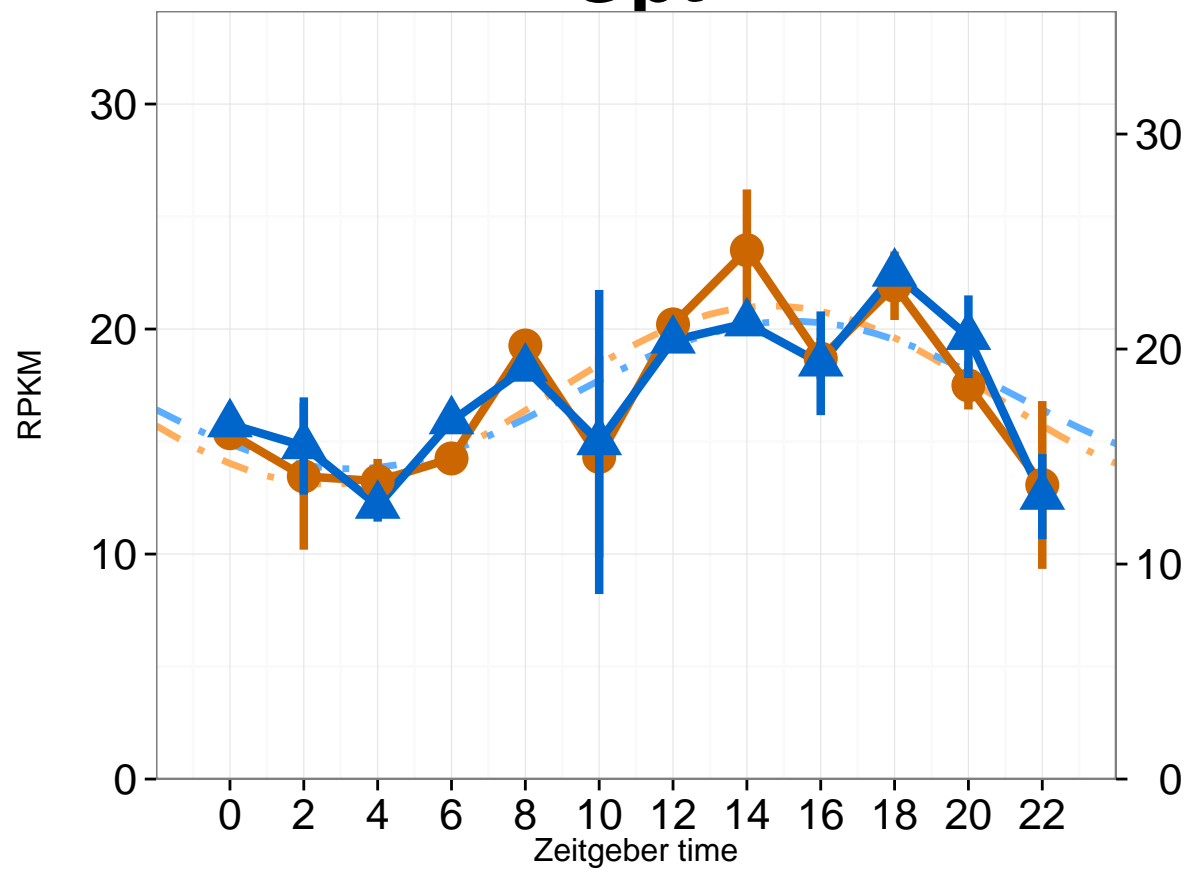

## Gpt

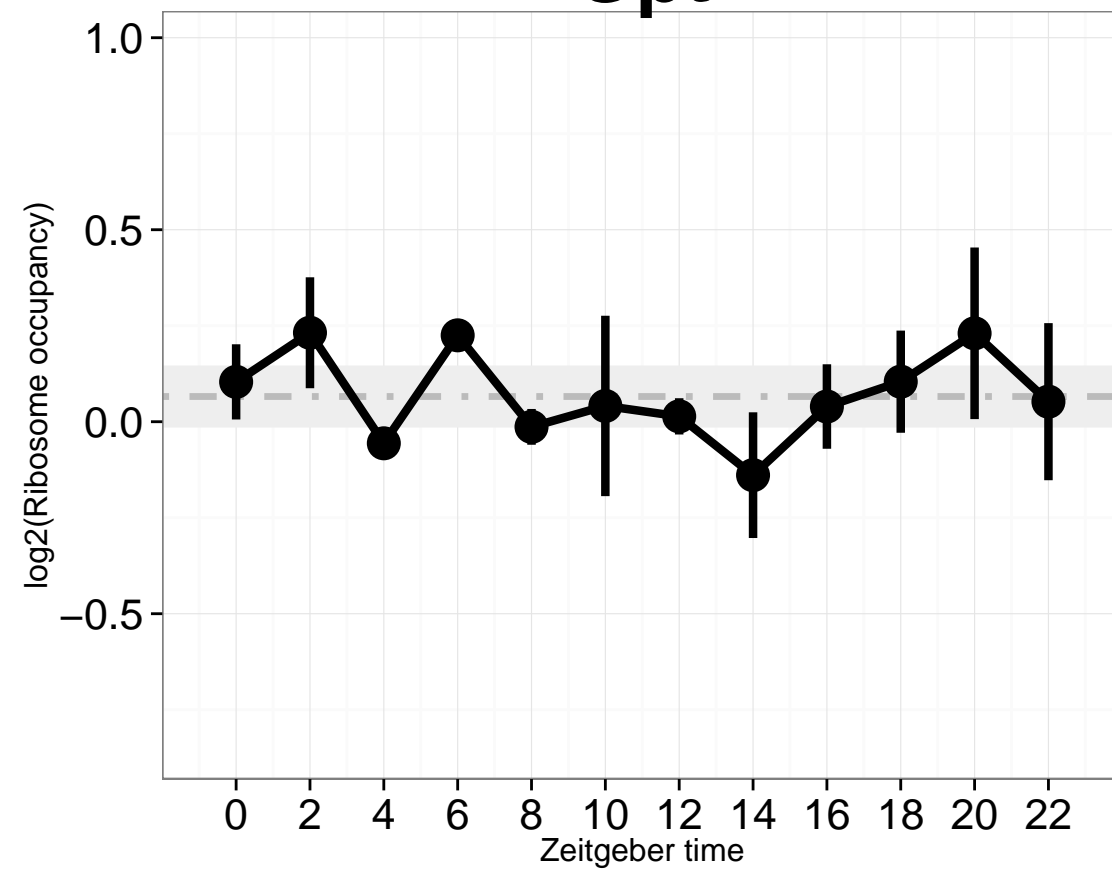

Supplement: Supplementary file 3695 [file 1]

## Casc3

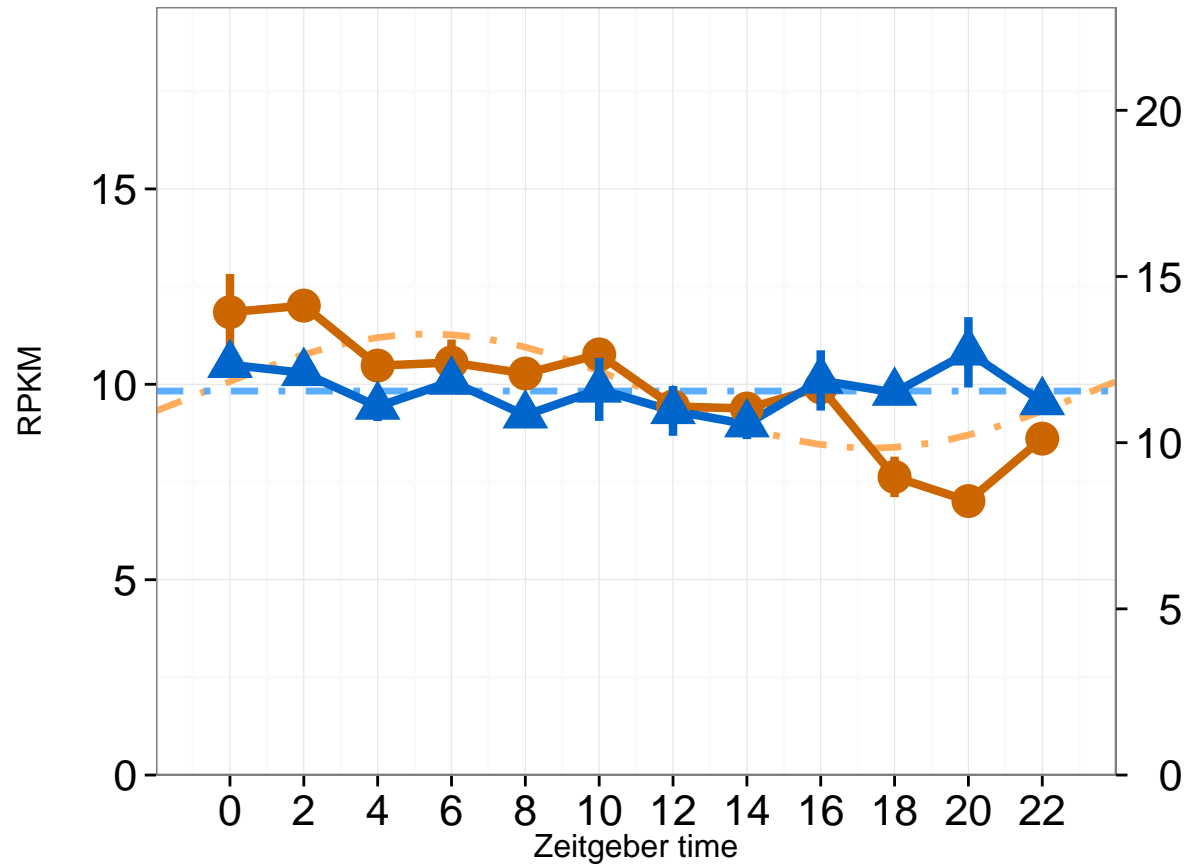

## Casc3

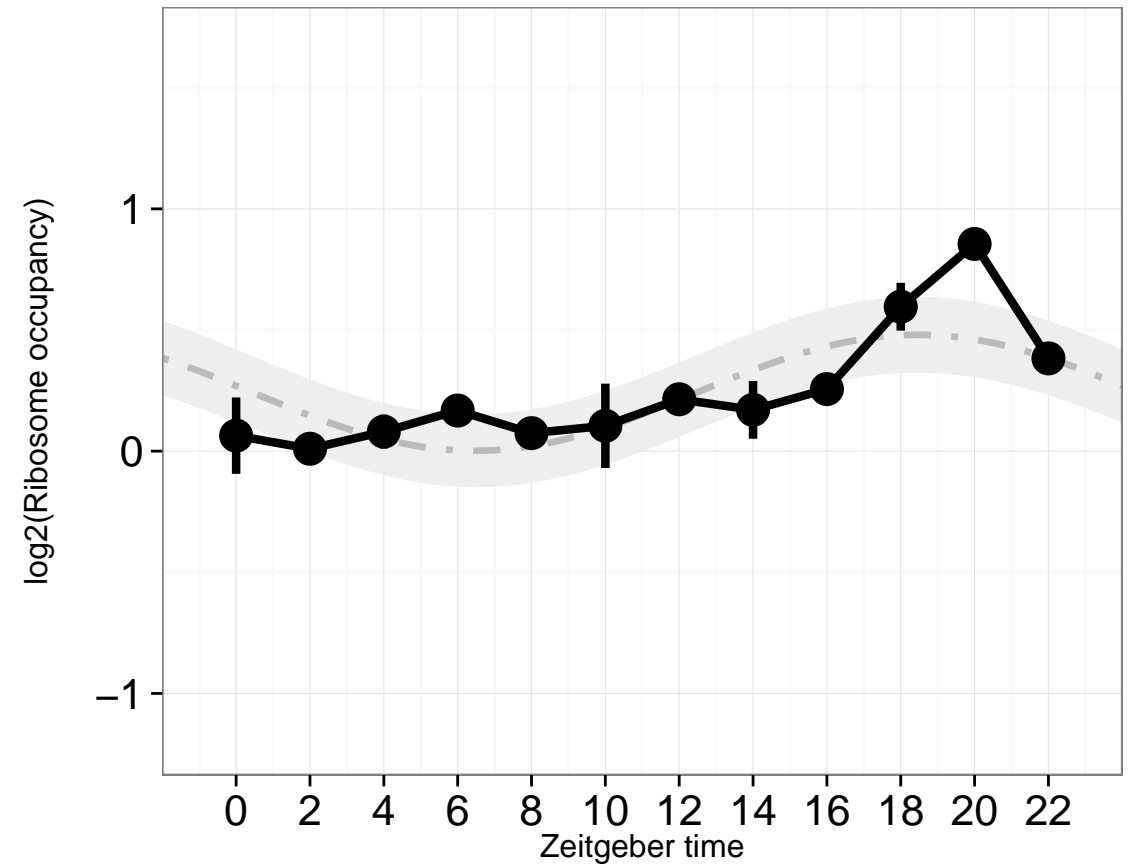

Supplement: Supplementary file 3696 [file 1]

## Cln6

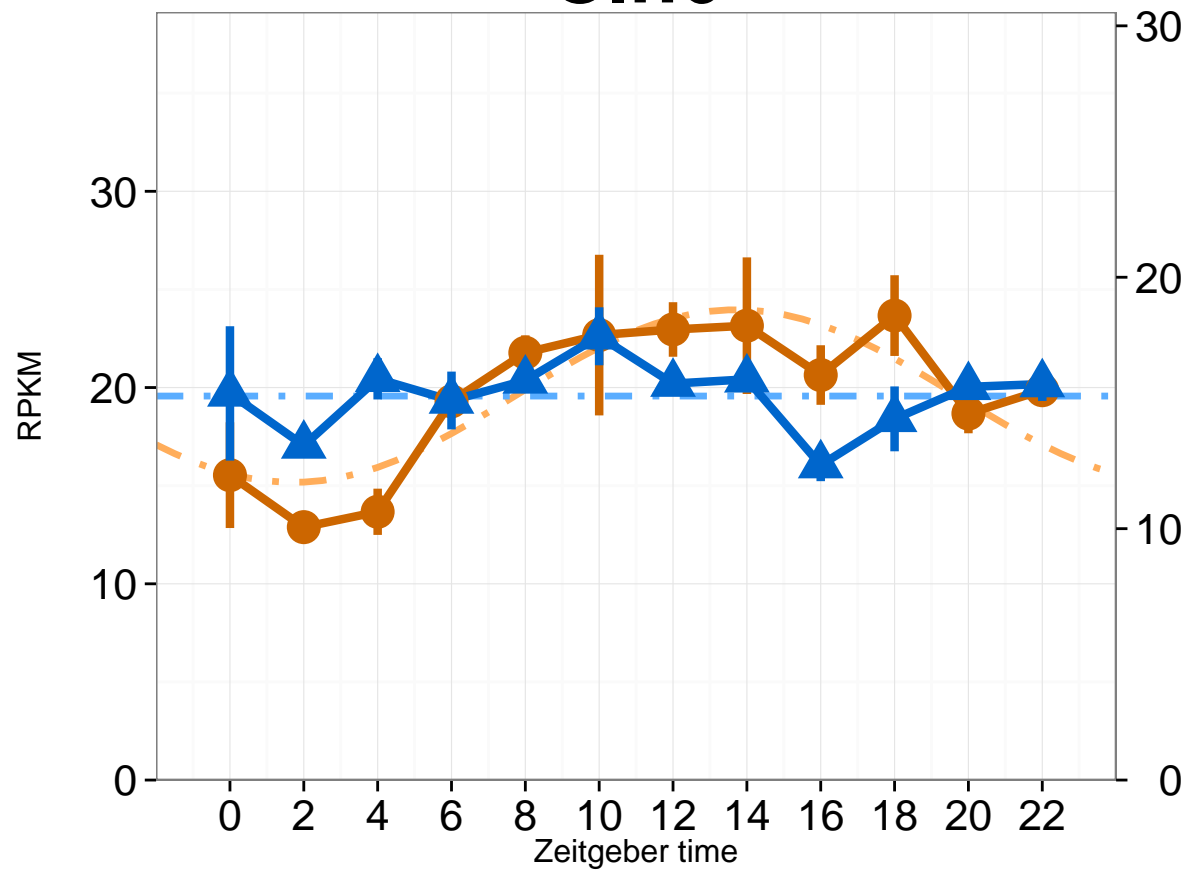

## Cln6

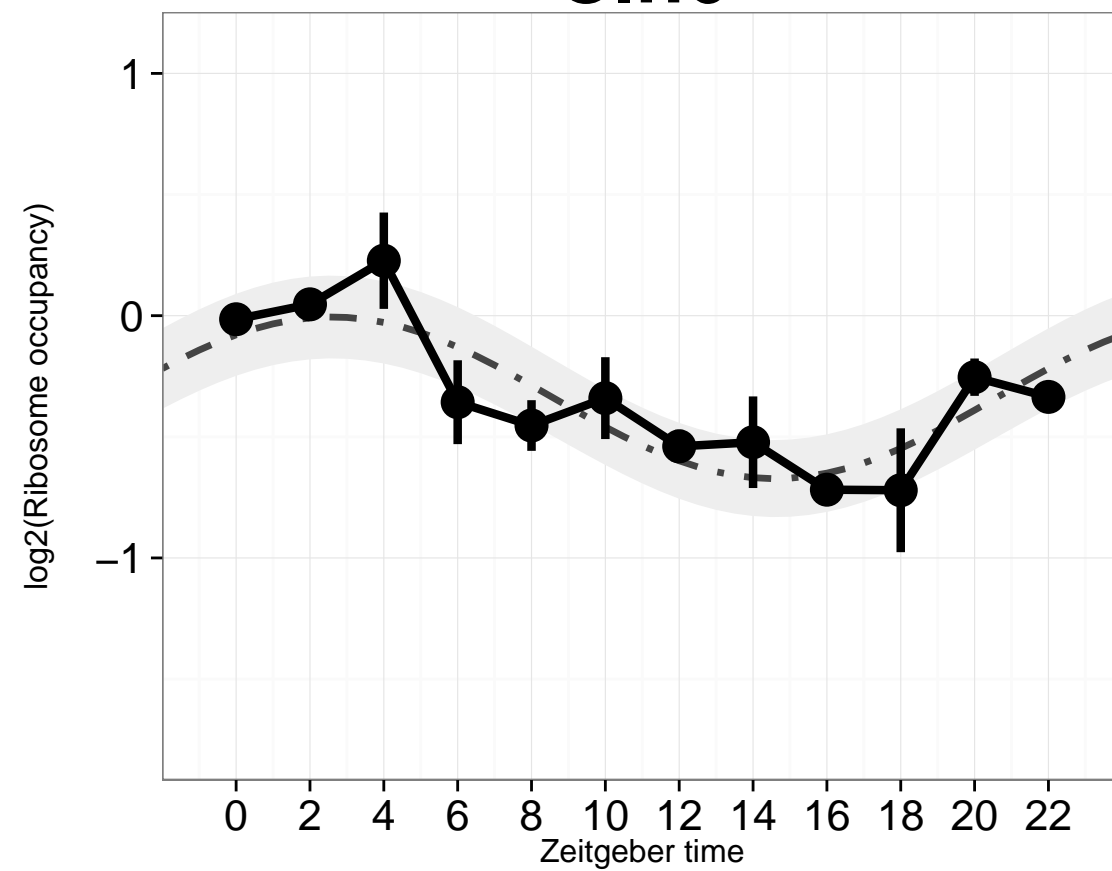

Supplement: Supplementary file 3697 [file 1]

# ler5l

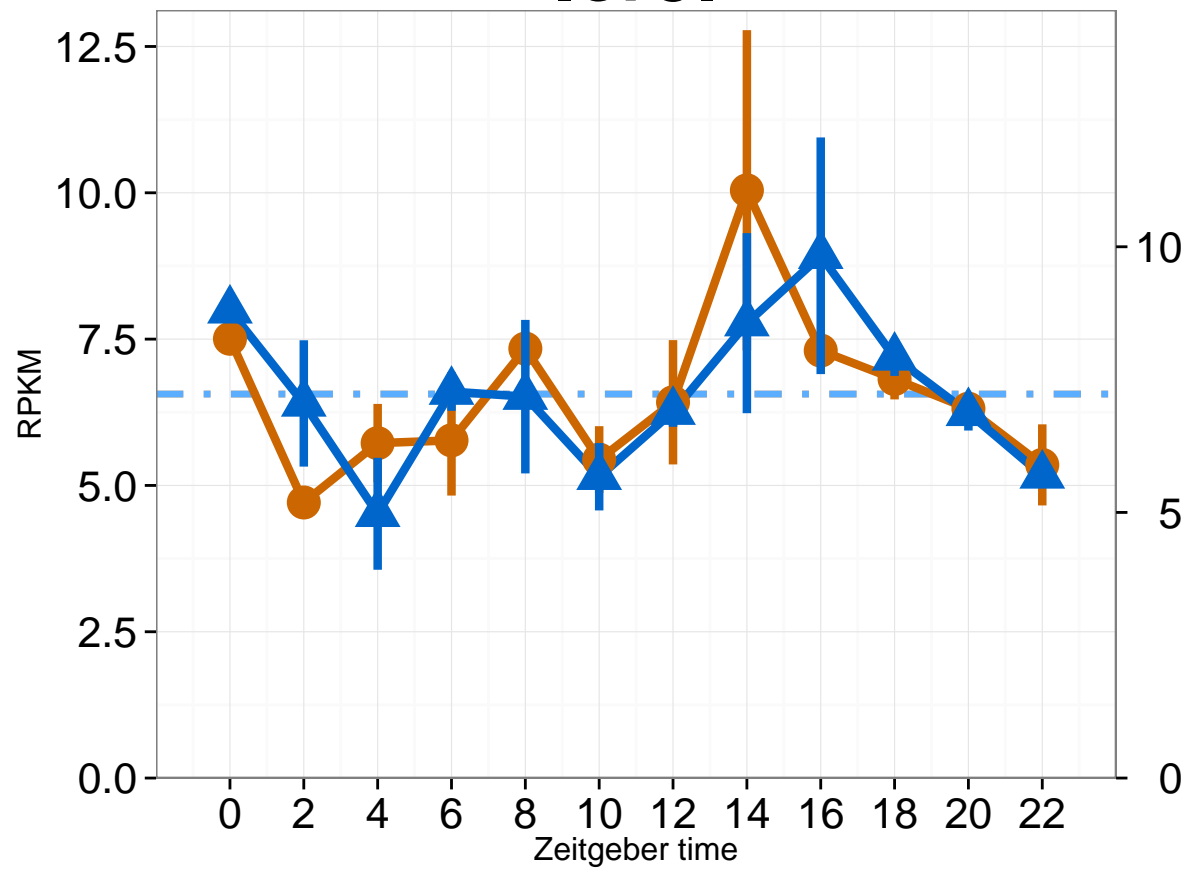

# ler5l

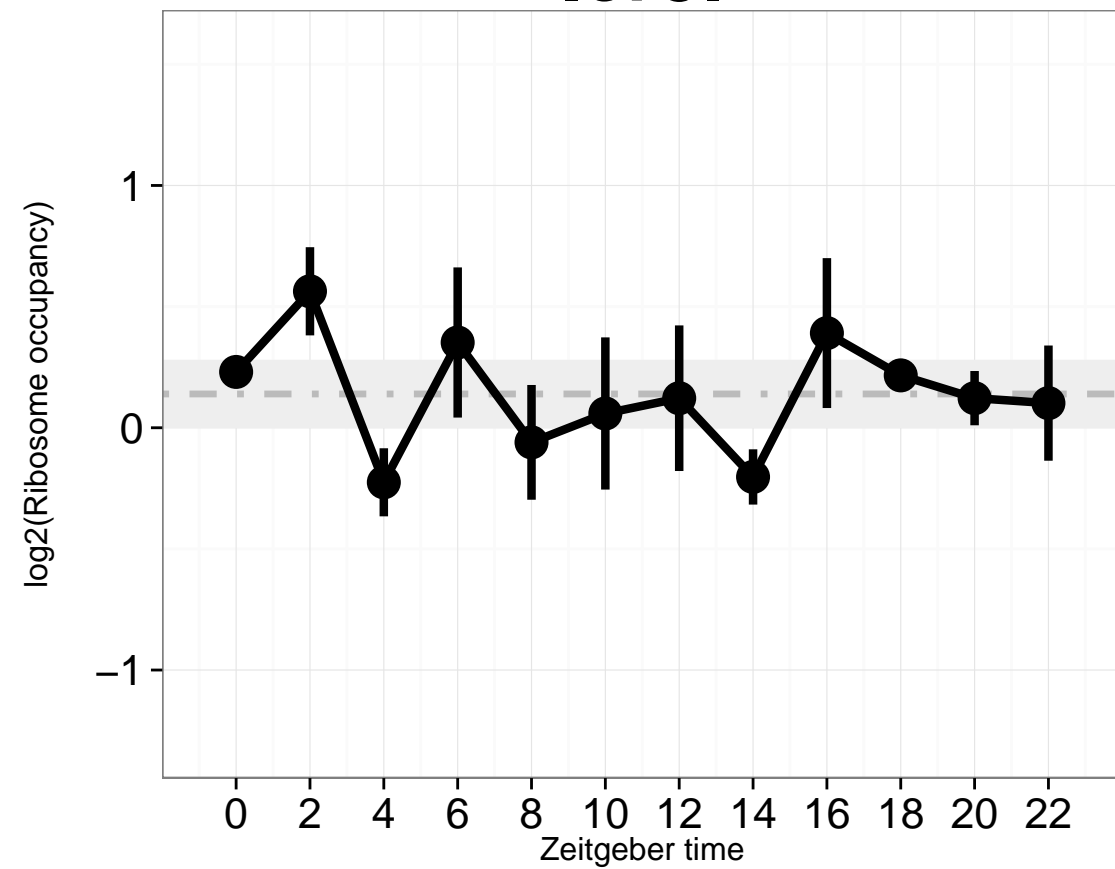

Supplement: Supplementary file 3698 [file 1]

# Sgpl1

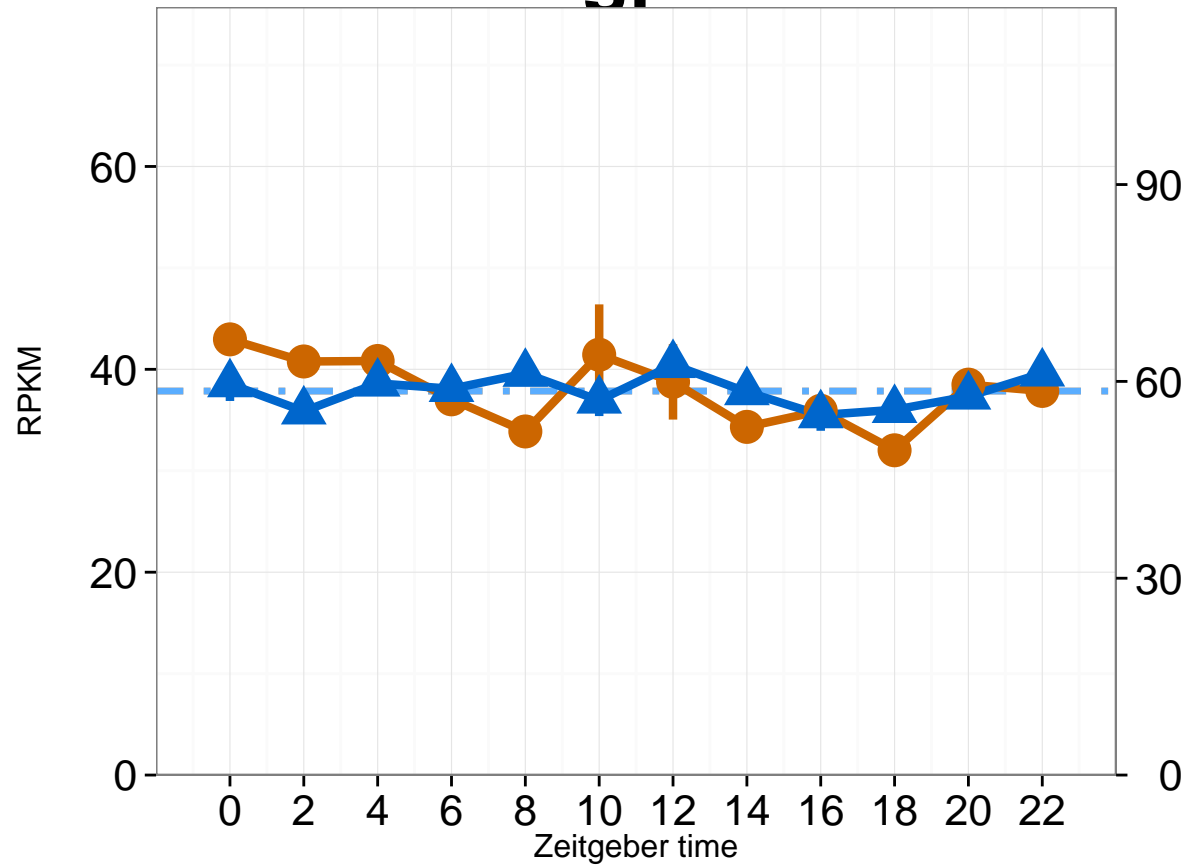

# Sgpl1

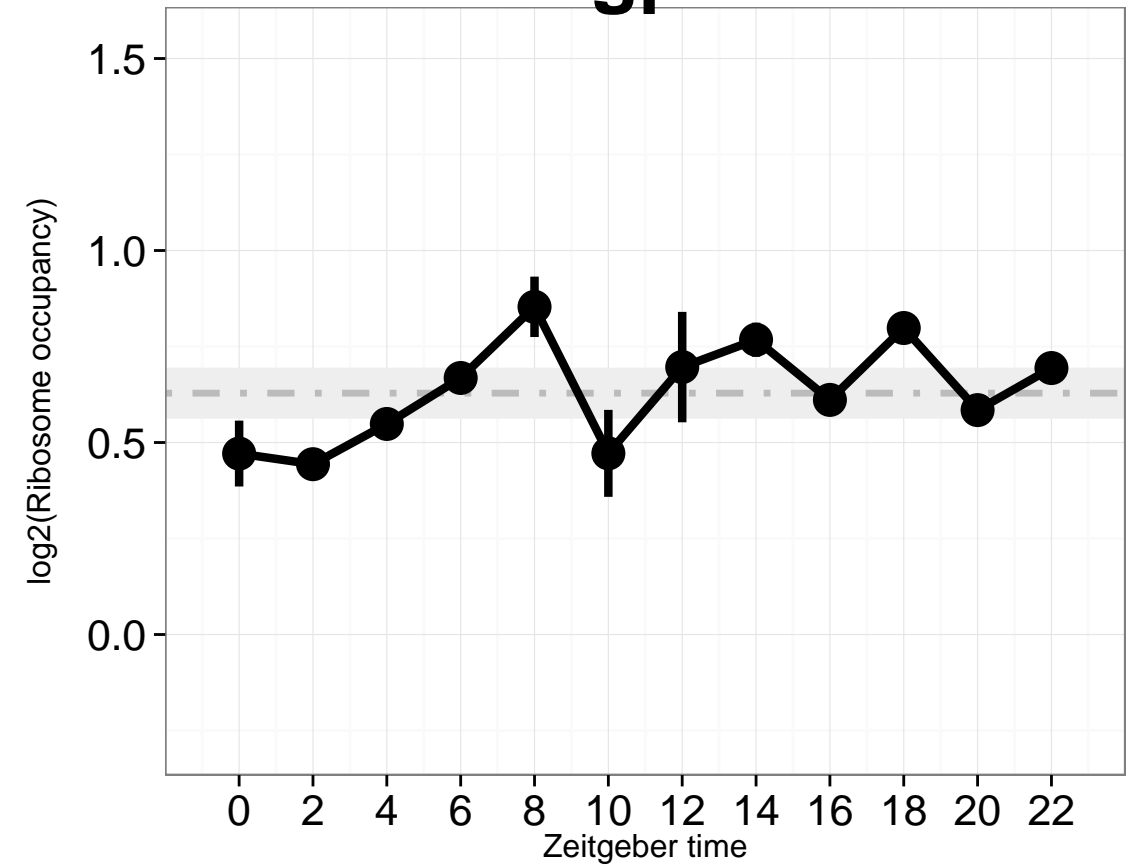

Supplement: Supplementary file 3699 [file 1]

Gm17604

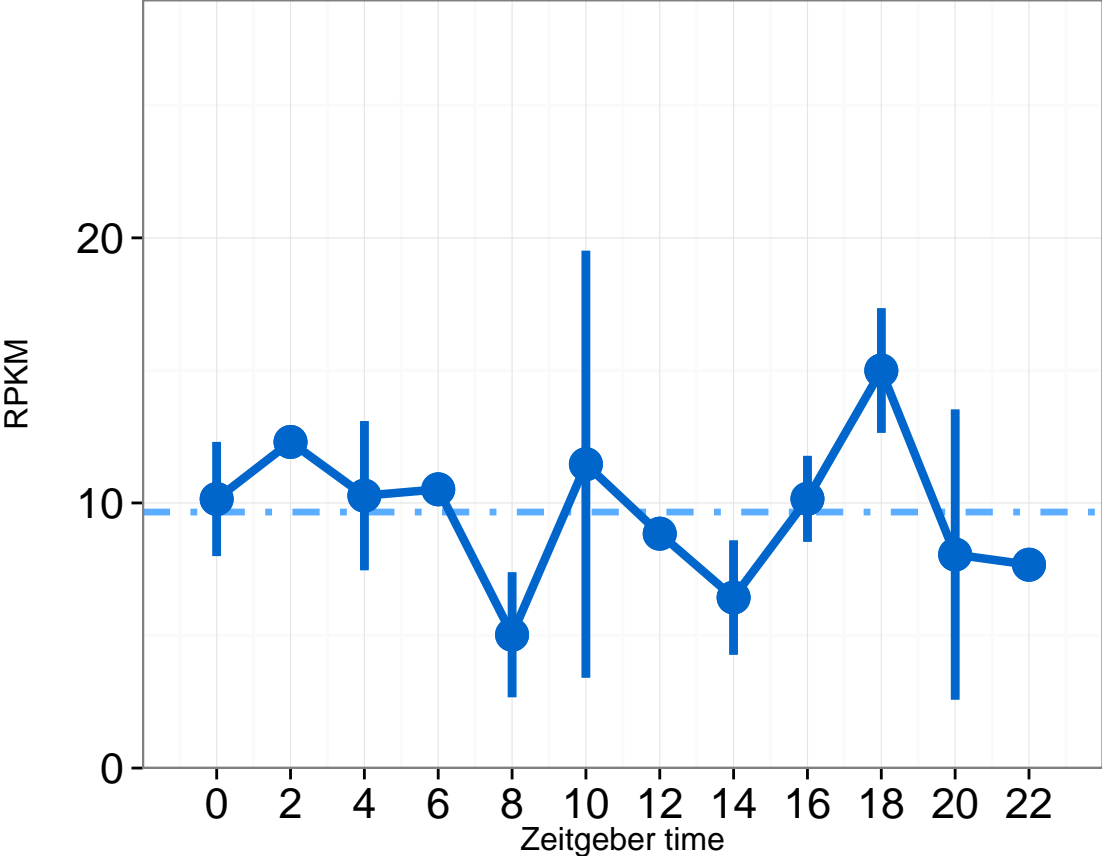

Gm17604 log2(Ribosome occupanc

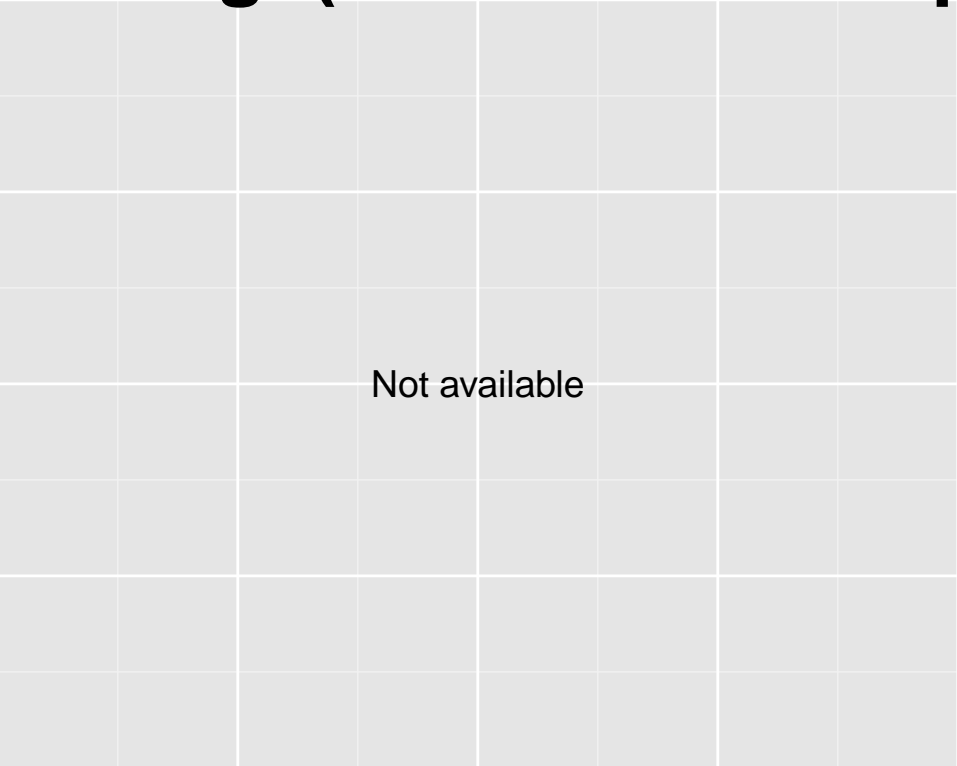

Supplement: Supplementary file 3700 [file 1]

# Zfp229

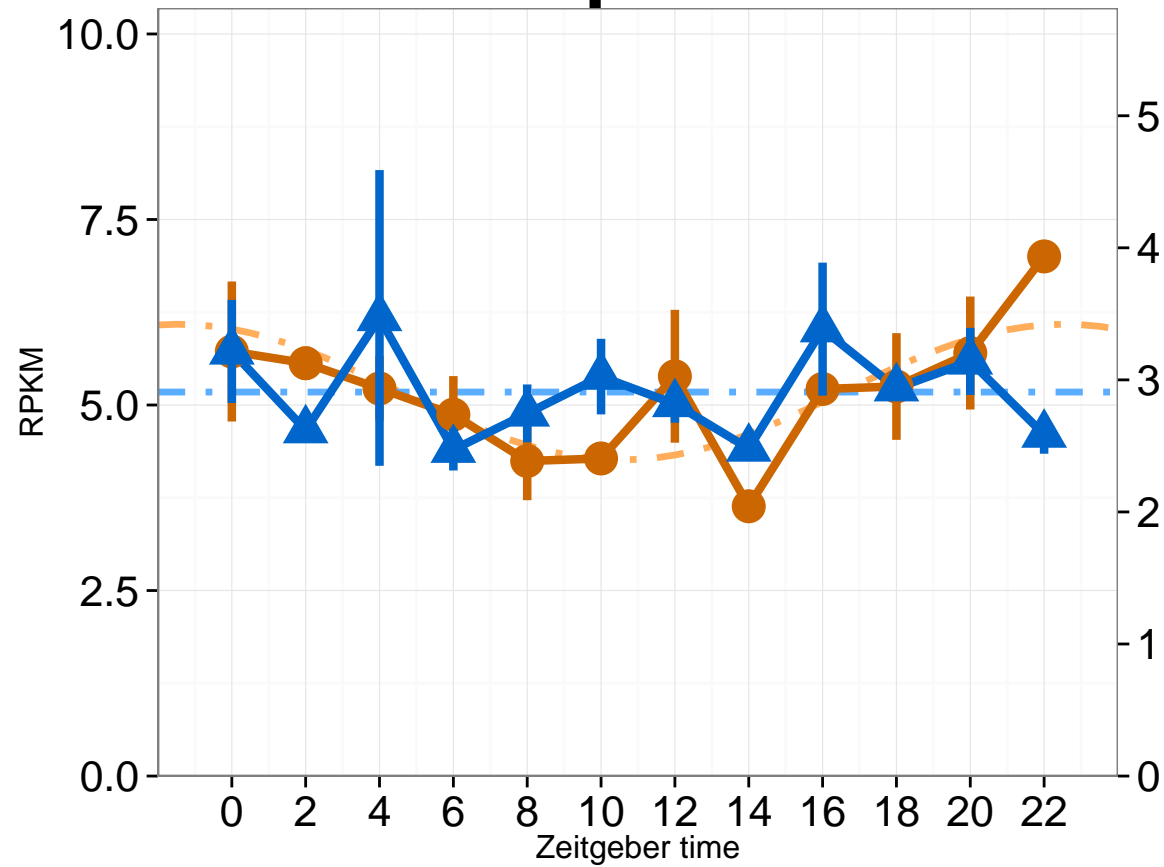

# Zfp229

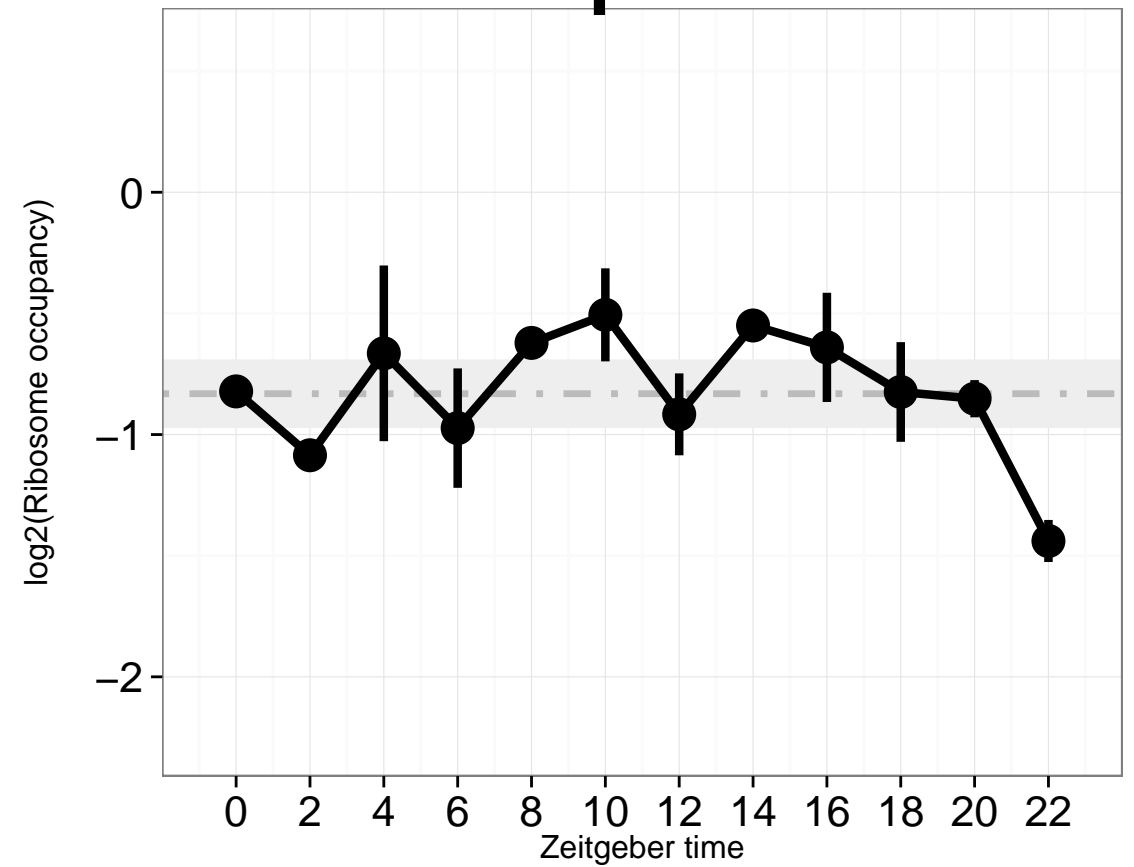

Supplement: Supplementary file 3701 [file 1]

## Rhpn1

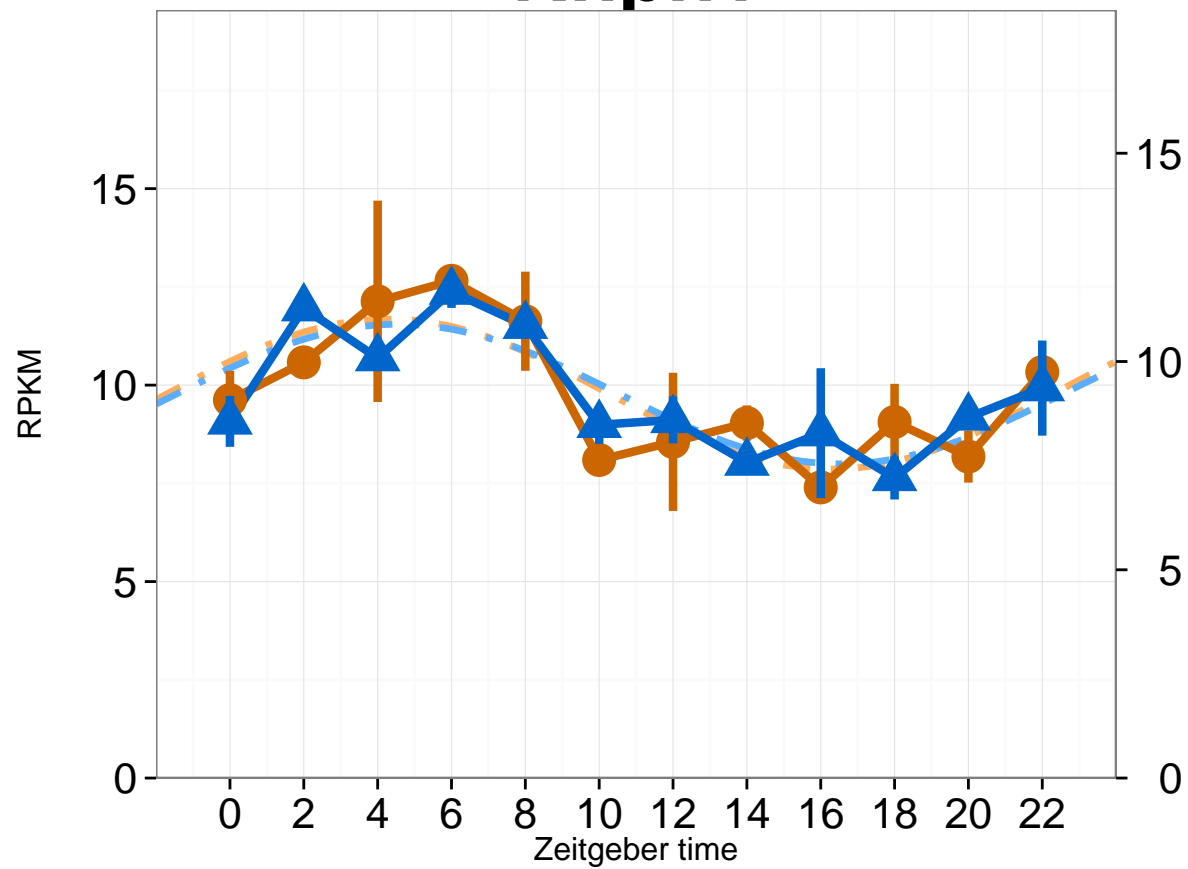

## Rhpn1

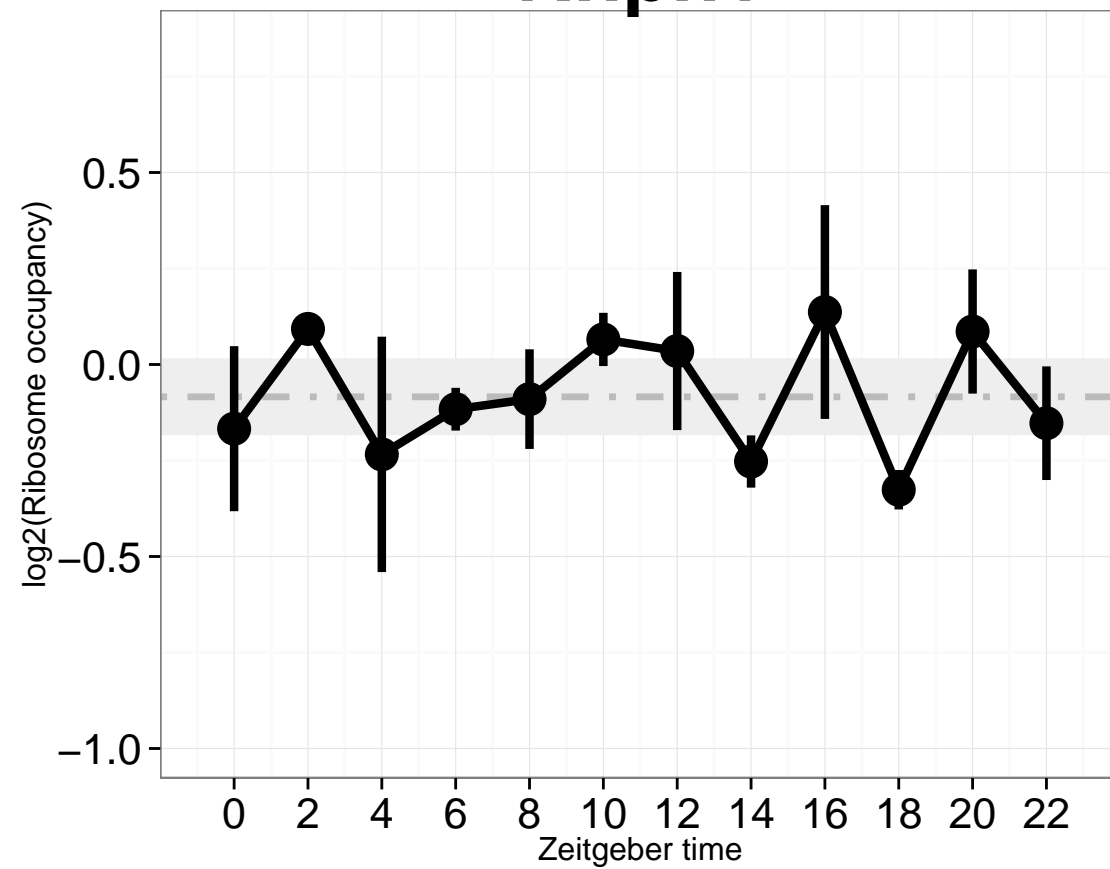

Supplement: Supplementary file 3702 [file 1]

# Gnpda2

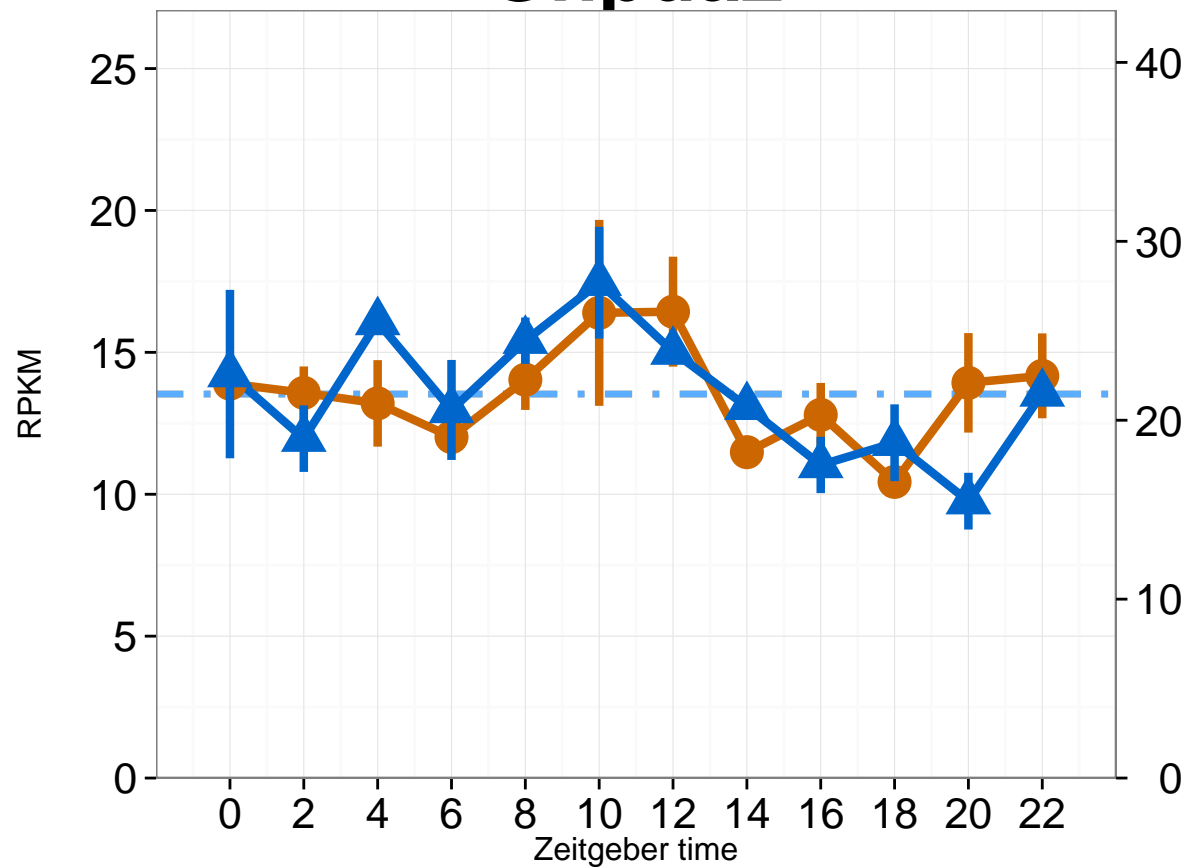

# Gnpda2

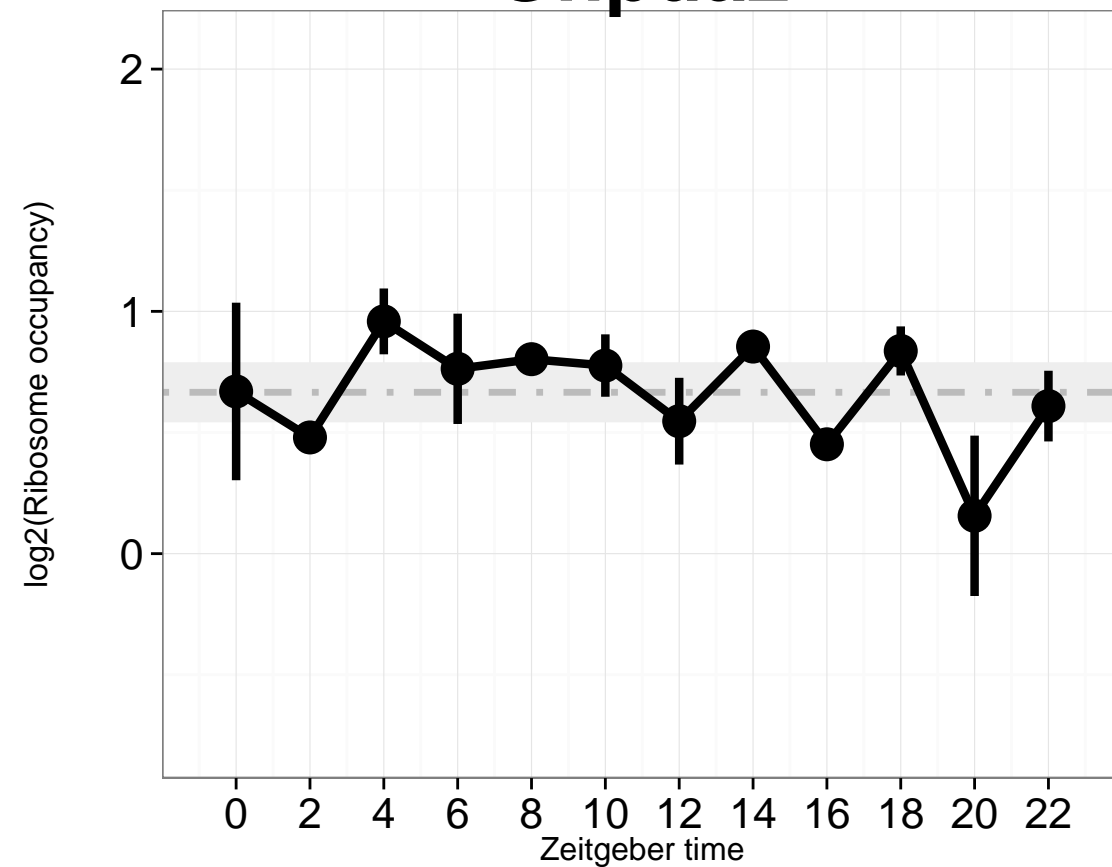

Supplement: Supplementary file 3703 [file 1]

# Prorsd1

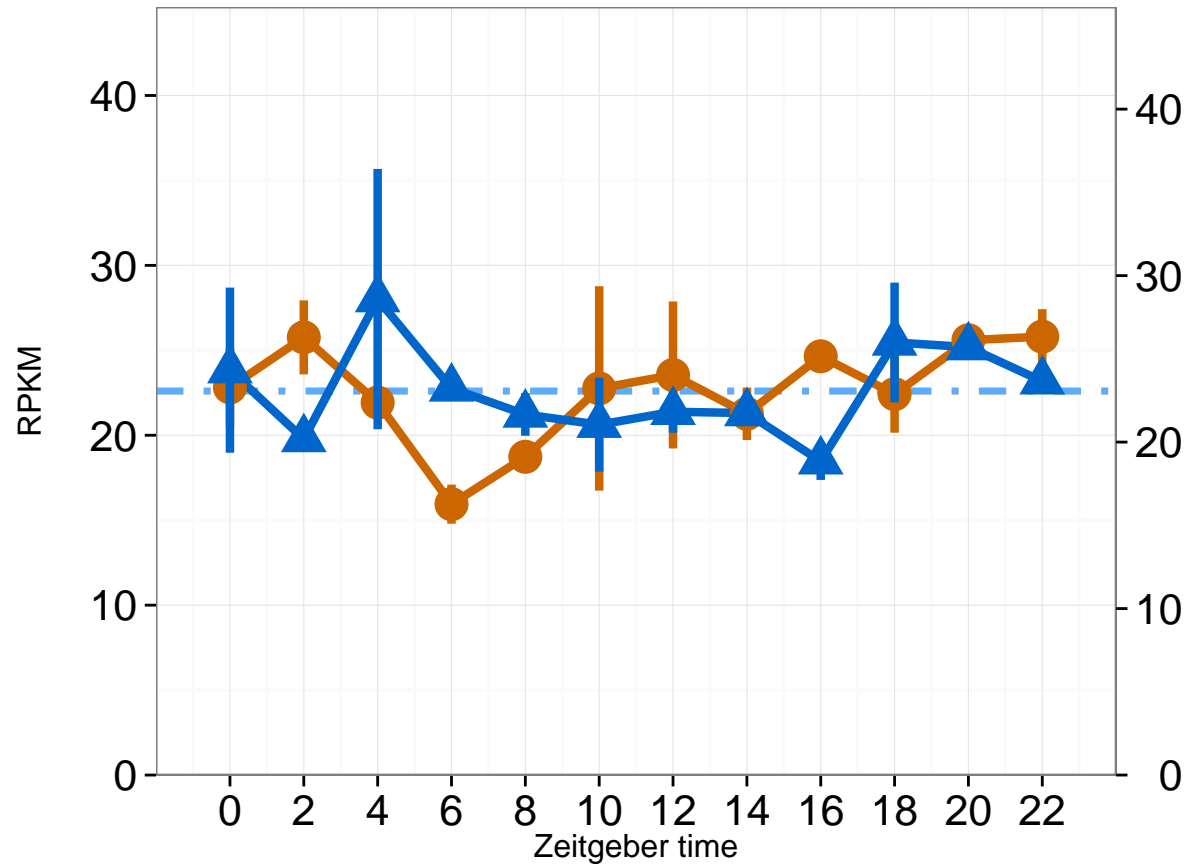

# Prorsd1

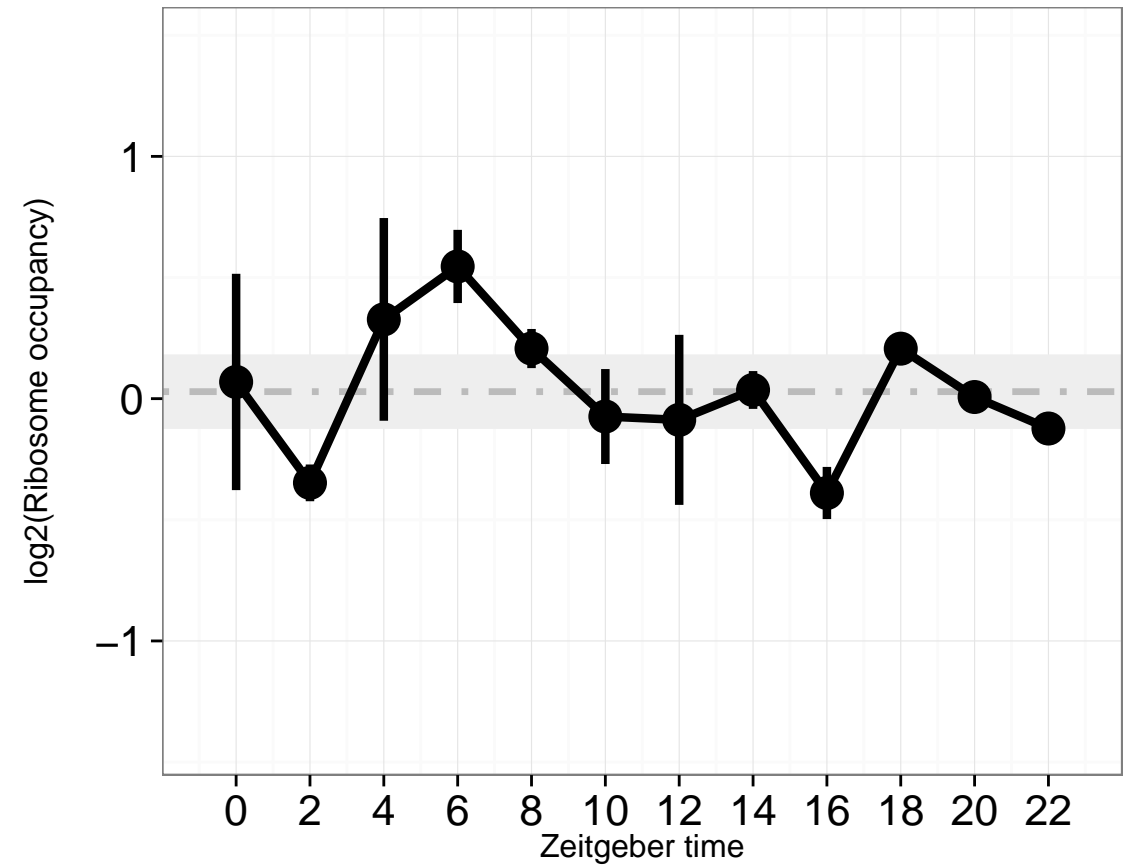

Supplement: Supplementary file 3704 [file 1]

## Slc15a2

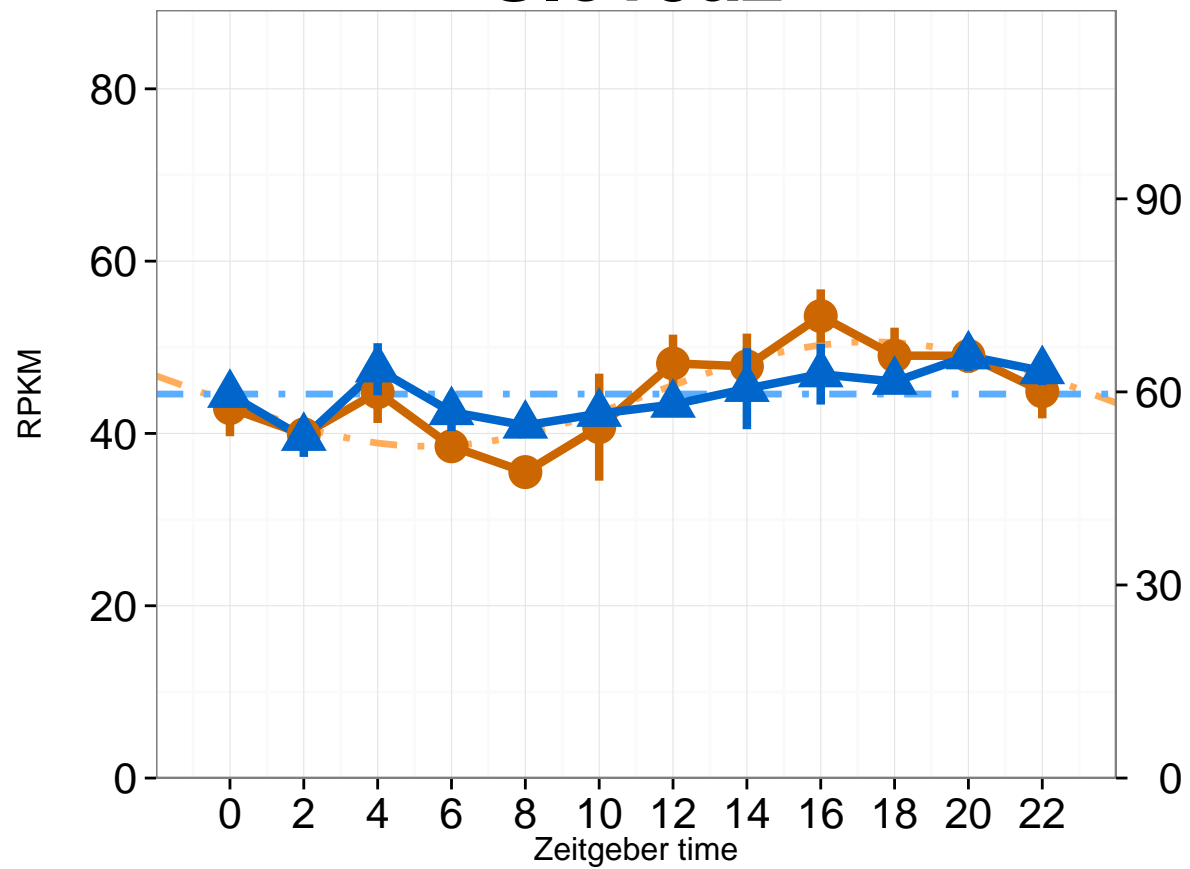

## Slc15a2

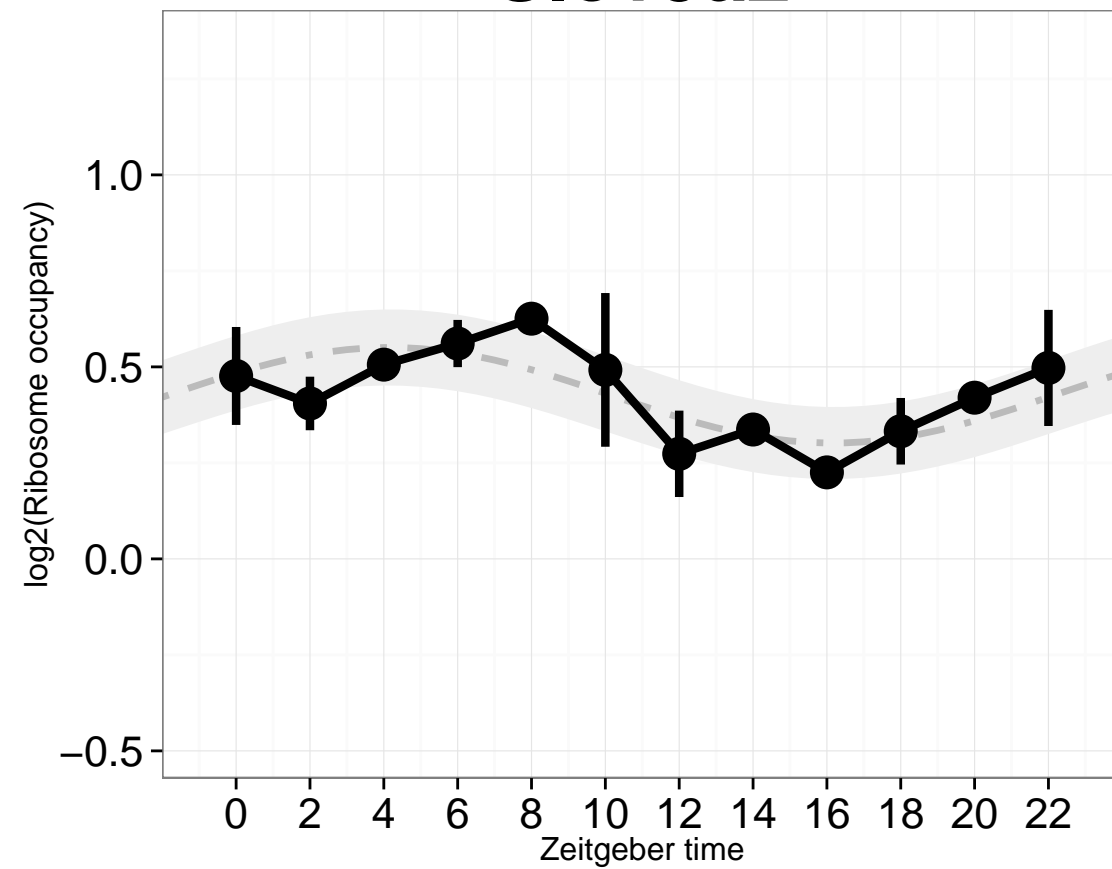

Supplement: Supplementary file 3705 [file 1]

# St6galnac5

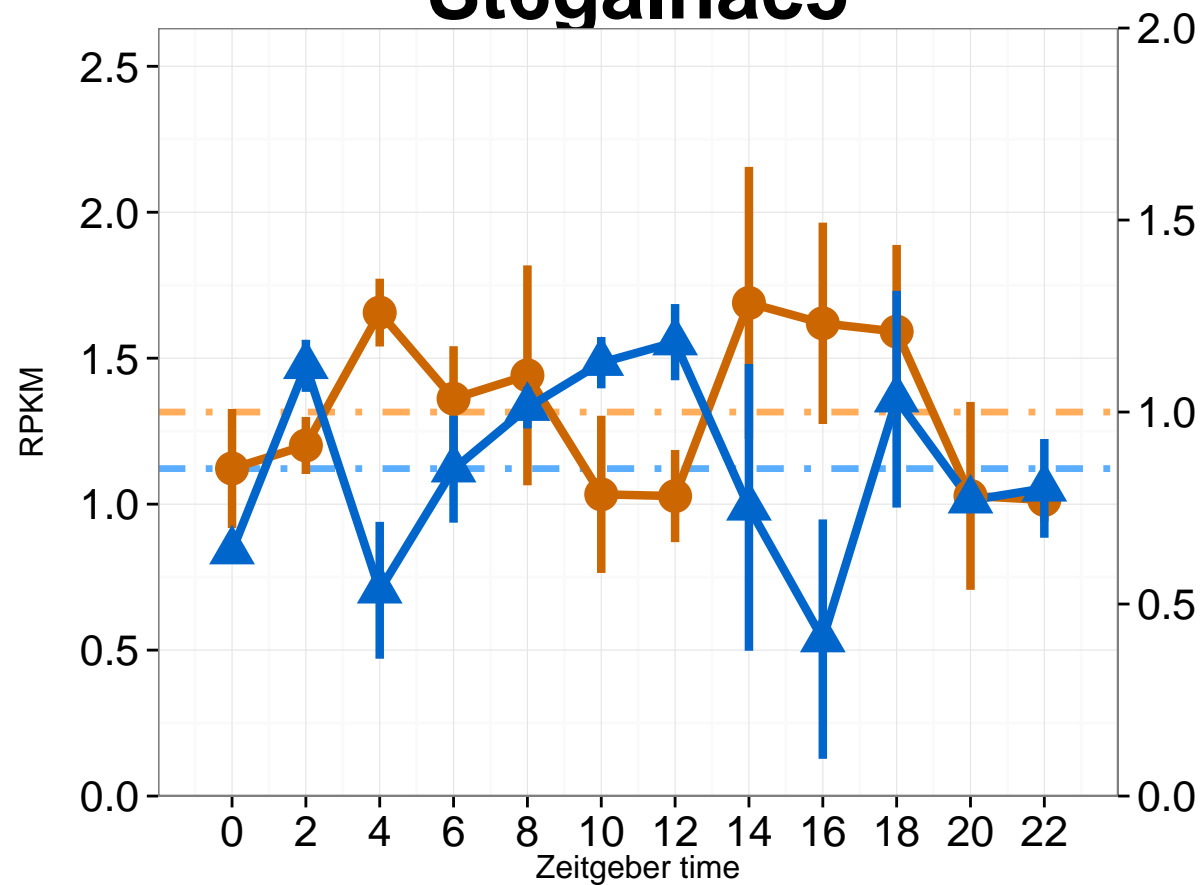

# St6galnac5

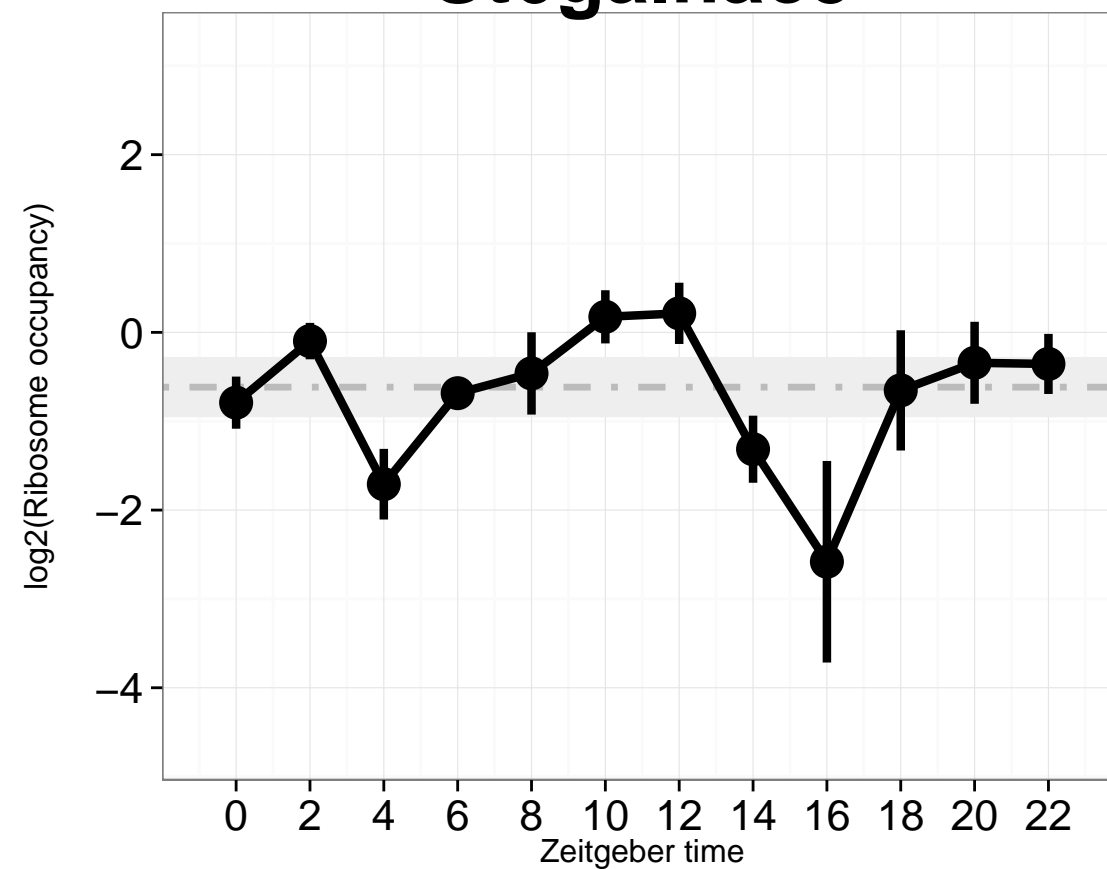

Supplement: Supplementary file 3706 [file 1]

# Tspan14

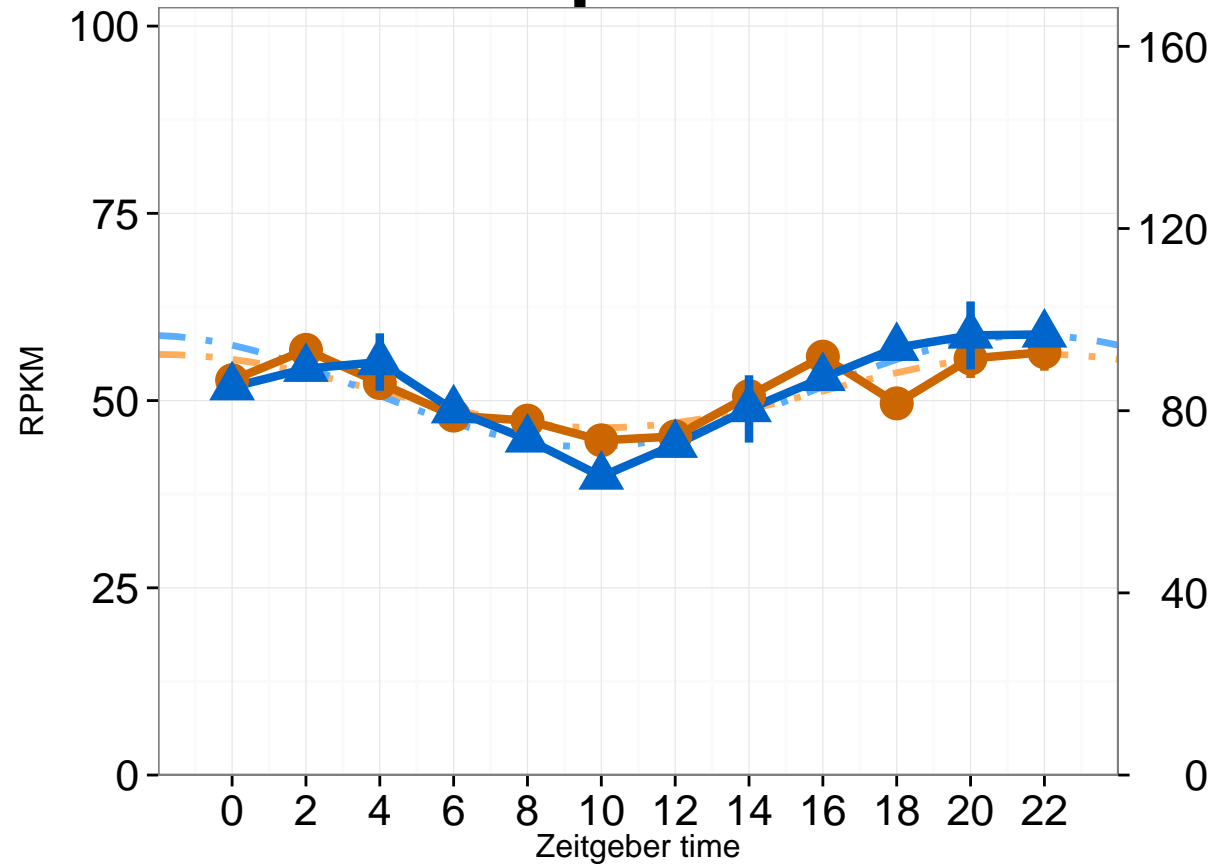

# Tspan14

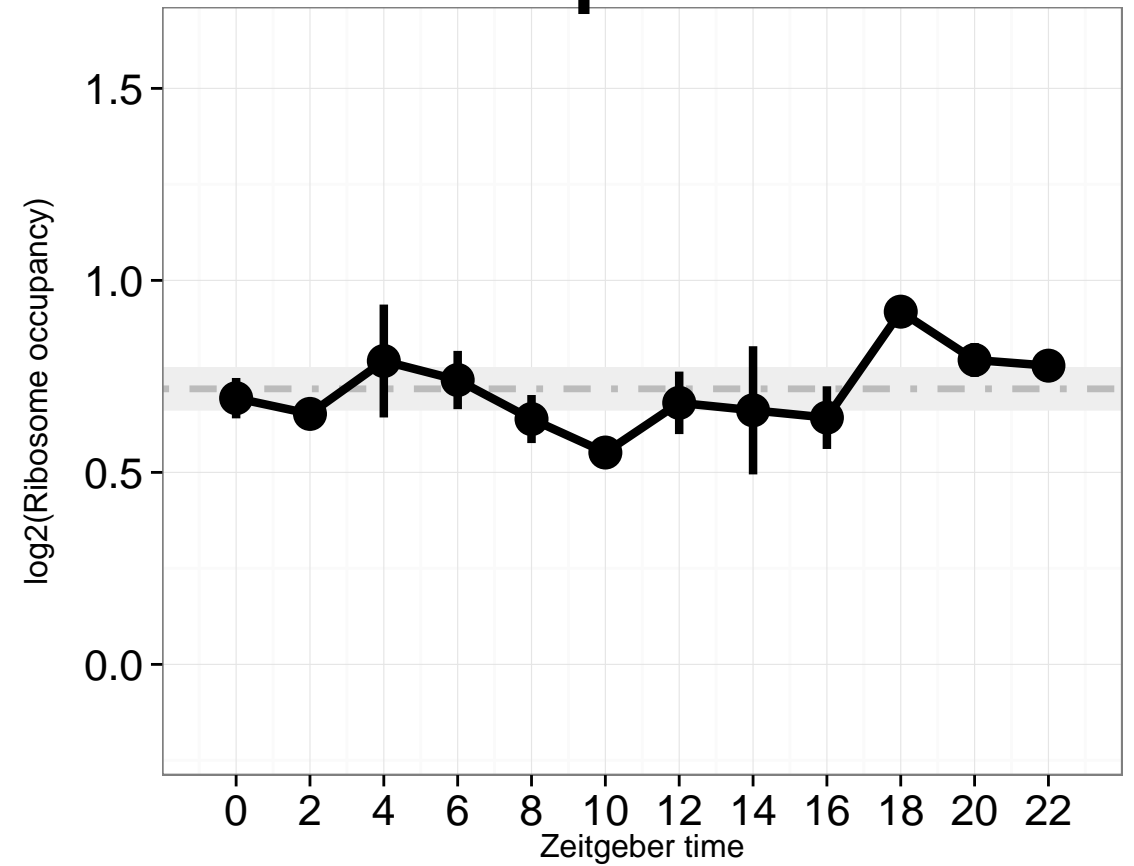

Supplement: Supplementary file 3707 [file 1]

# Pik3r2

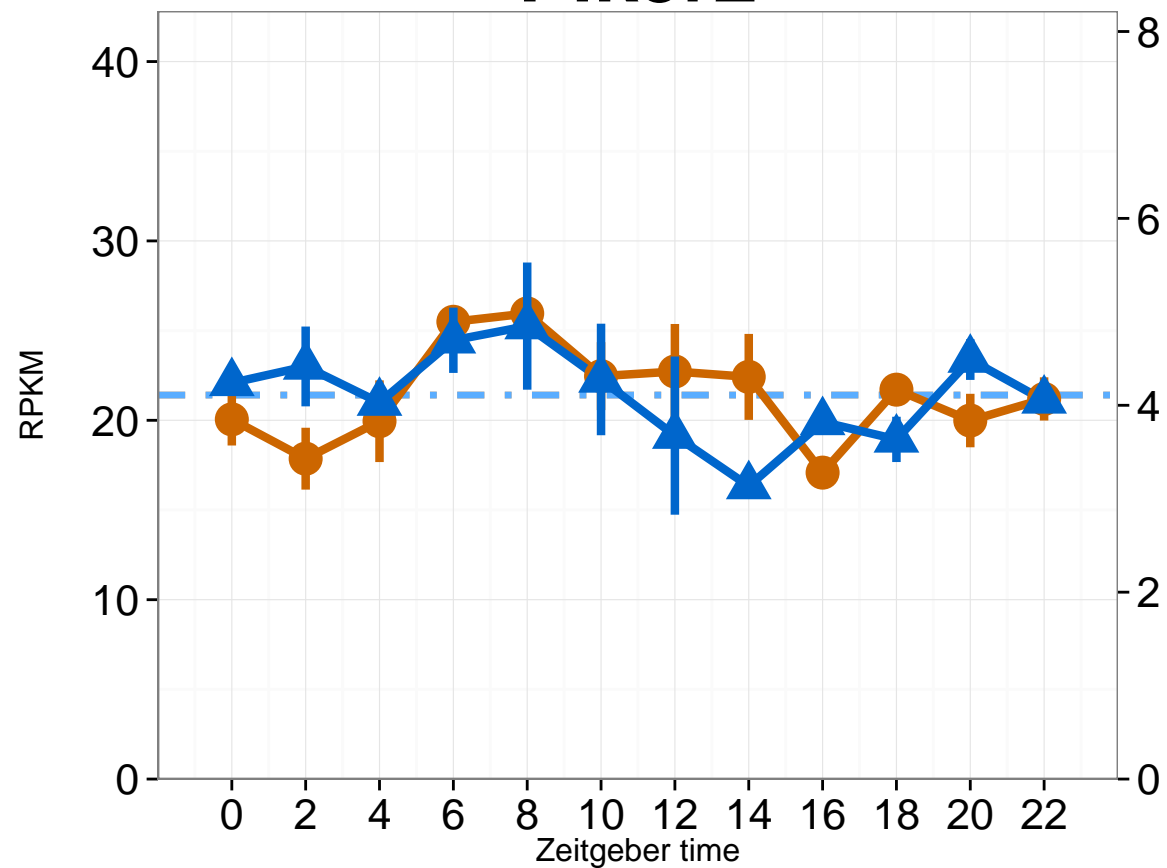

# Pik3r2

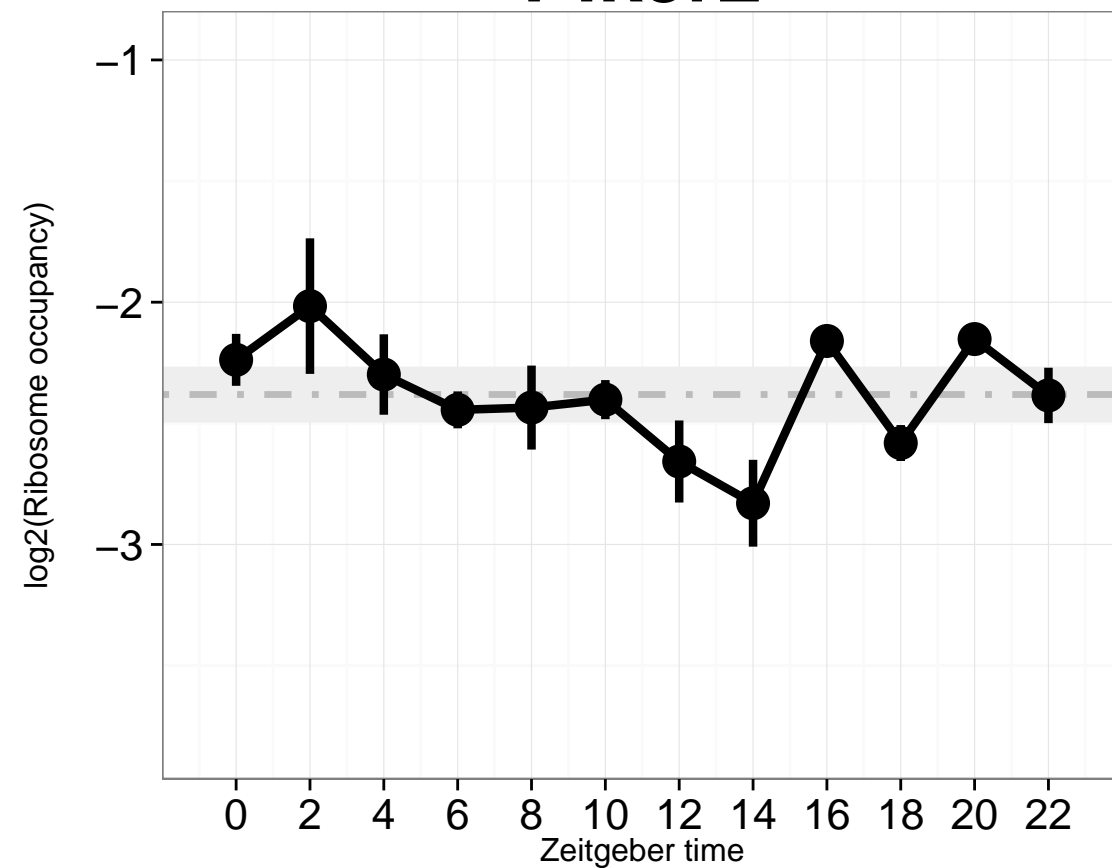

Supplement: Supplementary file 3708 [file 1]

## Yif1b

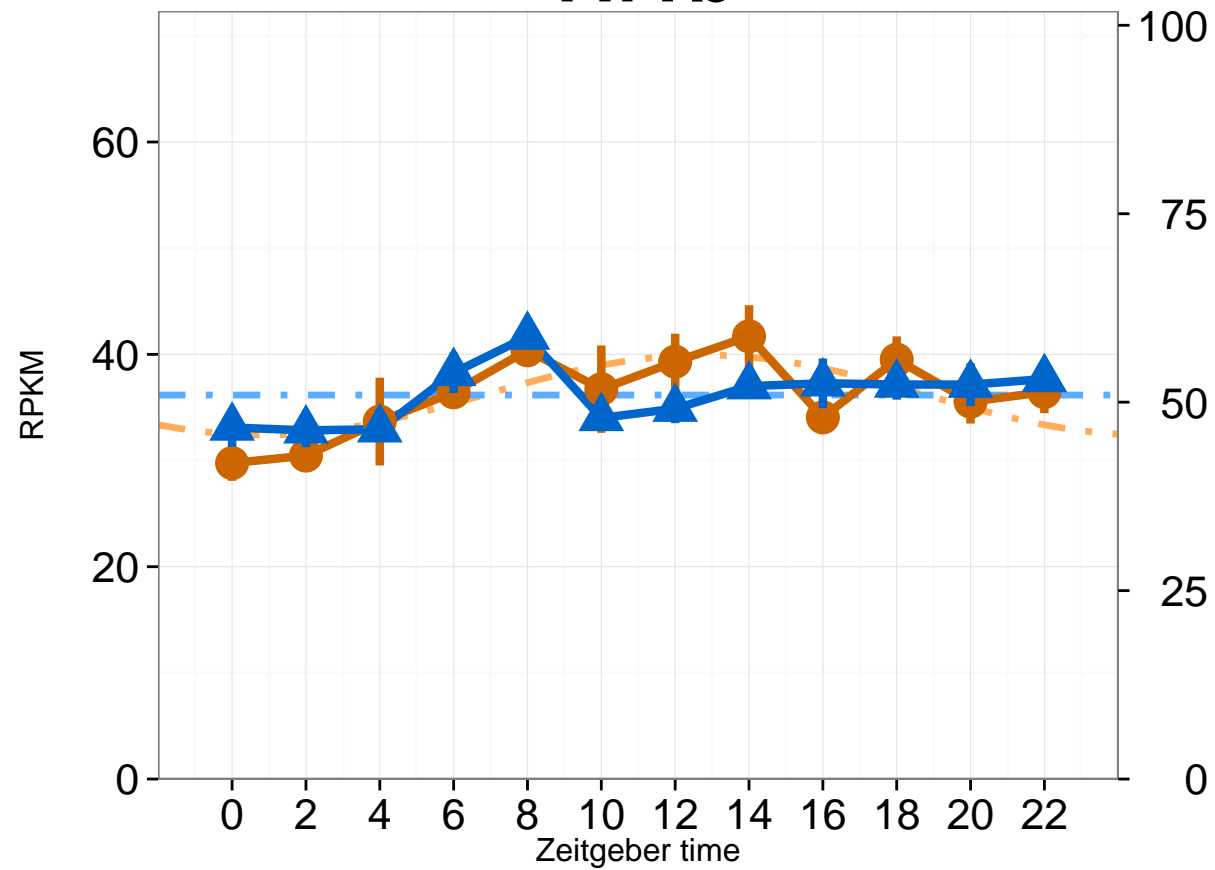

## Yif1b

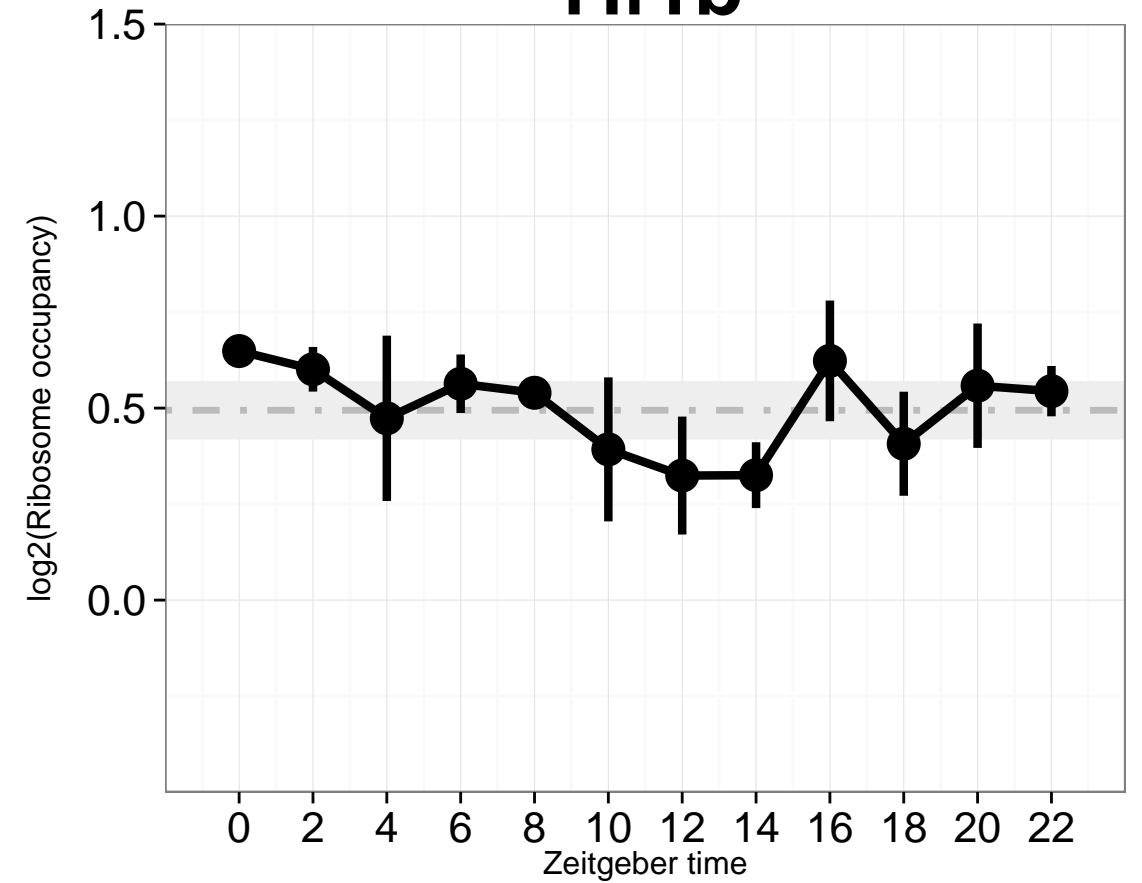

Supplement: Supplementary file 3709 [file 1]

# Fubp3

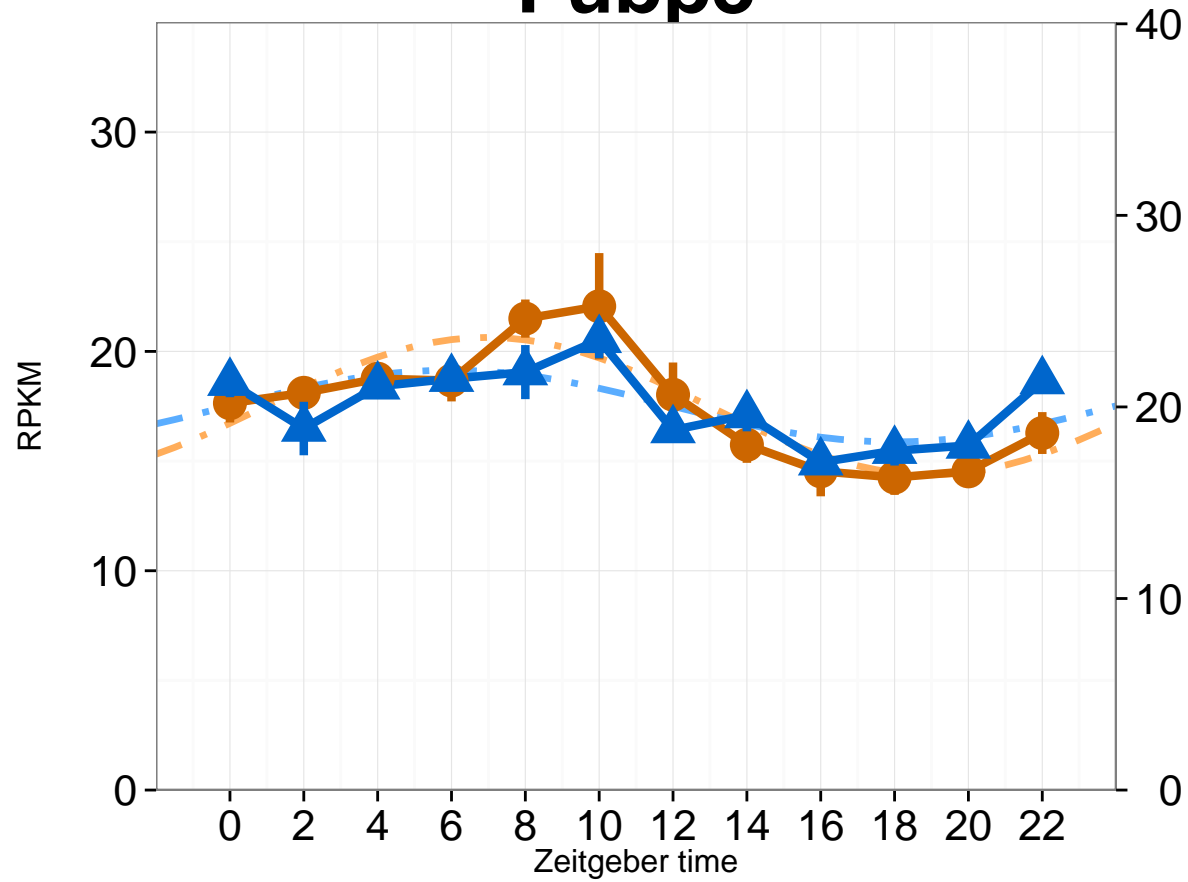

# Fubp3

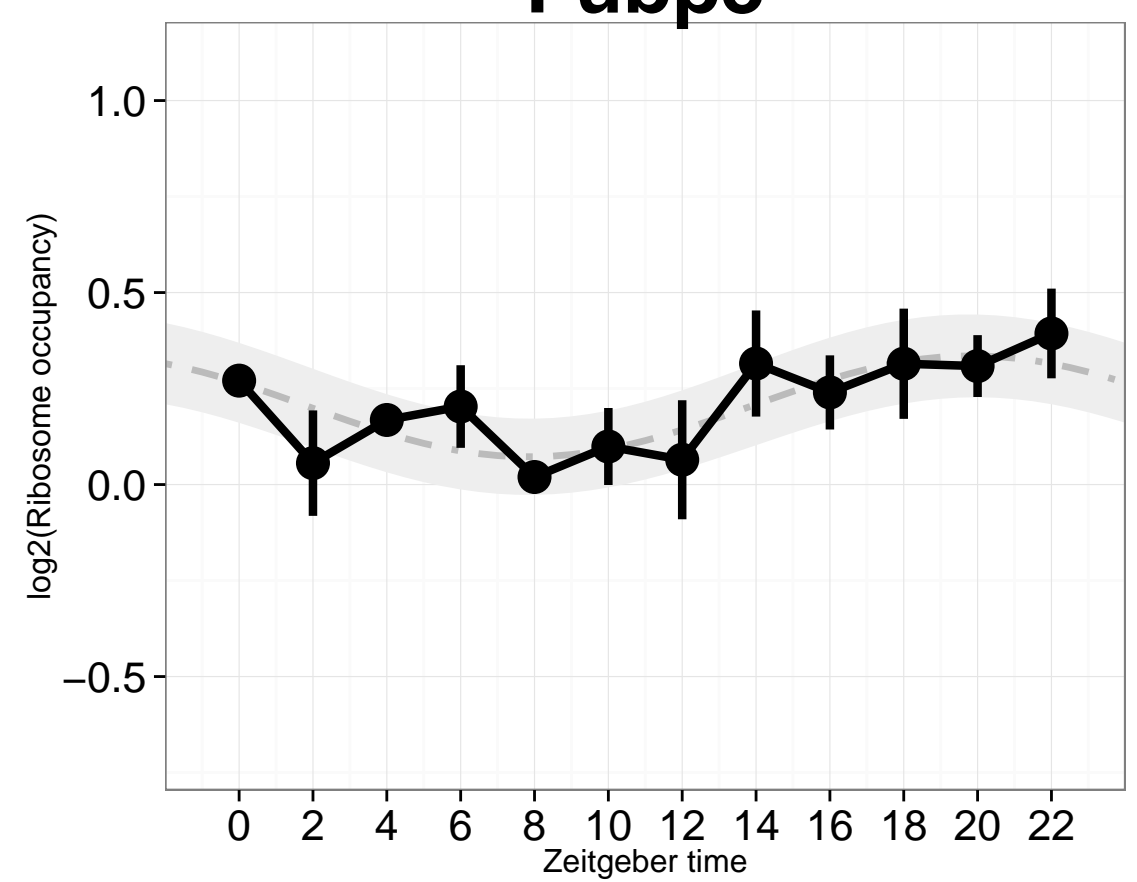

Supplement: Supplementary file 3710 [file 1]

# 3110082I17Rik

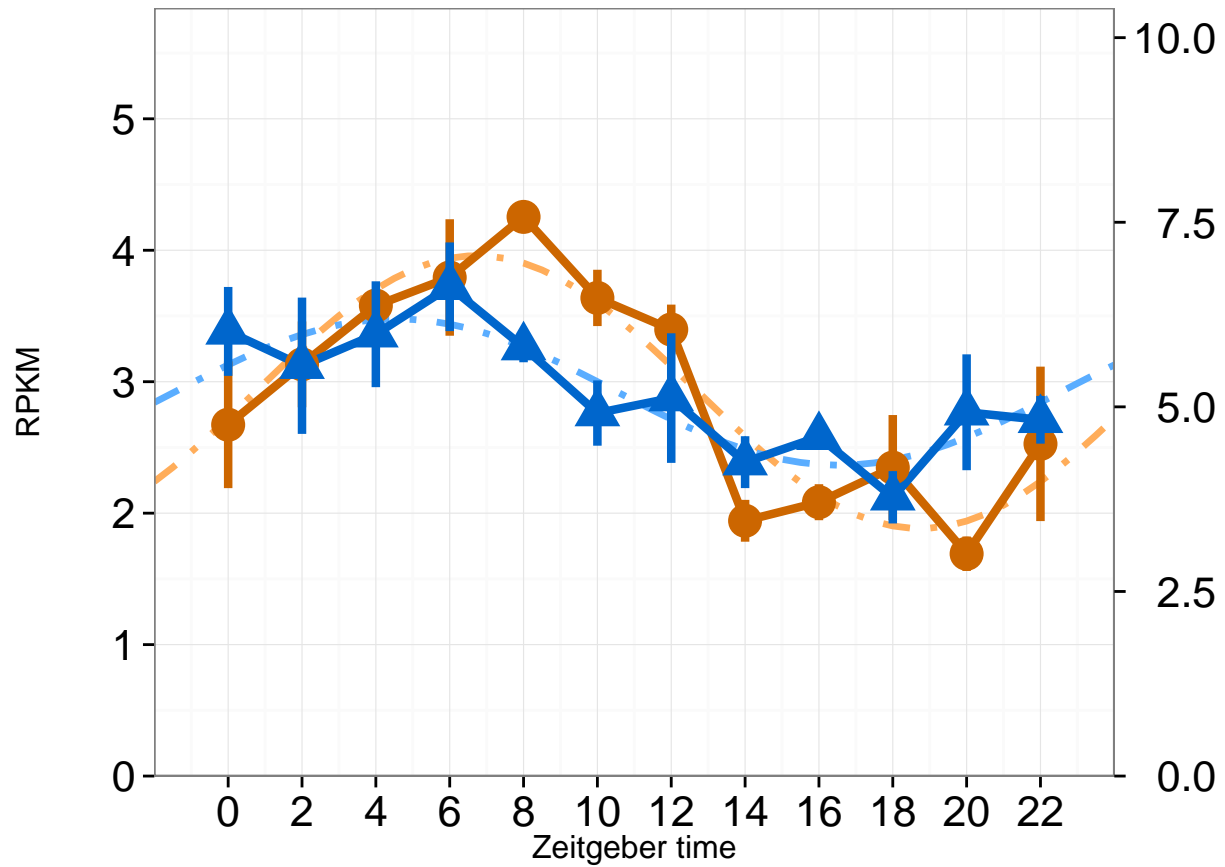

# 3110082I17Rik

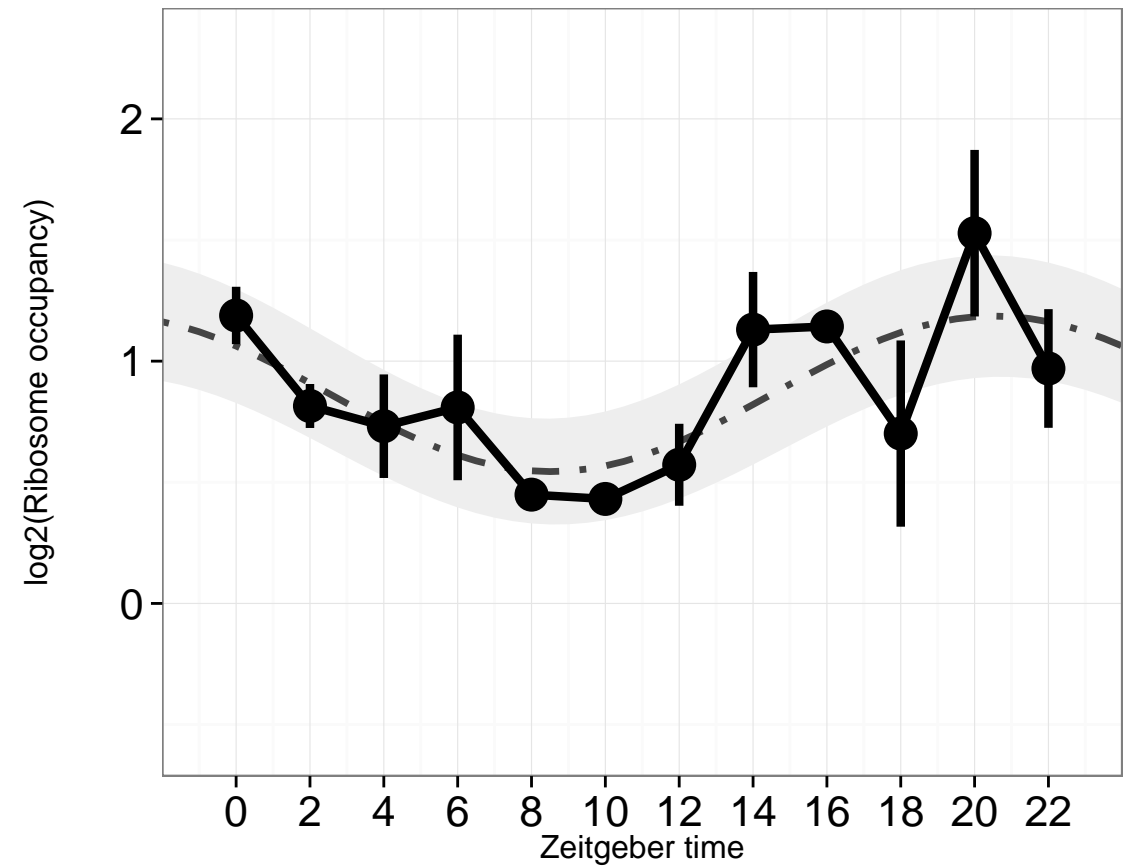

Supplement: Supplementary file 3711 [file 1]

# Maml1

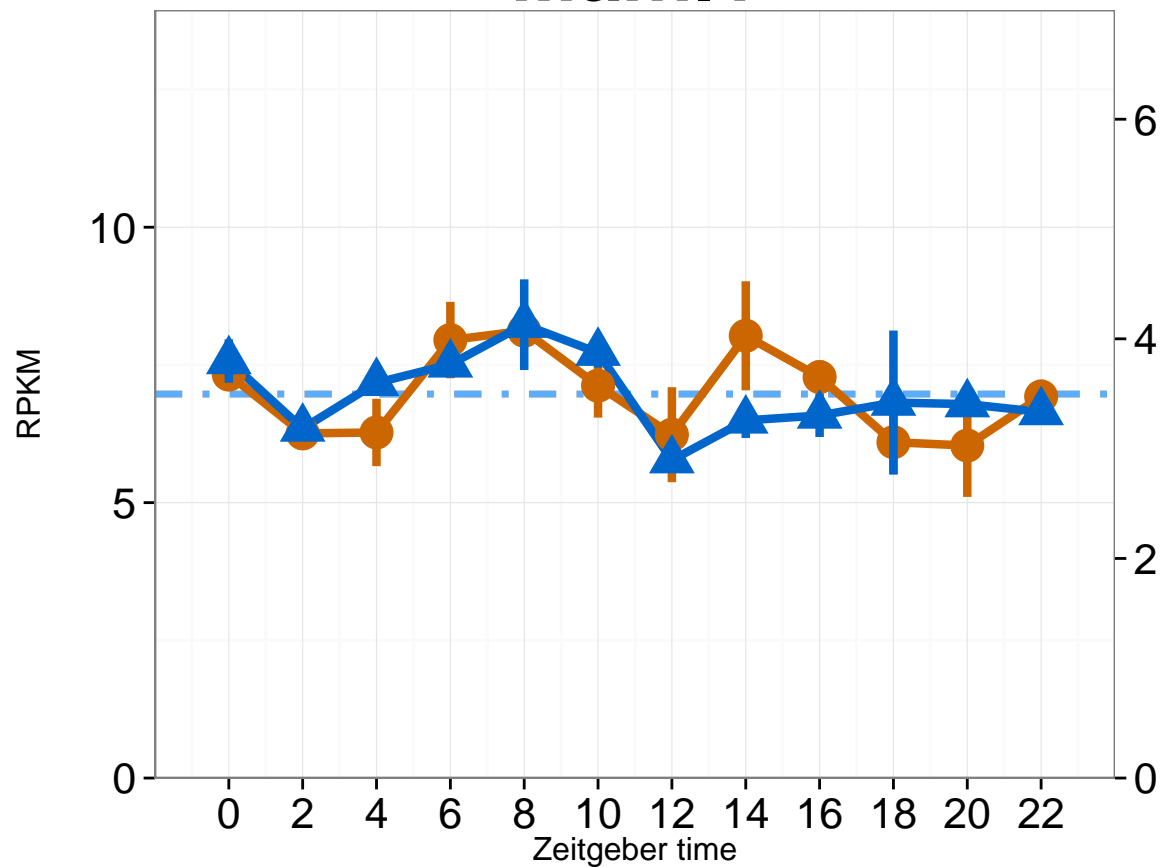

# Maml1

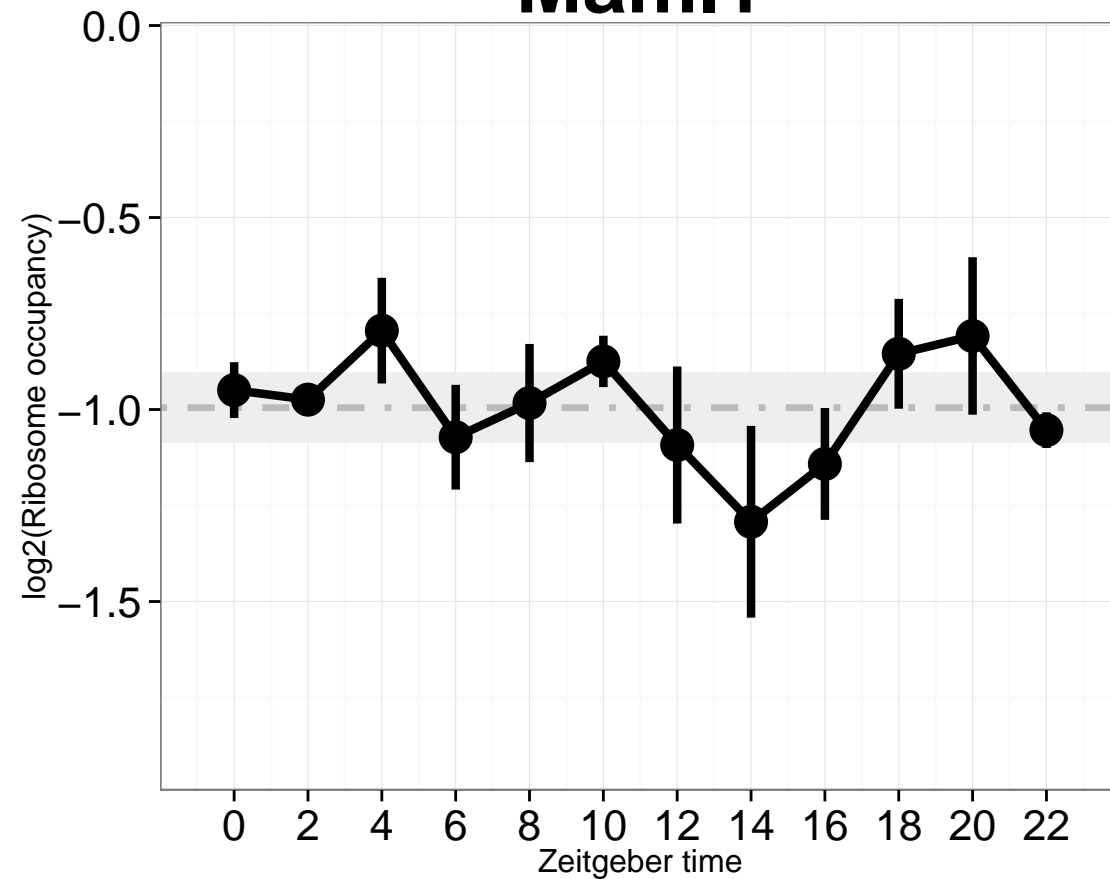

Supplement: Supplementary file 3712 [file 1]

## Lanc13

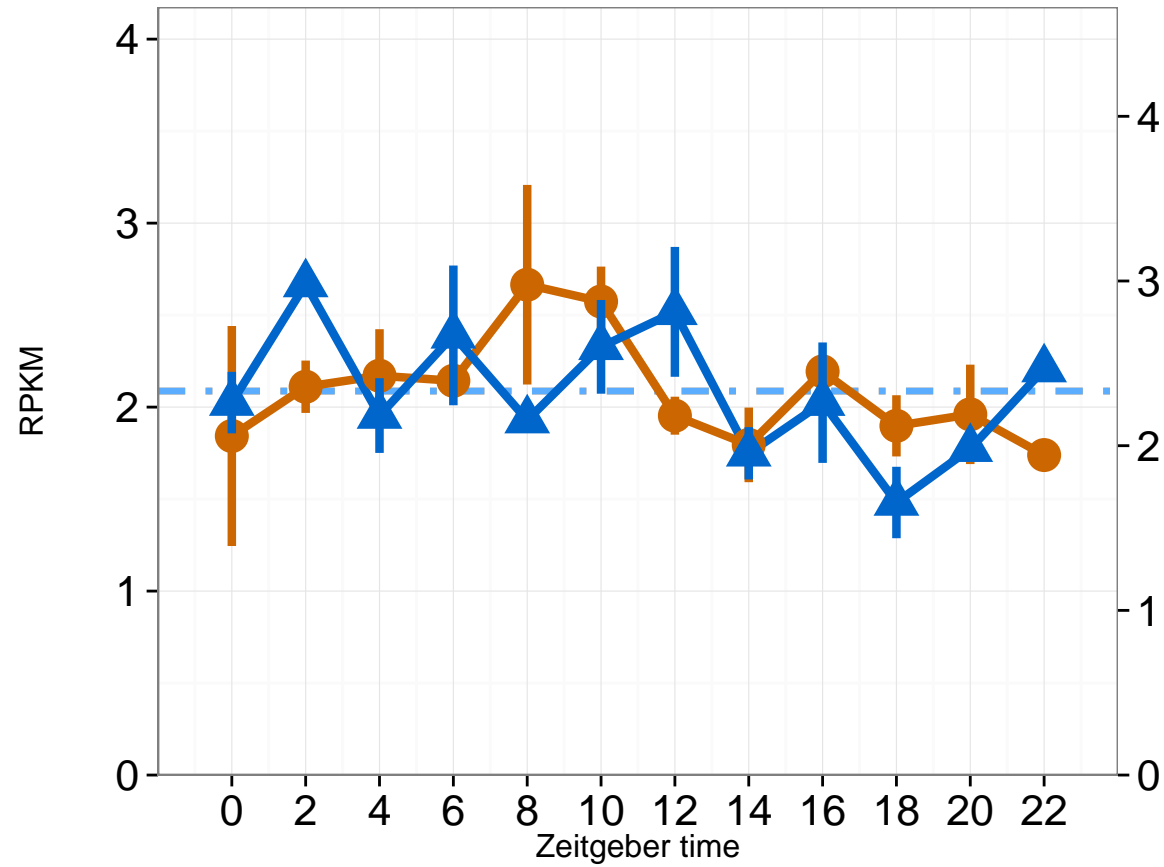

## Lanc13

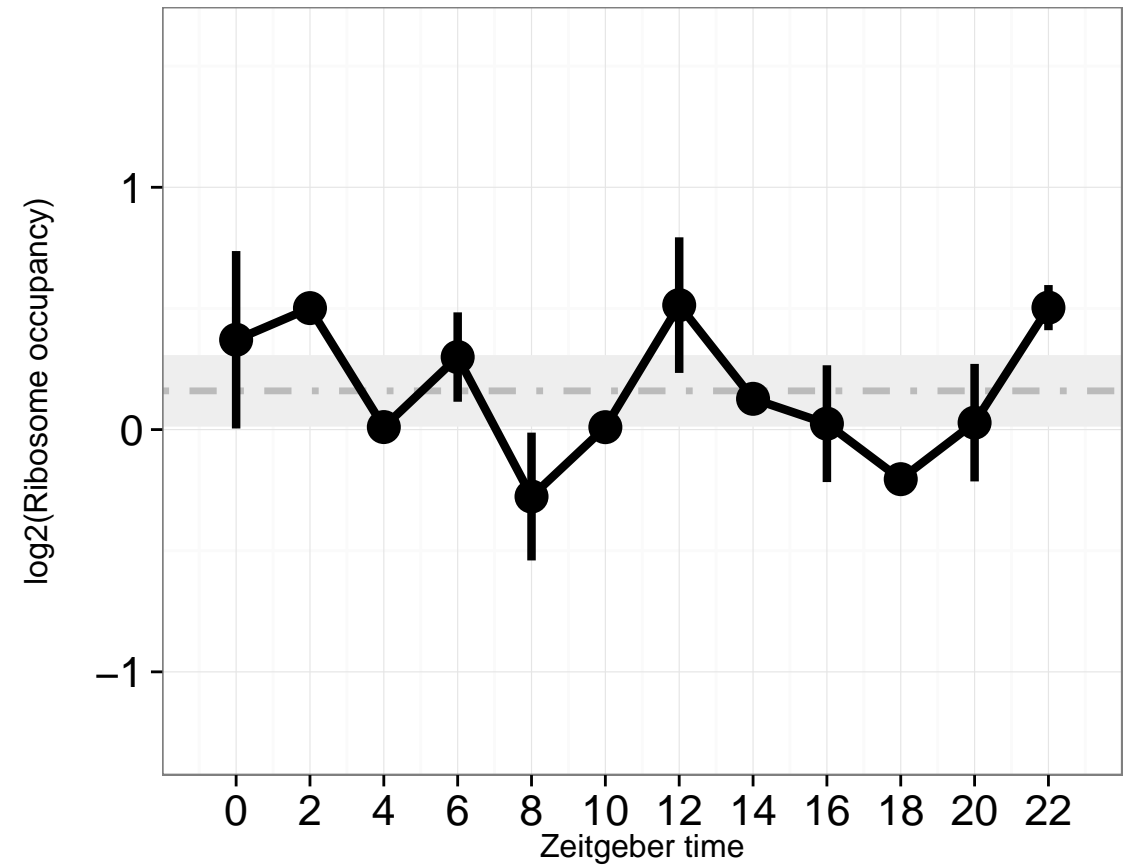

Supplement: Supplementary file 3714 [file 1]
