# Supplementary material (part 38 of 133)
Source: publisher figshare collection journal article supplement (https://springernature.figshare.com/articles/dataset/_/4903193)

# Zcwpw1

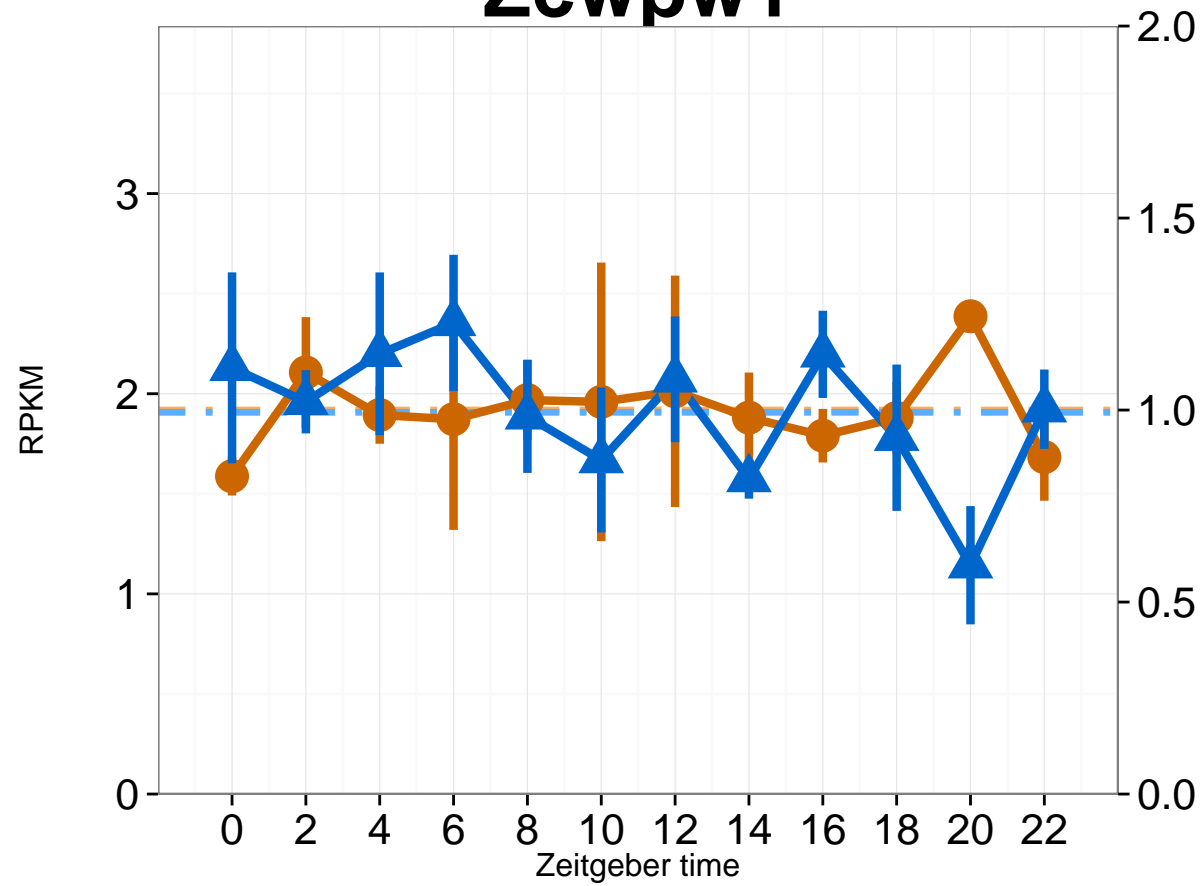

# Zcwpw1

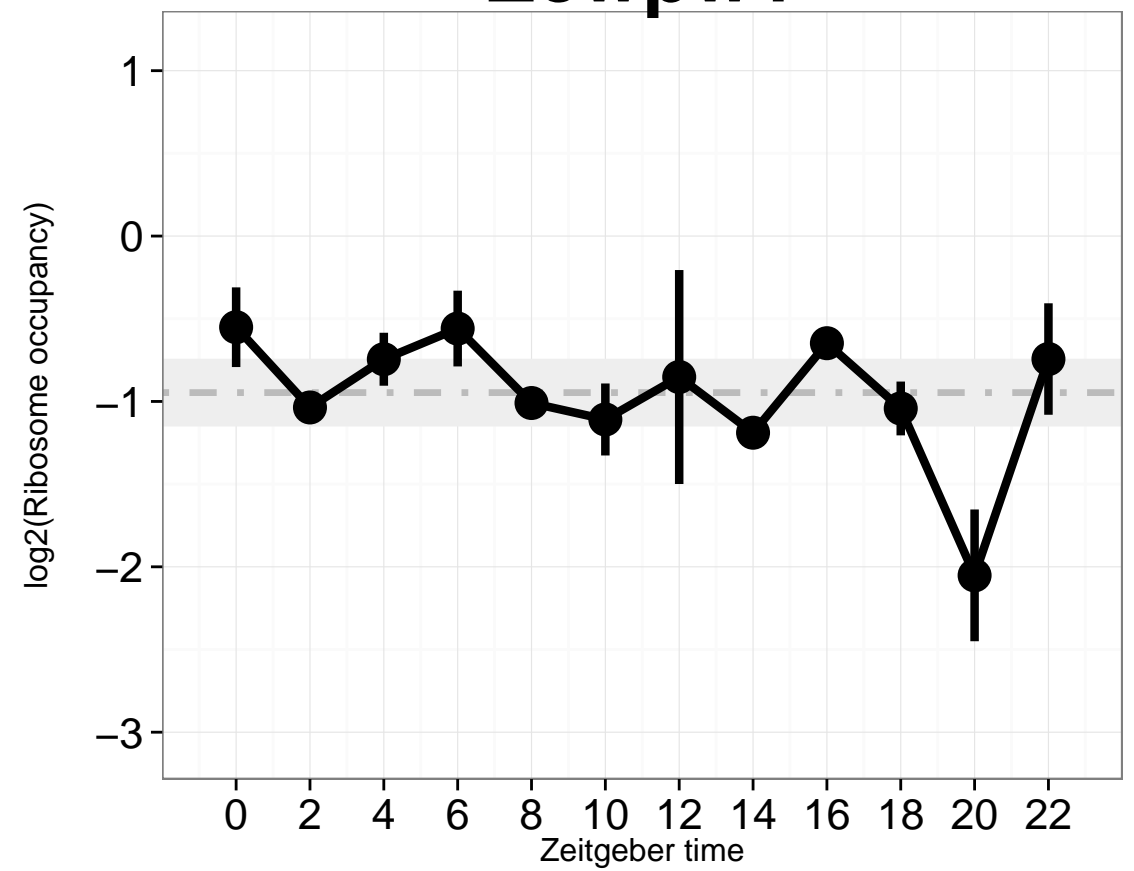

Supplement: Supplementary file 3715 [file 1]

# Nr1h3

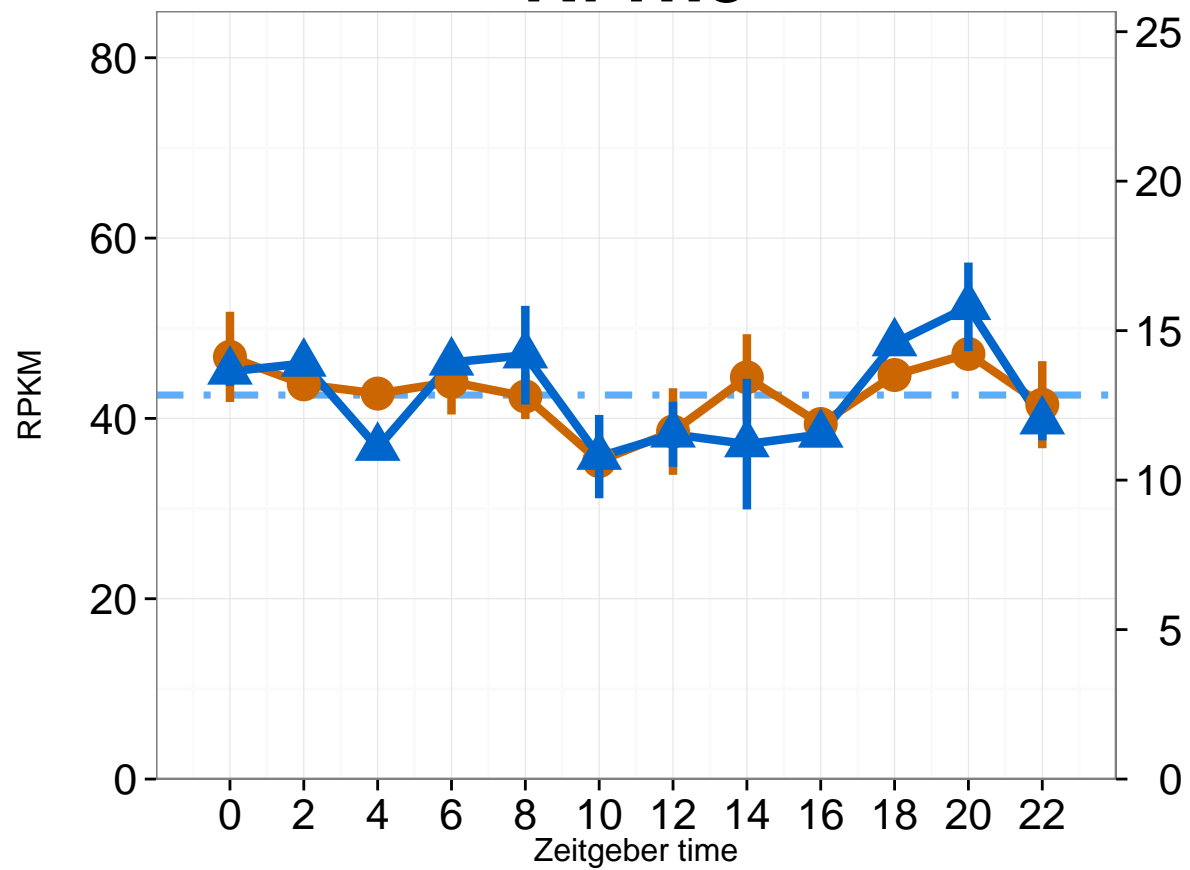

# Nr1h3

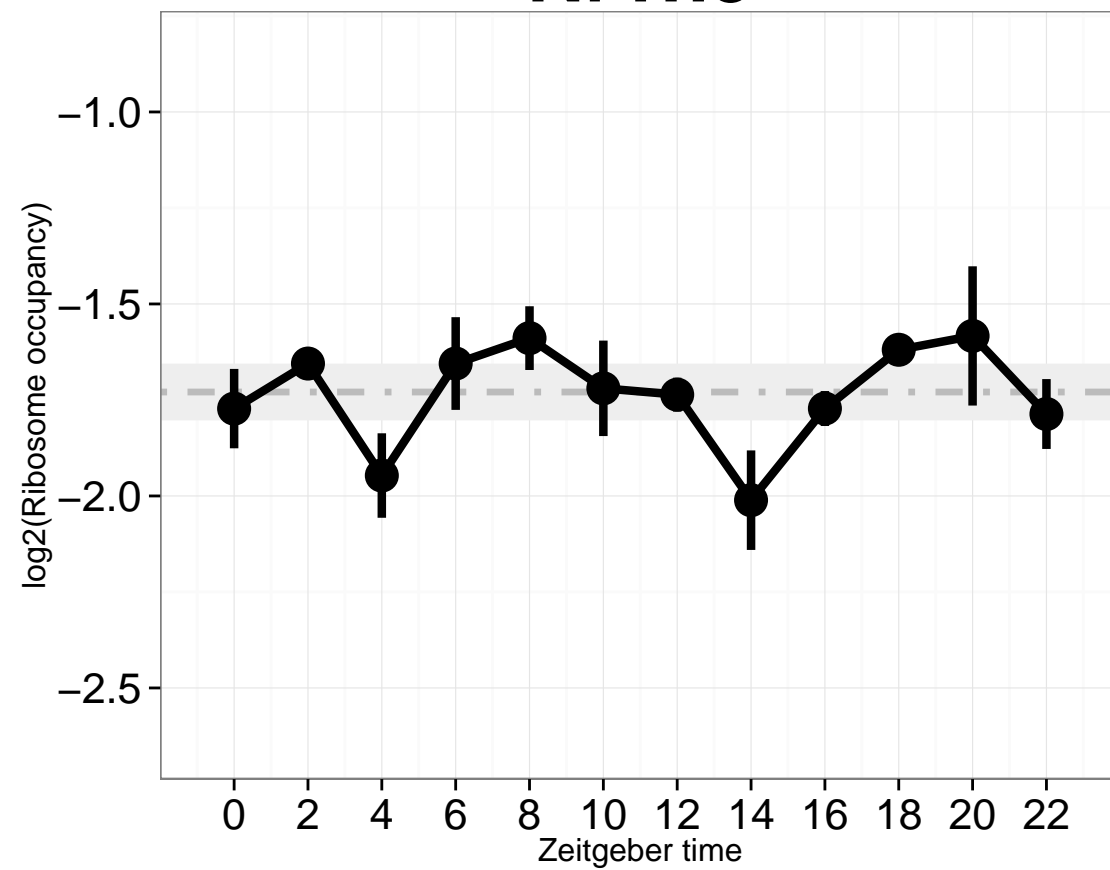

Supplement: Supplementary file 3716 [file 1]

# Taf13

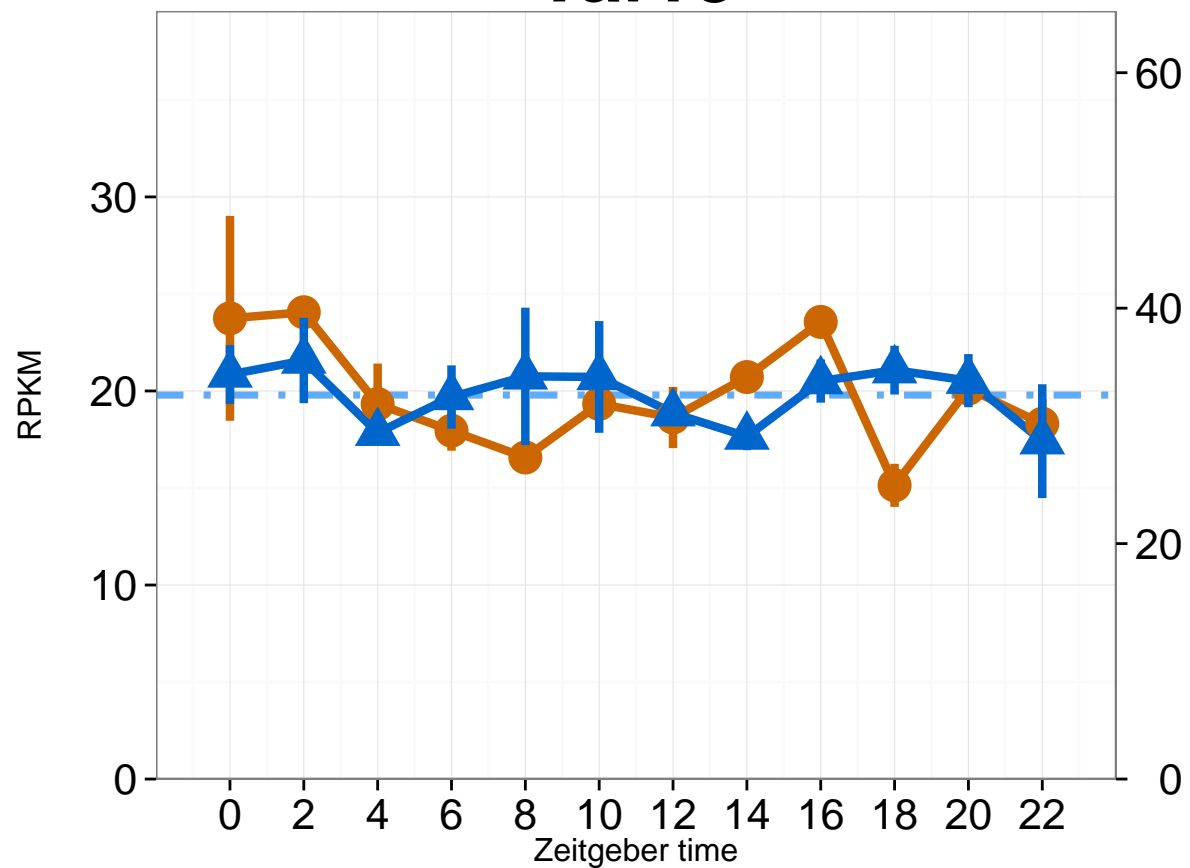

# Taf13

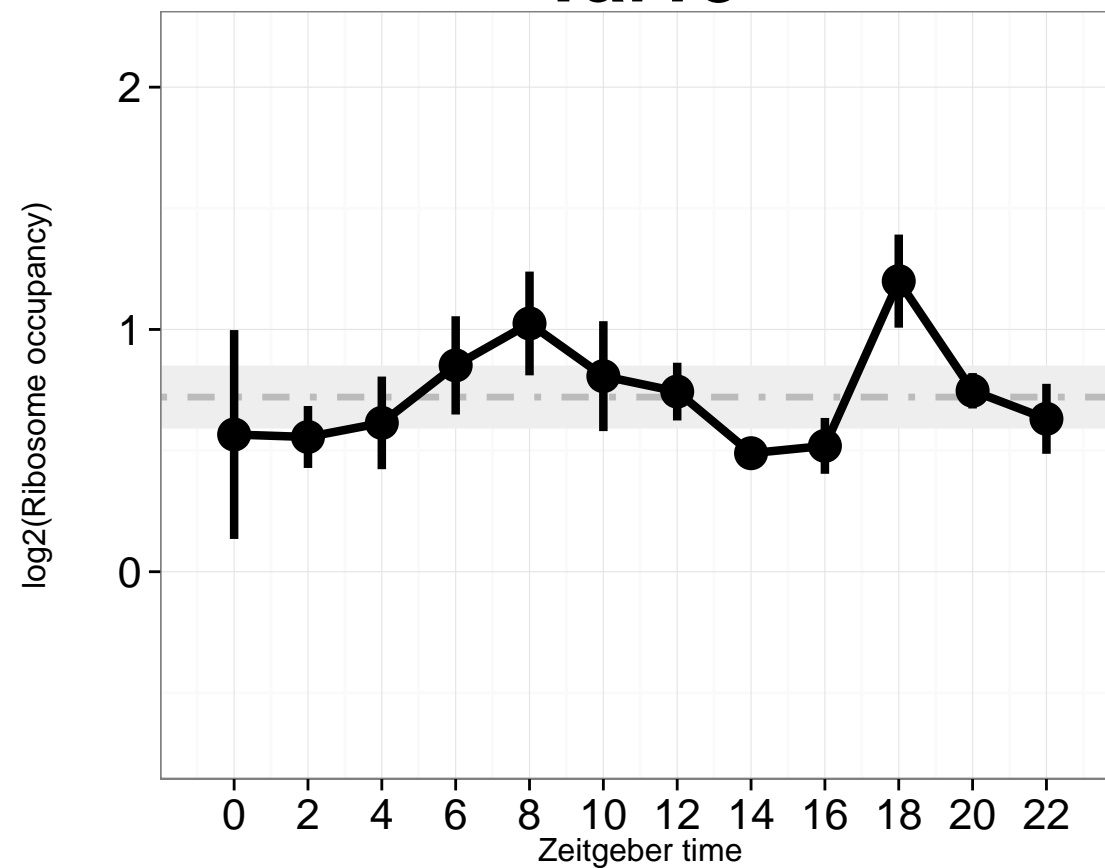

Supplement: Supplementary file 3717 [file 1]

# Fam174b

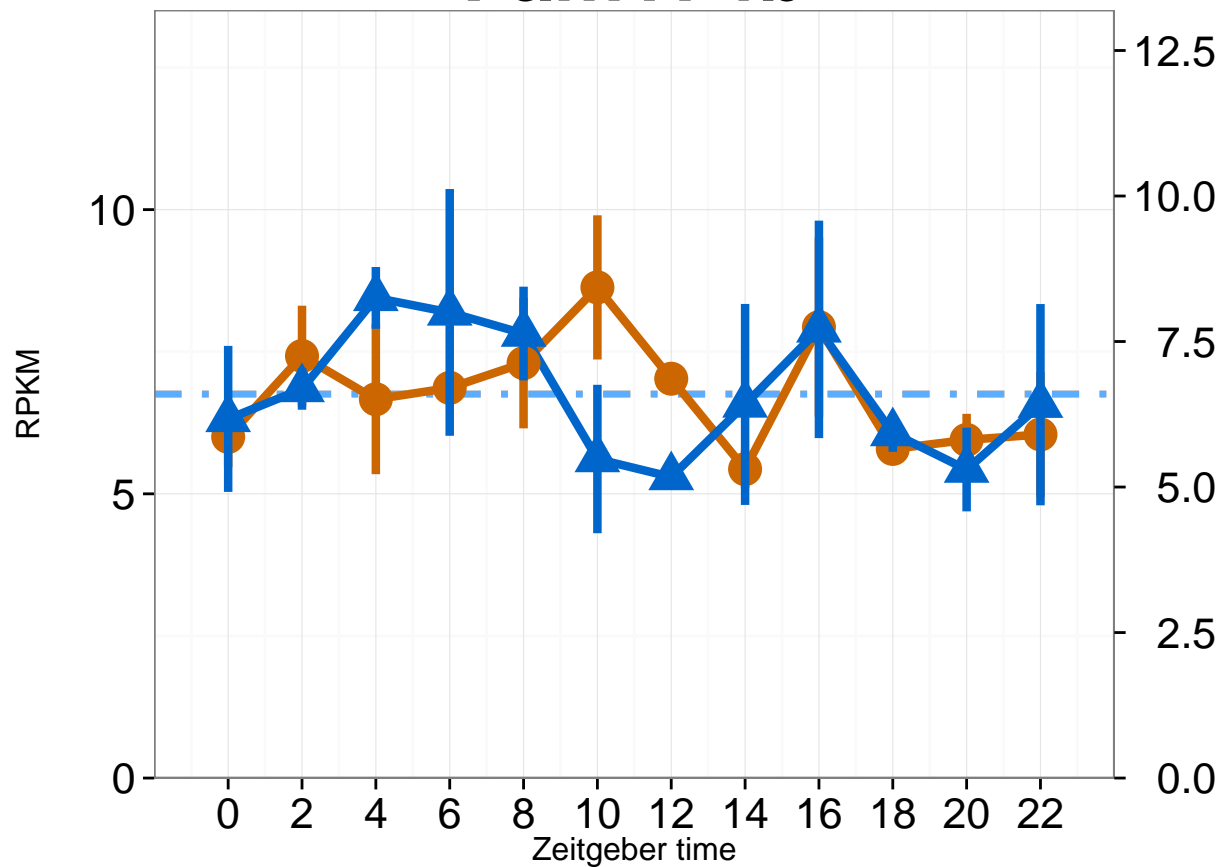

# Fam174b

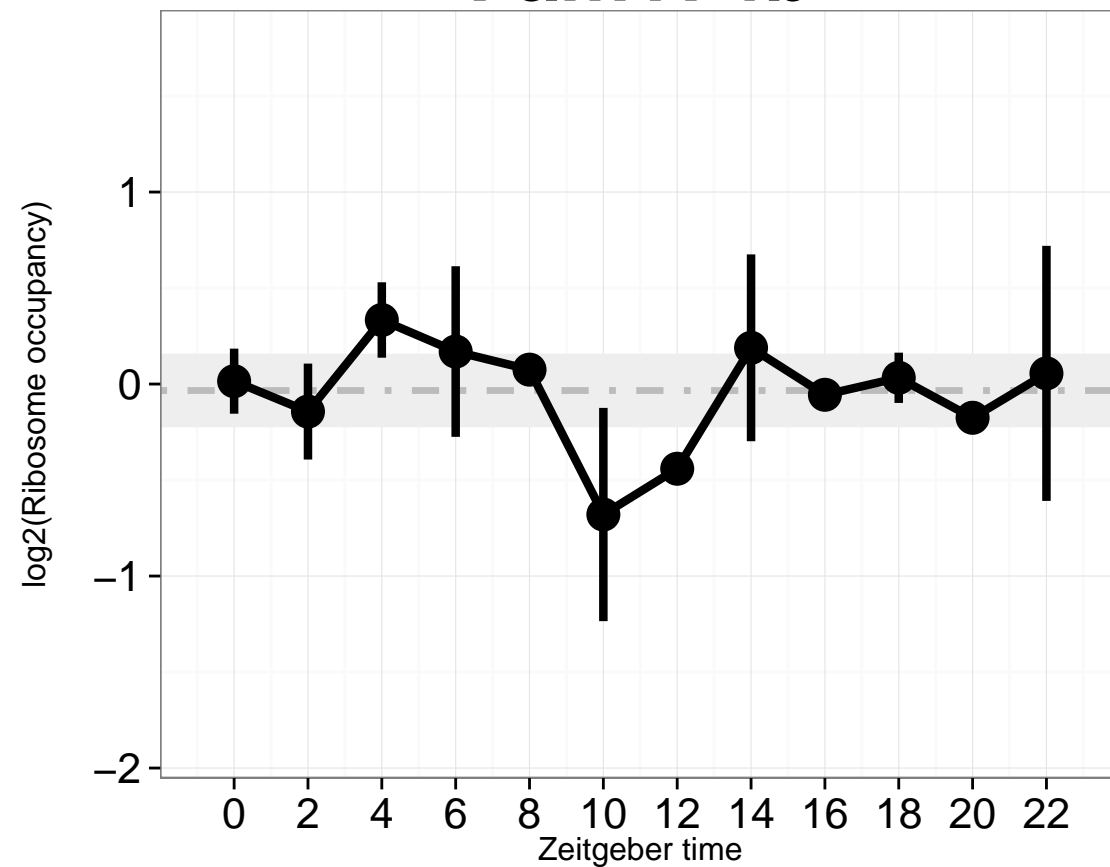

Supplement: Supplementary file 3718 [file 1]

# Ppp1r1b

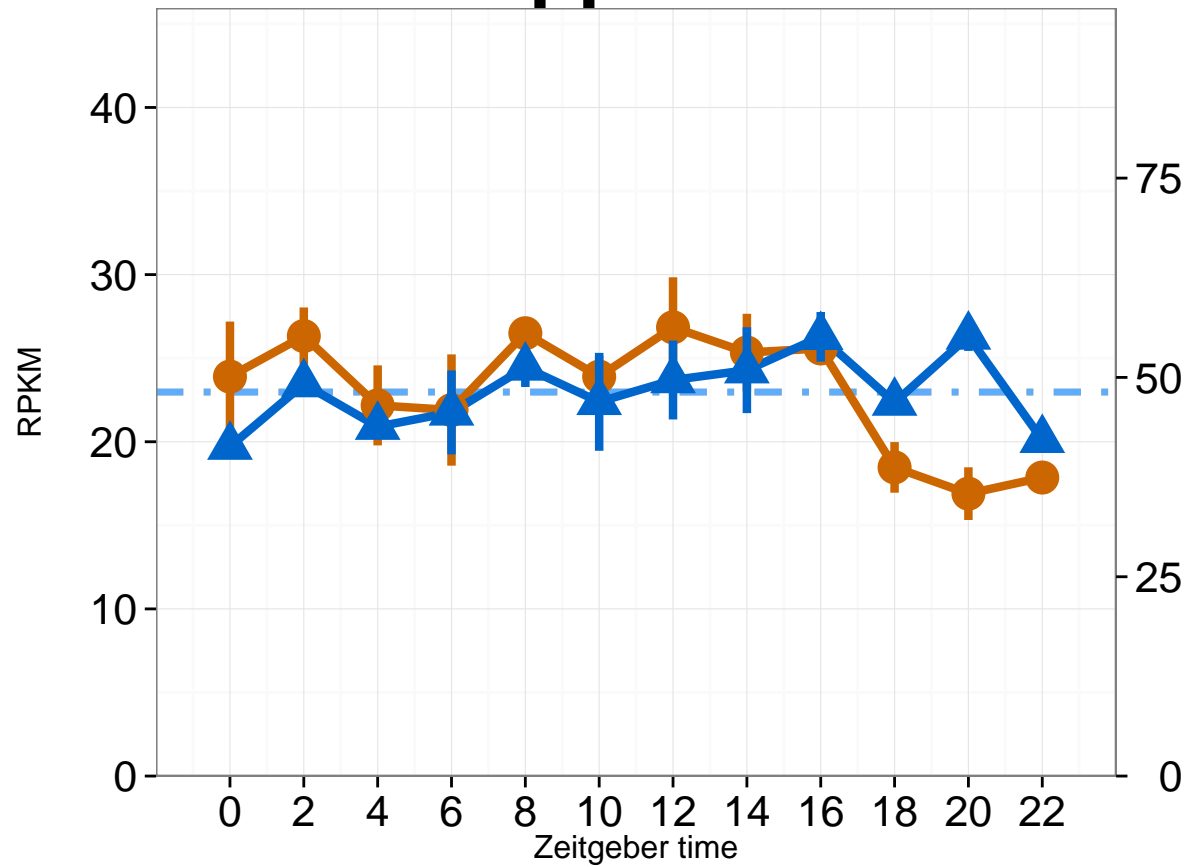

# Ppp1r1b

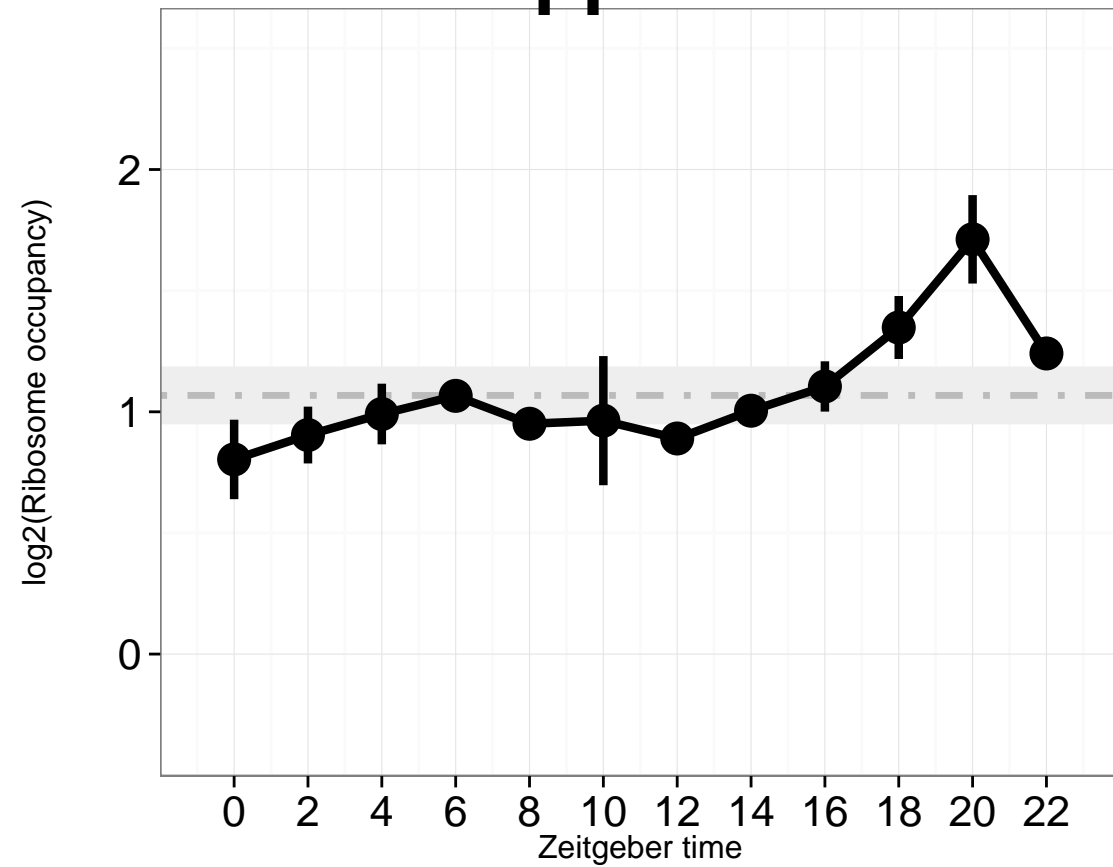

Supplement: Supplementary file 3719 [file 1]

## Zbtb46

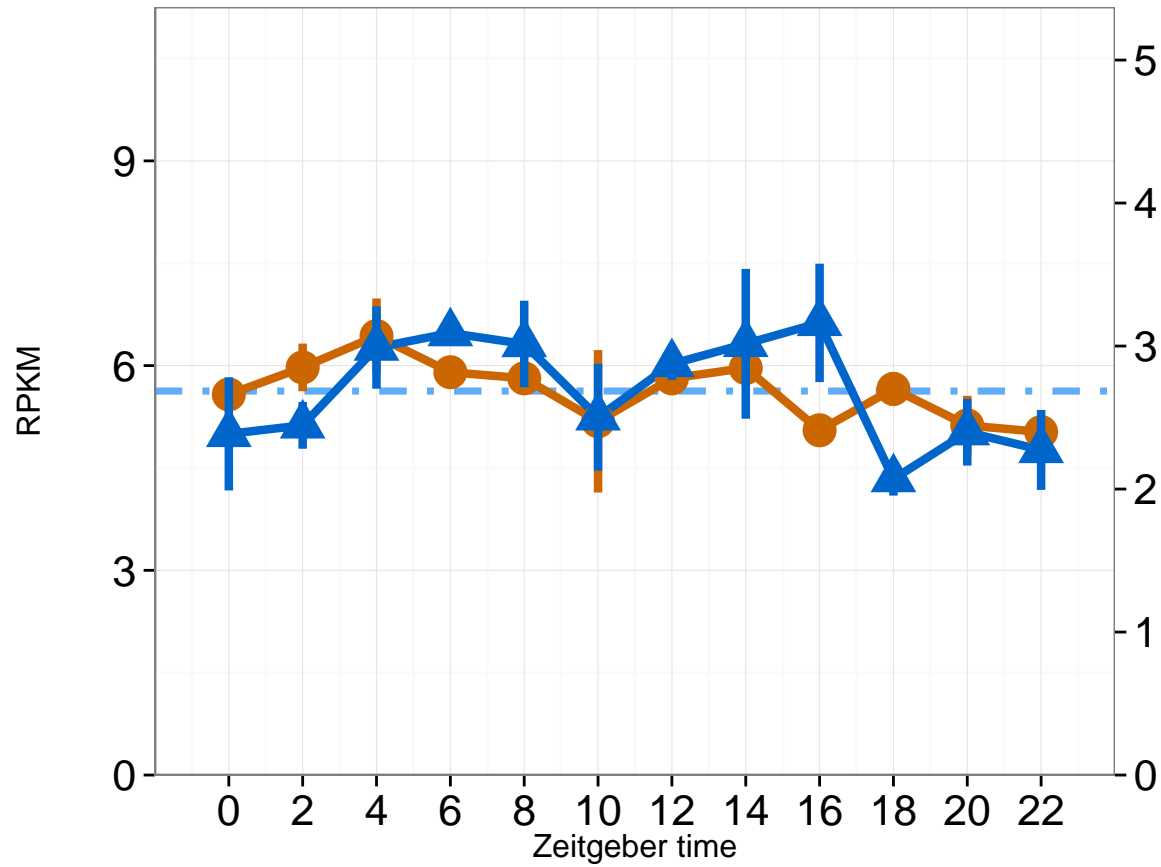

## Zbtb46

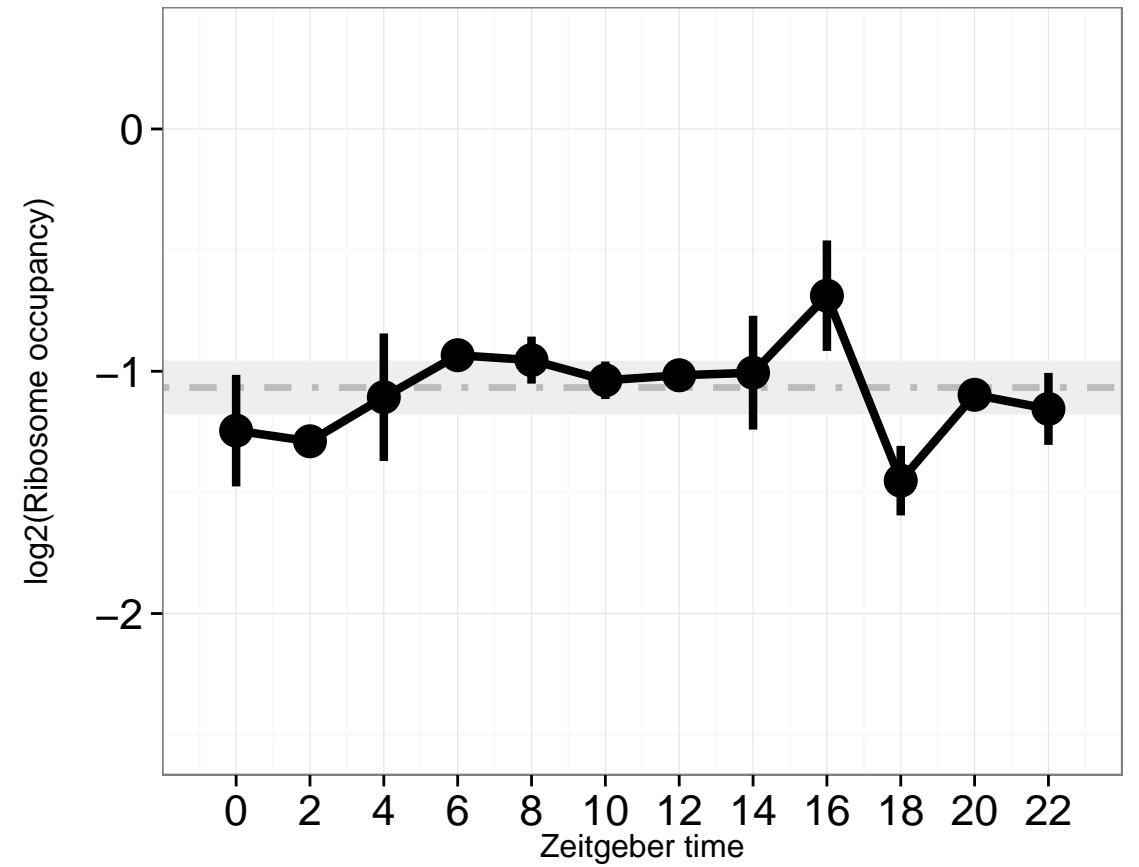

Supplement: Supplementary file 3720 [file 1]

## Afp

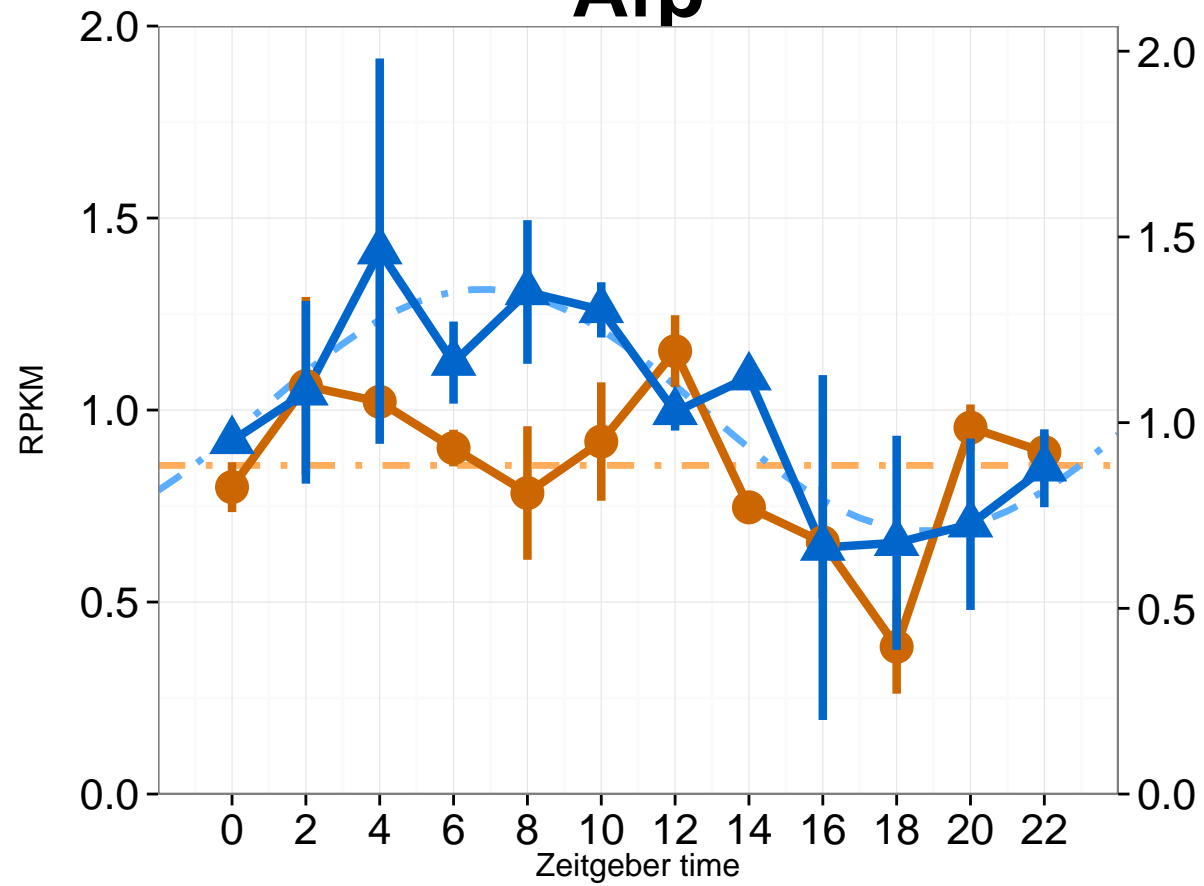

## Afp

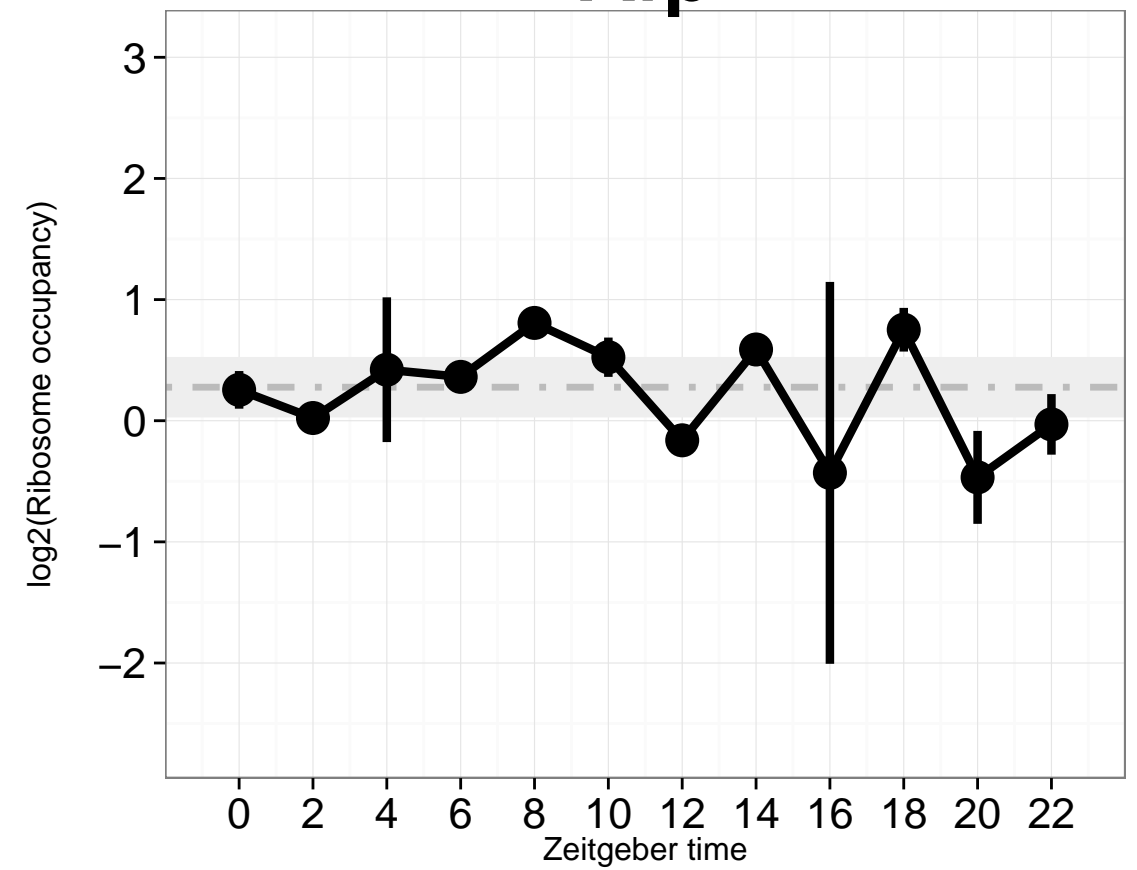

Supplement: Supplementary file 3721 [file 1]

## Irf2

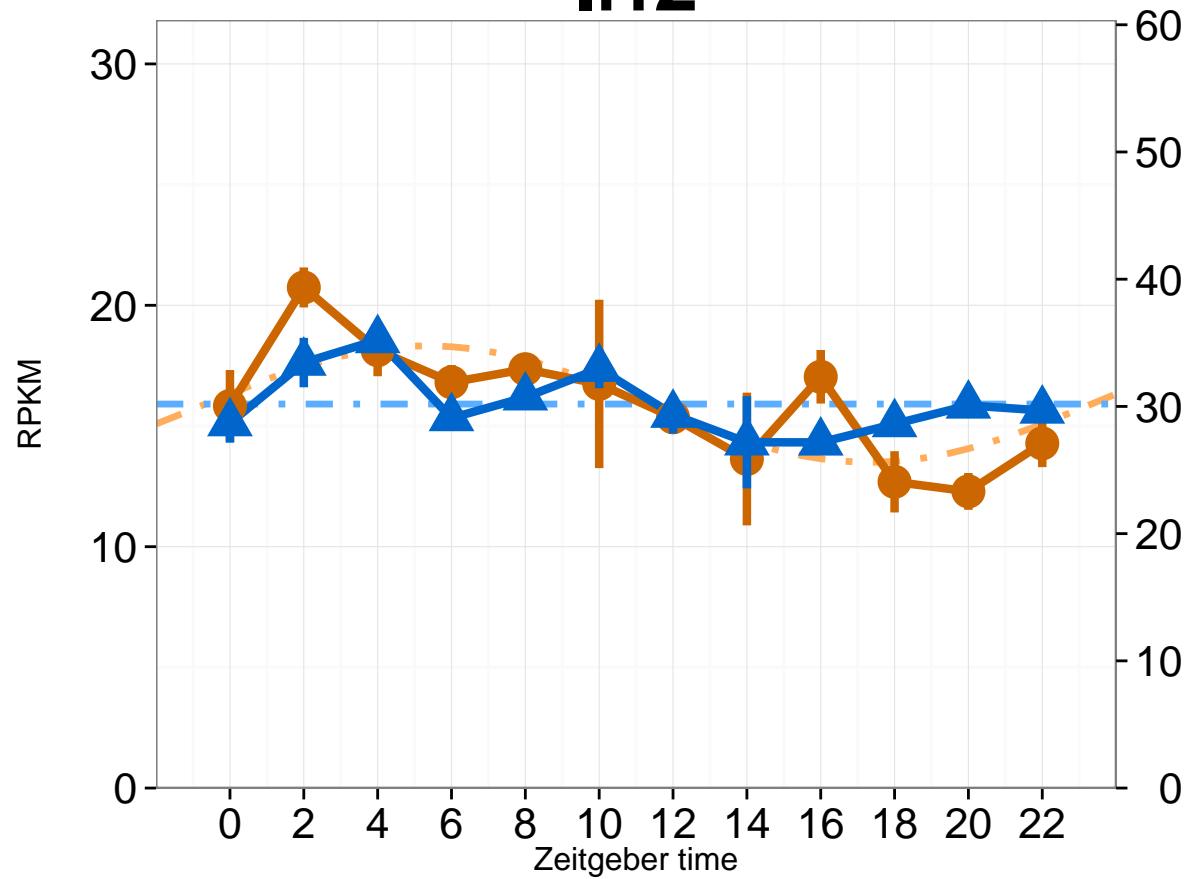

## Irf2

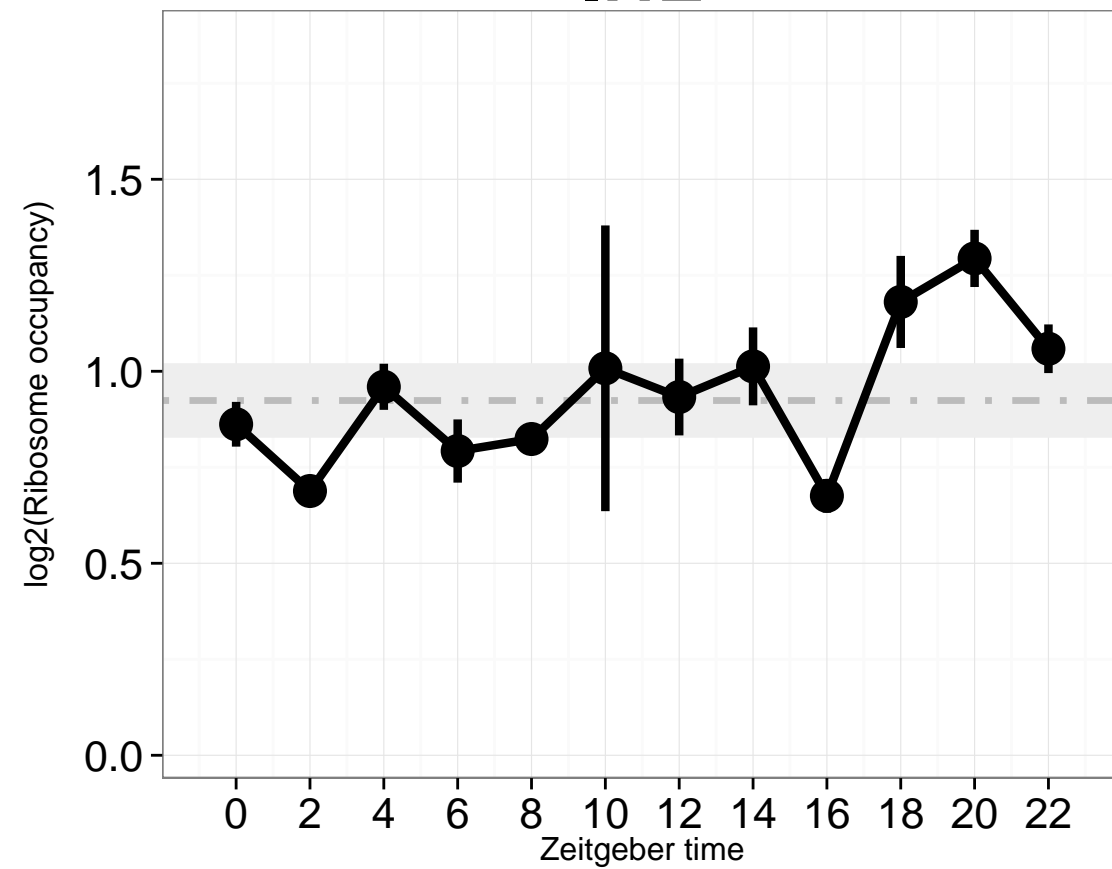

Supplement: Supplementary file 3722 [file 1]

## Canx

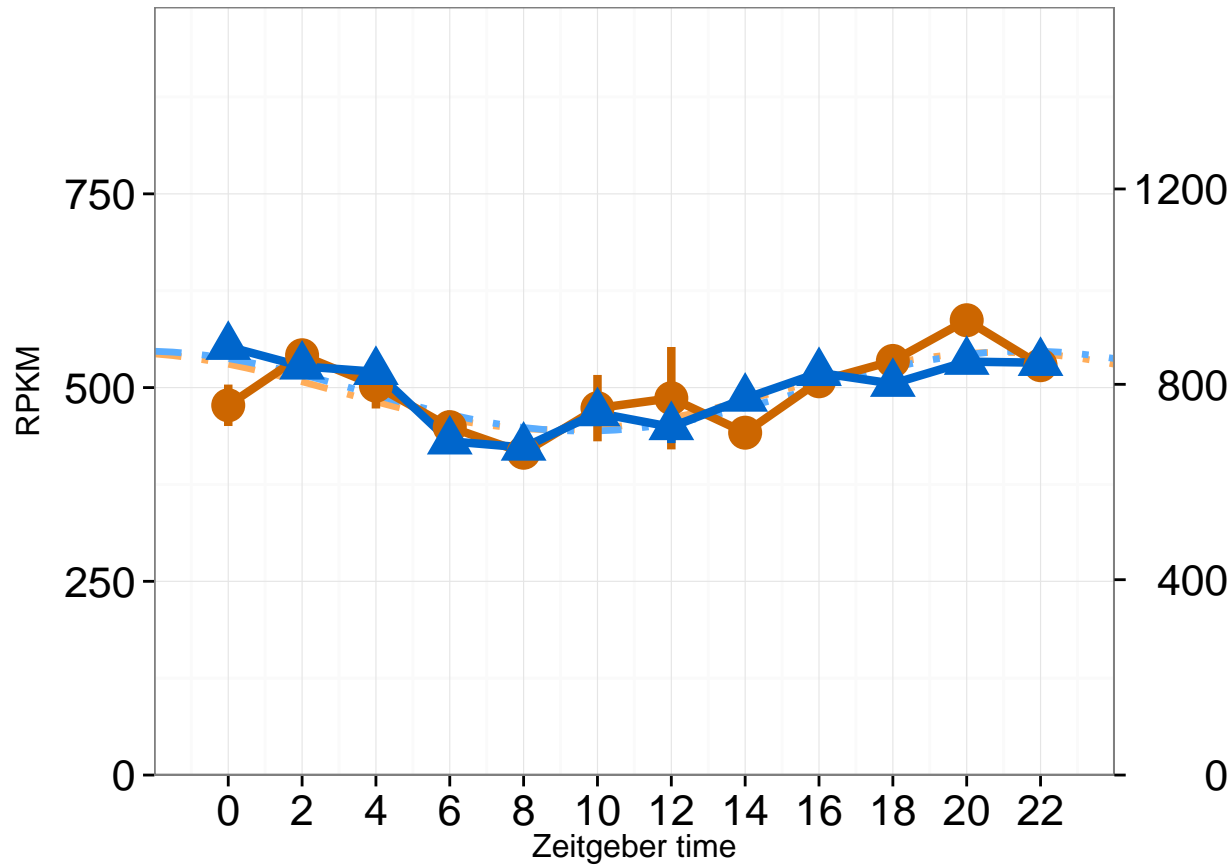

## Canx

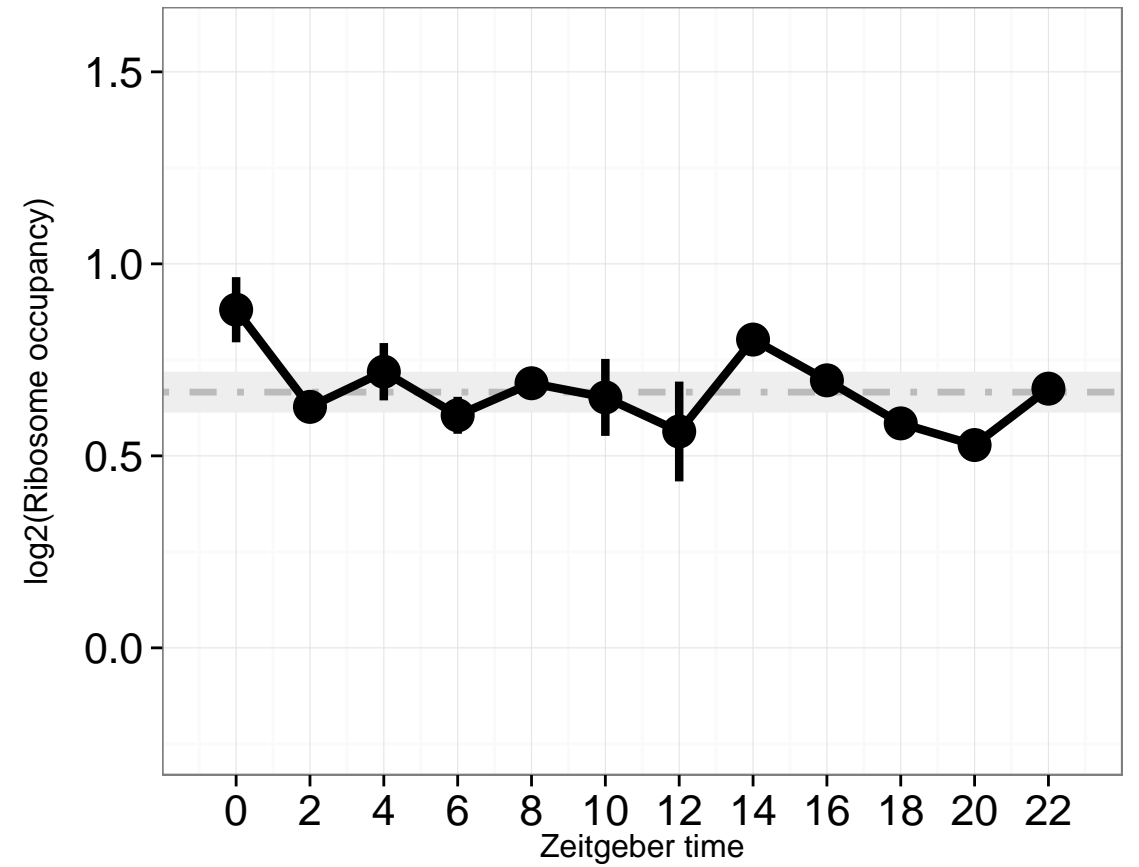

Supplement: Supplementary file 3723 [file 1]

# Chpt1

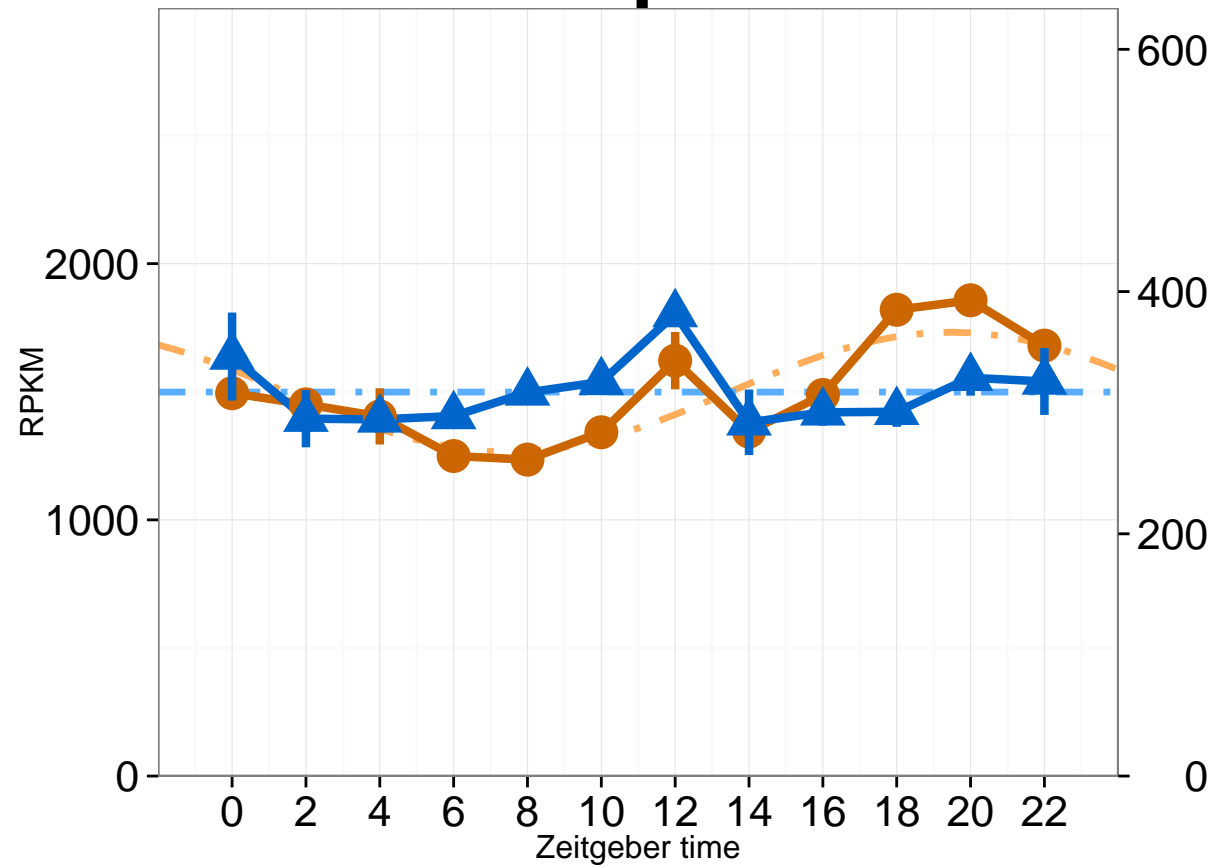

# Chpt1

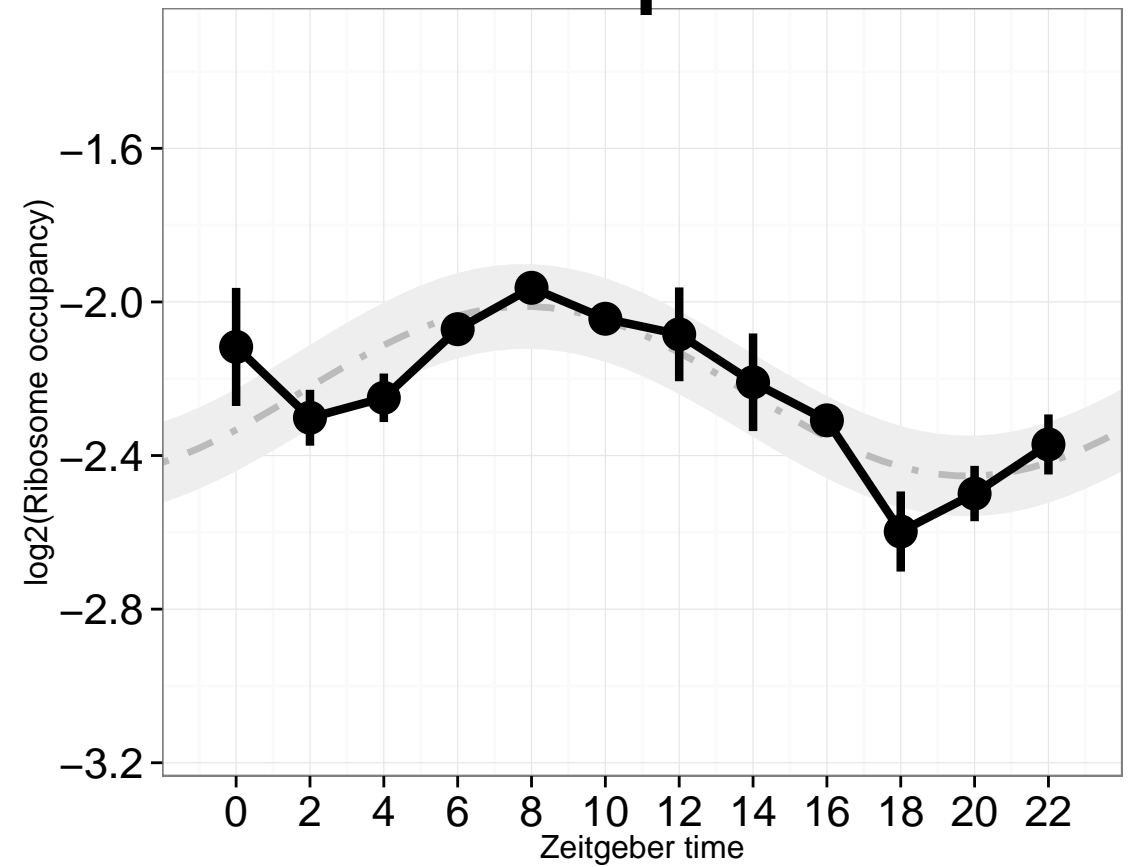

Supplement: Supplementary file 3724 [file 1]

## Cd14

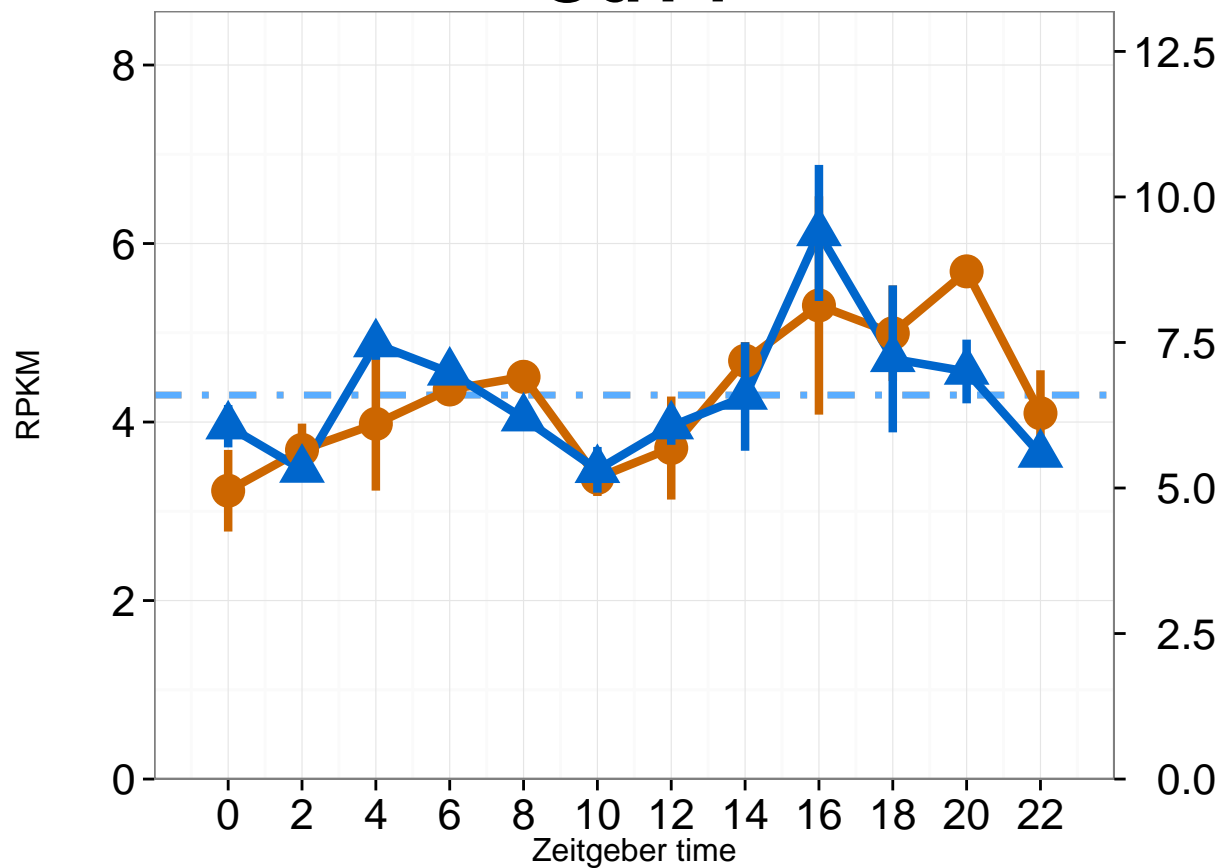

## Cd14

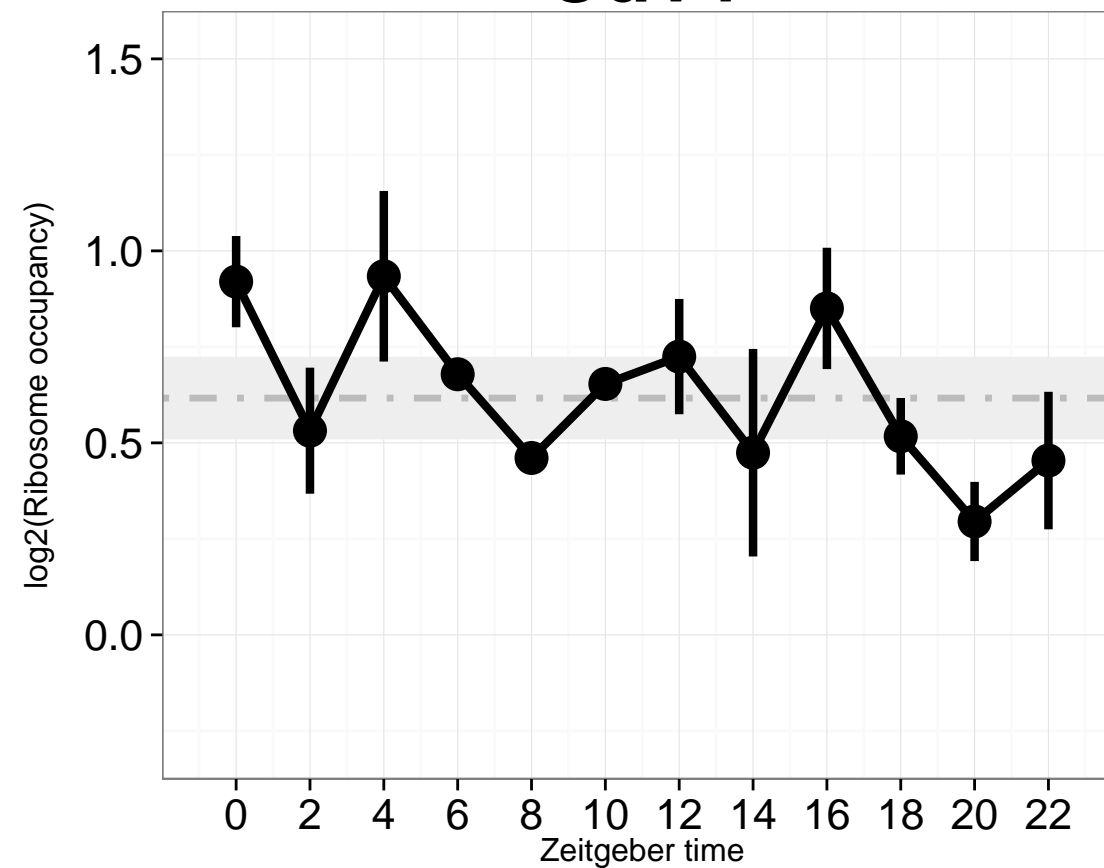

Supplement: Supplementary file 3725 [file 1]

# Cacna1g

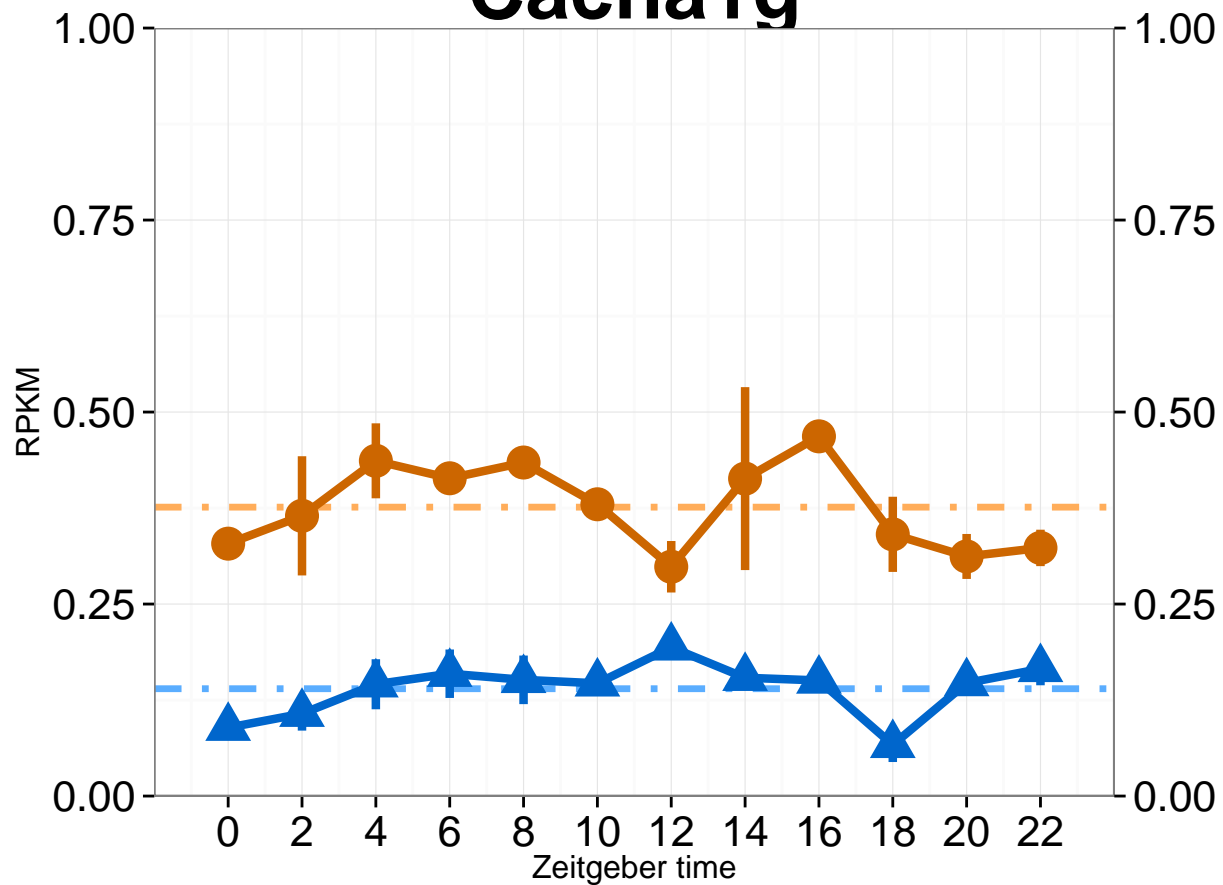

# Cacna1g

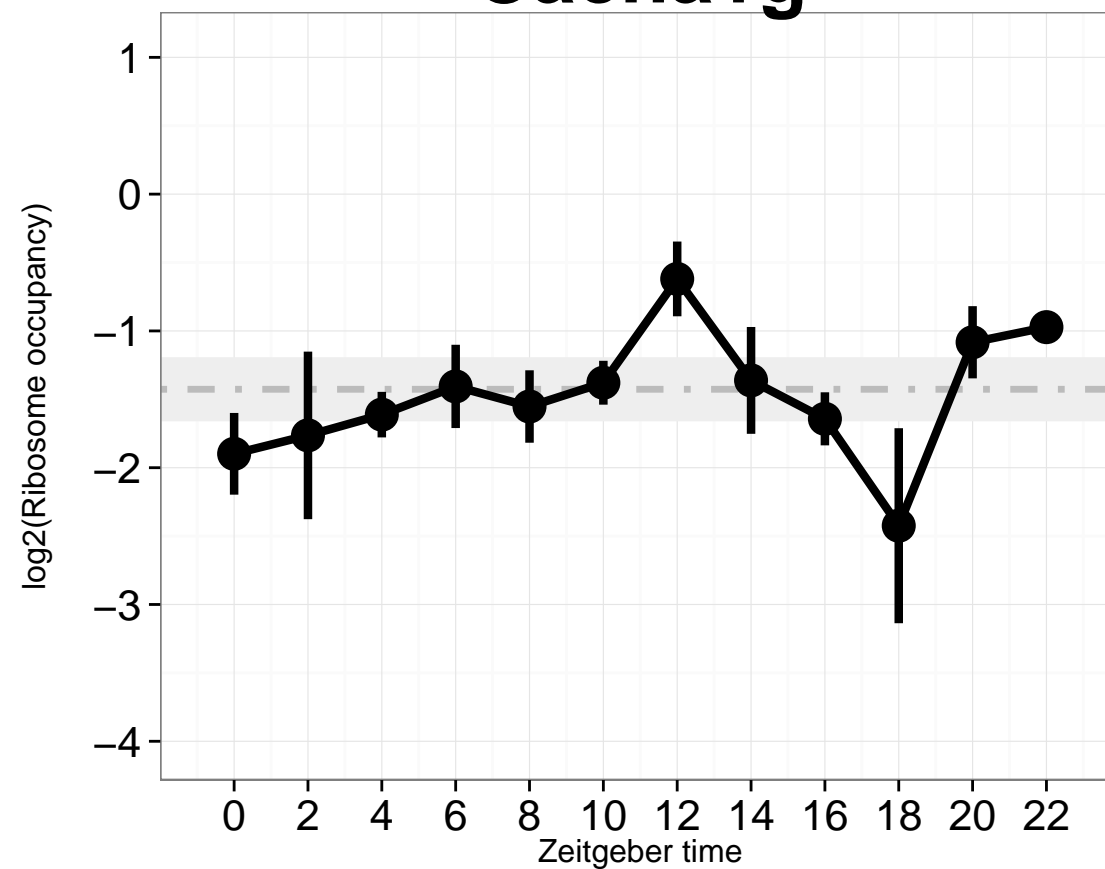

Supplement: Supplementary file 3726 [file 1]

## Nudt7

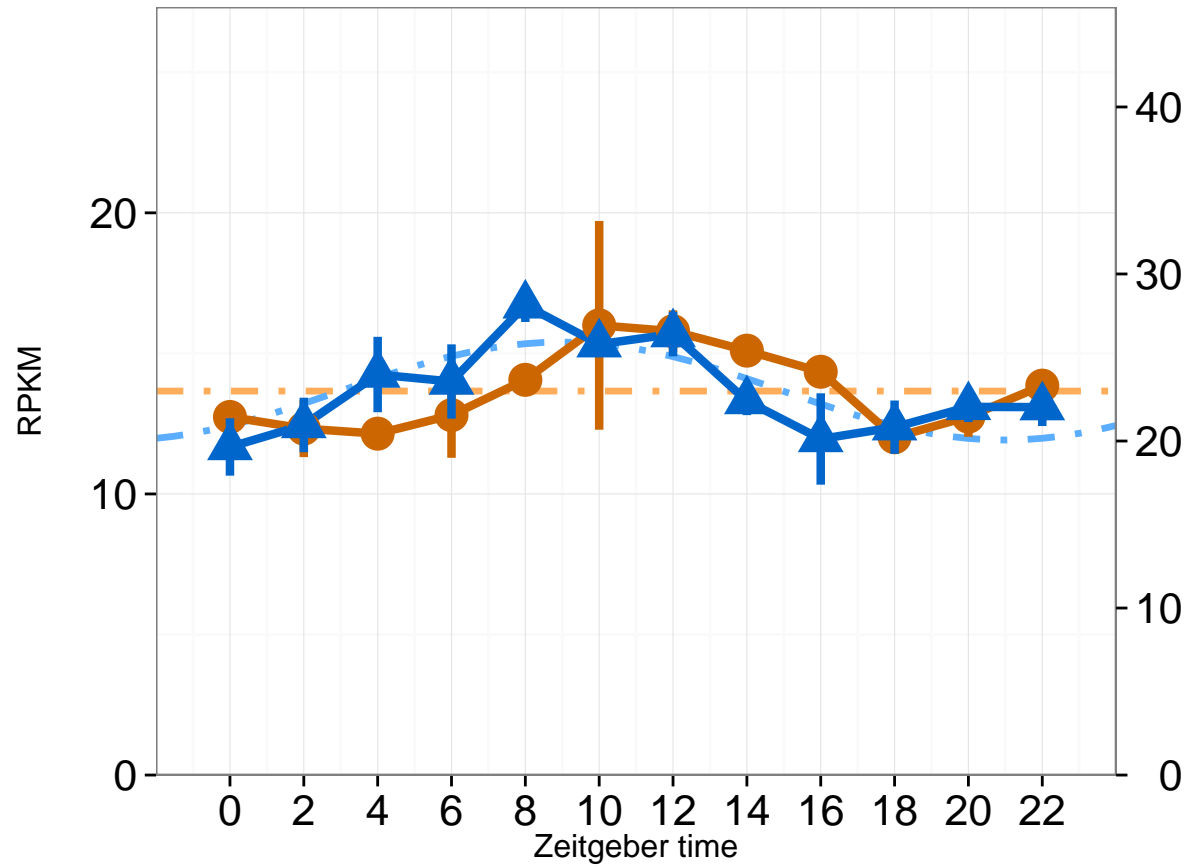

## Nudt7

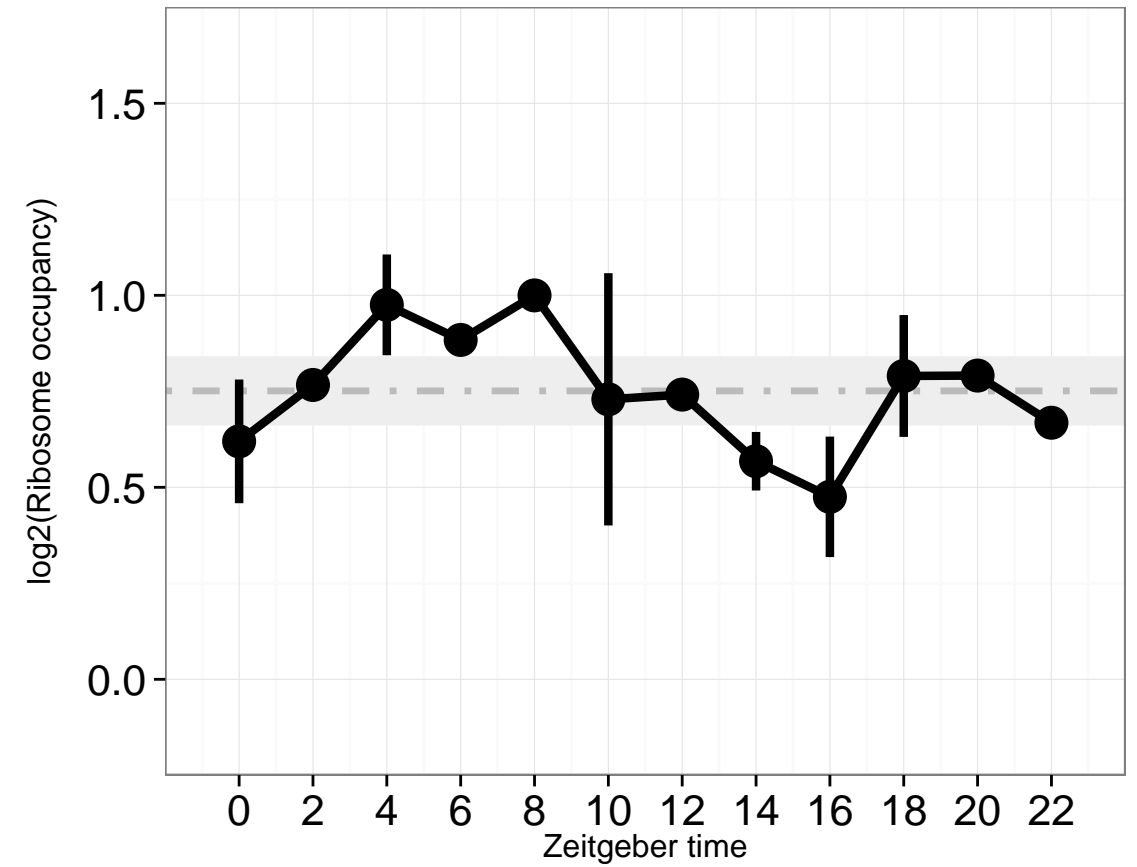

Supplement: Supplementary file 3727 [file 1]

# Rsad2

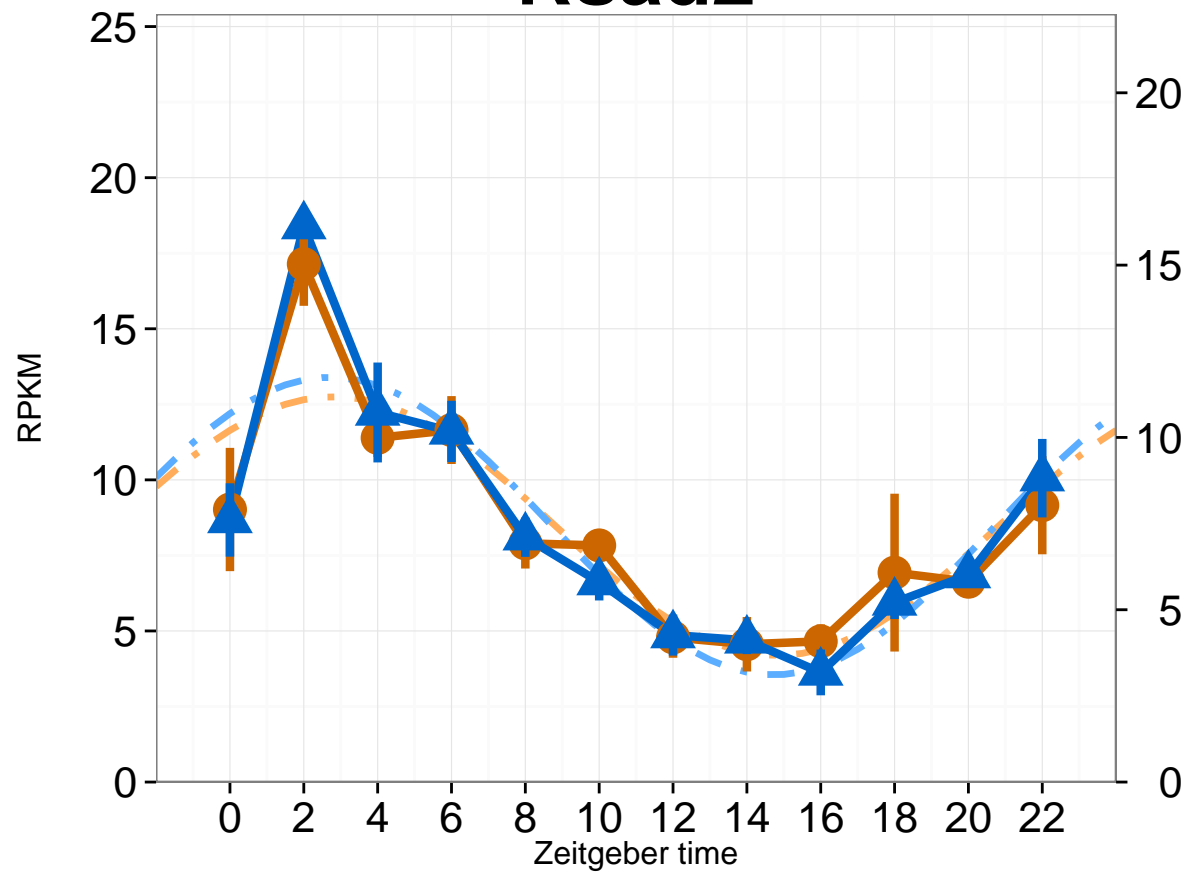

# Rsad2

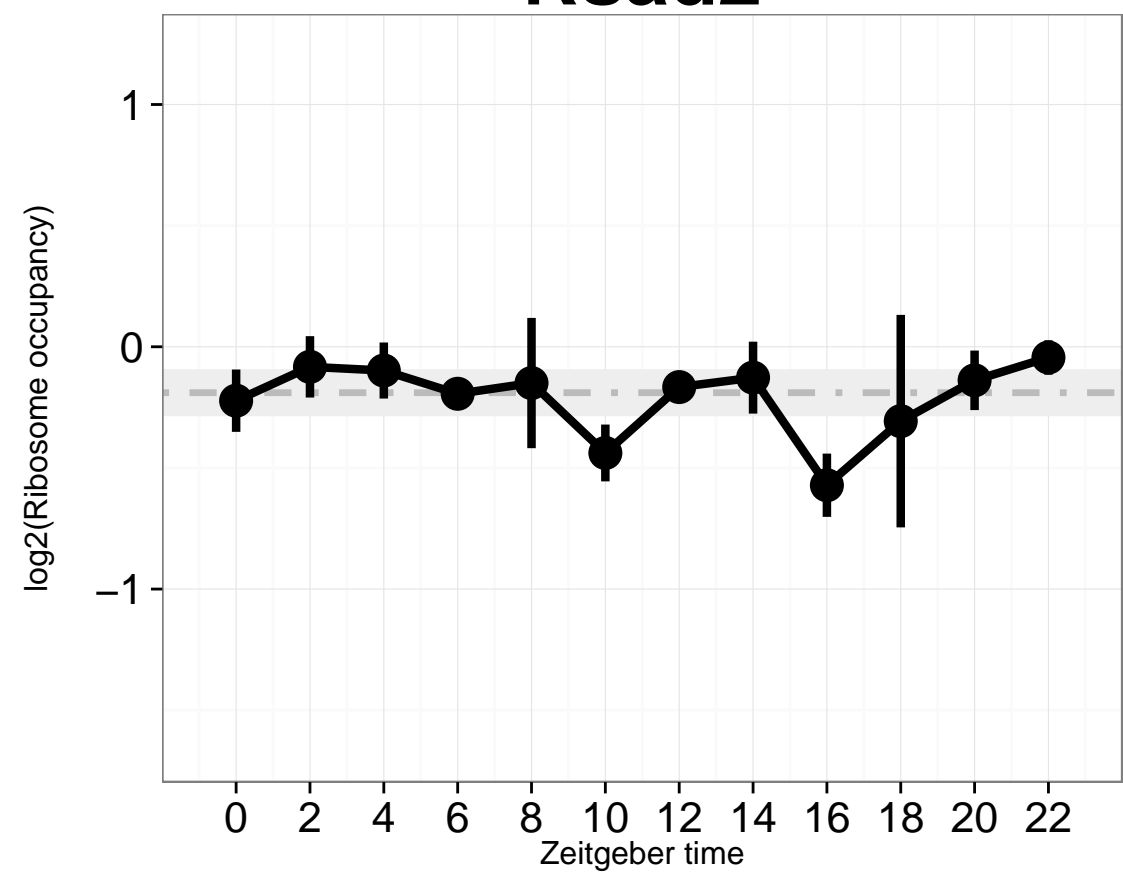

Supplement: Supplementary file 3728 [file 1]

# Tmem246

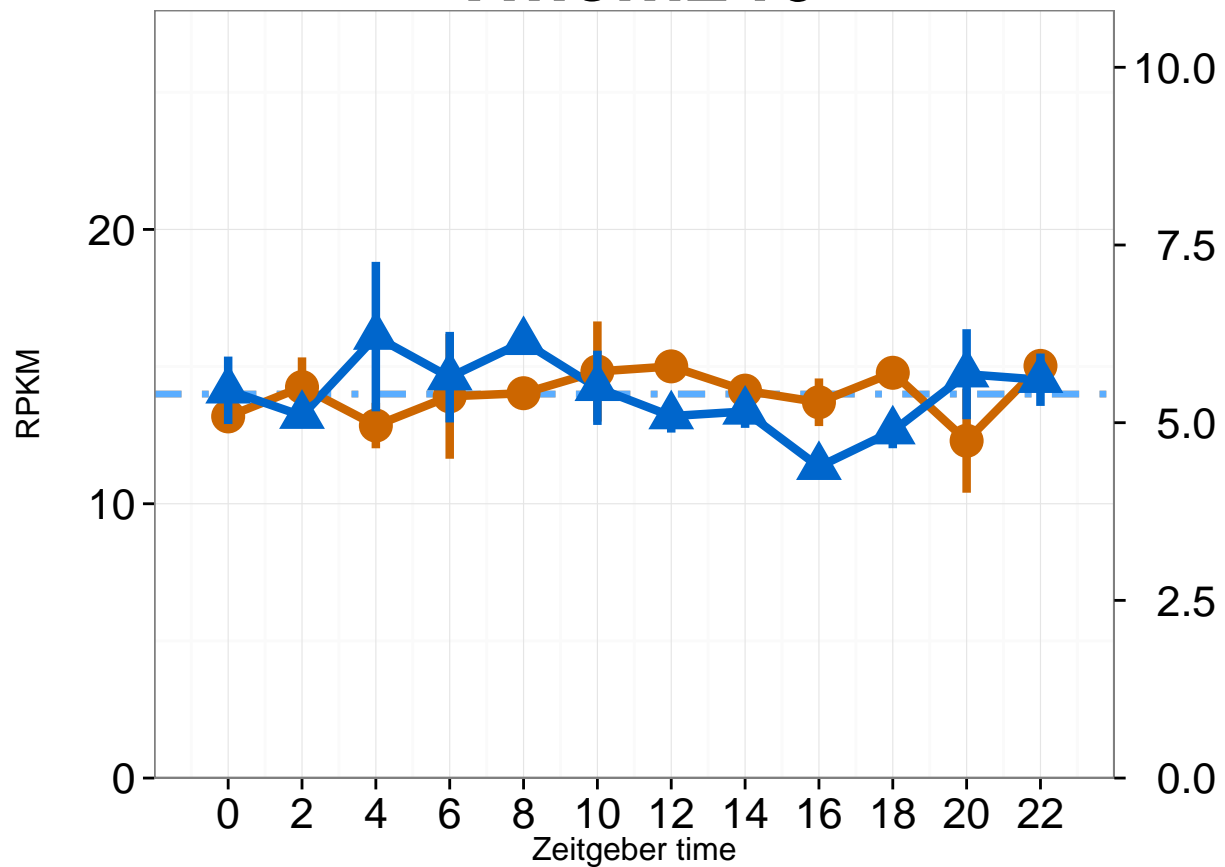

# Tmem246

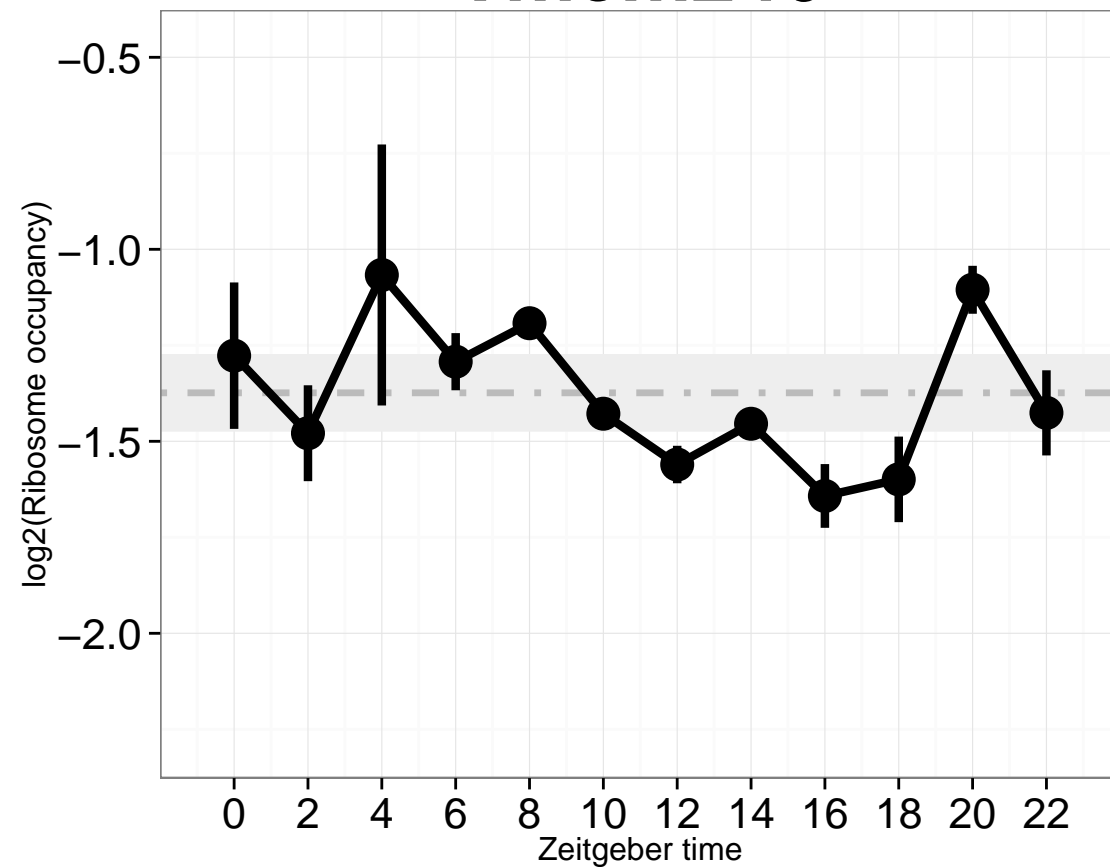

Supplement: Supplementary file 3729 [file 1]

# Nr1i2

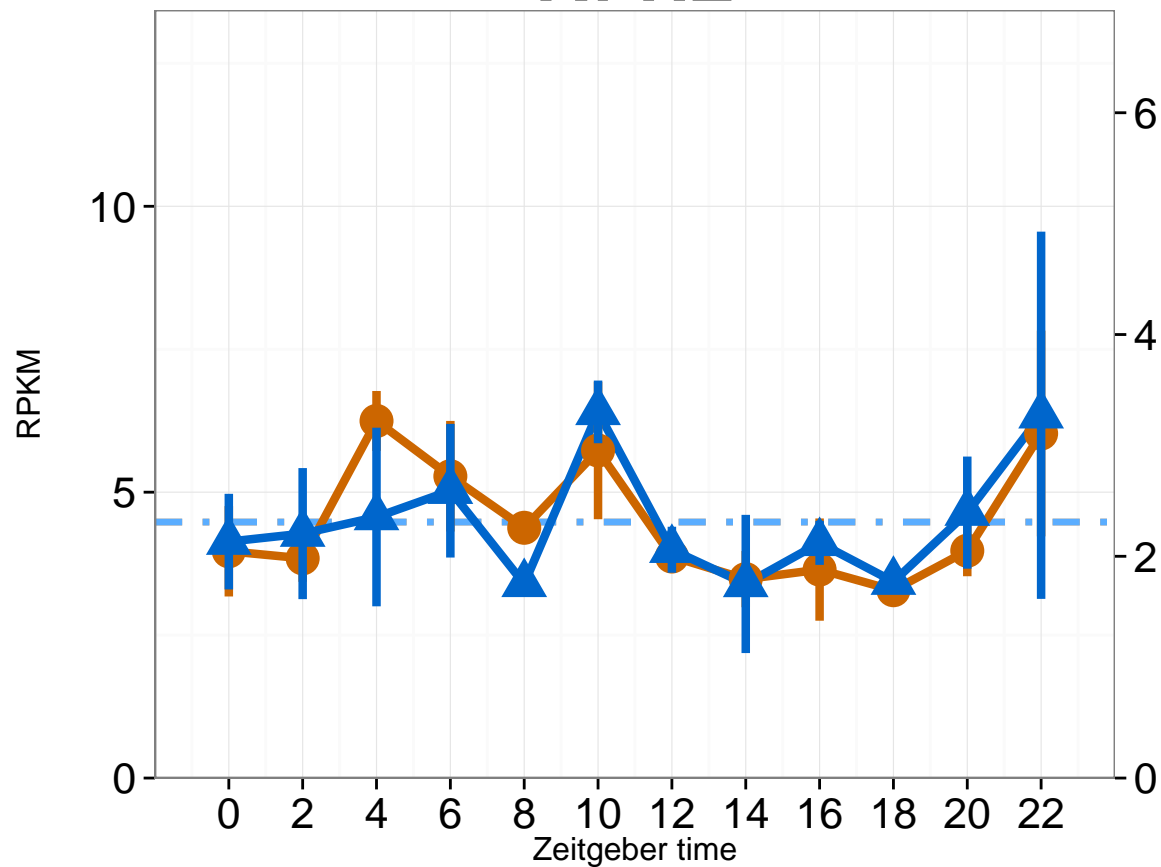

# Nr1i2

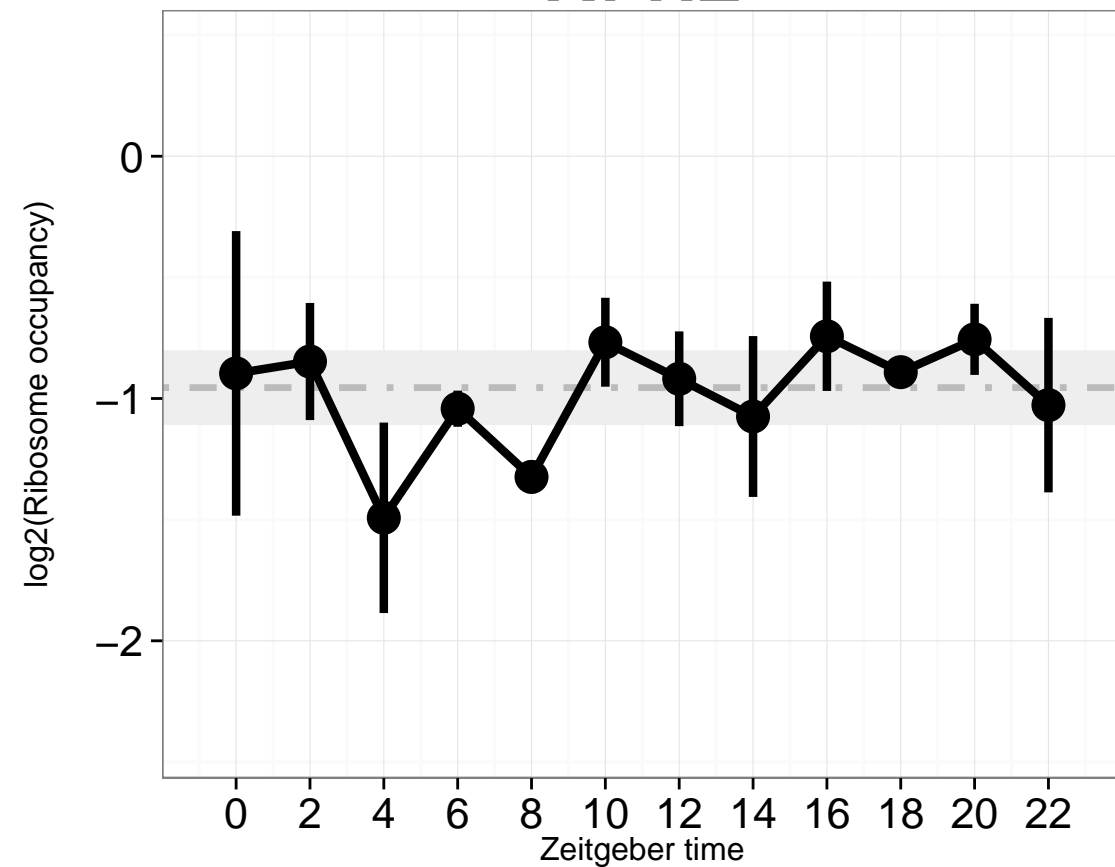

Supplement: Supplementary file 3730 [file 1]

# Arrdc2

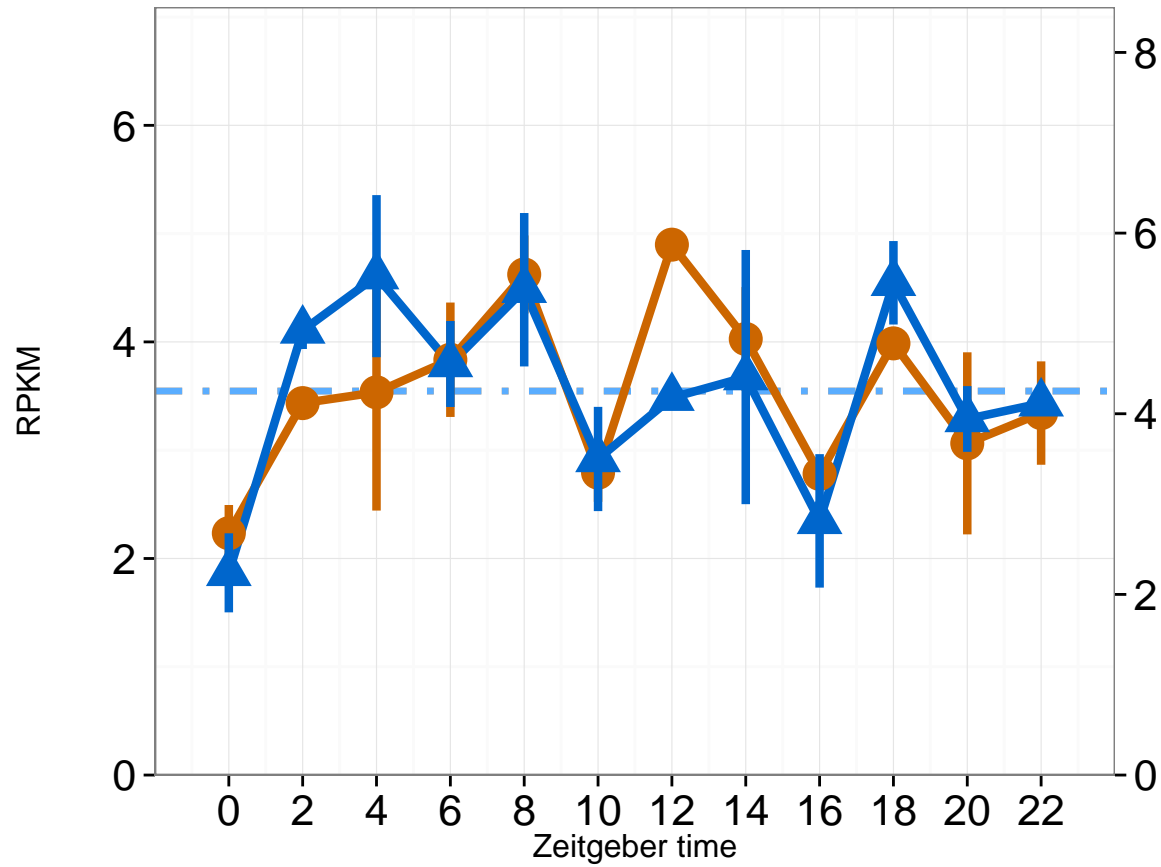

# Arrdc2

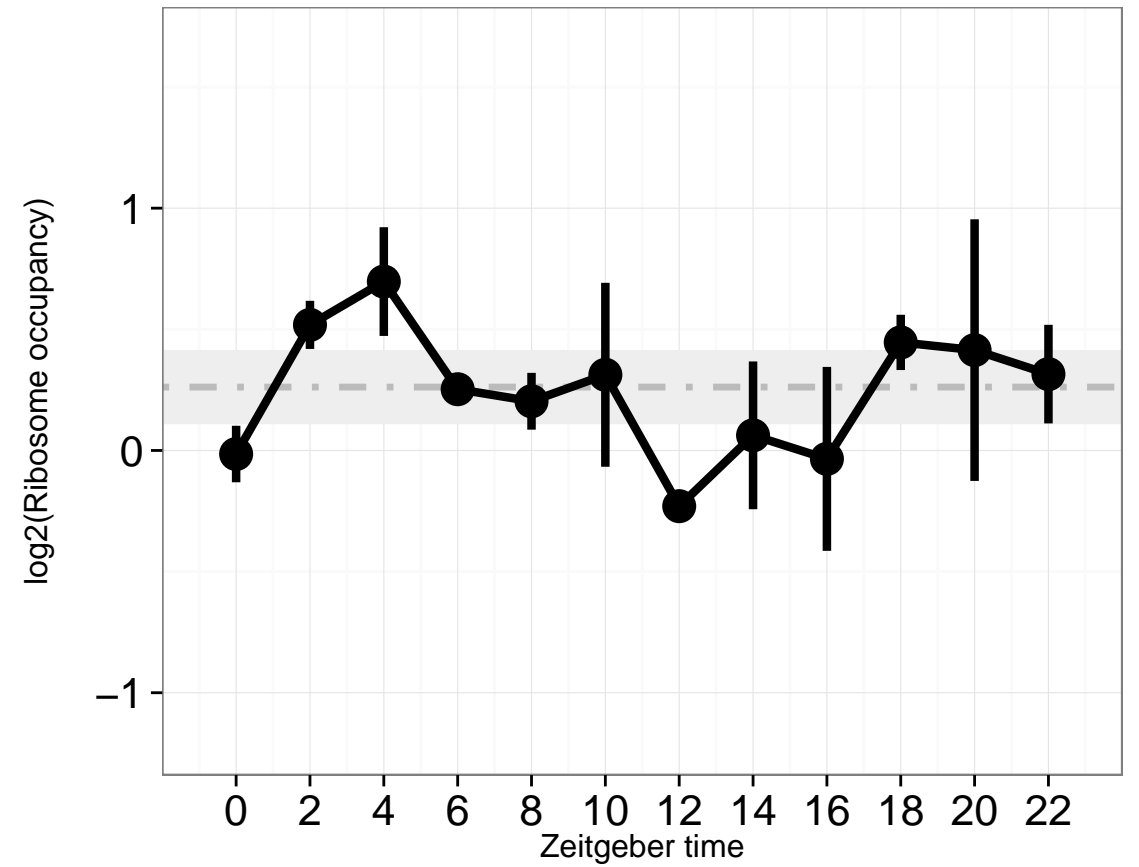

Supplement: Supplementary file 3731 [file 1]

## Cox6a2

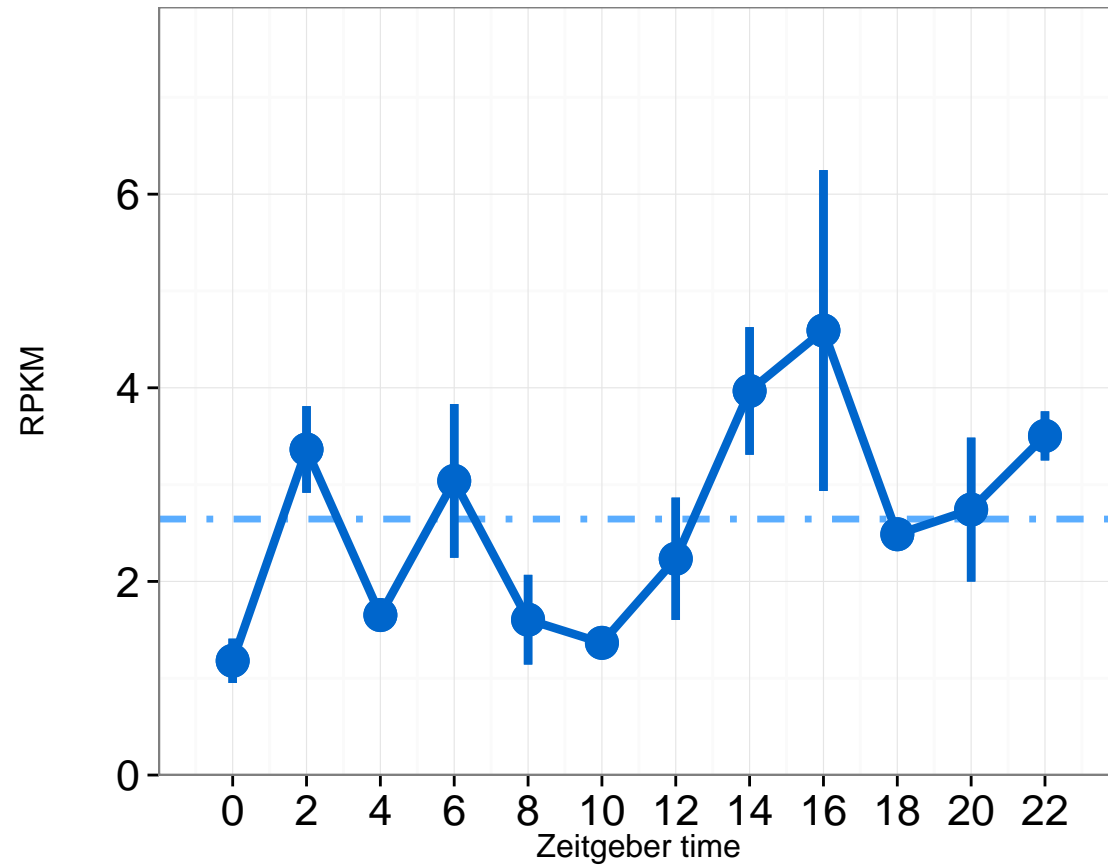

## Cox6a2 log2(Ribosome occupancy)

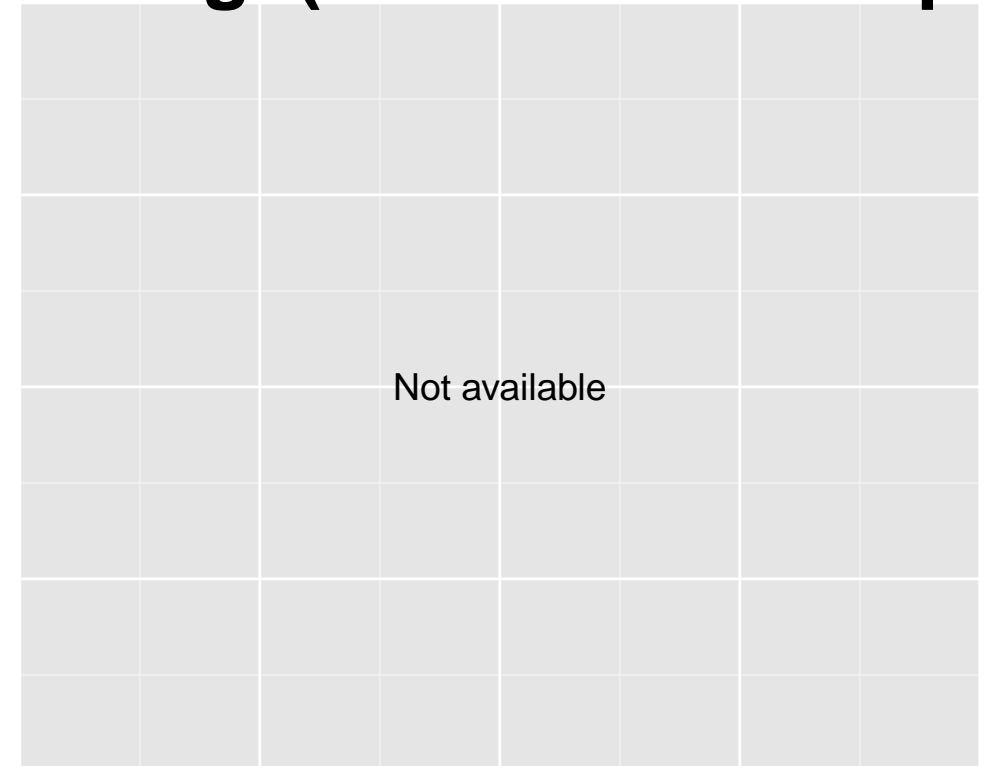

Supplement: Supplementary file 3732 [file 1]

## Ptpla

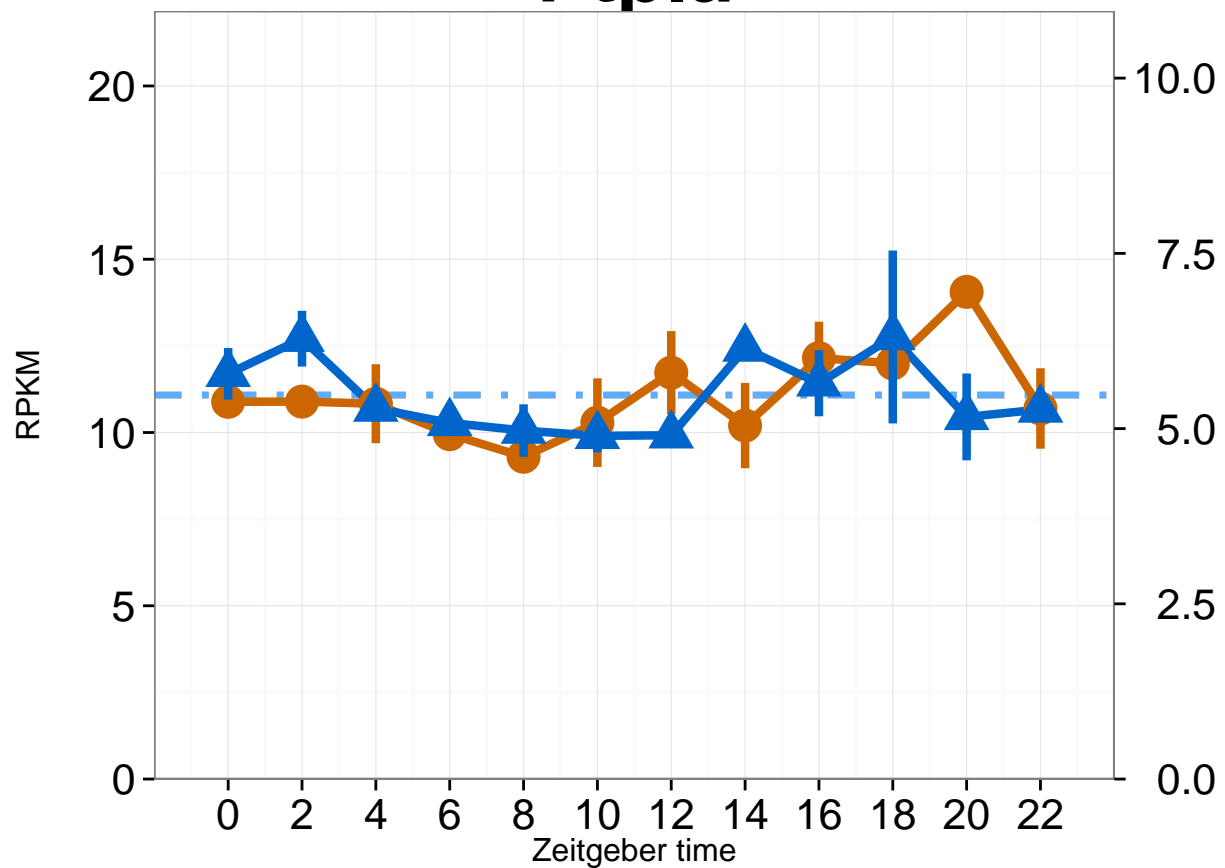

## Ptpla

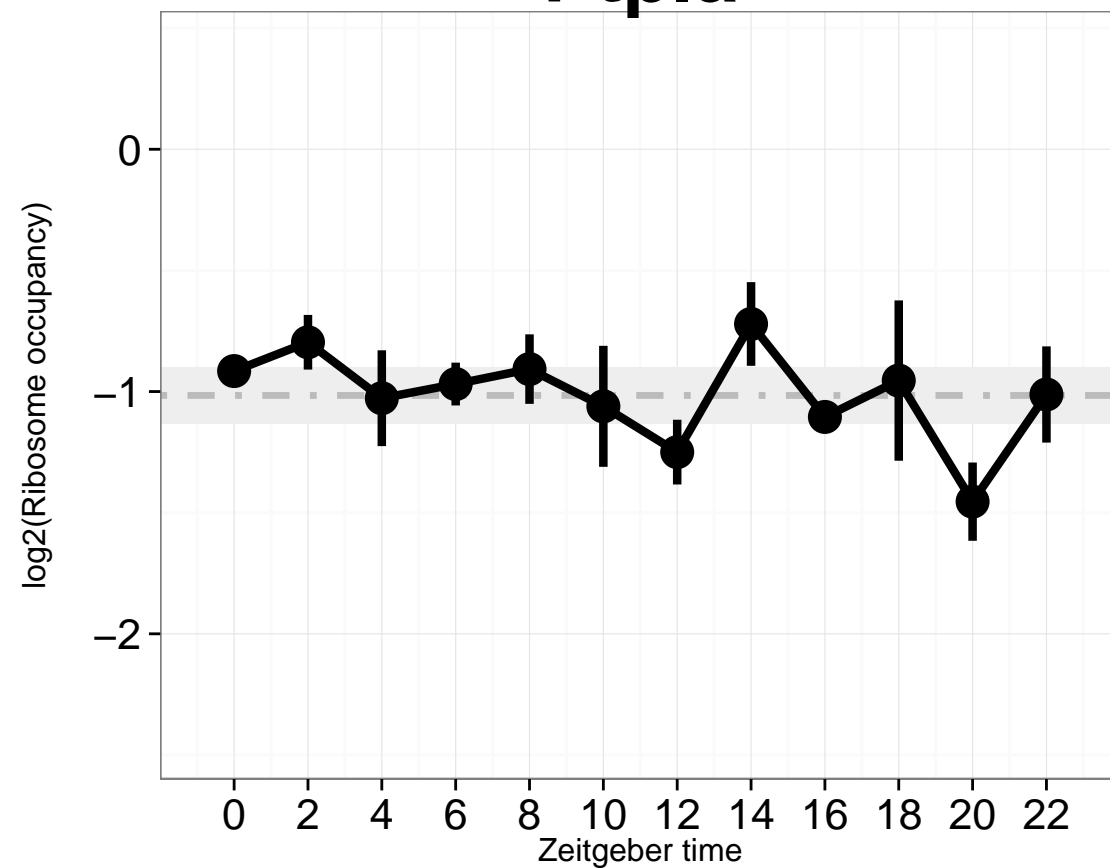

Supplement: Supplementary file 3733 [file 1]

## Irf1

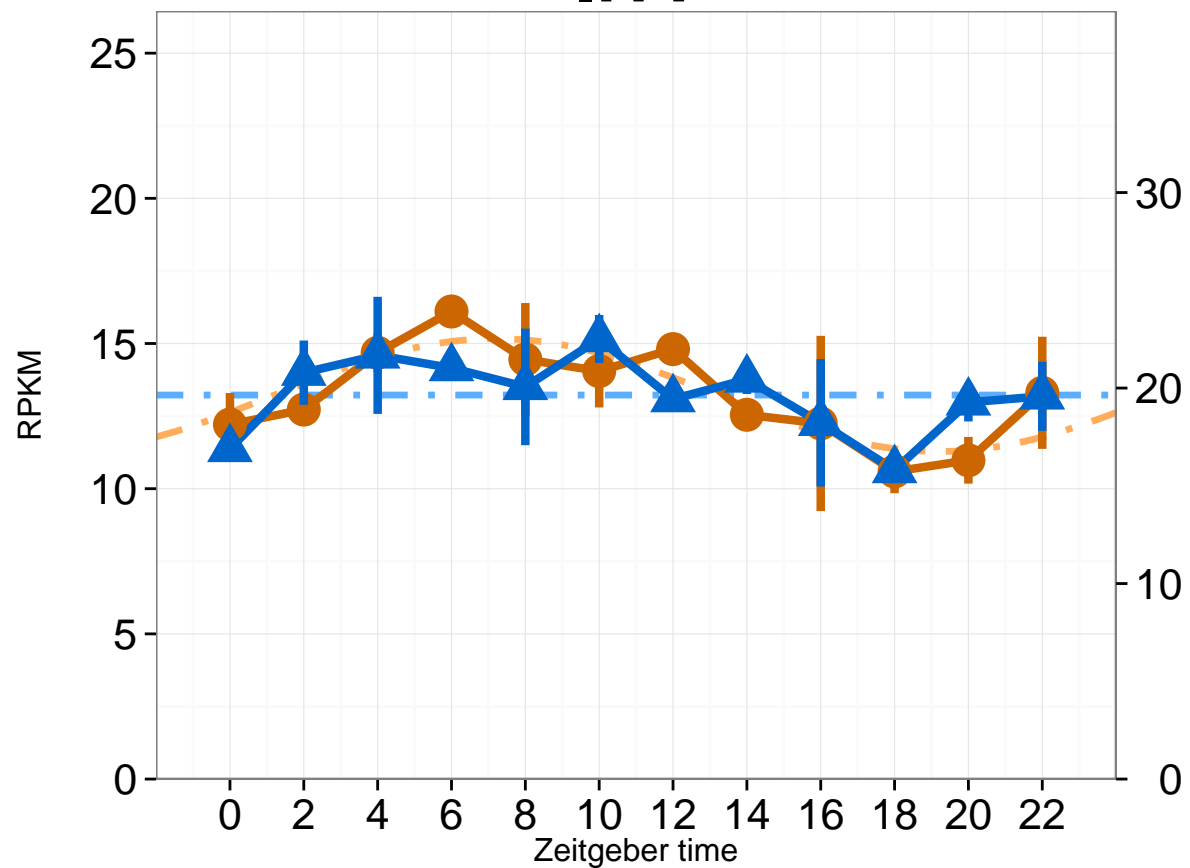

## Irf1

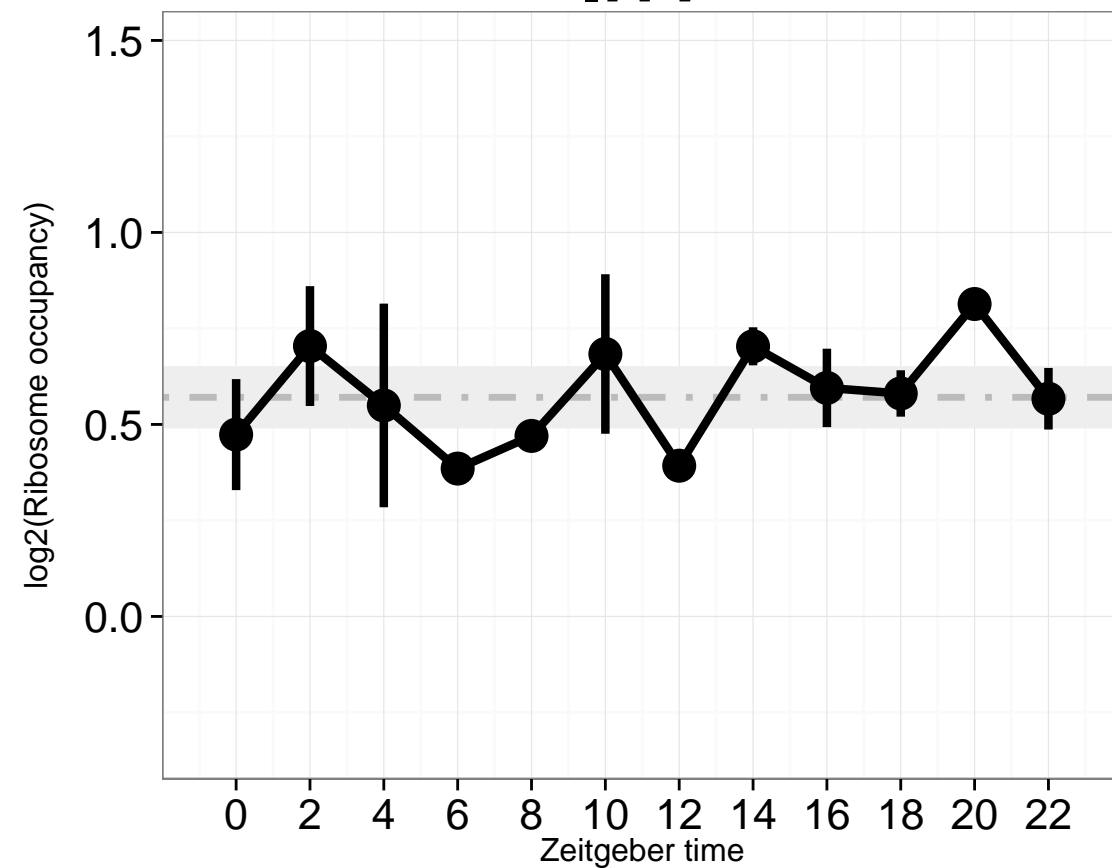

Supplement: Supplementary file 3734 [file 1]

# Cnot6

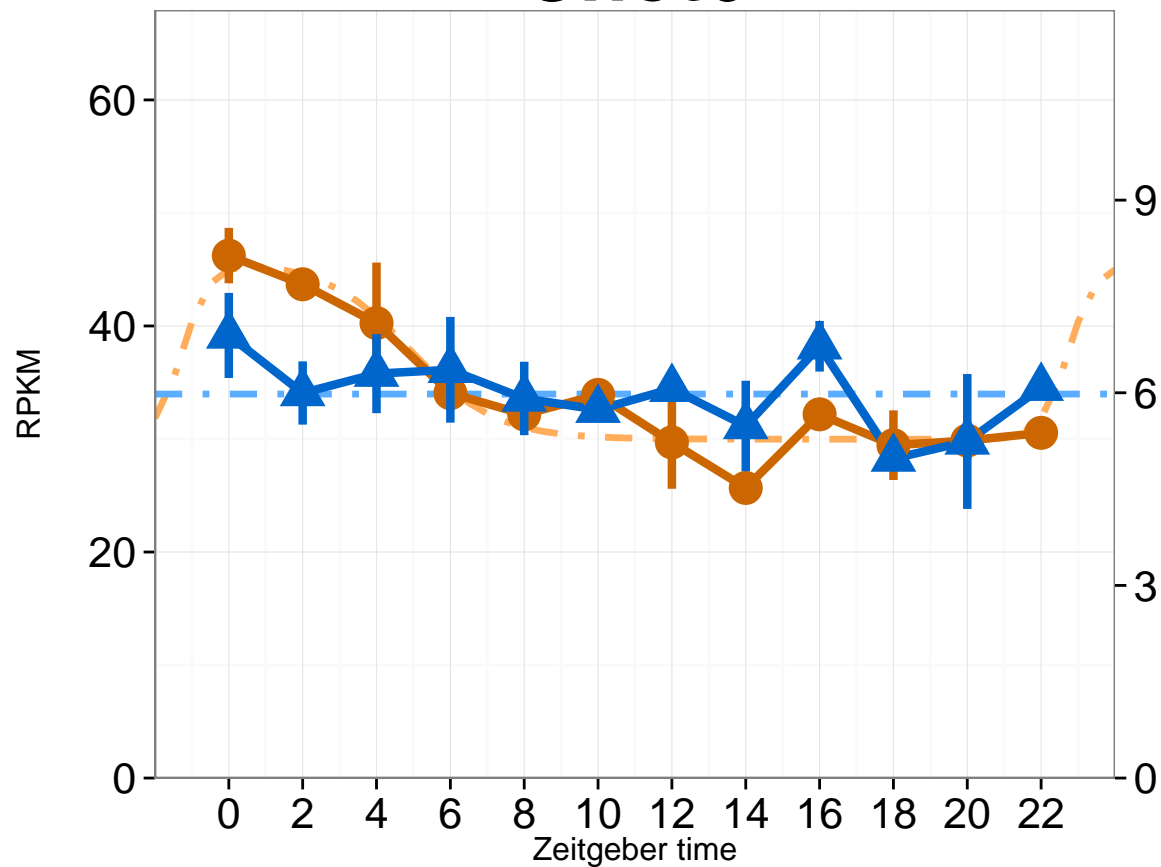

# Cnot6

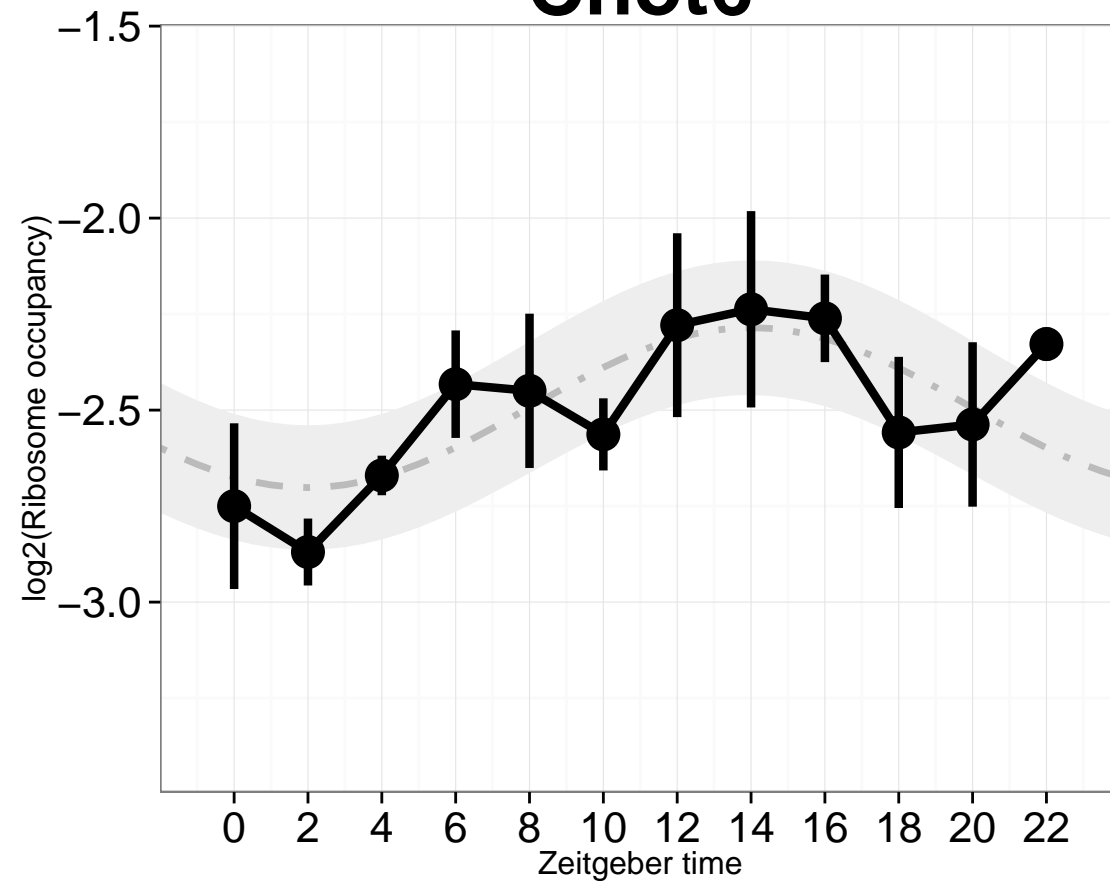

Supplement: Supplementary file 3735 [file 1]

## Enpp2

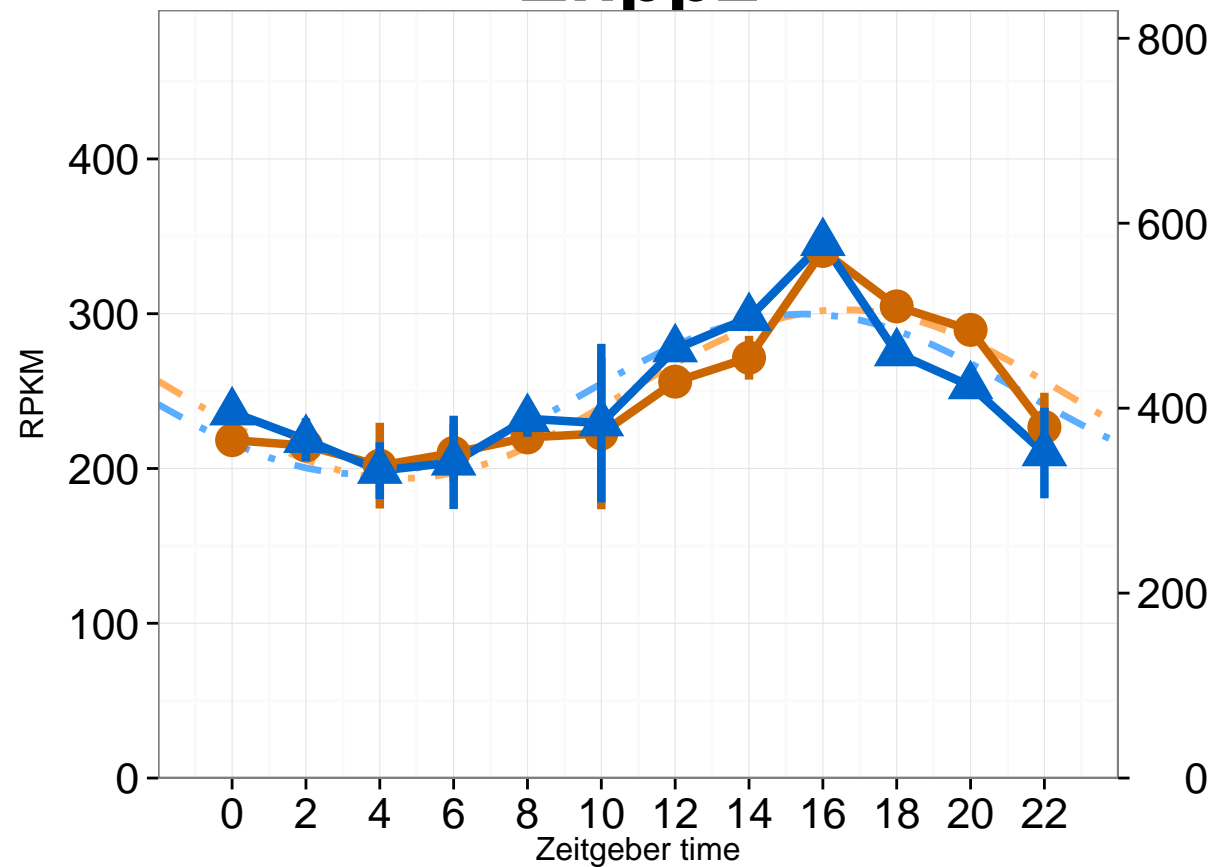

## Enpp2

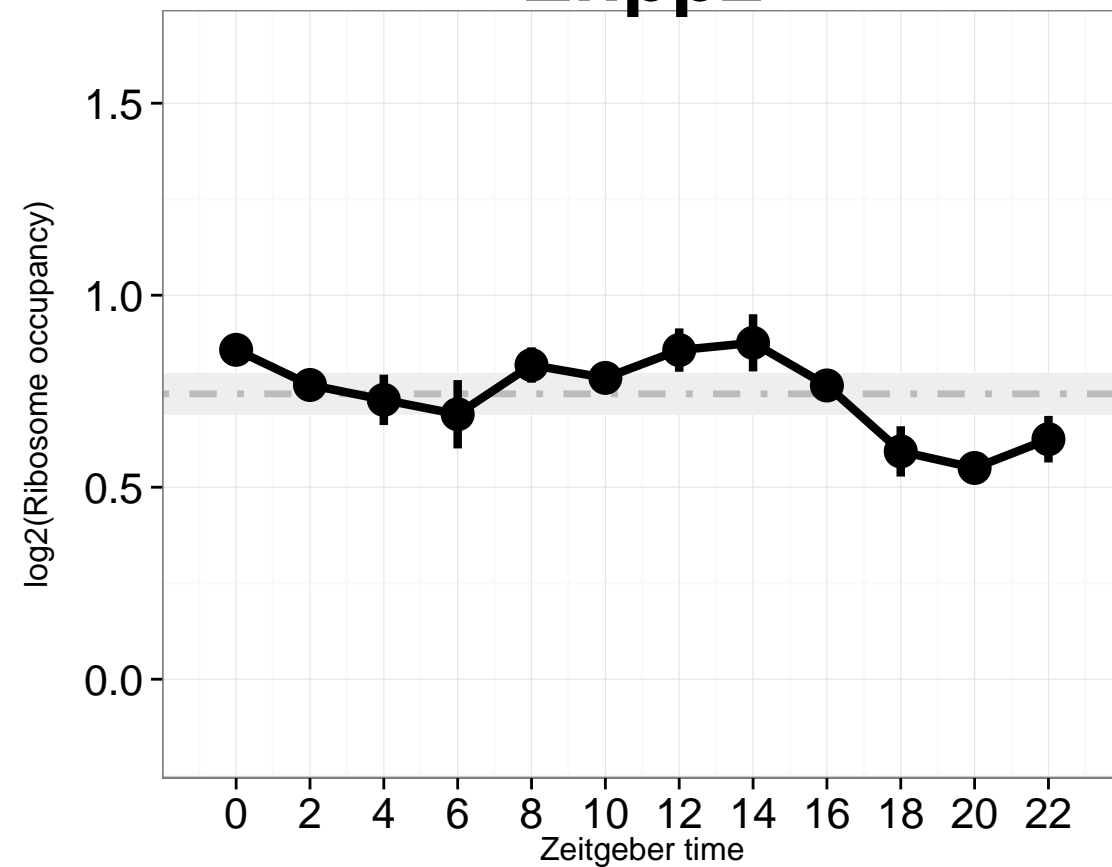

Supplement: Supplementary file 3736 [file 1]

# Pspc1

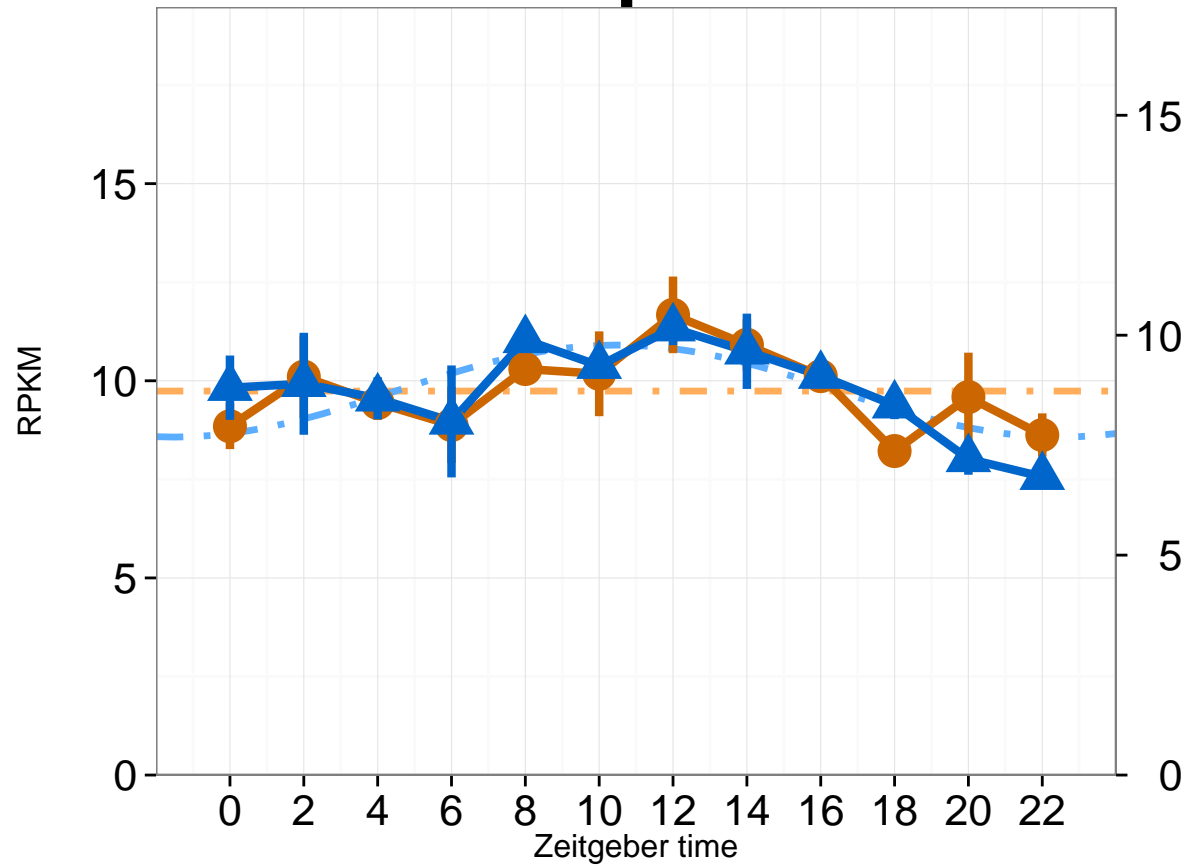

# Pspc1

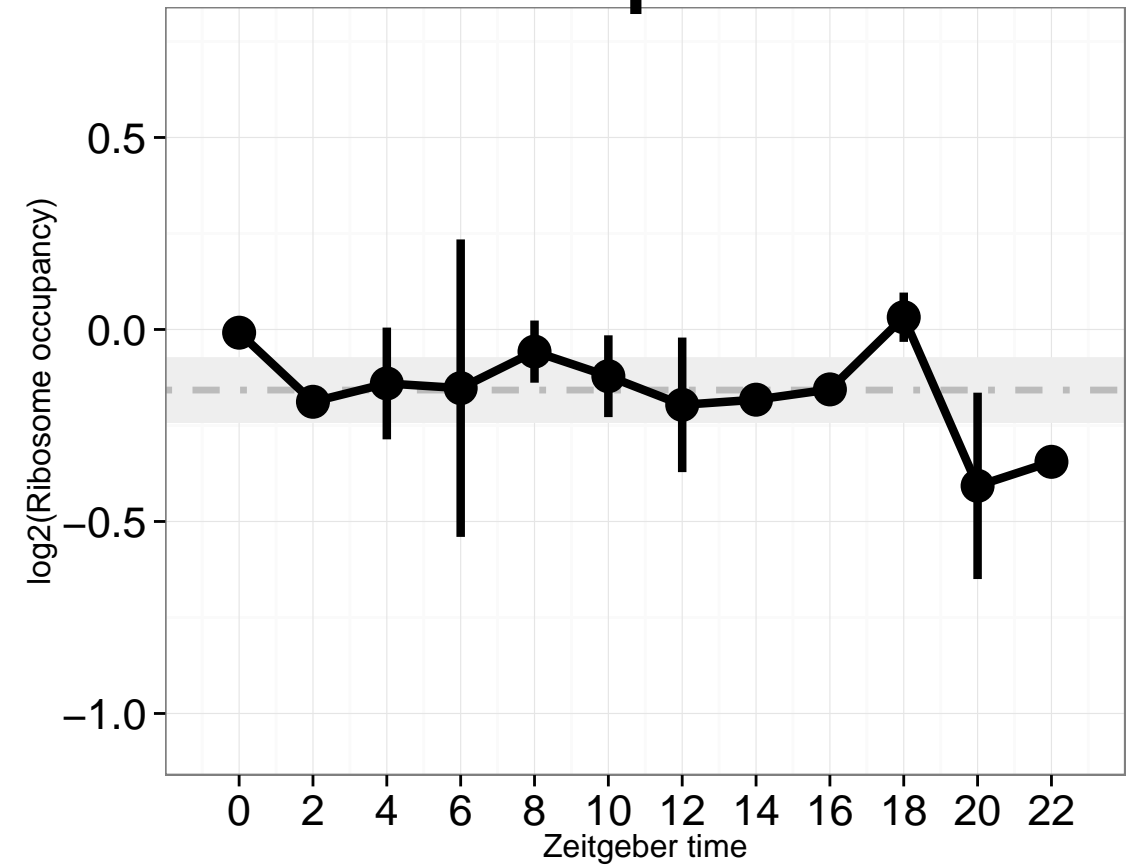

Supplement: Supplementary file 3737 [file 1]

# Tmem86a

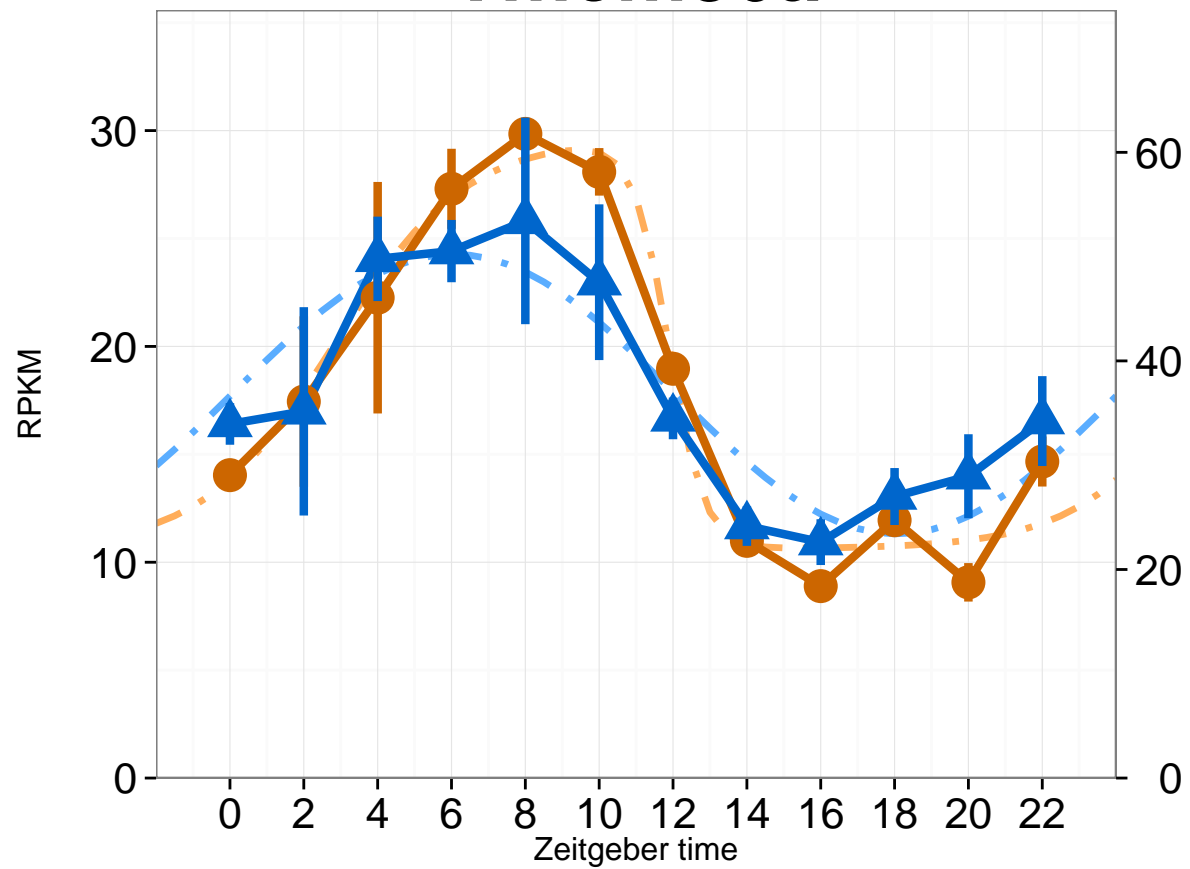

# Tmem86a

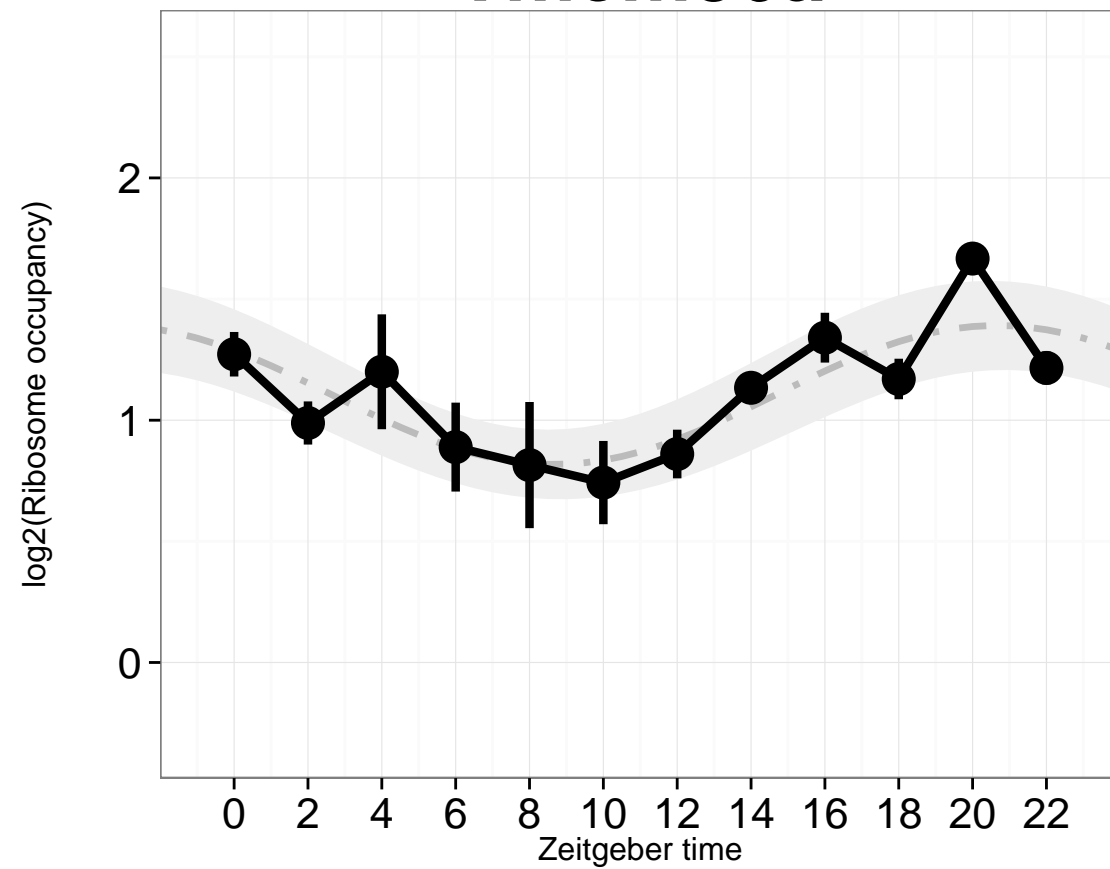

Supplement: Supplementary file 3738 [file 1]

# 1110012L19Rik

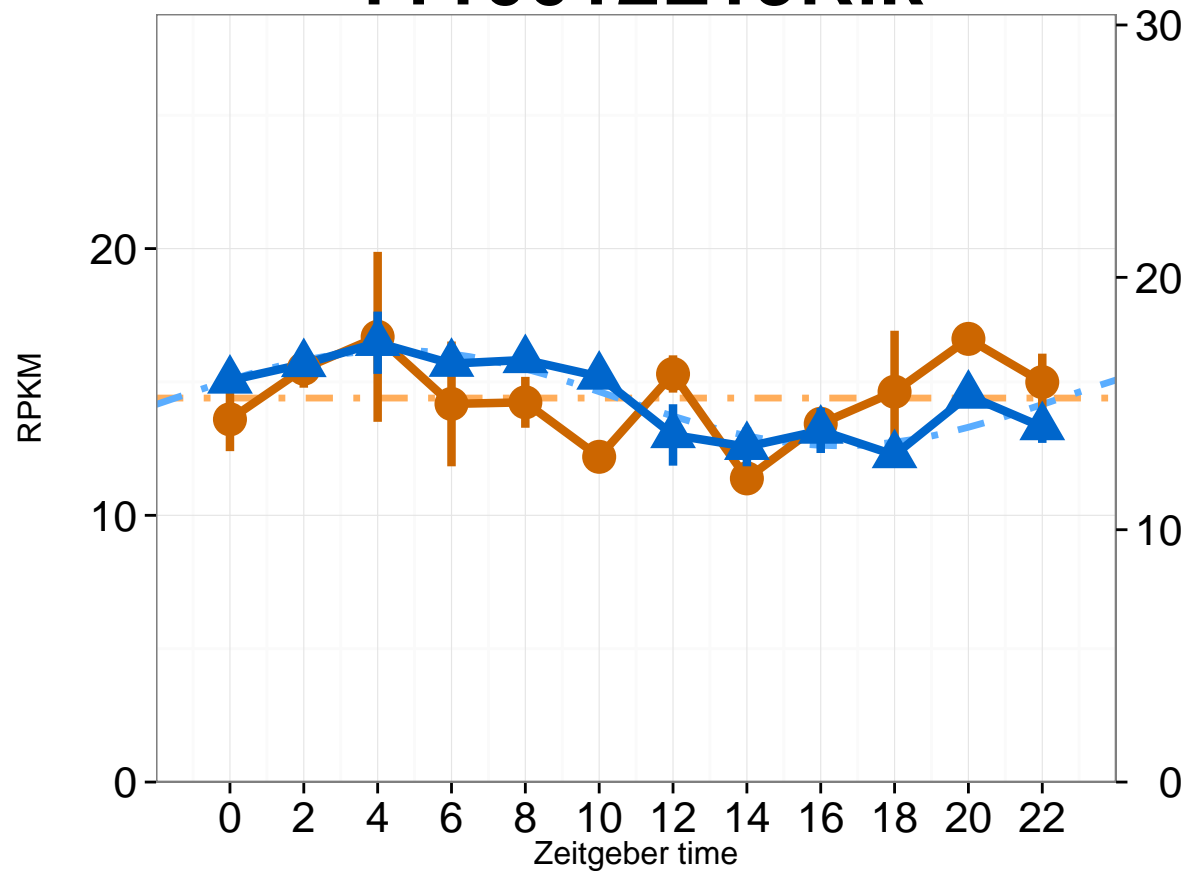

# 1110012L19Rik

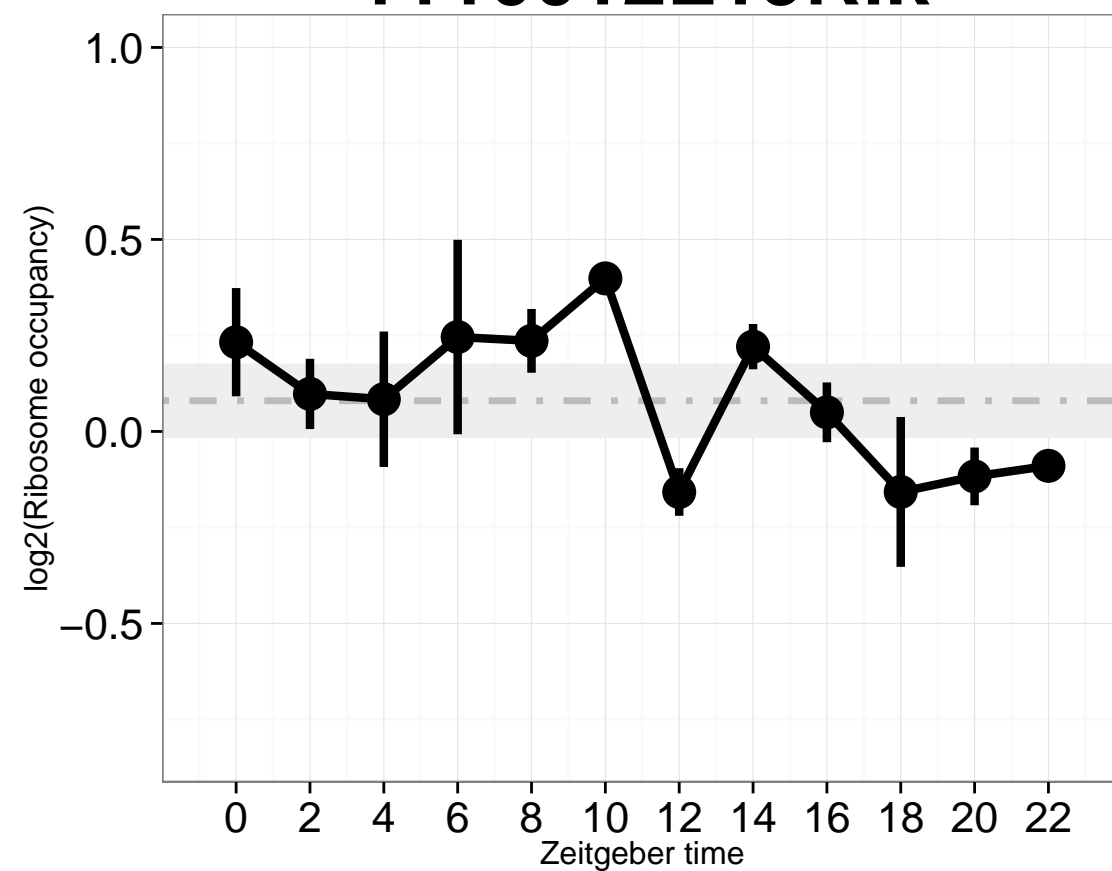

Supplement: Supplementary file 3740 [file 1]

# Rasl2-9

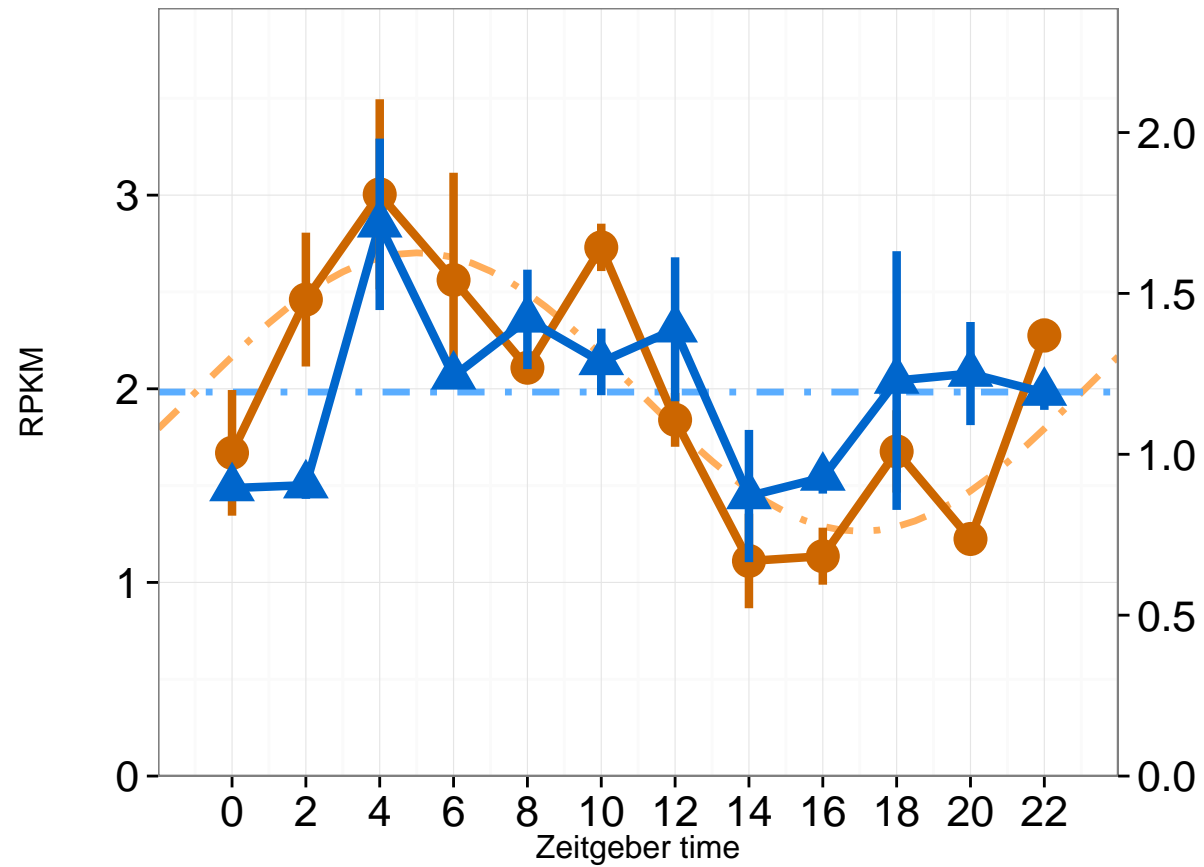

# Rasl2-9

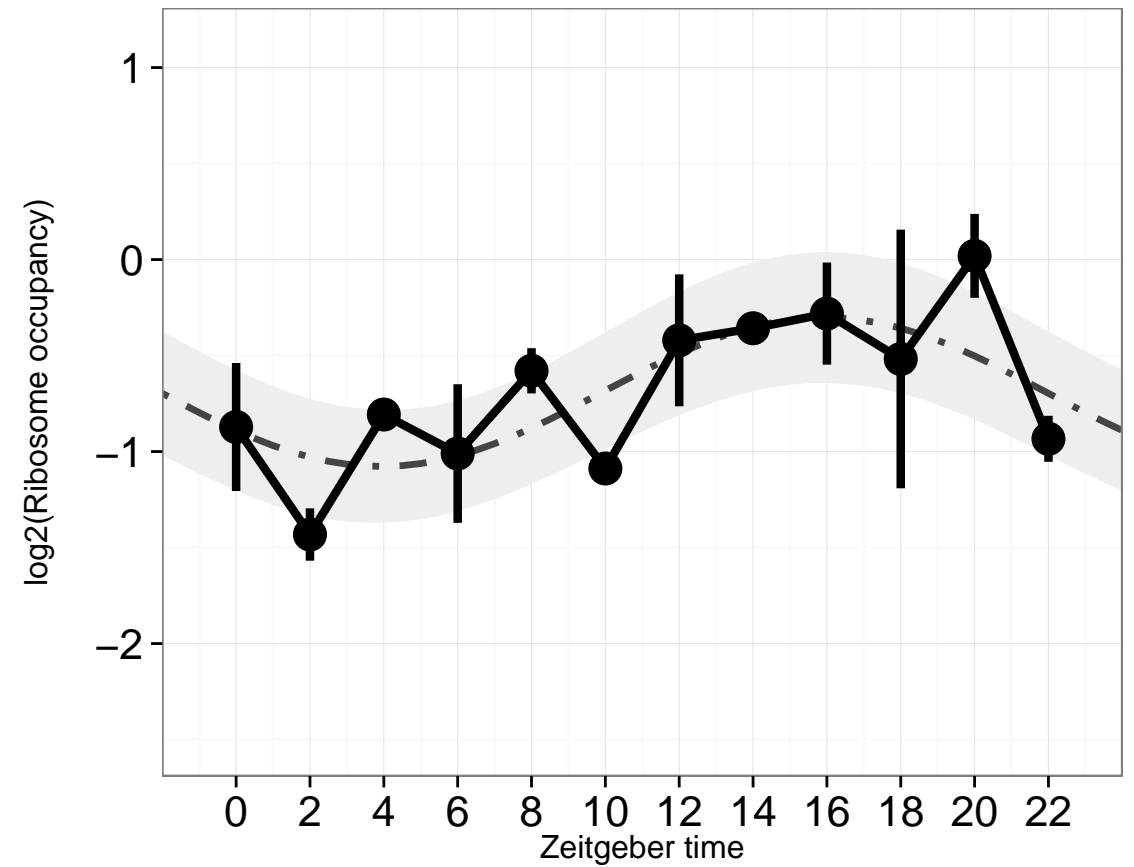

Supplement: Supplementary file 3741 [file 1]

## Rhot2

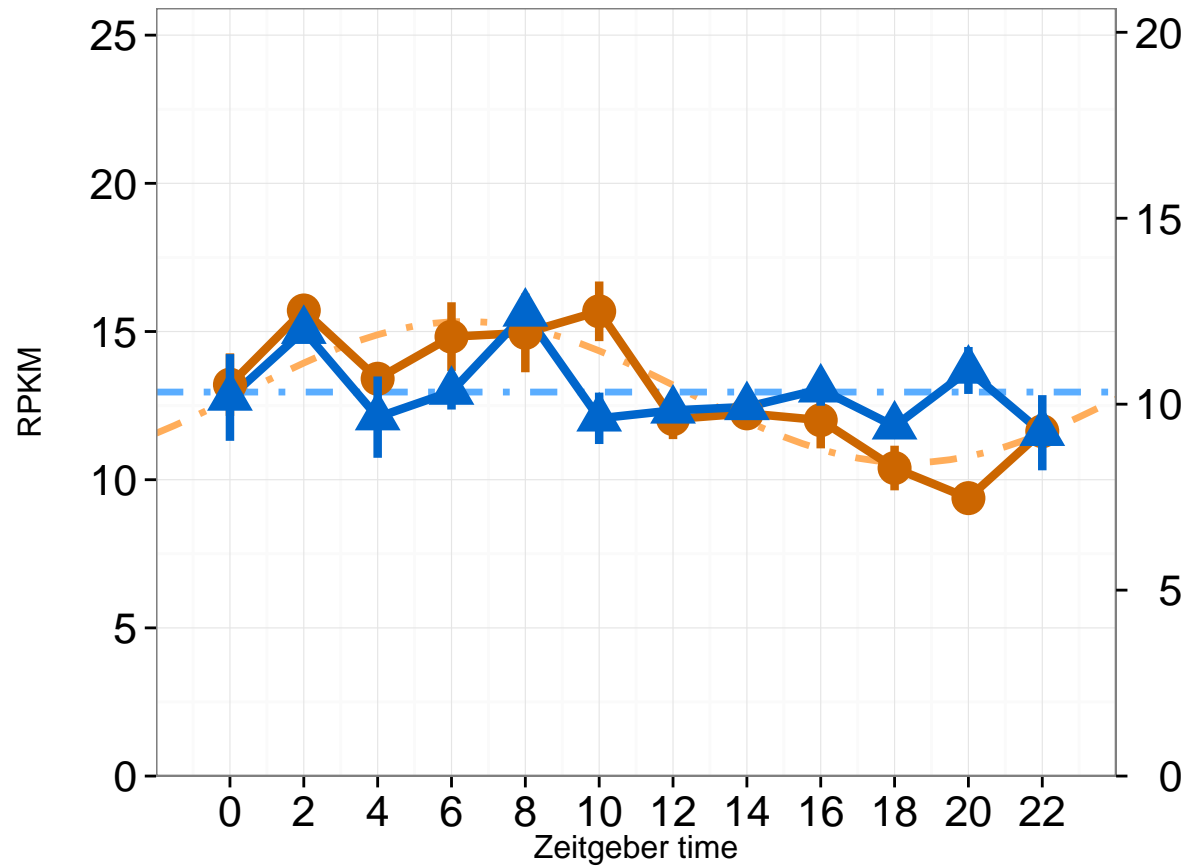

## Rhot2

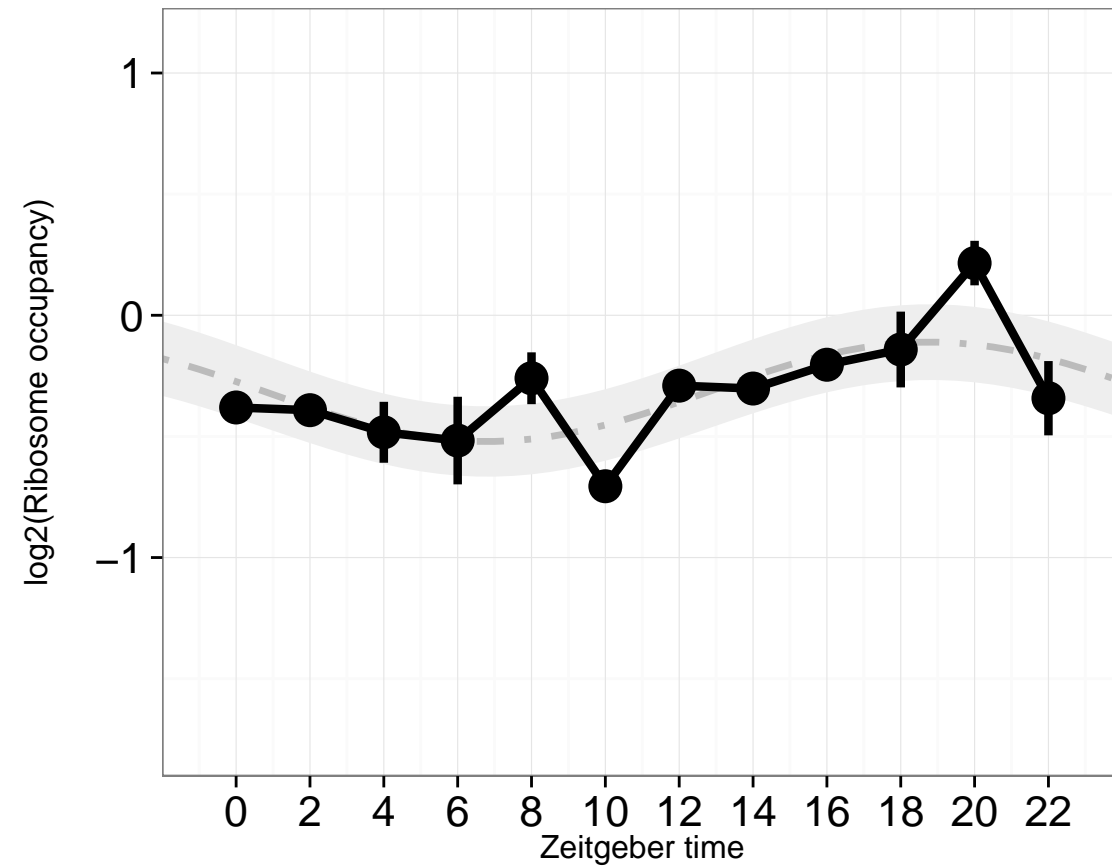

Supplement: Supplementary file 3742 [file 1]

# Extl3

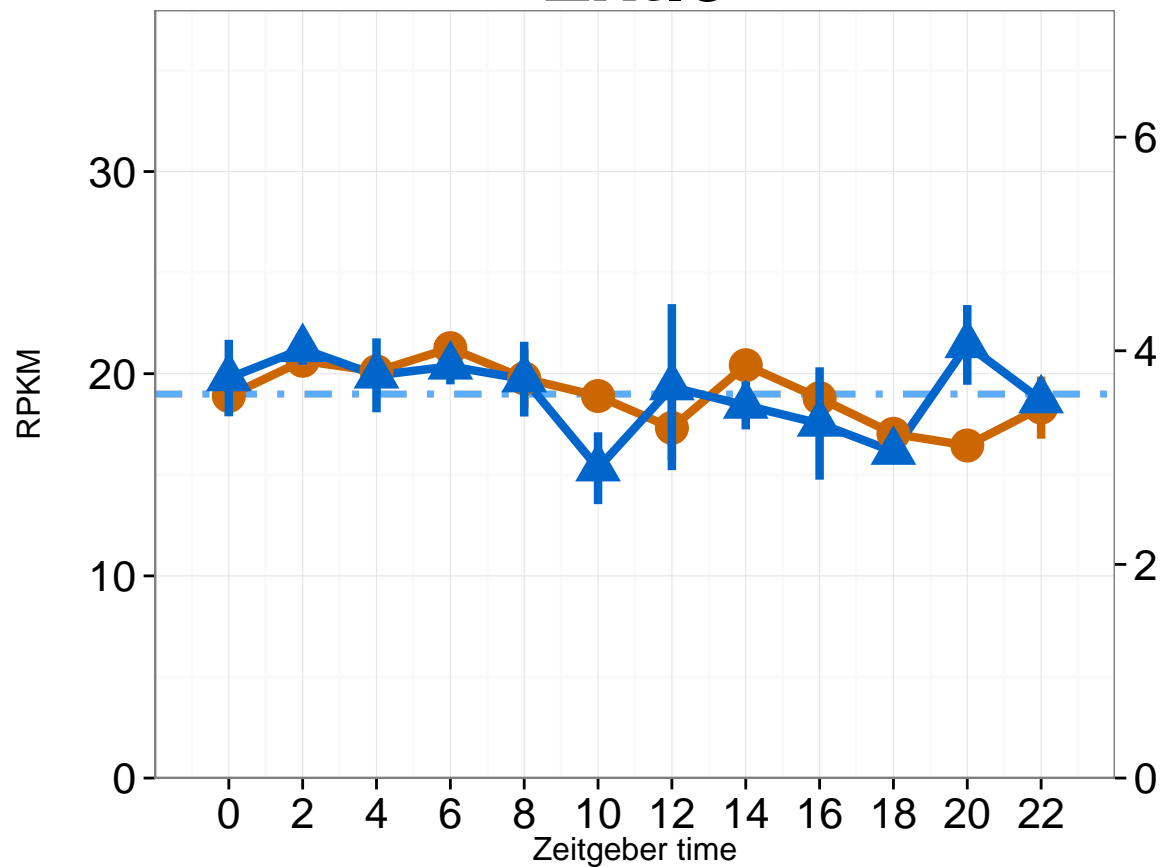

# Extl3

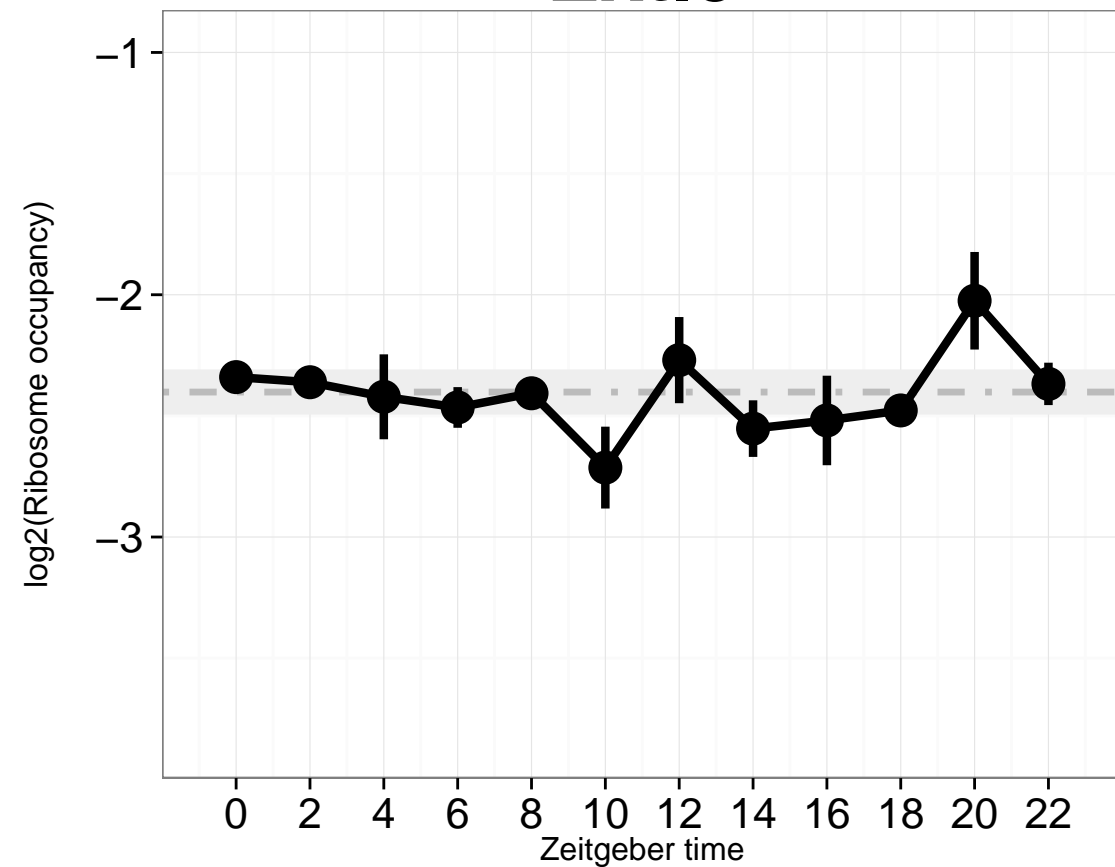

Supplement: Supplementary file 3743 [file 1]

## Mplkip

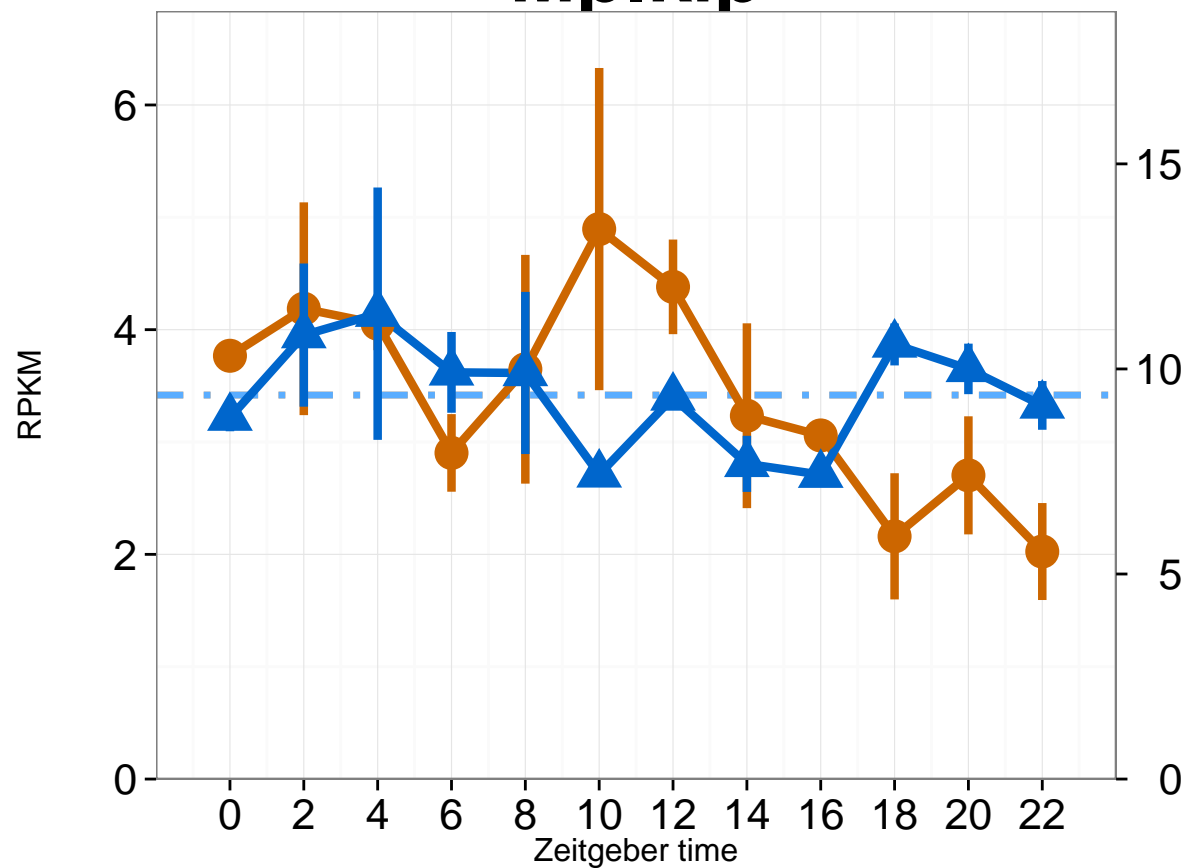

## Mplkip

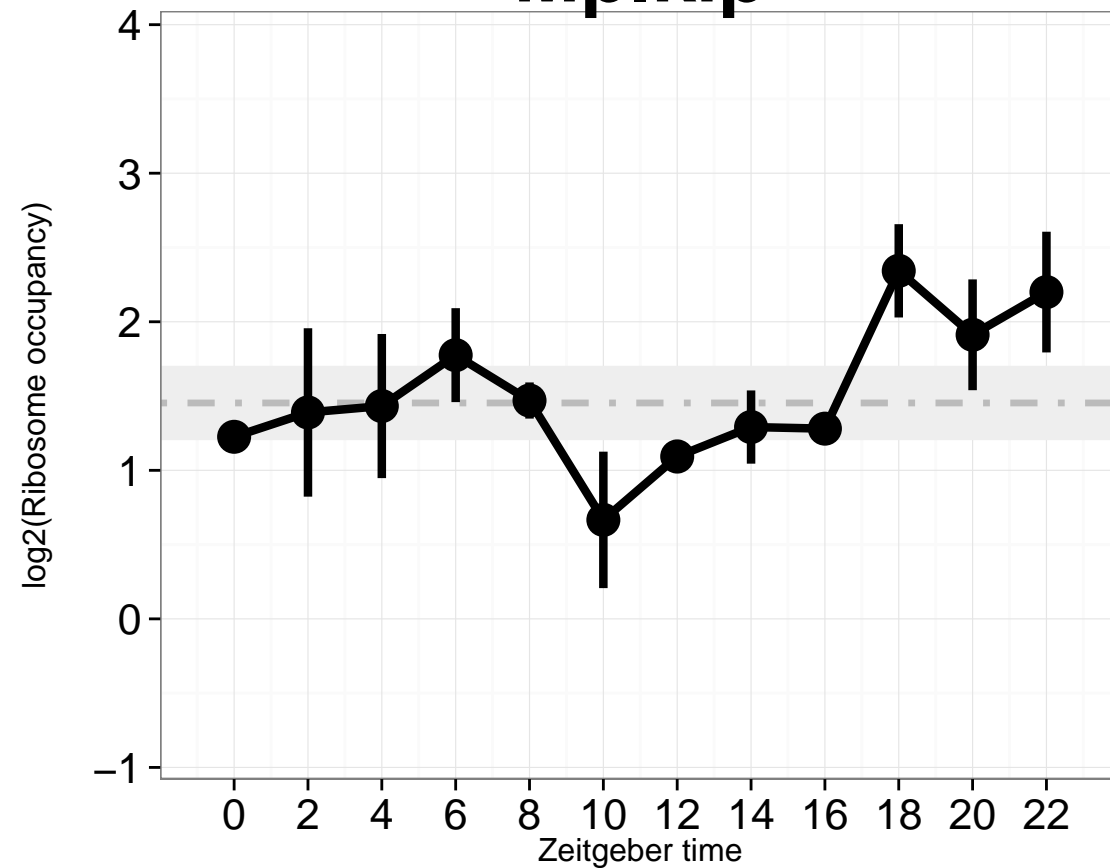

Supplement: Supplementary file 3744 [file 1]

# Tceal8

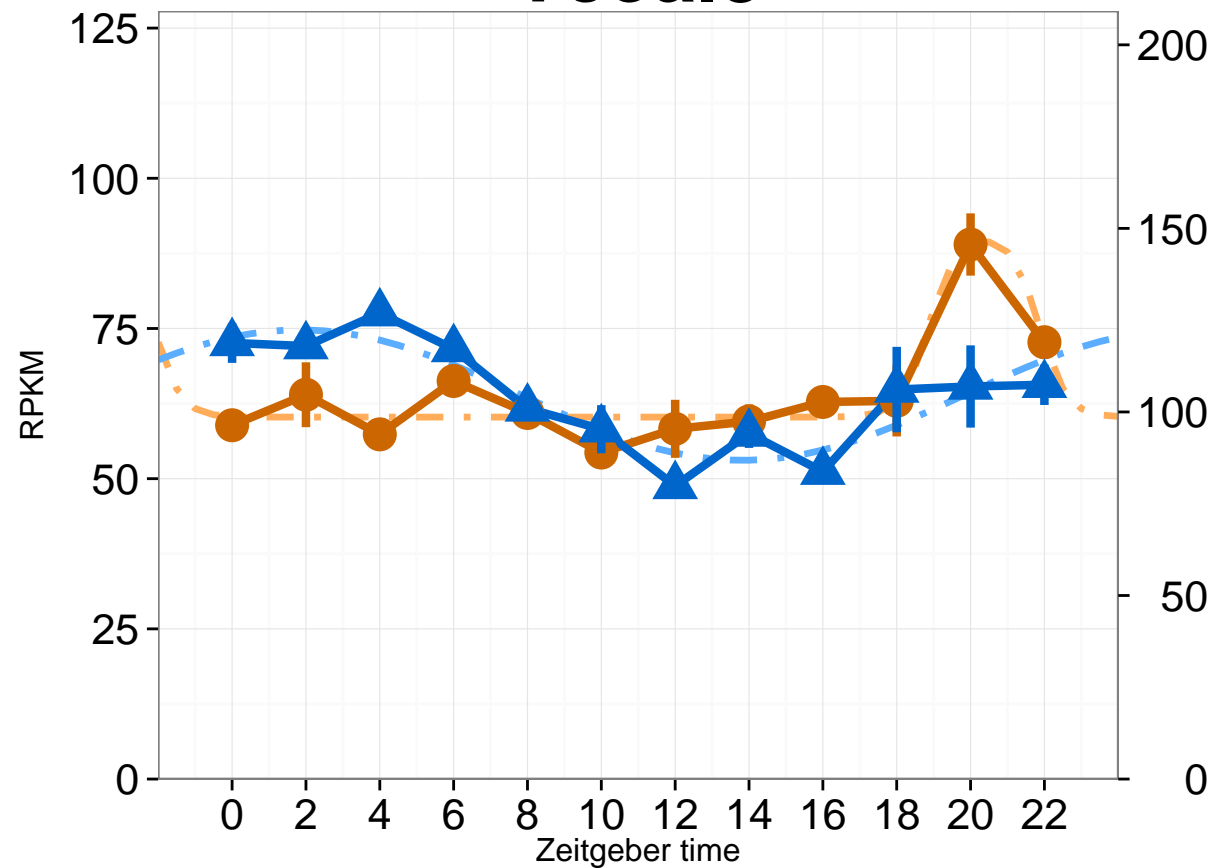

# Tceal8

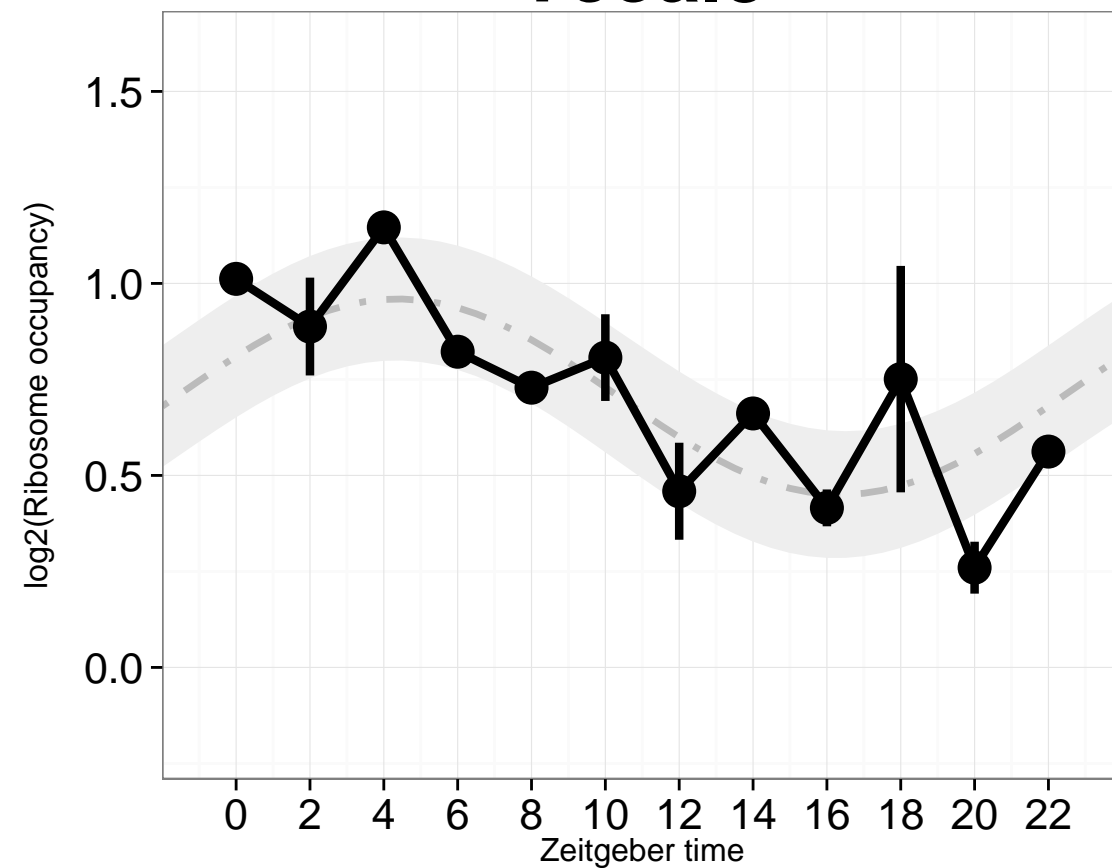

Supplement: Supplementary file 3745 [file 1]

## Arsb

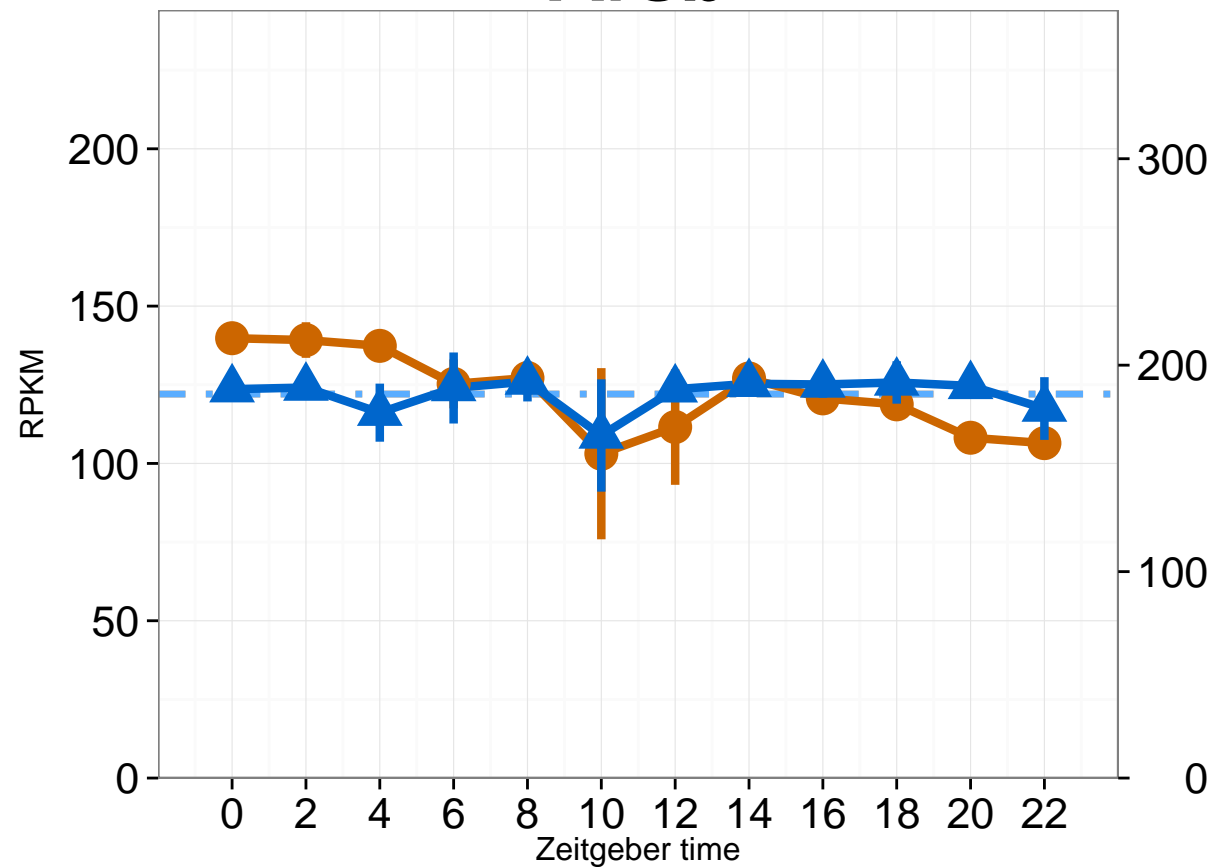

## Arsb

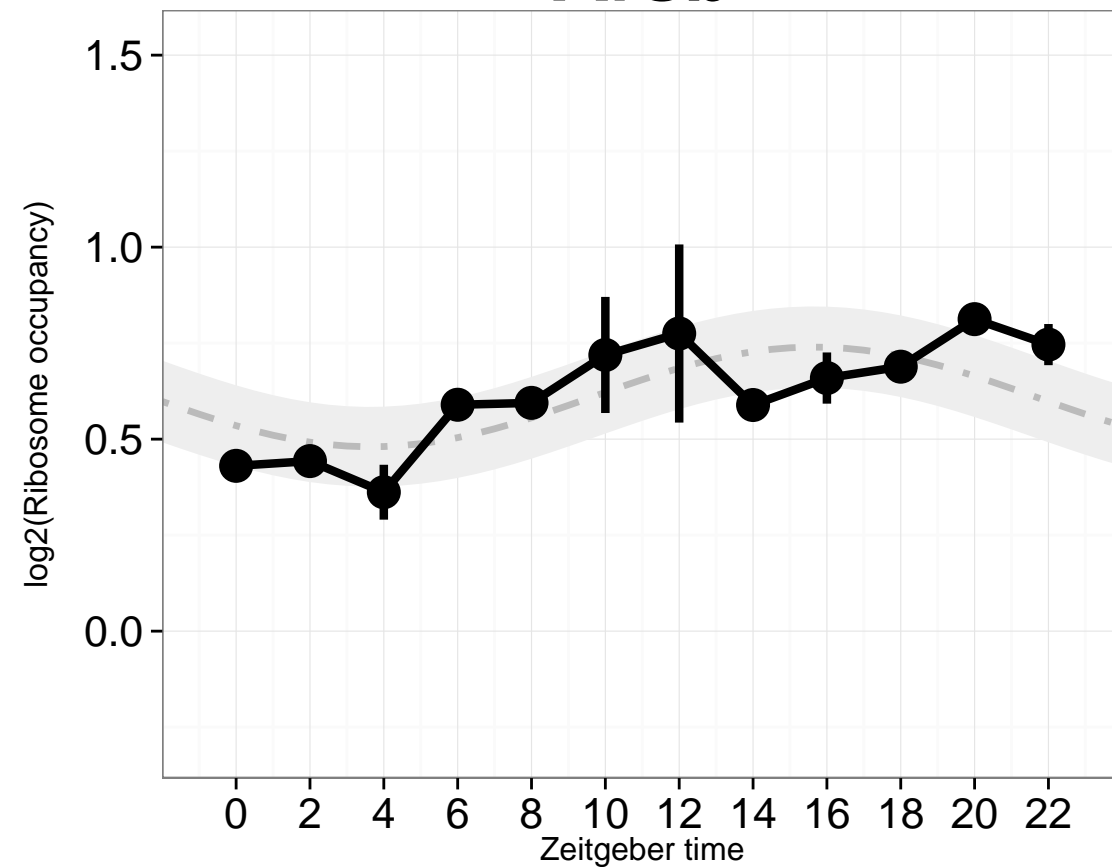

Supplement: Supplementary file 3746 [file 1]

## Nrip1

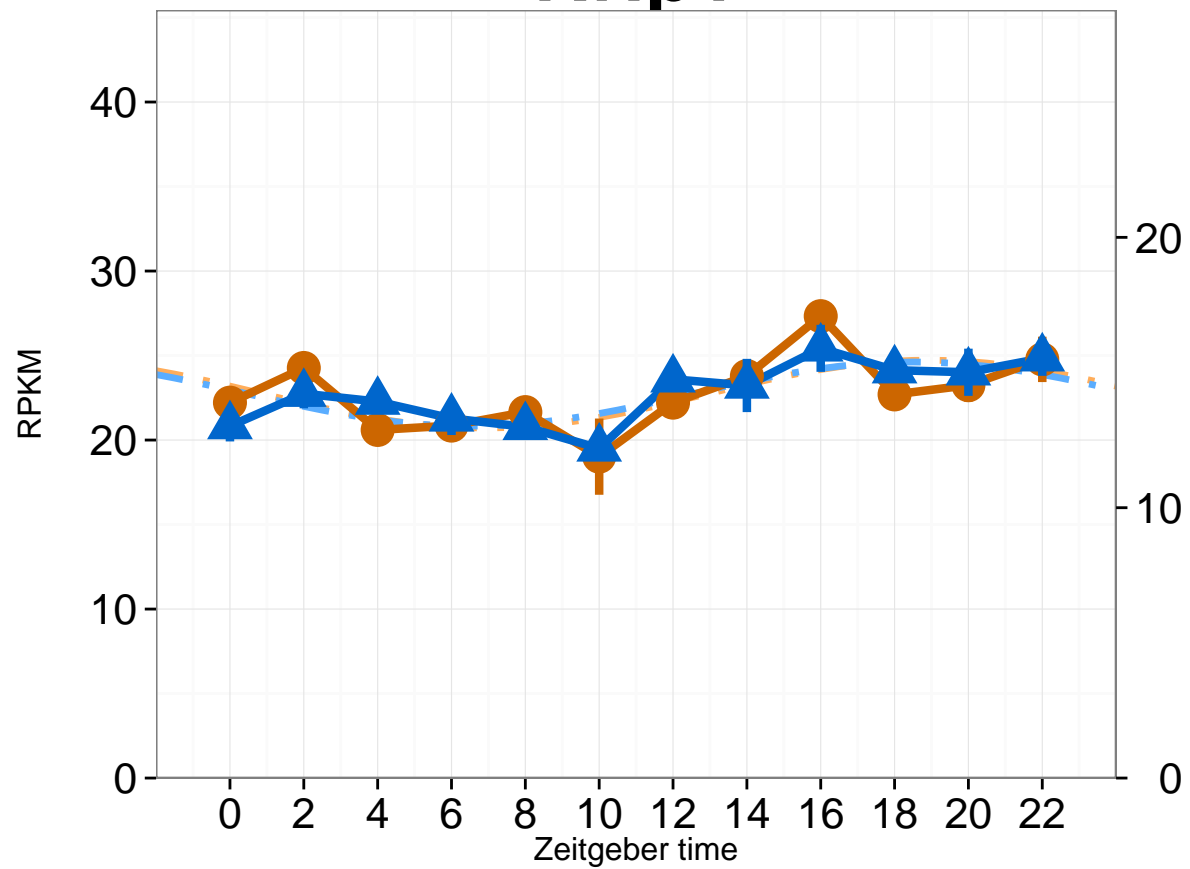

## Nrip1

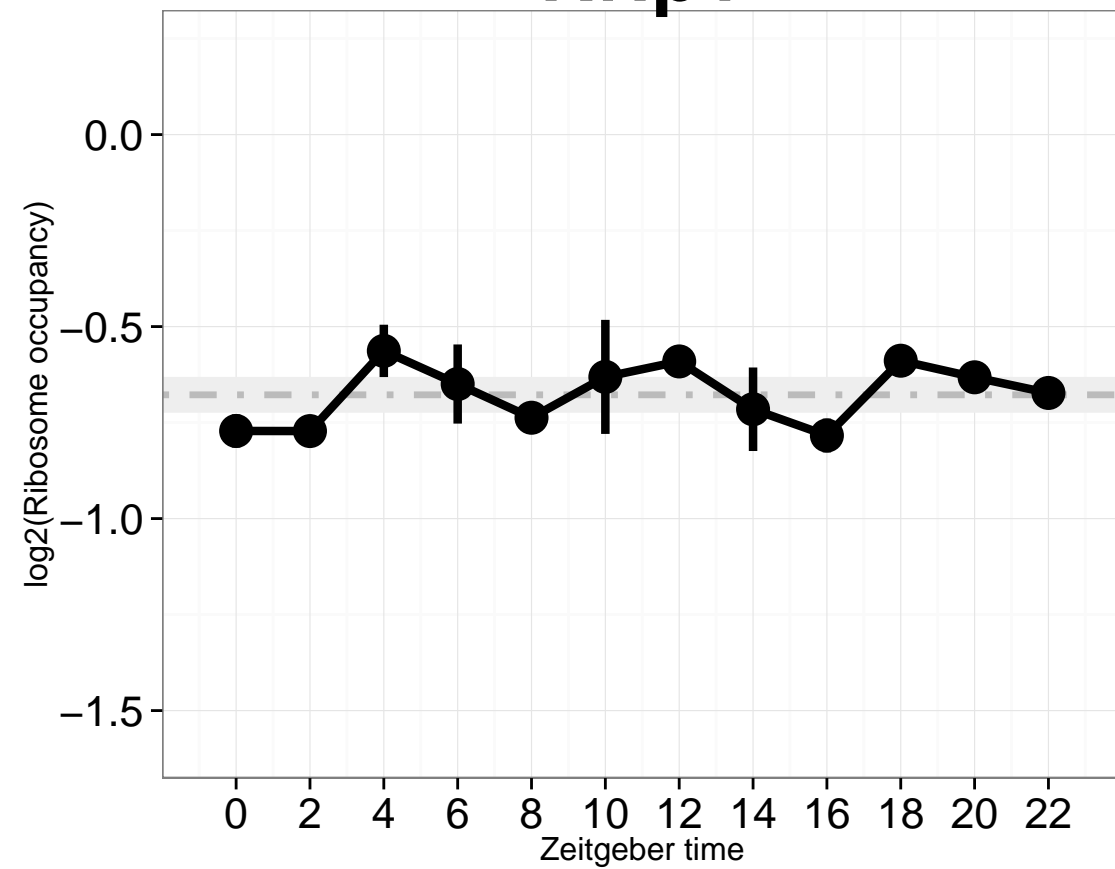

Supplement: Supplementary file 3747 [file 1]

# Kdm6a

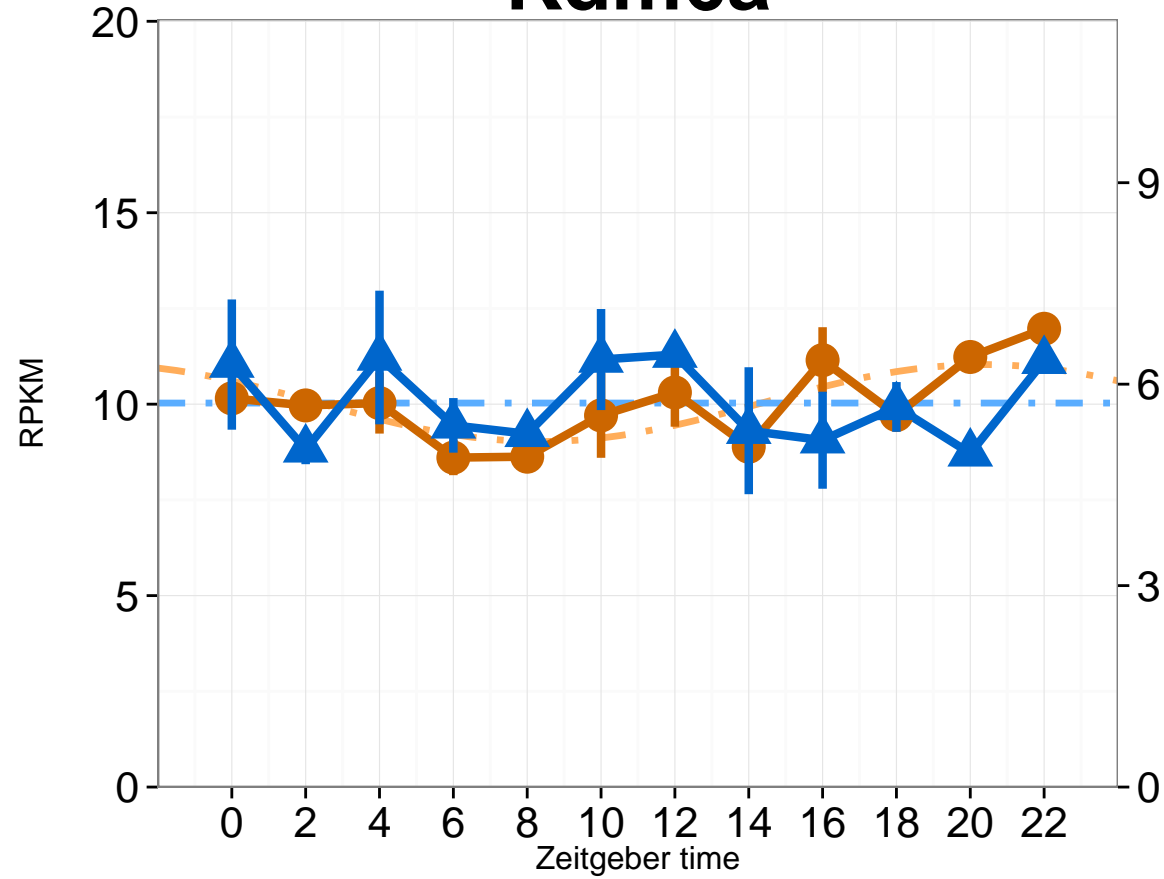

# Kdm6a

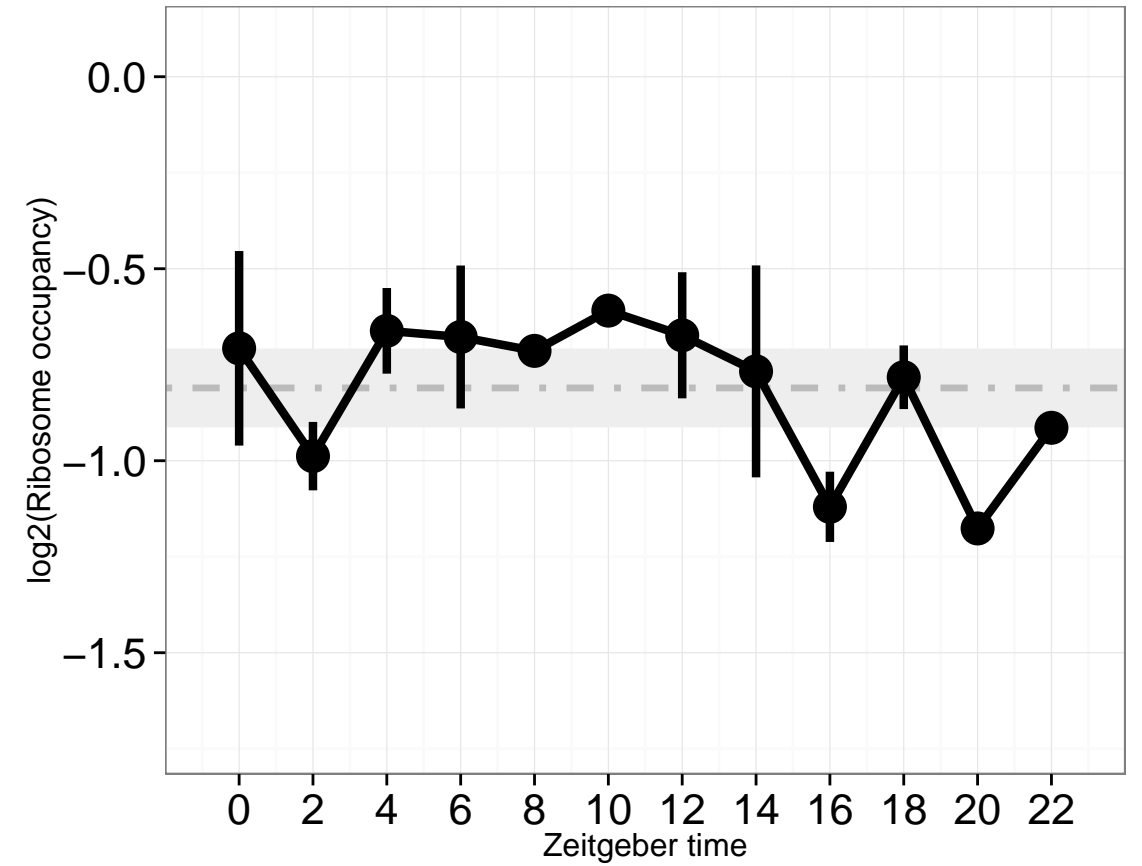

Supplement: Supplementary file 3748 [file 1]

# Prkca

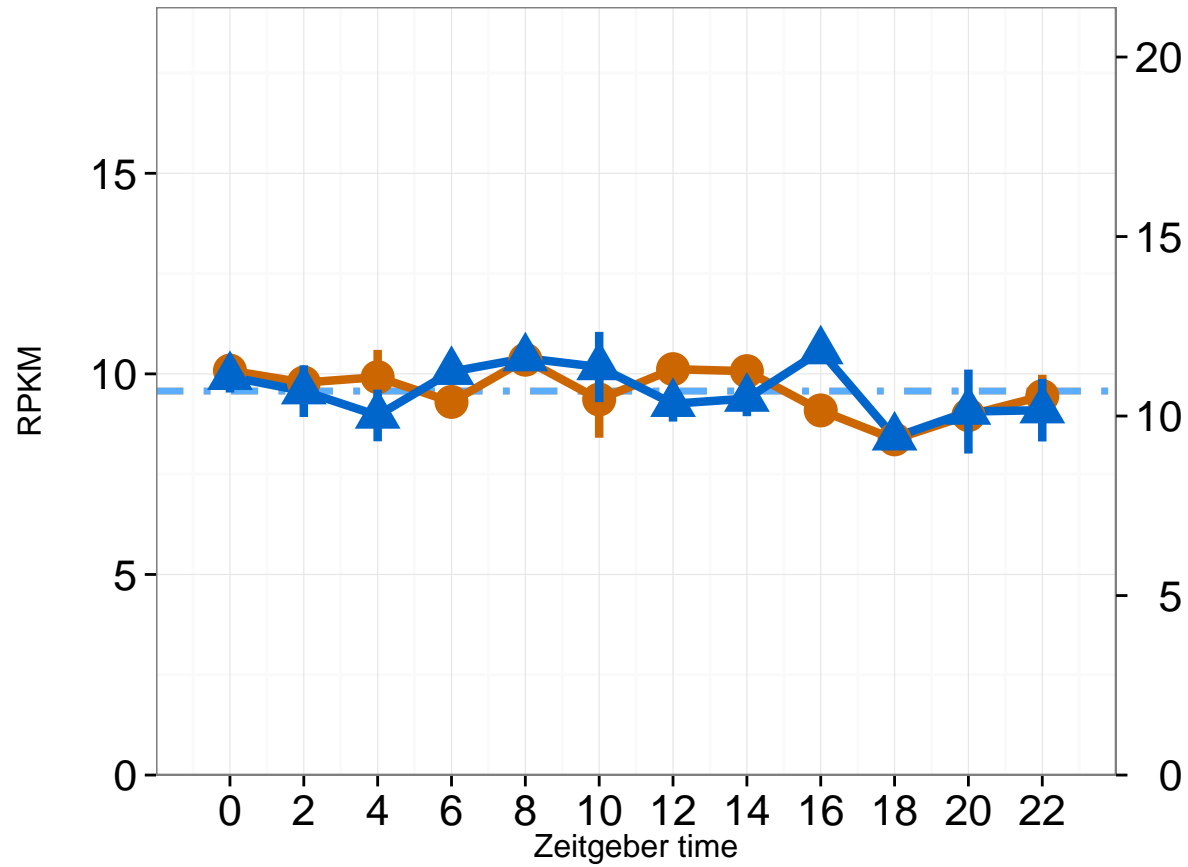

# Prkca

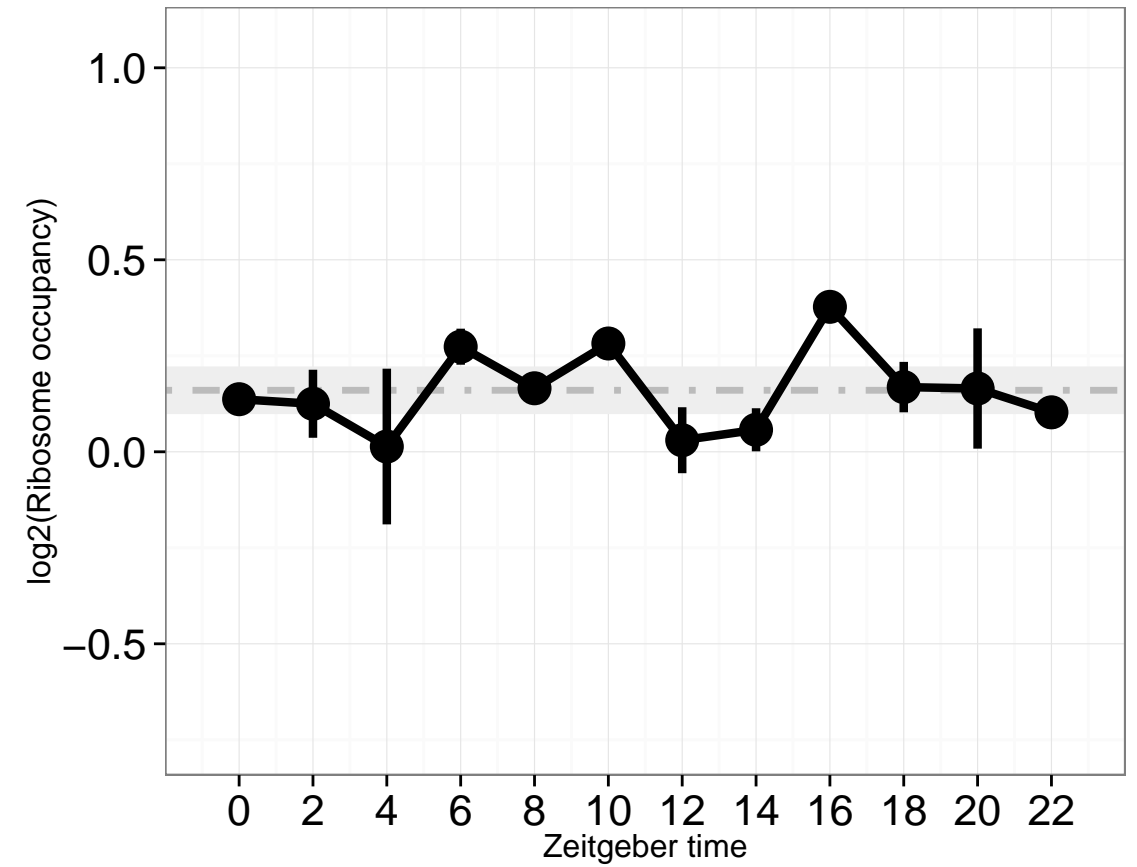

Supplement: Supplementary file 3749 [file 1]

## Chtf8

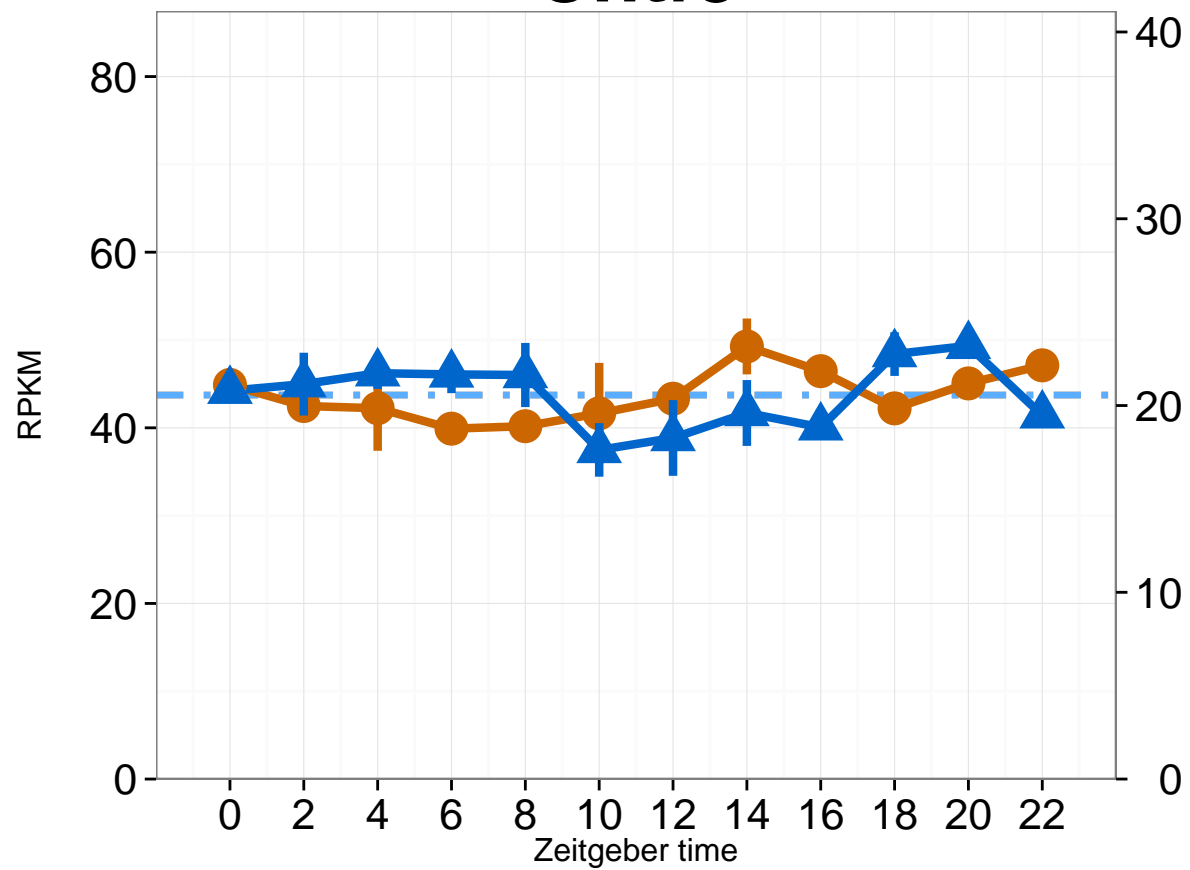

## Chtf8

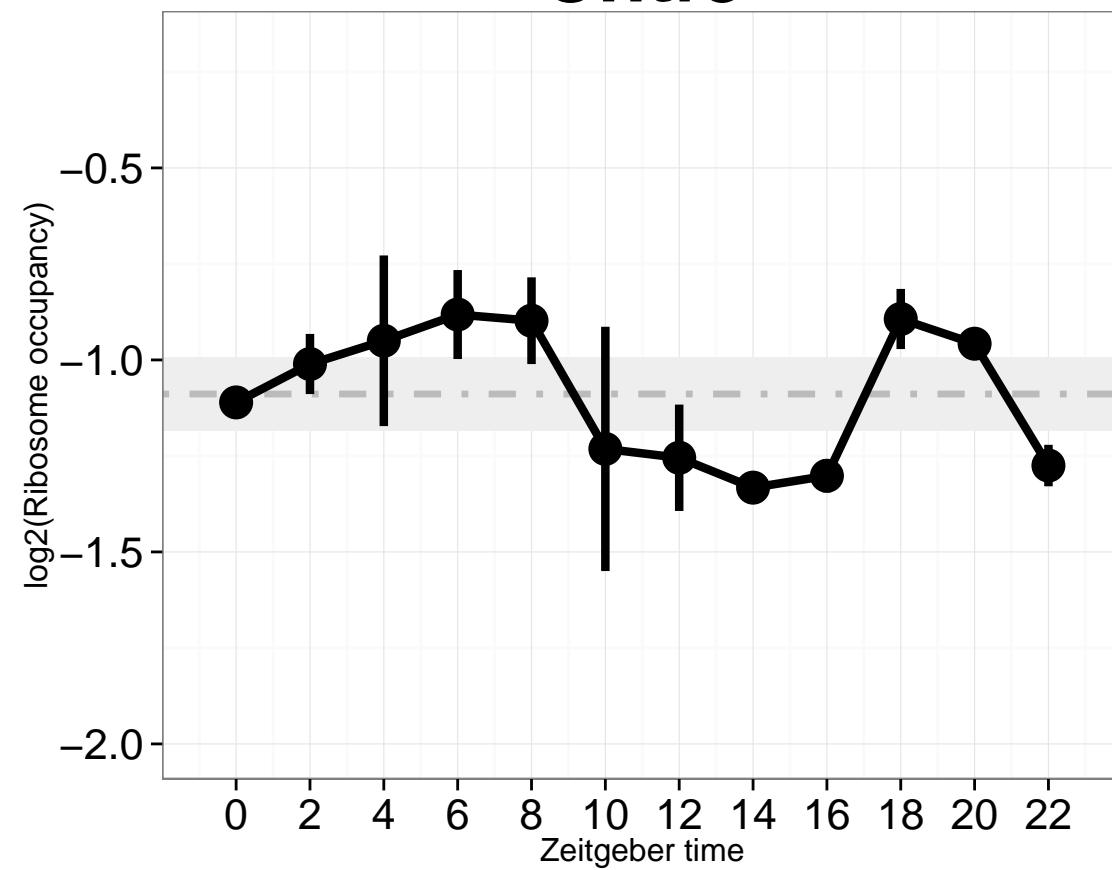

Supplement: Supplementary file 3750 [file 1]

# Camk2g

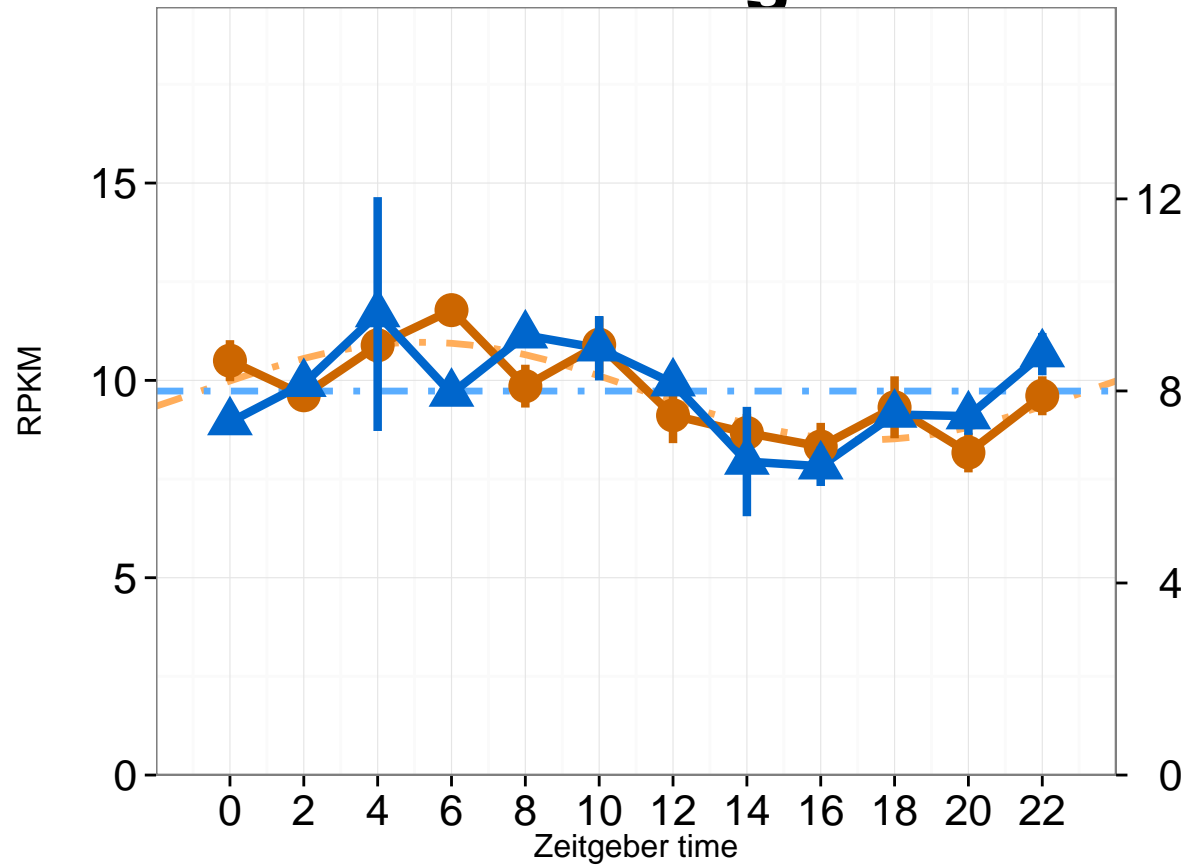

# Camk2g

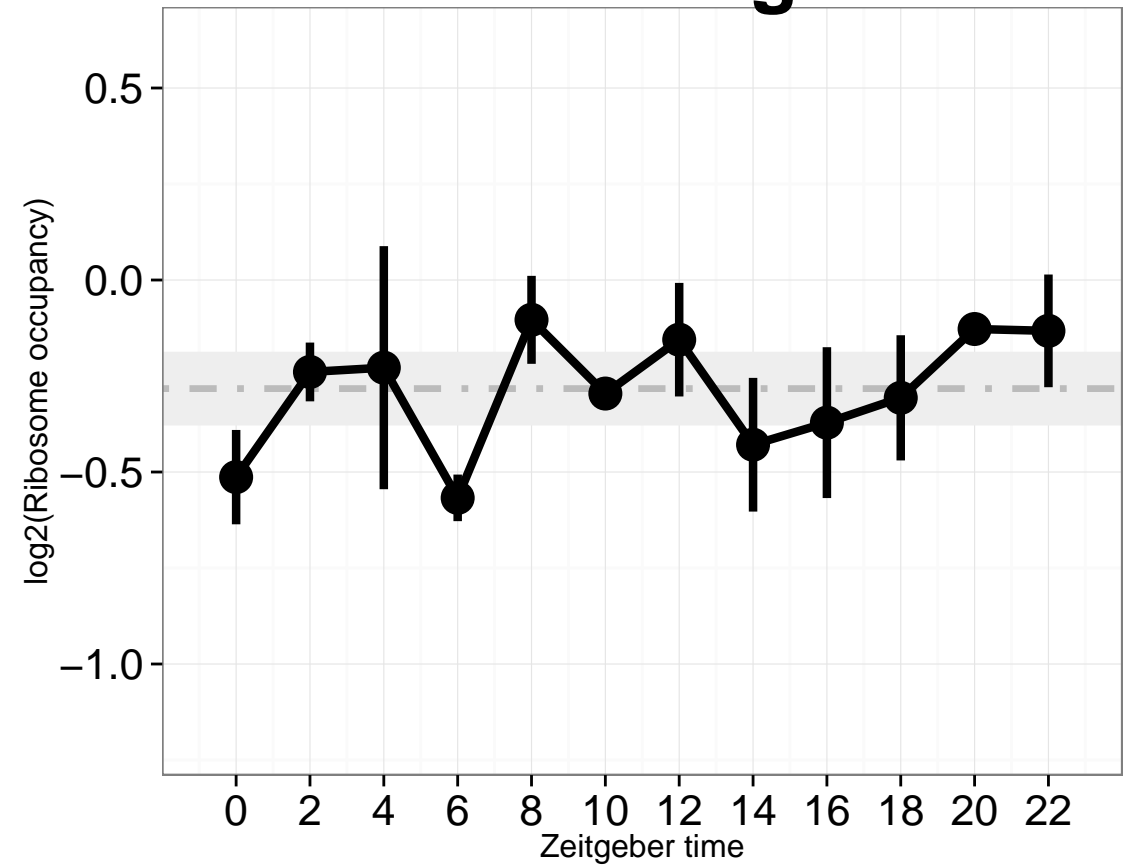

Supplement: Supplementary file 3751 [file 1]

# Tstd1

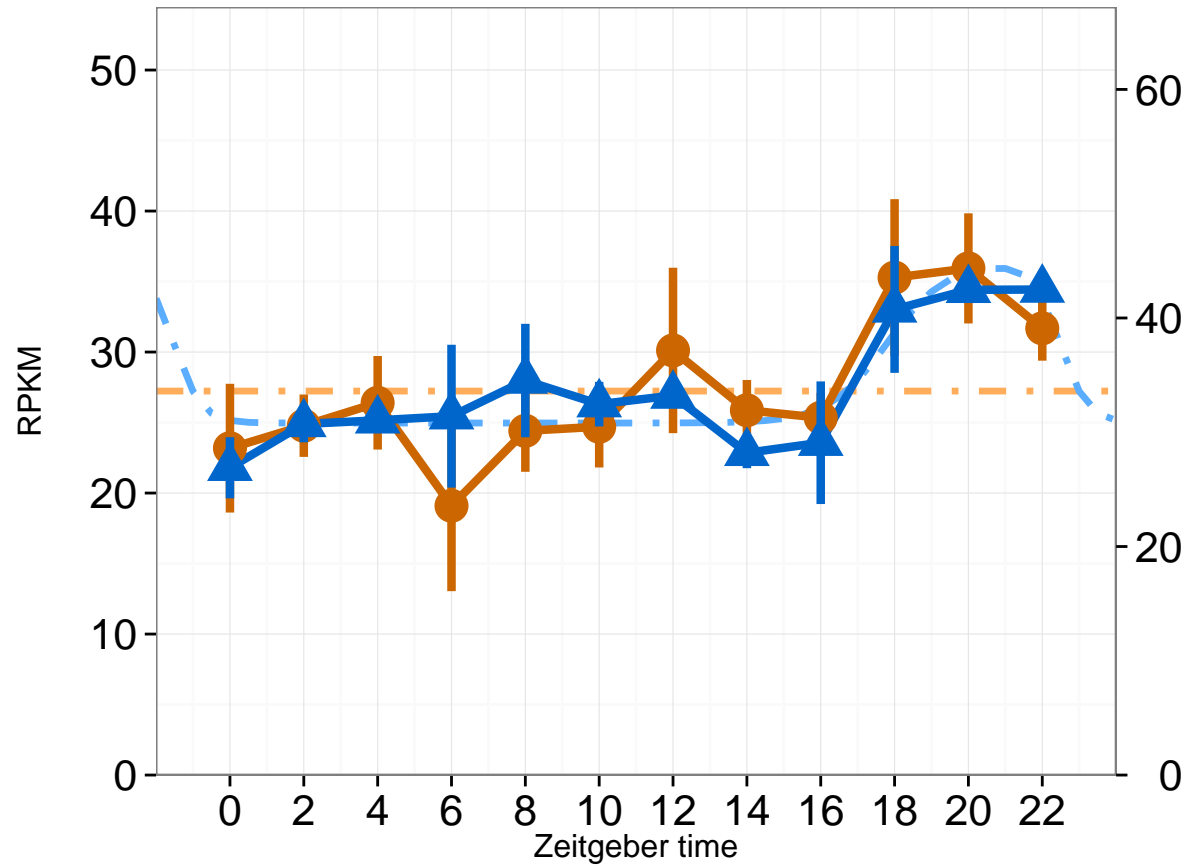

# Tstd1

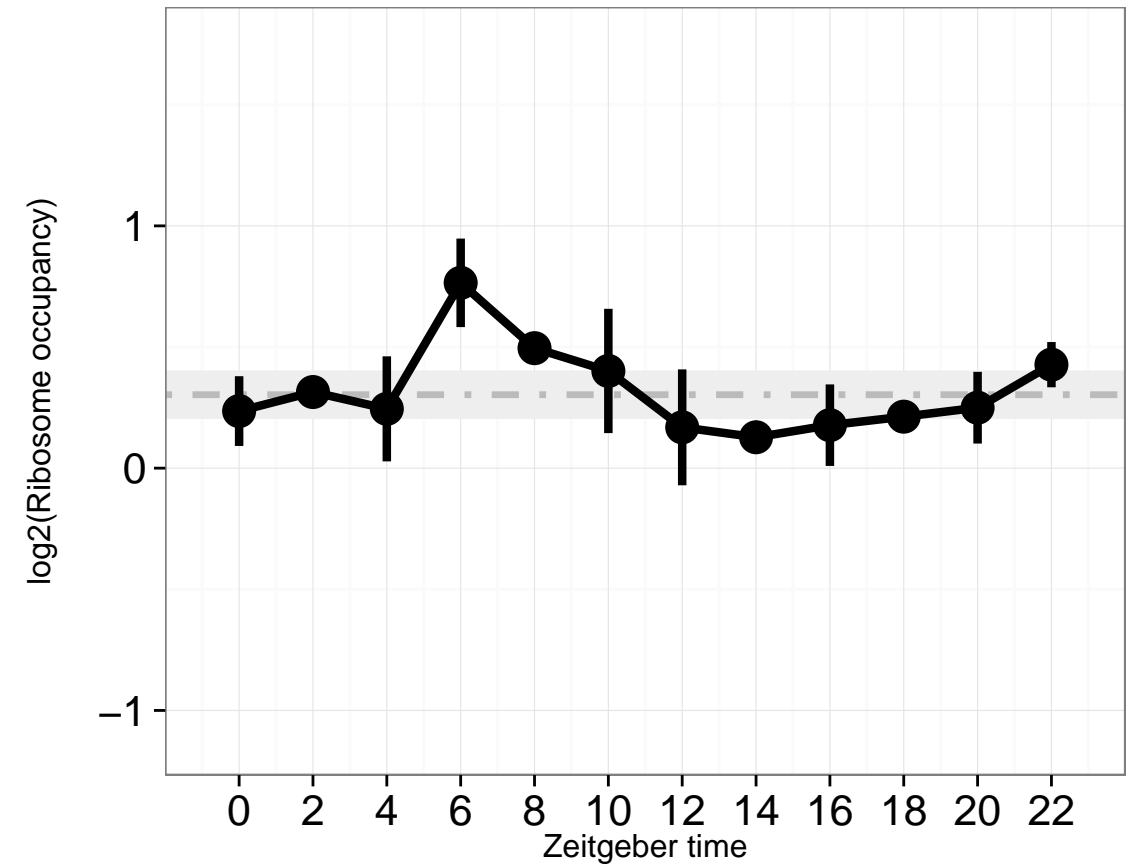

Supplement: Supplementary file 3752 [file 1]

## Cad

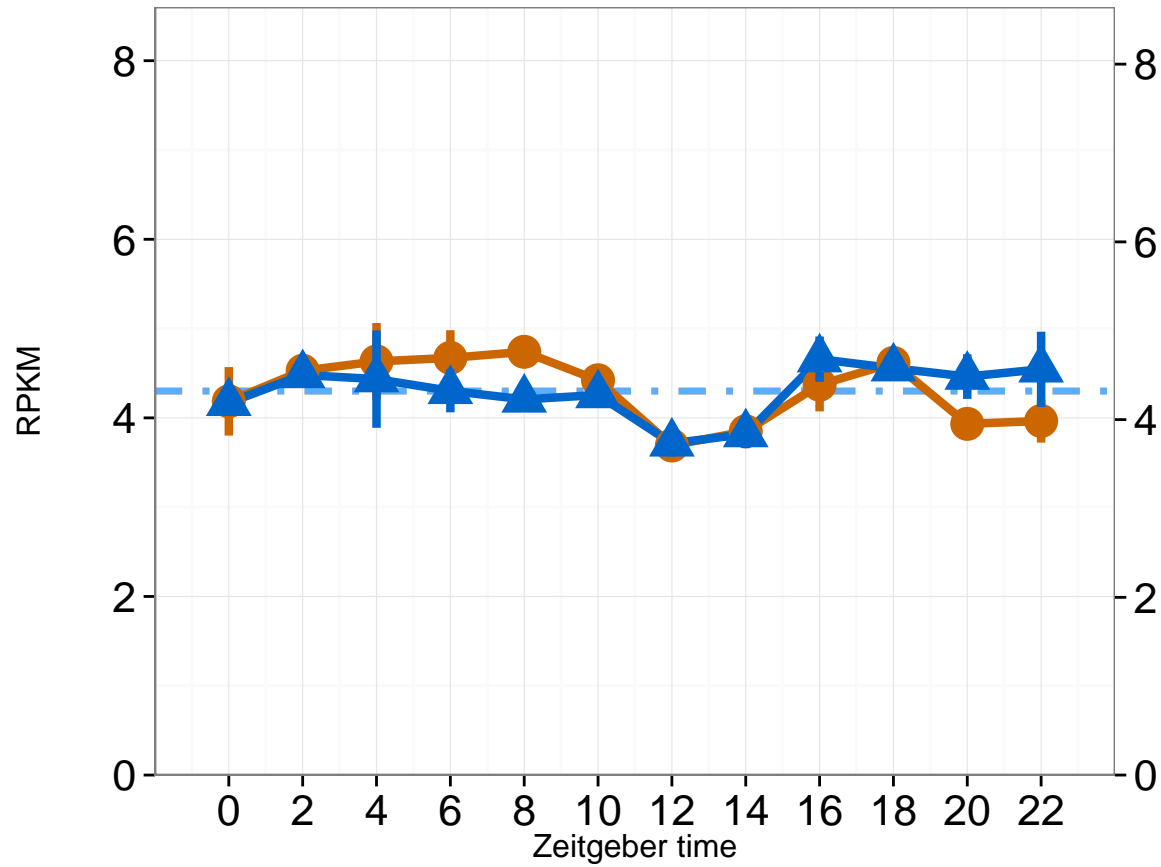

## Cad

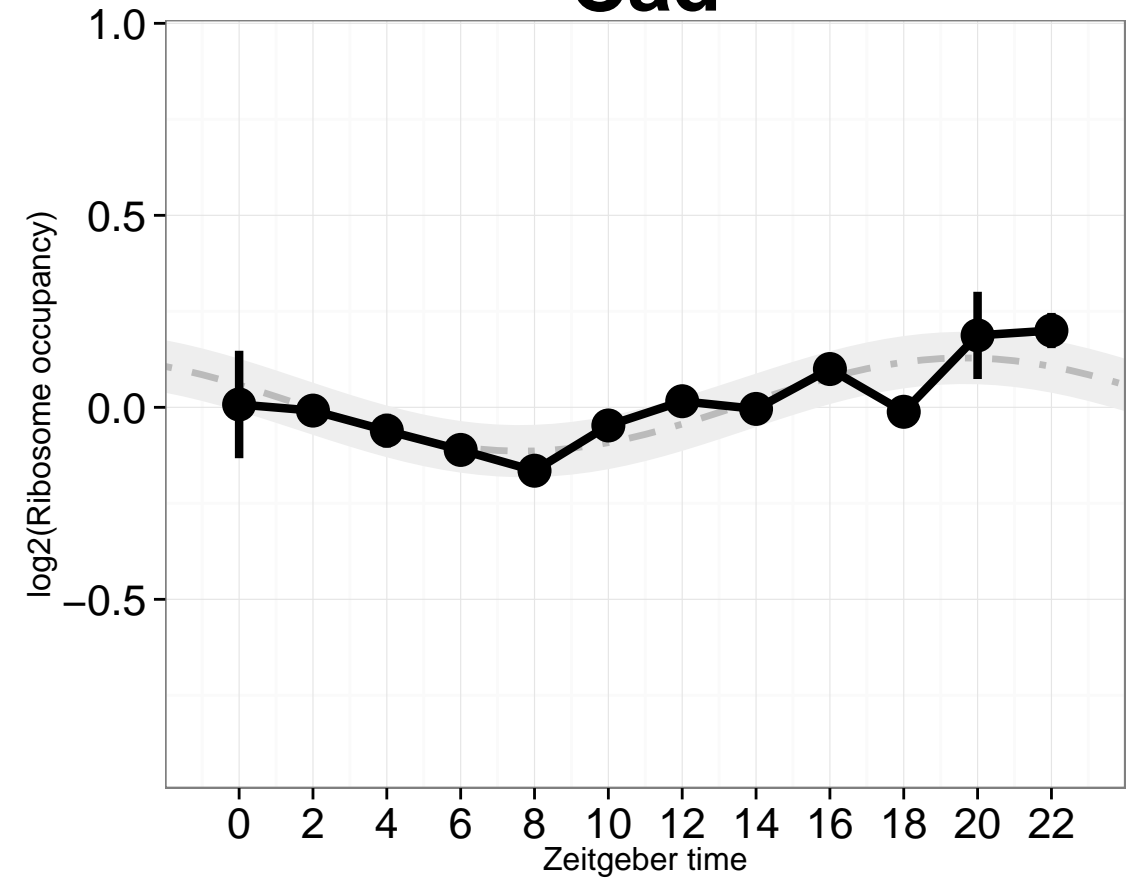

Supplement: Supplementary file 3753 [file 1]

# Gprin3

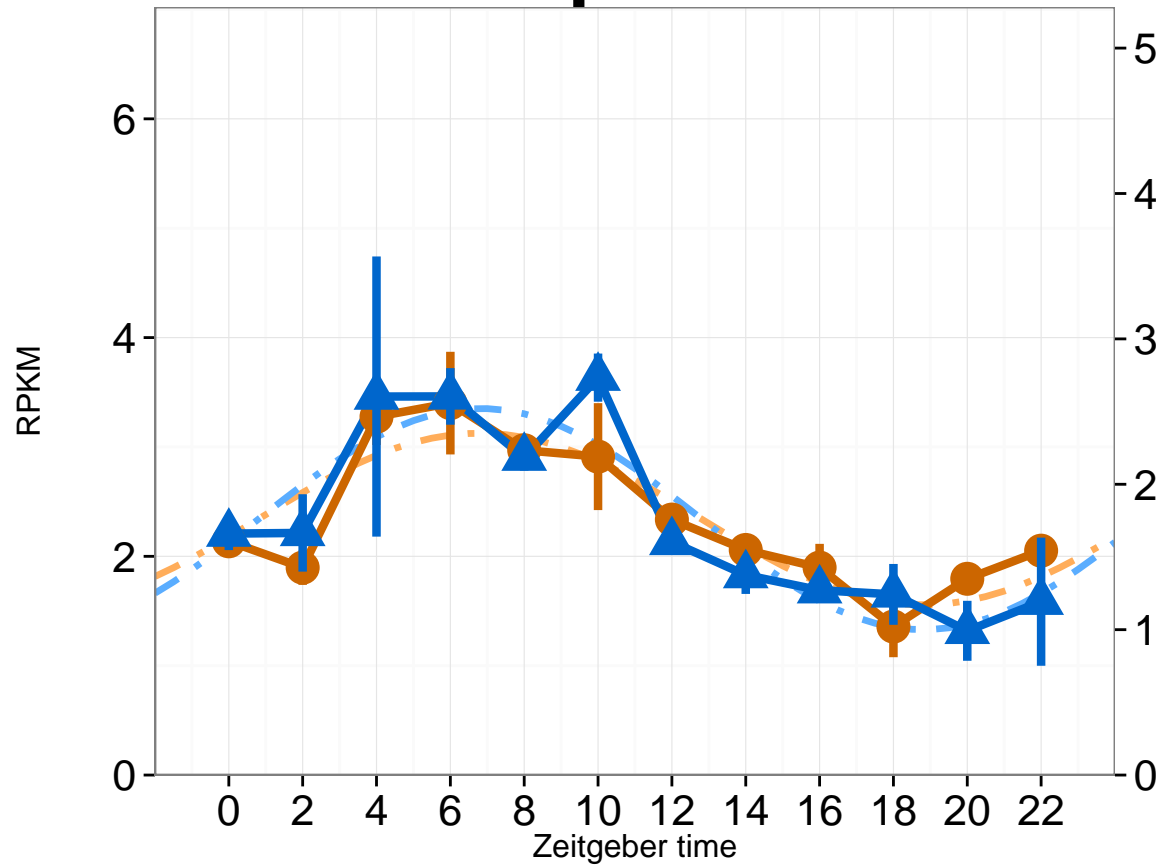

# Gprin3

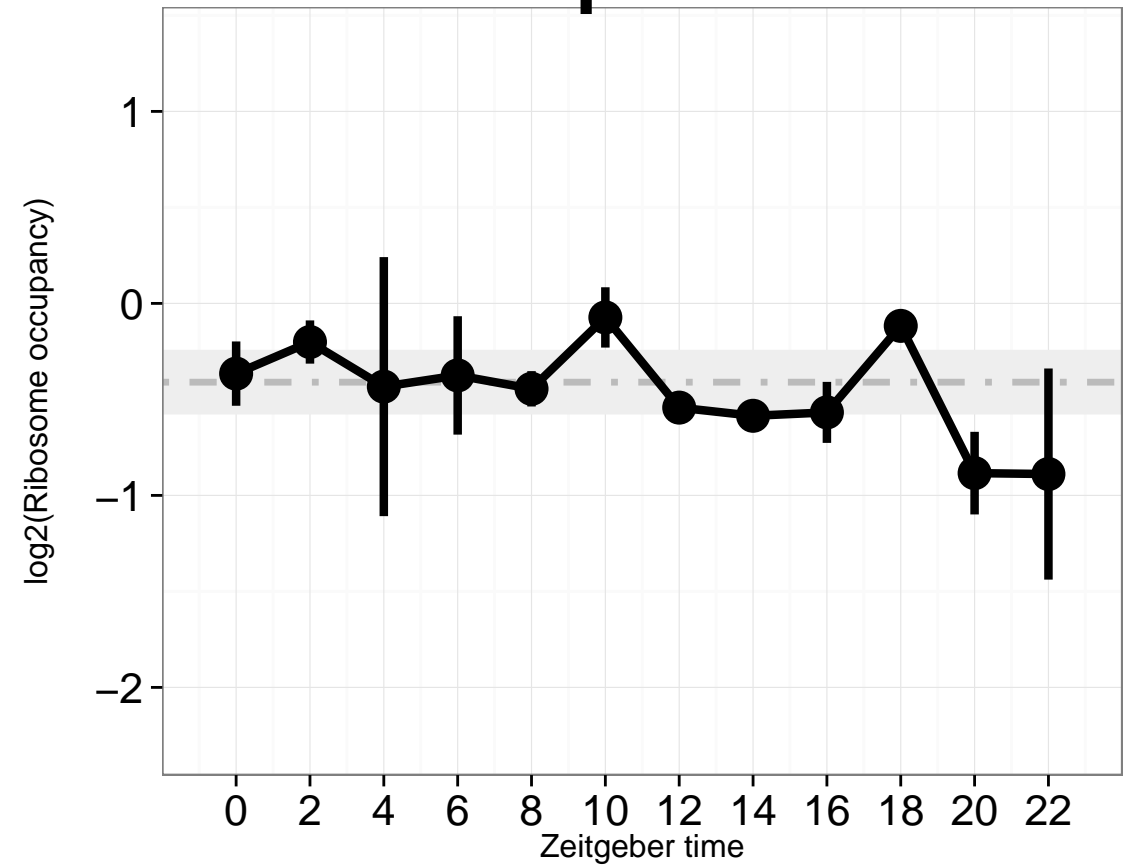

Supplement: Supplementary file 3754 [file 1]

# C330006D17Rik

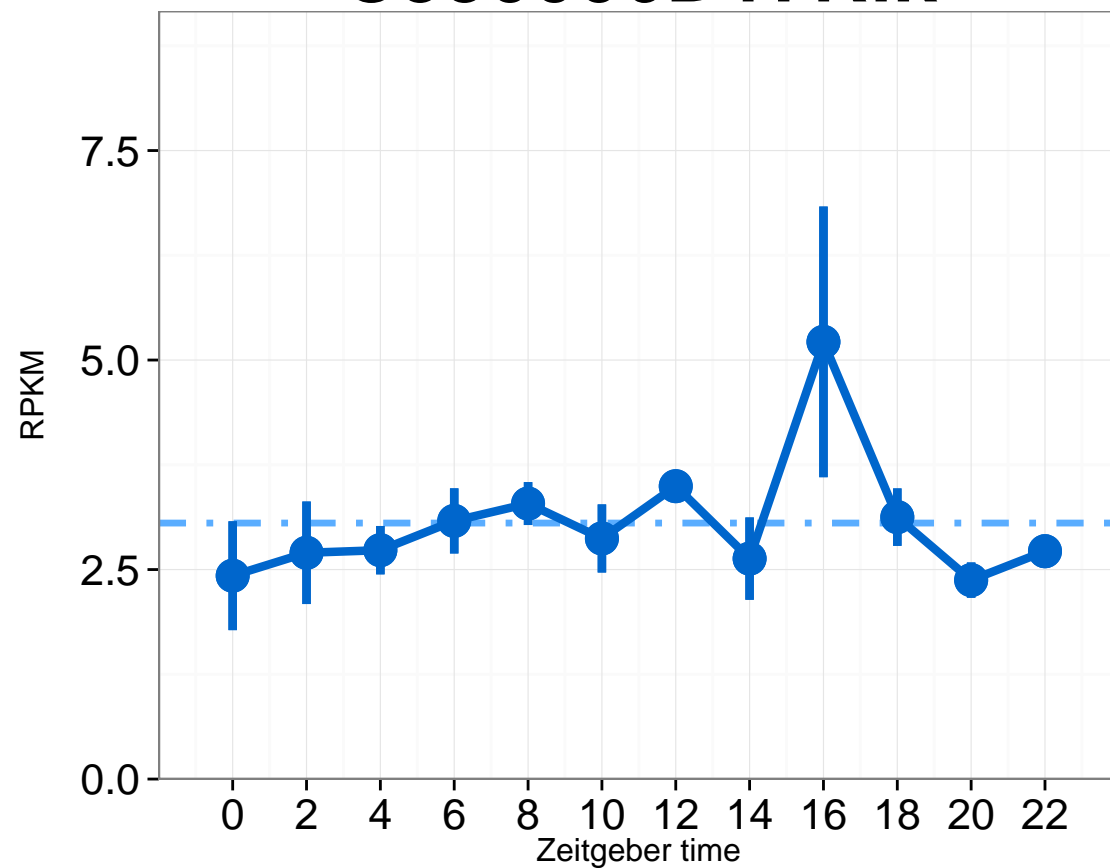

# C330006D17Rik log2(Ribosome occup

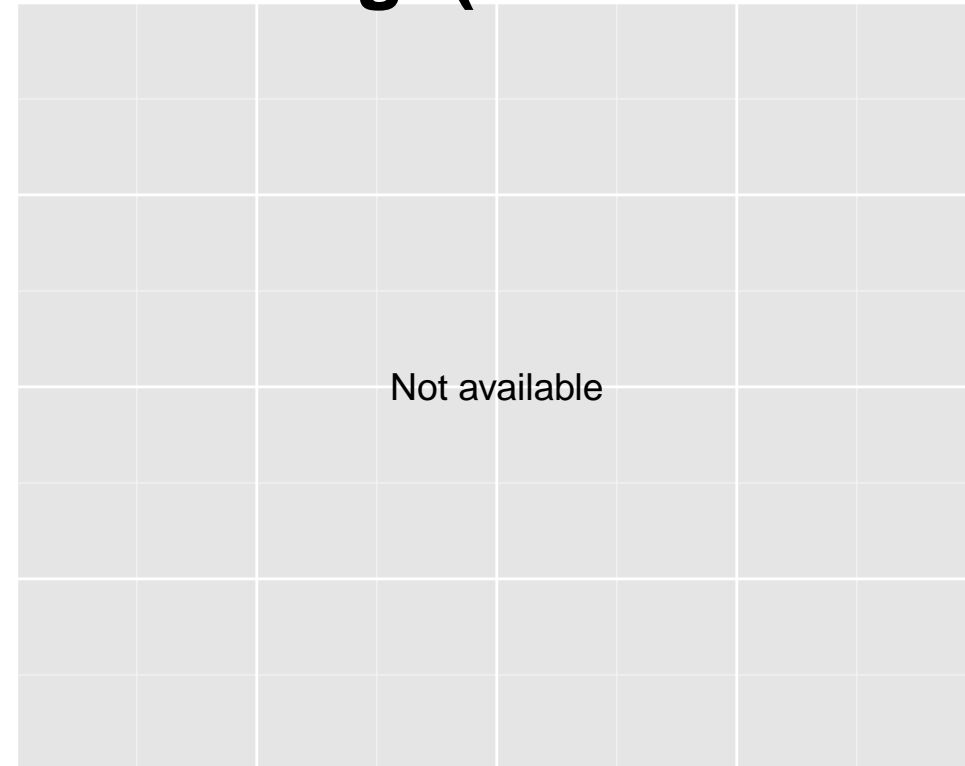

Supplement: Supplementary file 3755 [file 1]

# Mib1

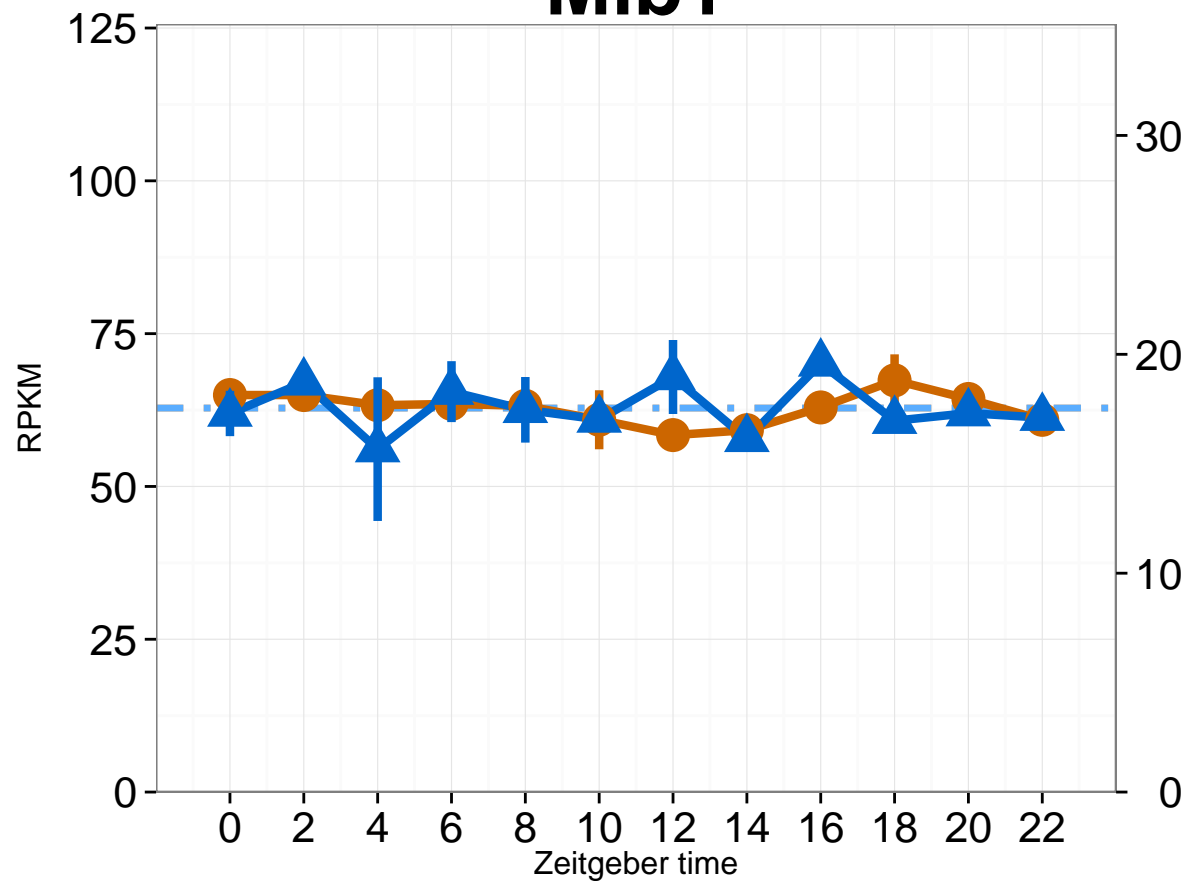

# Mib1

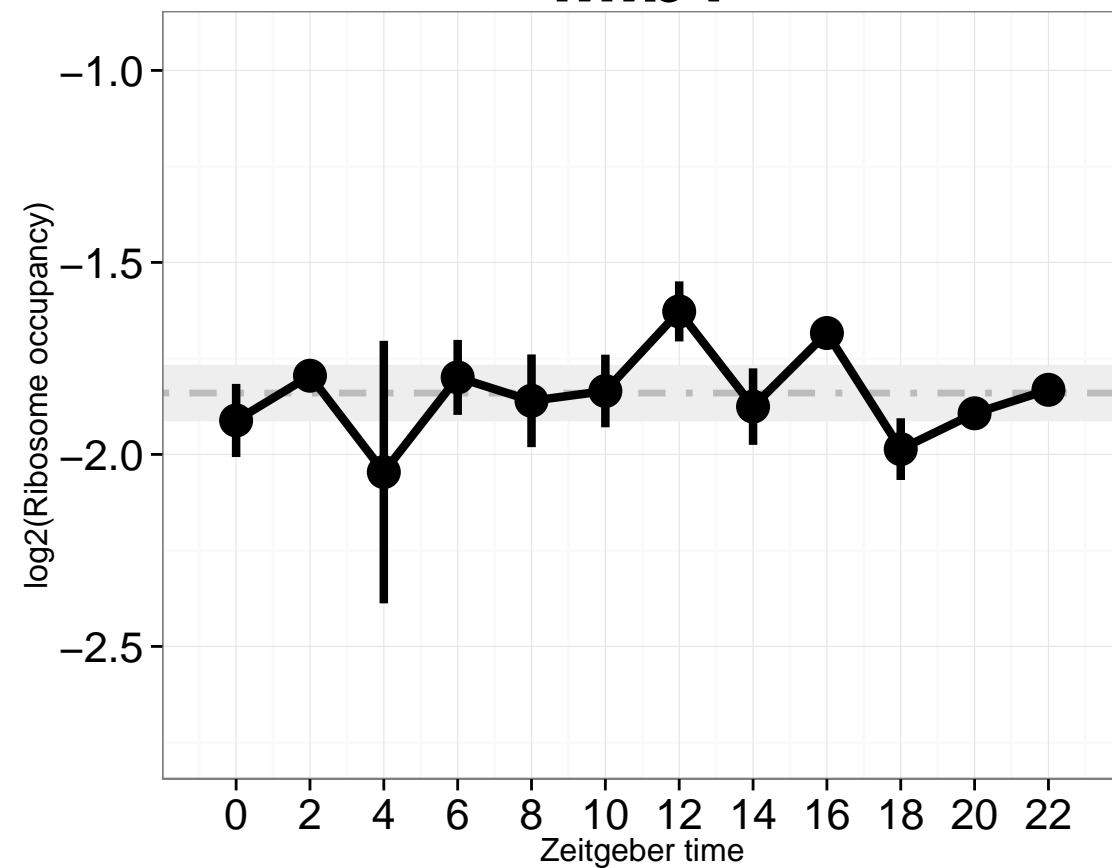

Supplement: Supplementary file 3756 [file 1]

## Entpd6

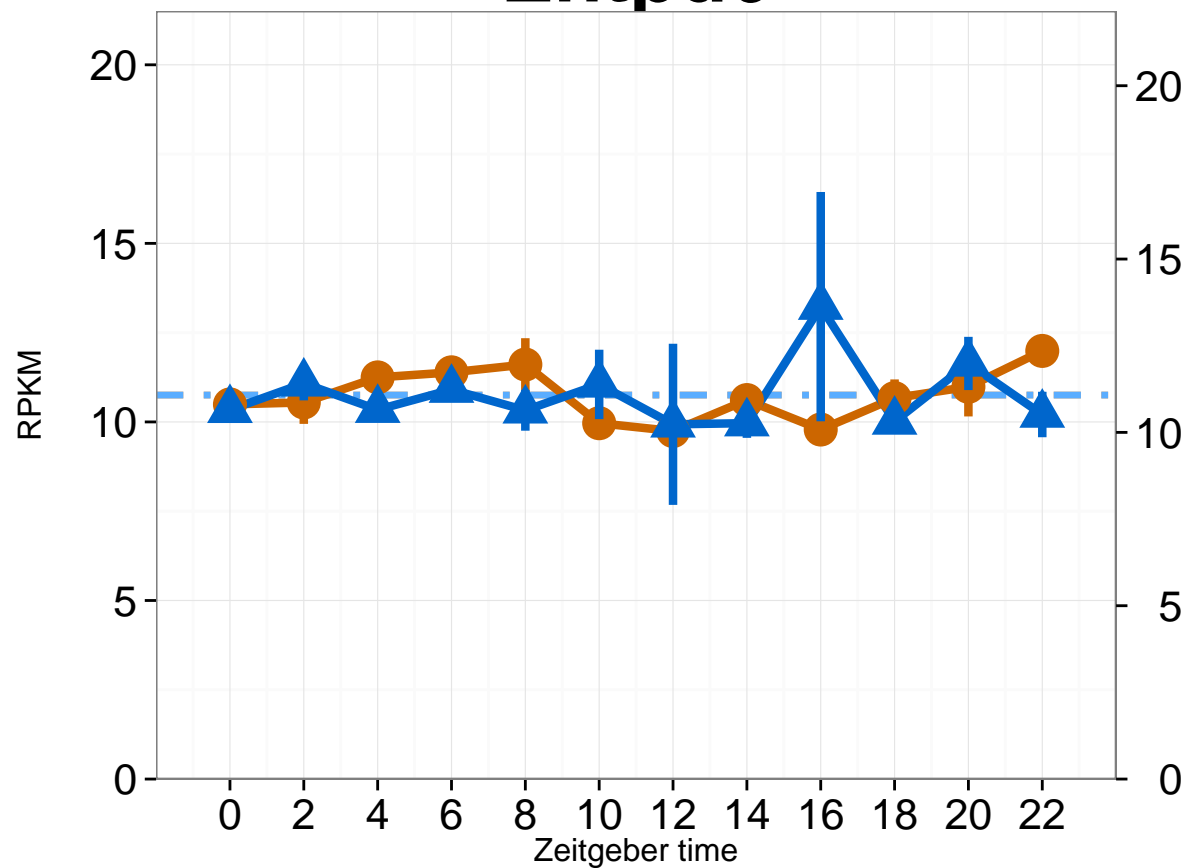

## Entpd6

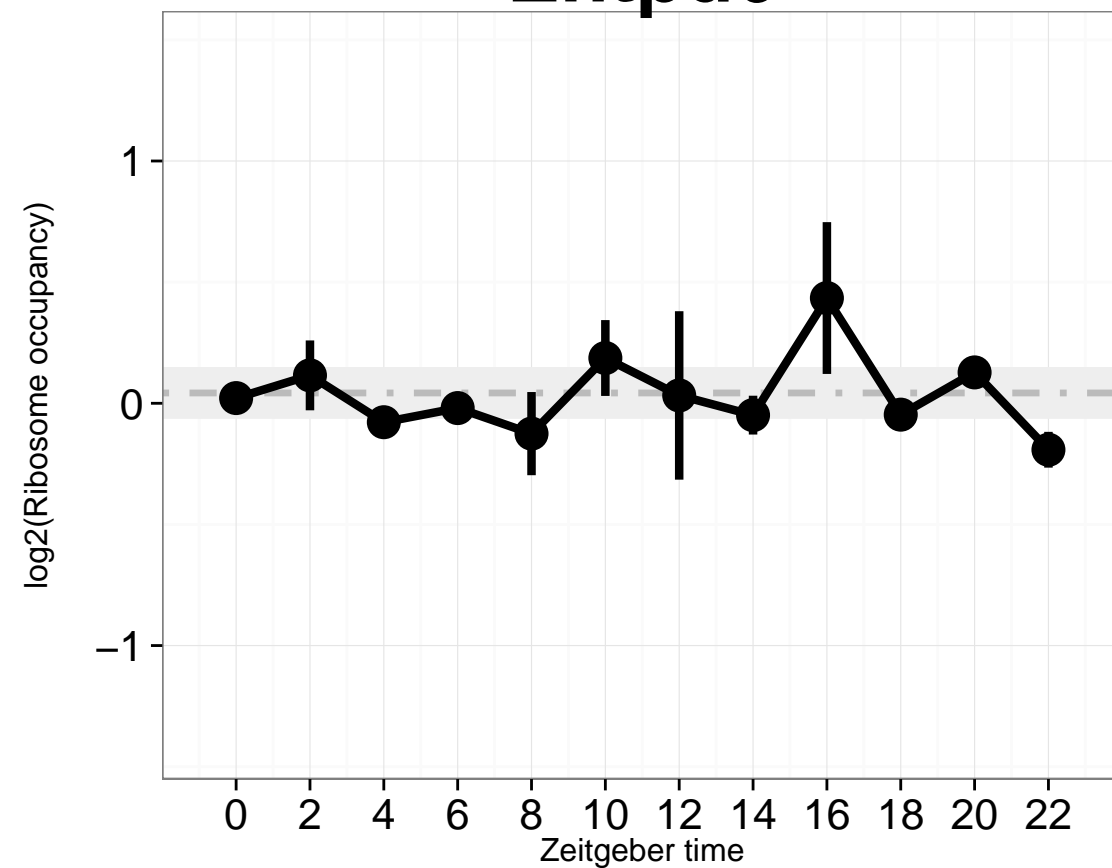

Supplement: Supplementary file 3757 [file 1]

# Rnf157

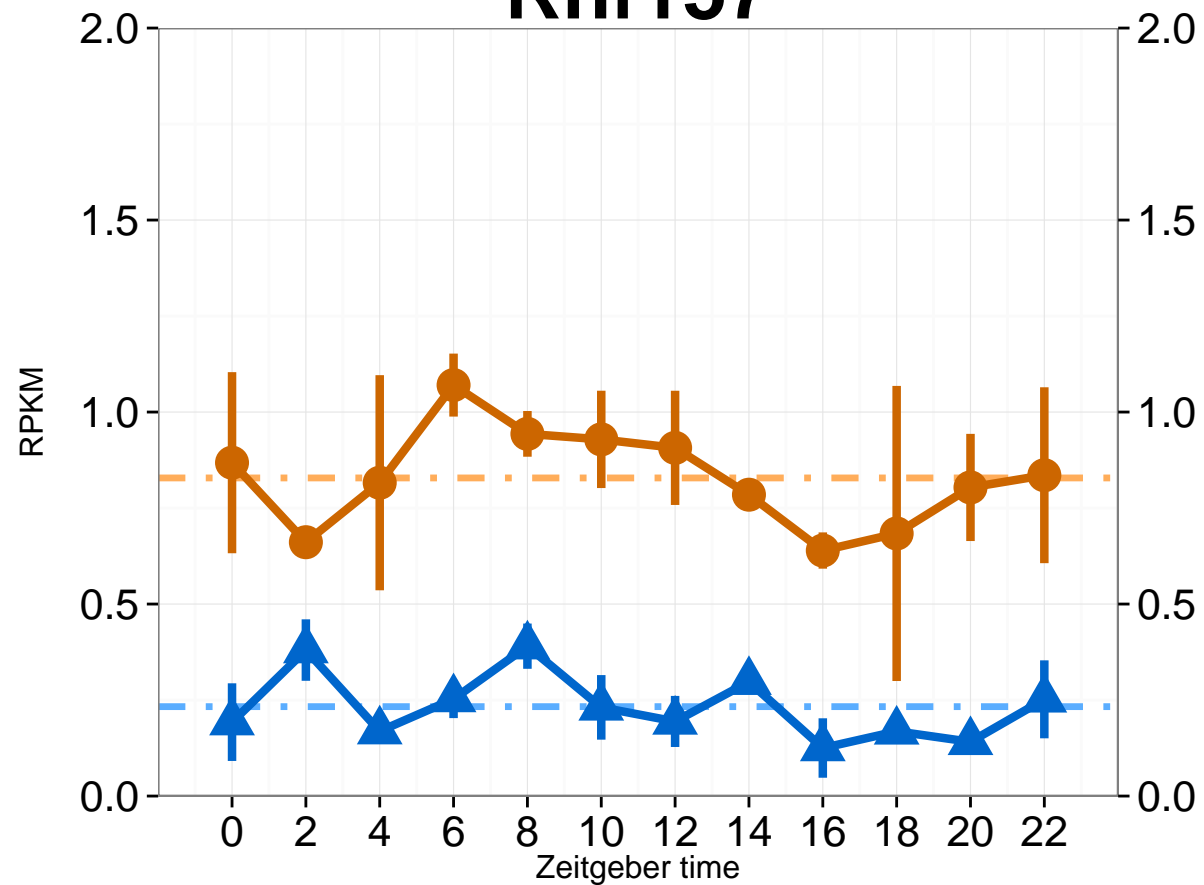

# Rnf157

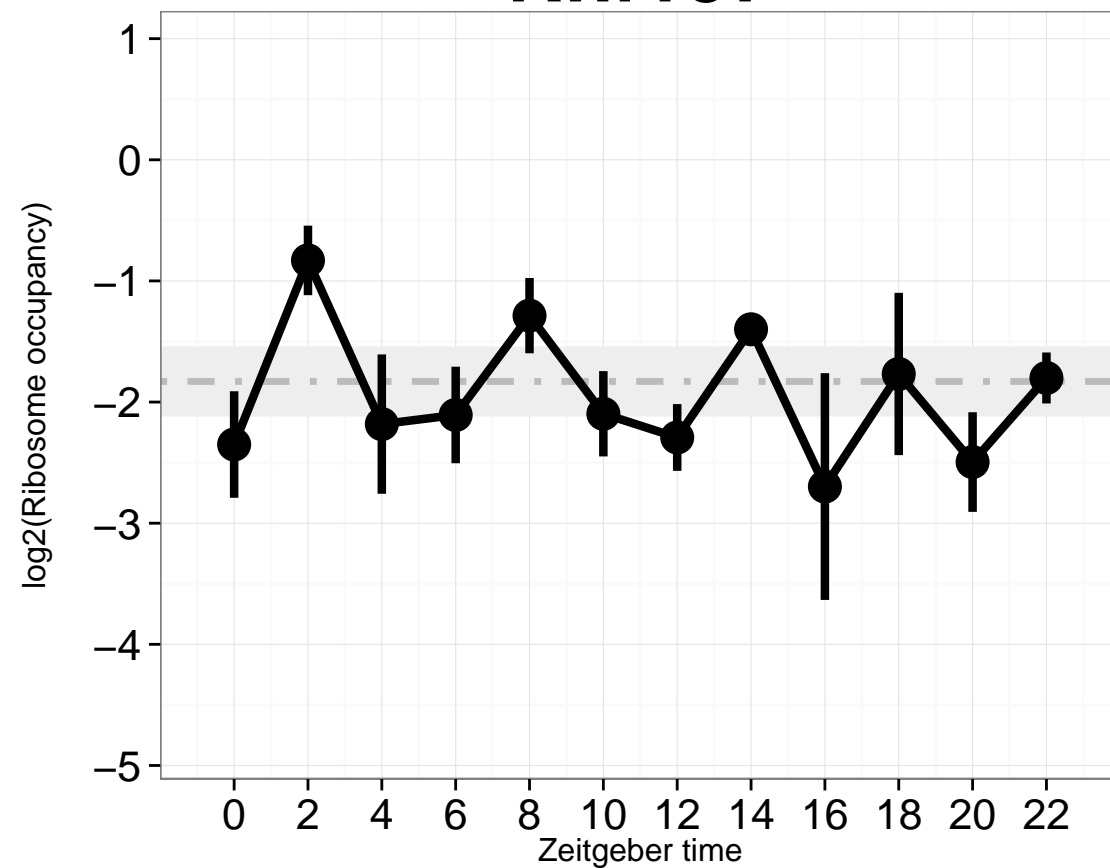

Supplement: Supplementary file 3758 [file 1]

# Cgref1

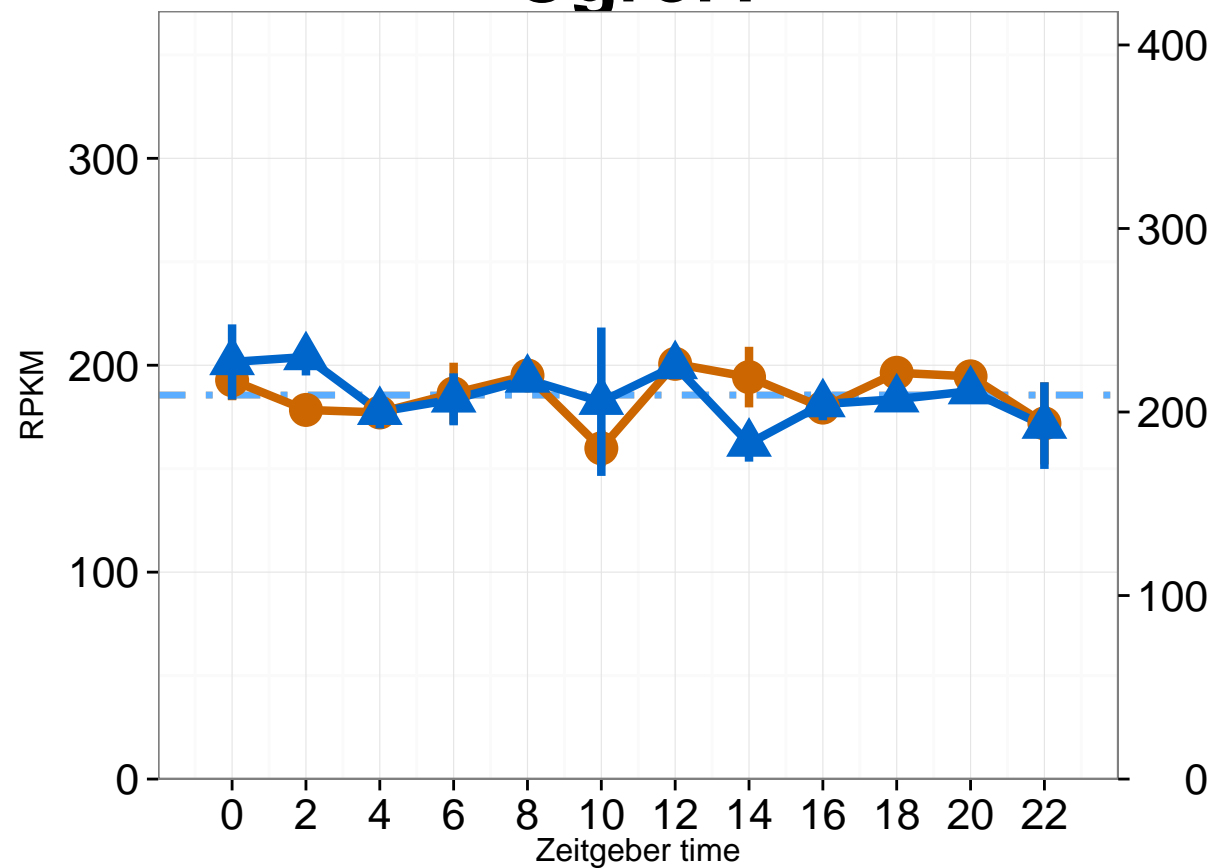

# Cgref1

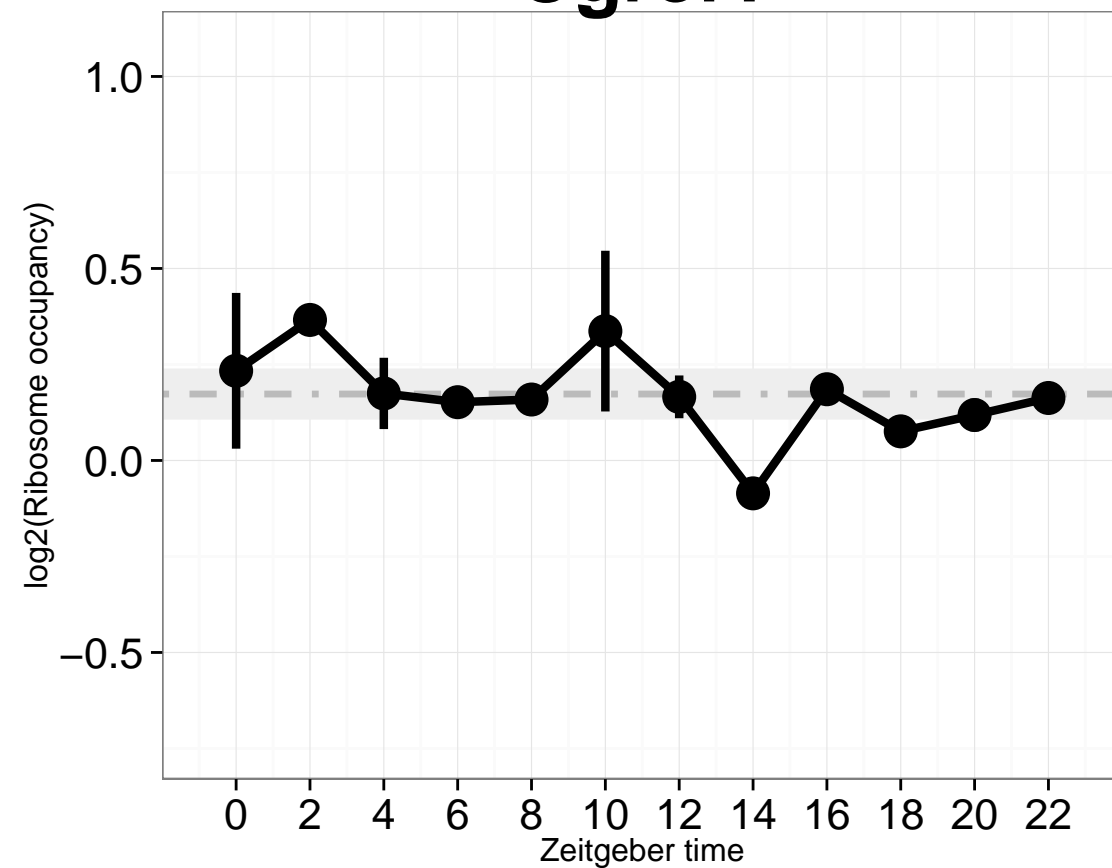

Supplement: Supplementary file 3759 [file 1]

## Ddx10

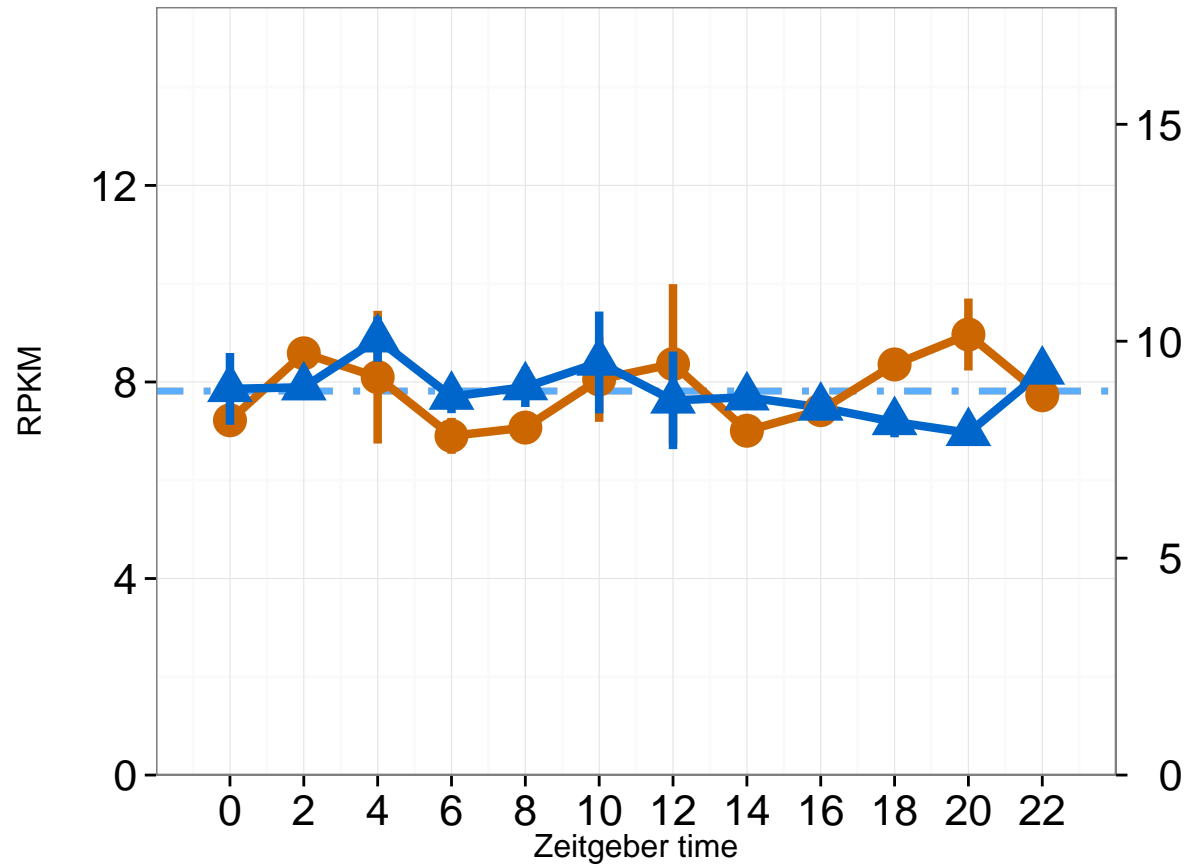

## Ddx10

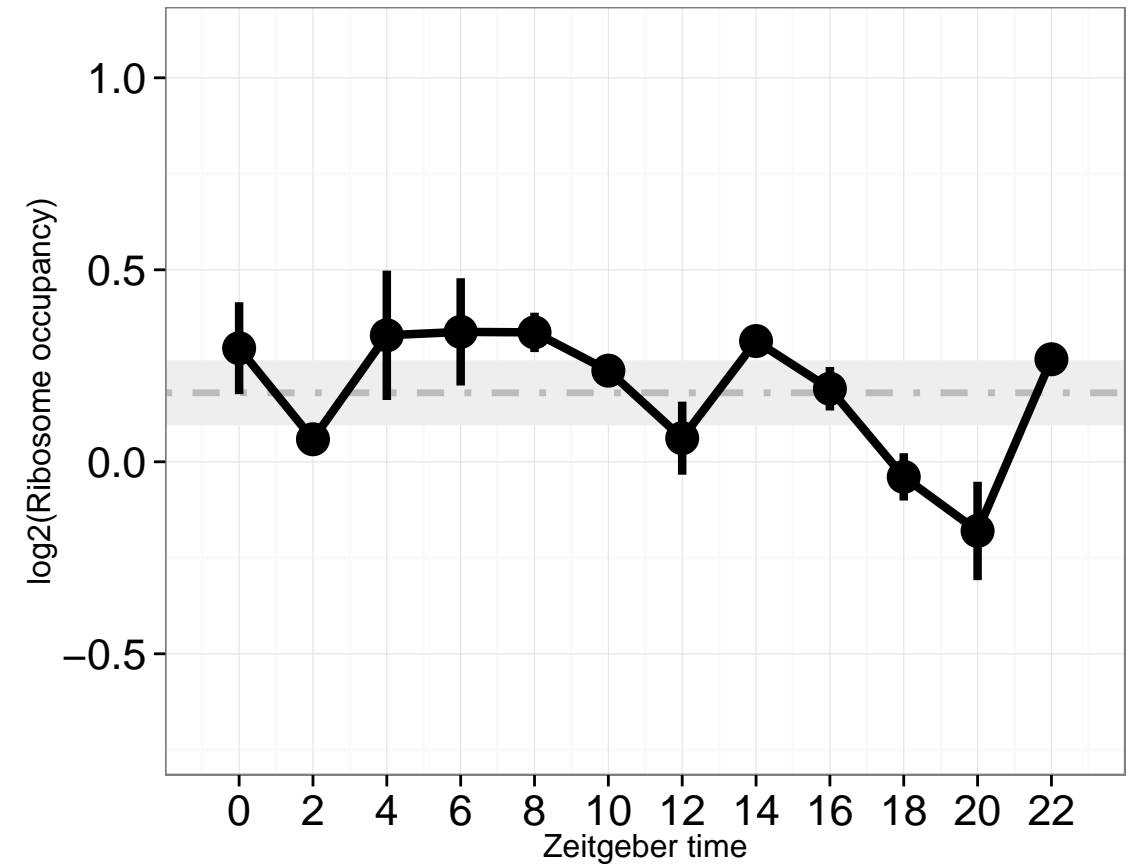

Supplement: Supplementary file 3760 [file 1]

**5730409E04Rik**

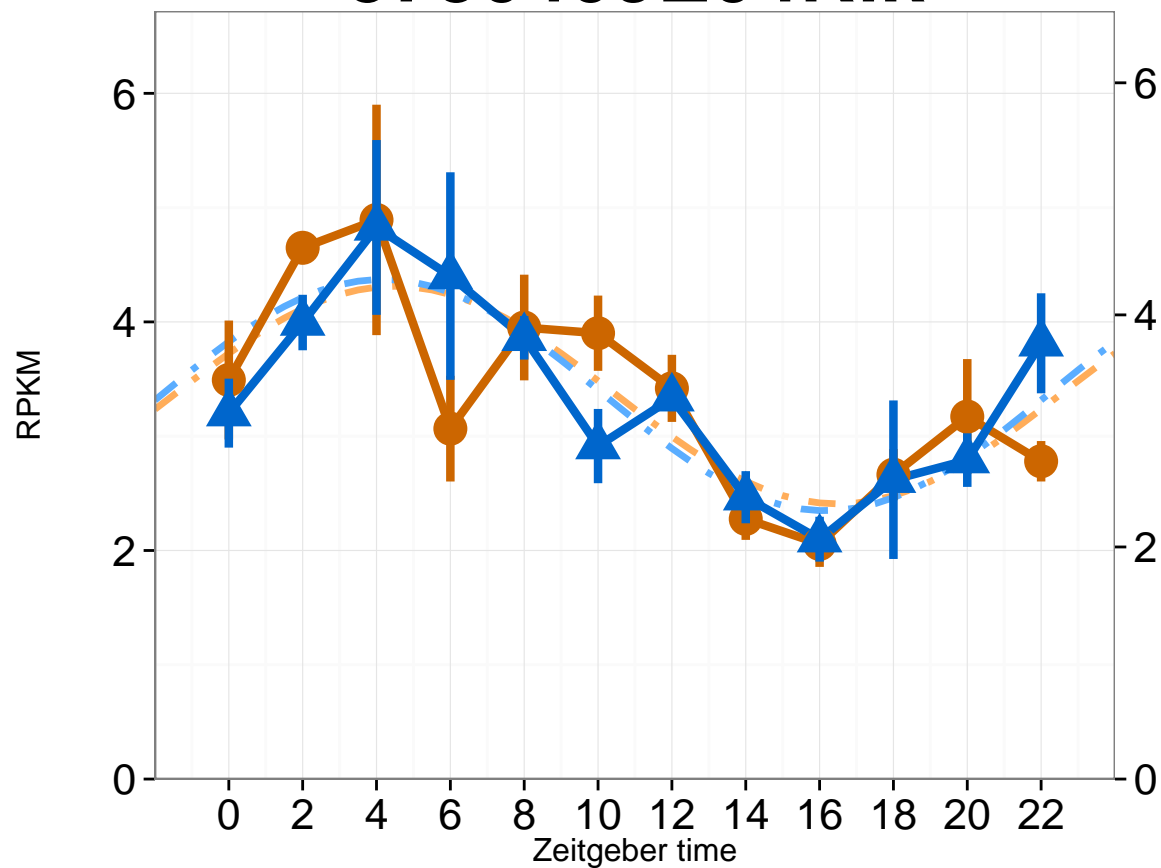

**5730409E04Rik**

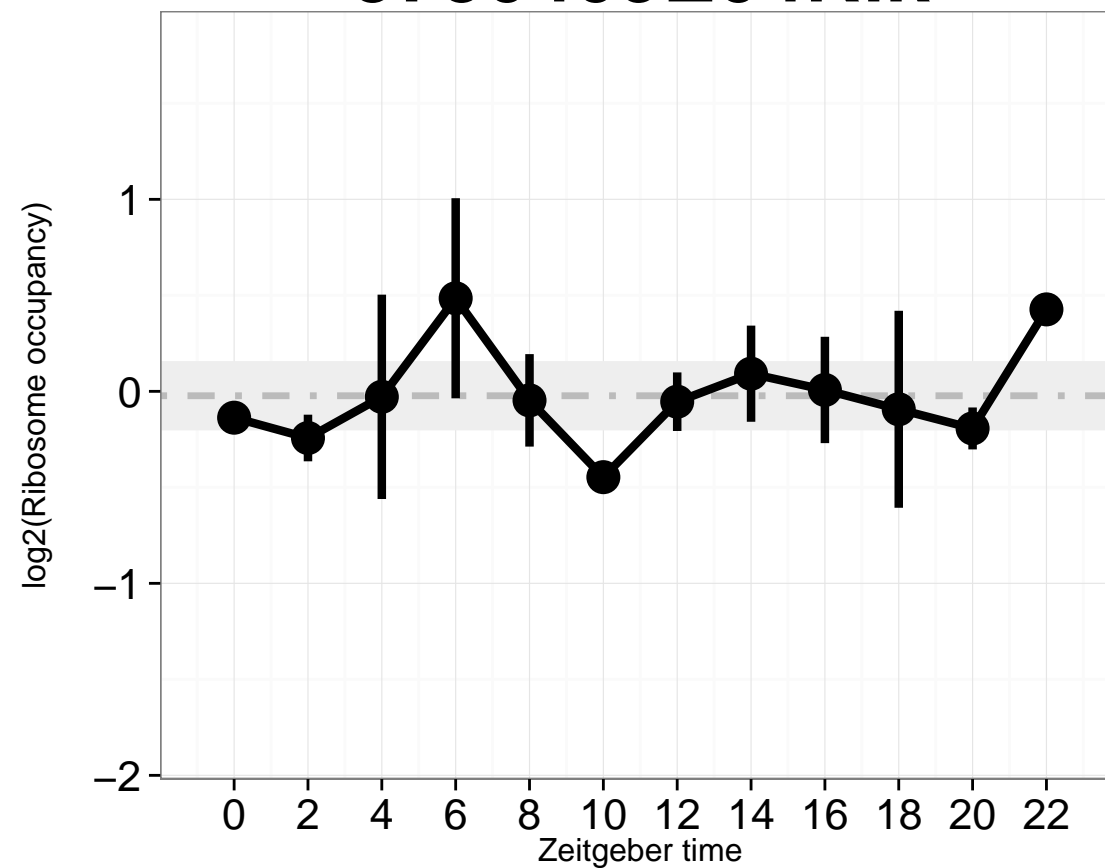

Supplement: Supplementary file 3761 [file 1]

## Tmx4

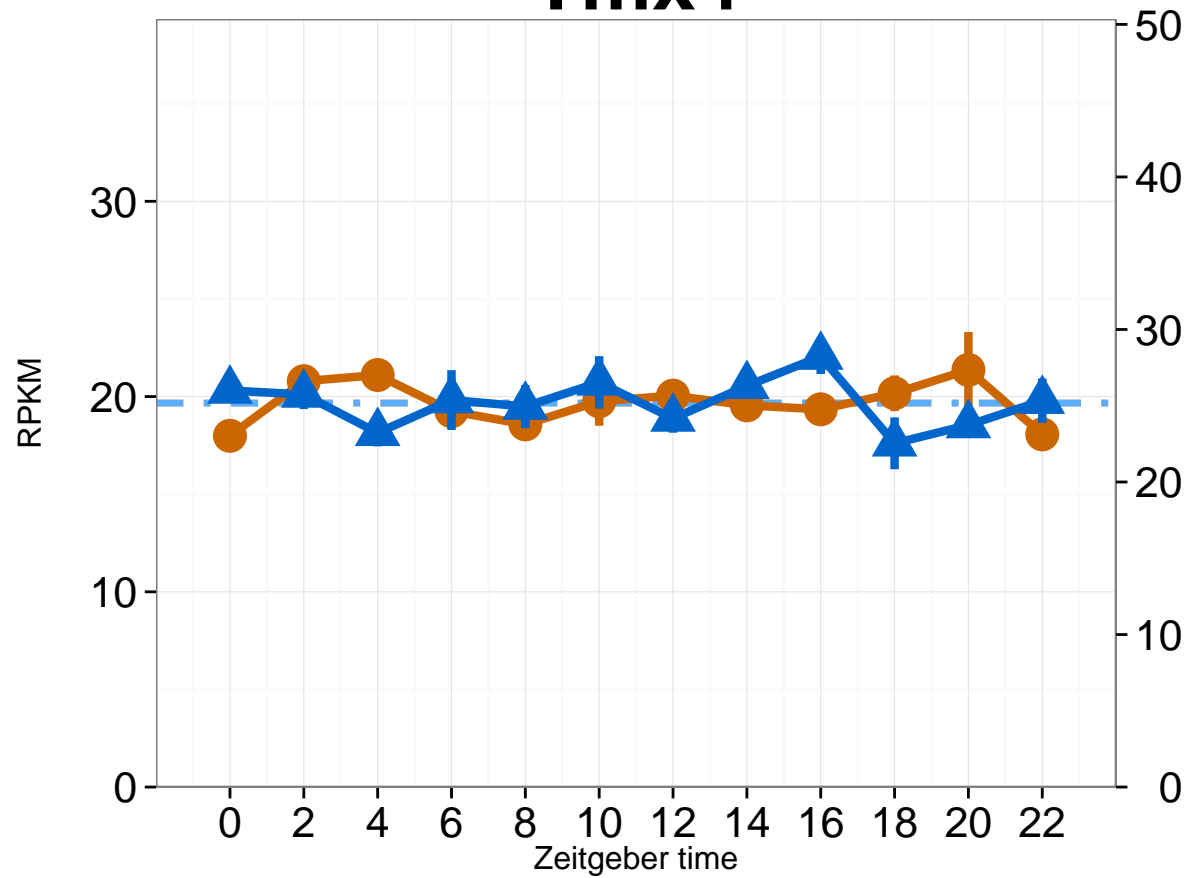

## Tmx4

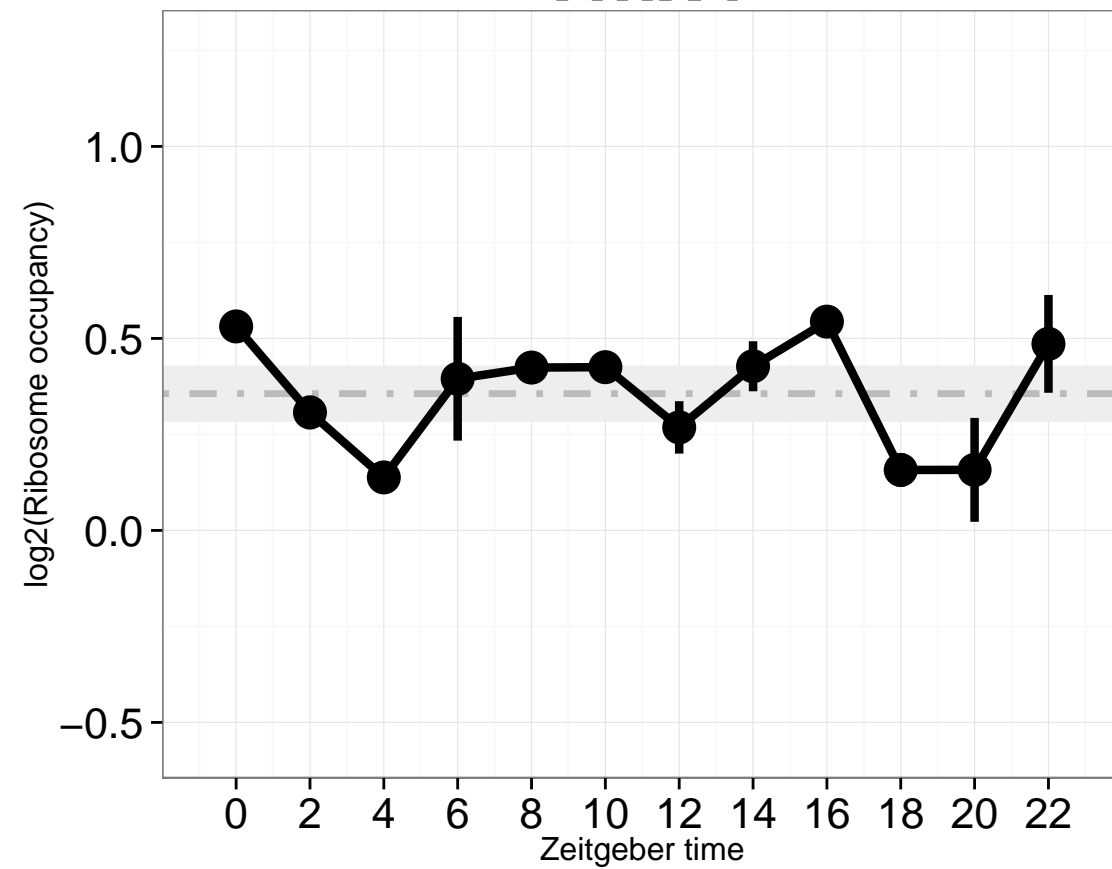

Supplement: Supplementary file 3762 [file 1]

## Klhl29

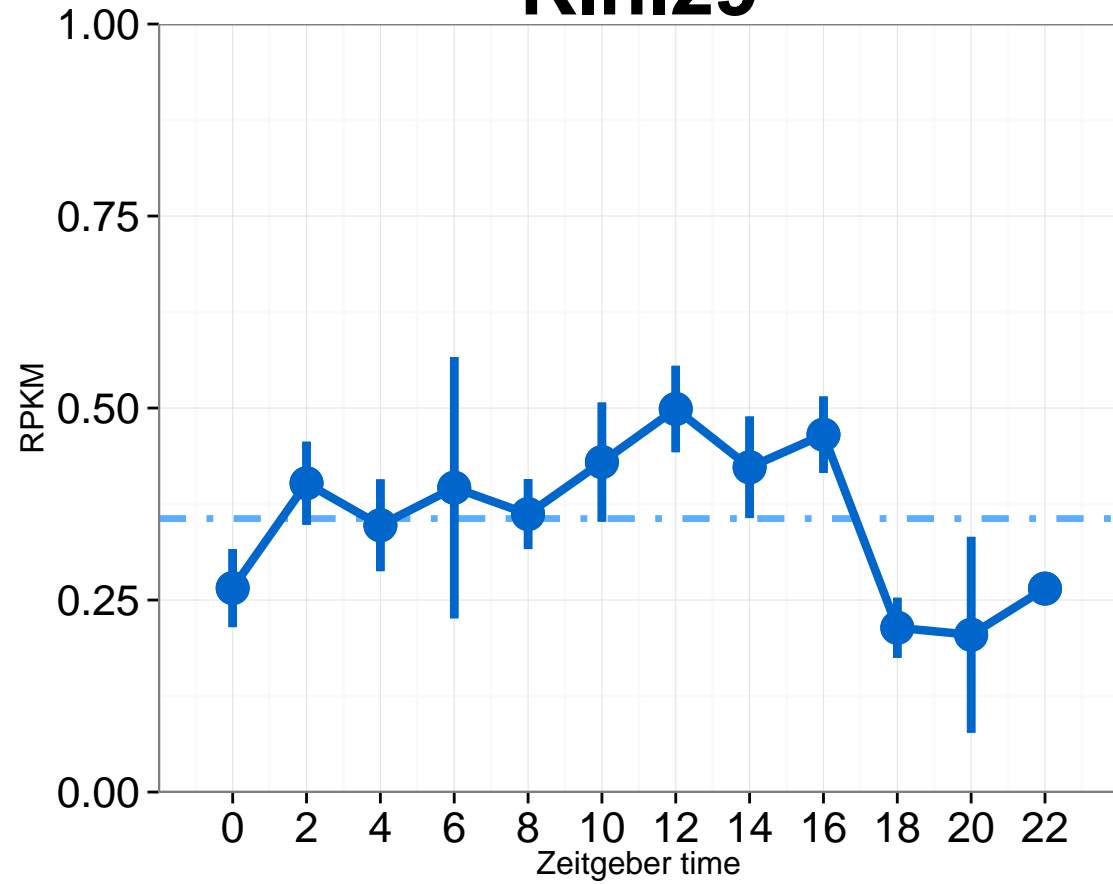

## Klhl29 log2(Ribosome occupancy

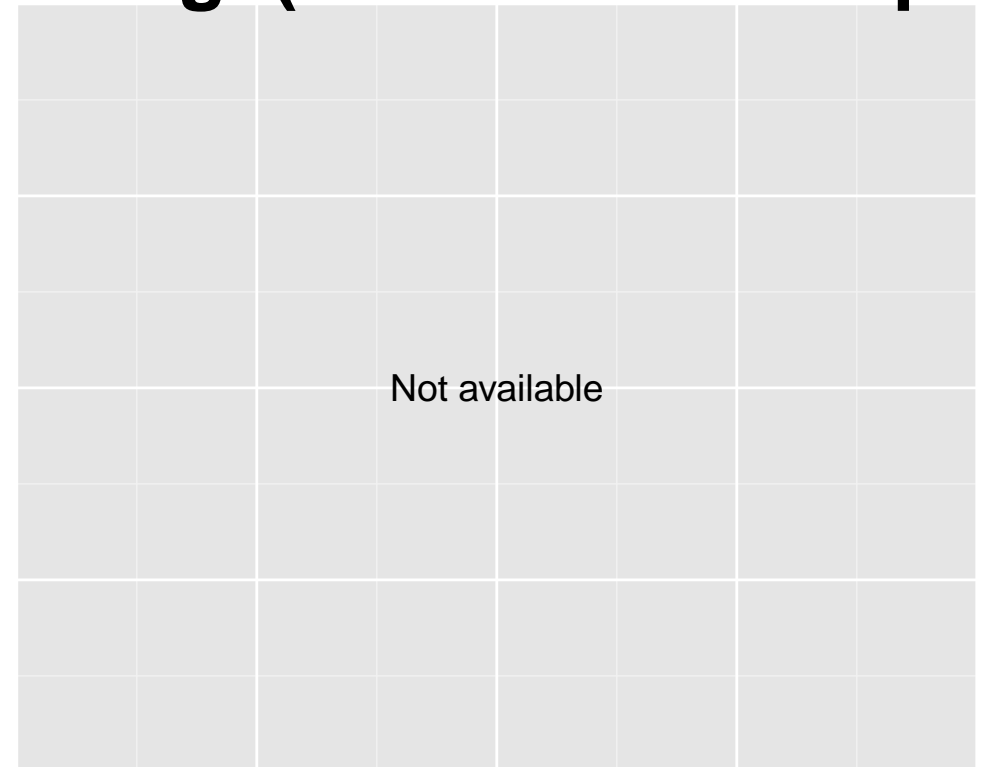

Supplement: Supplementary file 3763 [file 1]

## Kri1

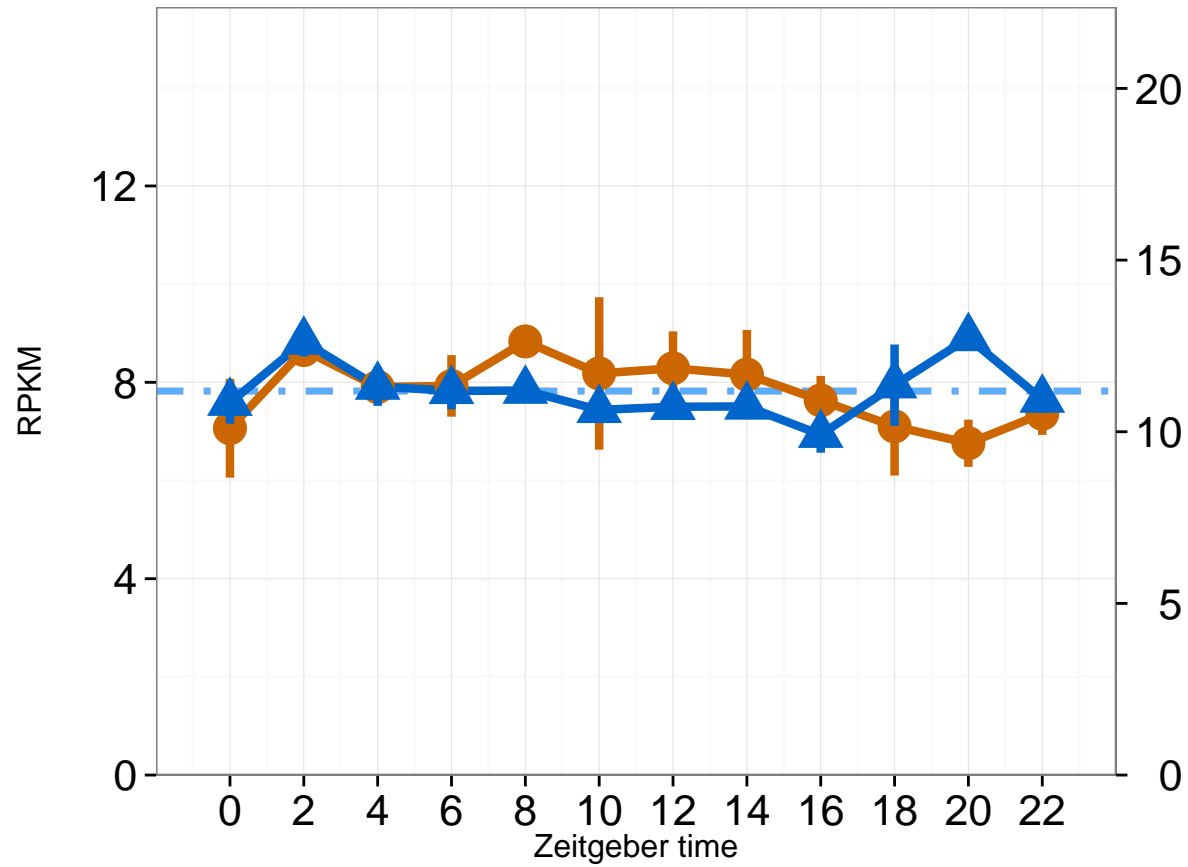

## Kri1

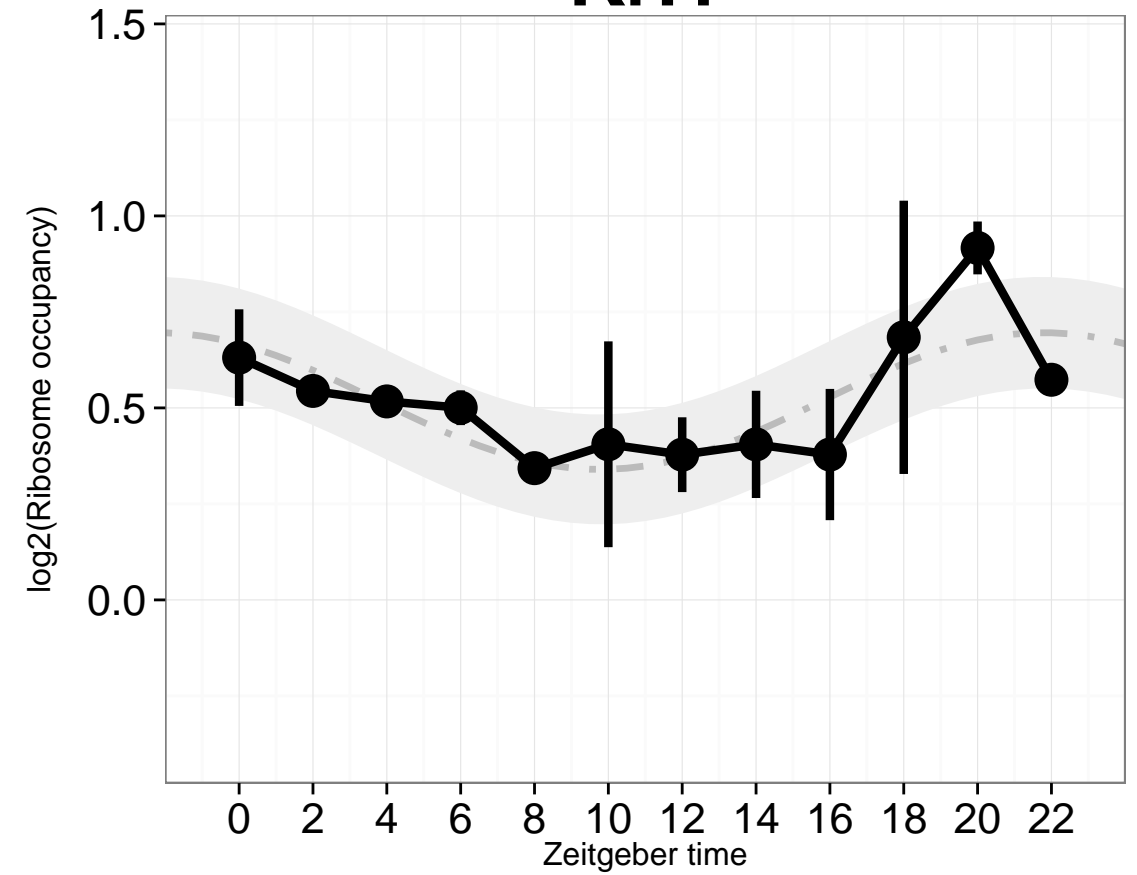

Supplement: Supplementary file 3764 [file 1]

## Magi3

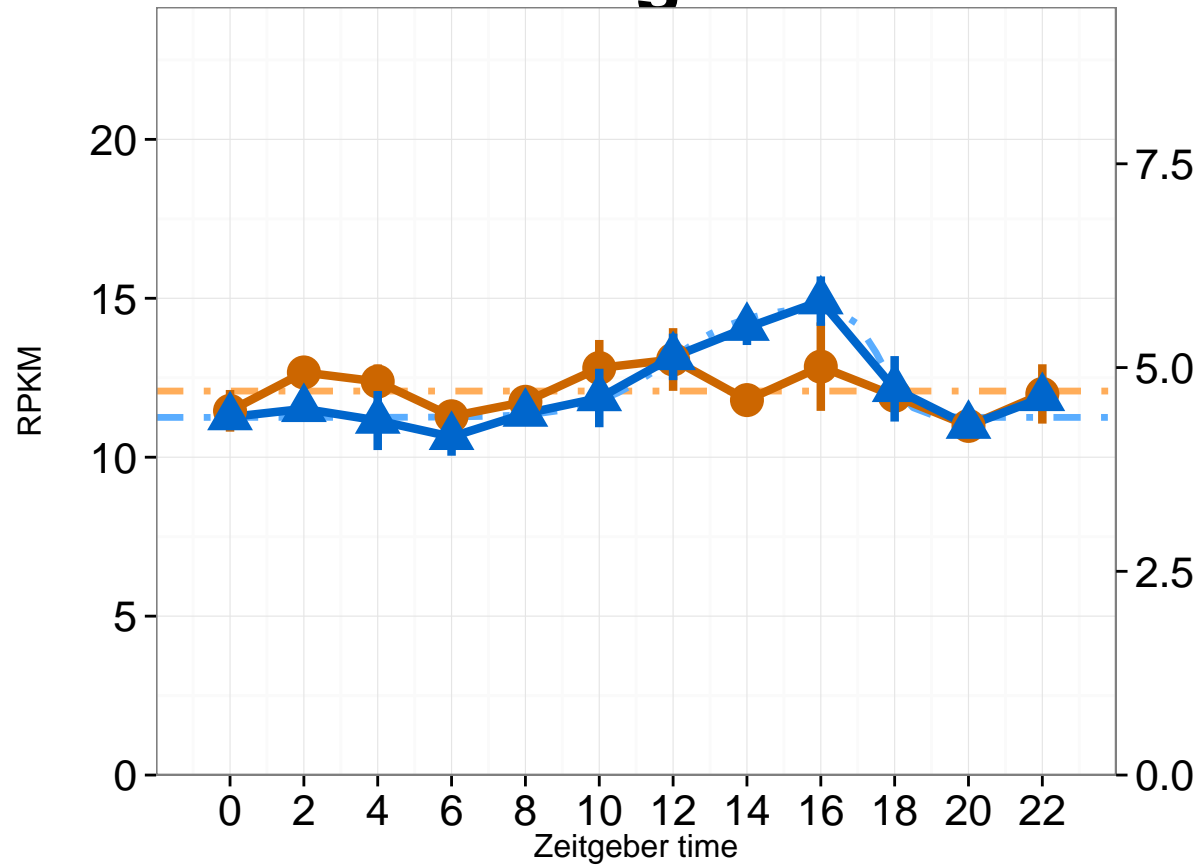

## Magi3

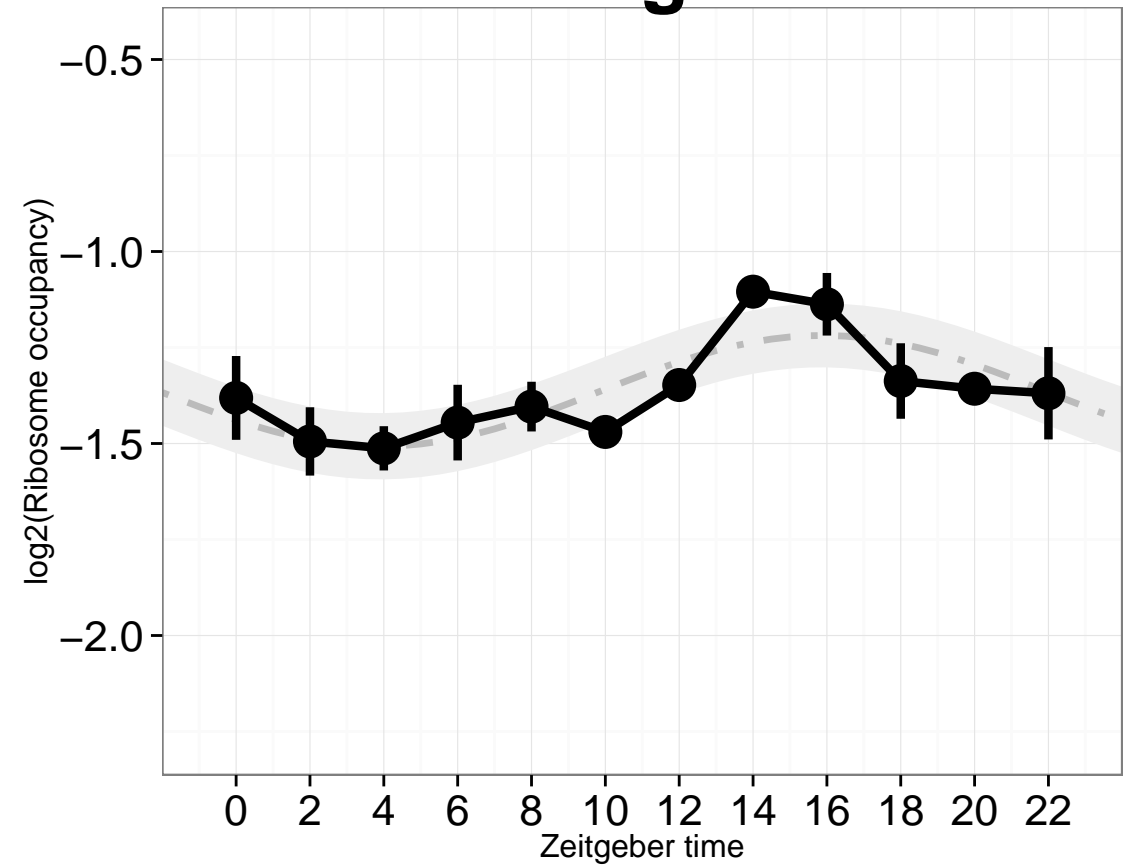

Supplement: Supplementary file 3765 [file 1]

# AU041133

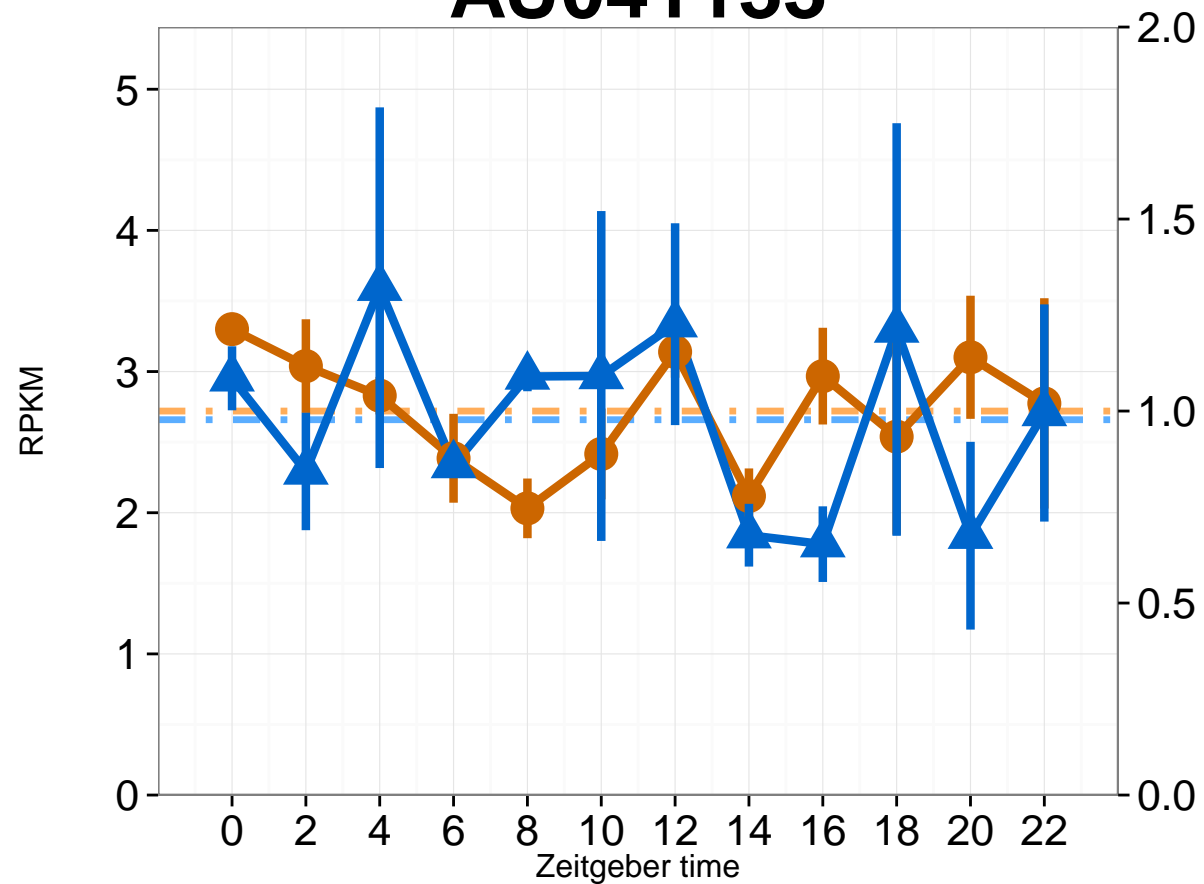

# AU041133

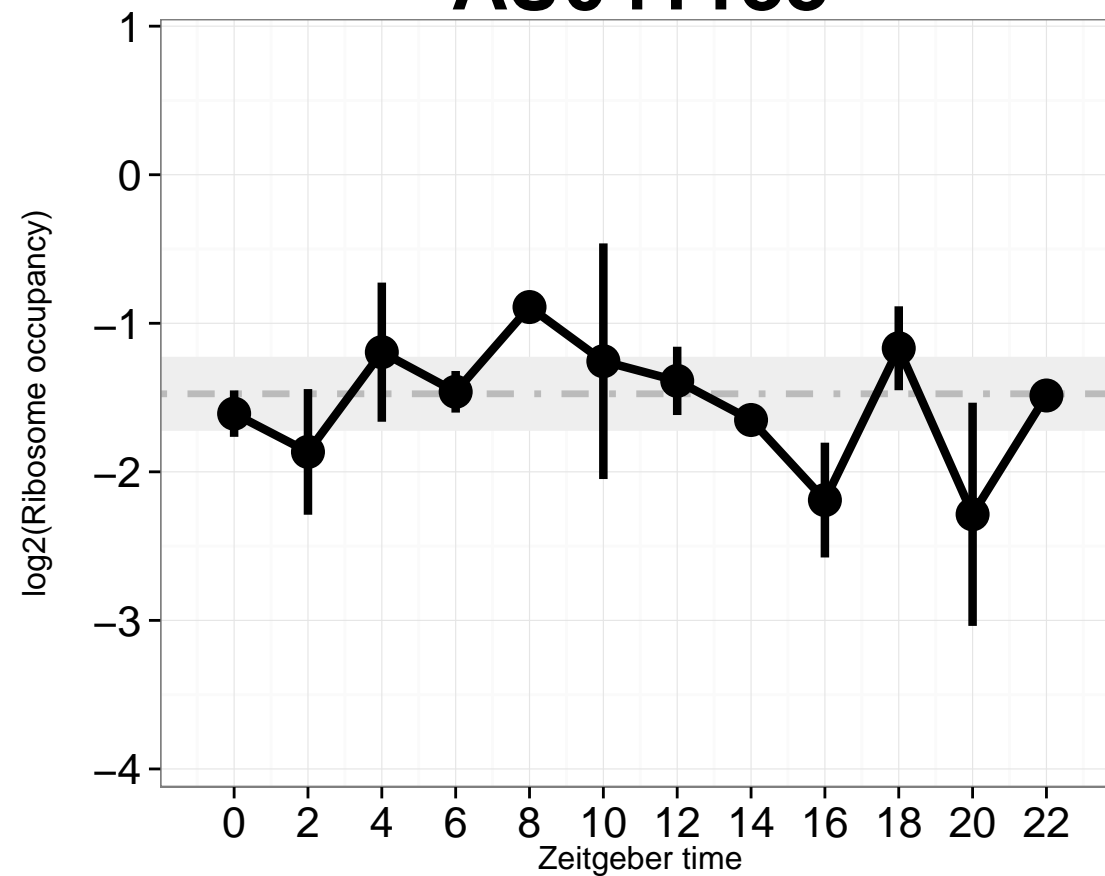

Supplement: Supplementary file 3766 [file 1]

# Atat1

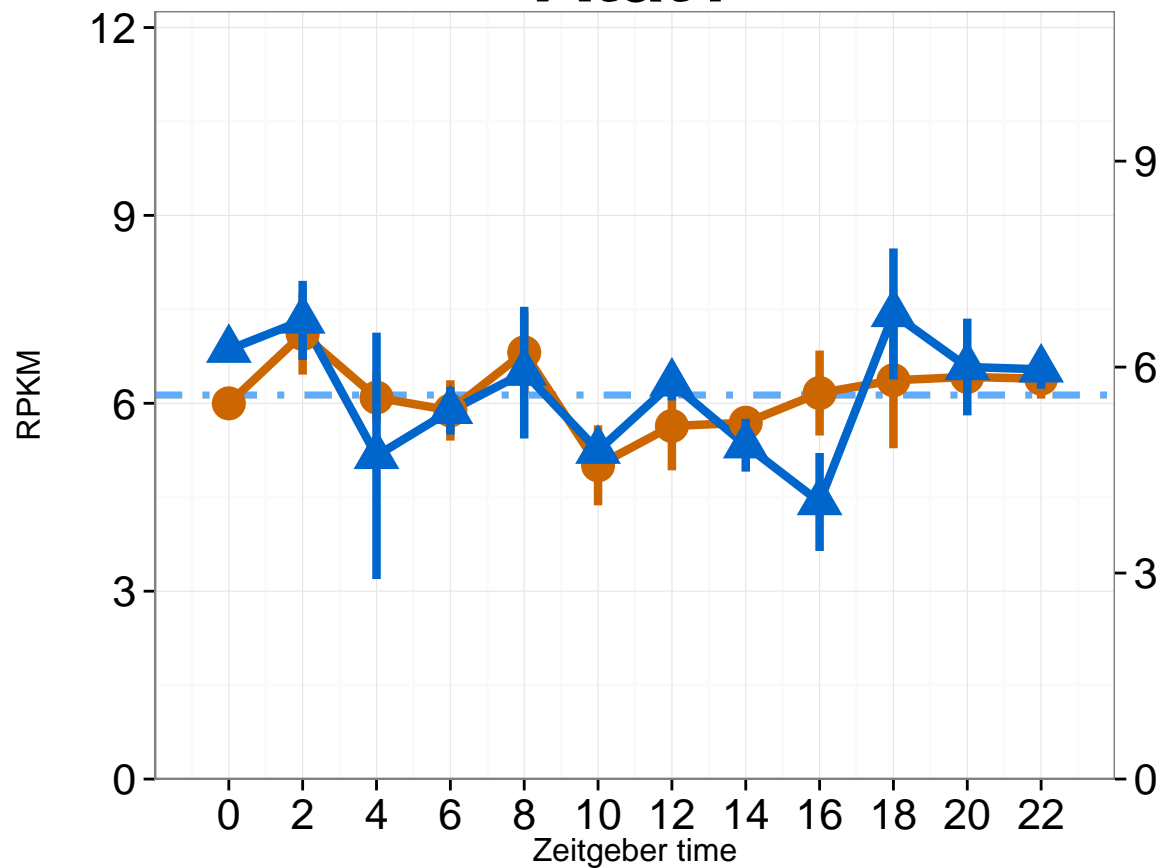

# Atat1

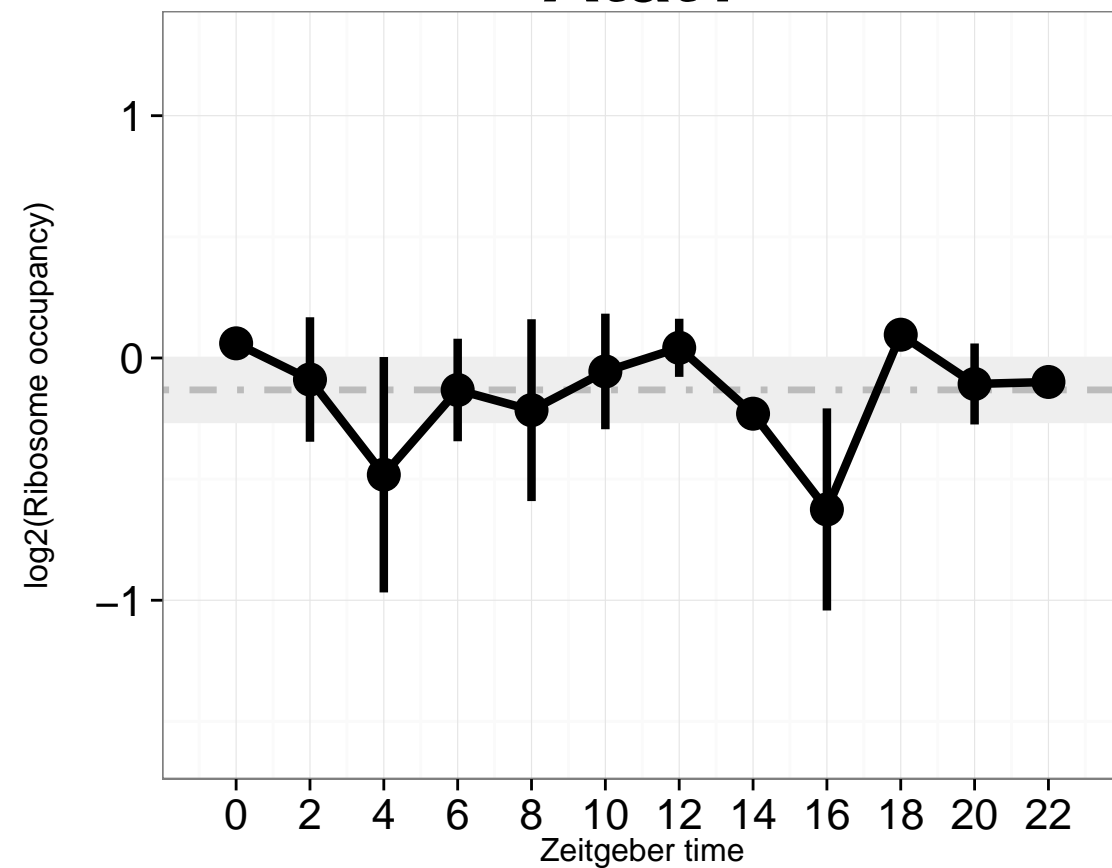

Supplement: Supplementary file 3767 [file 1]

## Amigo3

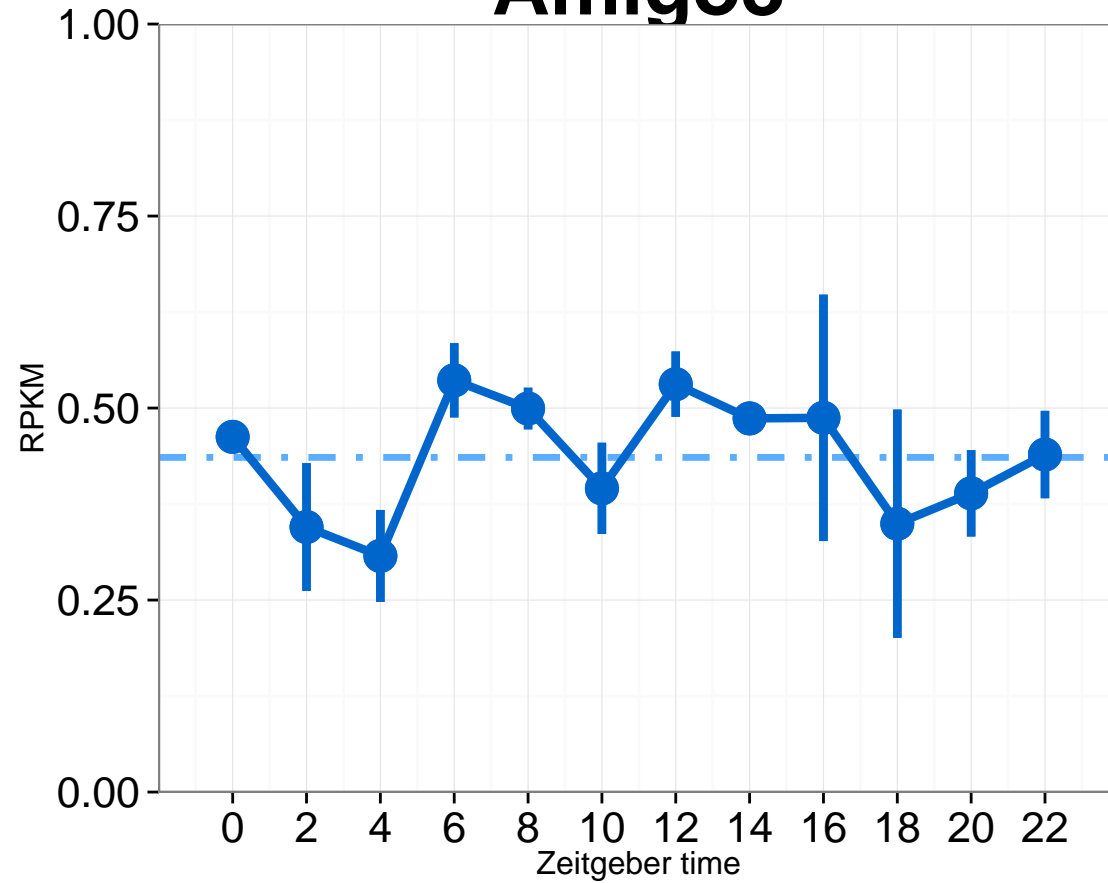

## Amigo3 log2(Ribosome occupancy)

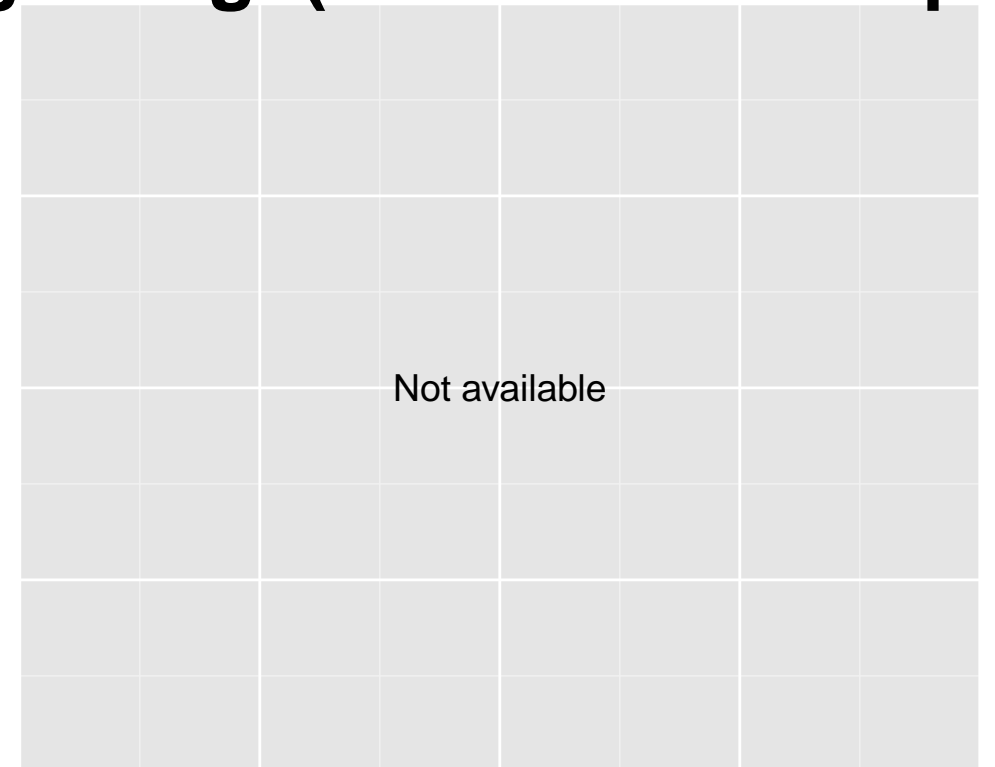

Supplement: Supplementary file 3768 [file 1]

## Acnat2

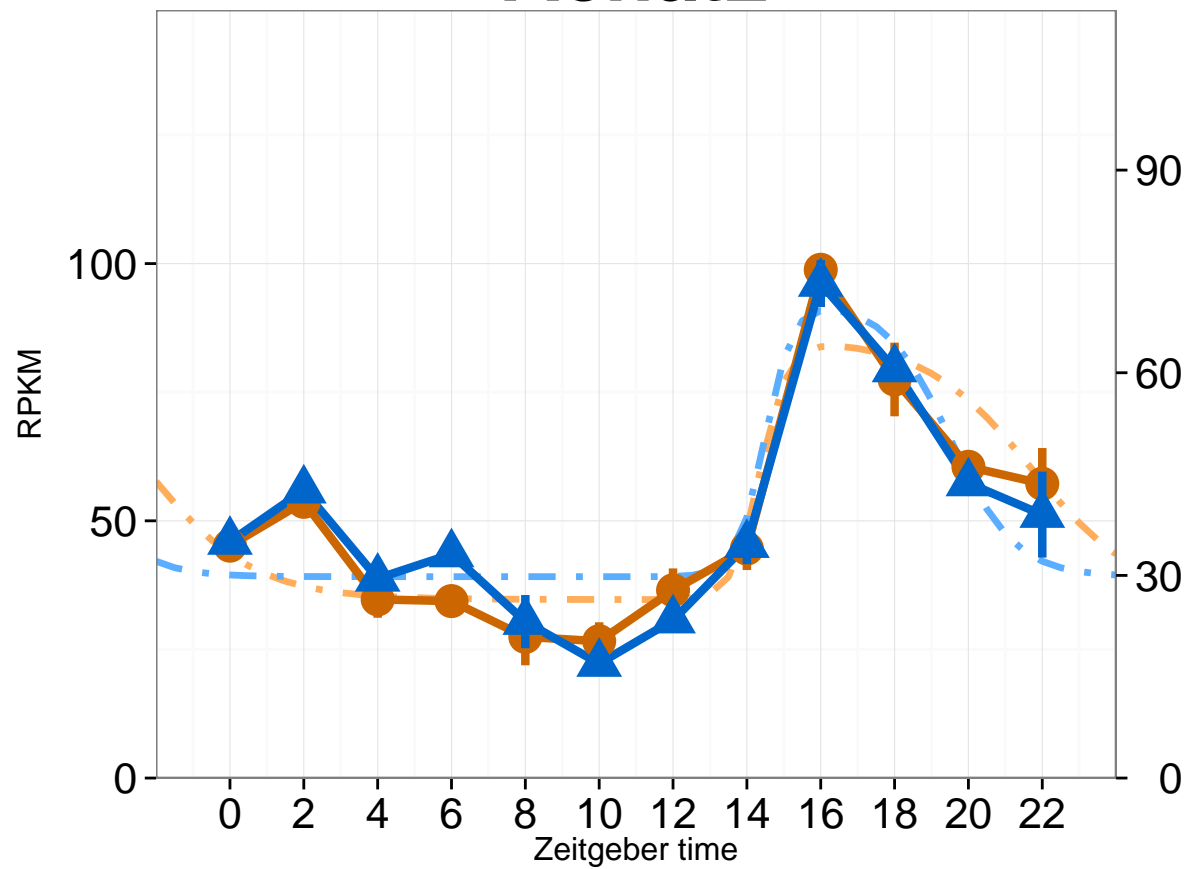

## Acnat2

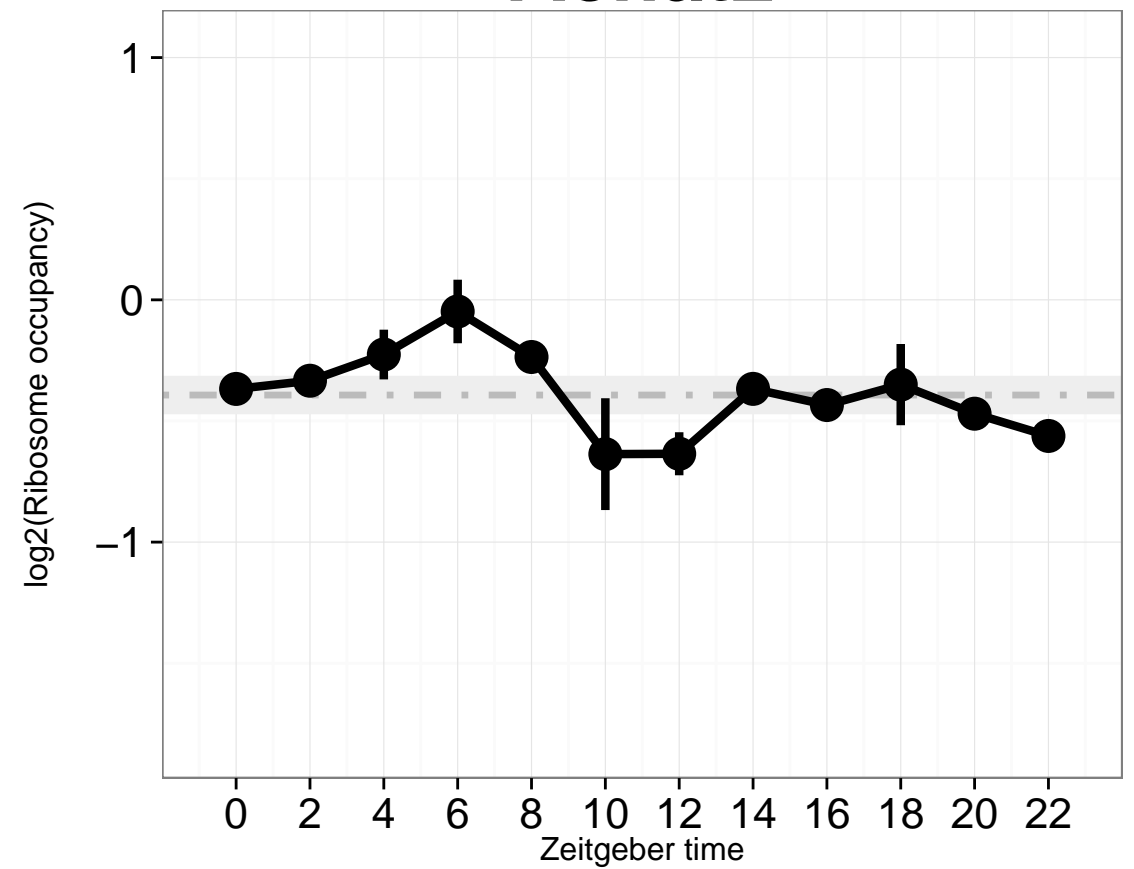

Supplement: Supplementary file 3769 [file 1]

## Acat3

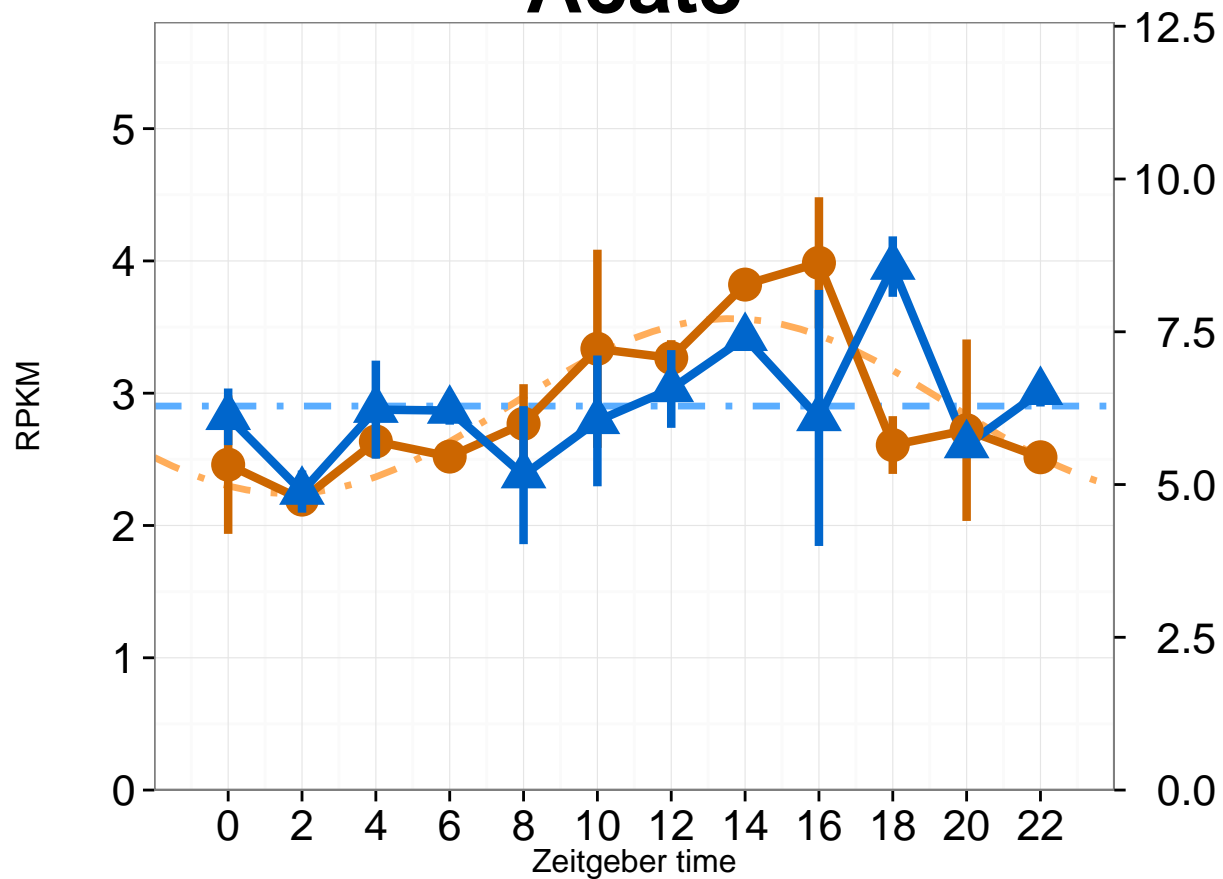

## Acat3

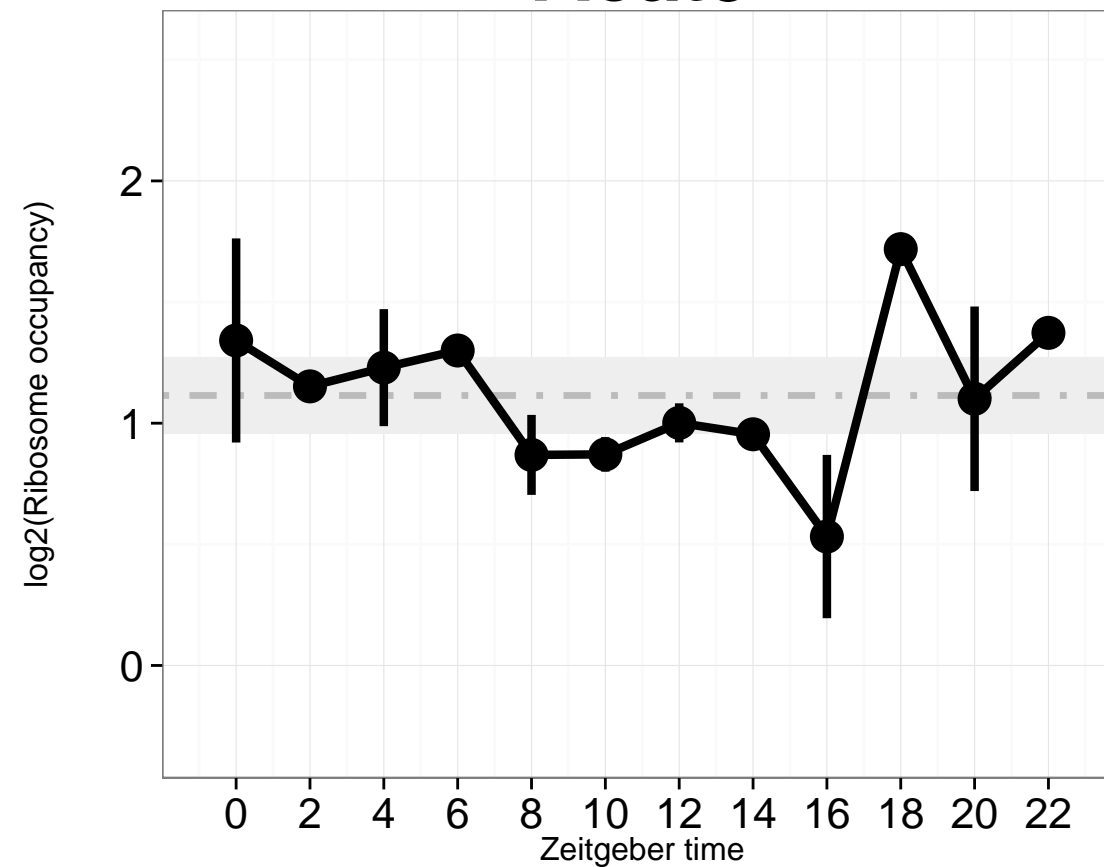

Supplement: Supplementary file 3770 [file 1]

## Sowahb

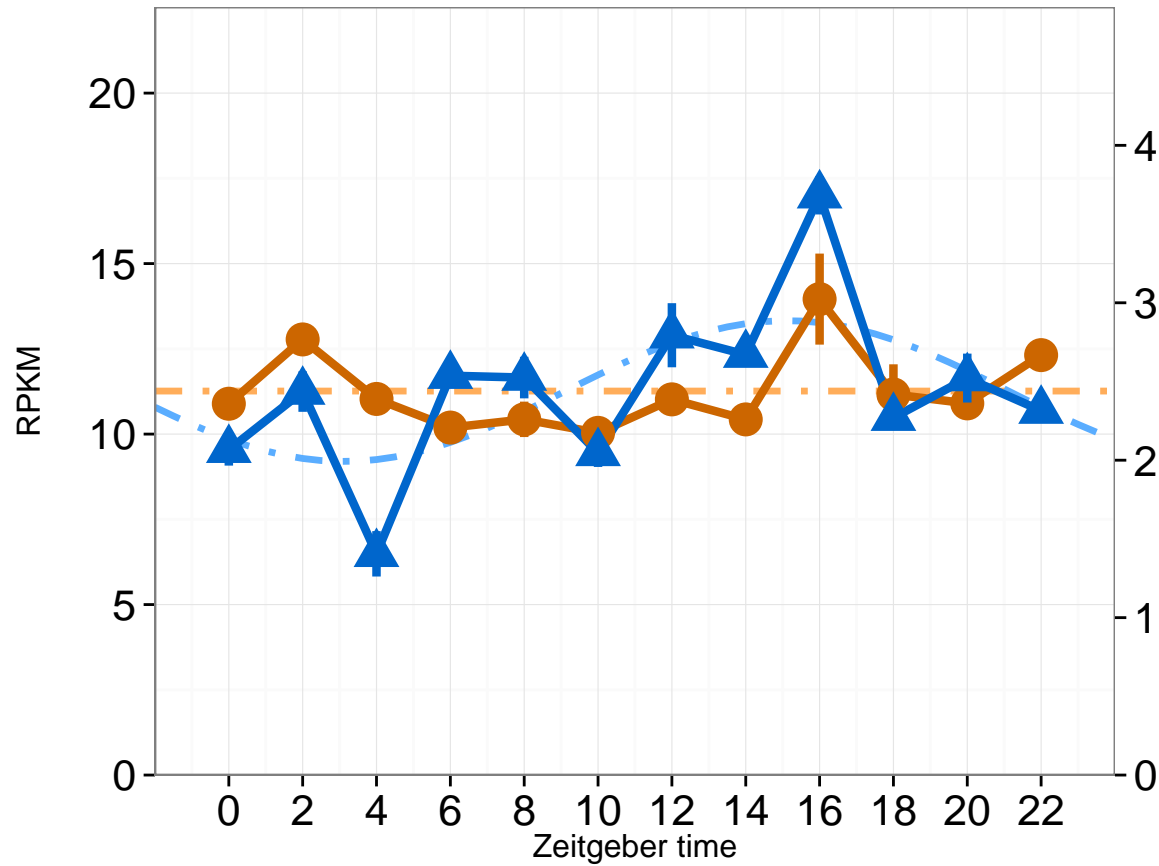

## Sowahb

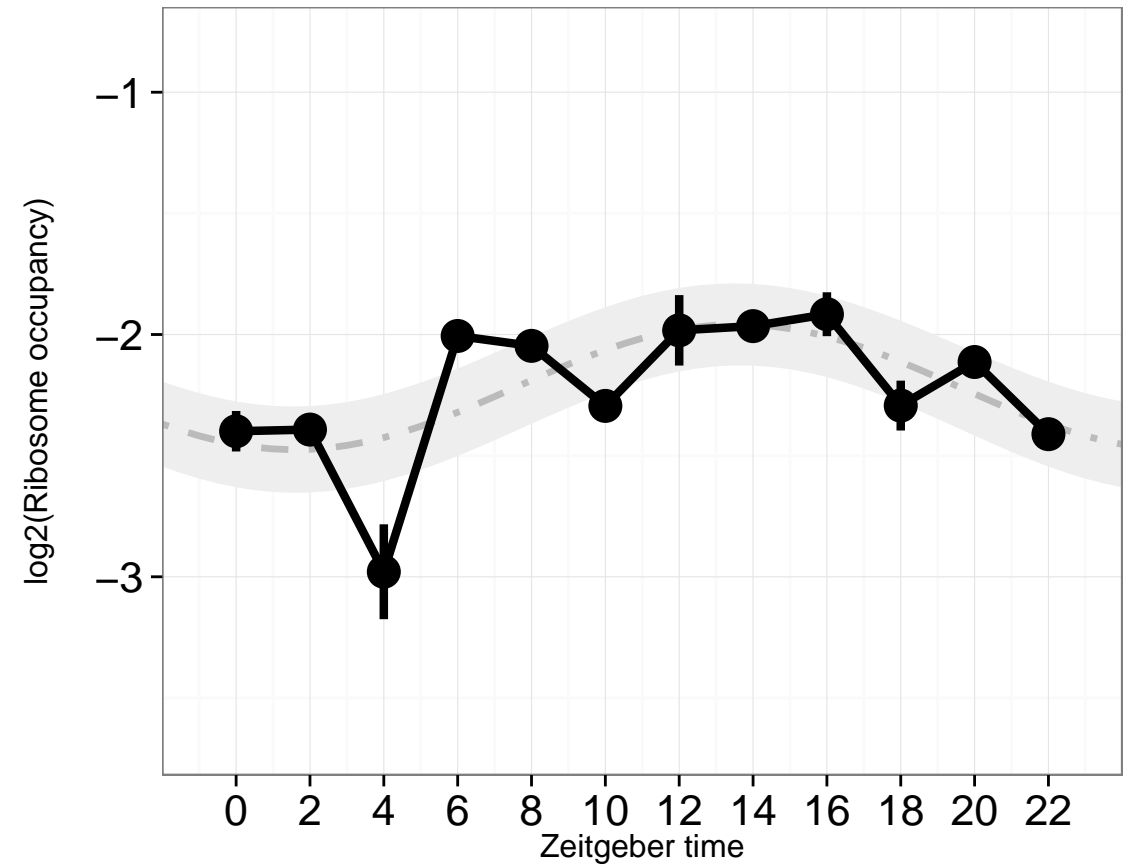

Supplement: Supplementary file 3771 [file 1]

# Uhrf1bp1

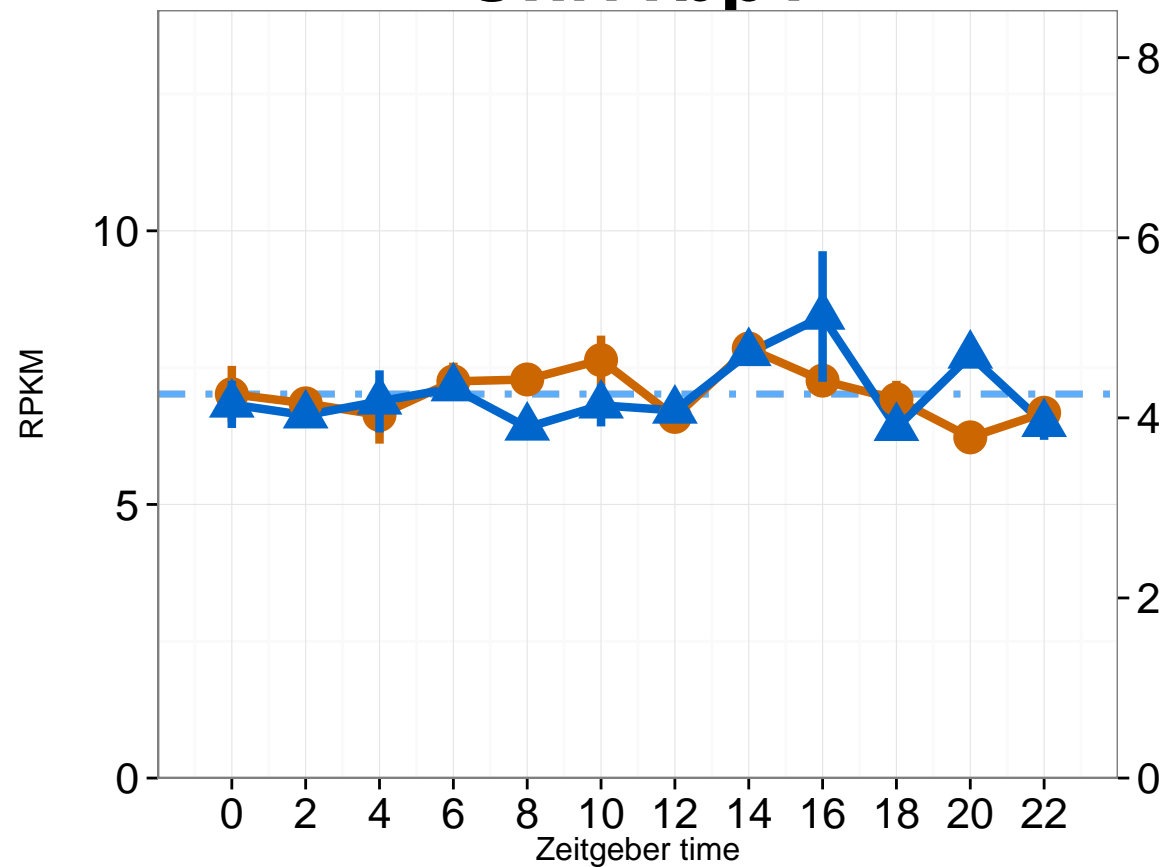

# Uhrf1bp1

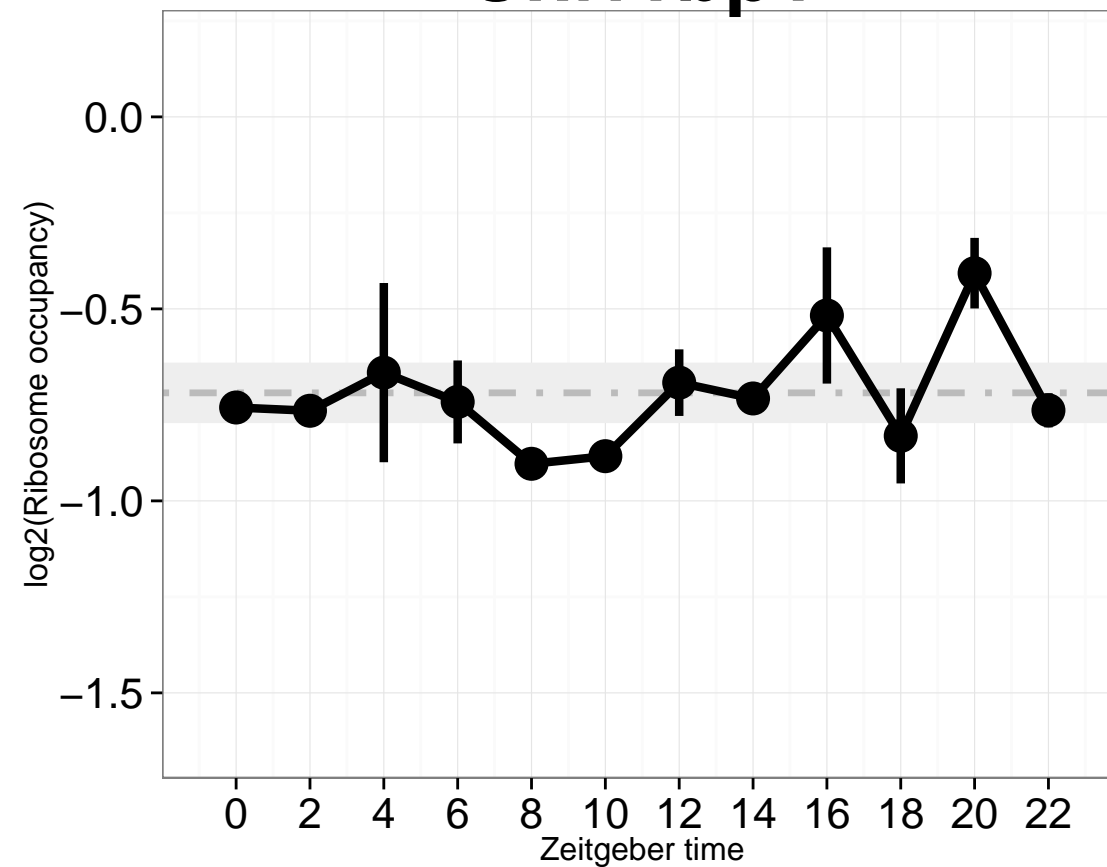

Supplement: Supplementary file 3772 [file 1]

# Emc7

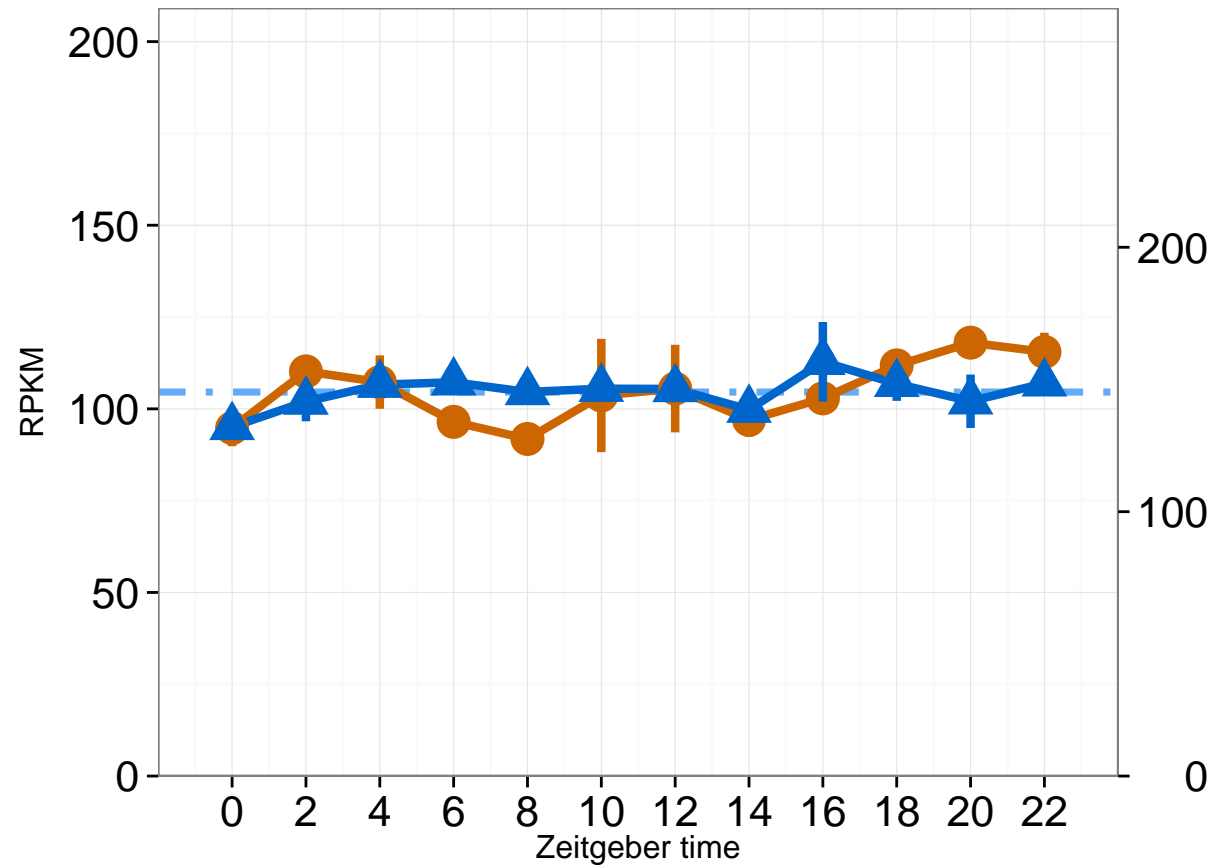

# Emc7

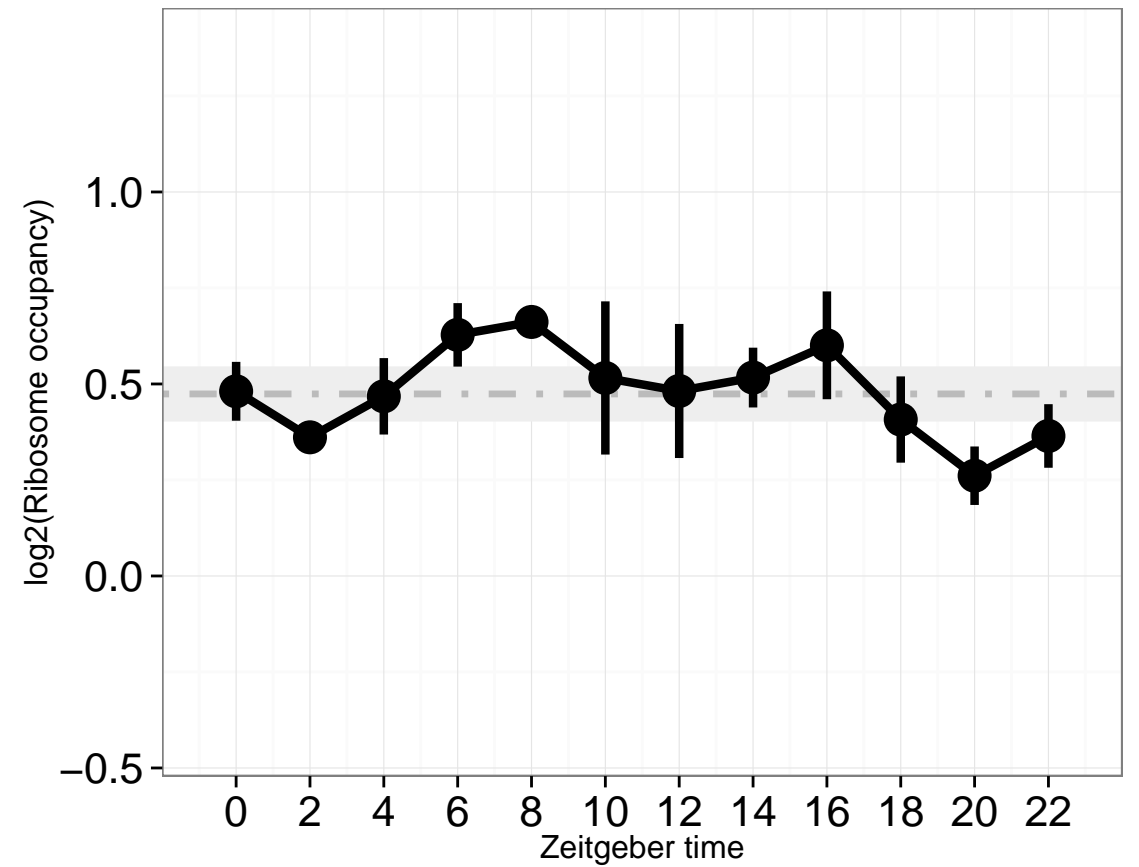

Supplement: Supplementary file 3773 [file 1]

## Thumpd2

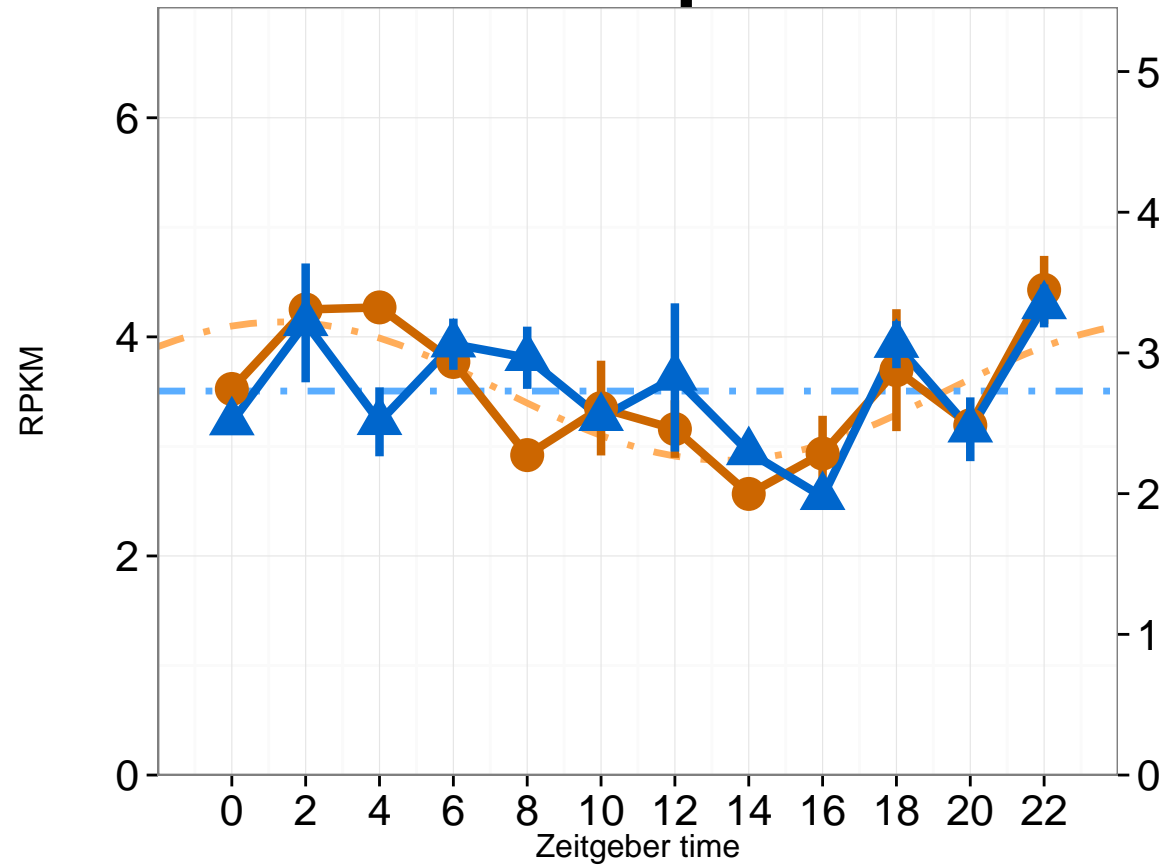

## Thumpd2

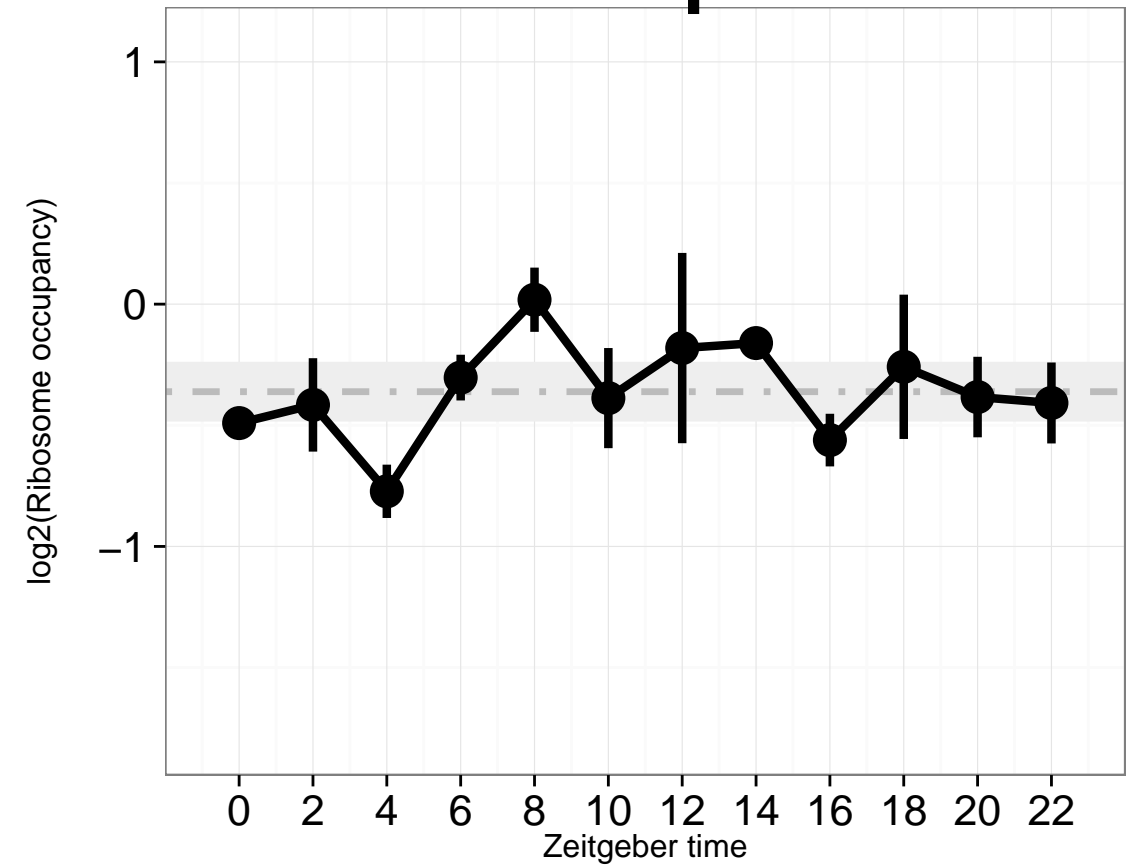

Supplement: Supplementary file 3774 [file 1]

## Syne4

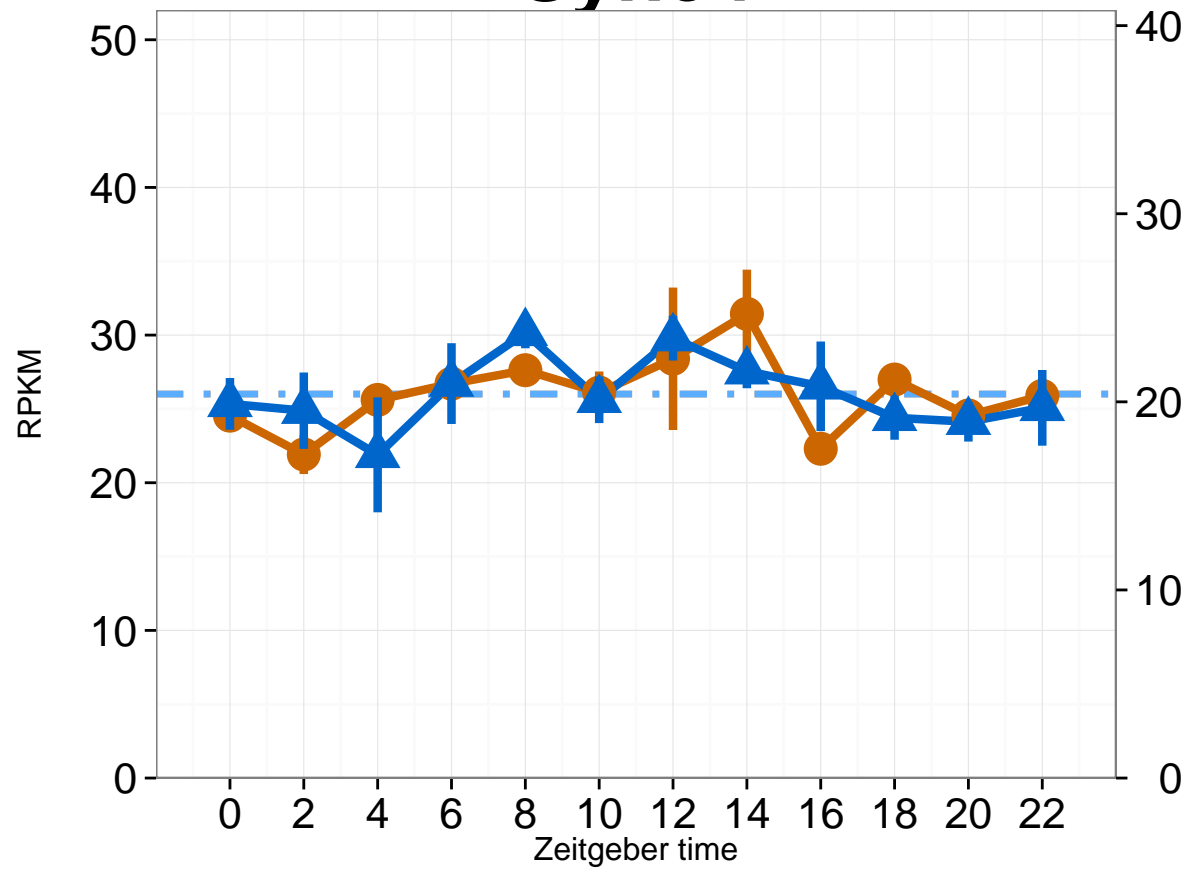

## Syne4

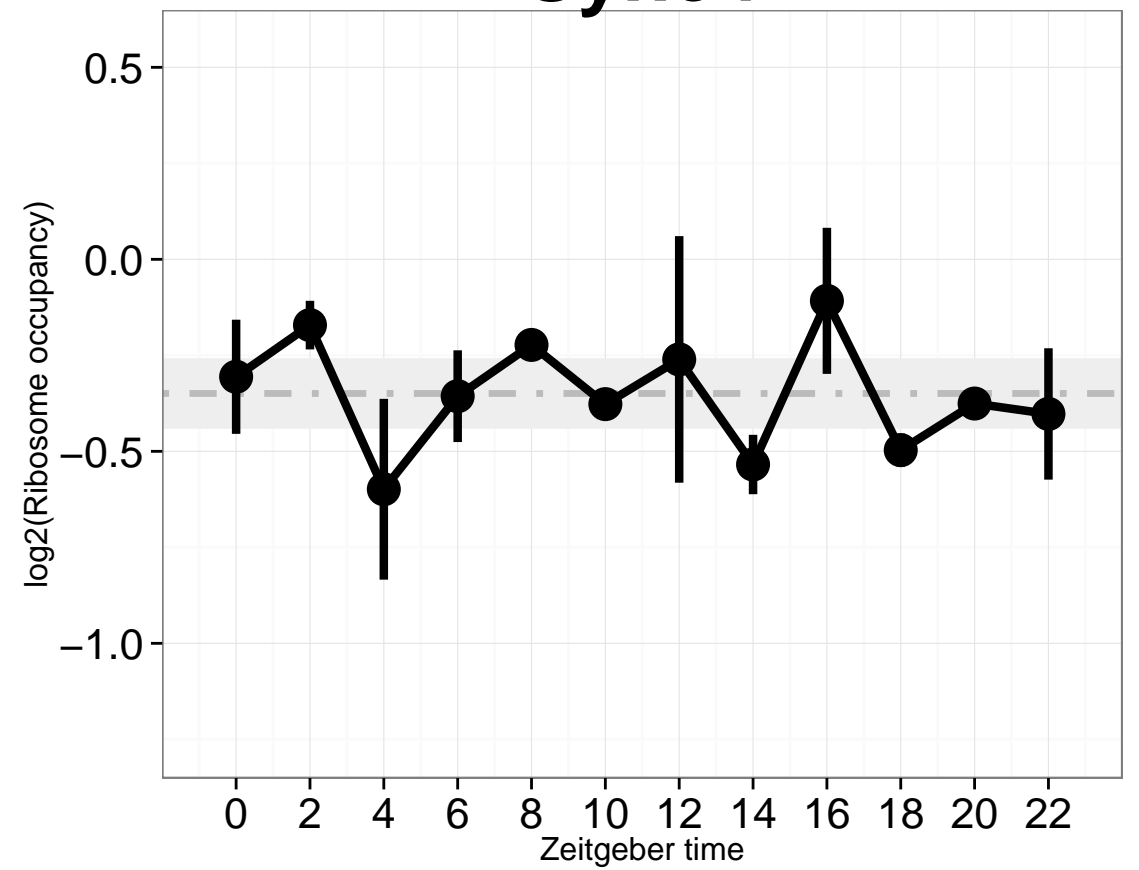

Supplement: Supplementary file 3775 [file 1]

## Arhgef40

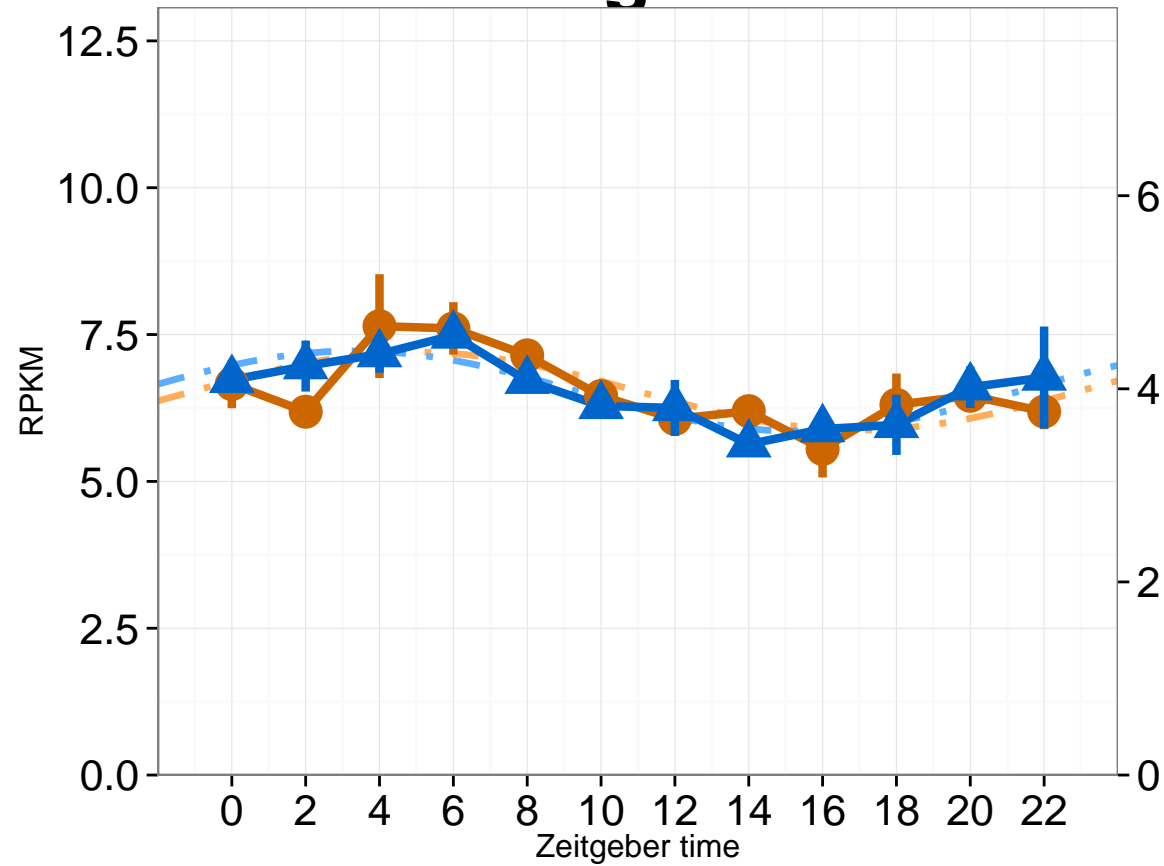

## Arhgef40

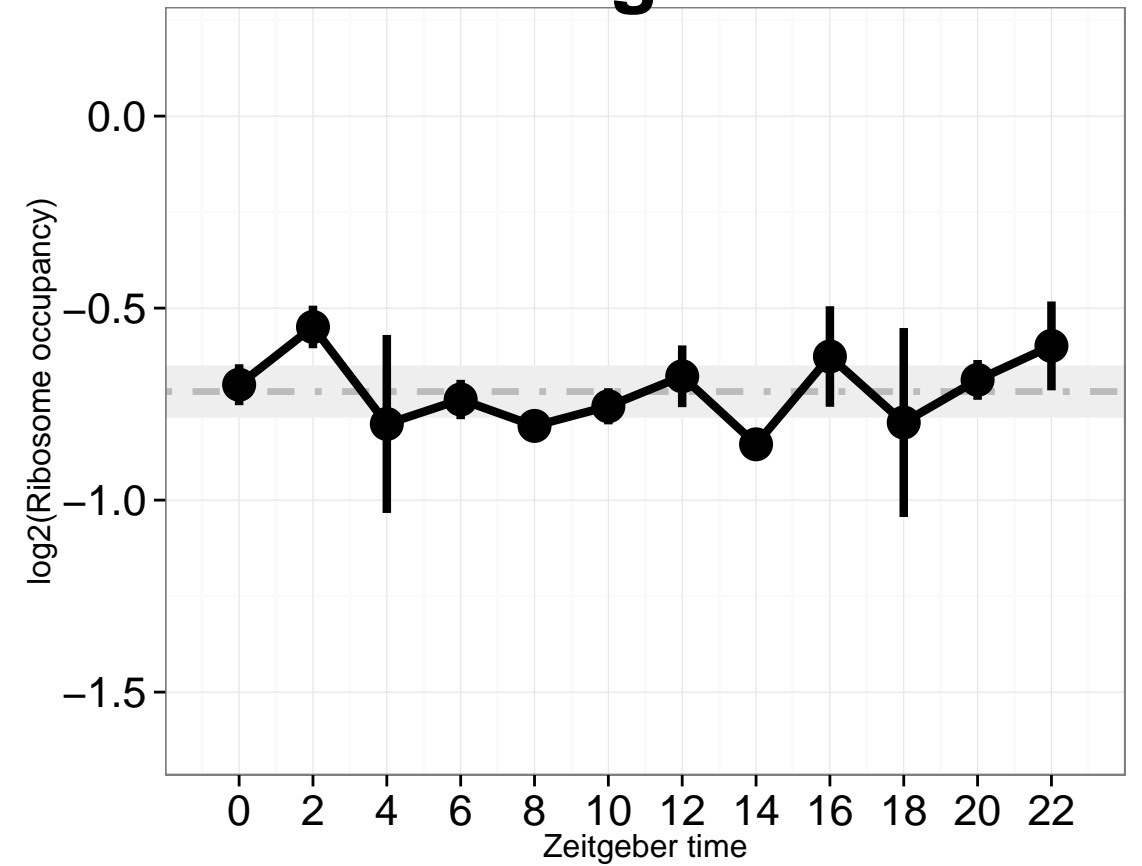

Supplement: Supplementary file 3776 [file 1]

## Spi1

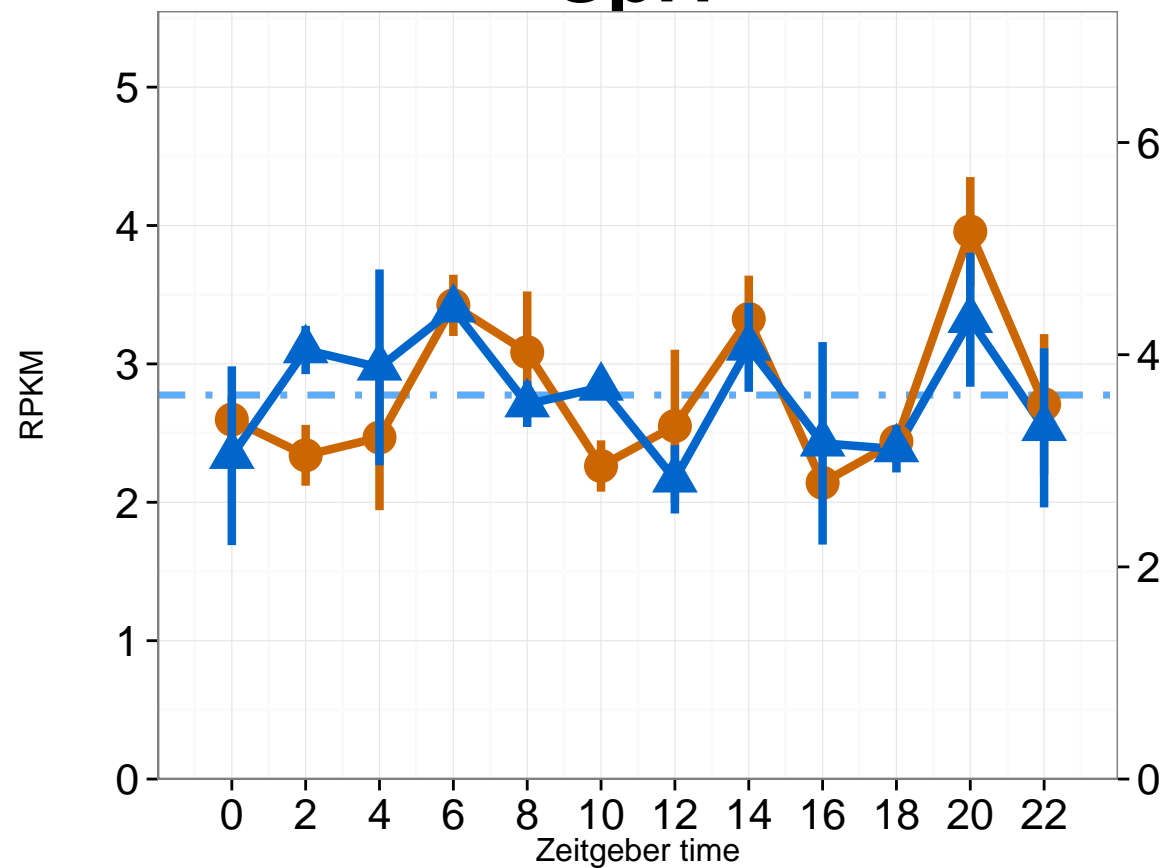

## Spi1

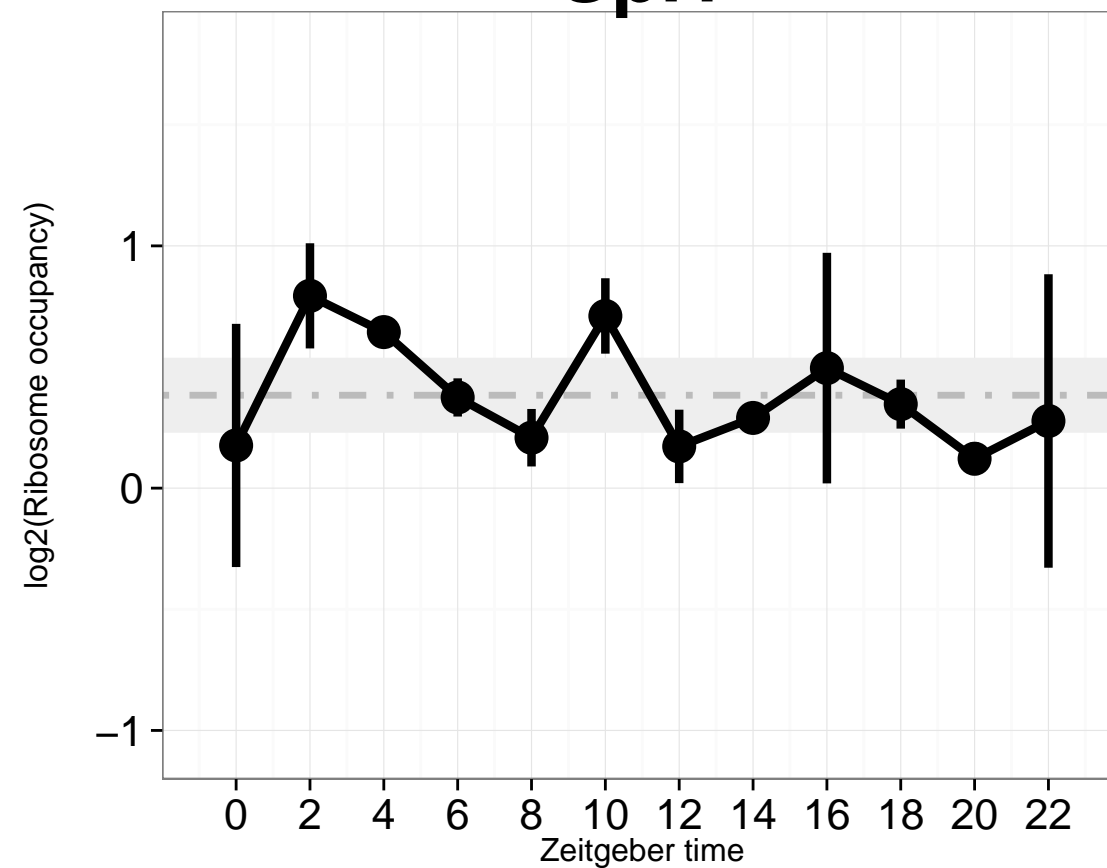

Supplement: Supplementary file 3777 [file 1]

## Gns

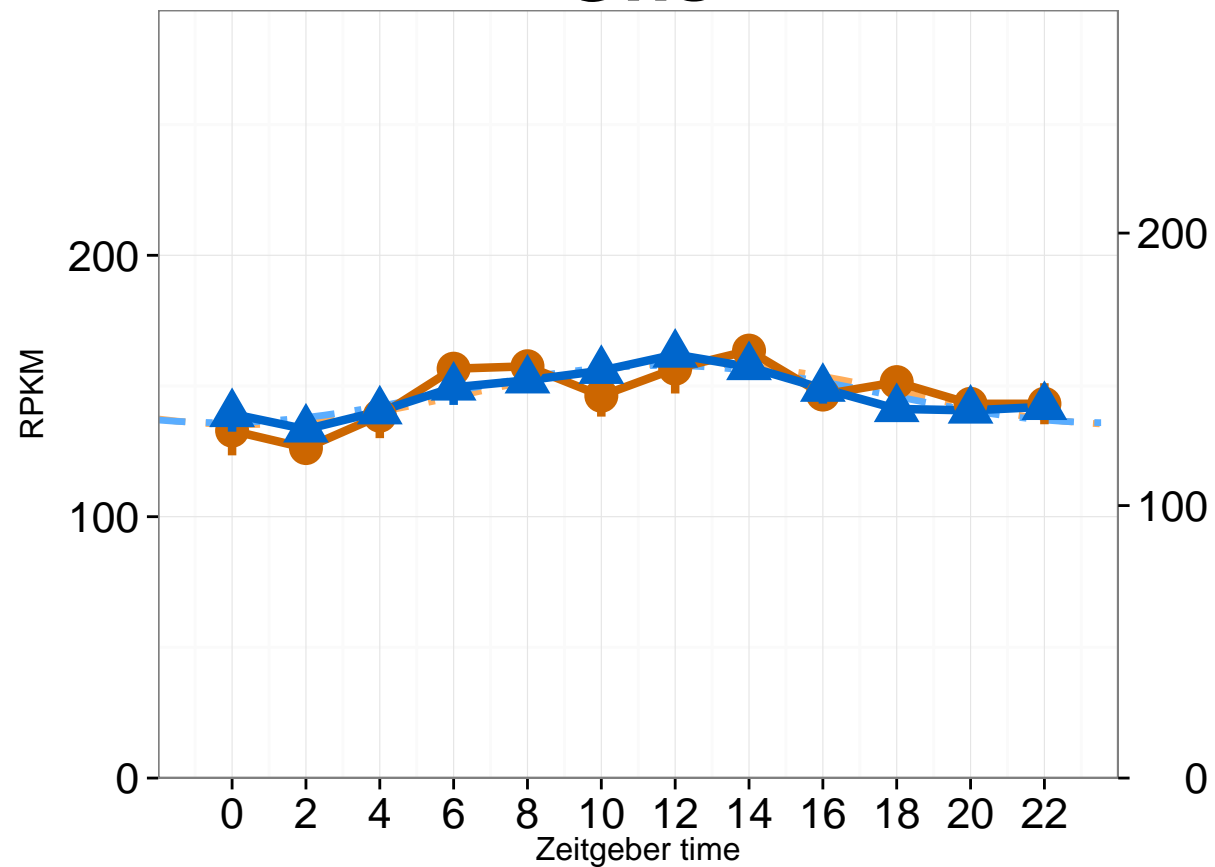

## Gns

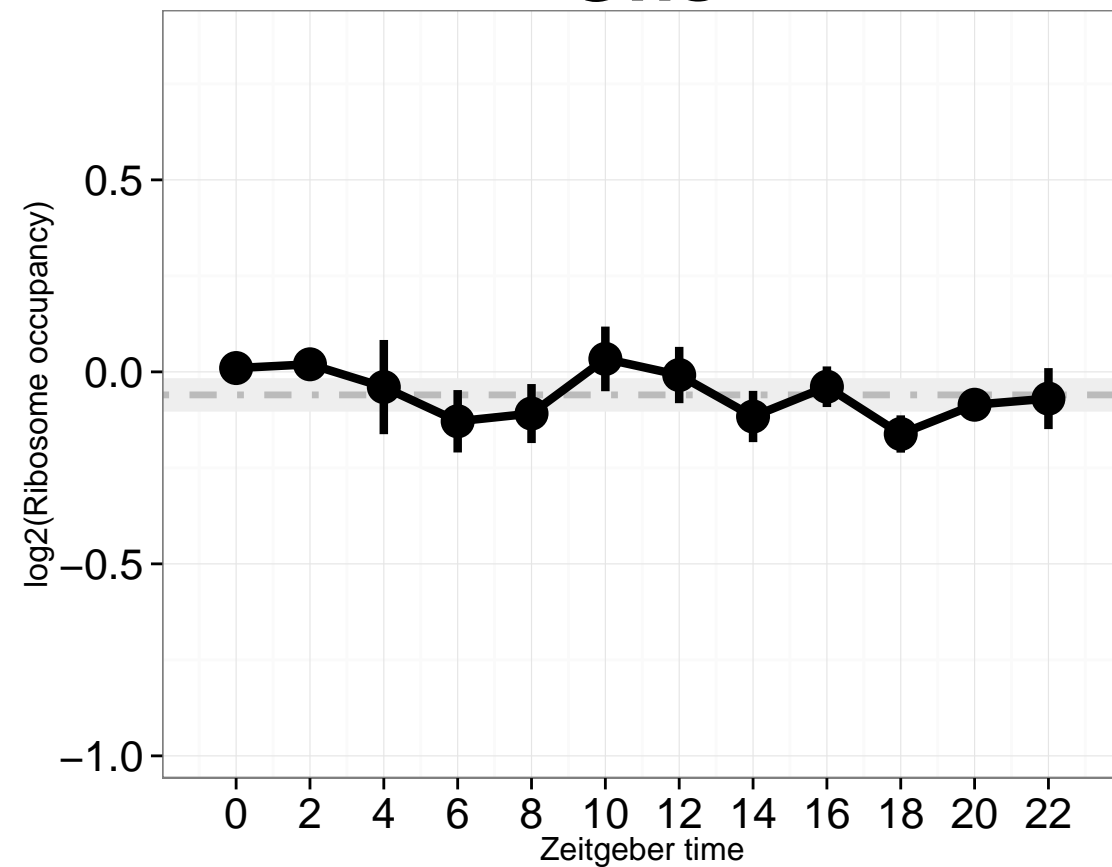

Supplement: Supplementary file 3778 [file 1]

# Irs1

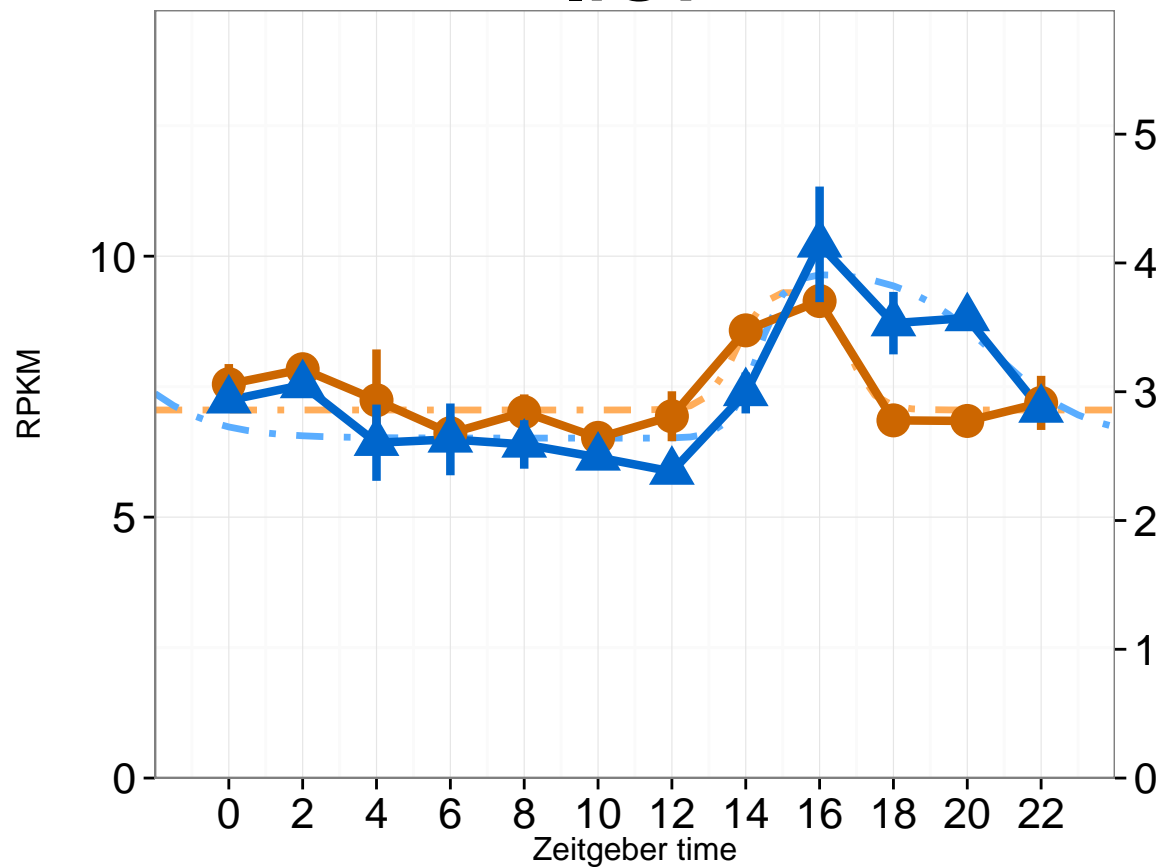

# Irs1

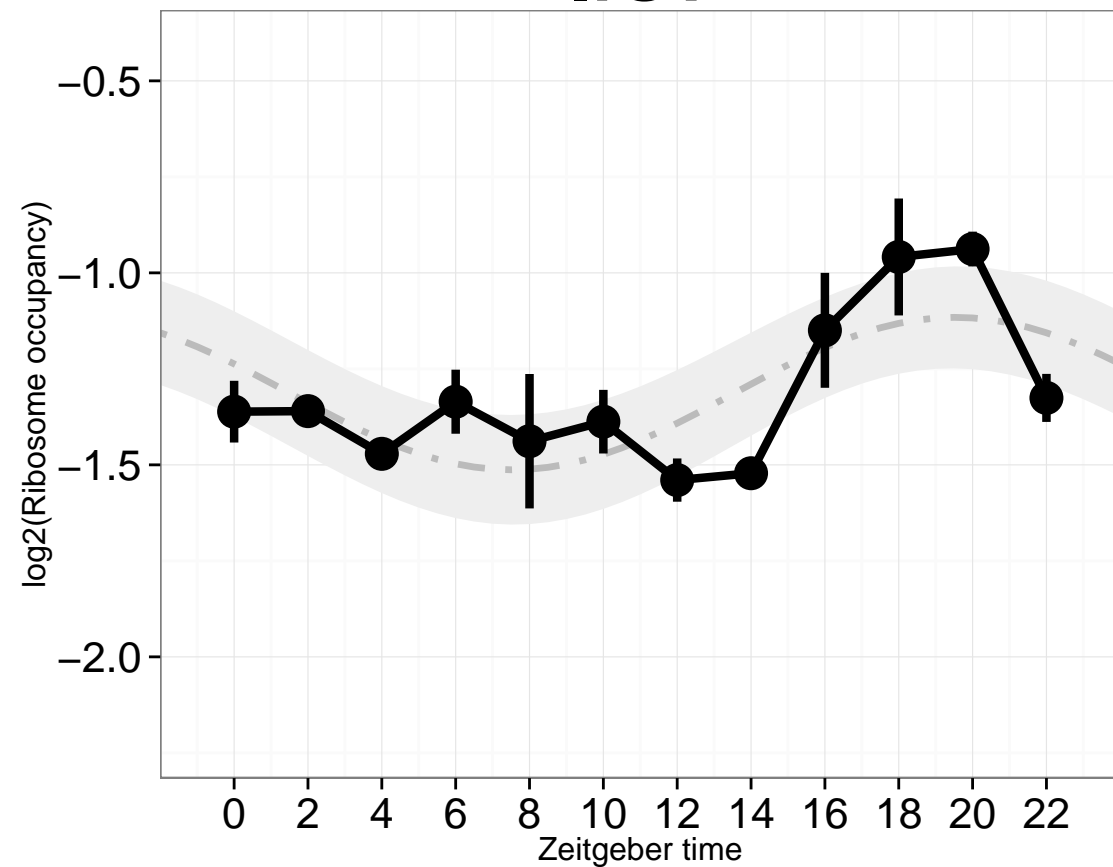

Supplement: Supplementary file 3779 [file 1]

# Trp53inp1

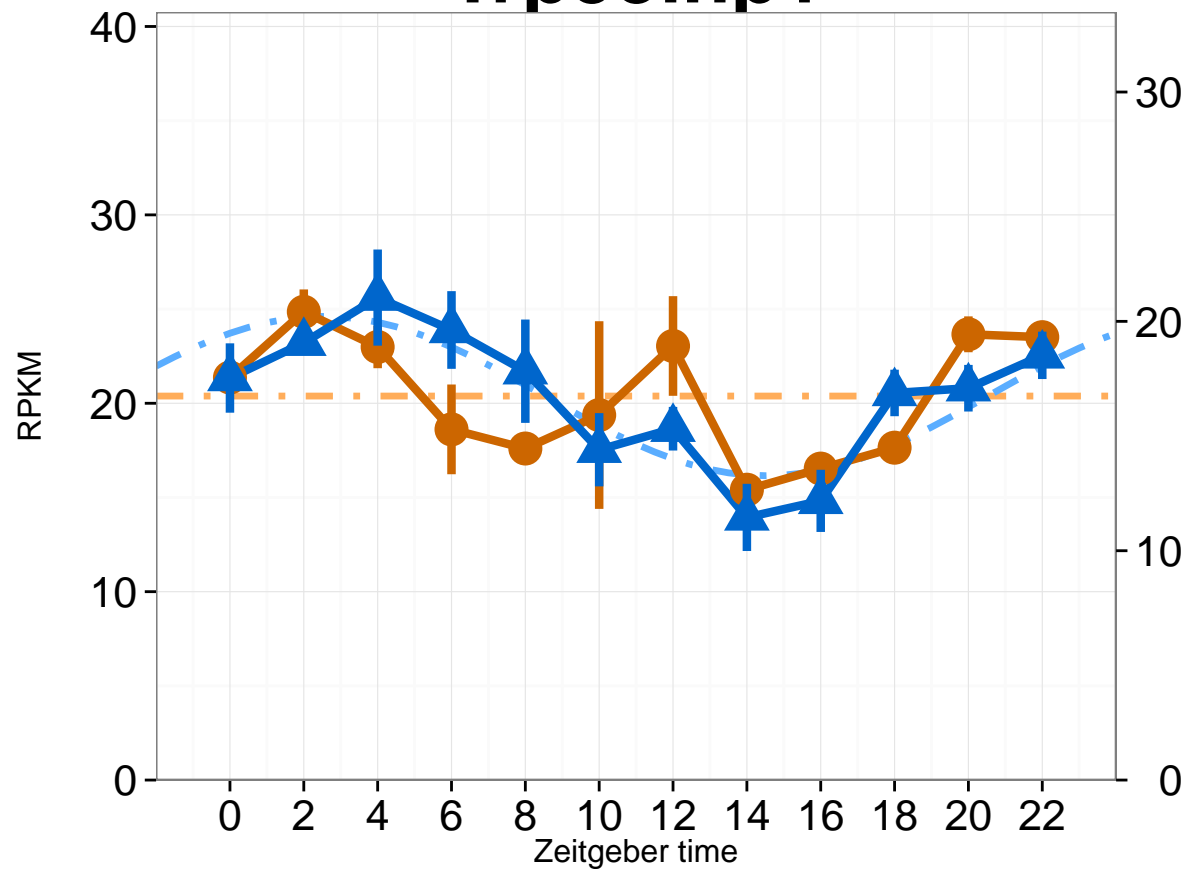

# Trp53inp1

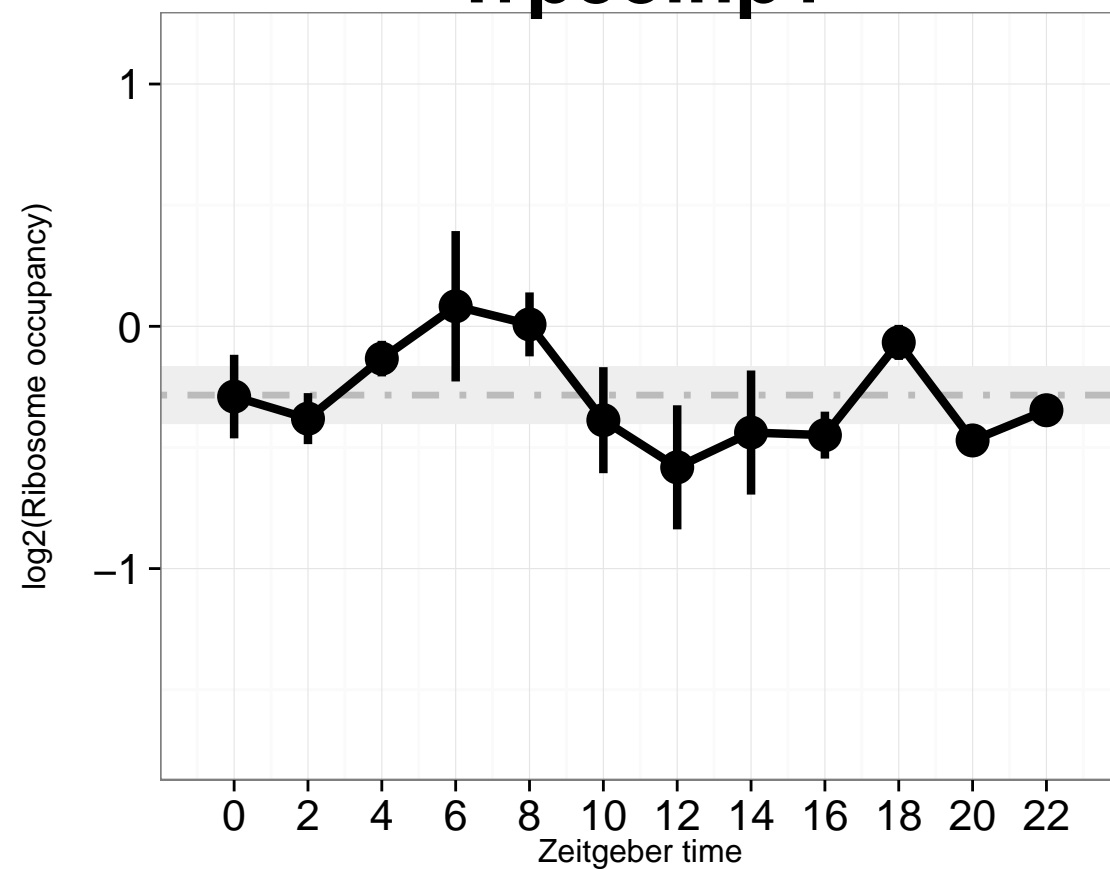

Supplement: Supplementary file 3780 [file 1]

## Flt3l

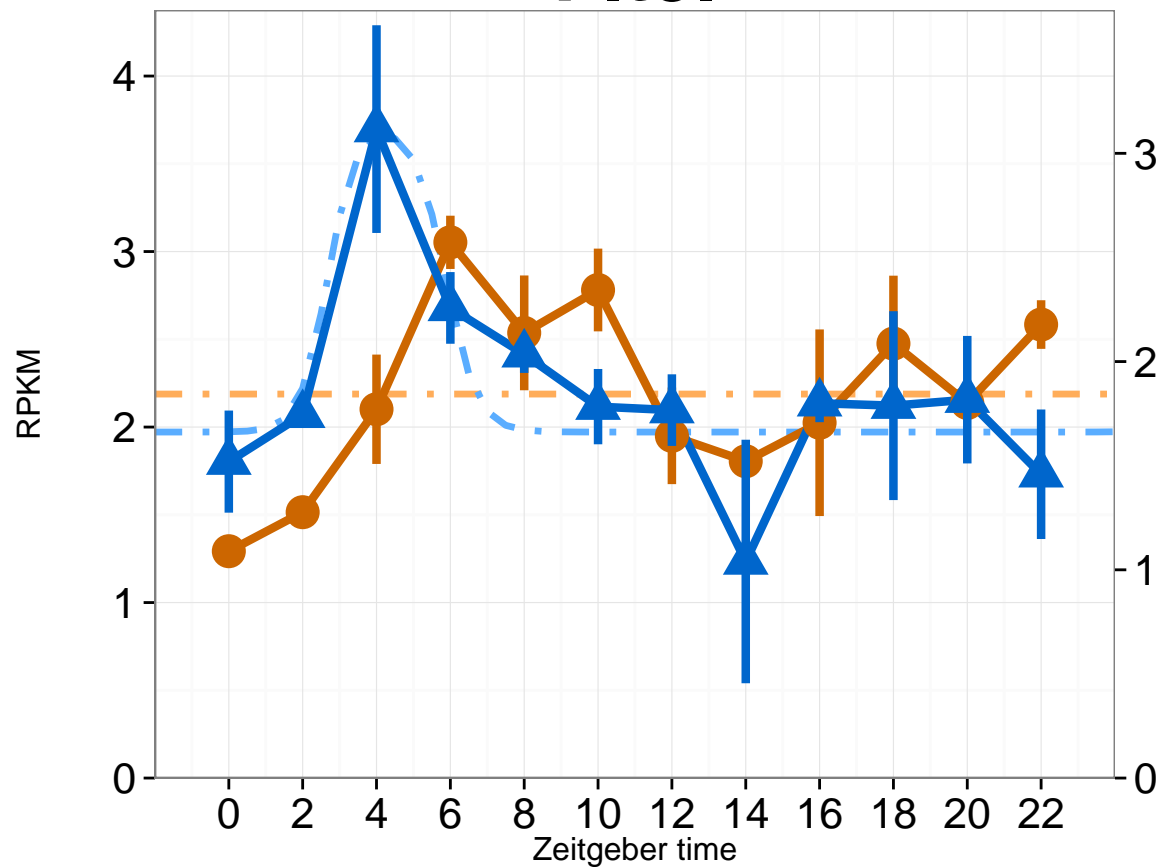

## Flt3l

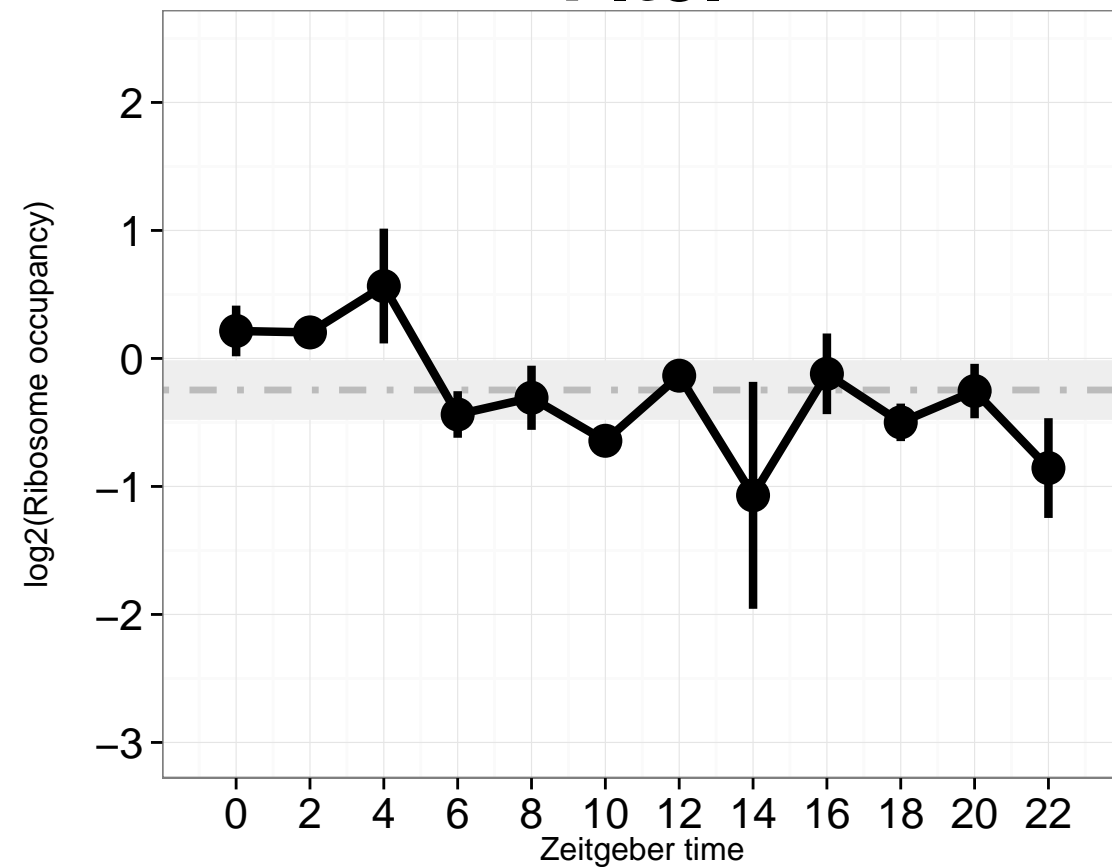

Supplement: Supplementary file 3781 [file 1]

## Lama3

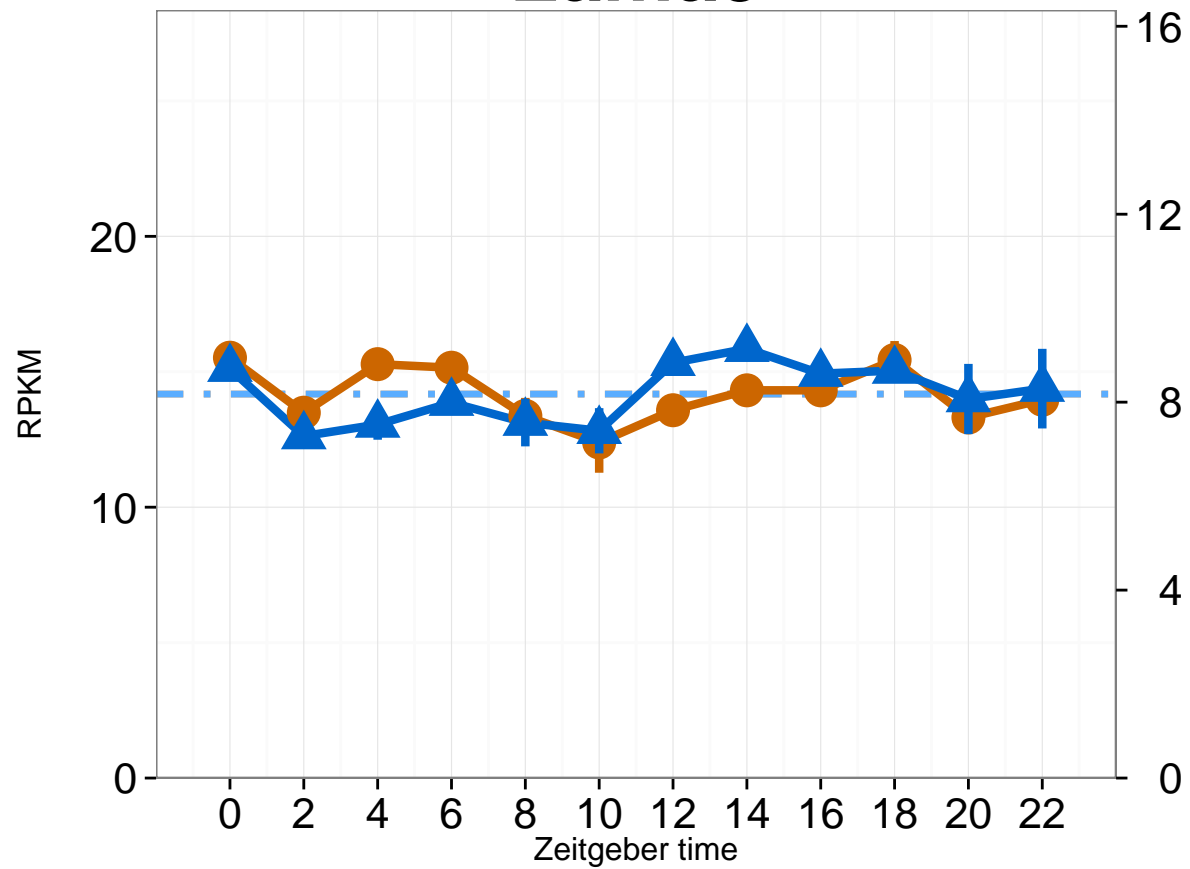

## Lama3

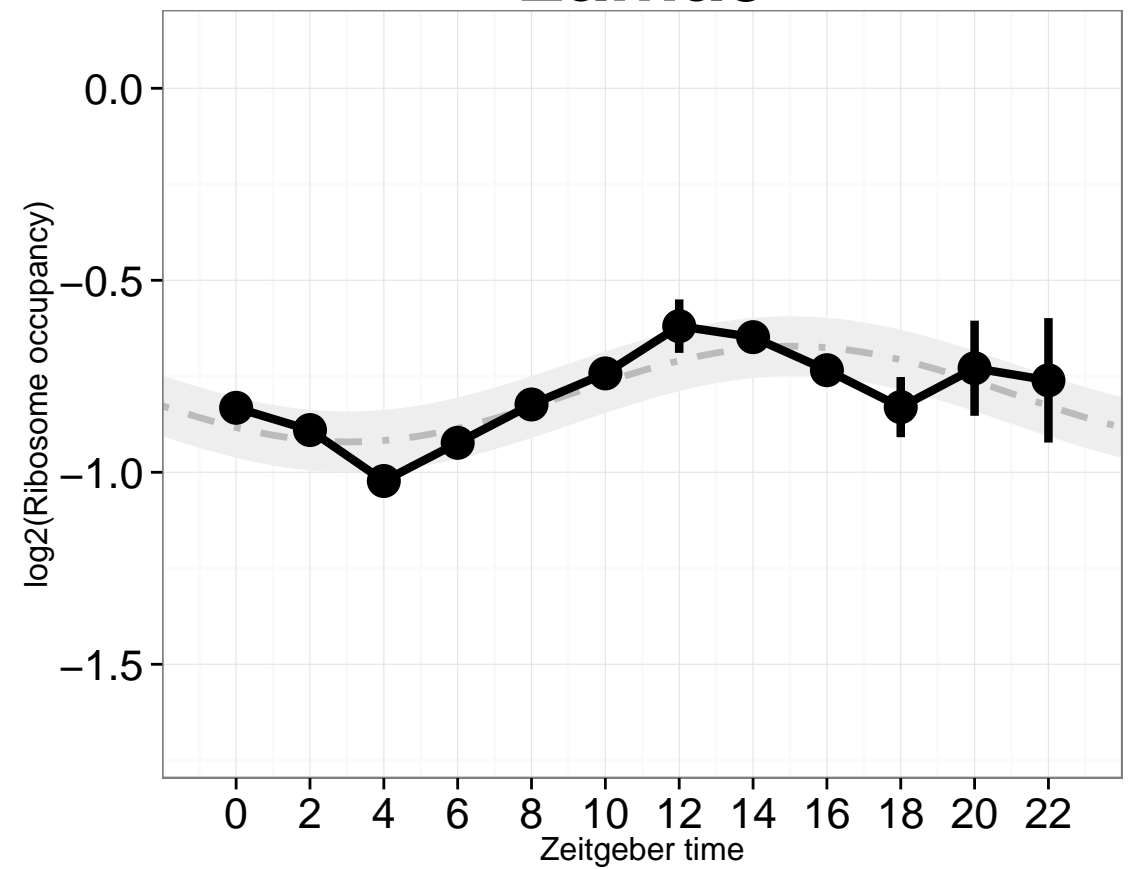

Supplement: Supplementary file 3782 [file 1]

# Anp32a

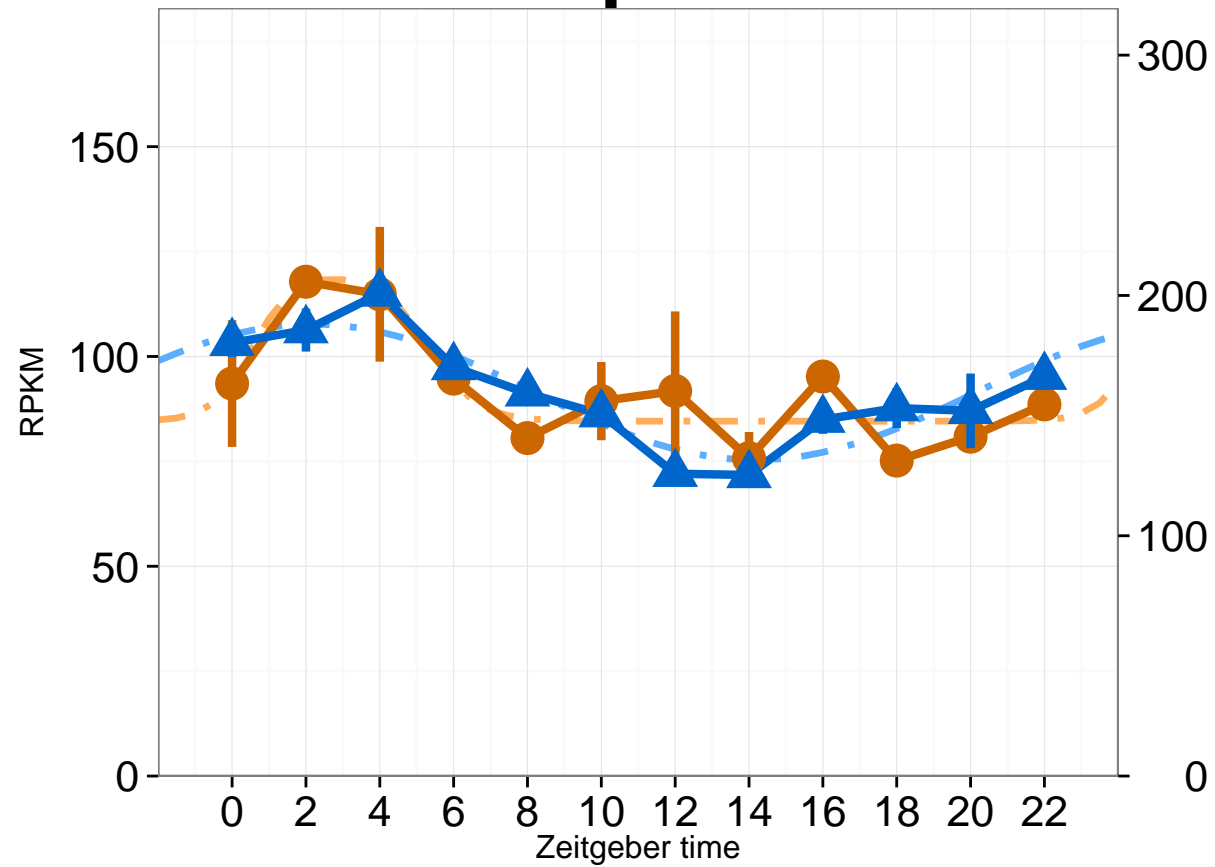

# Anp32a

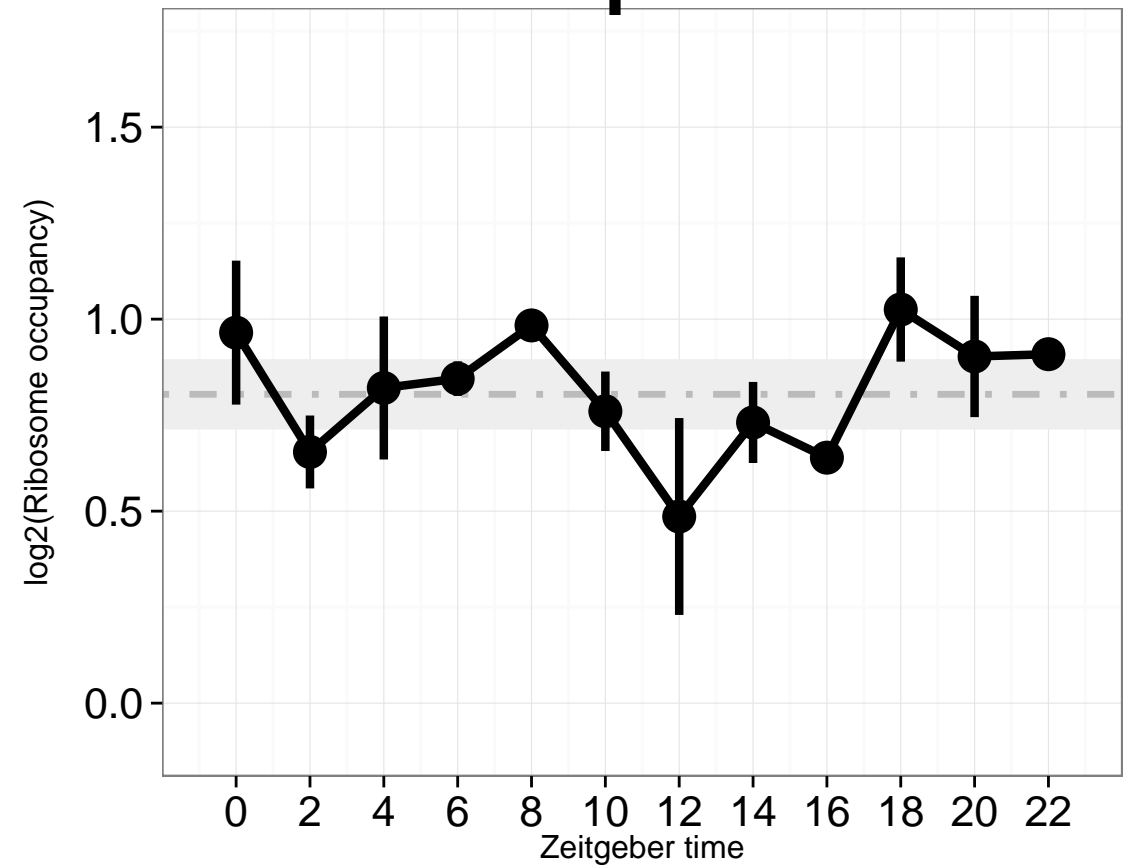

Supplement: Supplementary file 3783 [file 1]

# Nckap5

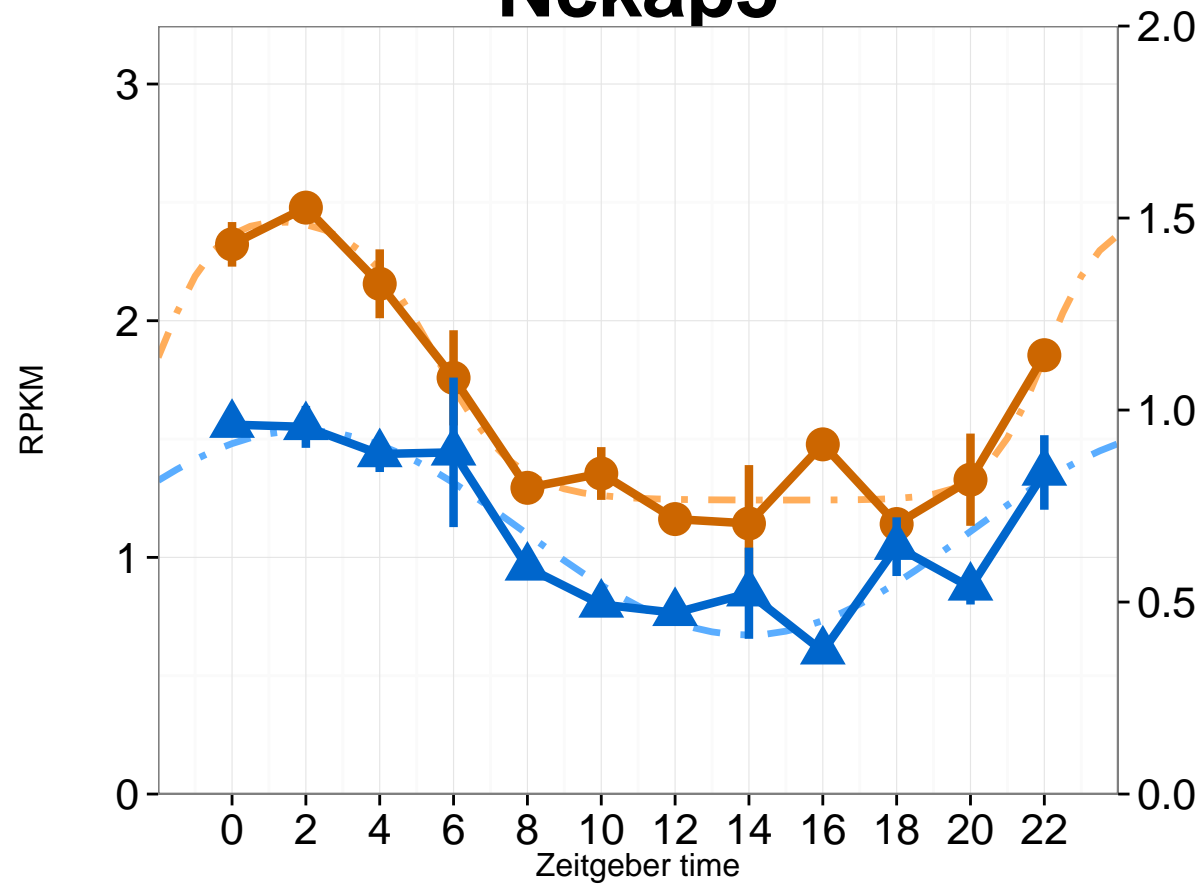

# Nckap5

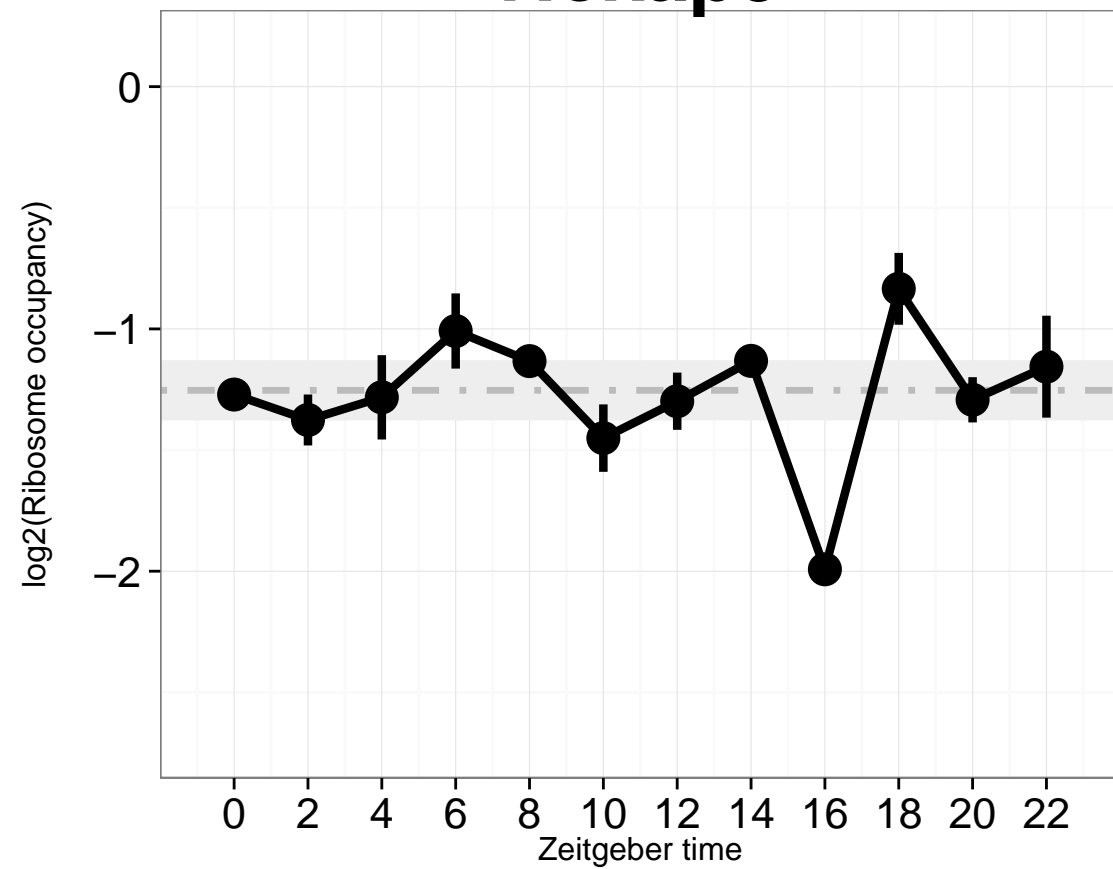

Supplement: Supplementary file 3784 [file 1]

## Mpdz

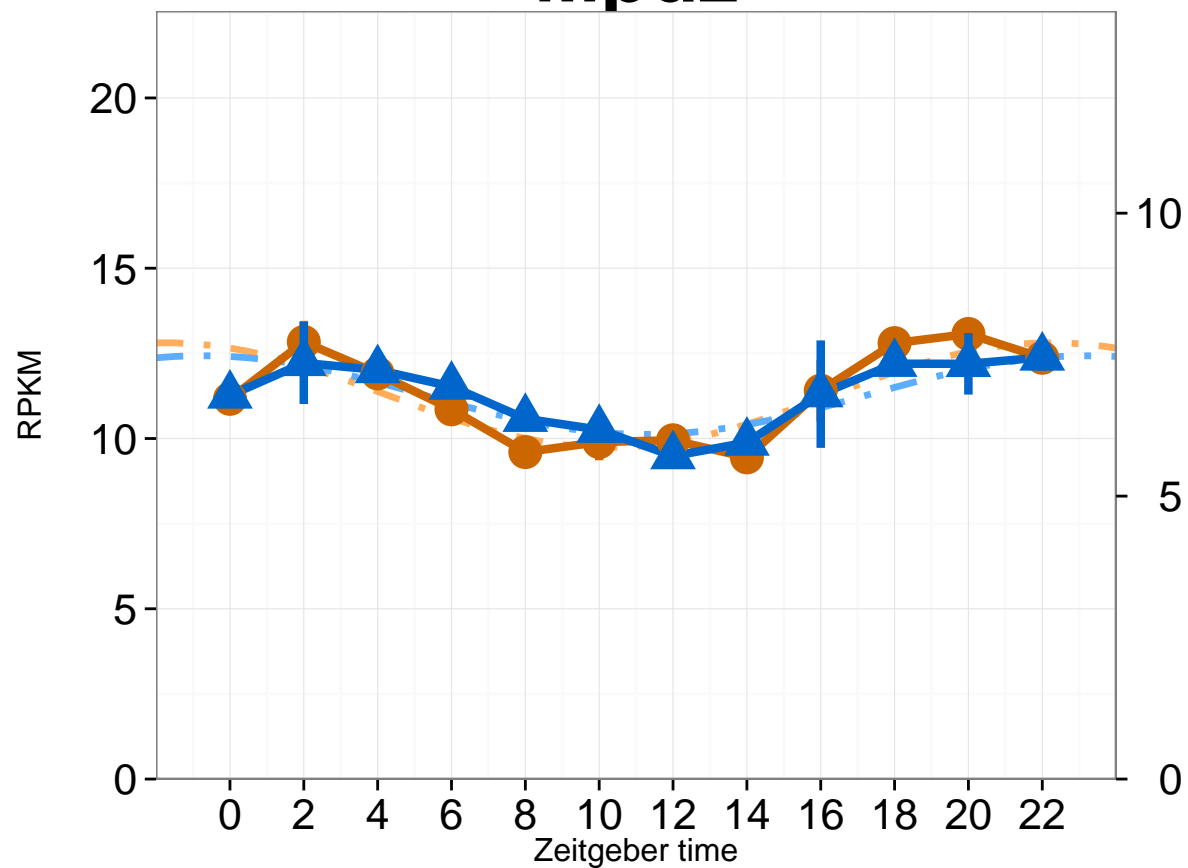

## Mpdz

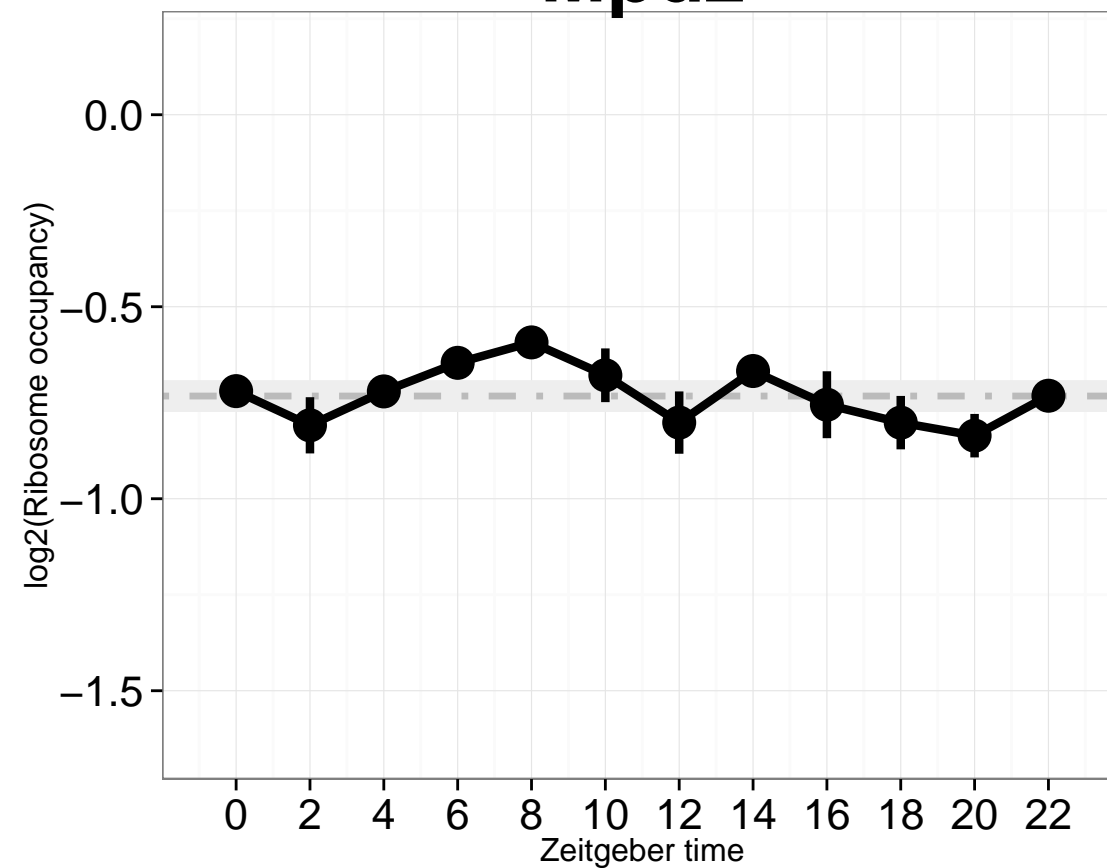

Supplement: Supplementary file 3785 [file 1]

## Snd1

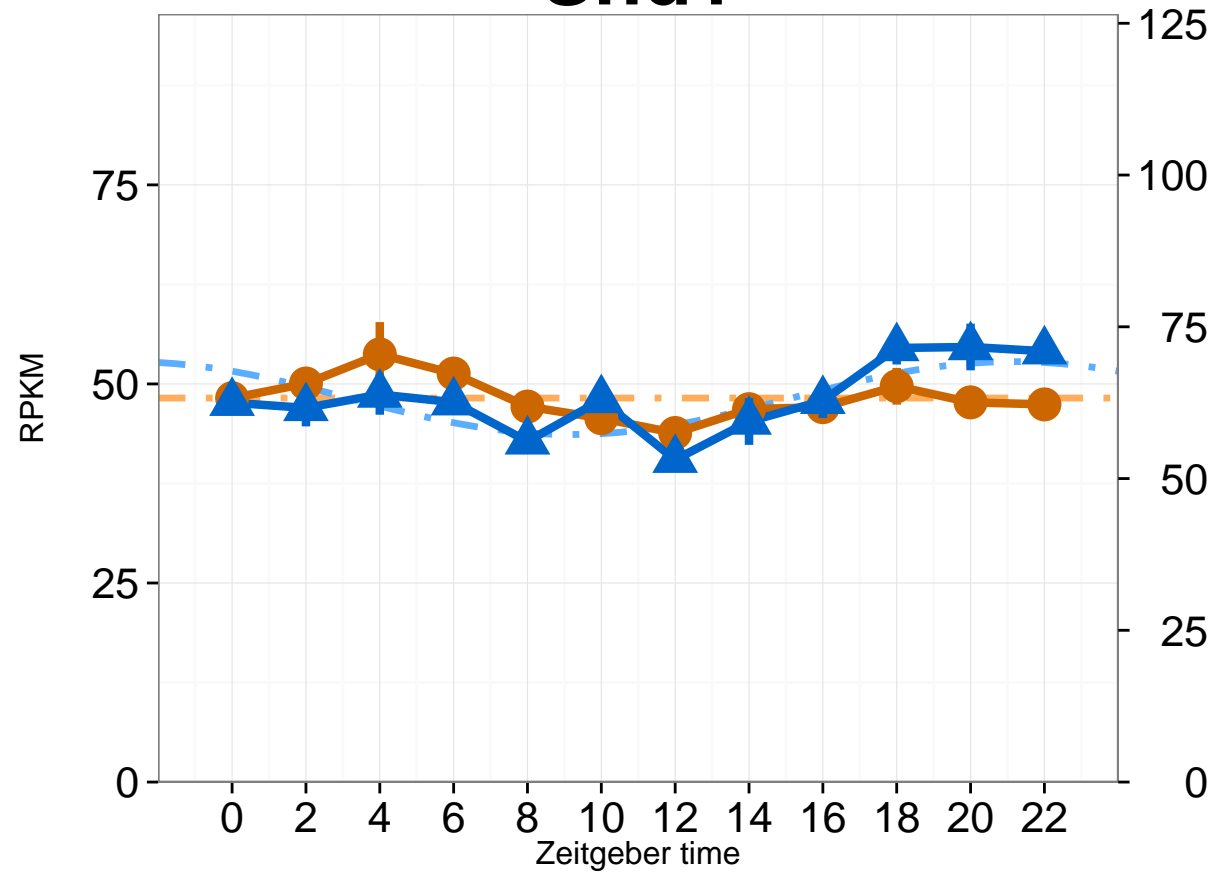

## Snd1

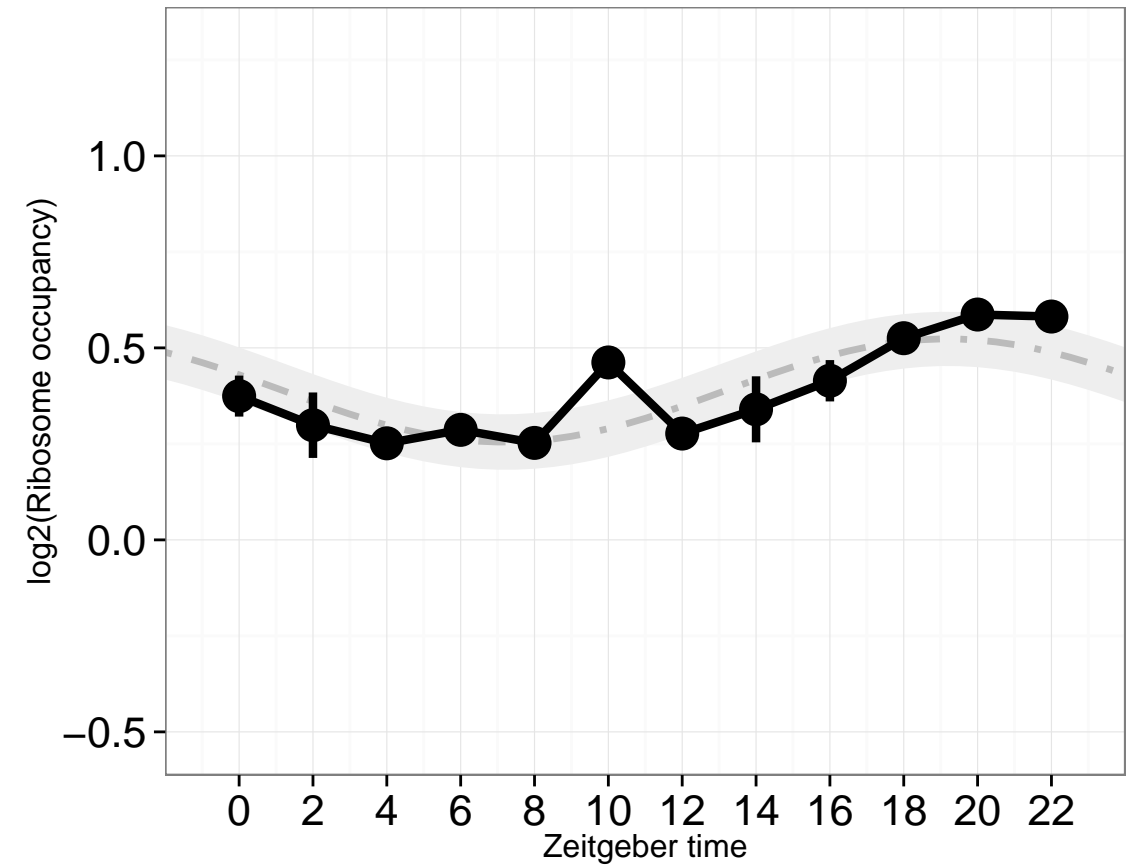

Supplement: Supplementary file 3786 [file 1]

## Ppil1

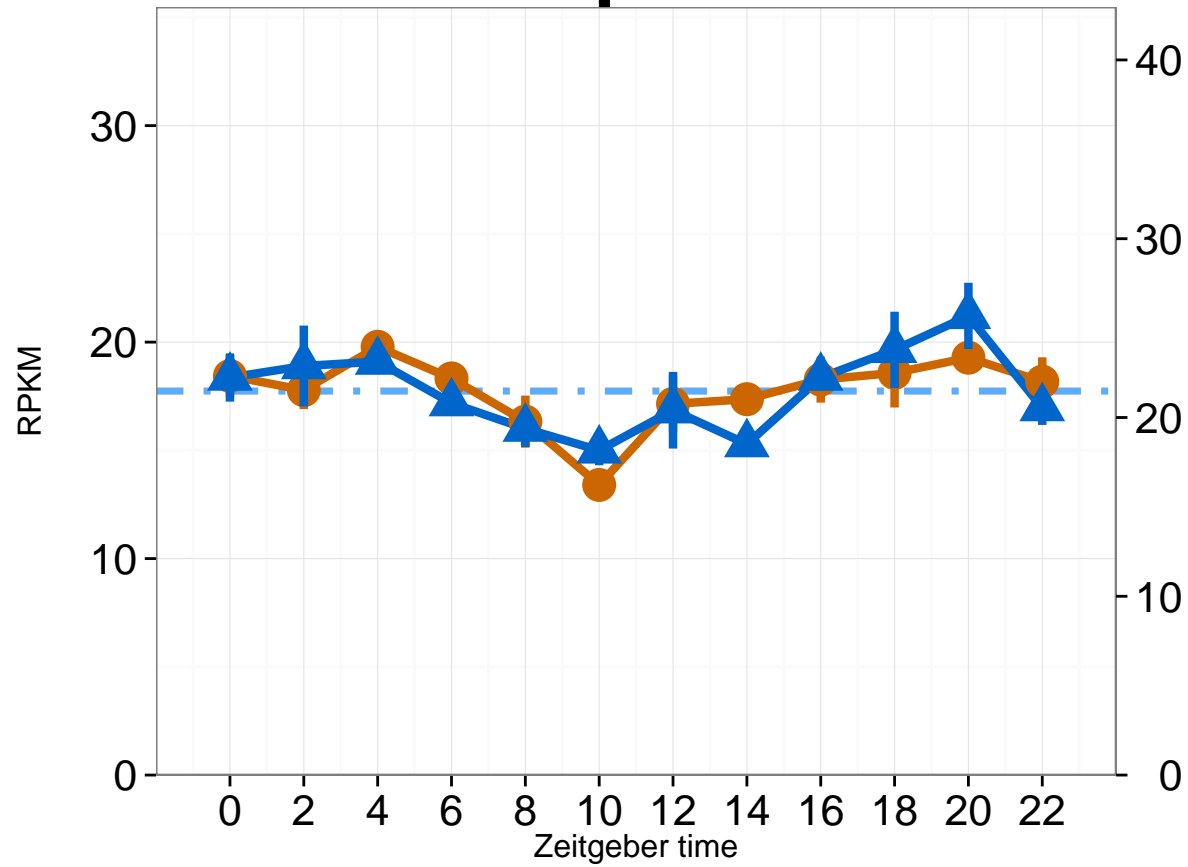

## Ppil1

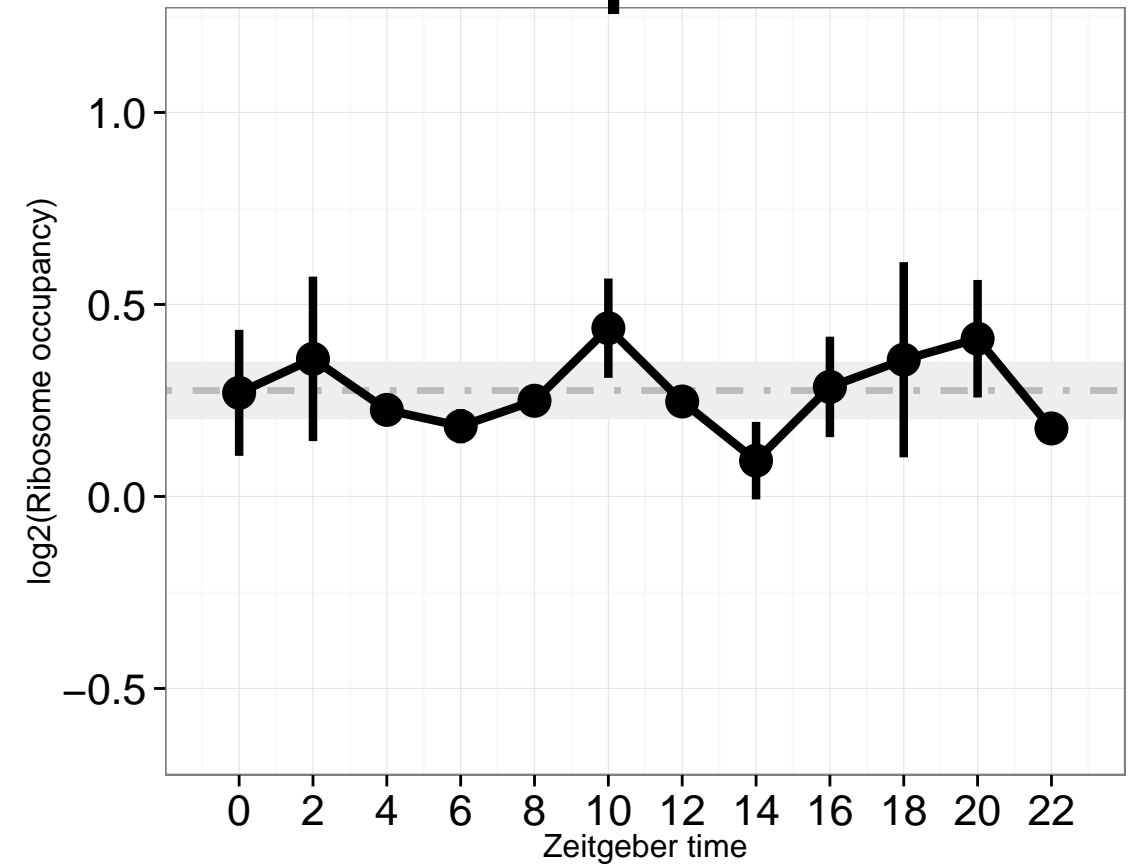

Supplement: Supplementary file 3787 [file 1]

# Actr6

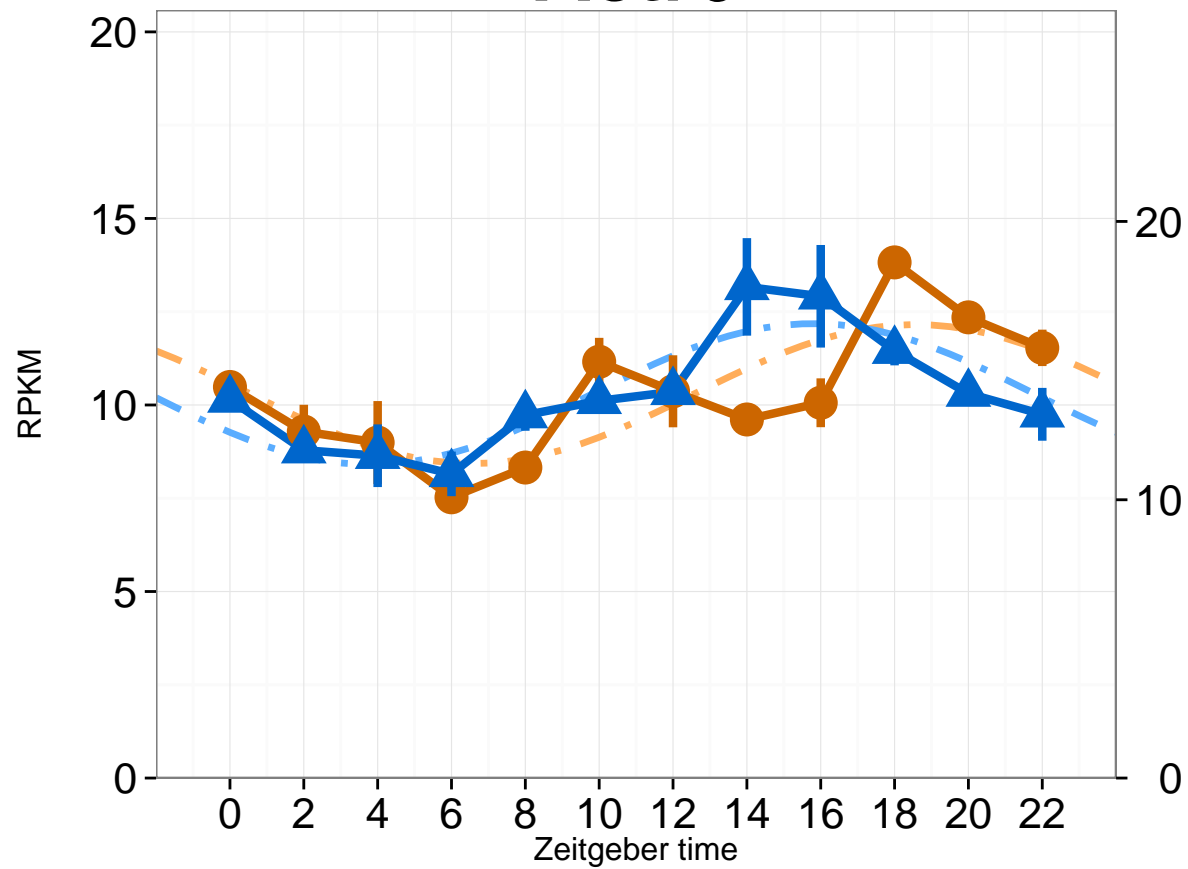

# Actr6

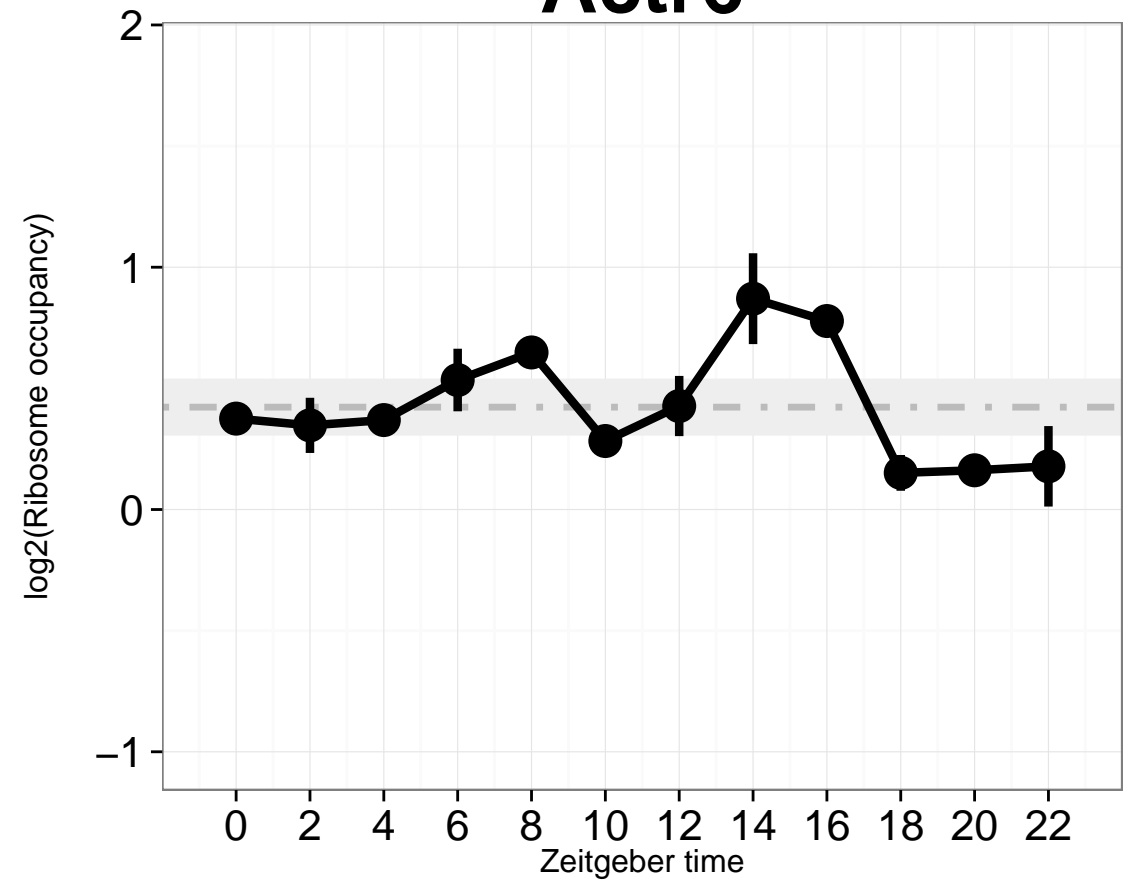

Supplement: Supplementary file 3788 [file 1]

## Nt5c3

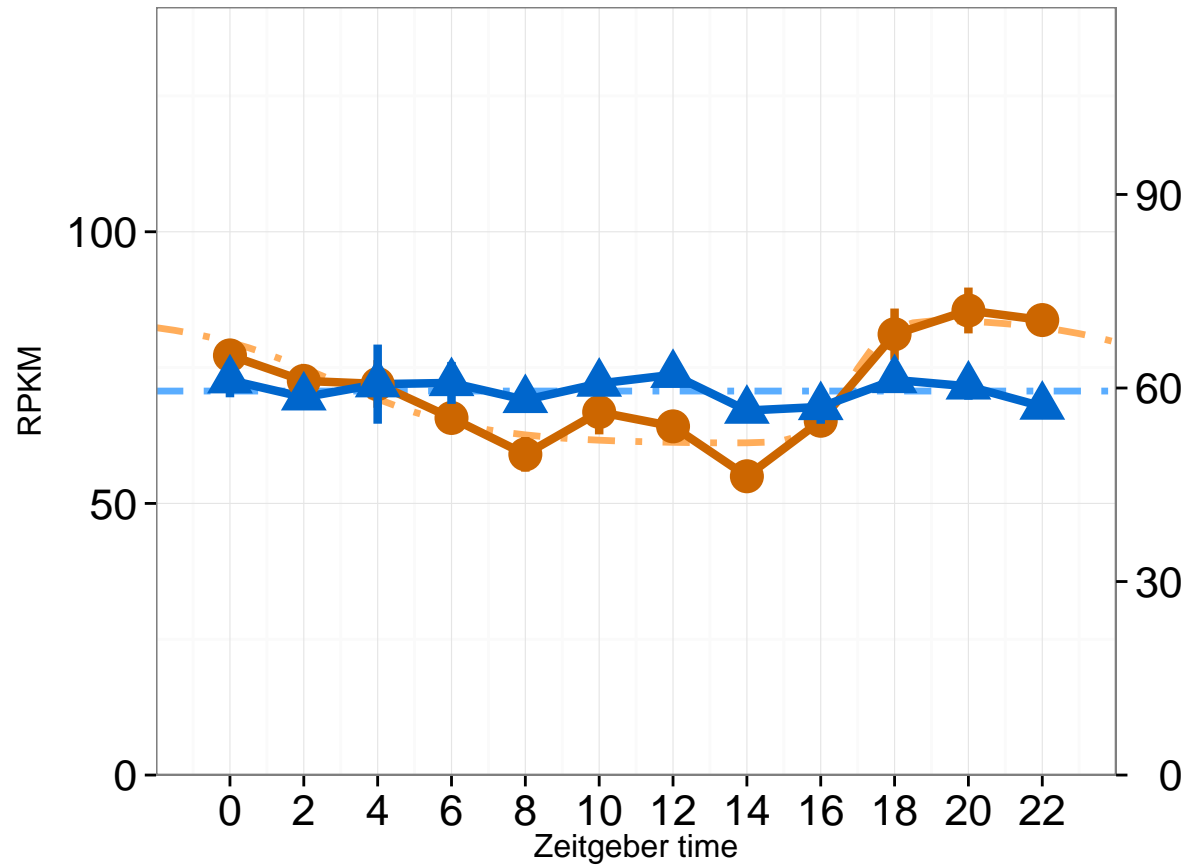

## Nt5c3

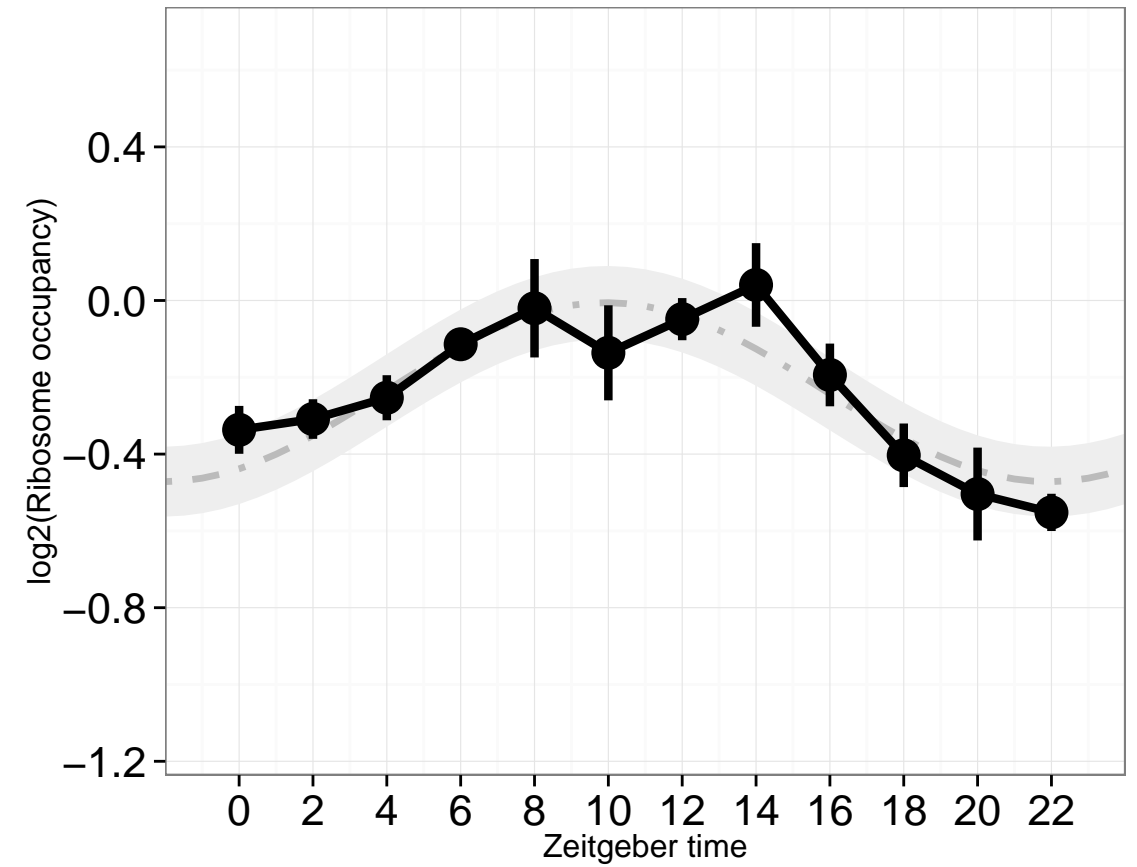

Supplement: Supplementary file 3789 [file 1]

# Tbccd1

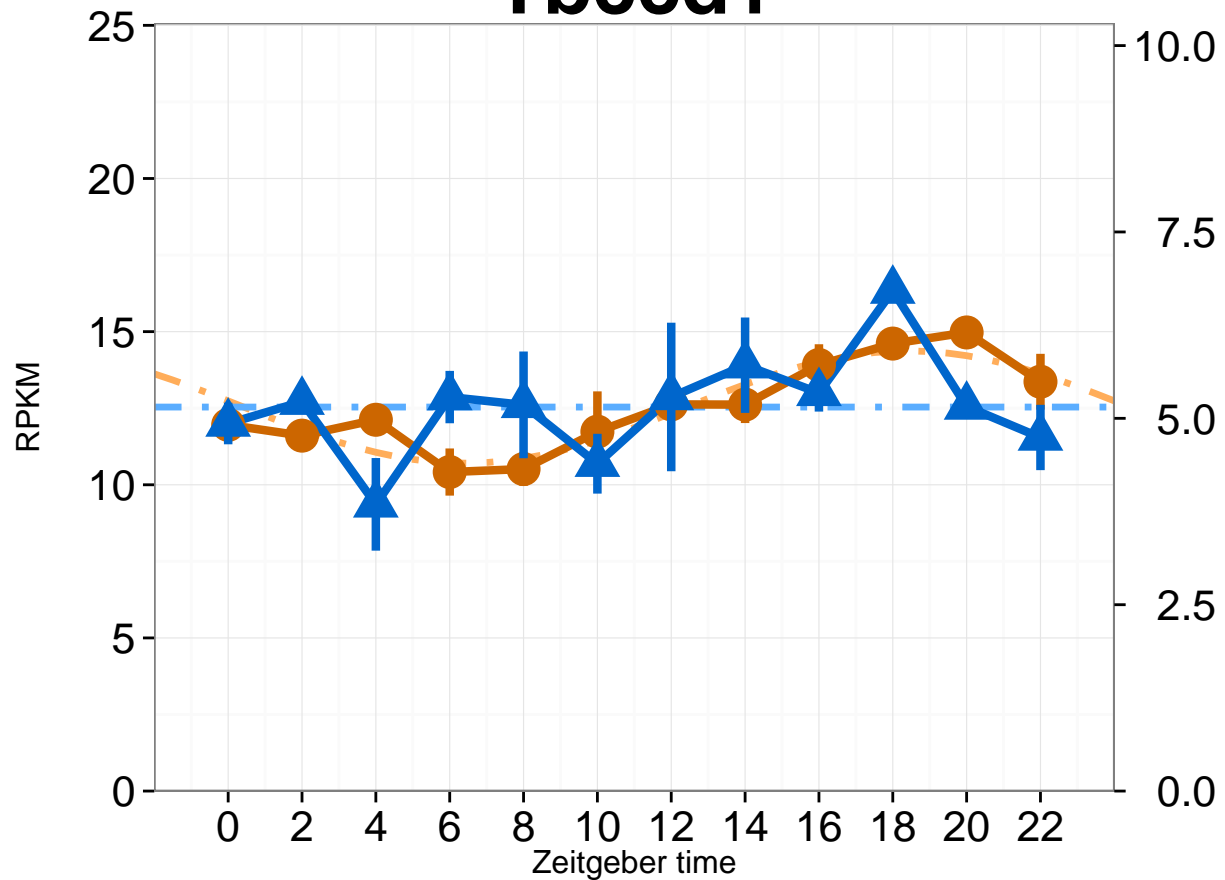

# Tbccd1

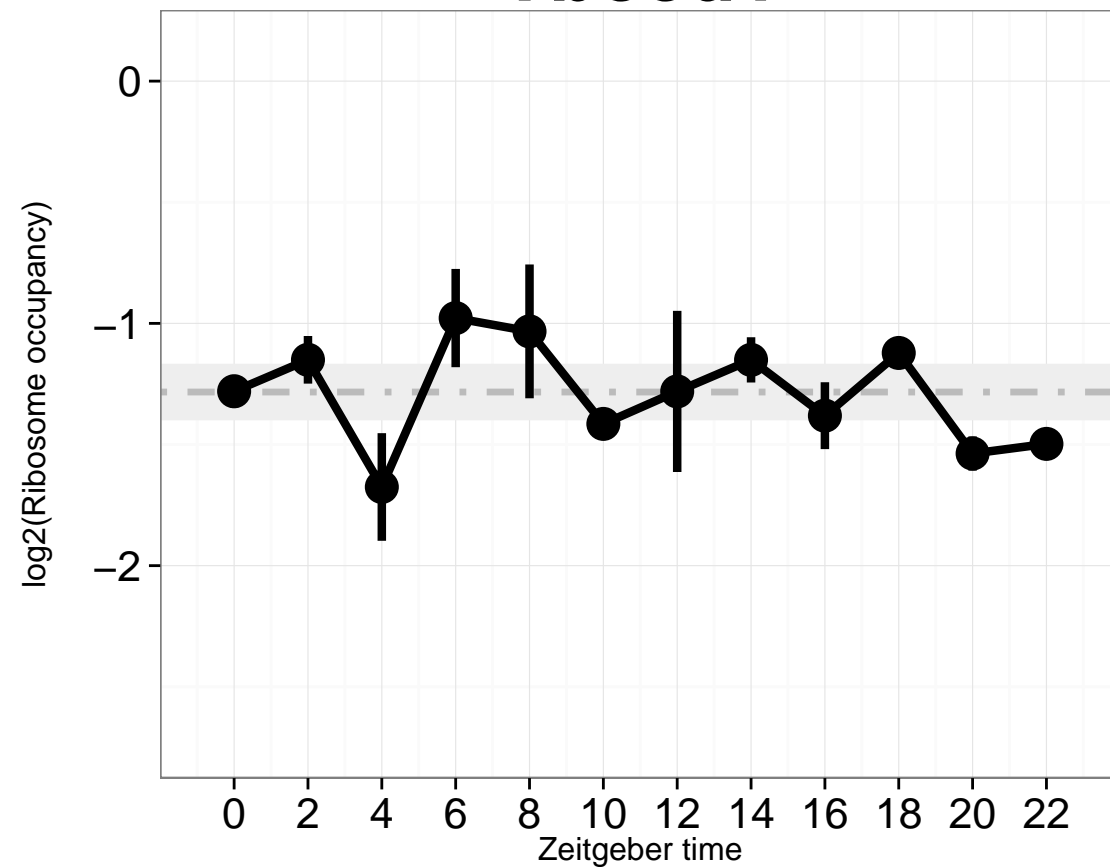

Supplement: Supplementary file 3790 [file 1]

# Fam122a

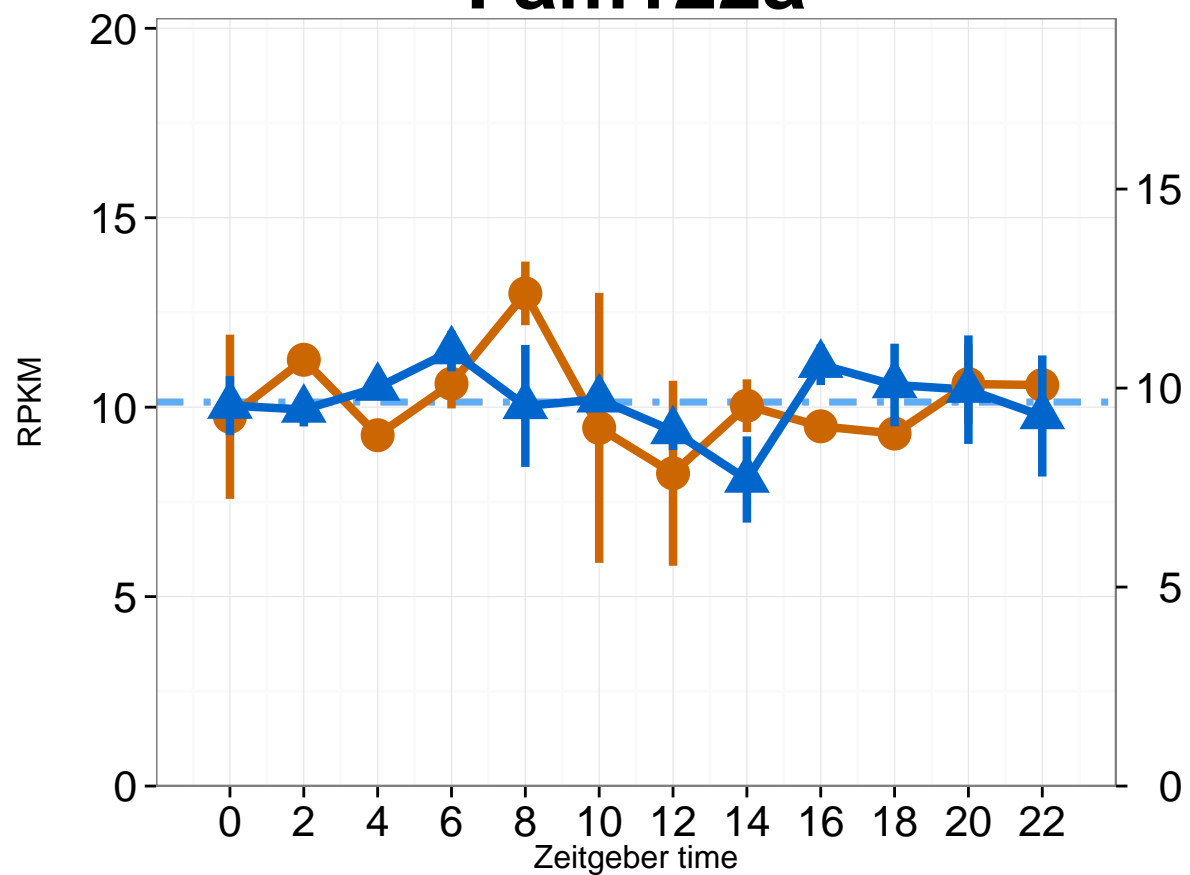

# Fam122a

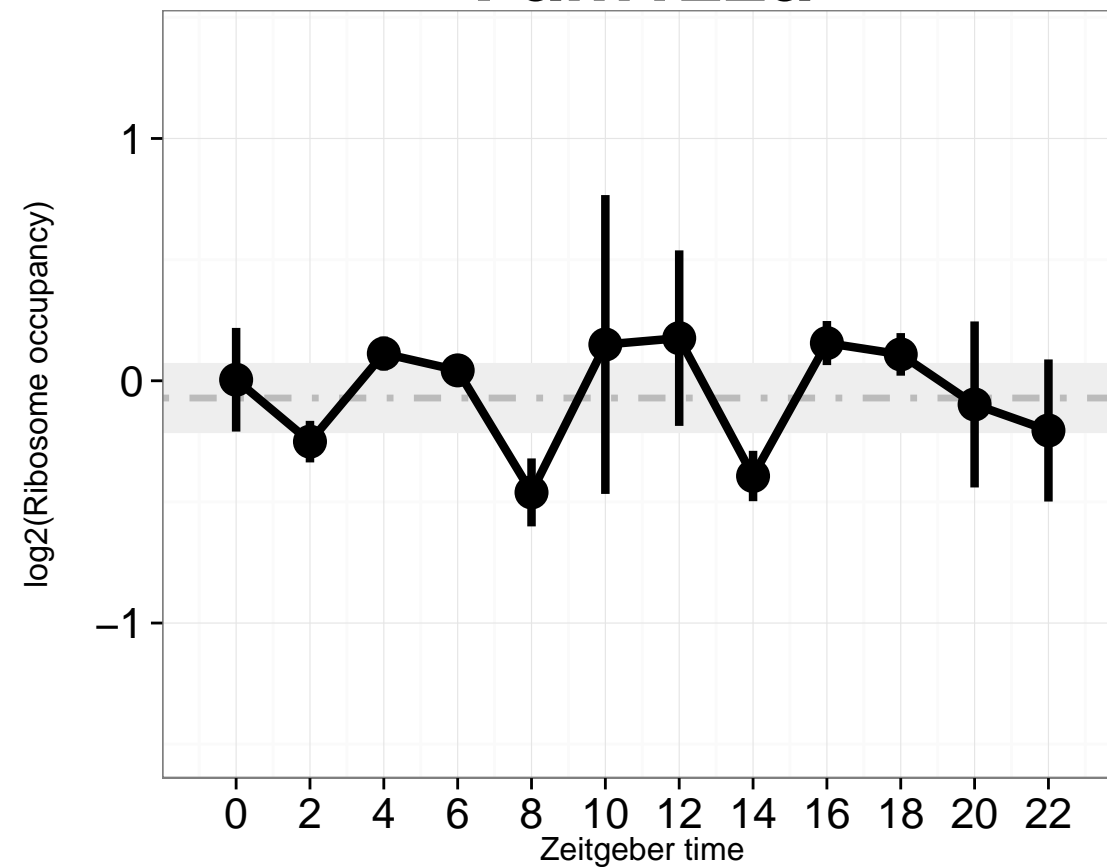

Supplement: Supplementary file 3791 [file 1]

## Fli1

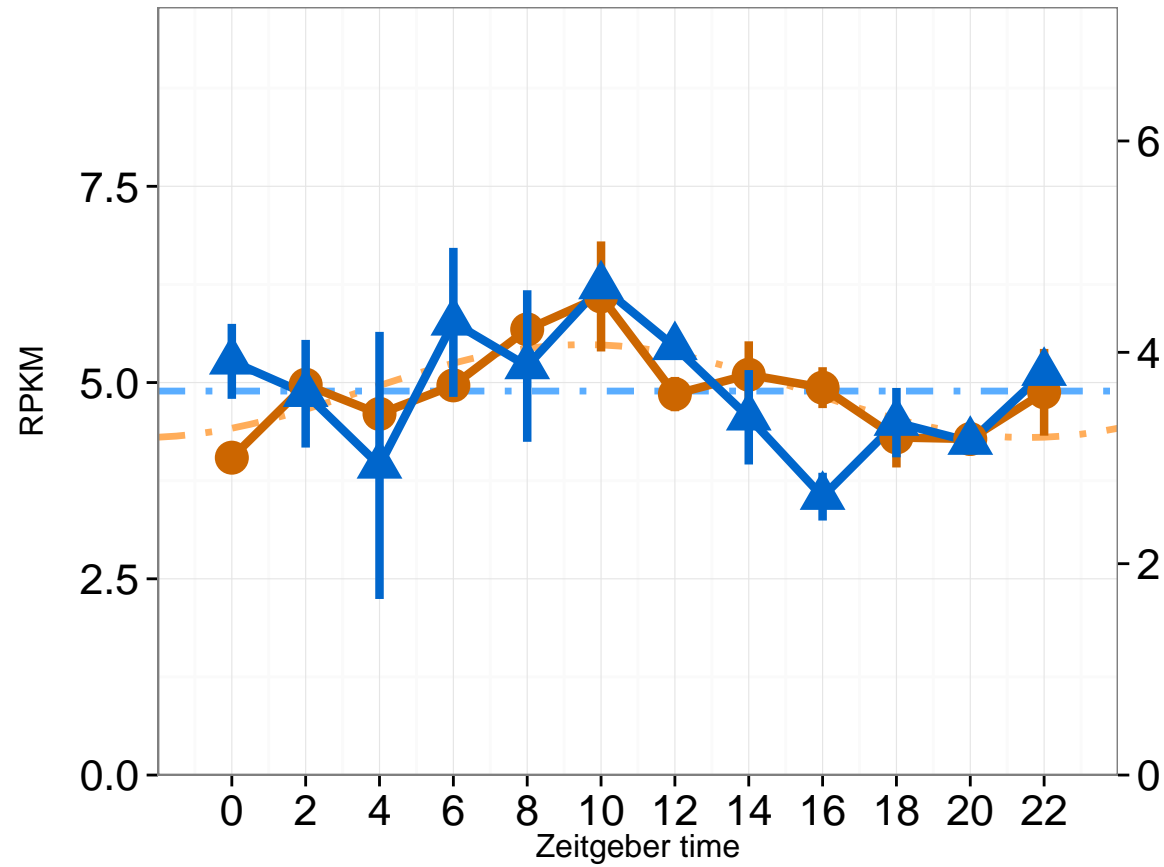

## Fli1

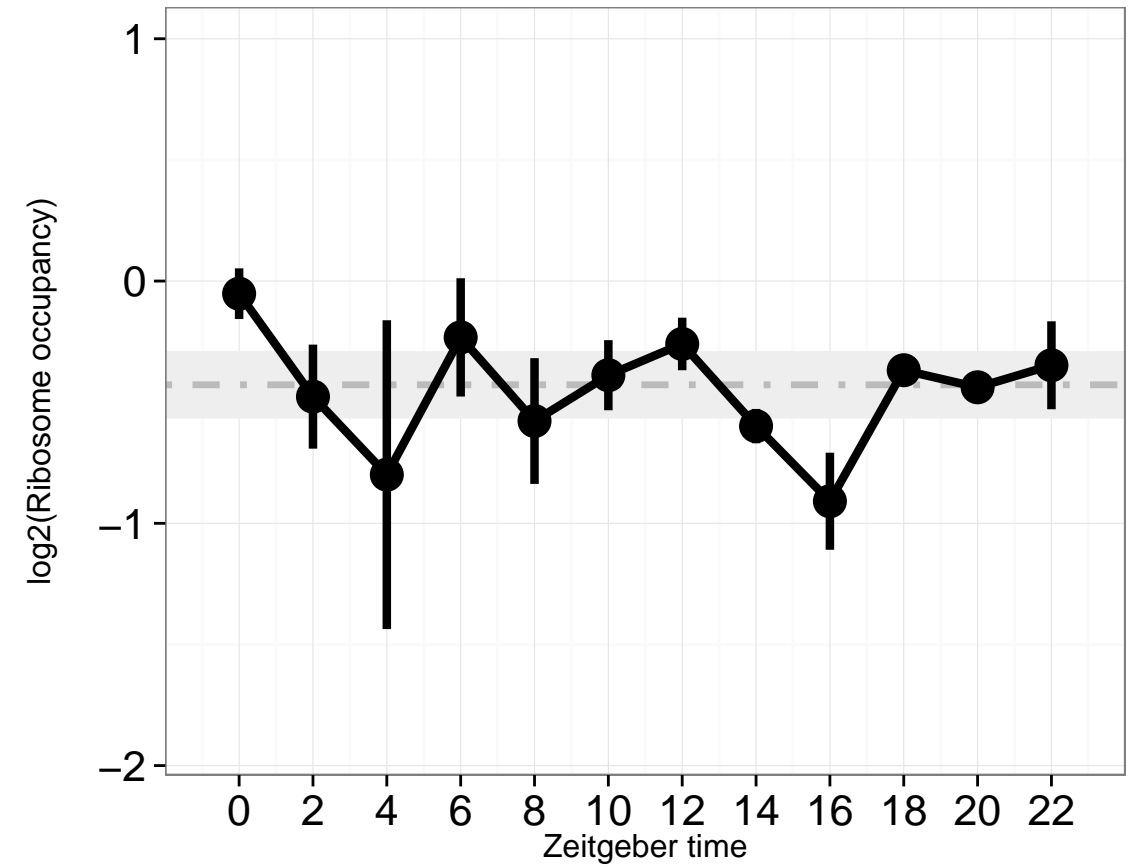

Supplement: Supplementary file 3792 [file 1]

# Zfp46

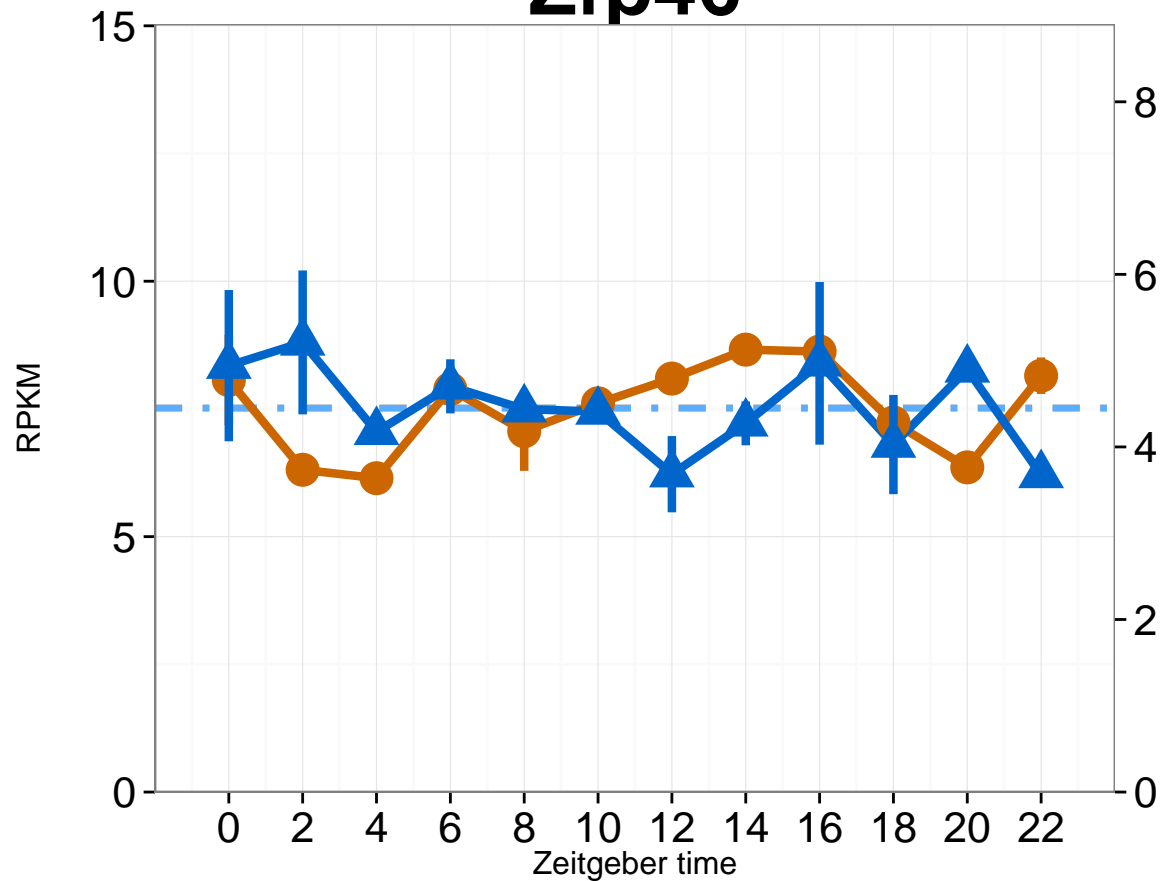

# Zfp46

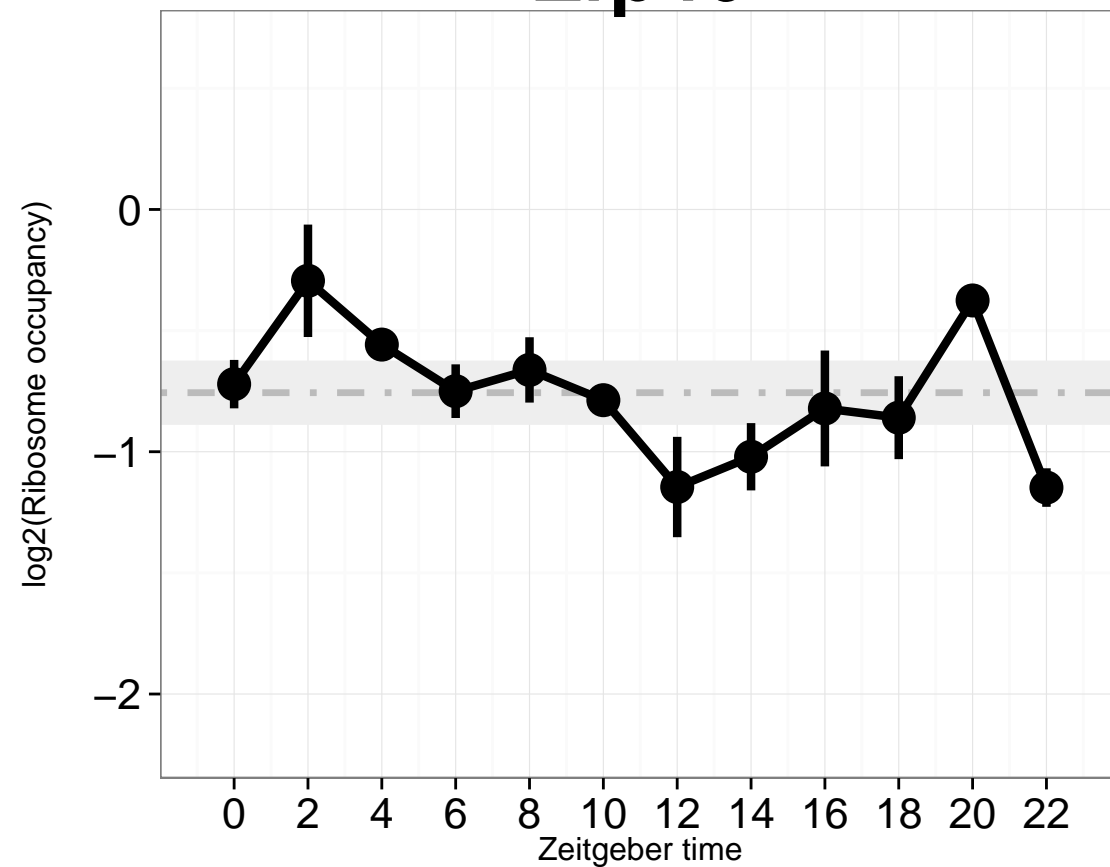

Supplement: Supplementary file 3793 [file 1]

## Flad1

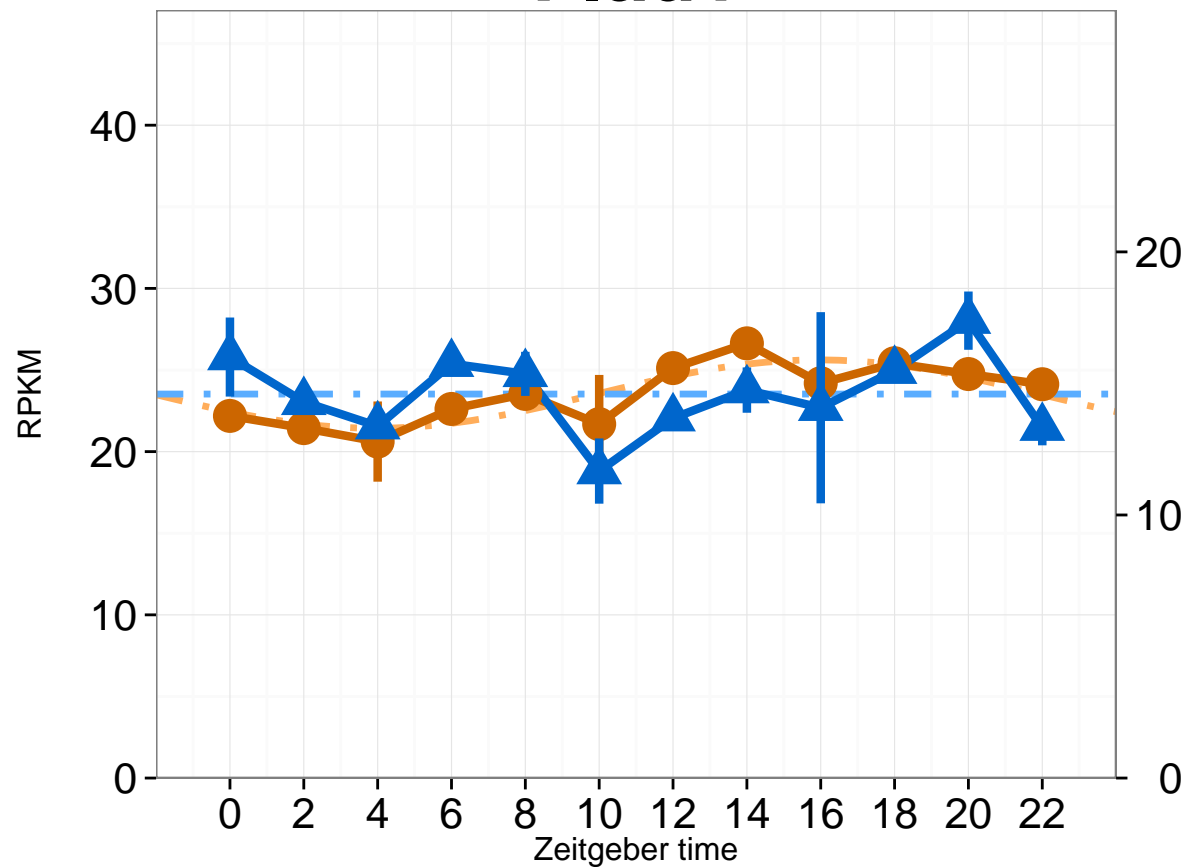

## Flad1

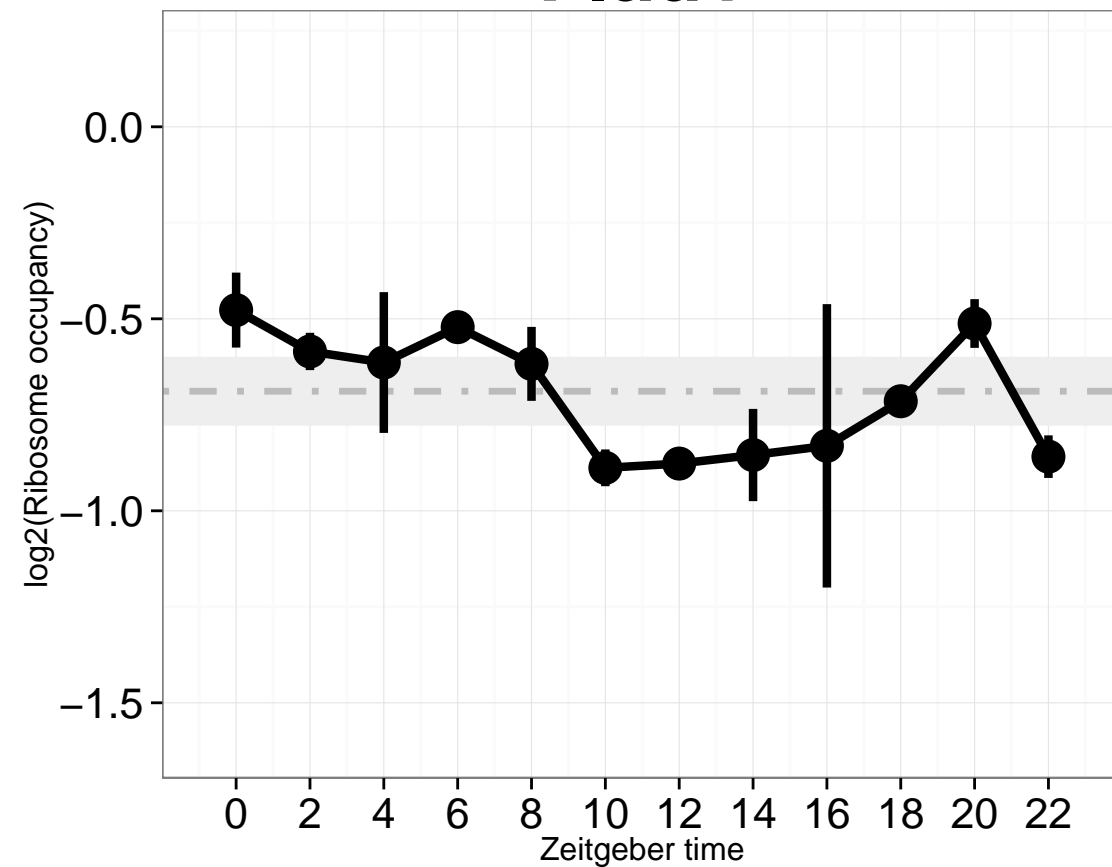

Supplement: Supplementary file 3794 [file 1]

## Nme2

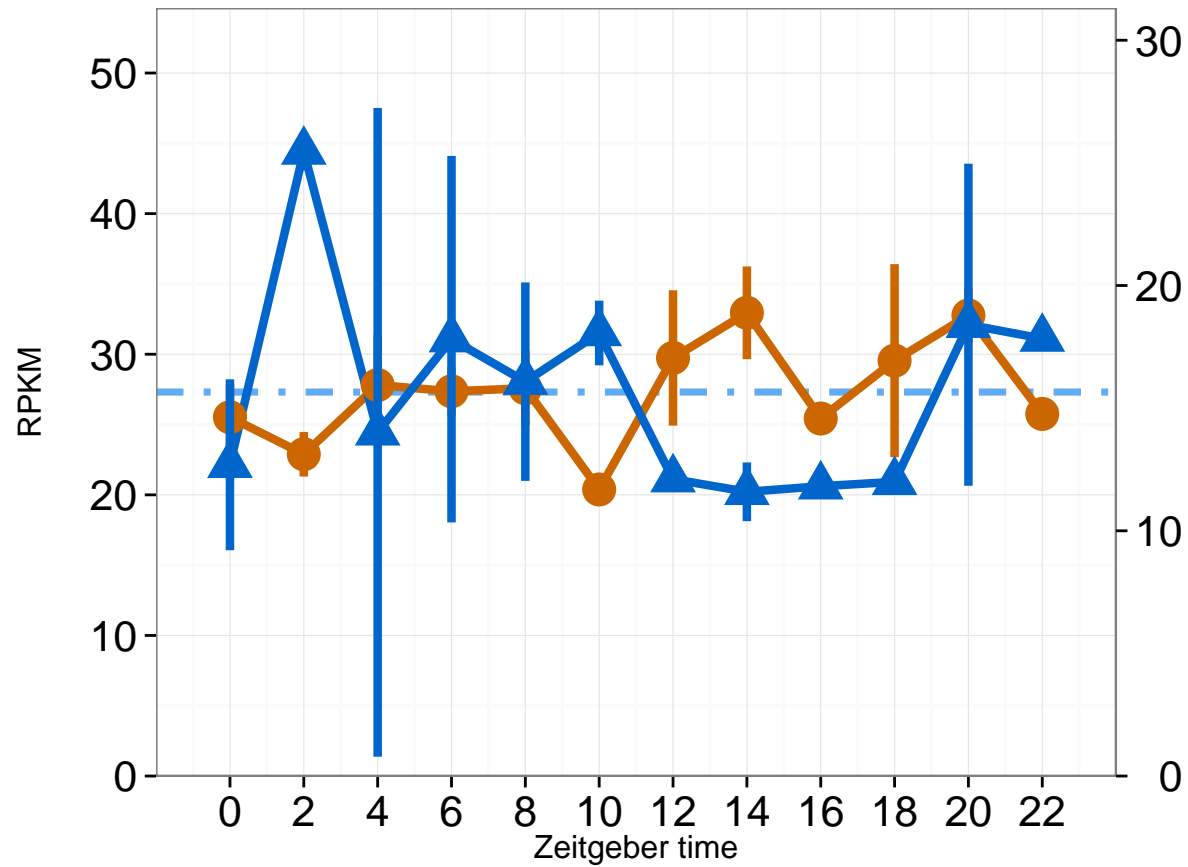

## Nme2

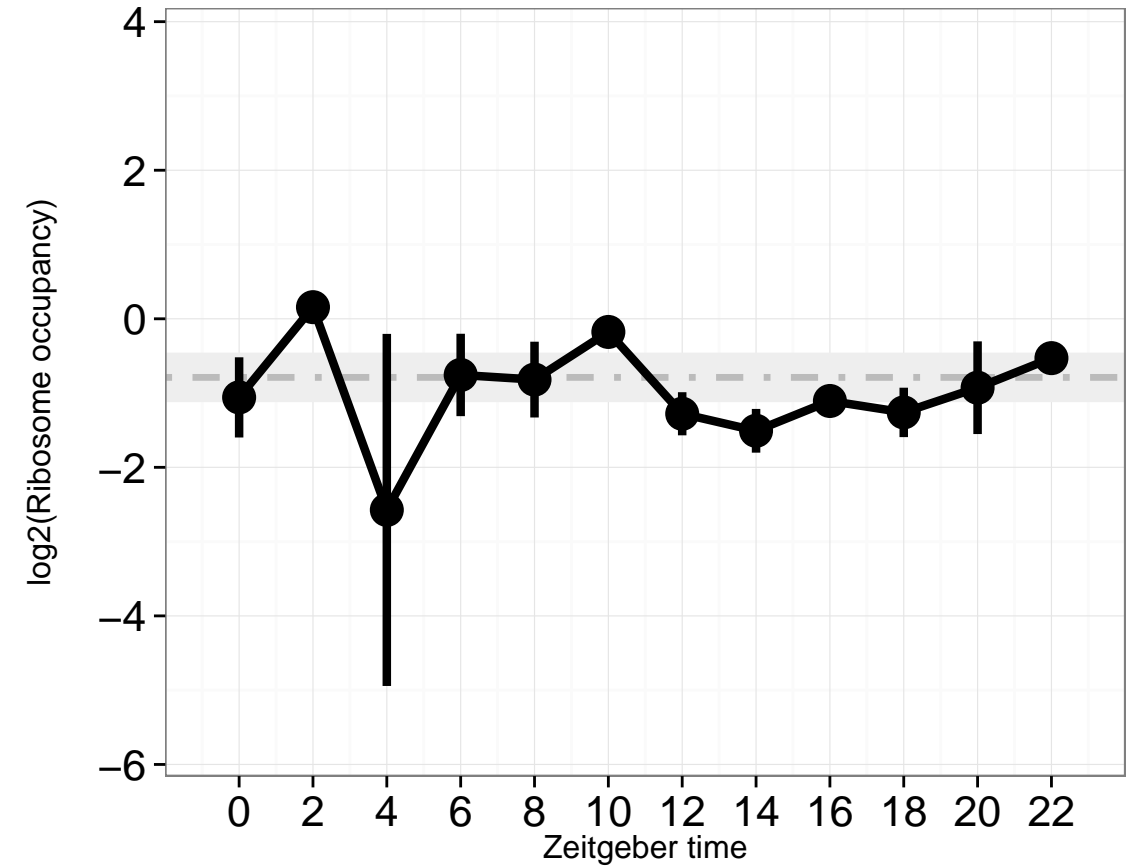

Supplement: Supplementary file 3795 [file 1]

## Cdhr5

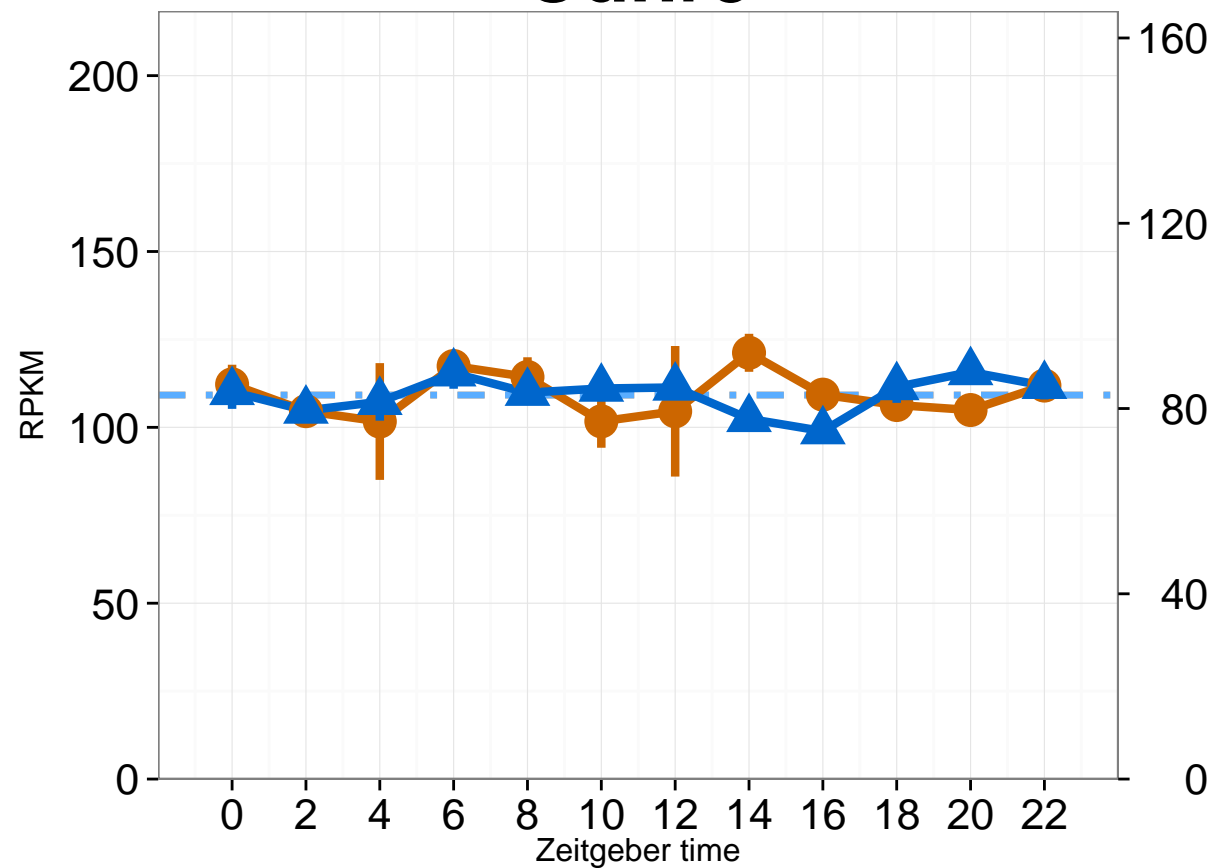

## Cdhr5

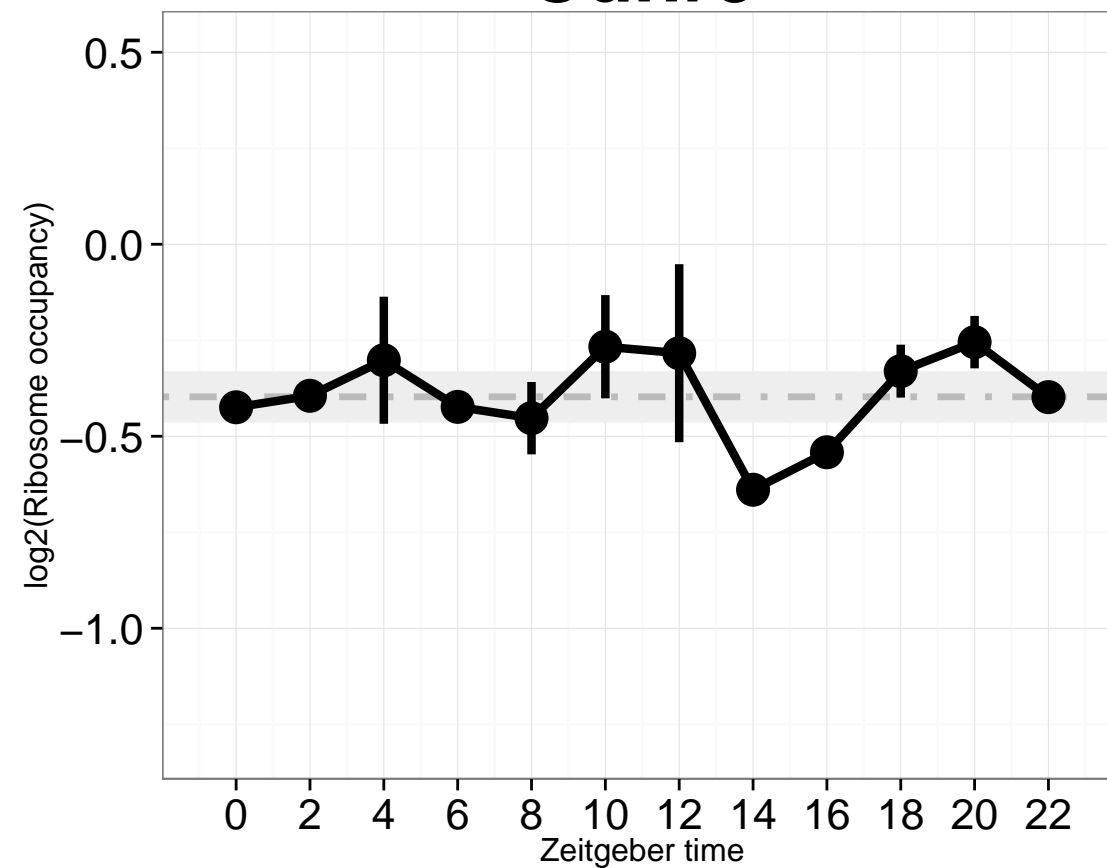

Supplement: Supplementary file 3796 [file 1]

## Rnf43

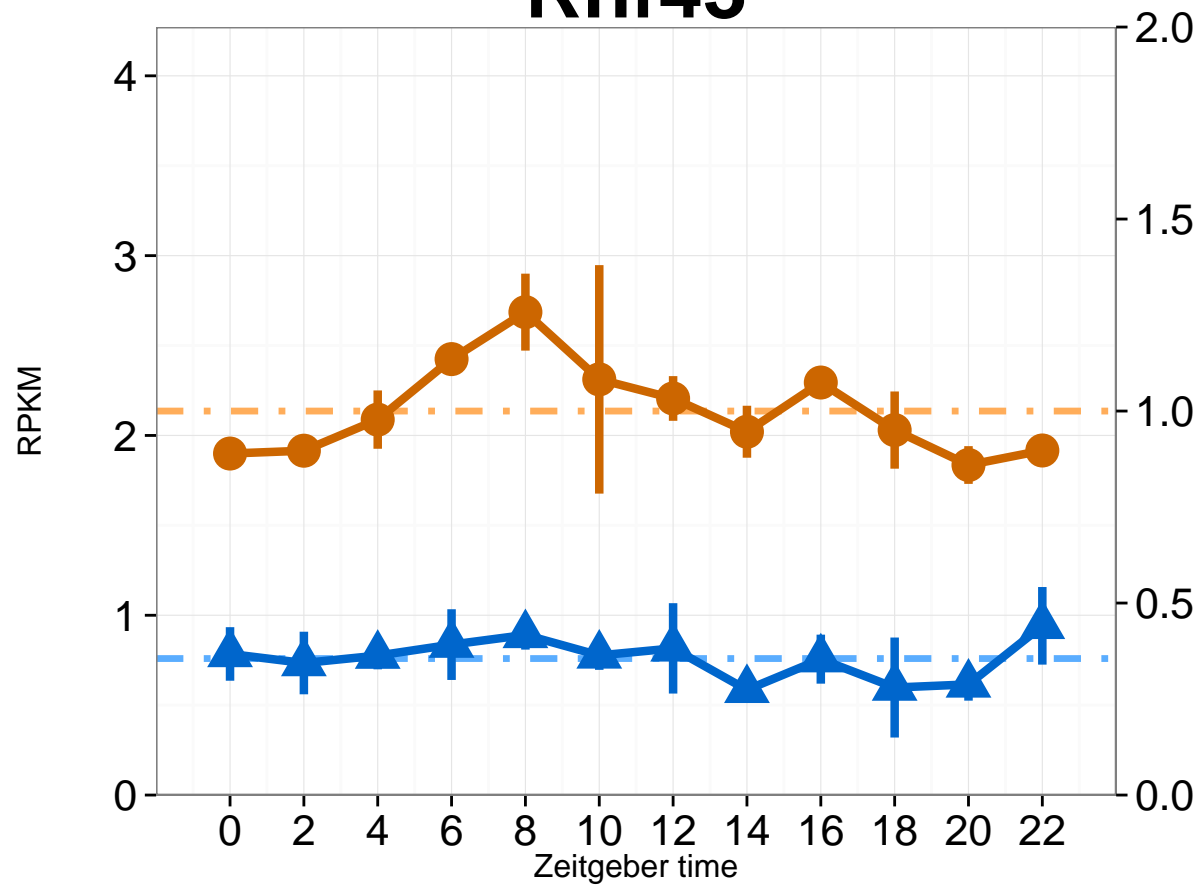

## Rnf43

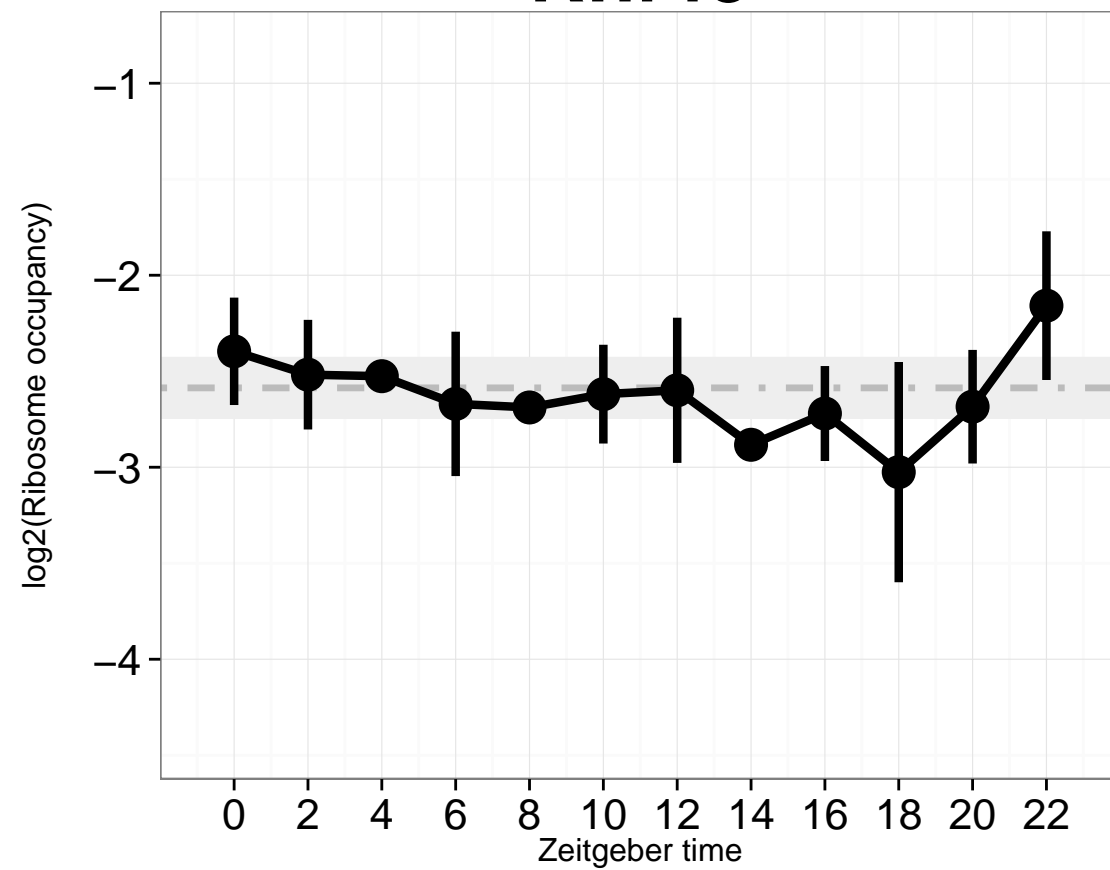

Supplement: Supplementary file 3797 [file 1]

## Pole

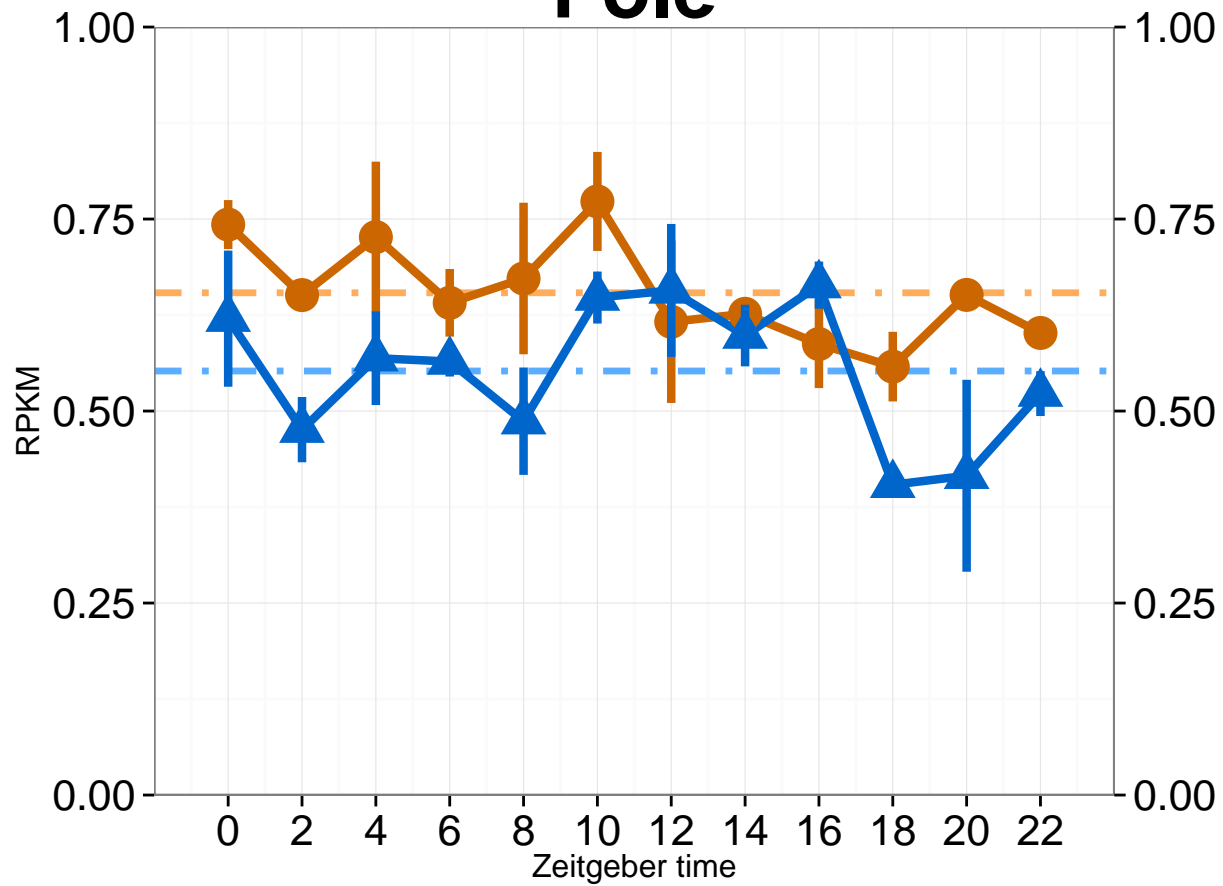

## Pole

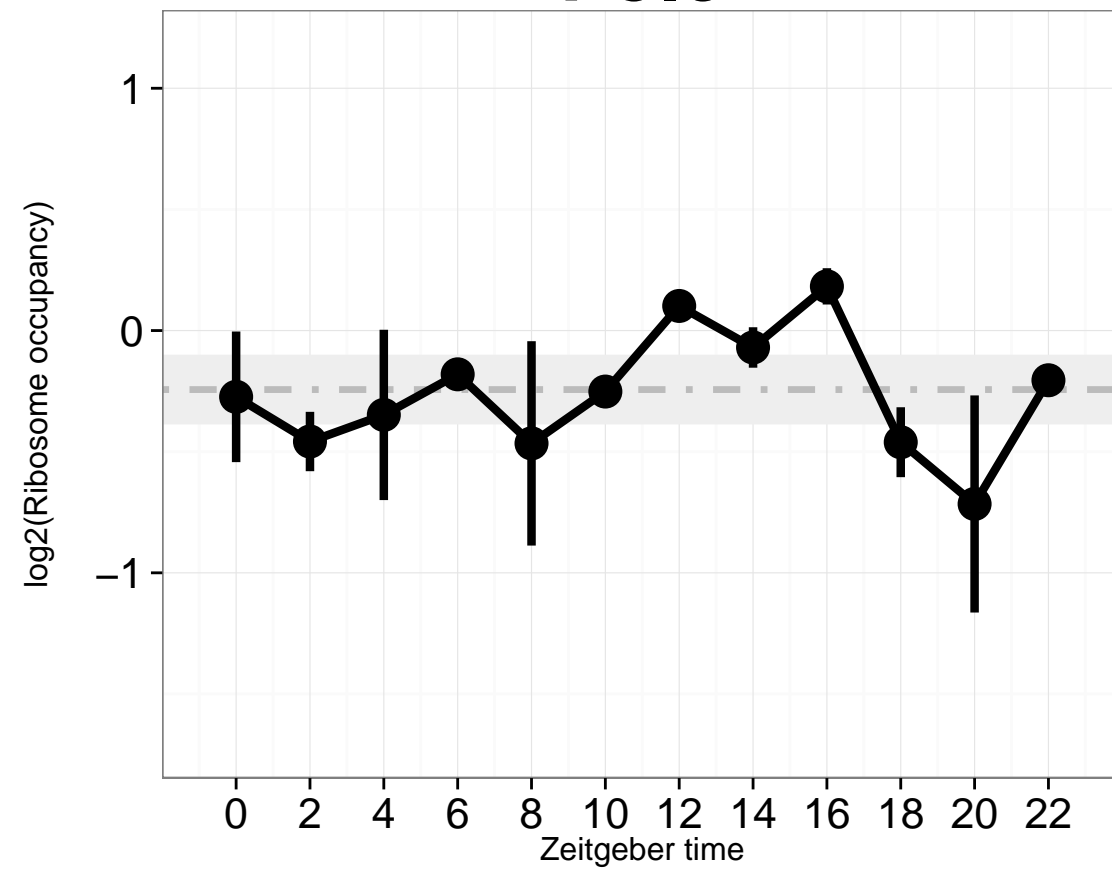

Supplement: Supplementary file 3798 [file 1]

# Zmym1

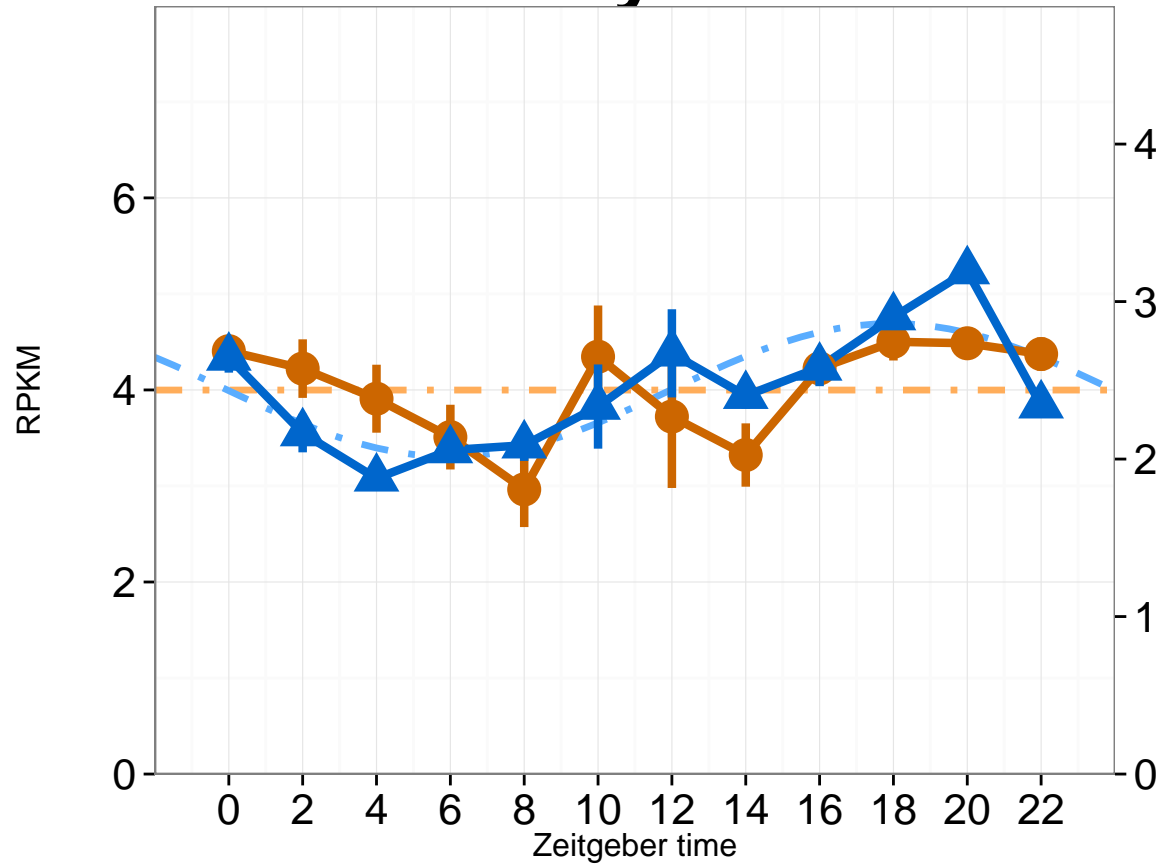

# Zmym1

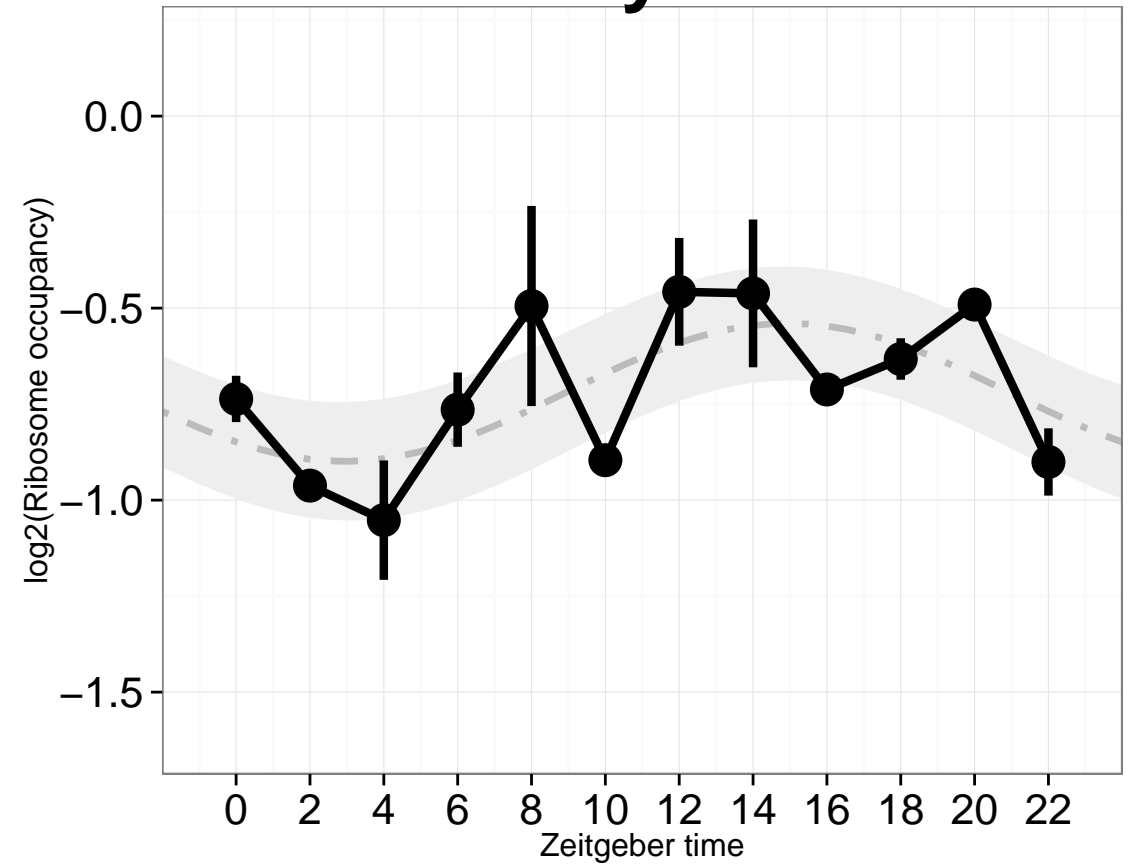

Supplement: Supplementary file 3799 [file 1]

## Hmg20b

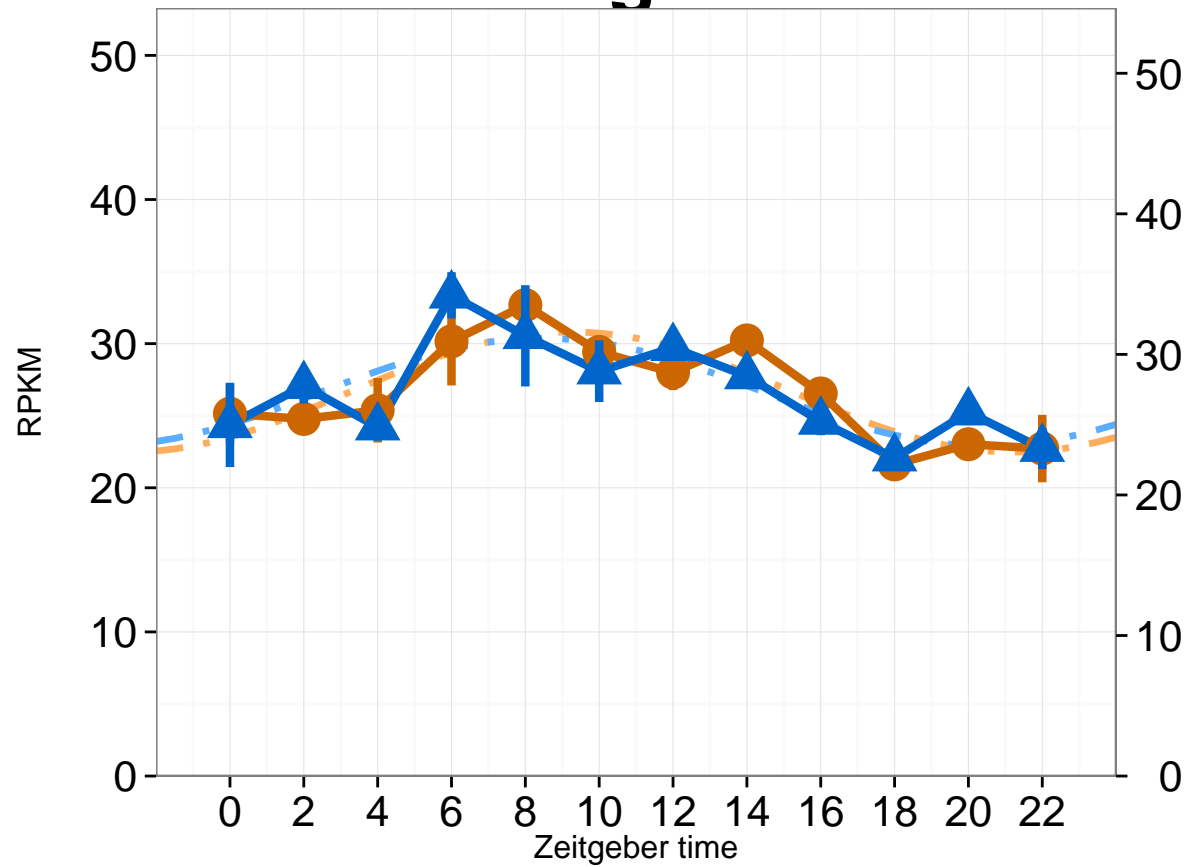

## Hmg20b

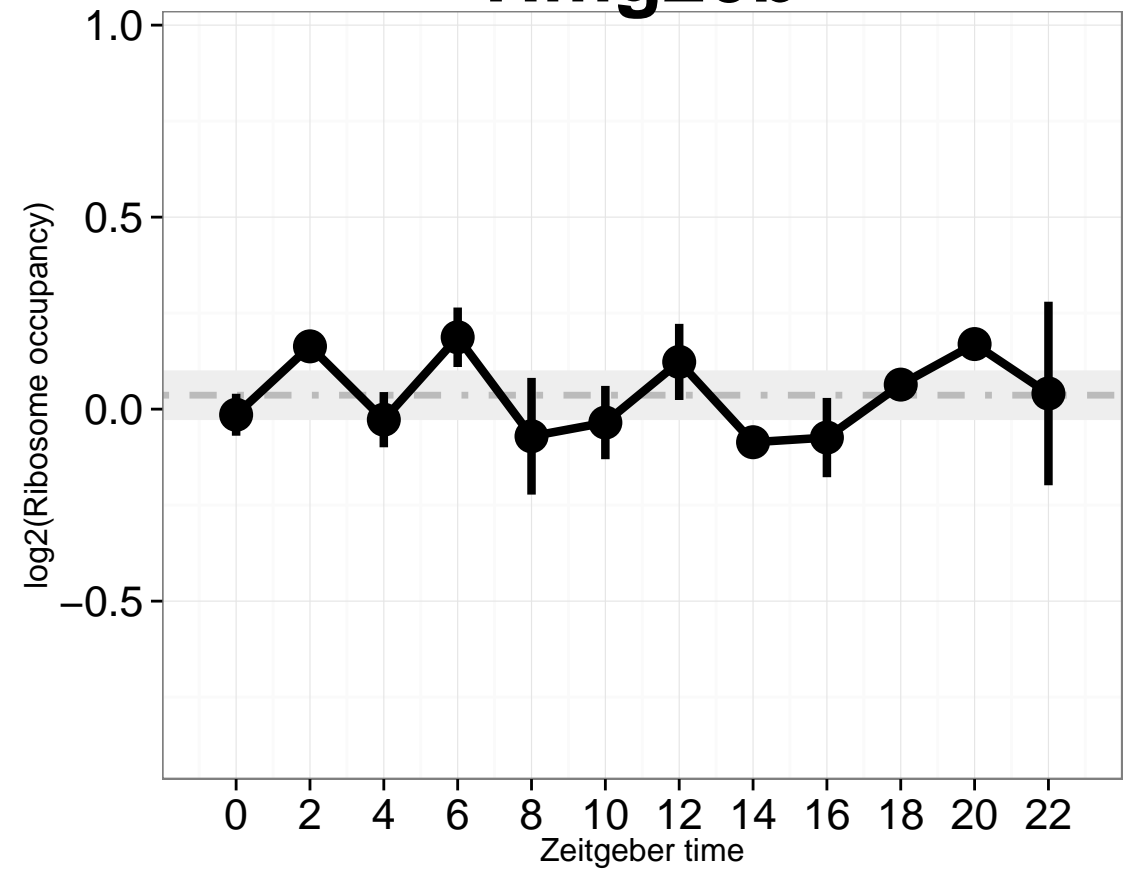

Supplement: Supplementary file 3800 [file 1]

# Fem1a

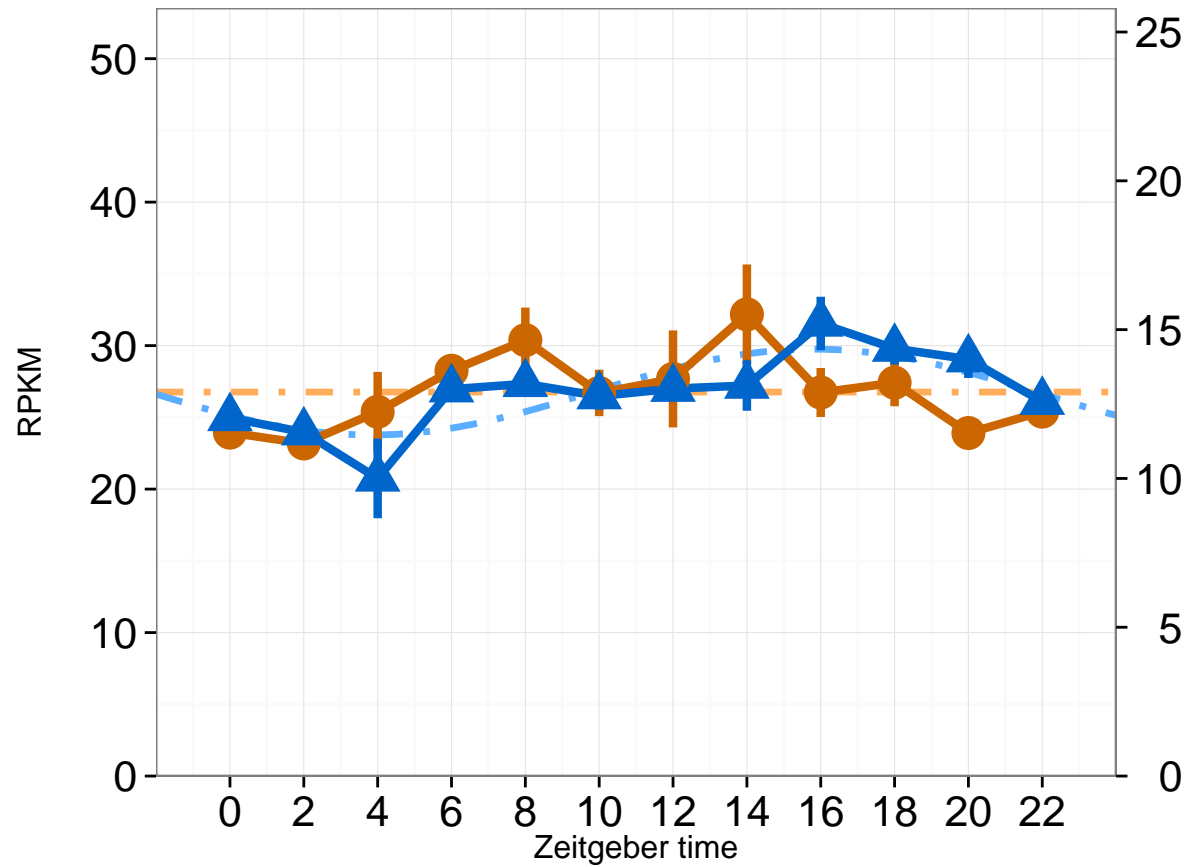

# Fem1a

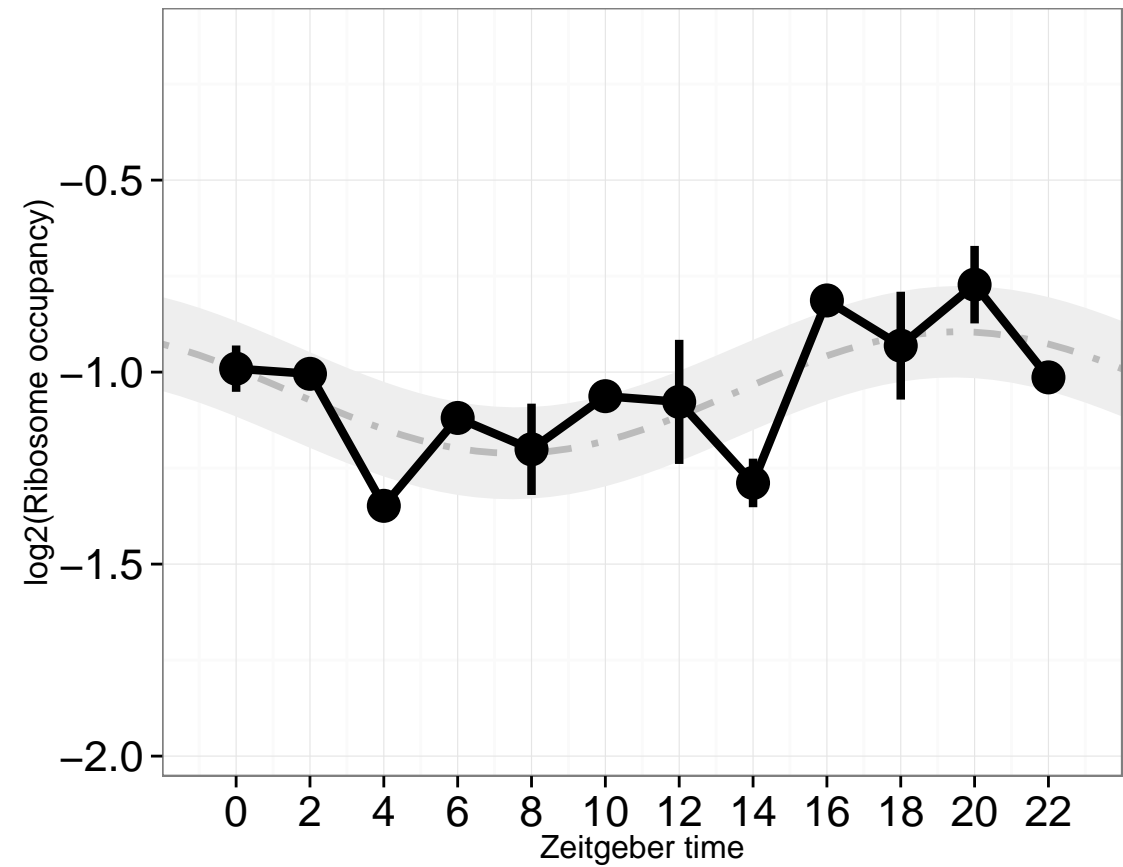

Supplement: Supplementary file 3801 [file 1]

# Fabp1

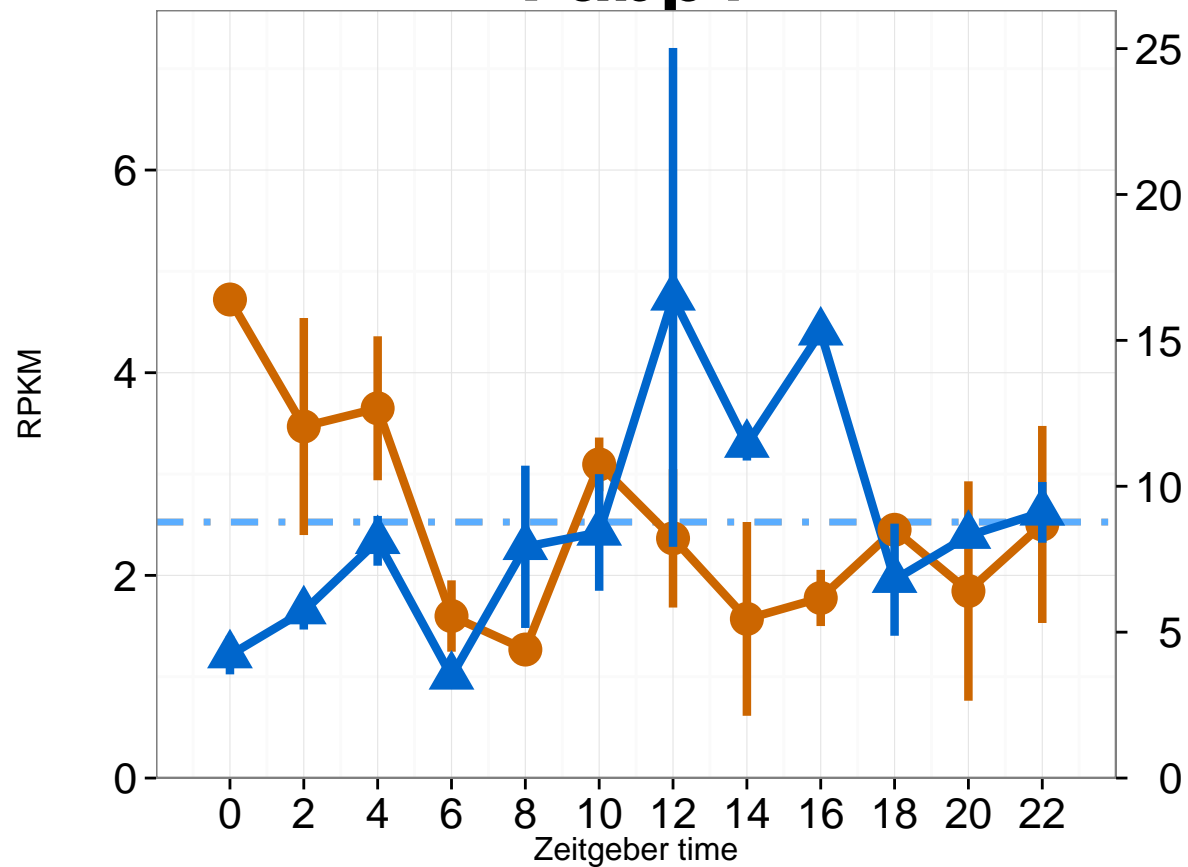

# Fabp1

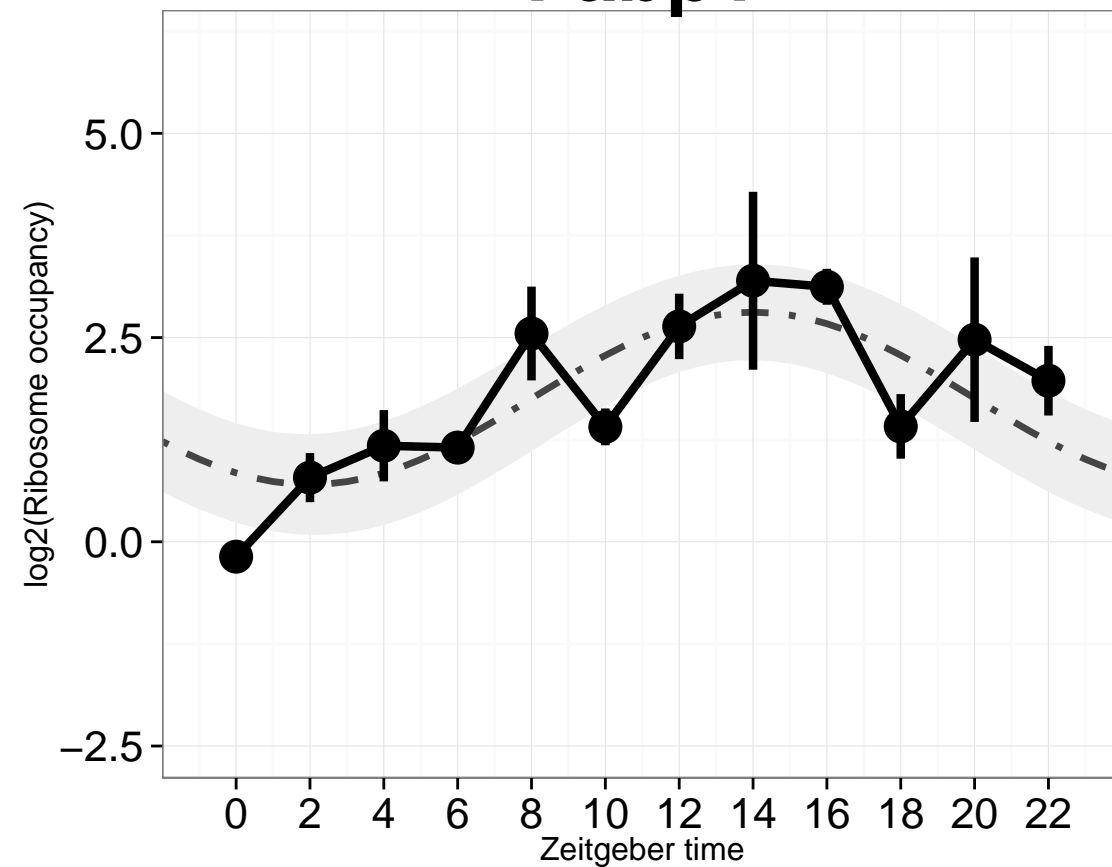

Supplement: Supplementary file 3802 [file 1]

## Os9

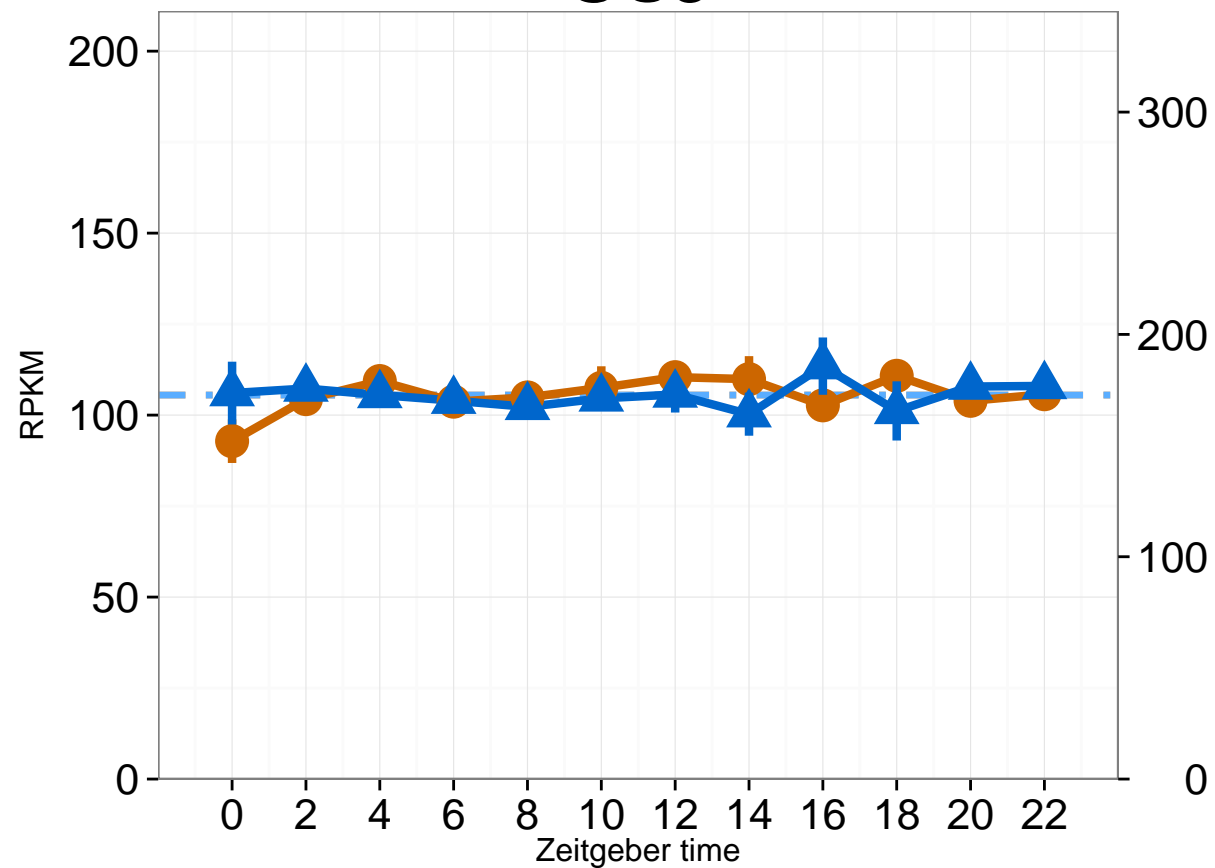

## Os9

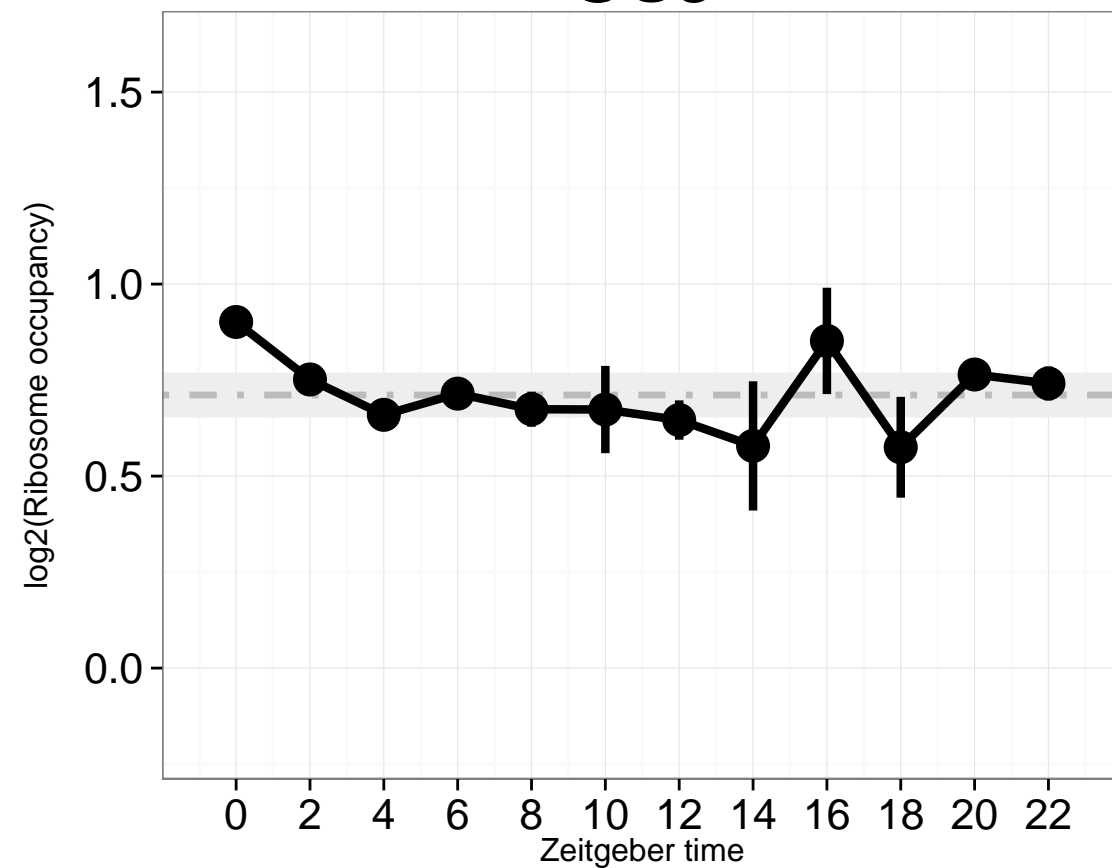

Supplement: Supplementary file 3803 [file 1]

# 1810037I17Rik

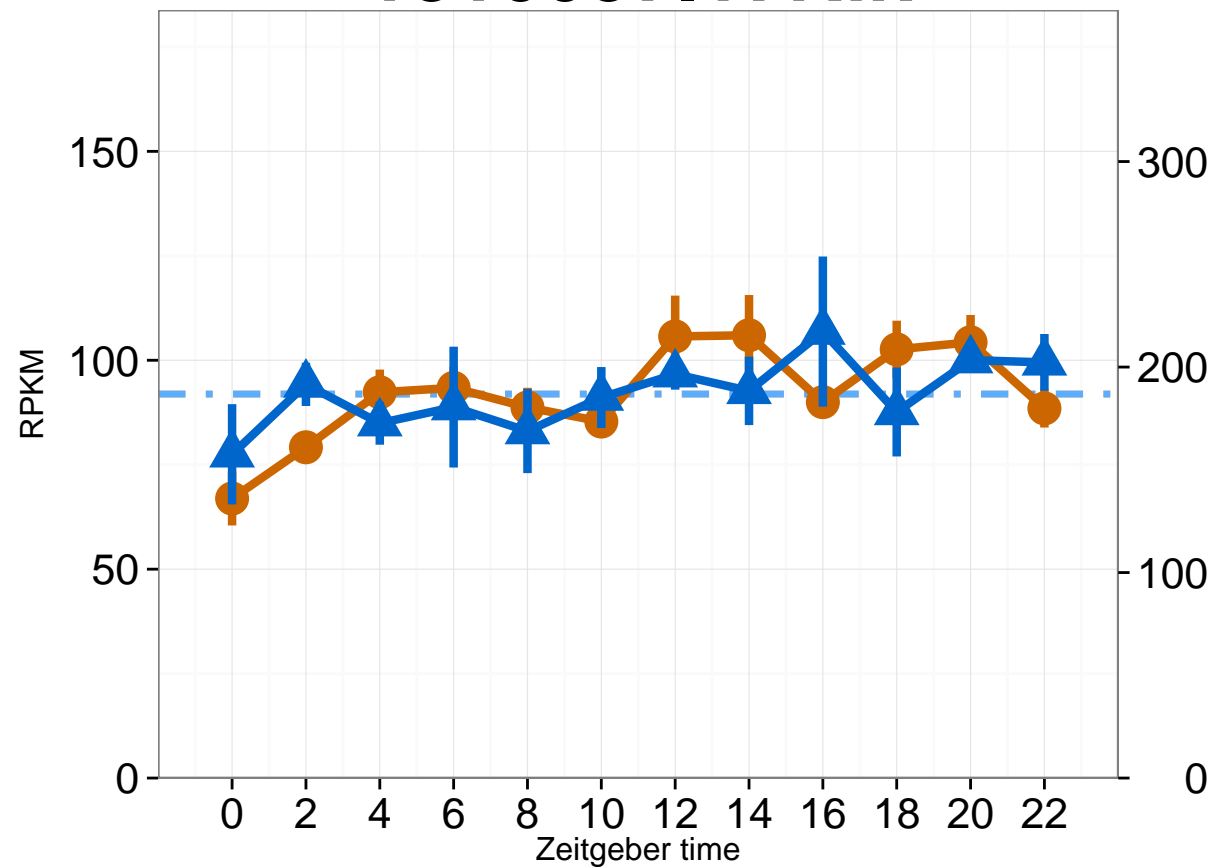

# 1810037I17Rik

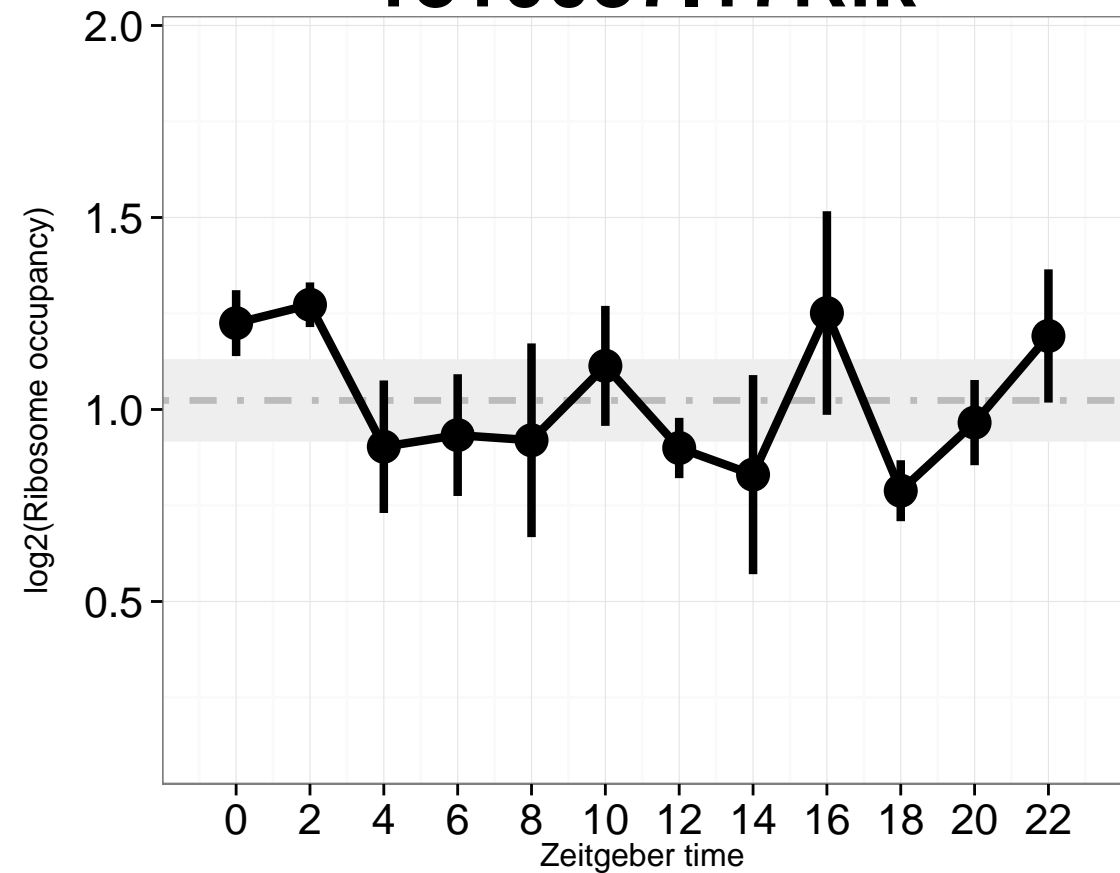

Supplement: Supplementary file 3804 [file 1]

## Srsf2

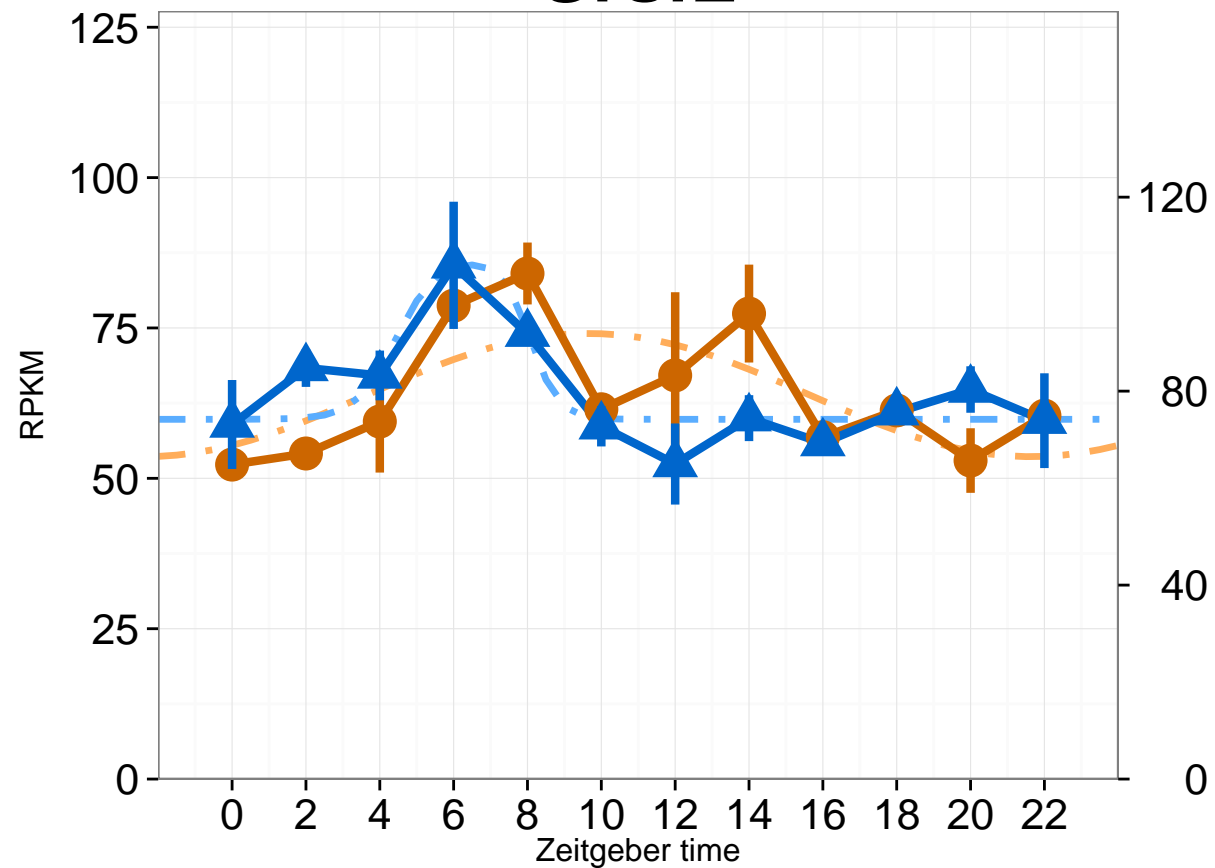

## Srsf2

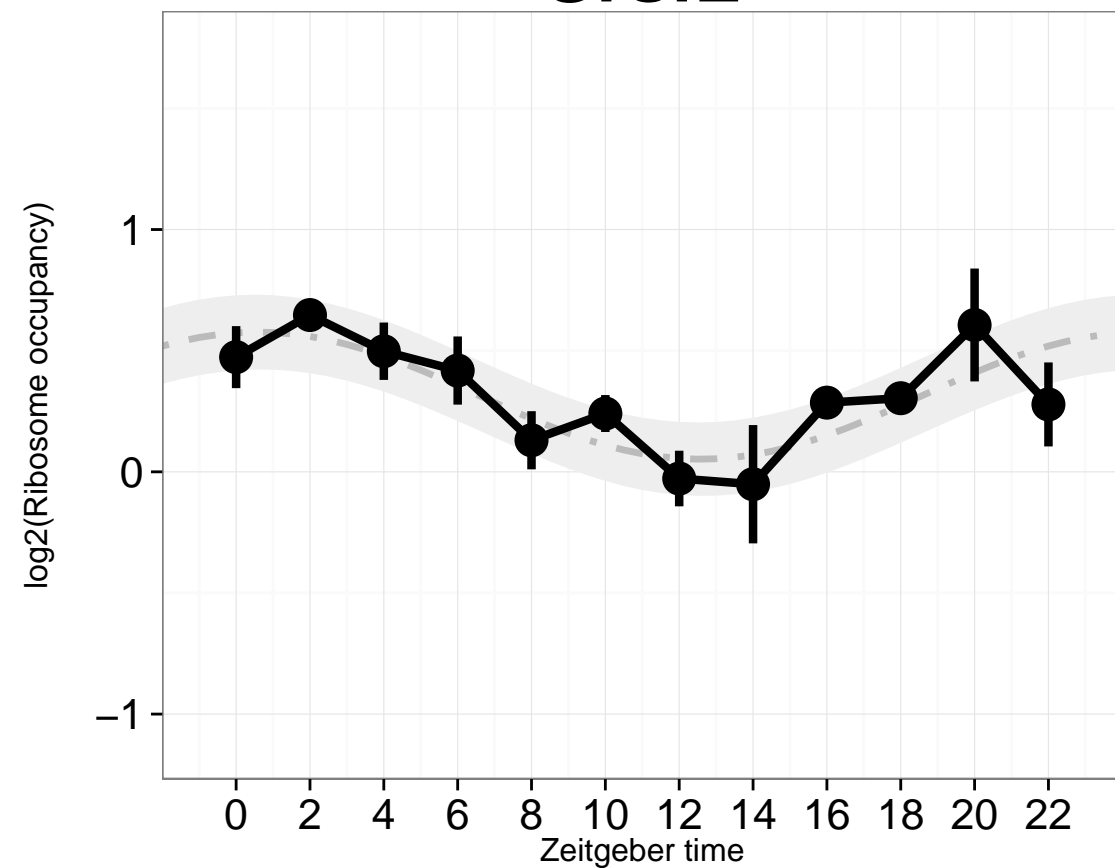

Supplement: Supplementary file 3805 [file 1]

## Zbp1

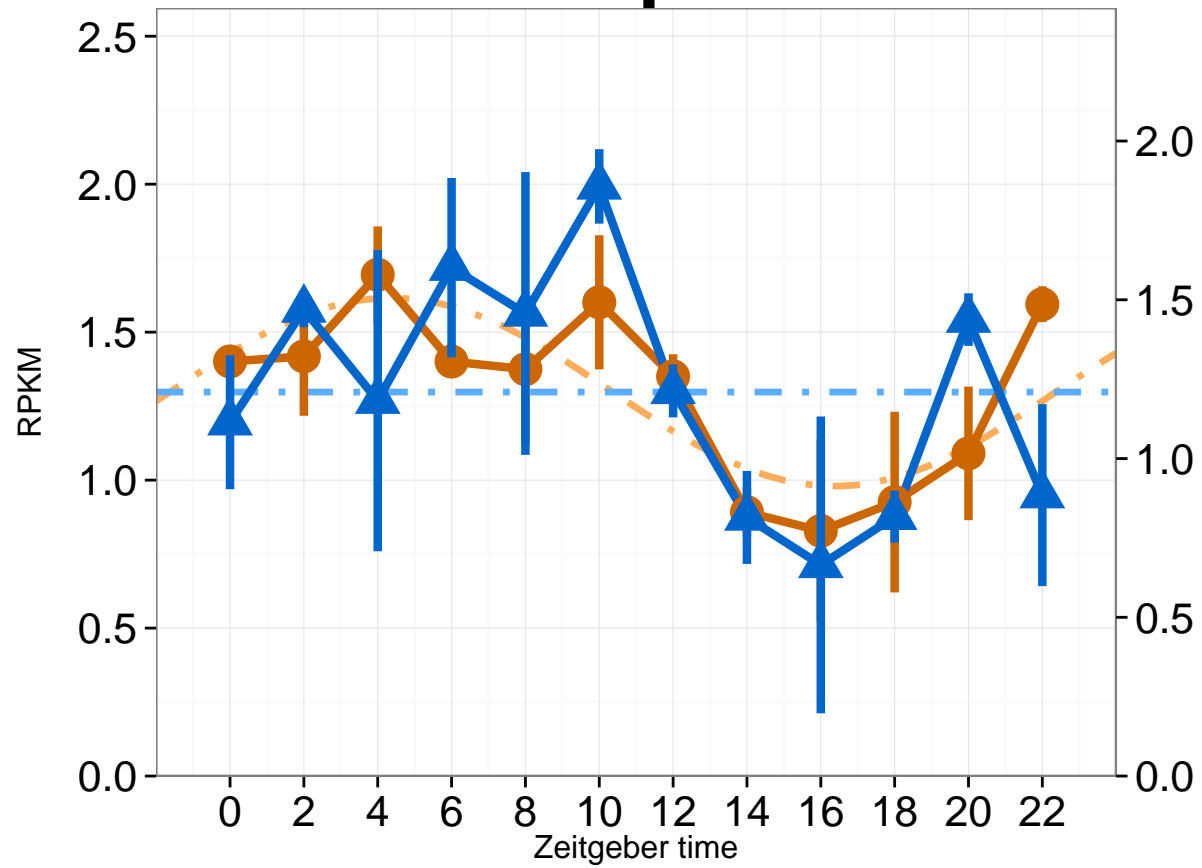

## Zbp1

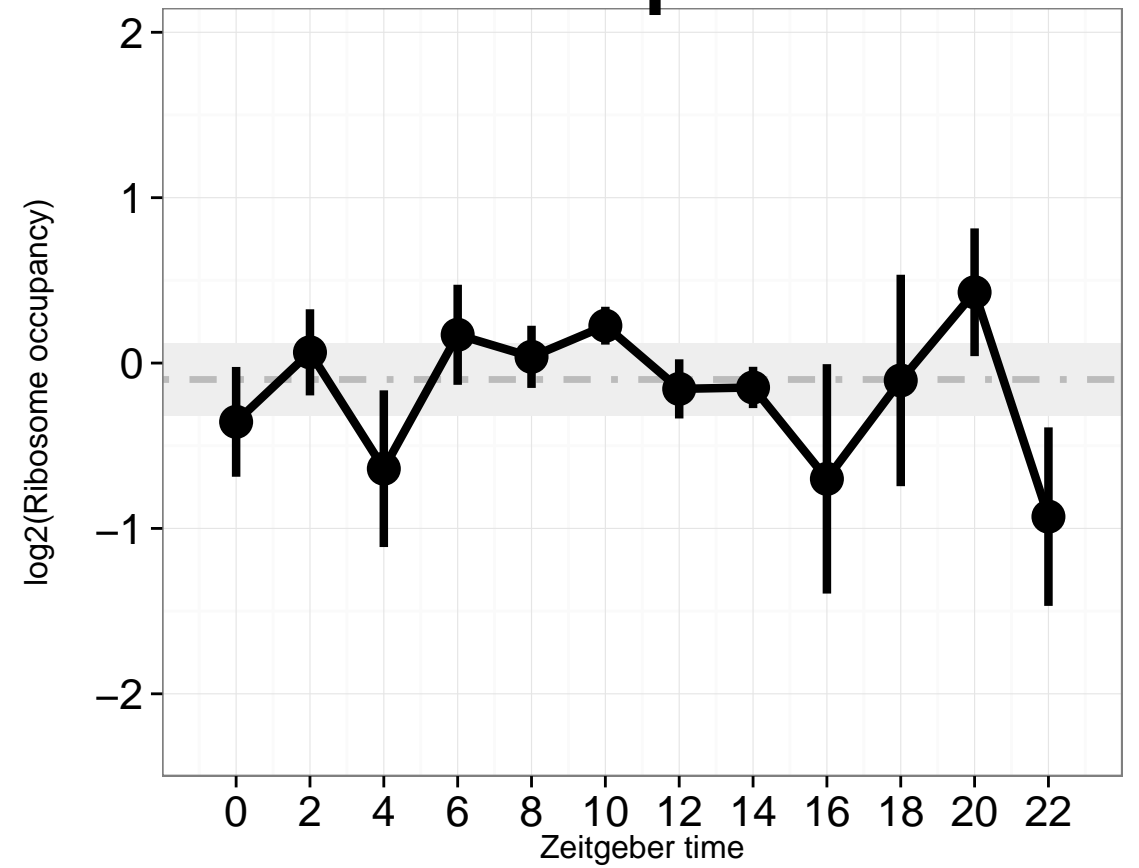

Supplement: Supplementary file 3806 [file 1]

# 3110001I22Rik

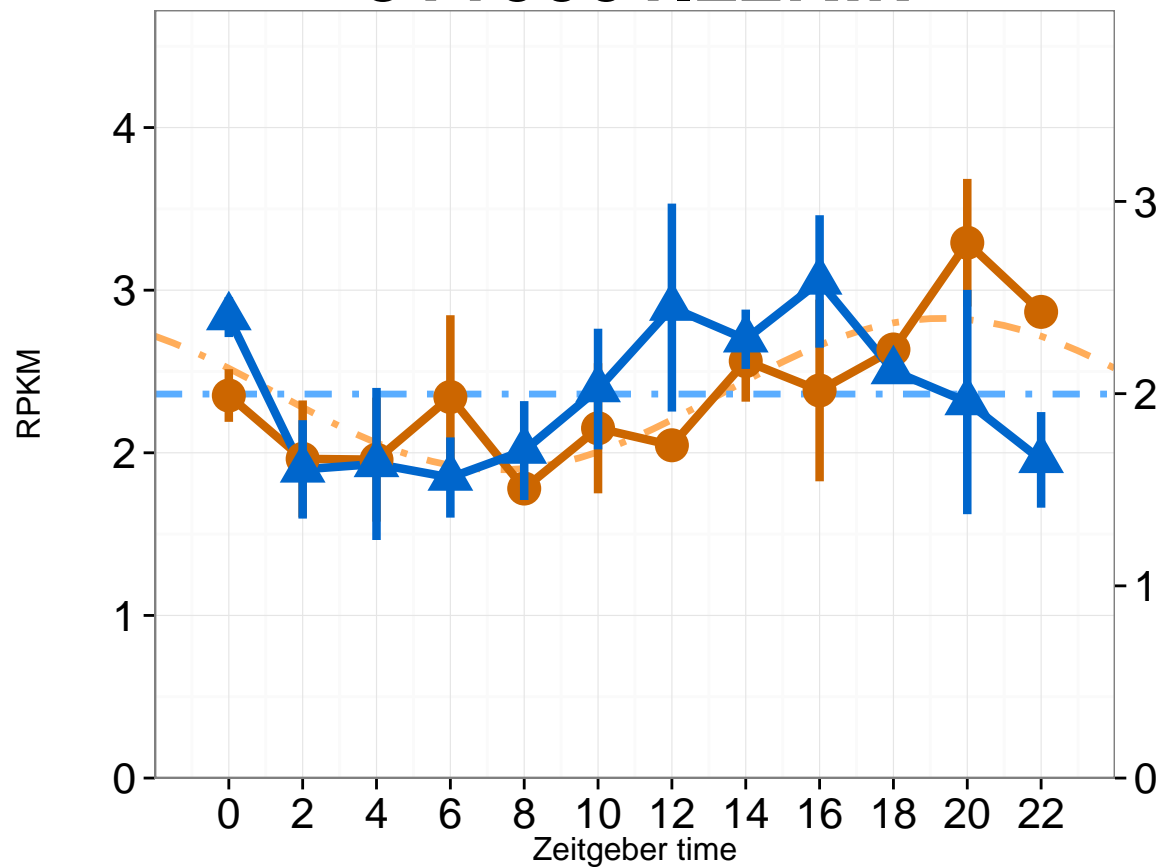

# 3110001I22Rik

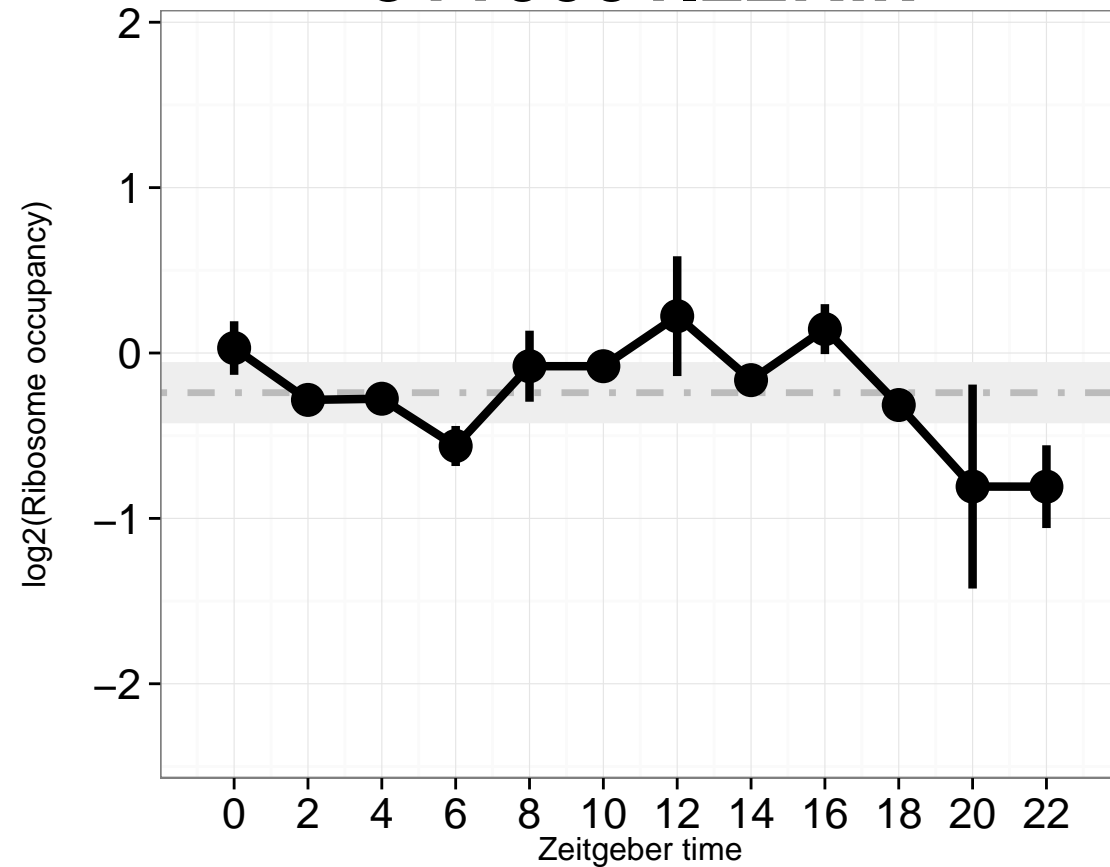

Supplement: Supplementary file 3807 [file 1]

# Fgf1

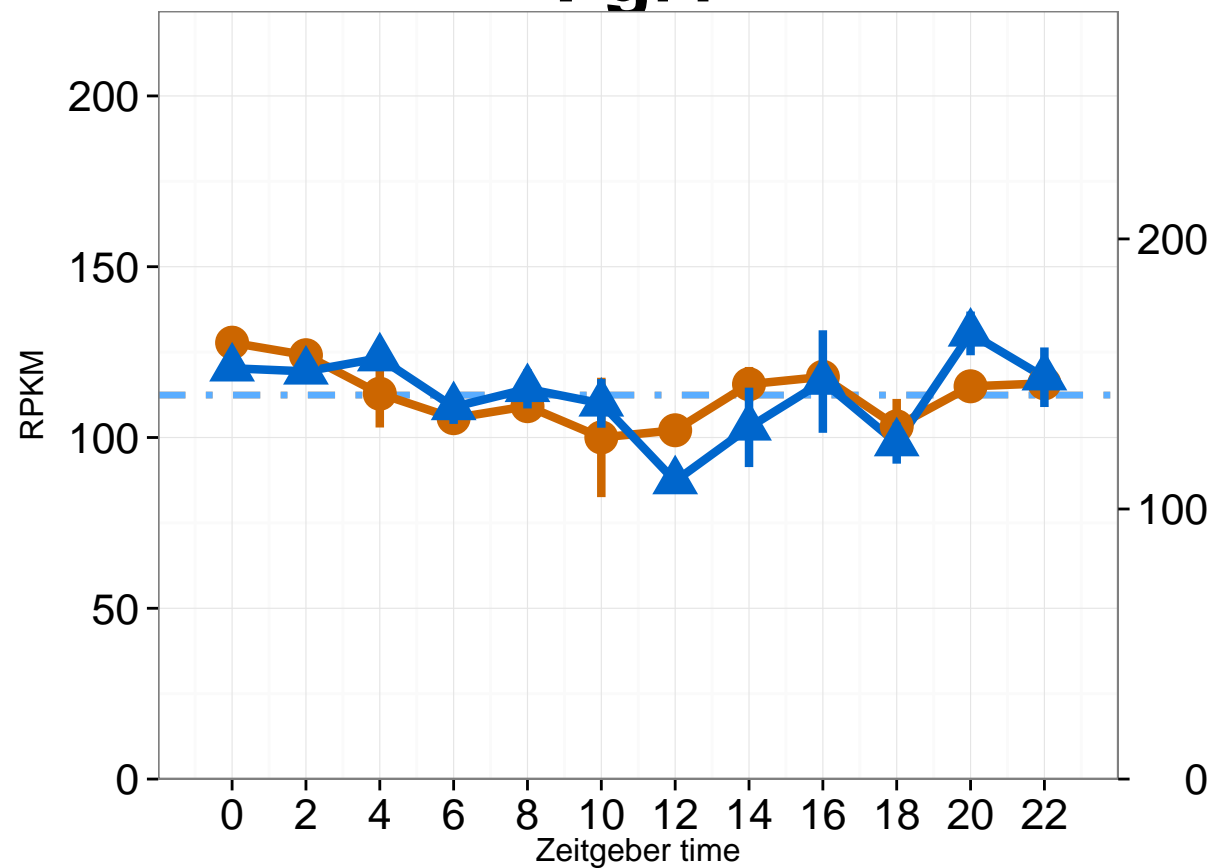

# Fgf1

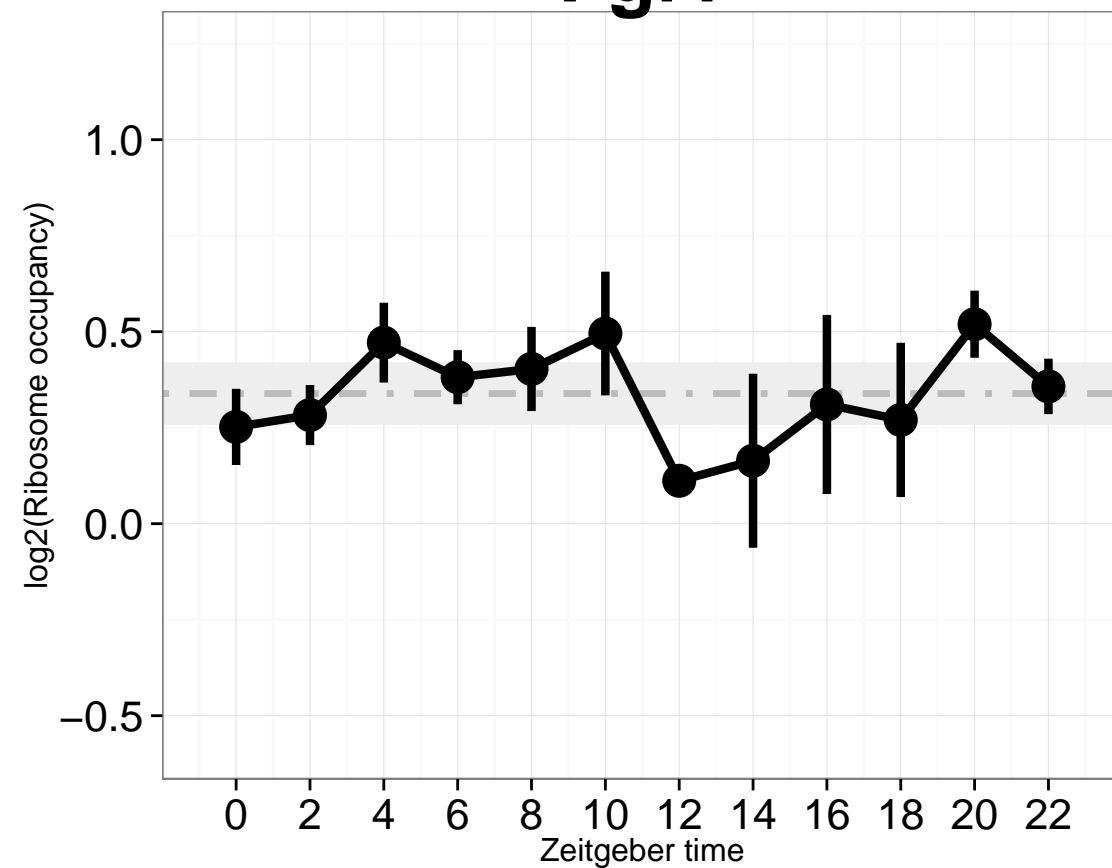

Supplement: Supplementary file 3808 [file 1]

## Phka2

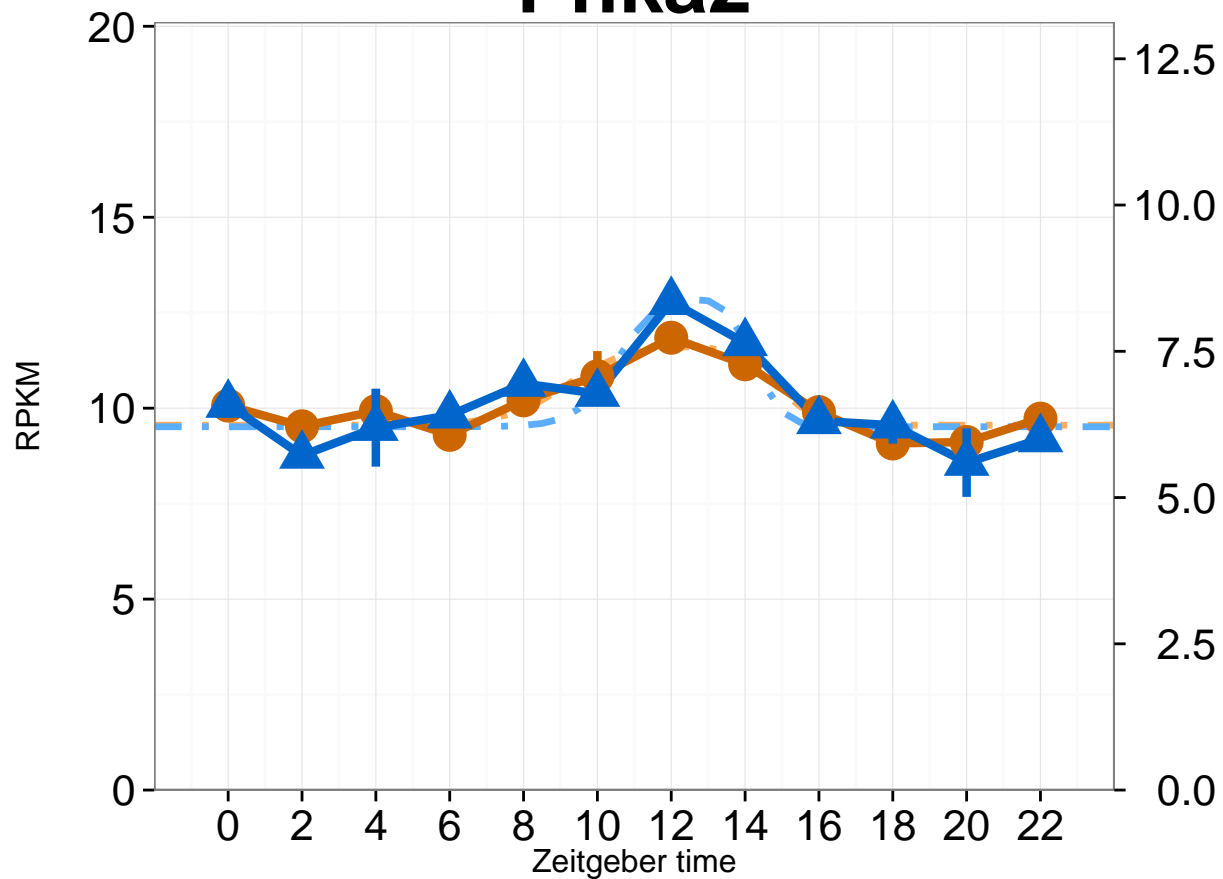

## Phka2

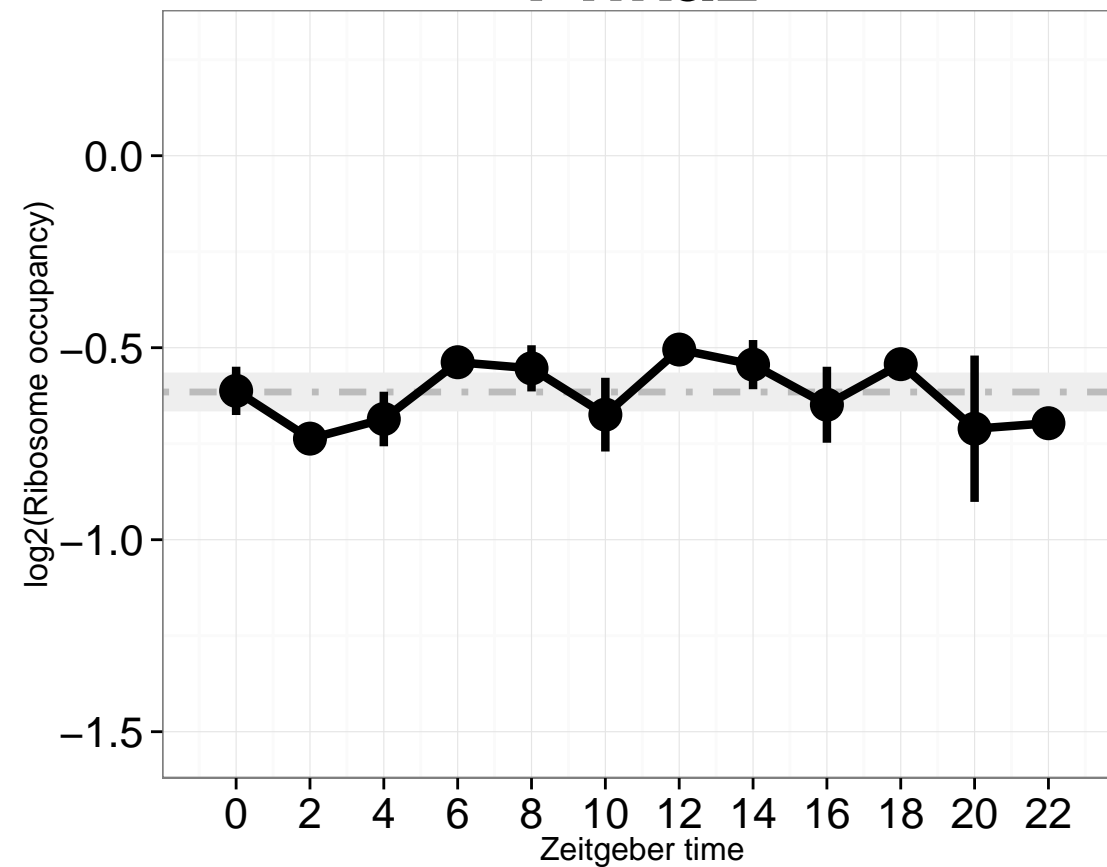

Supplement: Supplementary file 3809 [file 1]

## Bgn

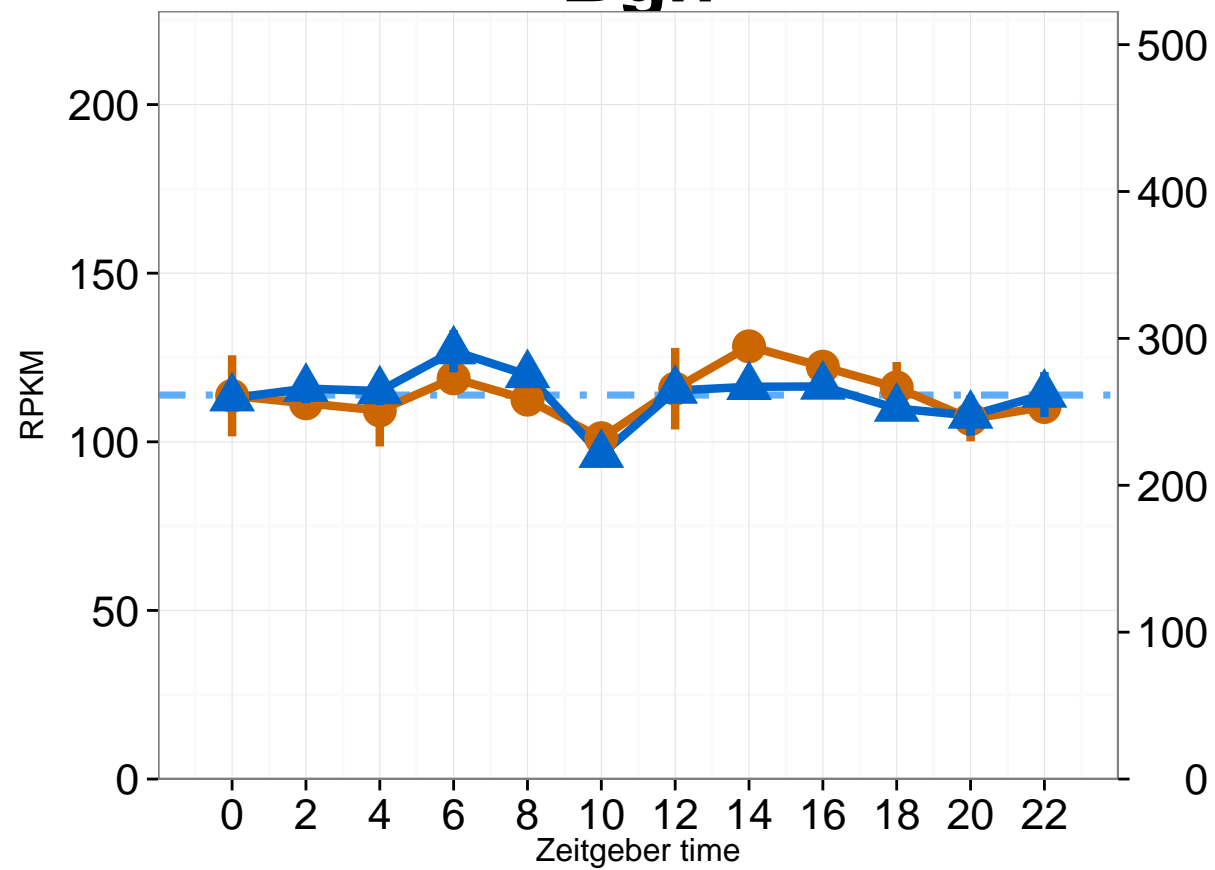

## Bgn

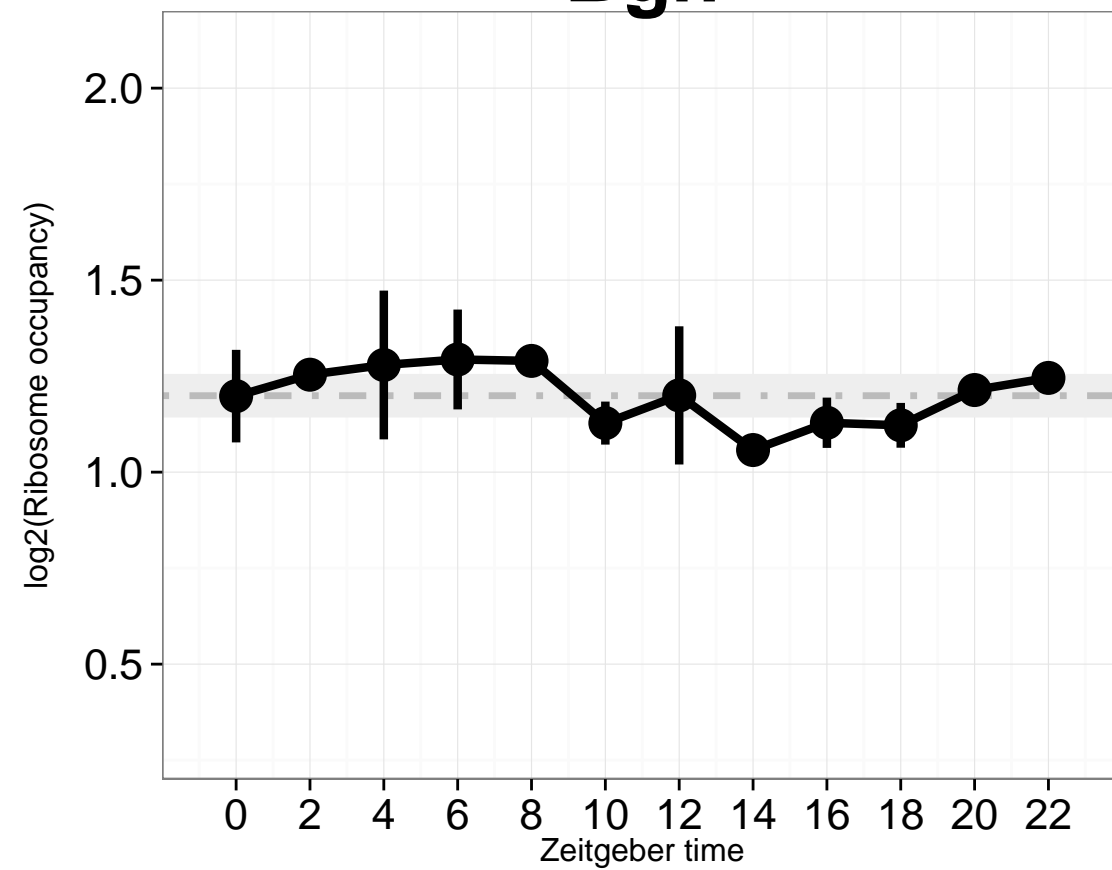

Supplement: Supplementary file 3810 [file 1]

# Best3

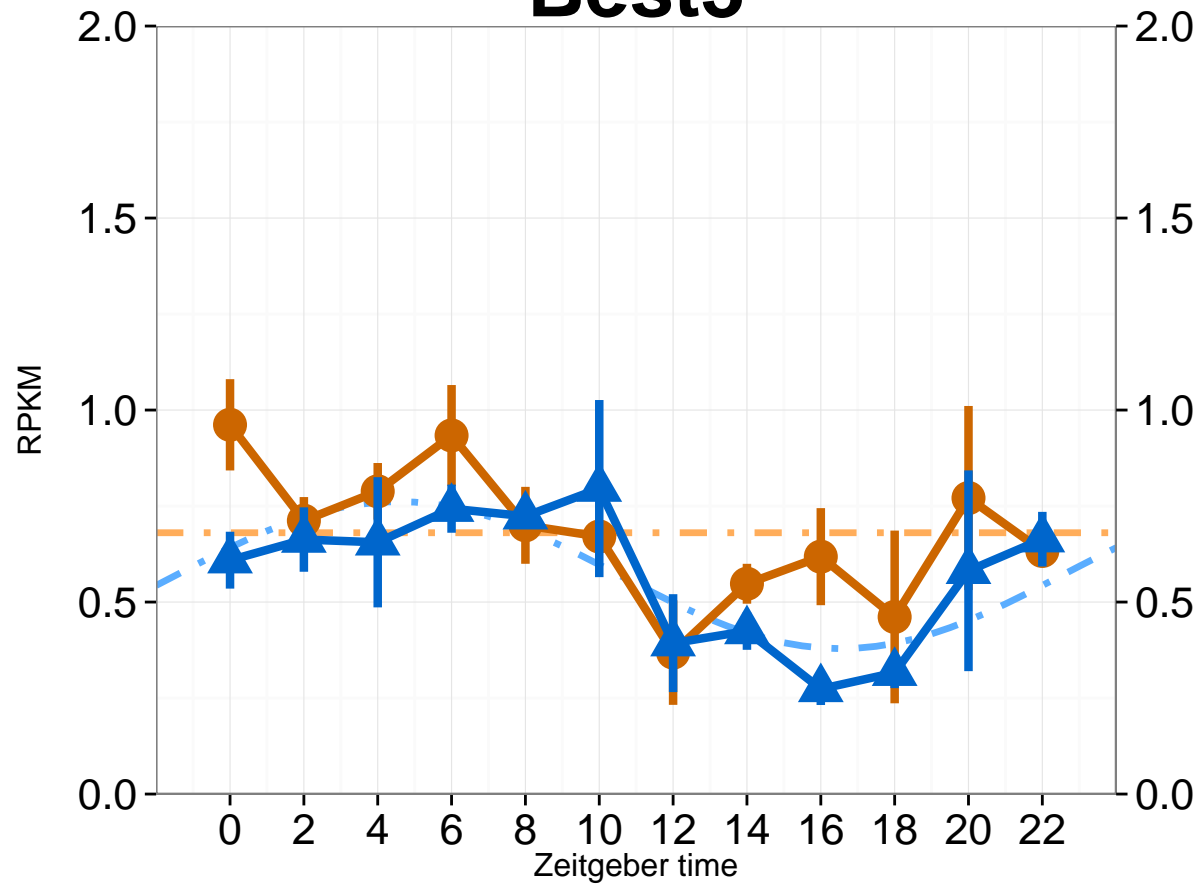

# Best3

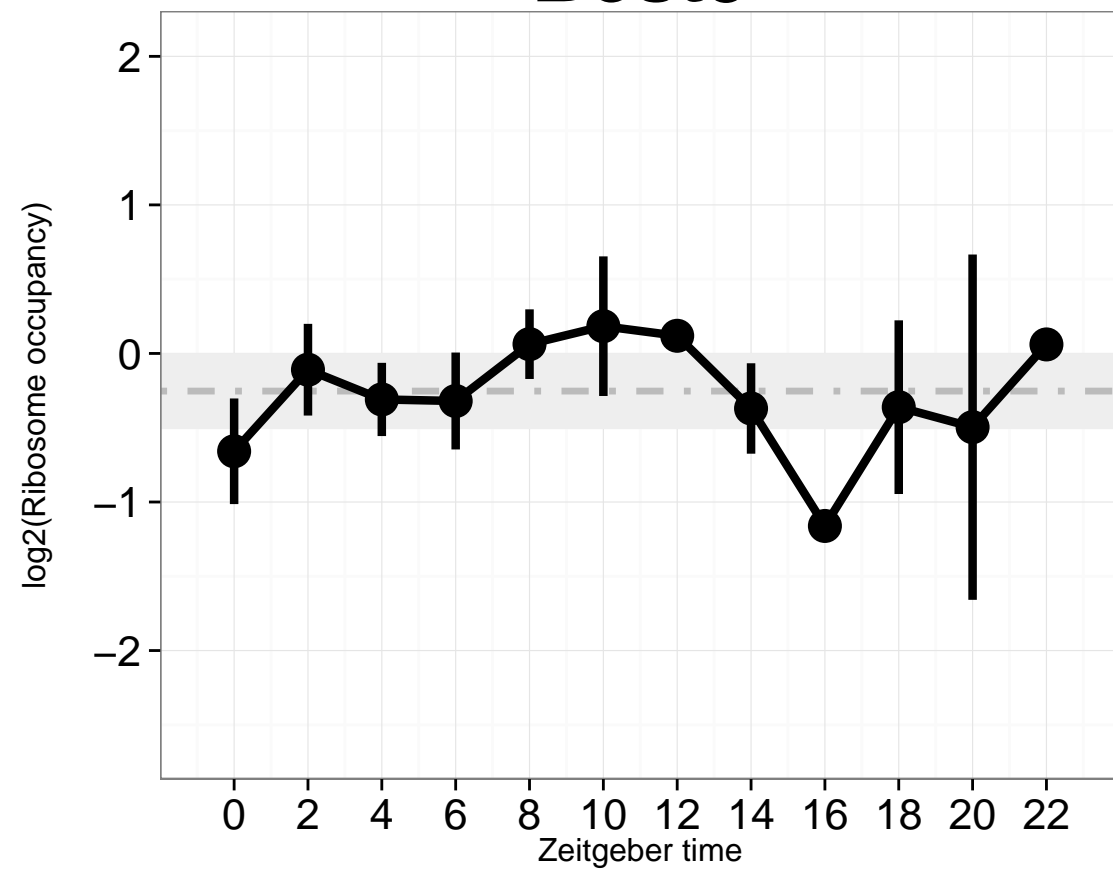

Supplement: Supplementary file 3811 [file 1]

## Mtr

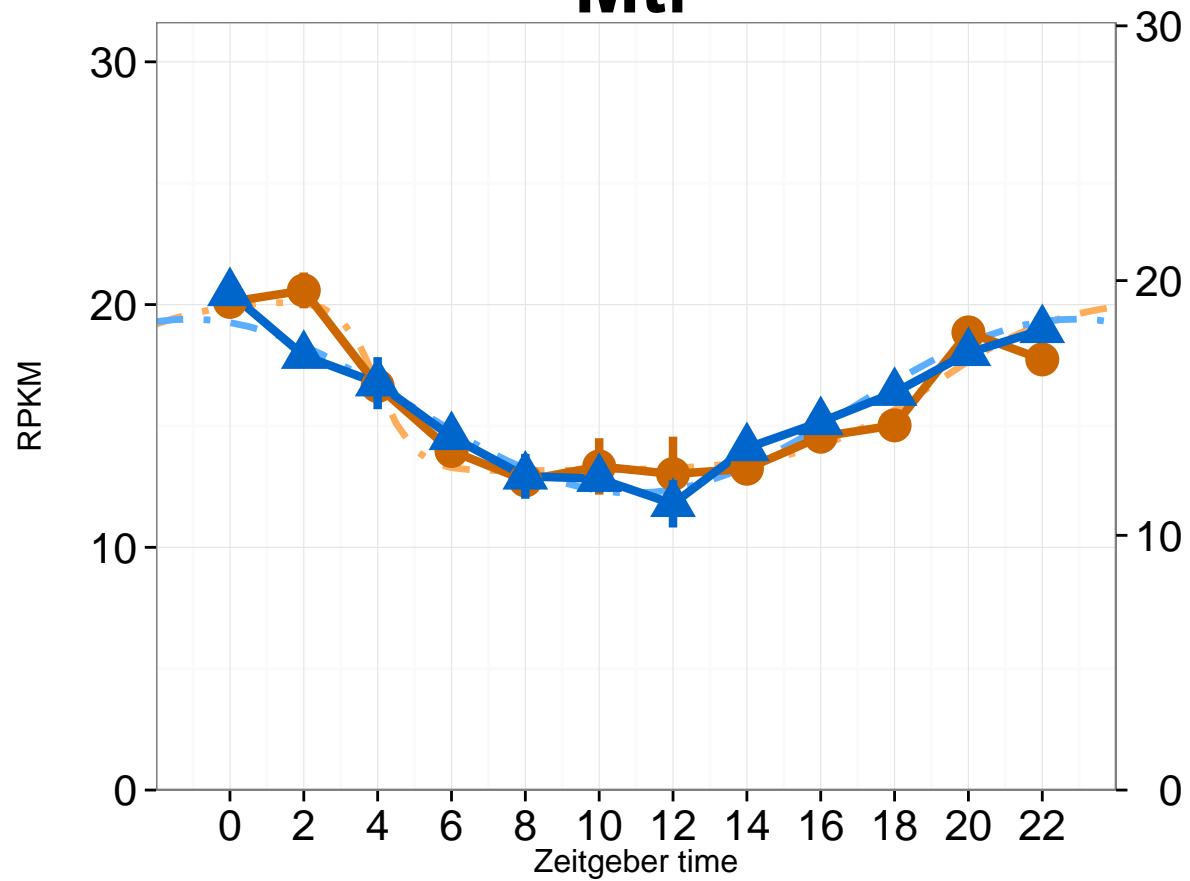

## Mtr

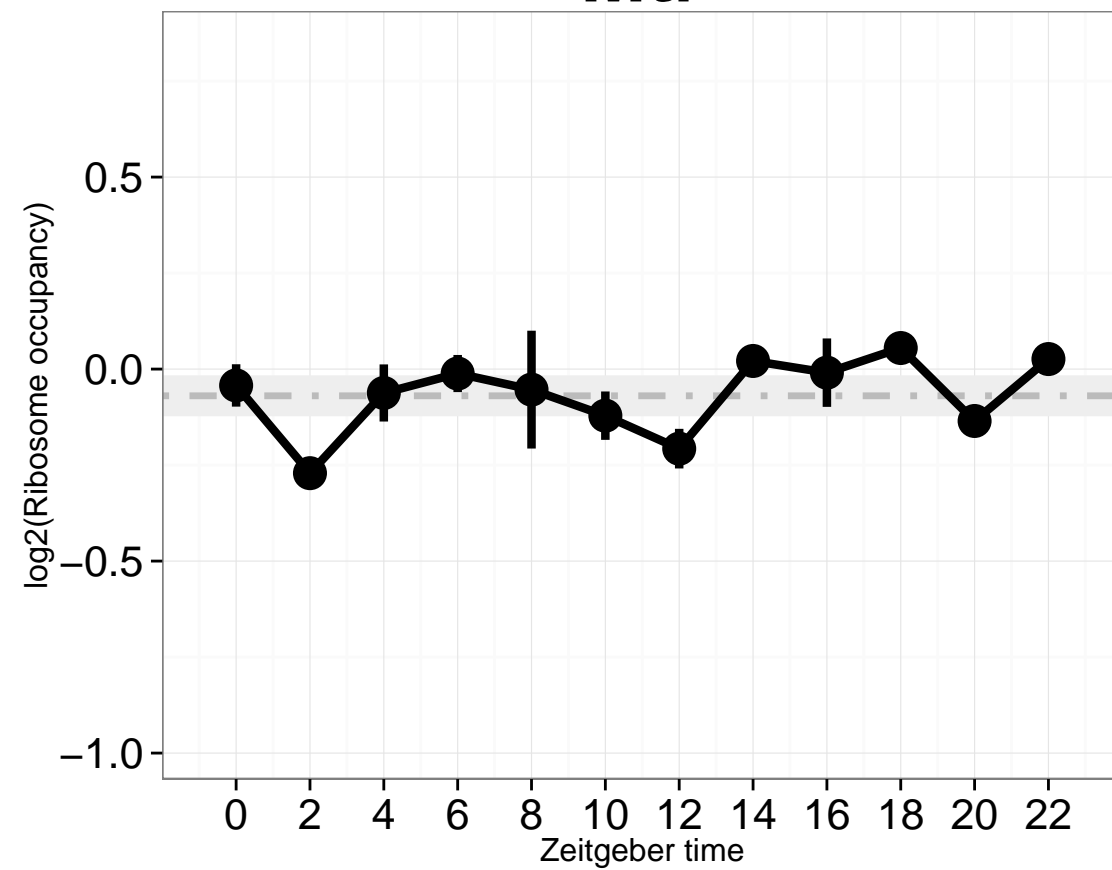

Supplement: Supplementary file 3812 [file 1]

## BImh

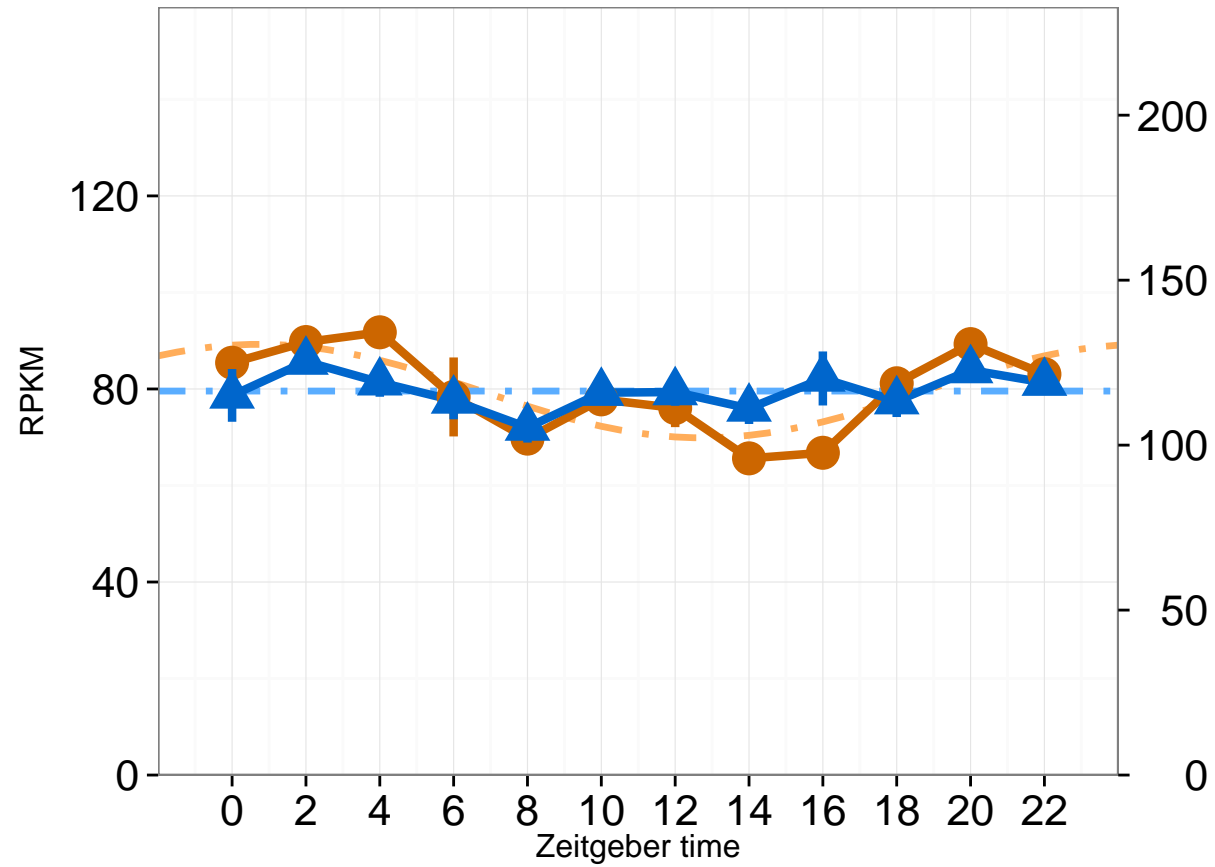

## BImh

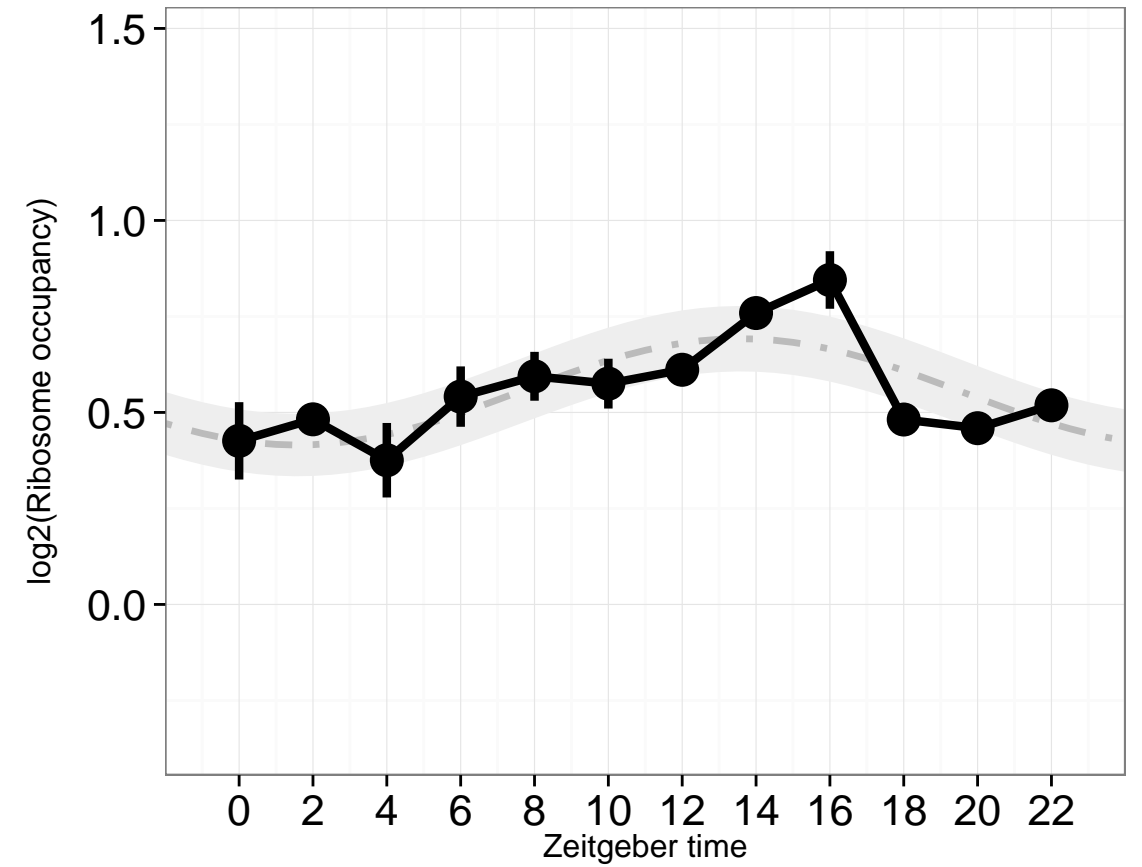

Supplement: Supplementary file 3813 [file 1]

## Ube4a

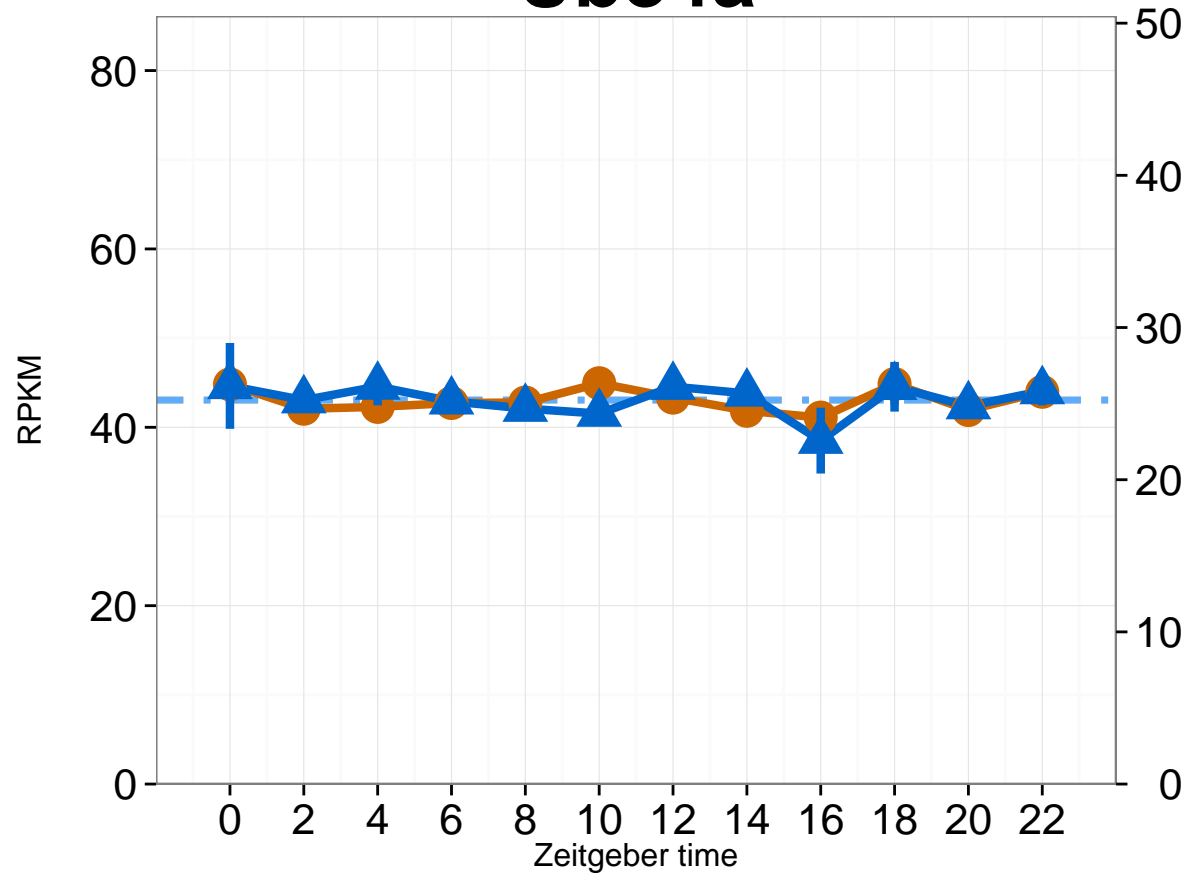

## Ube4a

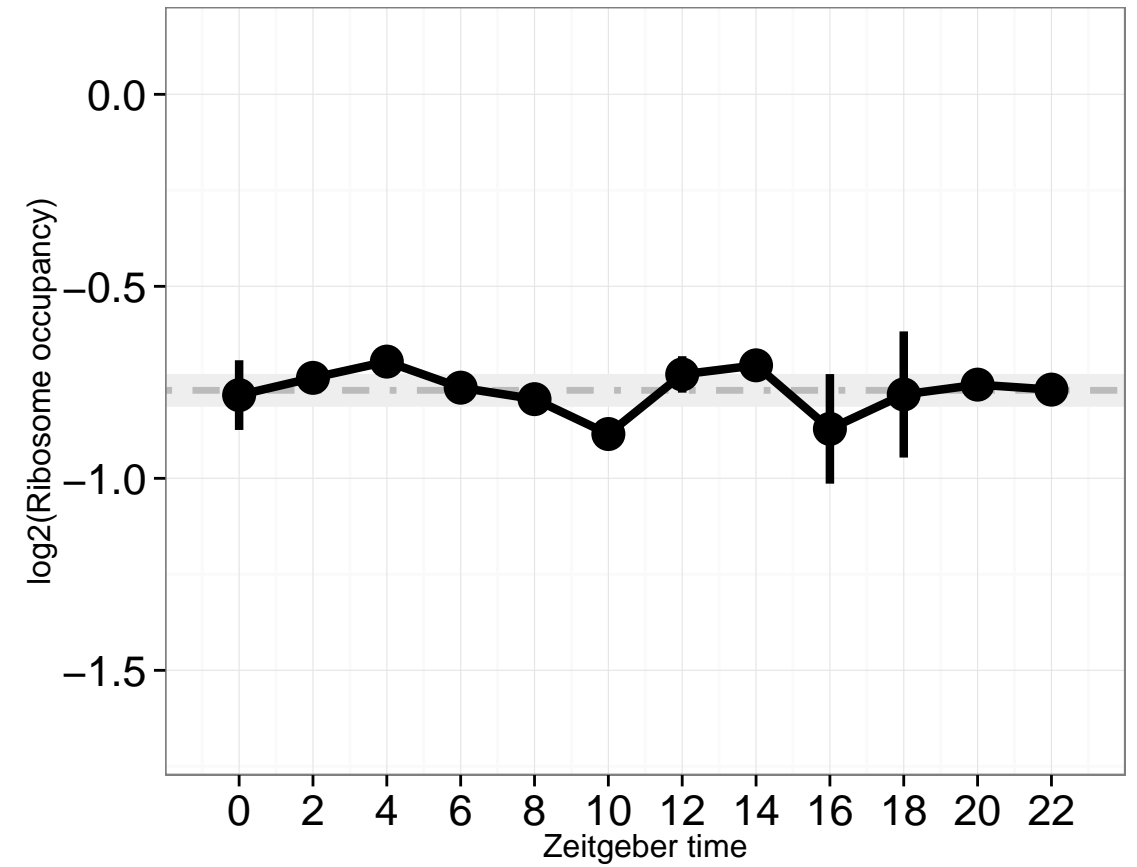

Supplement: Supplementary file 3814 [file 1]

# Itfg1

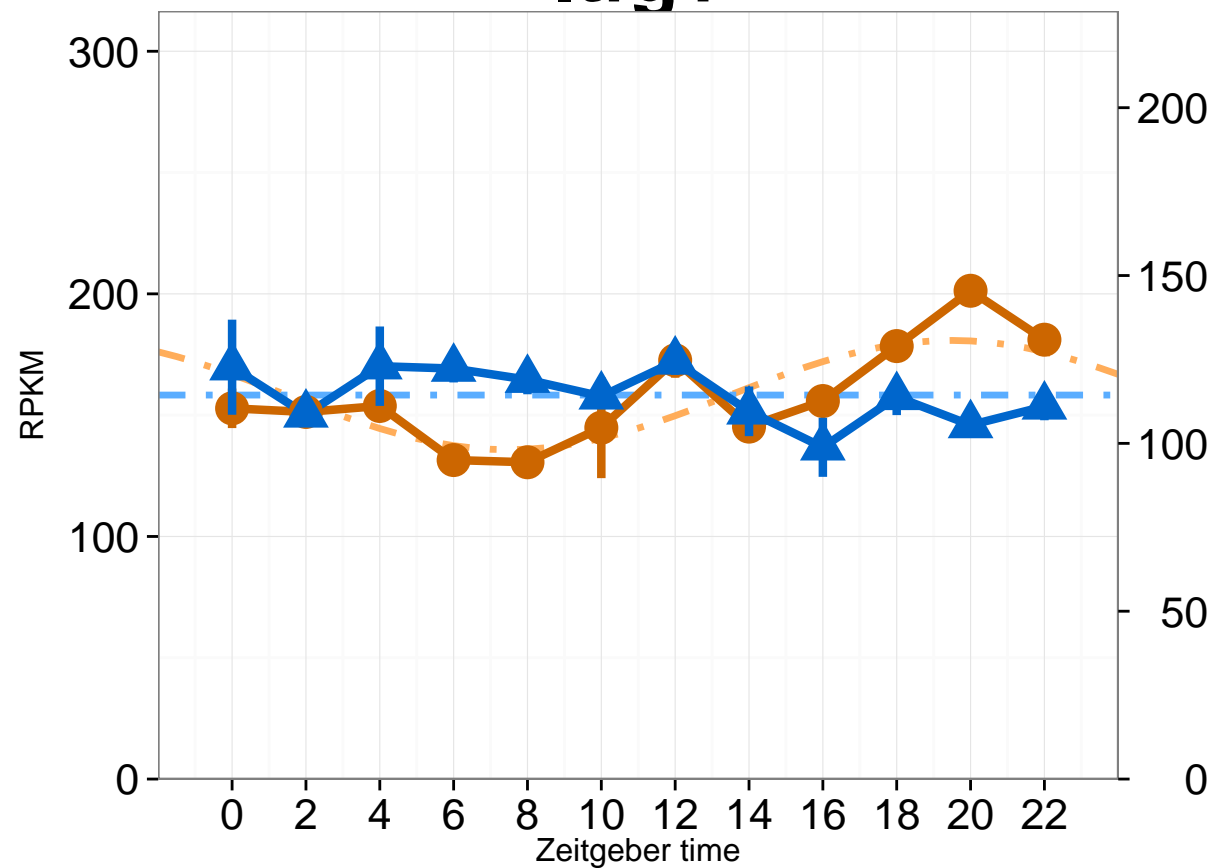

# Itfg1

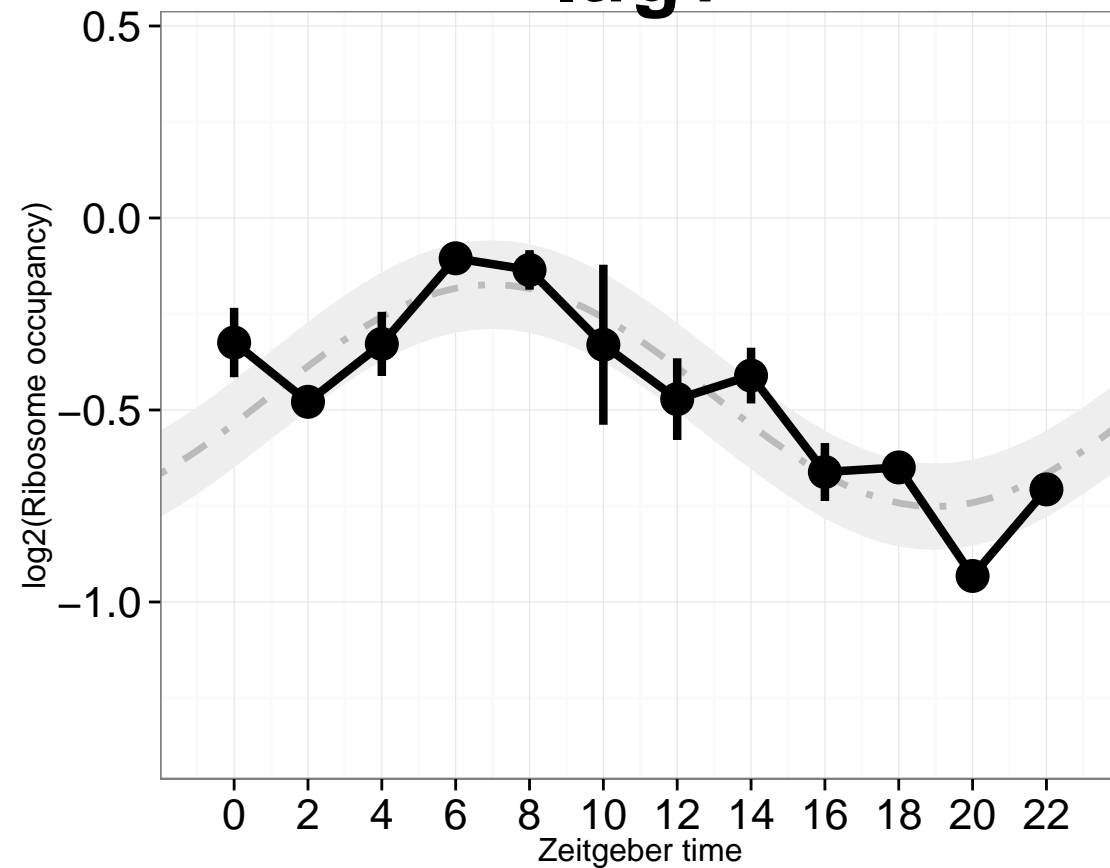

Supplement: Supplementary file 3815 [file 1]
