# Supplementary material (part 39 of 133)
Source: publisher figshare collection journal article supplement (https://springernature.figshare.com/articles/dataset/_/4903193)

# Tubb4b

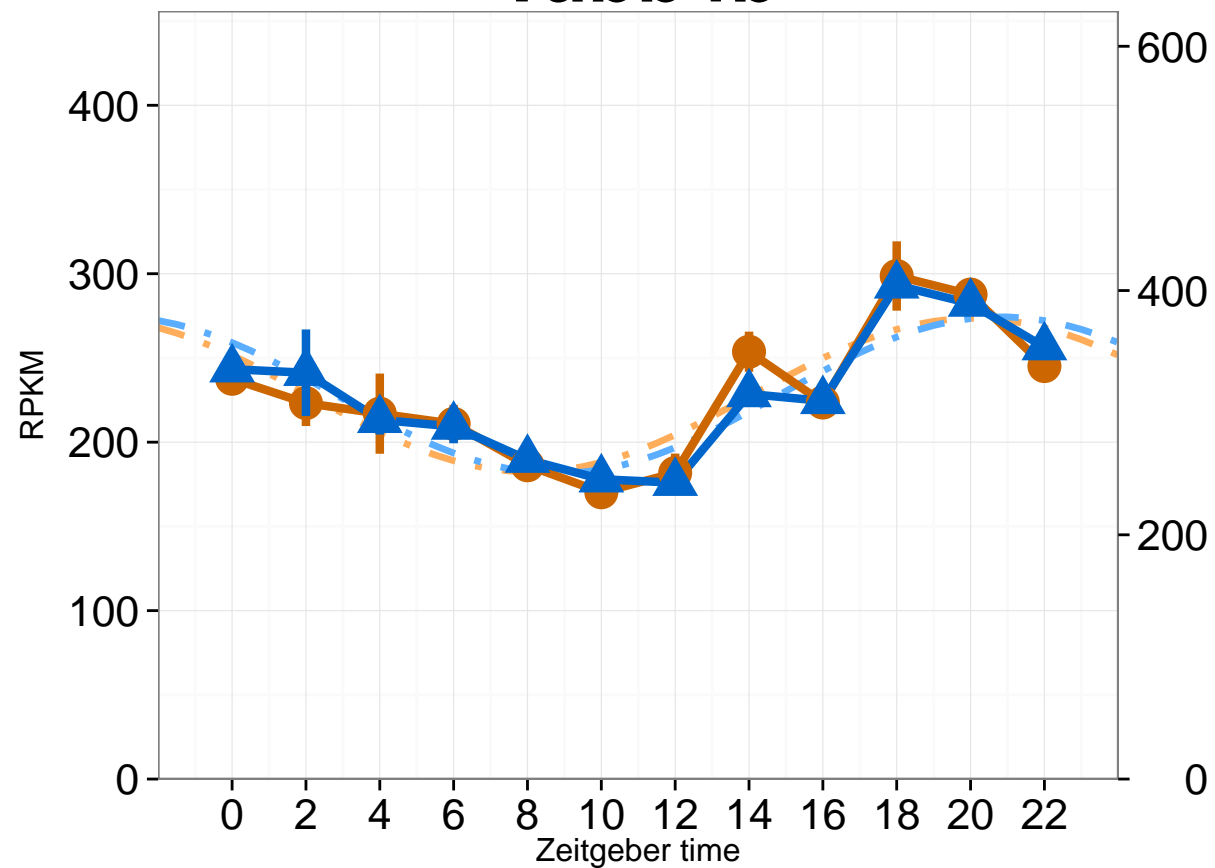

# Tubb4b

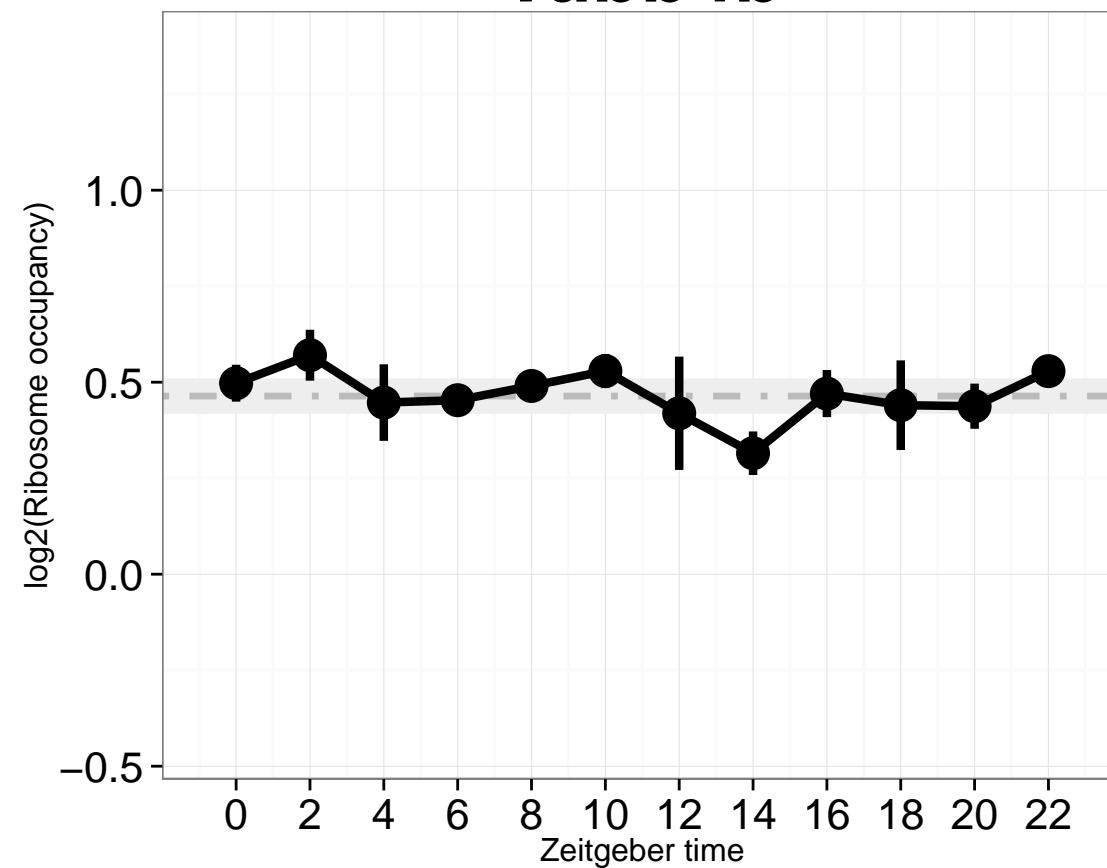

Supplement: Supplementary file 3816 [file 1]

**Lgals12 TR**

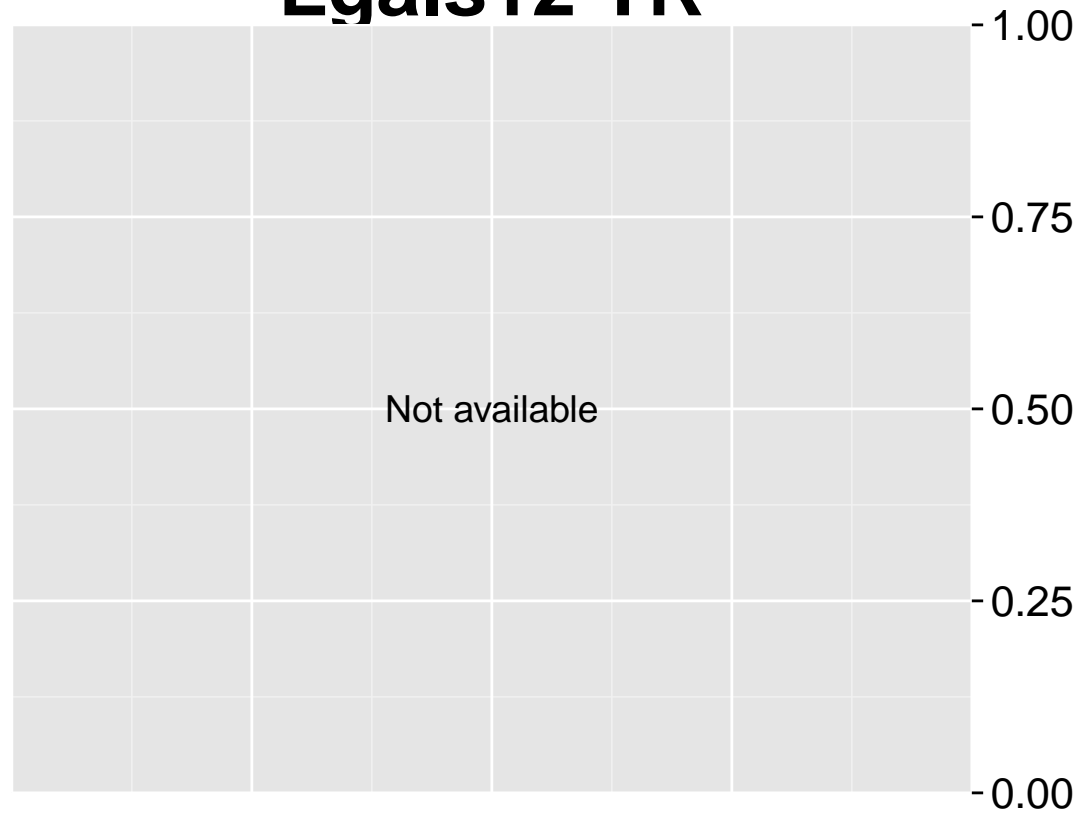

**Lgals12 log2(Ribosome occupancy**

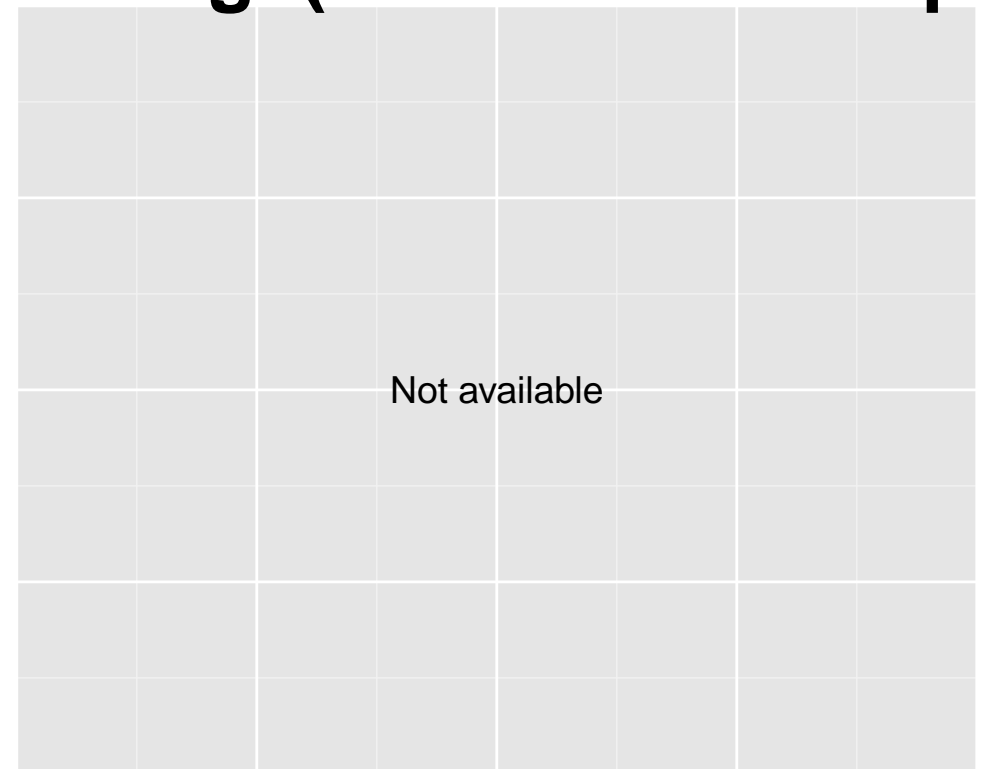

Supplement: Supplementary file 3817 [file 1]

# Mrps25

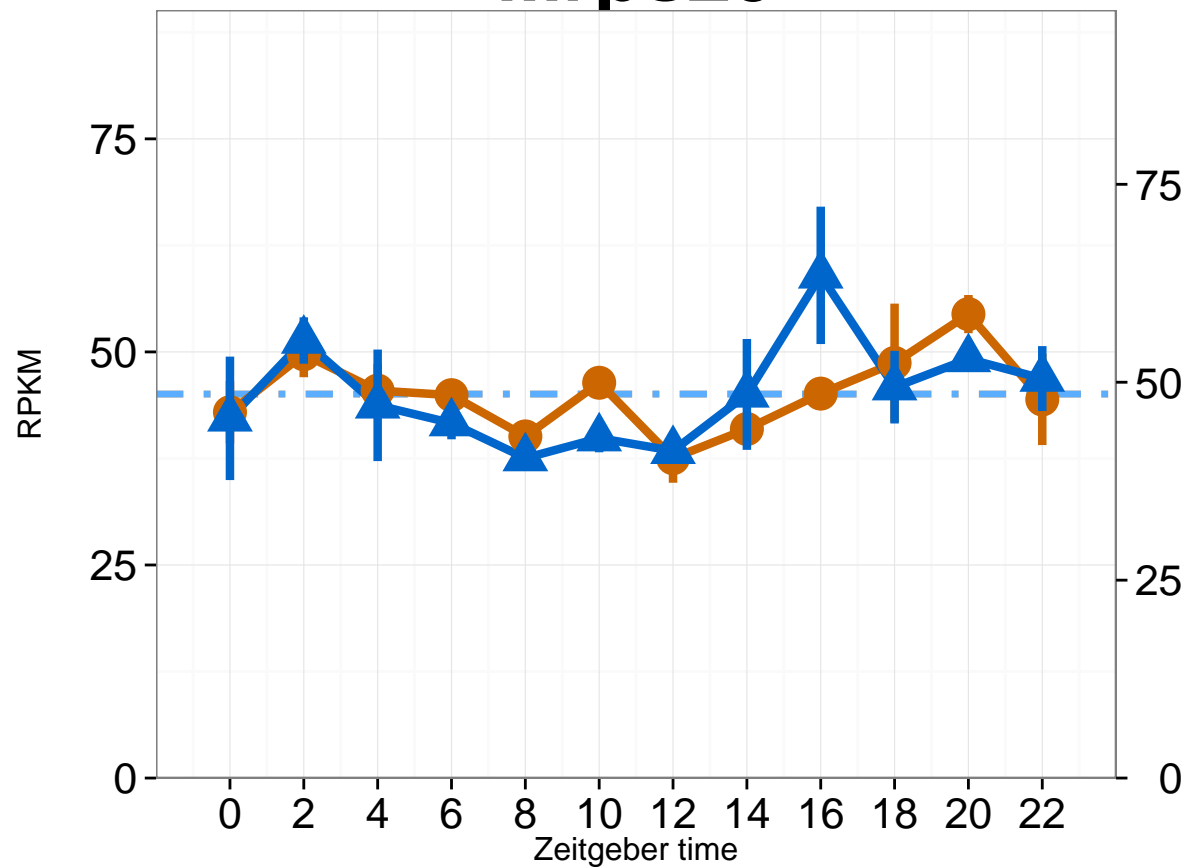

# Mrps25

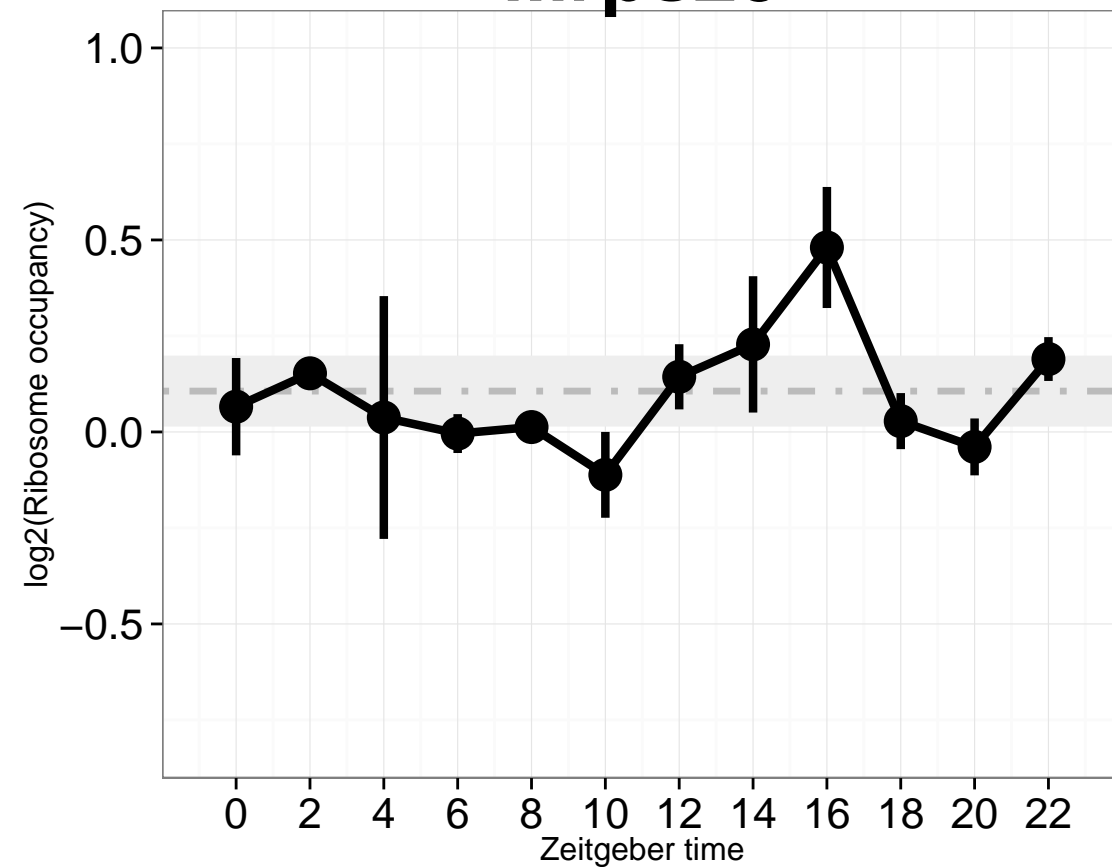

Supplement: Supplementary file 3818 [file 1]

# Zfp37

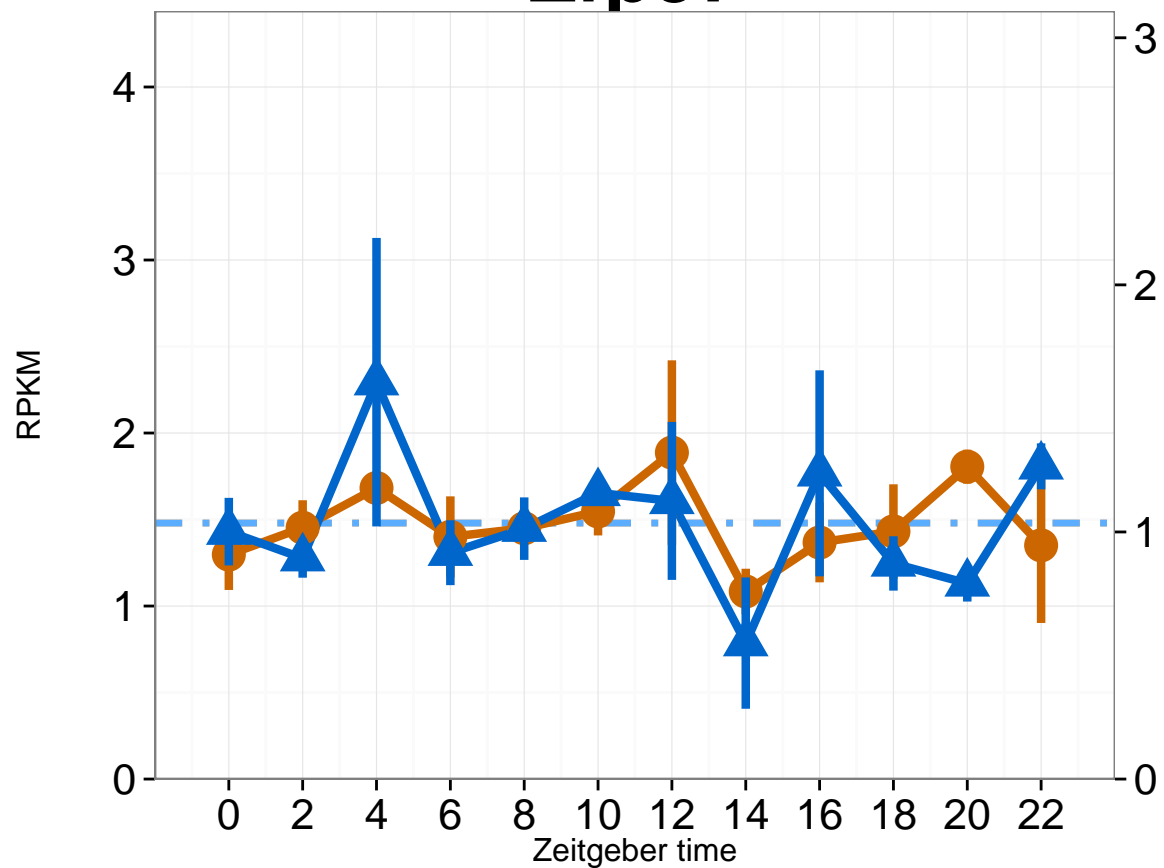

# Zfp37

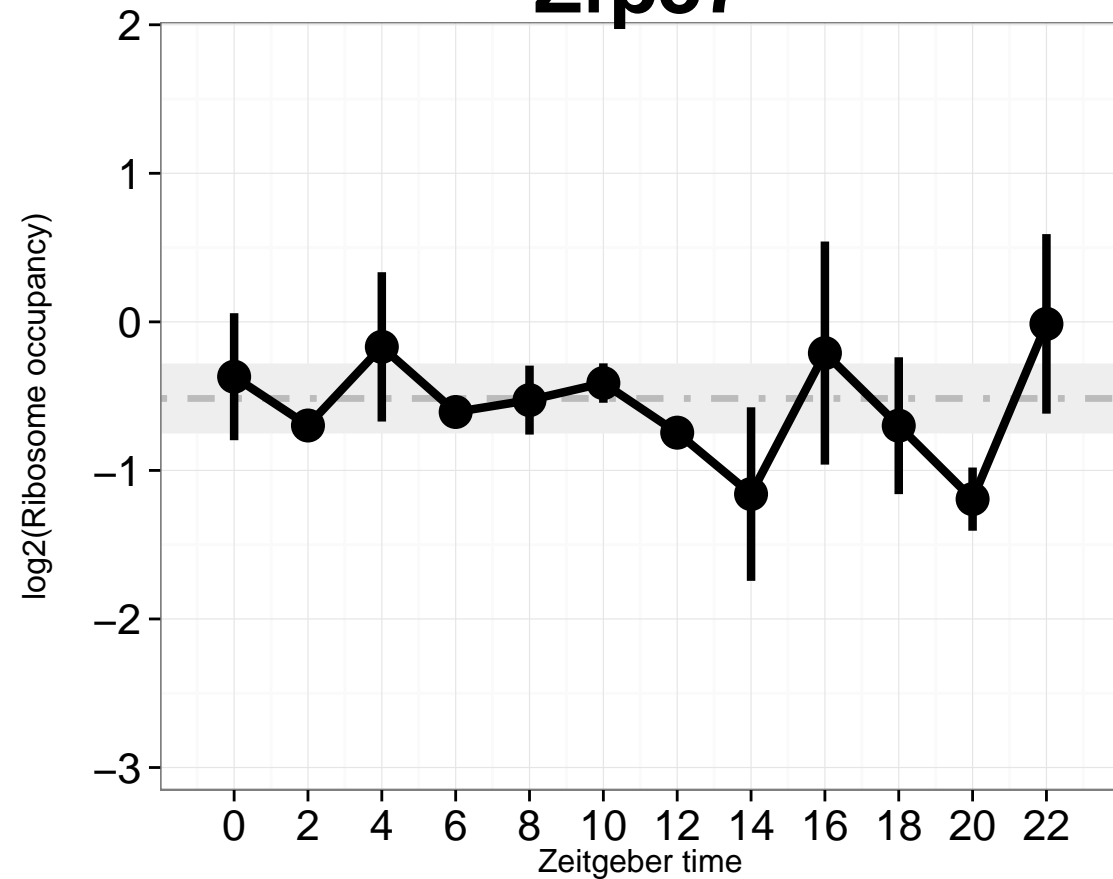

Supplement: Supplementary file 3819 [file 1]

## Nab2

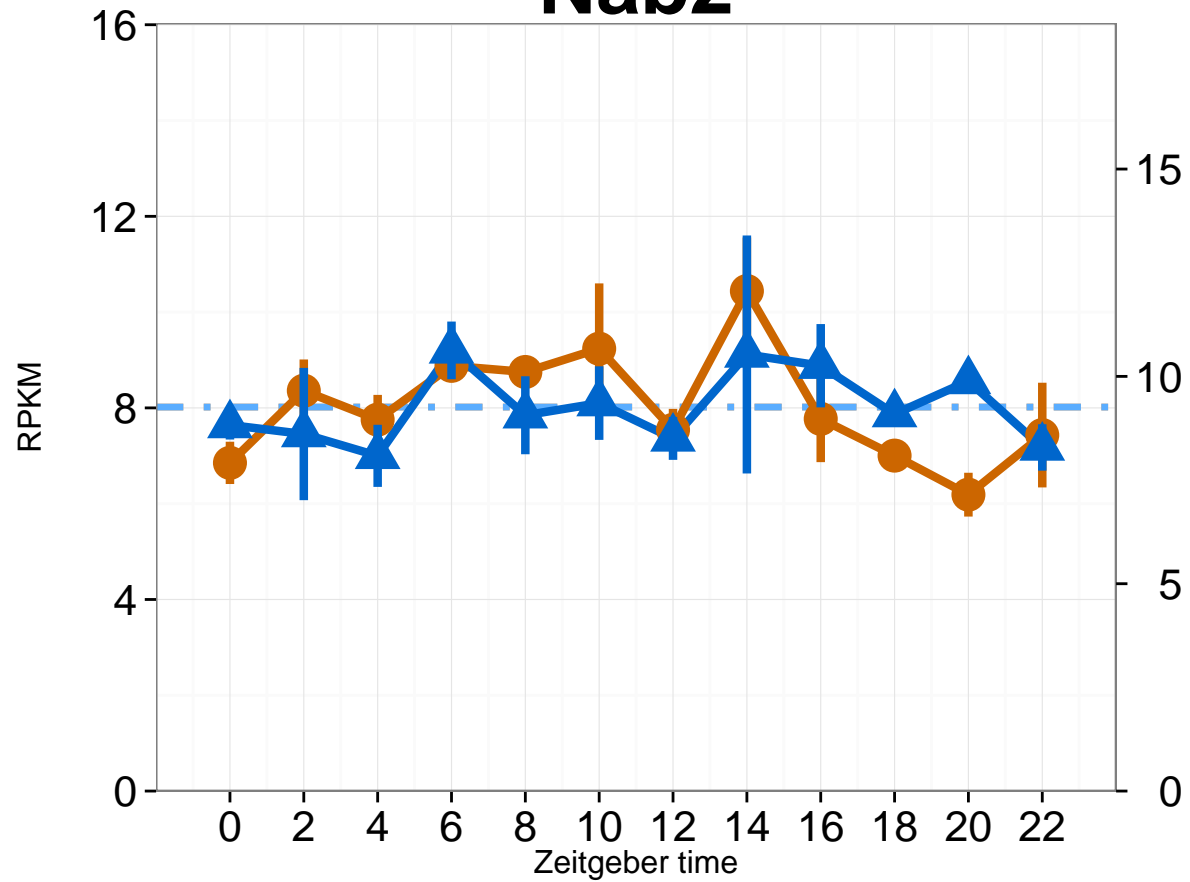

## Nab2

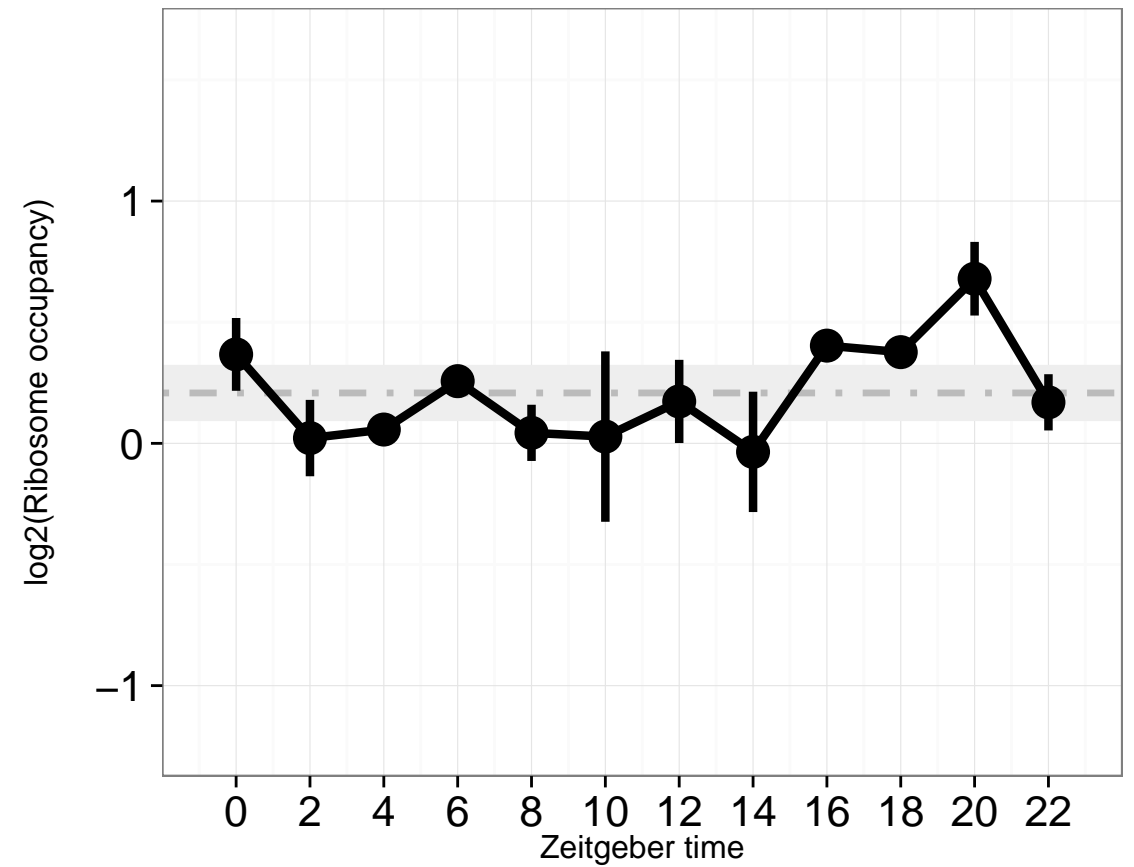

Supplement: Supplementary file 3820 [file 1]

## Grhpr

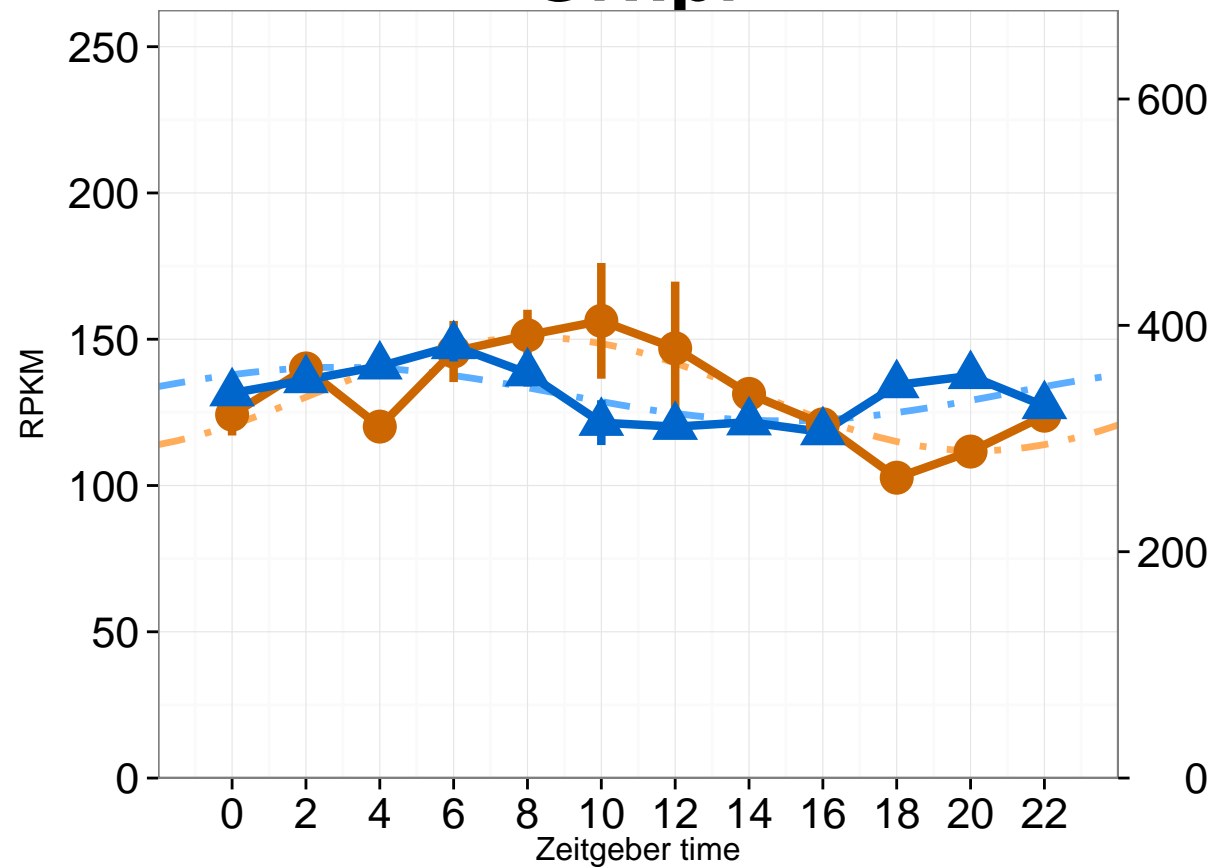

## Grhpr

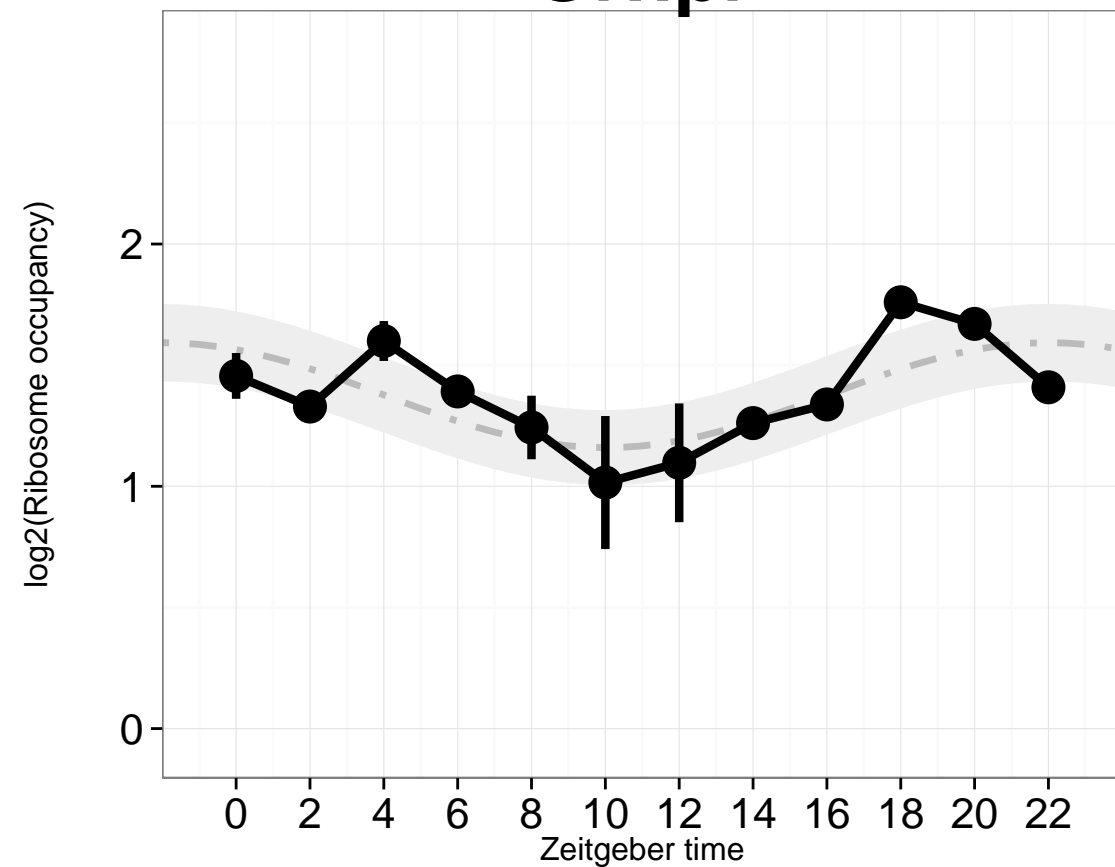

Supplement: Supplementary file 3821 [file 1]

## Sobp

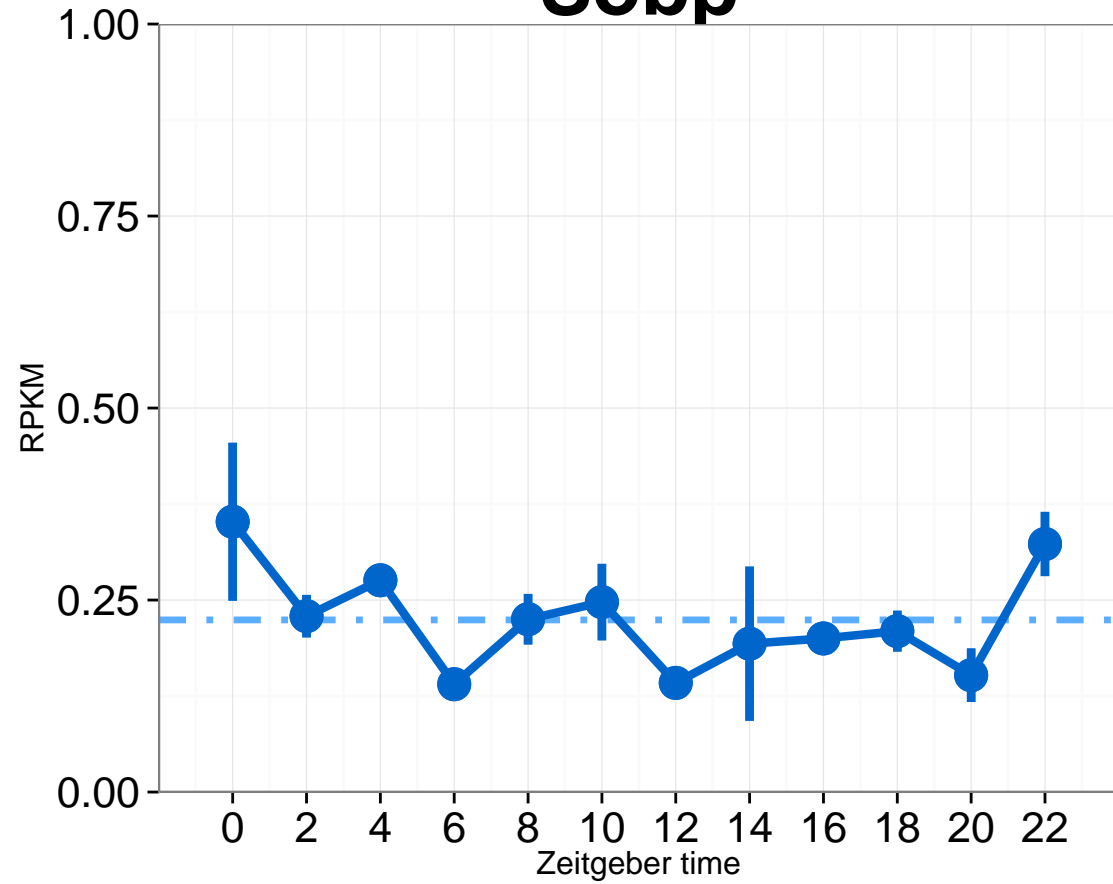

## Sobp log2(Ribosome occupancy)

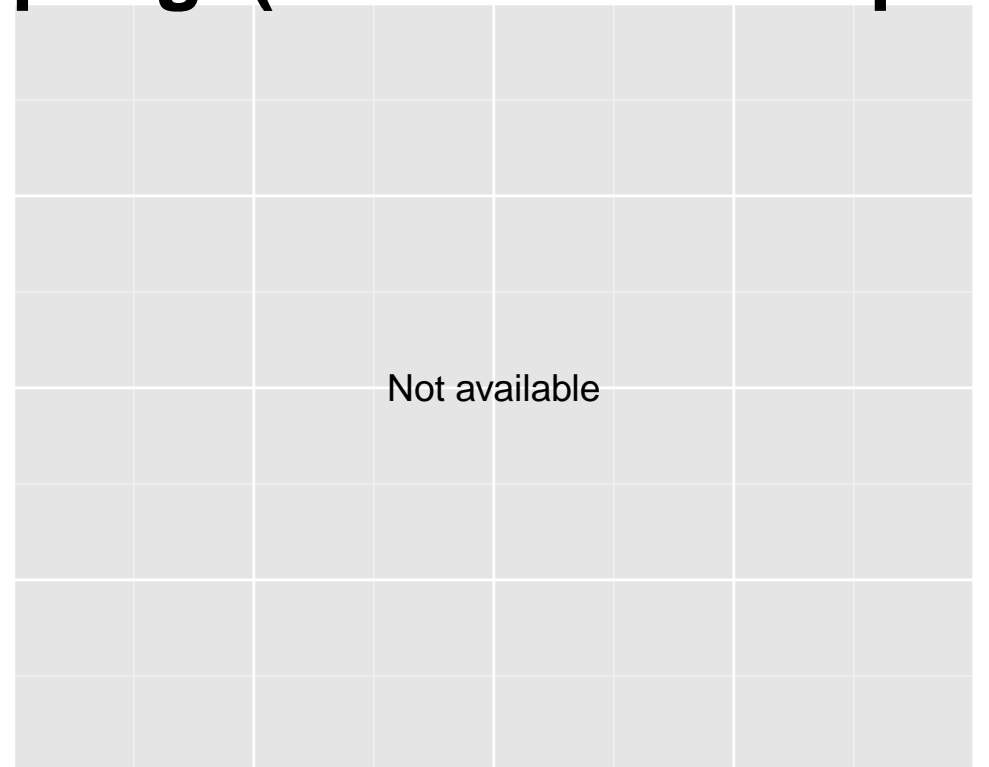

Supplement: Supplementary file 3822 [file 1]

# Synm

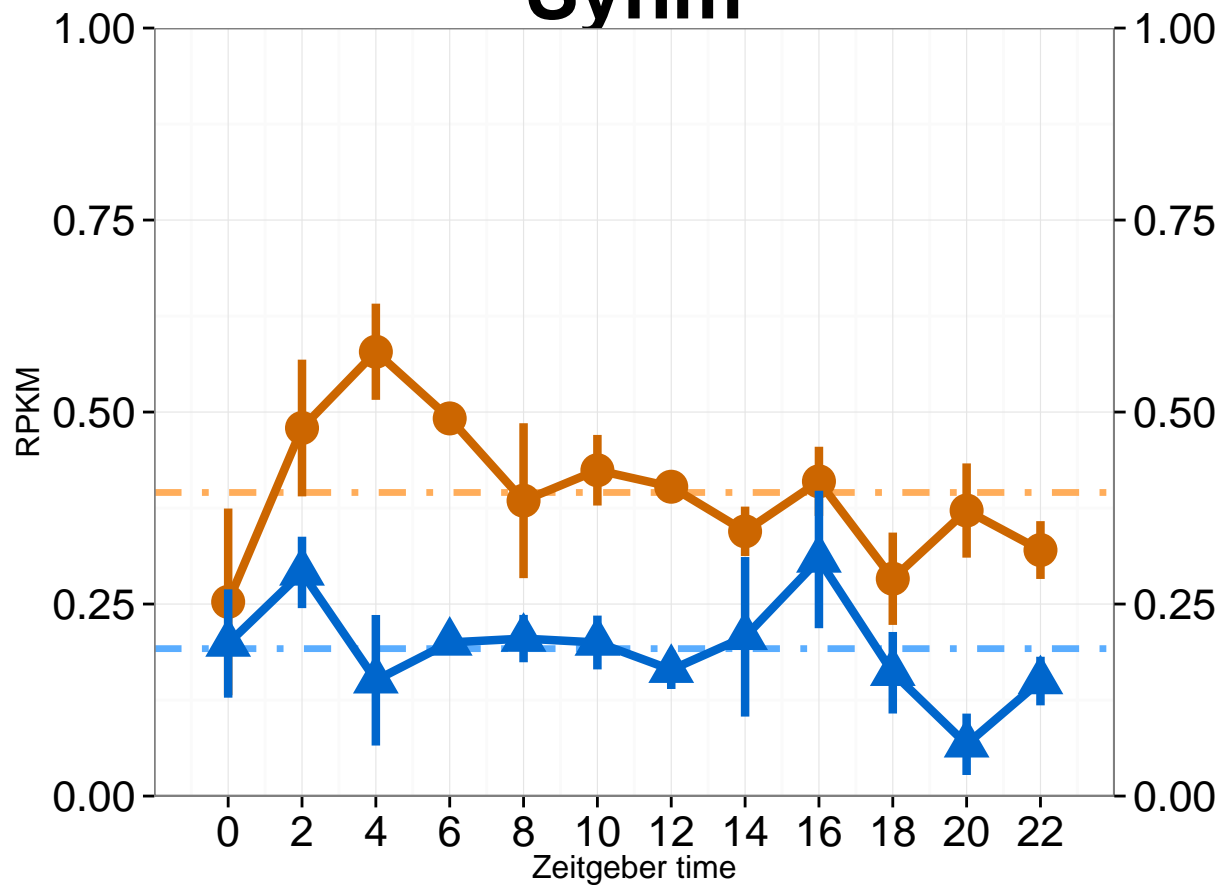

# Synm

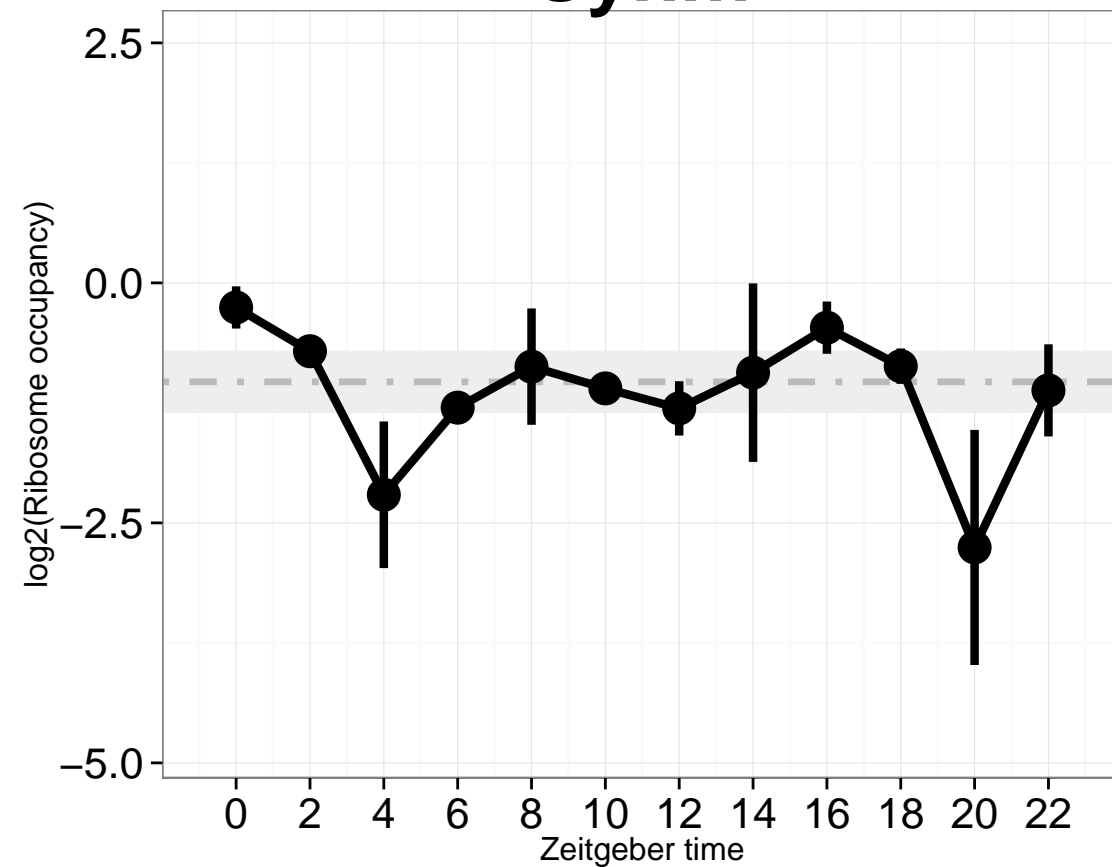

Supplement: Supplementary file 3823 [file 1]

**Sema4b**

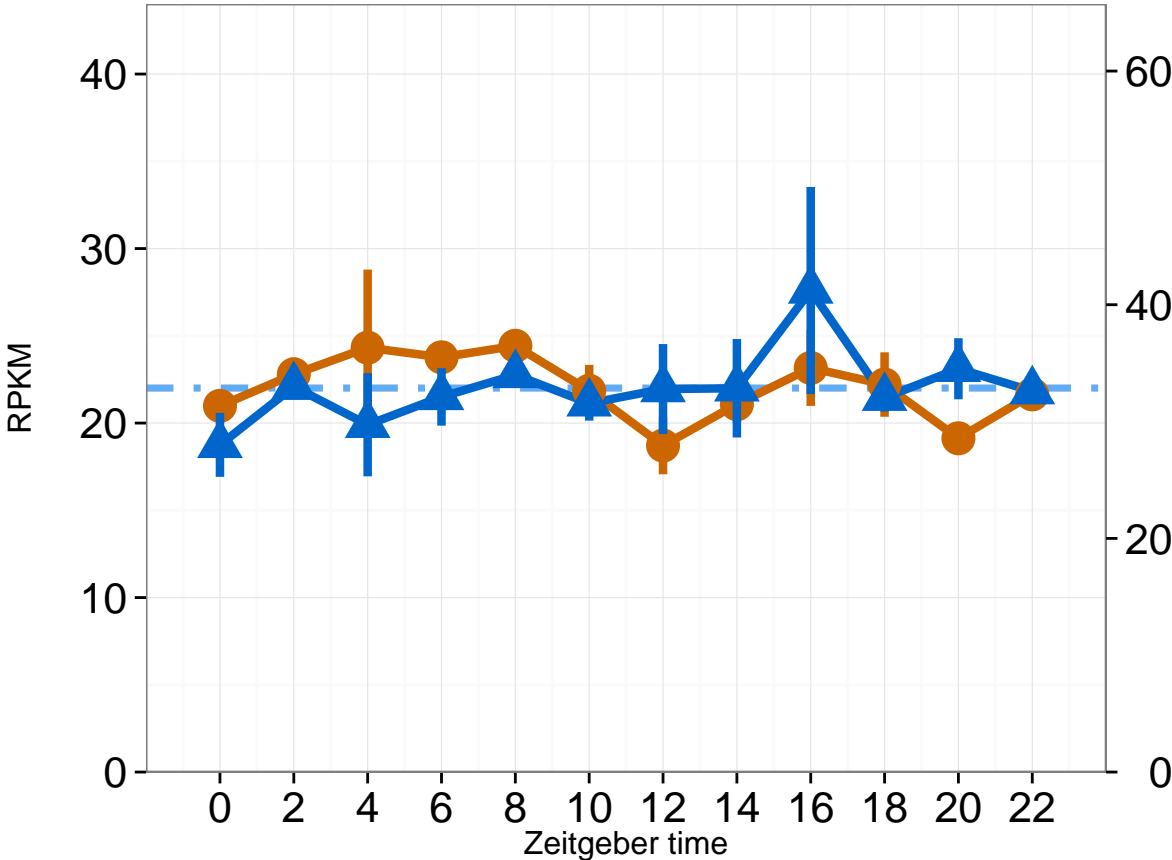

**Sema4b**

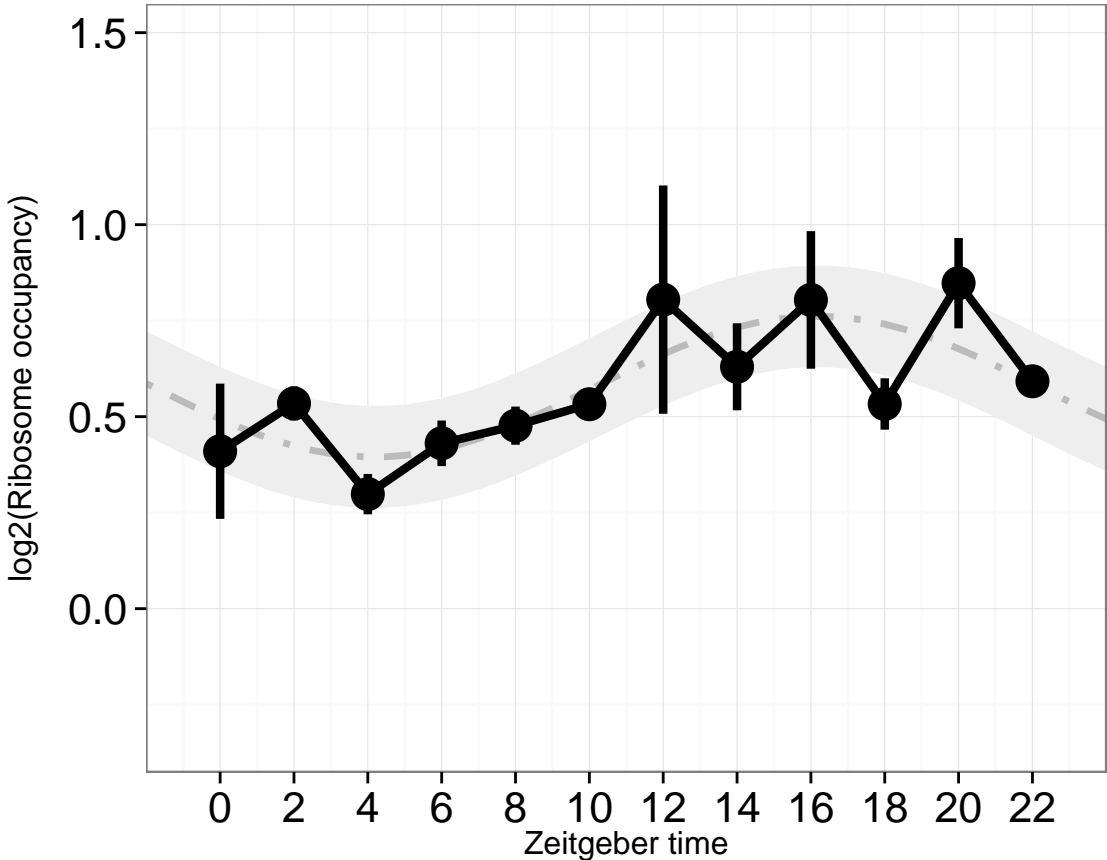

Supplement: Supplementary file 3824 [file 1]

# Ept1

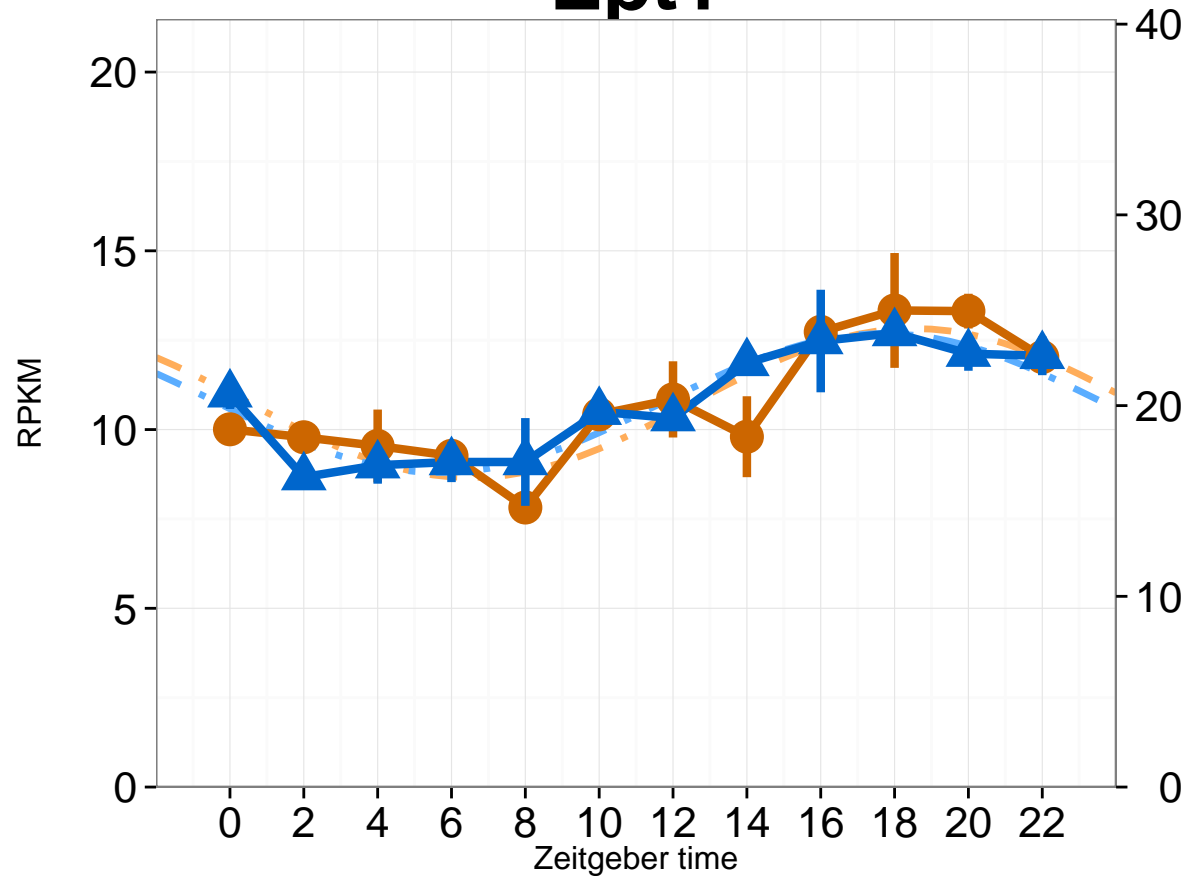

# Ept1

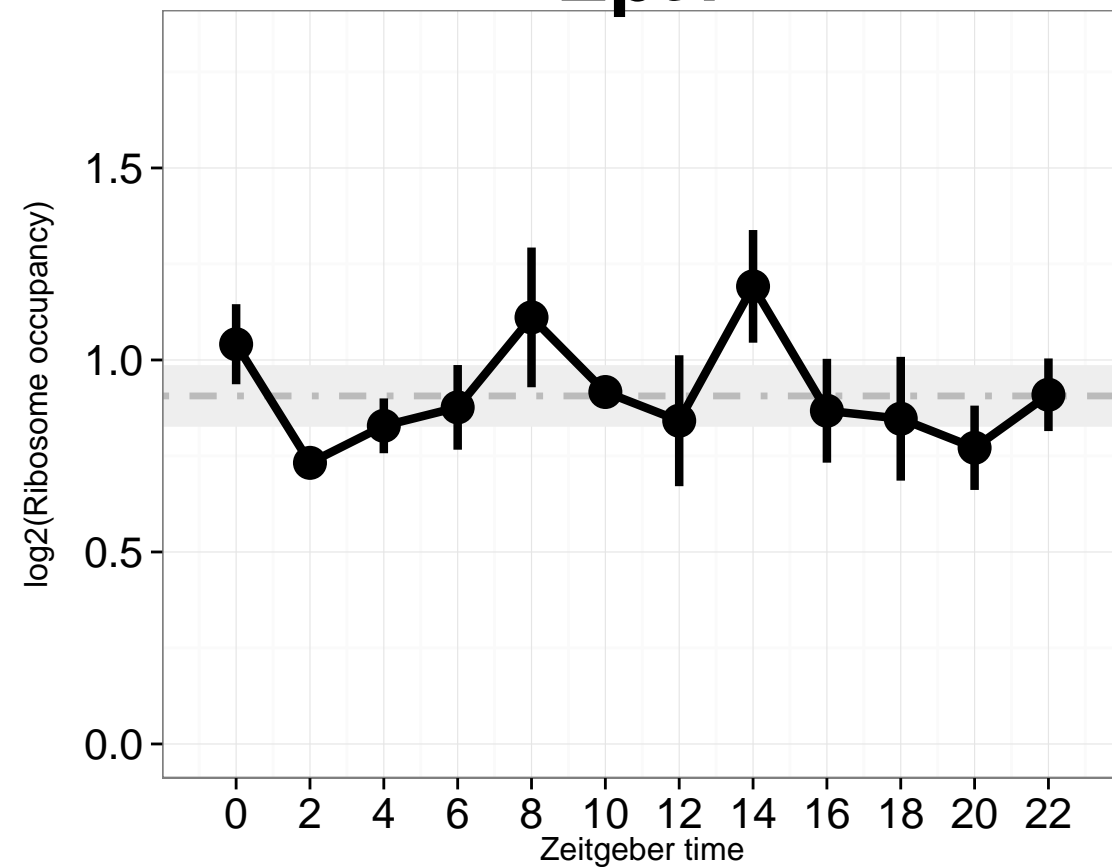

Supplement: Supplementary file 3825 [file 1]

## Cpd

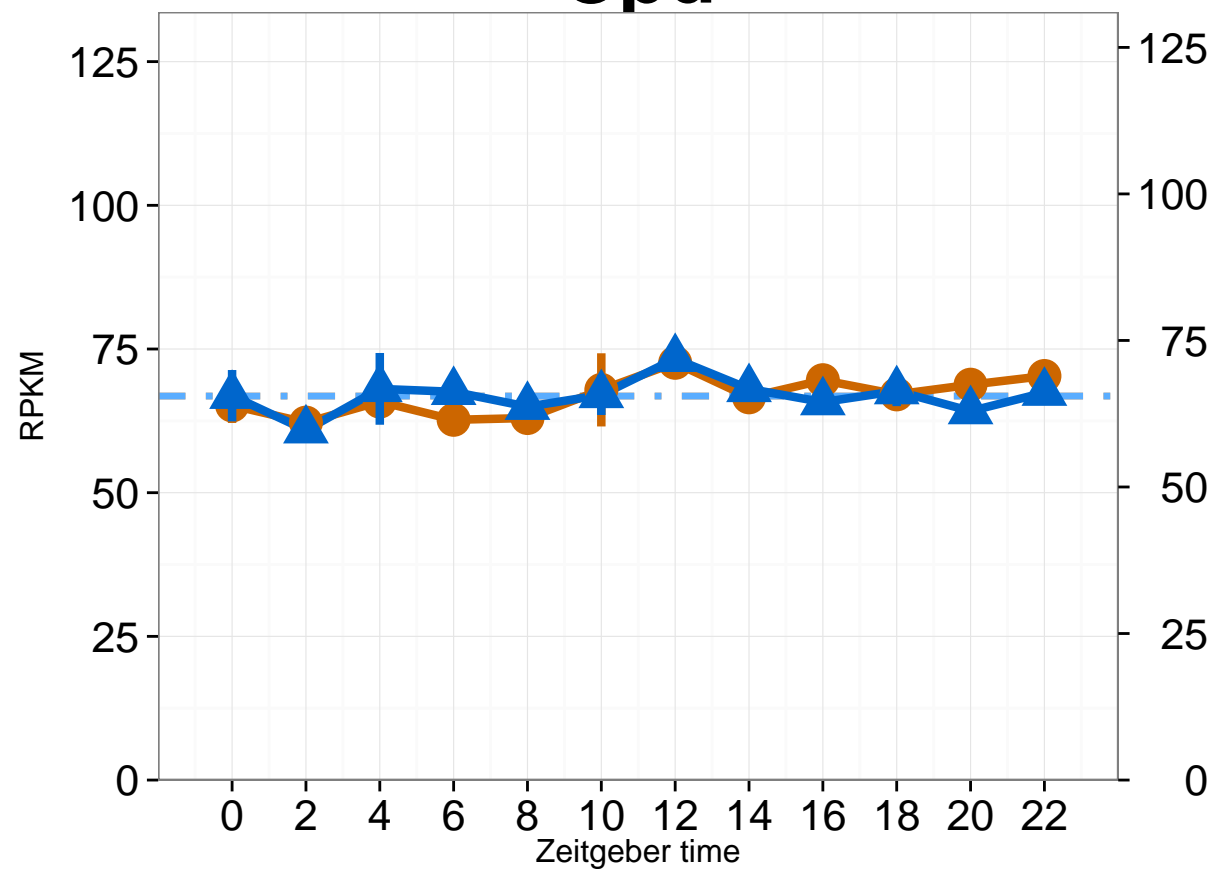

## Cpd

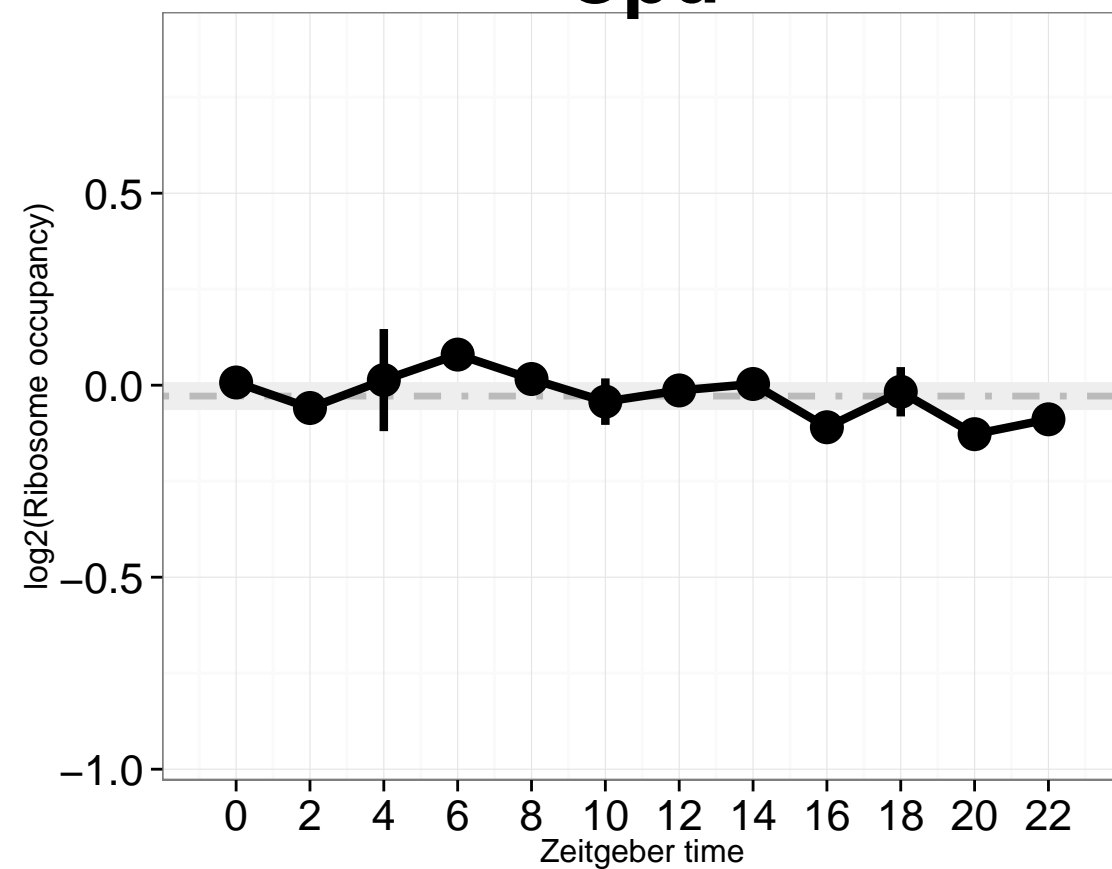

Supplement: Supplementary file 3826 [file 1]

# Ano5

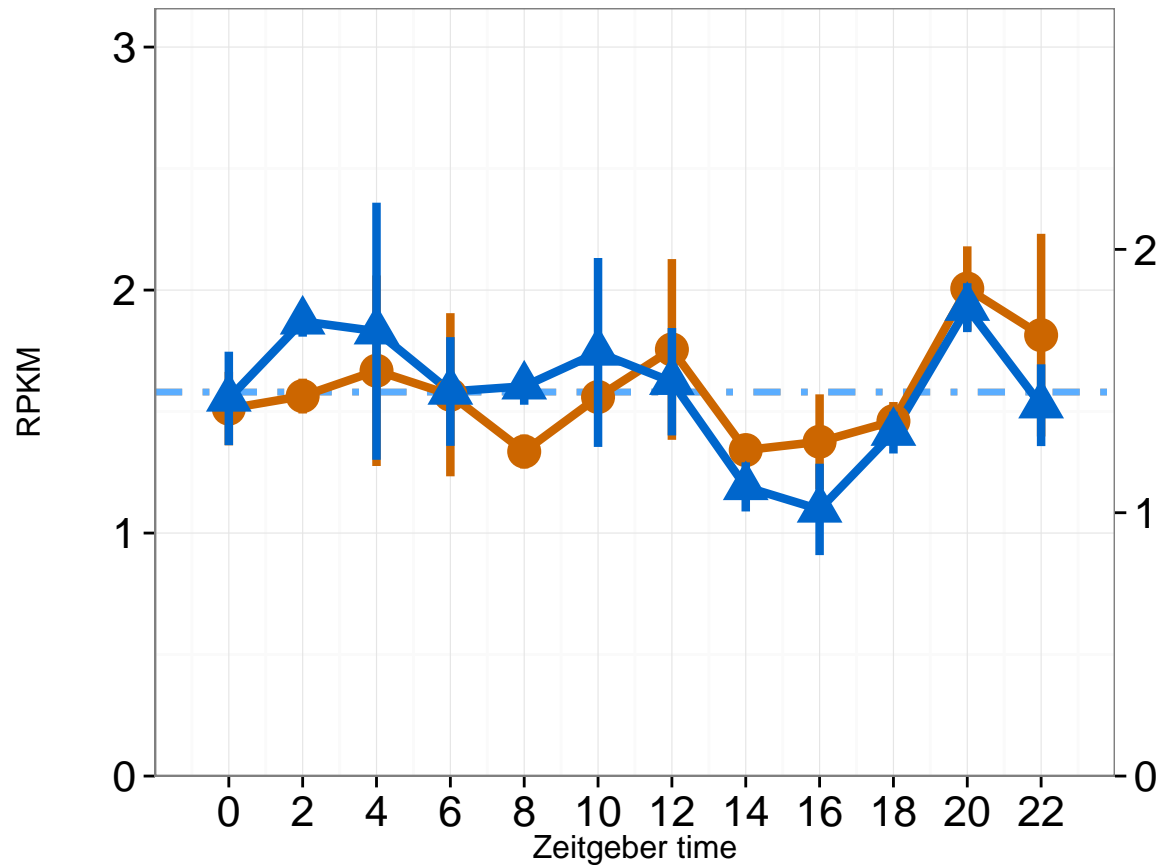

# Ano5

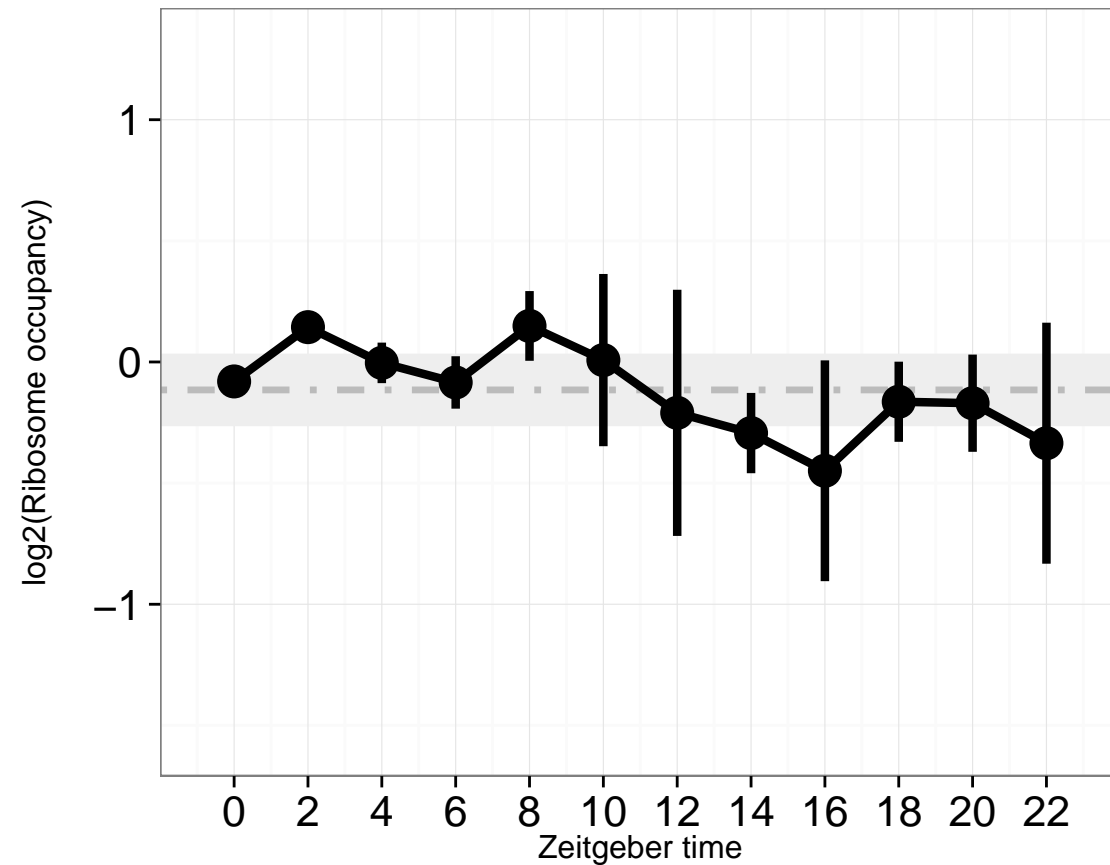

Supplement: Supplementary file 3827 [file 1]

## Gid8

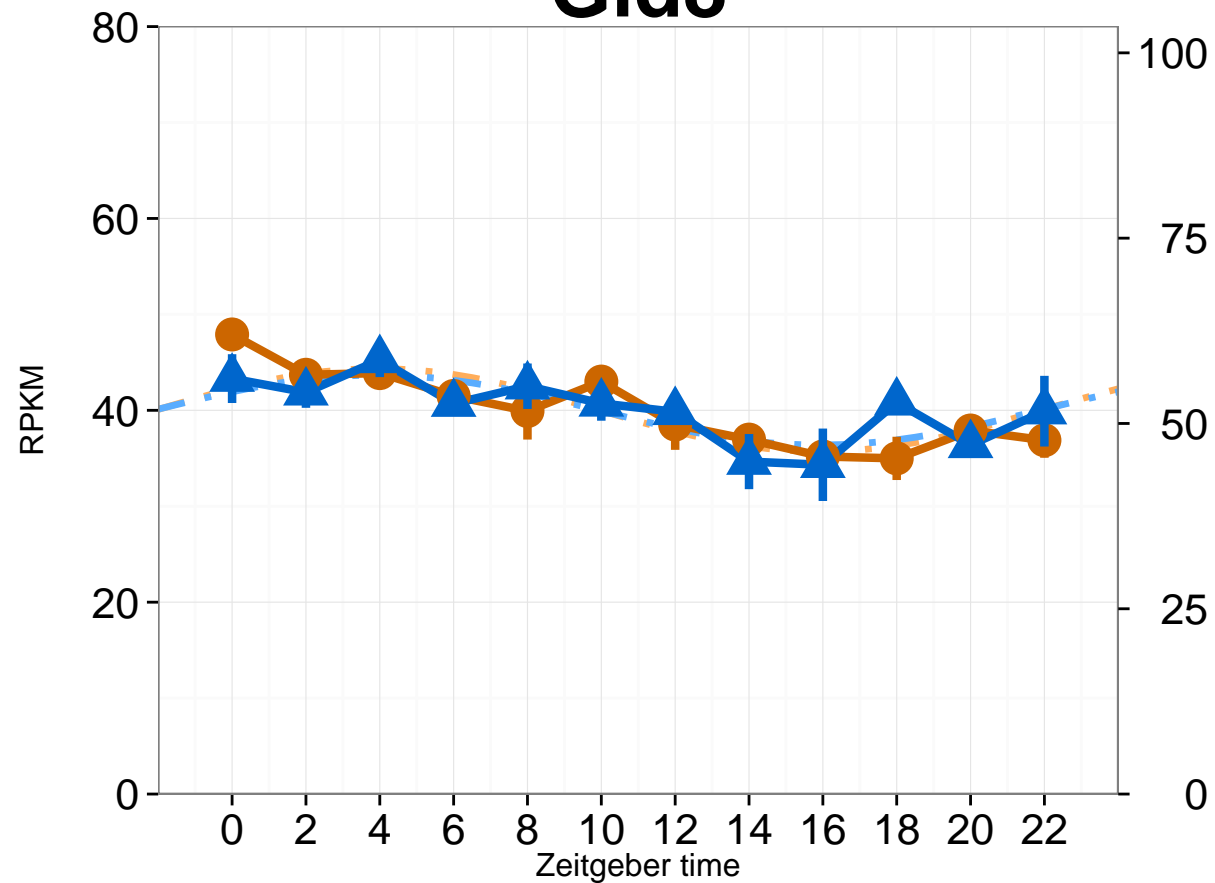

## Gid8

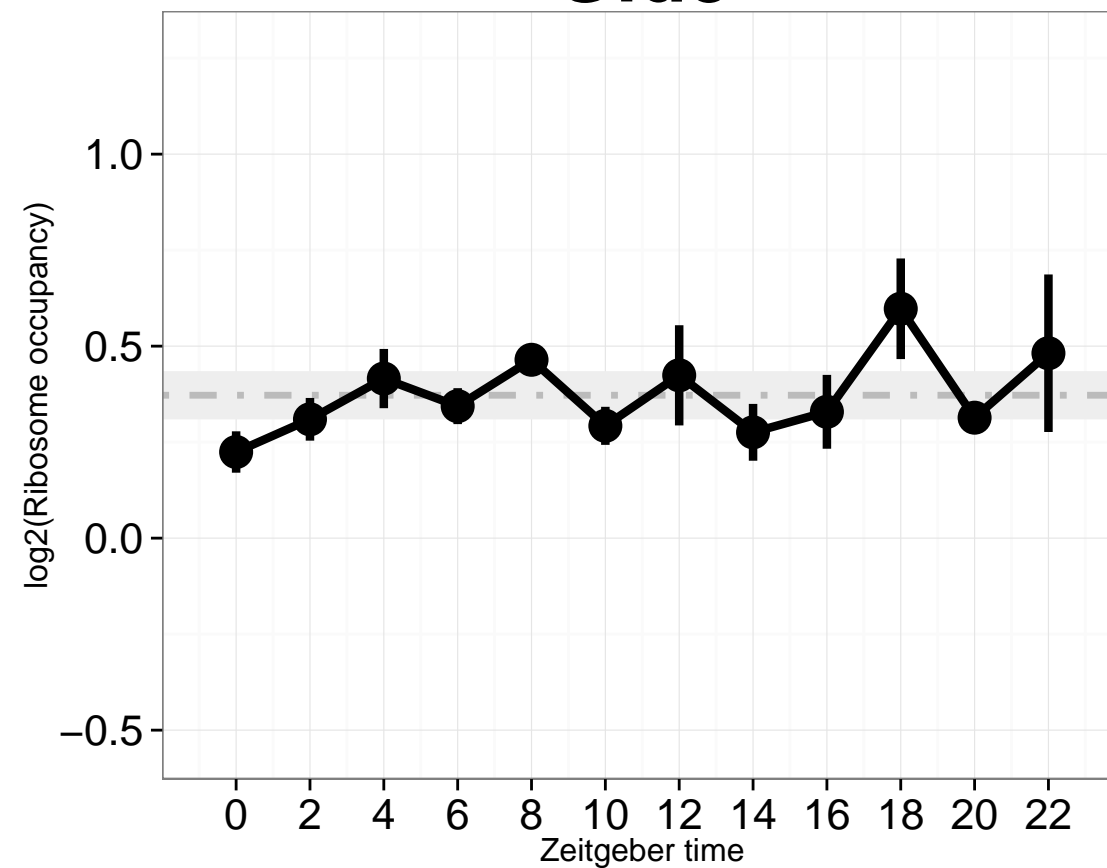

Supplement: Supplementary file 3828 [file 1]

## EmI2

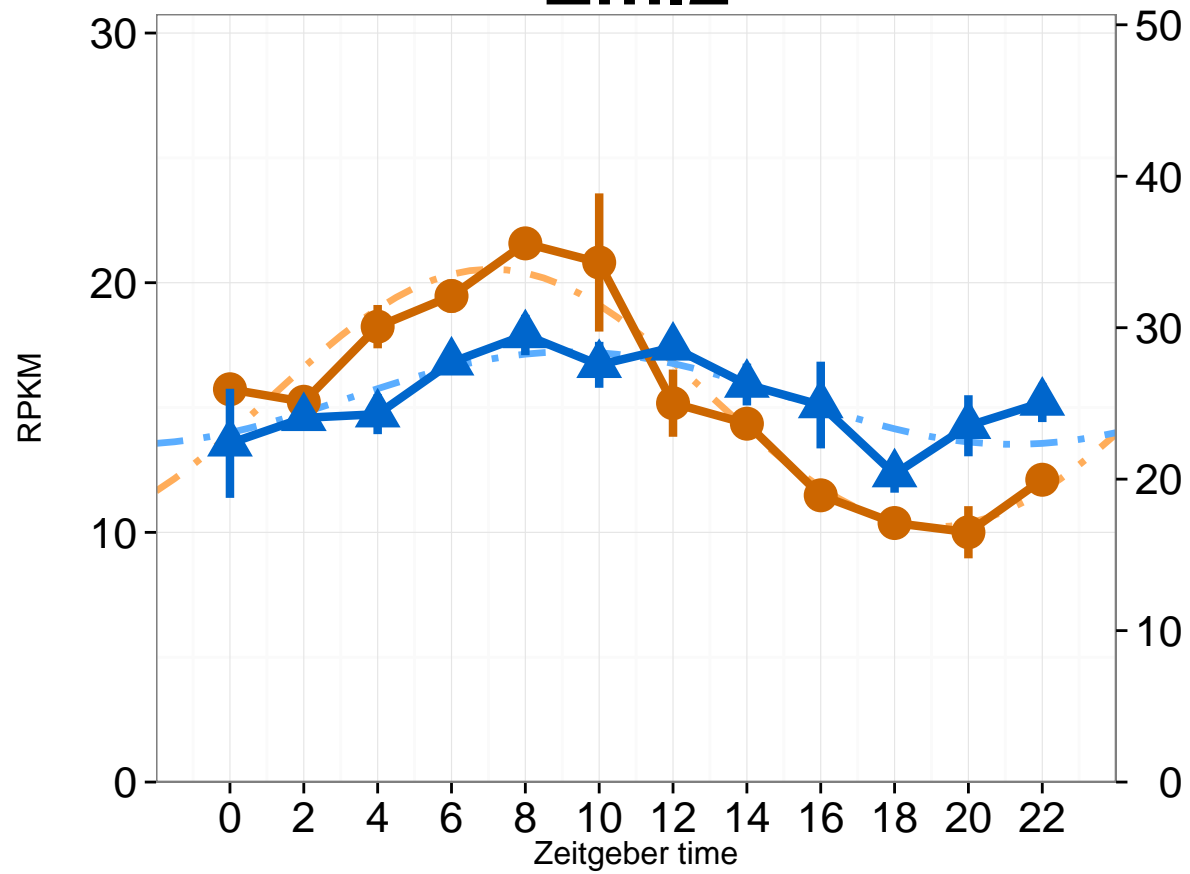

## EmI2

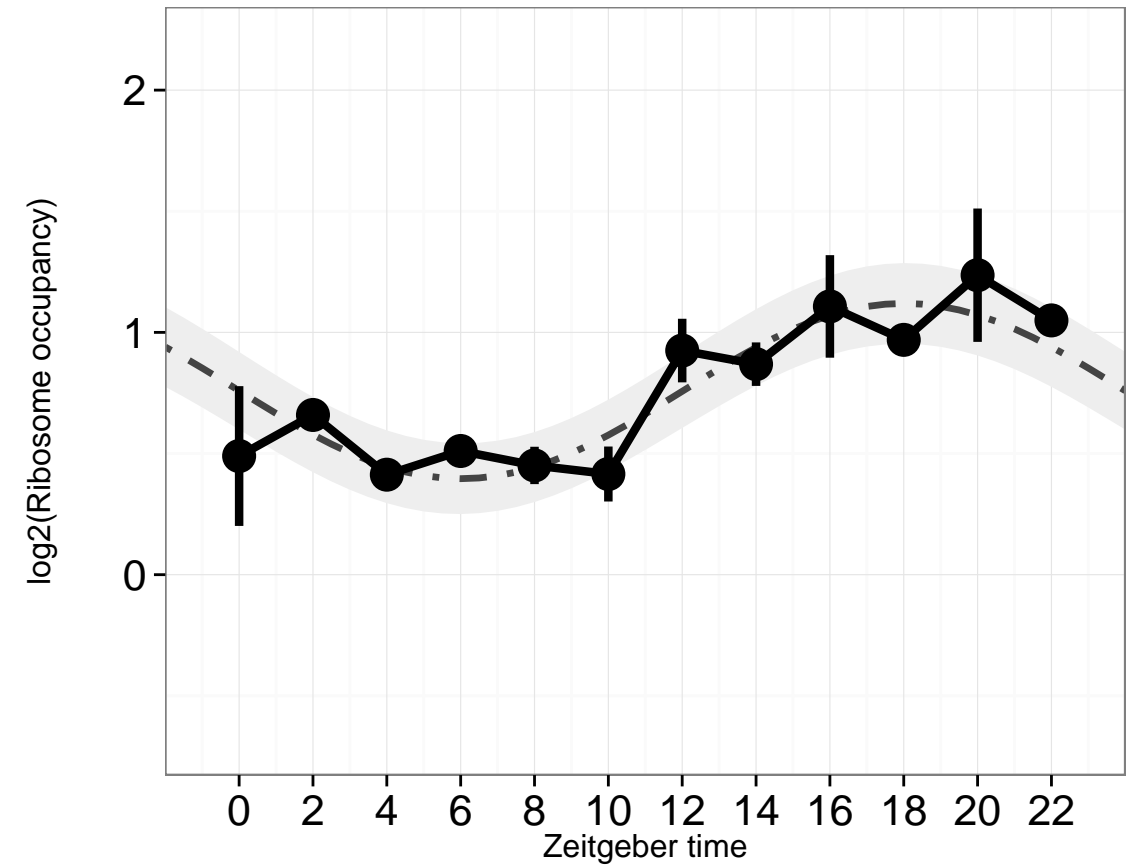

Supplement: Supplementary file 3829 [file 1]

# Rpain

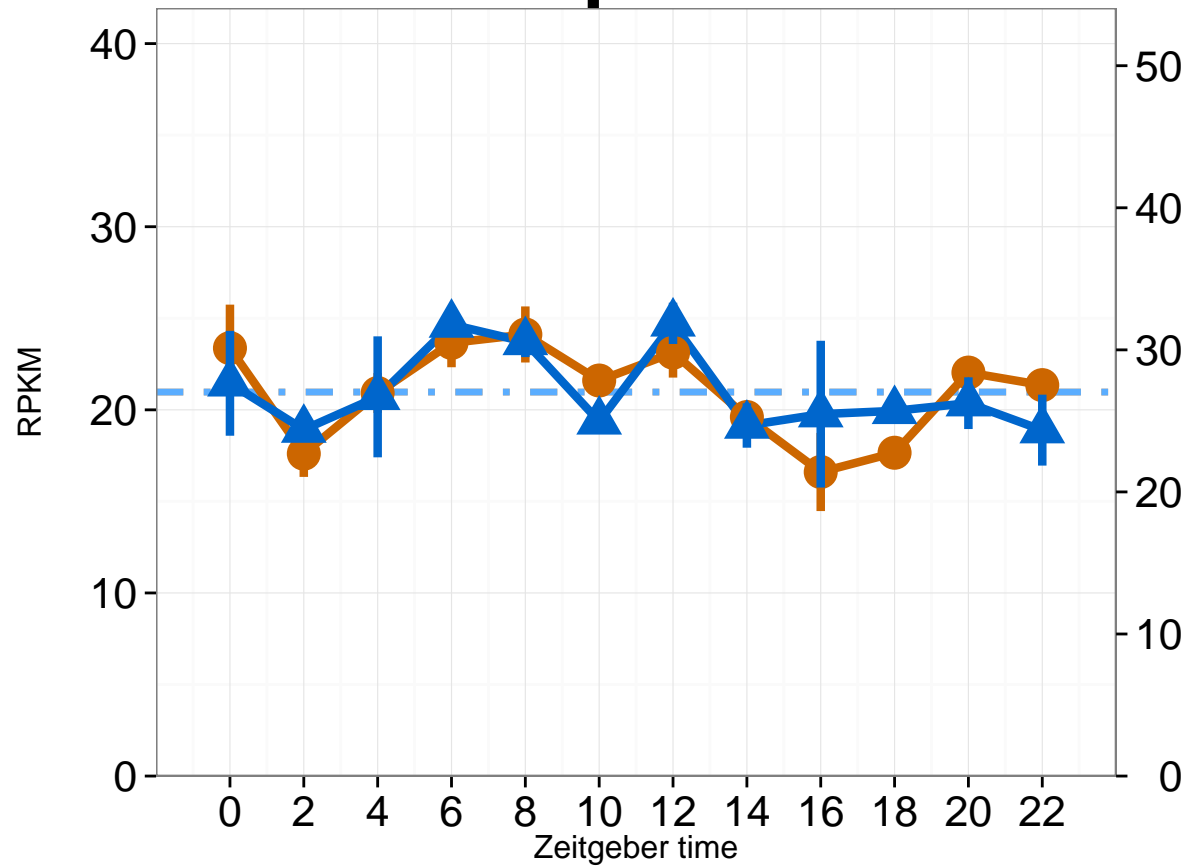

# Rpain

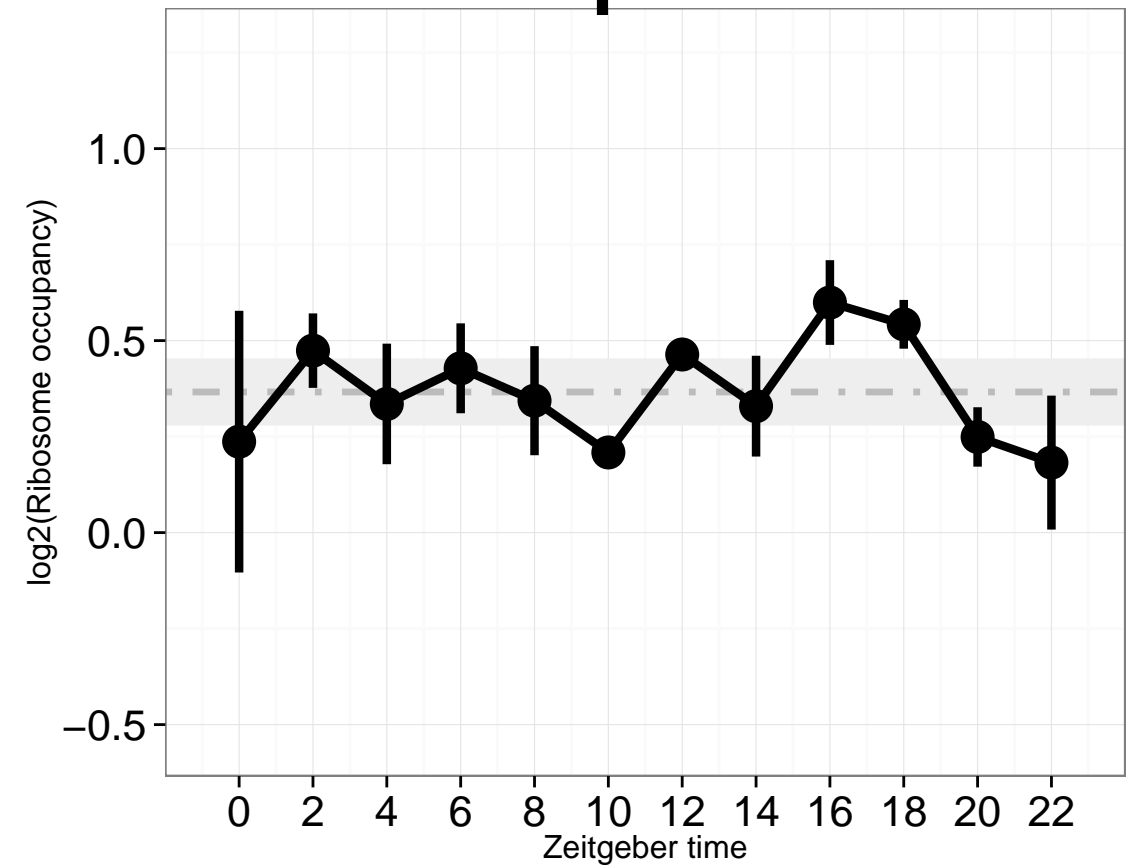

Supplement: Supplementary file 3830 [file 1]

## Orai2

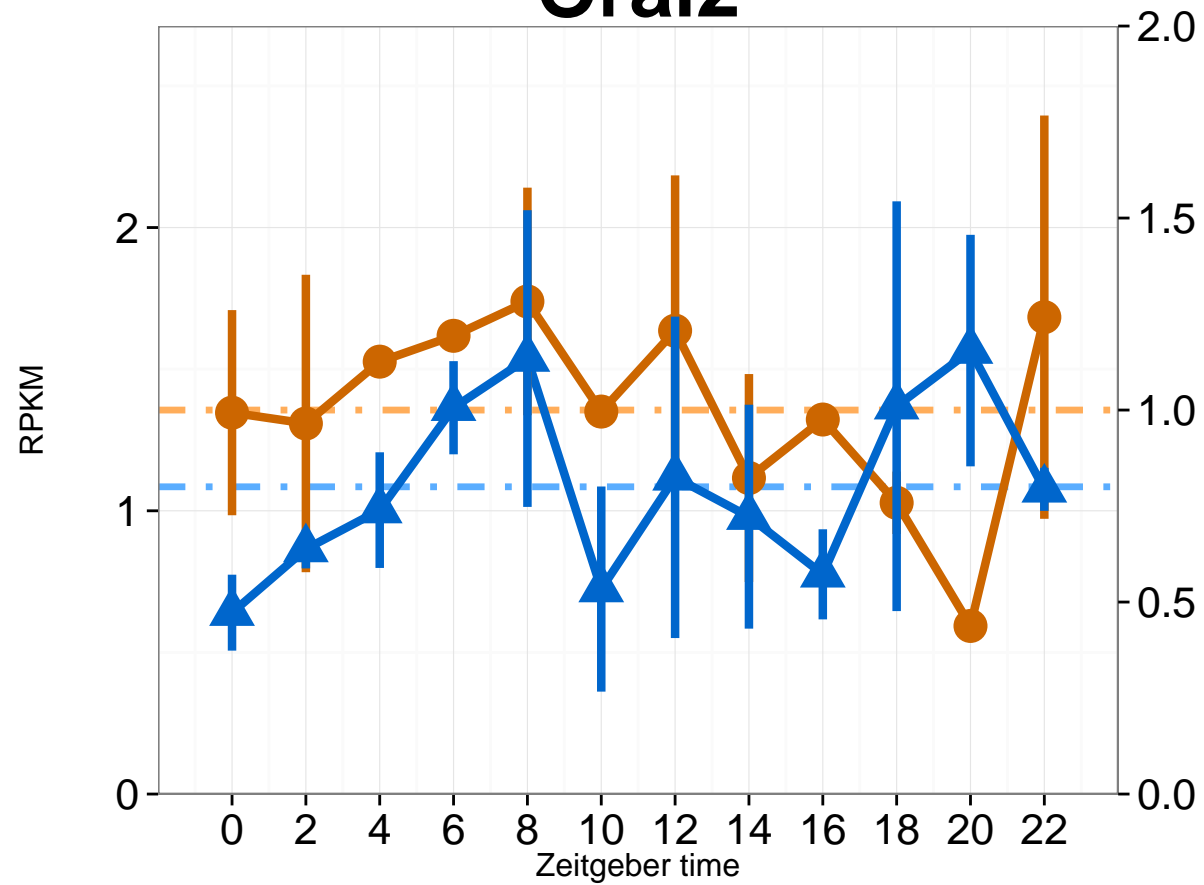

## Orai2

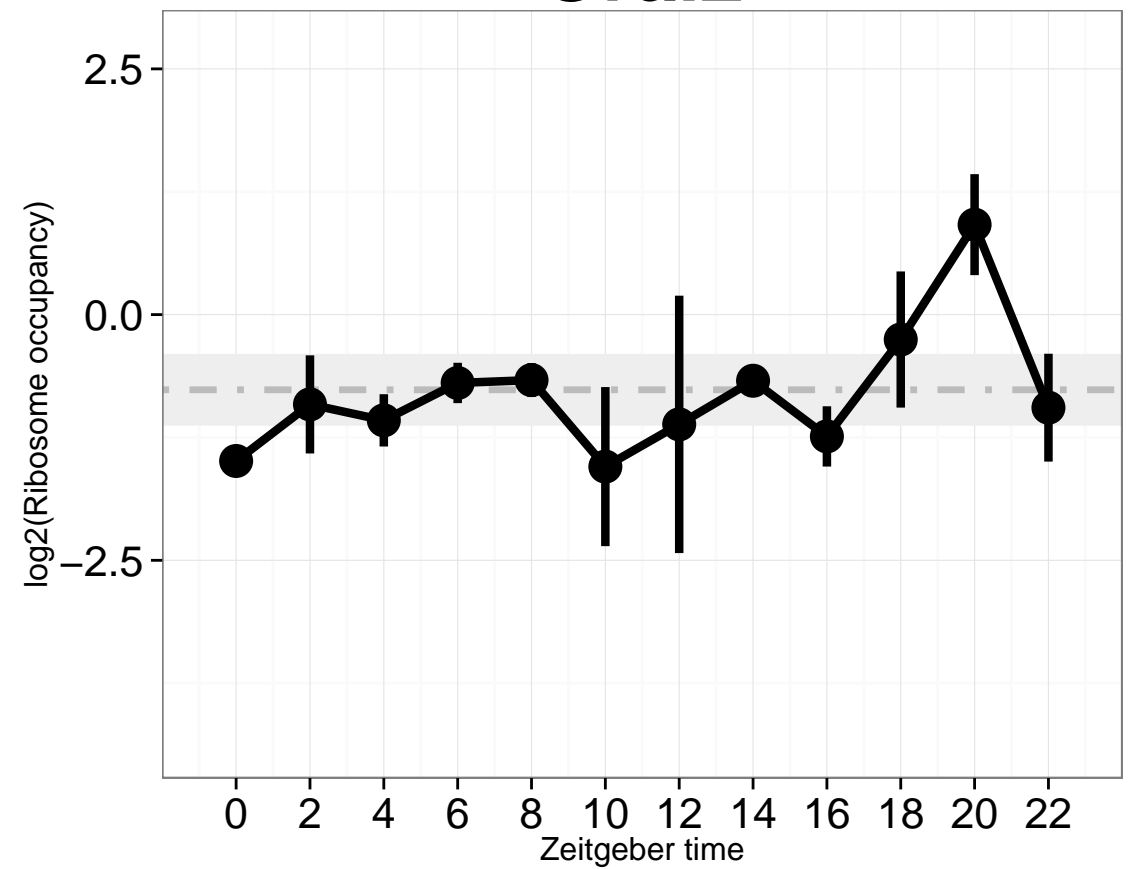

Supplement: Supplementary file 3831 [file 1]

## Ppp6c

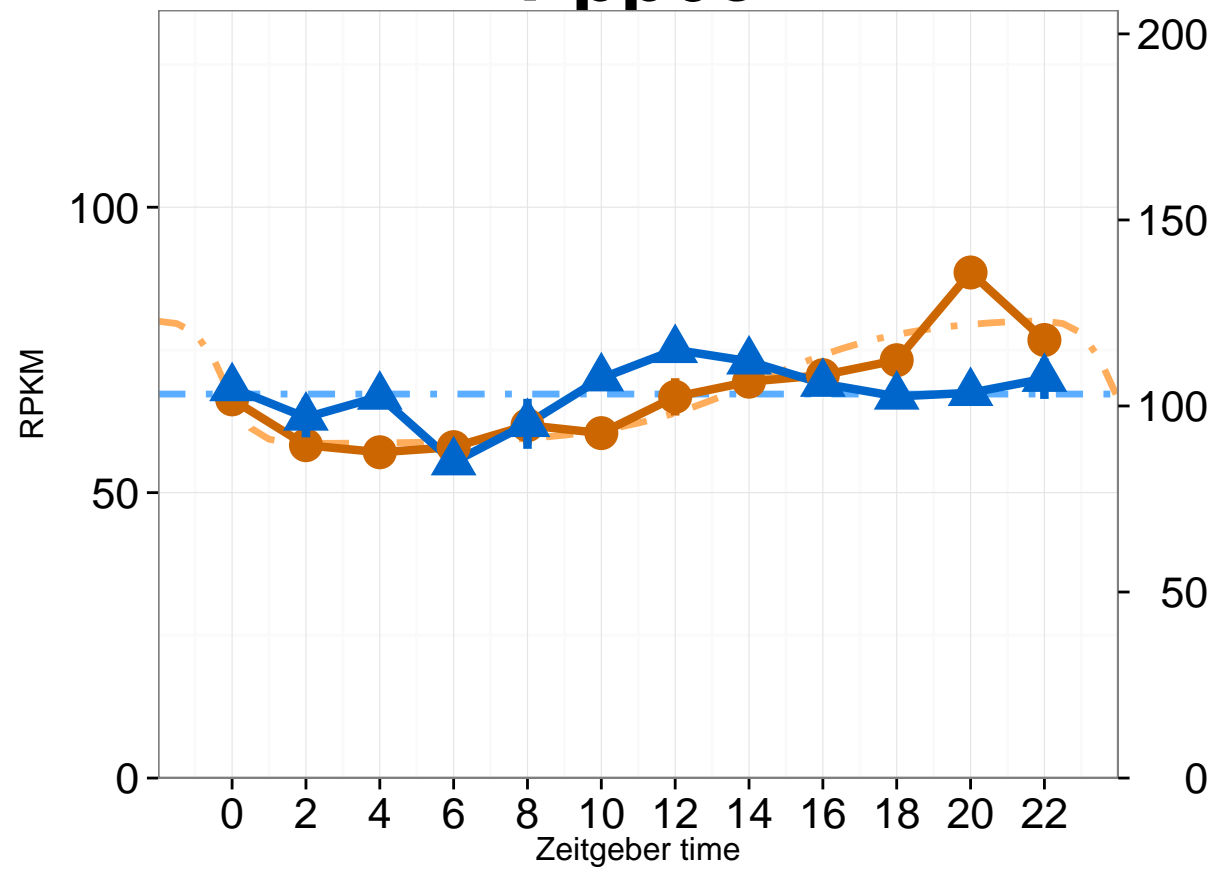

## Ppp6c

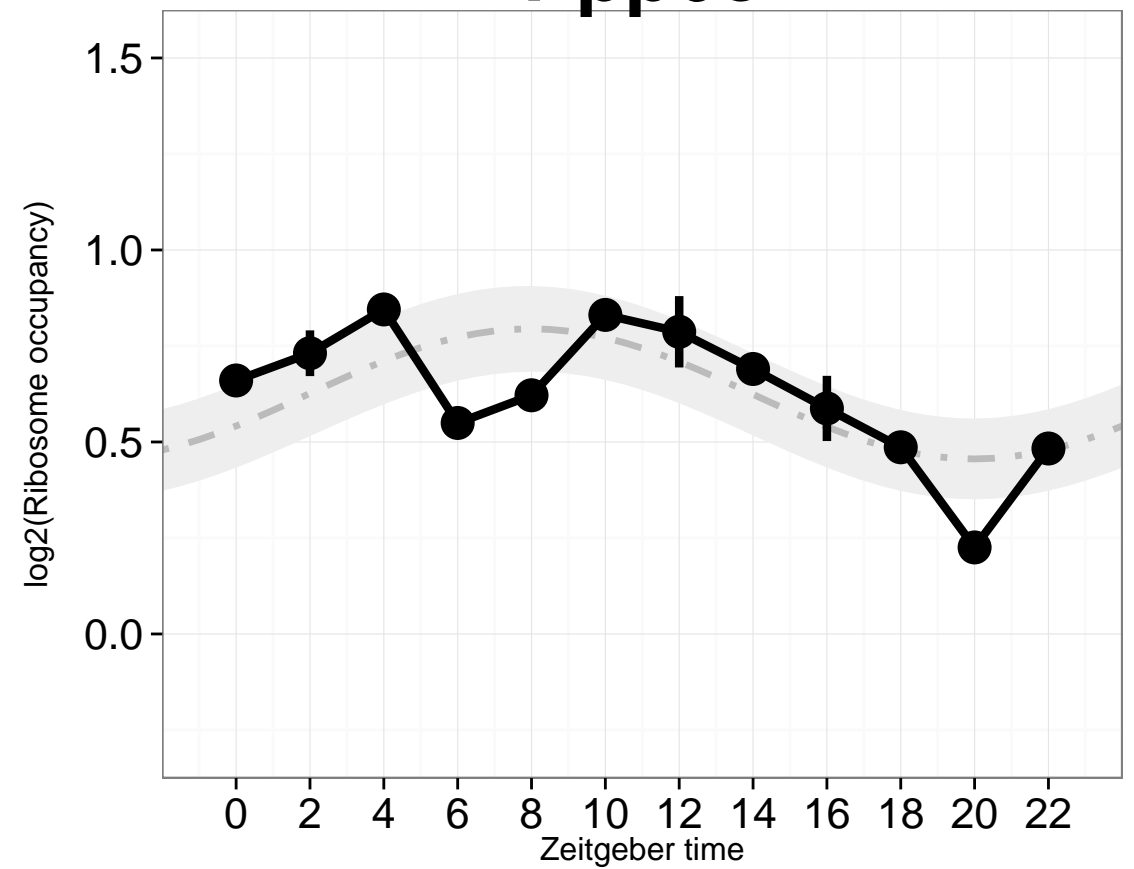

Supplement: Supplementary file 3832 [file 1]

## Ddx39

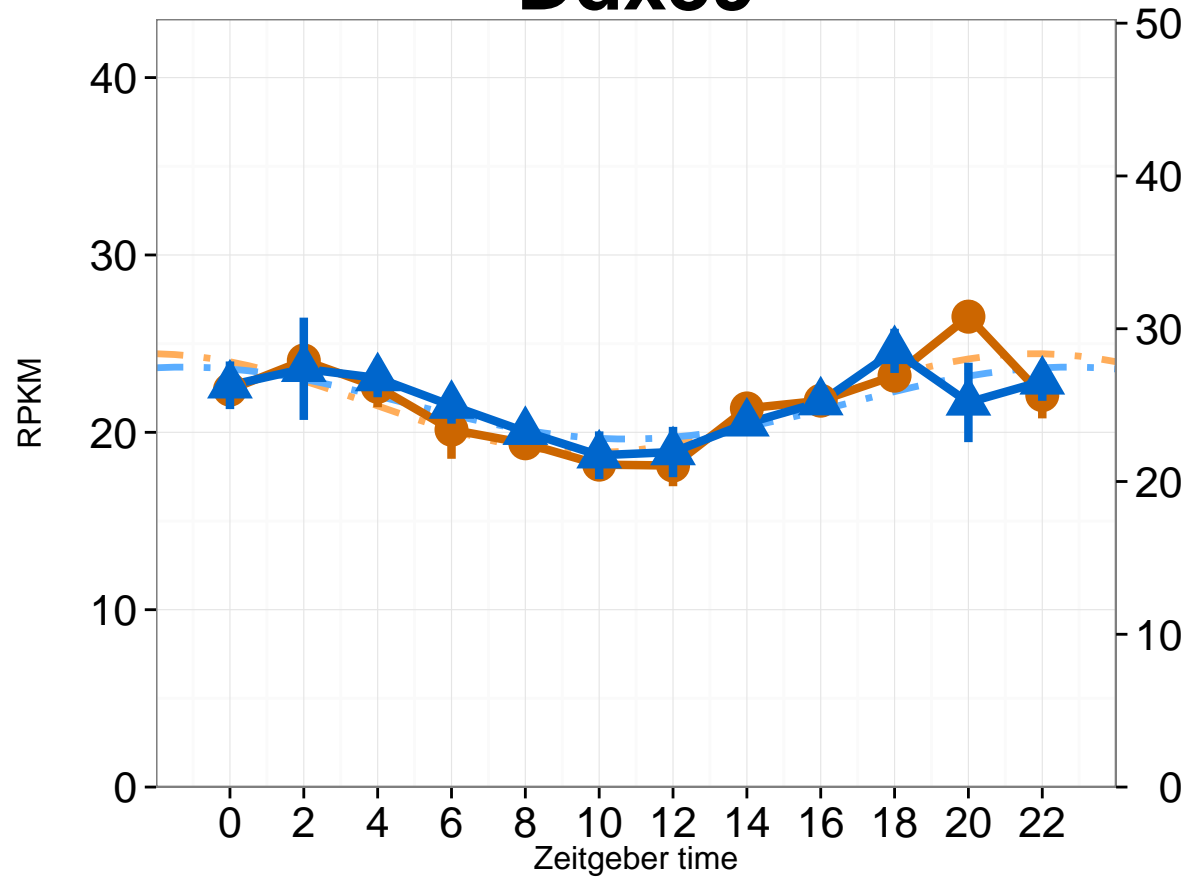

## Ddx39

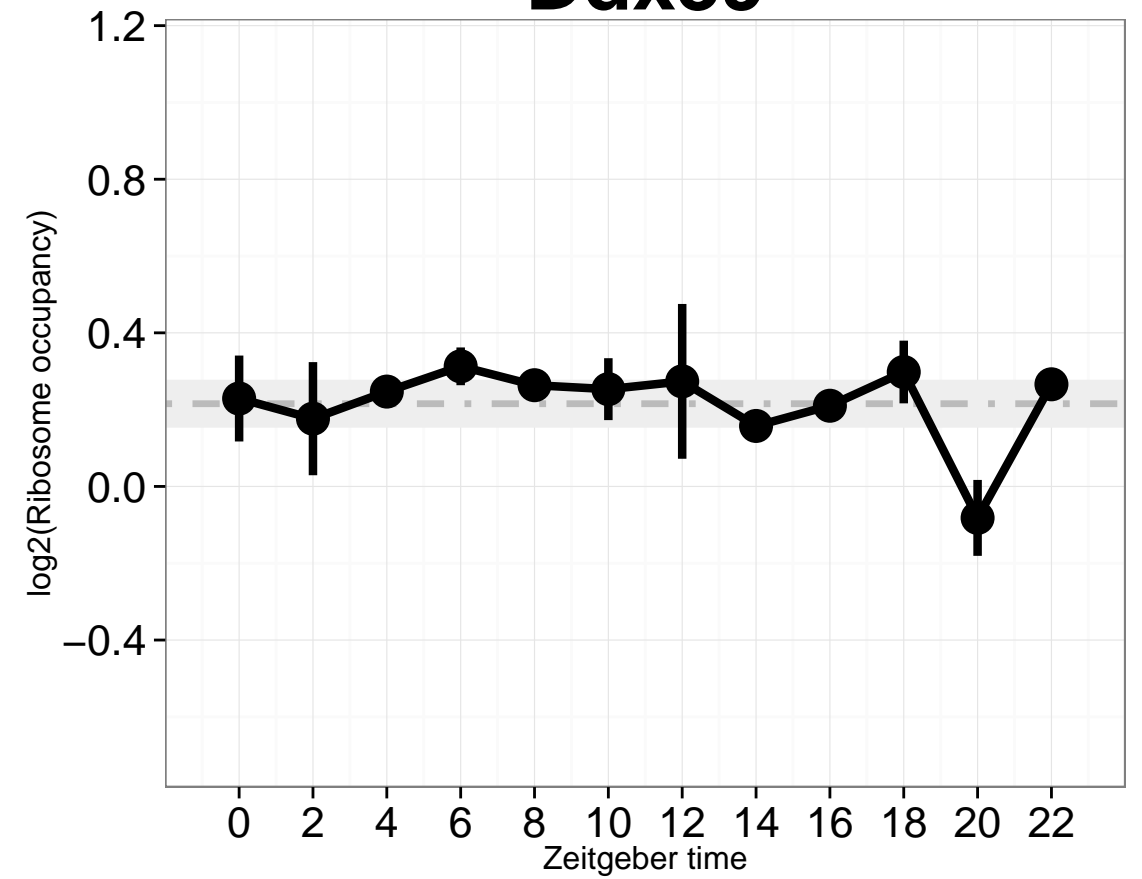

Supplement: Supplementary file 3833 [file 1]

# Map10

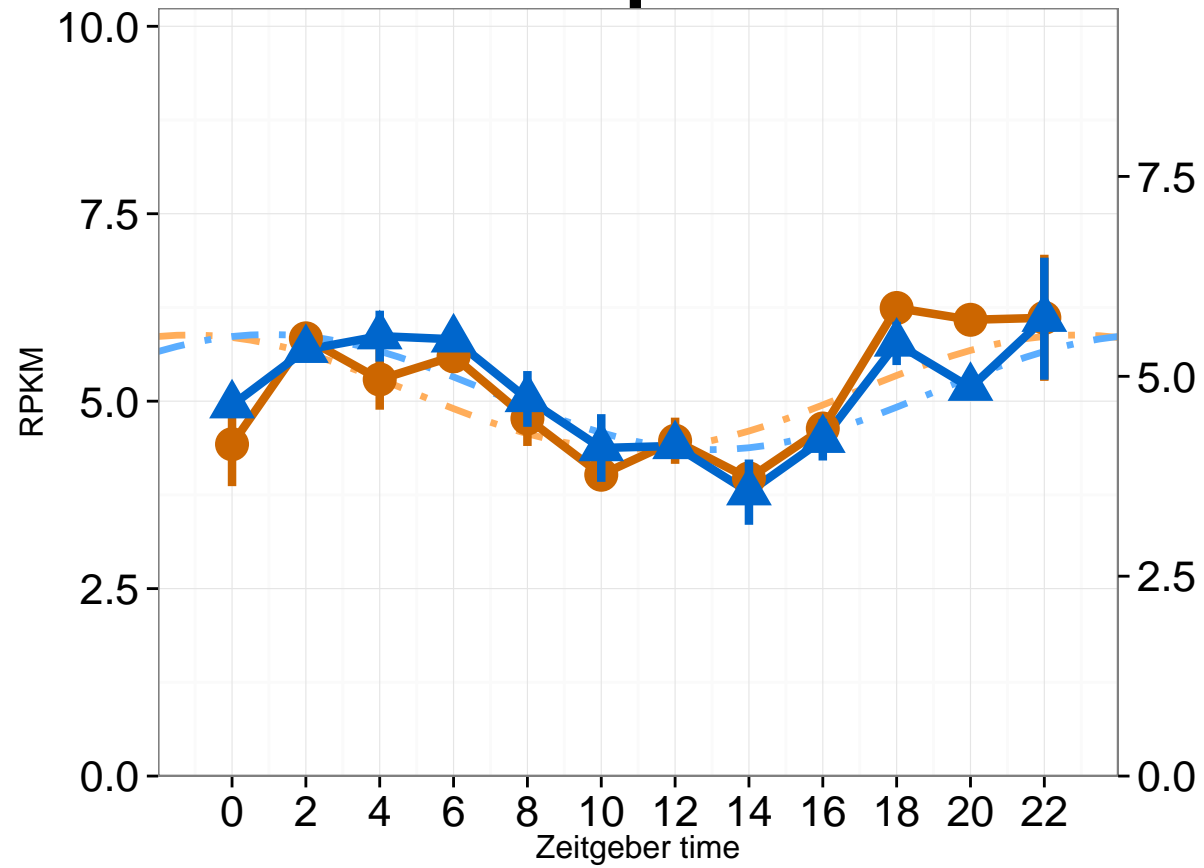

# Map10

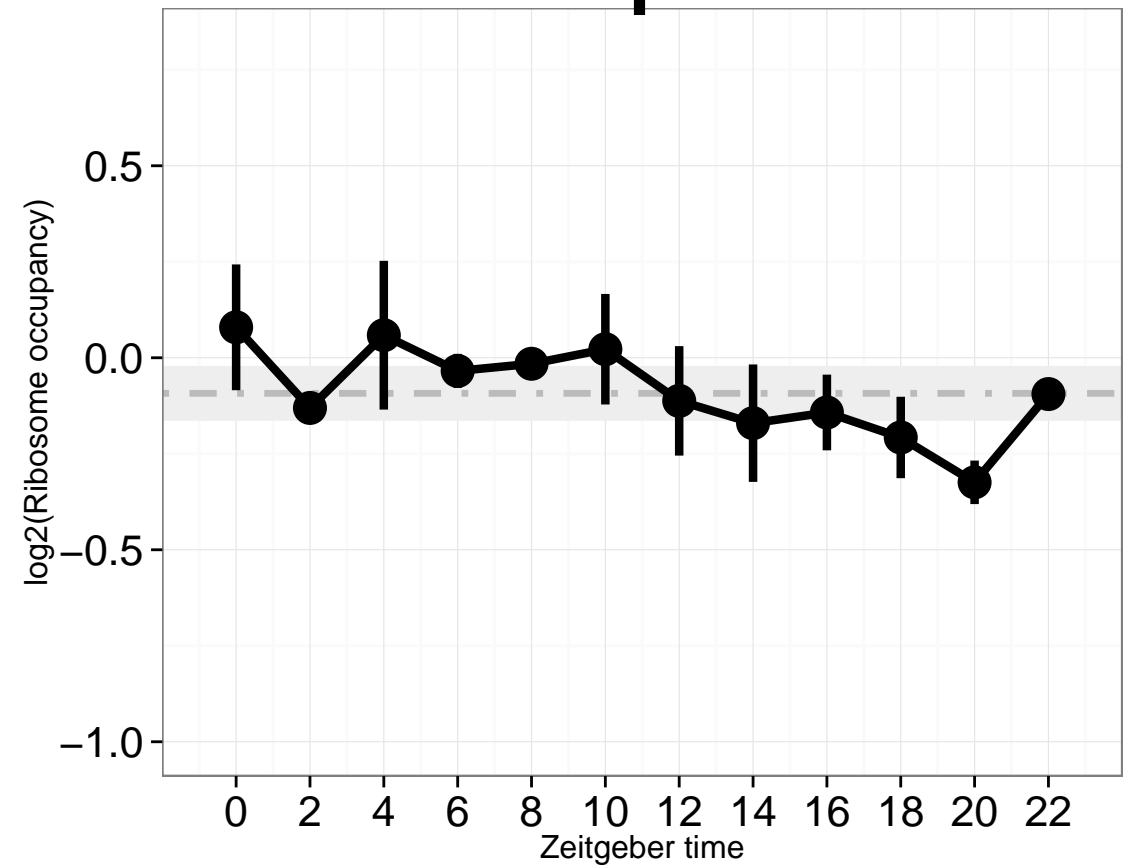

Supplement: Supplementary file 3834 [file 1]

## KlhI9

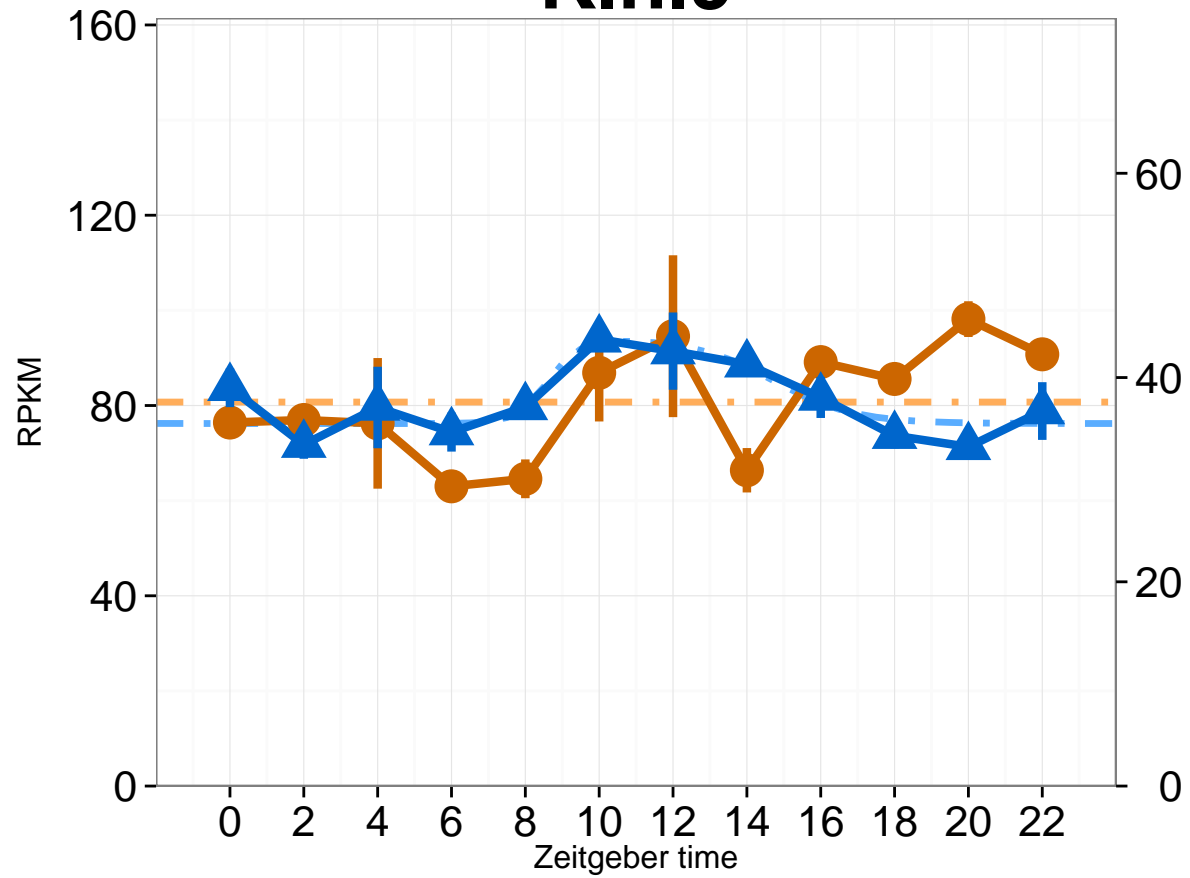

## KlhI9

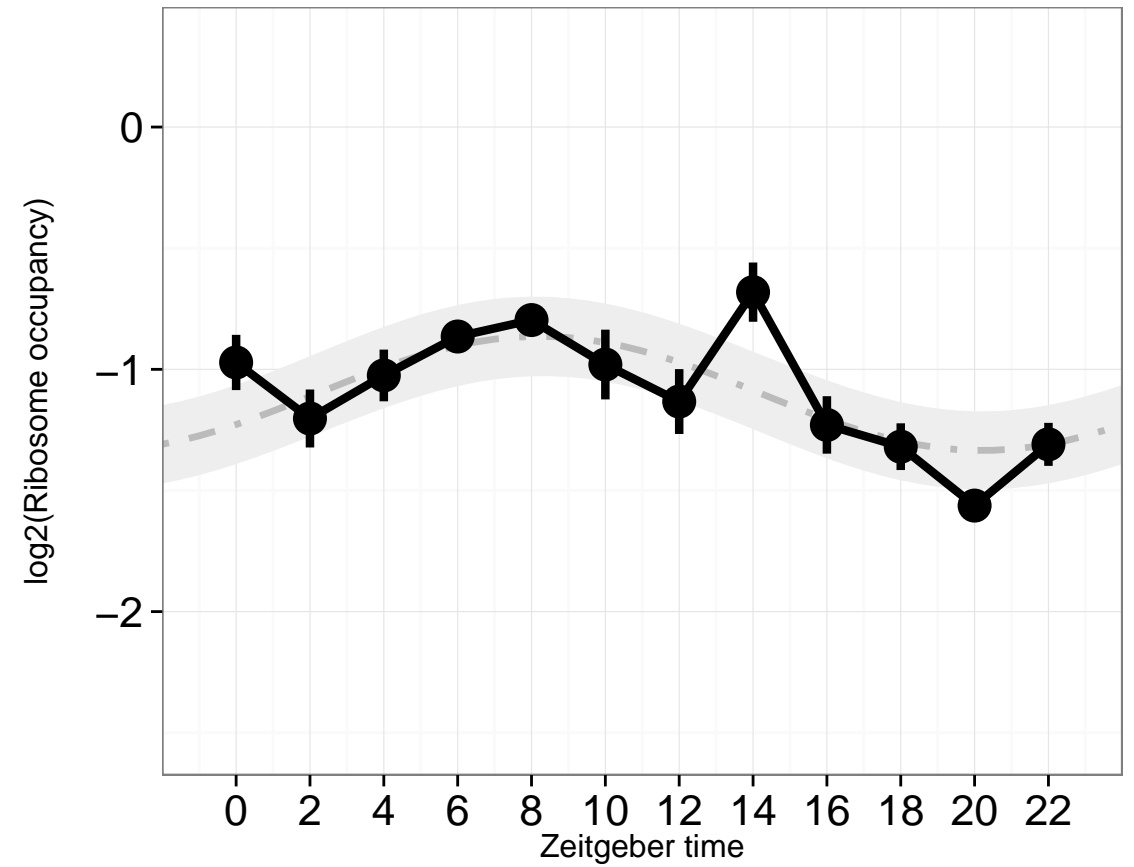

Supplement: Supplementary file 3835 [file 1]

## Plxdc2

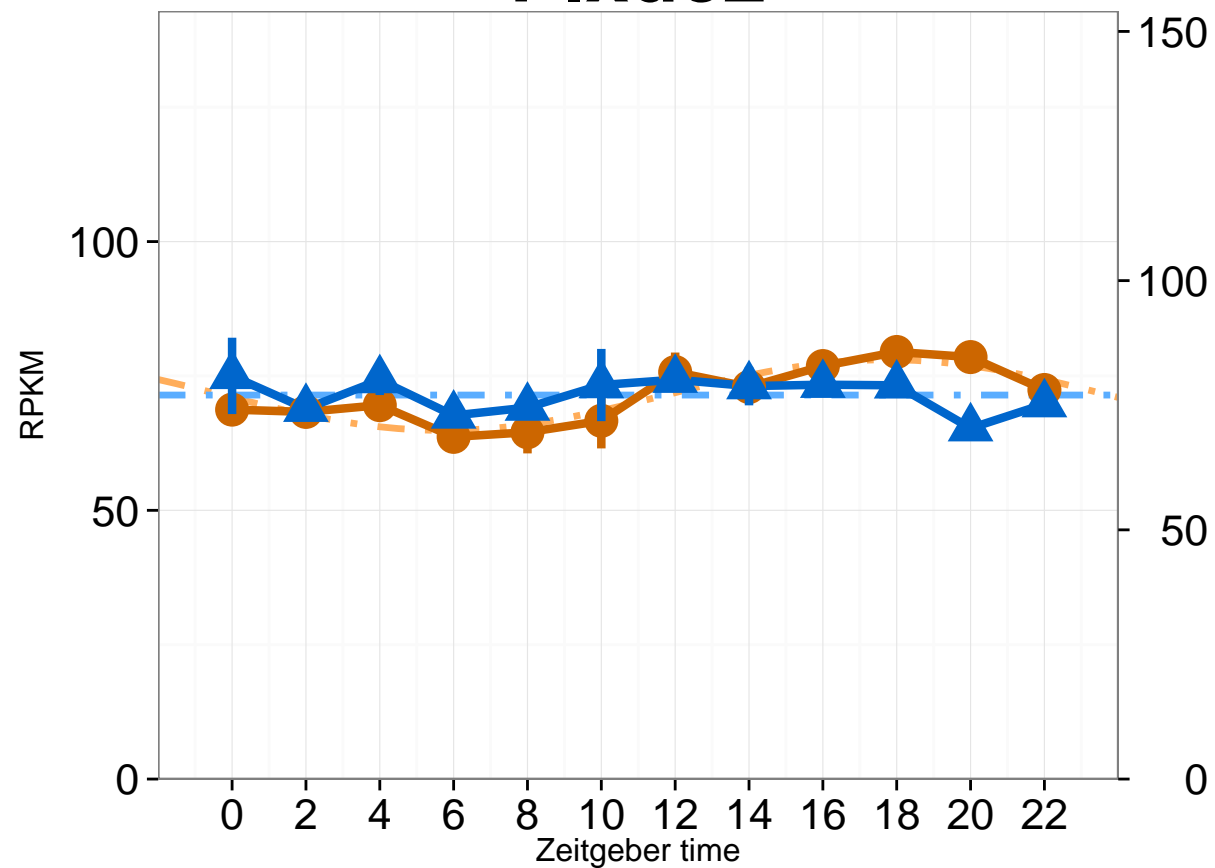

## Plxdc2

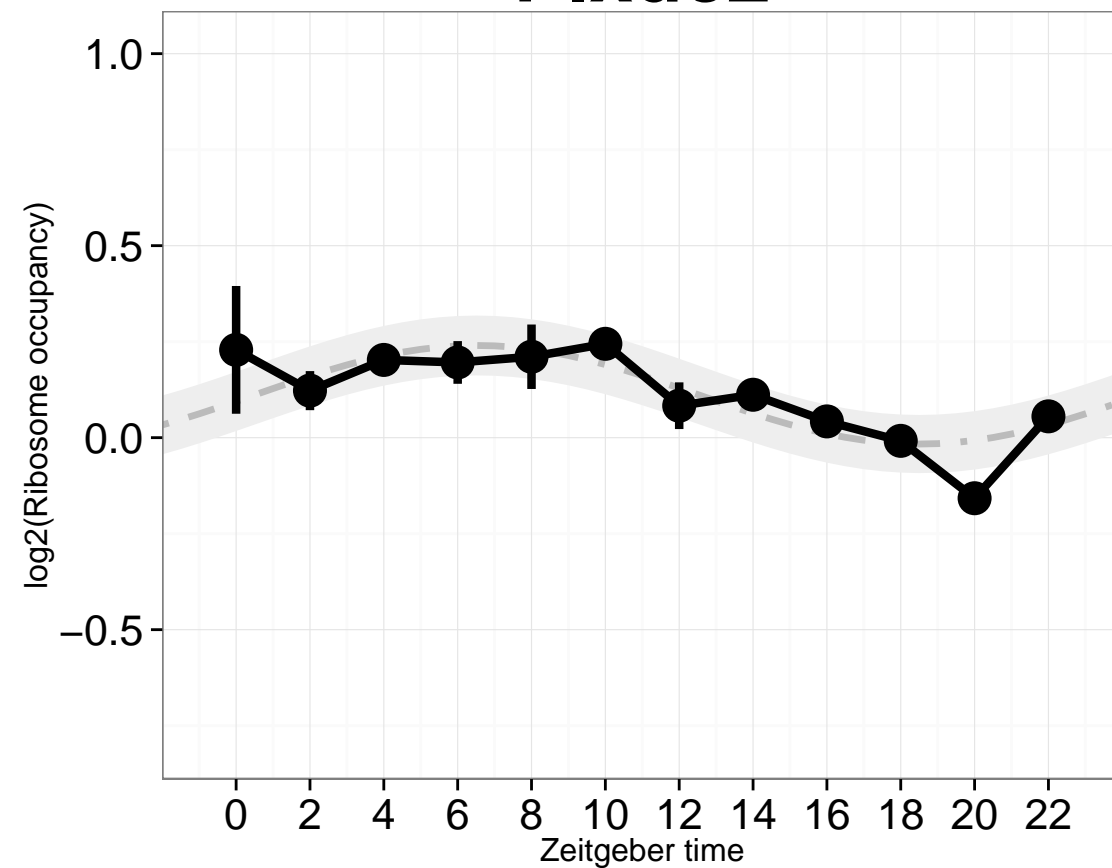

Supplement: Supplementary file 3836 [file 1]

## Oxsm

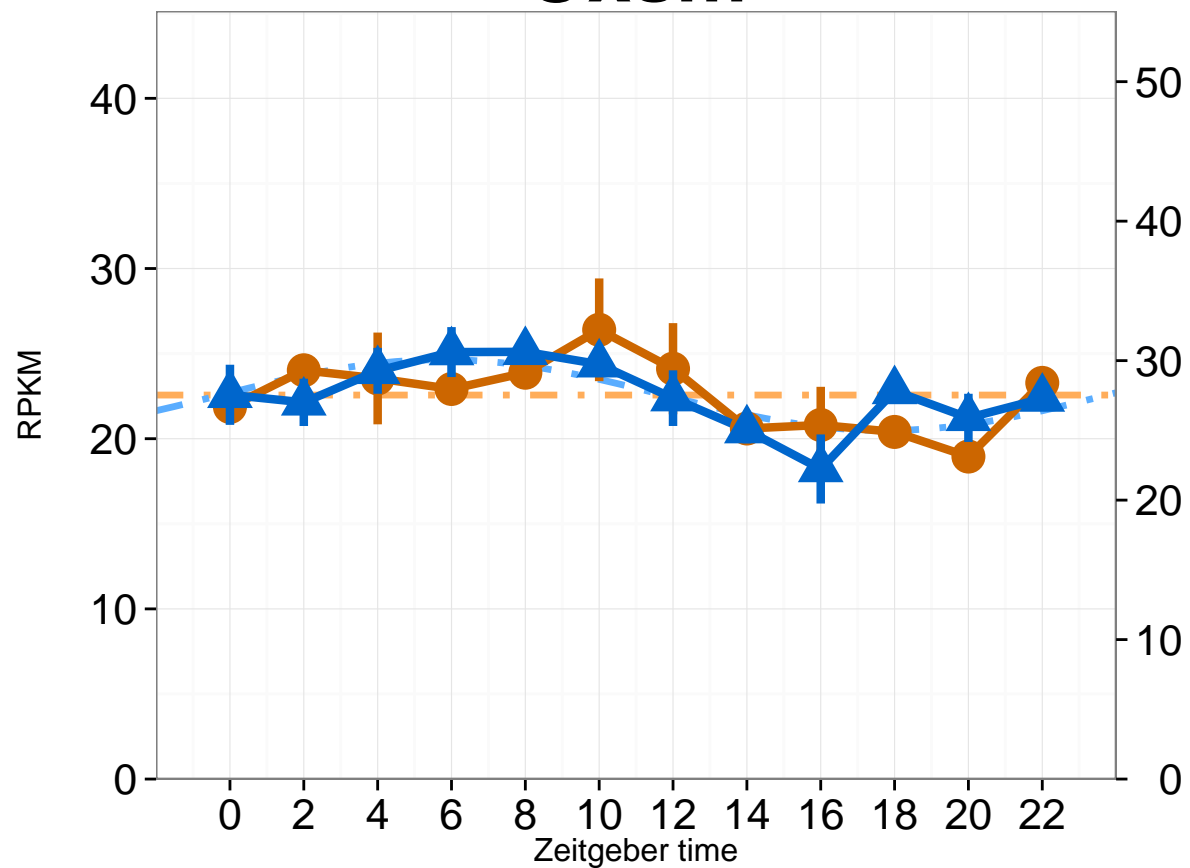

## Oxsm

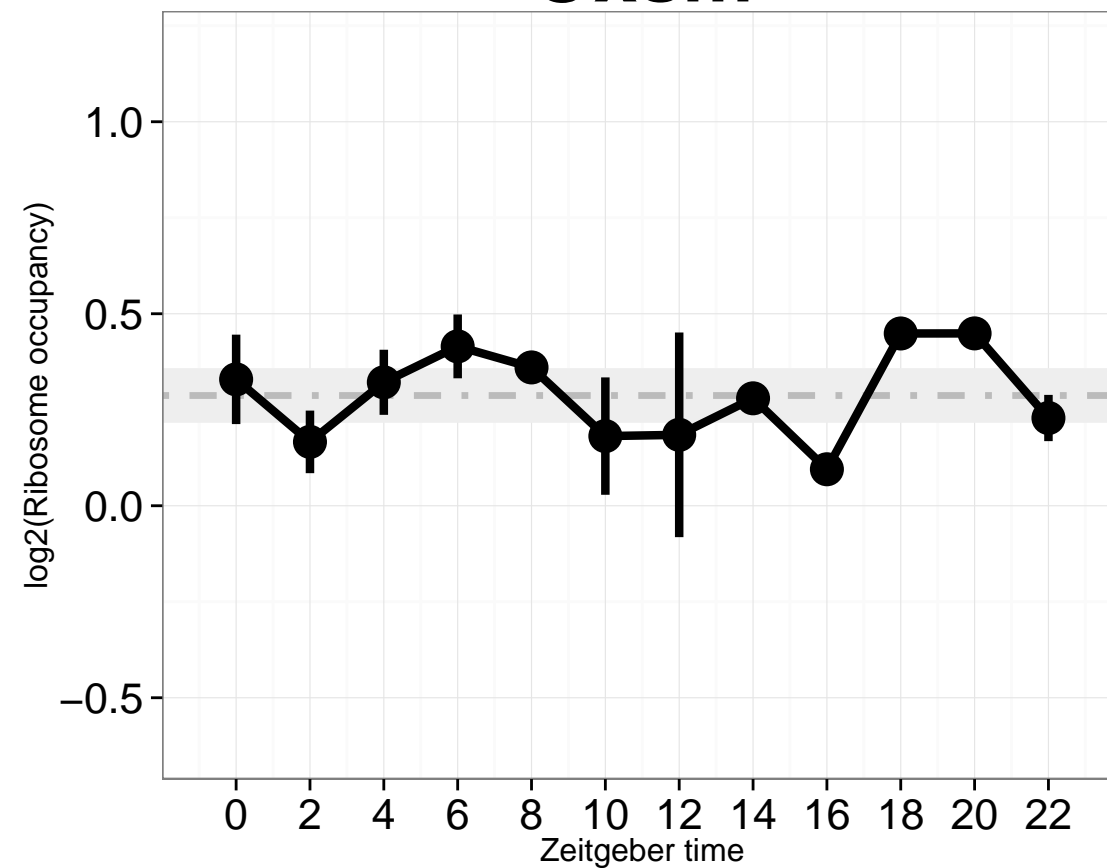

Supplement: Supplementary file 3837 [file 1]

## Lrp2

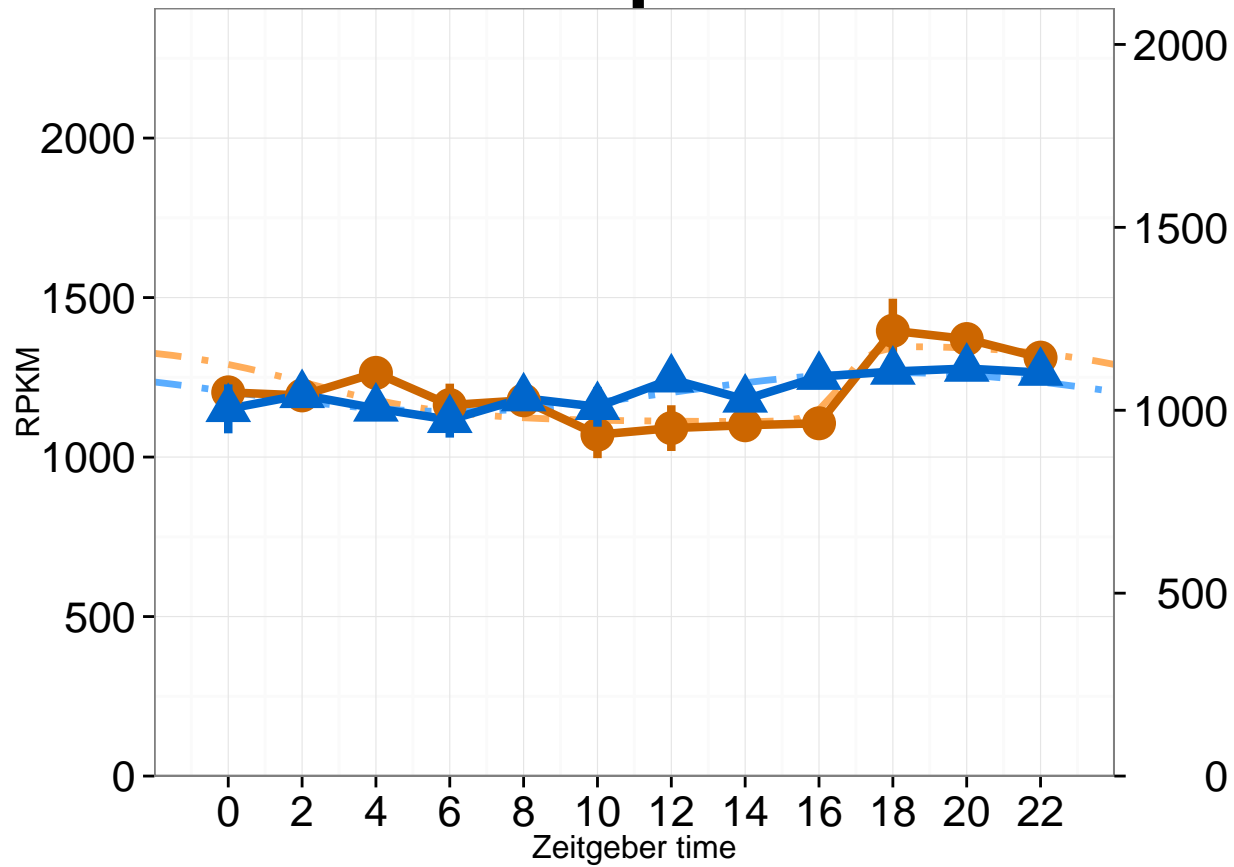

## Lrp2

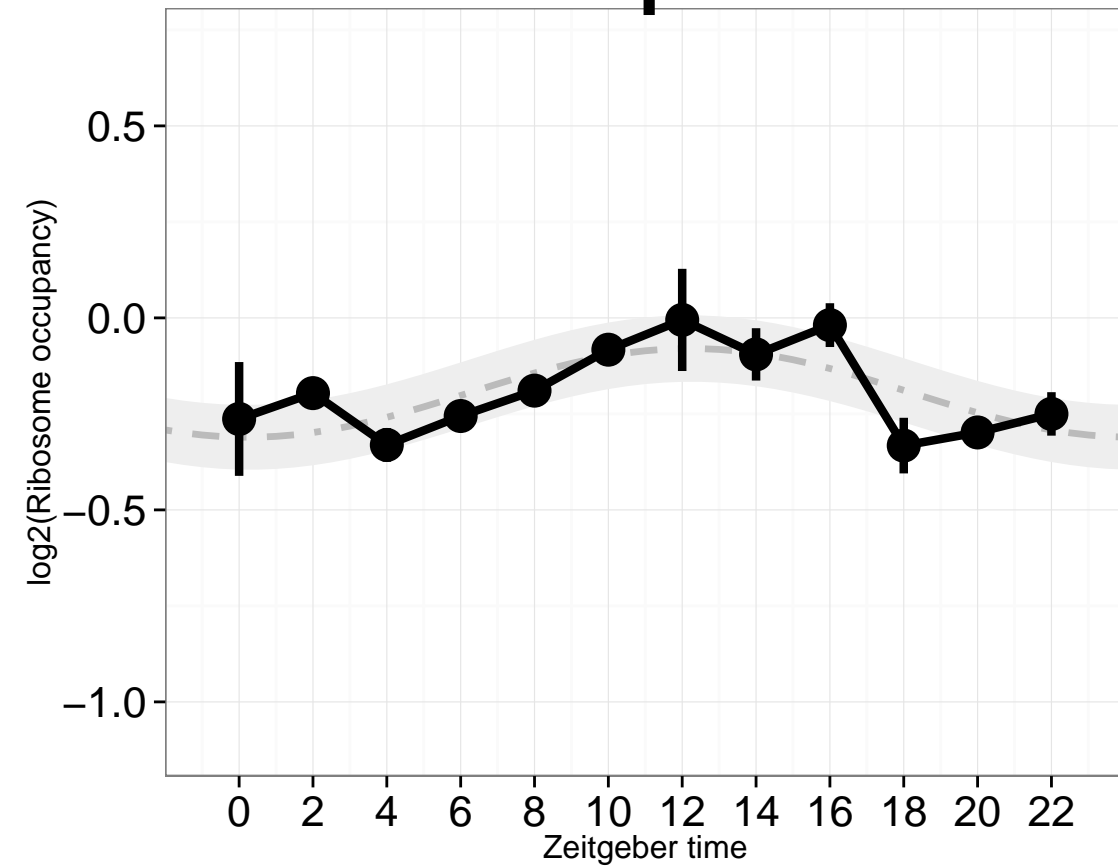

Supplement: Supplementary file 3838 [file 1]

# Hs6st1

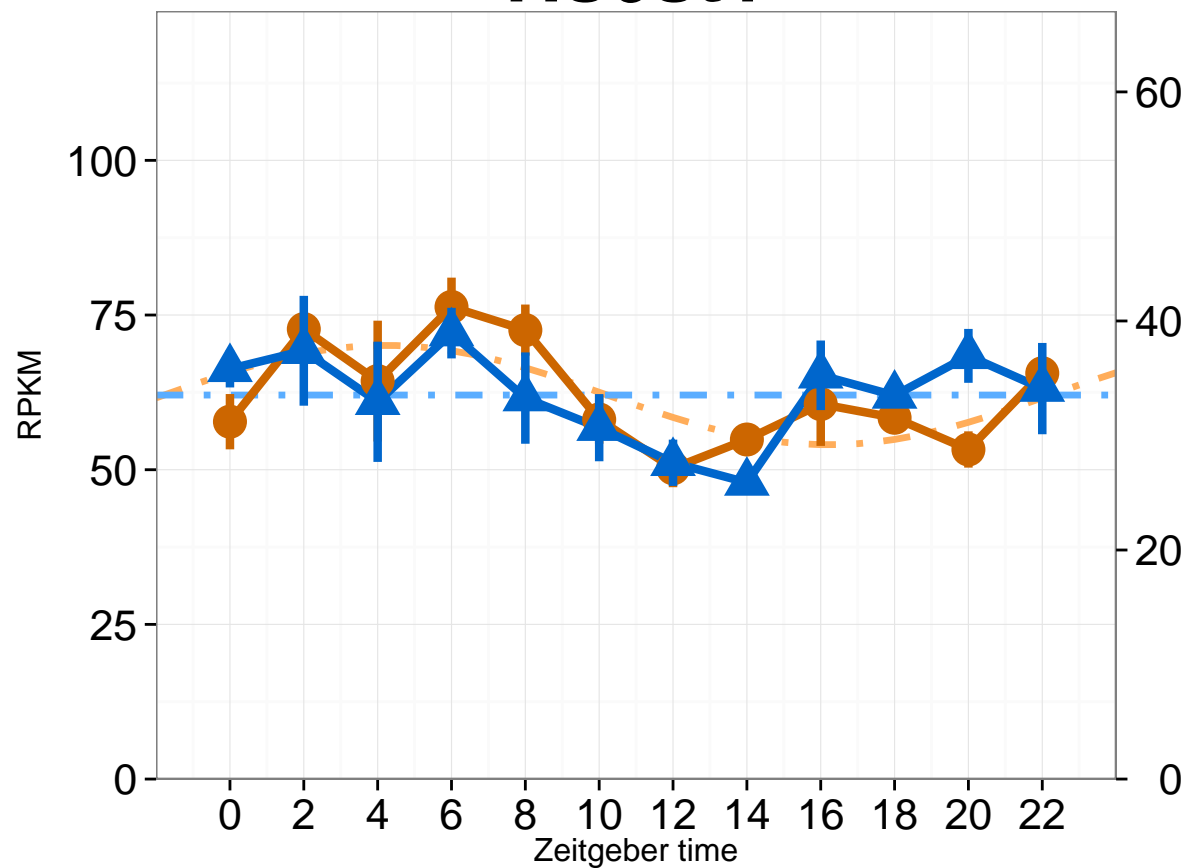

# Hs6st1

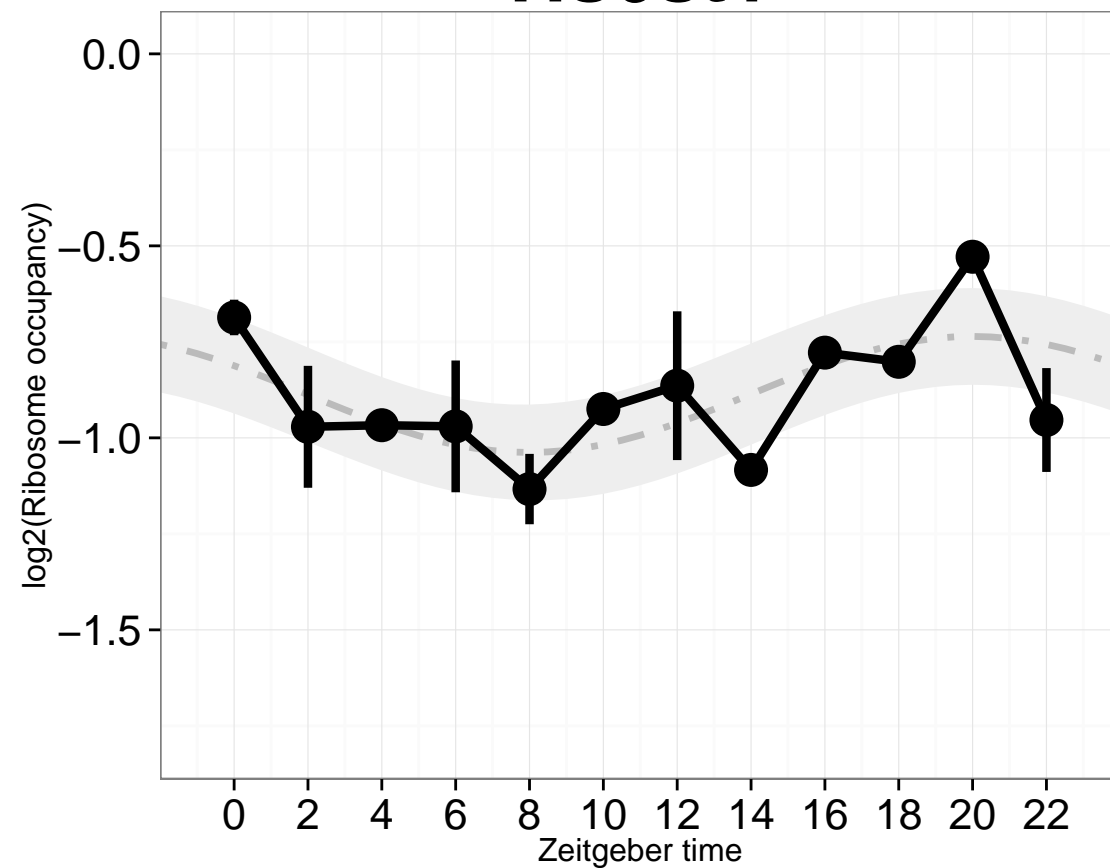

Supplement: Supplementary file 3839 [file 1]

# Prrc2c

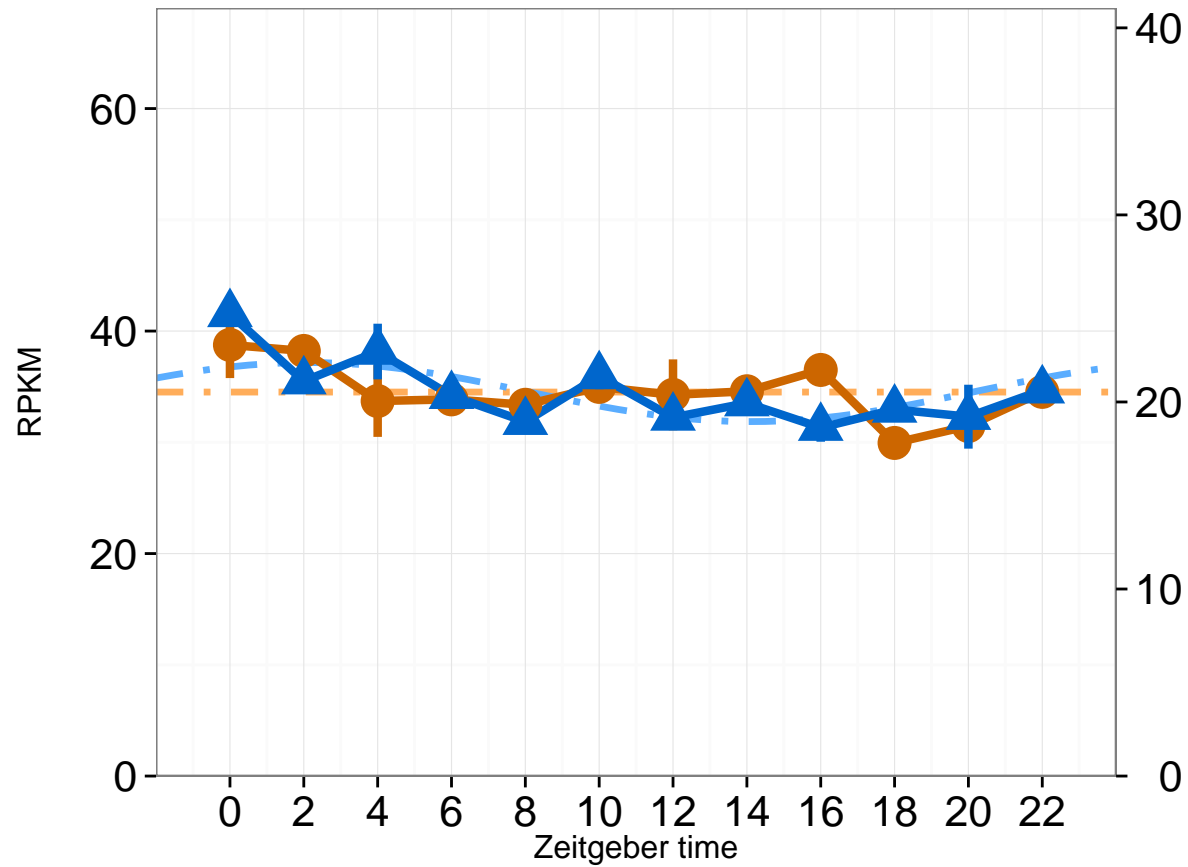

# Prrc2c

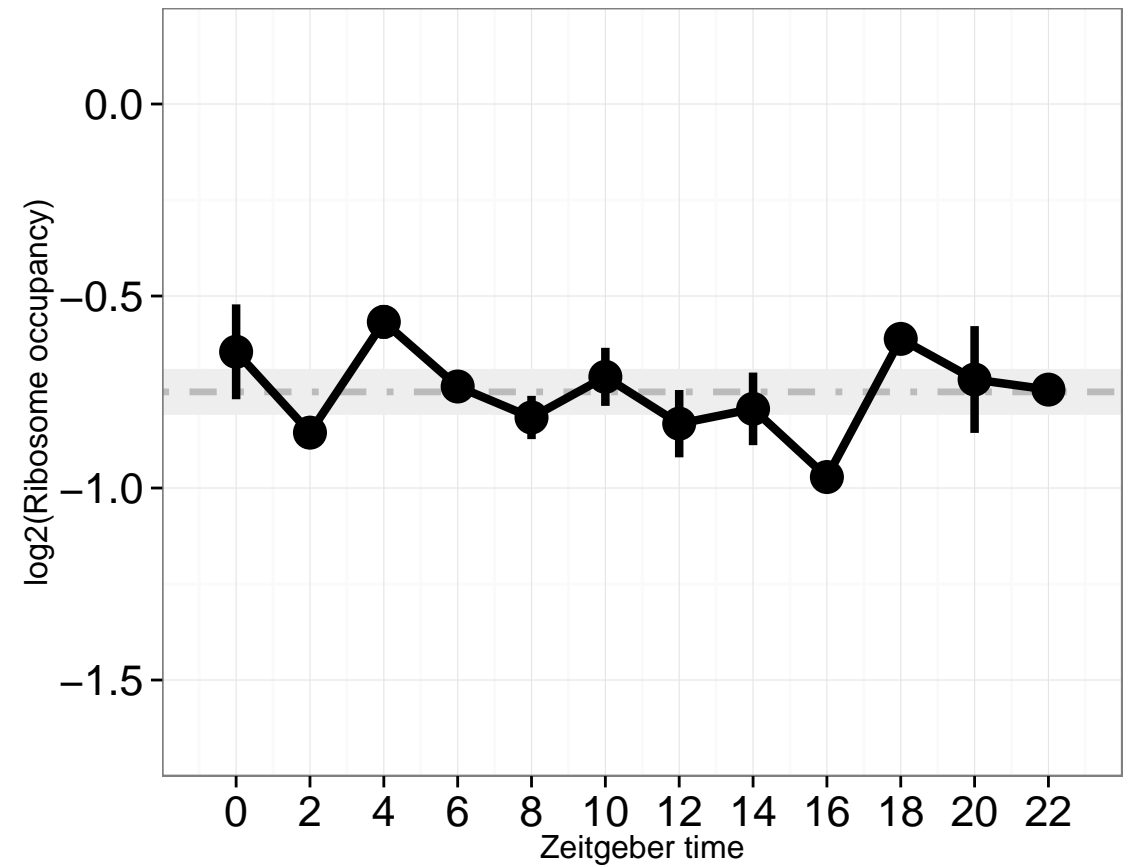

Supplement: Supplementary file 3840 [file 1]

# RalyI

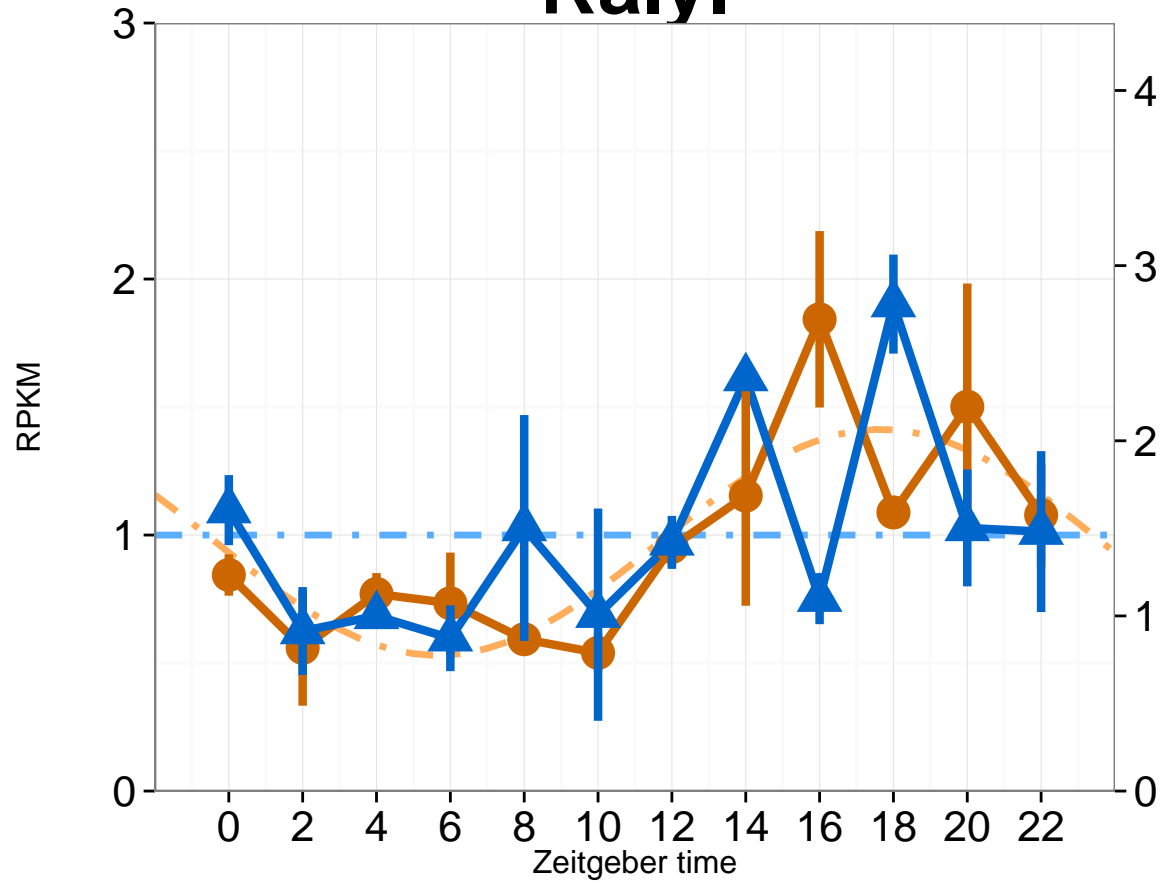

# RalyI

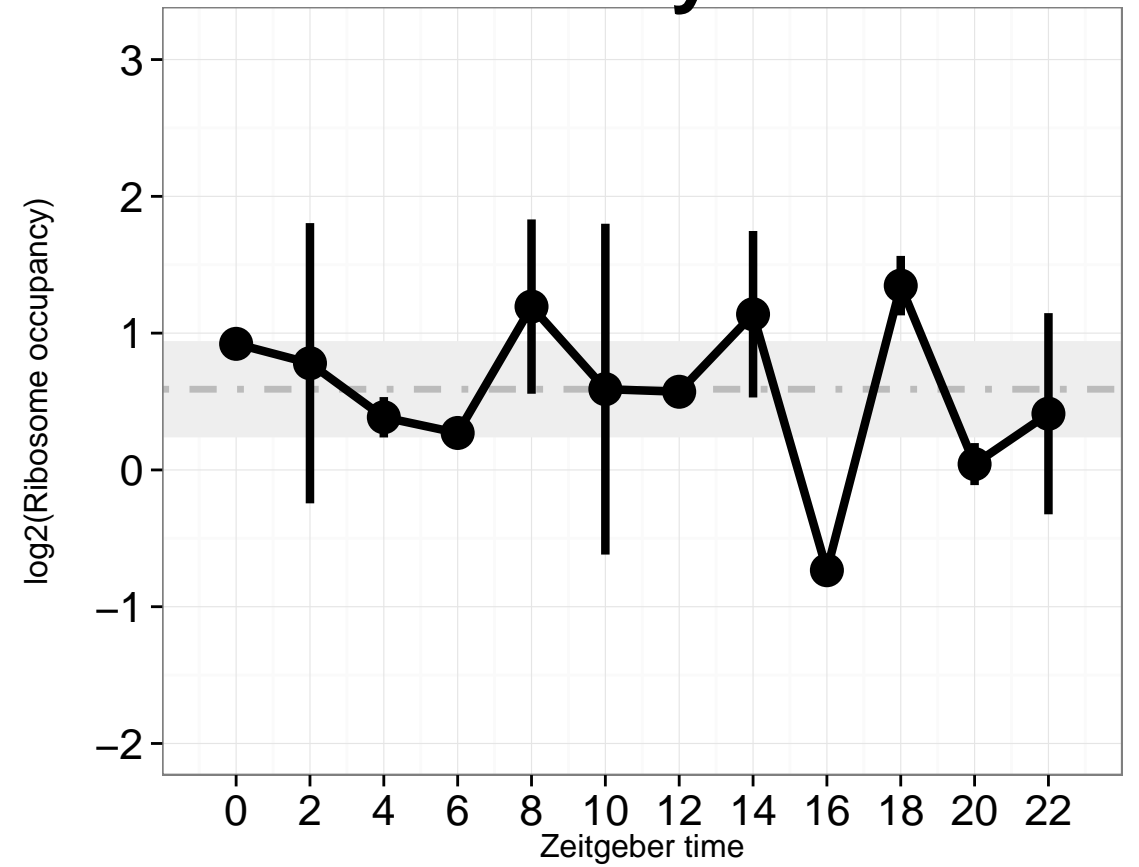

Supplement: Supplementary file 3841 [file 1]

# Gm527

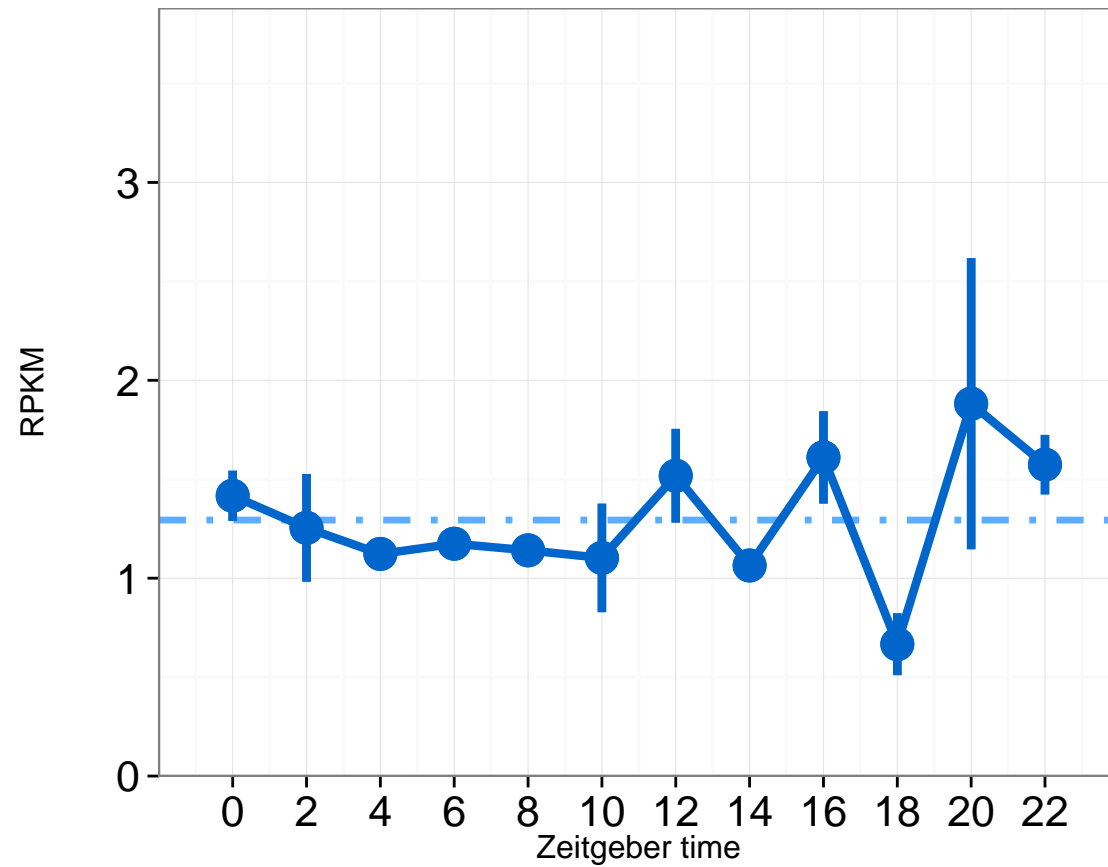

# Gm527 log2(Ribosome occupancy)

Supplement: Supplementary file 3842 [file 1]

## Ccdc124

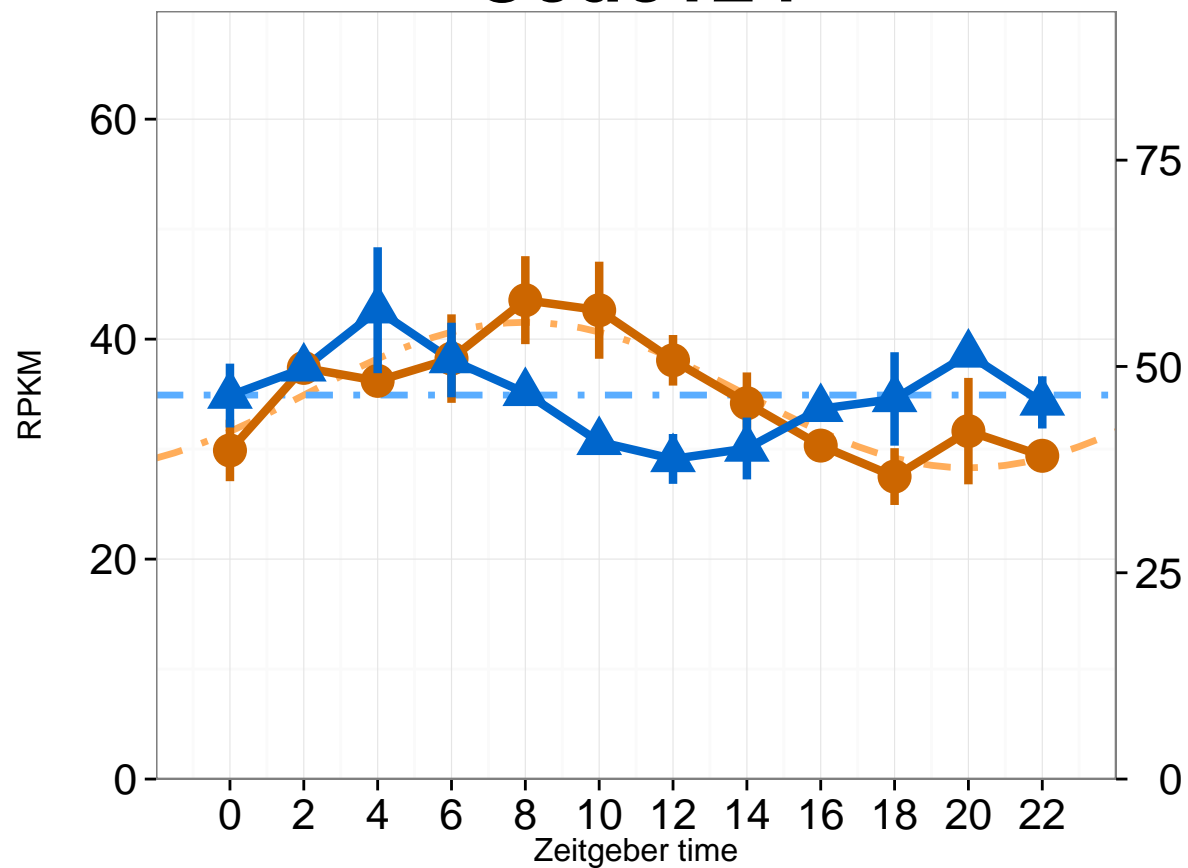

## Ccdc124

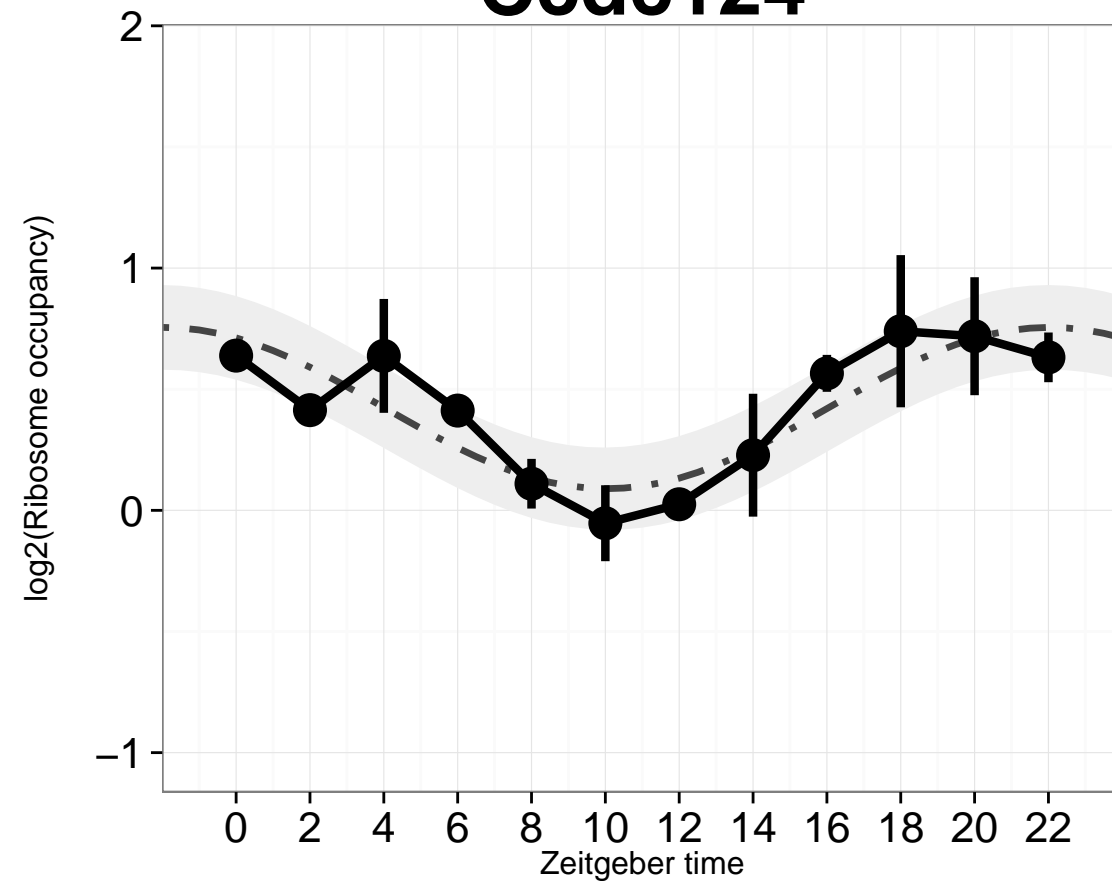

Supplement: Supplementary file 3843 [file 1]

## Plcg2

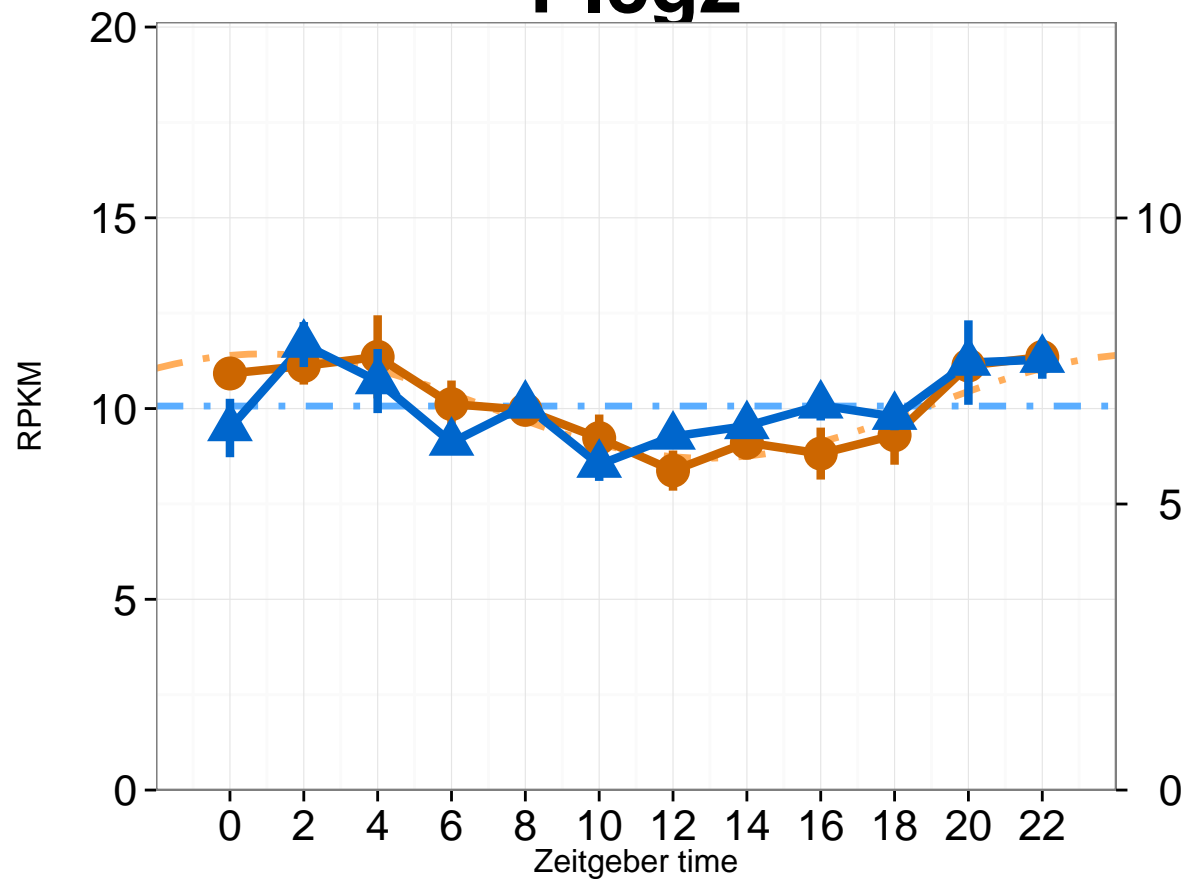

## Plcg2

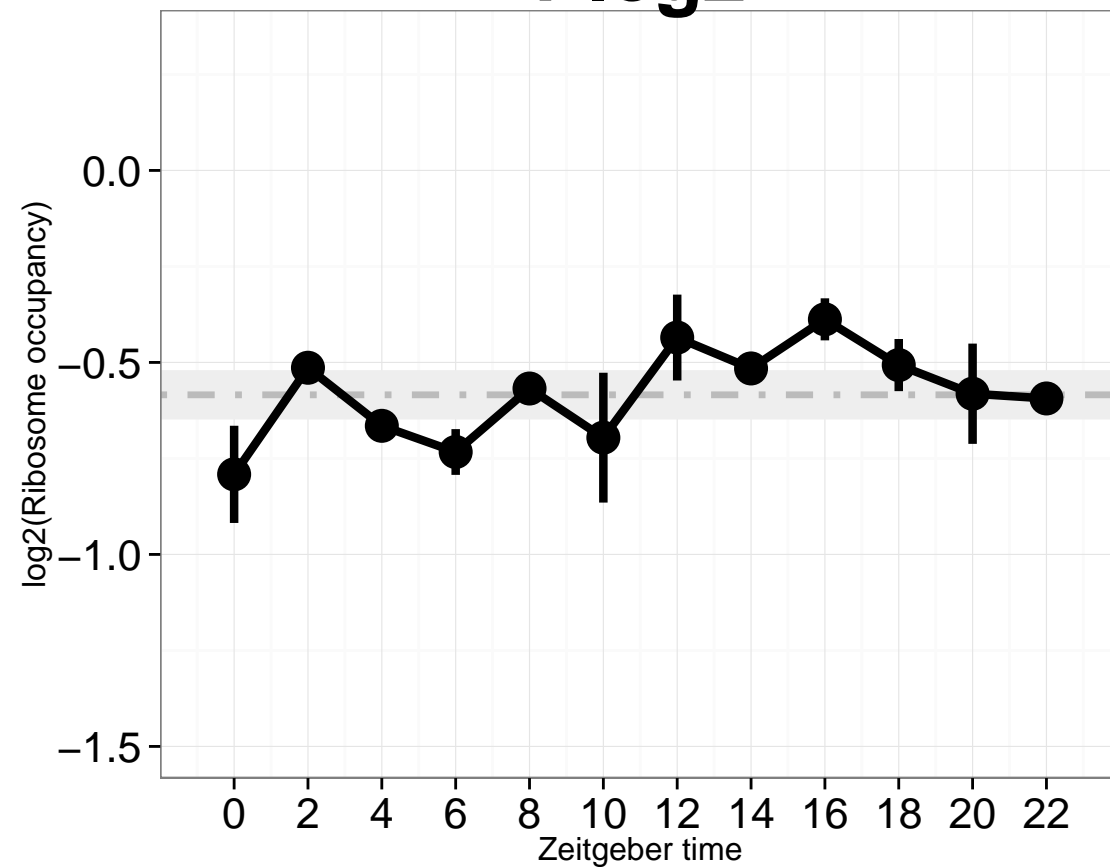

Supplement: Supplementary file 3844 [file 1]

## Dnph1

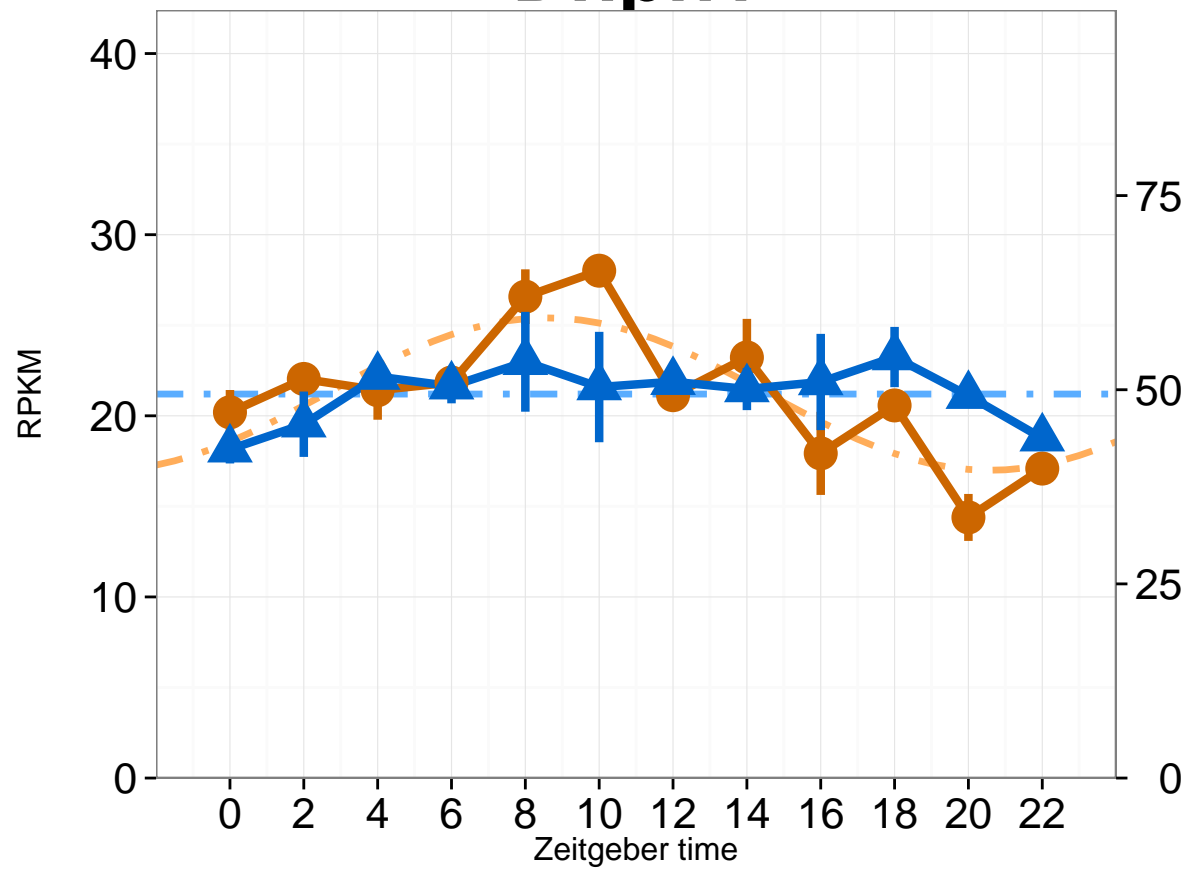

## Dnph1

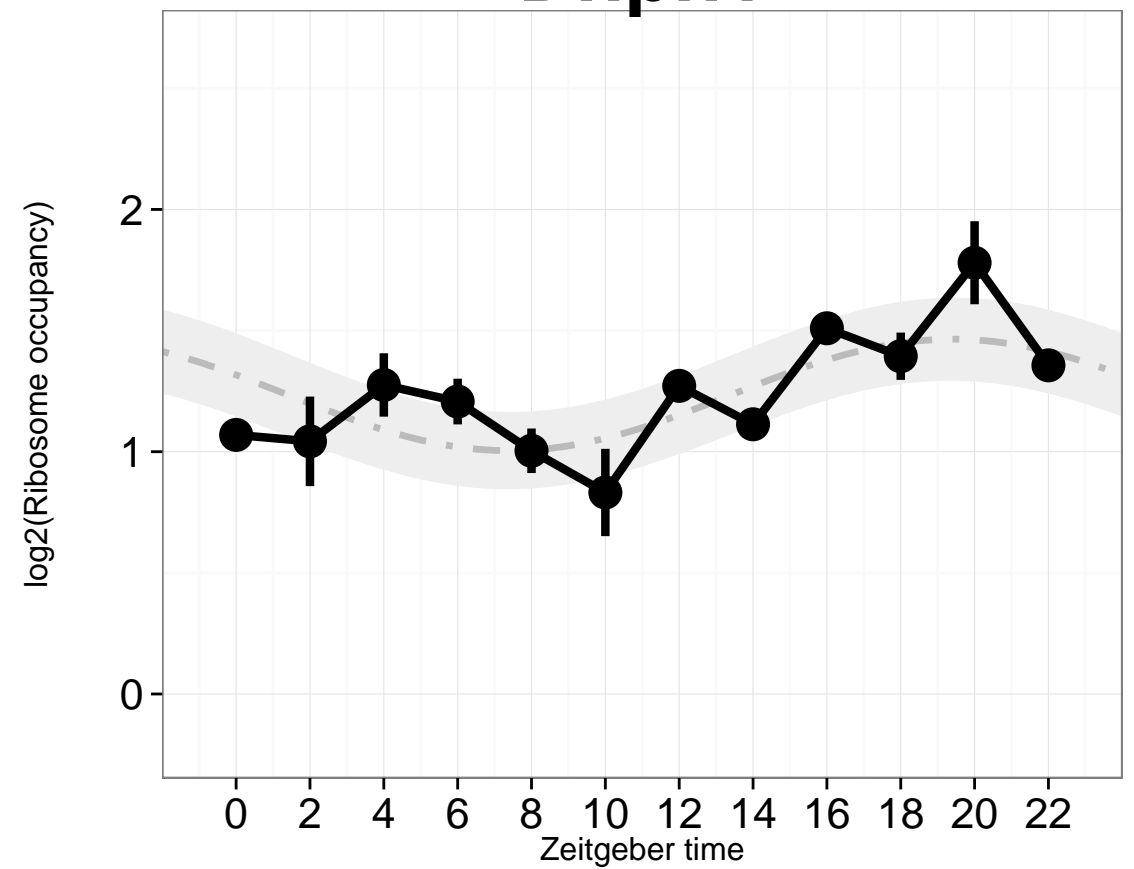

Supplement: Supplementary file 3845 [file 1]

# Cldn4

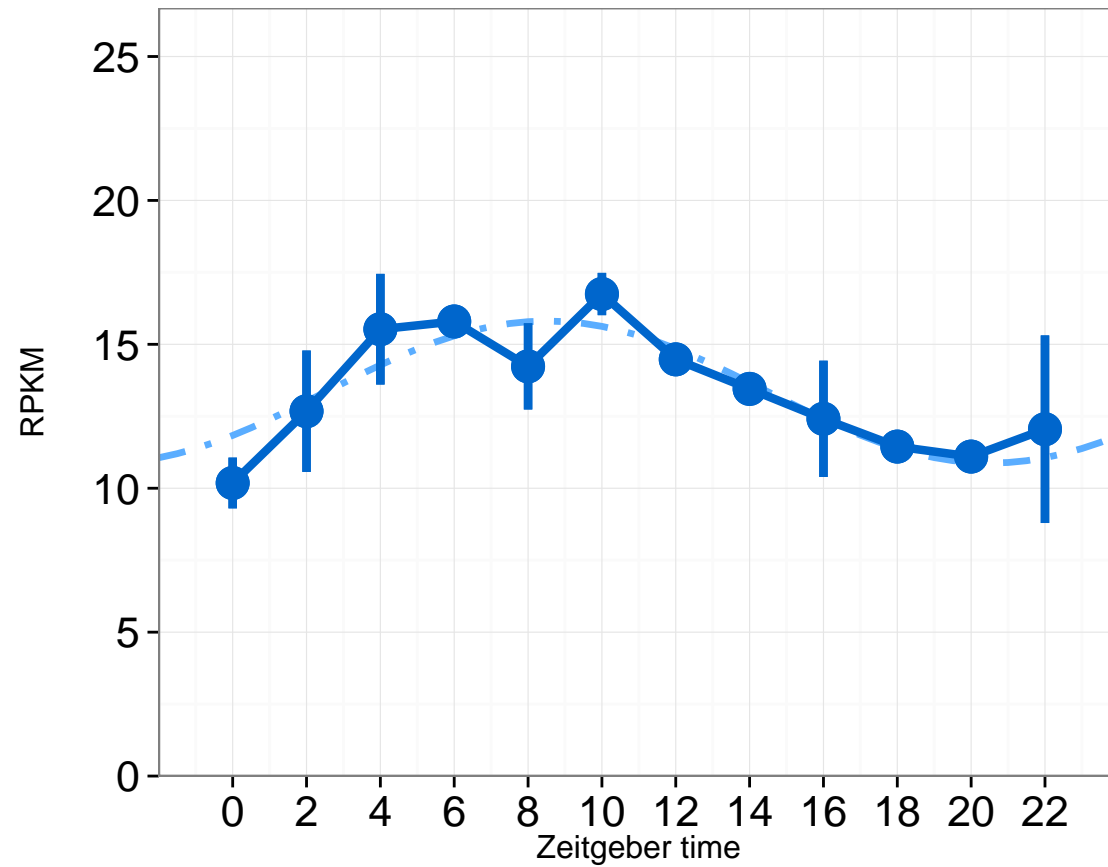

# Cldn4 log2(Ribosome occupancy

Supplement: Supplementary file 3846 [file 1]

# Higd2a

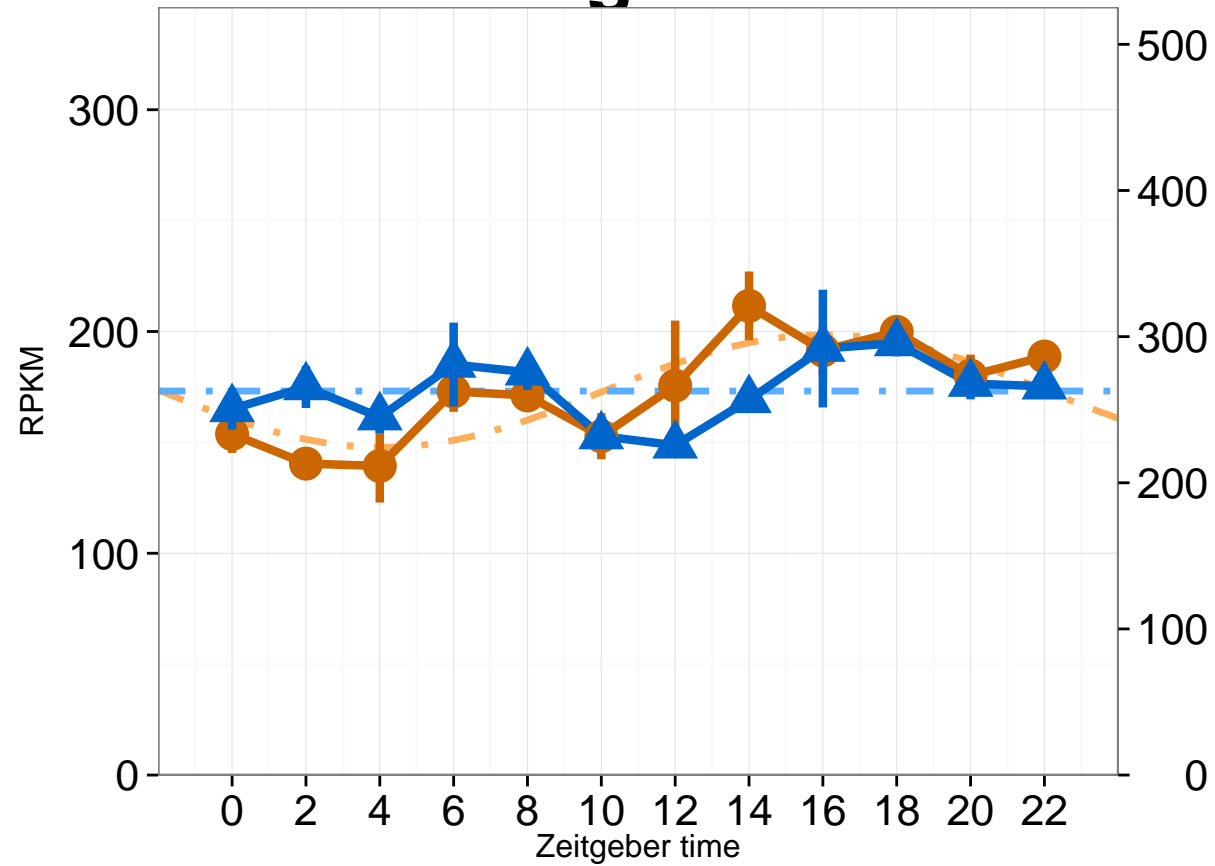

# Higd2a

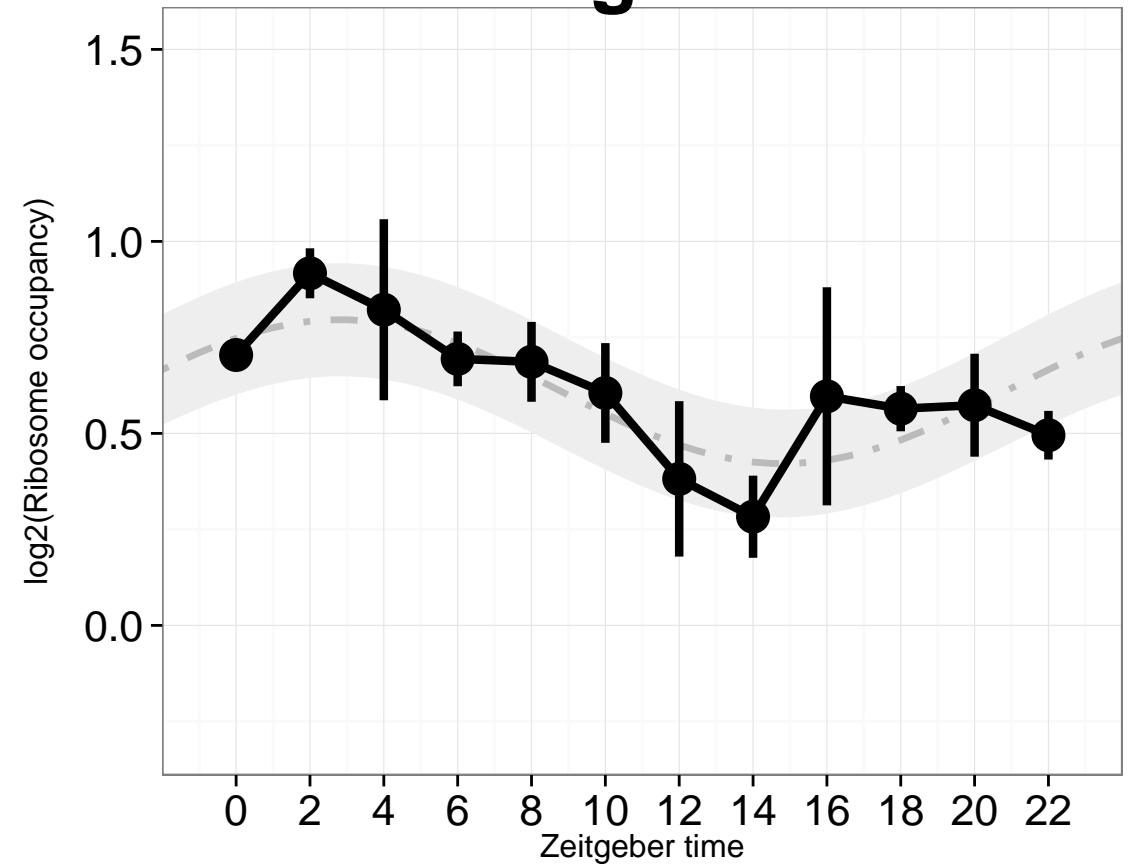

Supplement: Supplementary file 3847 [file 1]

## Plrg1

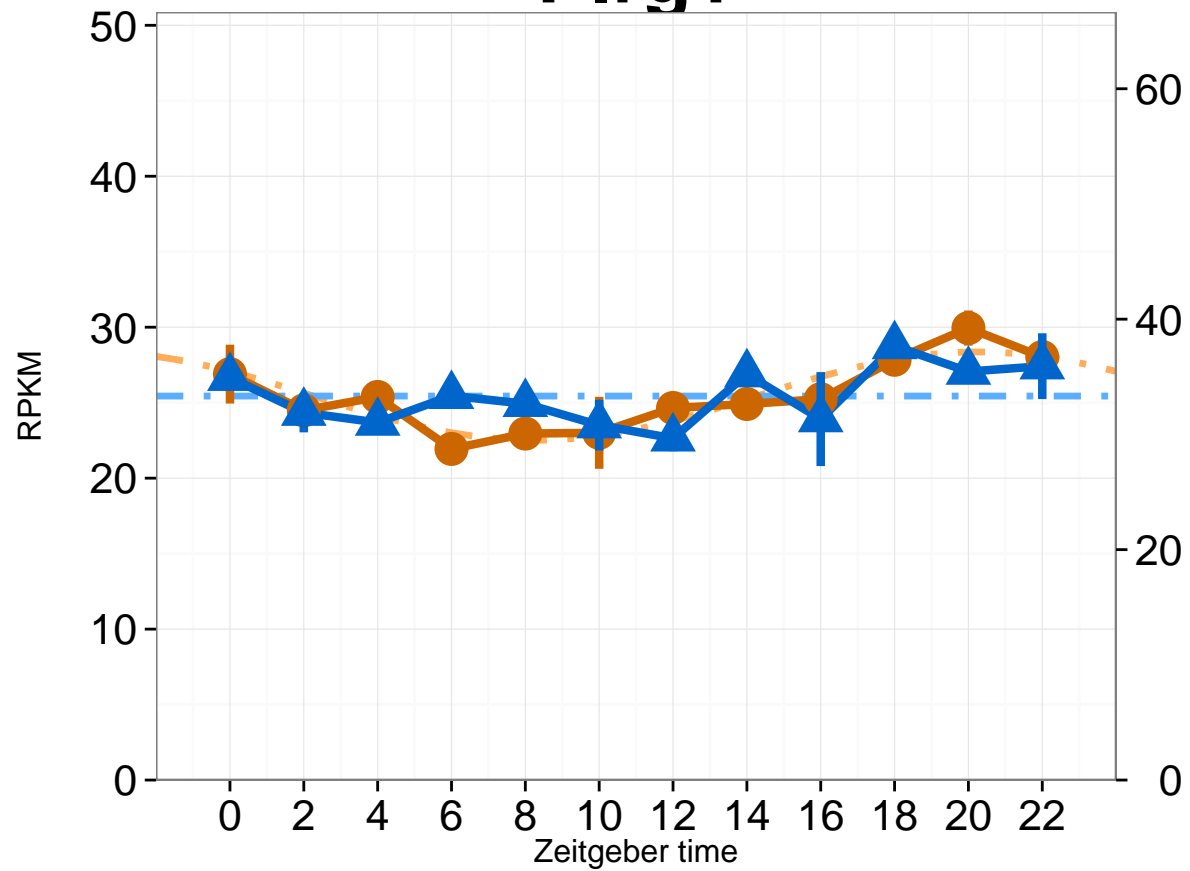

## Plrg1

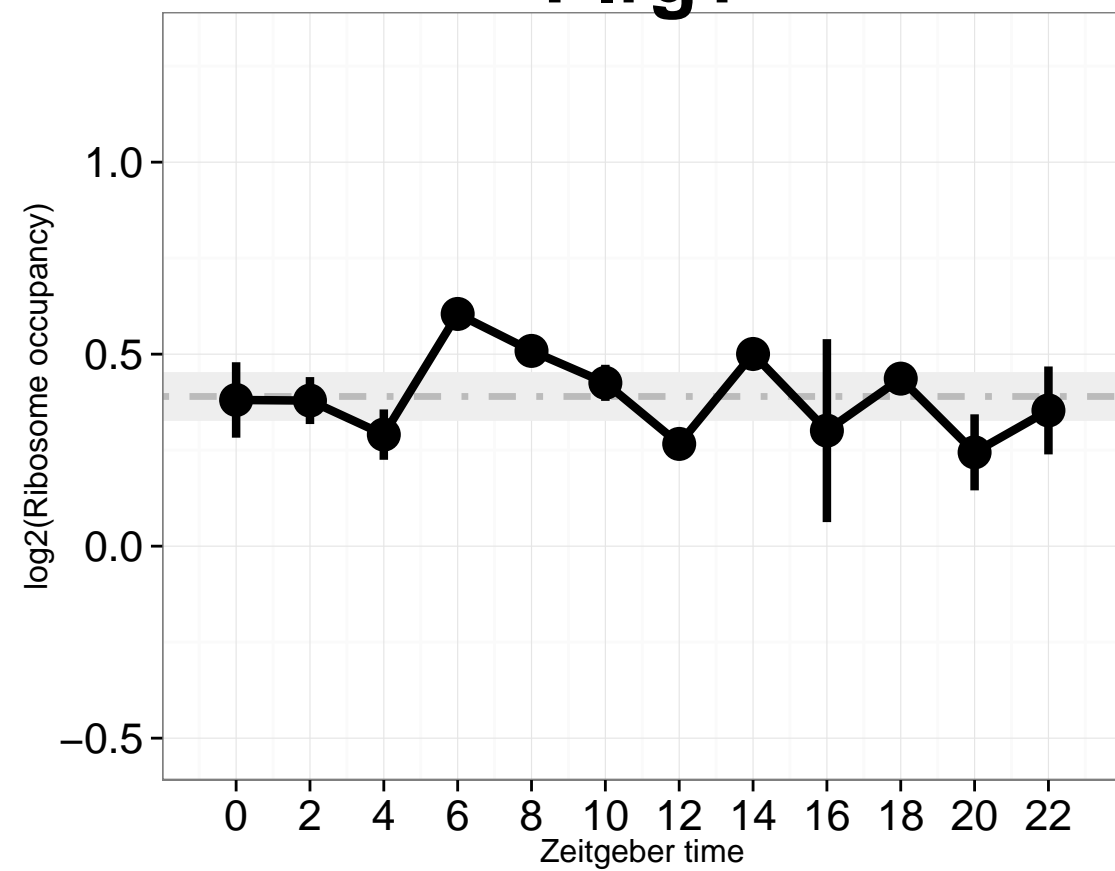

Supplement: Supplementary file 3848 [file 1]

# Fbxo44

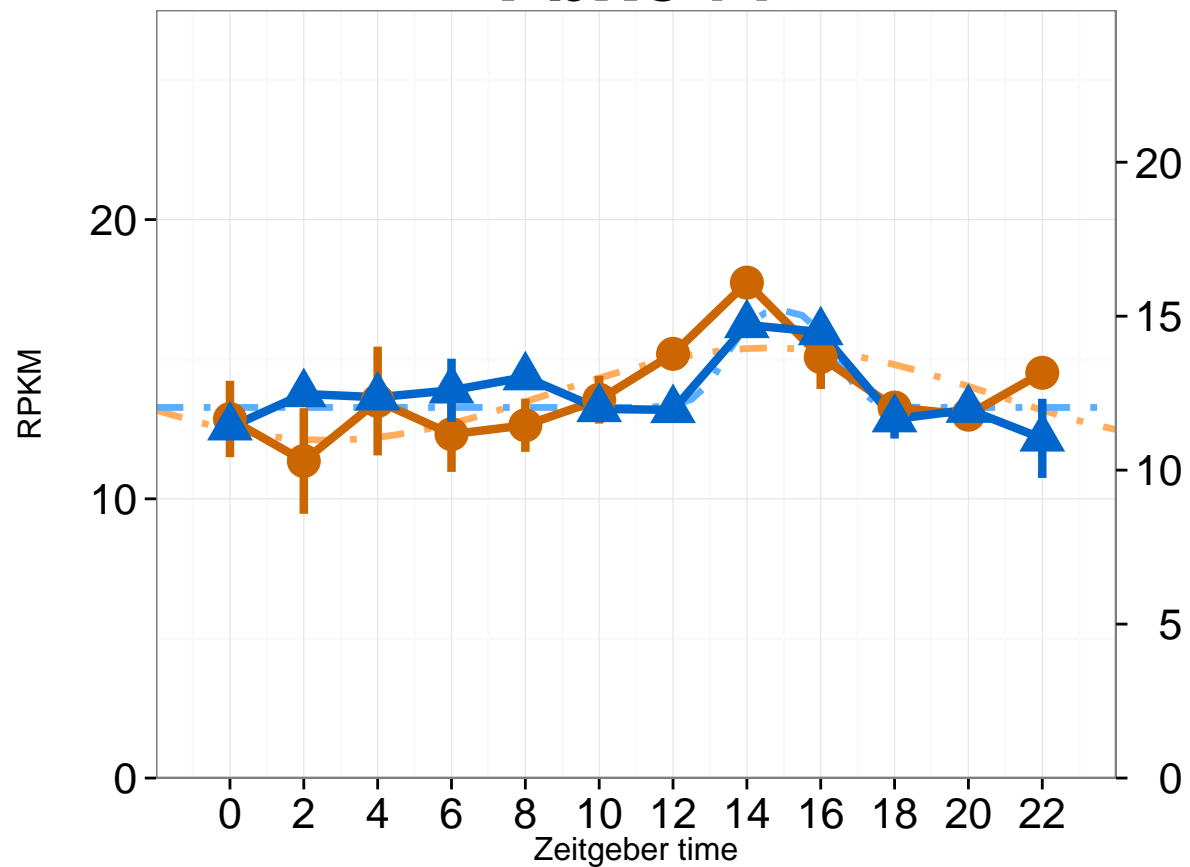

# Fbxo44

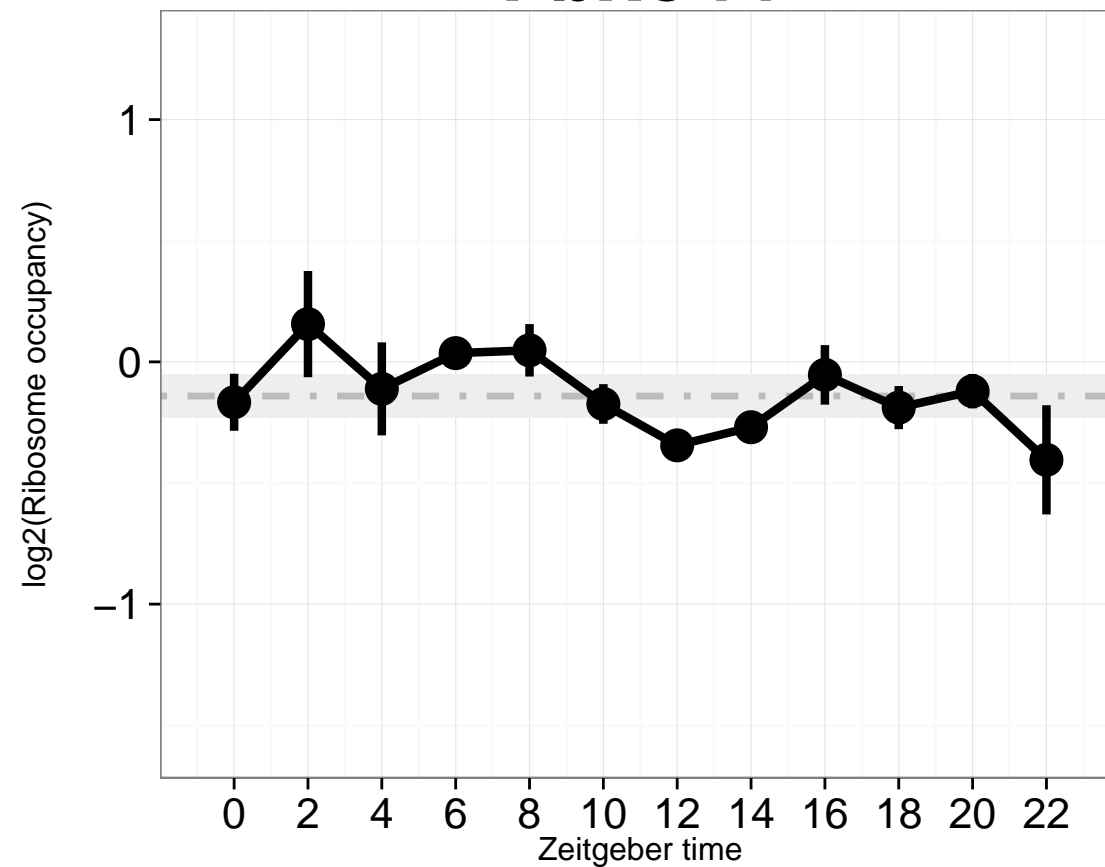

Supplement: Supplementary file 3849 [file 1]

# Hhatl

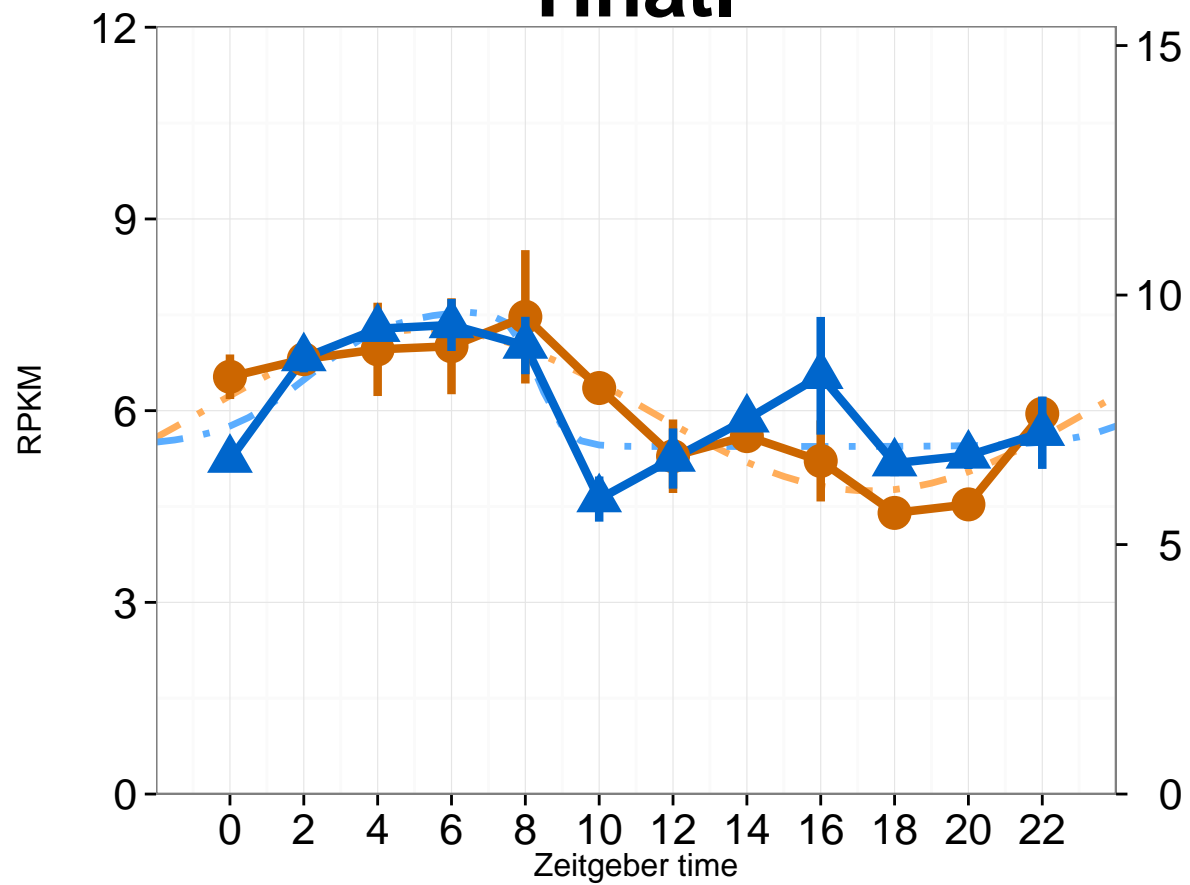

# Hhatl

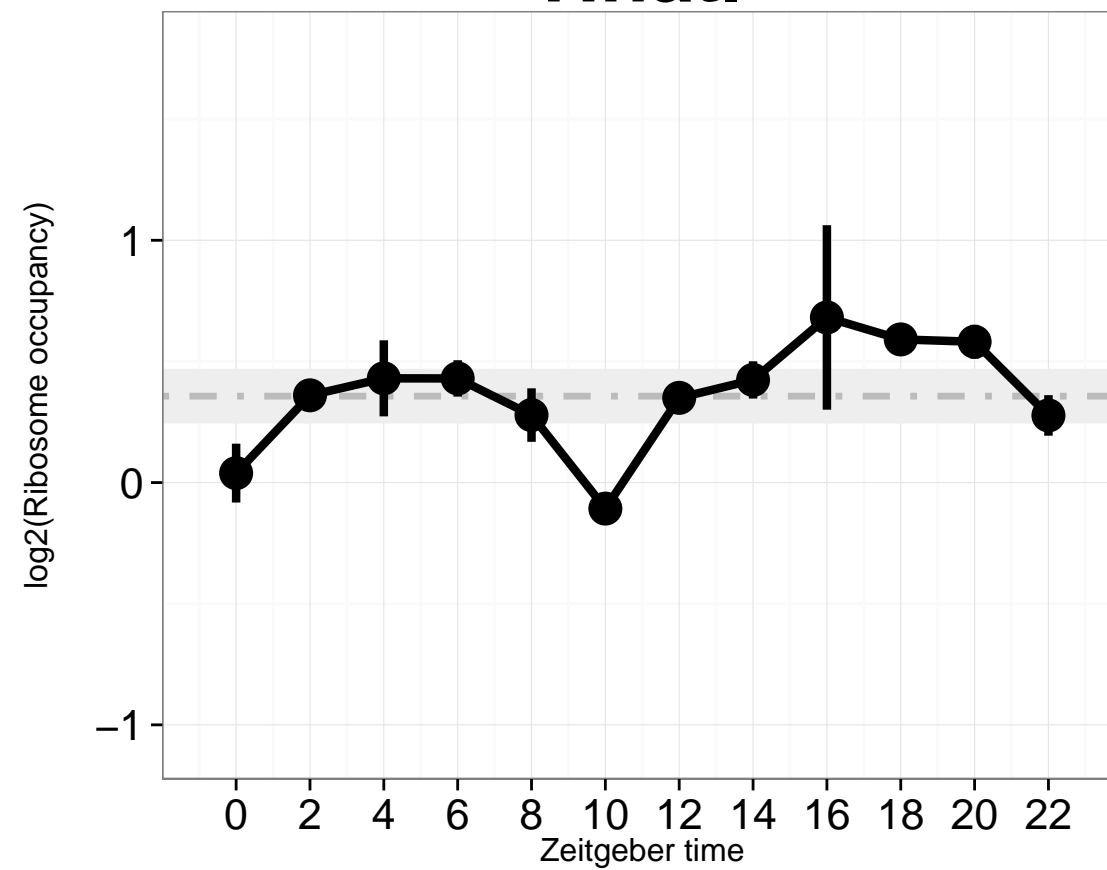

Supplement: Supplementary file 3850 [file 1]

## Ltbr

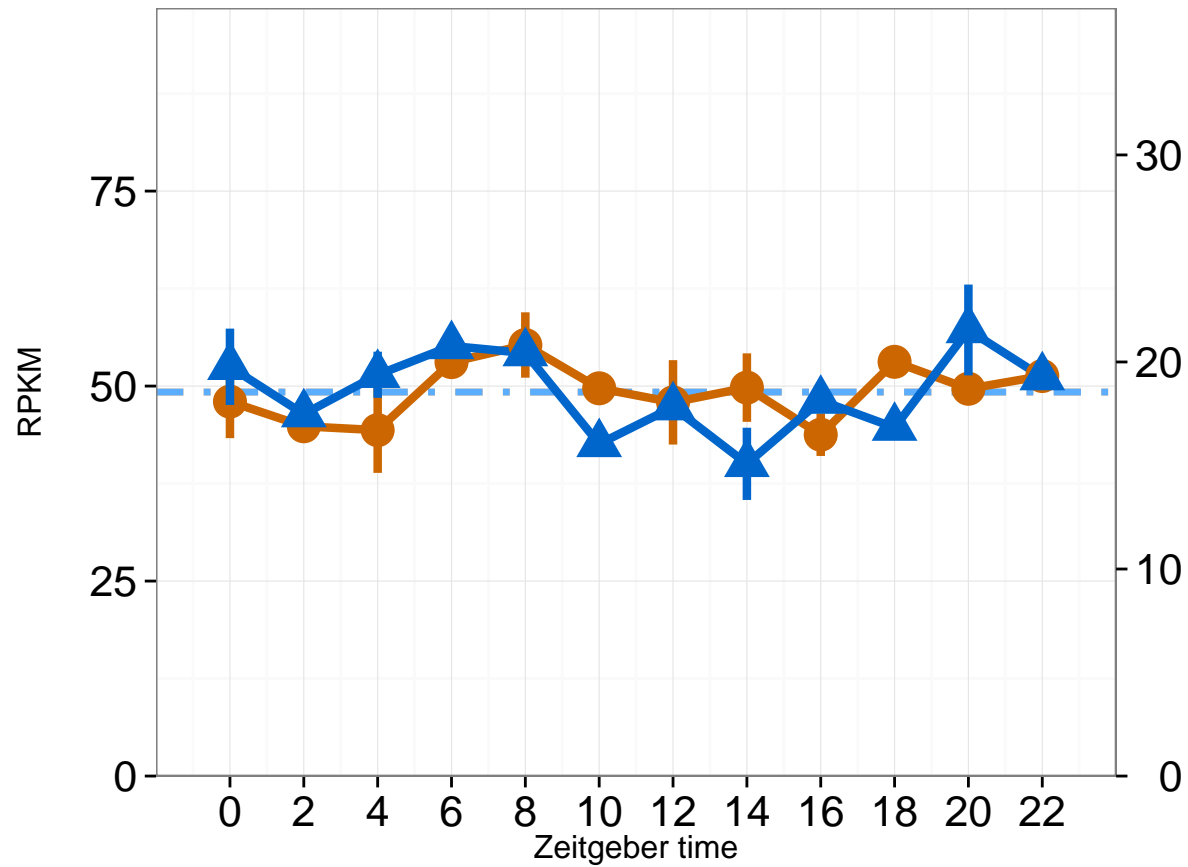

## Ltbr

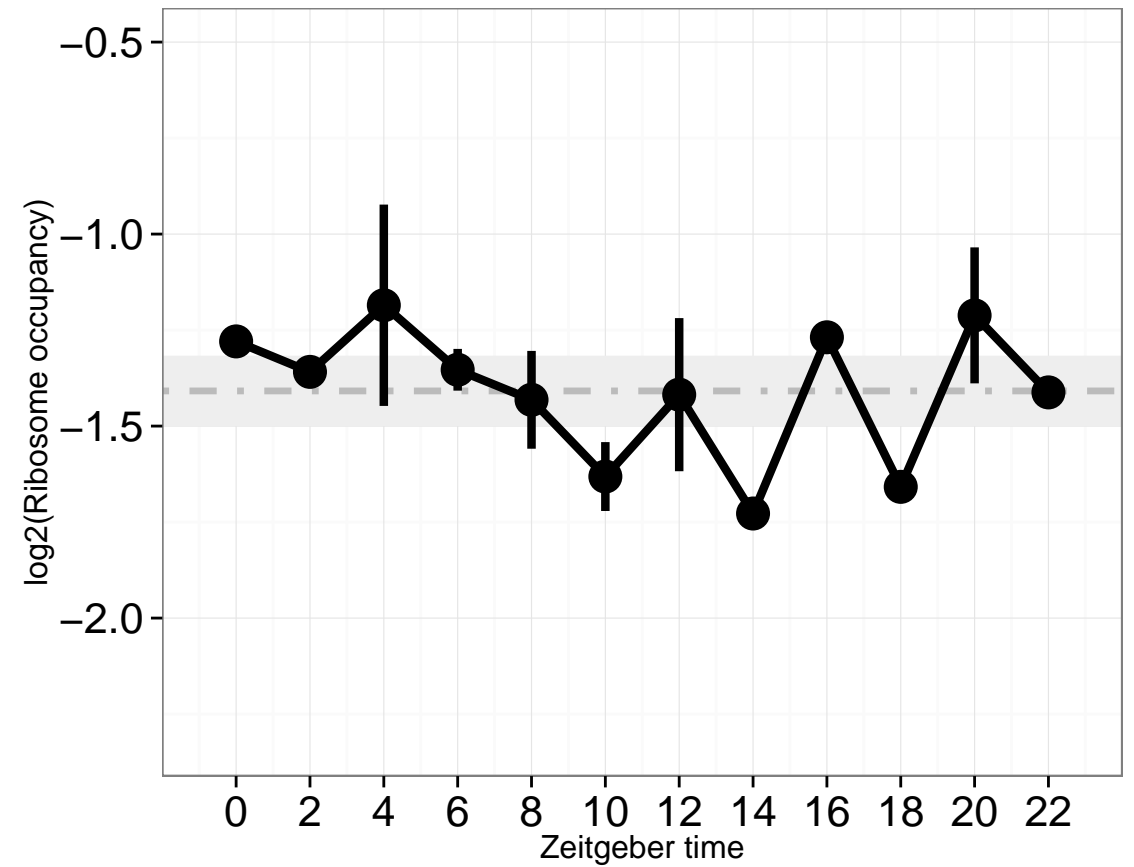

Supplement: Supplementary file 3851 [file 1]

## Myo7b

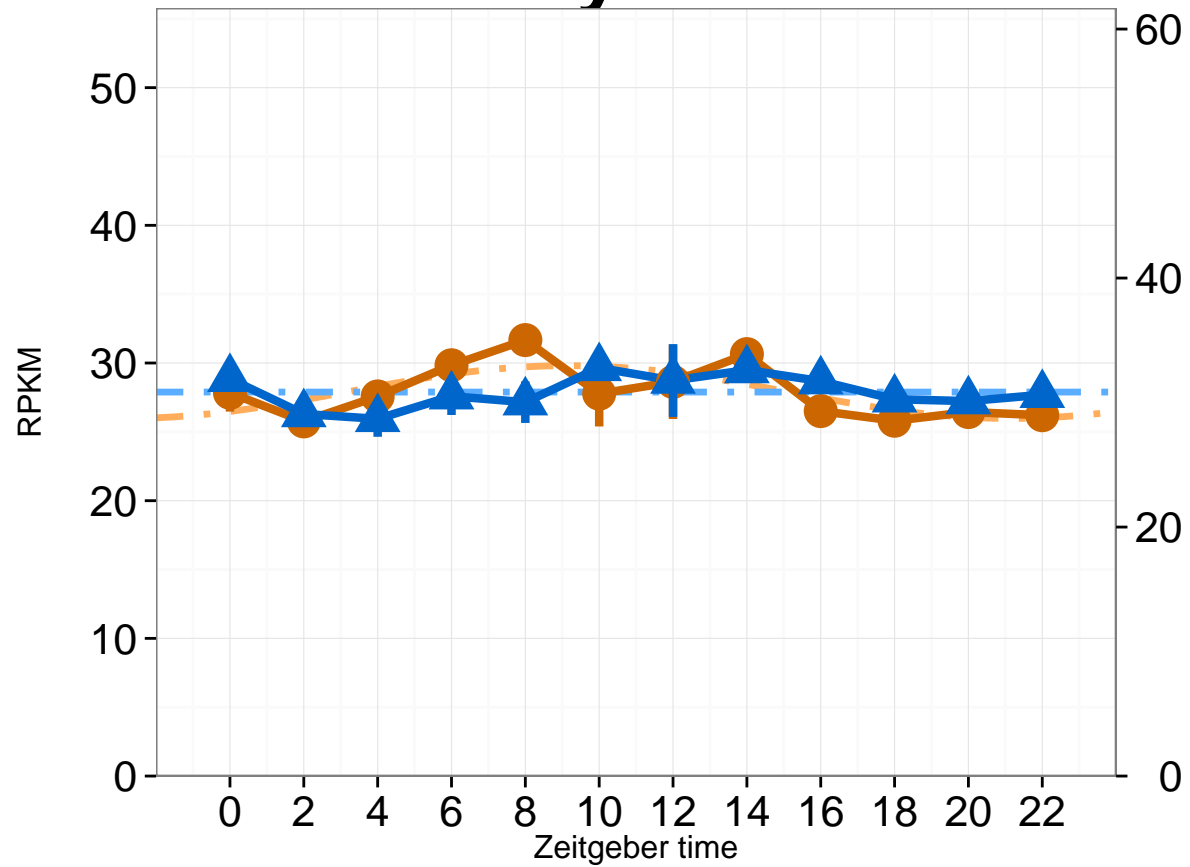

## Myo7b

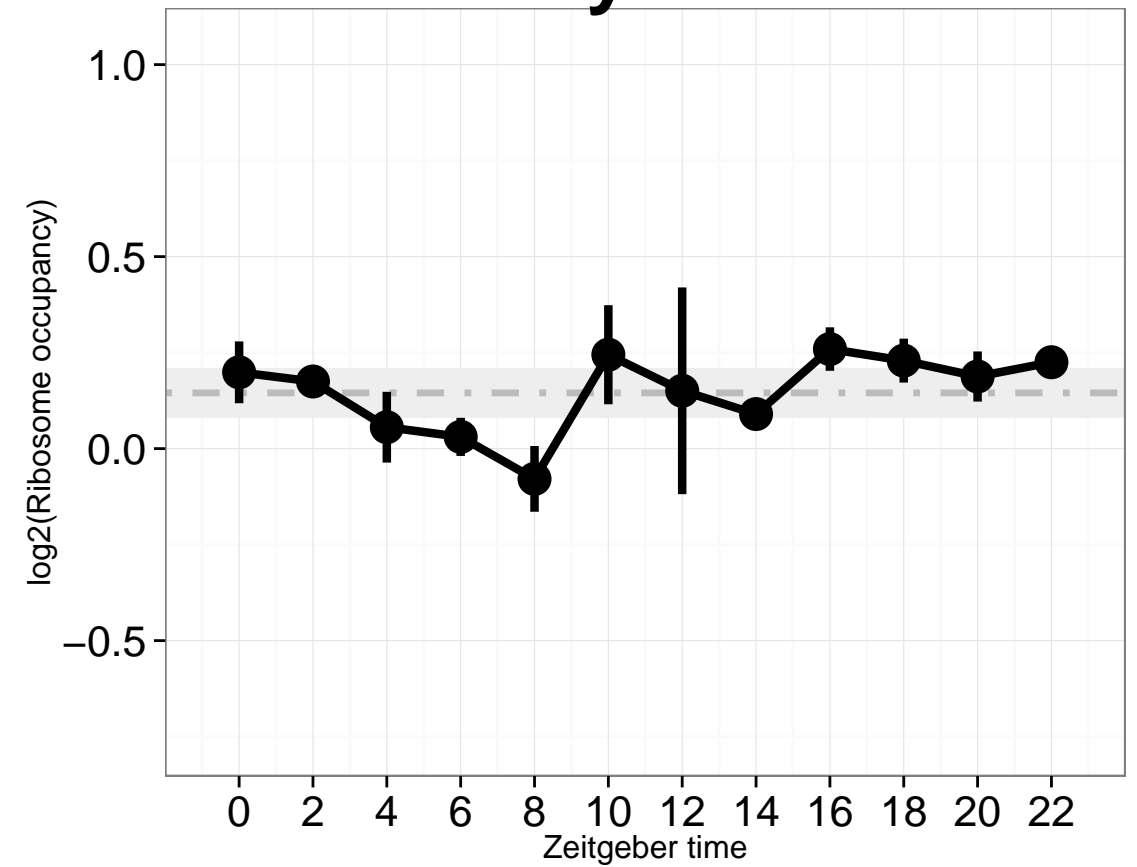

Supplement: Supplementary file 3852 [file 1]

## Nhs1

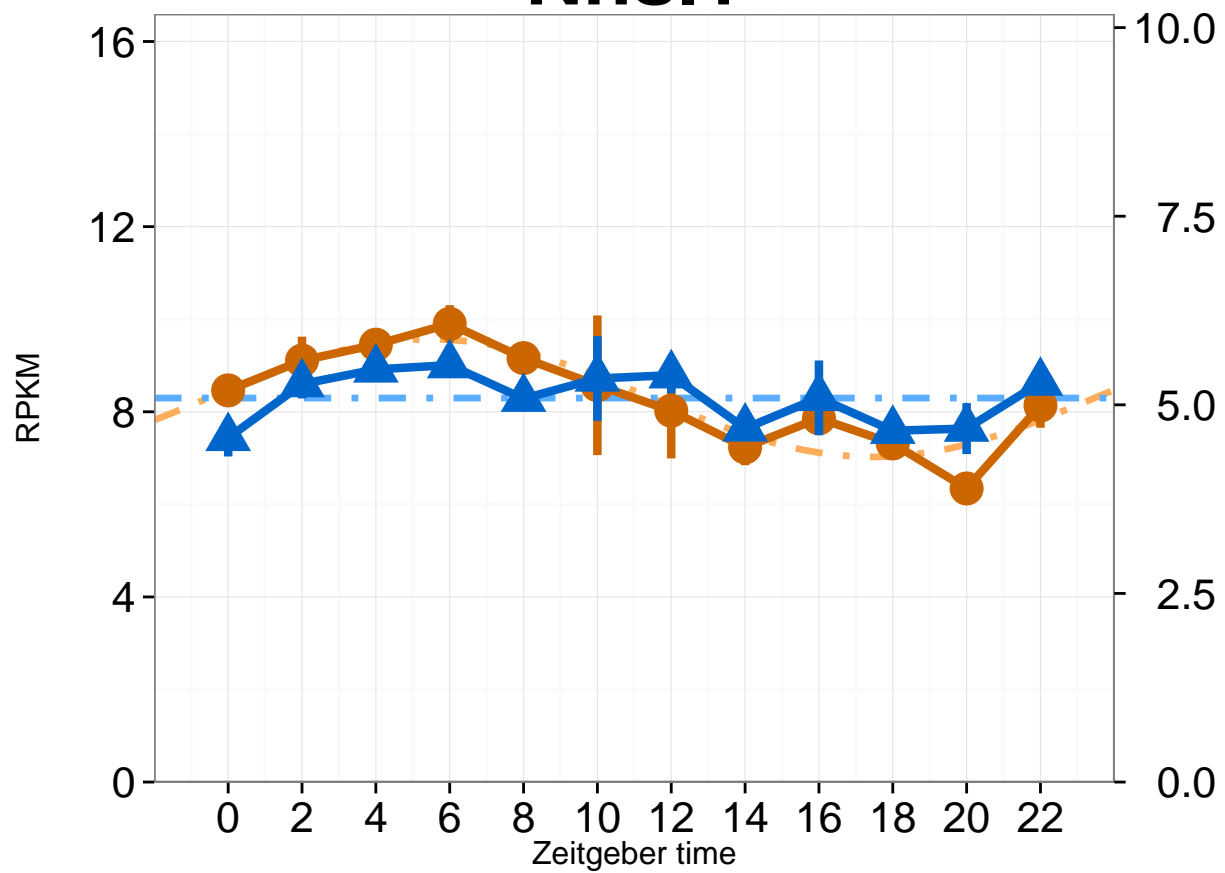

## Nhs1

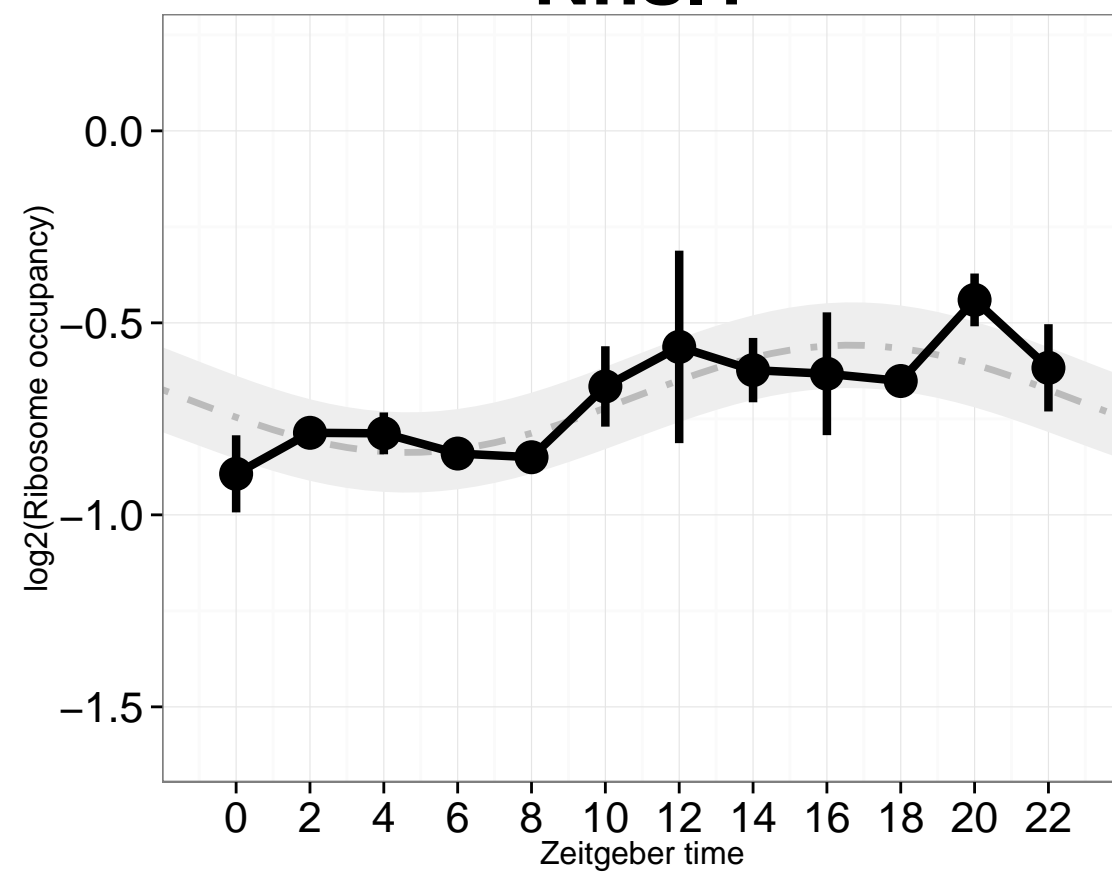

Supplement: Supplementary file 3853 [file 1]

## Adam4

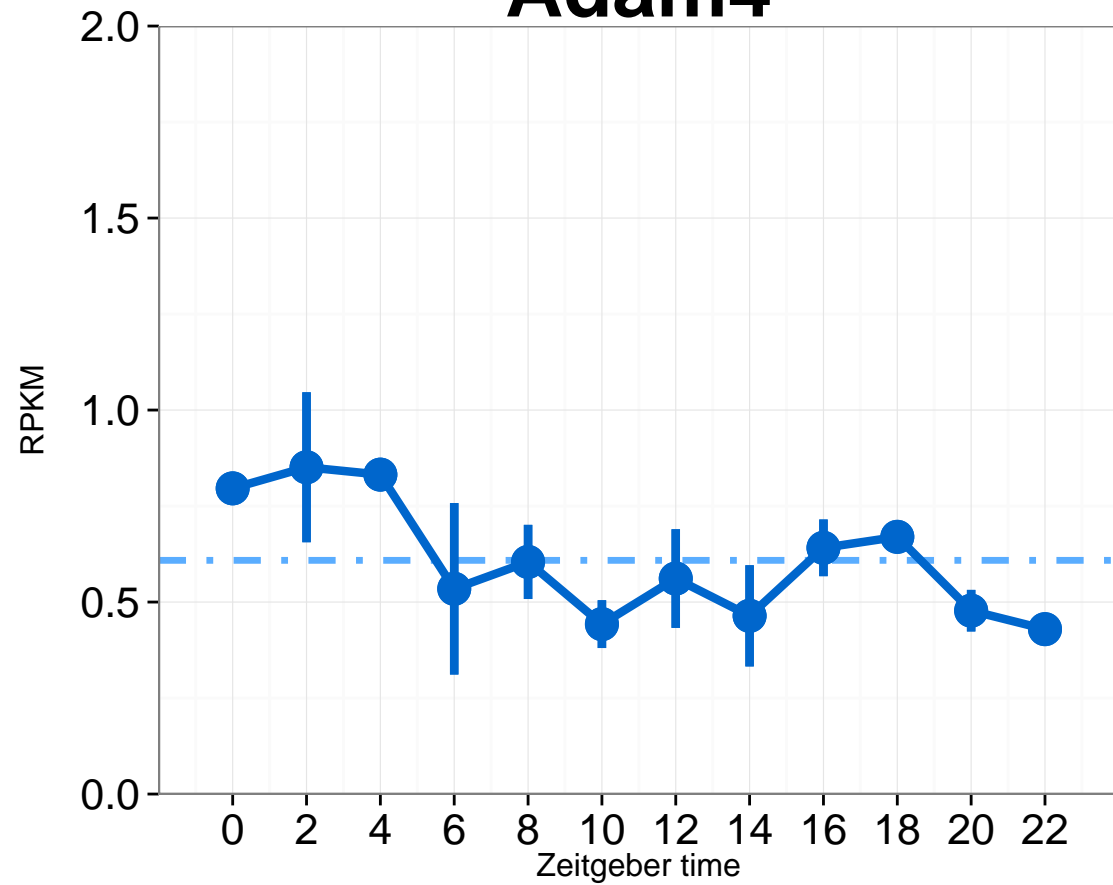

## Adam4 log2(Ribosome occupancy

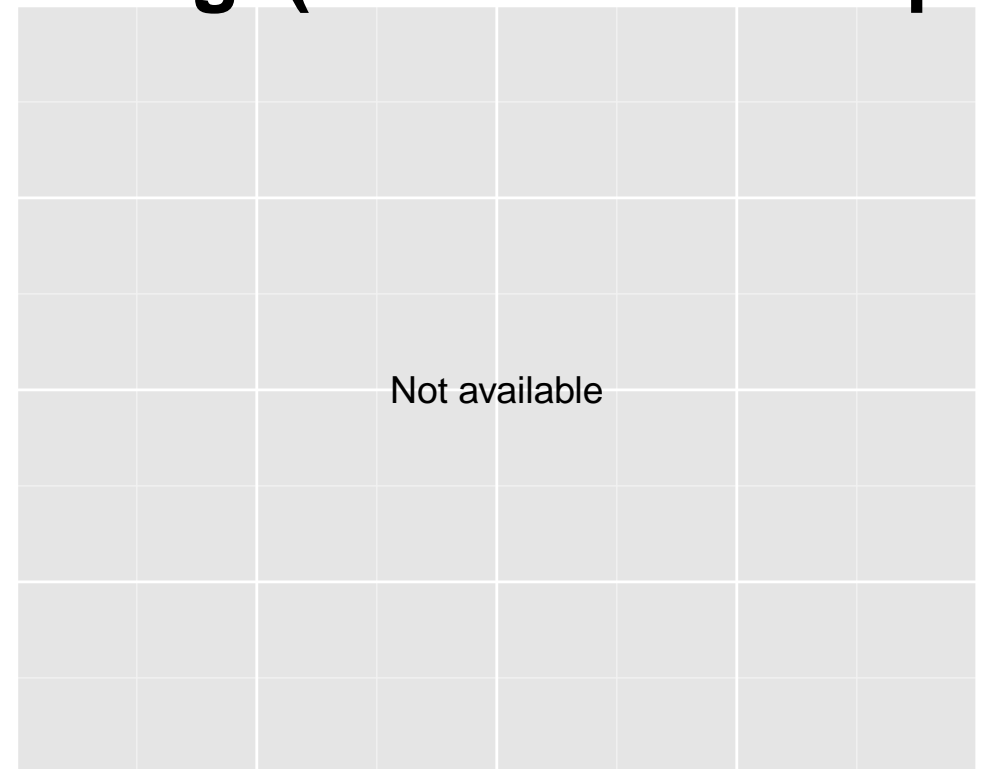

Supplement: Supplementary file 3854 [file 1]

## Rab10

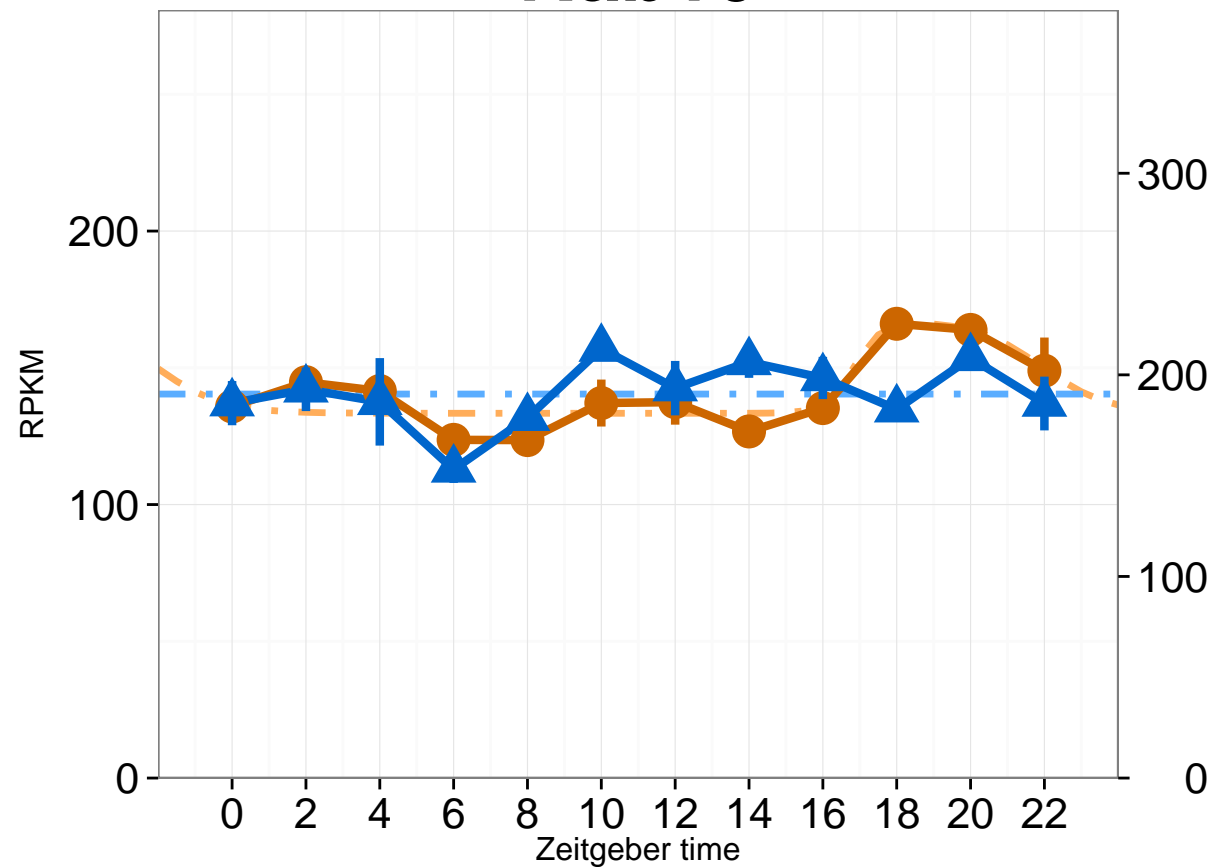

## Rab10

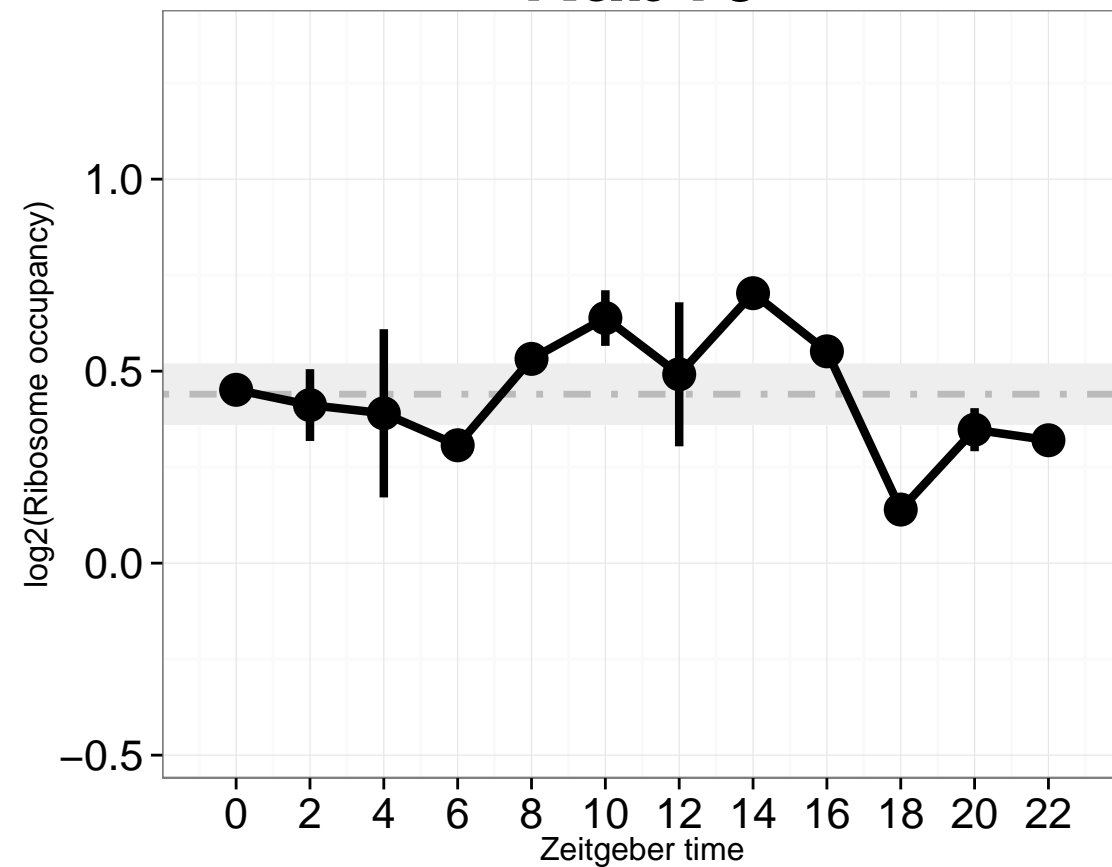

Supplement: Supplementary file 3855 [file 1]

## Clk4

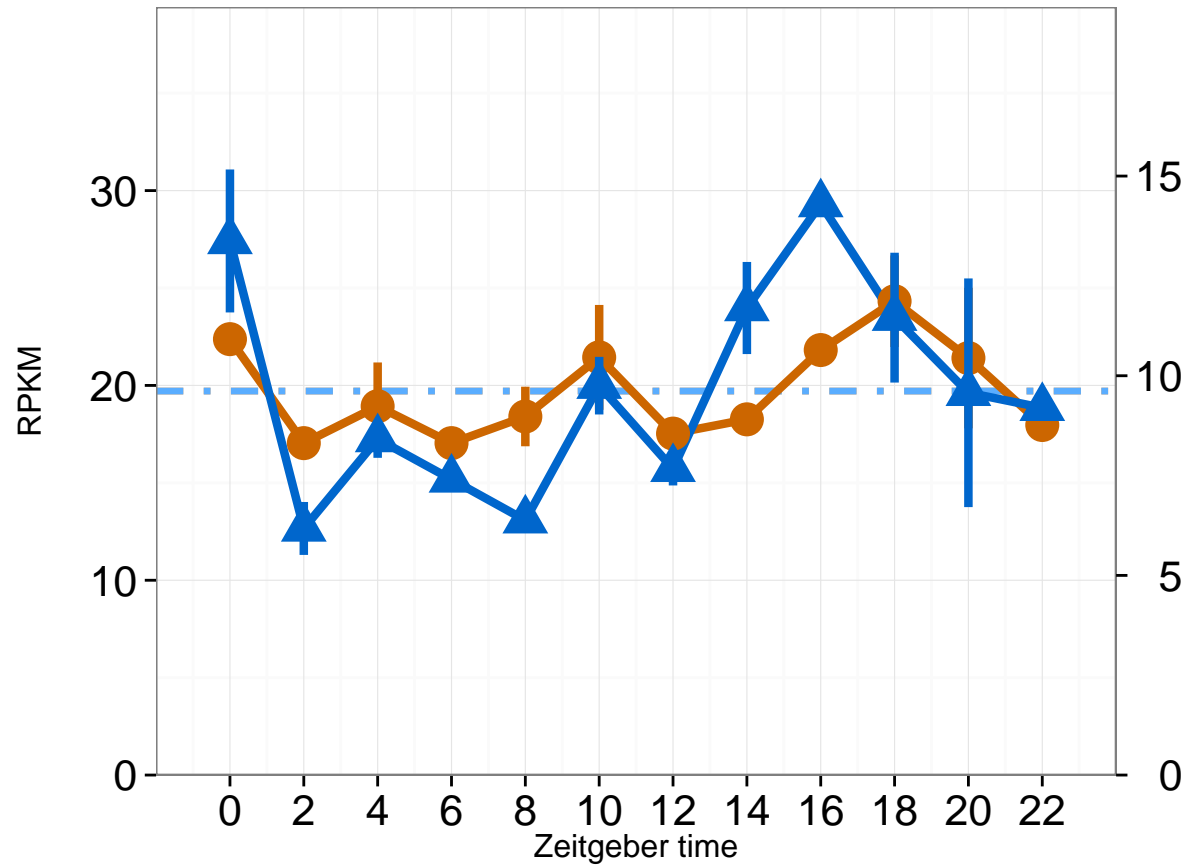

## Clk4

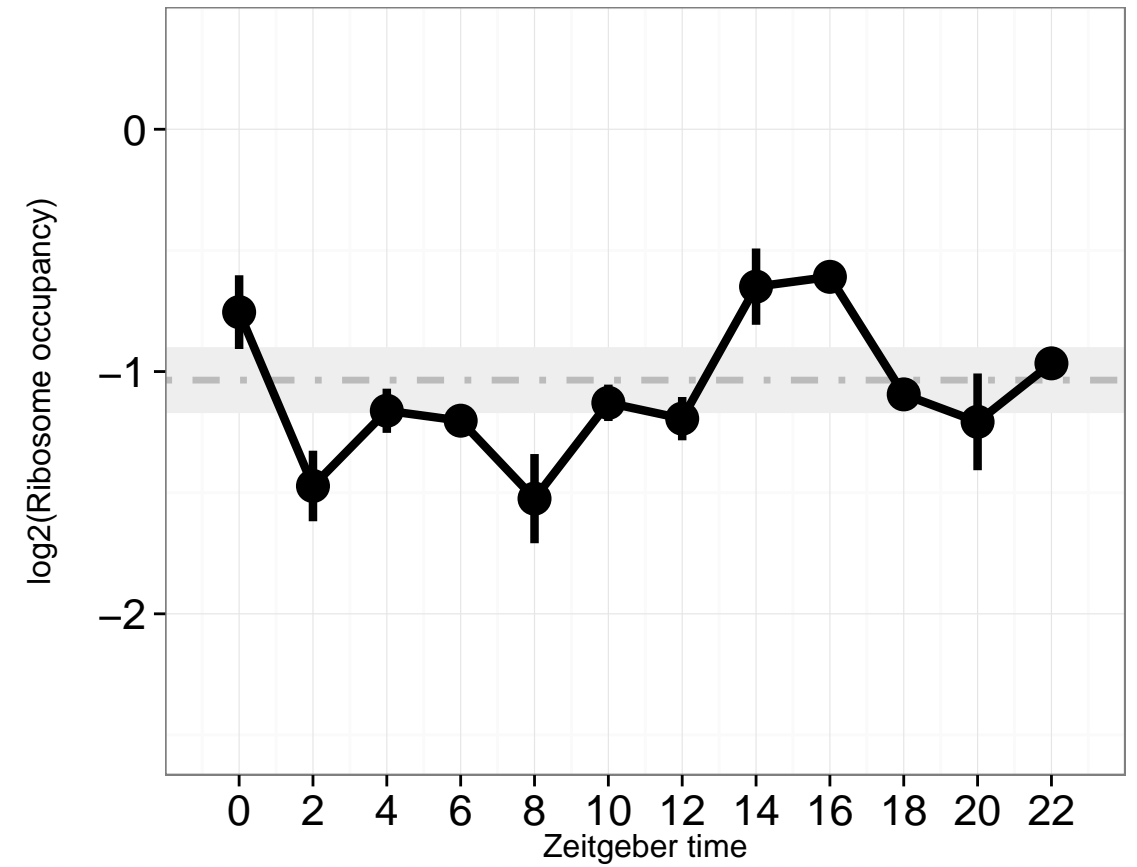

Supplement: Supplementary file 3856 [file 1]

## Cot11

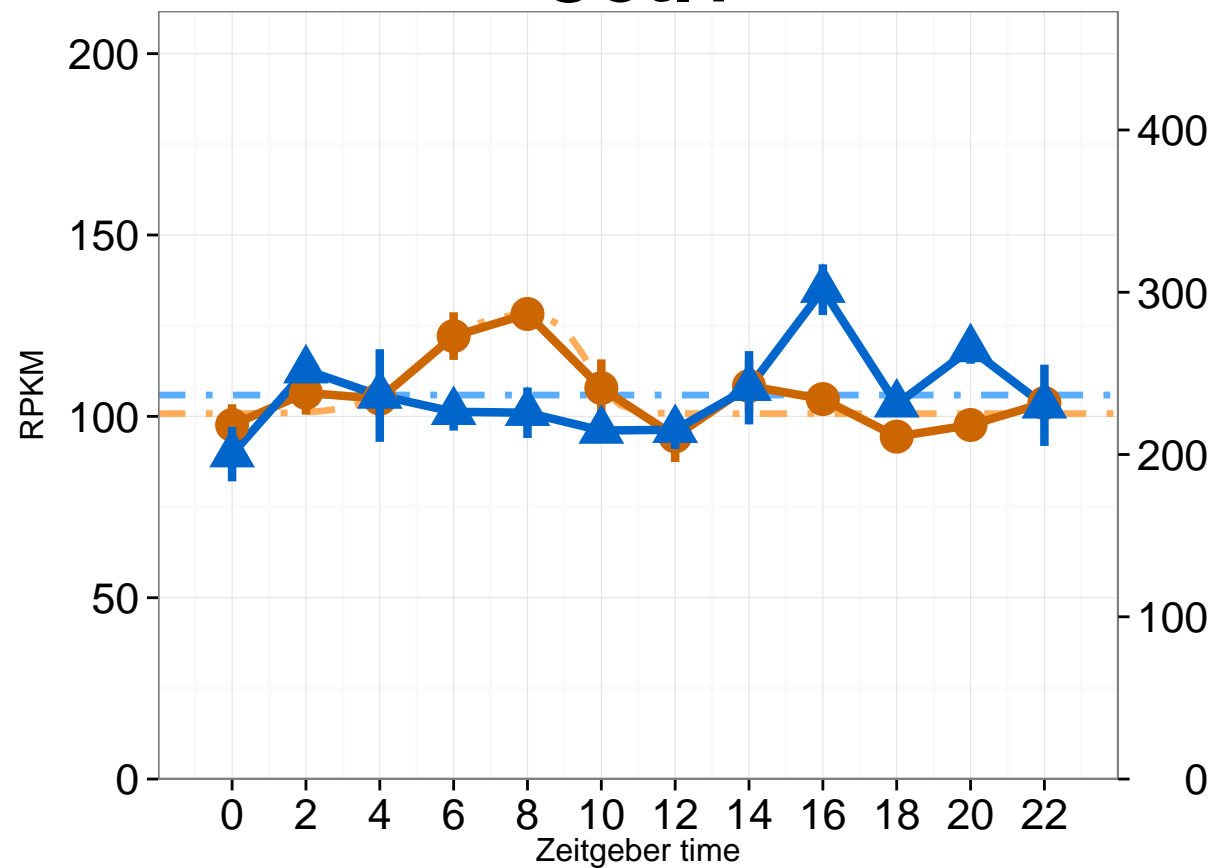

## Cot11

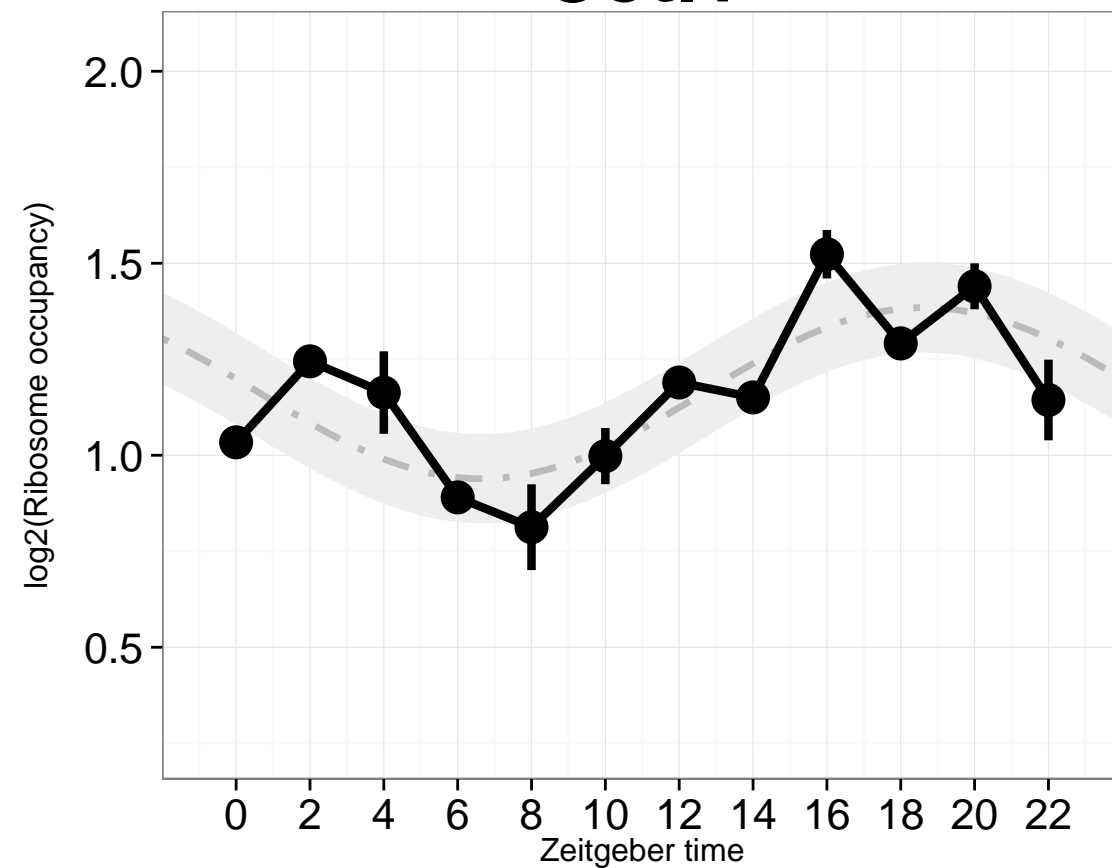

Supplement: Supplementary file 3857 [file 1]

## Tmtc2

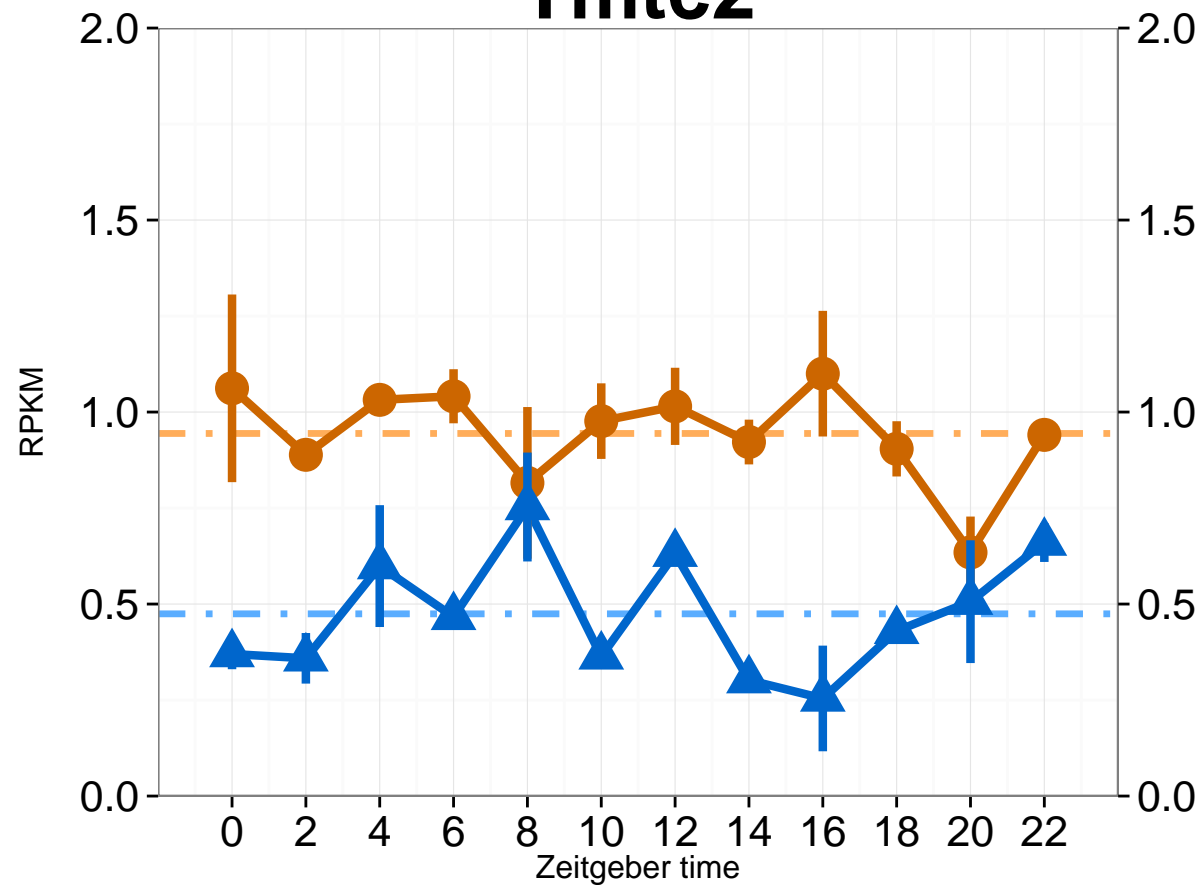

## Tmtc2

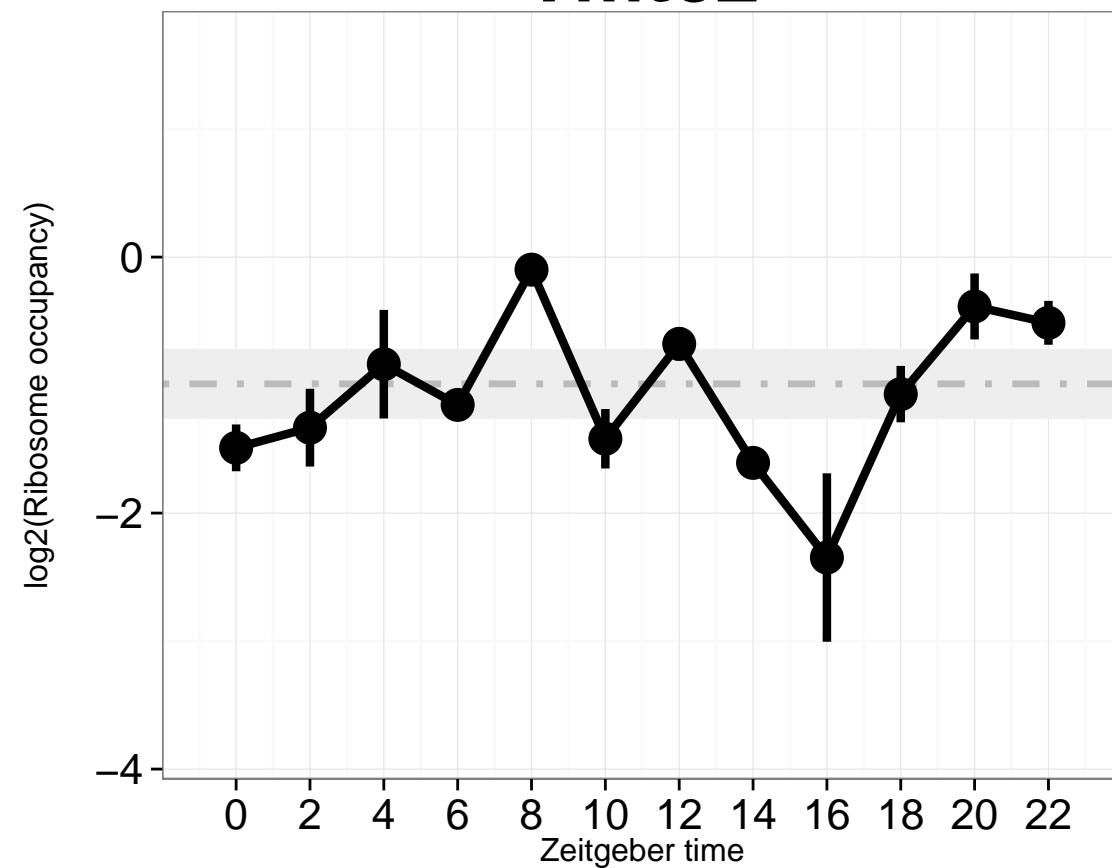

Supplement: Supplementary file 3858 [file 1]

# Cyp2a5

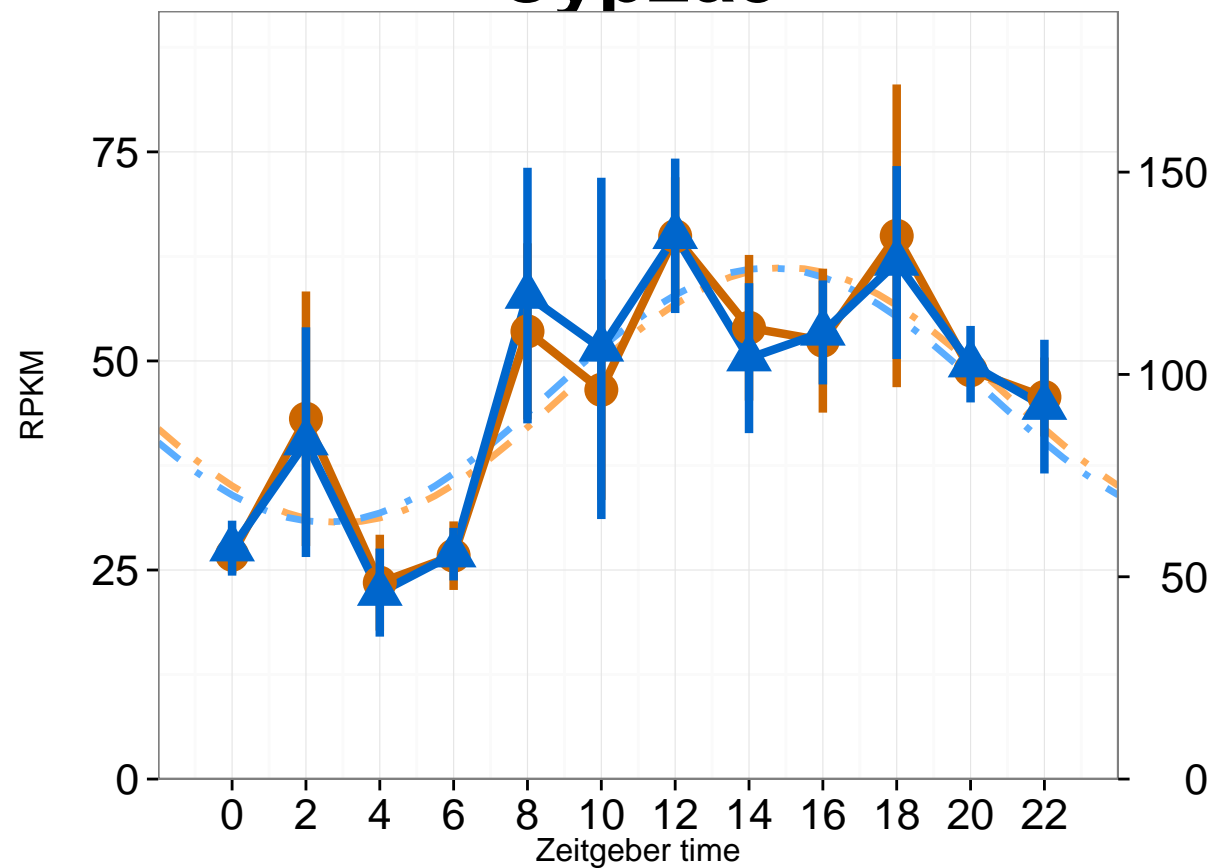

# Cyp2a5

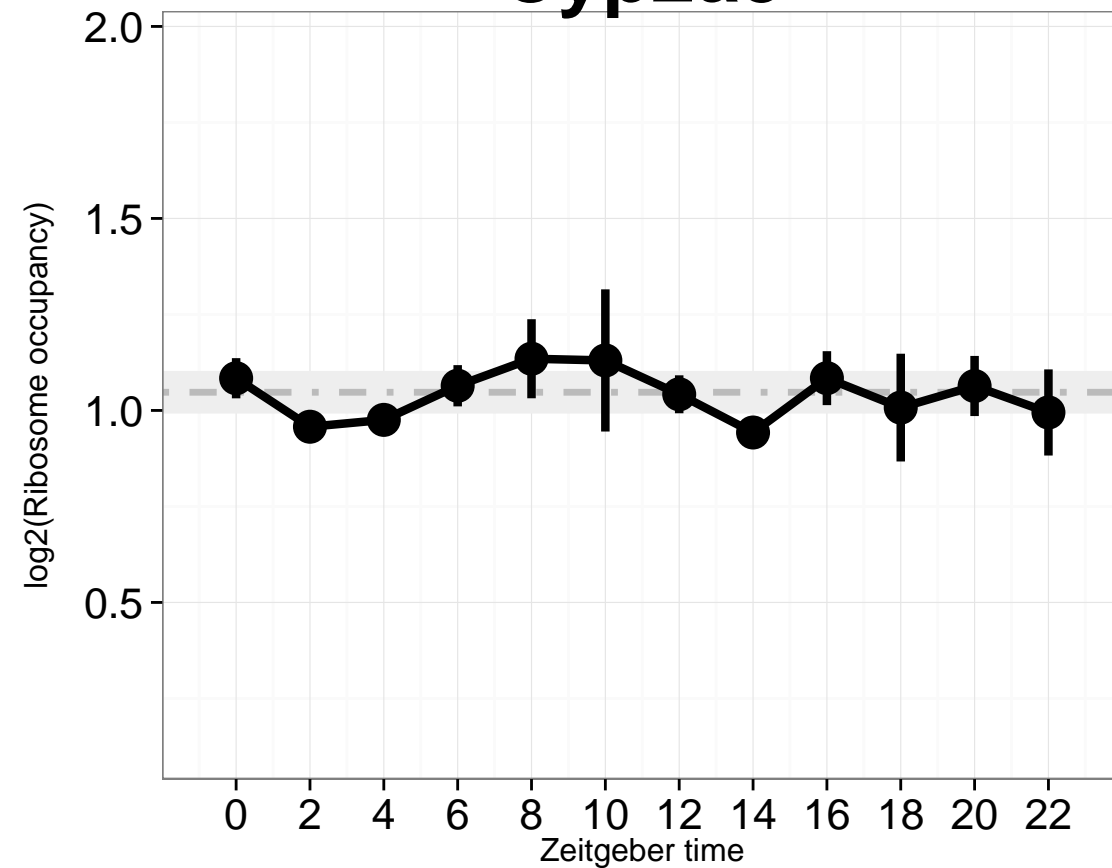

Supplement: Supplementary file 3859 [file 1]

## Vdac3

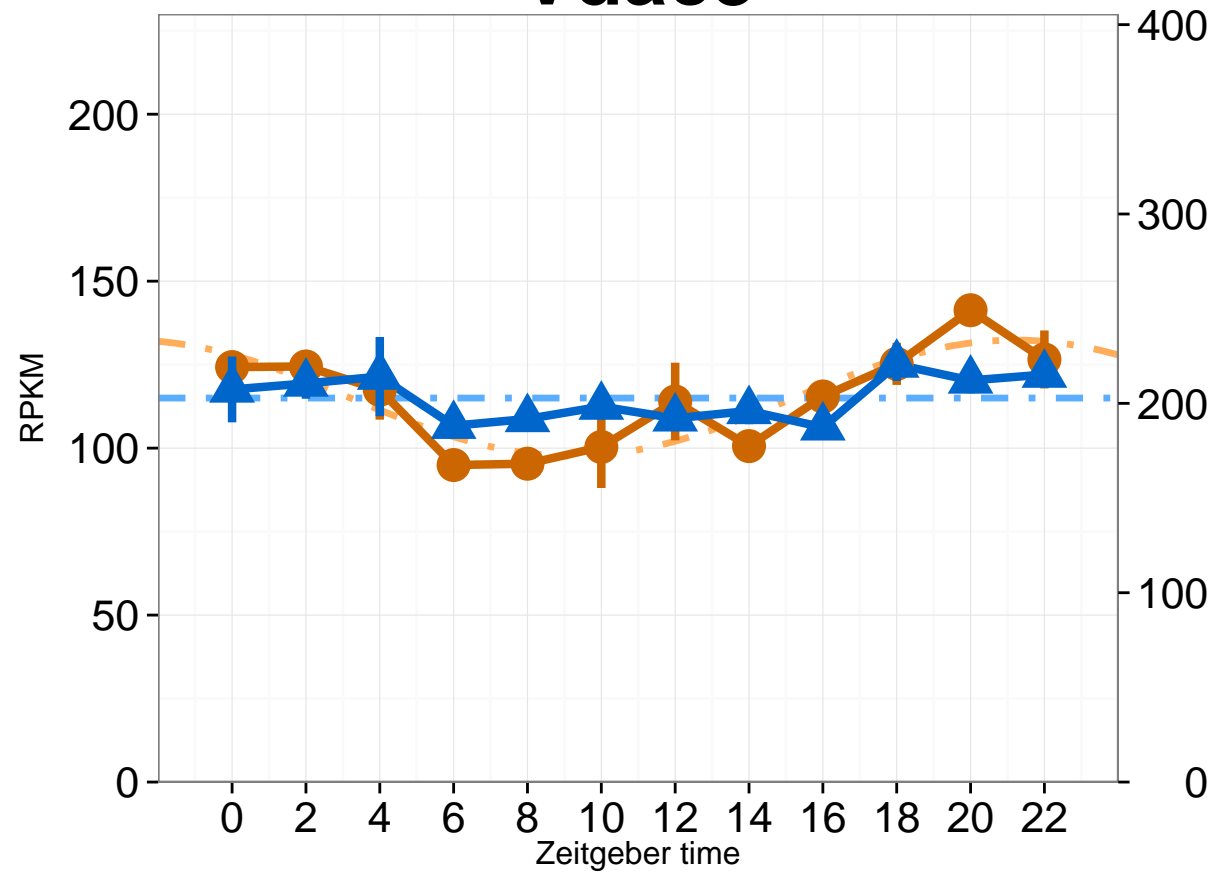

## Vdac3

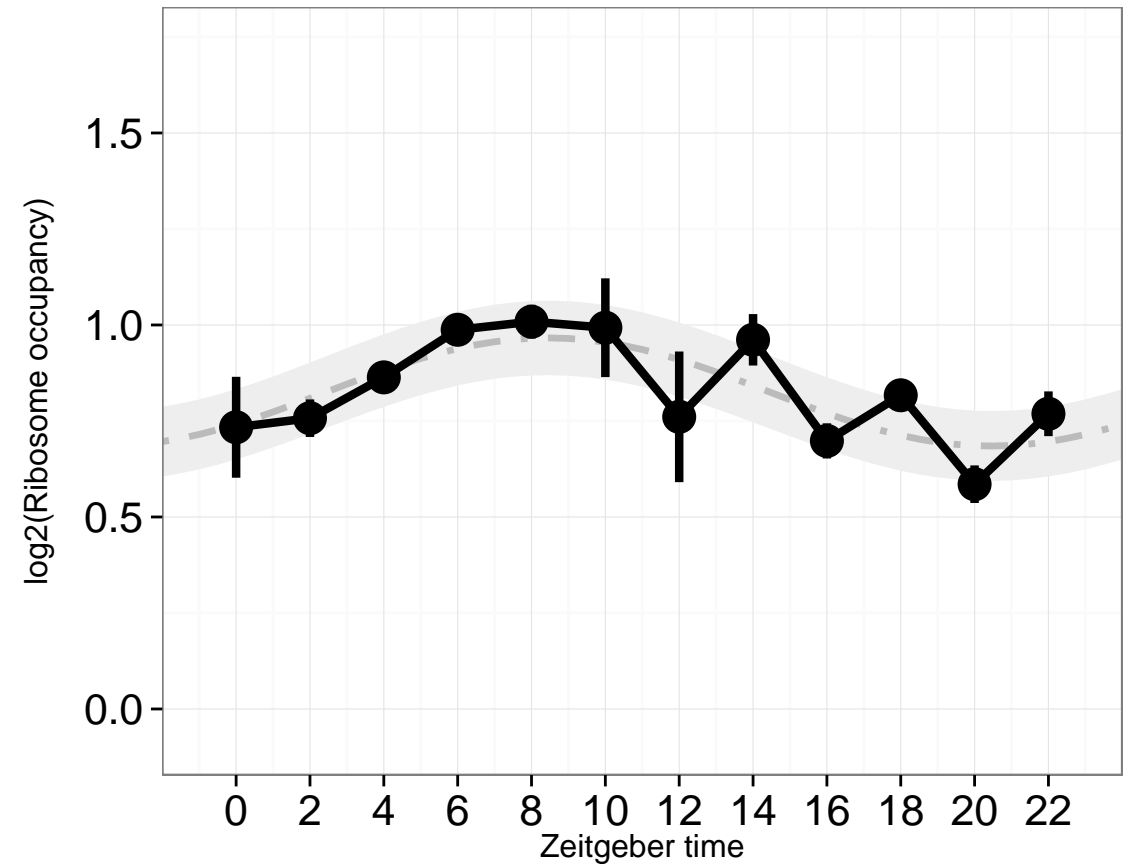

Supplement: Supplementary file 3860 [file 1]

## Tec

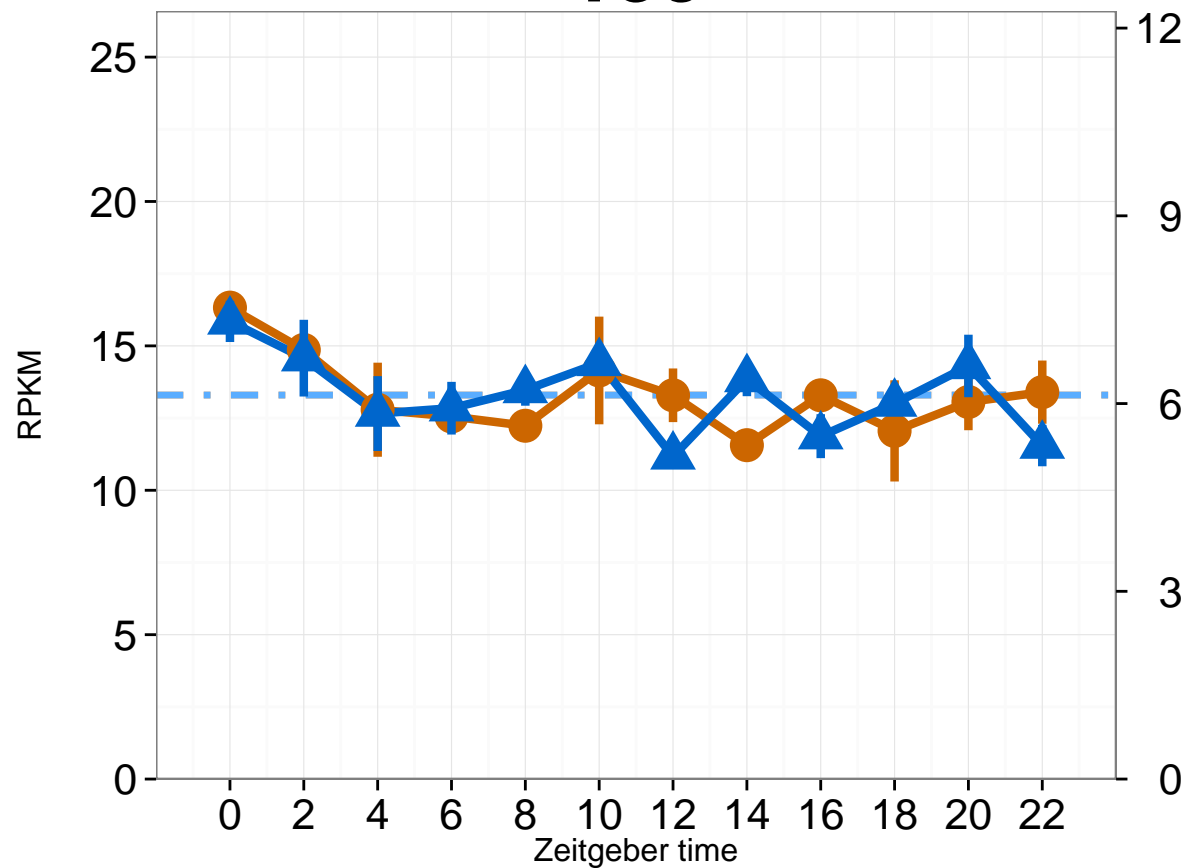

## Tec

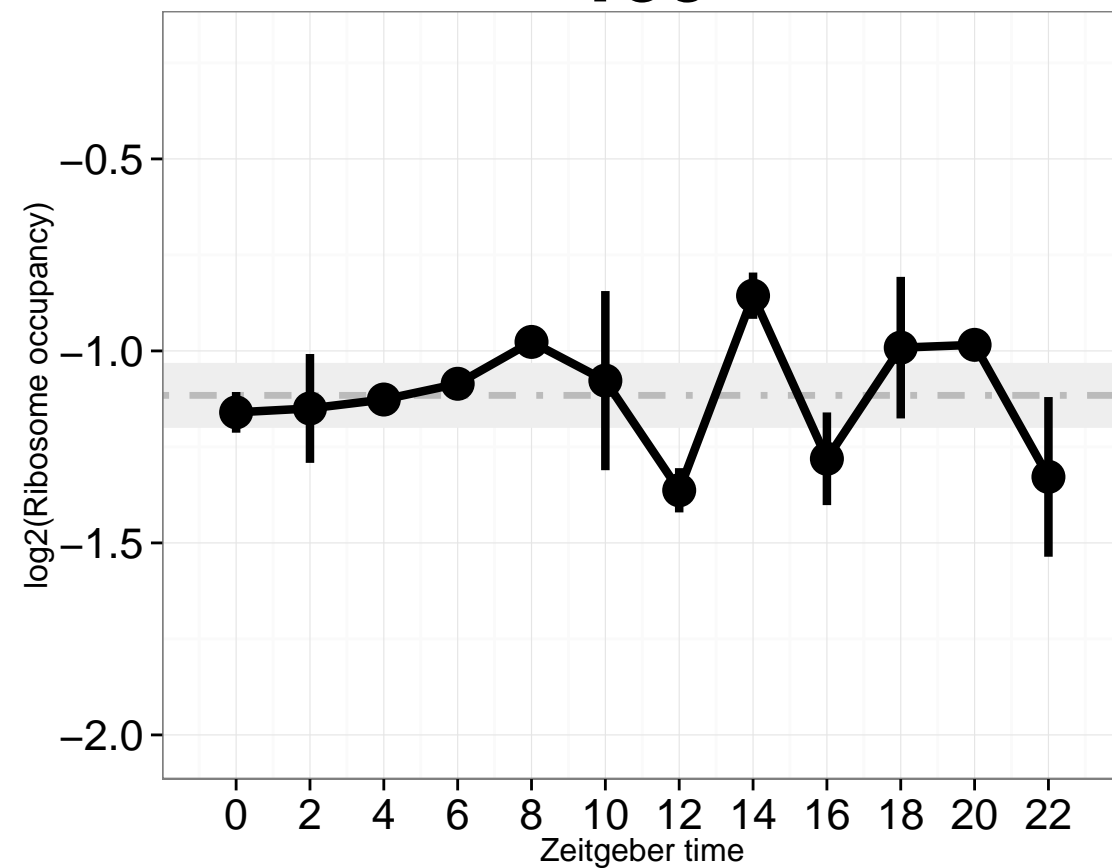

Supplement: Supplementary file 3861 [file 1]

# Col16a1

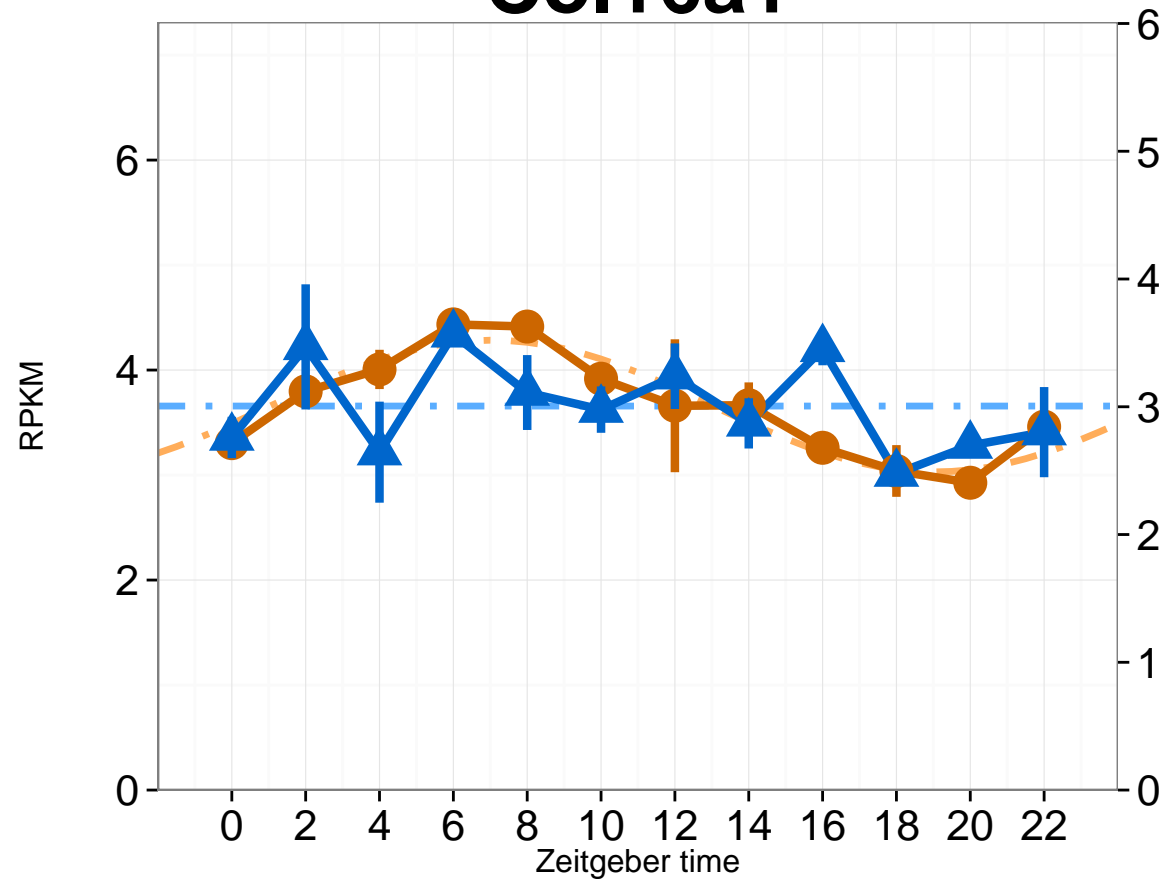

# Col16a1

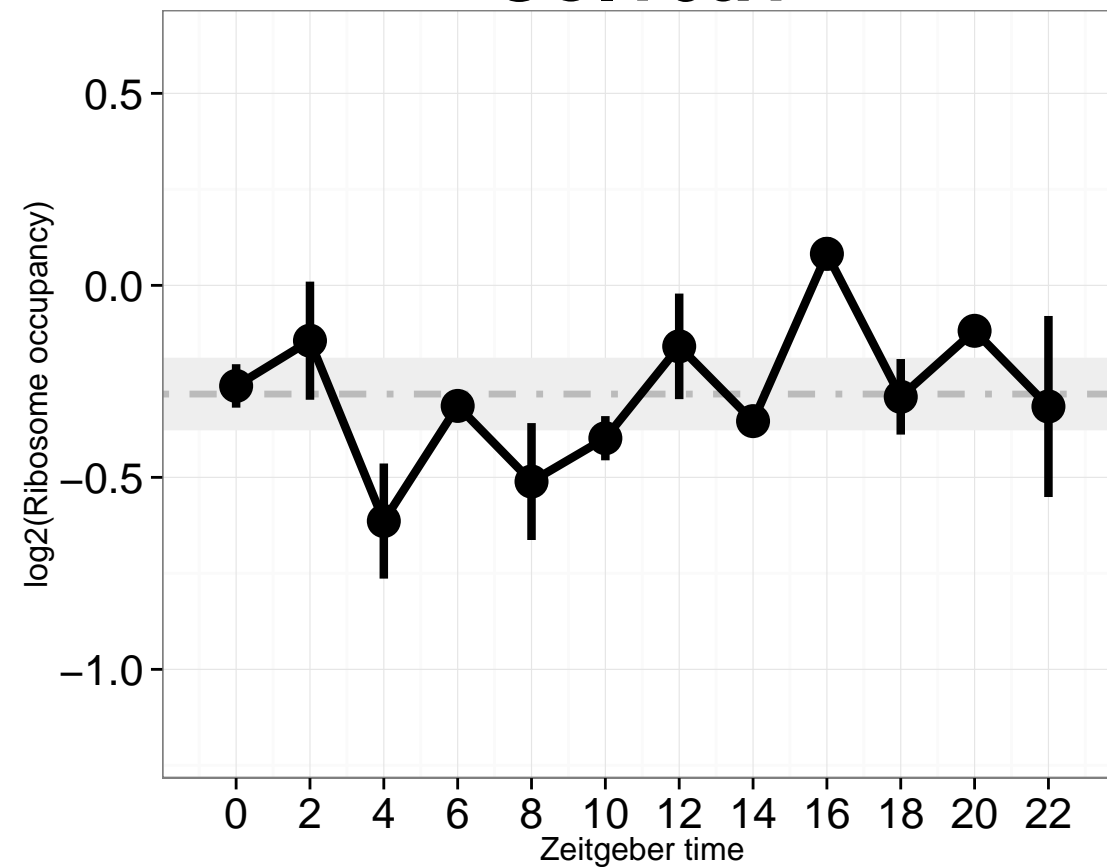

Supplement: Supplementary file 3862 [file 1]

# Ptcd1

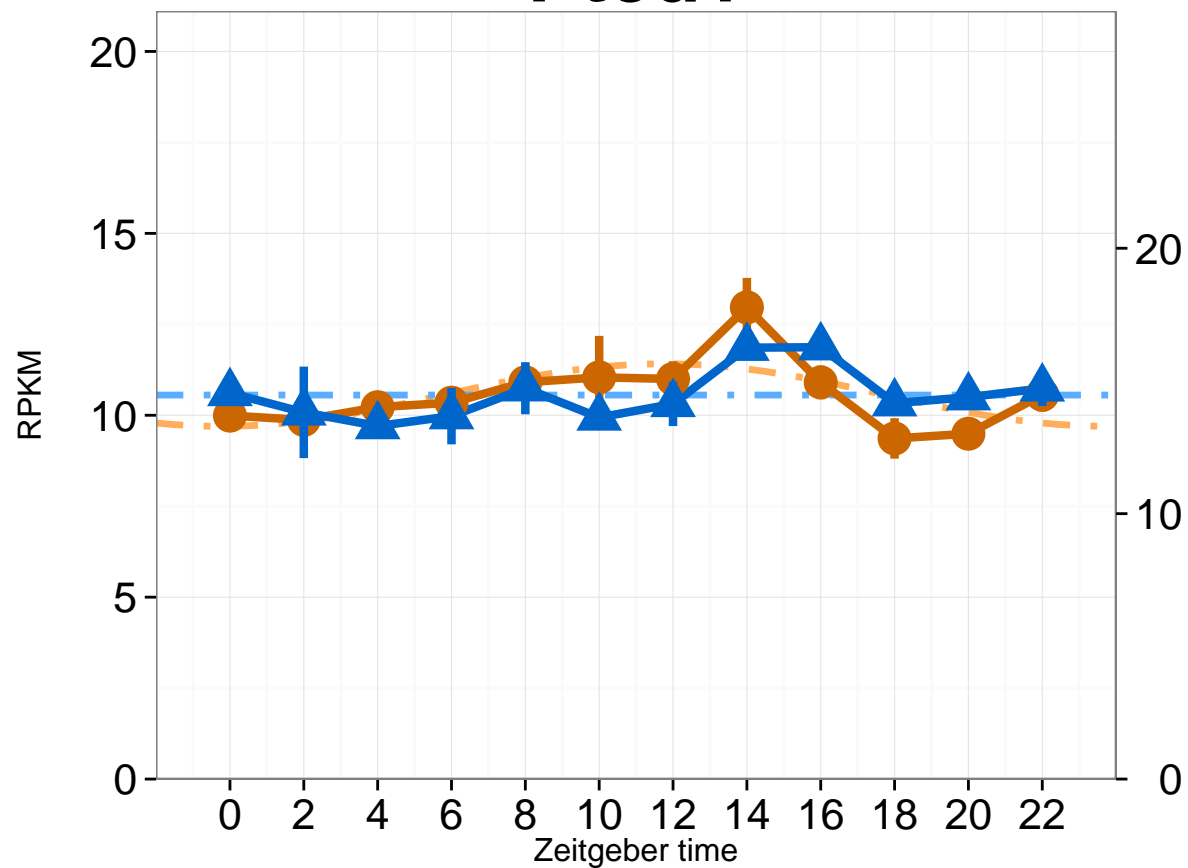

# Ptcd1

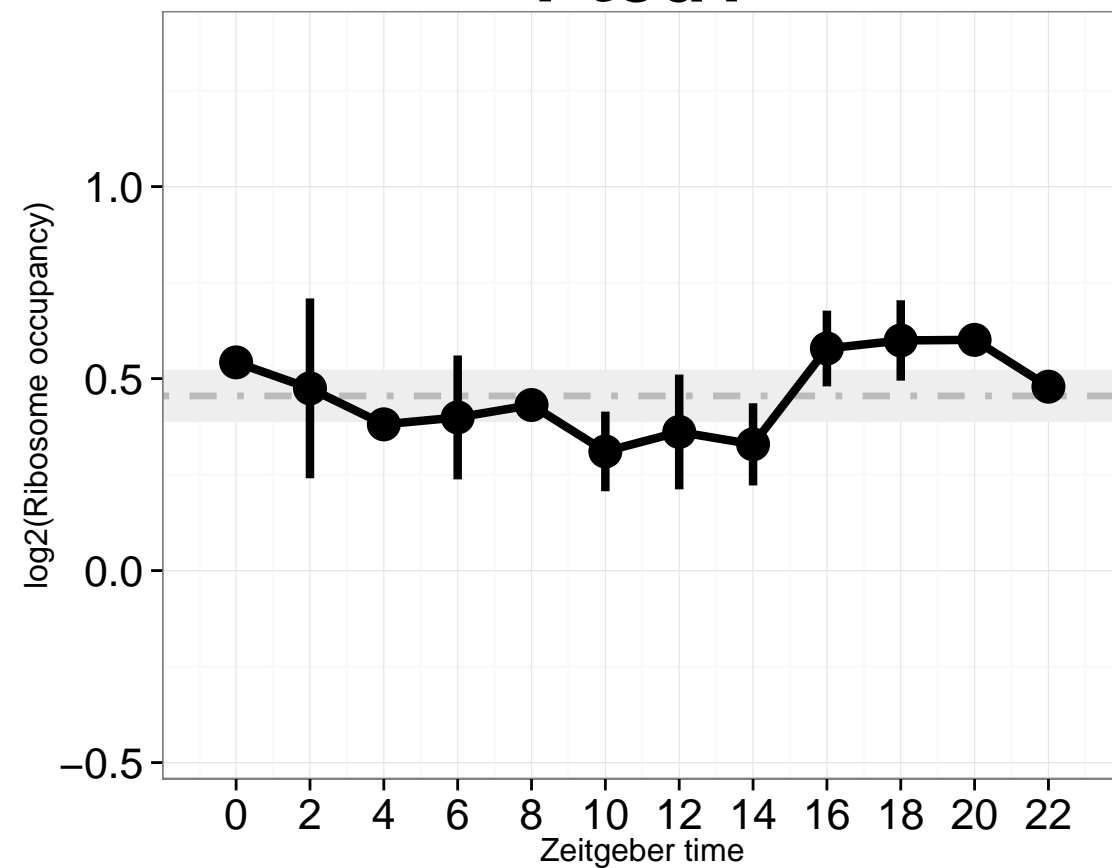

Supplement: Supplementary file 3863 [file 1]

## Slc25a12

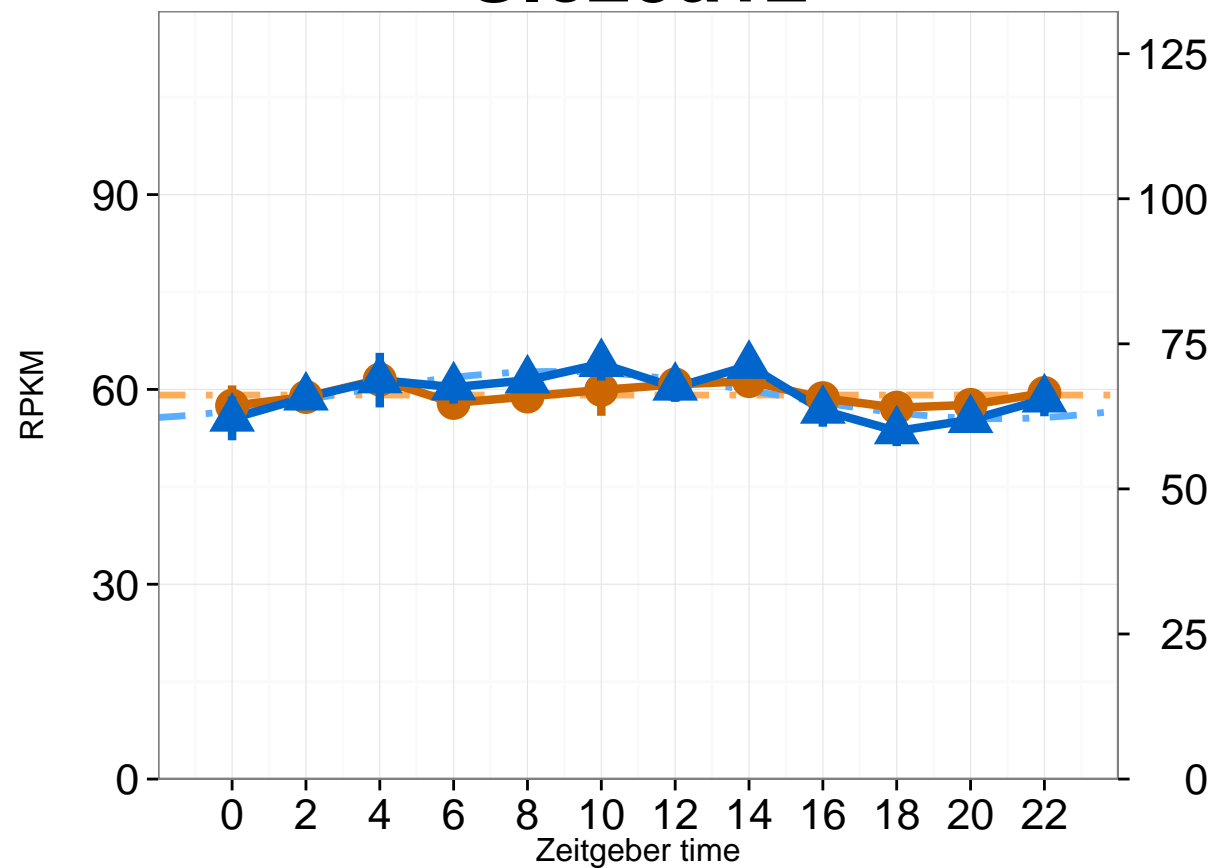

## Slc25a12

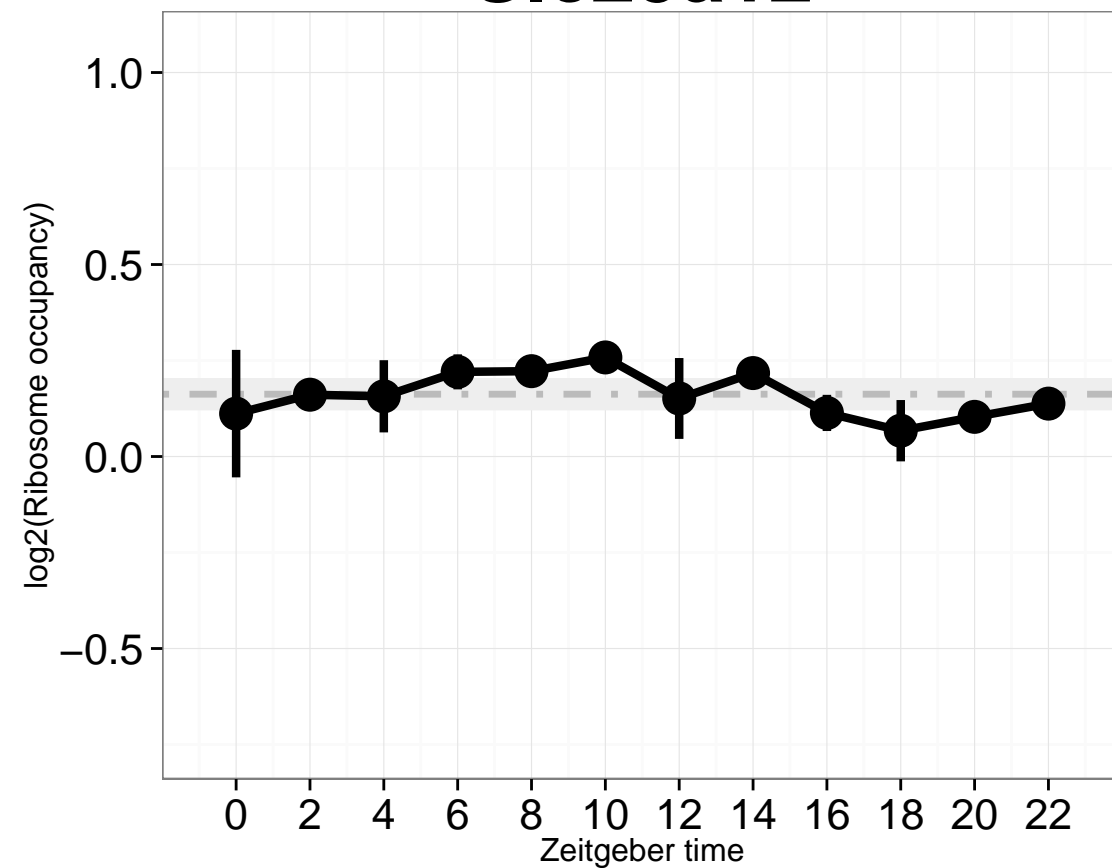

Supplement: Supplementary file 3864 [file 1]

## Glis2

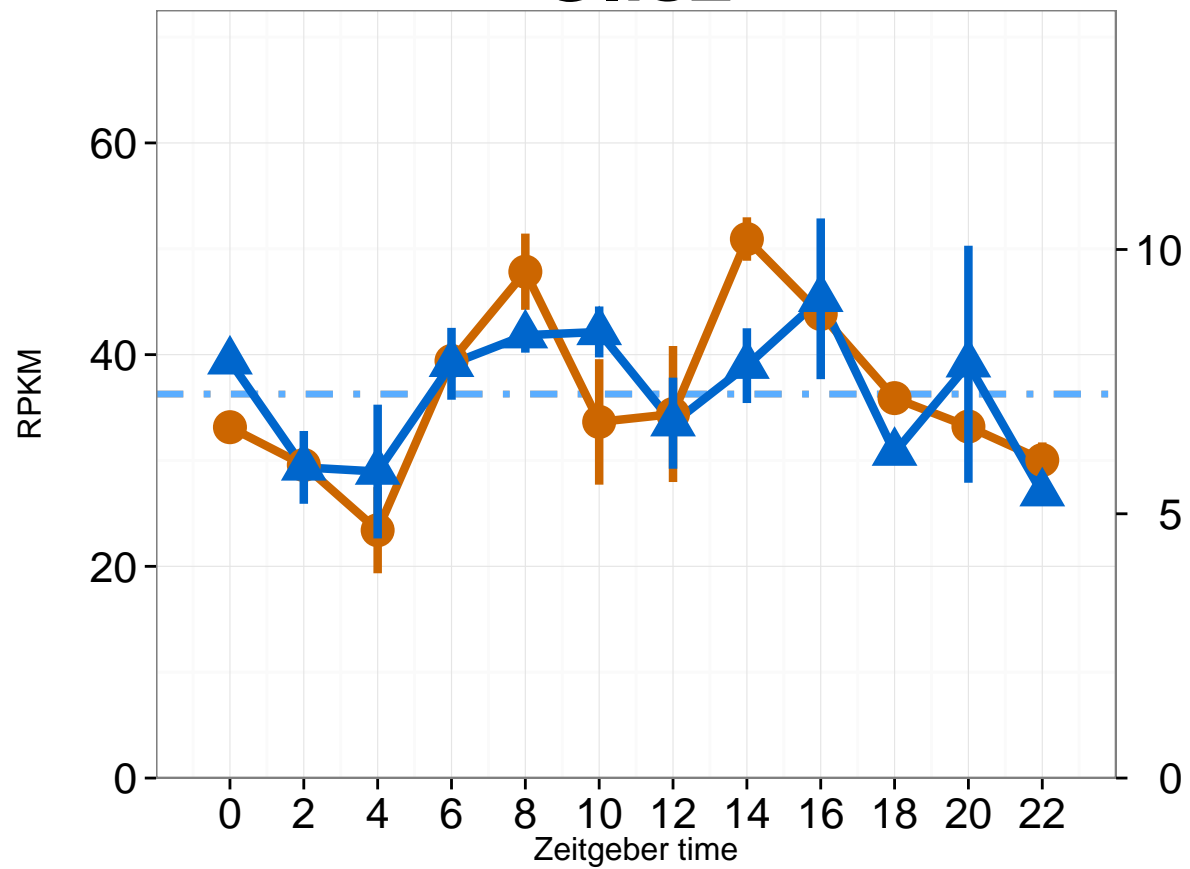

## Glis2

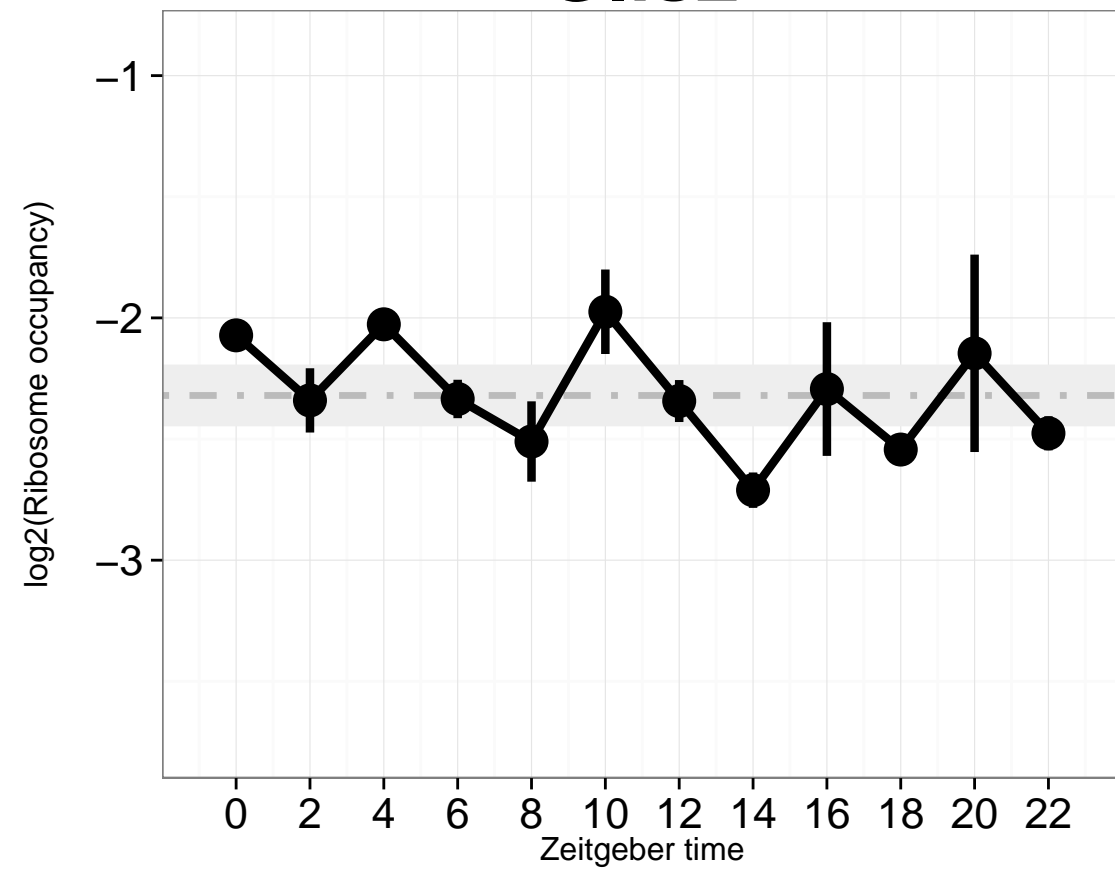

Supplement: Supplementary file 3865 [file 1]

## Gpt2

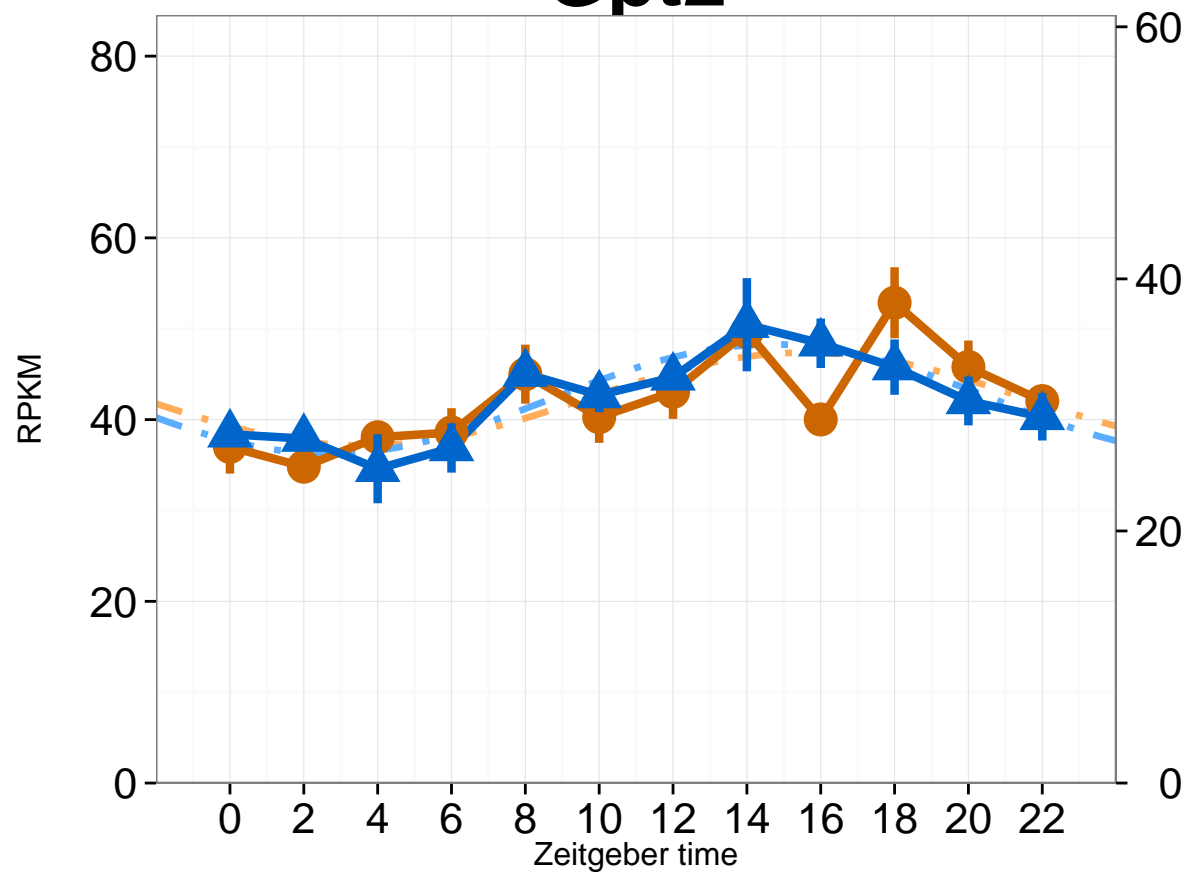

## Gpt2

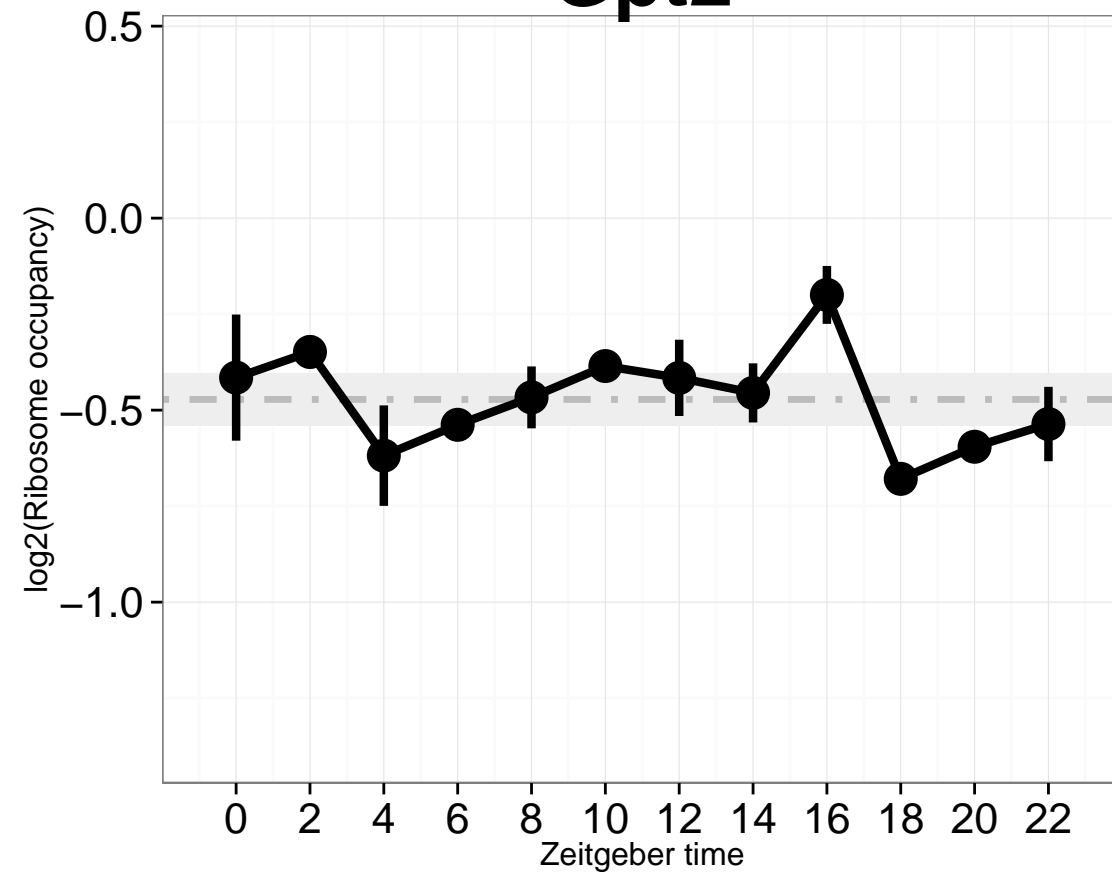

Supplement: Supplementary file 3866 [file 1]

## Ino80

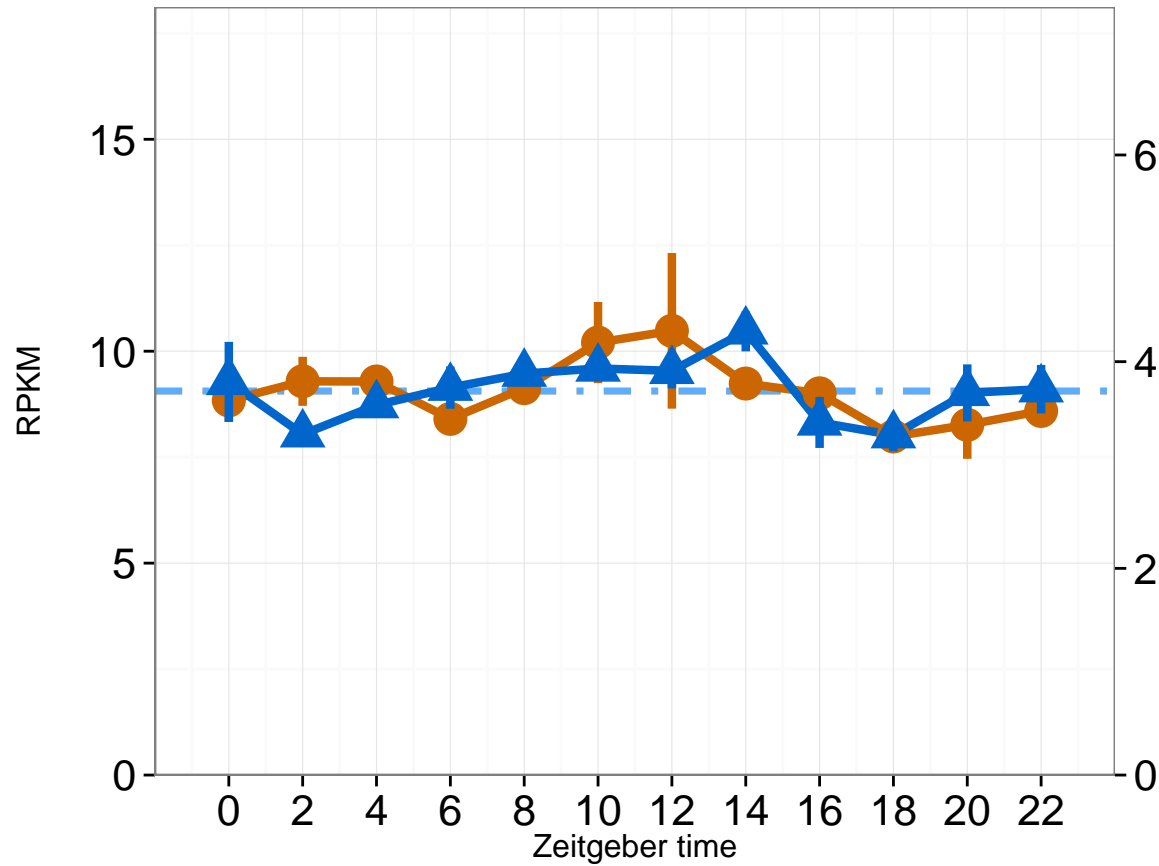

## Ino80

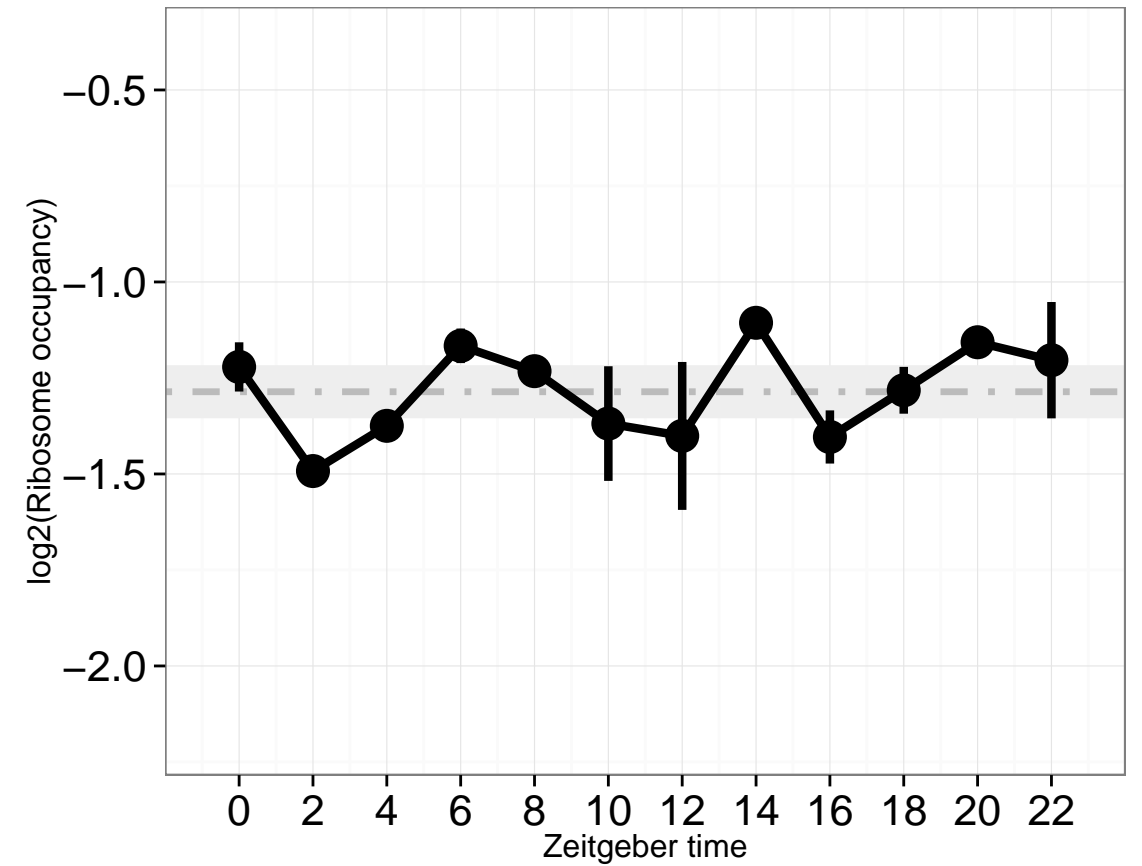

Supplement: Supplementary file 3867 [file 1]

## Sap130

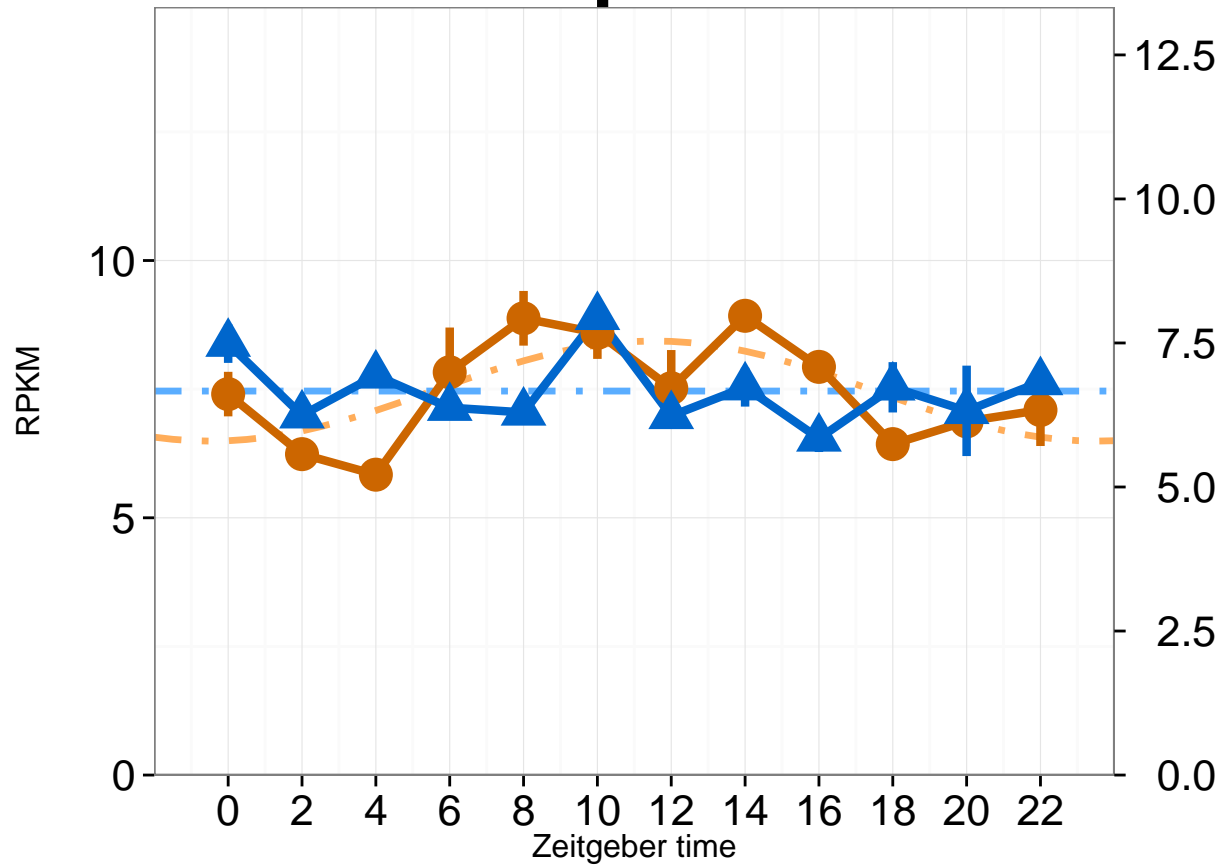

## Sap130

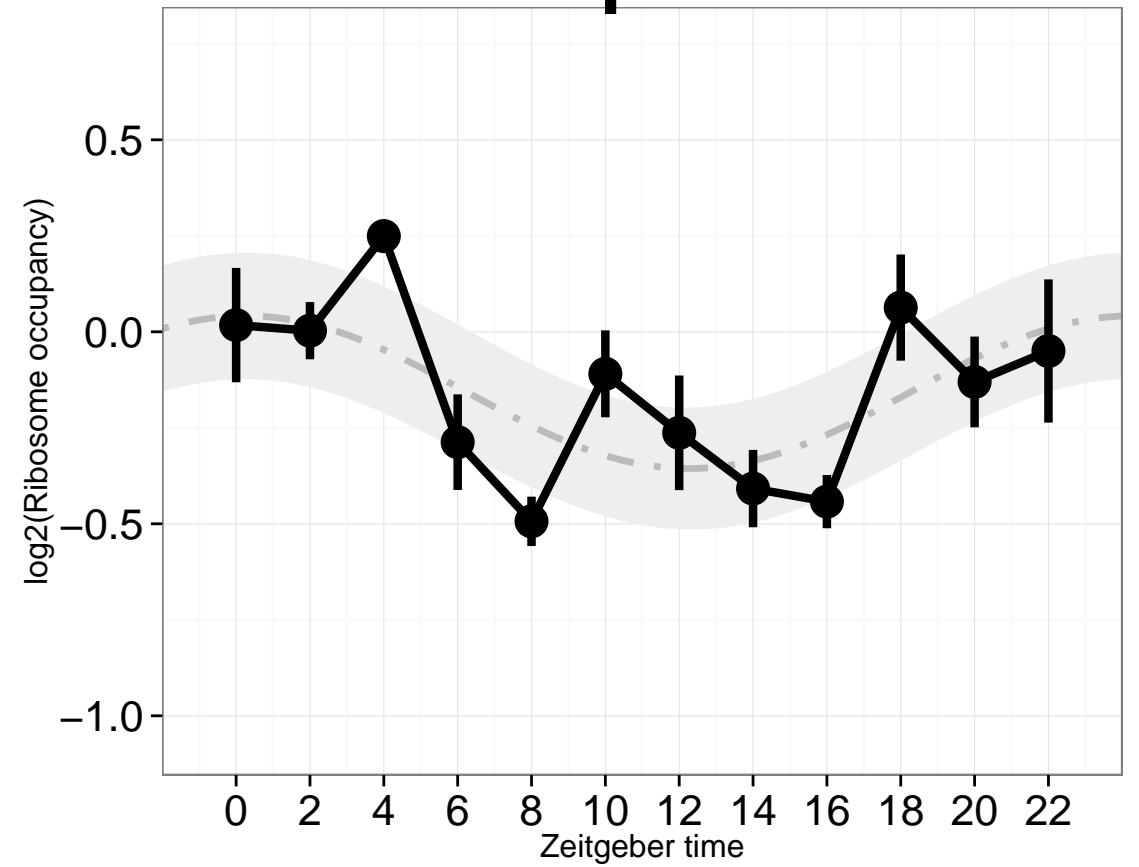

Supplement: Supplementary file 3868 [file 1]

## Fhl2

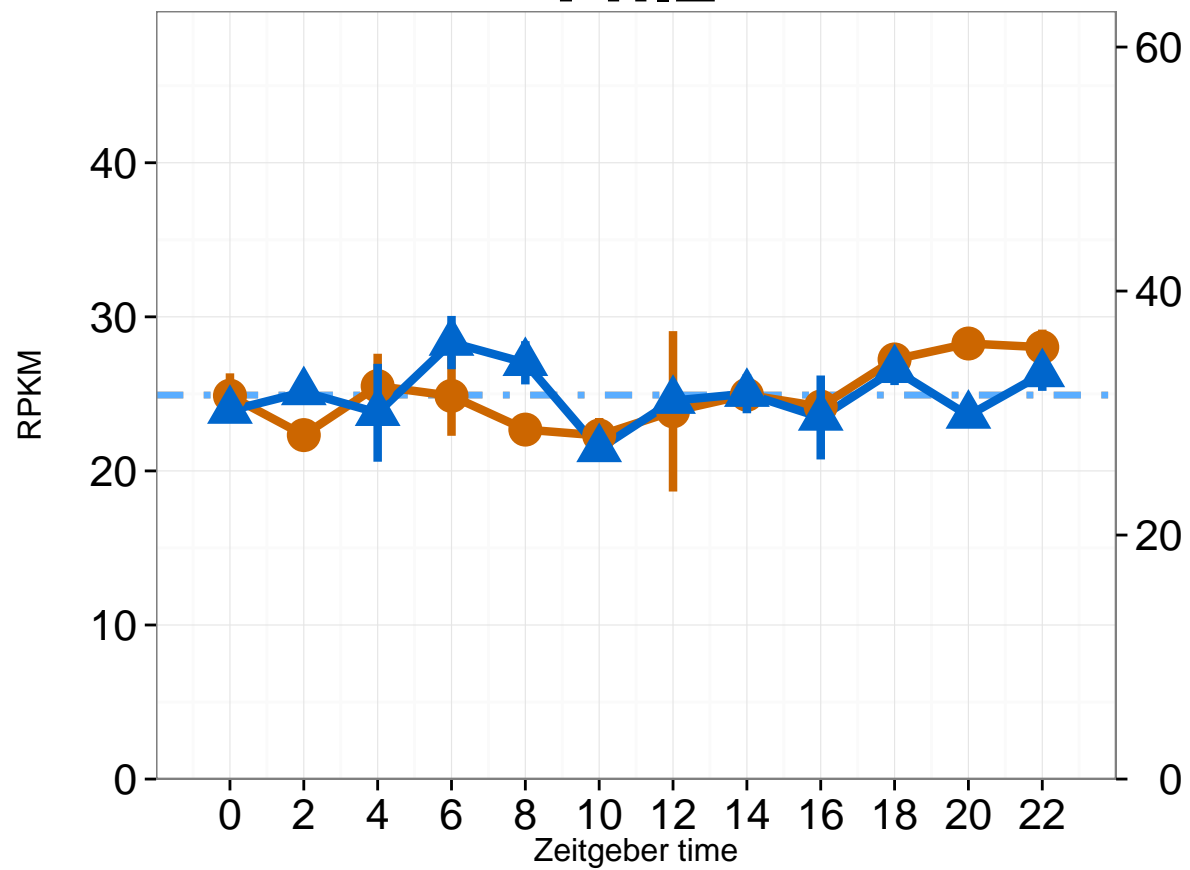

## Fhl2

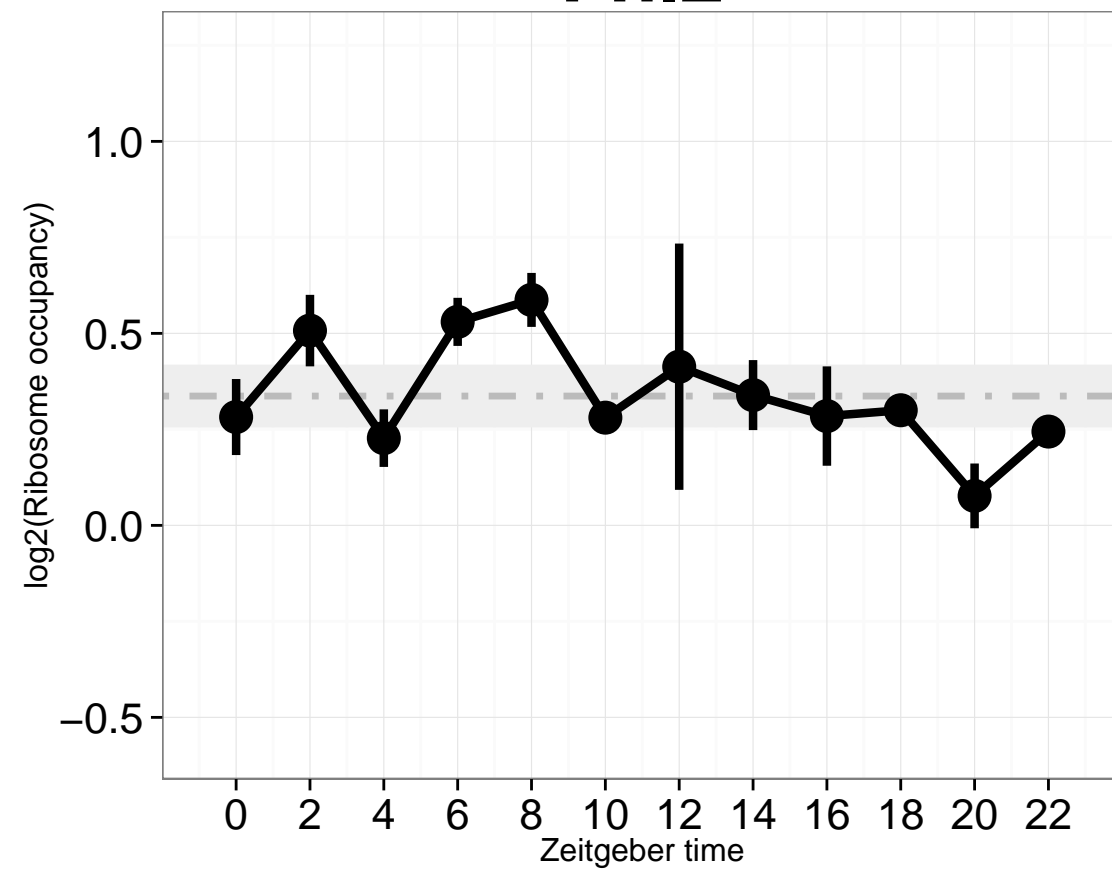

Supplement: Supplementary file 3869 [file 1]

# Mfsd6

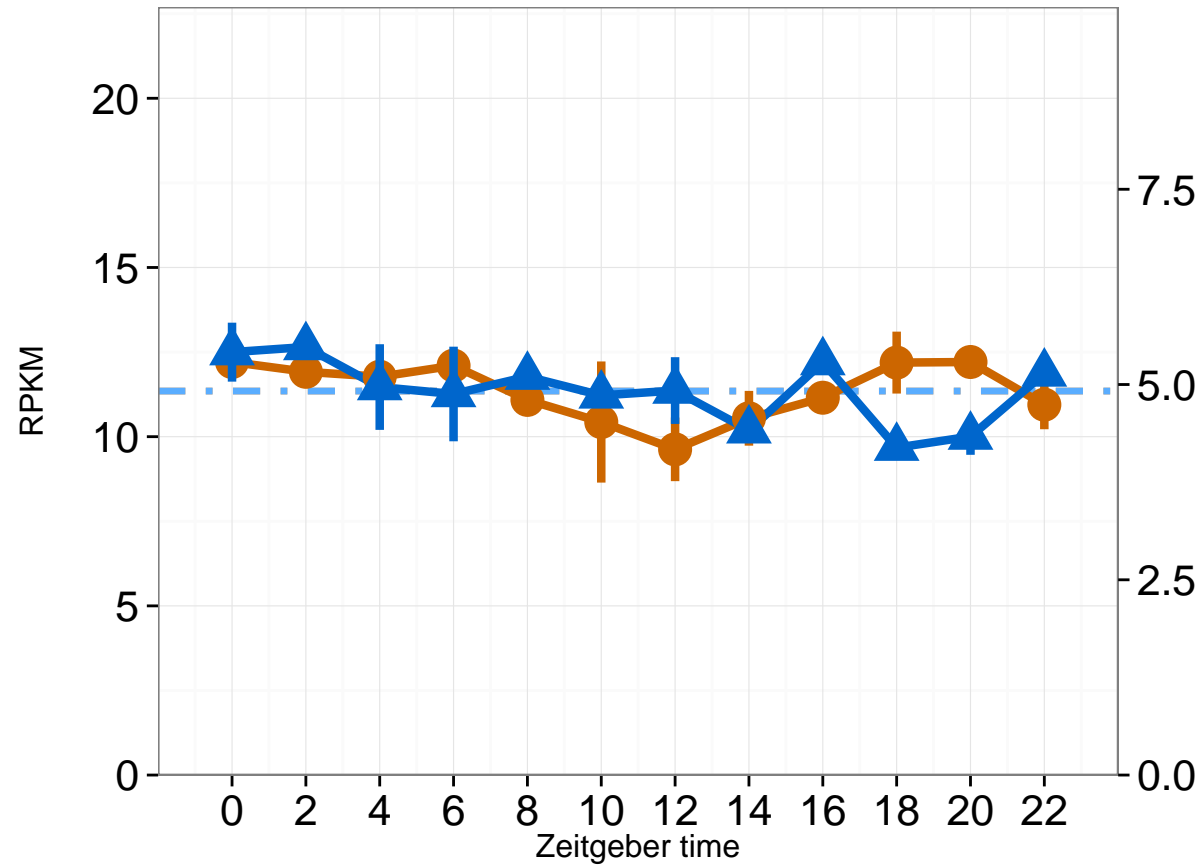

# Mfsd6

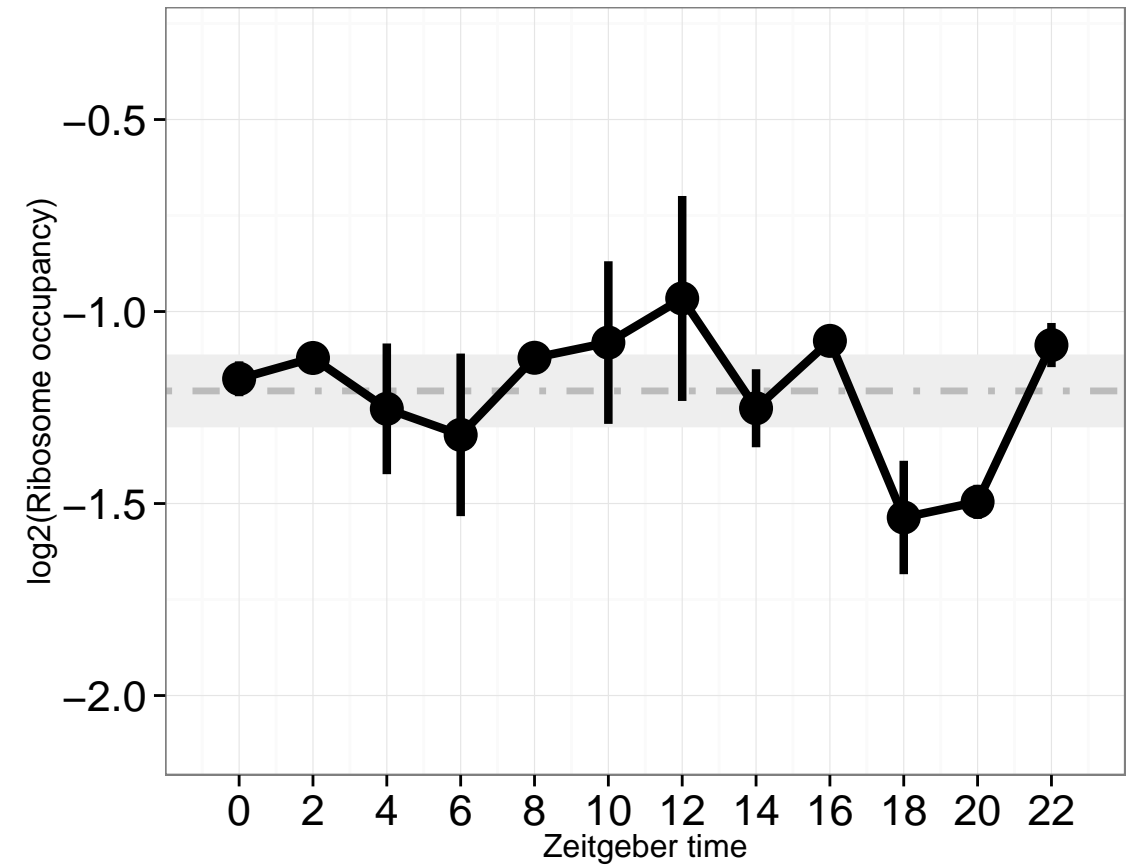

Supplement: Supplementary file 3870 [file 1]

# Wbscr27

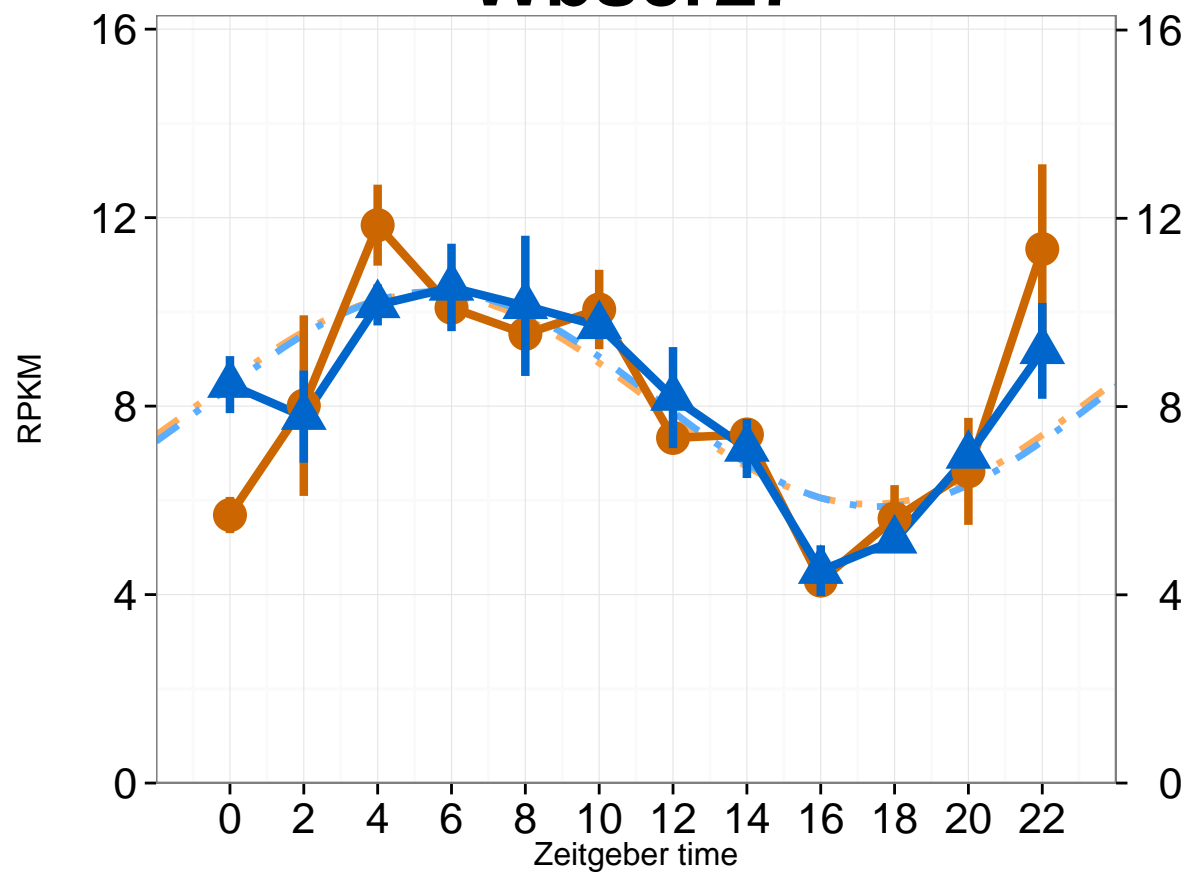

# Wbscr27

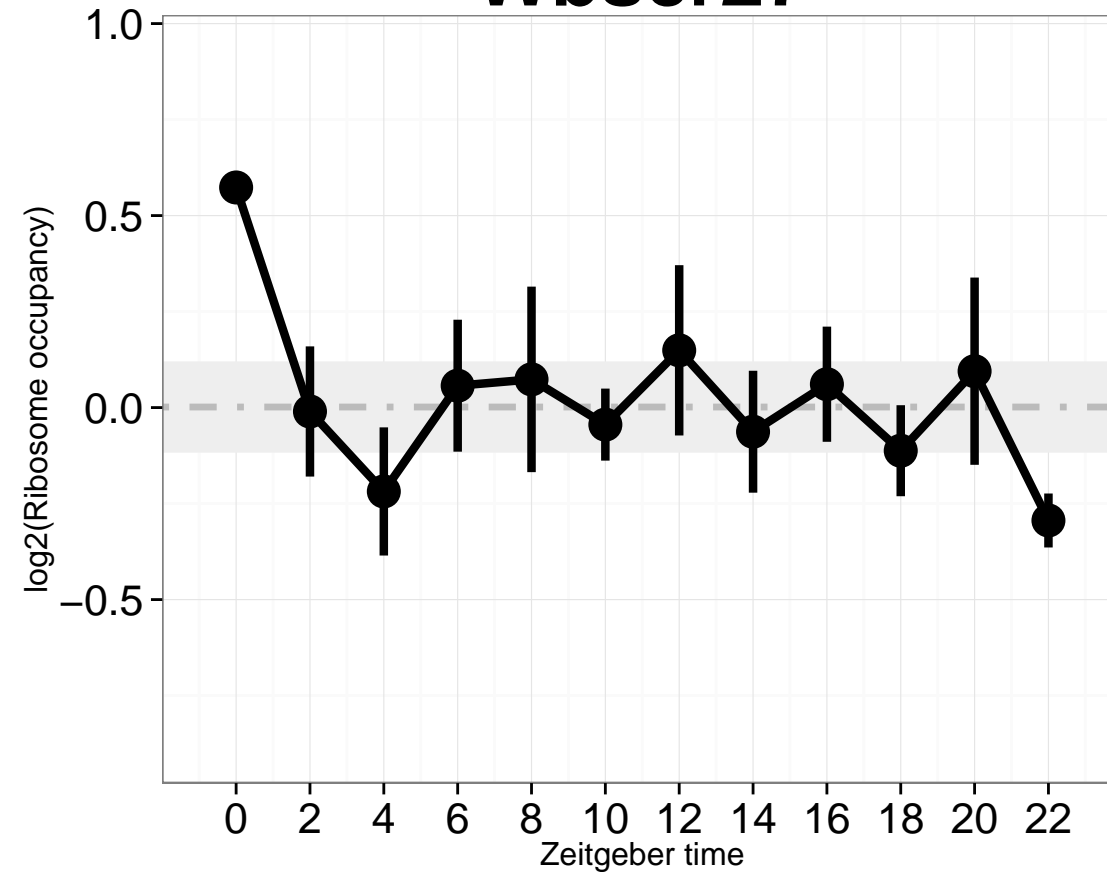

Supplement: Supplementary file 3871 [file 1]

# Sar1a

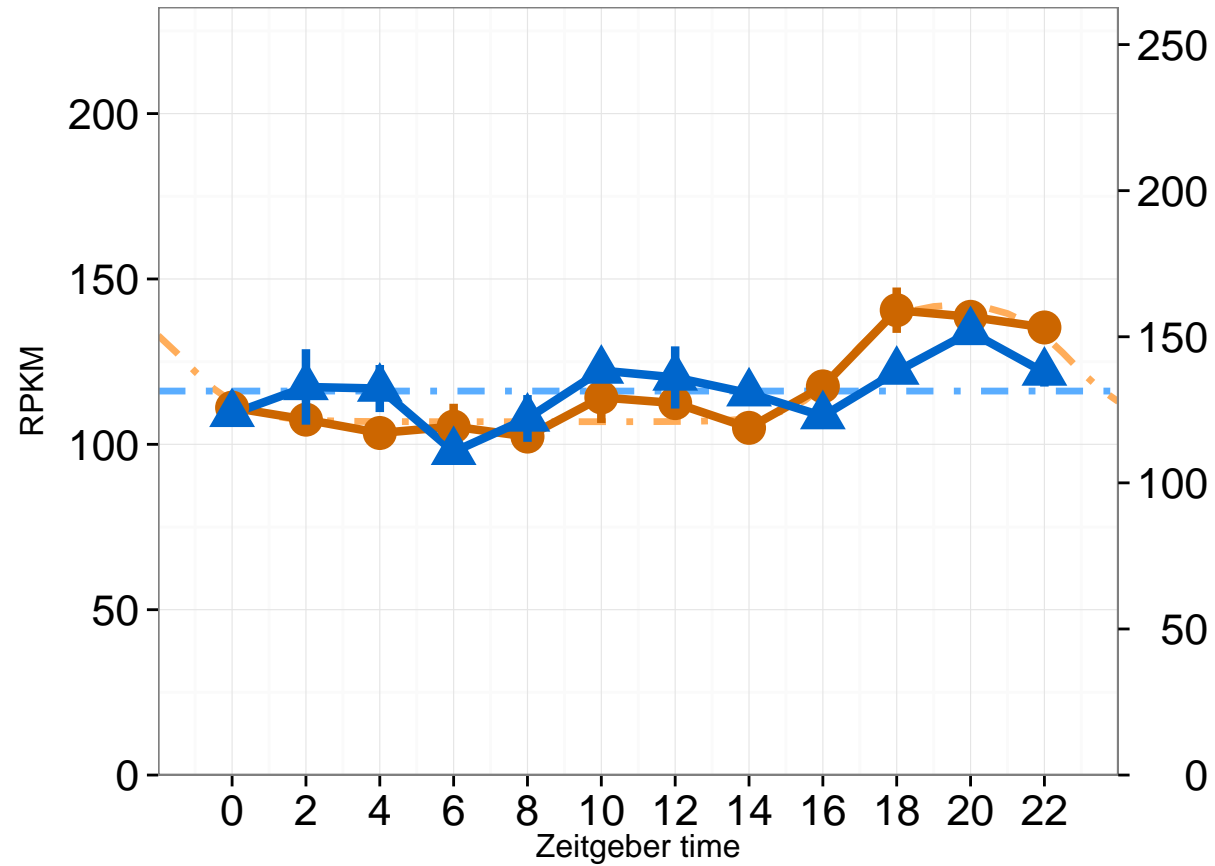

# Sar1a

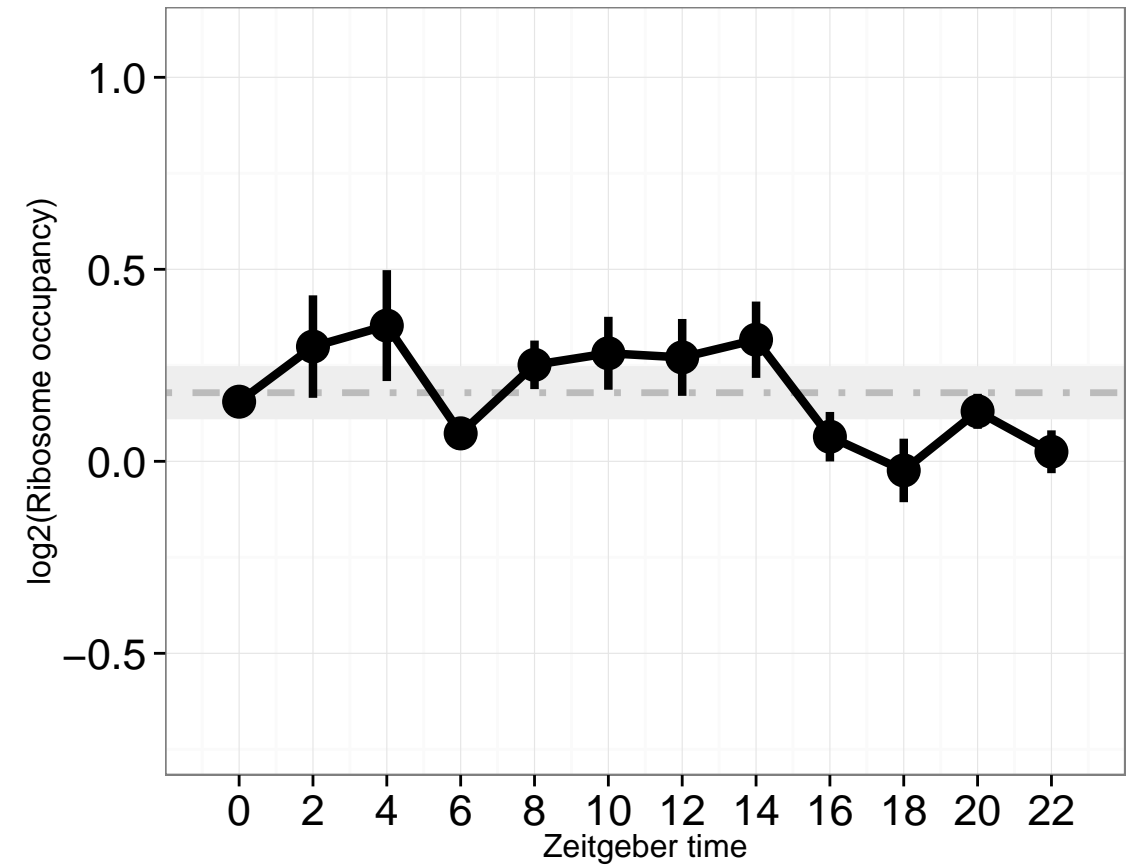

Supplement: Supplementary file 3872 [file 1]

## Ing4

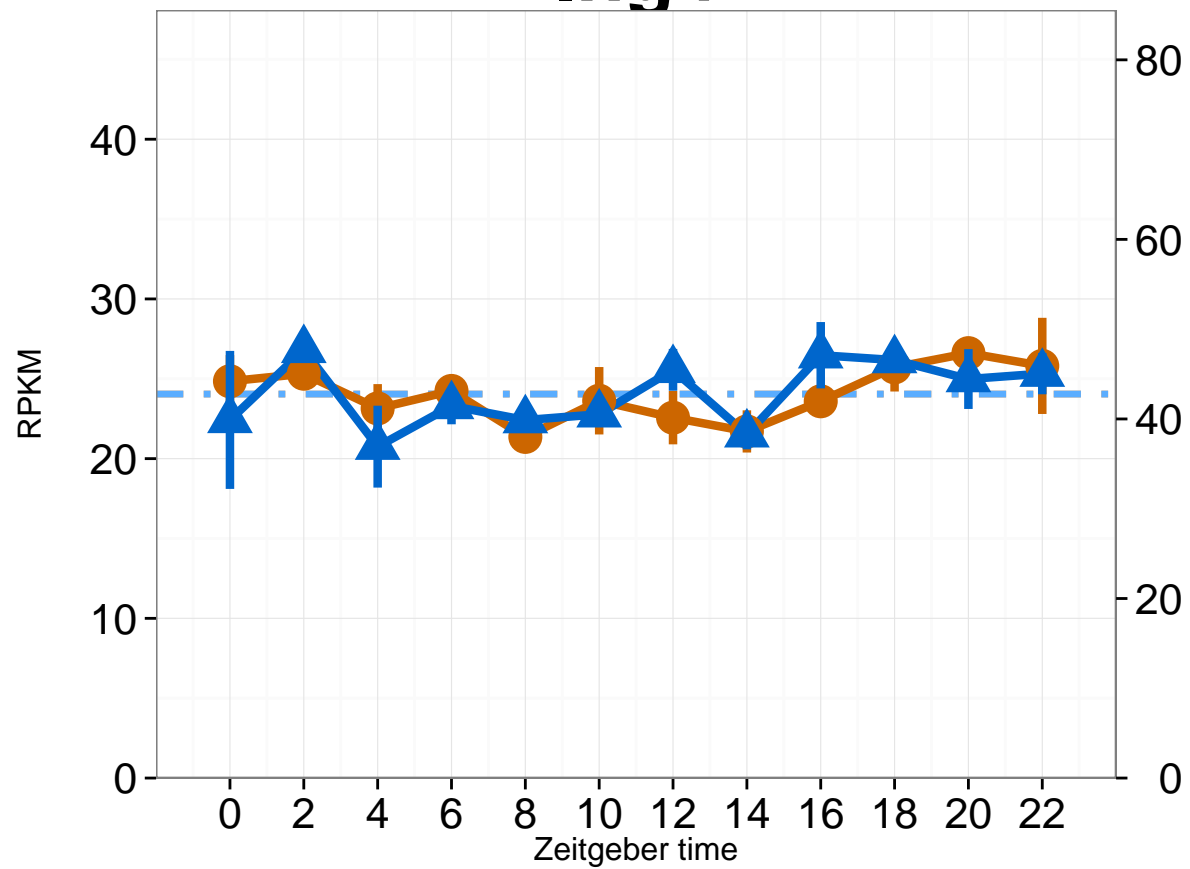

## Ing4

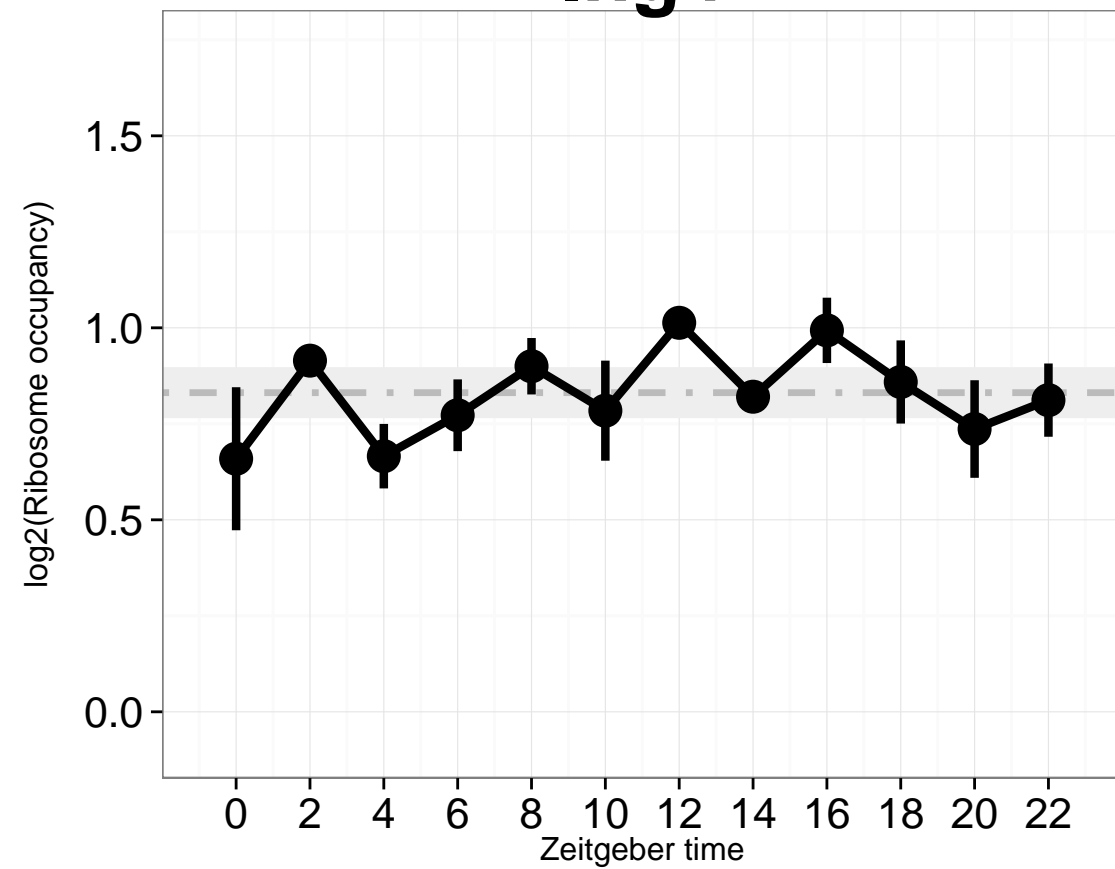

Supplement: Supplementary file 3873 [file 1]

## Usp22

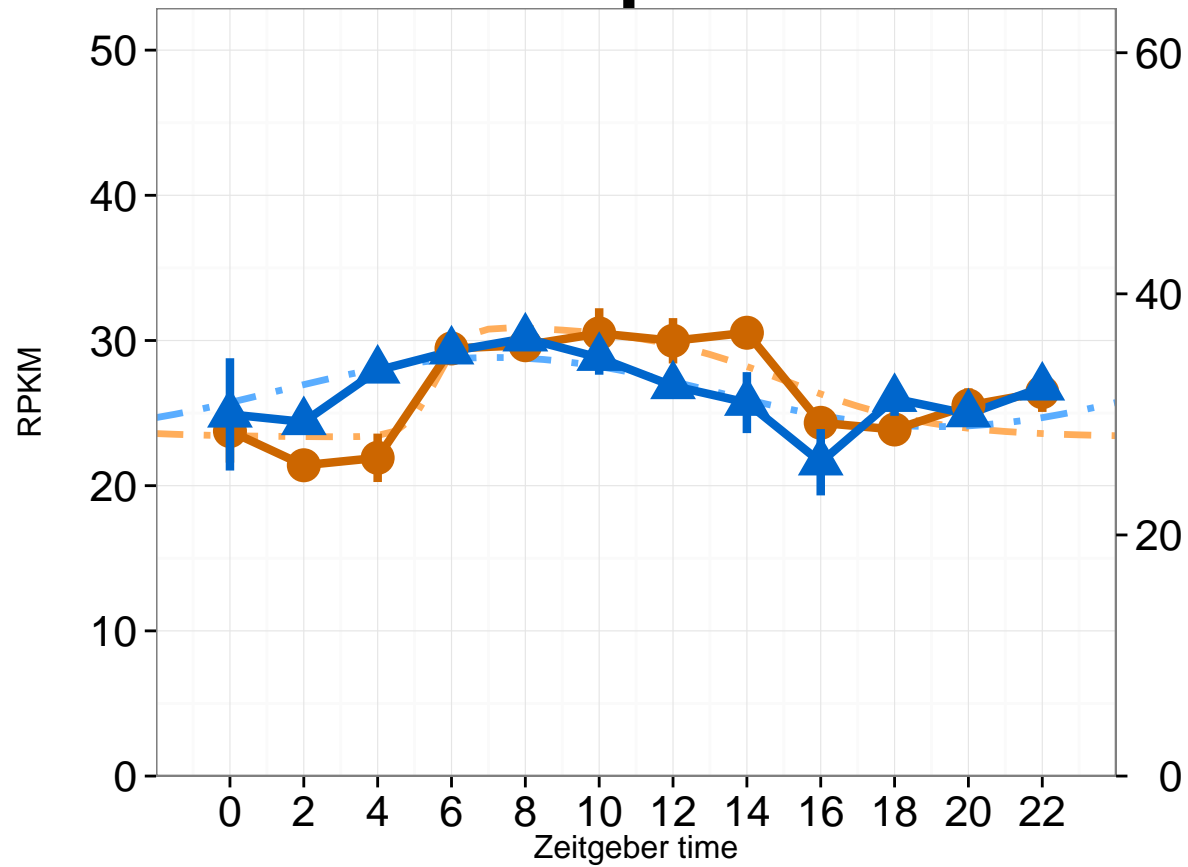

## Usp22

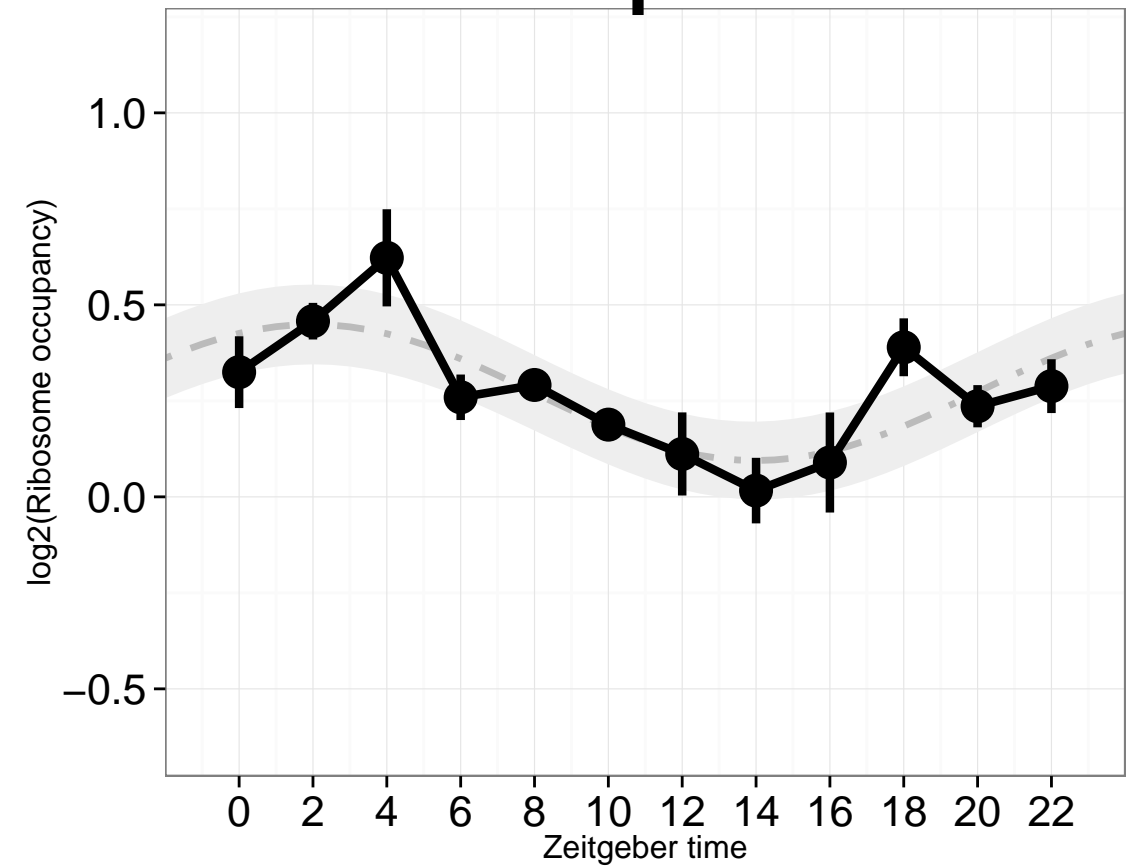

Supplement: Supplementary file 3874 [file 1]

## Asx1

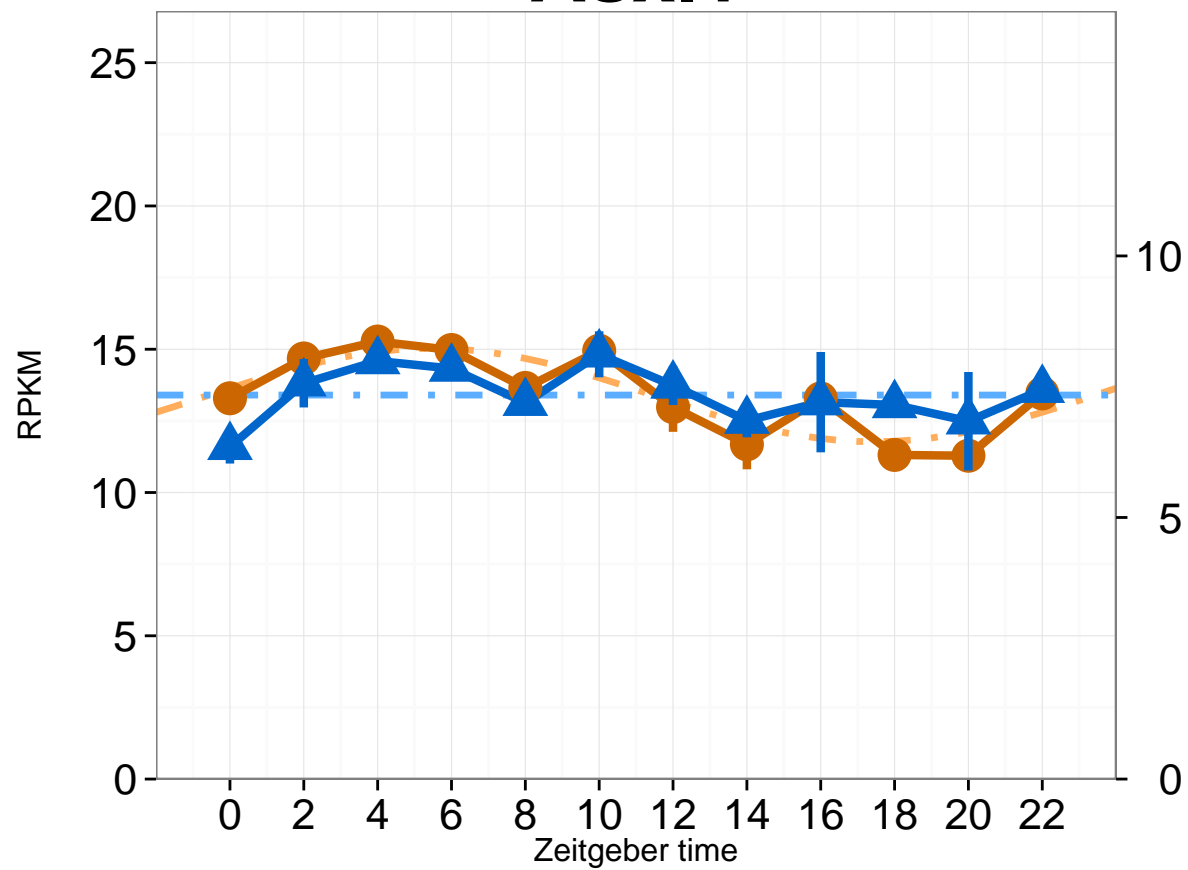

## Asx1

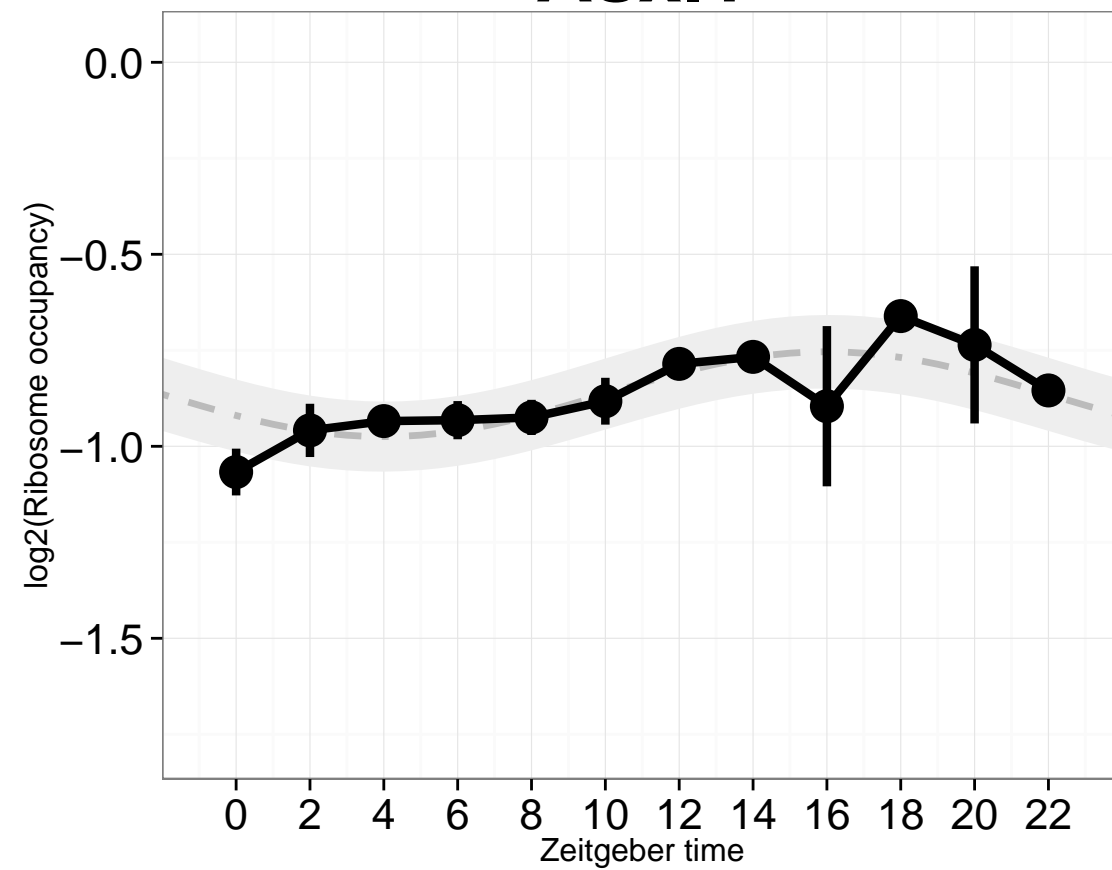

Supplement: Supplementary file 3875 [file 1]

# Zfp57

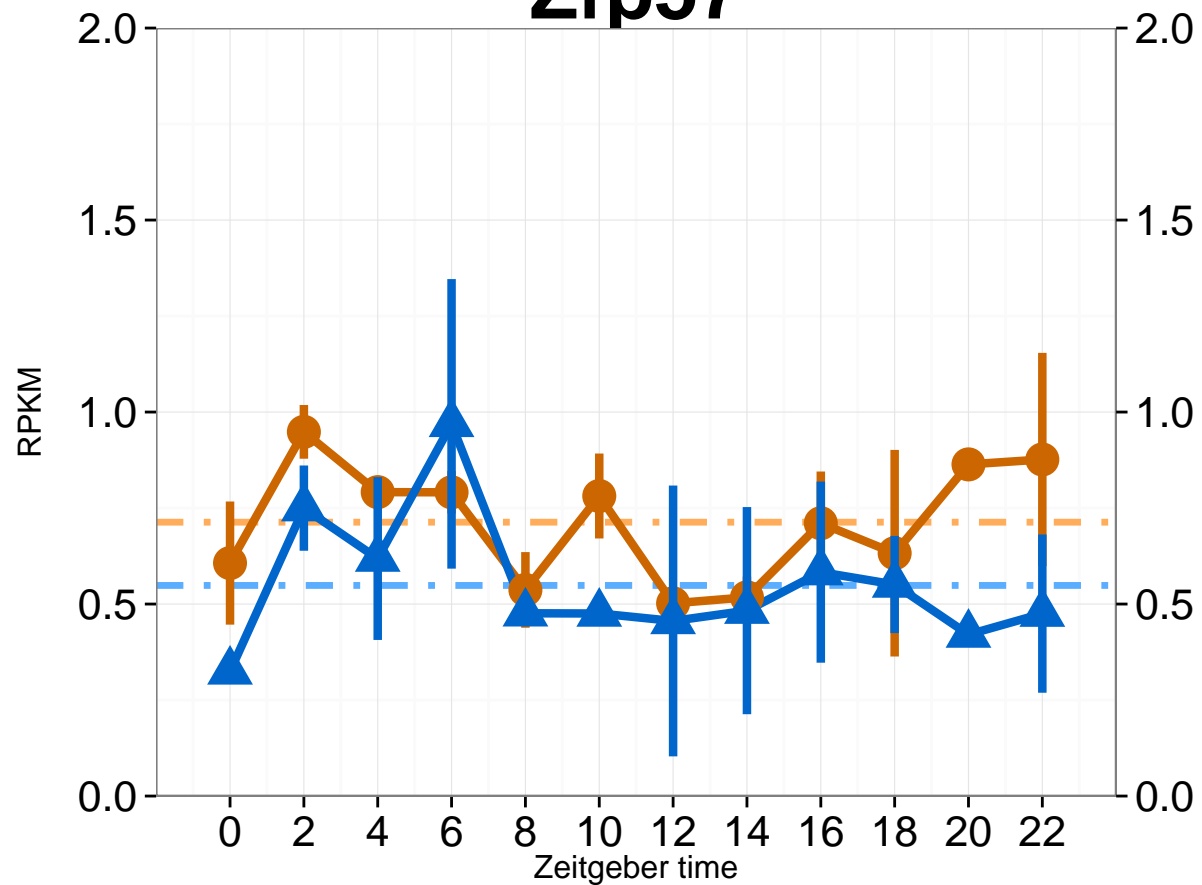

# Zfp57

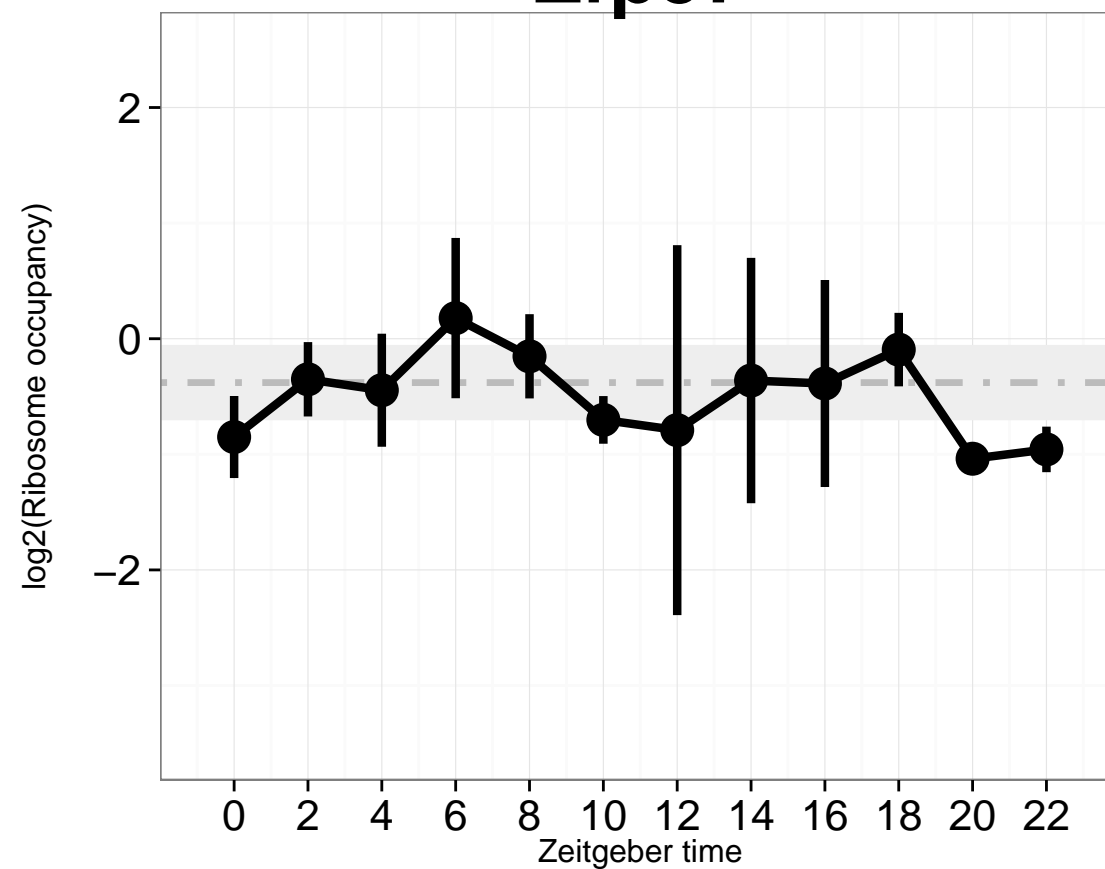

Supplement: Supplementary file 3876 [file 1]

# Gimap5

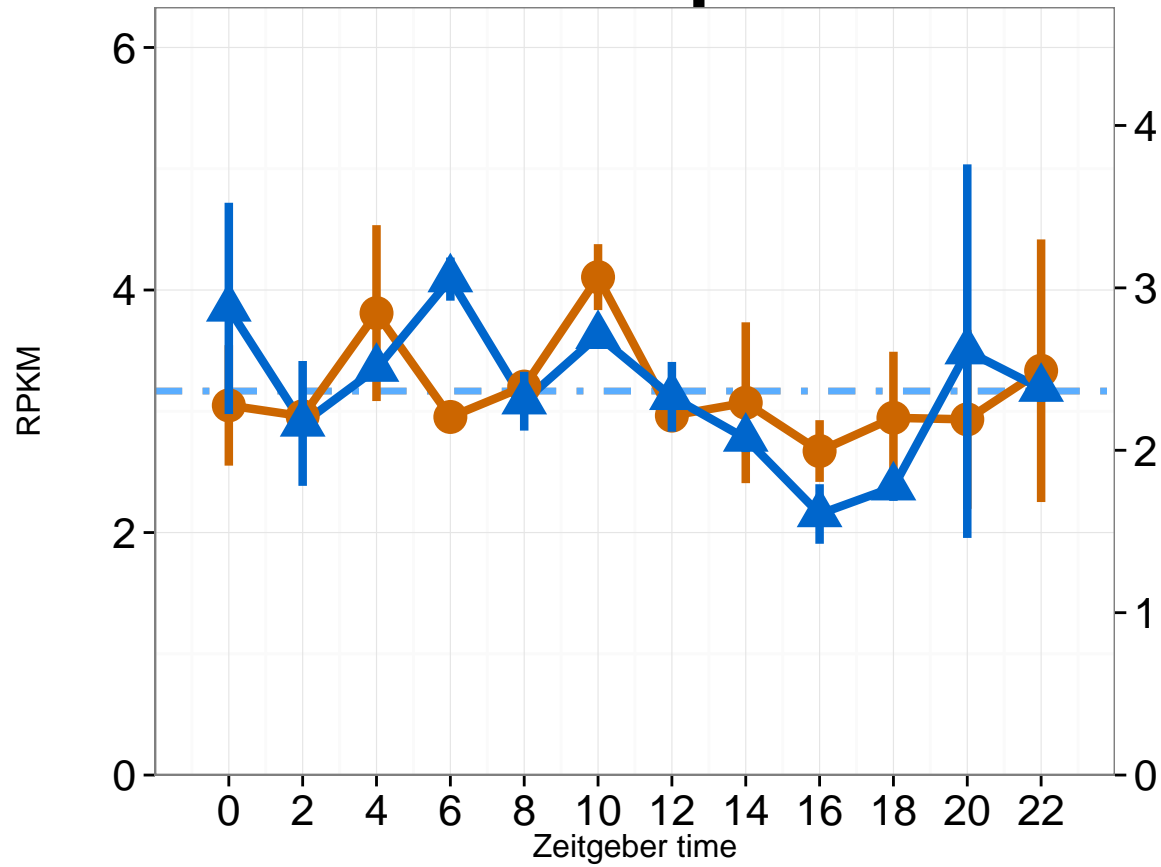

# Gimap5

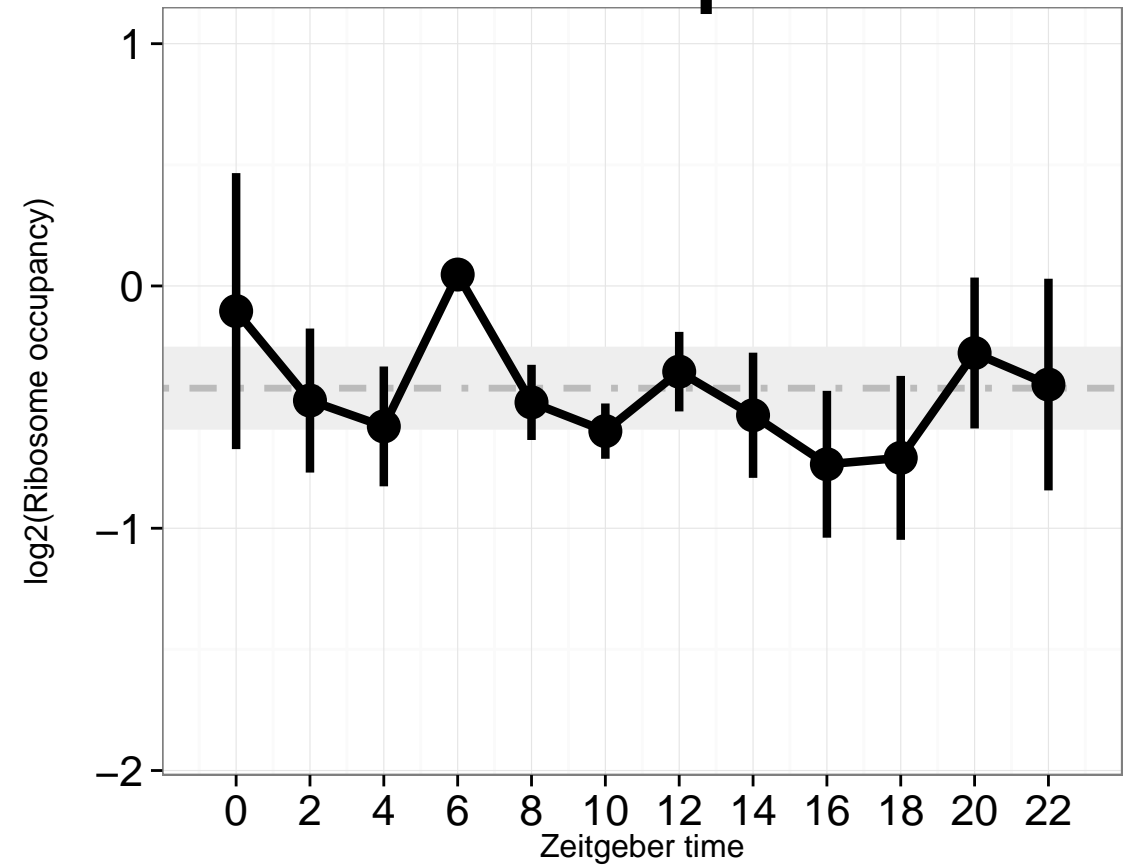

Supplement: Supplementary file 3877 [file 1]

# Lrrc3b

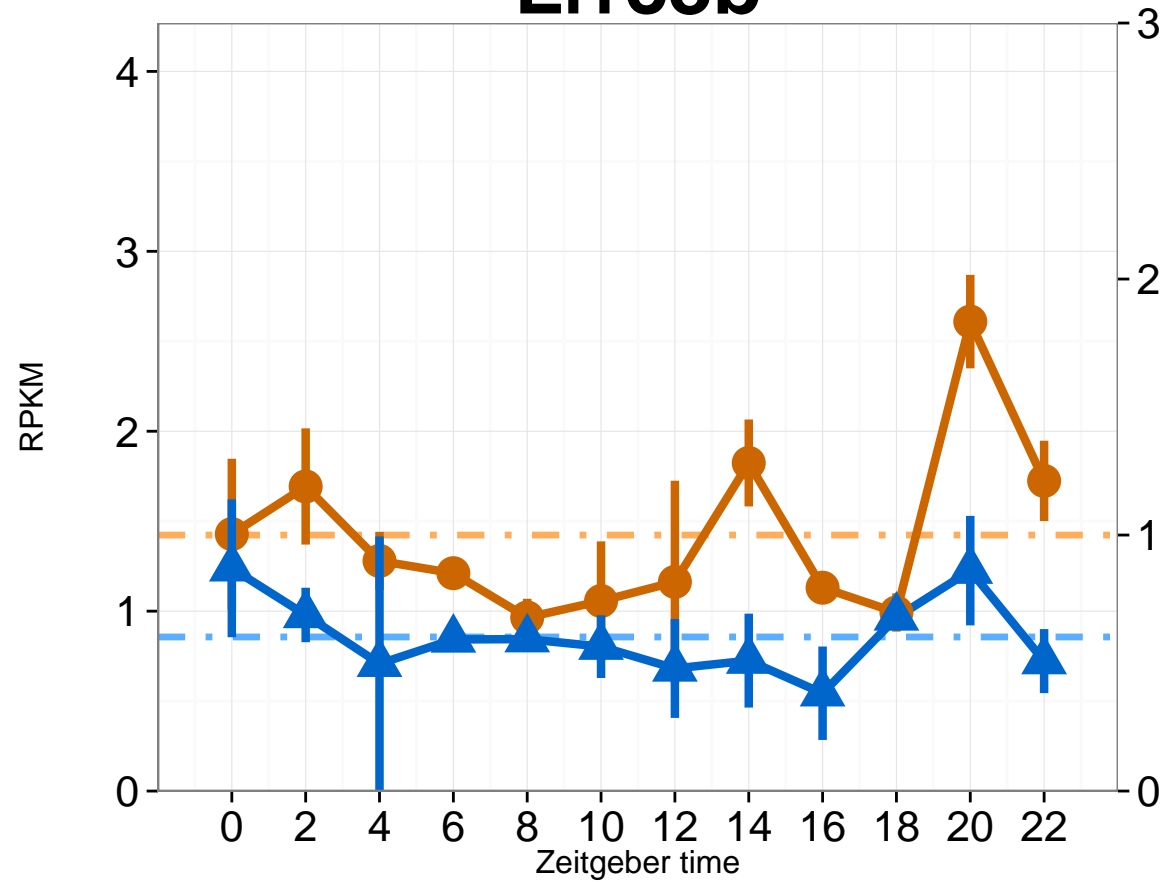

# Lrrc3b

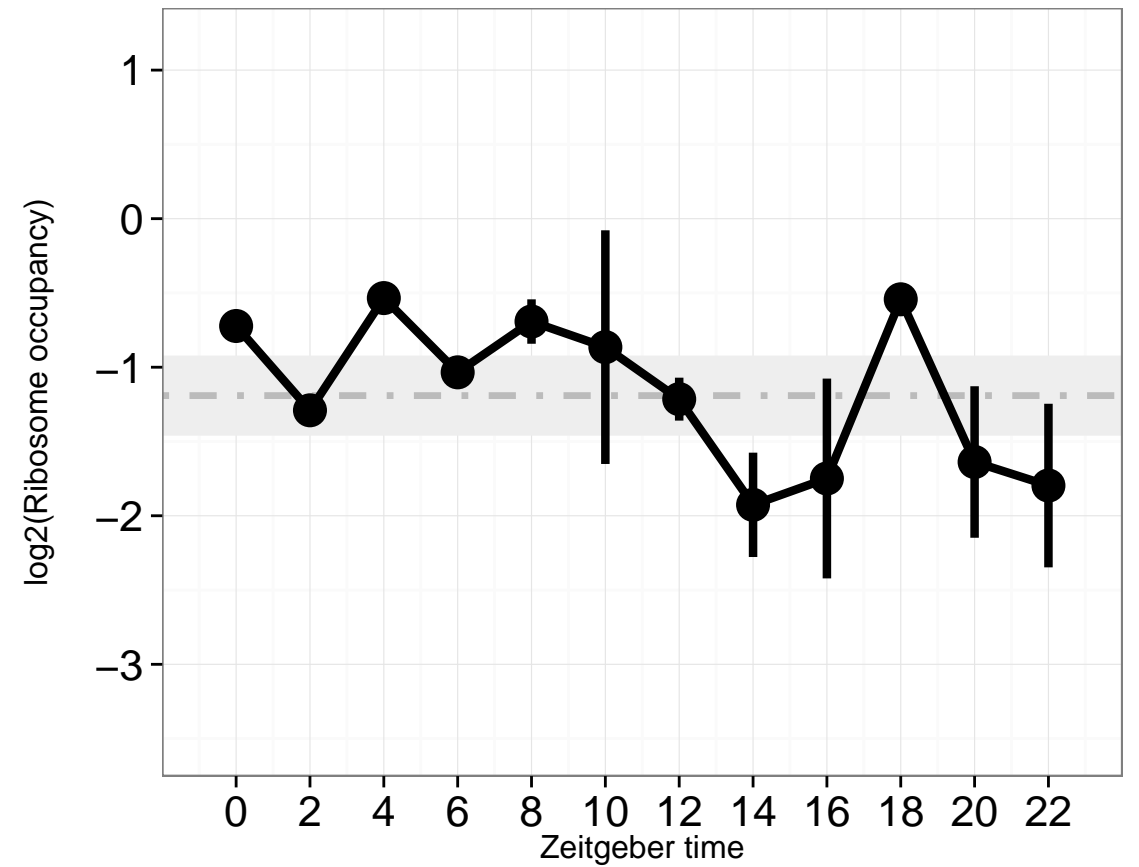

Supplement: Supplementary file 3878 [file 1]

## Tusc3

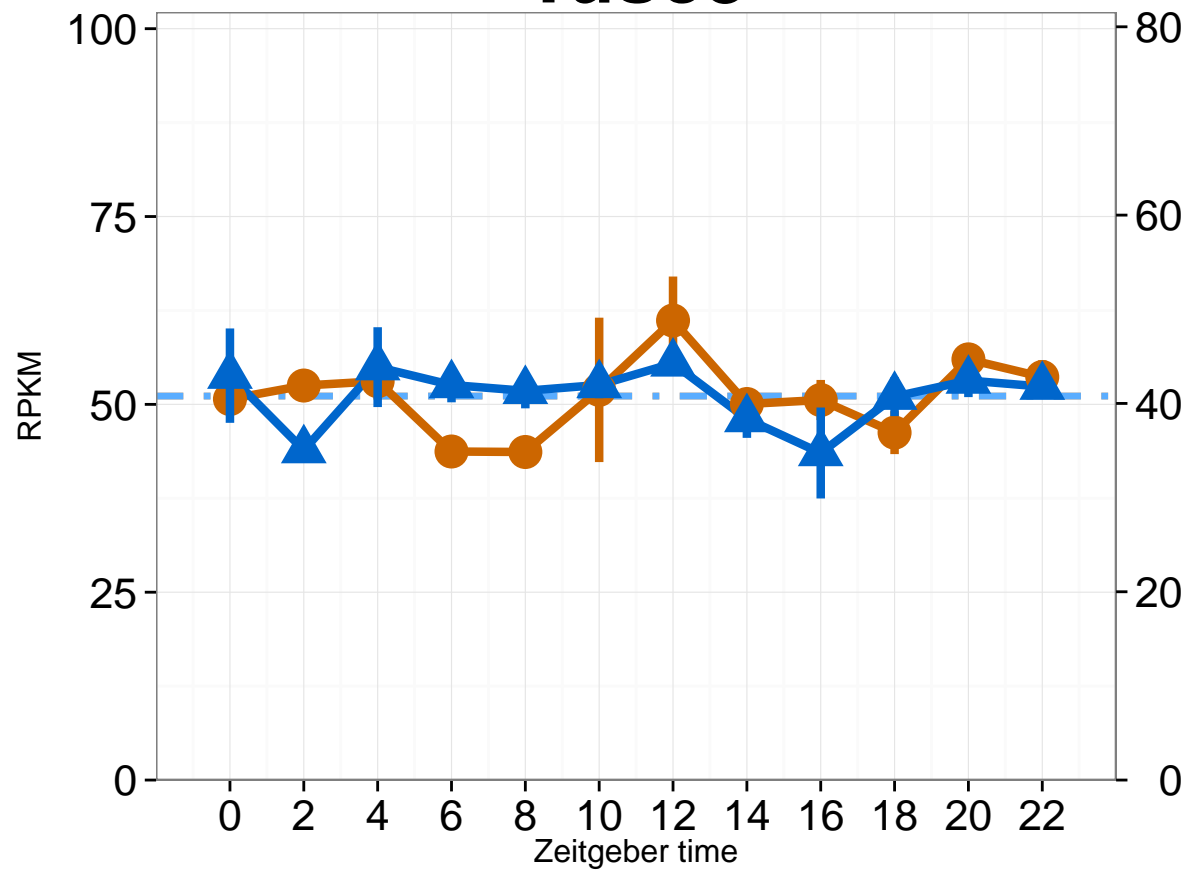

## Tusc3

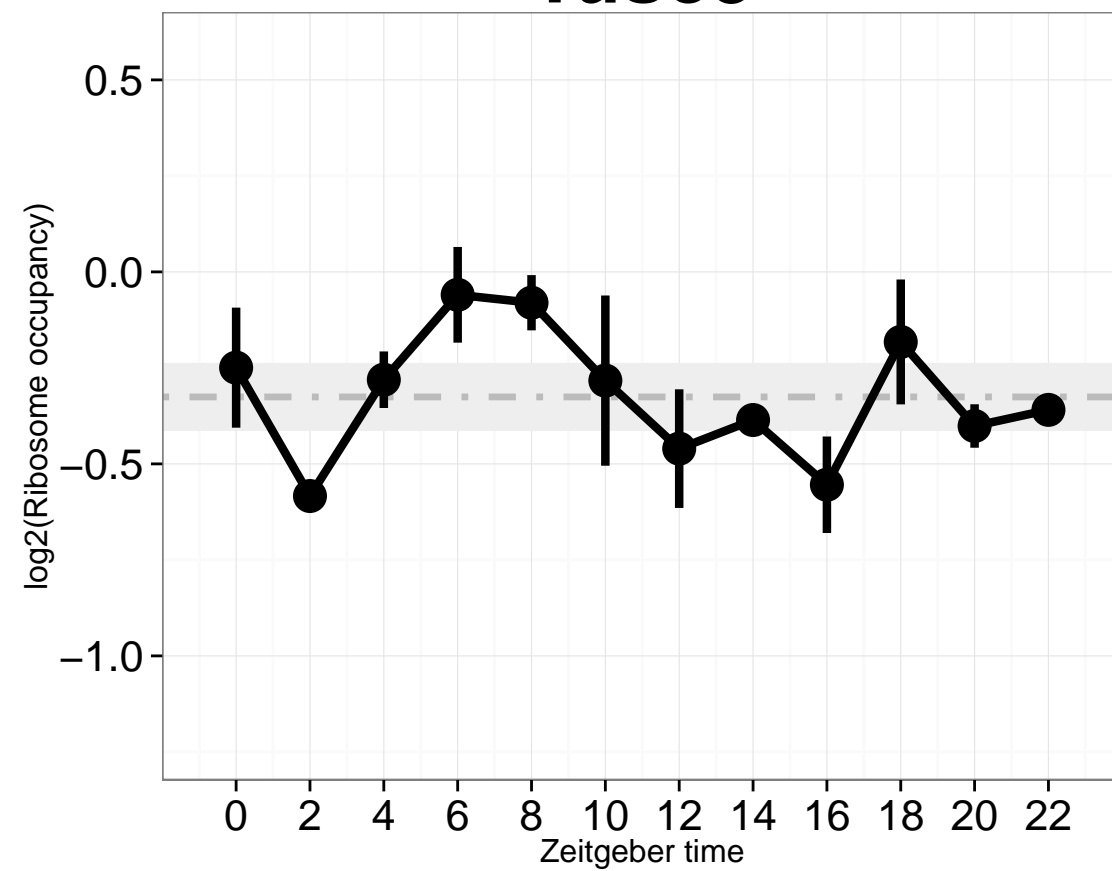

Supplement: Supplementary file 3879 [file 1]

# Gpi1

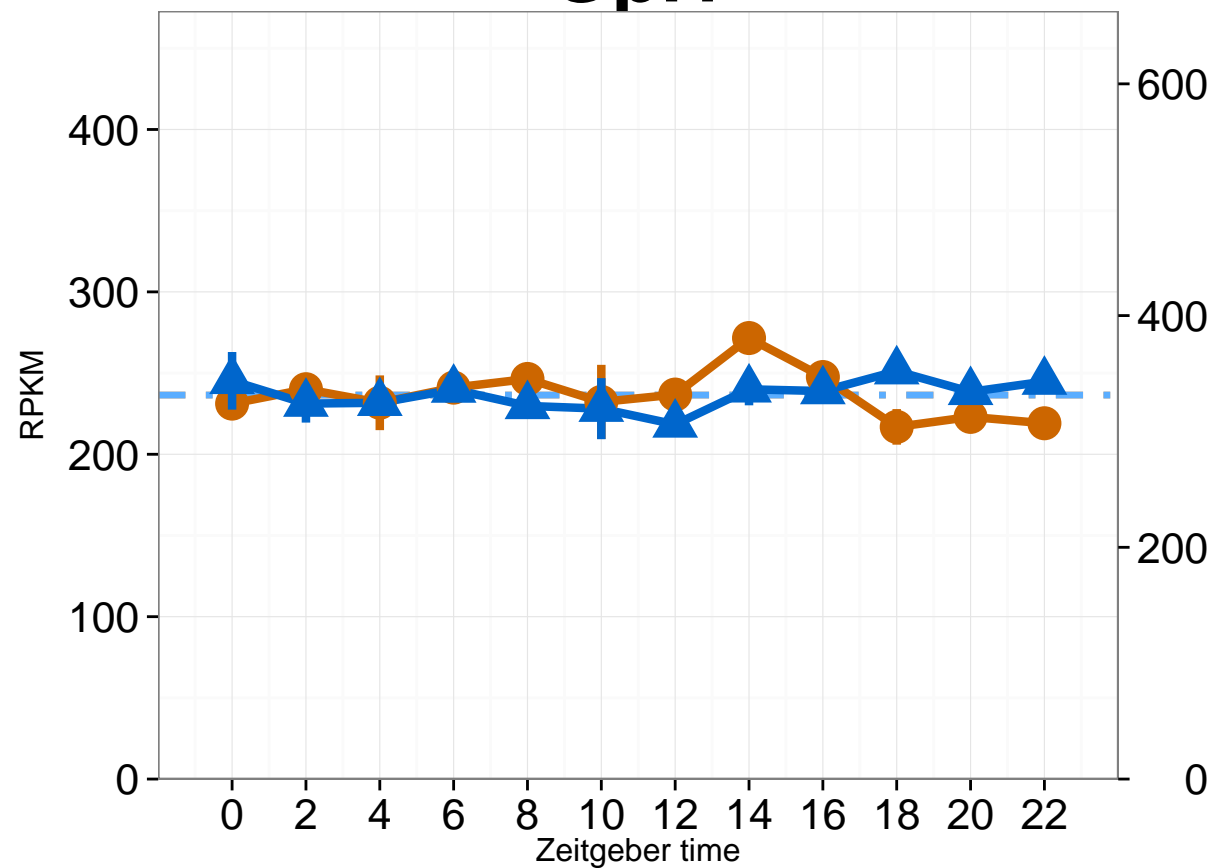

# Gpi1

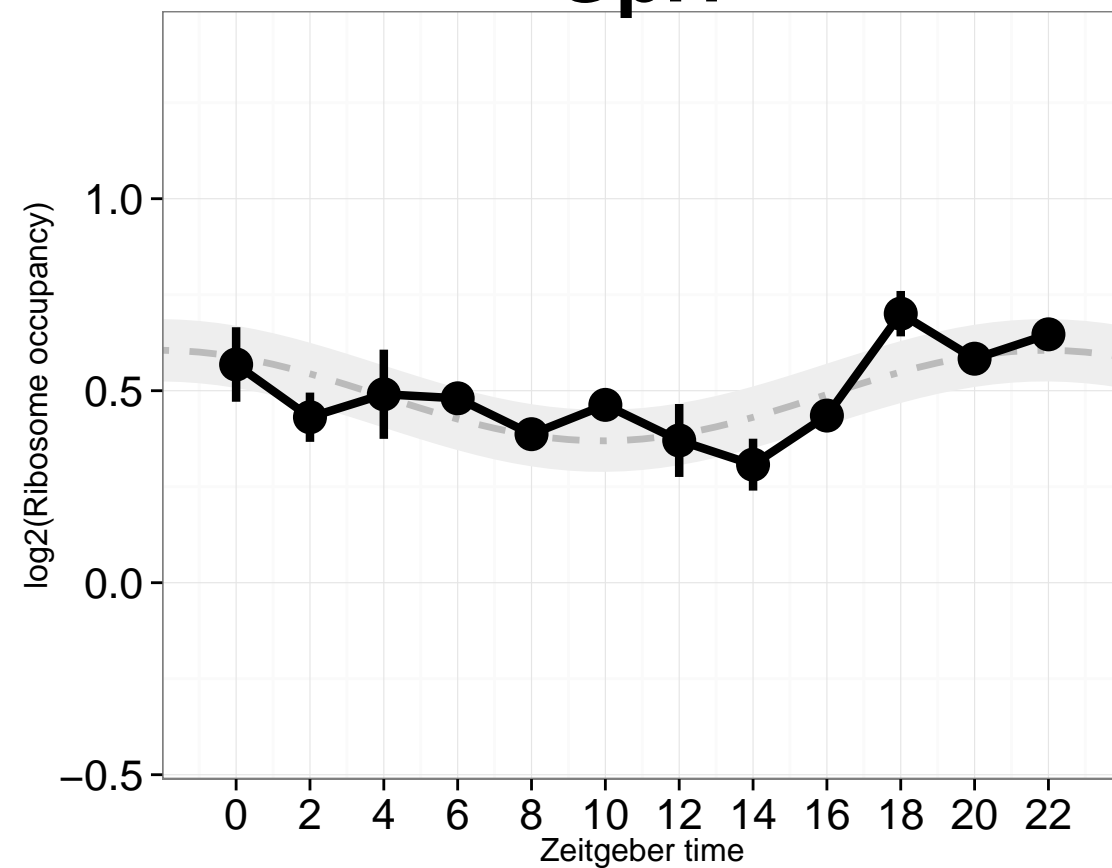

Supplement: Supplementary file 3880 [file 1]

## Fry

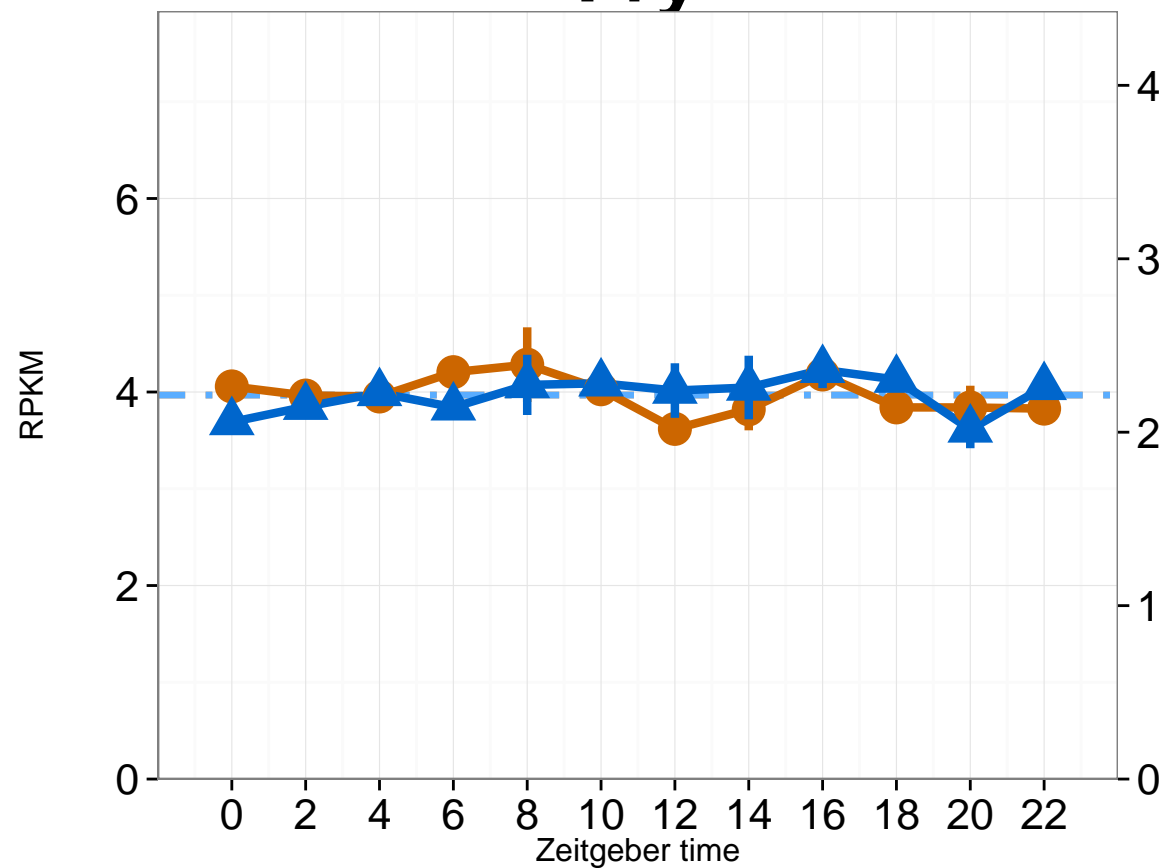

## Fry

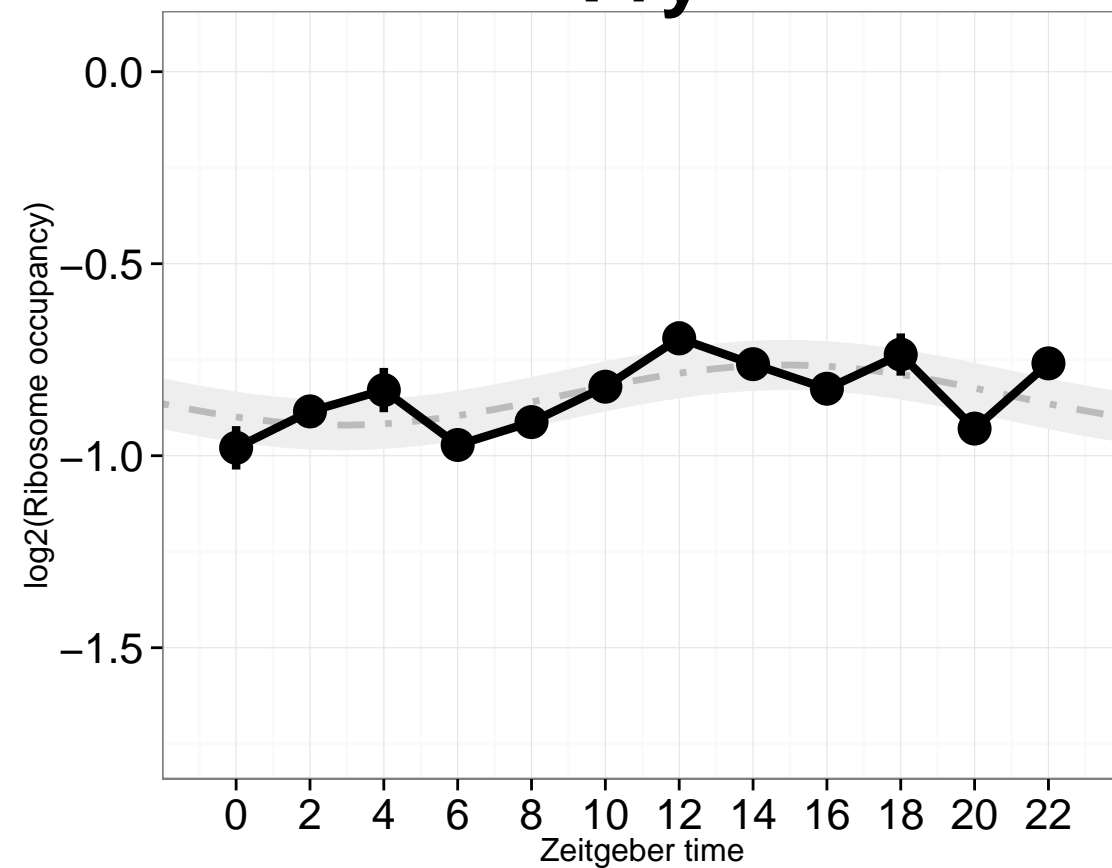

Supplement: Supplementary file 3881 [file 1]

## Cxadr

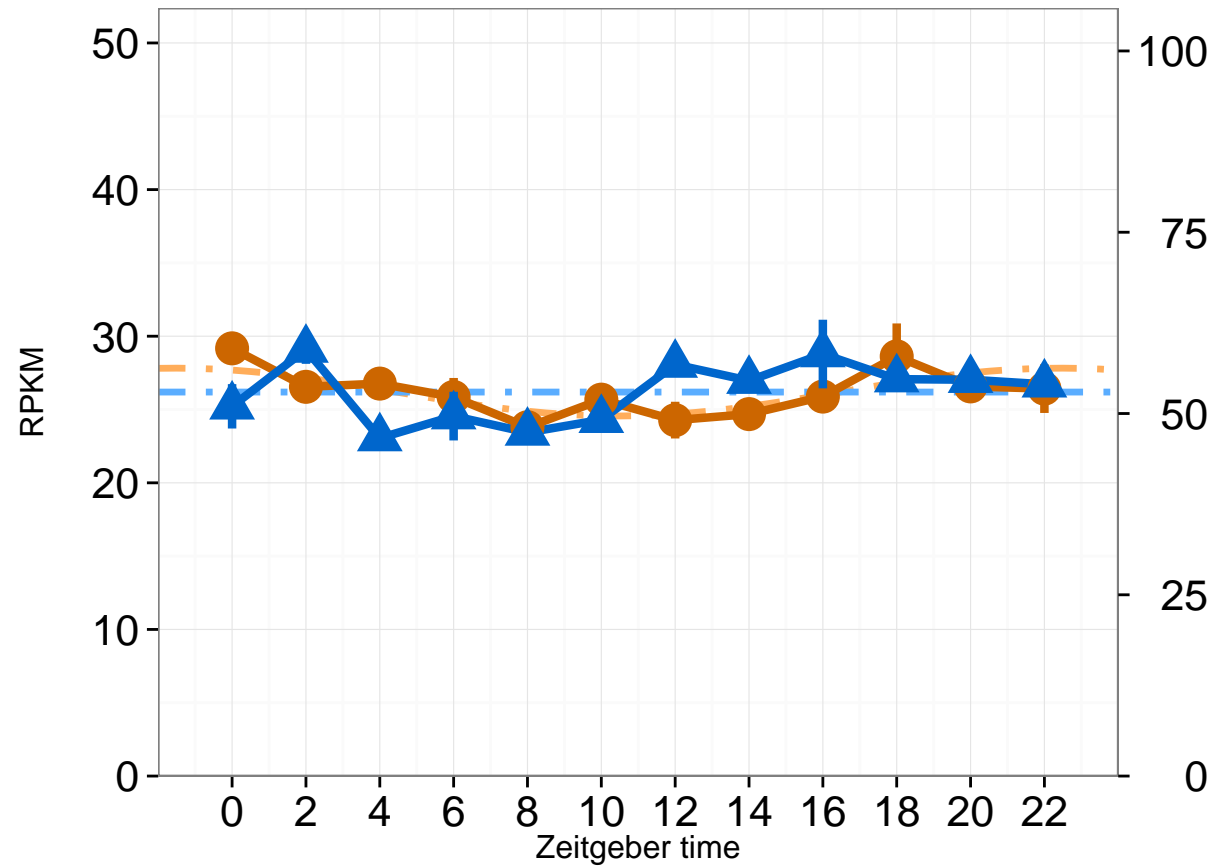

## Cxadr

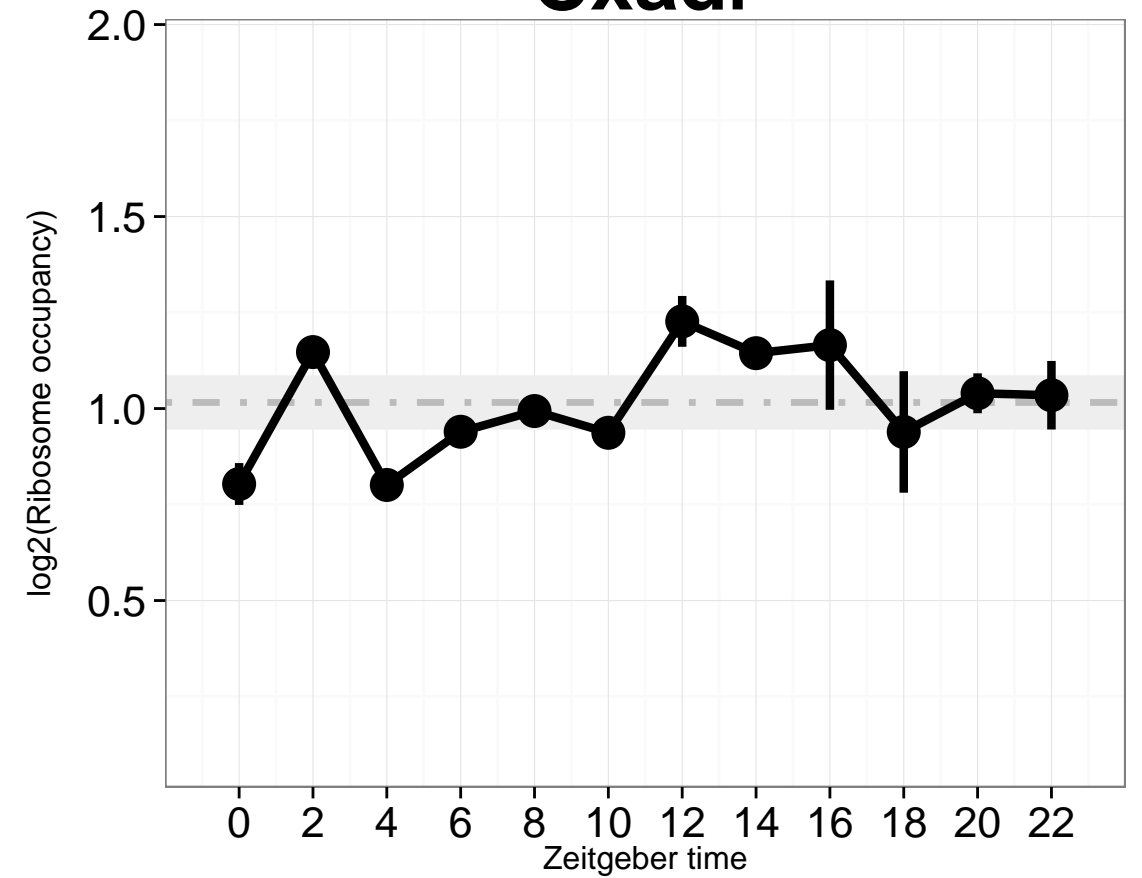

Supplement: Supplementary file 3882 [file 1]

## Itga8

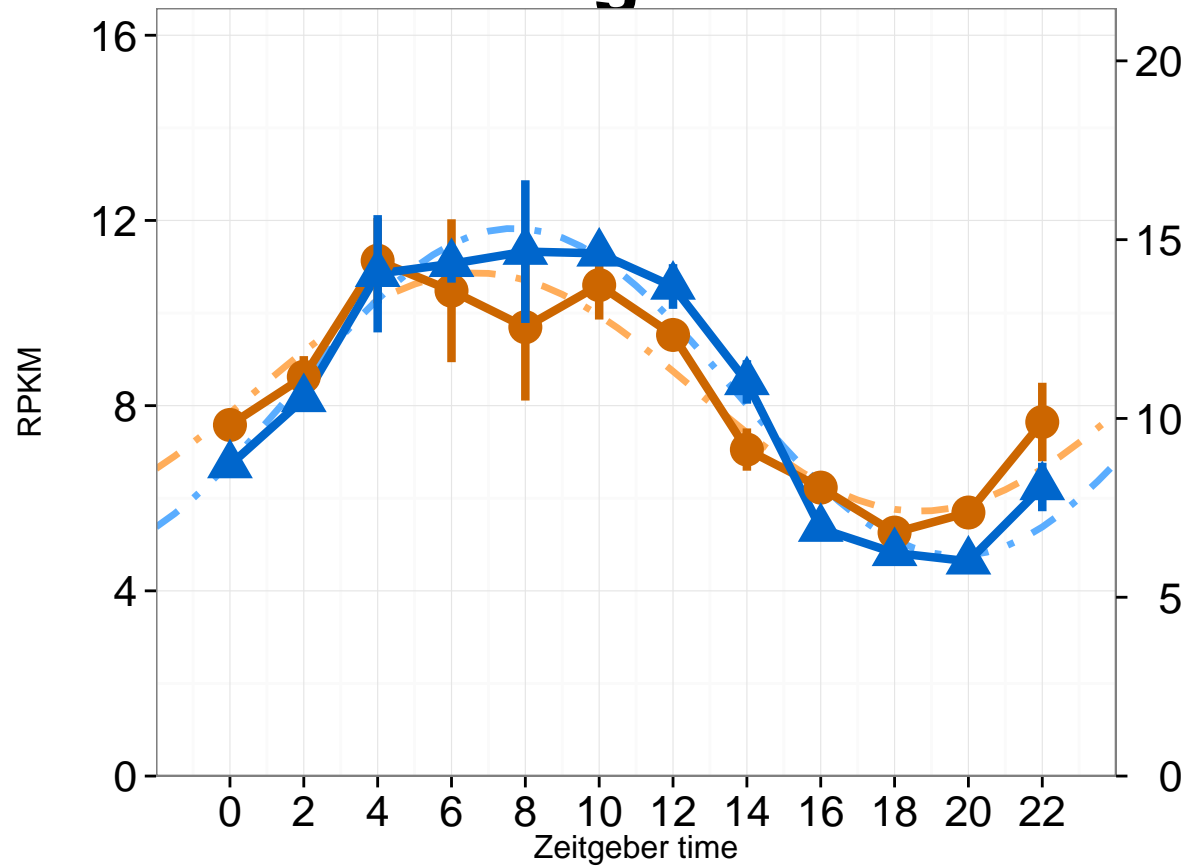

## Itga8

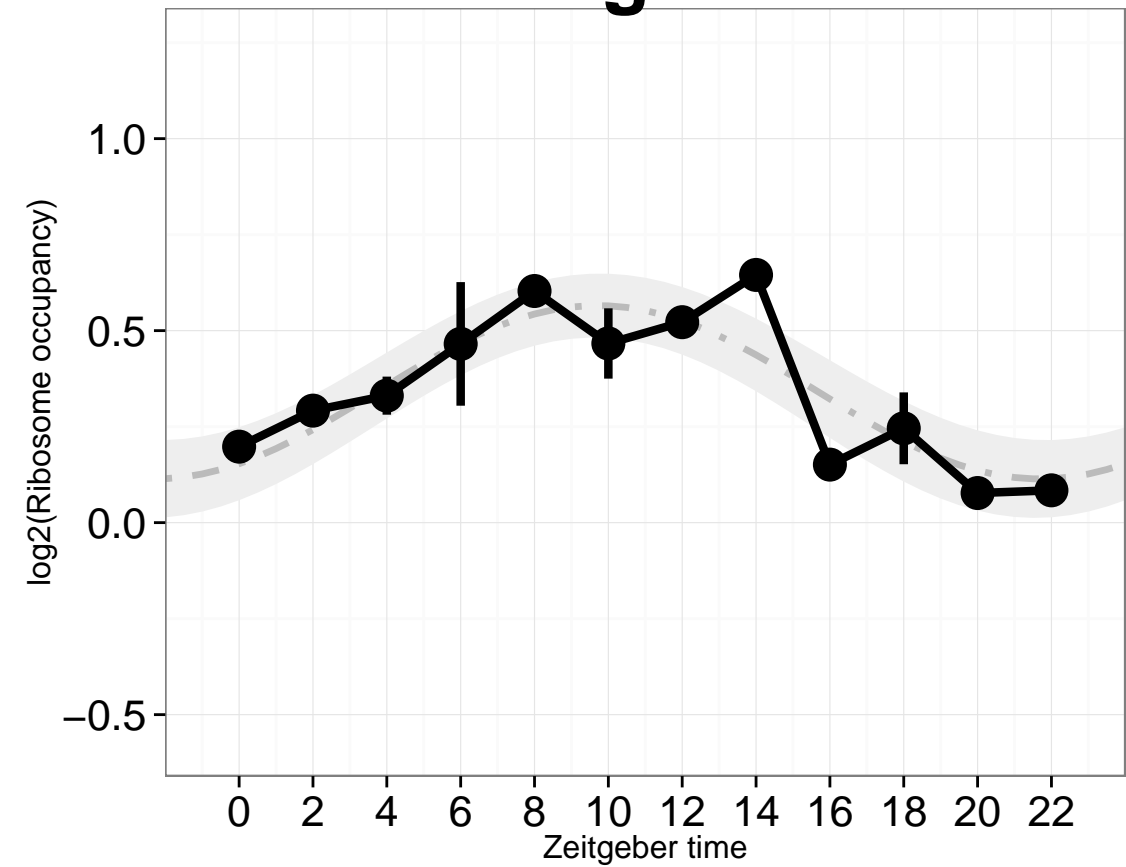

Supplement: Supplementary file 3883 [file 1]

## 2310039H08Rik

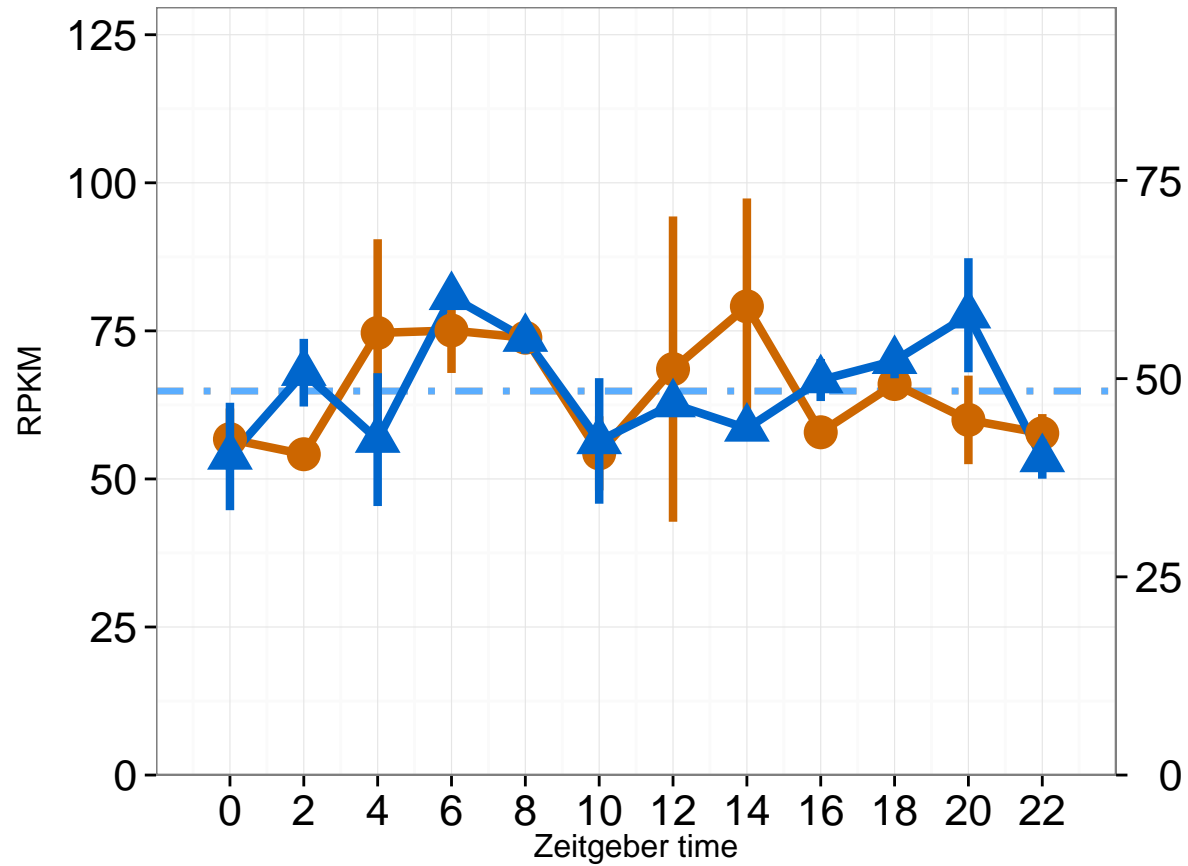

## 2310039H08Rik

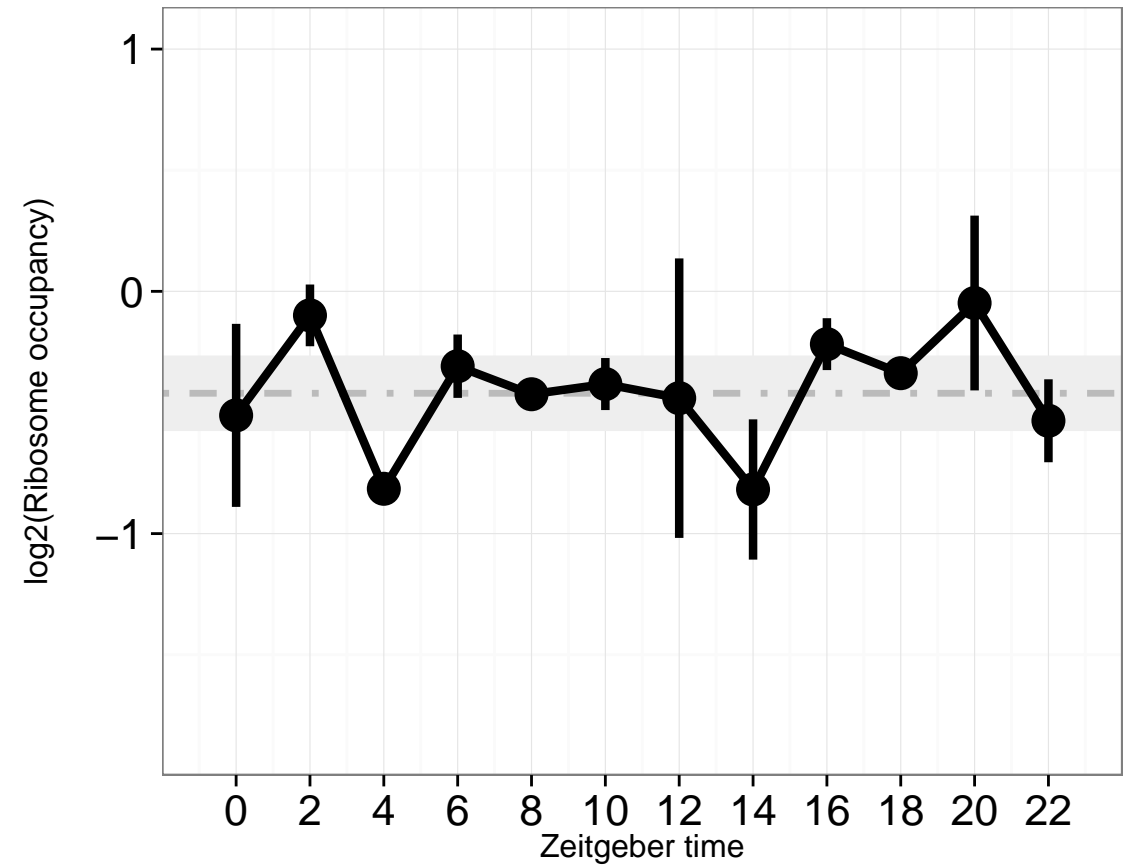

Supplement: Supplementary file 3884 [file 1]

# Col6a2

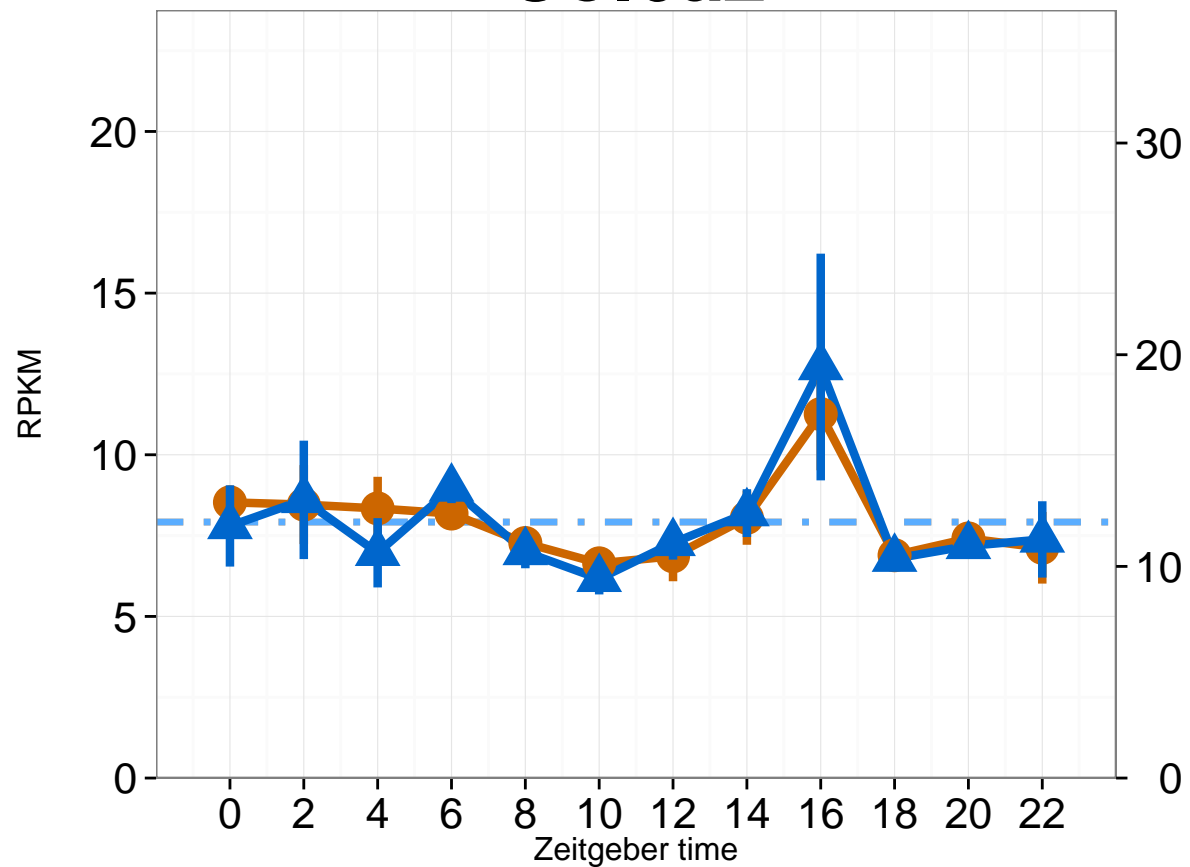

# Col6a2

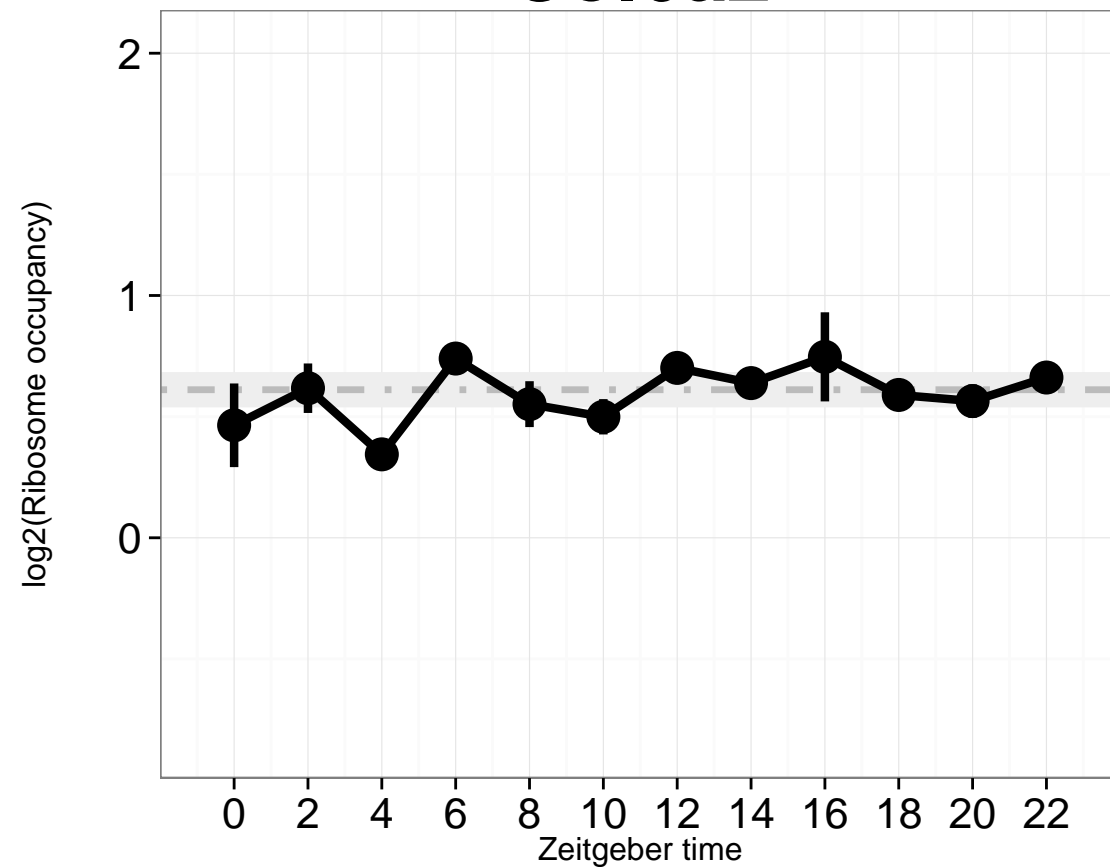

Supplement: Supplementary file 3885 [file 1]

# Trim36

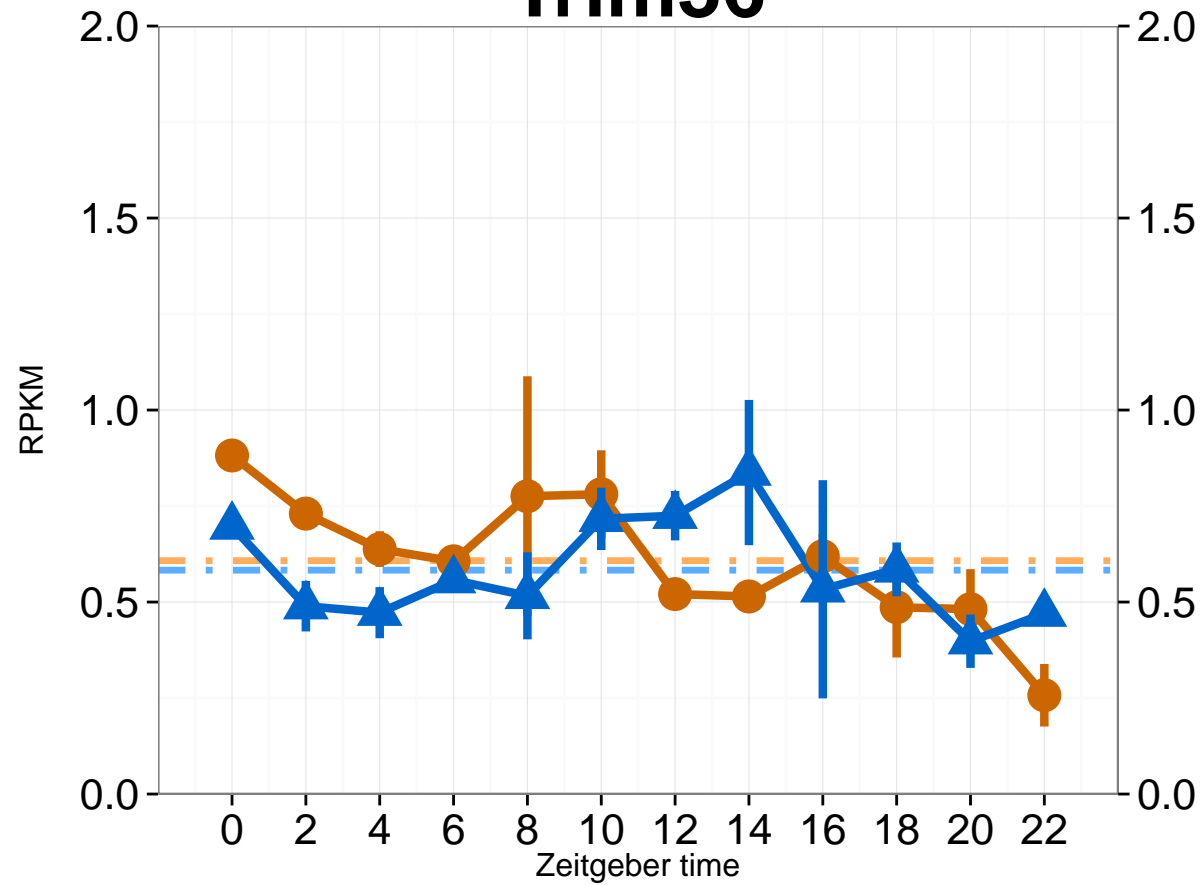

# Trim36

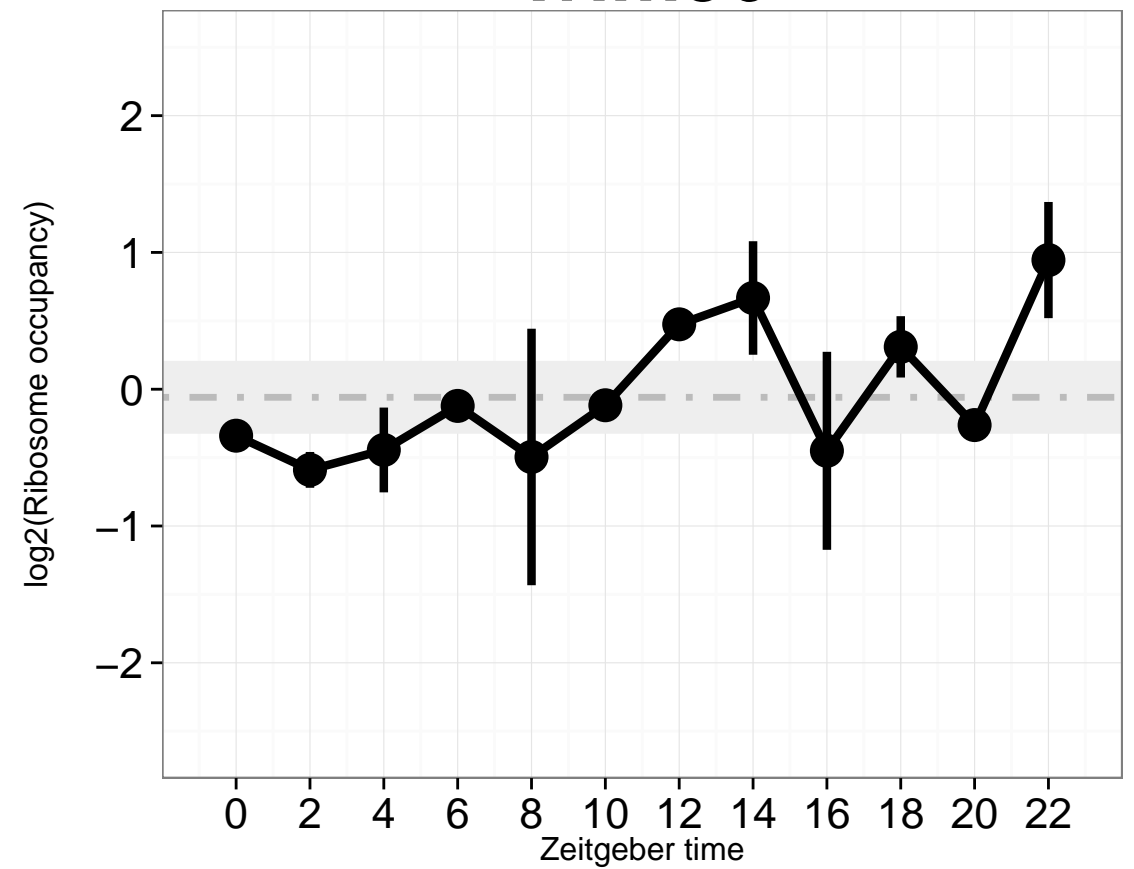

Supplement: Supplementary file 3886 [file 1]

## Hey2

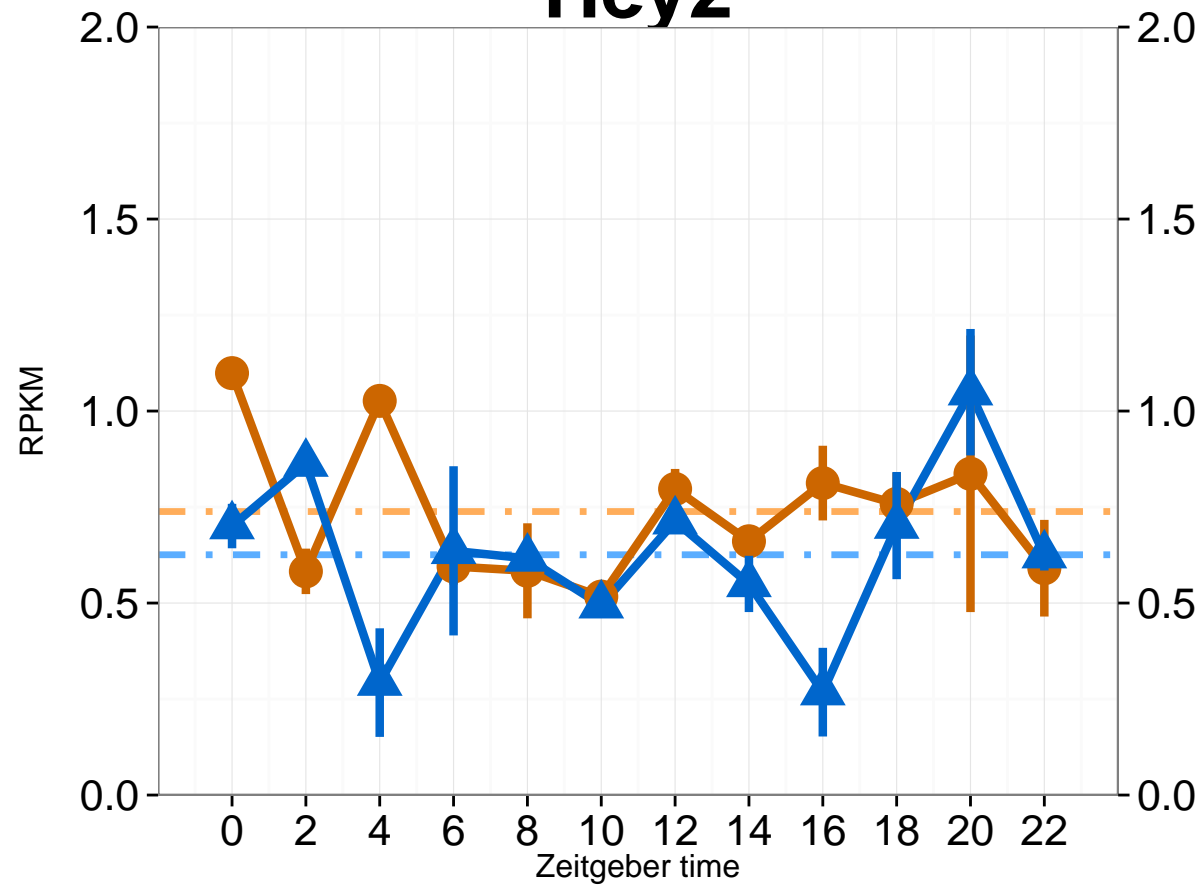

## Hey2

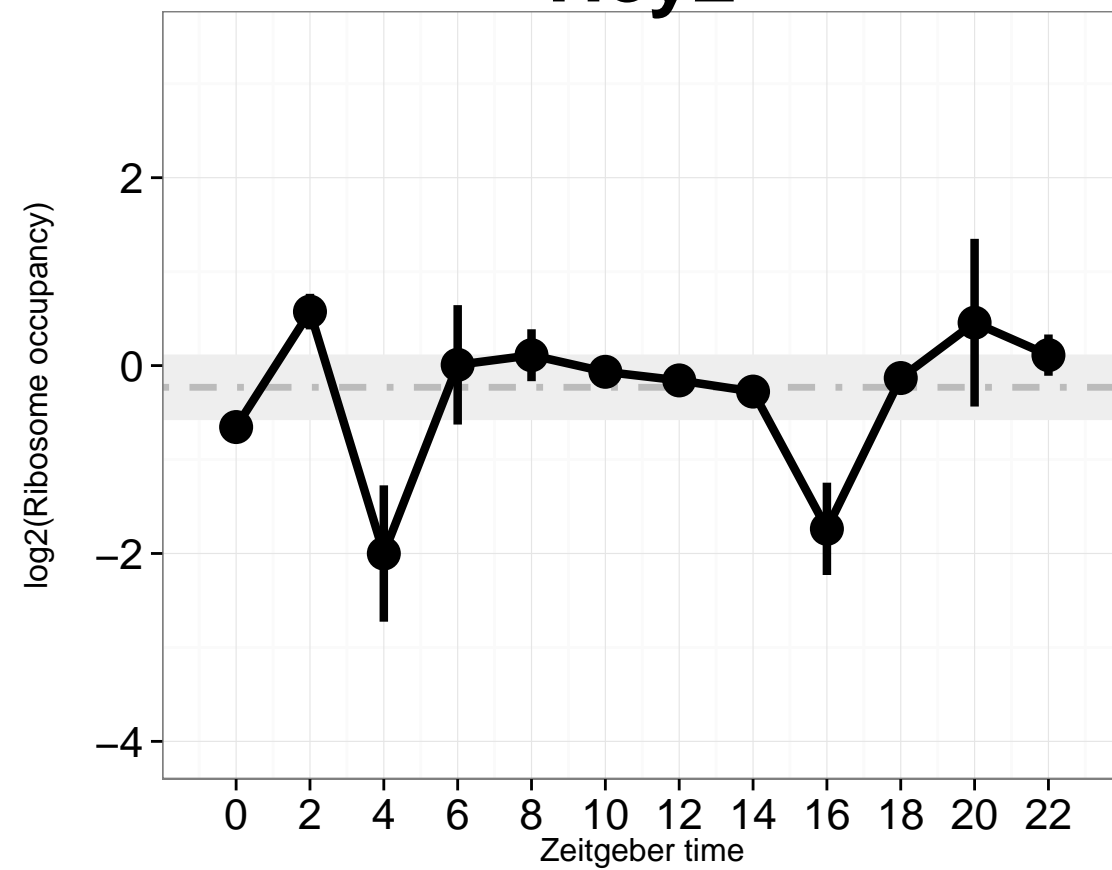

Supplement: Supplementary file 3887 [file 1]

## Cpeb3

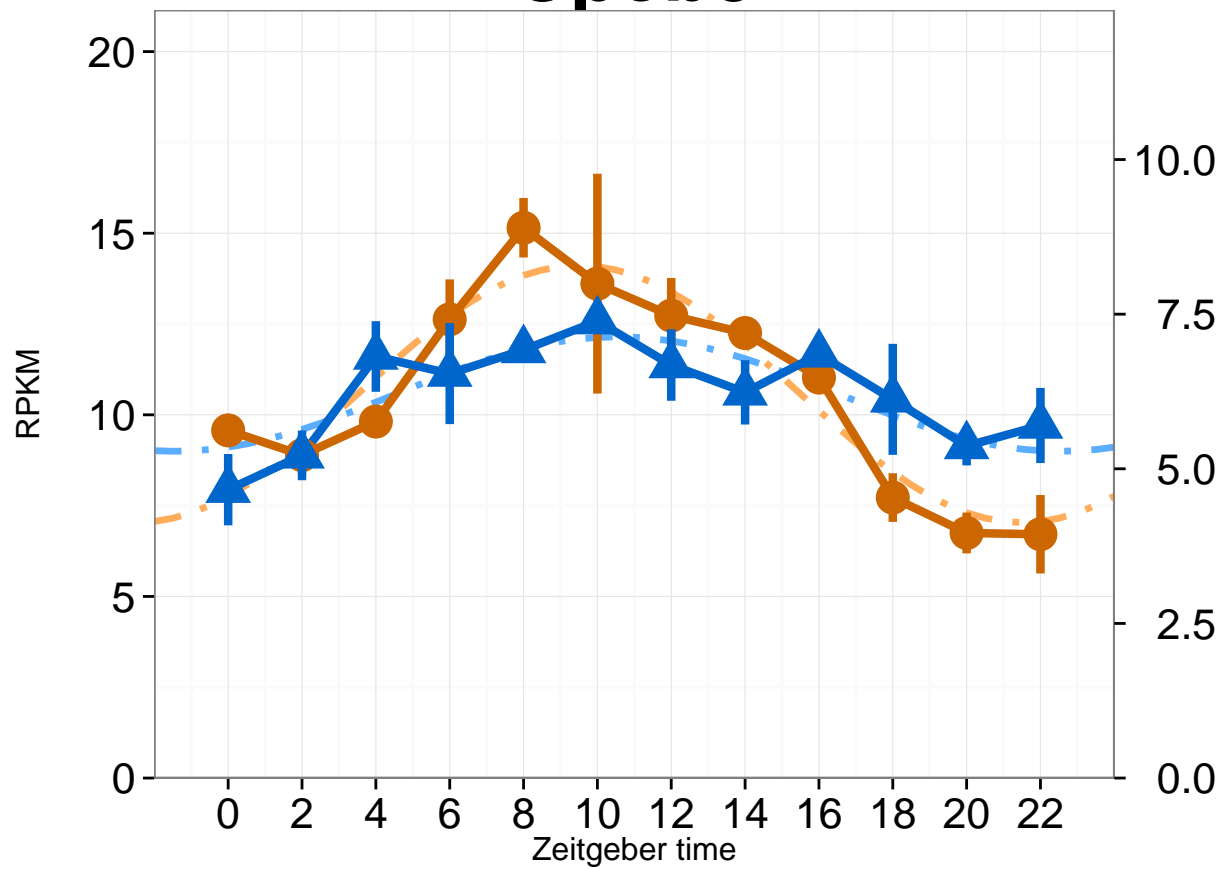

## Cpeb3

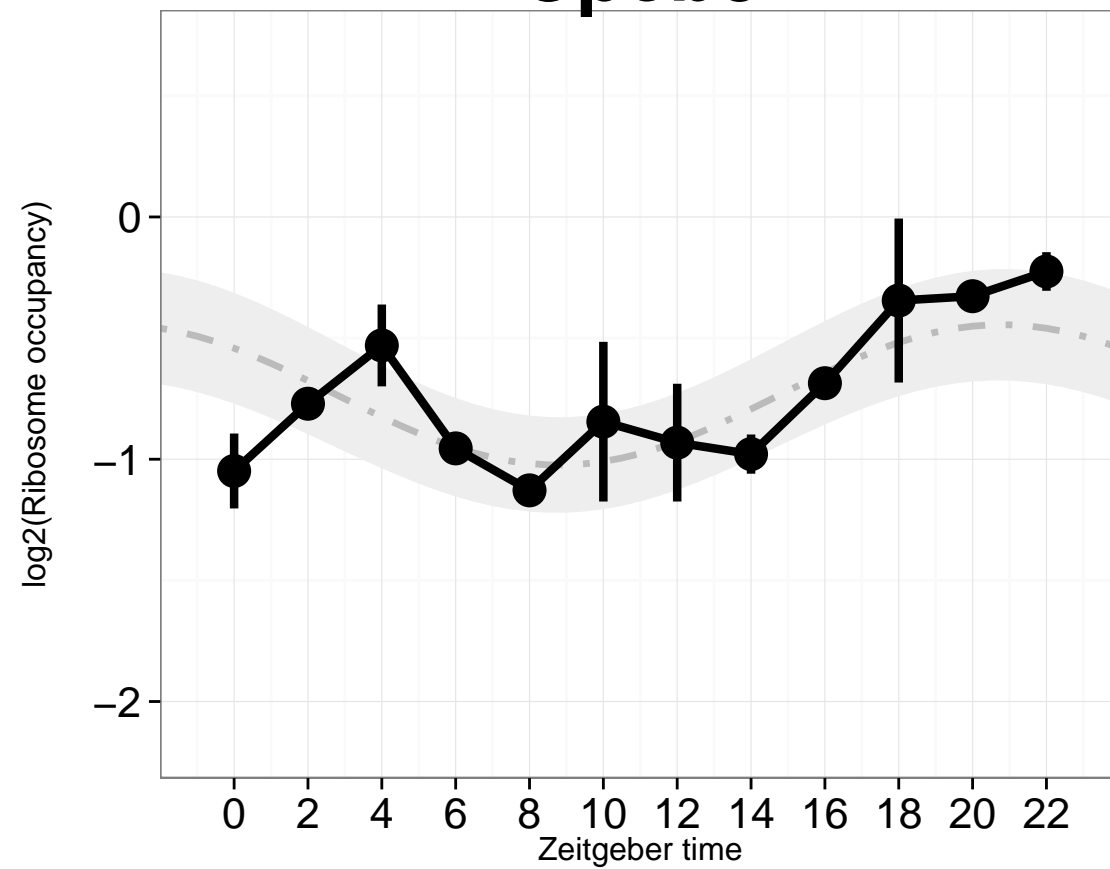

Supplement: Supplementary file 3888 [file 1]

## Ccdc53

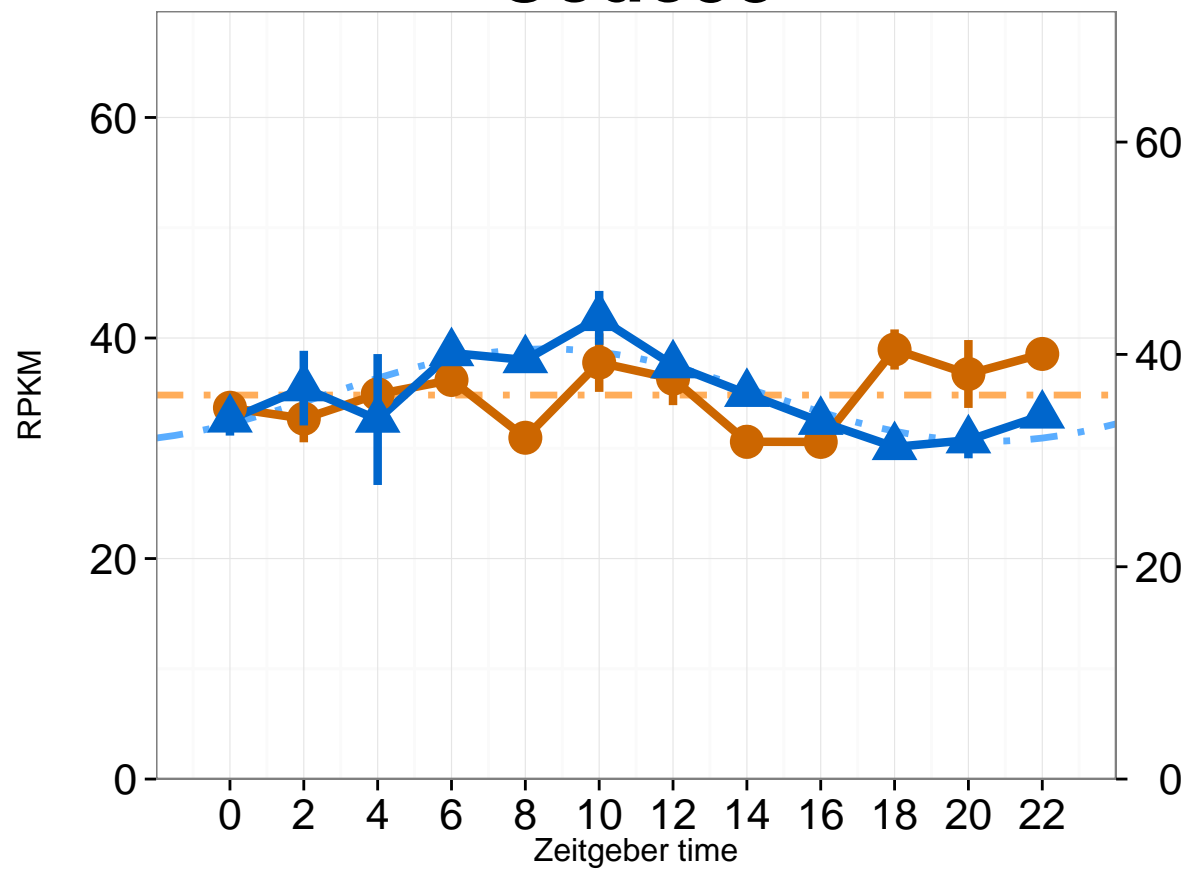

## Ccdc53

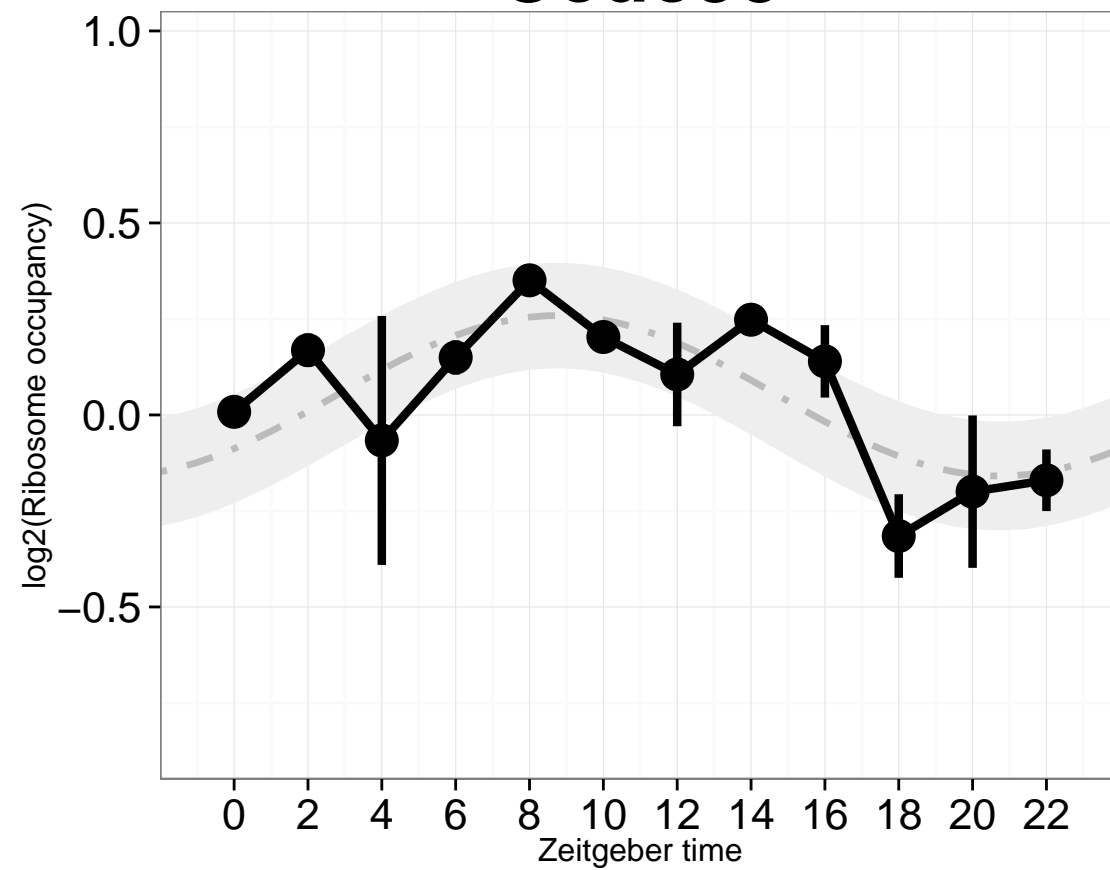

Supplement: Supplementary file 3889 [file 1]

## Clcnka

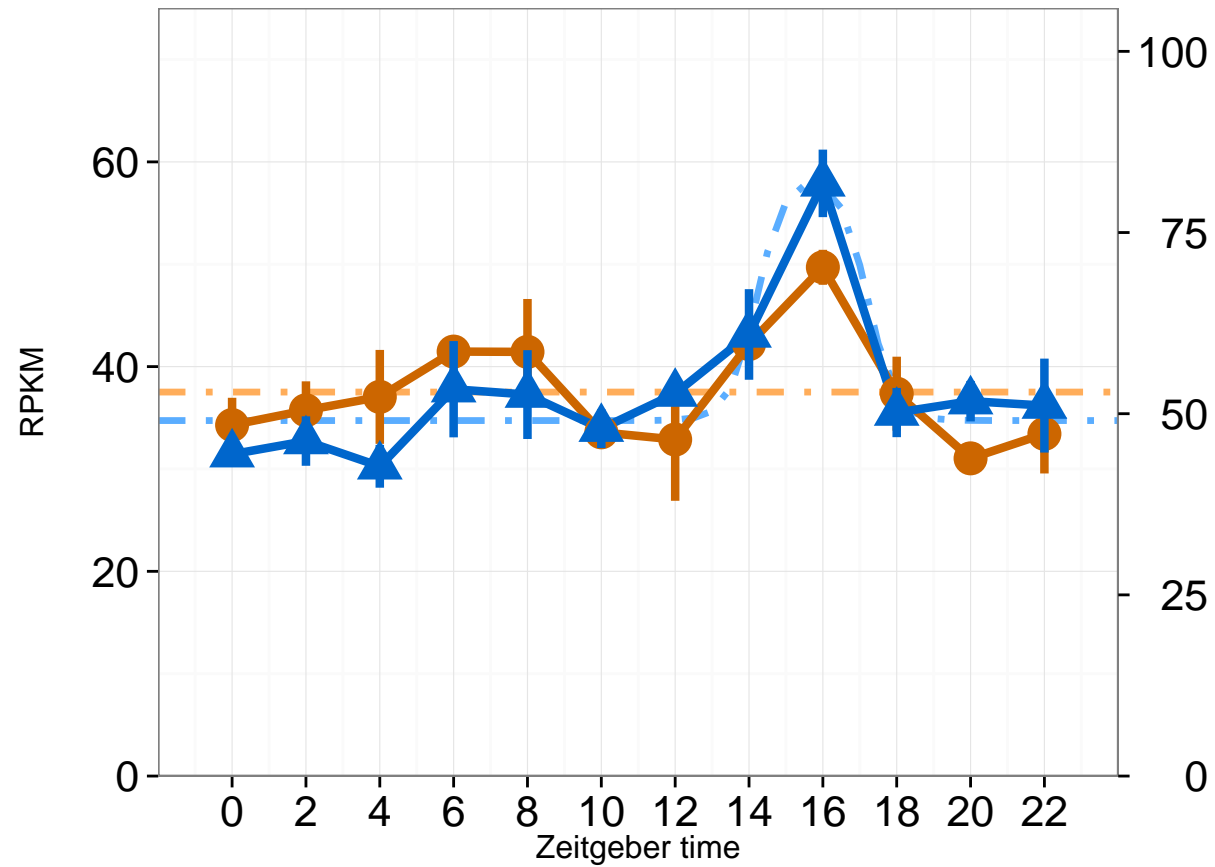

## Clcnka

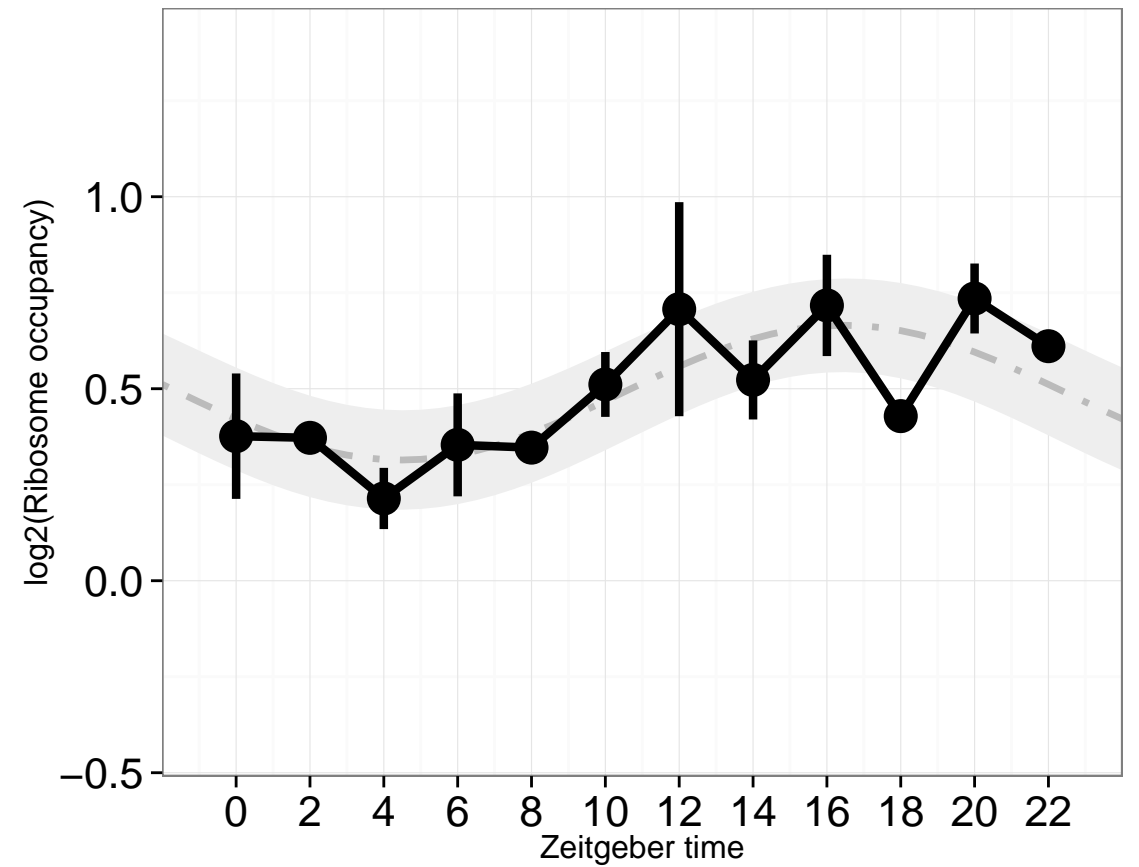

Supplement: Supplementary file 3890 [file 1]

## Axin2

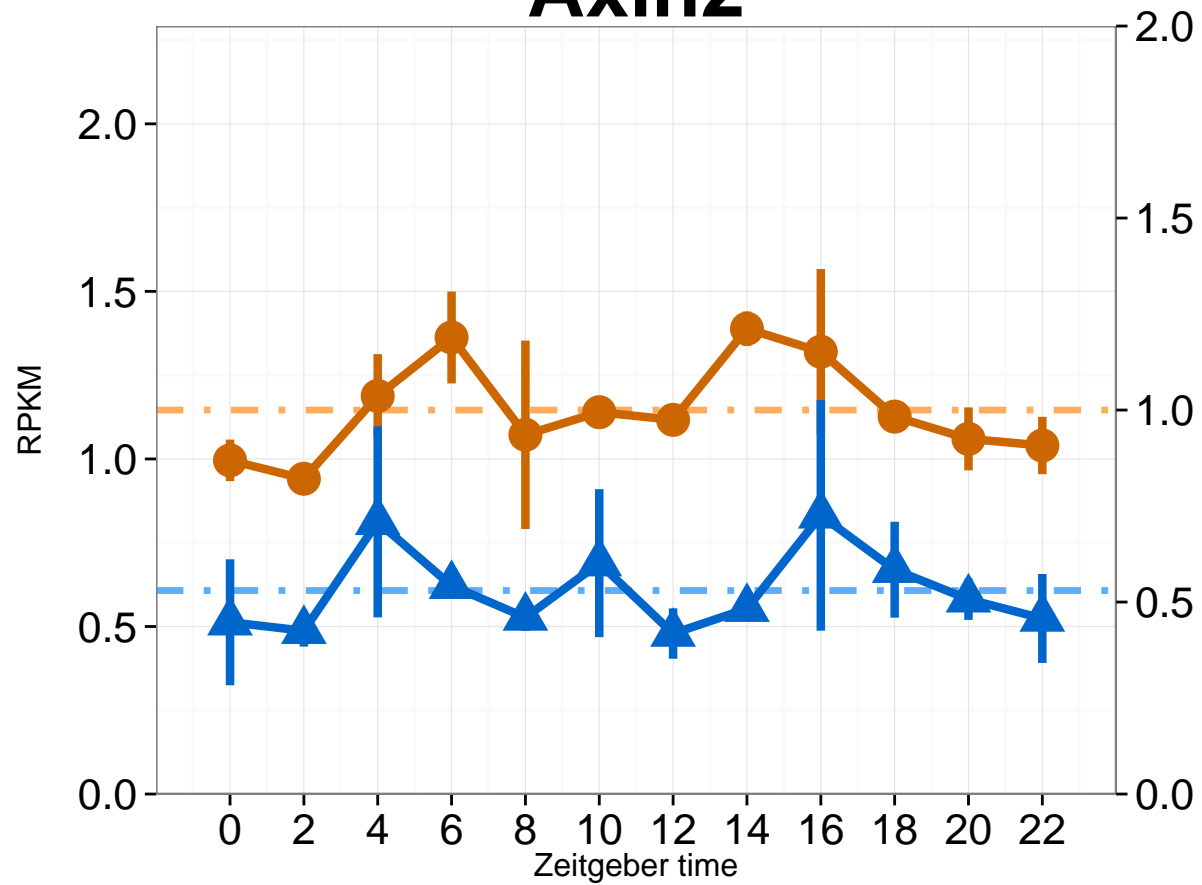

## Axin2

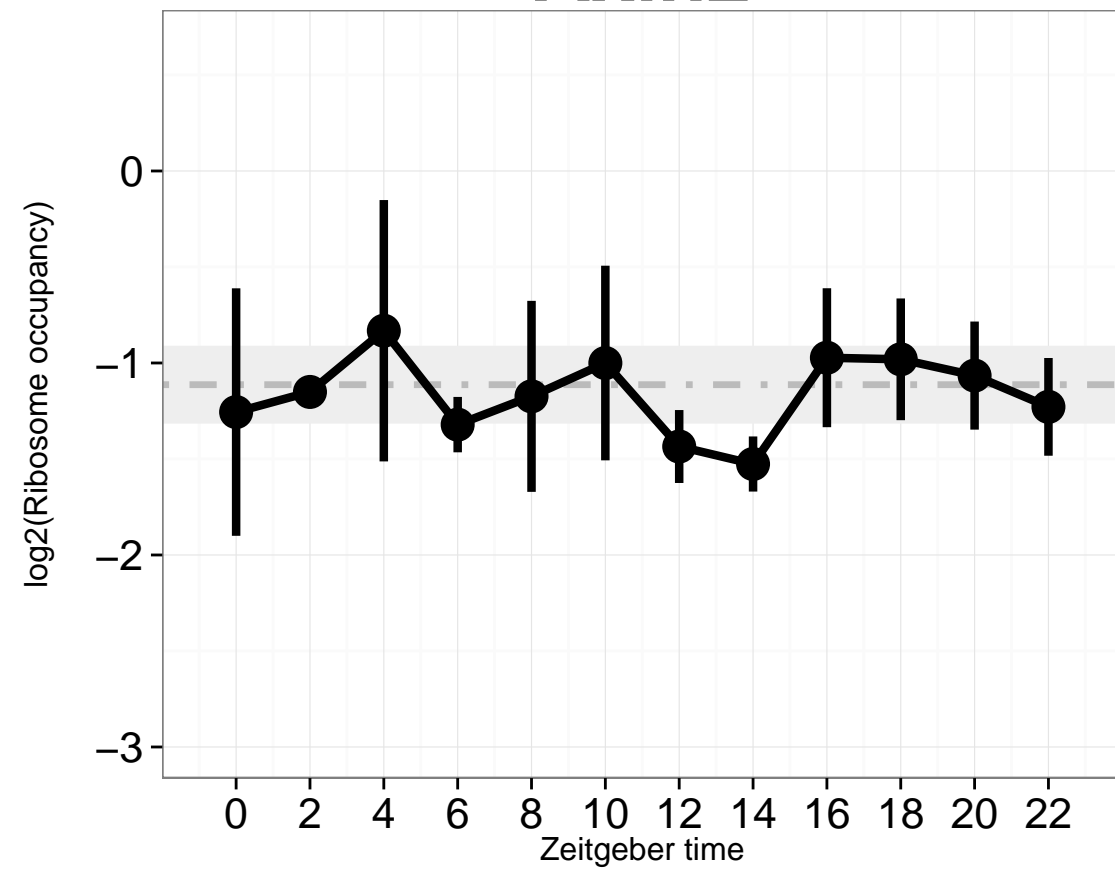

Supplement: Supplementary file 3891 [file 1]

# Ubash3b

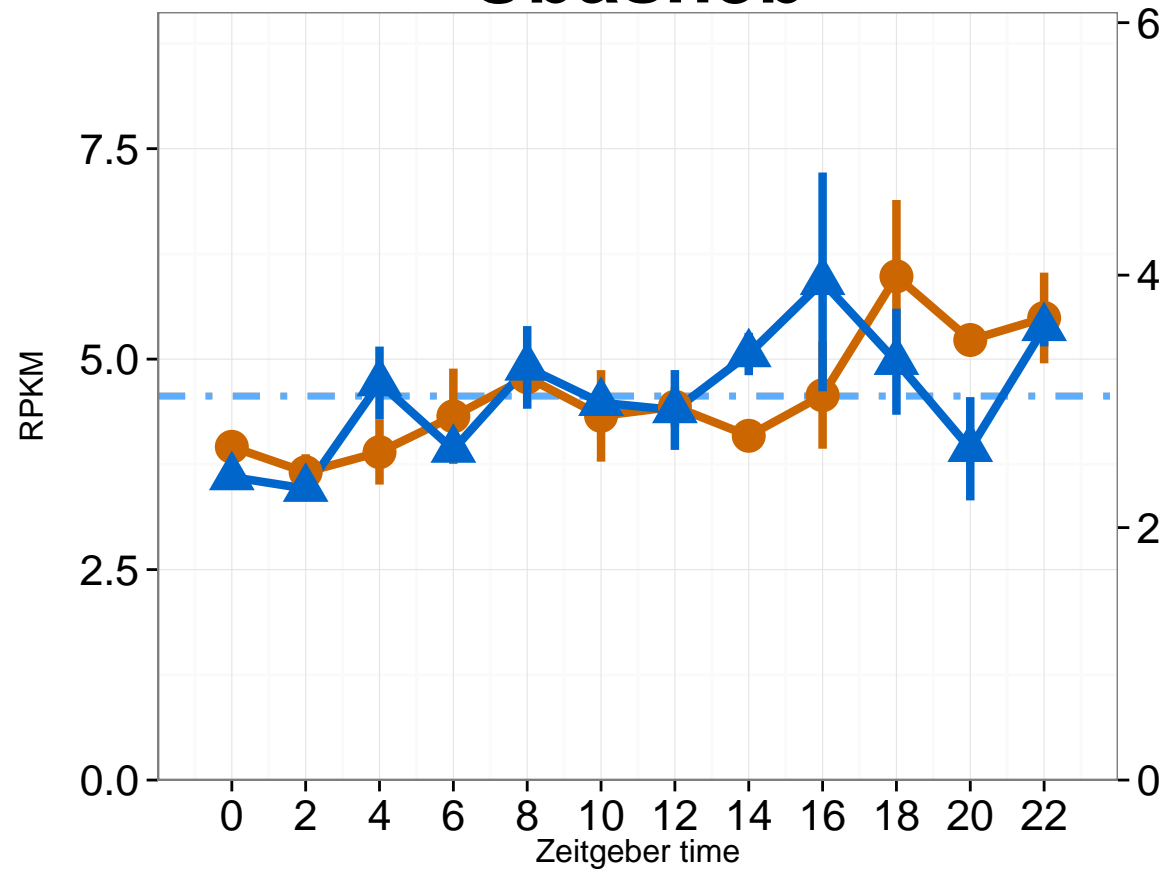

# Ubash3b

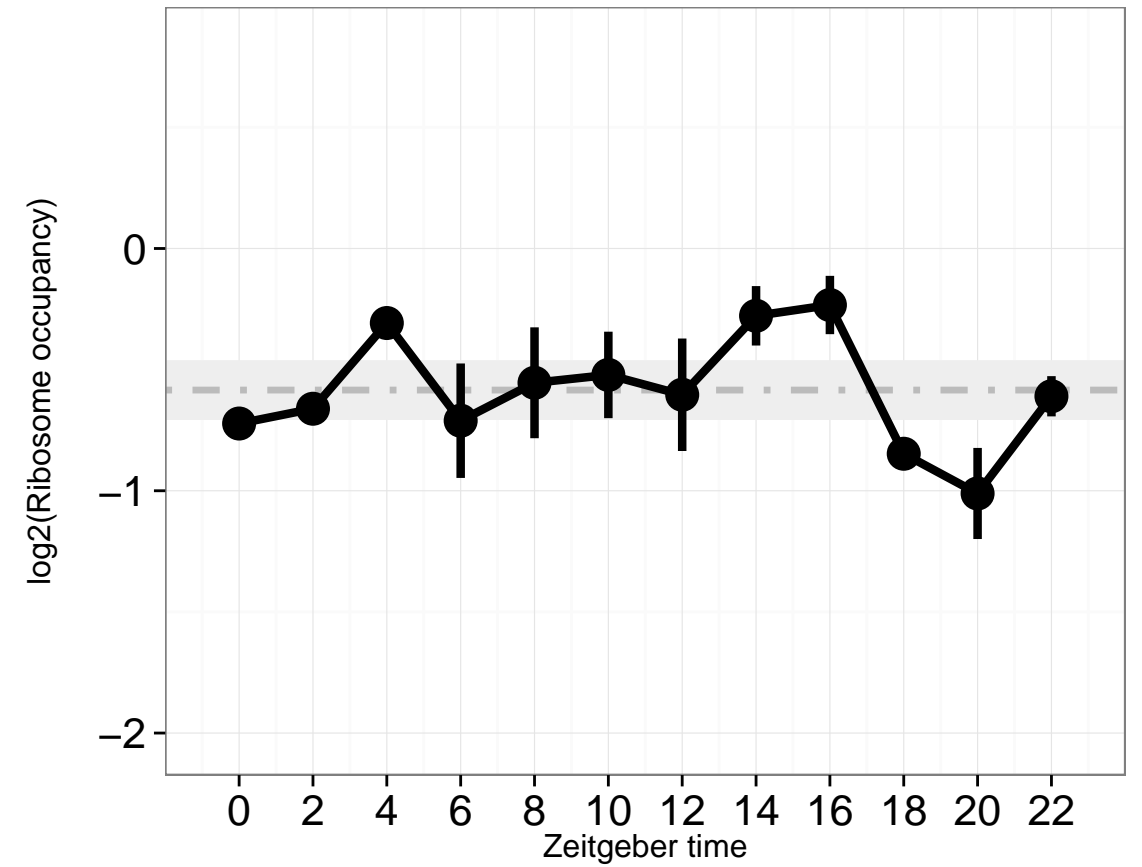

Supplement: Supplementary file 3892 [file 1]

# Trabd

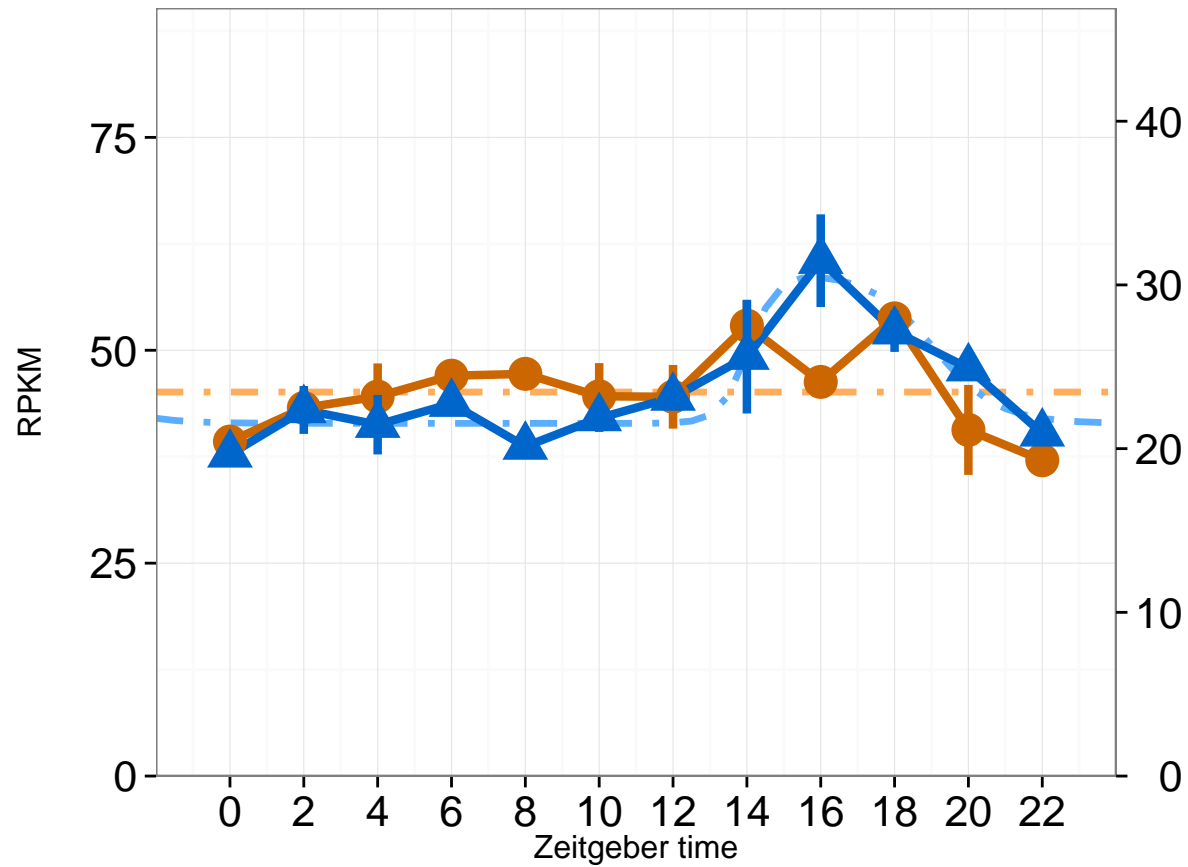

# Trabd

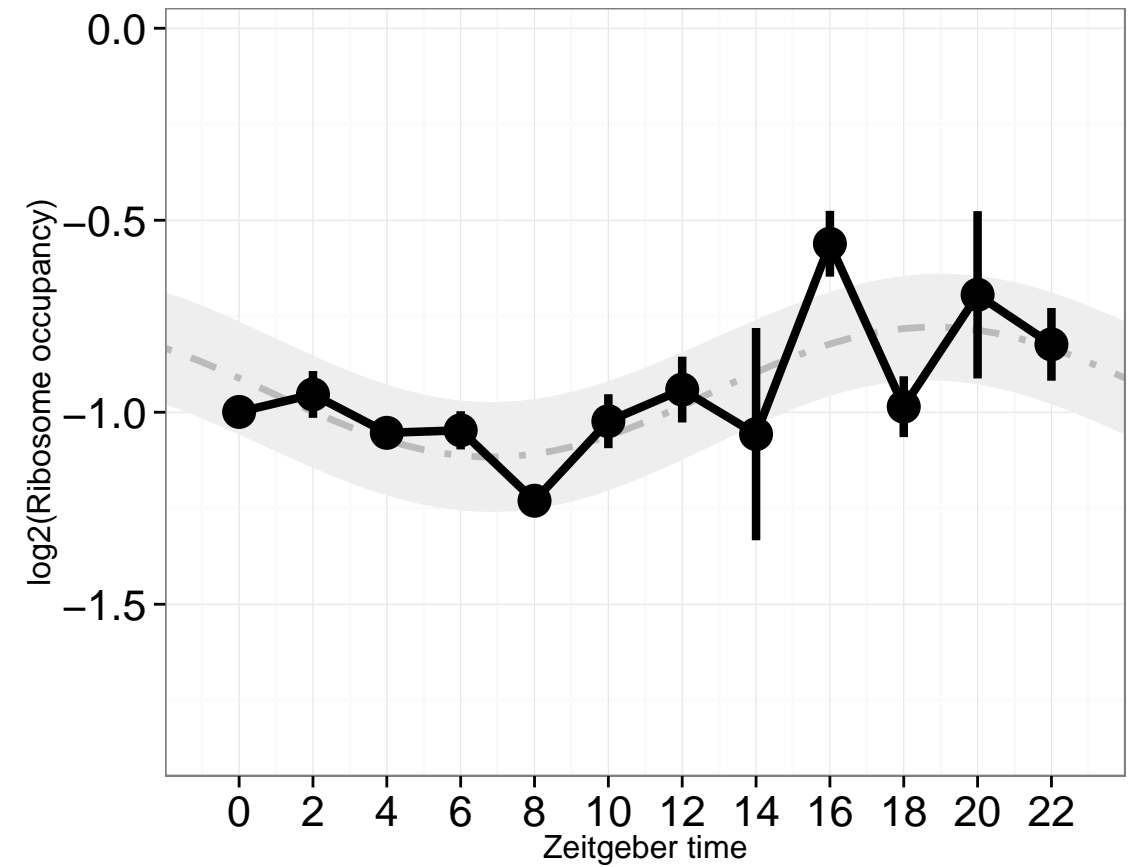

Supplement: Supplementary file 3893 [file 1]

## Rnf44

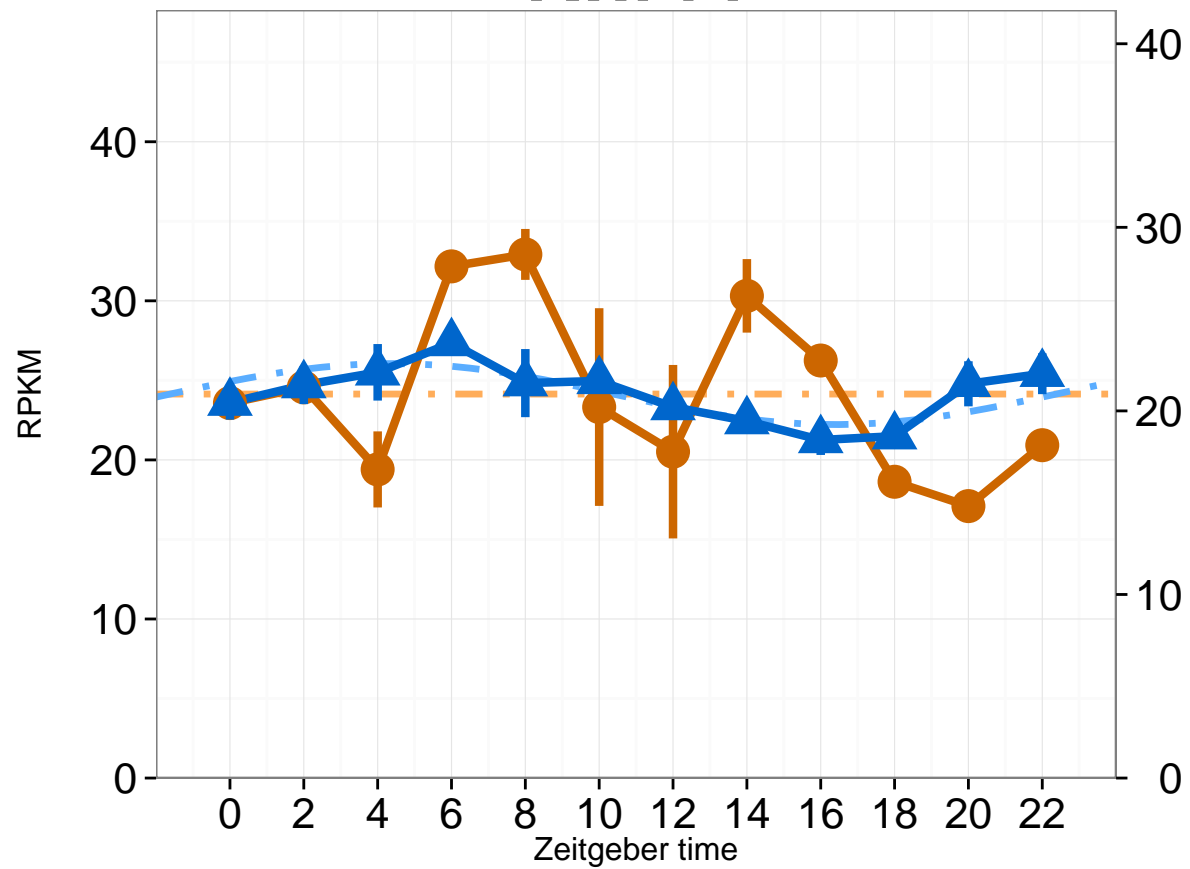

## Rnf44

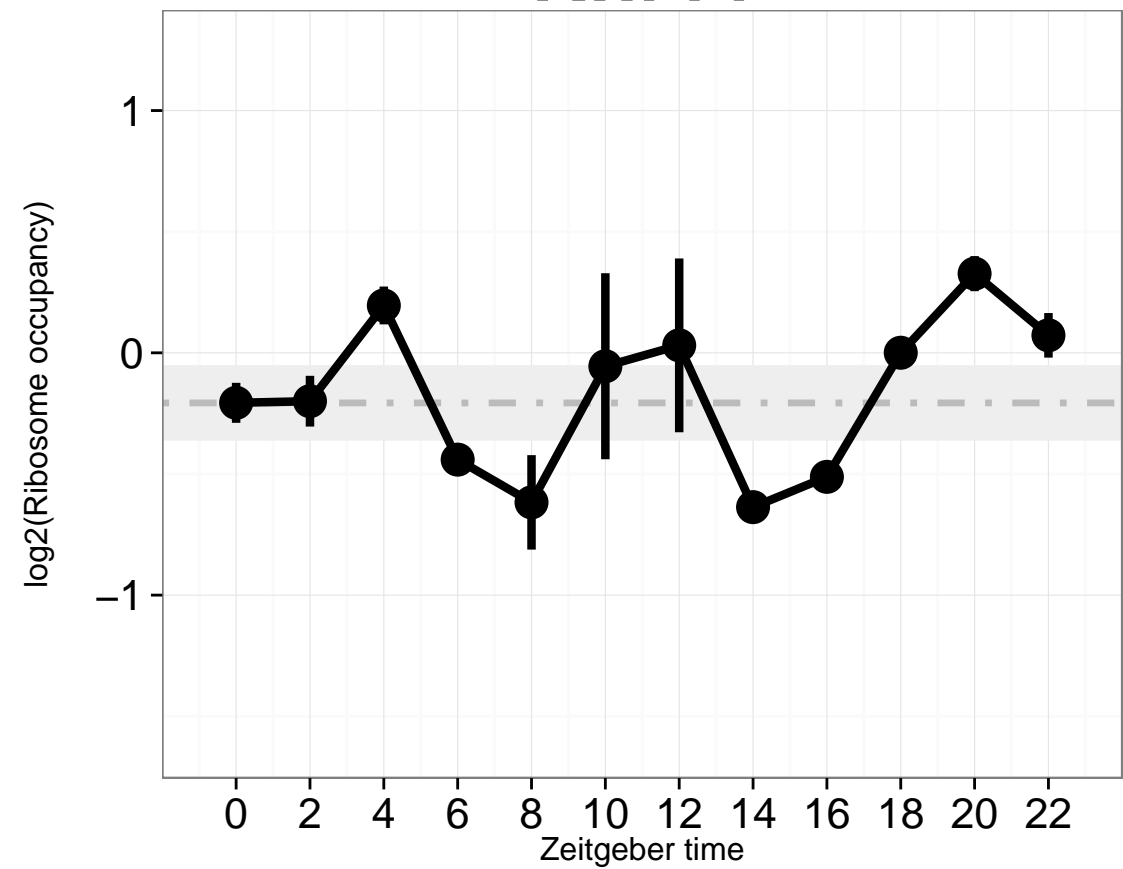

Supplement: Supplementary file 3894 [file 1]

# Cpe

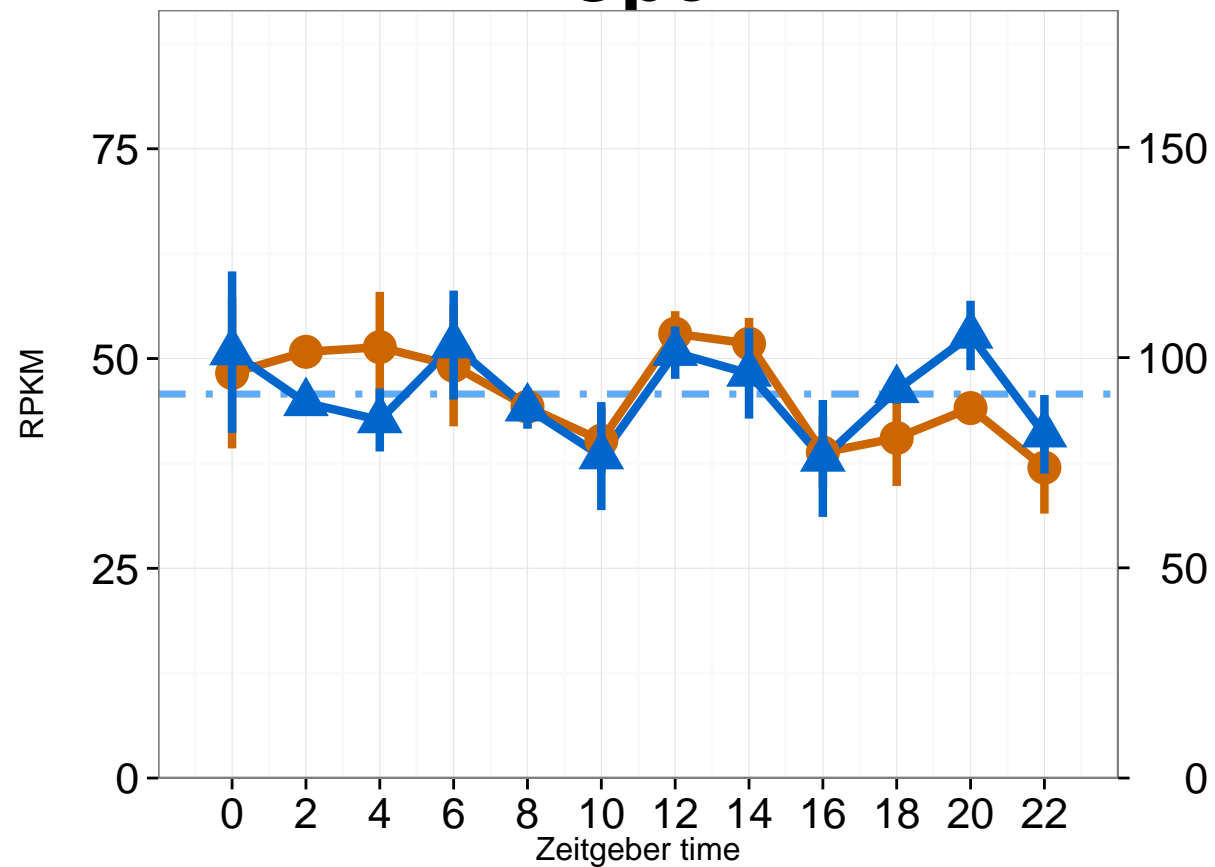

# Cpe

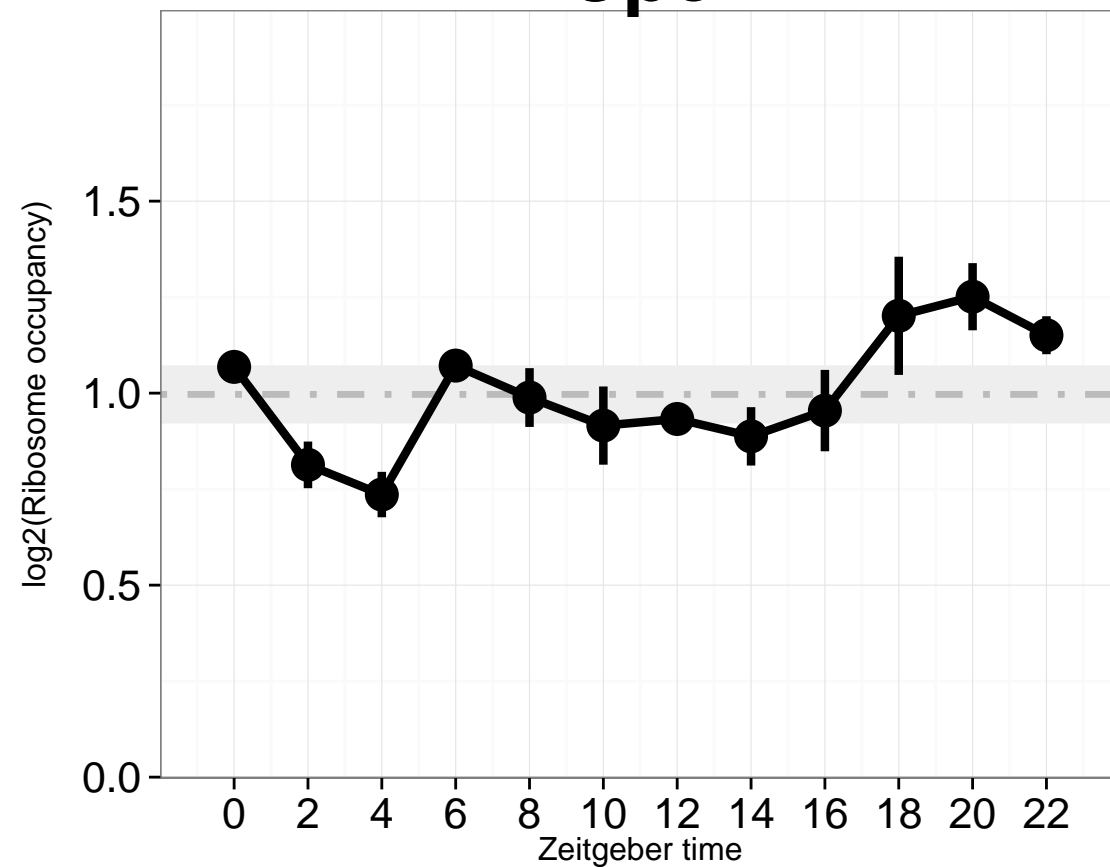

Supplement: Supplementary file 3895 [file 1]

# Clstn1

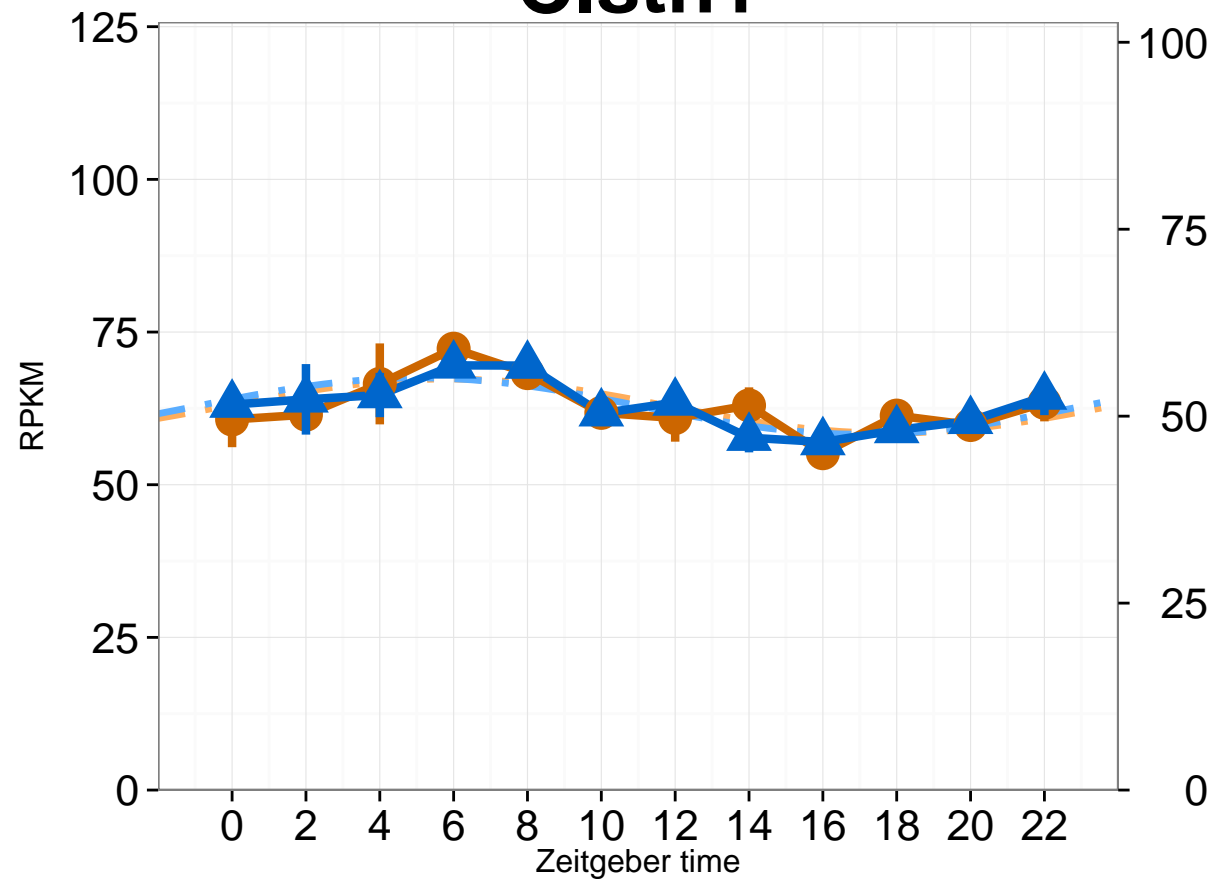

# Clstn1

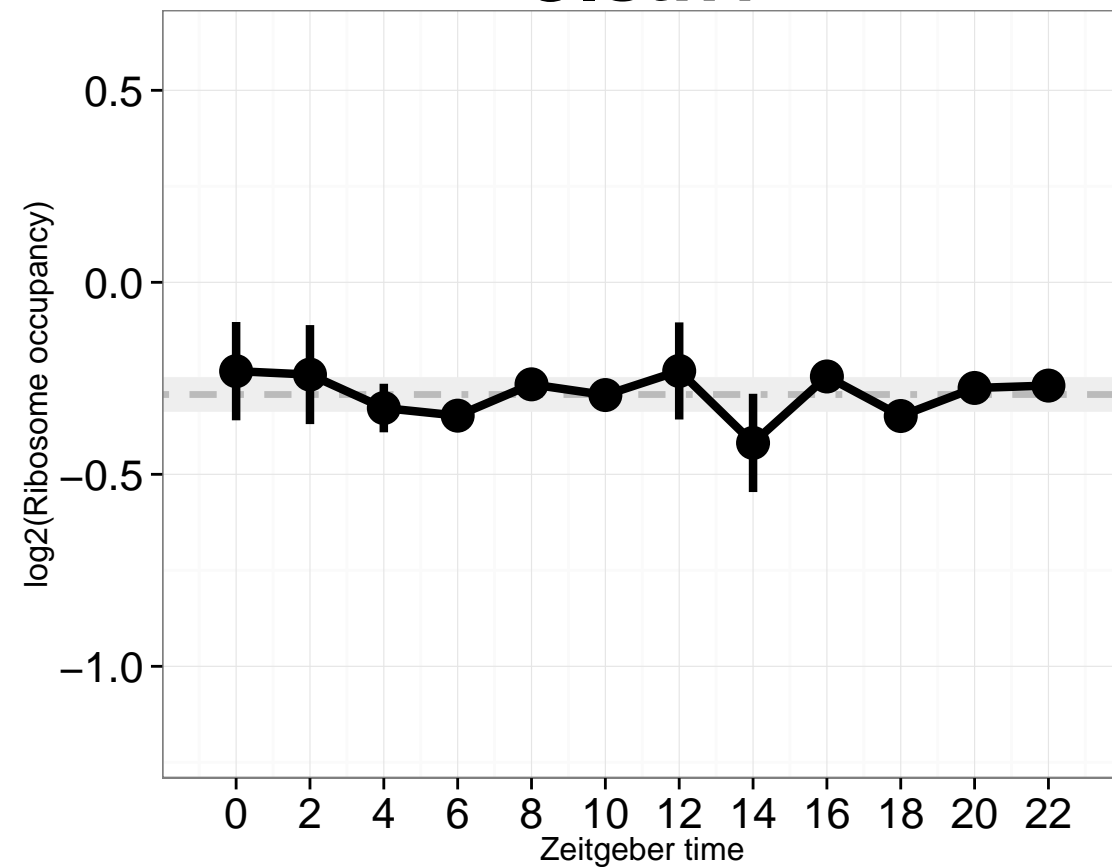

Supplement: Supplementary file 3896 [file 1]

# Sele TR

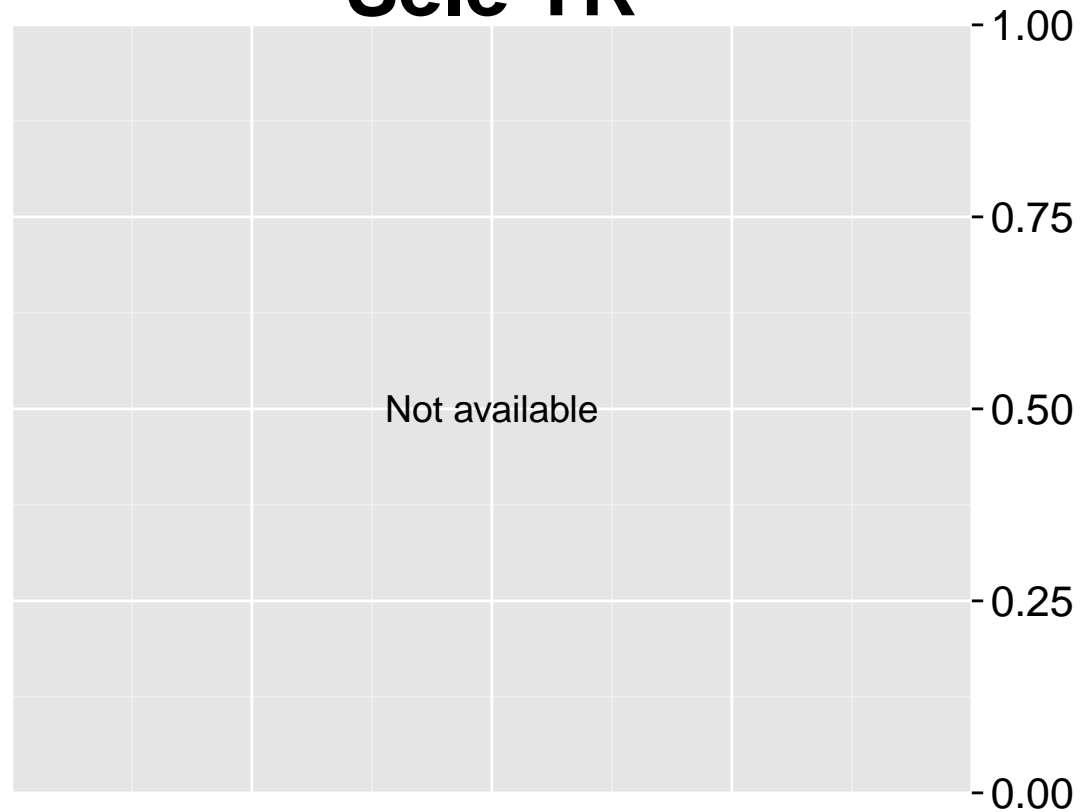

## Sele log2(Ribosome occupancy)

Supplement: Supplementary file 3897 [file 1]

# Gng10

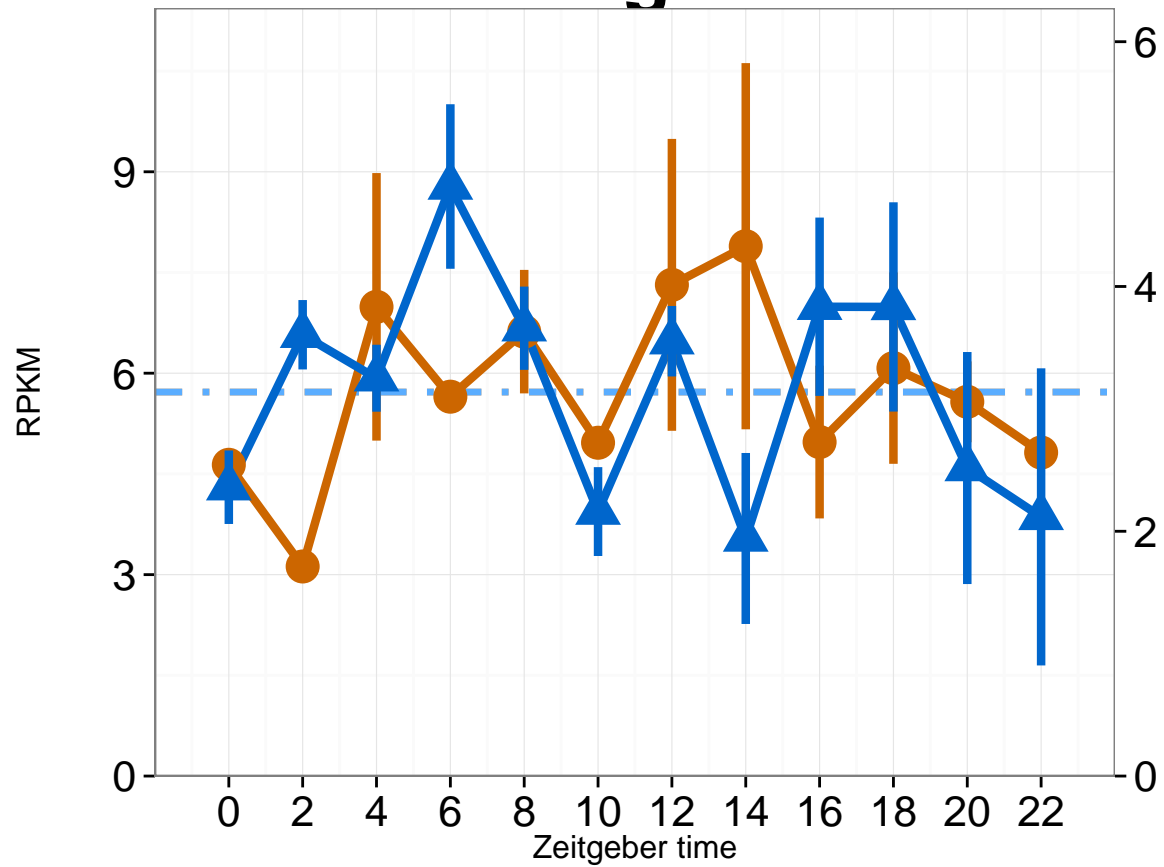

# Gng10

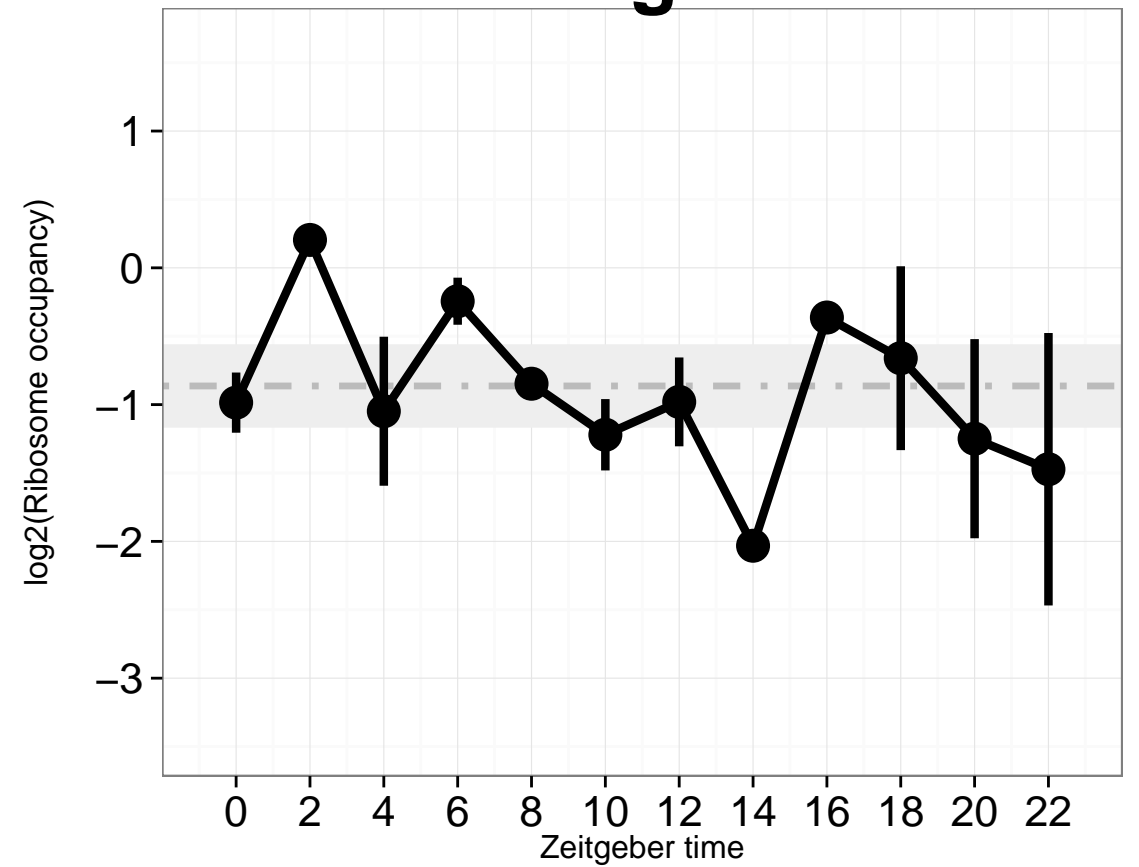

Supplement: Supplementary file 3898 [file 1]

## Grip2

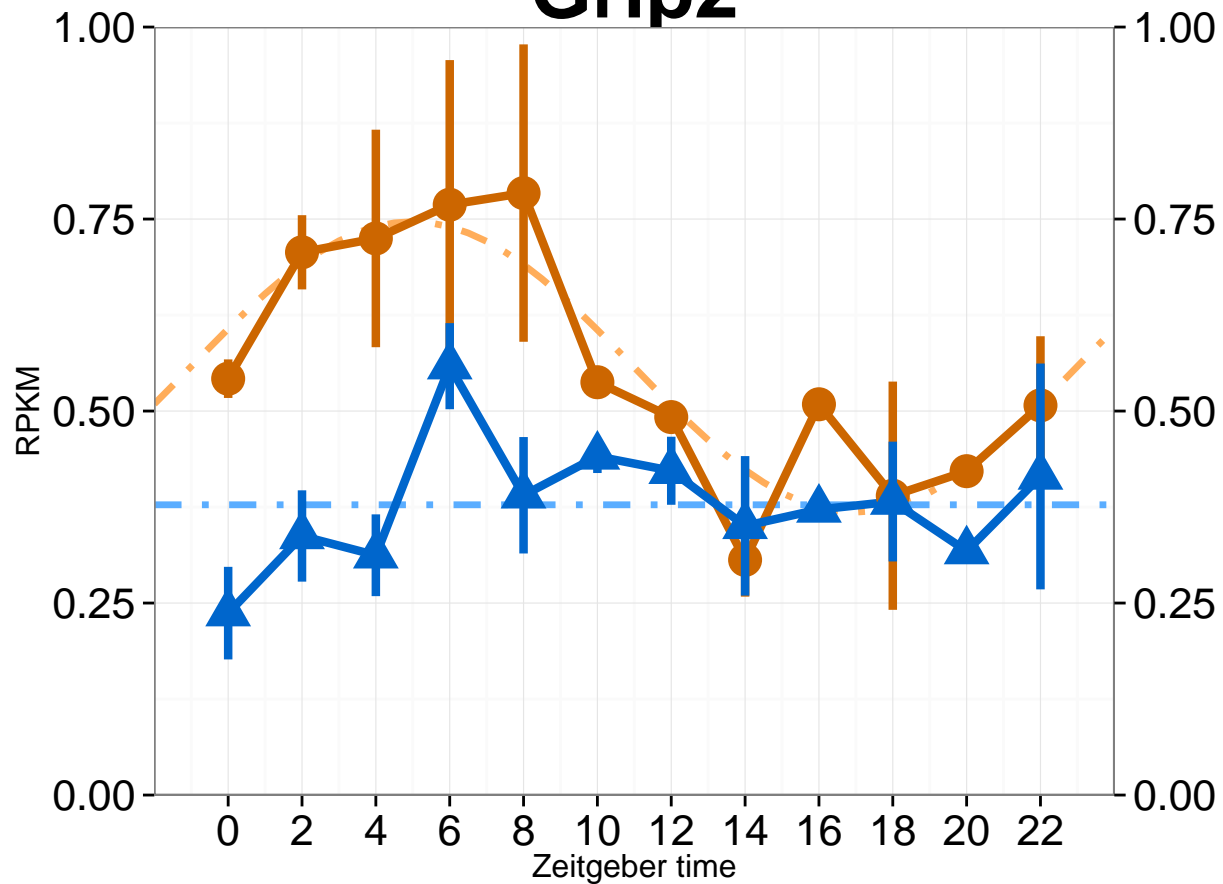

## Grip2

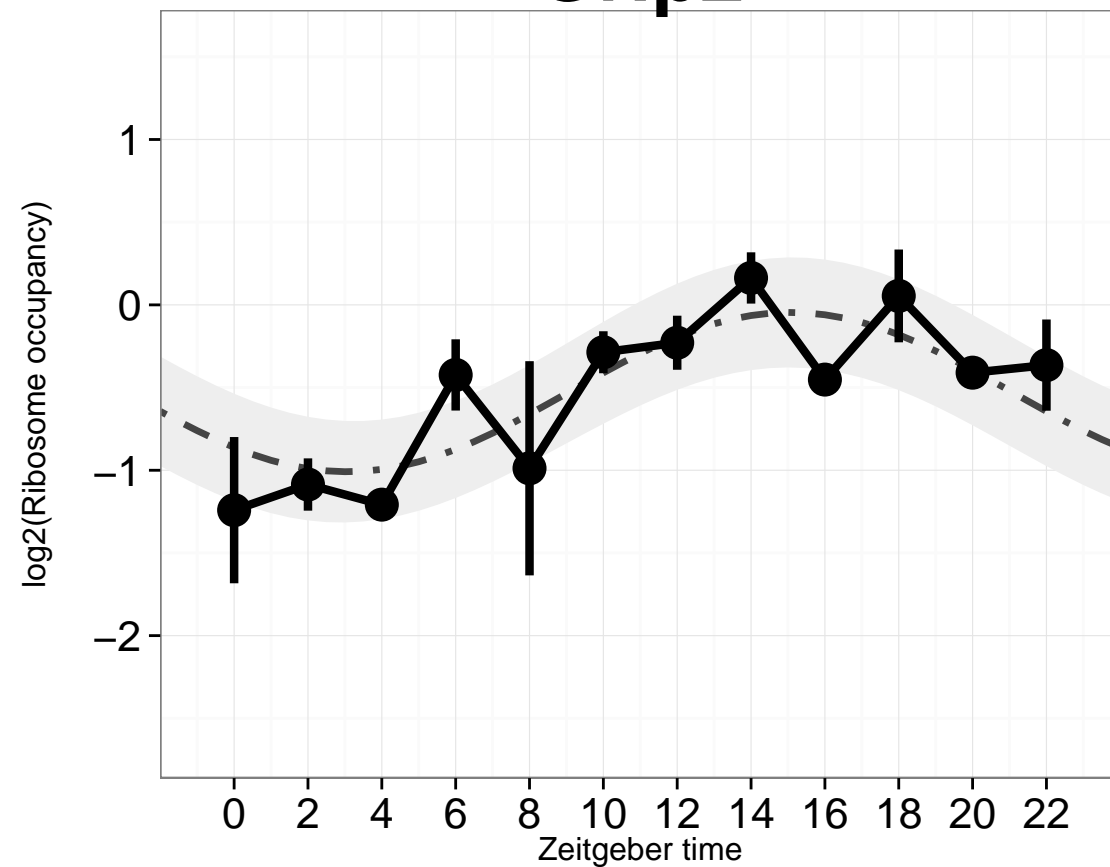

Supplement: Supplementary file 3899 [file 1]

# Ndrg1

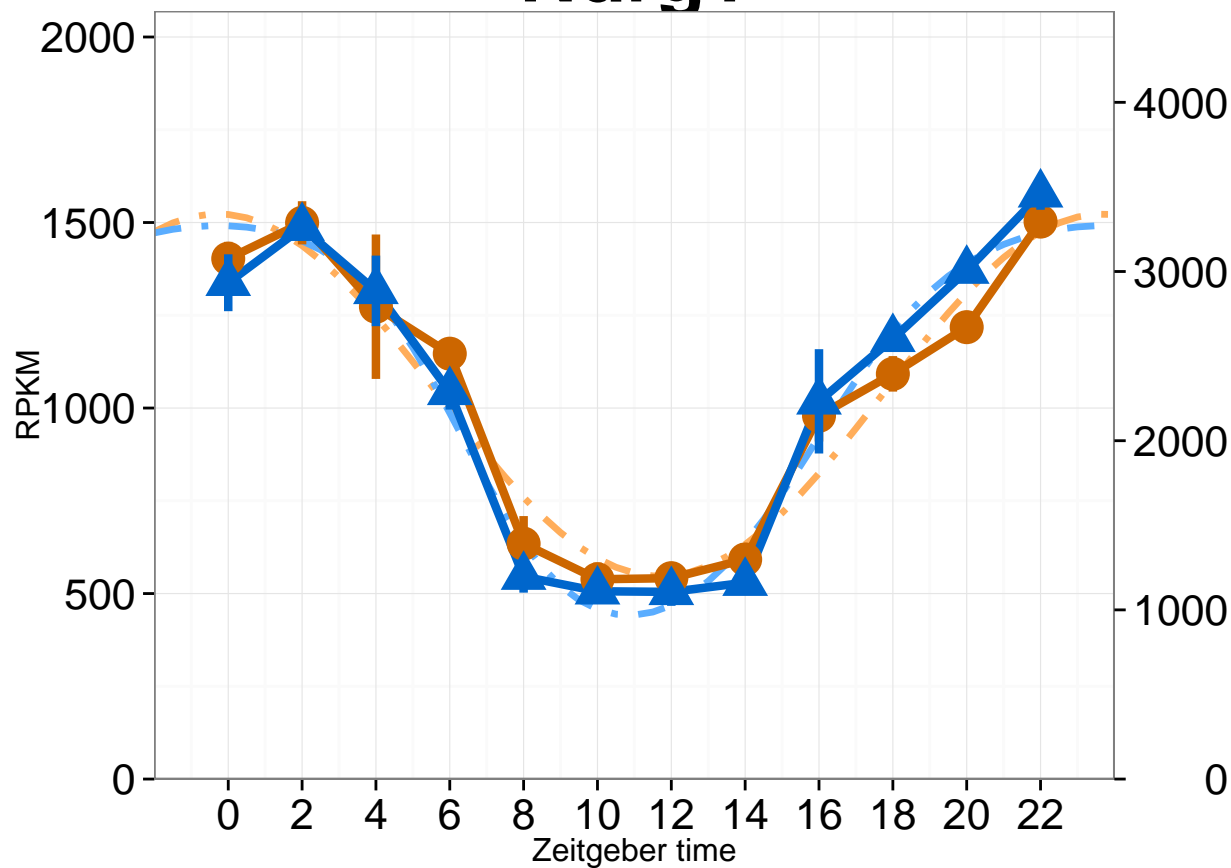

# Ndrg1

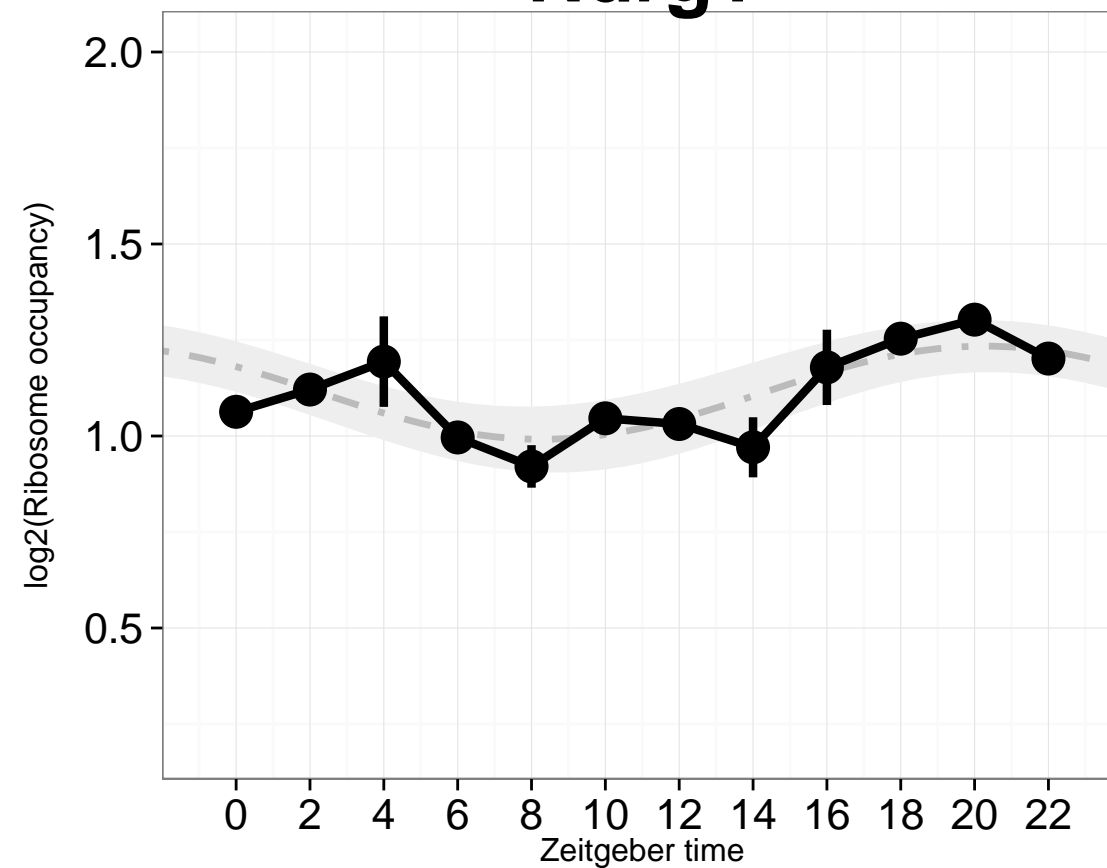

Supplement: Supplementary file 3900 [file 1]

## Calu

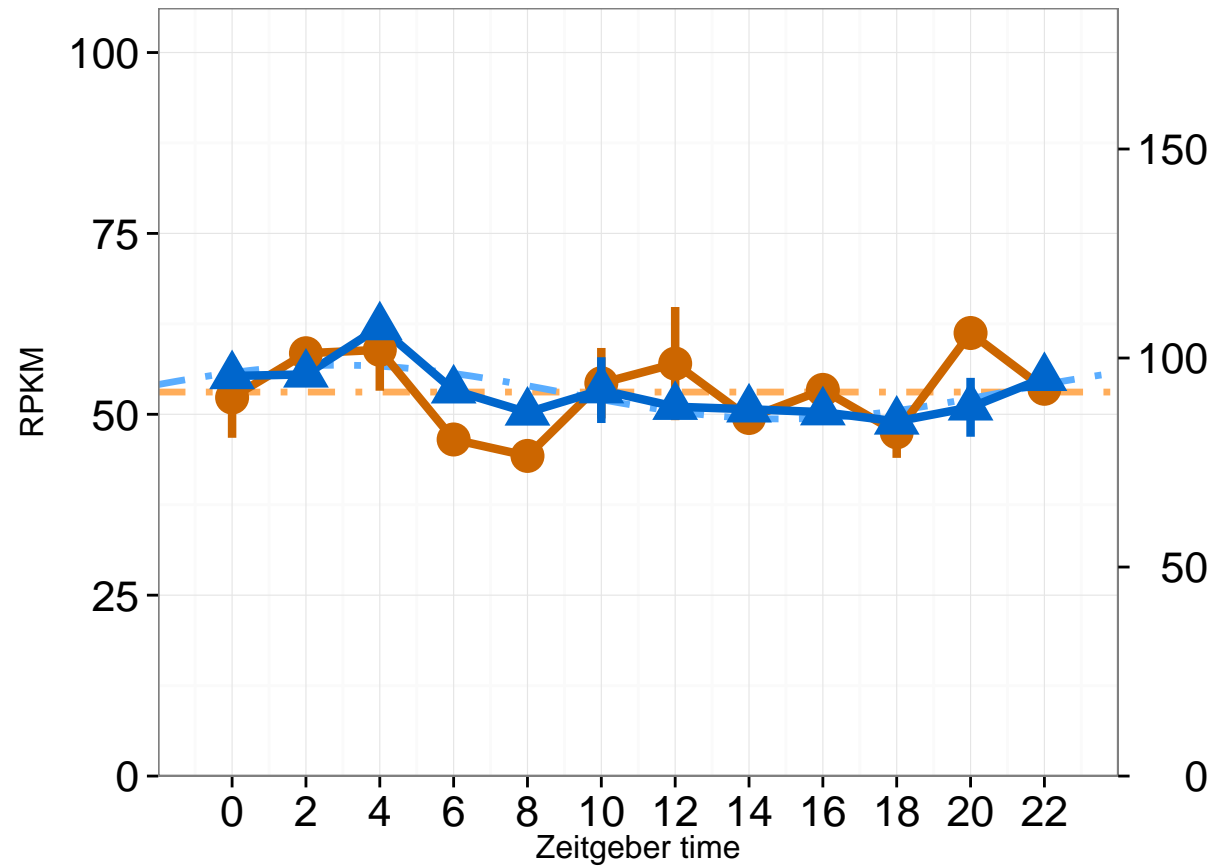

## Calu

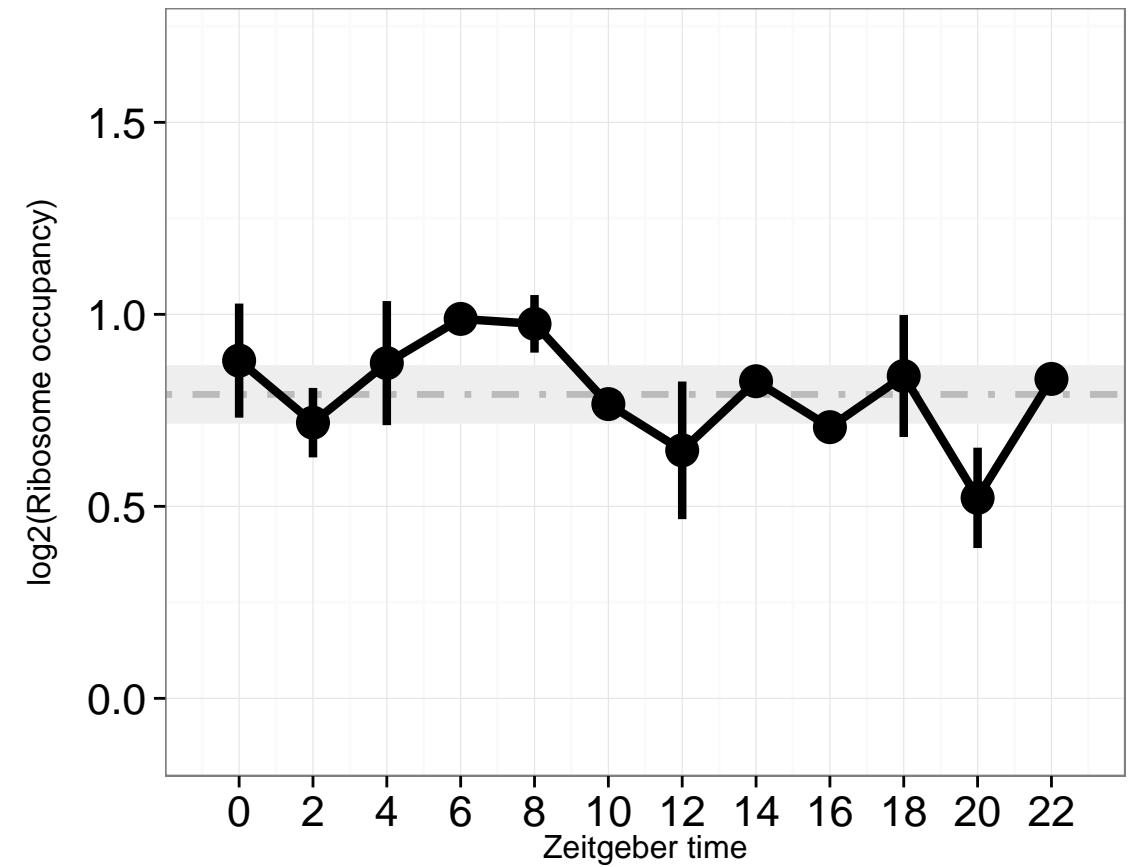

Supplement: Supplementary file 3901 [file 1]

# Camsap3

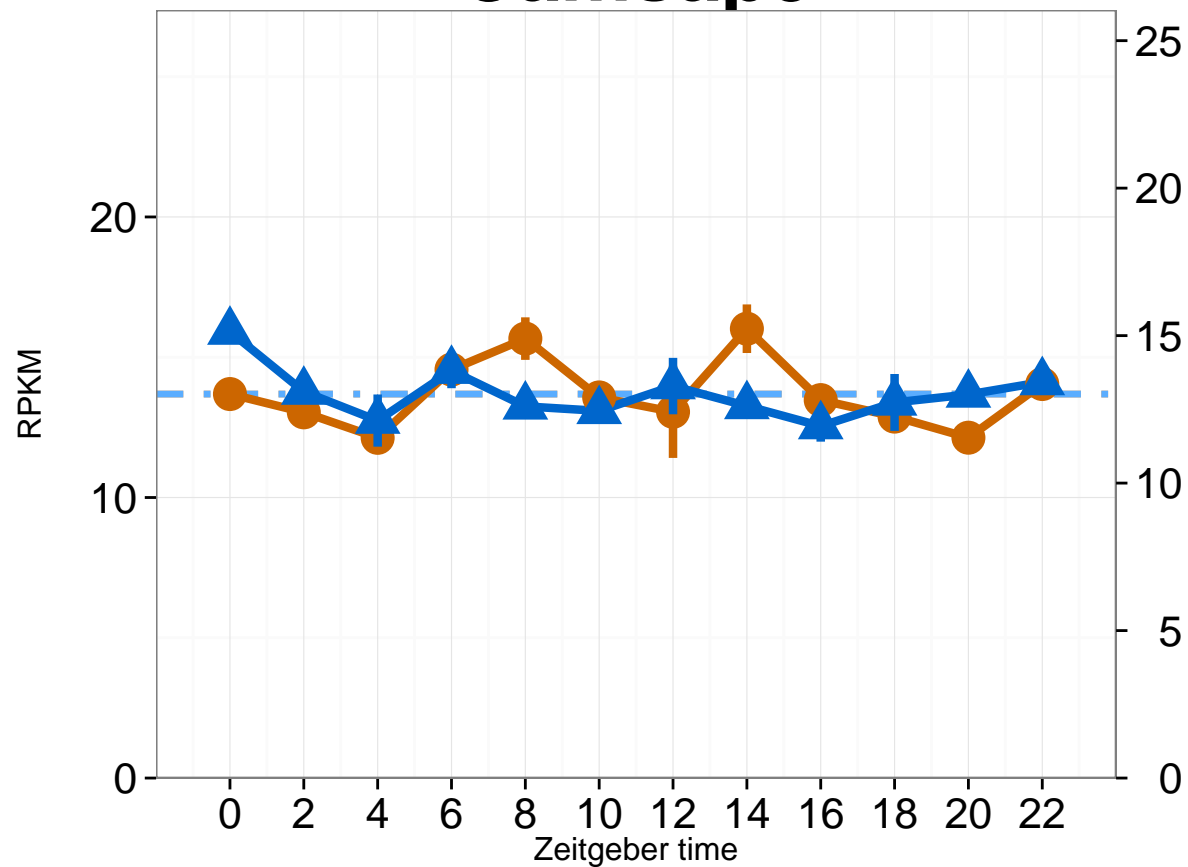

# Camsap3

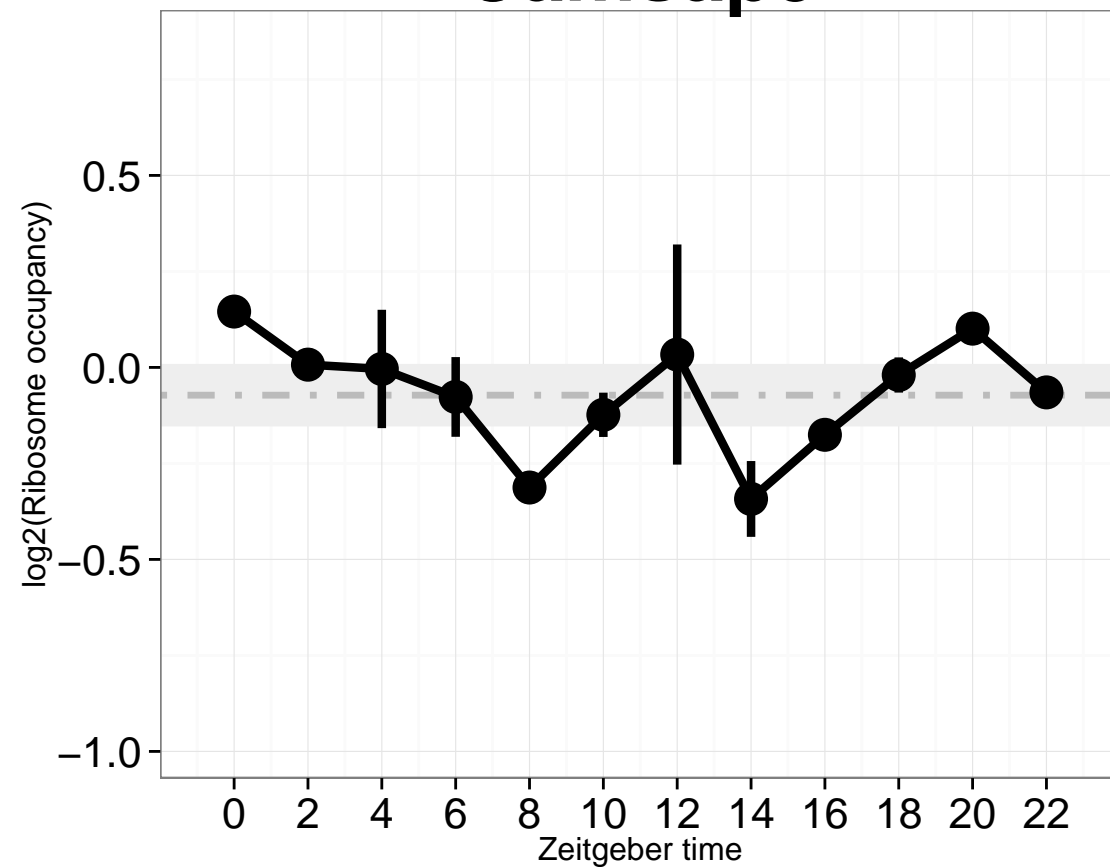

Supplement: Supplementary file 3902 [file 1]

## Rbm7

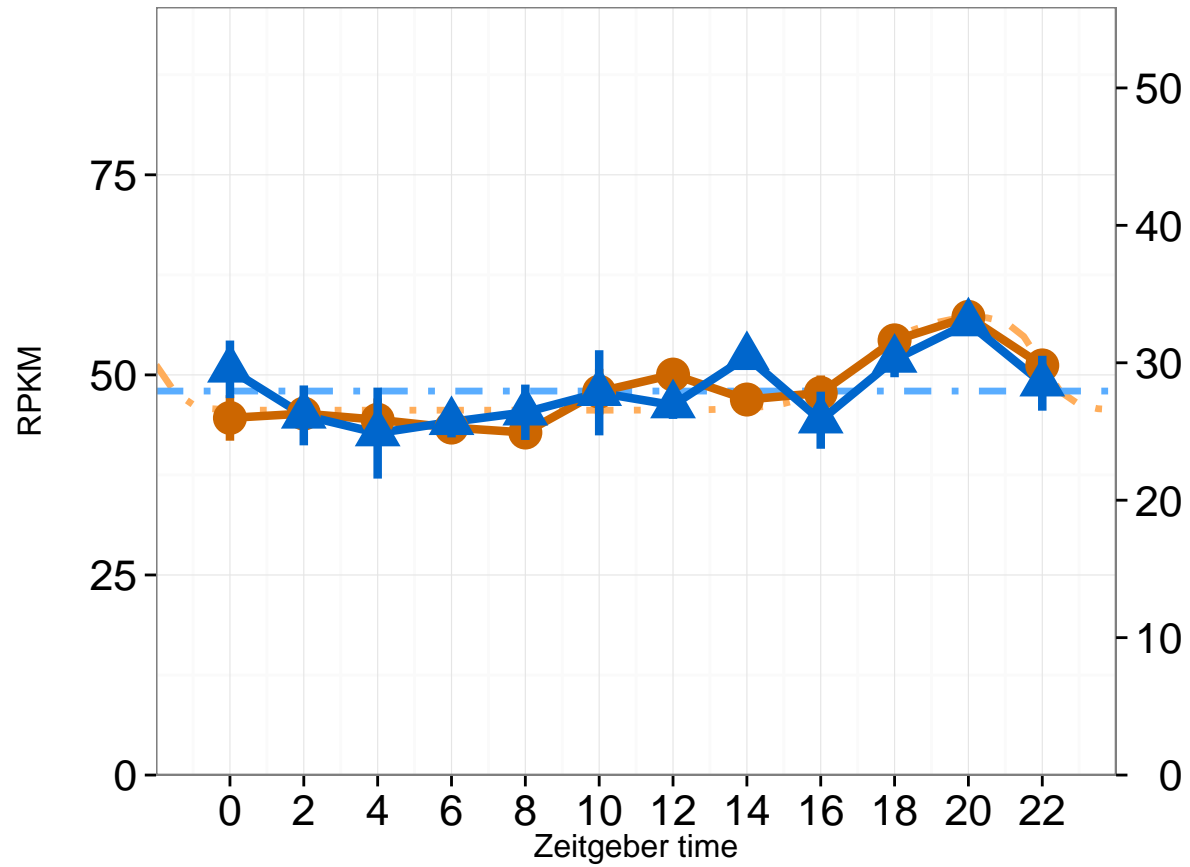

## Rbm7

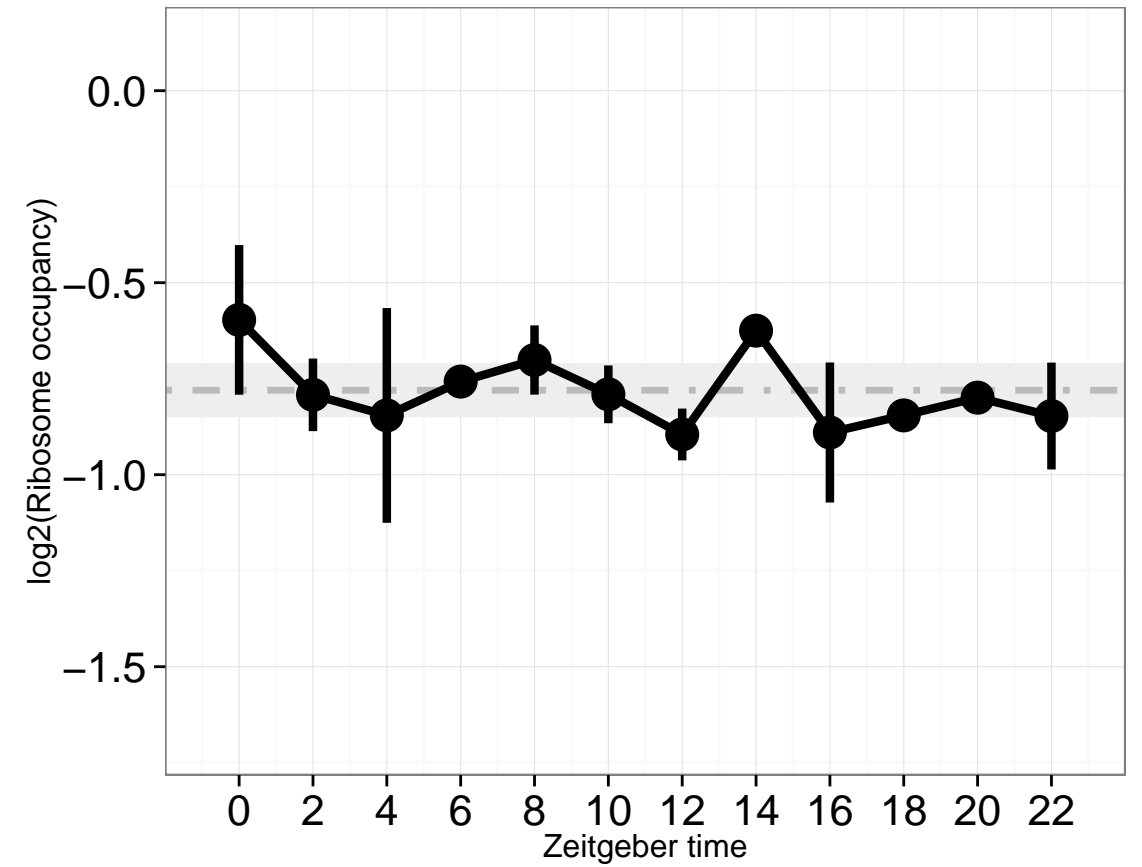

Supplement: Supplementary file 3903 [file 1]

## Hdac3

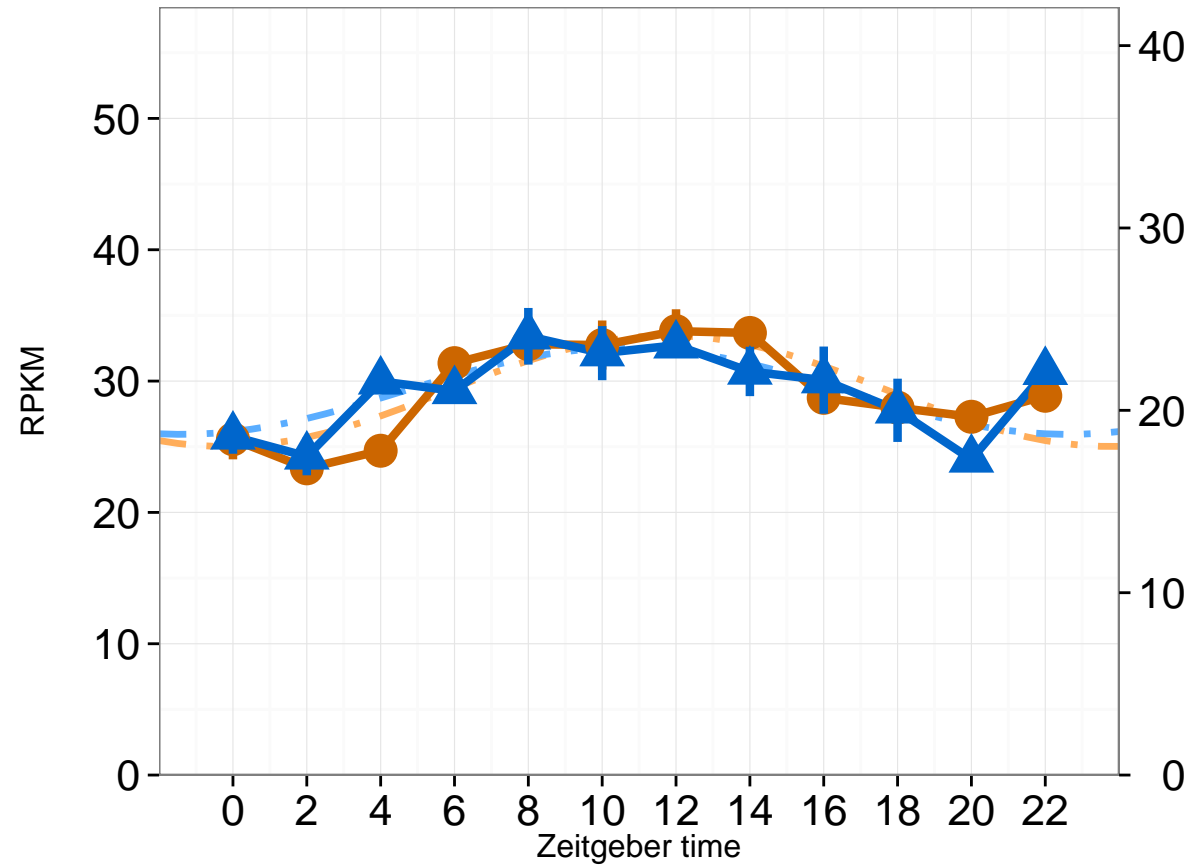

## Hdac3

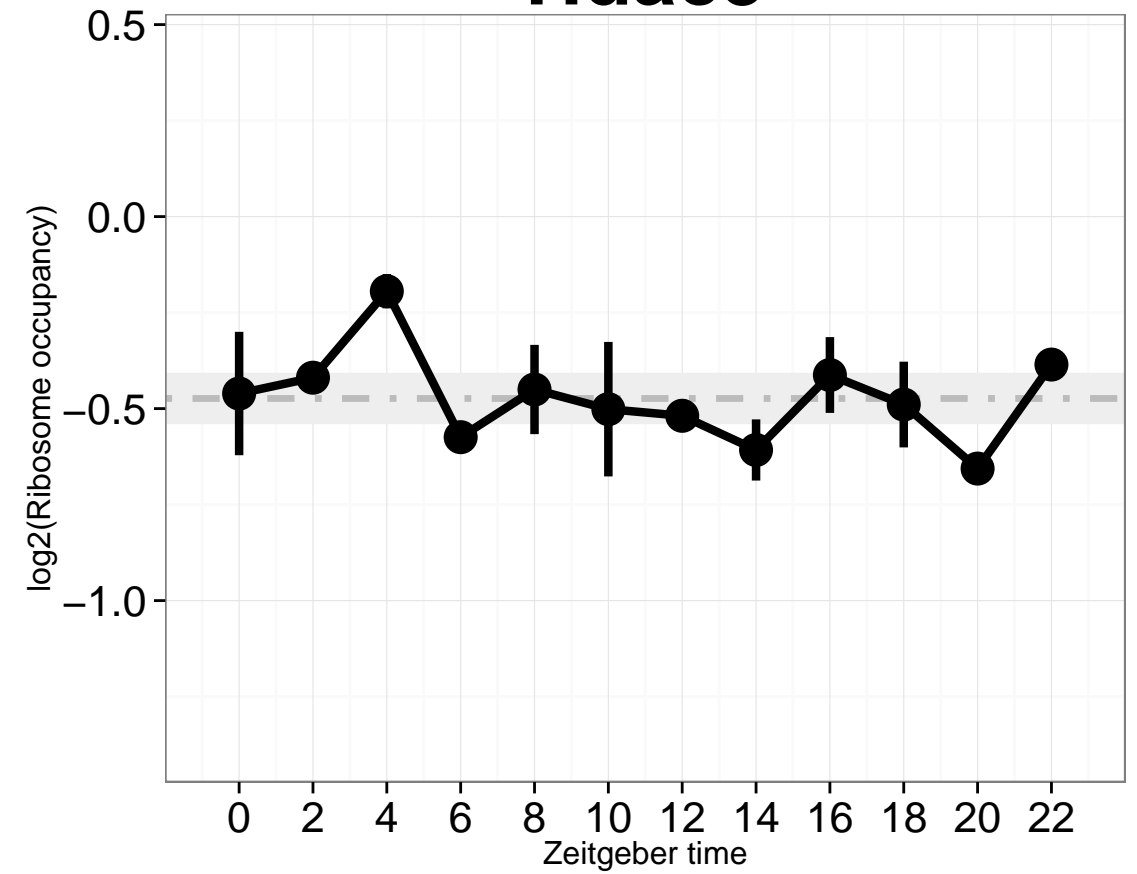

Supplement: Supplementary file 3904 [file 1]

# Fam102a

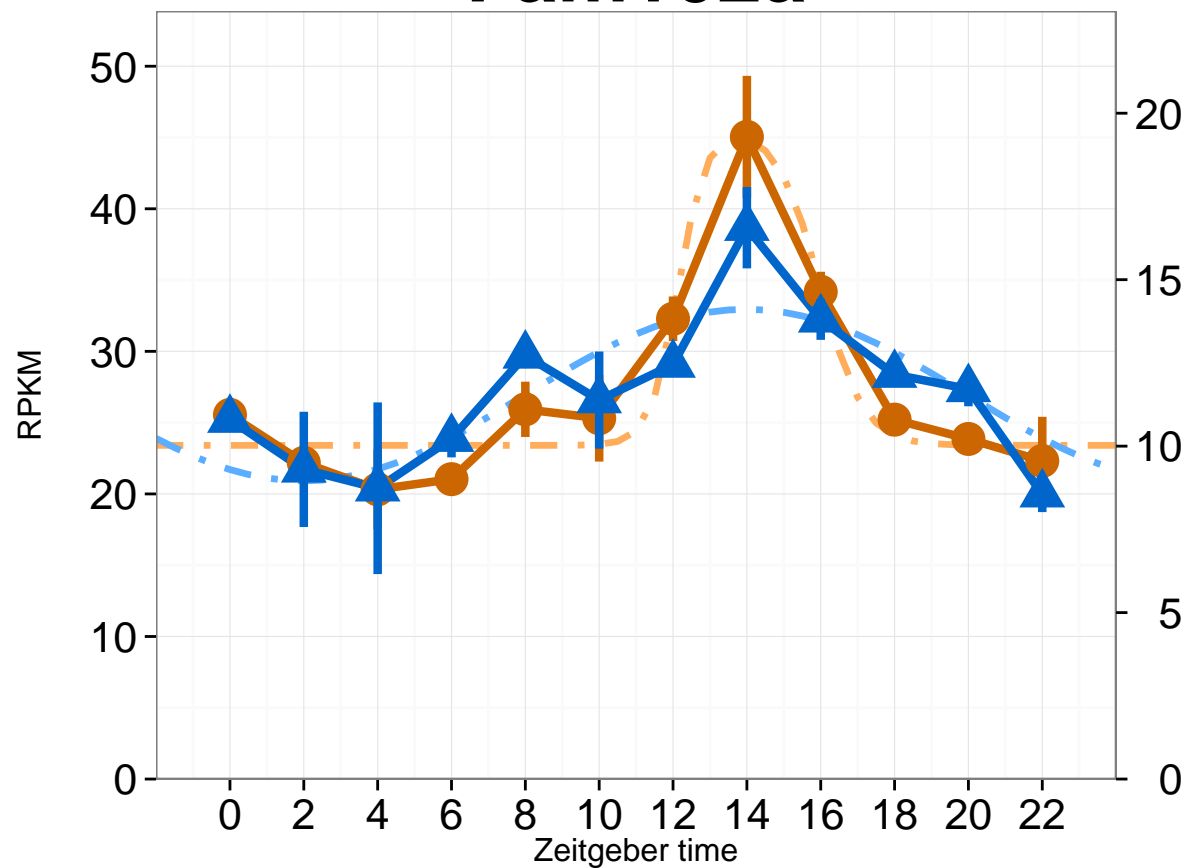

# Fam102a

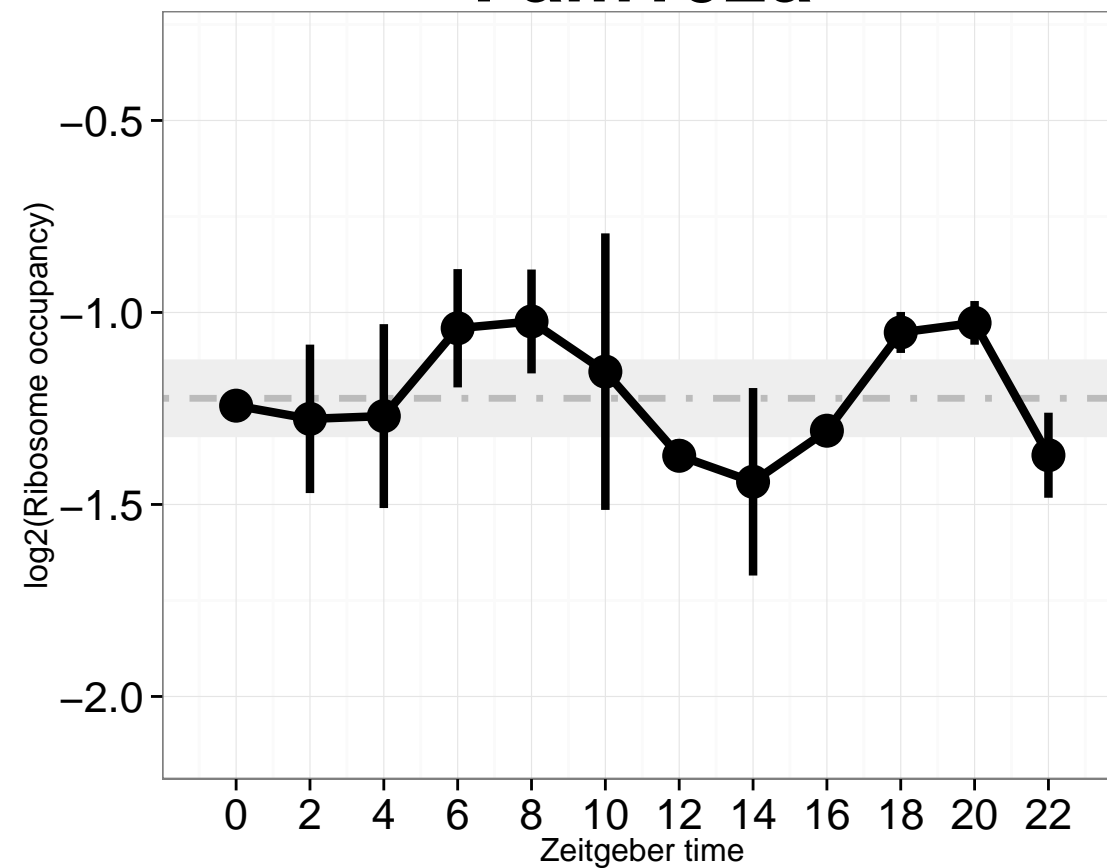

Supplement: Supplementary file 3905 [file 1]

## Usp46

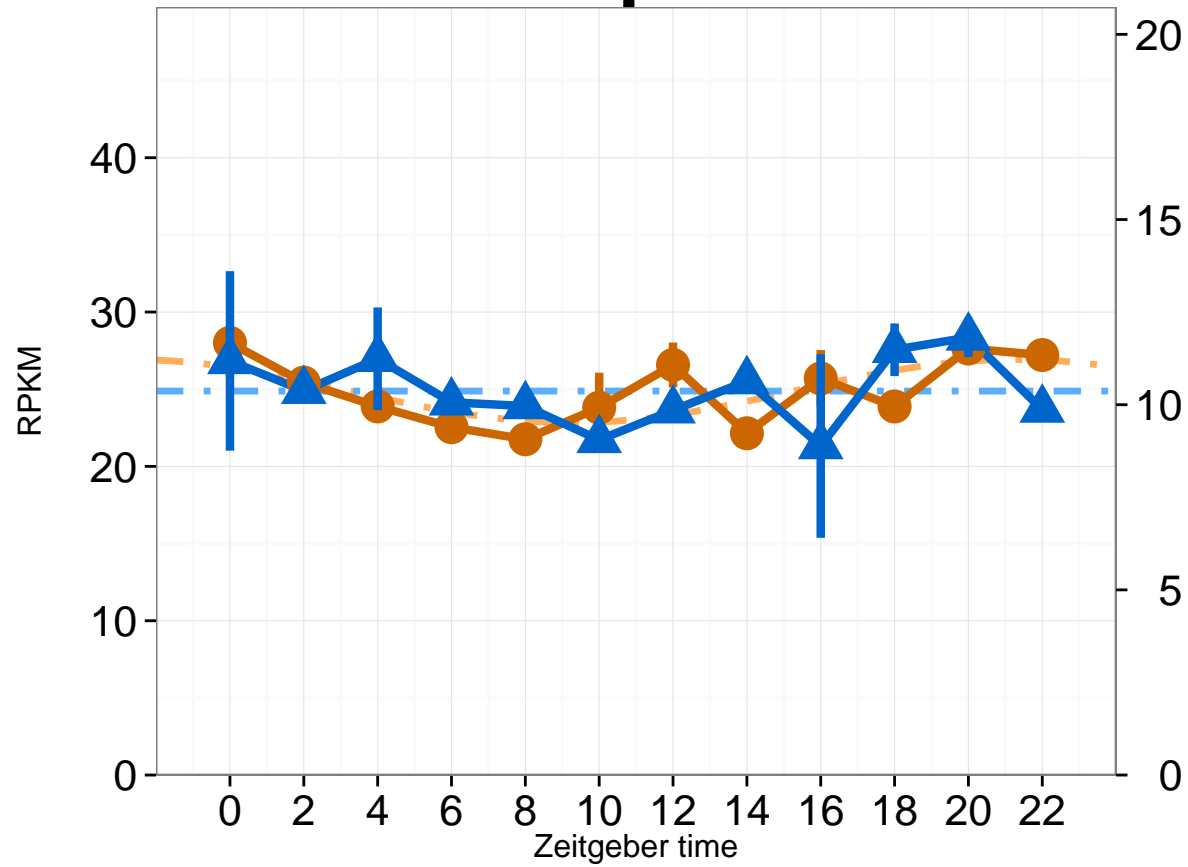

## Usp46

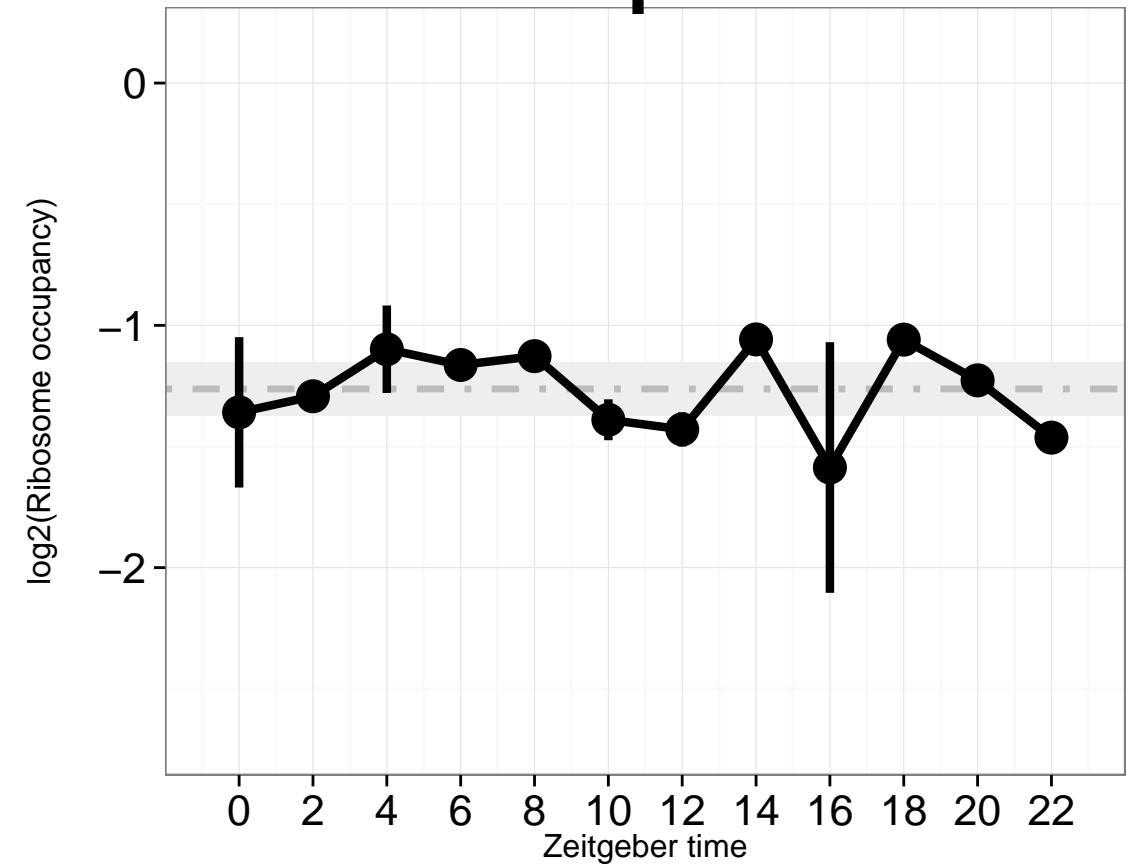

Supplement: Supplementary file 3906 [file 1]

## Eif4g3

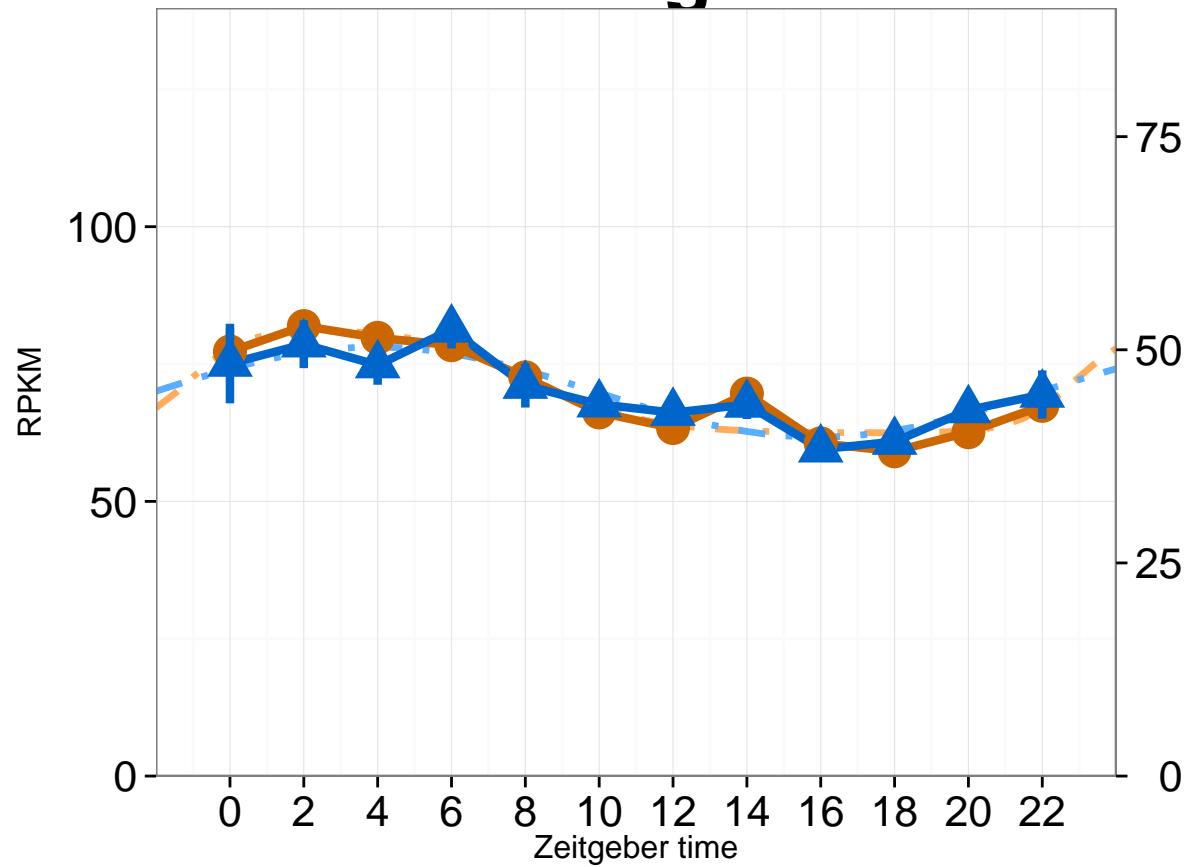

## Eif4g3

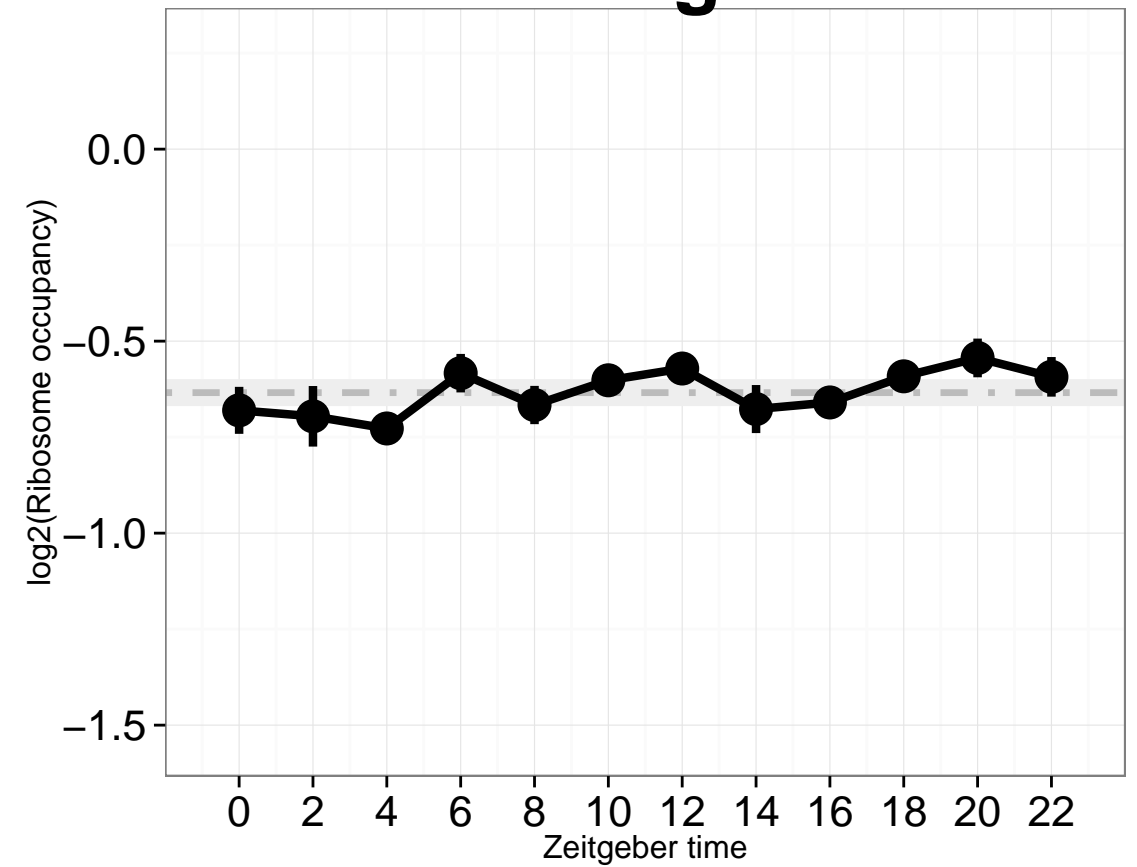

Supplement: Supplementary file 3907 [file 1]

## Nfe2l1

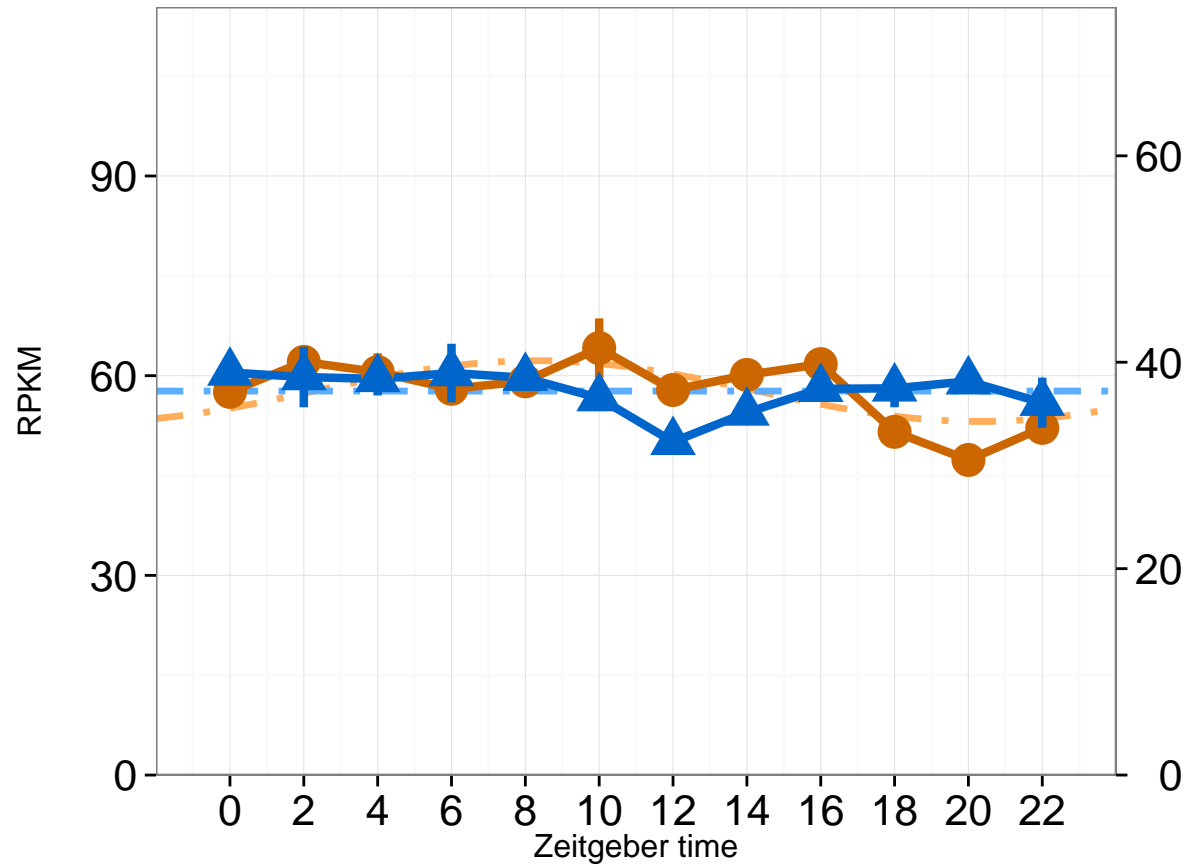

## Nfe2l1

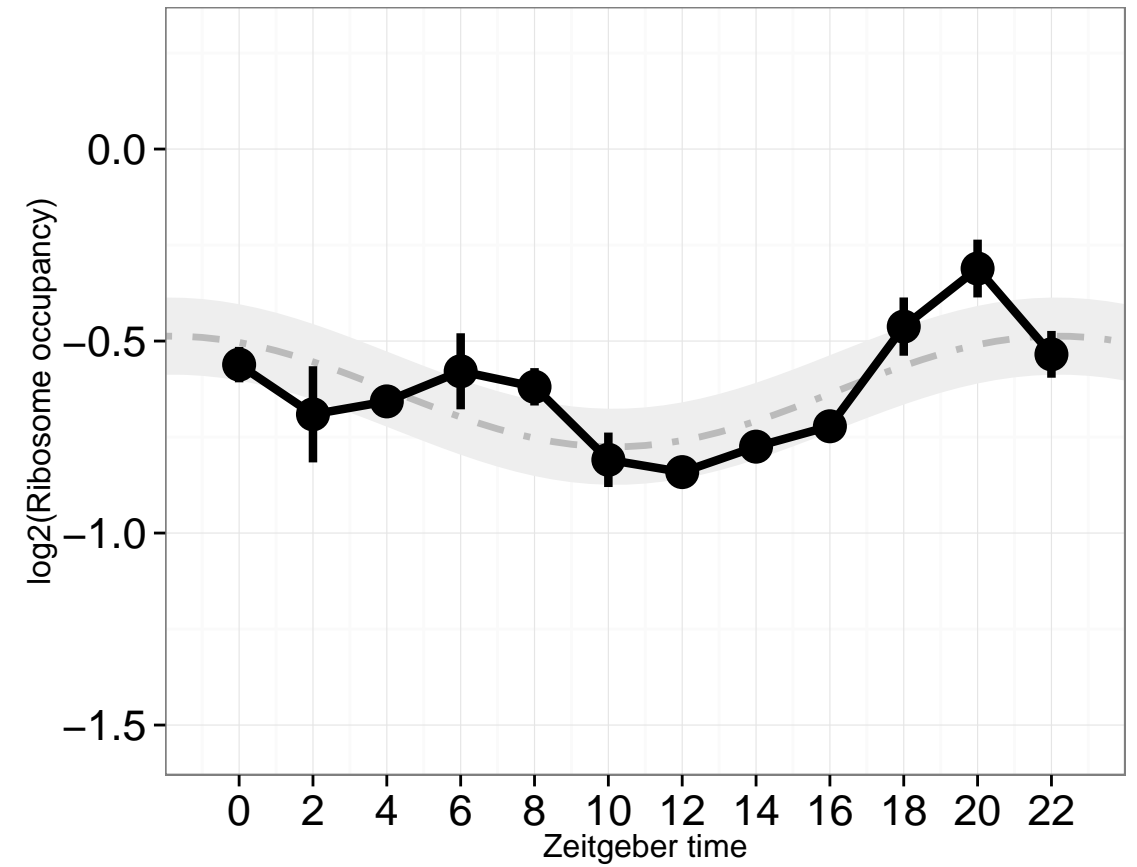

Supplement: Supplementary file 3908 [file 1]

## Ethe1

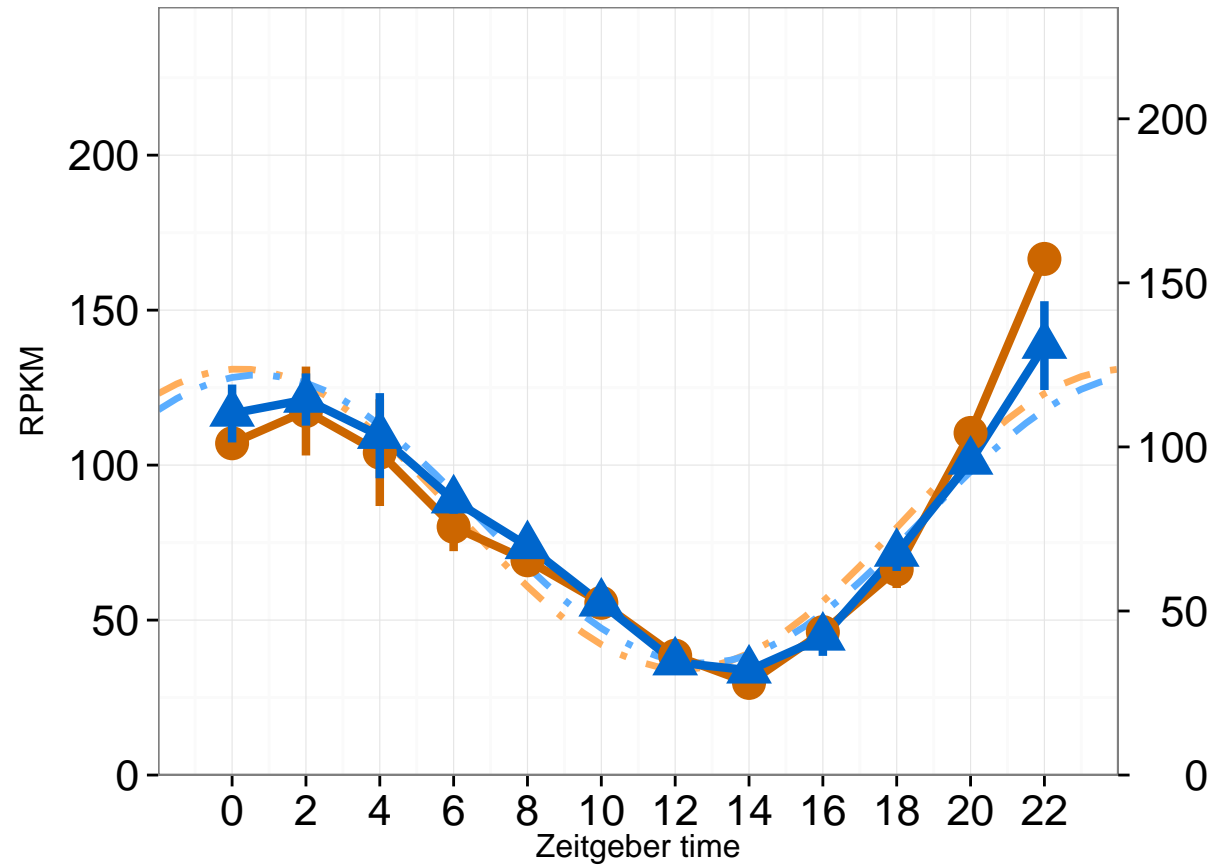

## Ethe1

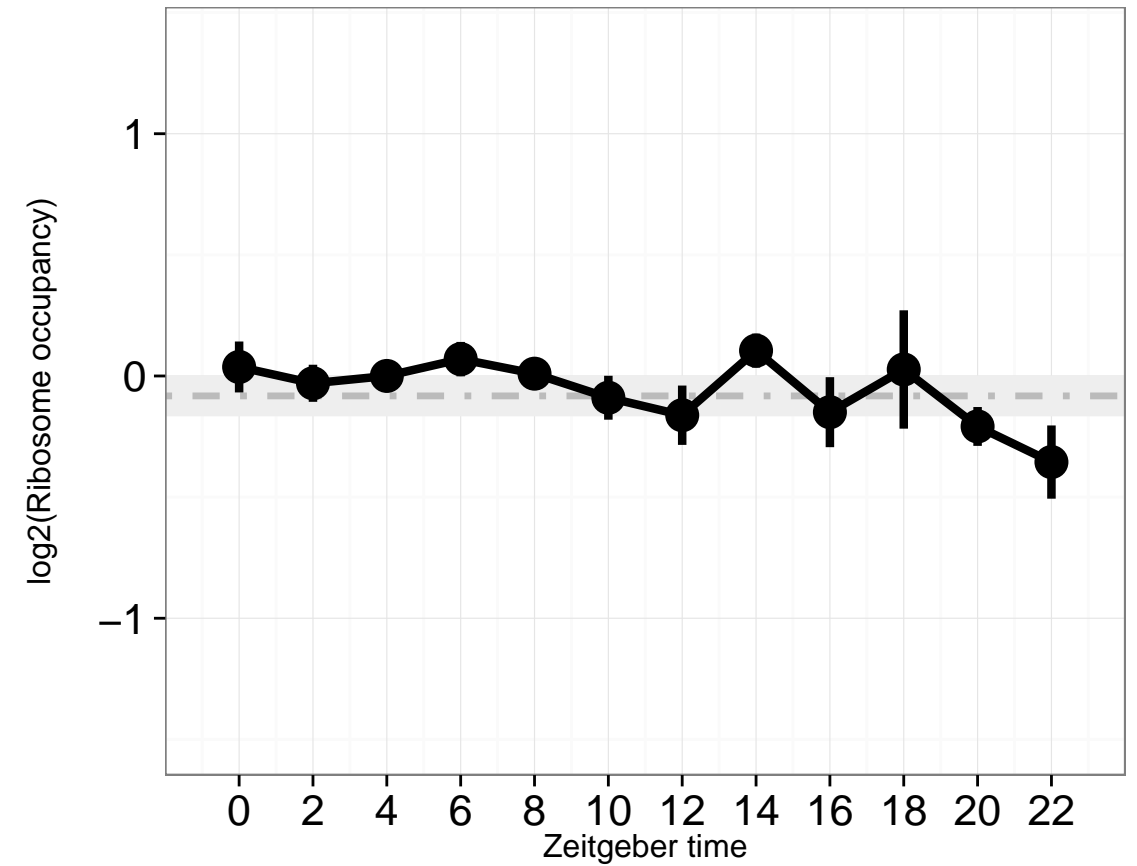

Supplement: Supplementary file 3909 [file 1]

## Sgk3

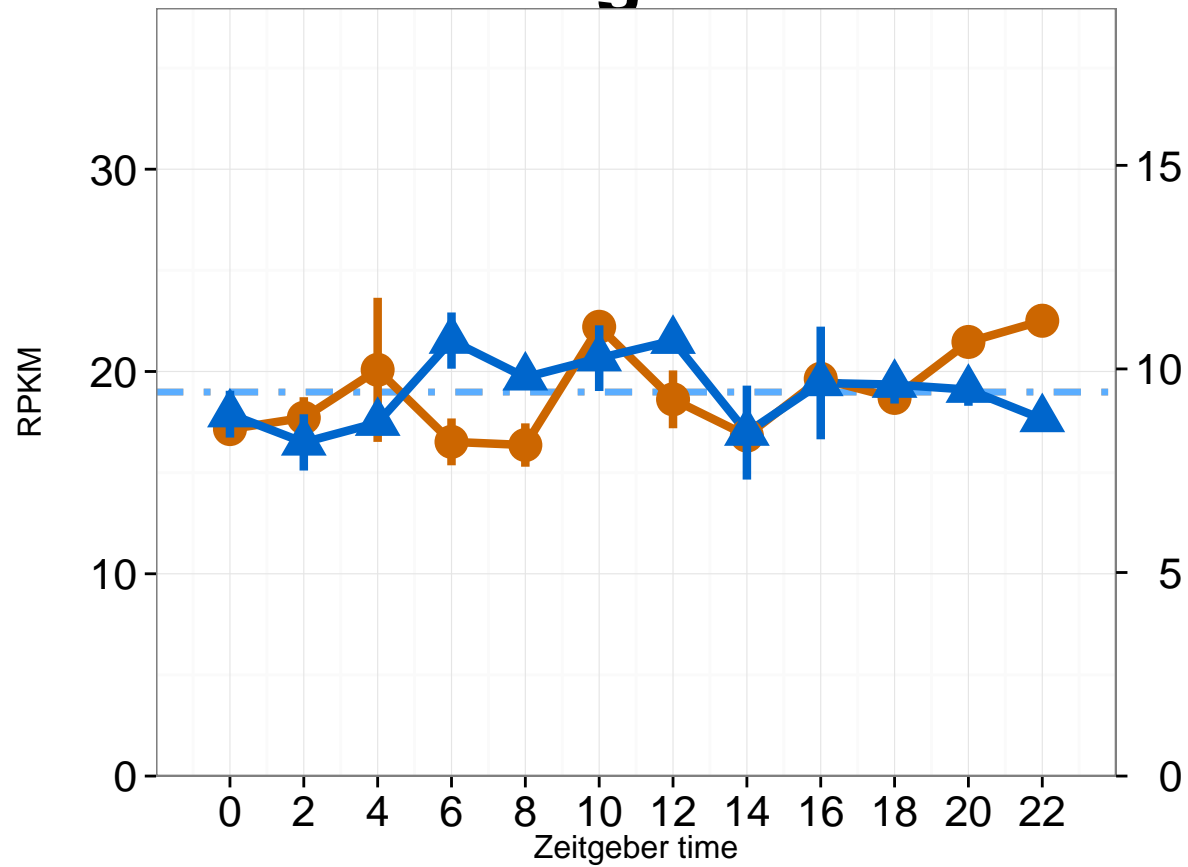

## Sgk3

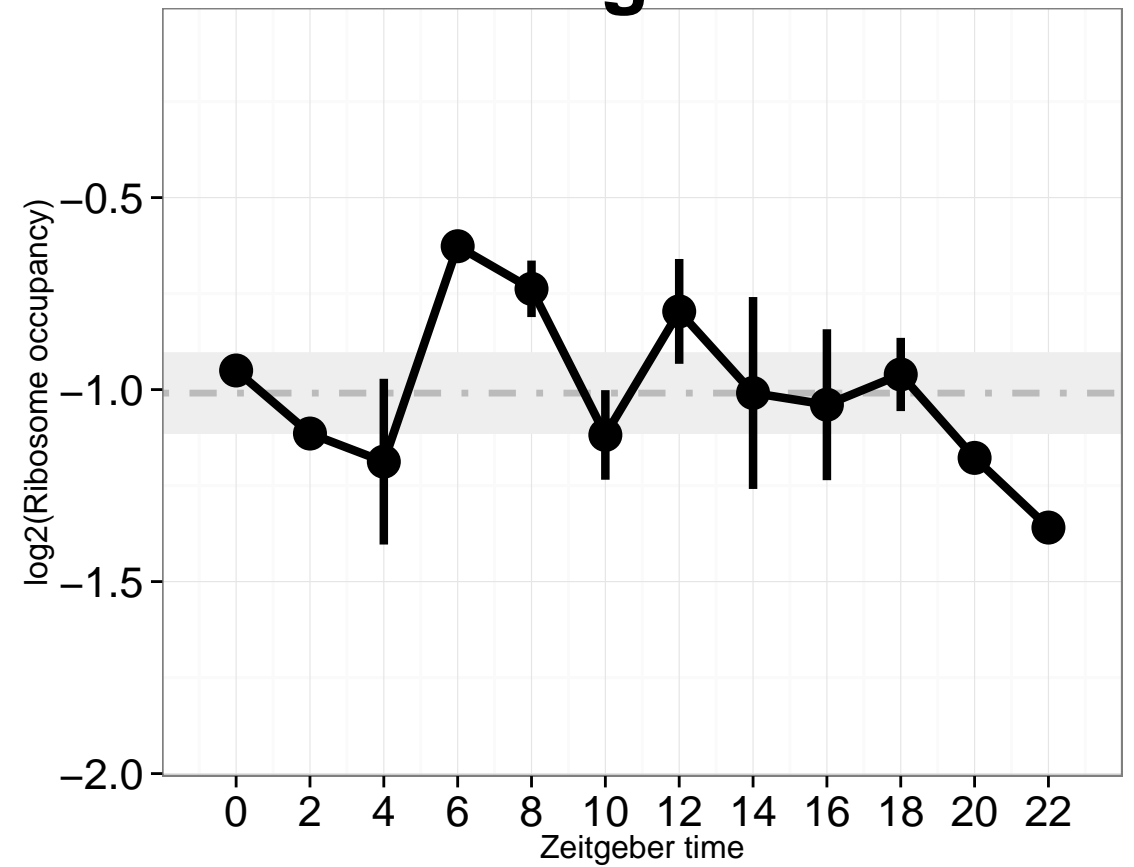

Supplement: Supplementary file 3910 [file 1]

# Gulp1

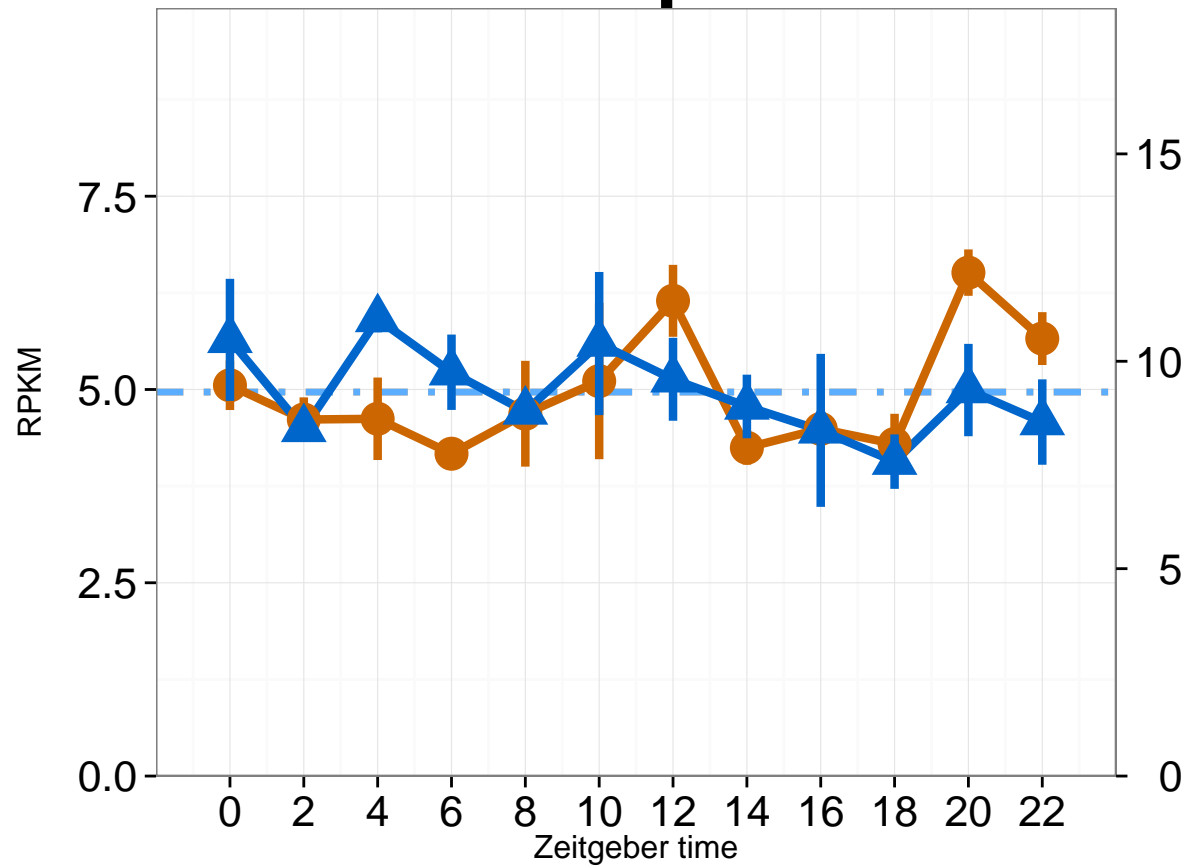

# Gulp1

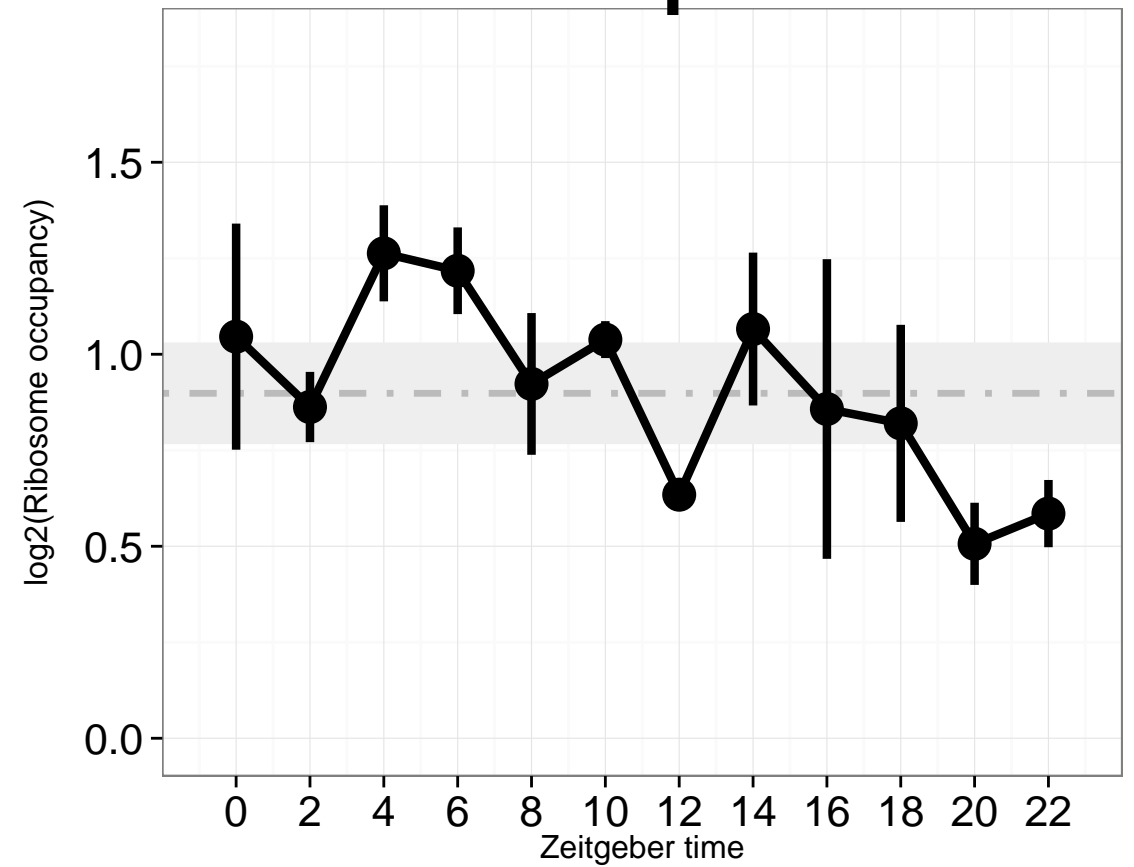

Supplement: Supplementary file 3911 [file 1]

# Zfp146

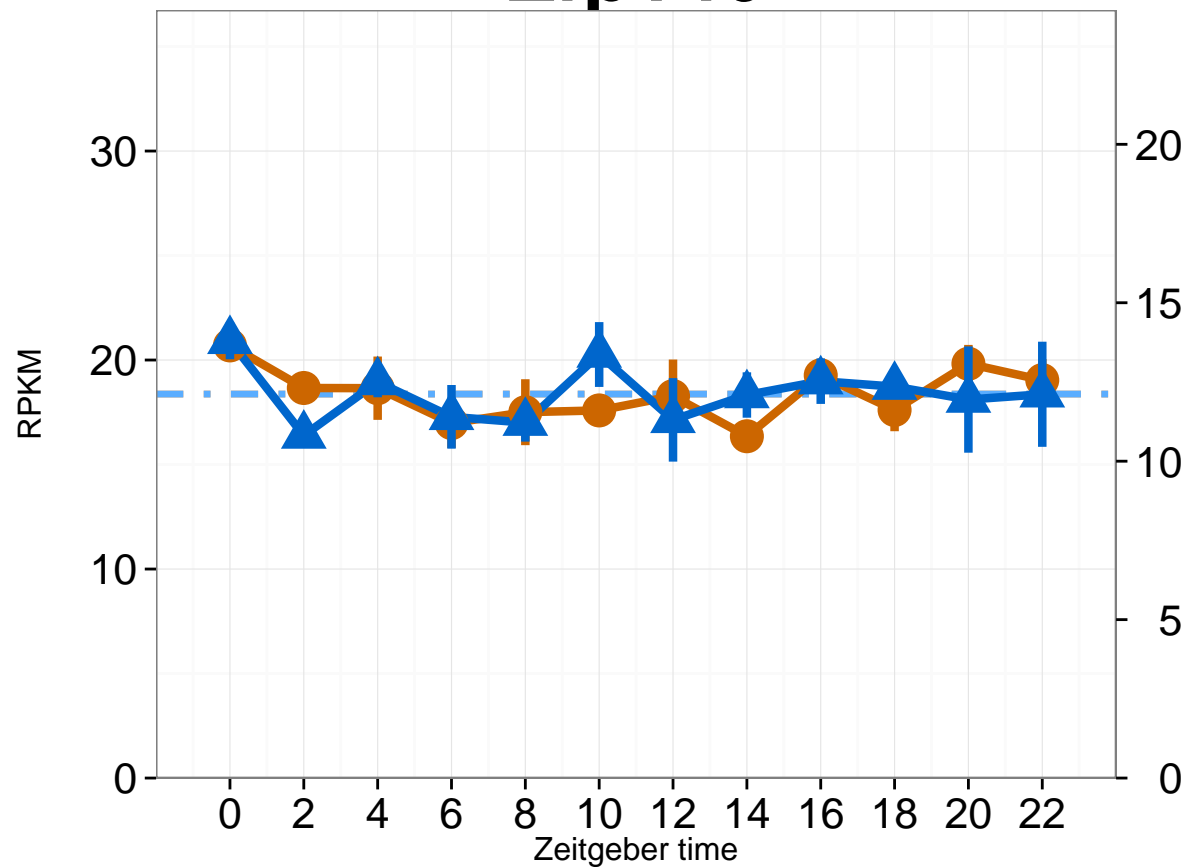

# Zfp146

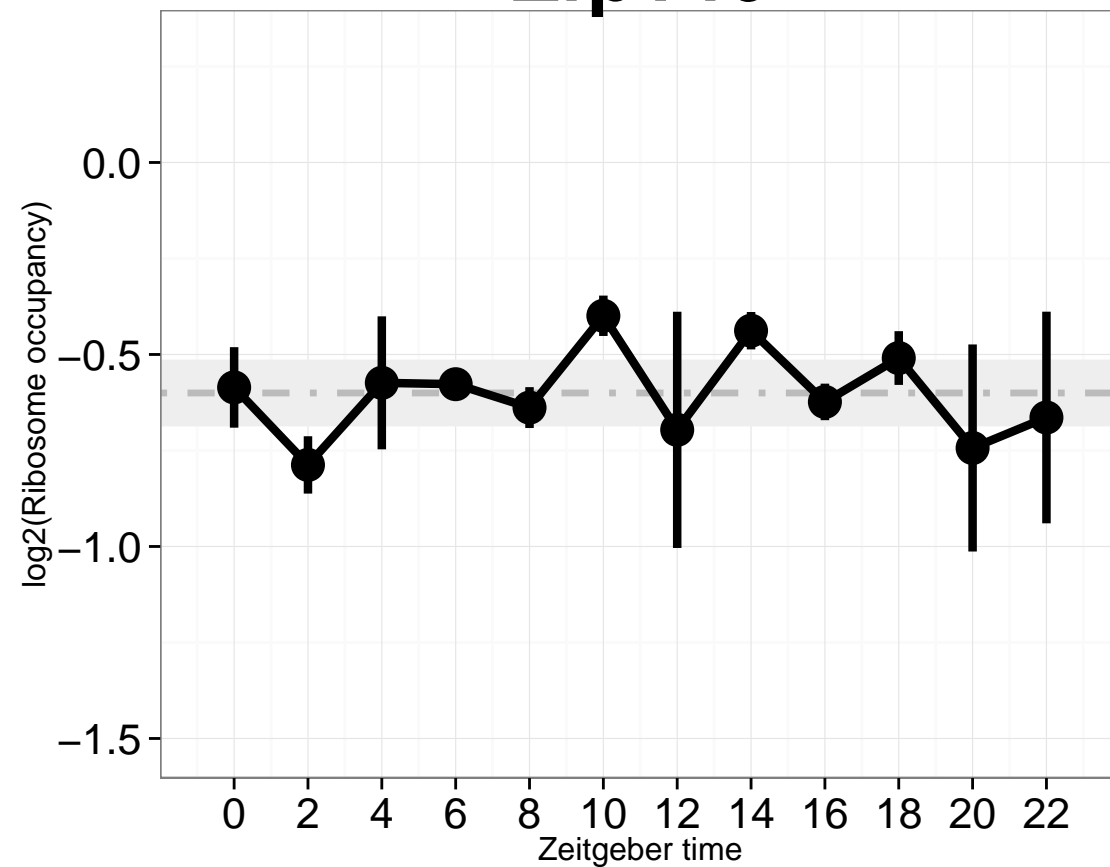

Supplement: Supplementary file 3912 [file 1]

## Kdm2b

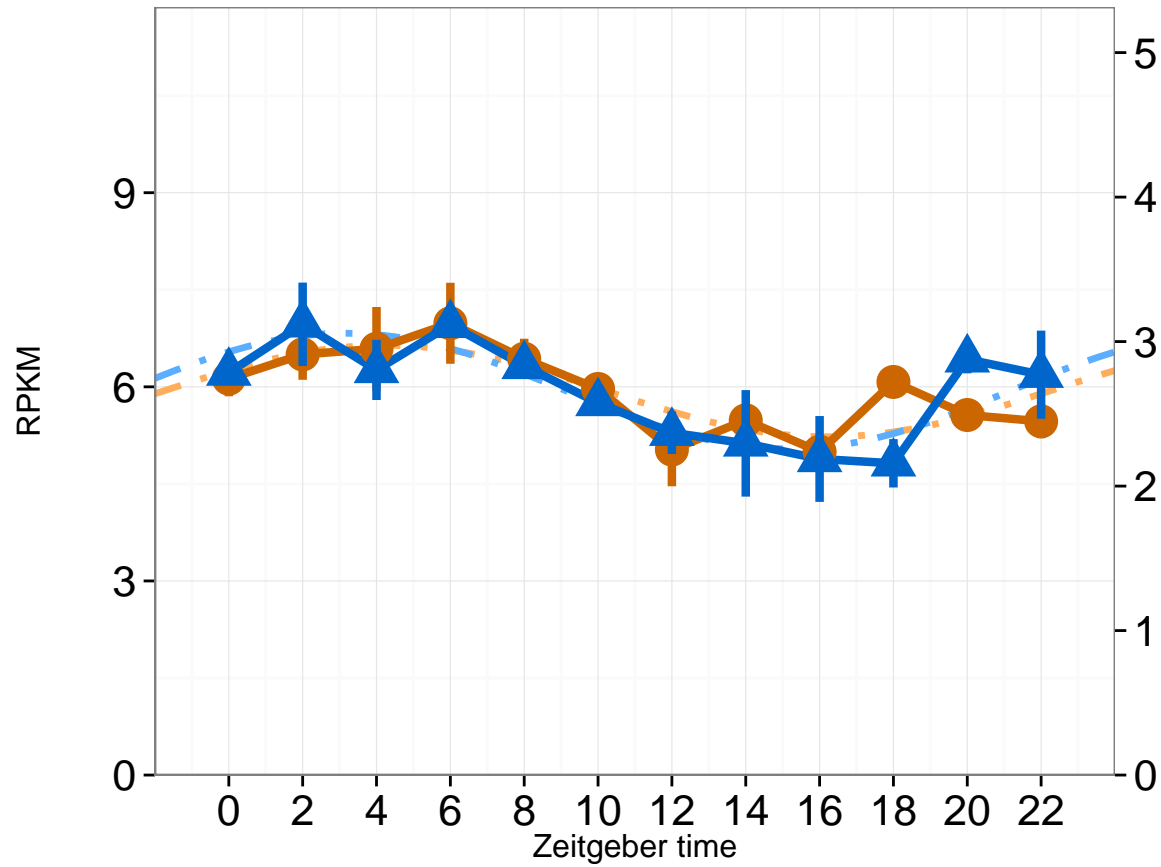

## Kdm2b

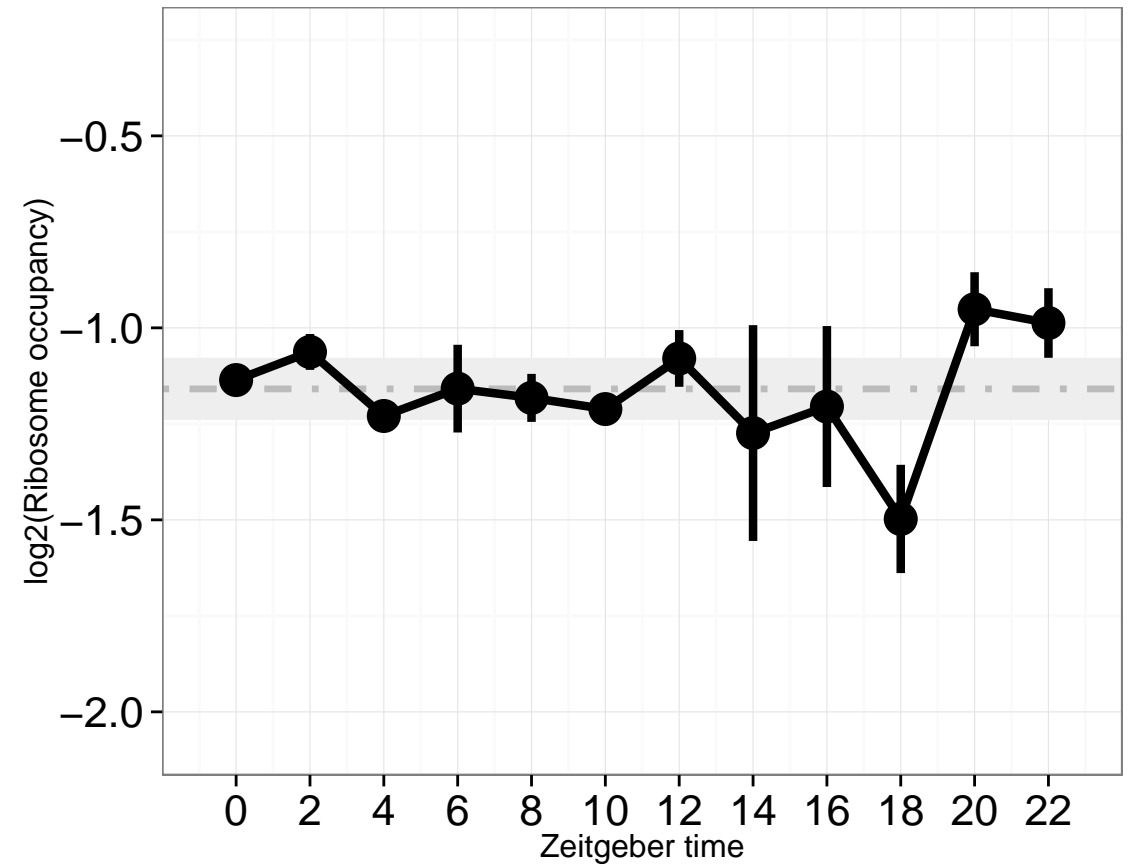

Supplement: Supplementary file 3913 [file 1]

## Rfx7

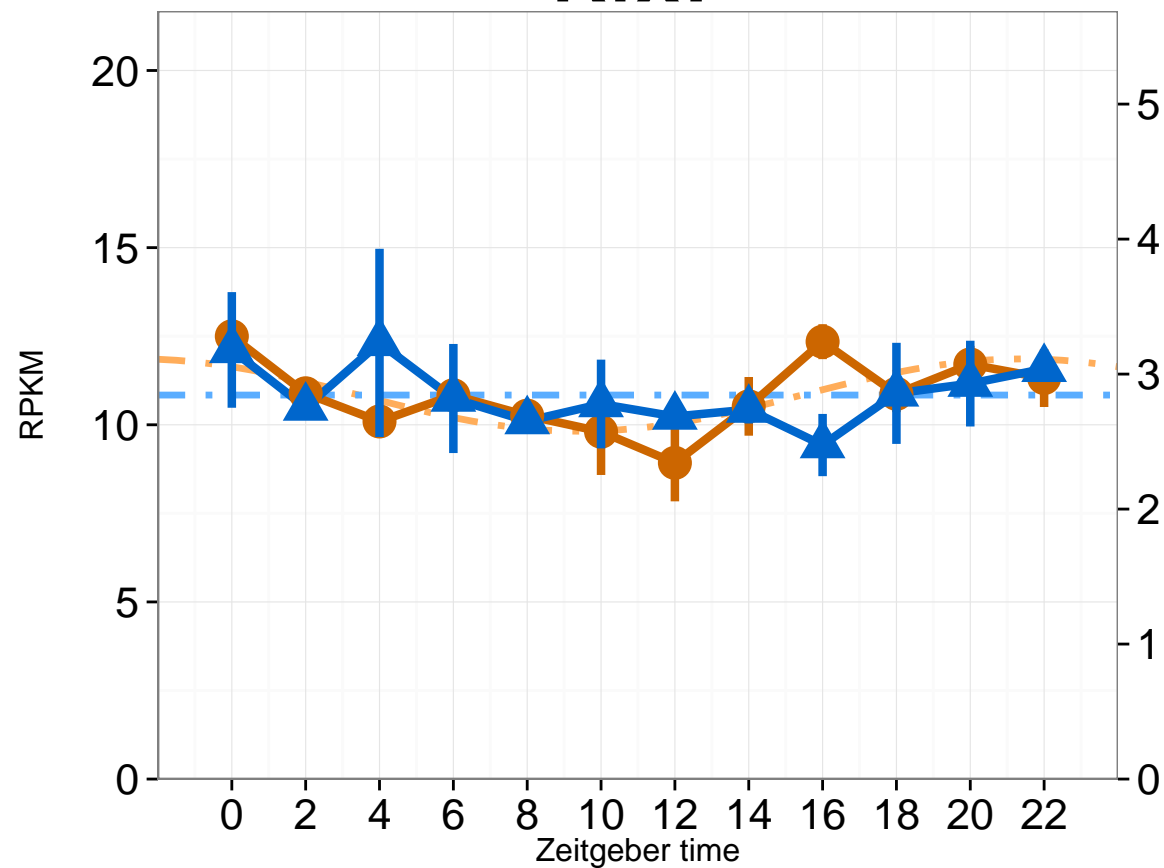

## Rfx7

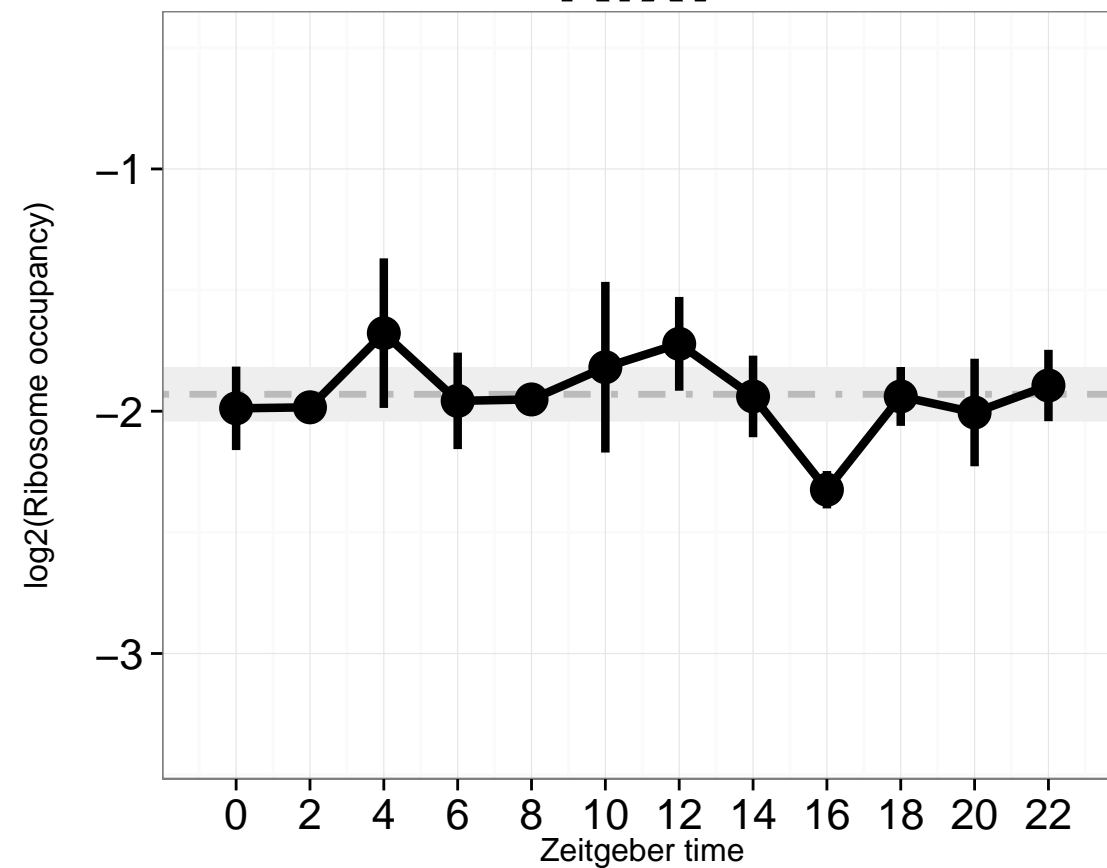

Supplement: Supplementary file 3914 [file 1]

## Clpx

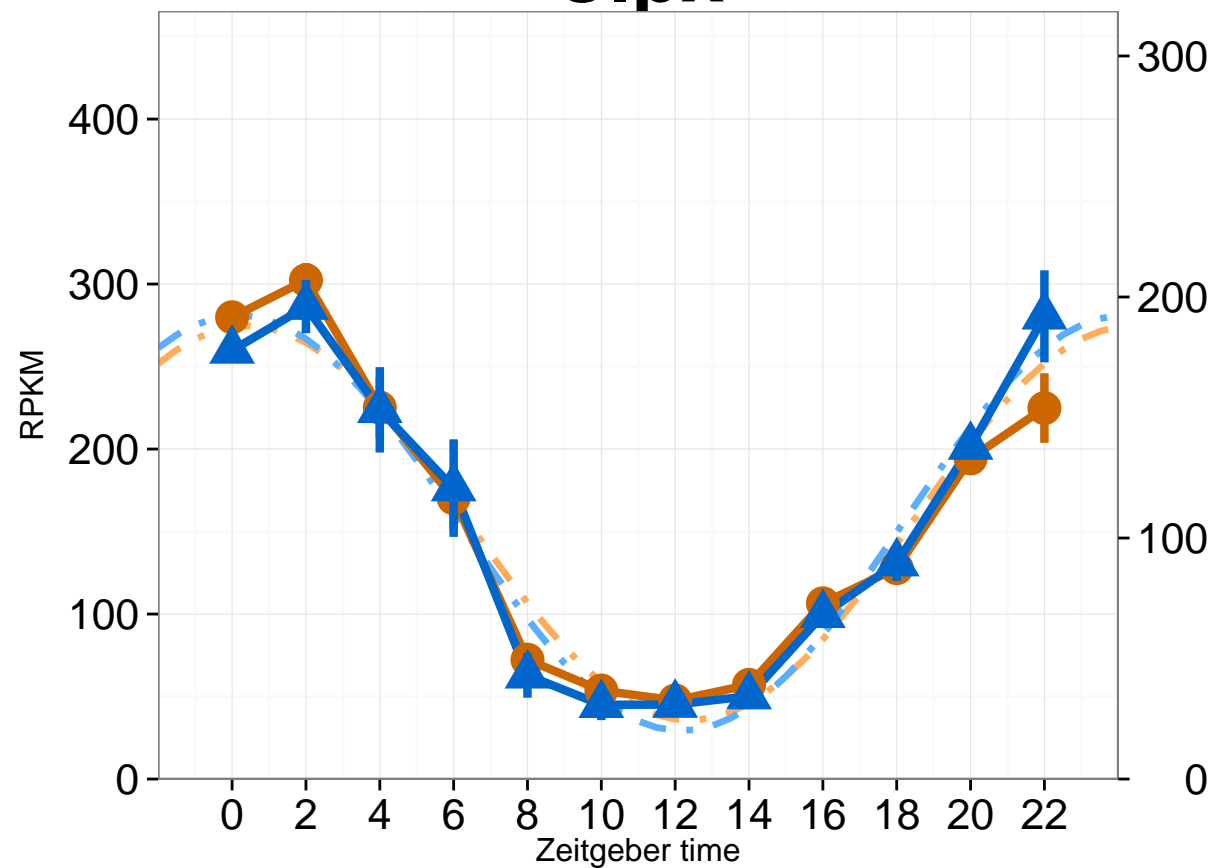

## Clpx

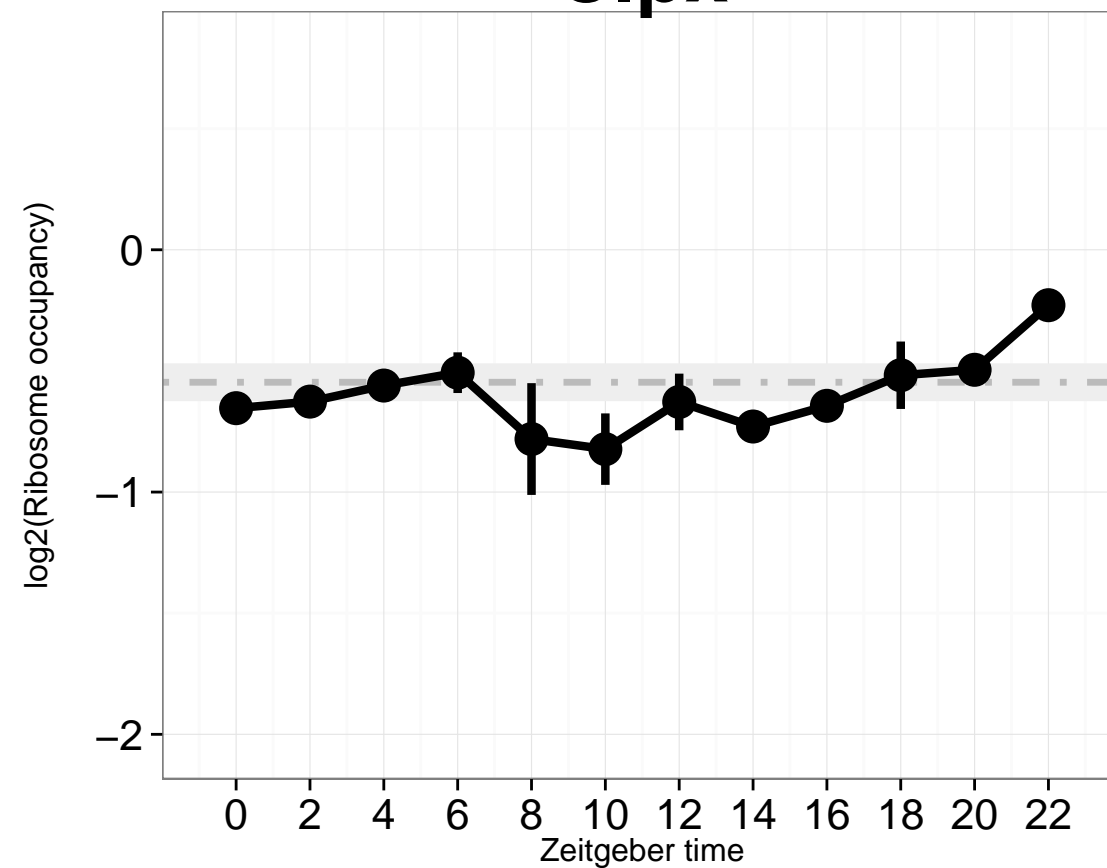

Supplement: Supplementary file 3915 [file 1]
