# Supplementary material (part 40 of 133)
Source: publisher figshare collection journal article supplement (https://springernature.figshare.com/articles/dataset/_/4903193)

## Hoxb9

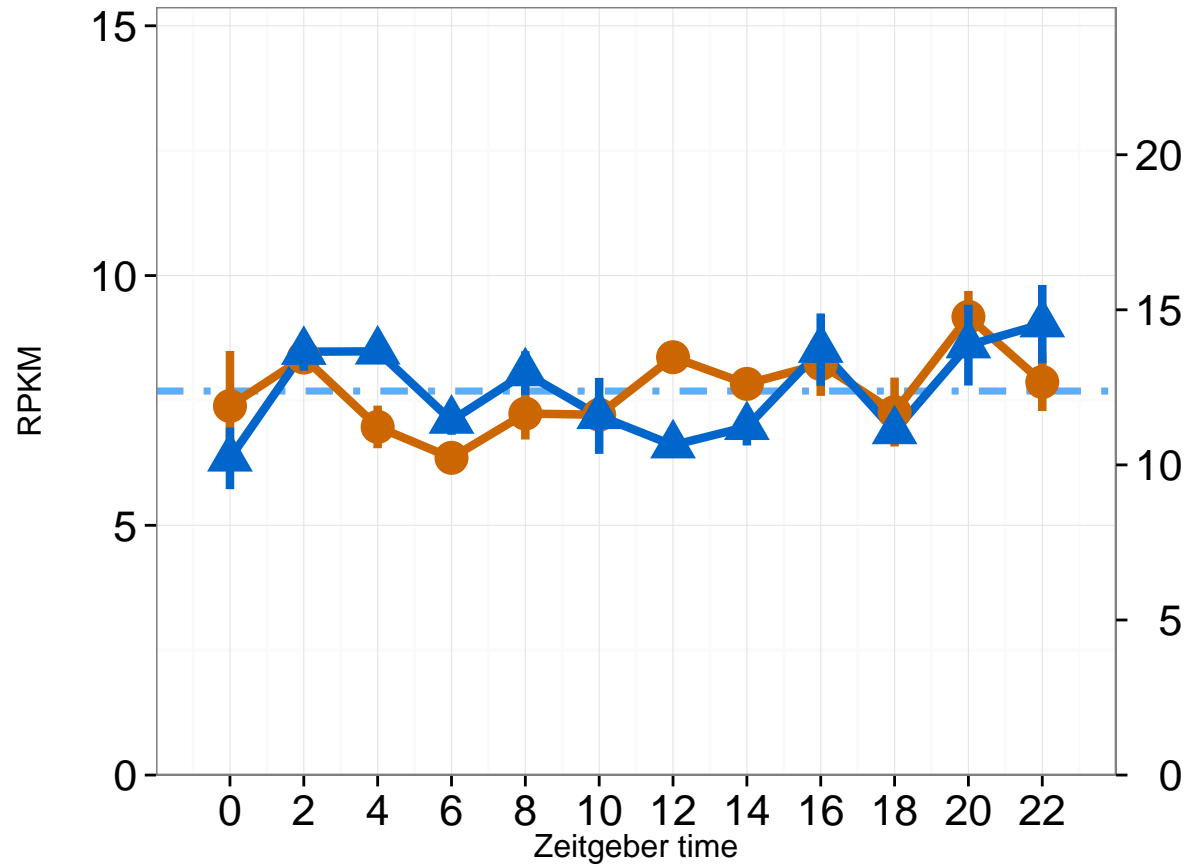

## Hoxb9

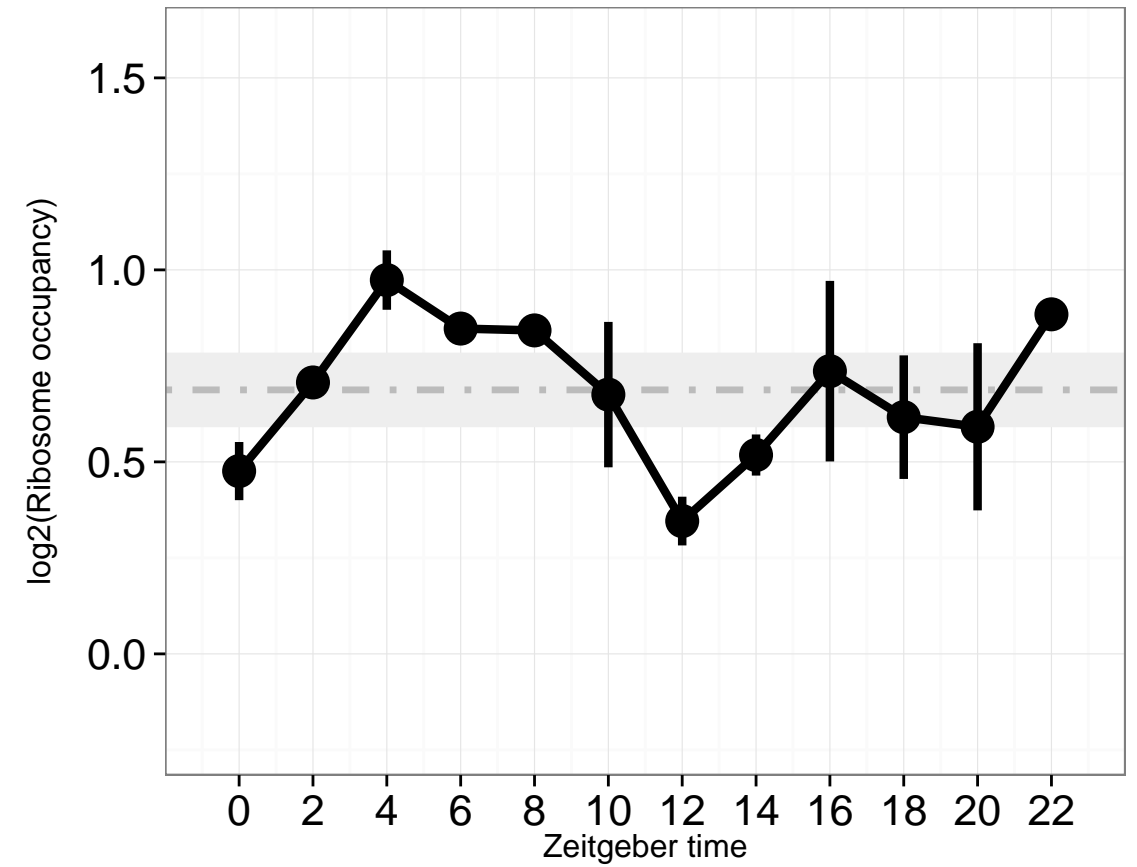

Supplement: Supplementary file 3916 [file 1]

## Naf1

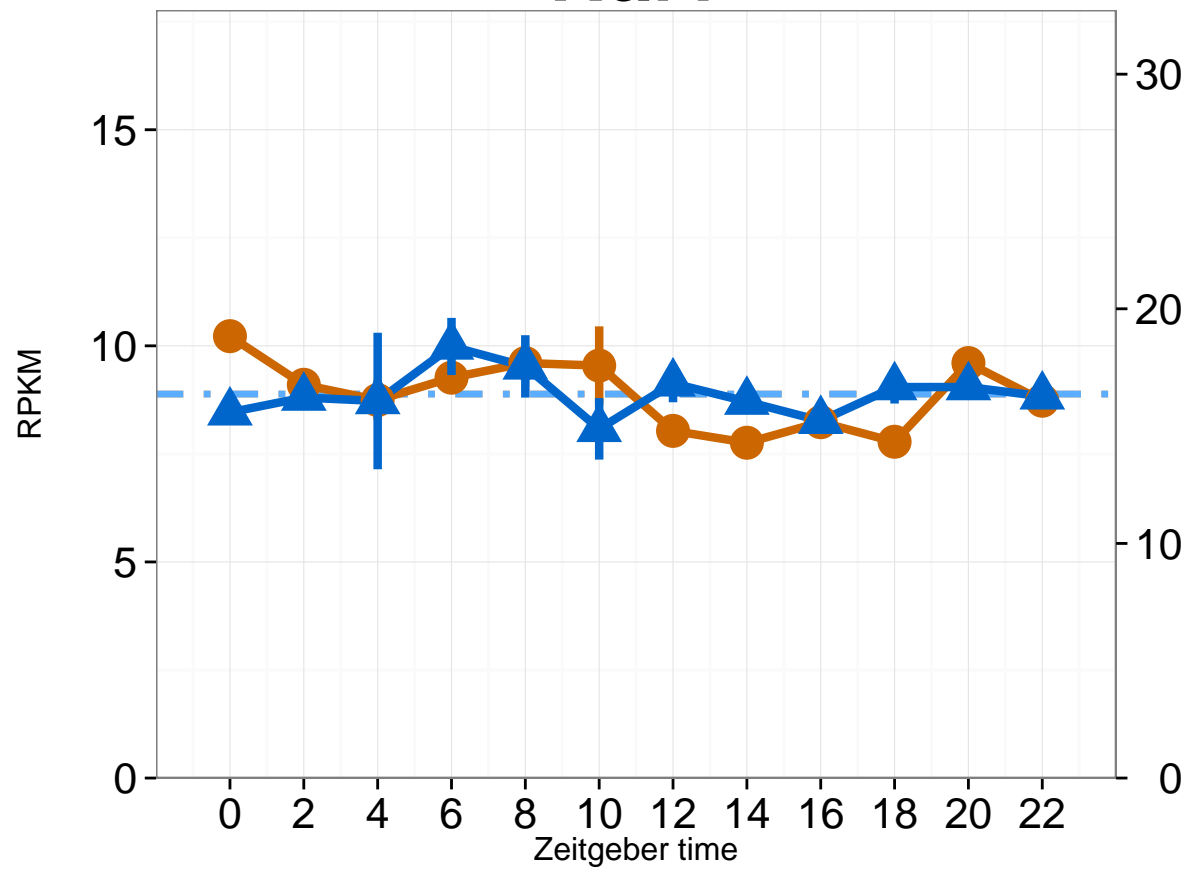

## Naf1

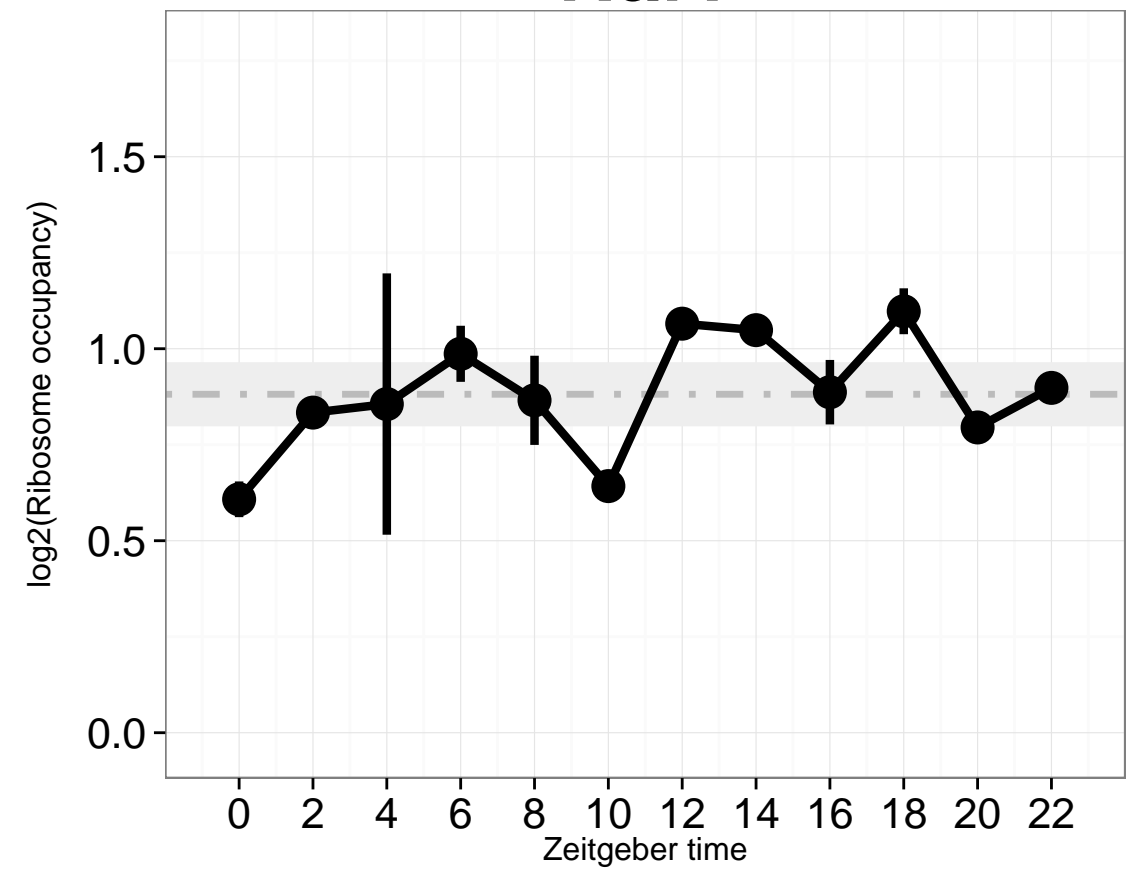

Supplement: Supplementary file 3917 [file 1]

## Ilf3

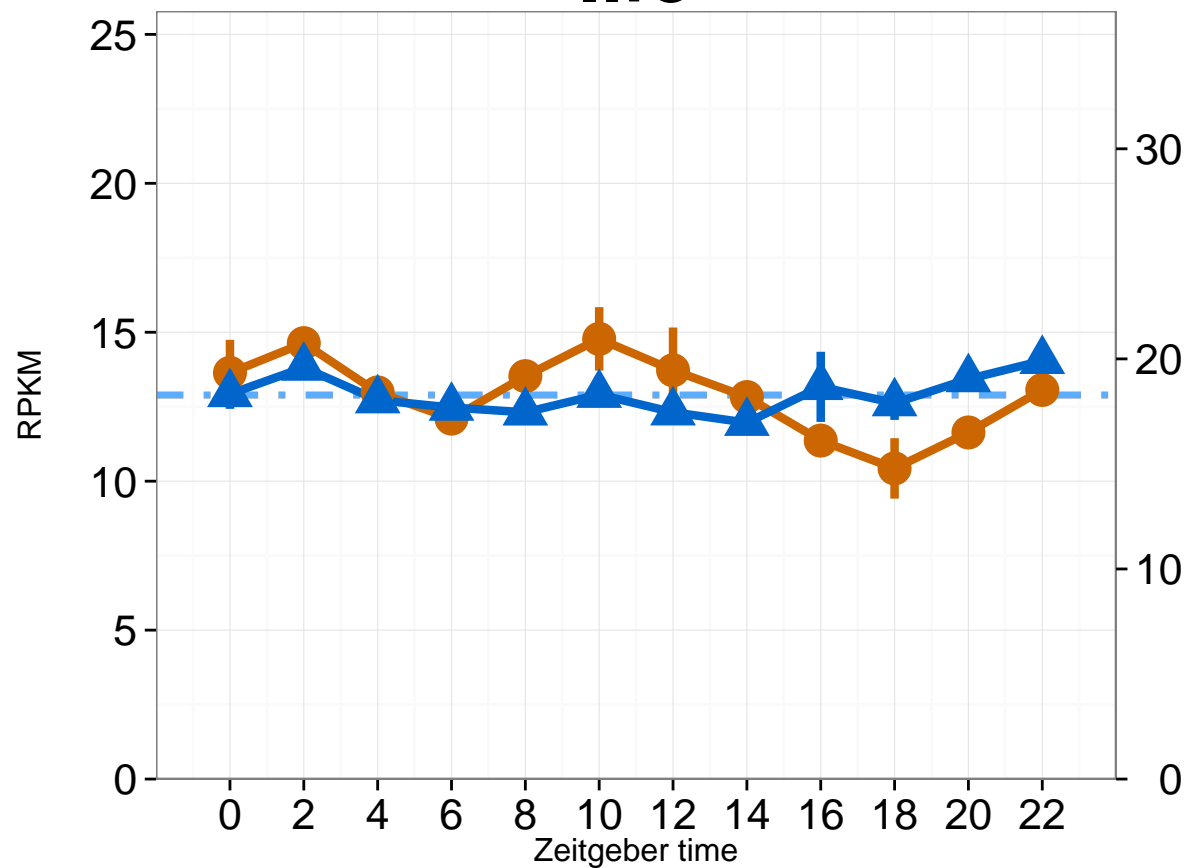

## Ilf3

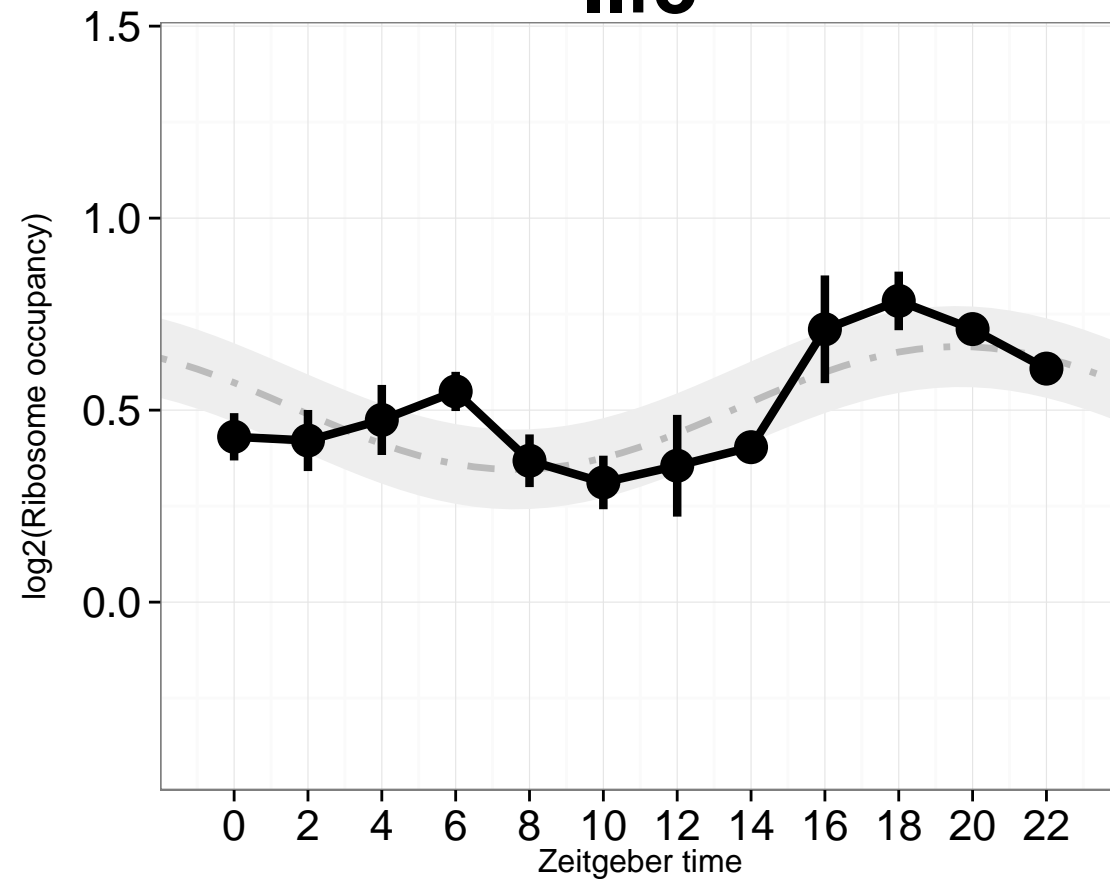

Supplement: Supplementary file 3918 [file 1]

# Dcun1d1

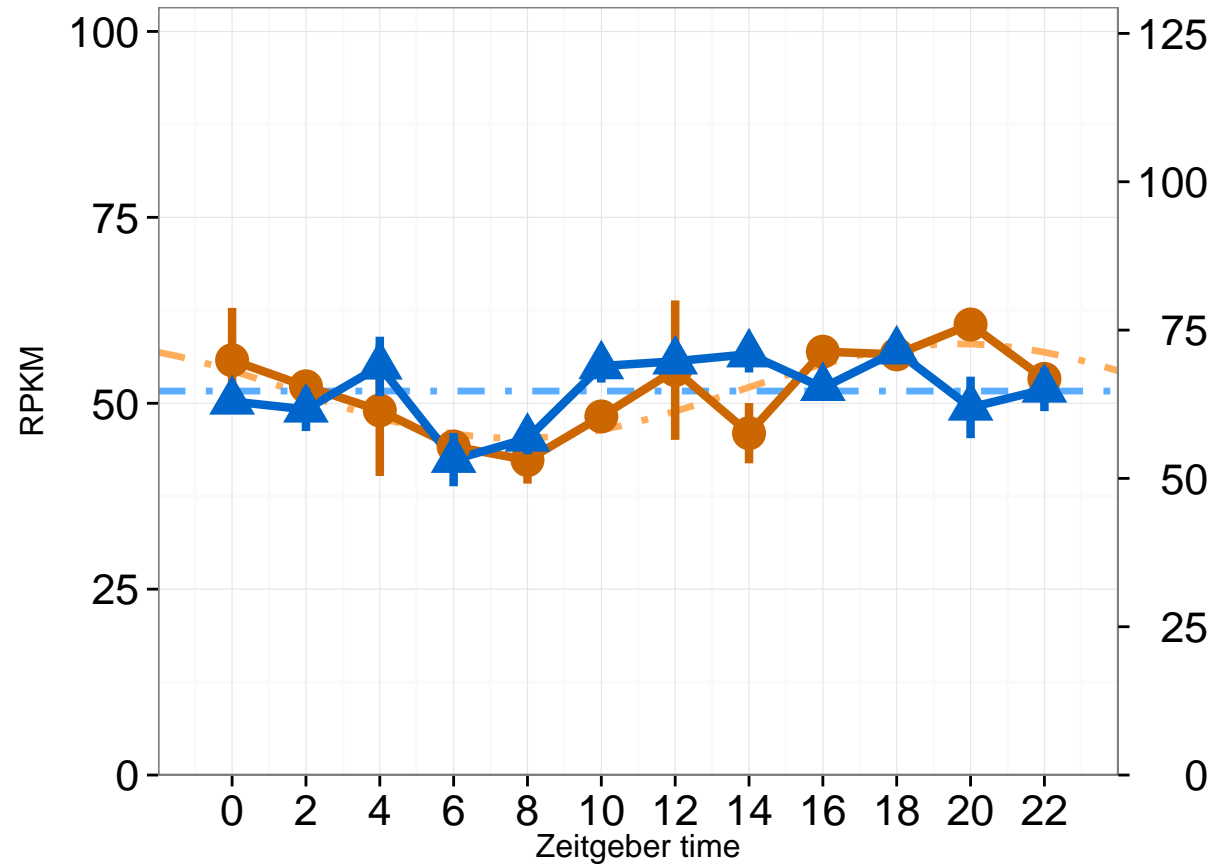

# Dcun1d1

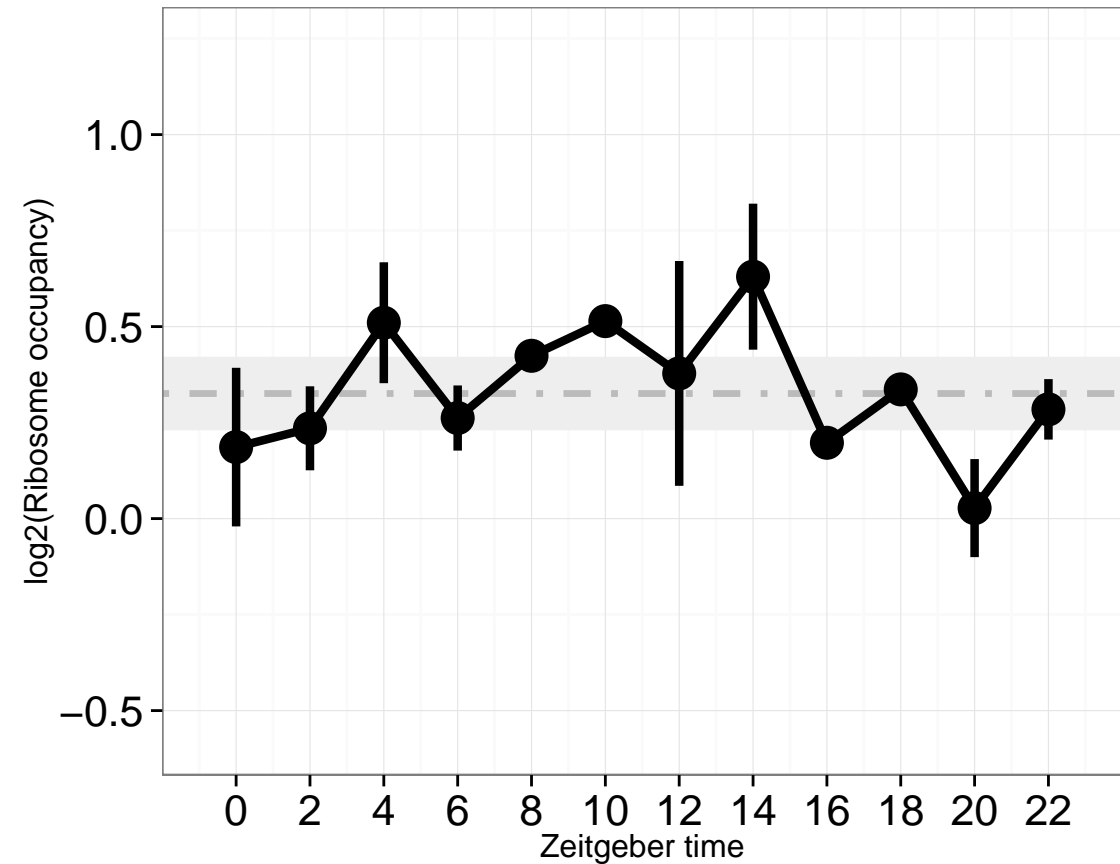

Supplement: Supplementary file 3919 [file 1]

# Cyp2j11

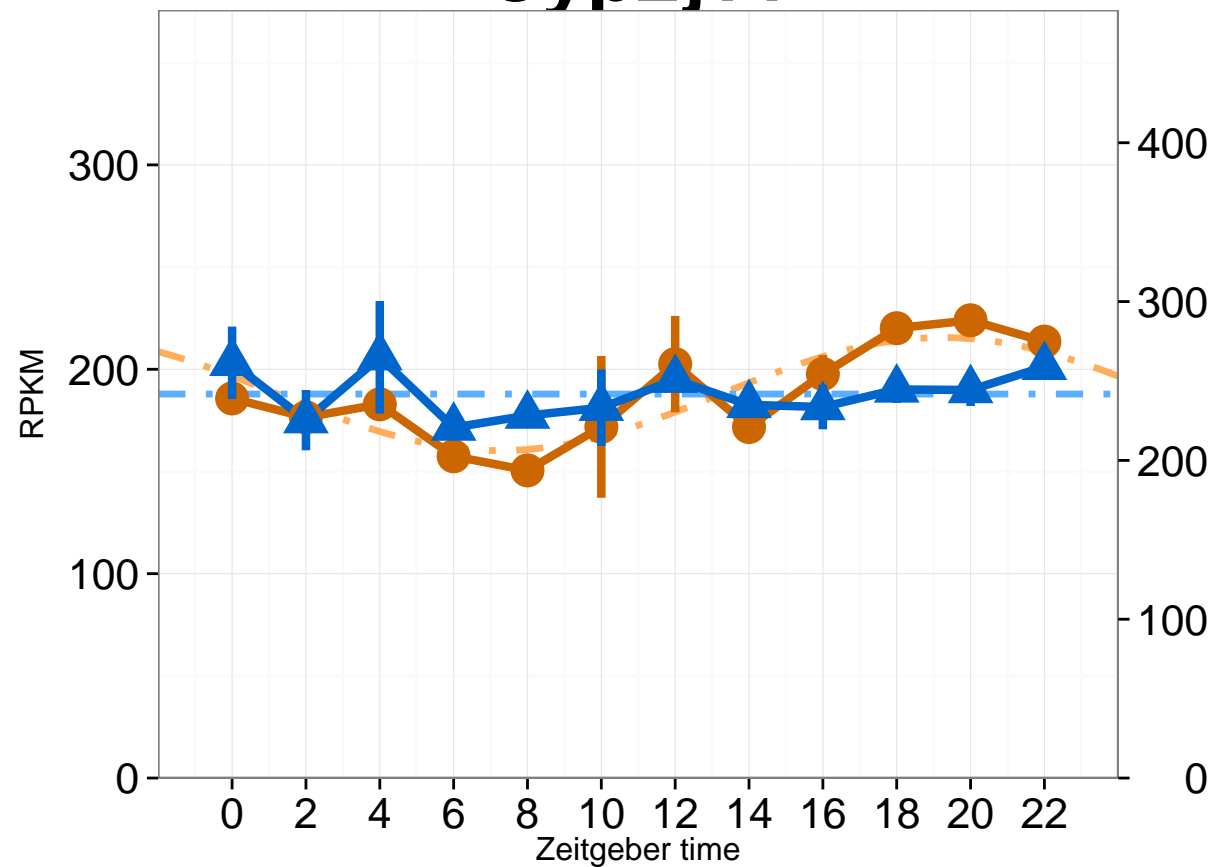

# Cyp2j11

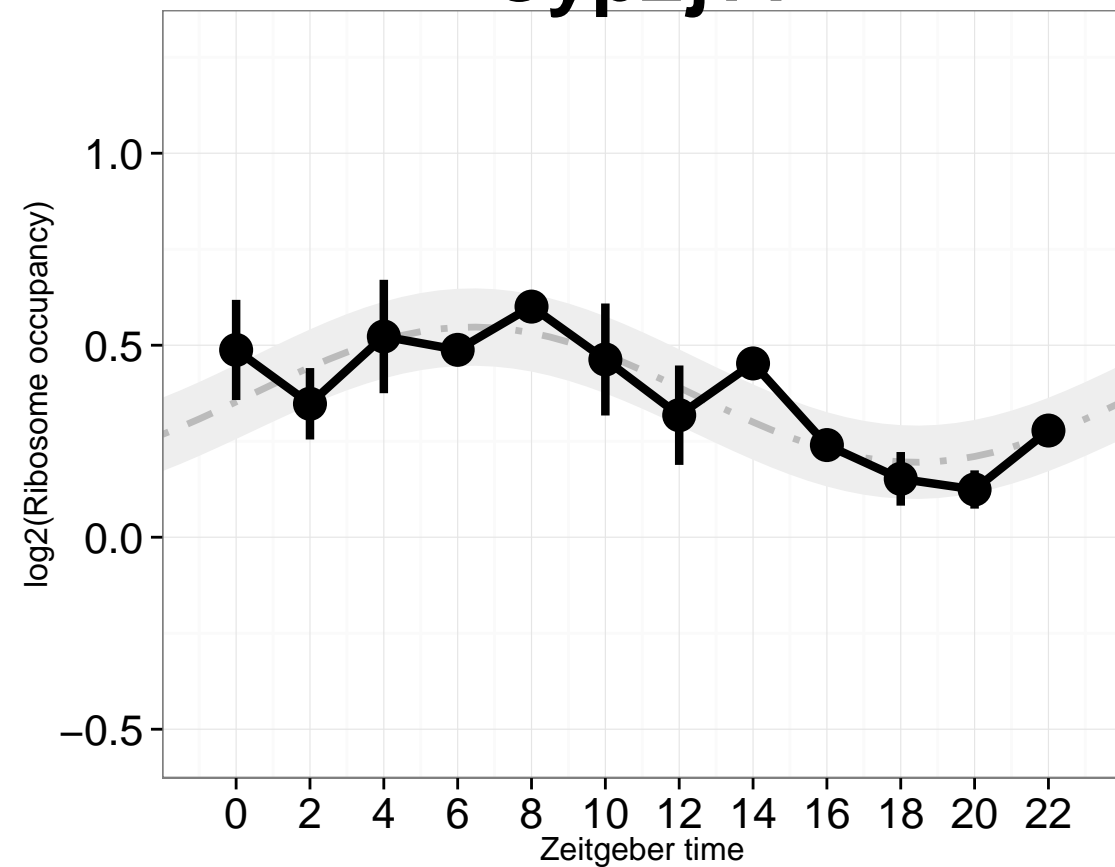

Supplement: Supplementary file 3920 [file 1]

Clec10a

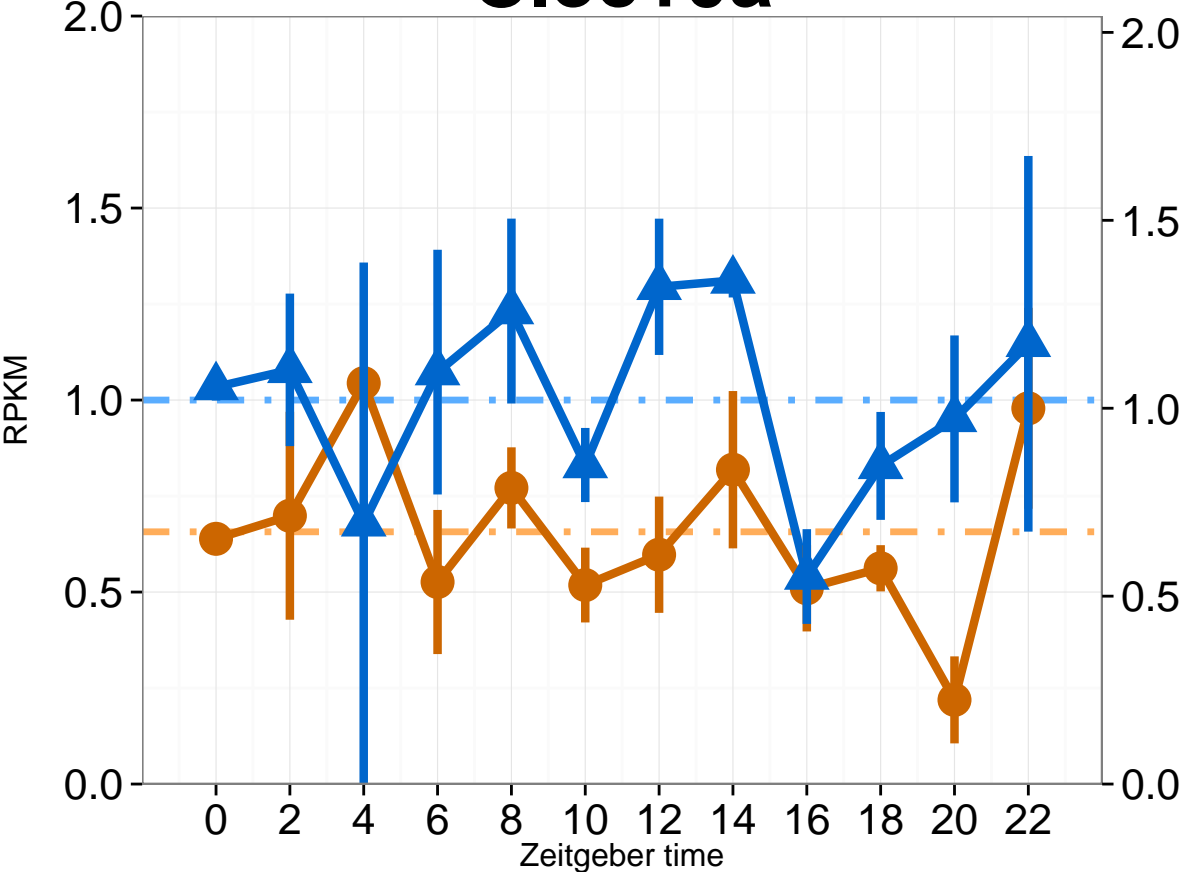

Clec10a

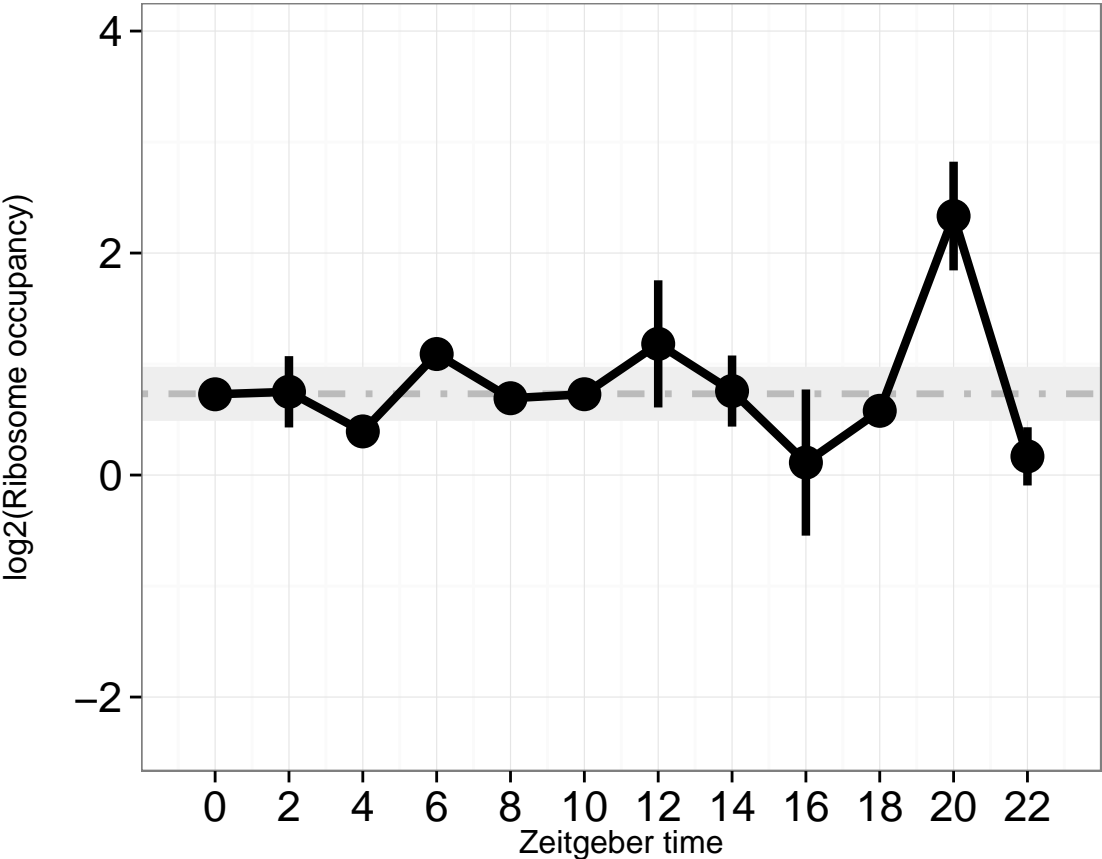

Supplement: Supplementary file 3921 [file 1]

# Zfp580

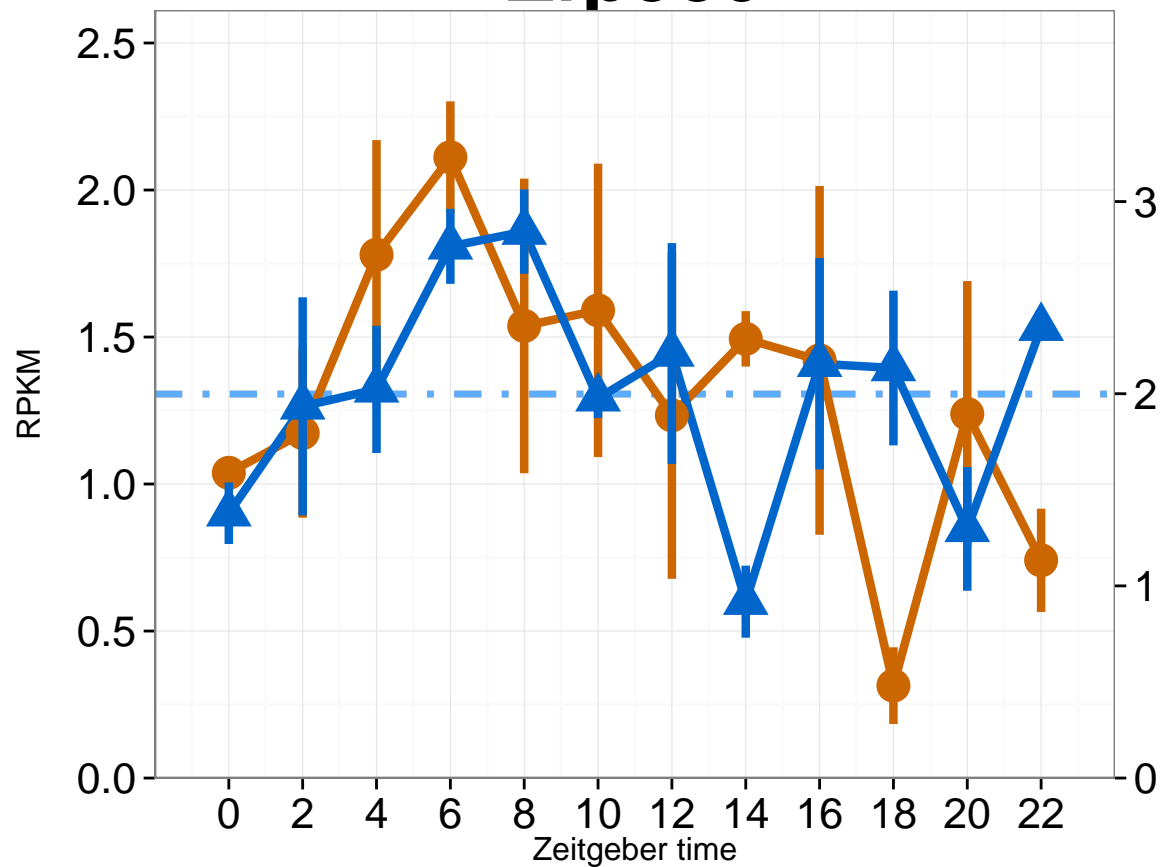

# Zfp580

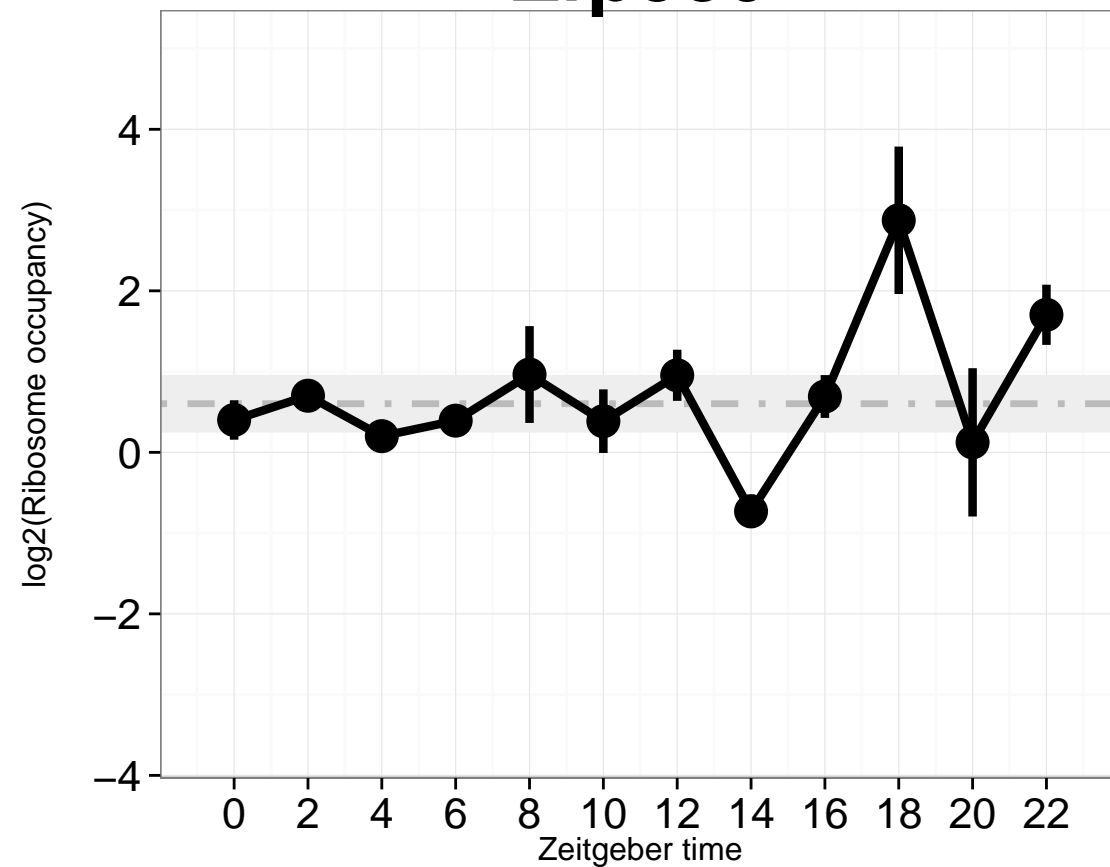

Supplement: Supplementary file 3922 [file 1]

# EvI

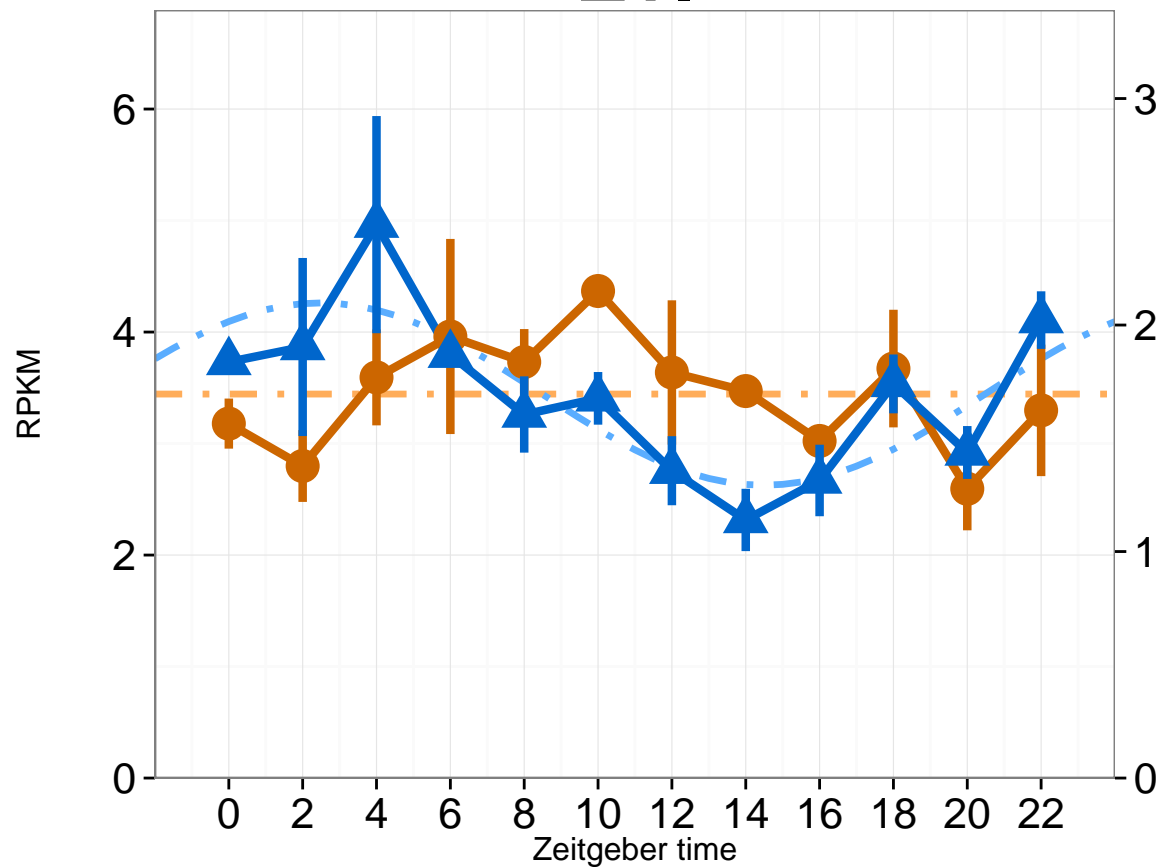

# EvI

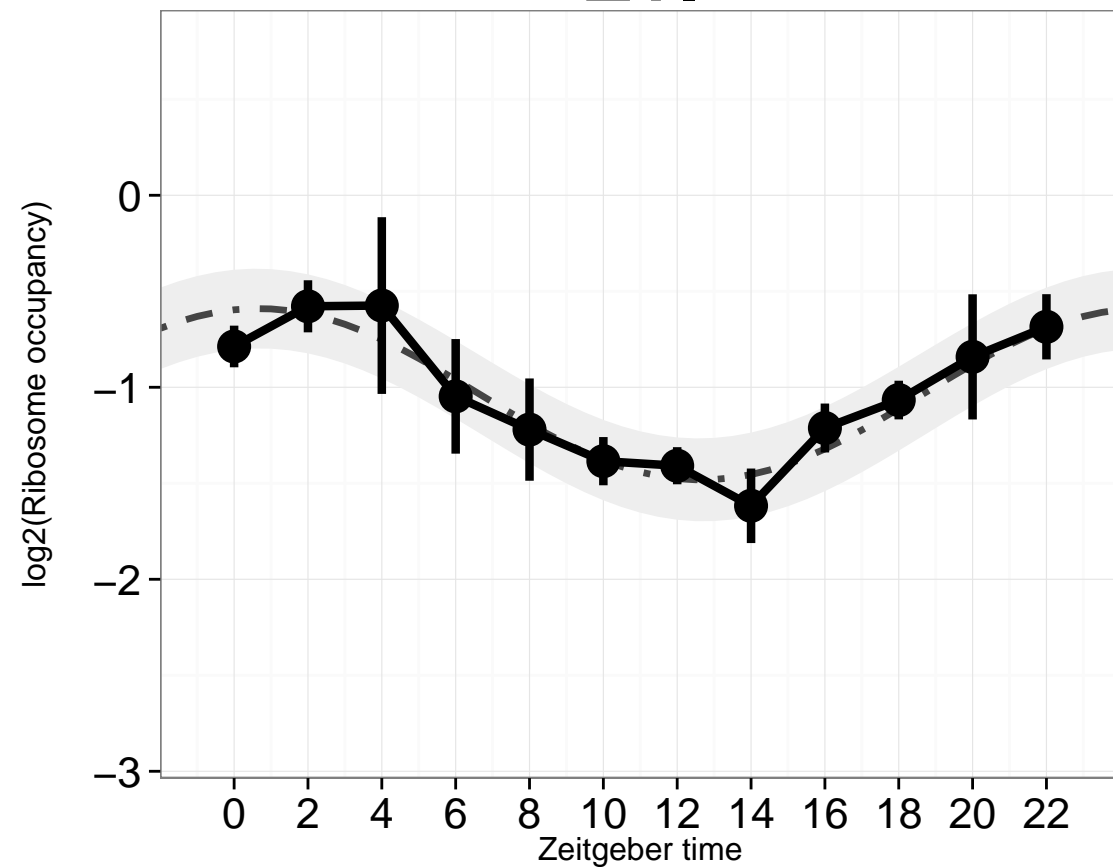

Supplement: Supplementary file 3923 [file 1]

## Tmem33

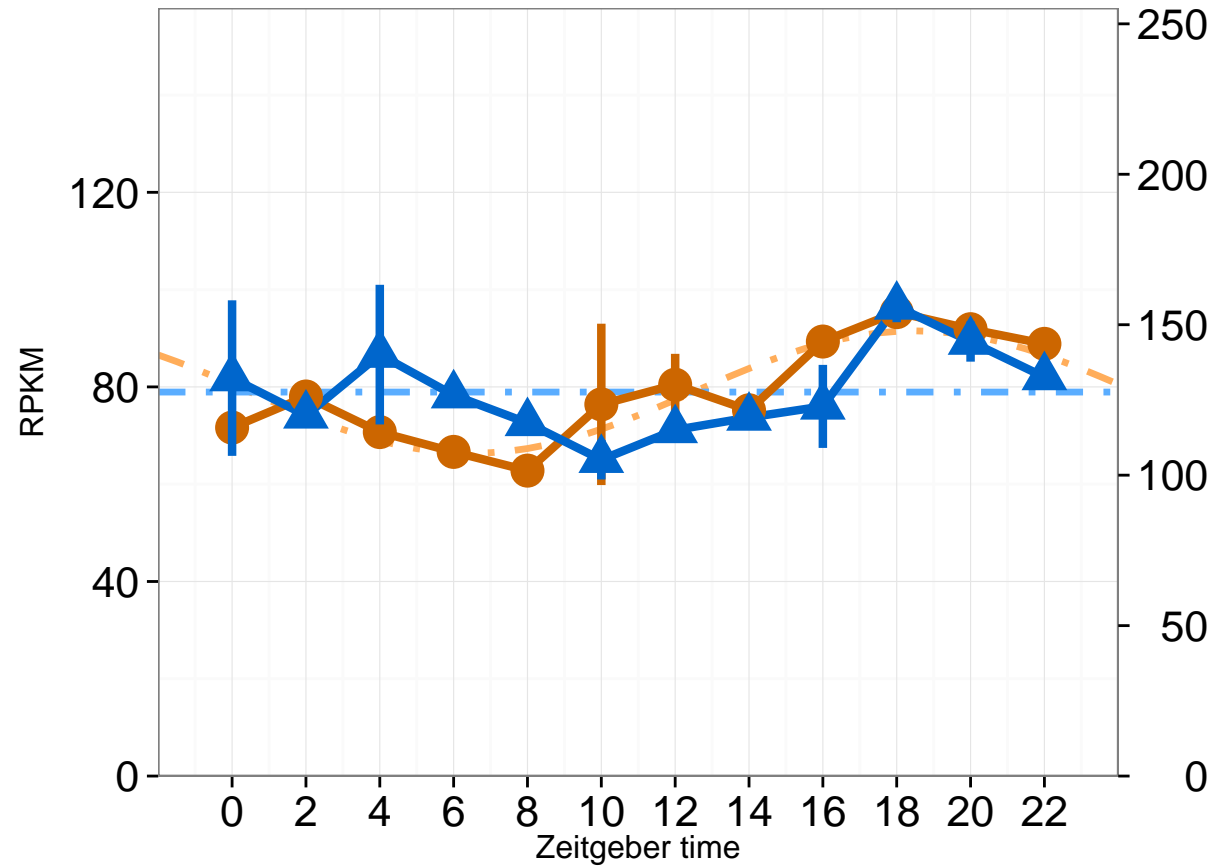

## Tmem33

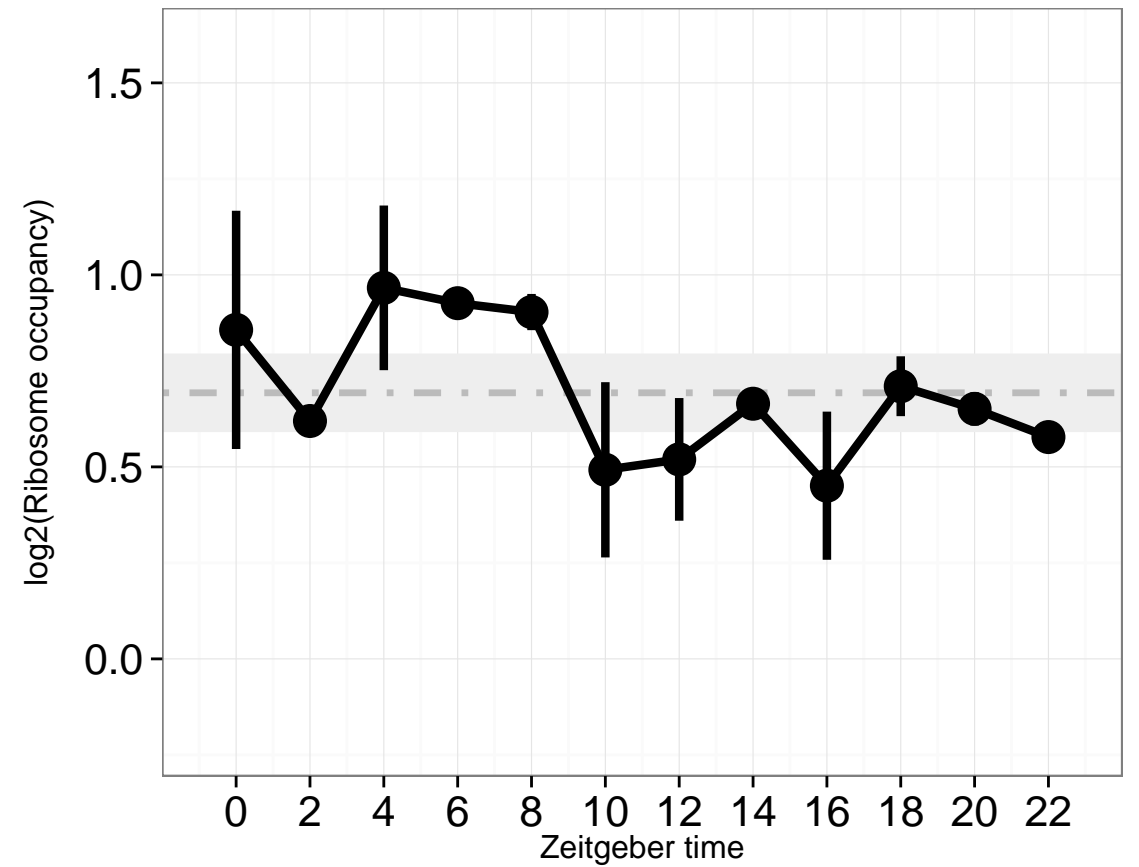

Supplement: Supplementary file 3924 [file 1]

# Wbp1

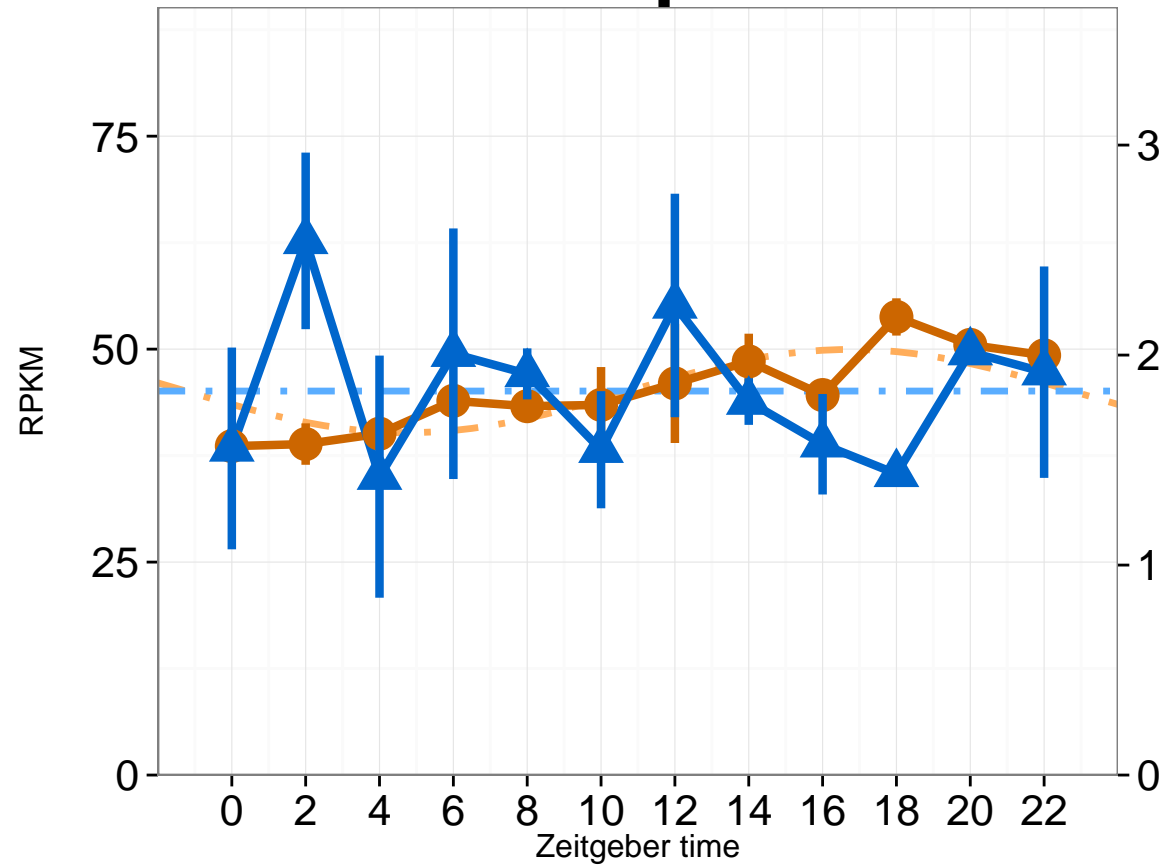

# Wbp1

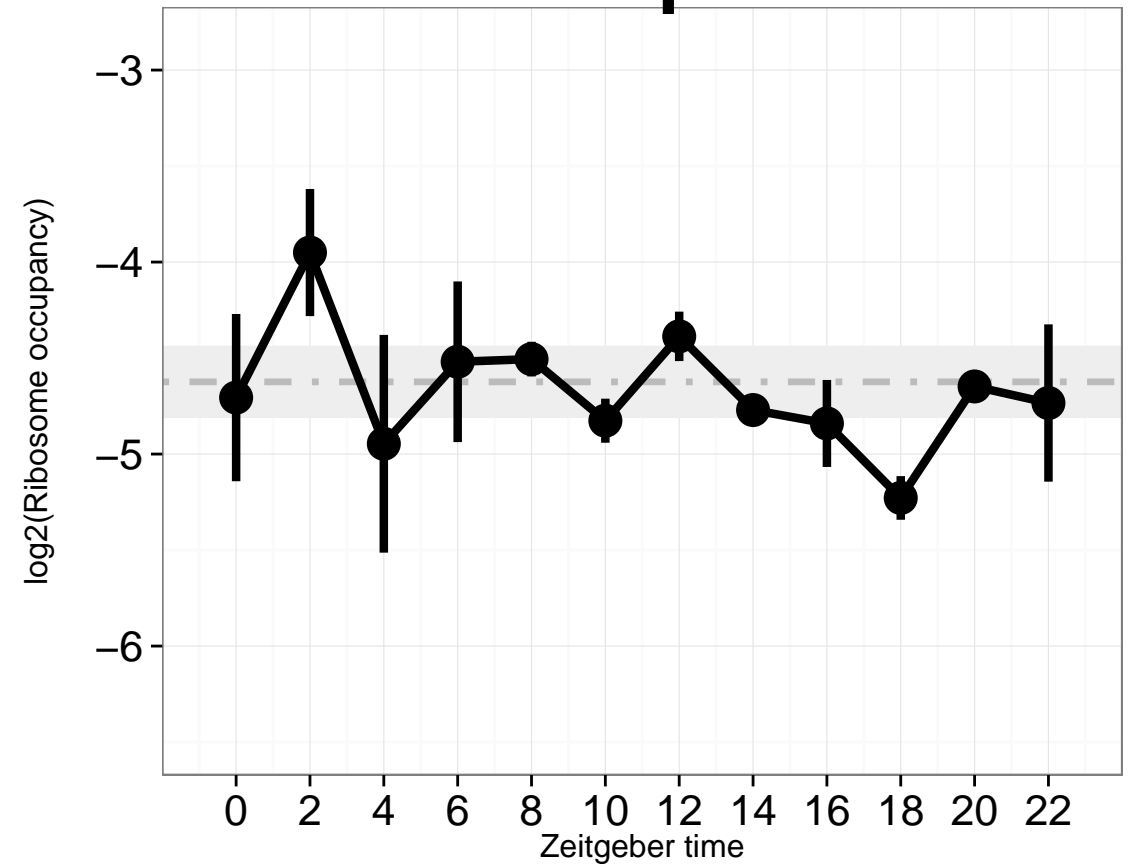

Supplement: Supplementary file 3925 [file 1]

## Rrbp1

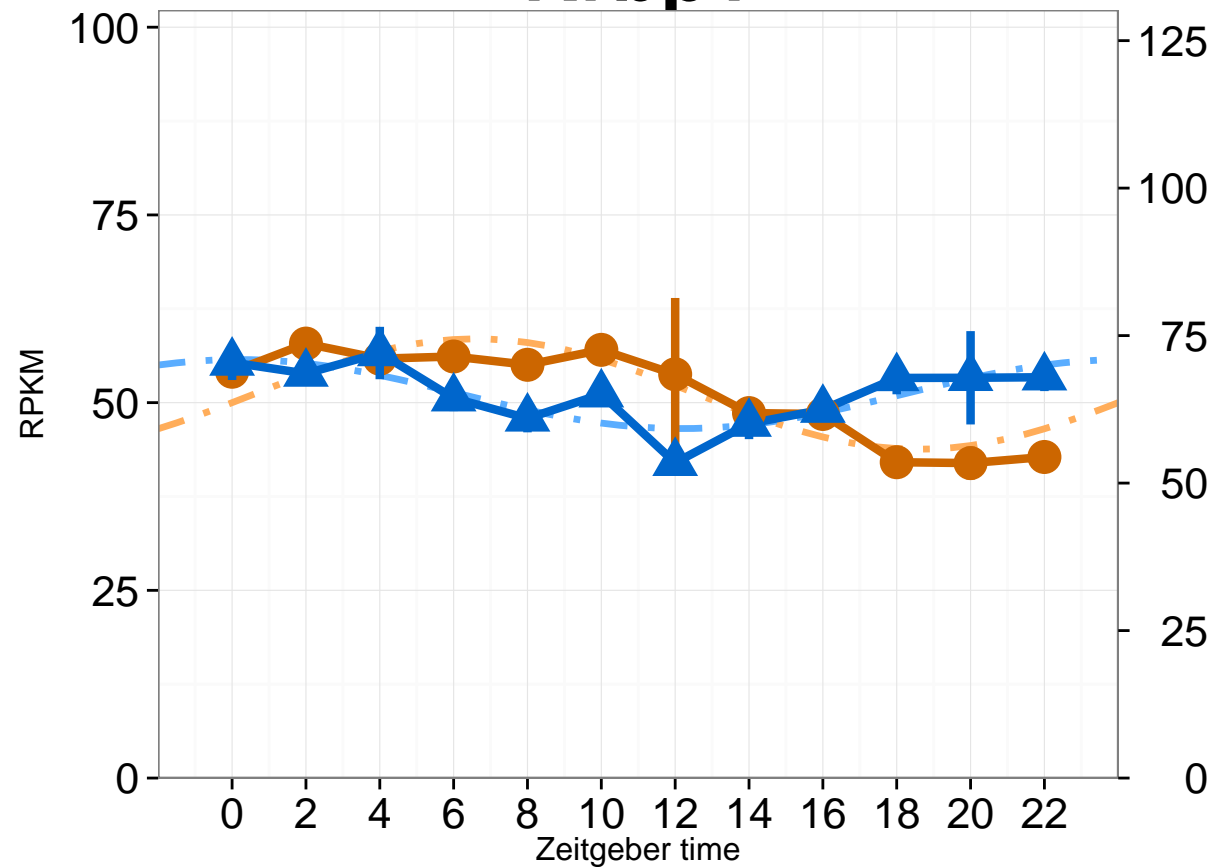

## Rrbp1

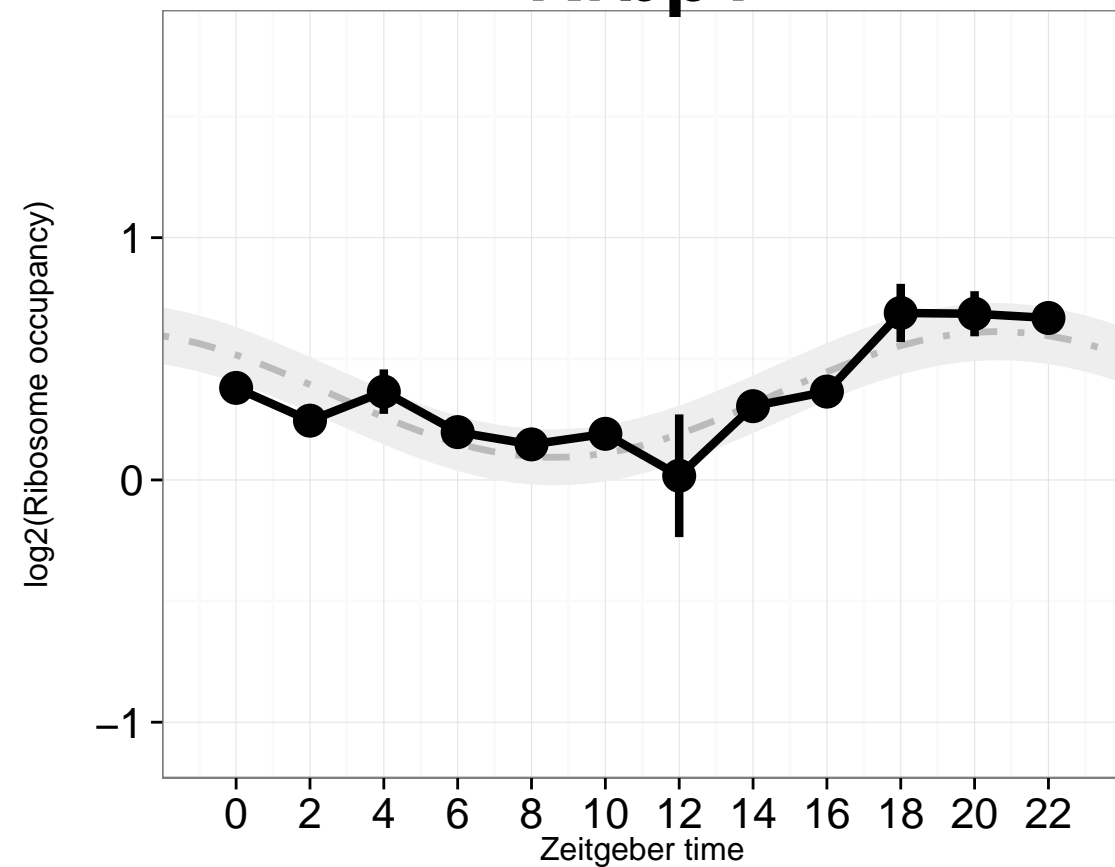

Supplement: Supplementary file 3926 [file 1]

## Dkk2

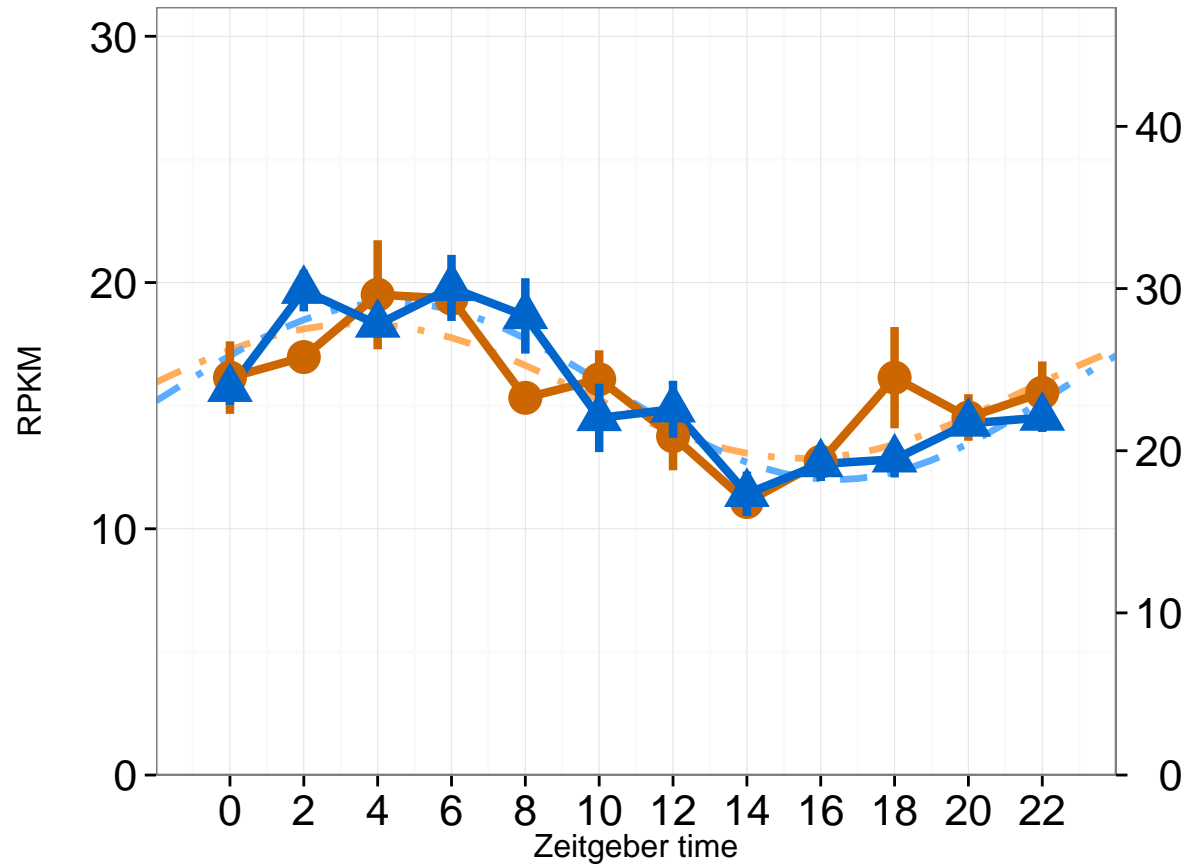

## Dkk2

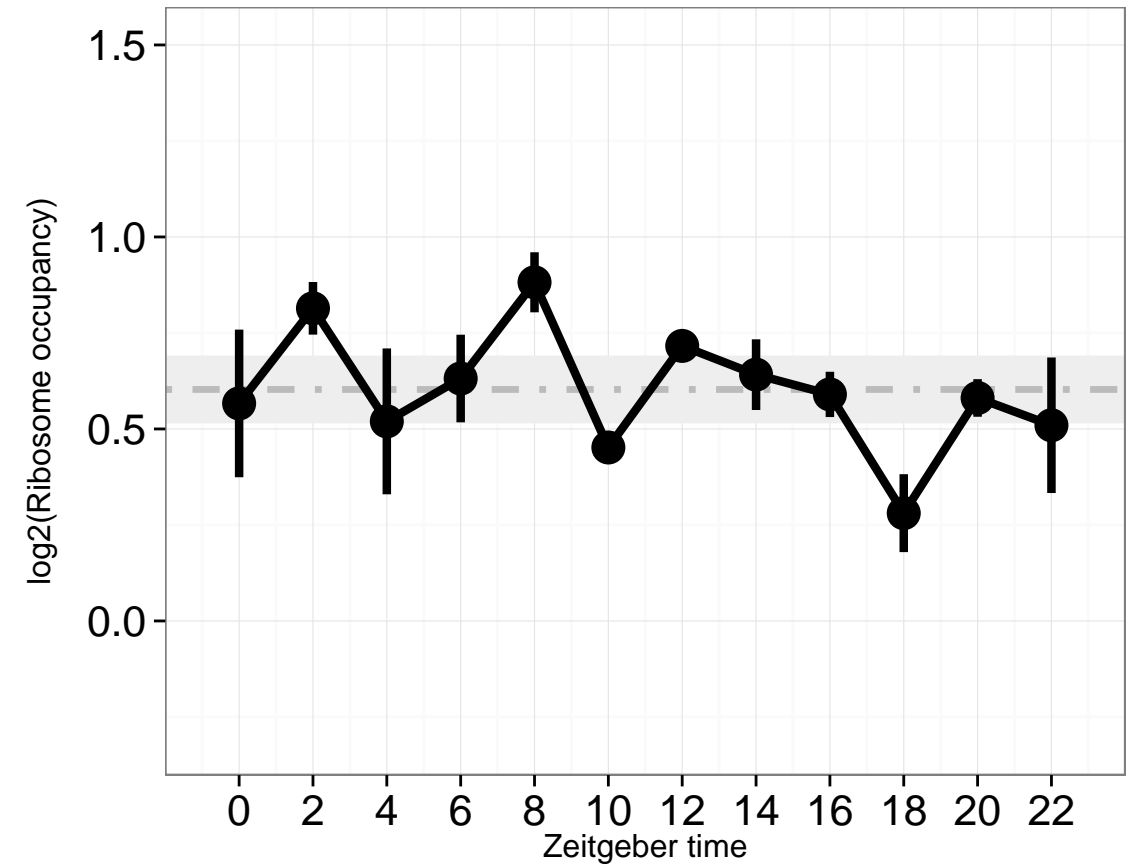

Supplement: Supplementary file 3927 [file 1]

**Lpo TR**

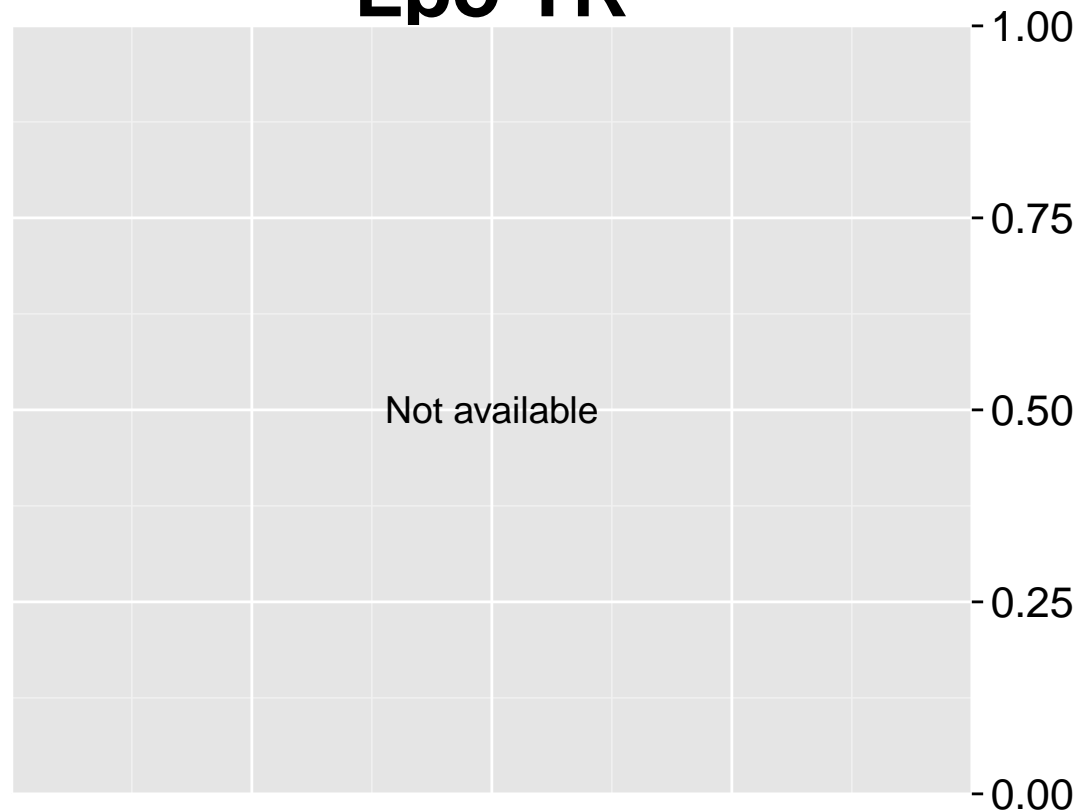

**Lpo log2(Ribosome occupancy)**

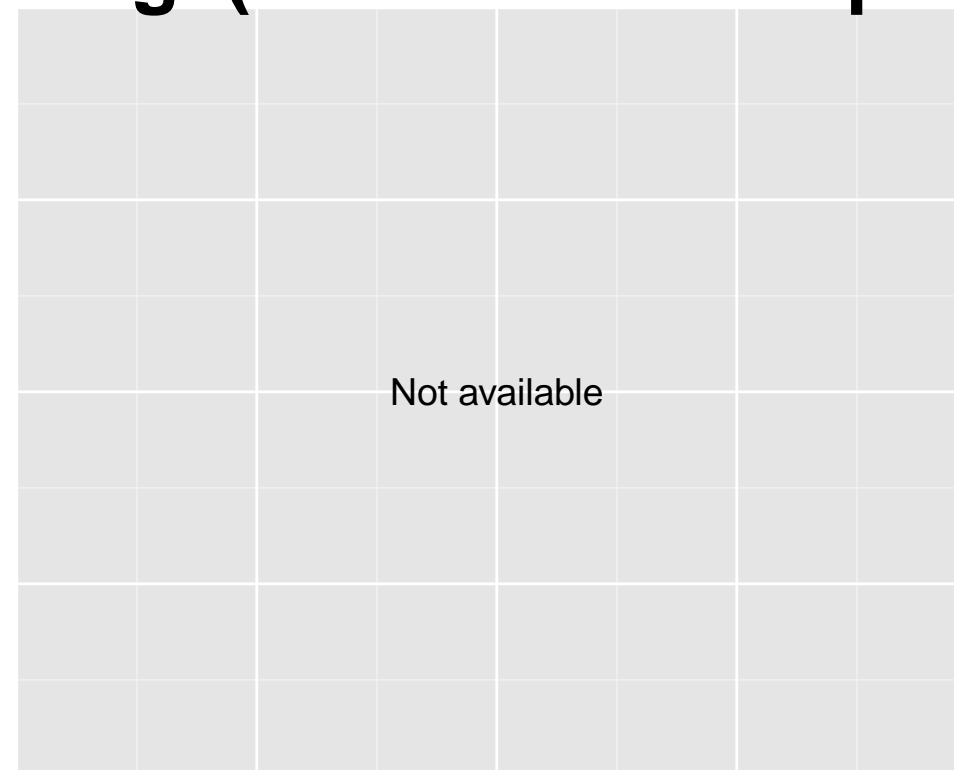

Supplement: Supplementary file 3928 [file 1]

# Hspa2

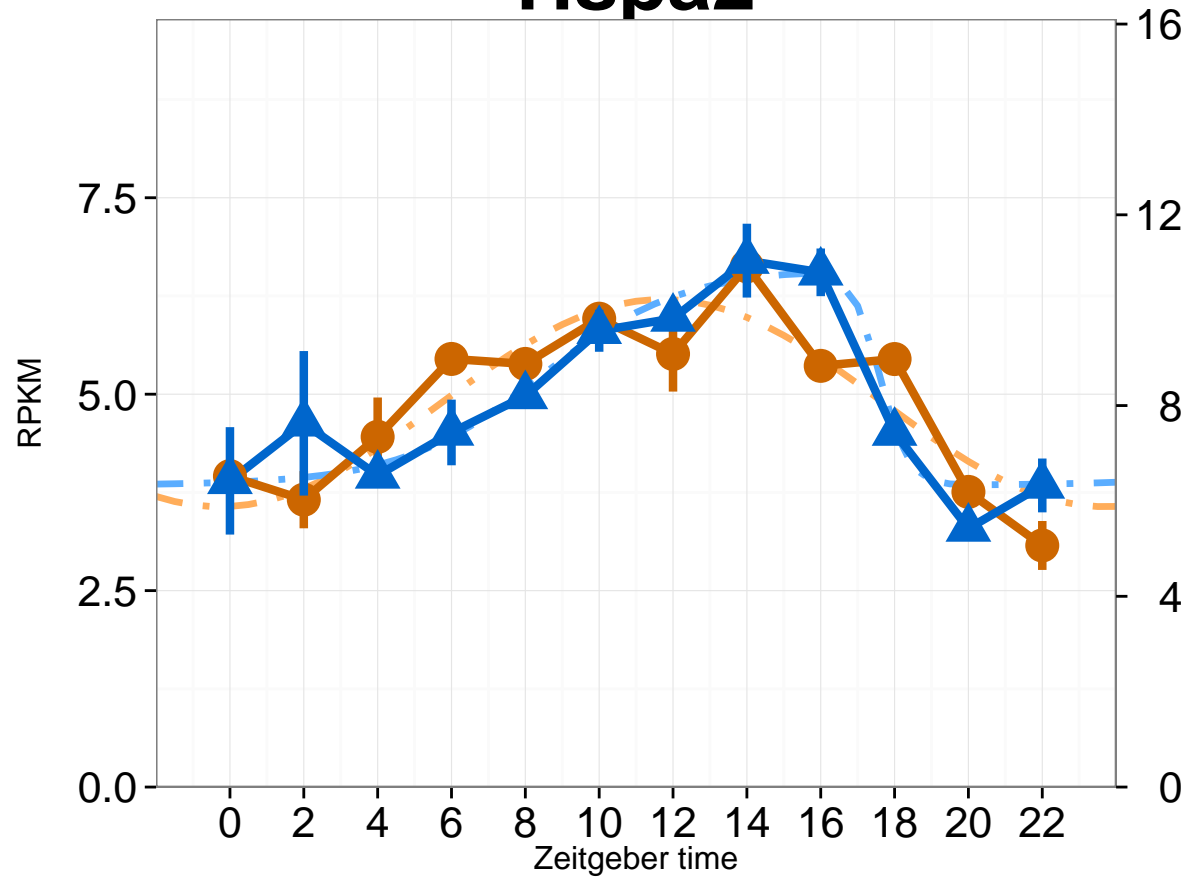

# Hspa2

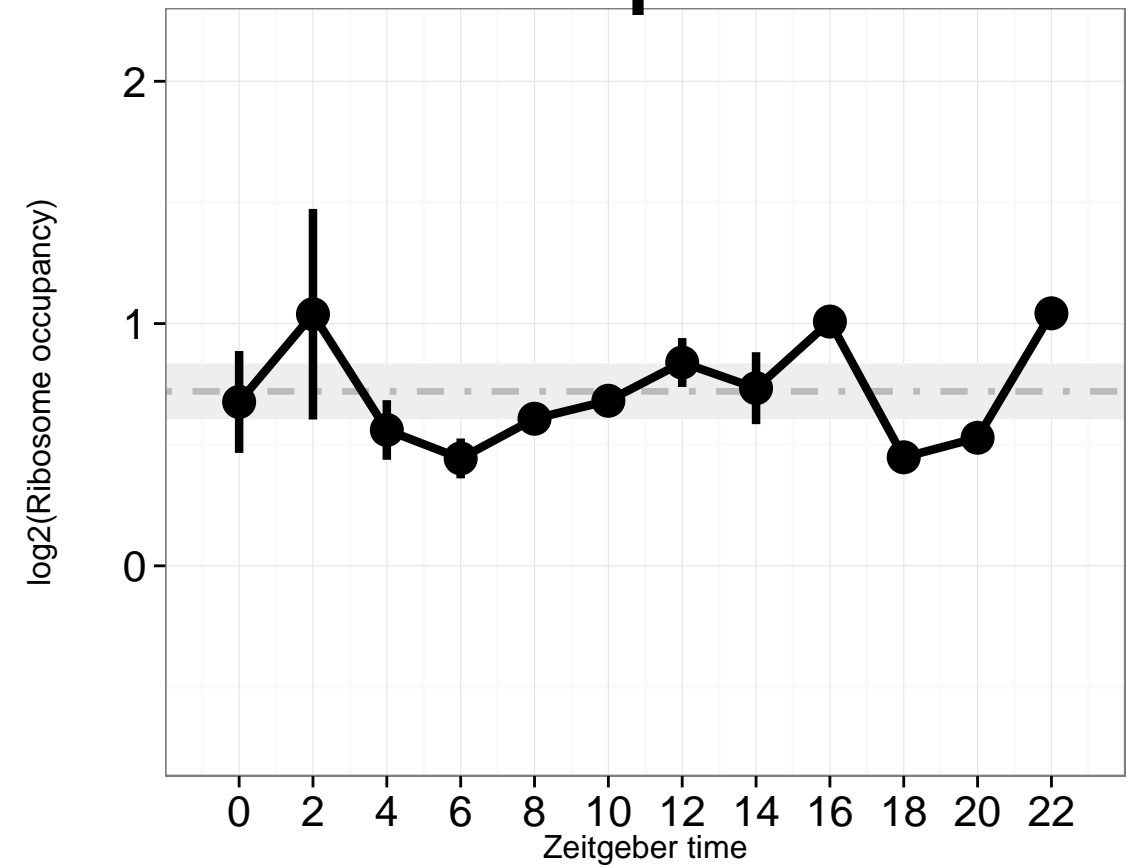

Supplement: Supplementary file 3930 [file 1]

# Polr1e

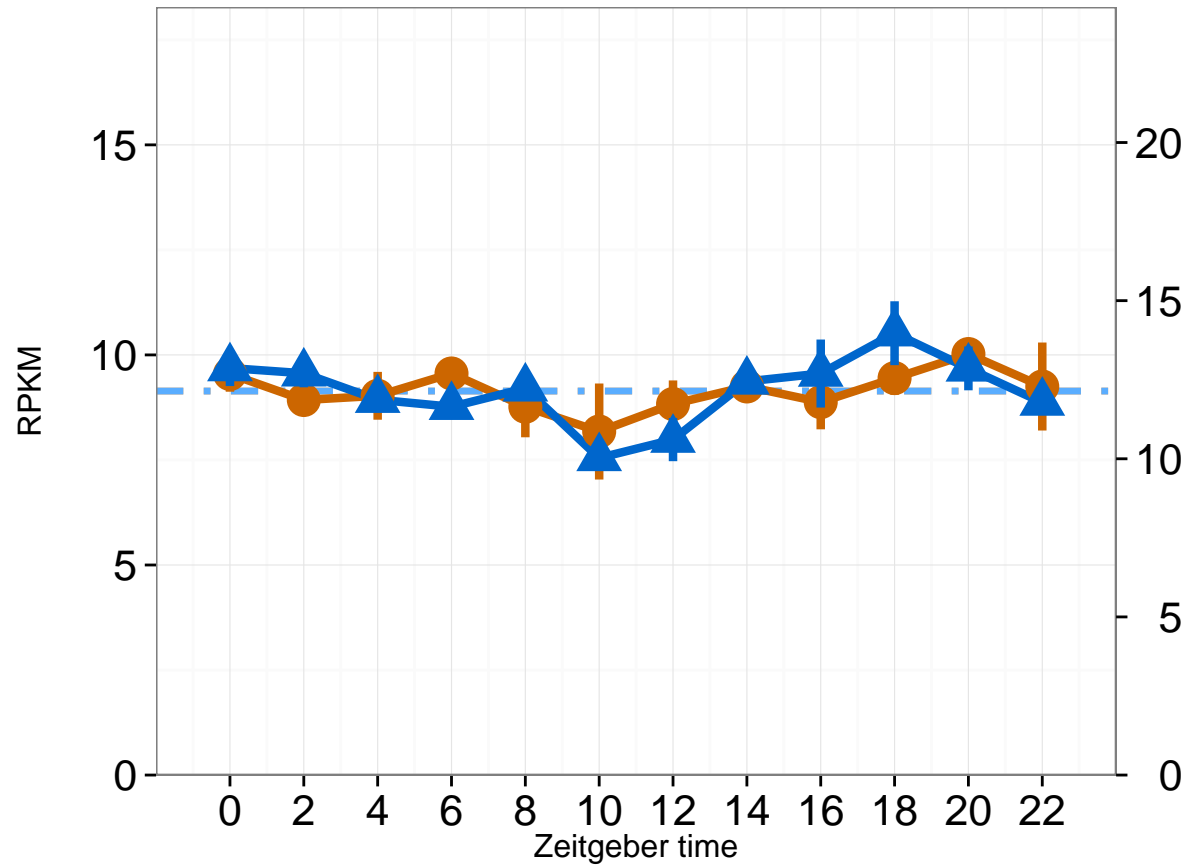

# Polr1e

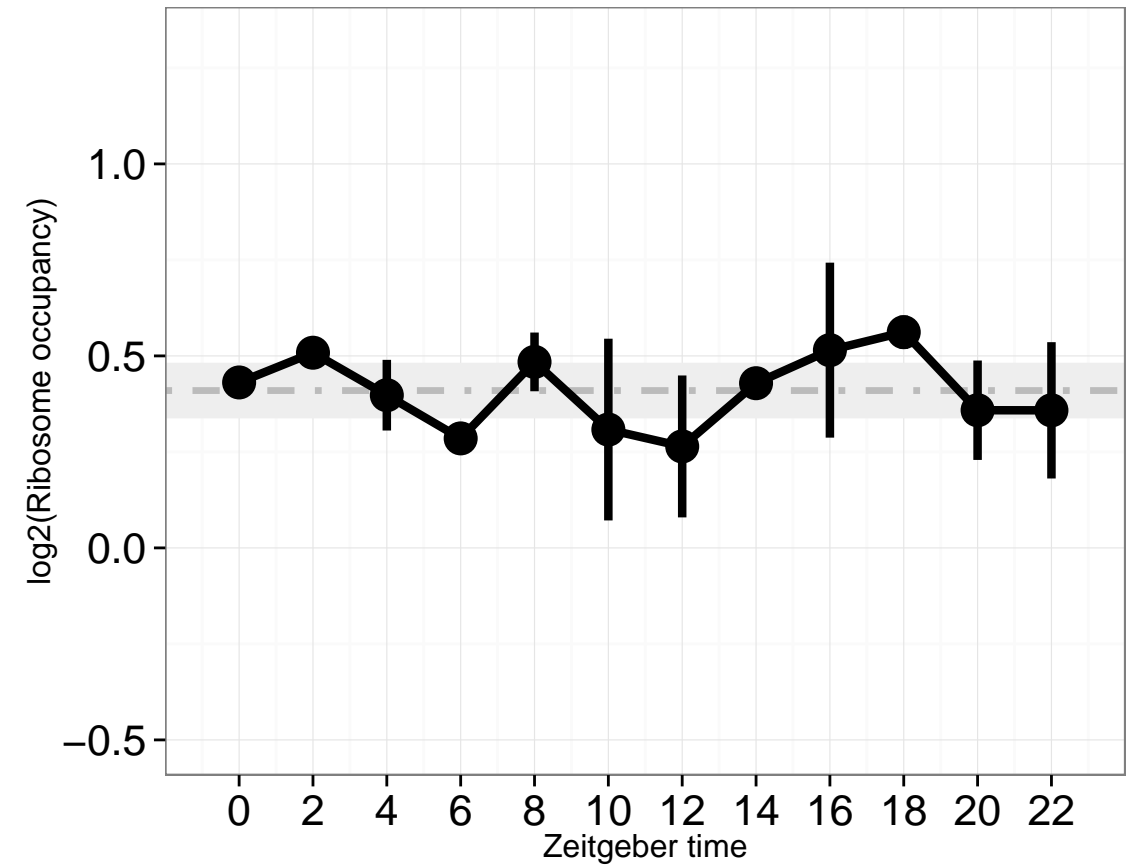

Supplement: Supplementary file 3931 [file 1]

# 4930550C14Rik

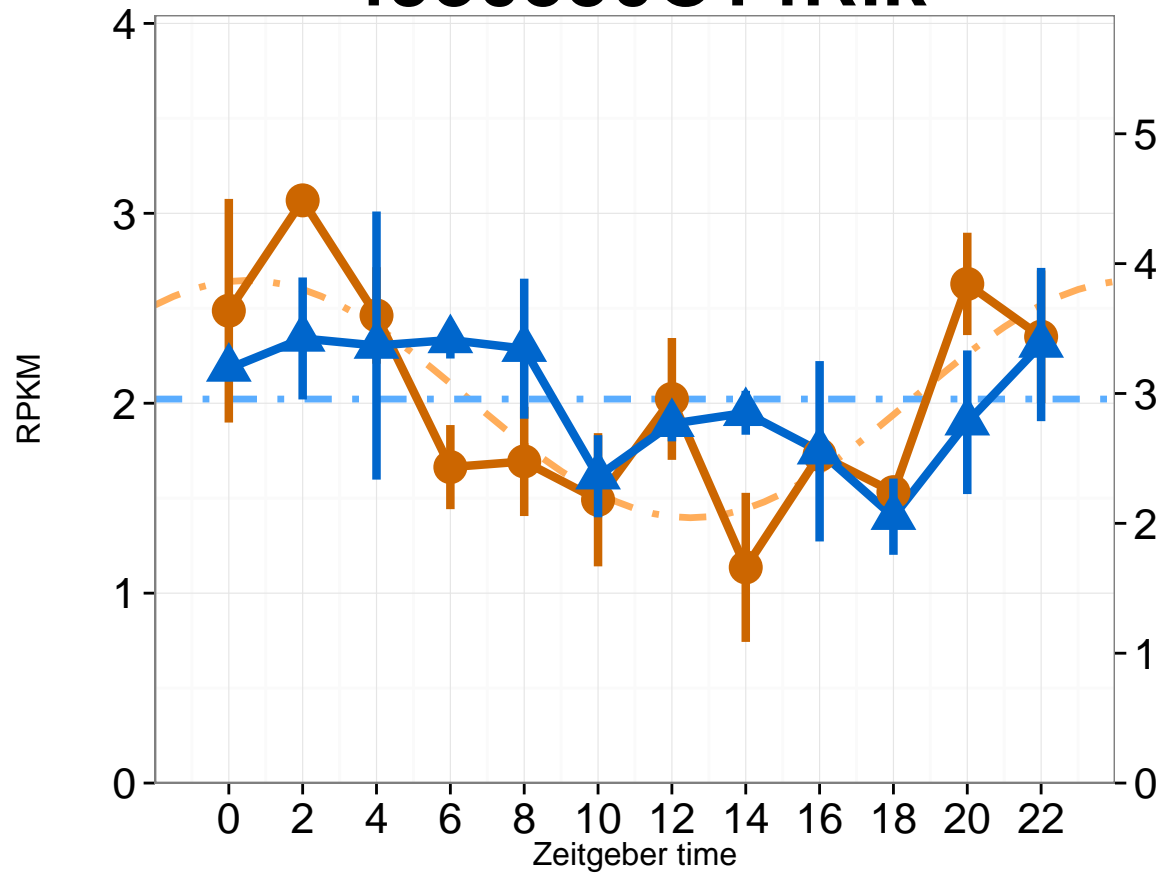

# 4930550C14Rik

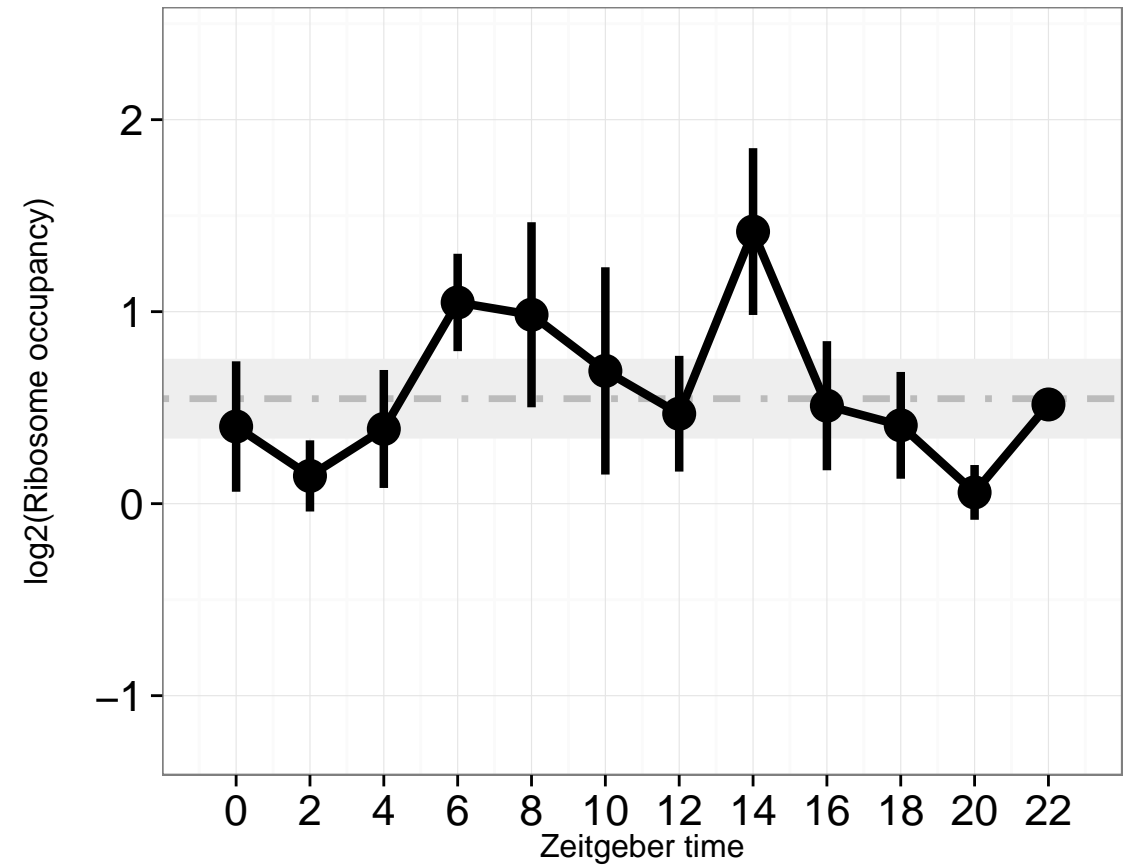

Supplement: Supplementary file 3932 [file 1]

## Sars2

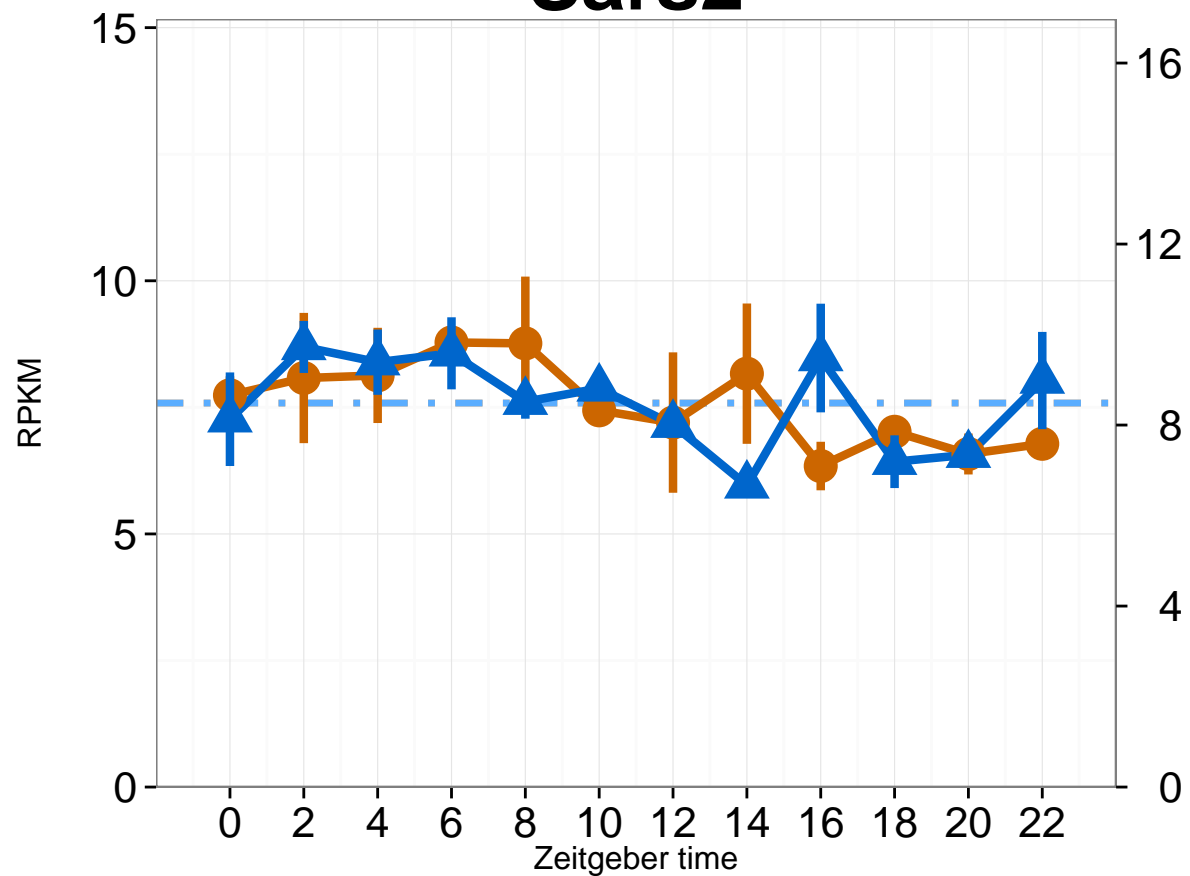

## Sars2

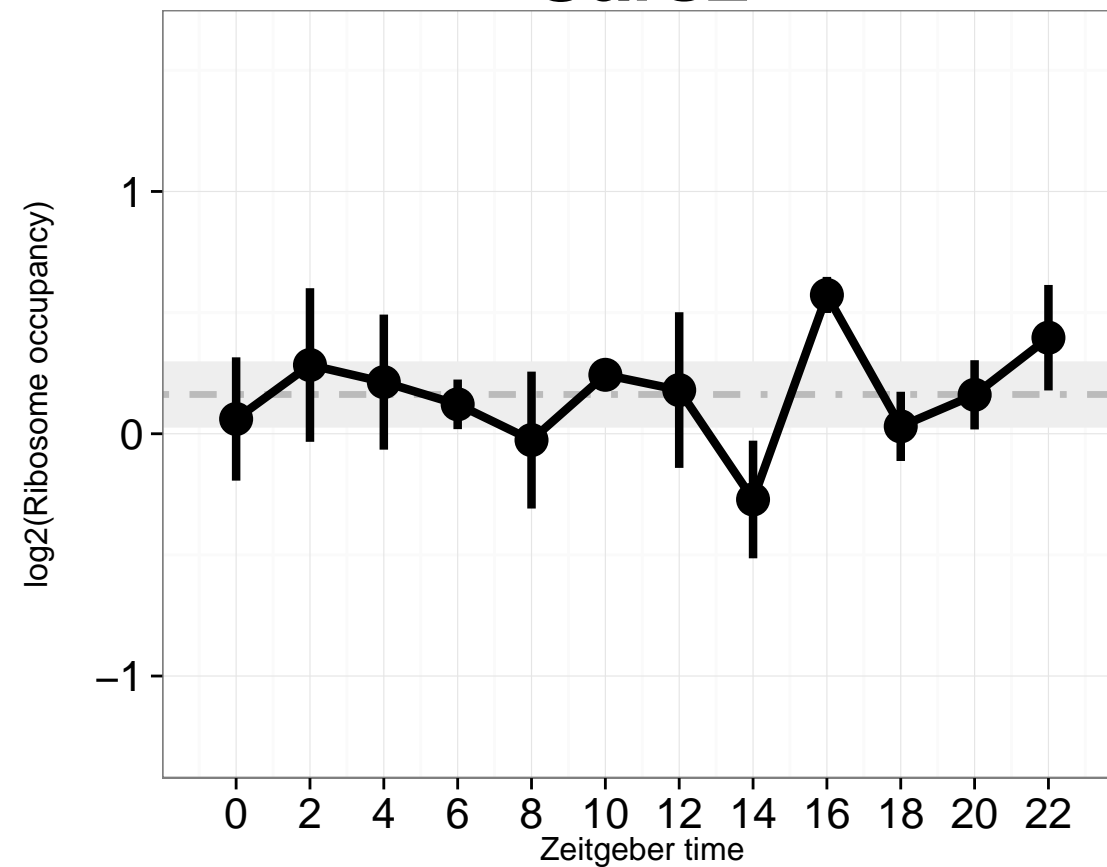

Supplement: Supplementary file 3933 [file 1]

# Gdpgp1

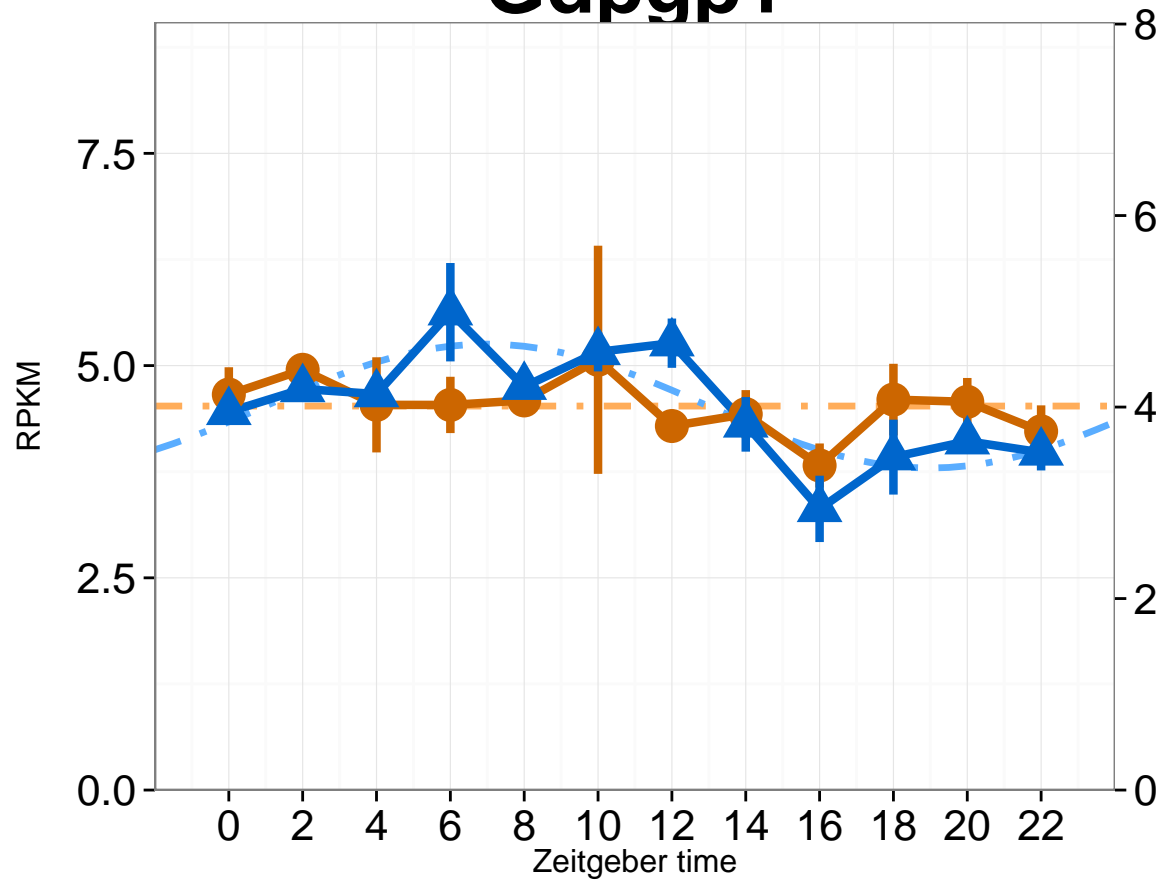

# Gdpgp1

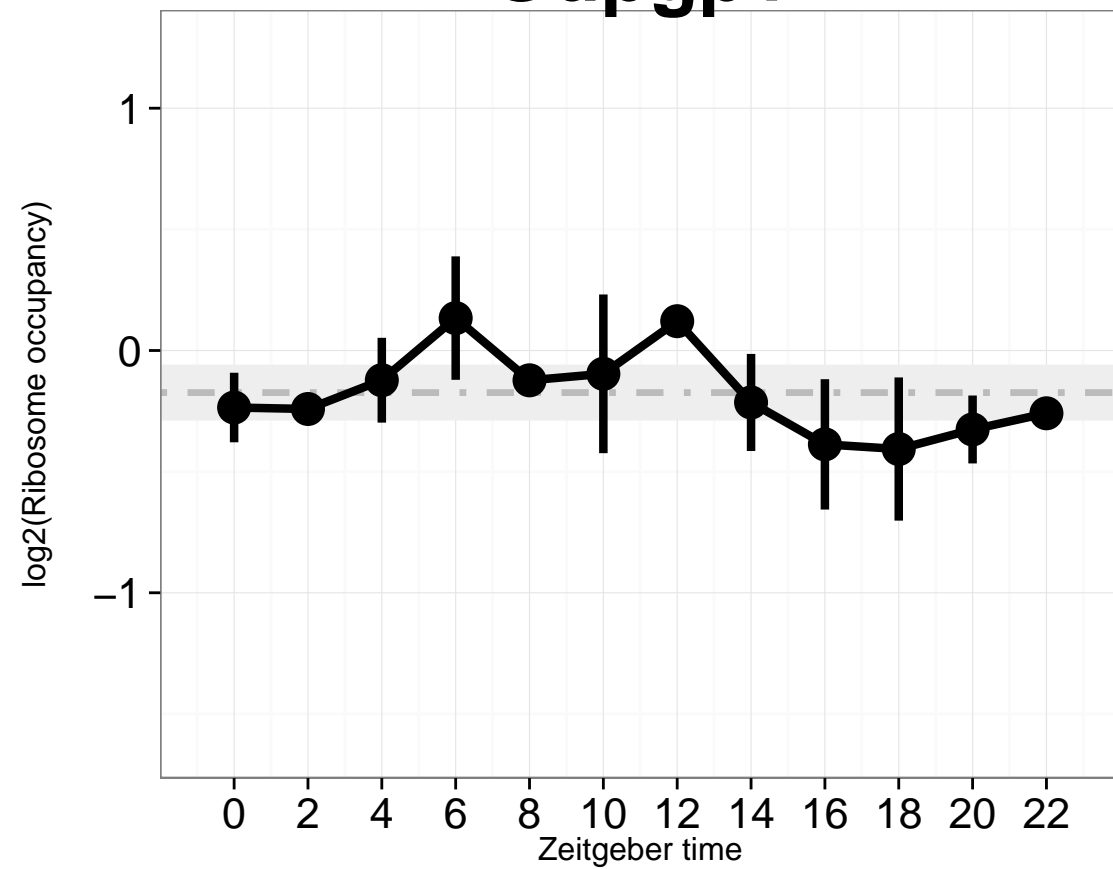

Supplement: Supplementary file 3934 [file 1]

## Commd9

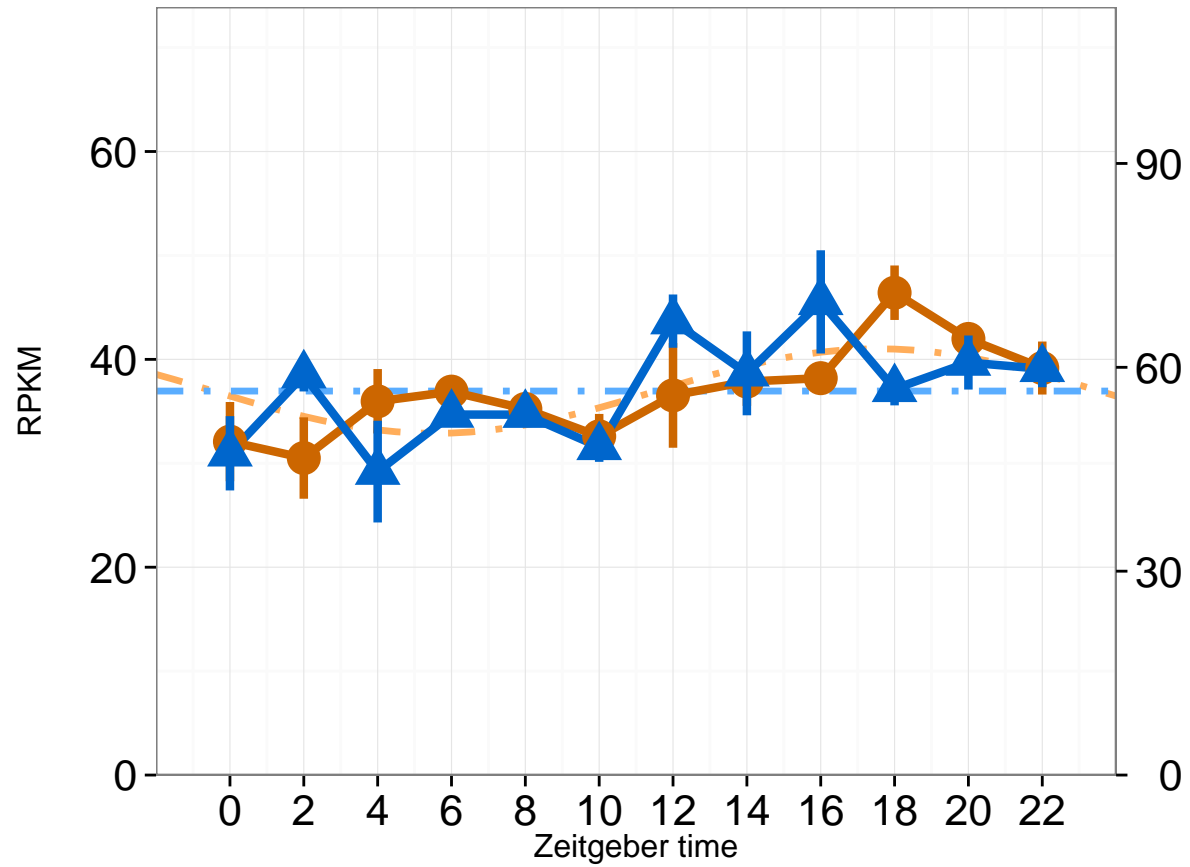

## Commd9

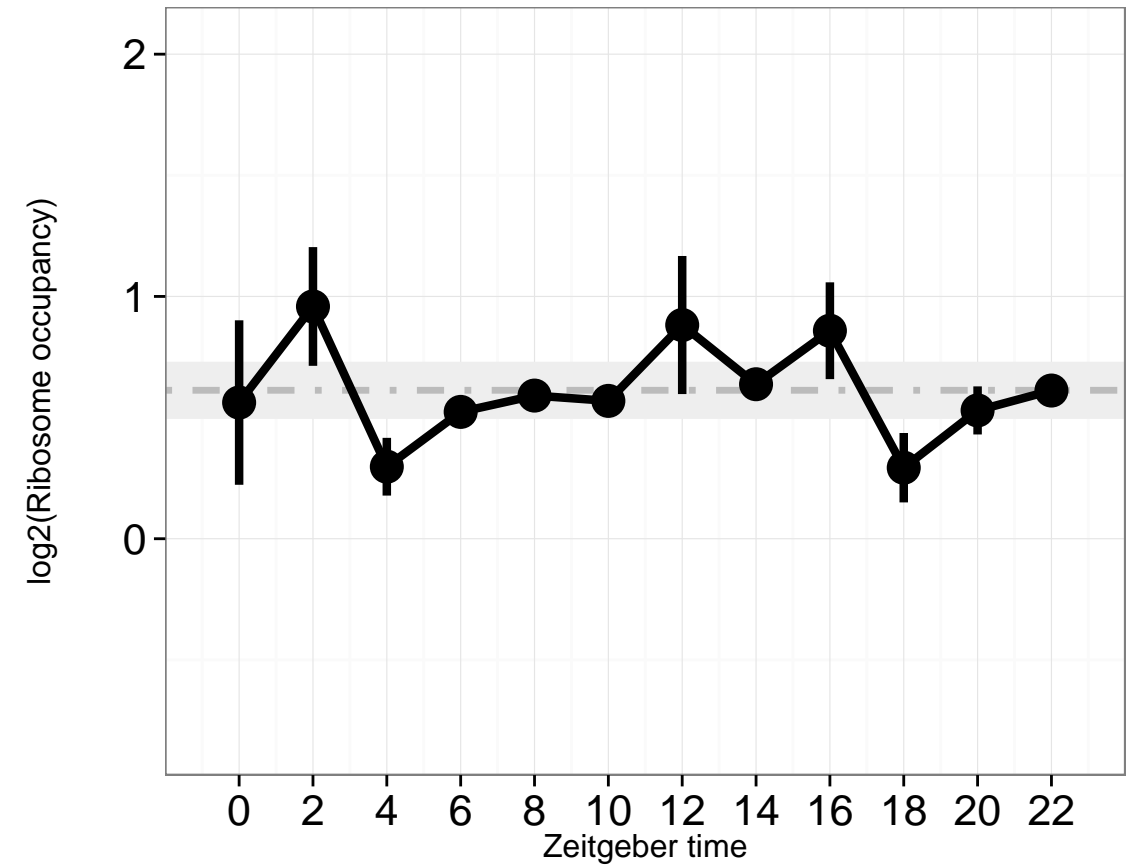

Supplement: Supplementary file 3935 [file 1]

## Rreb1

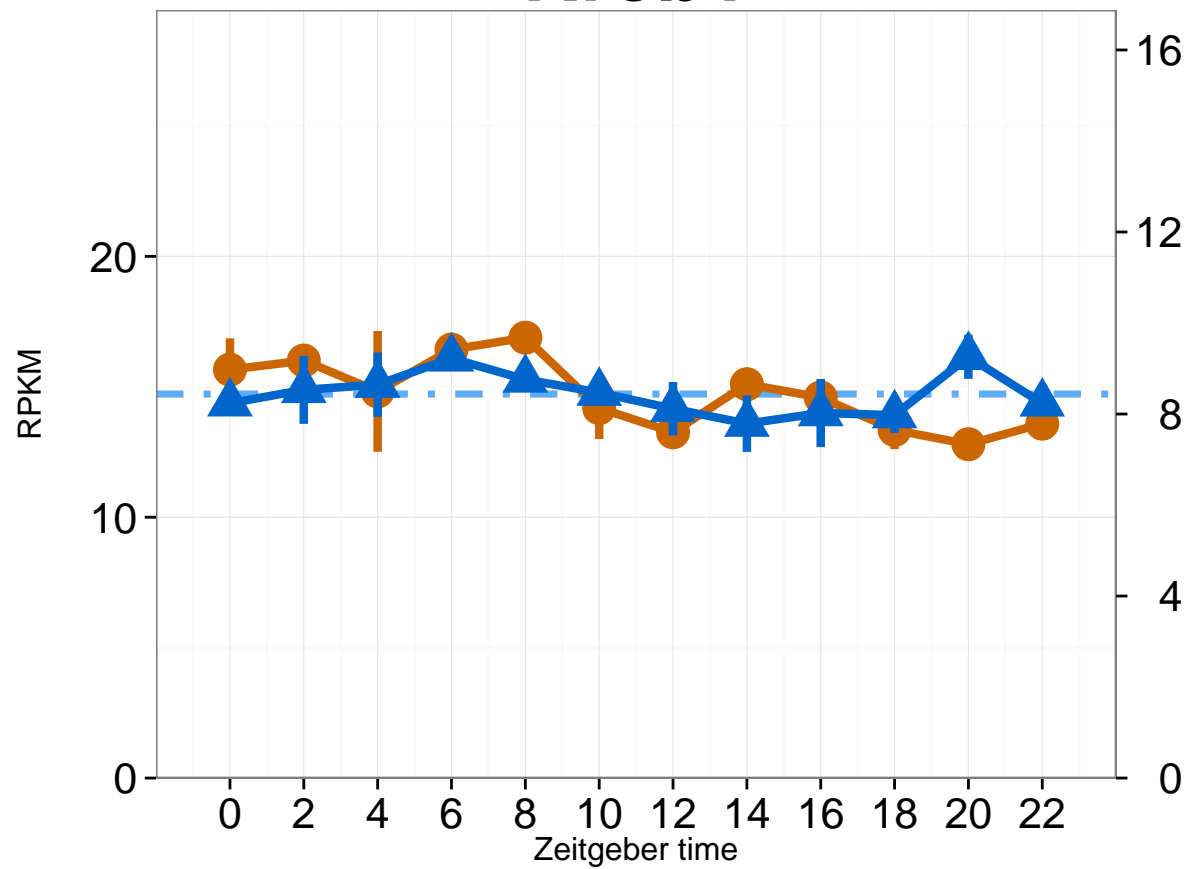

## Rreb1

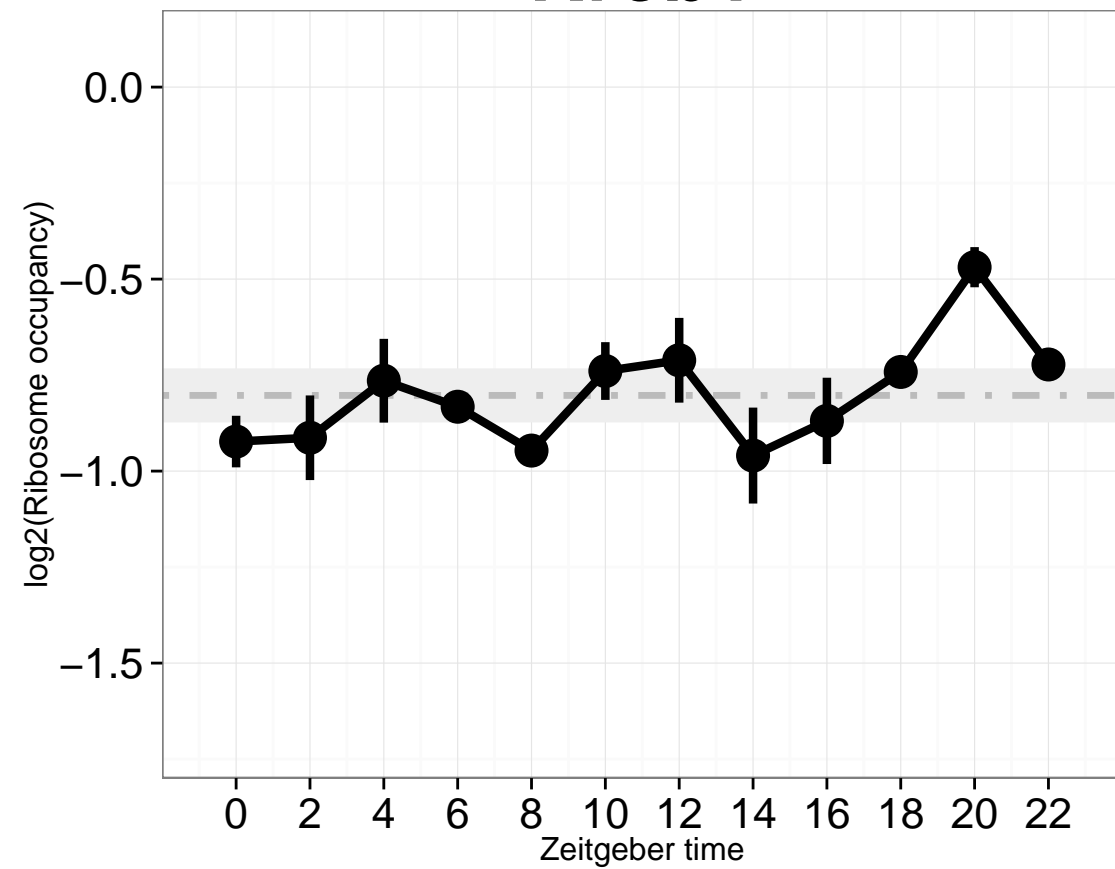

Supplement: Supplementary file 3936 [file 1]

## Evi5l

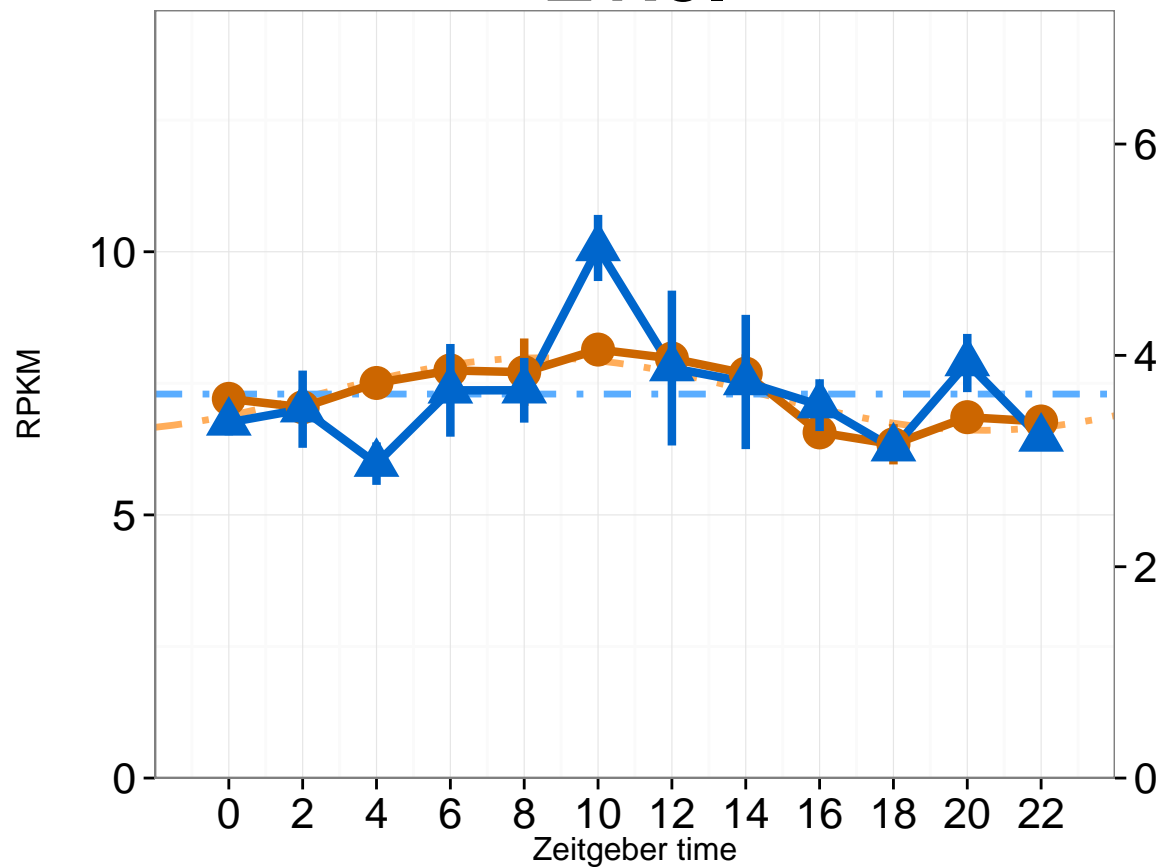

## Evi5l

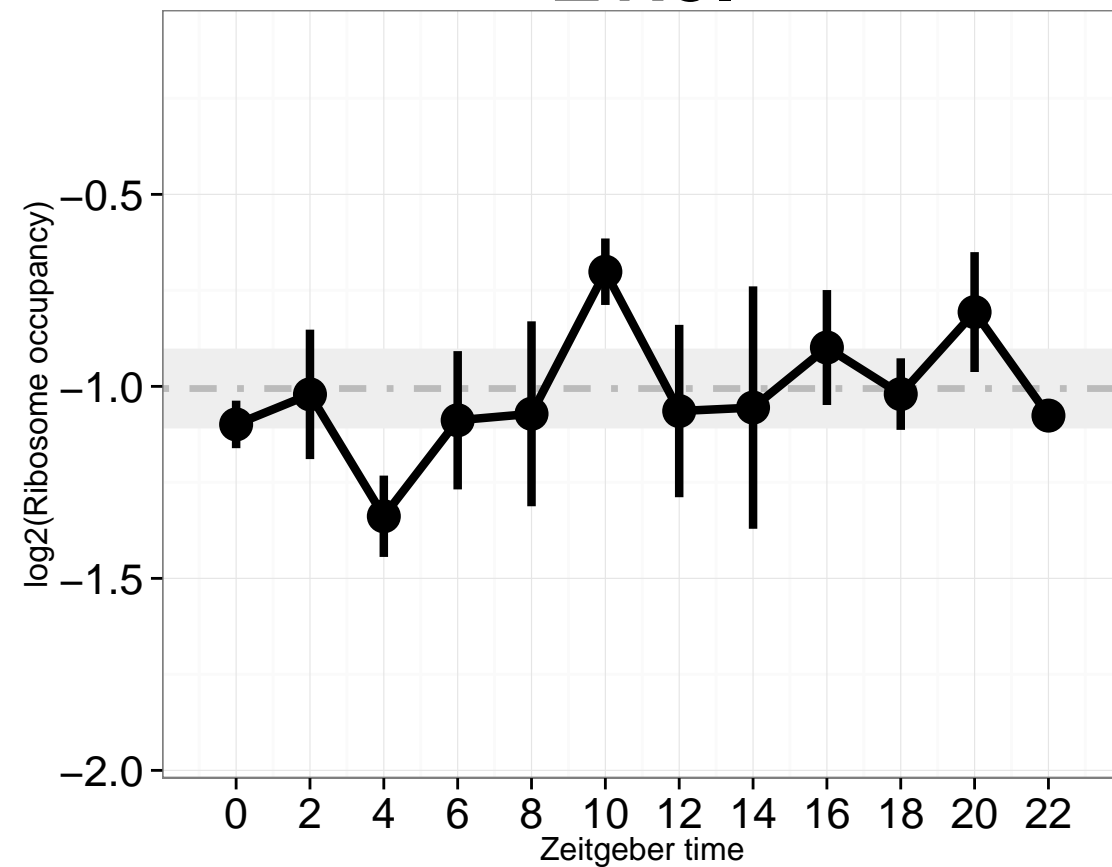

Supplement: Supplementary file 3937 [file 1]

## Pcca

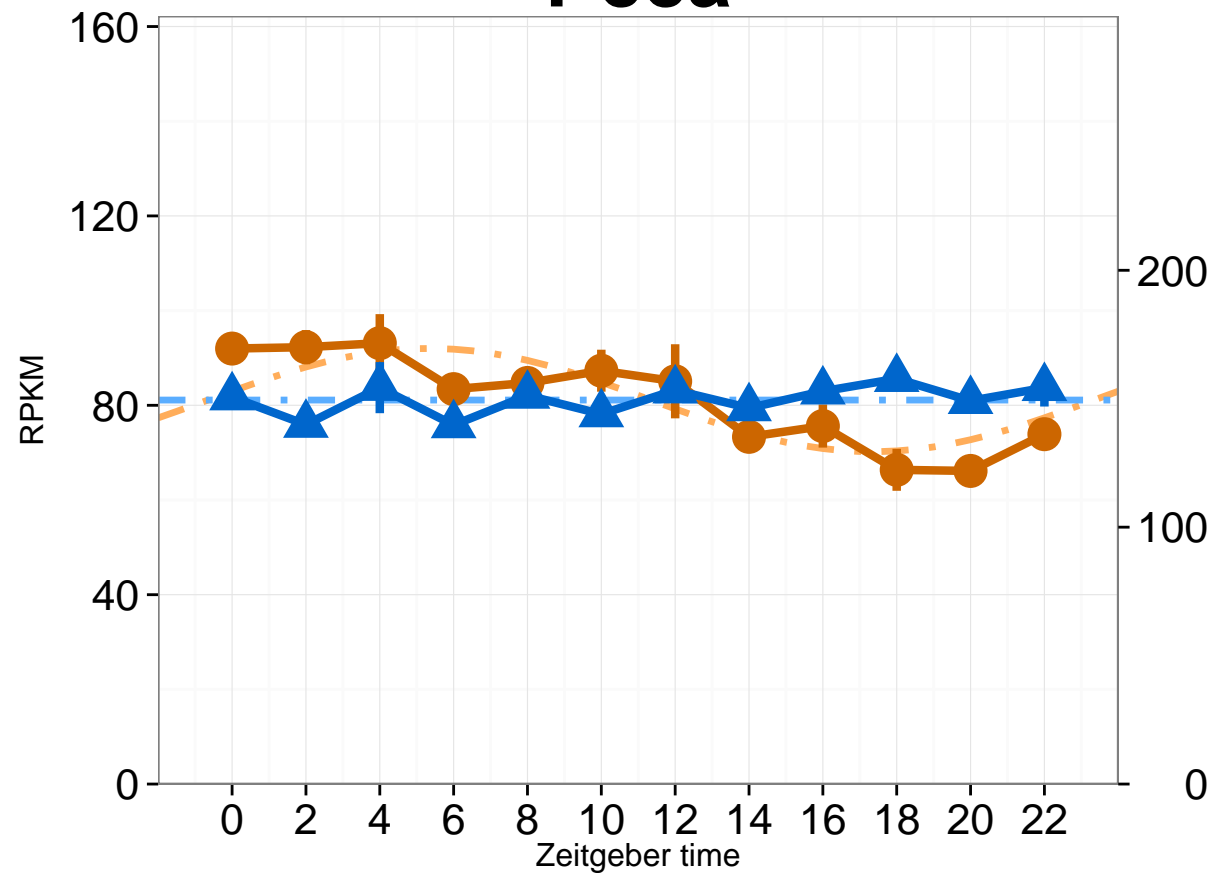

## Pcca

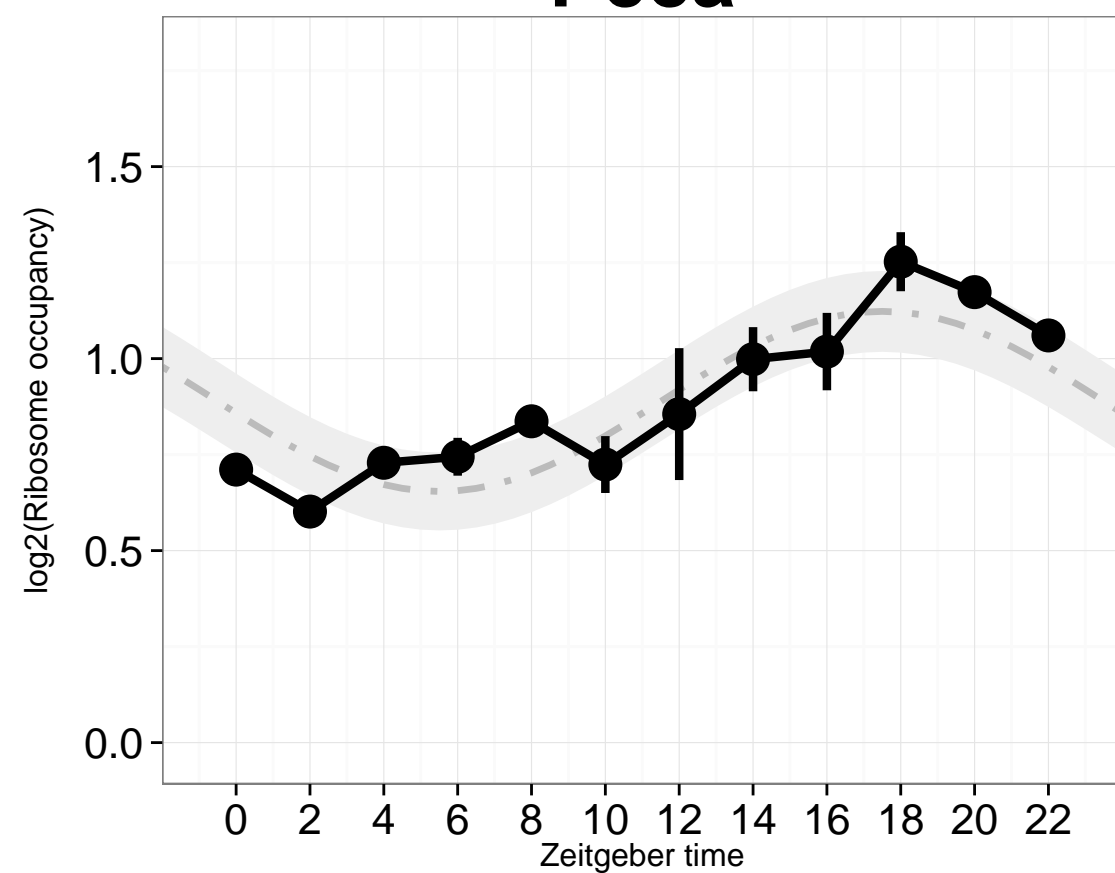

Supplement: Supplementary file 3938 [file 1]

# Abcg3

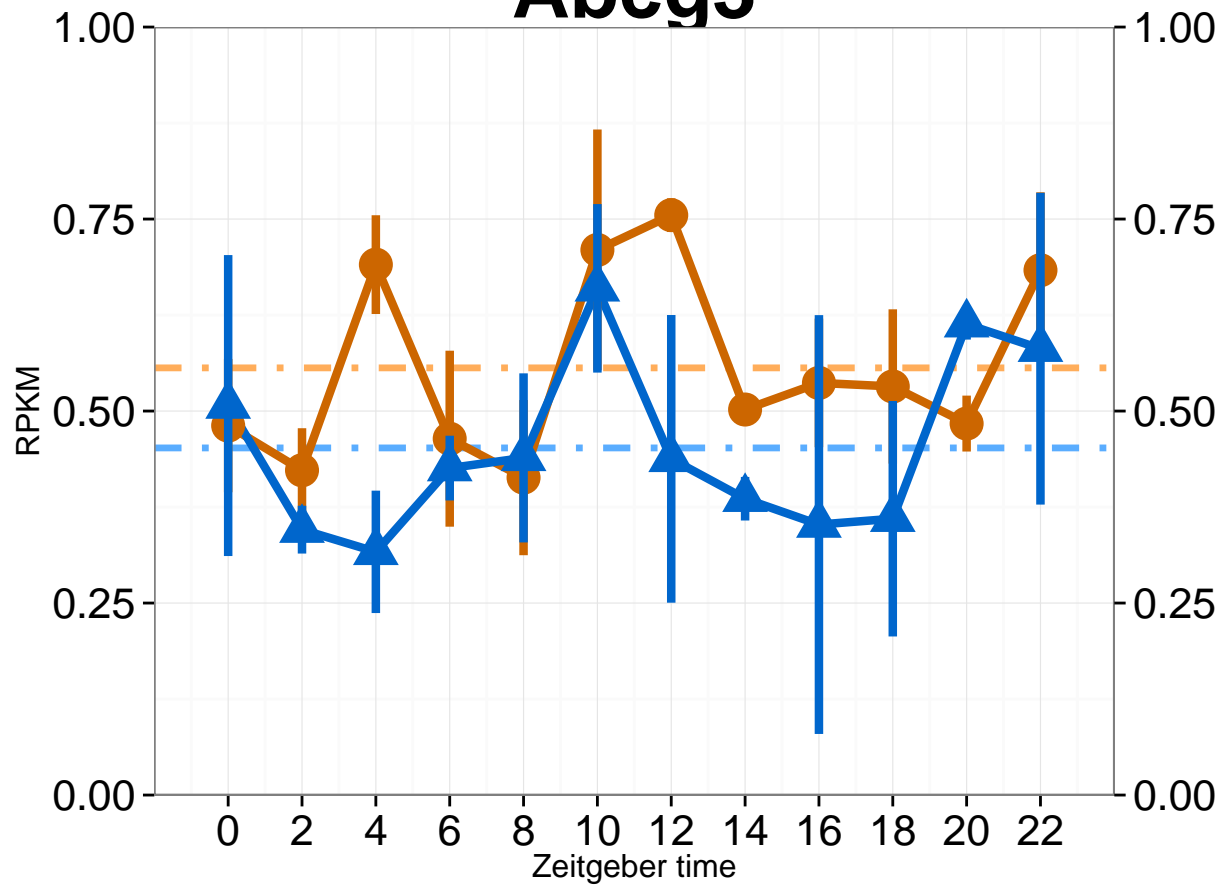

# Abcg3

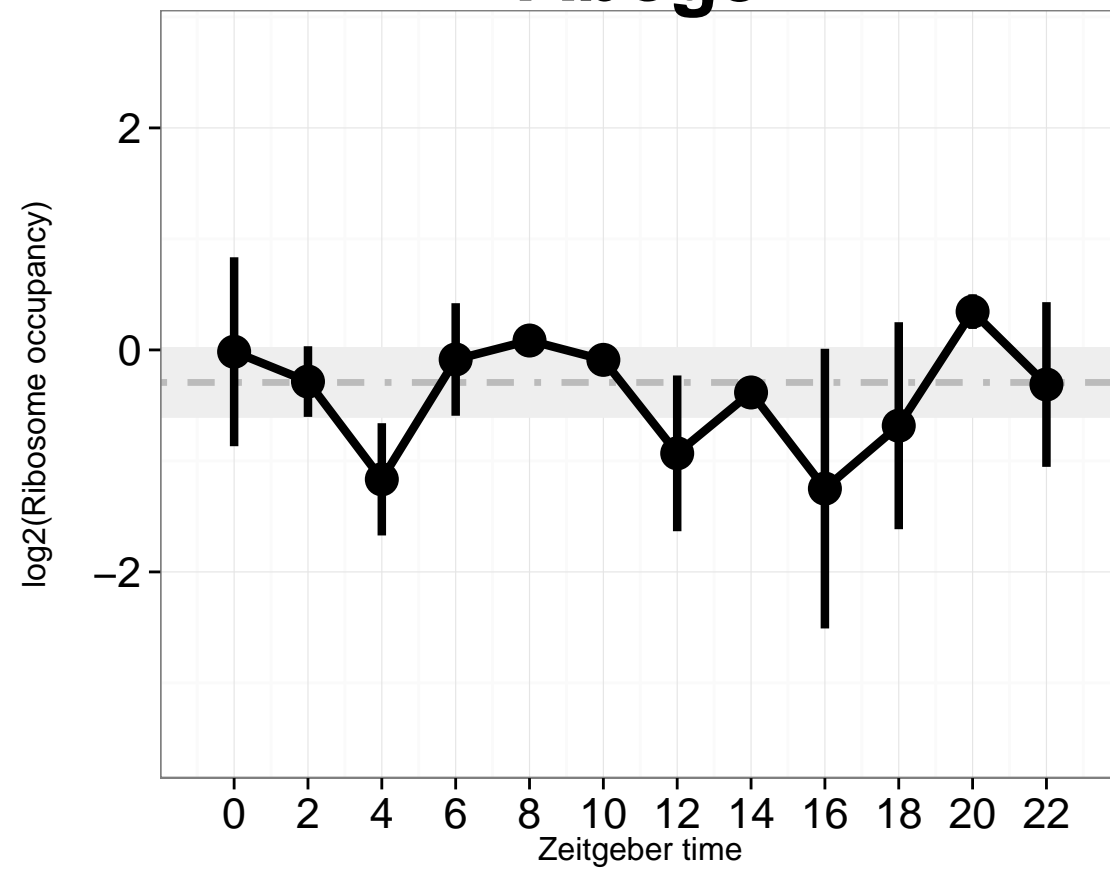

Supplement: Supplementary file 3939 [file 1]

## Gkap1

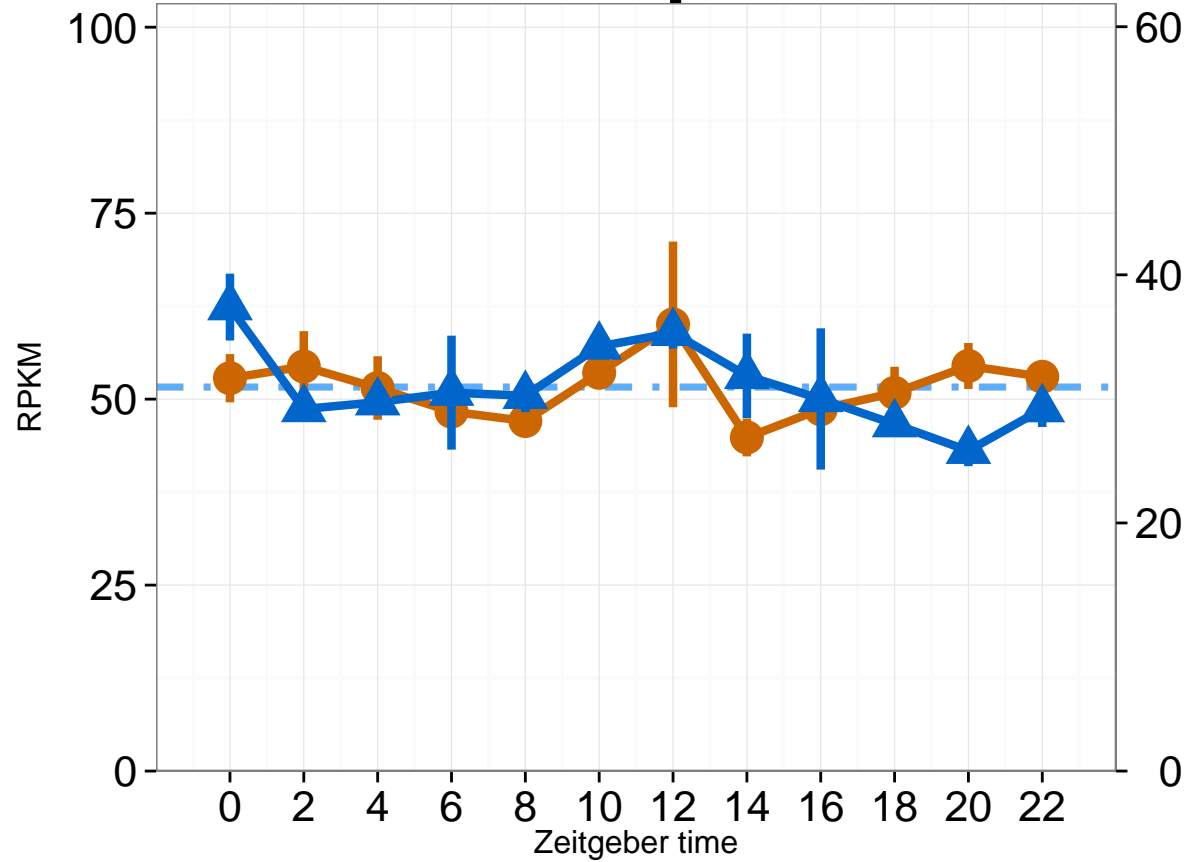

## Gkap1

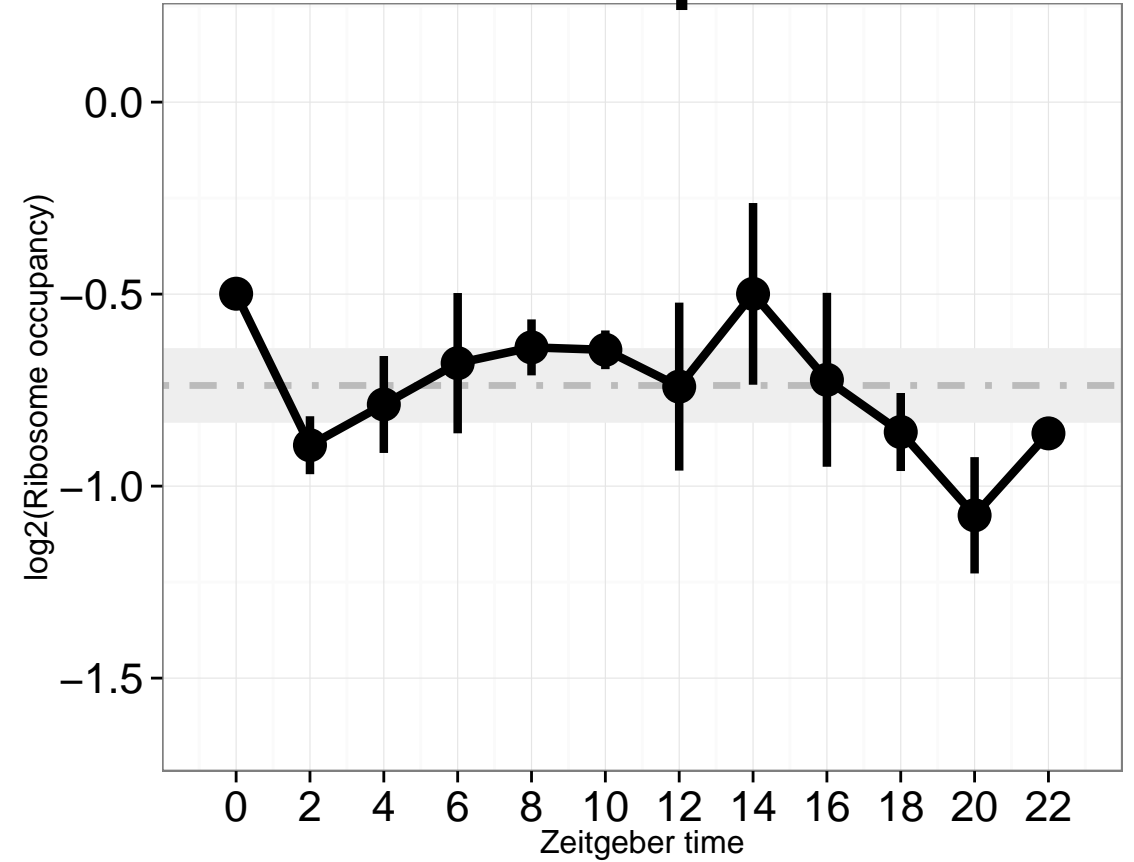

Supplement: Supplementary file 3940 [file 1]

# Igbp1

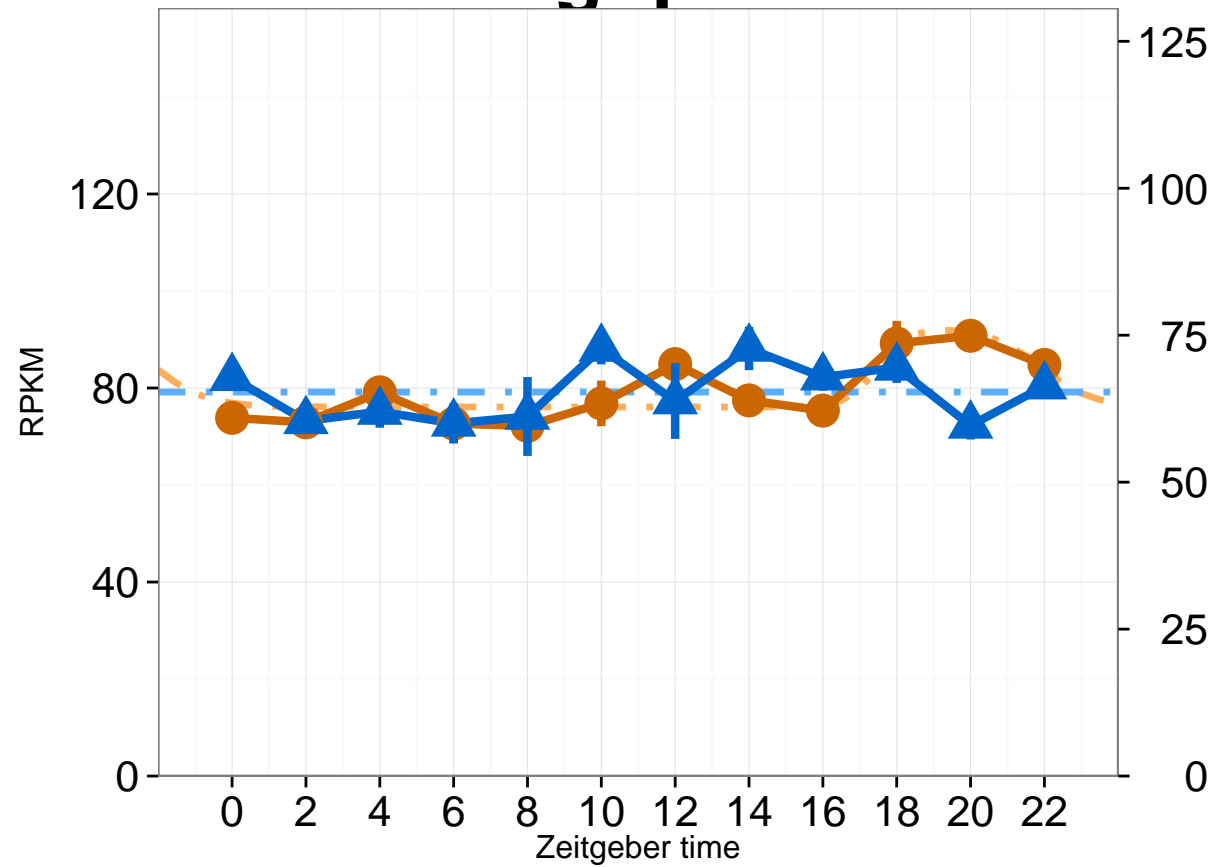

# Igbp1

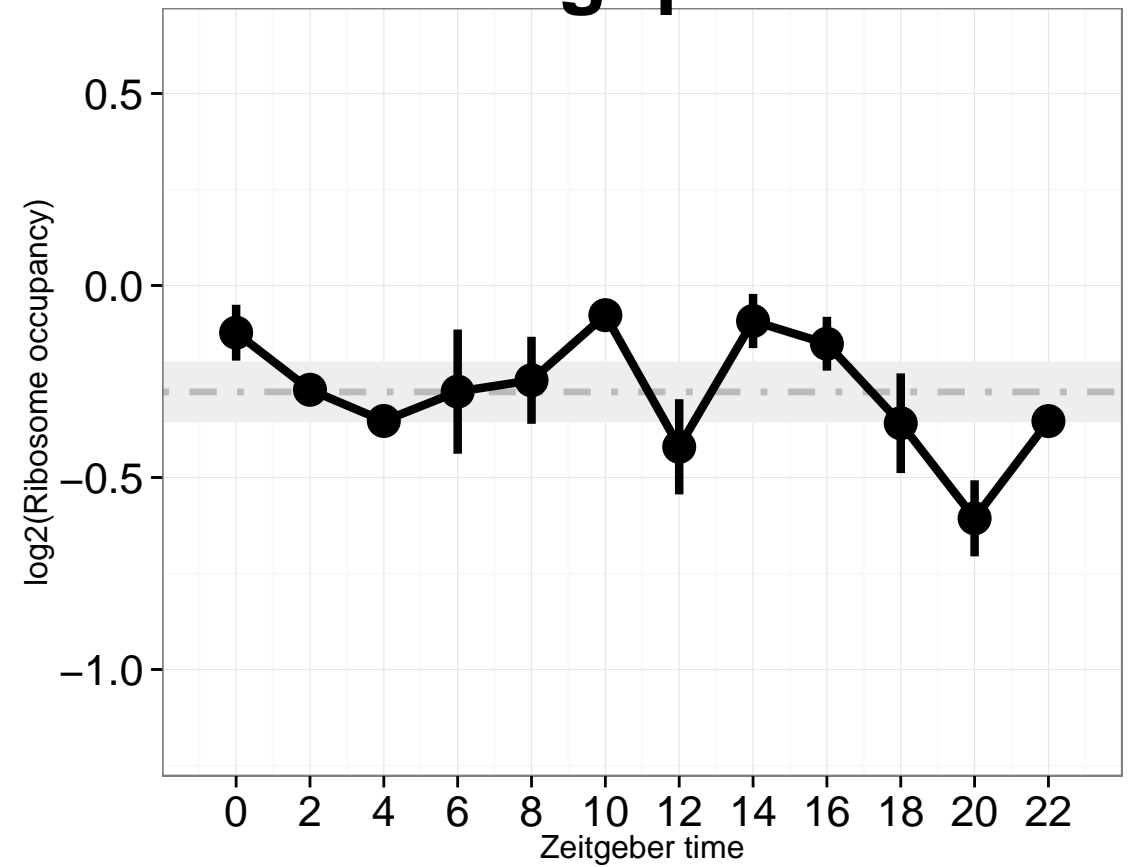

Supplement: Supplementary file 3941 [file 1]

# Slc22a5

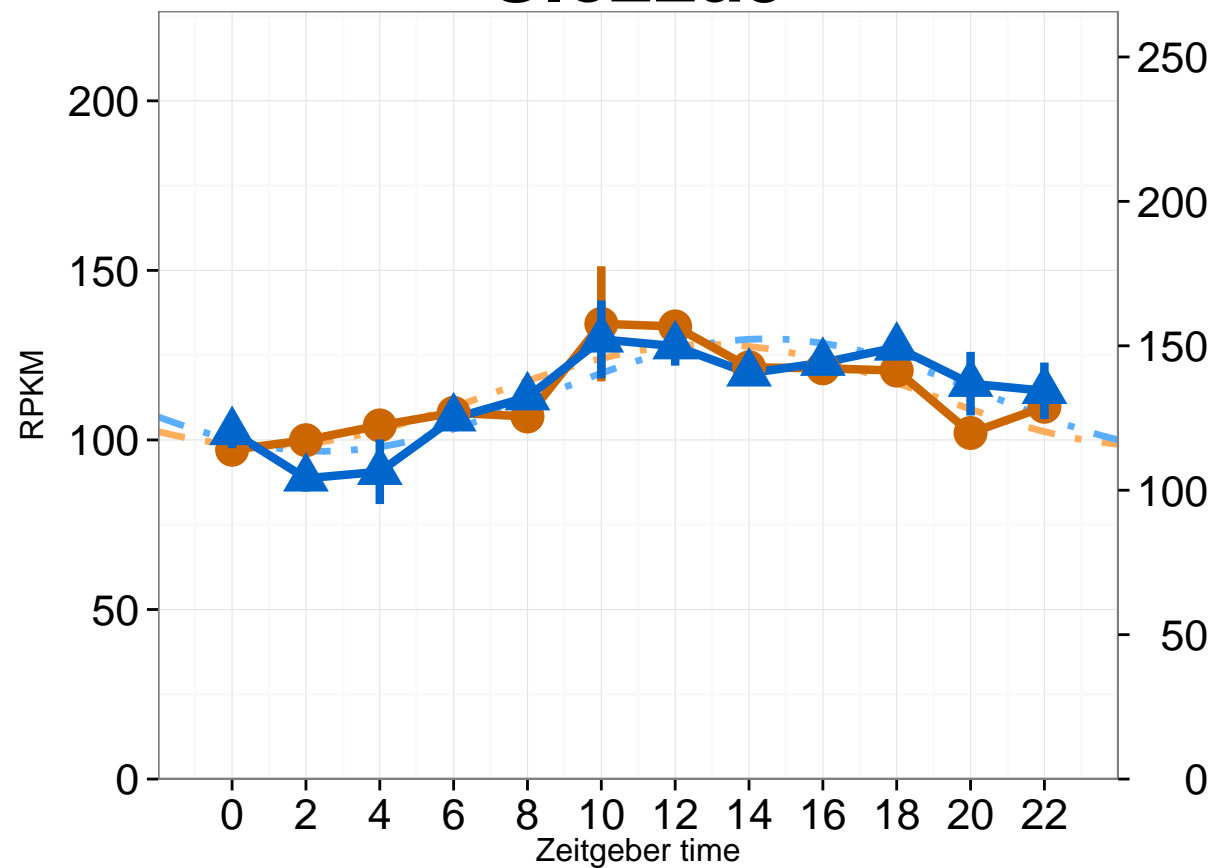

# Slc22a5

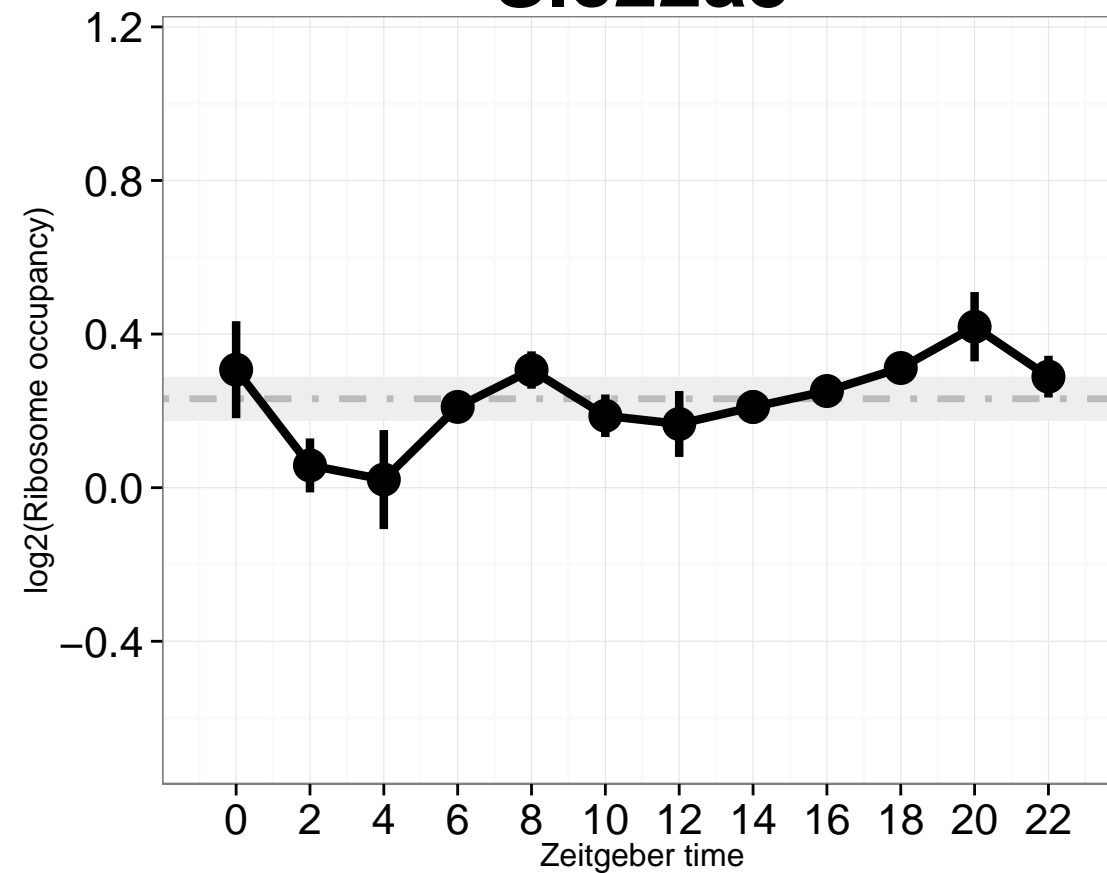

Supplement: Supplementary file 3942 [file 1]

# Pde9a

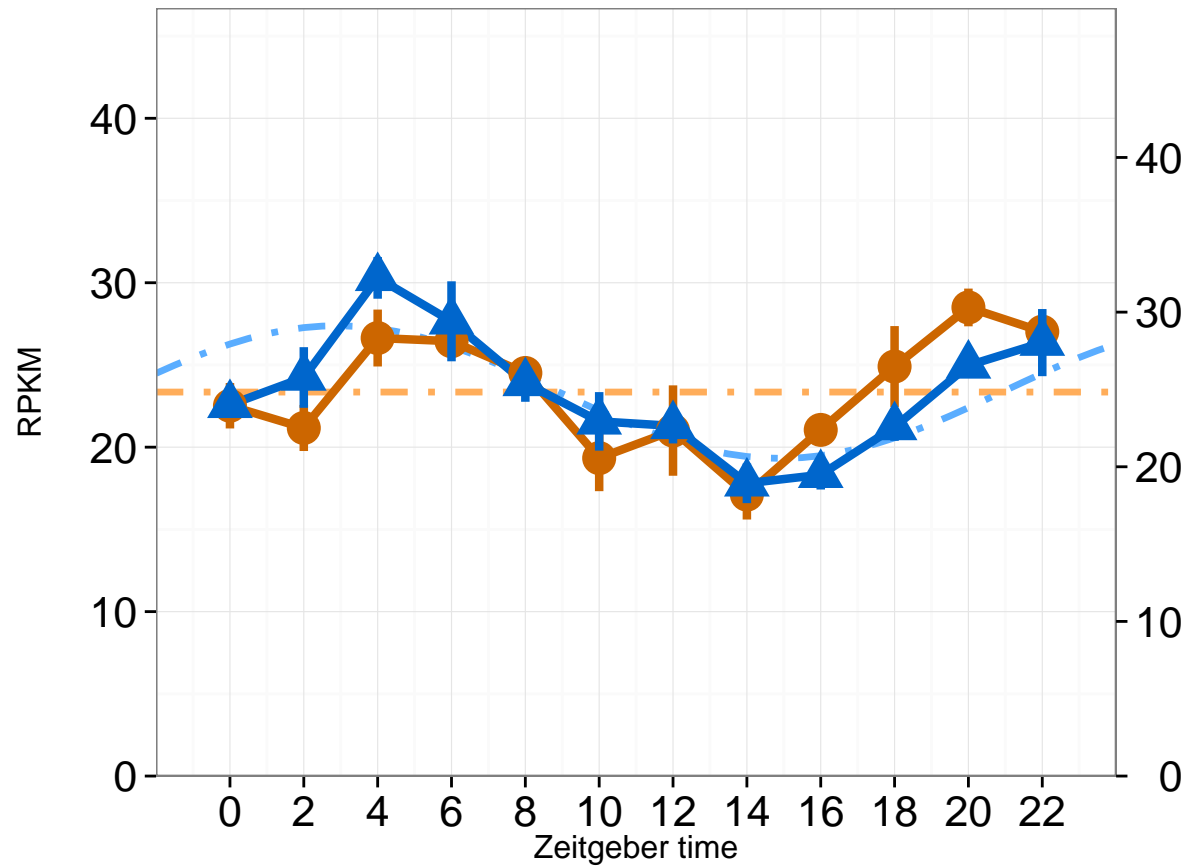

# Pde9a

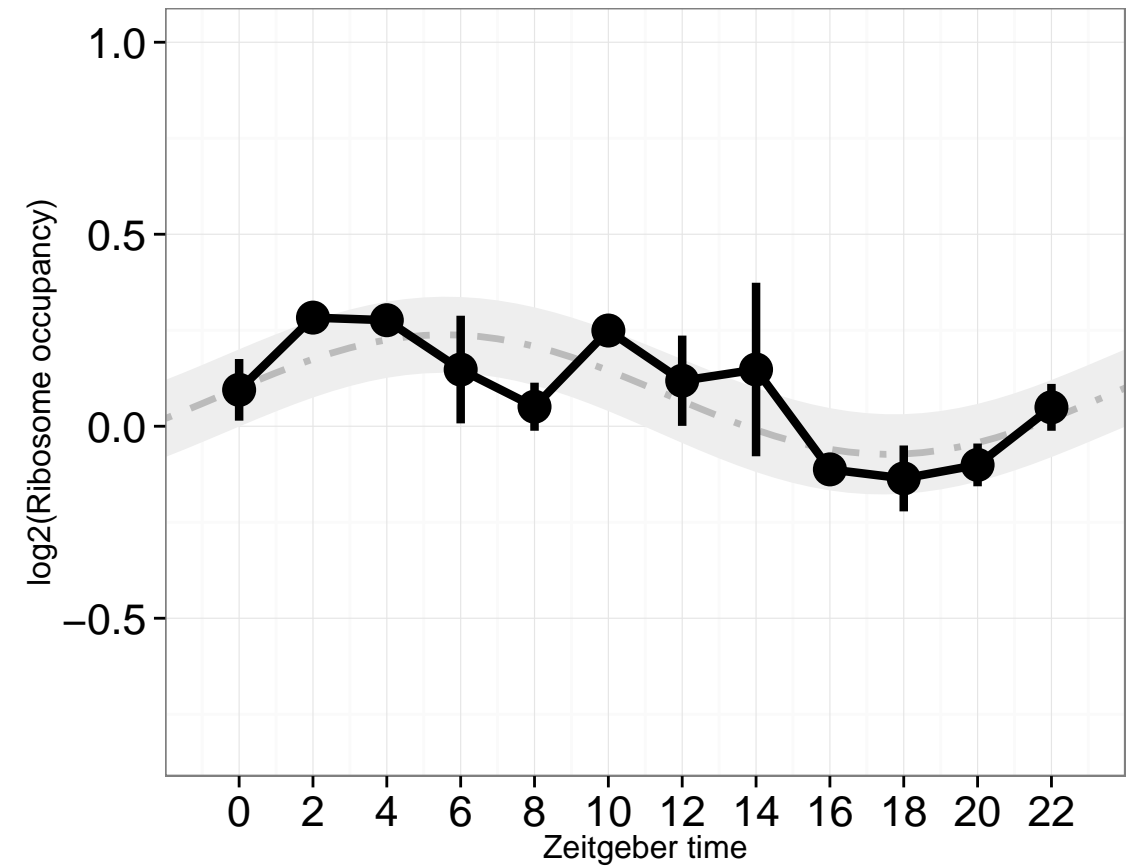

Supplement: Supplementary file 3943 [file 1]

# Pelp1

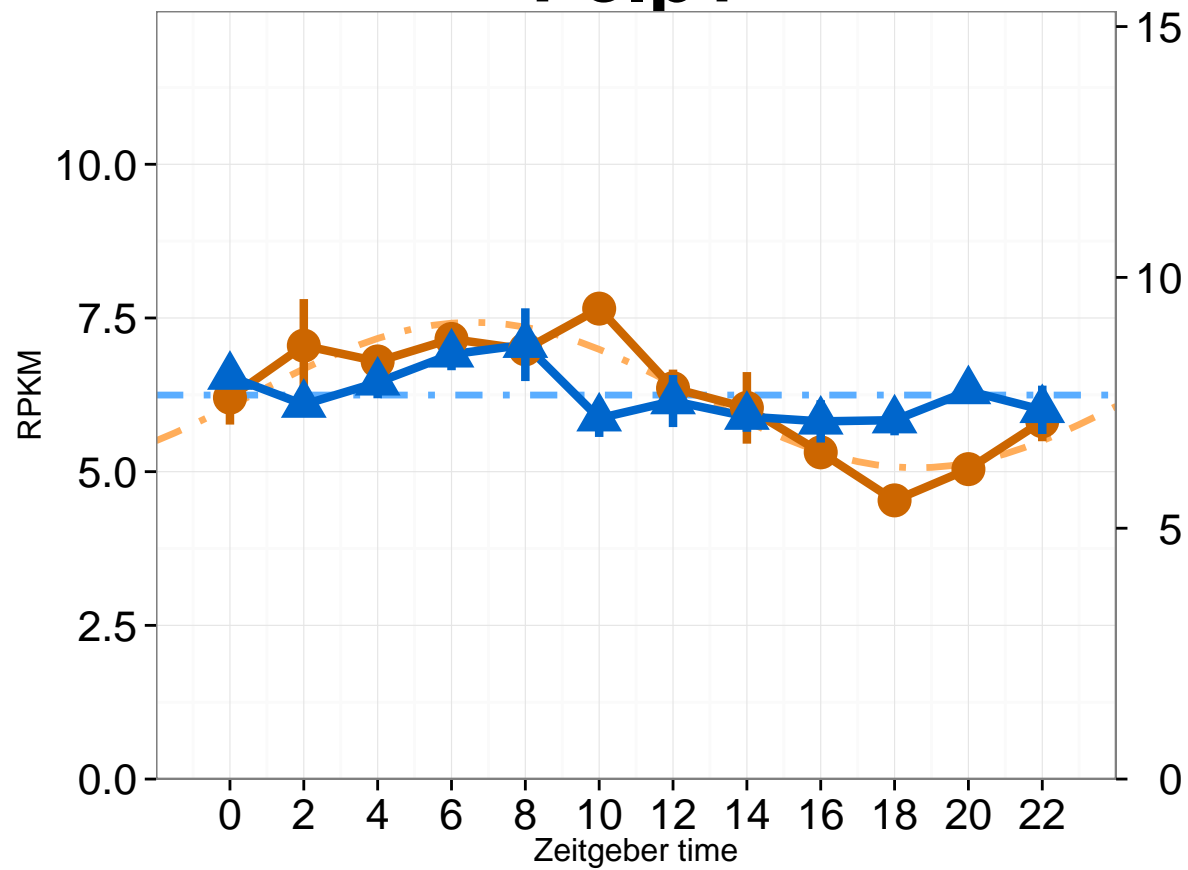

# Pelp1

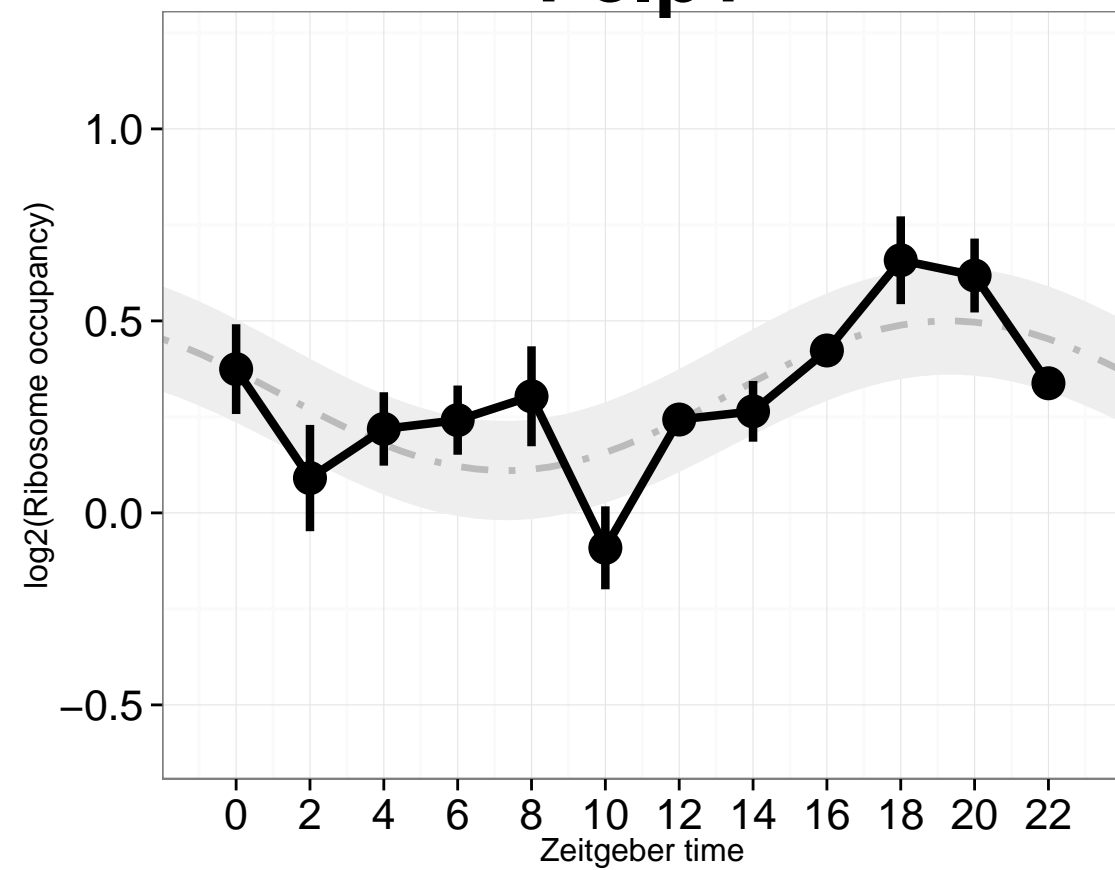

Supplement: Supplementary file 3944 [file 1]

# Lrrc48

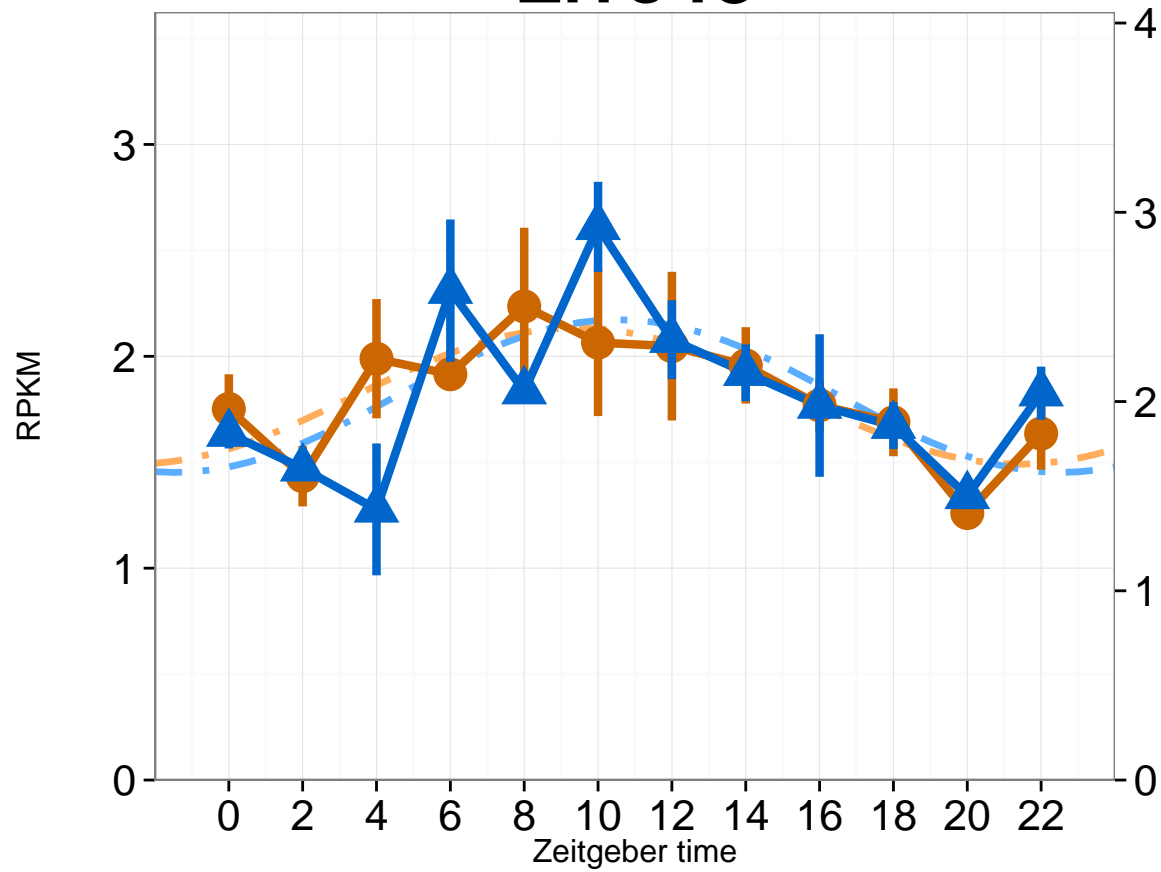

# Lrrc48

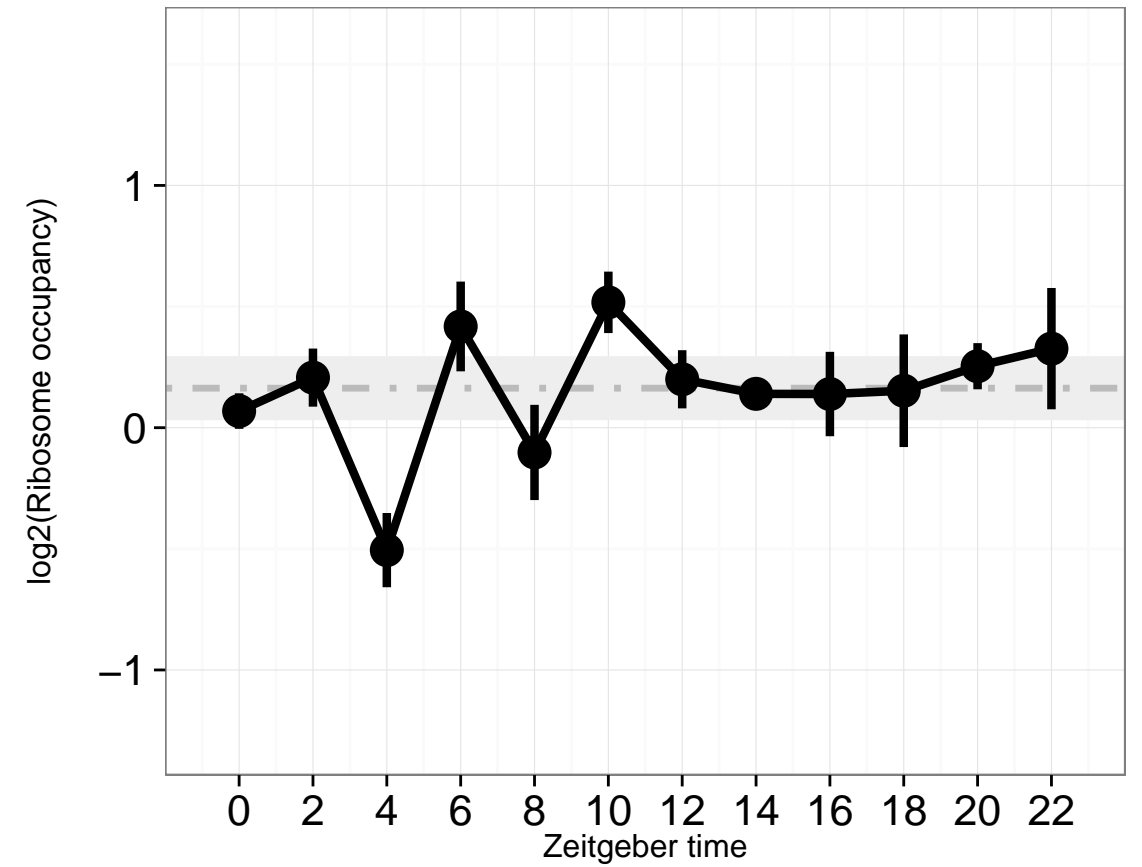

Supplement: Supplementary file 3945 [file 1]

## Mon1b

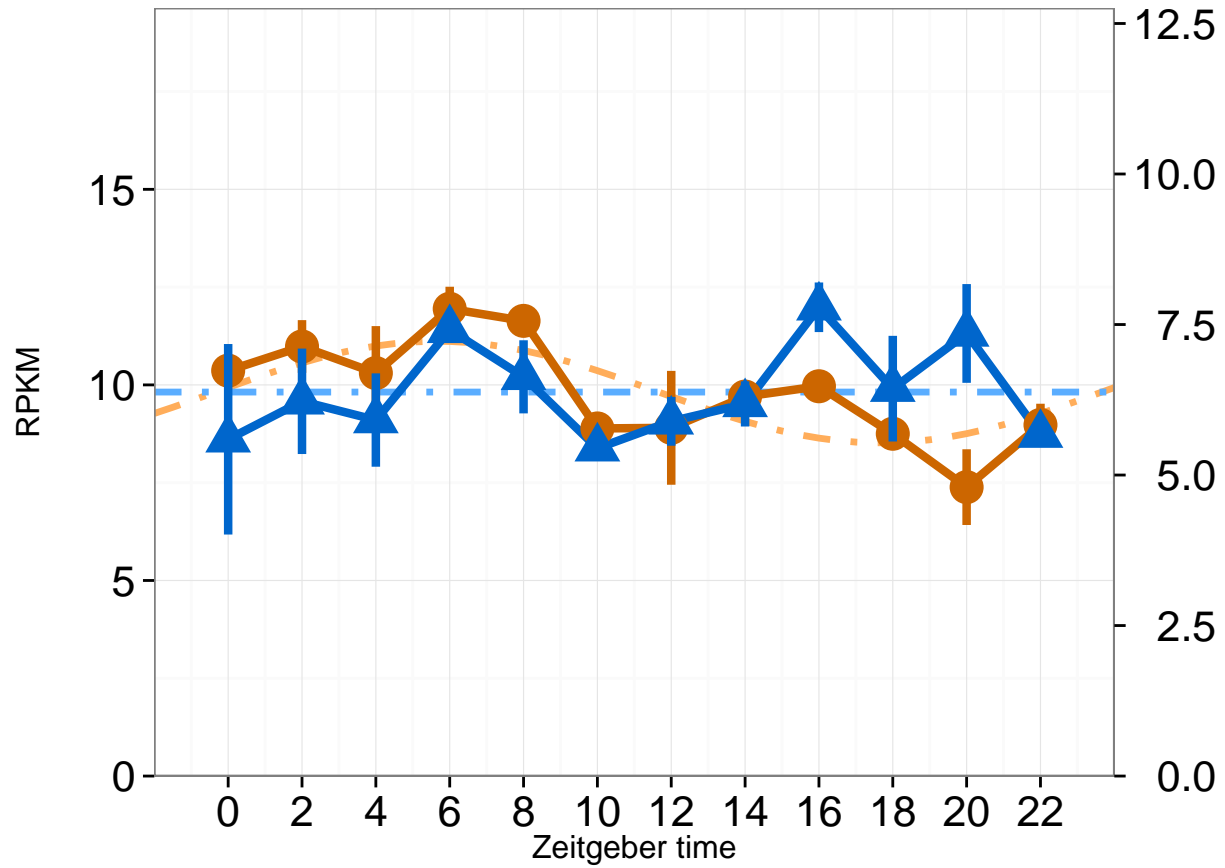

## Mon1b

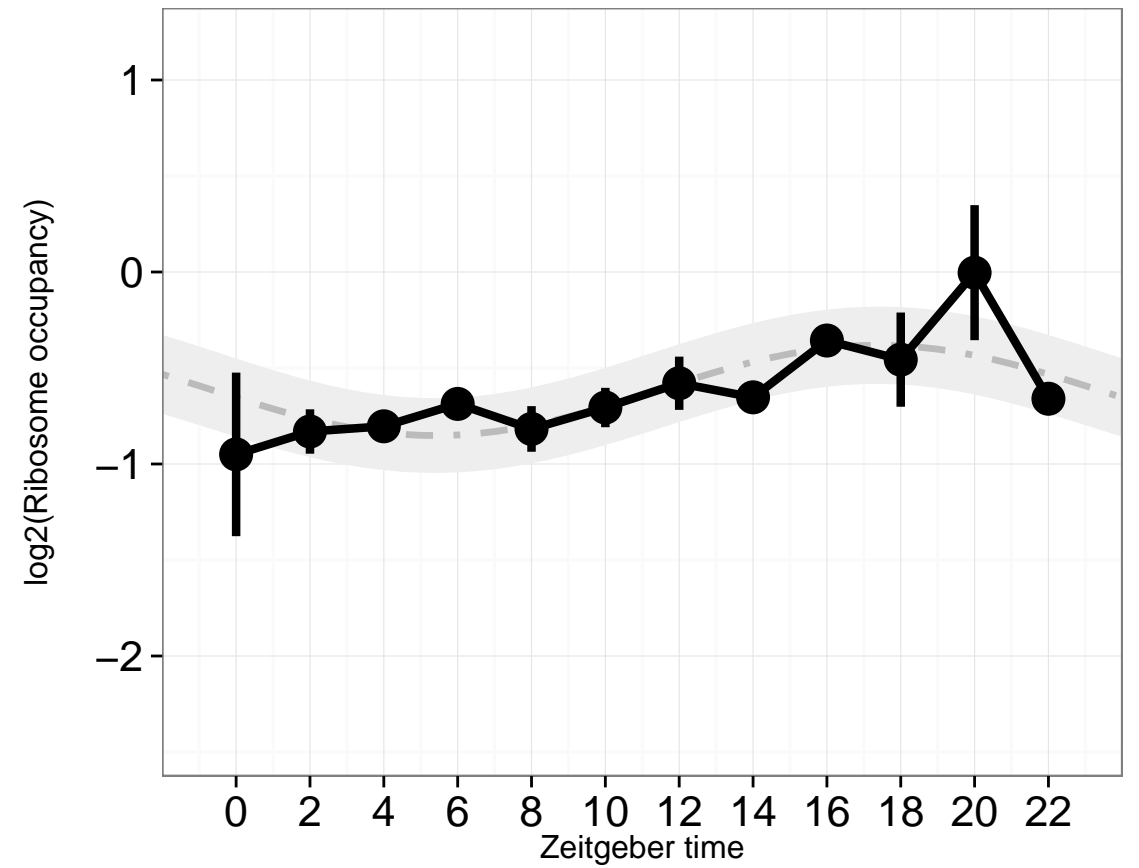

Supplement: Supplementary file 3946 [file 1]

## Foxs1

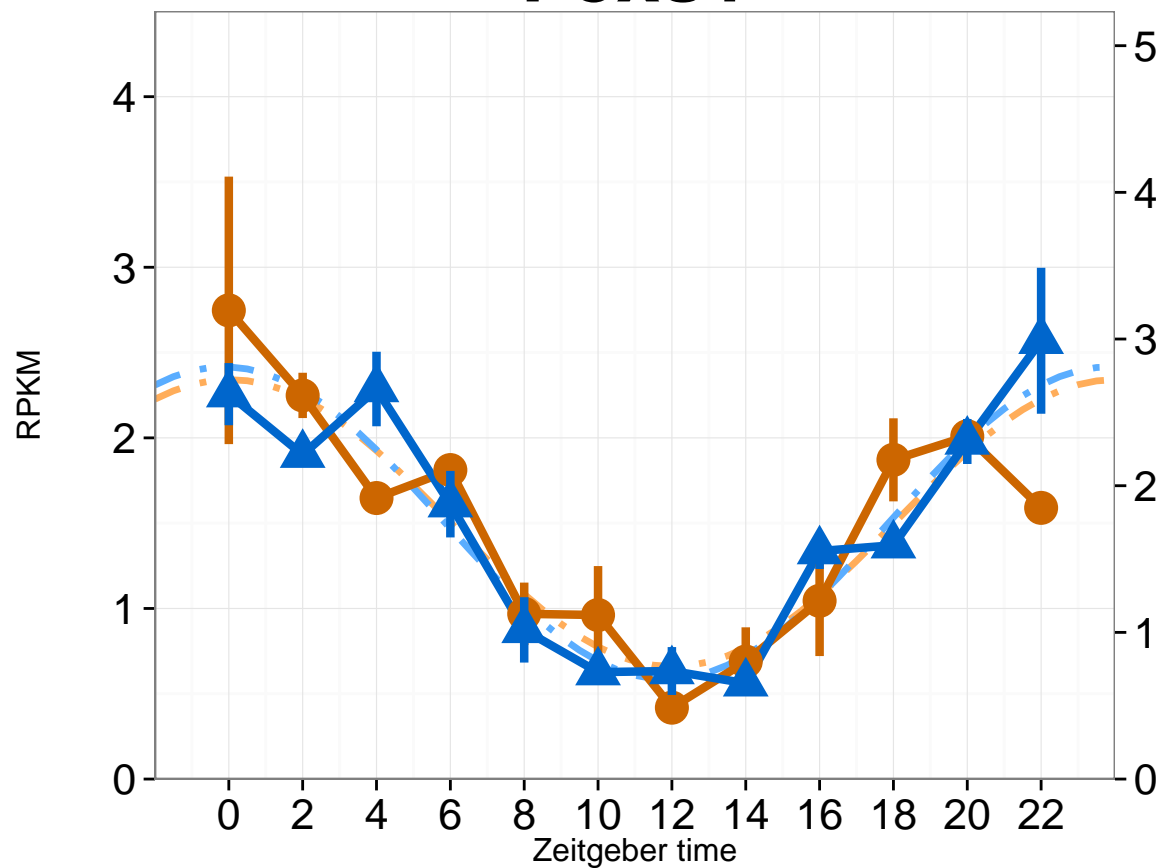

## Foxs1

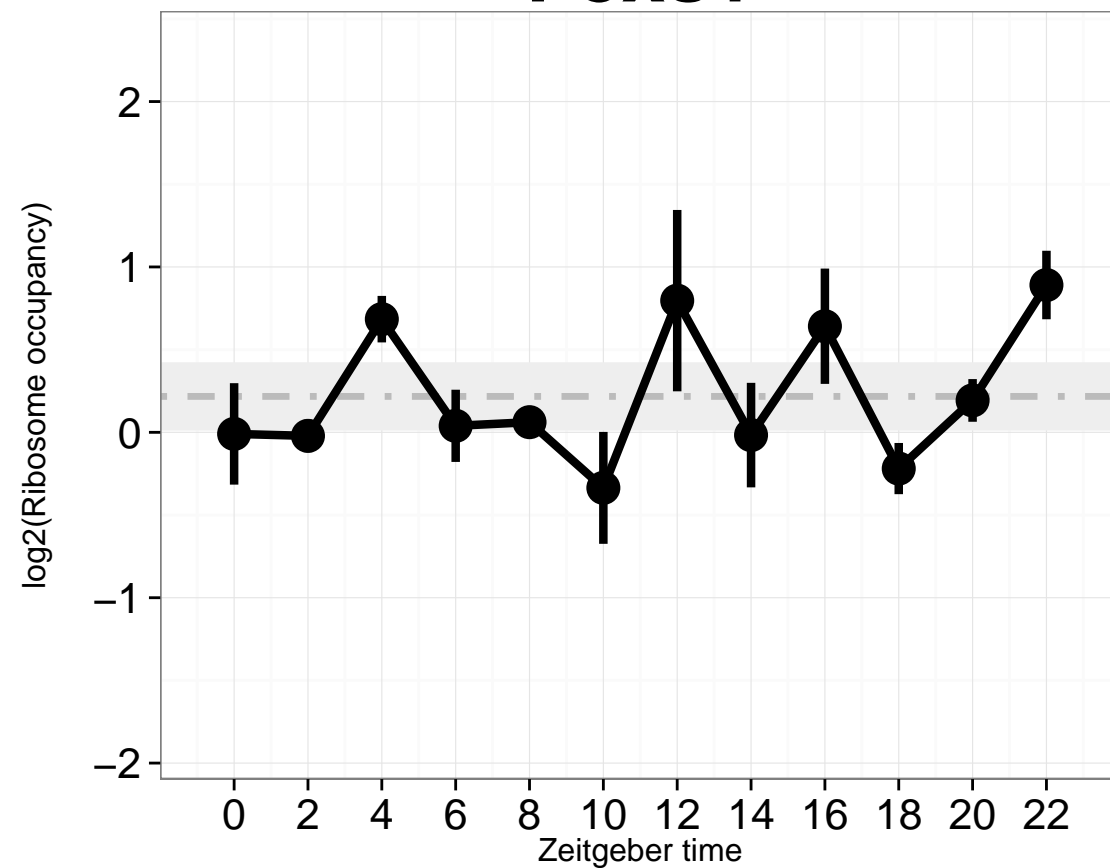

Supplement: Supplementary file 3947 [file 1]

## Nfya

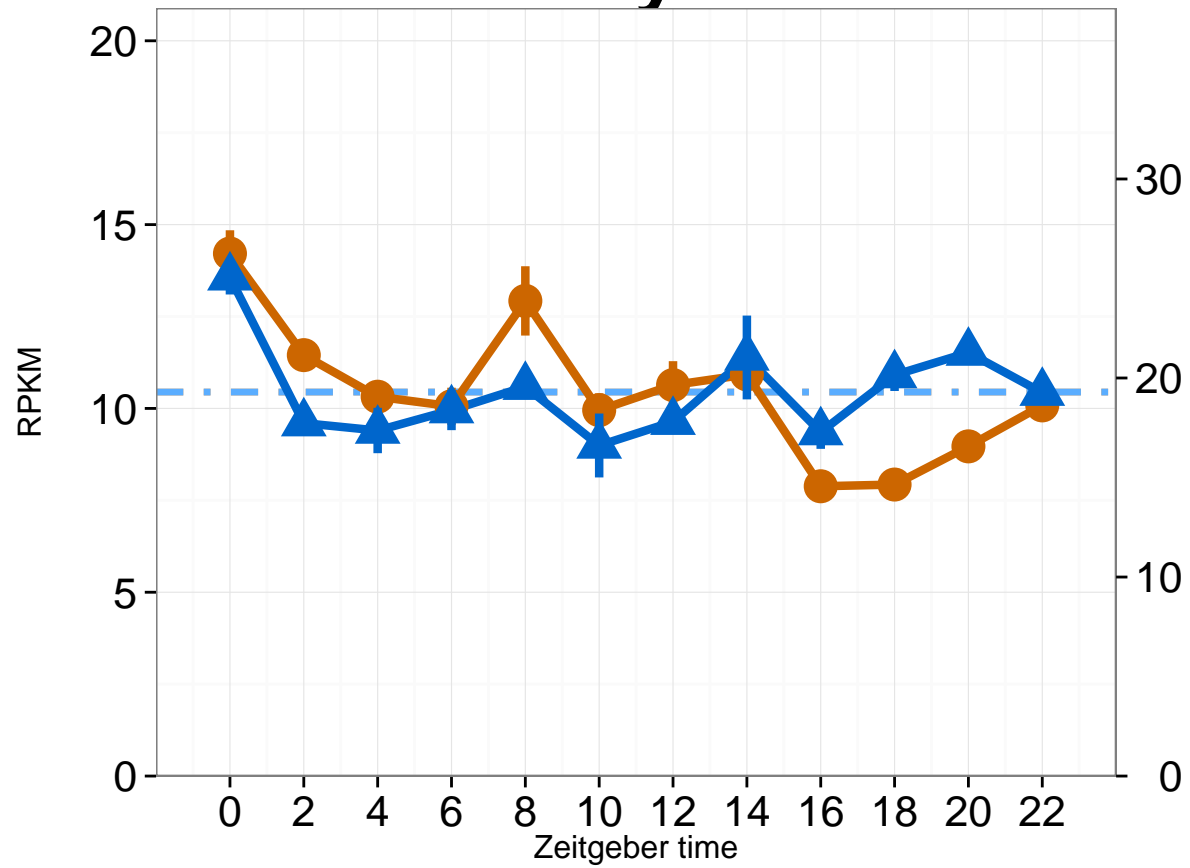

## Nfya

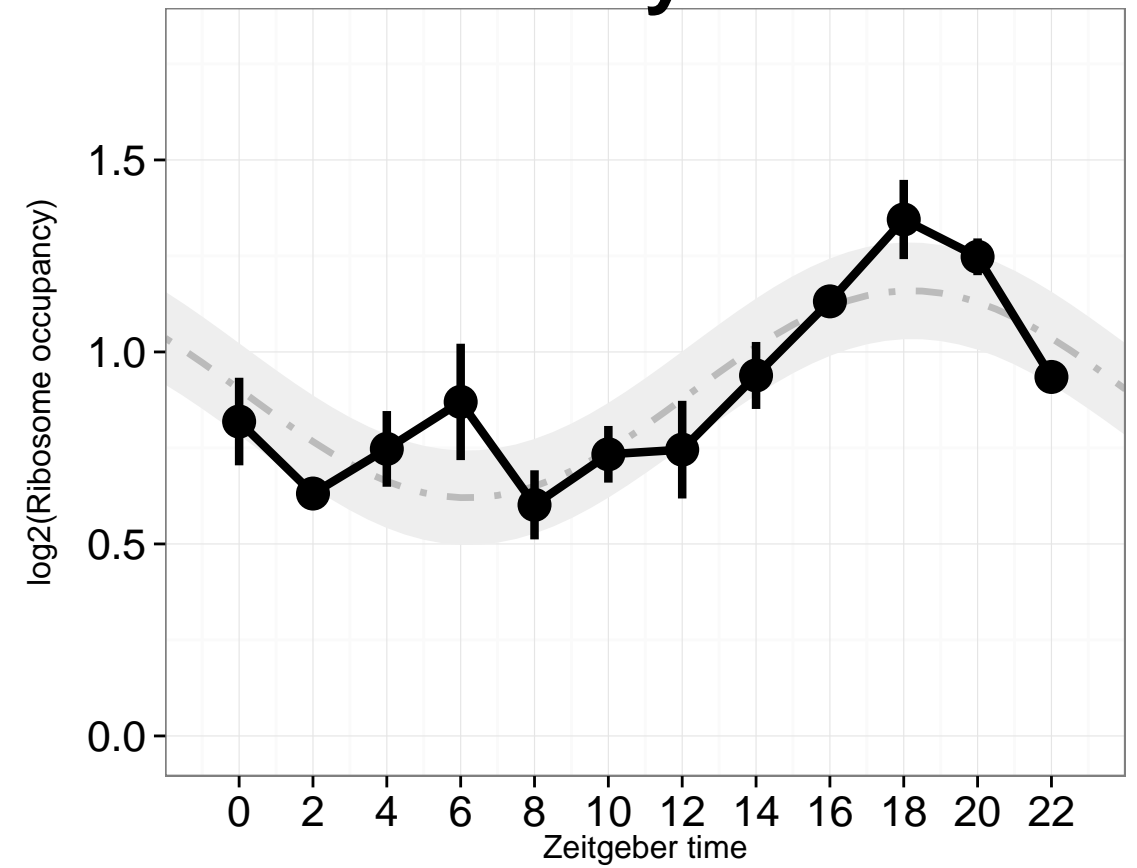

Supplement: Supplementary file 3948 [file 1]

## Gm9978

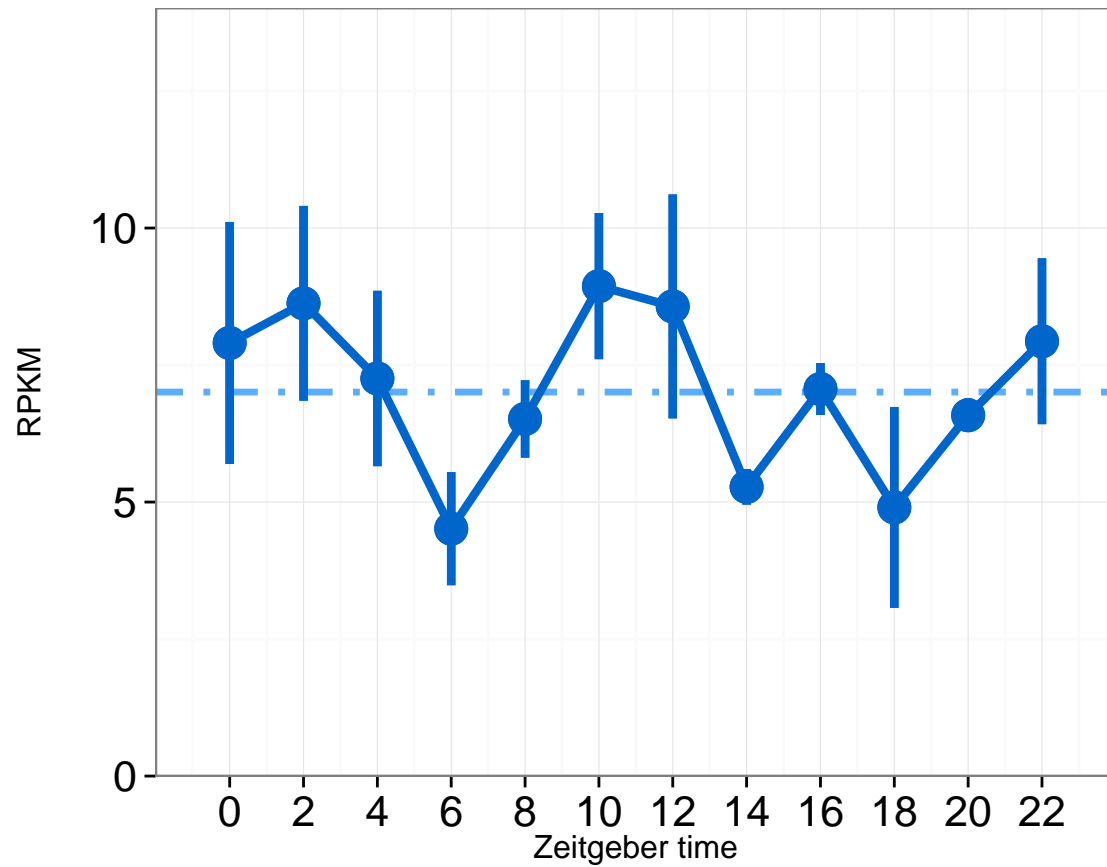

## Gm9978 log2(Ribosome occupanc

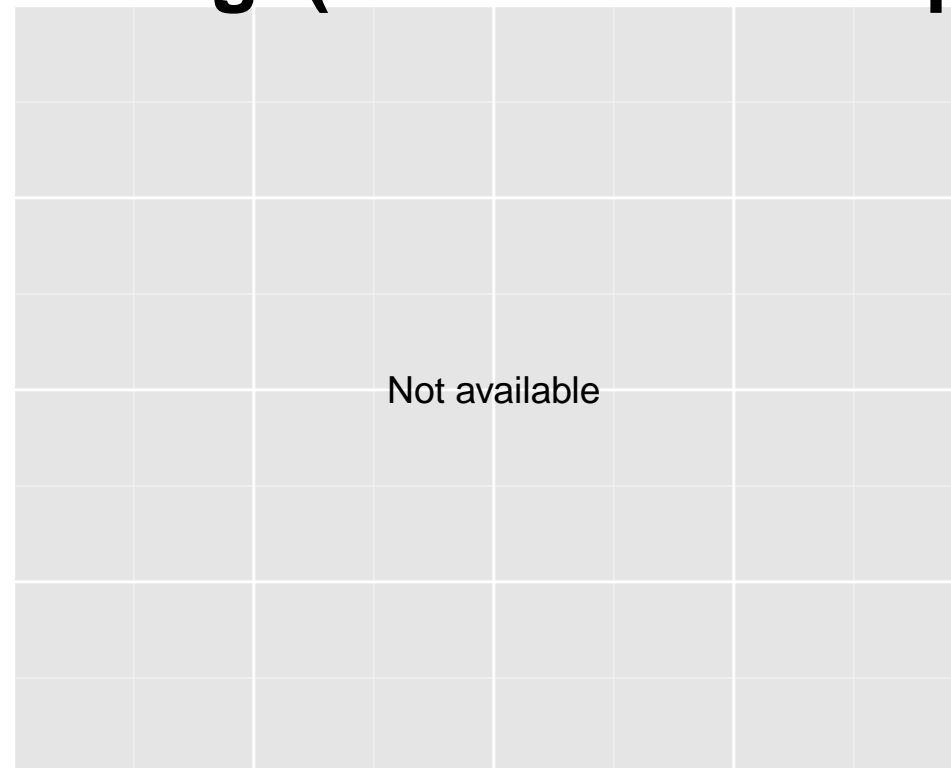

Supplement: Supplementary file 3949 [file 1]

## Zfp853

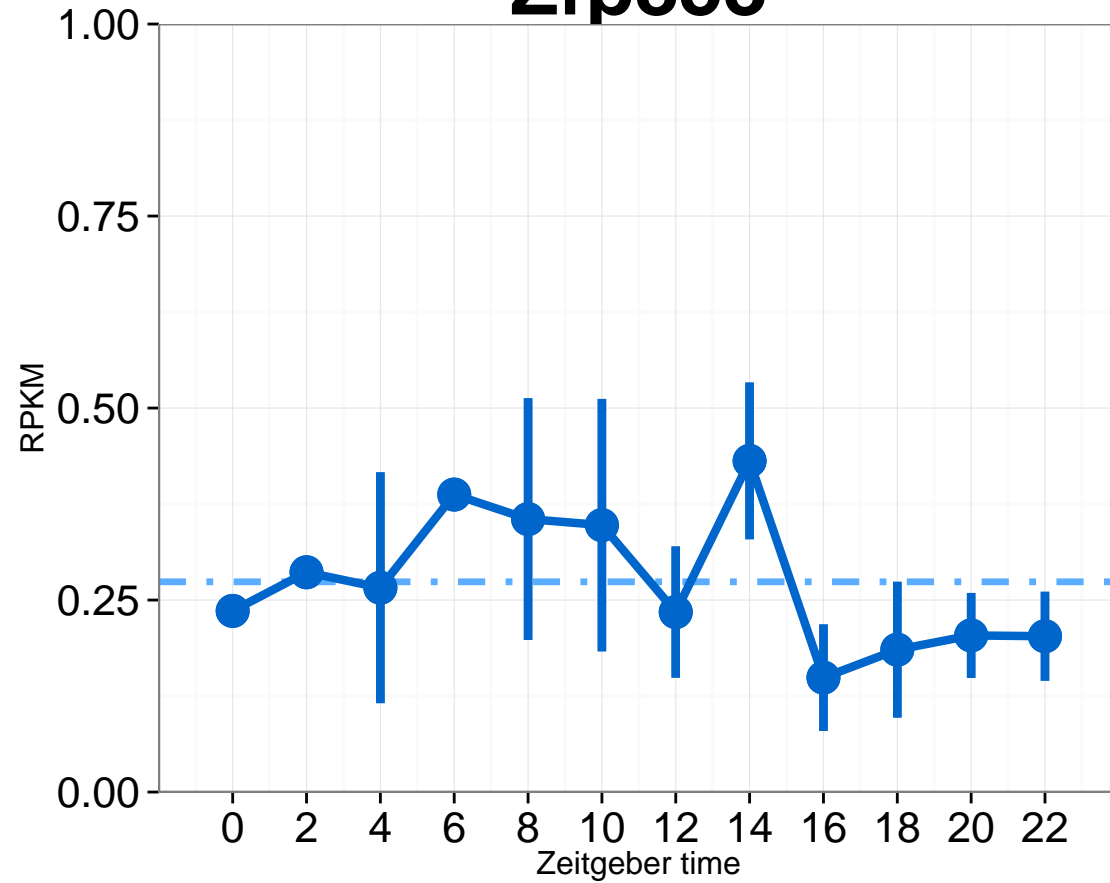

## Zfp853 log2(Ribosome occupancy

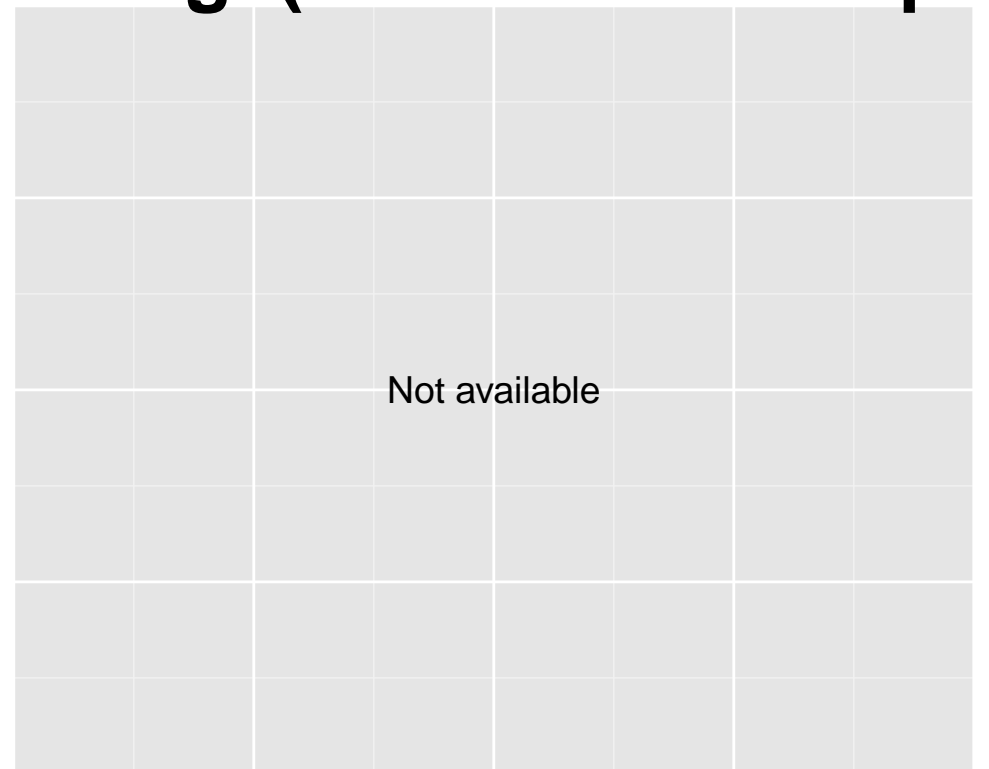

Supplement: Supplementary file 3950 [file 1]

## Cd226

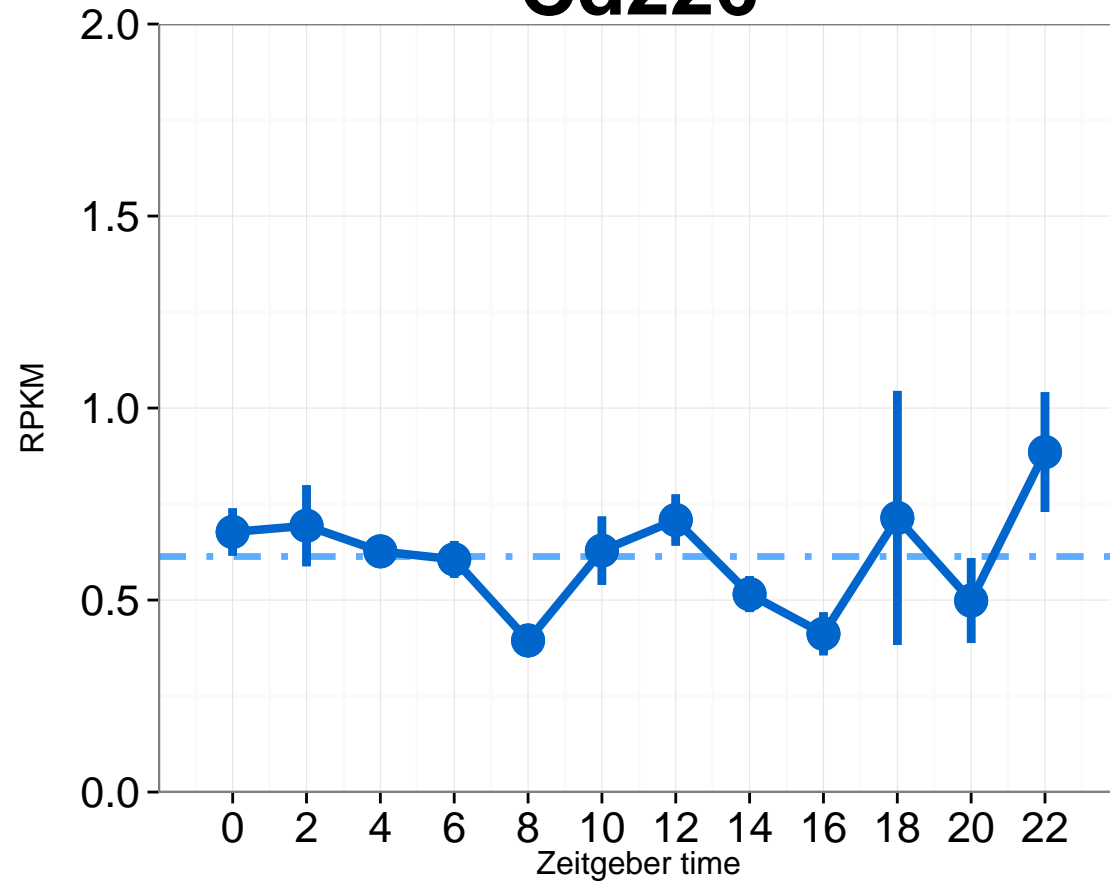

## Cd226 log2(Ribosome occupancy

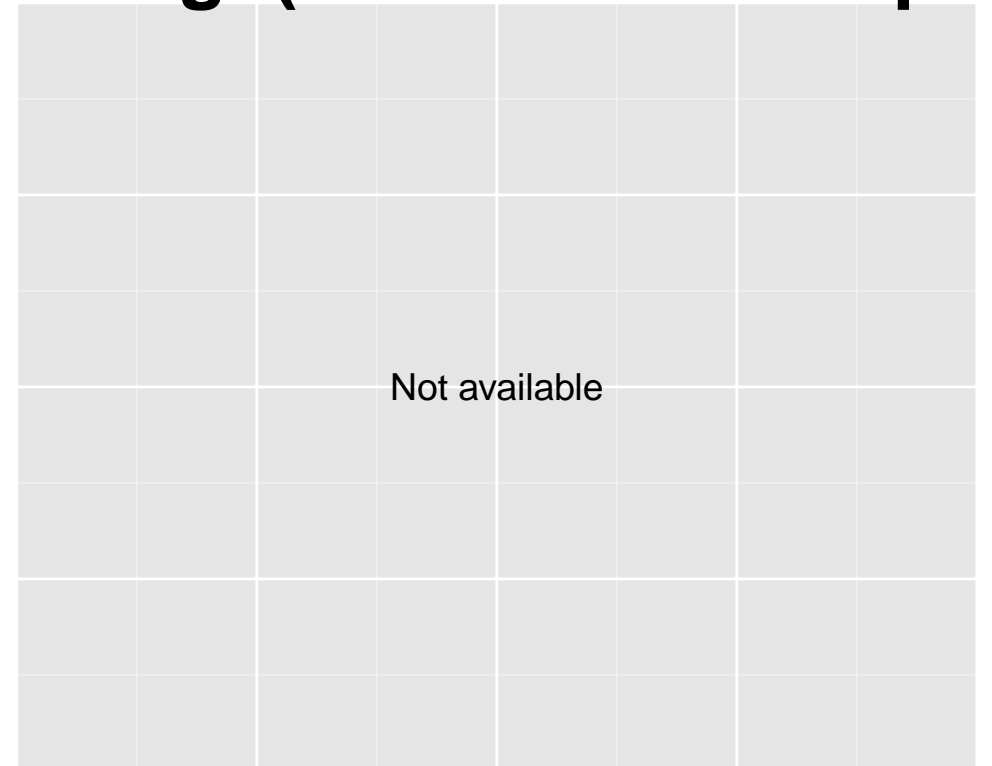

Supplement: Supplementary file 3951 [file 1]

## Ly6g6d

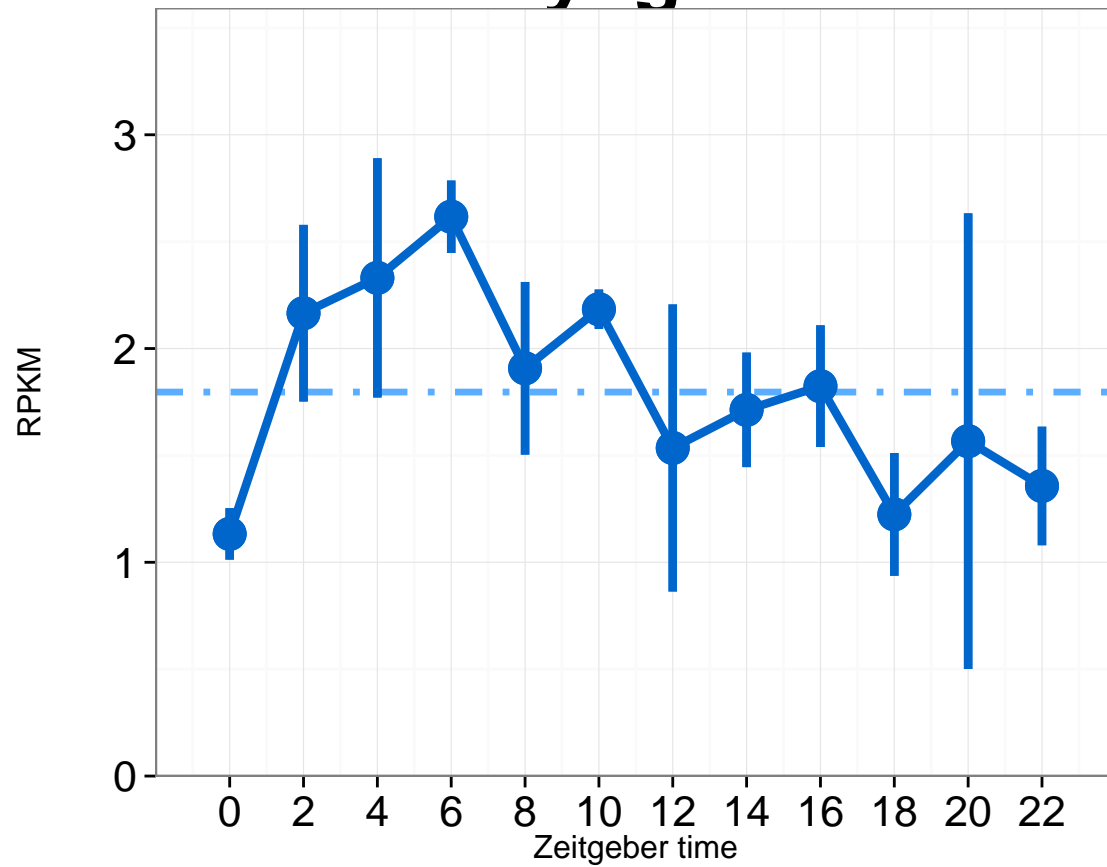

## Ly6g6d log2(Ribosome occupancy

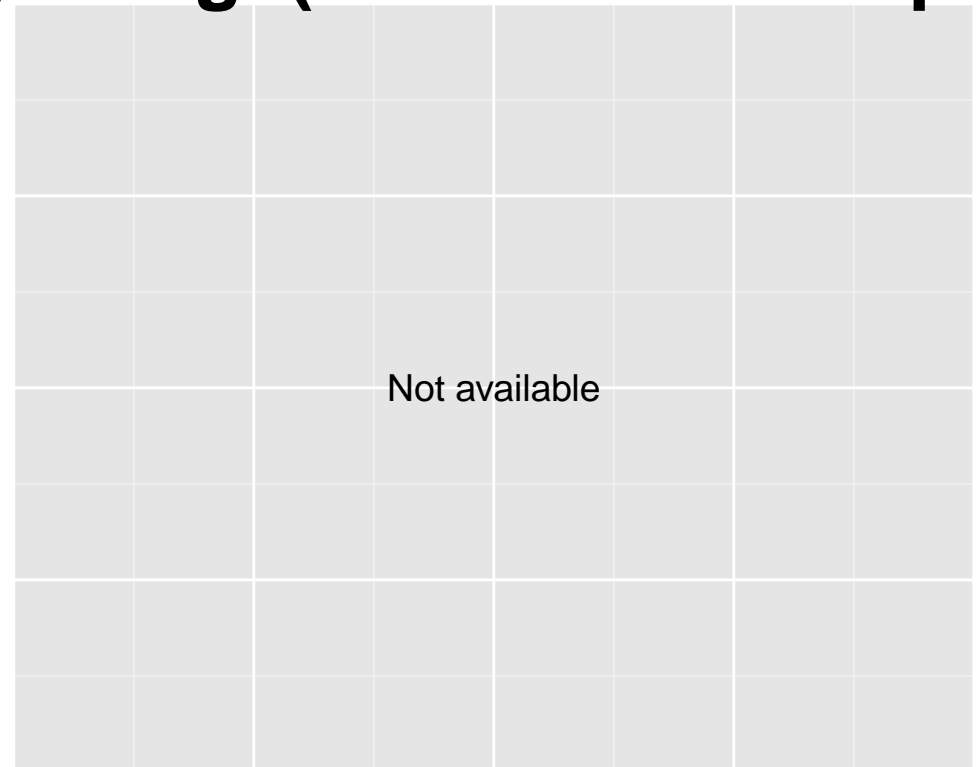

Supplement: Supplementary file 3952 [file 1]

# Abca1

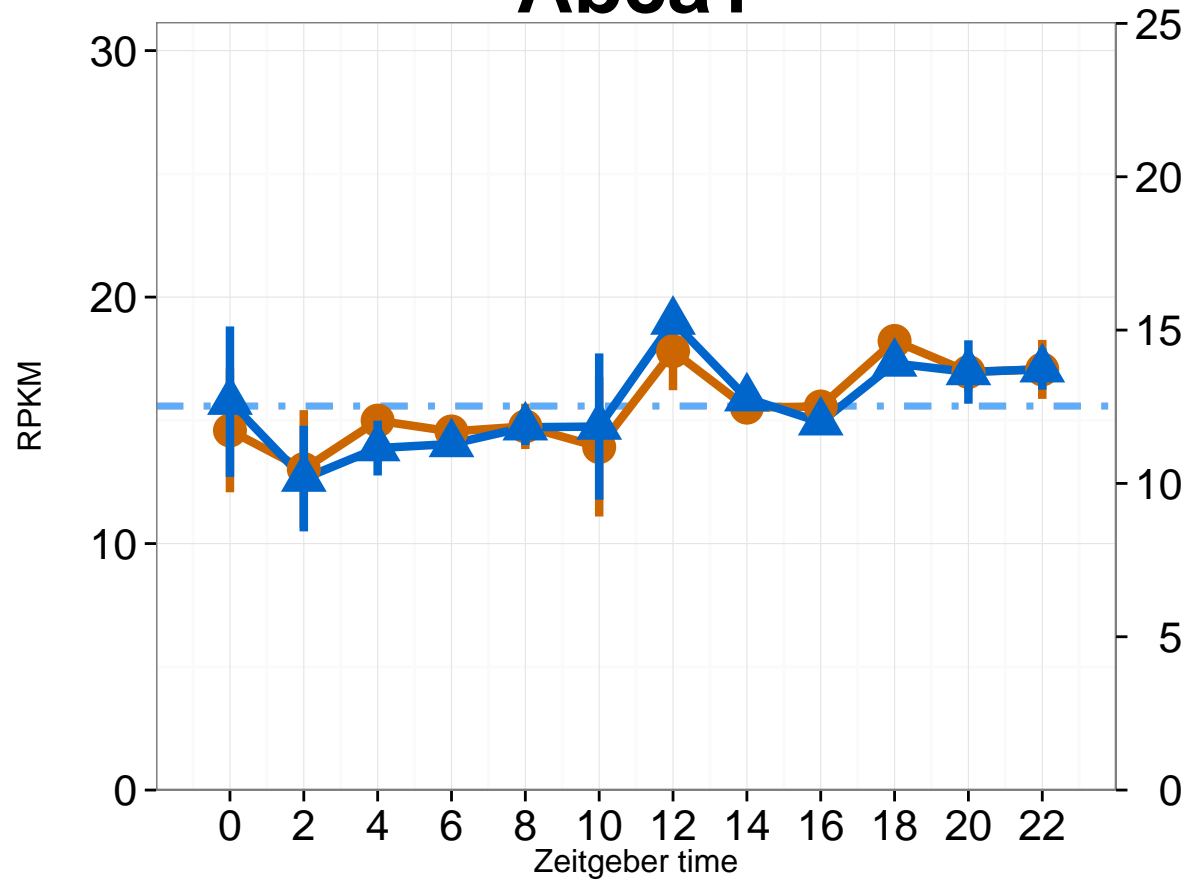

# Abca1

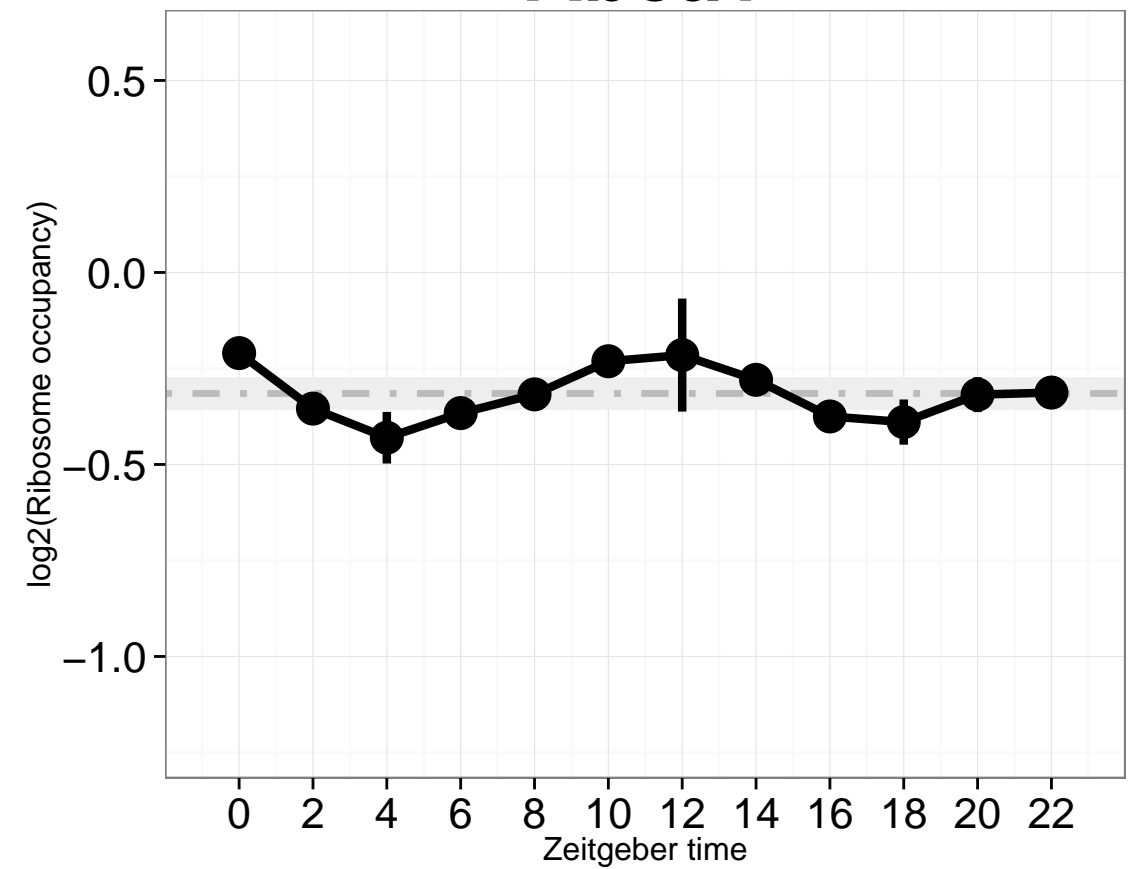

Supplement: Supplementary file 3953 [file 1]

## Gbp4

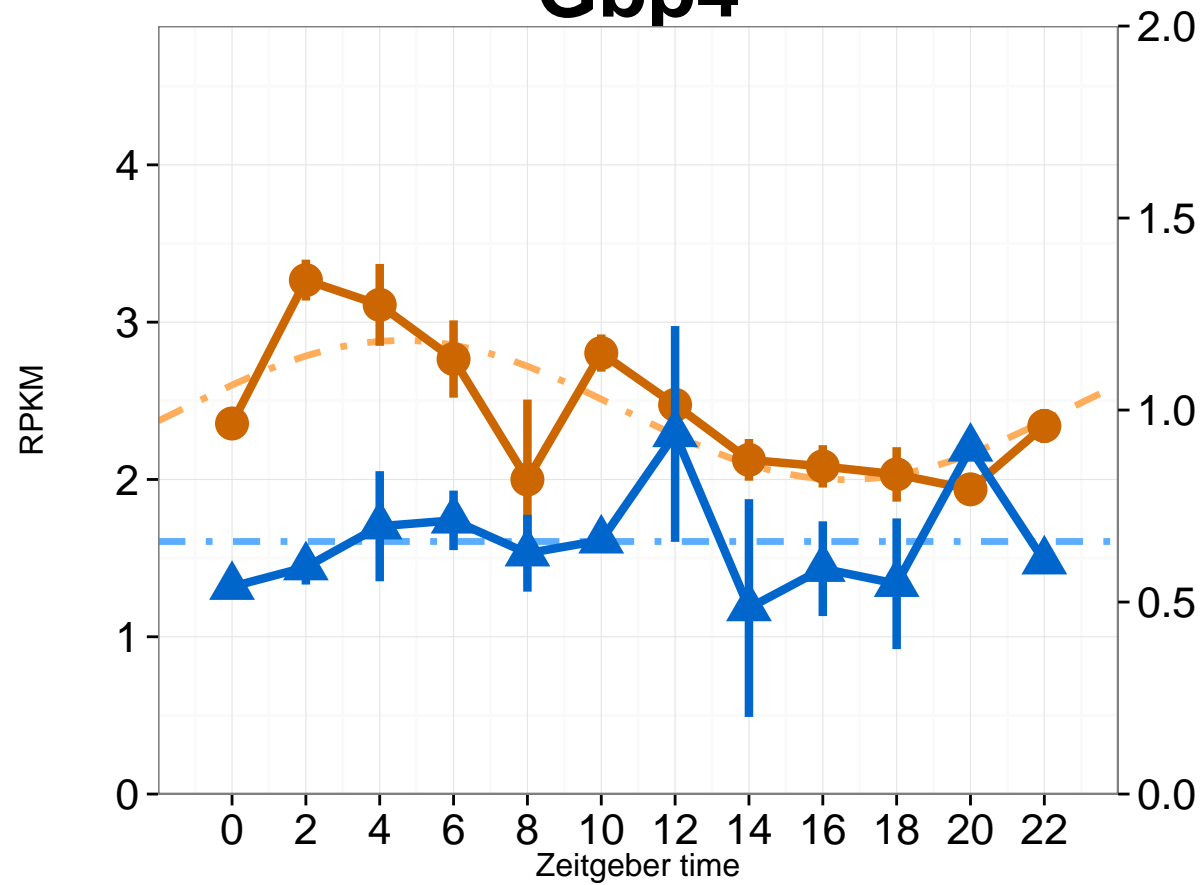

## Gbp4

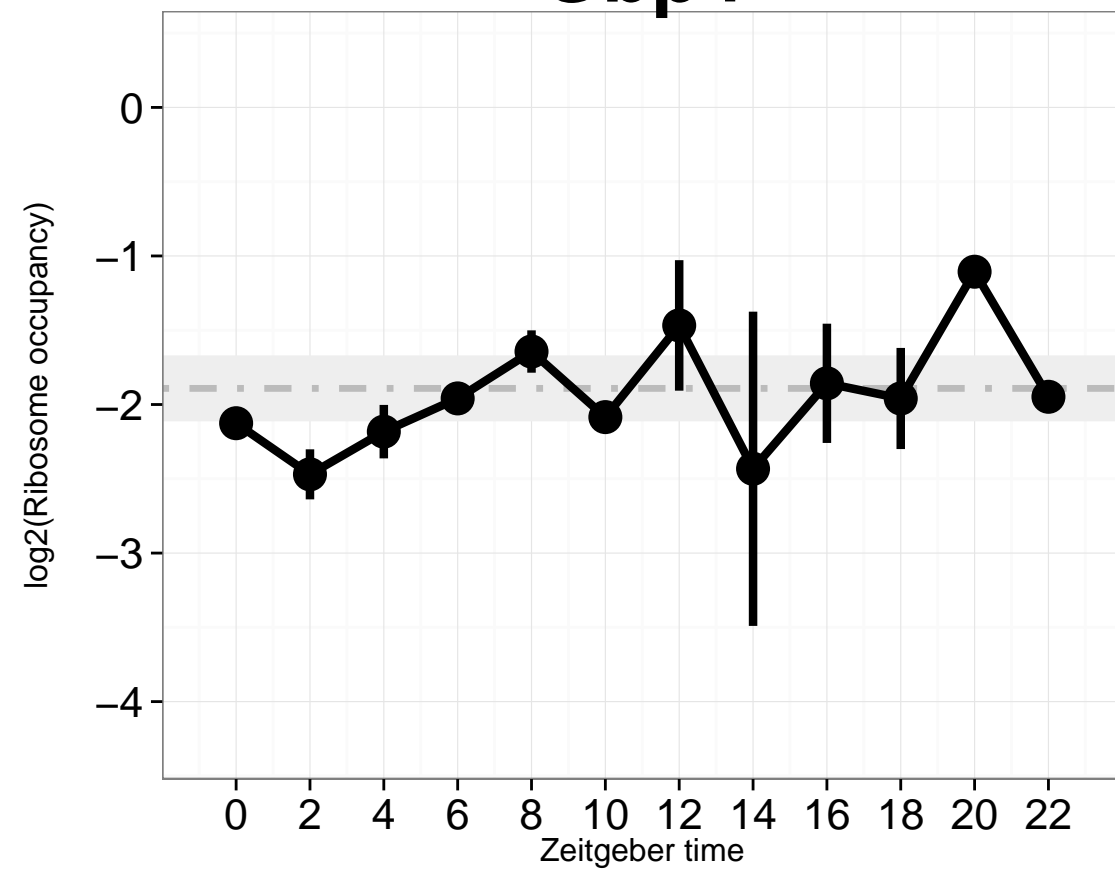

Supplement: Supplementary file 3954 [file 1]

## Zswim7

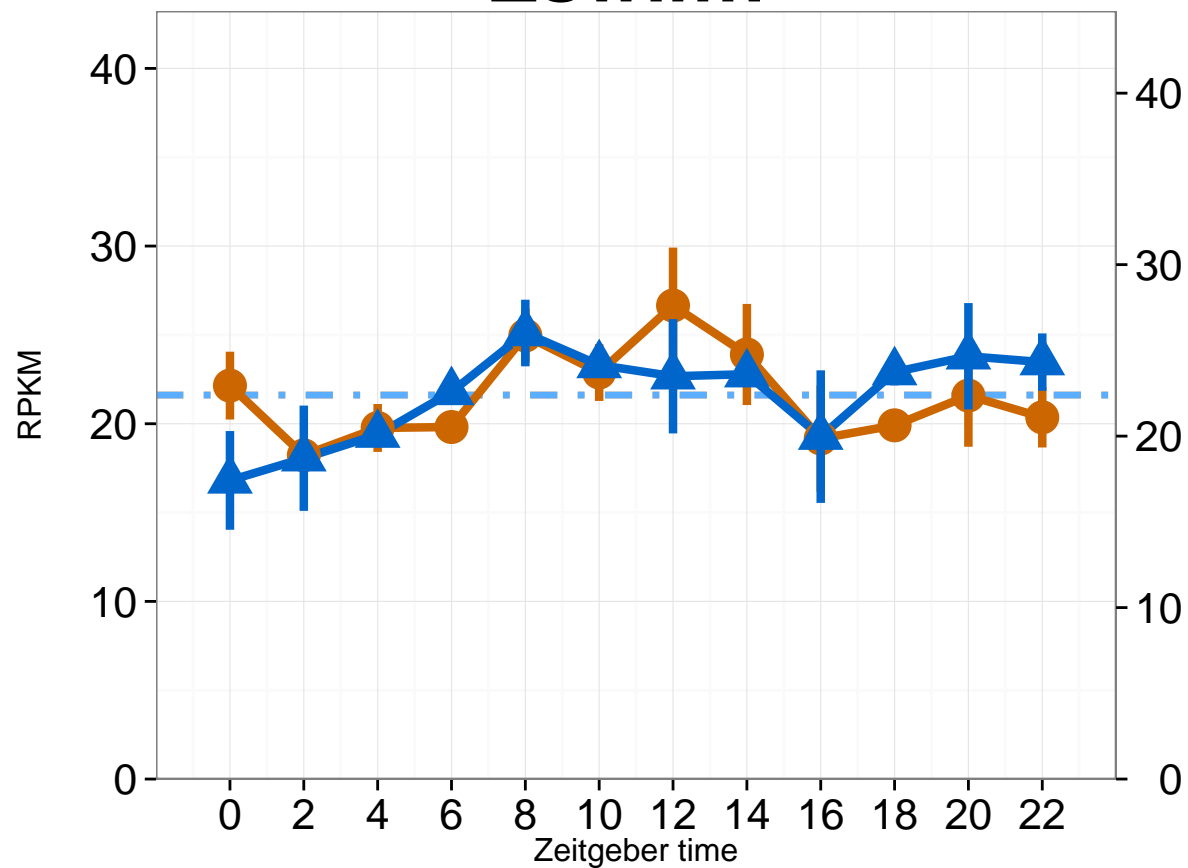

## Zswim7

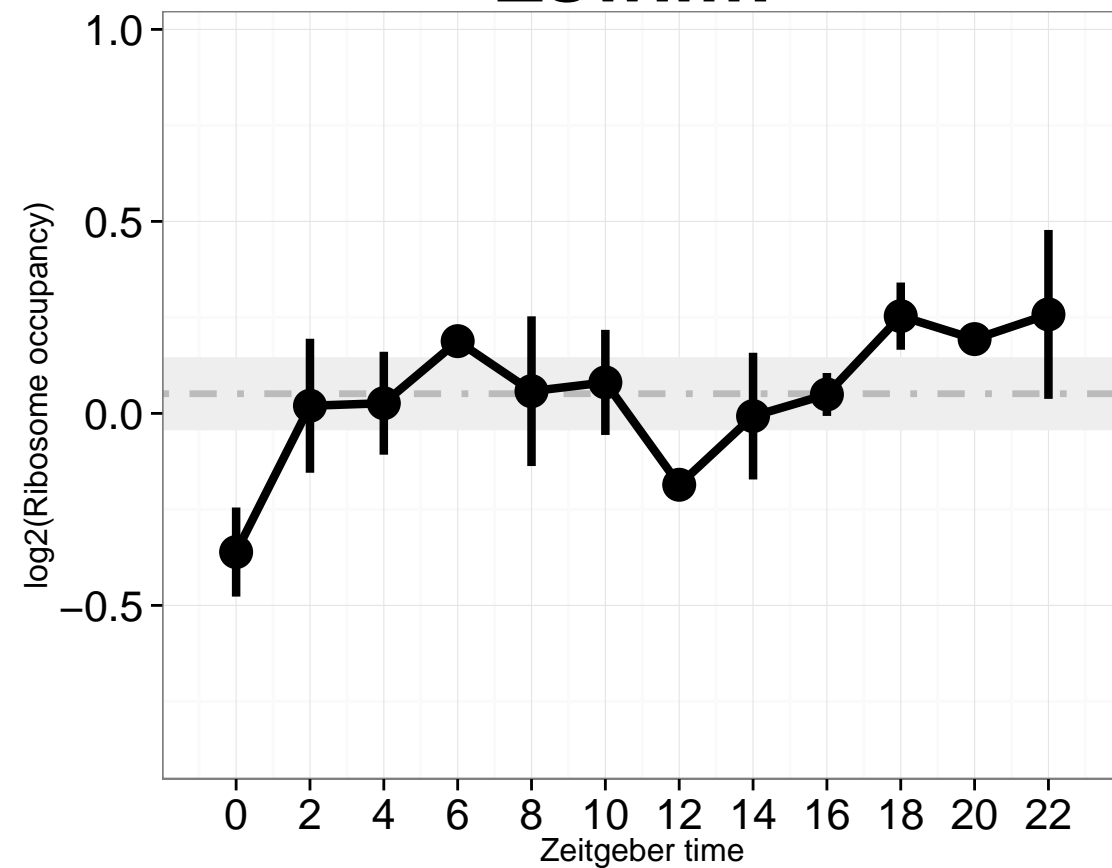

Supplement: Supplementary file 3955 [file 1]

## Cftr

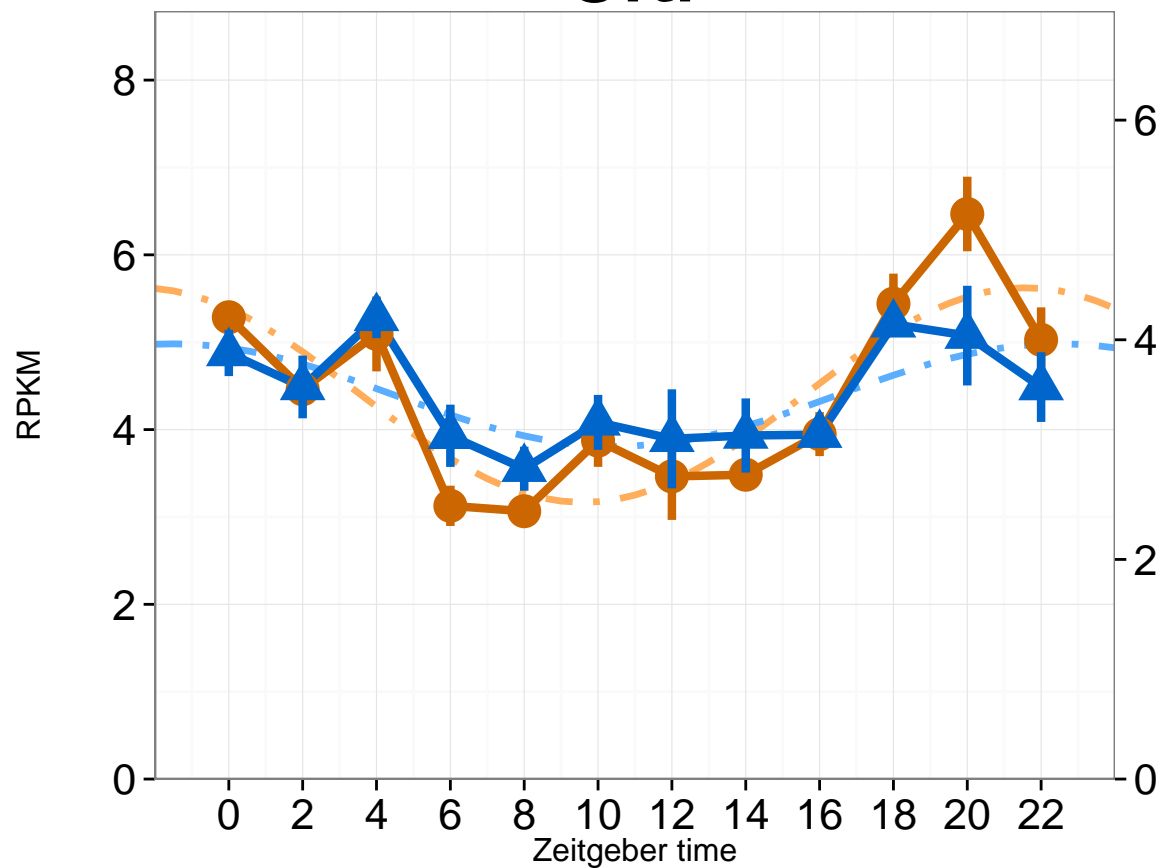

## Cftr

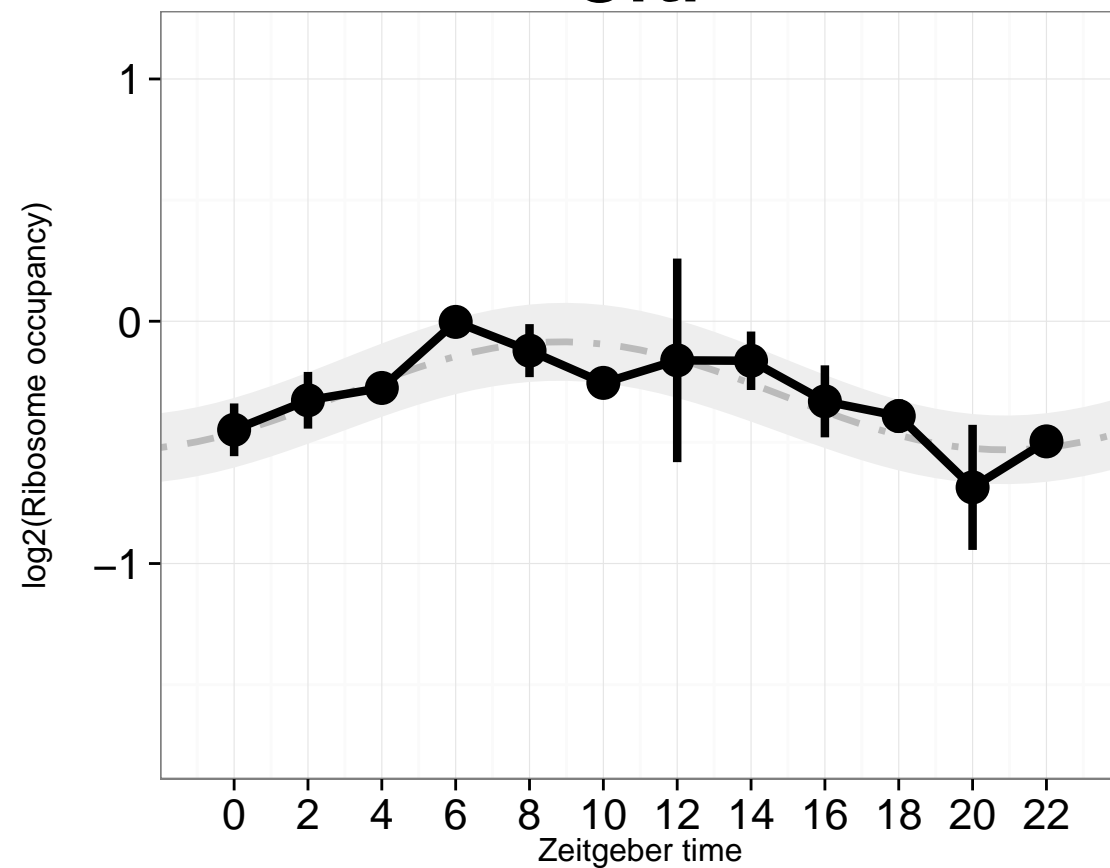

Supplement: Supplementary file 3956 [file 1]

## PrIr

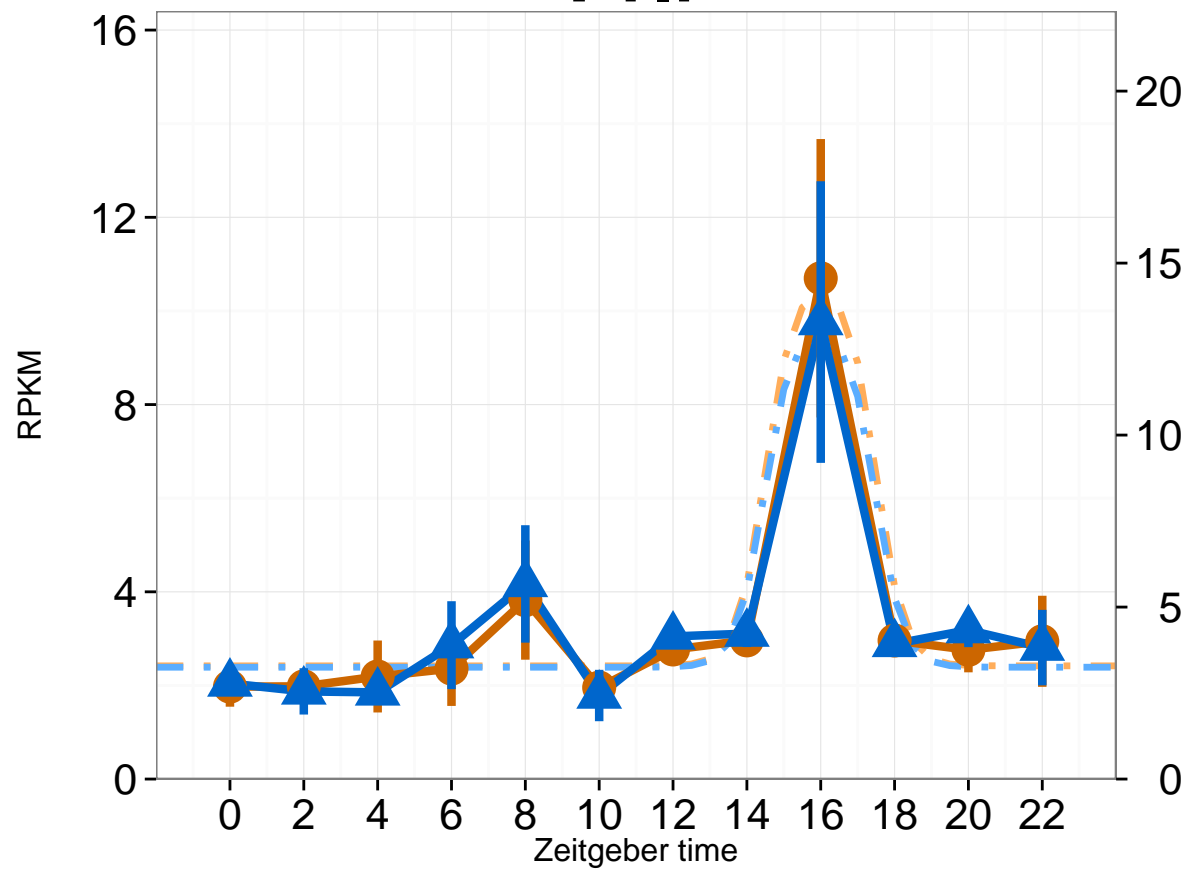

## PrIr

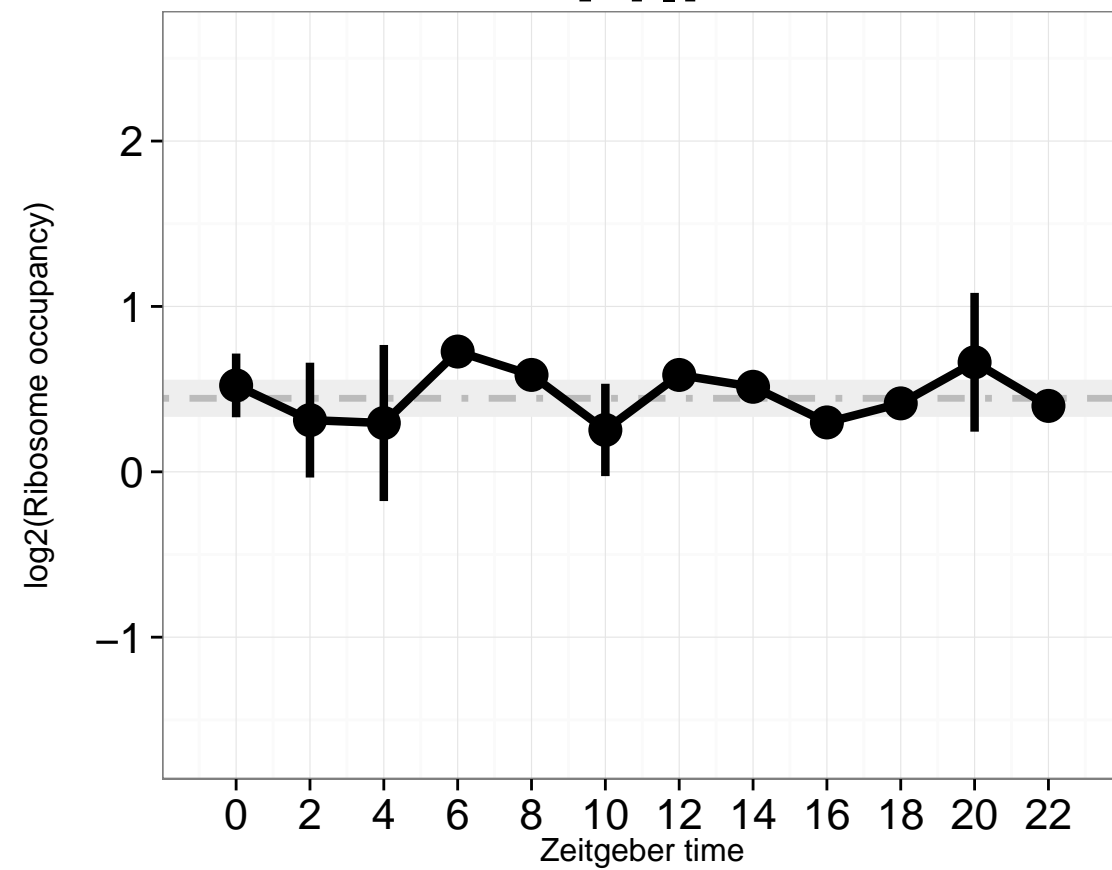

Supplement: Supplementary file 3957 [file 1]

## Aldh1l1

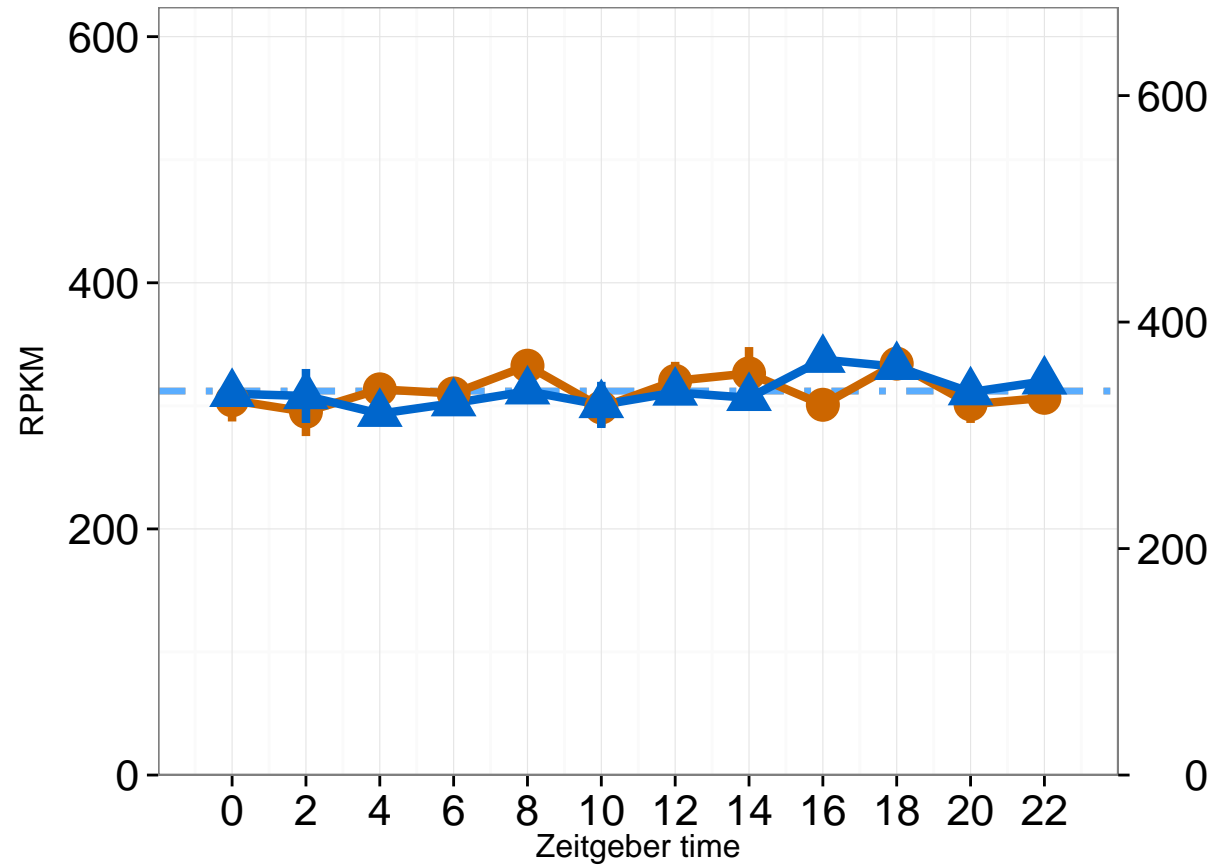

## Aldh1l1

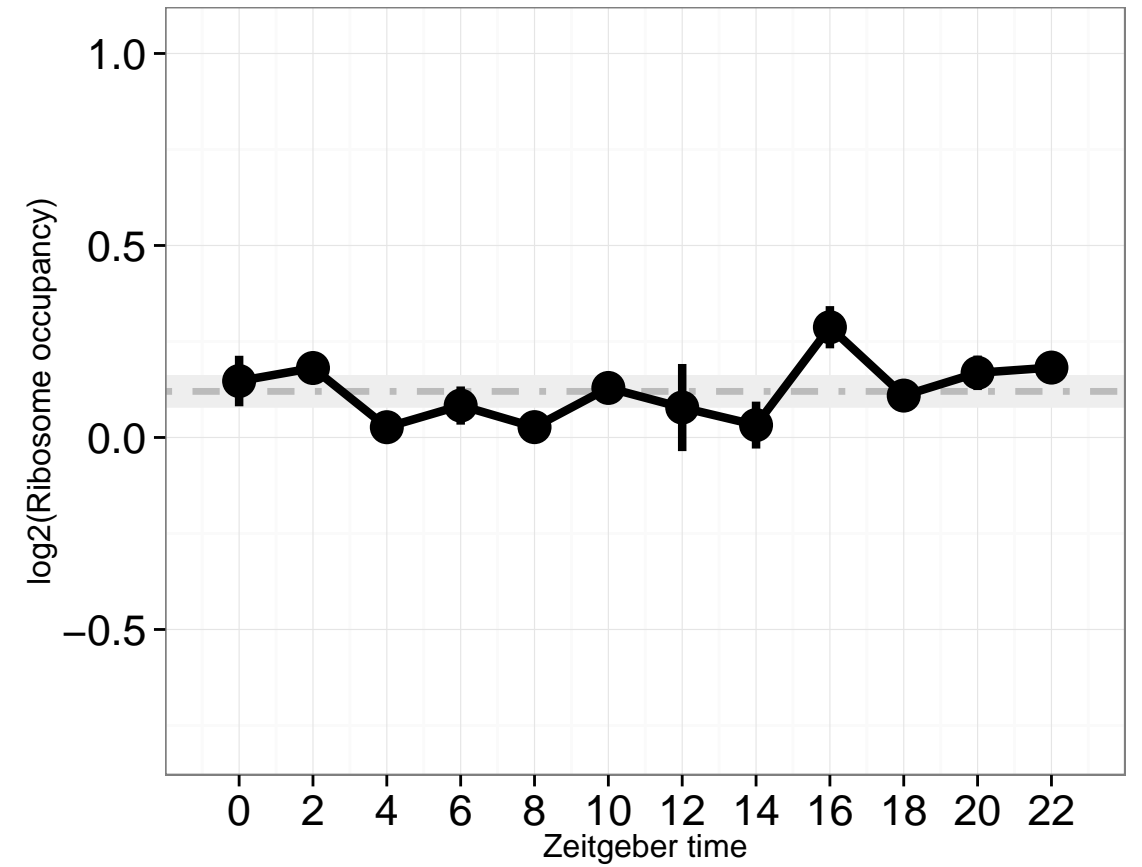

Supplement: Supplementary file 3958 [file 1]

# 1700052N19Rik

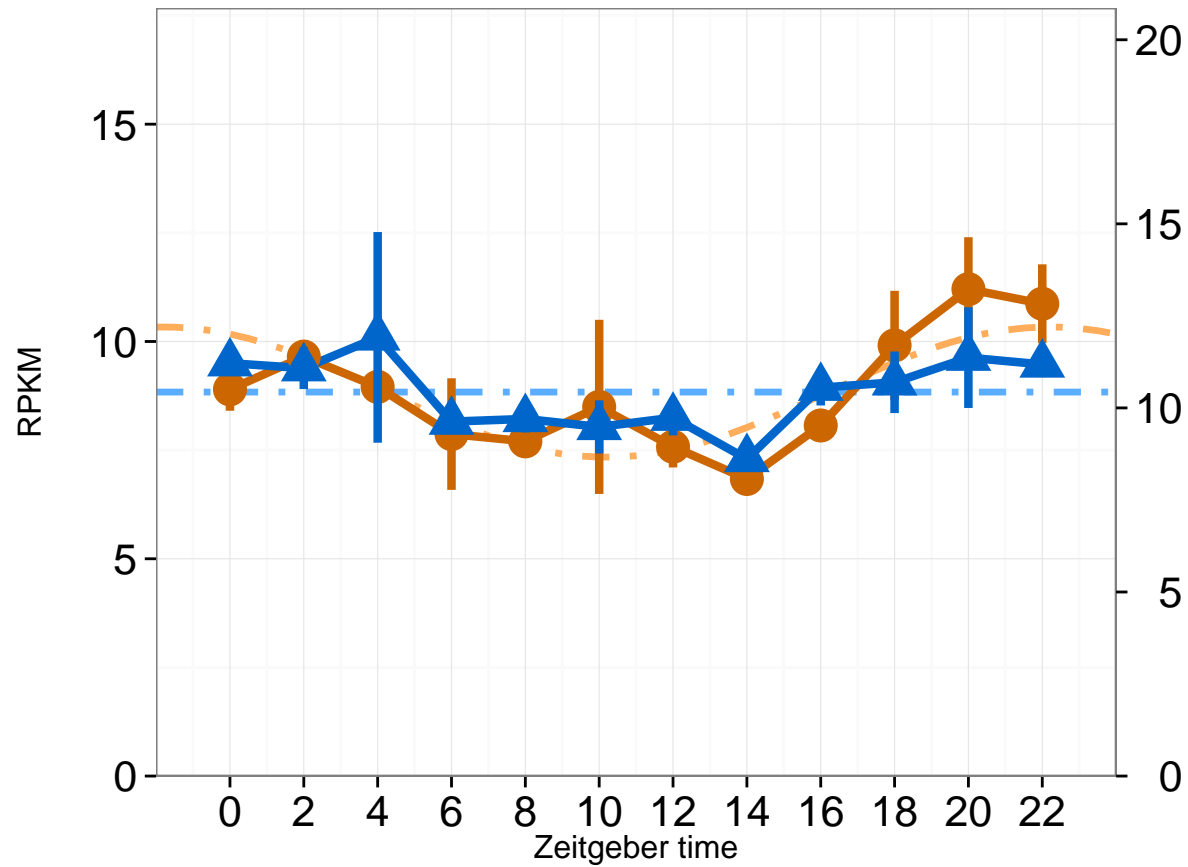

# 1700052N19Rik

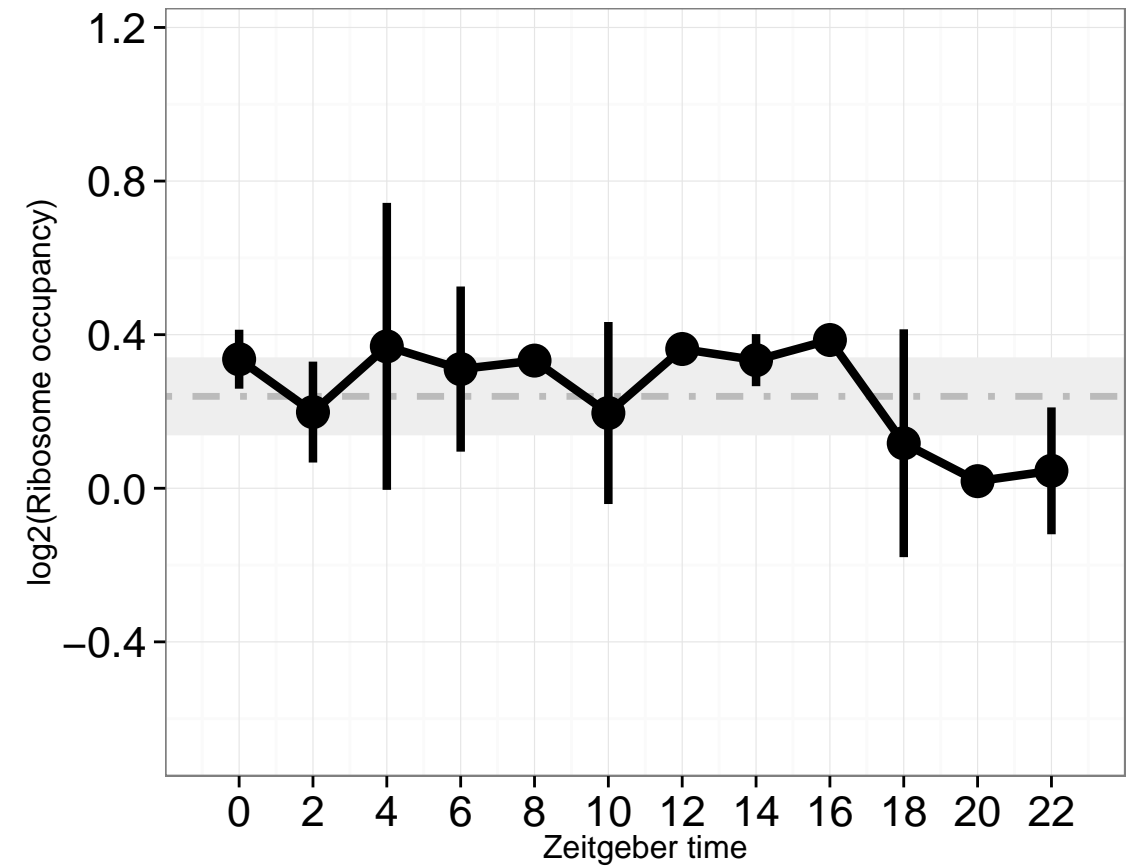

Supplement: Supplementary file 3959 [file 1]

# Tmem167b

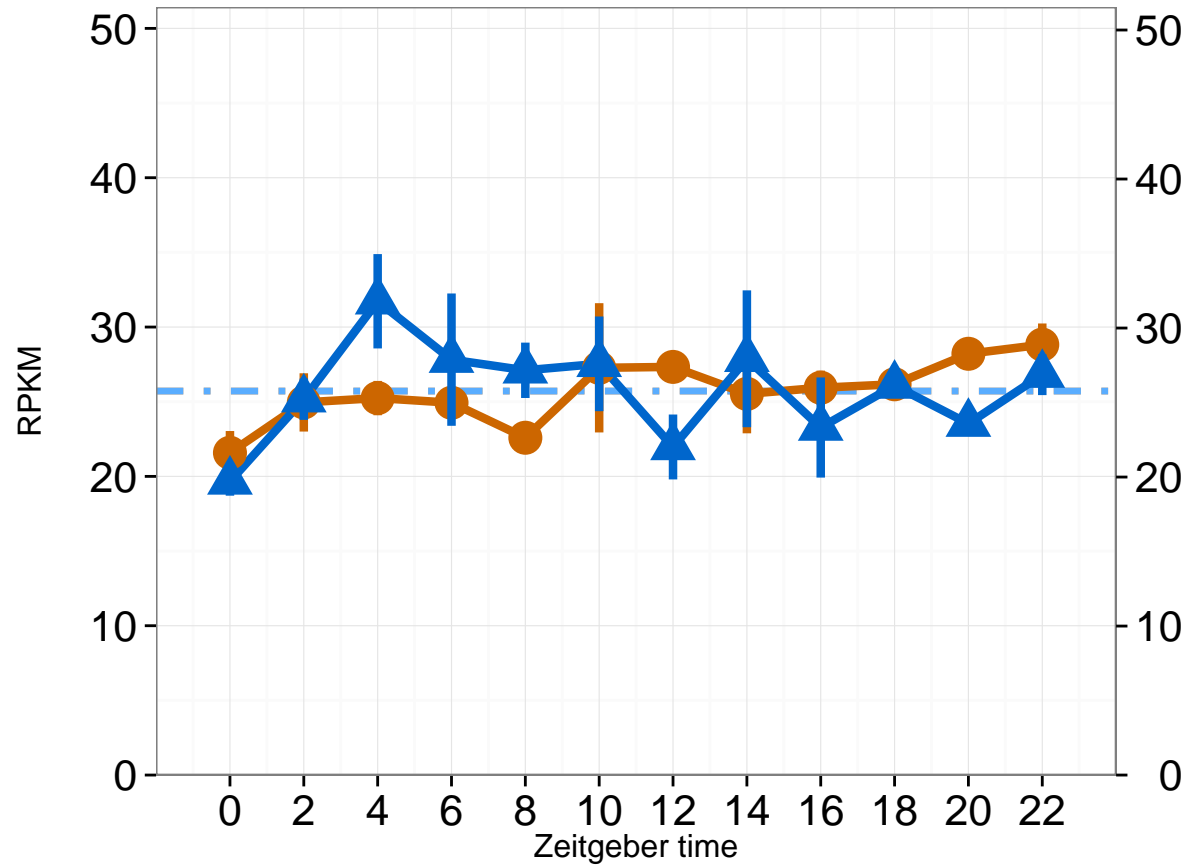

# Tmem167b

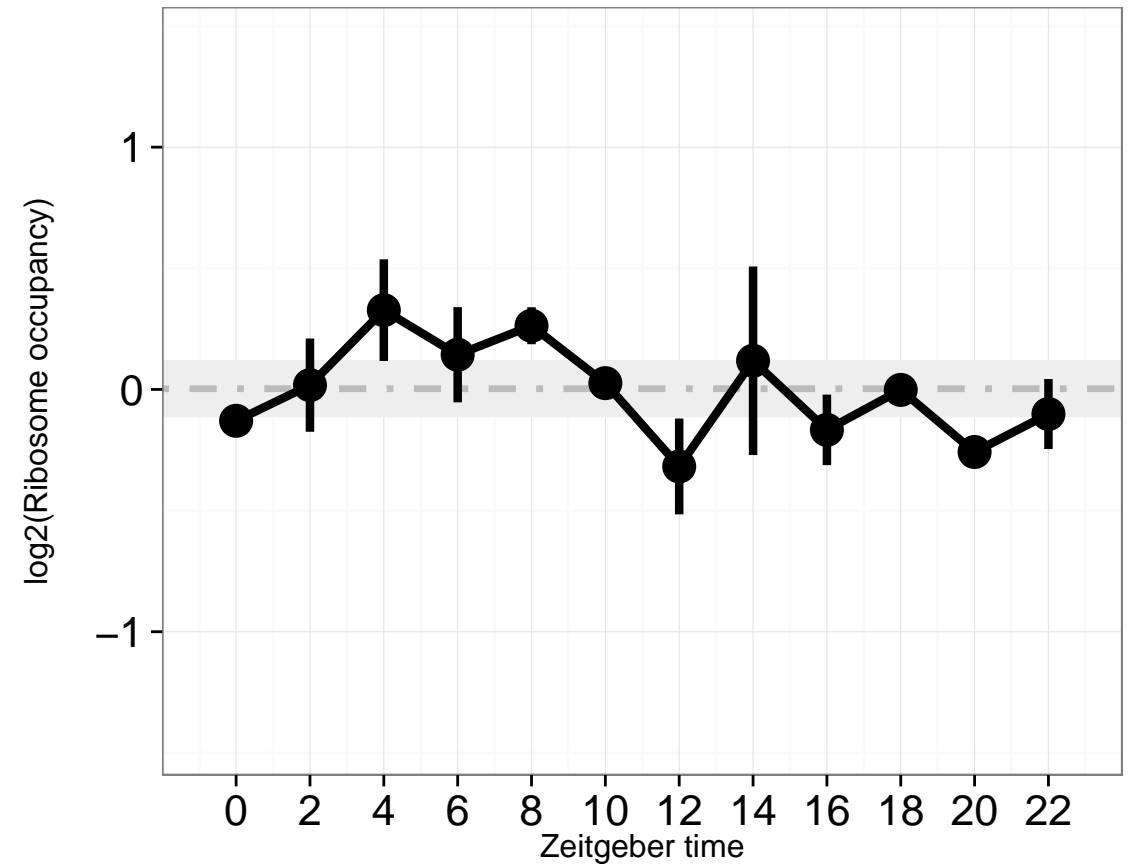

Supplement: Supplementary file 3960 [file 1]

# Mmgt1

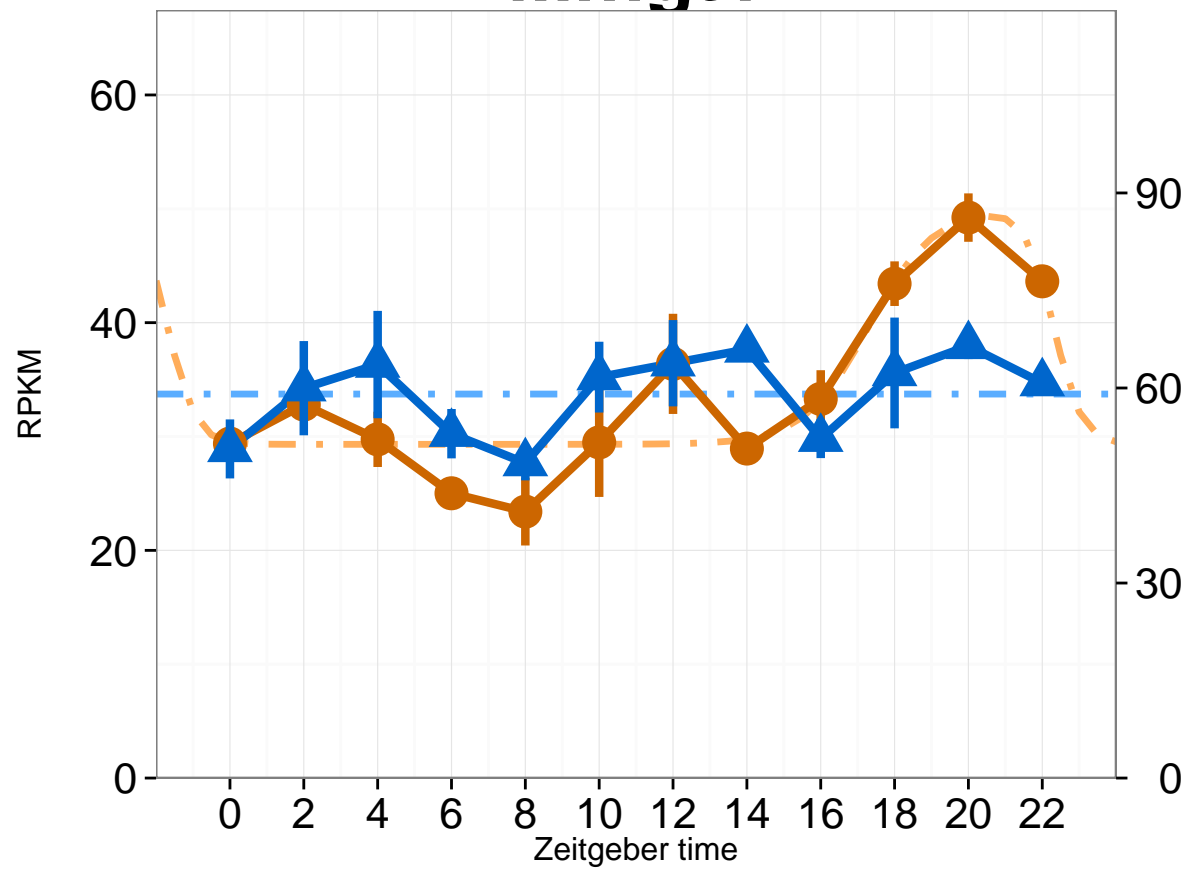

# Mmgt1

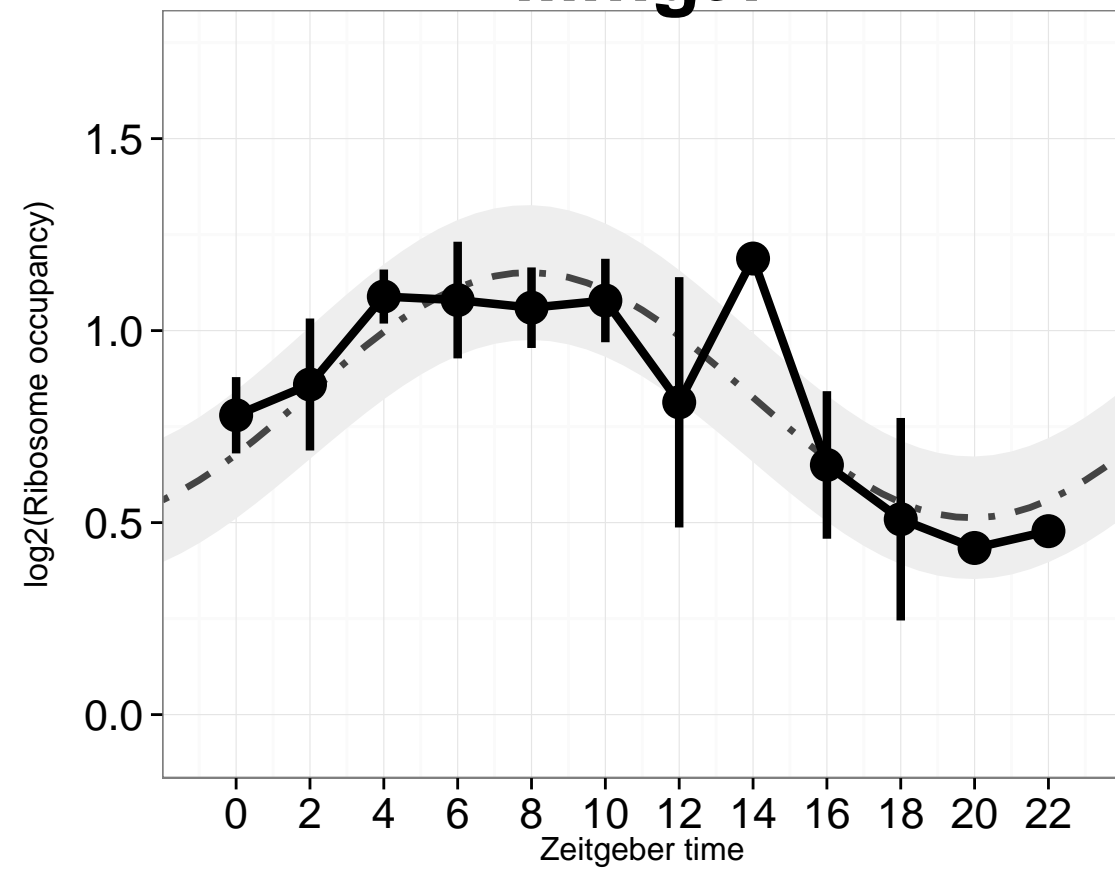

Supplement: Supplementary file 3961 [file 1]

## Lamtor3

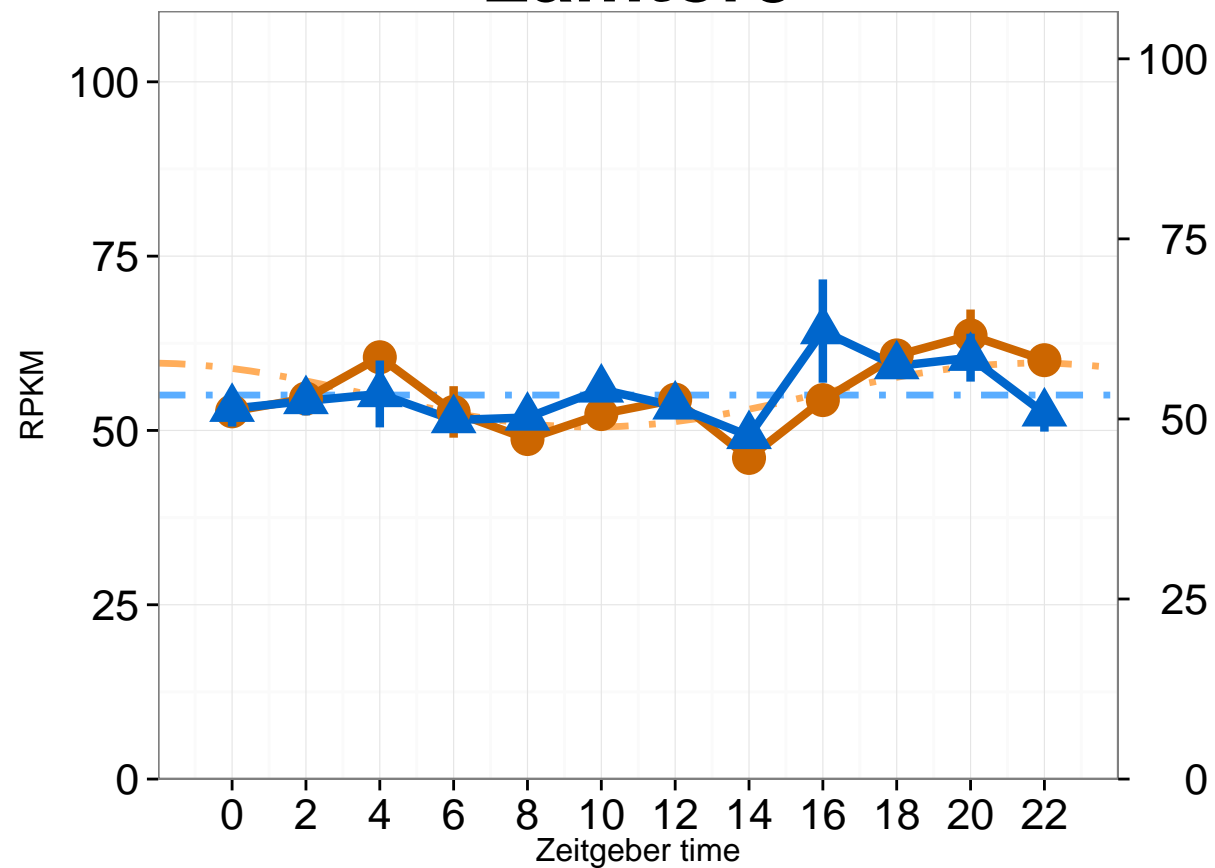

## Lamtor3

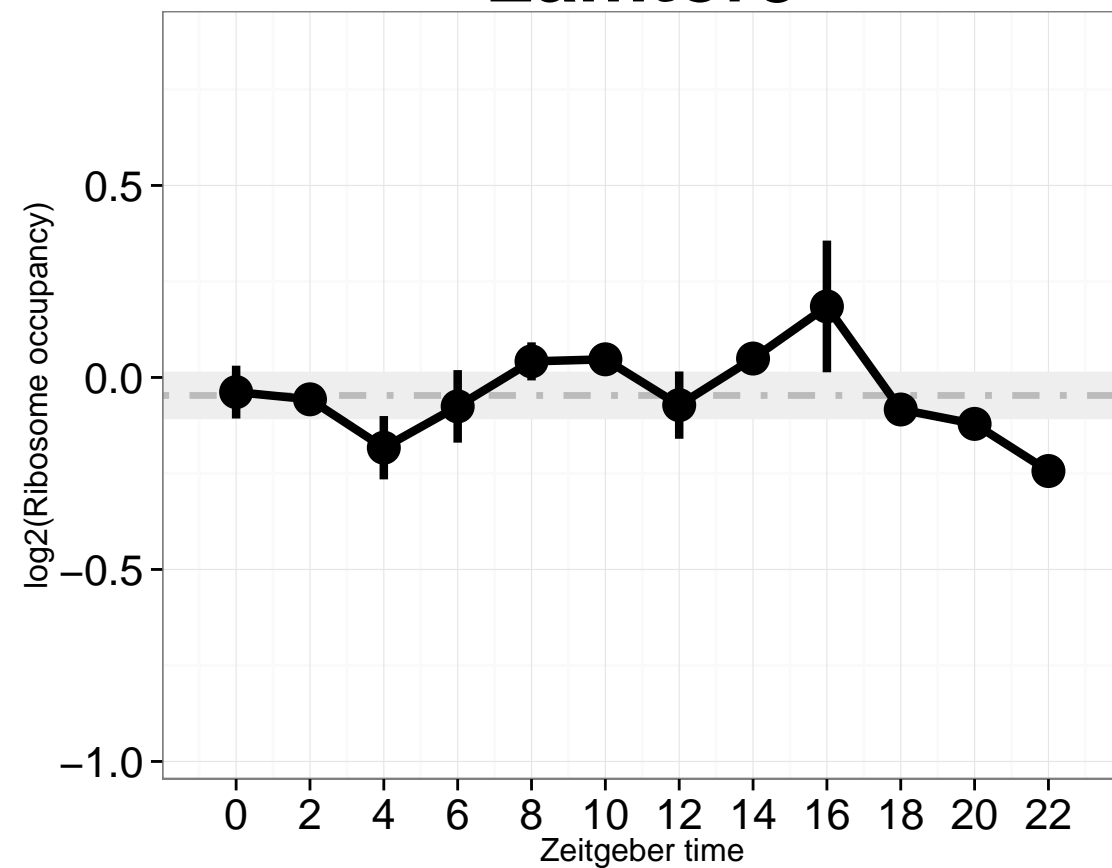

Supplement: Supplementary file 3962 [file 1]

# Dcp1a

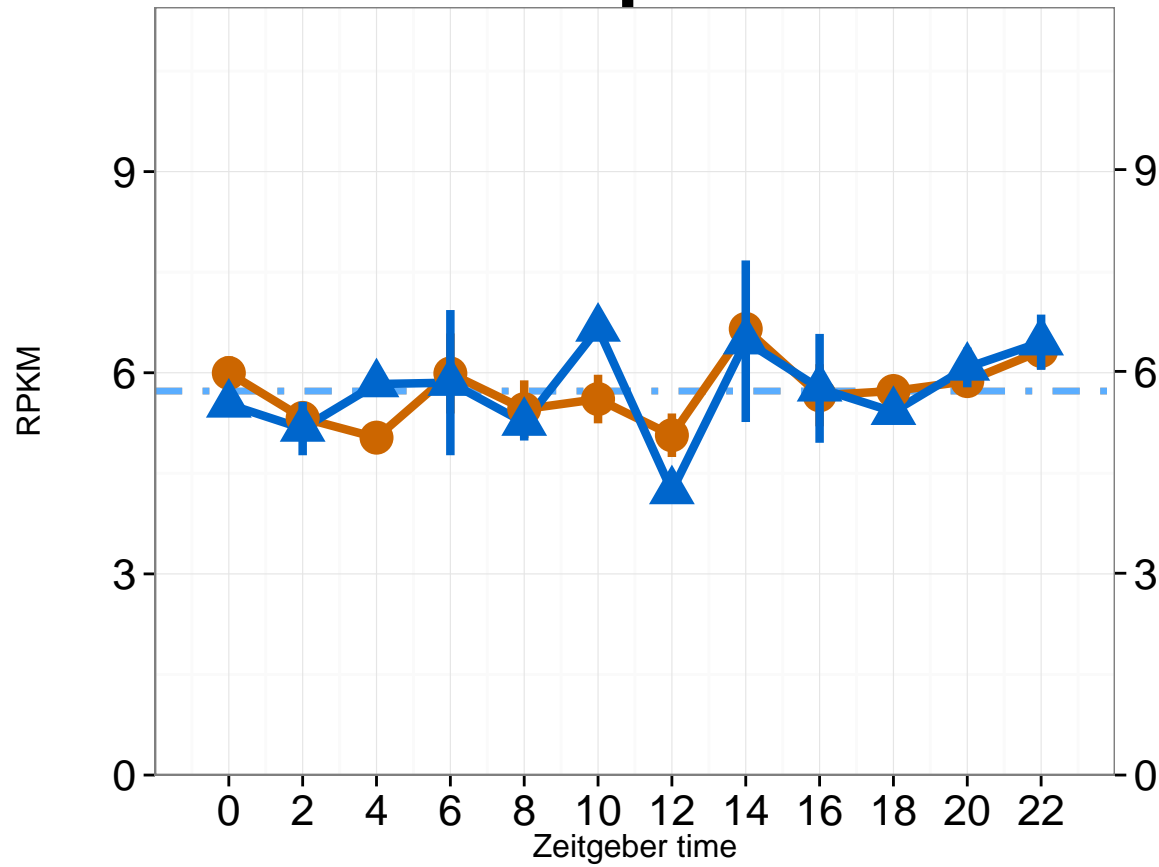

# Dcp1a

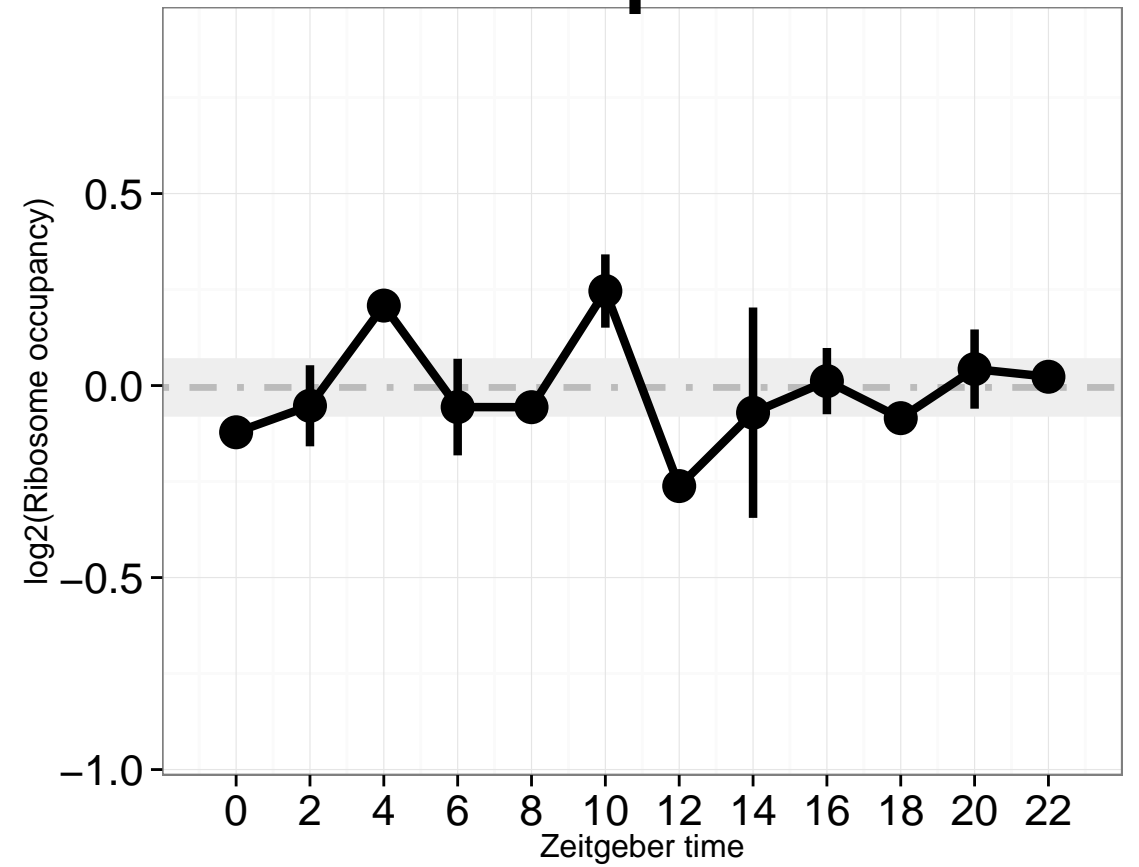

Supplement: Supplementary file 3963 [file 1]

## Inadl

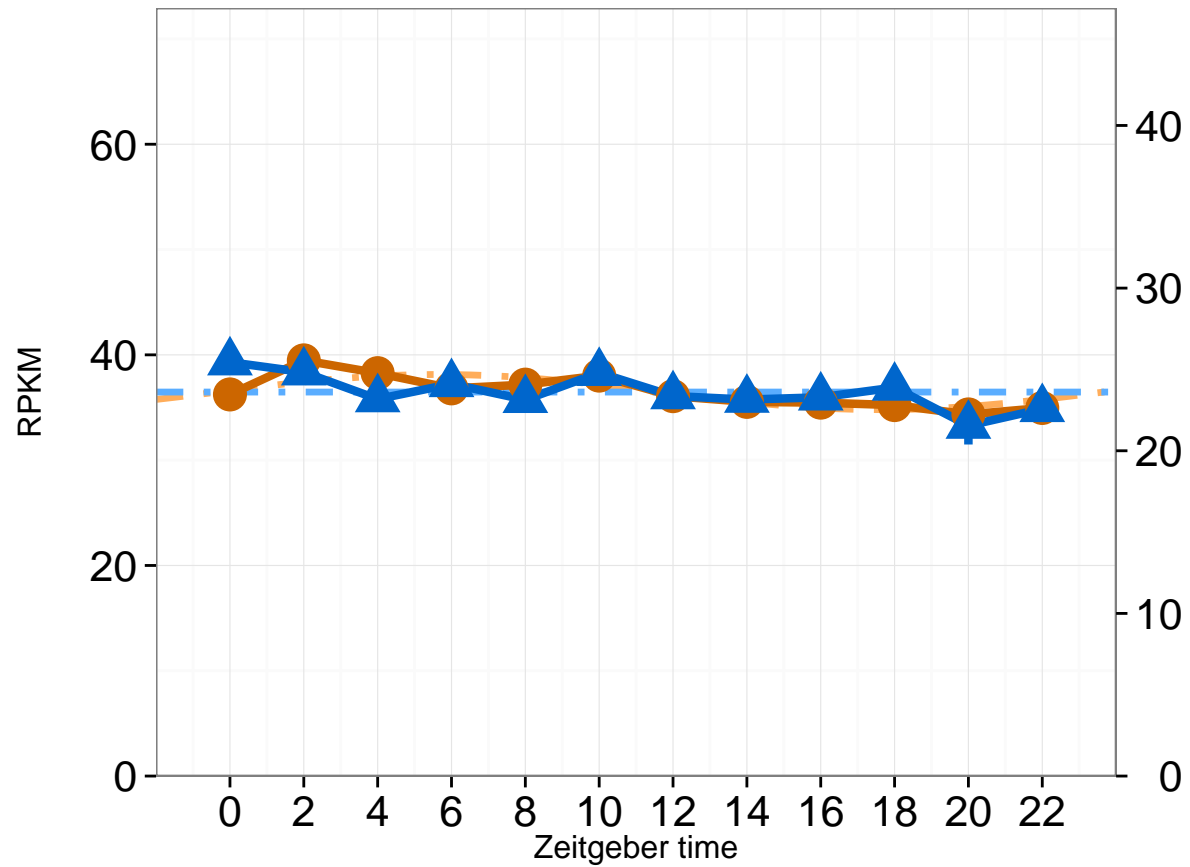

## Inadl

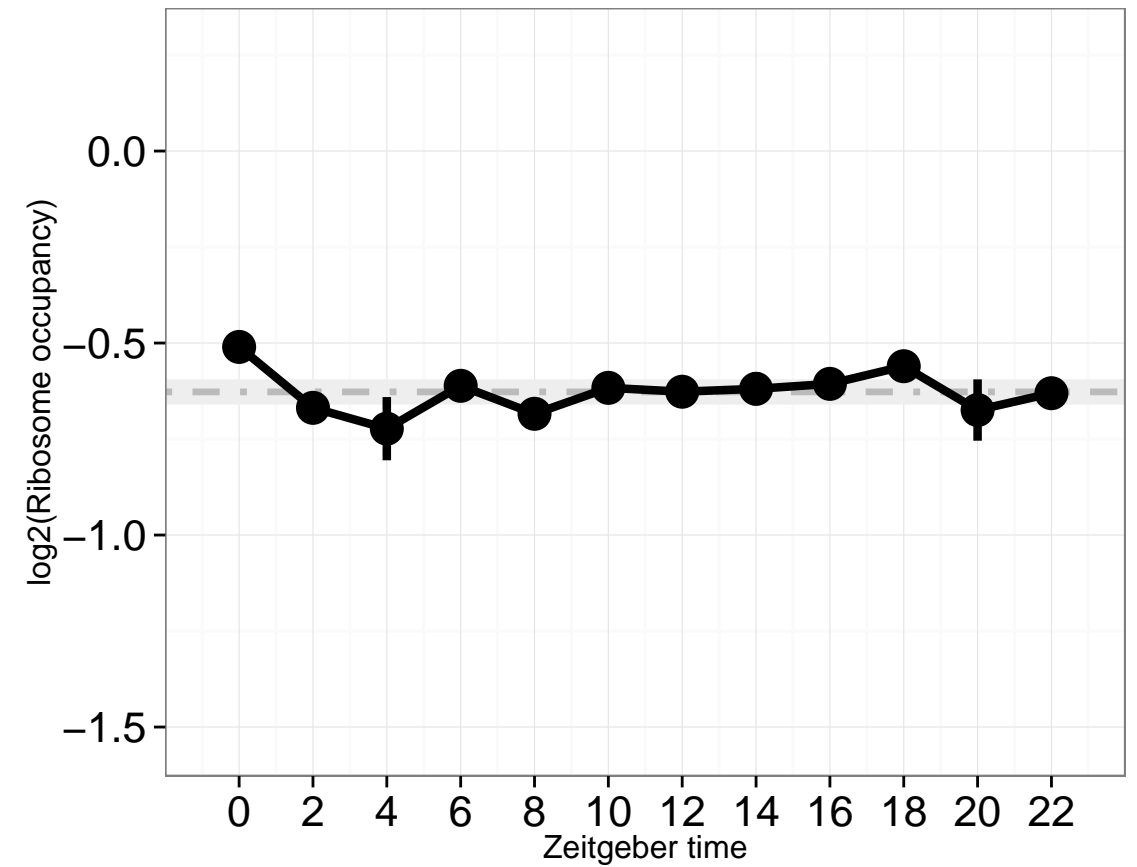

Supplement: Supplementary file 3964 [file 1]

## Celsr2

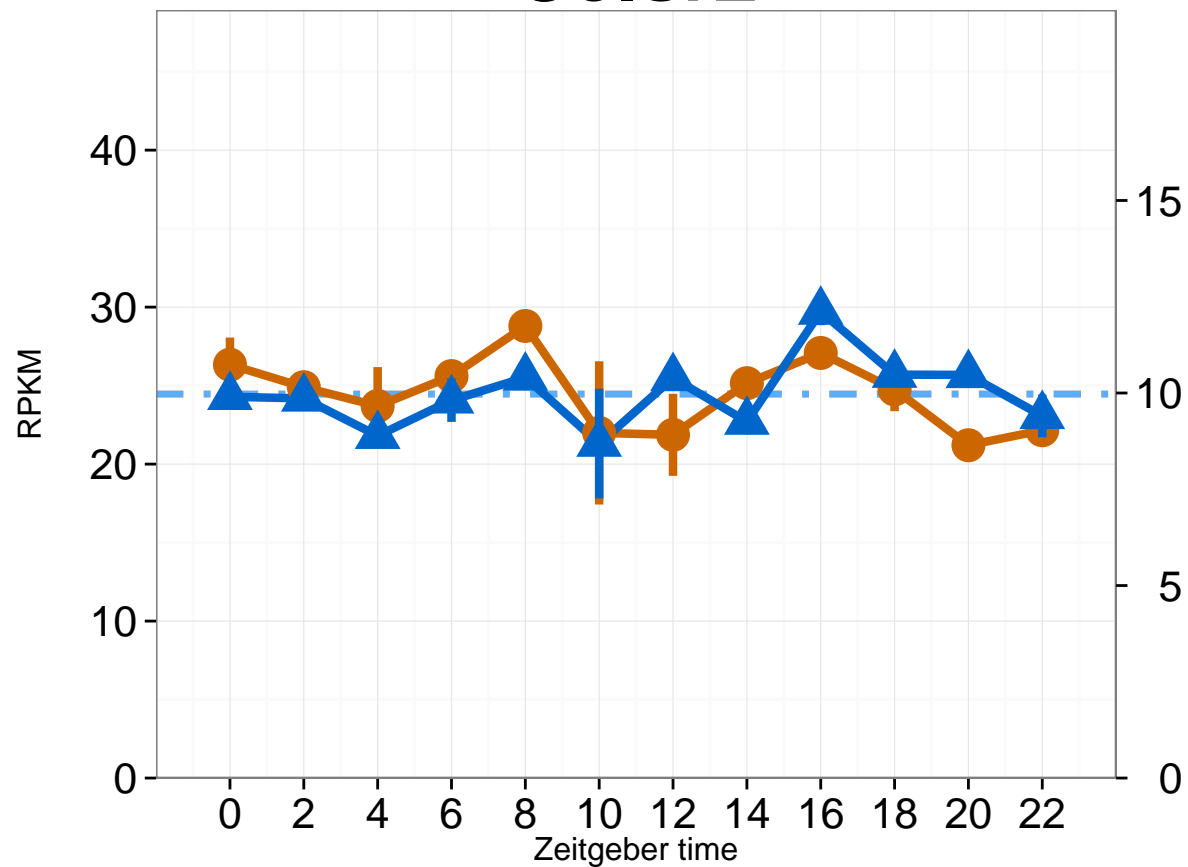

## Celsr2

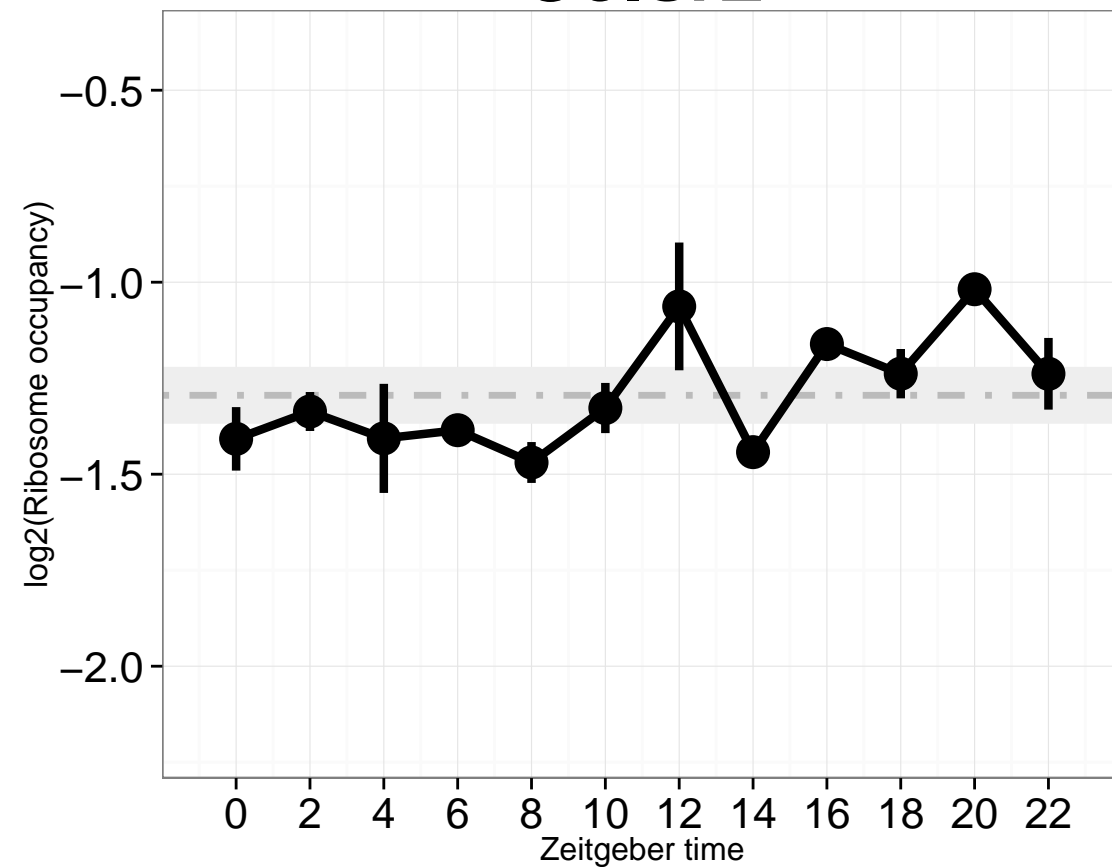

Supplement: Supplementary file 3965 [file 1]

## Gna15

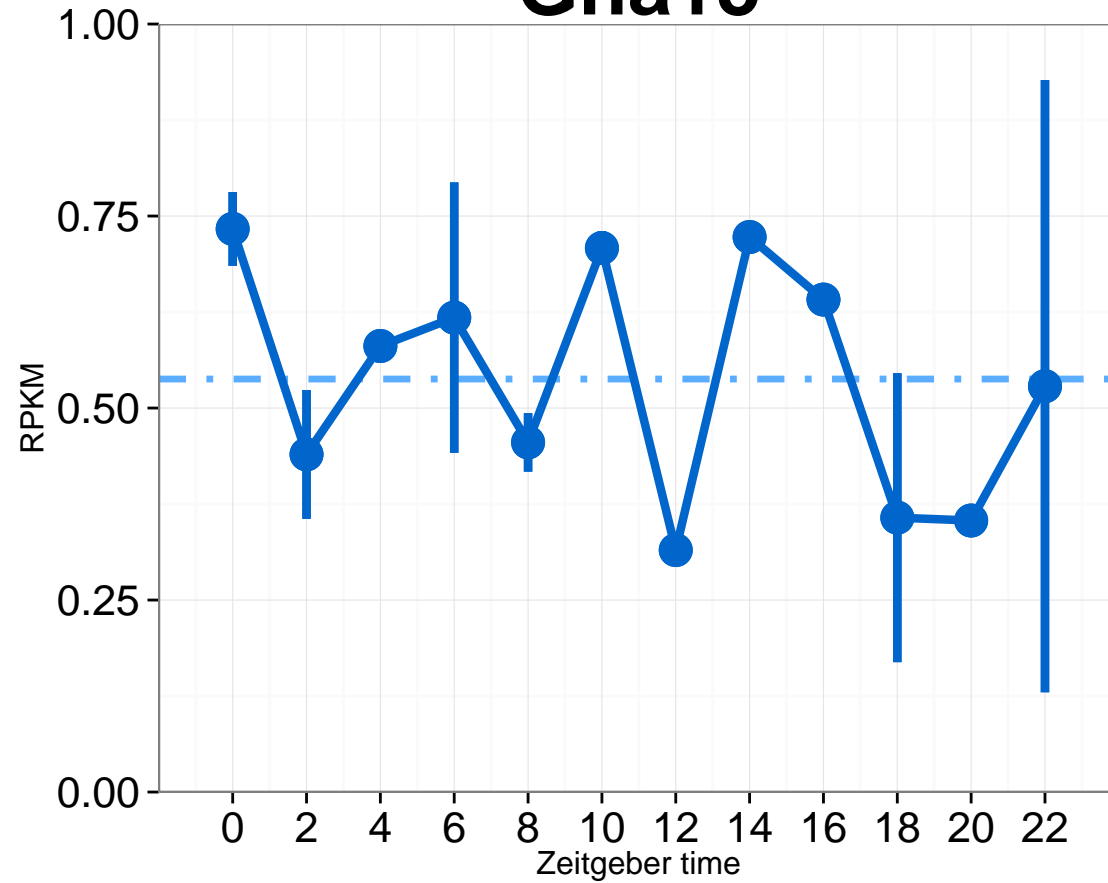

## Gna15 log2(Ribosome occupancy

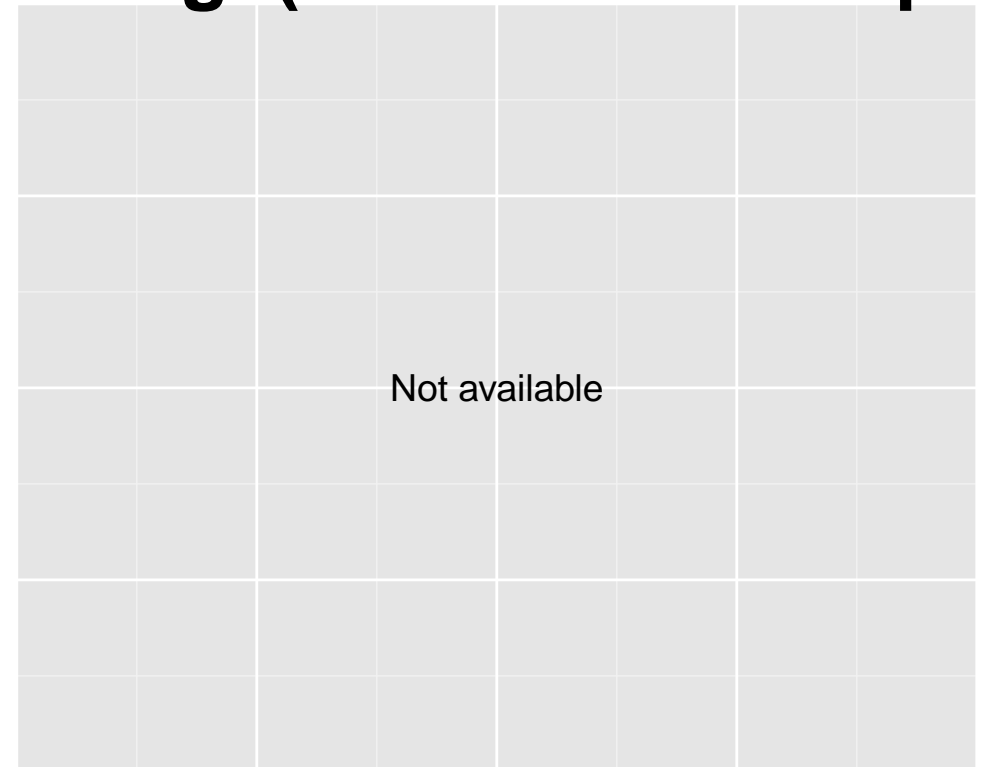

Supplement: Supplementary file 3966 [file 1]

# Btbd1

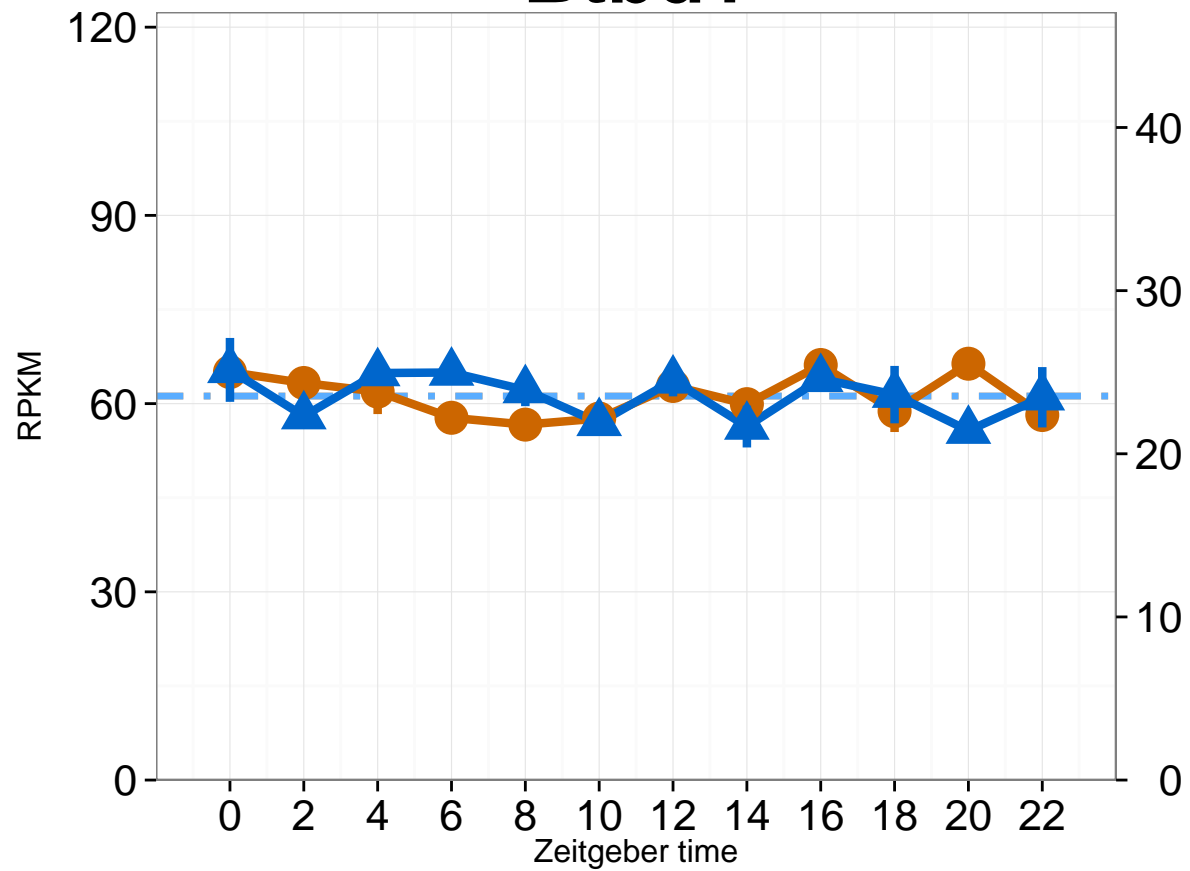

# Btbd1

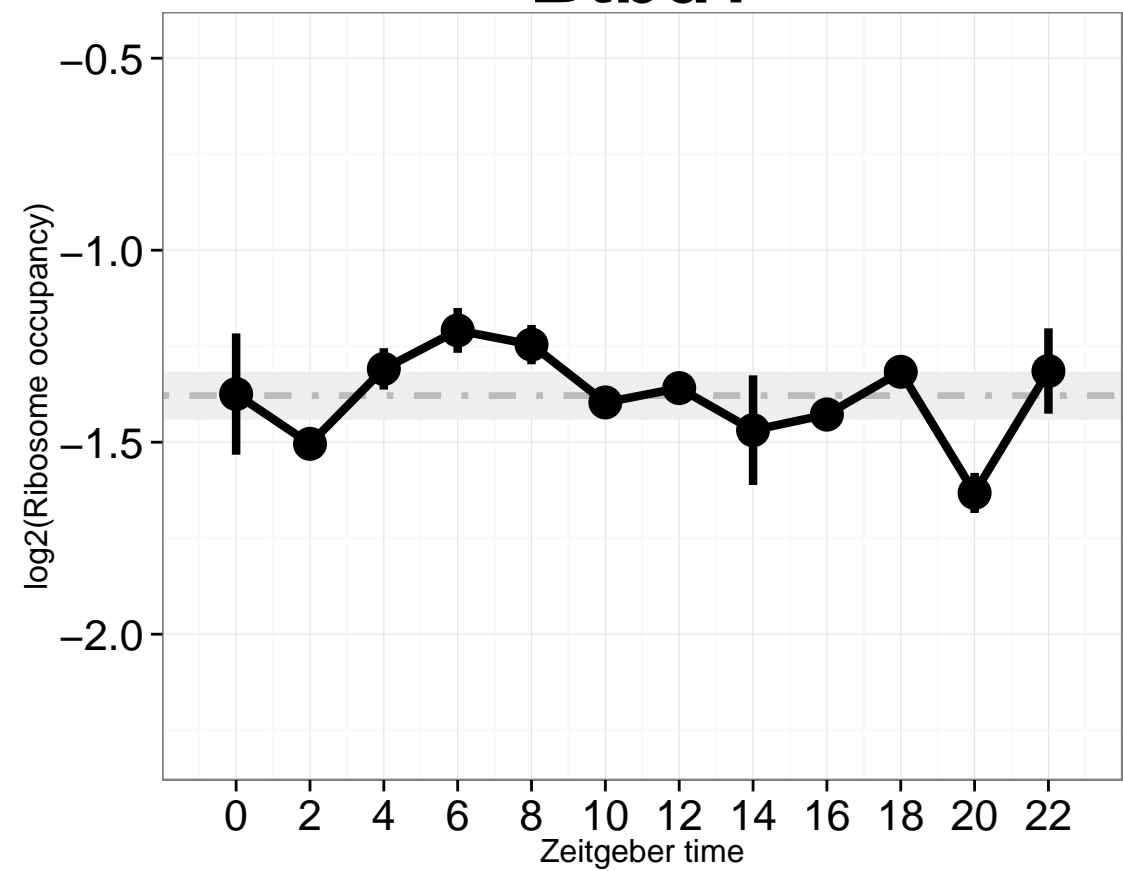

Supplement: Supplementary file 3967 [file 1]

# Akr1c6

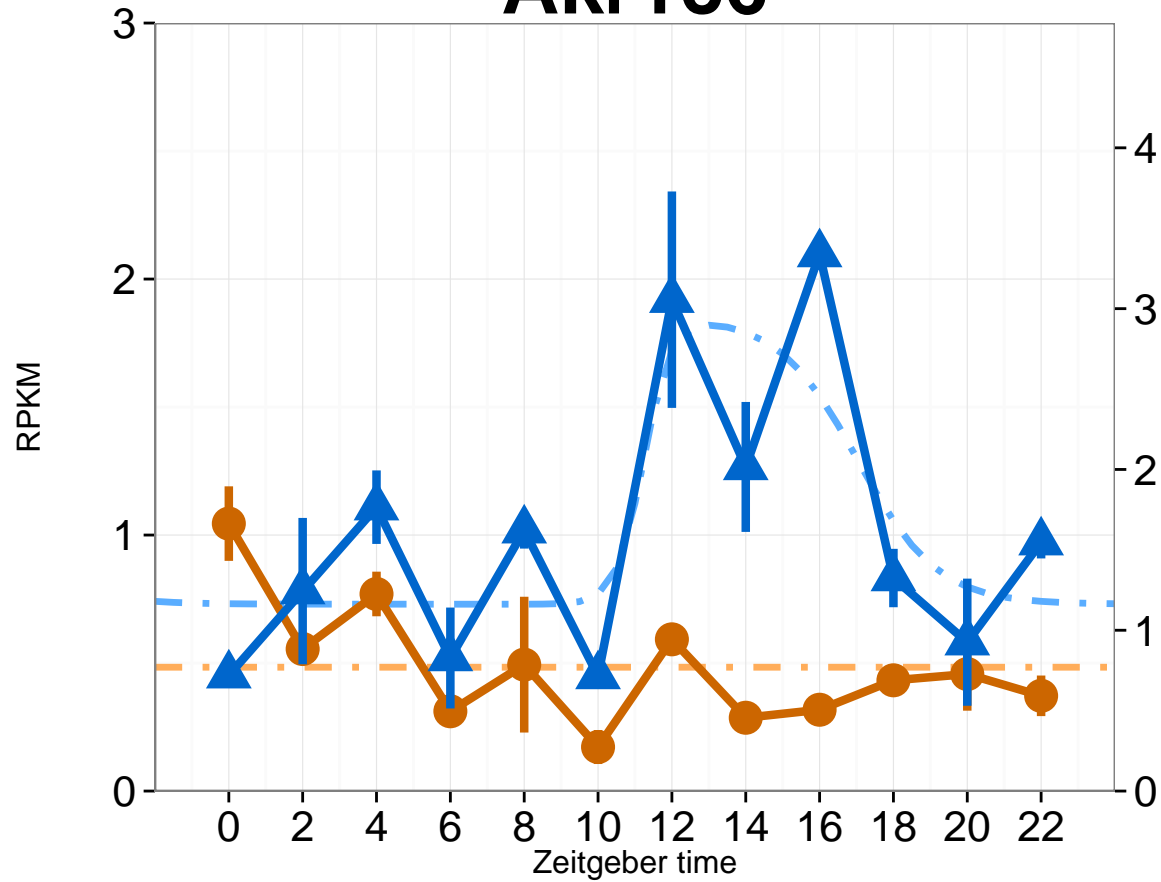

# Akr1c6

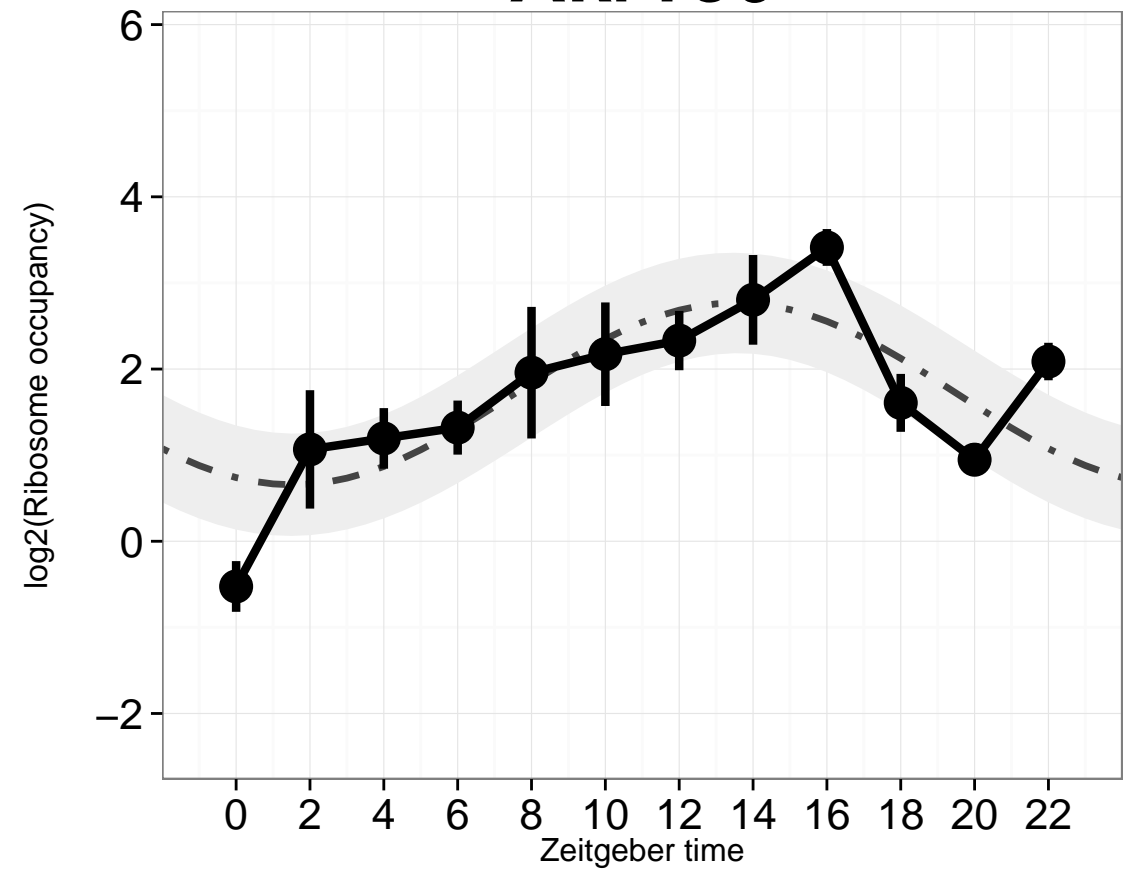

Supplement: Supplementary file 3968 [file 1]

# Paqr7

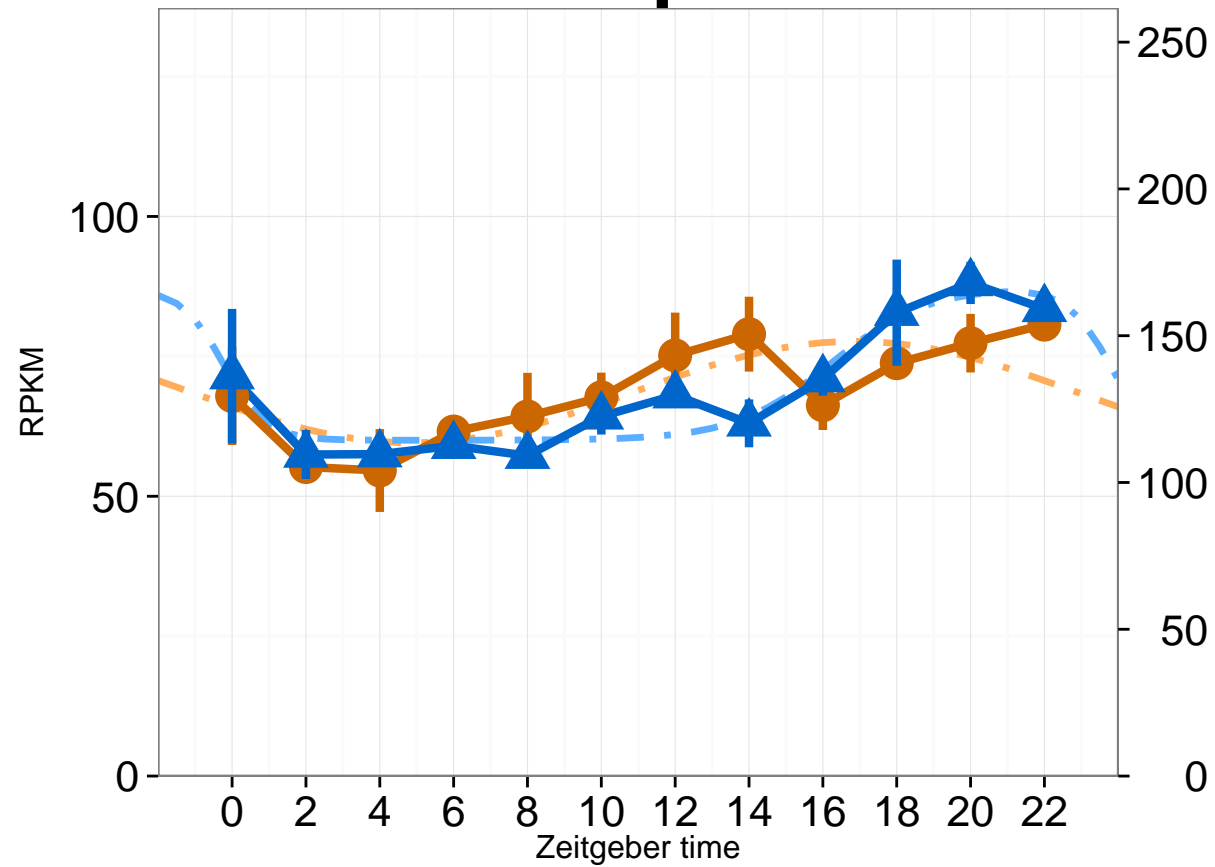

# Paqr7

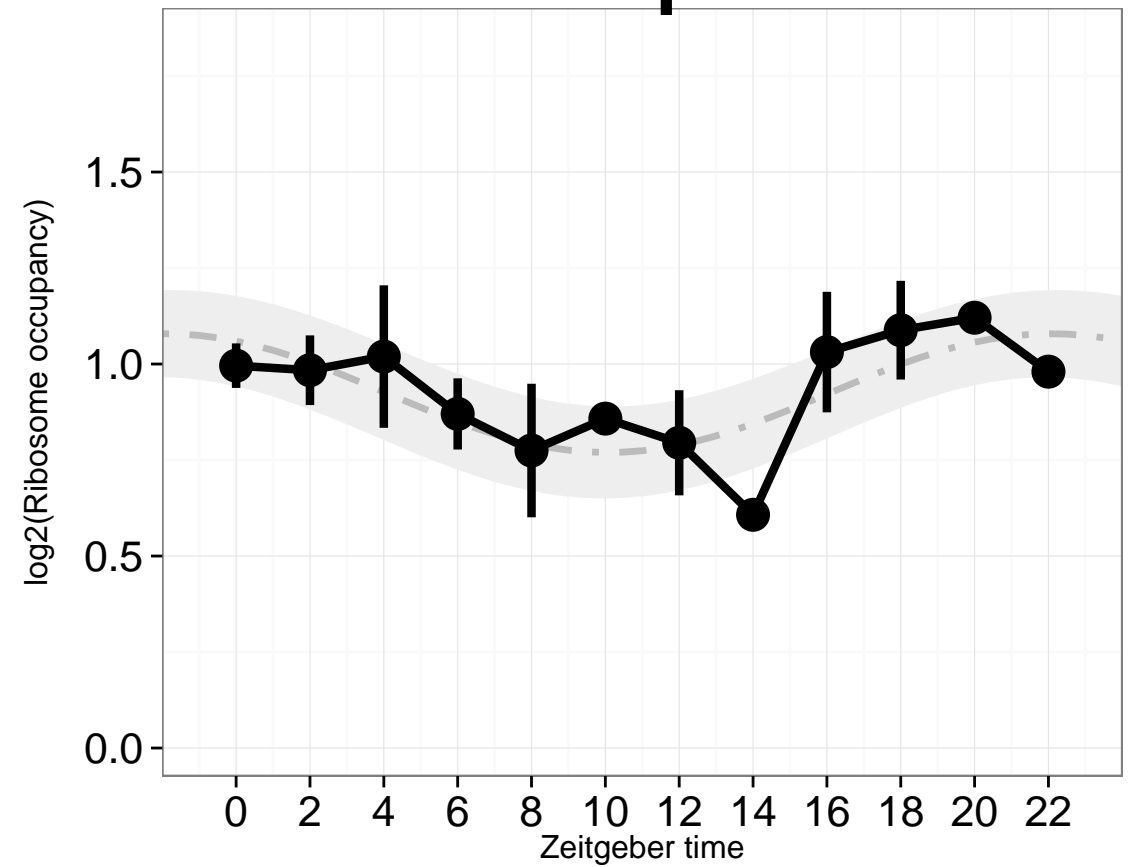

Supplement: Supplementary file 3969 [file 1]

## Spdl1

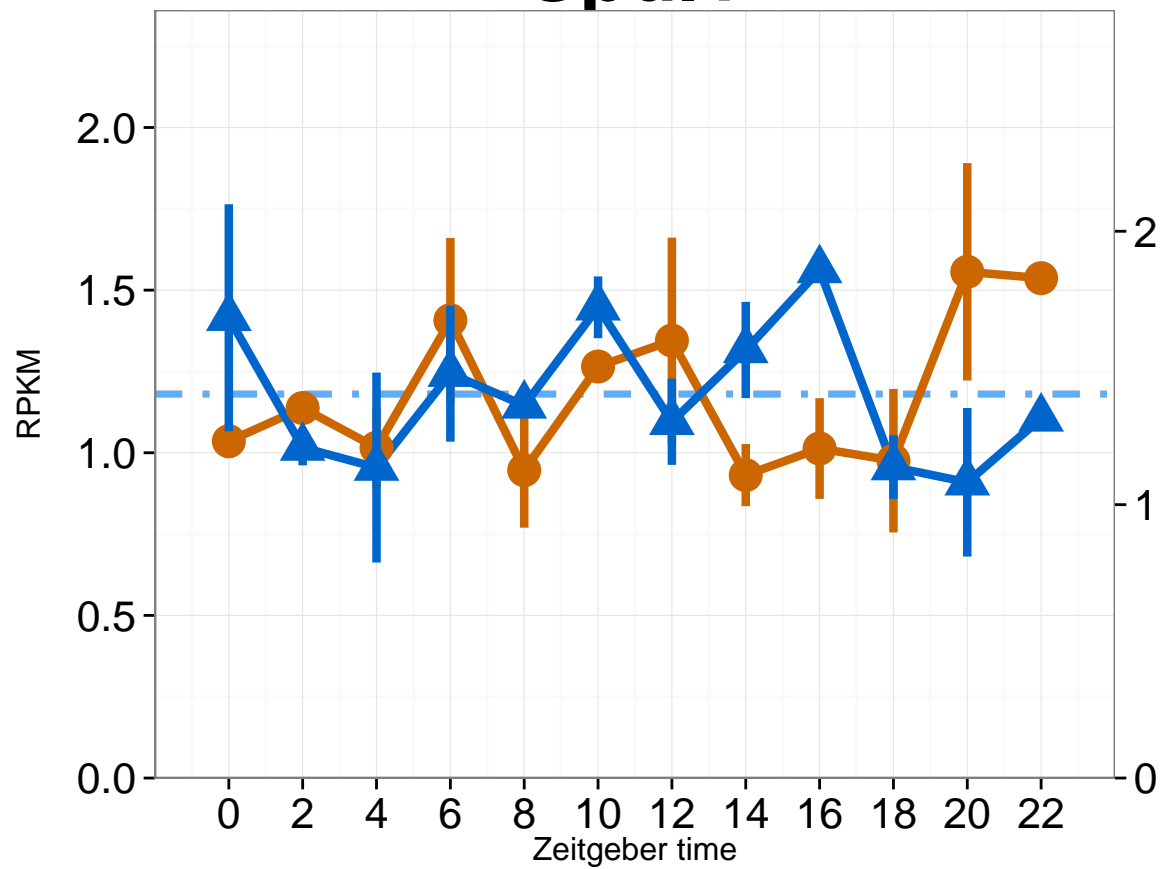

## Spdl1

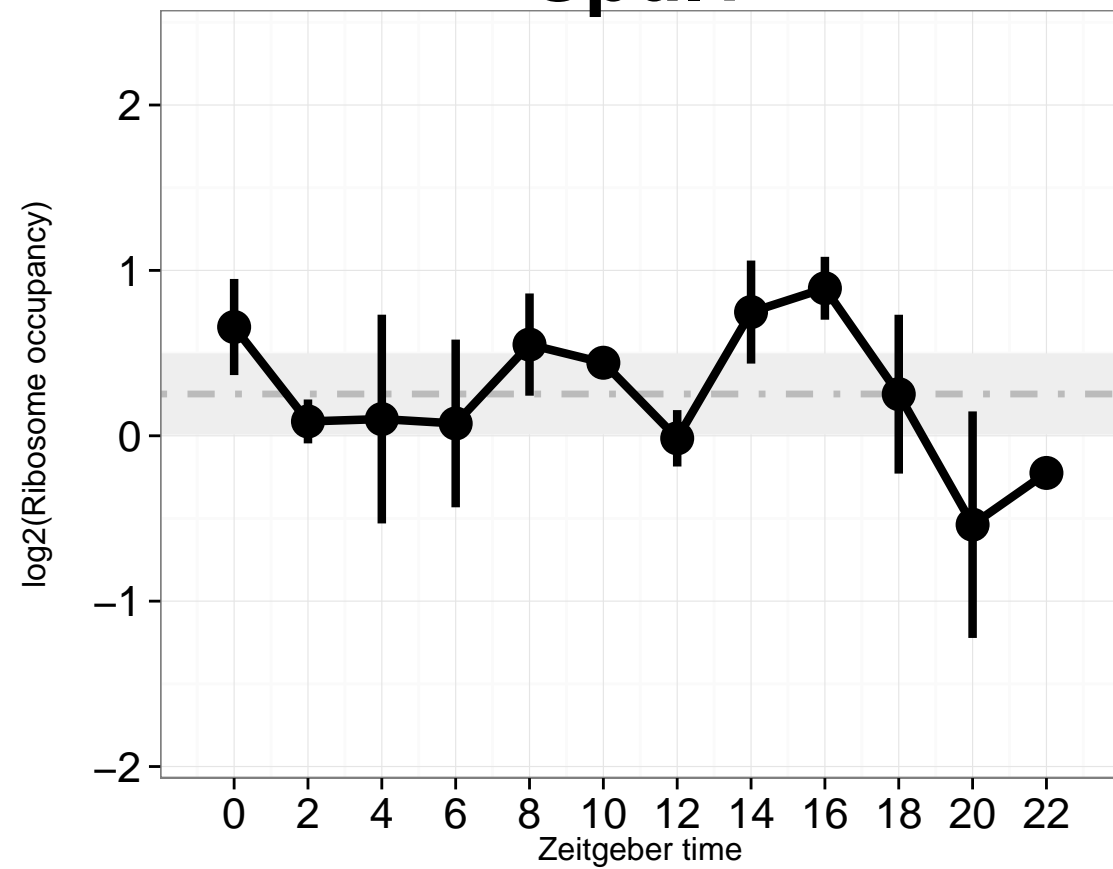

Supplement: Supplementary file 3970 [file 1]

# Prpf8

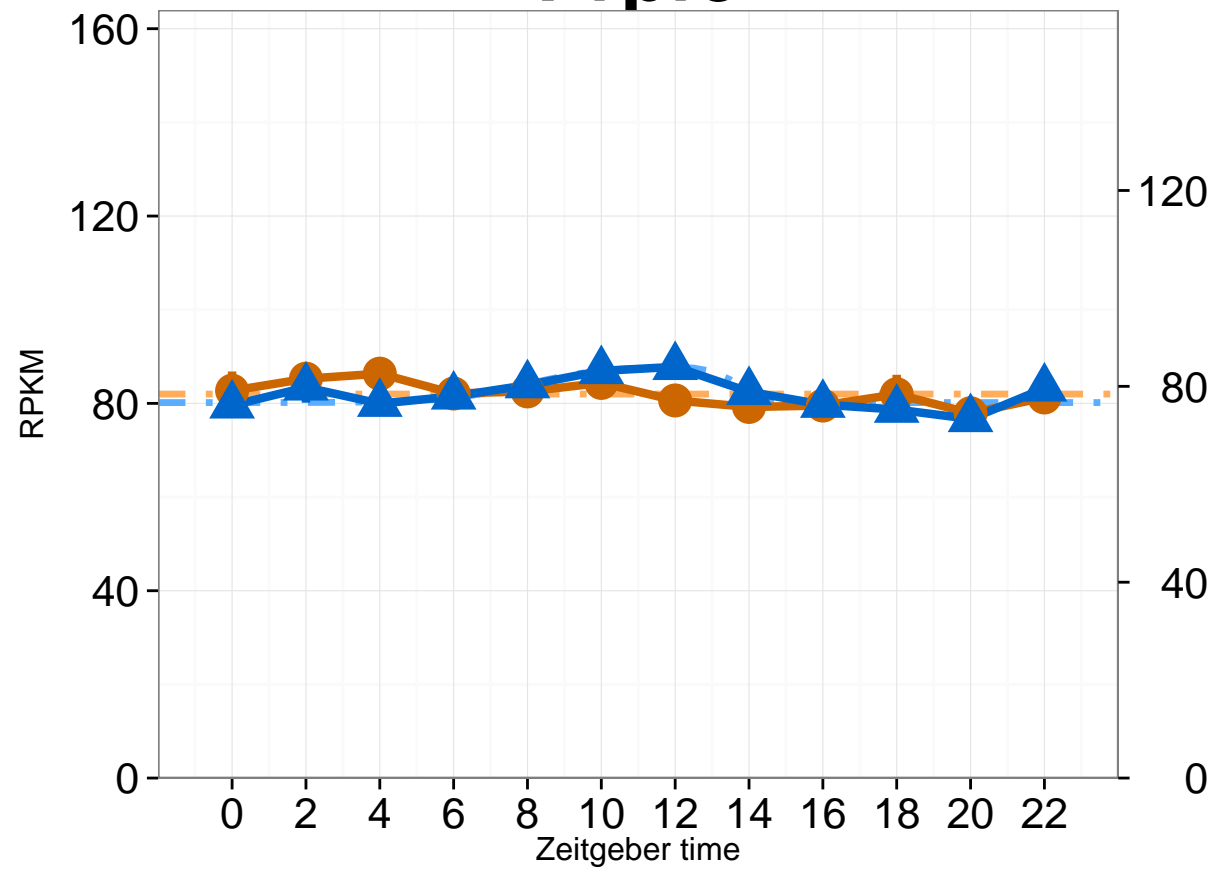

# Prpf8

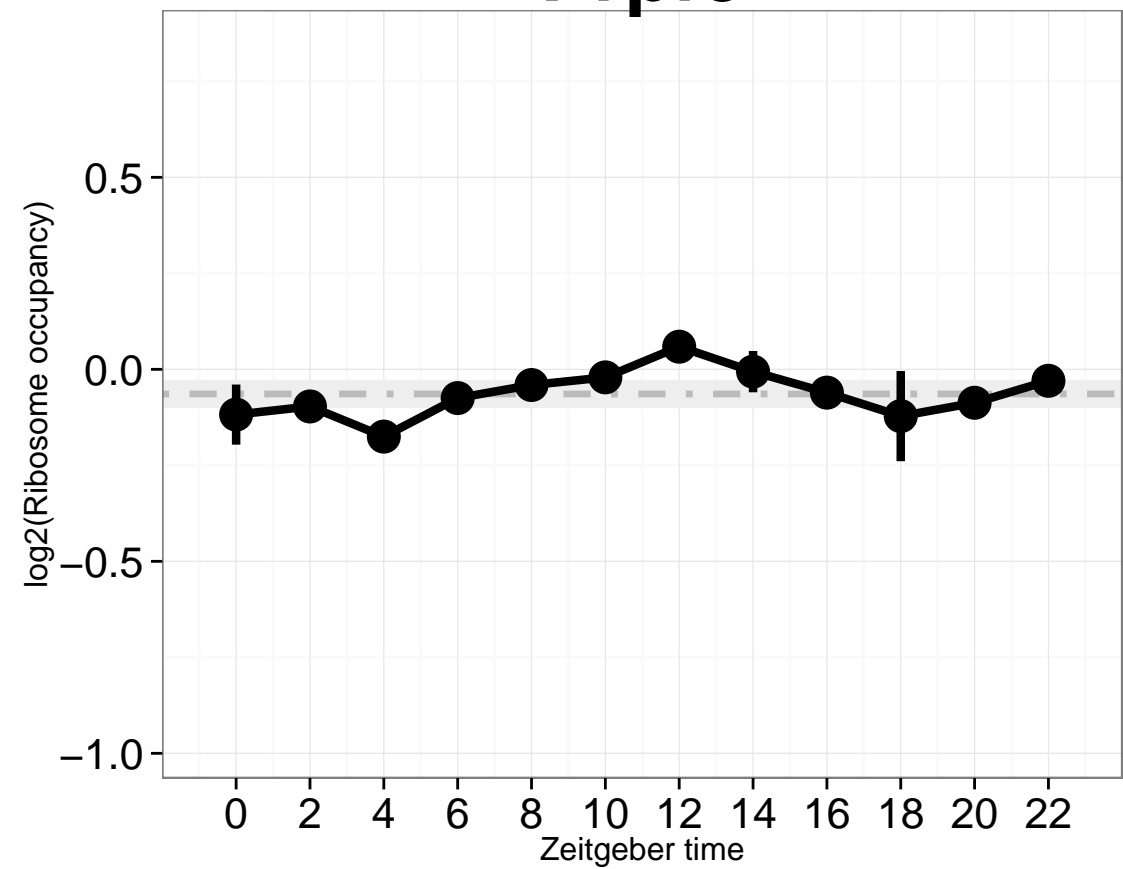

Supplement: Supplementary file 3971 [file 1]

## Slco2a1

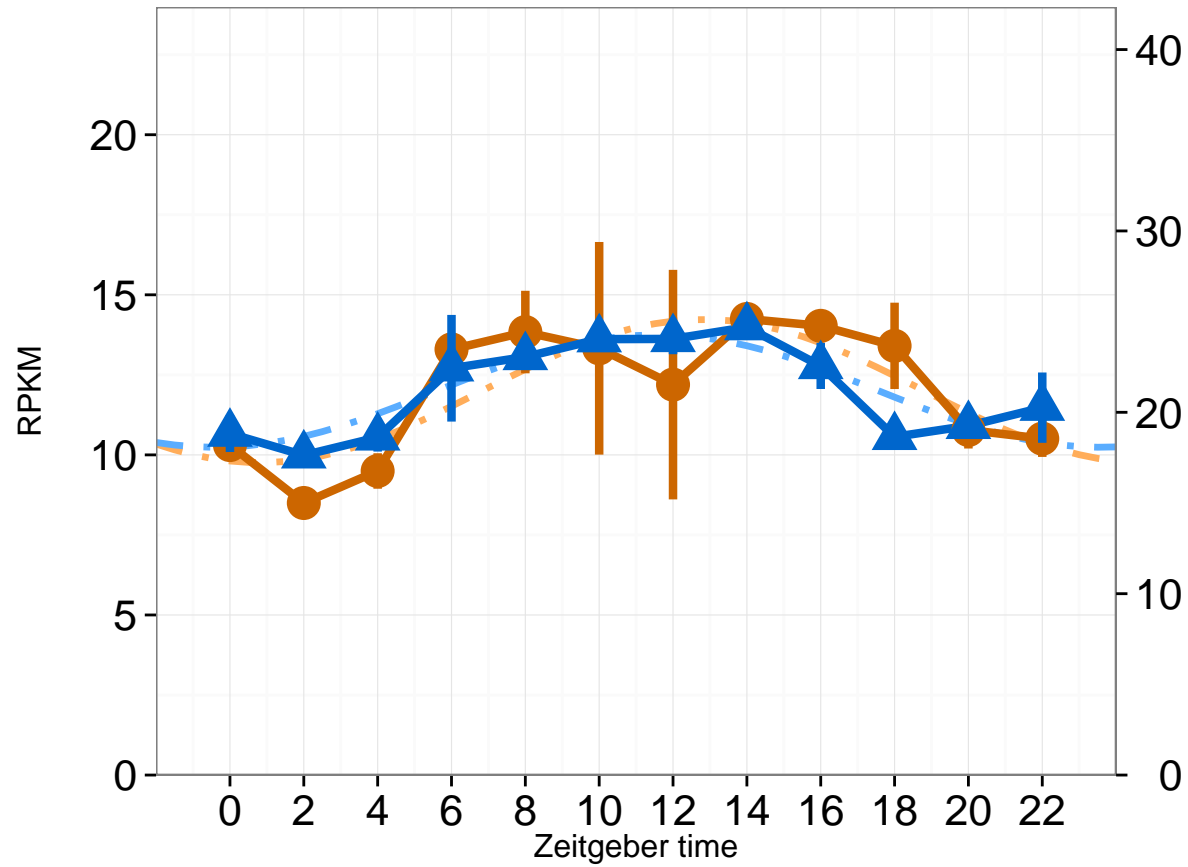

## Slco2a1

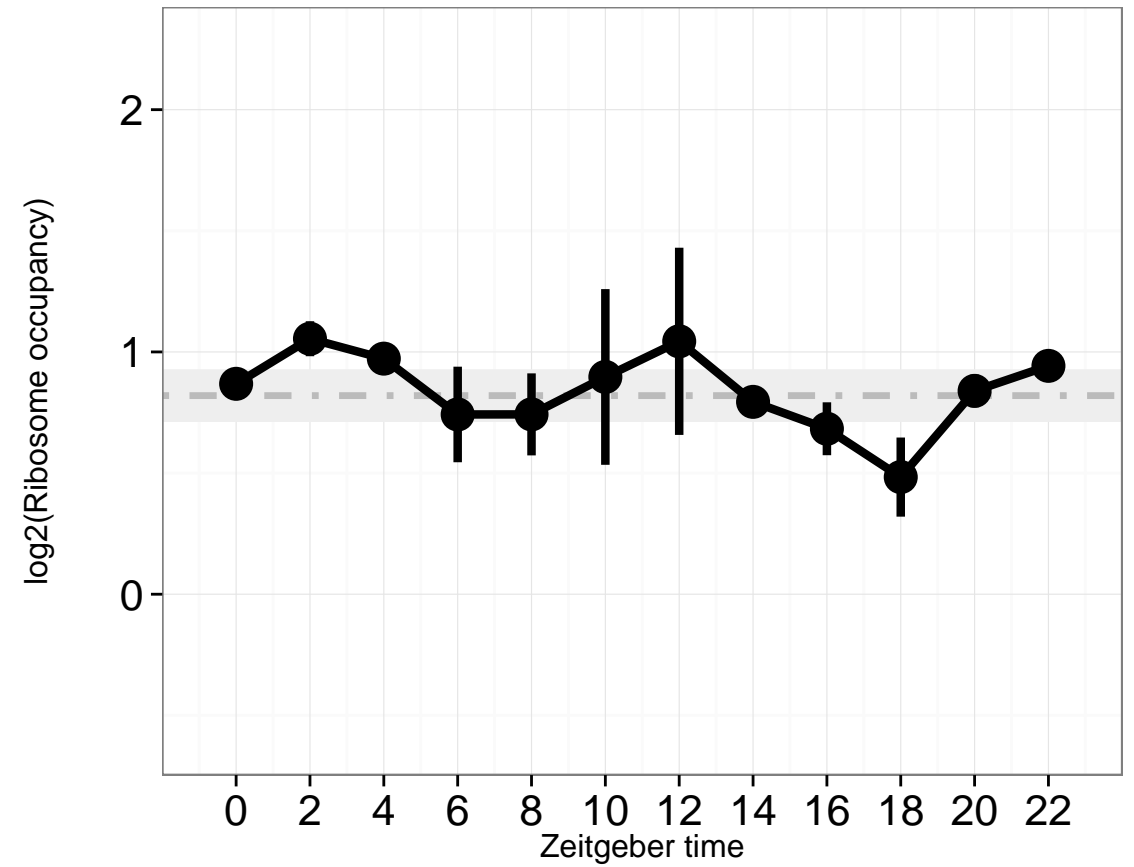

Supplement: Supplementary file 3972 [file 1]

# Msra

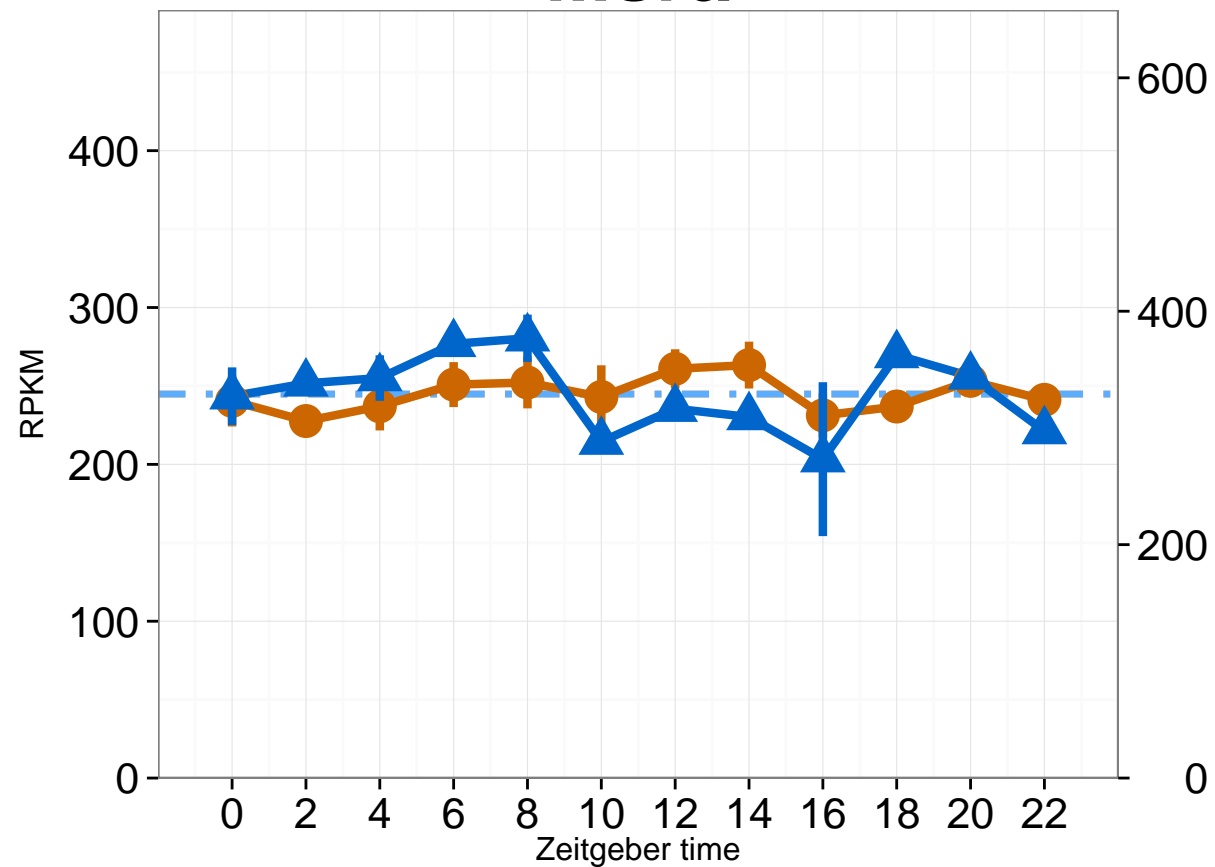

# Msra

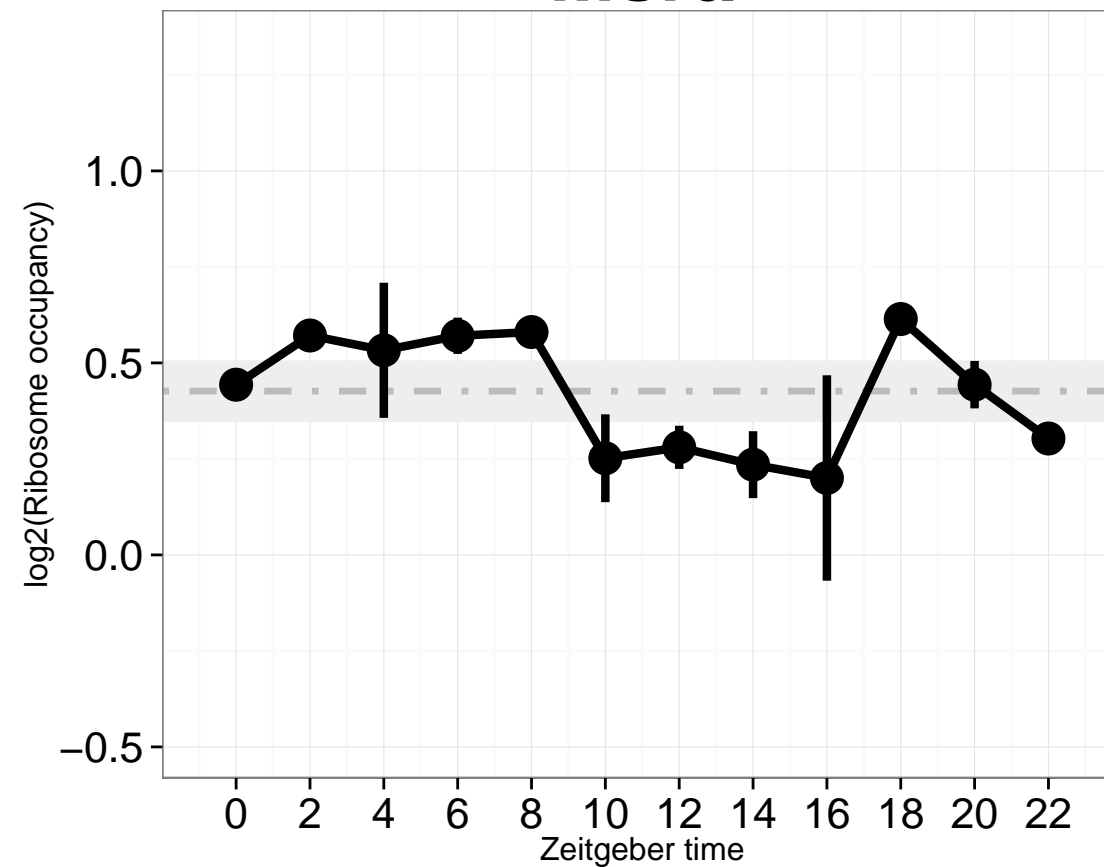

Supplement: Supplementary file 3973 [file 1]

## Pfdn2

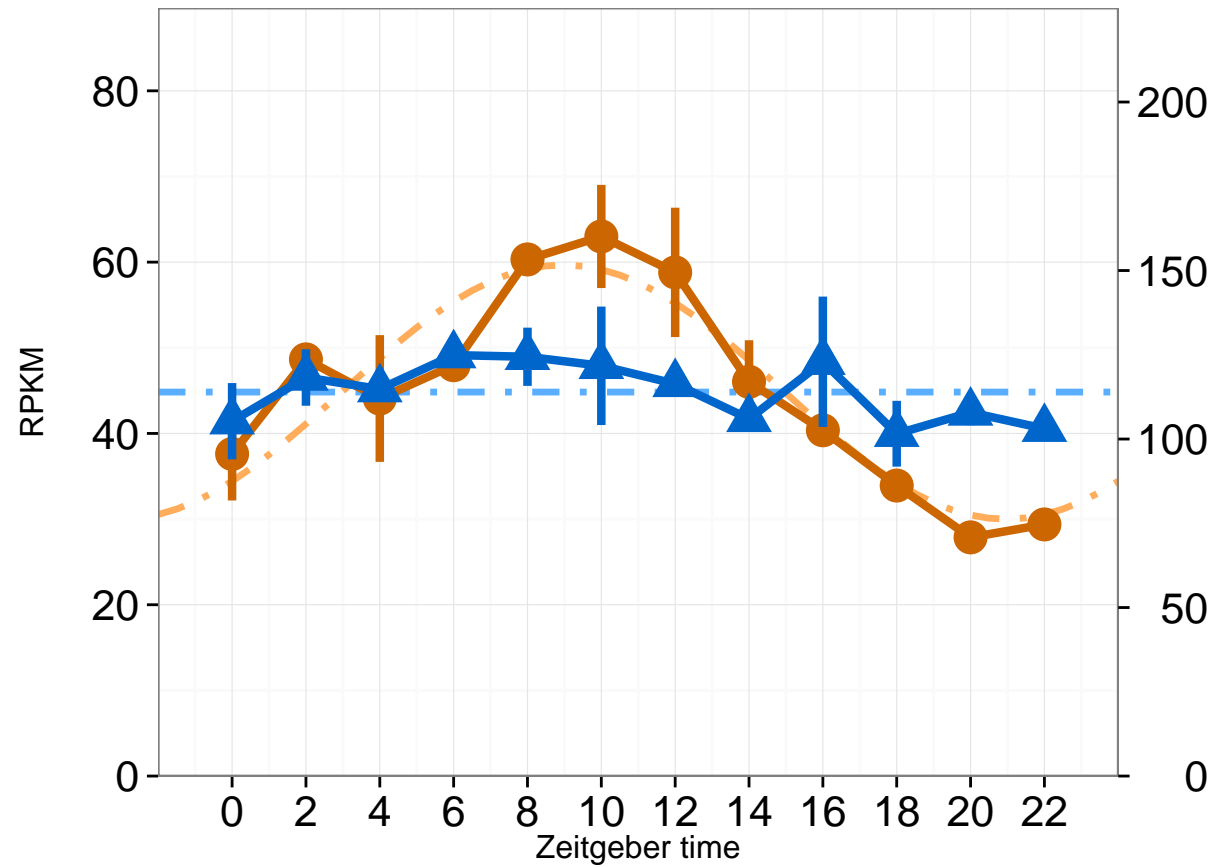

## Pfdn2

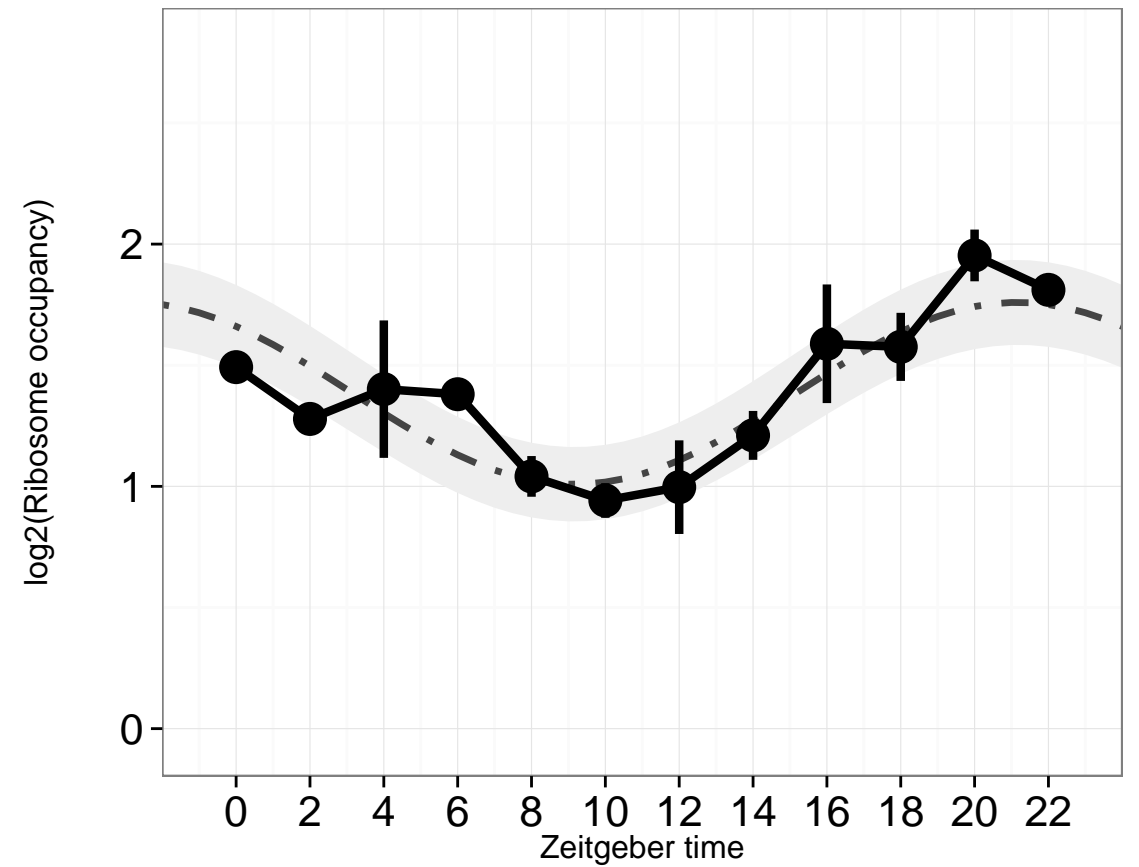

Supplement: Supplementary file 3974 [file 1]

# Prpf4

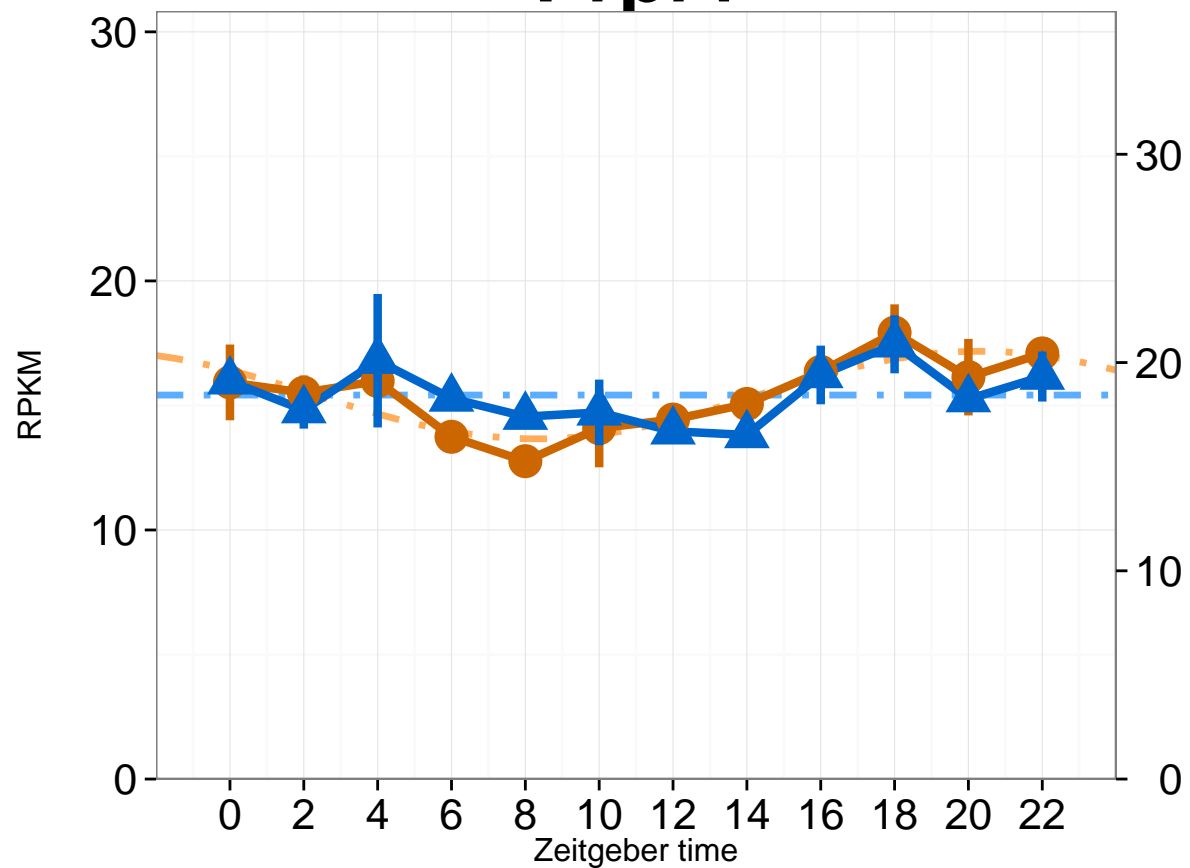

# Prpf4

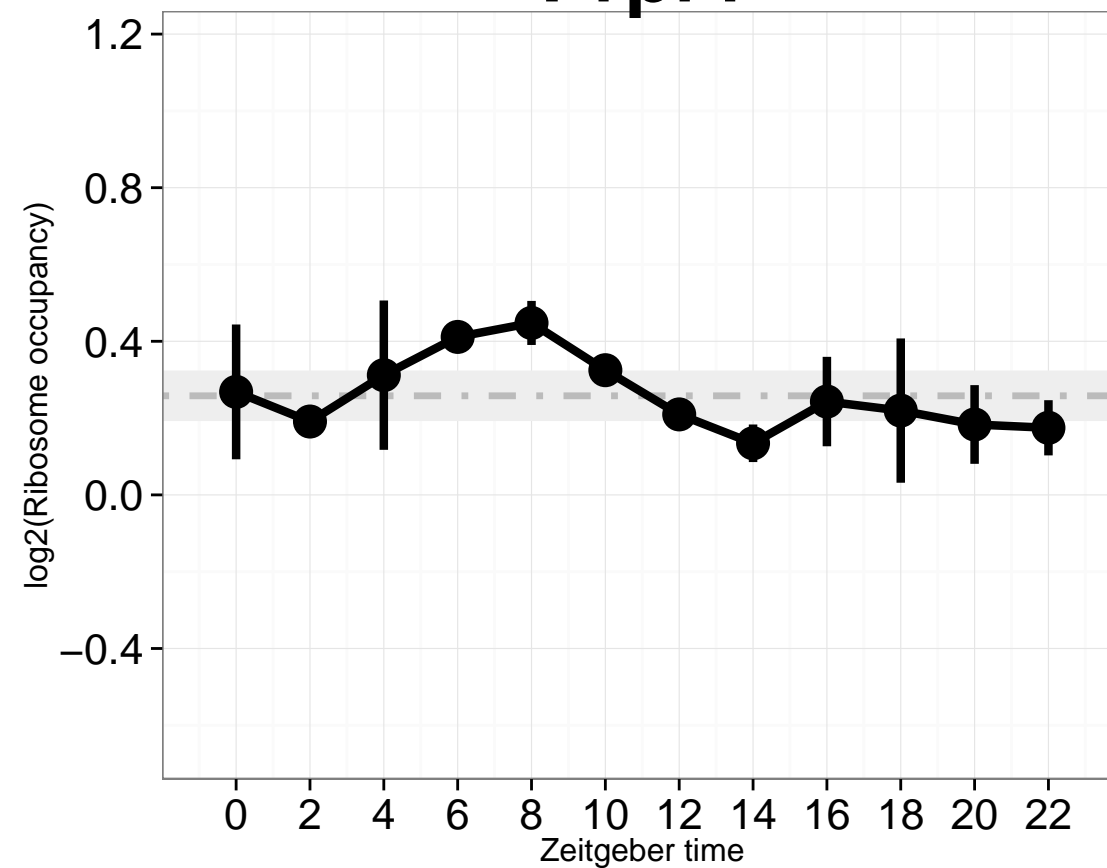

Supplement: Supplementary file 3975 [file 1]

## Cstf2

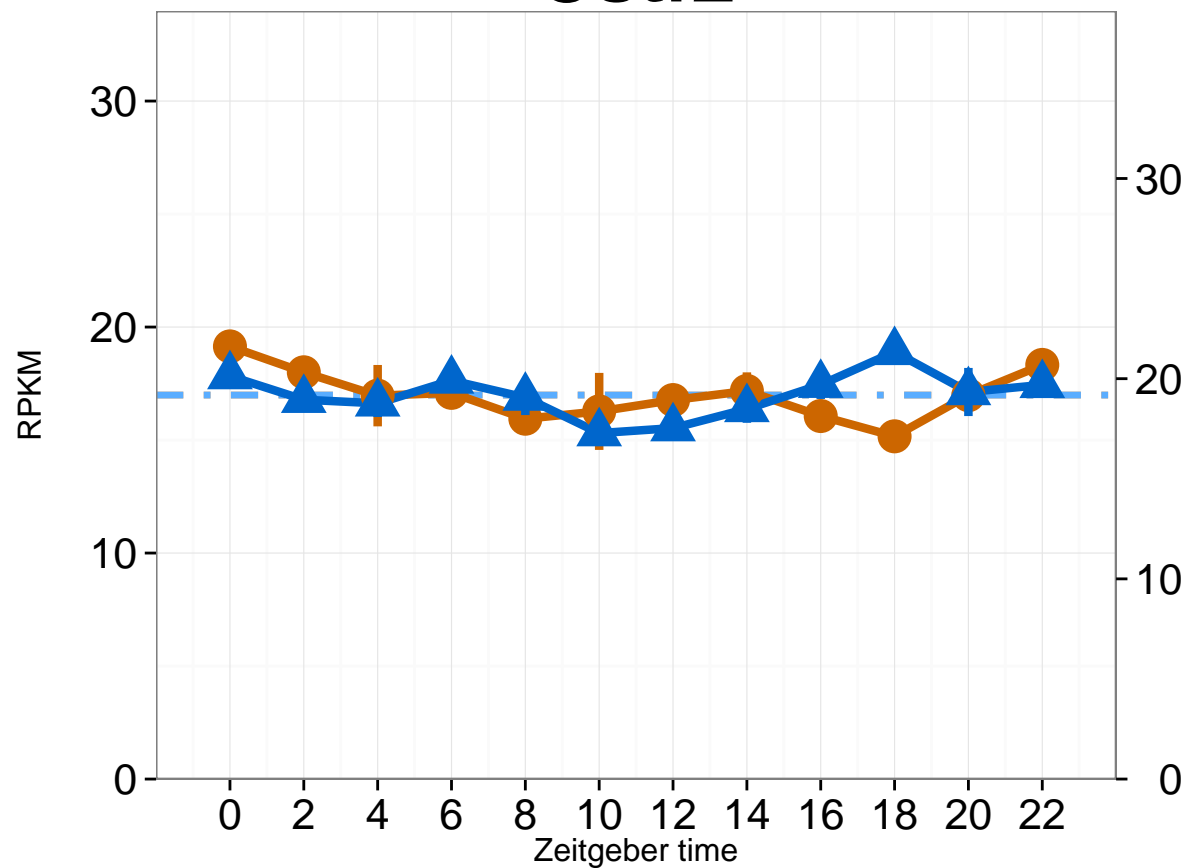

## Cstf2

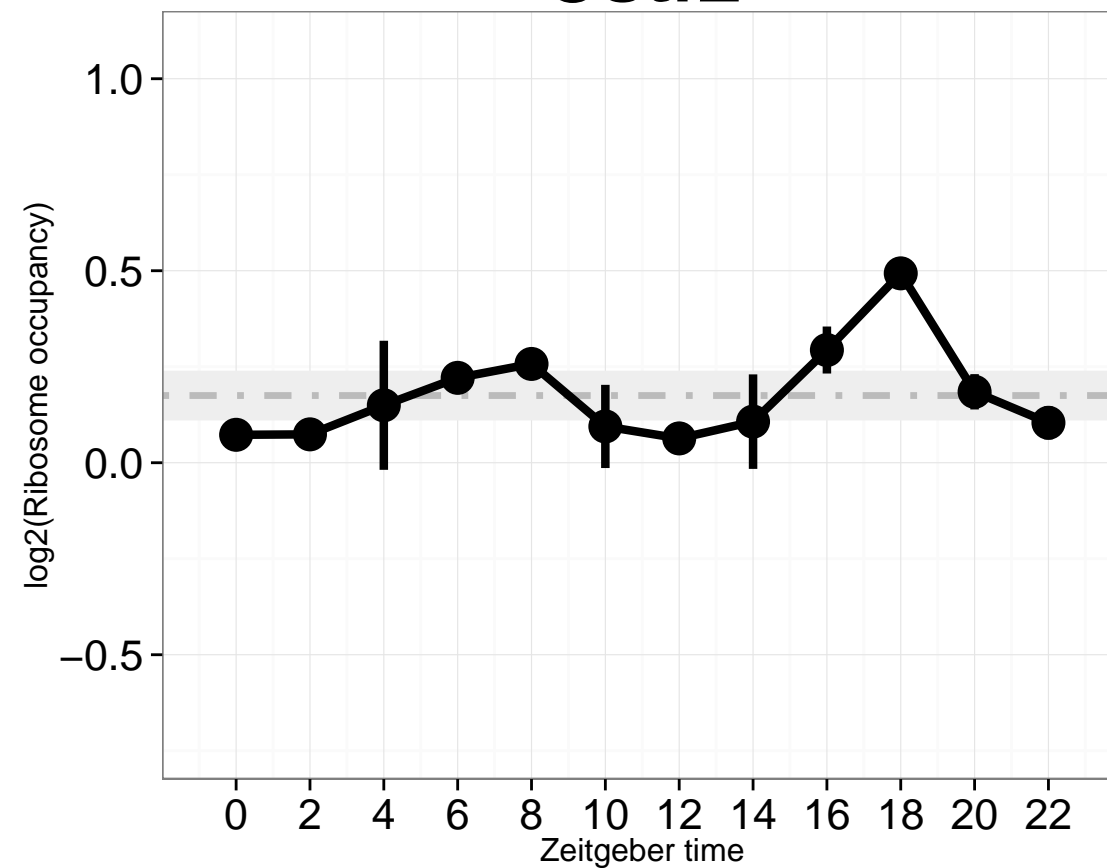

Supplement: Supplementary file 3976 [file 1]

## Ptges

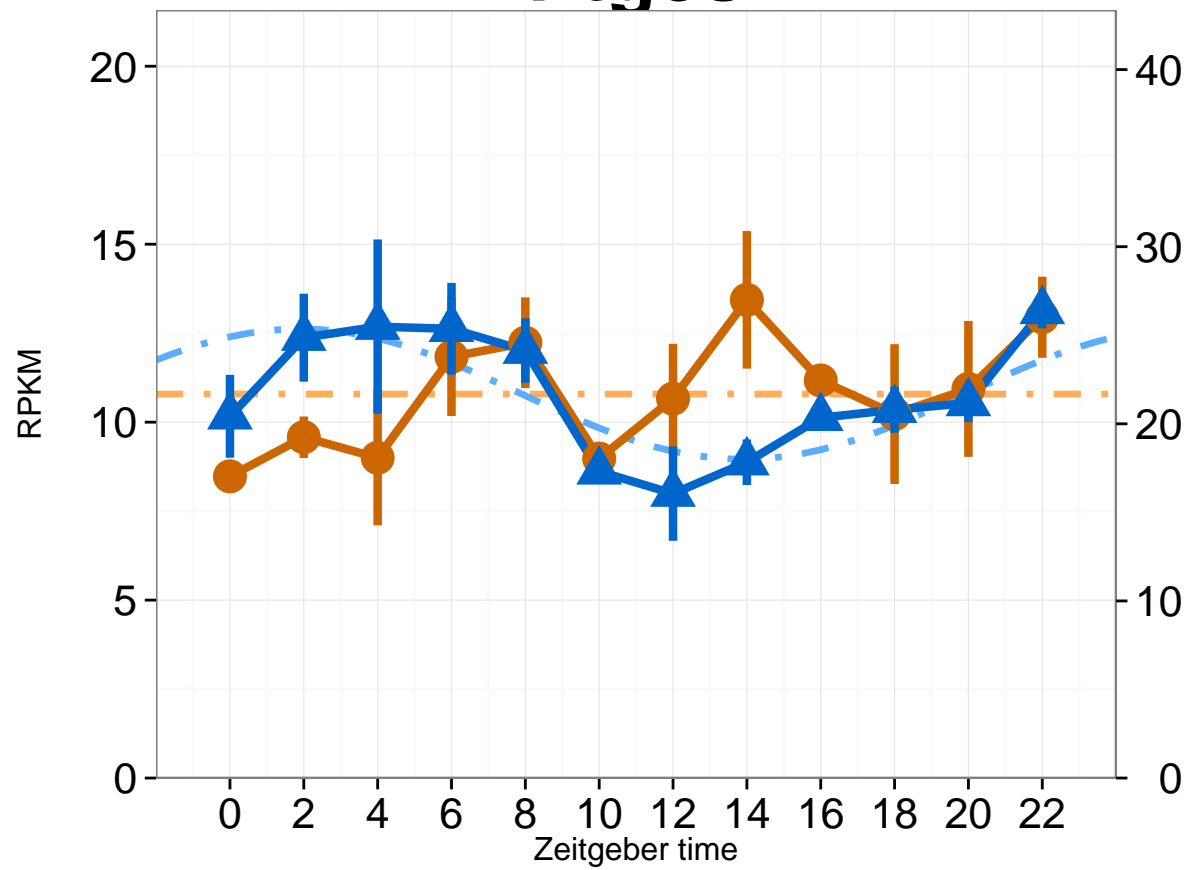

## Ptges

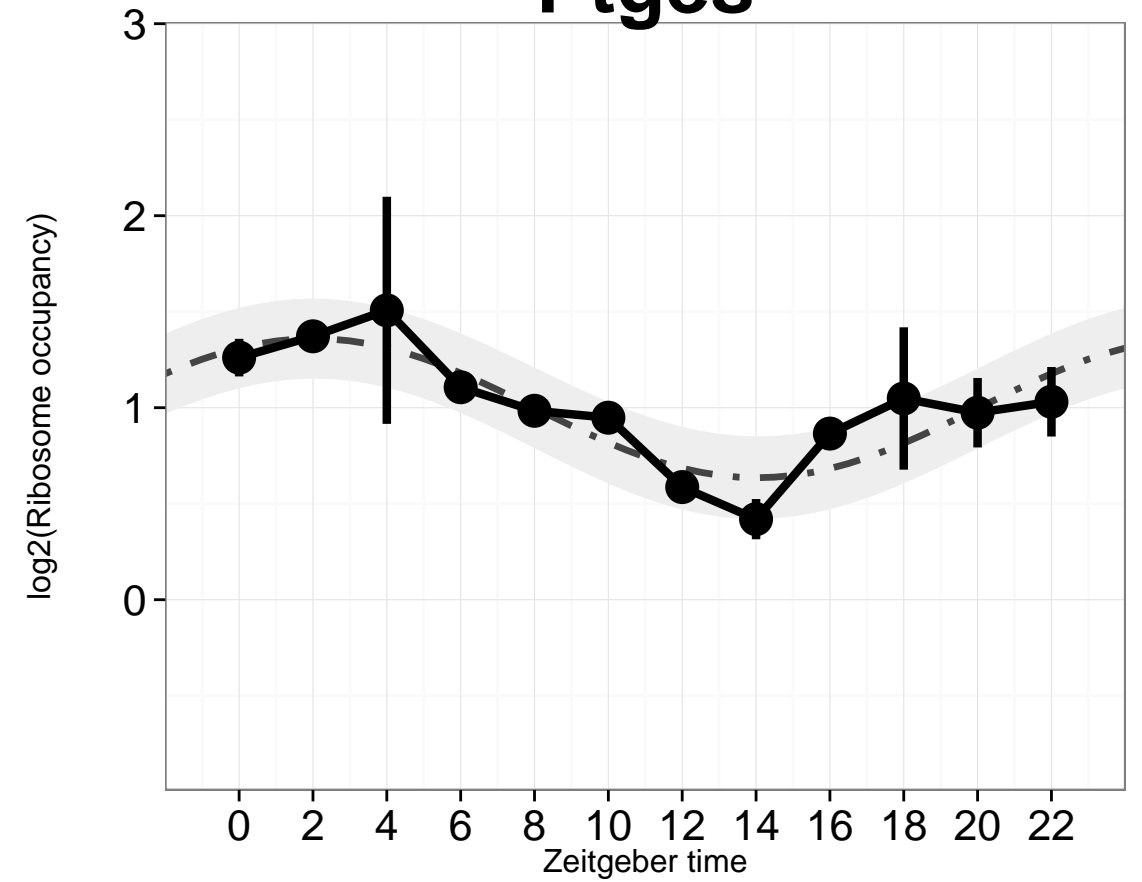

Supplement: Supplementary file 3977 [file 1]

## Guf1

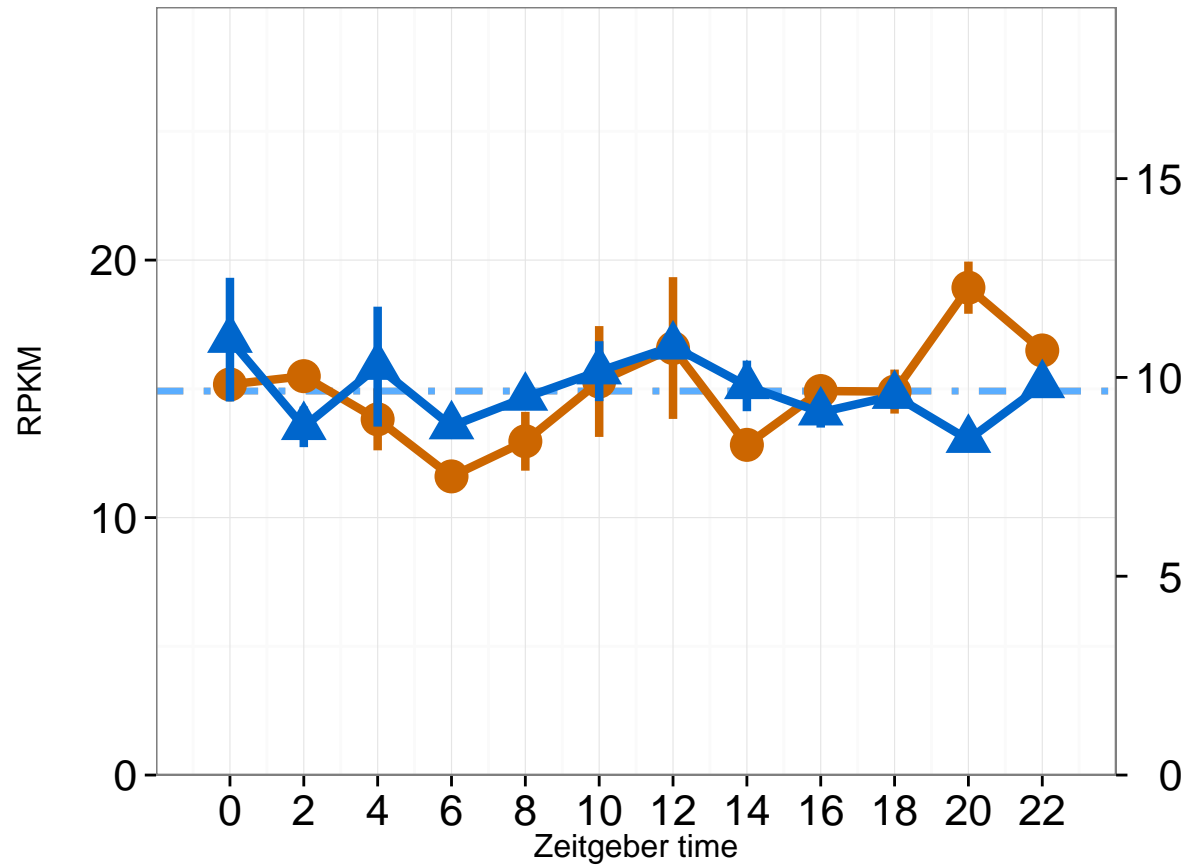

## Guf1

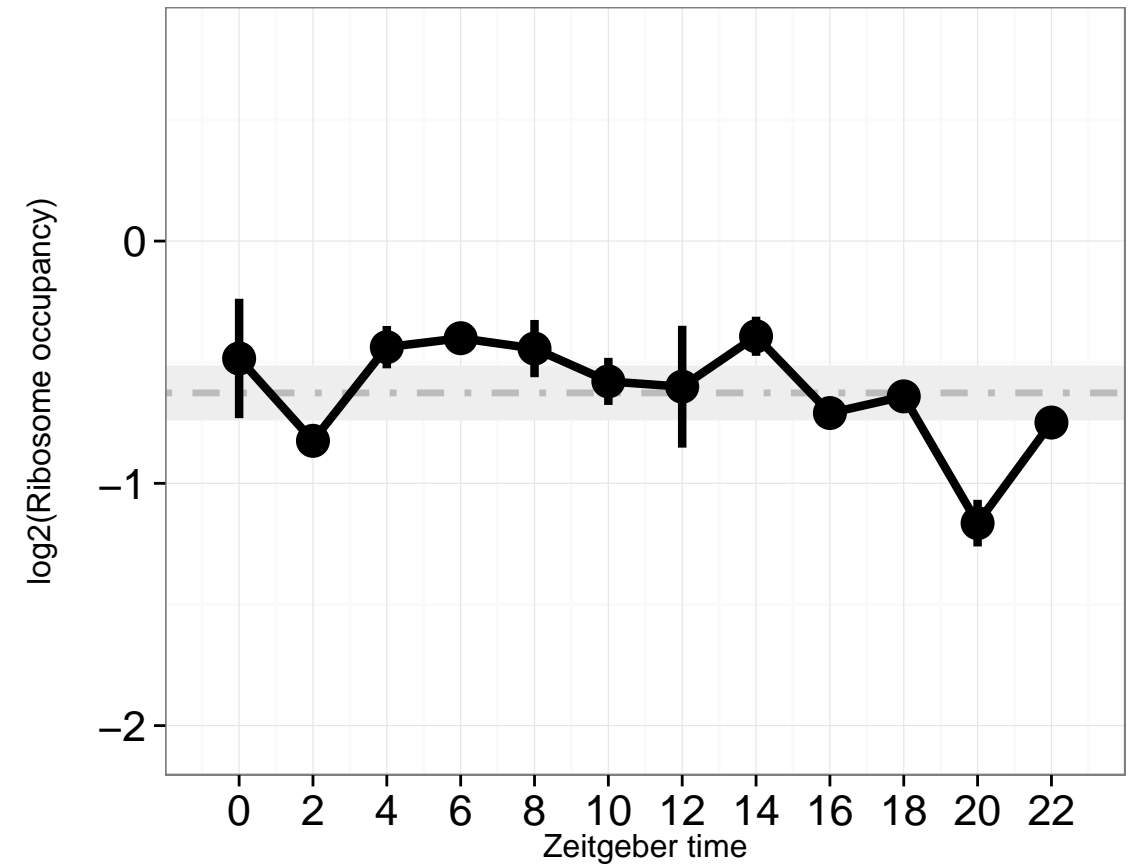

Supplement: Supplementary file 3978 [file 1]

# Tgtp1

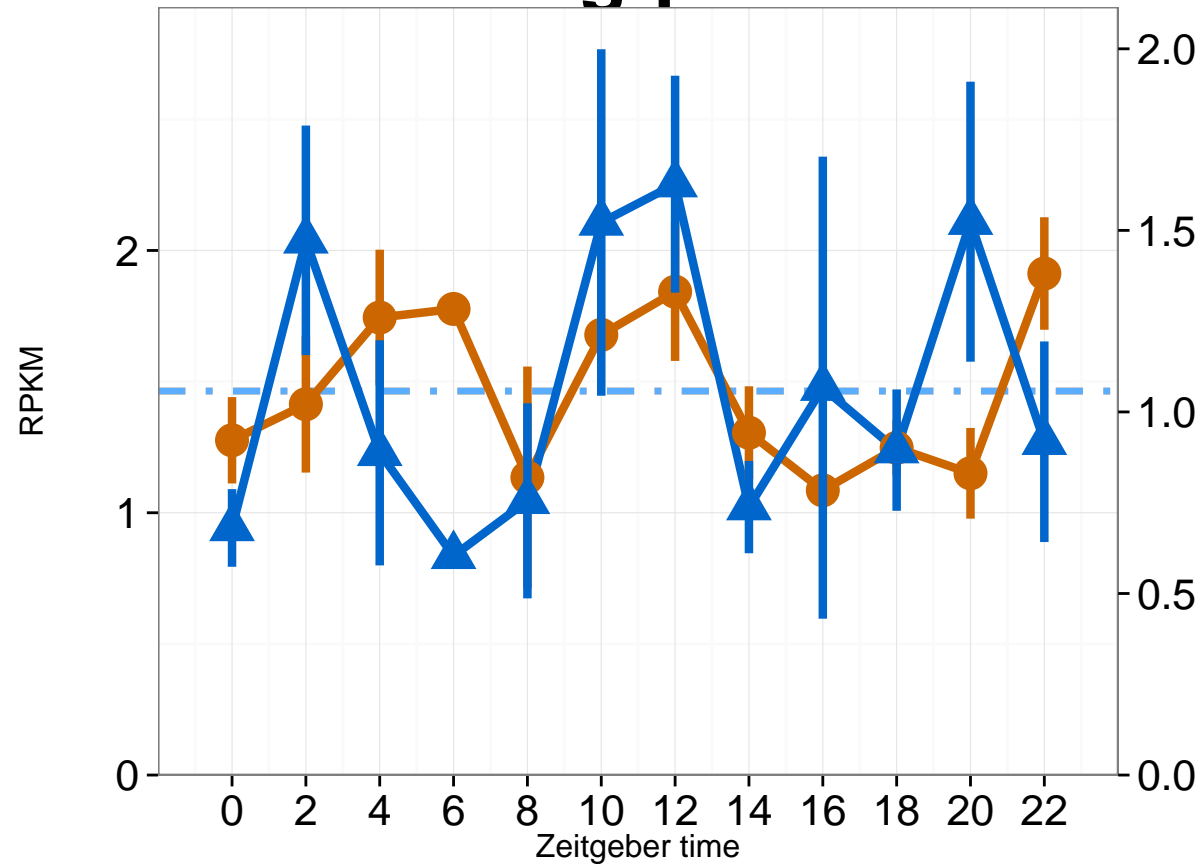

# Tgtp1

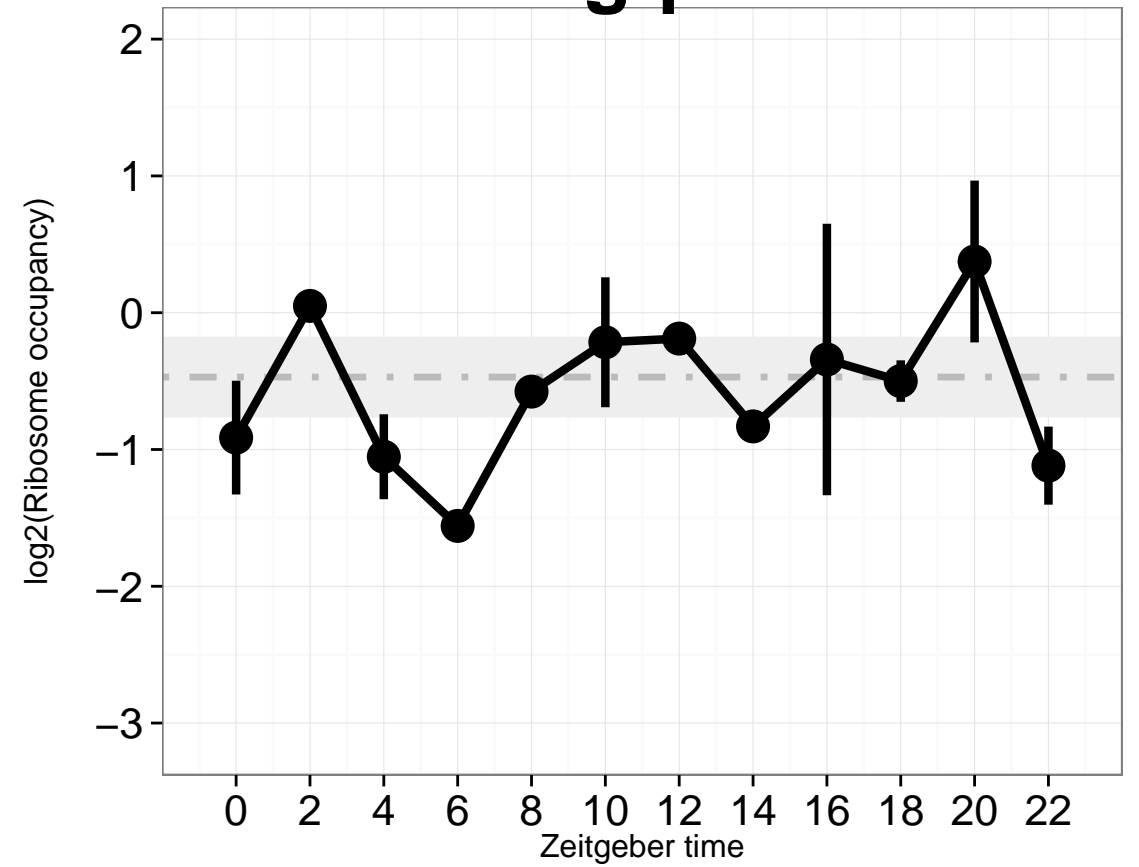

Supplement: Supplementary file 3979 [file 1]

# Tmem129

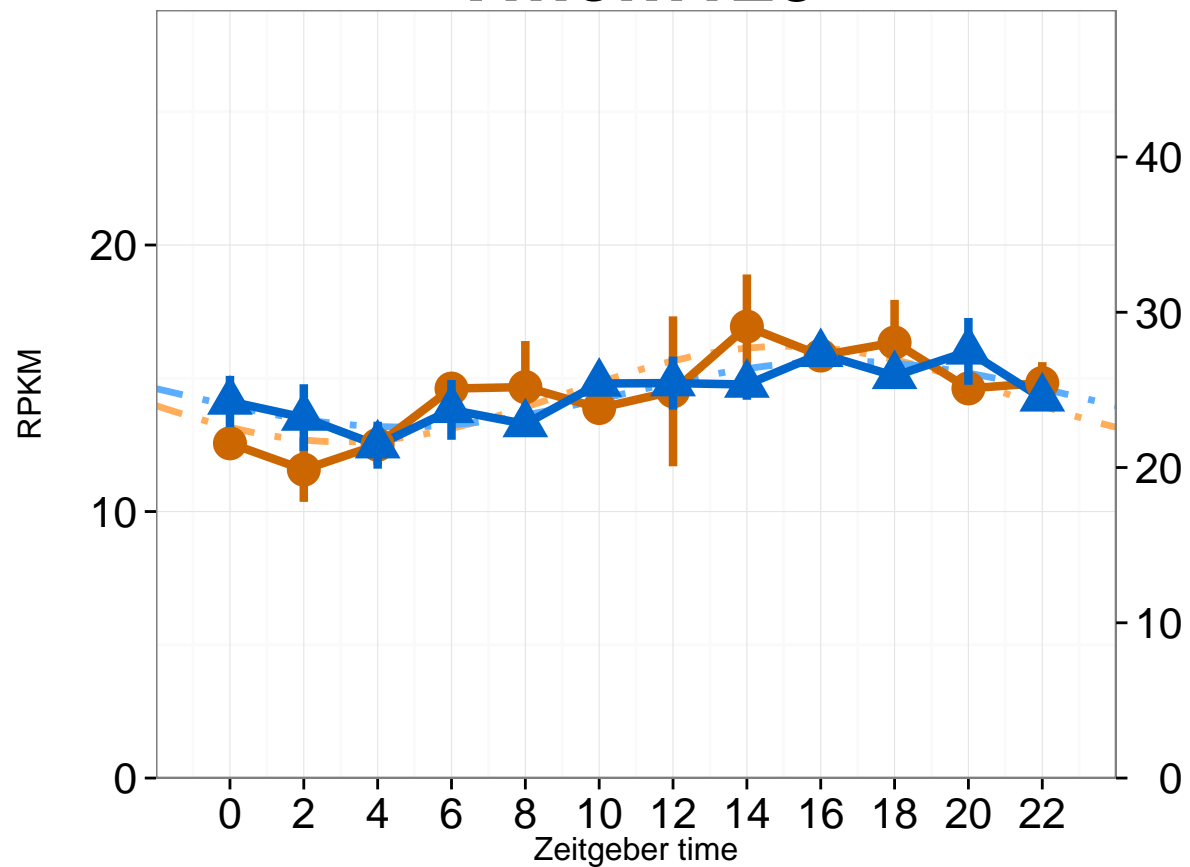

# Tmem129

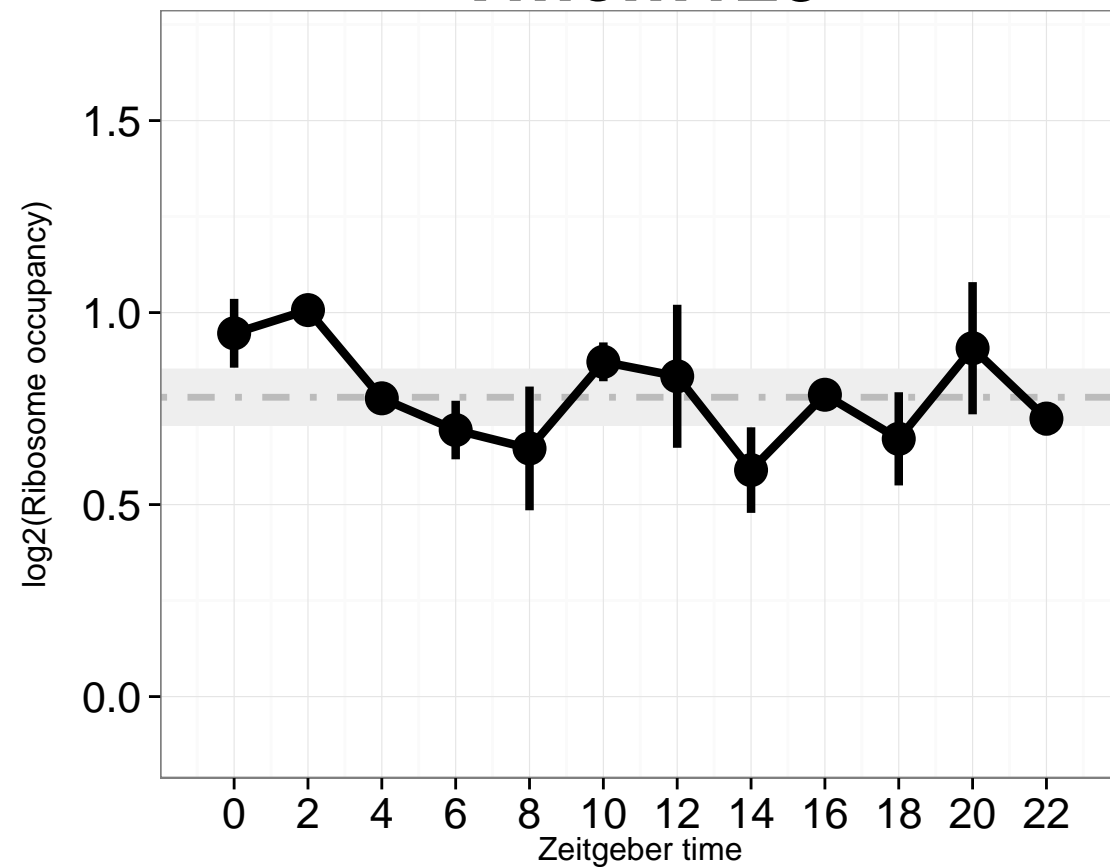

Supplement: Supplementary file 3980 [file 1]

## Snapc5

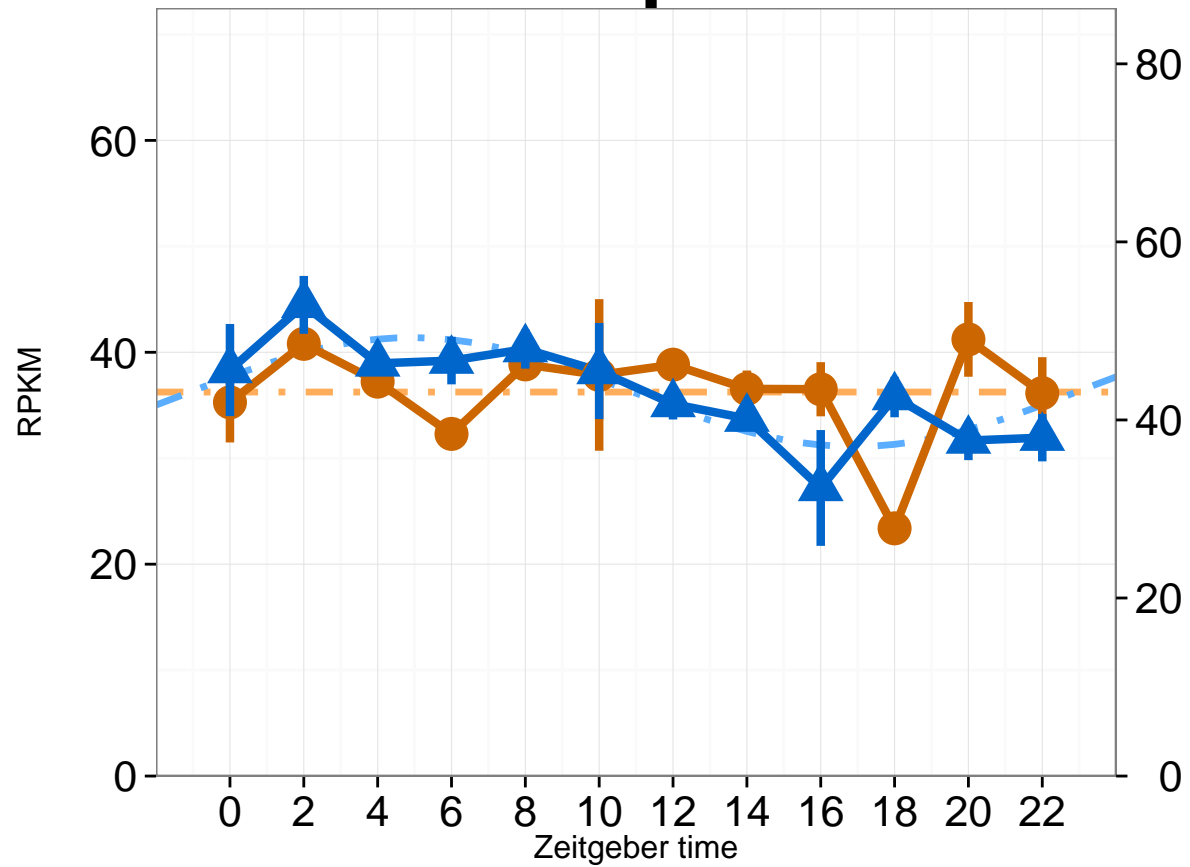

## Snapc5

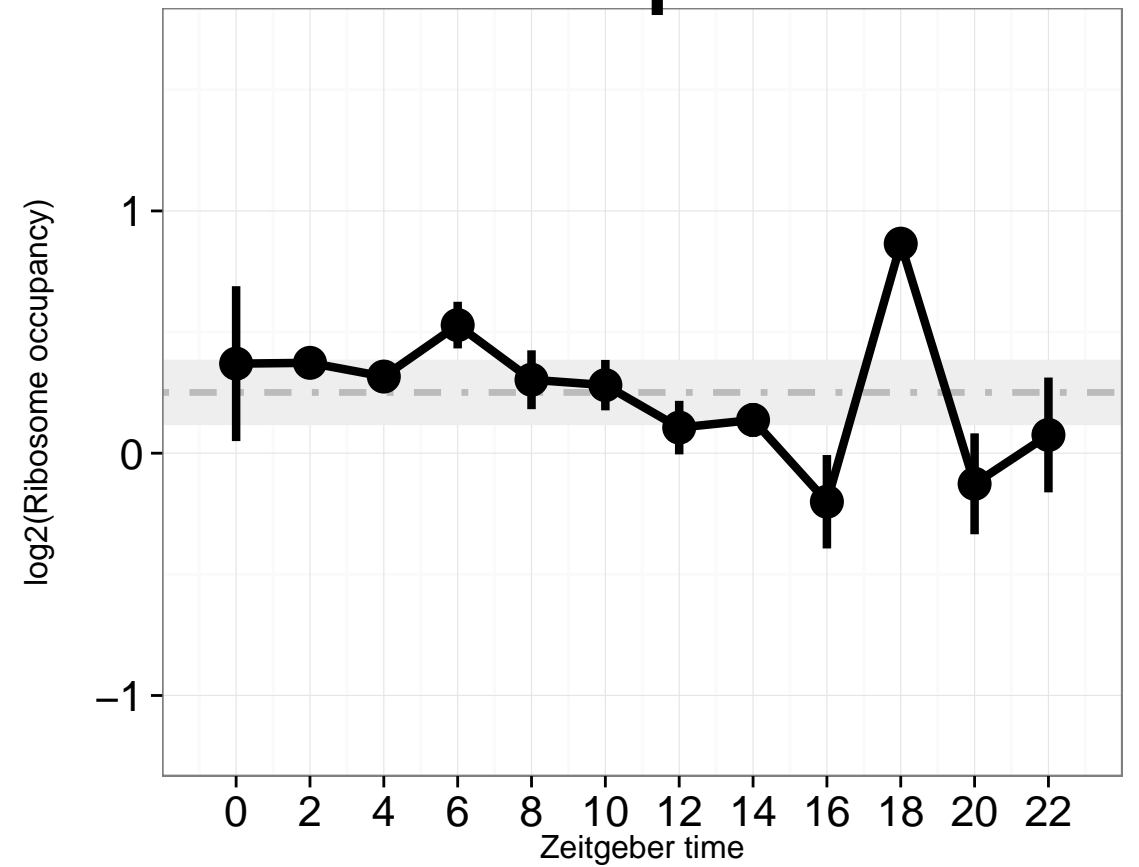

Supplement: Supplementary file 3981 [file 1]

## Trib1

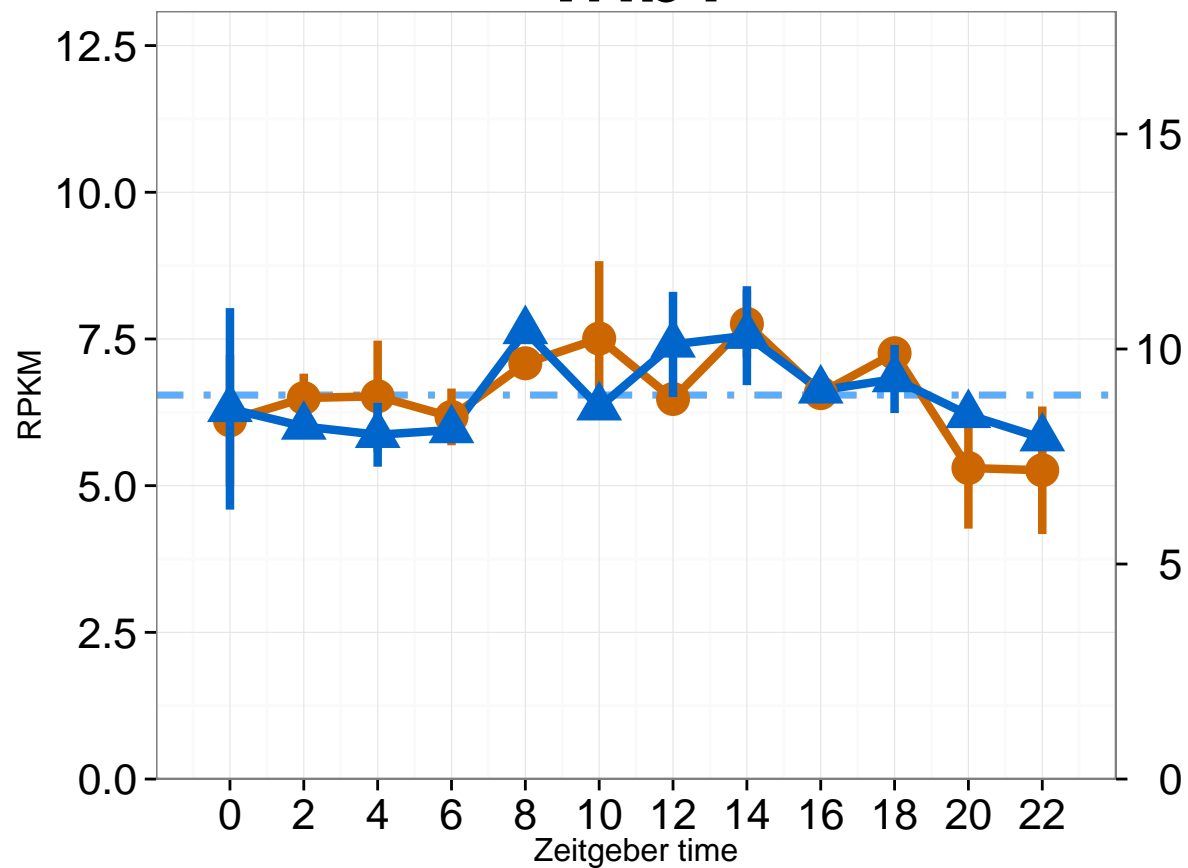

## Trib1

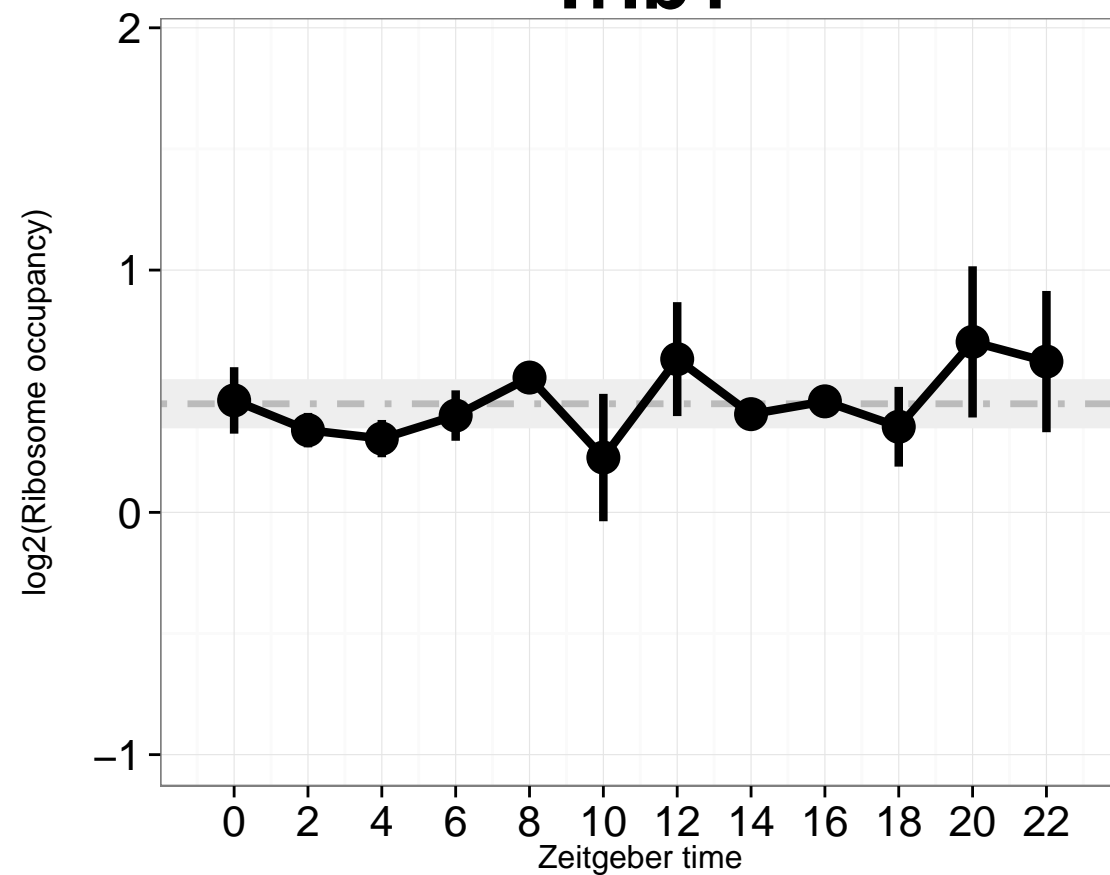

Supplement: Supplementary file 3982 [file 1]

# Gtpbp2

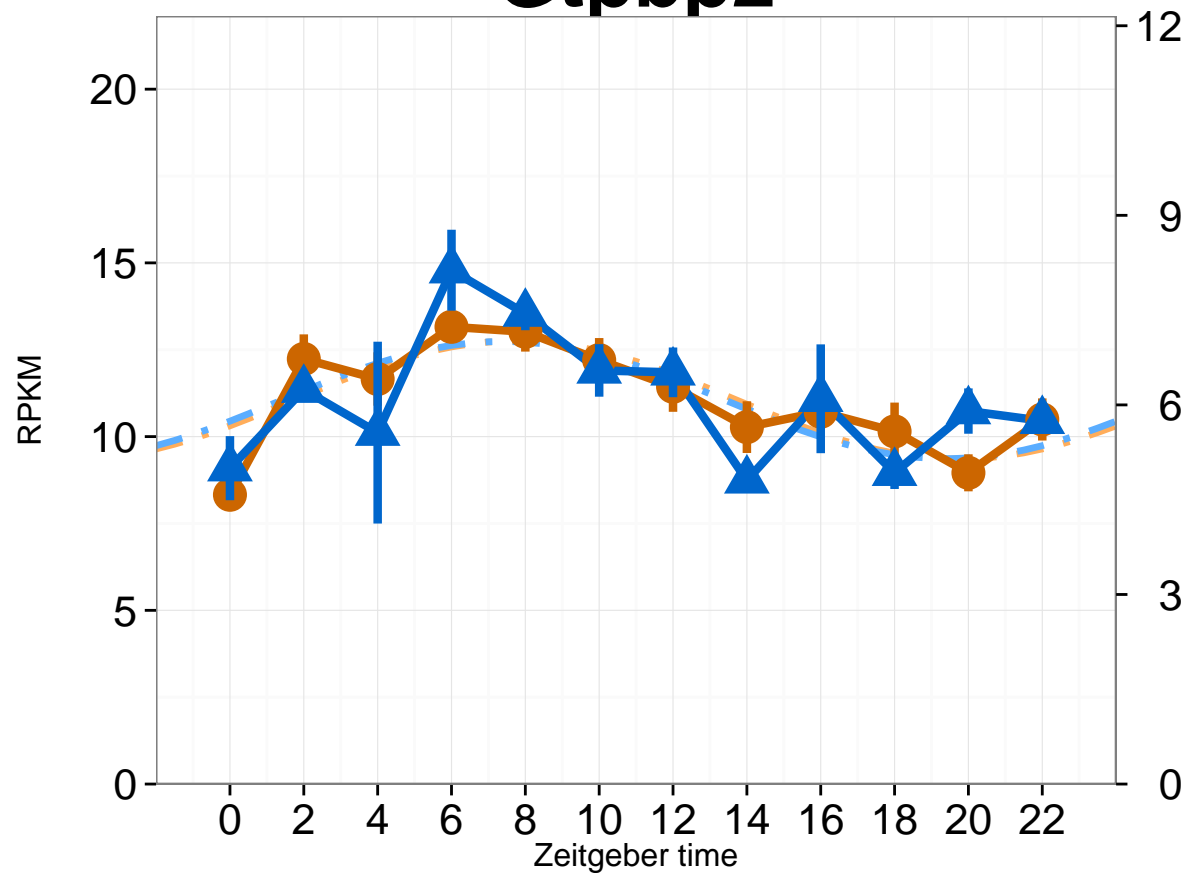

# Gtpbp2

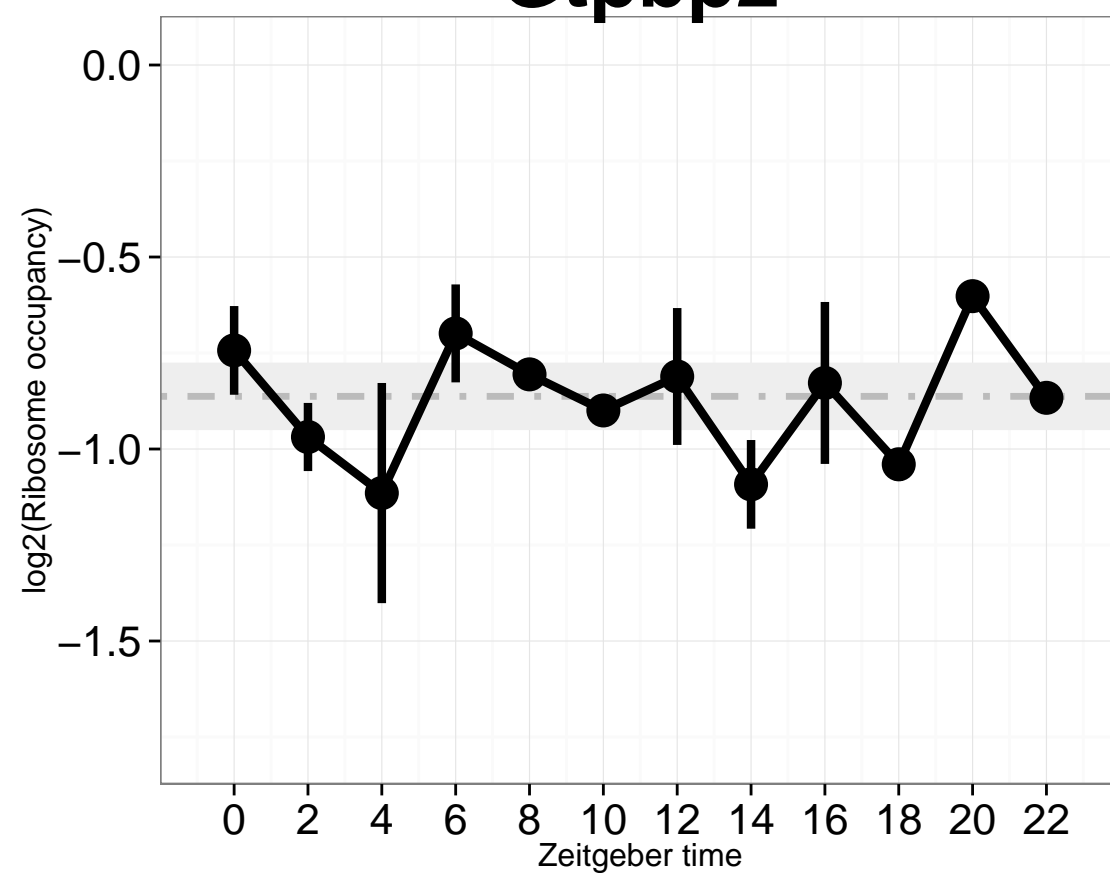

Supplement: Supplementary file 3983 [file 1]

# Lpin3

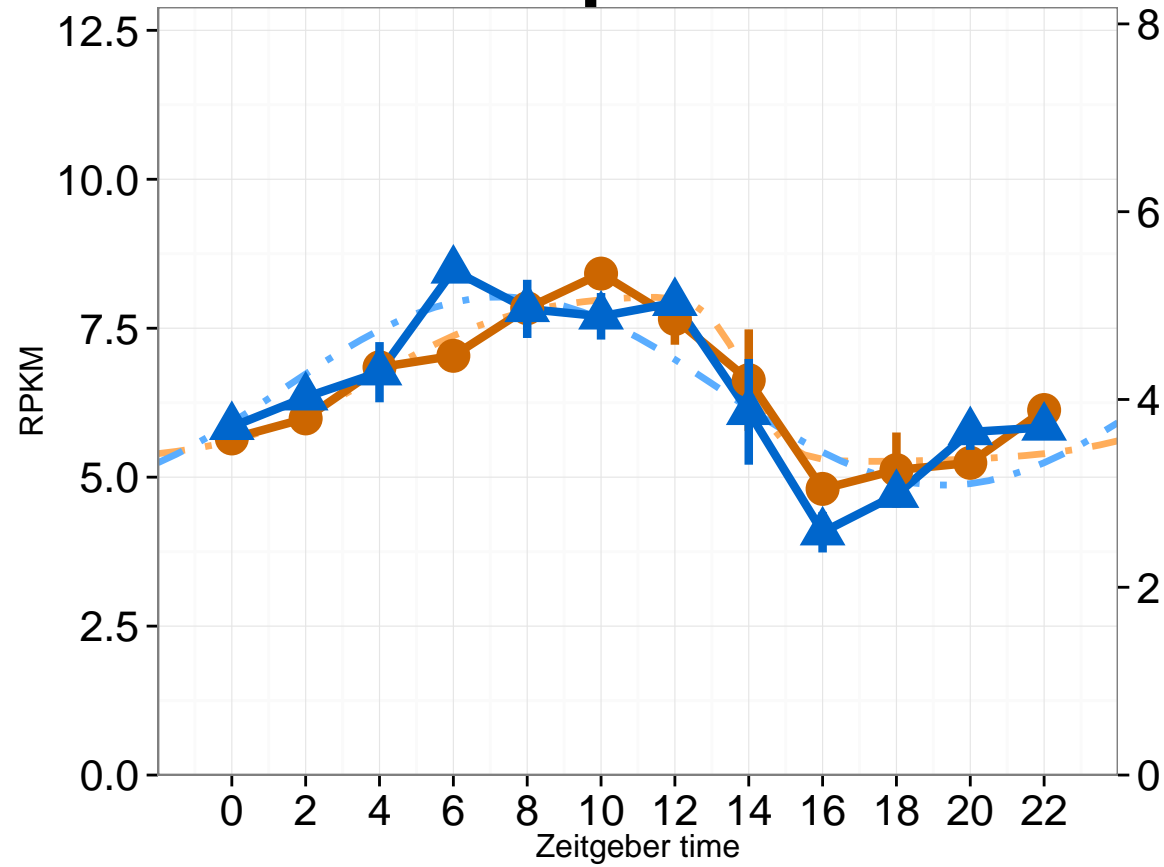

# Lpin3

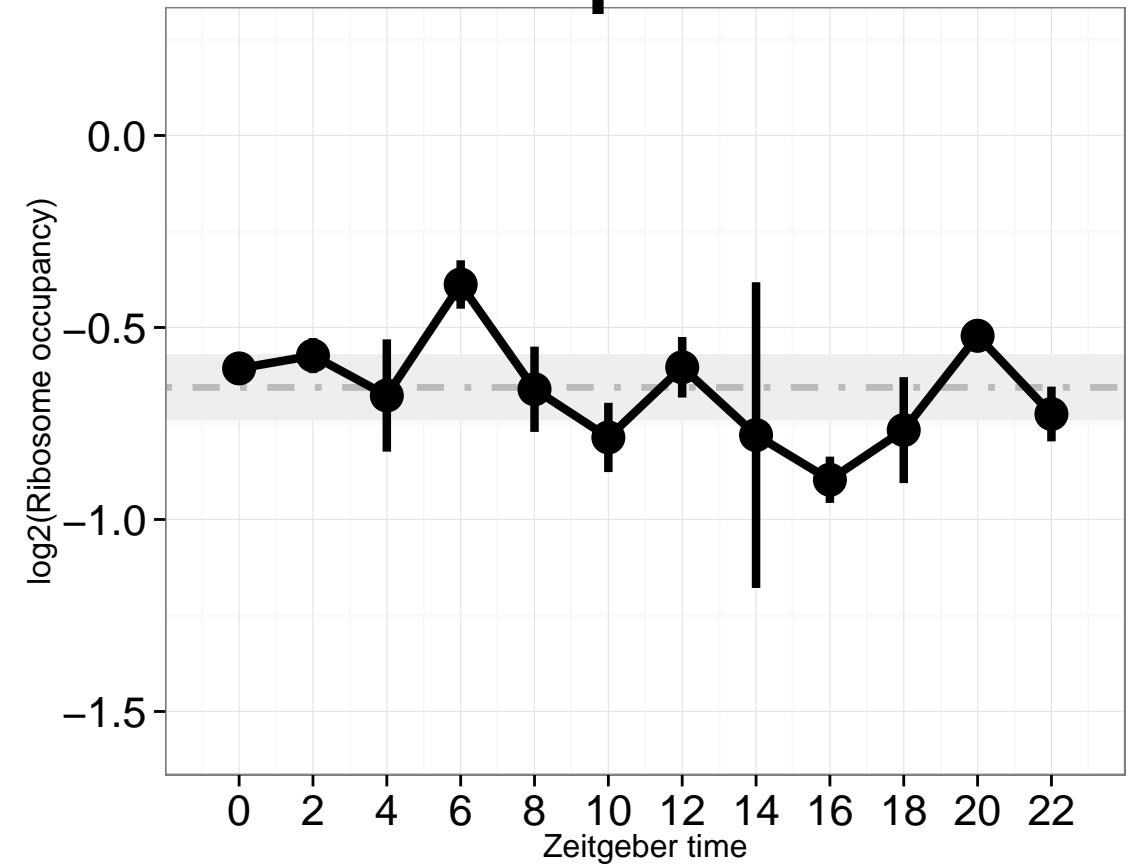

Supplement: Supplementary file 3984 [file 1]

# Kirrel

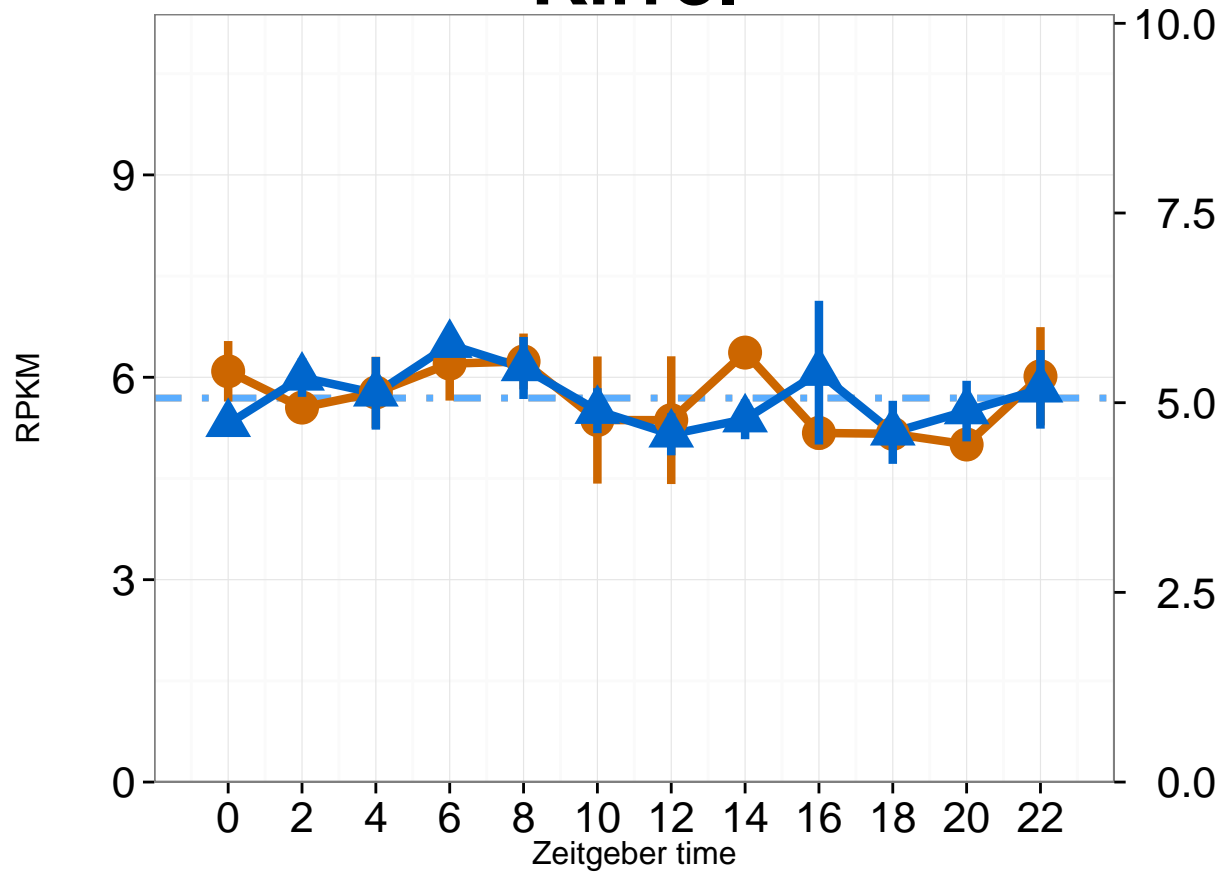

# Kirrel

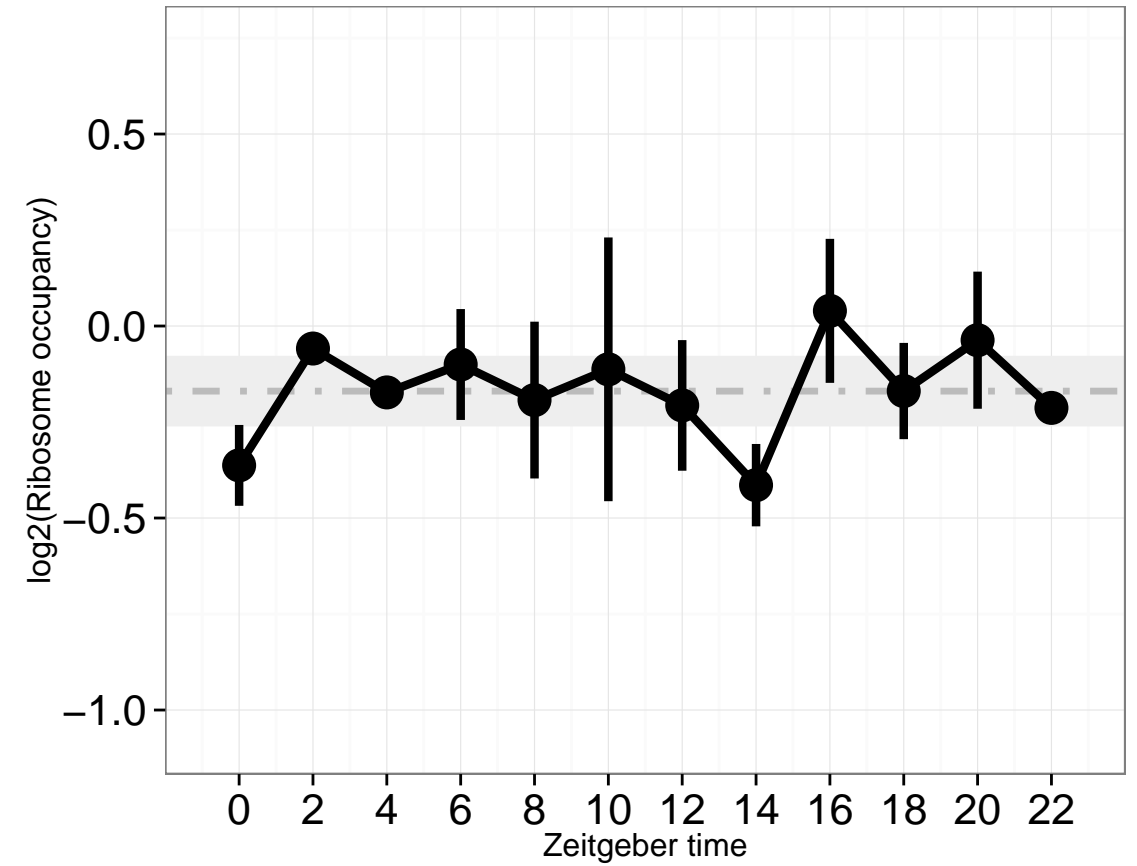

Supplement: Supplementary file 3985 [file 1]

# Msantd3

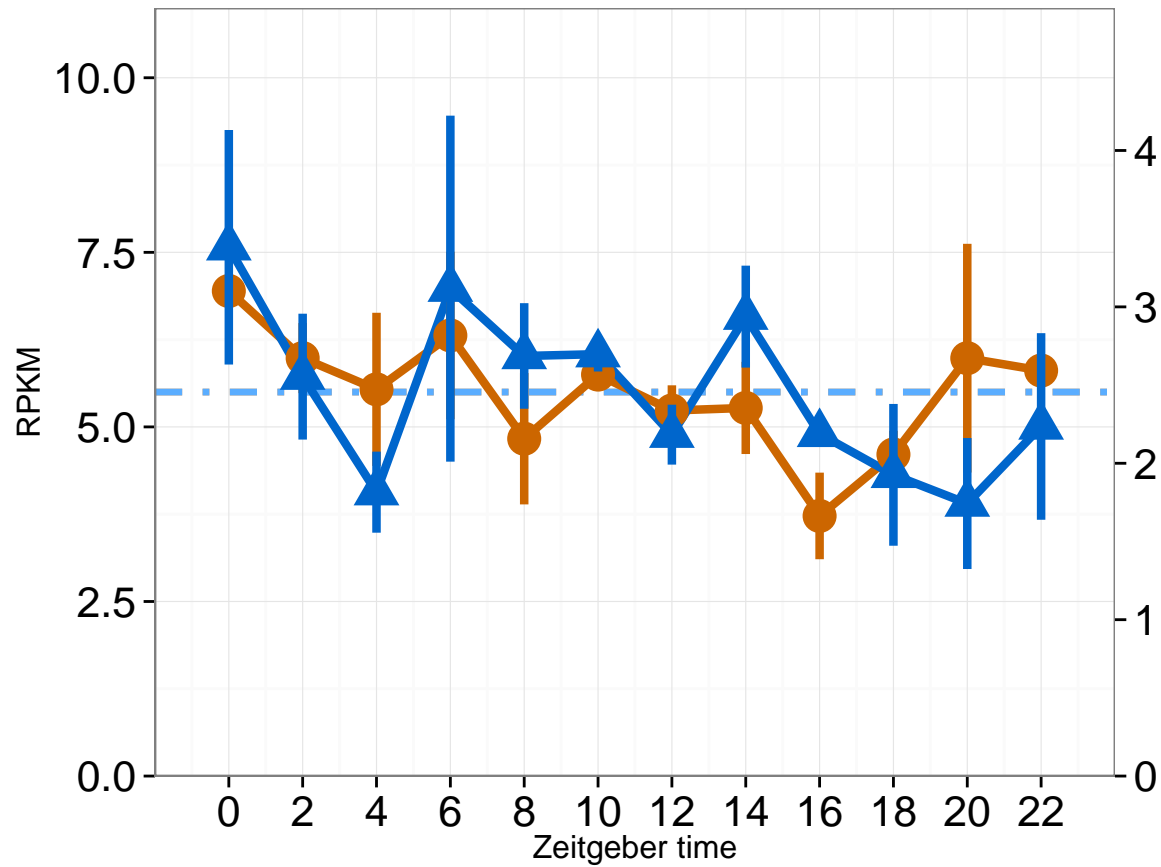

# Msantd3

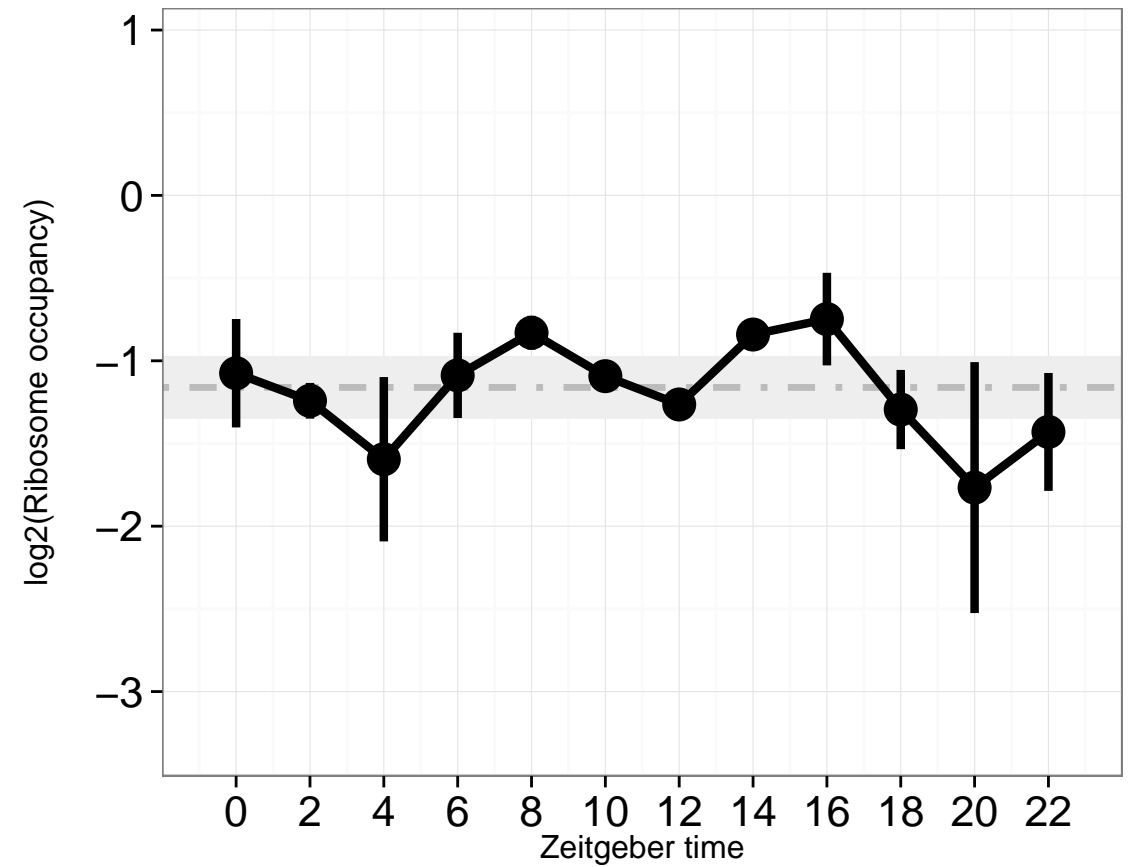

Supplement: Supplementary file 3986 [file 1]

# Zfp113

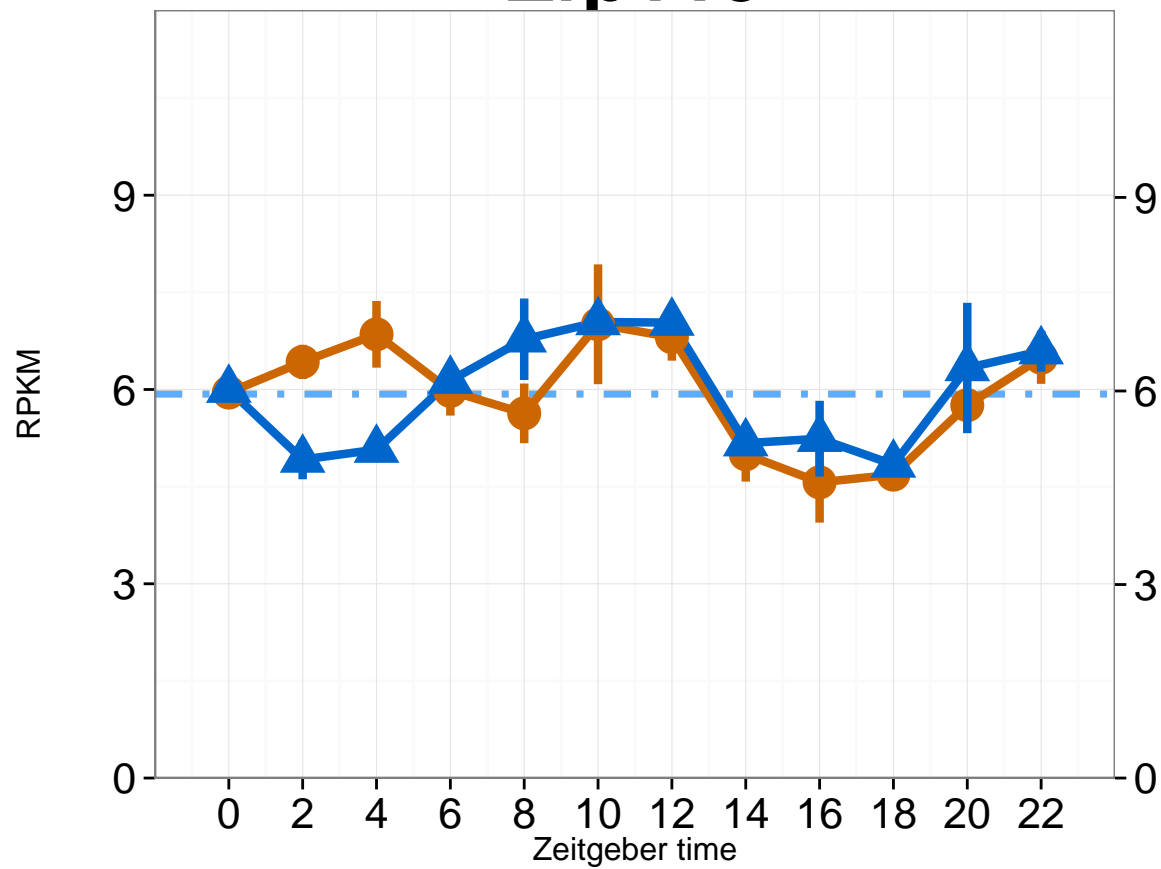

# Zfp113

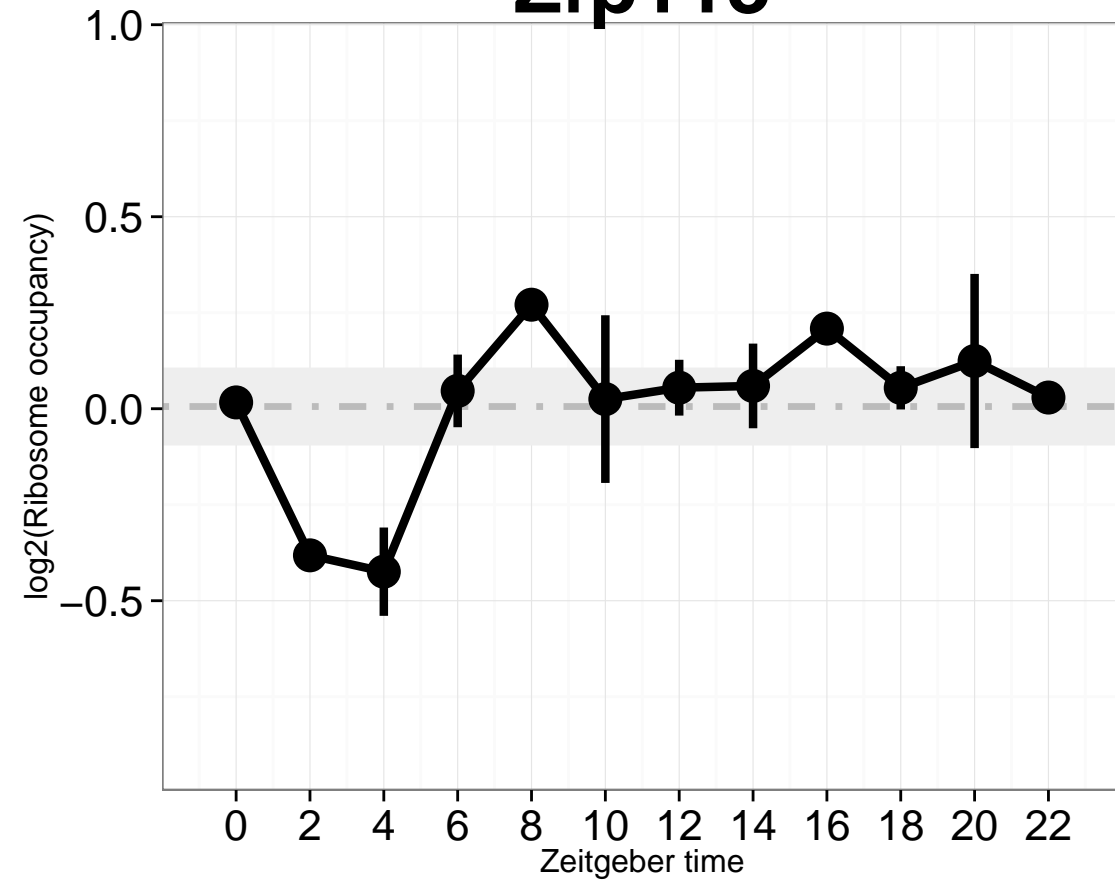

Supplement: Supplementary file 3987 [file 1]

# Ankrd42

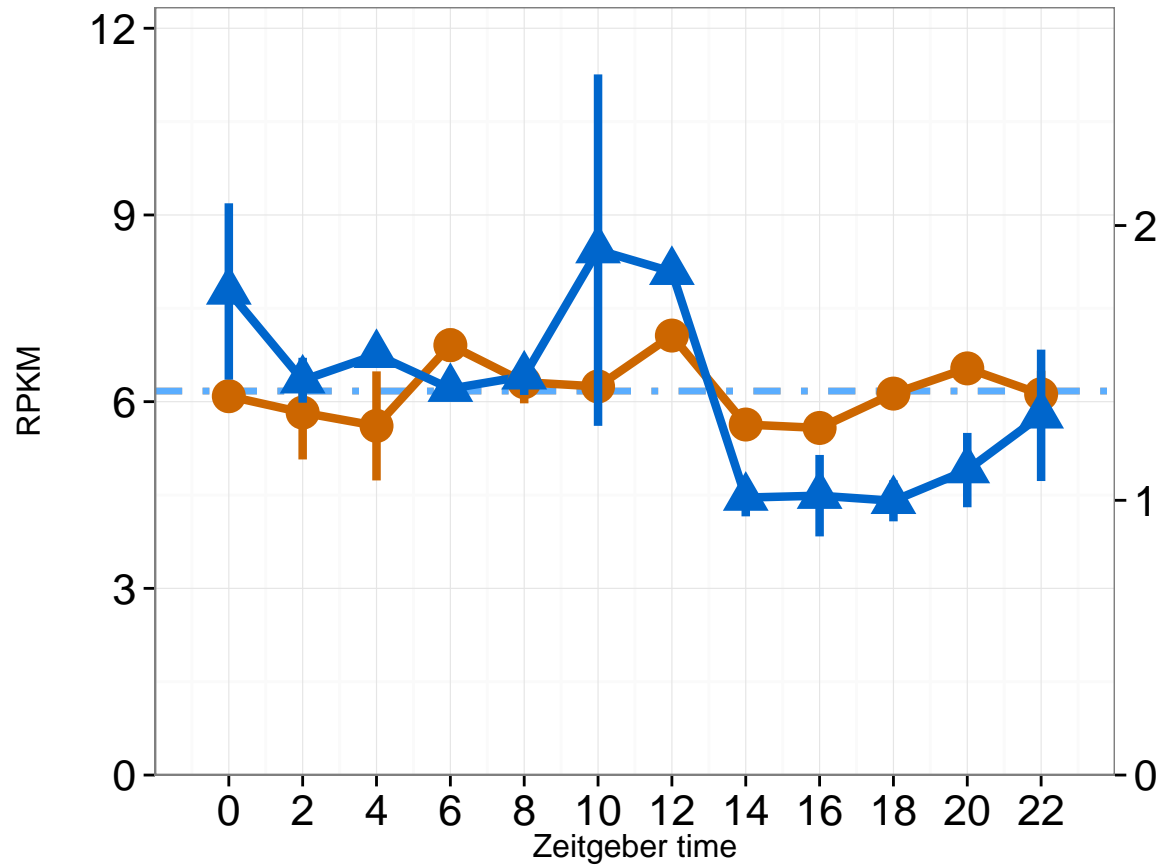

# Ankrd42

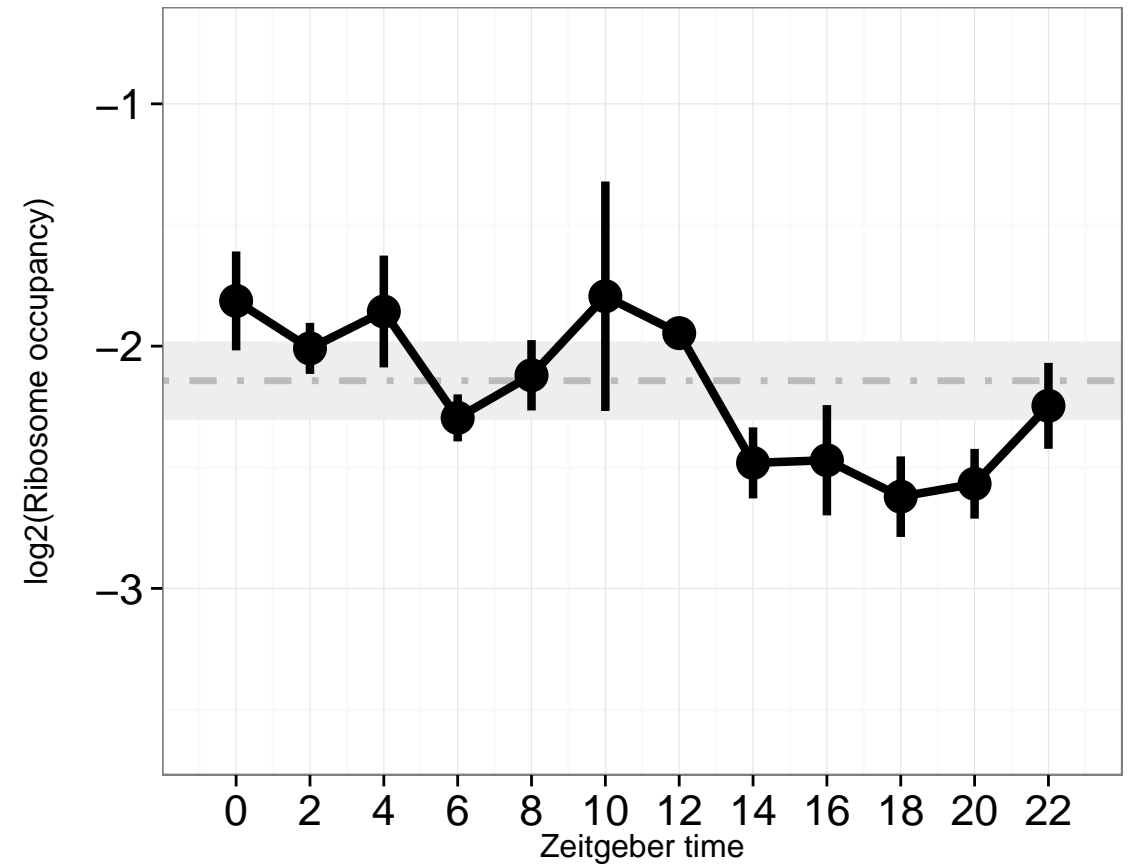

Supplement: Supplementary file 3988 [file 1]

## Eps8

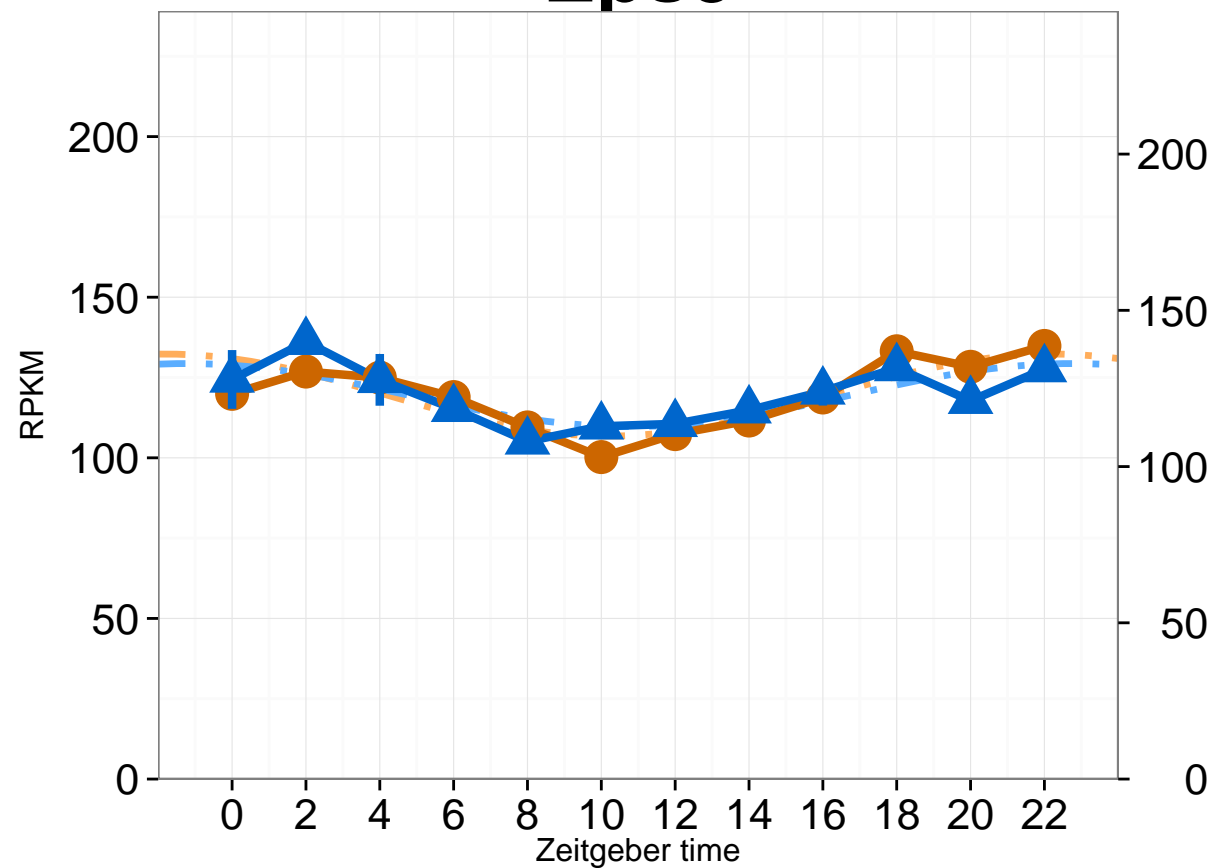

## Eps8

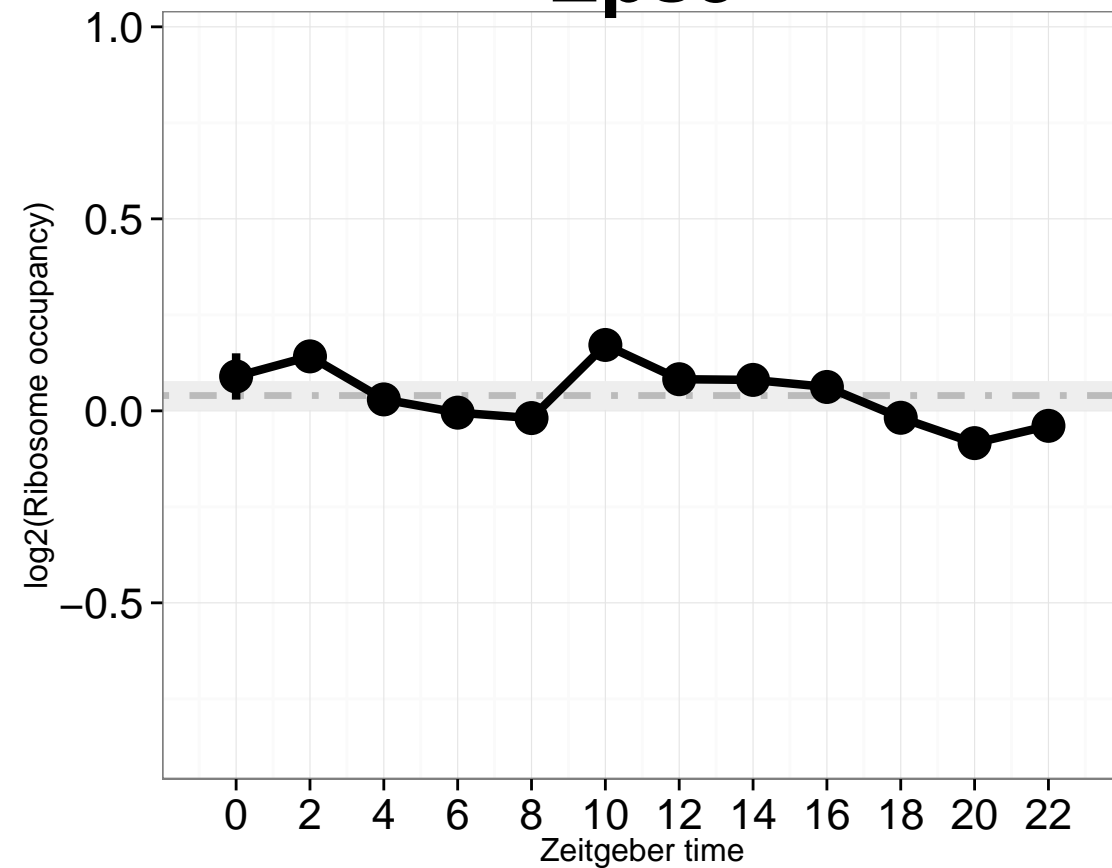

Supplement: Supplementary file 3989 [file 1]

# B4galnt3

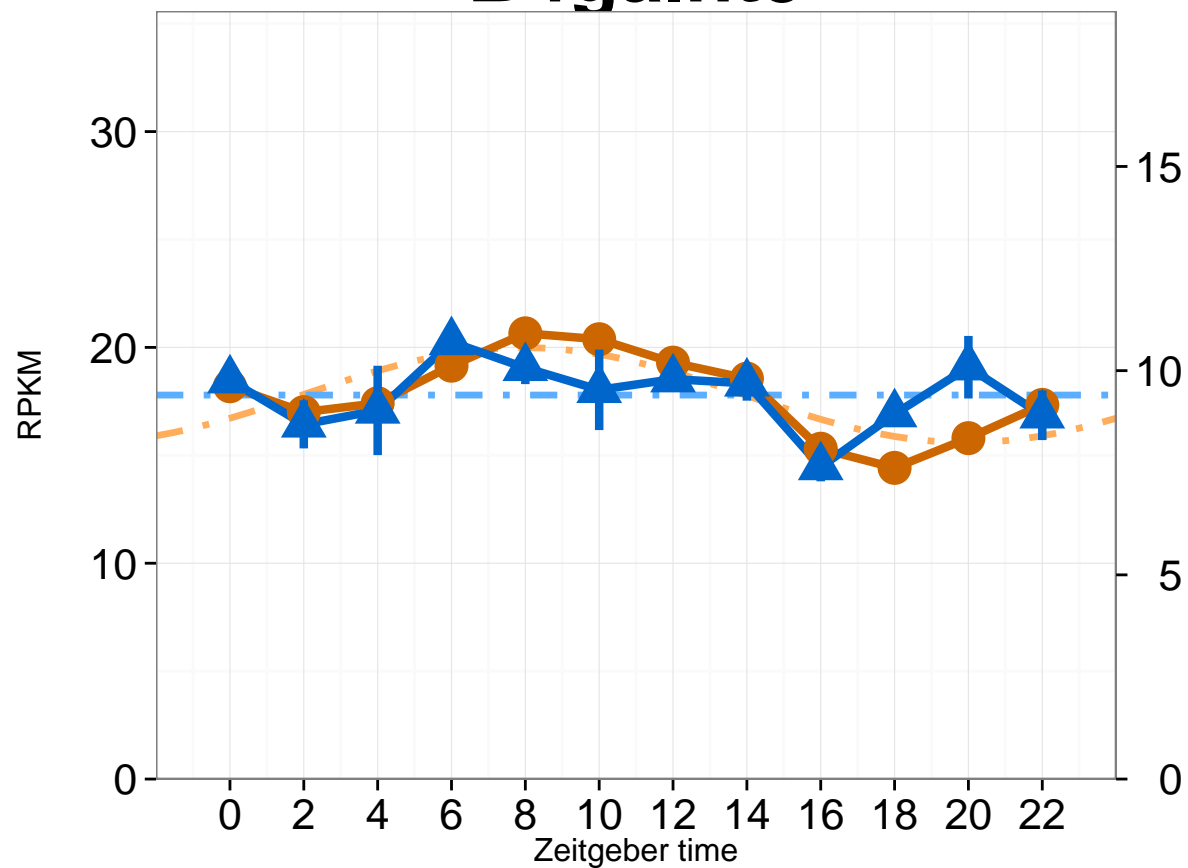

# B4galnt3

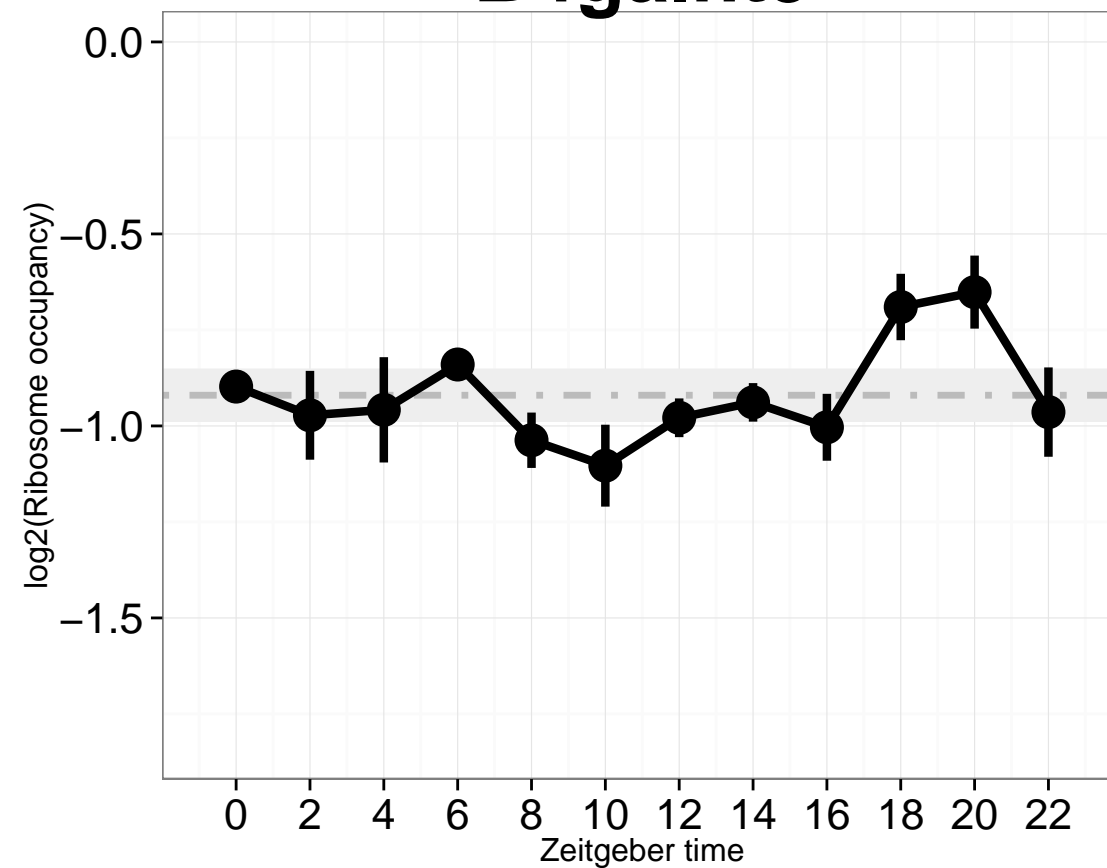

Supplement: Supplementary file 3990 [file 1]

## Frk

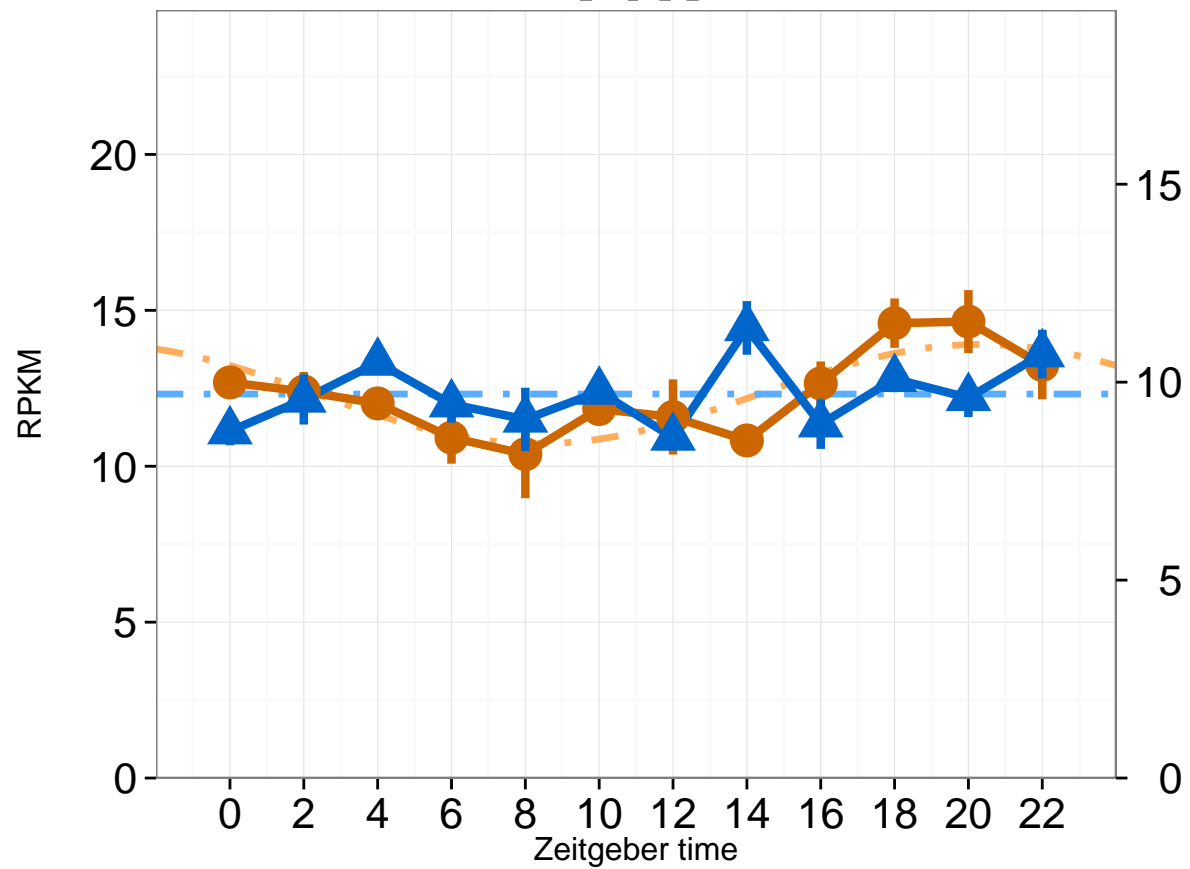

## Frk

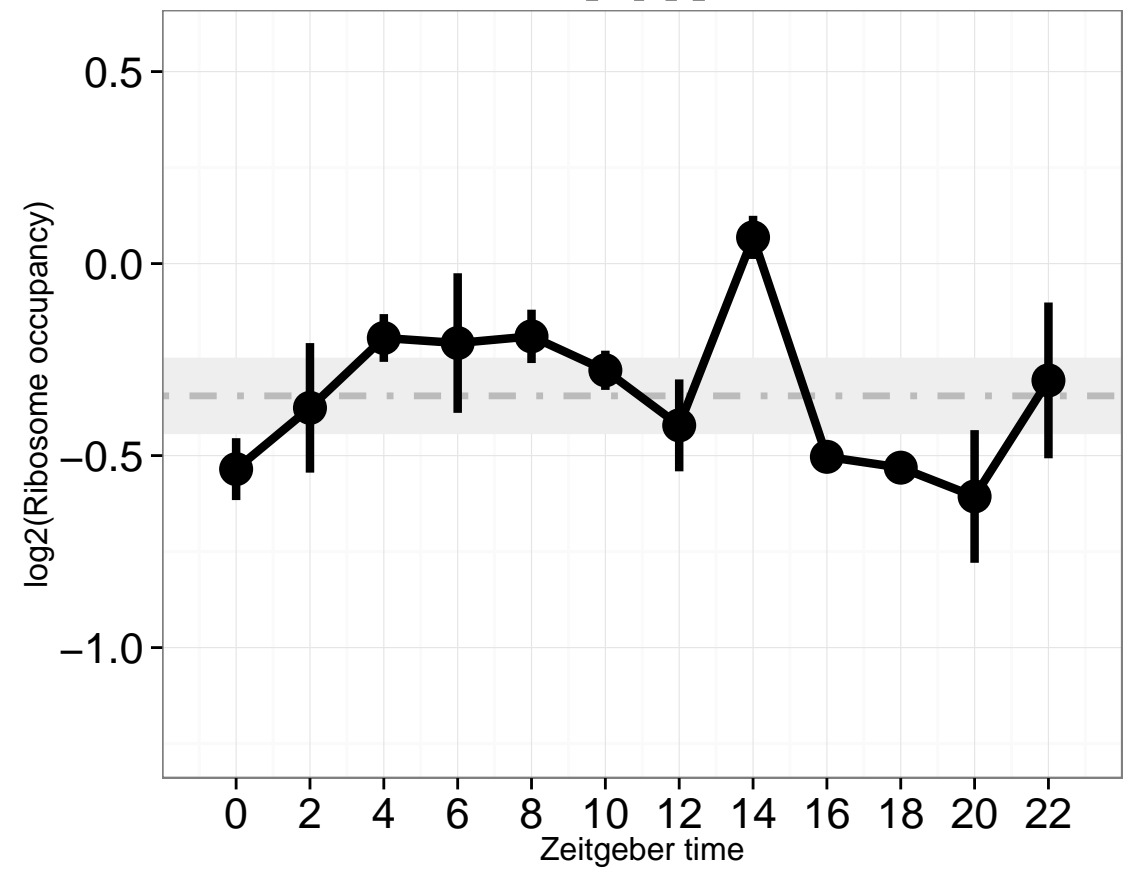

Supplement: Supplementary file 3991 [file 1]

# Car7

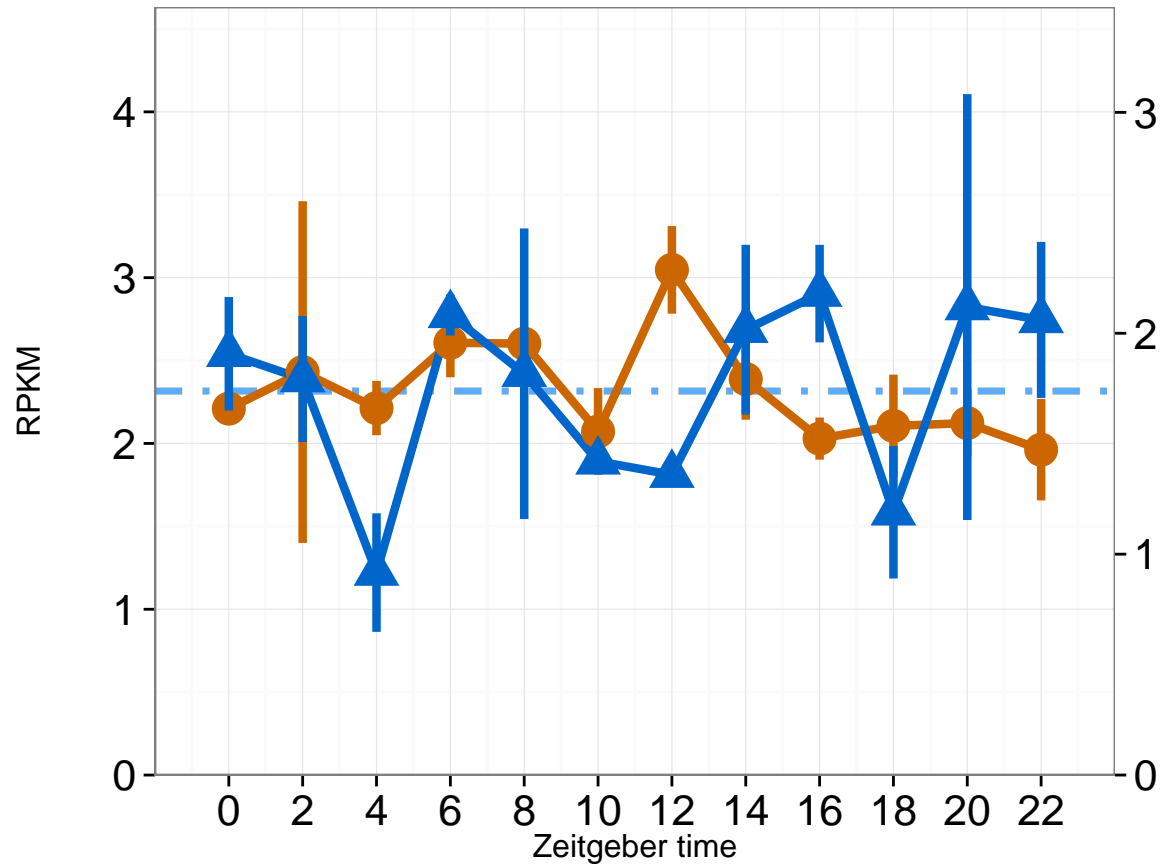

# Car7

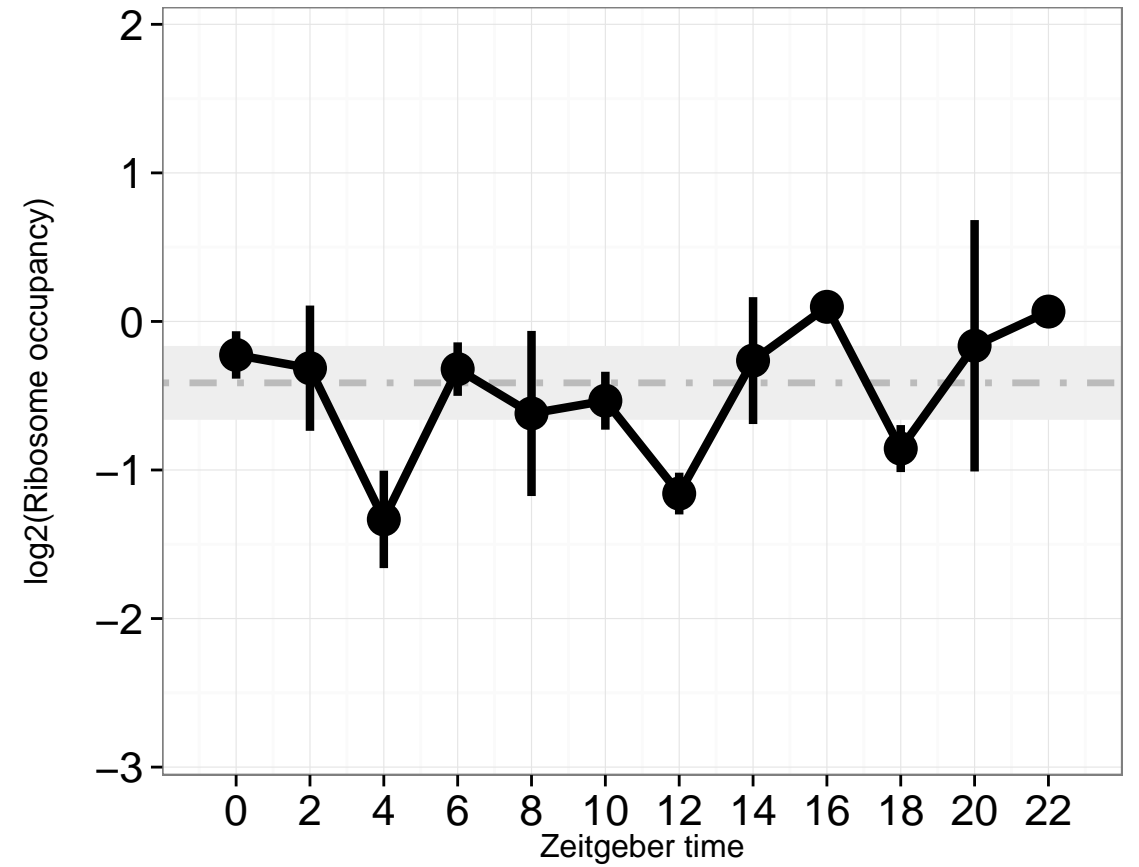

Supplement: Supplementary file 3992 [file 1]

# Ttc1

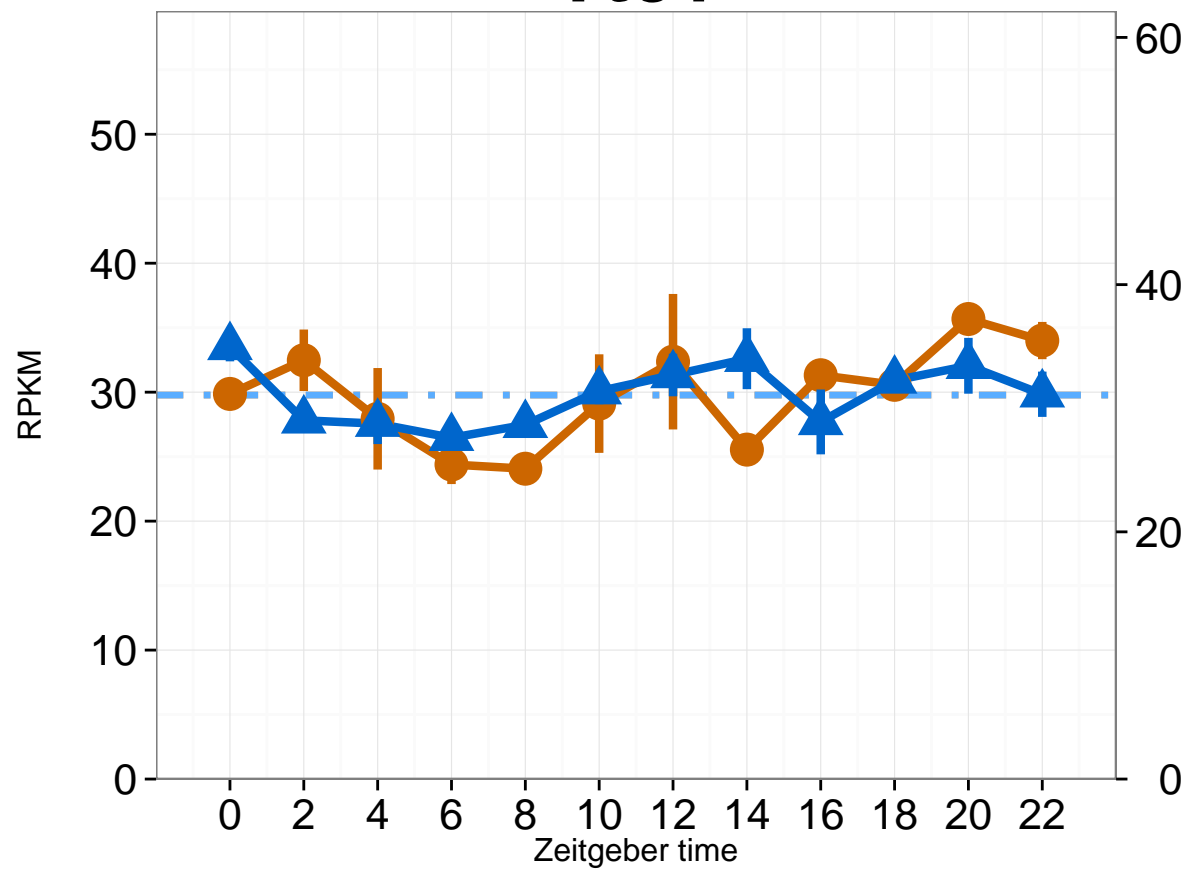

# Ttc1

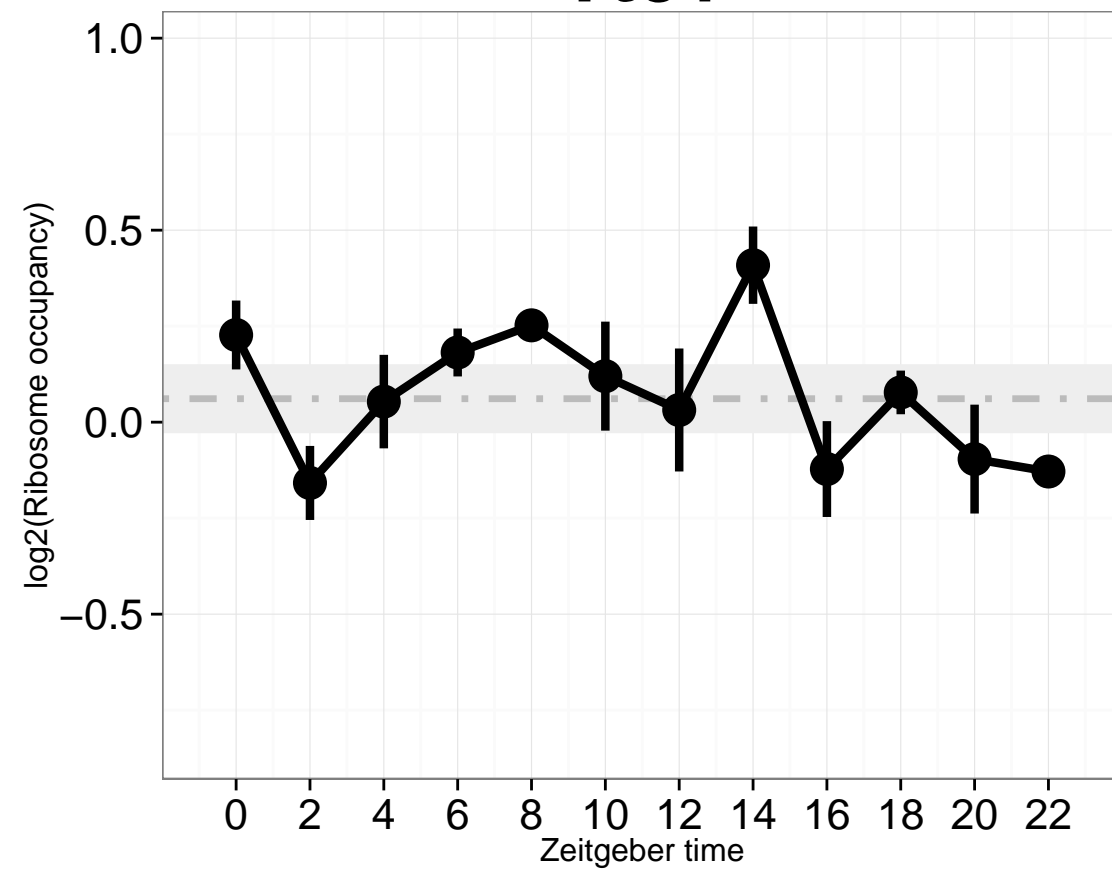

Supplement: Supplementary file 3993 [file 1]

## Cidec

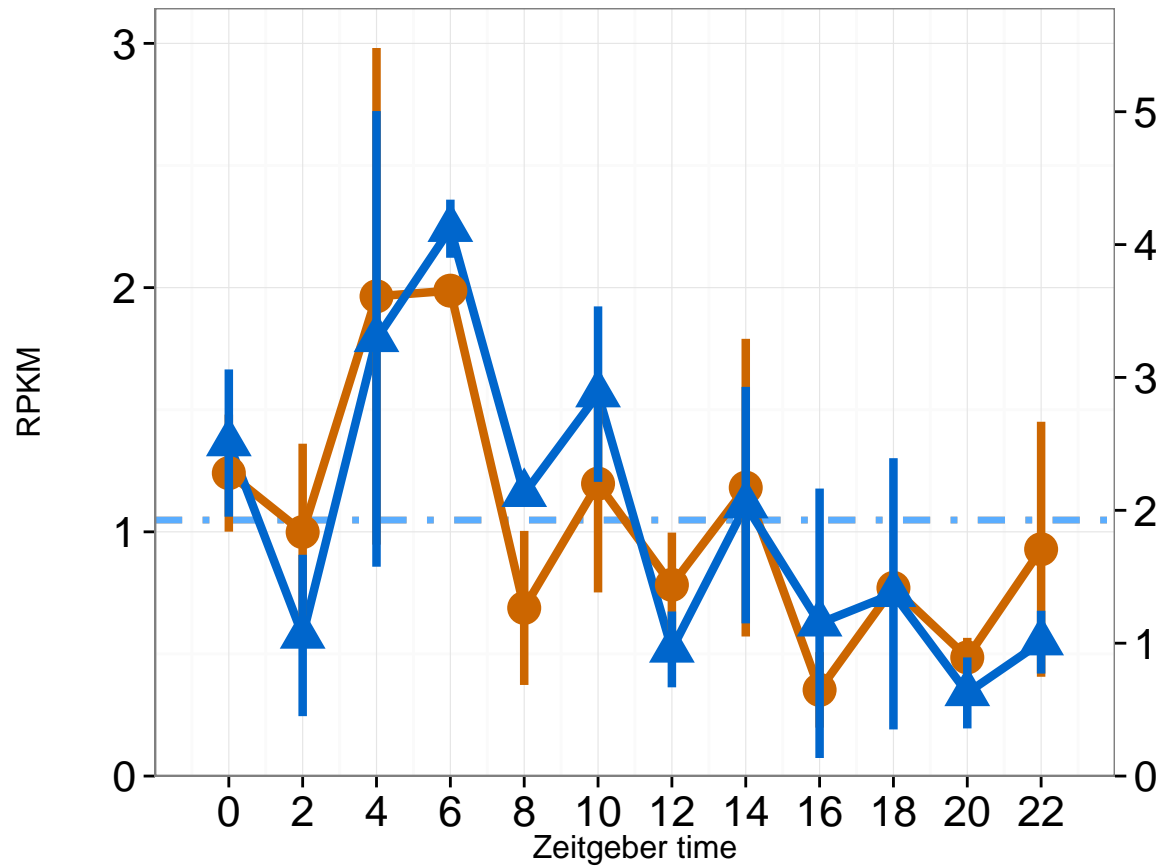

## Cidec

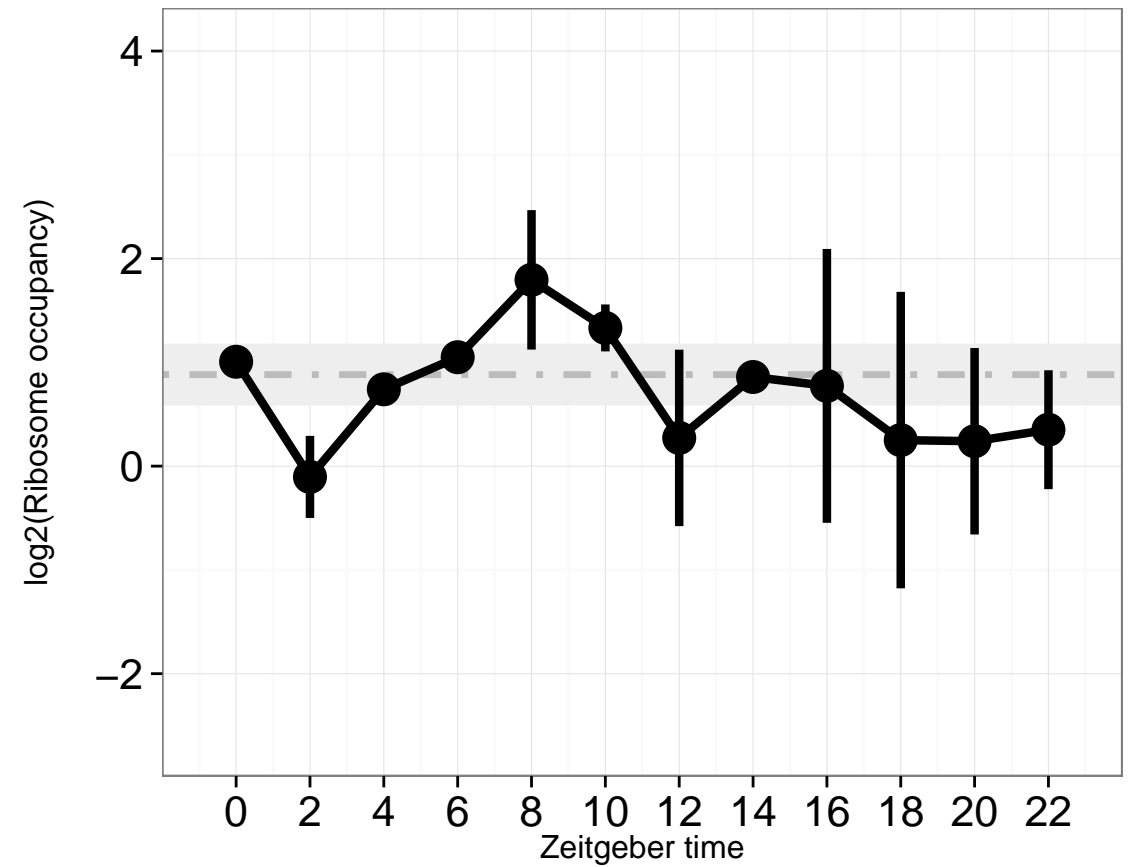

Supplement: Supplementary file 3994 [file 1]

# Gpr107

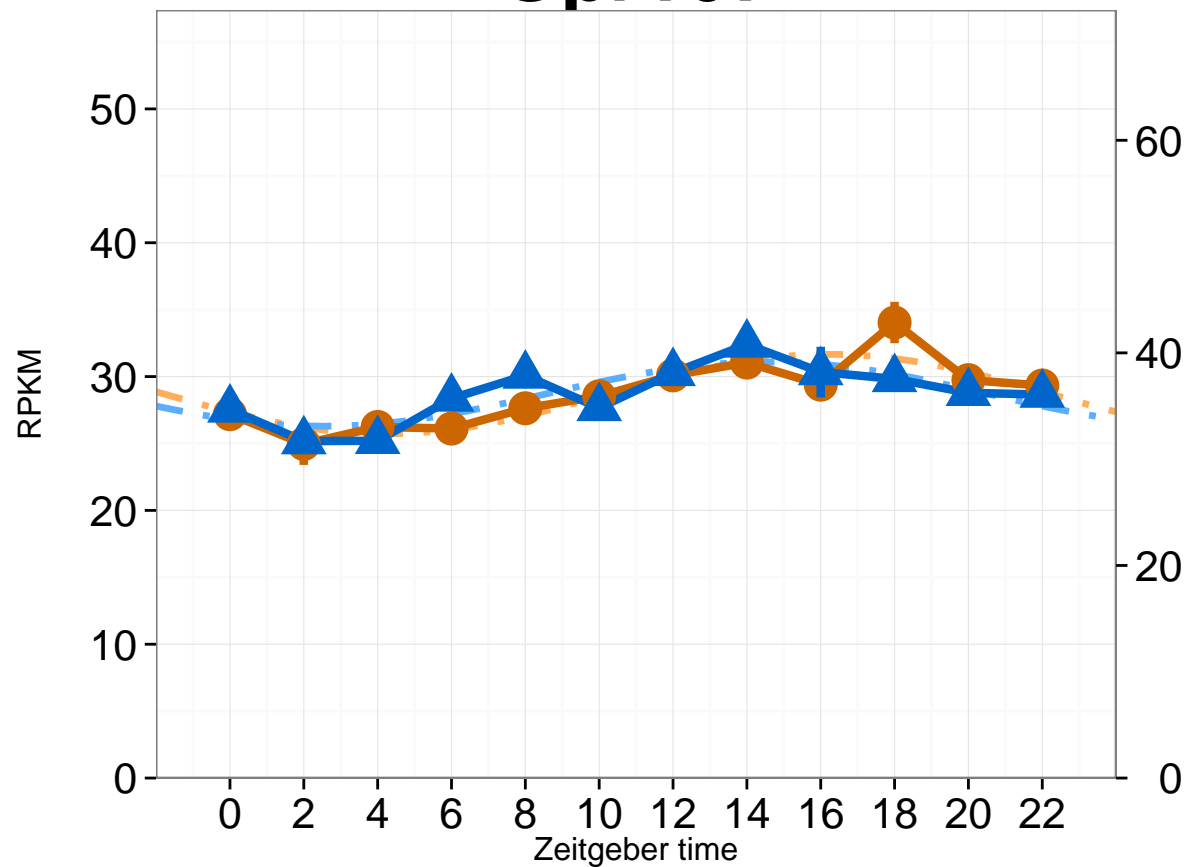

# Gpr107

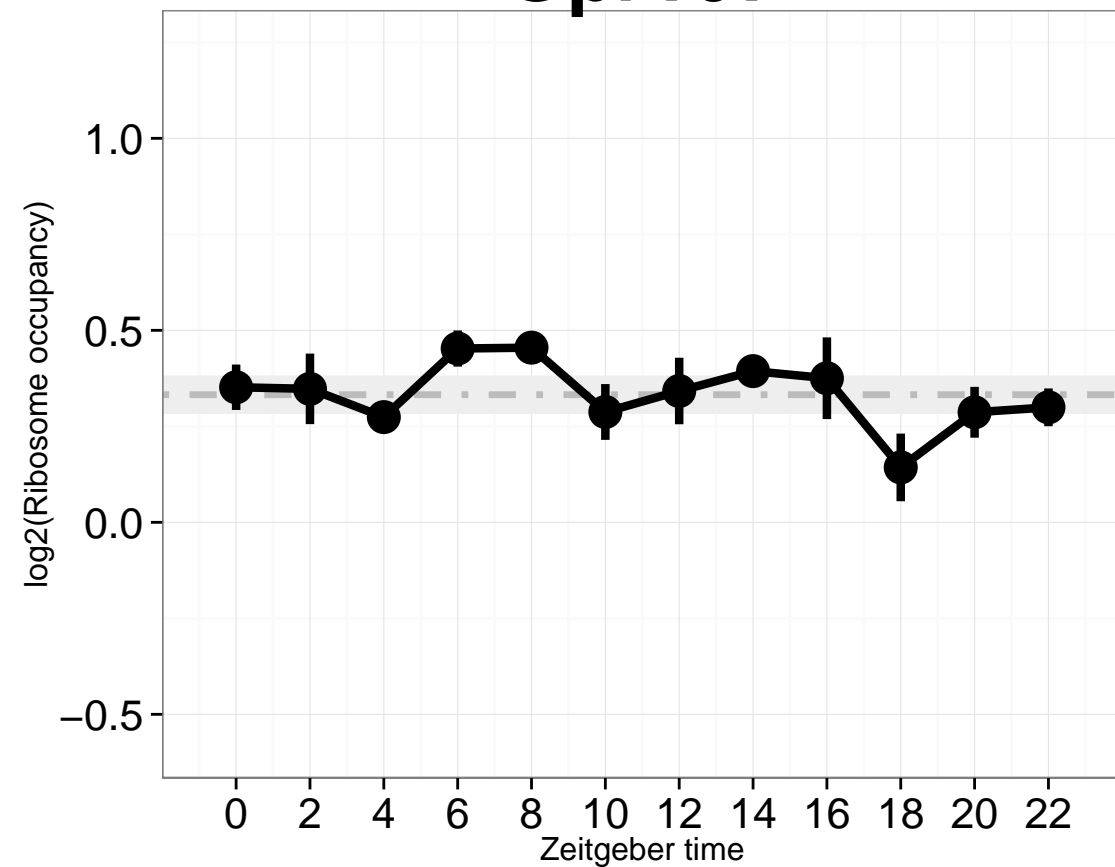

Supplement: Supplementary file 3995 [file 1]

# A230050P20Rik

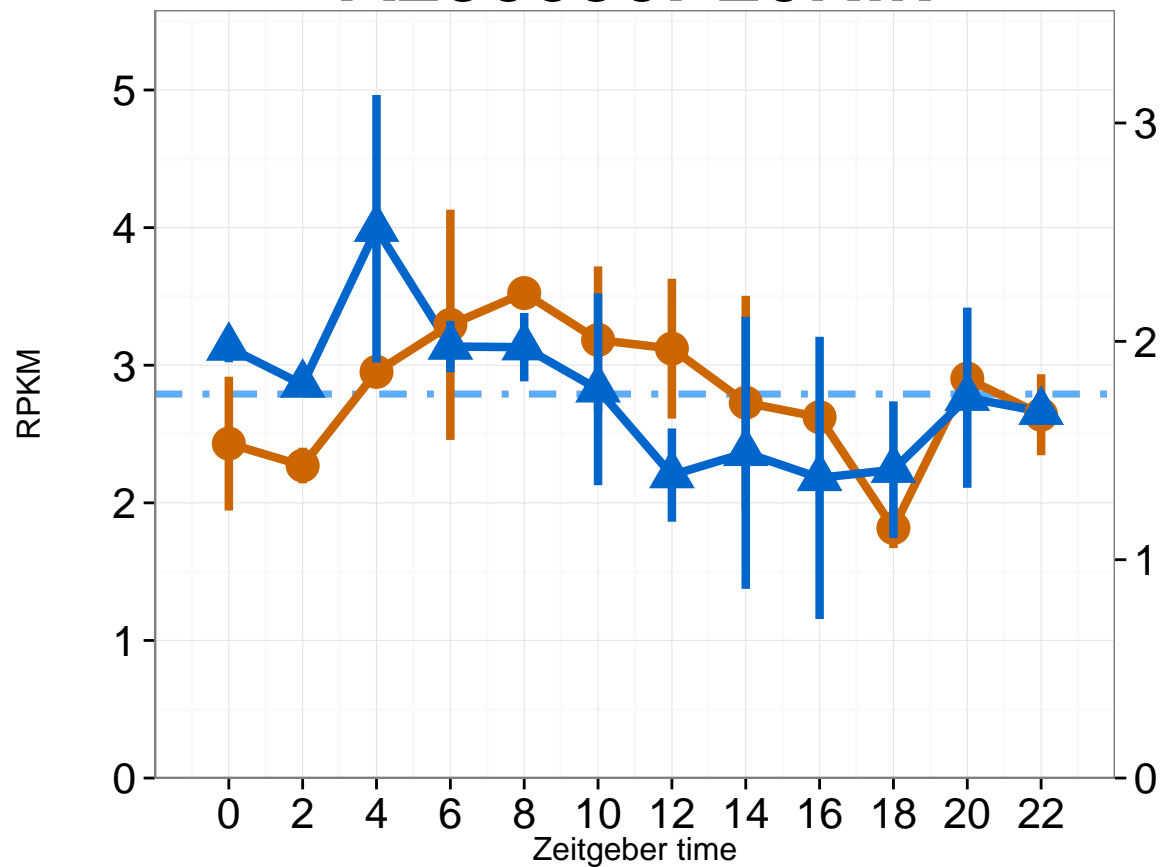

# A230050P20Rik

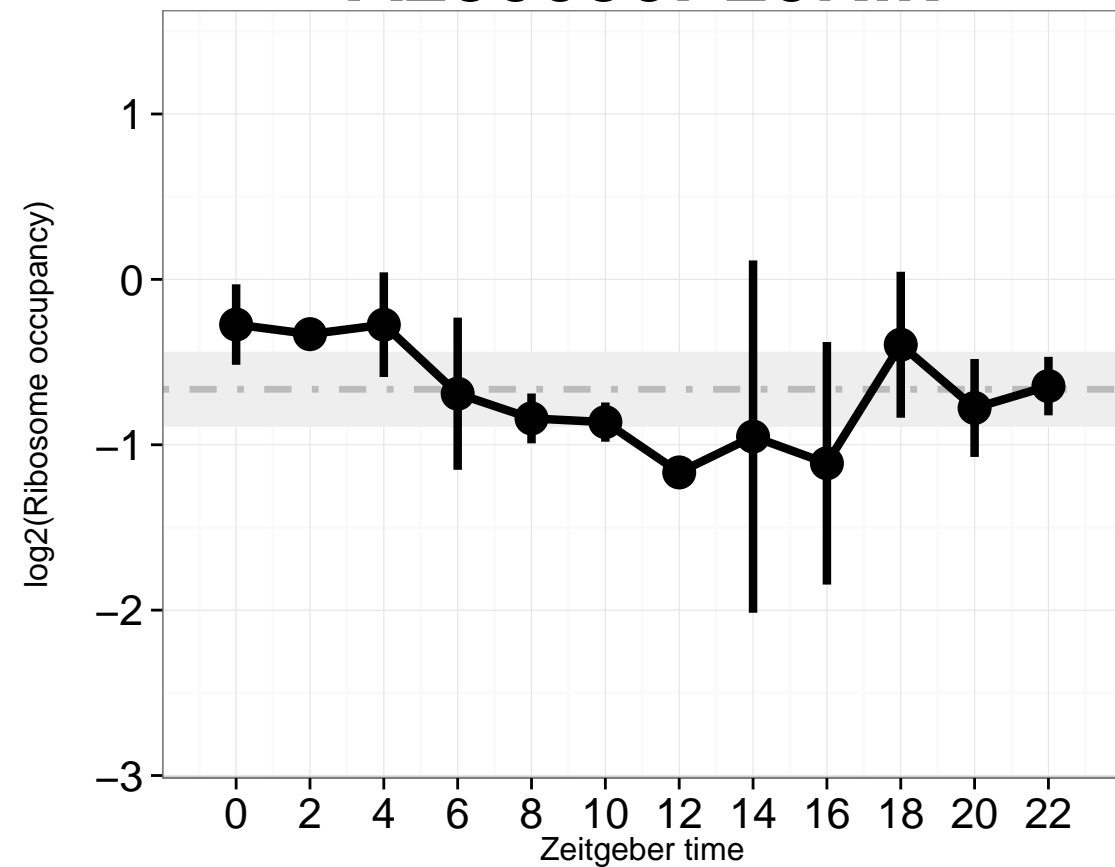

Supplement: Supplementary file 3996 [file 1]

# Tnpo1

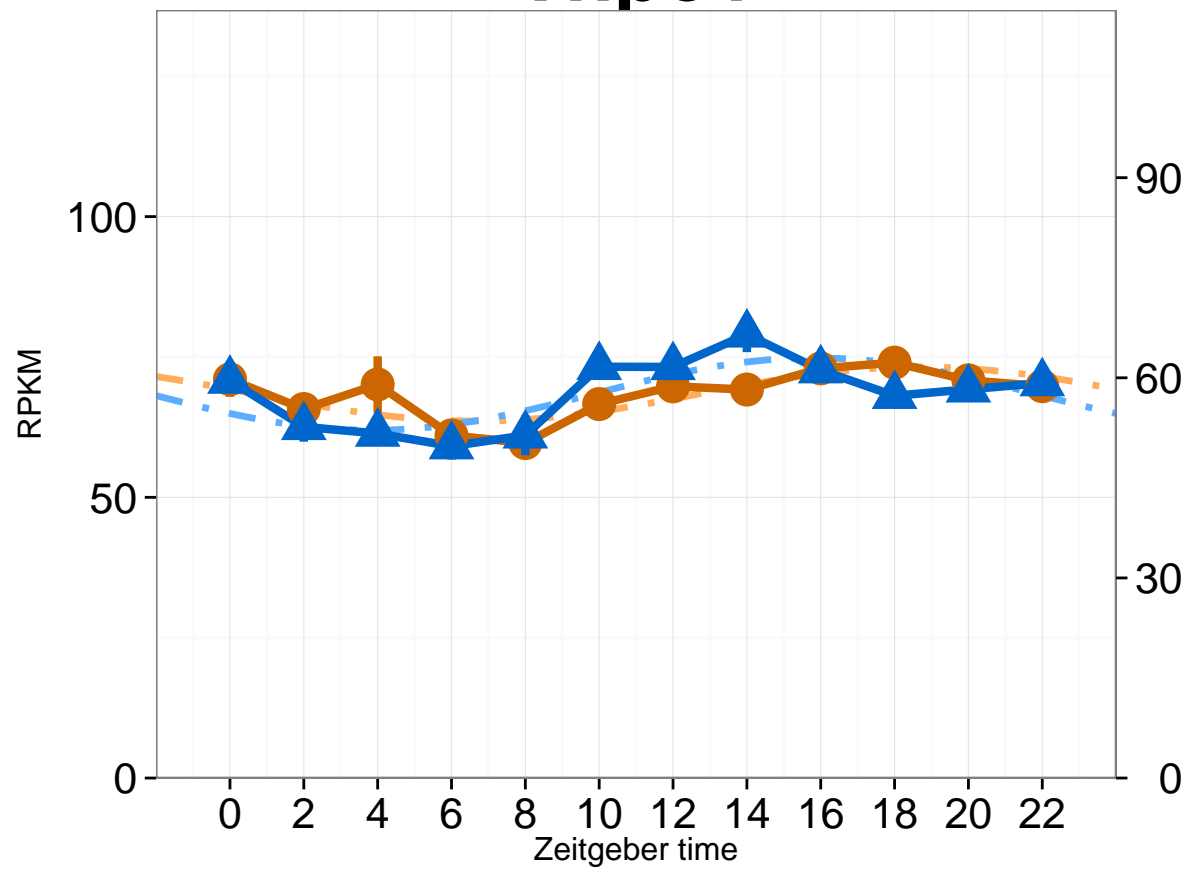

# Tnpo1

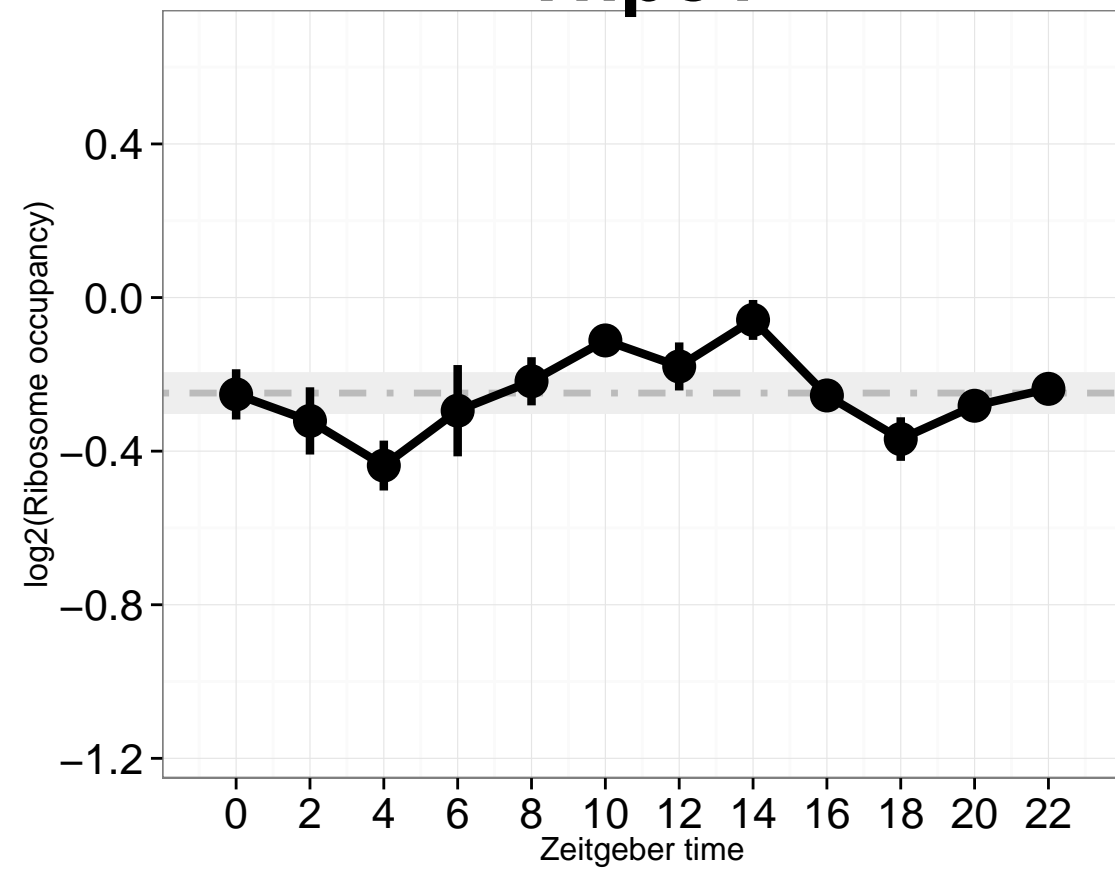

Supplement: Supplementary file 3997 [file 1]

## Fdps

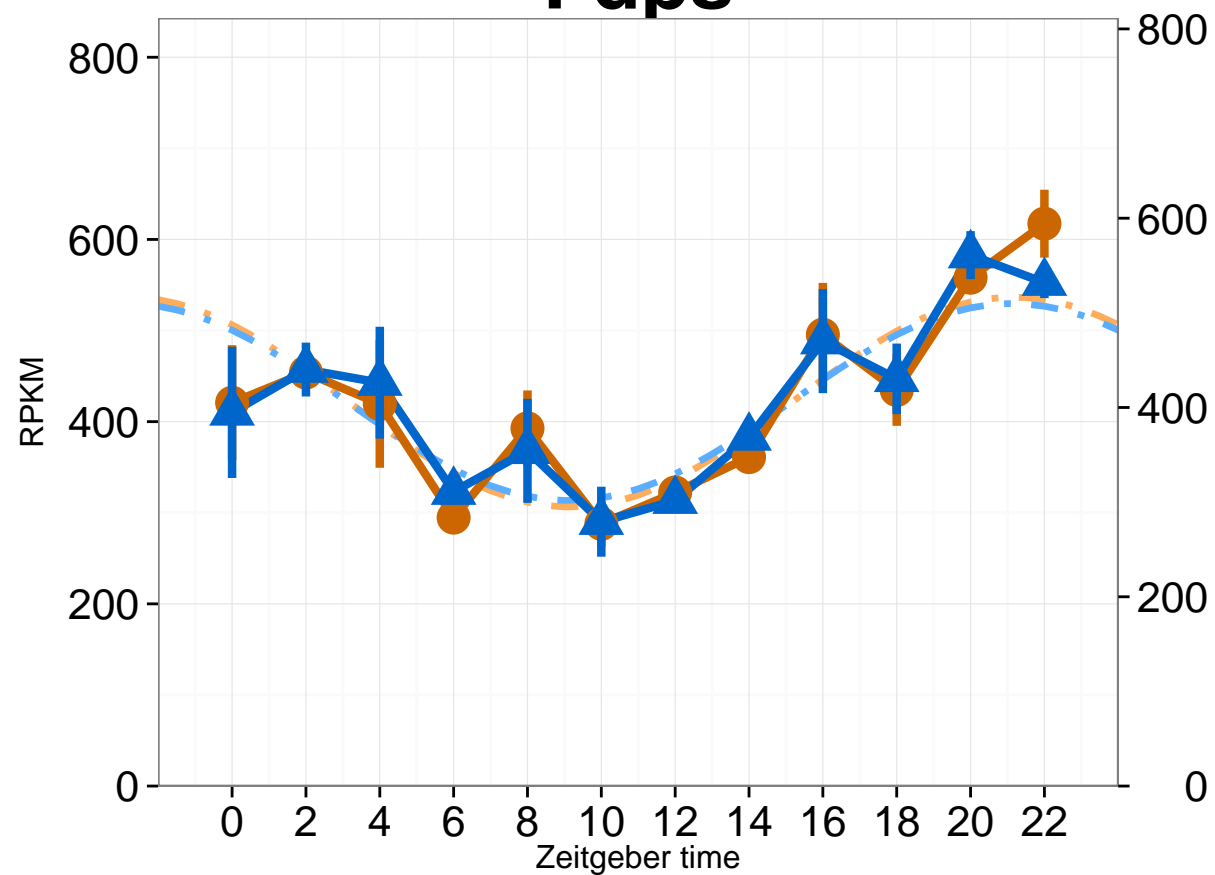

## Fdps

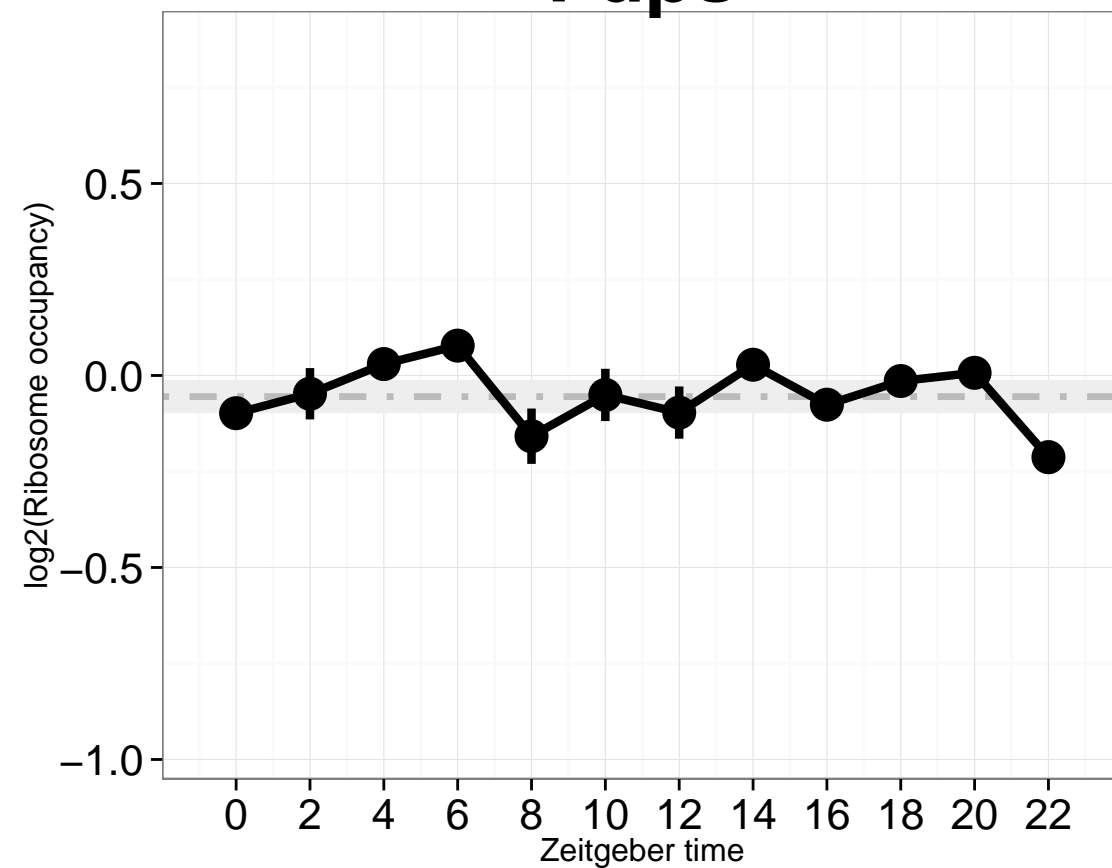

Supplement: Supplementary file 3998 [file 1]

## Dbp

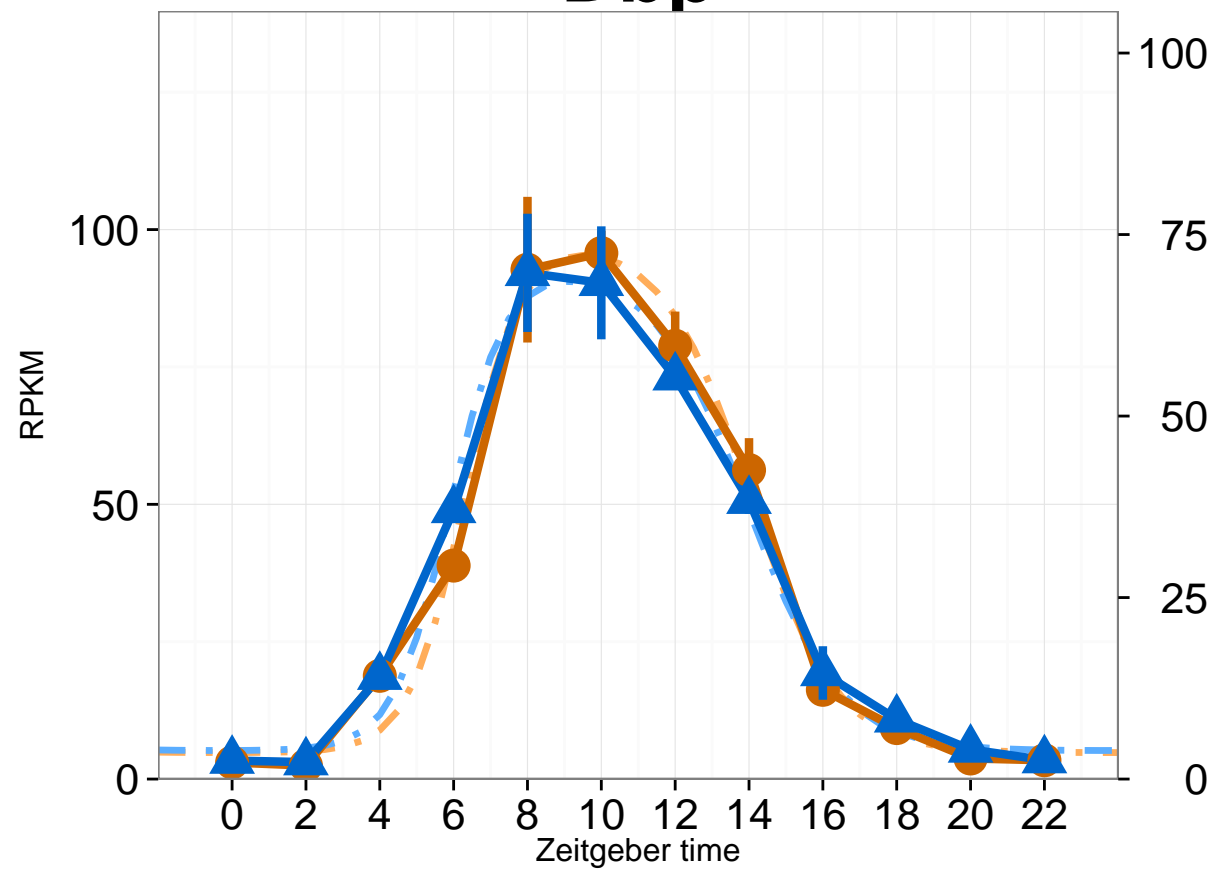

## Dbp

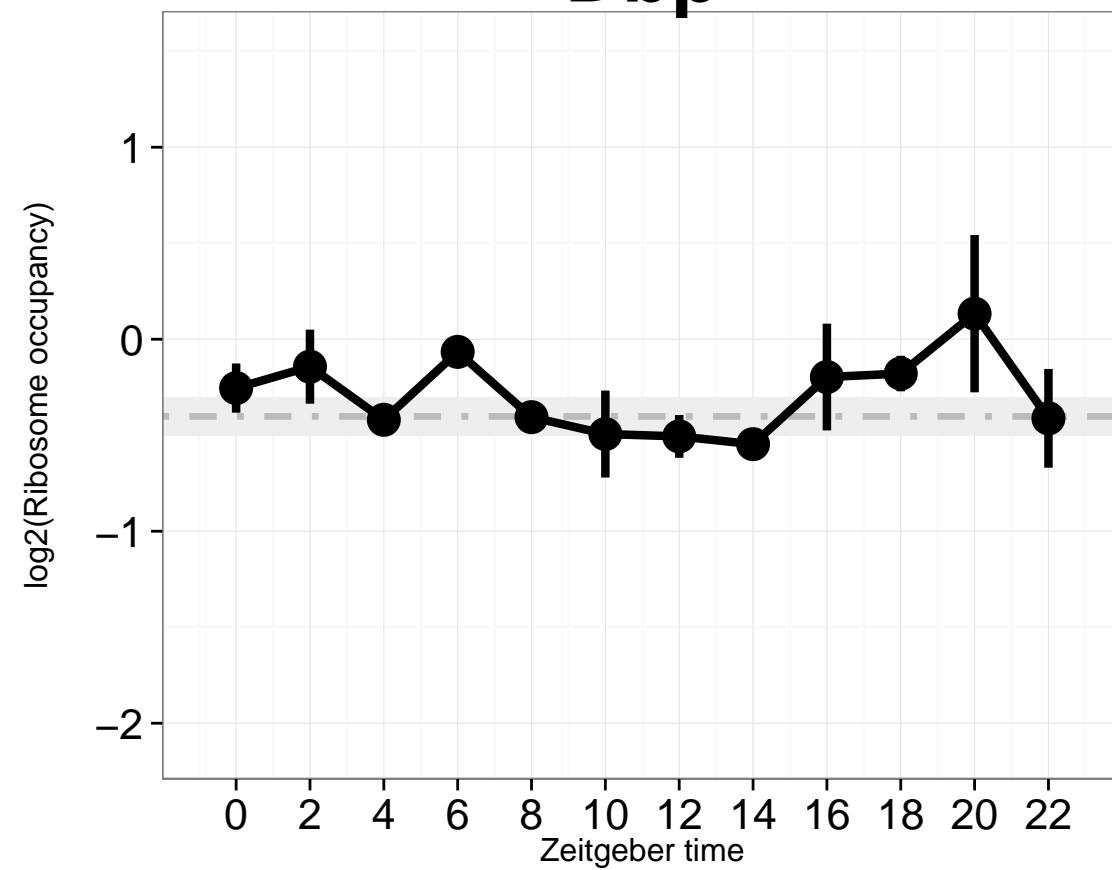

Supplement: Supplementary file 3999 [file 1]

## Etnk2

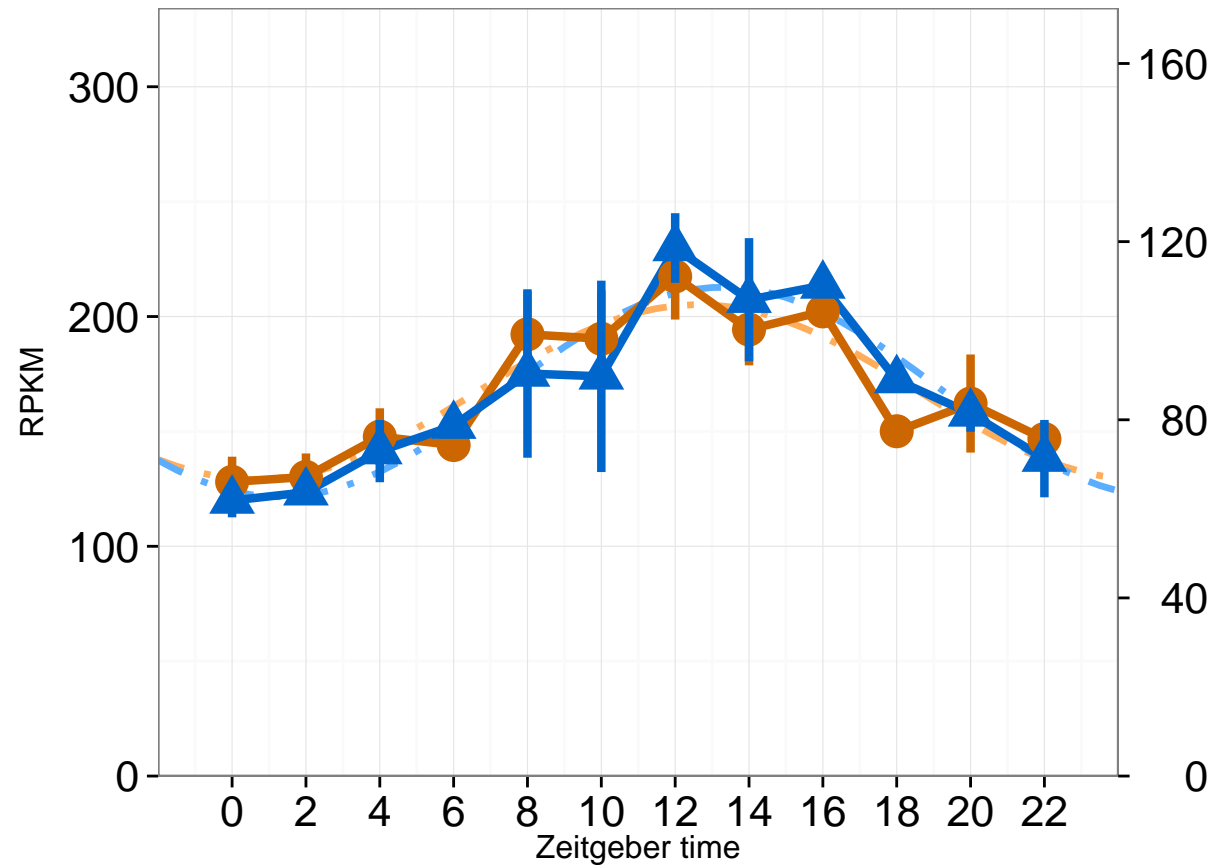

## Etnk2

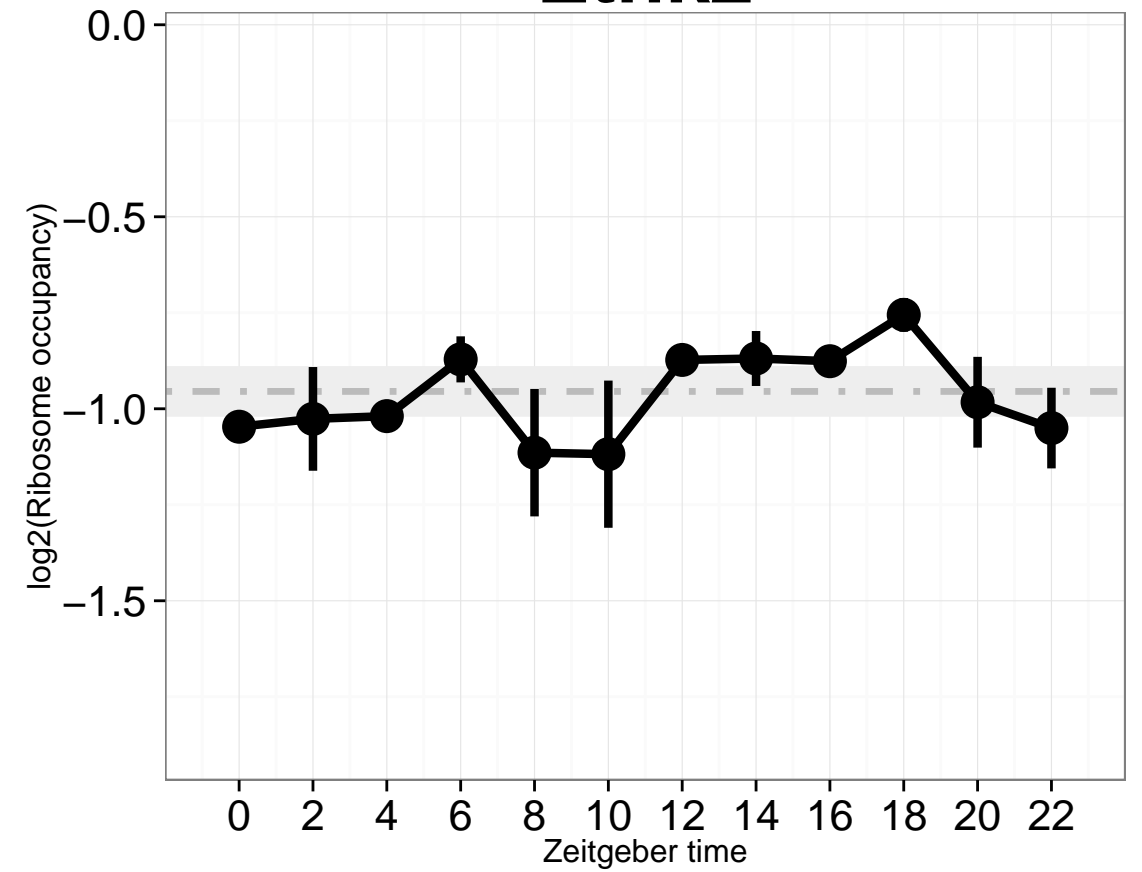

Supplement: Supplementary file 4000 [file 1]

## Ybey

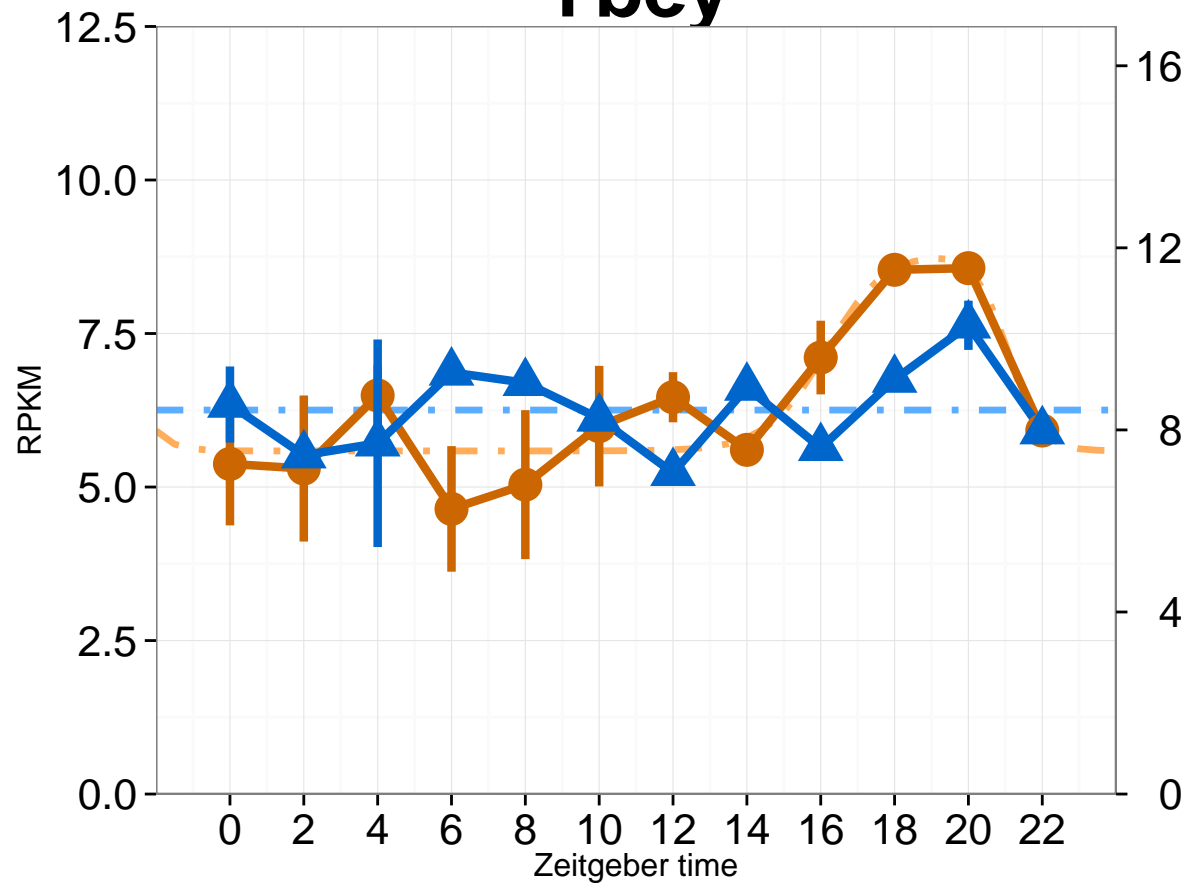

## Ybey

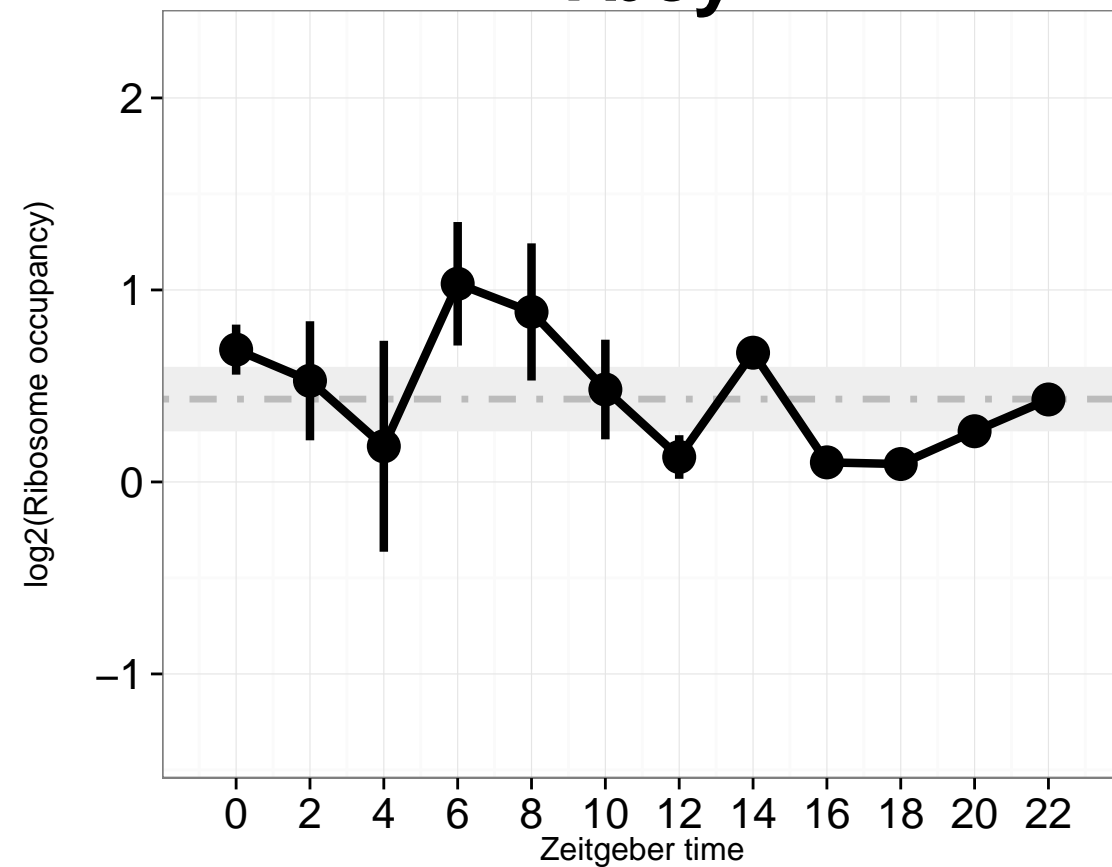

Supplement: Supplementary file 4001 [file 1]

## Ddit4l

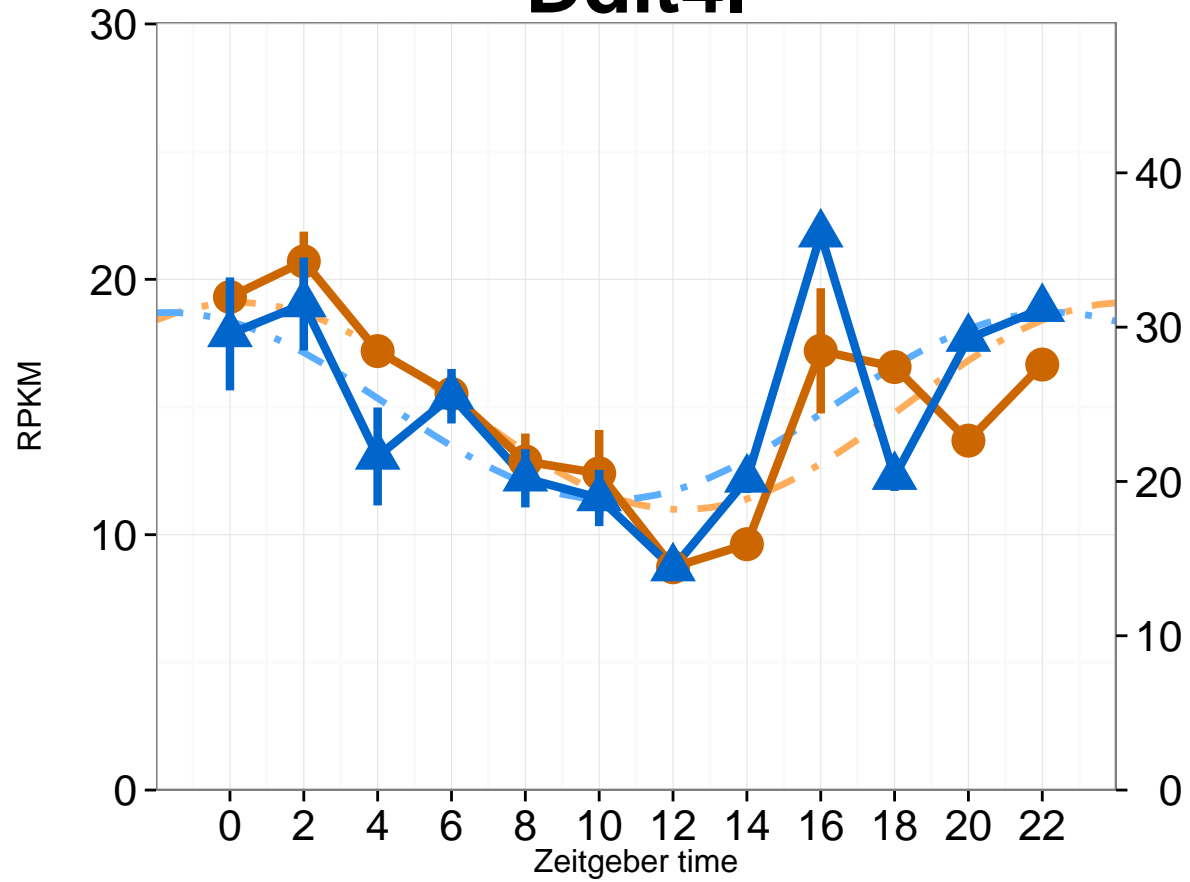

## Ddit4l

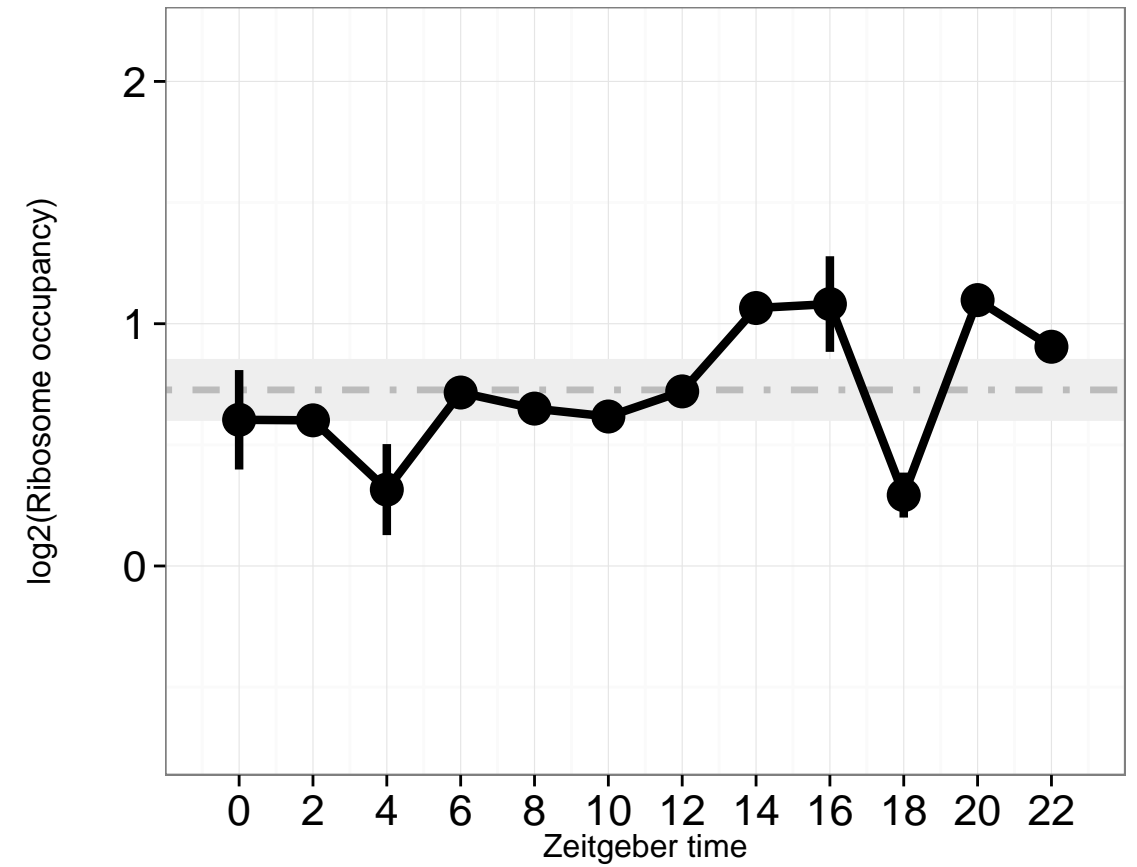

Supplement: Supplementary file 4002 [file 1]

## Cd33

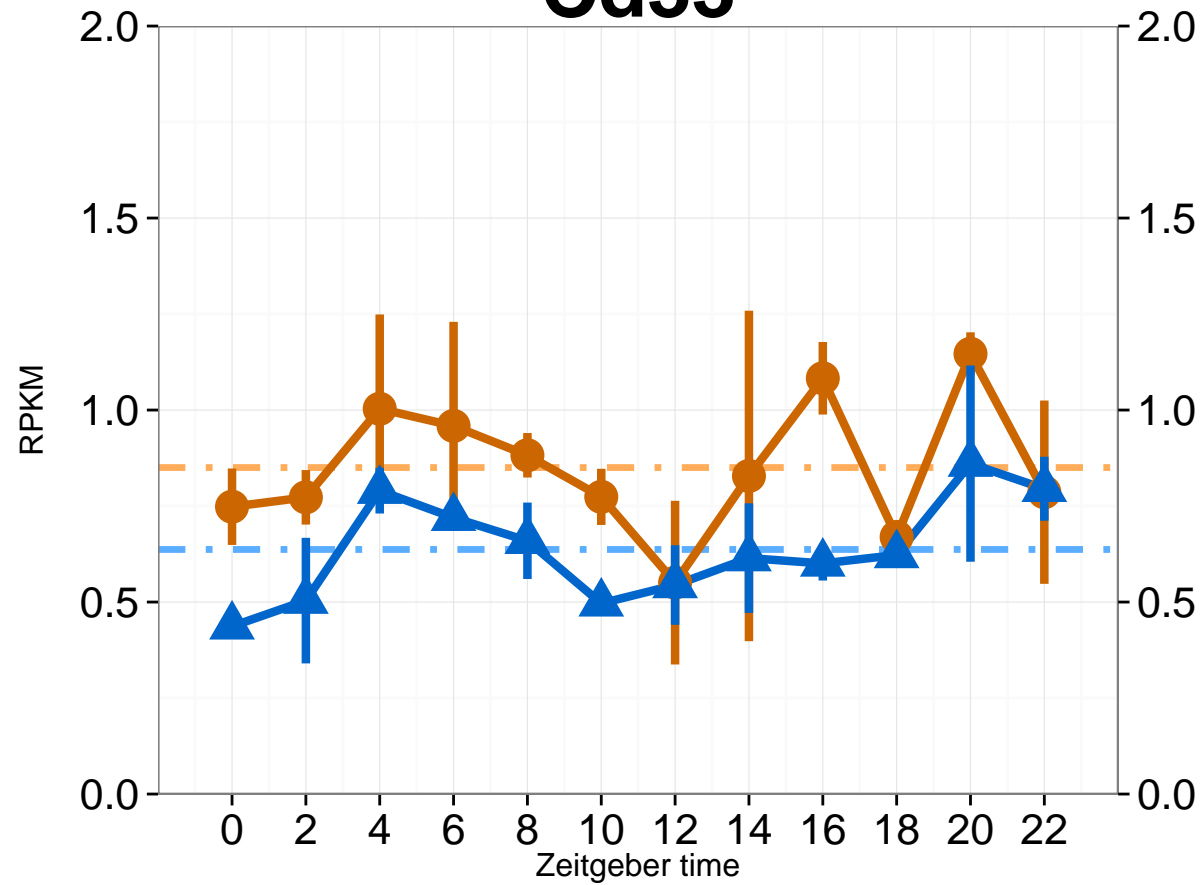

## Cd33

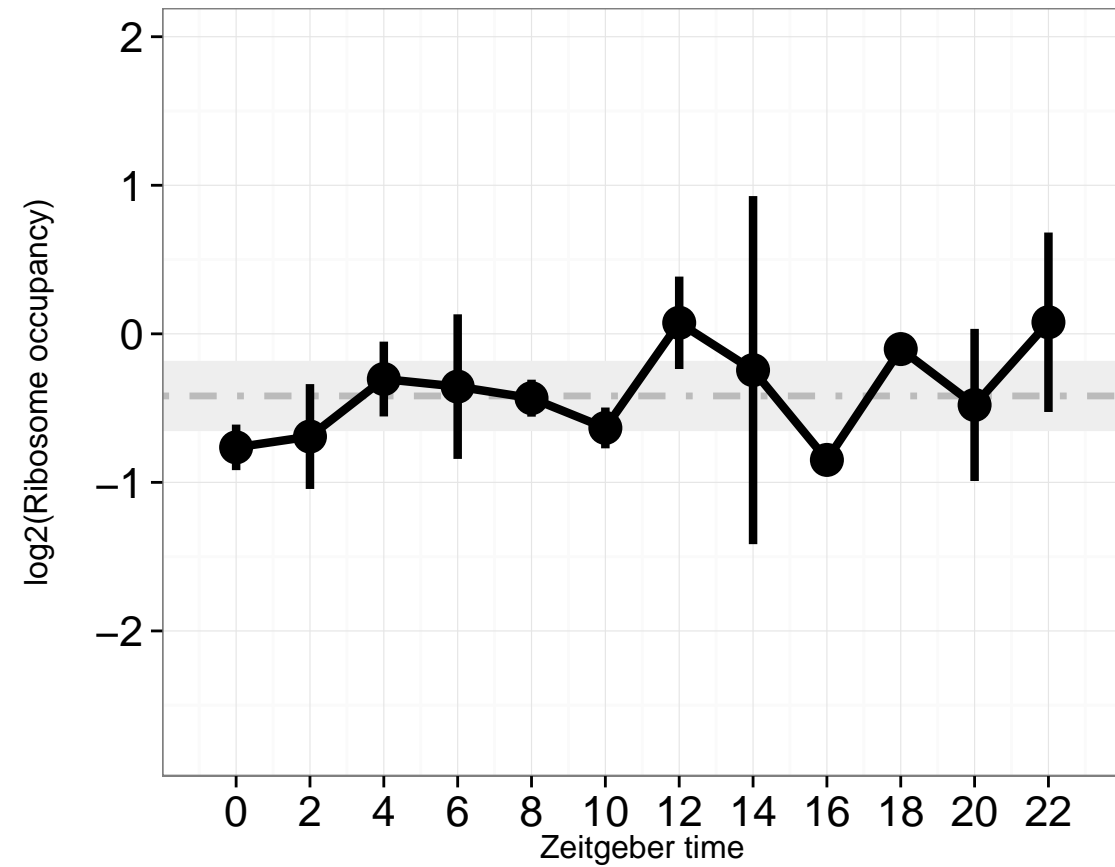

Supplement: Supplementary file 4003 [file 1]

# Nudt18

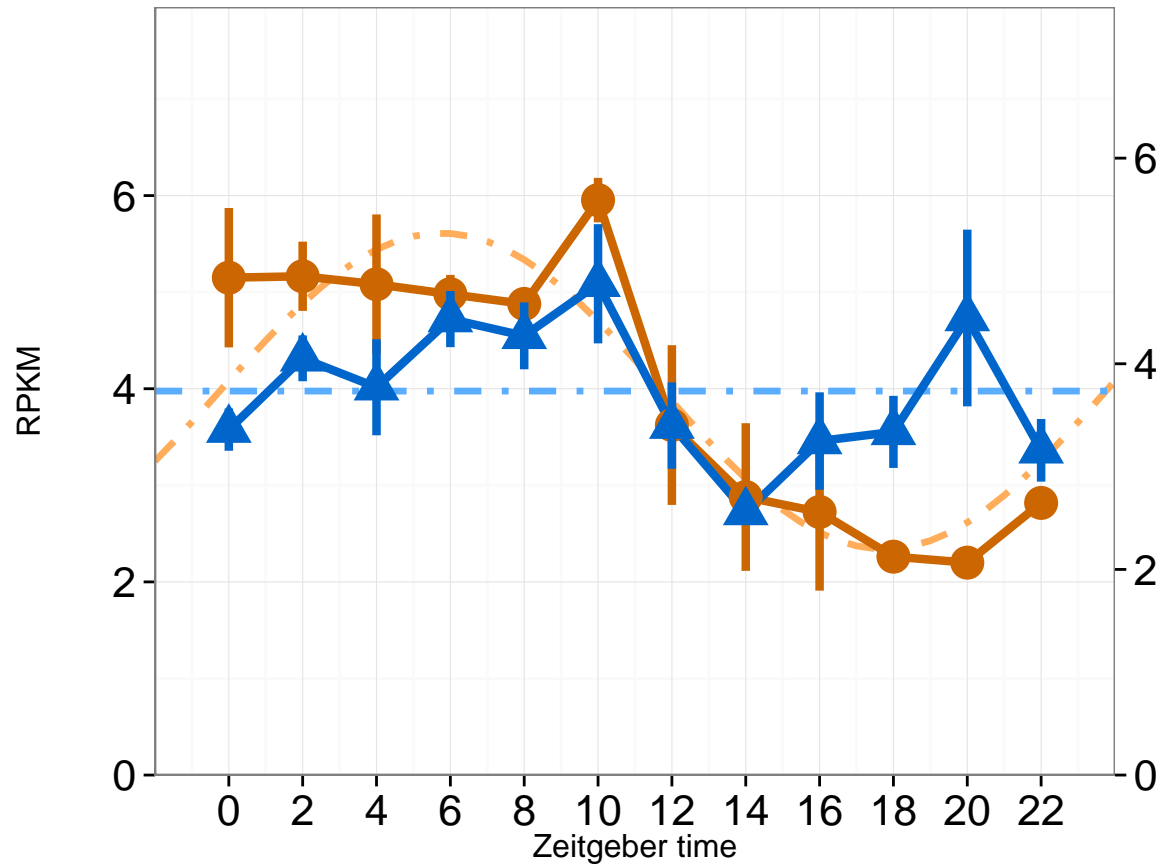

# Nudt18

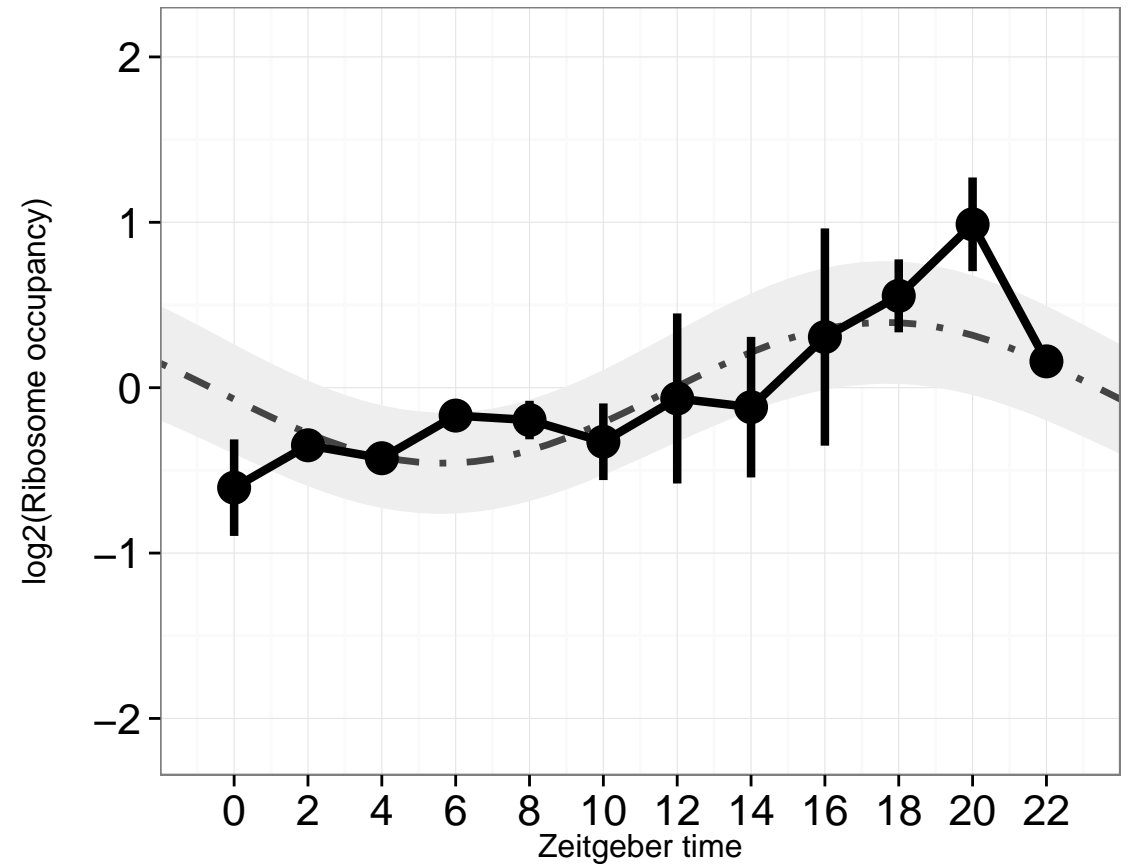

Supplement: Supplementary file 4004 [file 1]

## Ngf

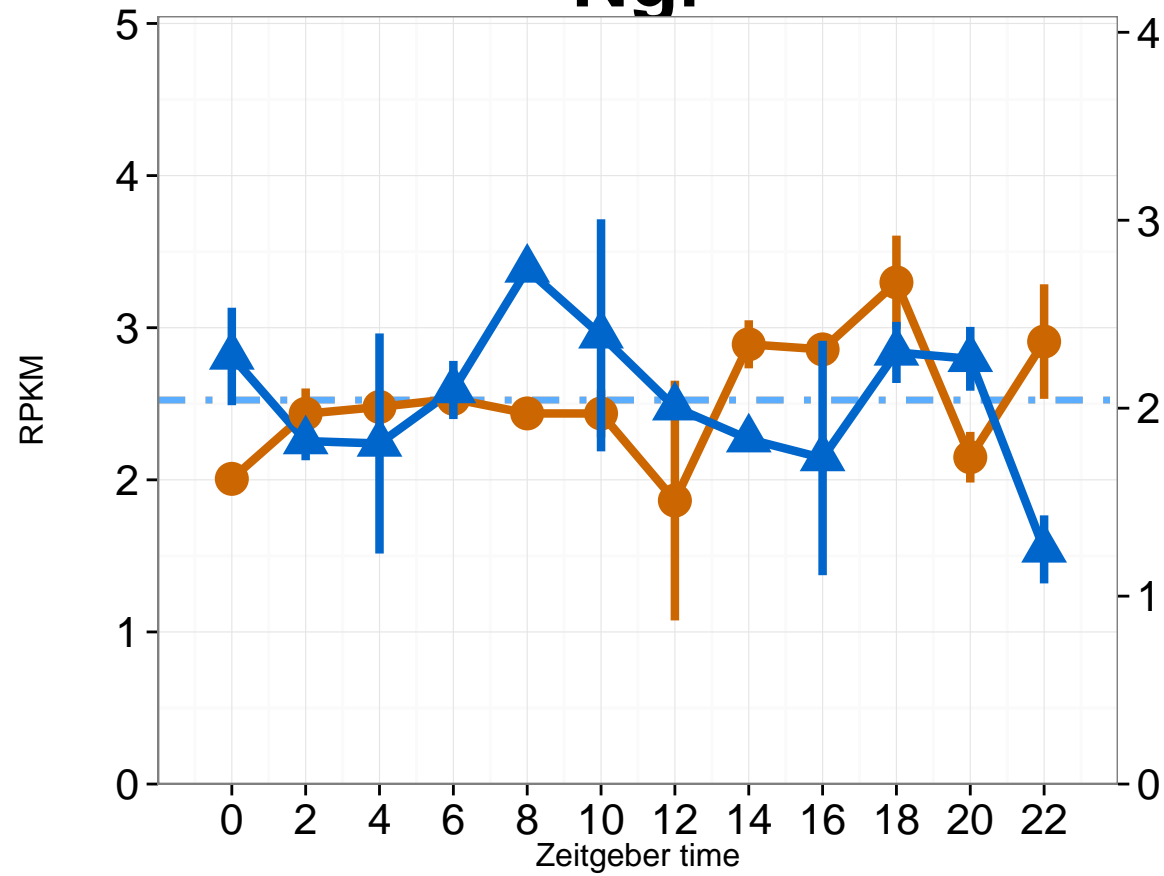

## Ngf

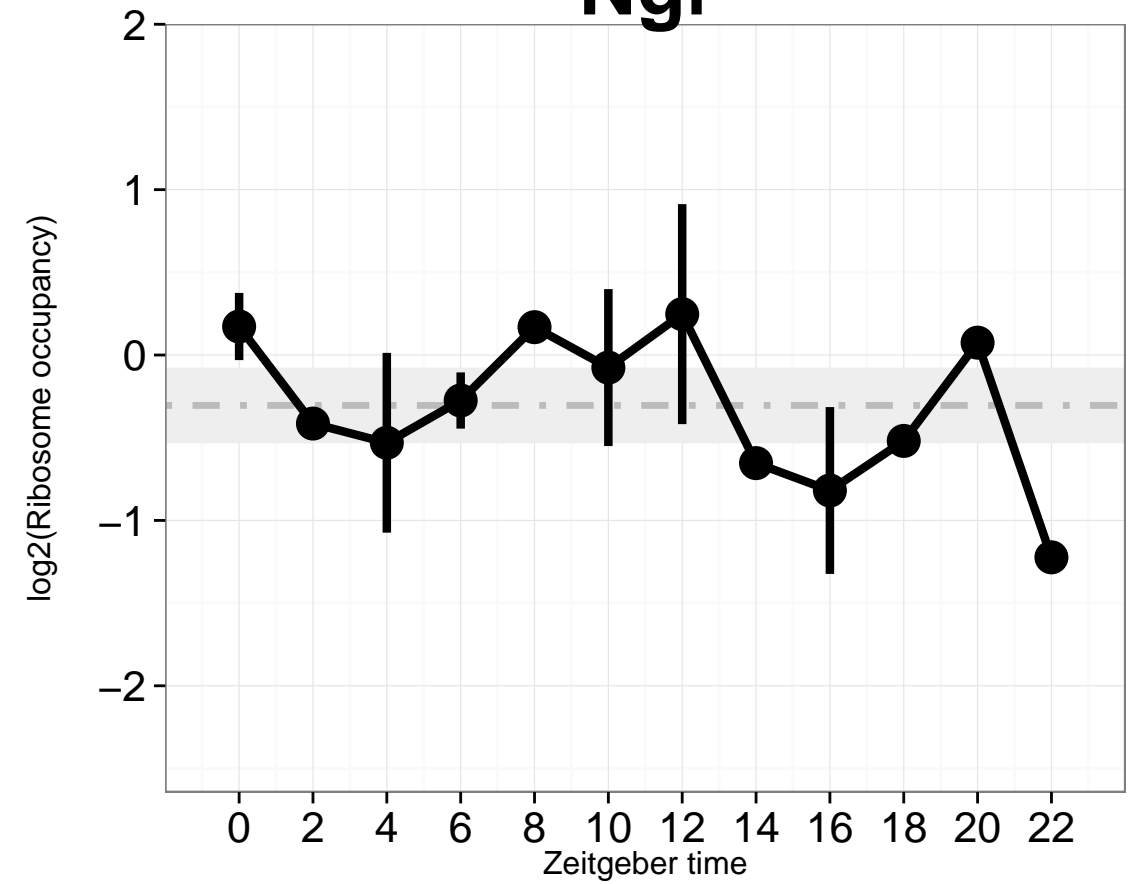

Supplement: Supplementary file 4005 [file 1]

# Klk1b16

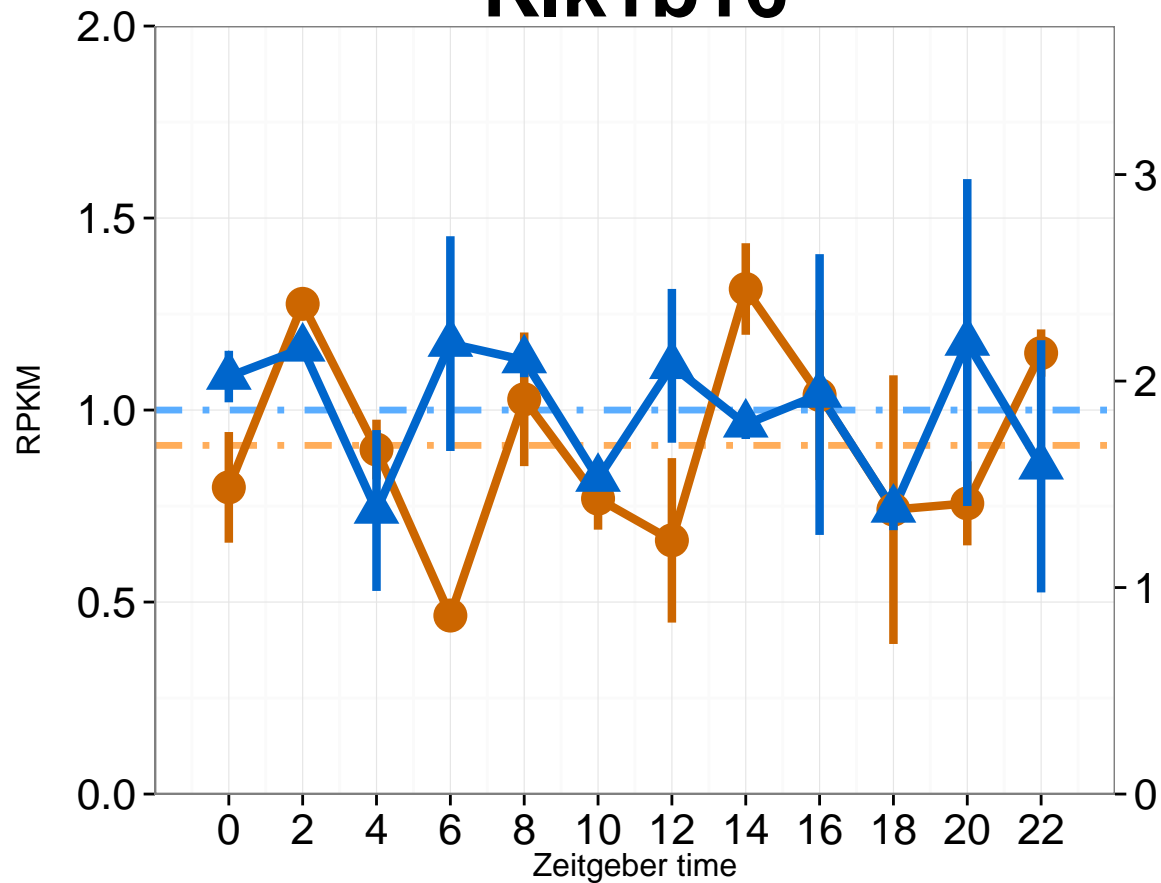

# Klk1b16

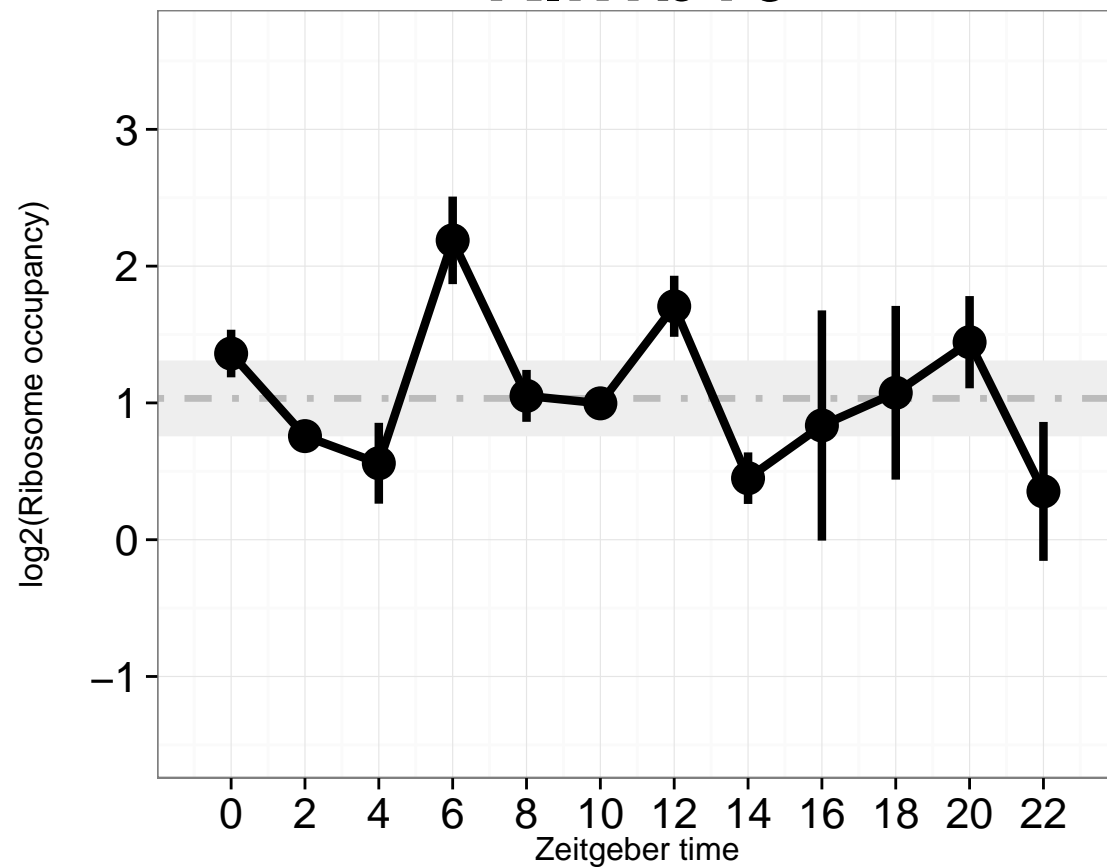

Supplement: Supplementary file 4006 [file 1]

## Cfb

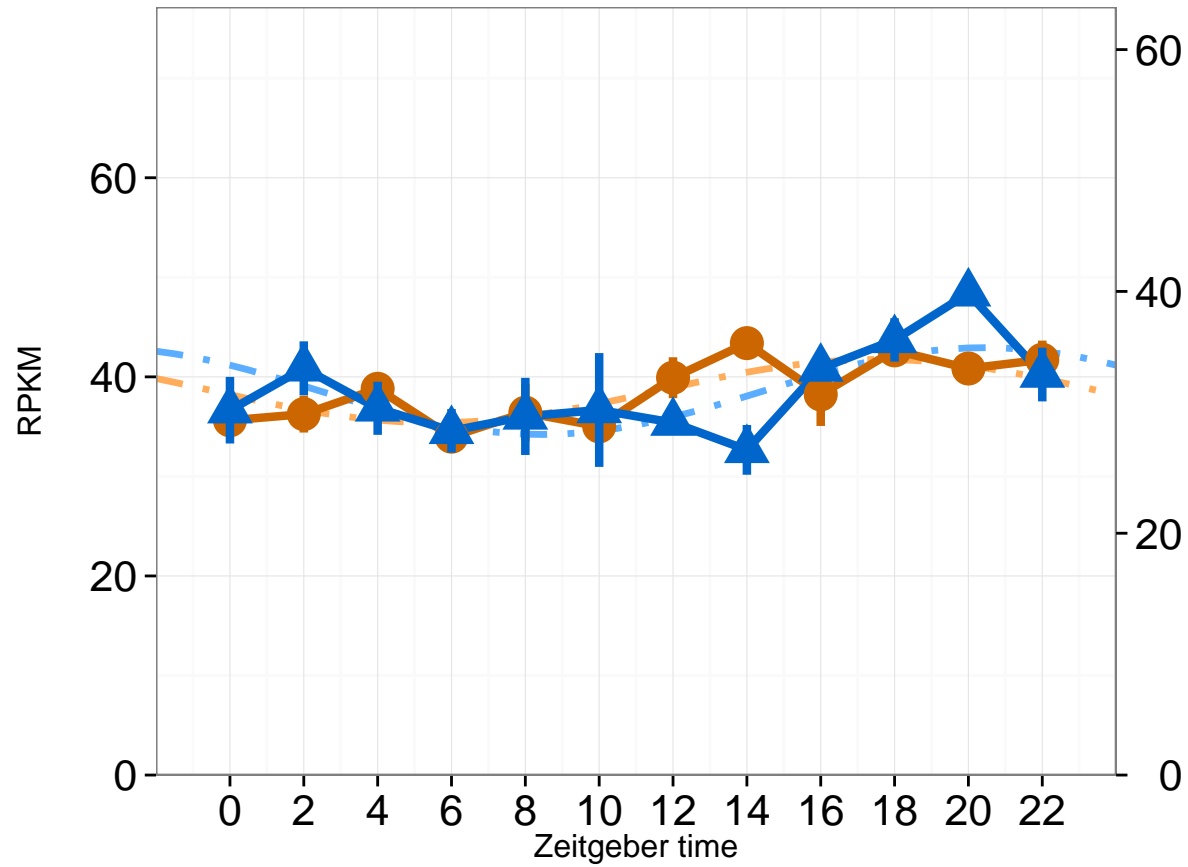

## Cfb

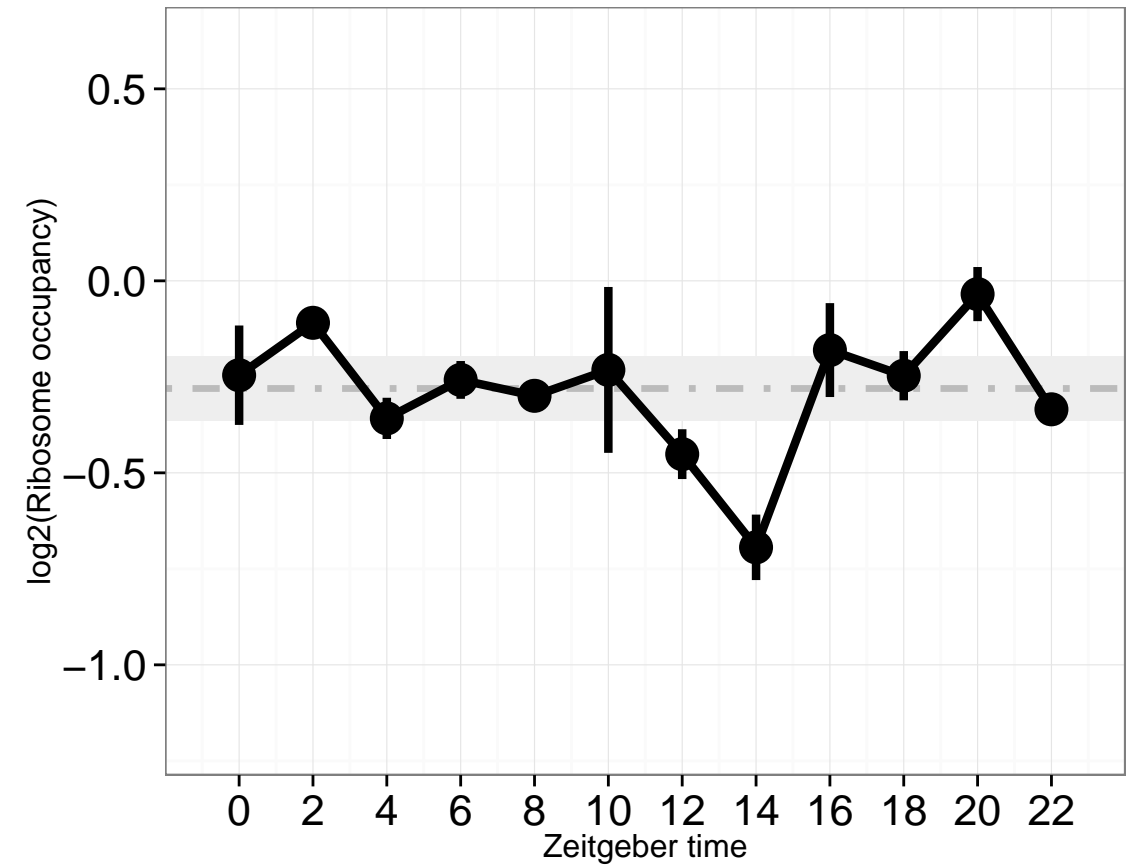

Supplement: Supplementary file 4007 [file 1]

# Cdc42ep3

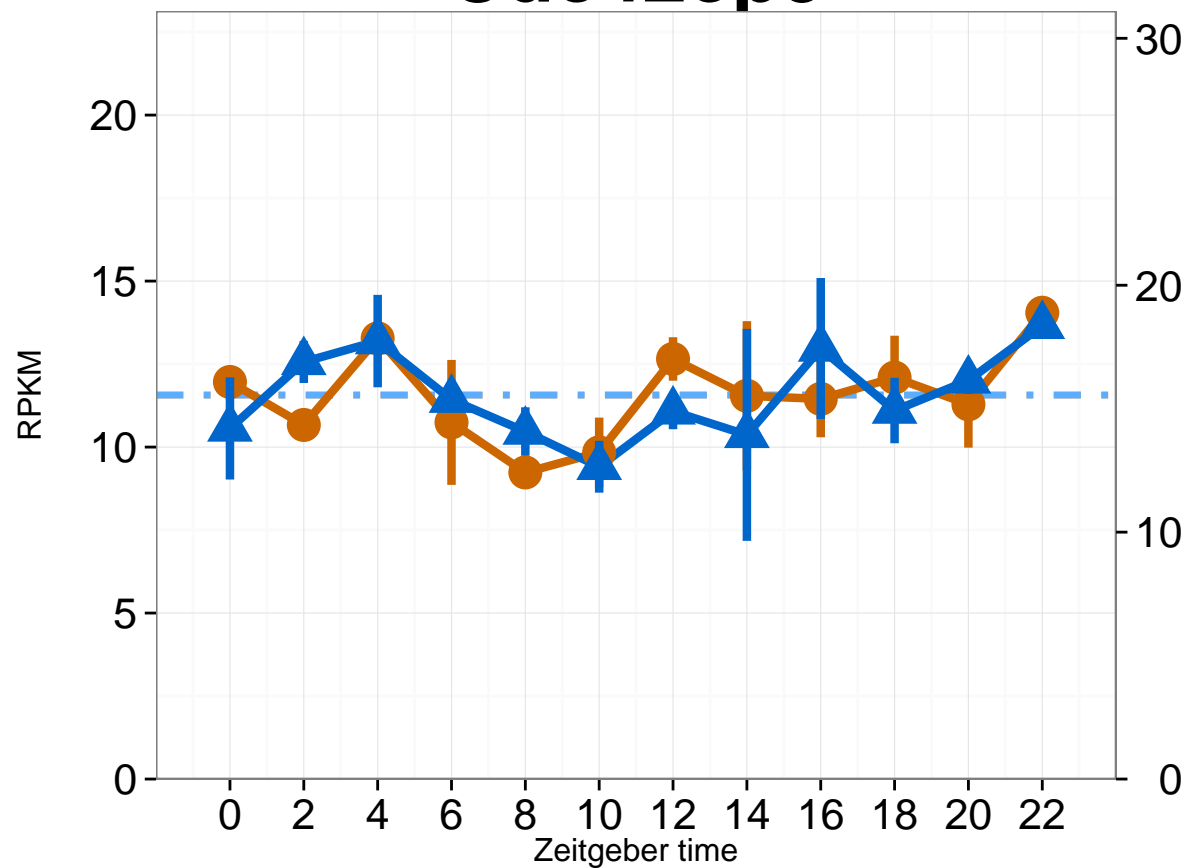

# Cdc42ep3

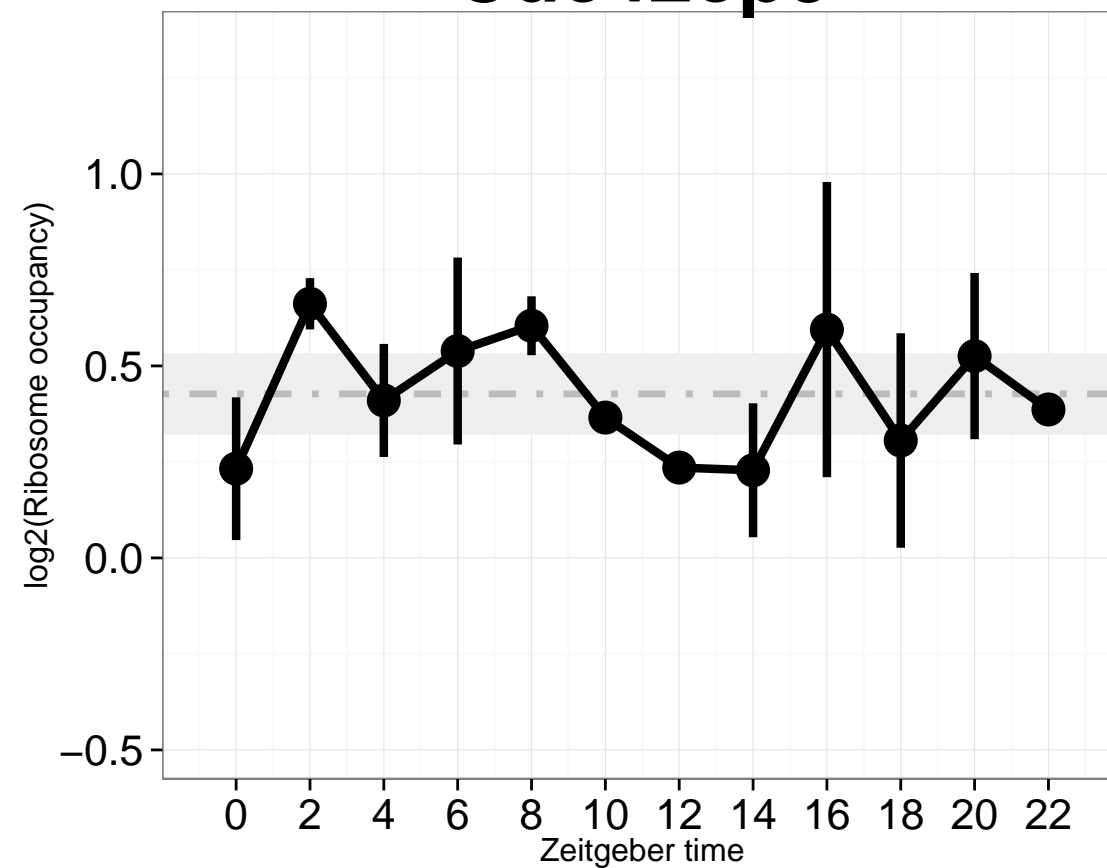

Supplement: Supplementary file 4008 [file 1]

# Senp5

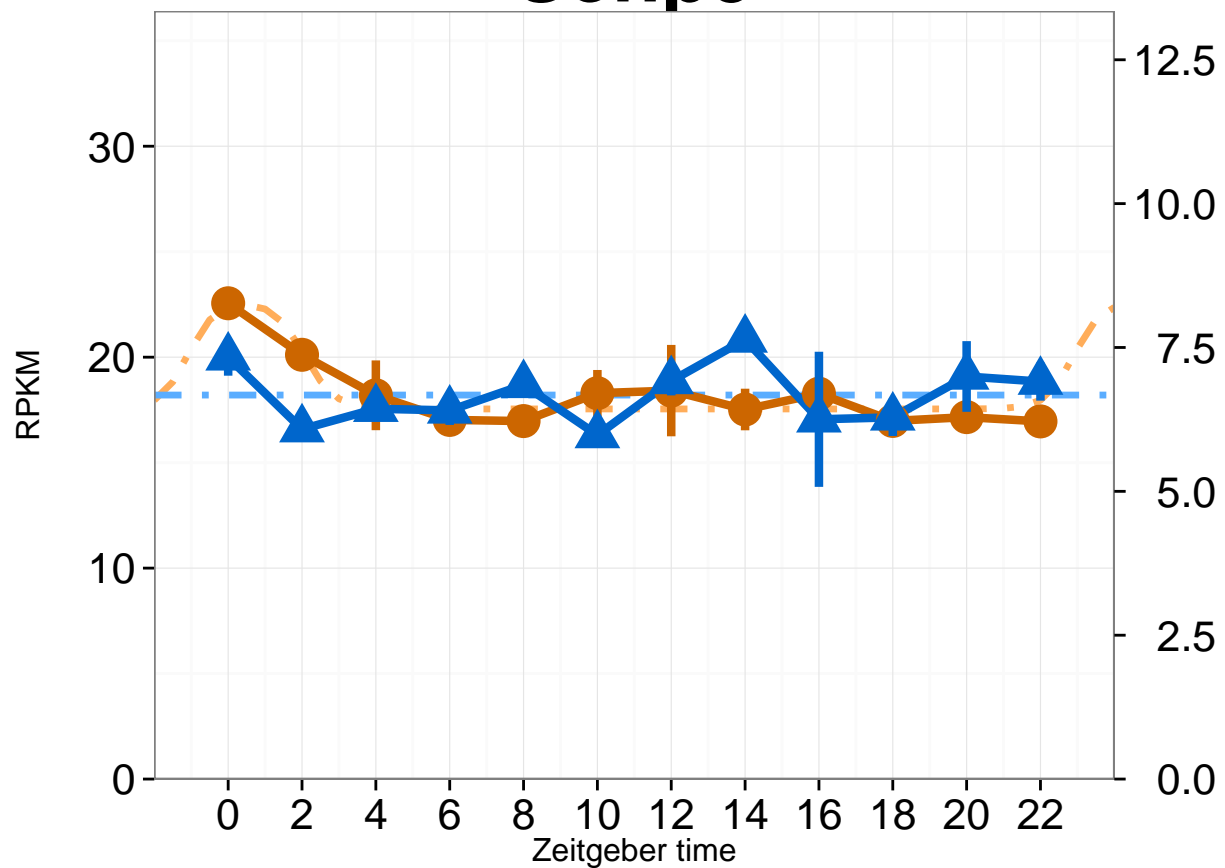

# Senp5

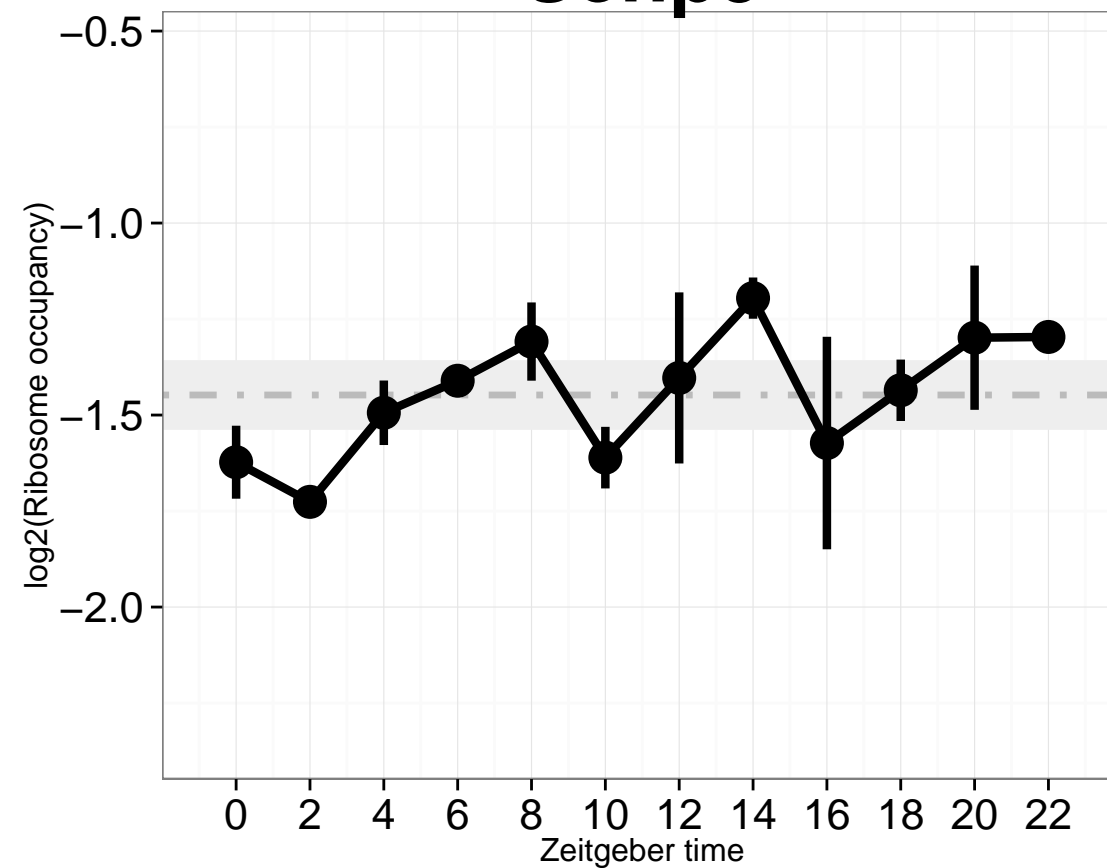

Supplement: Supplementary file 4009 [file 1]

## Zfand3

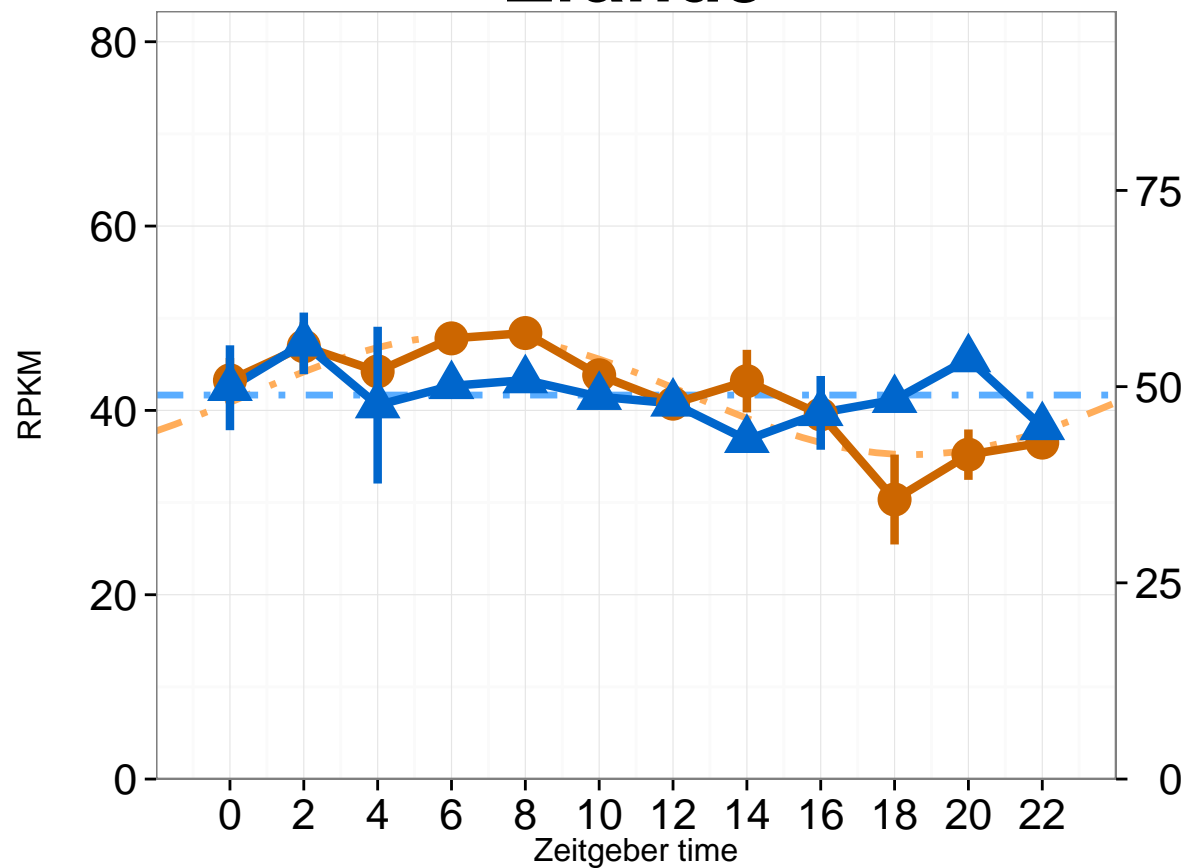

## Zfand3

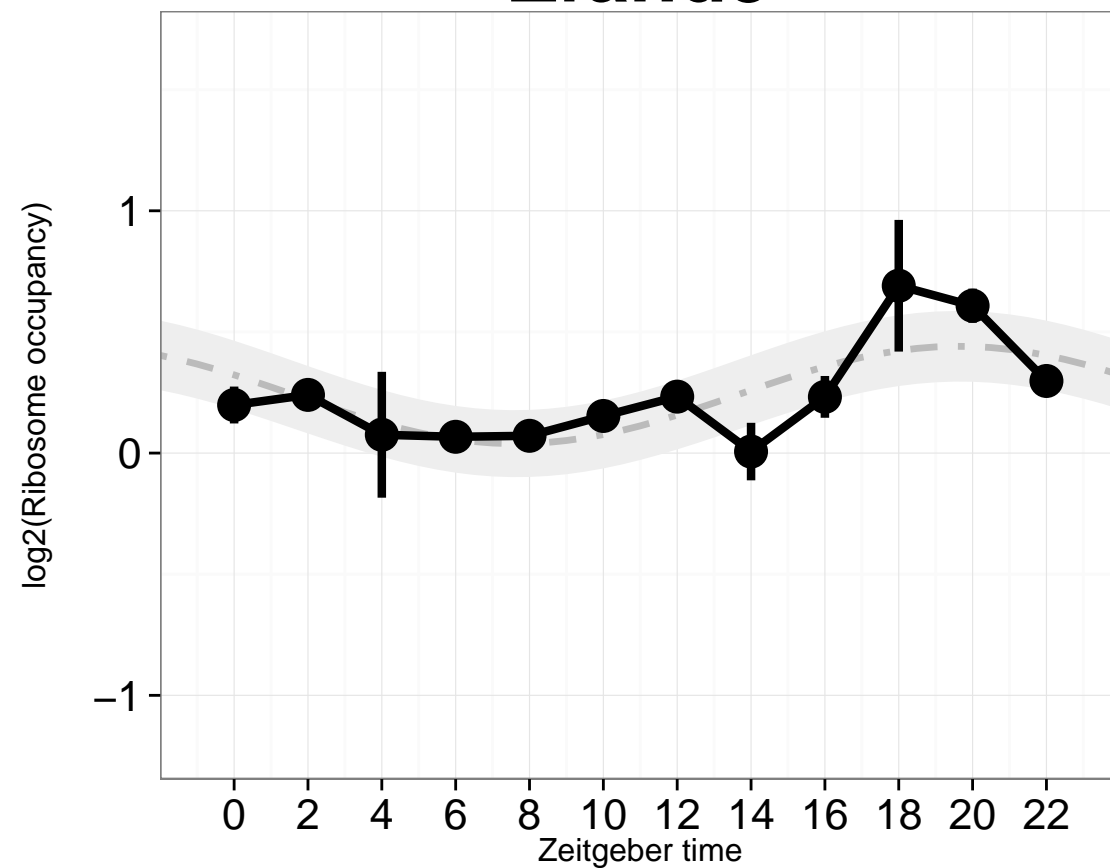

Supplement: Supplementary file 4010 [file 1]

## Styk1

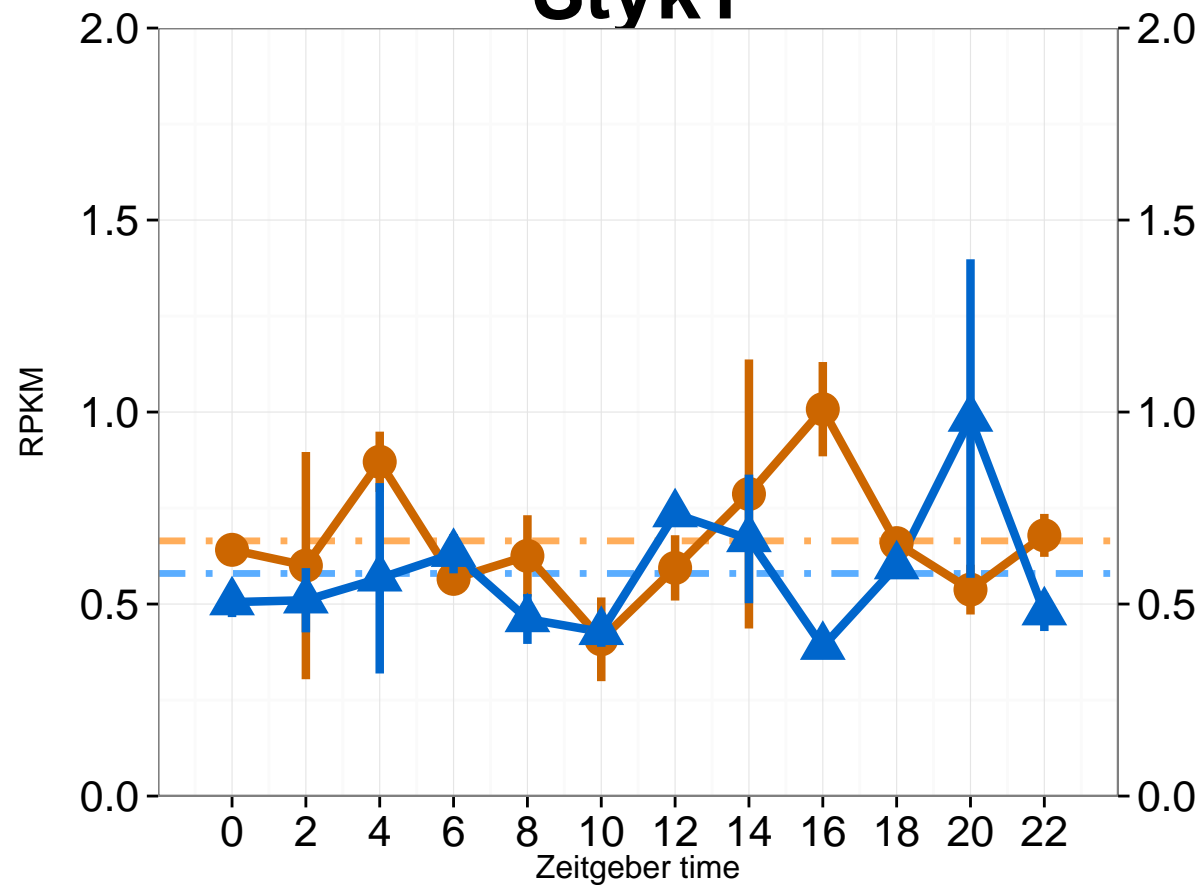

## Styk1

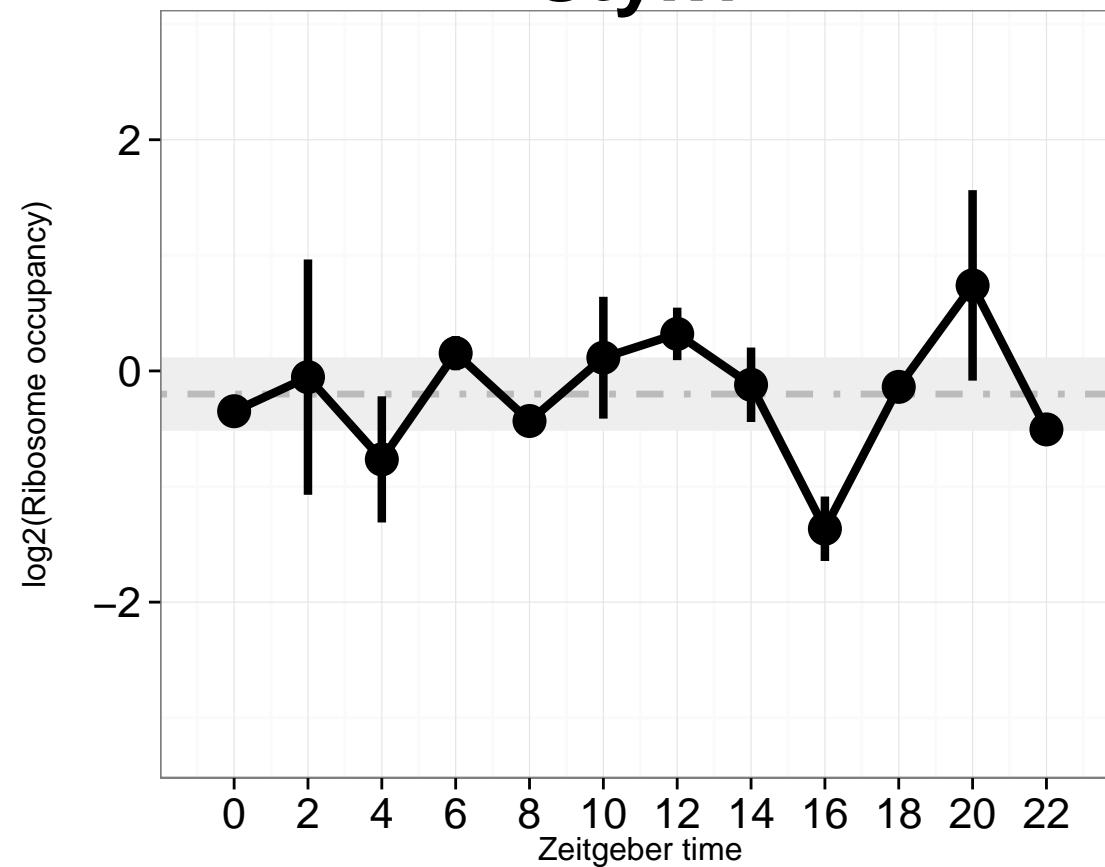

Supplement: Supplementary file 4011 [file 1]

## Nt5c

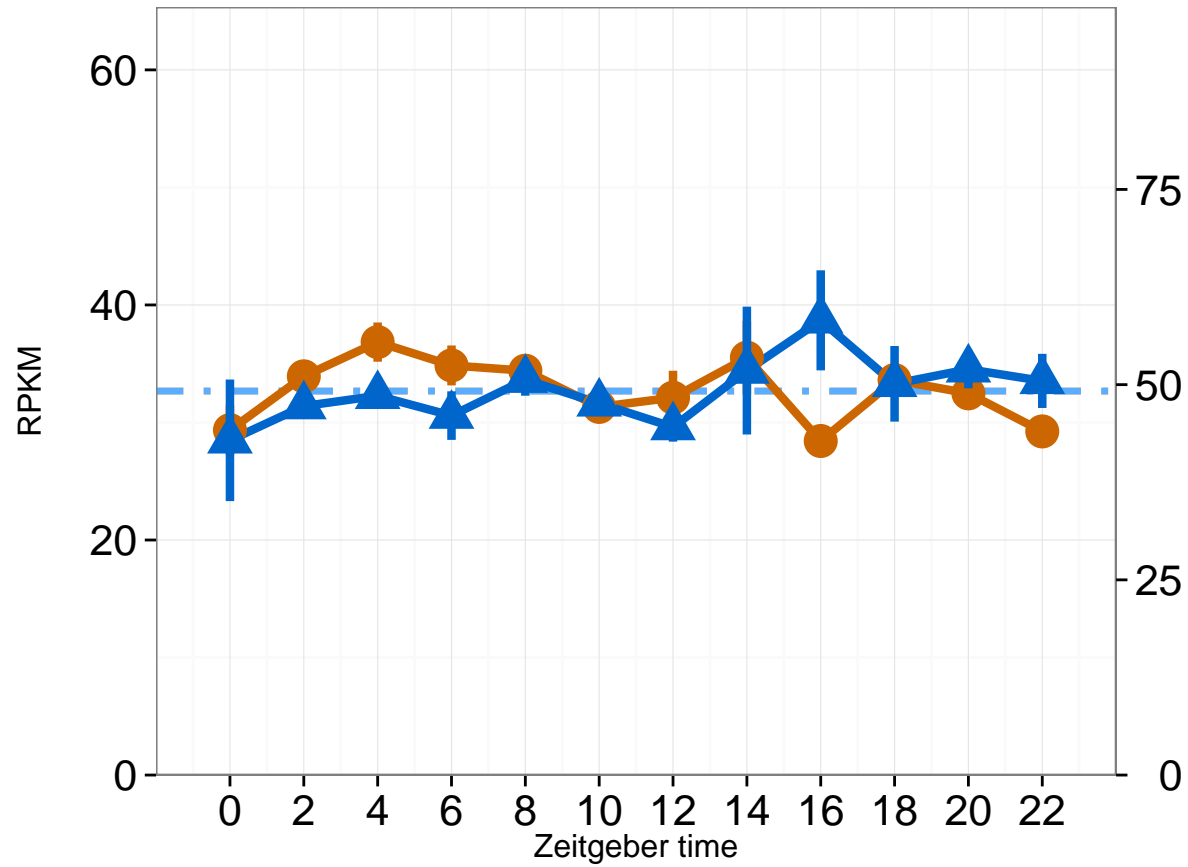

## Nt5c

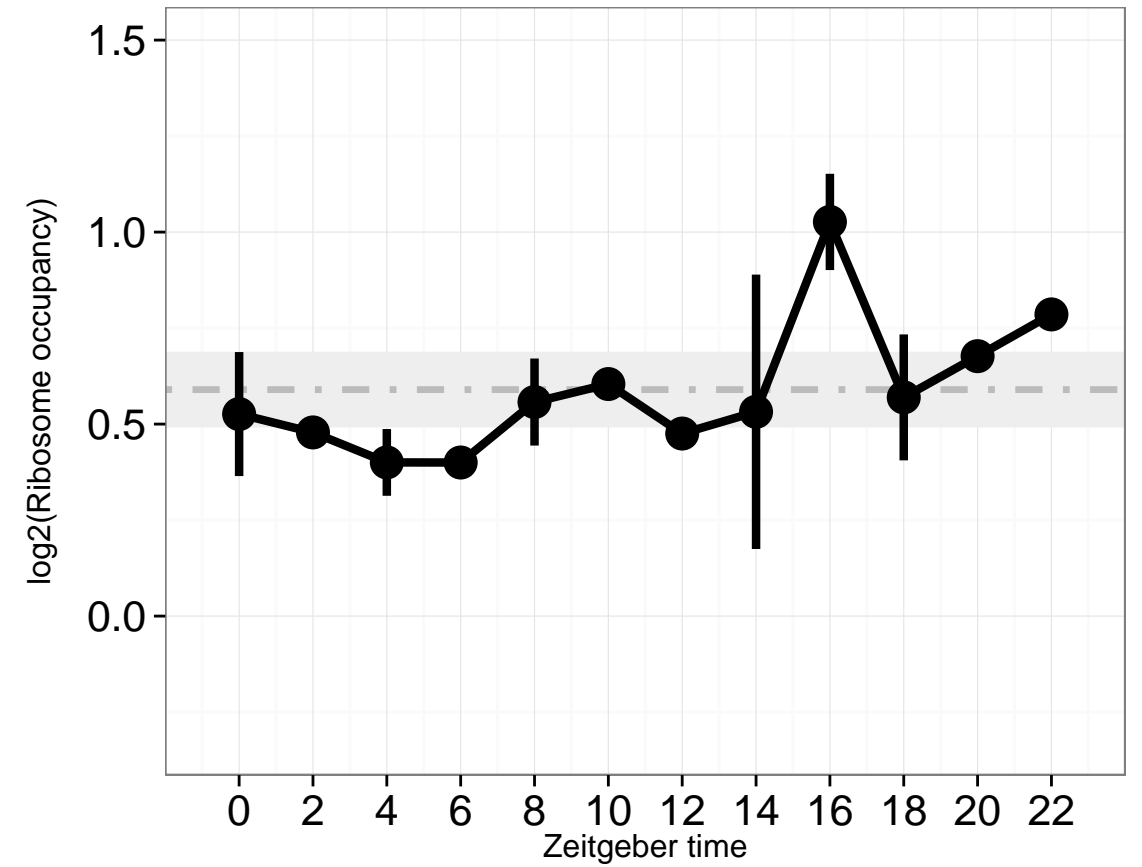

Supplement: Supplementary file 4012 [file 1]

# 1300002K09Rik

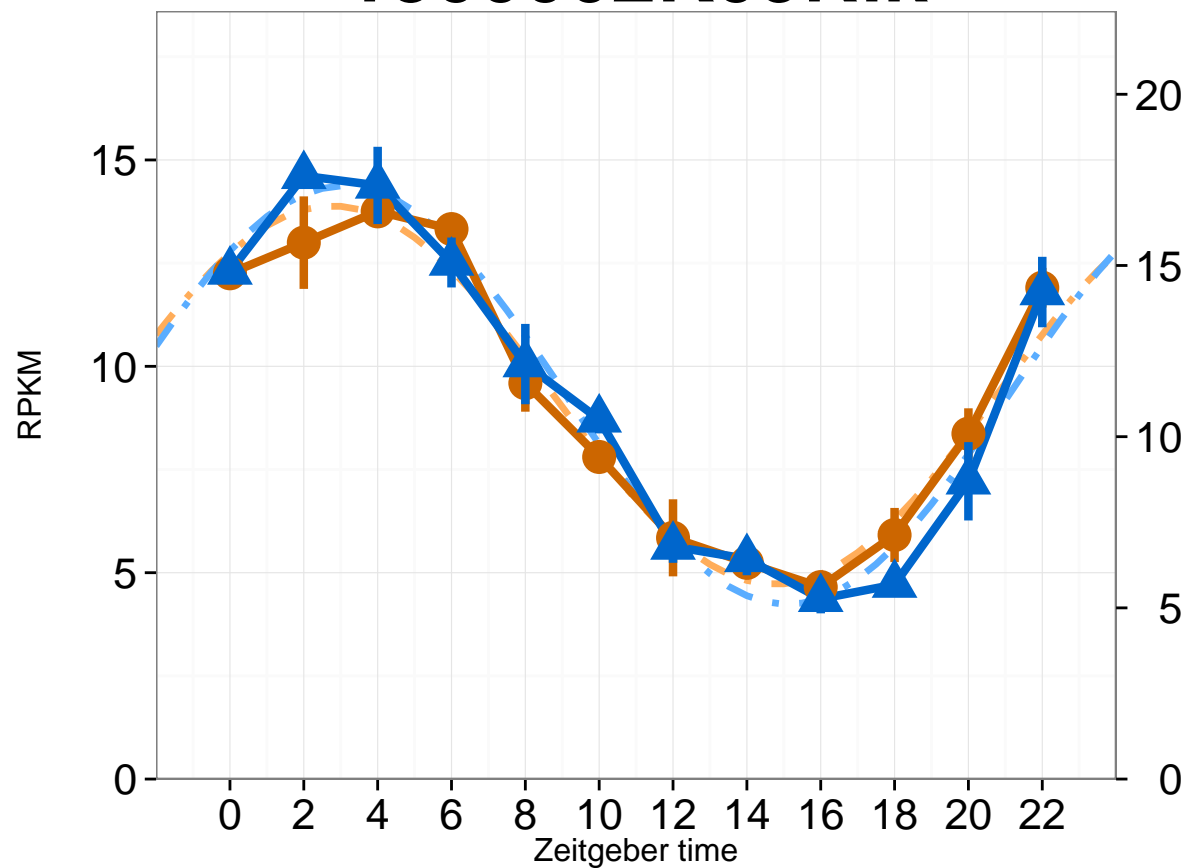

# 1300002K09Rik

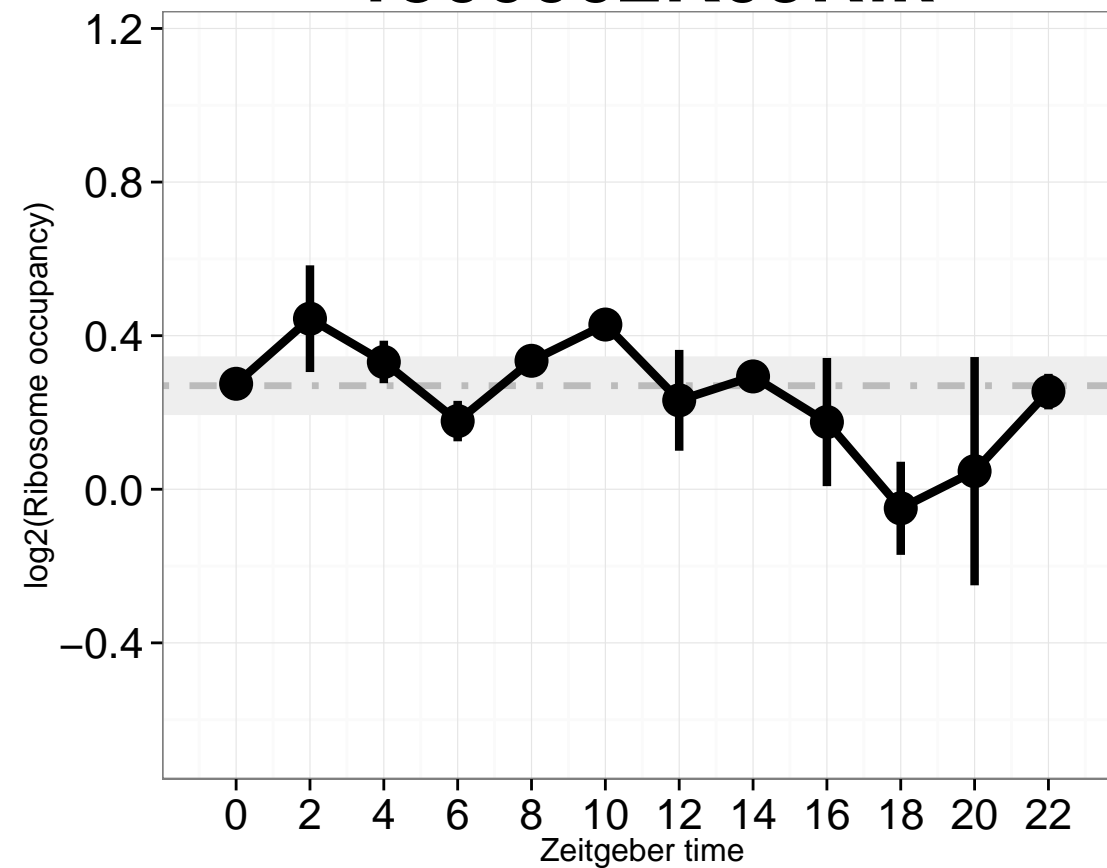

Supplement: Supplementary file 4013 [file 1]

# Gpr150

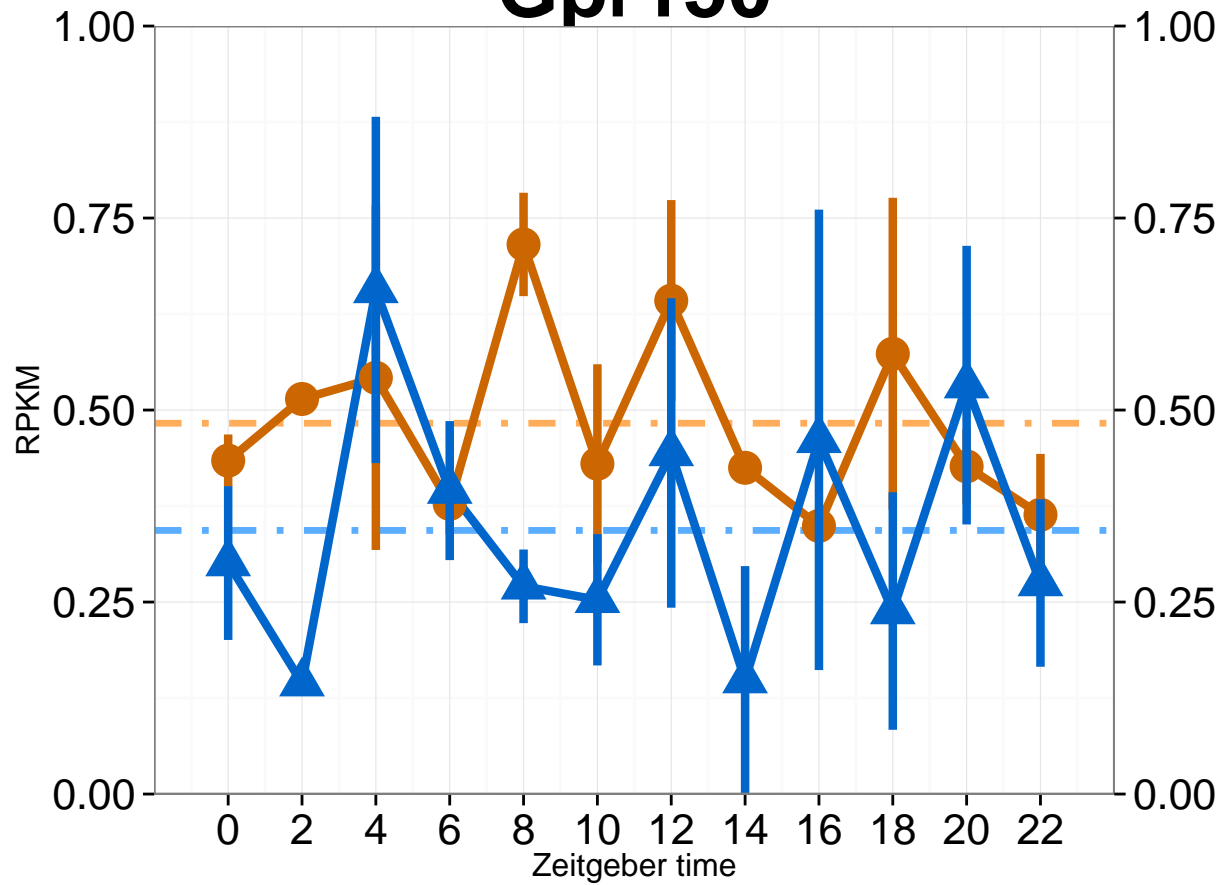

# Gpr150

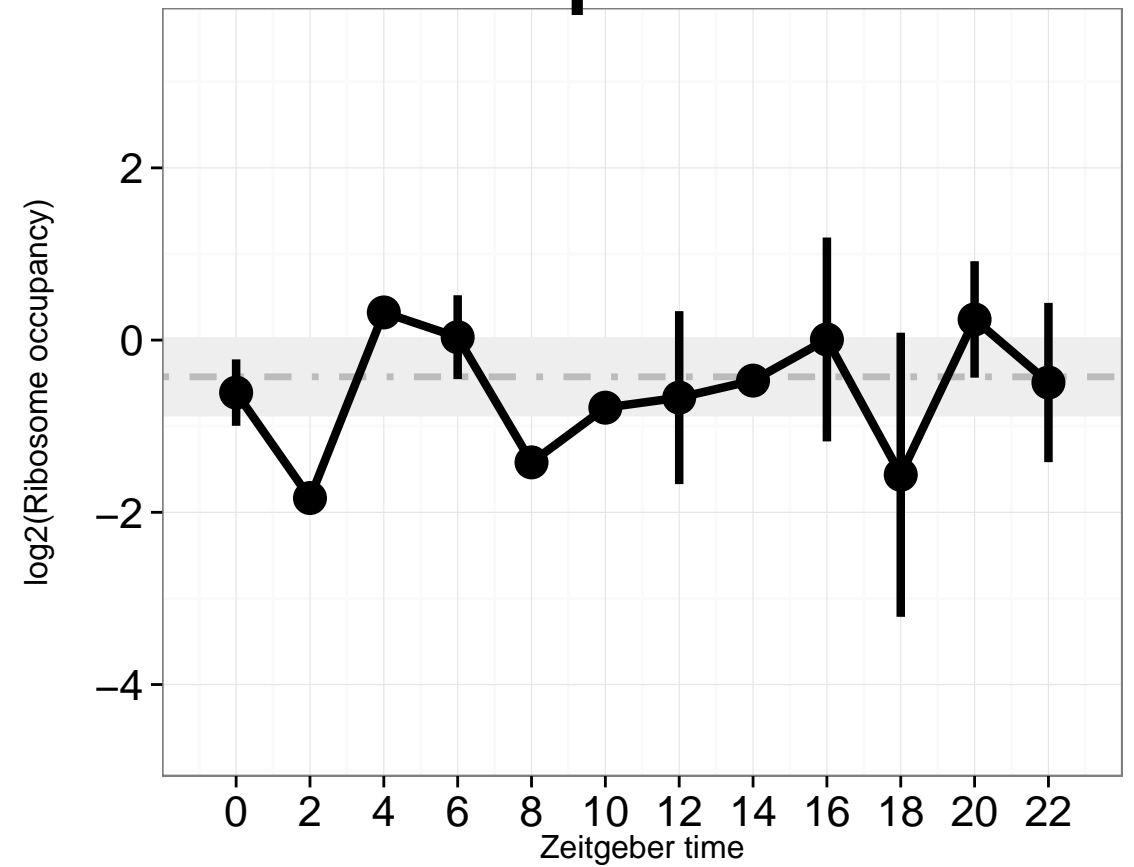

Supplement: Supplementary file 4014 [file 1]

## Usp39

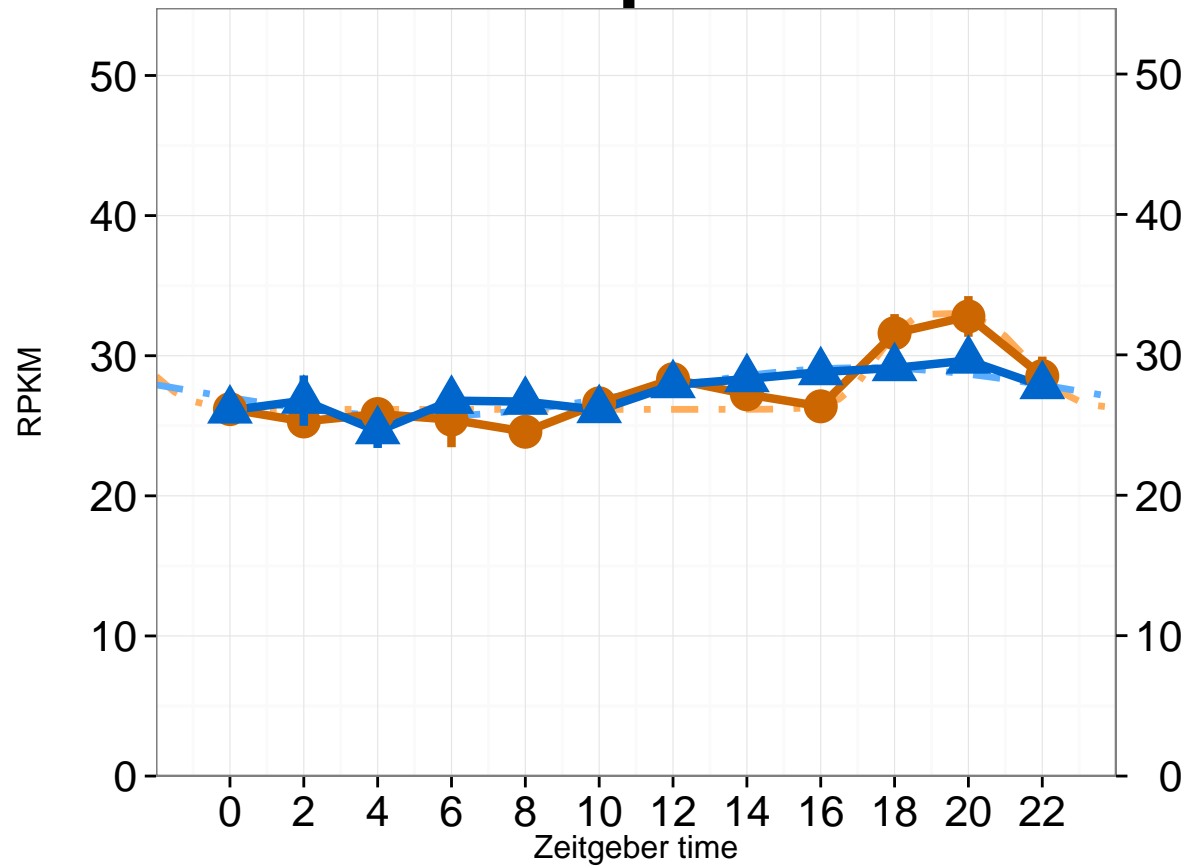

## Usp39

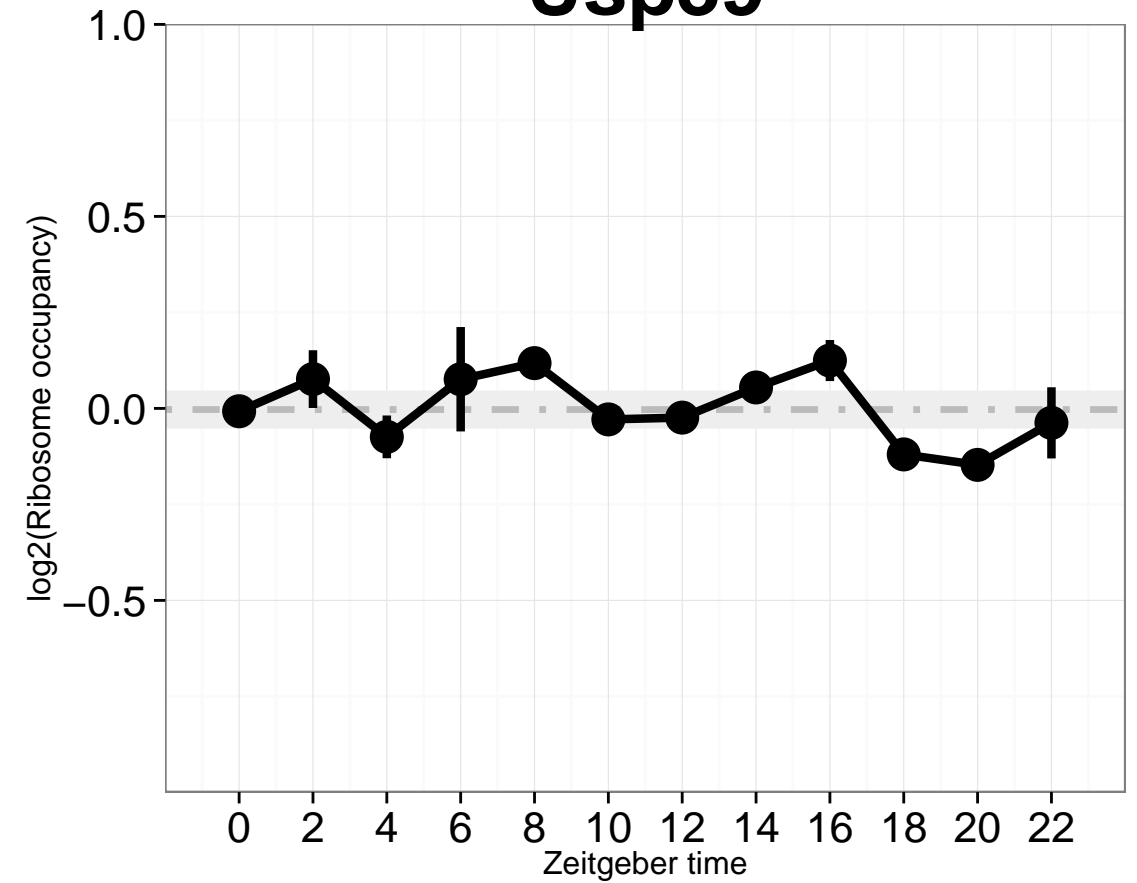

Supplement: Supplementary file 4015 [file 1]

# Hspa2

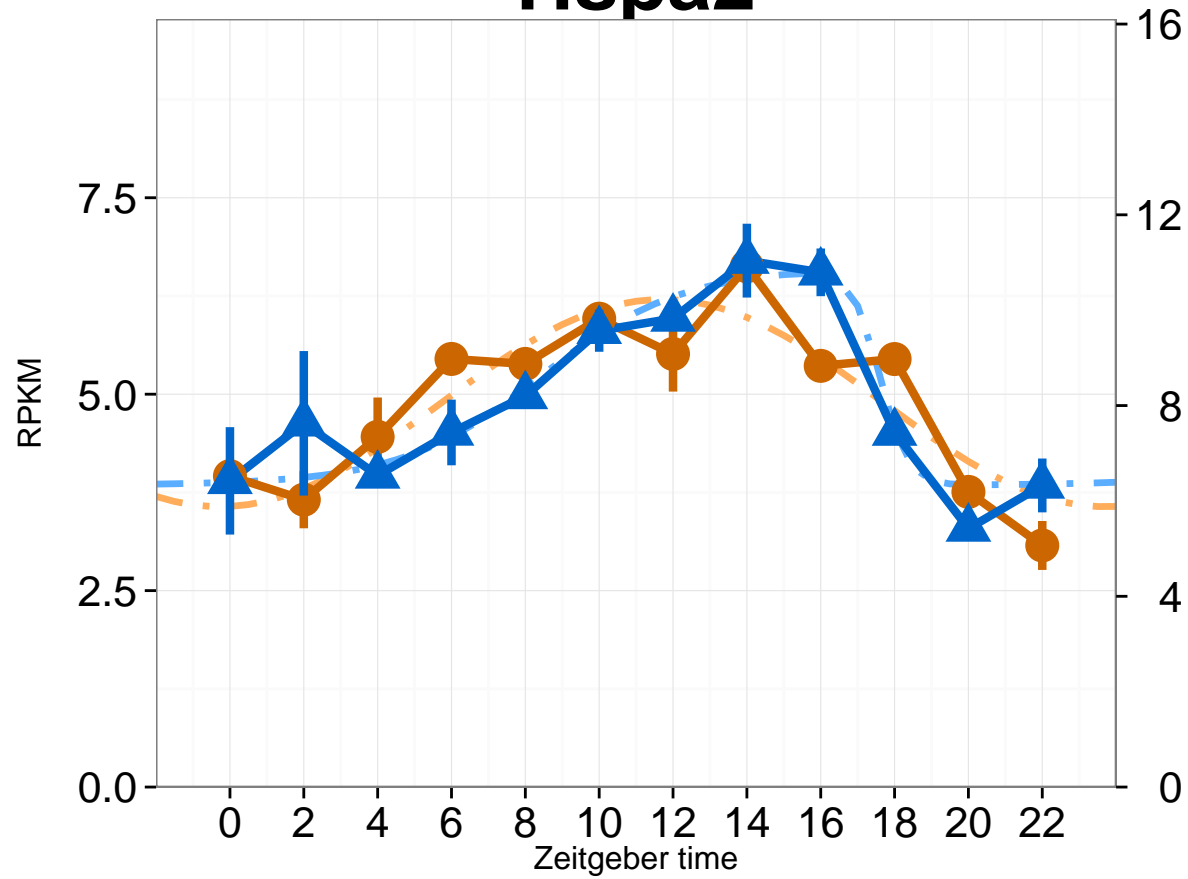

# Hspa2

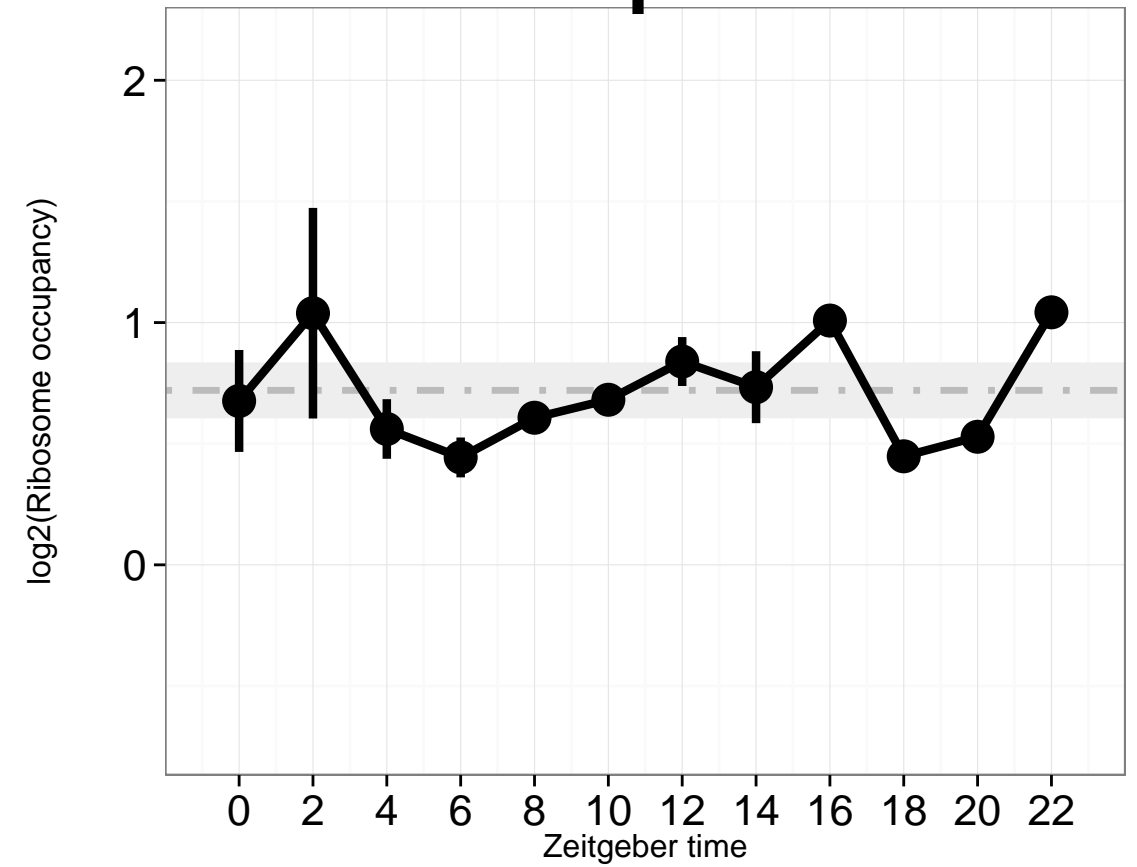

Supplement: Supplementary file 4016 [file 1]
