# Supplementary material (part 41 of 133)
Source: publisher figshare collection journal article supplement (https://springernature.figshare.com/articles/dataset/_/4903193)

## Ccnk

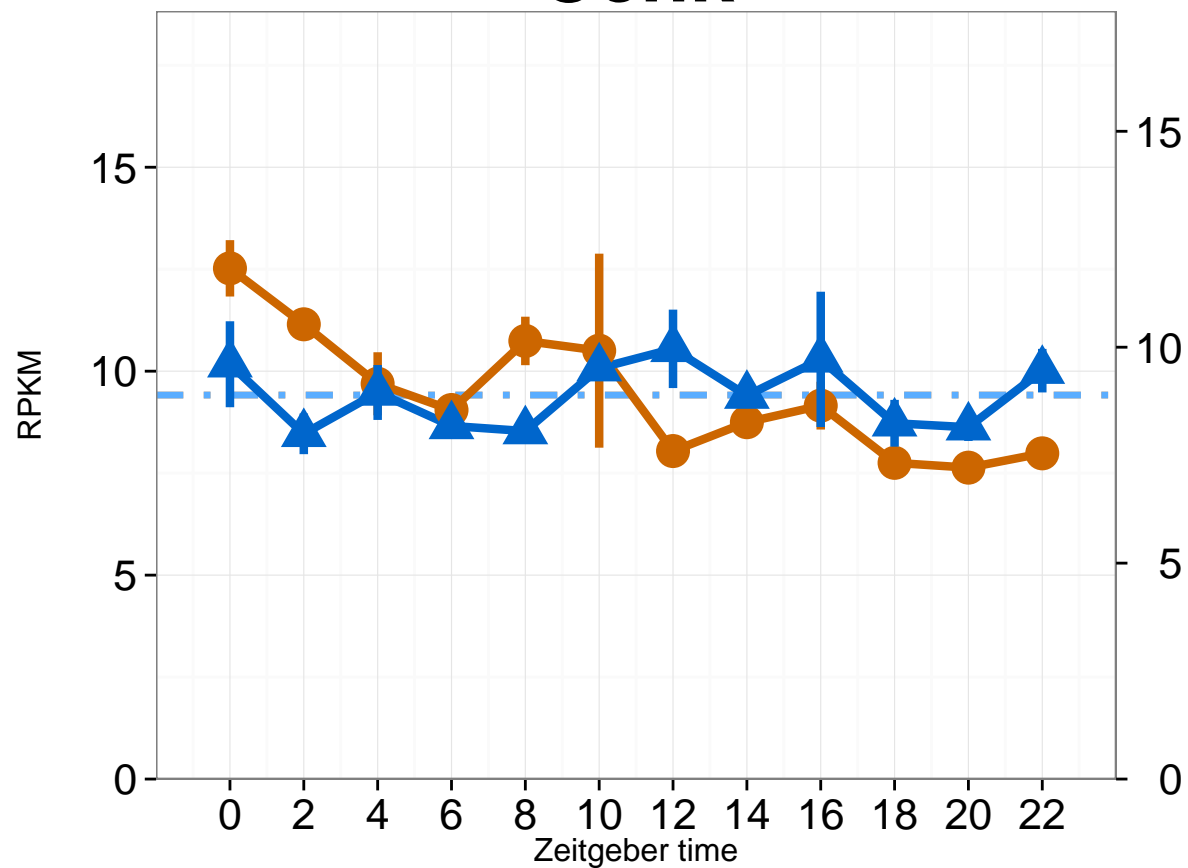

## Ccnk

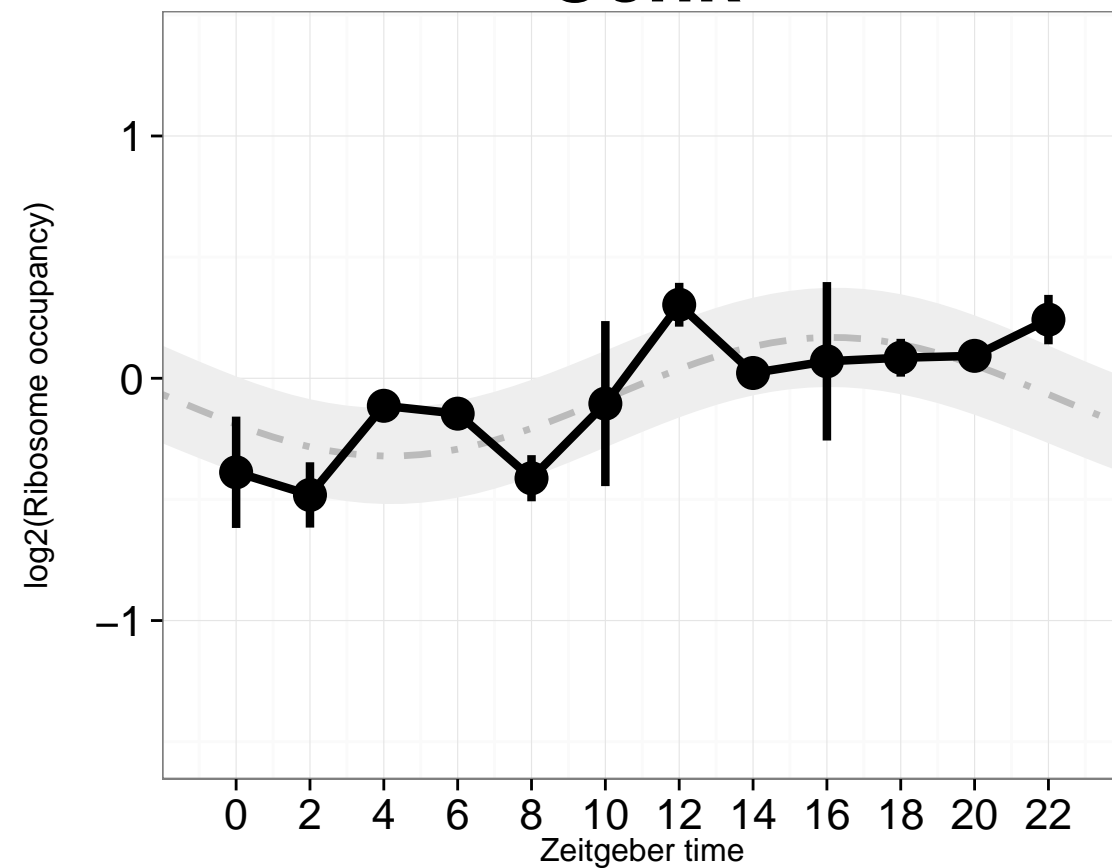

Supplement: Supplementary file 4017 [file 1]

## Icosl

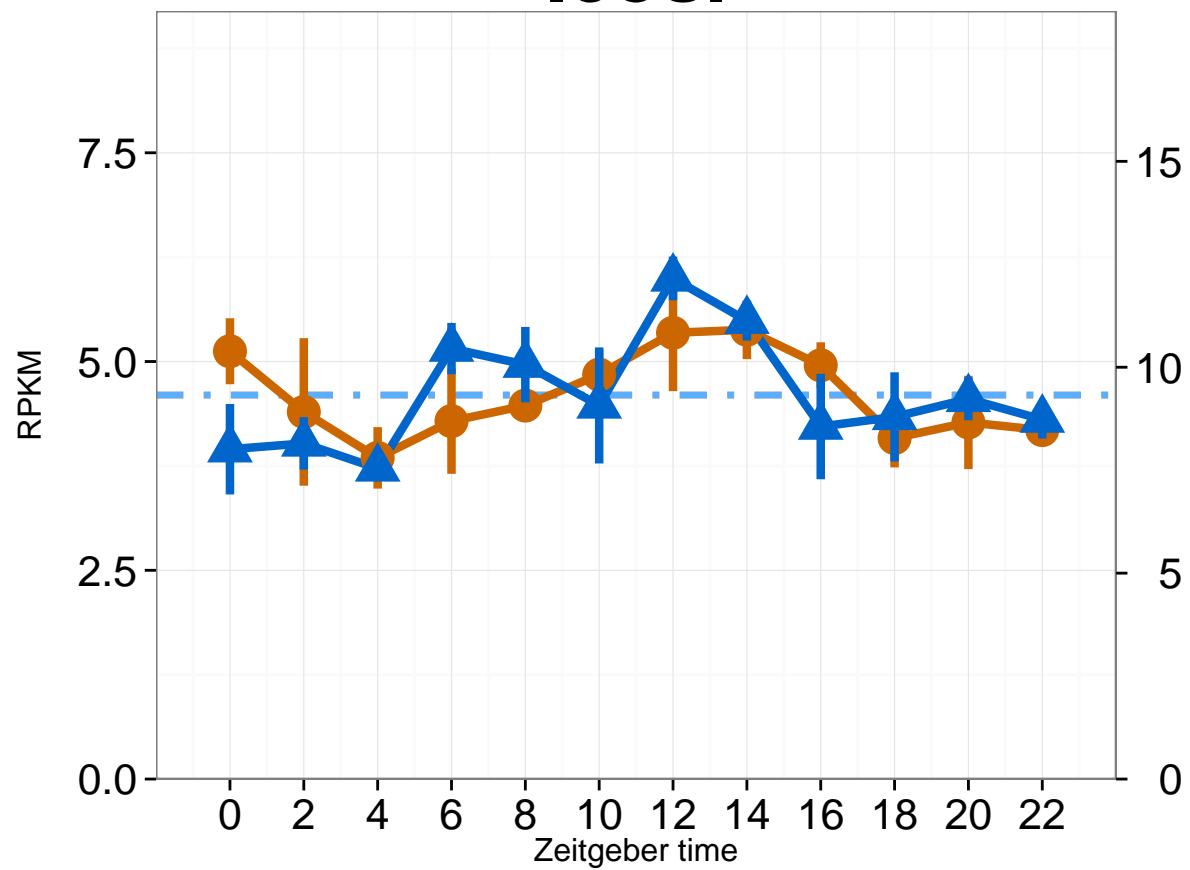

## Icosl

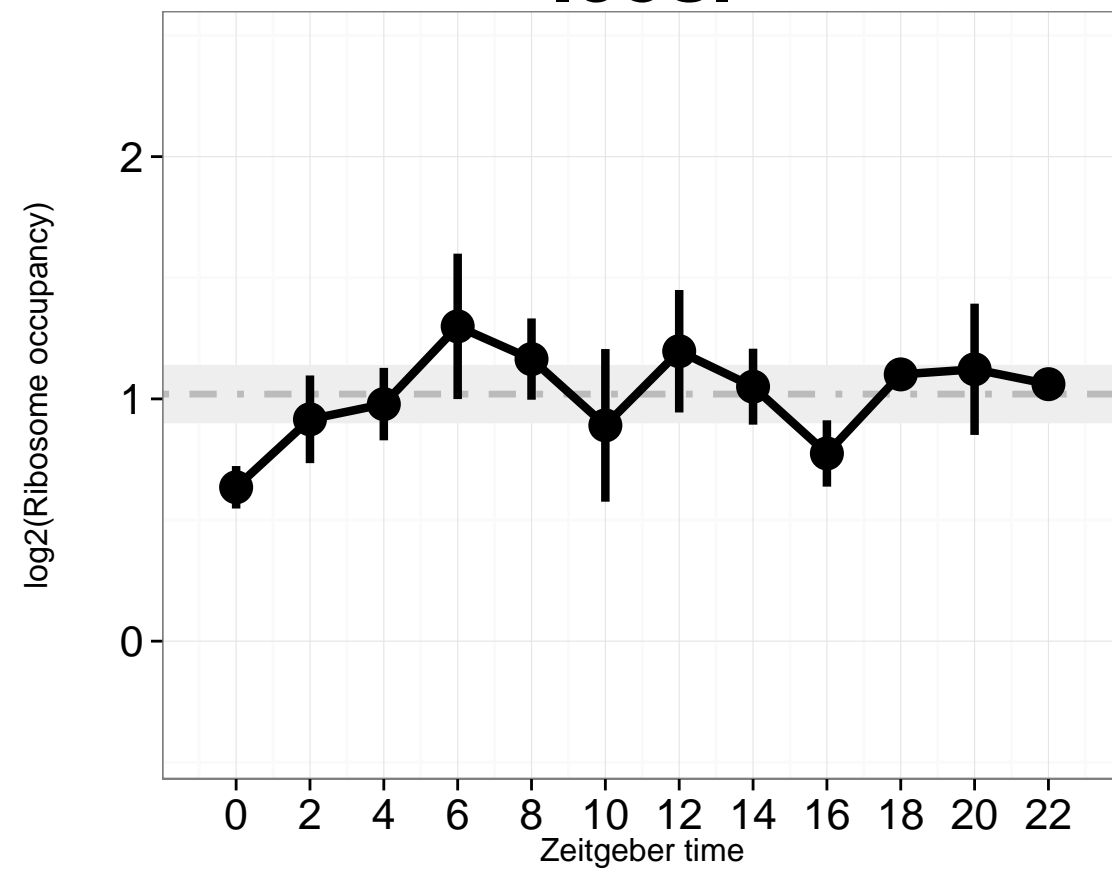

Supplement: Supplementary file 4018 [file 1]

# Ncam2

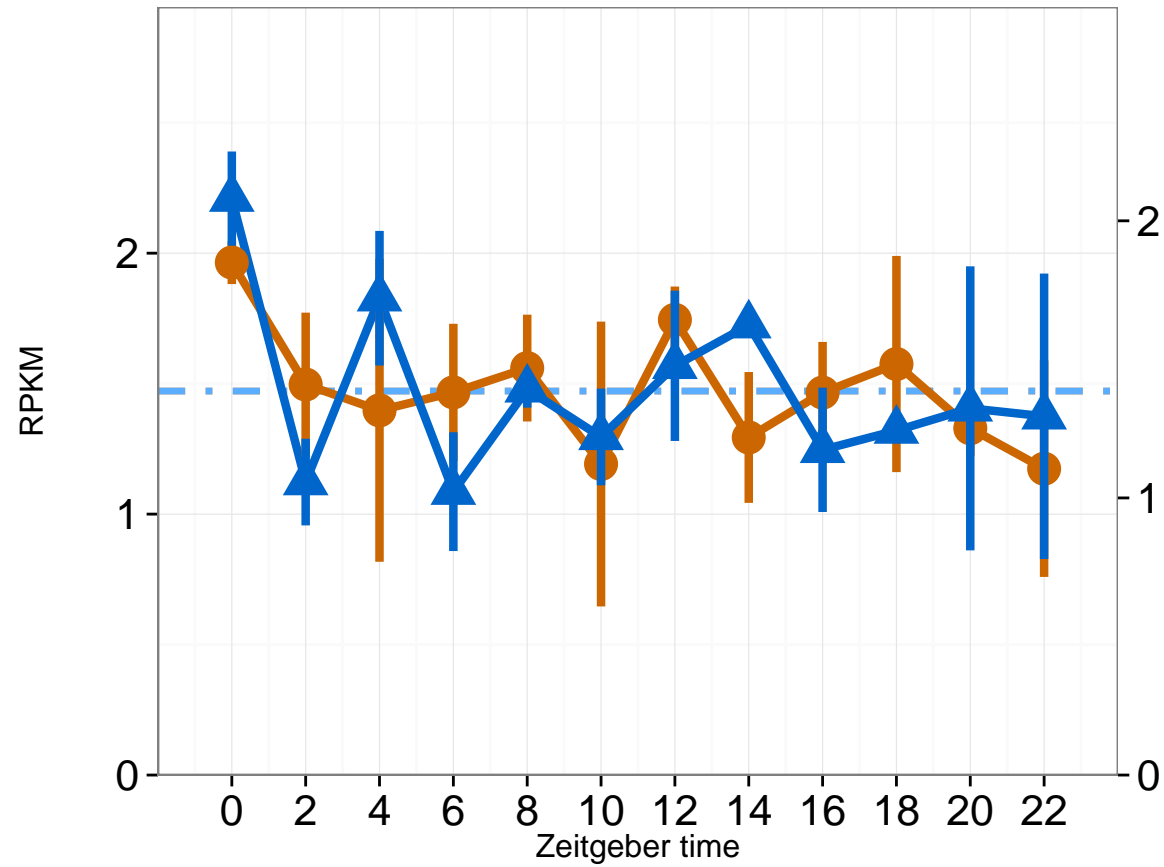

# Ncam2

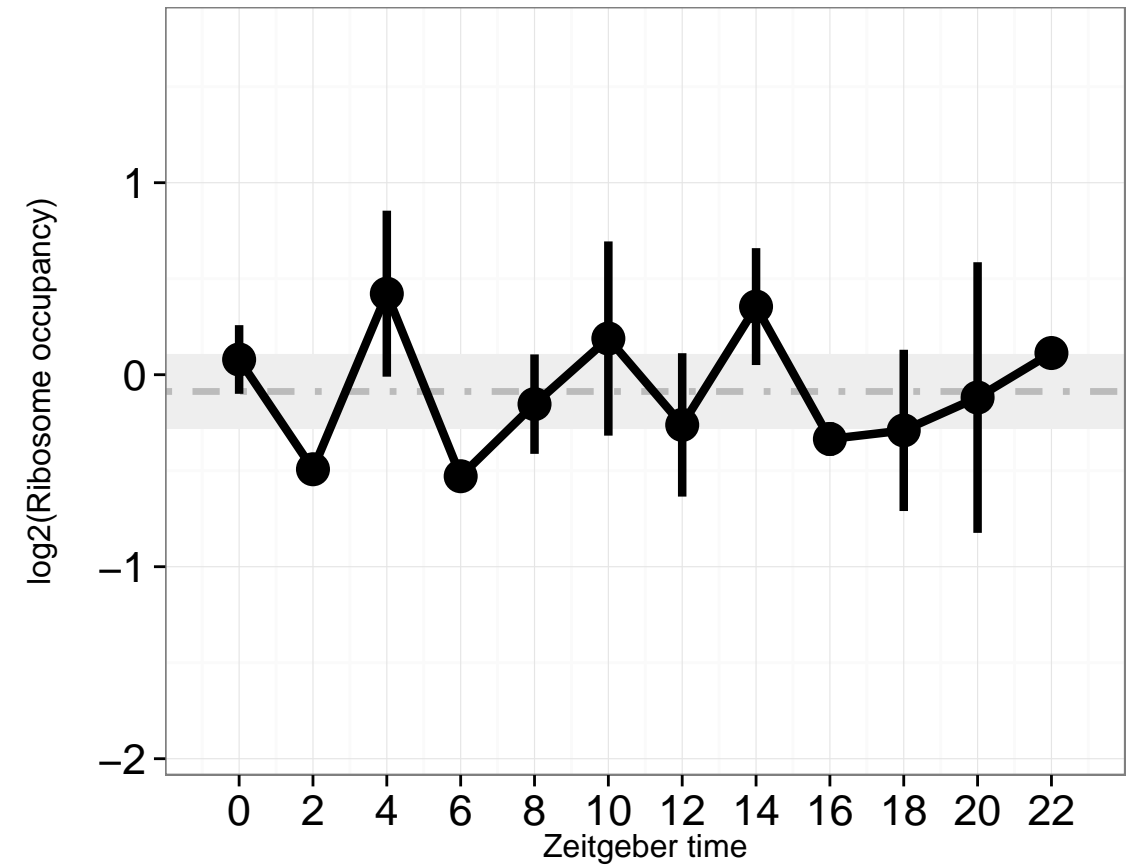

Supplement: Supplementary file 4019 [file 1]

## Eny2

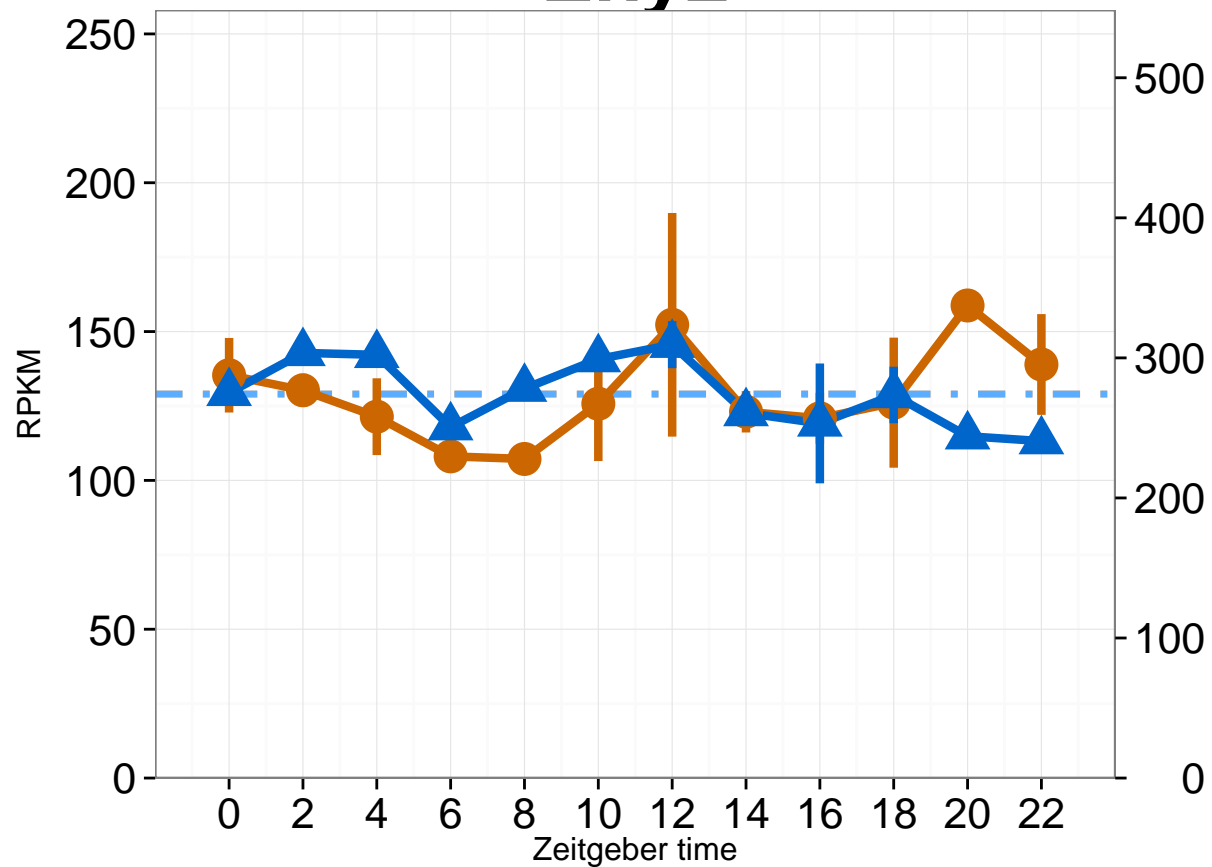

## Eny2

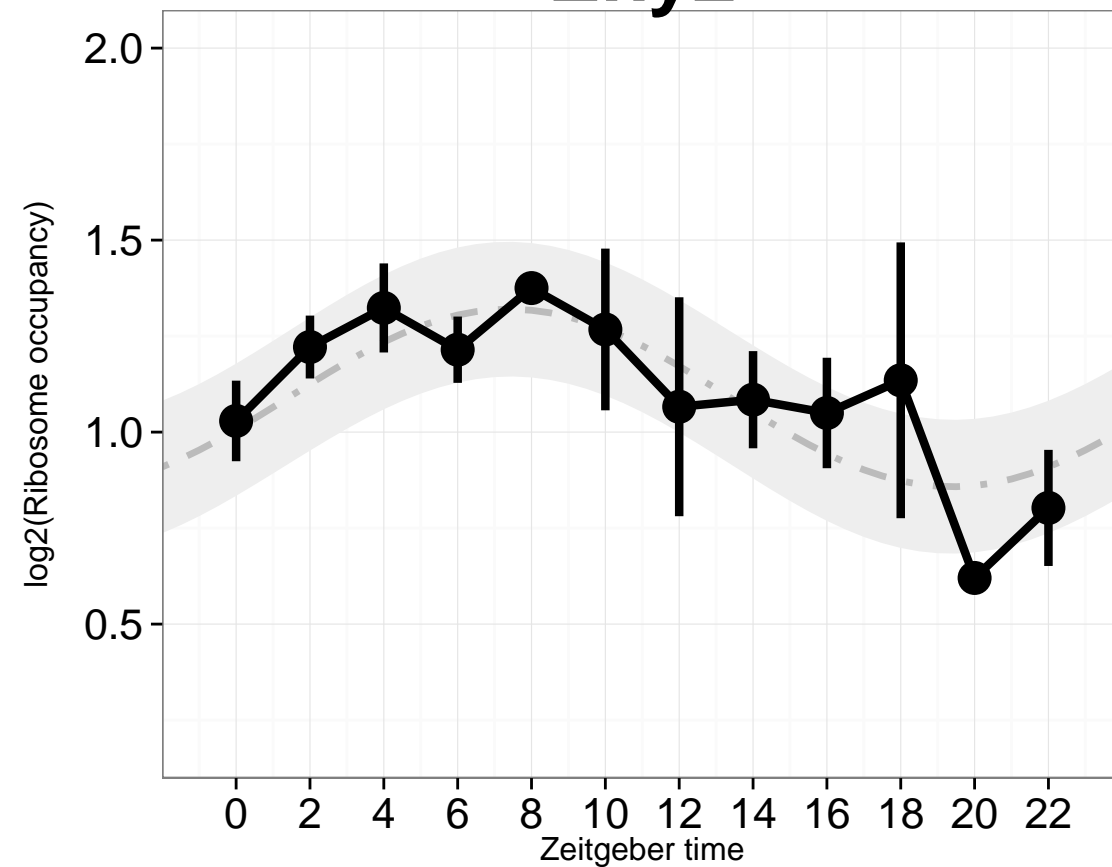

Supplement: Supplementary file 4020 [file 1]

# Gtf2ird1

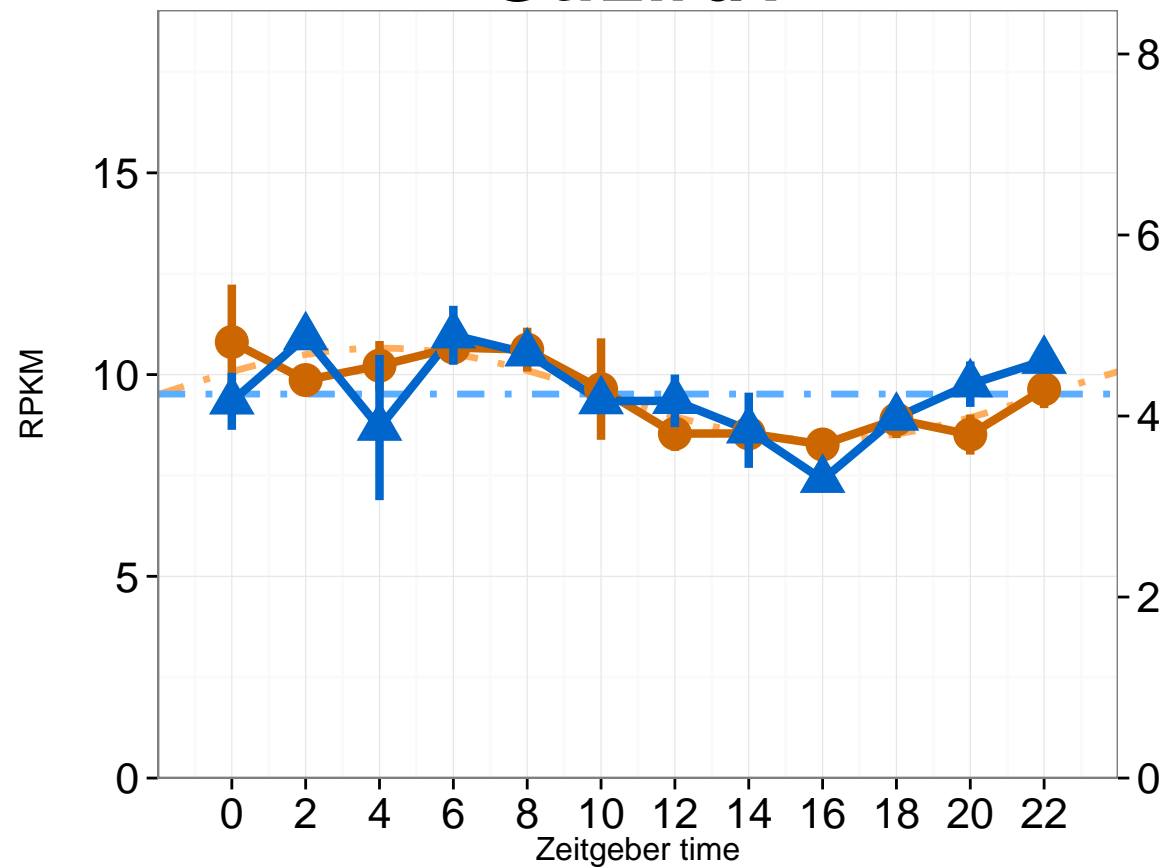

# Gtf2ird1

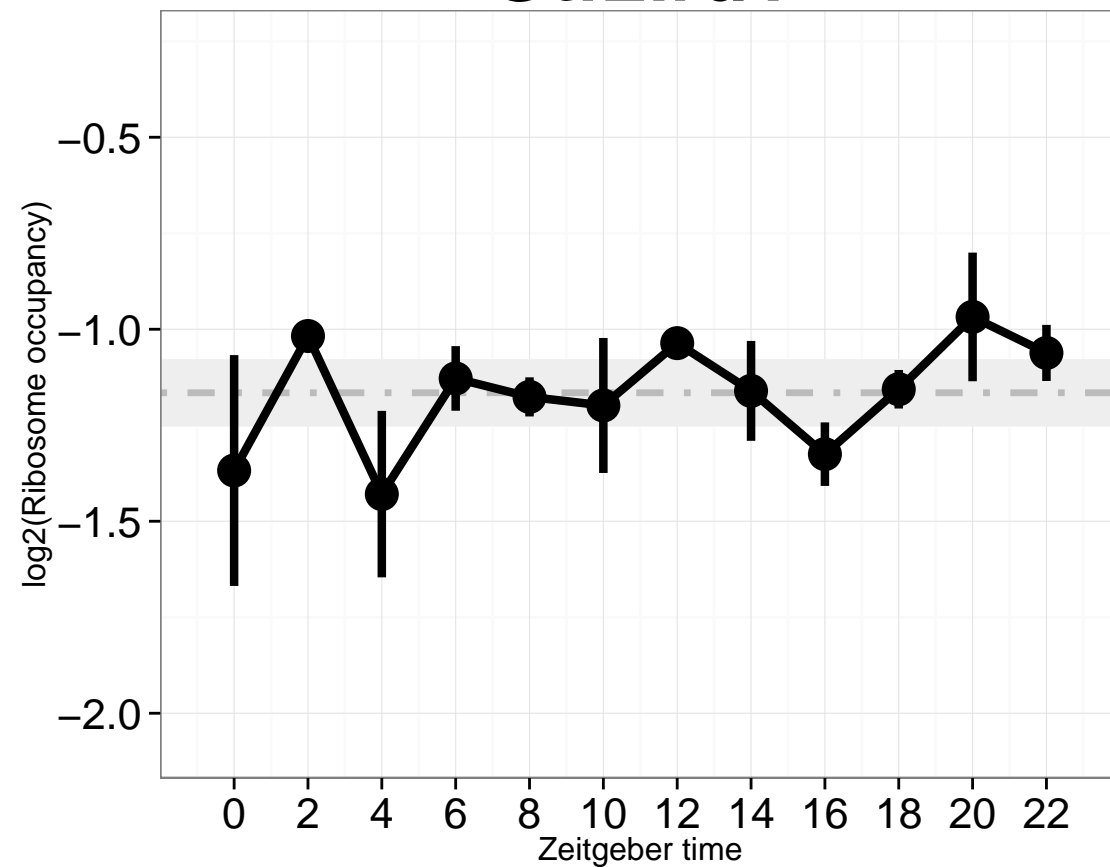

Supplement: Supplementary file 4021 [file 1]

## Vps13b

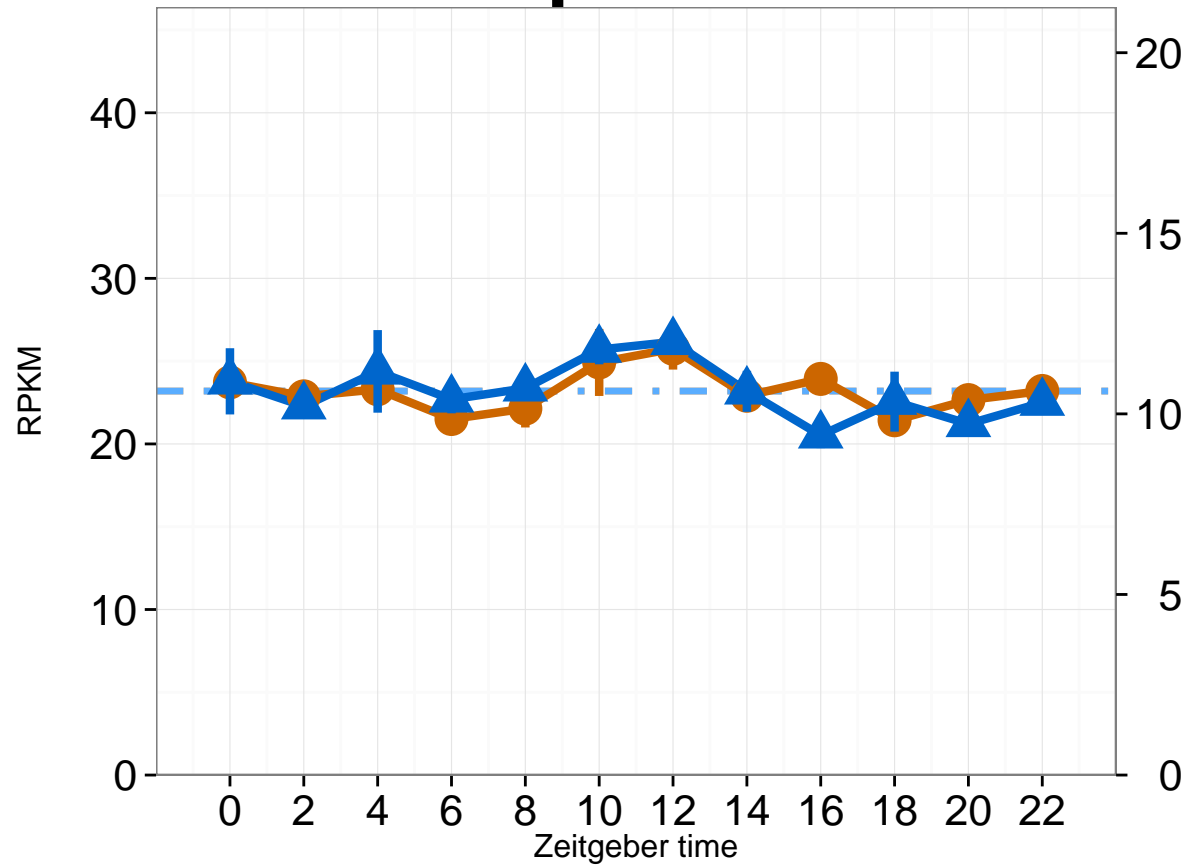

## Vps13b

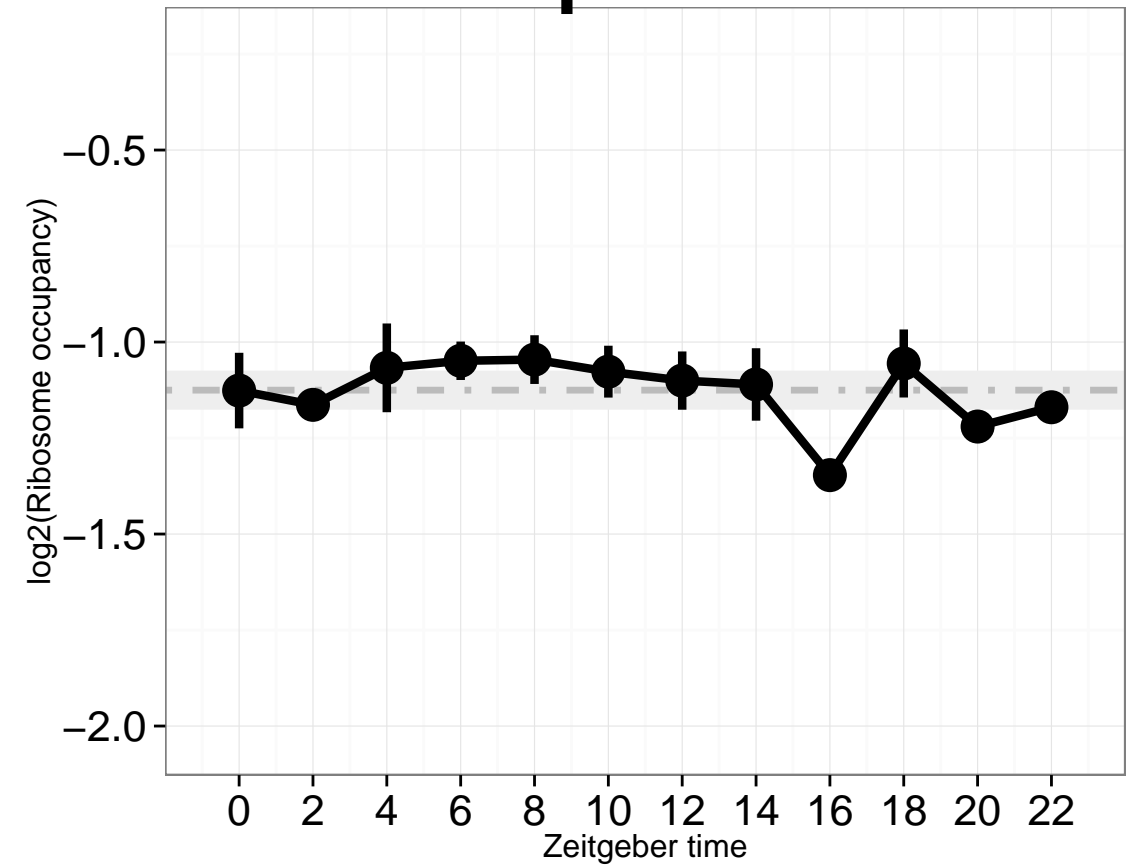

Supplement: Supplementary file 4022 [file 1]

# Larp1

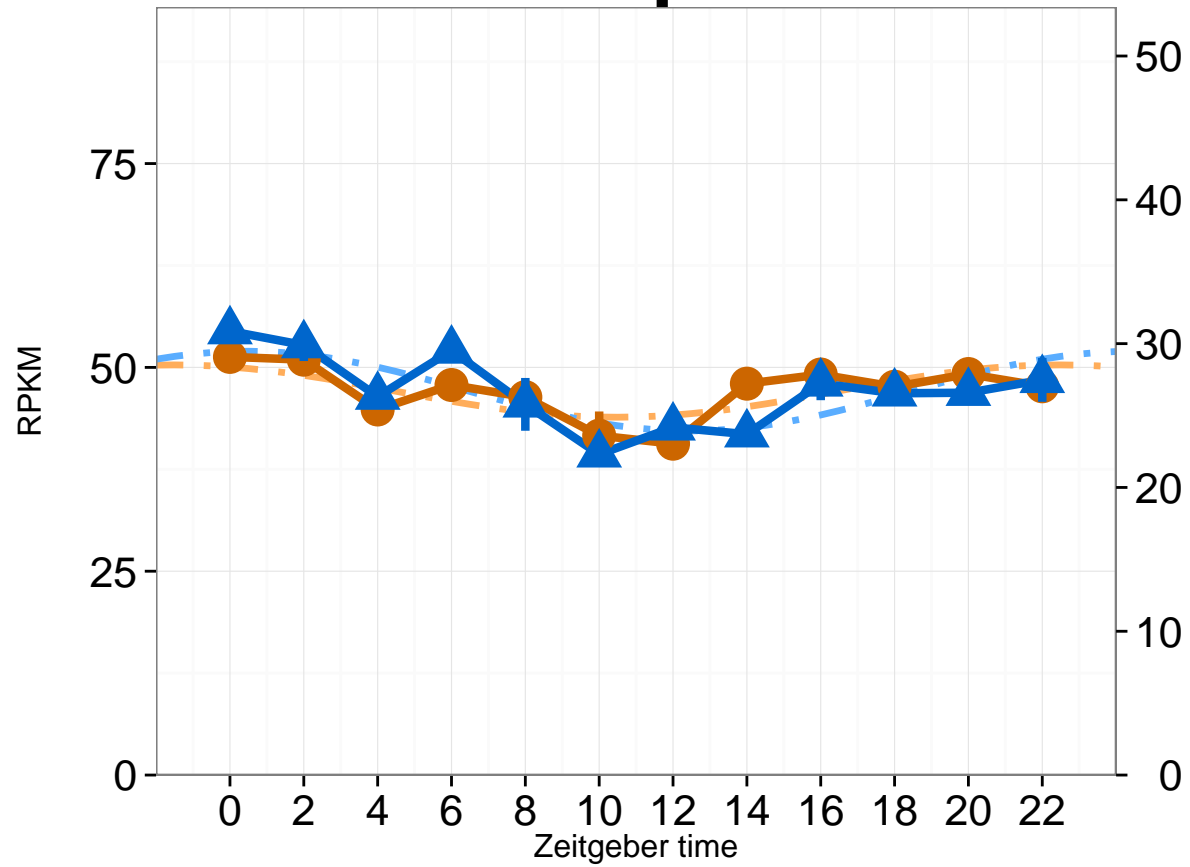

# Larp1

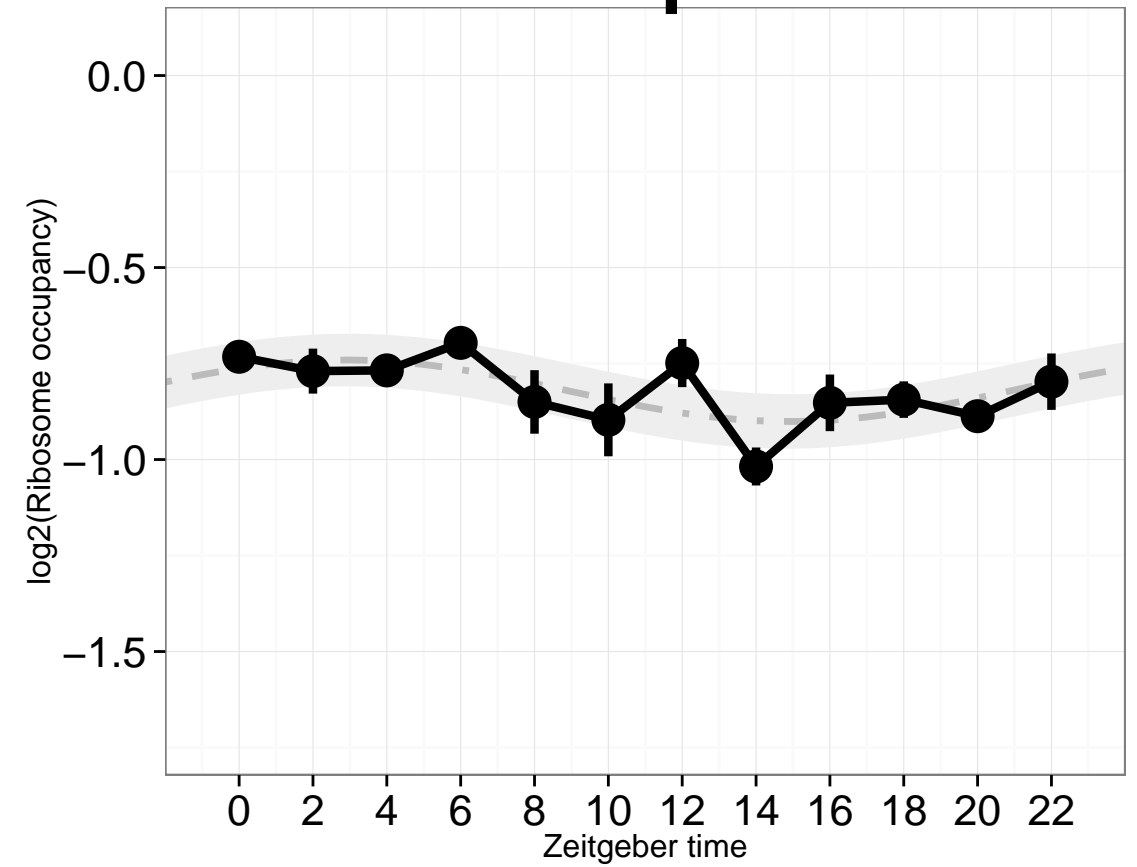

Supplement: Supplementary file 4023 [file 1]

## Slc6a15

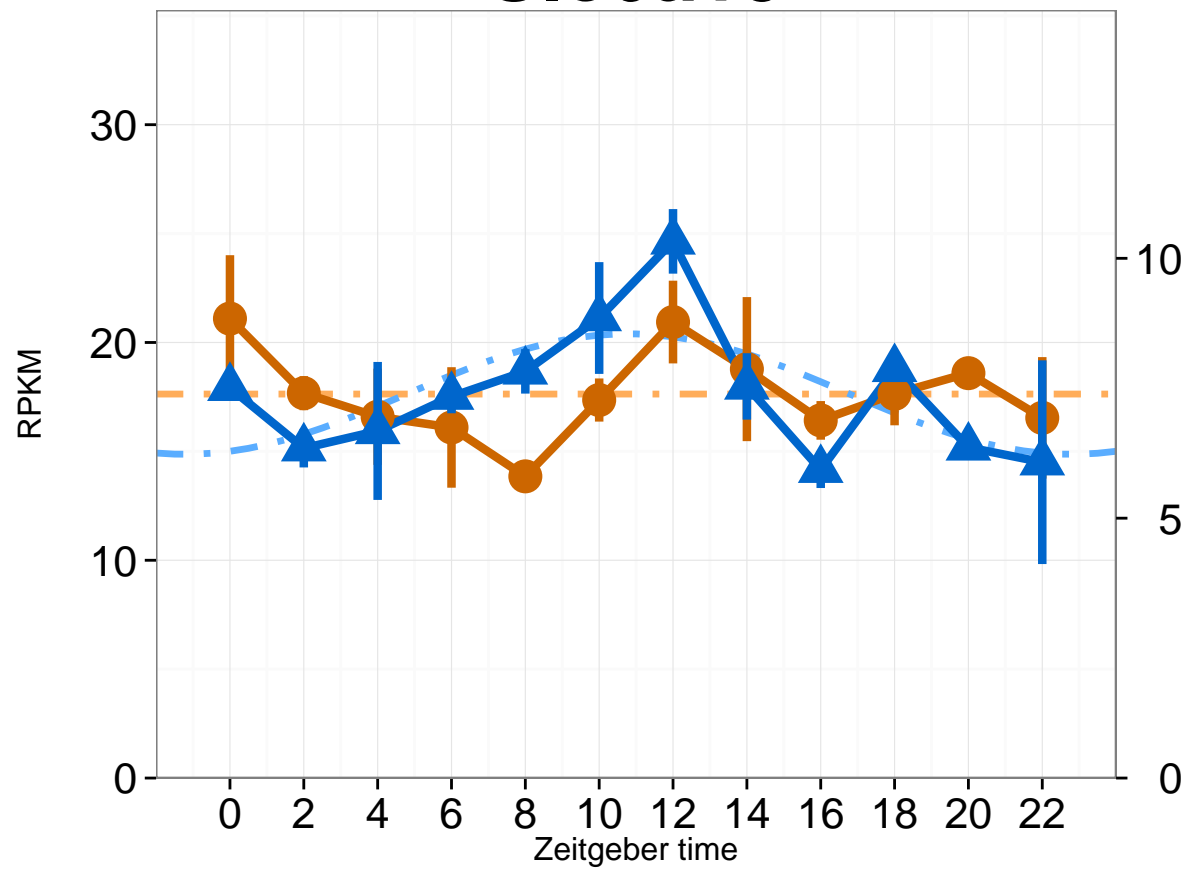

## Slc6a15

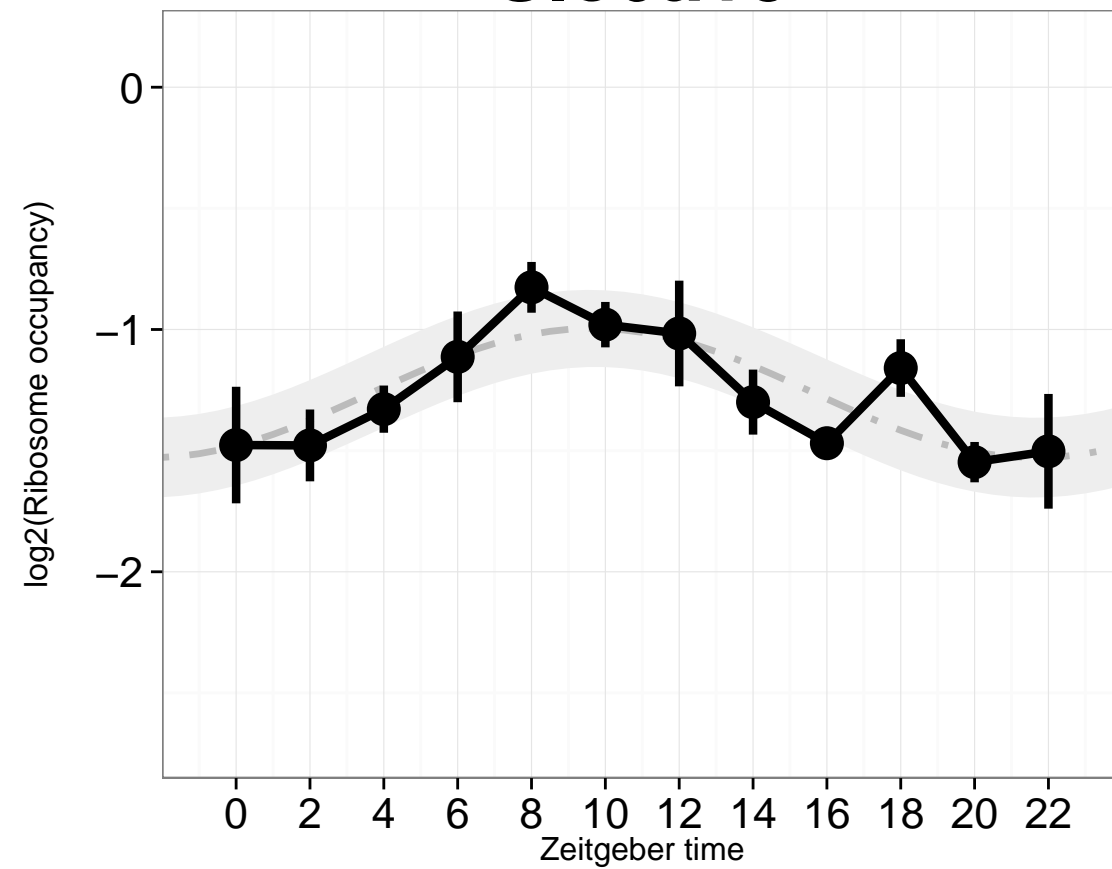

Supplement: Supplementary file 4024 [file 1]

# Gpx6

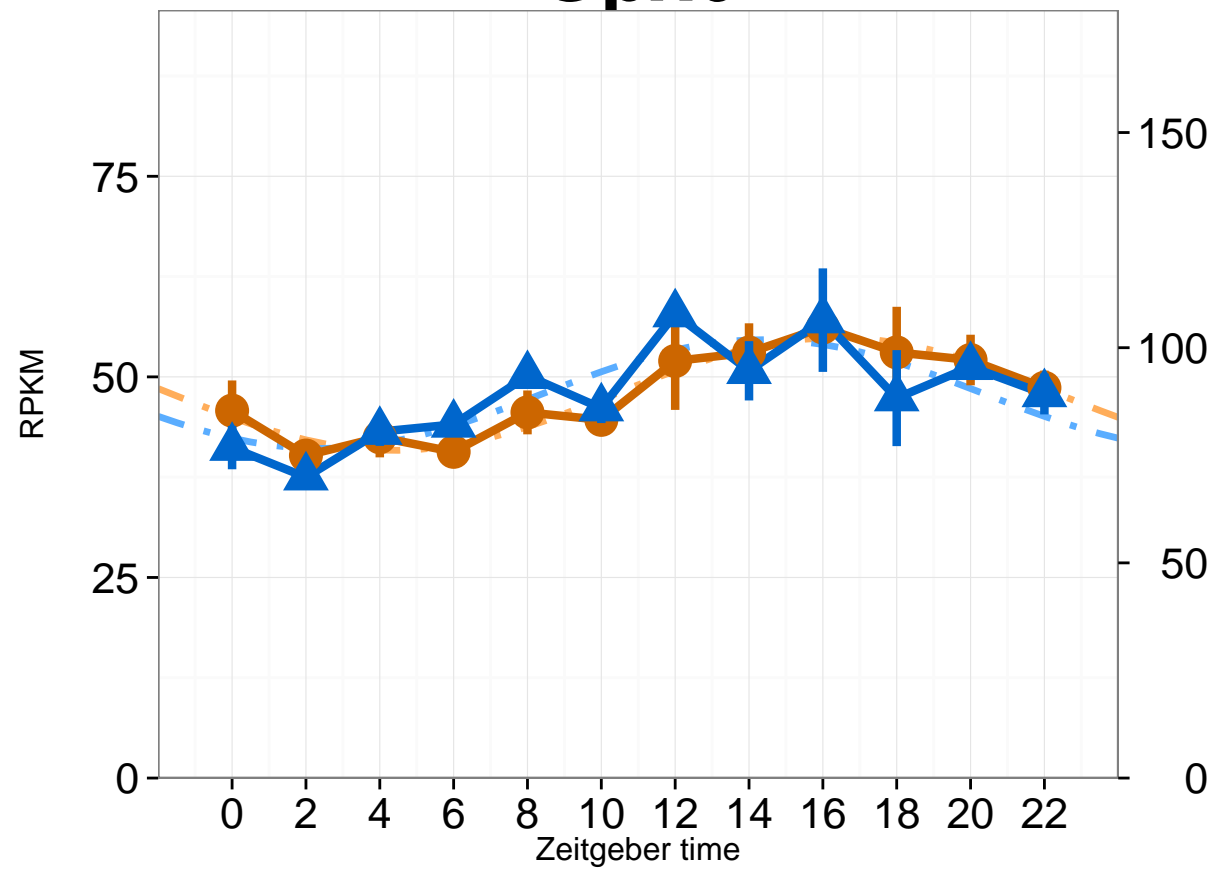

# Gpx6

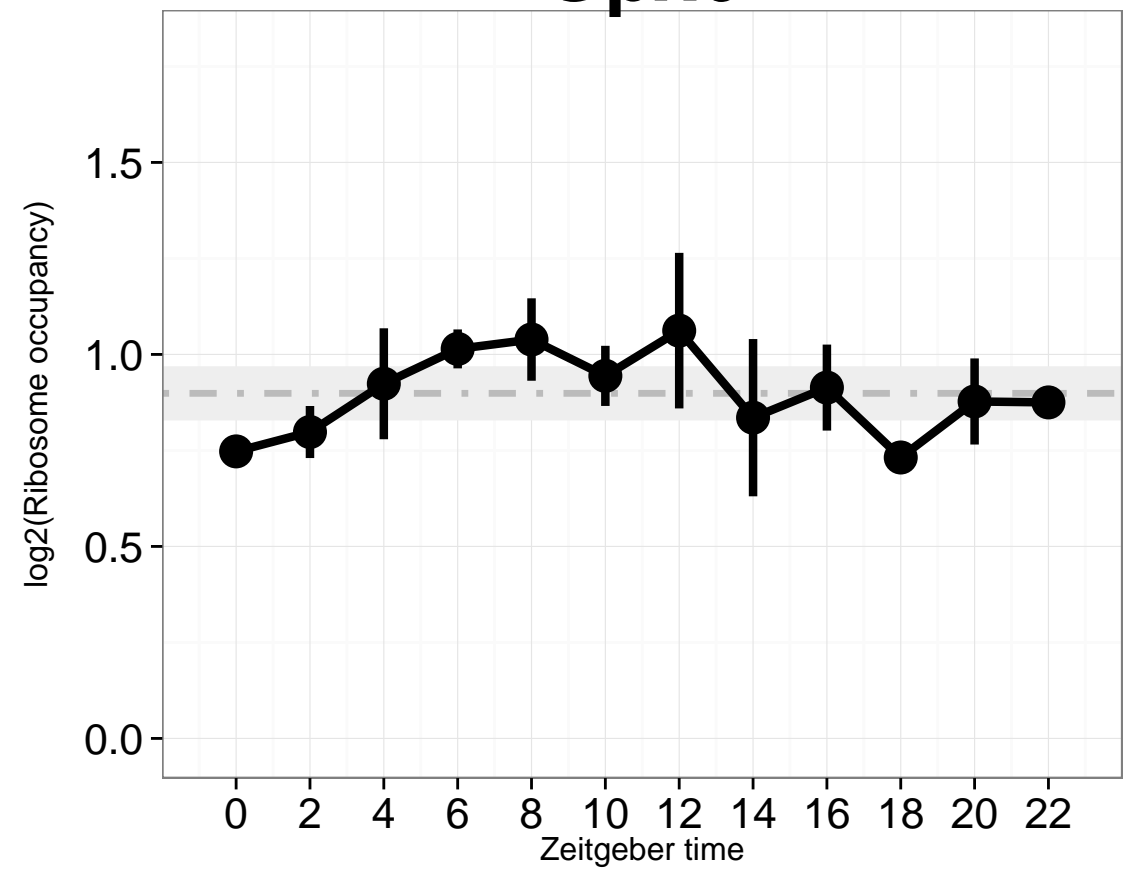

Supplement: Supplementary file 4025 [file 1]

# Thbs4

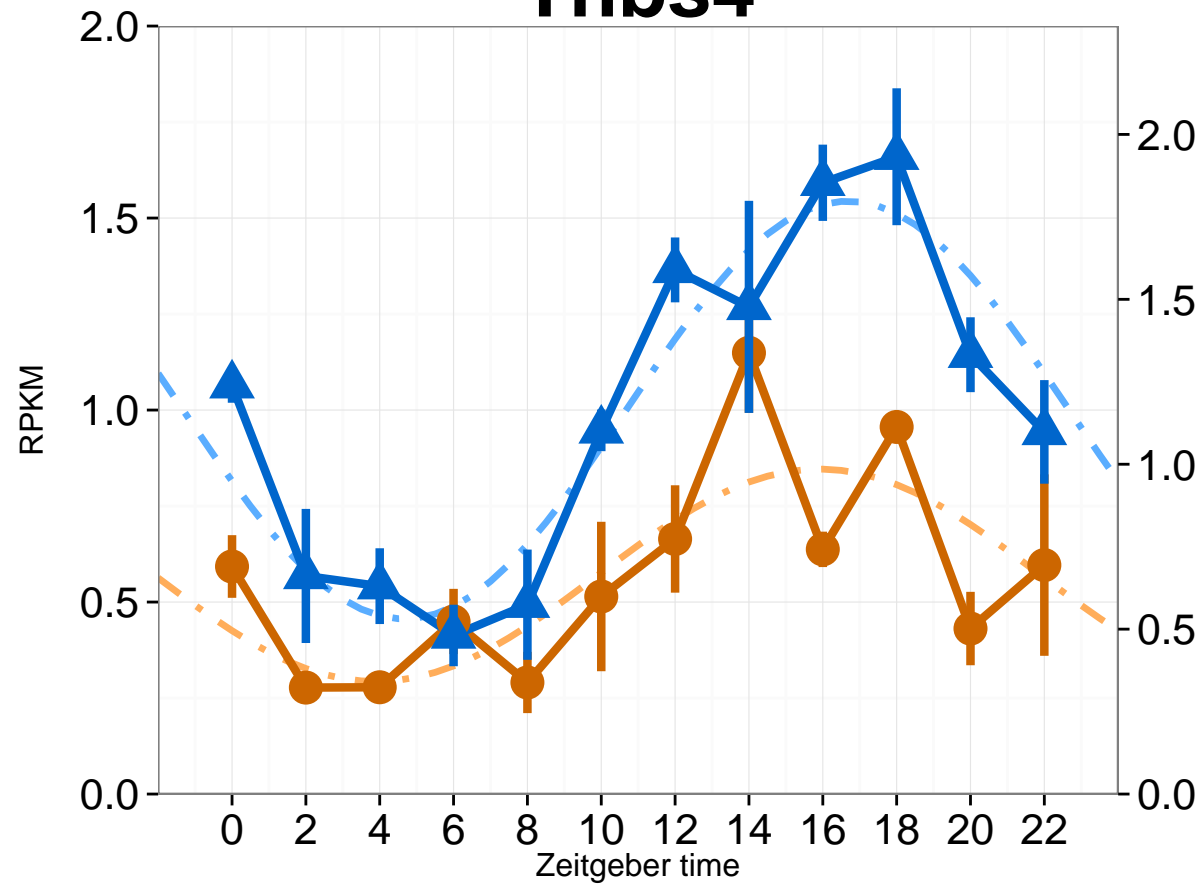

# Thbs4

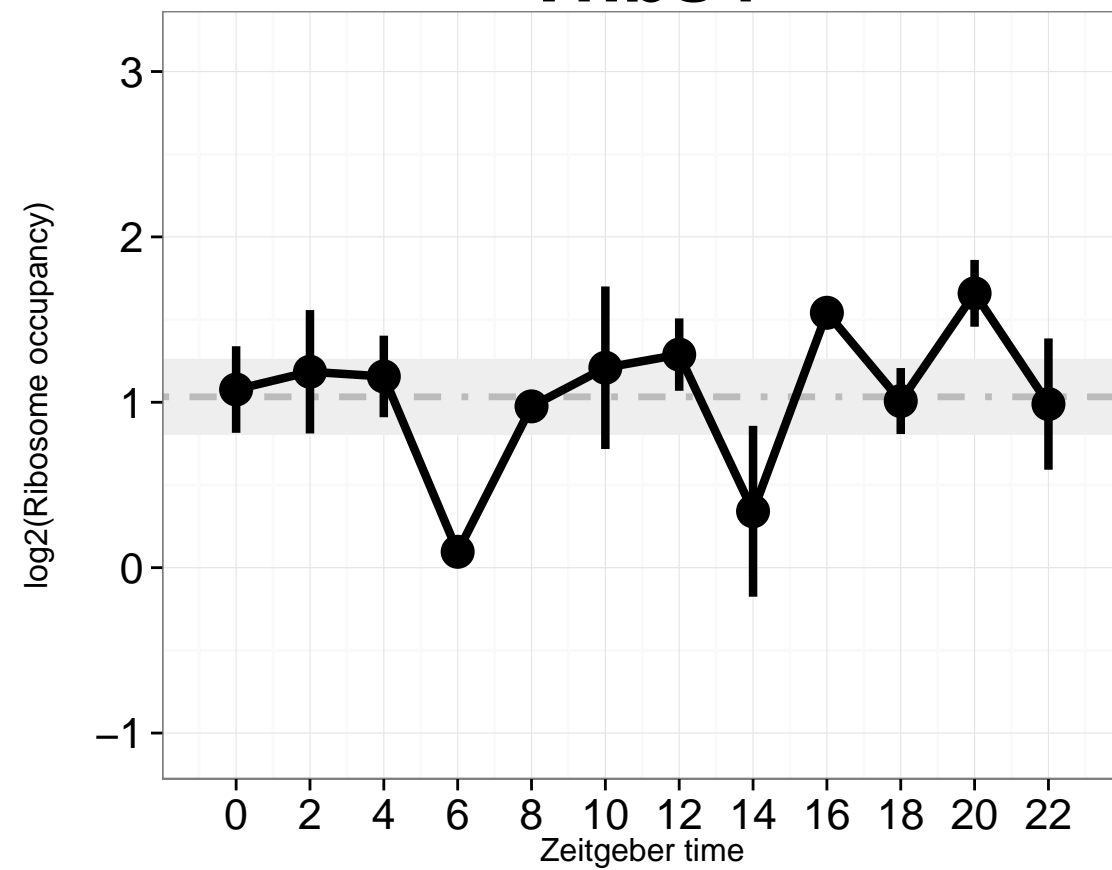

Supplement: Supplementary file 4026 [file 1]

# Psma3

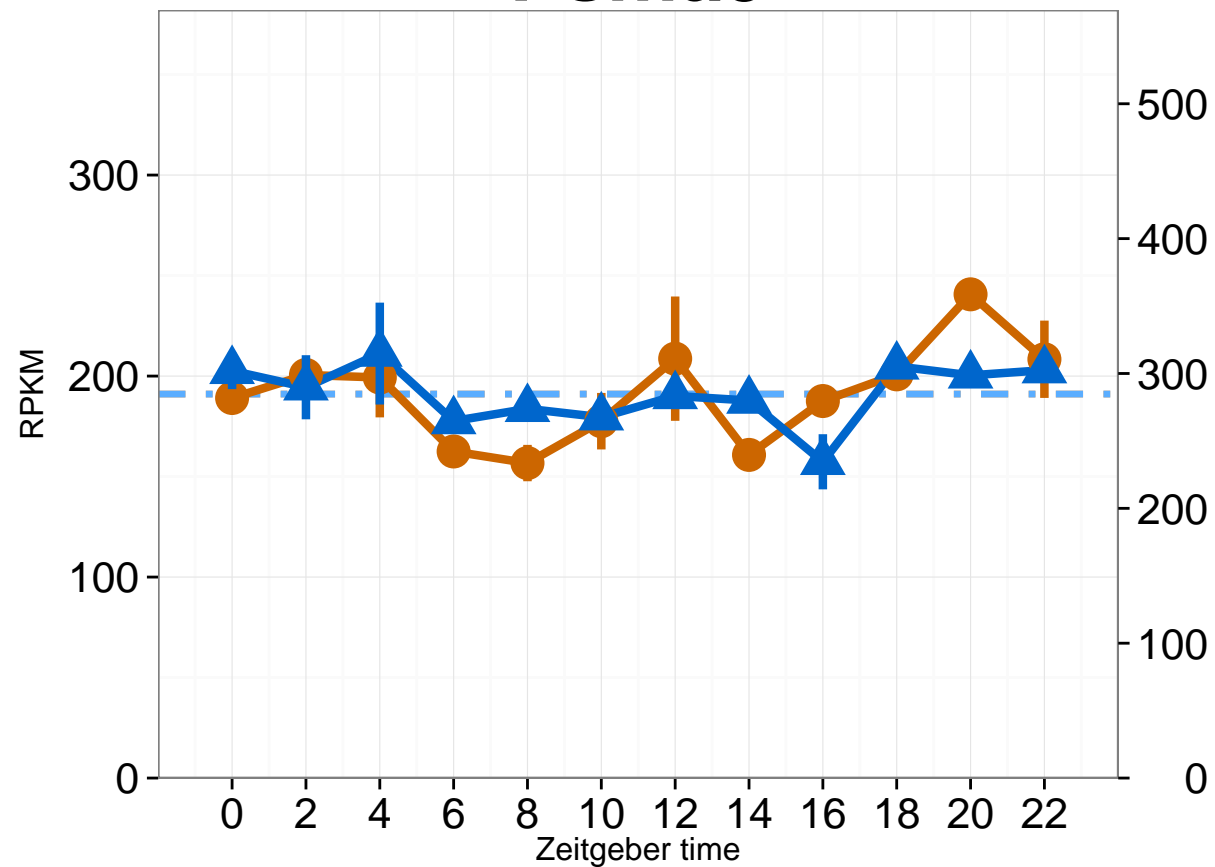

# Psma3

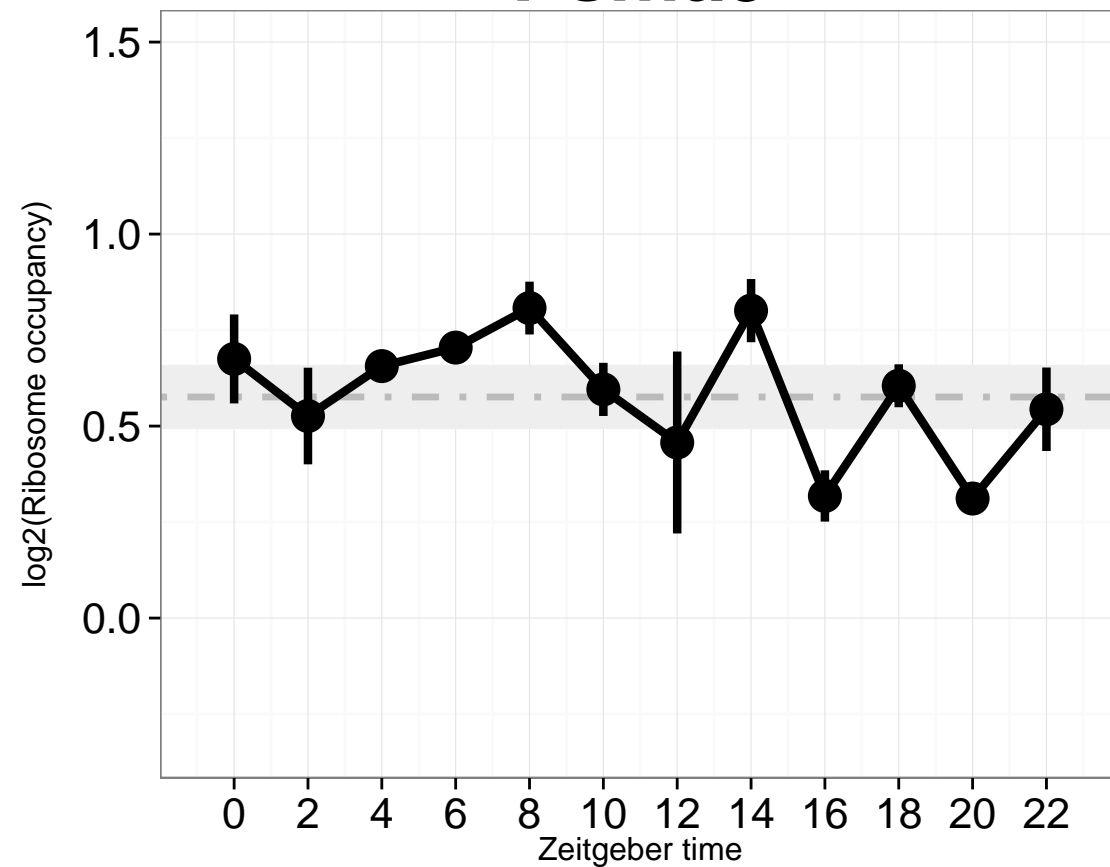

Supplement: Supplementary file 4027 [file 1]

## Sec63

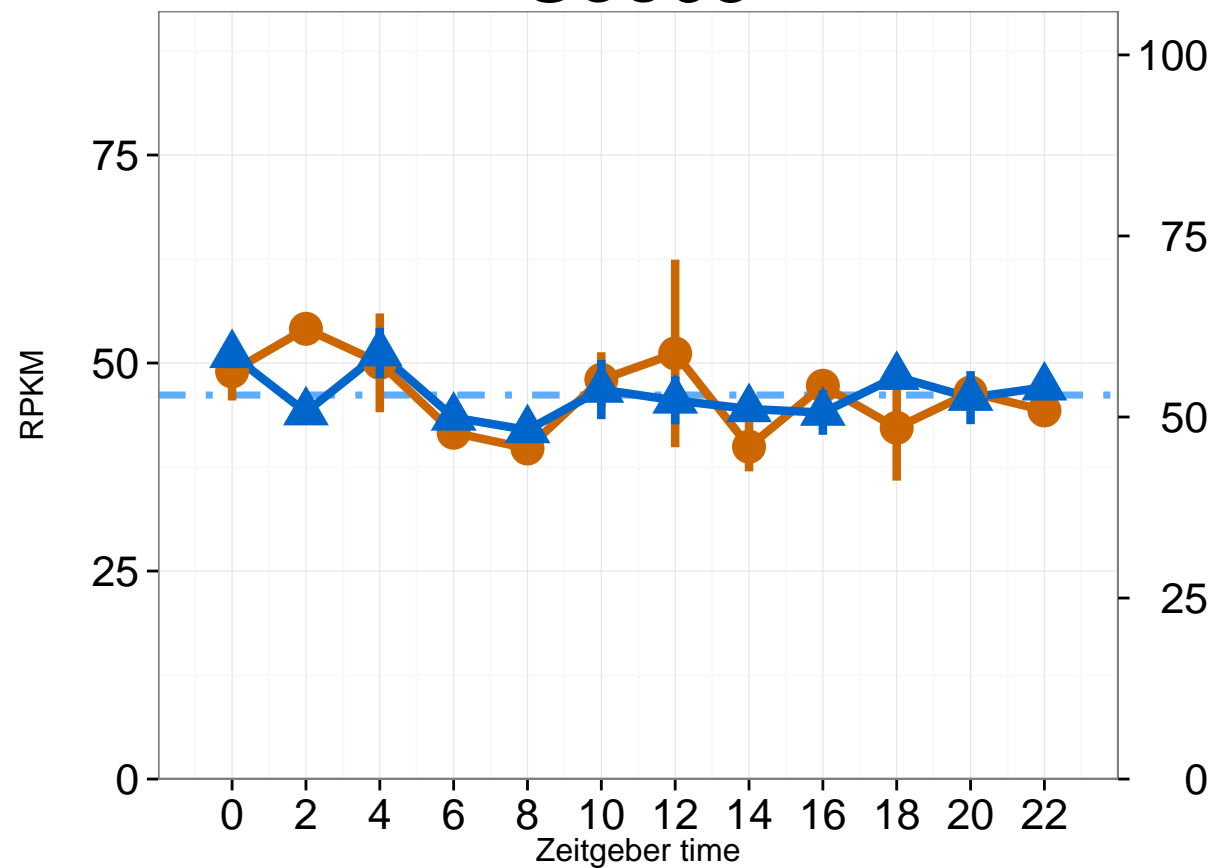

## Sec63

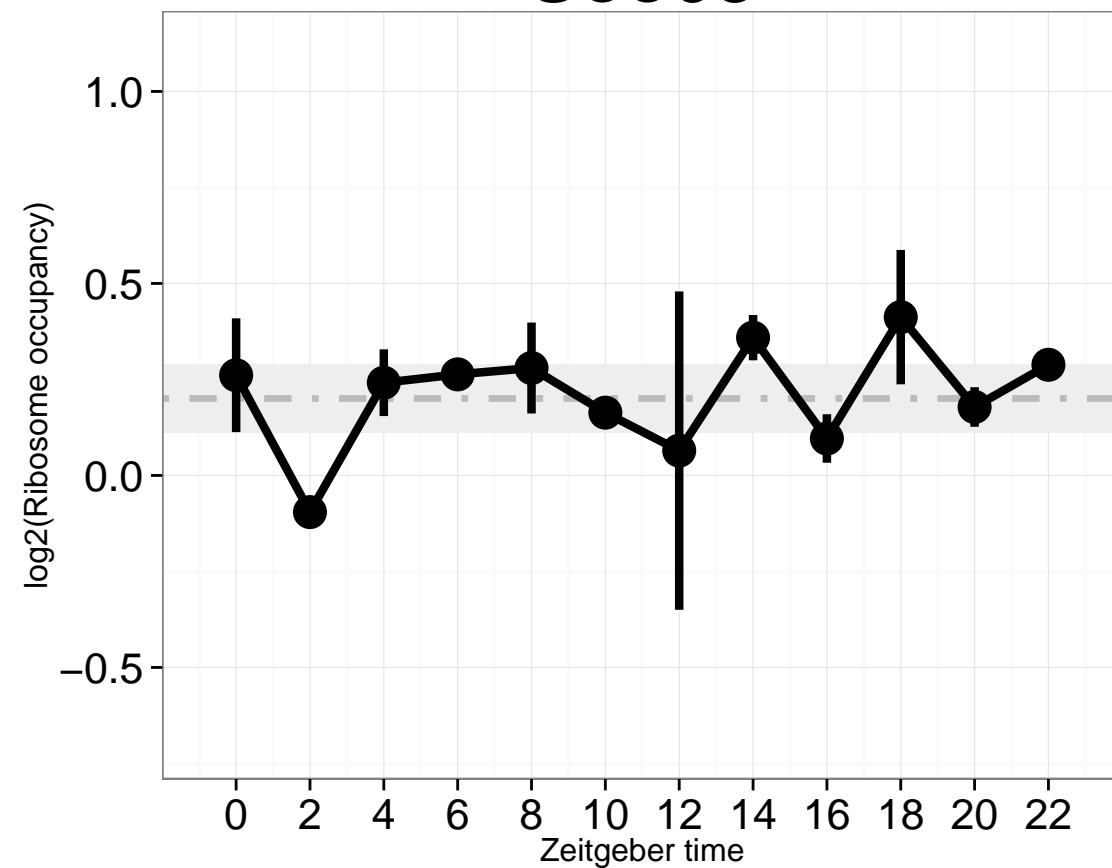

Supplement: Supplementary file 4028 [file 1]

## Cald1

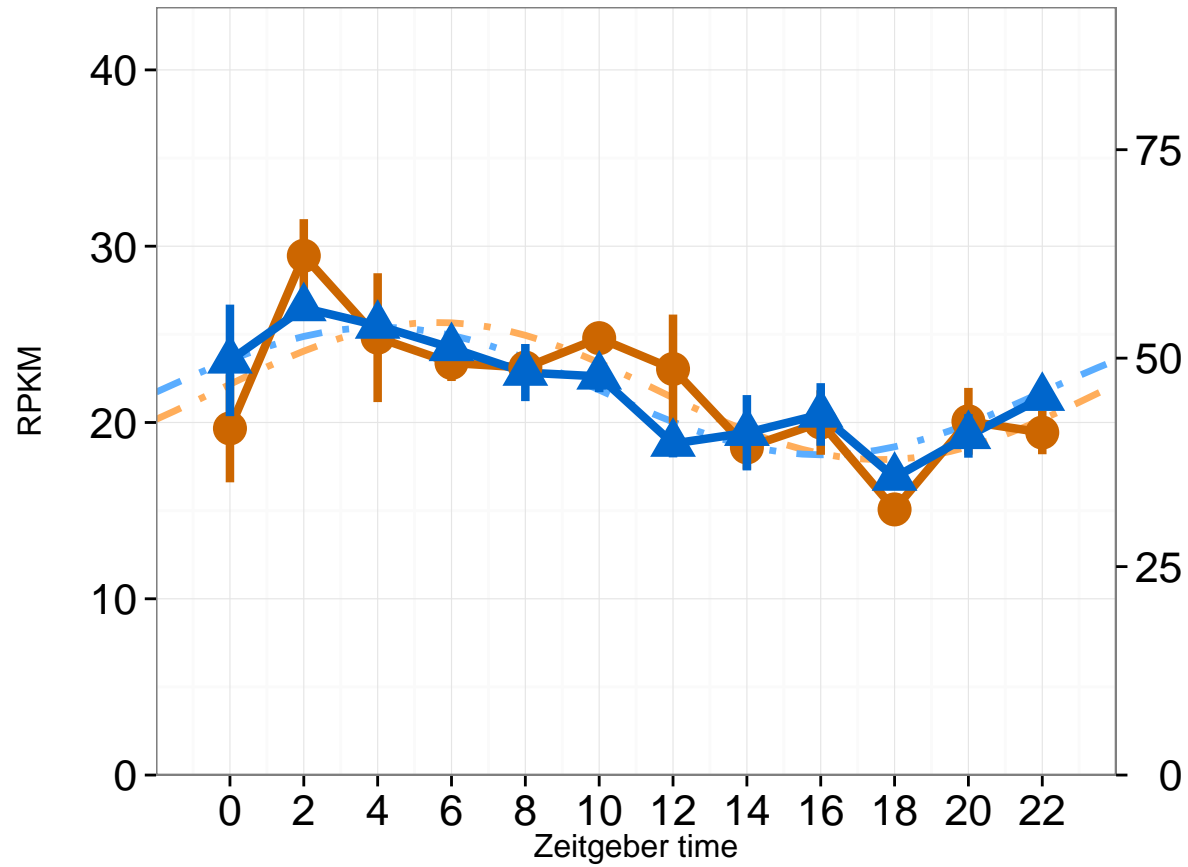

## Cald1

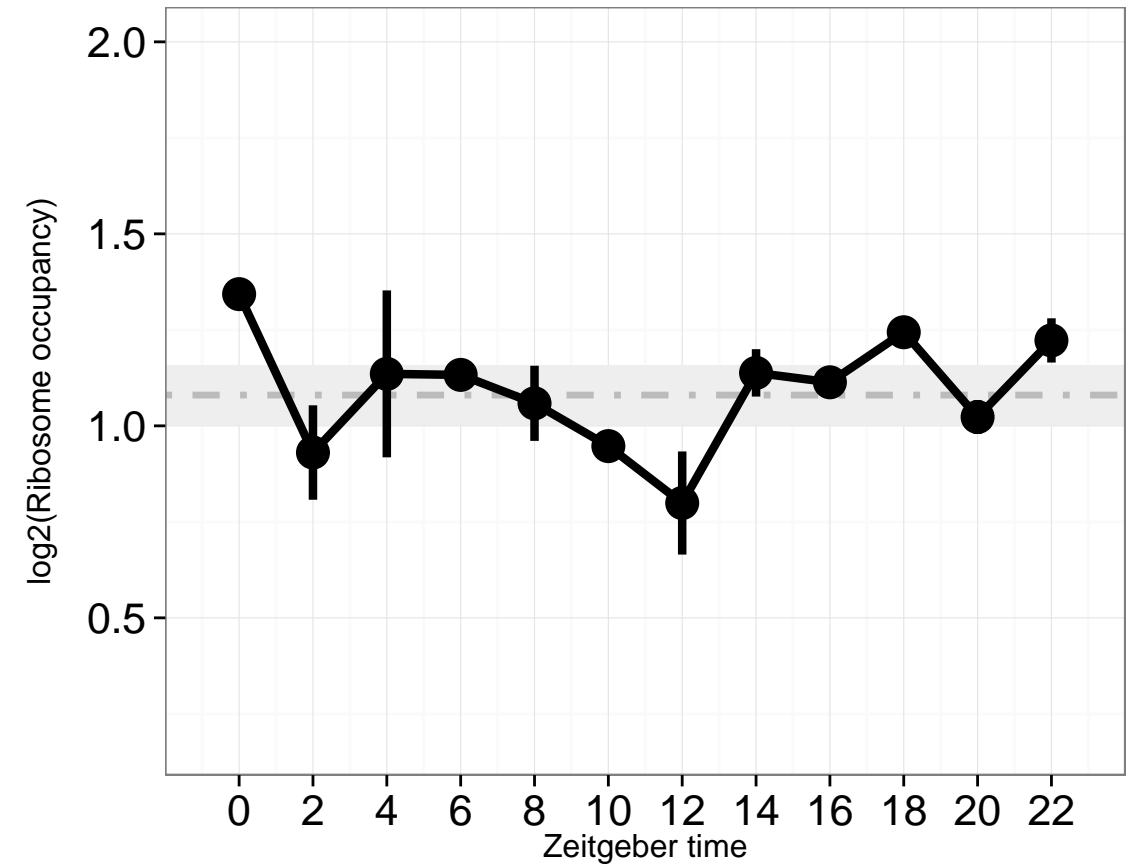

Supplement: Supplementary file 4029 [file 1]

# Kmt2d

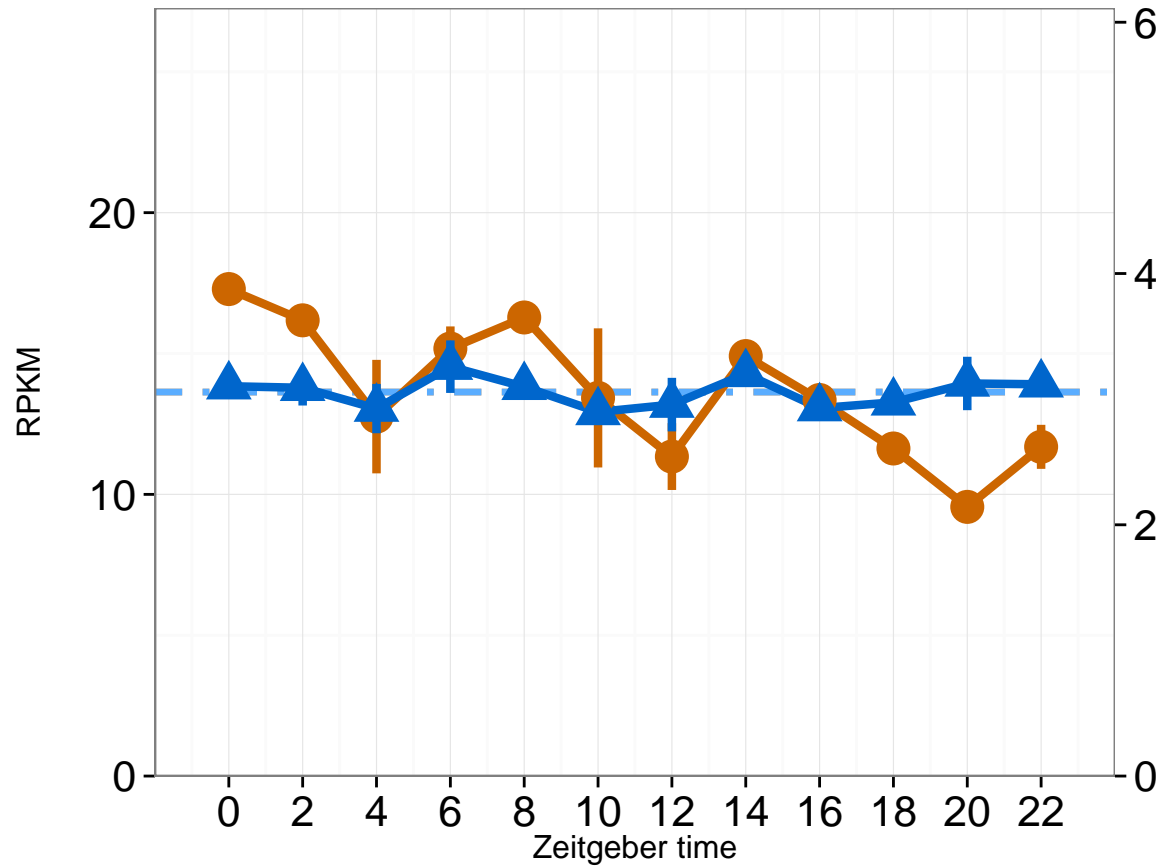

# Kmt2d

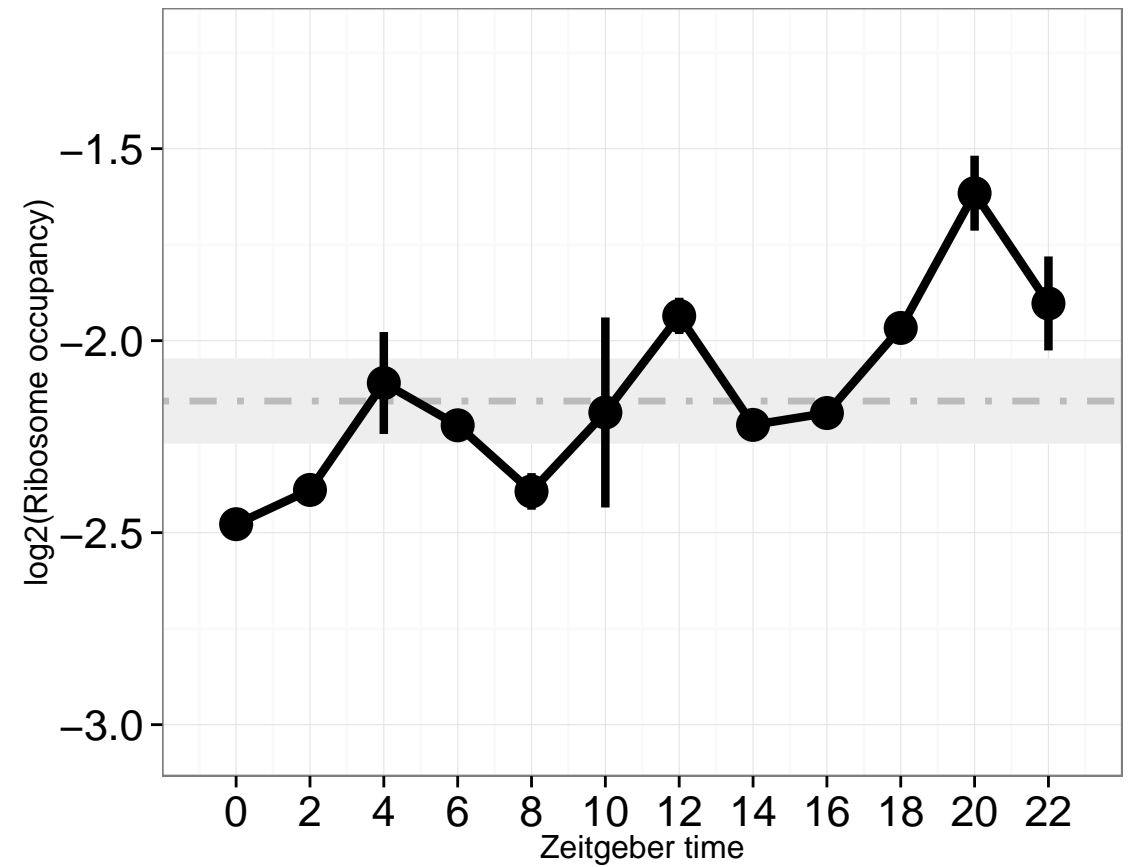

Supplement: Supplementary file 4030 [file 1]

# Hlx

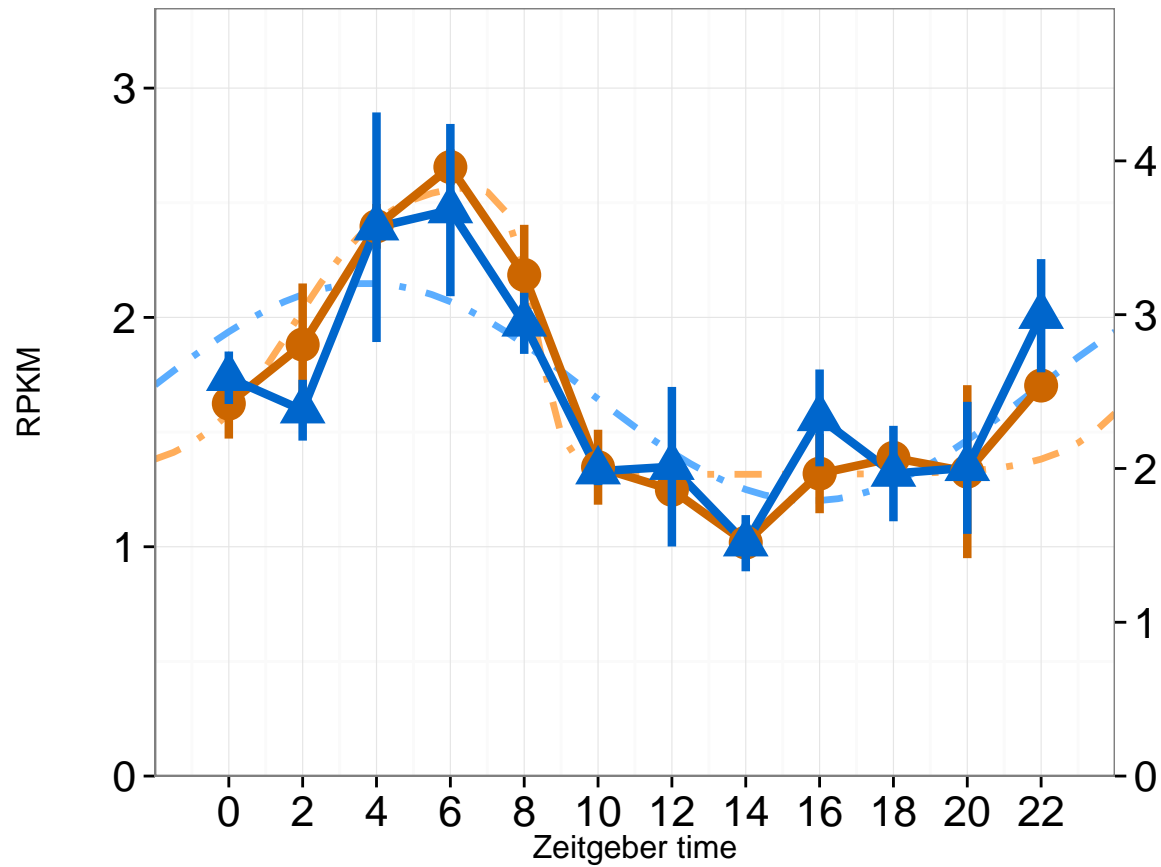

# Hlx

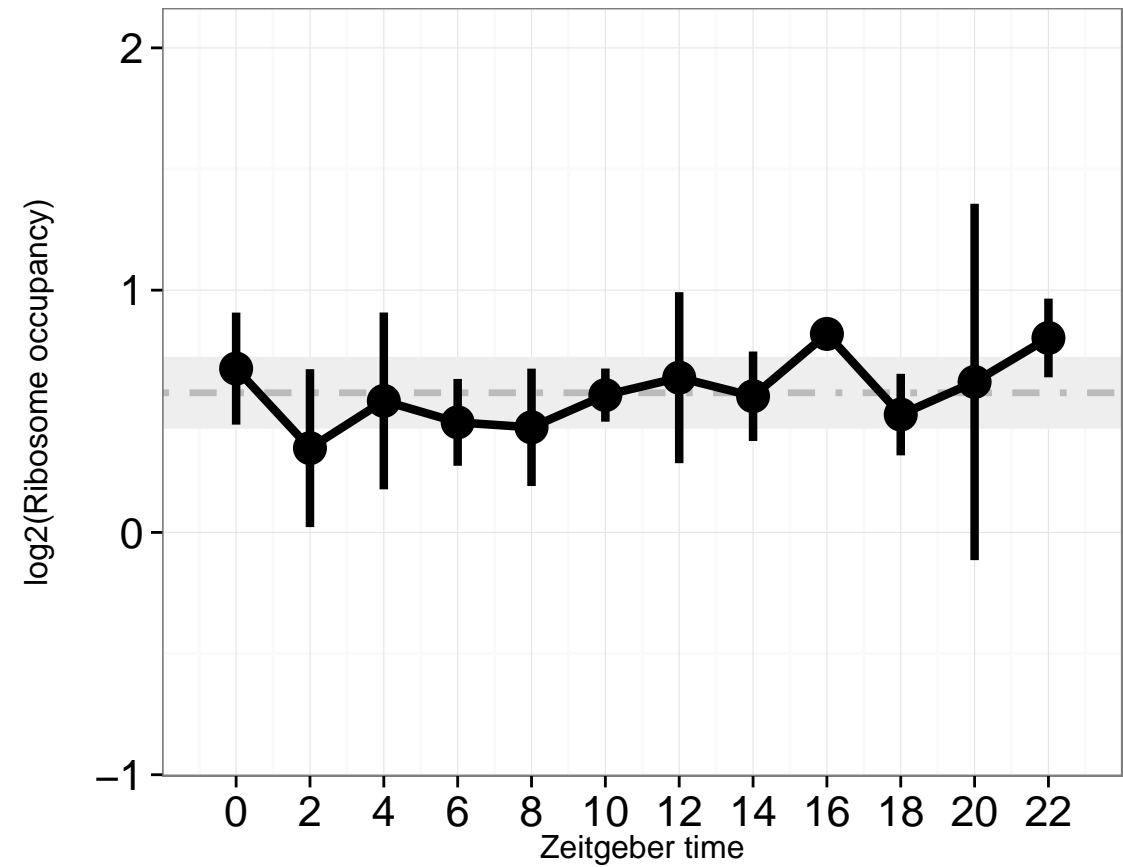

Supplement: Supplementary file 4031 [file 1]

# Slc22a17

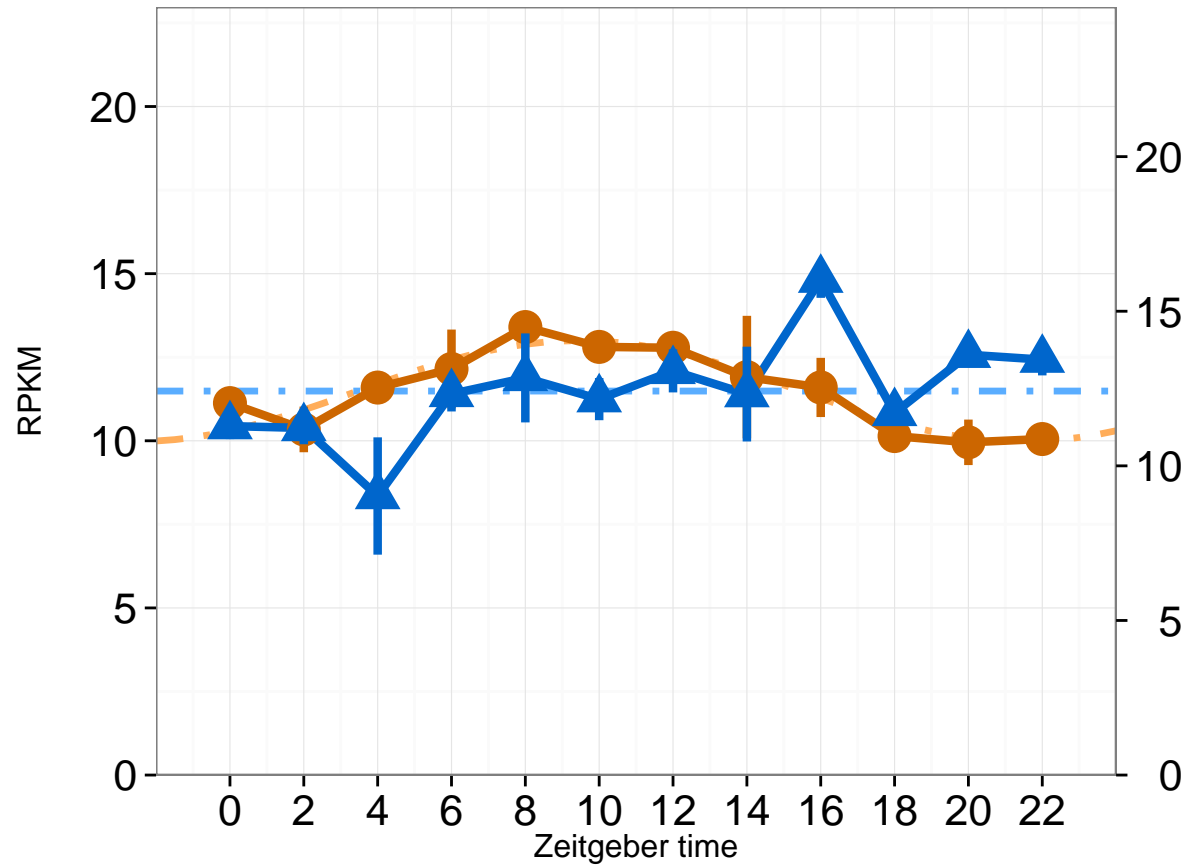

# Slc22a17

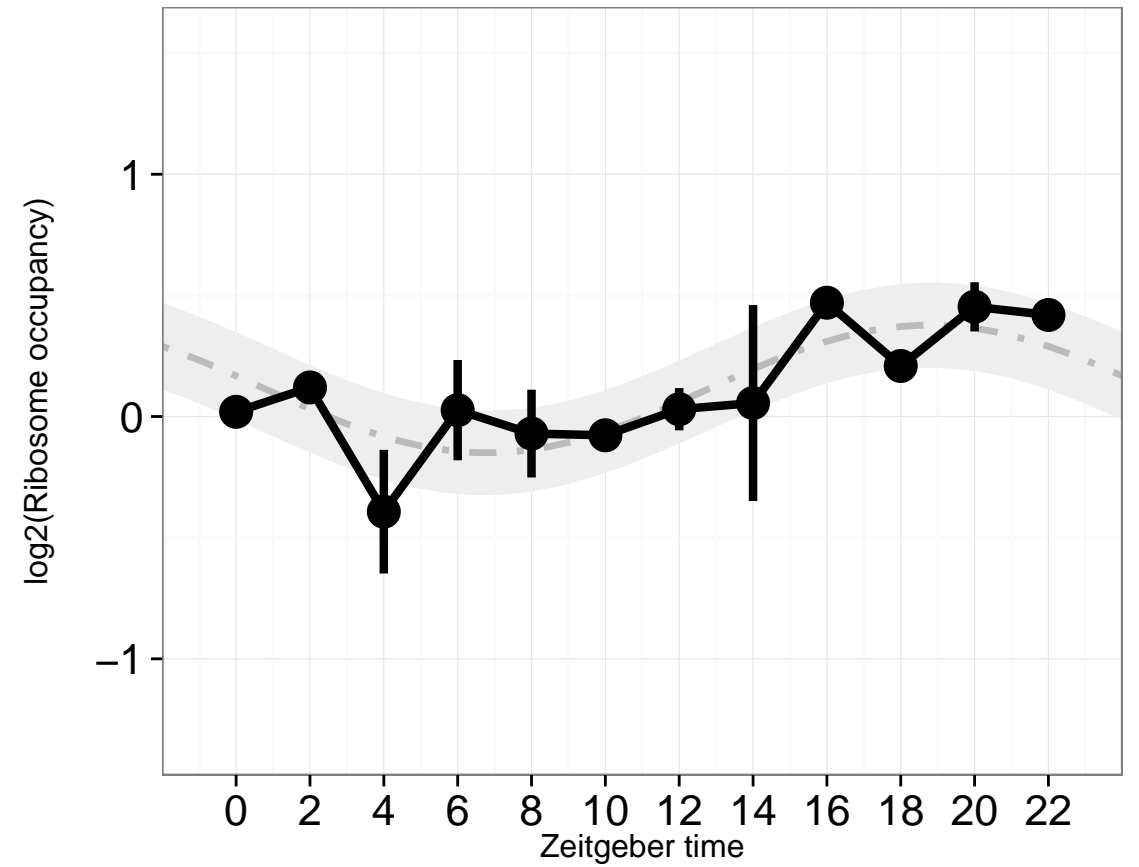

Supplement: Supplementary file 4032 [file 1]

# Gm11027

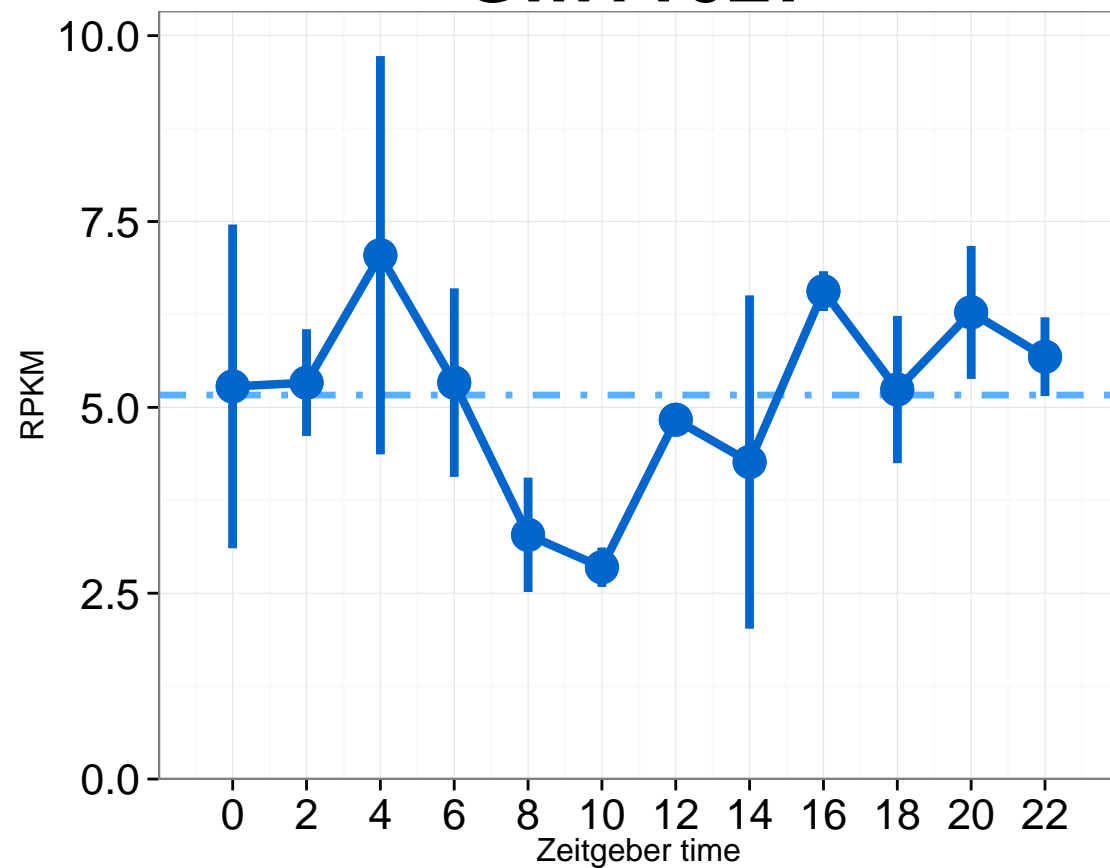

# Gm11027 log2(Ribosome occupancy)

Supplement: Supplementary file 4033 [file 1]

# Ugt1a2

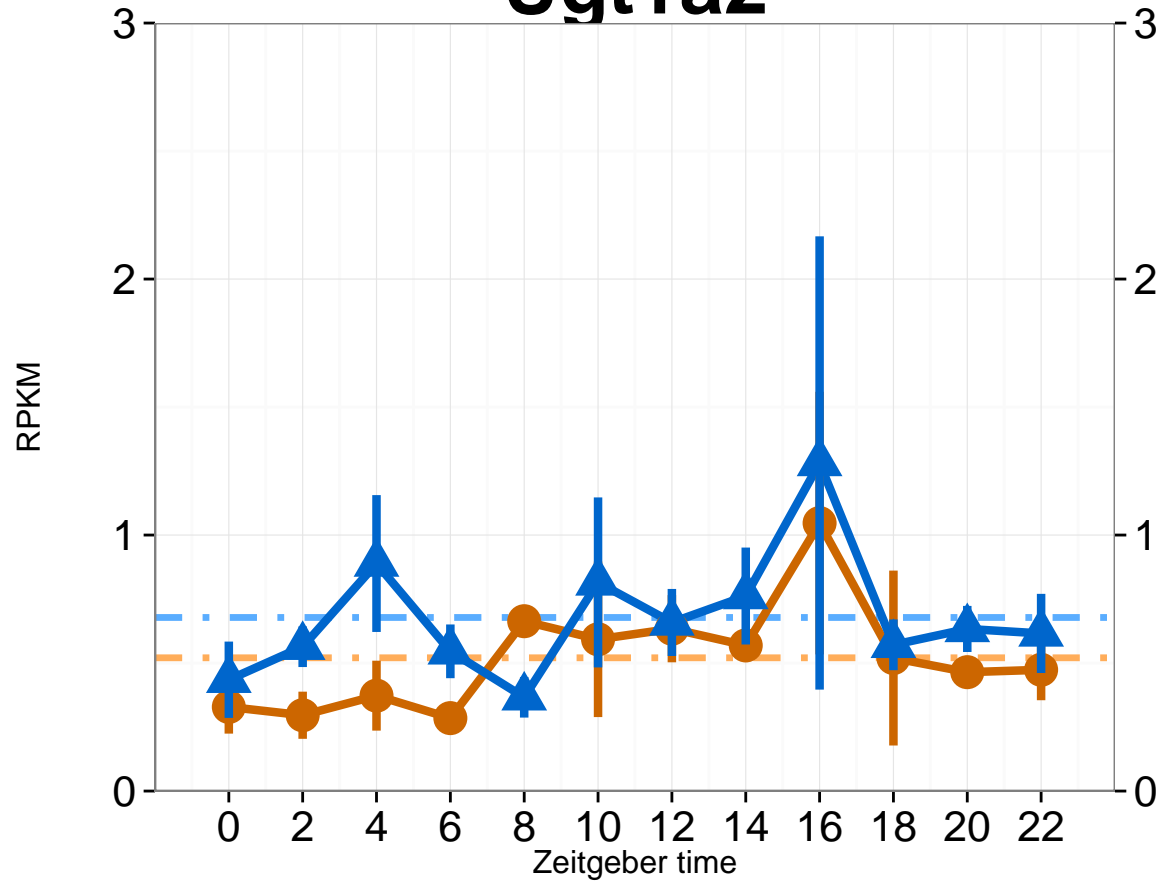

# Ugt1a2

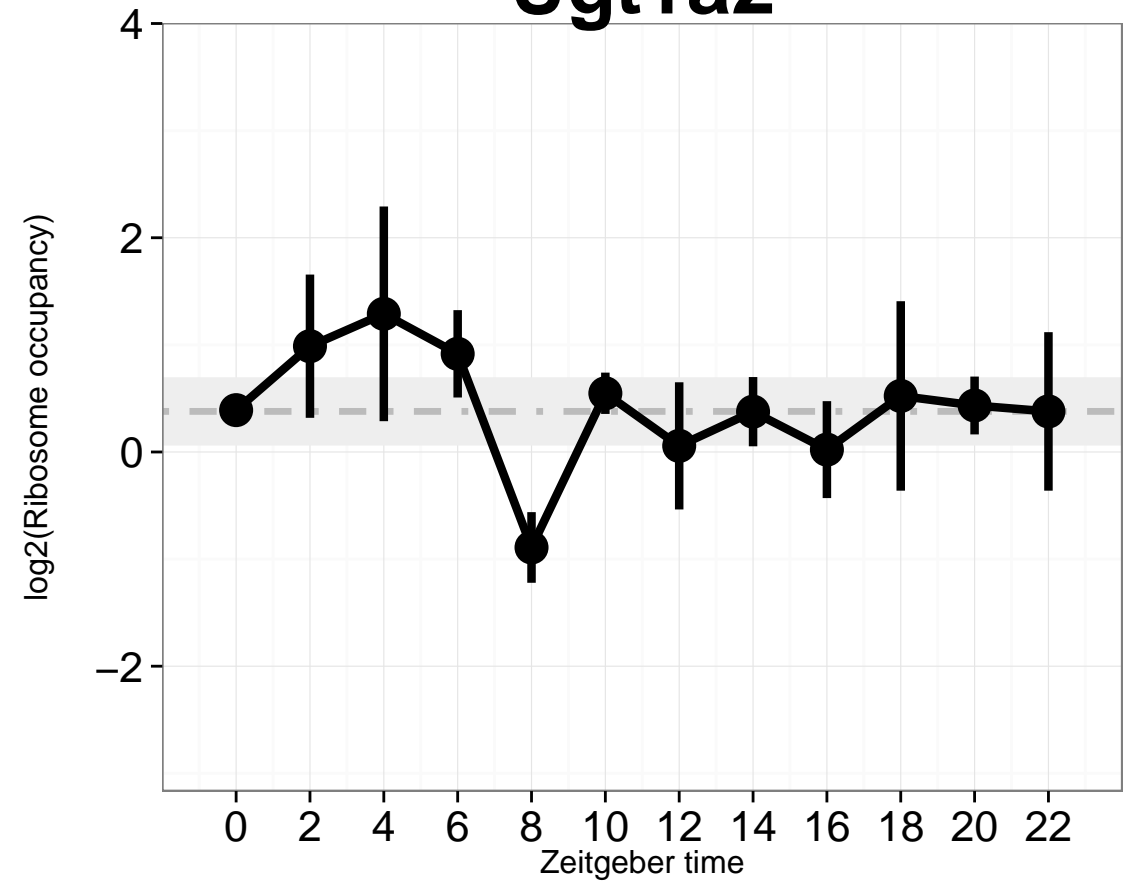

Supplement: Supplementary file 4034 [file 1]

## Esd

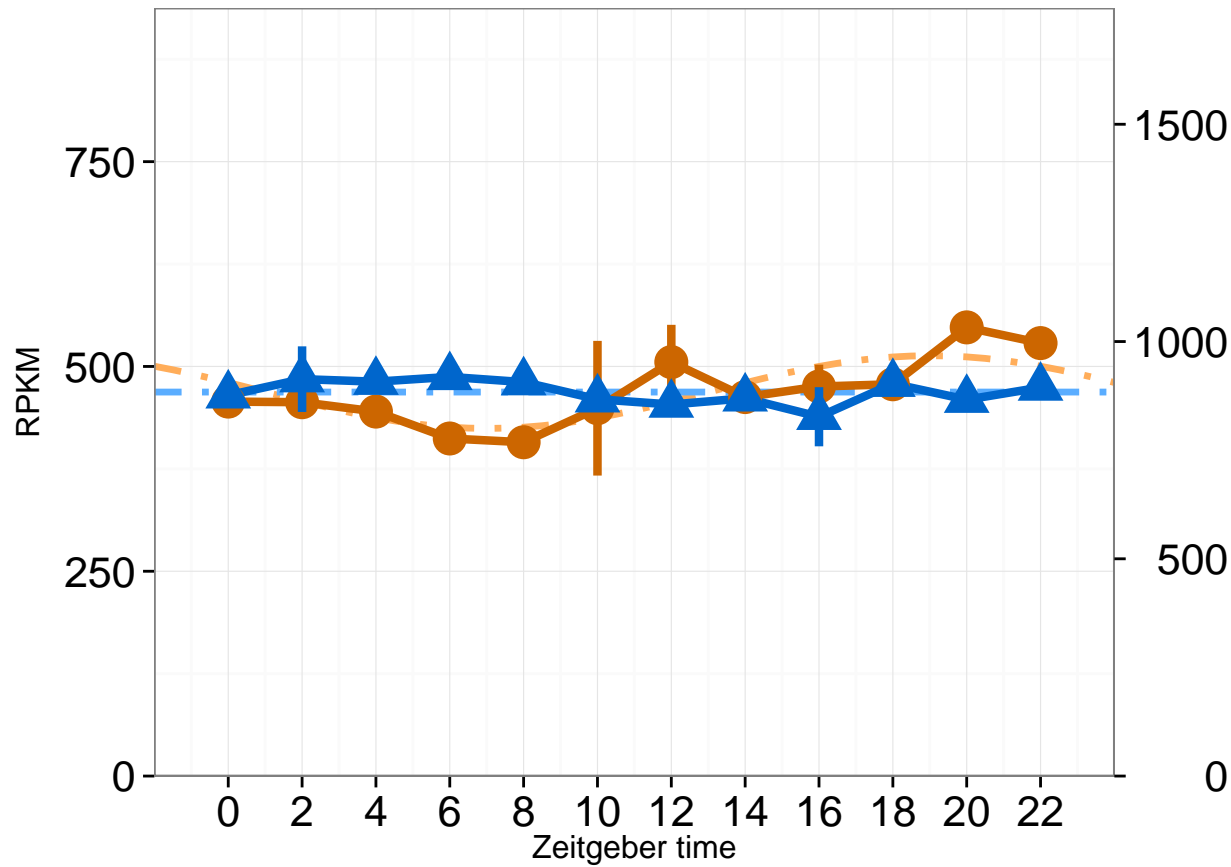

## Esd

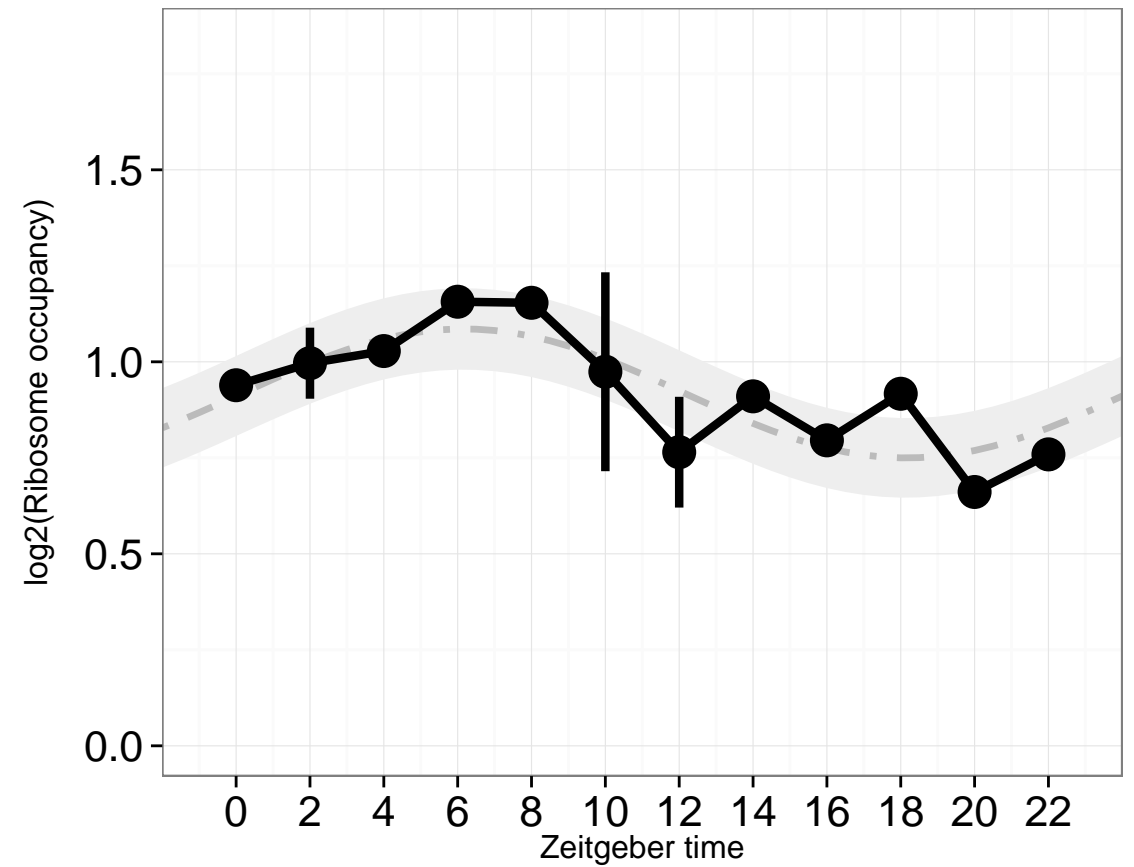

Supplement: Supplementary file 4035 [file 1]

# Apc2

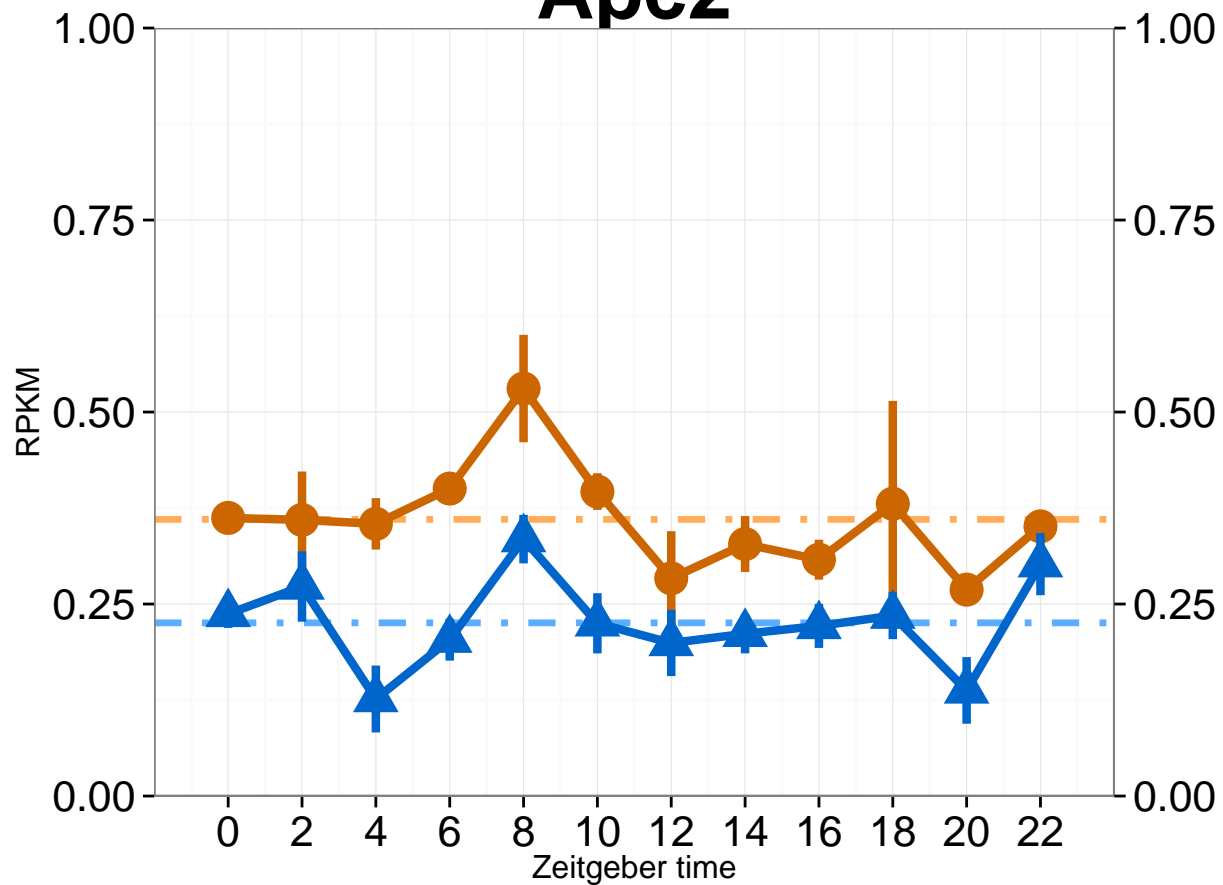

# Apc2

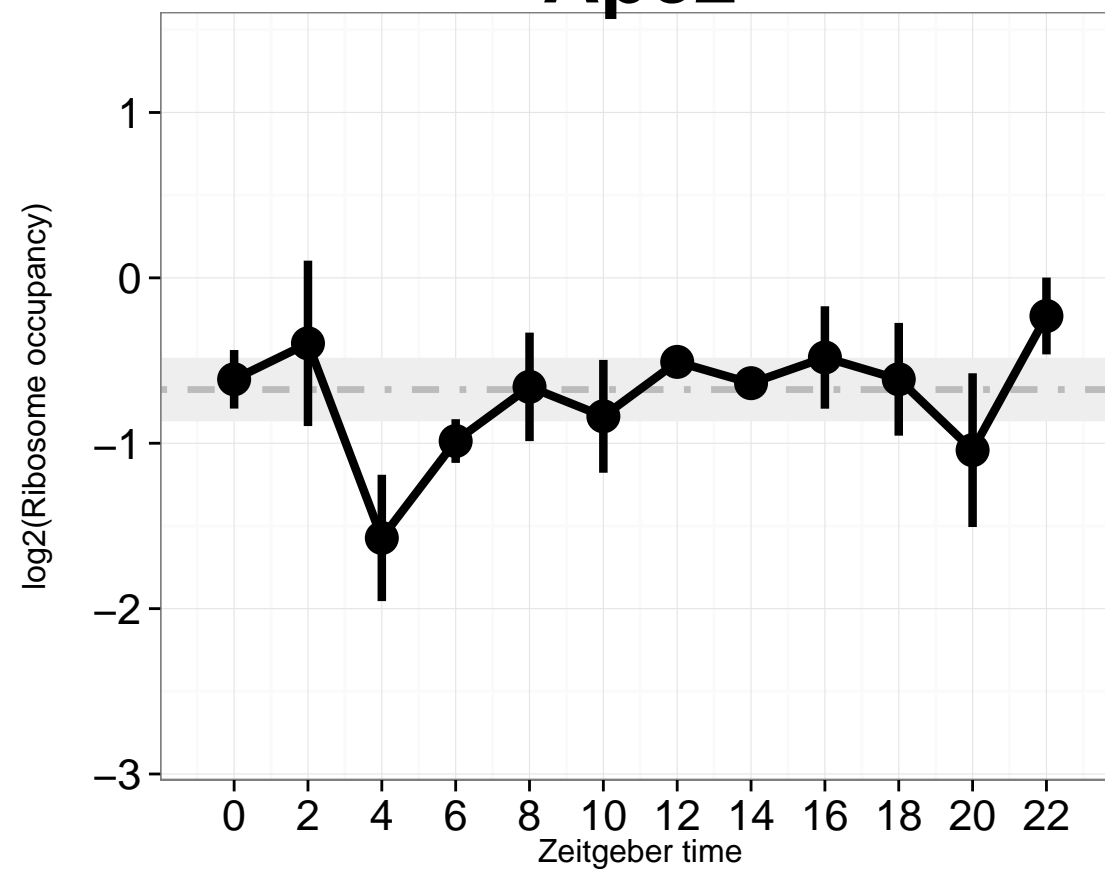

Supplement: Supplementary file 4036 [file 1]

## Tceb2

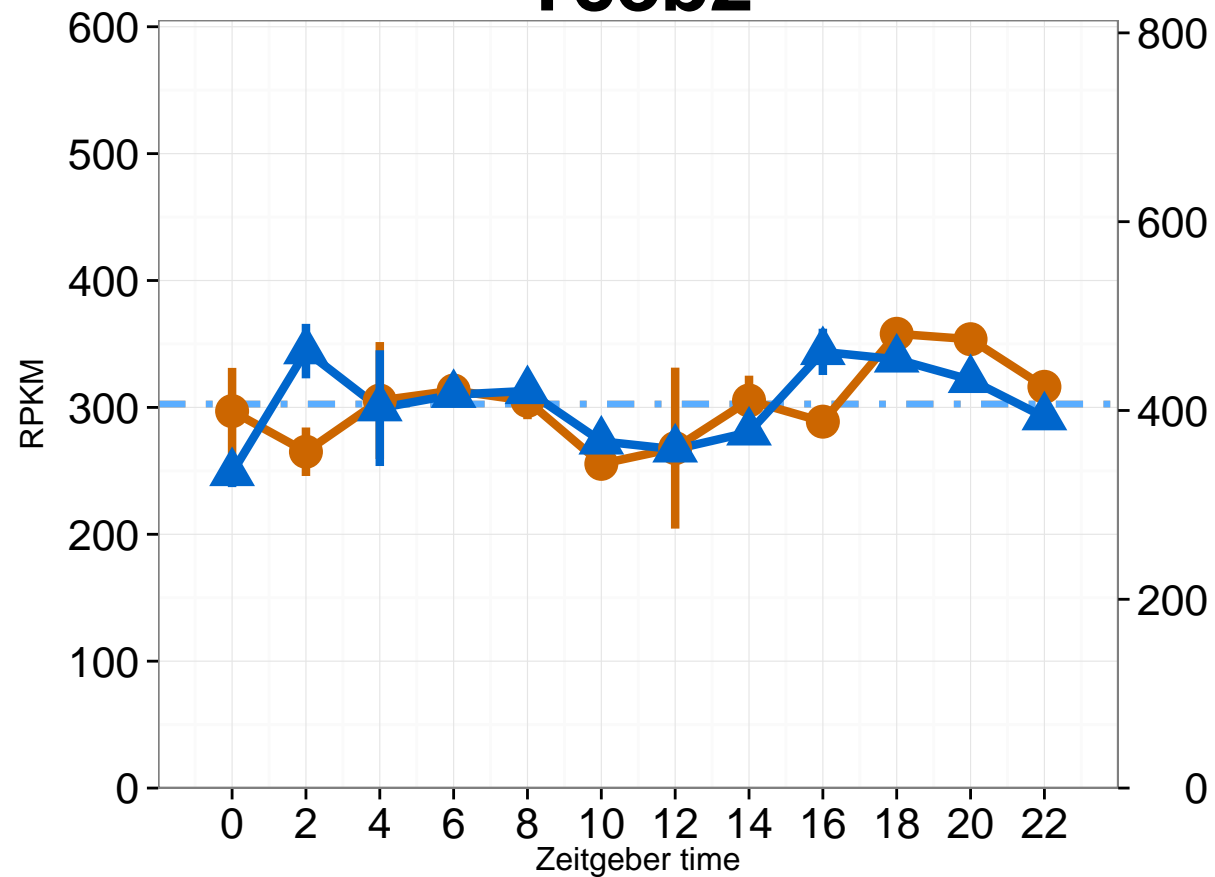

## Tceb2

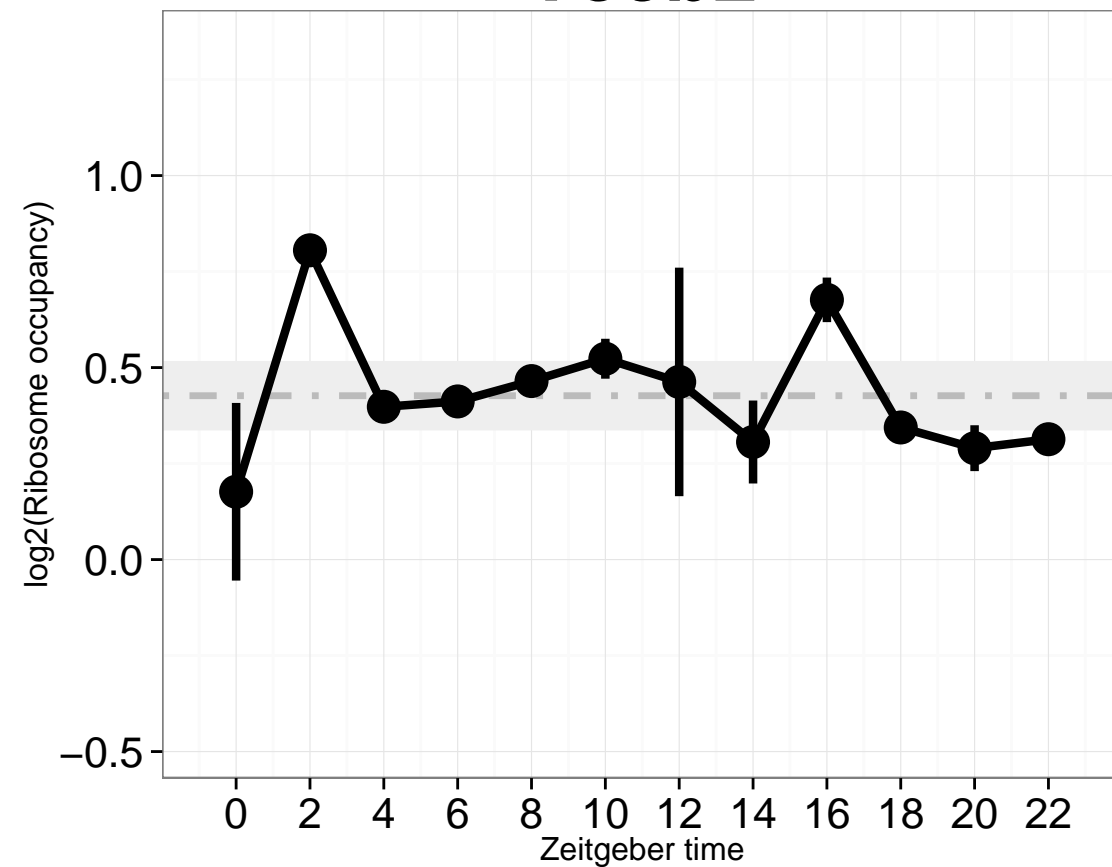

Supplement: Supplementary file 4037 [file 1]

# Paqr4

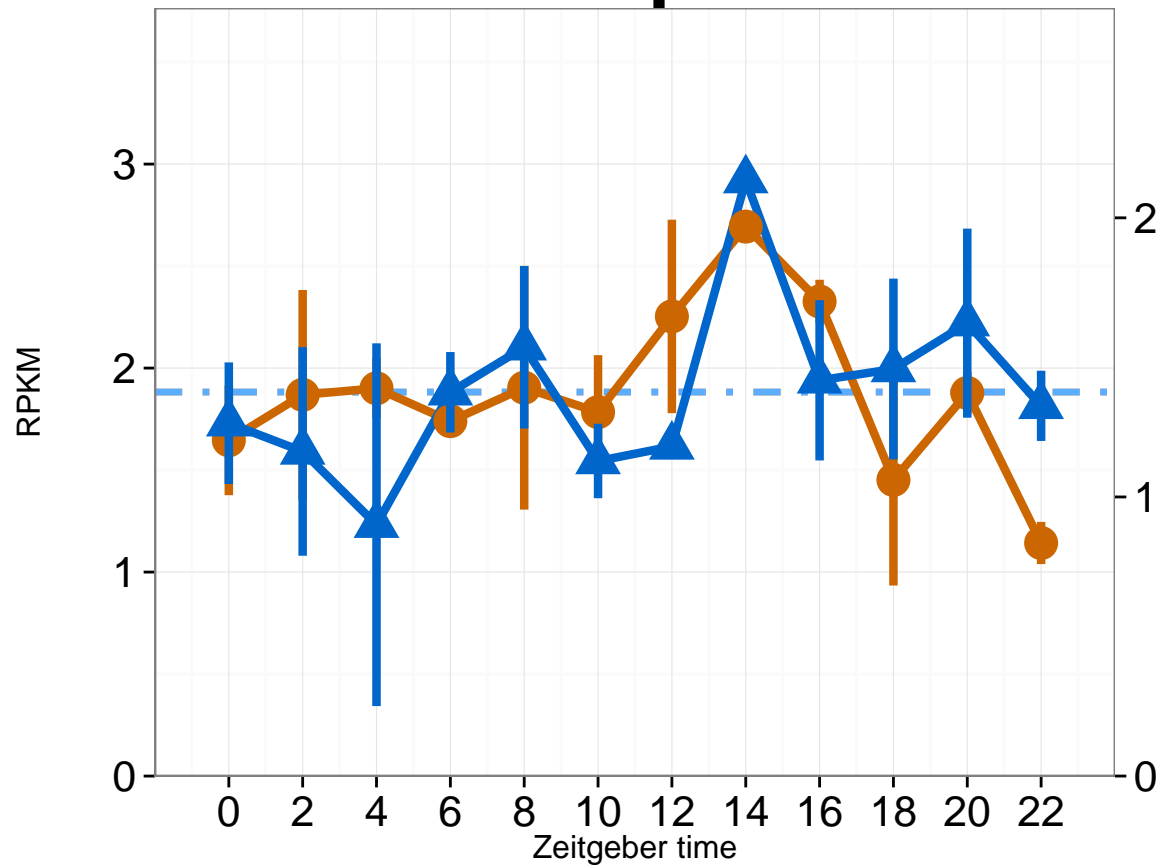

# Paqr4

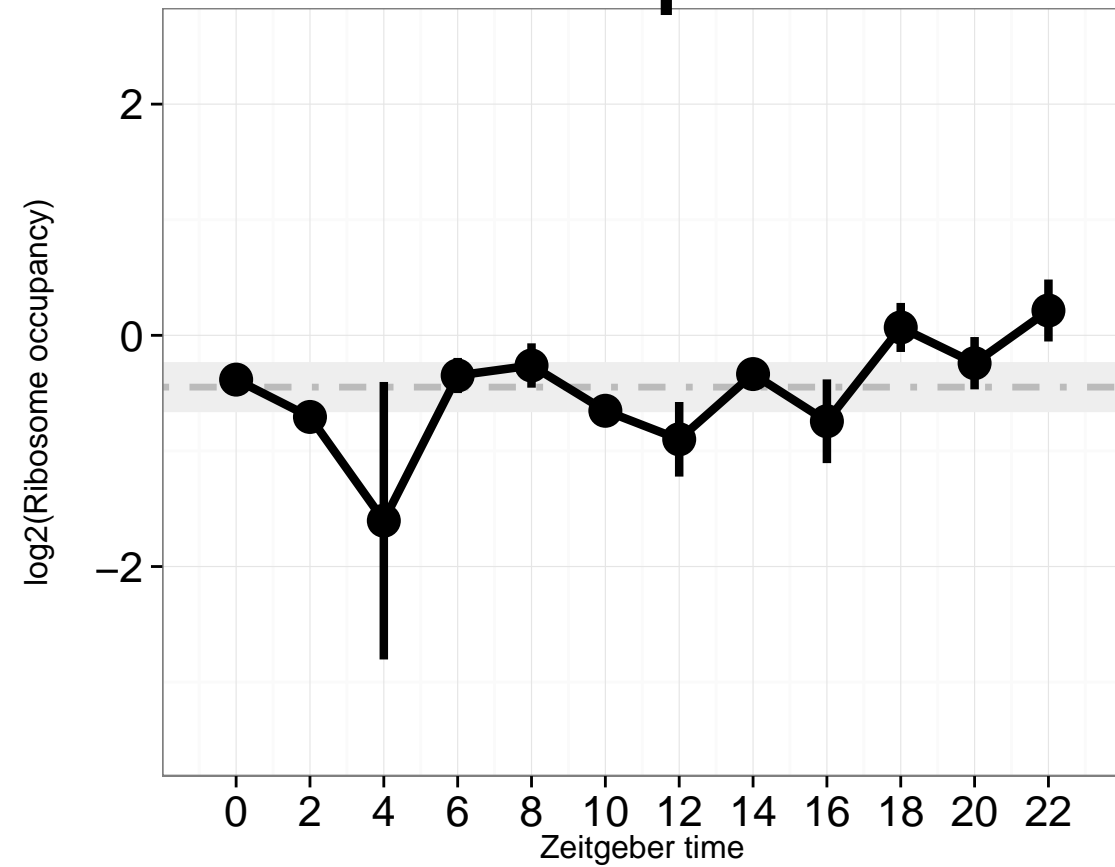

Supplement: Supplementary file 4038 [file 1]

## Palb2

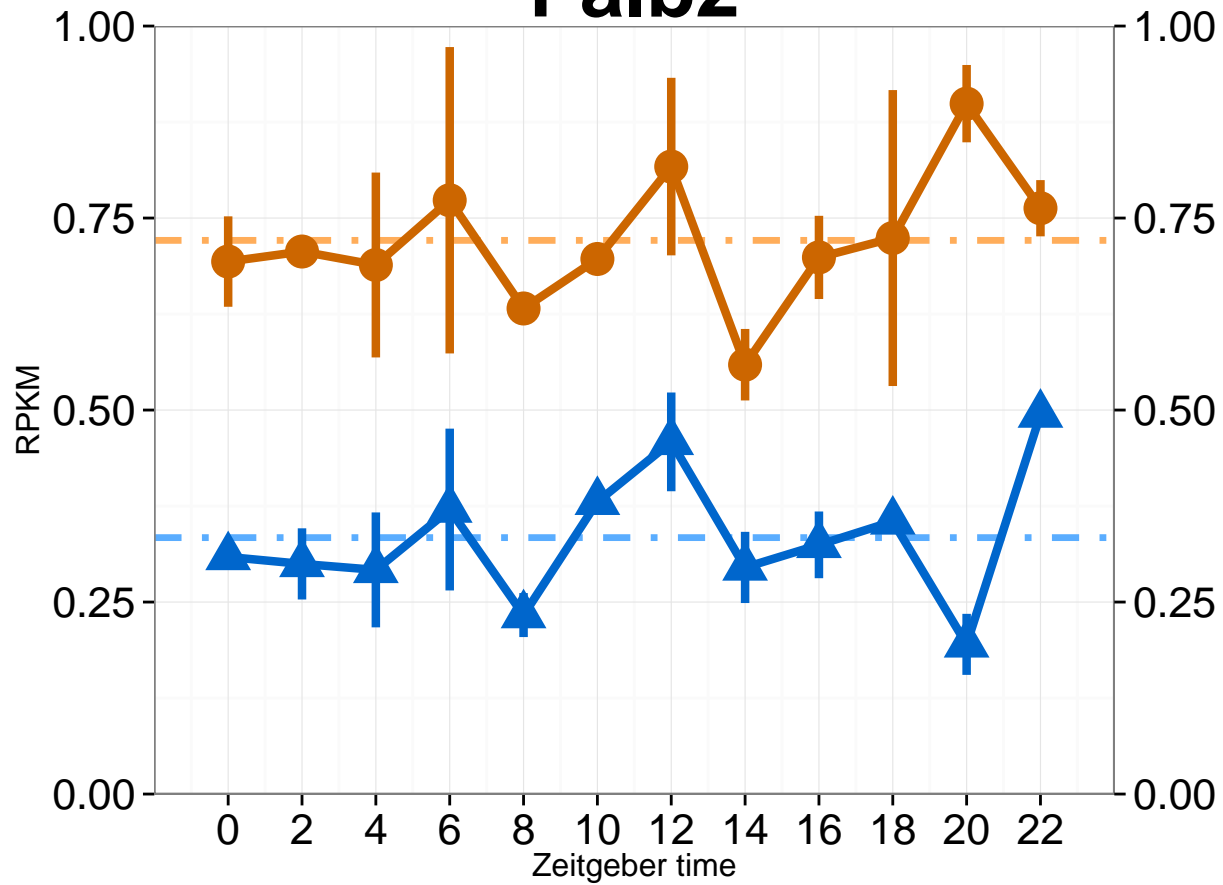

## Palb2

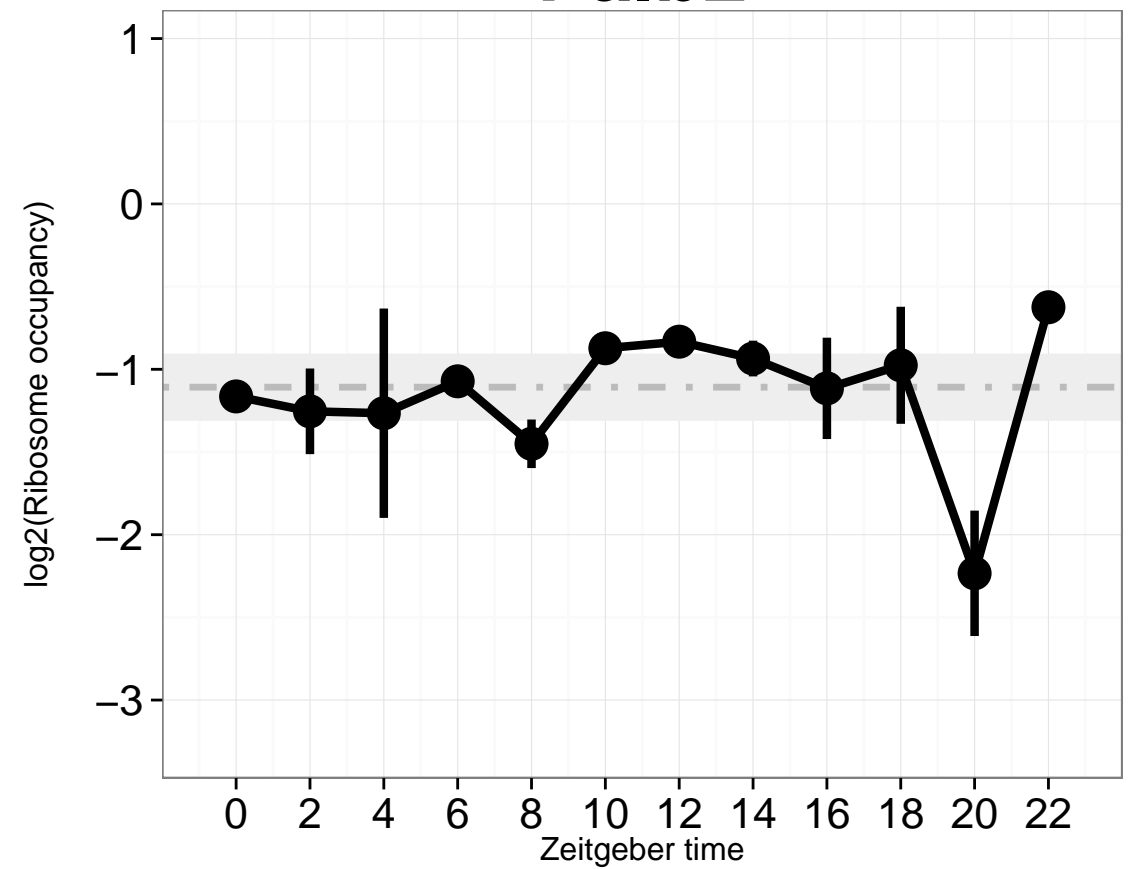

Supplement: Supplementary file 4039 [file 1]

# Man2a1

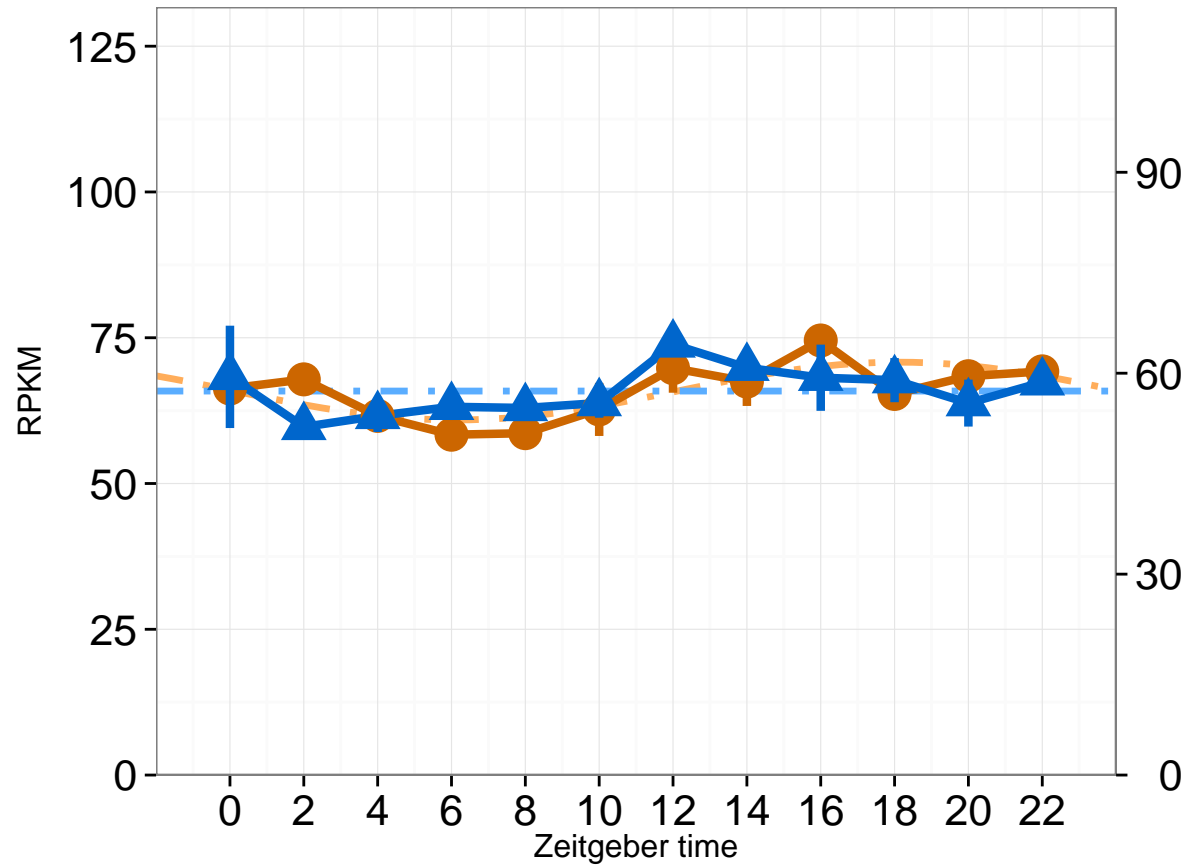

# Man2a1

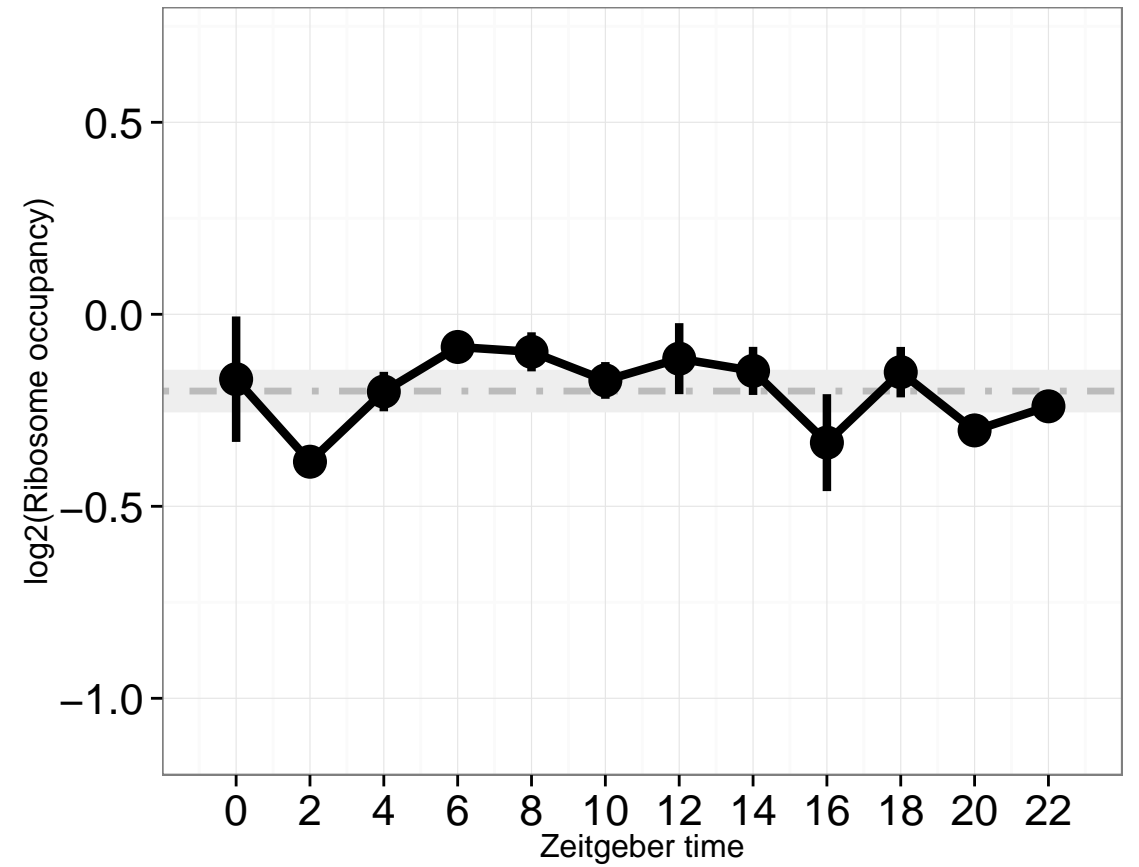

Supplement: Supplementary file 4040 [file 1]

## Klf5

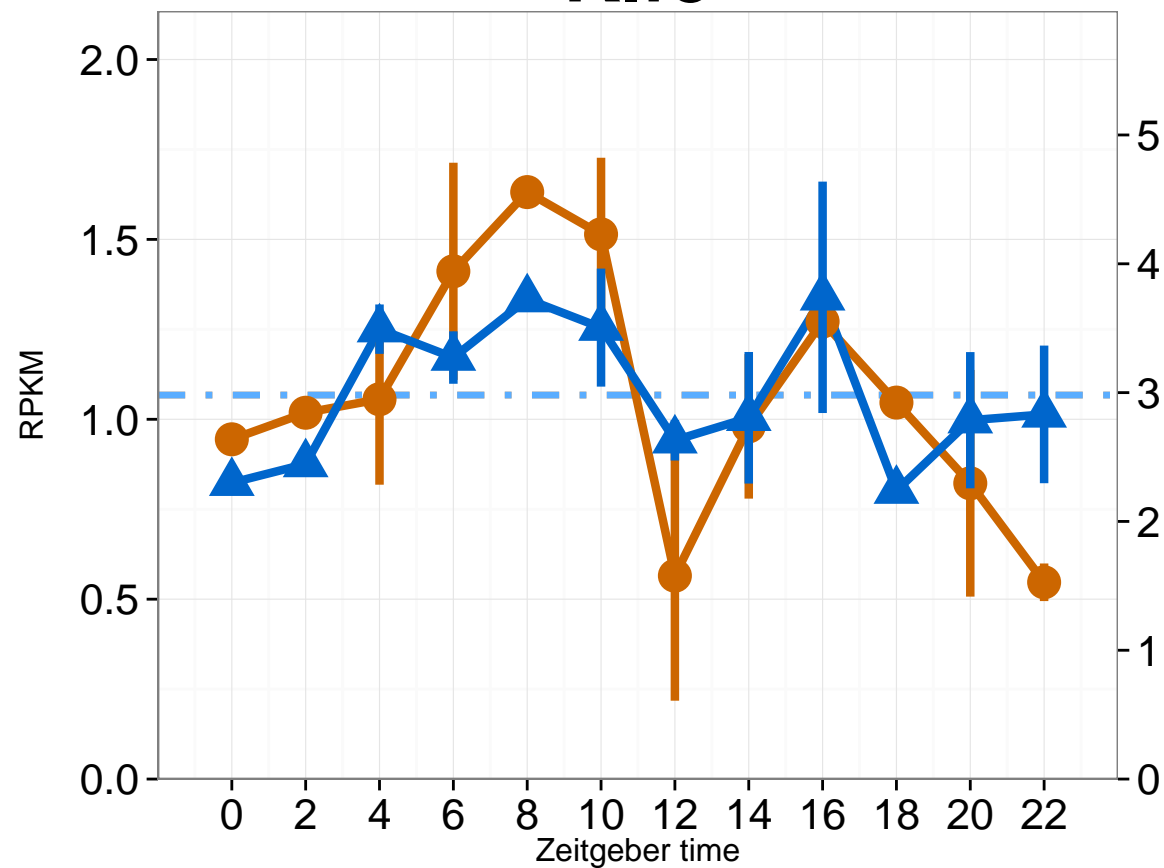

## Klf5

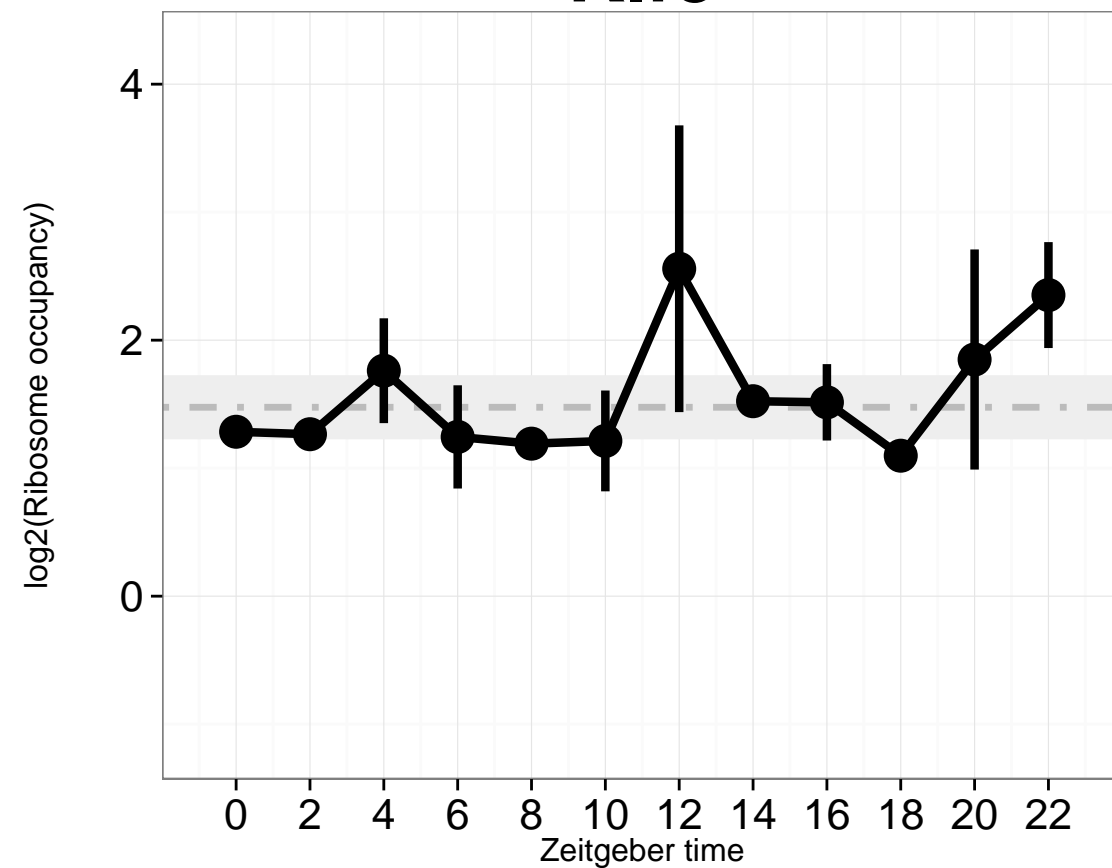

Supplement: Supplementary file 4041 [file 1]

## Scaper

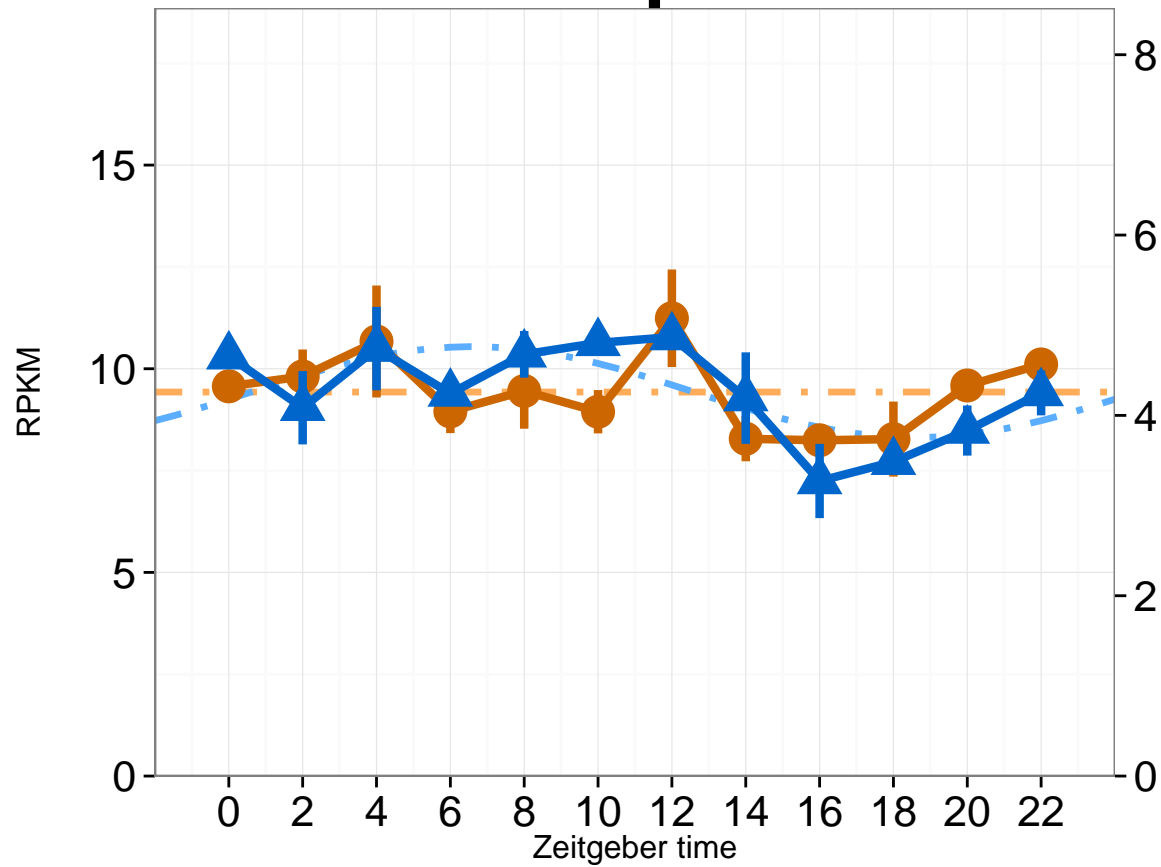

## Scaper

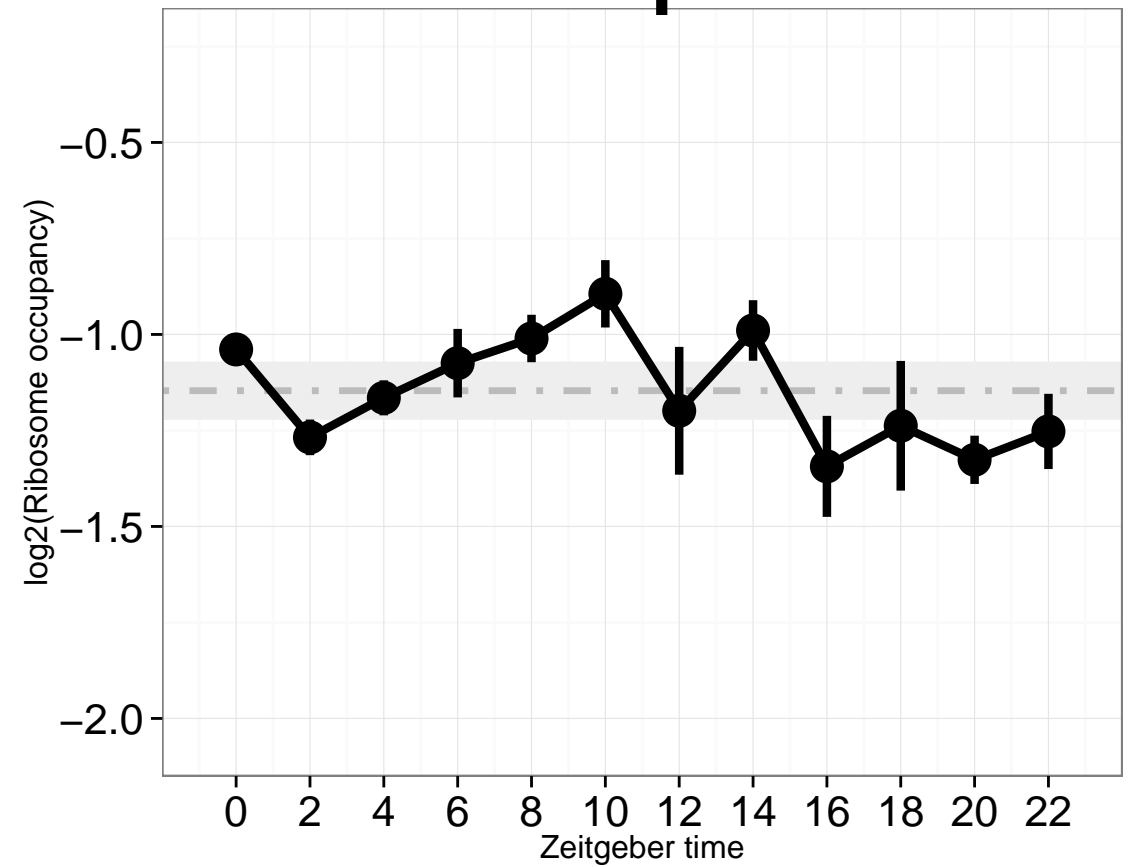

Supplement: Supplementary file 4042 [file 1]

# Lrrc16a

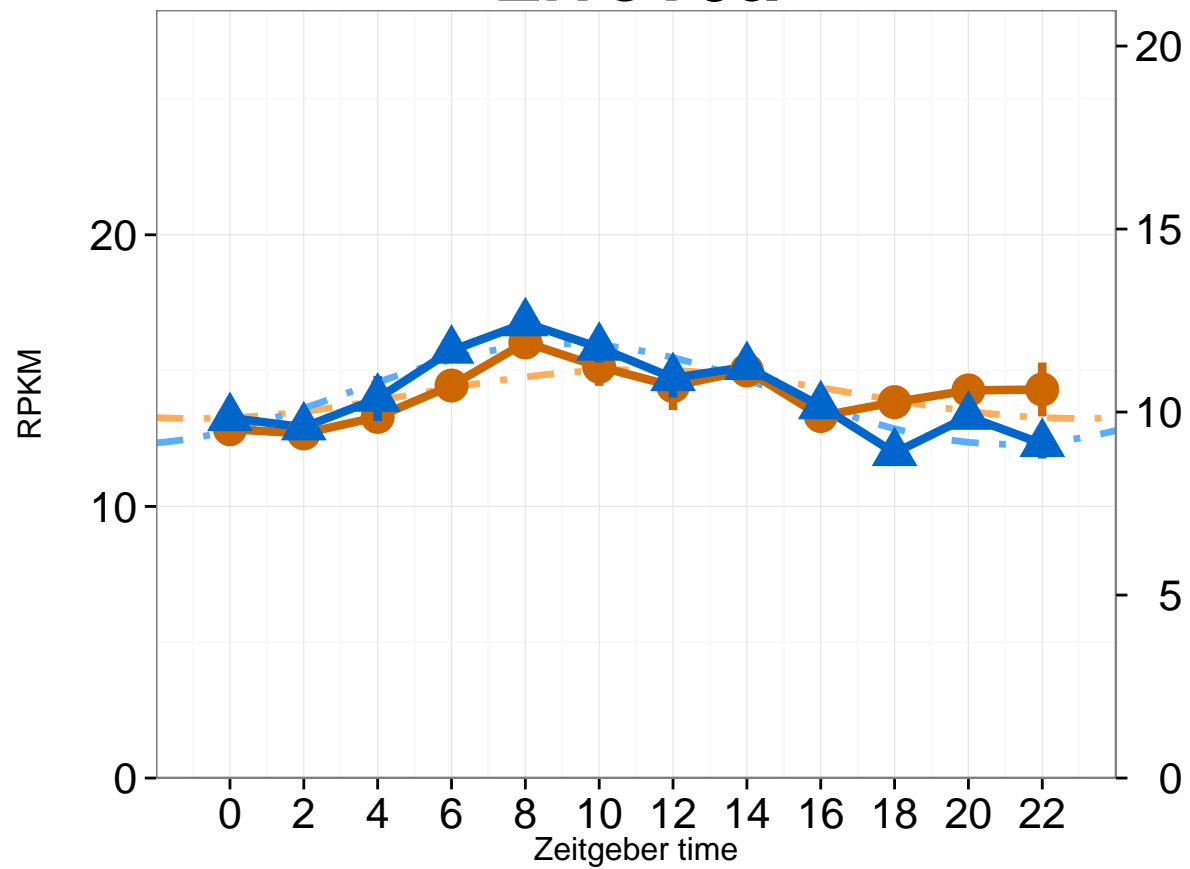

# Lrrc16a

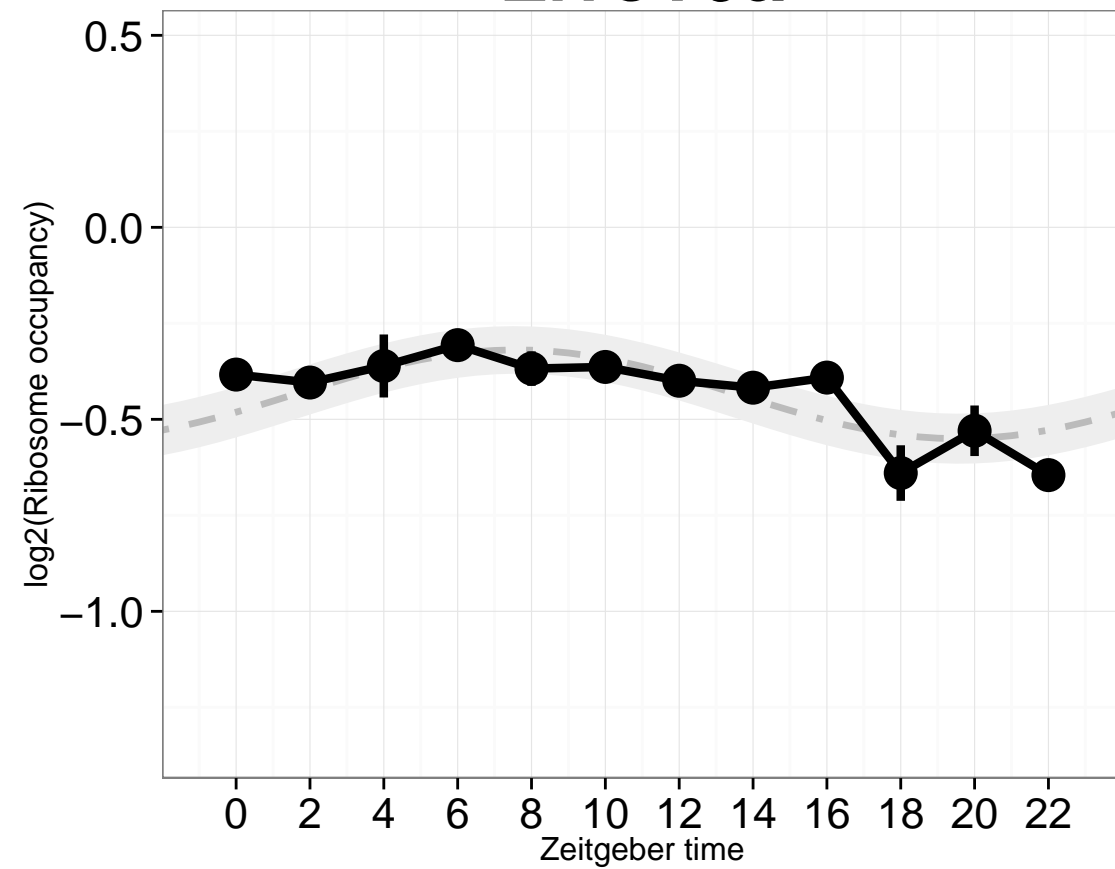

Supplement: Supplementary file 4043 [file 1]

# S1pr3

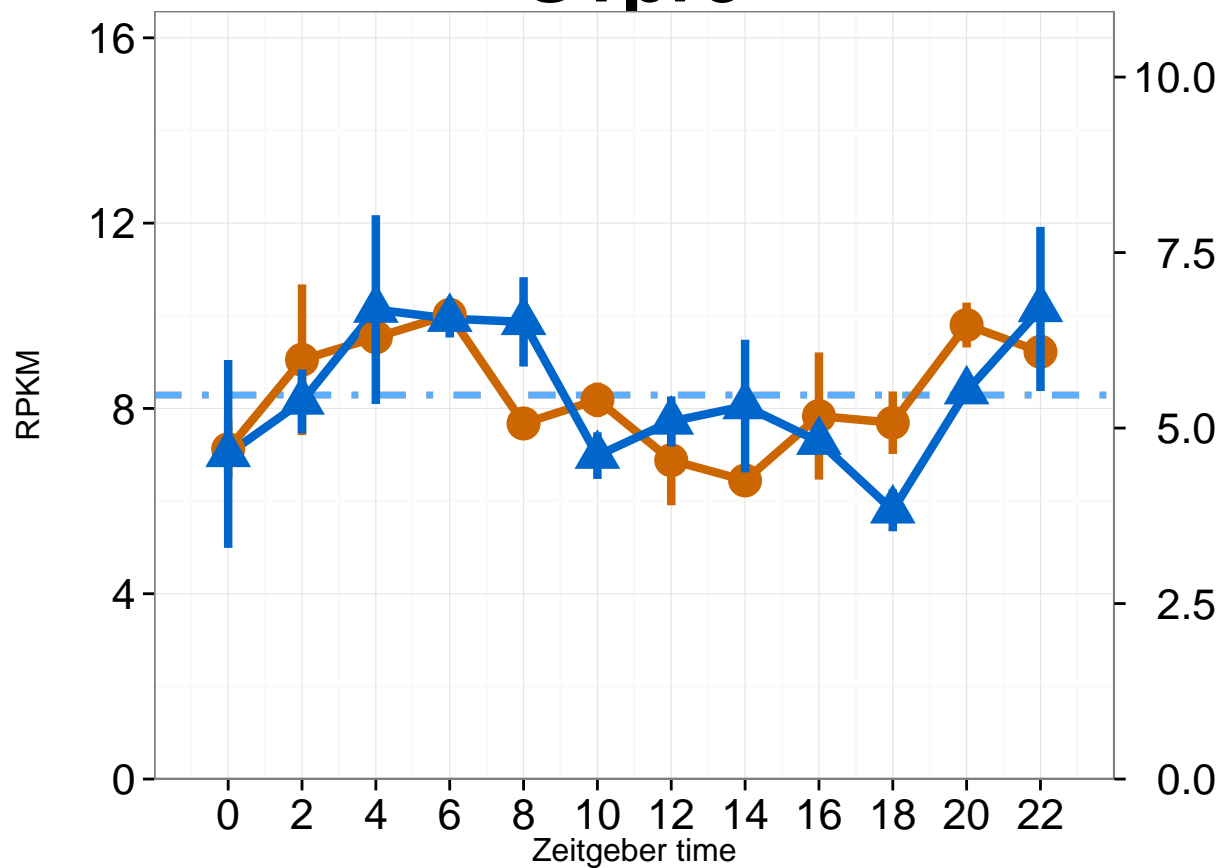

# S1pr3

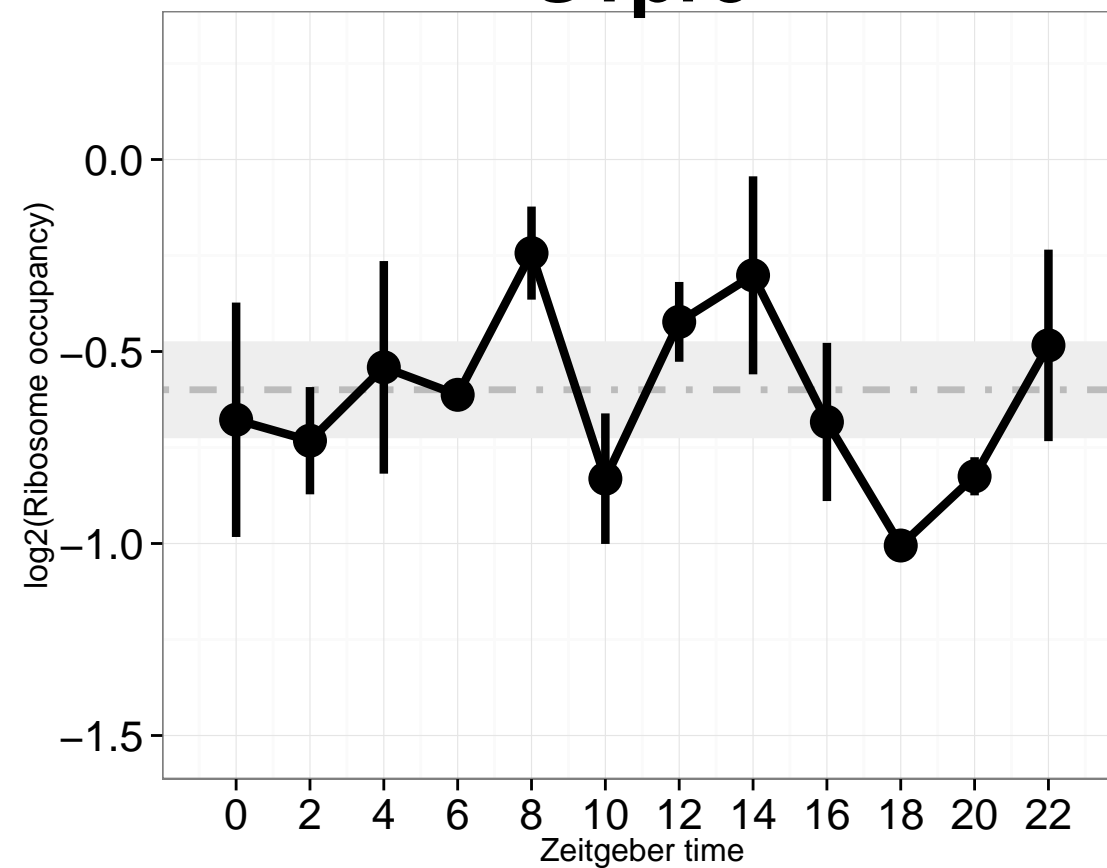

Supplement: Supplementary file 4044 [file 1]

# Fcgbp

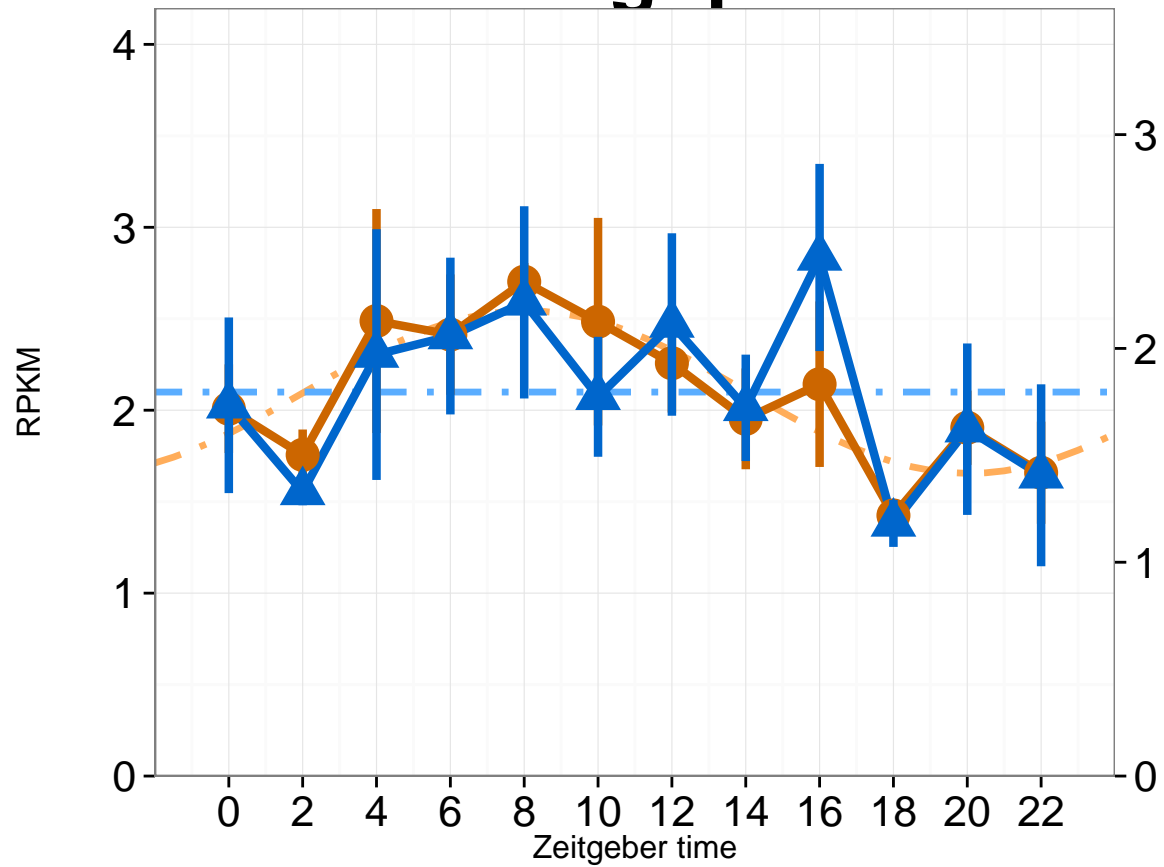

# Fcgbp

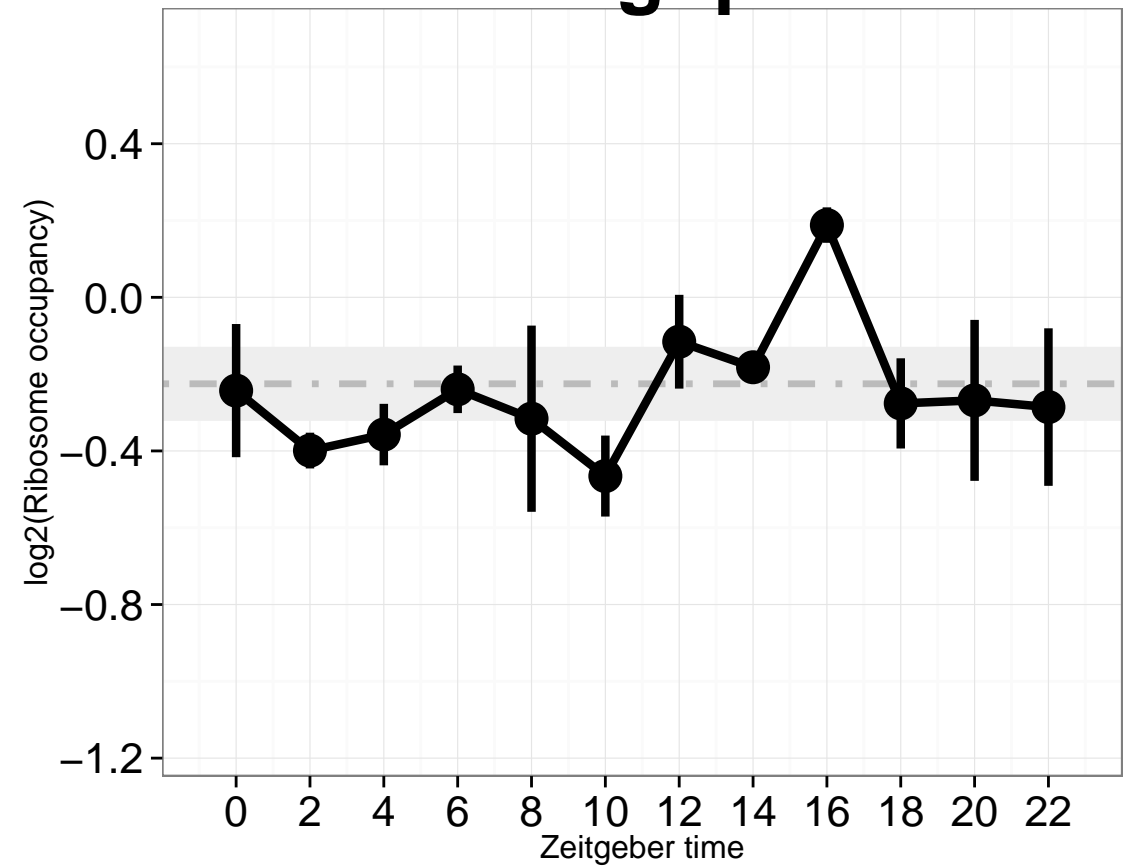

Supplement: Supplementary file 4045 [file 1]

# Ugt1a7c

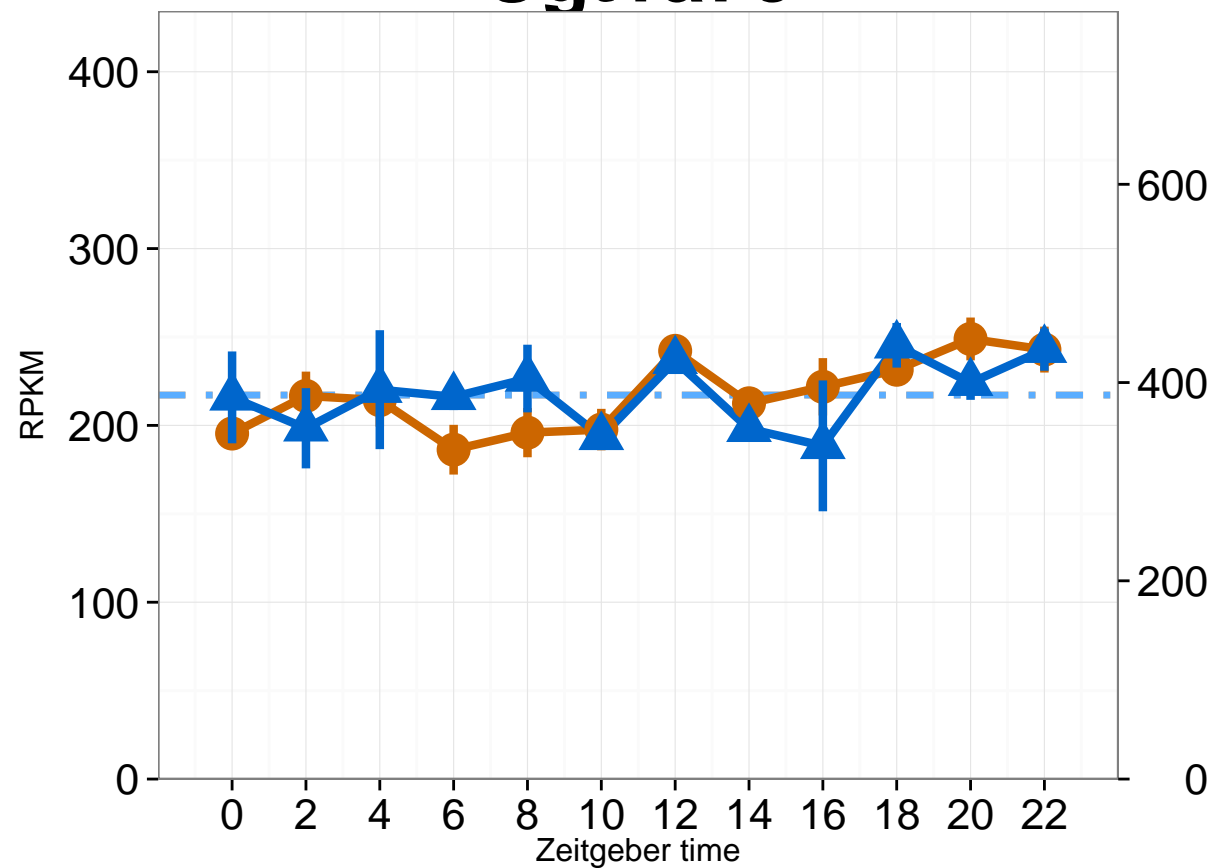

# Ugt1a7c

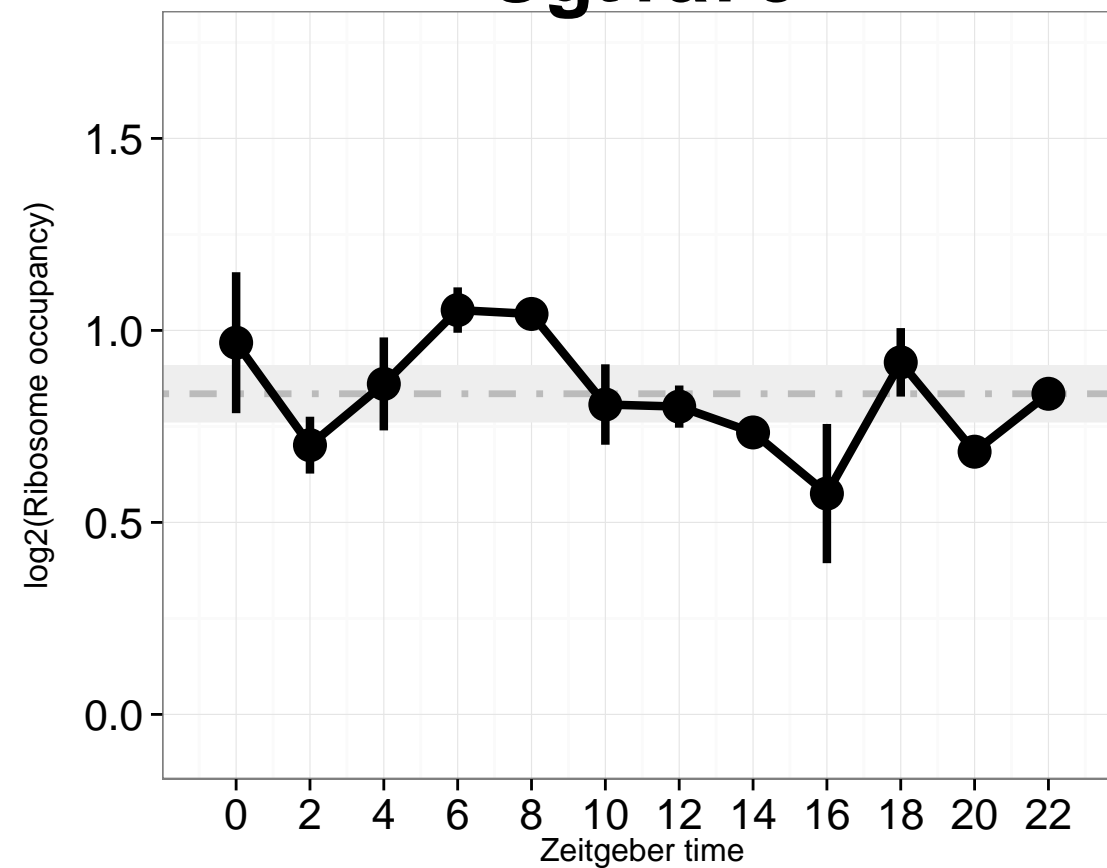

Supplement: Supplementary file 4046 [file 1]

## Mfsd5

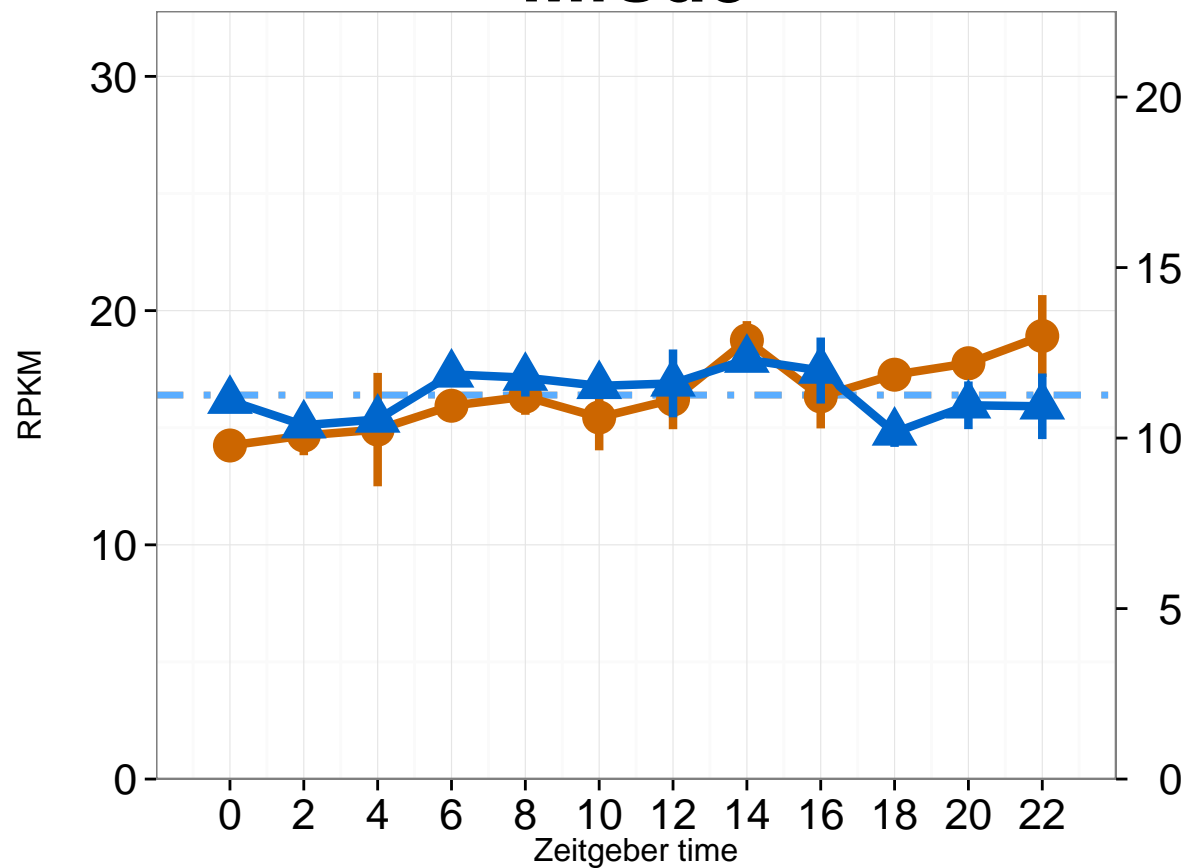

## Mfsd5

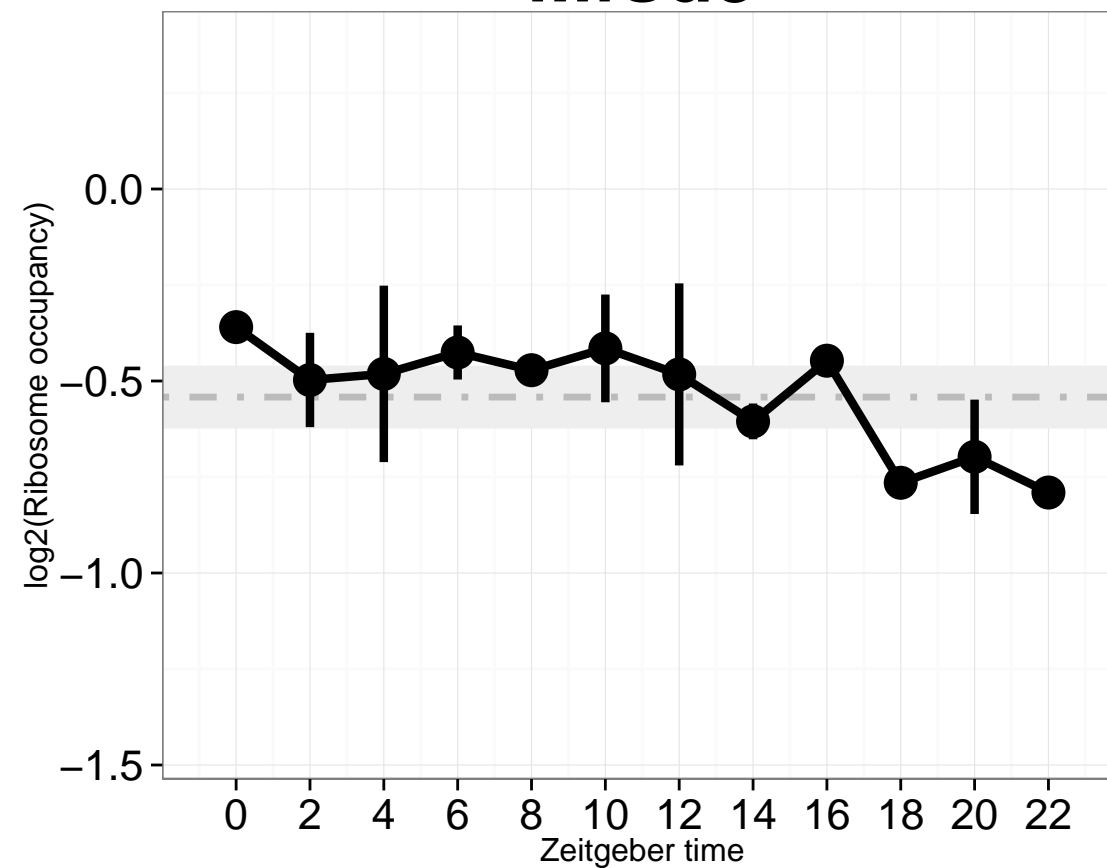

Supplement: Supplementary file 4047 [file 1]

# Tmem229b

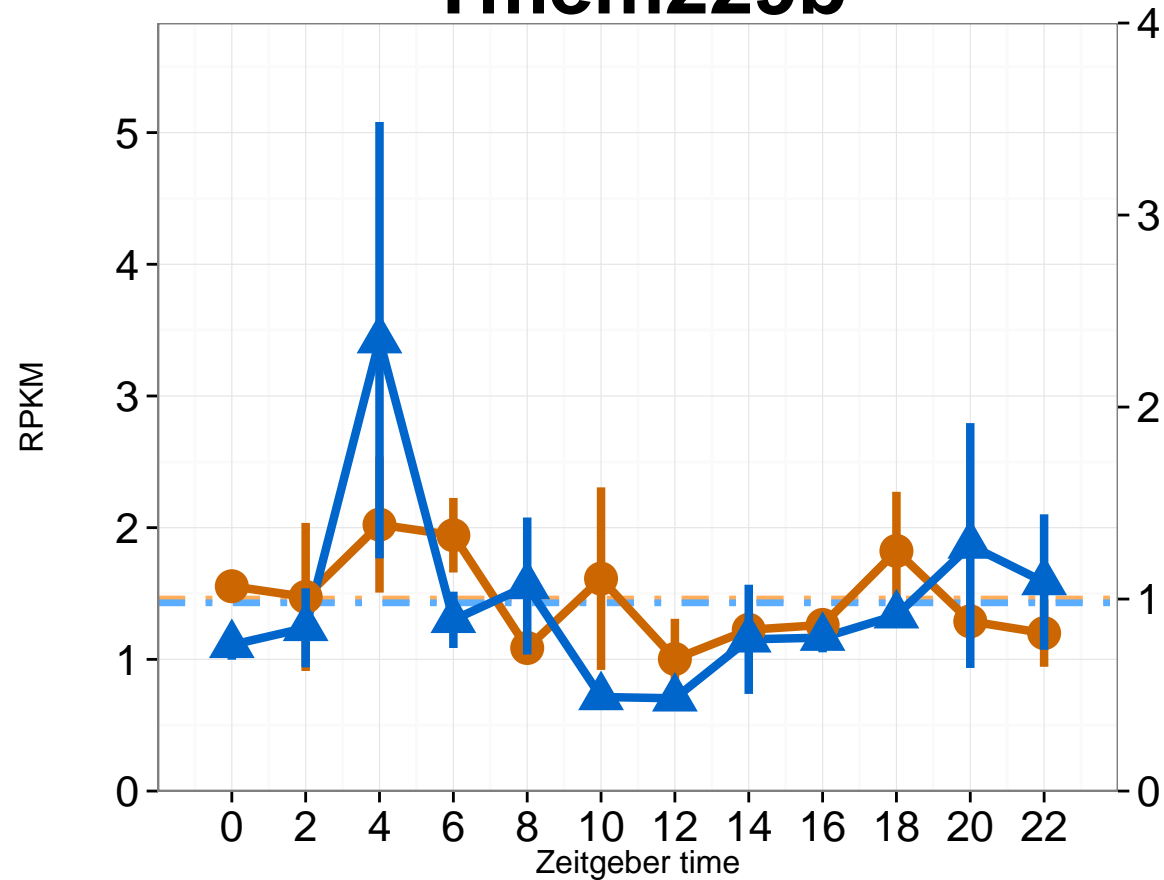

# Tmem229b

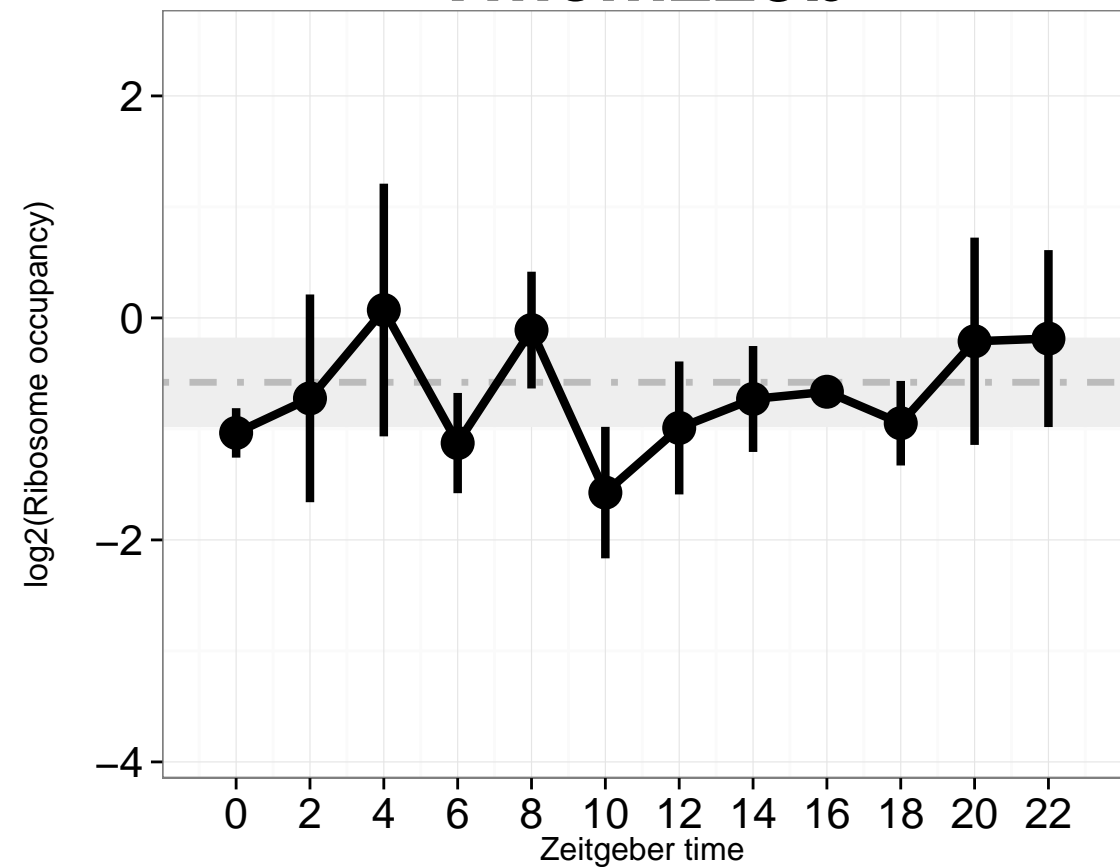

Supplement: Supplementary file 4048 [file 1]

## Pnpo

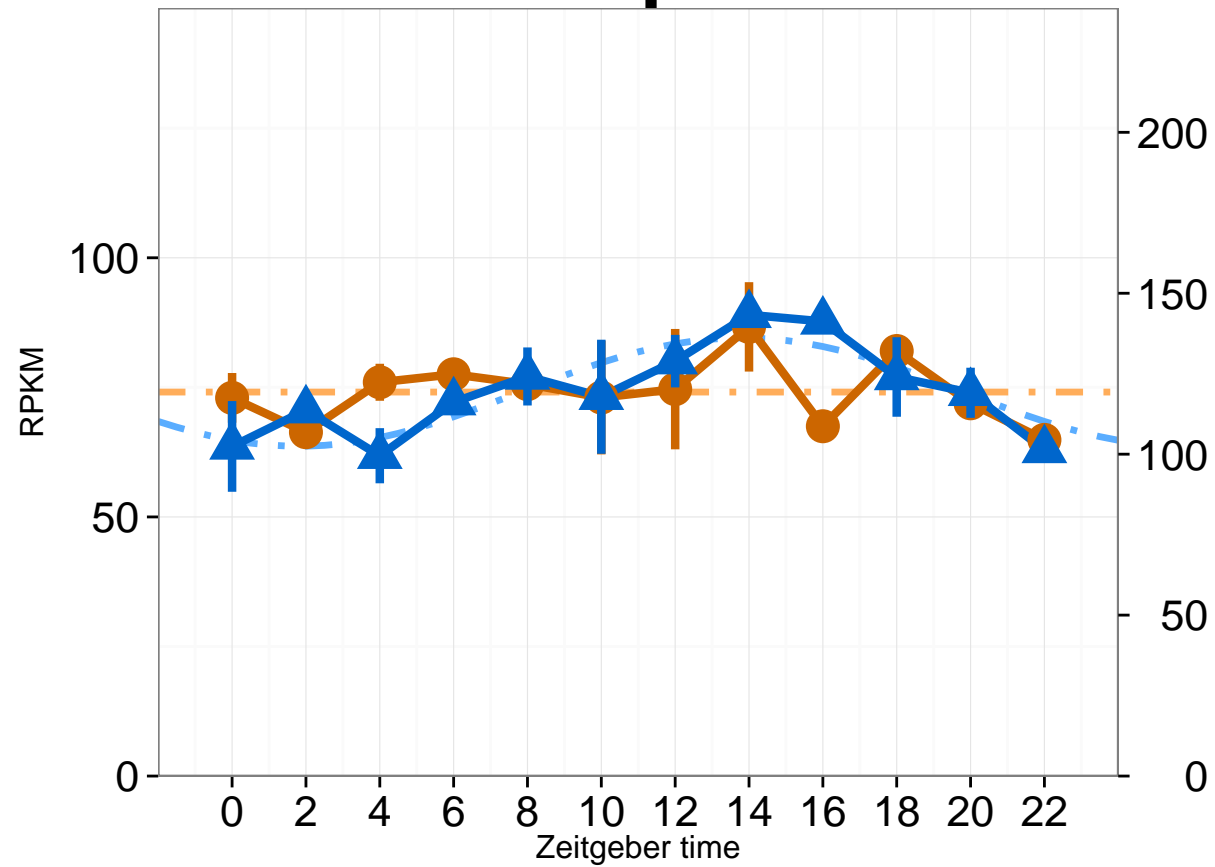

## Pnpo

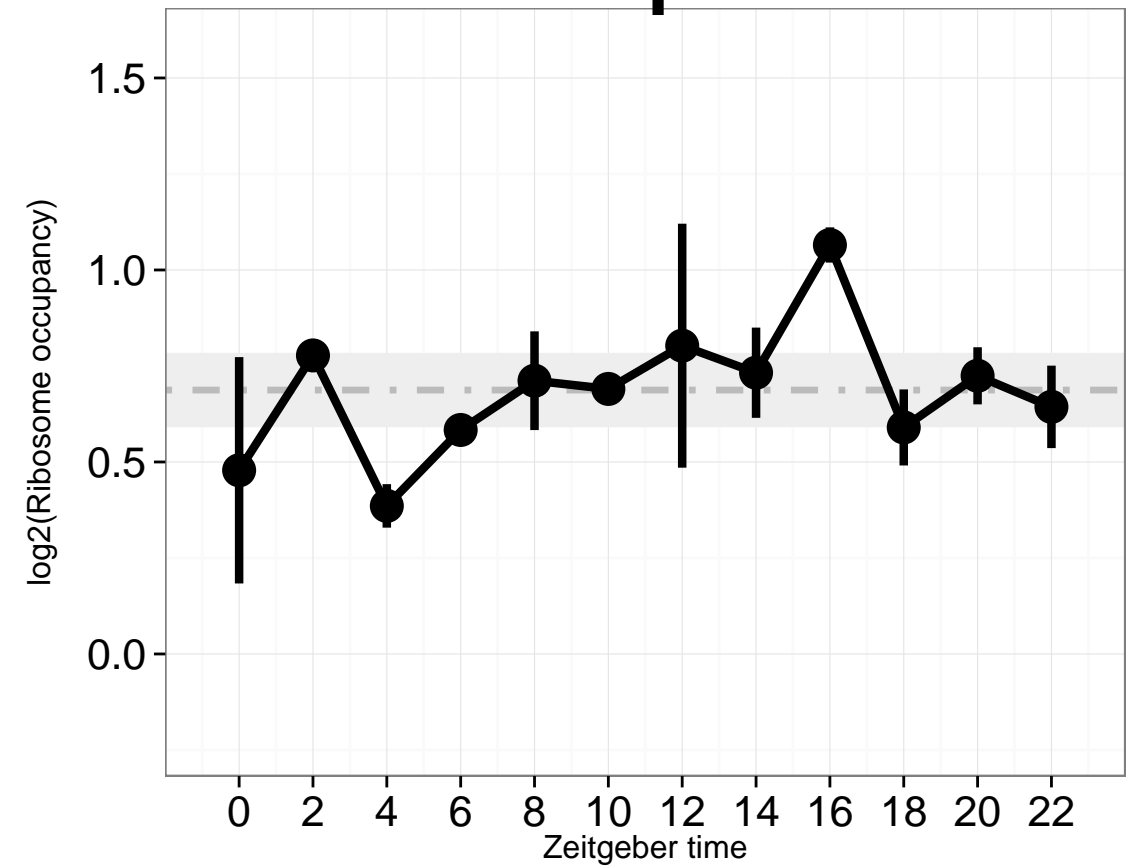

Supplement: Supplementary file 4049 [file 1]

## Ndufs1

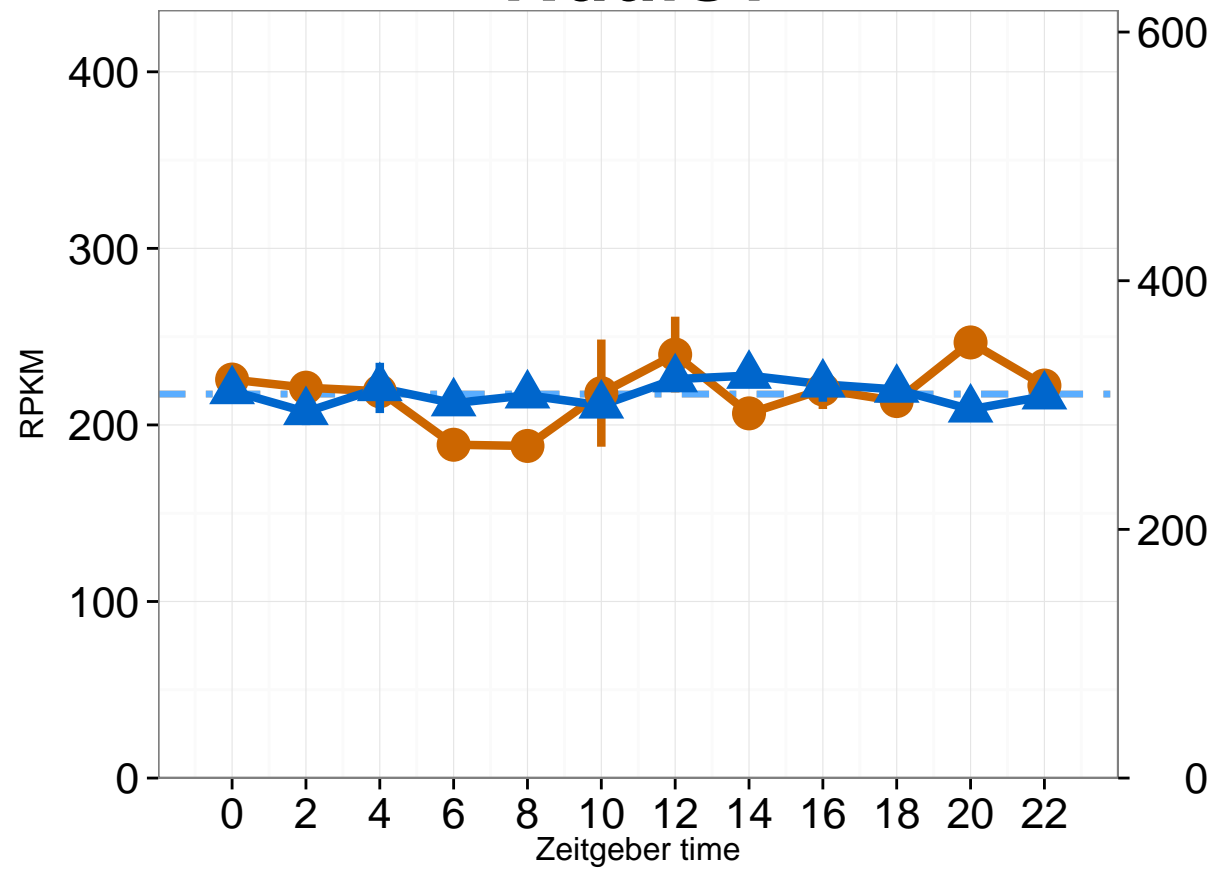

## Ndufs1

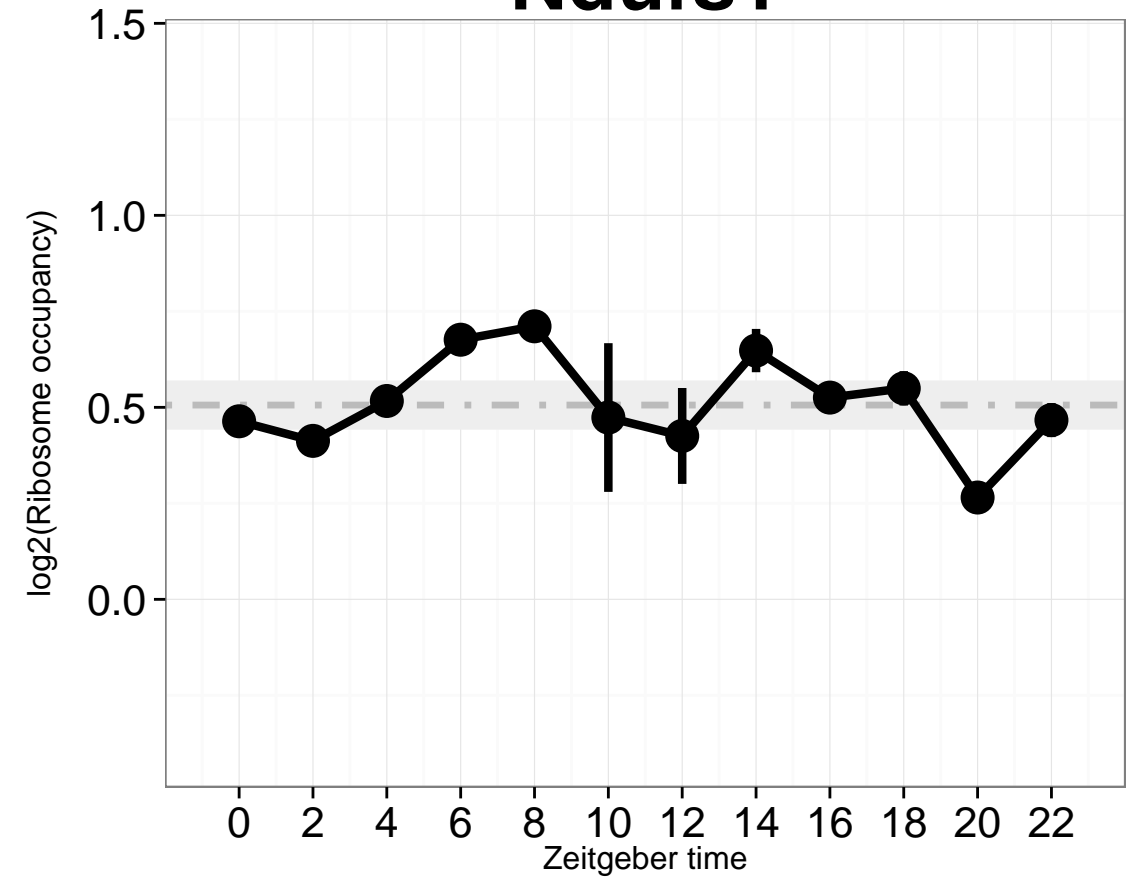

Supplement: Supplementary file 4050 [file 1]

## Nek1

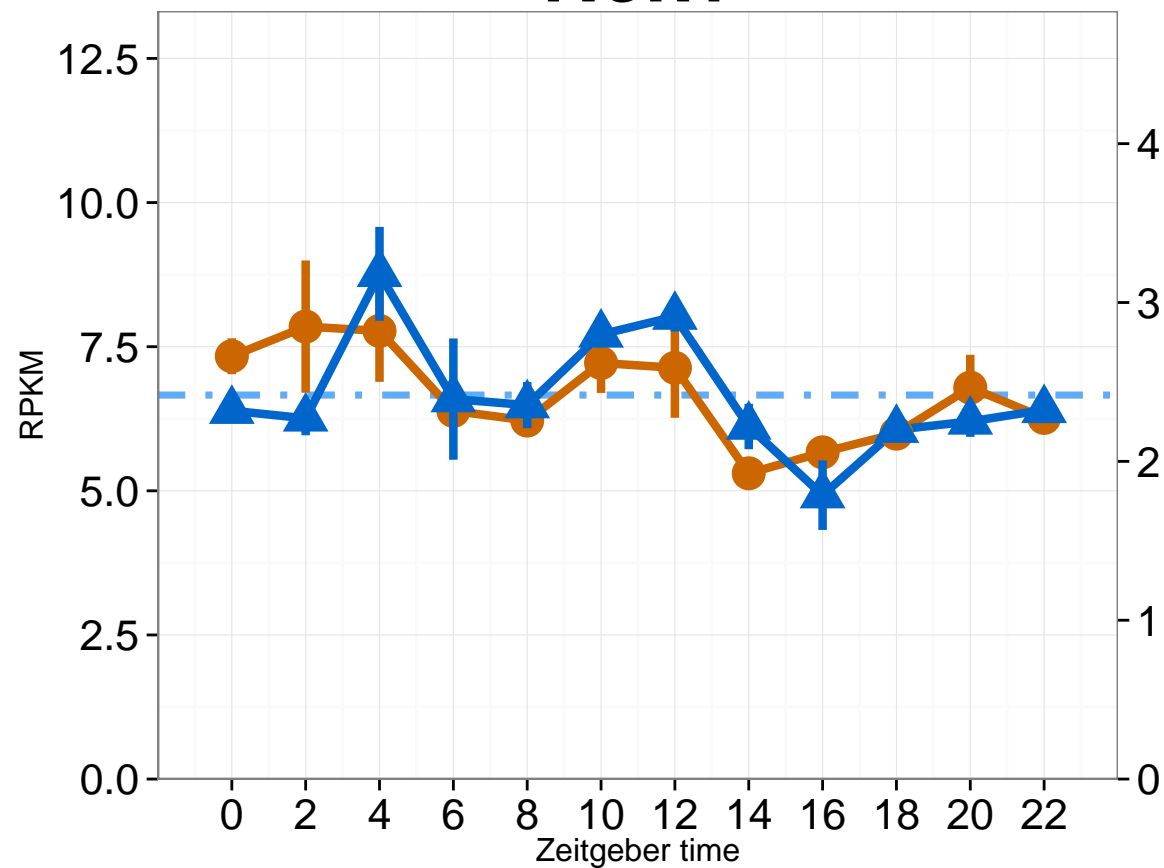

## Nek1

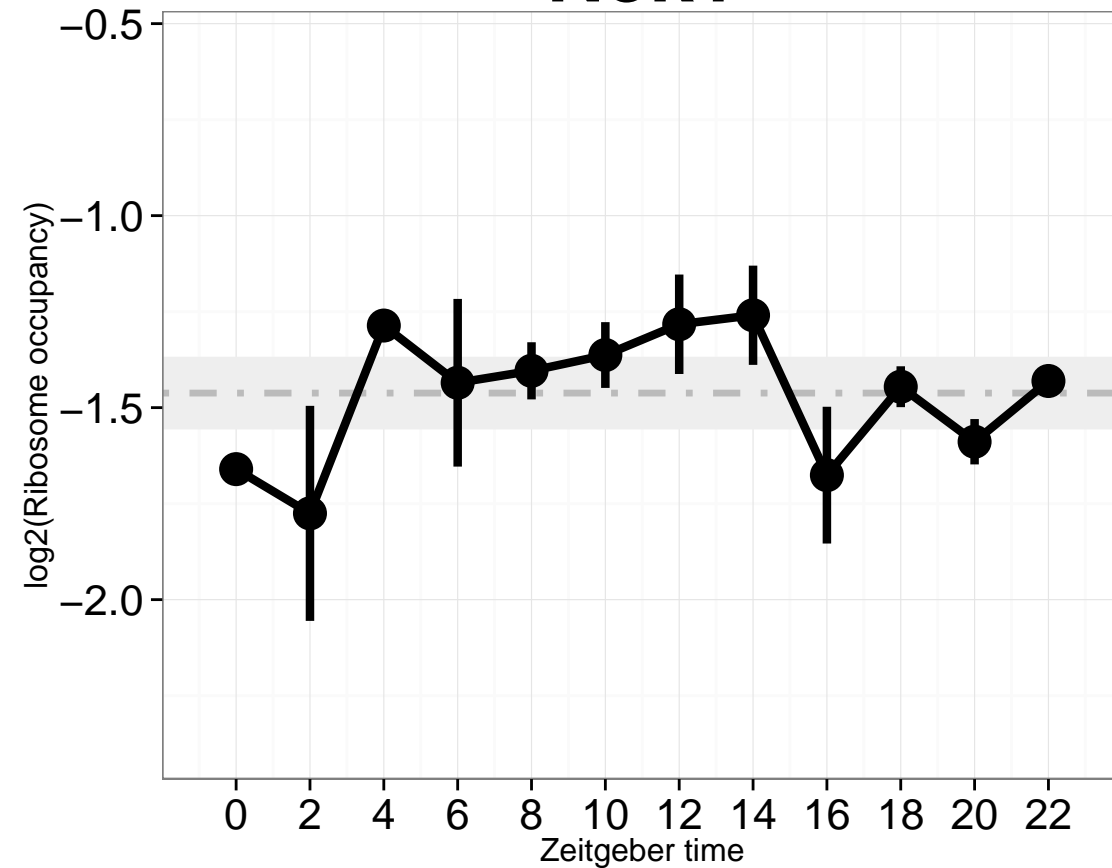

Supplement: Supplementary file 4051 [file 1]

## C1qbp

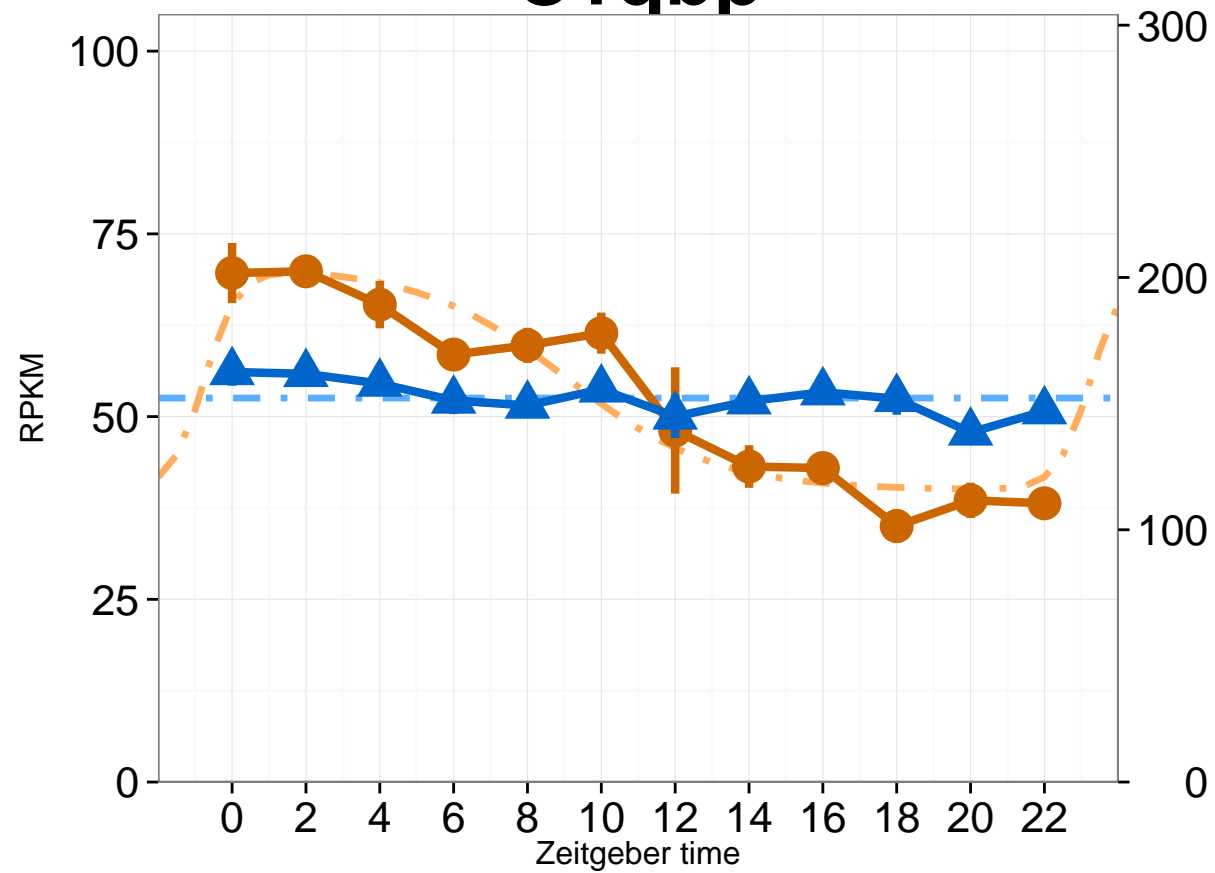

## C1qbp

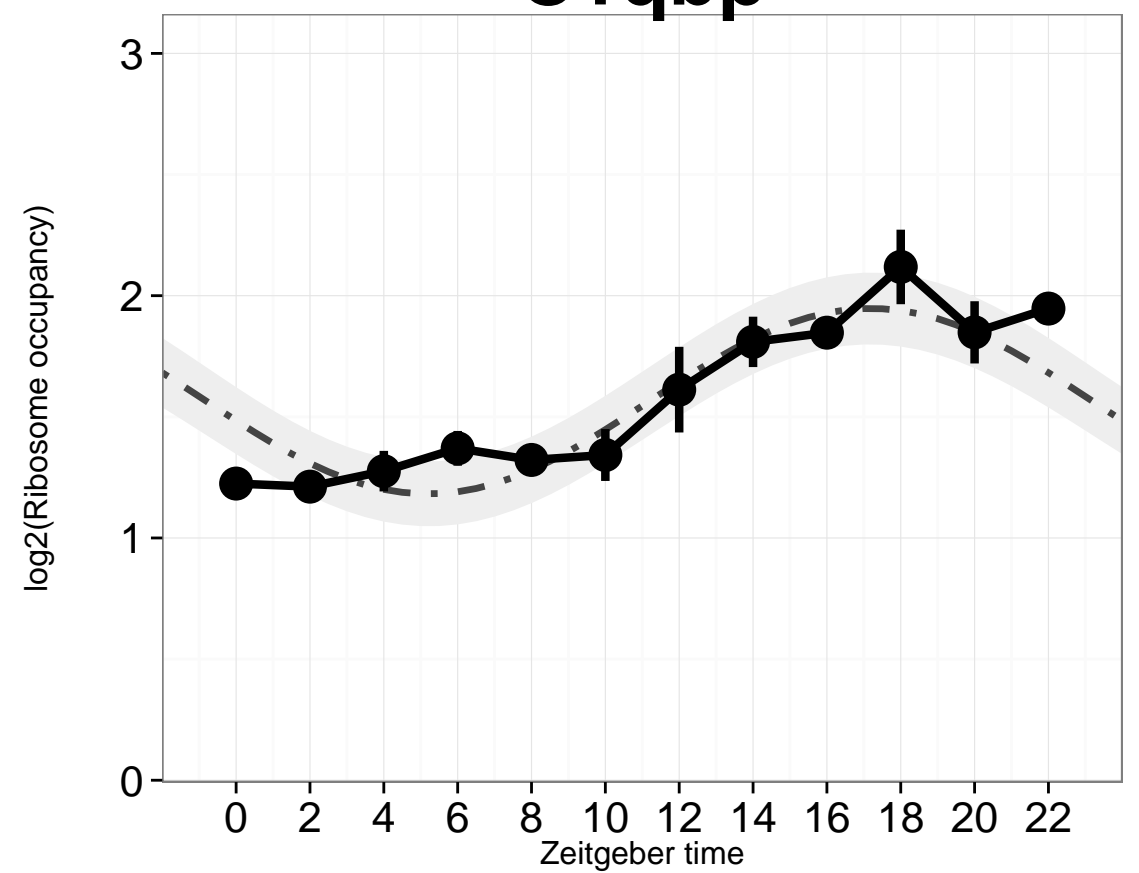

Supplement: Supplementary file 4052 [file 1]

## Dph3

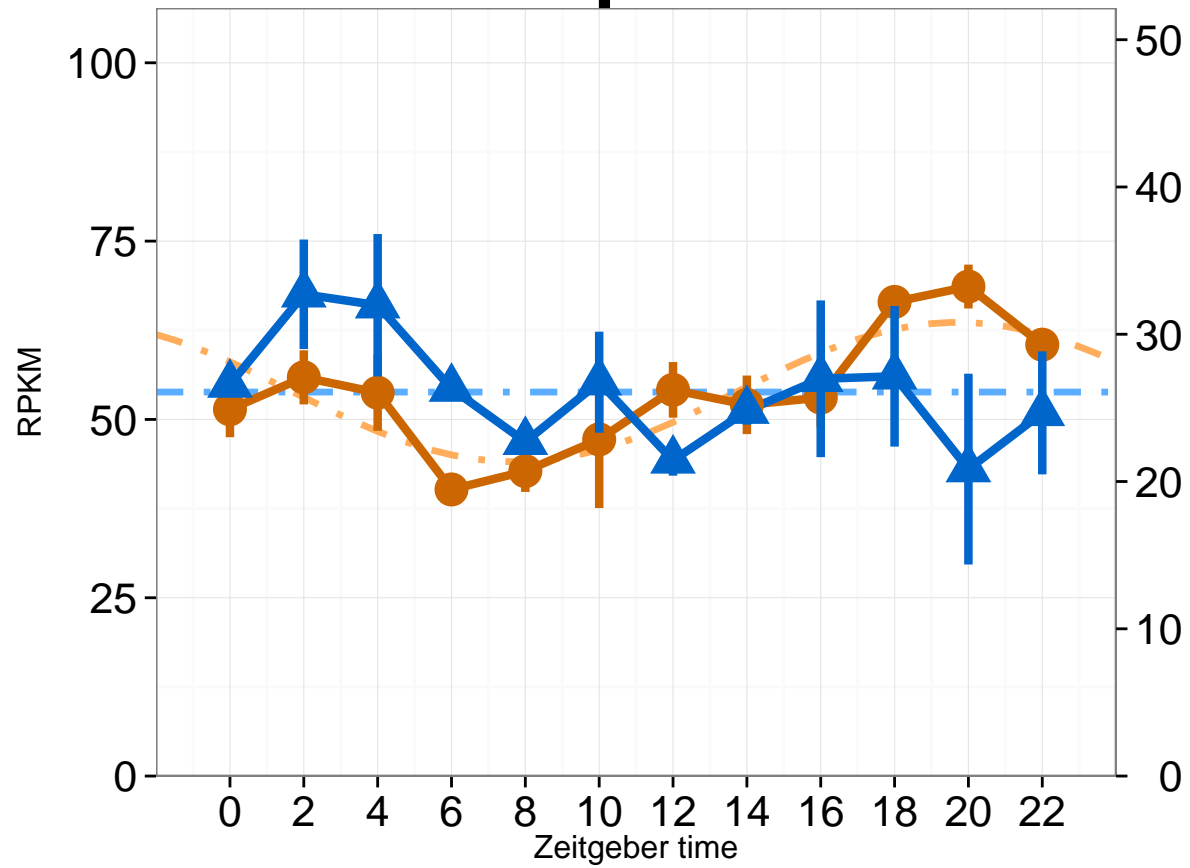

## Dph3

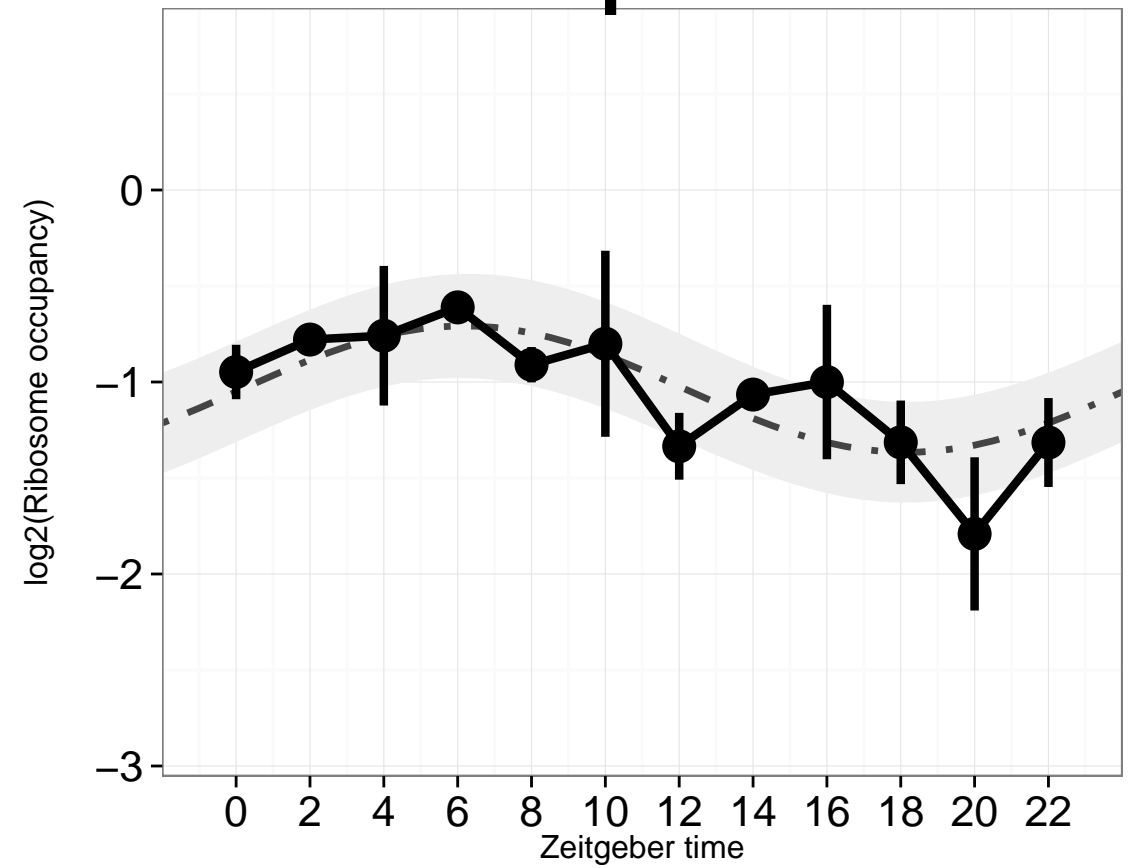

Supplement: Supplementary file 4053 [file 1]

# Gm26616

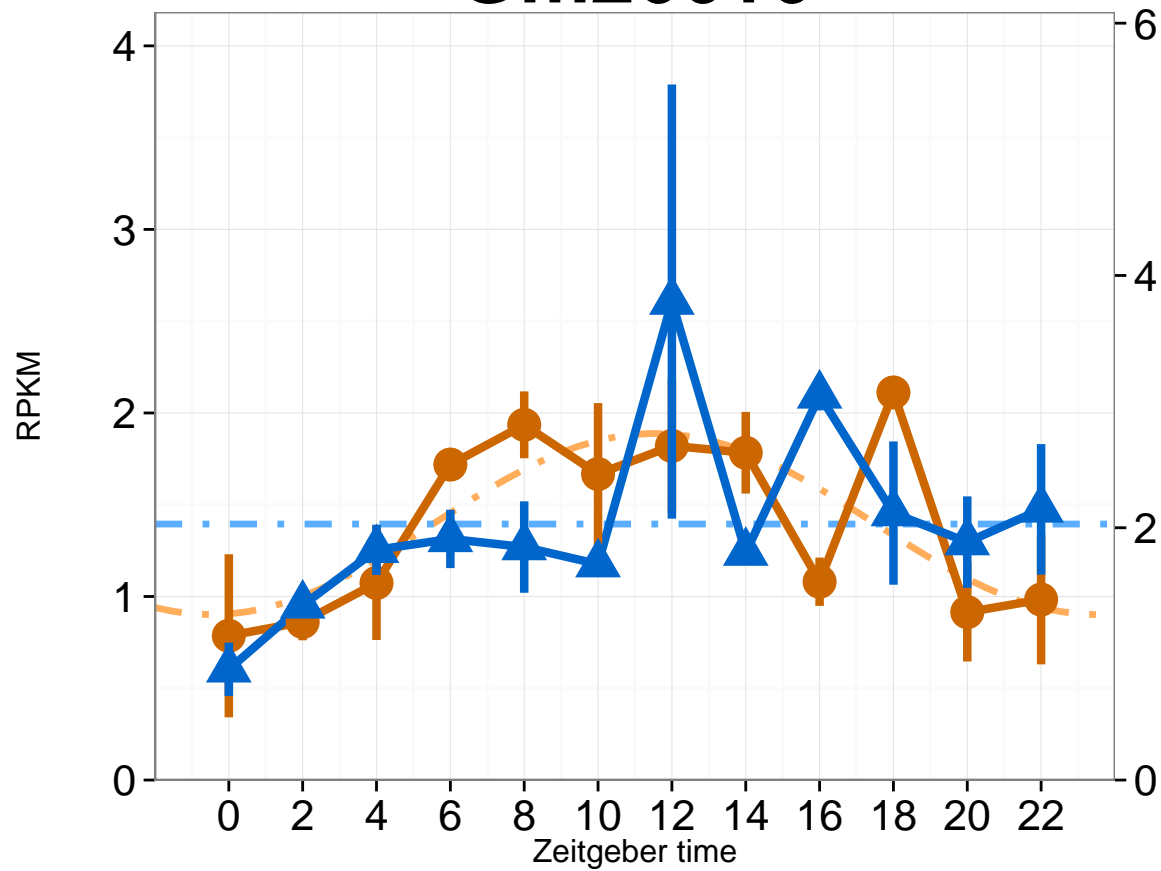

# Gm26616

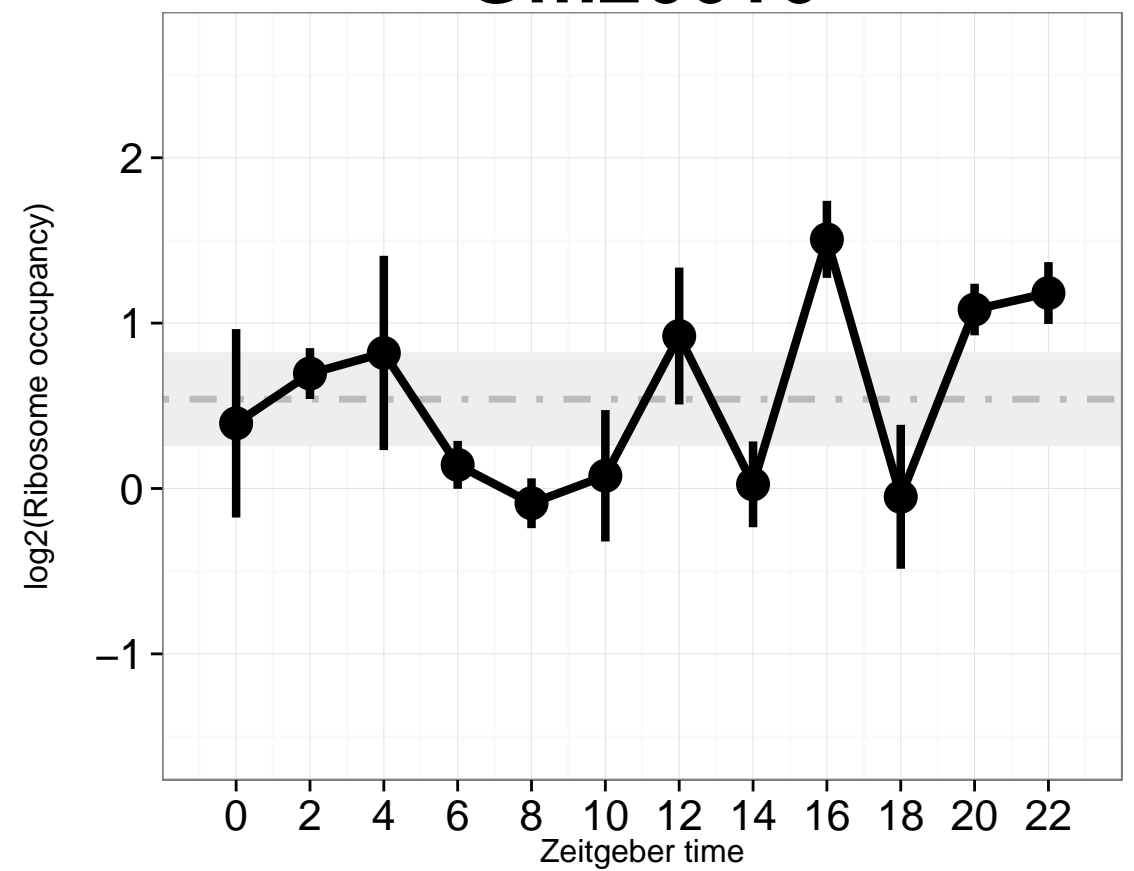

Supplement: Supplementary file 4054 [file 1]

## Dclk3

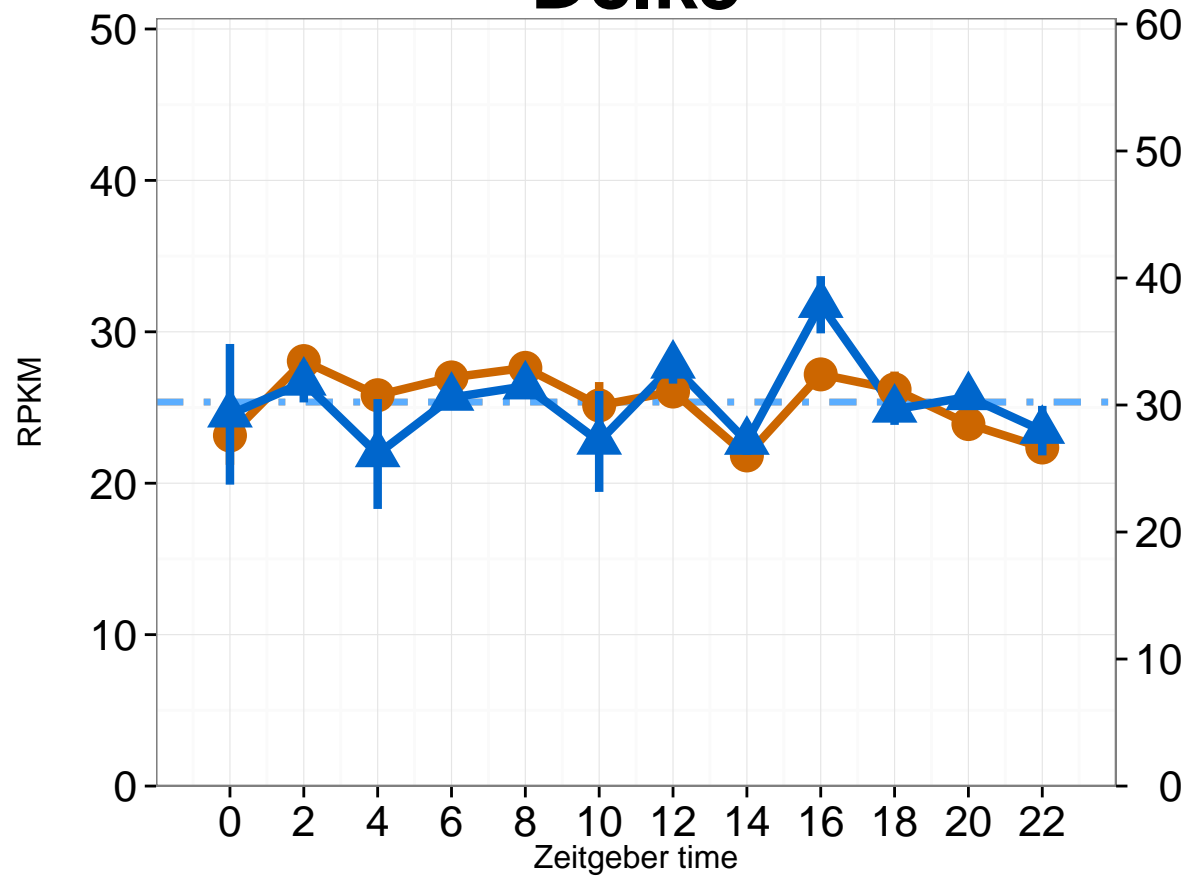

## Dclk3

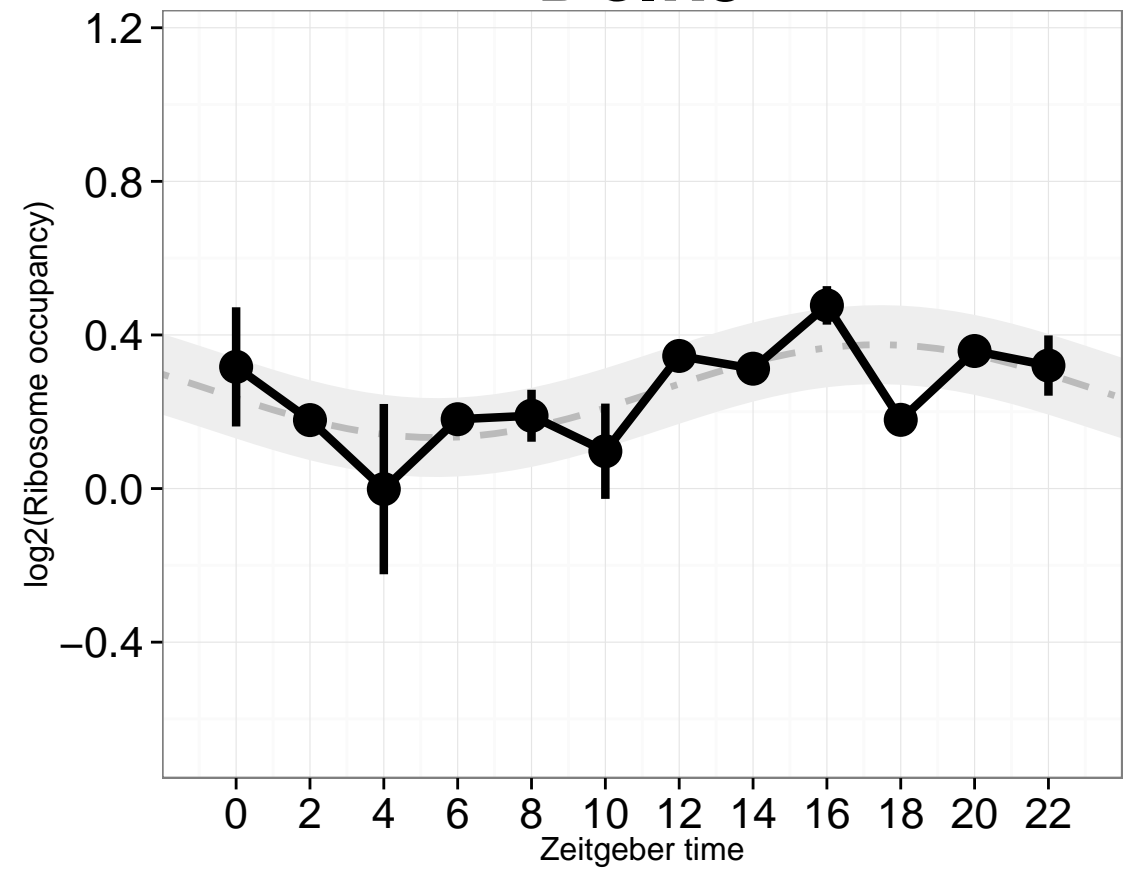

Supplement: Supplementary file 4055 [file 1]

## Uri1

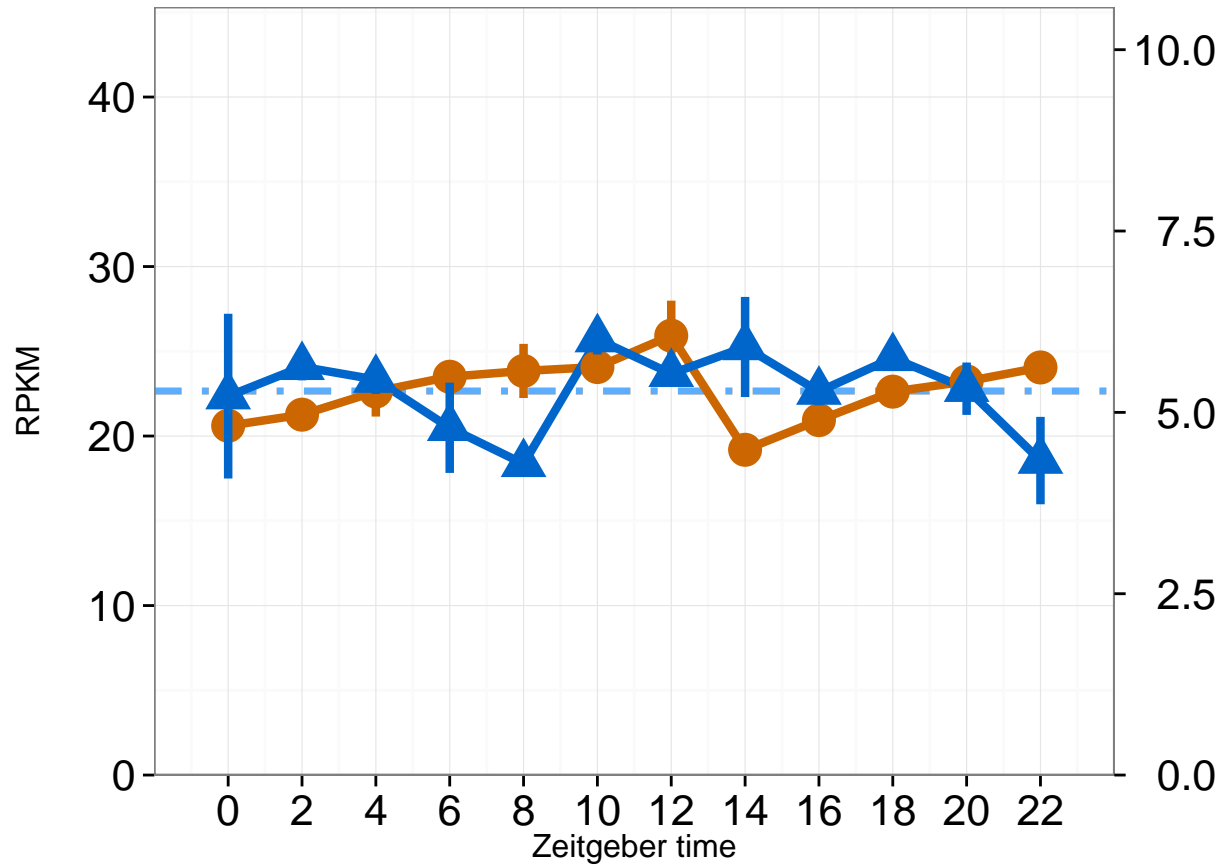

## Uri1

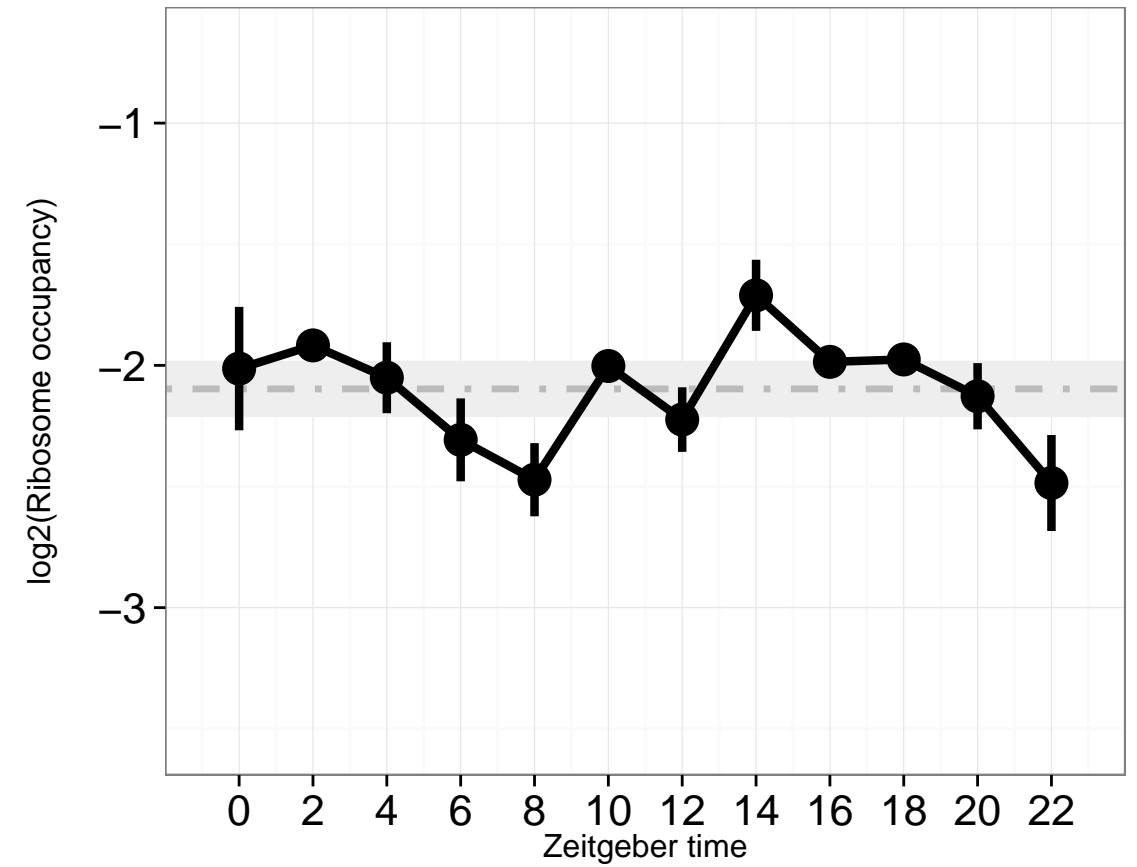

Supplement: Supplementary file 4056 [file 1]

## Cnksr1

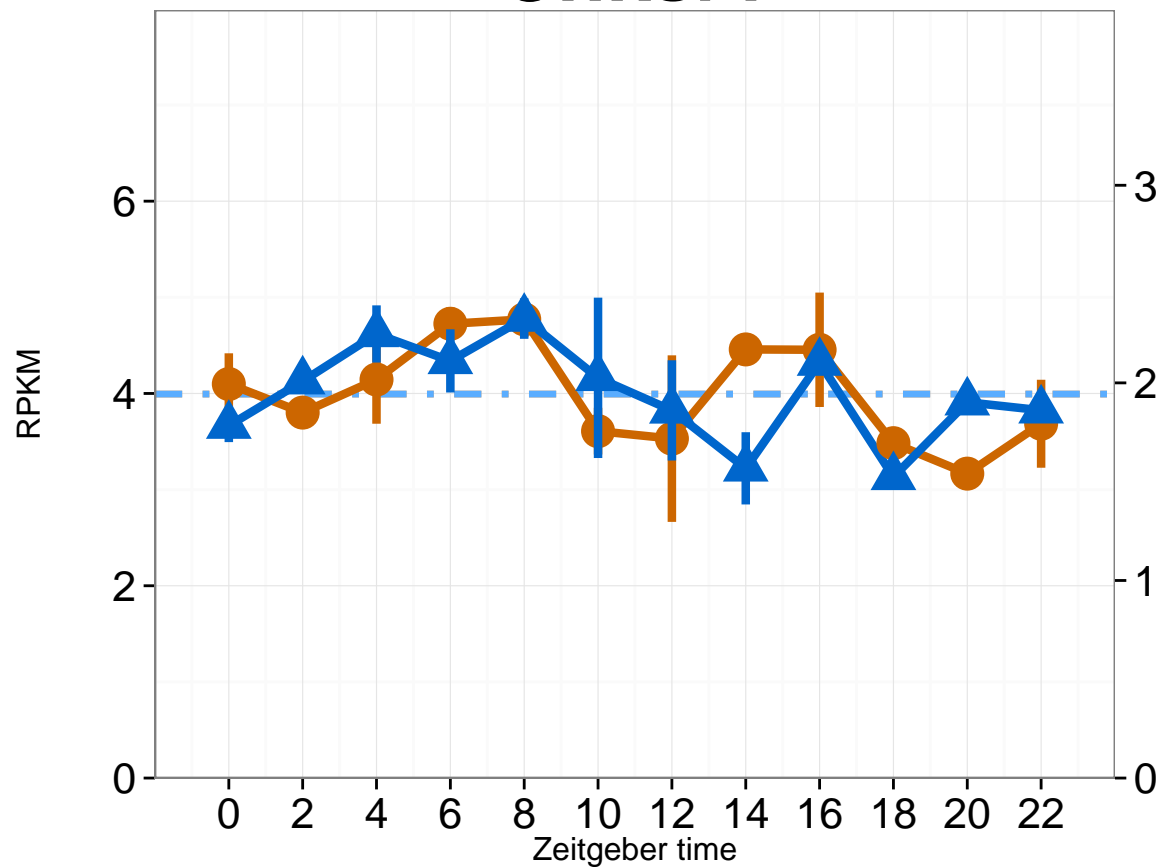

## Cnksr1

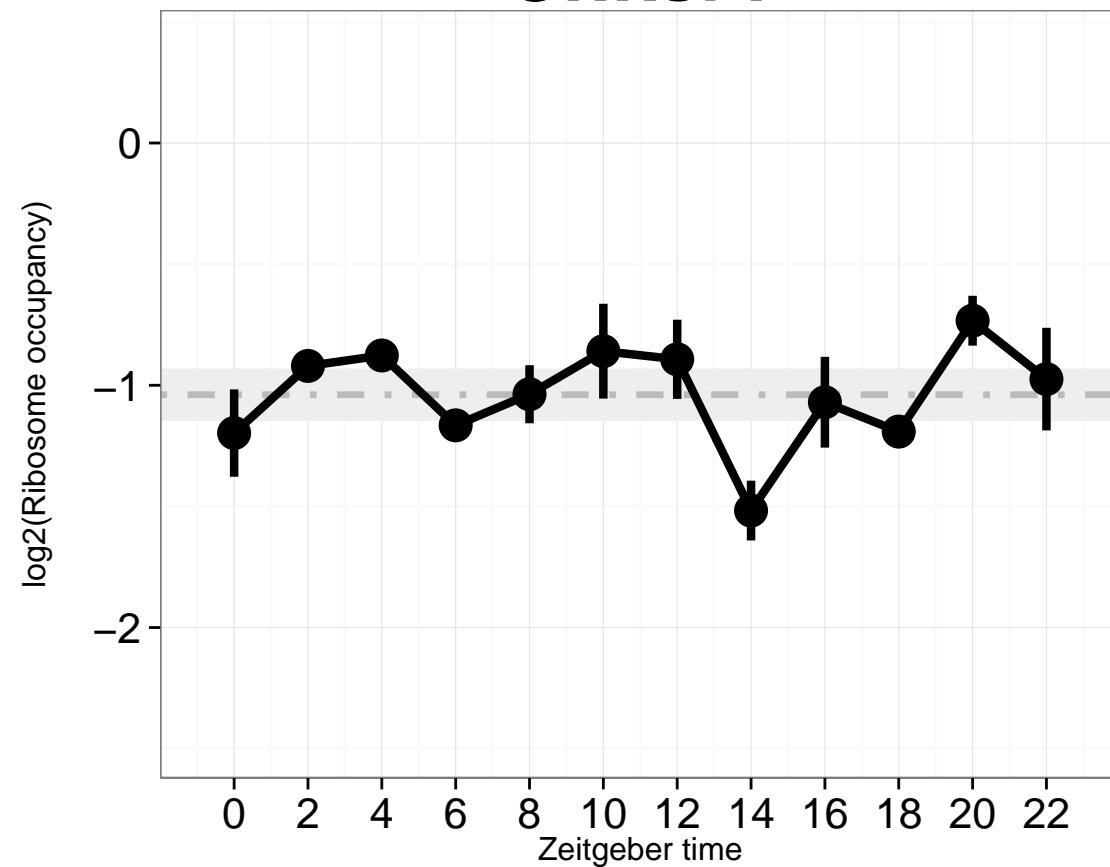

Supplement: Supplementary file 4057 [file 1]

## Fmnl1

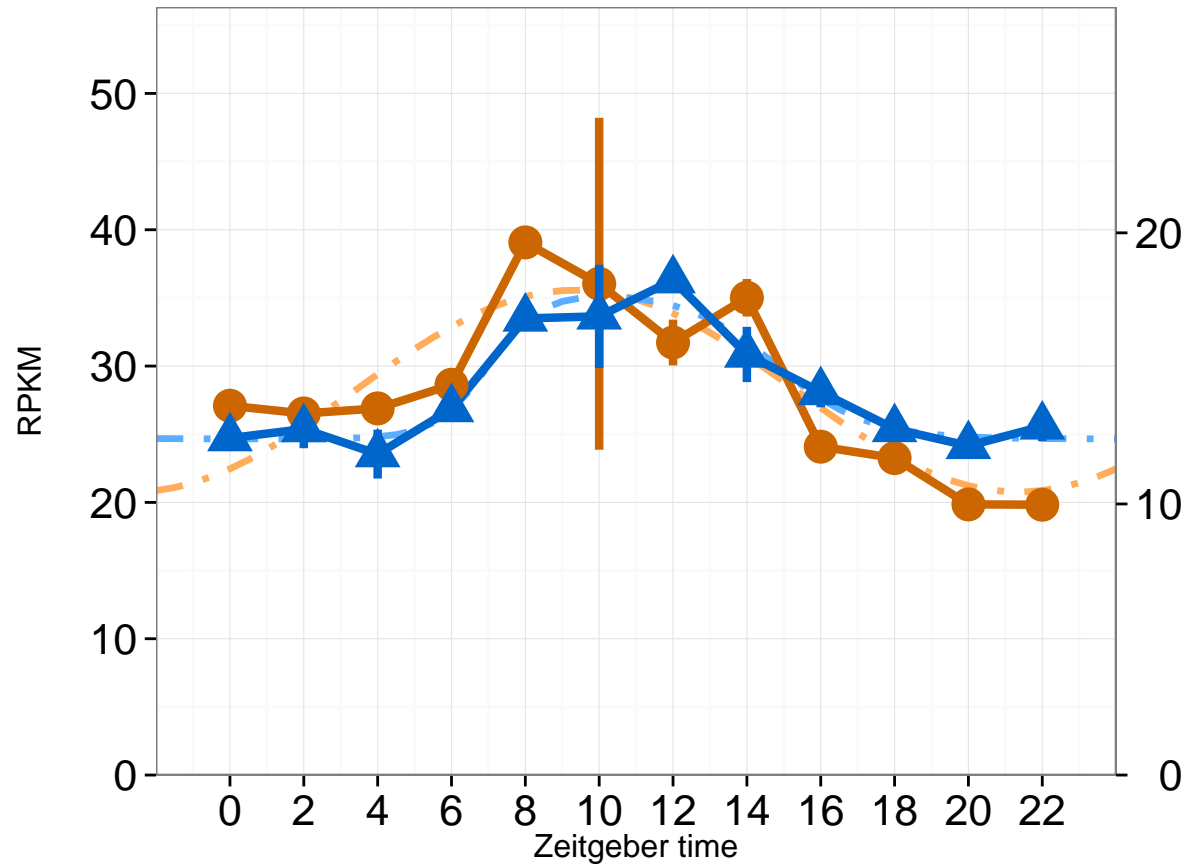

## Fmnl1

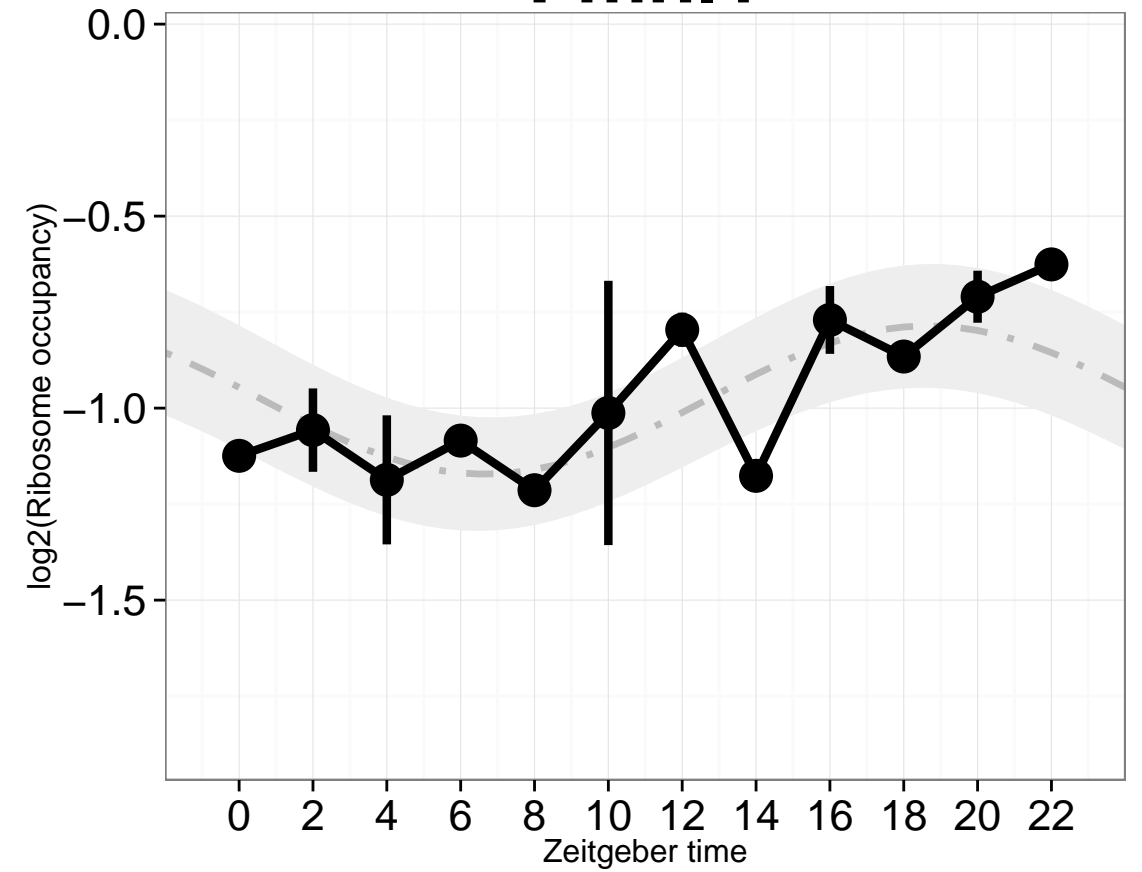

Supplement: Supplementary file 4058 [file 1]

## Gatsl3

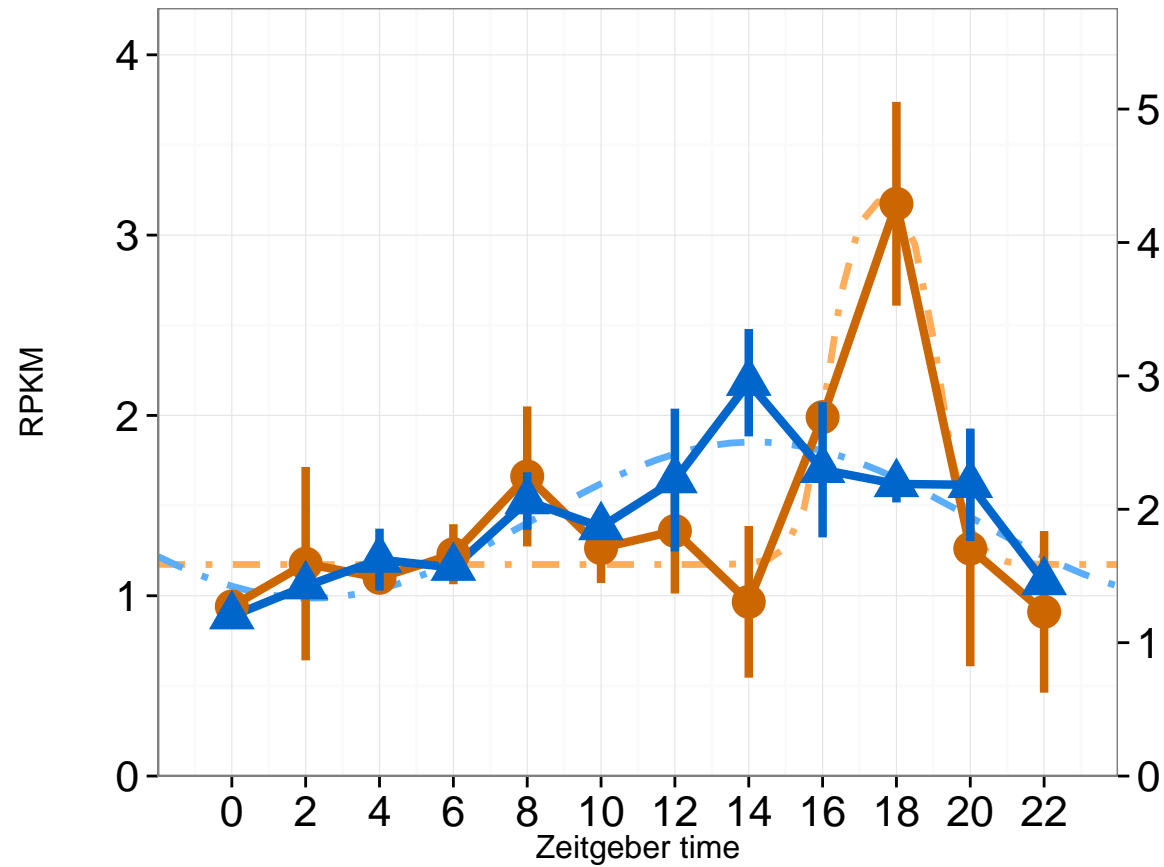

## Gatsl3

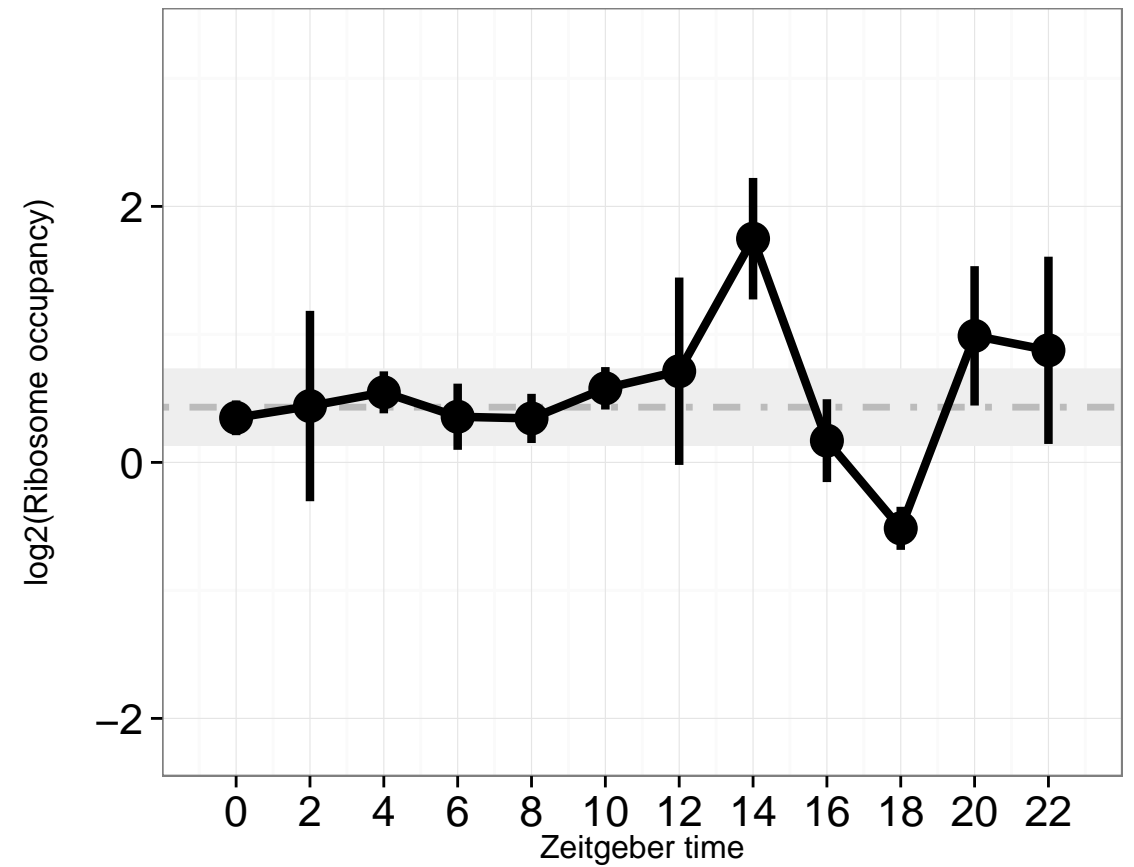

Supplement: Supplementary file 4059 [file 1]

# Trim30a

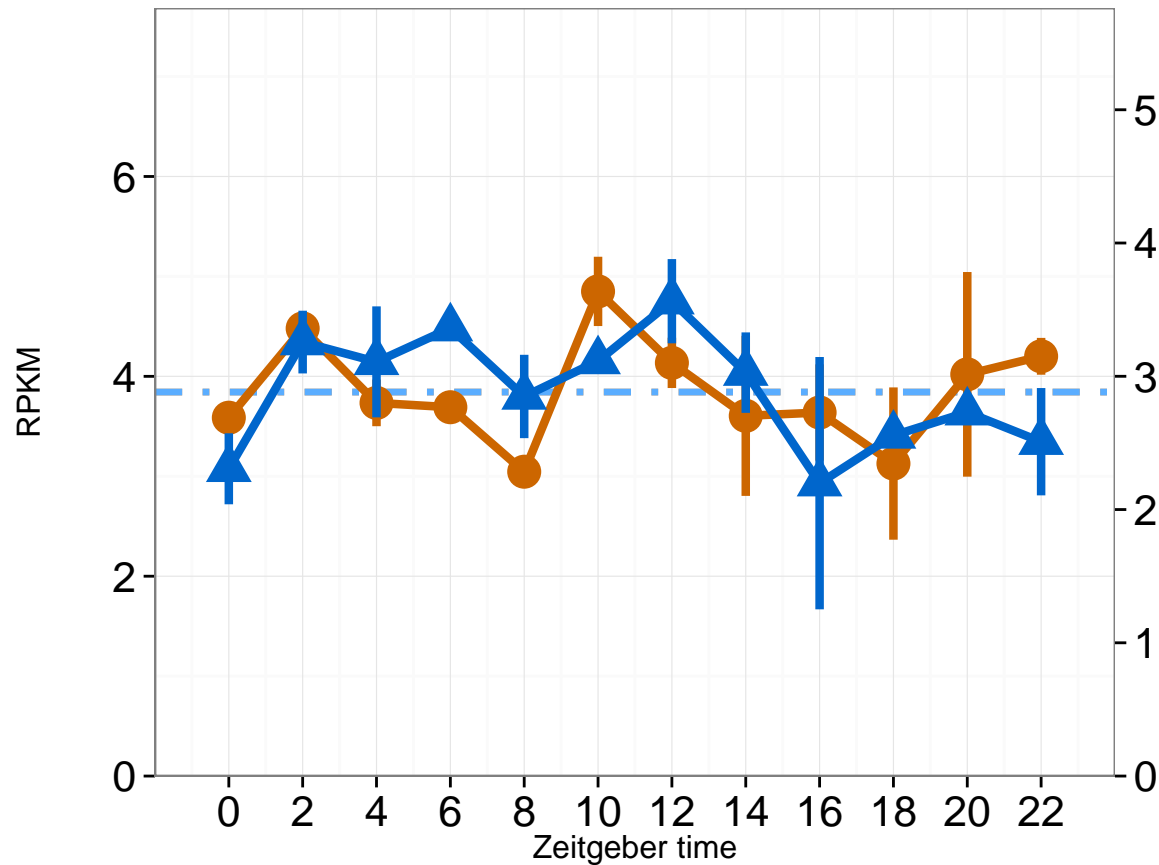

# Trim30a

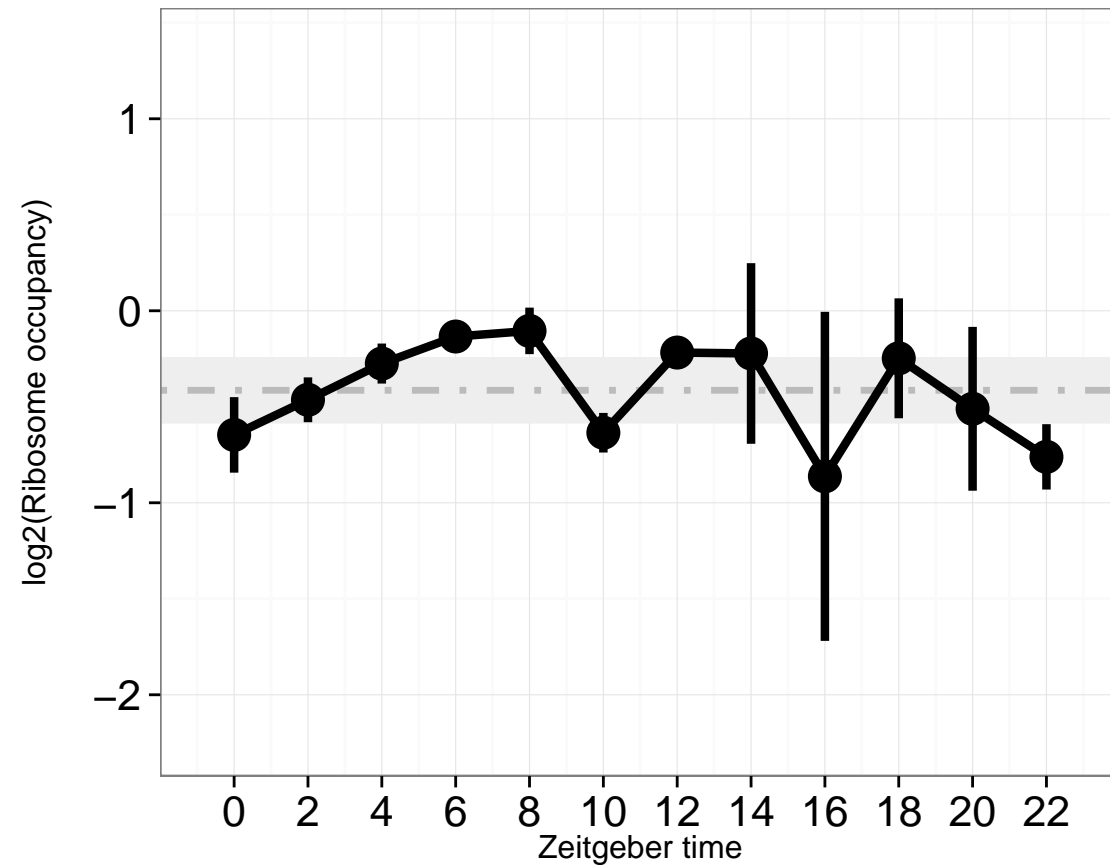

Supplement: Supplementary file 4060 [file 1]

# Atp6v0d1

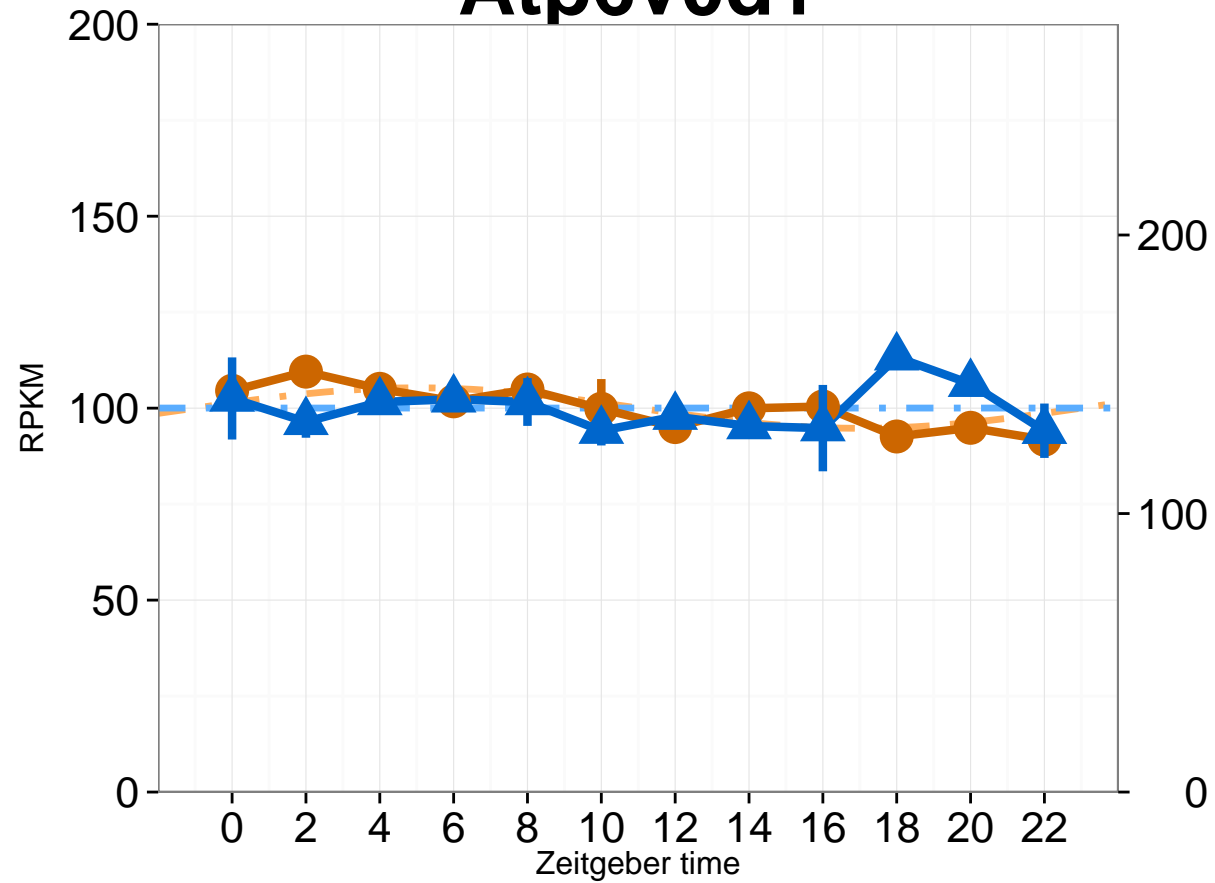

# Atp6v0d1

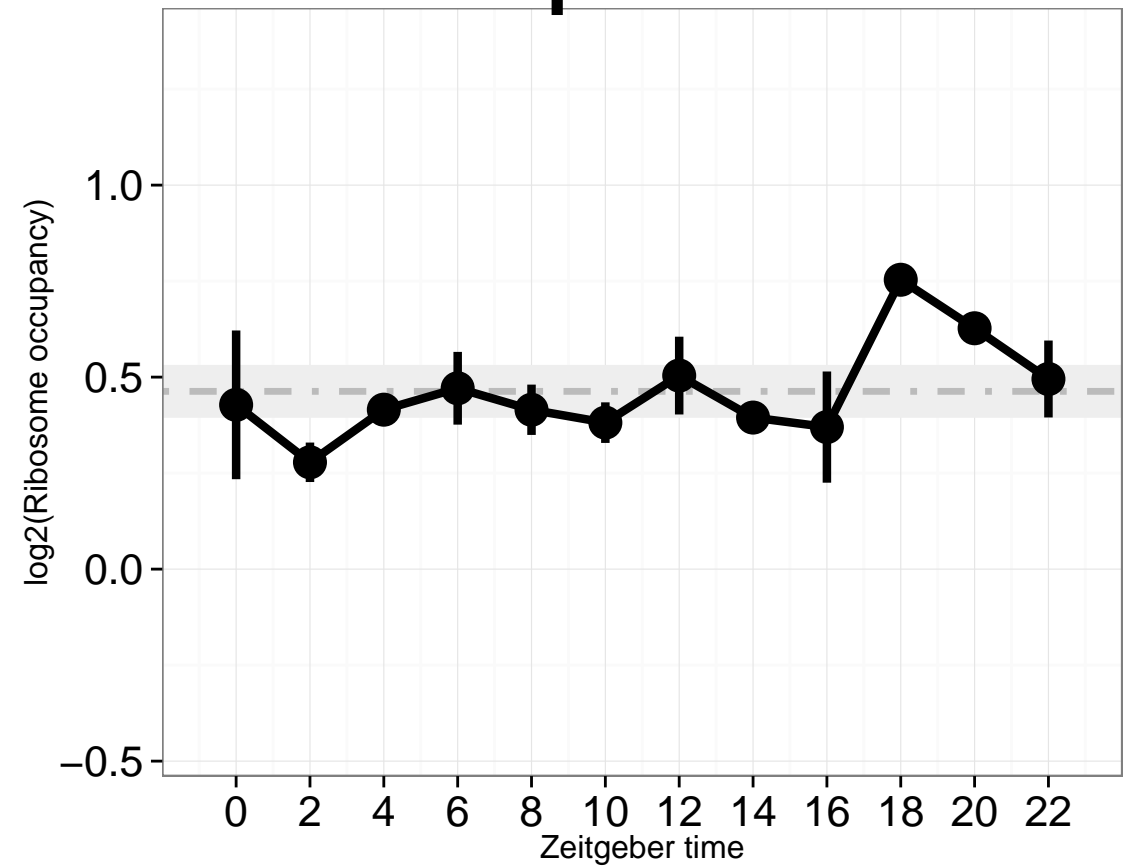

Supplement: Supplementary file 4061 [file 1]

## Dleu7

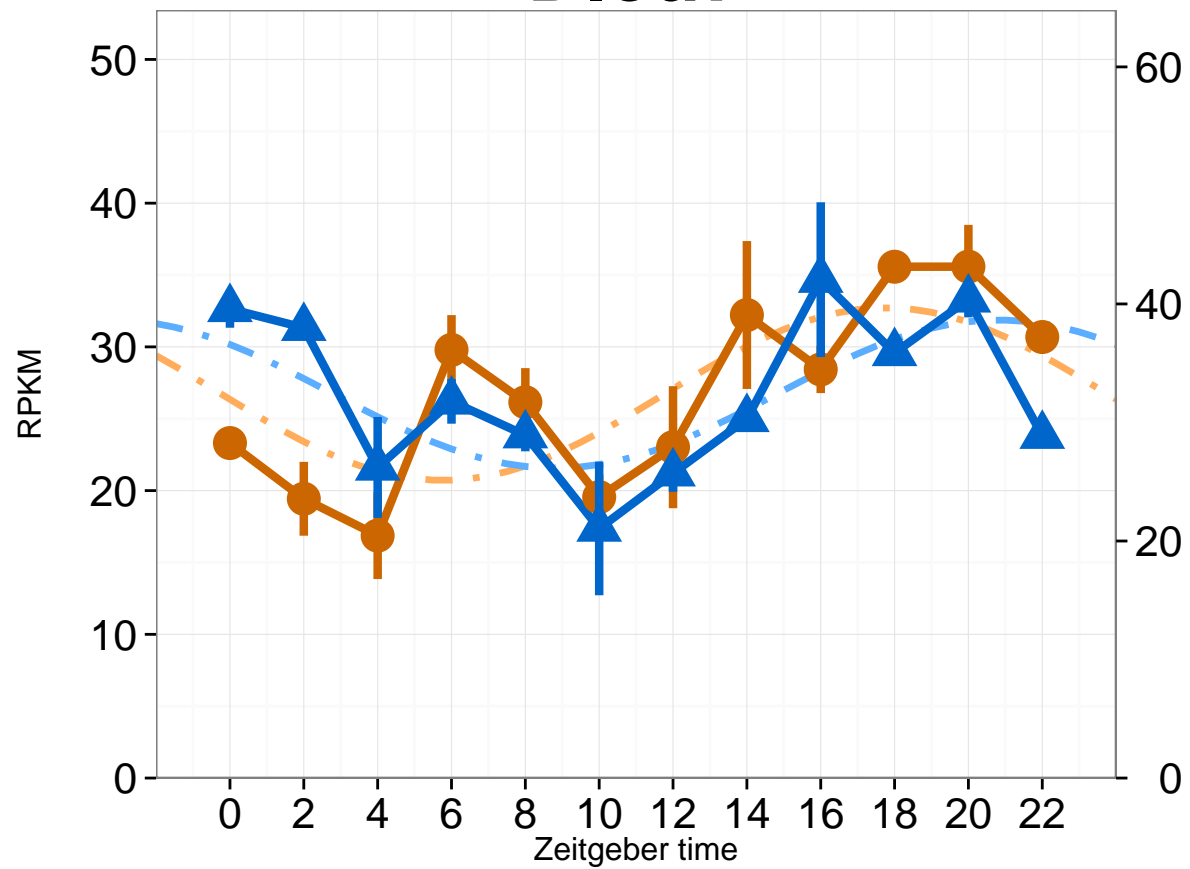

## Dleu7

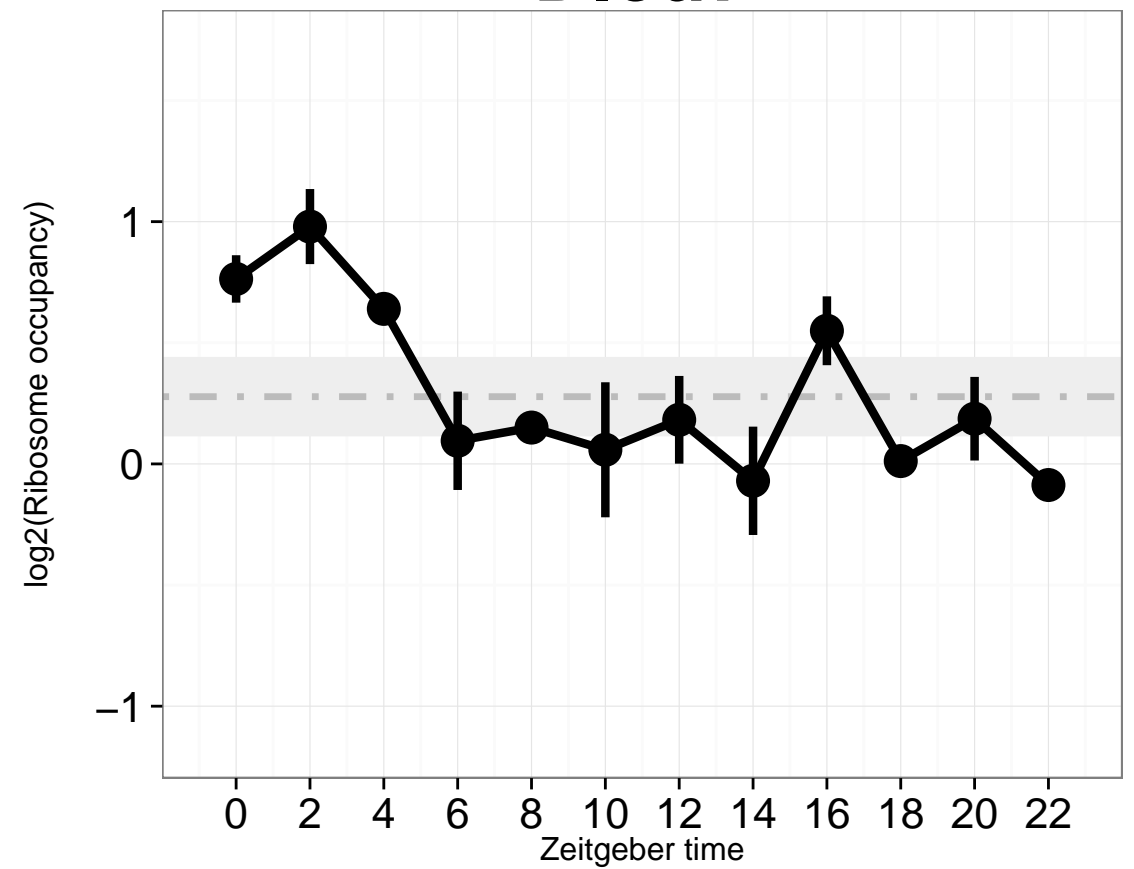

Supplement: Supplementary file 4062 [file 1]

## Ccdc167

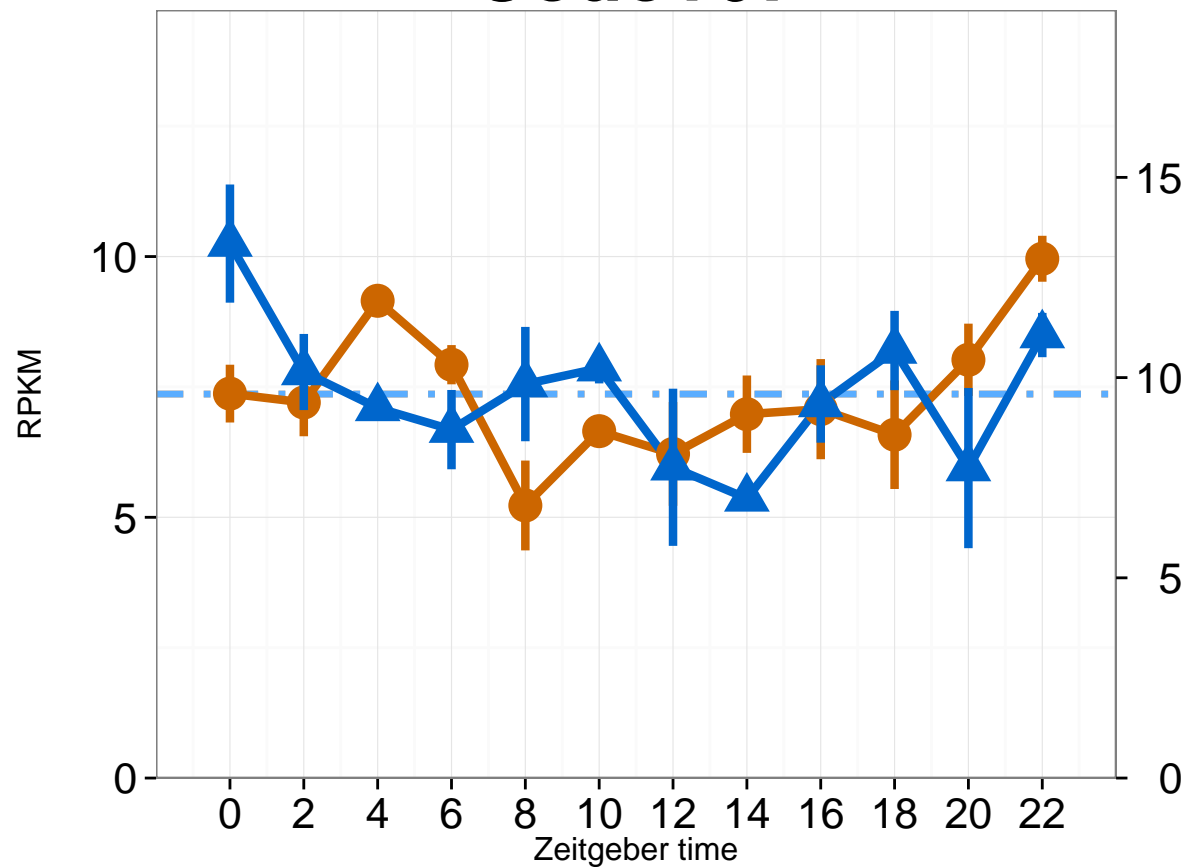

## Ccdc167

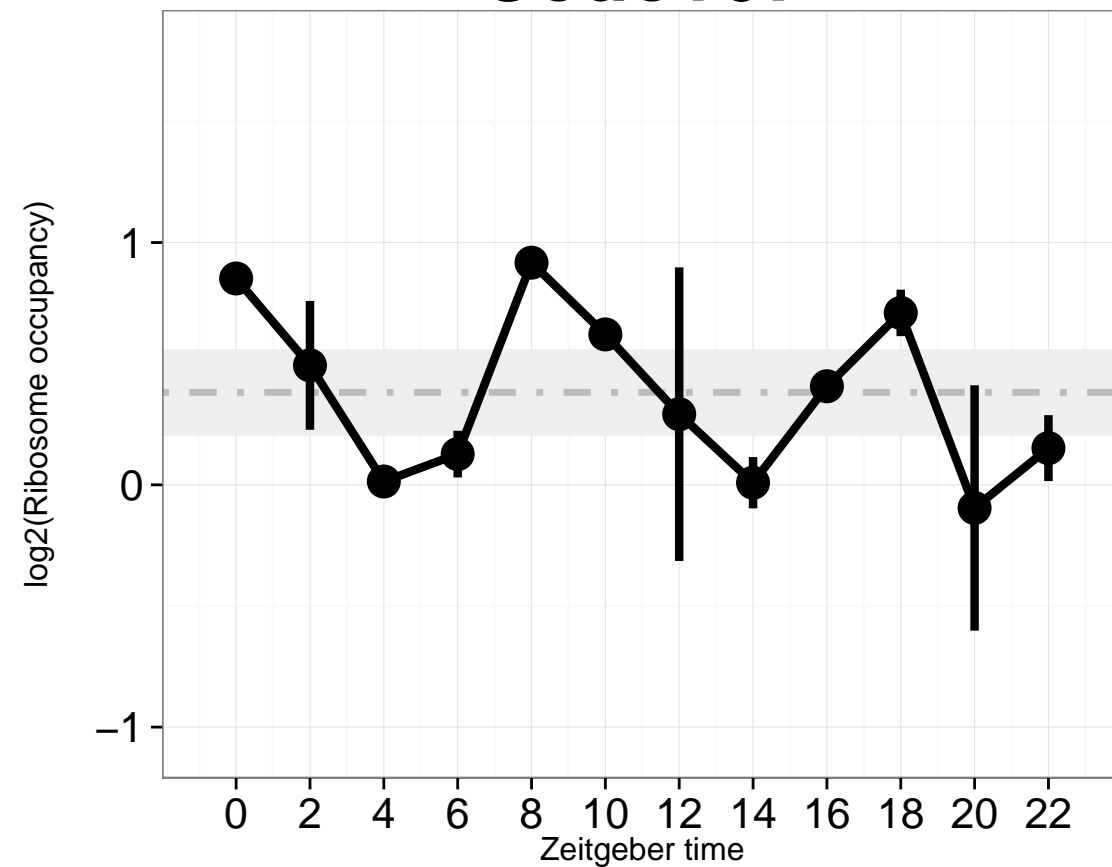

Supplement: Supplementary file 4063 [file 1]

# Rnf220

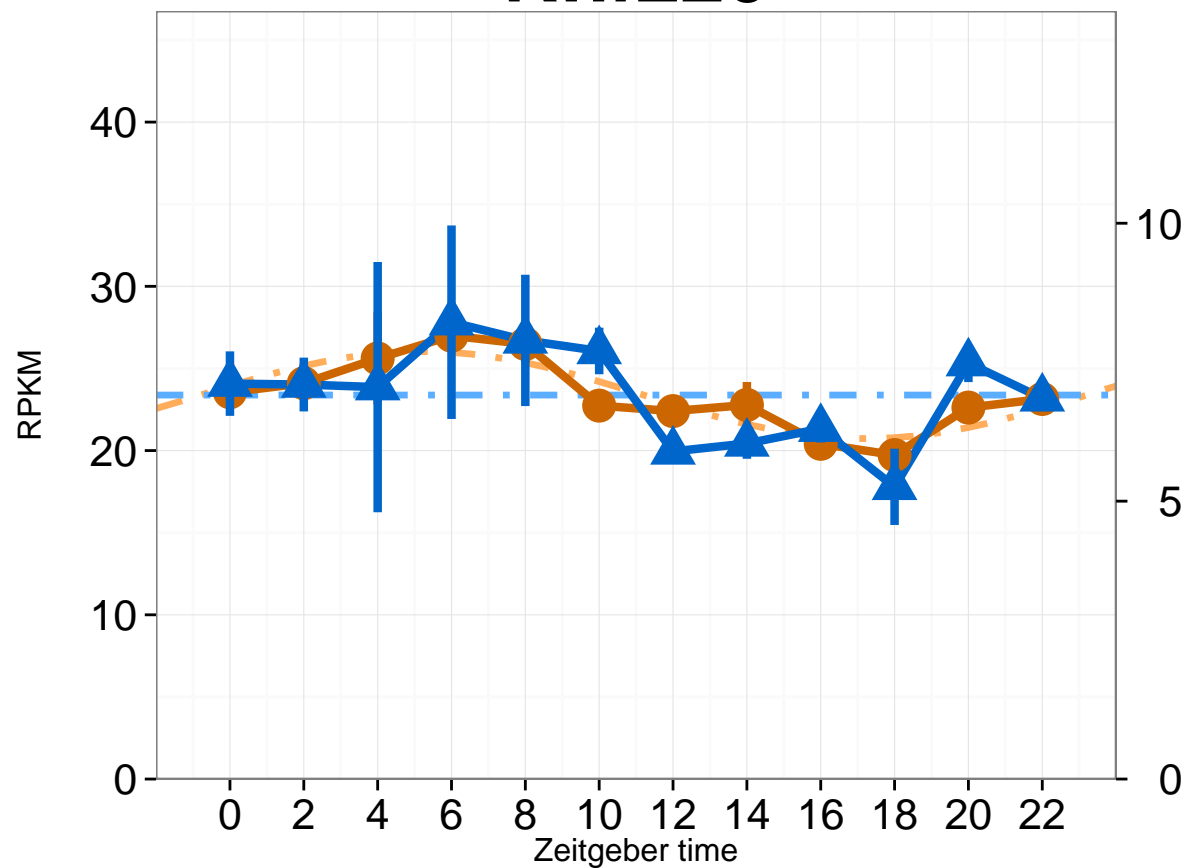

# Rnf220

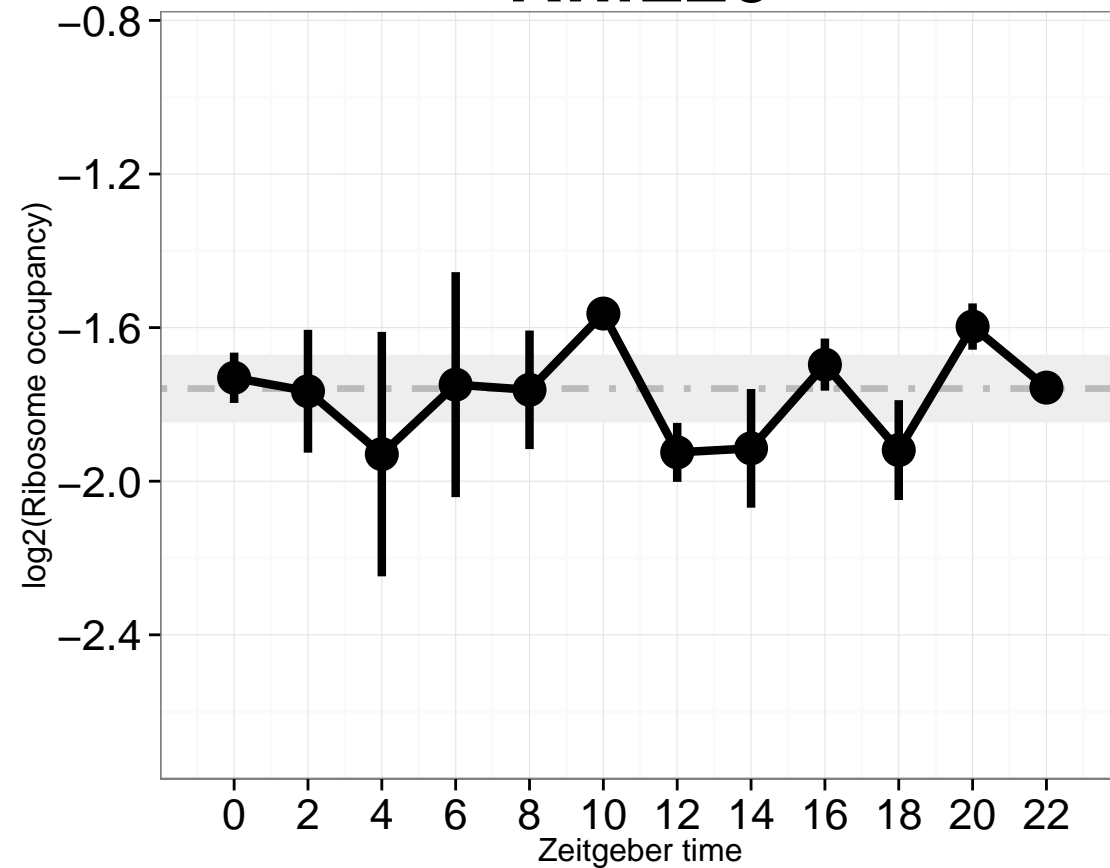

Supplement: Supplementary file 4064 [file 1]

## Plcl1

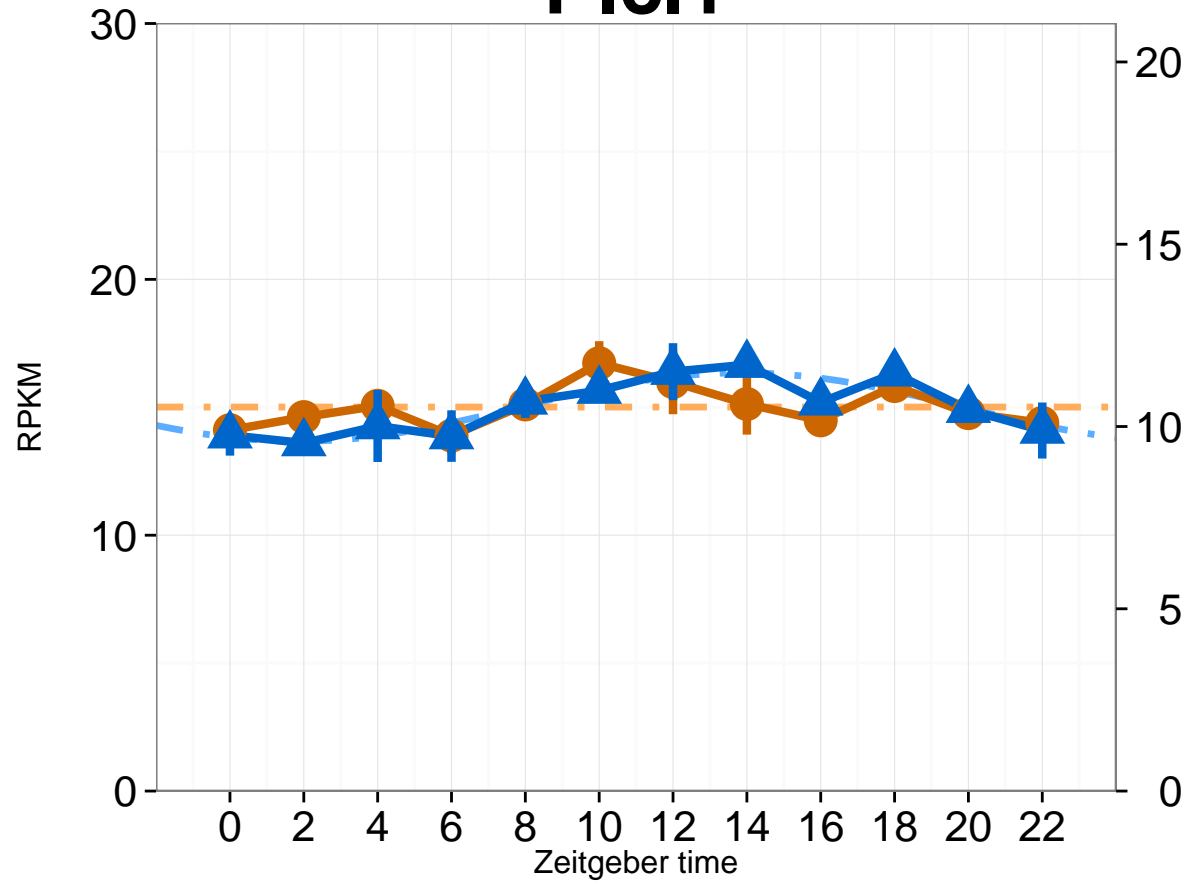

## Plcl1

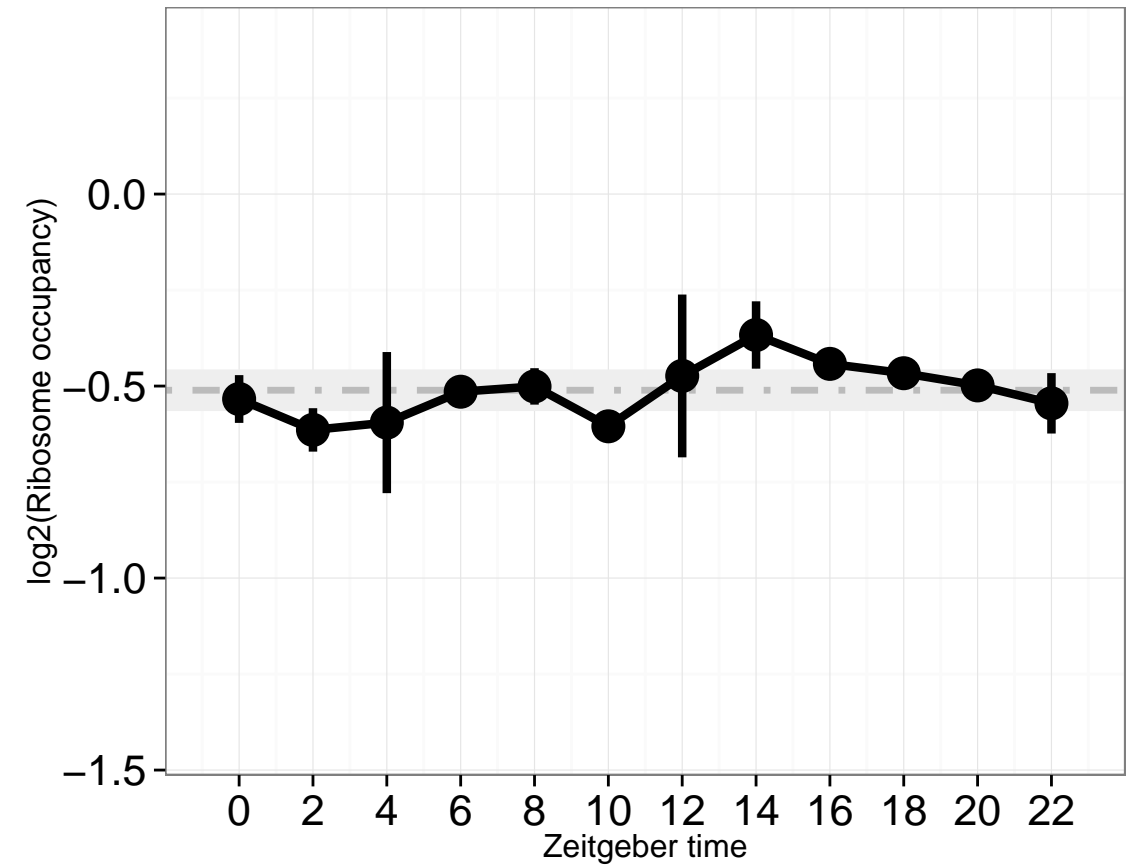

Supplement: Supplementary file 4065 [file 1]

## Adamts5

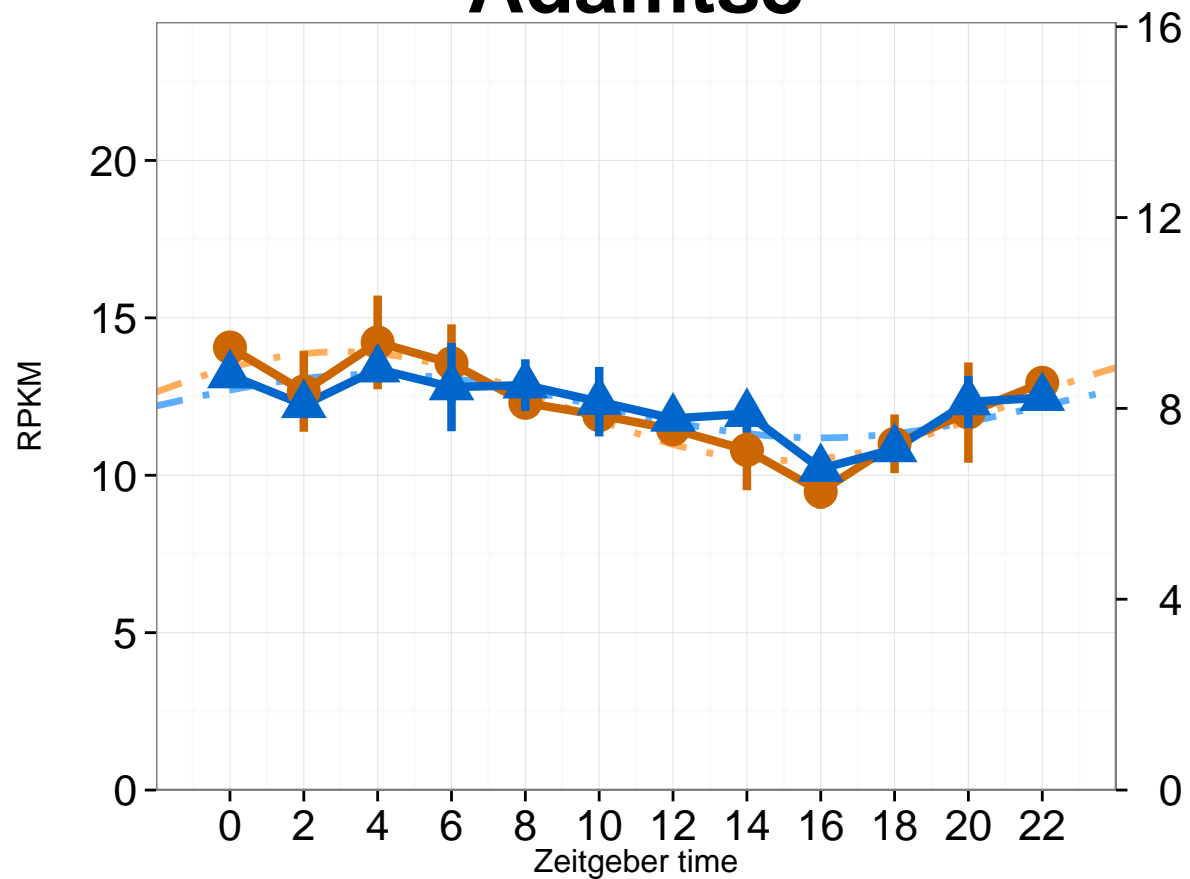

## Adamts5

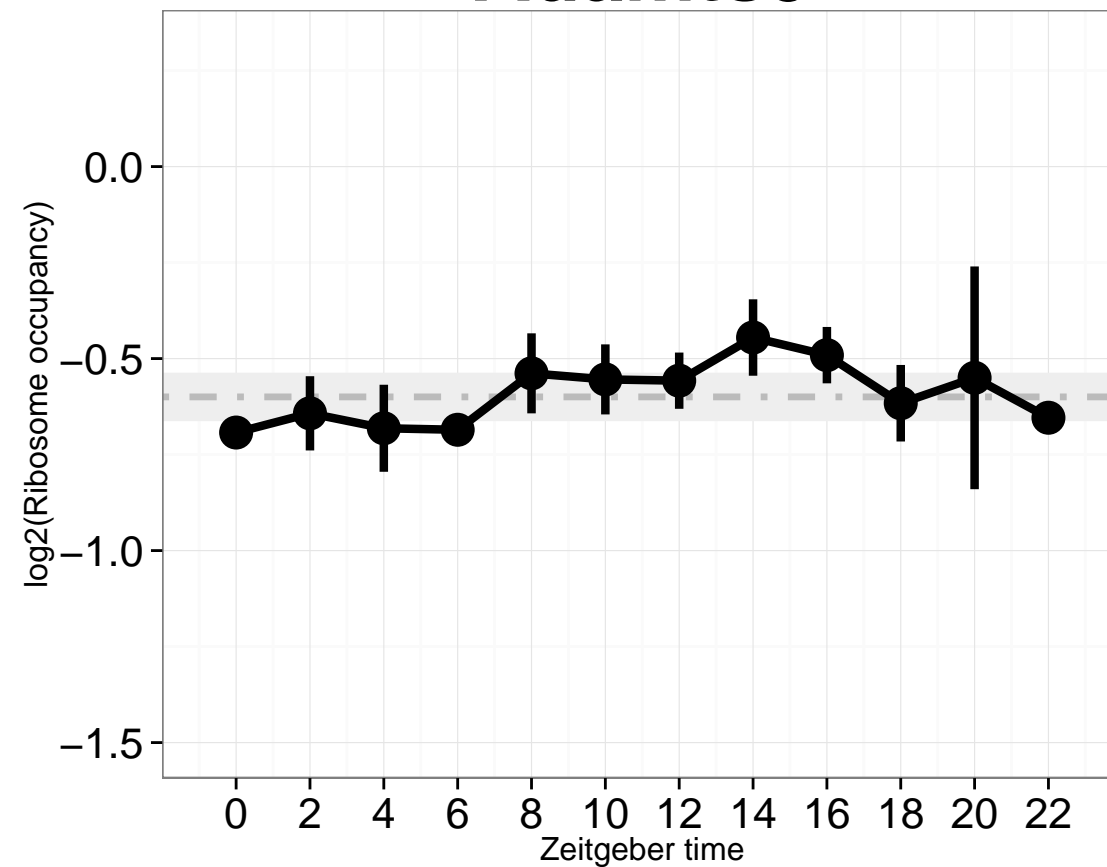

Supplement: Supplementary file 4066 [file 1]

# Fbxo46

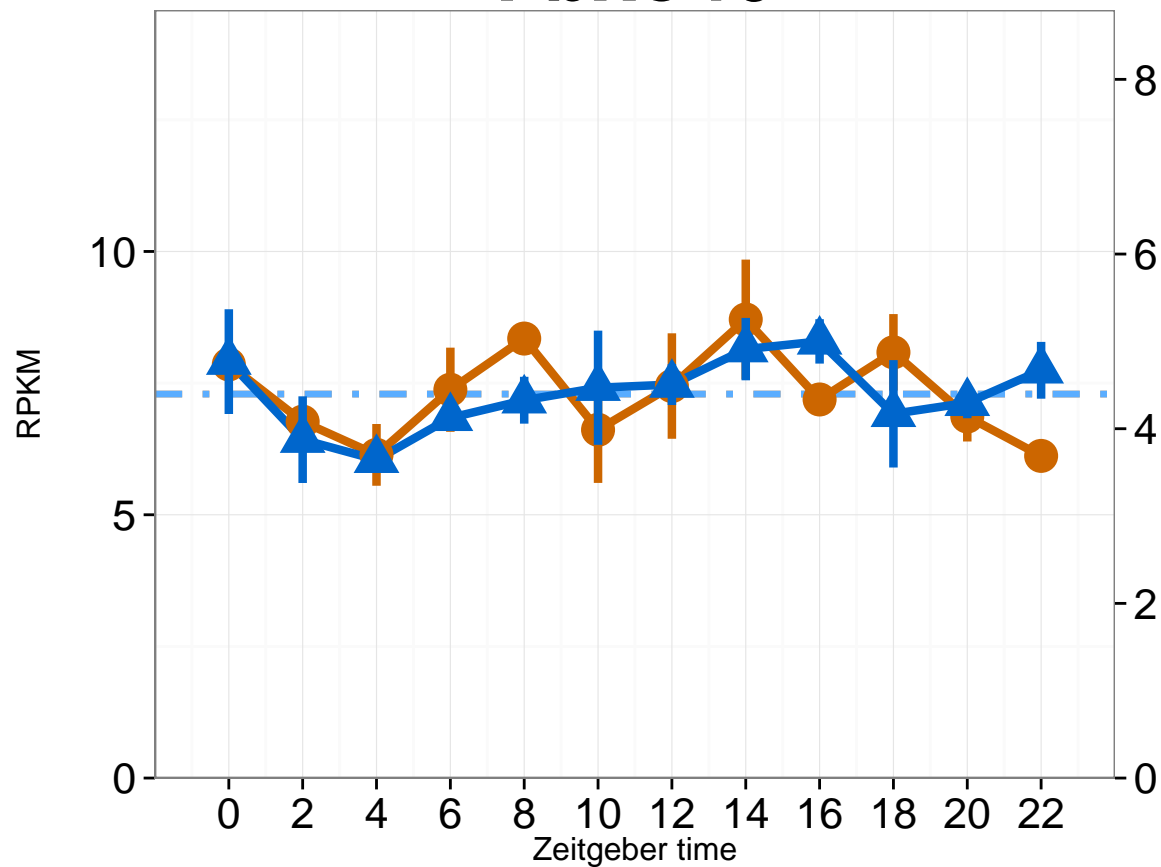

# Fbxo46

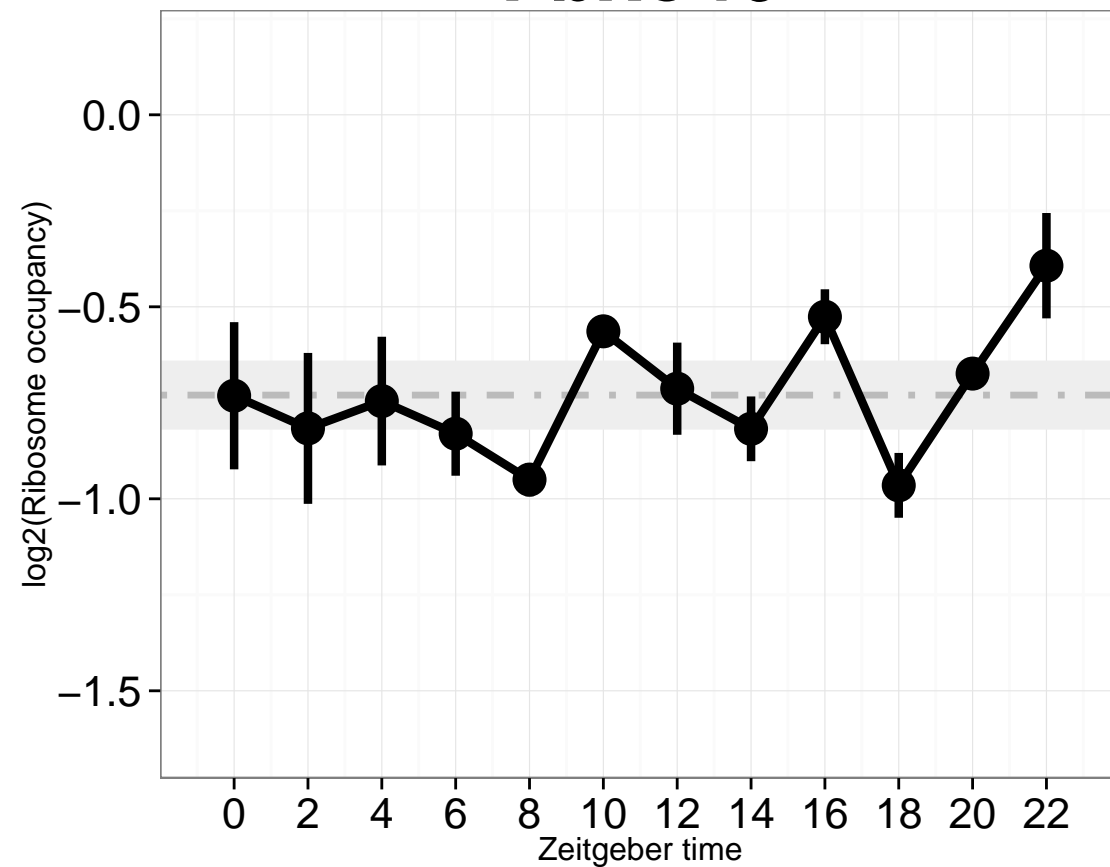

Supplement: Supplementary file 4067 [file 1]

## Tspan9

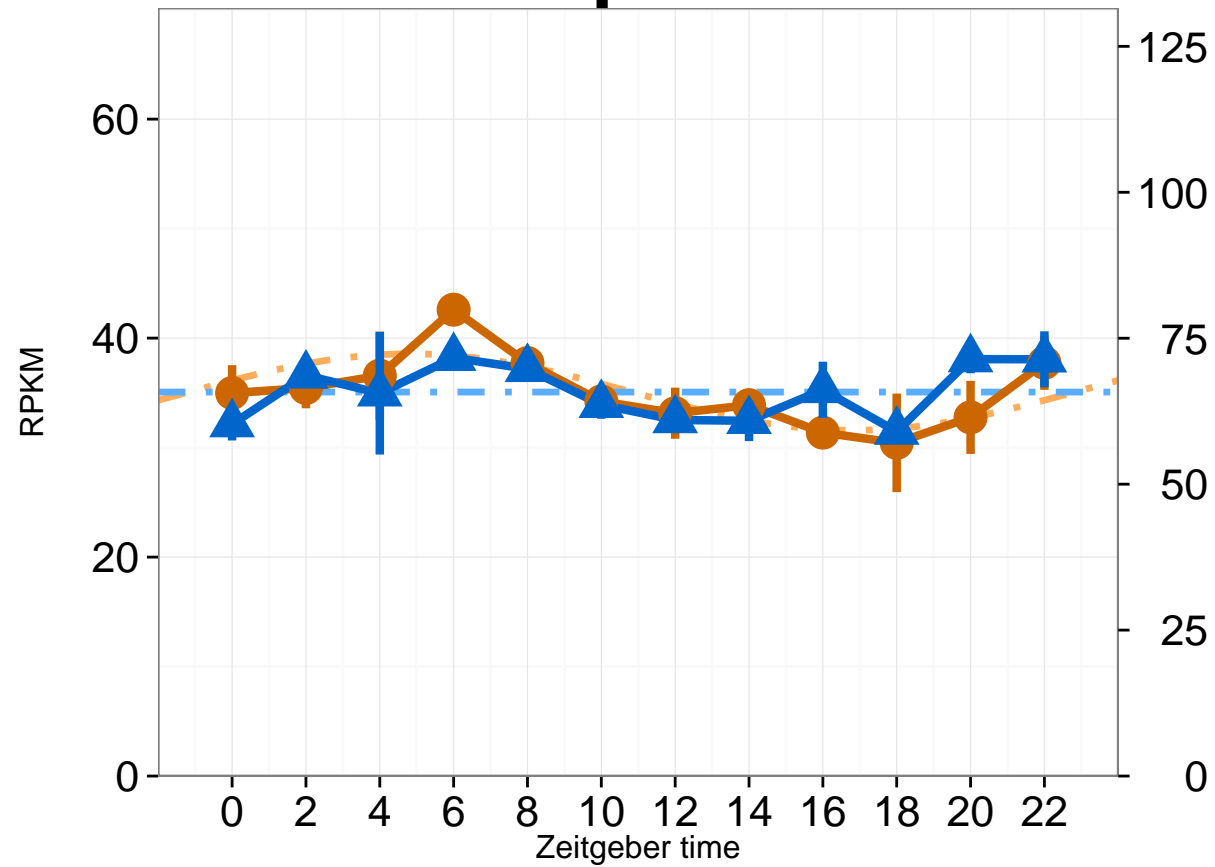

## Tspan9

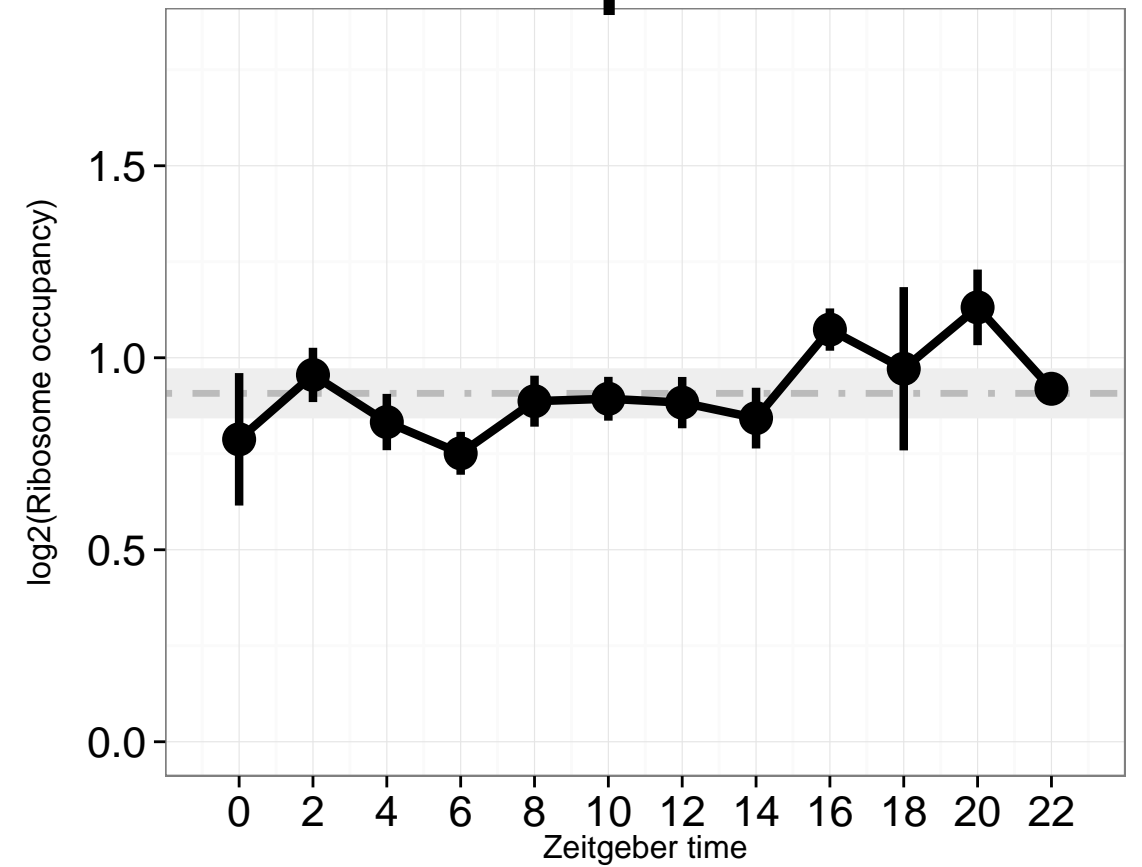

Supplement: Supplementary file 4068 [file 1]

## Sap30l

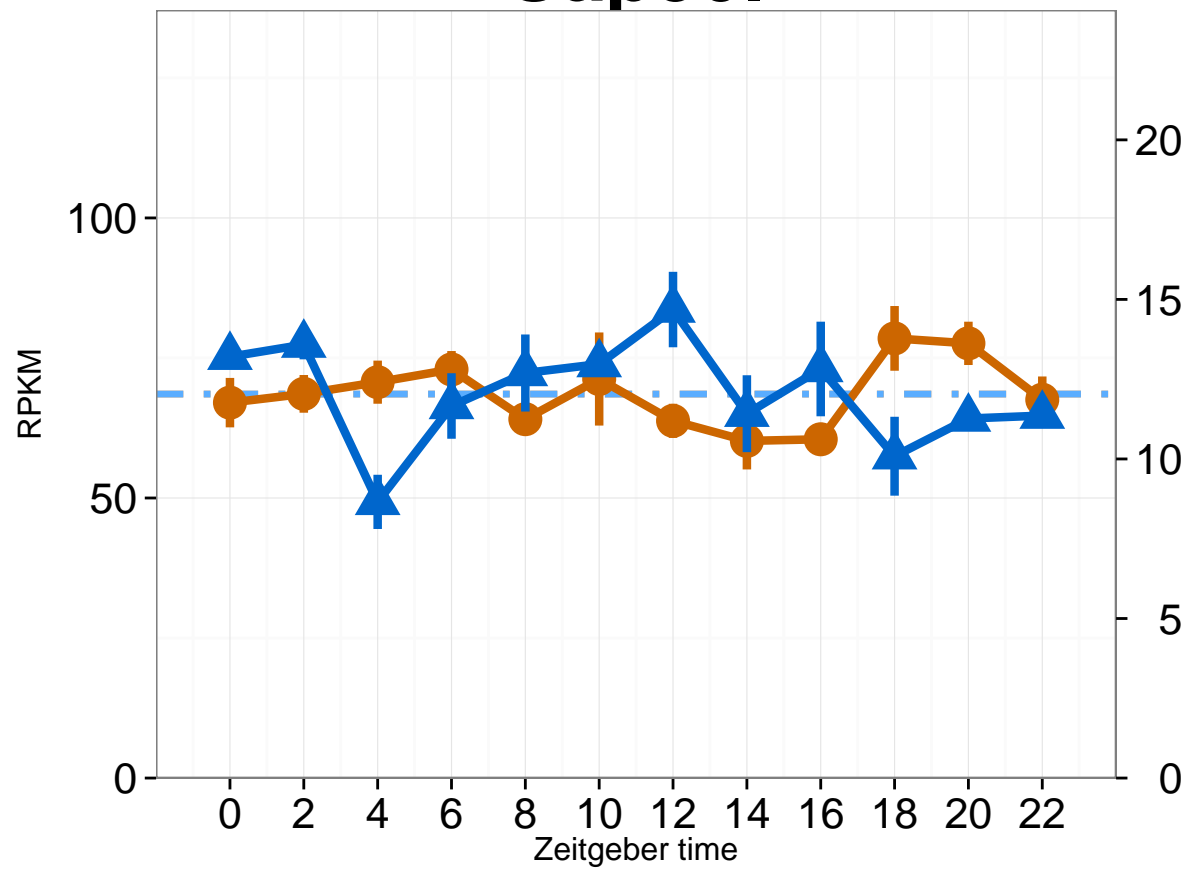

## Sap30l

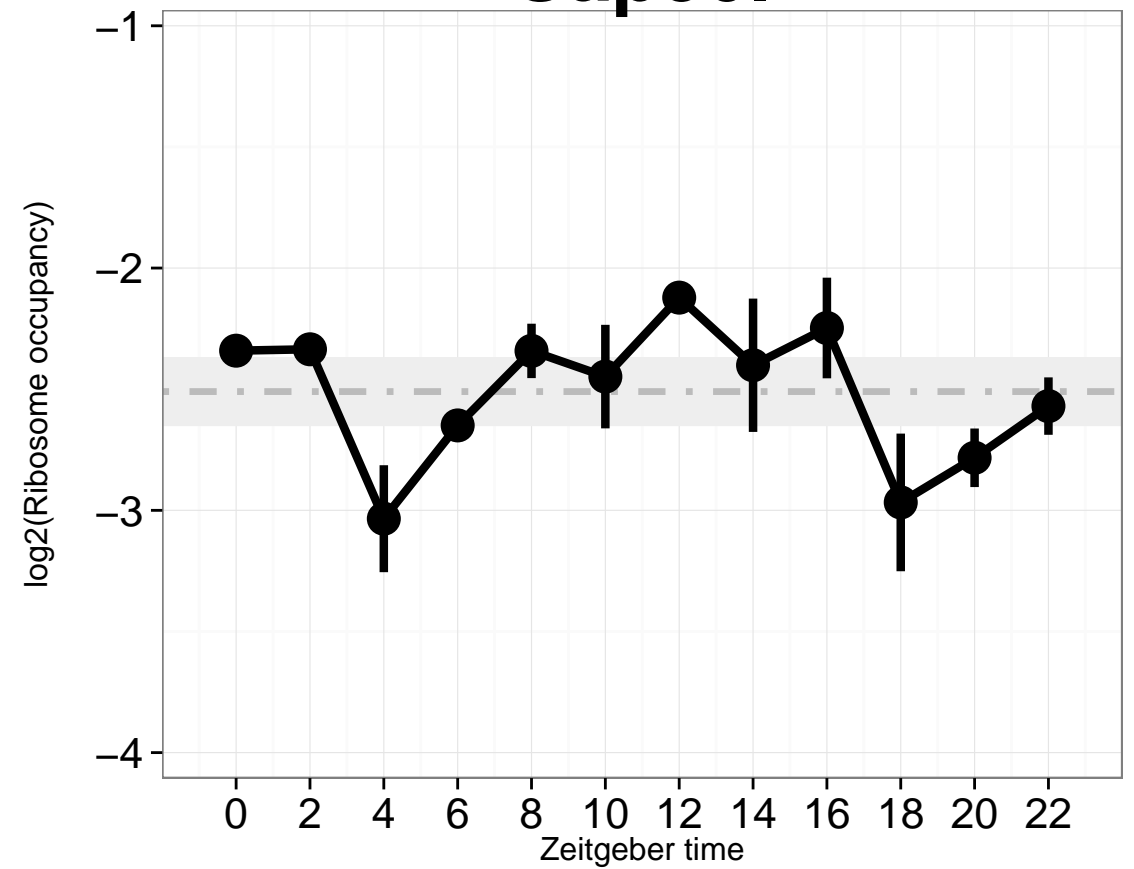

Supplement: Supplementary file 4069 [file 1]

# Cnn1

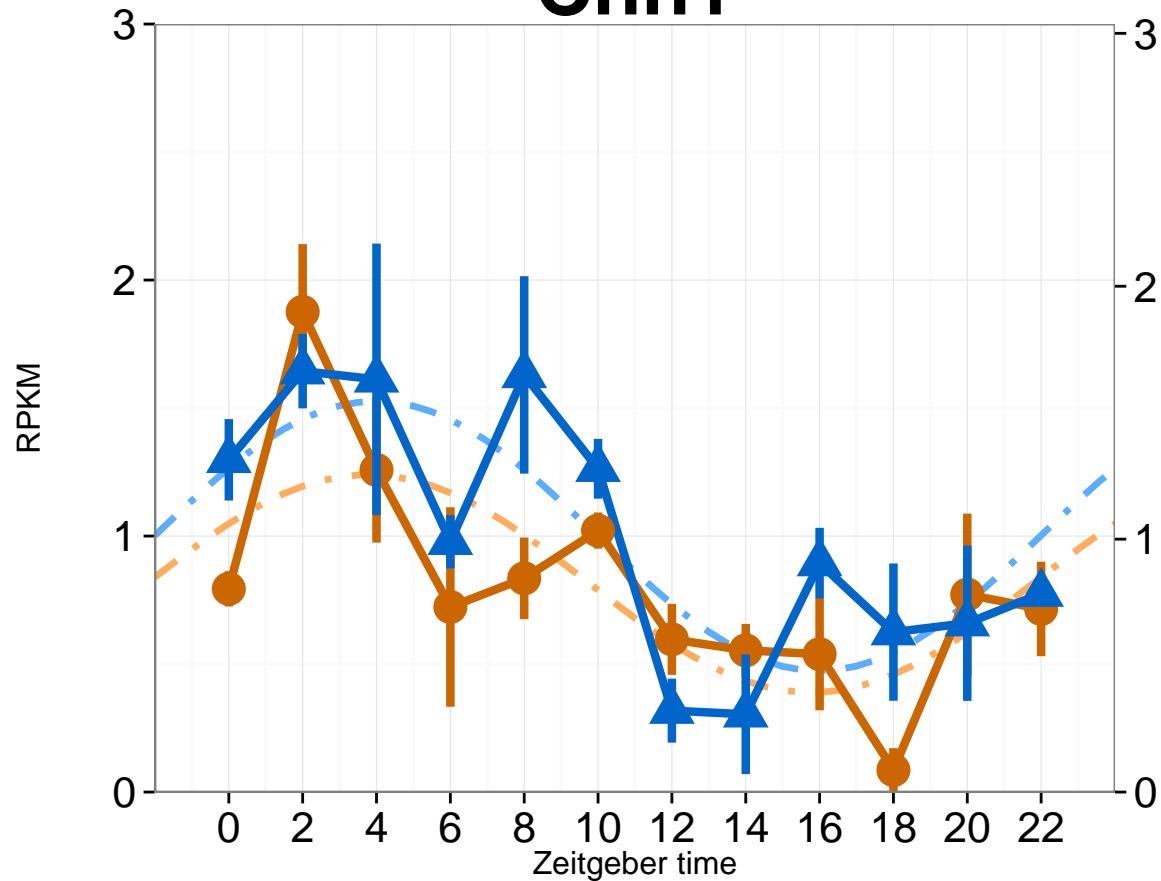

# Cnn1

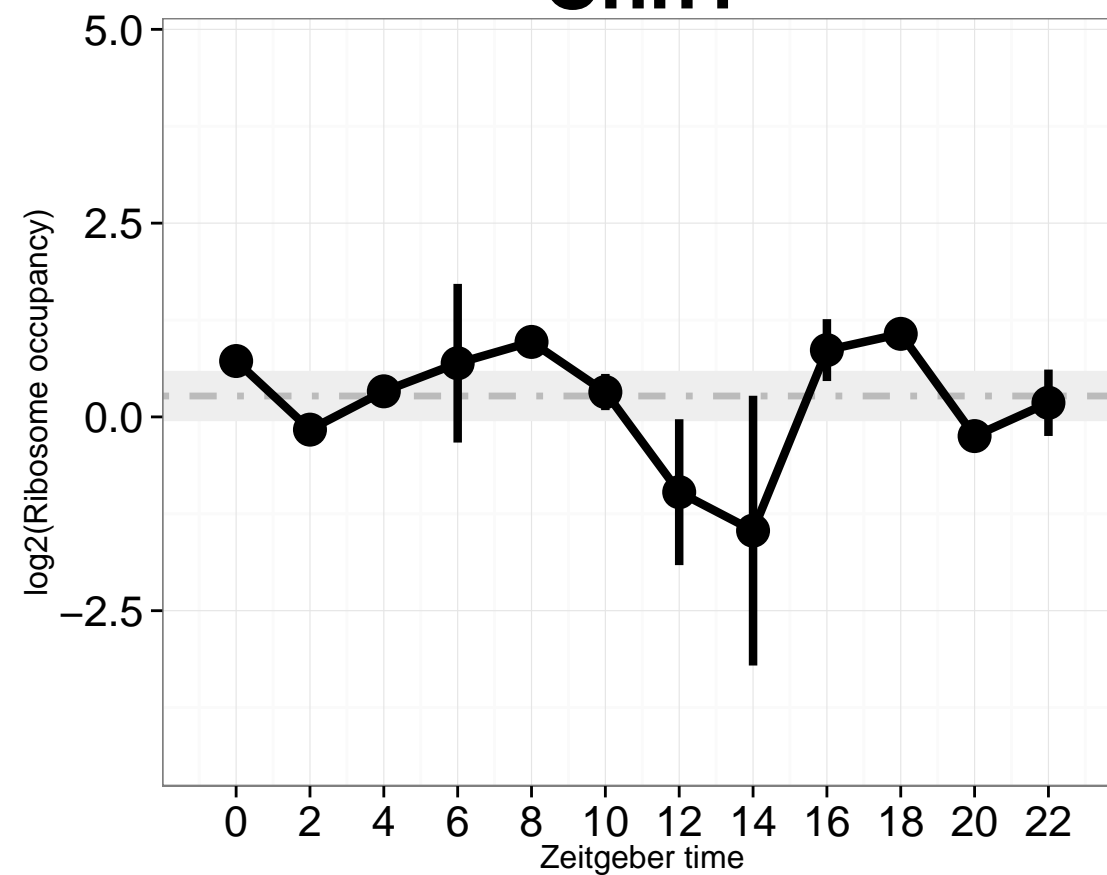

Supplement: Supplementary file 4070 [file 1]

# Dnajc19

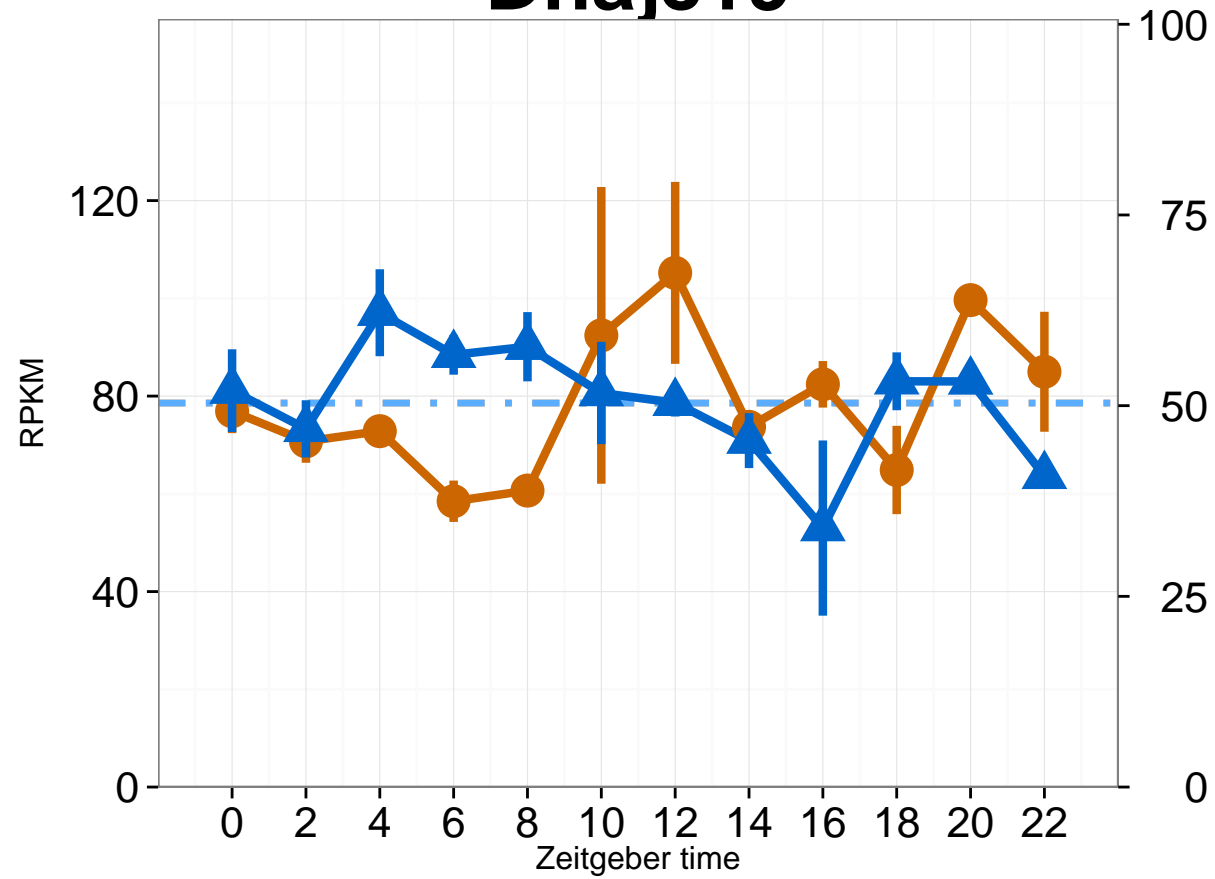

# Dnajc19

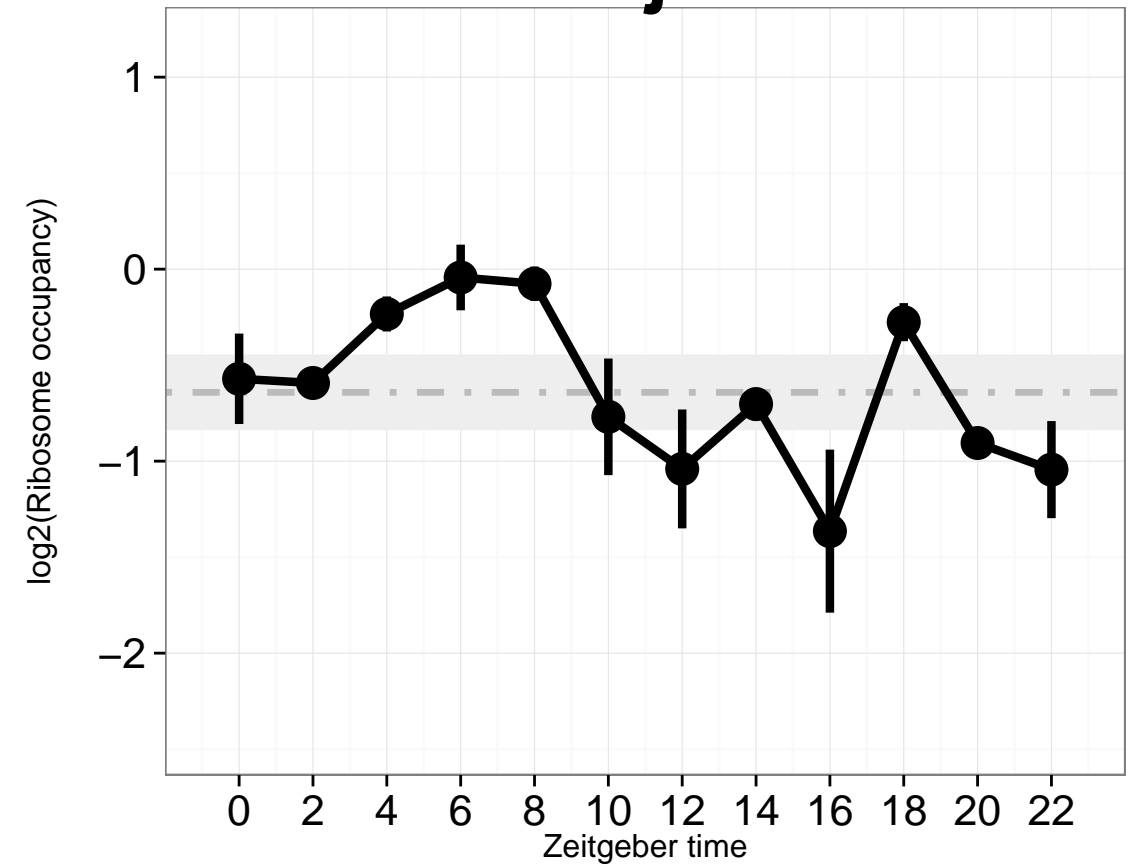

Supplement: Supplementary file 4072 [file 1]

# Gbp5

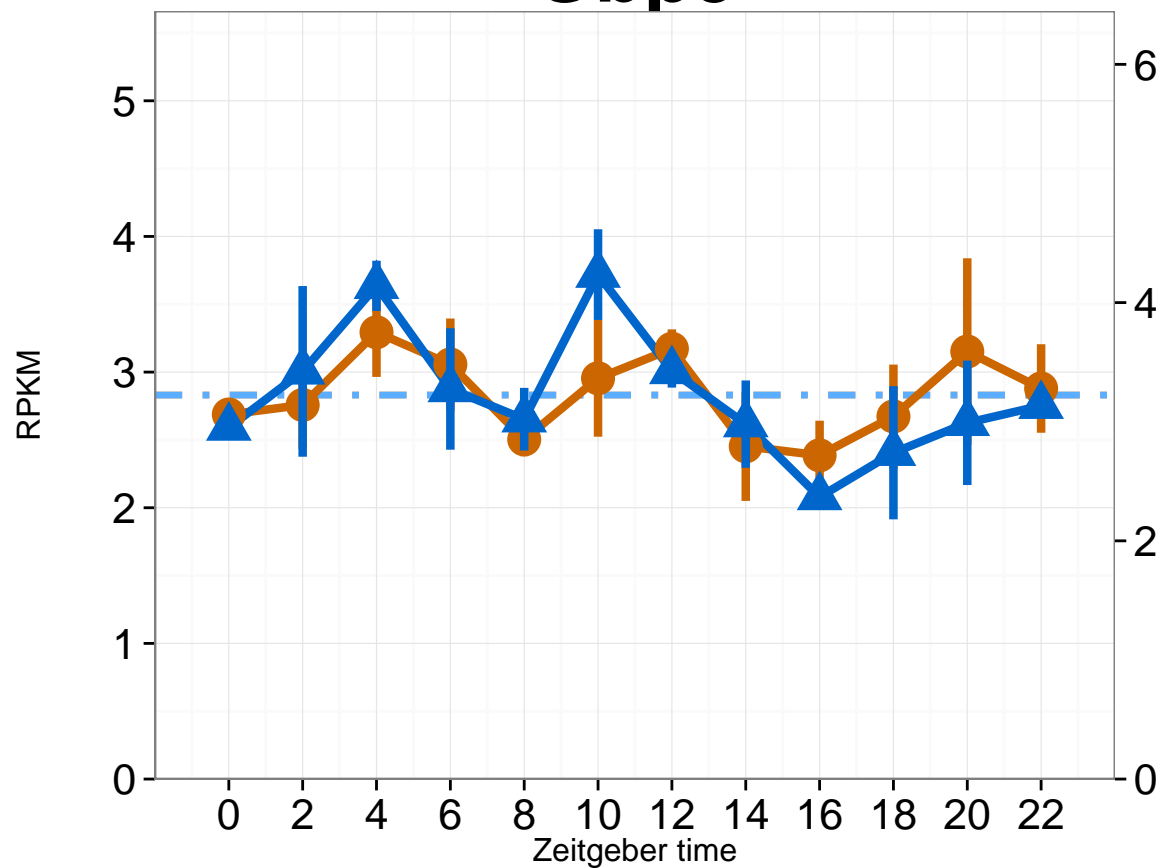

# Gbp5

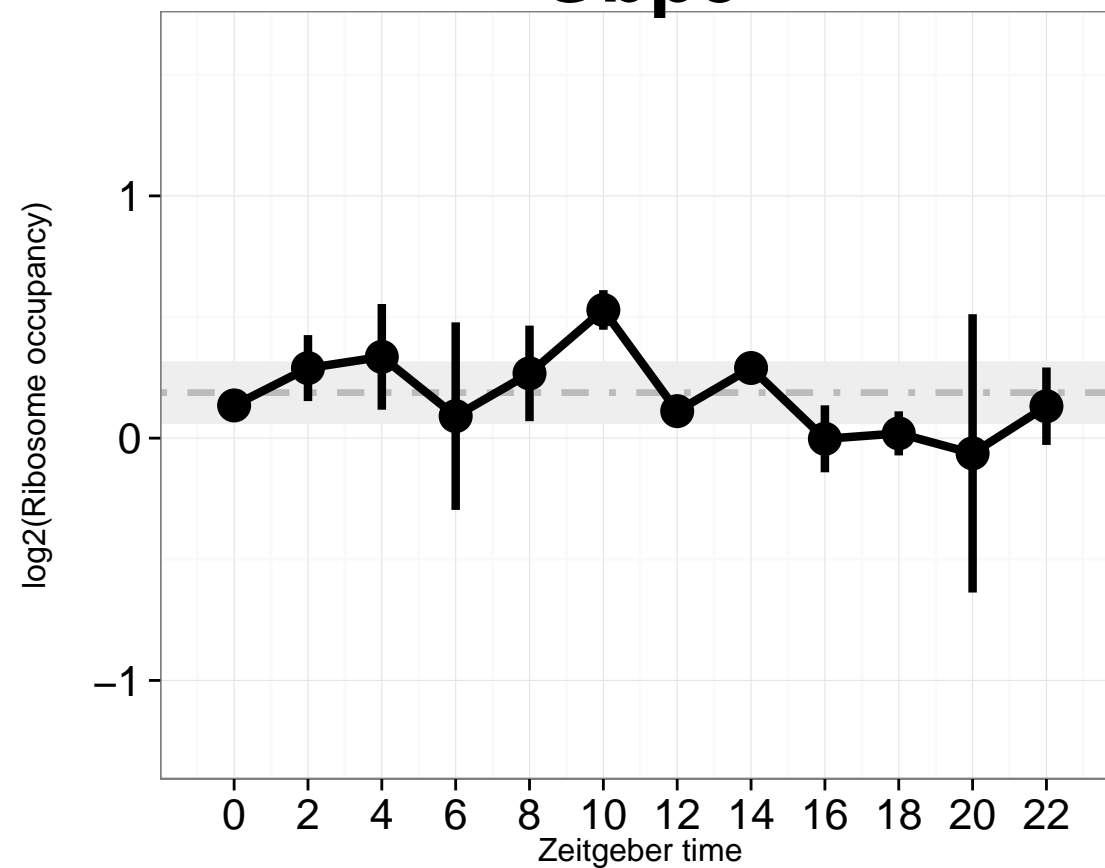

Supplement: Supplementary file 4073 [file 1]

# Anapc11

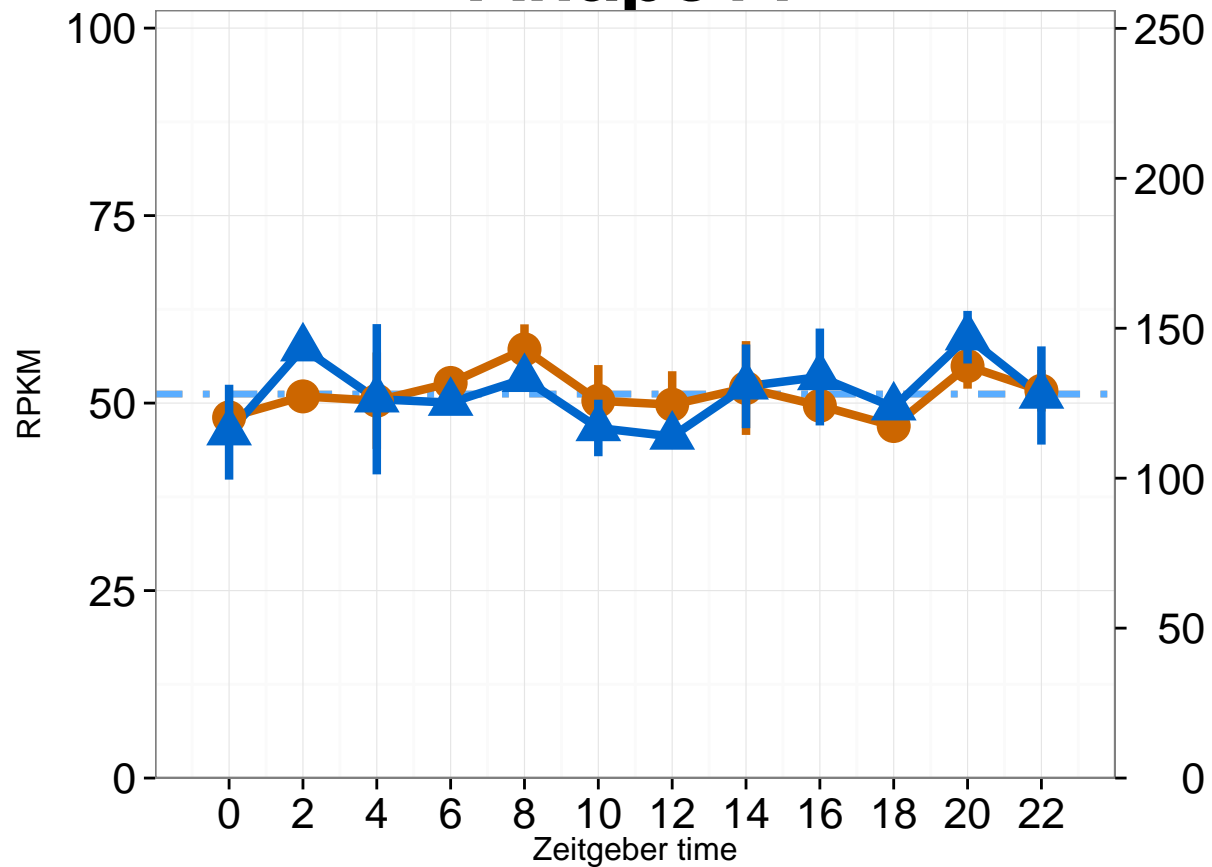

# Anapc11

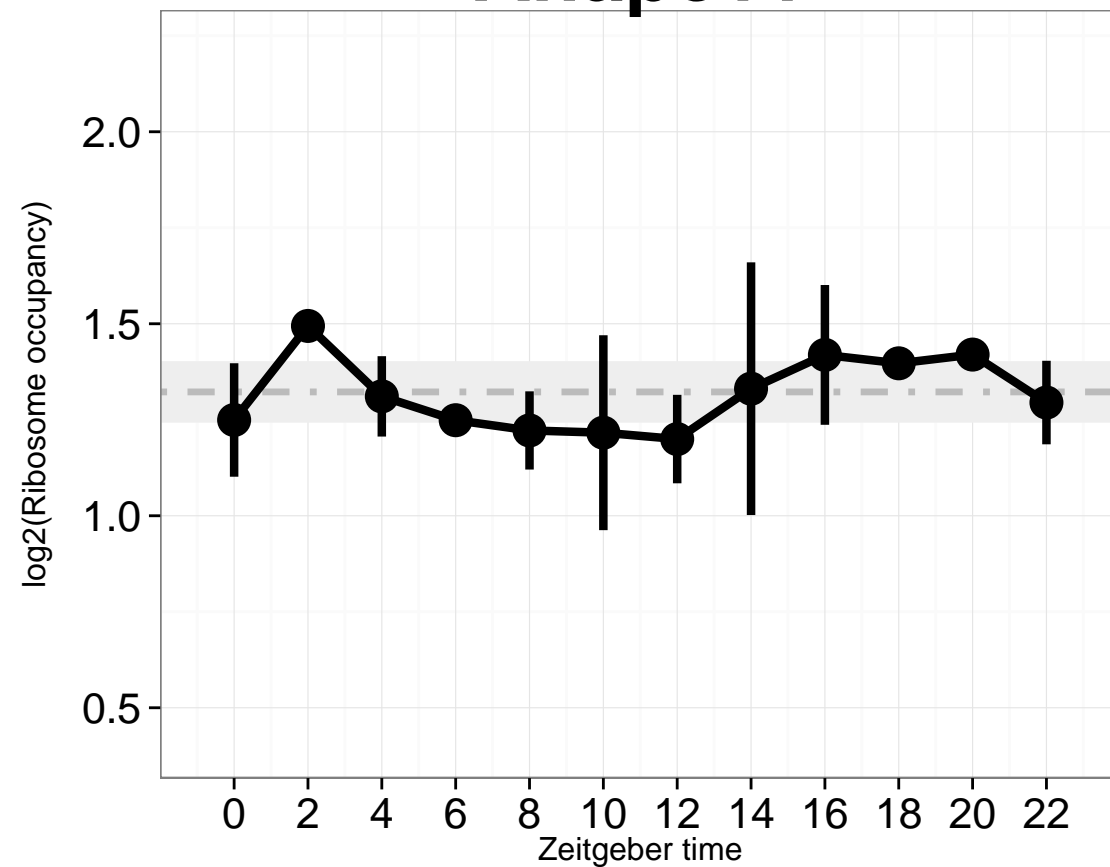

Supplement: Supplementary file 4074 [file 1]

## C1rl

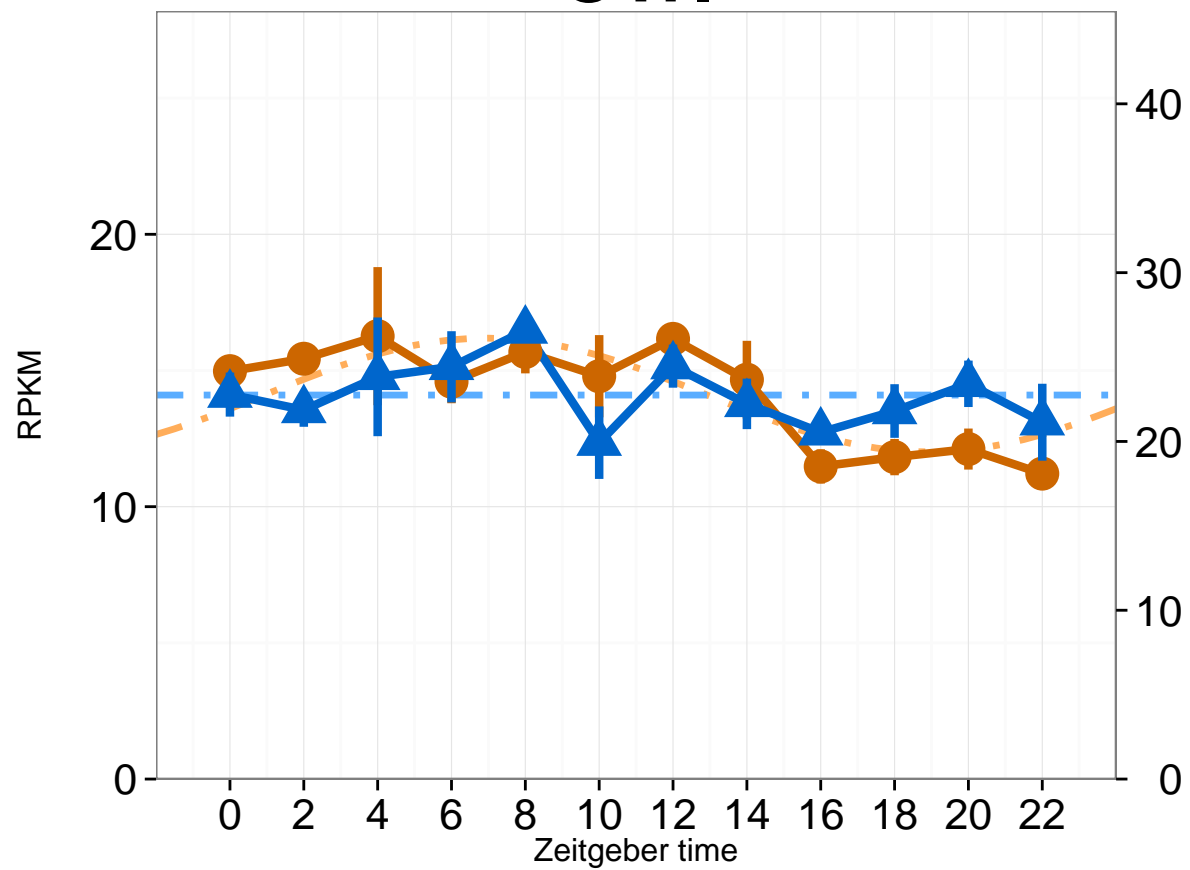

## C1rl

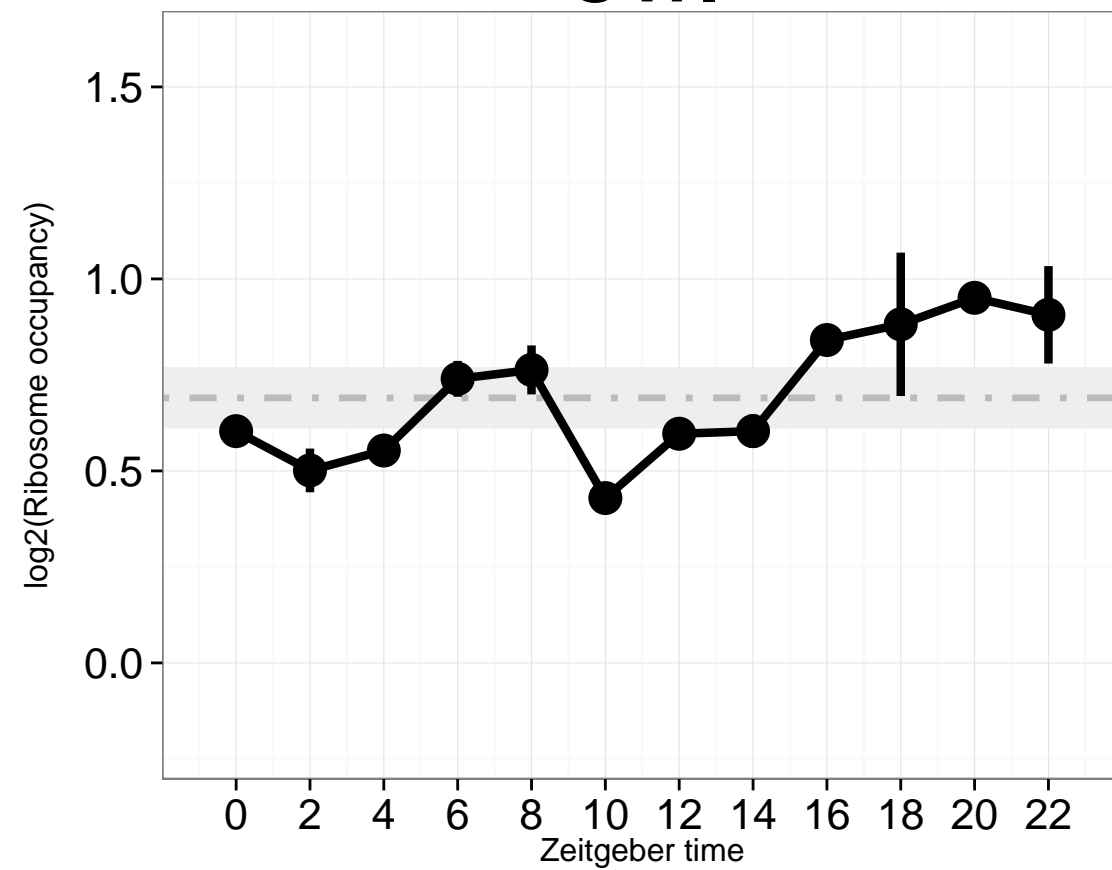

Supplement: Supplementary file 4075 [file 1]

# Was

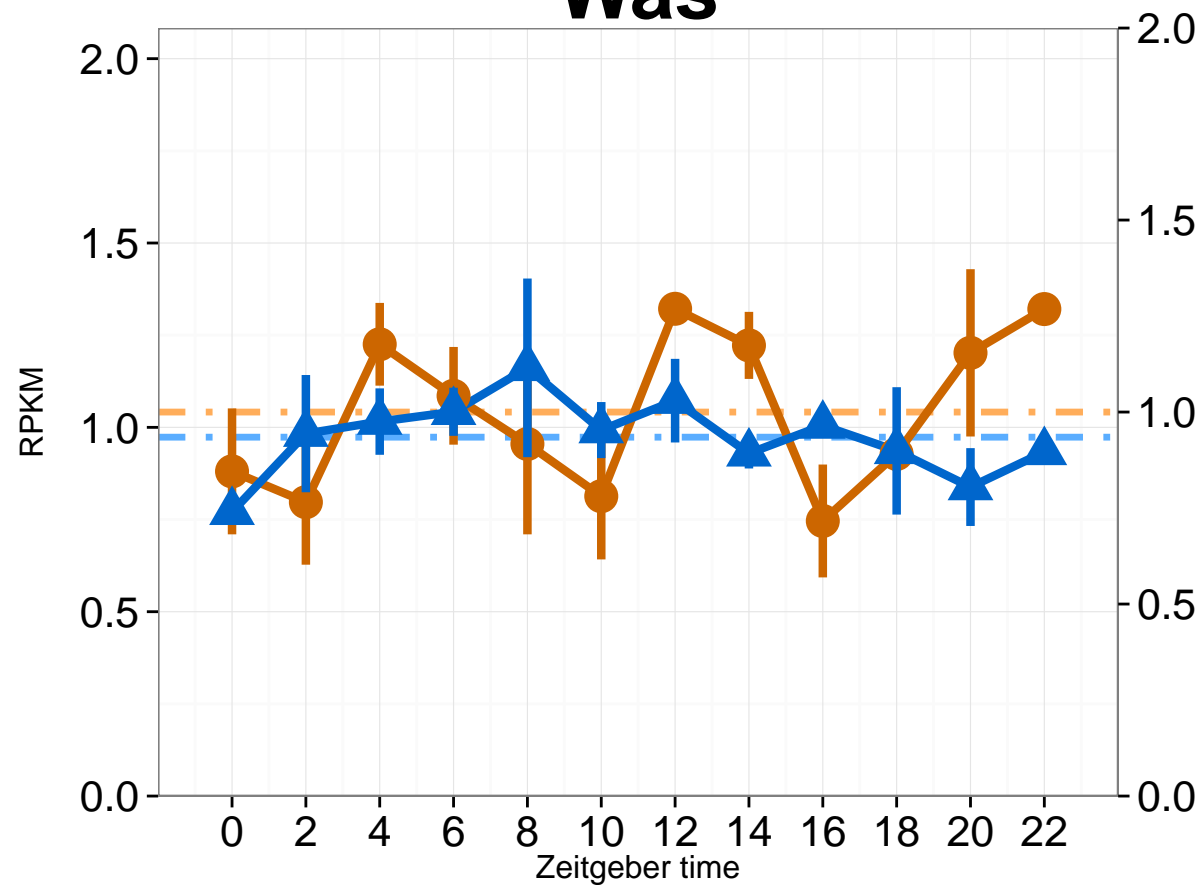

# Was

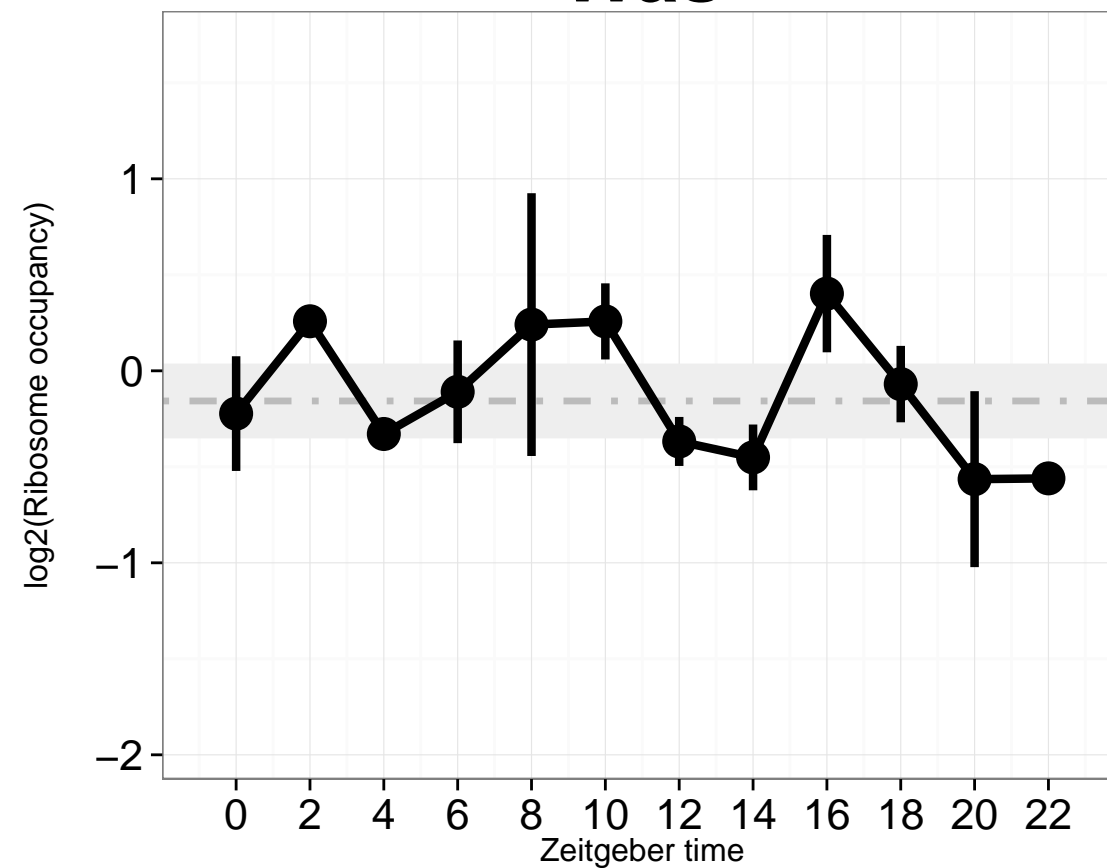

Supplement: Supplementary file 4076 [file 1]

## Kdm4b

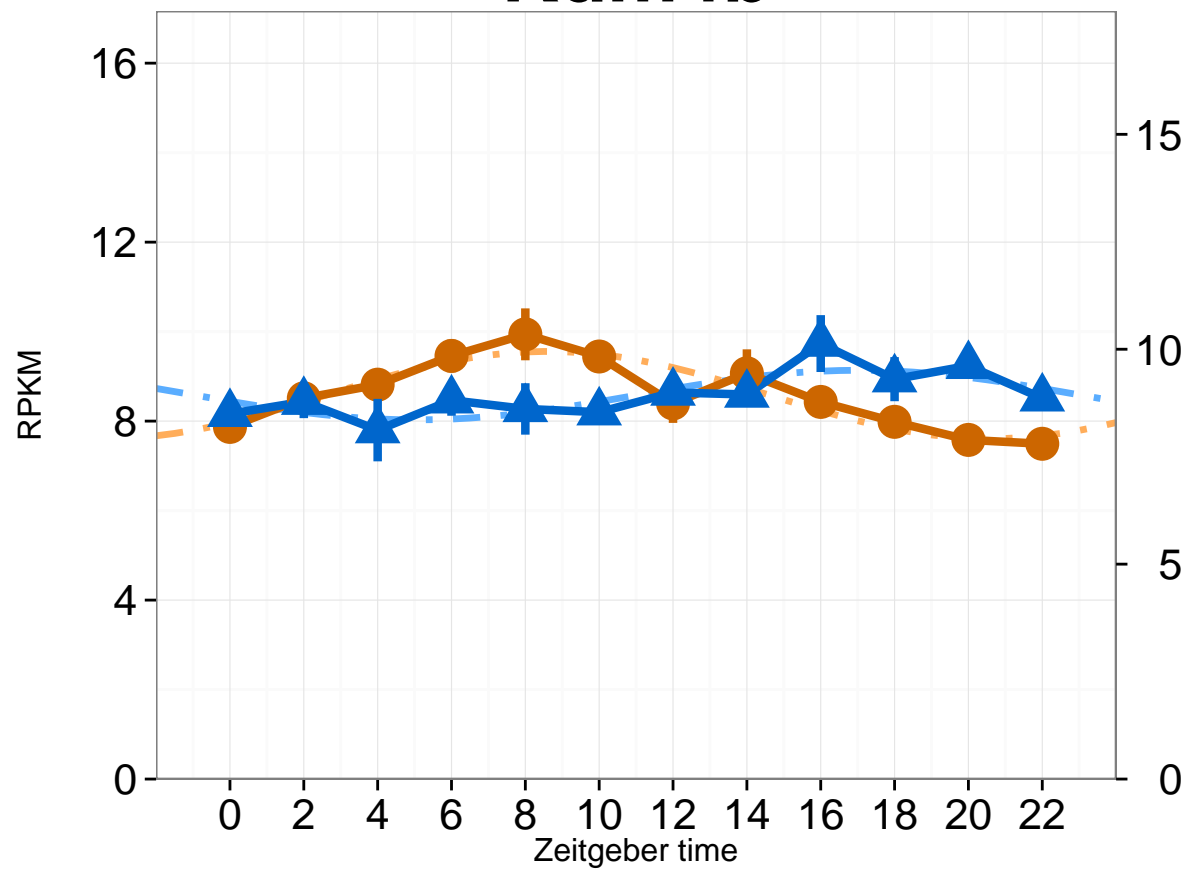

## Kdm4b

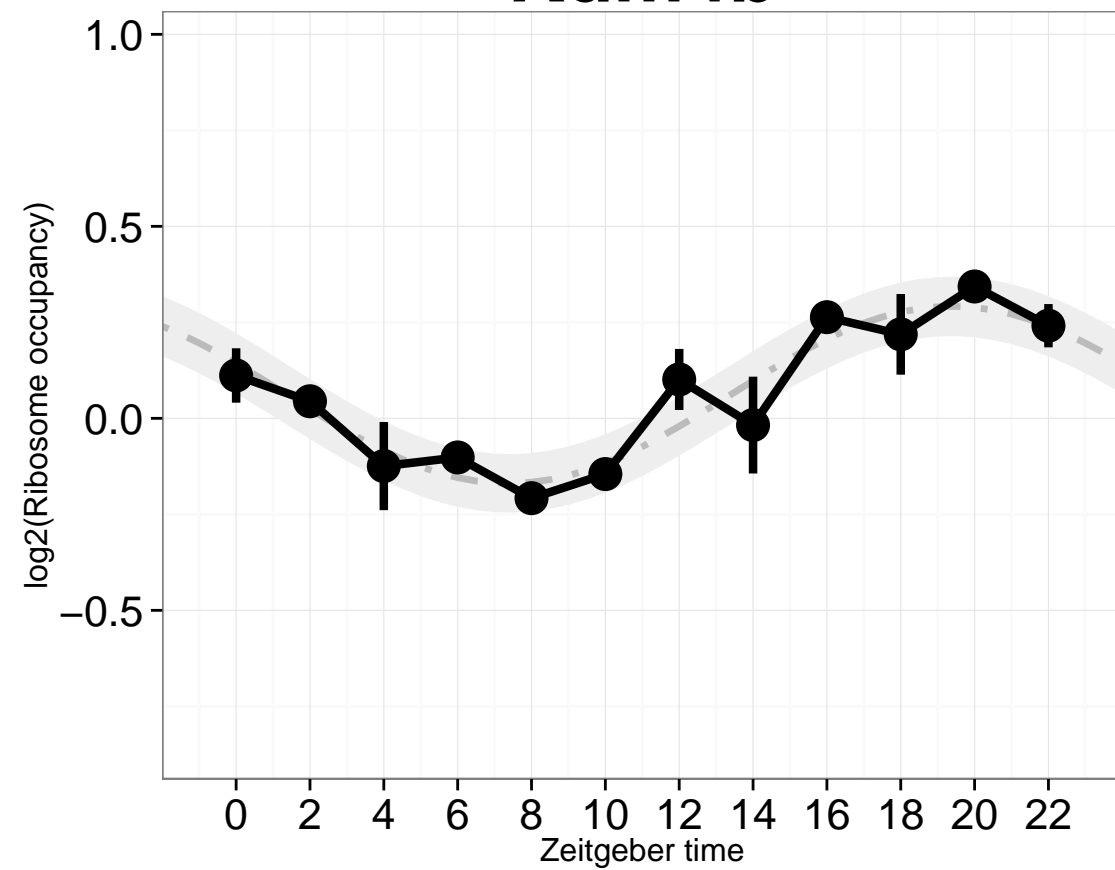

Supplement: Supplementary file 4077 [file 1]

## Smg5

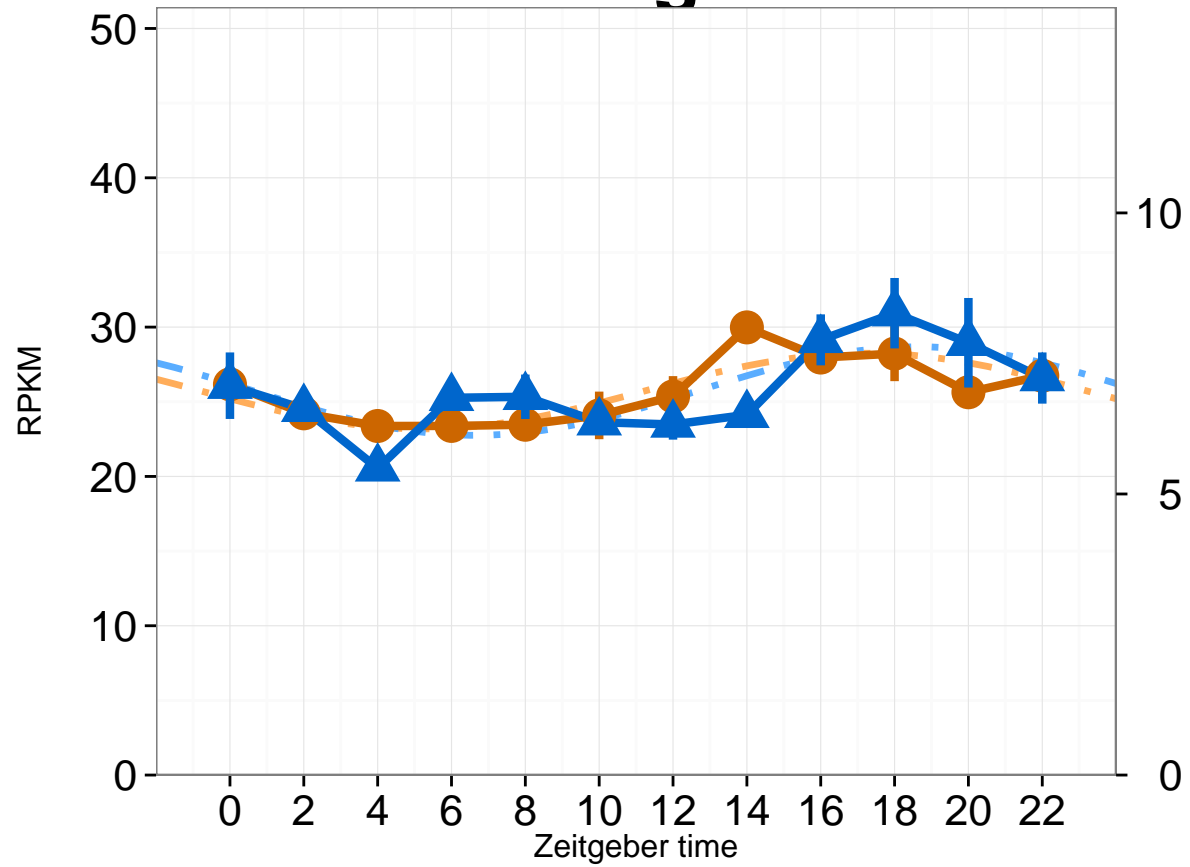

## Smg5

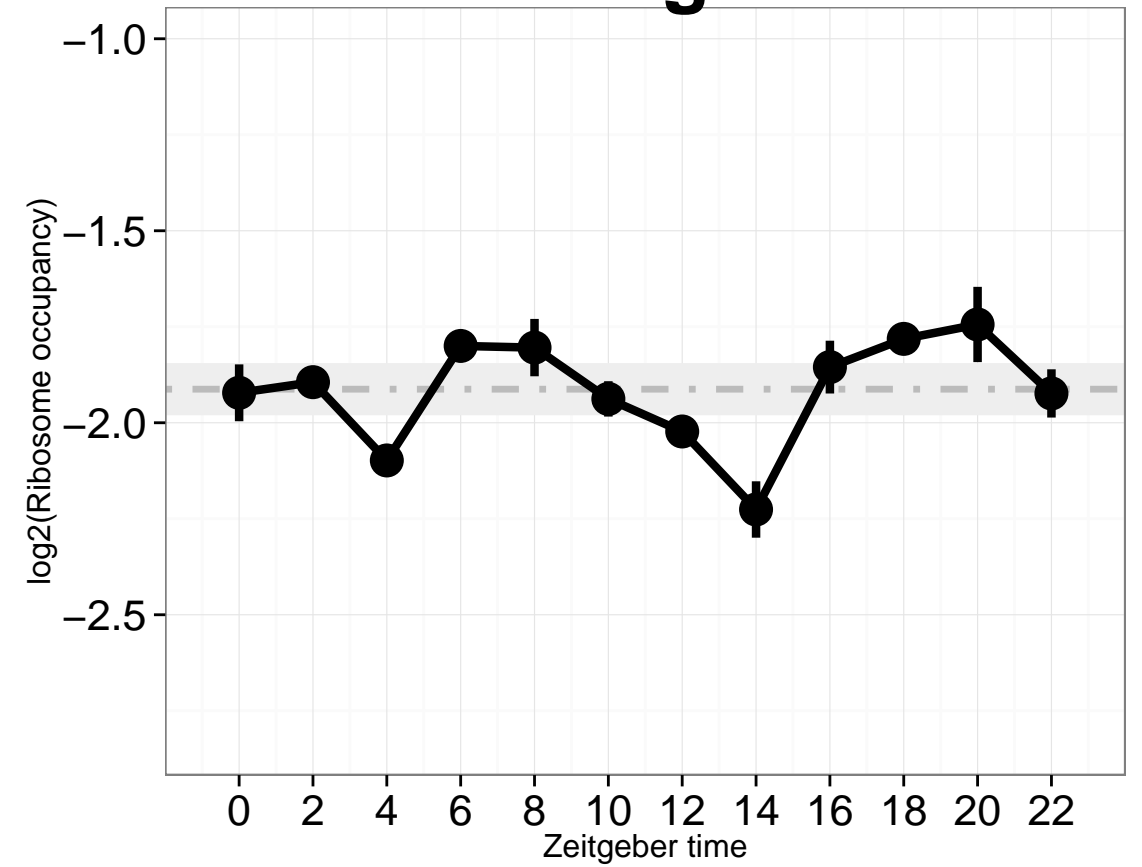

Supplement: Supplementary file 4078 [file 1]

## Rcor1

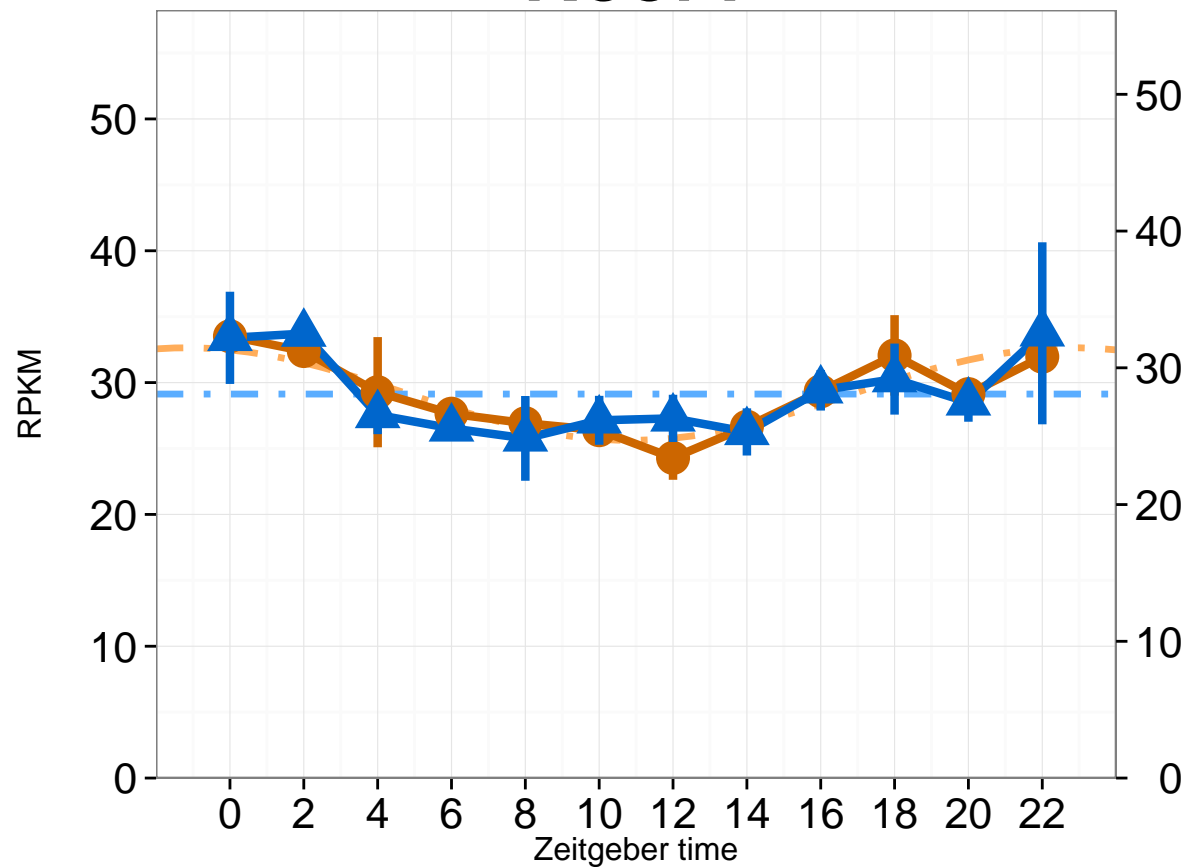

## Rcor1

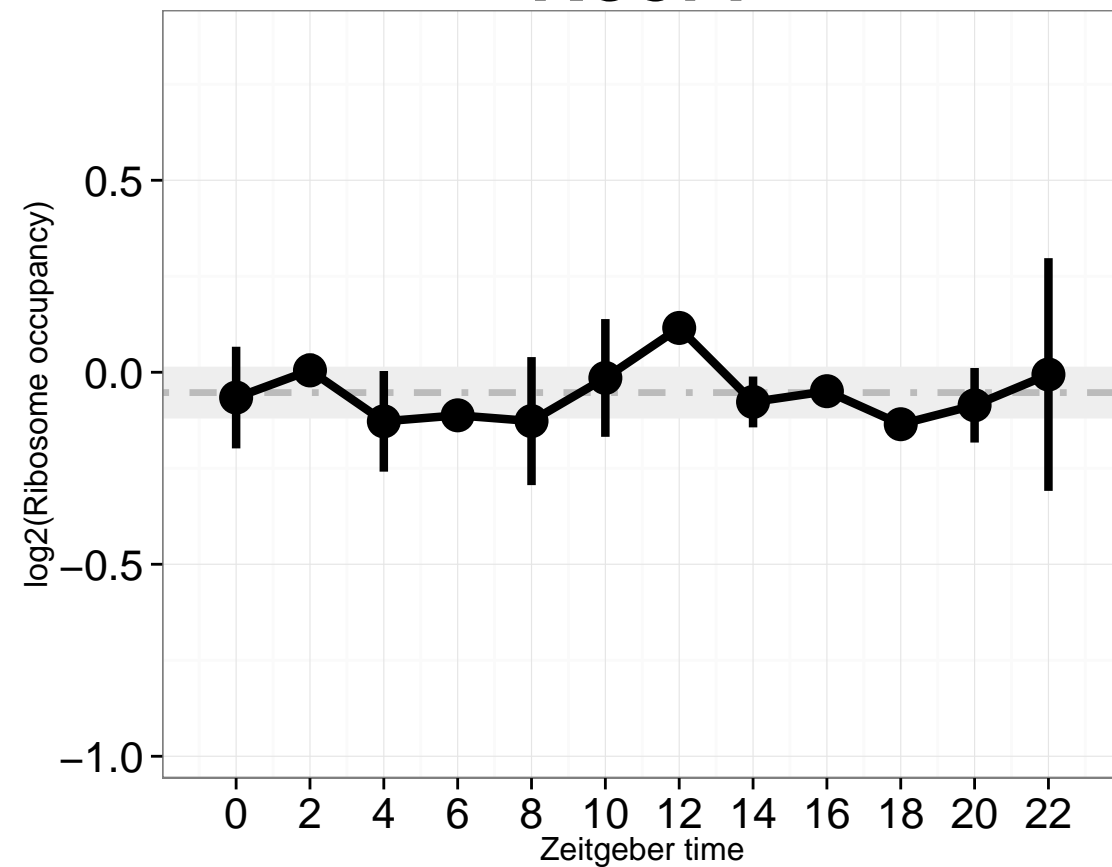

Supplement: Supplementary file 4079 [file 1]

## Fnip1

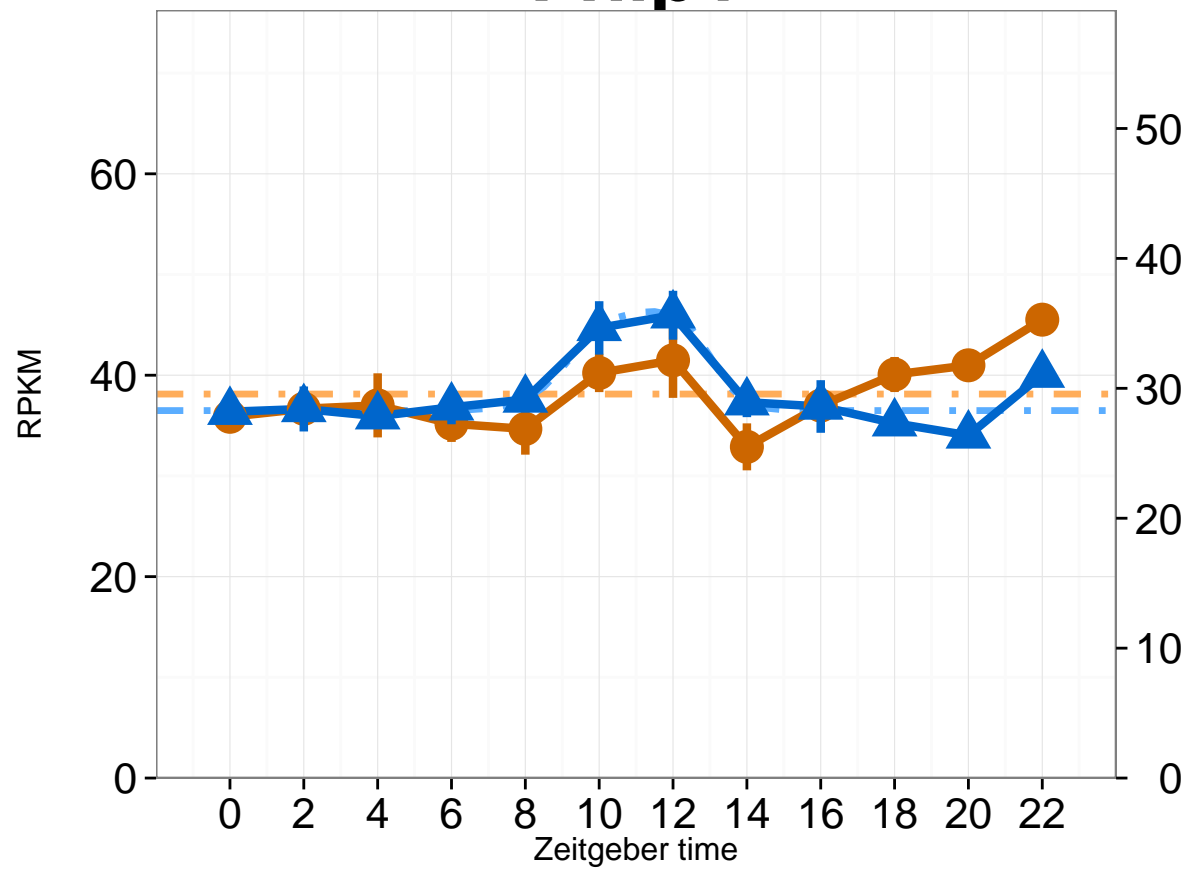

## Fnip1

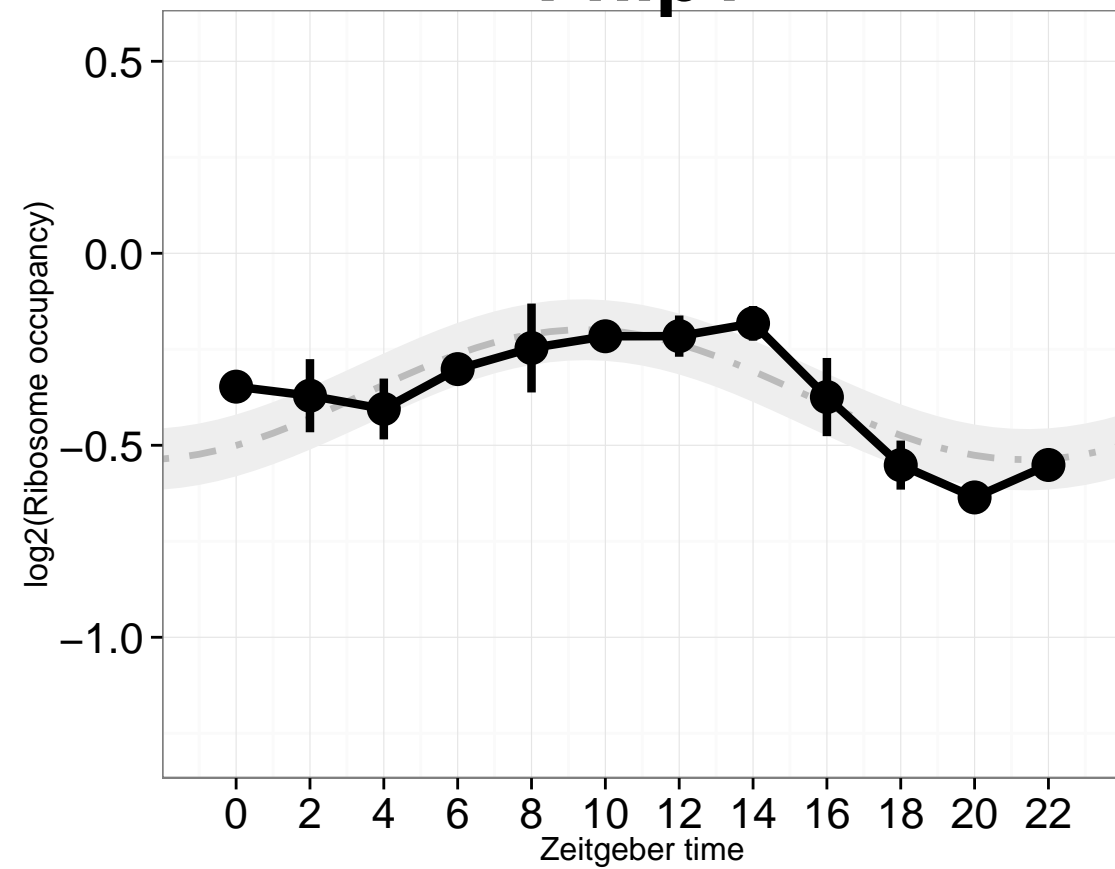

Supplement: Supplementary file 4080 [file 1]

# Zfp677

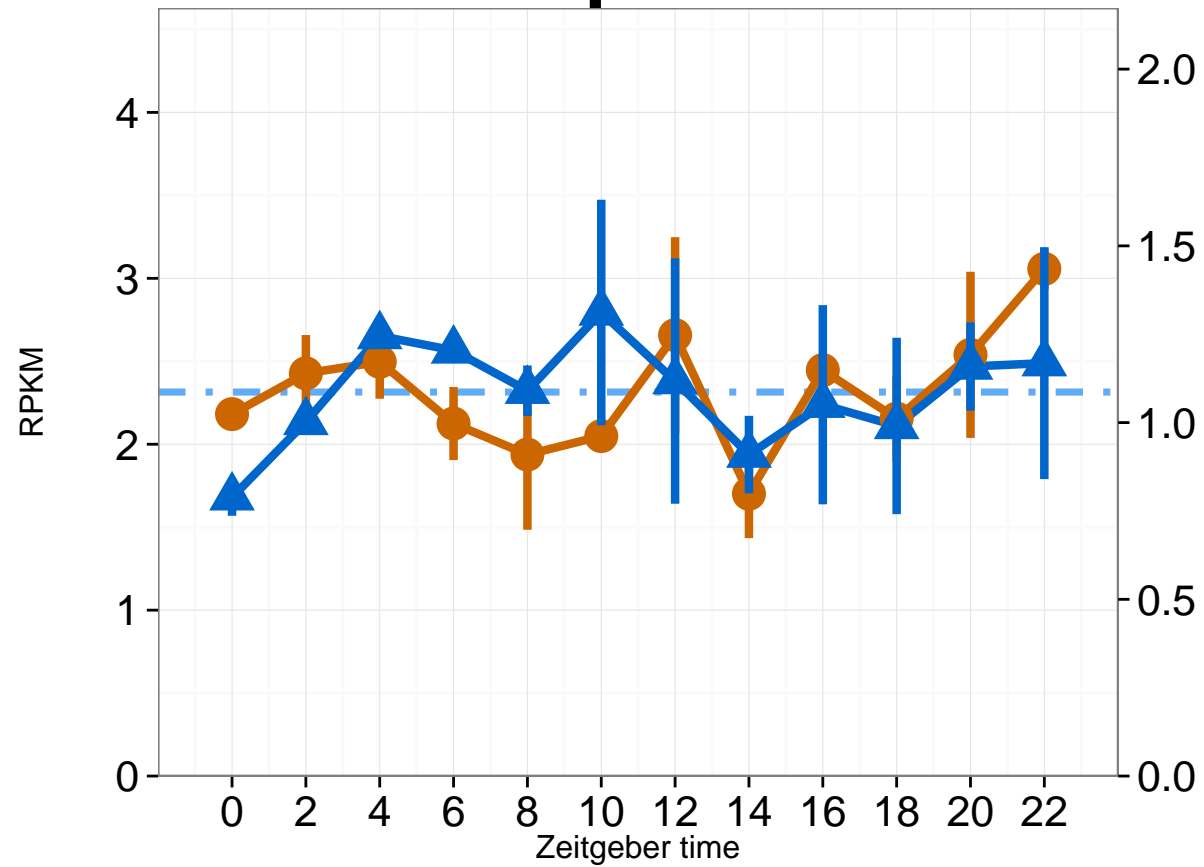

# Zfp677

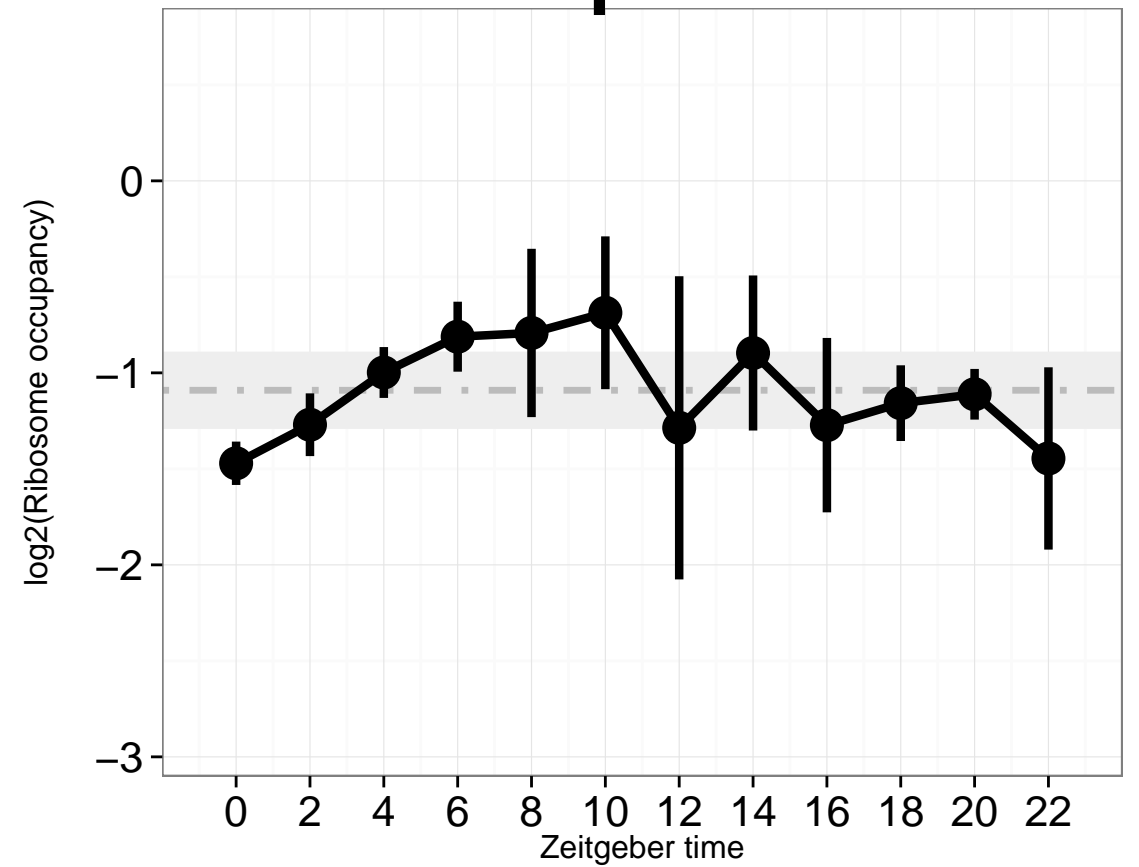

Supplement: Supplementary file 4081 [file 1]

## Fgf18

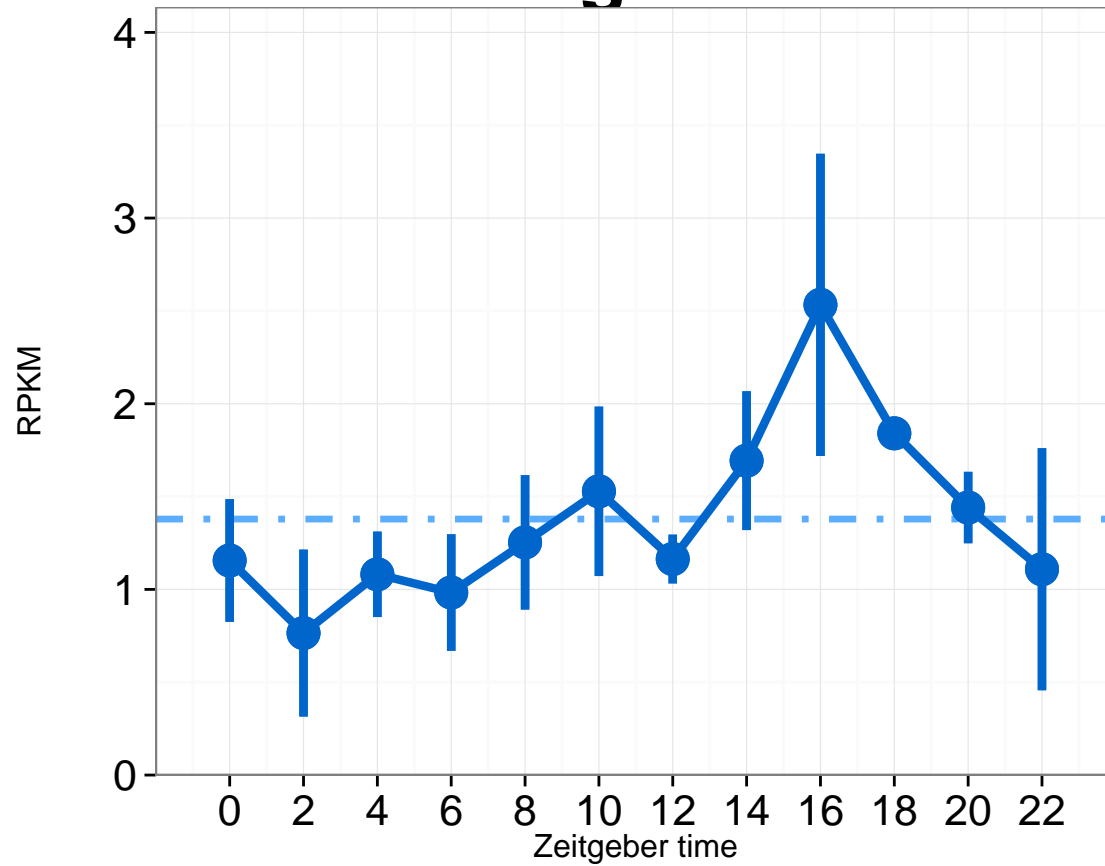

## Fgf18 log2(Ribosome occupancy)

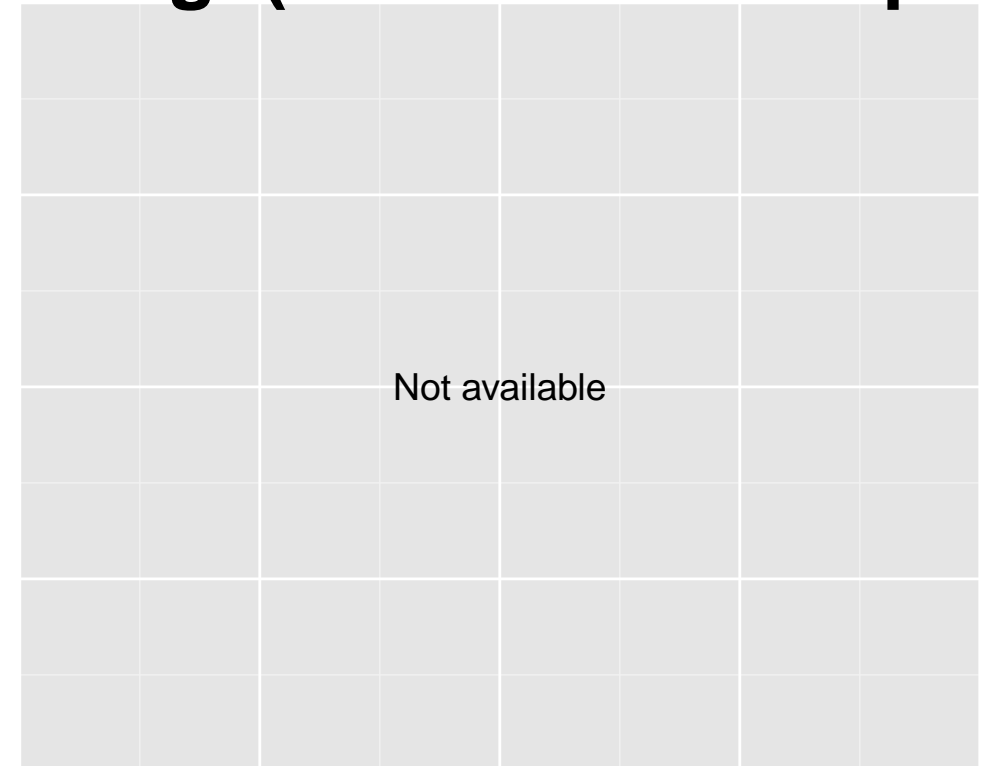

Supplement: Supplementary file 4082 [file 1]

## Slc25a36

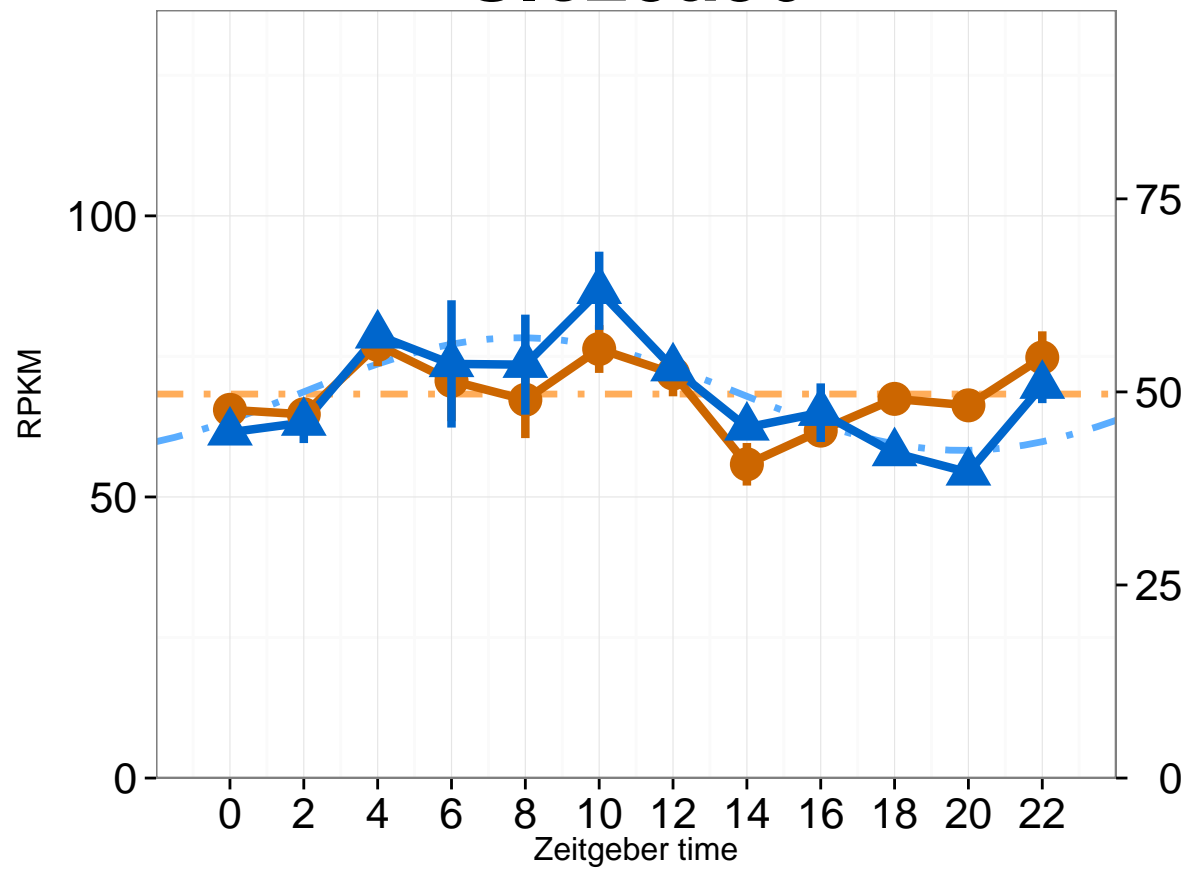

## Slc25a36

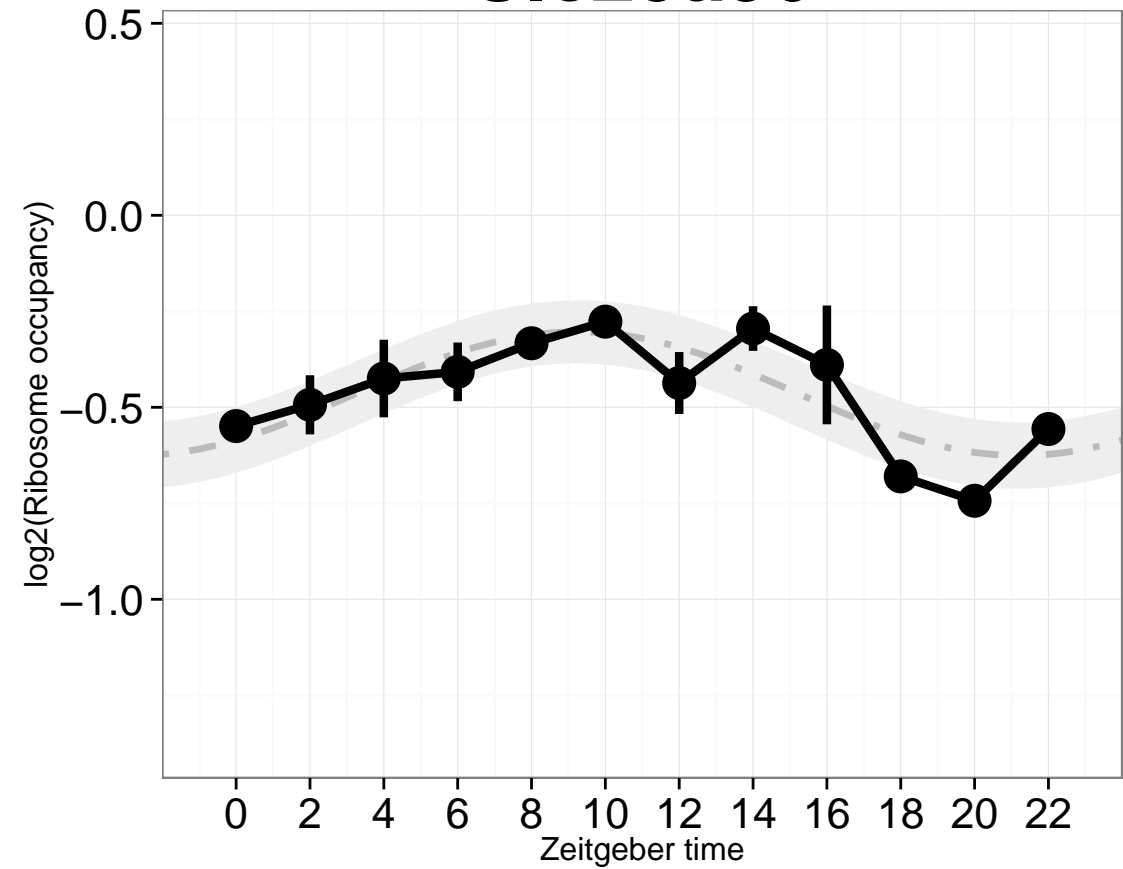

Supplement: Supplementary file 4083 [file 1]

**Tmem100 TR**

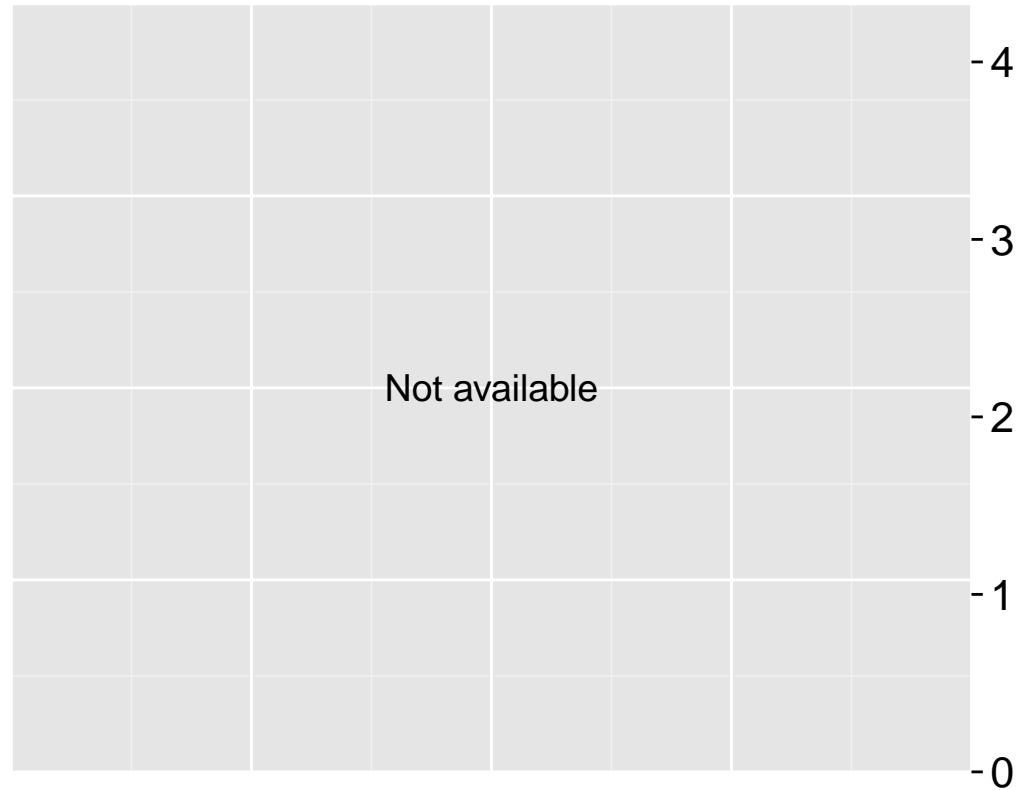

**Tmem100 log2(Ribosome occupancy)**

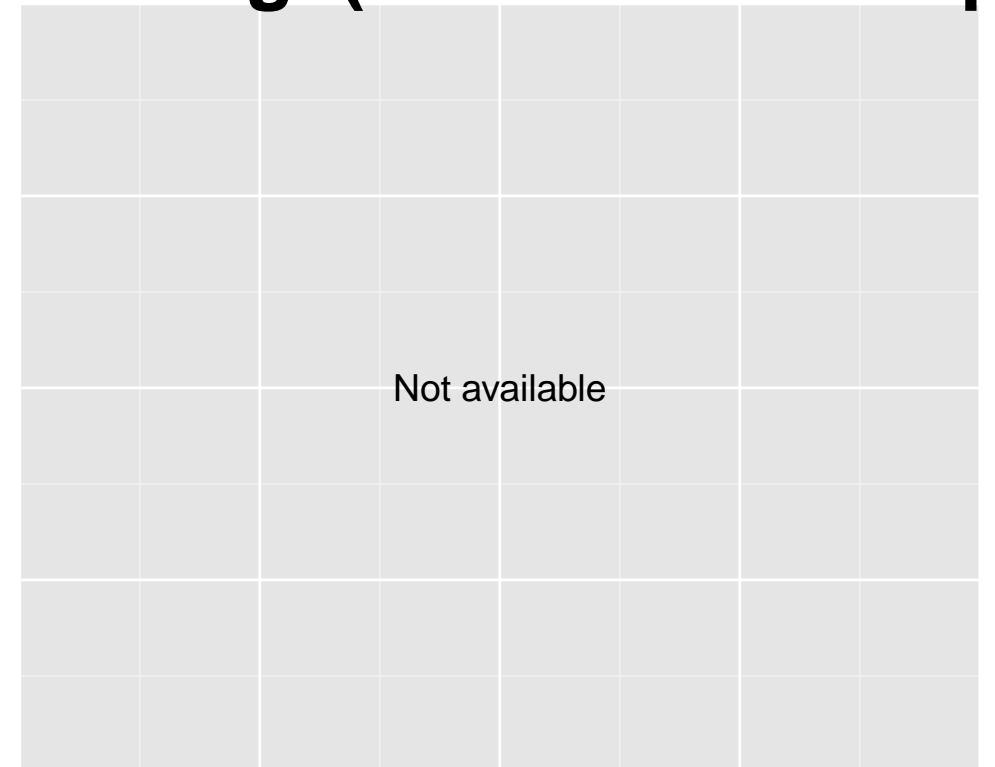

Supplement: Supplementary file 4084 [file 1]

## Naa10

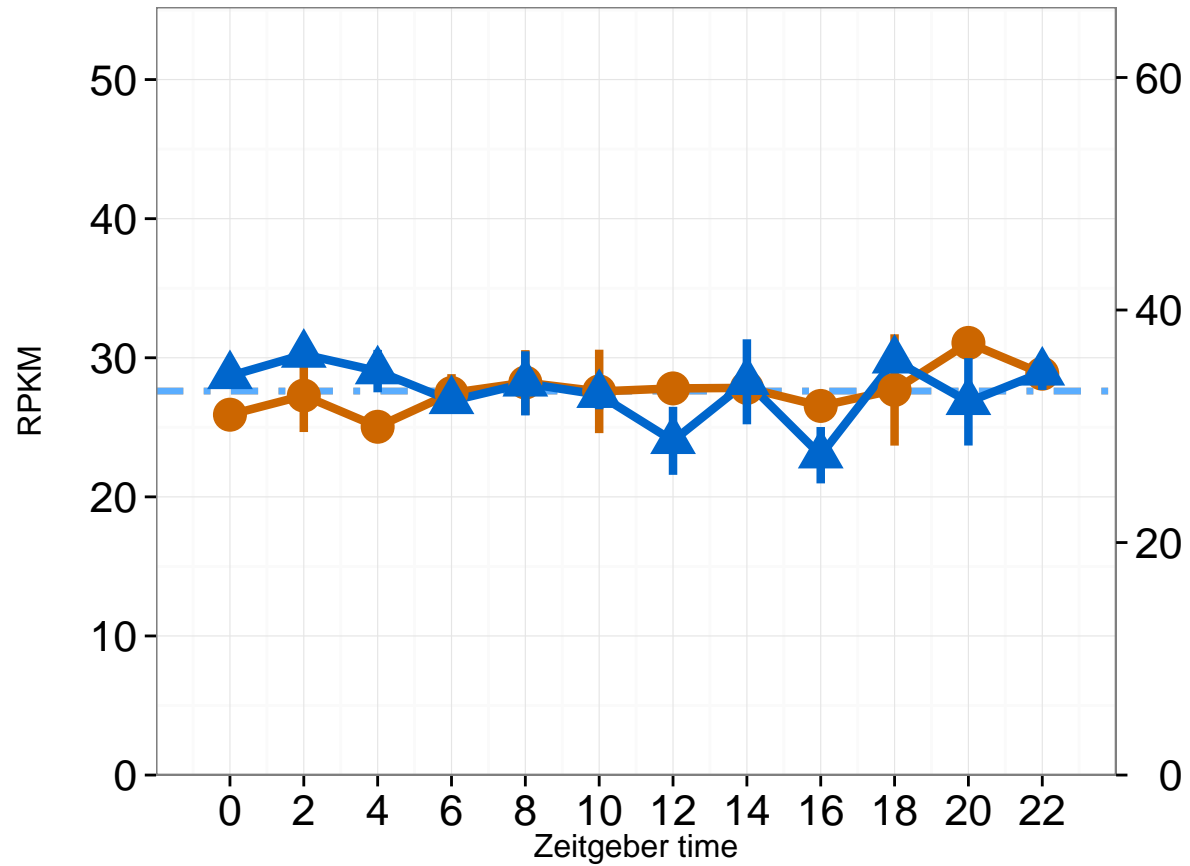

## Naa10

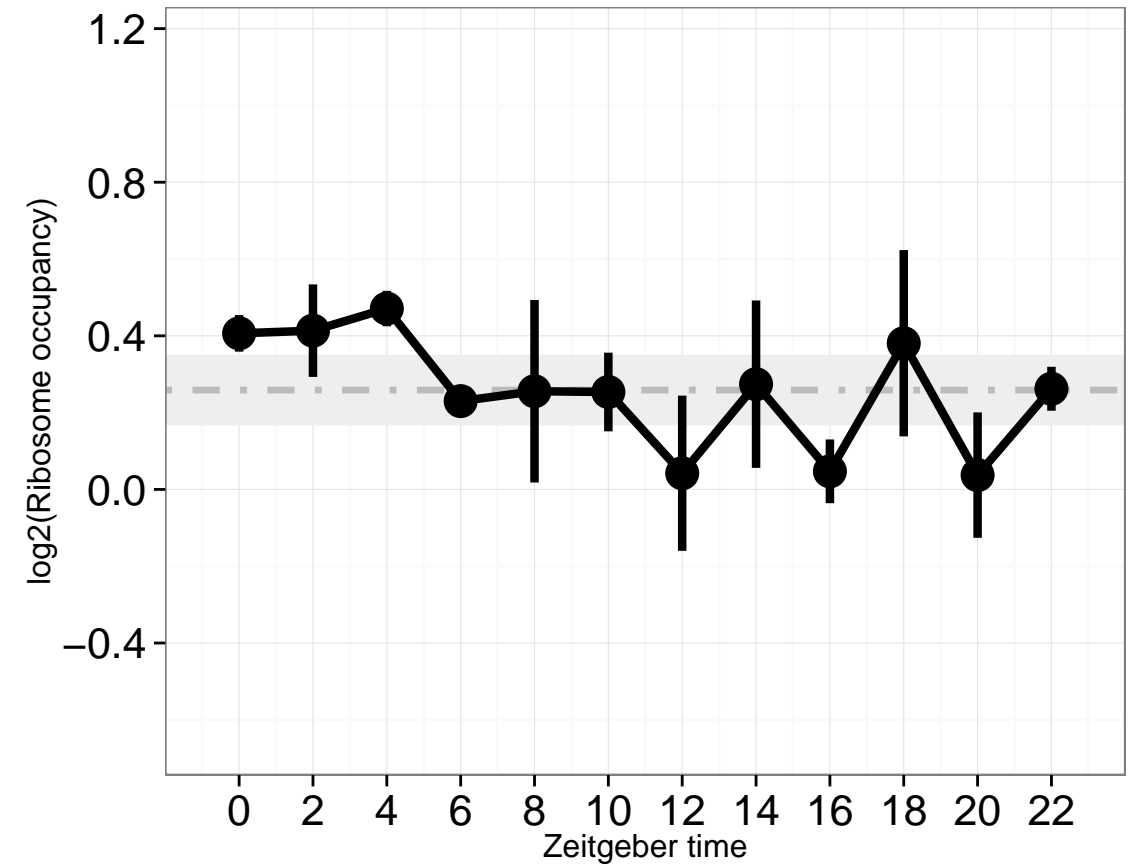

Supplement: Supplementary file 4085 [file 1]

## Aurkb

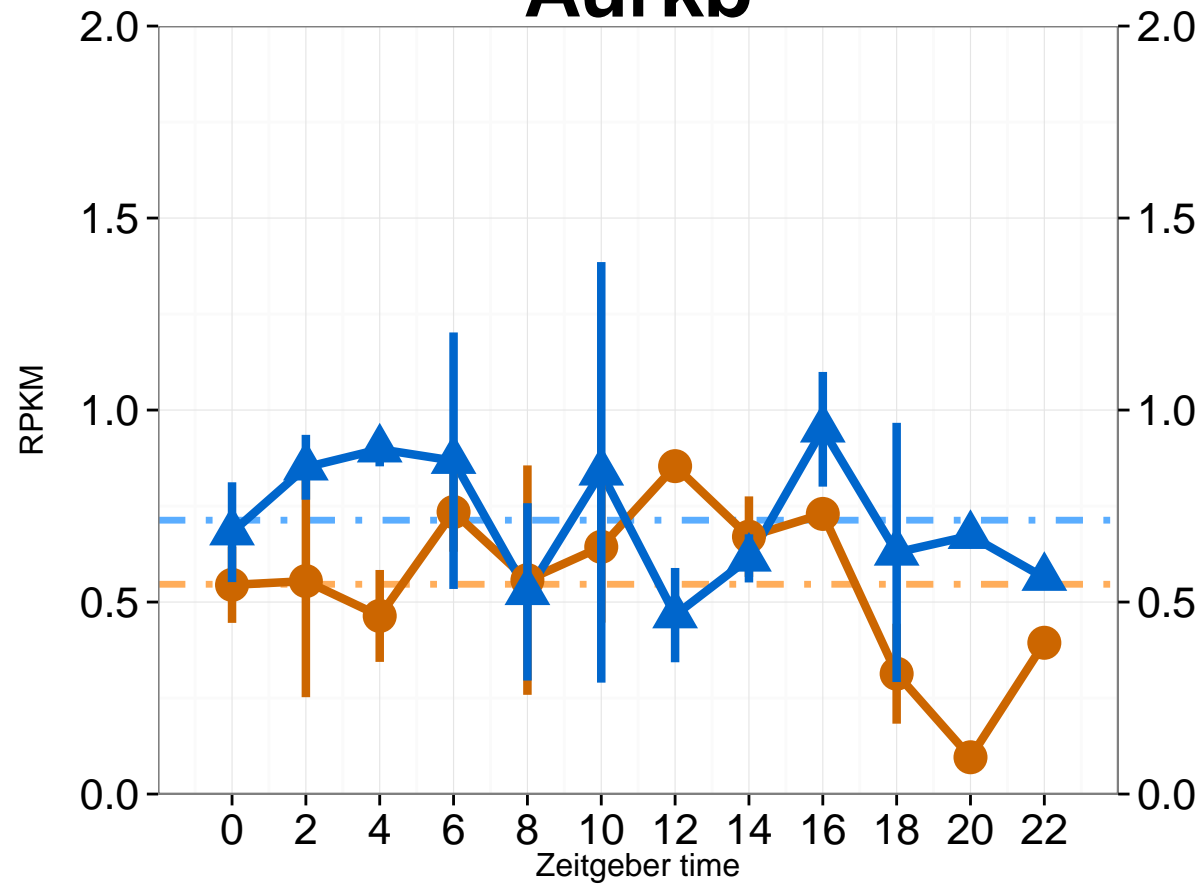

## Aurkb

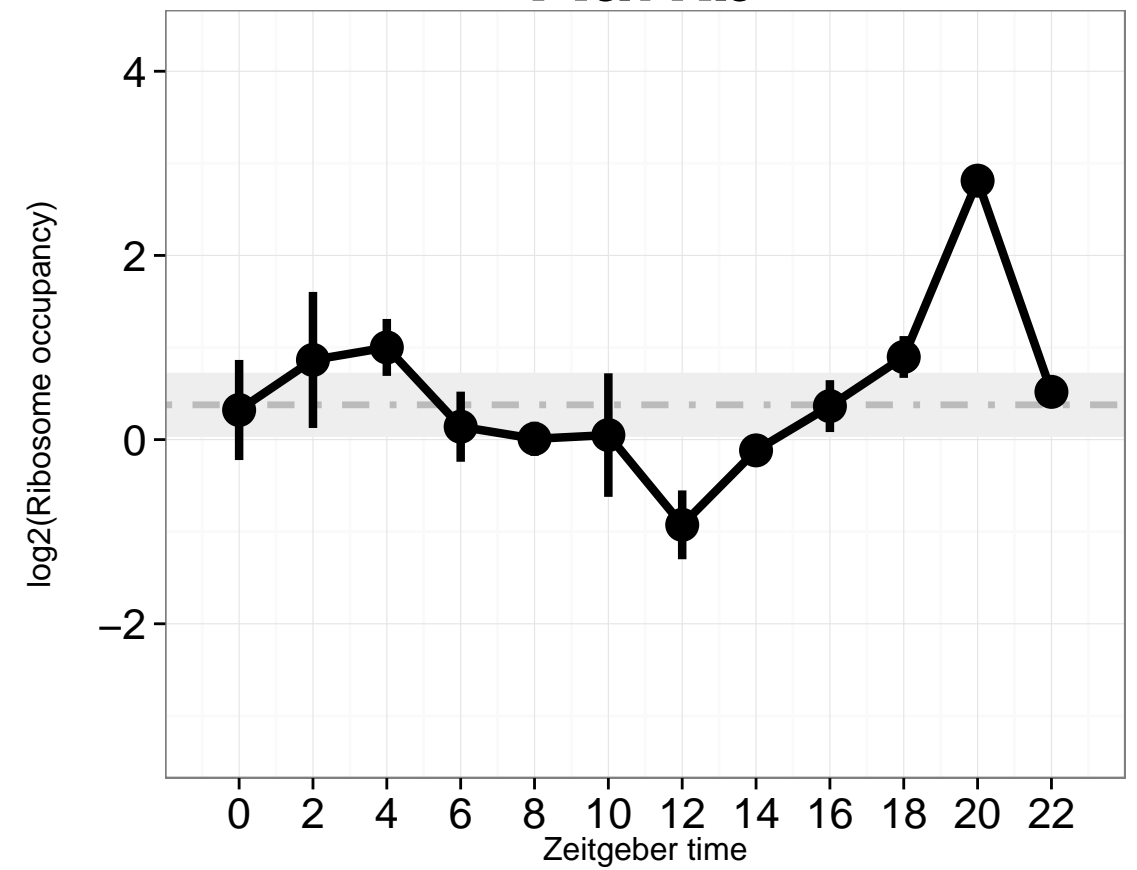

Supplement: Supplementary file 4086 [file 1]

## Rfng

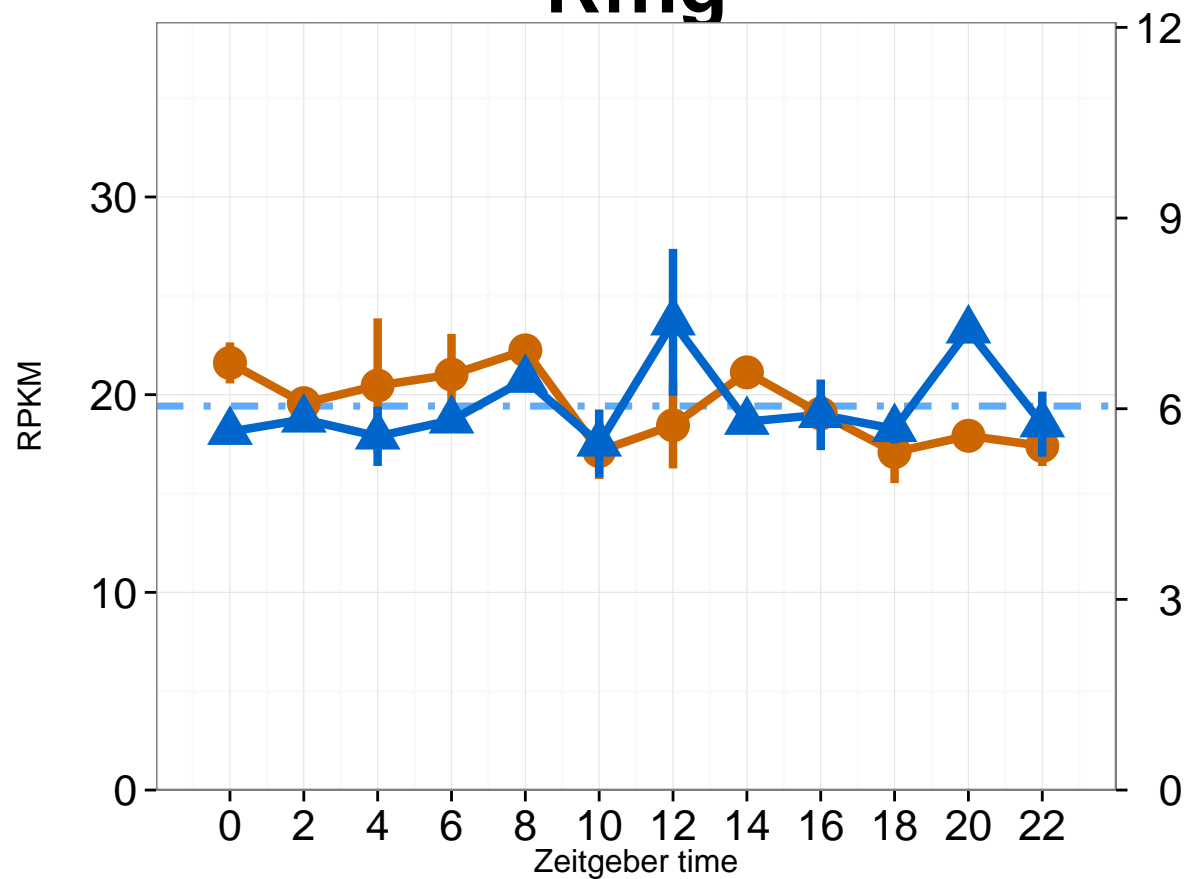

## Rfng

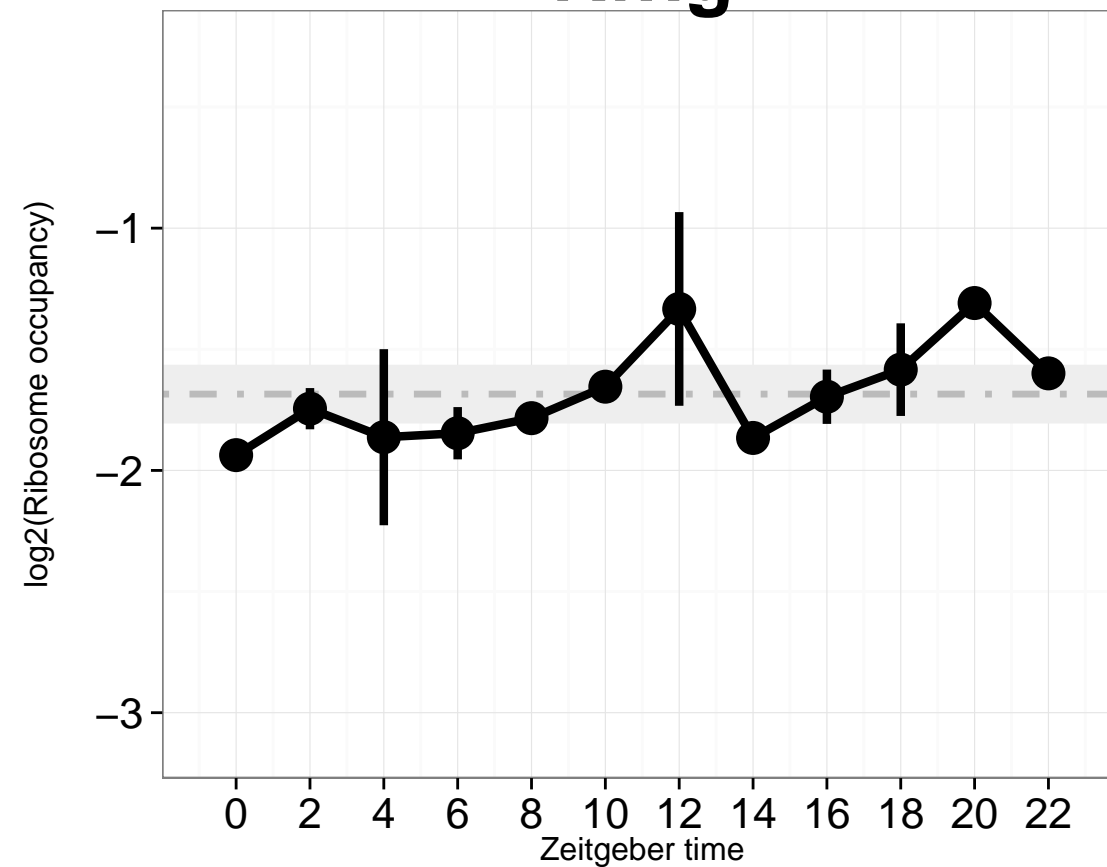

Supplement: Supplementary file 4087 [file 1]

# DynII1

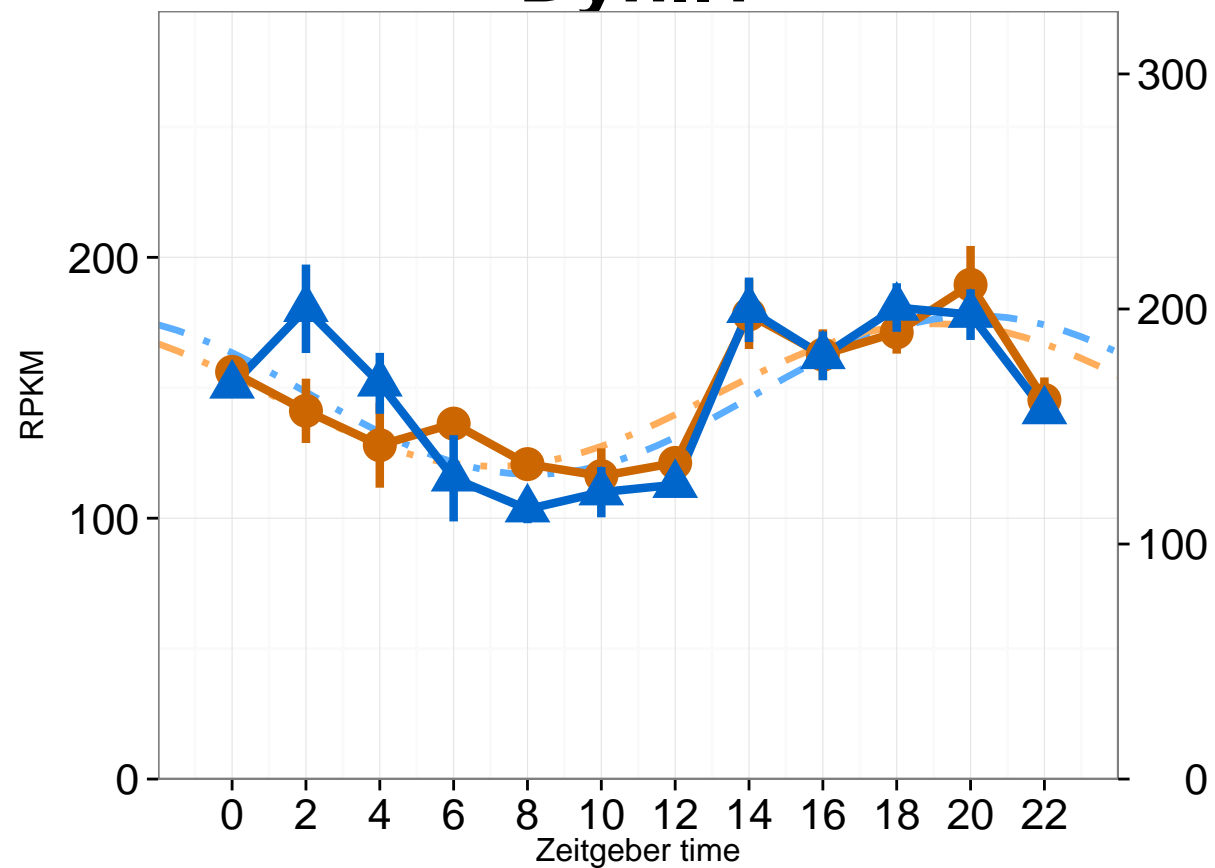

# DynII1

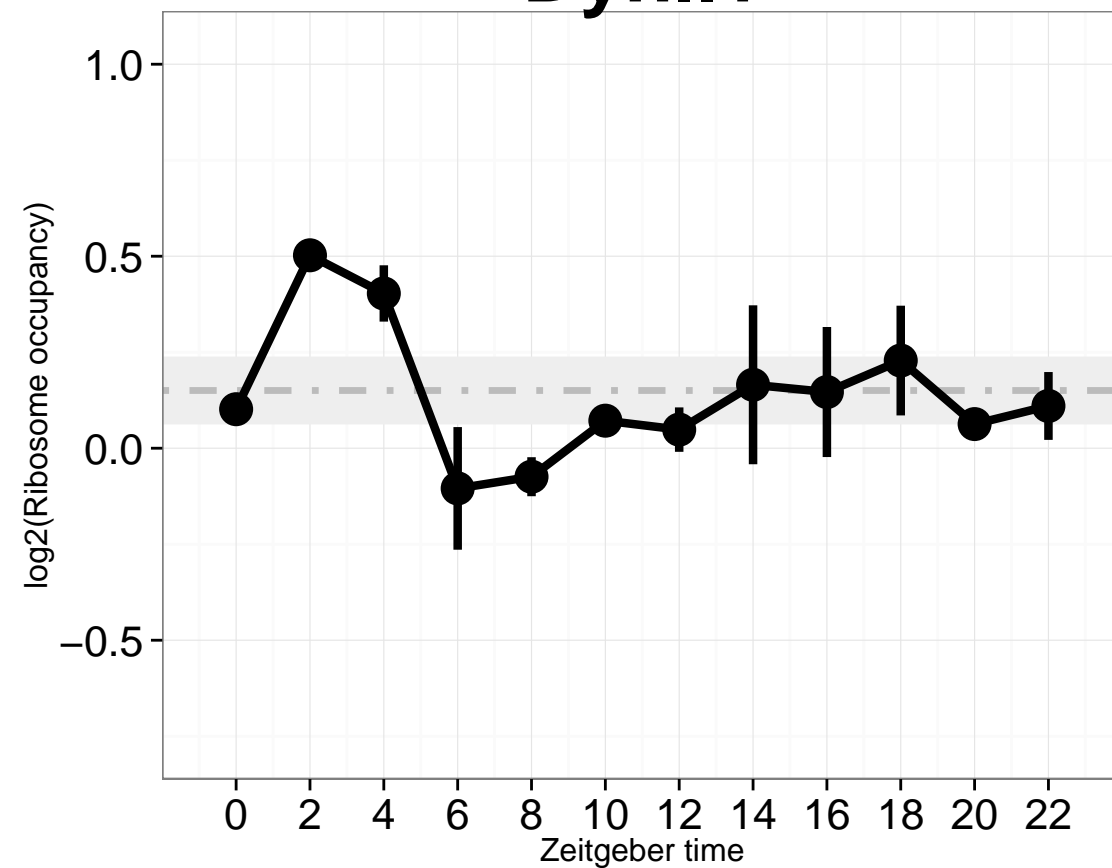

Supplement: Supplementary file 4088 [file 1]

## Bfar

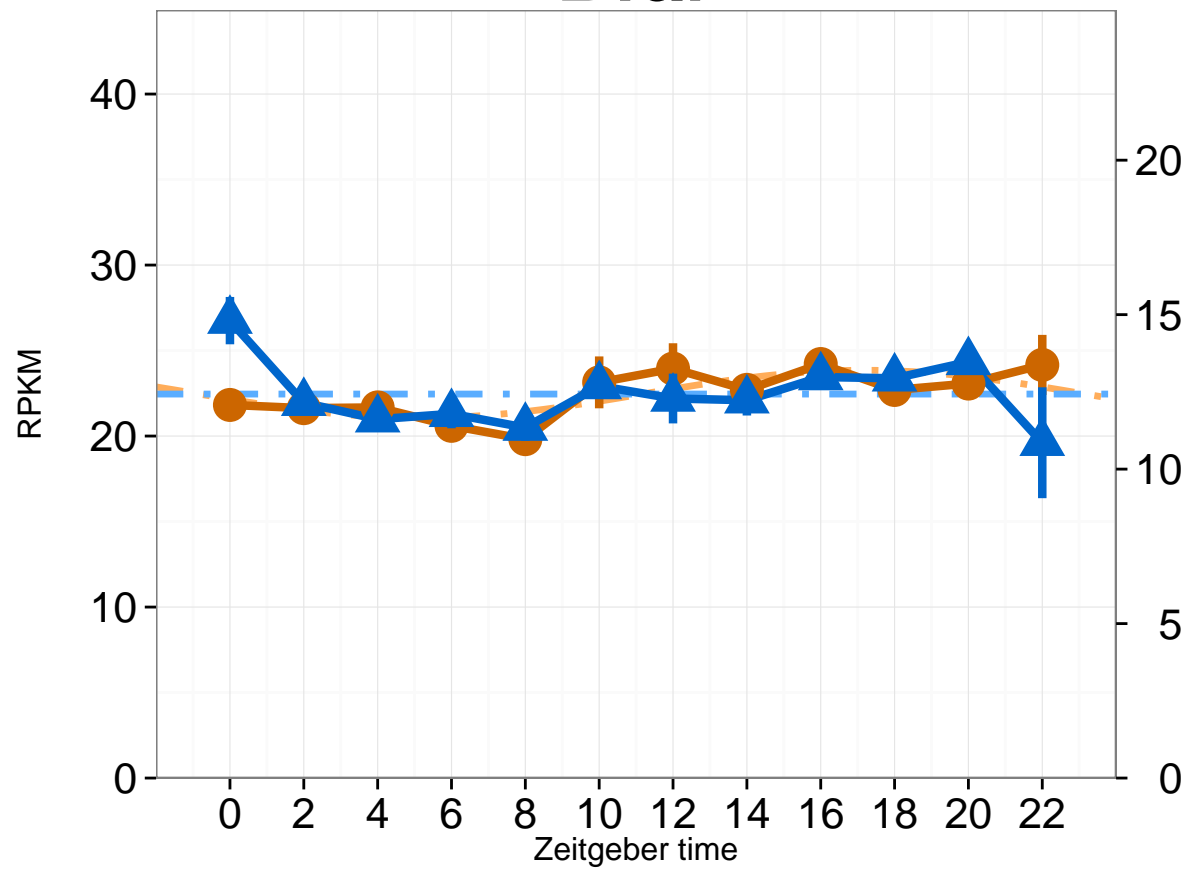

## Bfar

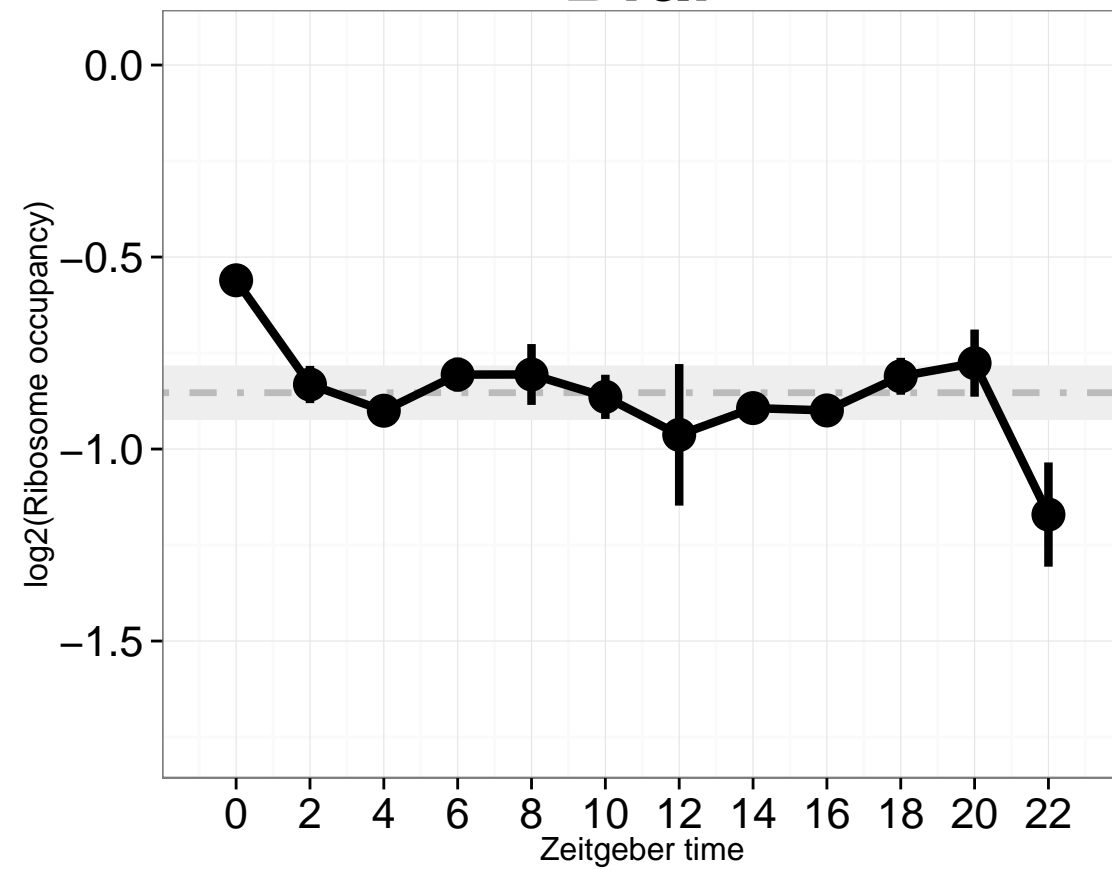

Supplement: Supplementary file 4089 [file 1]

## Lcmt2

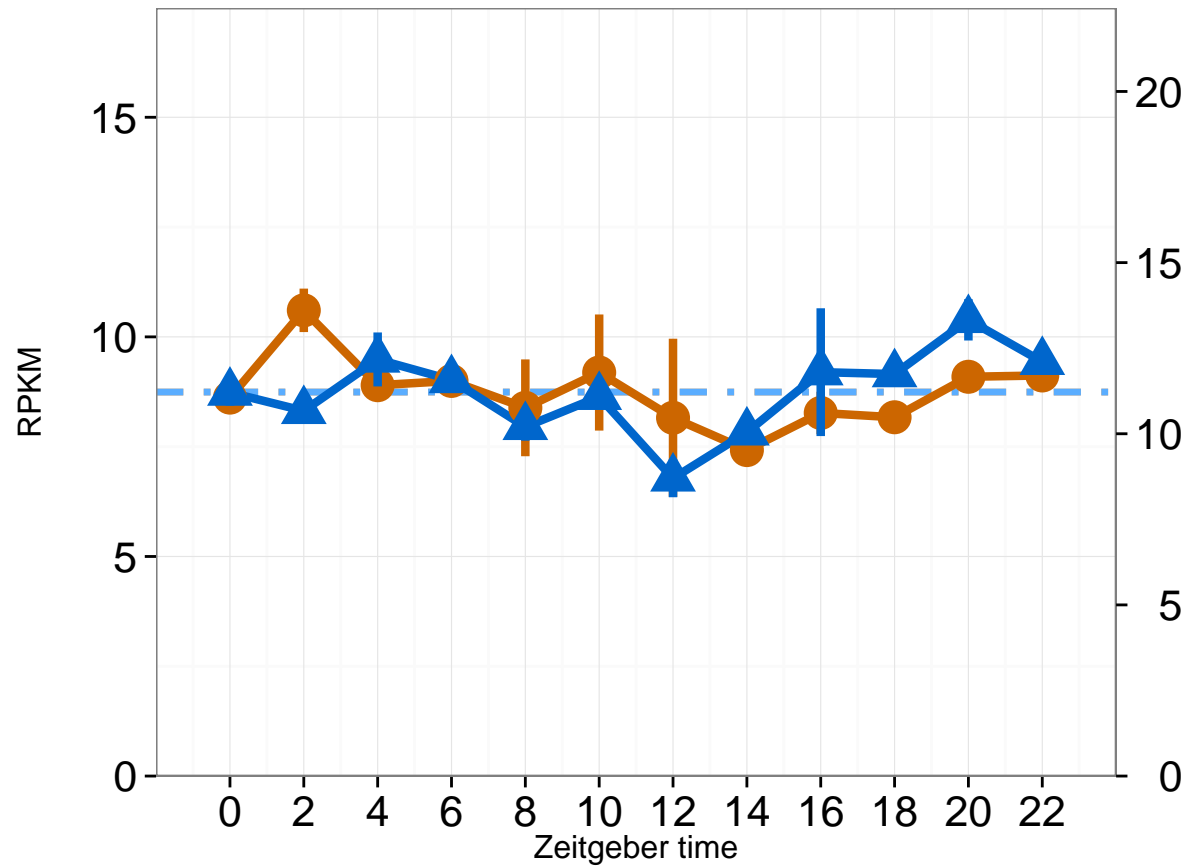

## Lcmt2

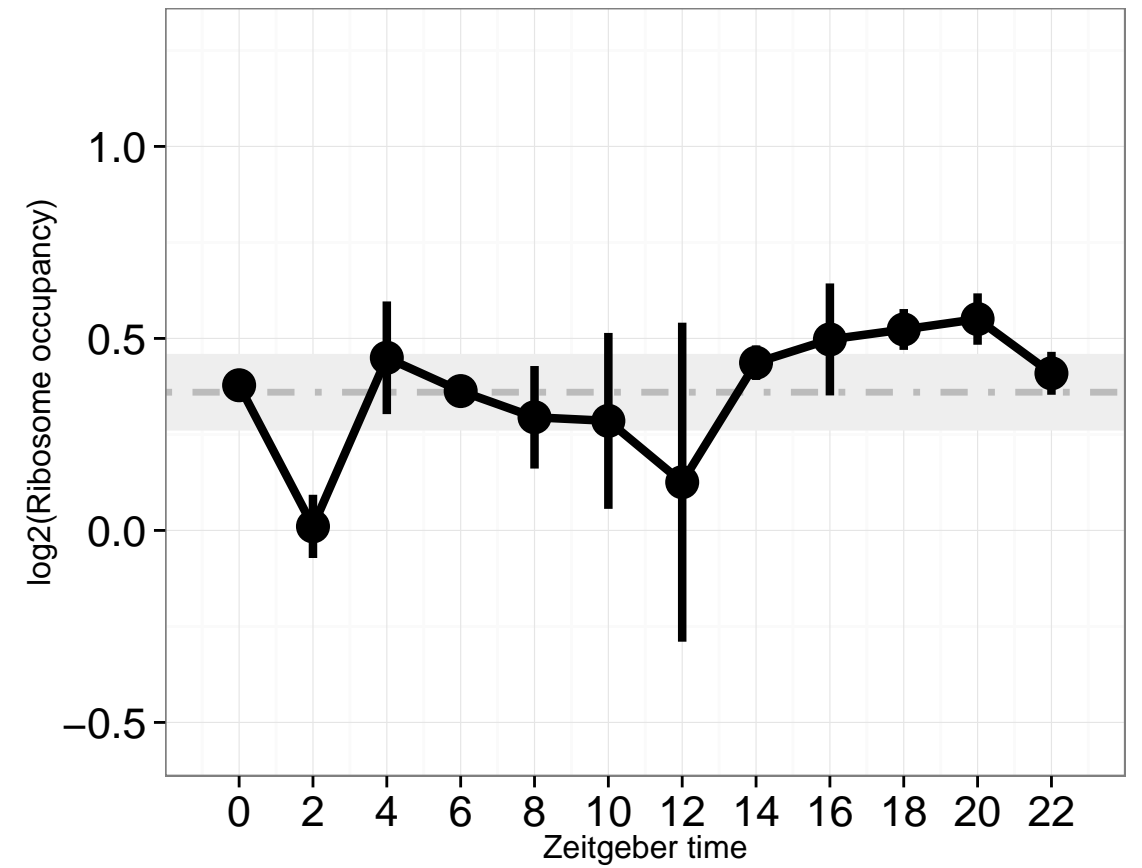

Supplement: Supplementary file 4090 [file 1]

## Kif12

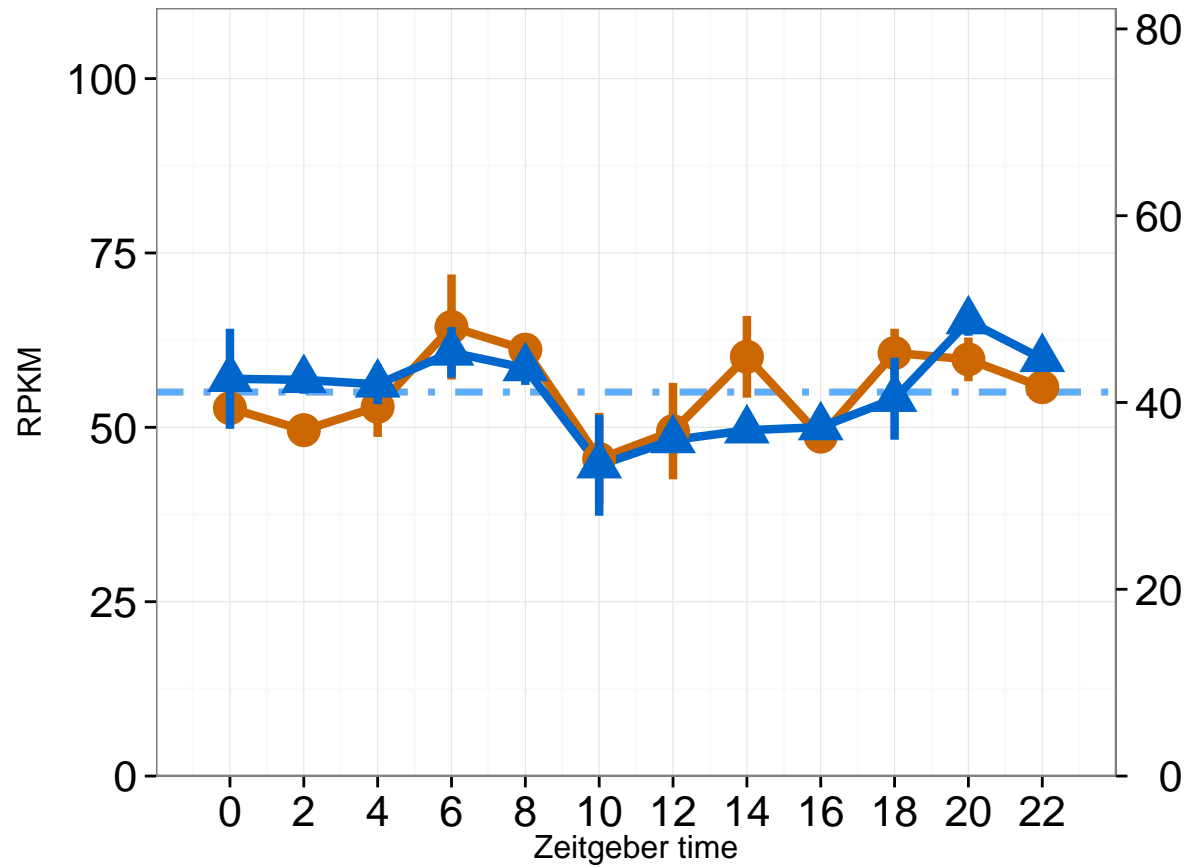

## Kif12

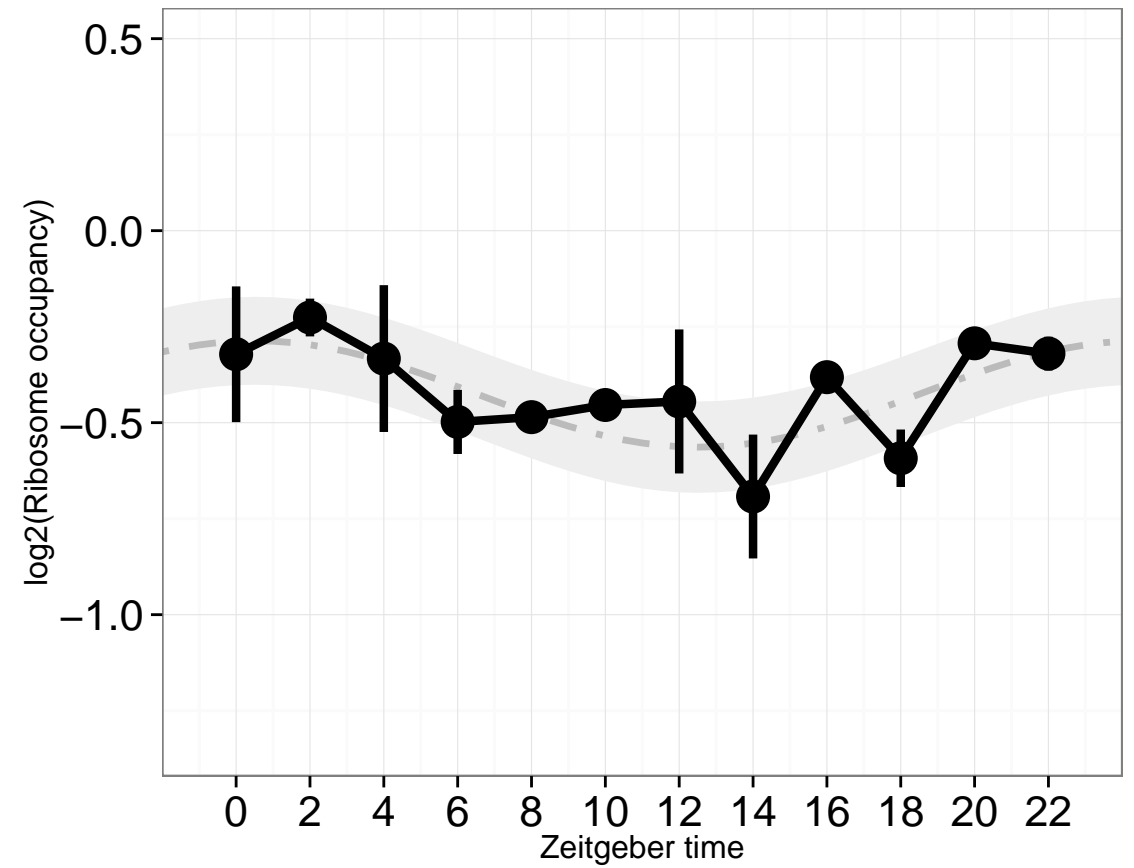

Supplement: Supplementary file 4091 [file 1]

# Ttc39c

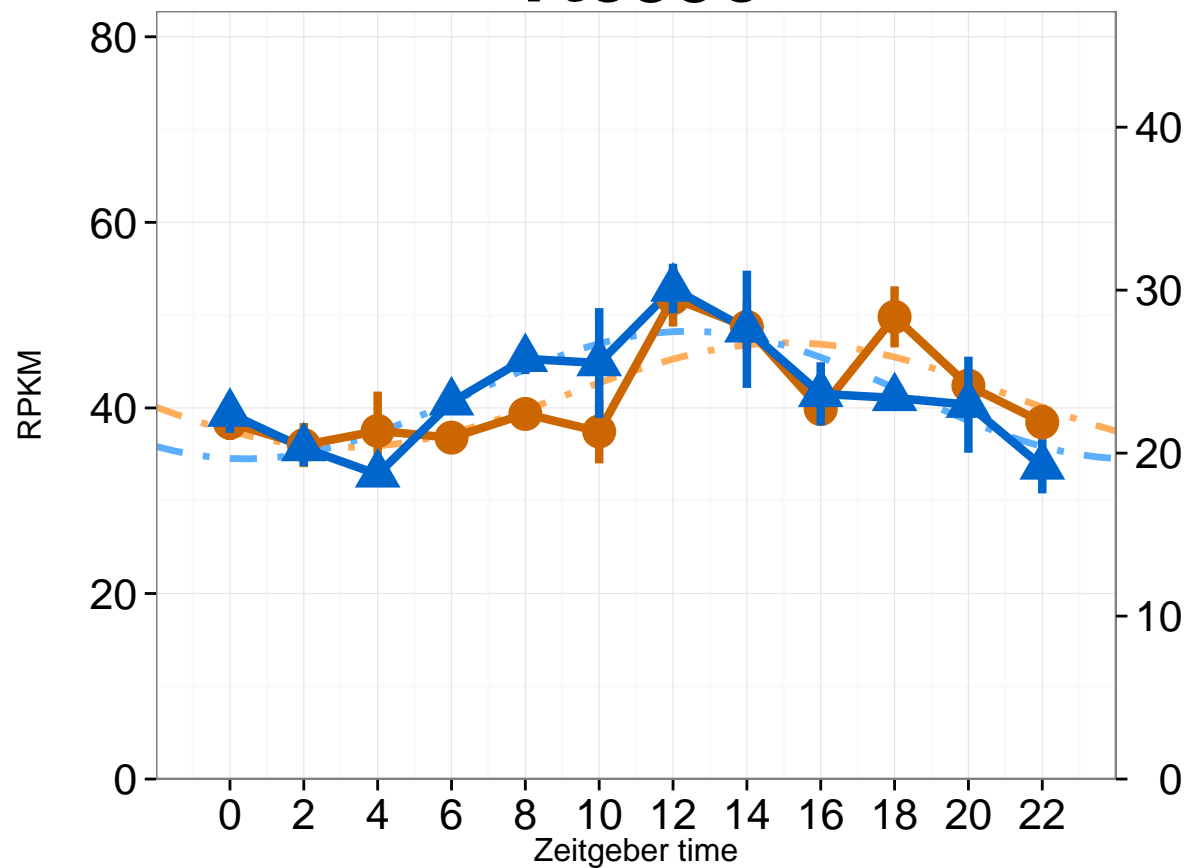

# Ttc39c

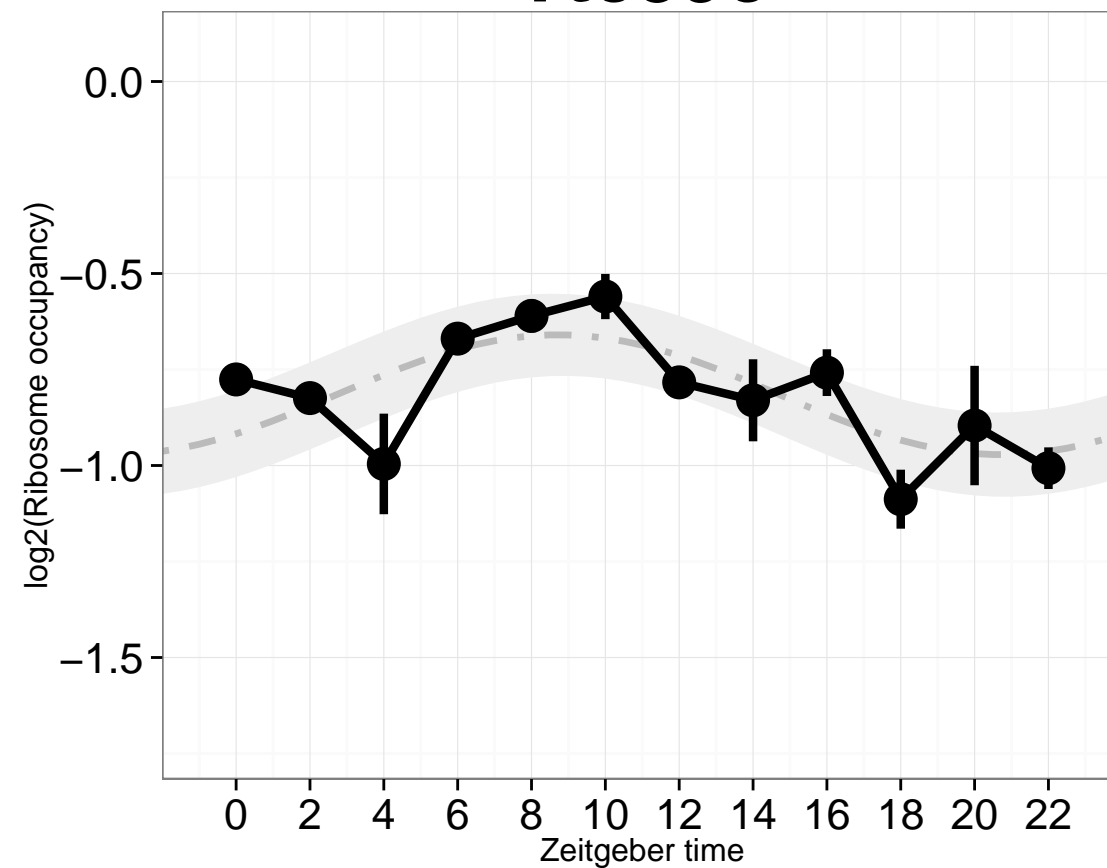

Supplement: Supplementary file 4092 [file 1]

## Pdhx

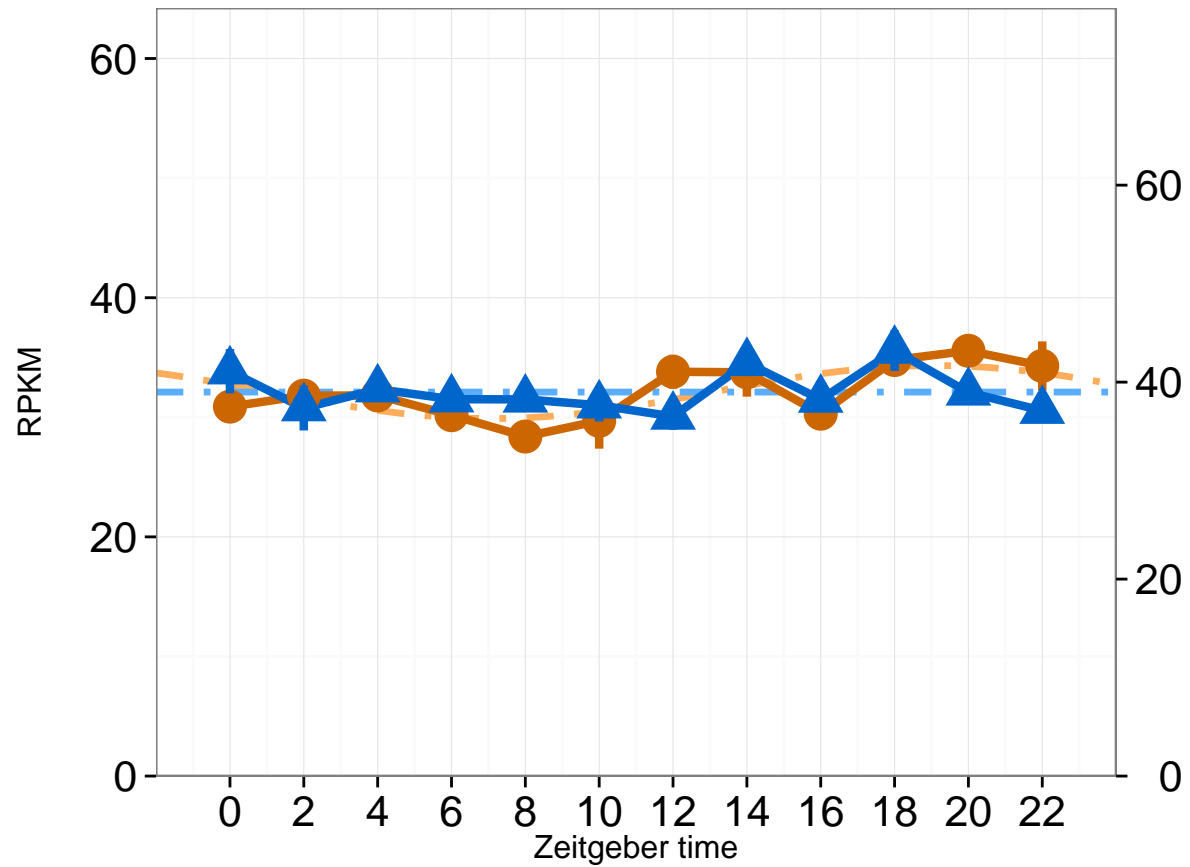

## Pdhx

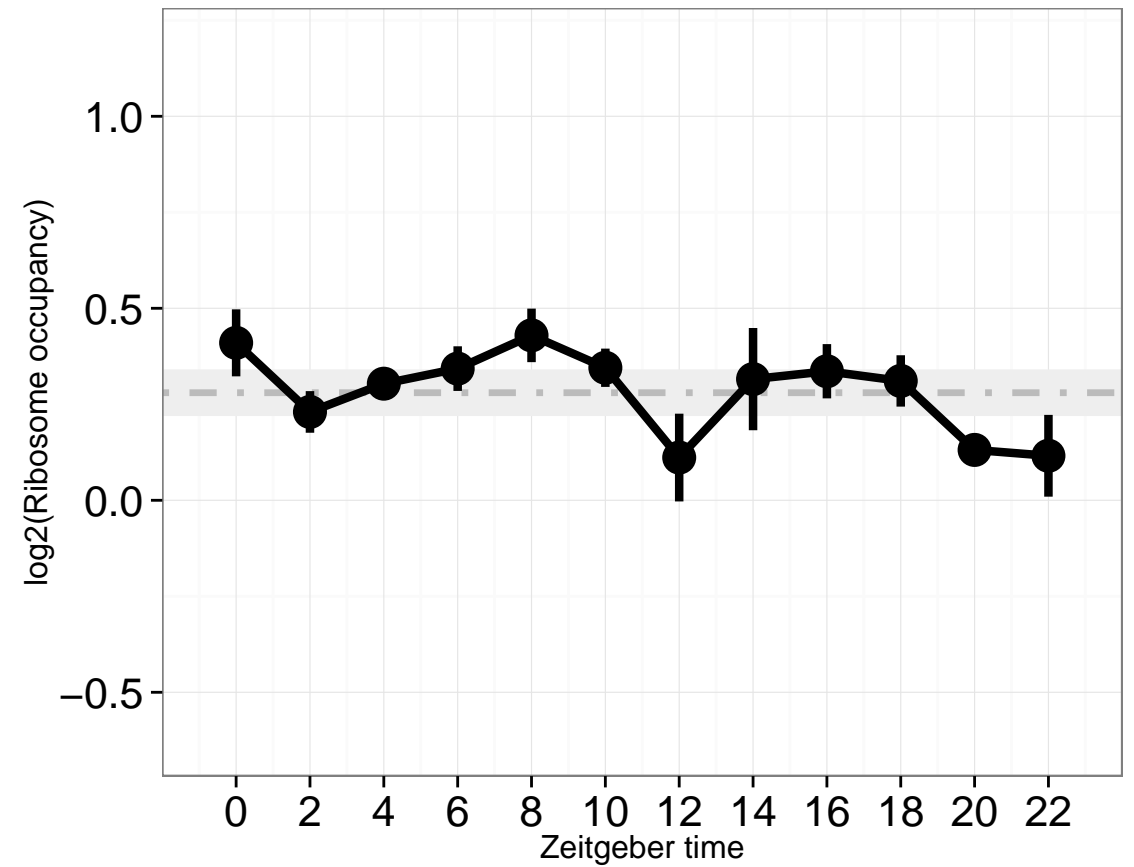

Supplement: Supplementary file 4093 [file 1]

## Ehd4

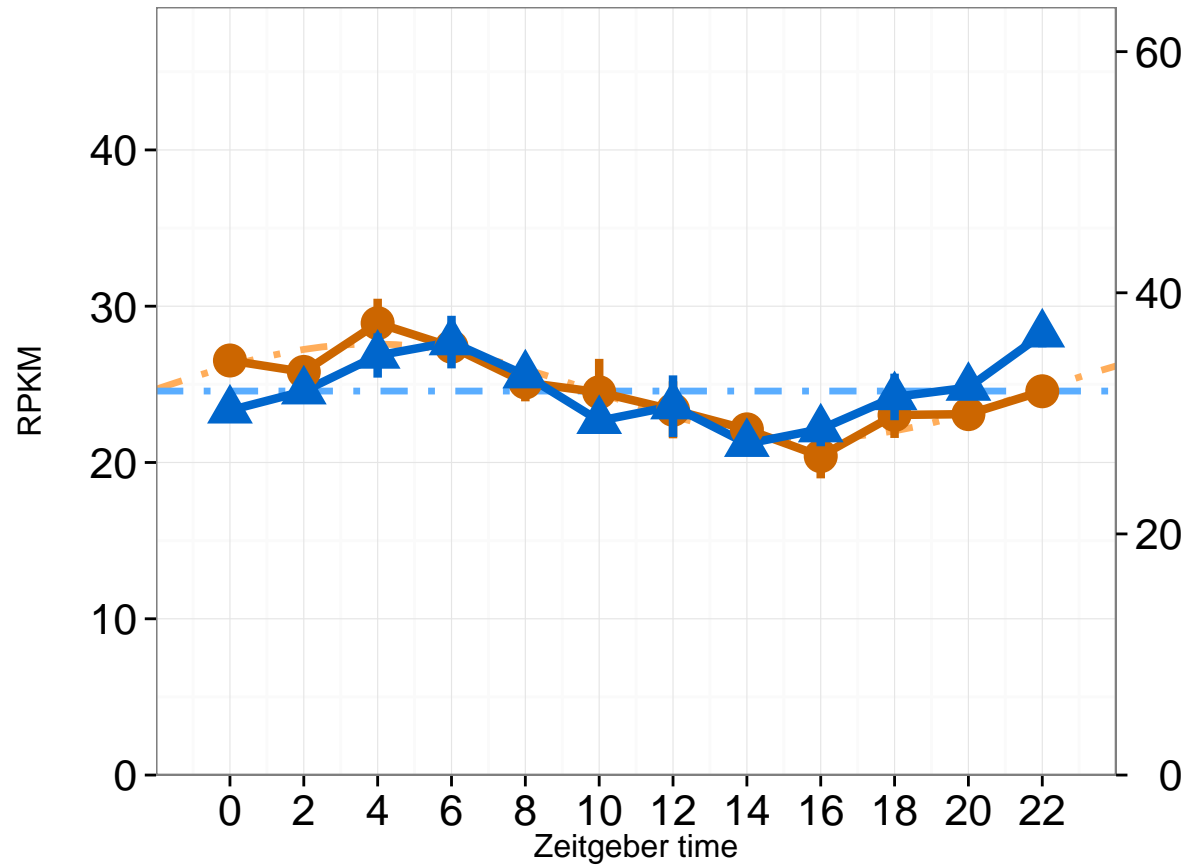

## Ehd4

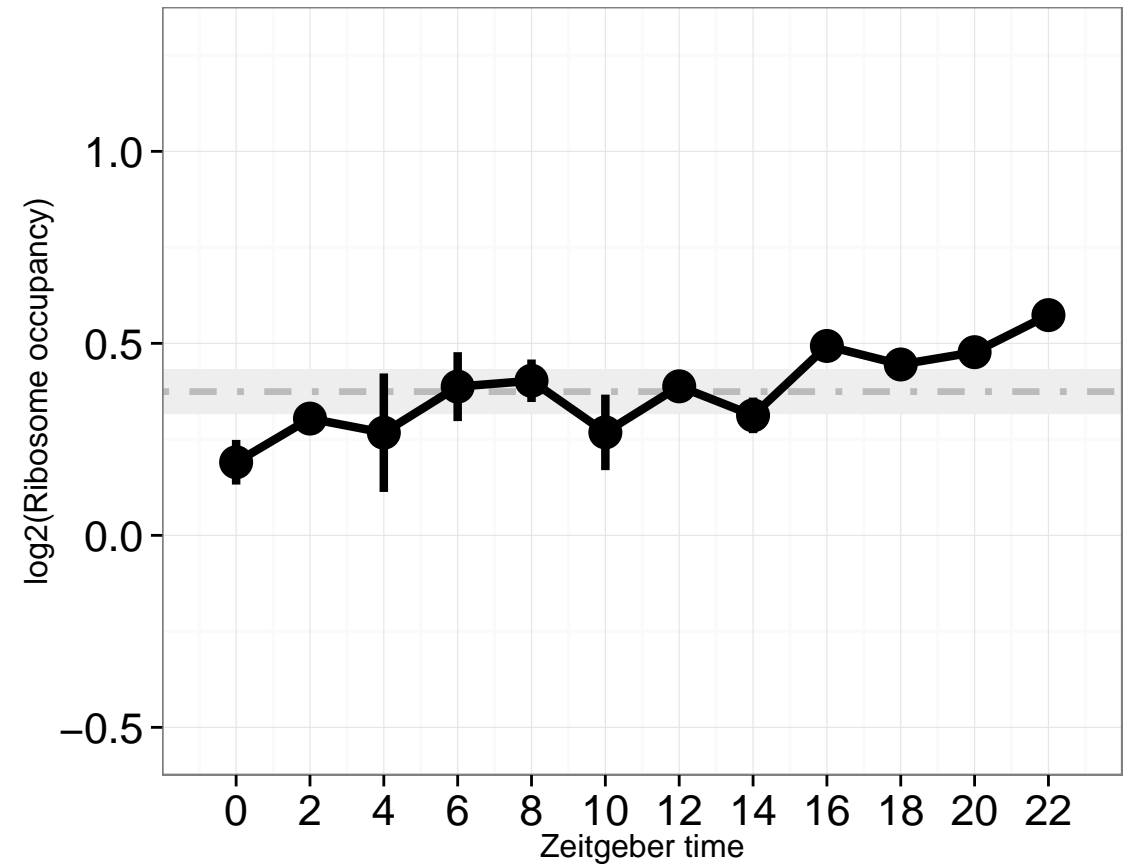

Supplement: Supplementary file 4094 [file 1]

# Akr7a5

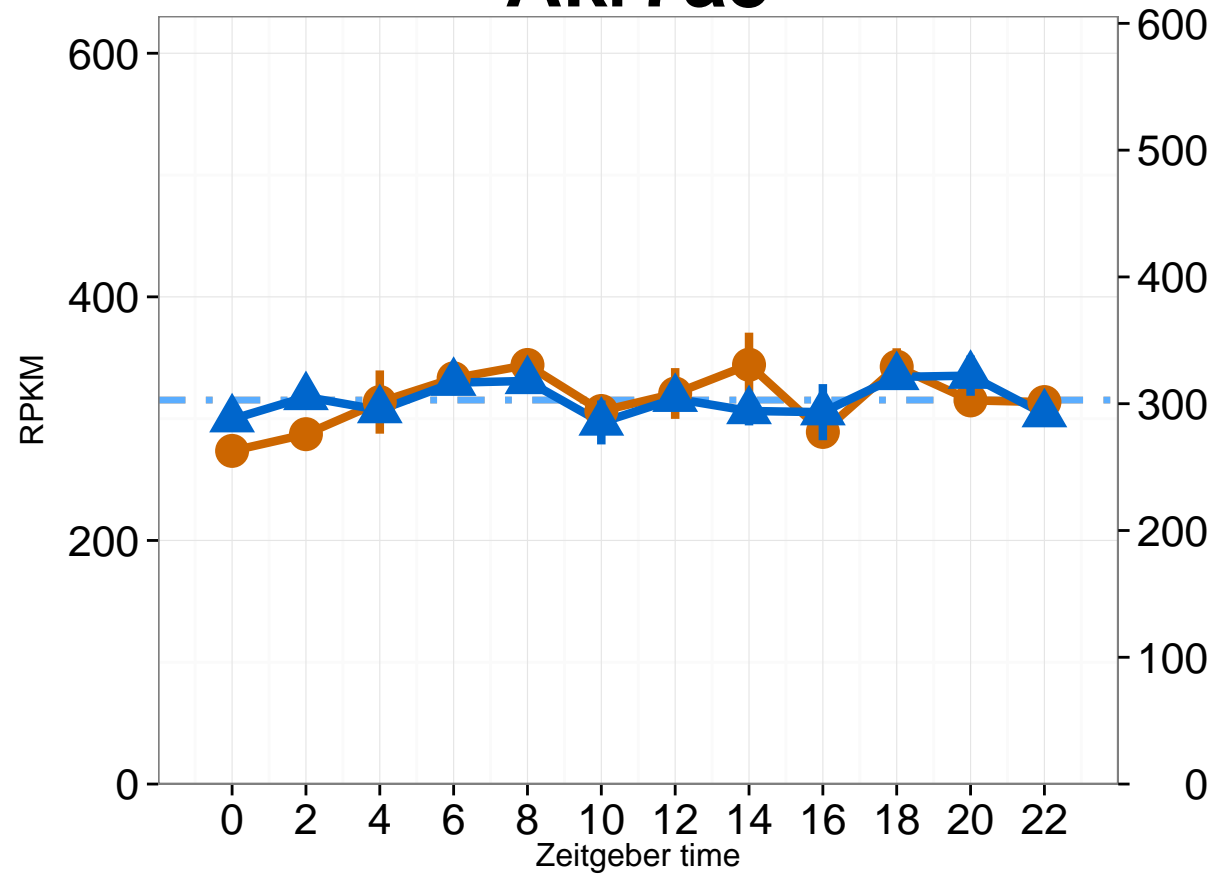

# Akr7a5

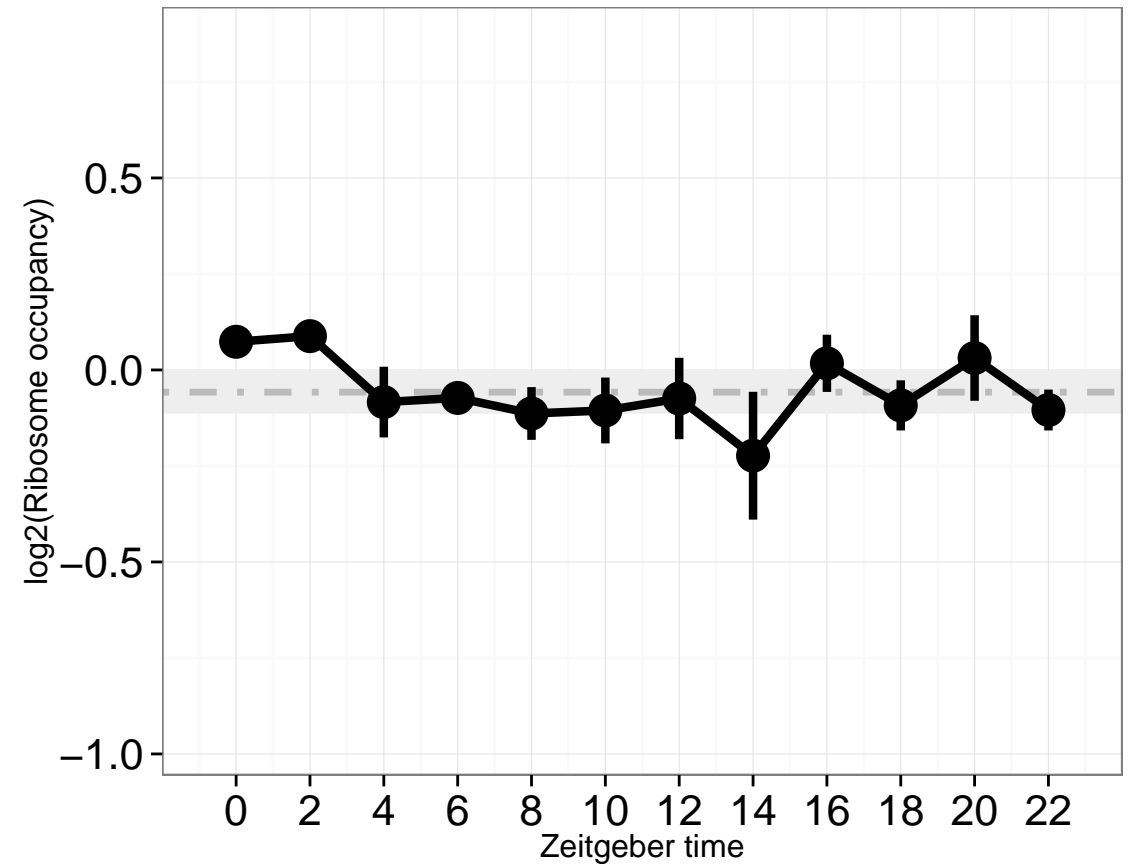

Supplement: Supplementary file 4095 [file 1]

## Kitl

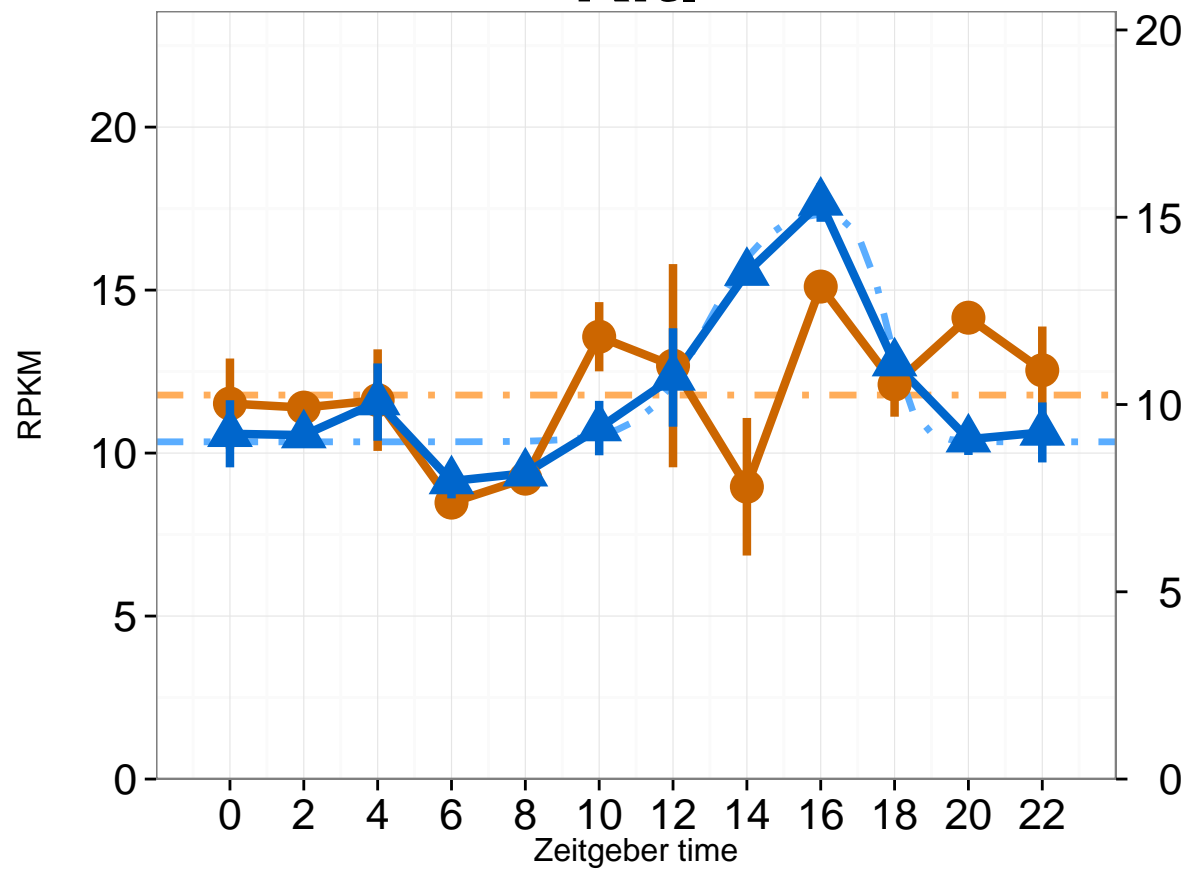

## Kitl

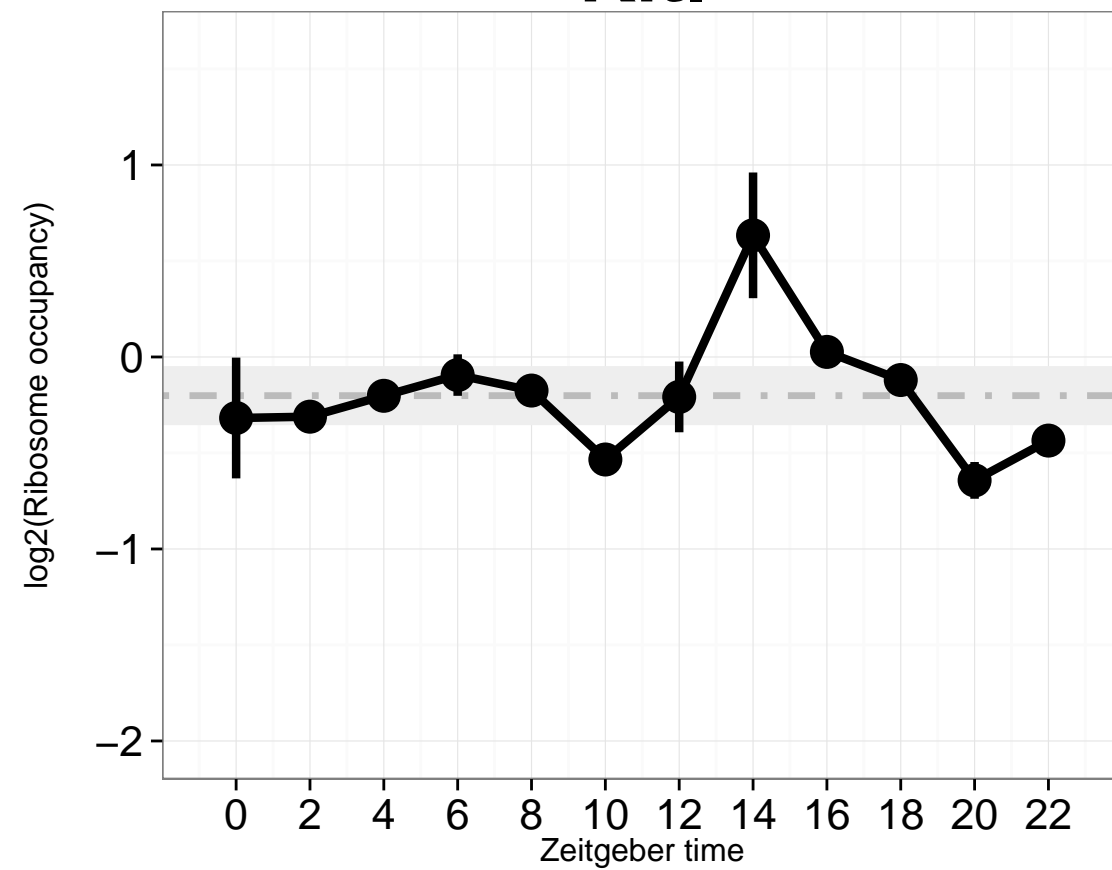

Supplement: Supplementary file 4096 [file 1]

## Cd180

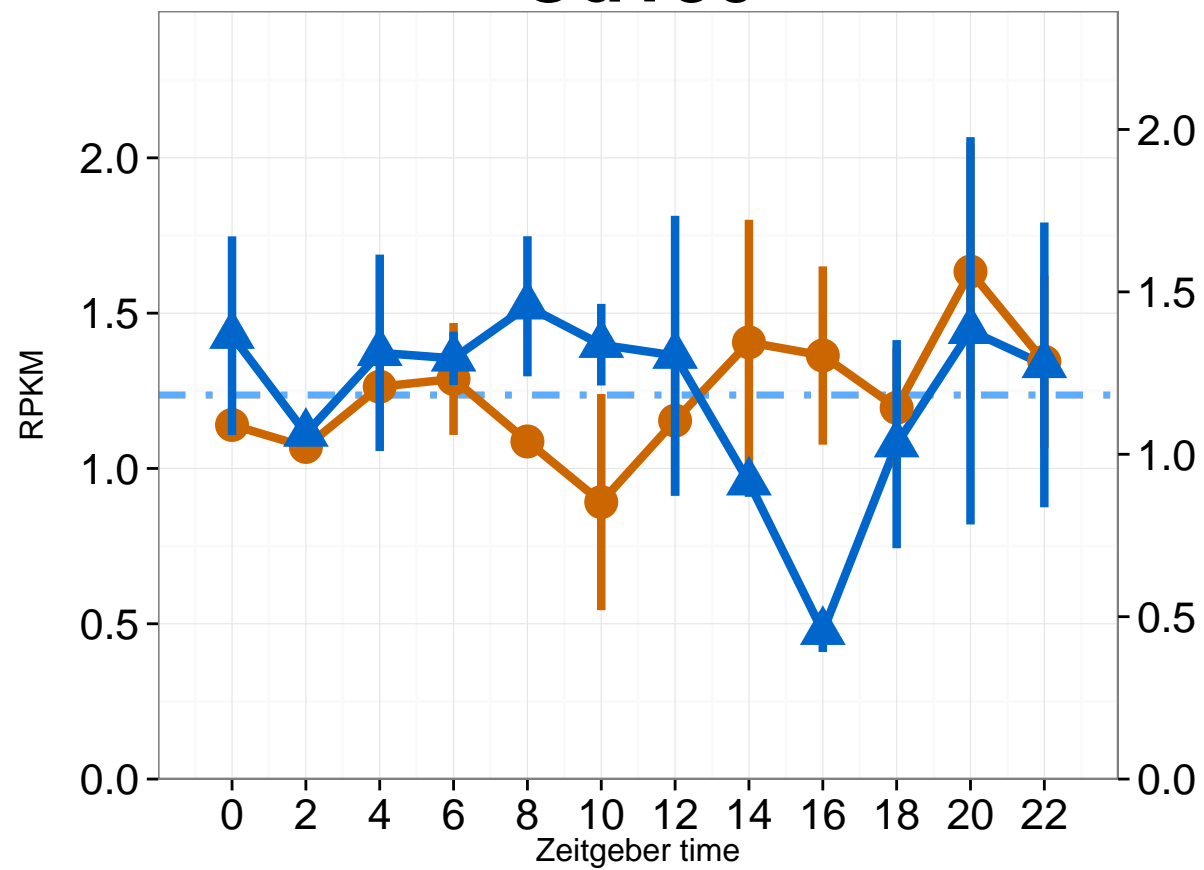

## Cd180

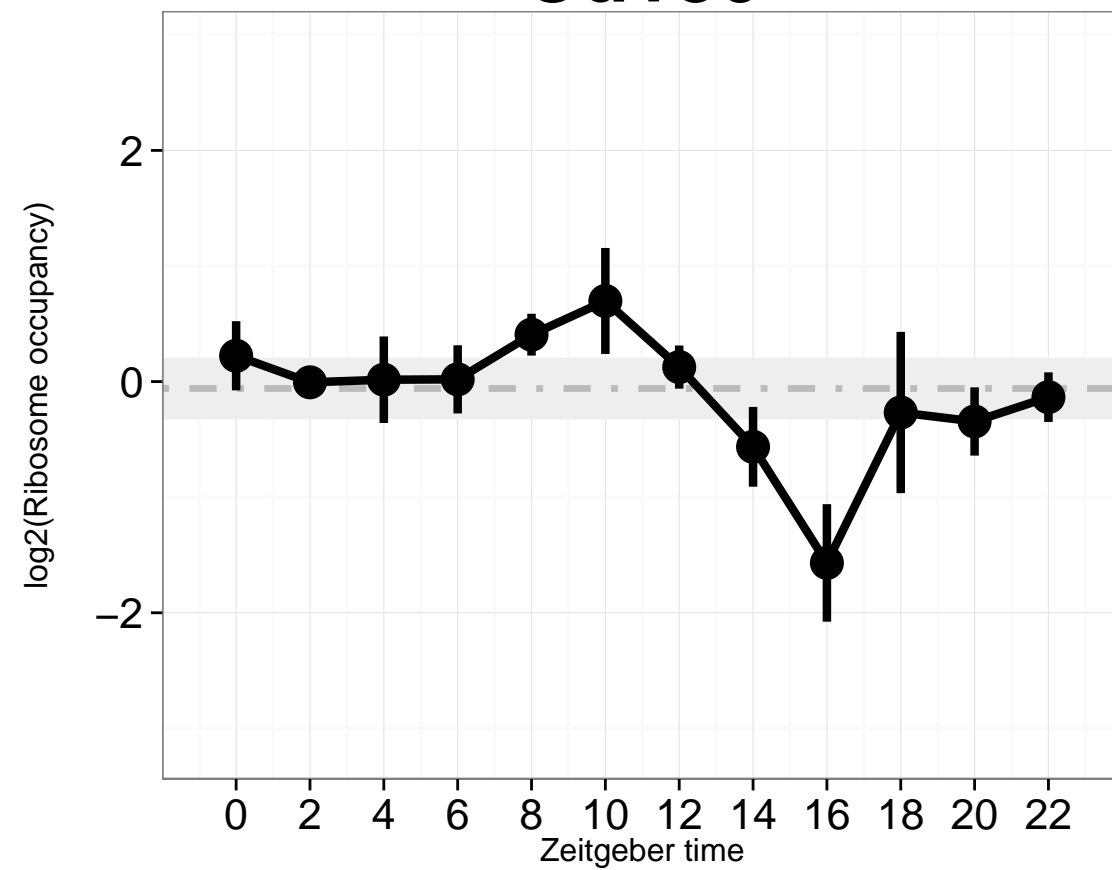

Supplement: Supplementary file 4097 [file 1]

## Elovl2

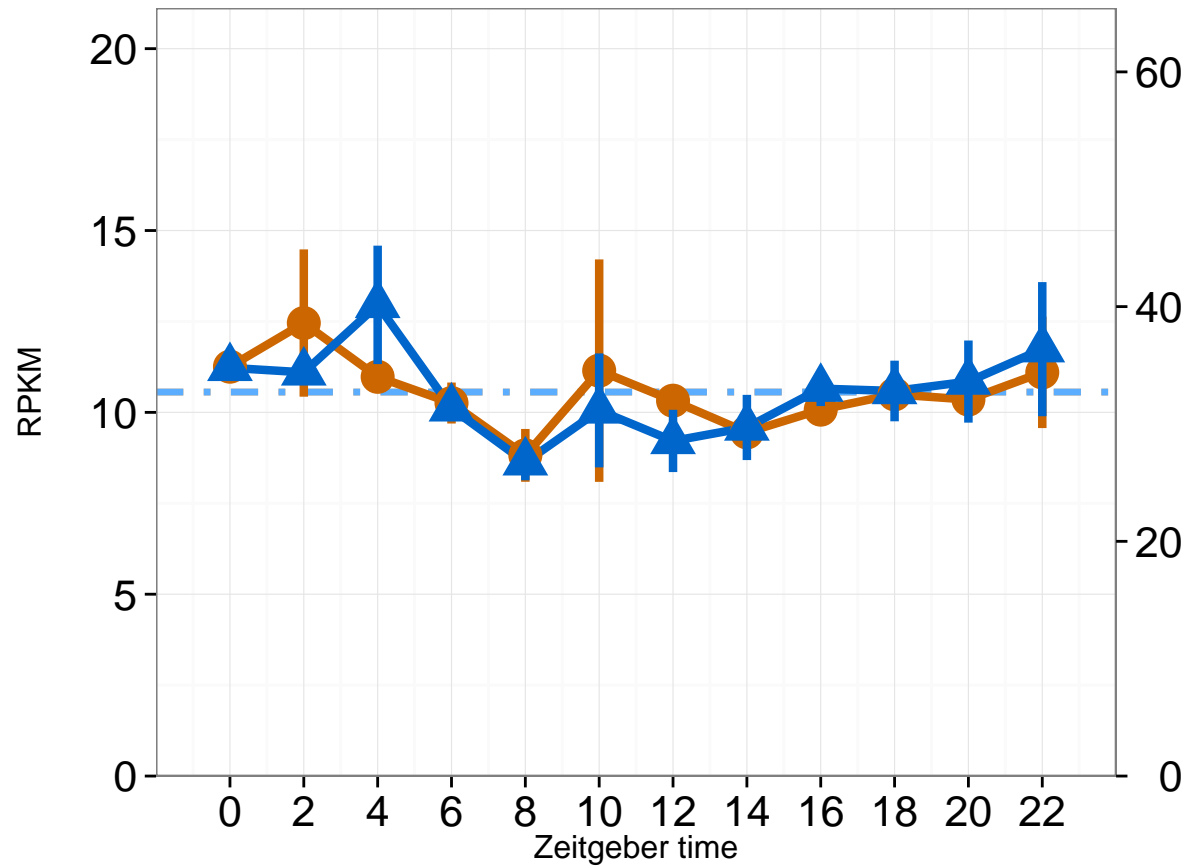

## Elovl2

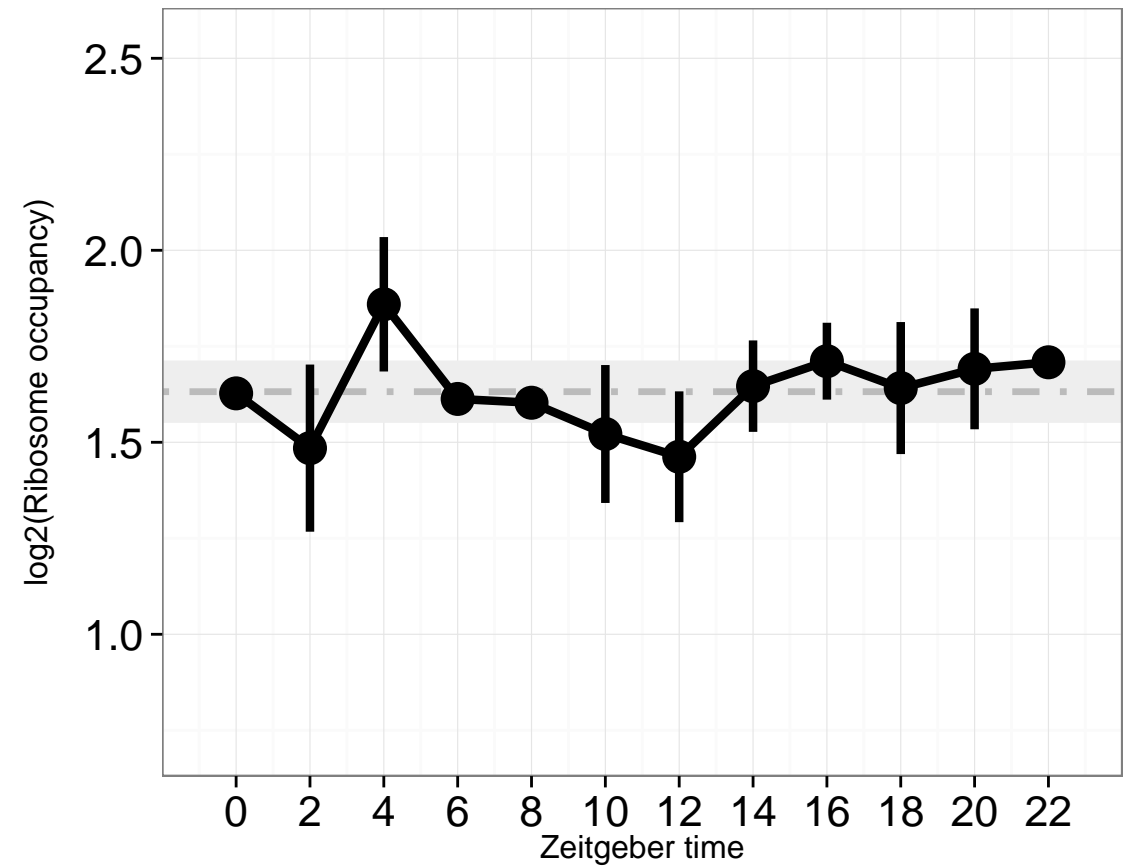

Supplement: Supplementary file 4098 [file 1]

# Fscn1

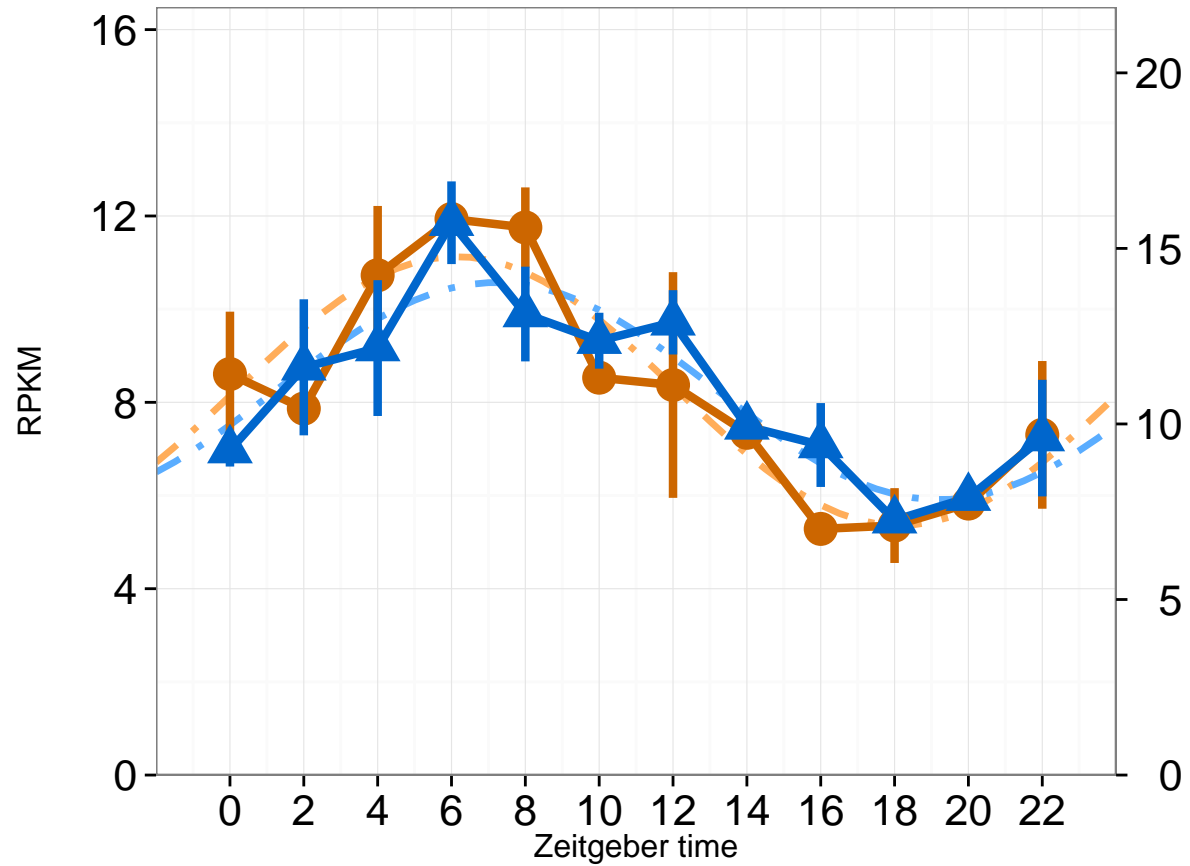

# Fscn1

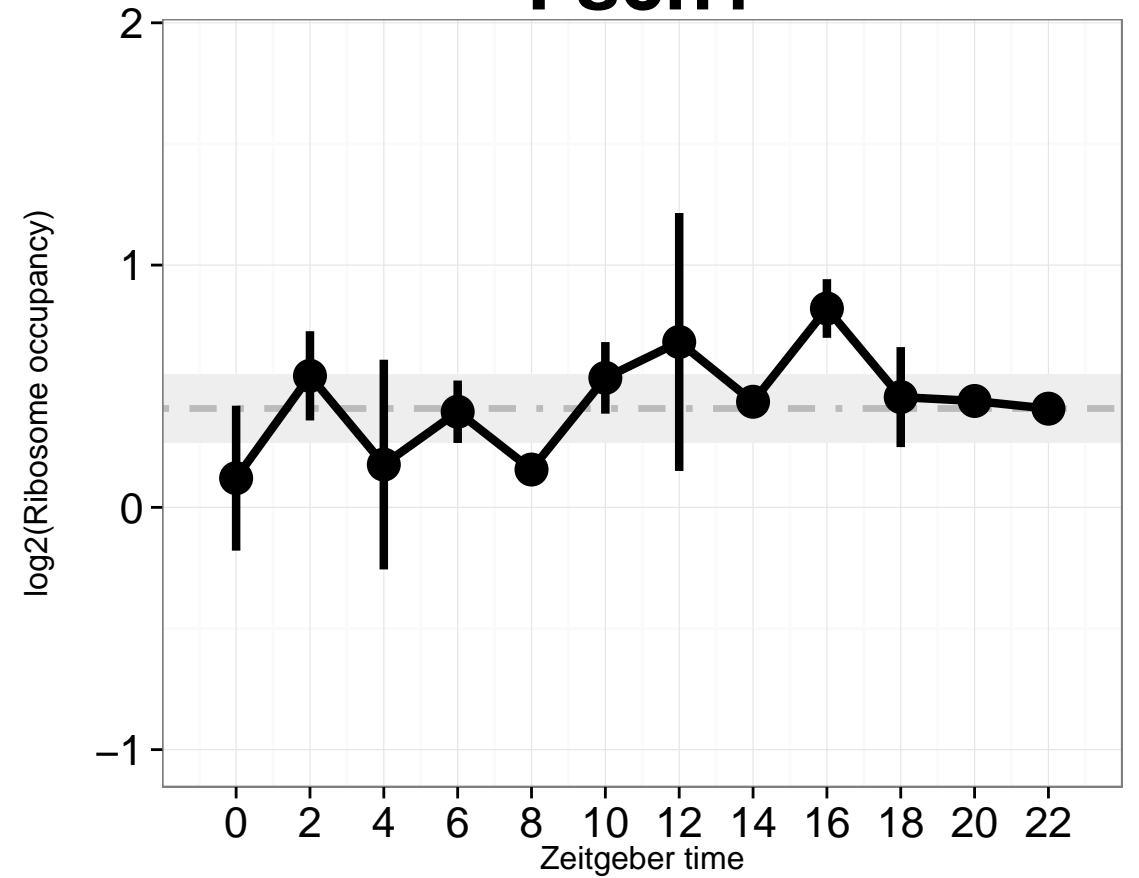

Supplement: Supplementary file 4099 [file 1]

## Ccnl2

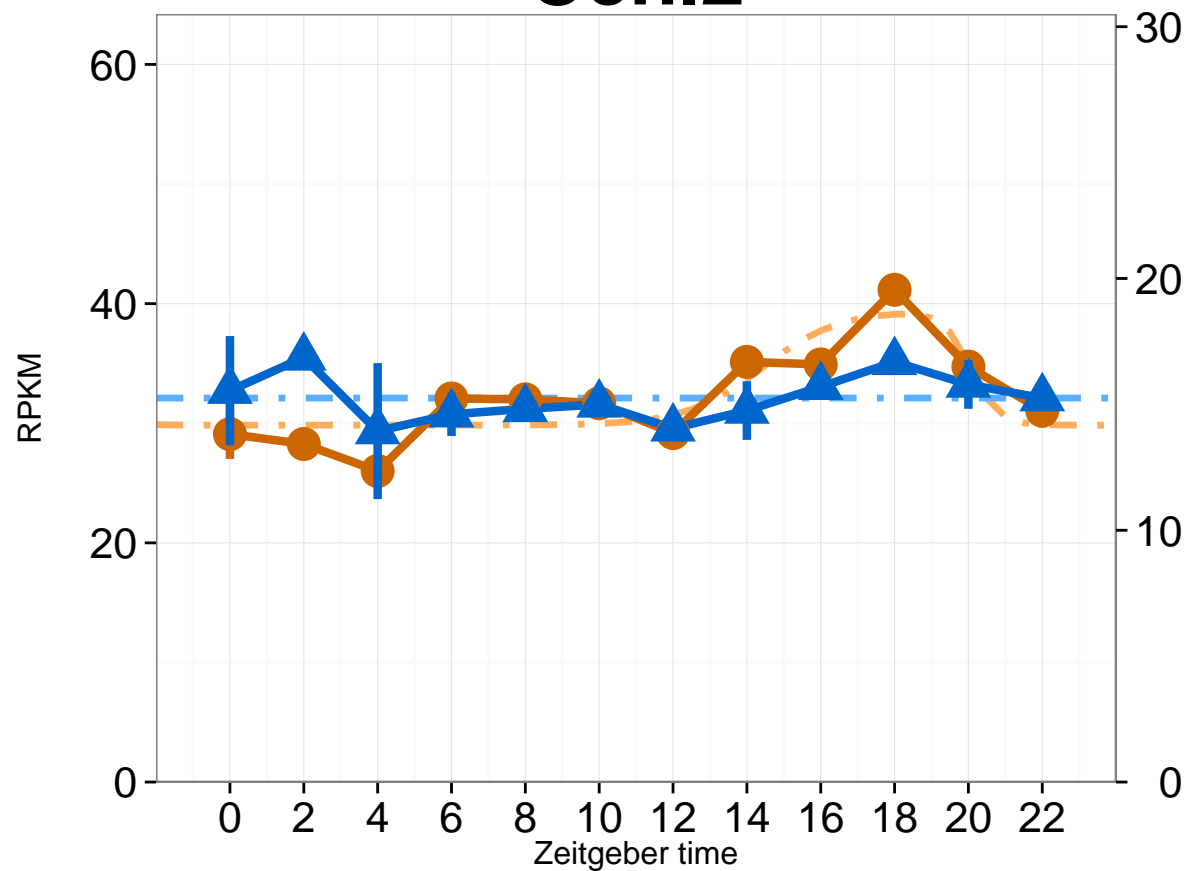

## Ccnl2

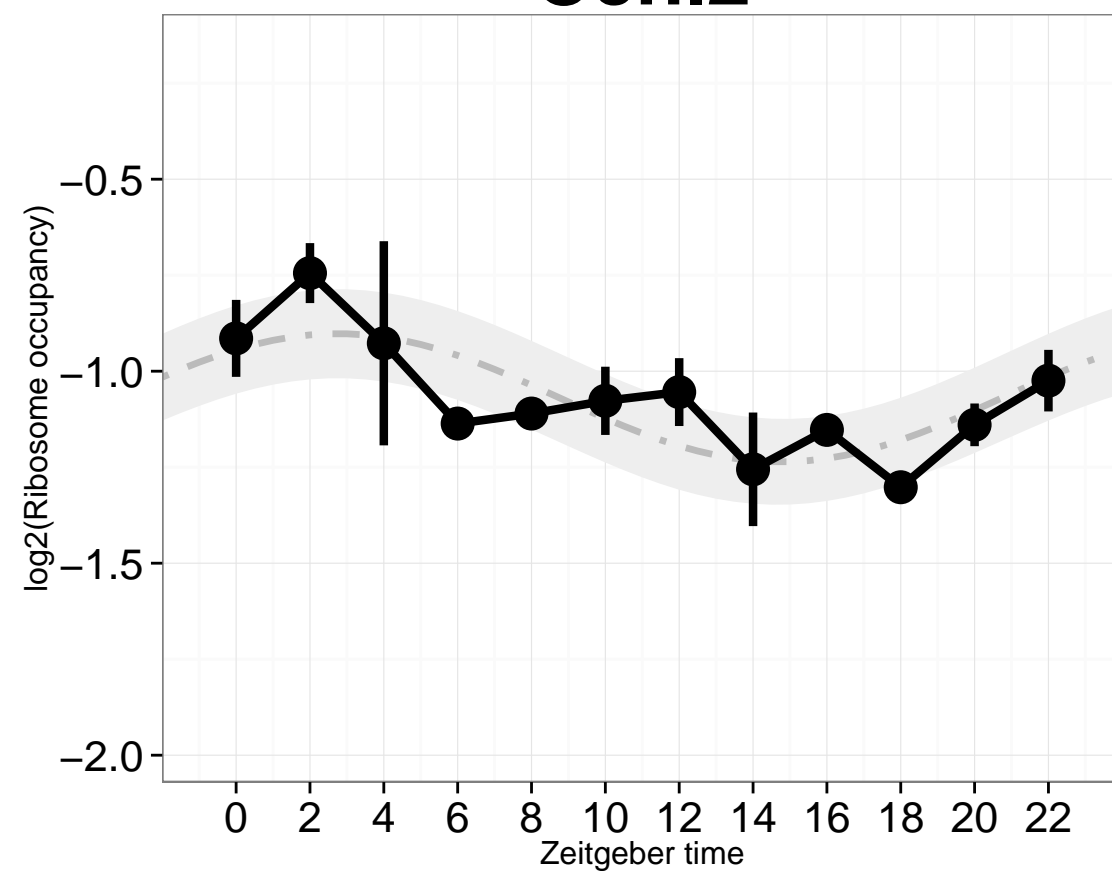

Supplement: Supplementary file 4100 [file 1]

## Crif2

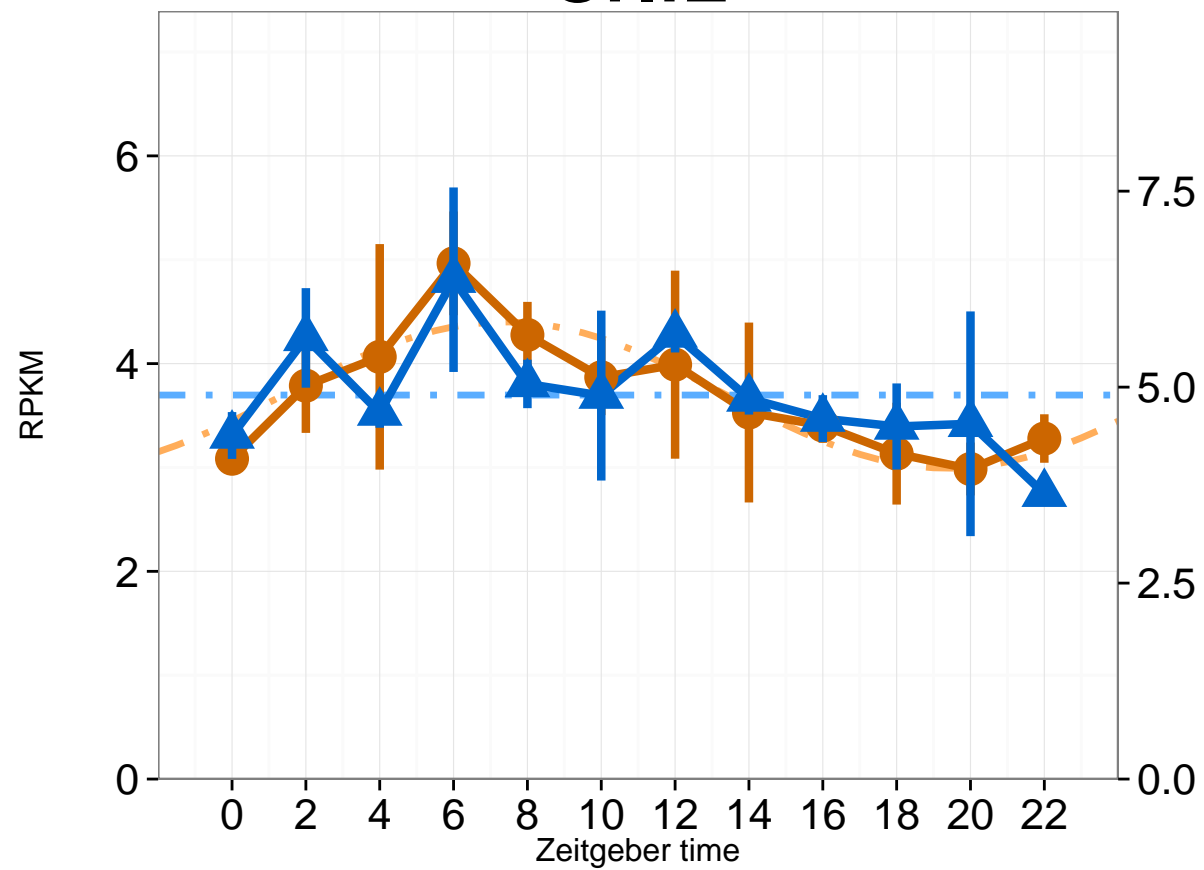

## Crif2

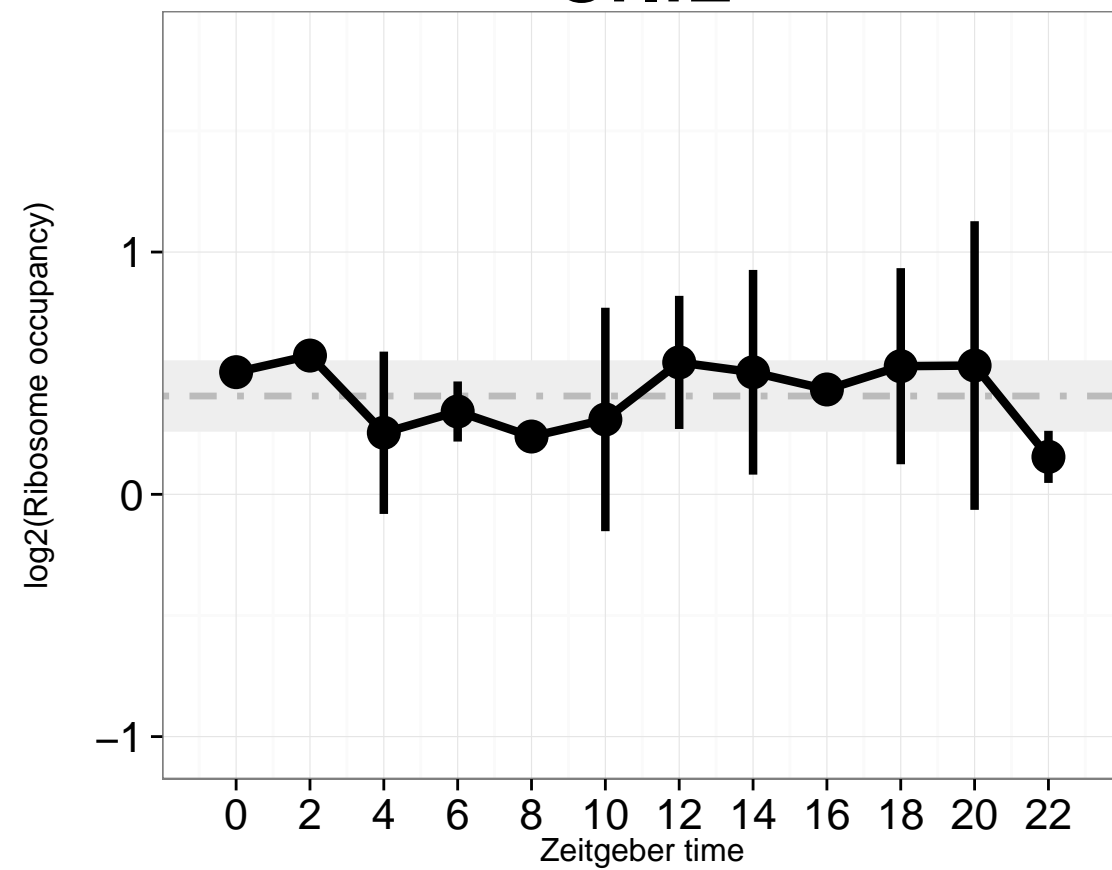

Supplement: Supplementary file 4101 [file 1]

**C2**

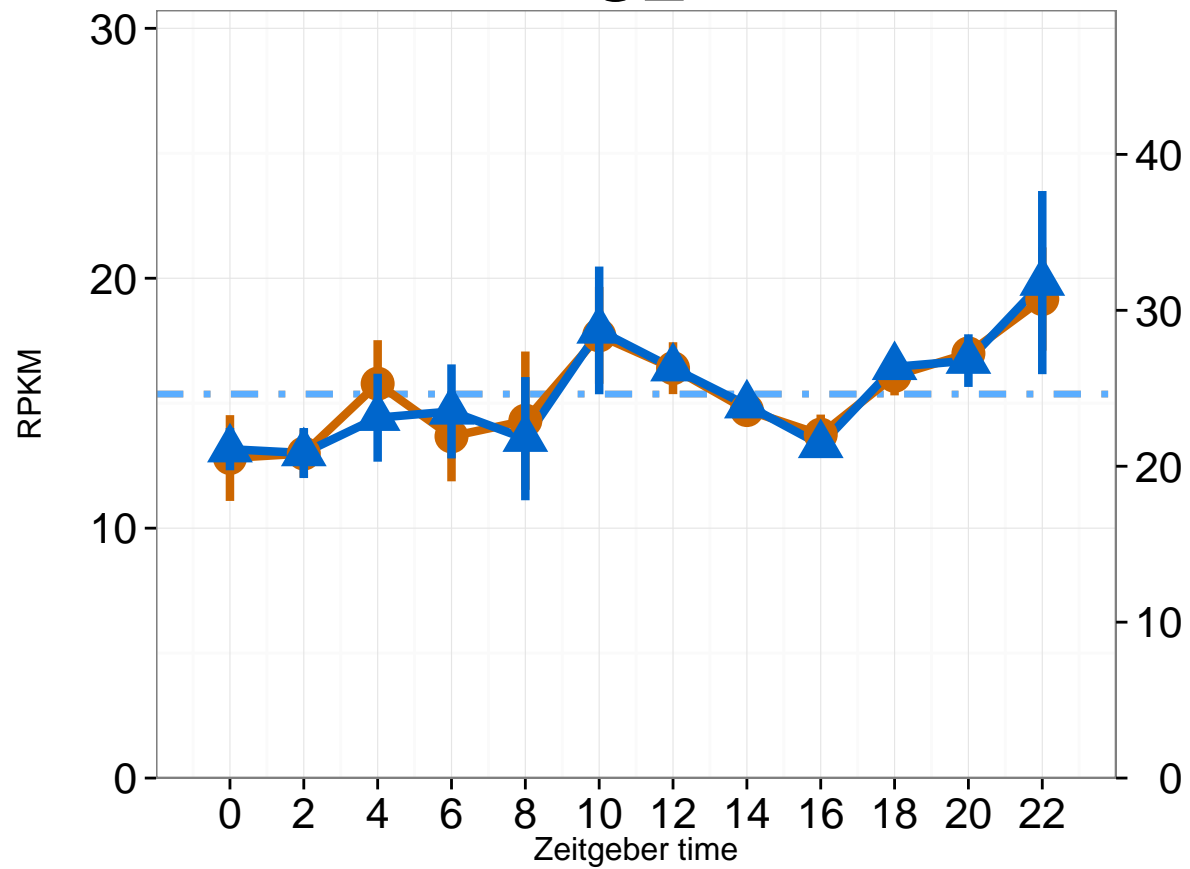

**C2**

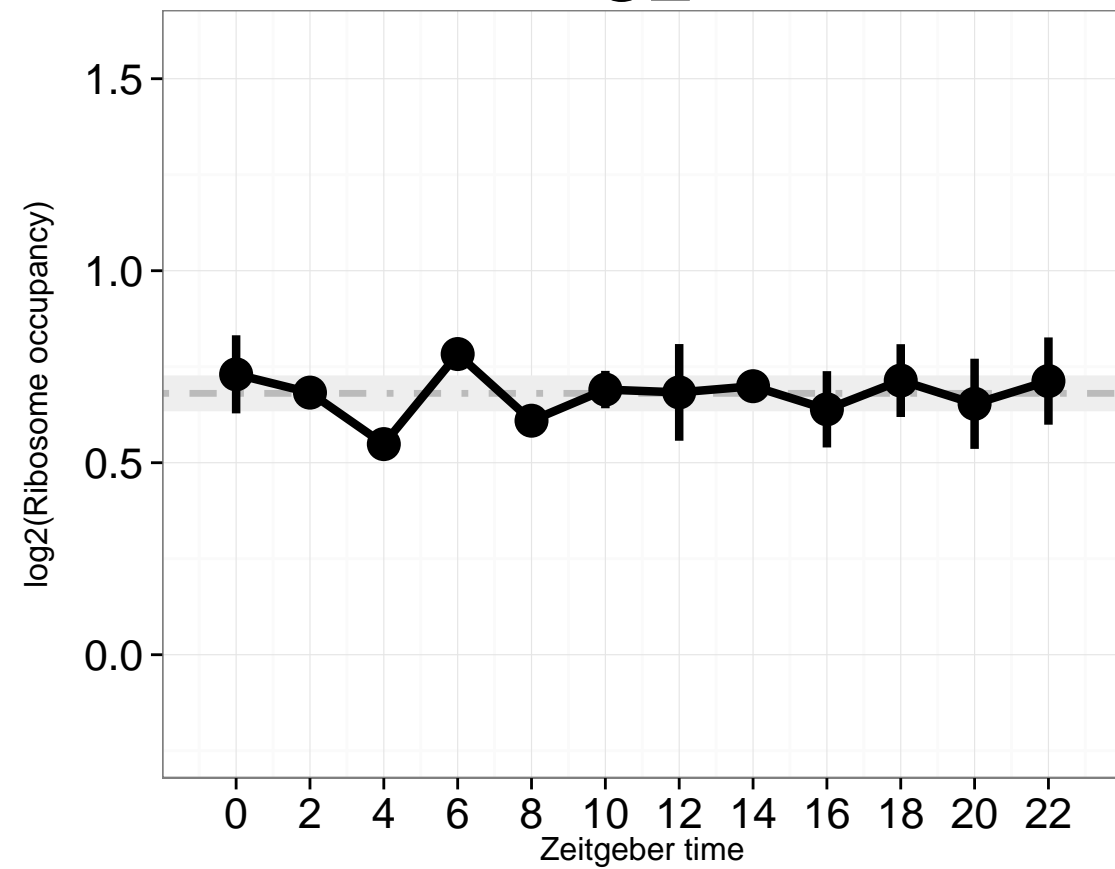

Supplement: Supplementary file 4102 [file 1]

# Cgnl1

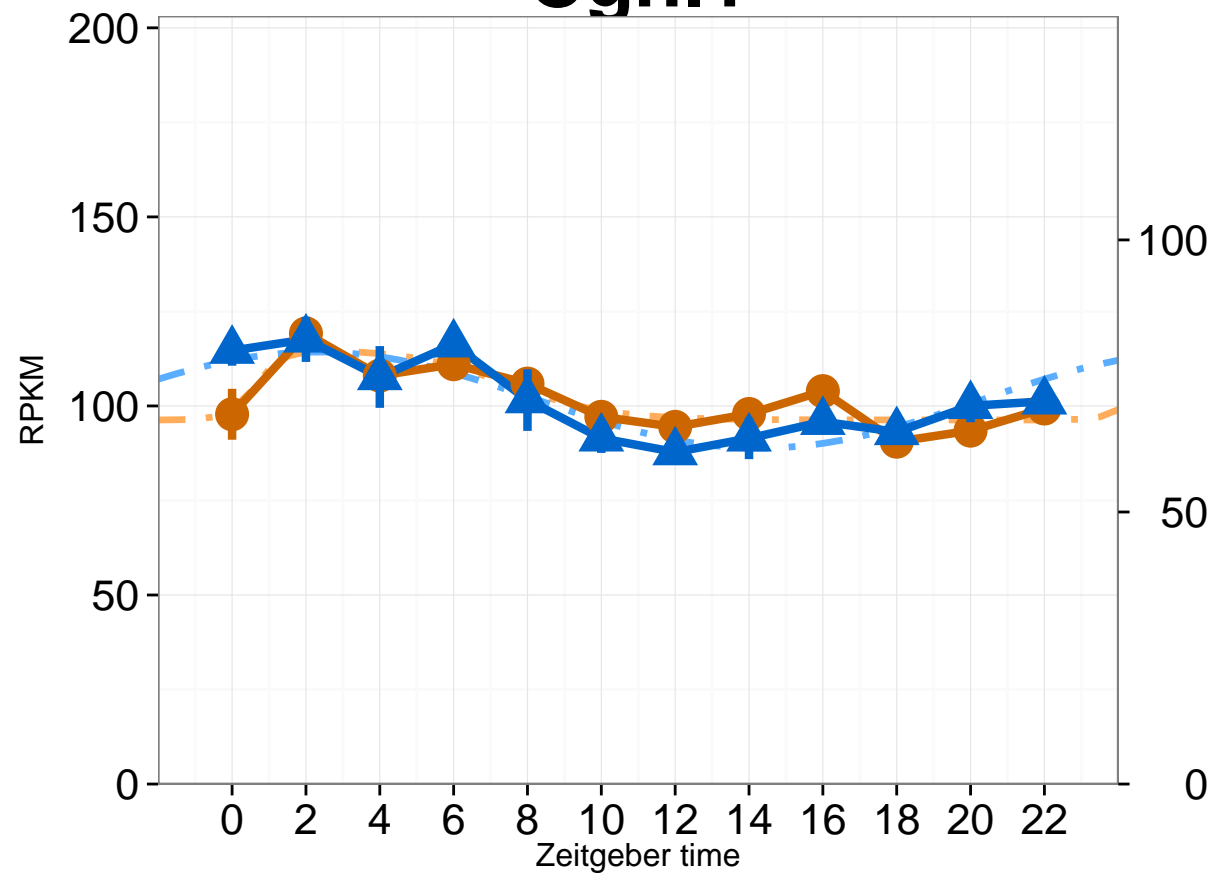

# Cgnl1

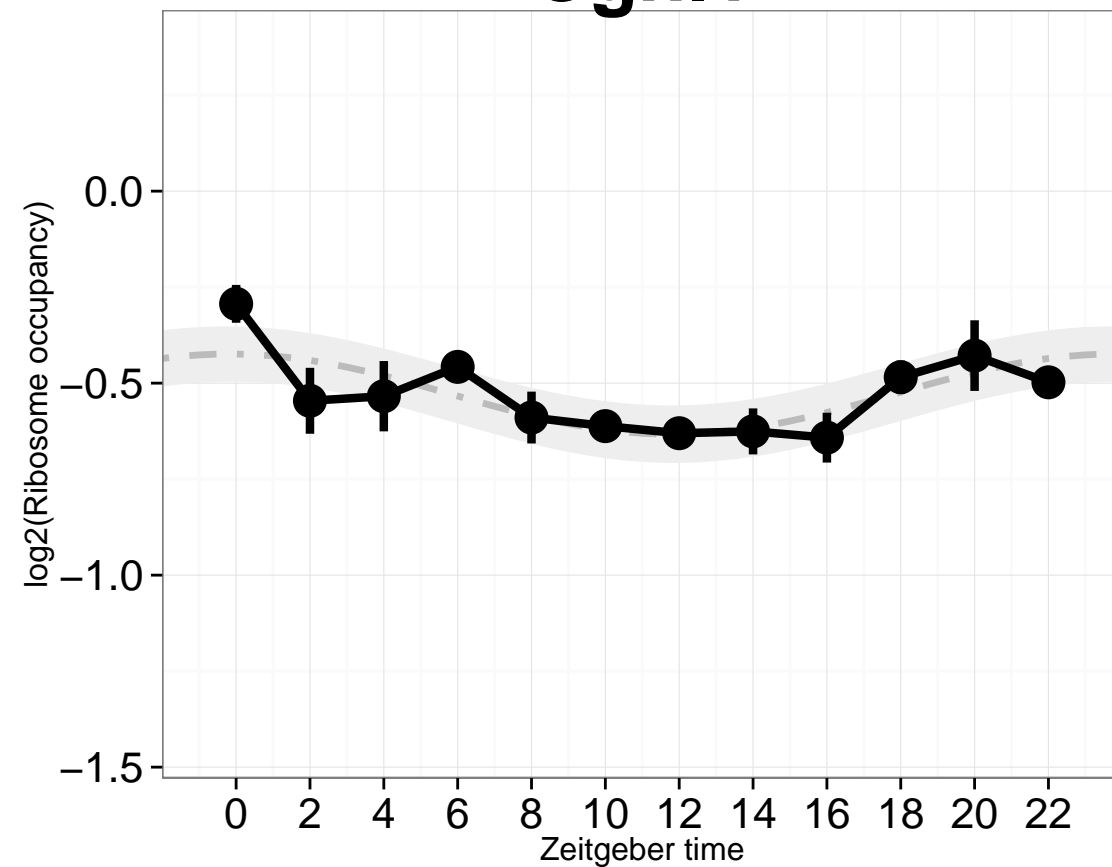

Supplement: Supplementary file 4103 [file 1]

## Cmc1

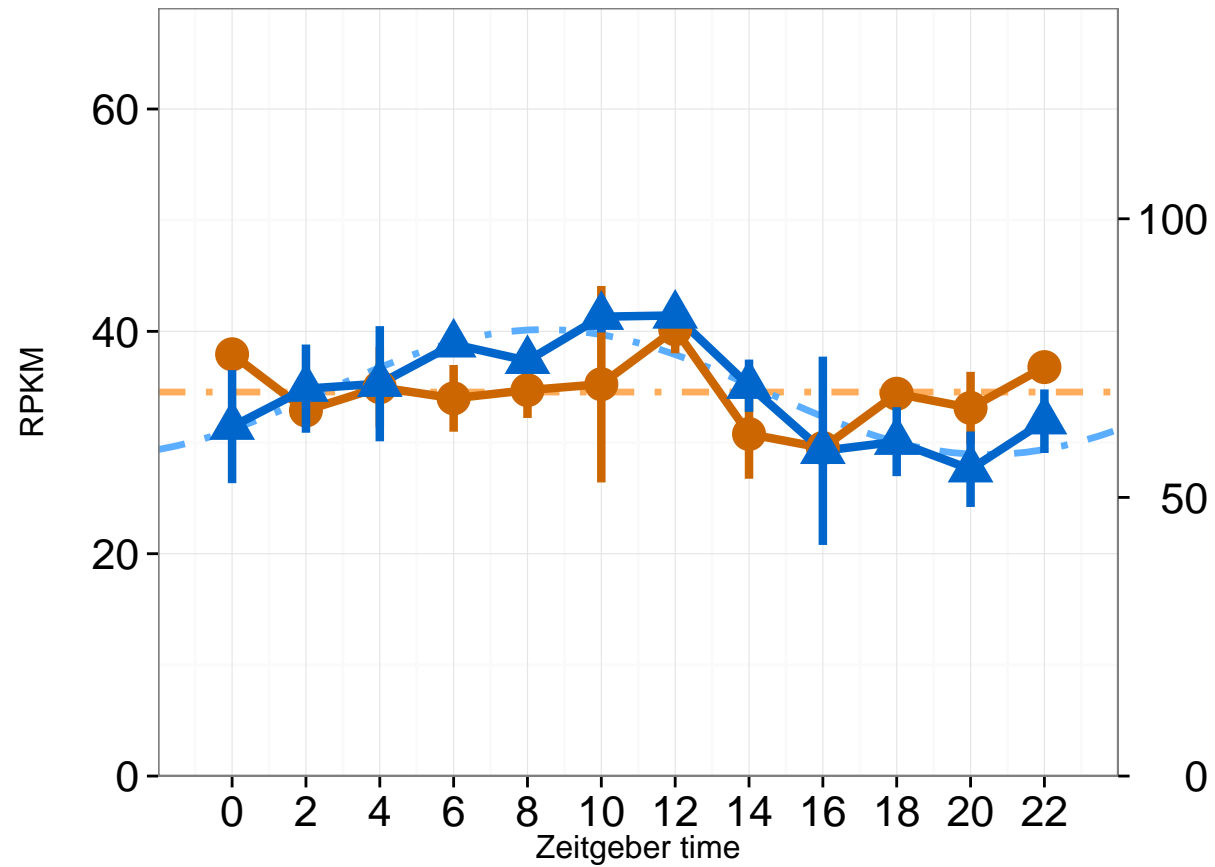

## Cmc1

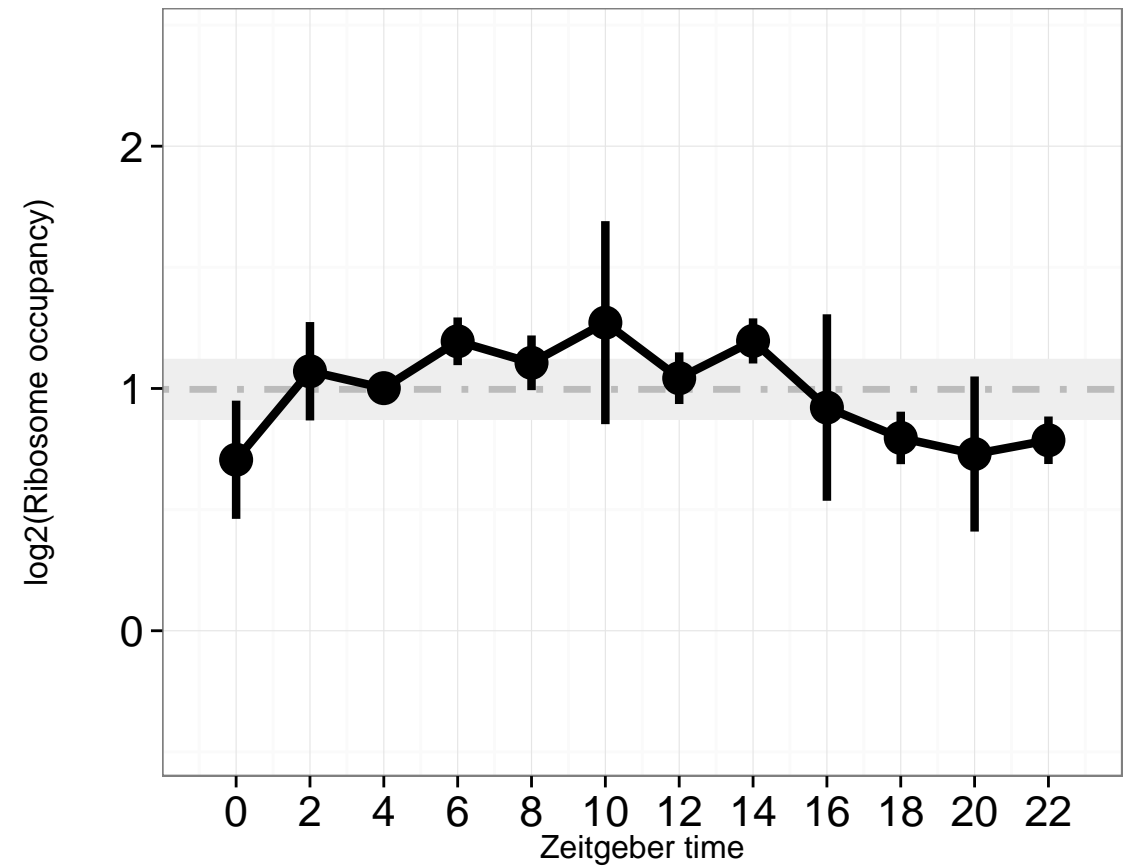

Supplement: Supplementary file 4104 [file 1]

## Endou

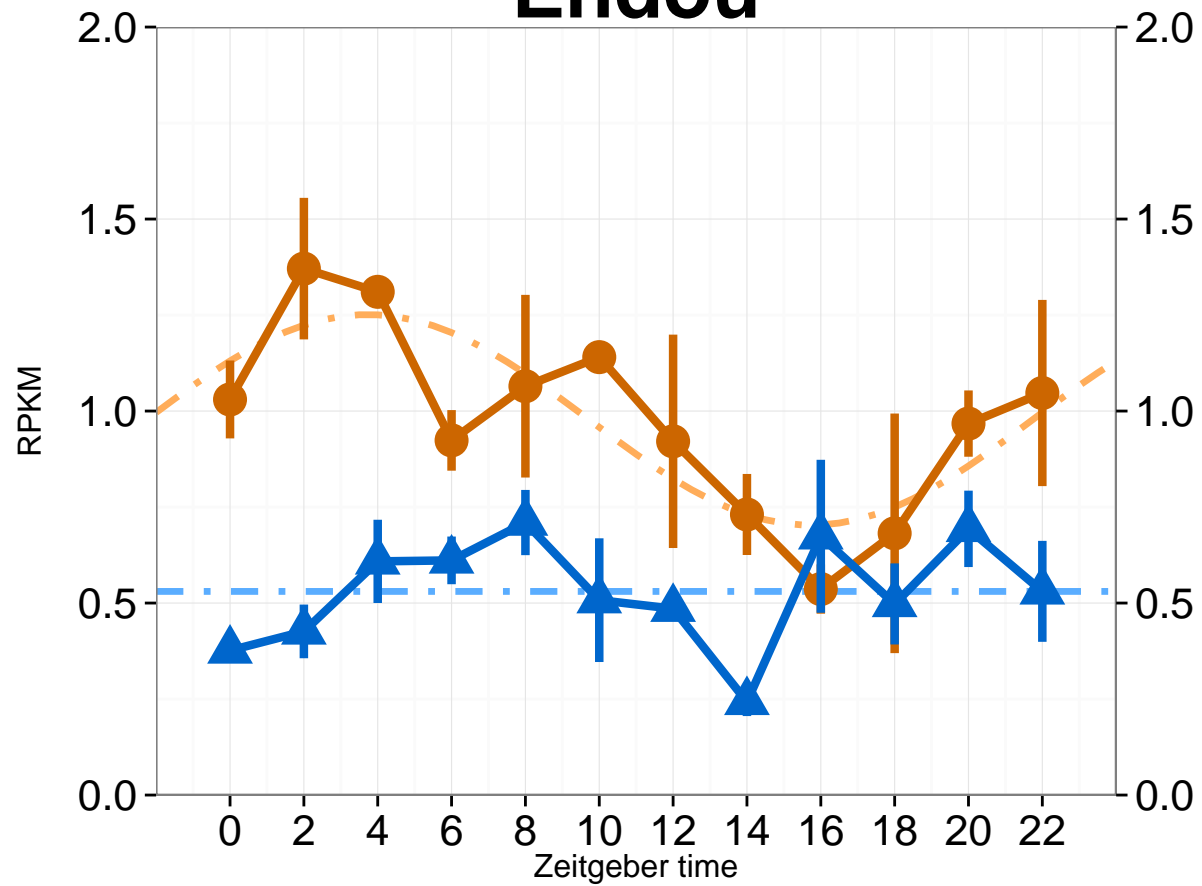

## Endou

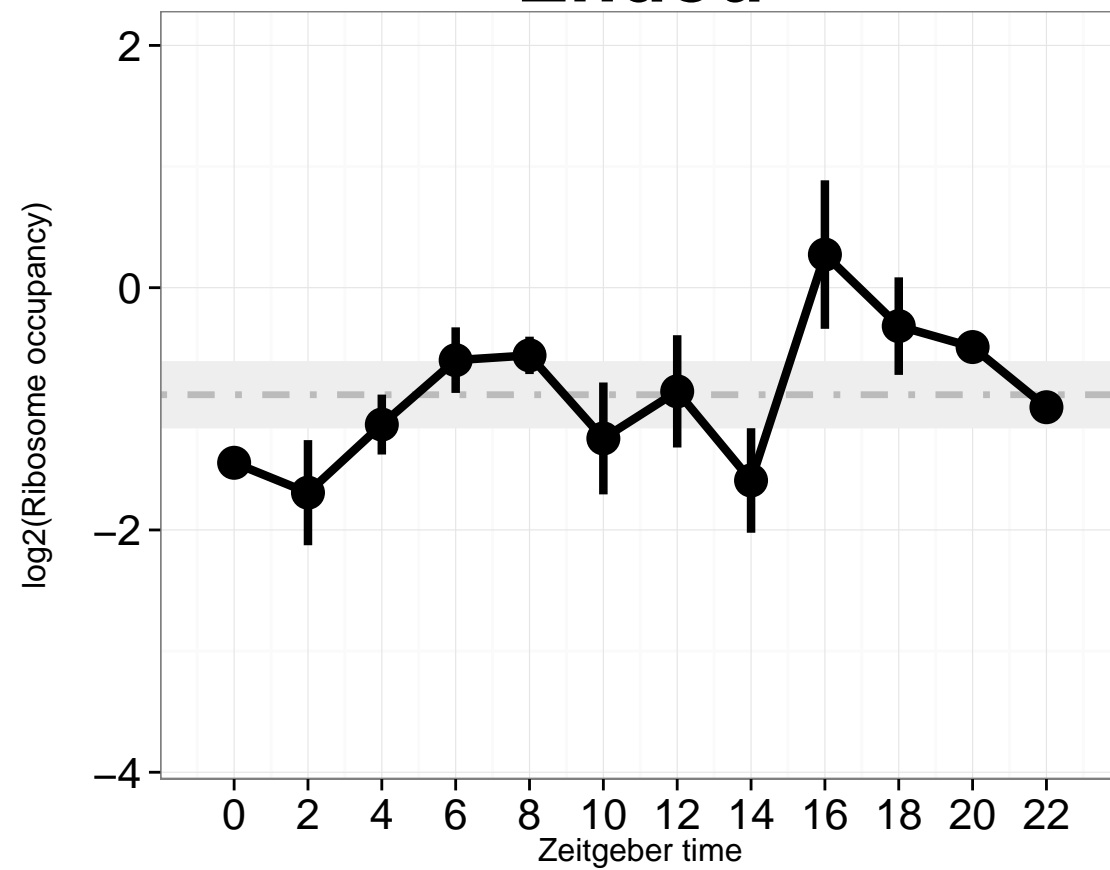

Supplement: Supplementary file 4105 [file 1]

# Bmpr1b

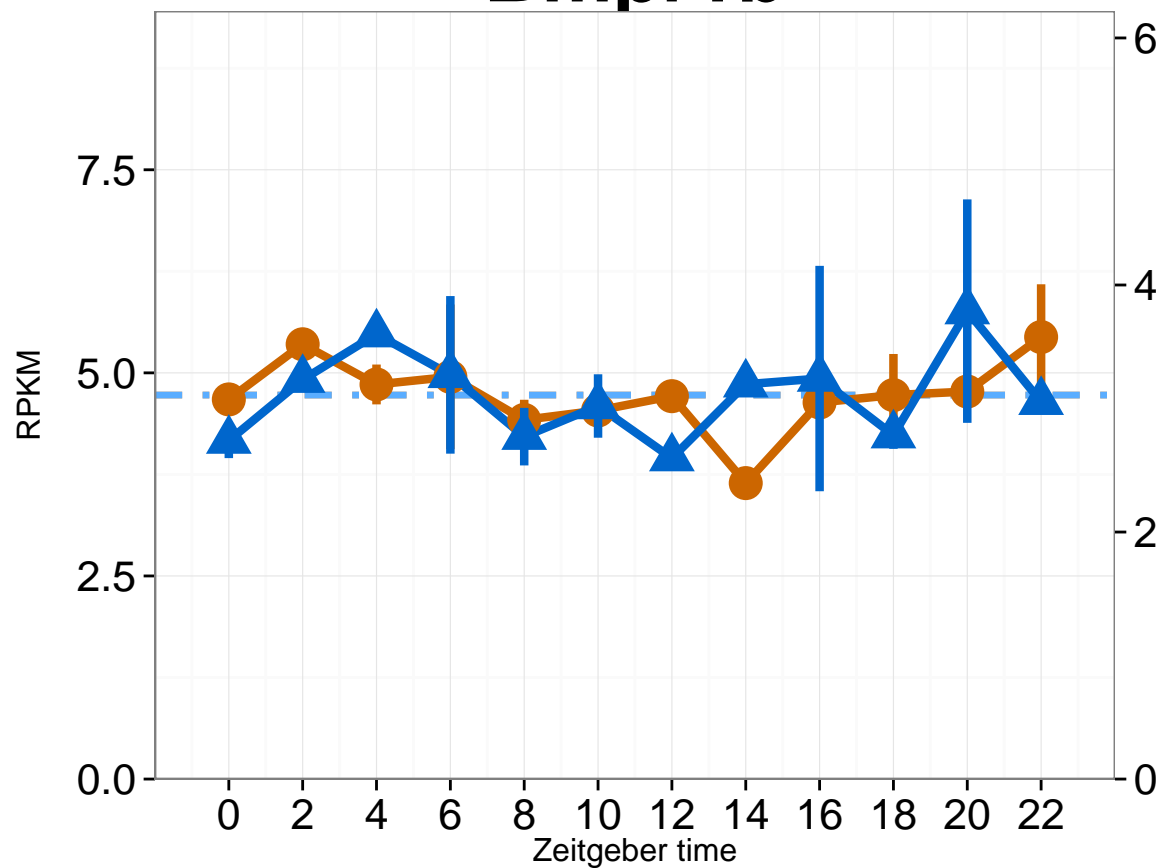

# Bmpr1b

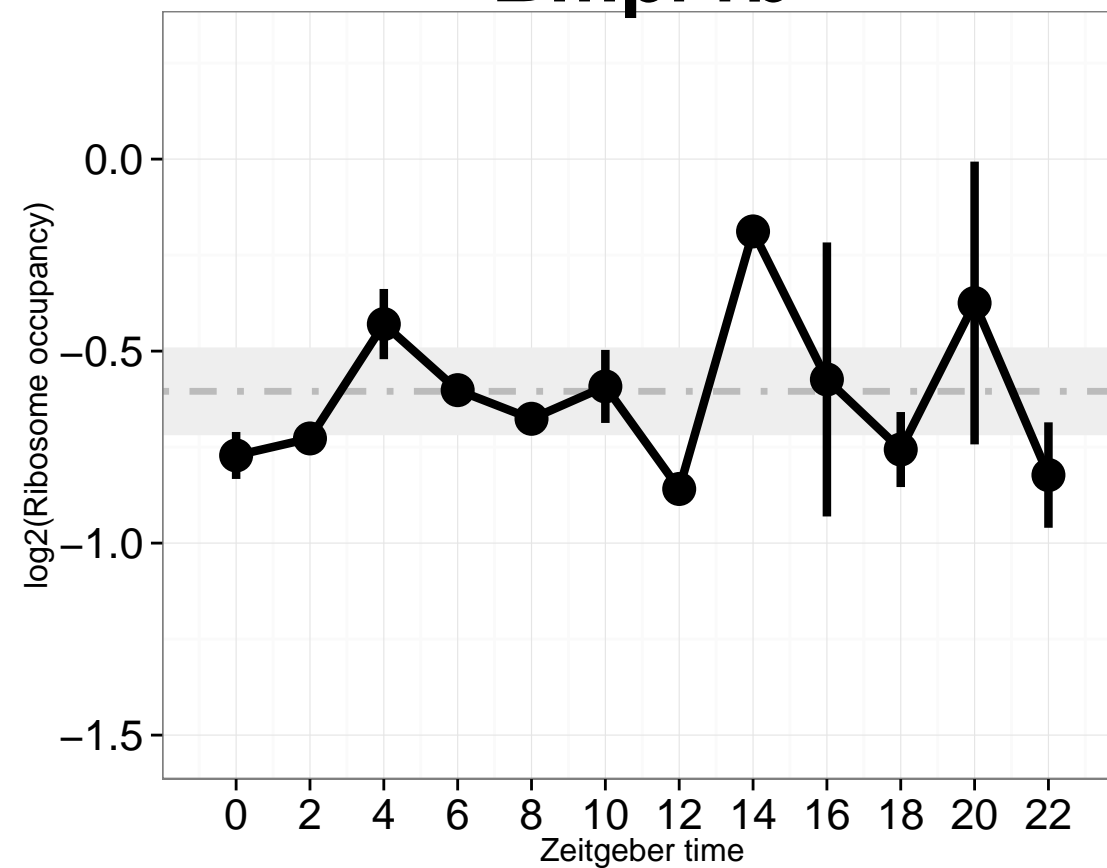

Supplement: Supplementary file 4106 [file 1]

## Gm17374

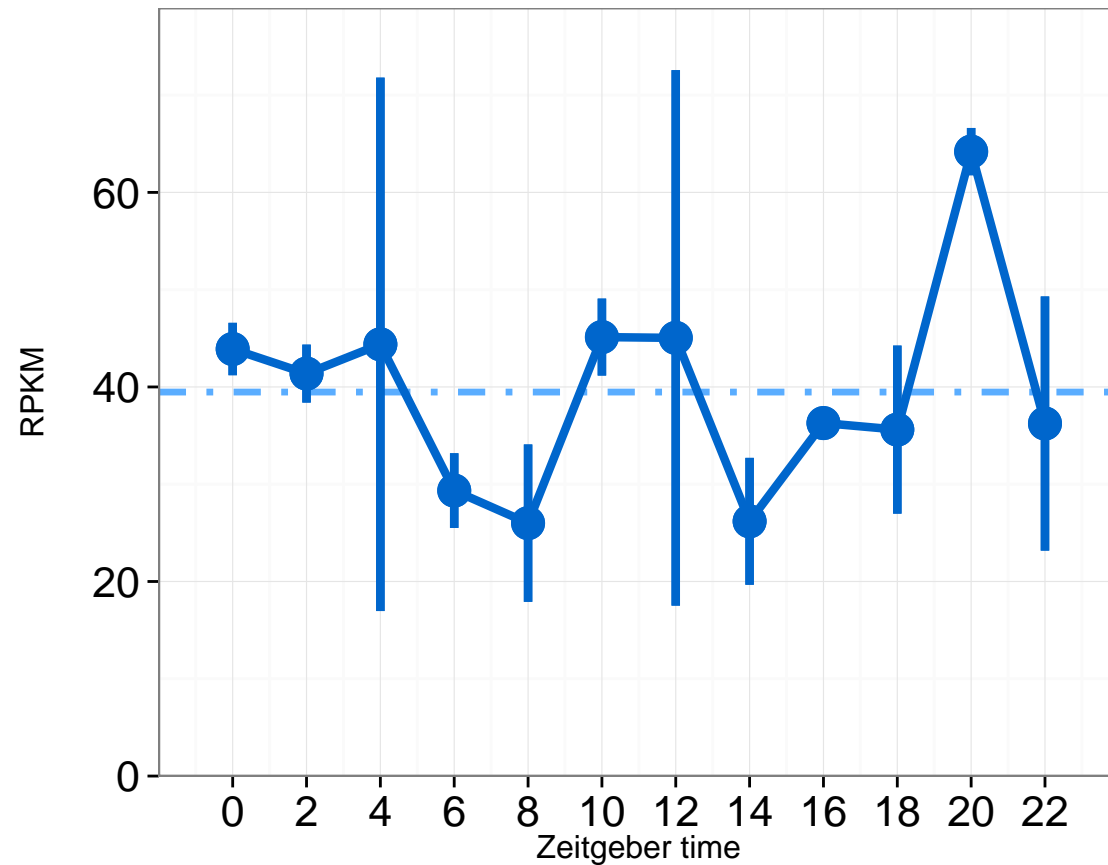

## Gm17374 log2(Ribosome occupanc

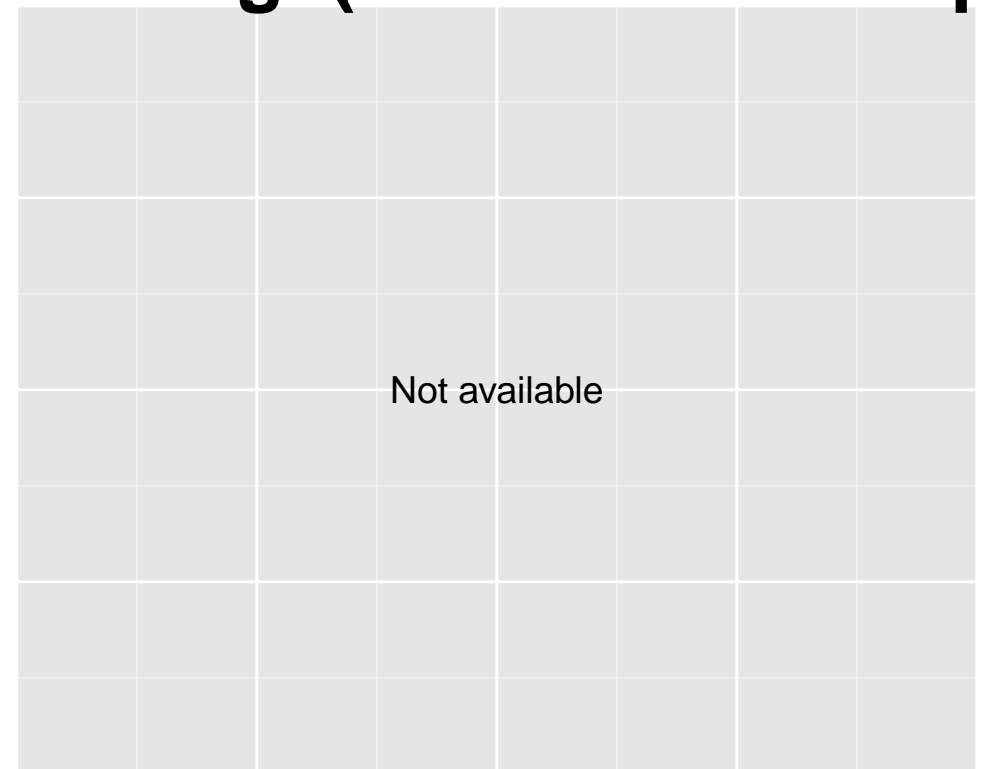

Supplement: Supplementary file 4107 [file 1]

## Npas2

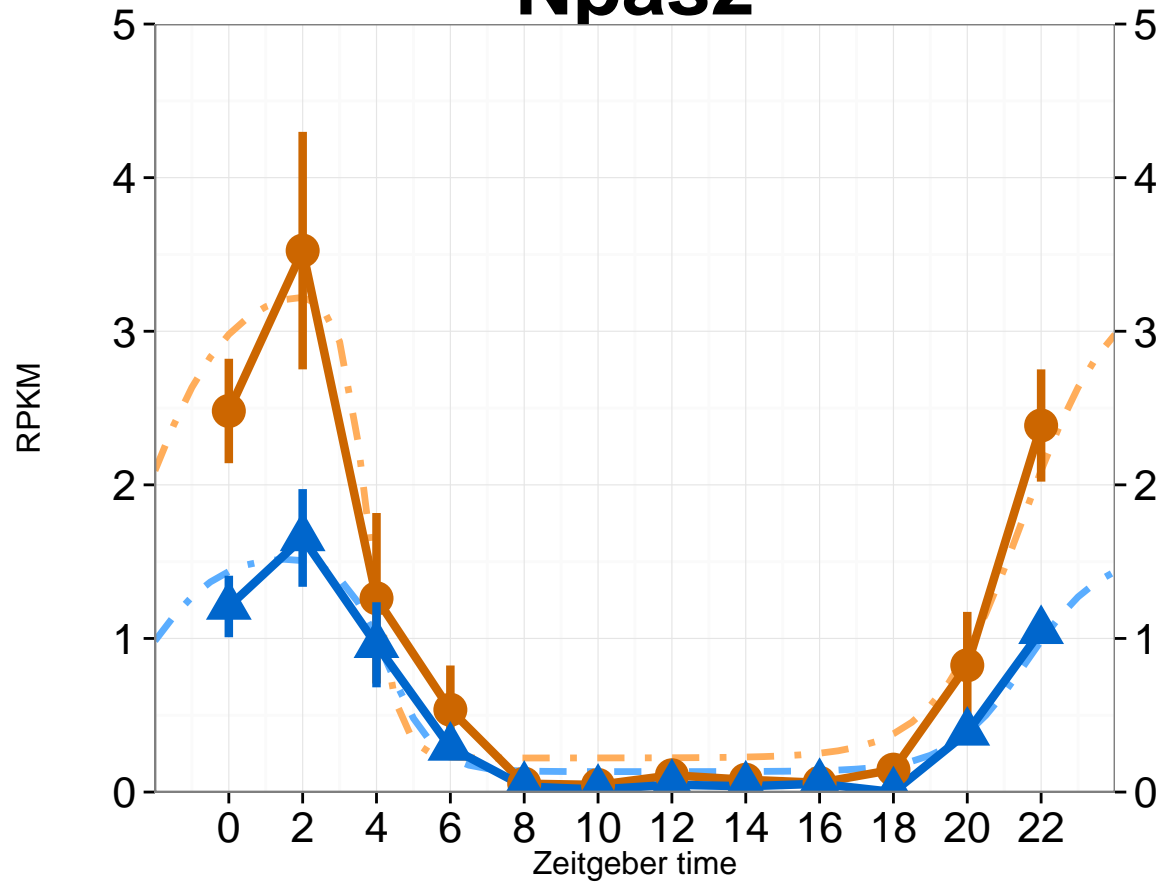

## Npas2

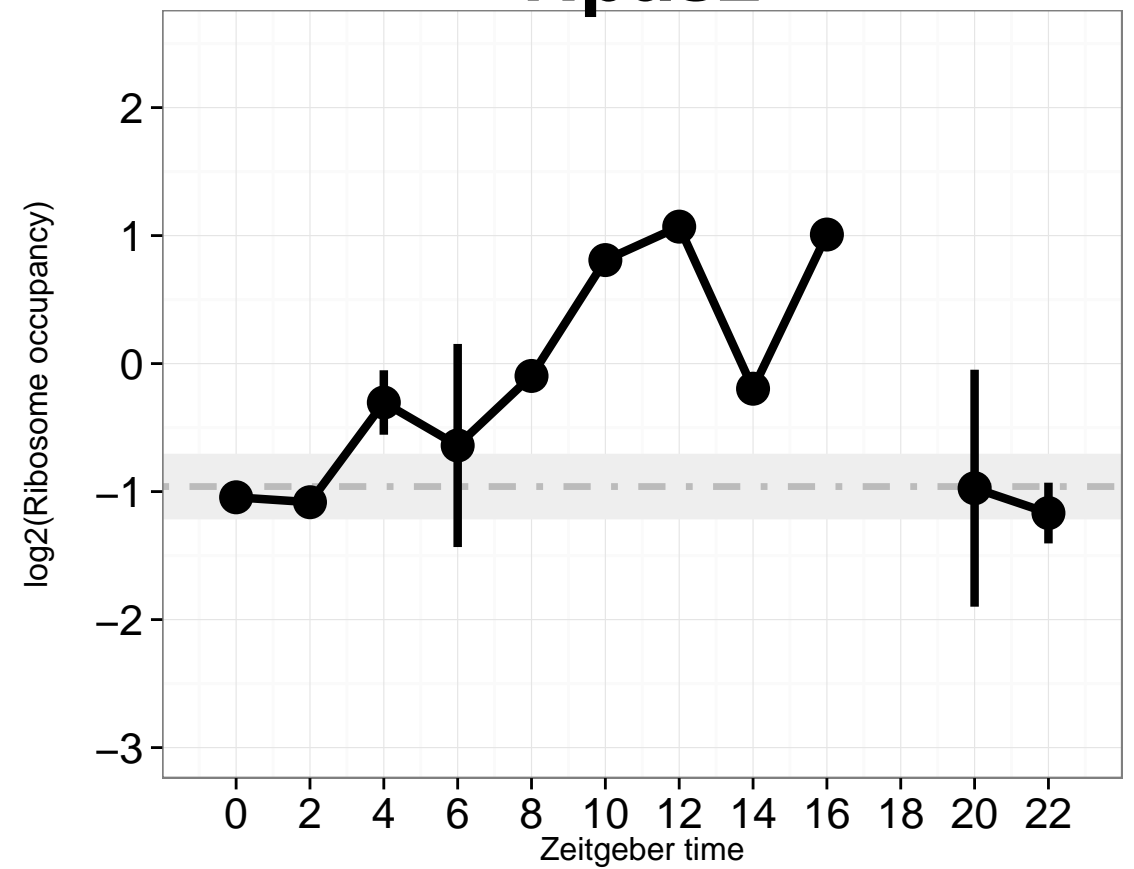

Supplement: Supplementary file 4108 [file 1]

## Mycn

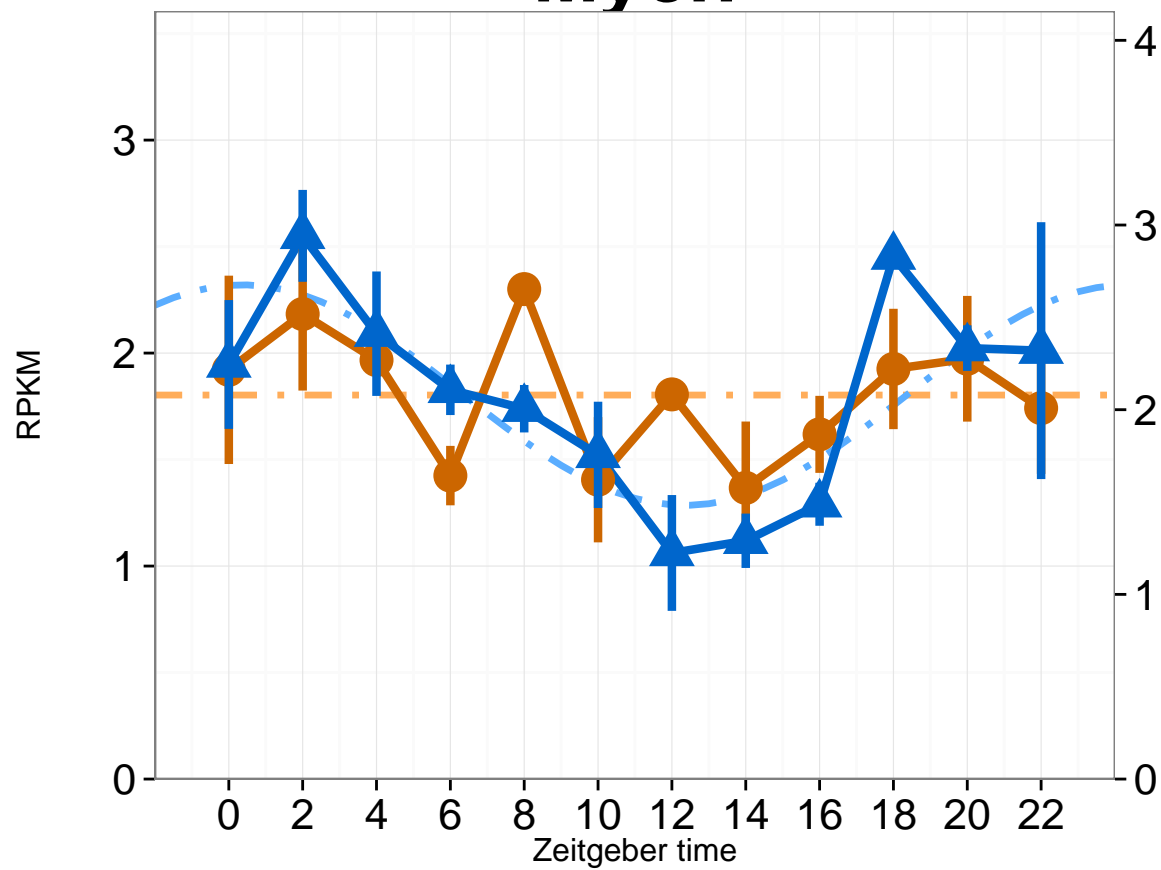

## Mycn

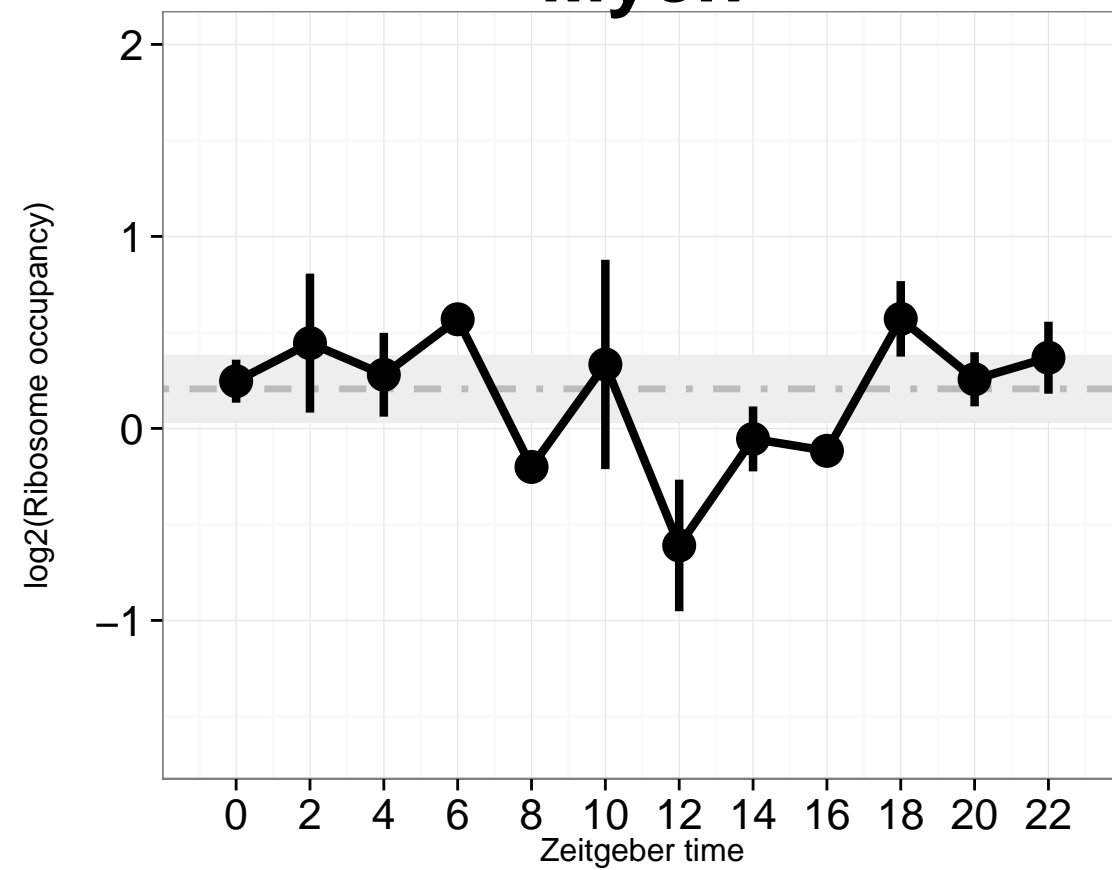

Supplement: Supplementary file 4109 [file 1]

# Slc2a1

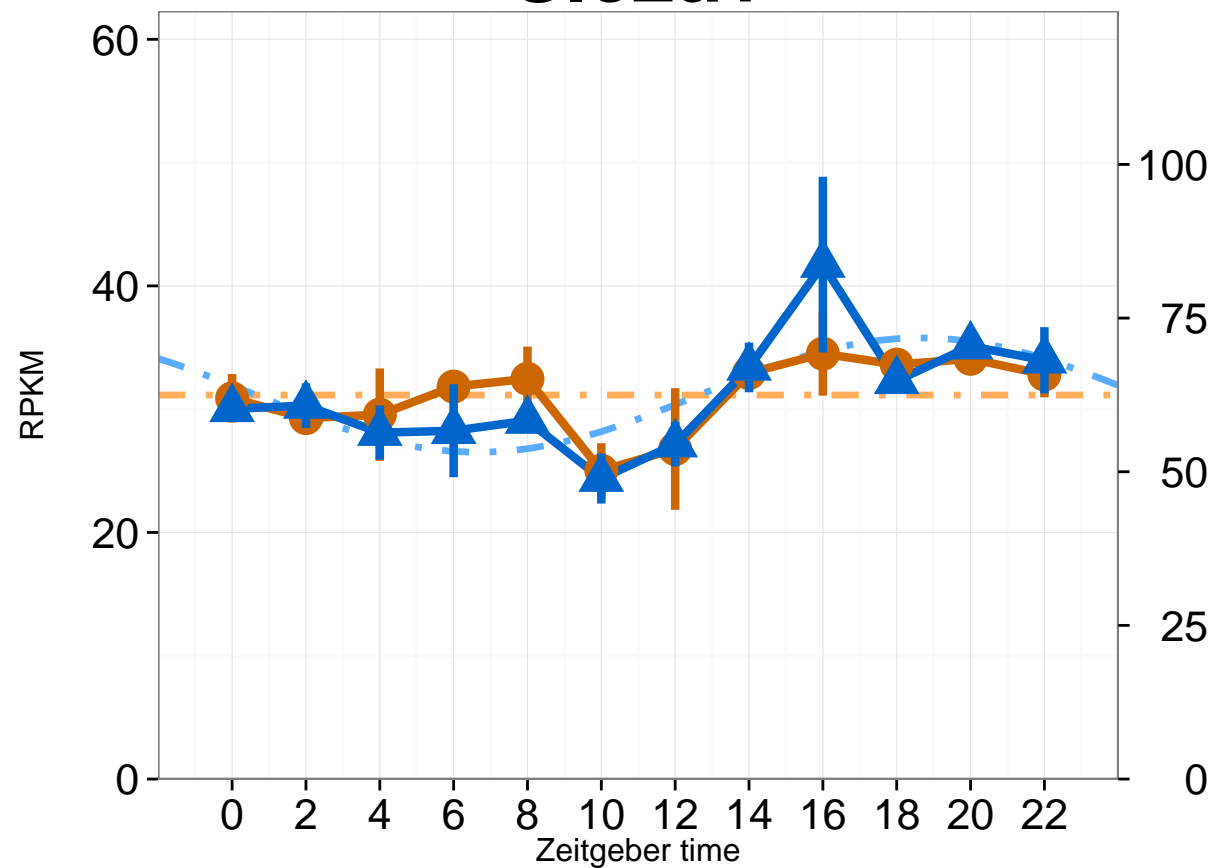

# Slc2a1

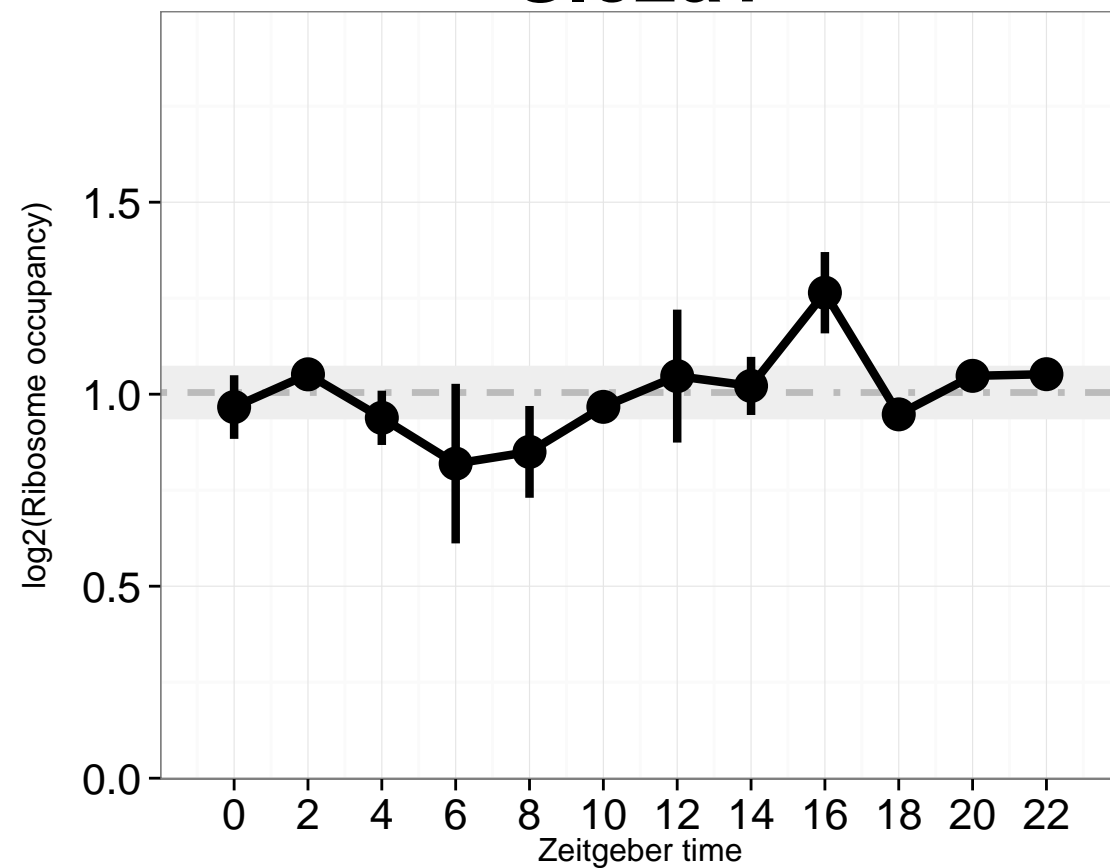

Supplement: Supplementary file 4110 [file 1]

## Mrpl45

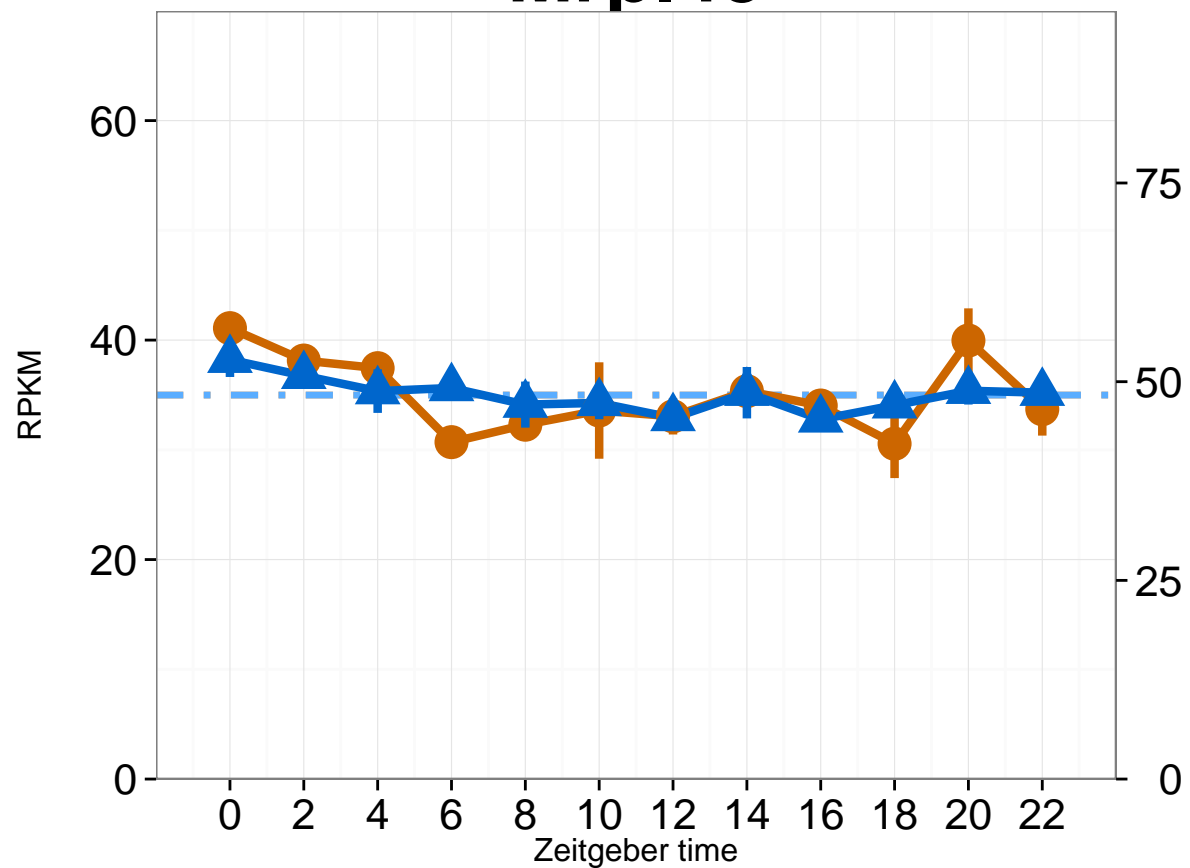

## Mrpl45

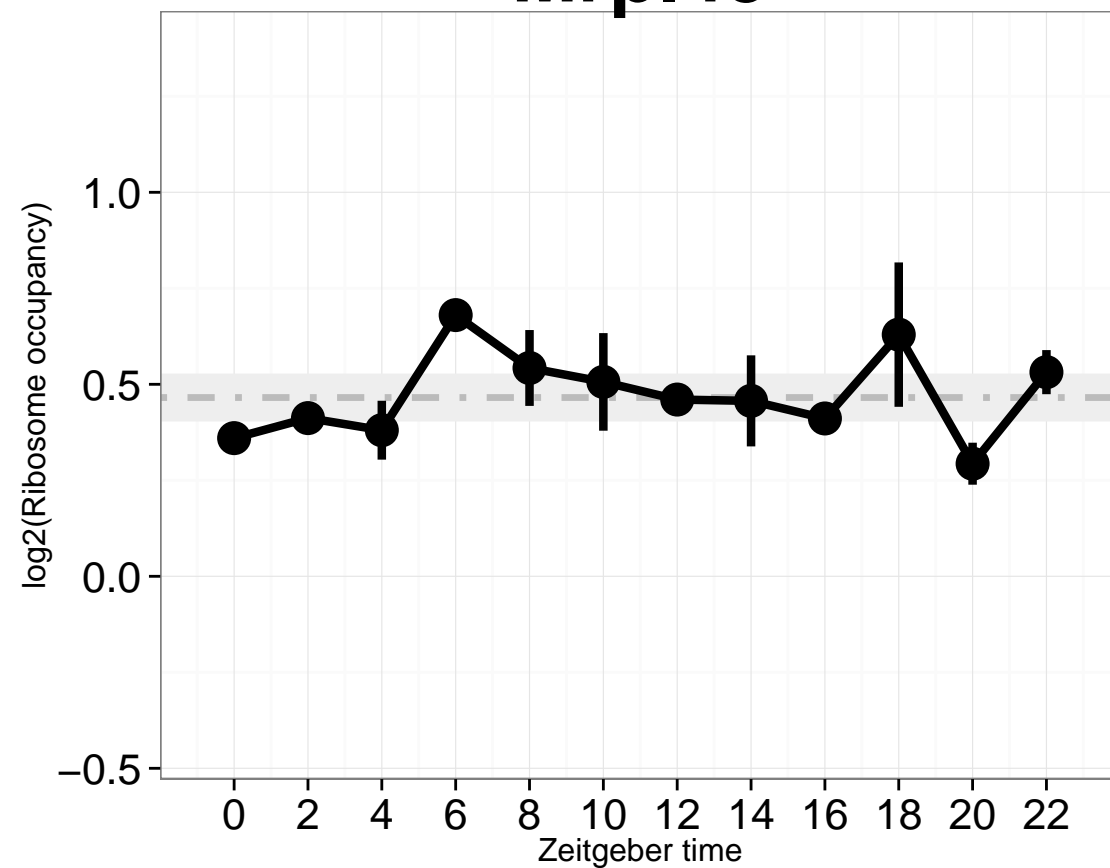

Supplement: Supplementary file 4111 [file 1]

# Apoa2

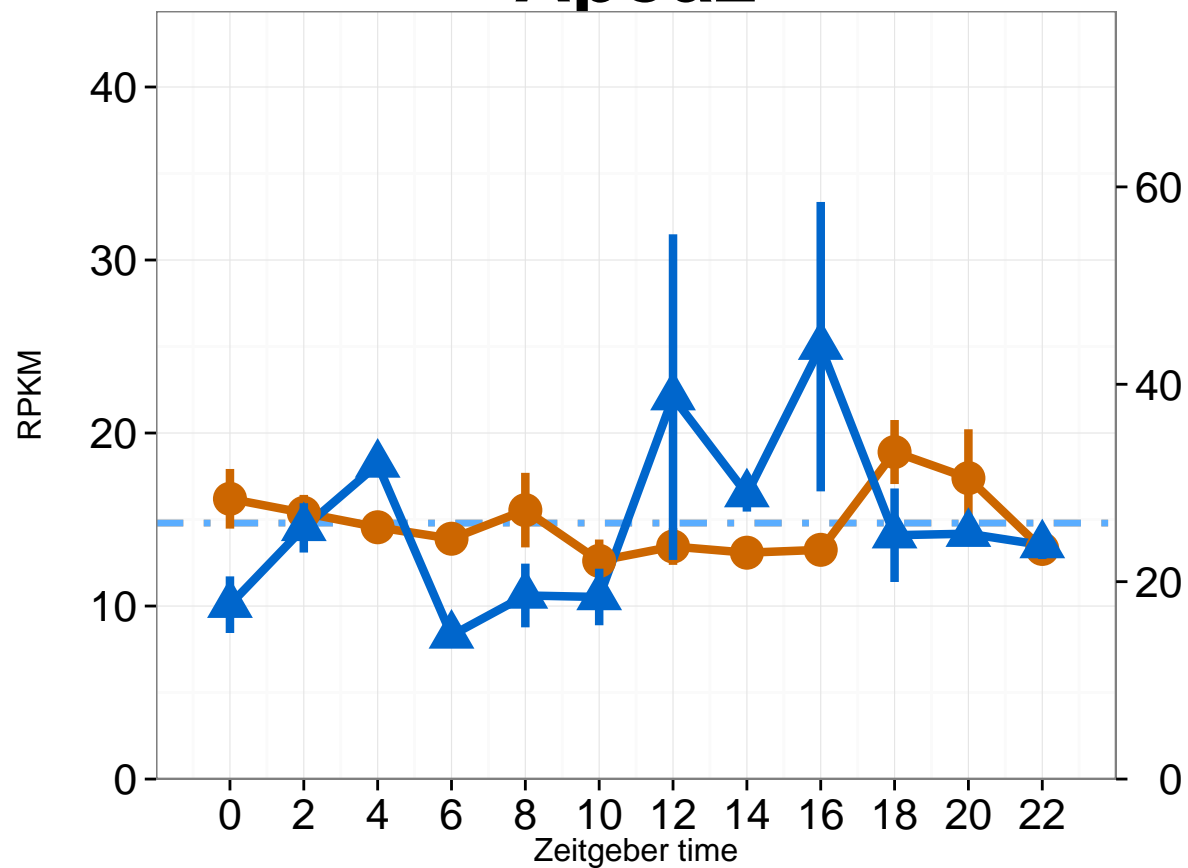

# Apoa2

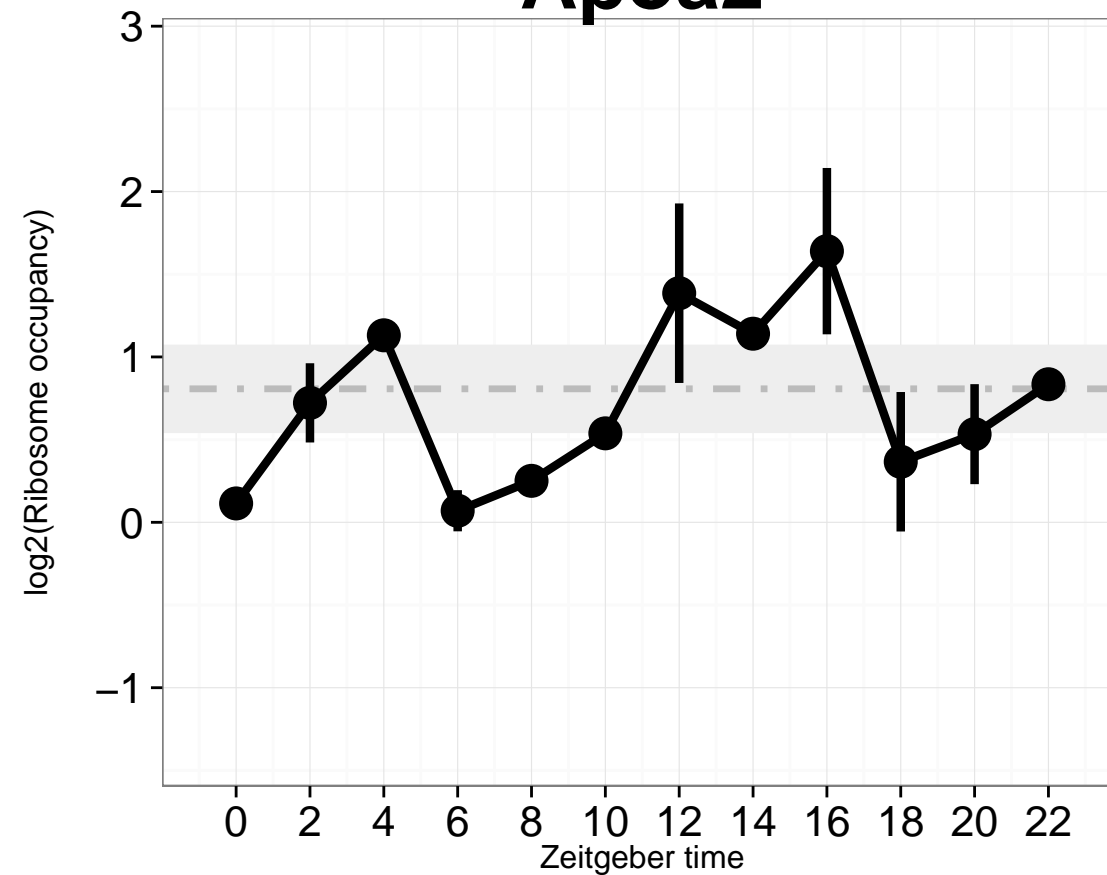

Supplement: Supplementary file 4112 [file 1]

# Rnf130

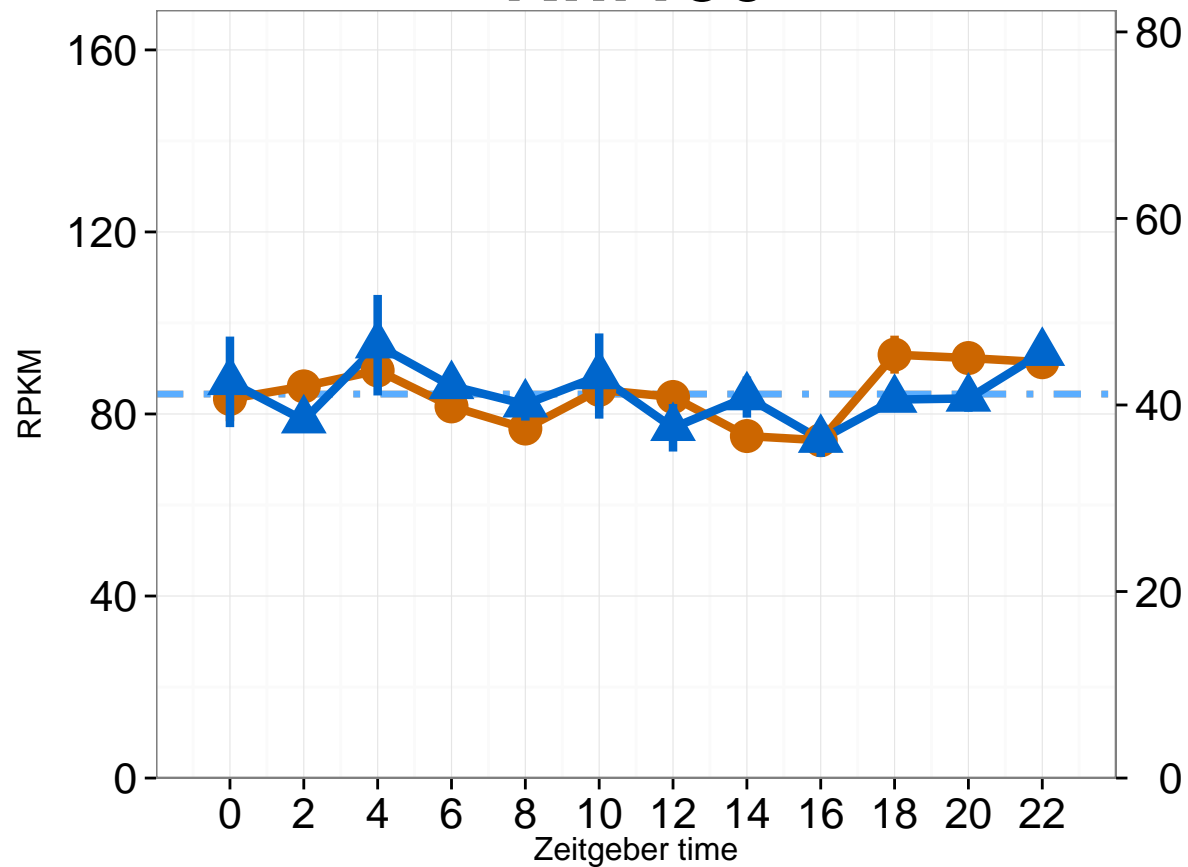

# Rnf130

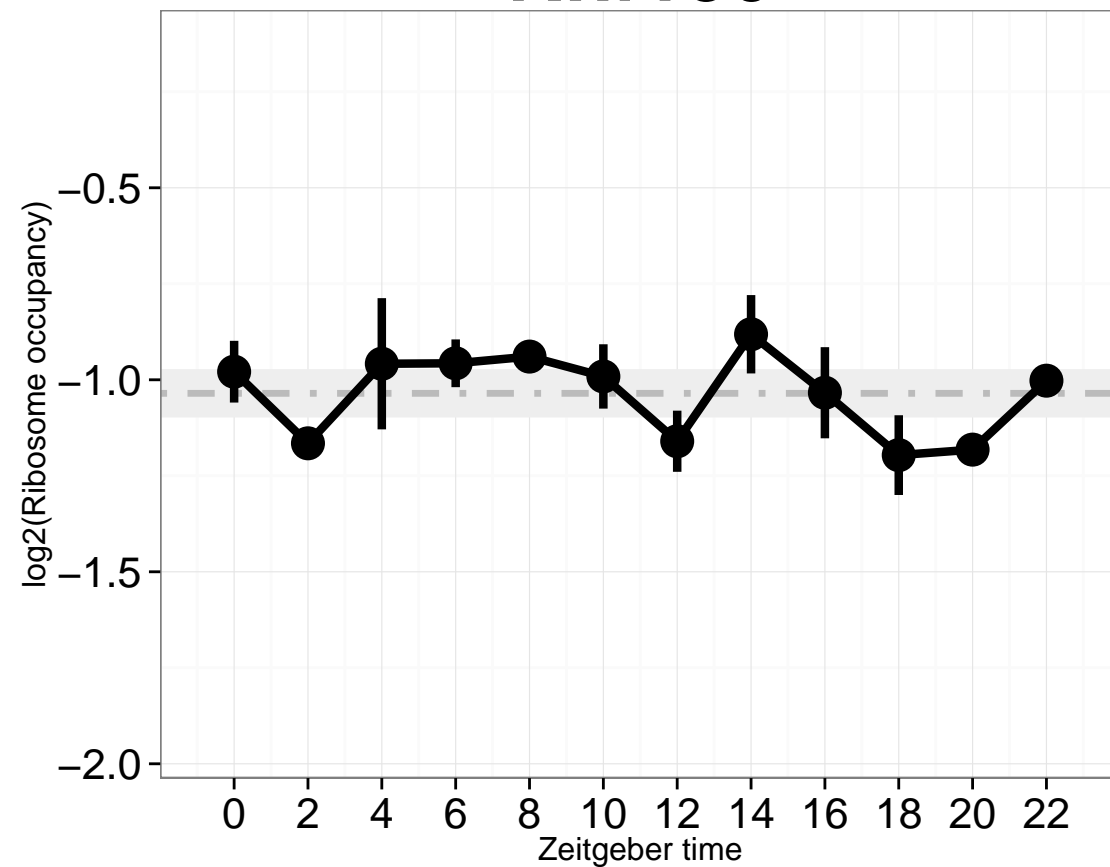

Supplement: Supplementary file 4113 [file 1]

## Exoc4

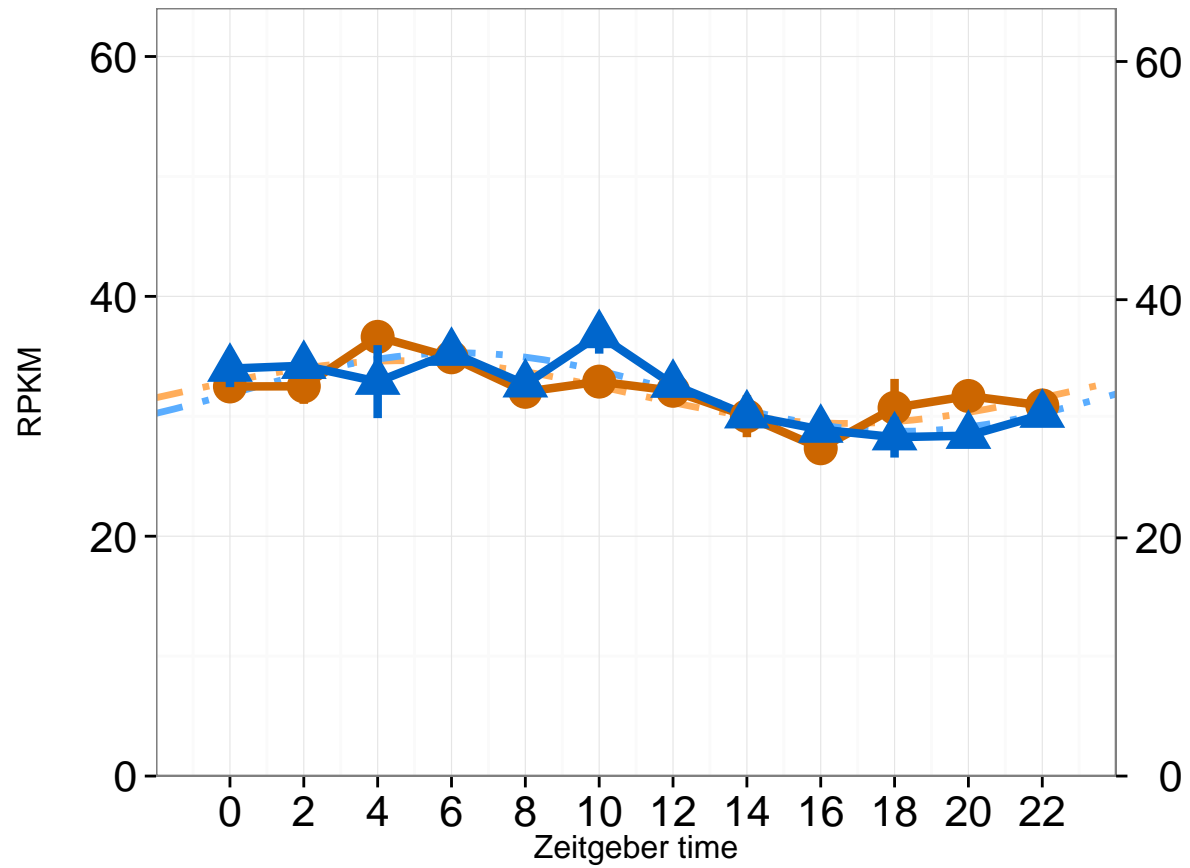

## Exoc4

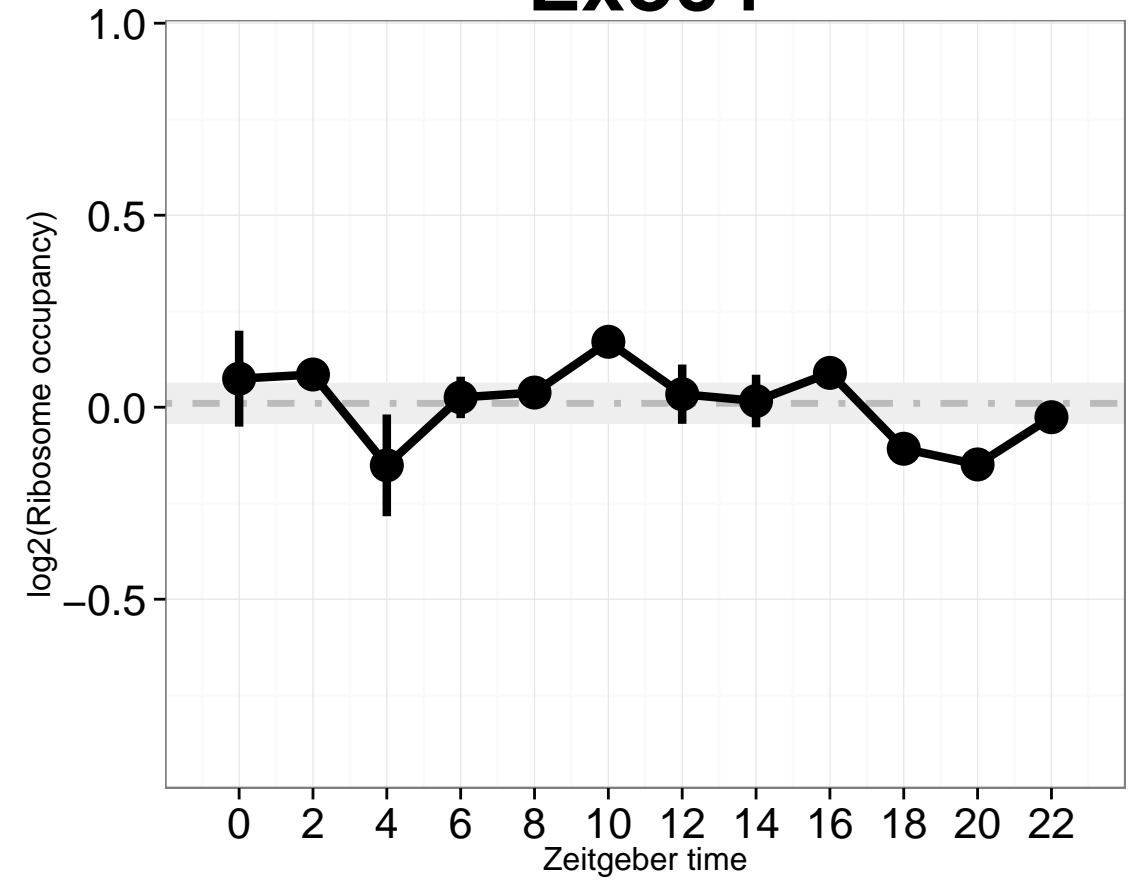

Supplement: Supplementary file 4114 [file 1]

## Dbi

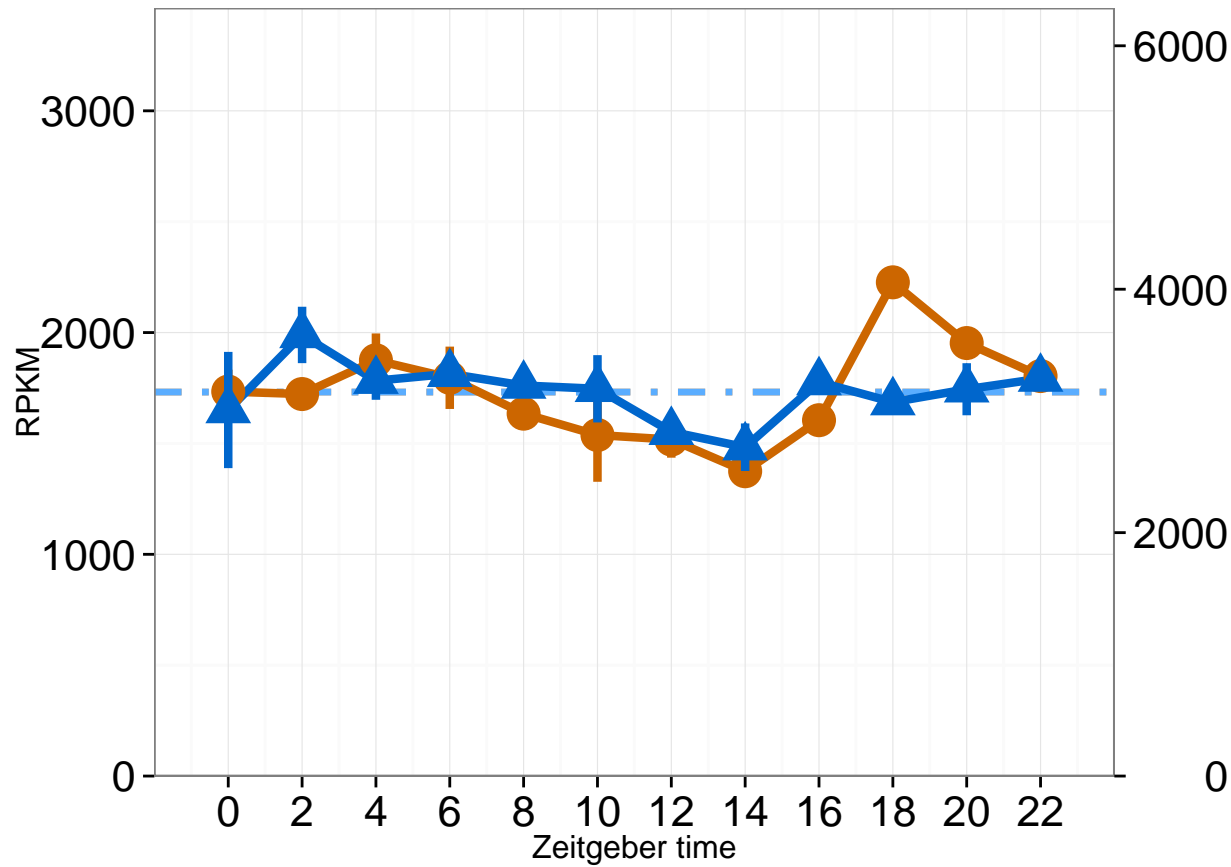

## Dbi

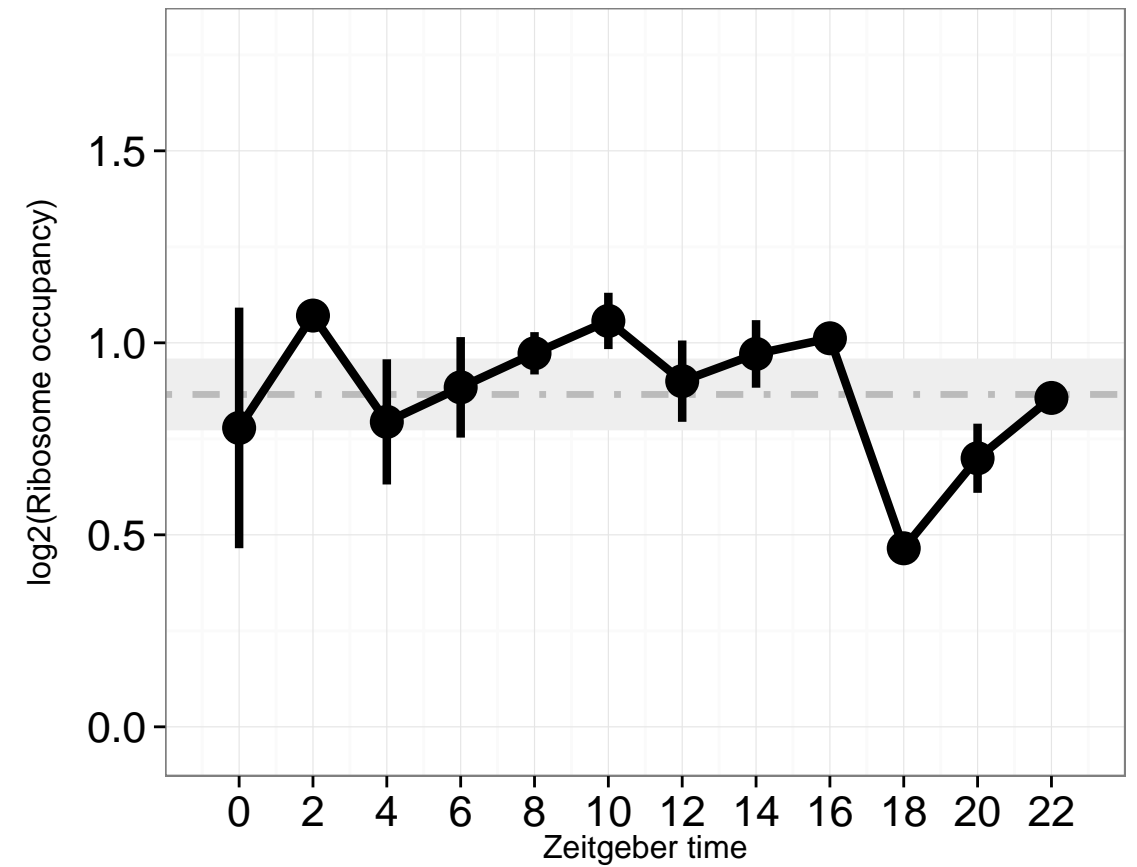

Supplement: Supplementary file 4115 [file 1]

## Cdc42bpb

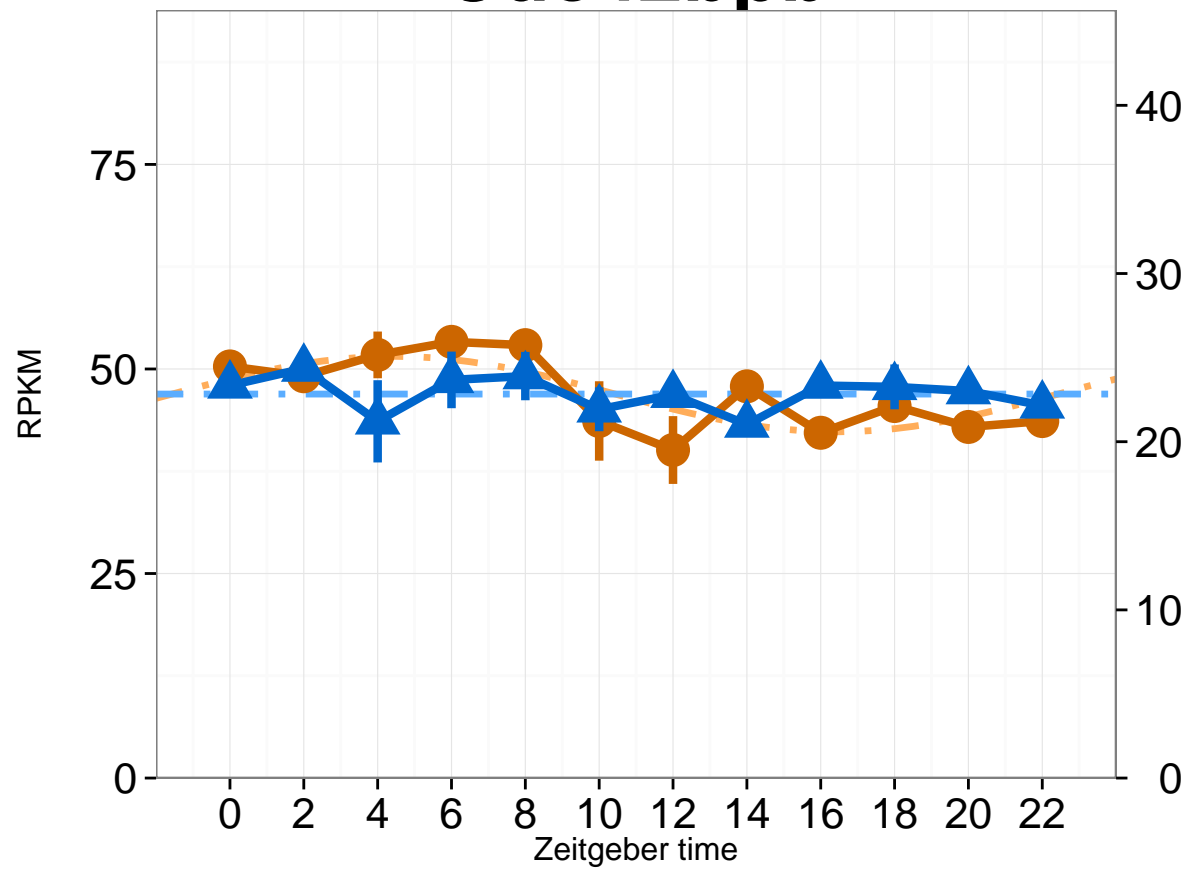

## Cdc42bpb

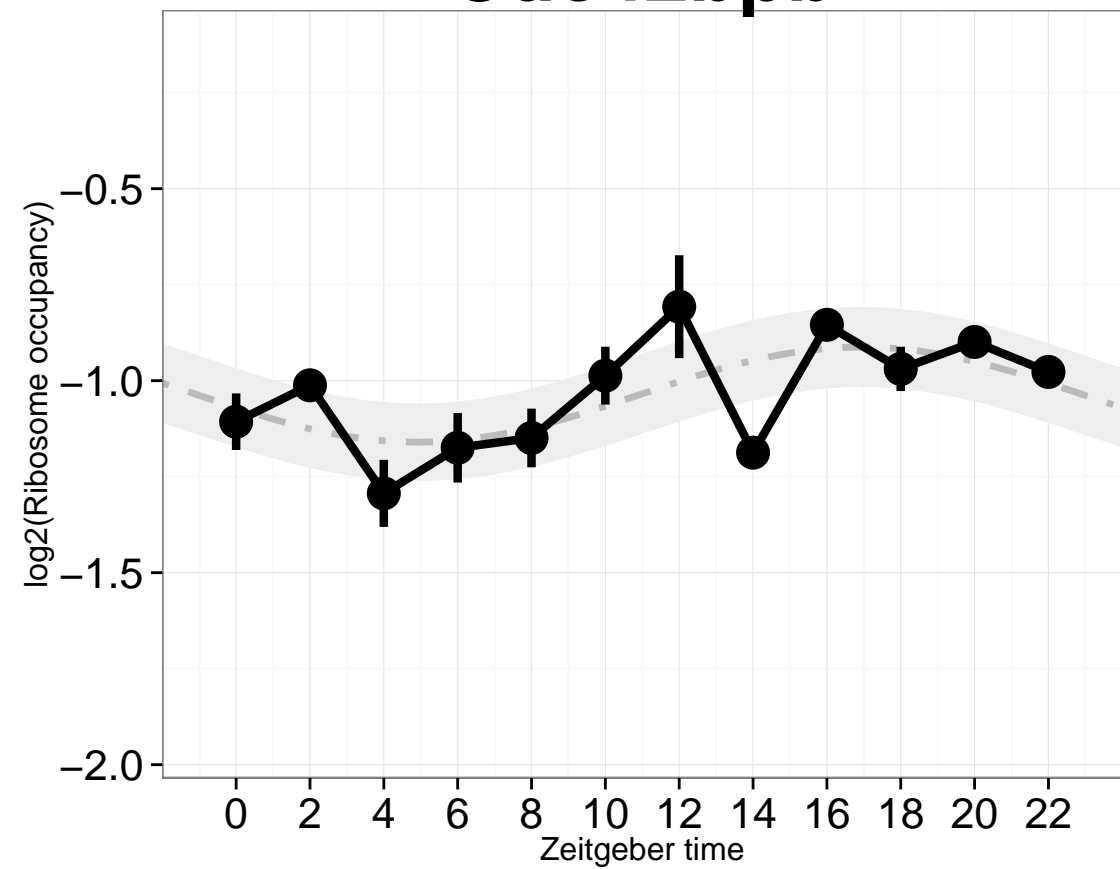

Supplement: Supplementary file 4116 [file 1]

## Pepd

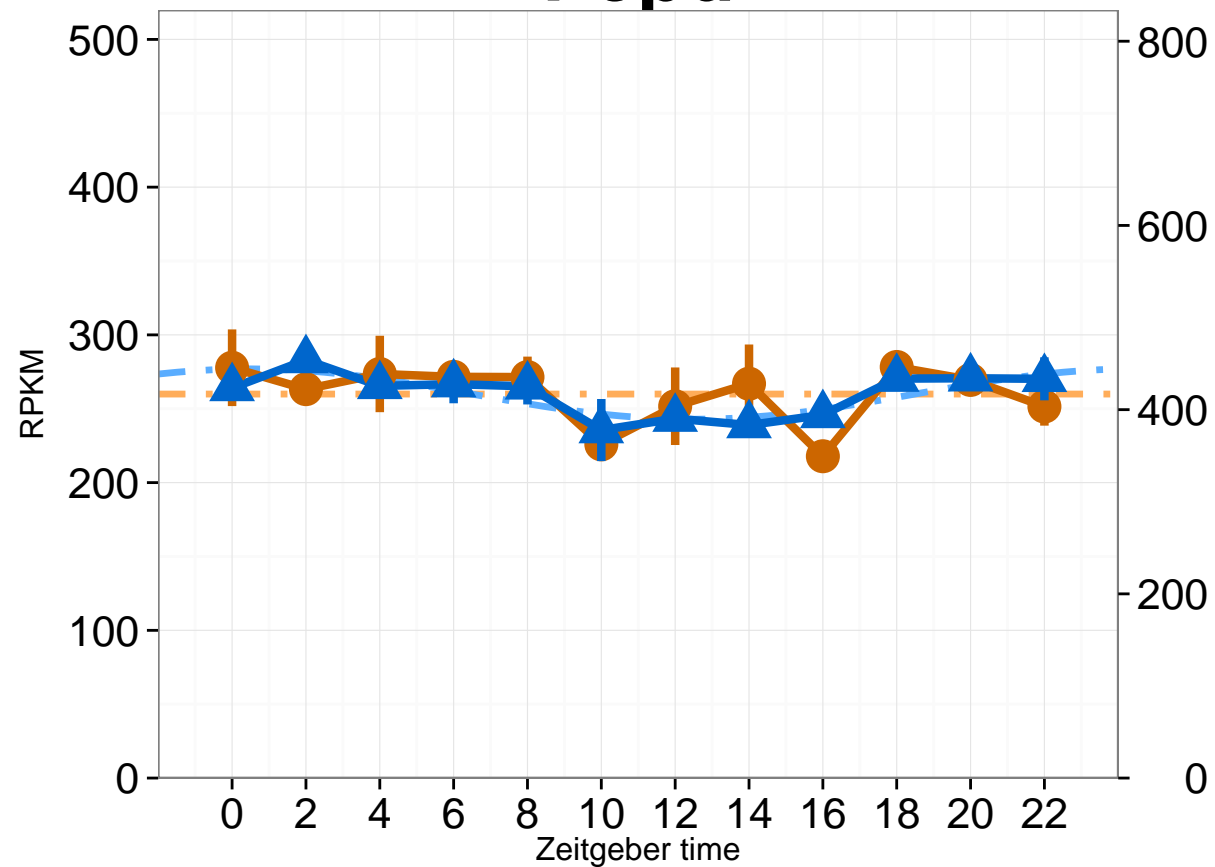

## Pepd

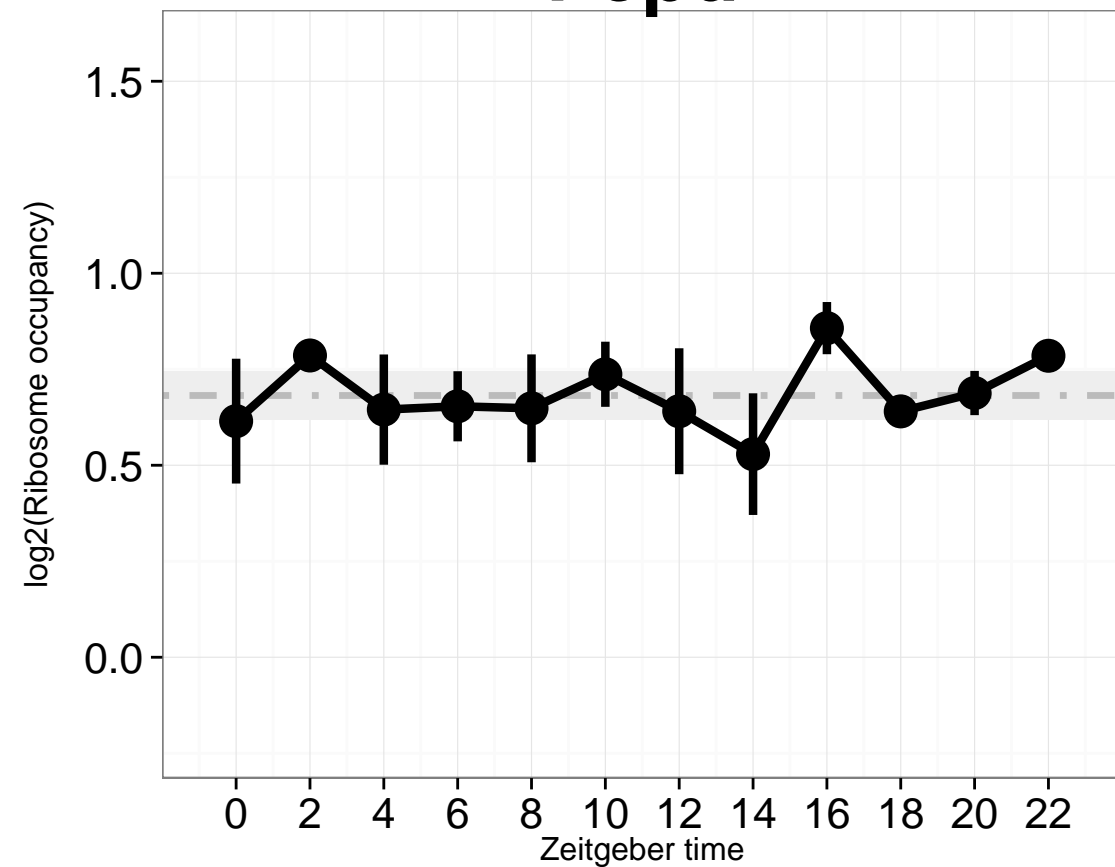

Supplement: Supplementary file 4117 [file 1]
