# Supplementary material (part 42 of 133)
Source: publisher figshare collection journal article supplement (https://springernature.figshare.com/articles/dataset/_/4903193)

## Slirp

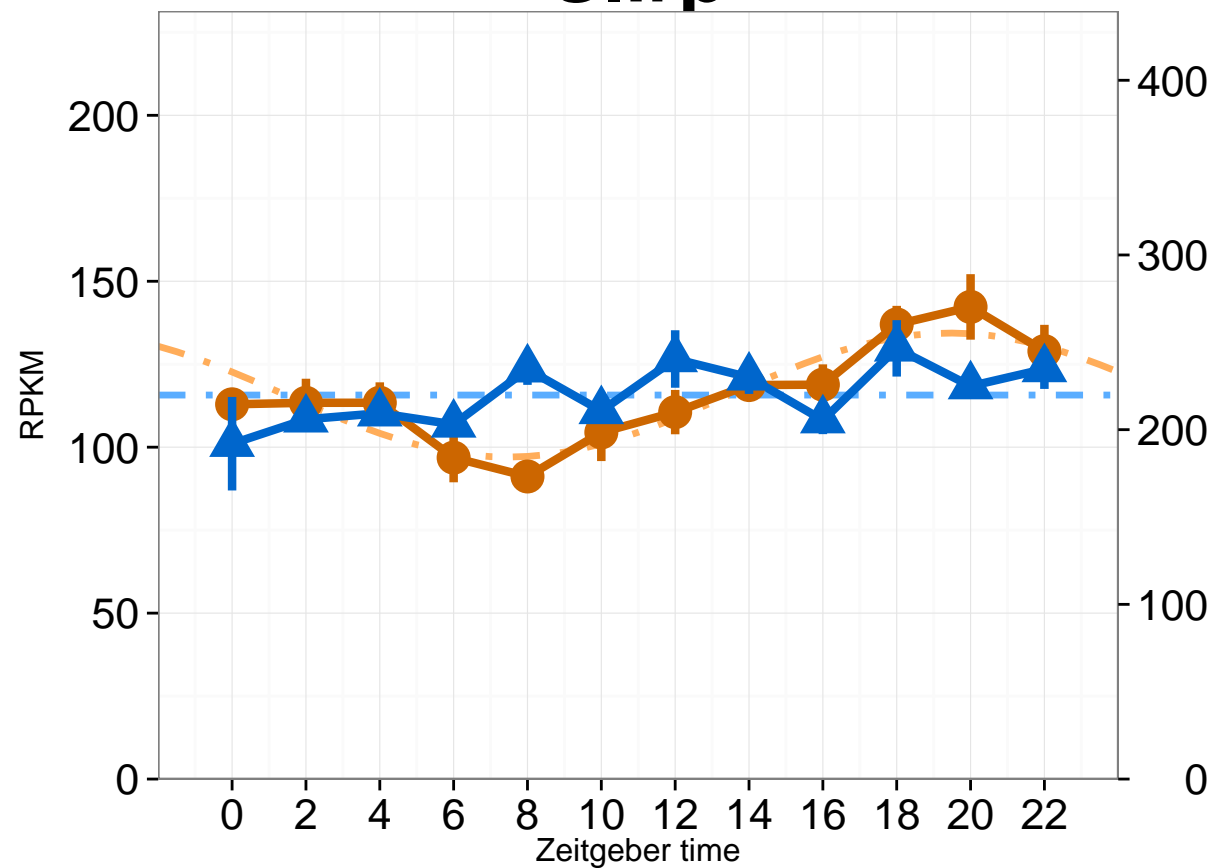

## Slirp

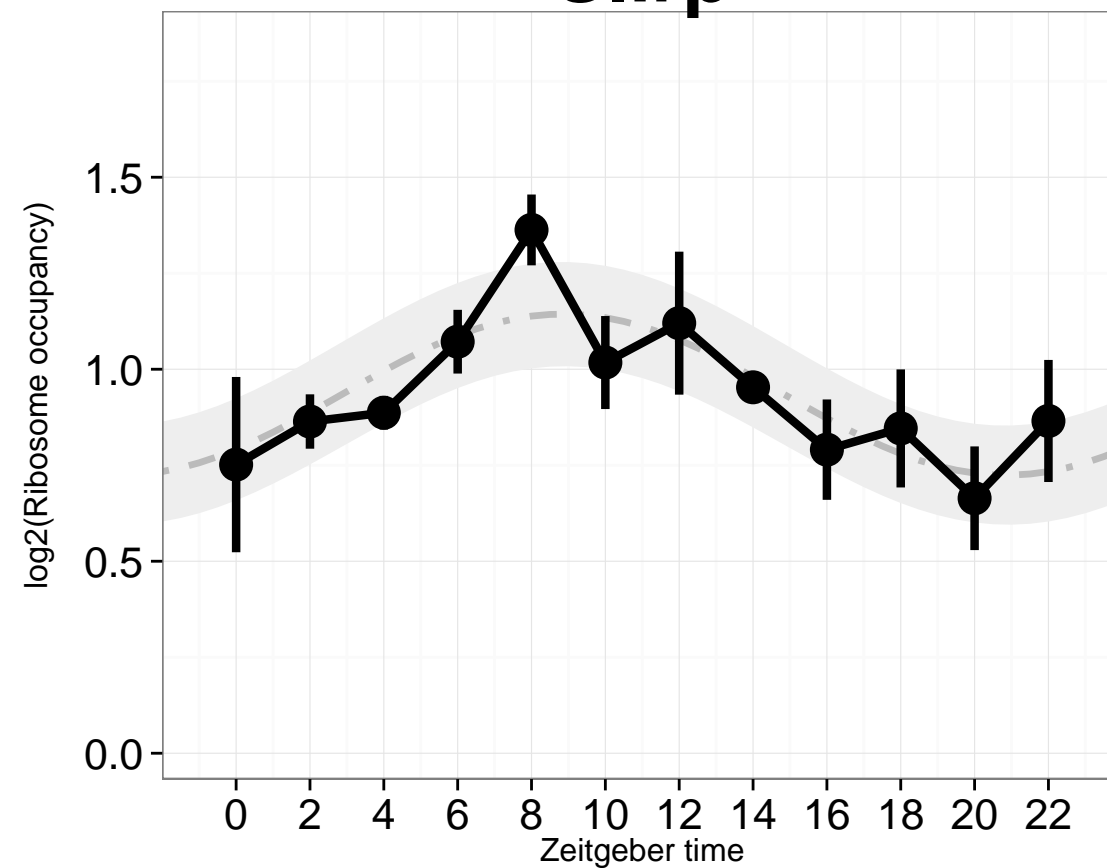

Supplement: Supplementary file 4118 [file 1]

## Cxcl10

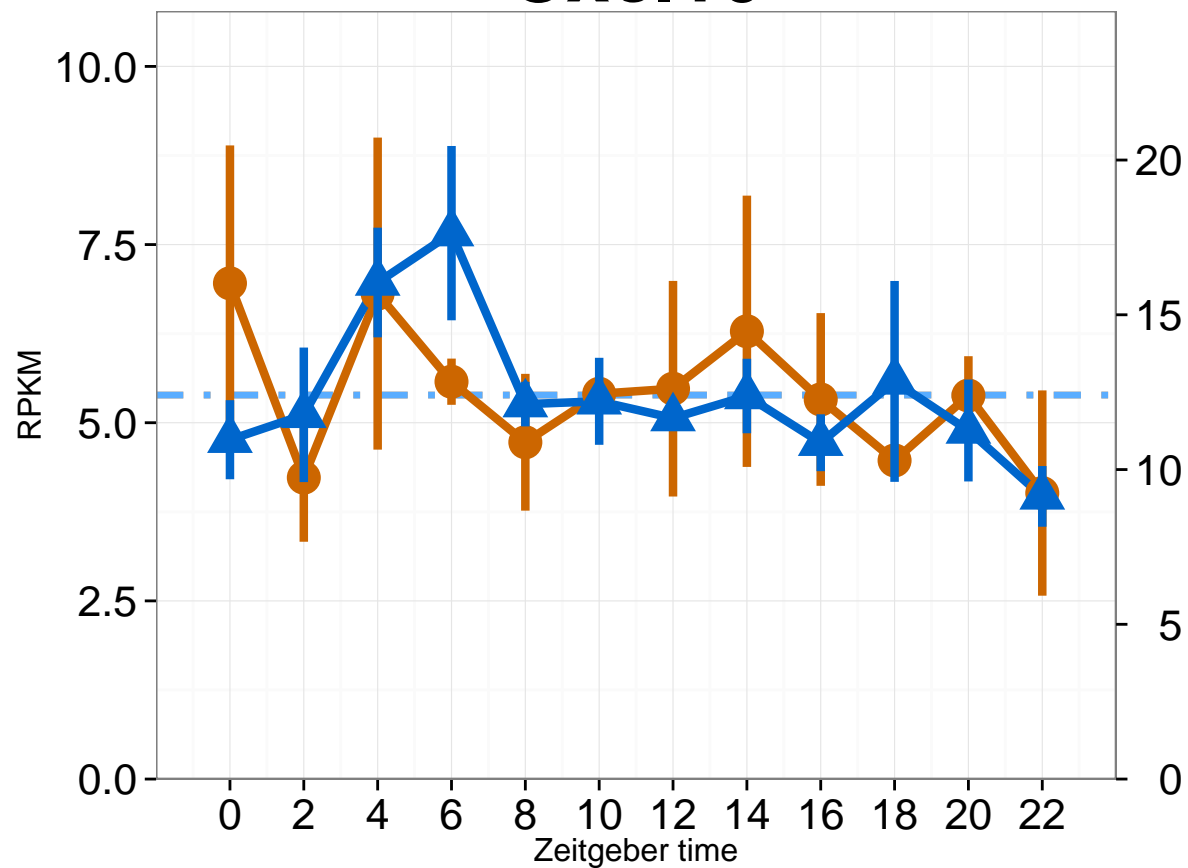

## Cxcl10

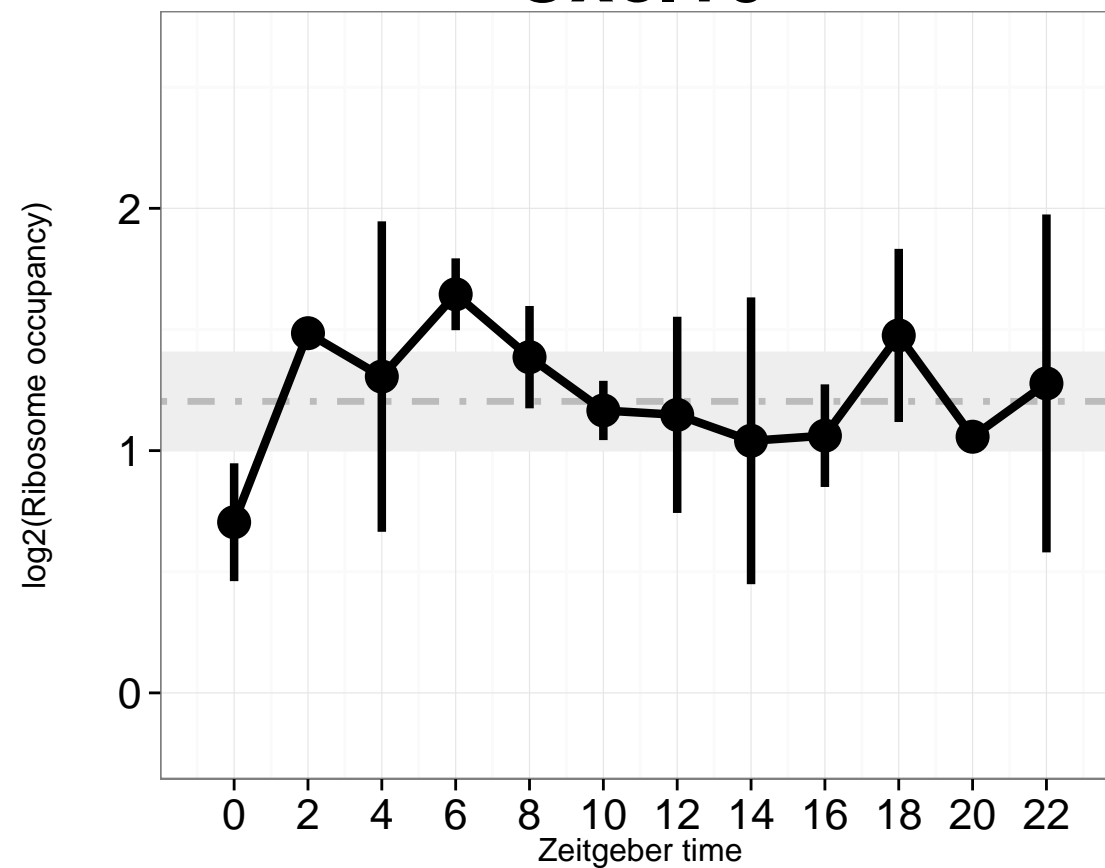

Supplement: Supplementary file 4119 [file 1]

# Mrpl48

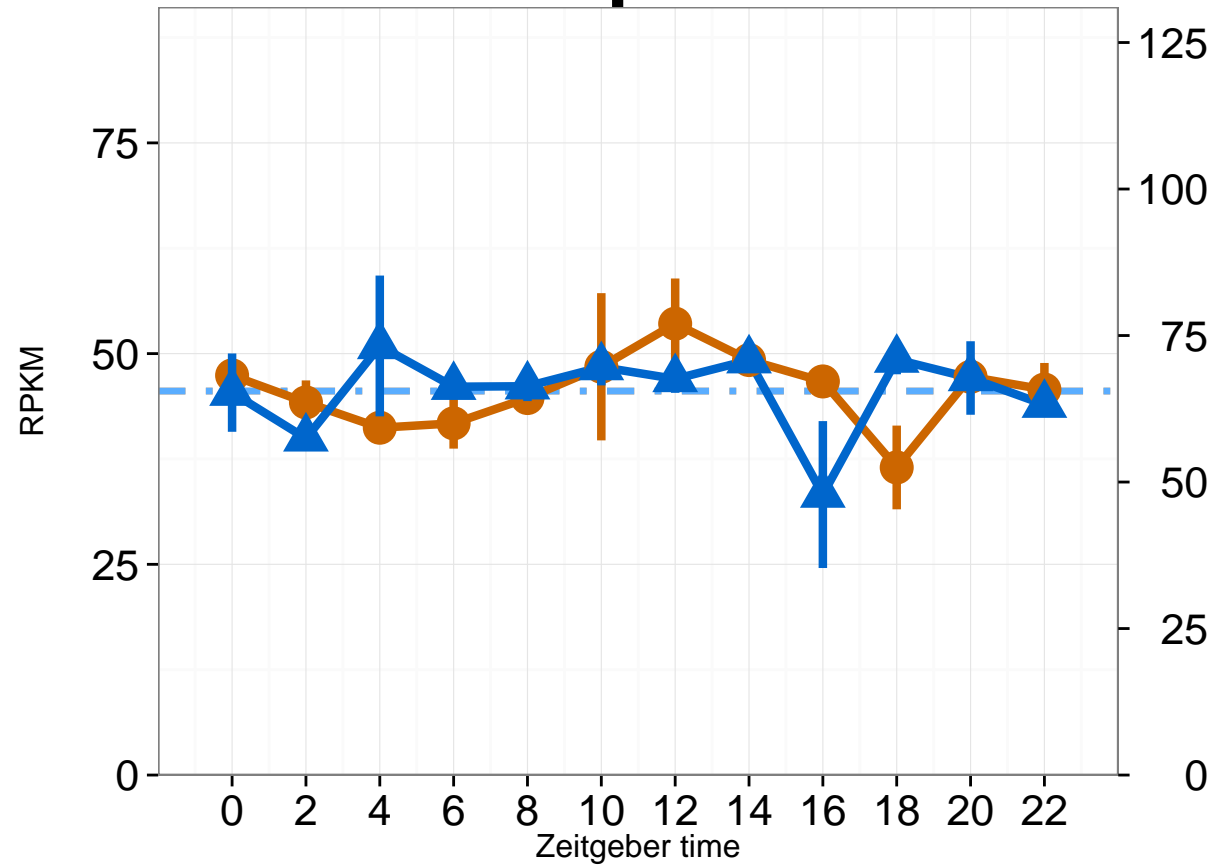

# Mrpl48

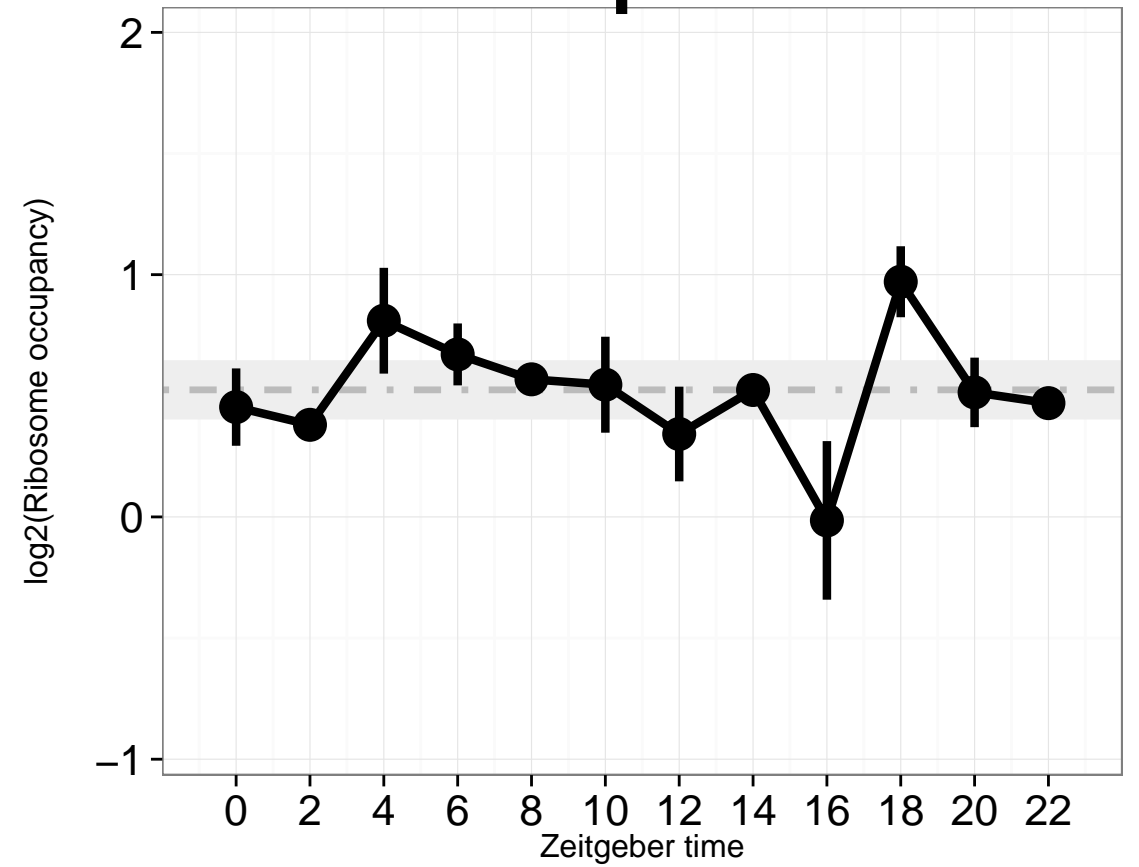

Supplement: Supplementary file 4120 [file 1]

## Cwc15

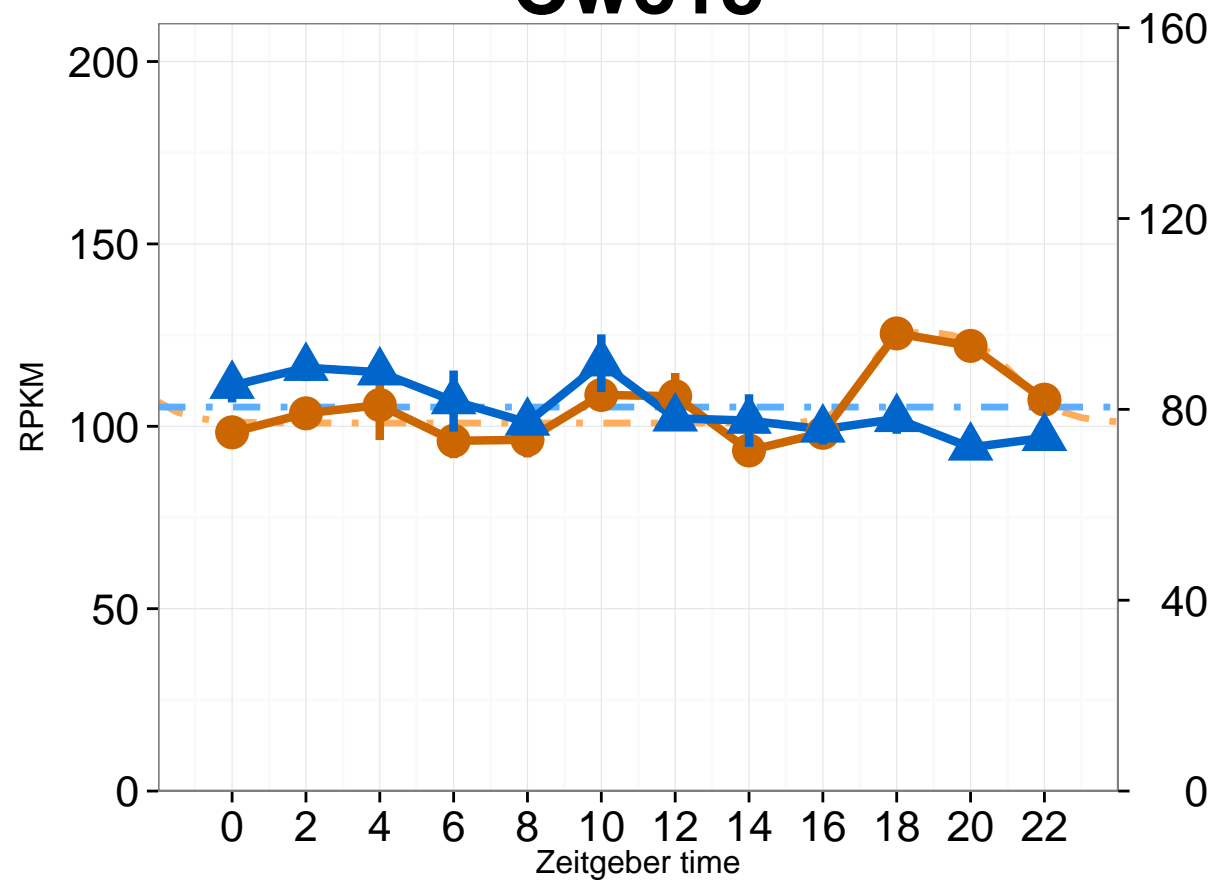

## Cwc15

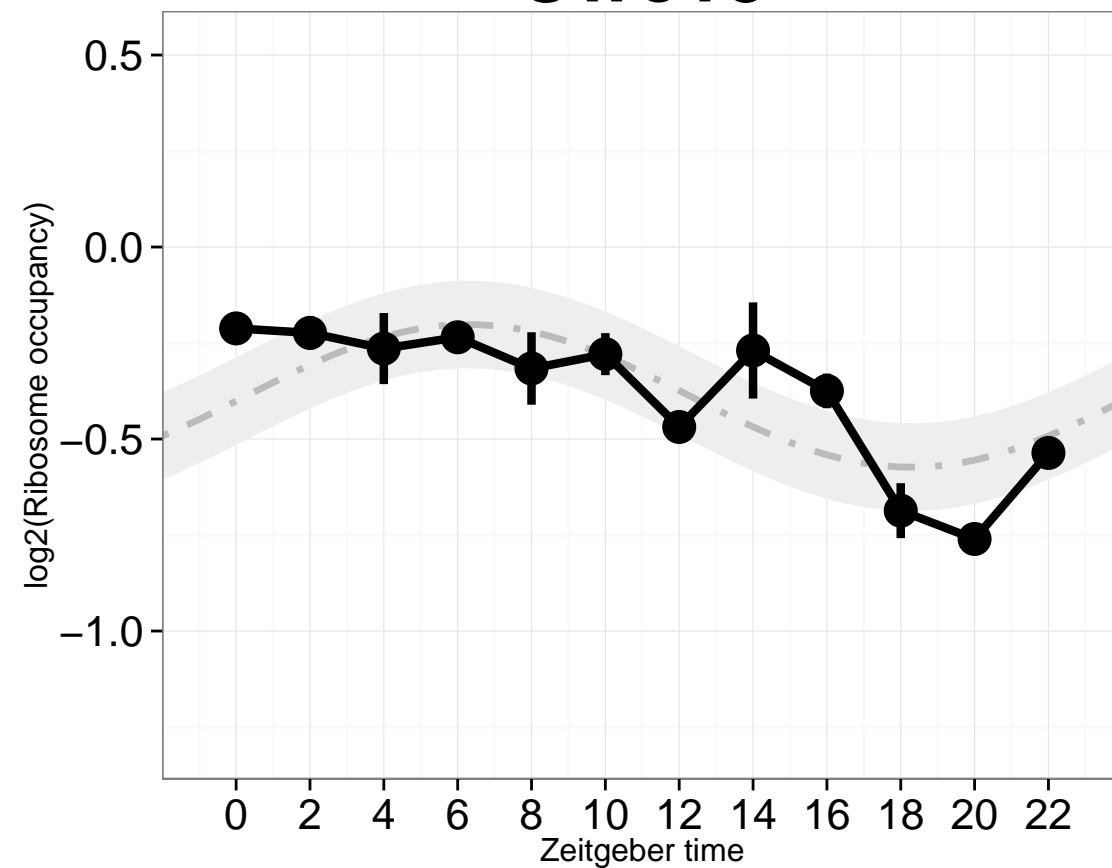

Supplement: Supplementary file 4121 [file 1]

## Rap1gap

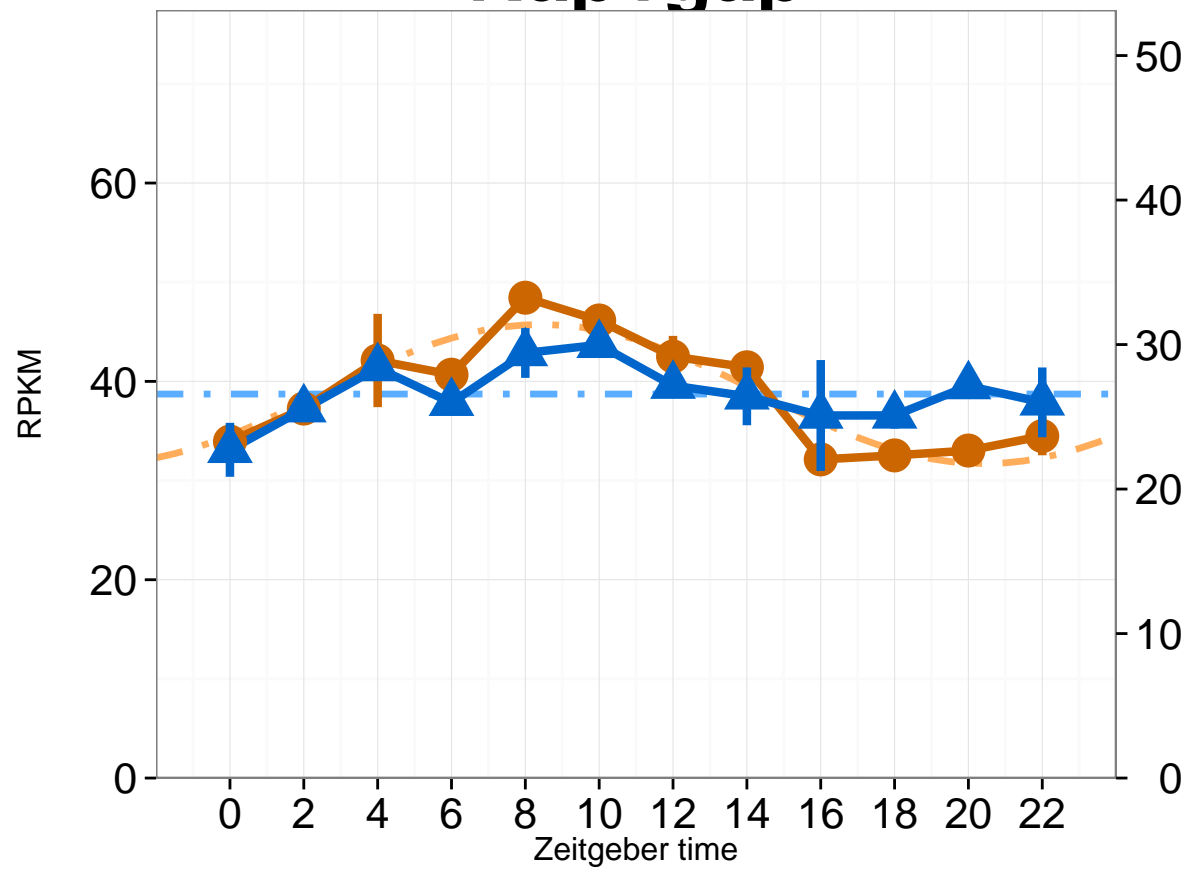

## Rap1gap

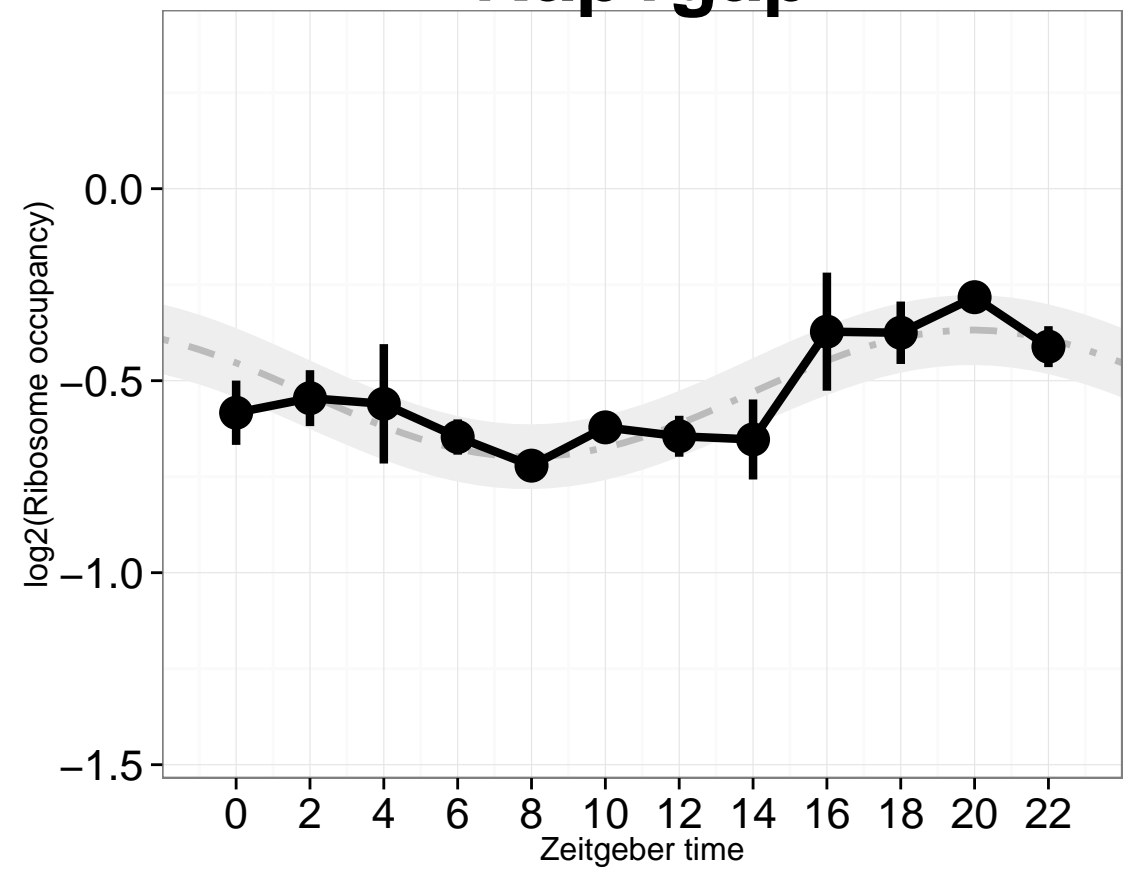

Supplement: Supplementary file 4122 [file 1]

**lpp**

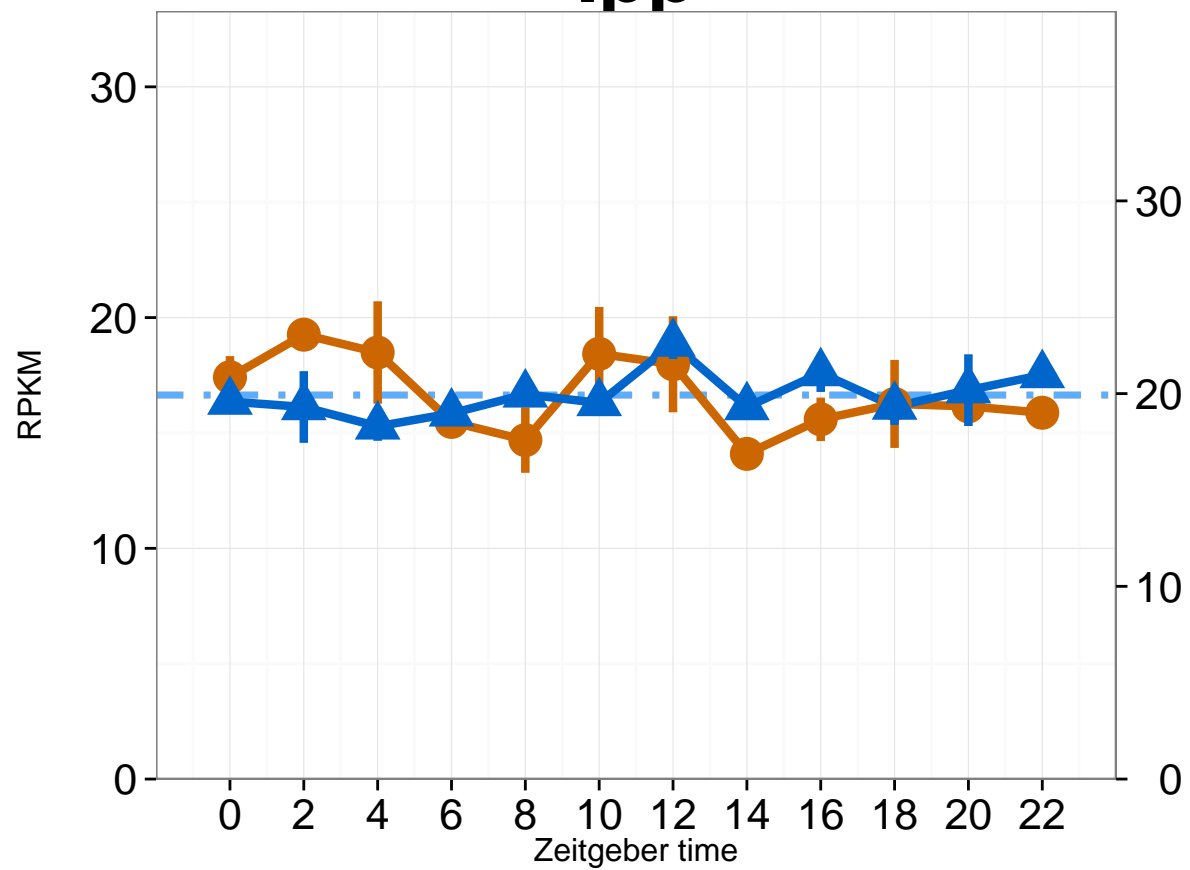

**lpp**

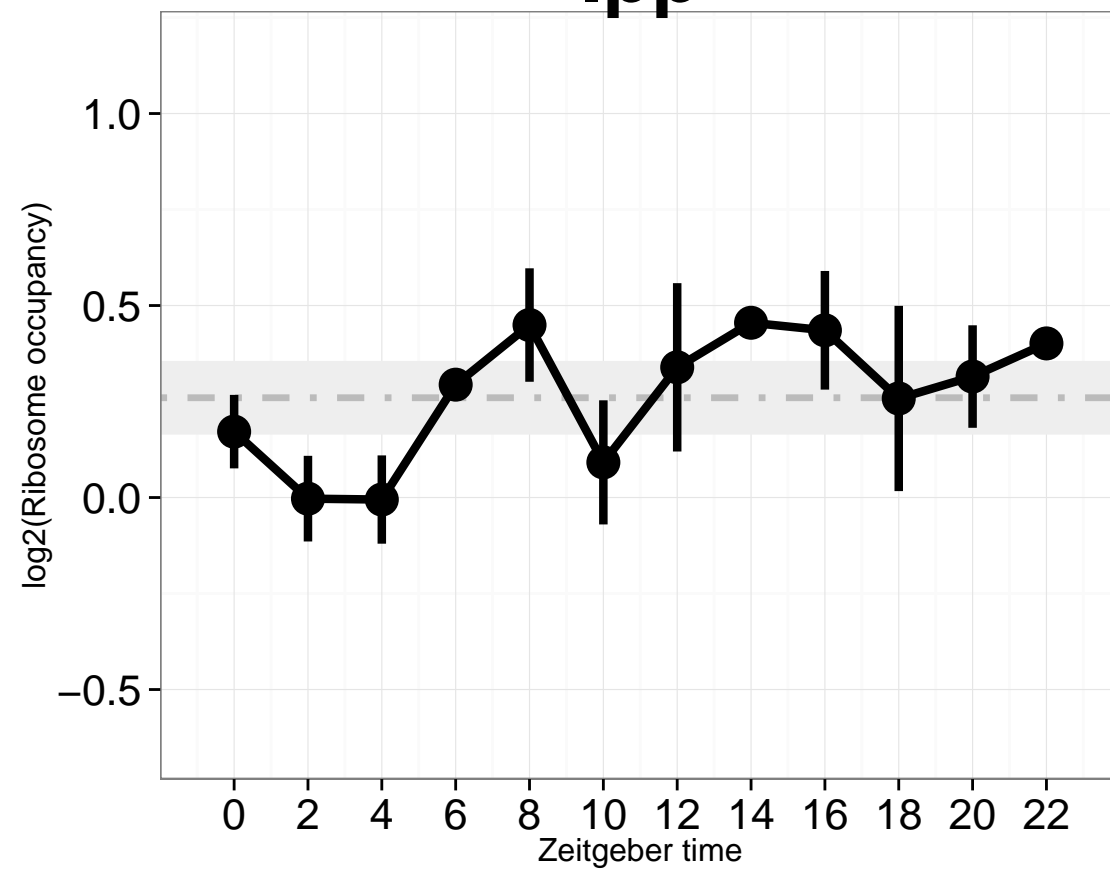

Supplement: Supplementary file 4123 [file 1]

# Zfp143

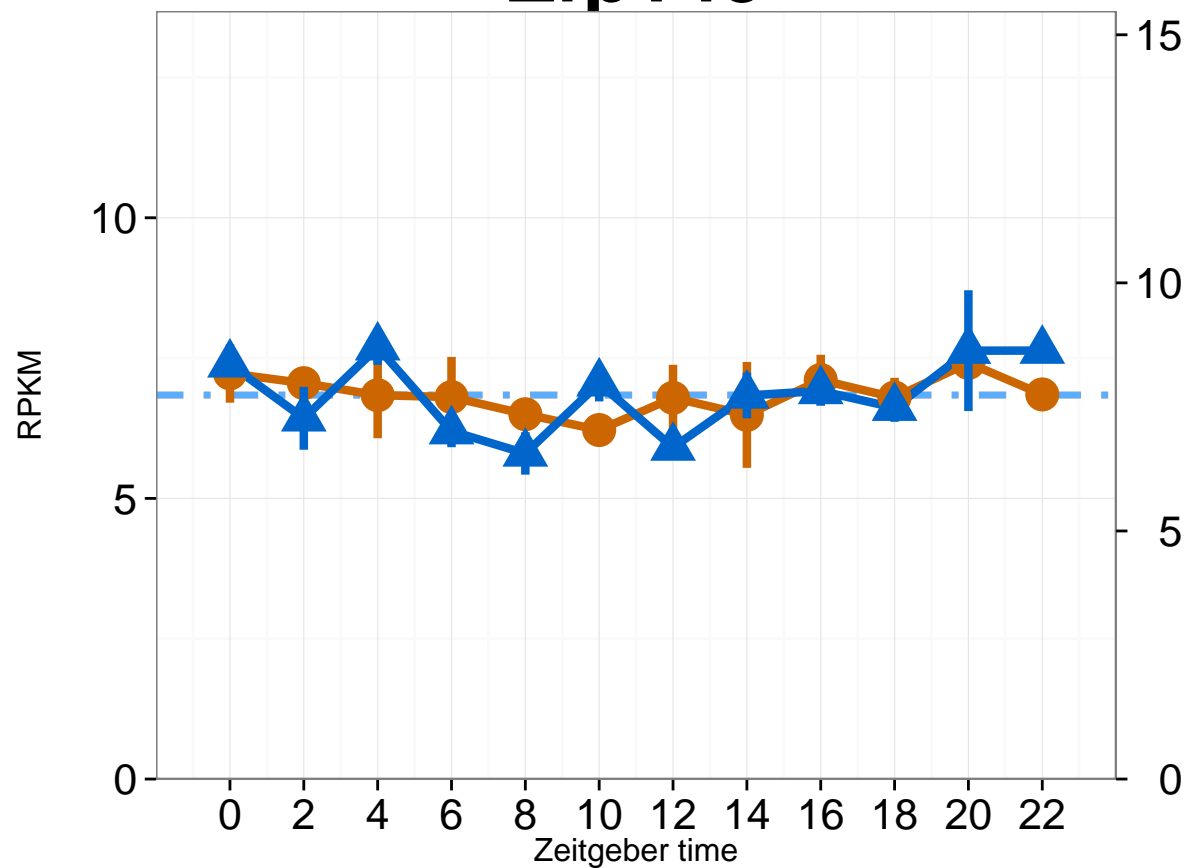

# Zfp143

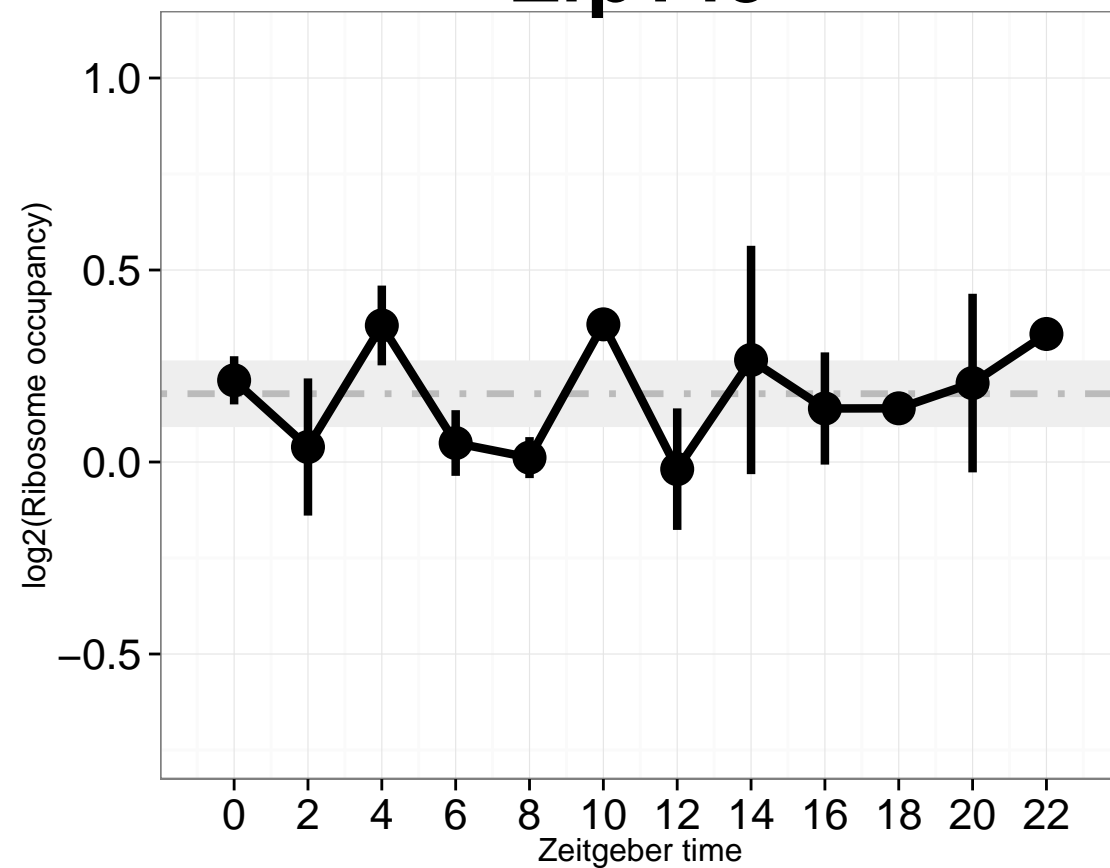

Supplement: Supplementary file 4124 [file 1]

# Camta1

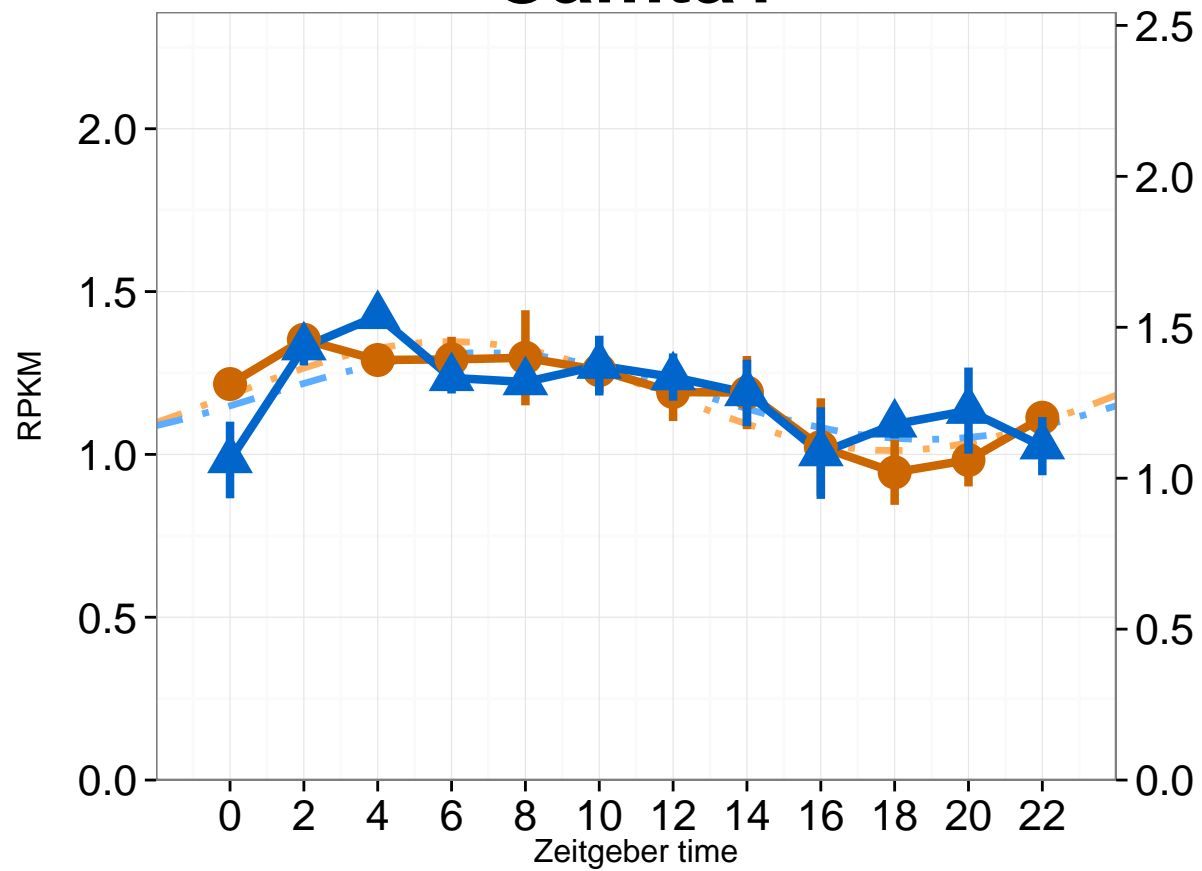

# Camta1

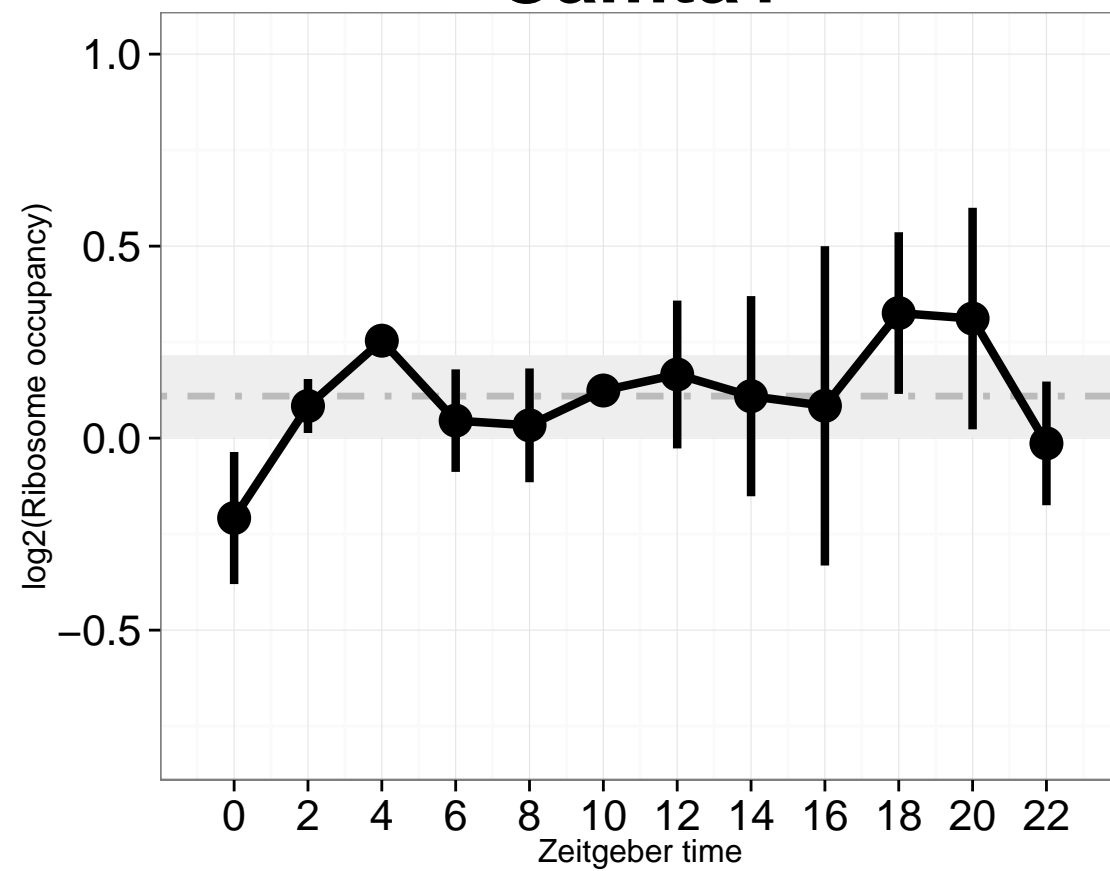

Supplement: Supplementary file 4125 [file 1]

# Cables2

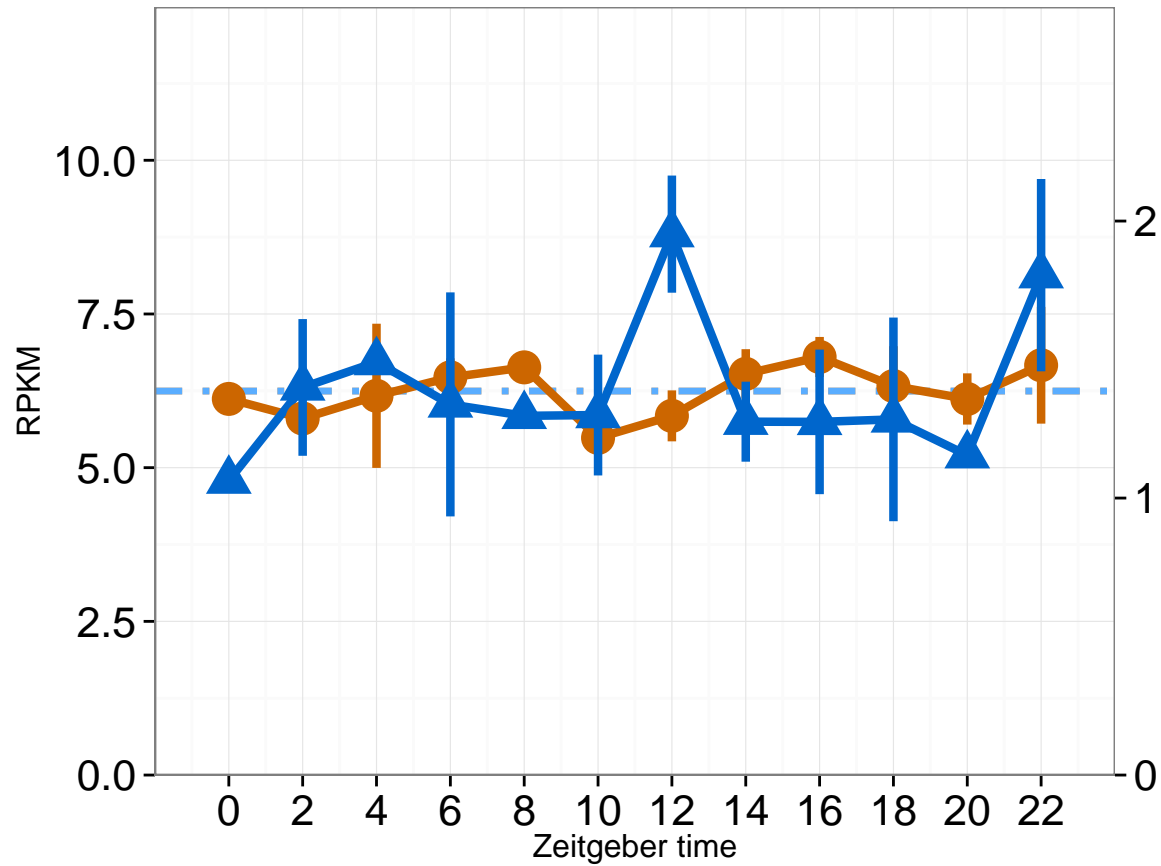

# Cables2

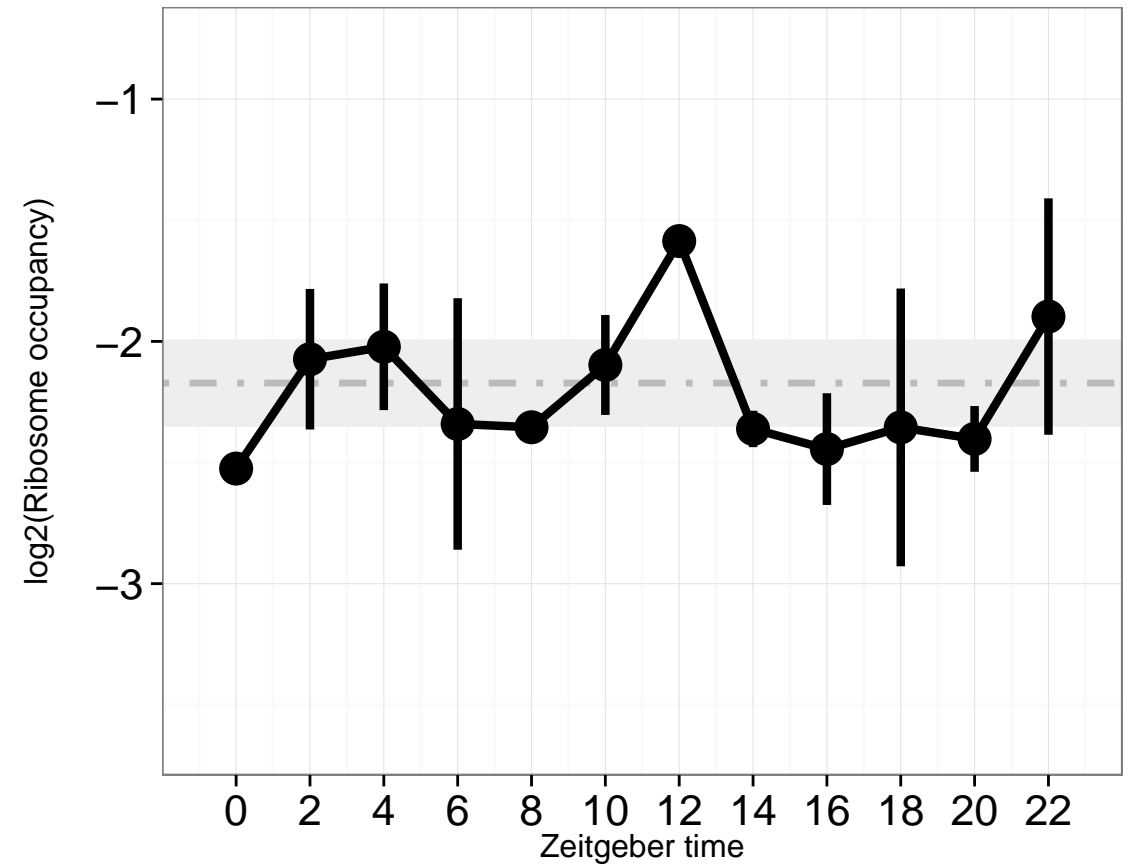

Supplement: Supplementary file 4126 [file 1]

# Oas1c

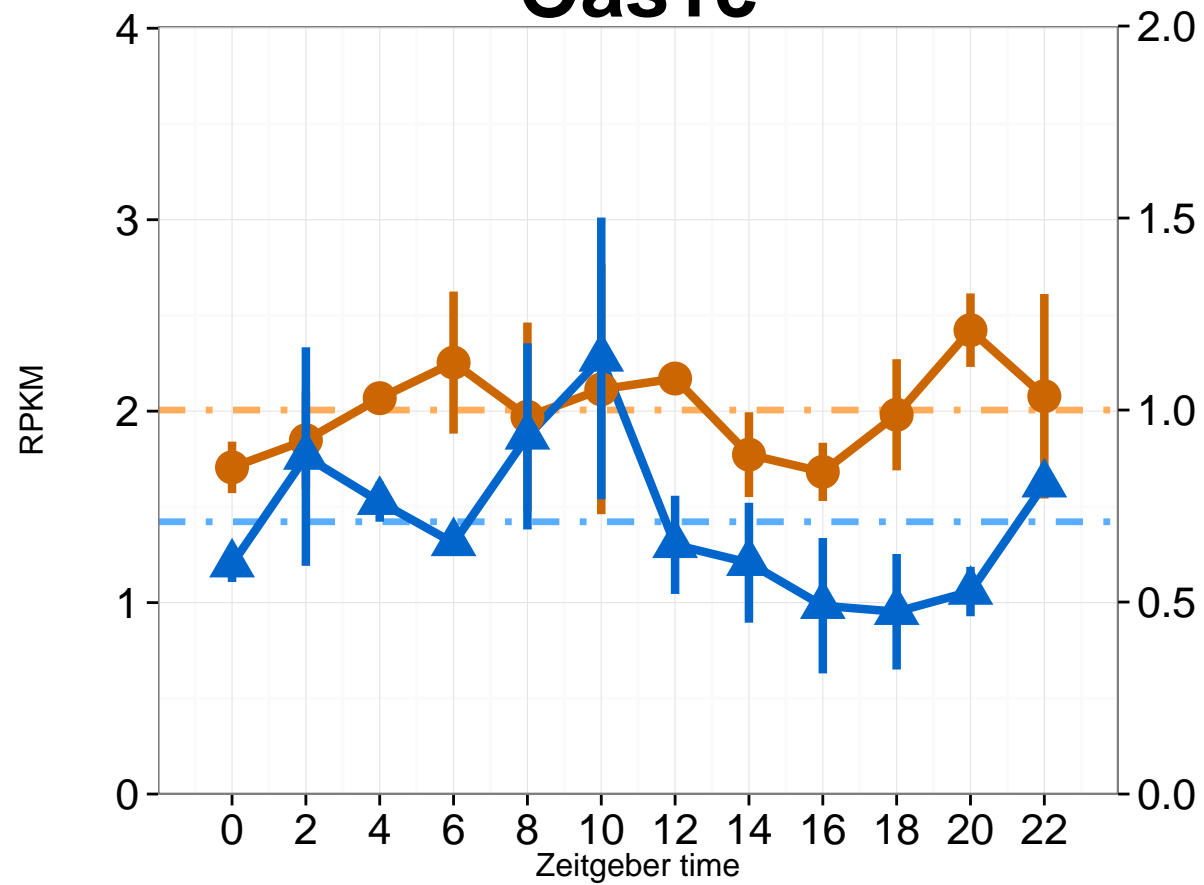

# Oas1c

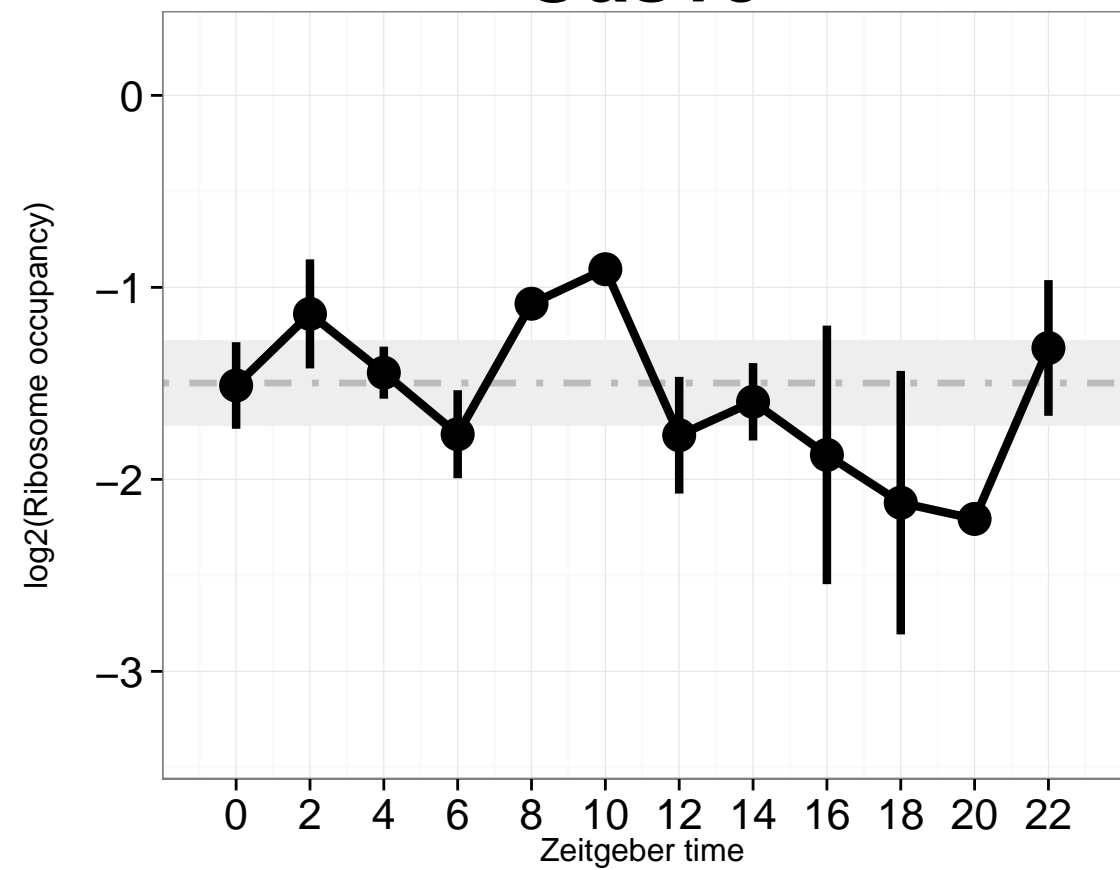

Supplement: Supplementary file 4127 [file 1]

## Ctdspl

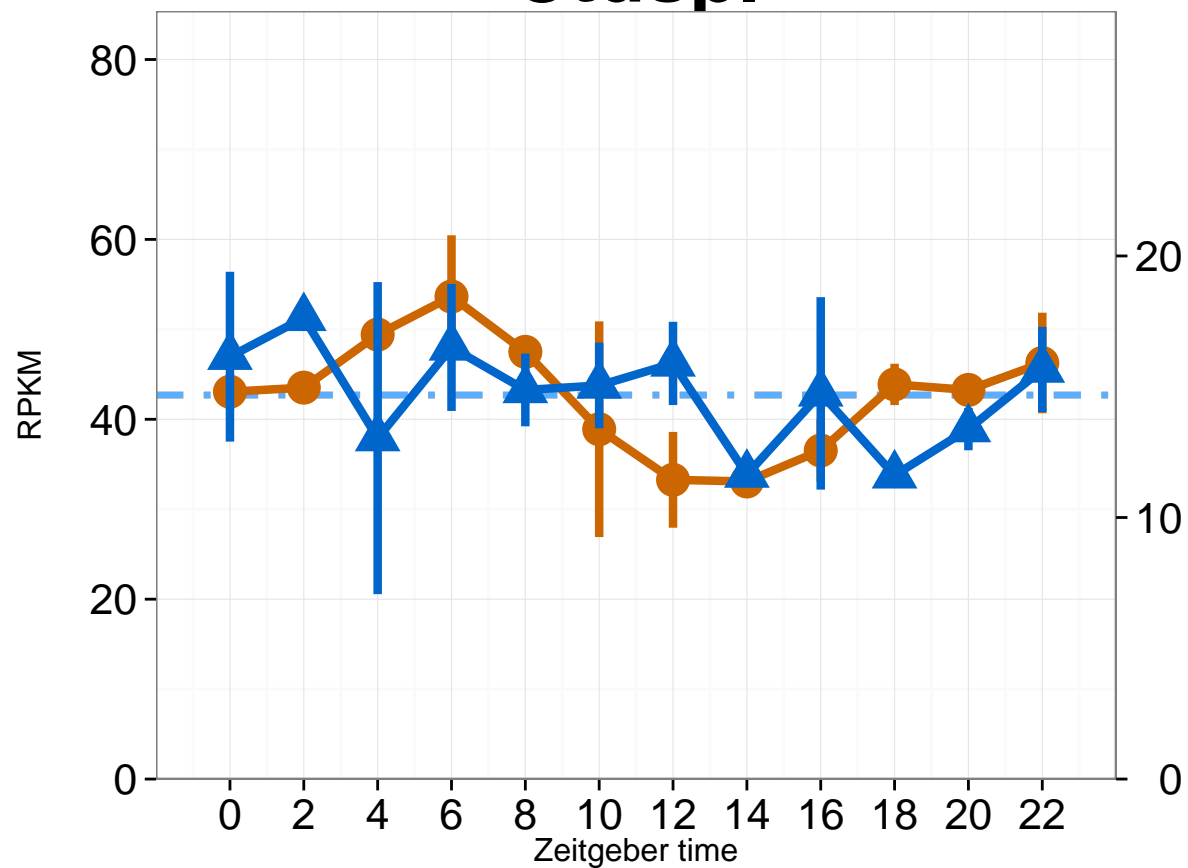

## Ctdspl

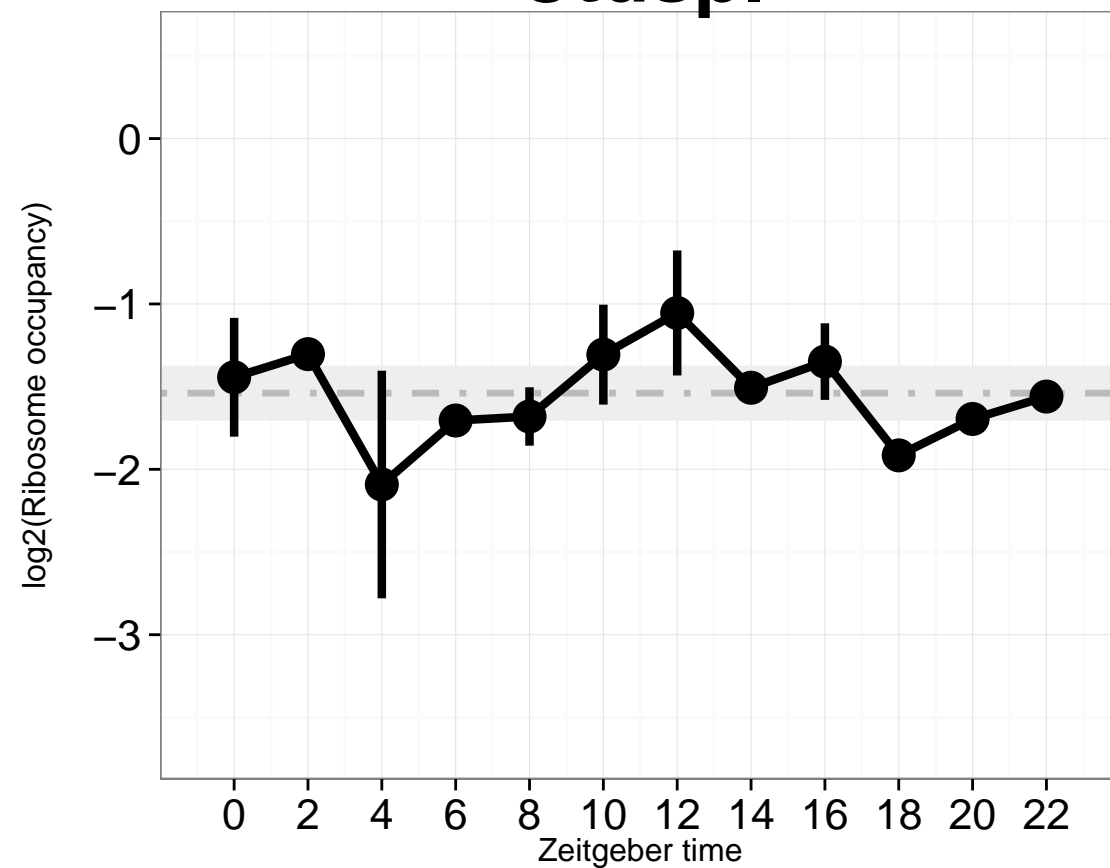

Supplement: Supplementary file 4128 [file 1]

# Pou6f1

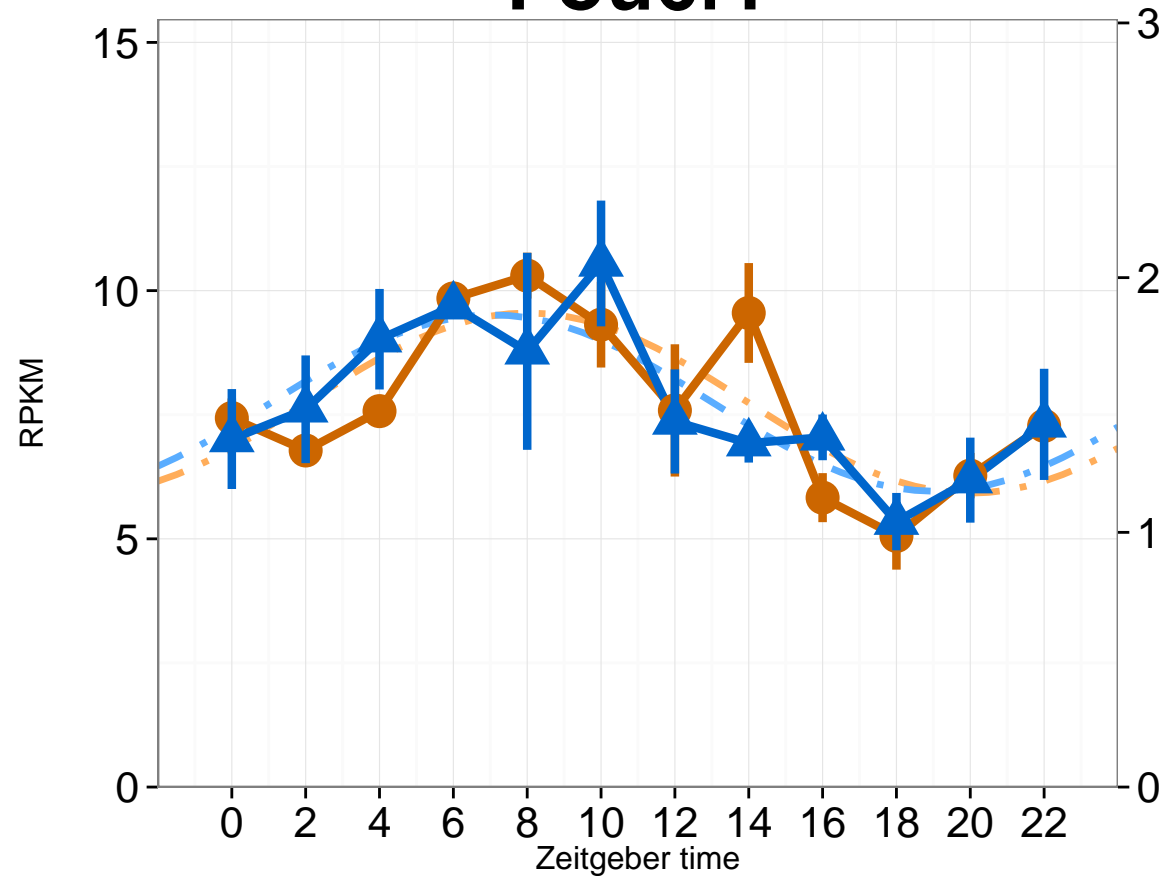

# Pou6f1

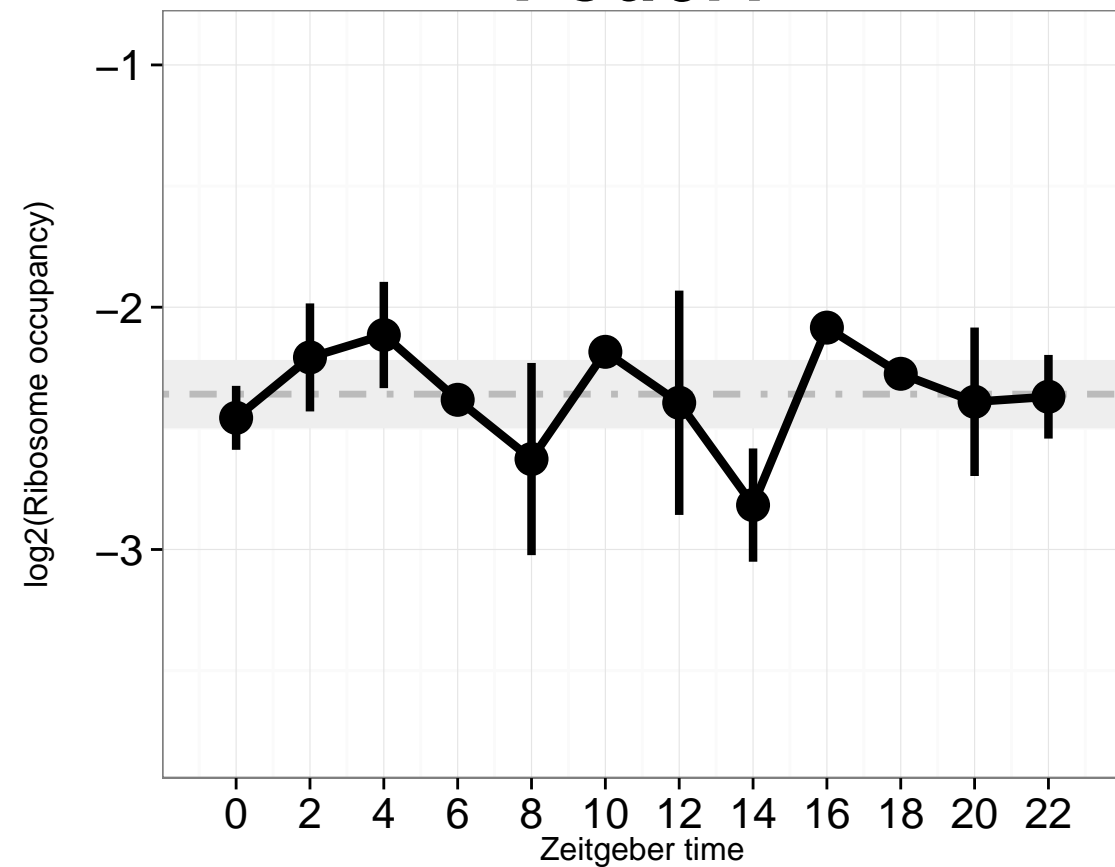

Supplement: Supplementary file 4129 [file 1]

## Ywhag

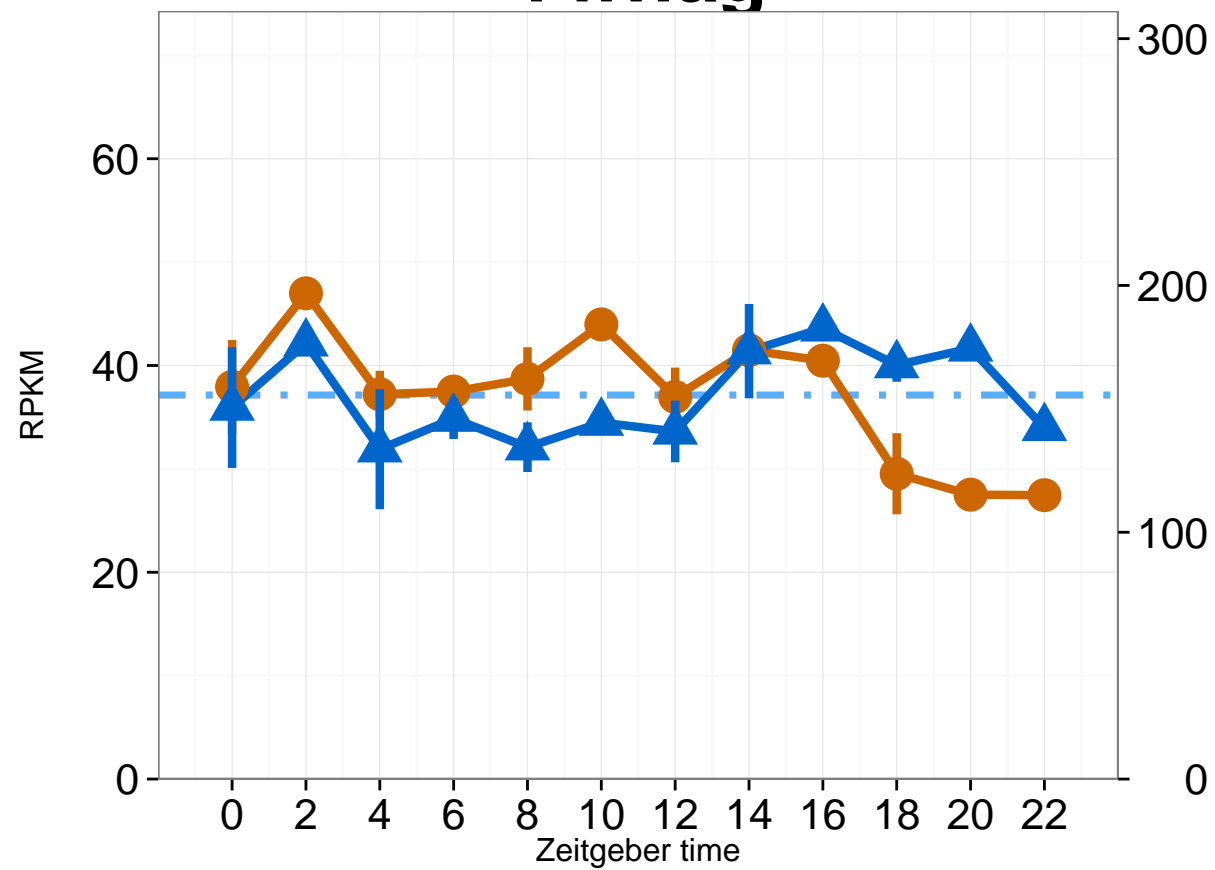

## Ywhag

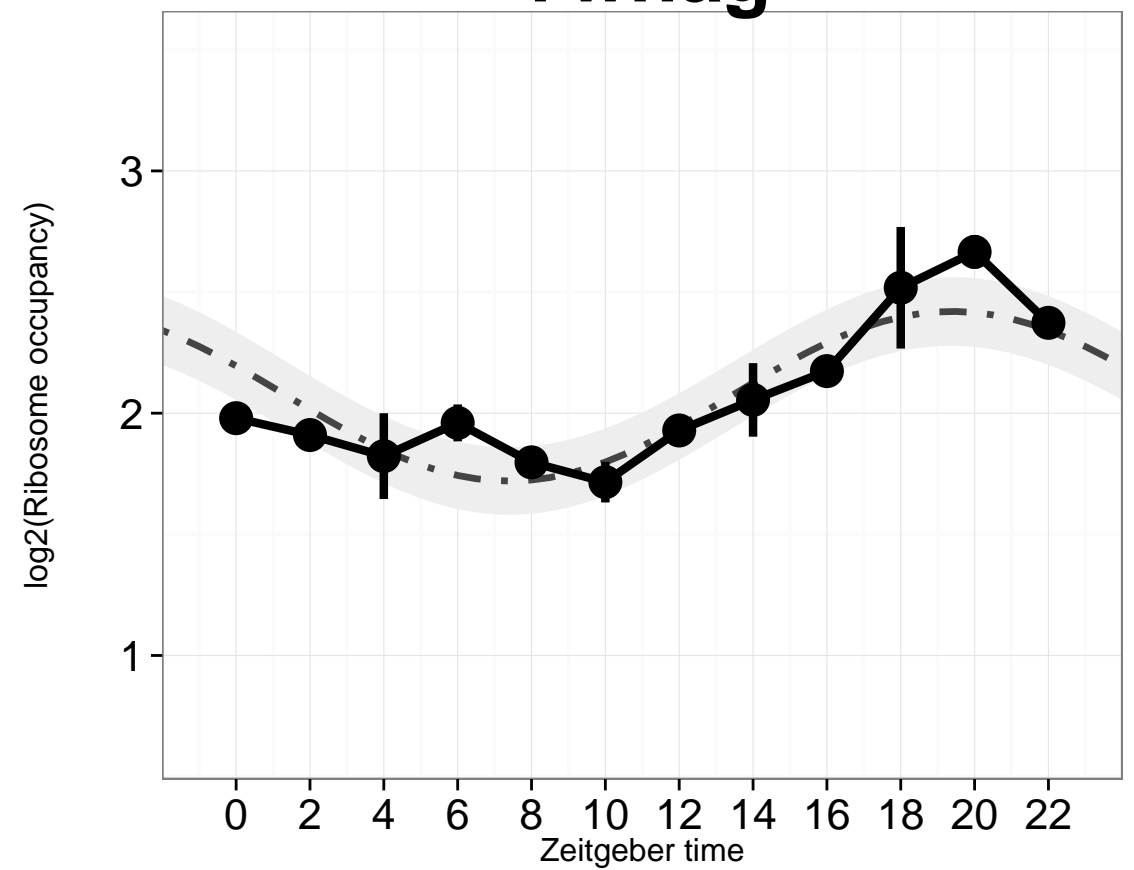

Supplement: Supplementary file 4130 [file 1]

## Rnpc3

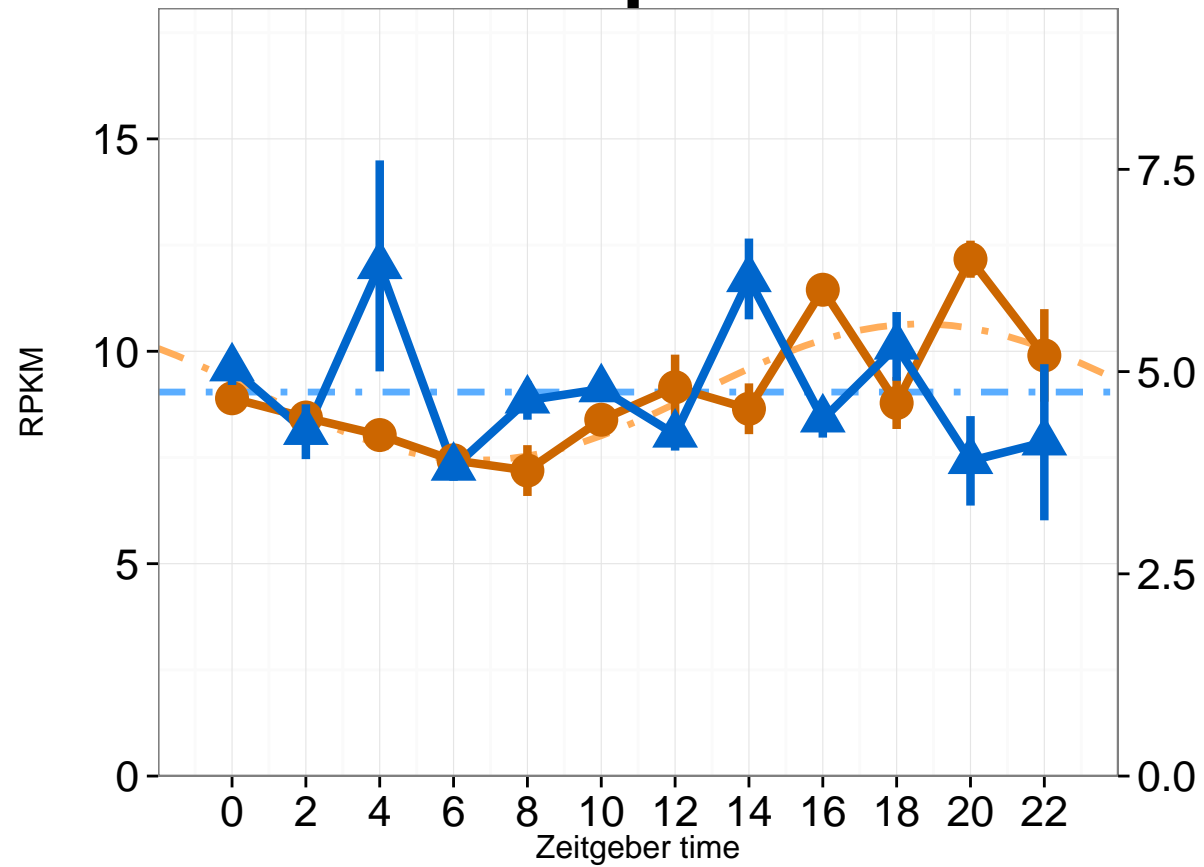

## Rnpc3

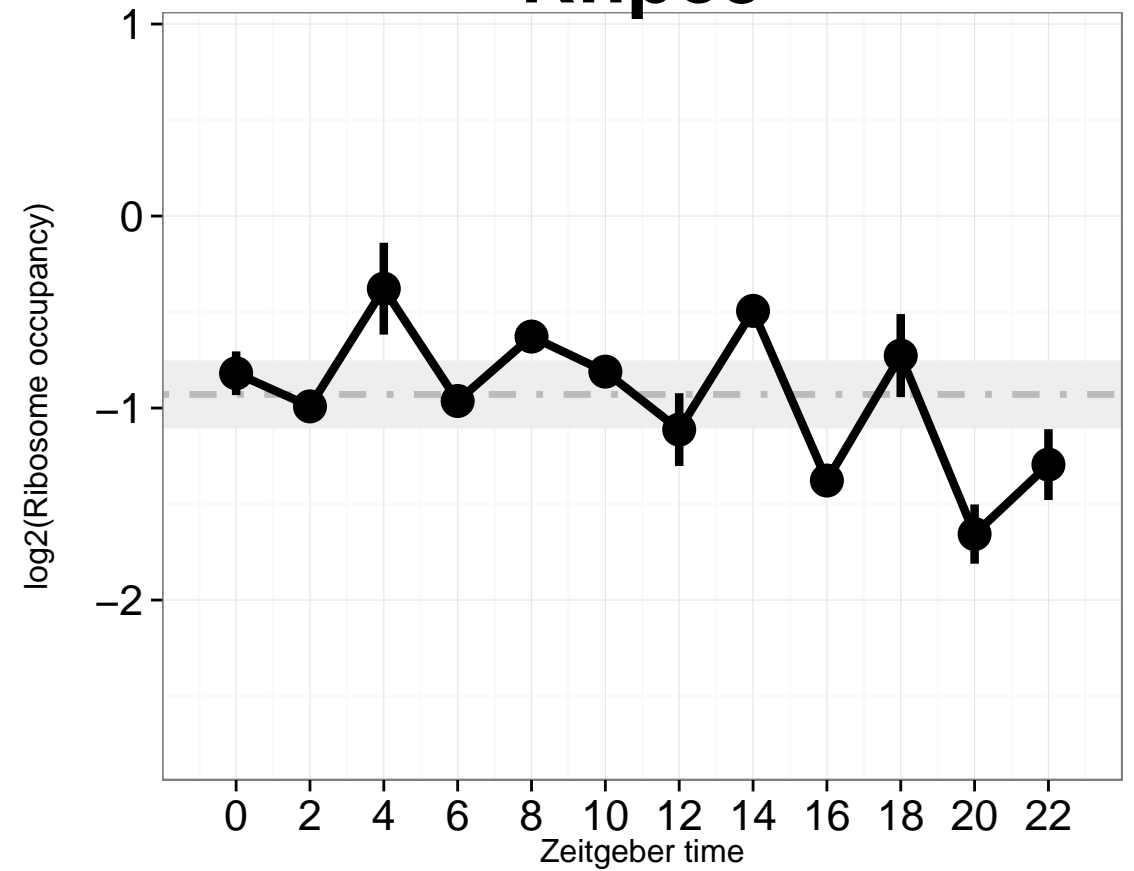

Supplement: Supplementary file 4131 [file 1]

# Mt1

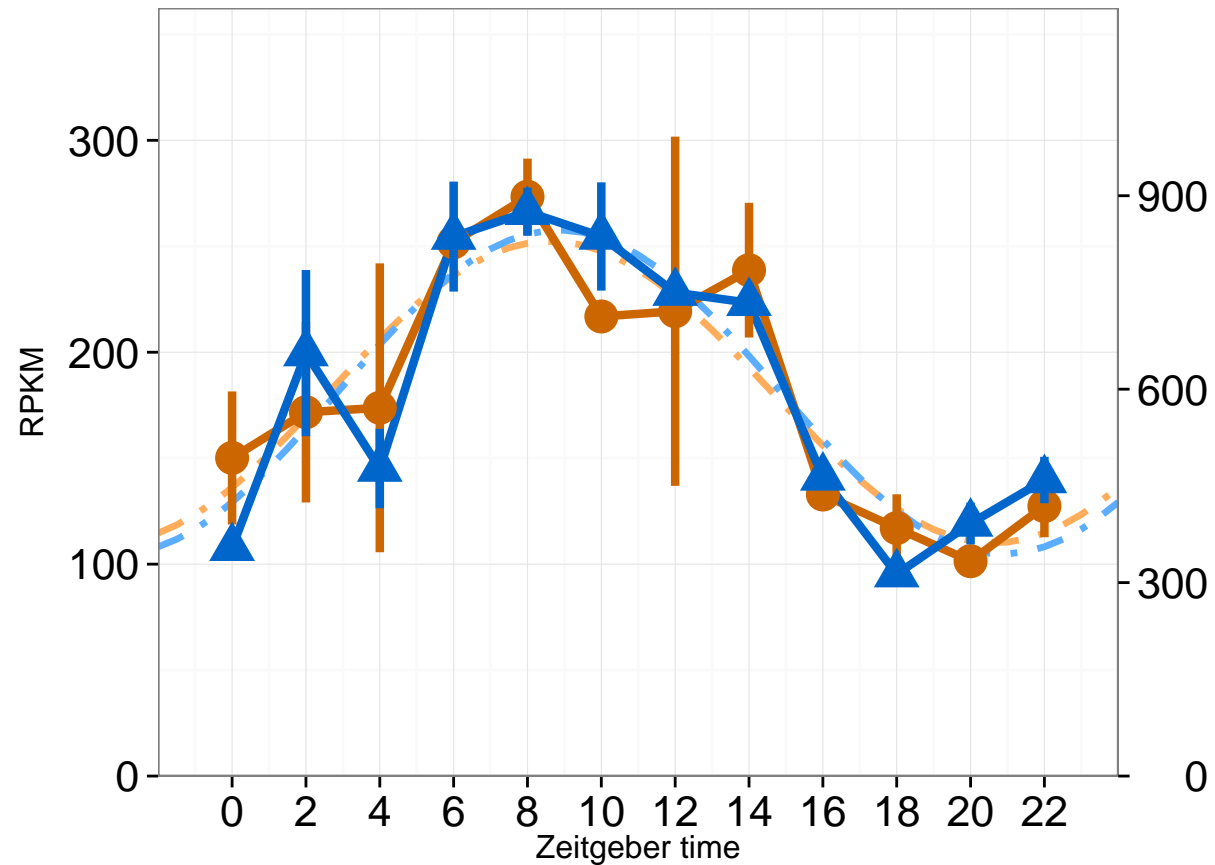

# Mt1

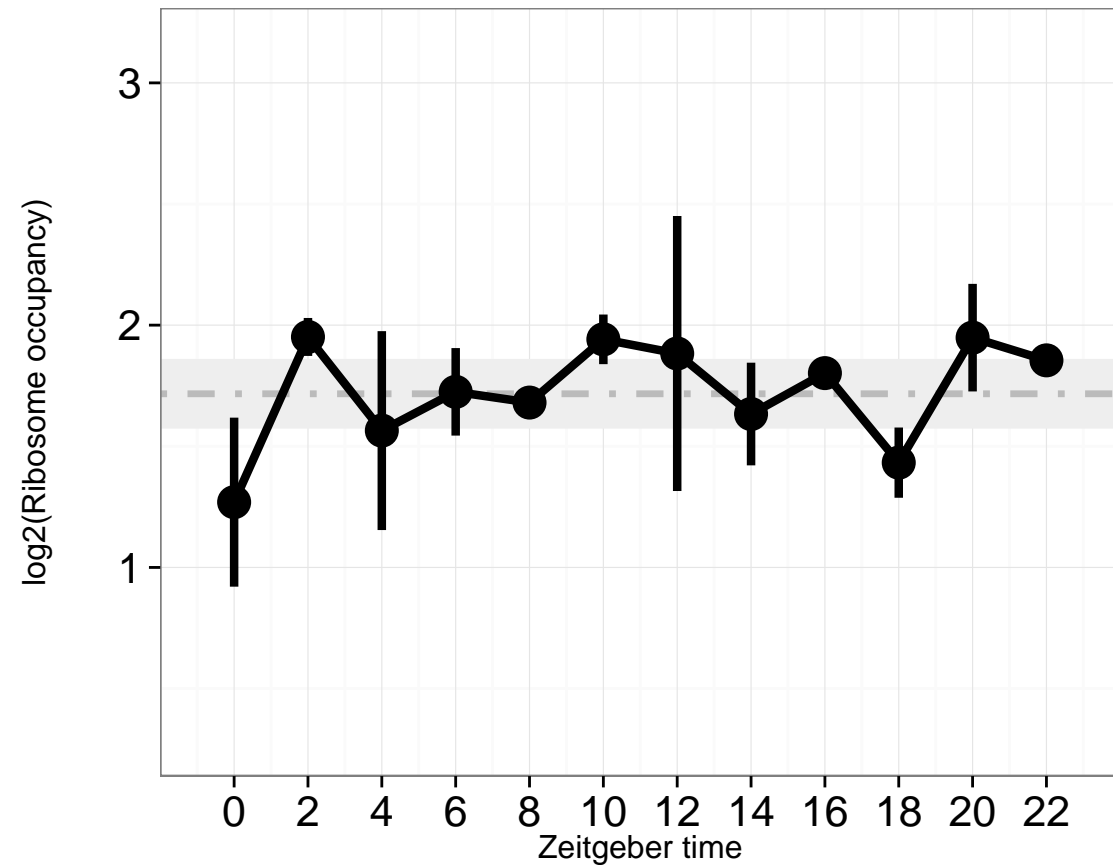

Supplement: Supplementary file 4132 [file 1]

**Fam26f TR**

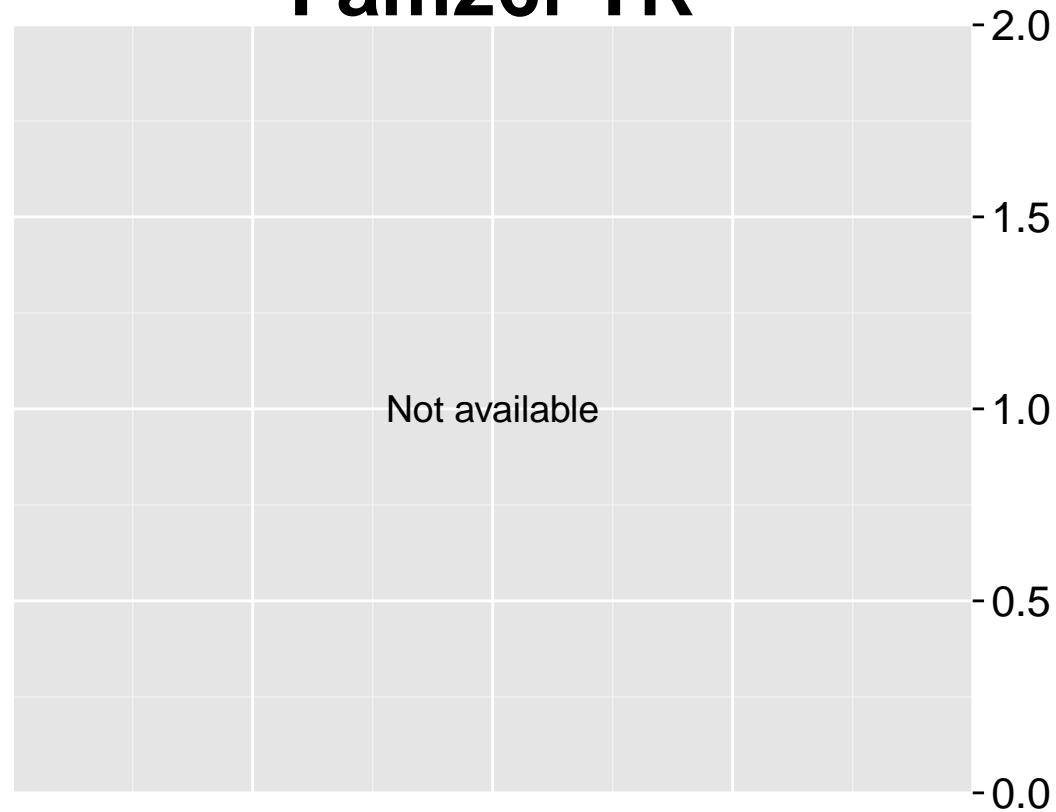

**Fam26f log2(Ribosome occupancy**

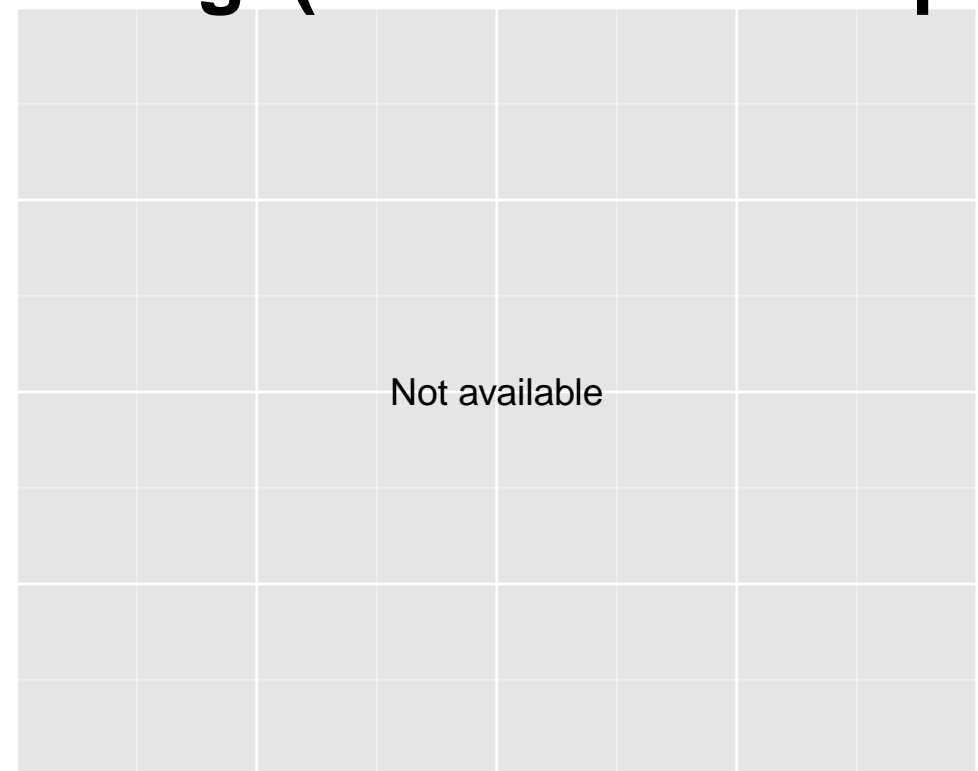

Supplement: Supplementary file 4133 [file 1]

## Sgce

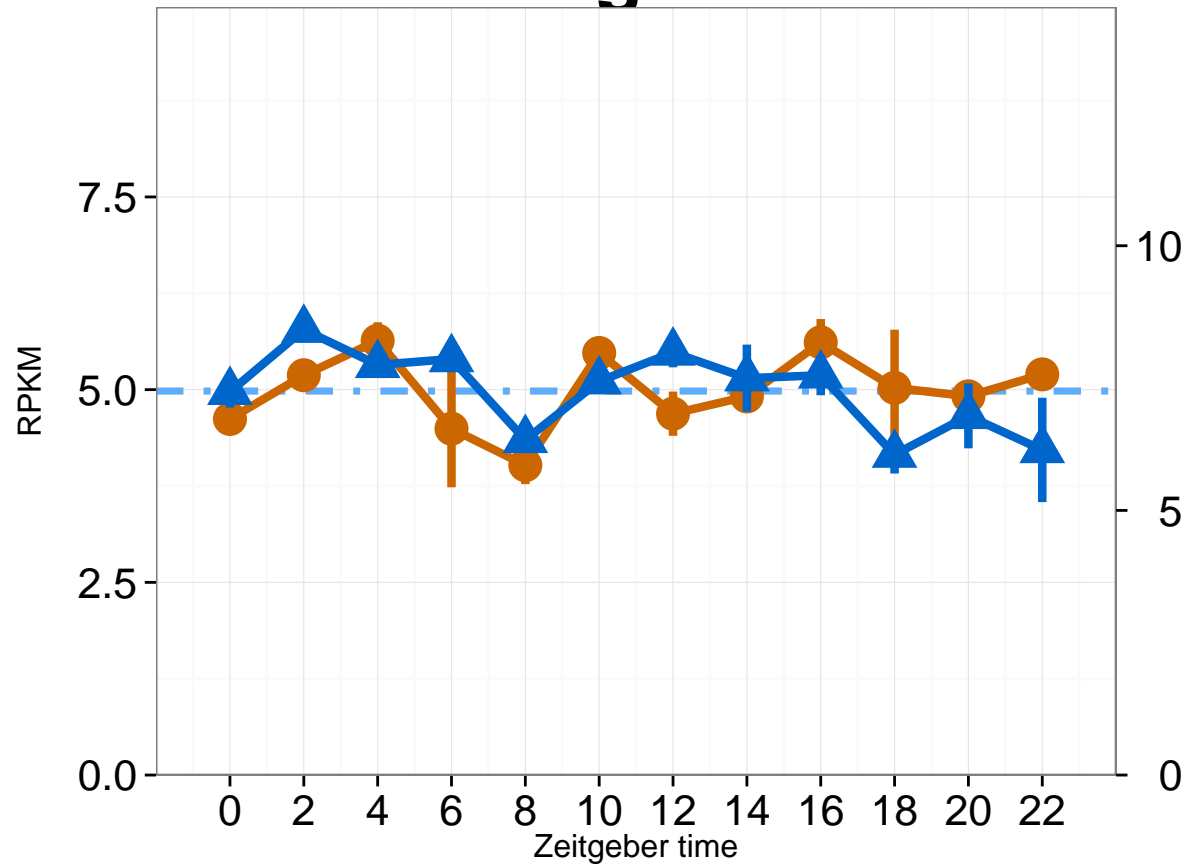

## Sgce

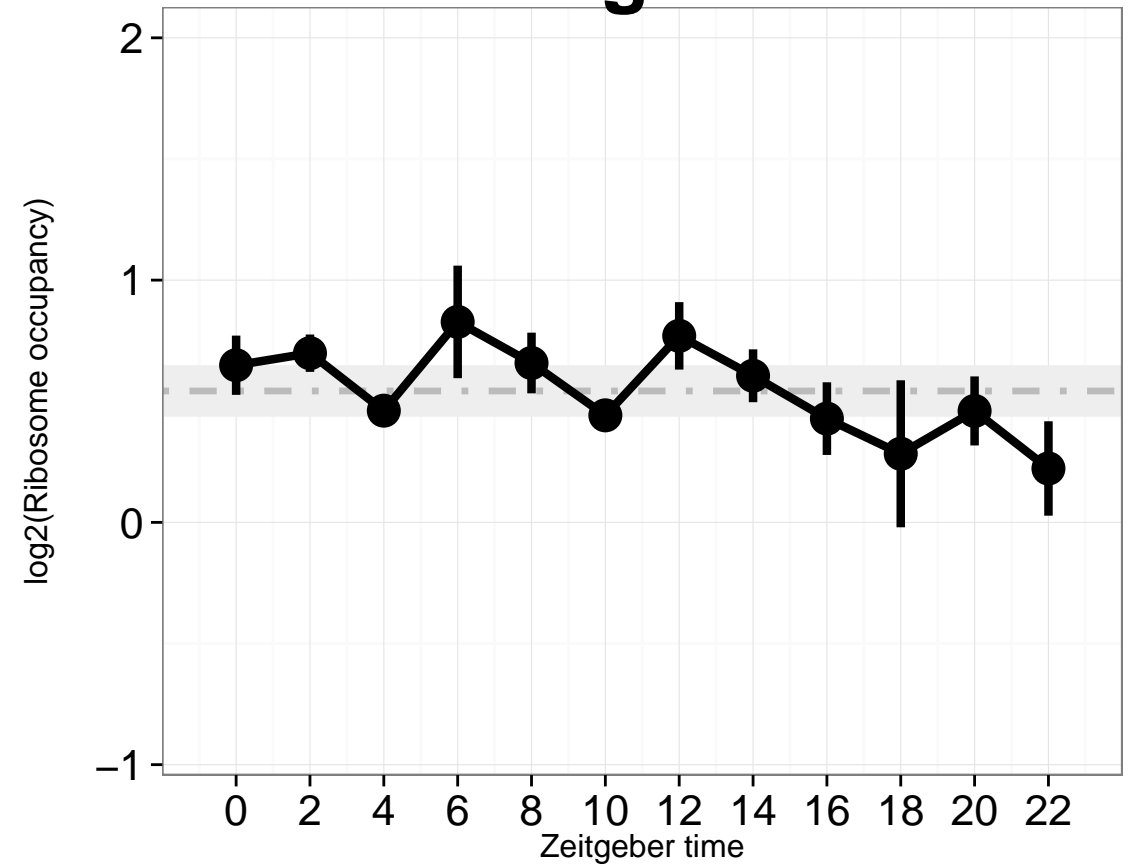

Supplement: Supplementary file 4134 [file 1]

# Rnft2

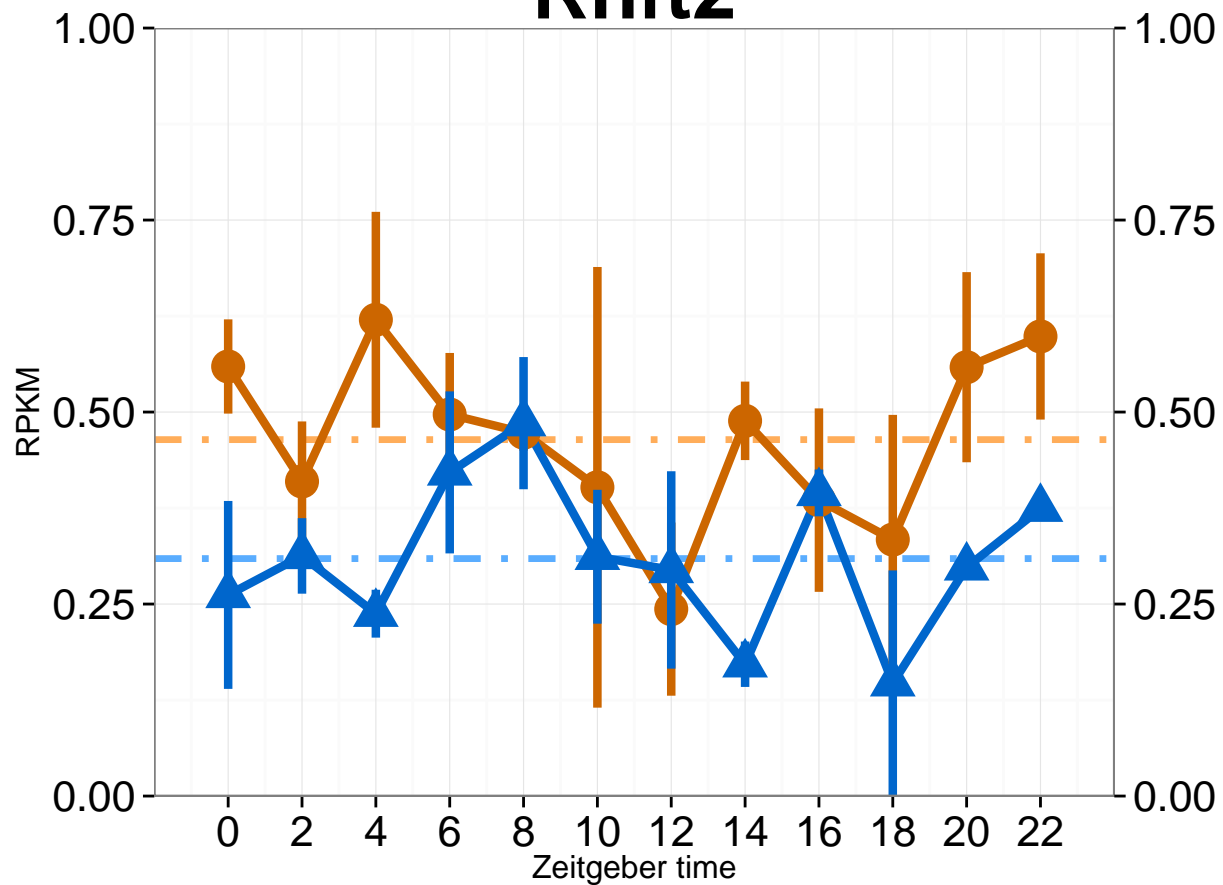

# Rnft2

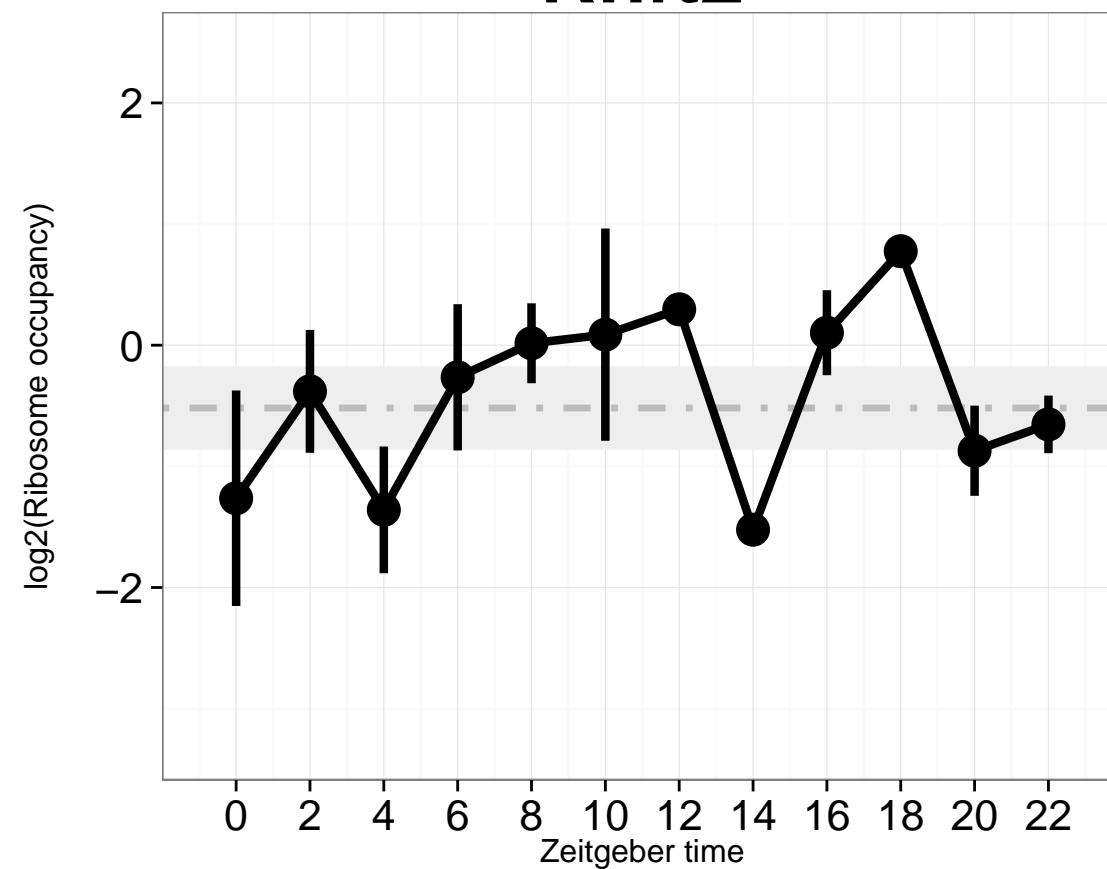

Supplement: Supplementary file 4135 [file 1]

# Cox11

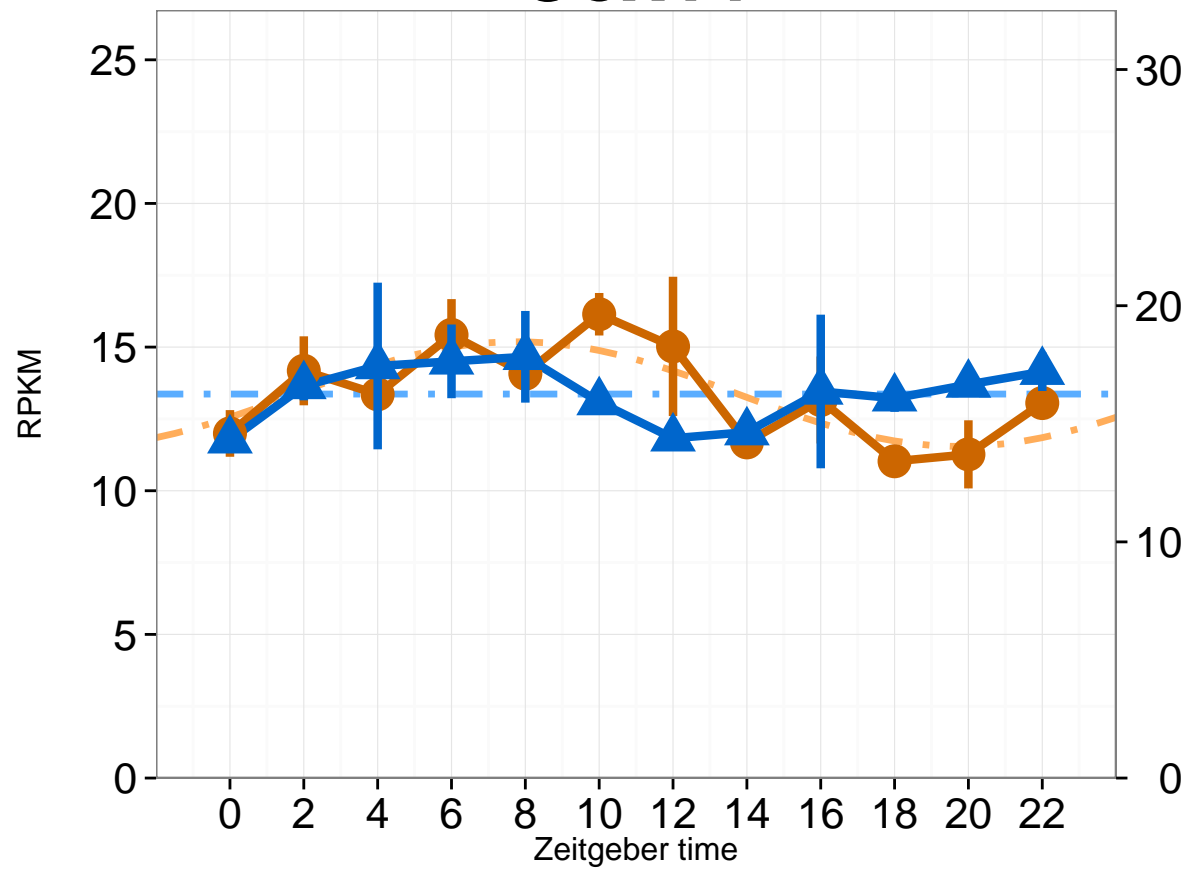

# Cox11

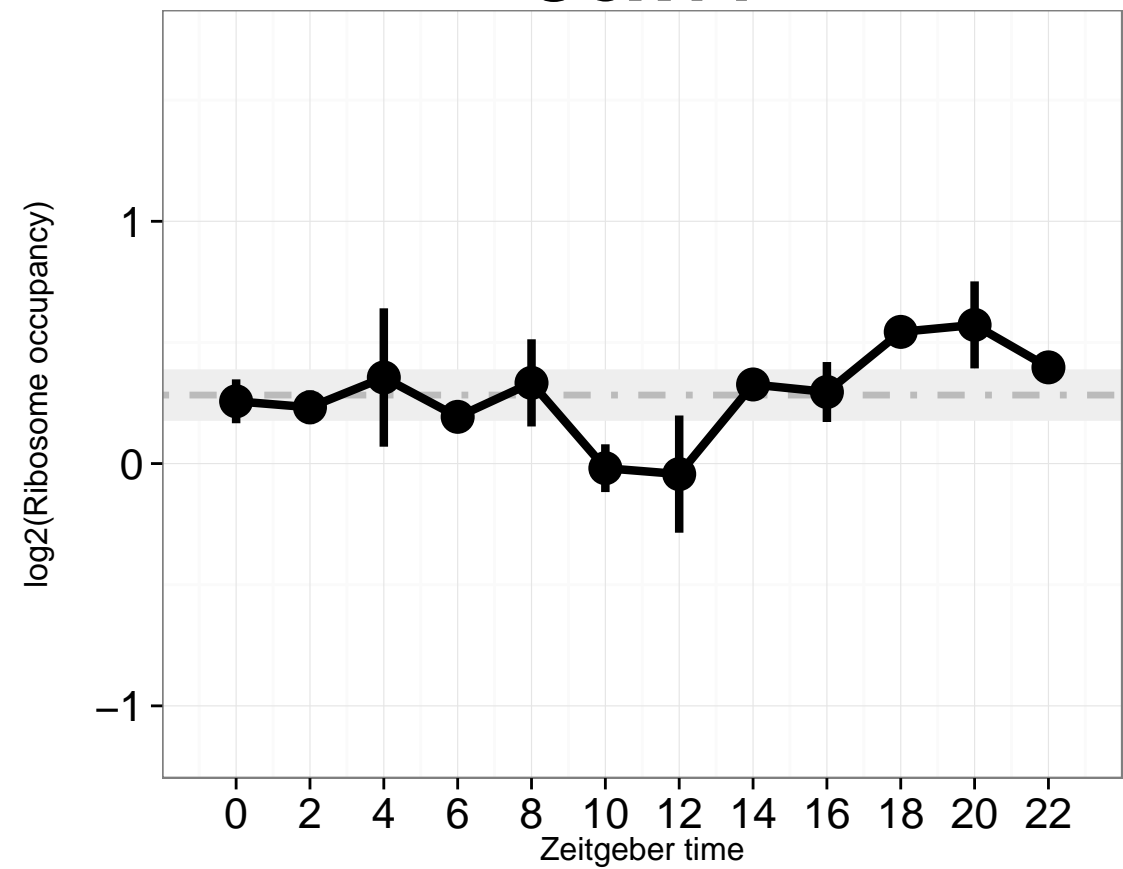

Supplement: Supplementary file 4136 [file 1]

## Slc8a1

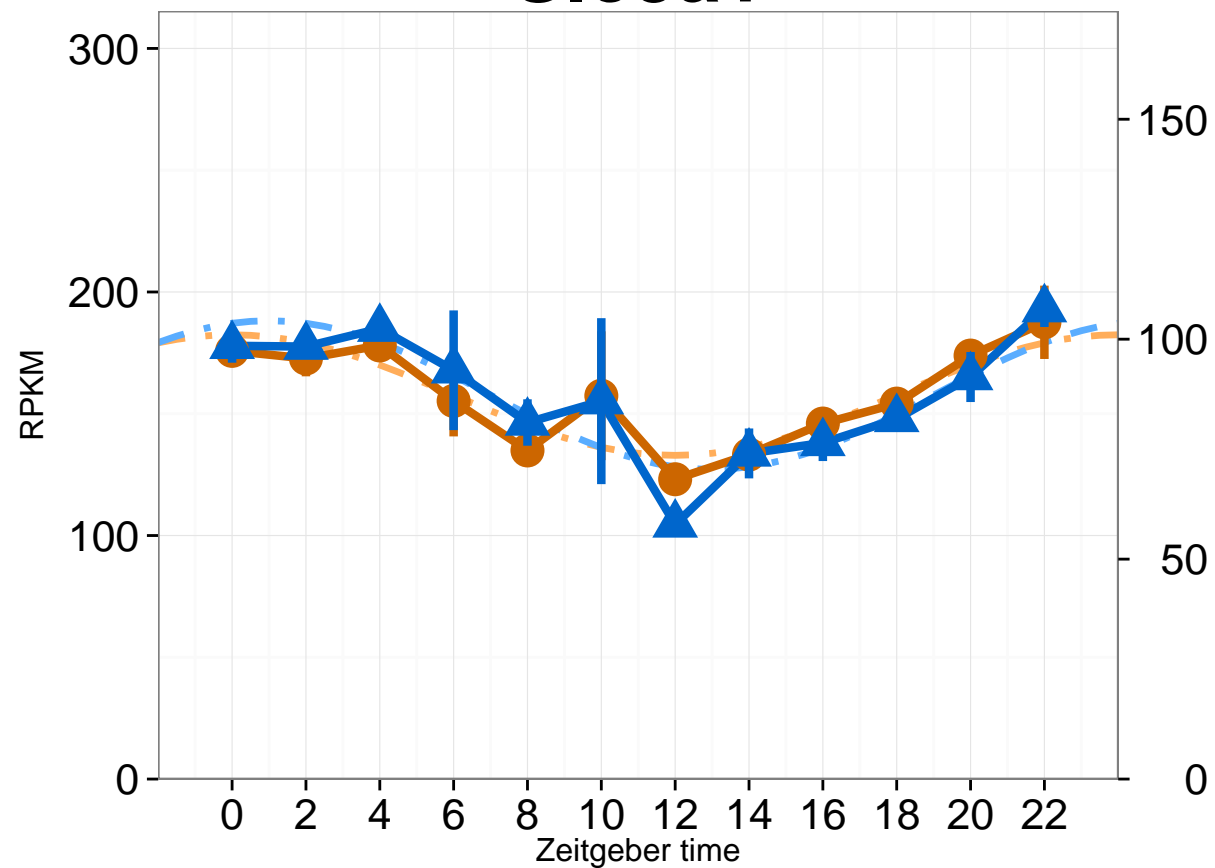

## Slc8a1

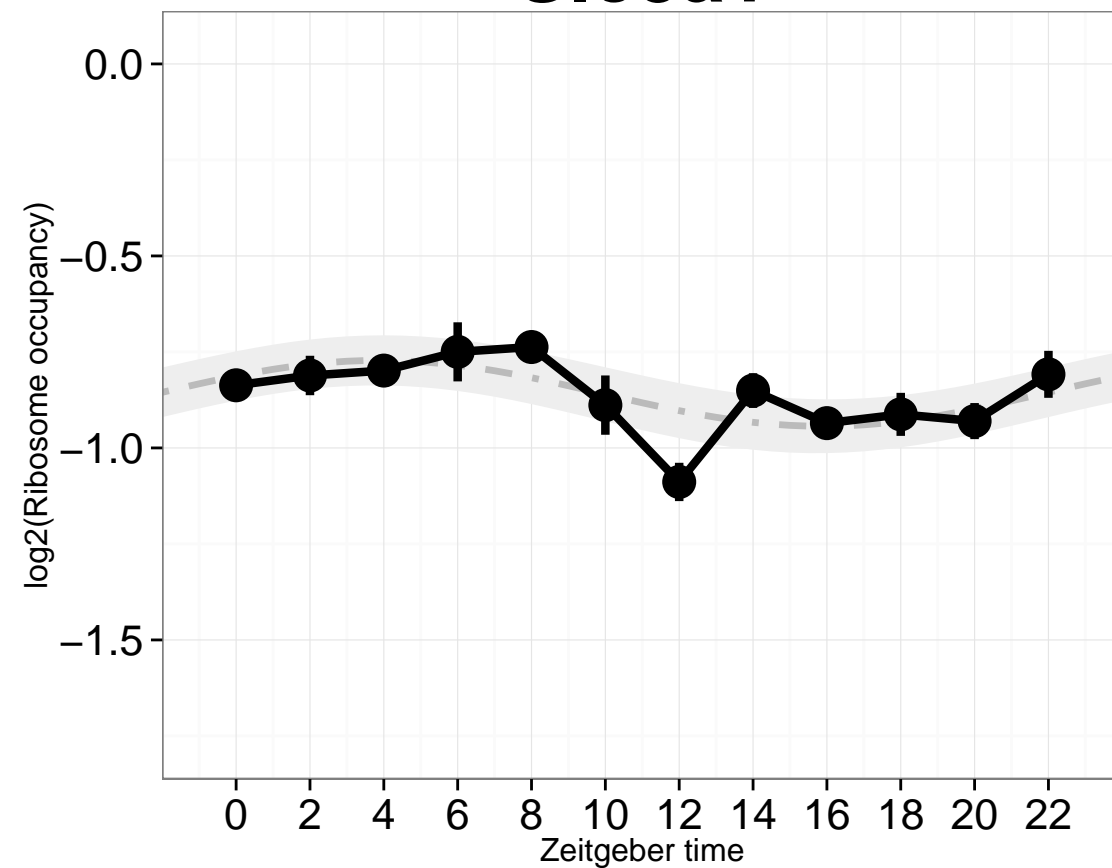

Supplement: Supplementary file 4137 [file 1]

## Vps33b

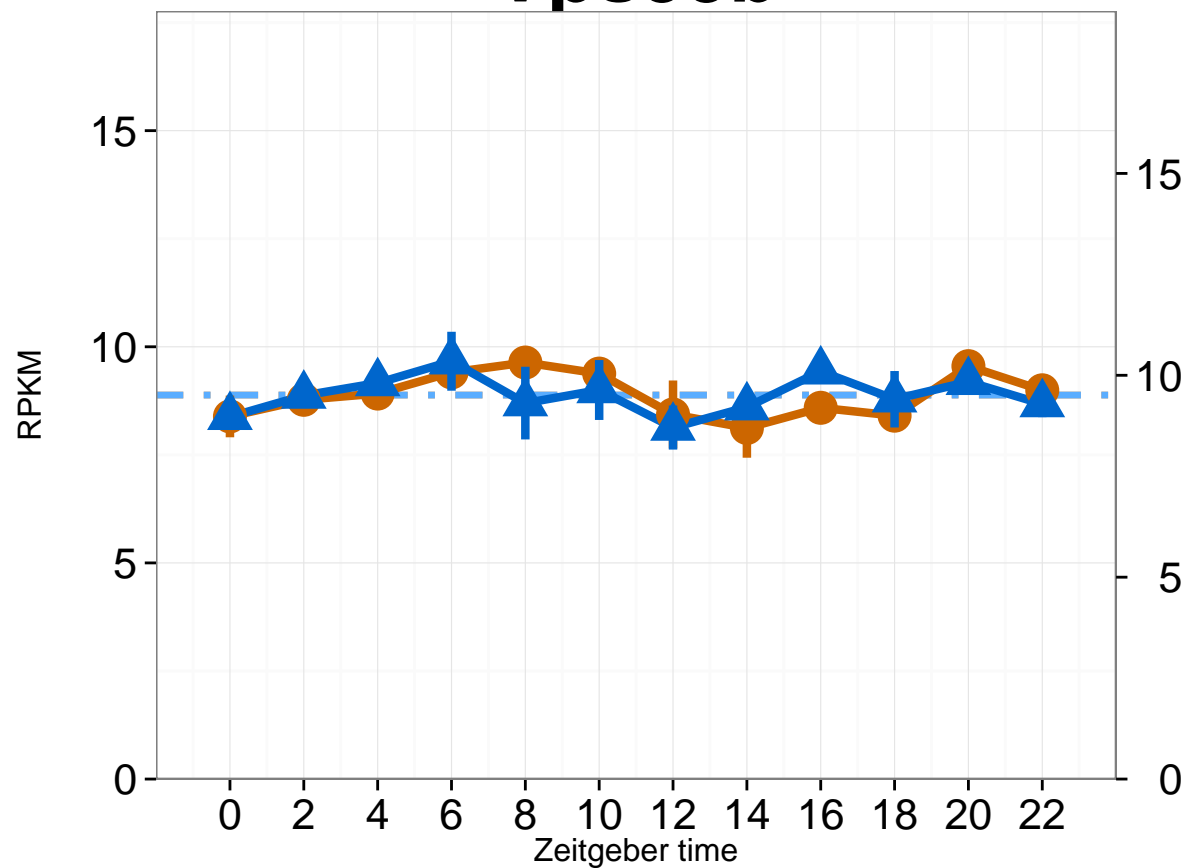

## Vps33b

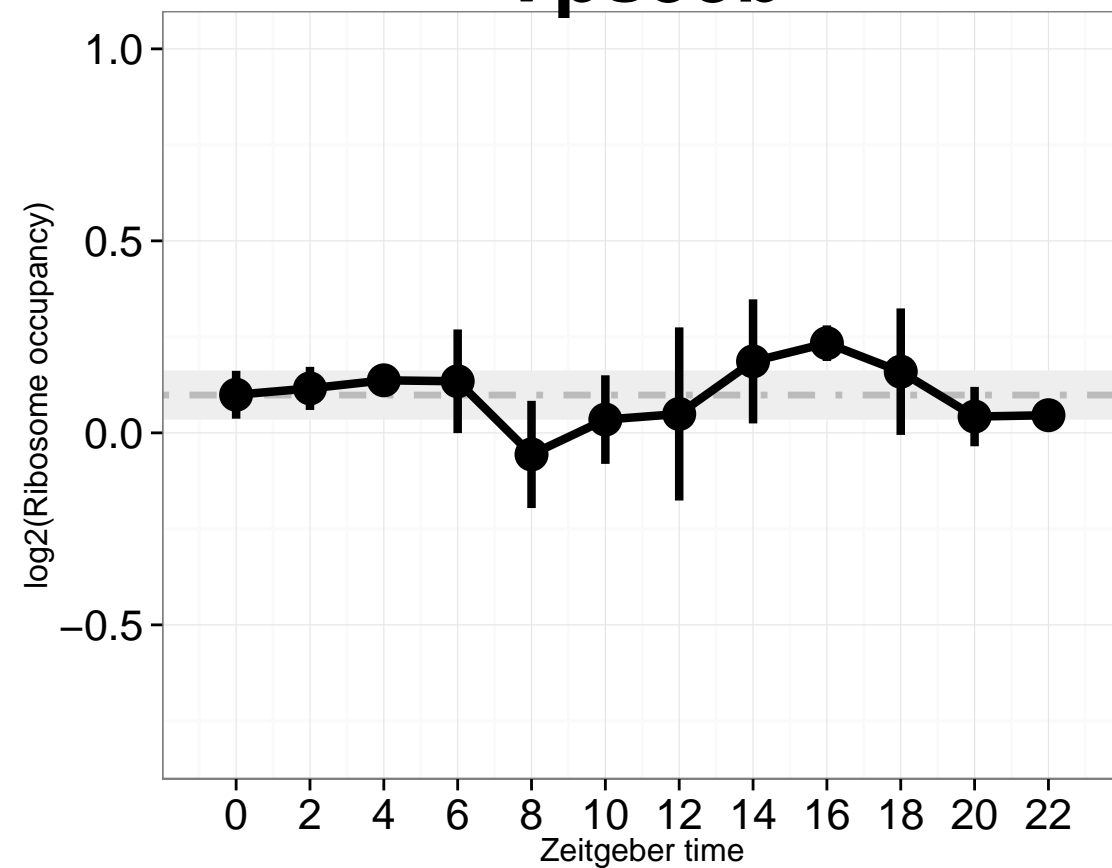

Supplement: Supplementary file 4138 [file 1]

## Ndufb3

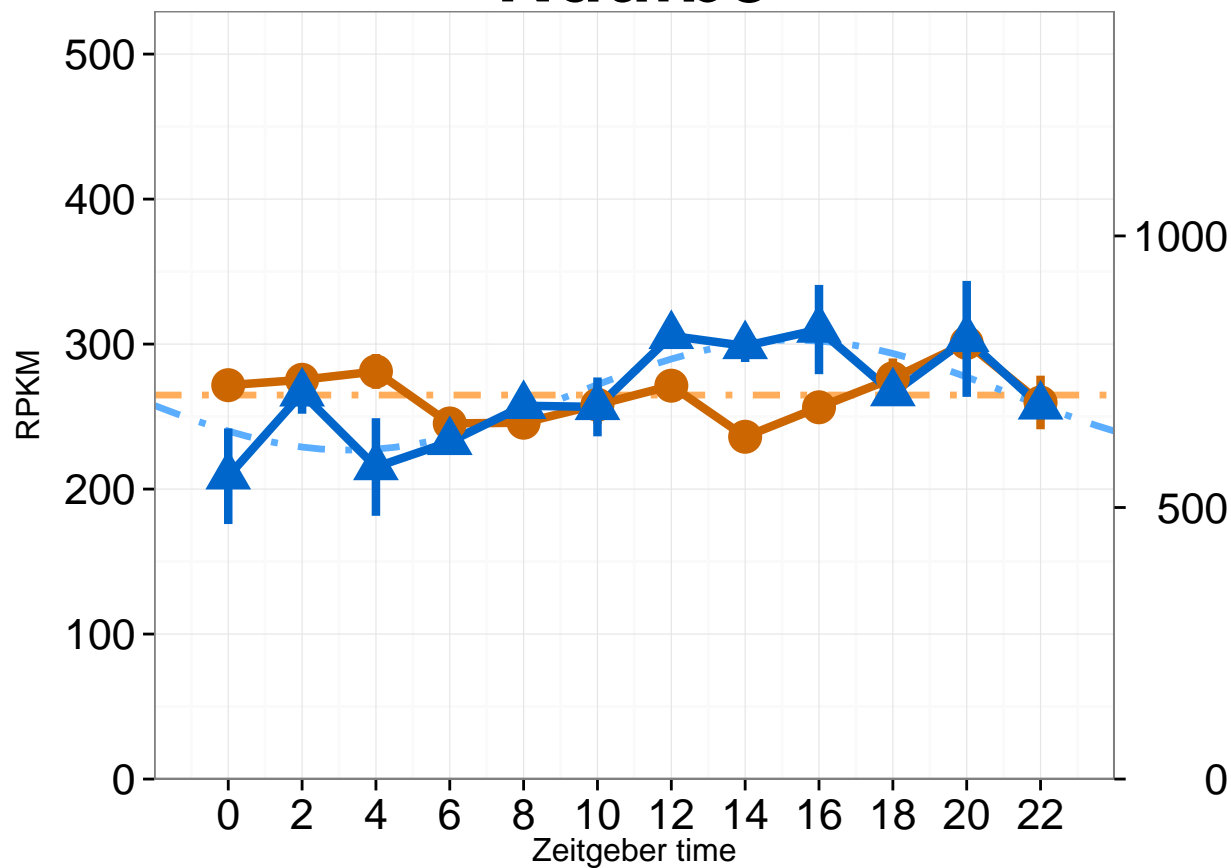

## Ndufb3

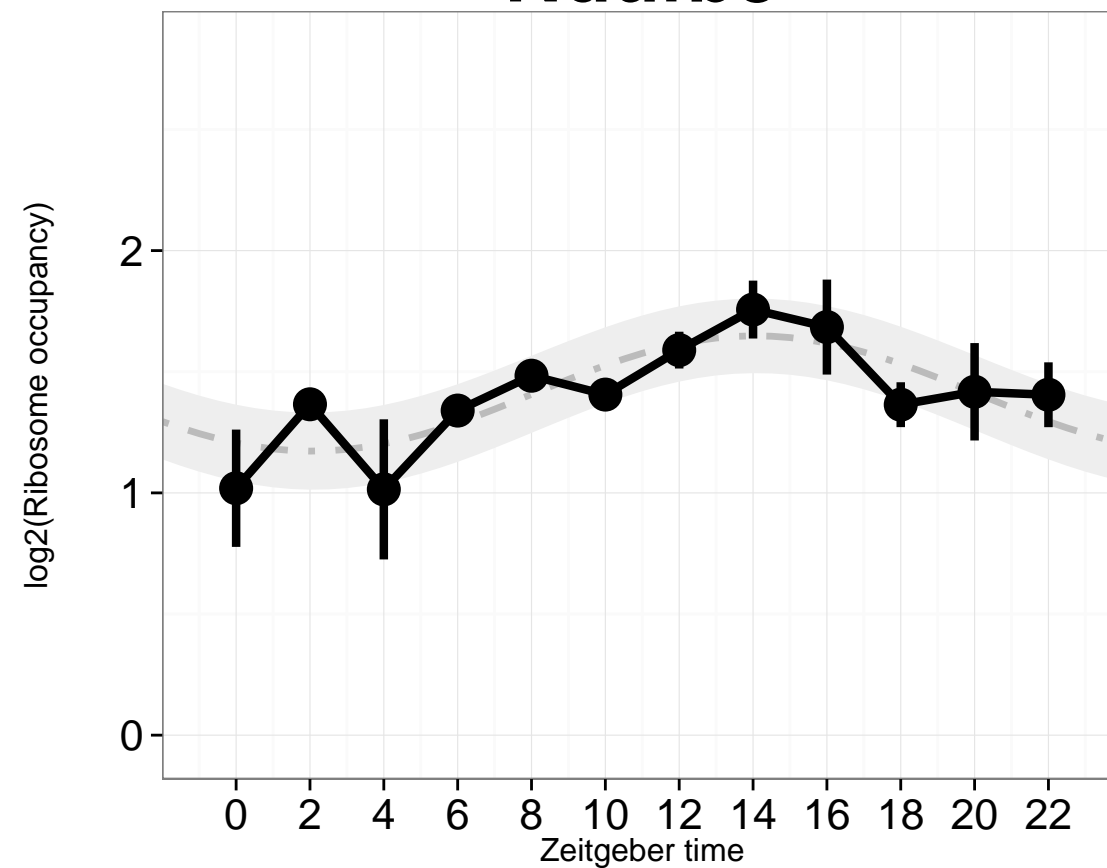

Supplement: Supplementary file 4139 [file 1]

## Entpd5

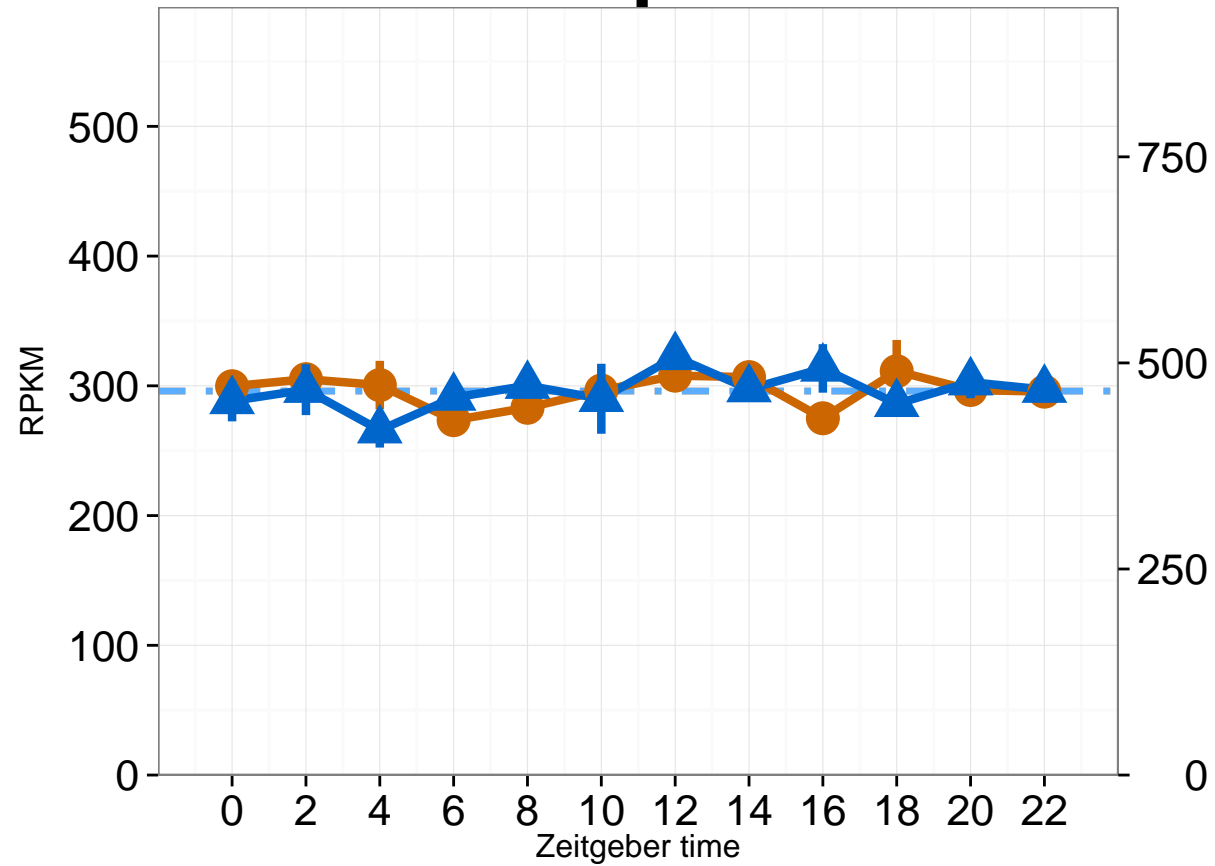

## Entpd5

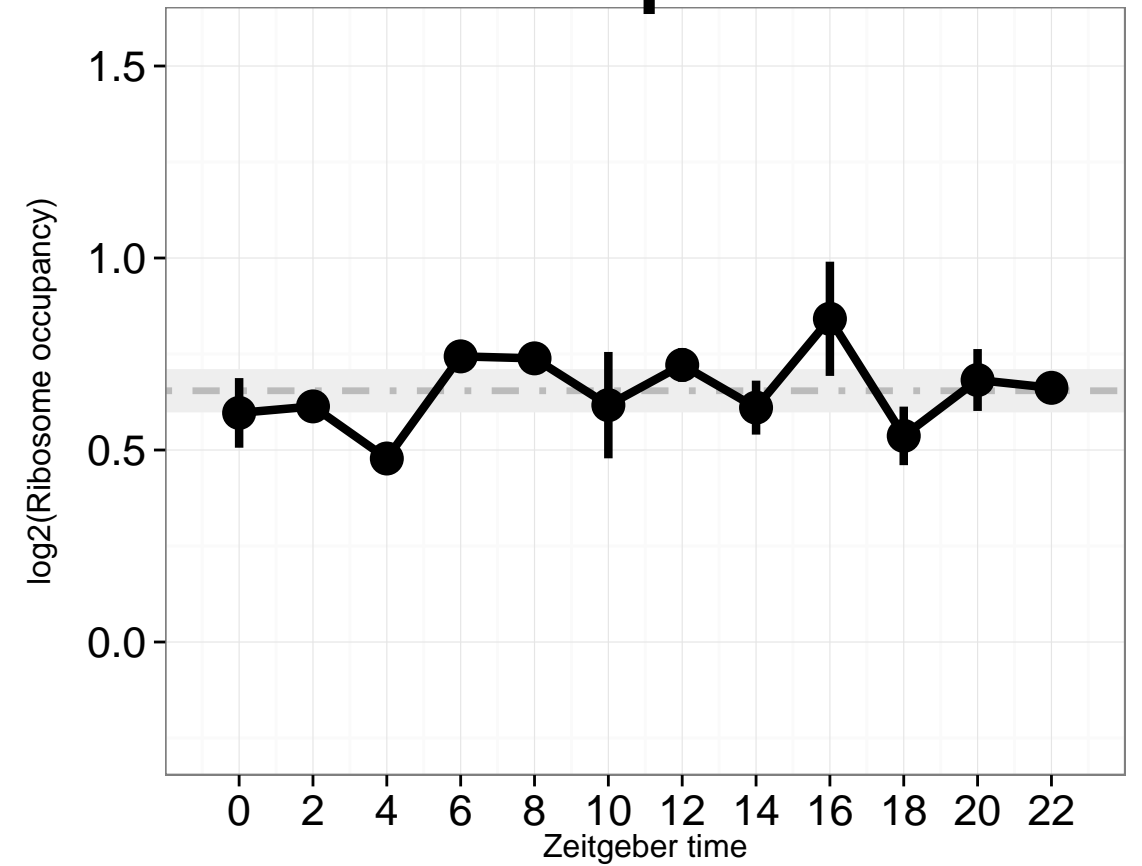

Supplement: Supplementary file 4140 [file 1]

# 2610020H08Rik

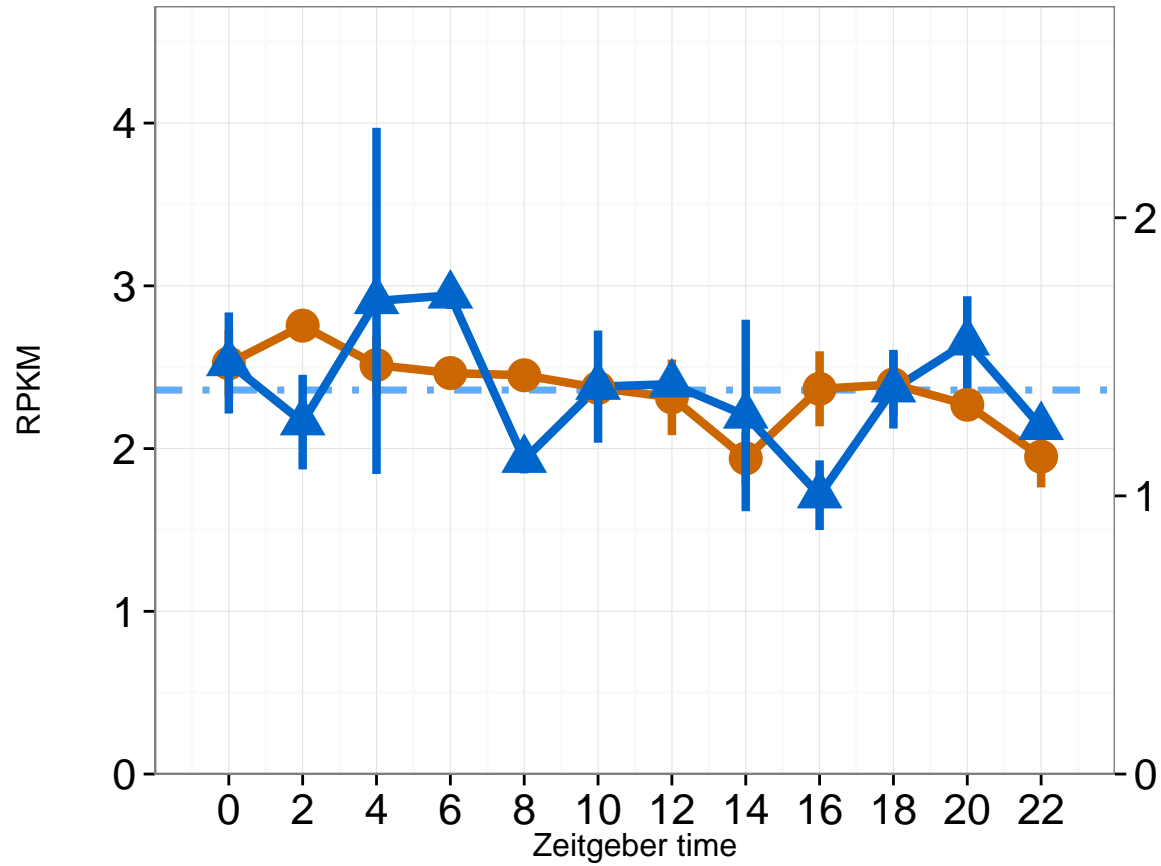

# 2610020H08Rik

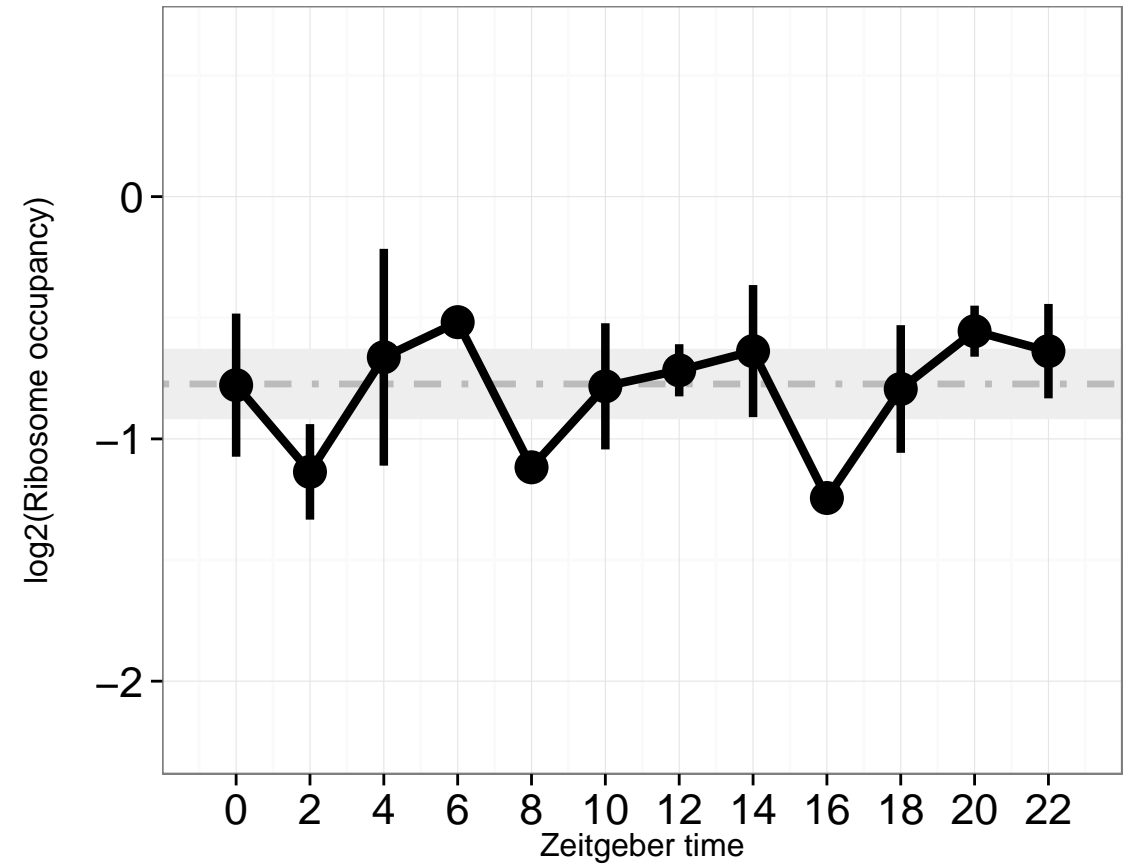

Supplement: Supplementary file 4141 [file 1]

# Ugt1a10

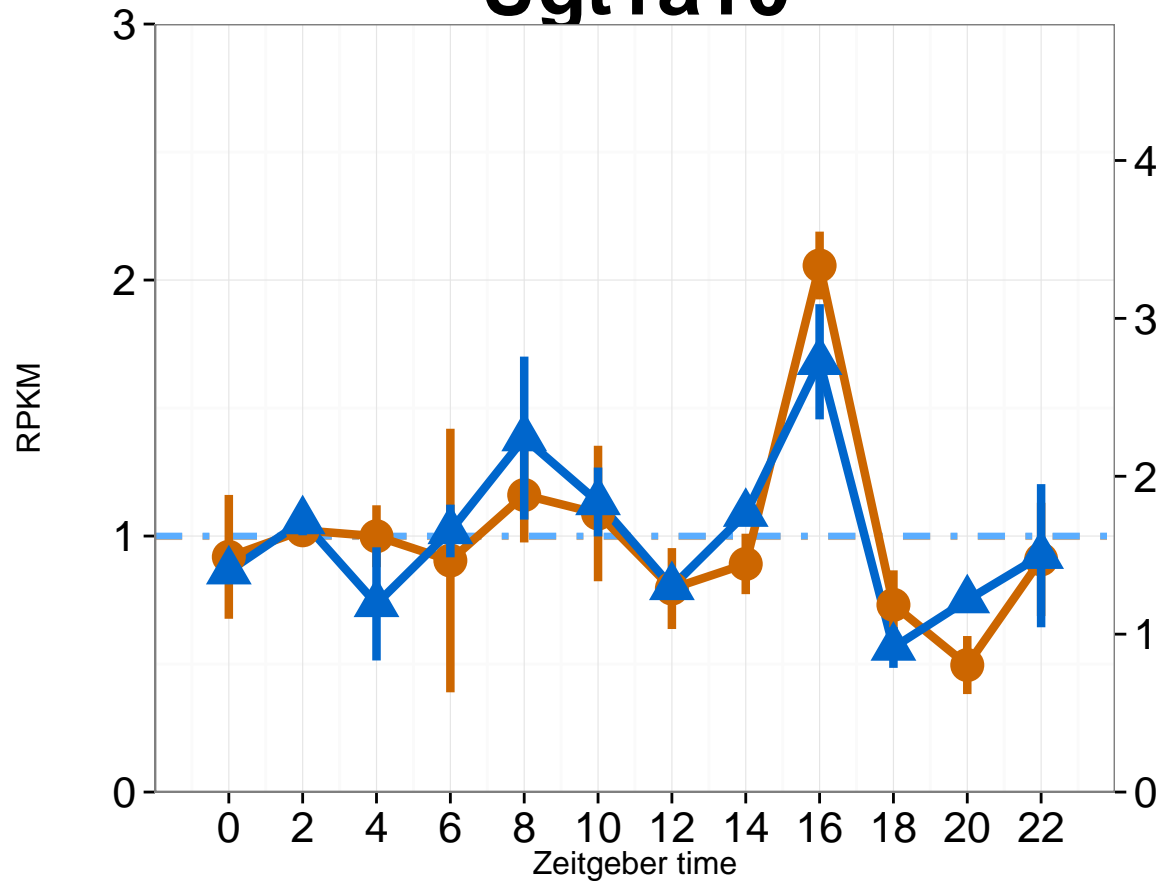

# Ugt1a10

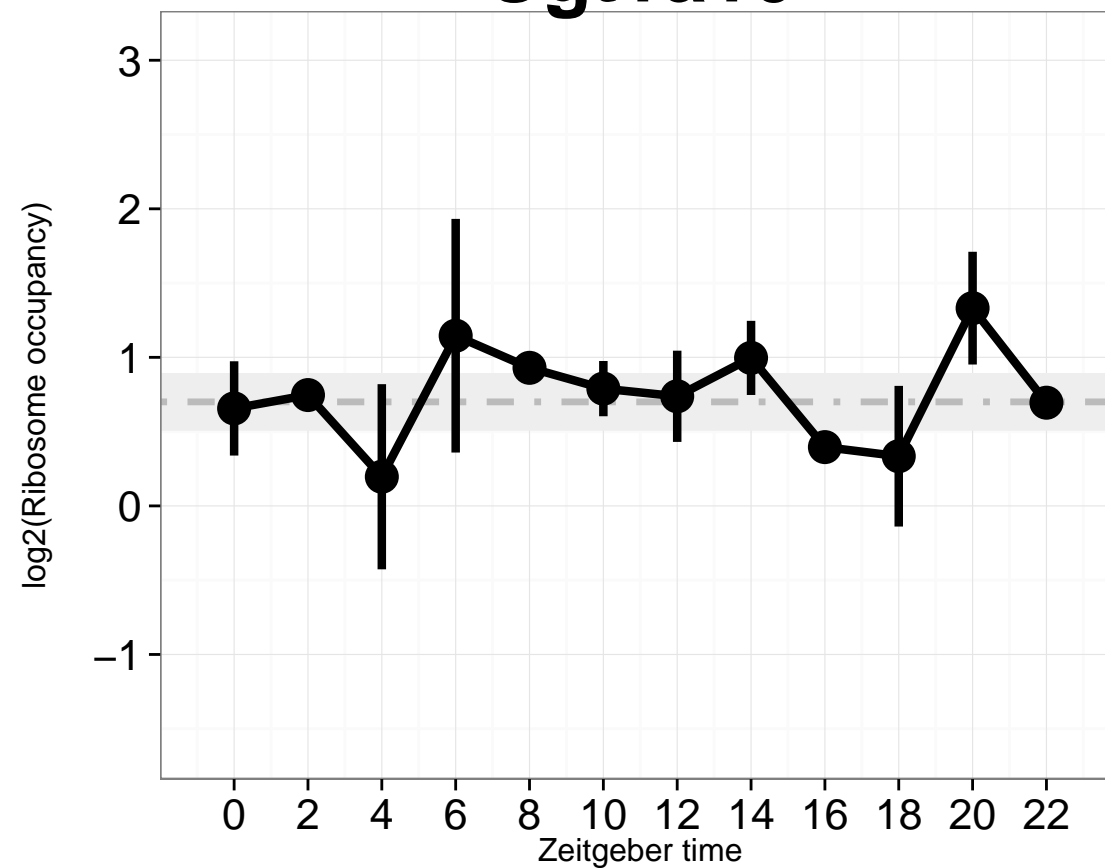

Supplement: Supplementary file 4142 [file 1]

# Mrpl14

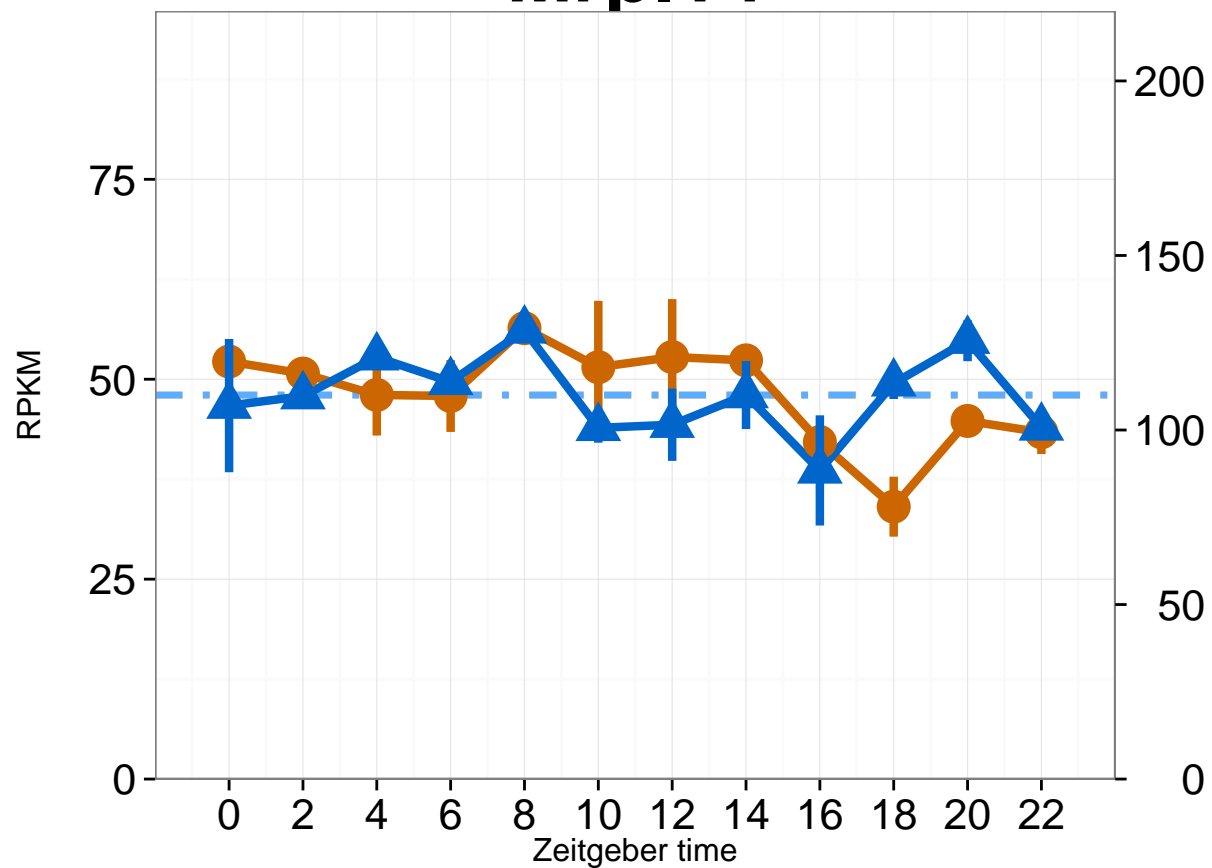

# Mrpl14

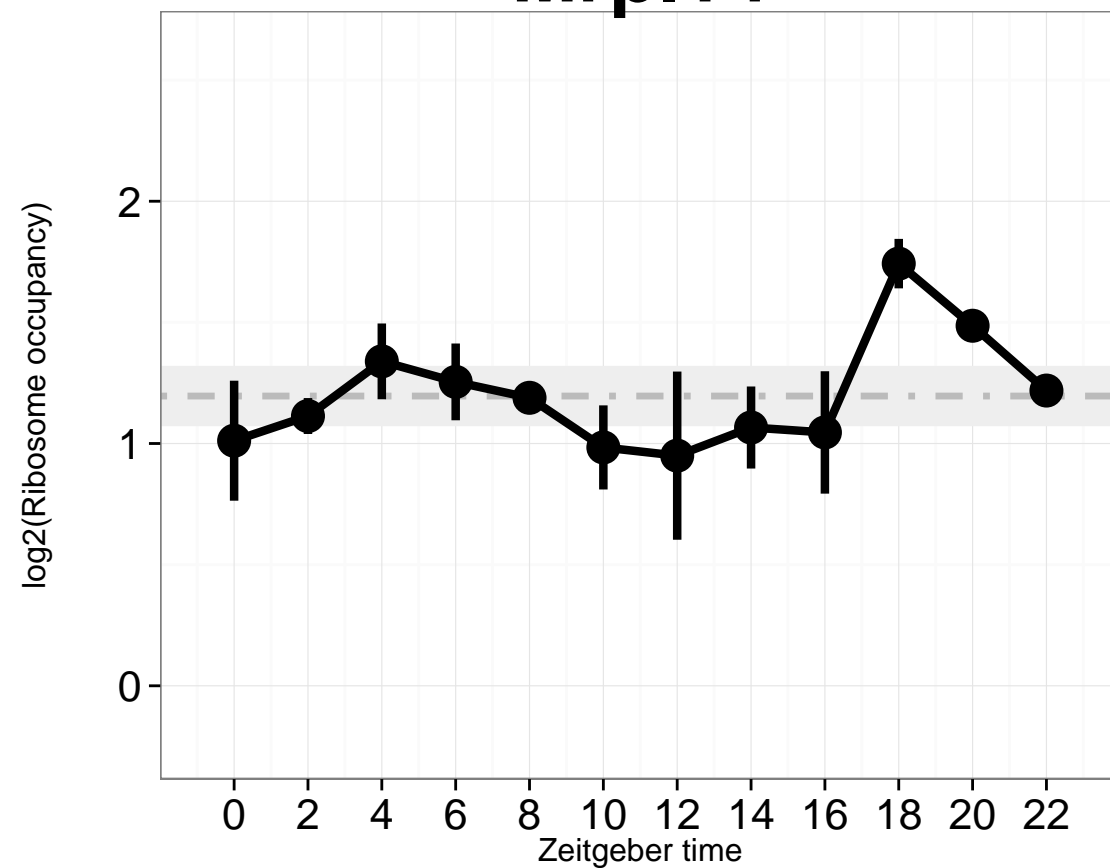

Supplement: Supplementary file 4143 [file 1]

# H1fx TR

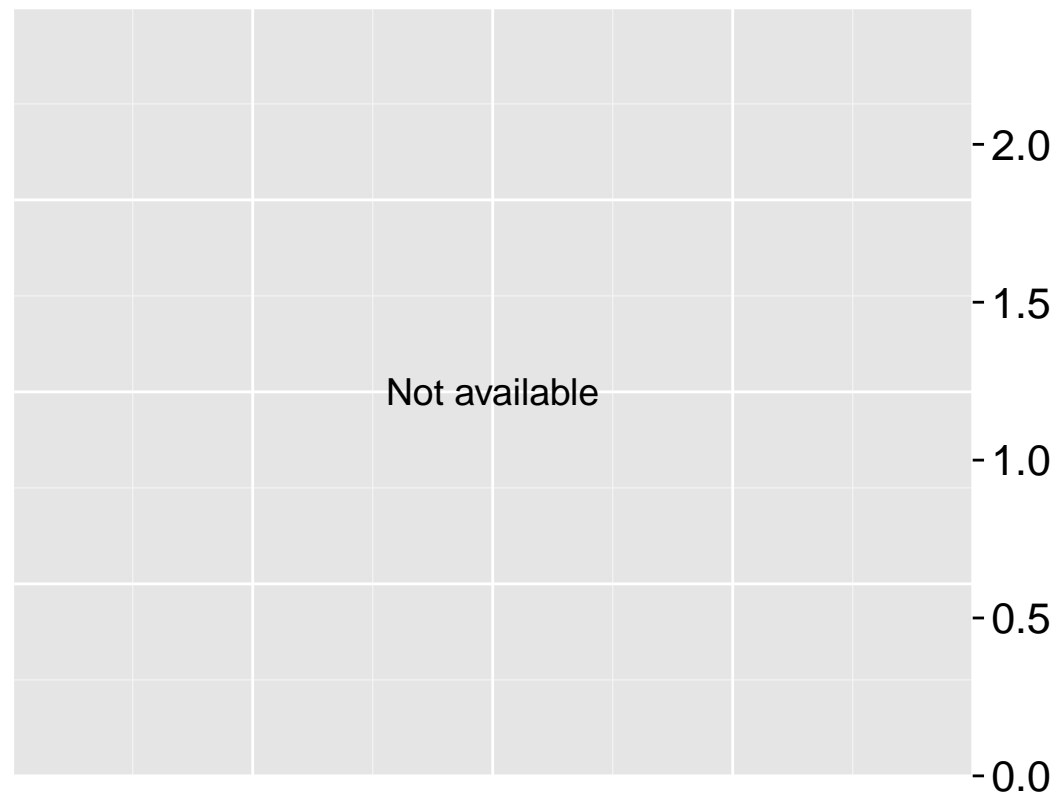

# H1fx log2(Ribosome occupancy)

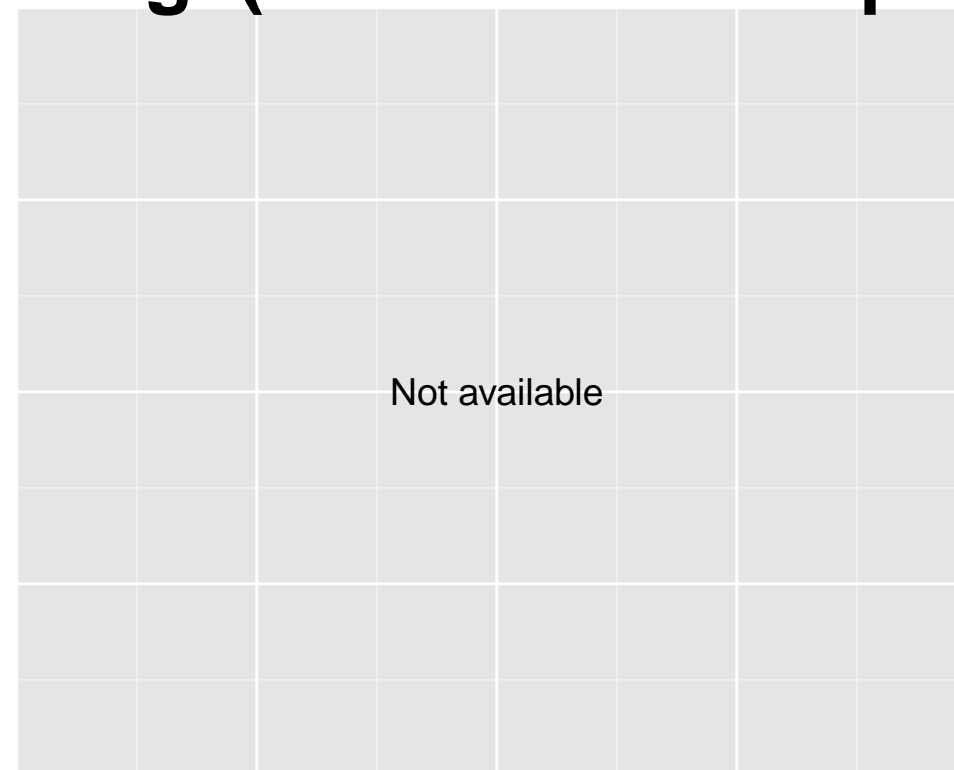

Supplement: Supplementary file 4144 [file 1]

## Narg2

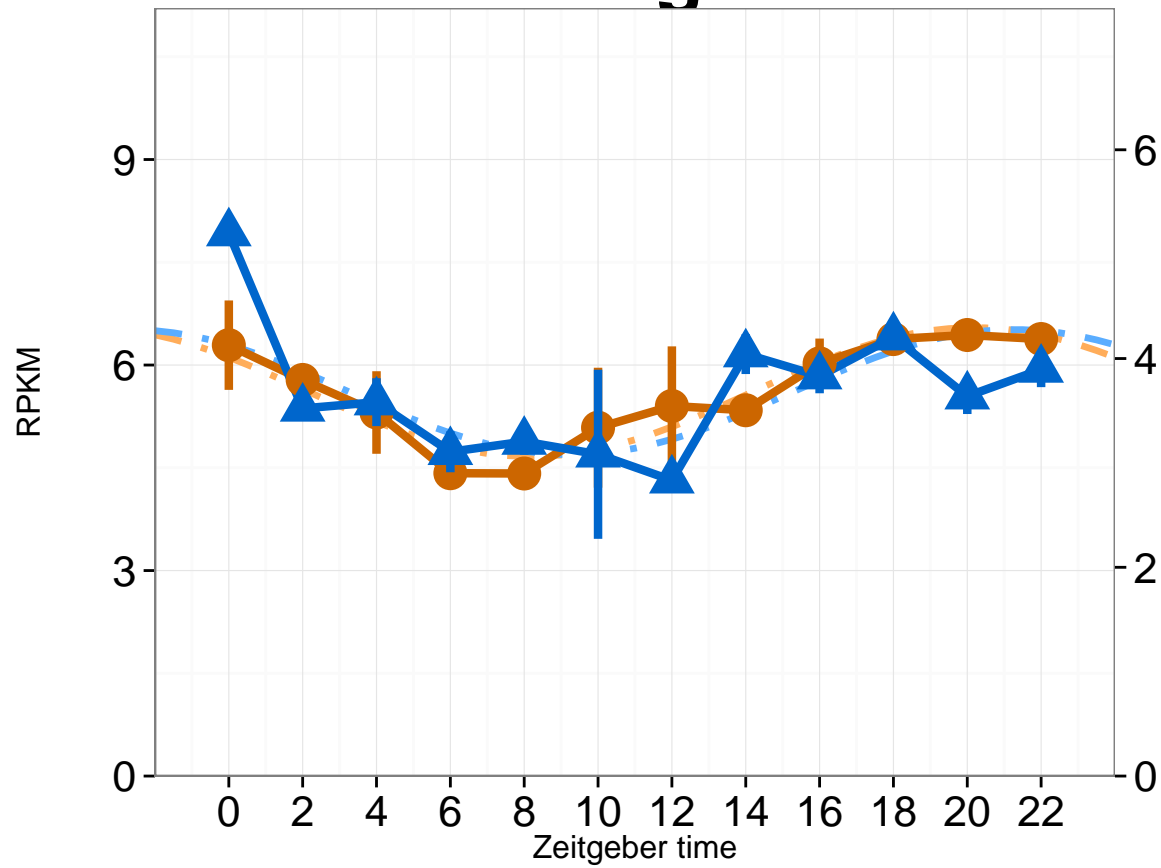

## Narg2

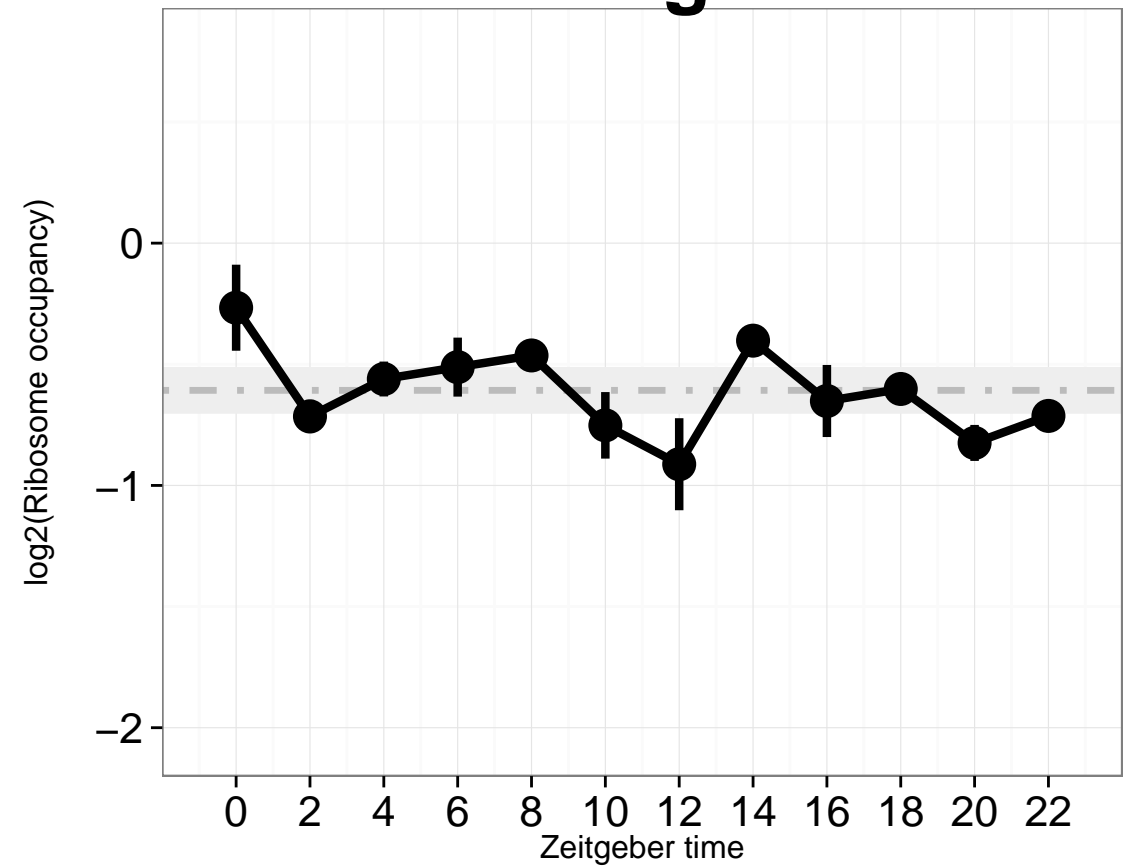

Supplement: Supplementary file 4145 [file 1]

## Gon4l

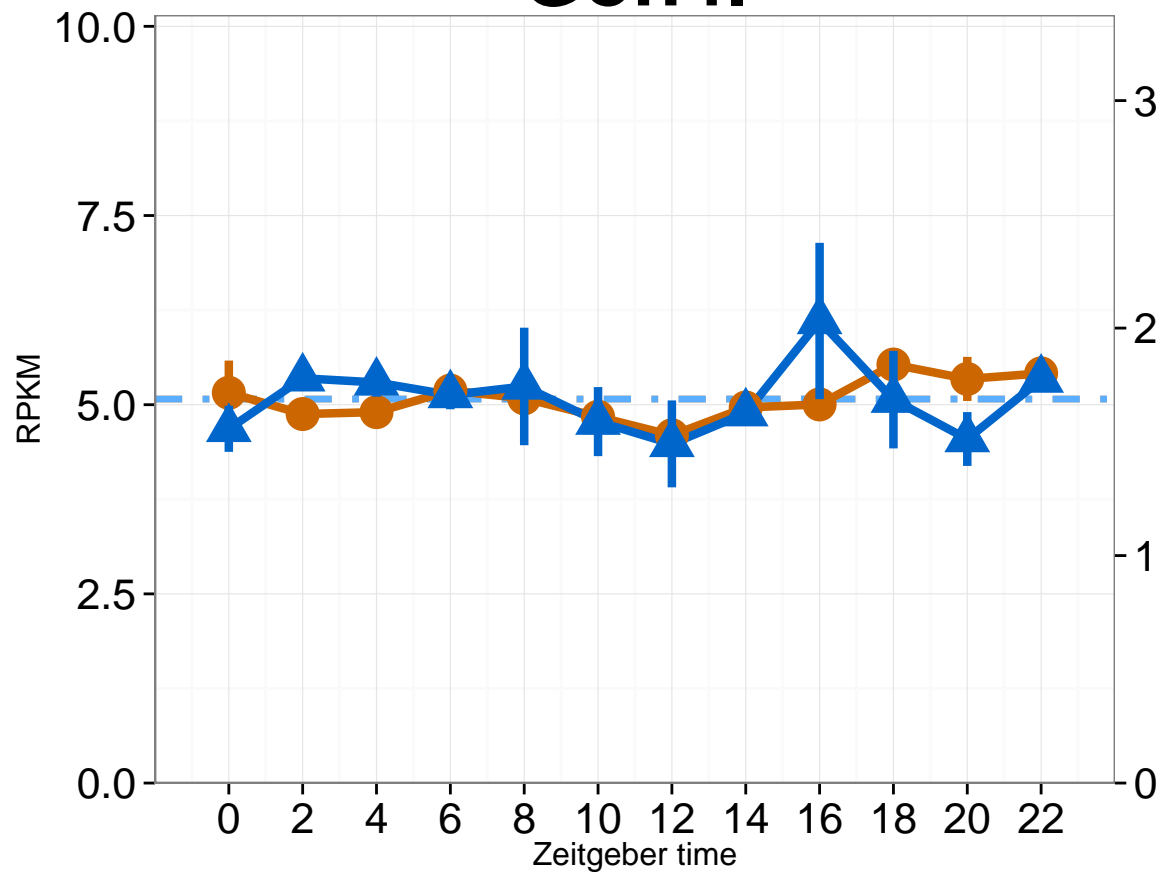

## Gon4l

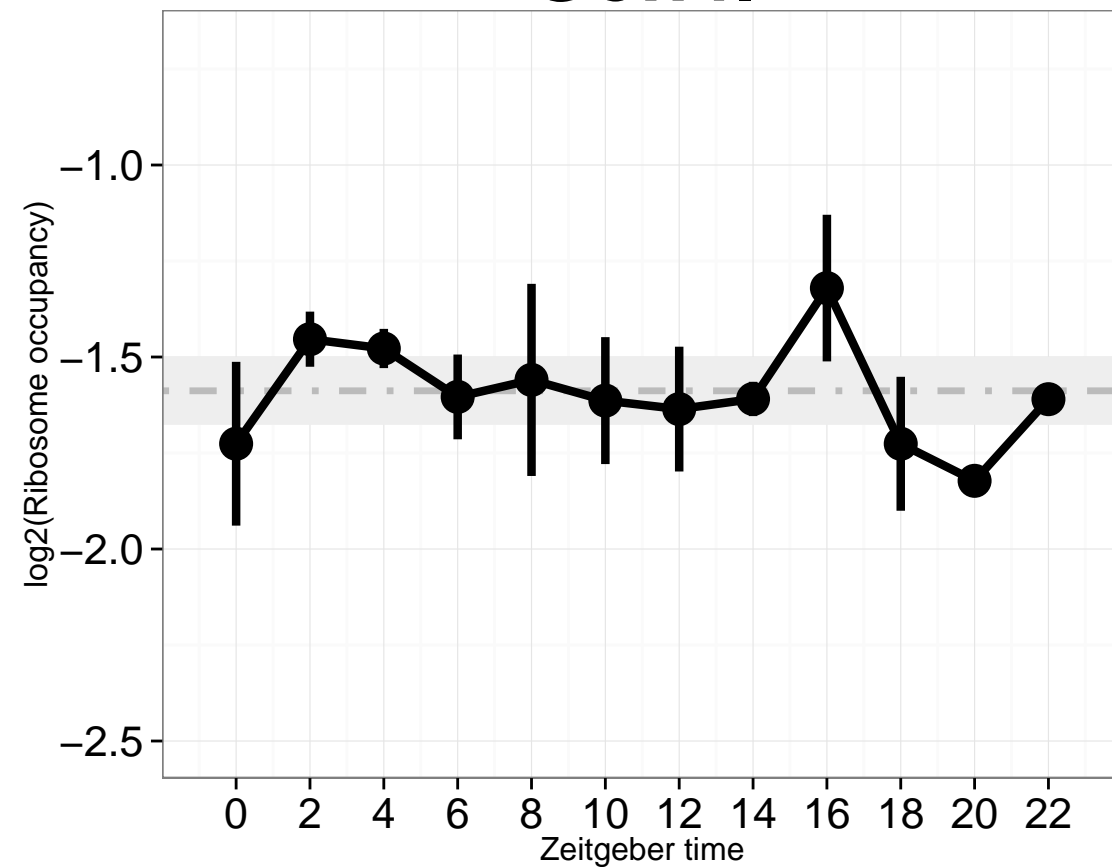

Supplement: Supplementary file 4146 [file 1]

## Cdr2l

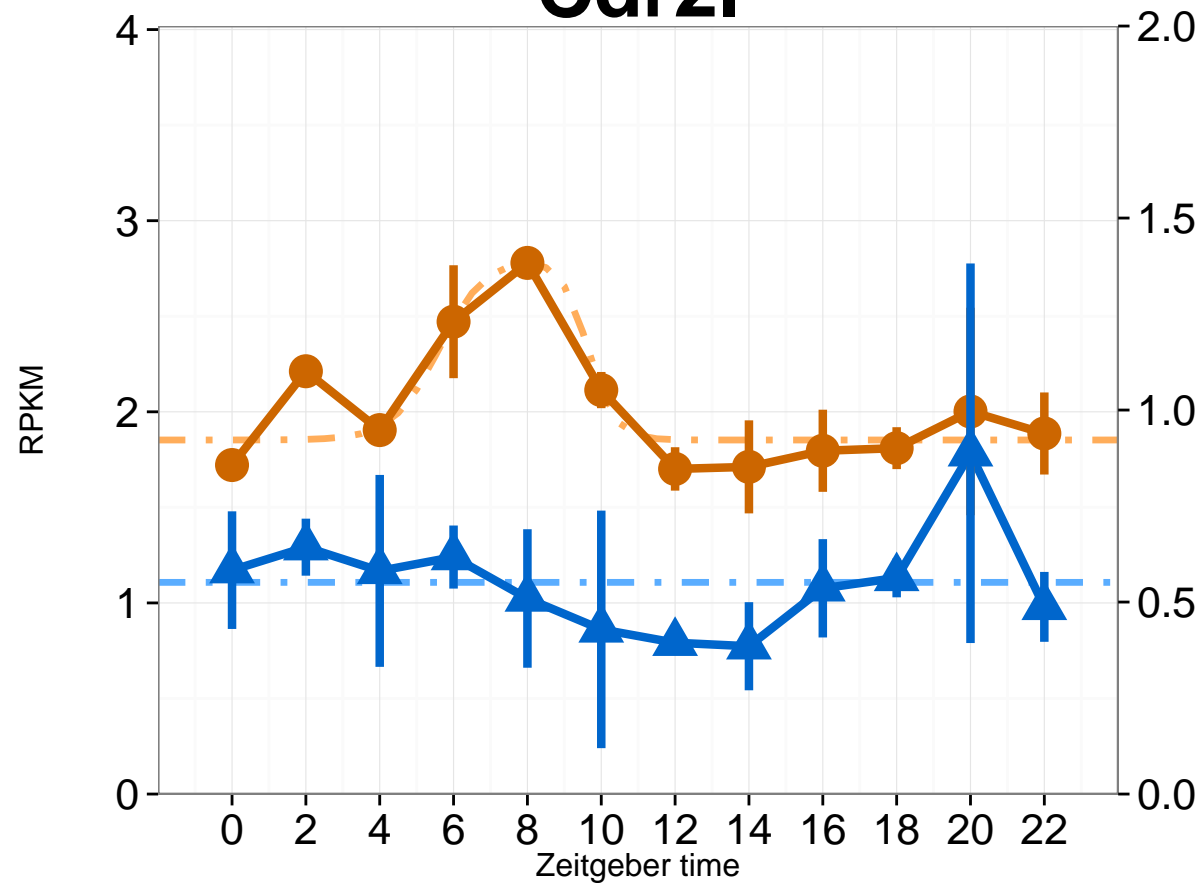

## Cdr2l

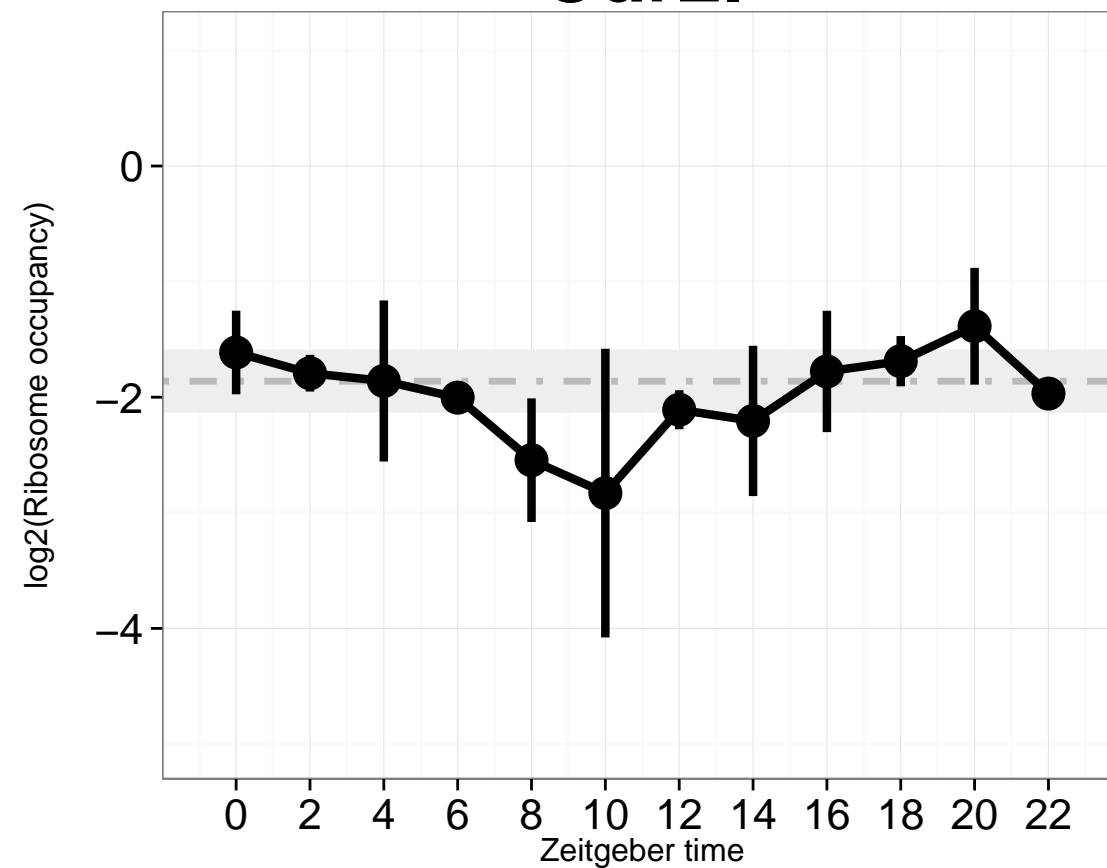

Supplement: Supplementary file 4147 [file 1]

# Ptprc

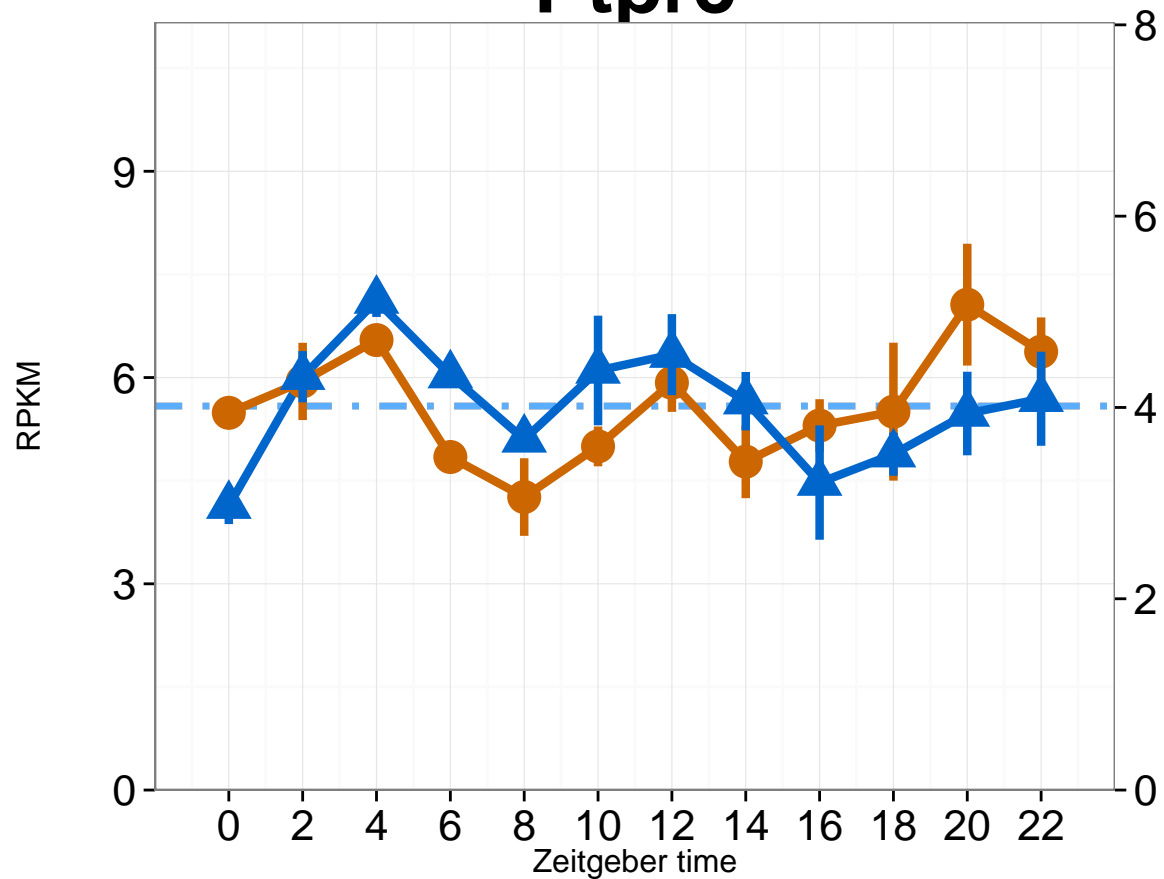

# Ptprc

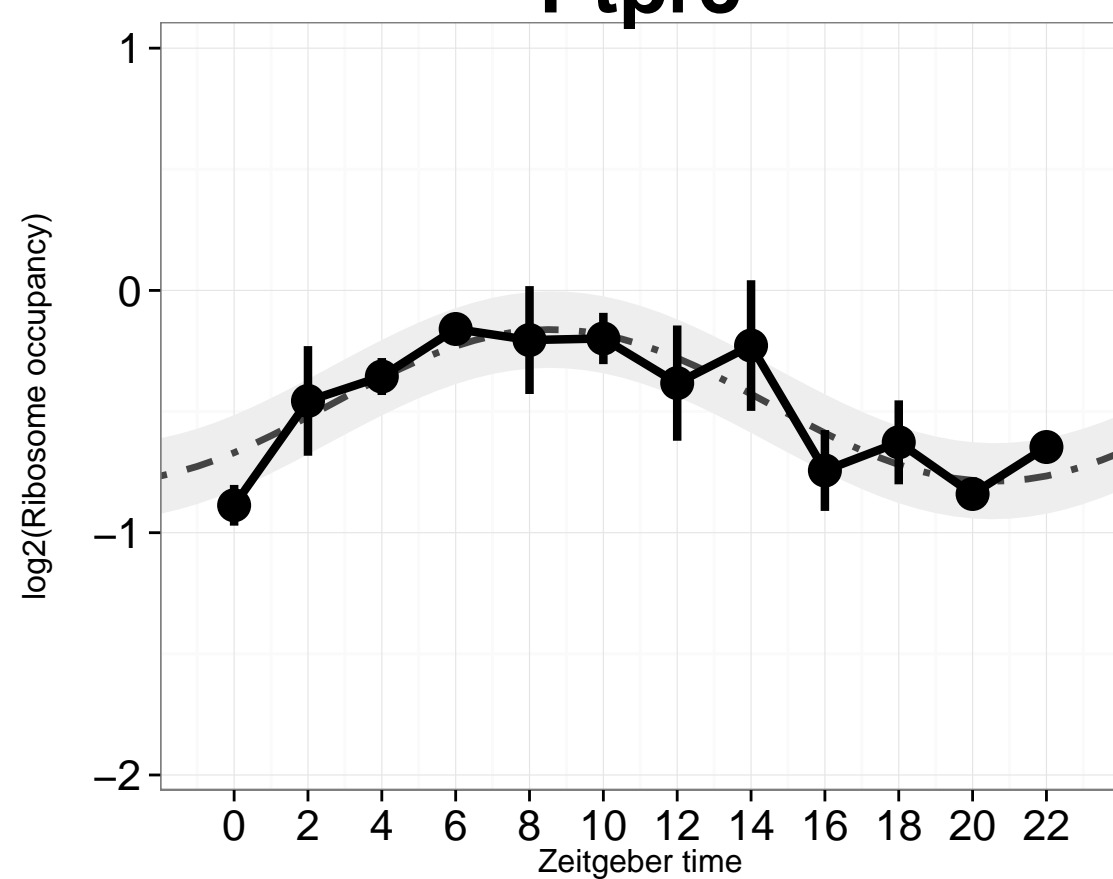

Supplement: Supplementary file 4148 [file 1]

## Tbx10

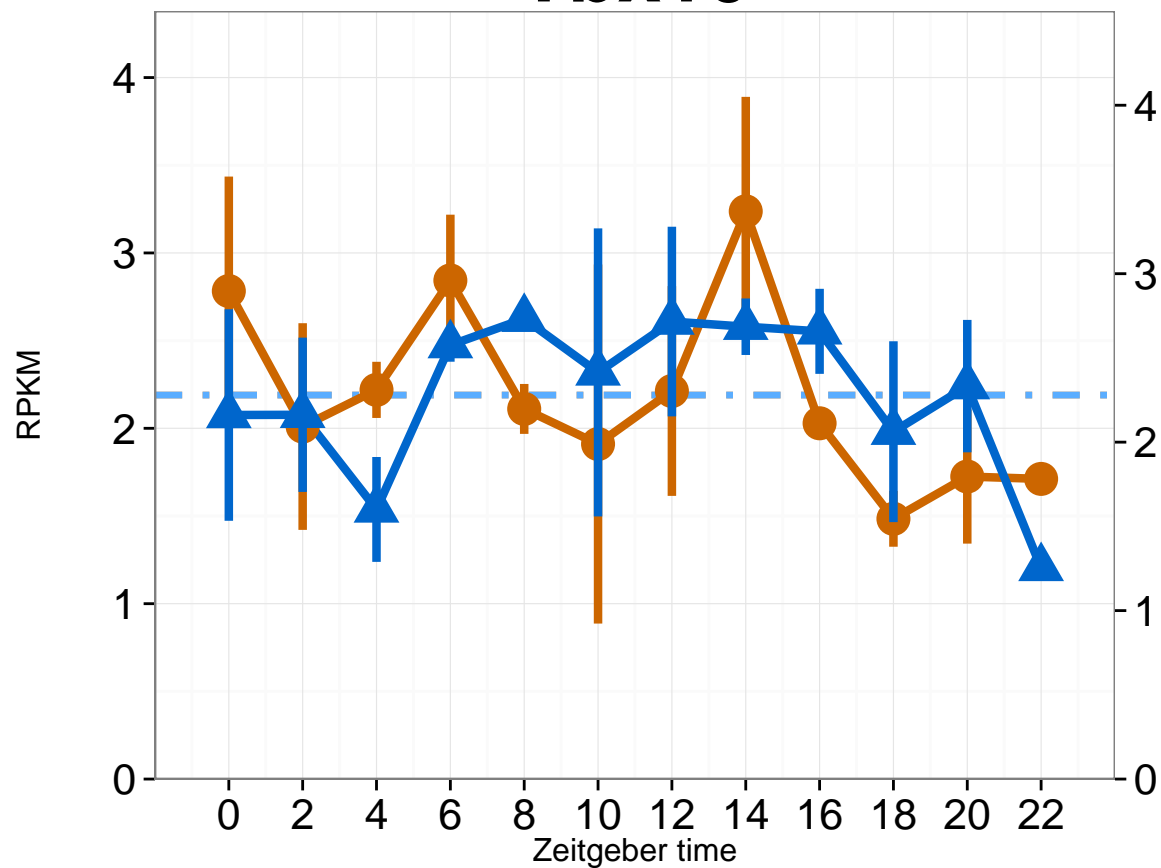

## Tbx10

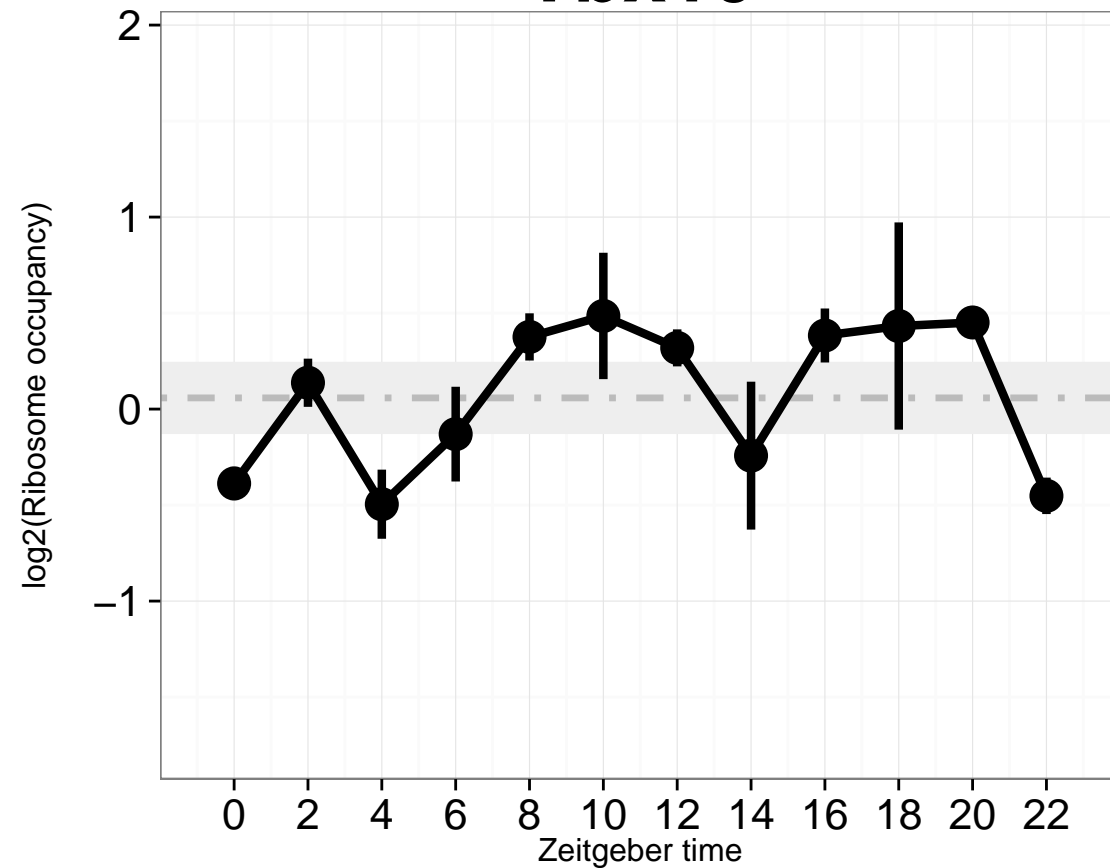

Supplement: Supplementary file 4149 [file 1]

## Rtcb

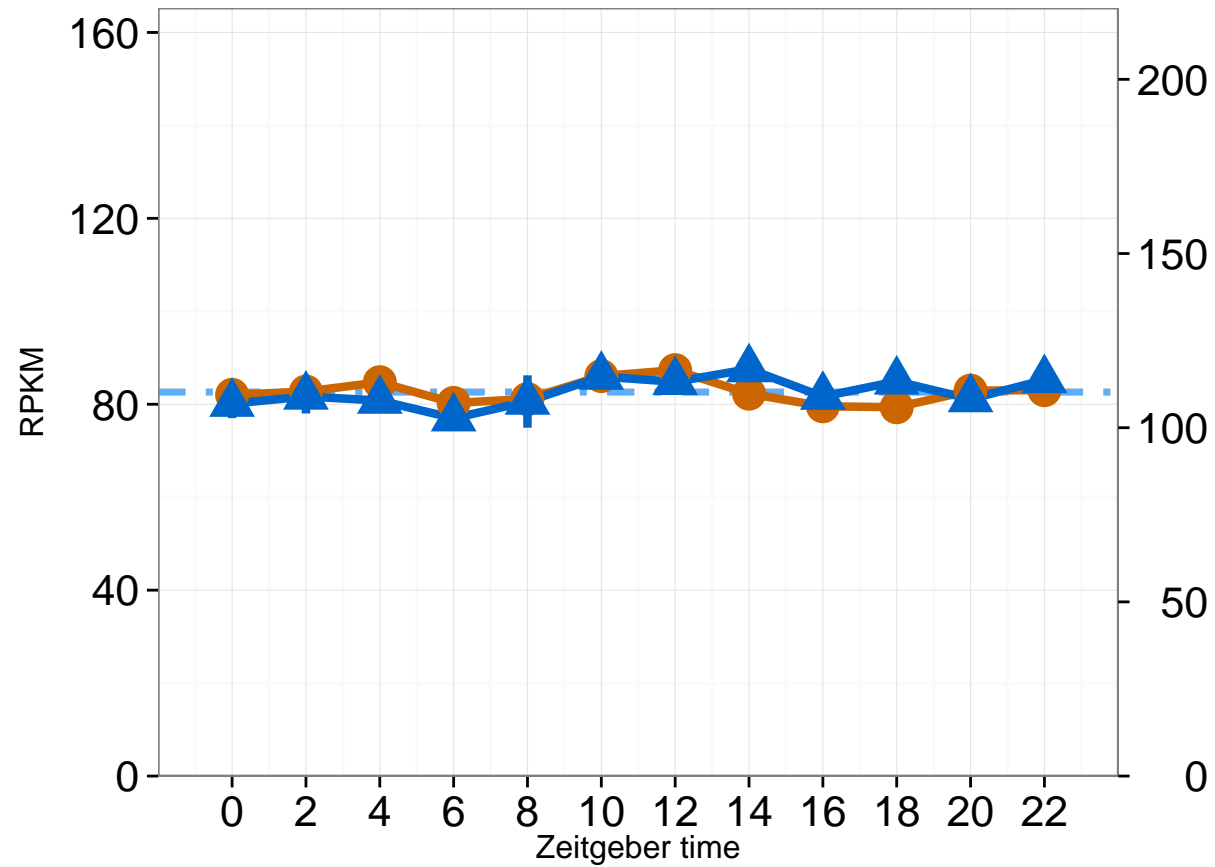

## Rtcb

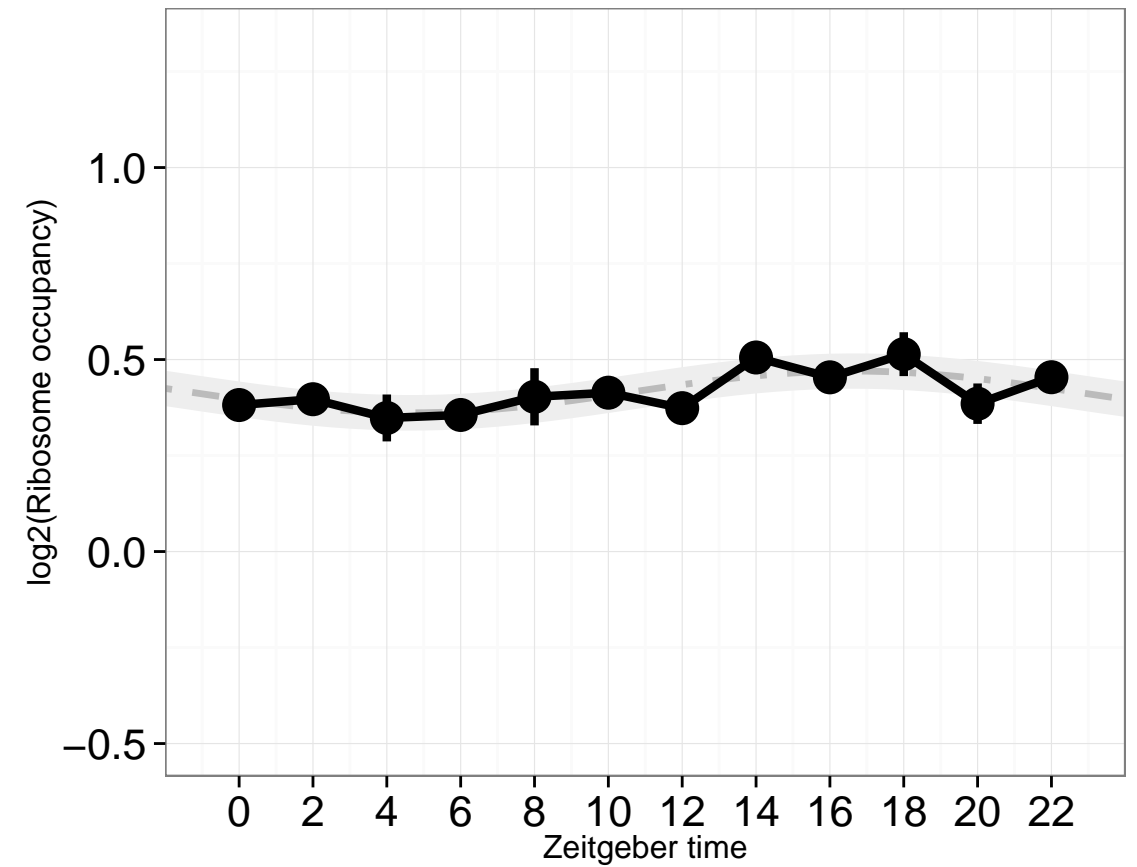

Supplement: Supplementary file 4150 [file 1]

# Bahd1

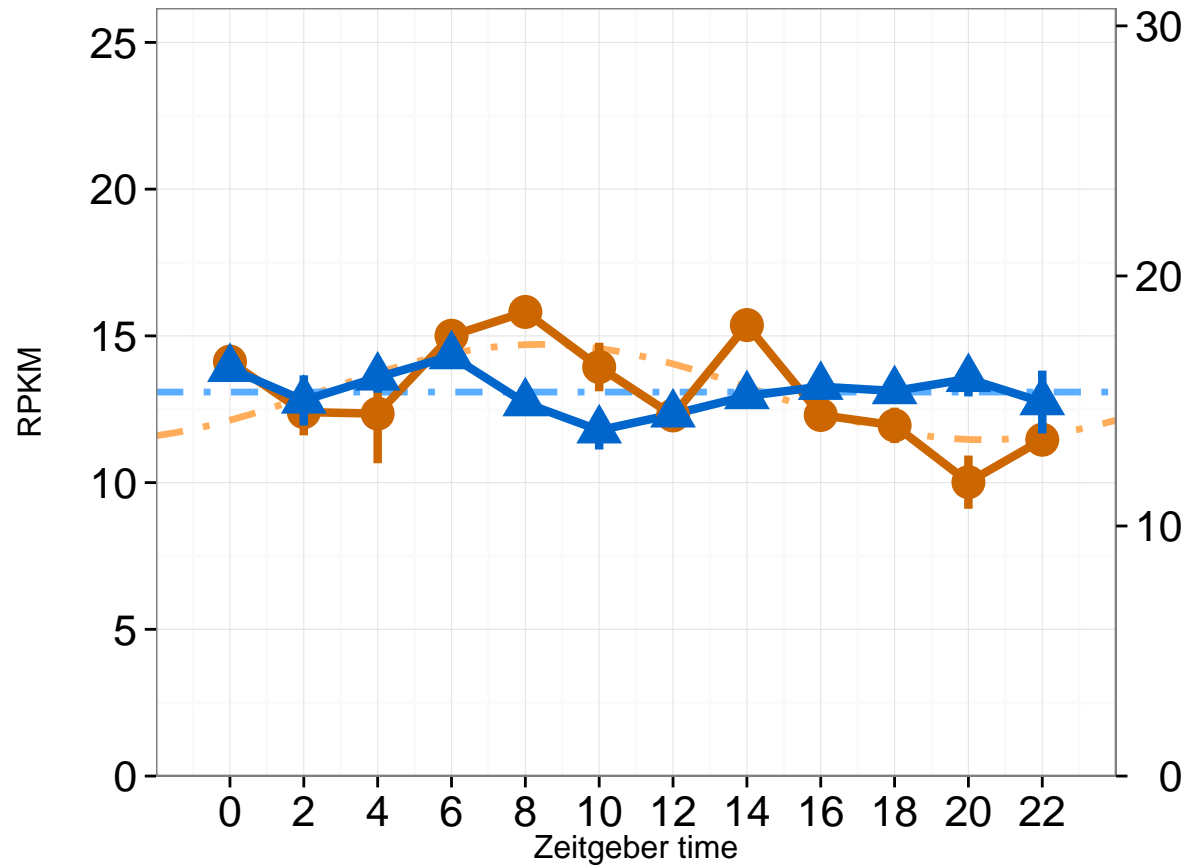

# Bahd1

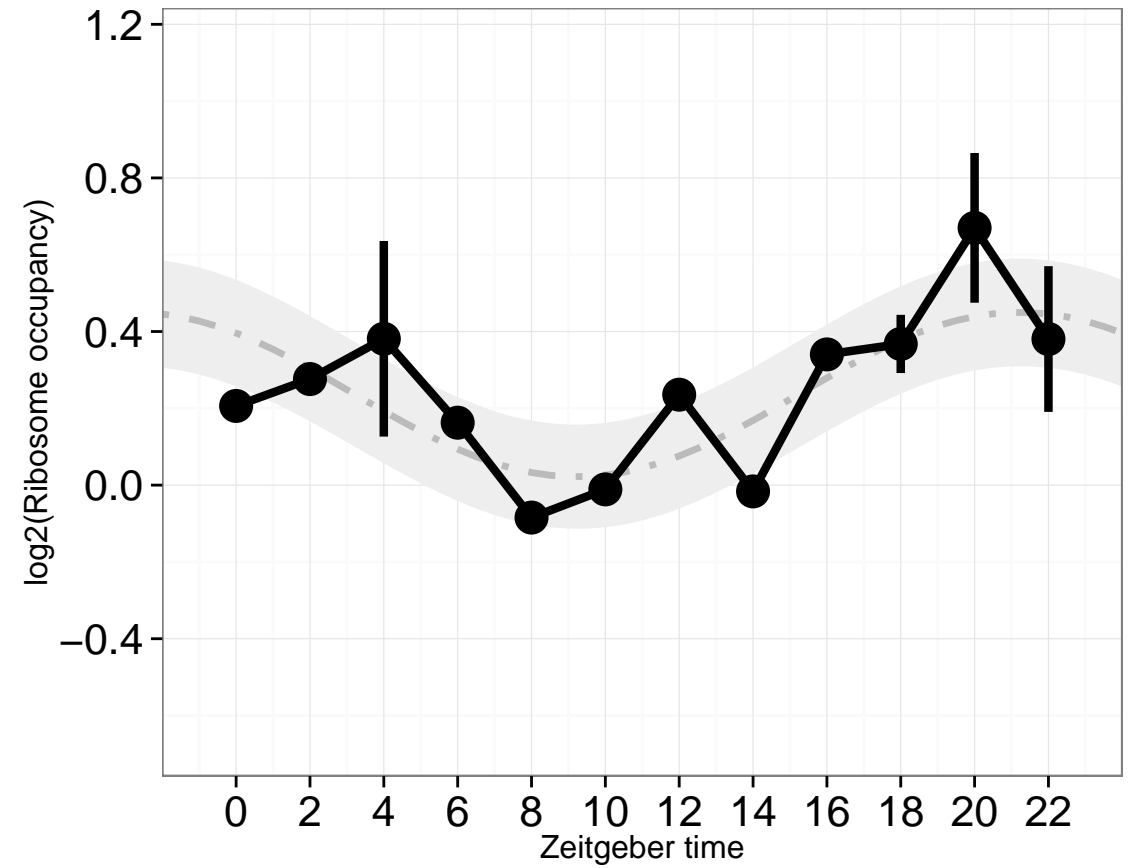

Supplement: Supplementary file 4151 [file 1]

## Ambp

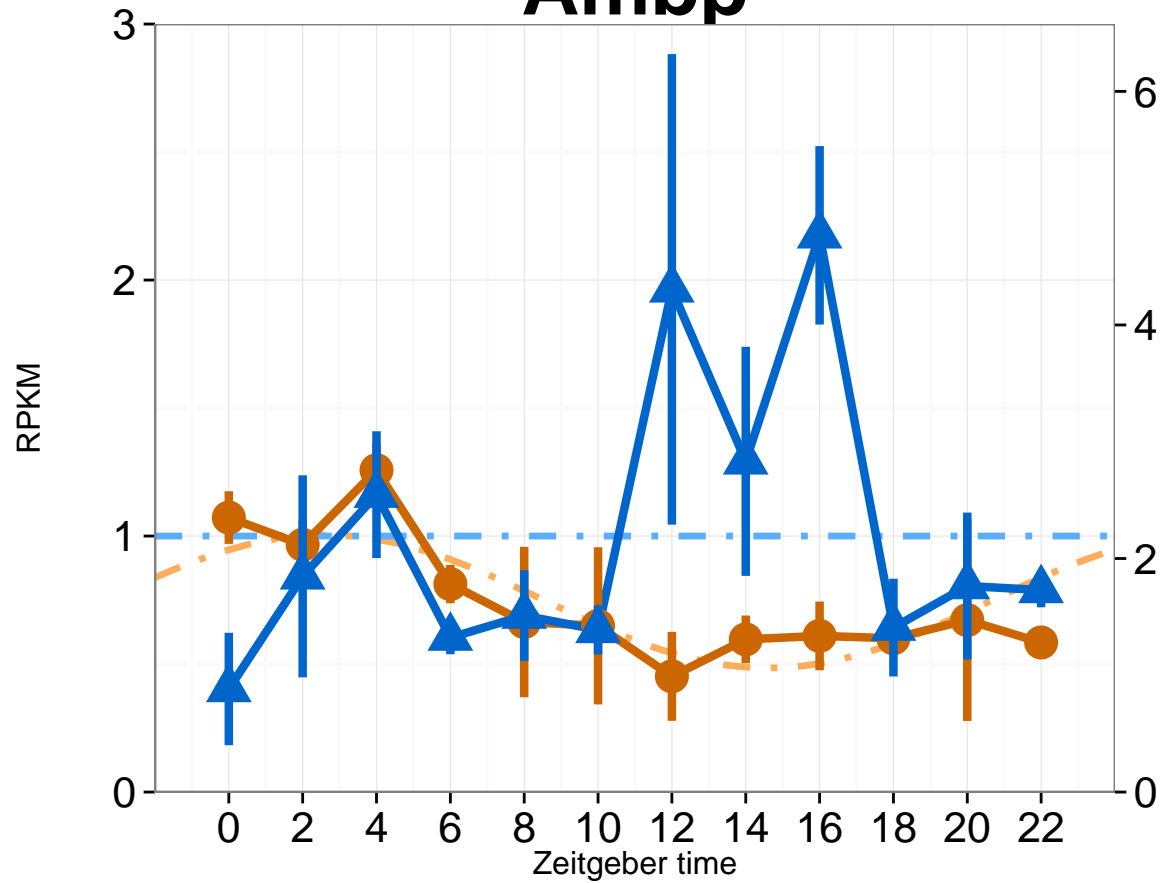

## Ambp

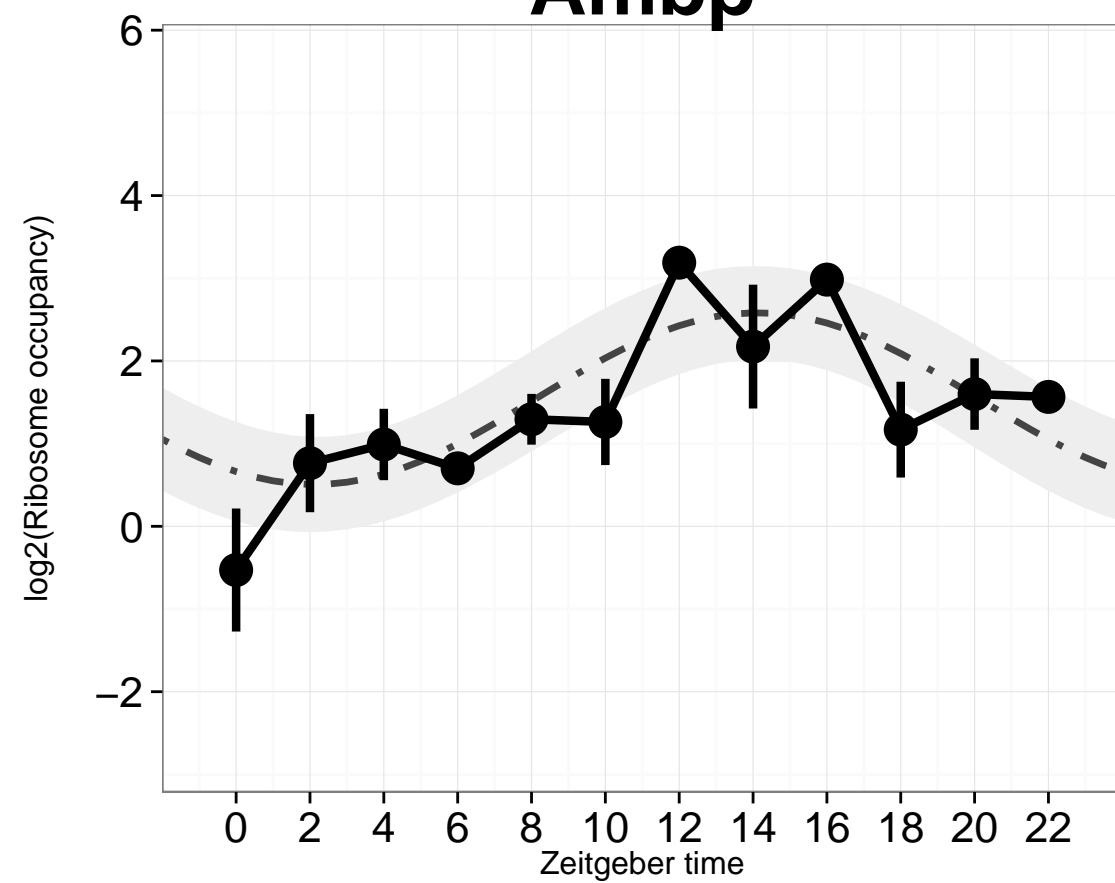

Supplement: Supplementary file 4152 [file 1]

# Cyth2

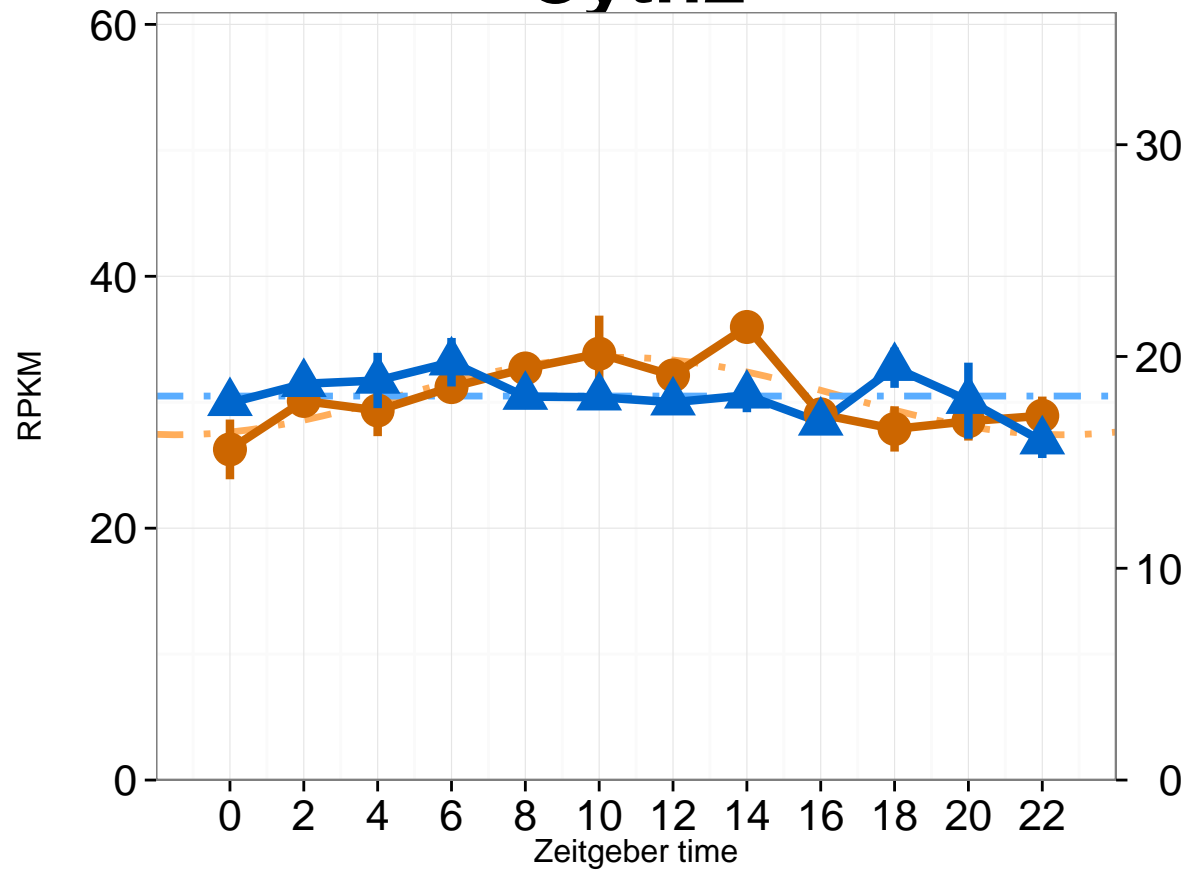

# Cyth2

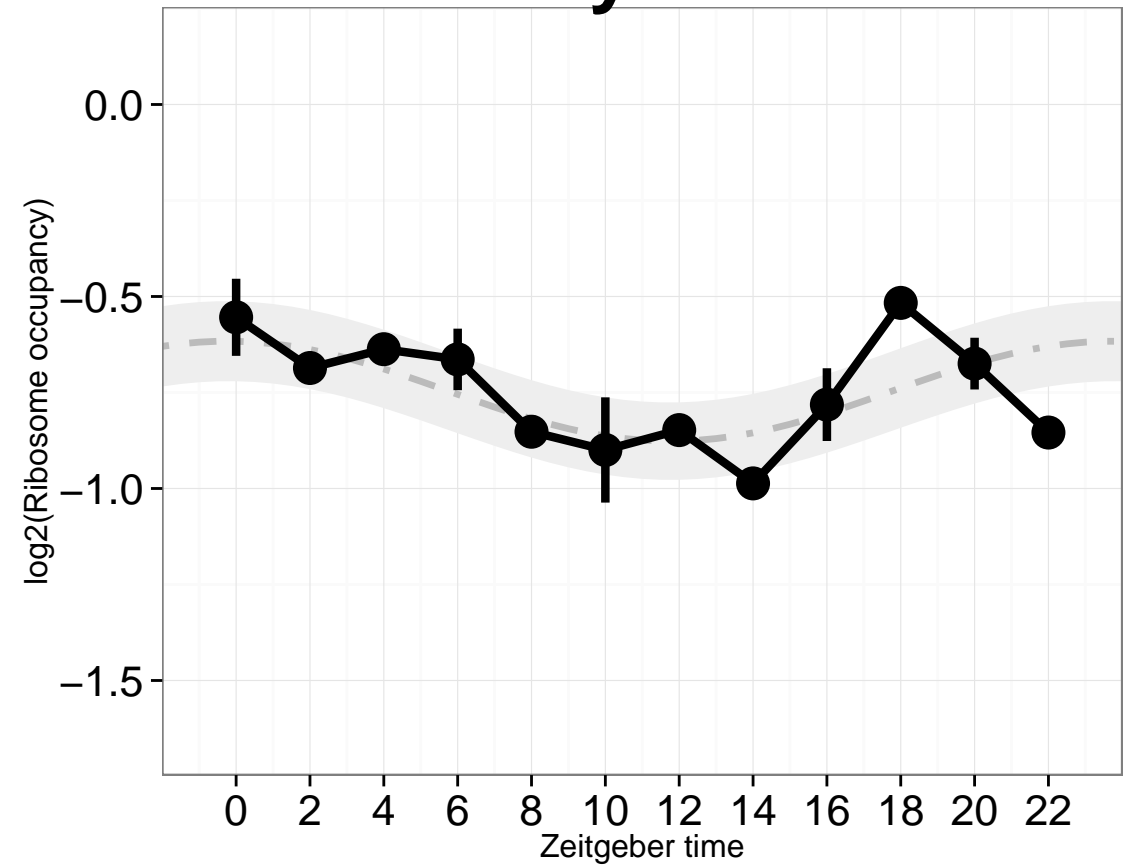

Supplement: Supplementary file 4153 [file 1]

## Nmt1

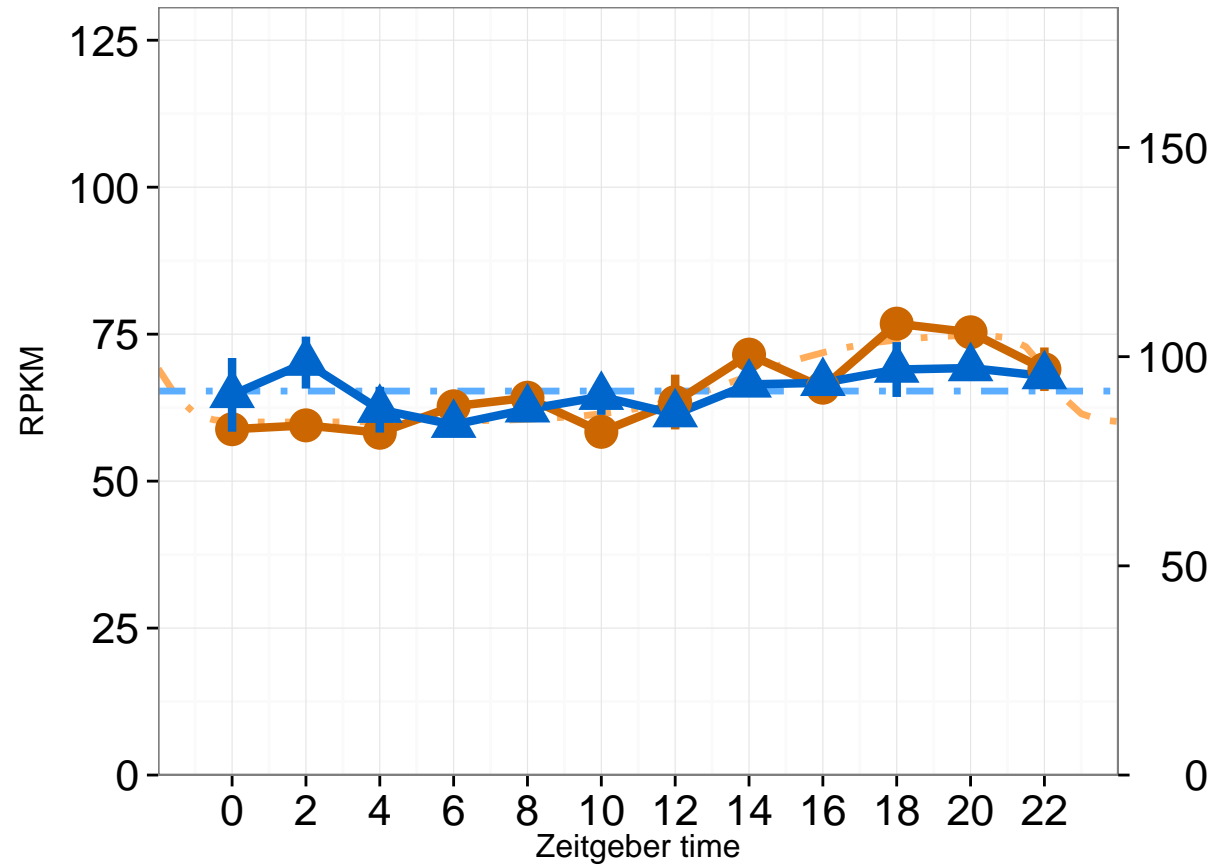

## Nmt1

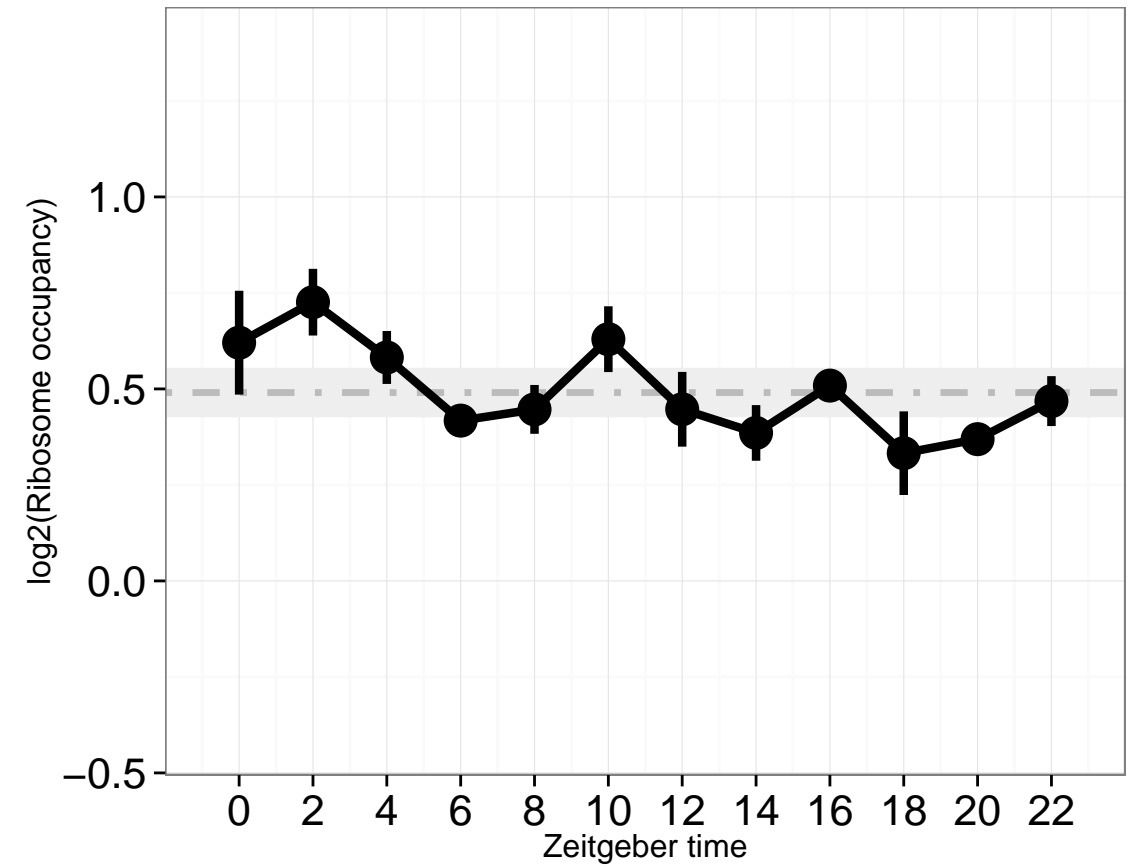

Supplement: Supplementary file 4154 [file 1]

## Fgb

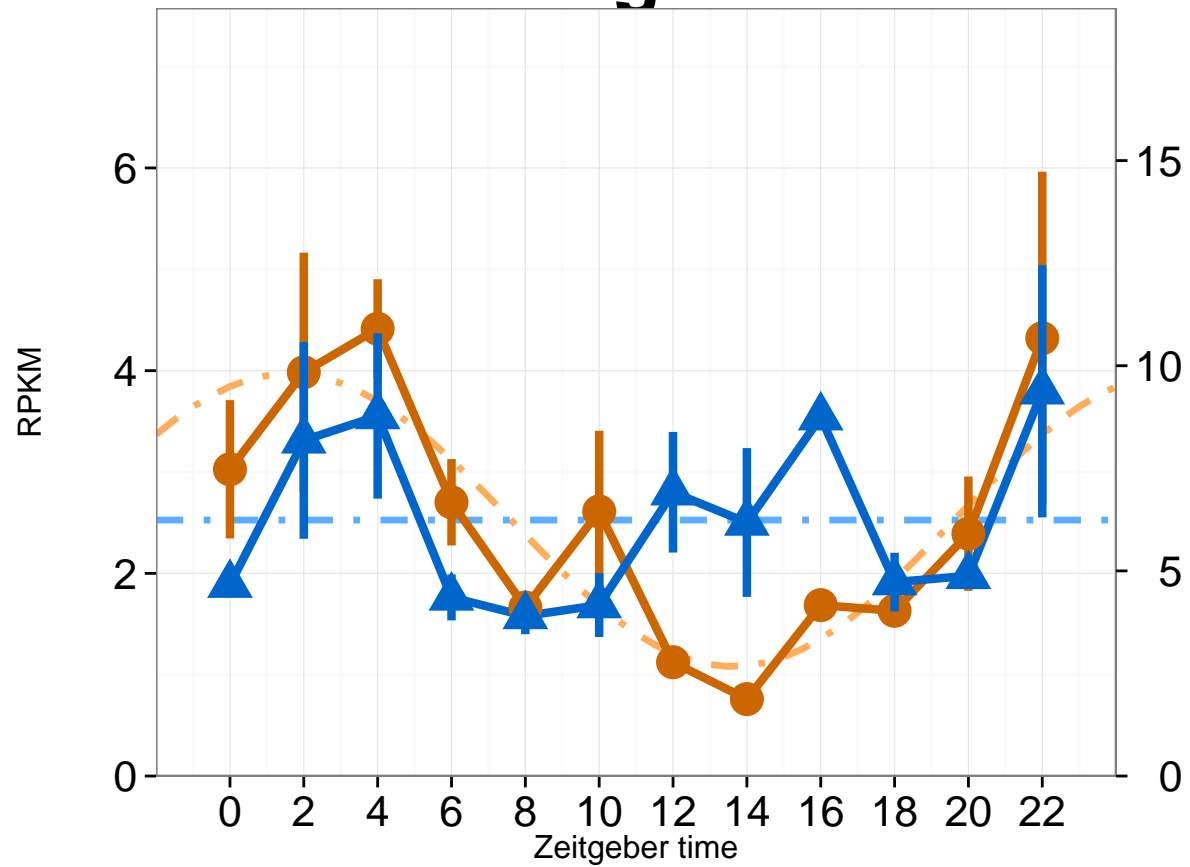

## Fgb

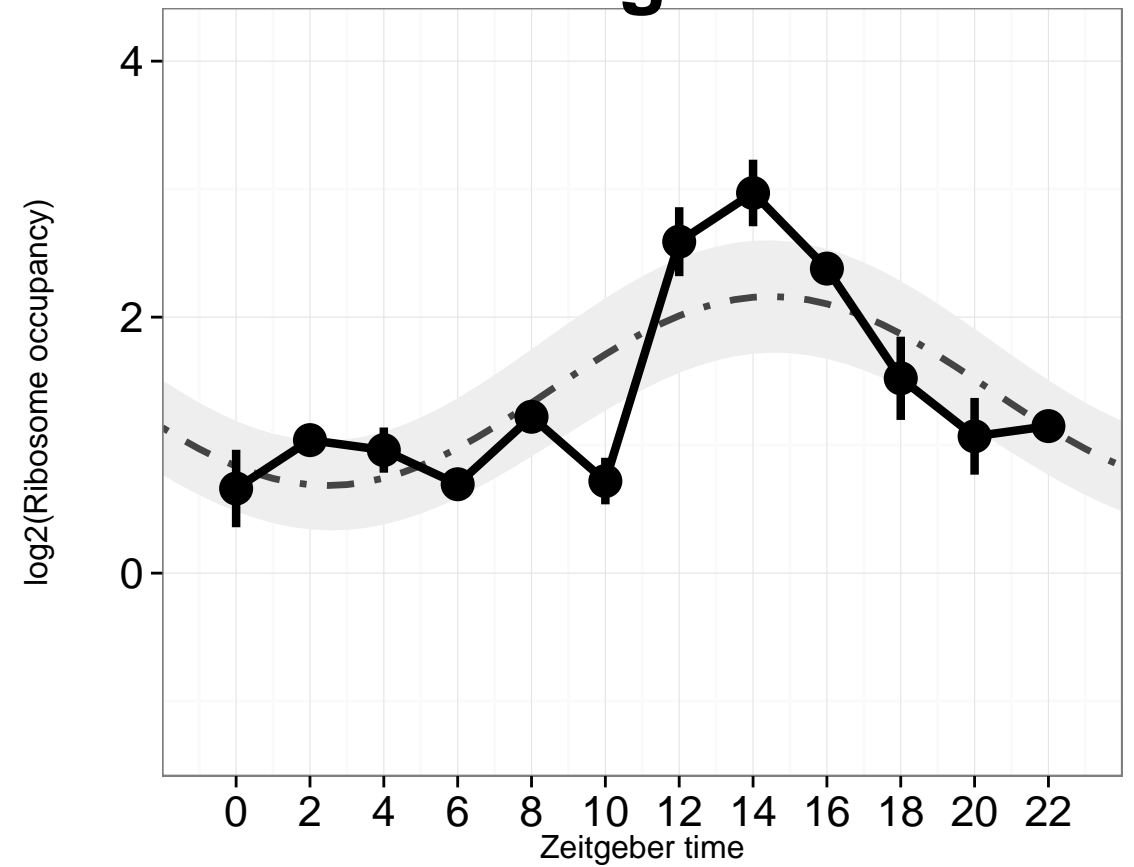

Supplement: Supplementary file 4155 [file 1]

# Fam160b2

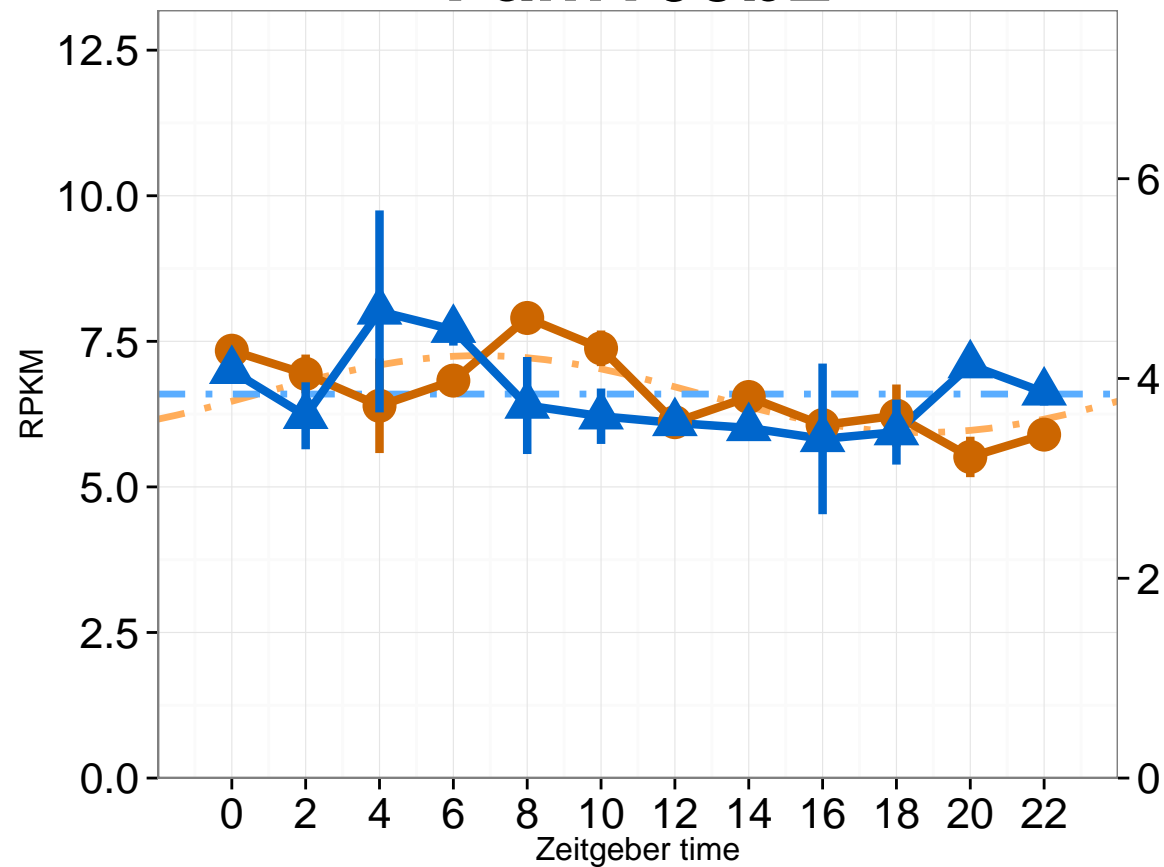

# Fam160b2

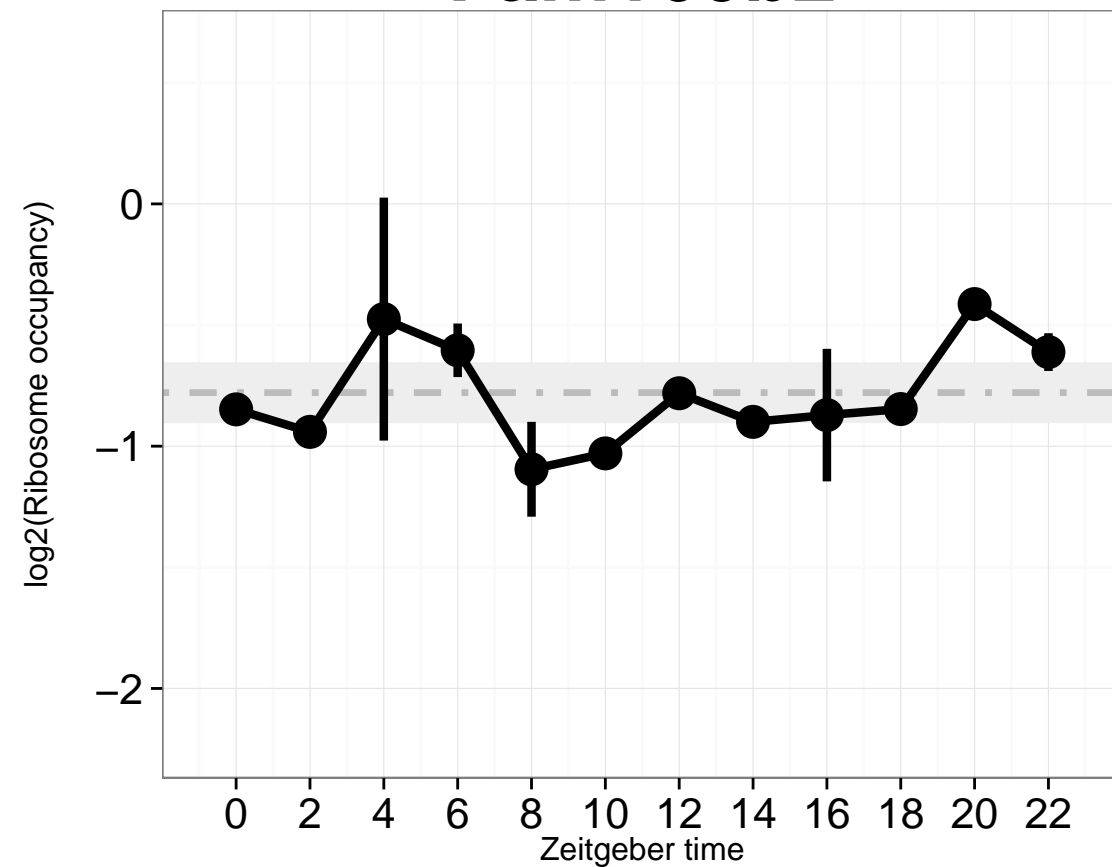

Supplement: Supplementary file 4156 [file 1]

## Chmp6

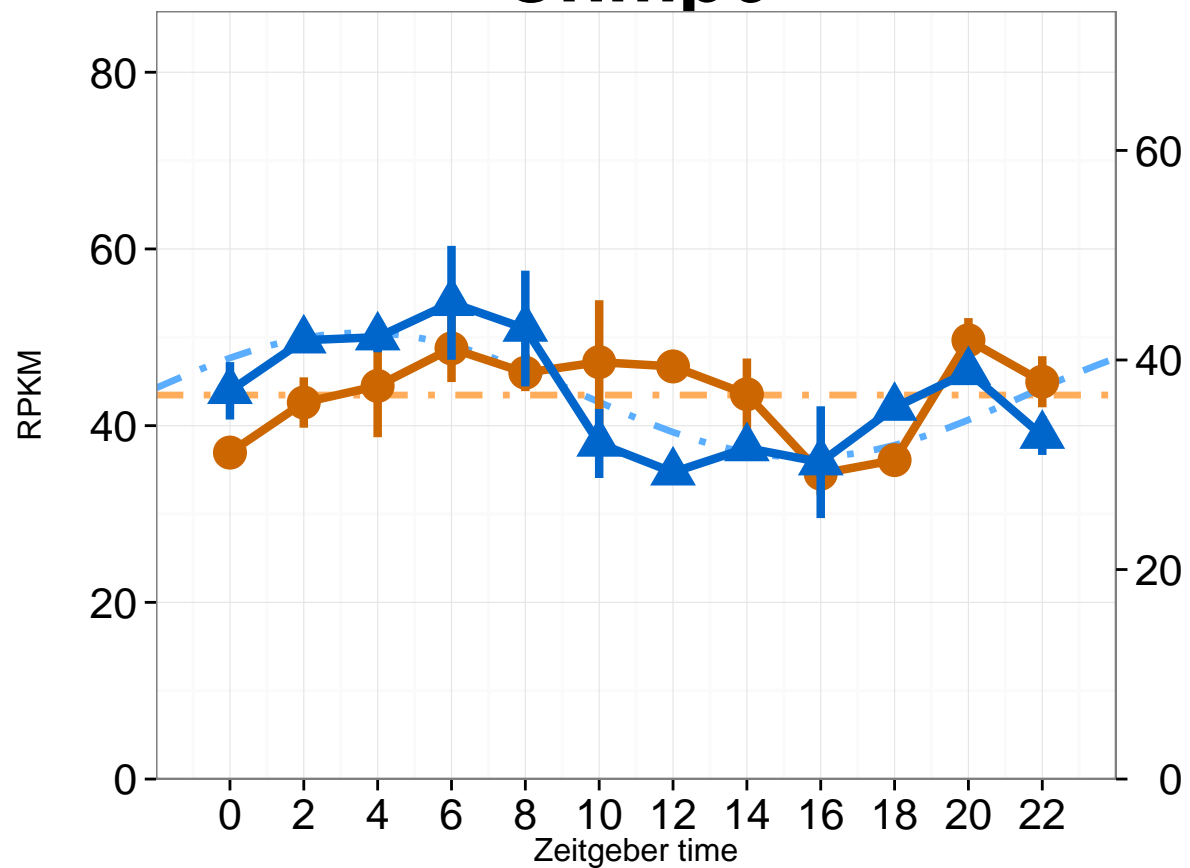

## Chmp6

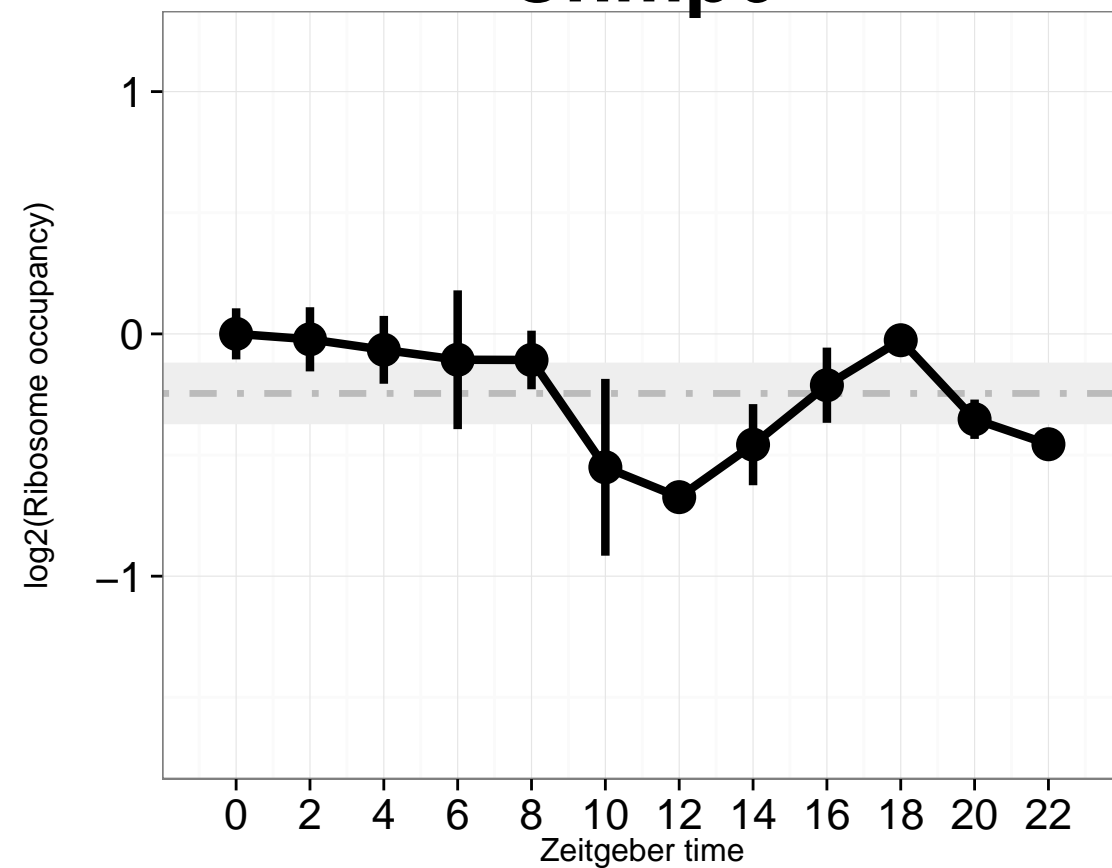

Supplement: Supplementary file 4157 [file 1]

## Rpl15

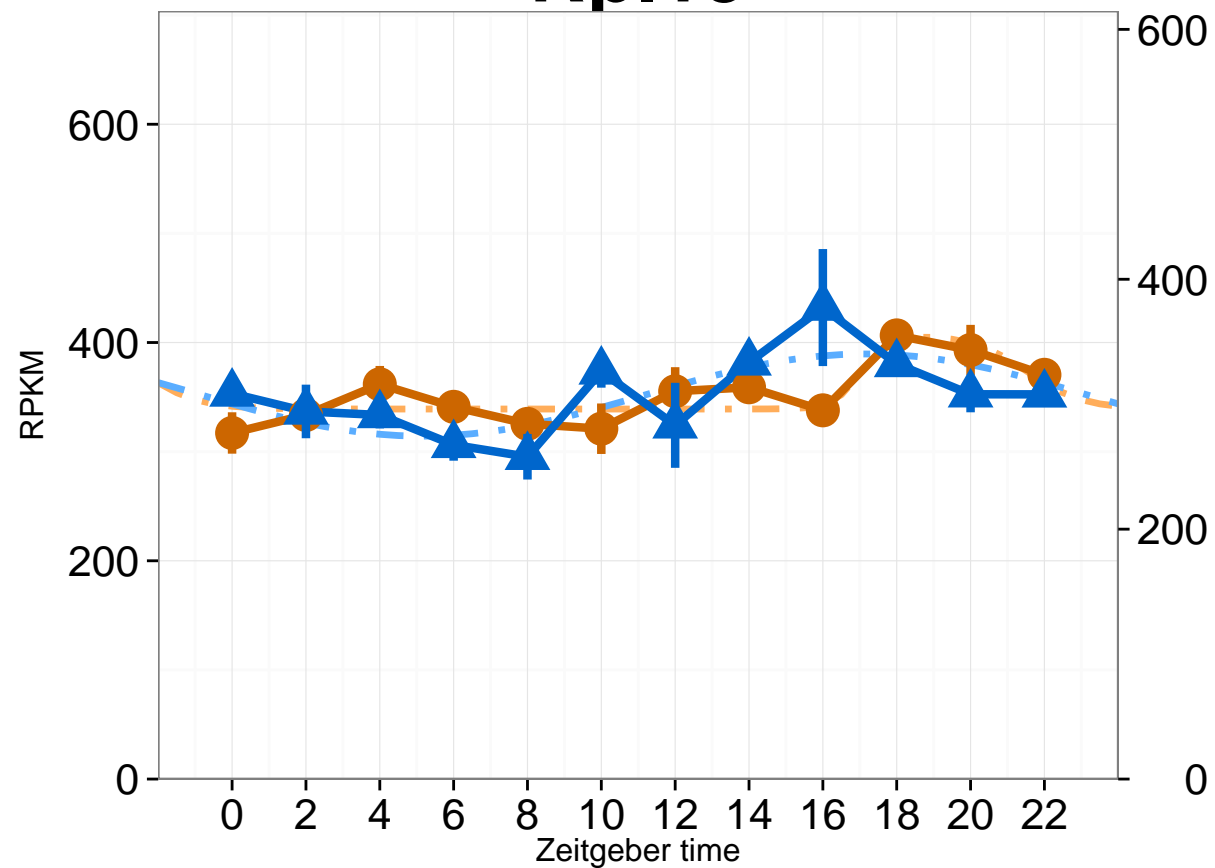

## Rpl15

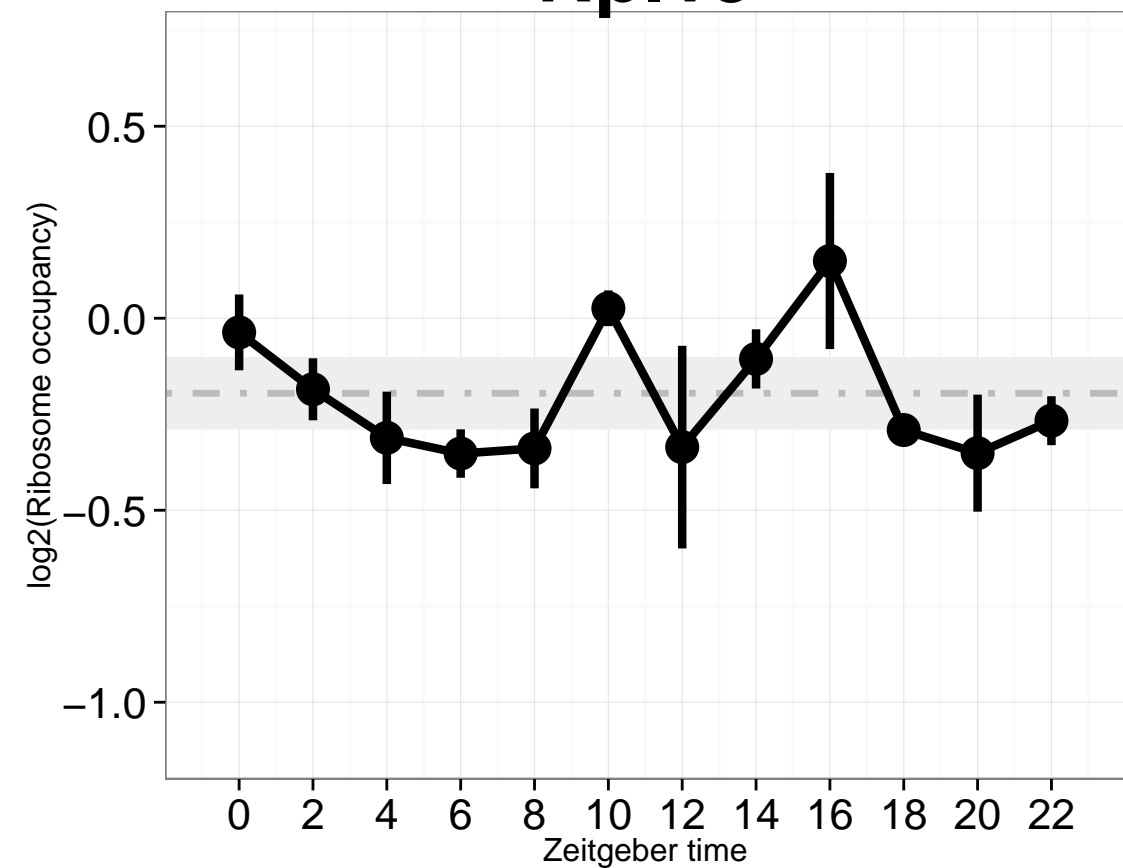

Supplement: Supplementary file 4158 [file 1]

# Lmtk3

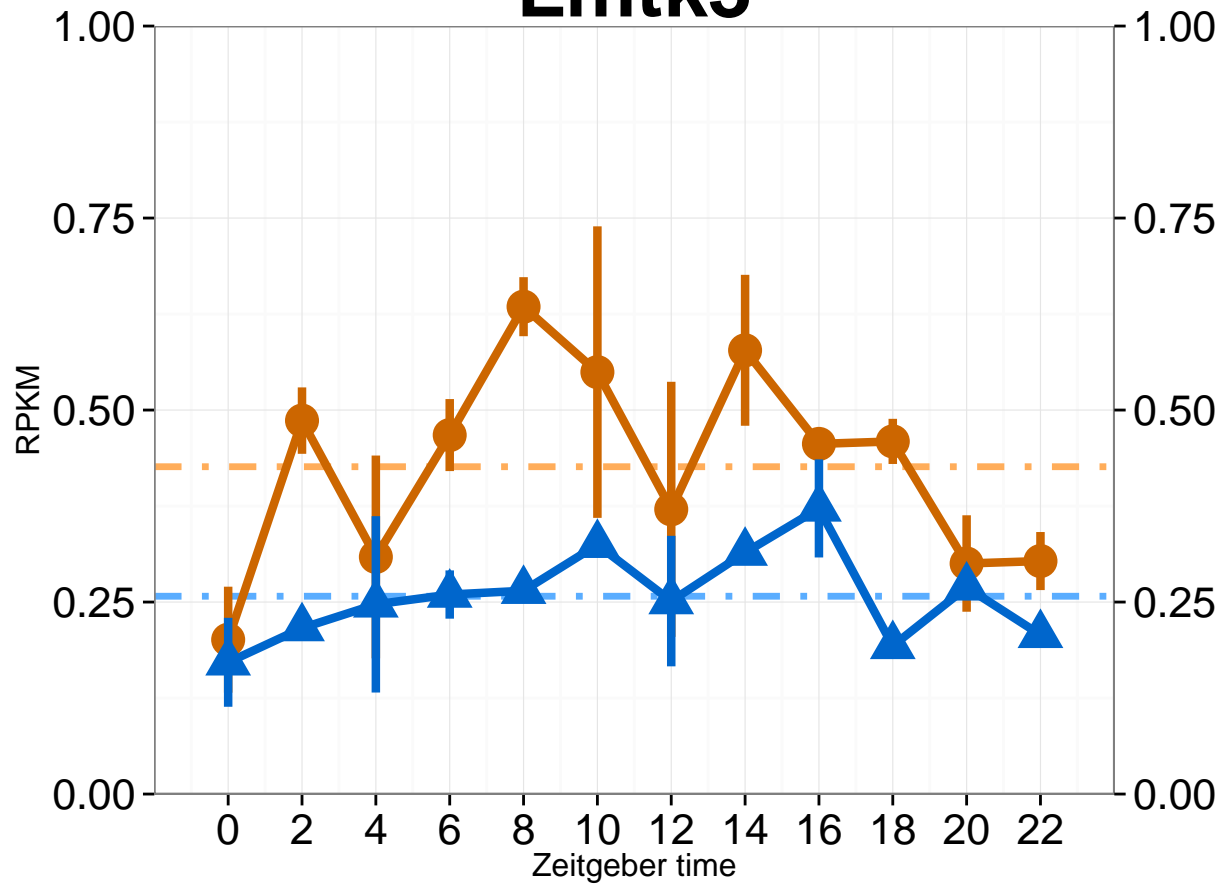

# Lmtk3

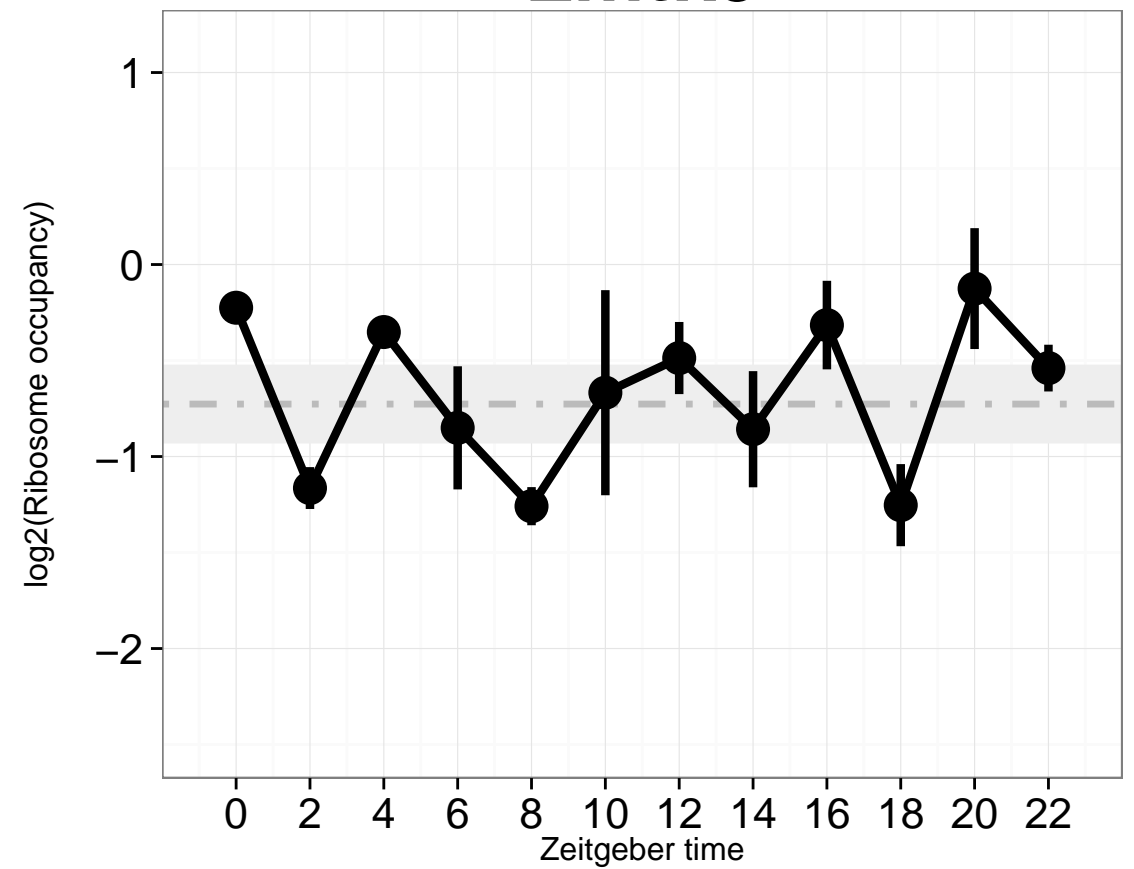

Supplement: Supplementary file 4159 [file 1]

# Csrp2bp

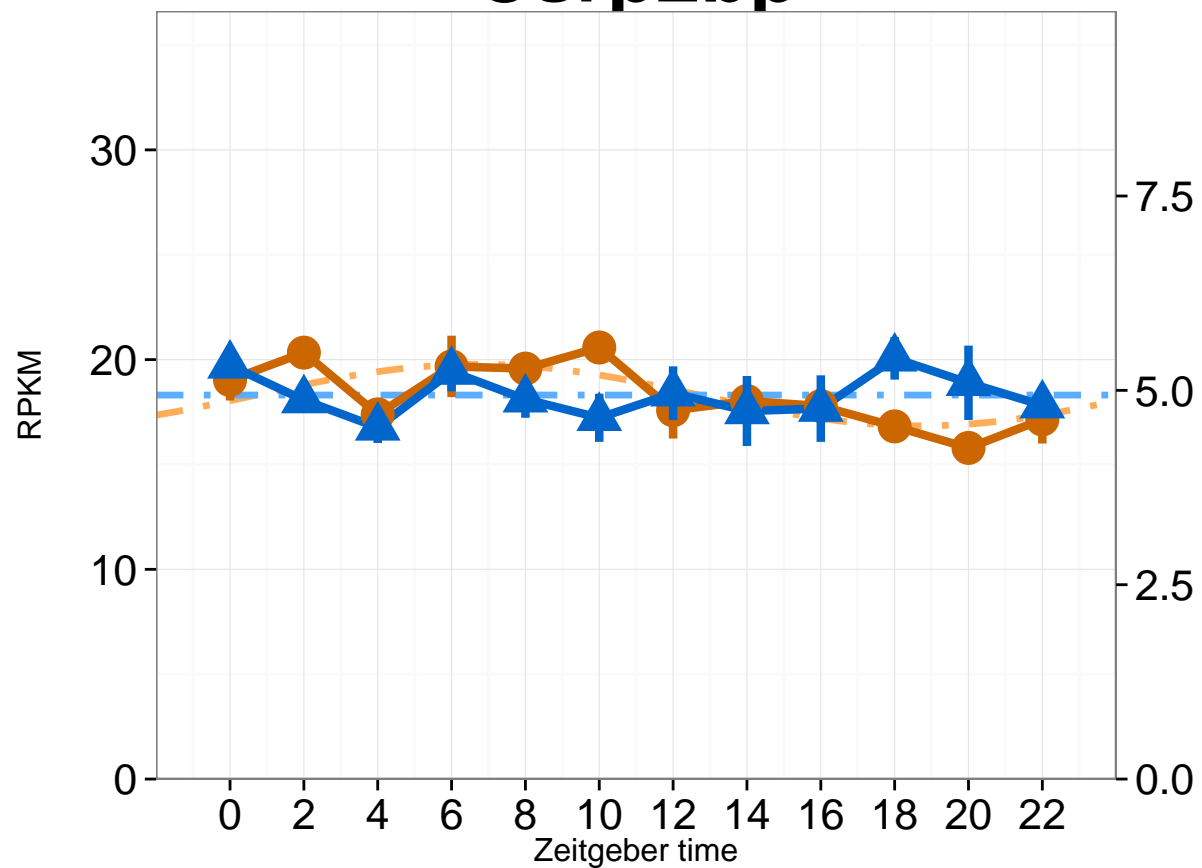

# Csrp2bp

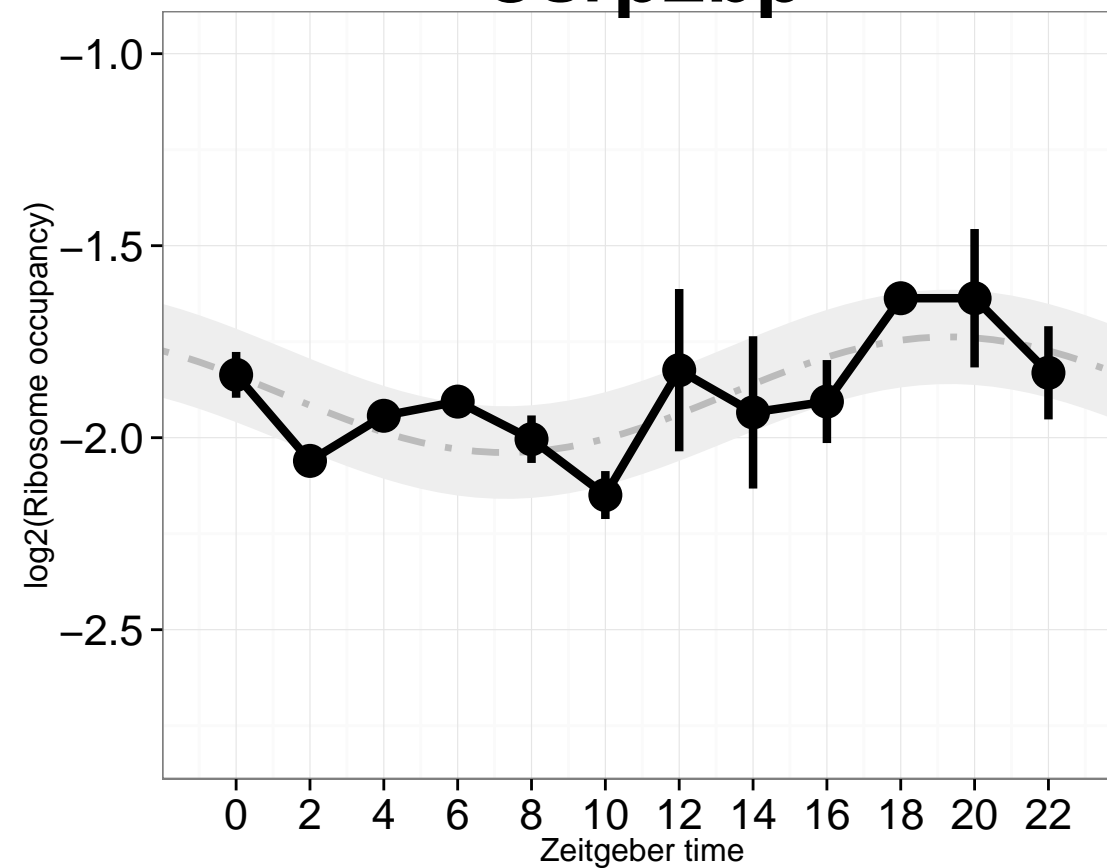

Supplement: Supplementary file 4160 [file 1]

# Smim6

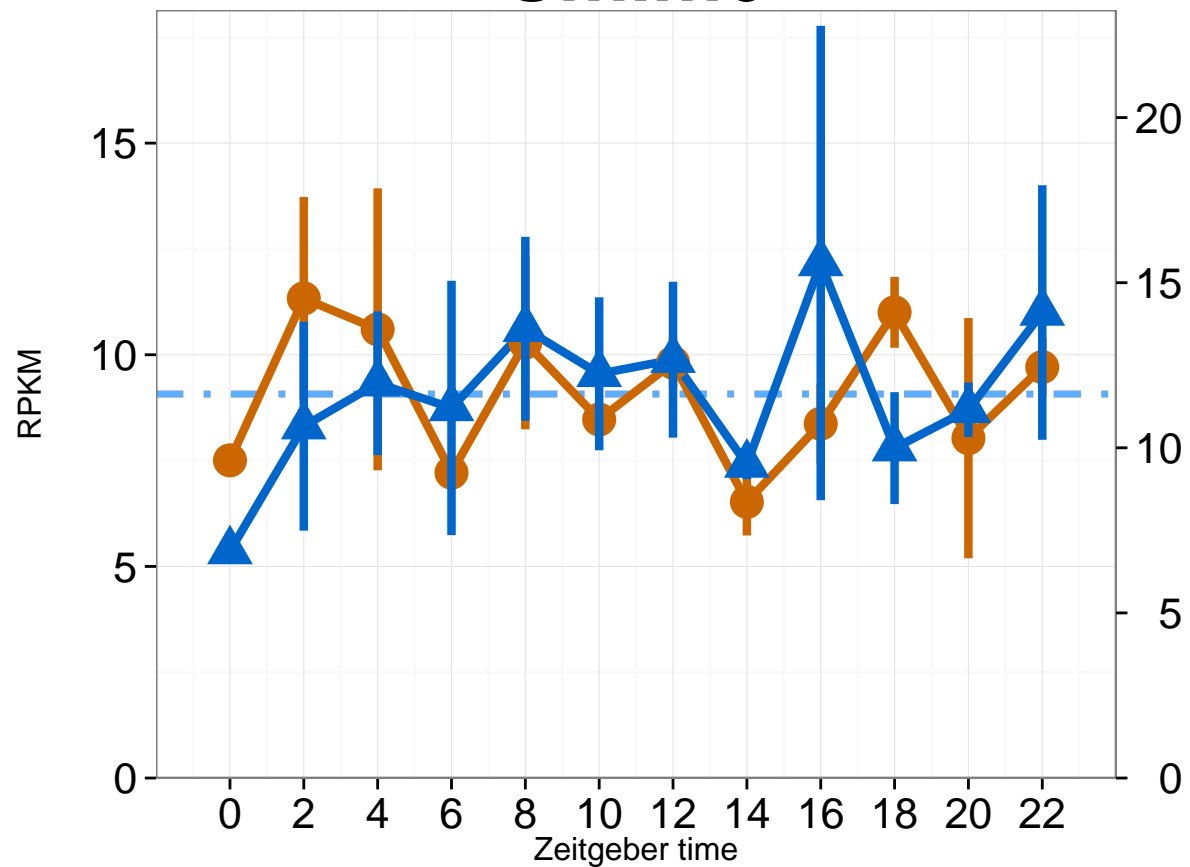

# Smim6

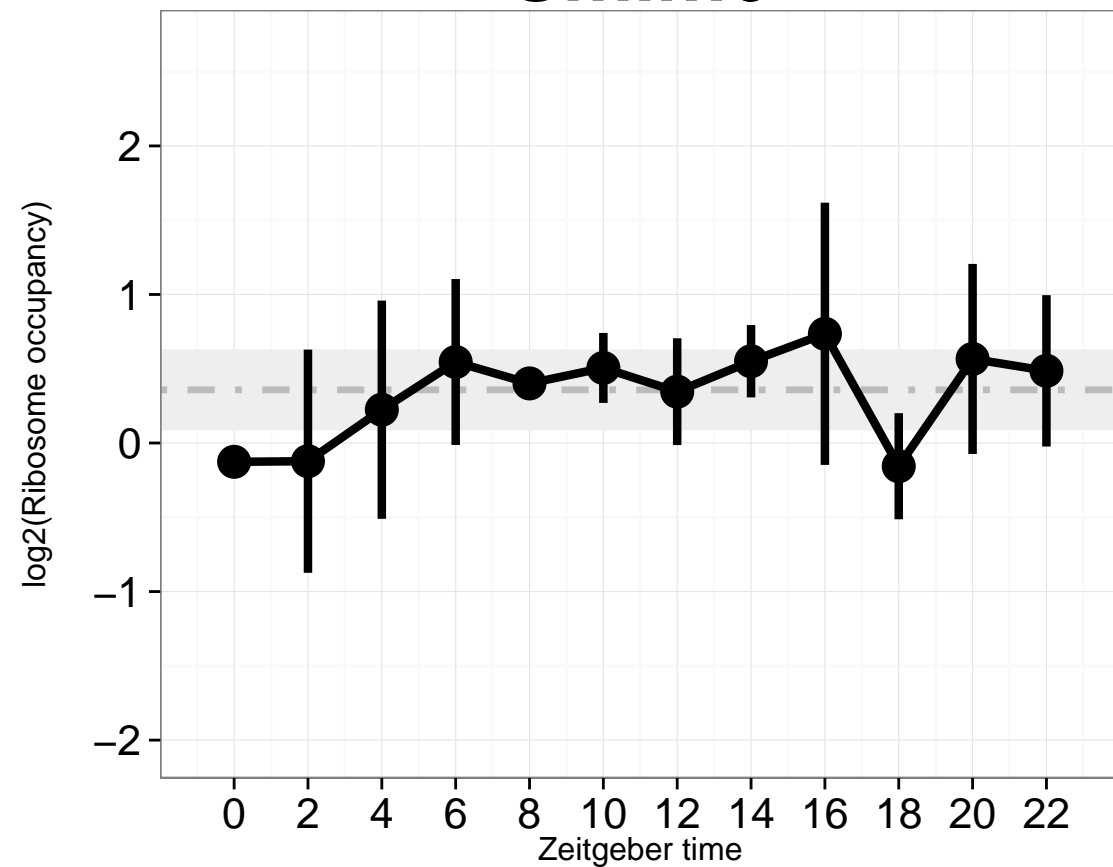

Supplement: Supplementary file 4161 [file 1]

# Rcan1

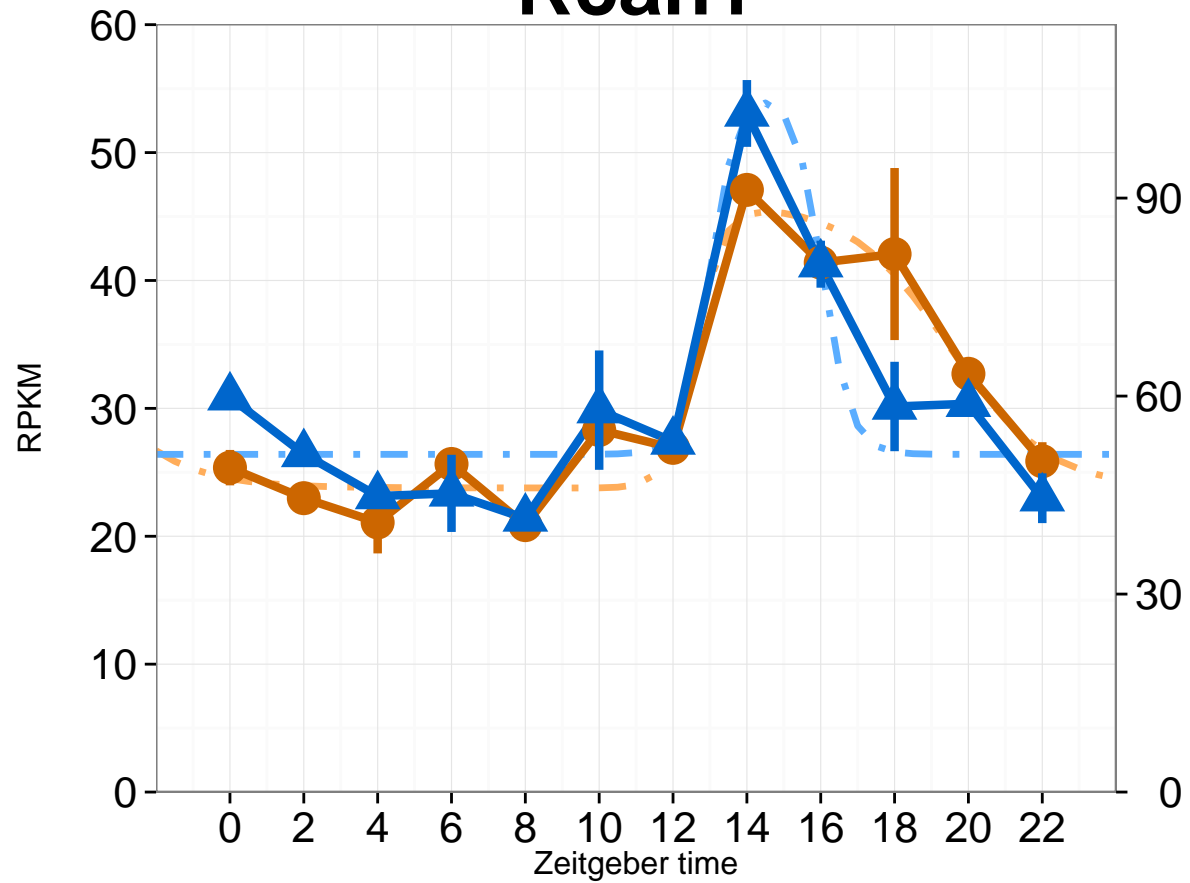

# Rcan1

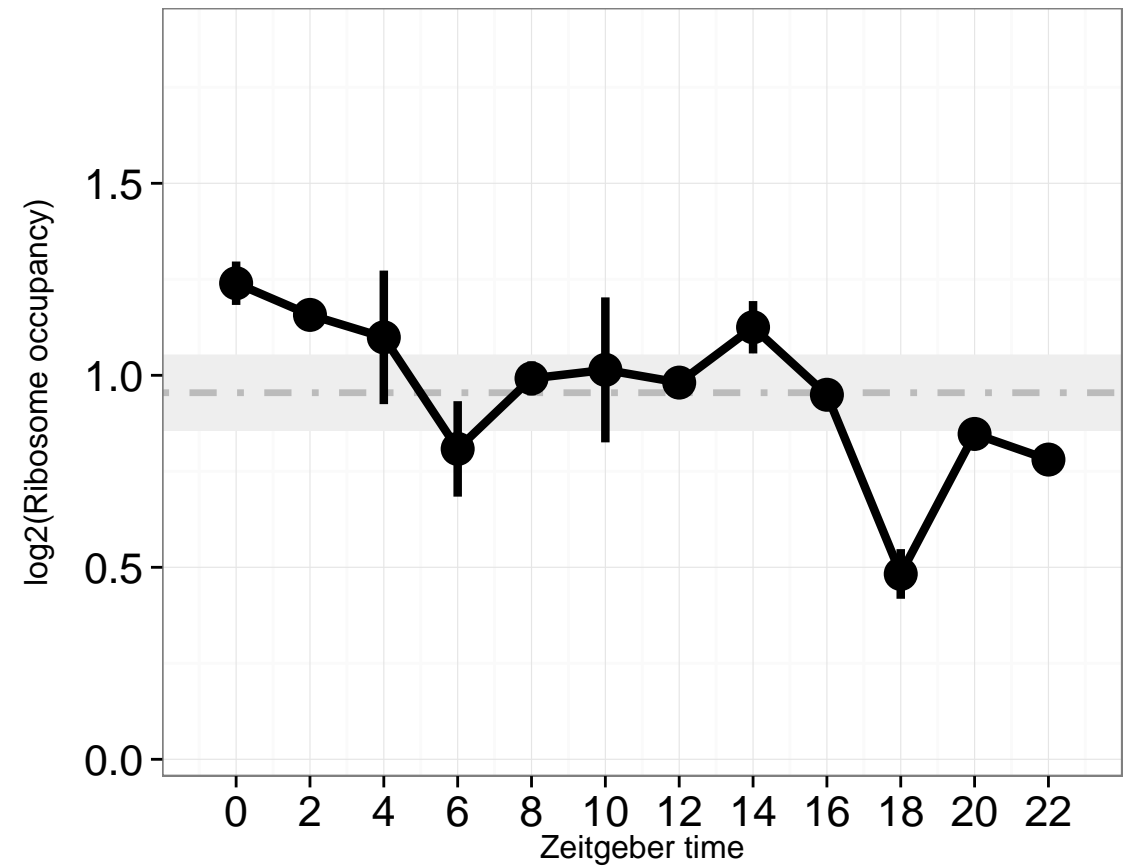

Supplement: Supplementary file 4162 [file 1]

# Cdc42ep2

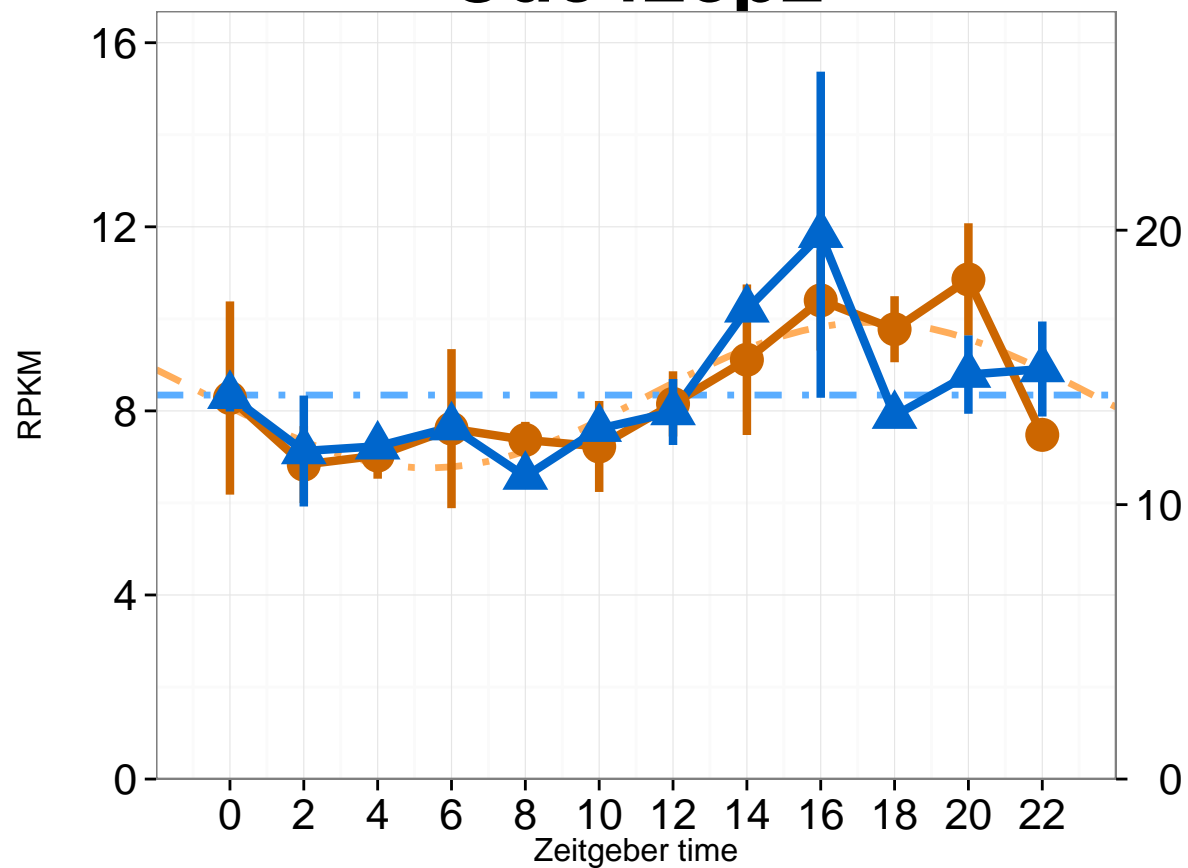

# Cdc42ep2

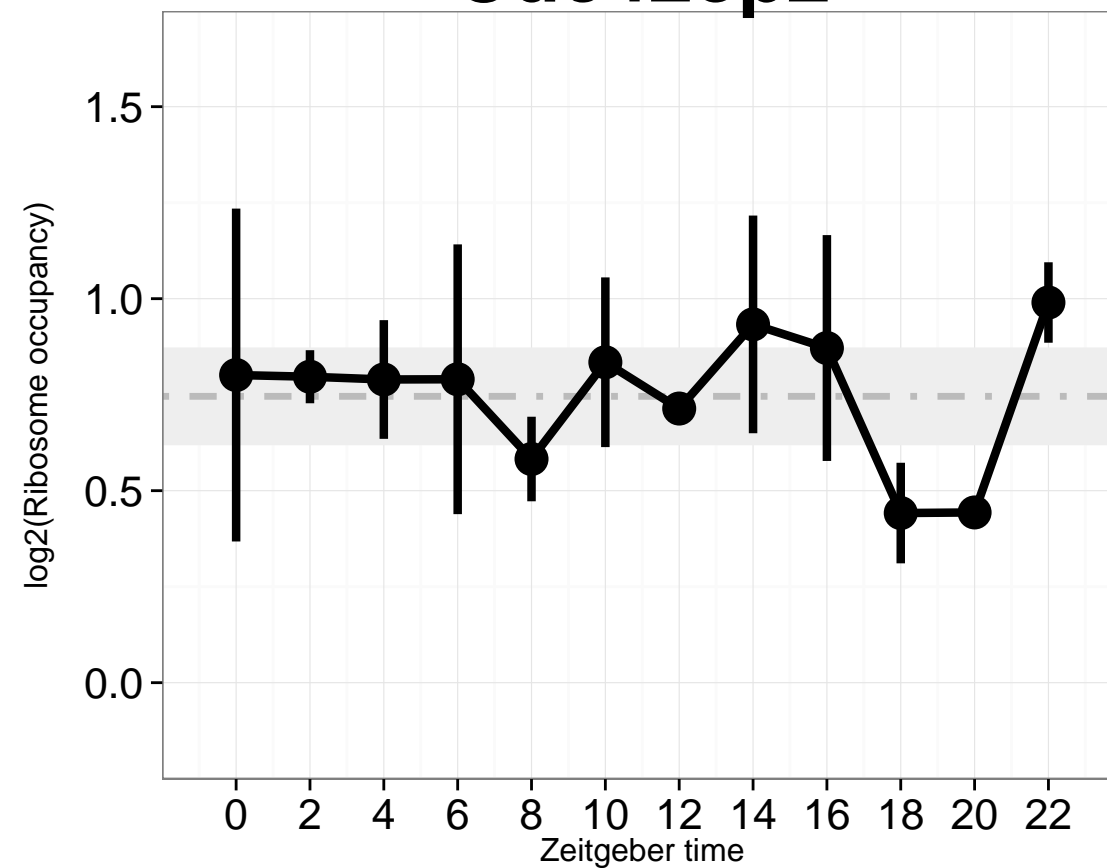

Supplement: Supplementary file 4163 [file 1]

## MiIt11

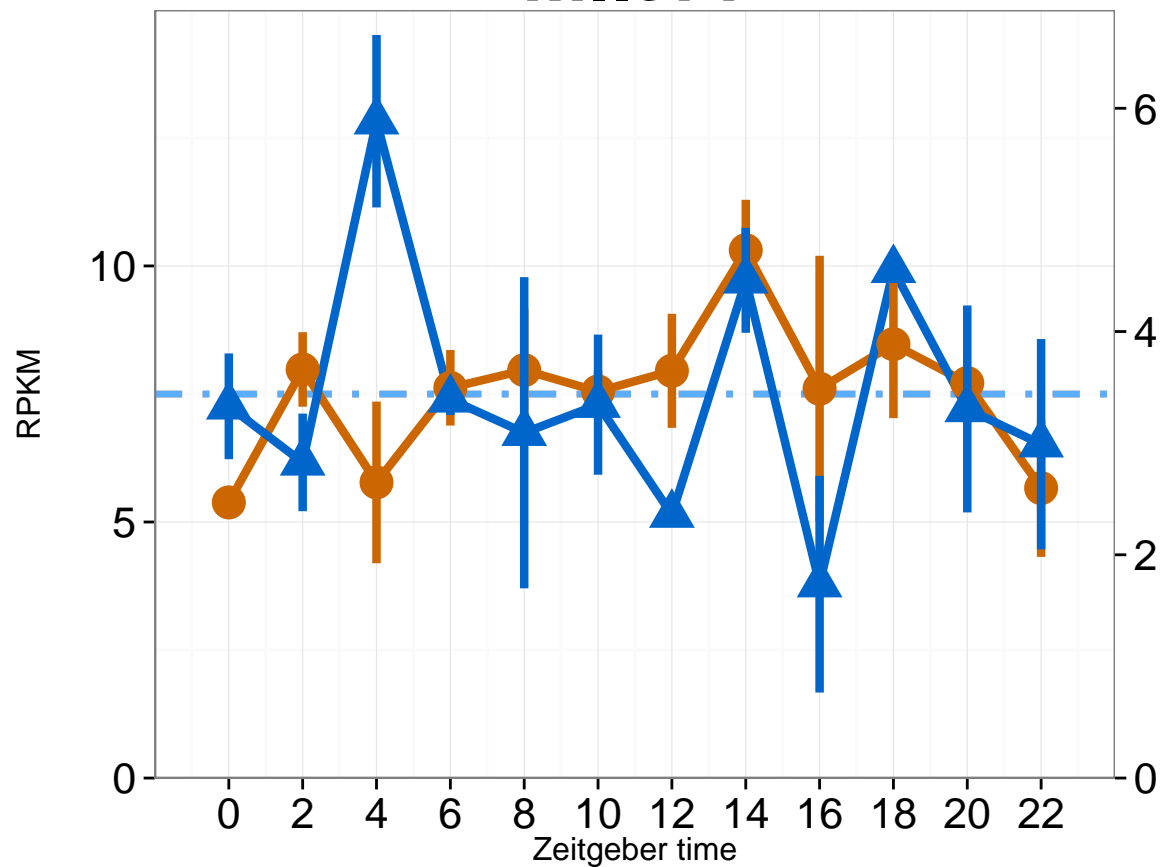

## MiIt11

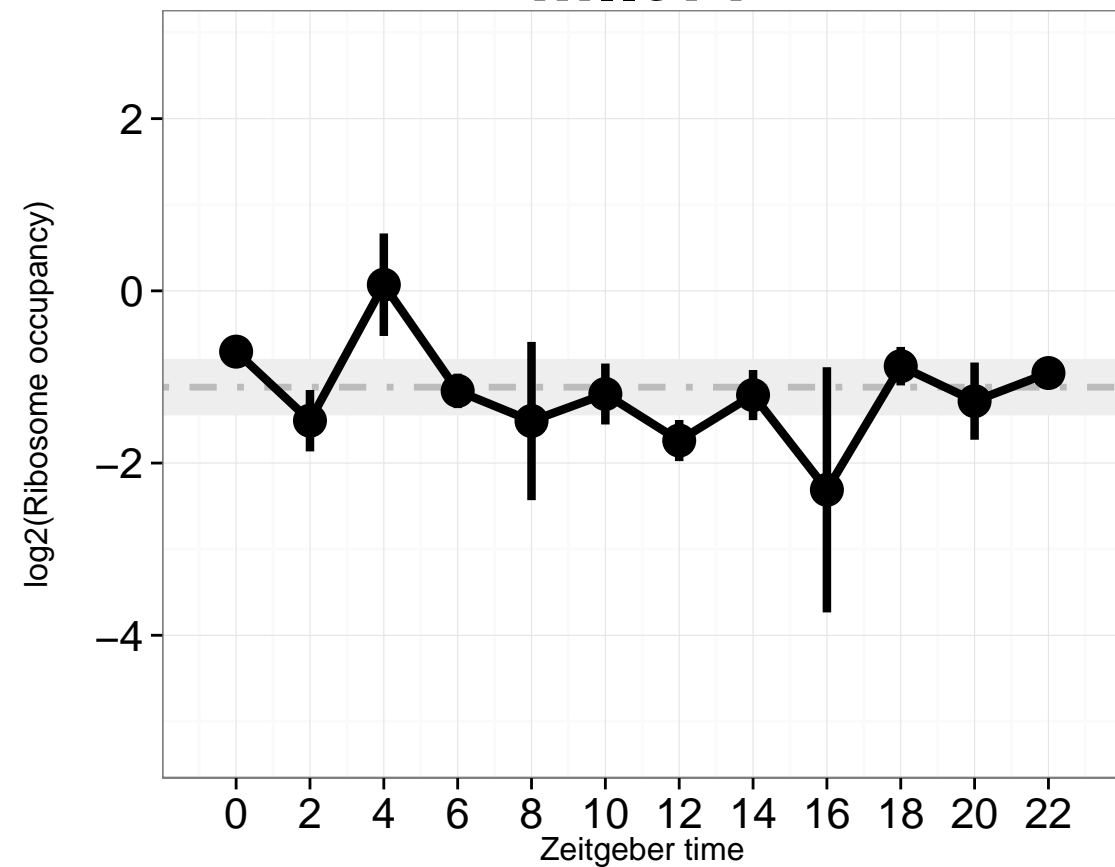

Supplement: Supplementary file 4164 [file 1]

## Necap2

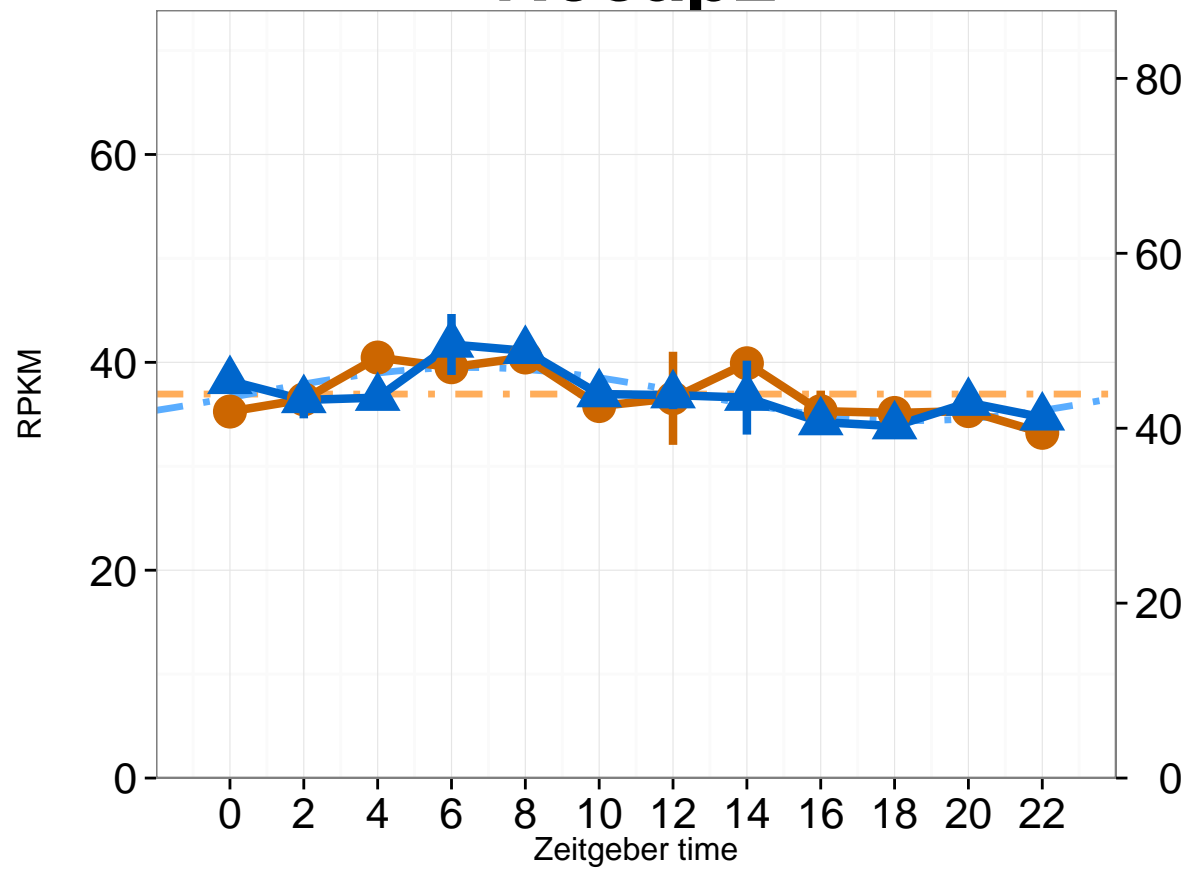

## Necap2

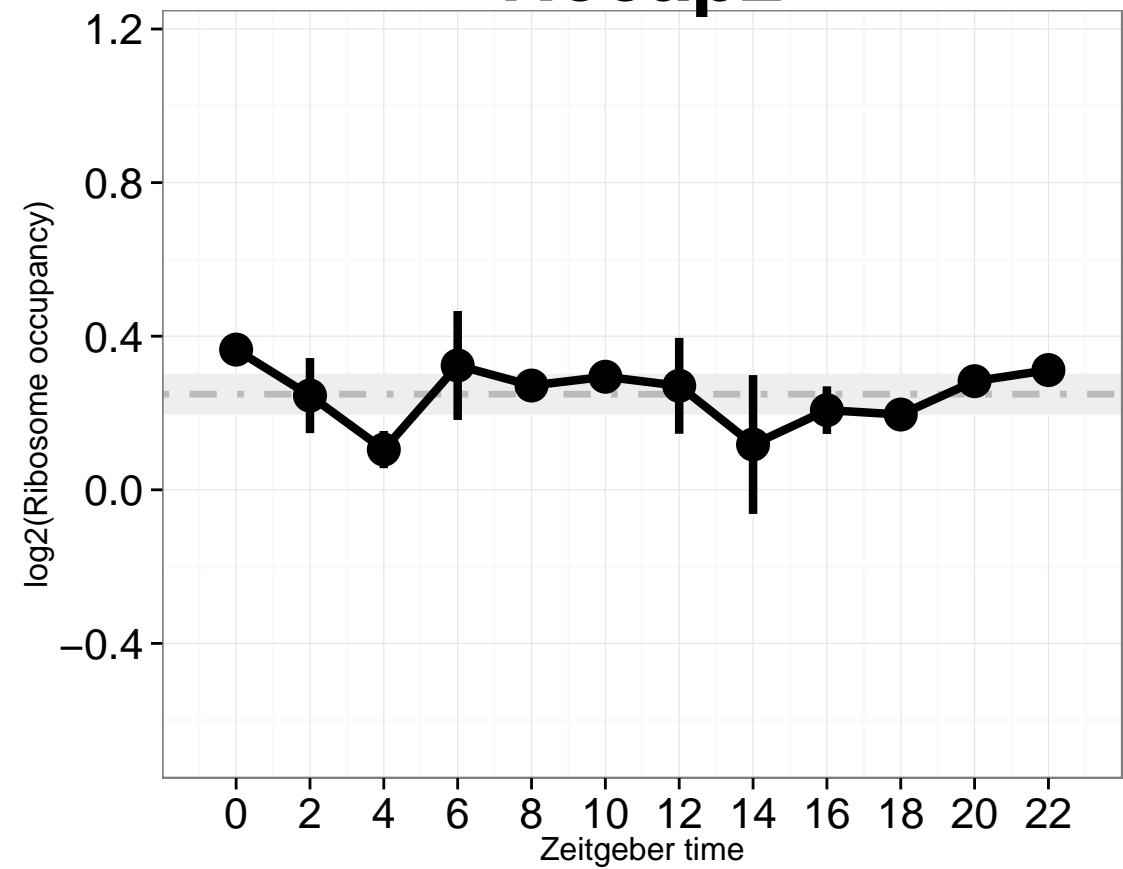

Supplement: Supplementary file 4165 [file 1]

Supv3l1

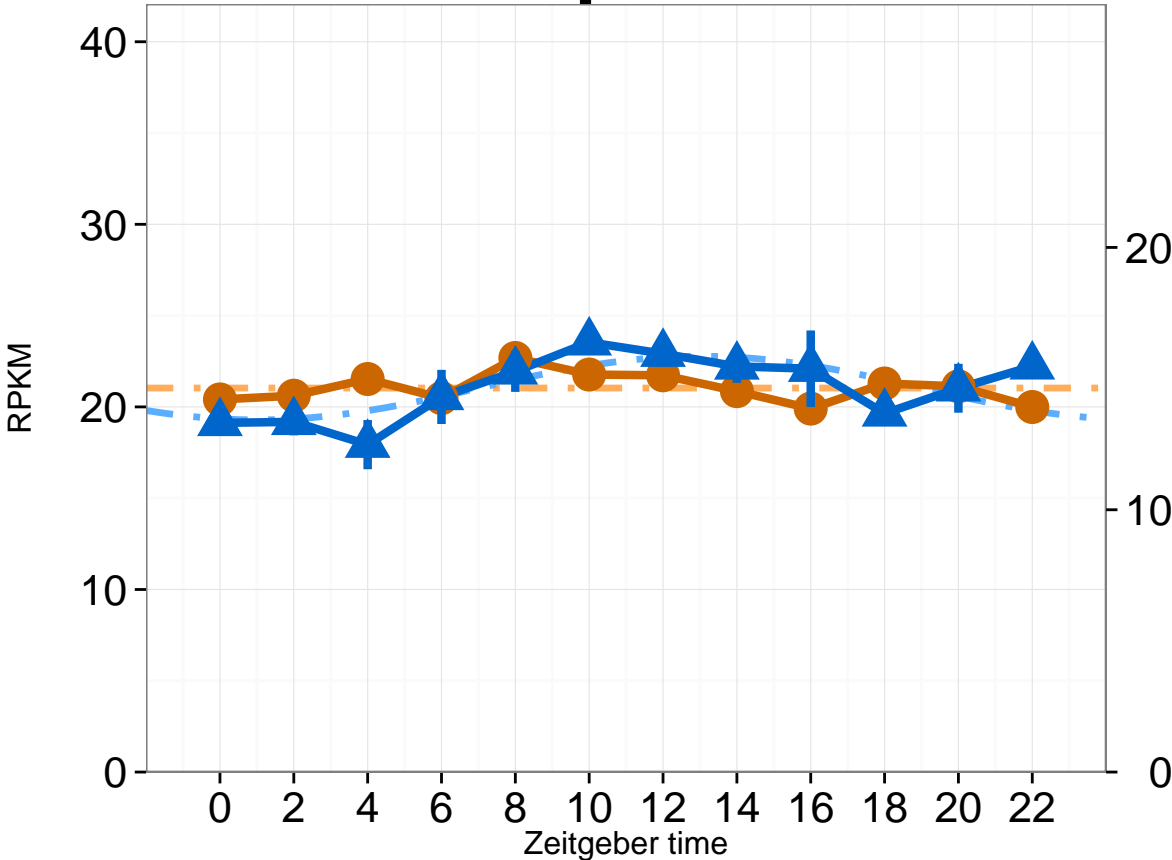

Supv3l1

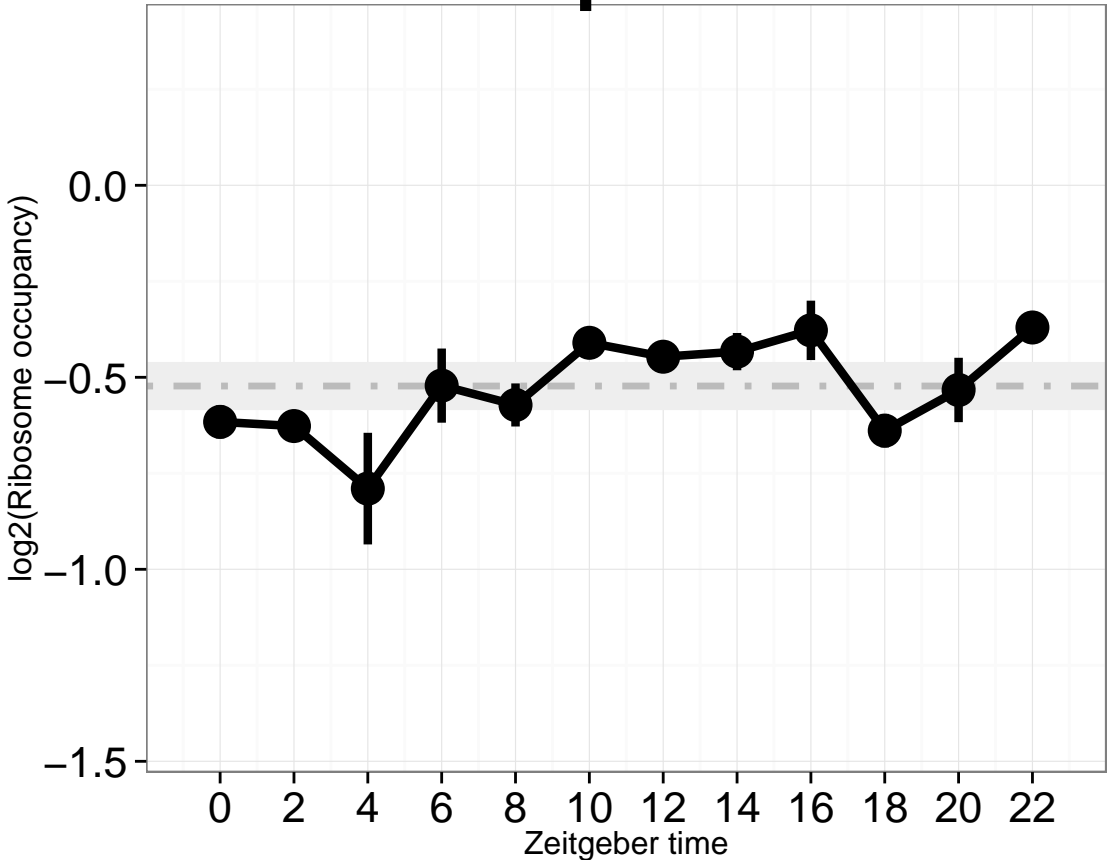

Supplement: Supplementary file 4166 [file 1]

## Abhd3

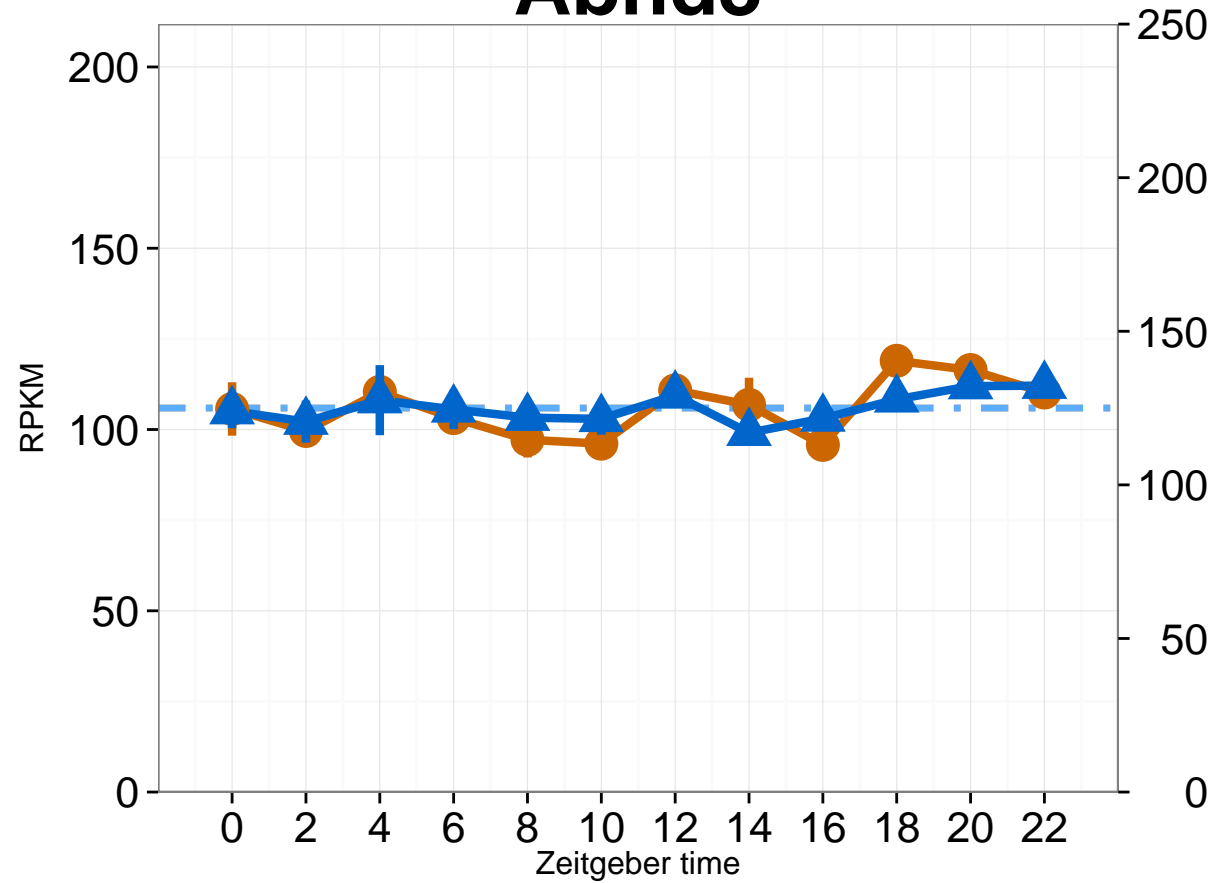

## Abhd3

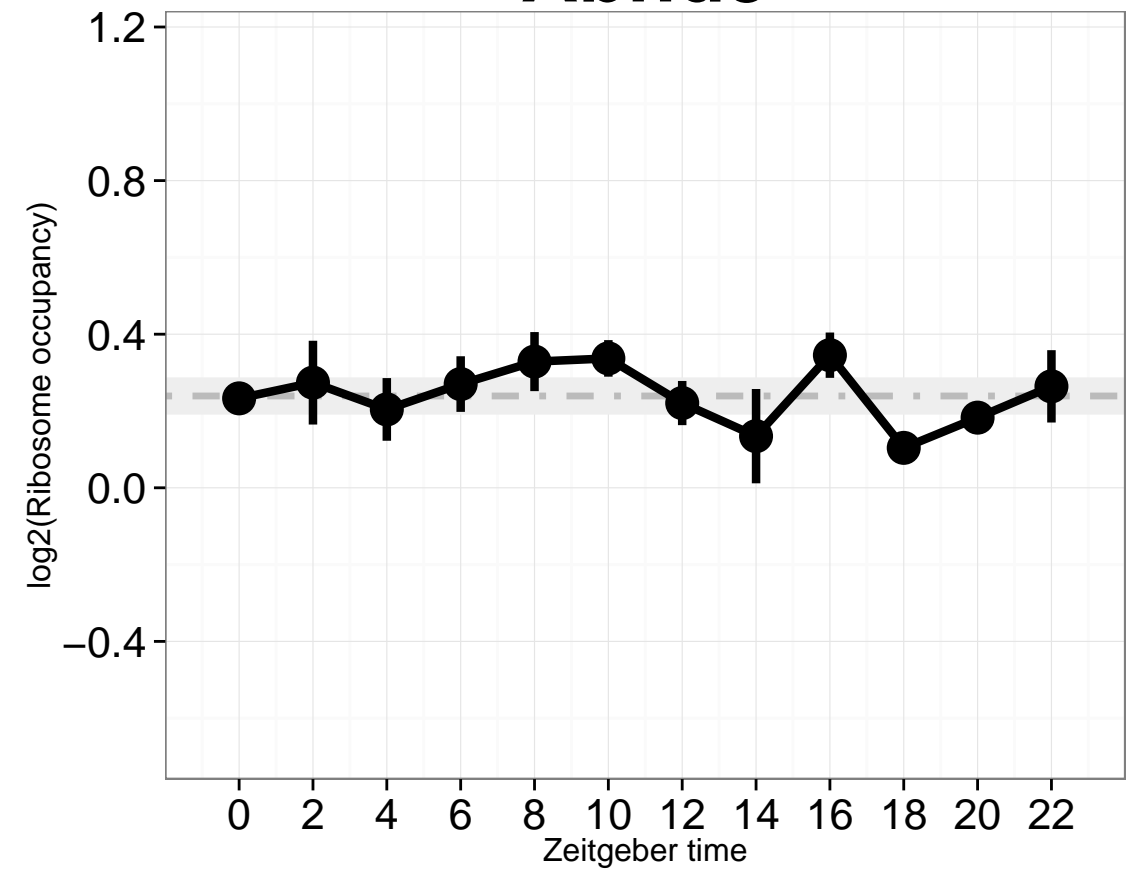

Supplement: Supplementary file 4167 [file 1]

## Riok3

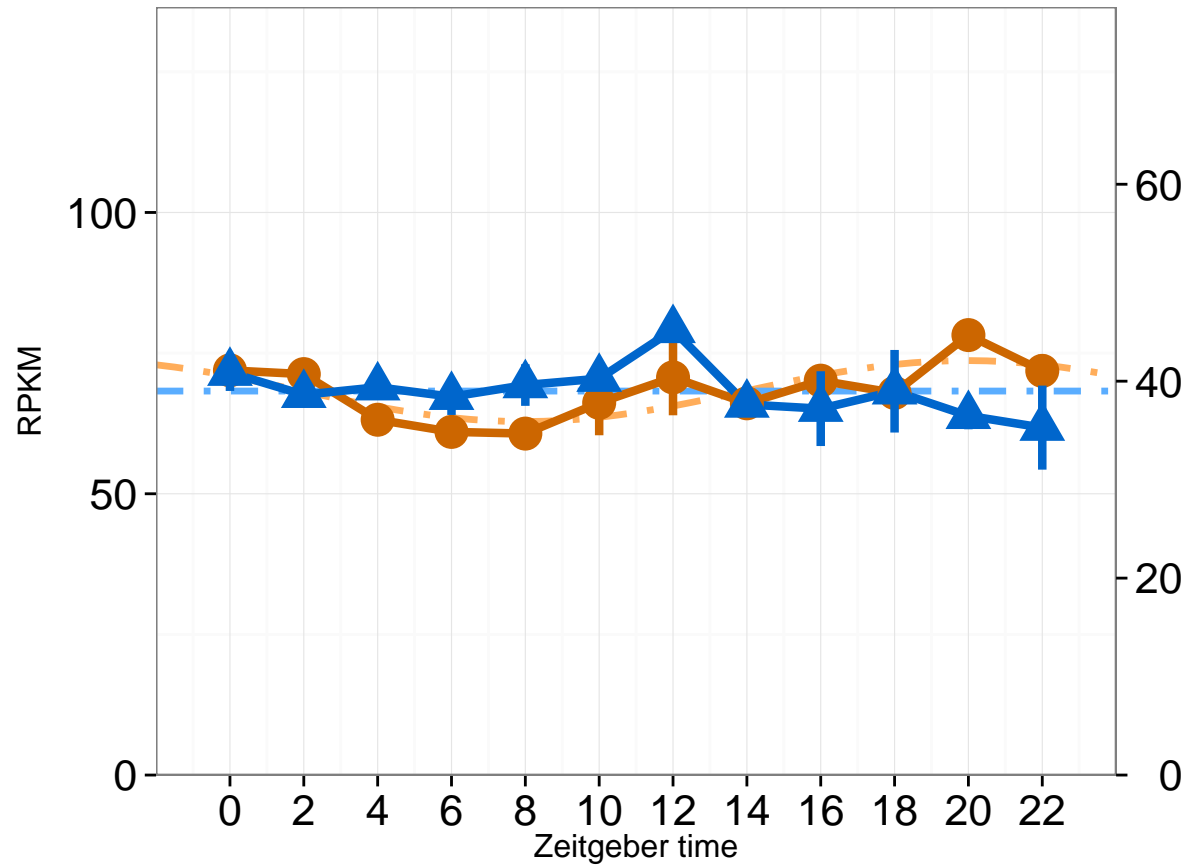

## Riok3

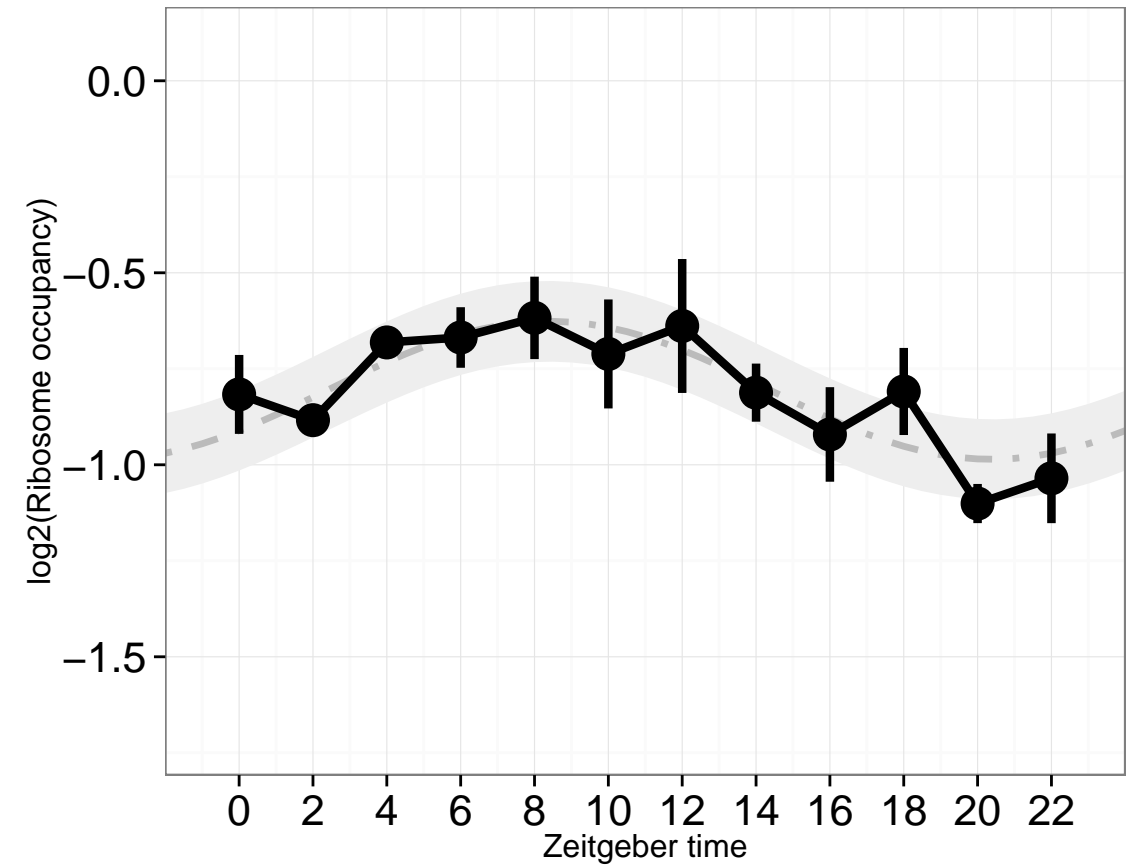

Supplement: Supplementary file 4168 [file 1]

## Nmb

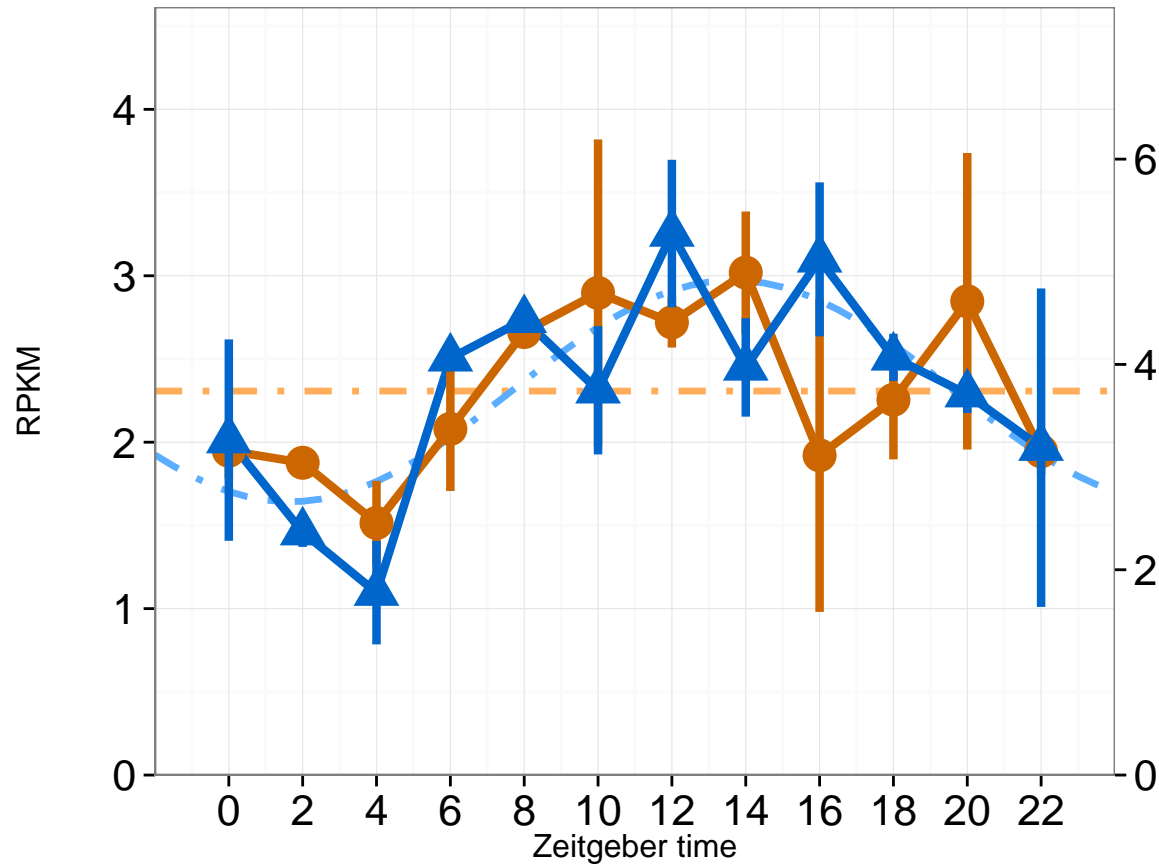

## Nmb

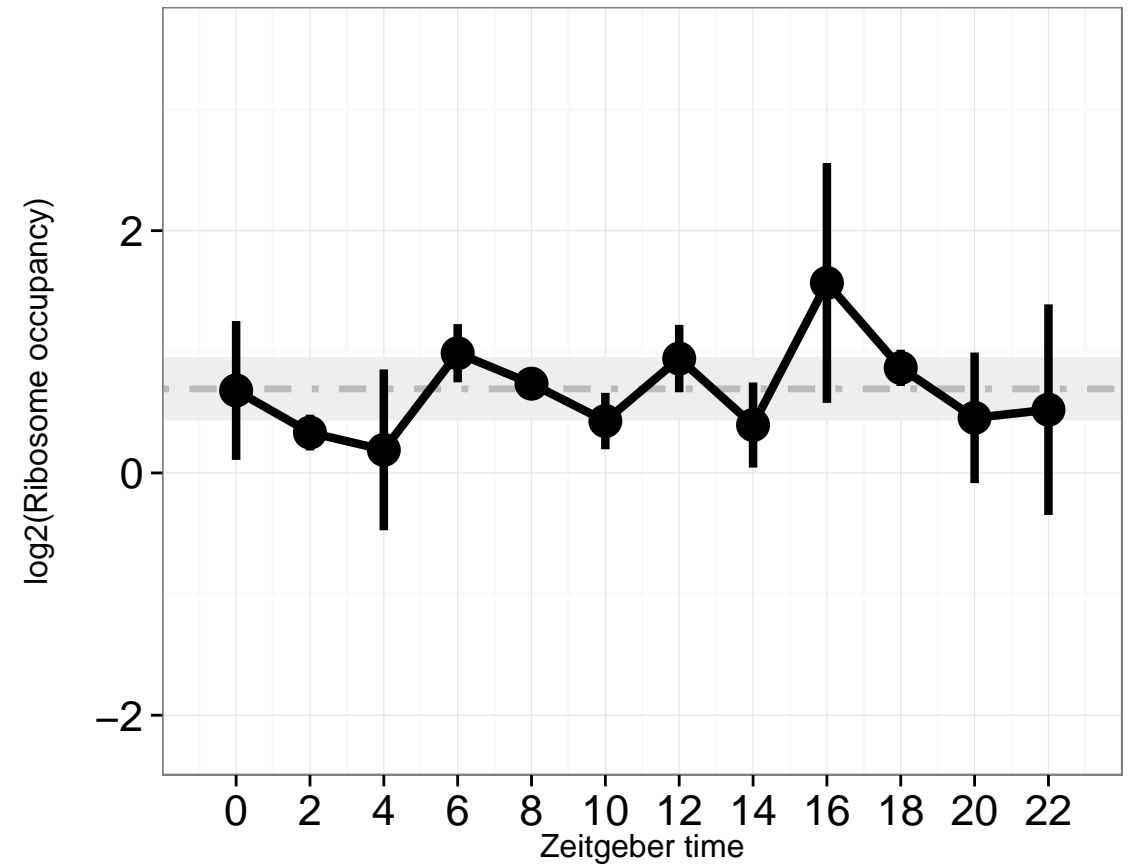

Supplement: Supplementary file 4169 [file 1]

## Nmi

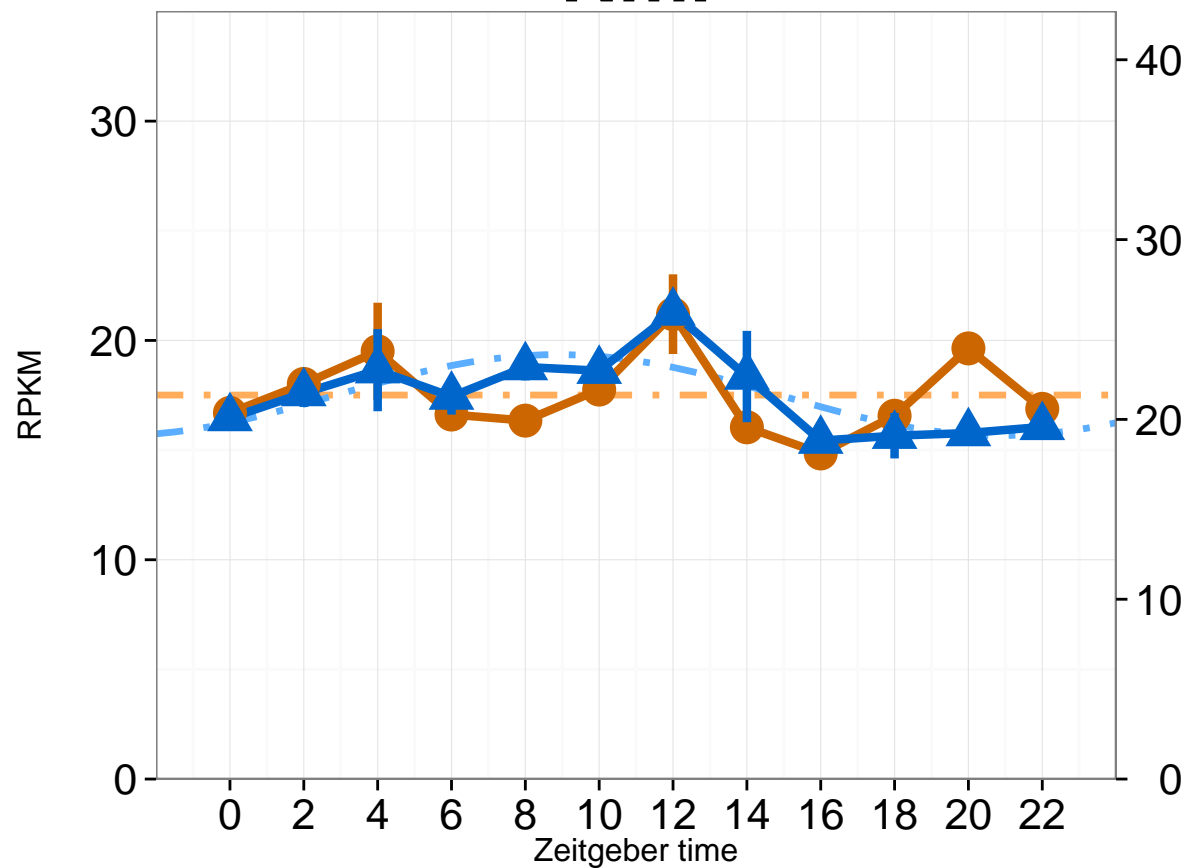

## Nmi

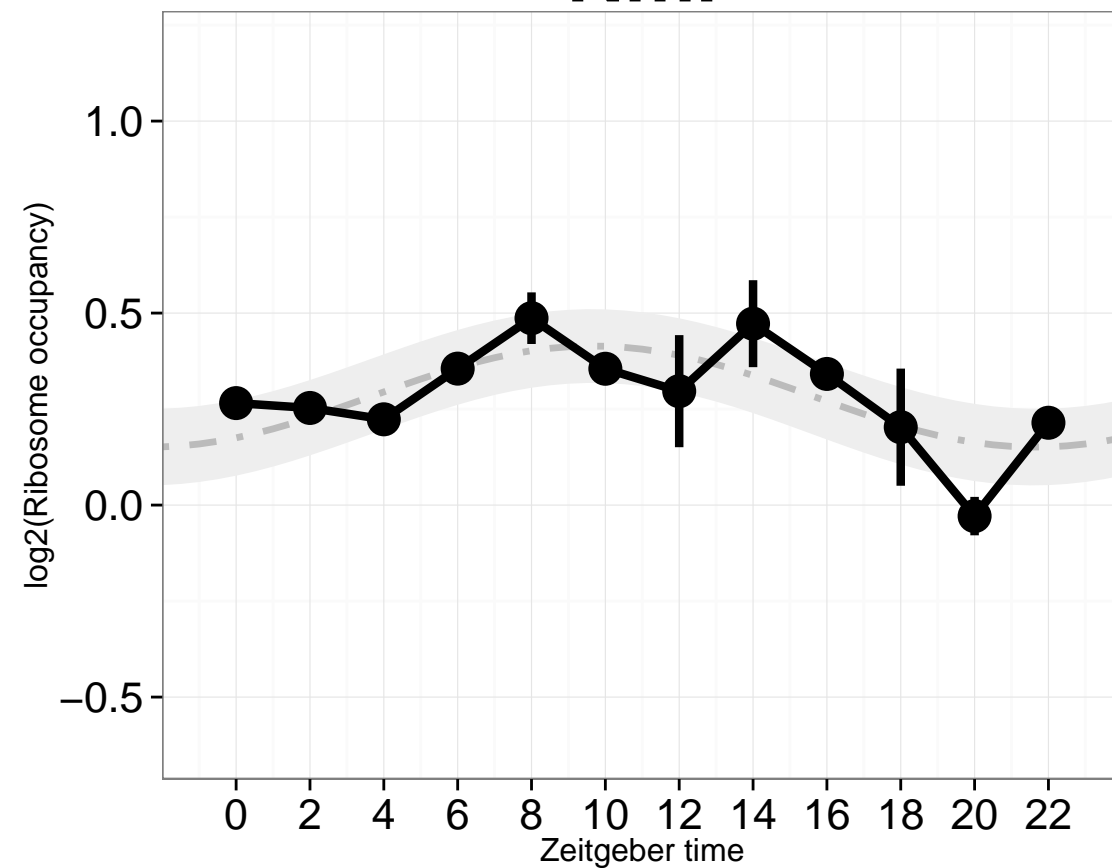

Supplement: Supplementary file 4170 [file 1]

# Eif4ebp1

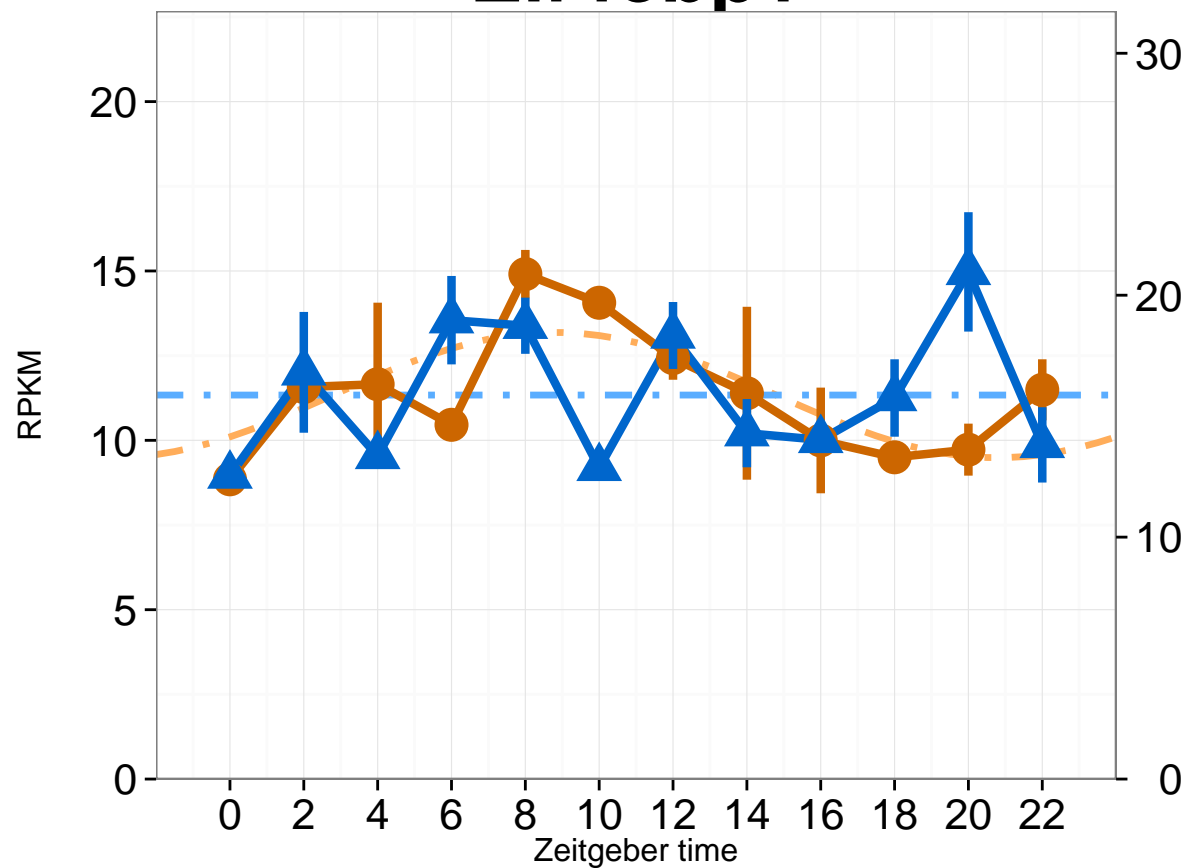

# Eif4ebp1

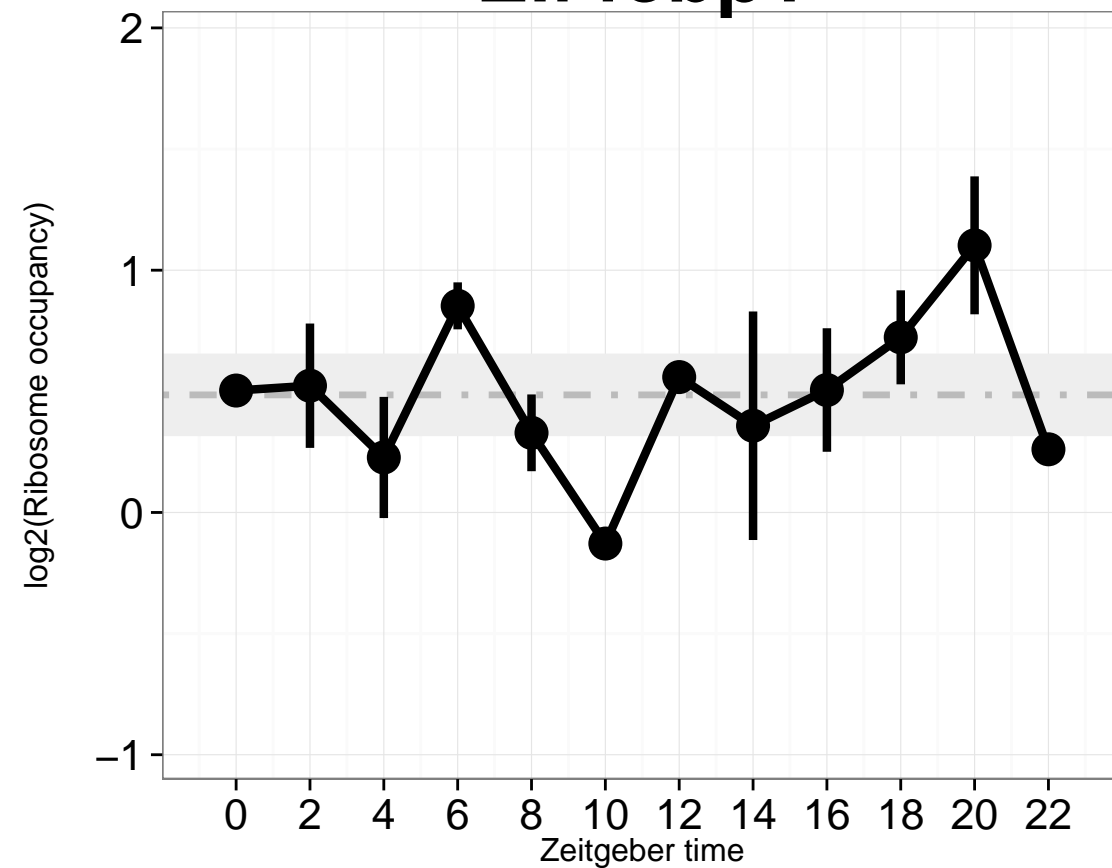

Supplement: Supplementary file 4171 [file 1]

# Eid2b

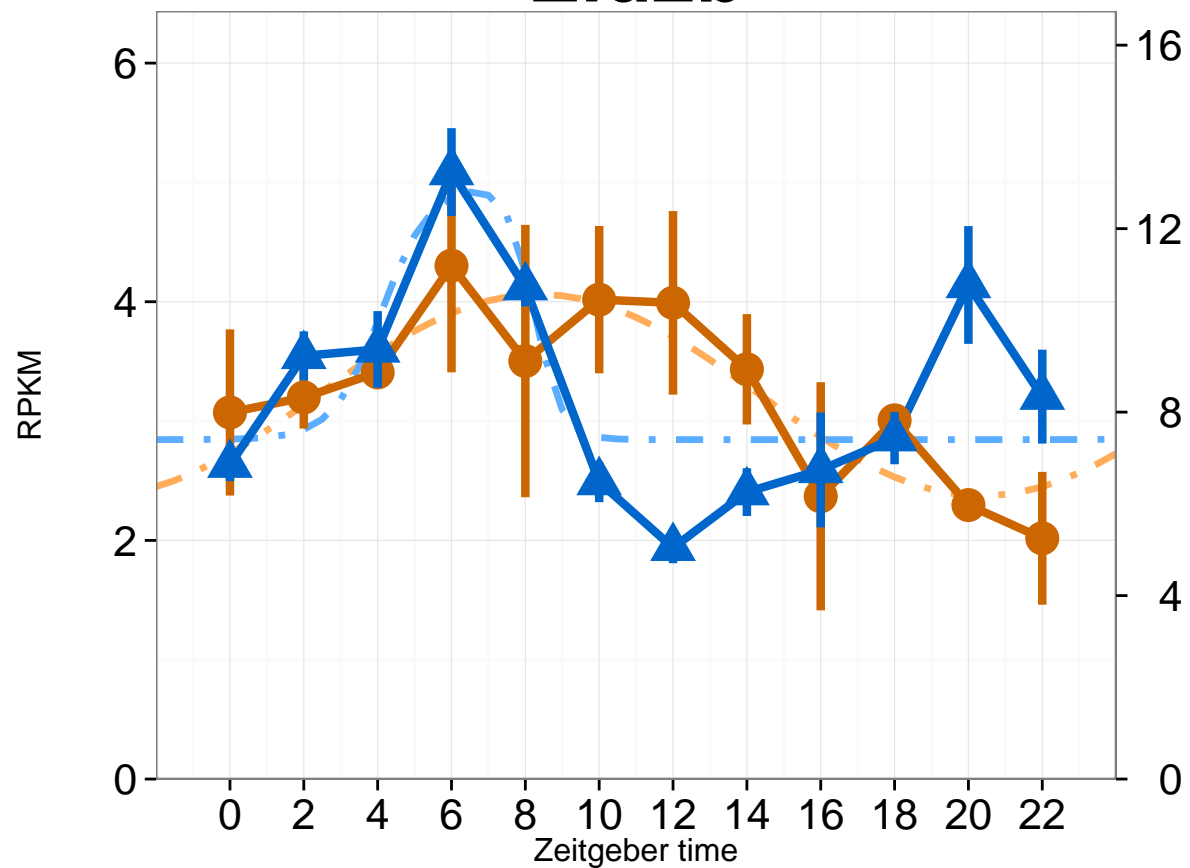

# Eid2b

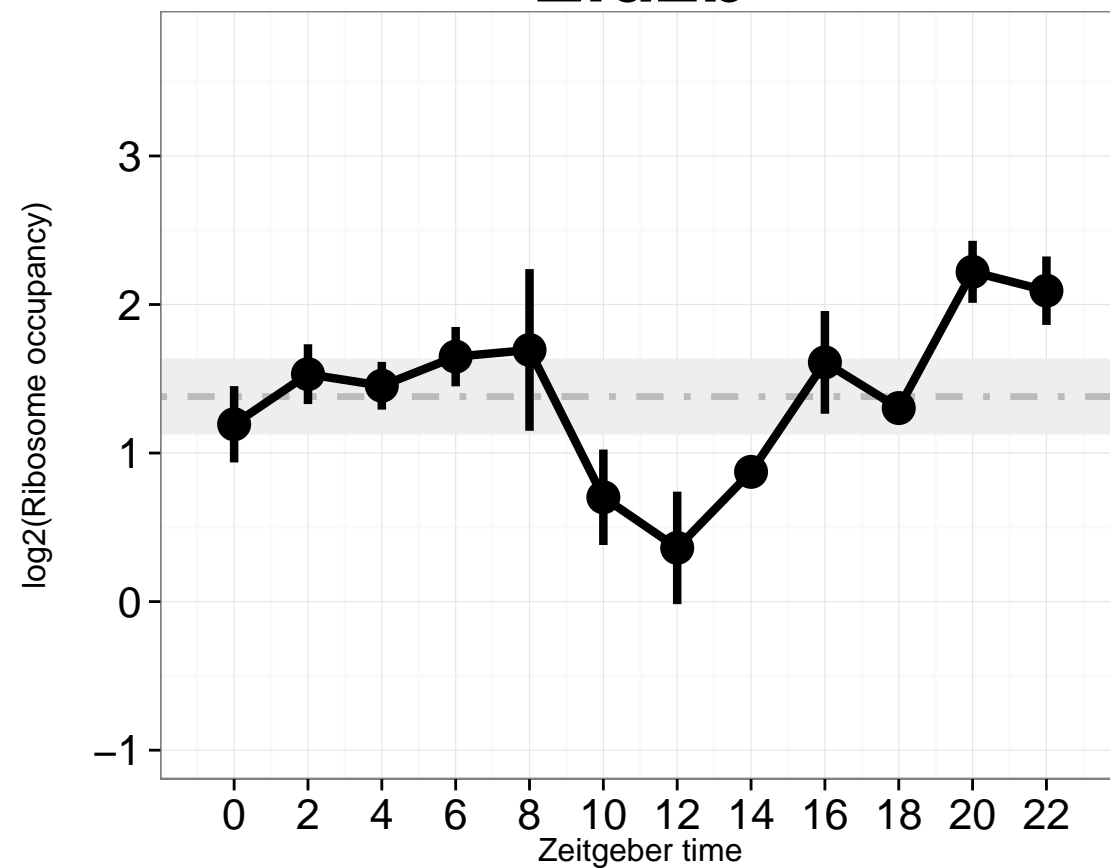

Supplement: Supplementary file 4172 [file 1]

# St8sia4

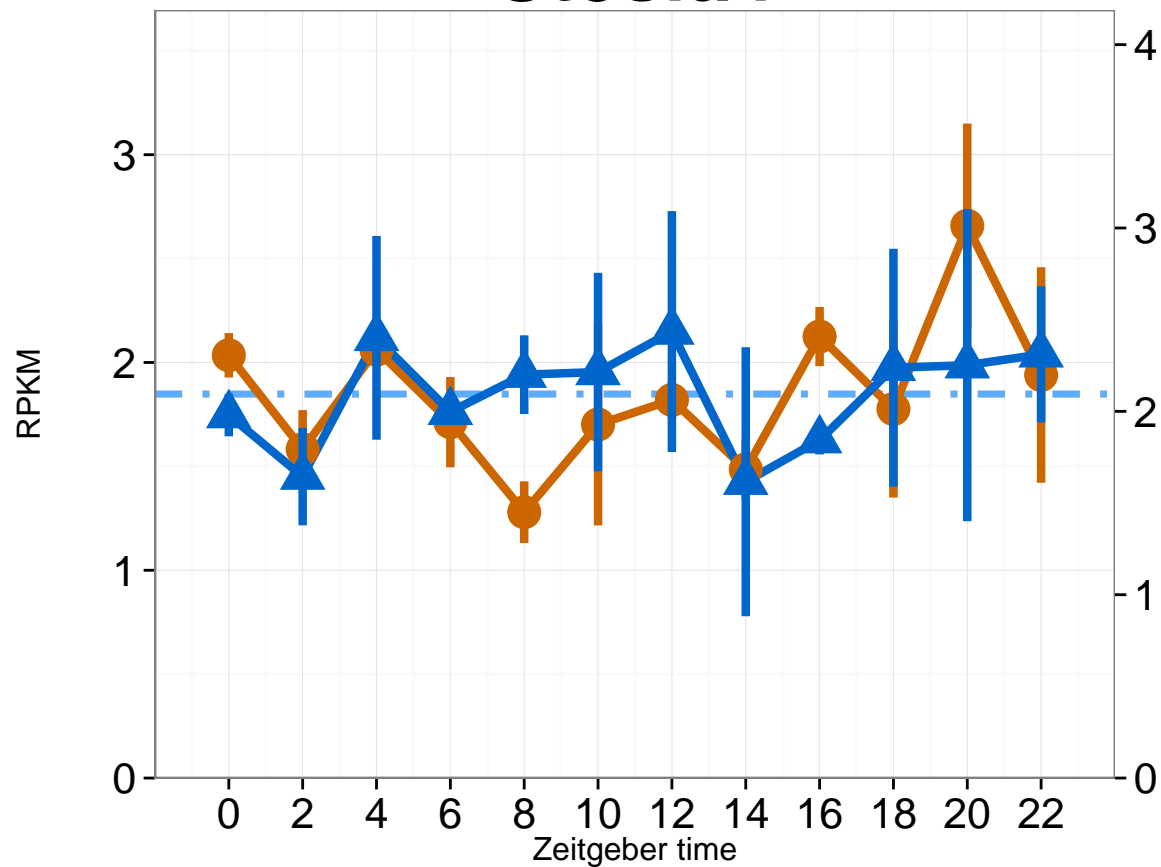

# St8sia4

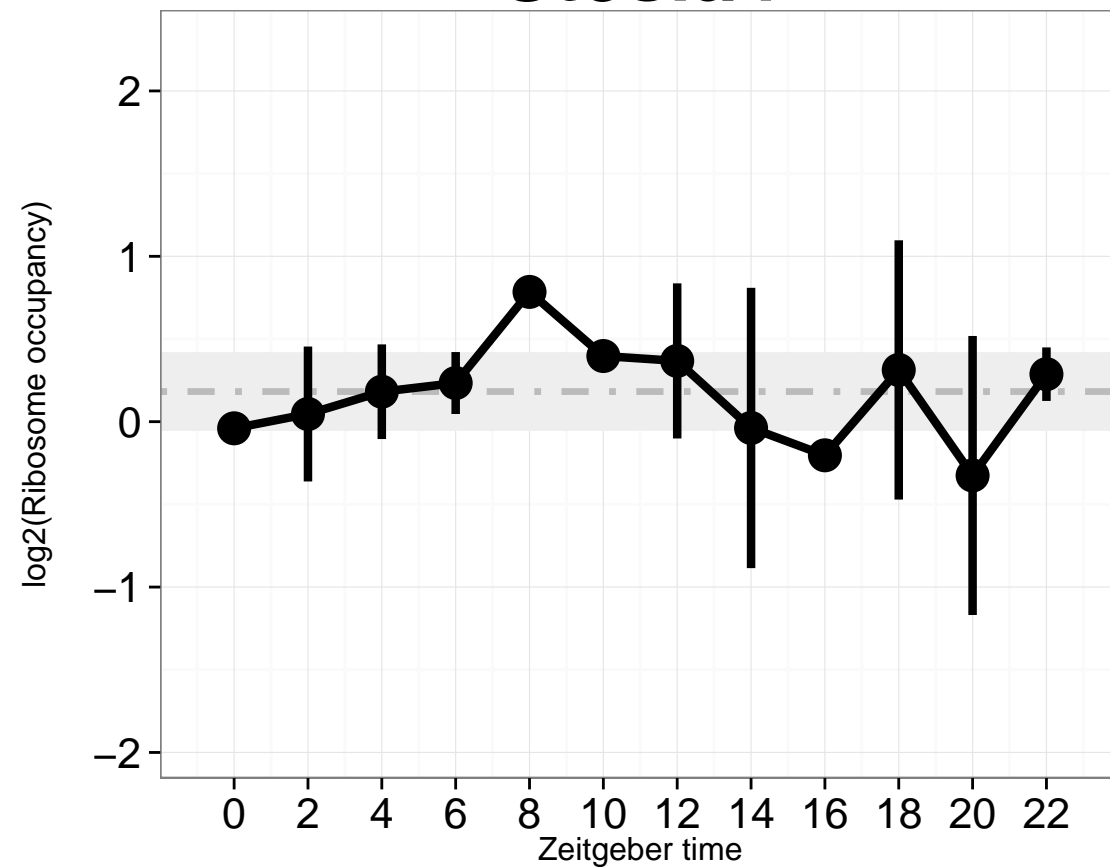

Supplement: Supplementary file 4173 [file 1]

# Fam25c

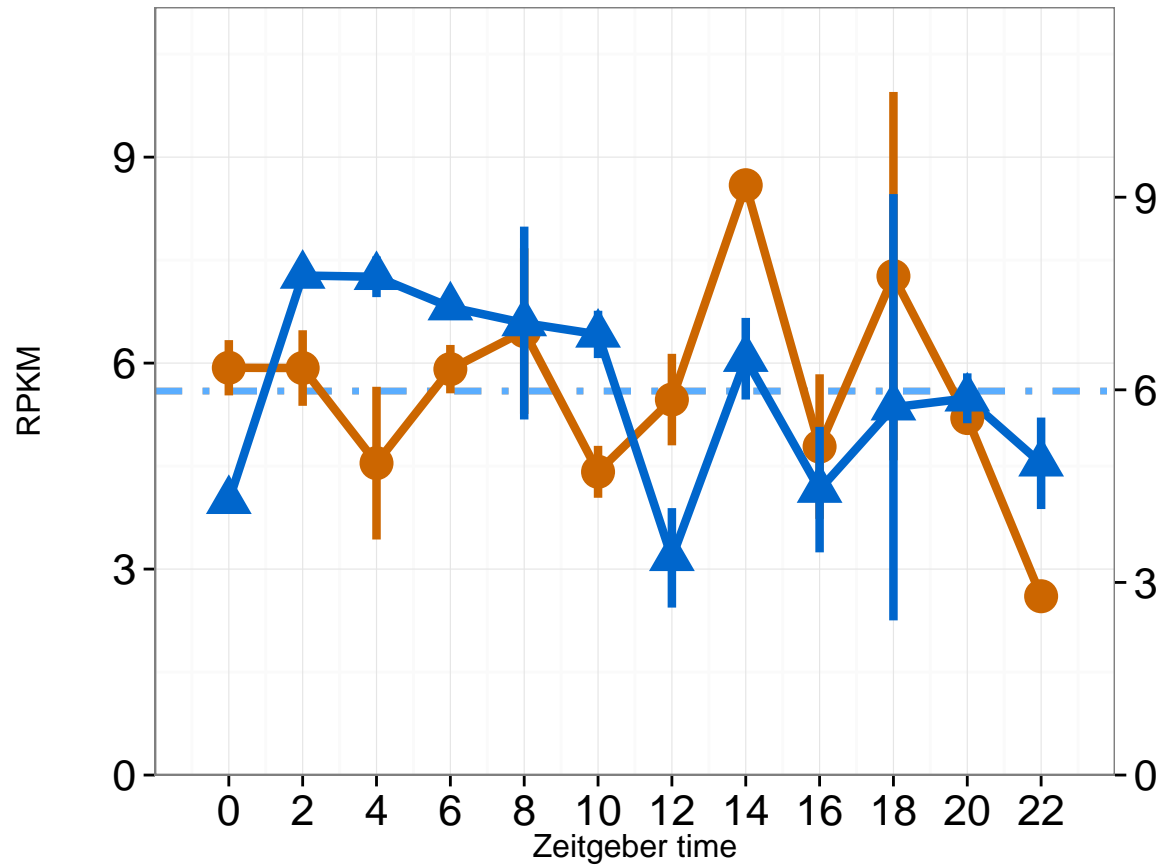

# Fam25c

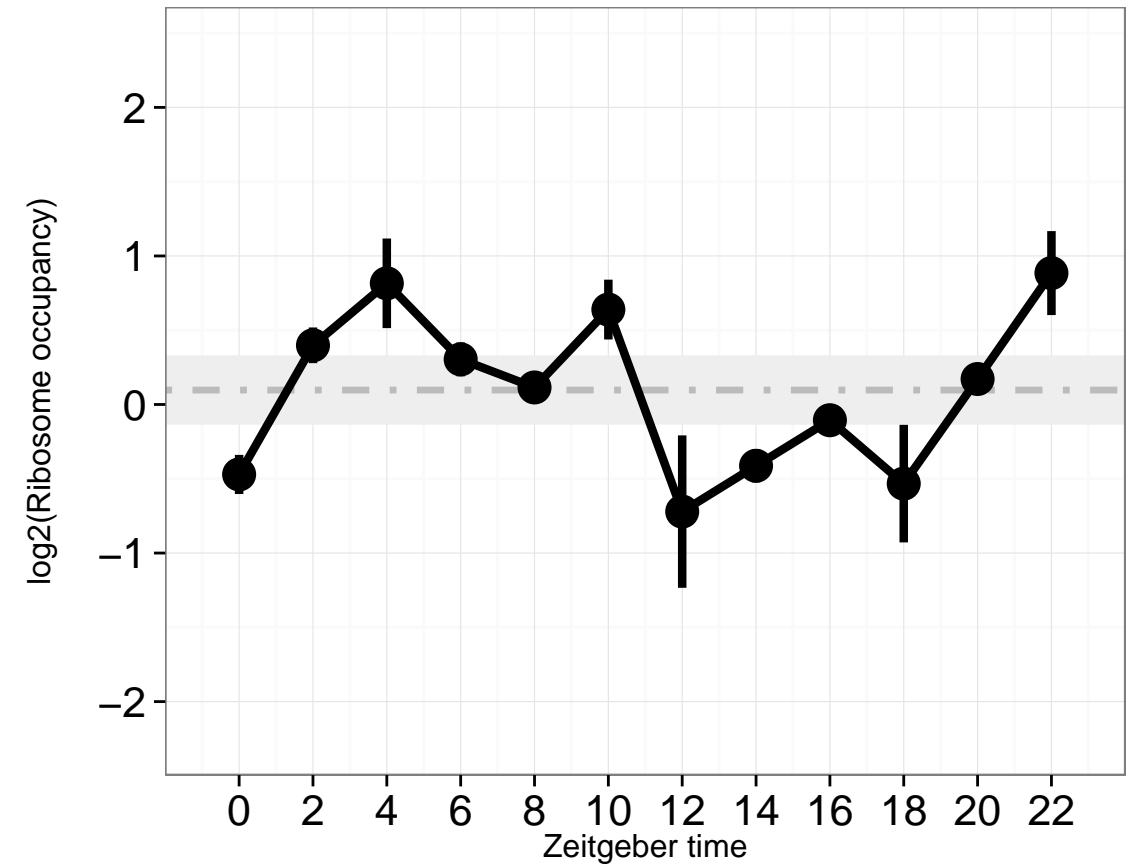

Supplement: Supplementary file 4174 [file 1]

# Tmem139

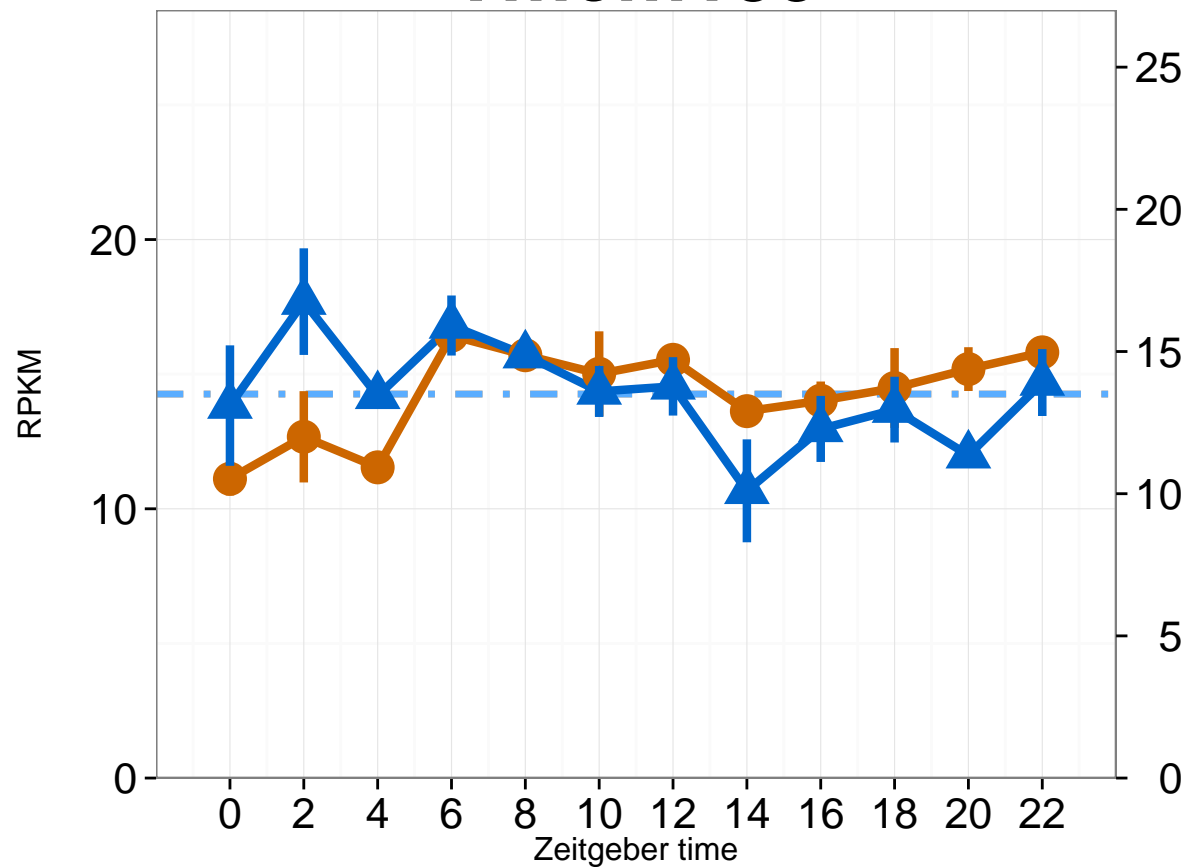

# Tmem139

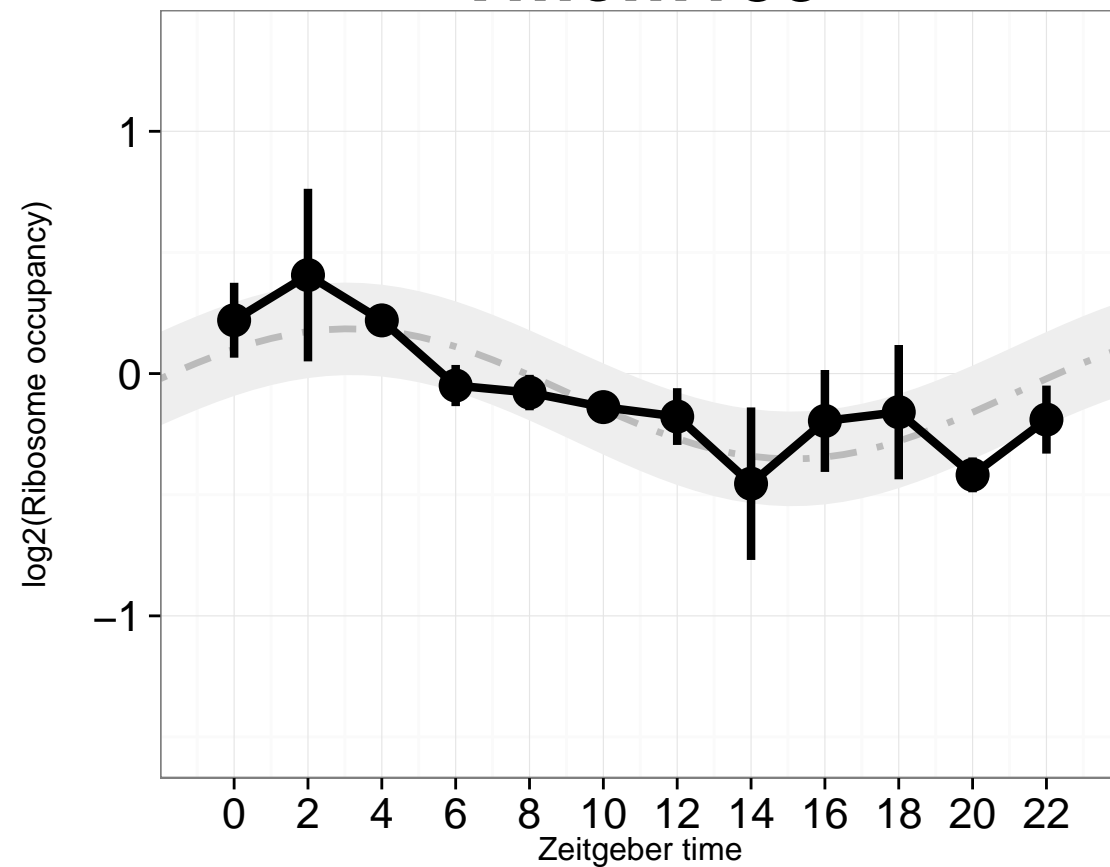

Supplement: Supplementary file 4175 [file 1]

# Apbb3

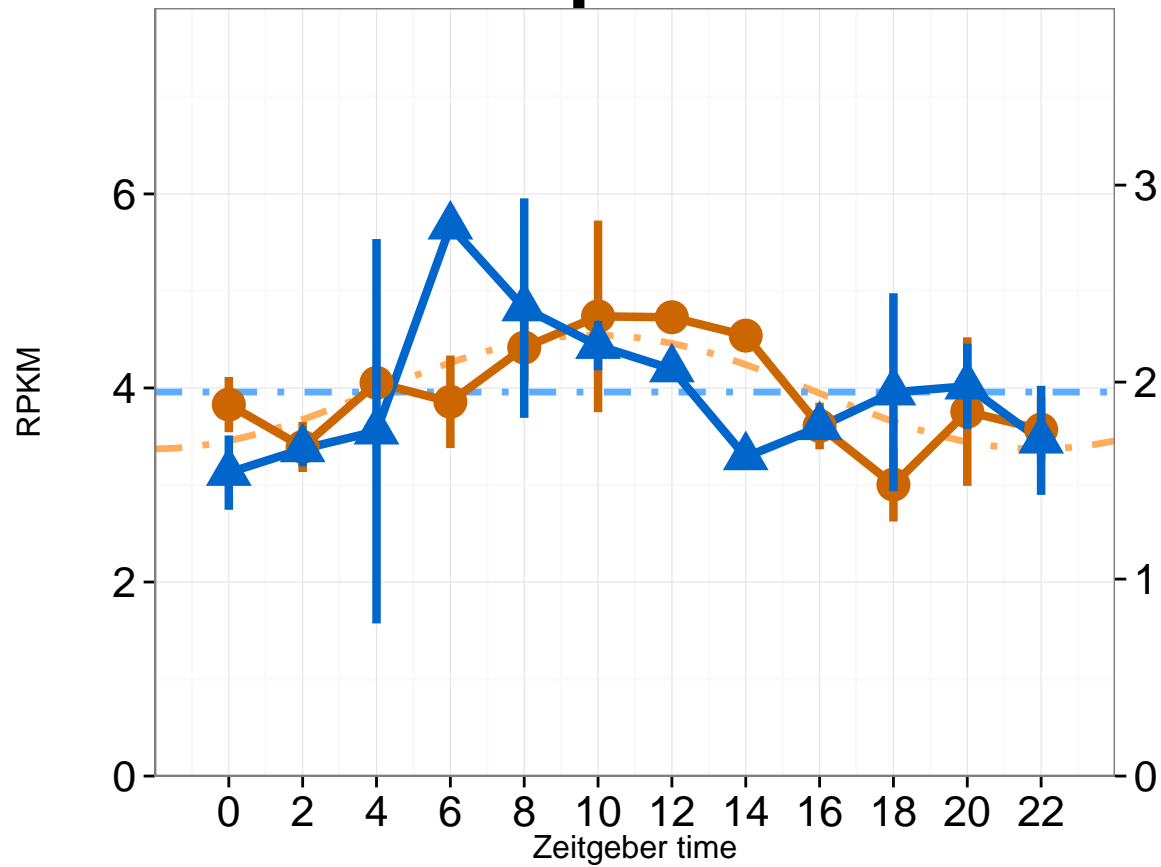

# Apbb3

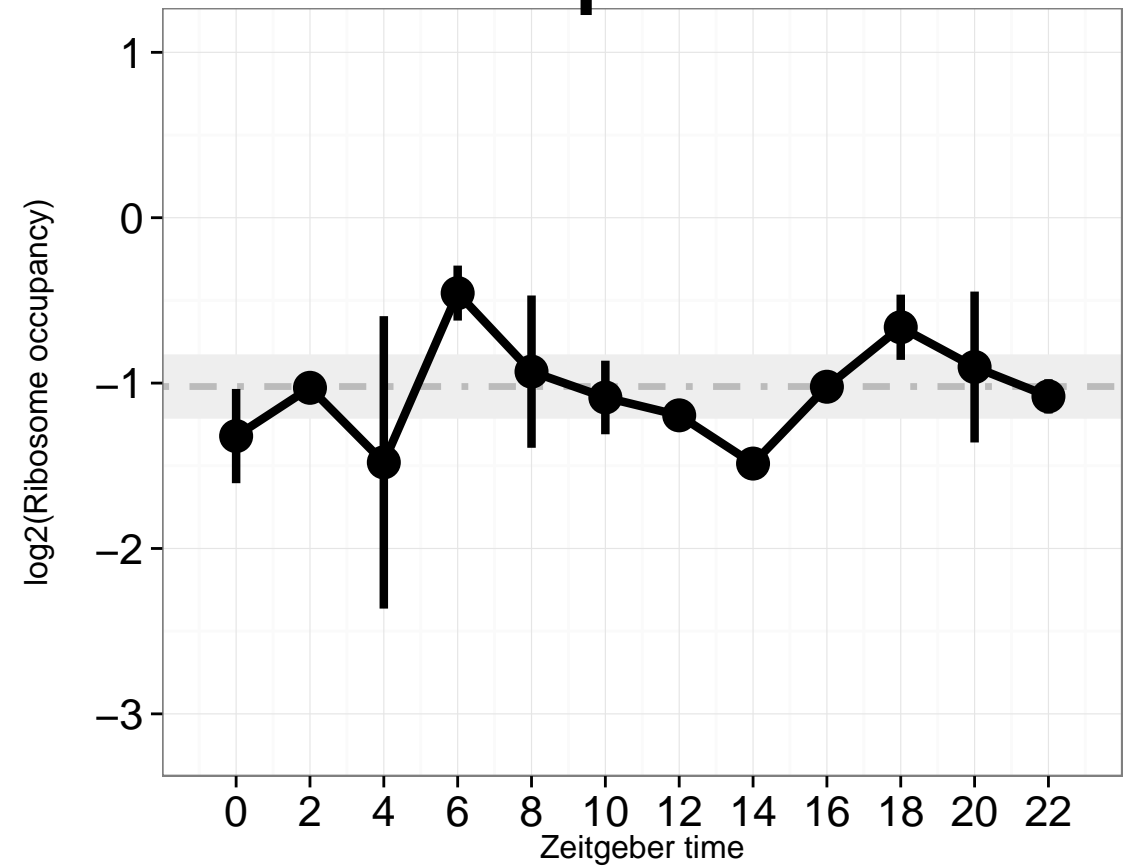

Supplement: Supplementary file 4176 [file 1]

## Nfkbiz

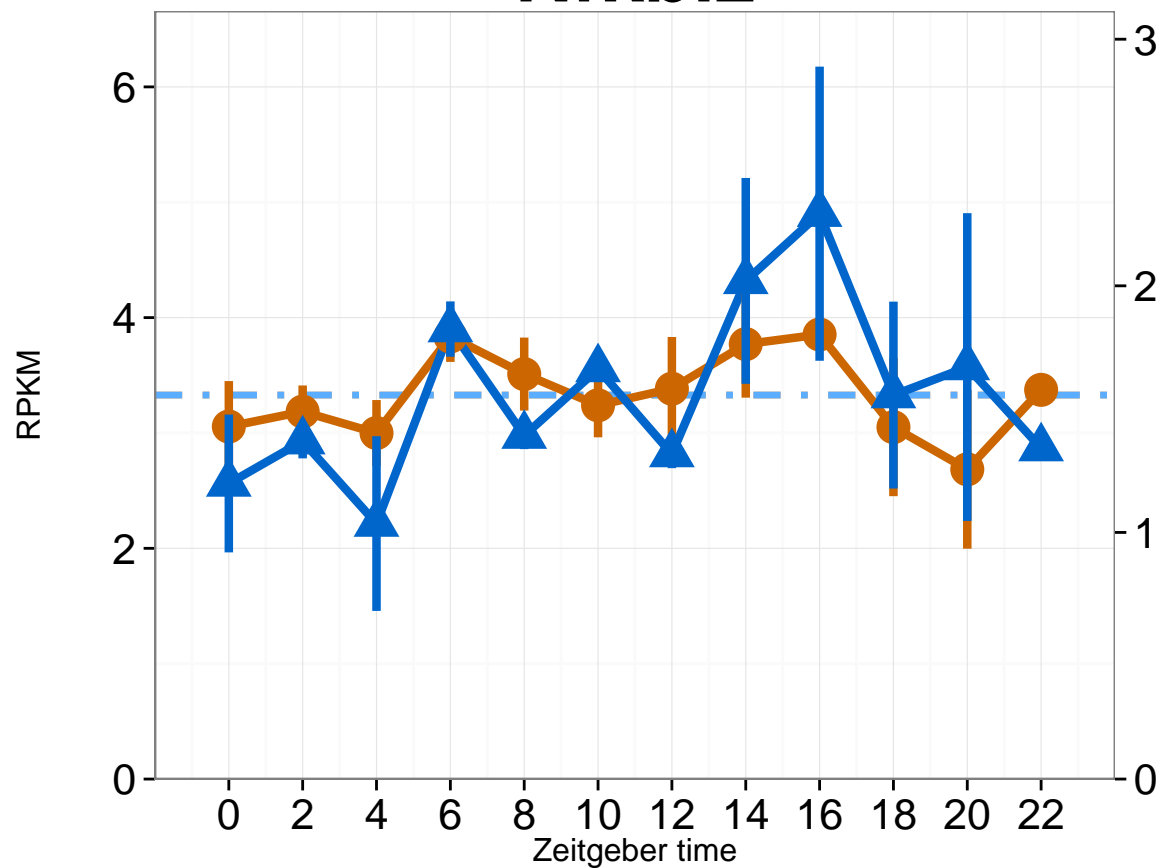

## Nfkbiz

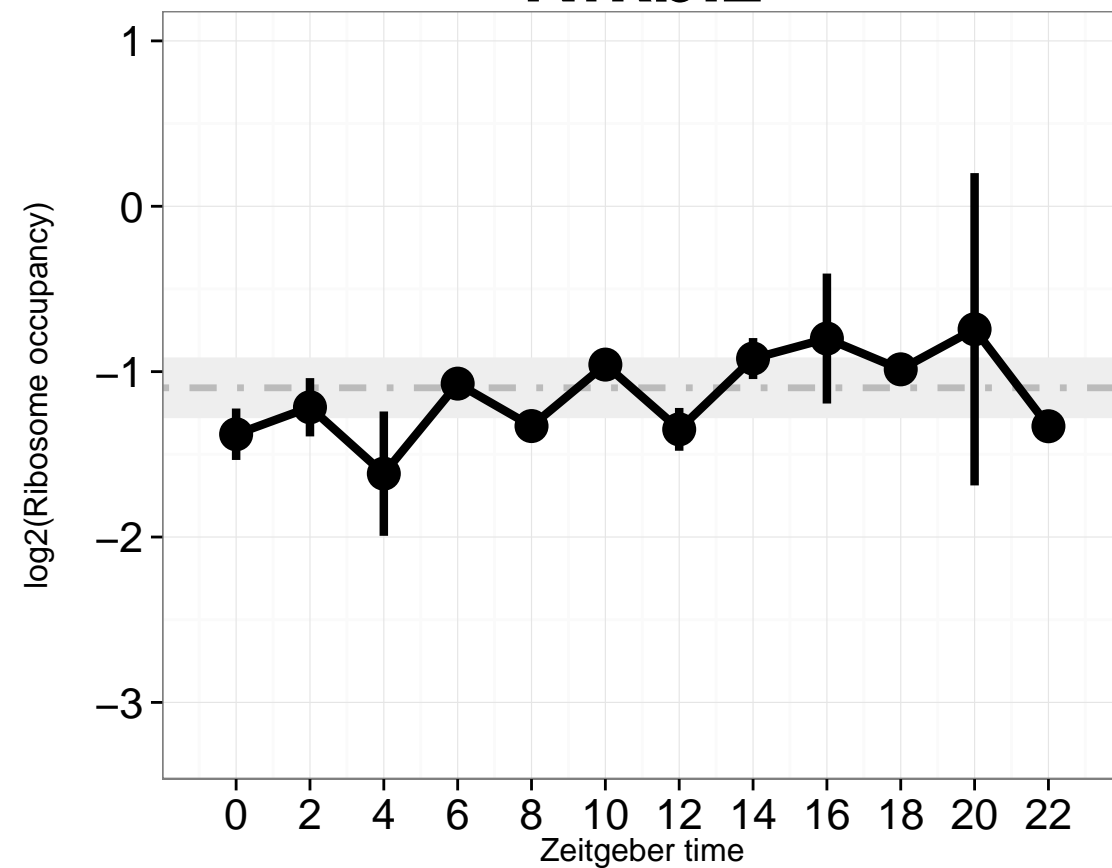

Supplement: Supplementary file 4177 [file 1]

## Arhgef5

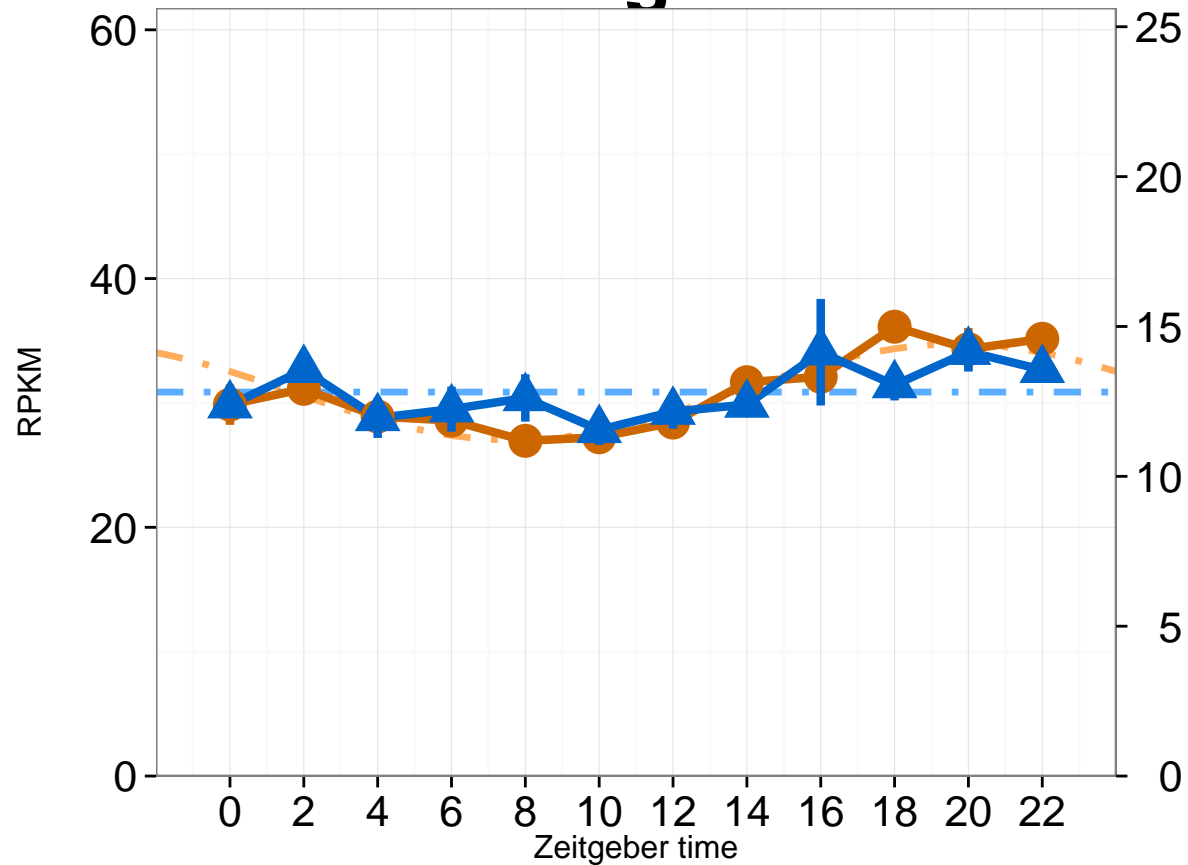

## Arhgef5

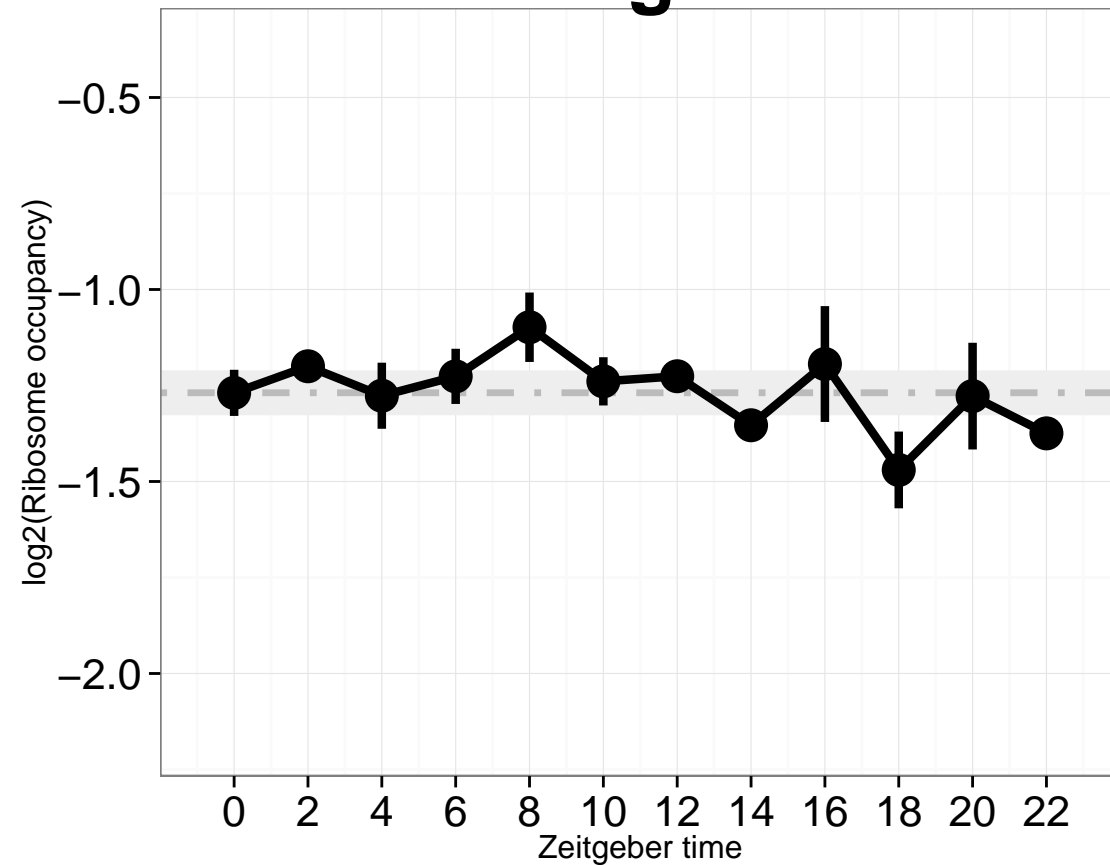

Supplement: Supplementary file 4178 [file 1]

# Mea1

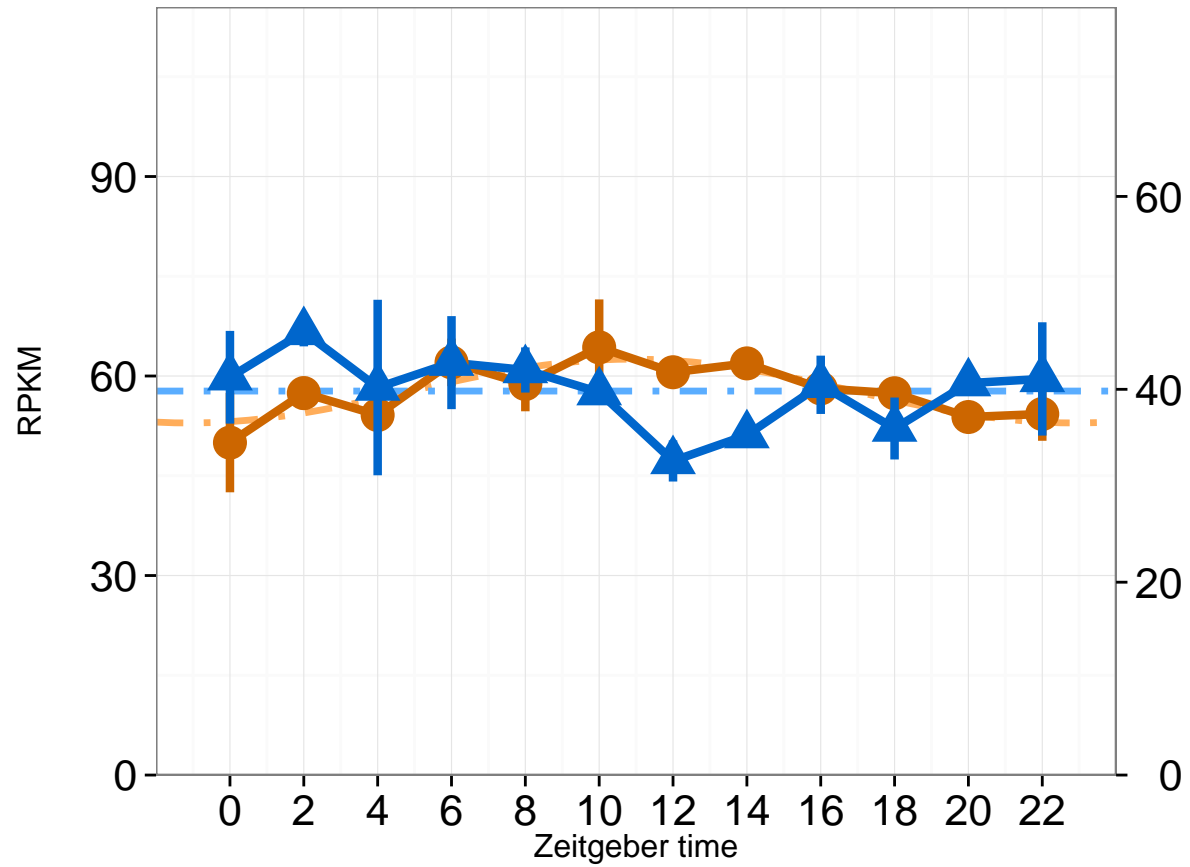

# Mea1

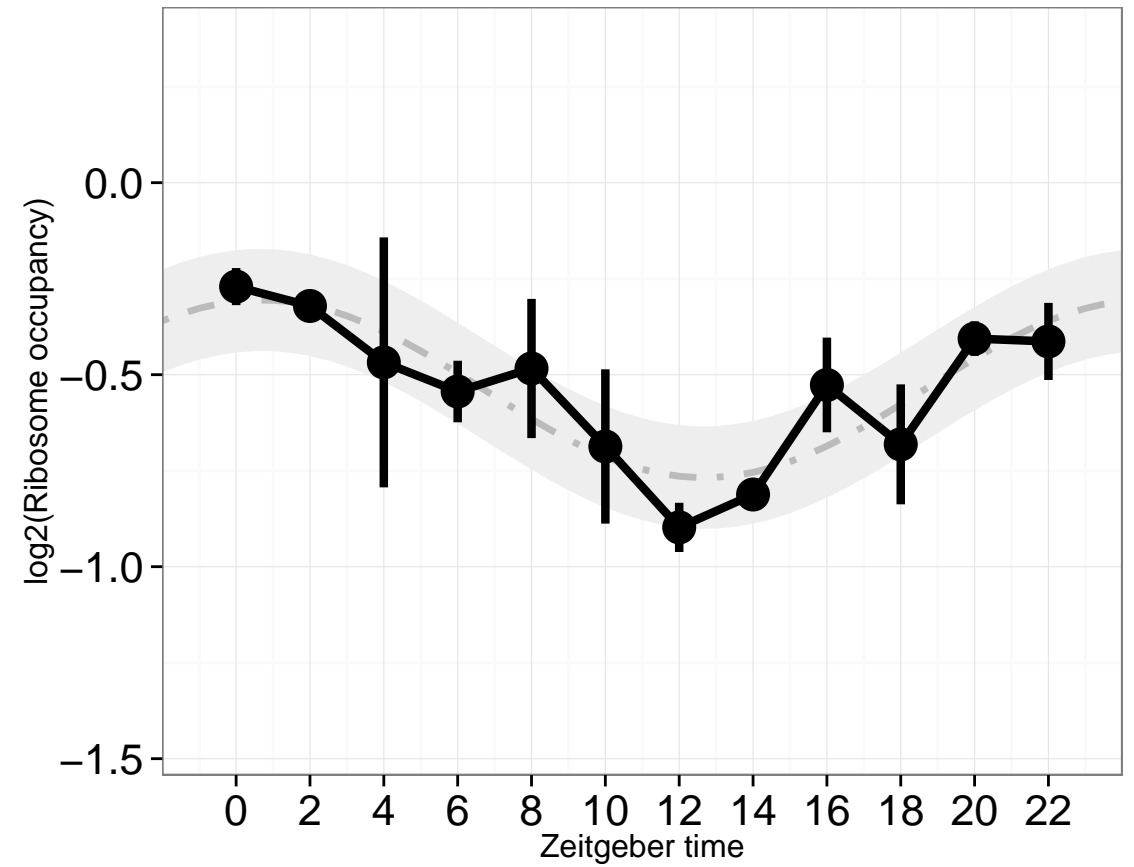

Supplement: Supplementary file 4179 [file 1]

# Dtx4

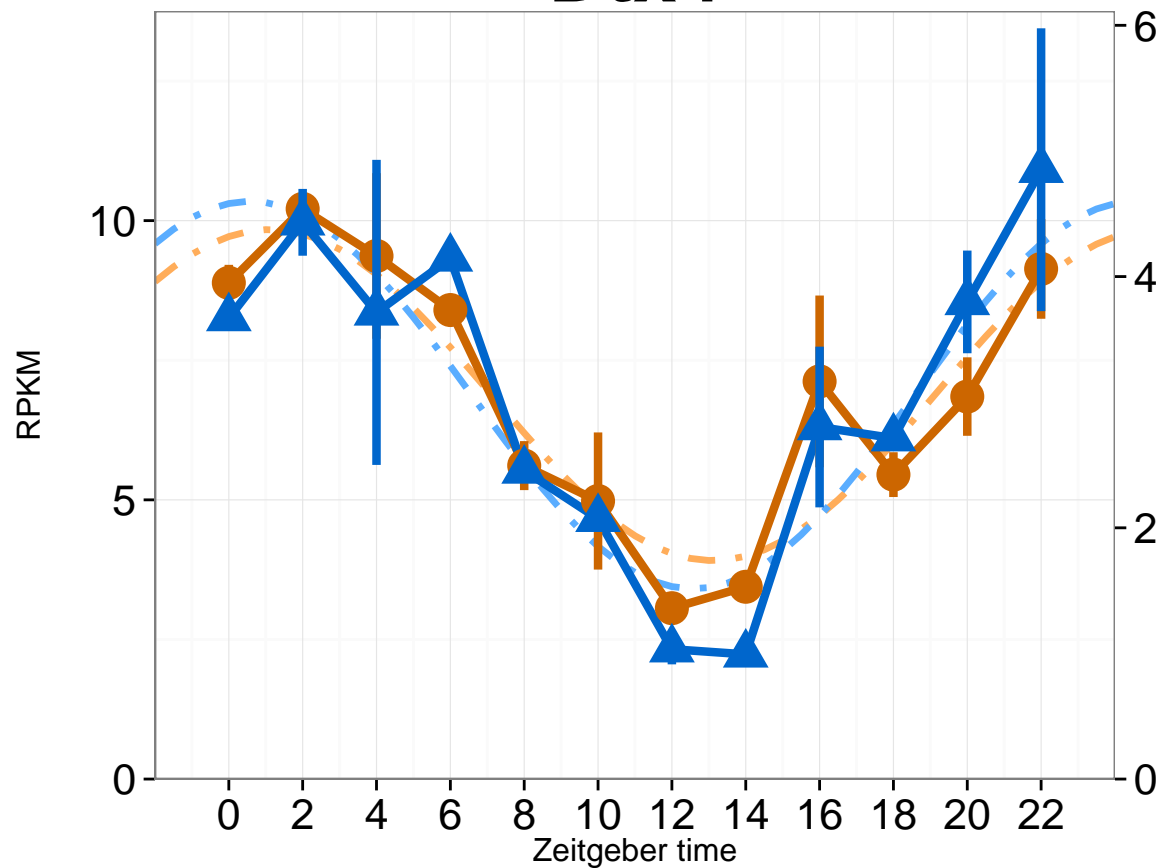

# Dtx4

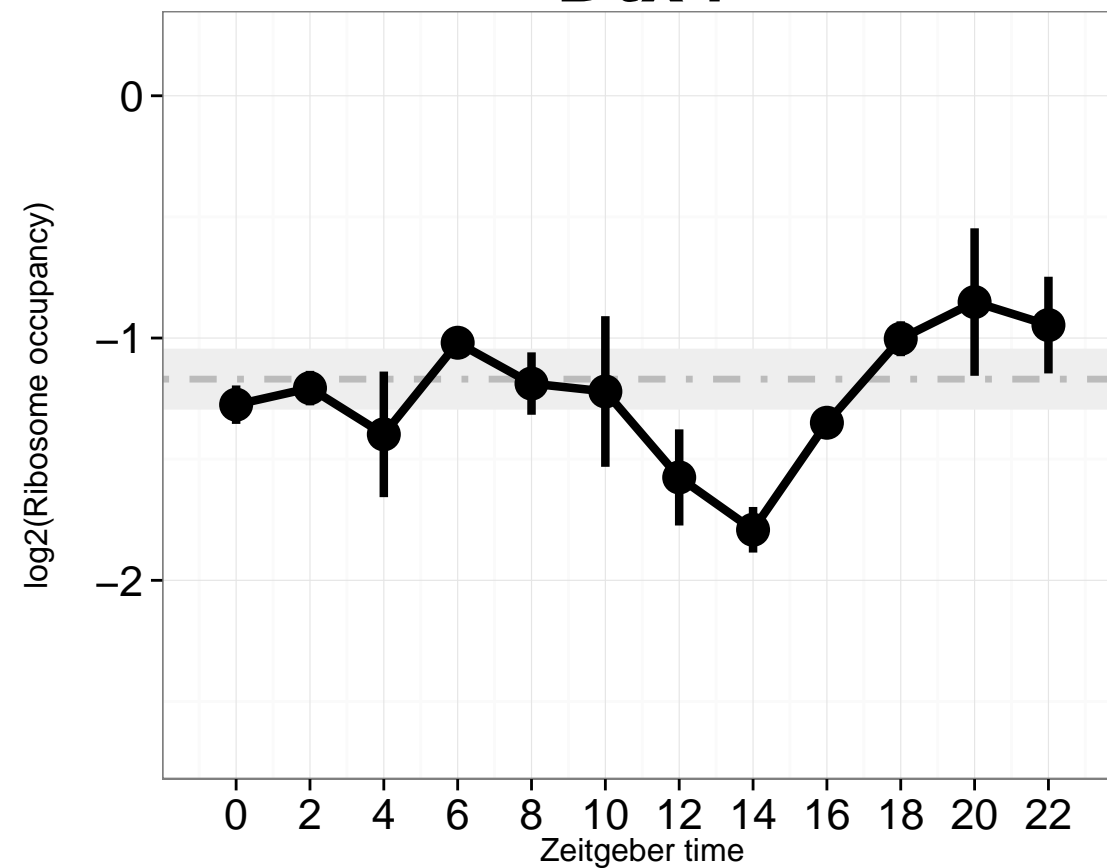

Supplement: Supplementary file 4180 [file 1]

## Ttc32

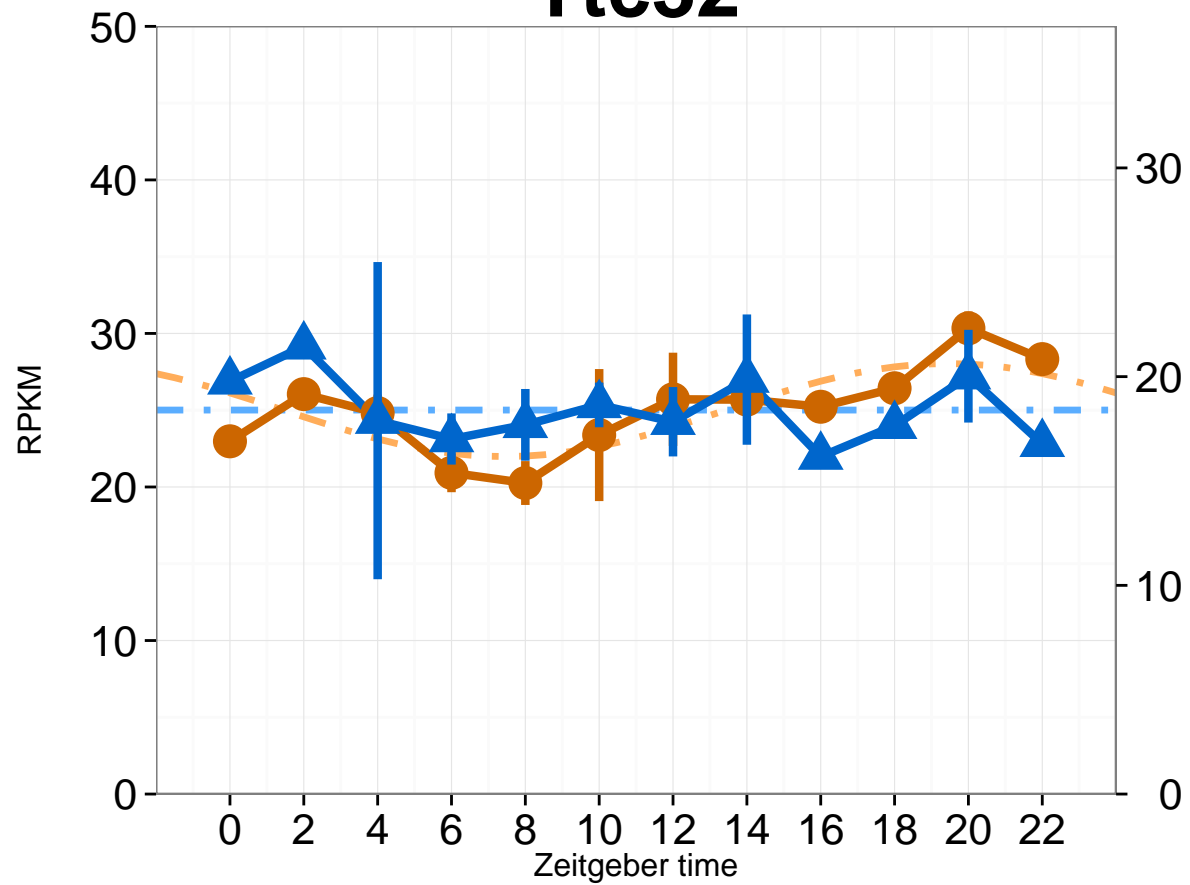

## Ttc32

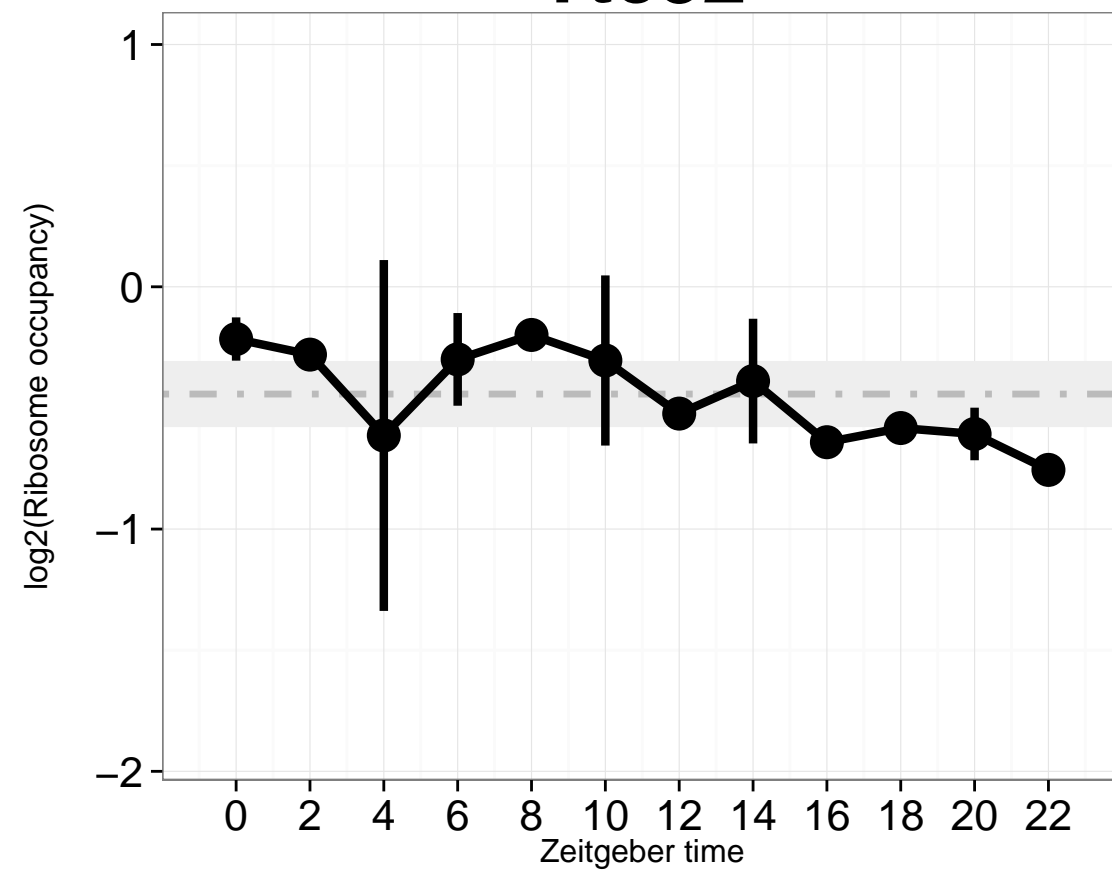

Supplement: Supplementary file 4181 [file 1]

## Shoc2

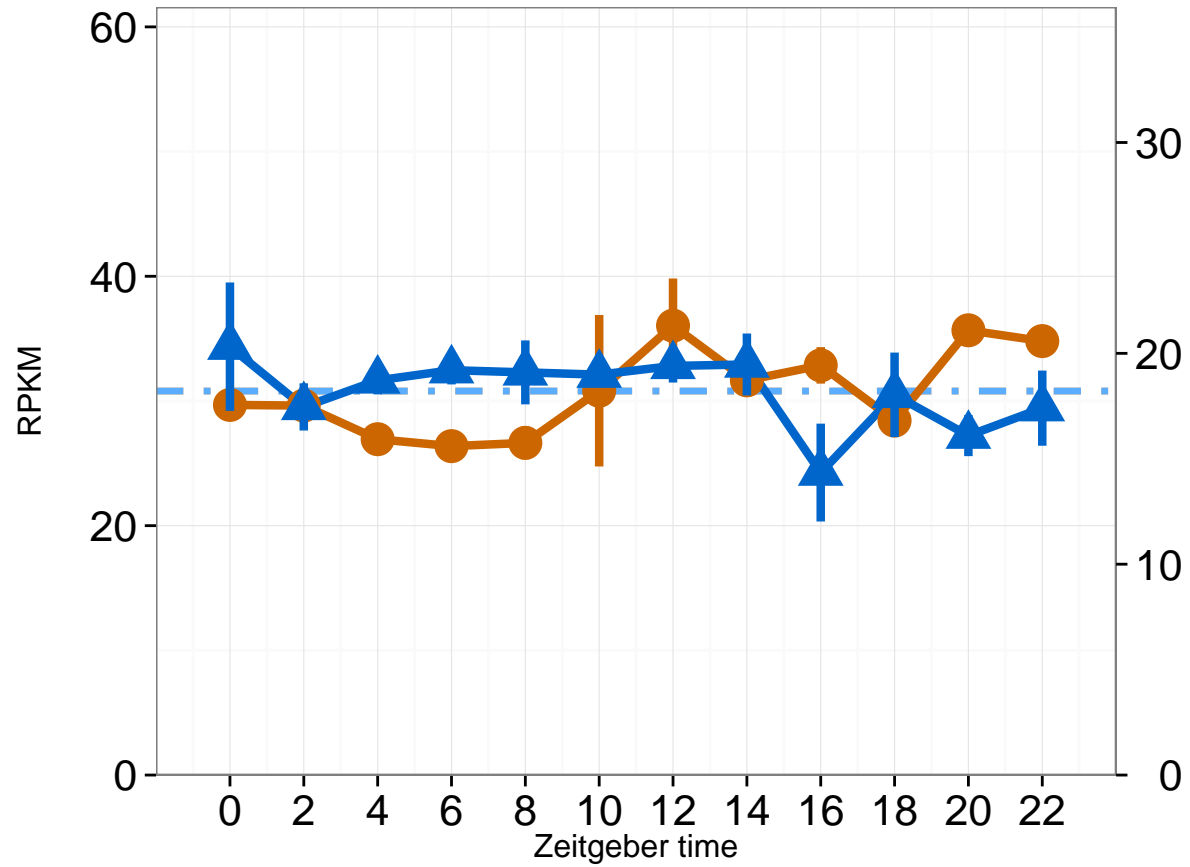

## Shoc2

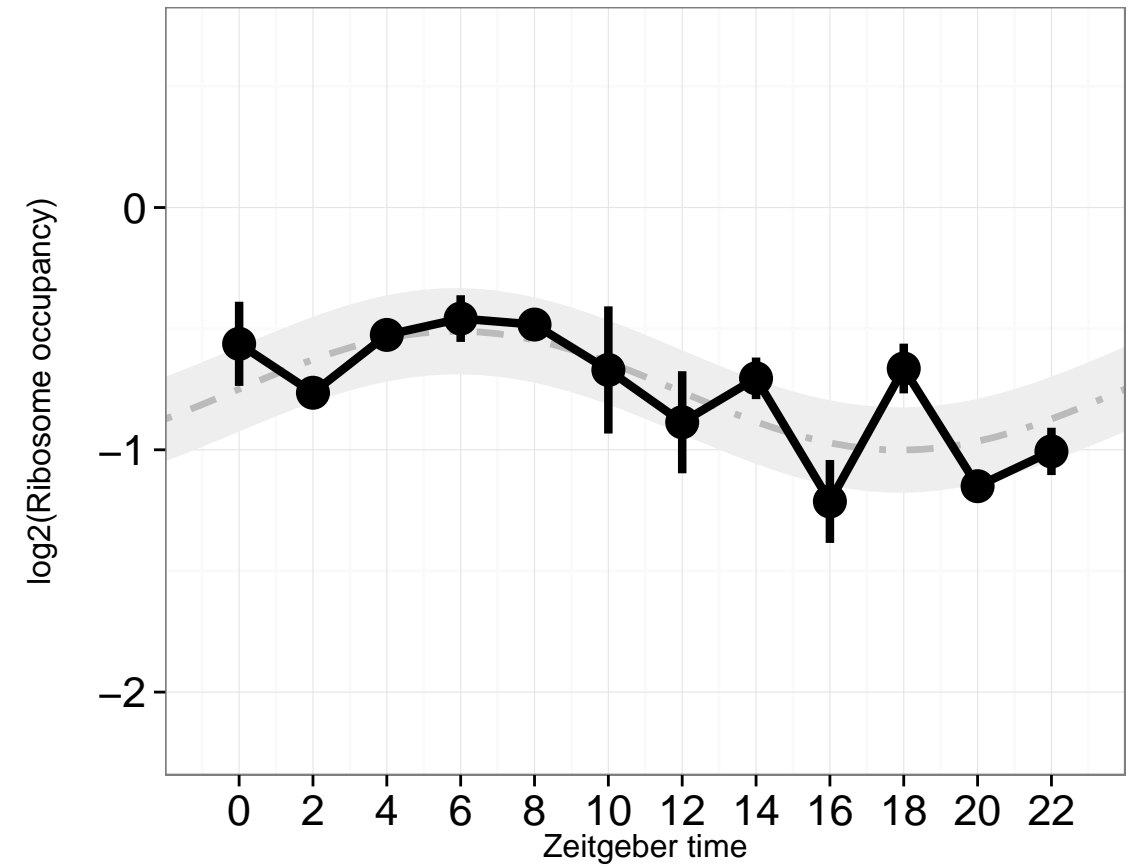

Supplement: Supplementary file 4182 [file 1]

# Aqp2

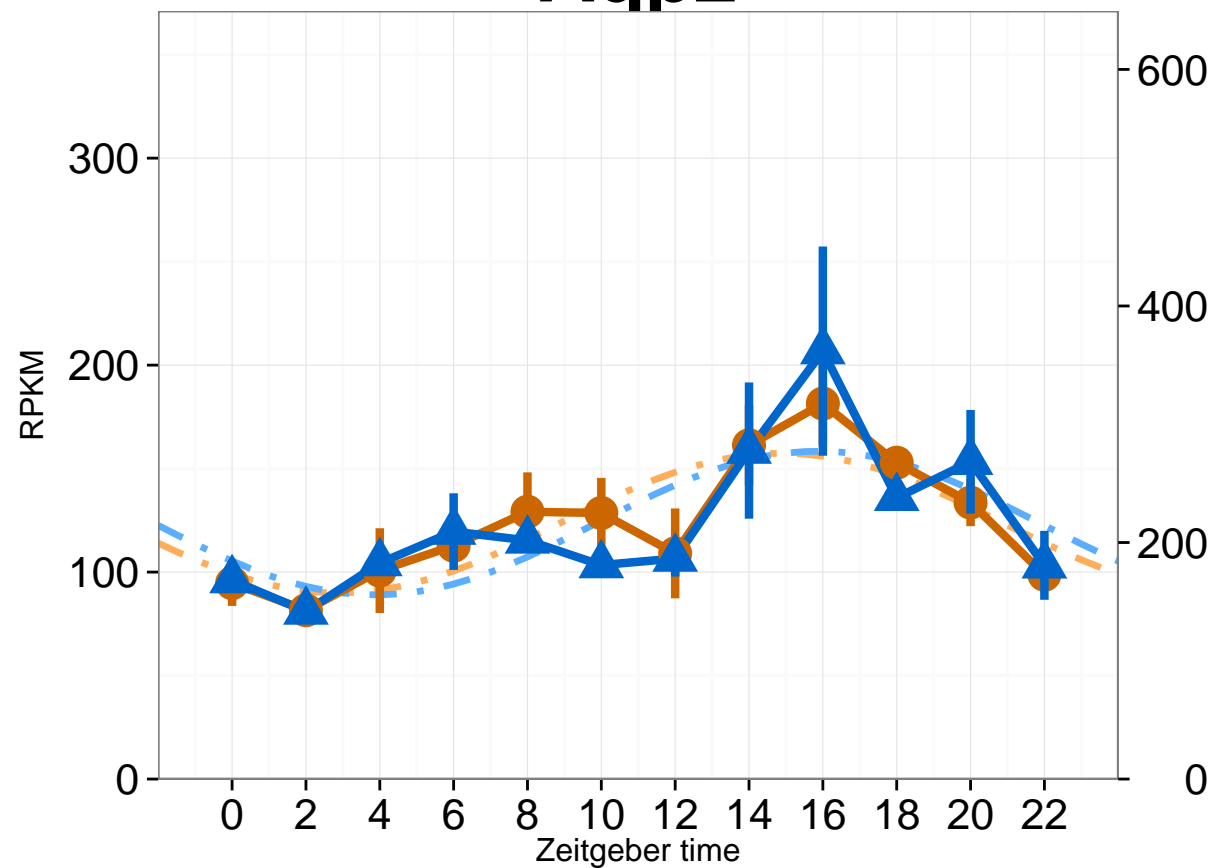

# Aqp2

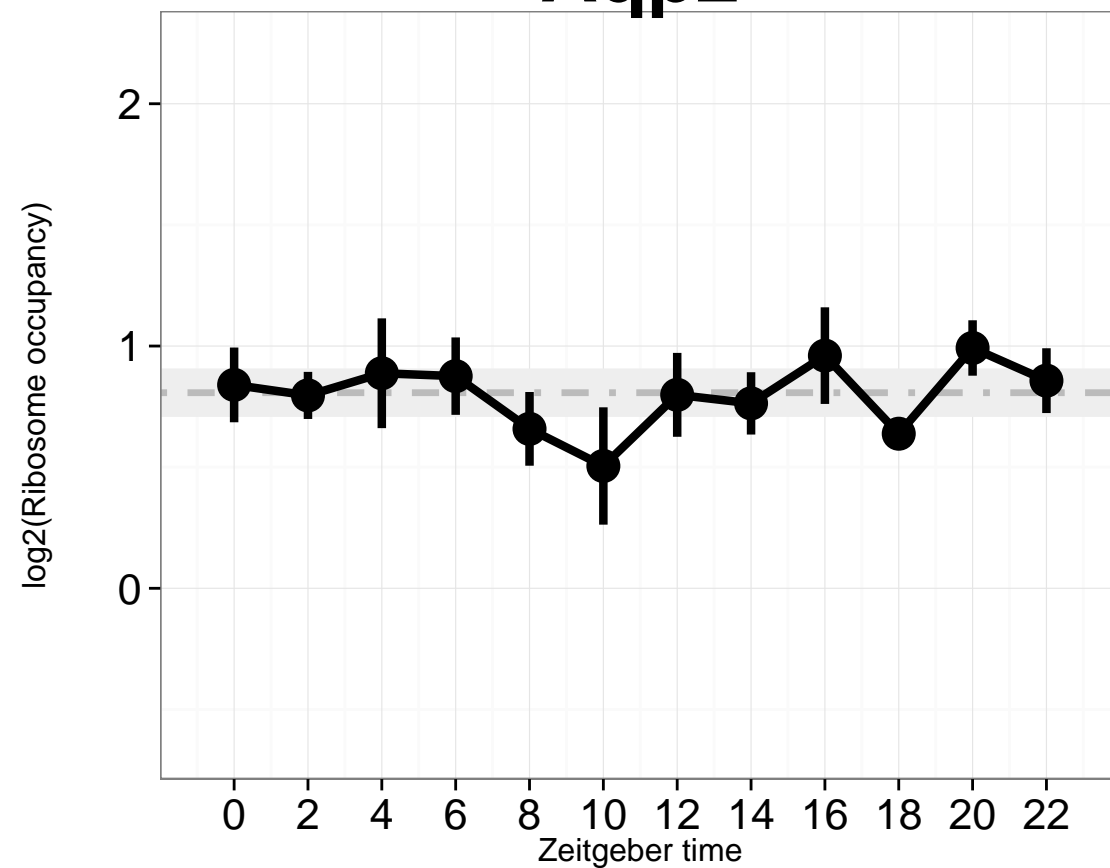

Supplement: Supplementary file 4183 [file 1]

# Fn1

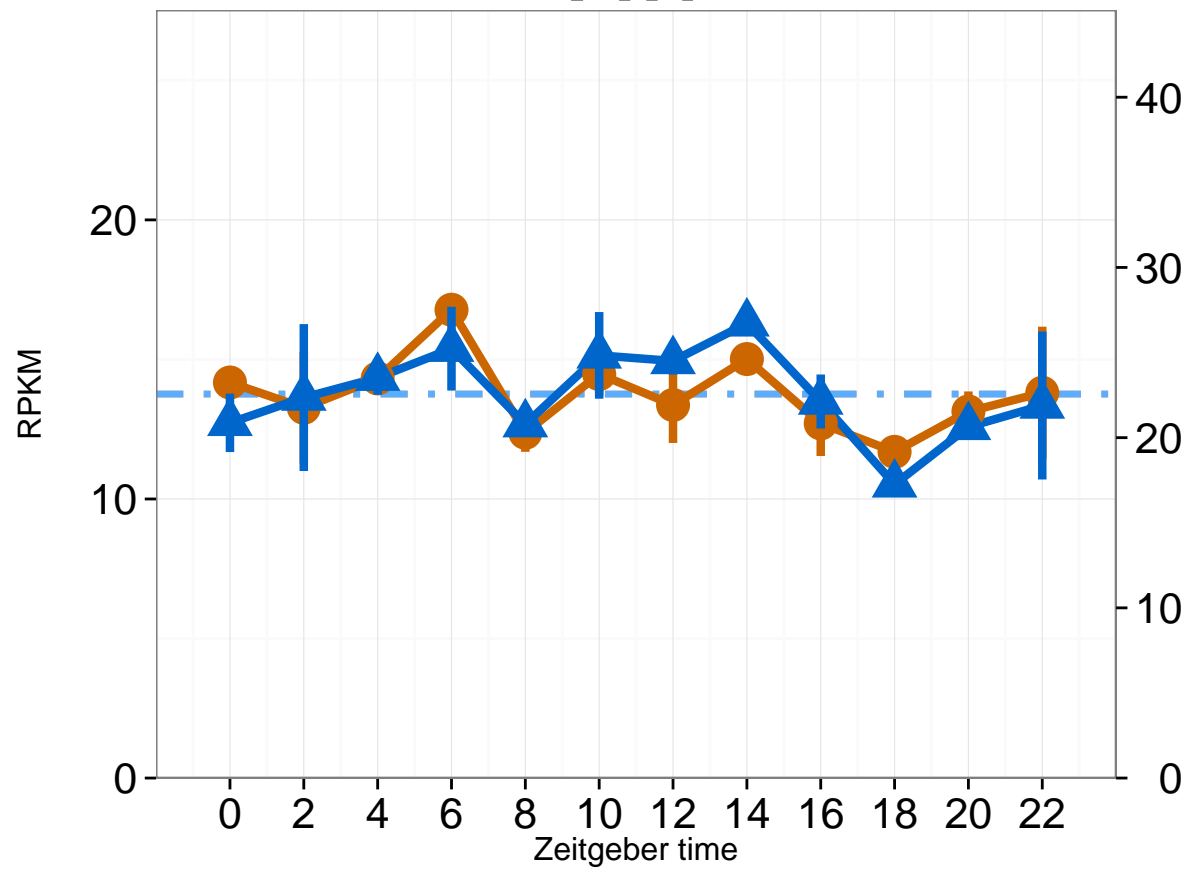

# Fn1

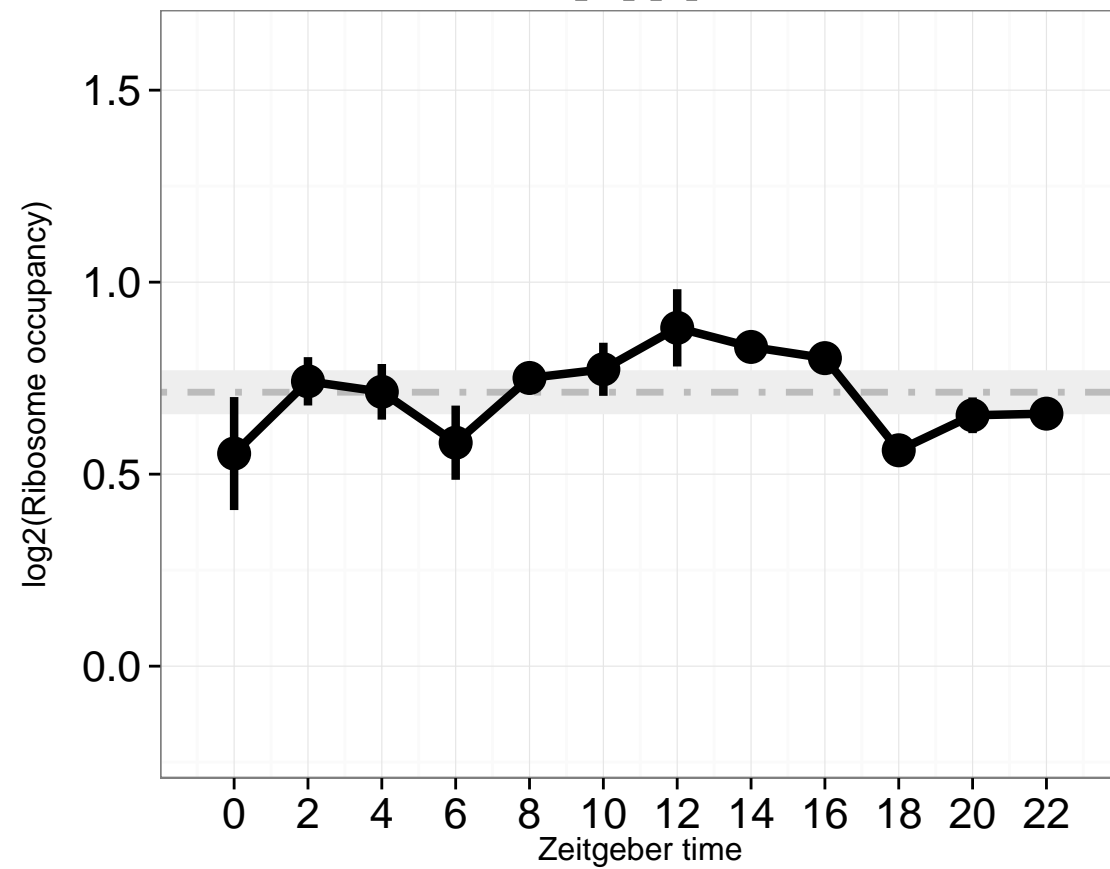

Supplement: Supplementary file 4184 [file 1]

# Slc1a2

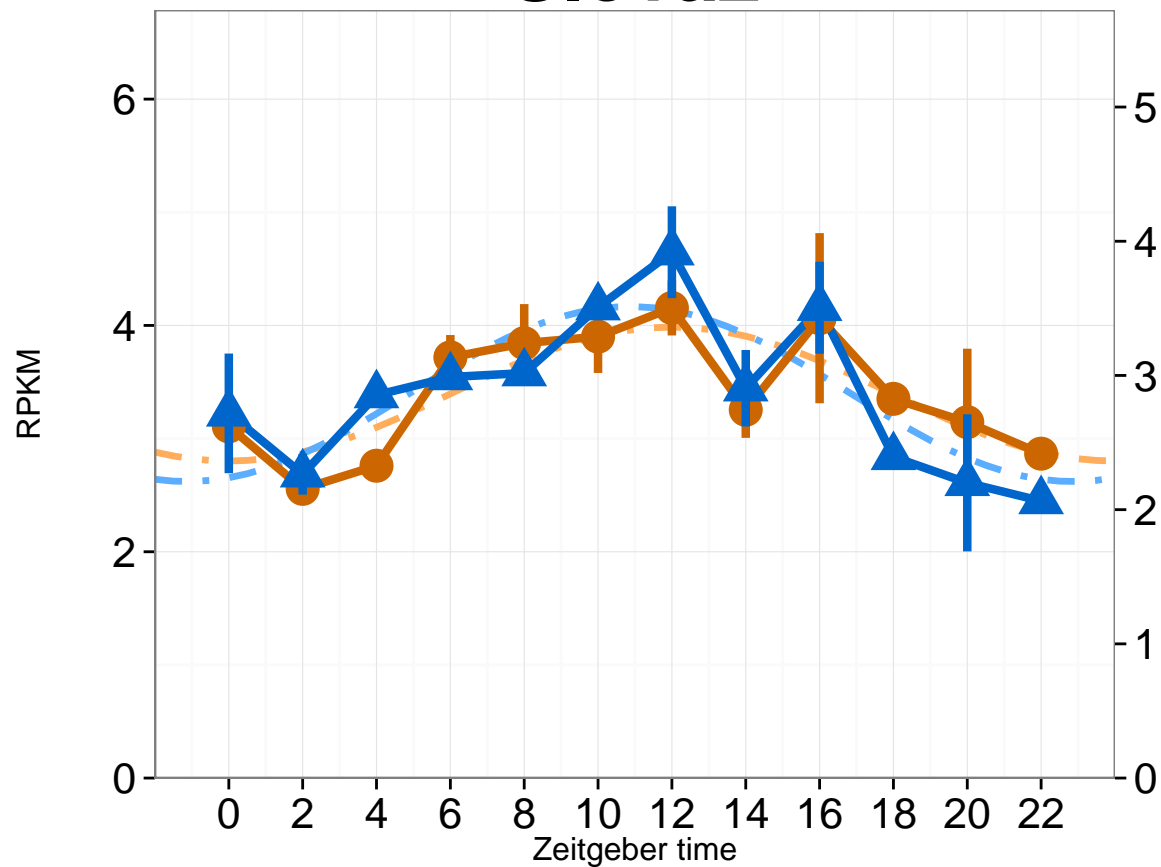

# Slc1a2

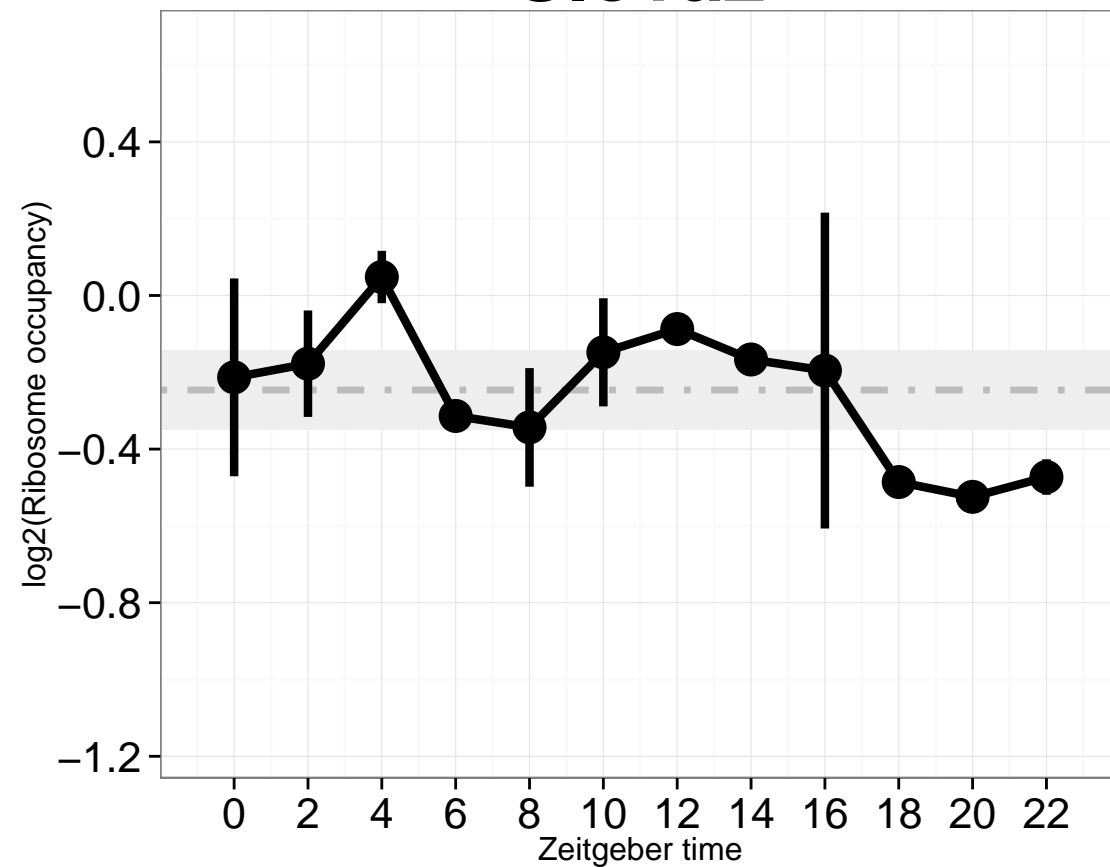

Supplement: Supplementary file 4185 [file 1]

# Pcsk6

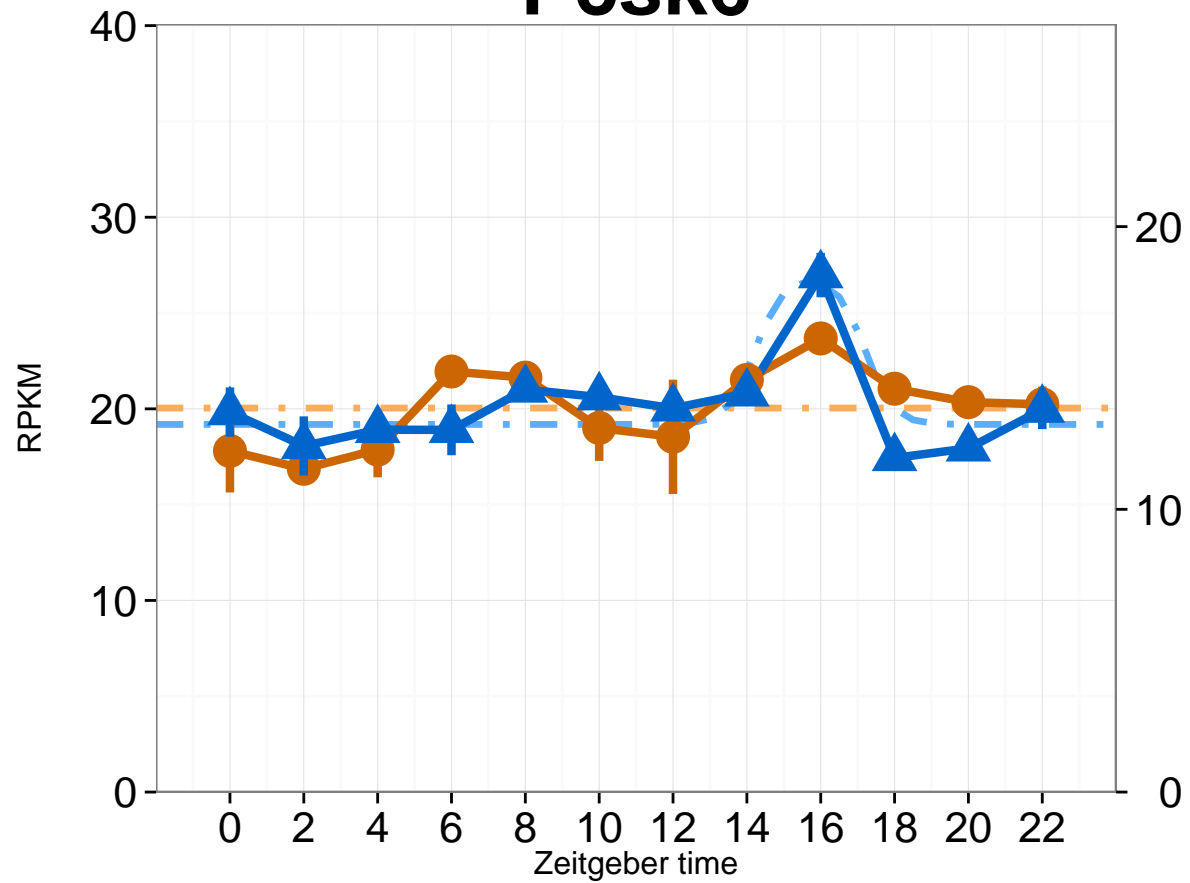

# Pcsk6

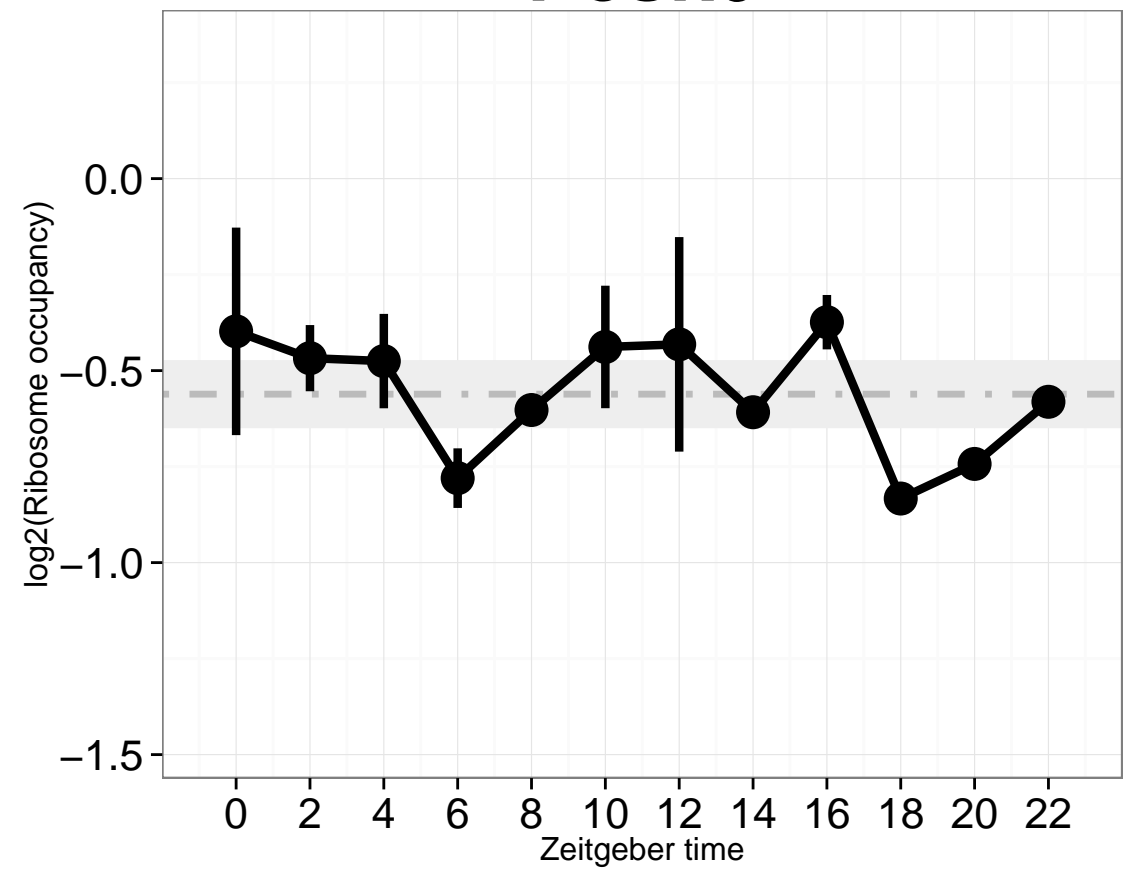

Supplement: Supplementary file 4186 [file 1]

# Task1

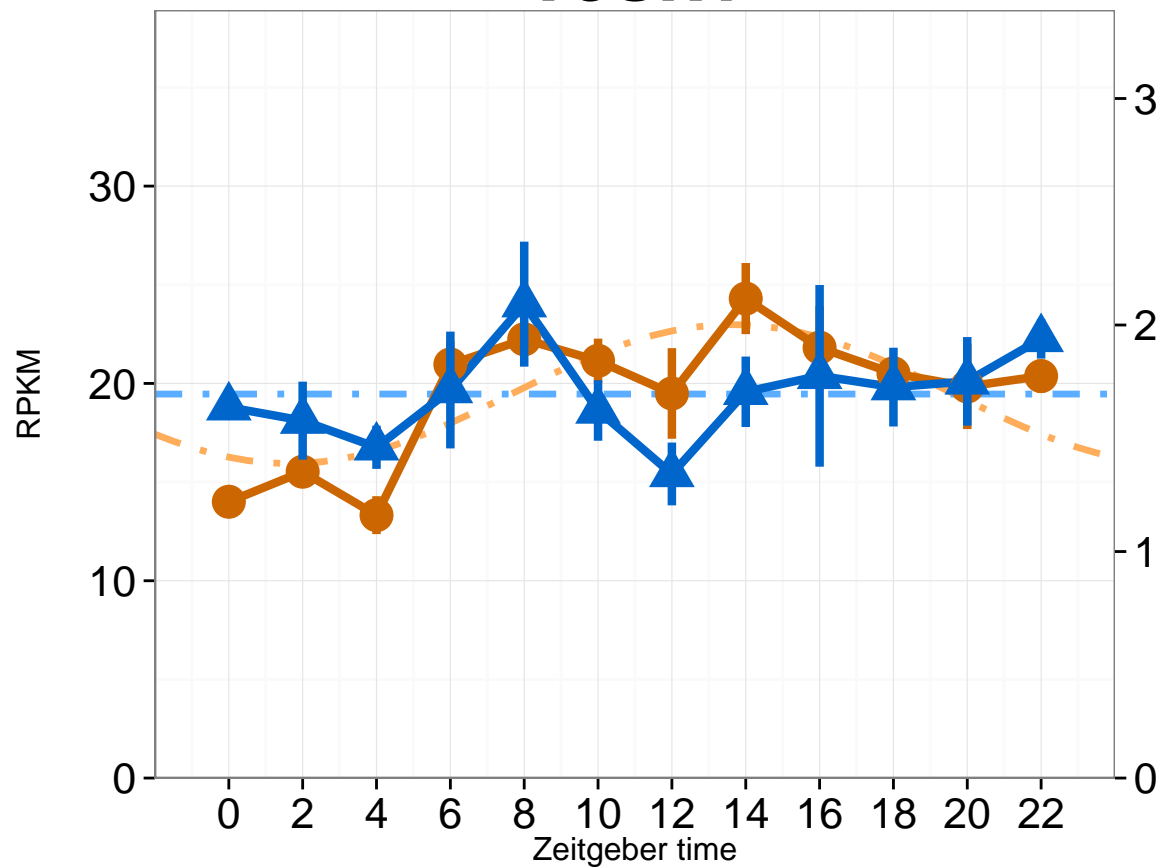

# Task1

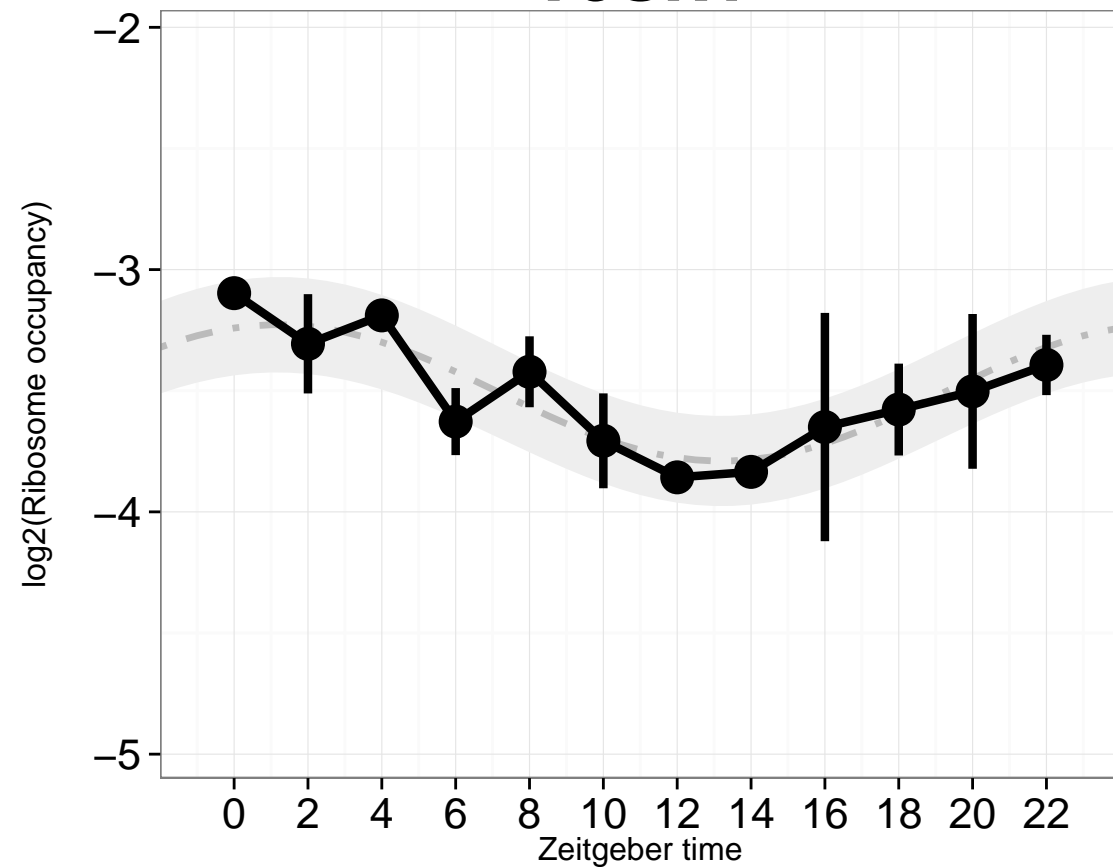

Supplement: Supplementary file 4187 [file 1]

## Arl10

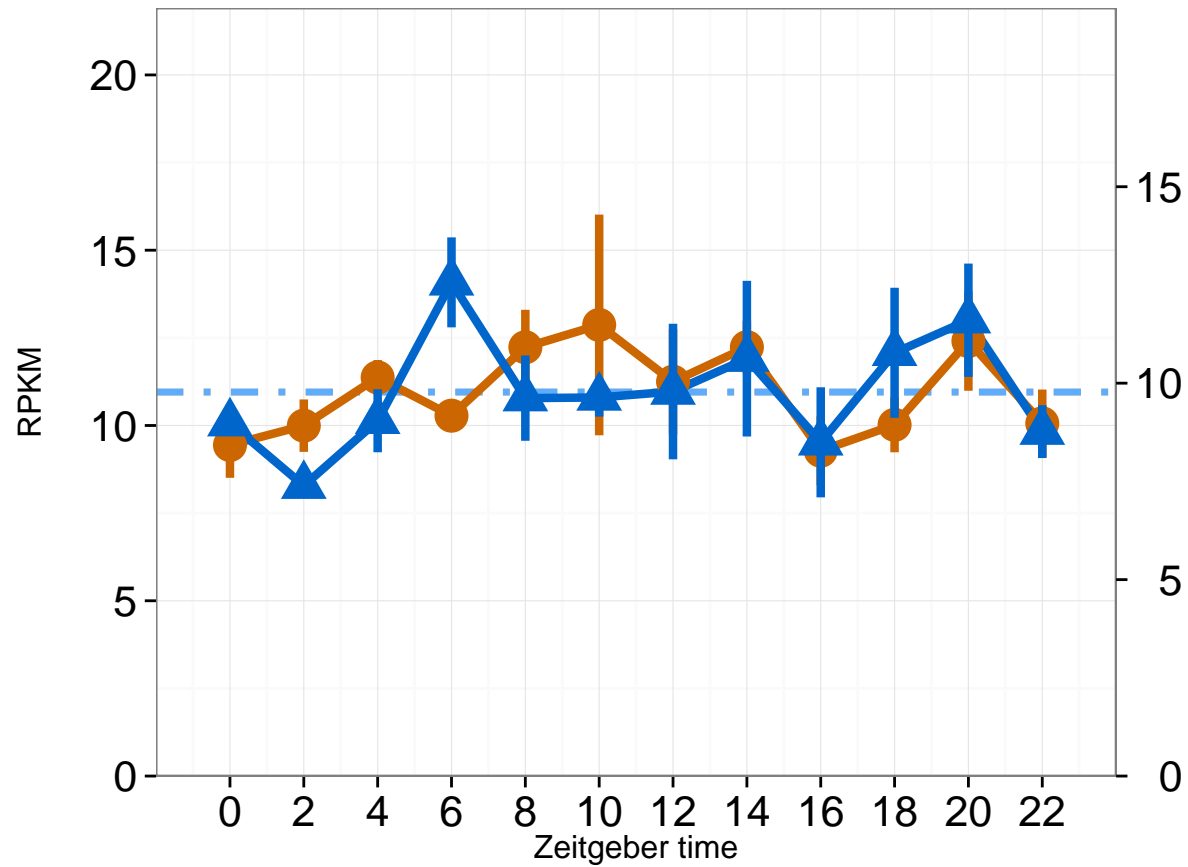

## Arl10

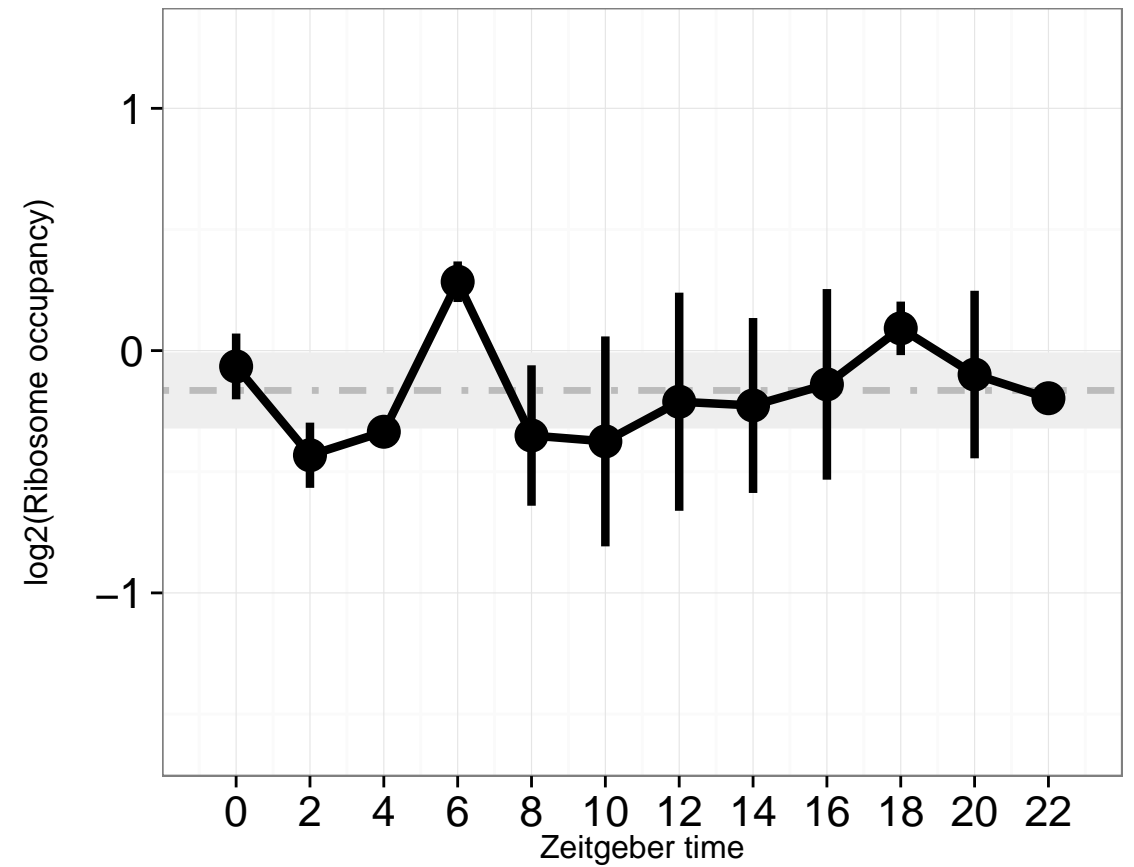

Supplement: Supplementary file 4188 [file 1]

## Pdcd4

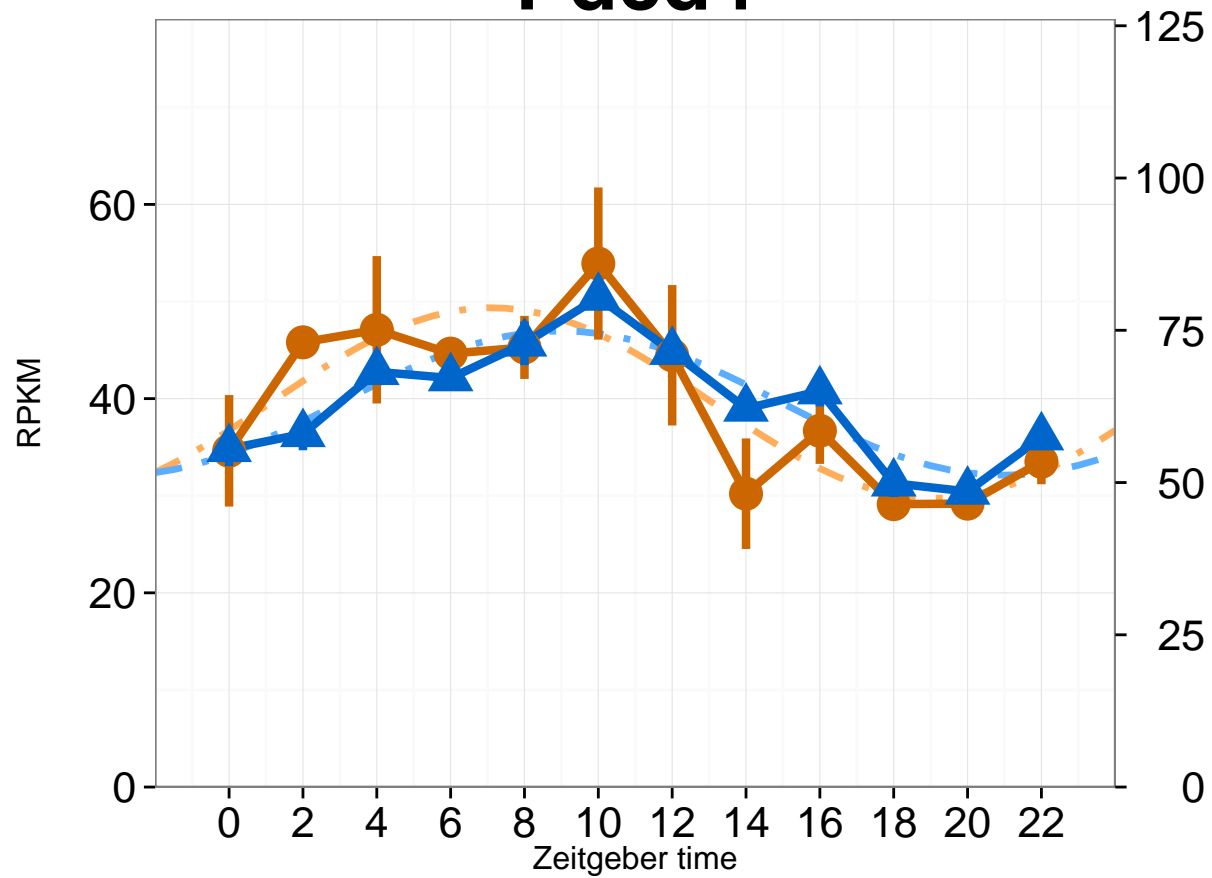

## Pdcd4

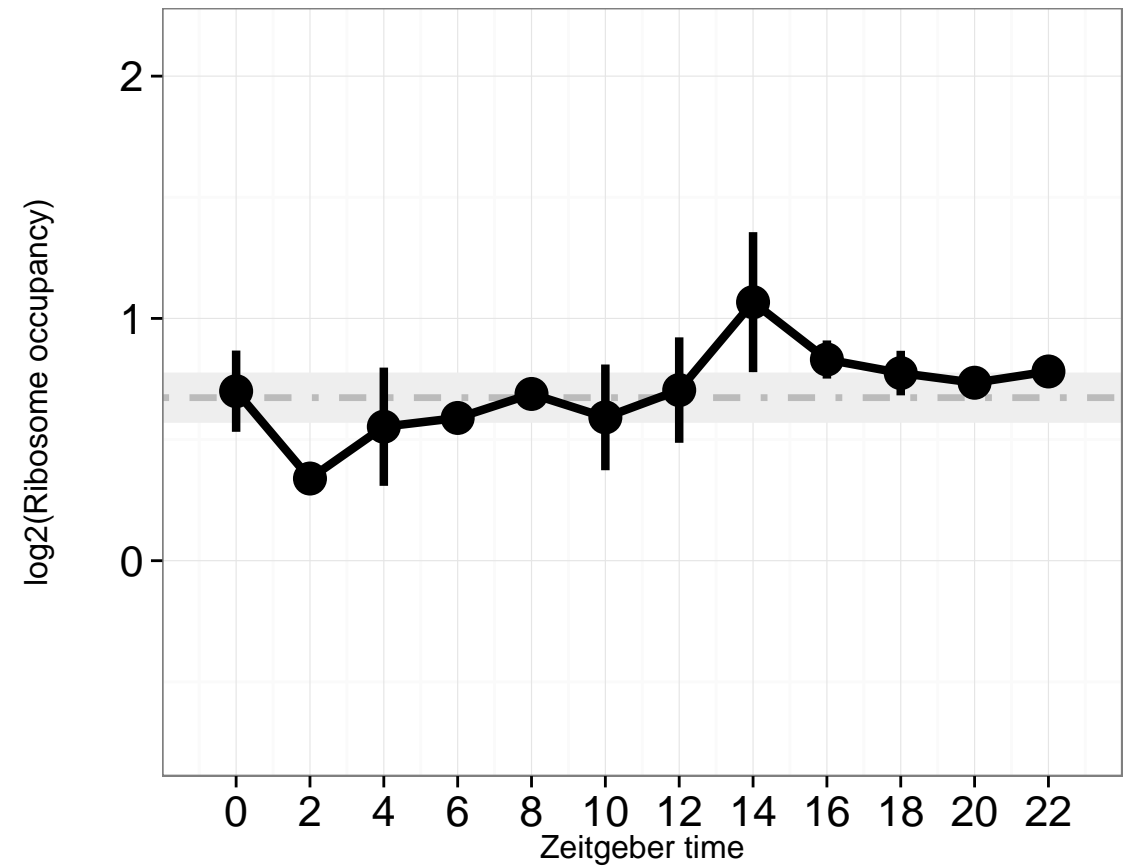

Supplement: Supplementary file 4189 [file 1]

# Ndufa3

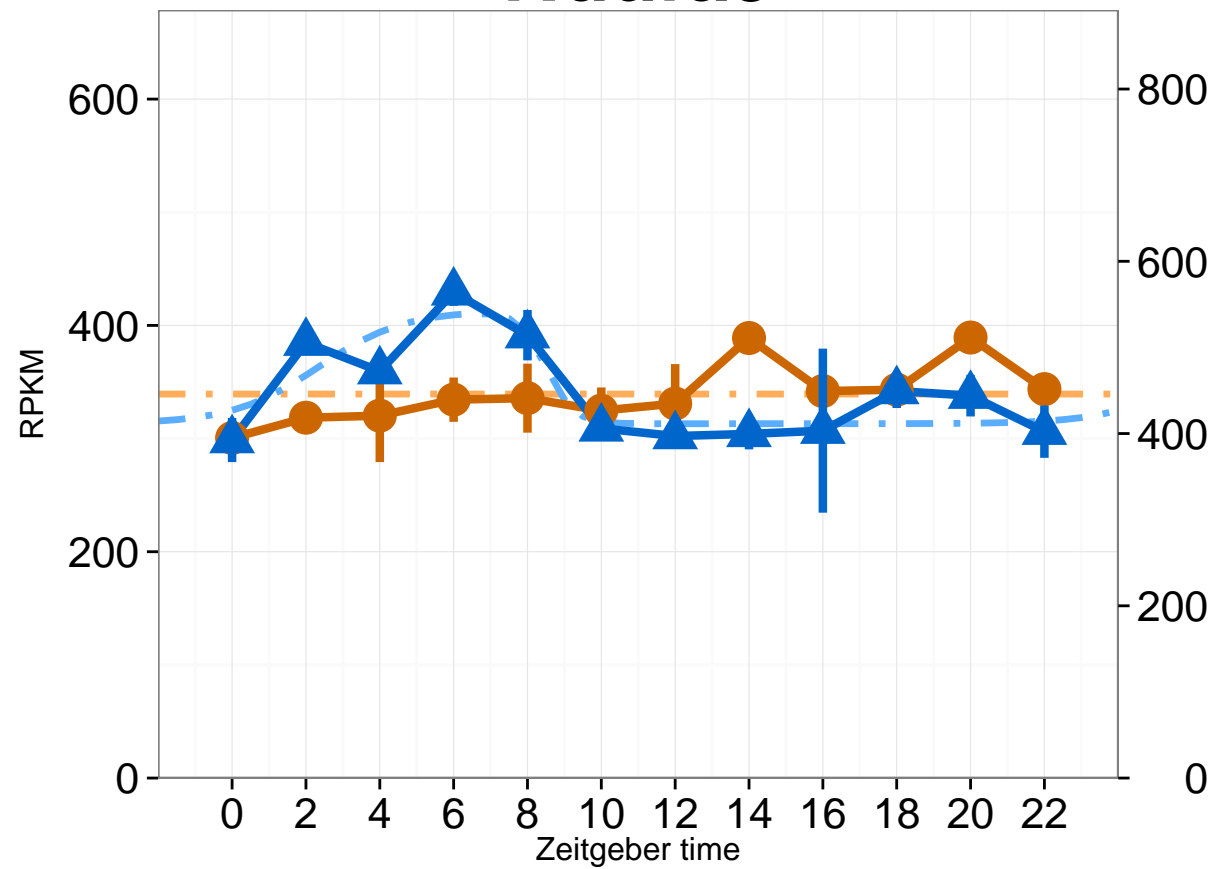

# Ndufa3

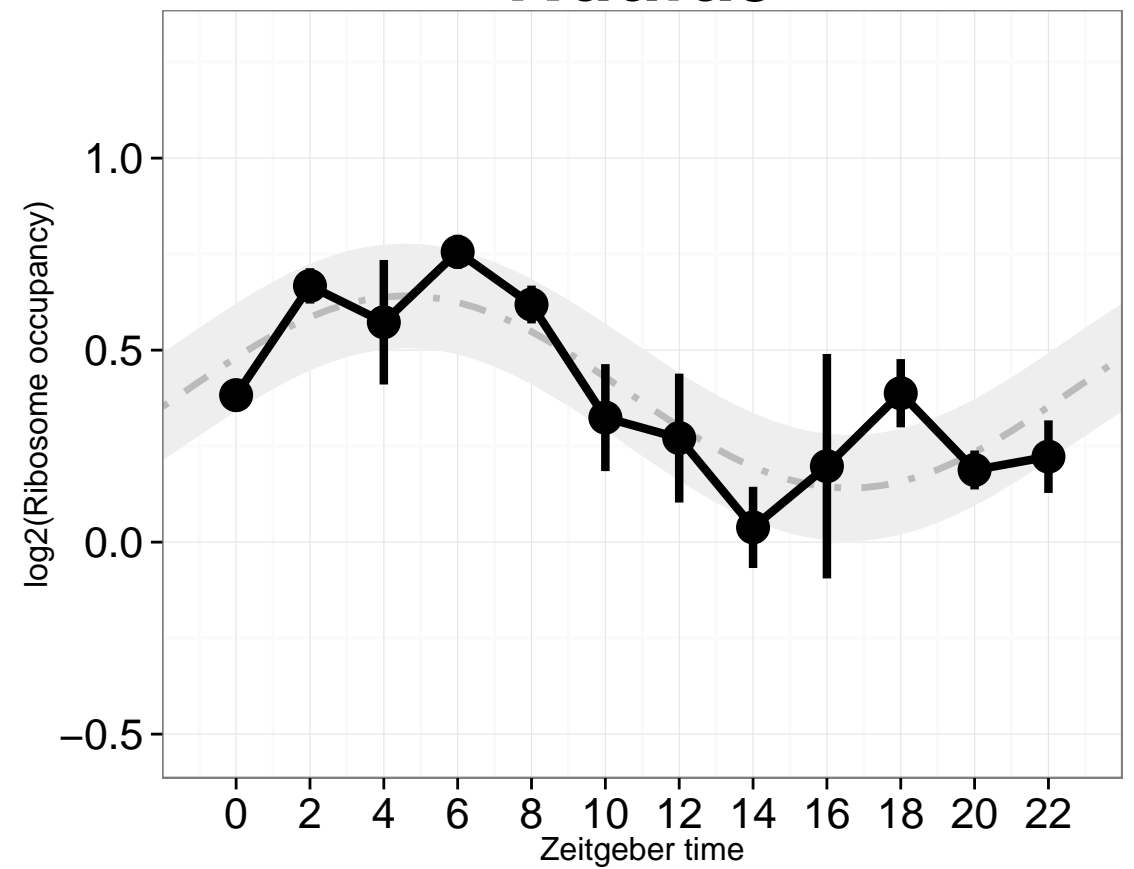

Supplement: Supplementary file 4190 [file 1]

## Gsn

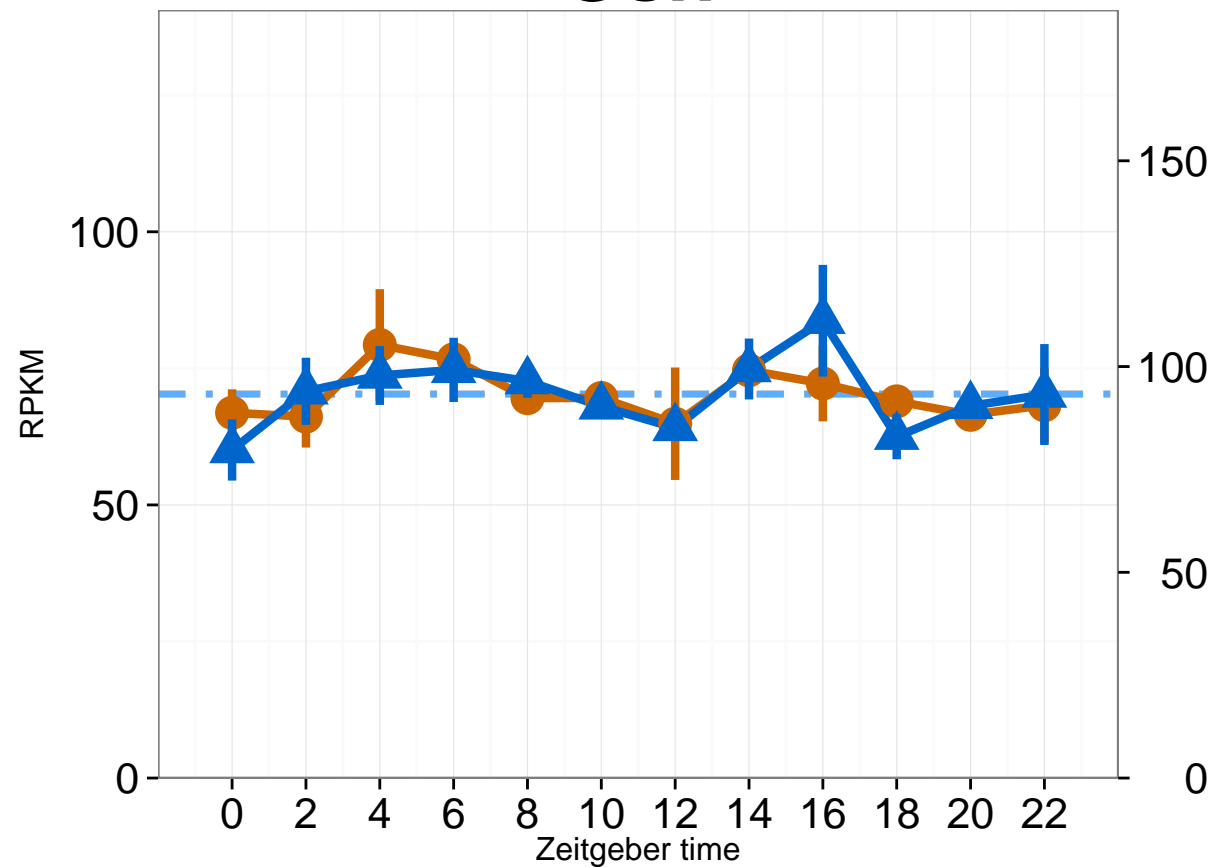

## Gsn

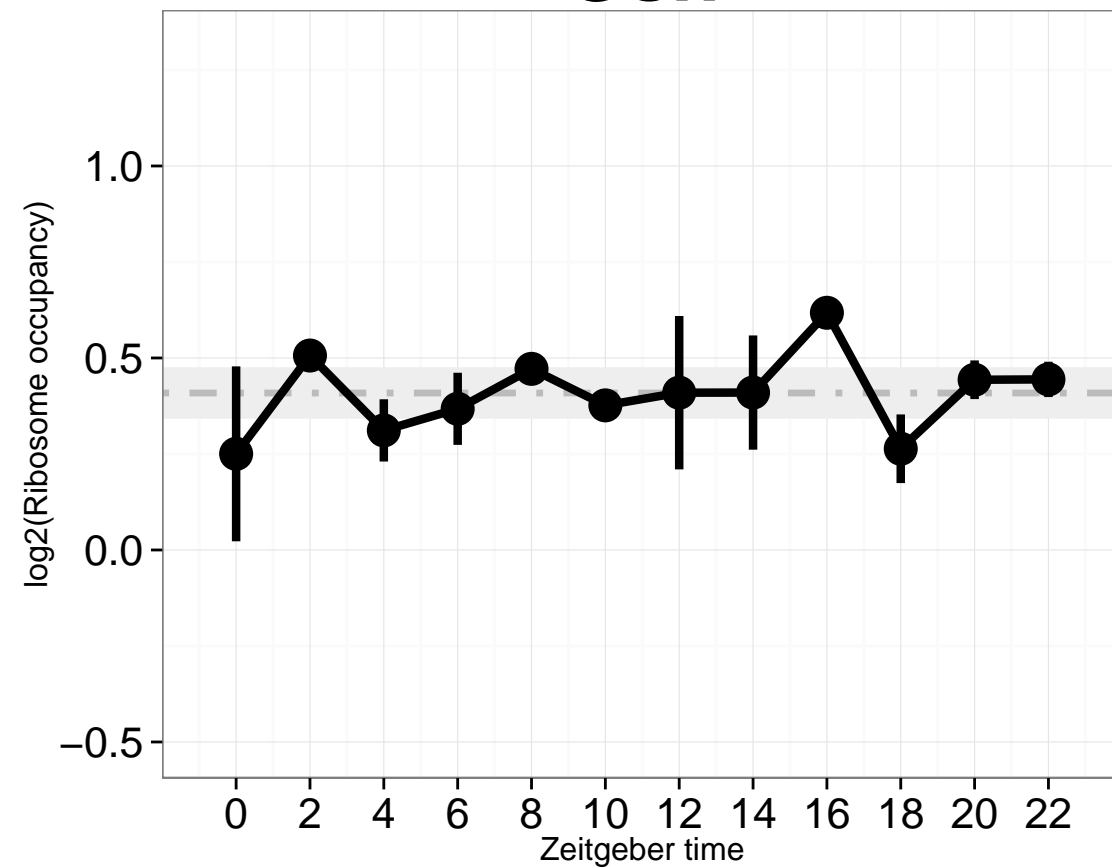

Supplement: Supplementary file 4191 [file 1]

## Nprl2

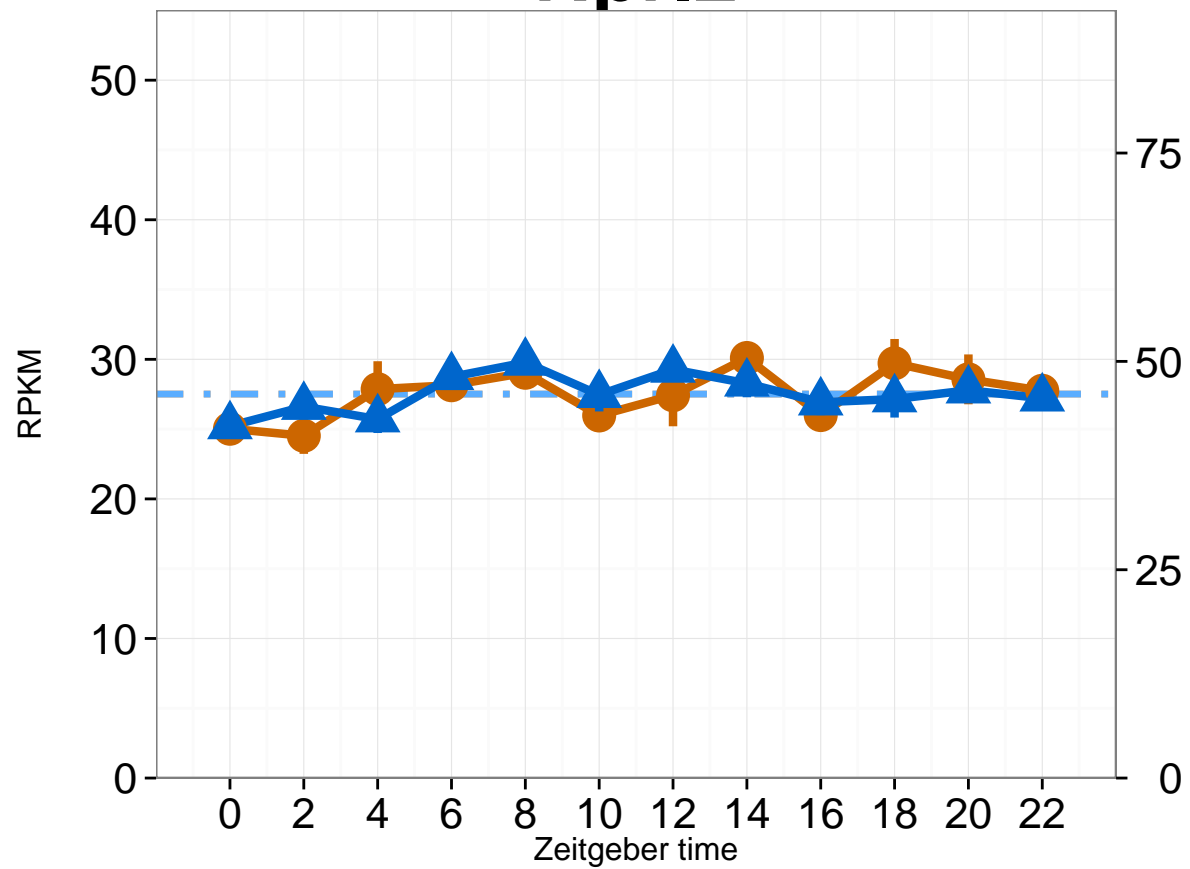

## Nprl2

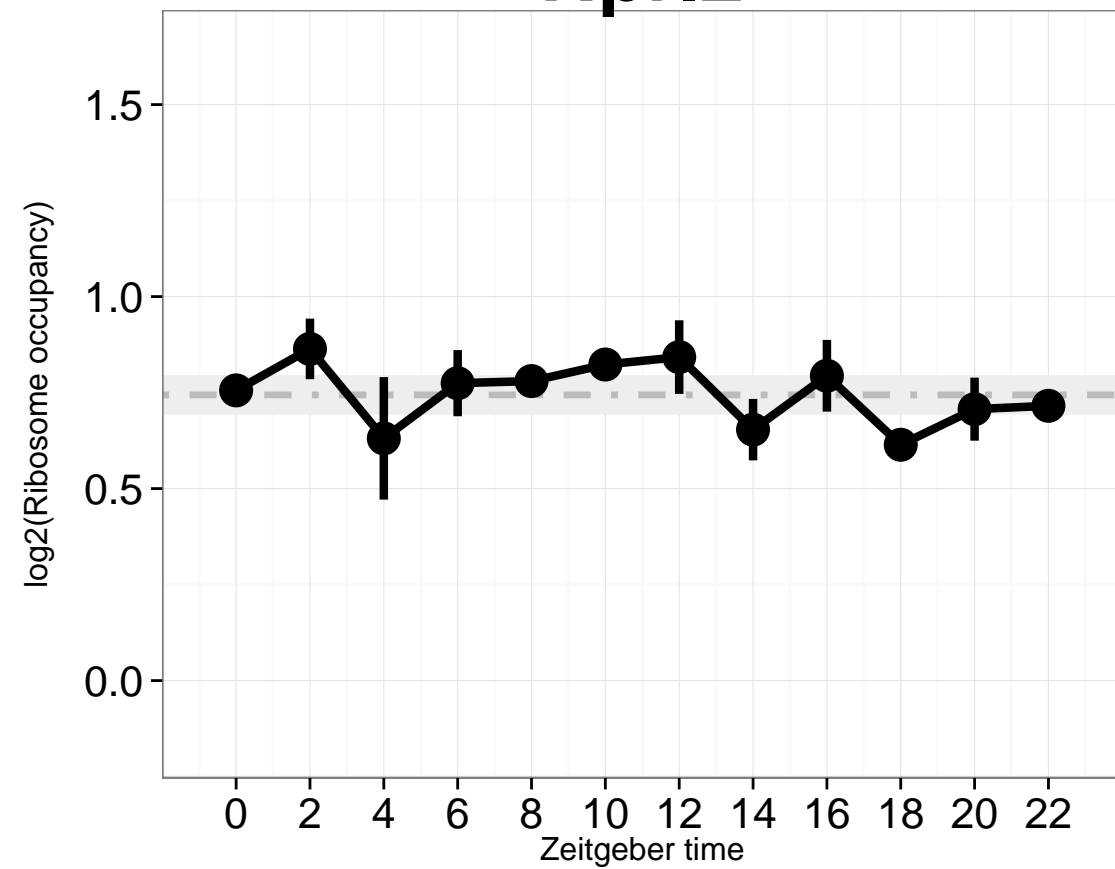

Supplement: Supplementary file 4192 [file 1]

# Coro1a

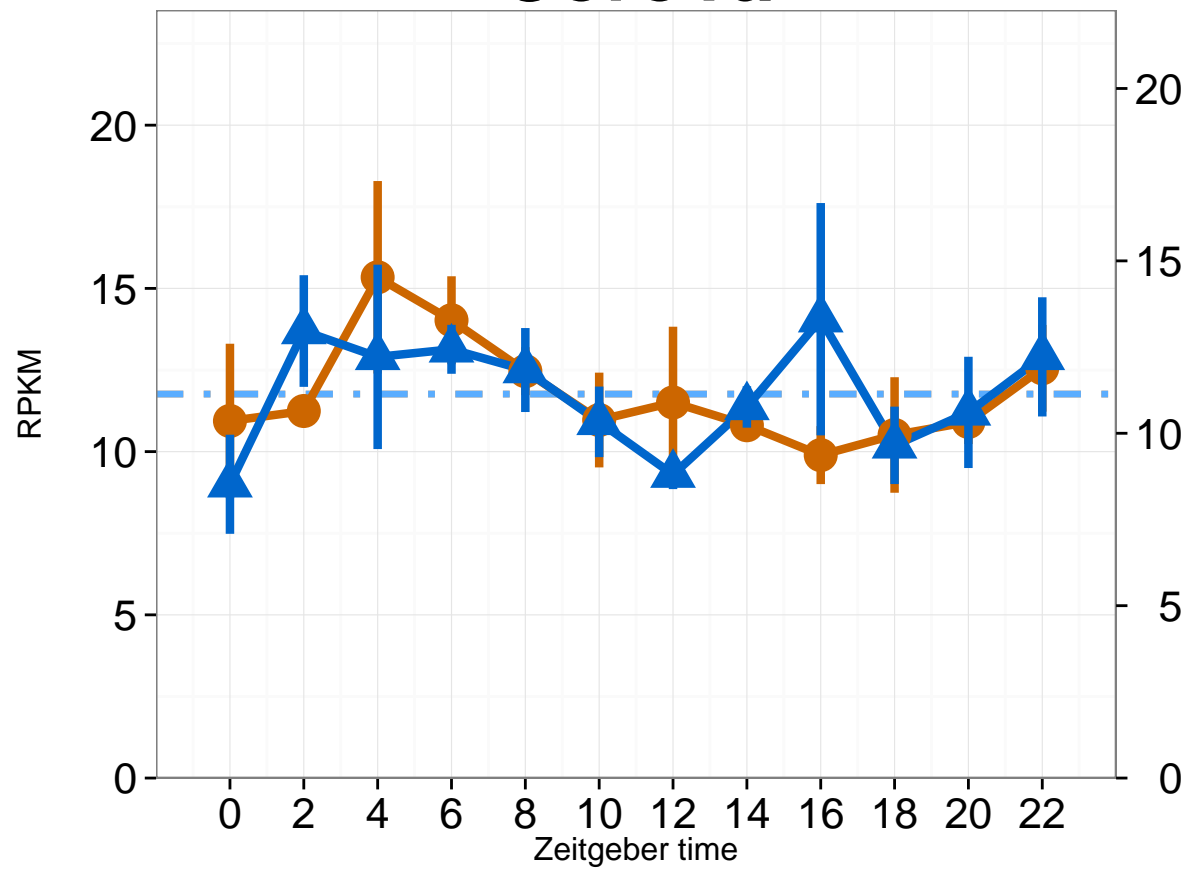

# Coro1a

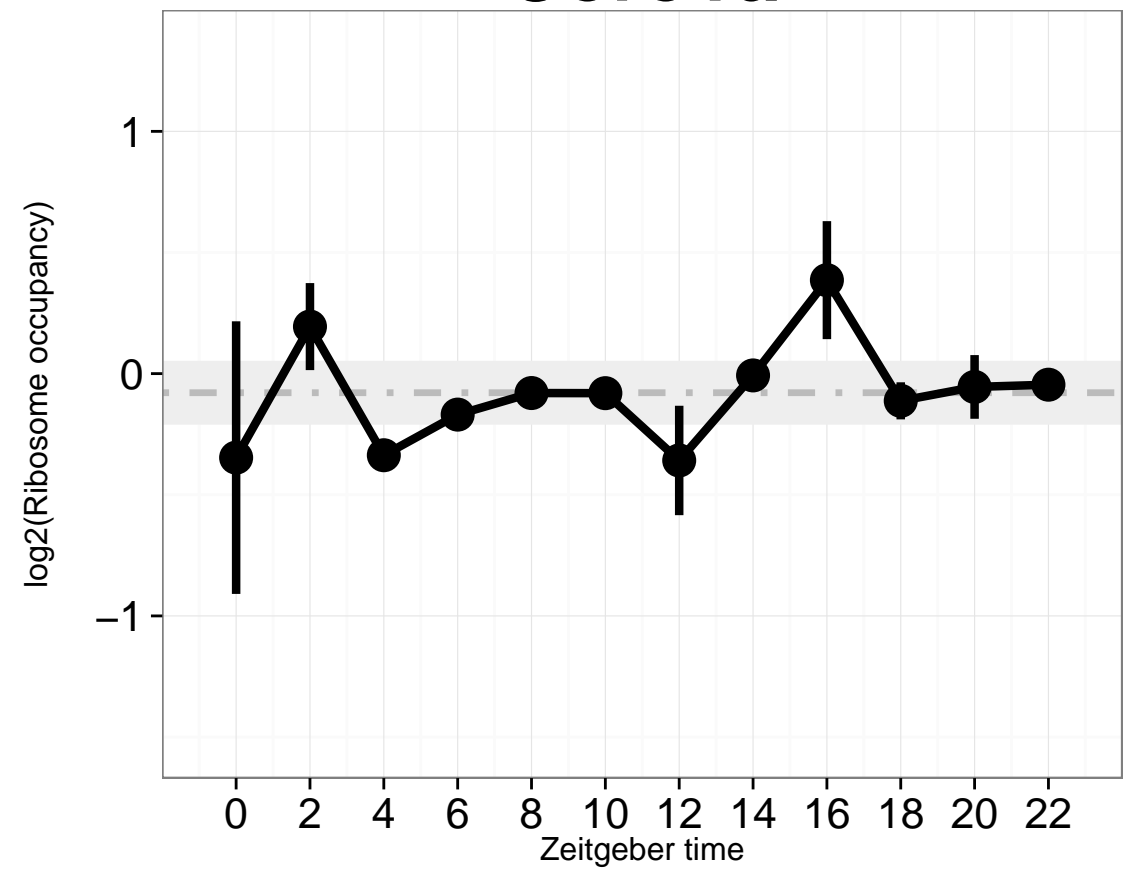

Supplement: Supplementary file 4193 [file 1]

## Ubxn7

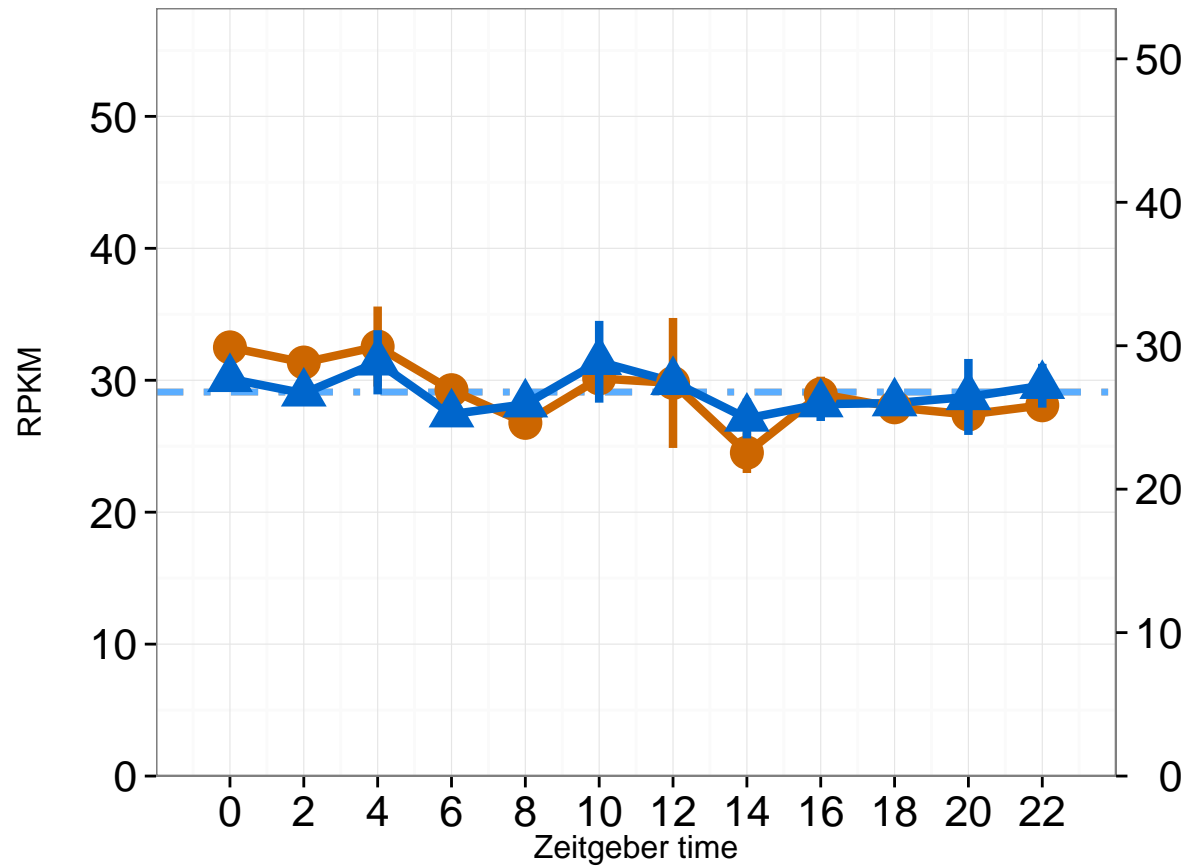

## Ubxn7

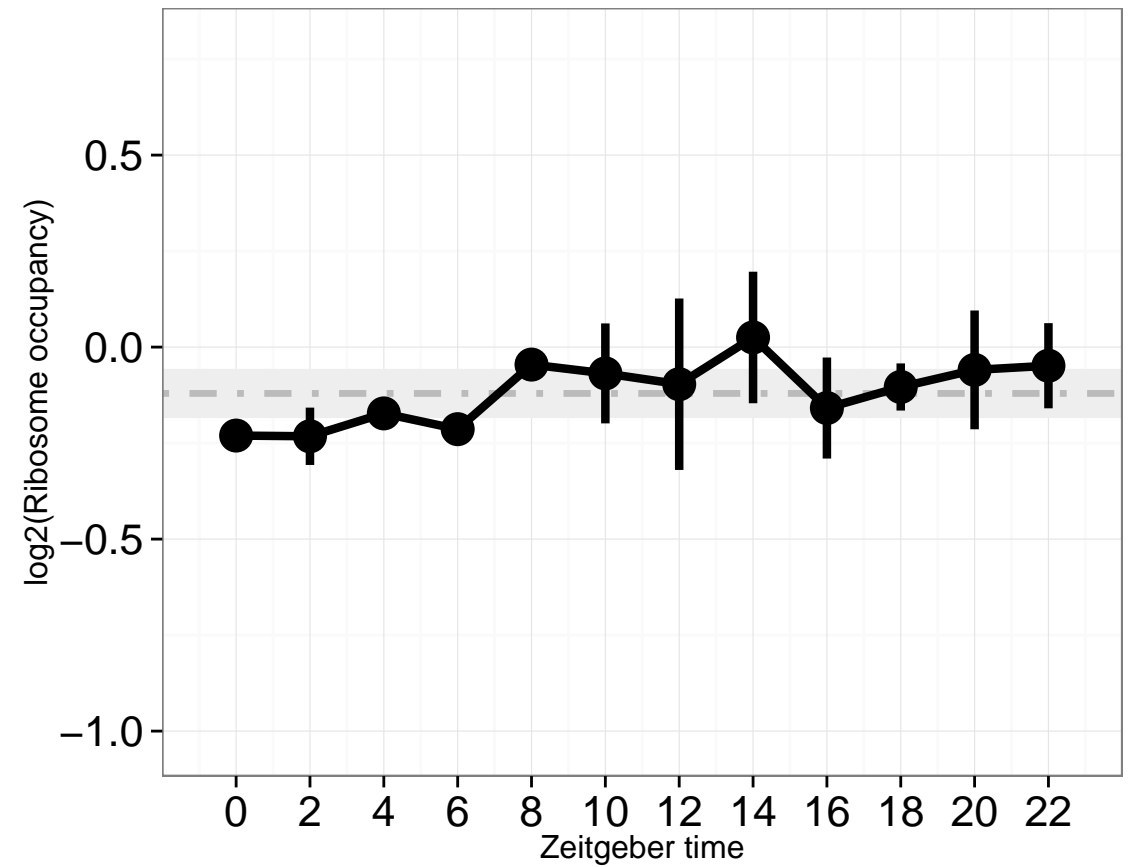

Supplement: Supplementary file 4194 [file 1]

## Tbxas1

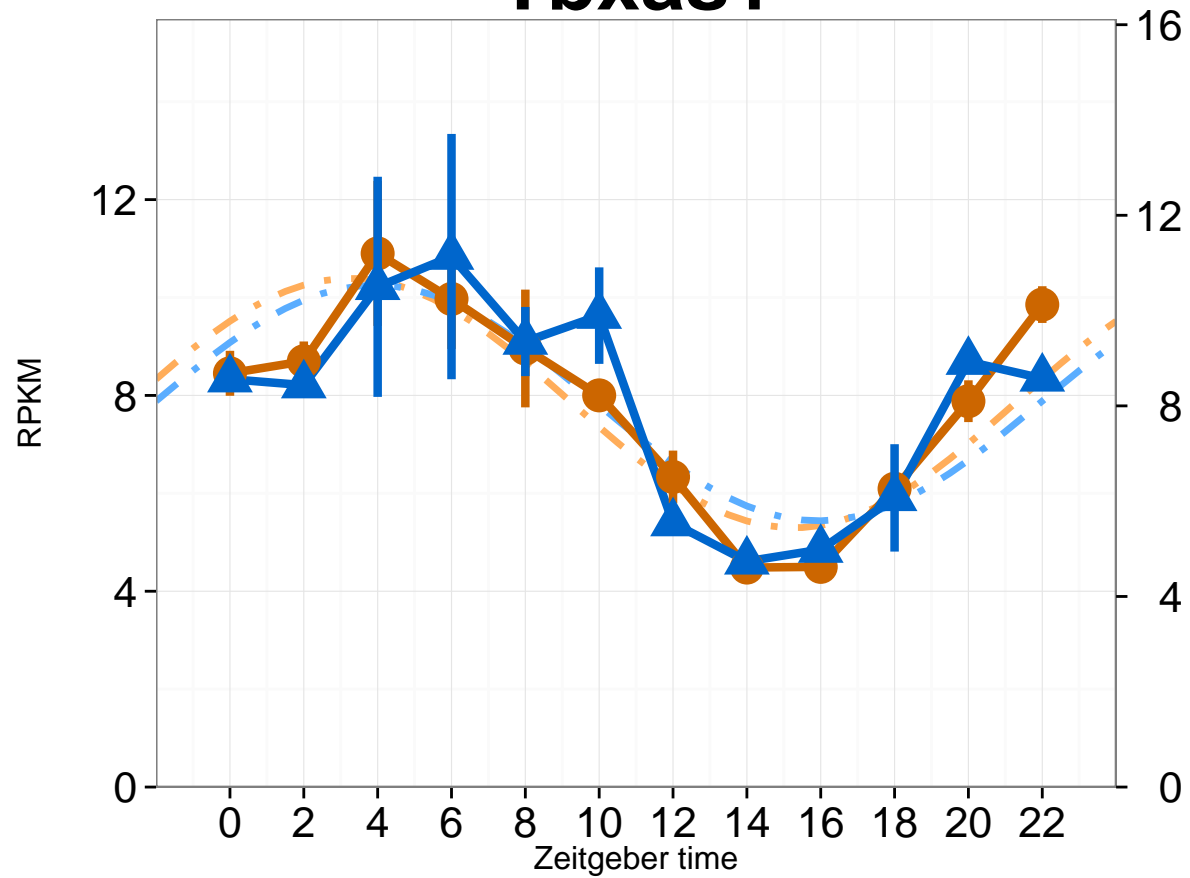

## Tbxas1

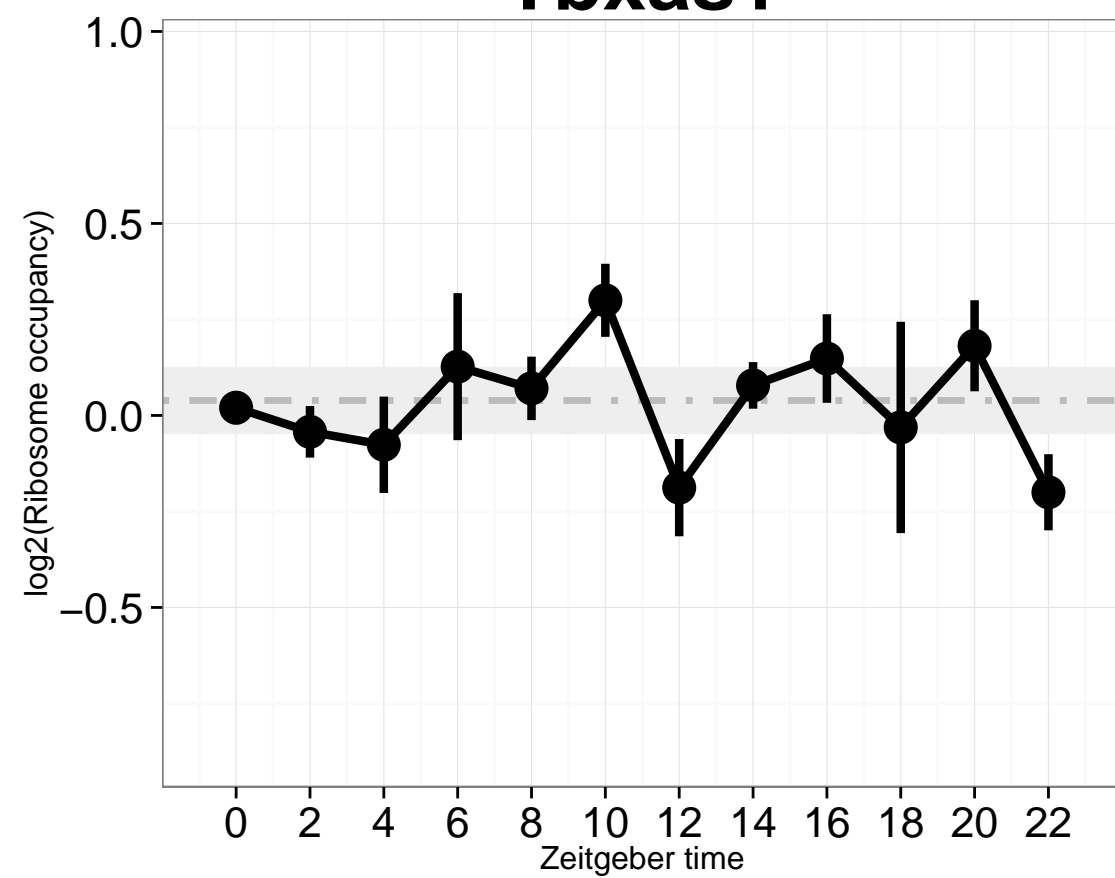

Supplement: Supplementary file 4195 [file 1]

# Ly6d

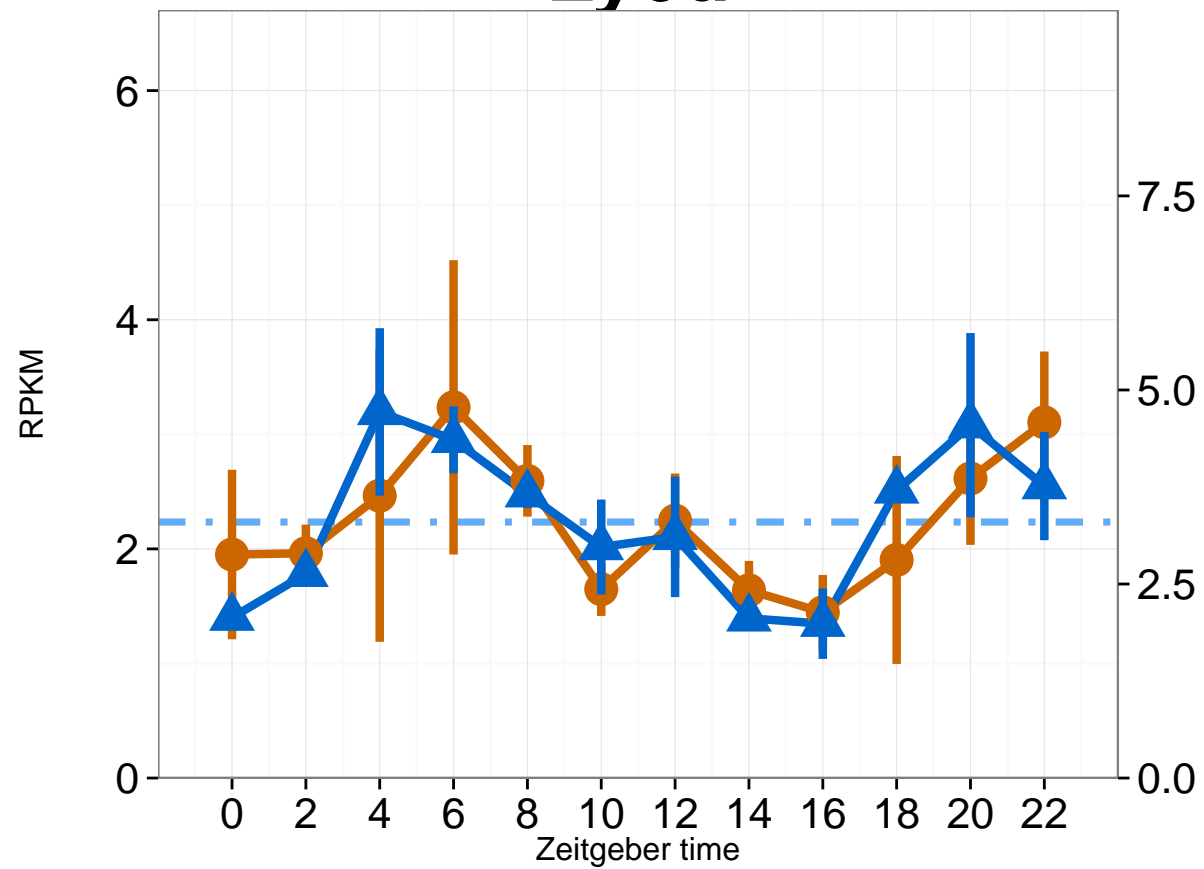

# Ly6d

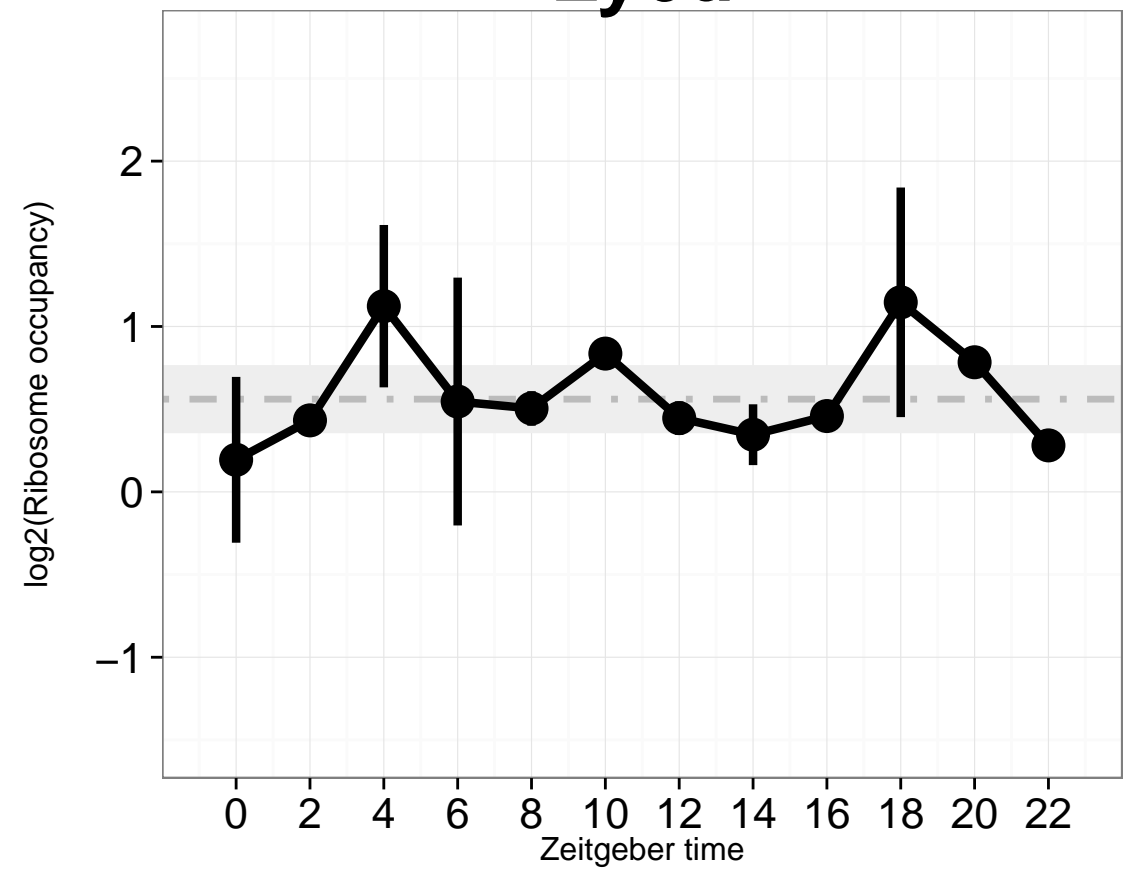

Supplement: Supplementary file 4196 [file 1]

## Rcan2

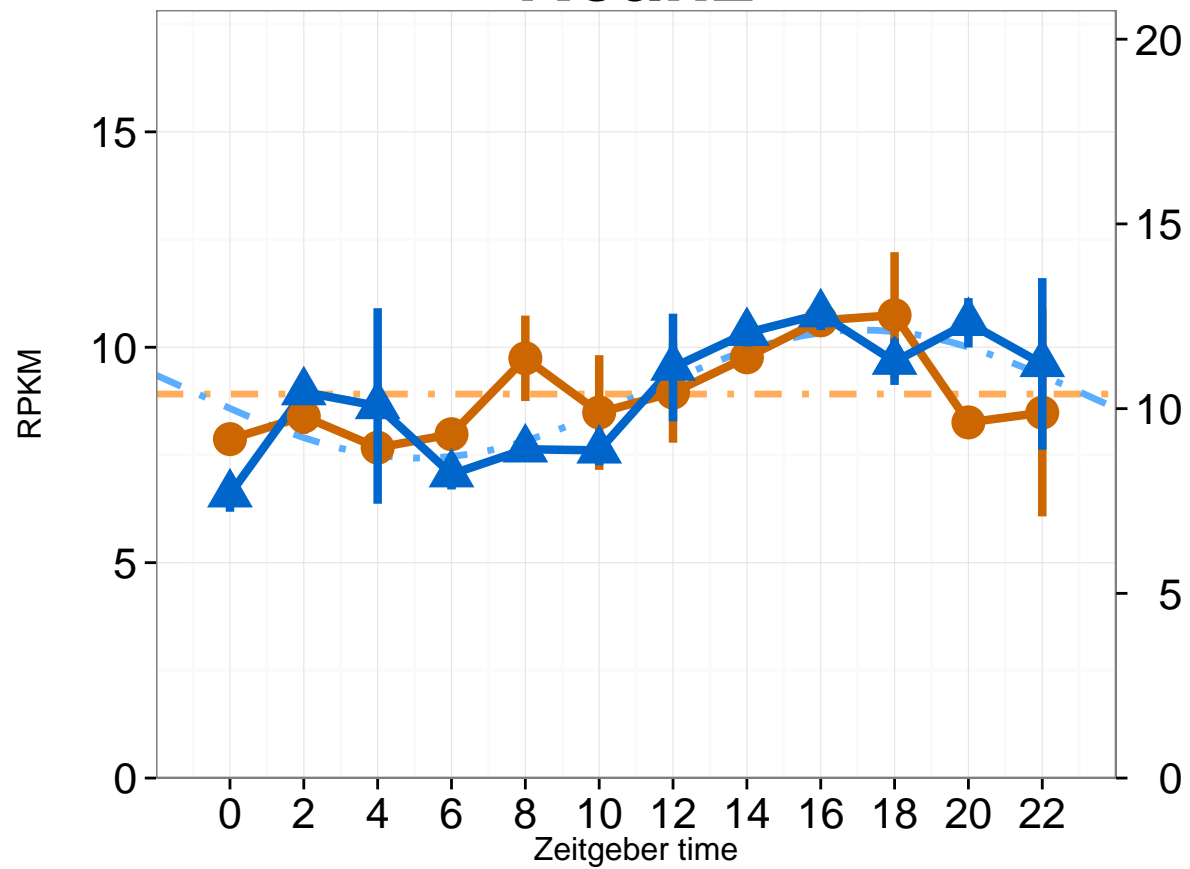

## Rcan2

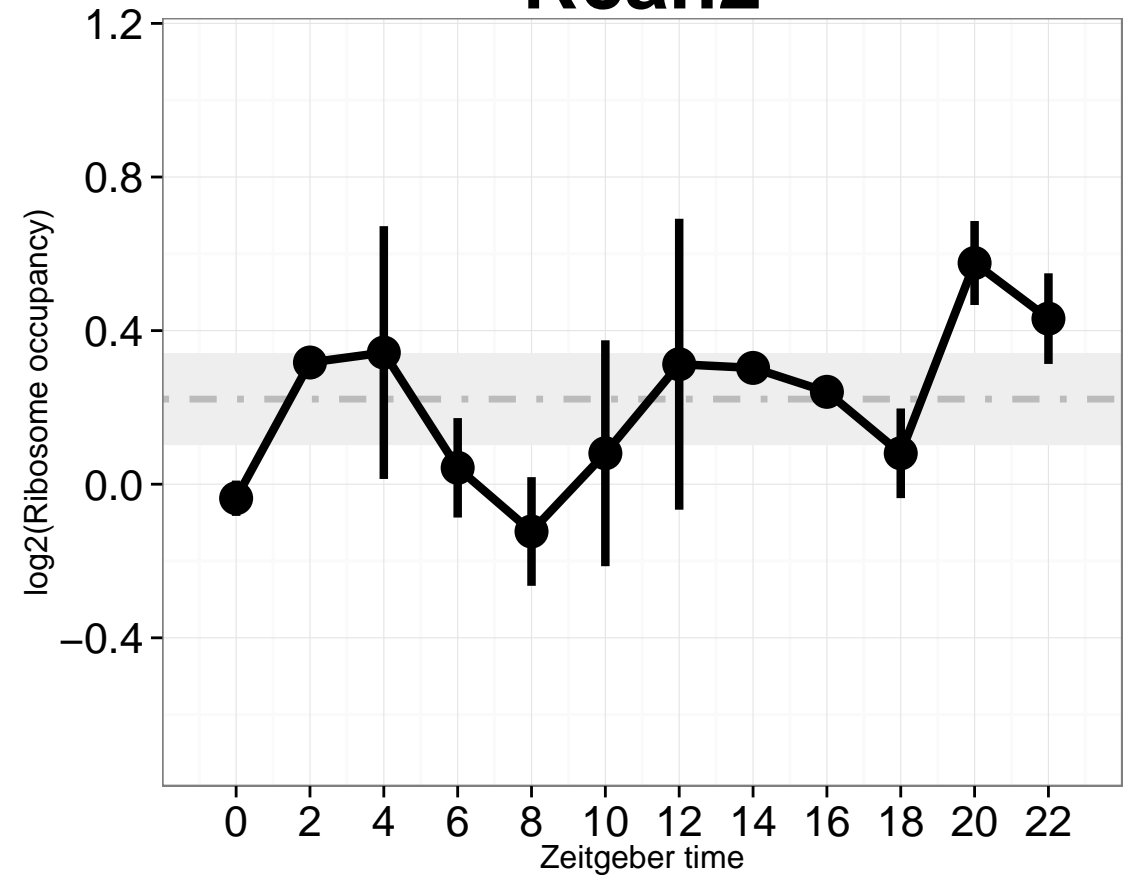

Supplement: Supplementary file 4197 [file 1]

4930423O20Rik

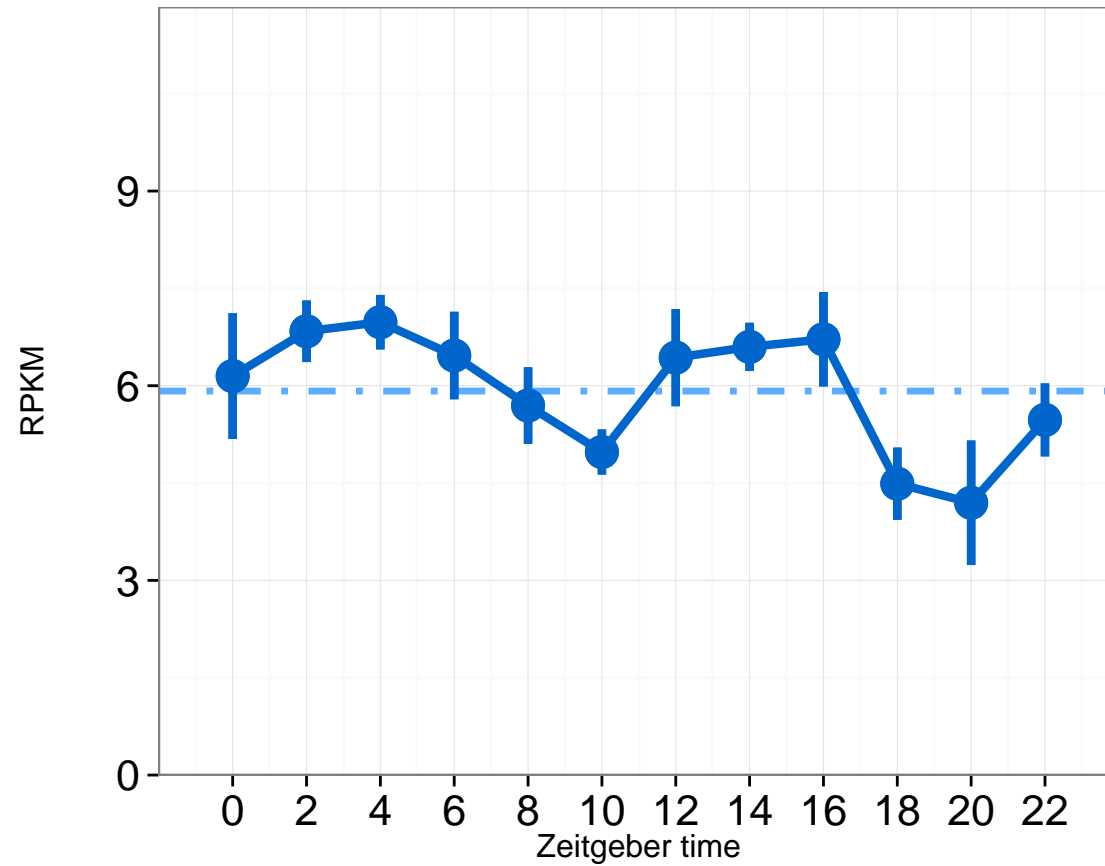

4930423O20Rik log<sub>2</sub>(Ribosome occup

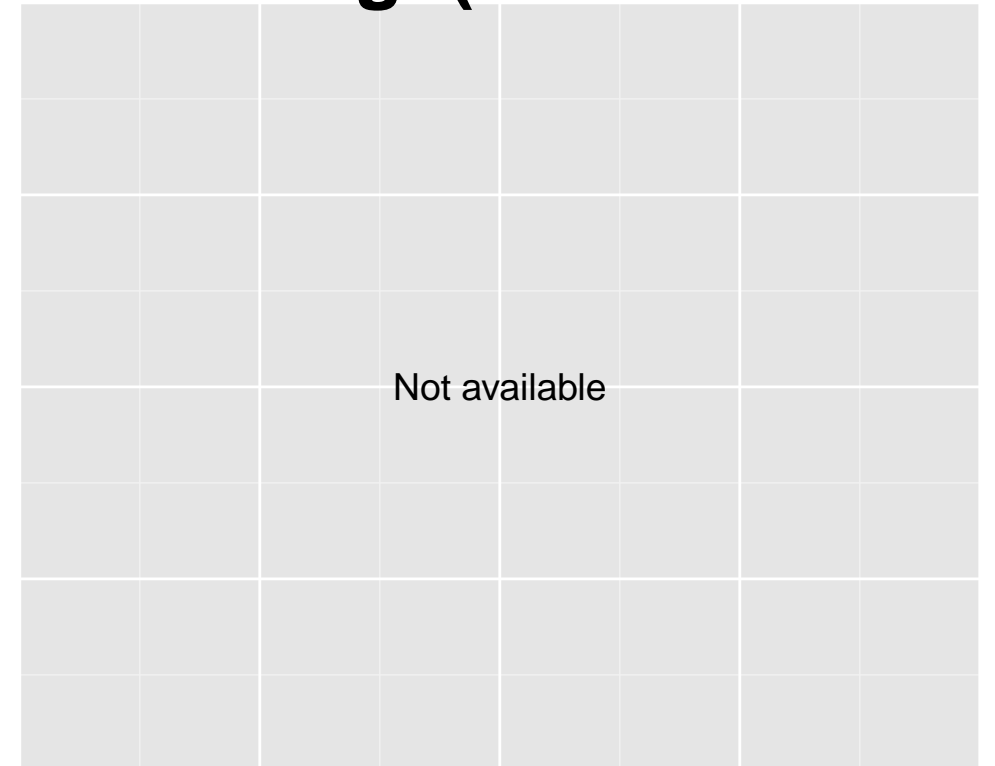

Supplement: Supplementary file 4198 [file 1]

# Dcaf10

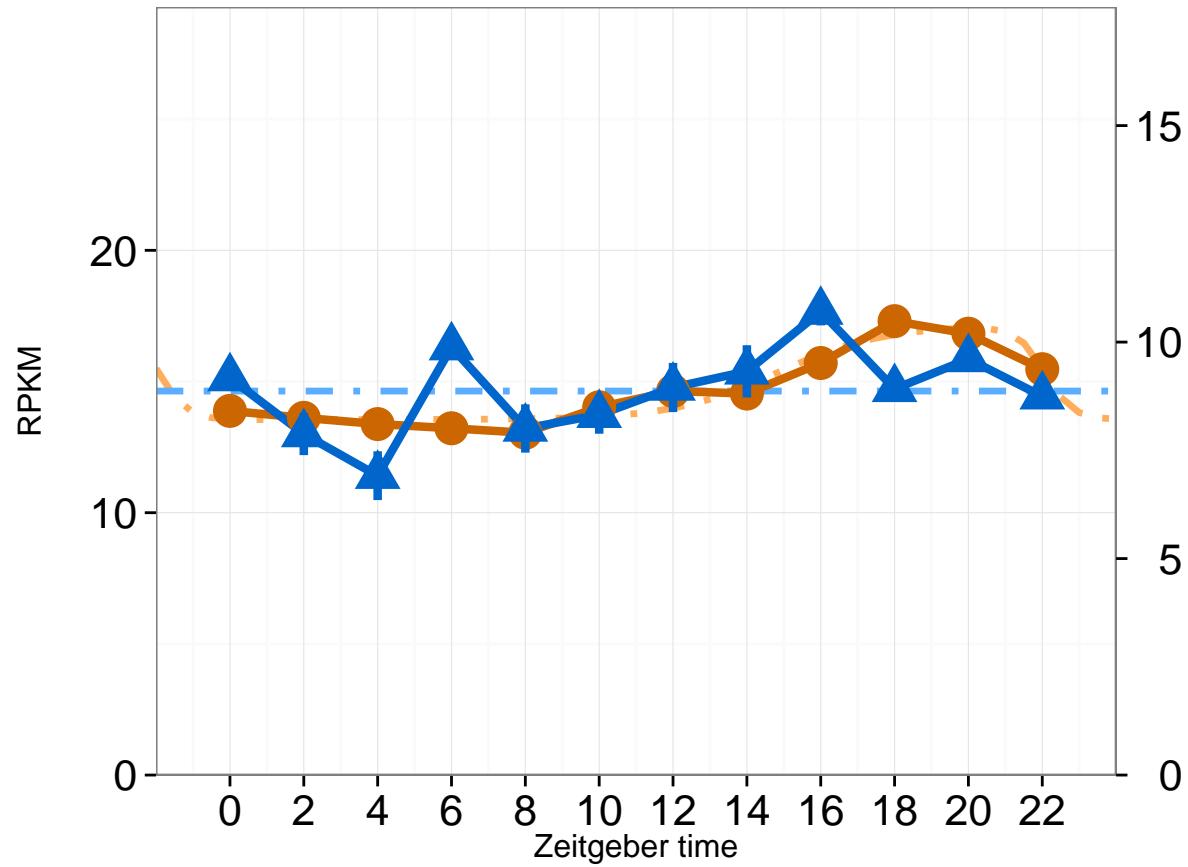

# Dcaf10

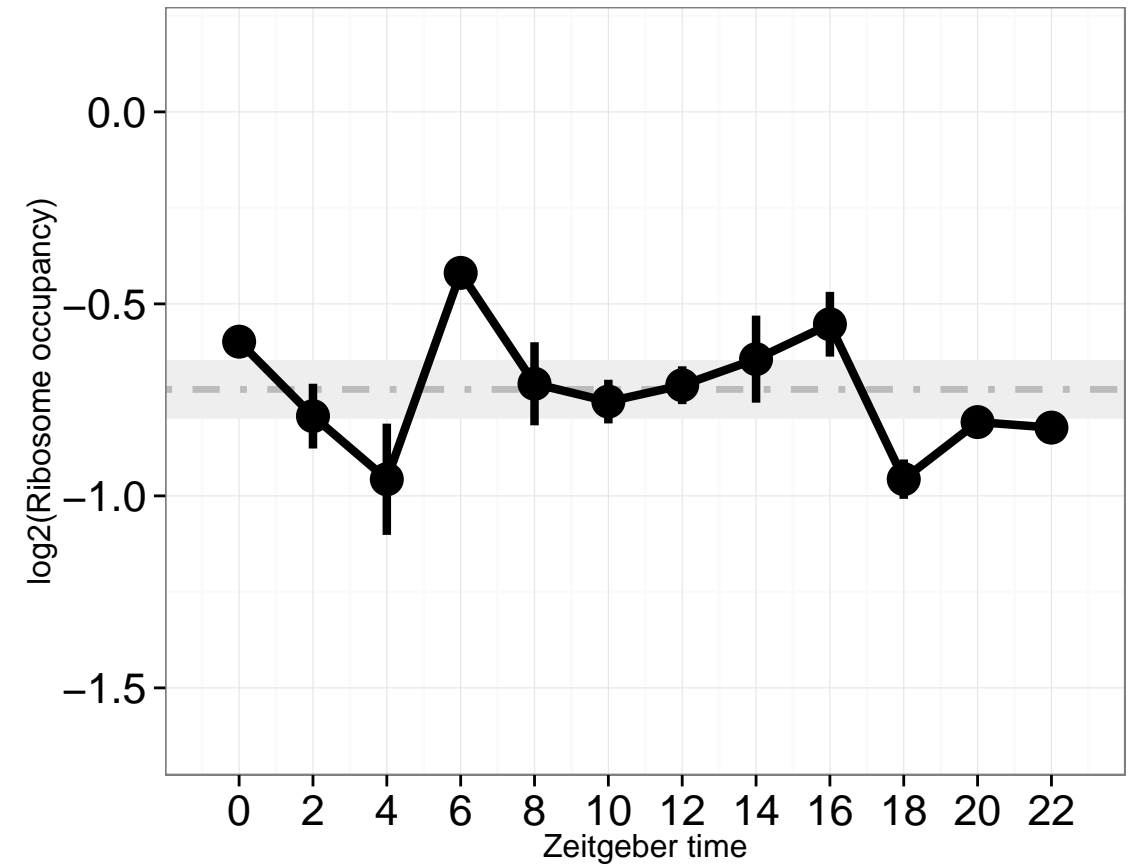

Supplement: Supplementary file 4199 [file 1]

# Vps4a

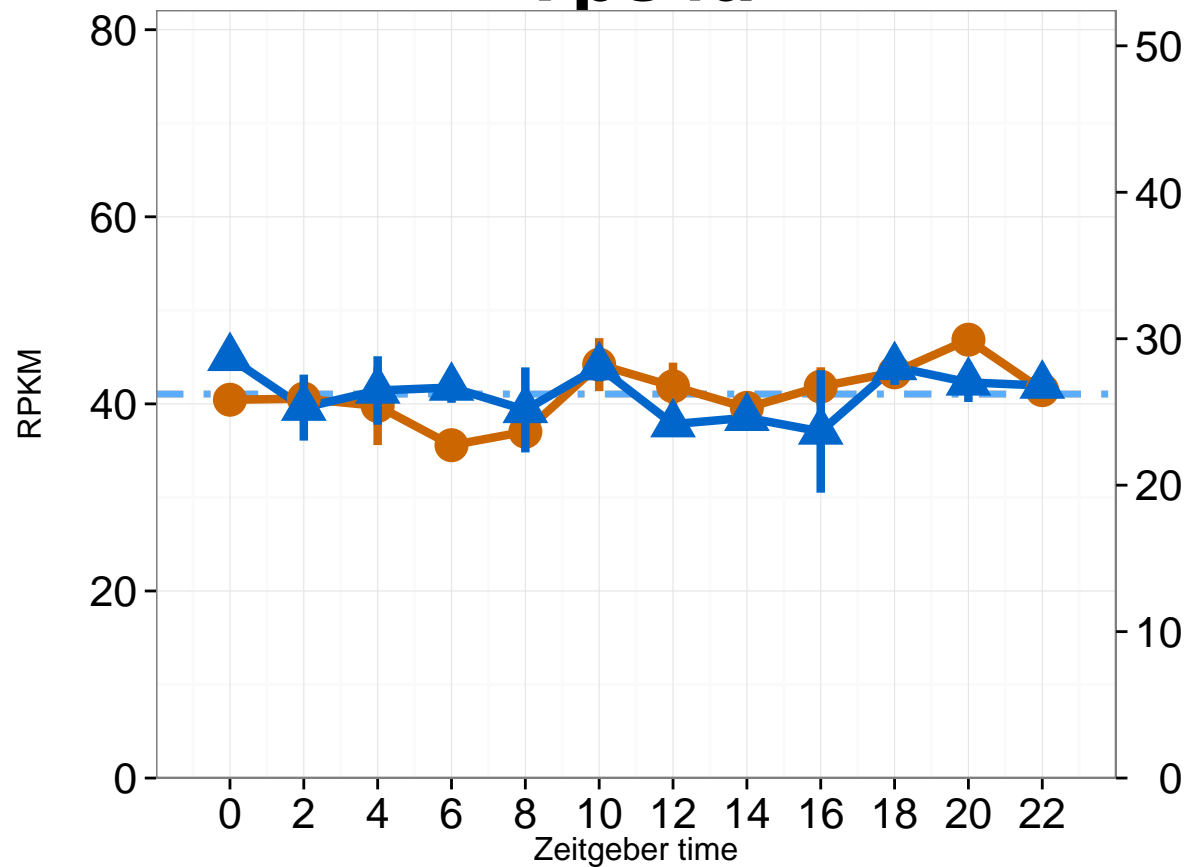

# Vps4a

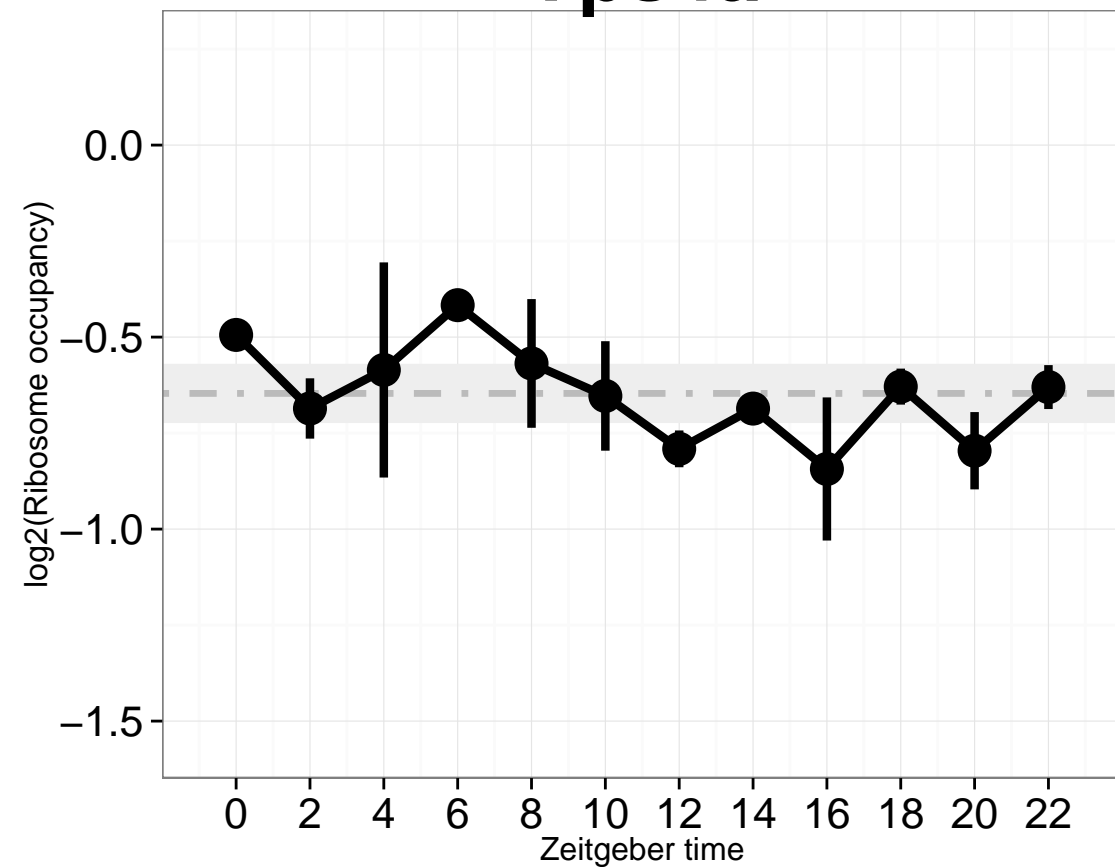

Supplement: Supplementary file 4200 [file 1]

# Ddx26b

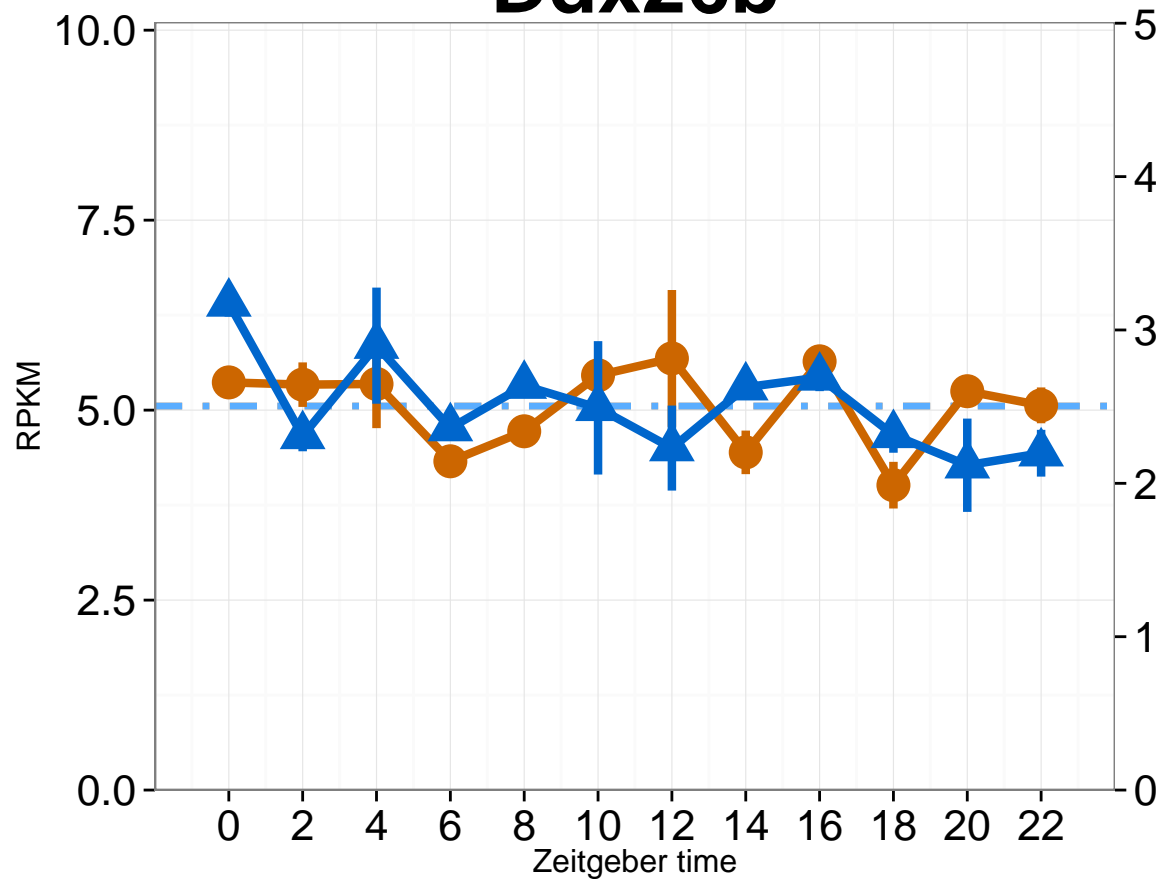

# Ddx26b

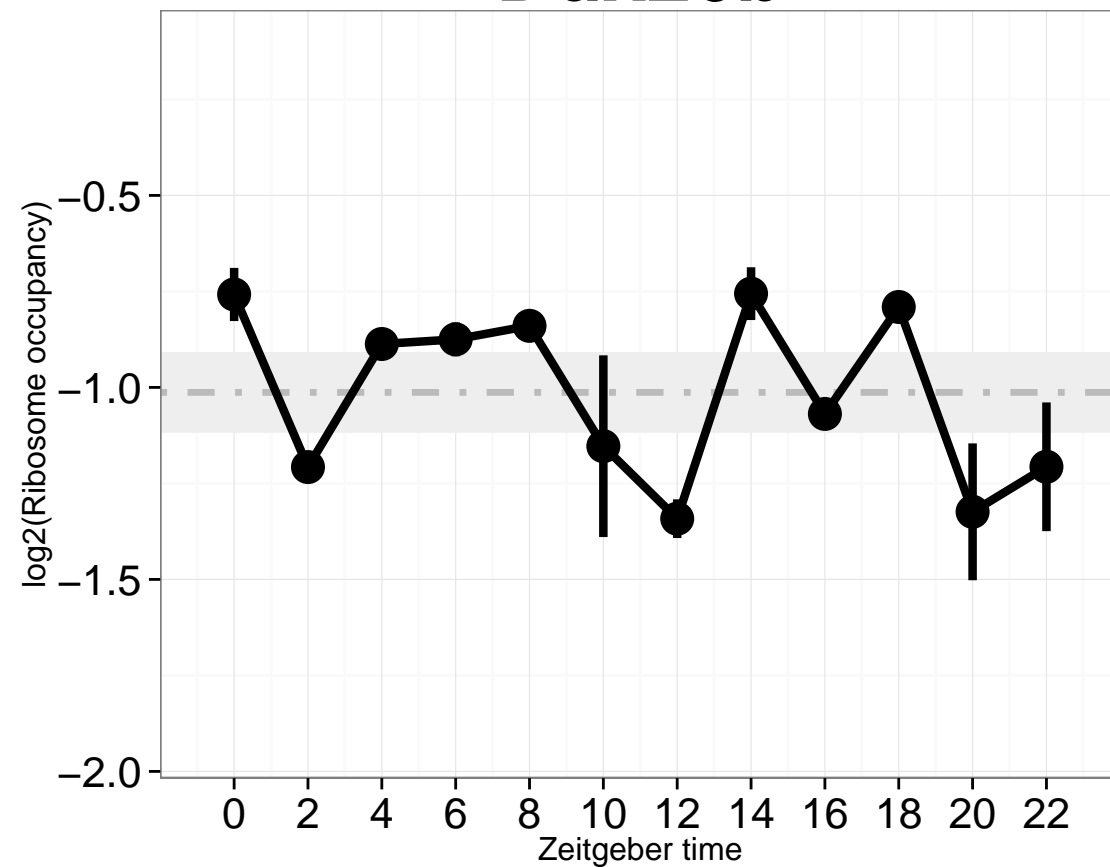

Supplement: Supplementary file 4201 [file 1]

# Kcnj13

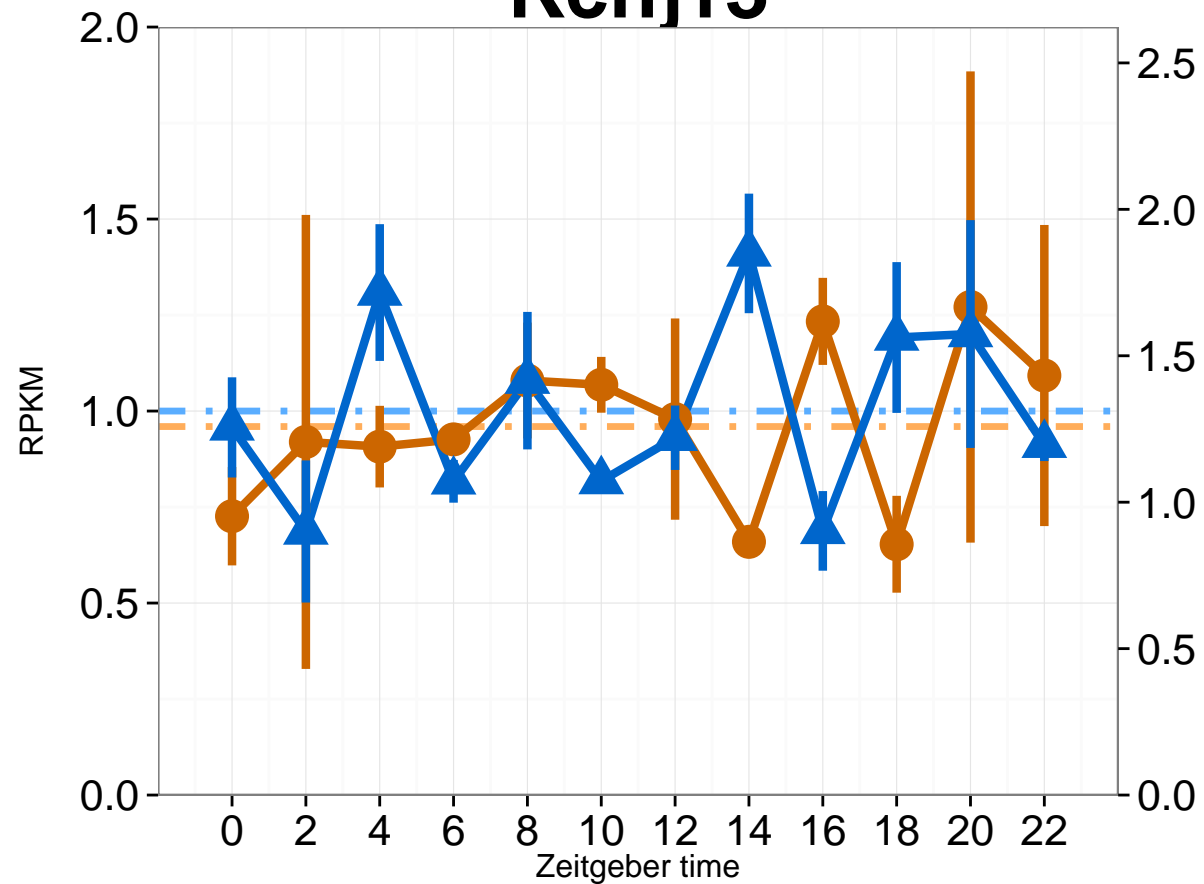

# Kcnj13

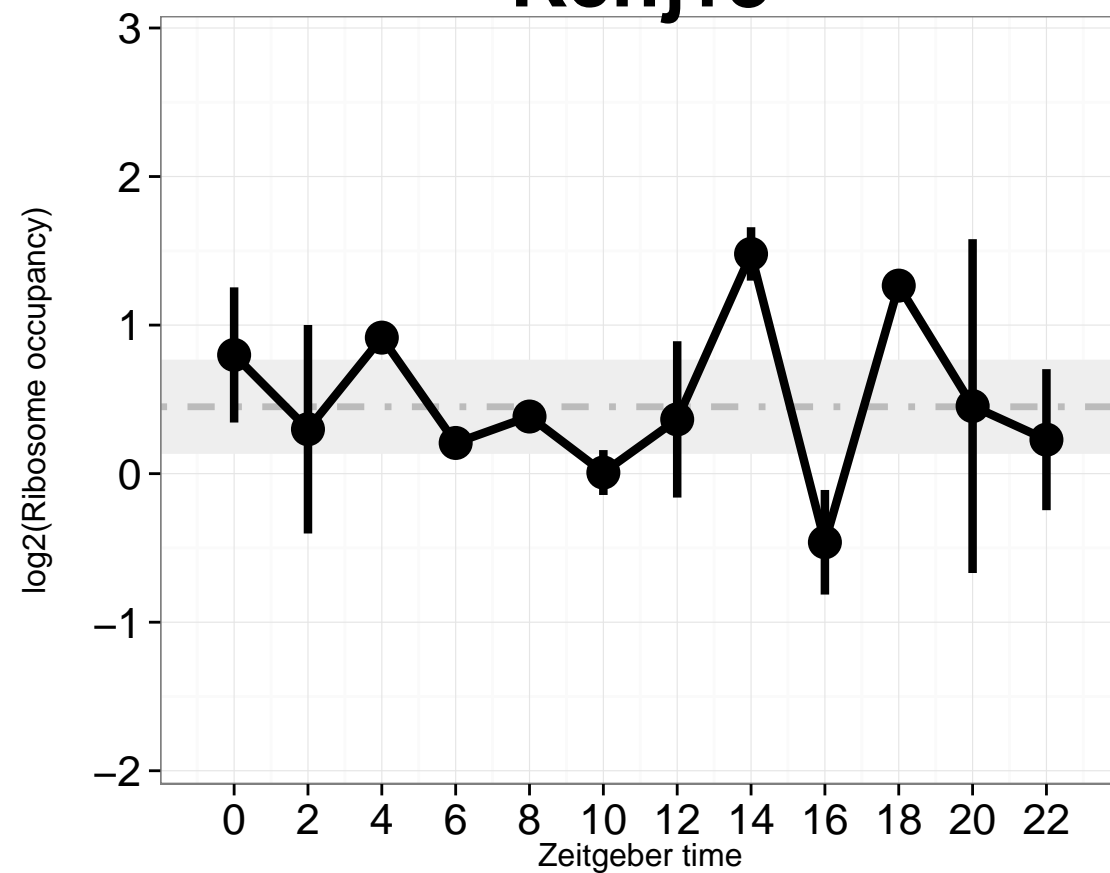

Supplement: Supplementary file 4202 [file 1]

# Ammecr1

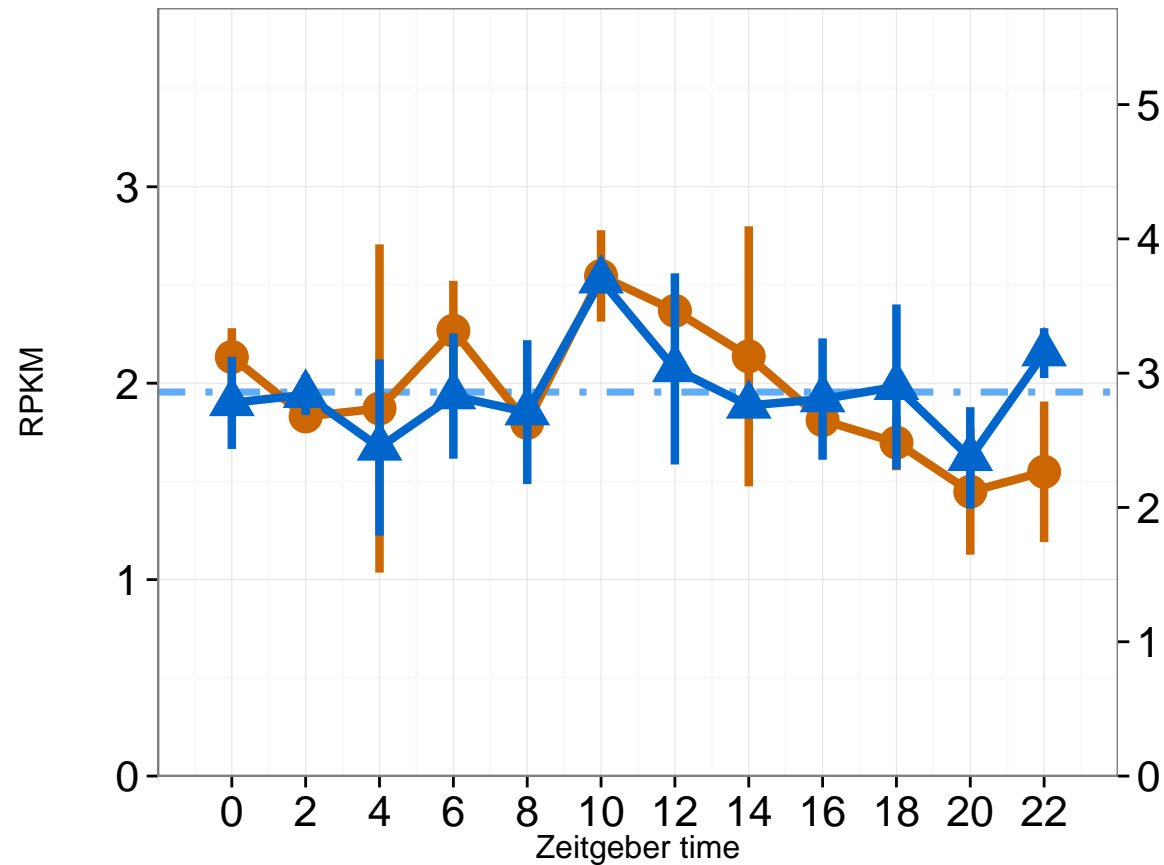

# Ammecr1

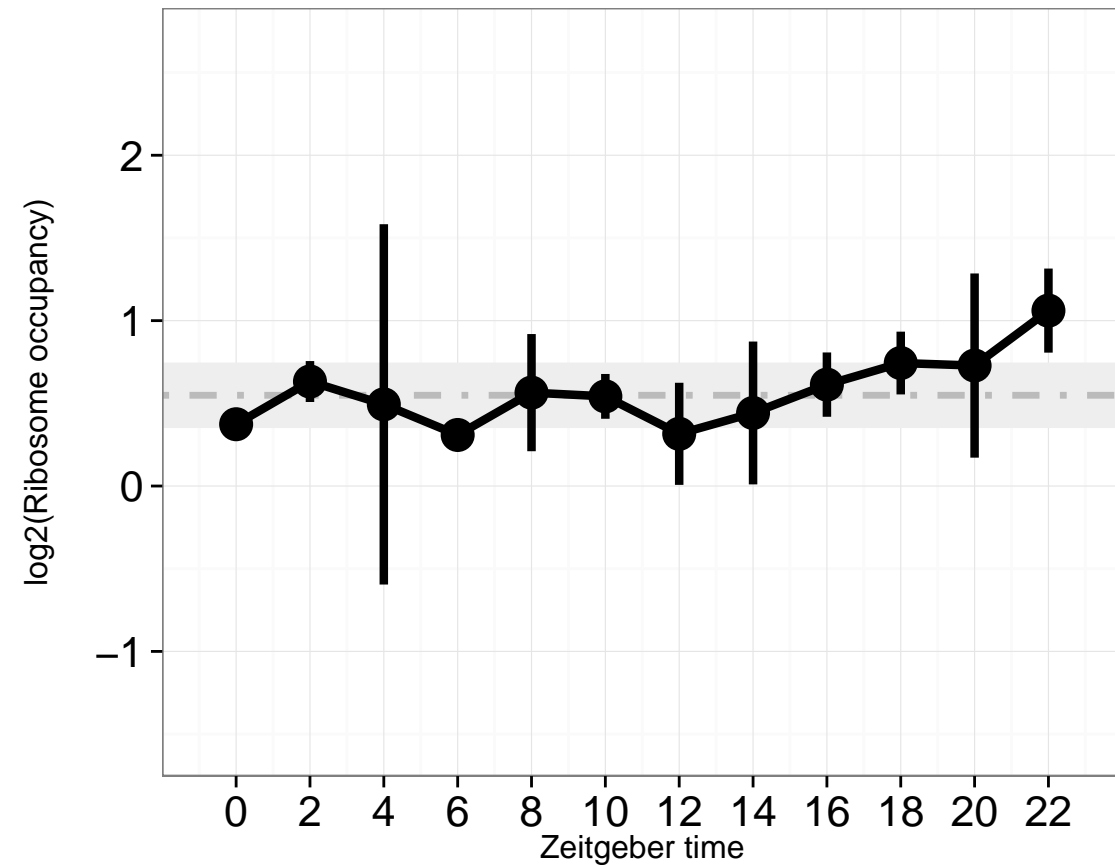

Supplement: Supplementary file 4203 [file 1]

## Slc5a3

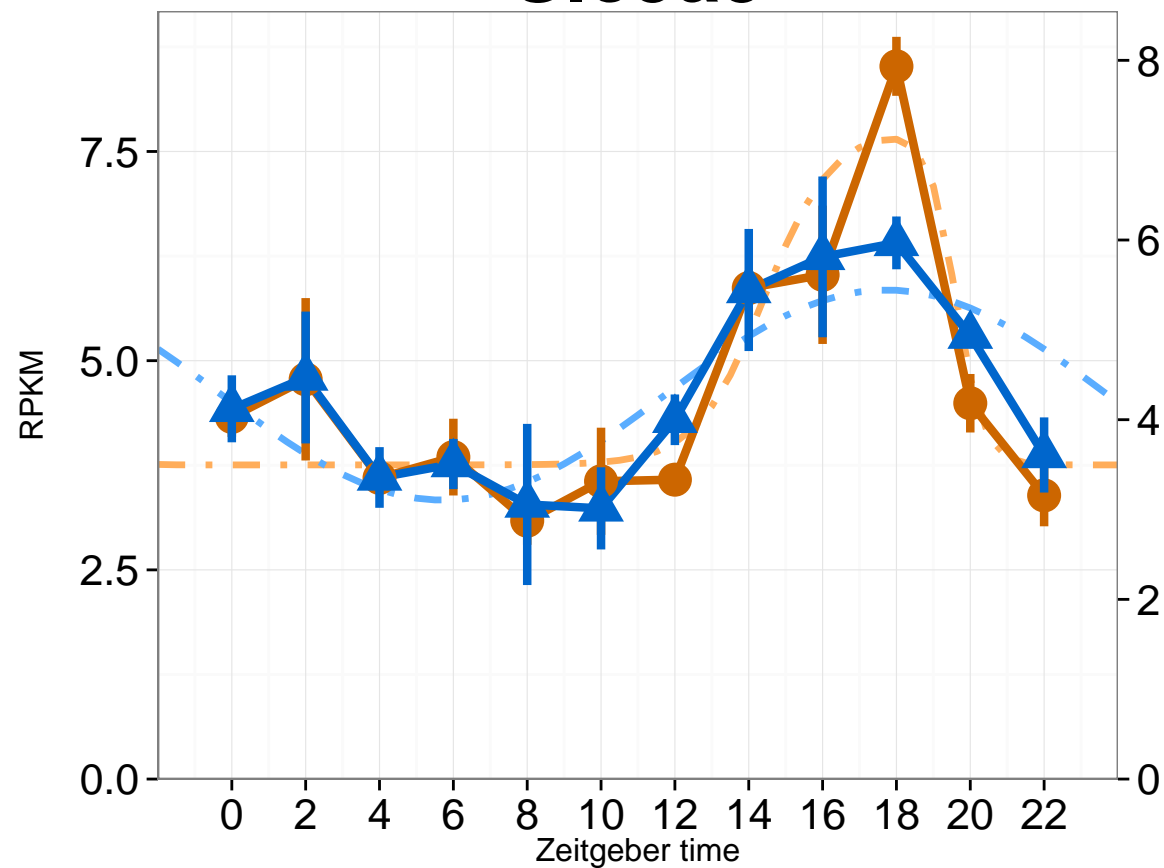

## Slc5a3

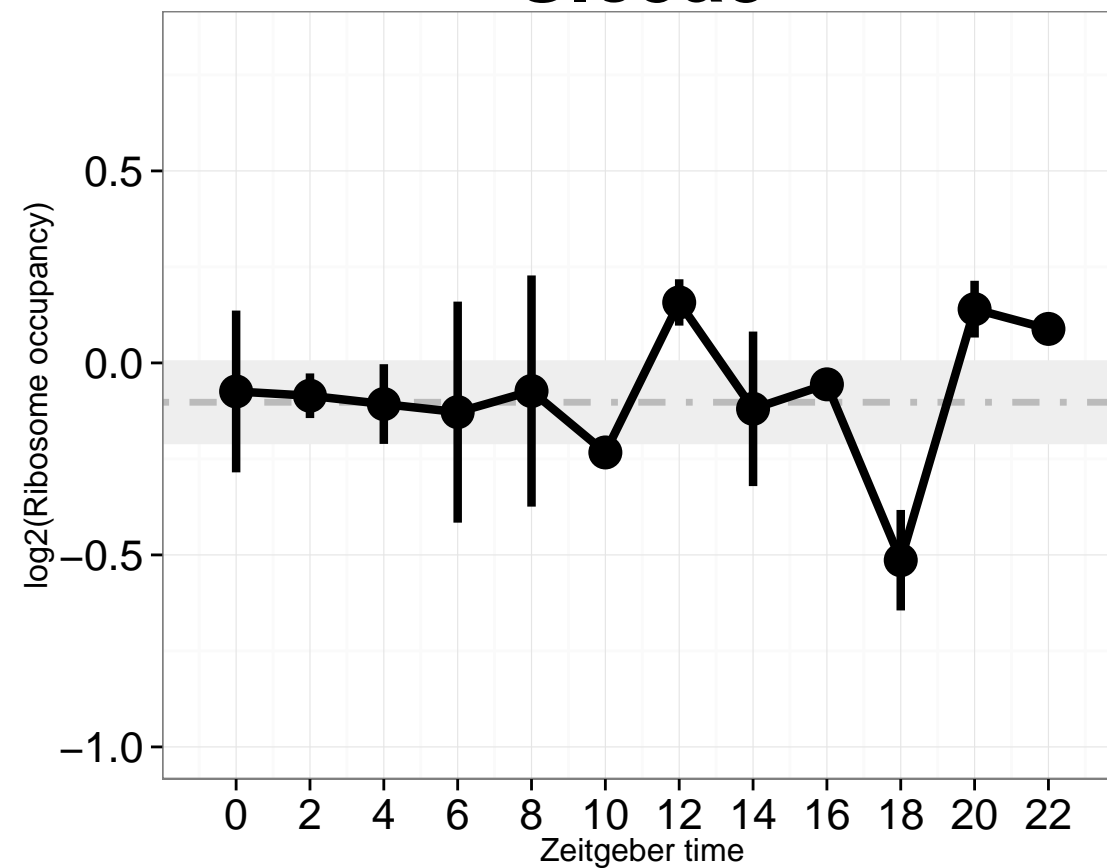

Supplement: Supplementary file 4204 [file 1]

## Npepl1

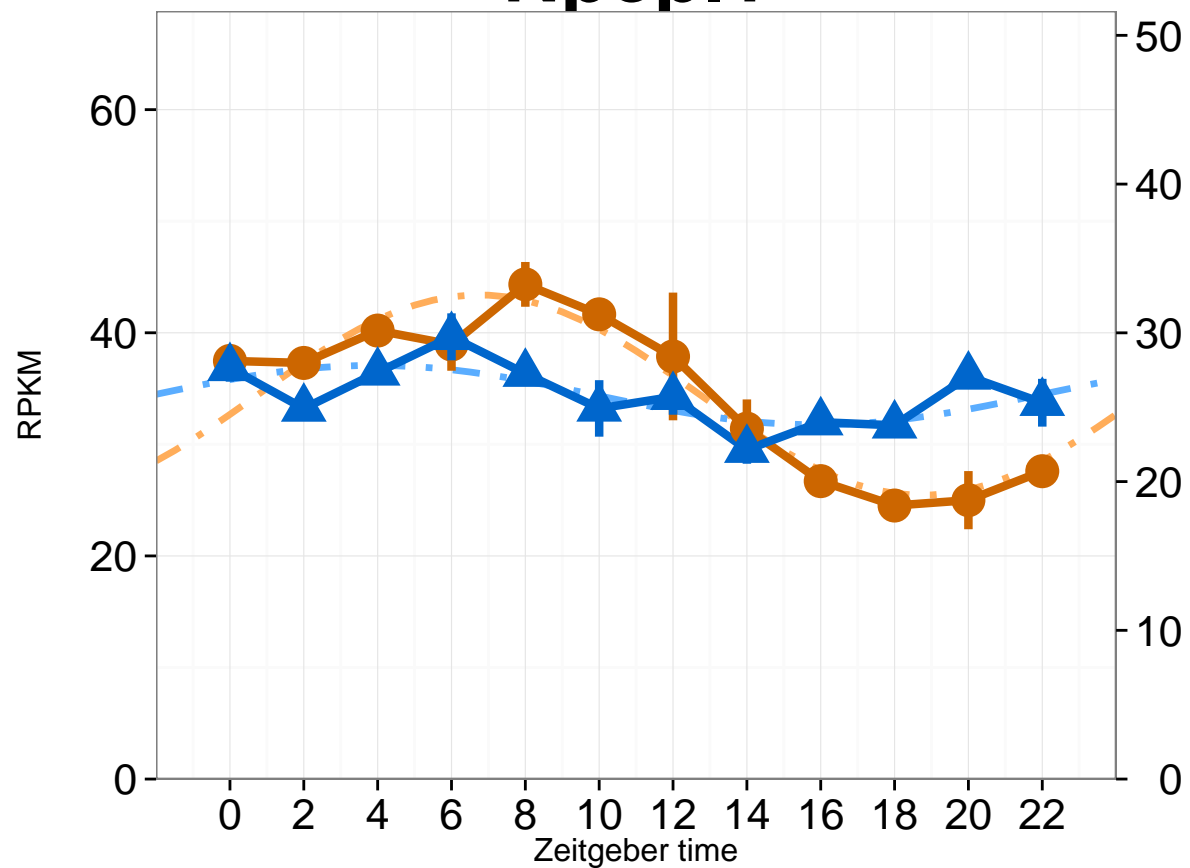

## Npepl1

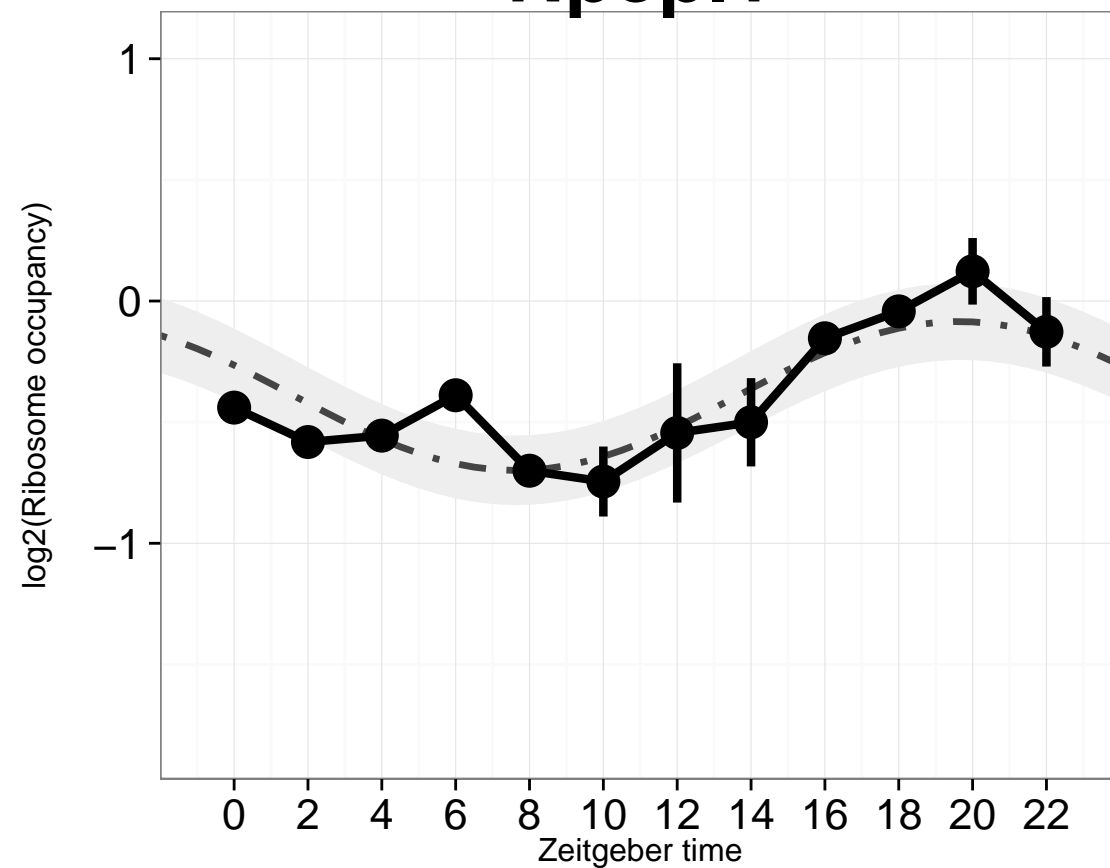

Supplement: Supplementary file 4205 [file 1]

## Tob2

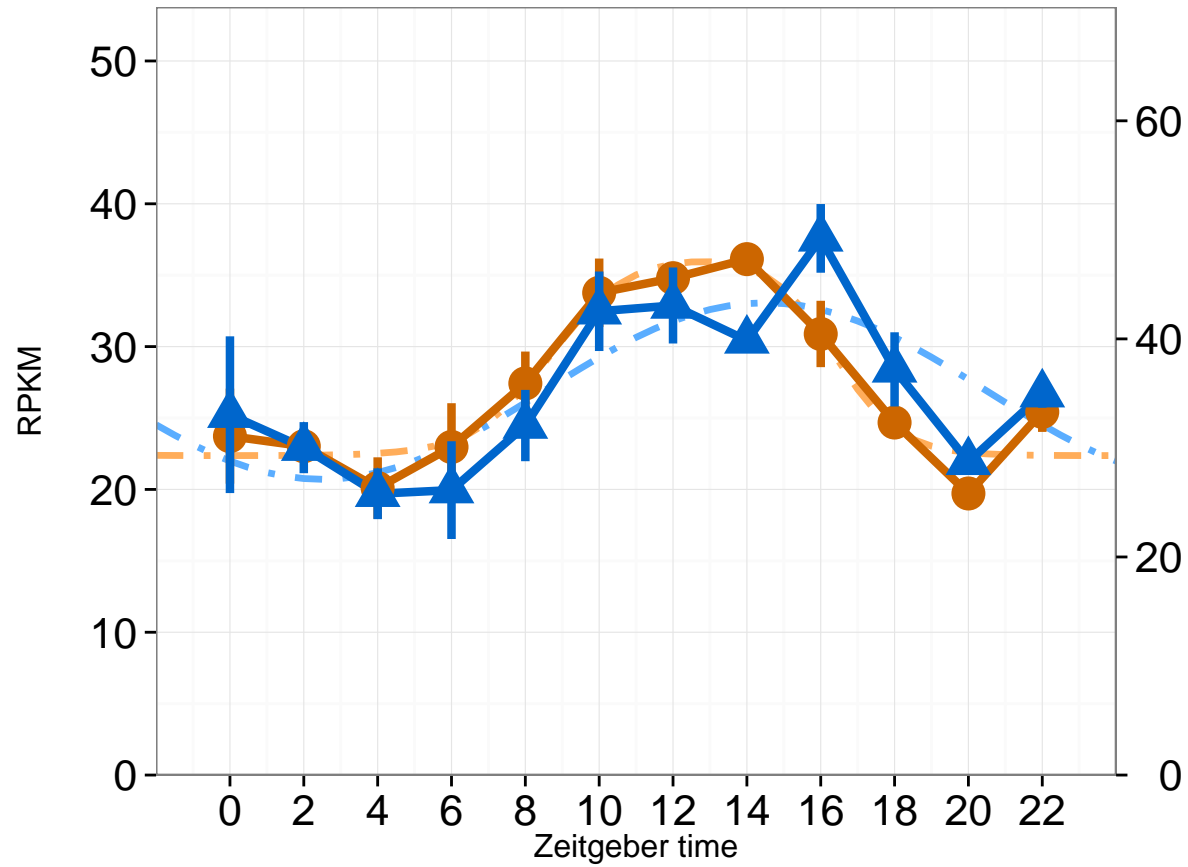

## Tob2

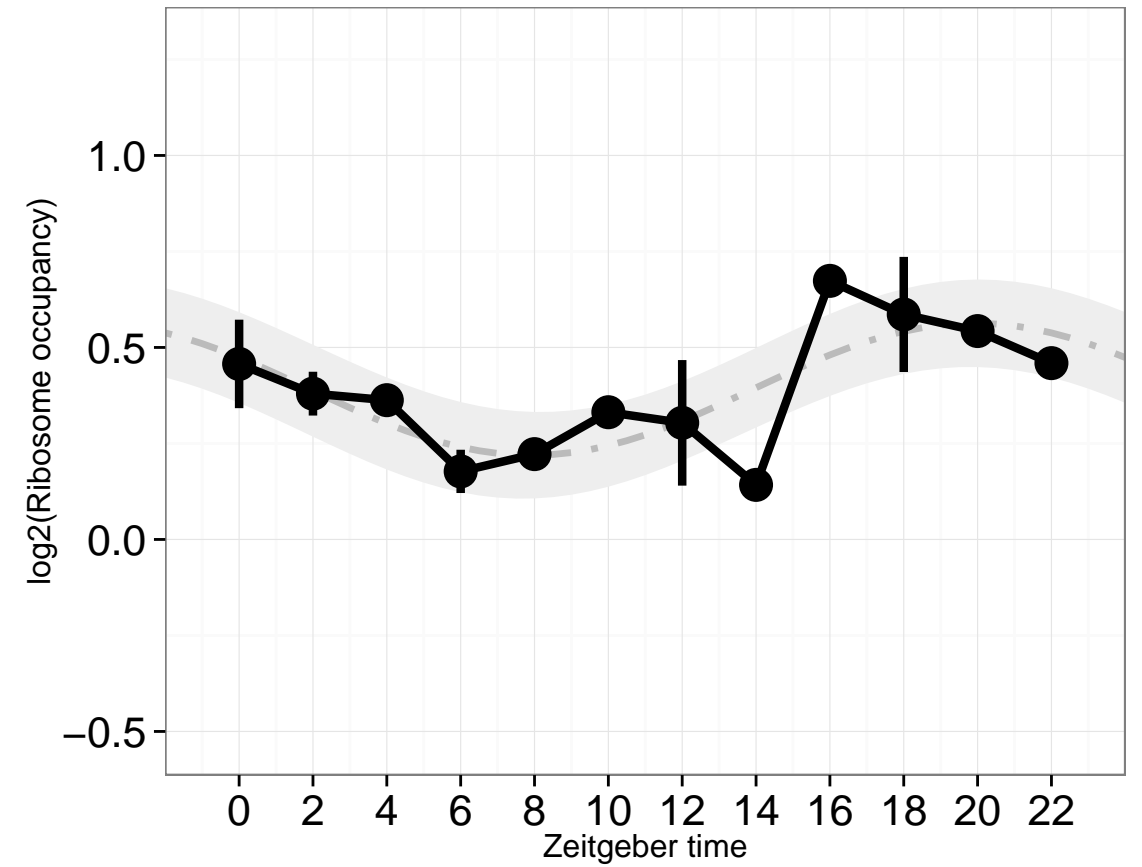

Supplement: Supplementary file 4206 [file 1]

## Sgsm2

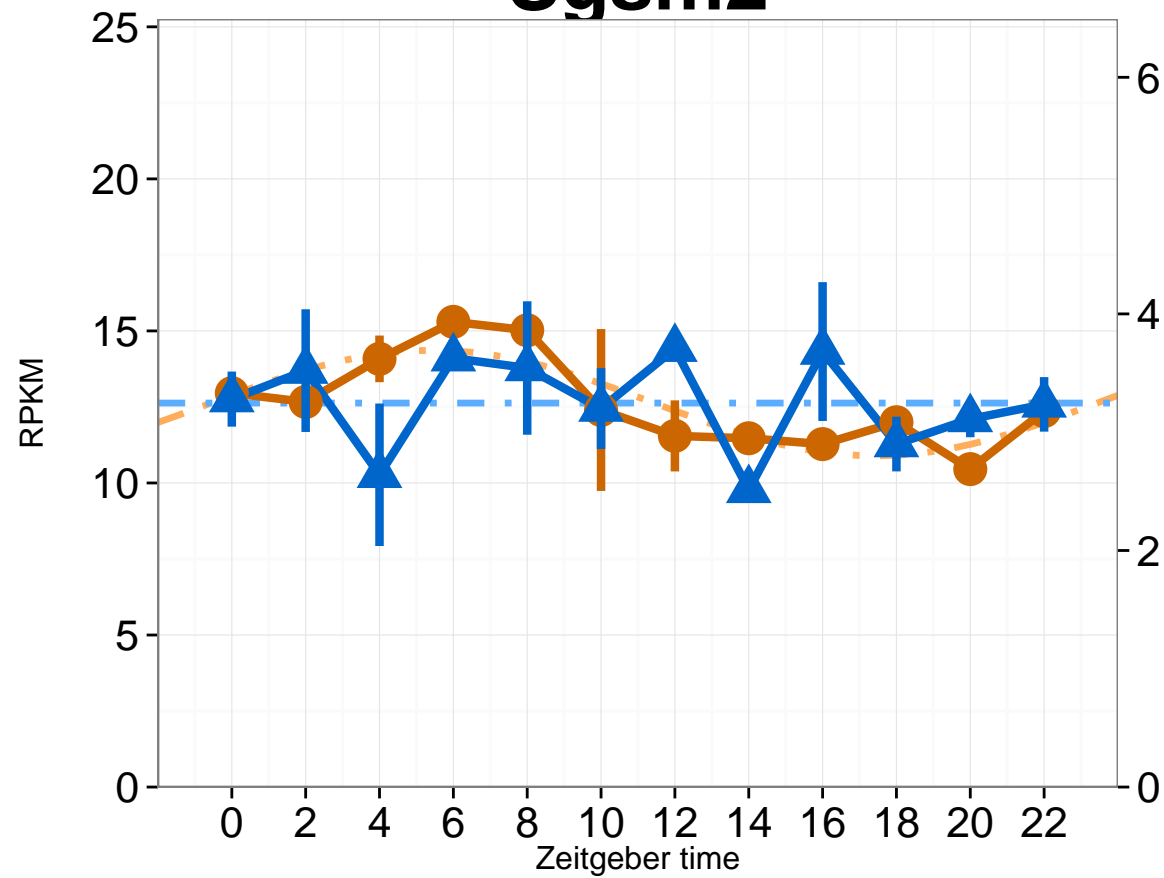

## Sgsm2

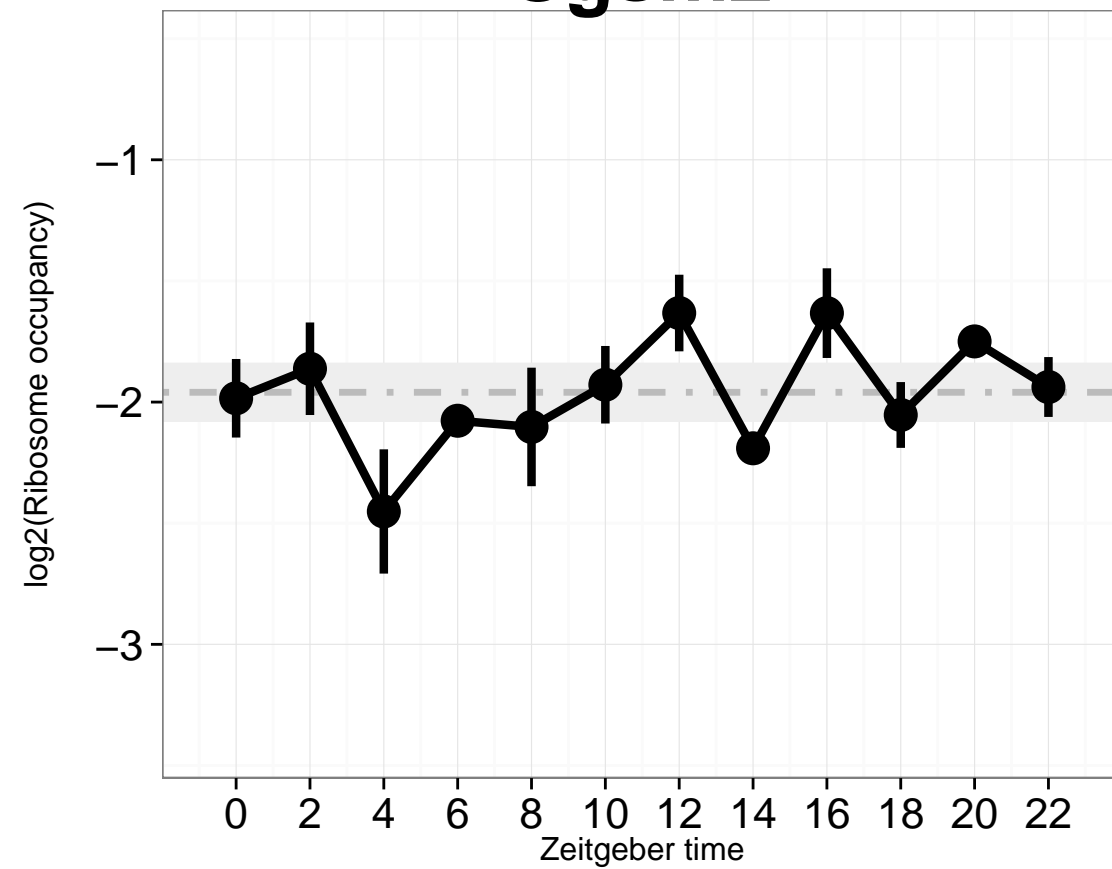

Supplement: Supplementary file 4207 [file 1]

# Parvg

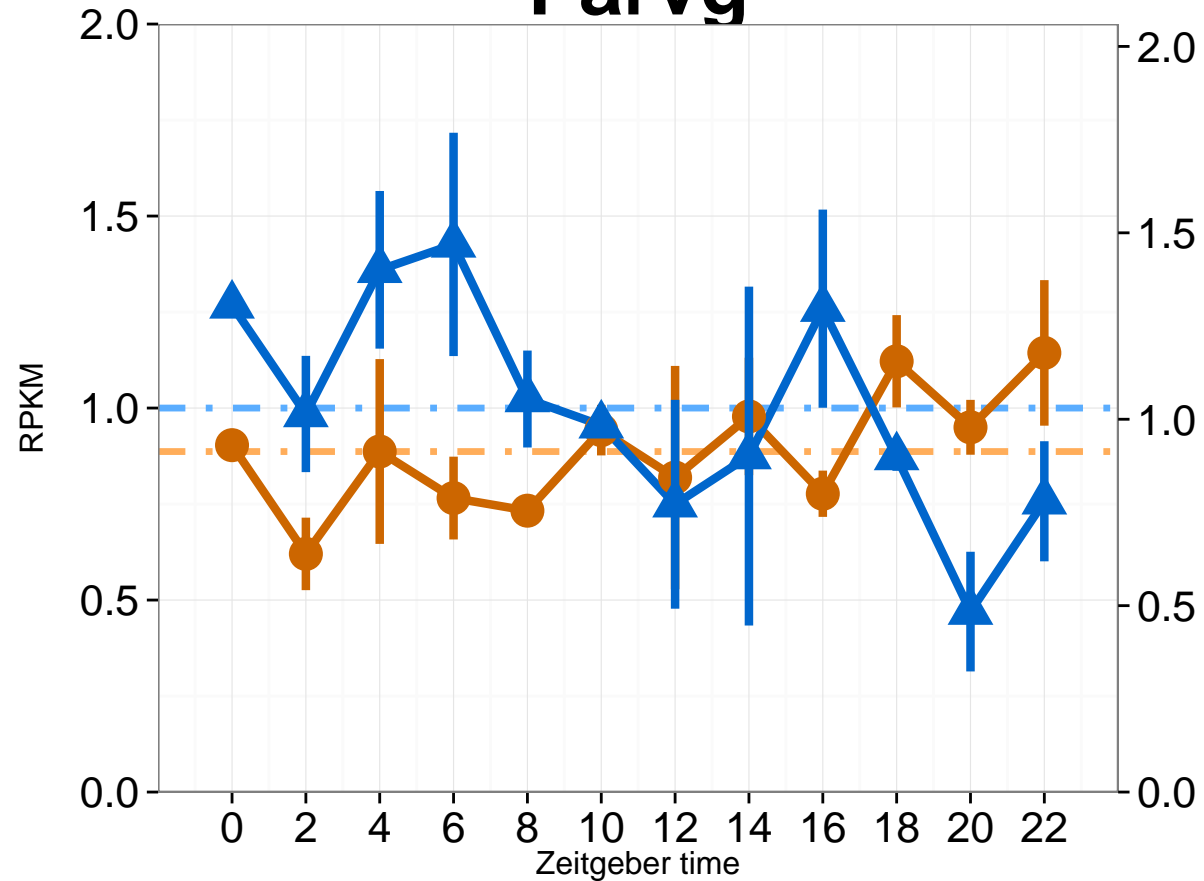

# Parvg

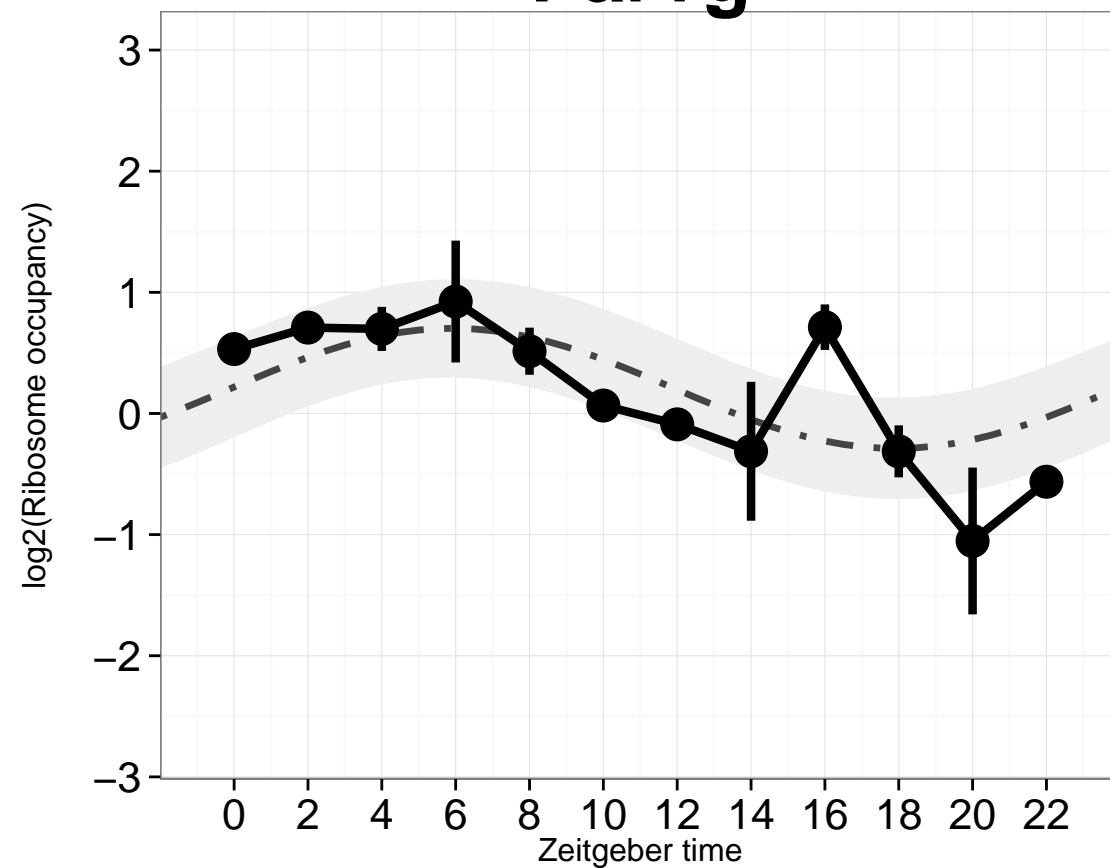

Supplement: Supplementary file 4208 [file 1]

# Tceal1

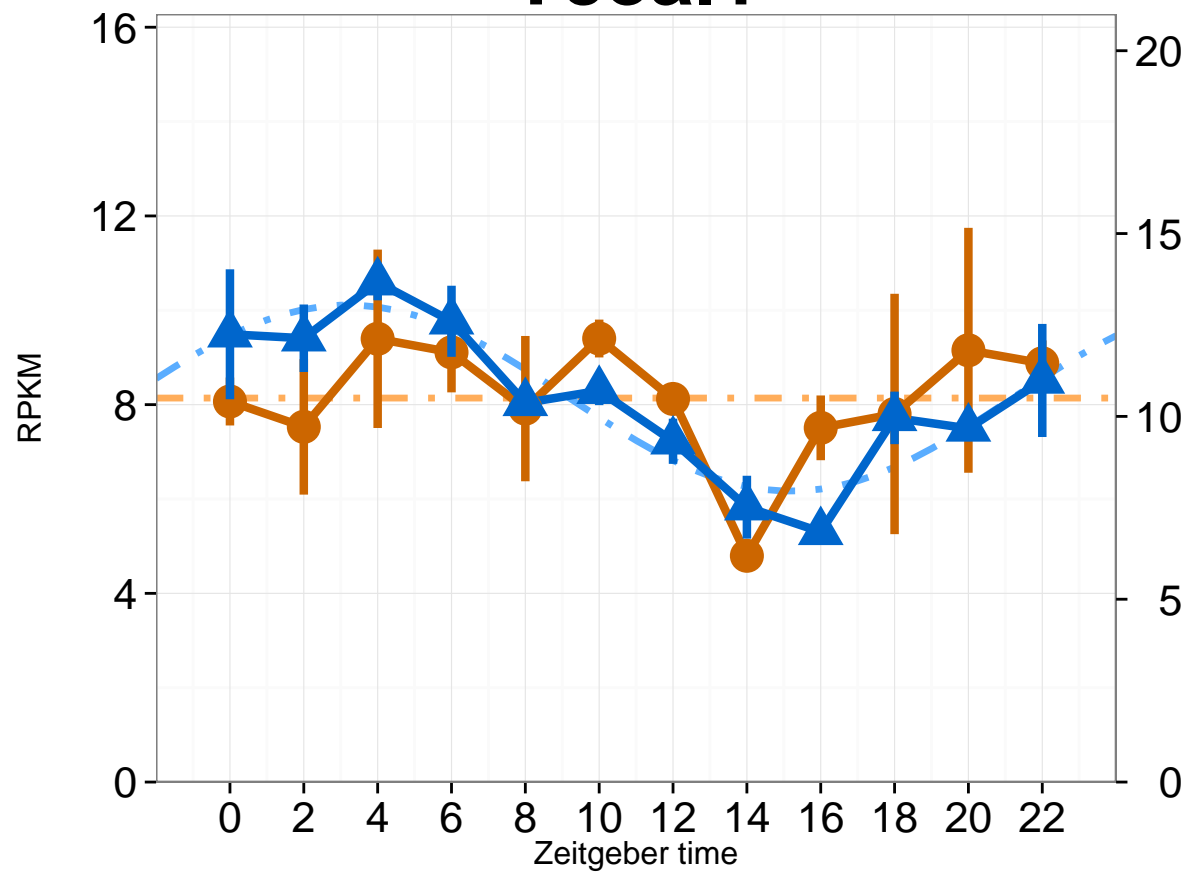

# Tceal1

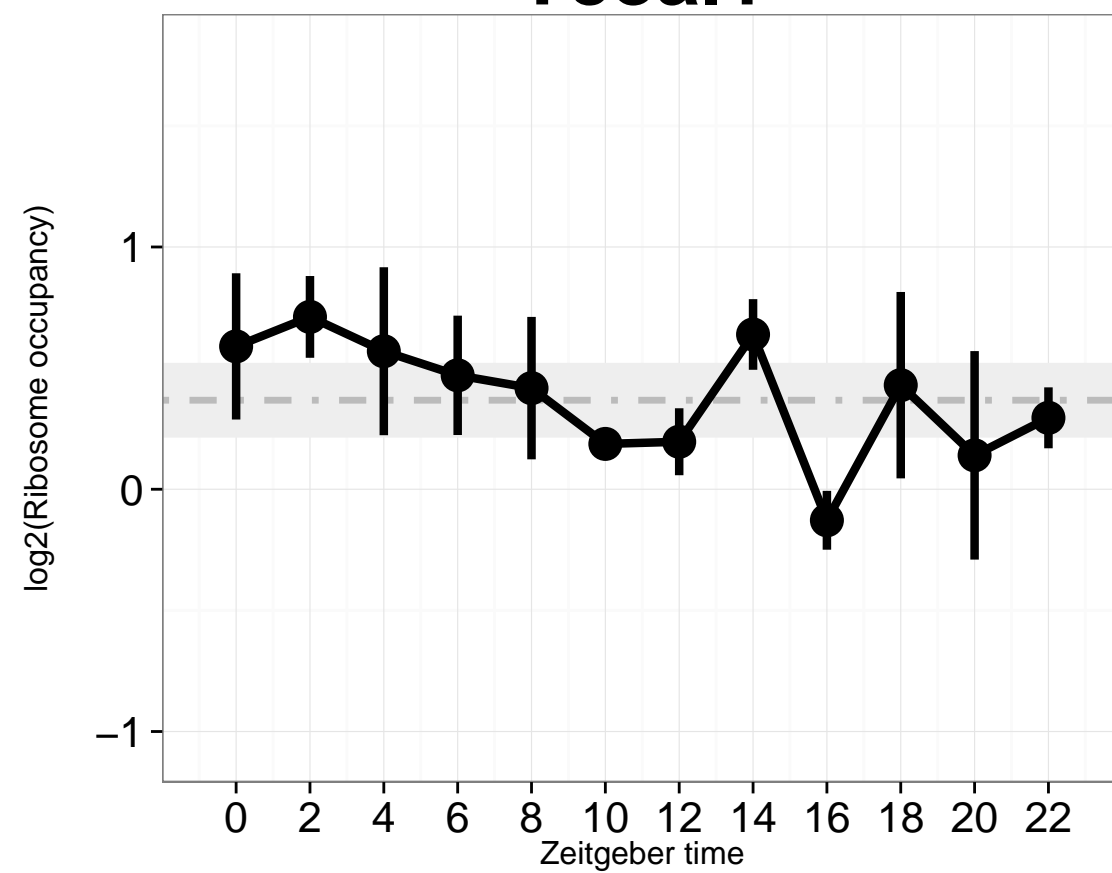

Supplement: Supplementary file 4209 [file 1]

## Pgk1

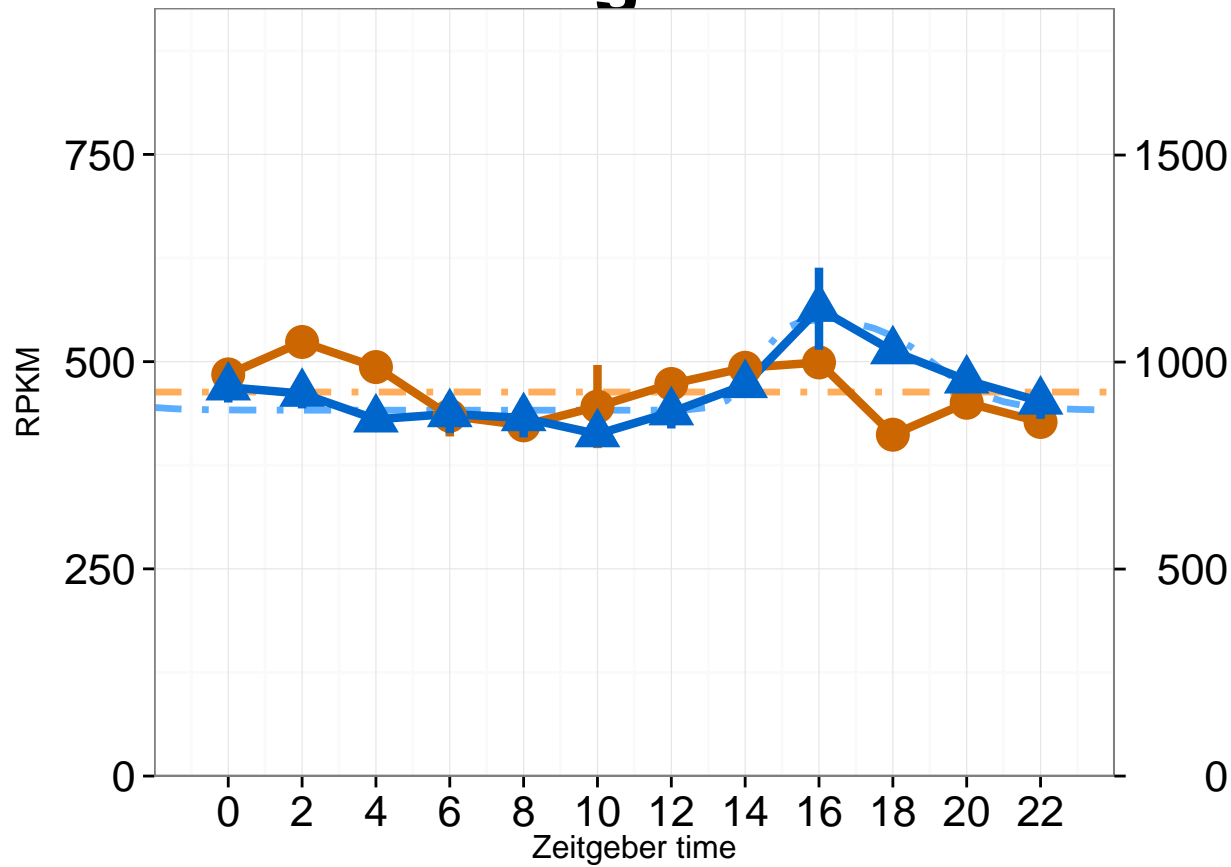

## Pgk1

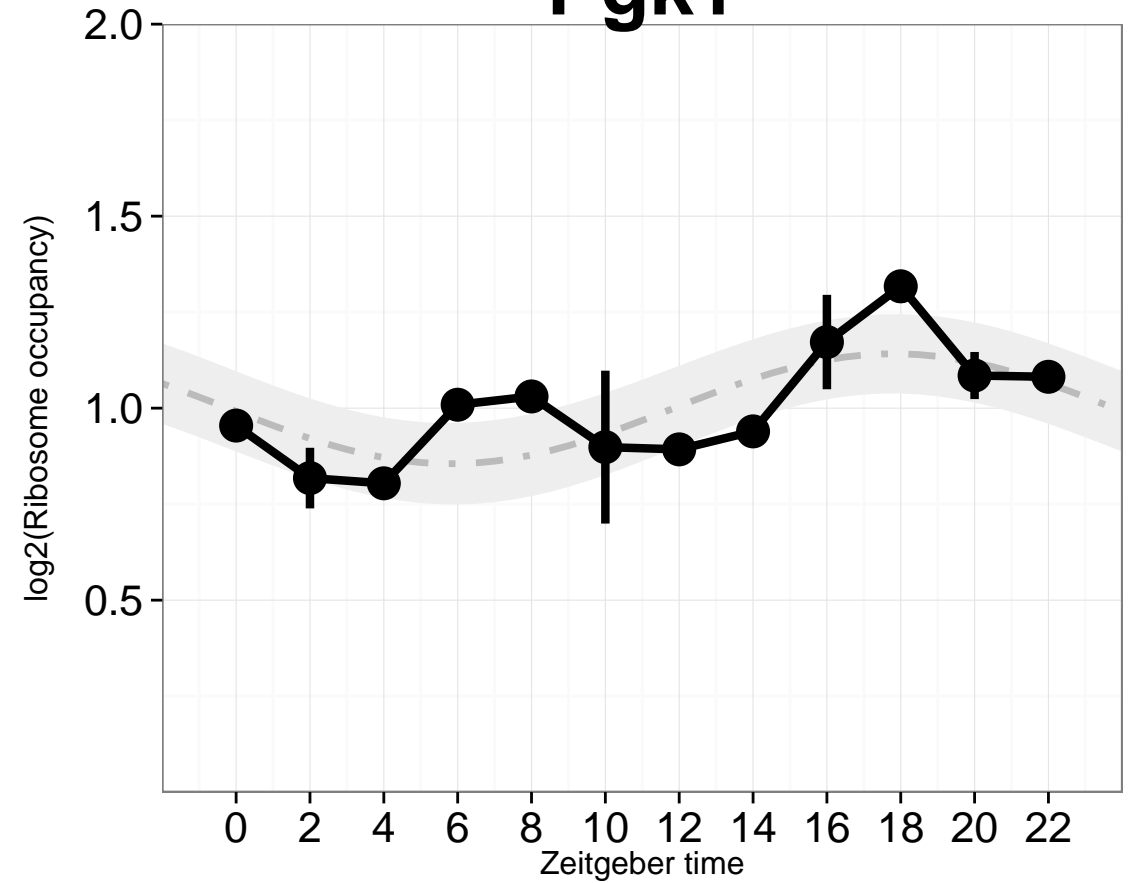

Supplement: Supplementary file 4210 [file 1]

# Ugt2b37

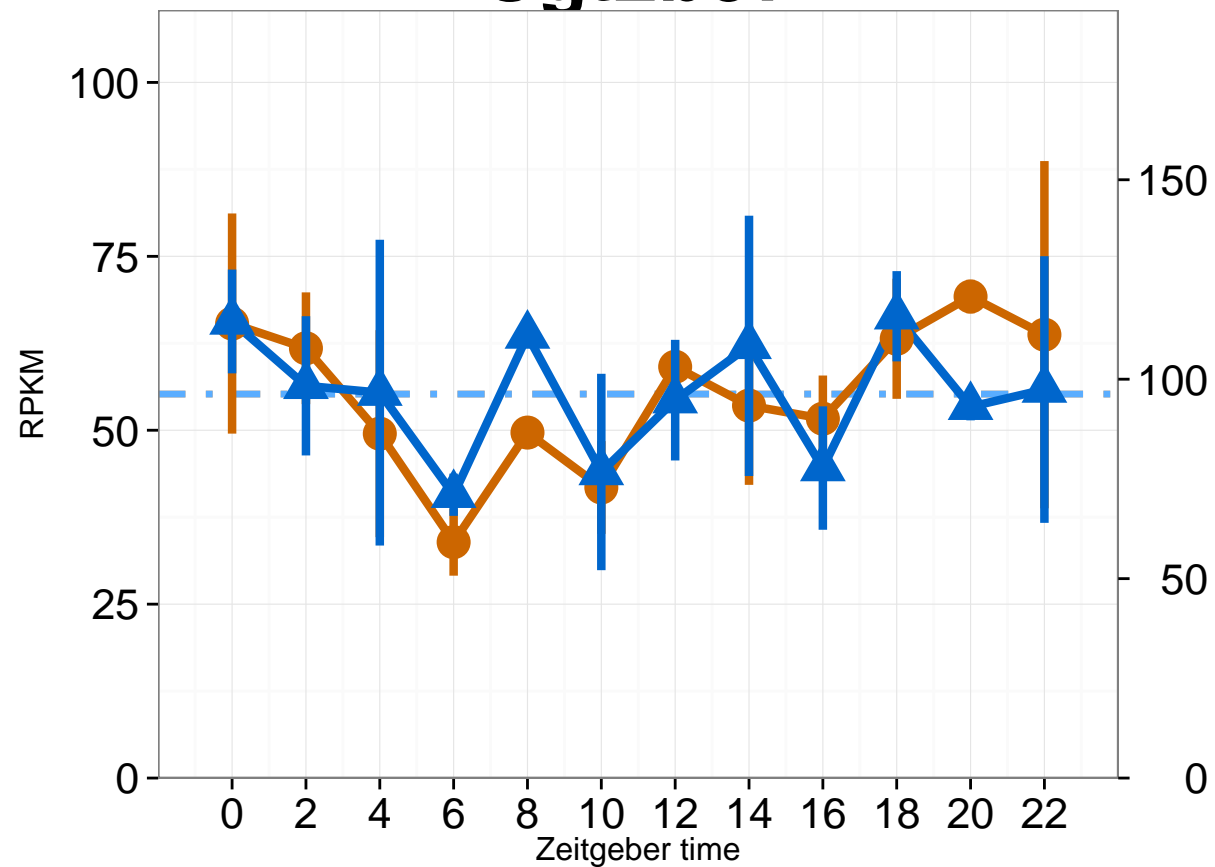

# Ugt2b37

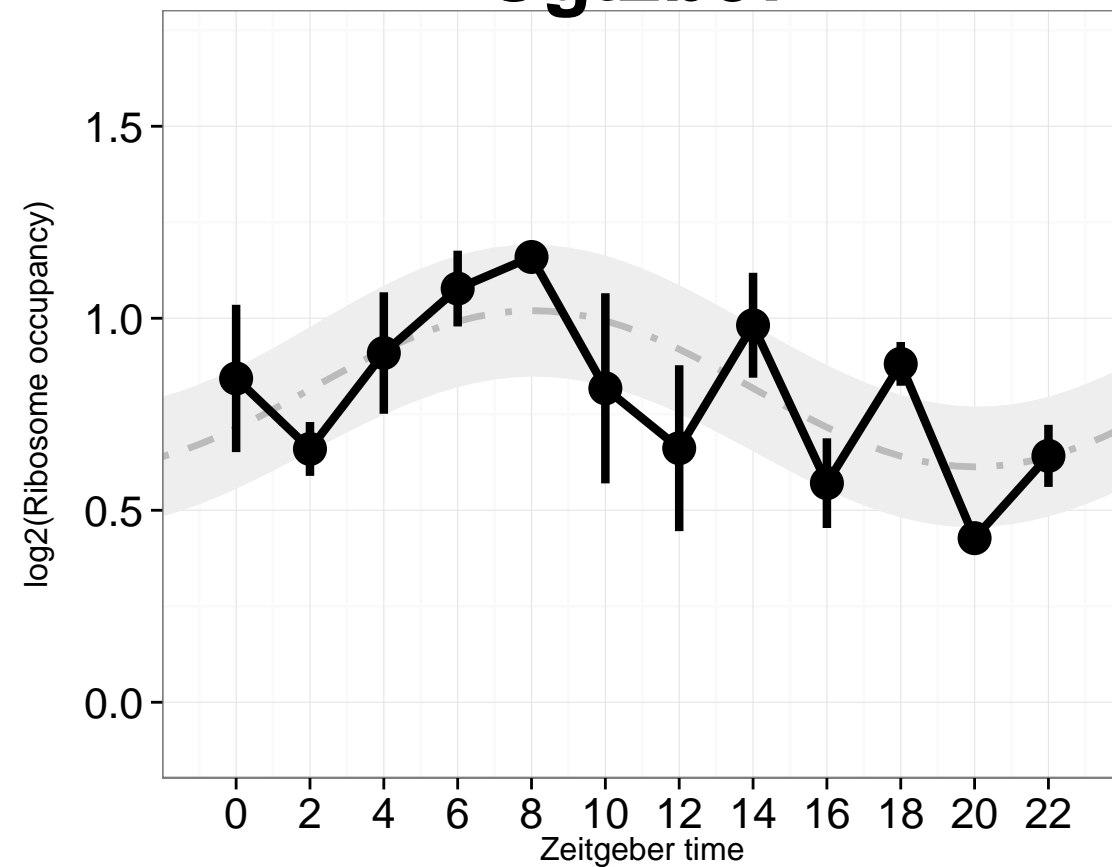

Supplement: Supplementary file 4211 [file 1]

## Tsku

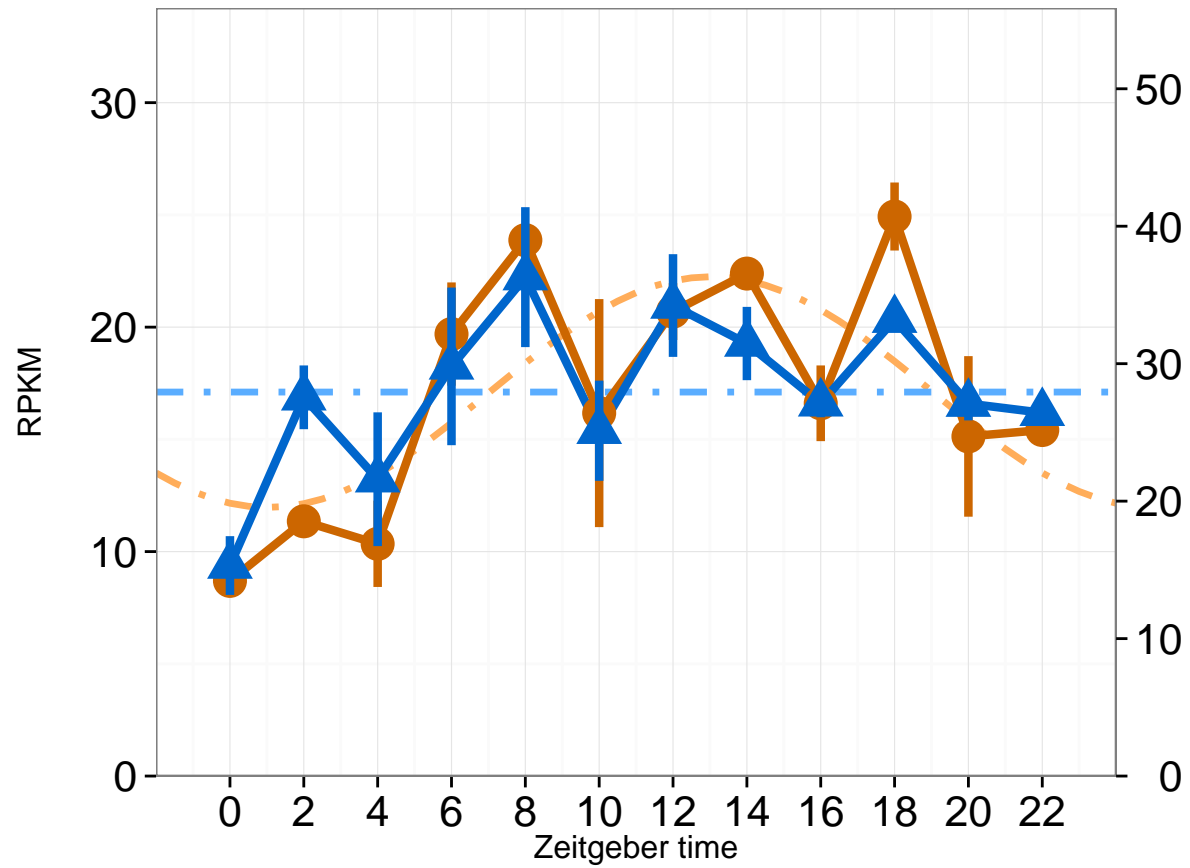

## Tsku

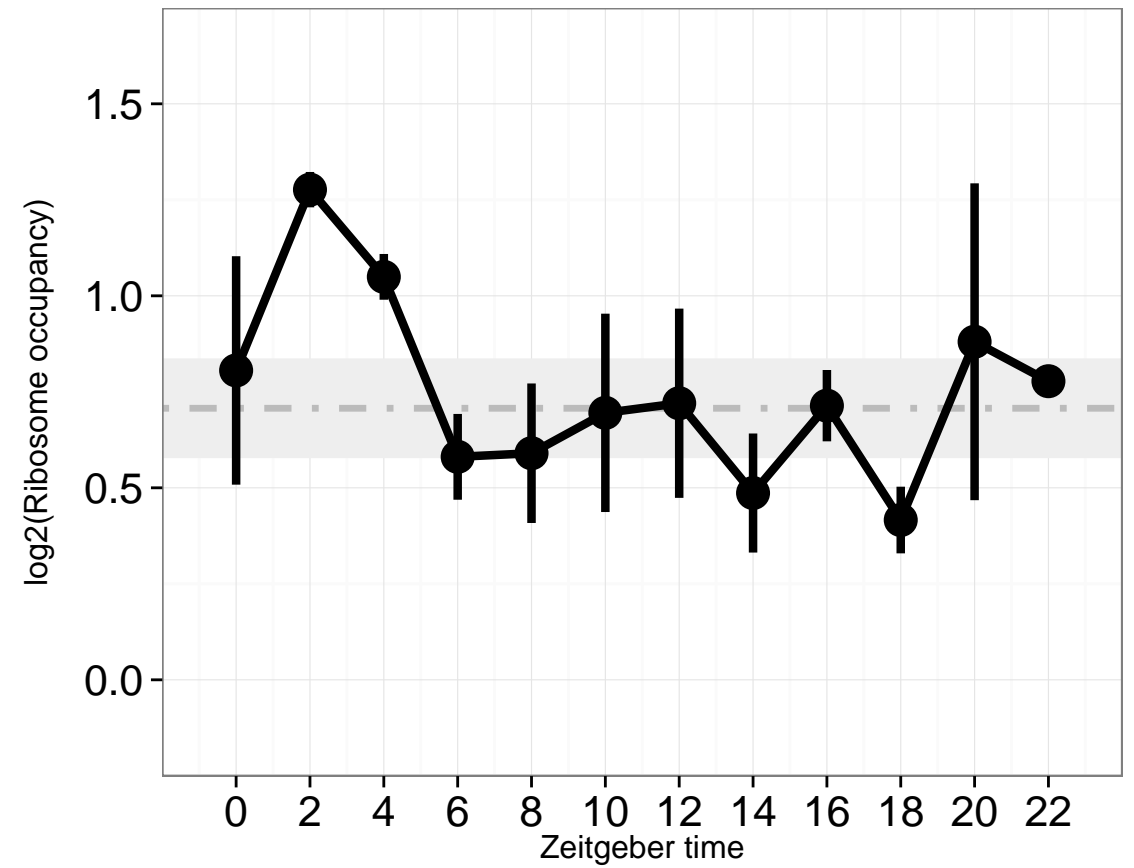

Supplement: Supplementary file 4212 [file 1]

# Zfp869

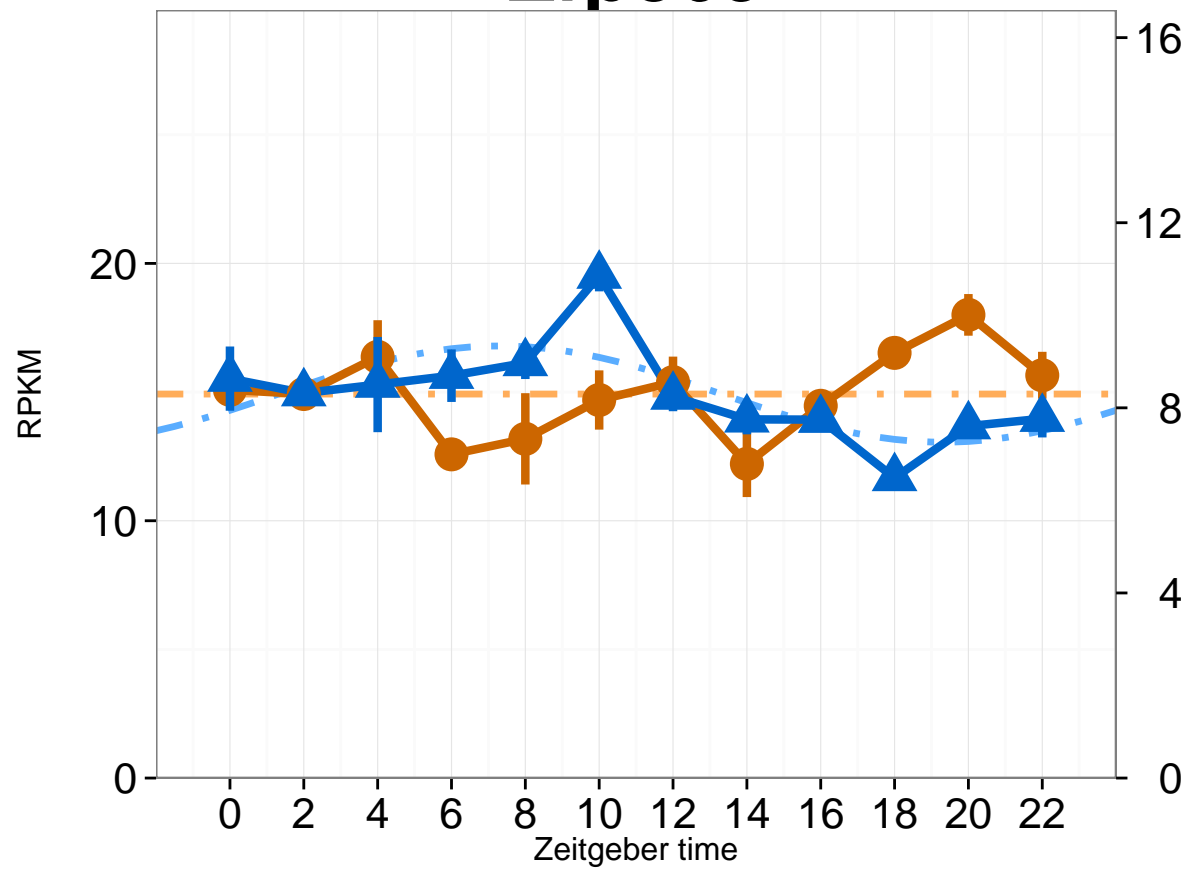

# Zfp869

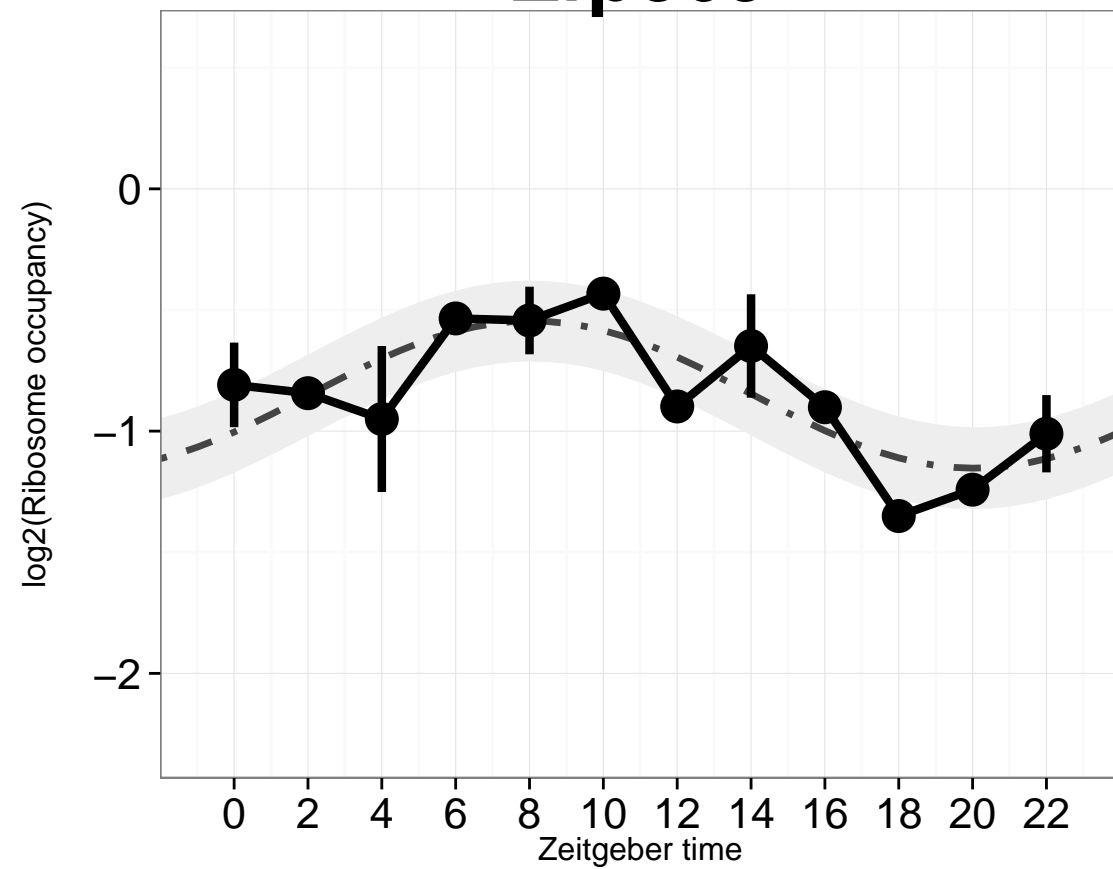

Supplement: Supplementary file 4213 [file 1]

# Zfp422

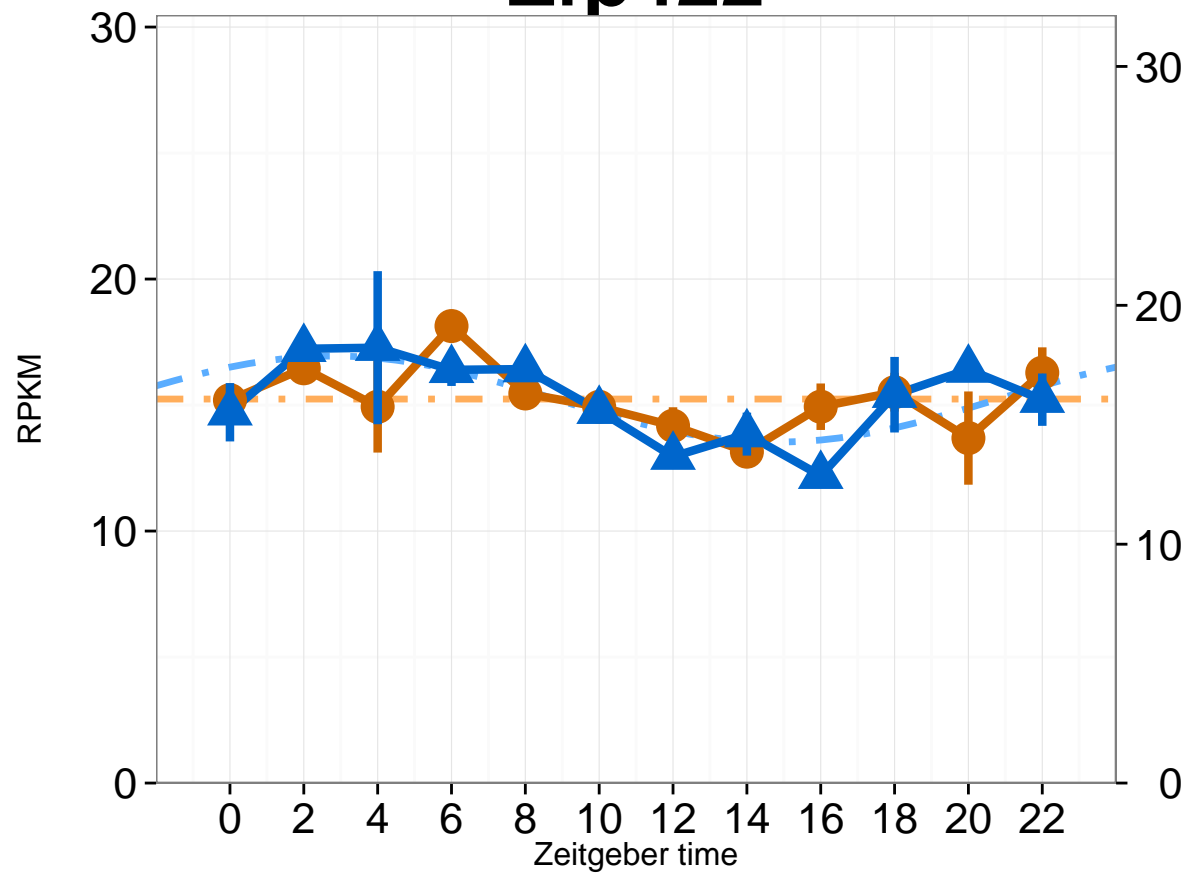

# Zfp422

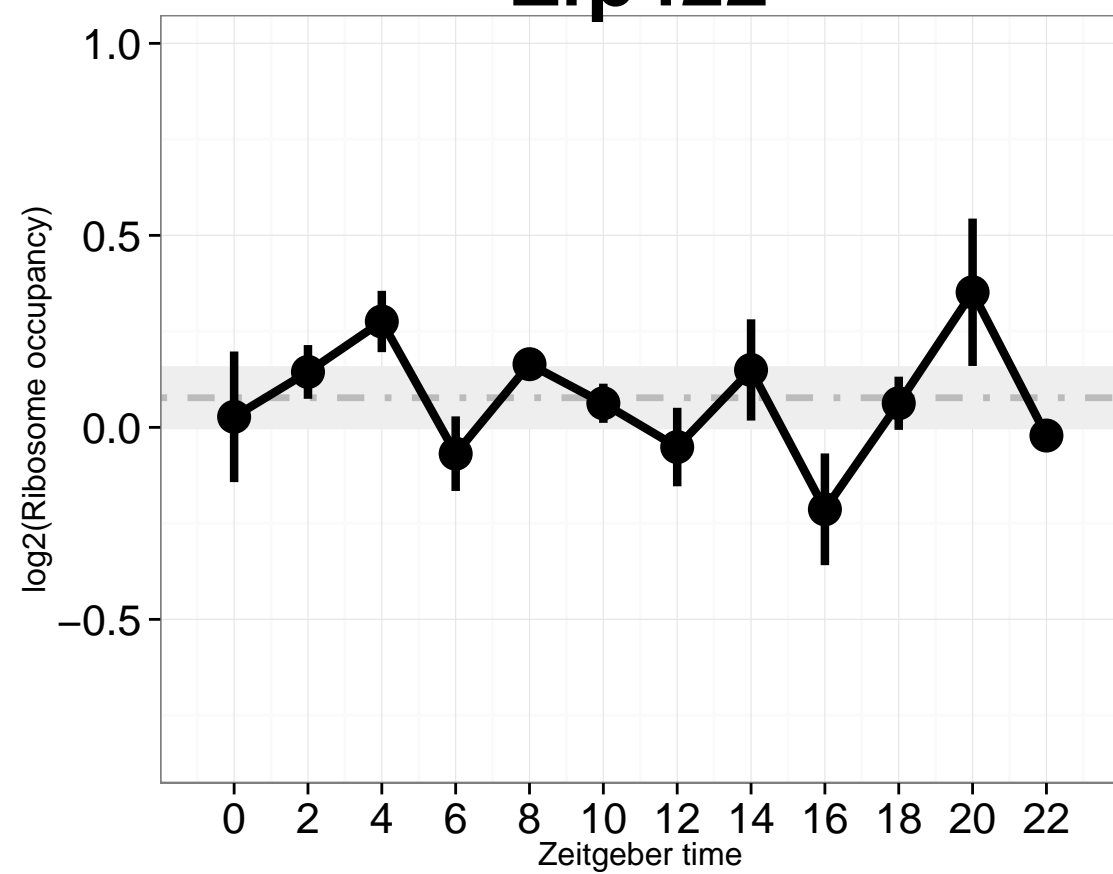

Supplement: Supplementary file 4214 [file 1]

## Dido1

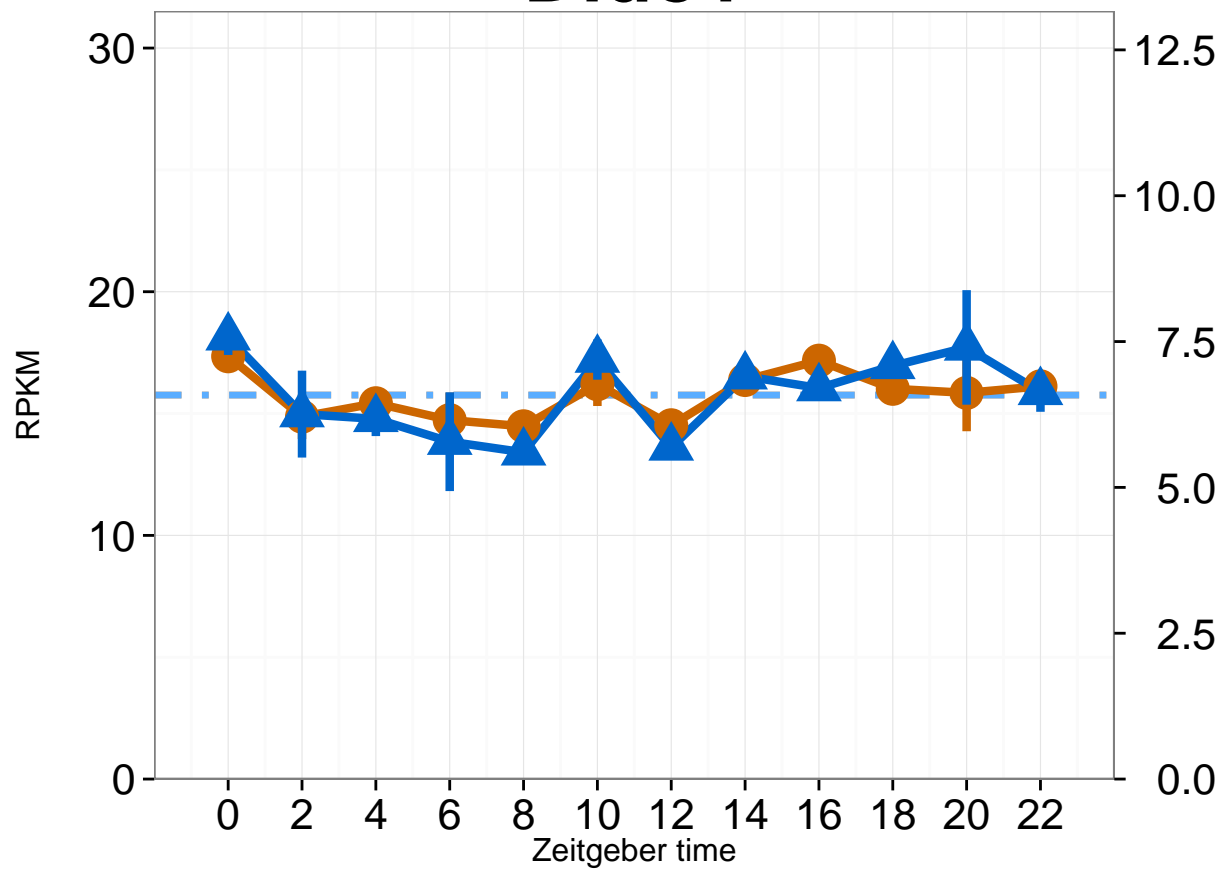

## Dido1

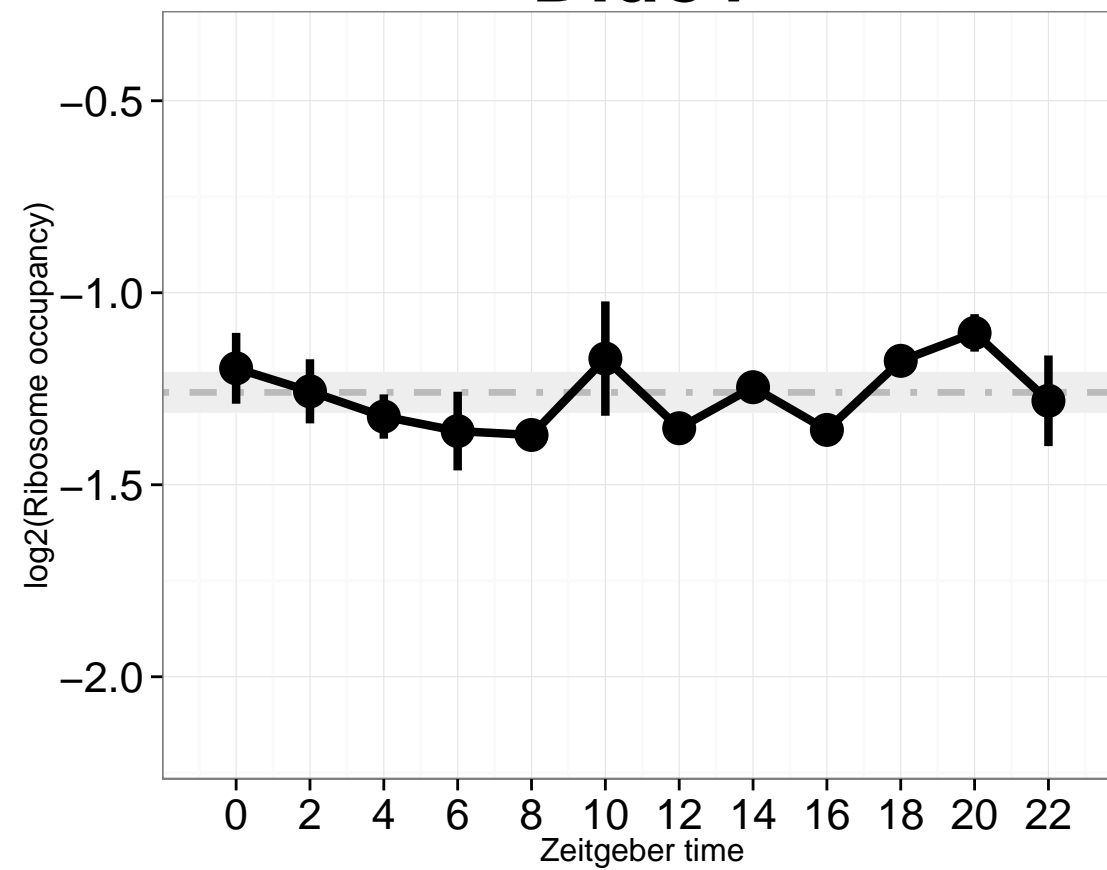

Supplement: Supplementary file 4215 [file 1]

## Arhgef19

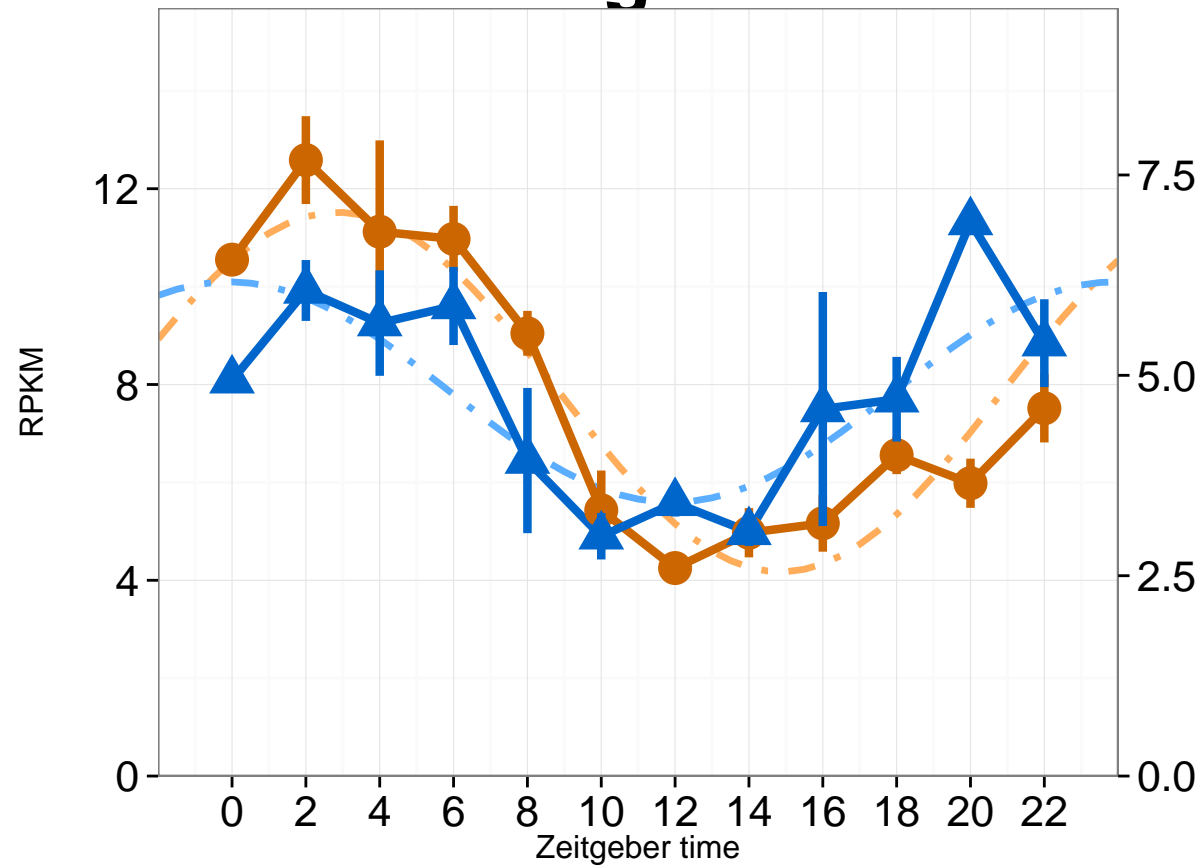

## Arhgef19

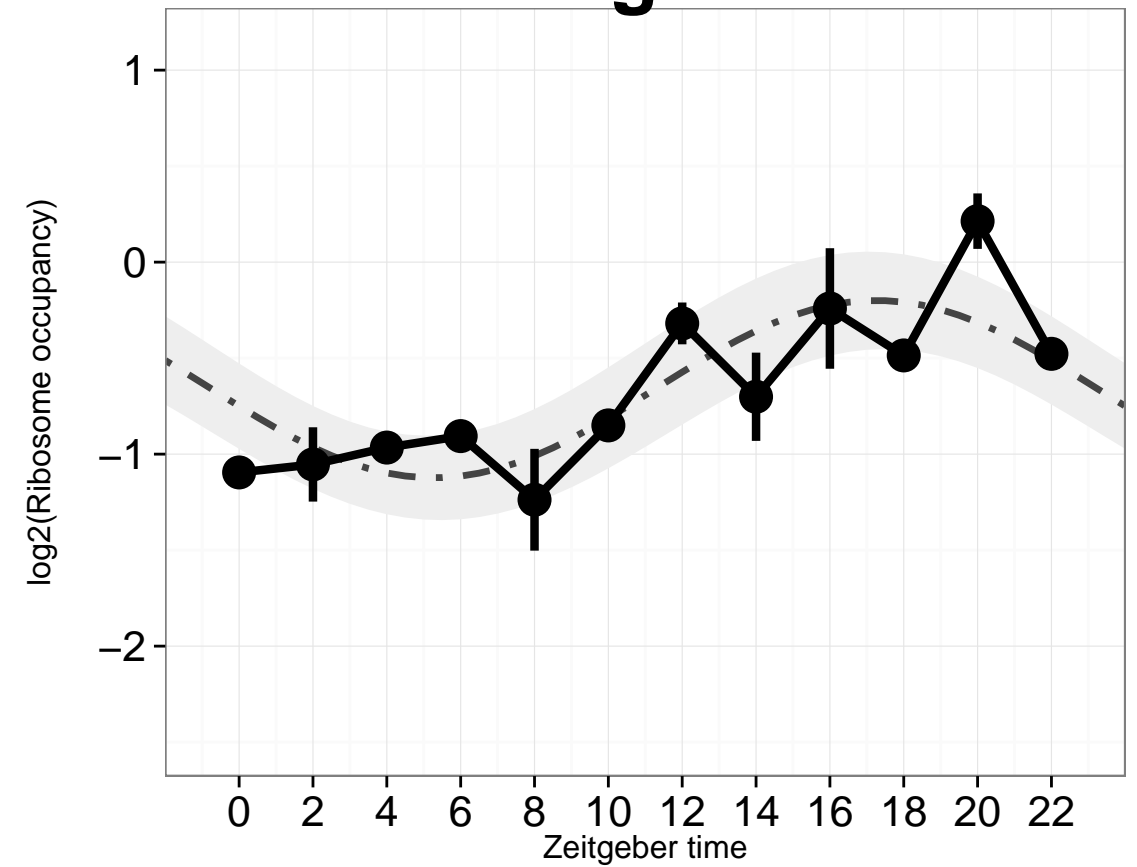

Supplement: Supplementary file 4216 [file 1]

# Nr0b2

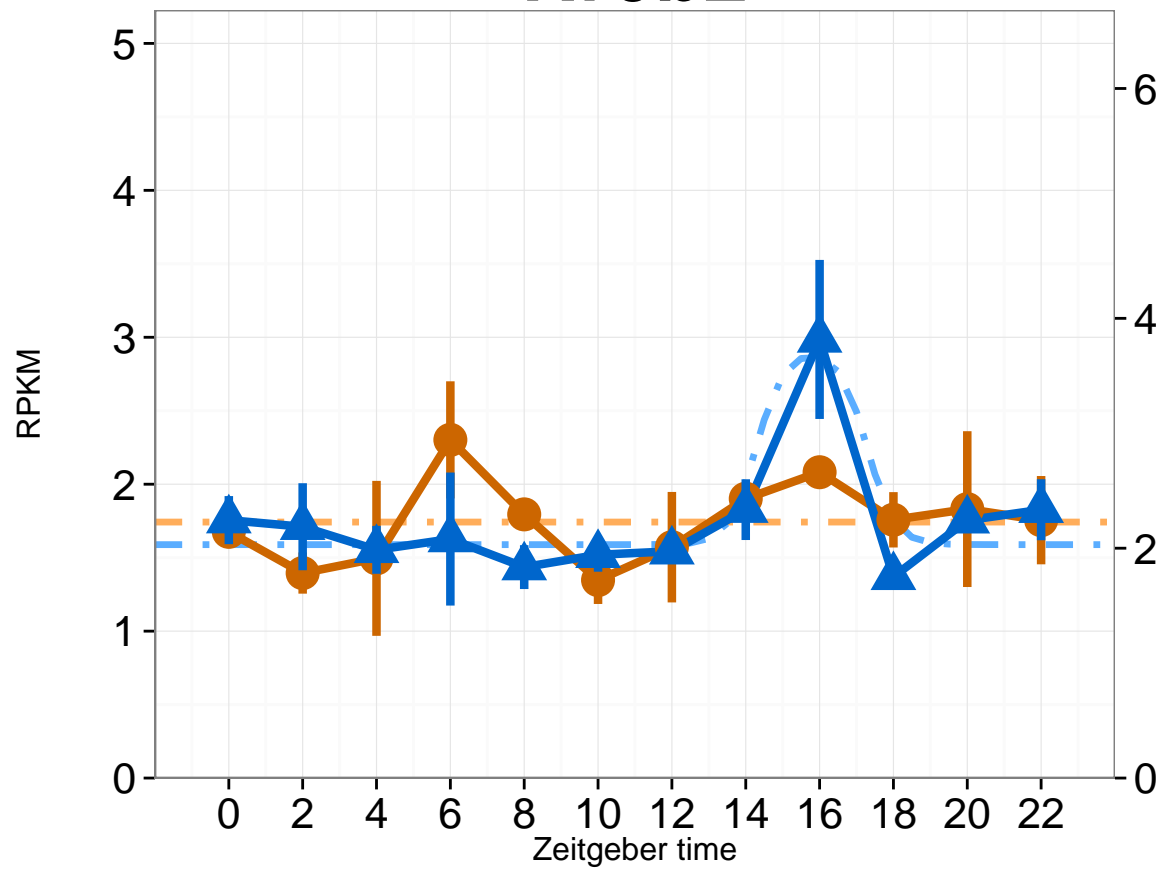

# Nr0b2

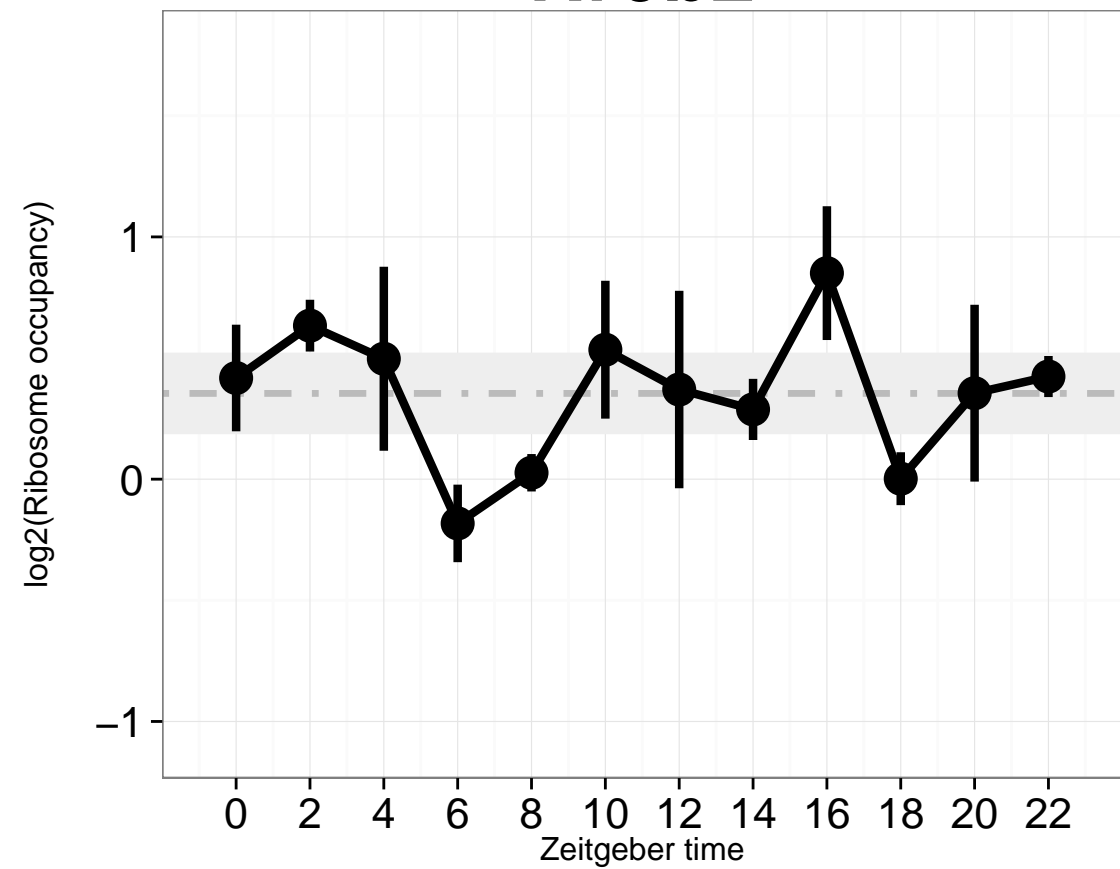

Supplement: Supplementary file 4217 [file 1]
