# Supplementary material (part 43 of 133)
Source: publisher figshare collection journal article supplement (https://springernature.figshare.com/articles/dataset/_/4903193)

# Rps19bp1

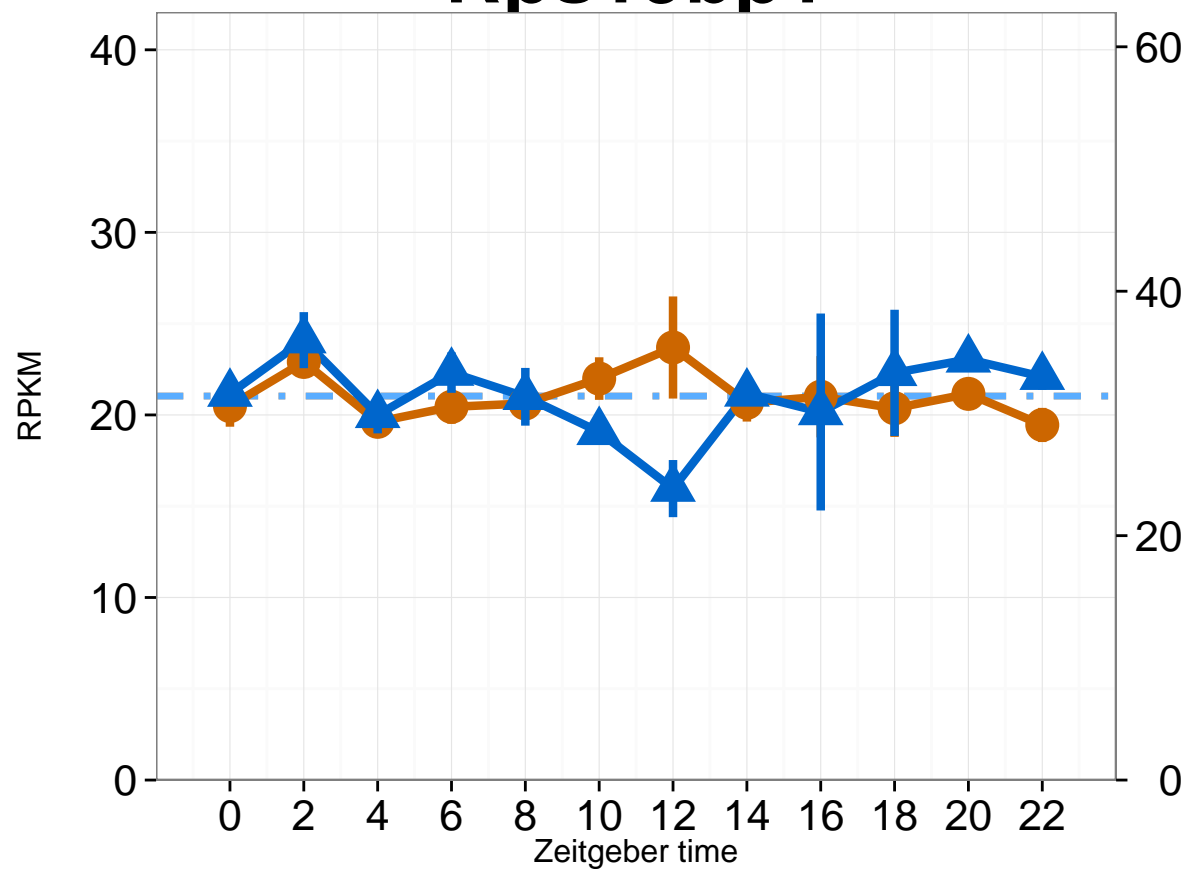

# Rps19bp1

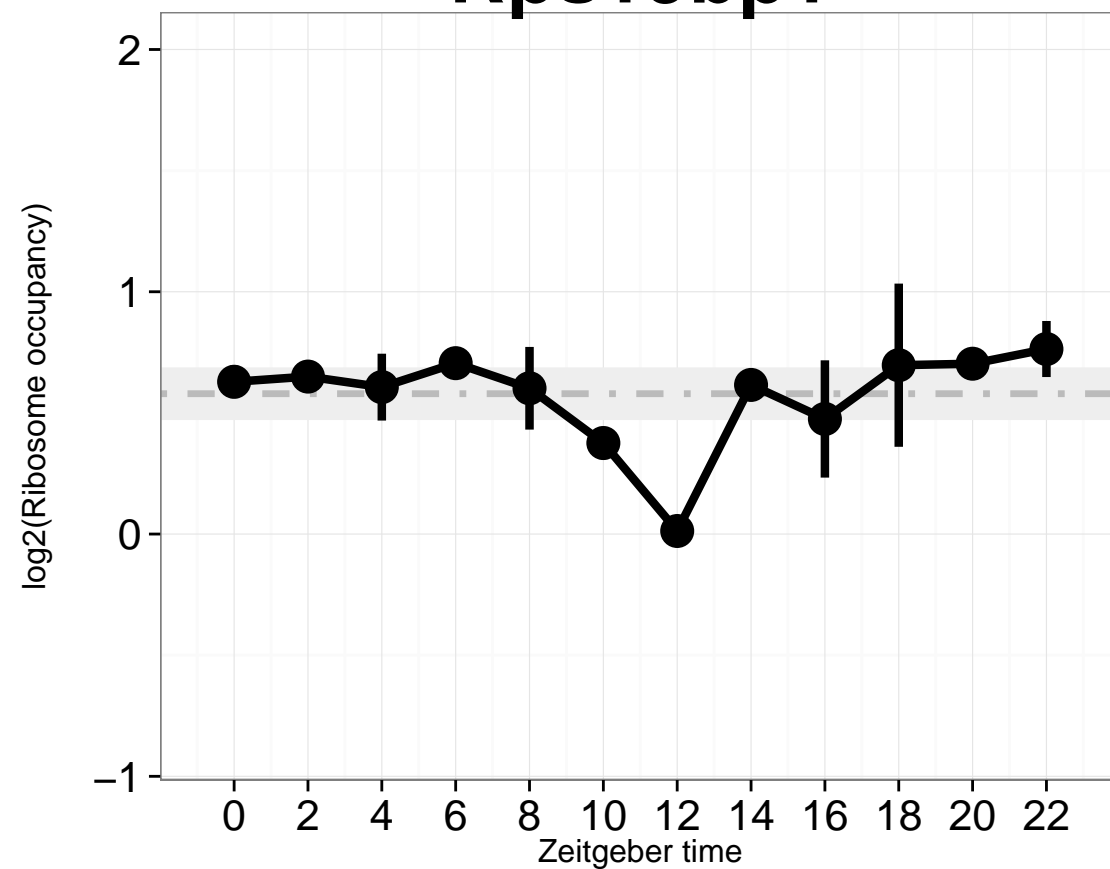

Supplement: Supplementary file 4218 [file 1]

# Gdpd5

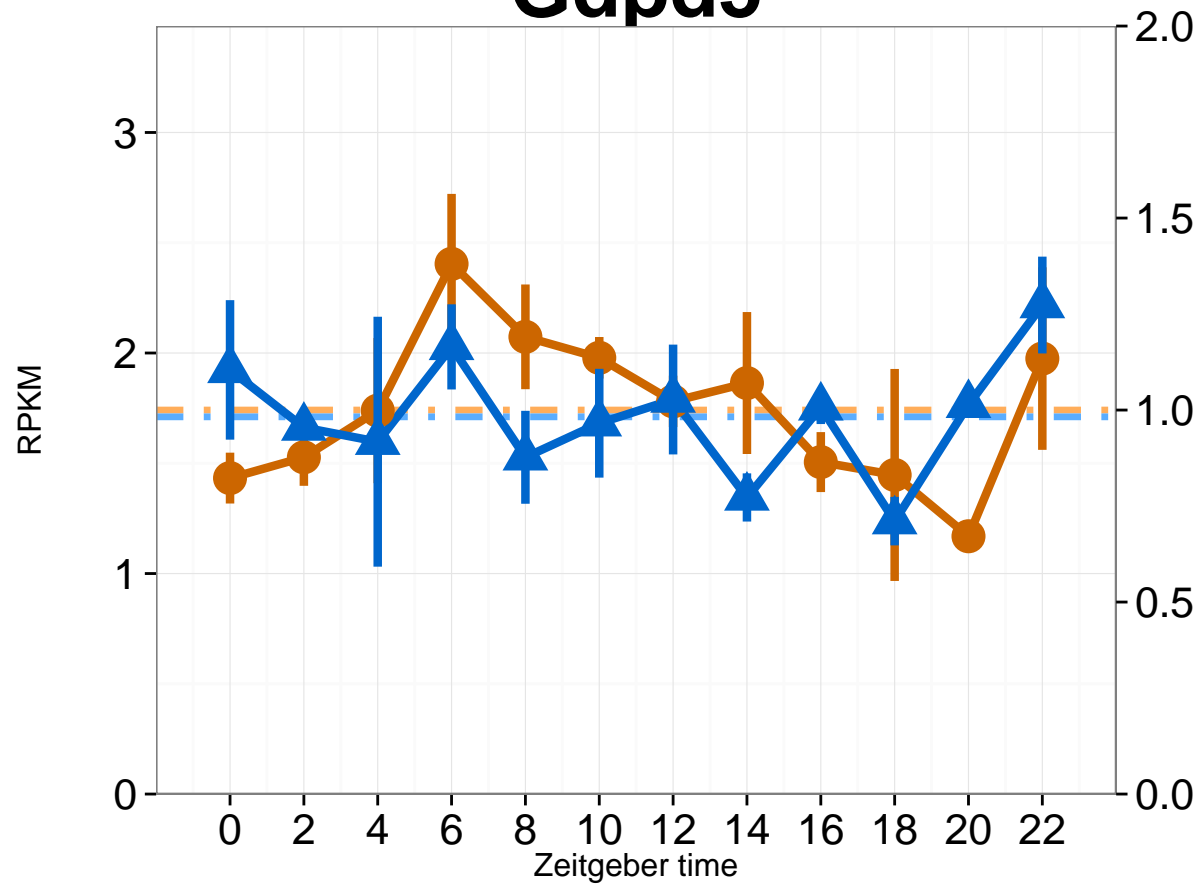

# Gdpd5

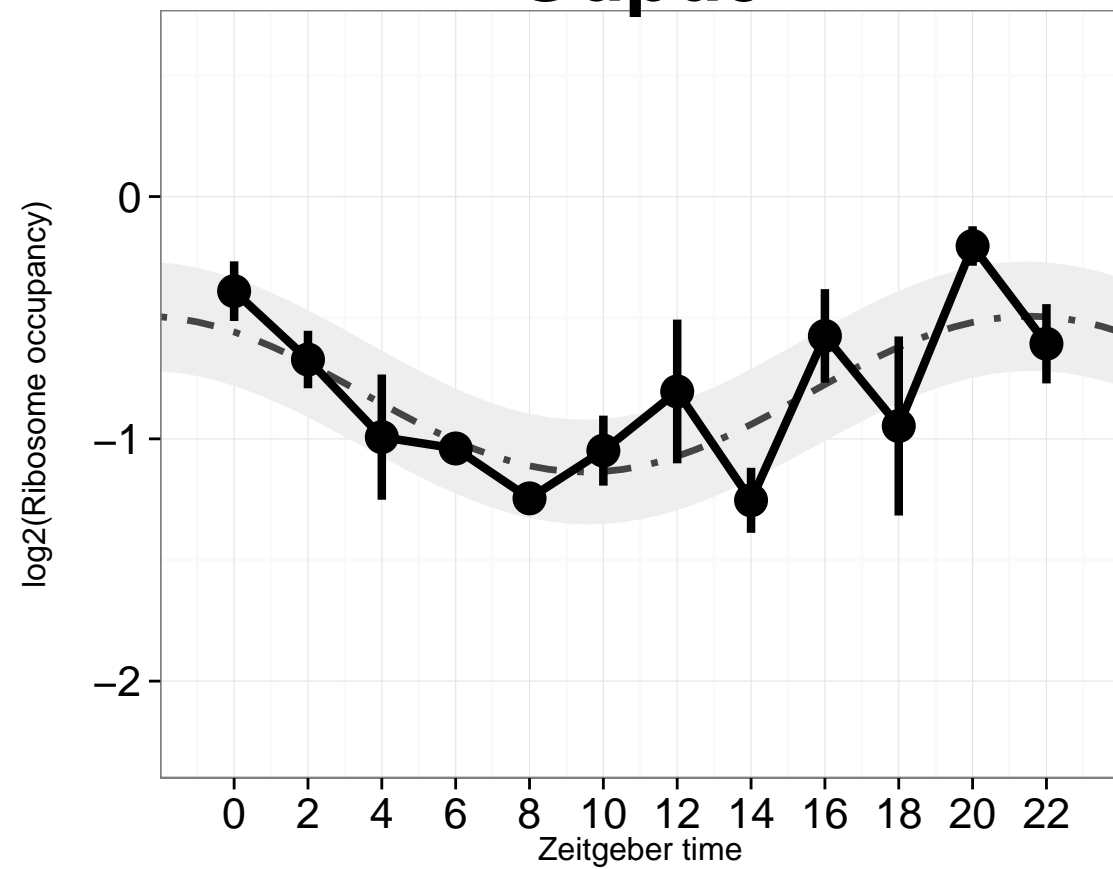

Supplement: Supplementary file 4219 [file 1]

## Emb

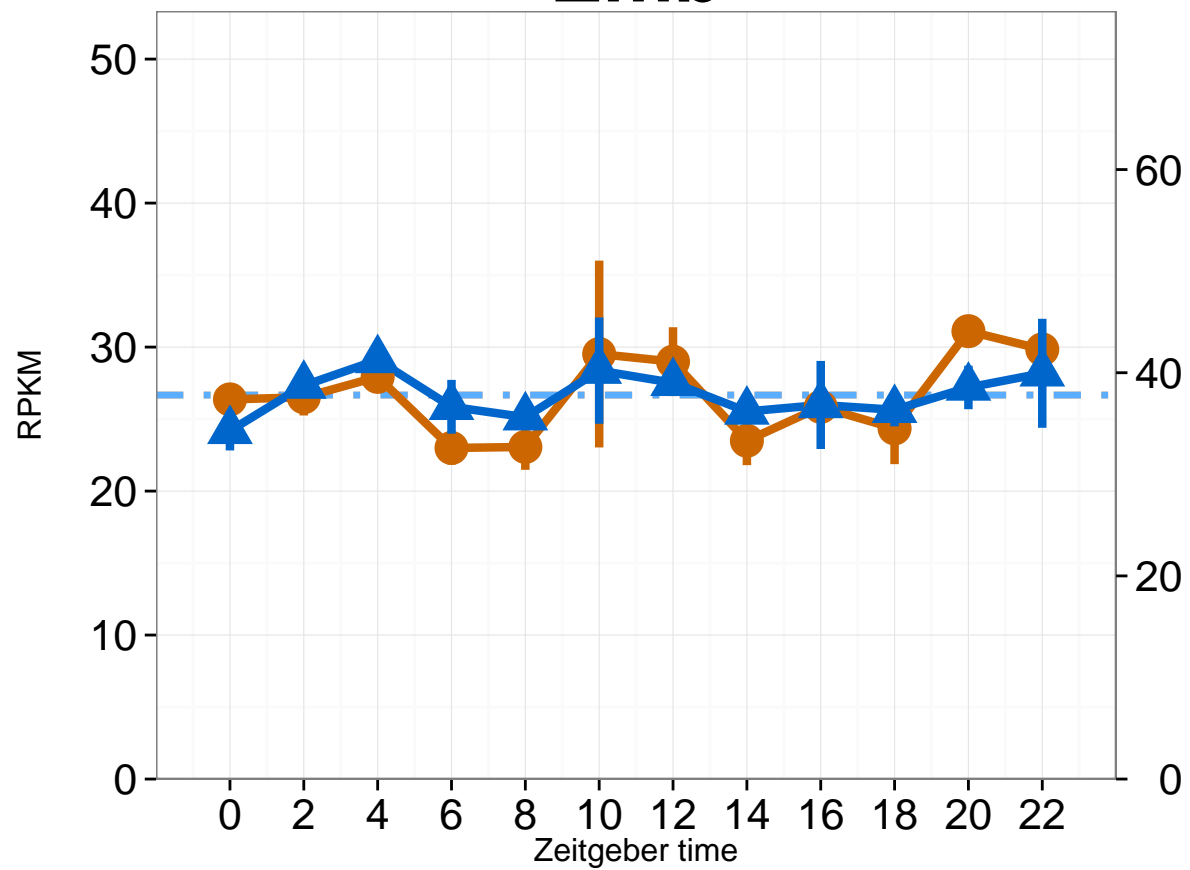

## Emb

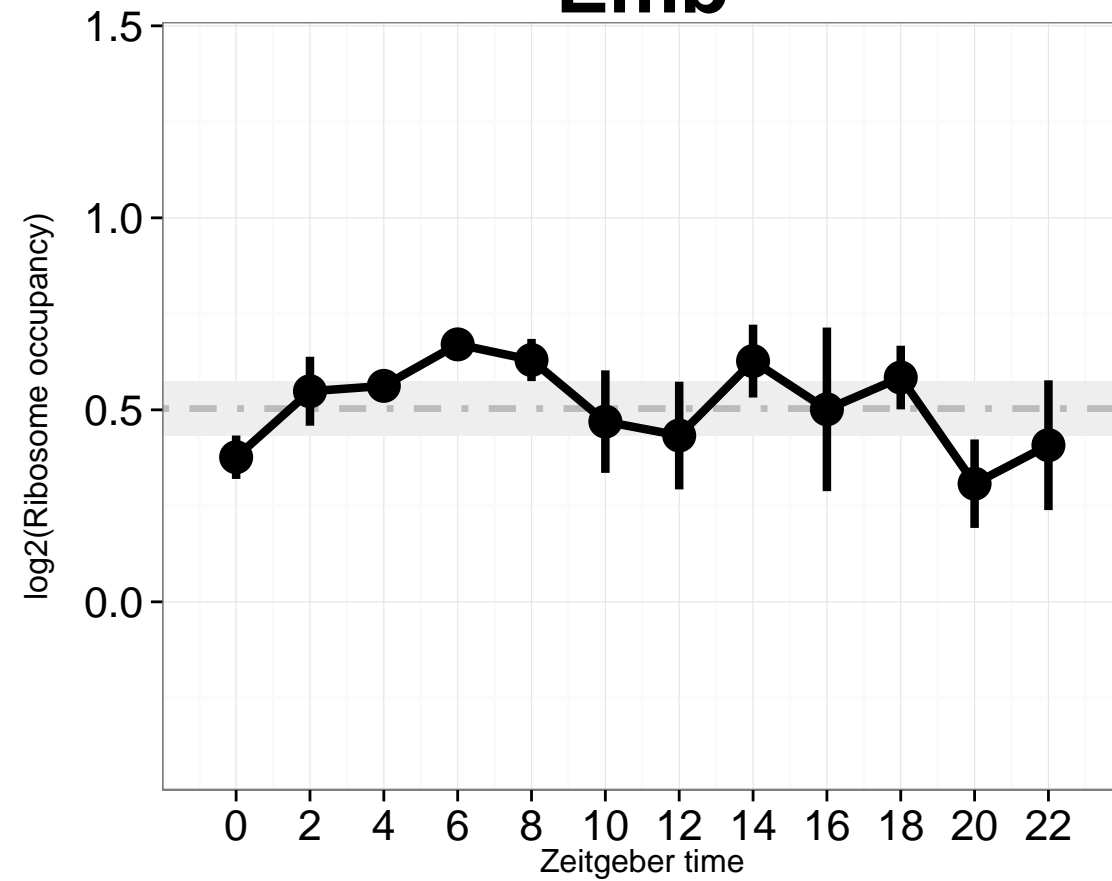

Supplement: Supplementary file 4220 [file 1]

# Plekha4

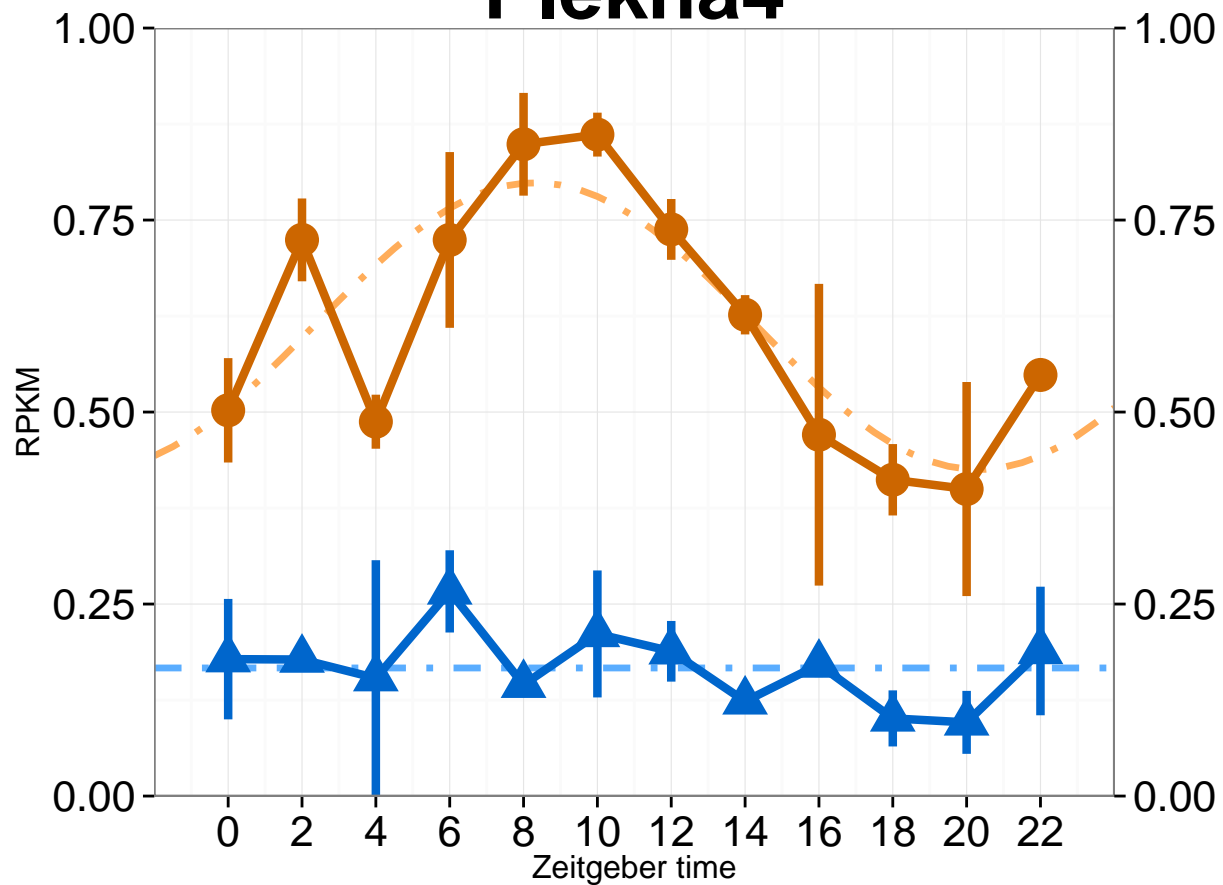

# Plekha4

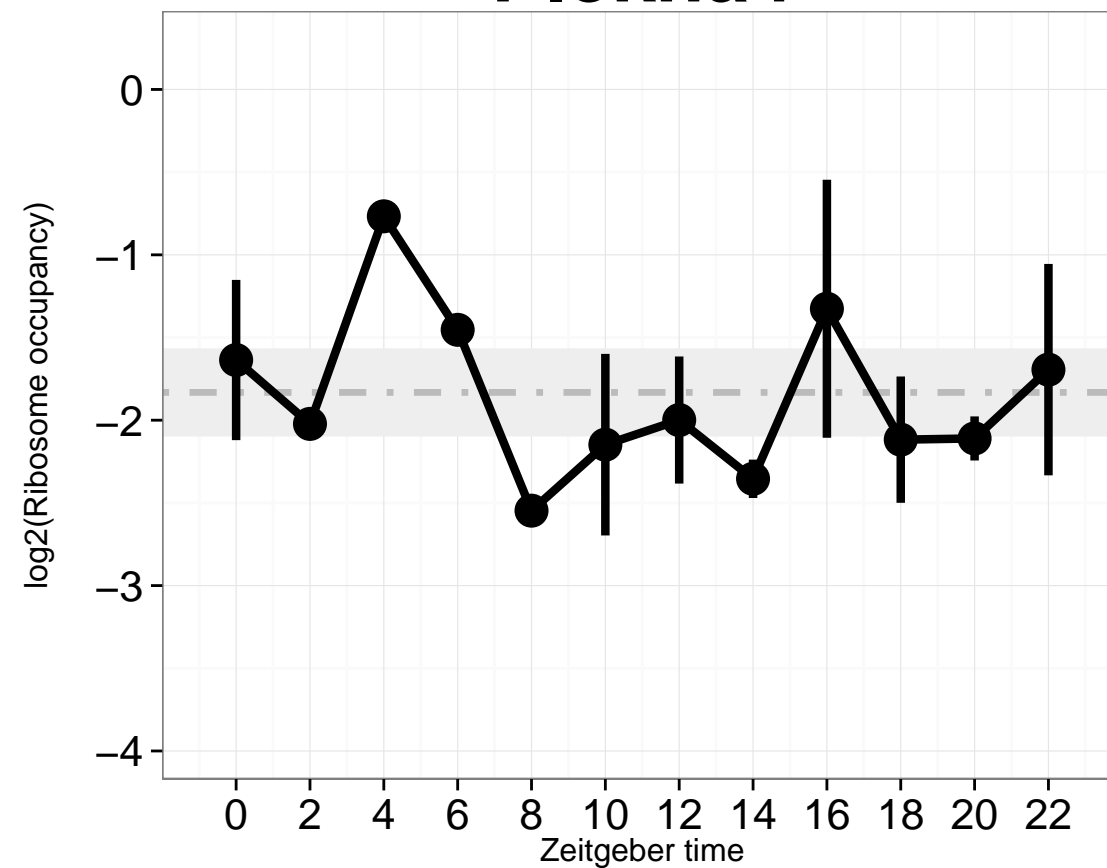

Supplement: Supplementary file 4221 [file 1]

## Shroom2

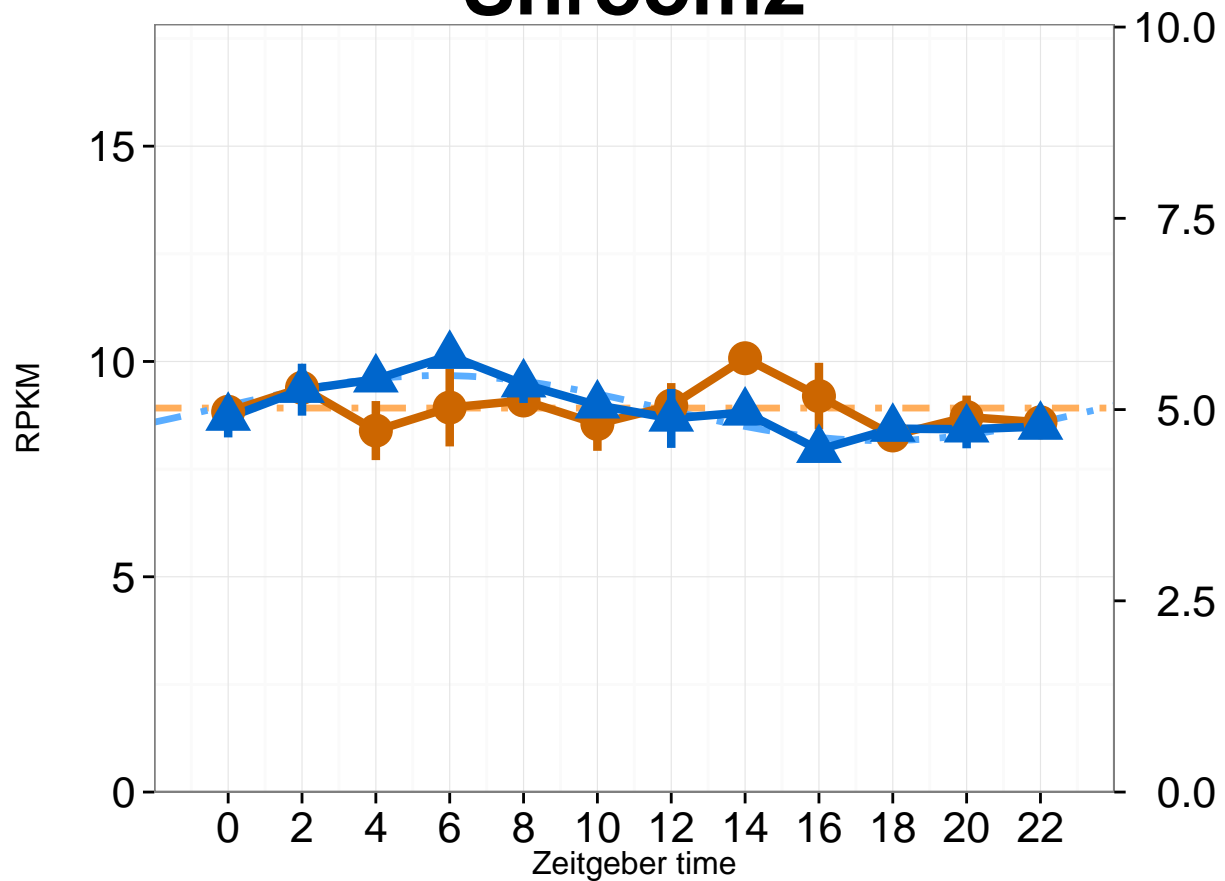

## Shroom2

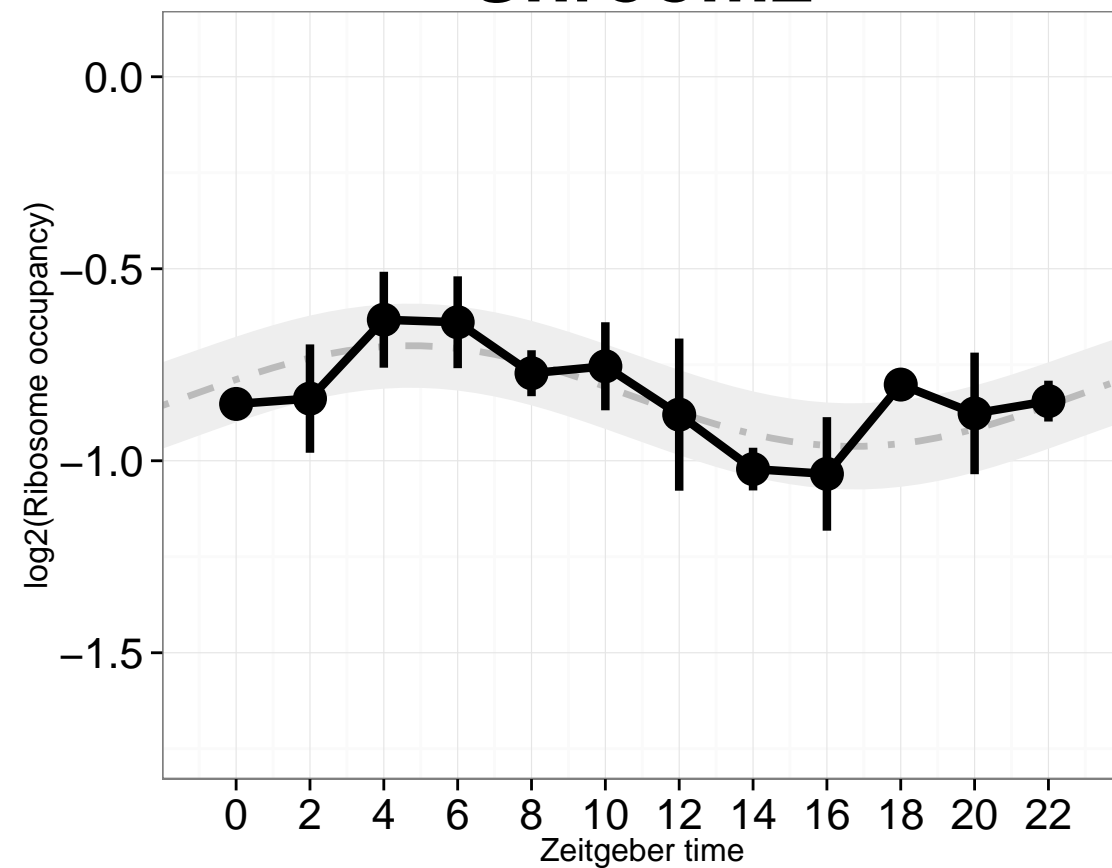

Supplement: Supplementary file 4222 [file 1]

# Zfp839

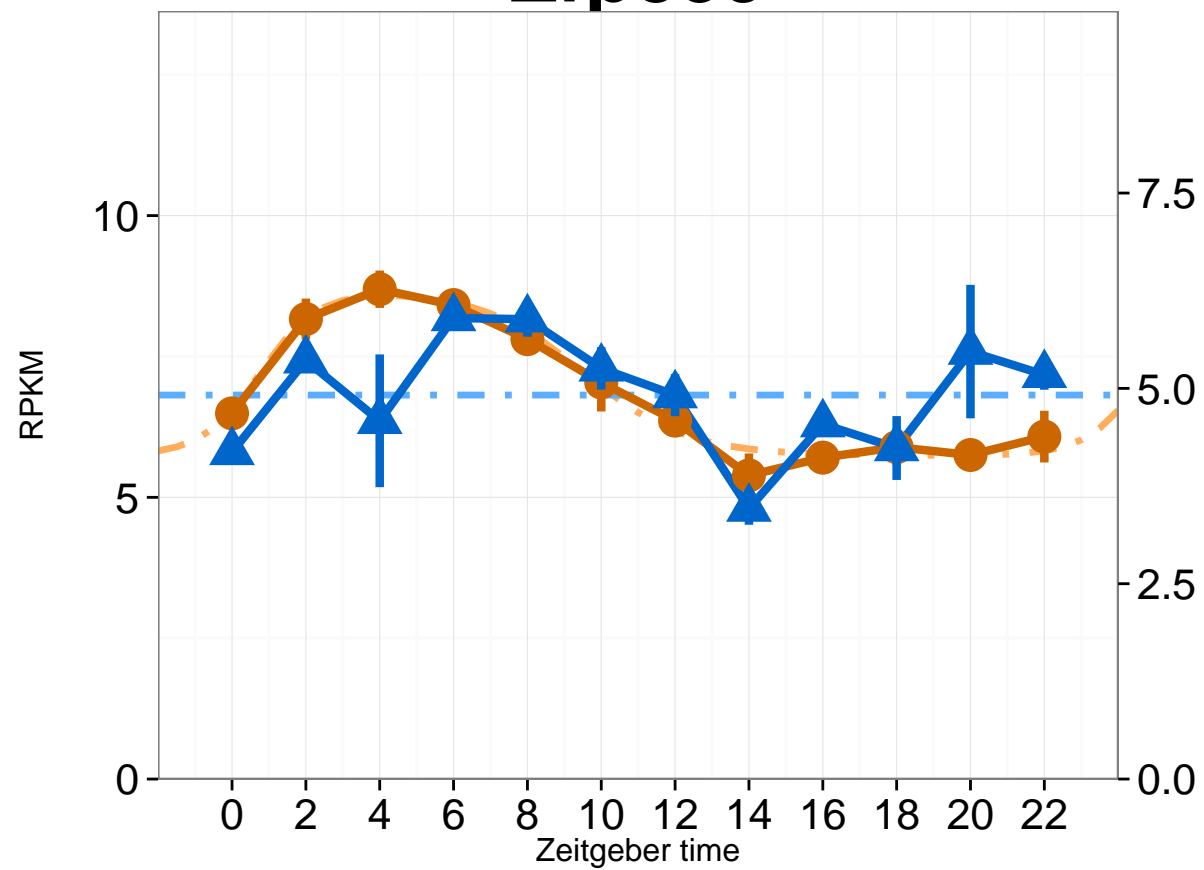

# Zfp839

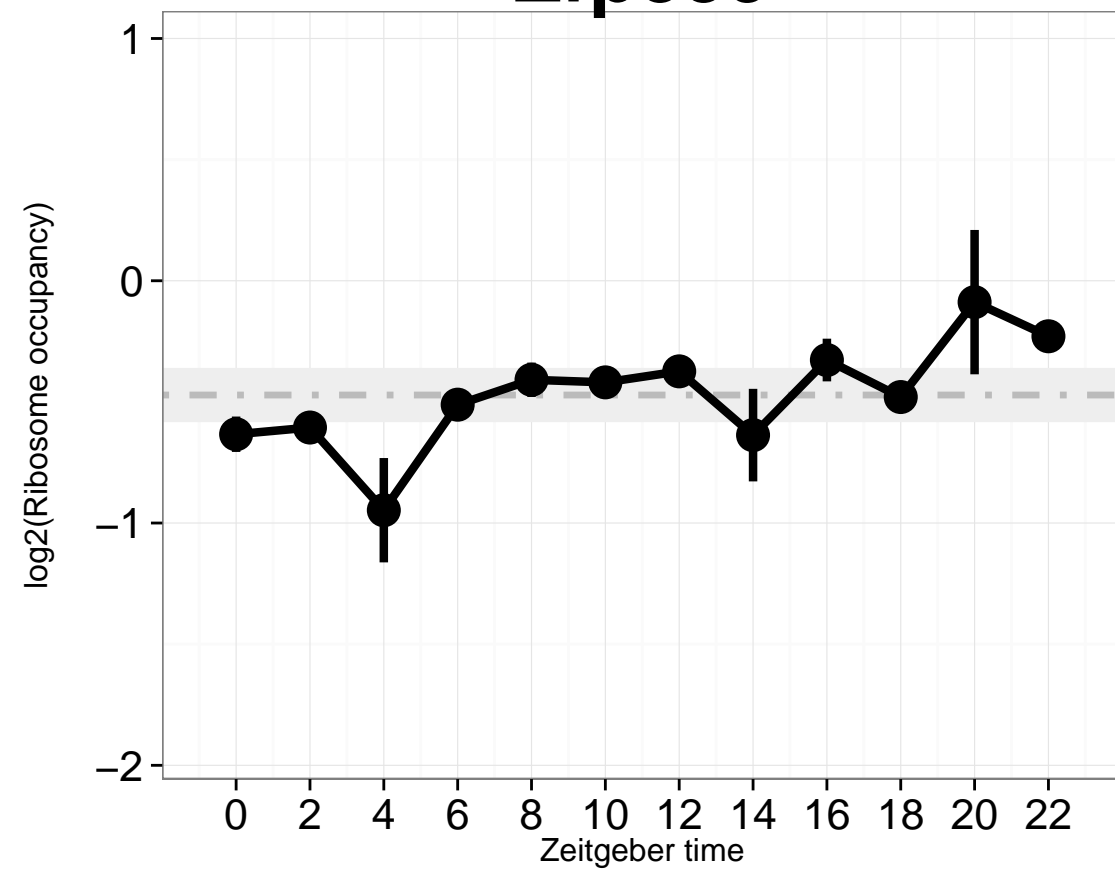

Supplement: Supplementary file 4223 [file 1]

## Abat

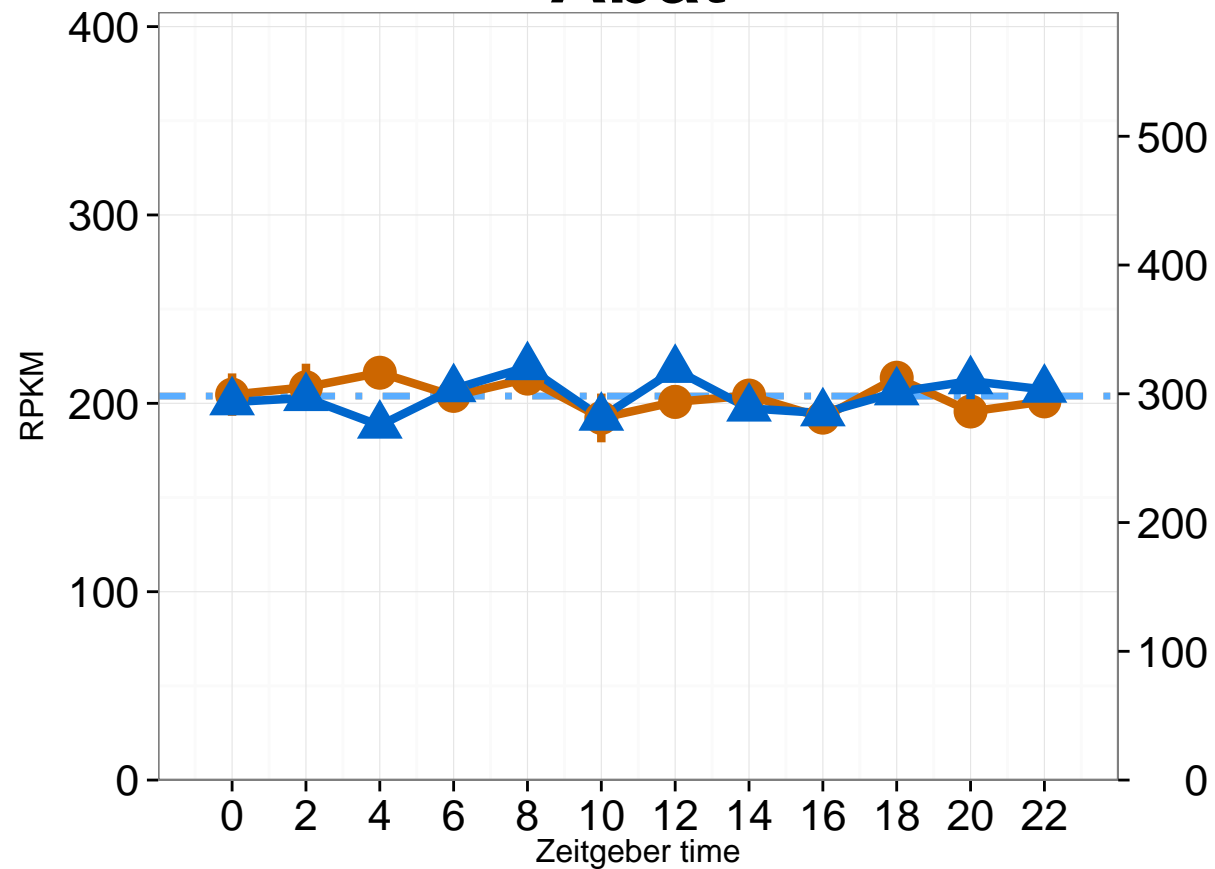

## Abat

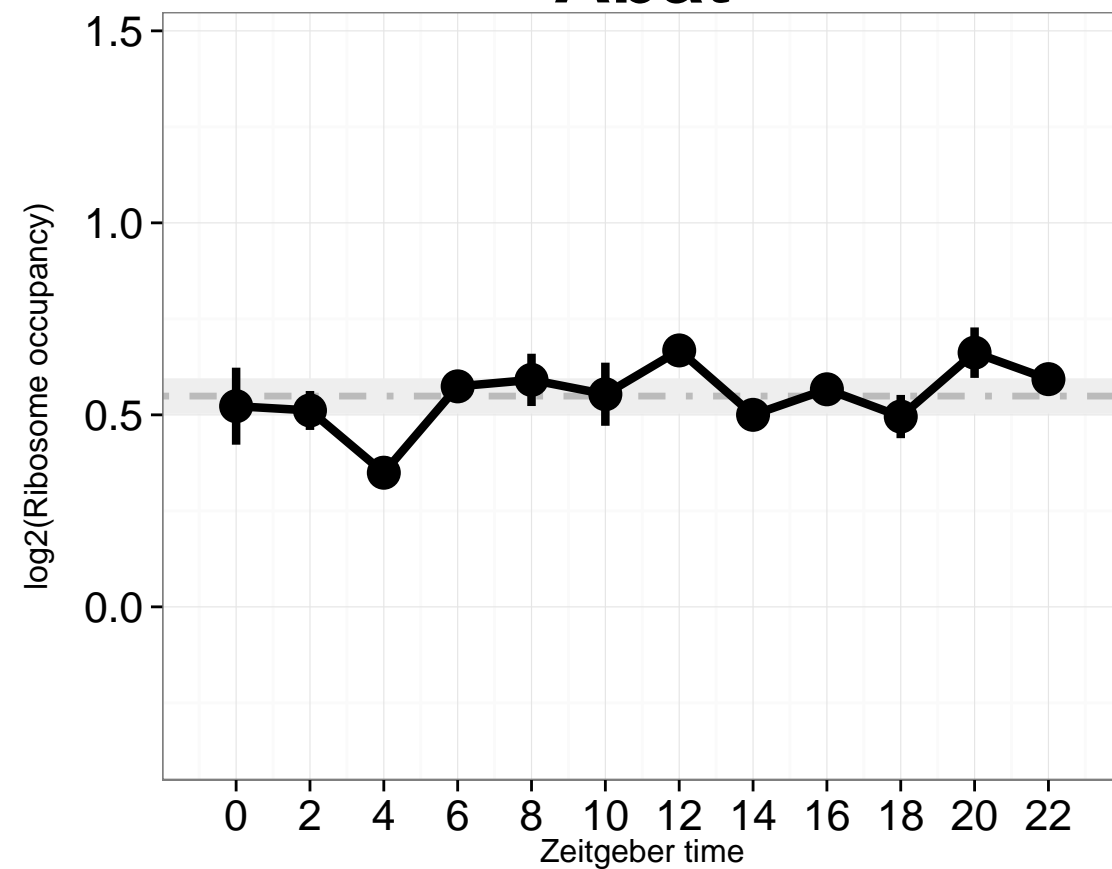

Supplement: Supplementary file 4224 [file 1]

## Sgol1

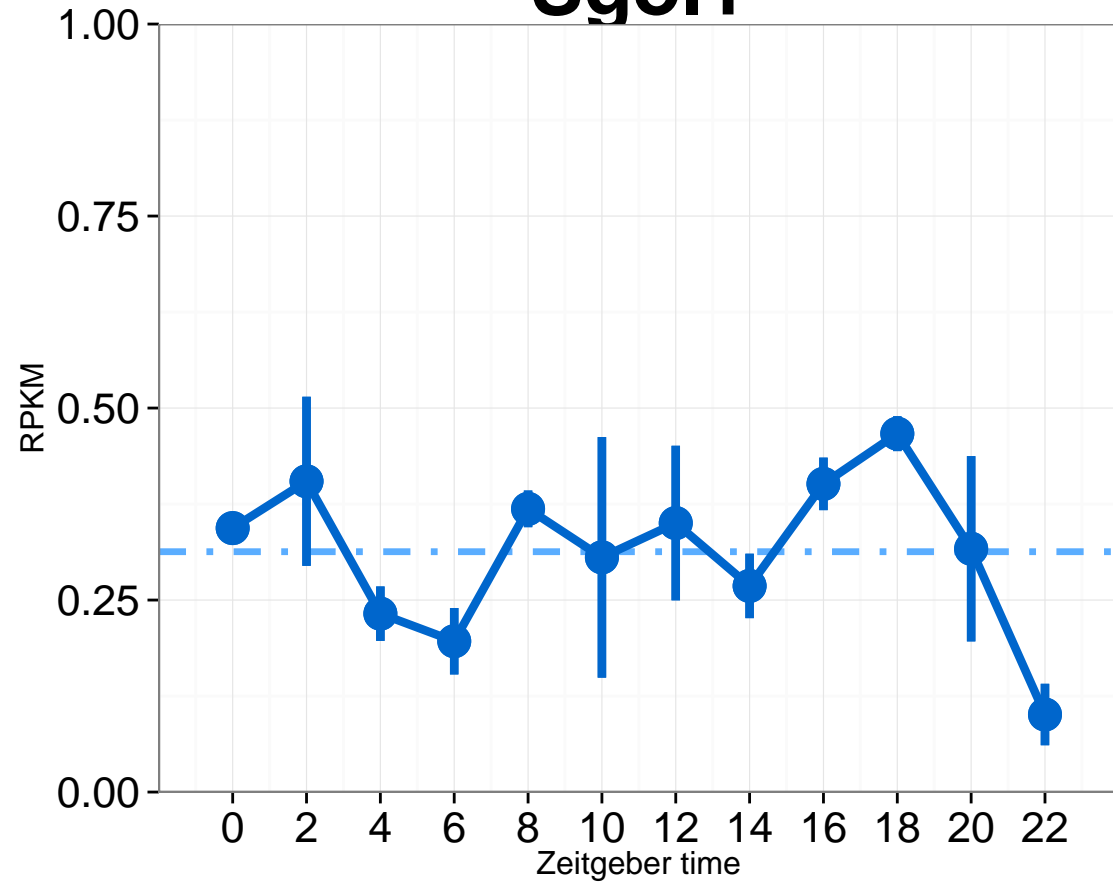

## Sgol1 log2(Ribosome occupancy)

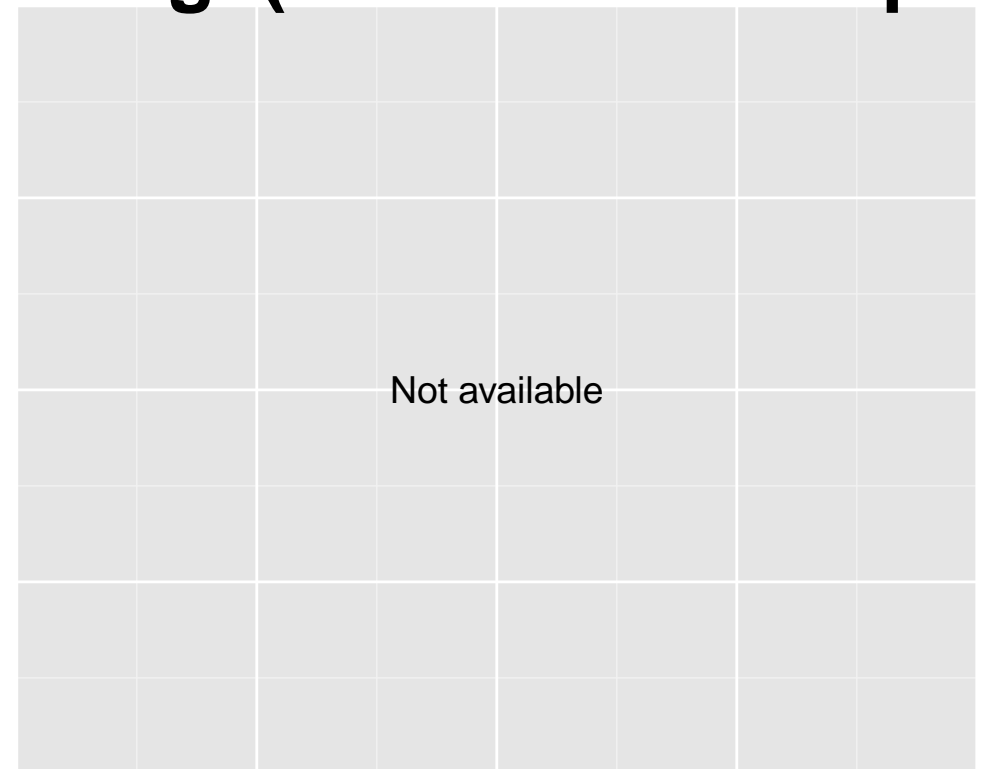

Supplement: Supplementary file 4225 [file 1]

## Tnfrsf22

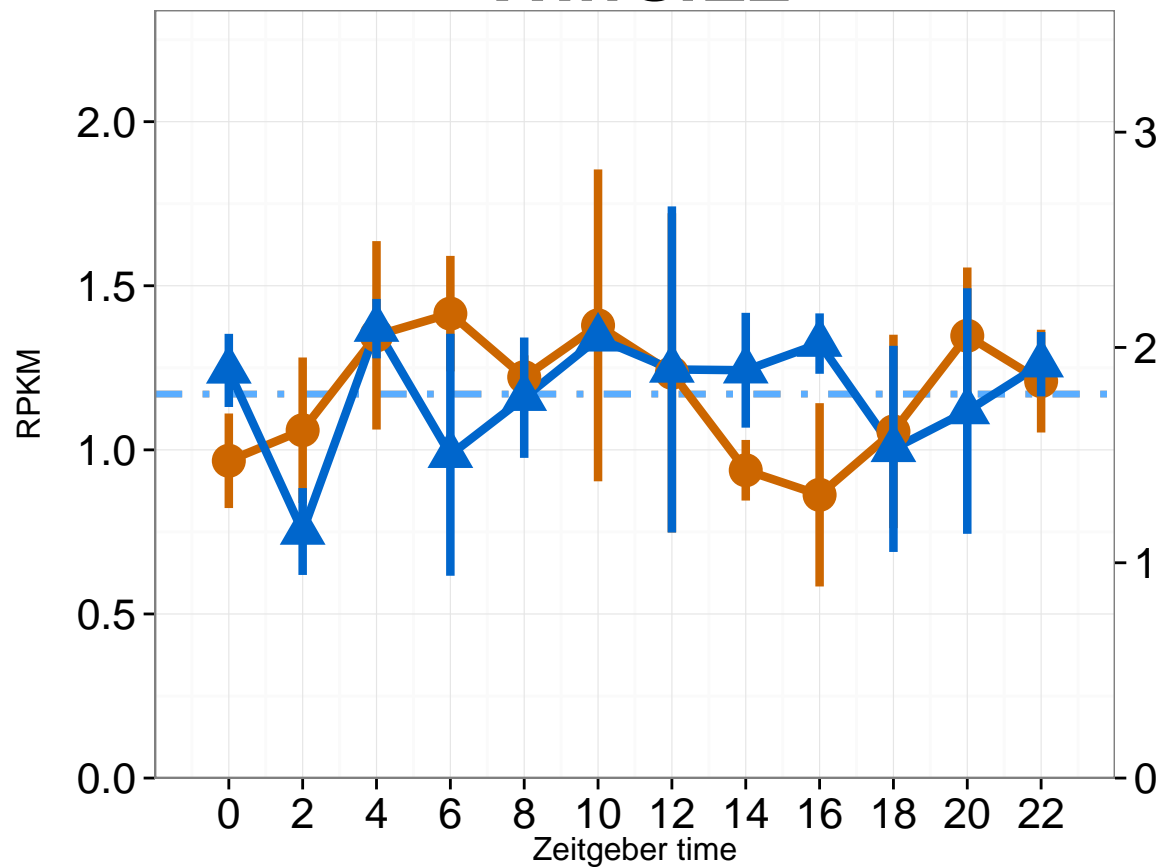

## Tnfrsf22

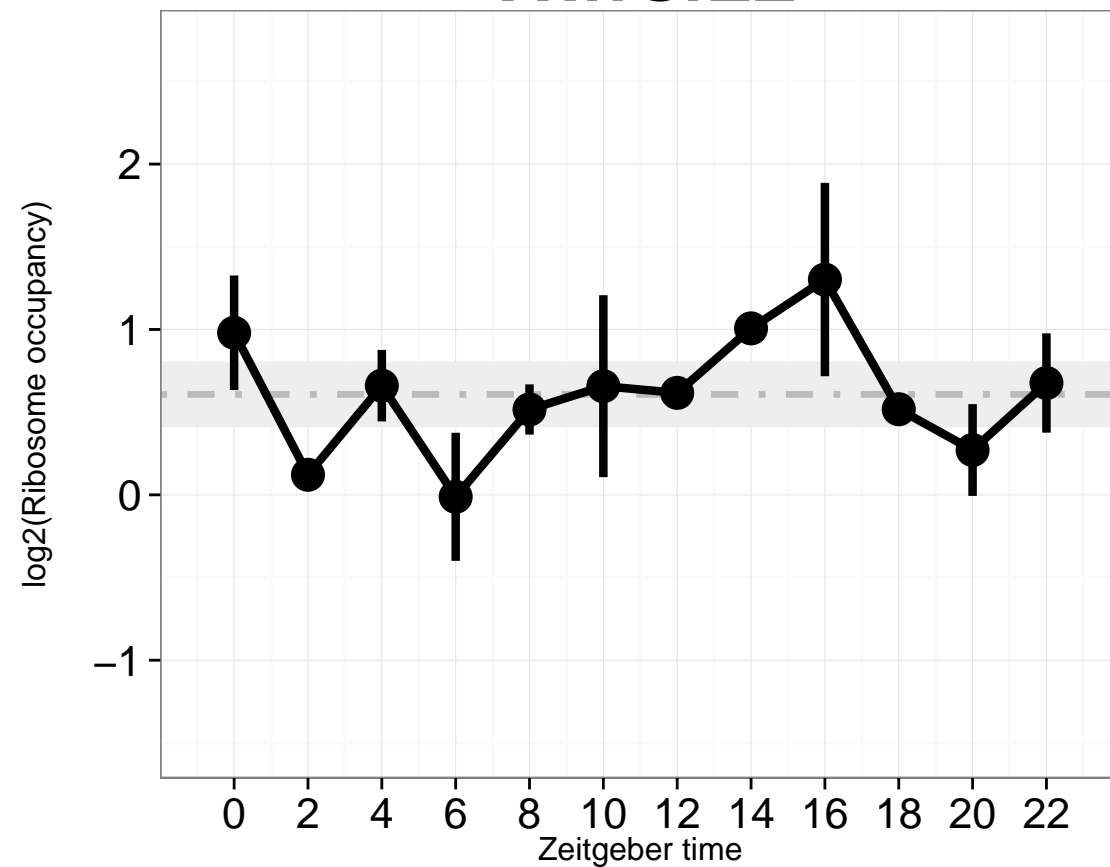

Supplement: Supplementary file 4226 [file 1]

## Tmem43

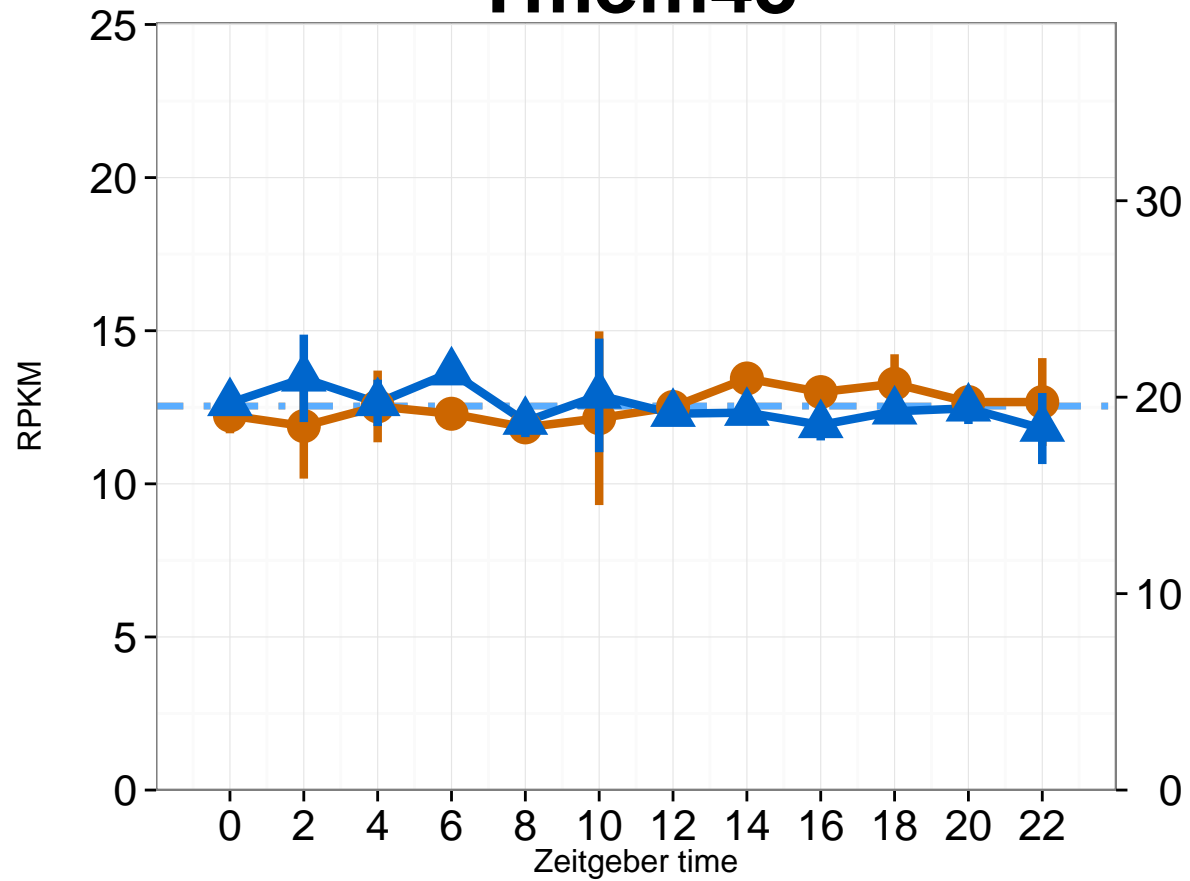

## Tmem43

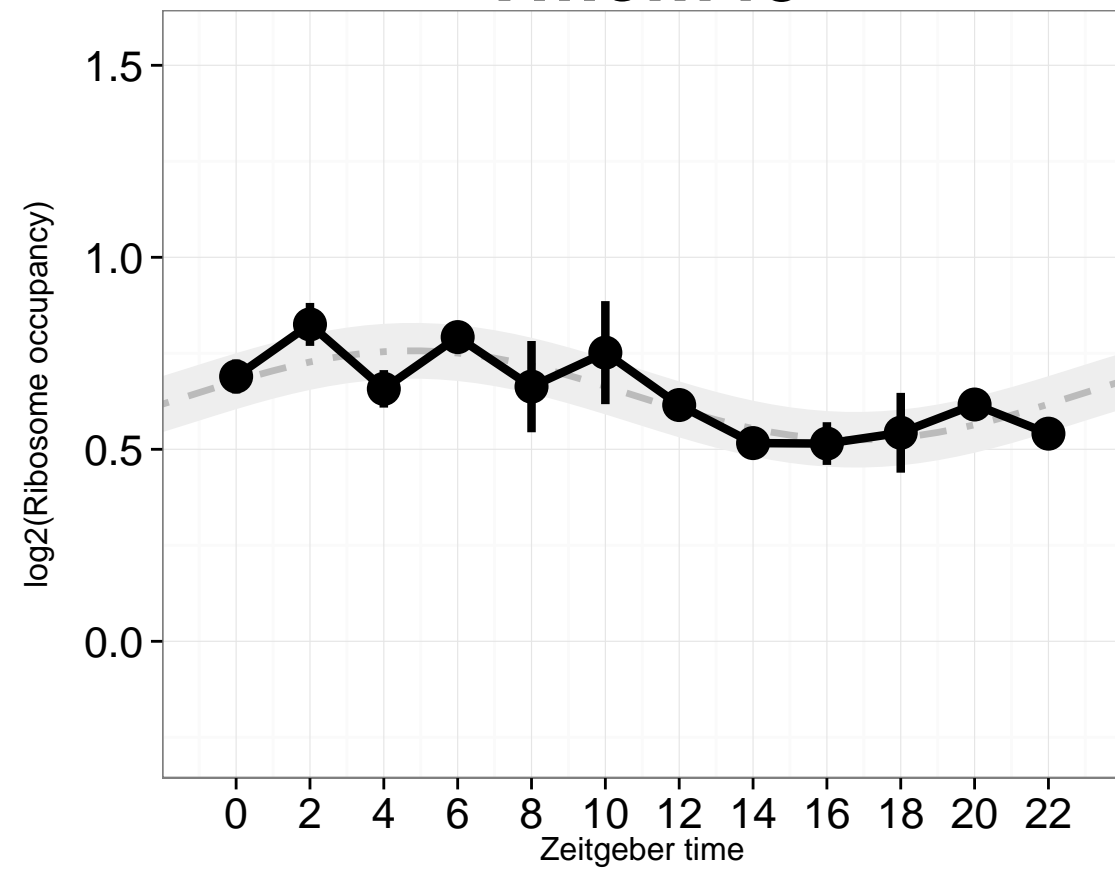

Supplement: Supplementary file 4227 [file 1]

# Myo9a

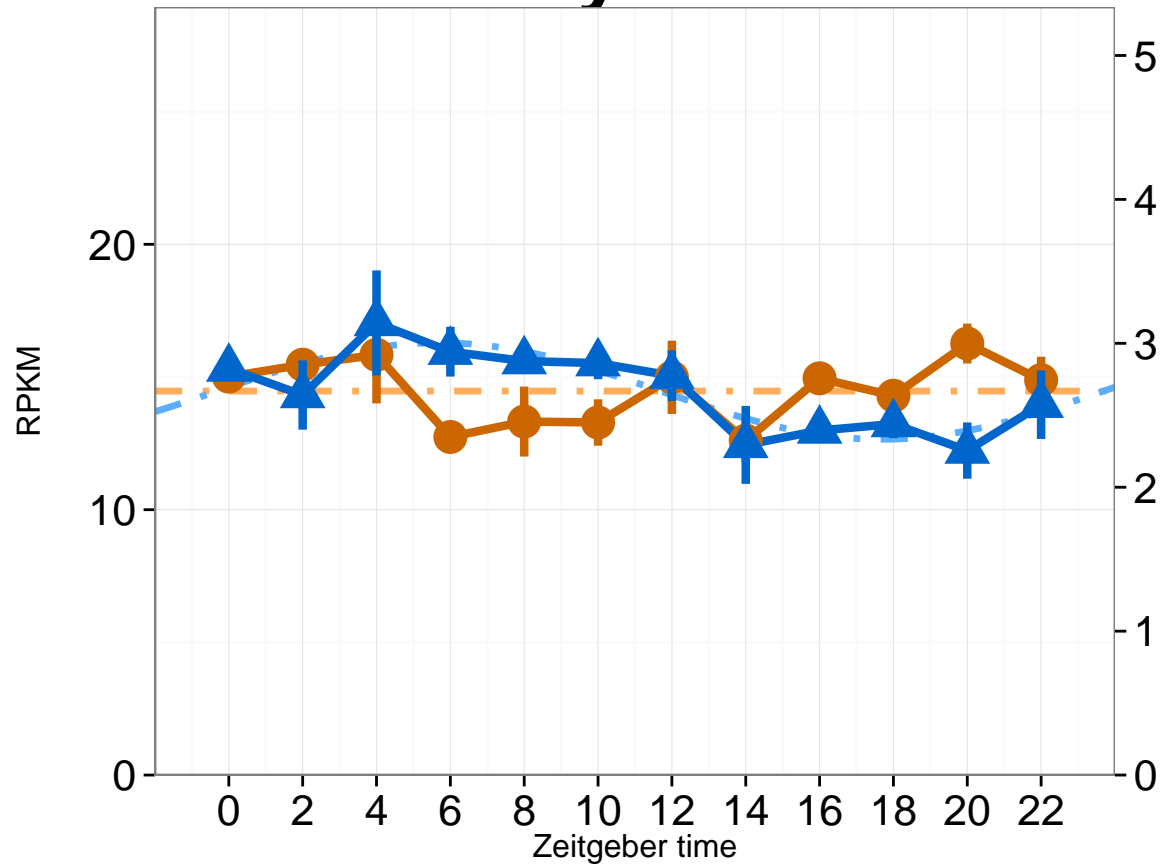

# Myo9a

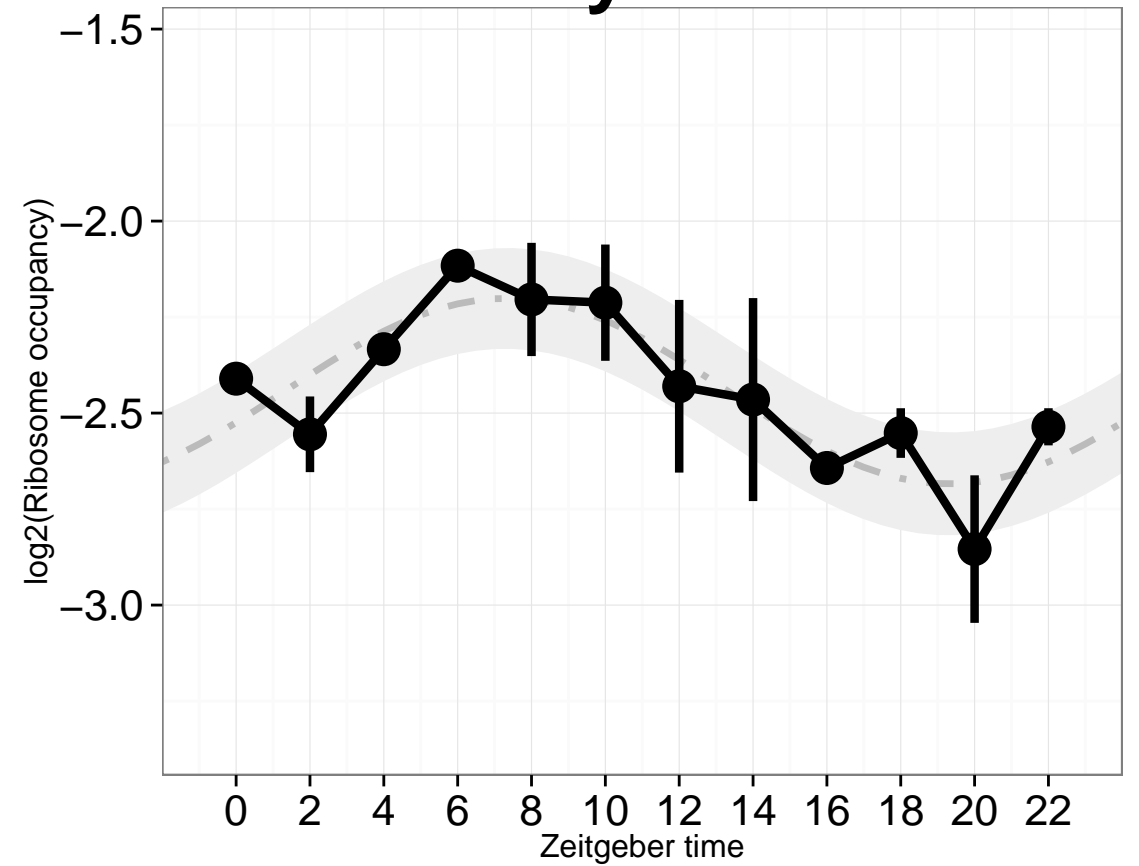

Supplement: Supplementary file 4228 [file 1]

# Ndutfaf5

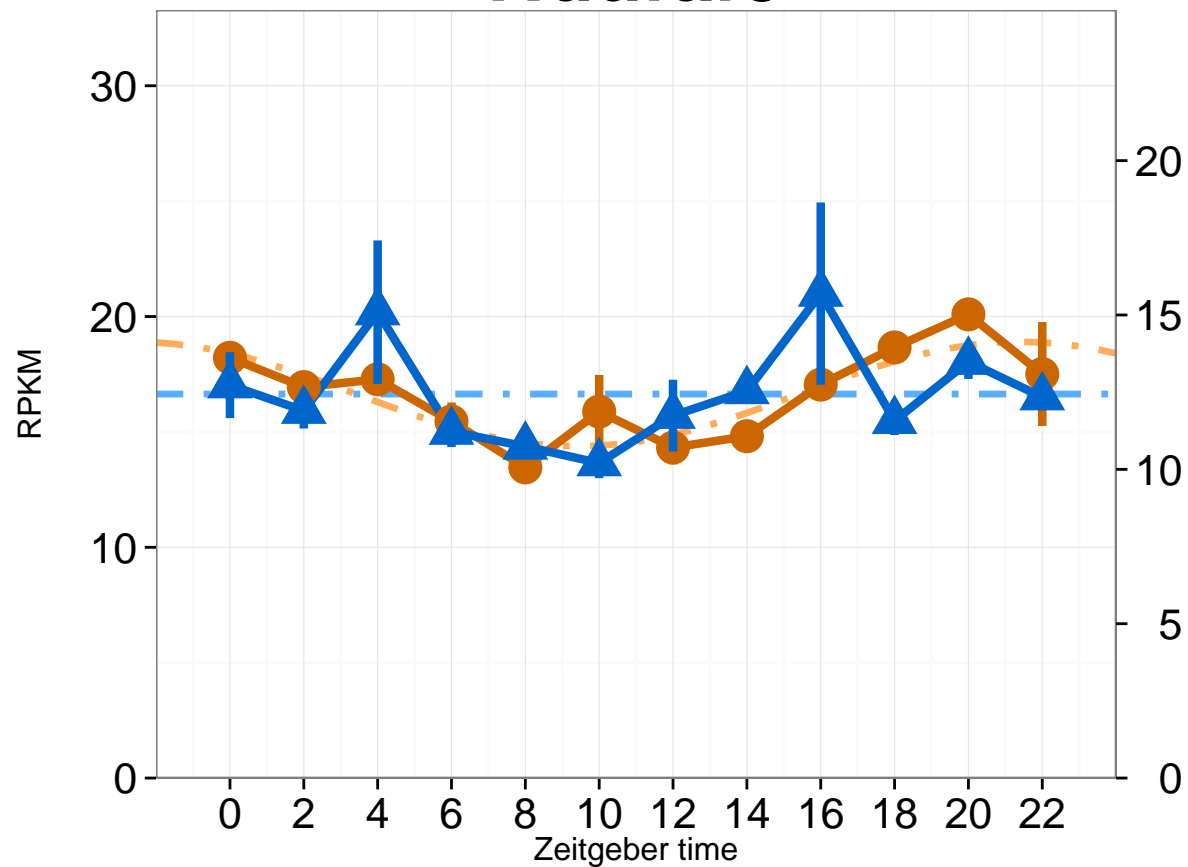

# Ndutfaf5

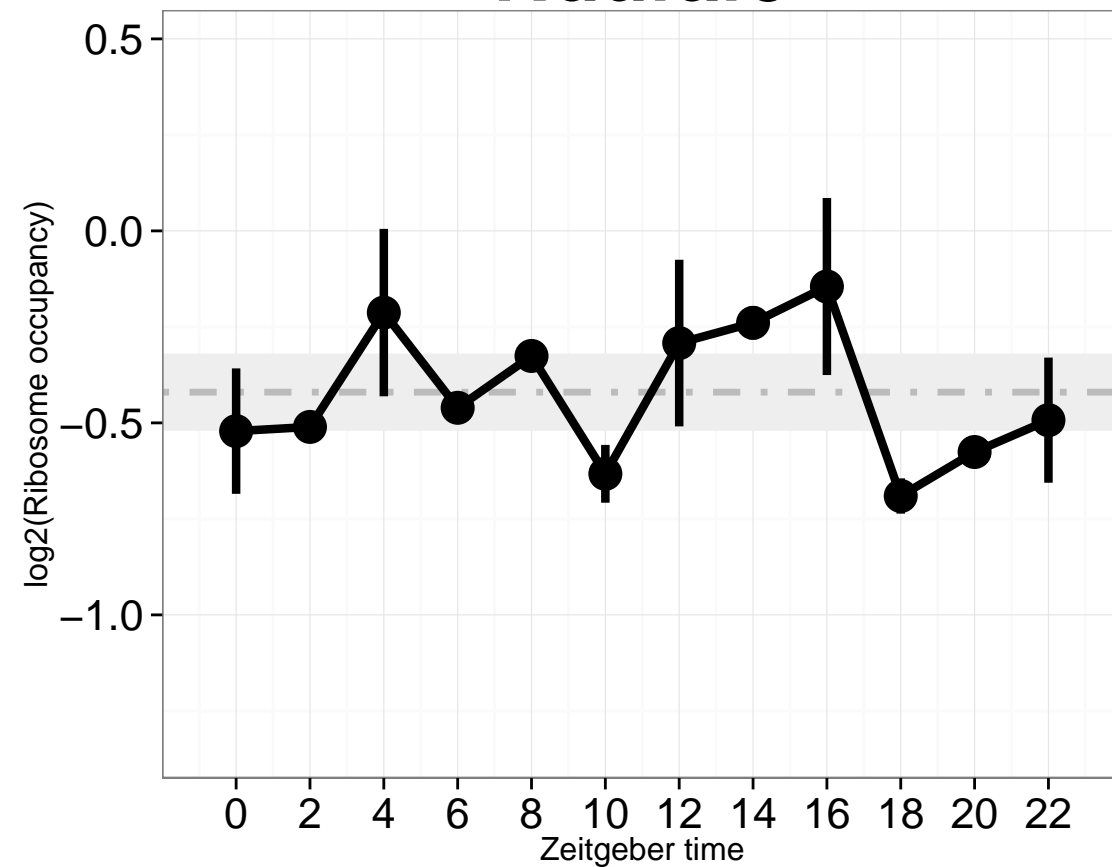

Supplement: Supplementary file 4229 [file 1]

## Serbp1

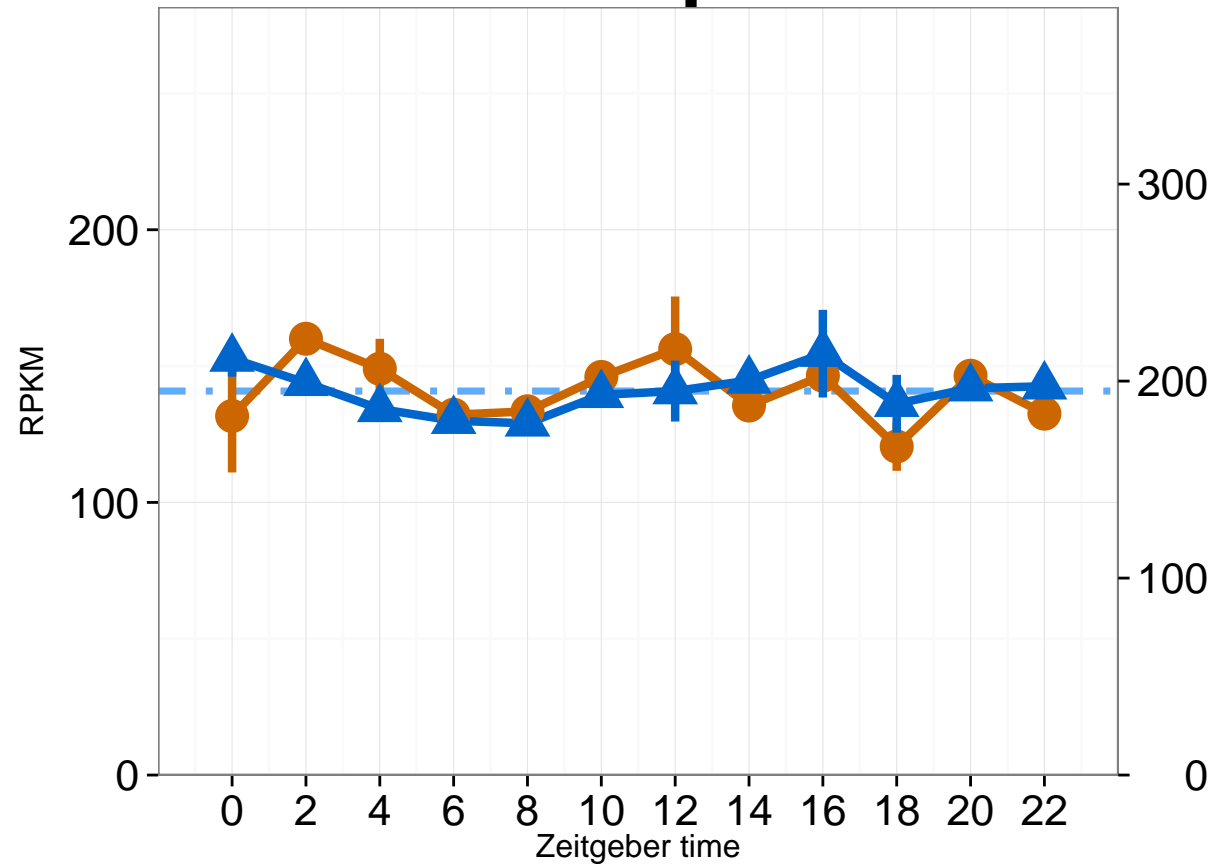

## Serbp1

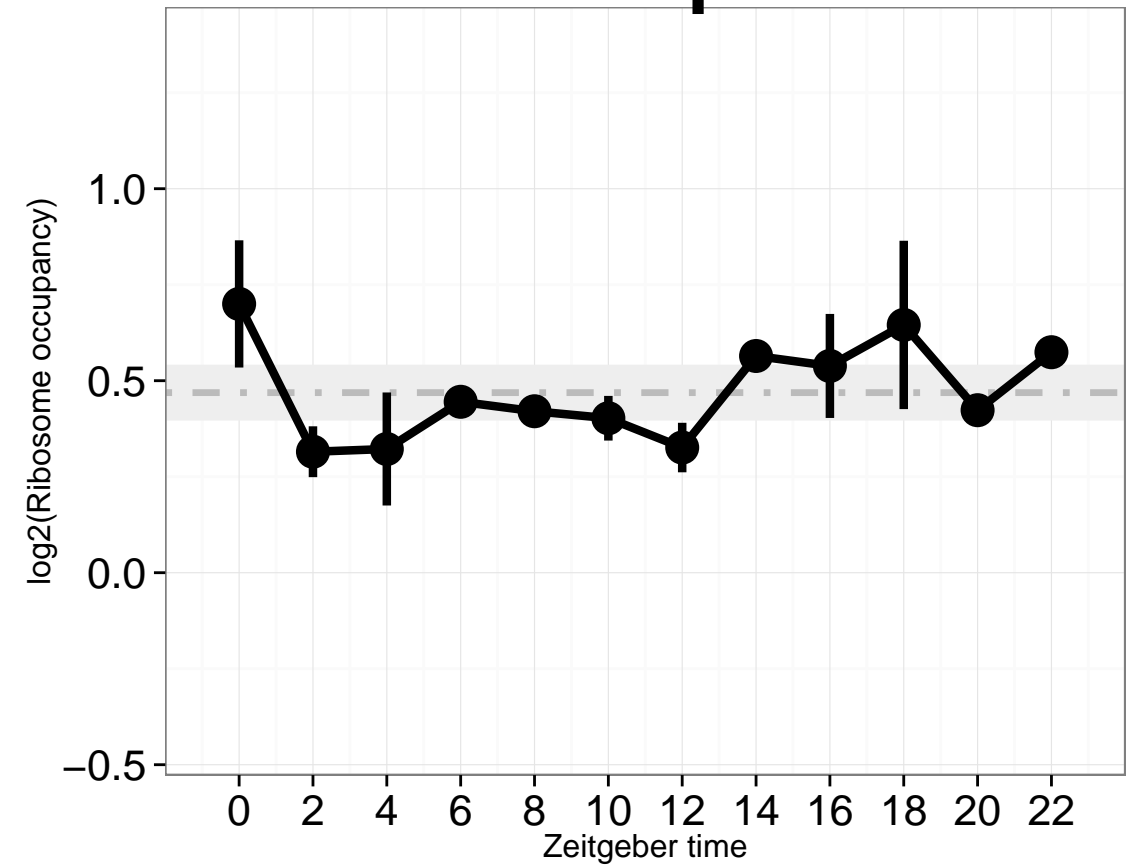

Supplement: Supplementary file 4230 [file 1]

# 3010026O09Rik

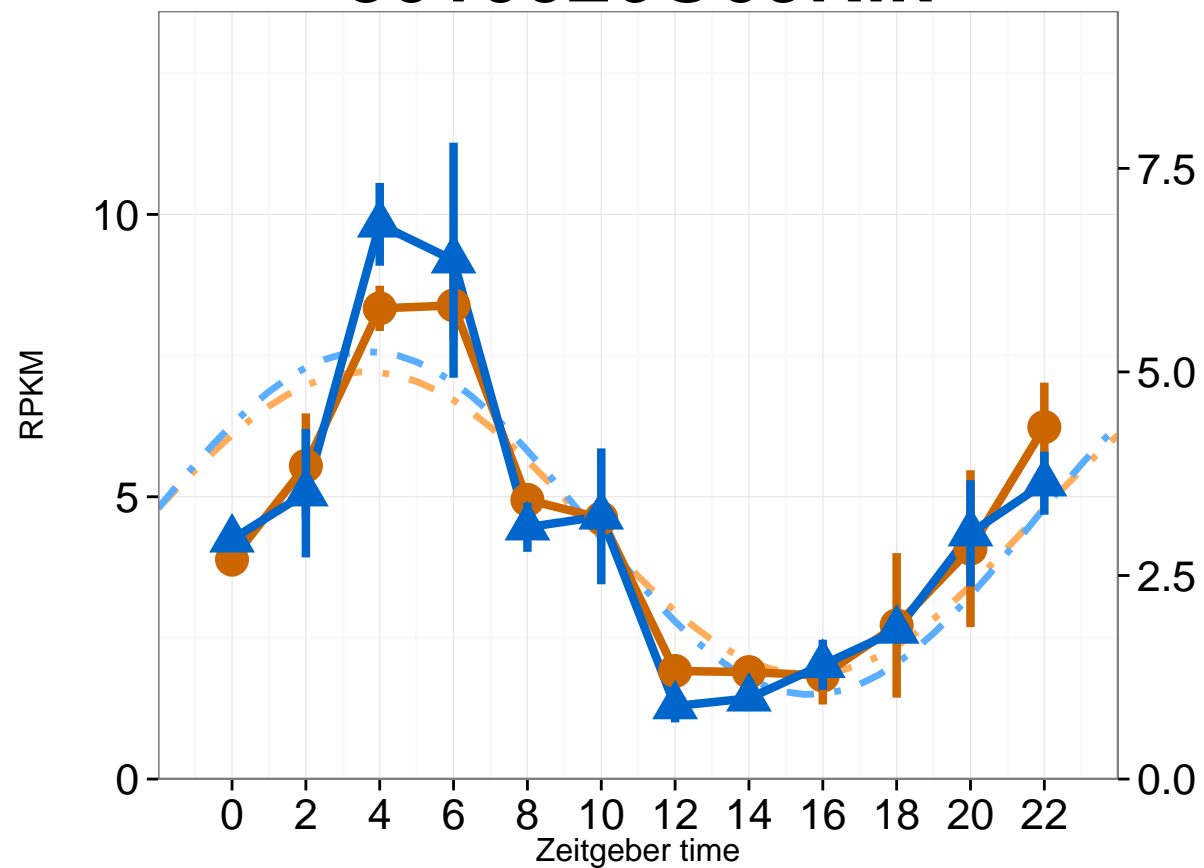

# 3010026O09Rik

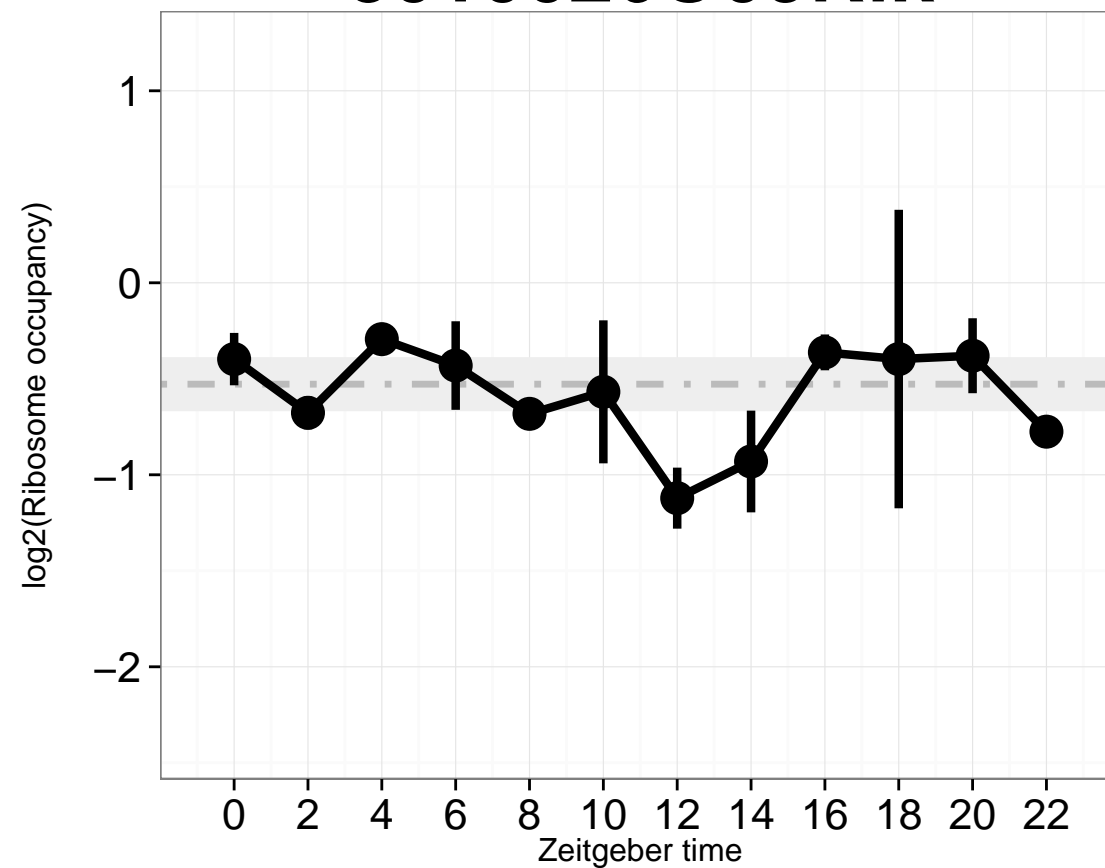

Supplement: Supplementary file 4231 [file 1]

# Zfp386

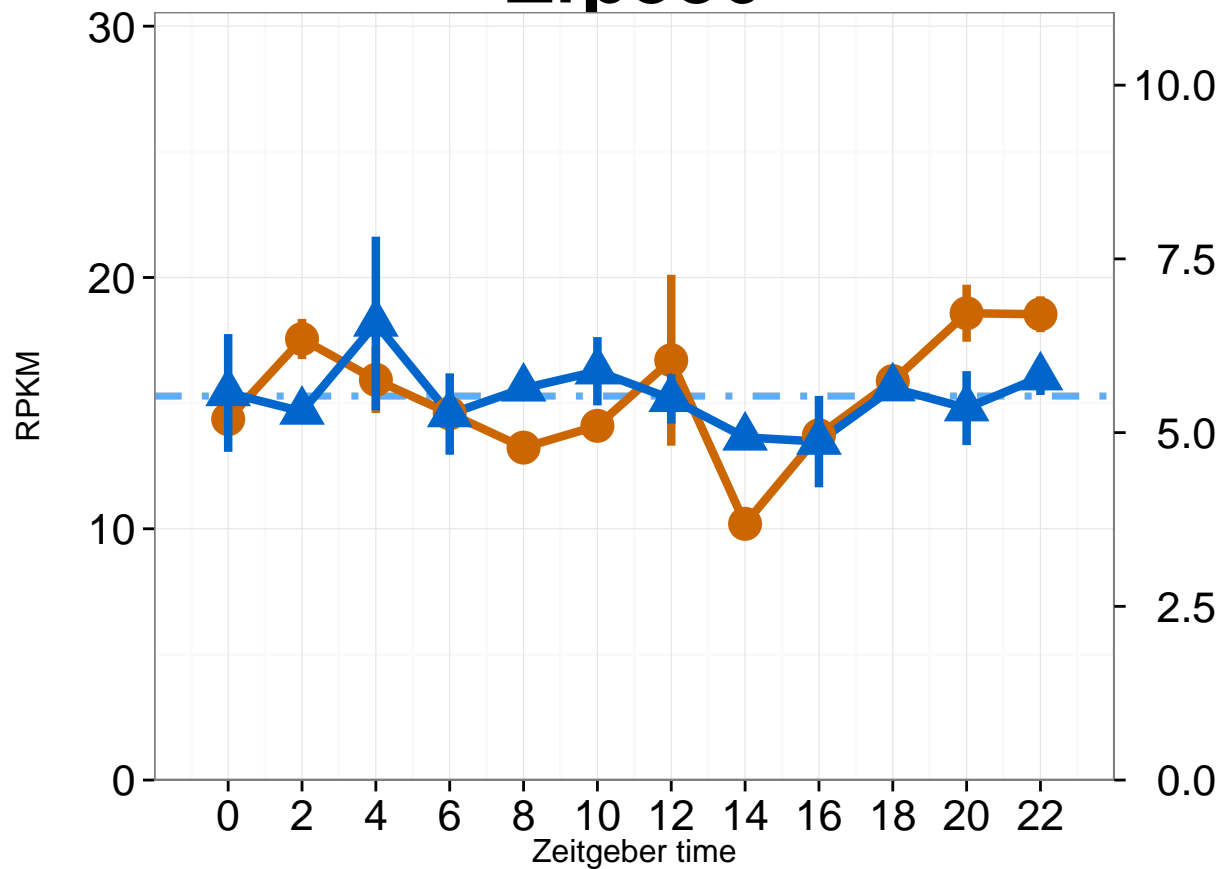

# Zfp386

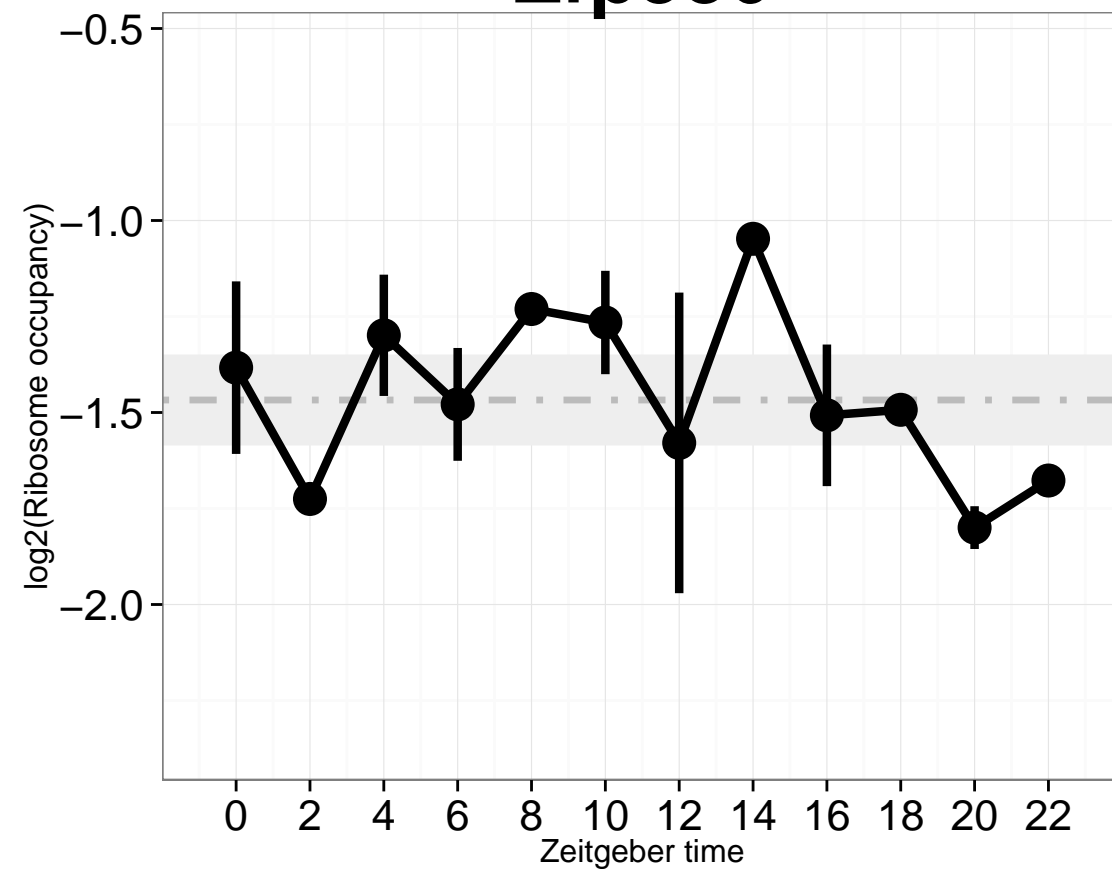

Supplement: Supplementary file 4232 [file 1]

# A530054K11Rik

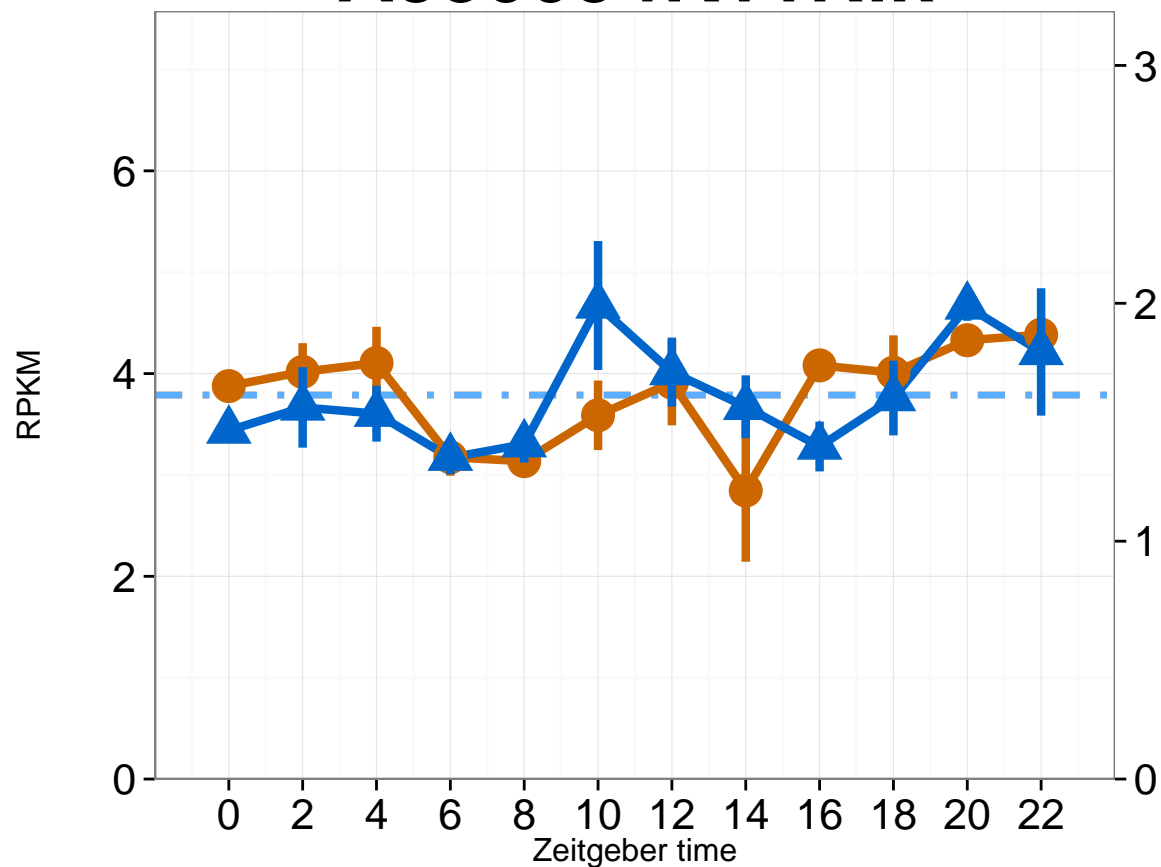

# A530054K11Rik

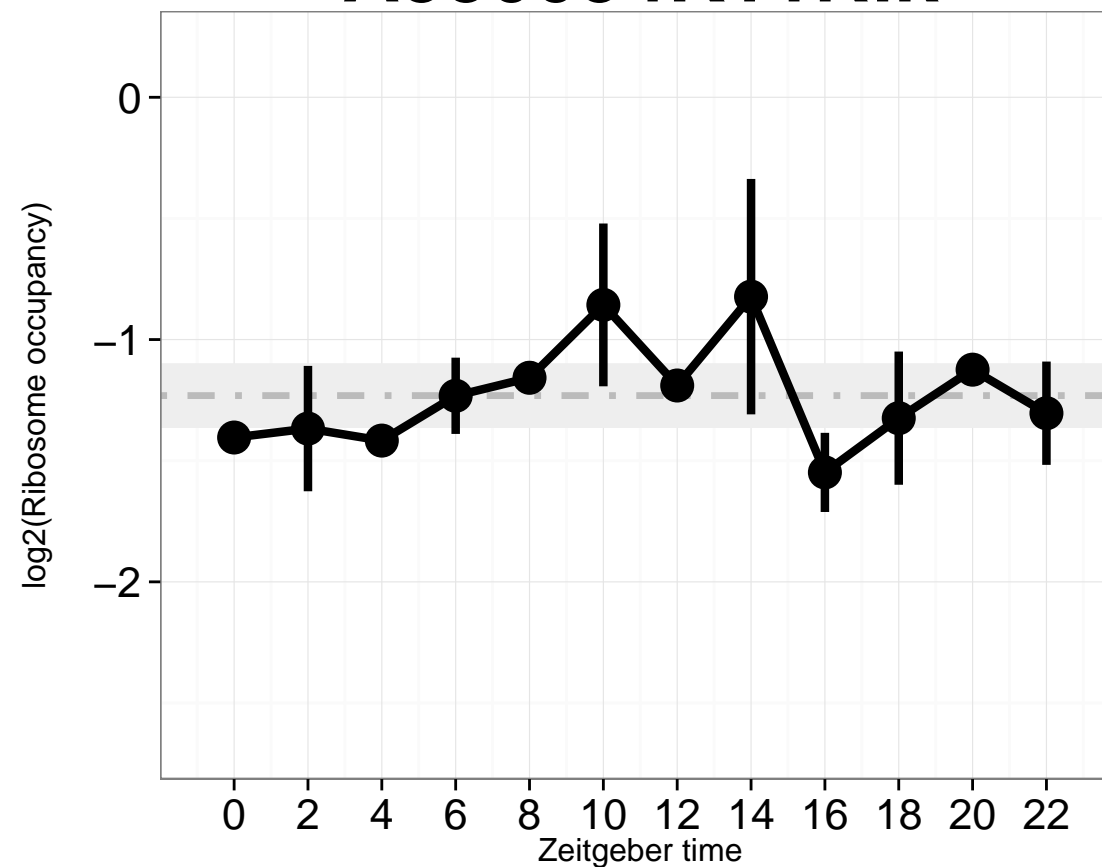

Supplement: Supplementary file 4233 [file 1]

## Wscd2

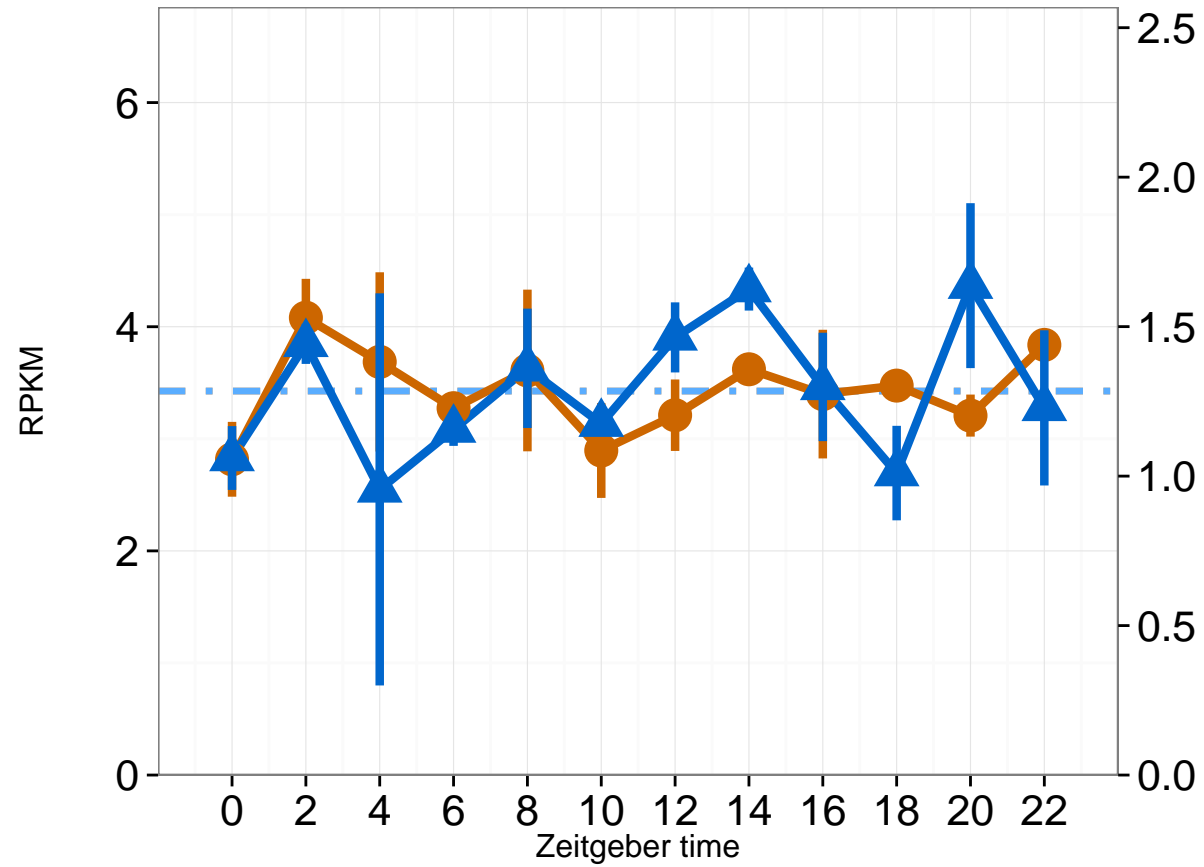

## Wscd2

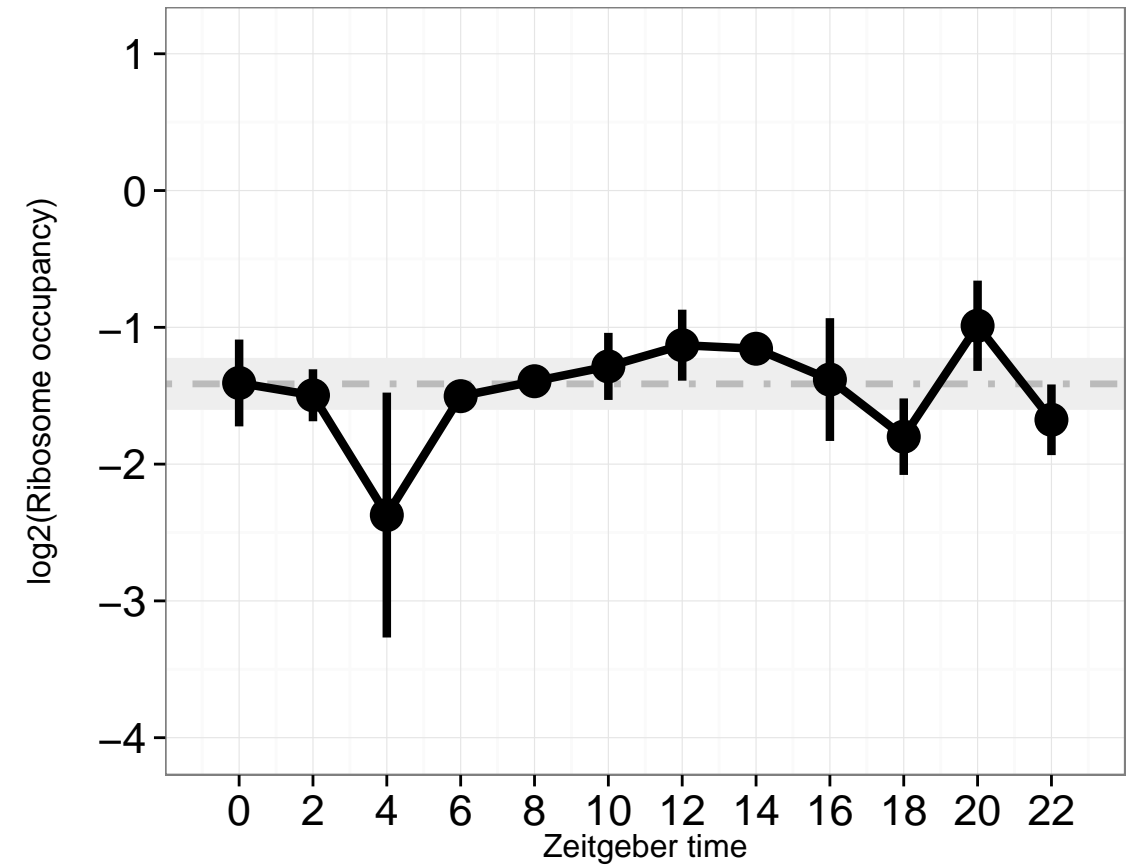

Supplement: Supplementary file 4234 [file 1]

## Utrn

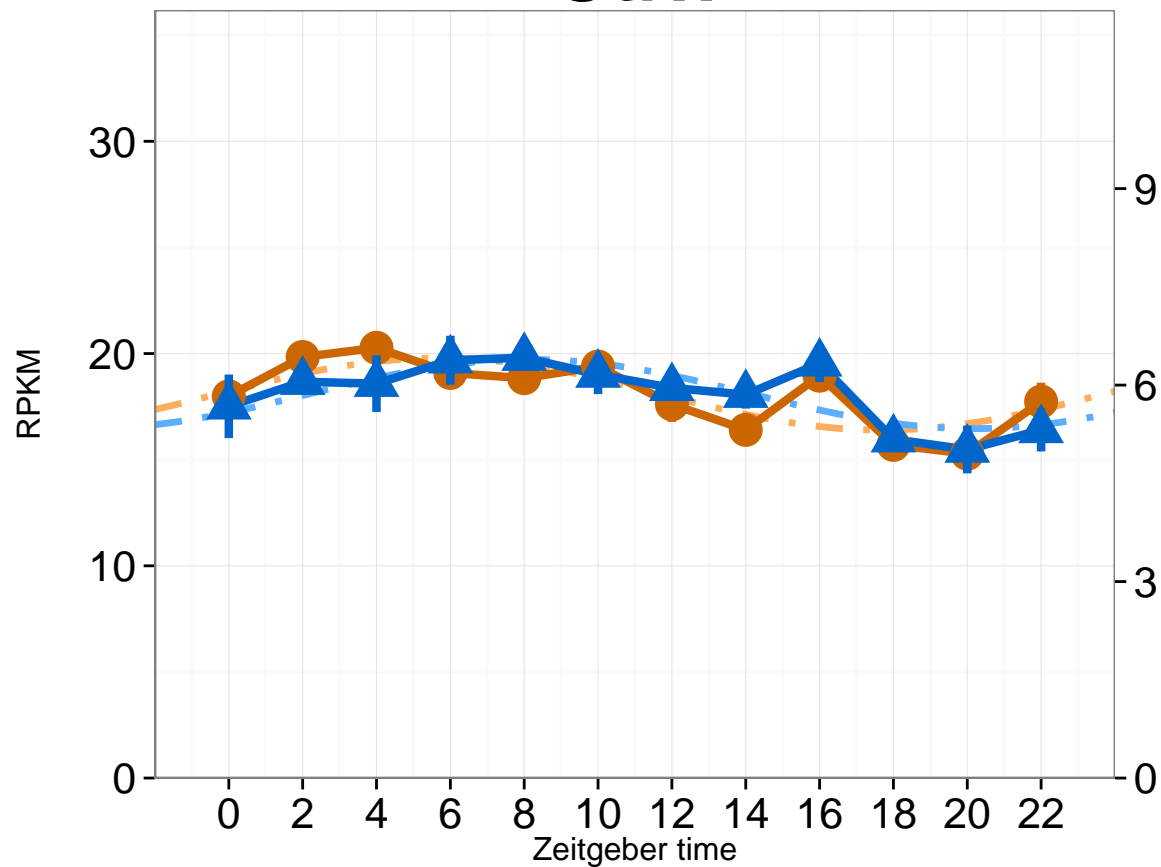

## Utrn

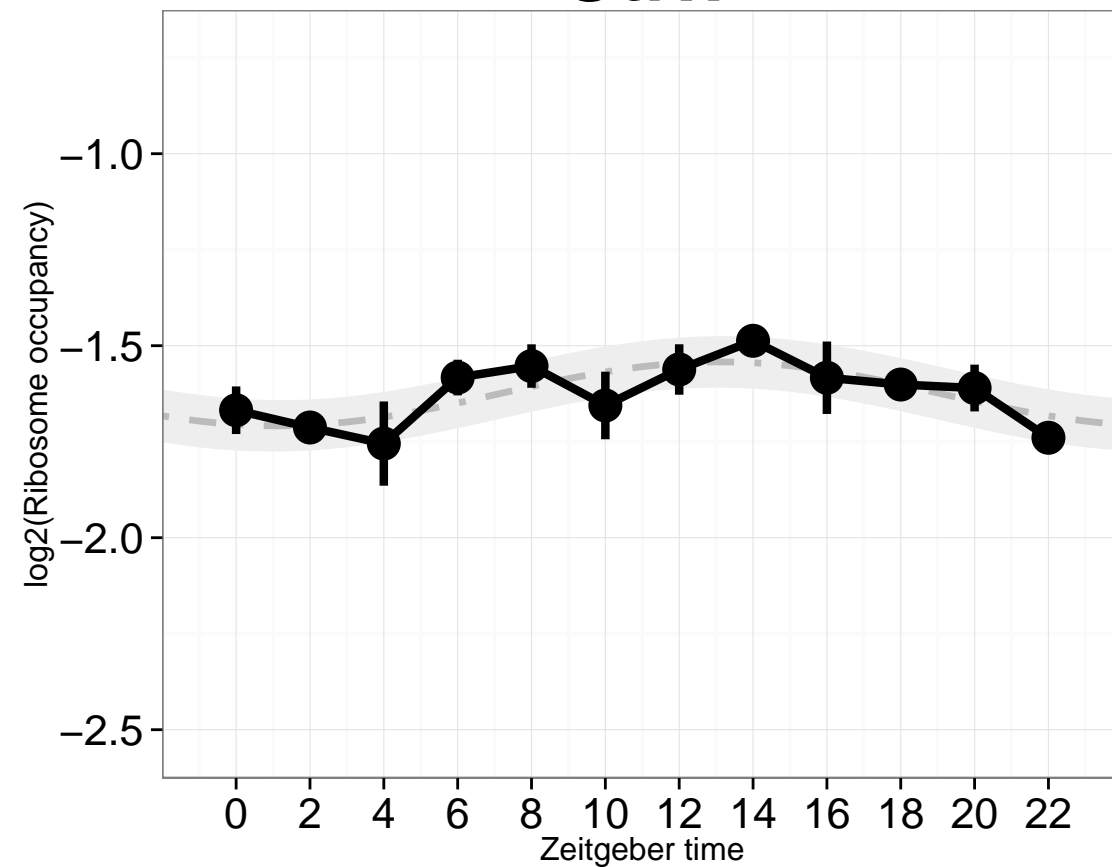

Supplement: Supplementary file 4235 [file 1]

# Fam154b

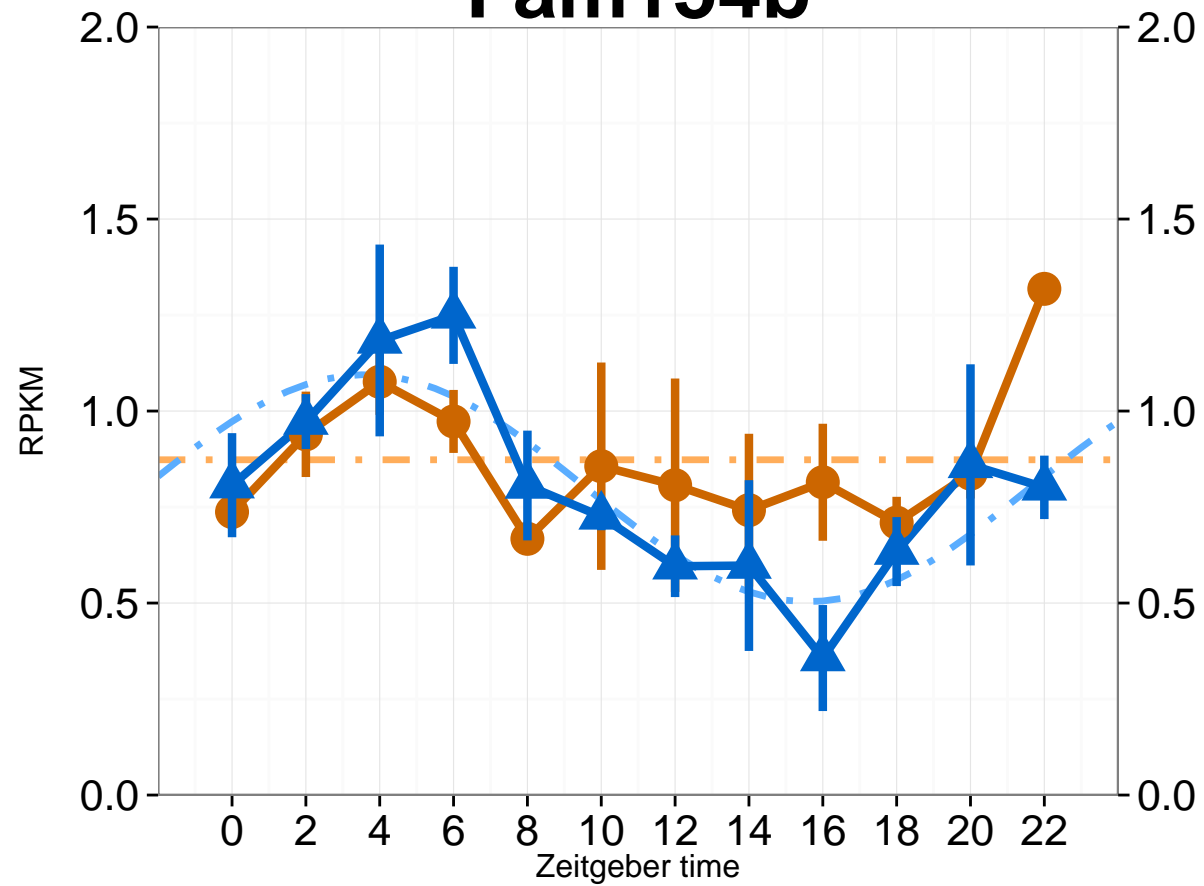

# Fam154b

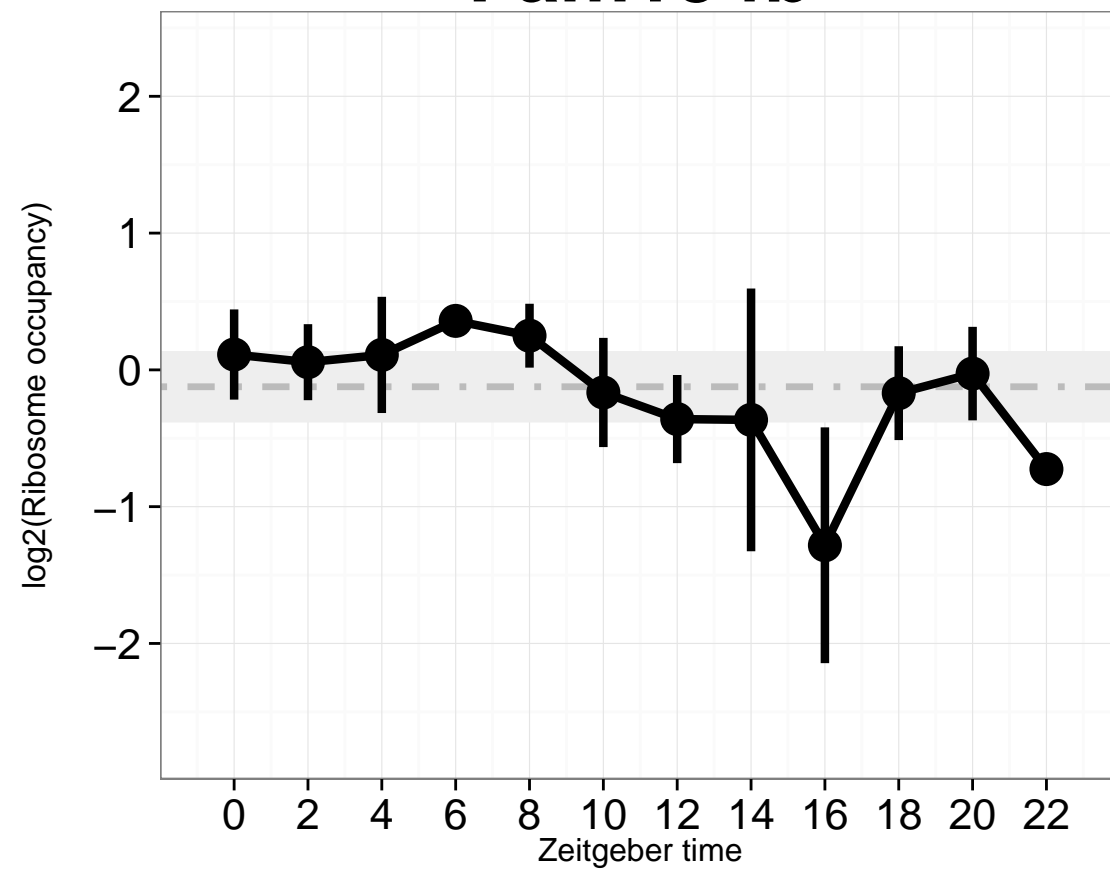

Supplement: Supplementary file 4236 [file 1]

# A4galt

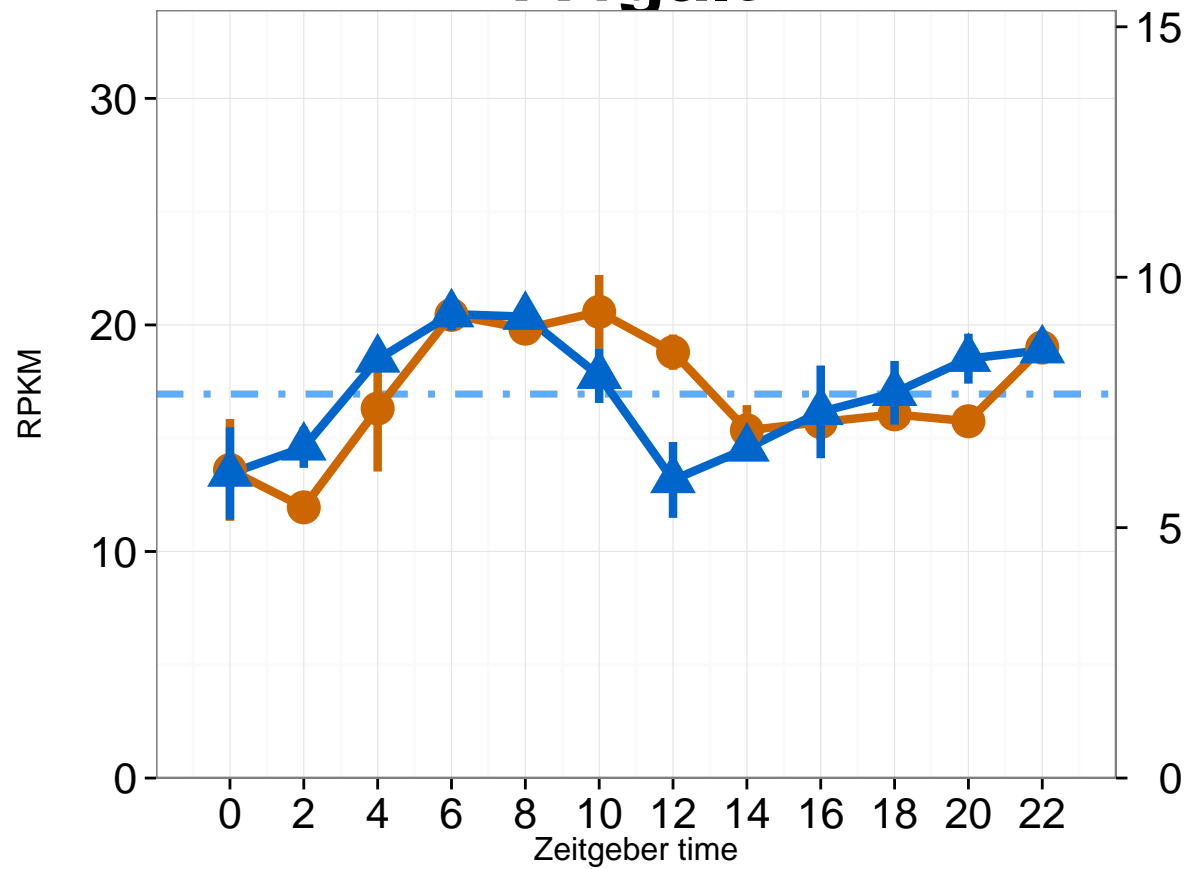

# A4galt

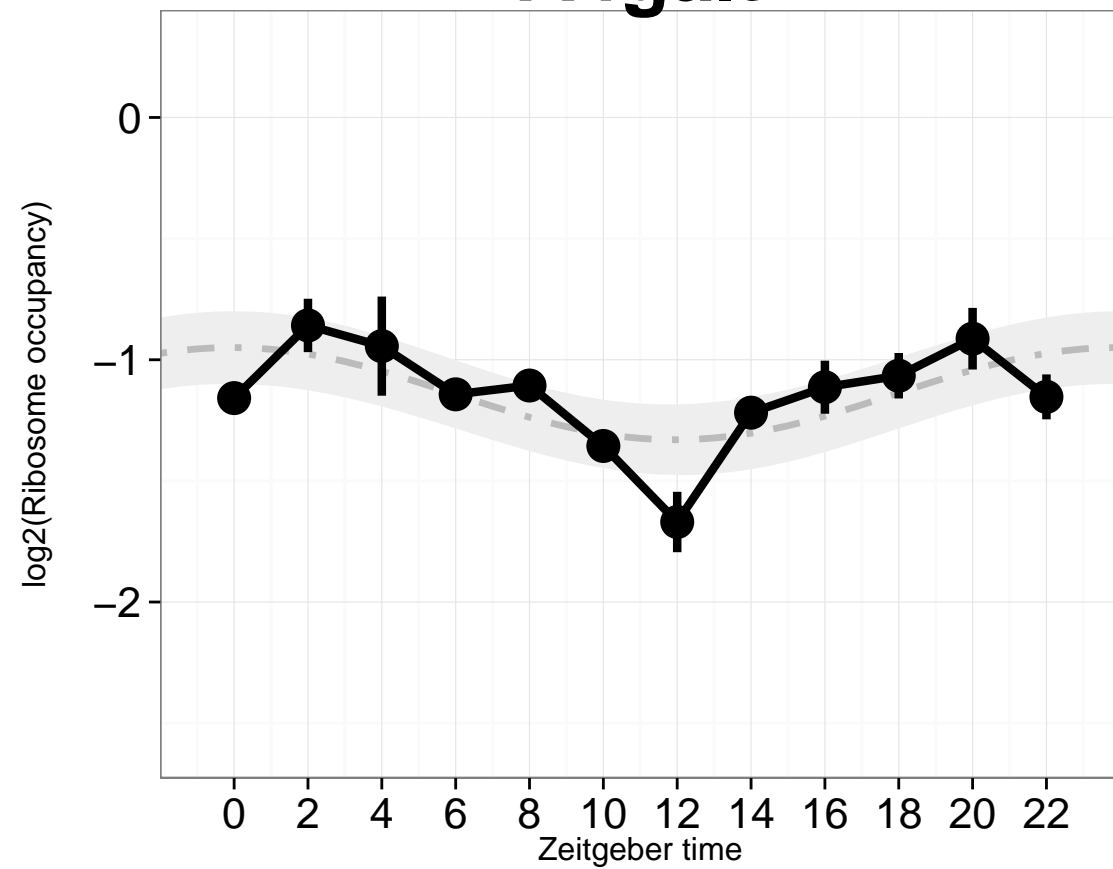

Supplement: Supplementary file 4237 [file 1]

## Arfip2

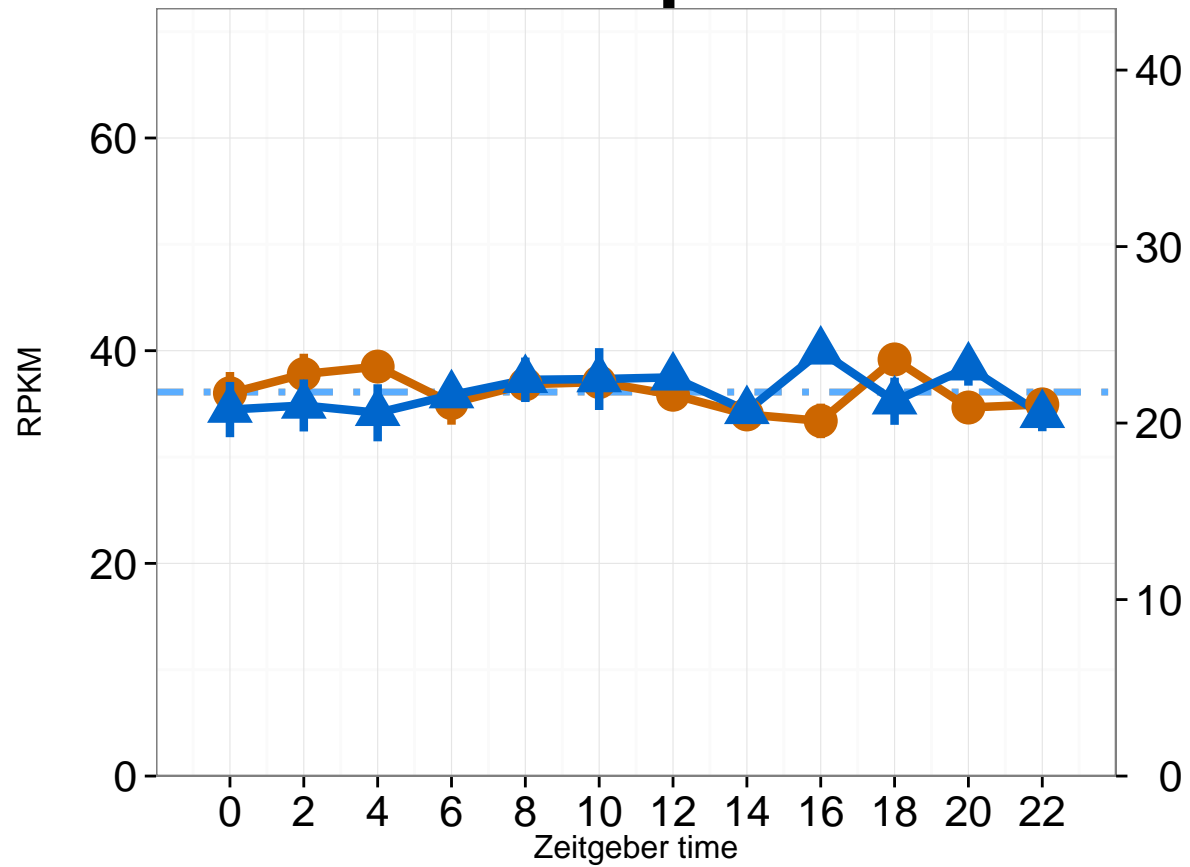

## Arfip2

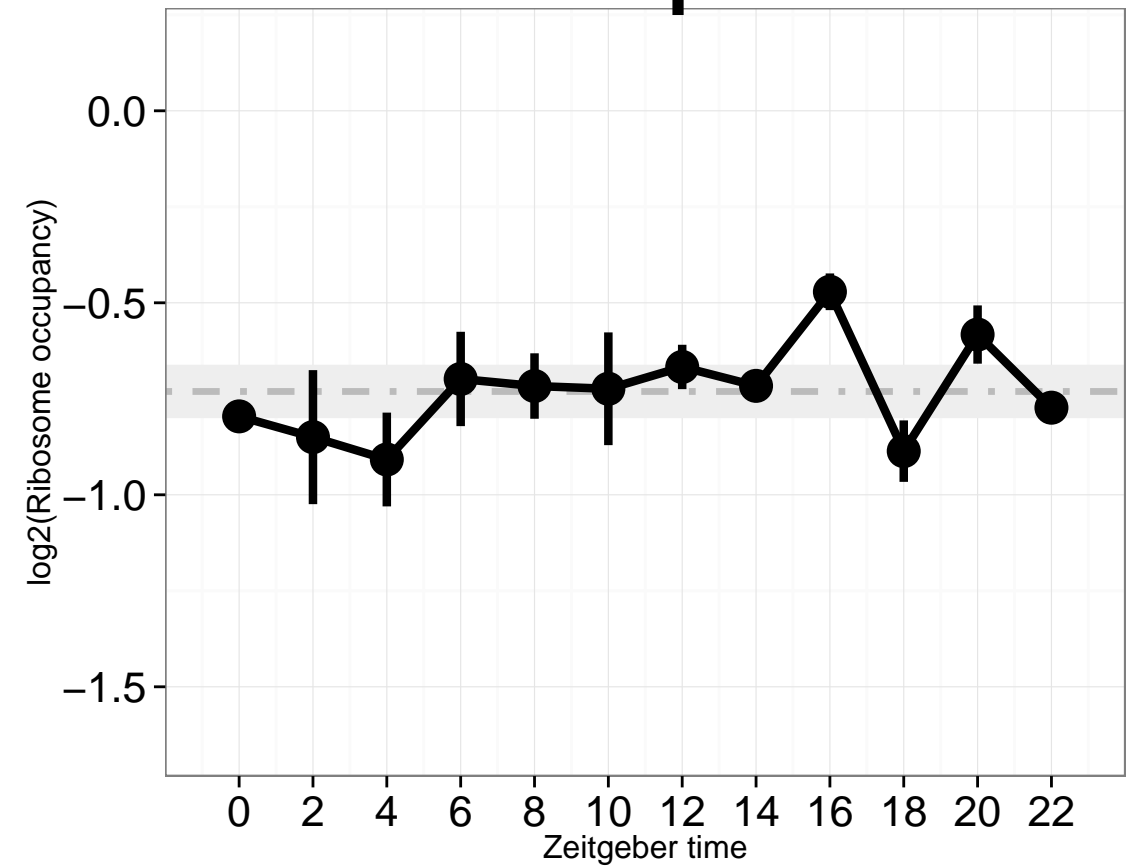

Supplement: Supplementary file 4238 [file 1]

## Spock2

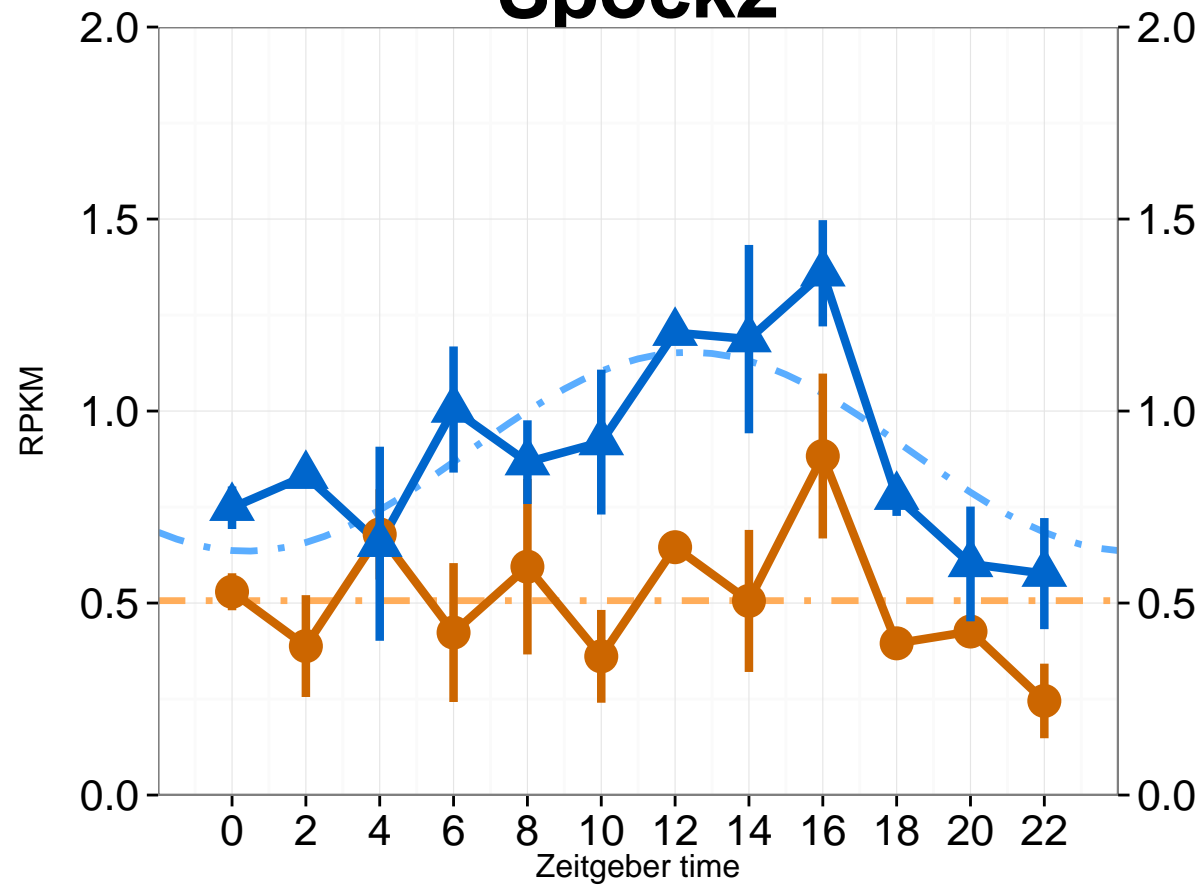

## Spock2

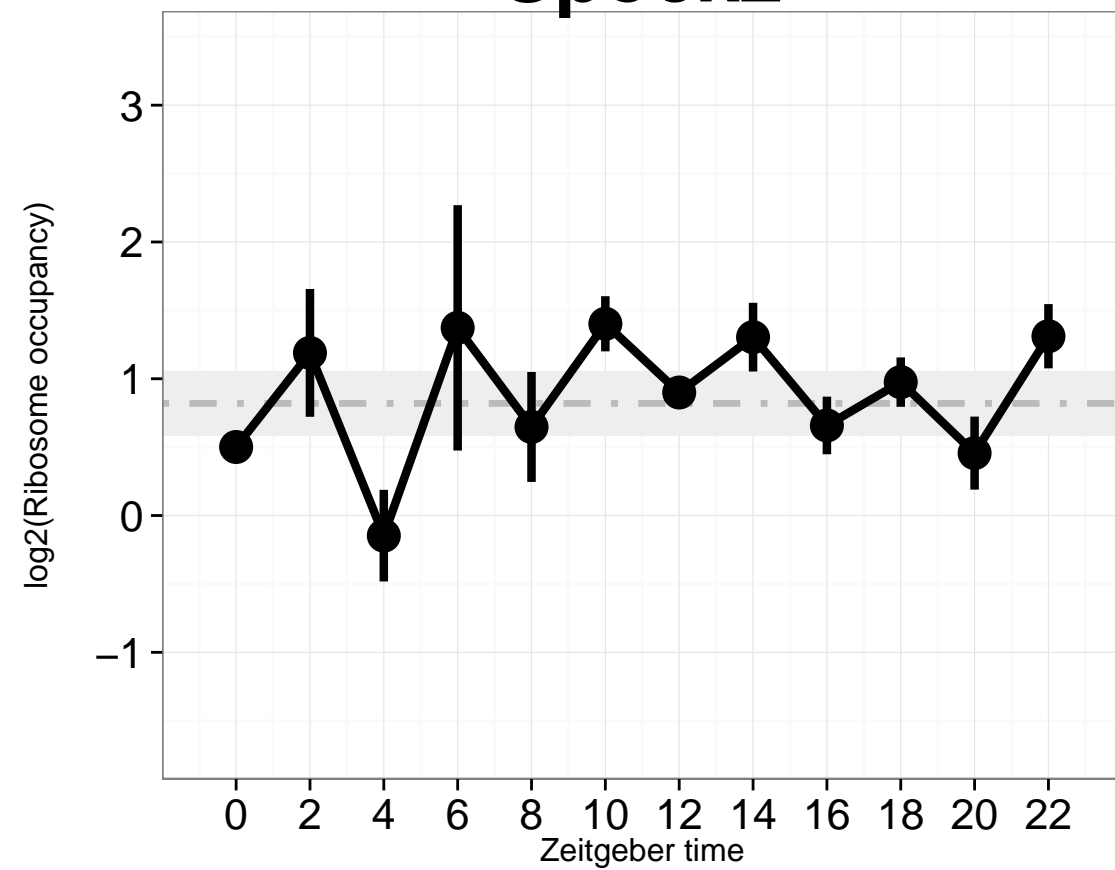

Supplement: Supplementary file 4239 [file 1]

# Clcn3

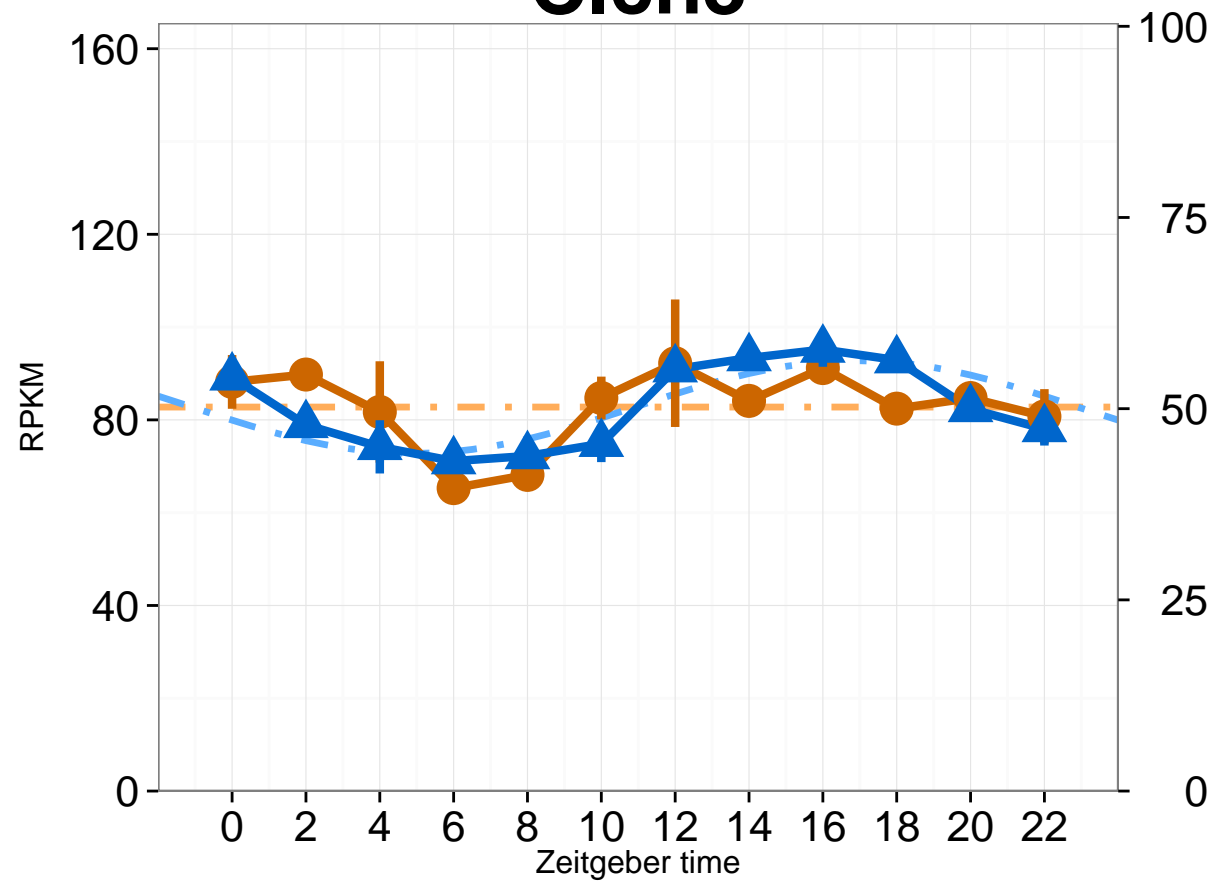

# Clcn3

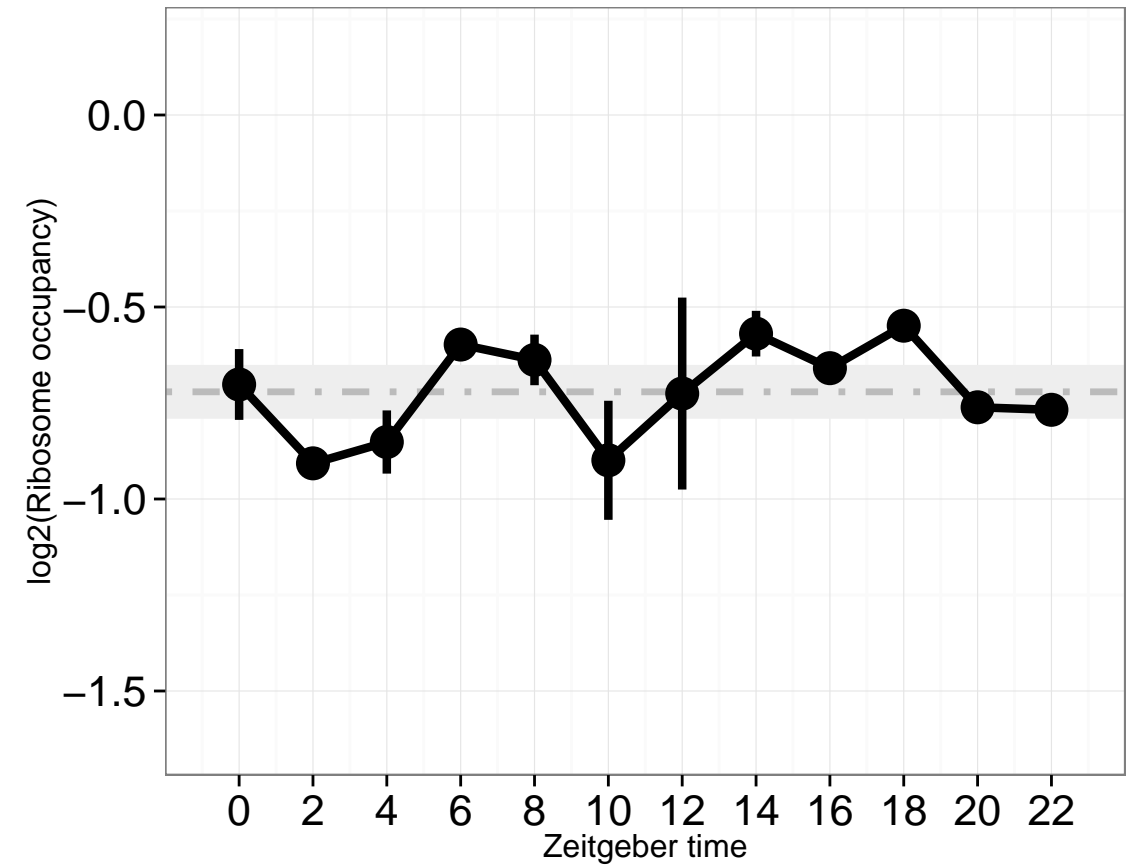

Supplement: Supplementary file 4240 [file 1]

# Ap5m1

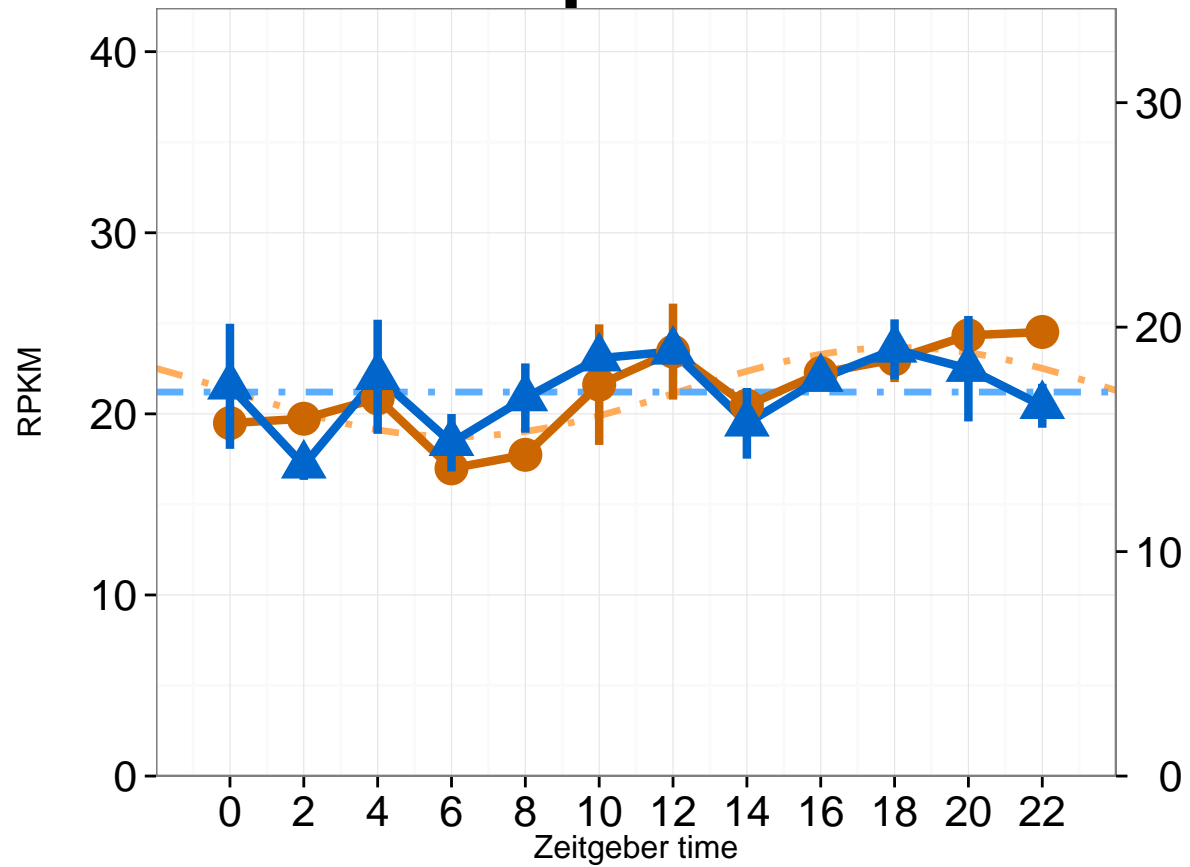

# Ap5m1

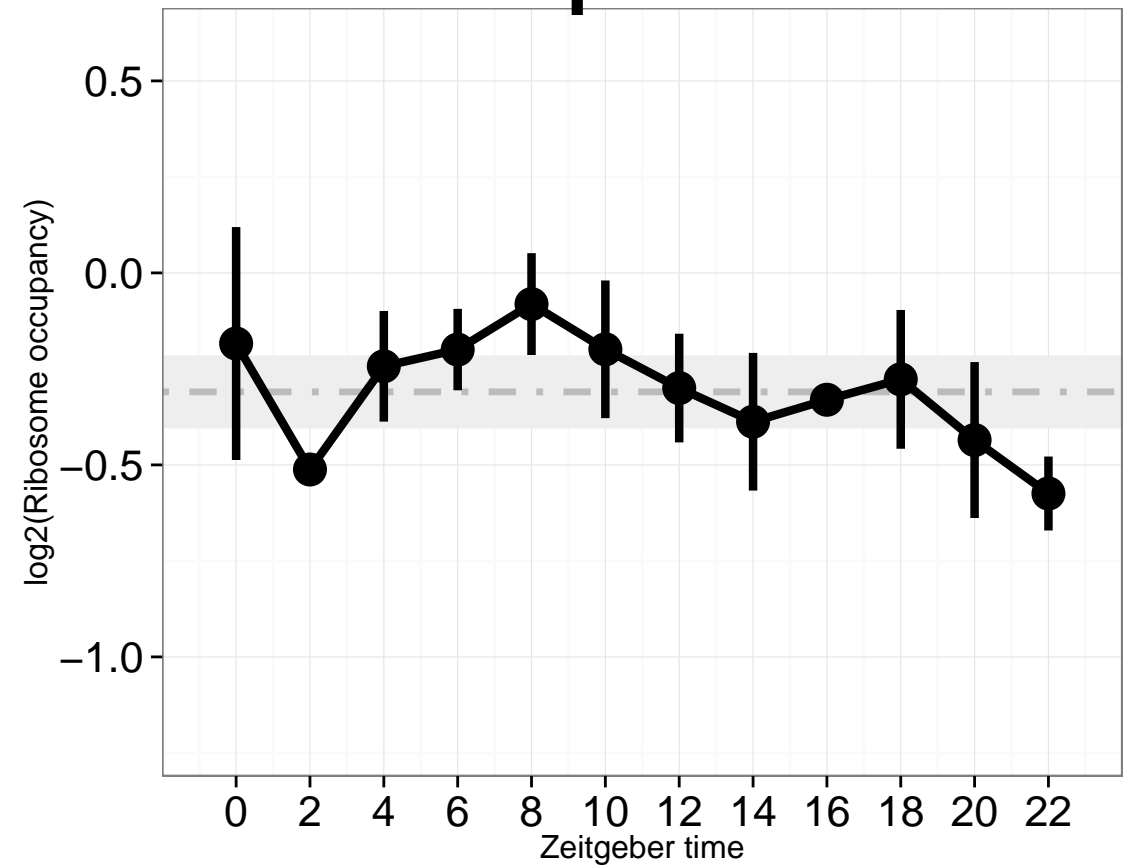

Supplement: Supplementary file 4241 [file 1]

# 2210408l21Rik

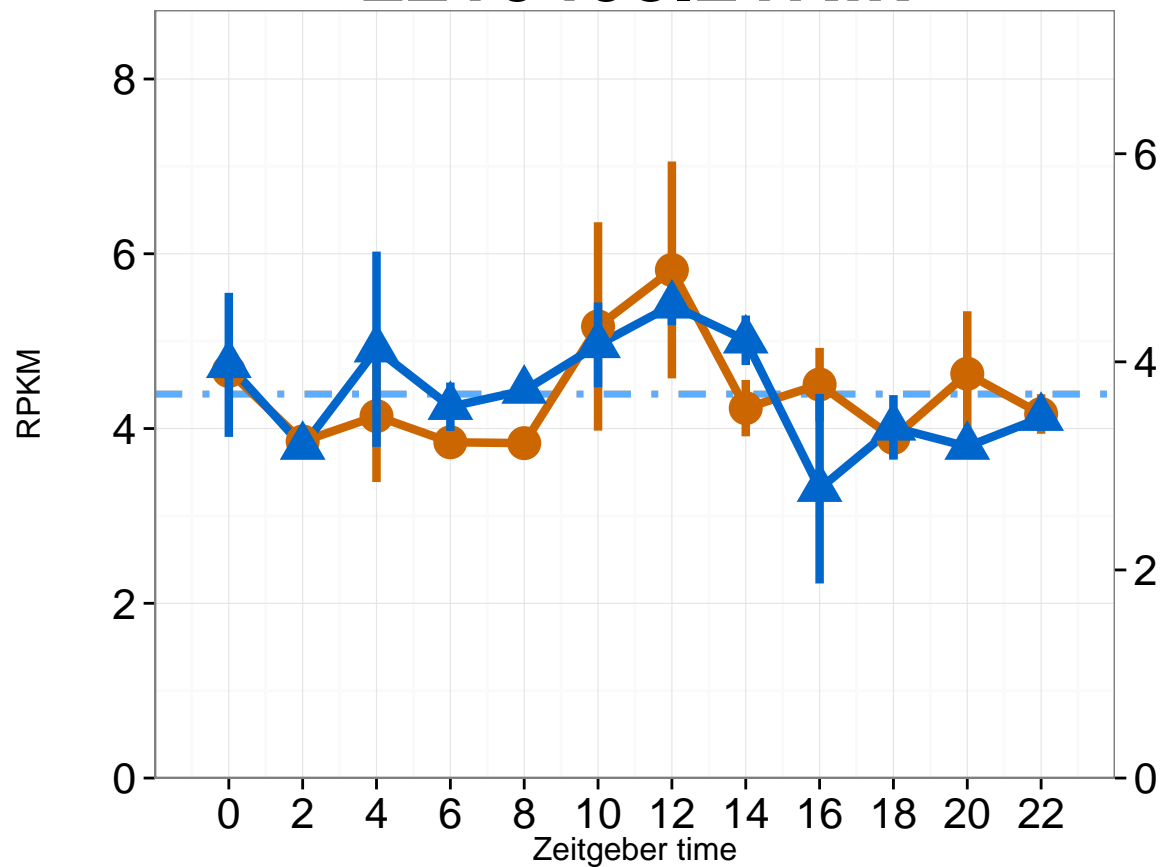

# 2210408l21Rik

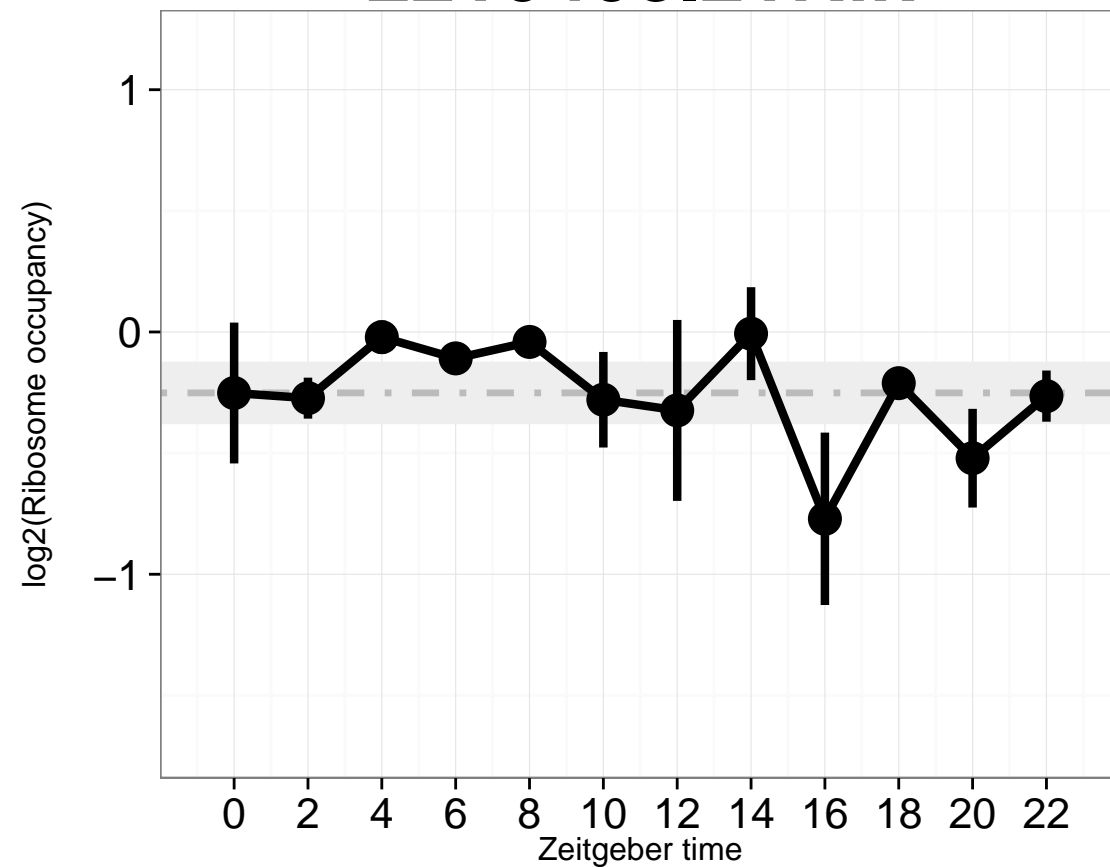

Supplement: Supplementary file 4242 [file 1]

## Hdac10

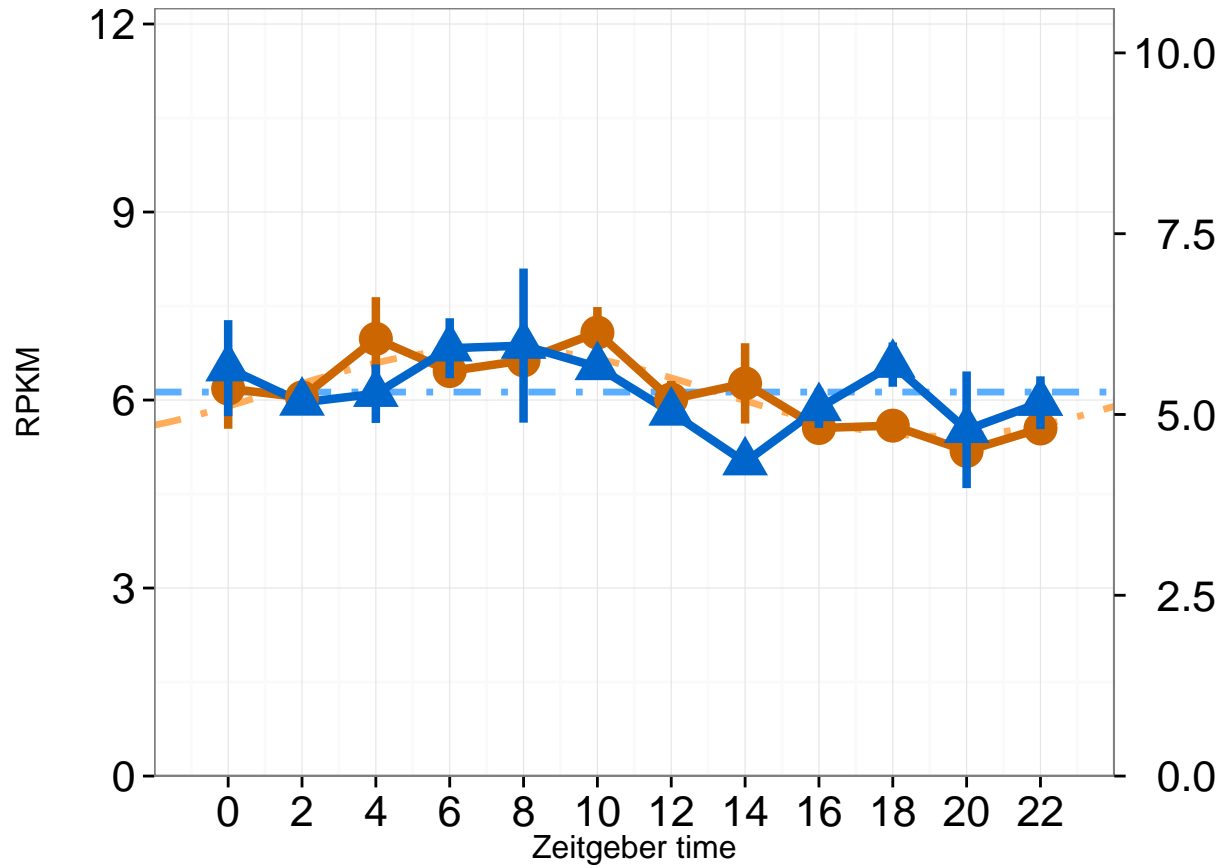

## Hdac10

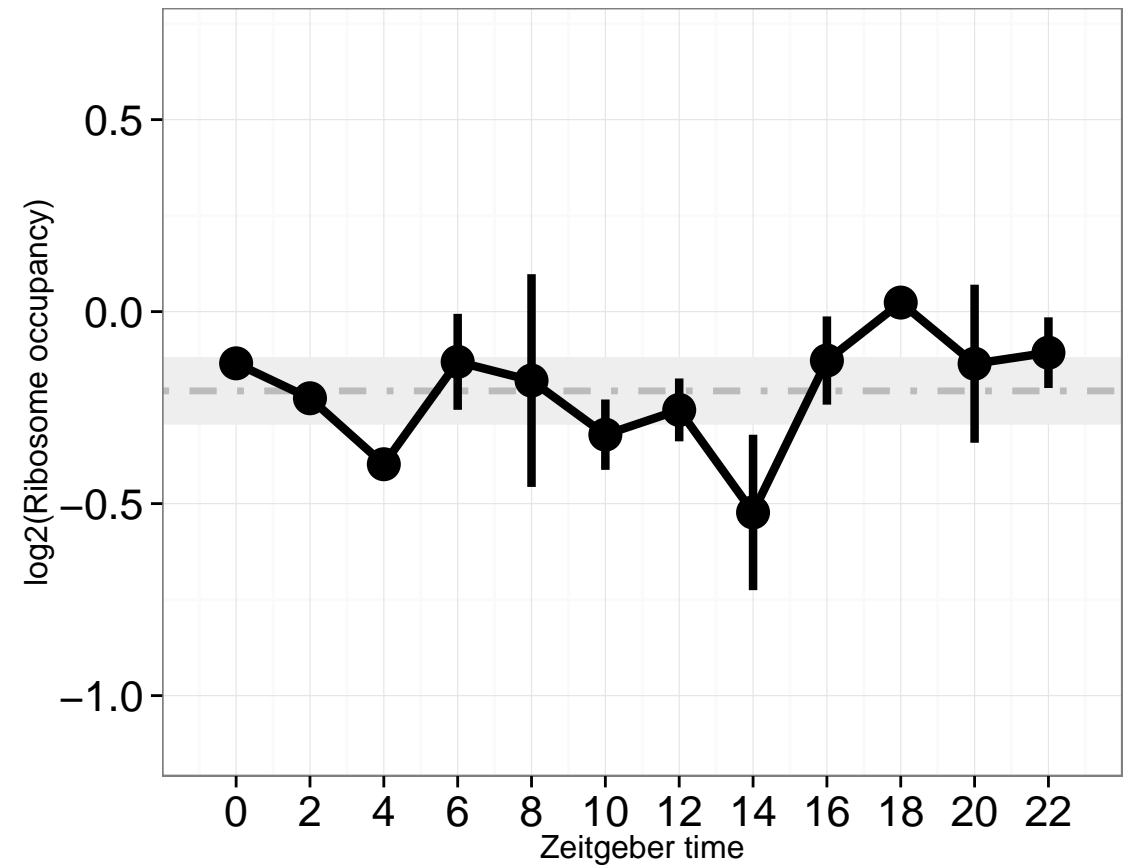

Supplement: Supplementary file 4243 [file 1]

# Rbm8a

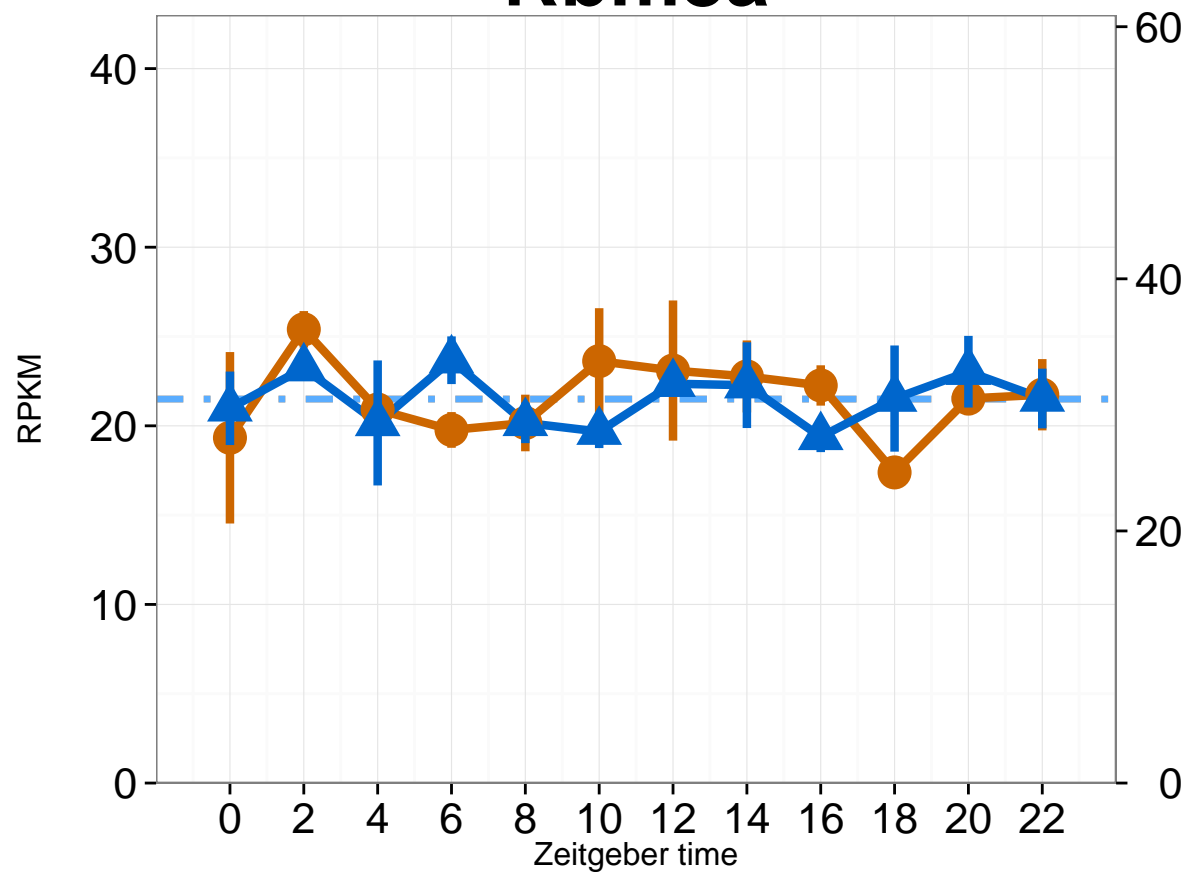

# Rbm8a

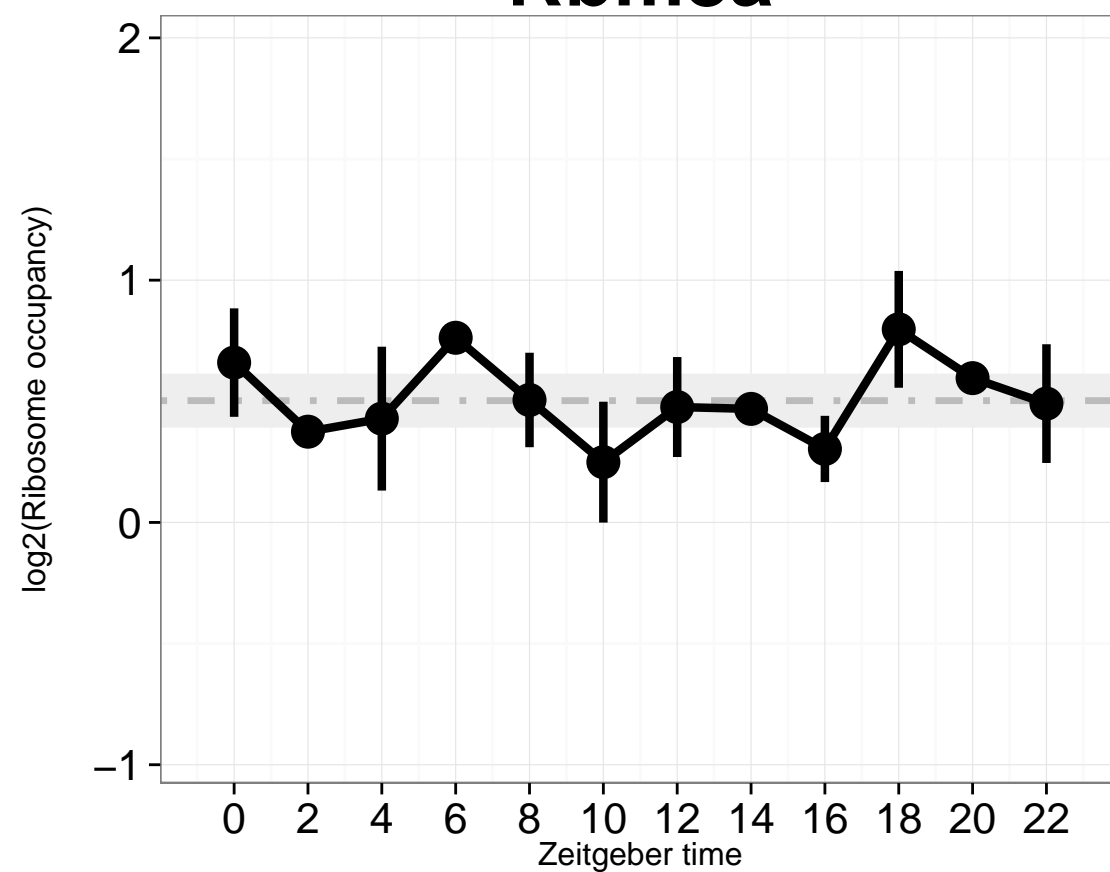

Supplement: Supplementary file 4244 [file 1]

## Amph

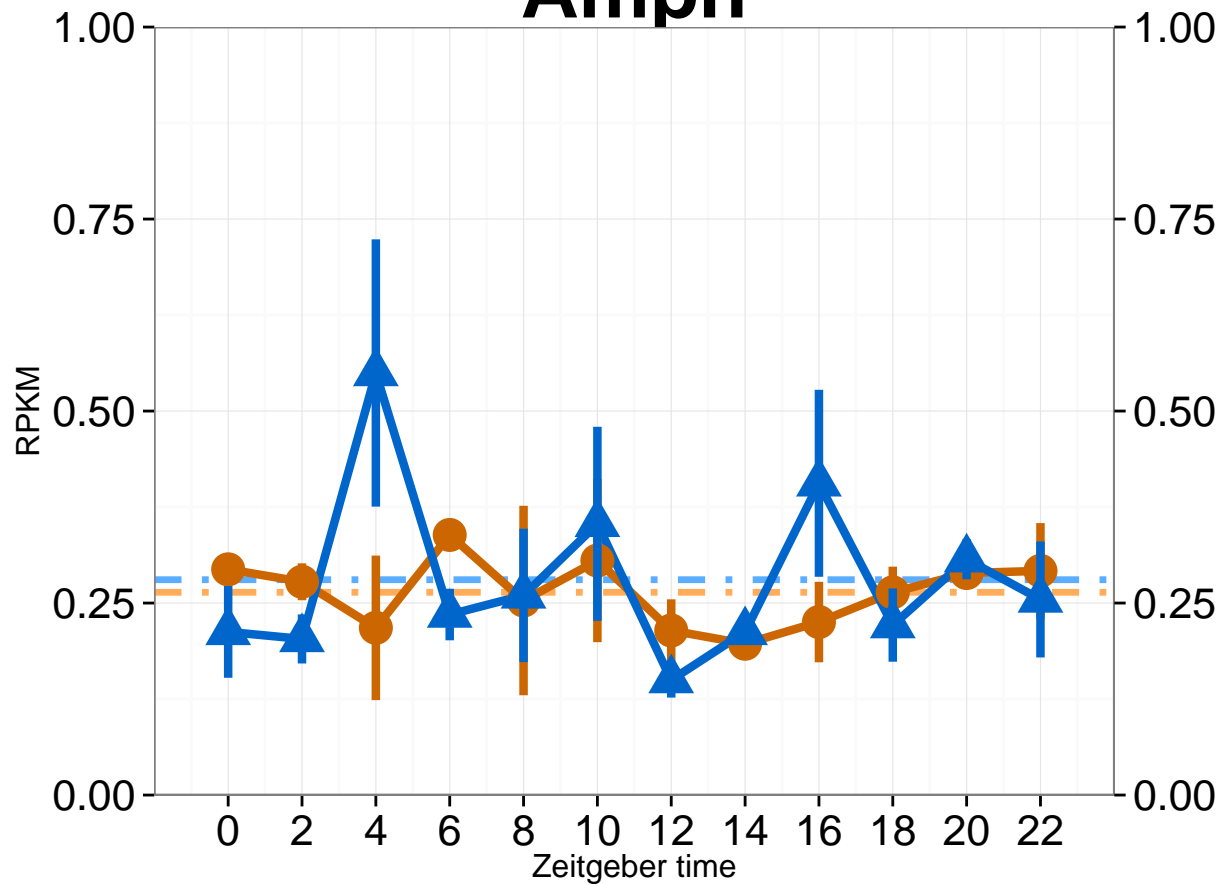

## Amph

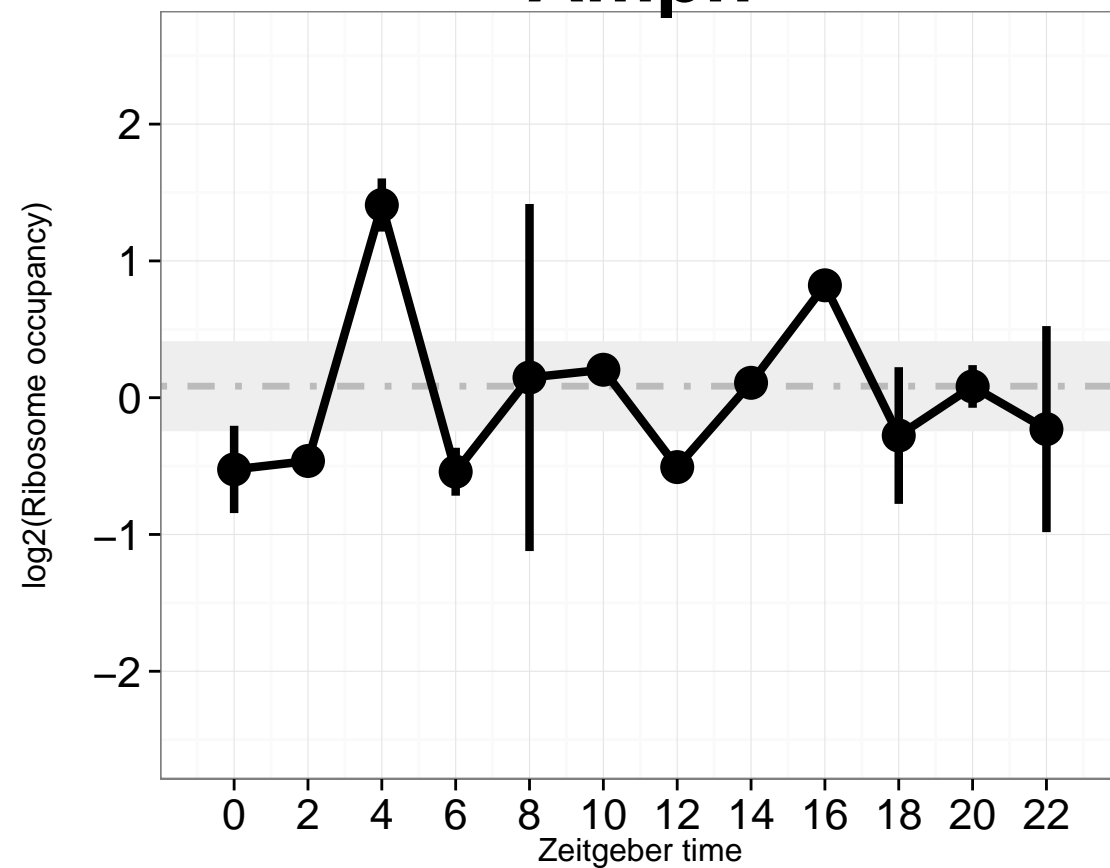

Supplement: Supplementary file 4245 [file 1]

# Jmjd6

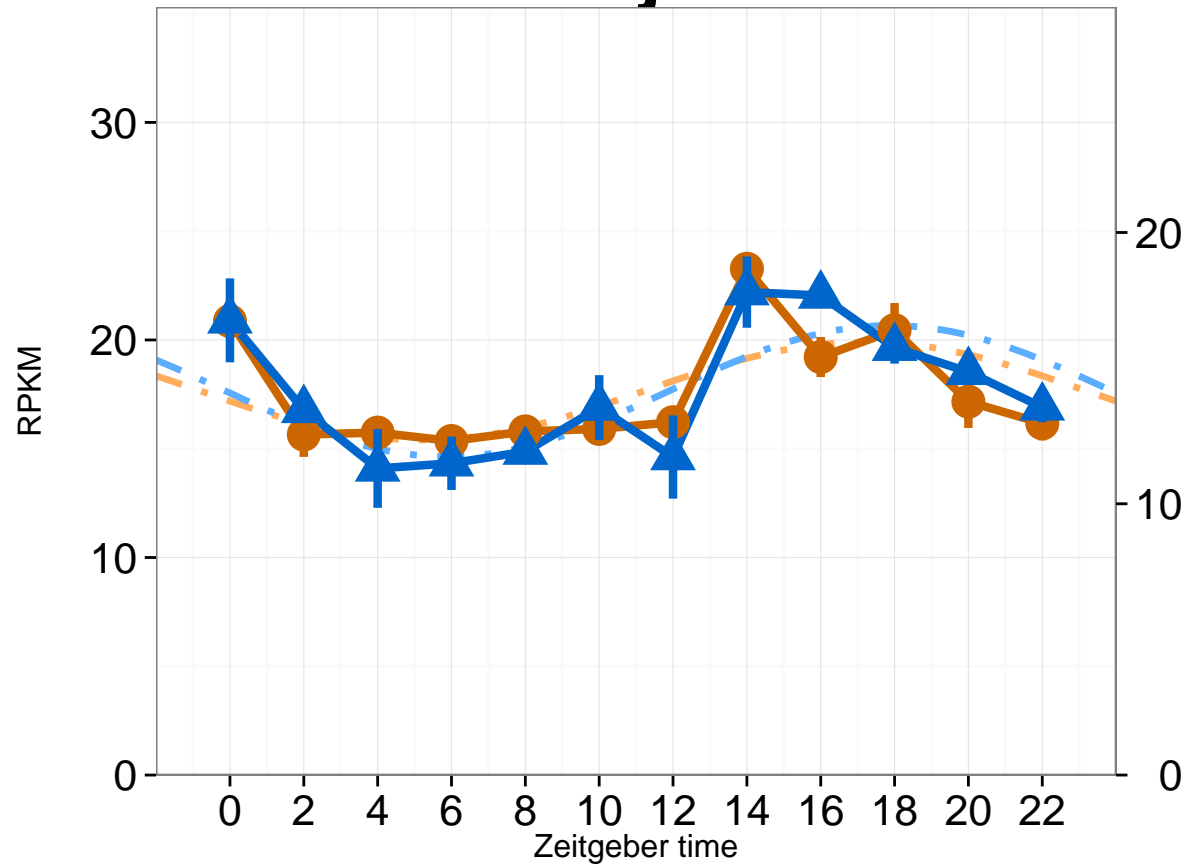

# Jmjd6

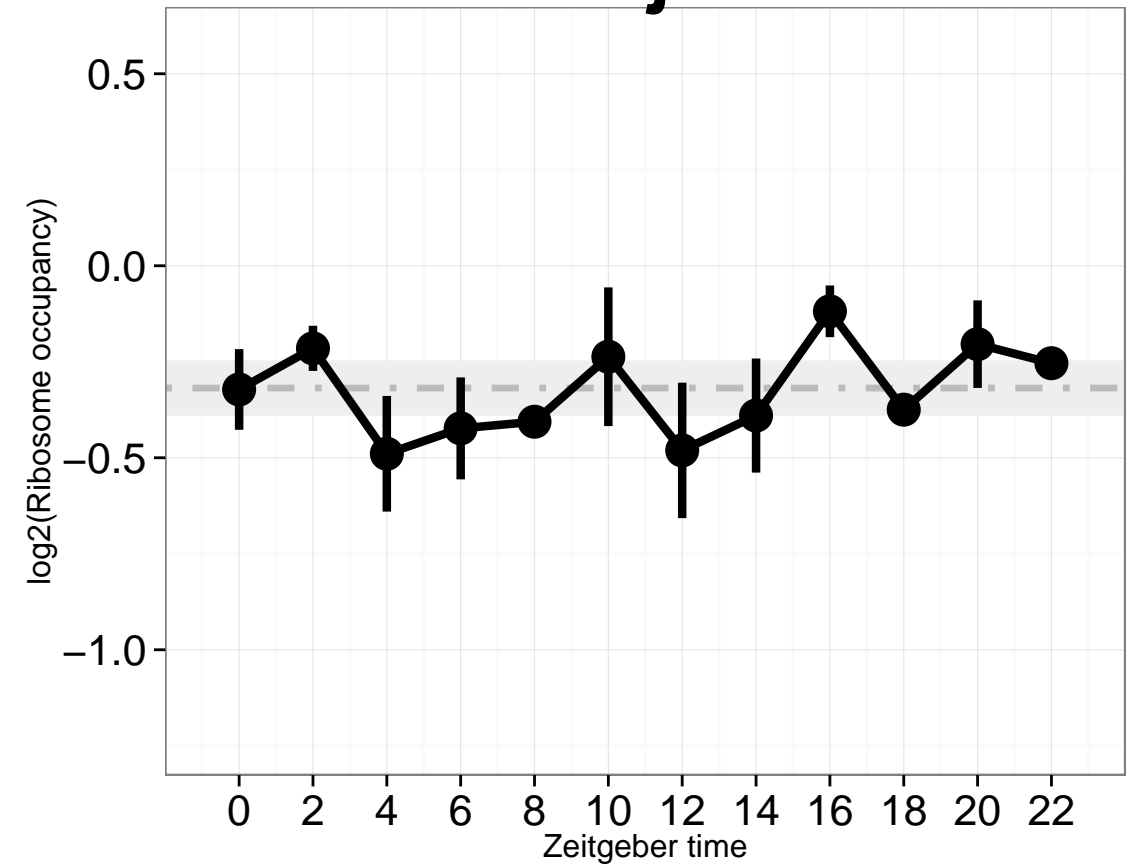

Supplement: Supplementary file 4246 [file 1]

# Prdx5

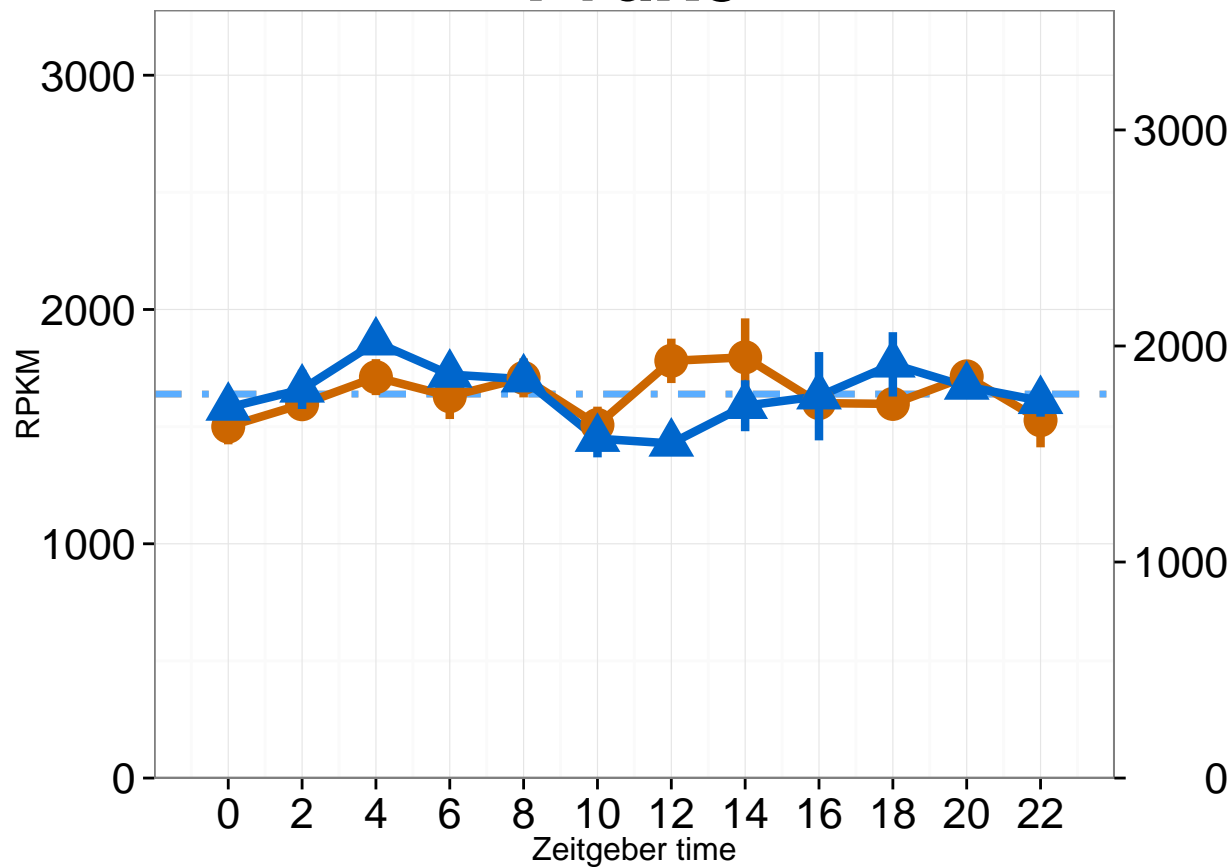

# Prdx5

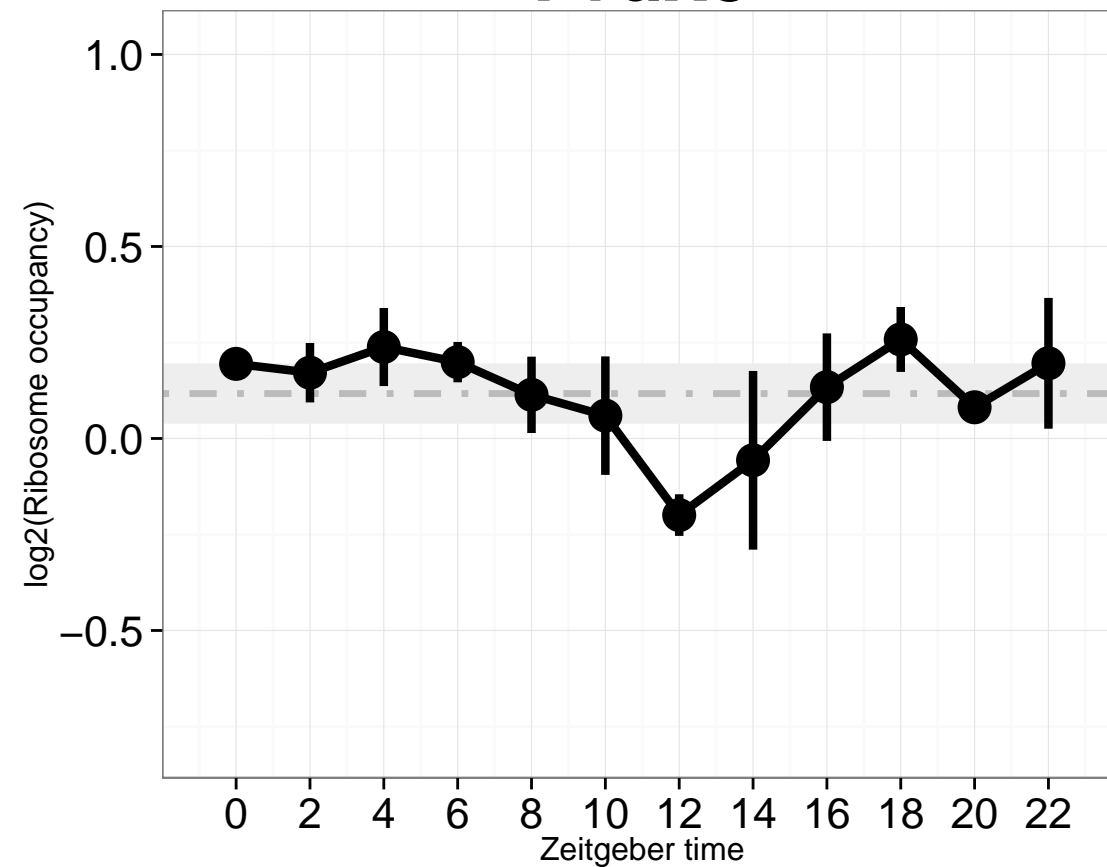

Supplement: Supplementary file 4247 [file 1]

## Fdps

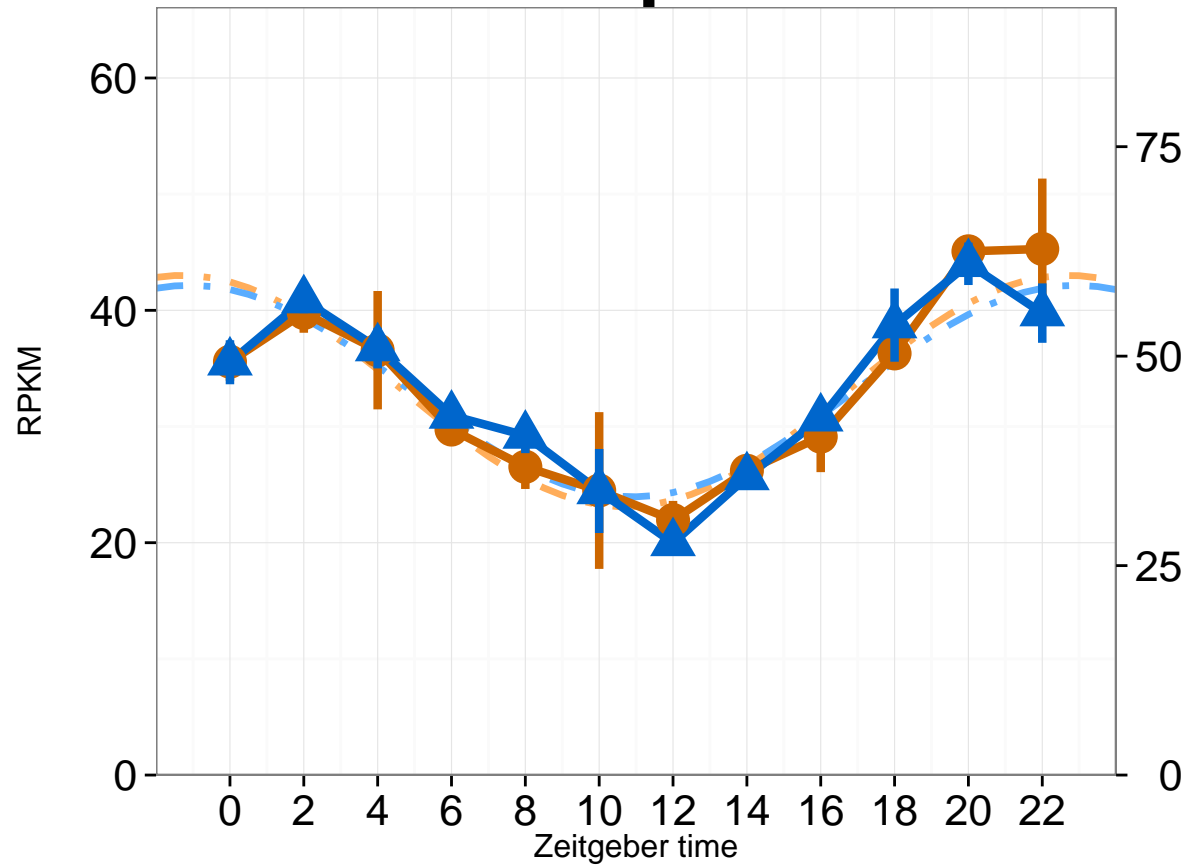

## Fdps

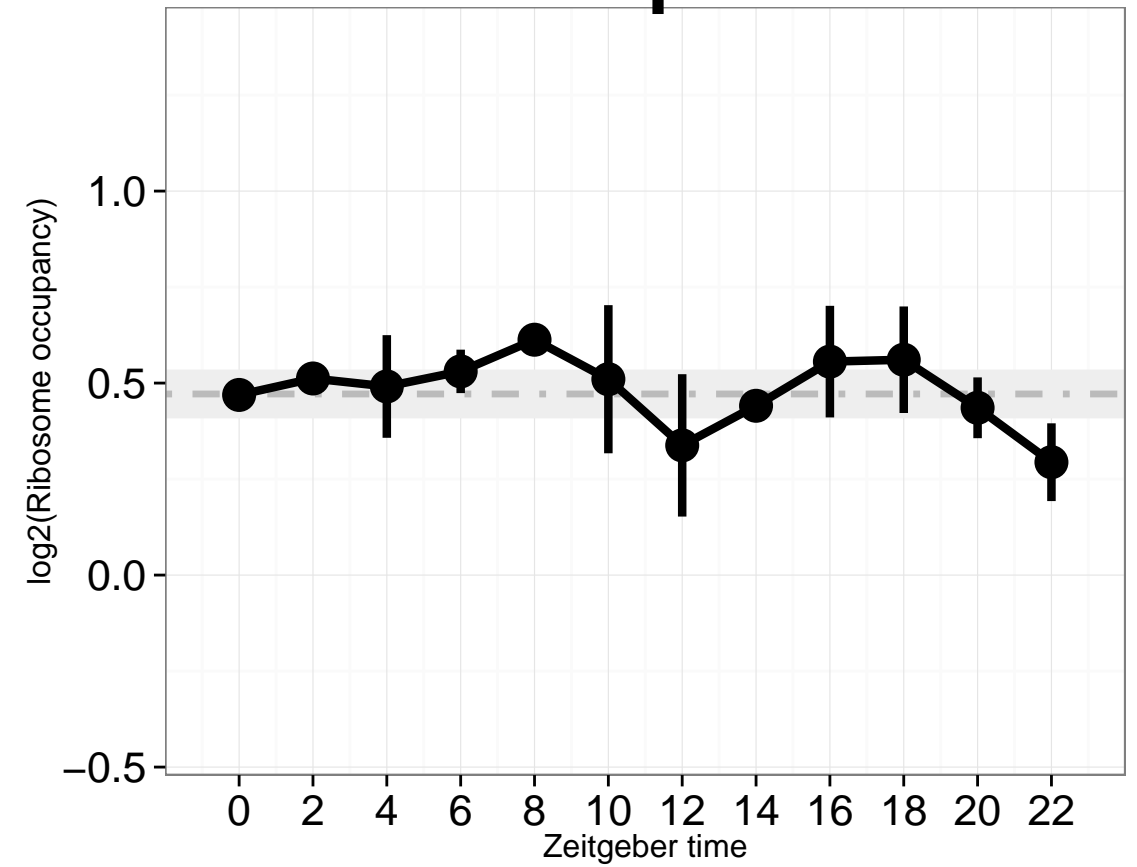

Supplement: Supplementary file 4248 [file 1]

# Isyna1

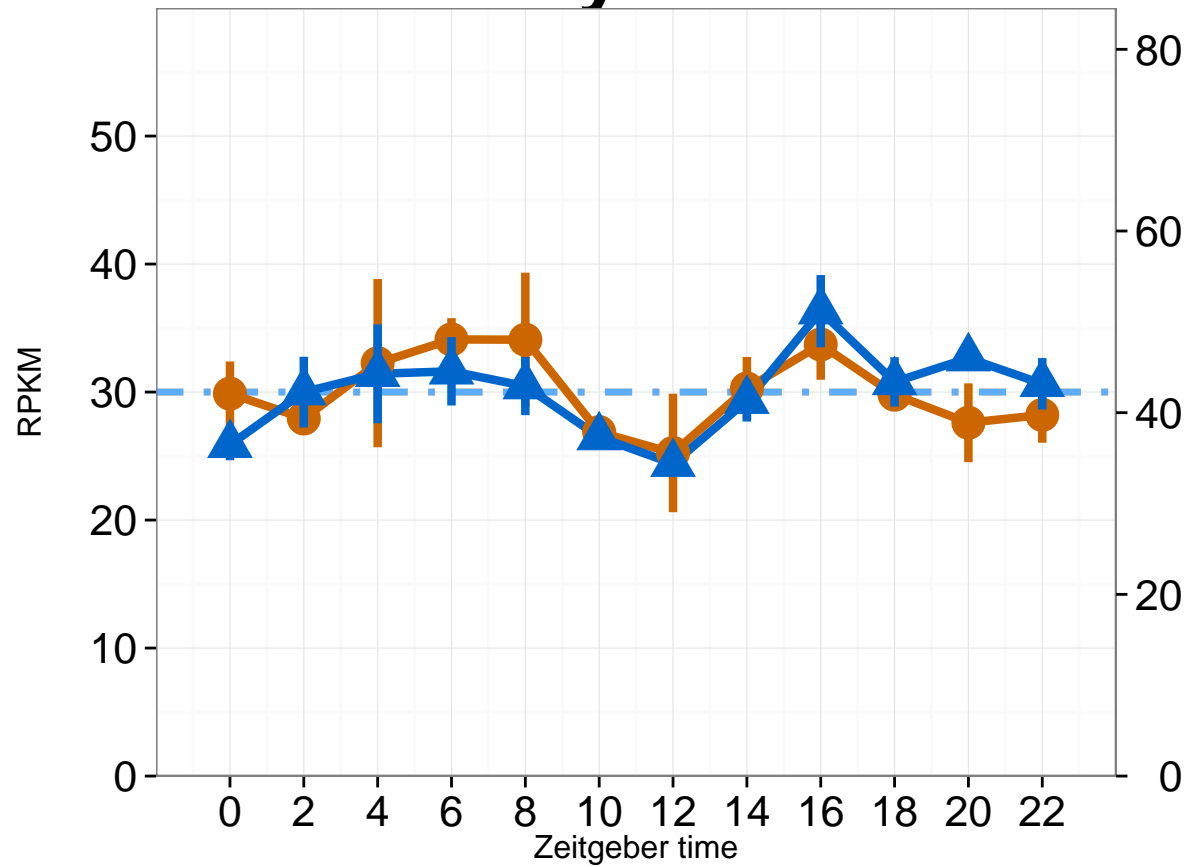

# Isyna1

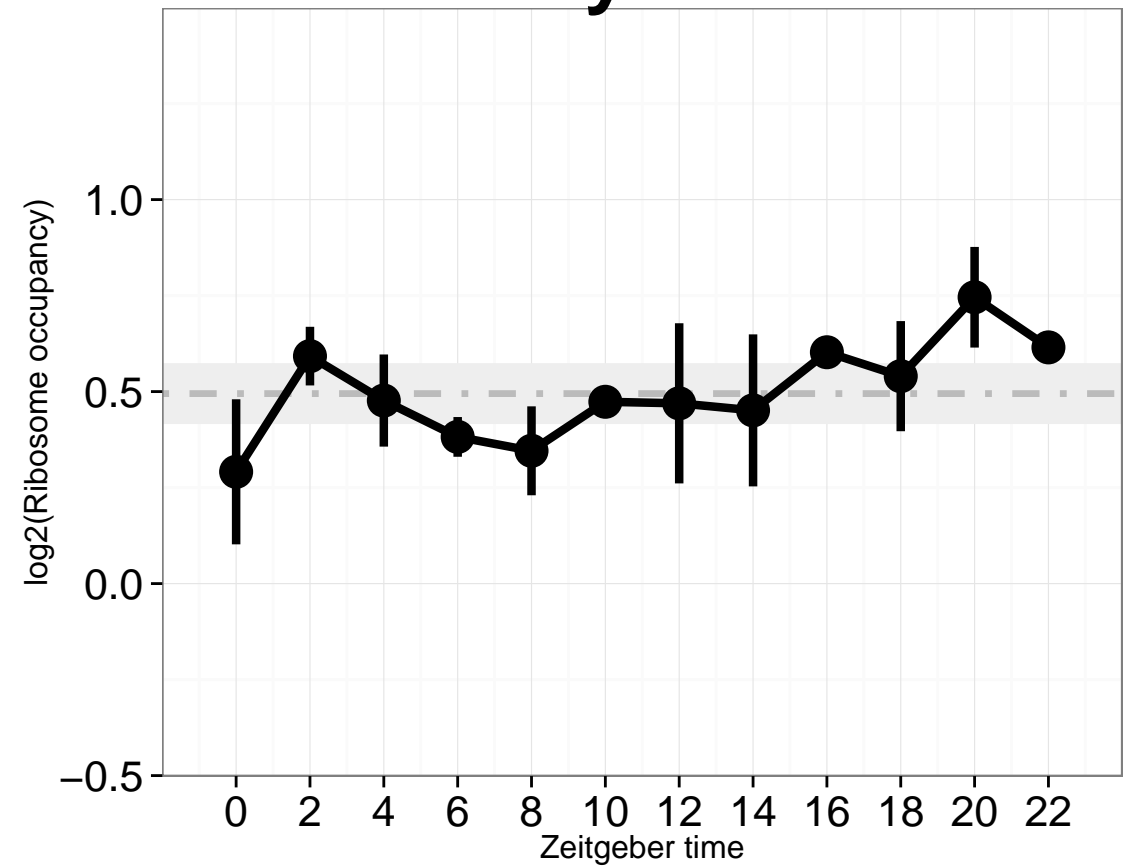

Supplement: Supplementary file 4249 [file 1]

## Khsrp

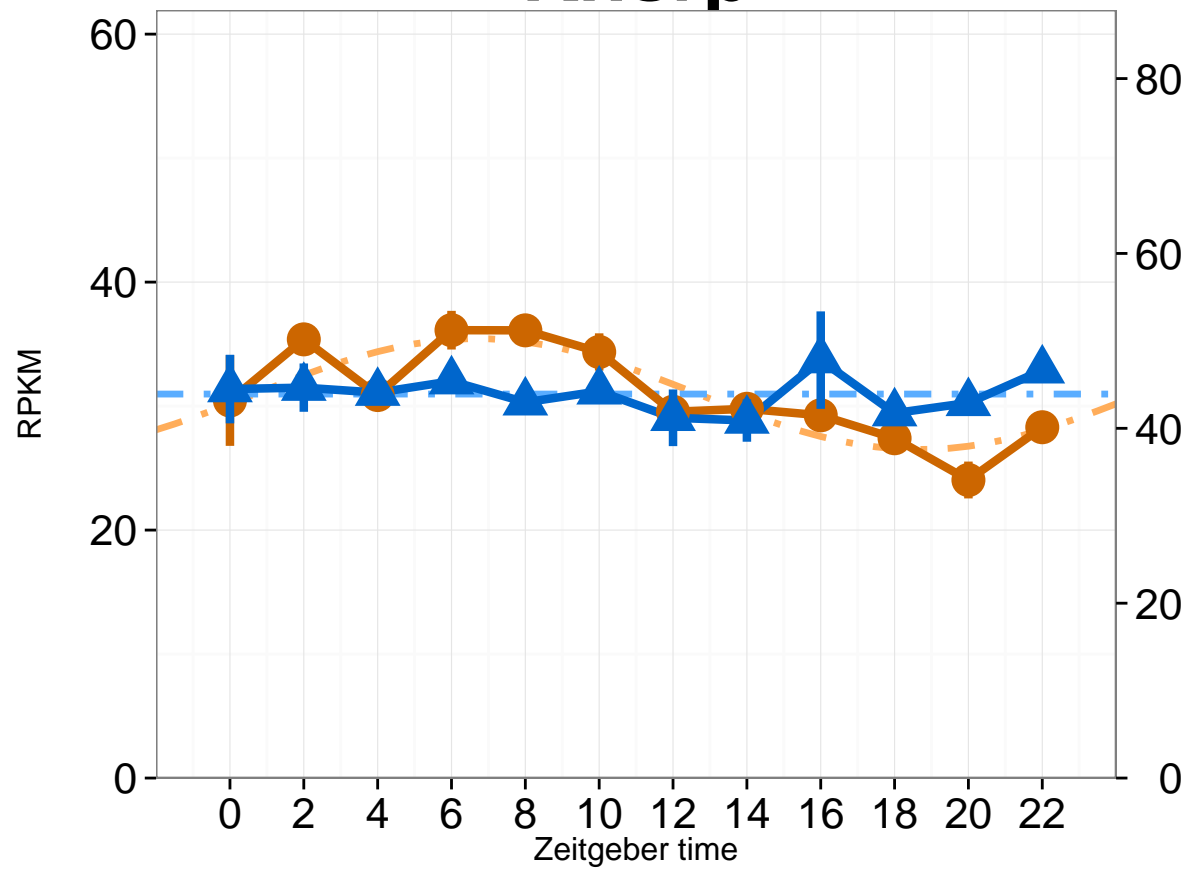

## Khsrp

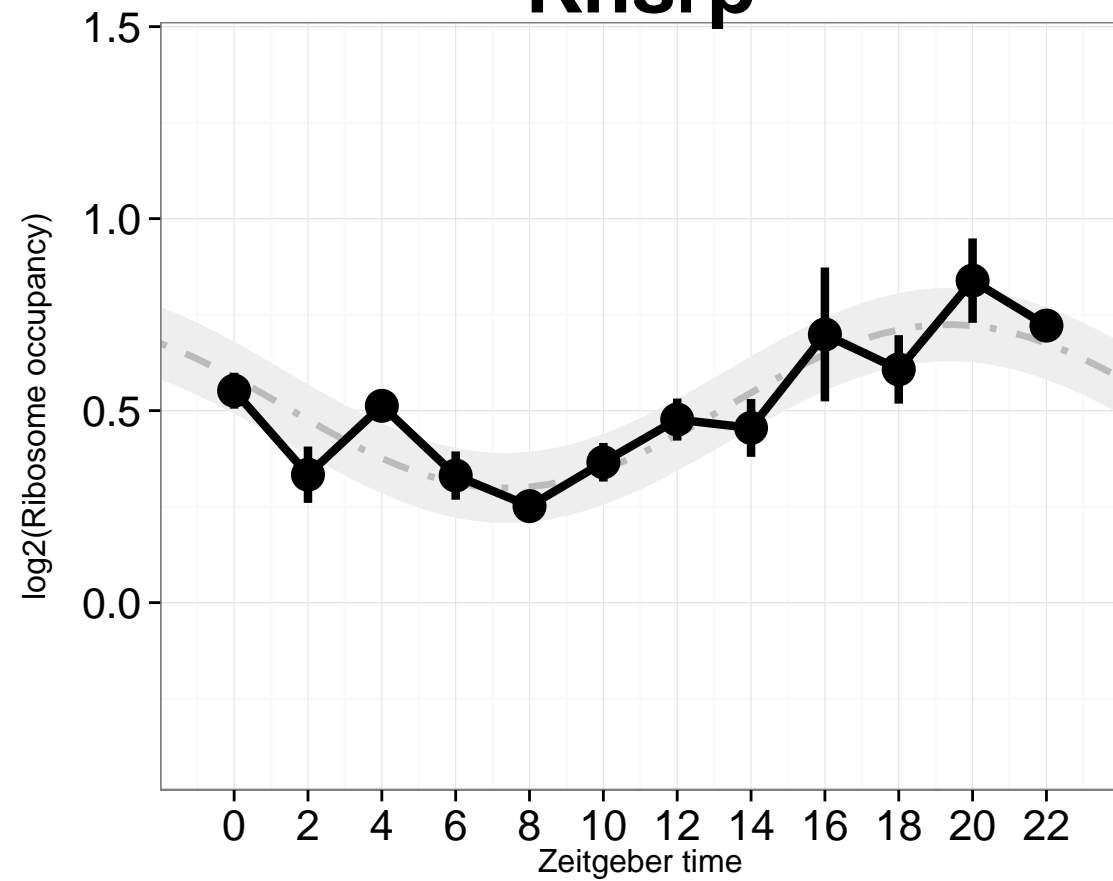

Supplement: Supplementary file 4250 [file 1]

## Adora1

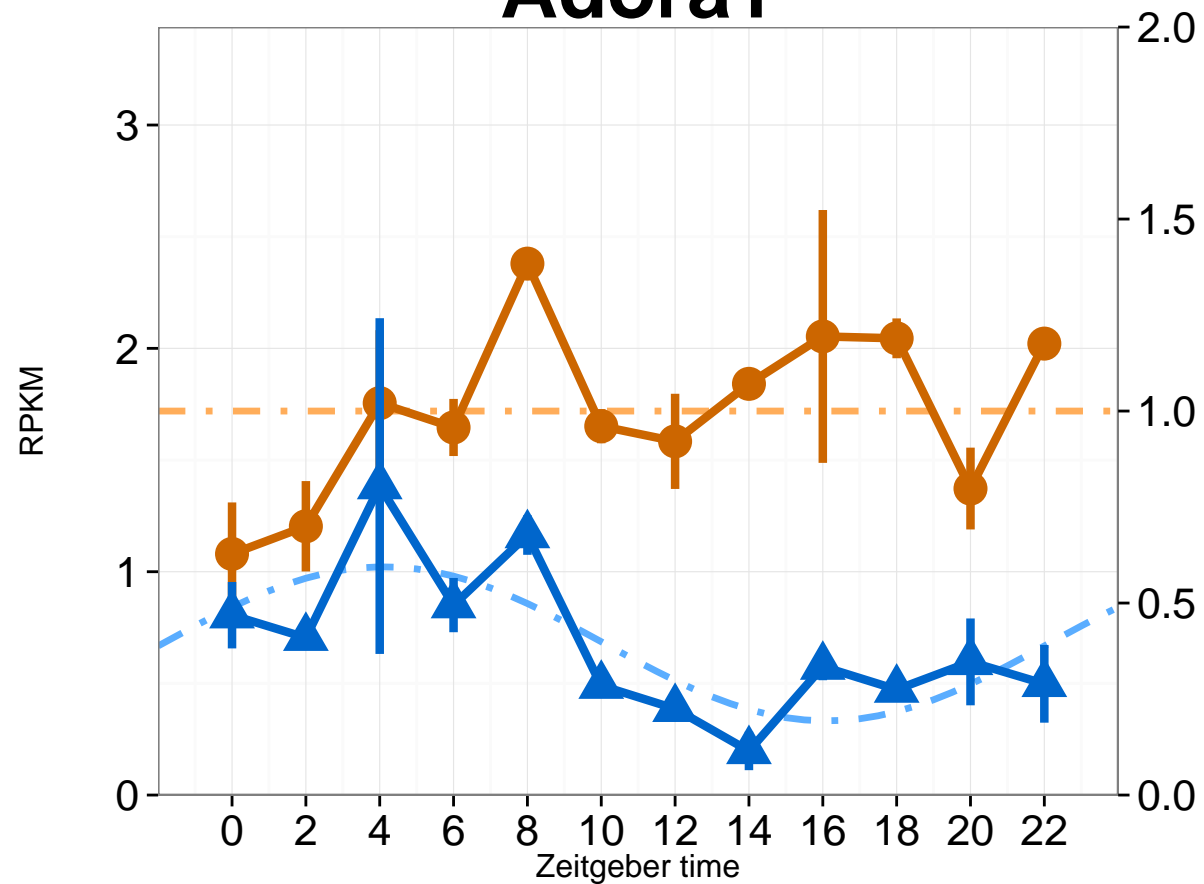

## Adora1

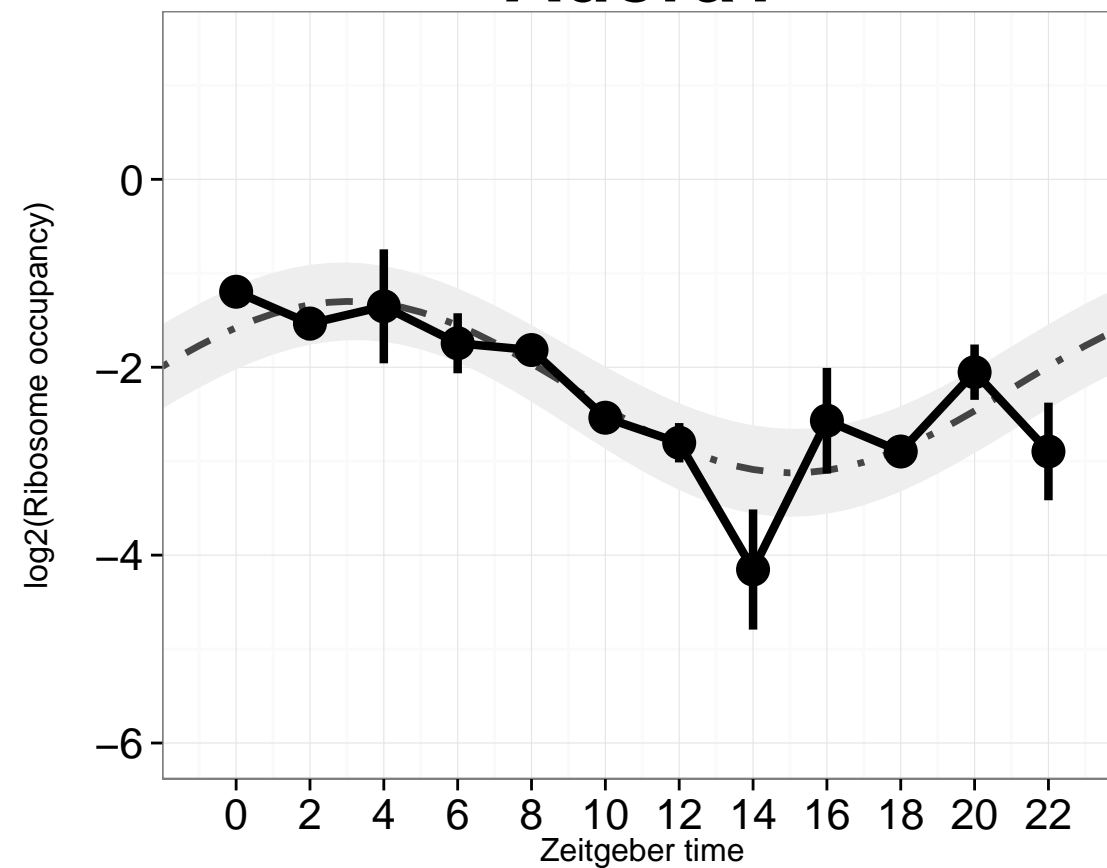

Supplement: Supplementary file 4251 [file 1]

# 4930452B06Rik

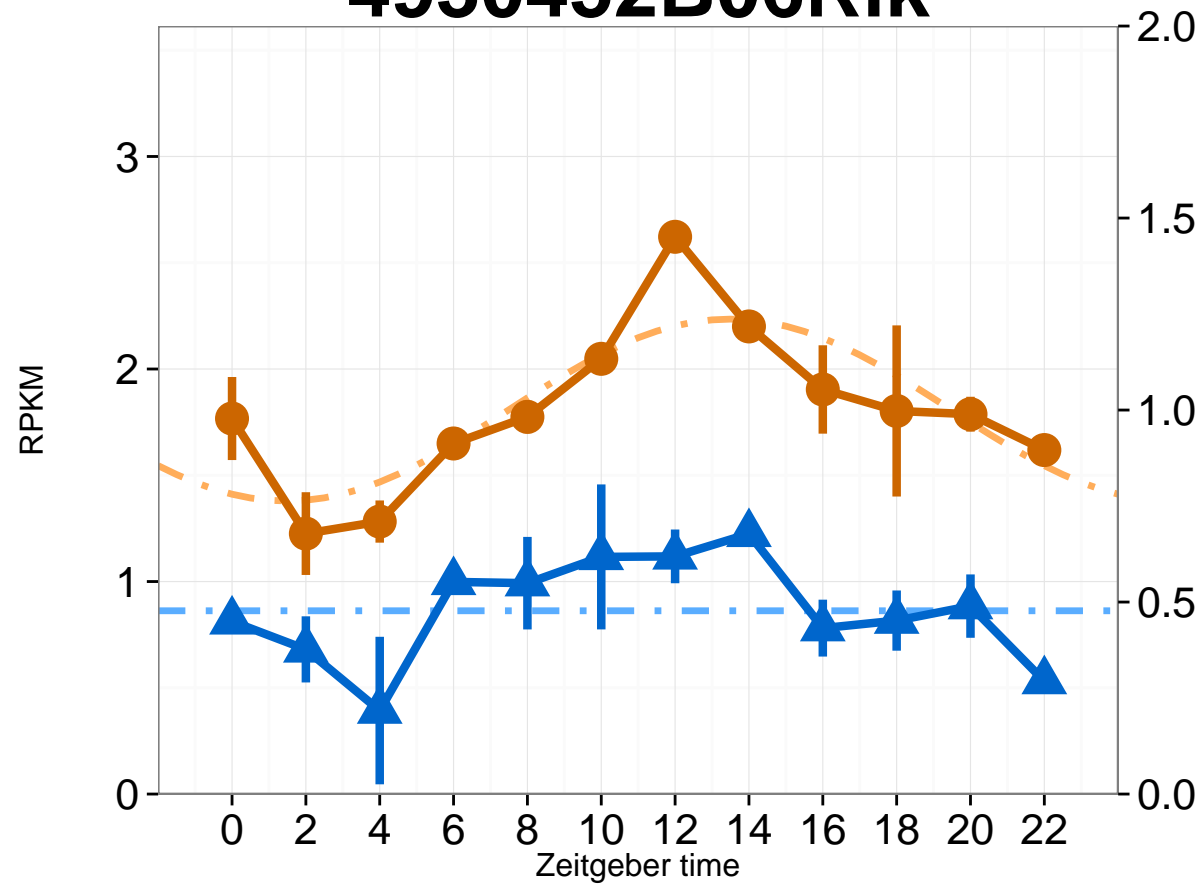

# 4930452B06Rik

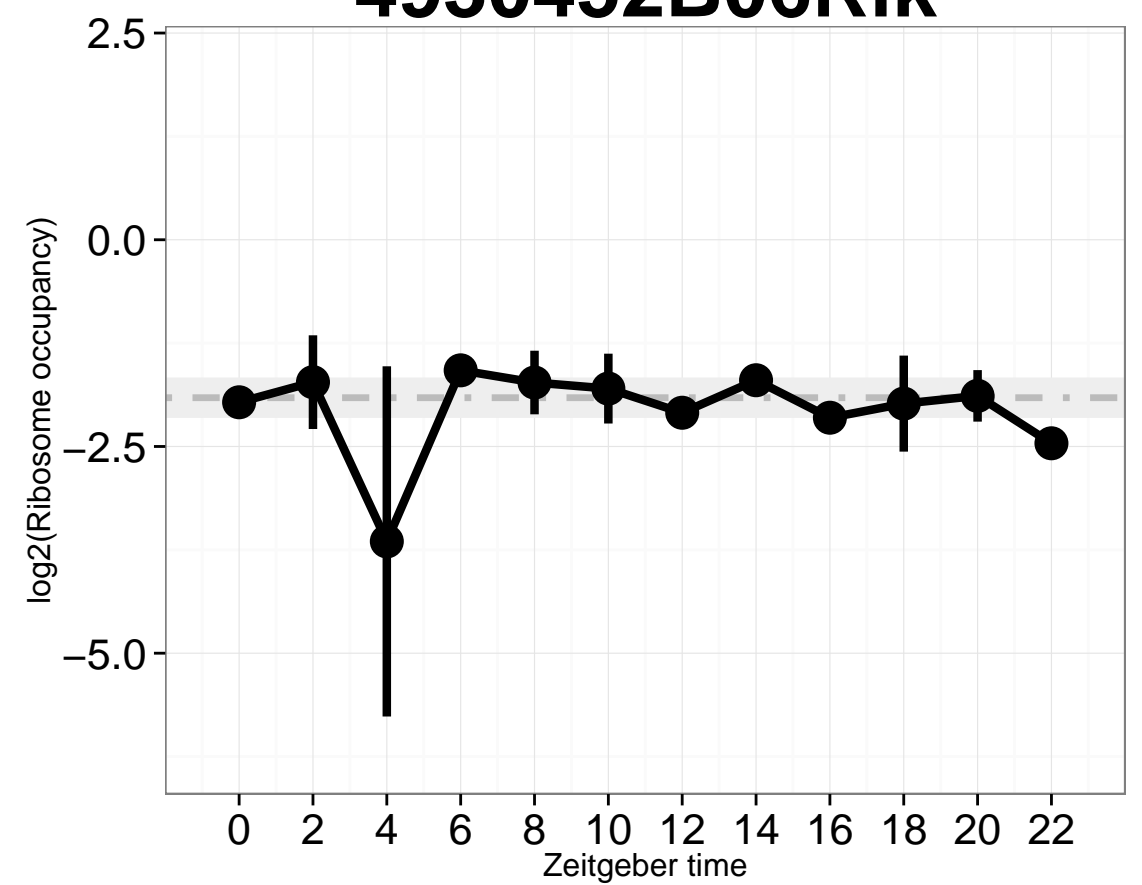

Supplement: Supplementary file 4252 [file 1]

## Rdh10

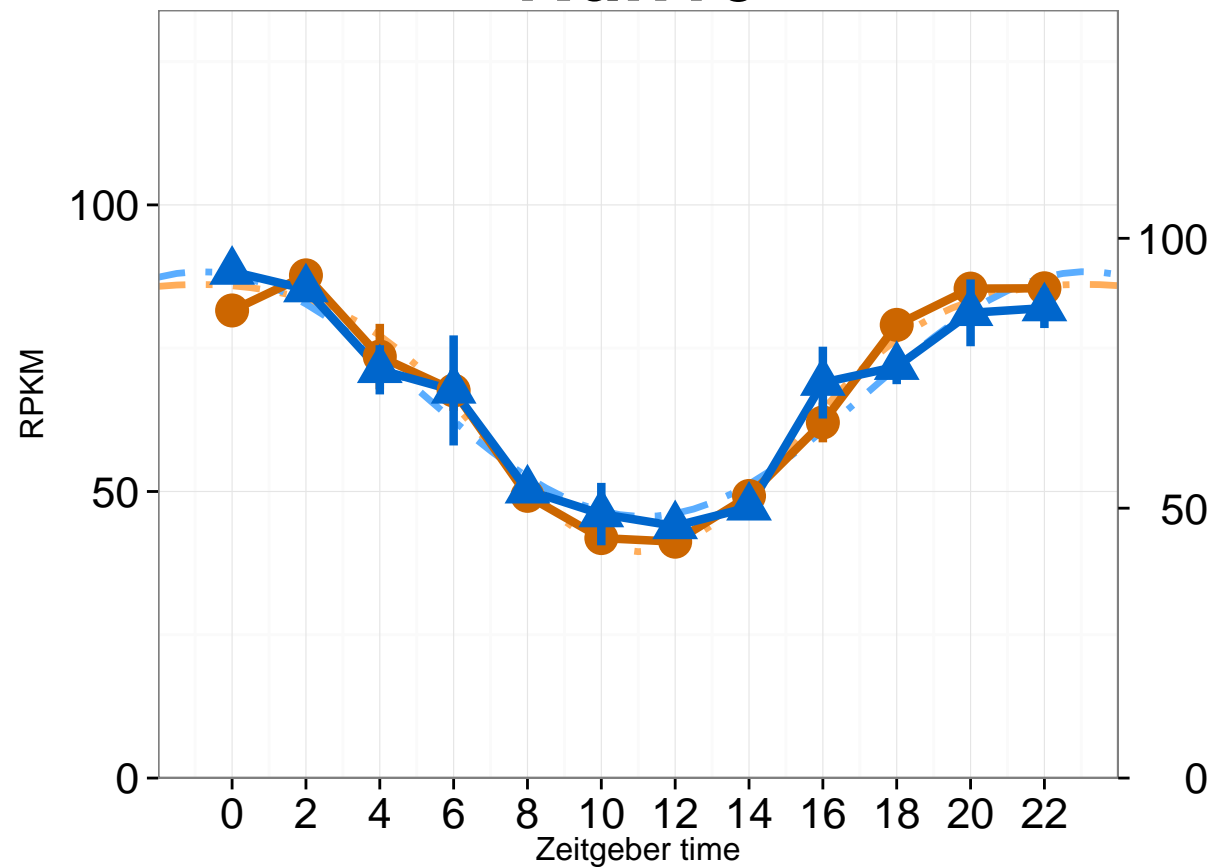

## Rdh10

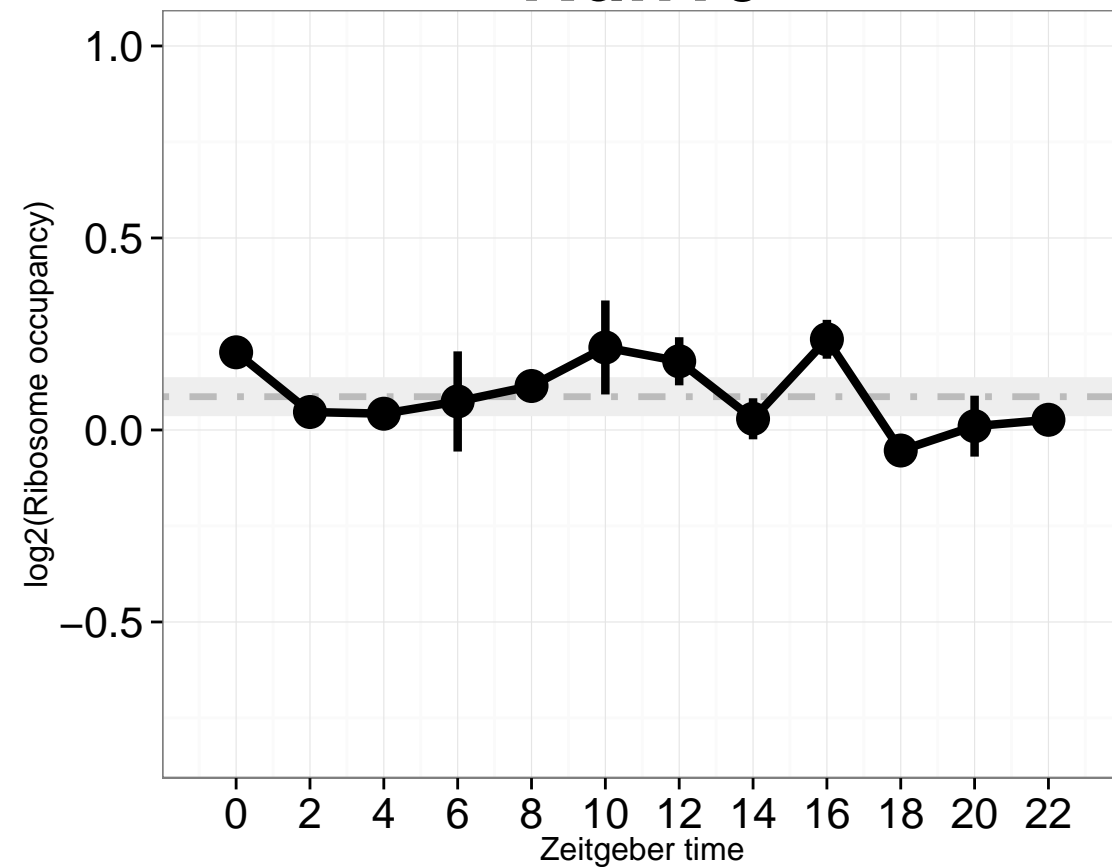

Supplement: Supplementary file 4253 [file 1]

# 2010003K11Rik

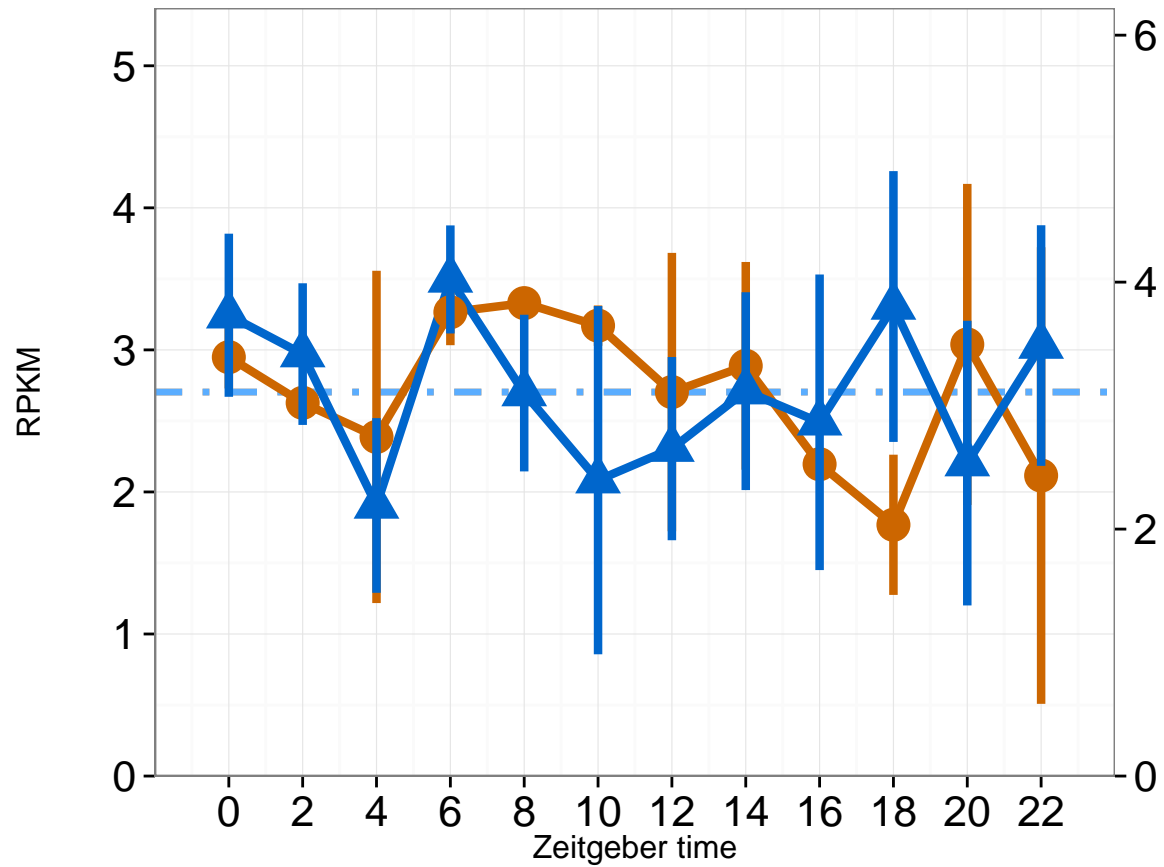

# 2010003K11Rik

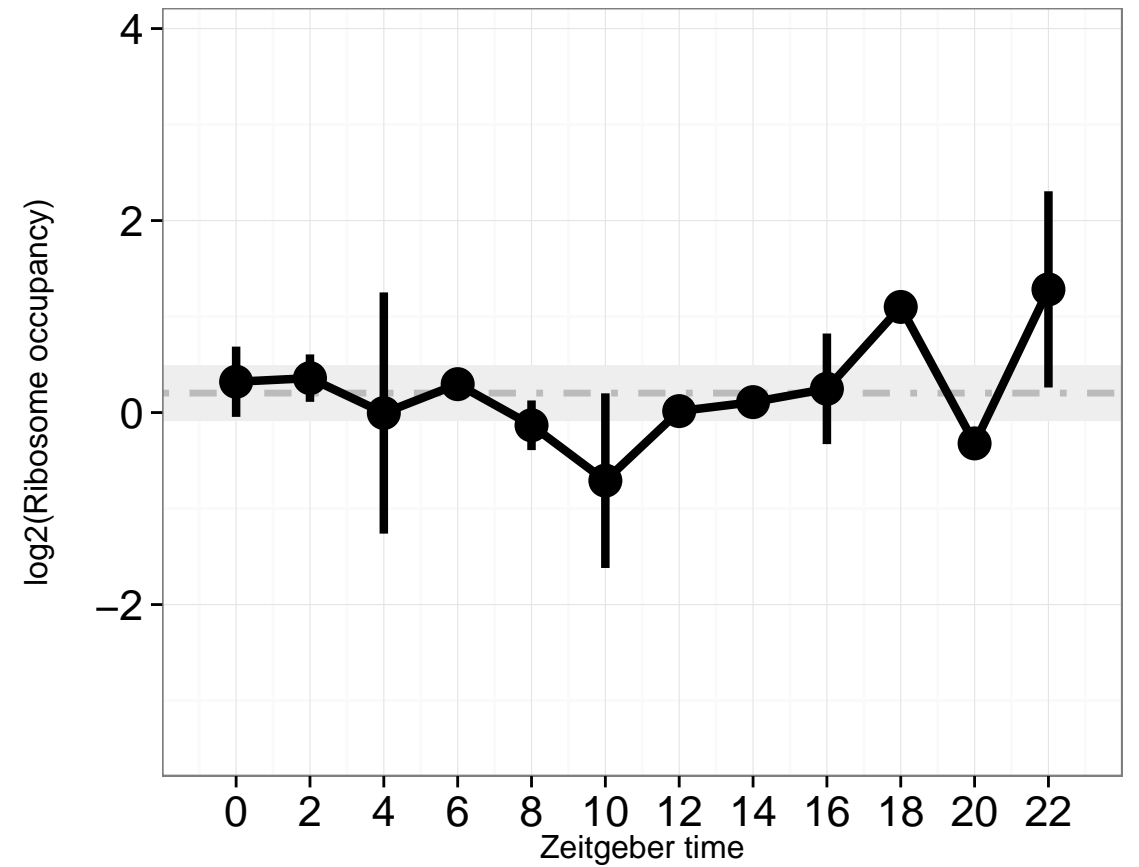

Supplement: Supplementary file 4254 [file 1]

# Map4k2

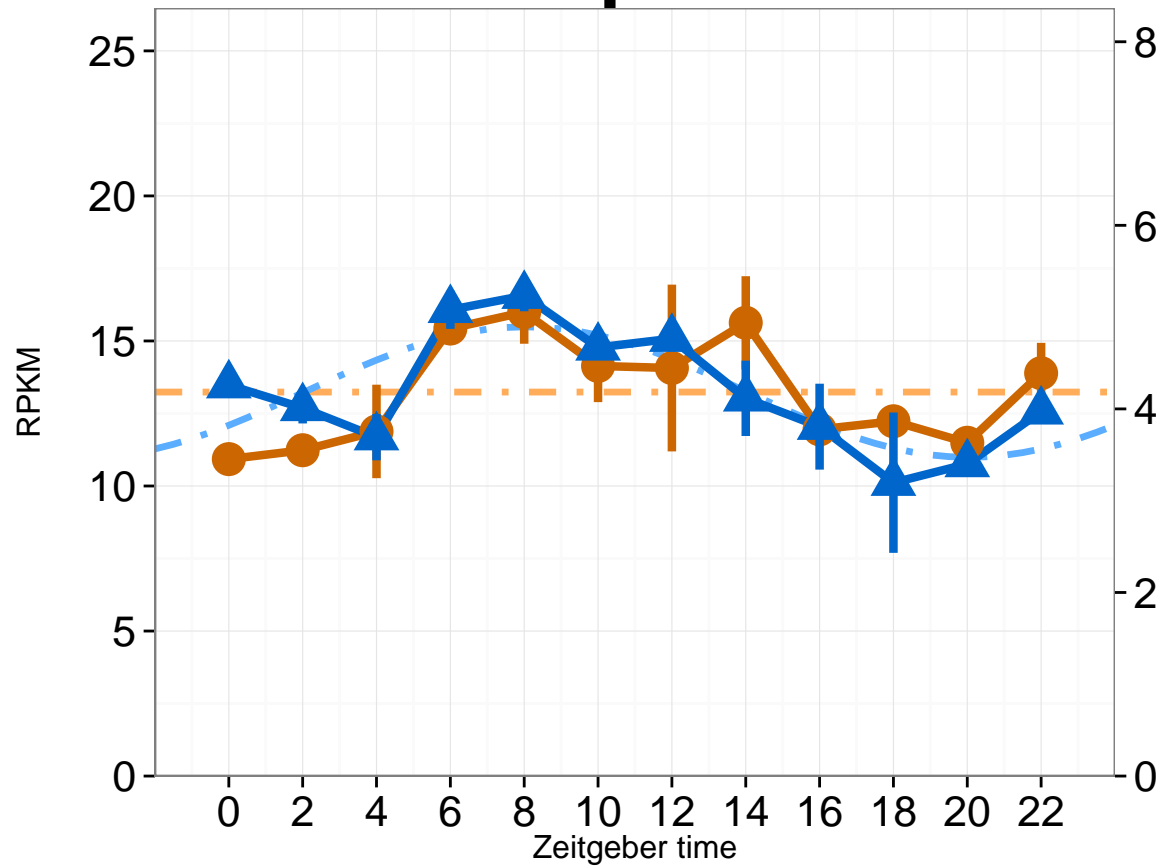

# Map4k2

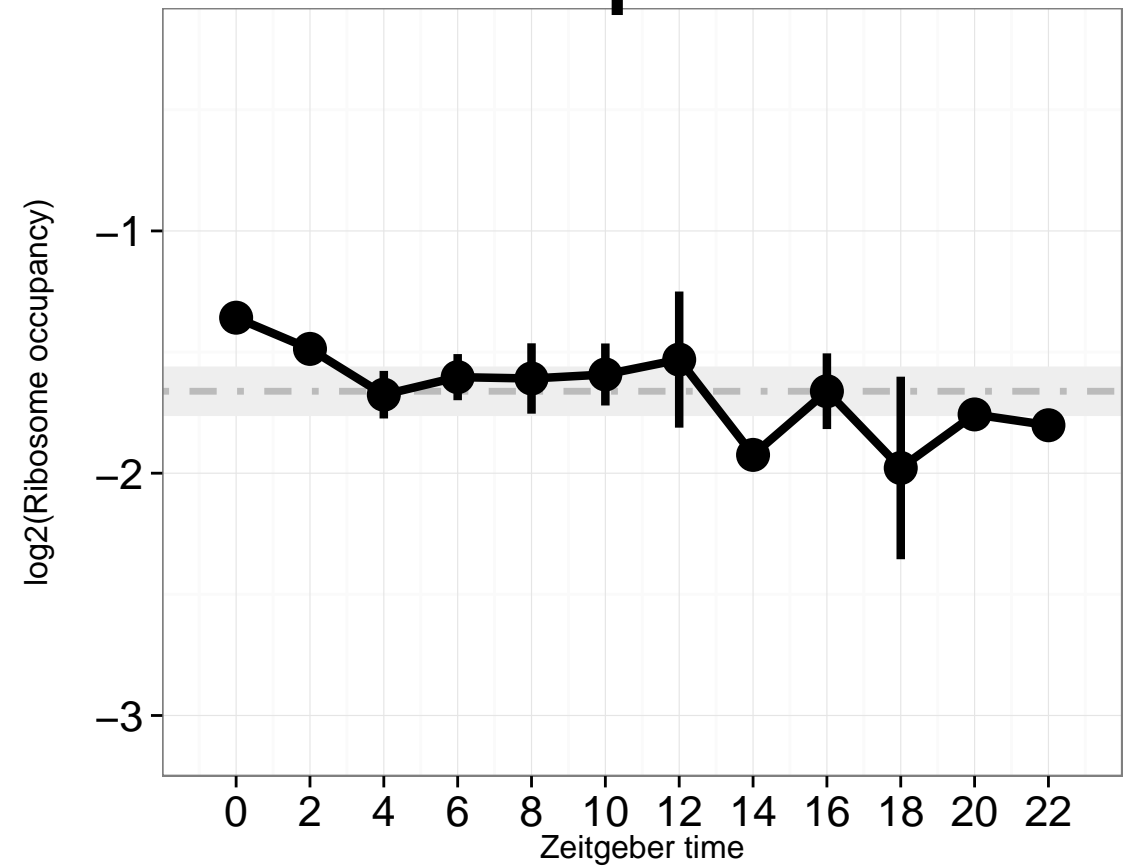

Supplement: Supplementary file 4256 [file 1]

# Mx2

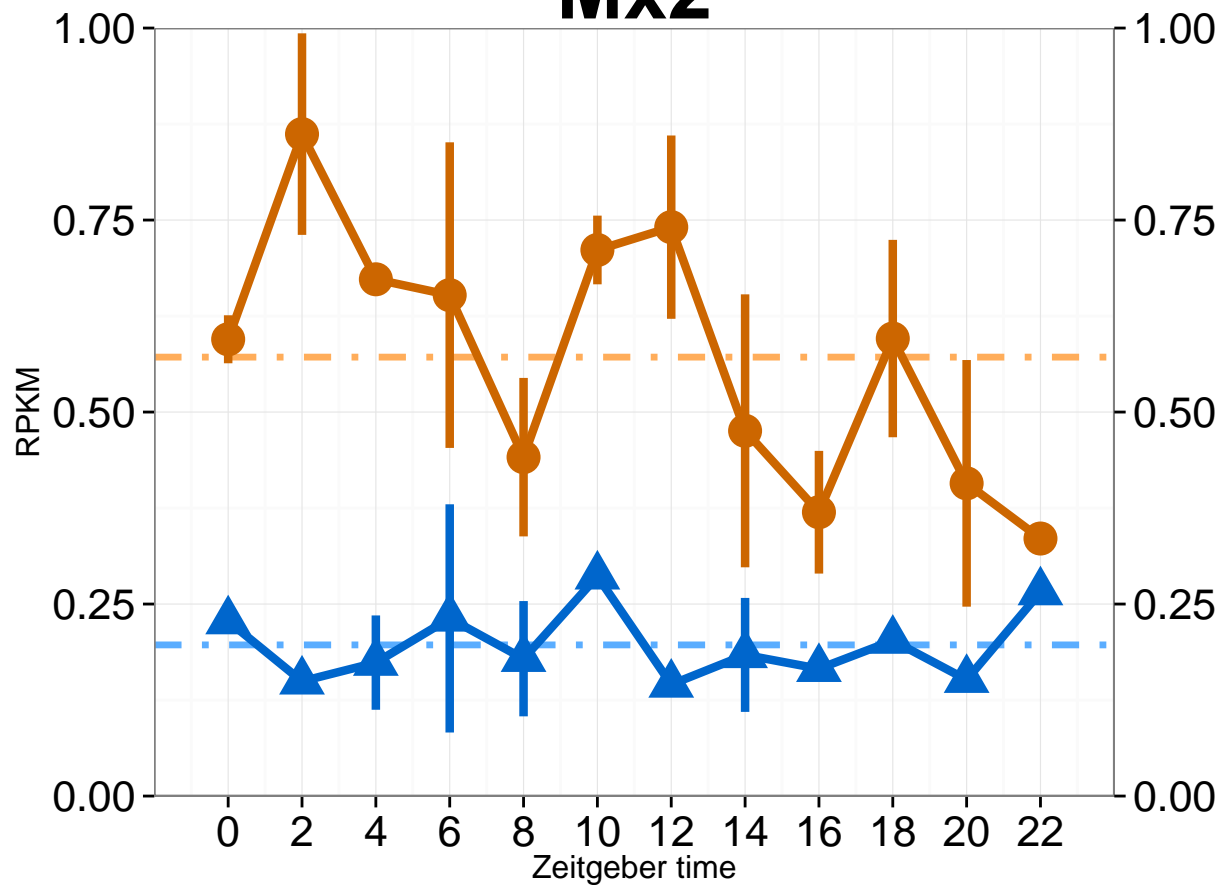

# Mx2

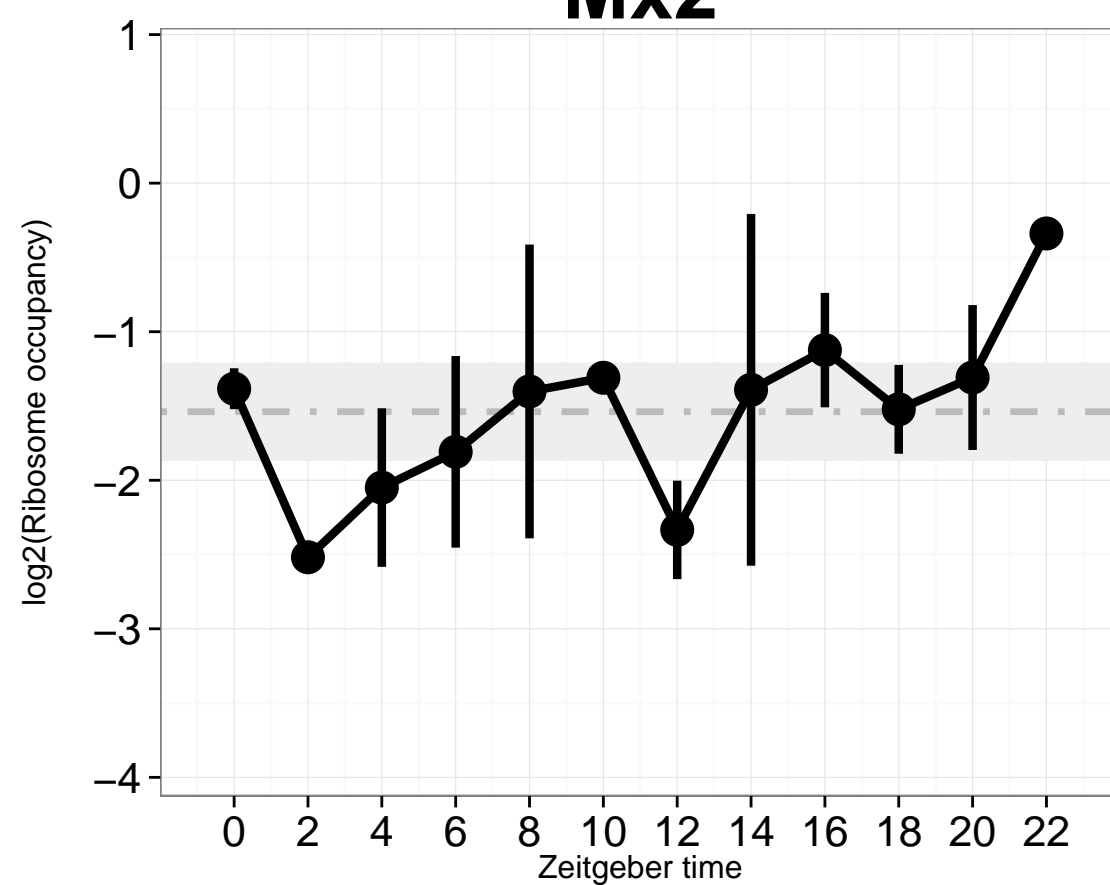

Supplement: Supplementary file 4257 [file 1]

## Myh9

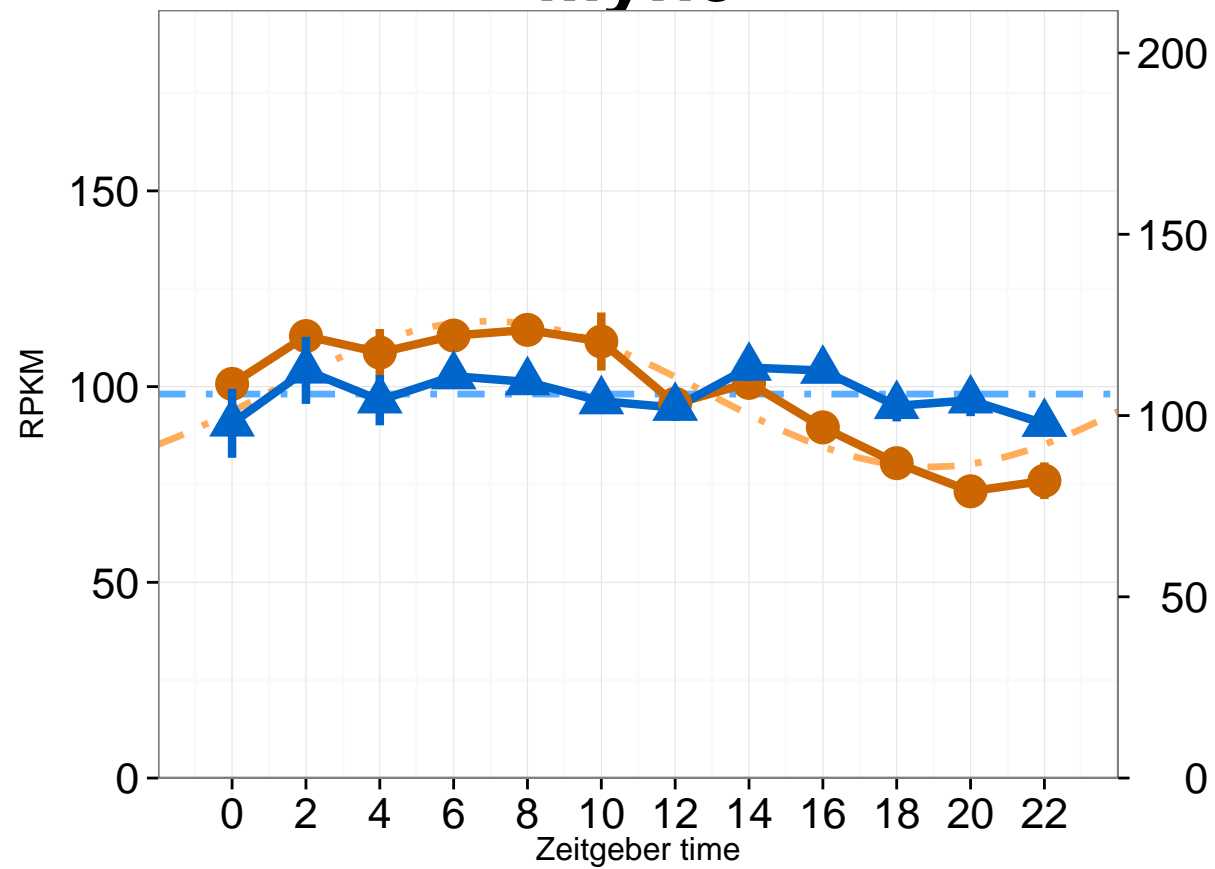

## Myh9

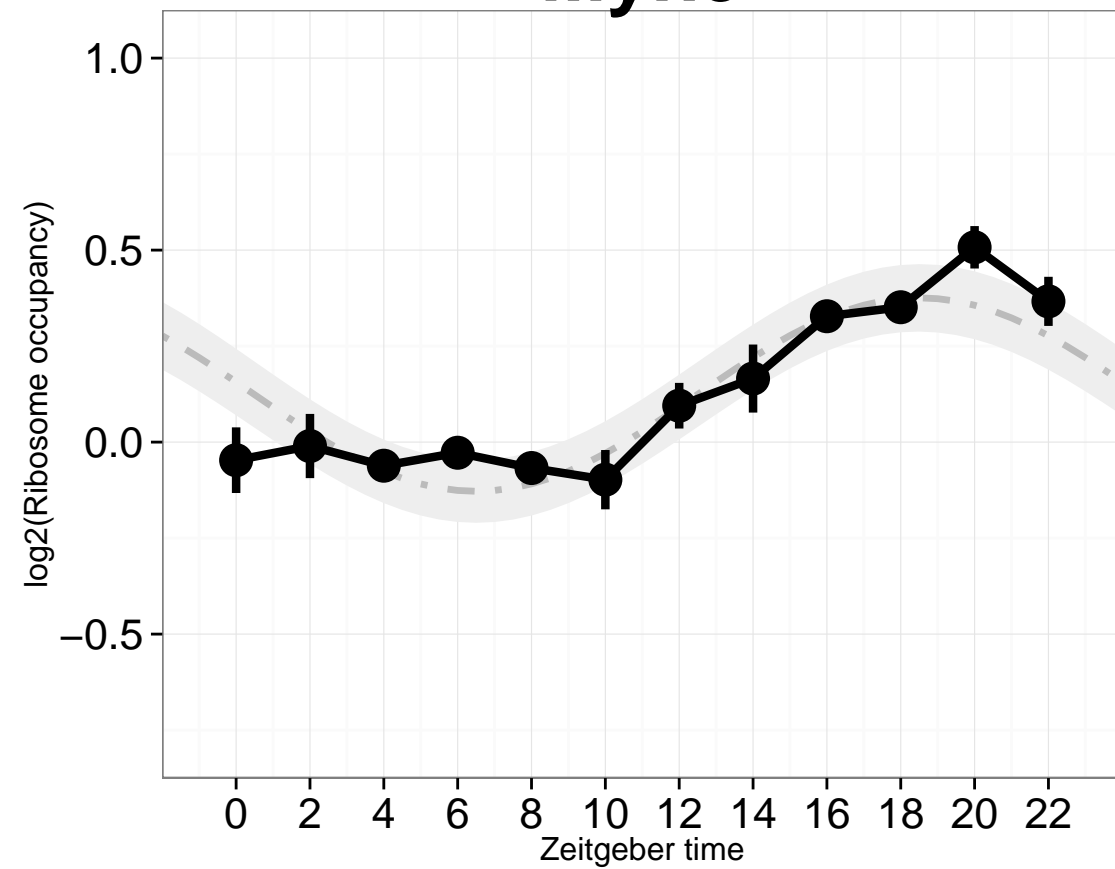

Supplement: Supplementary file 4258 [file 1]

## Exosc9

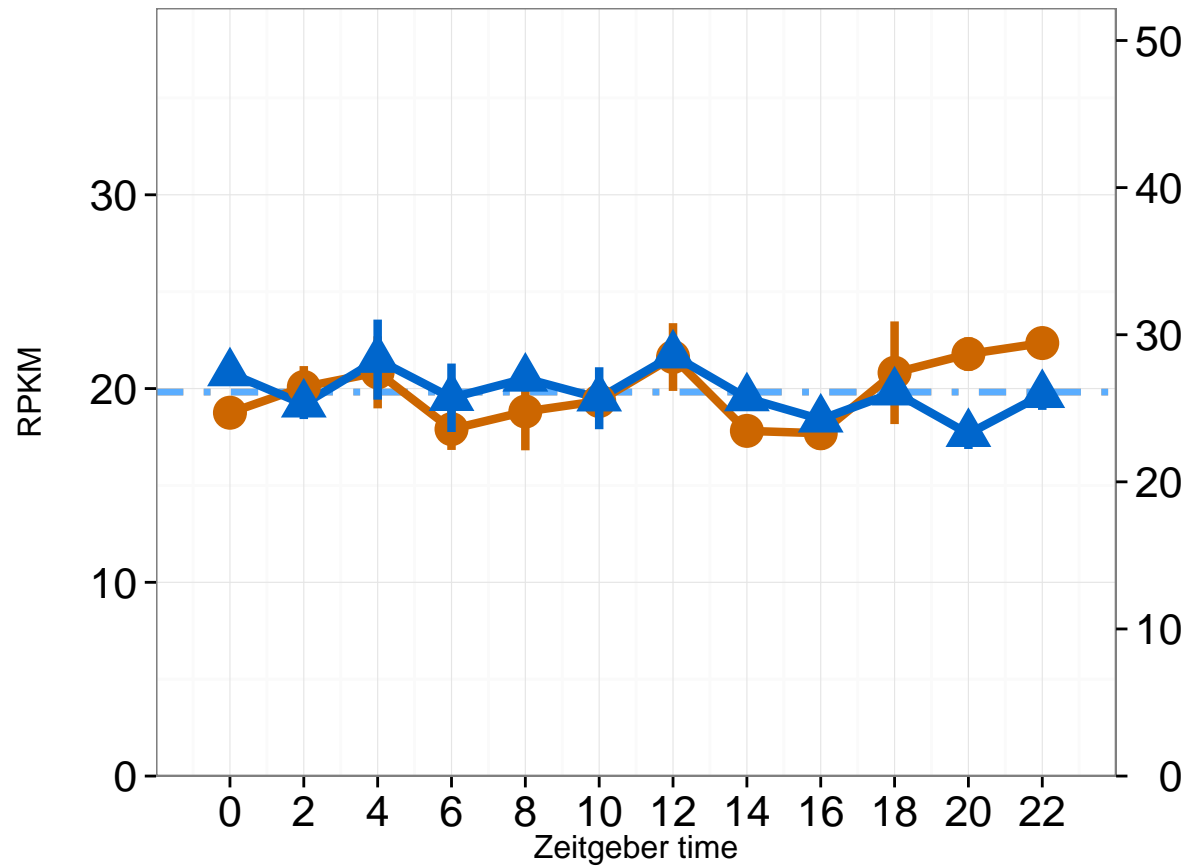

## Exosc9

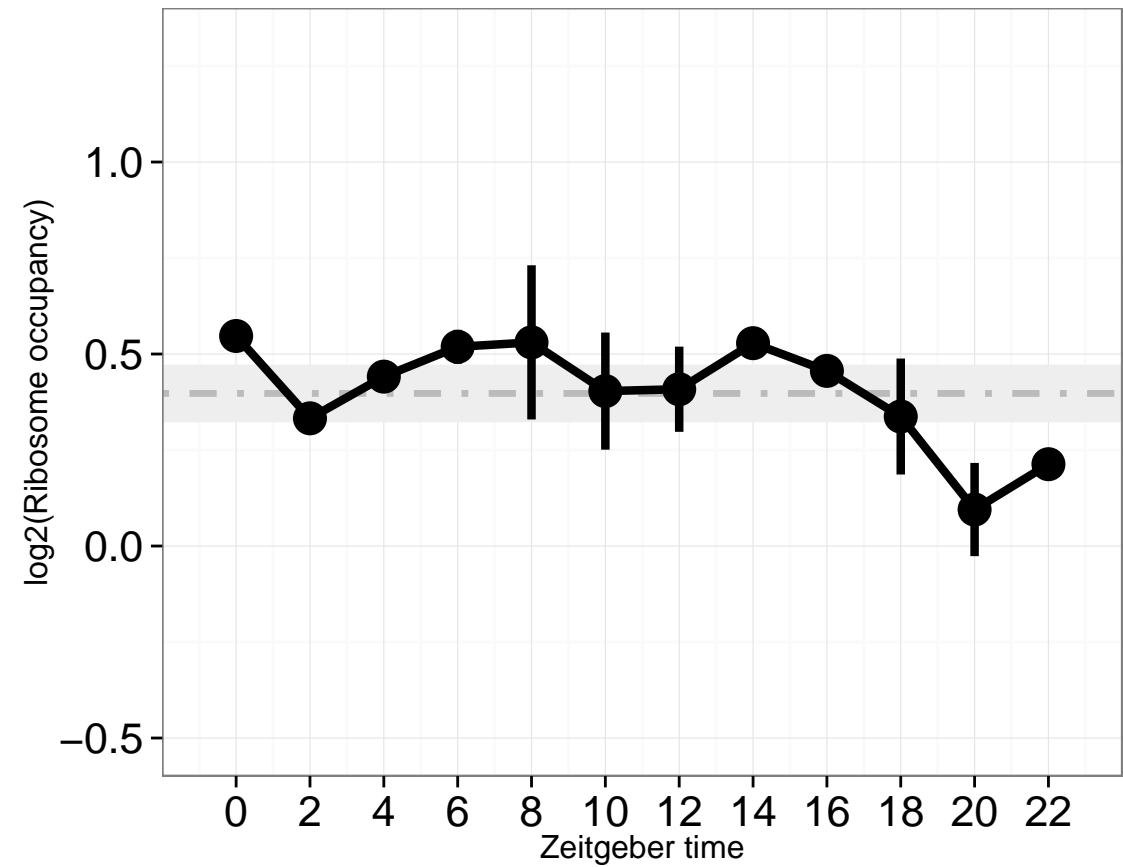

Supplement: Supplementary file 4259 [file 1]

## Uck1

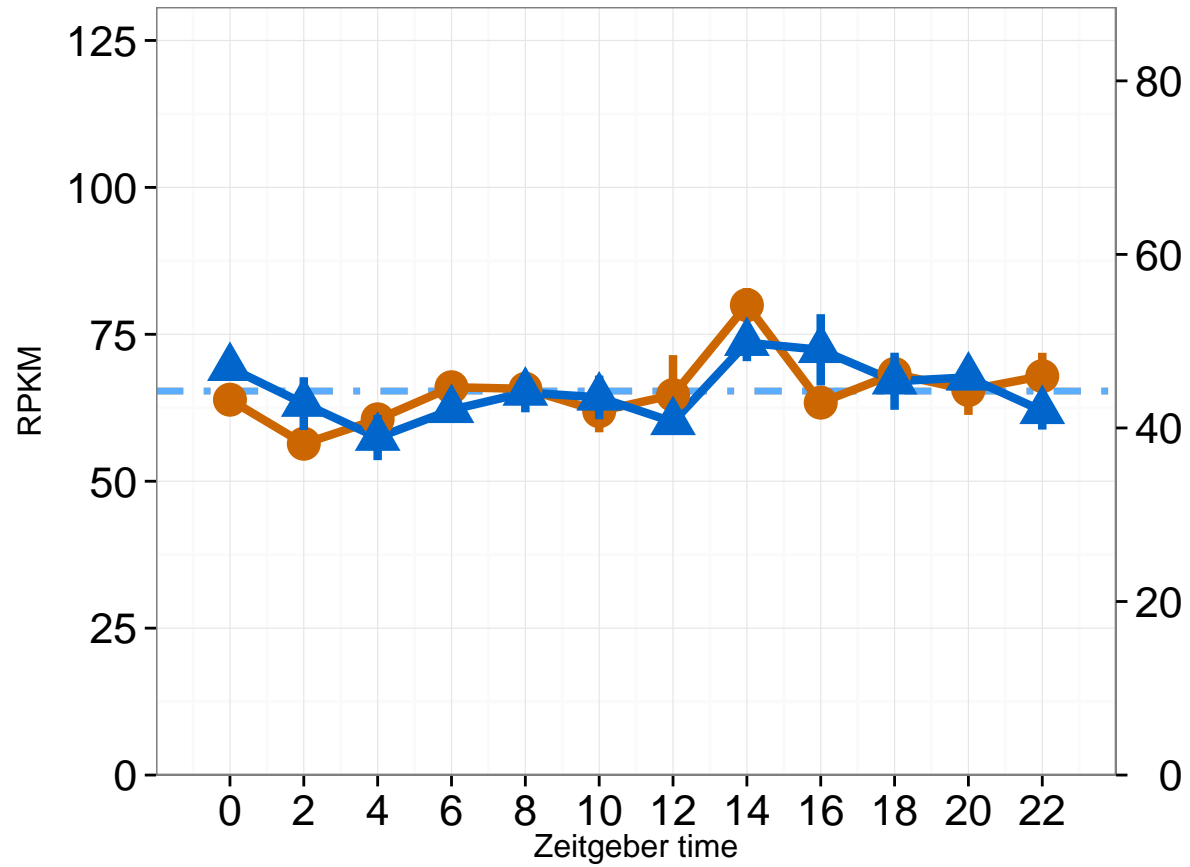

## Uck1

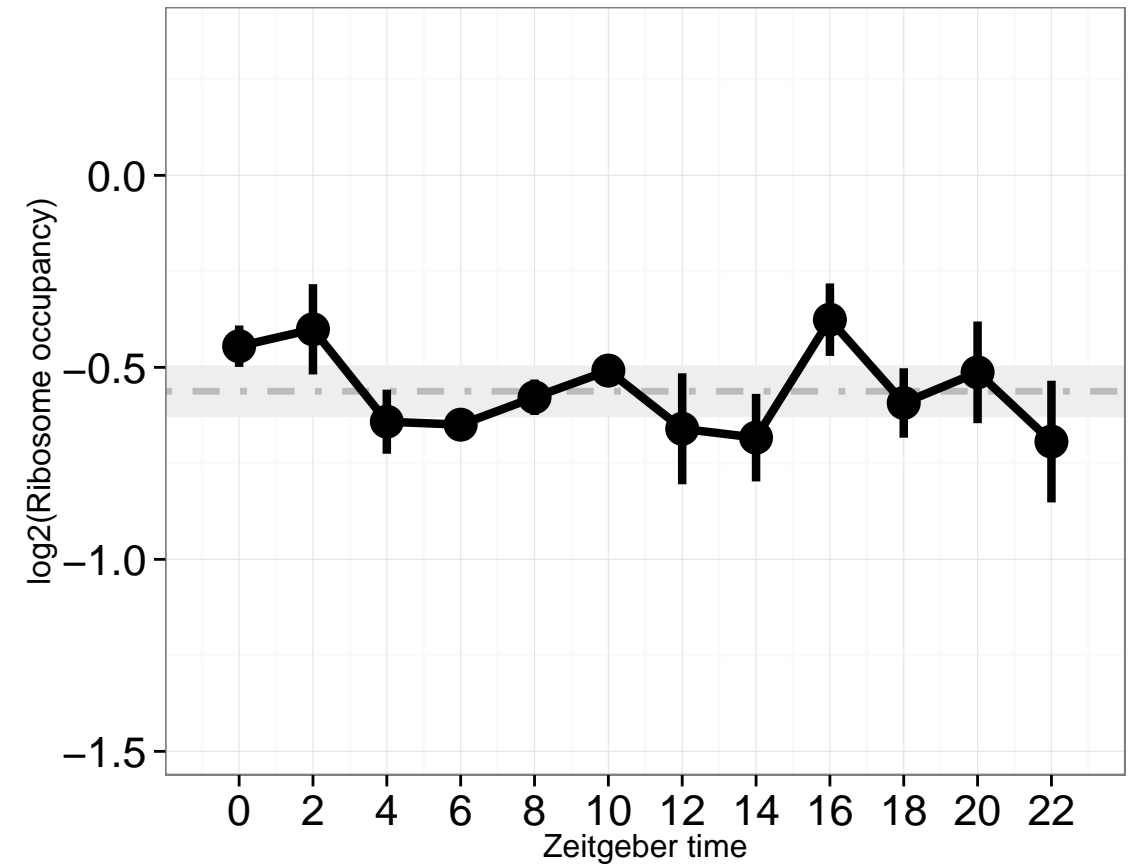

Supplement: Supplementary file 4260 [file 1]

## Mavs

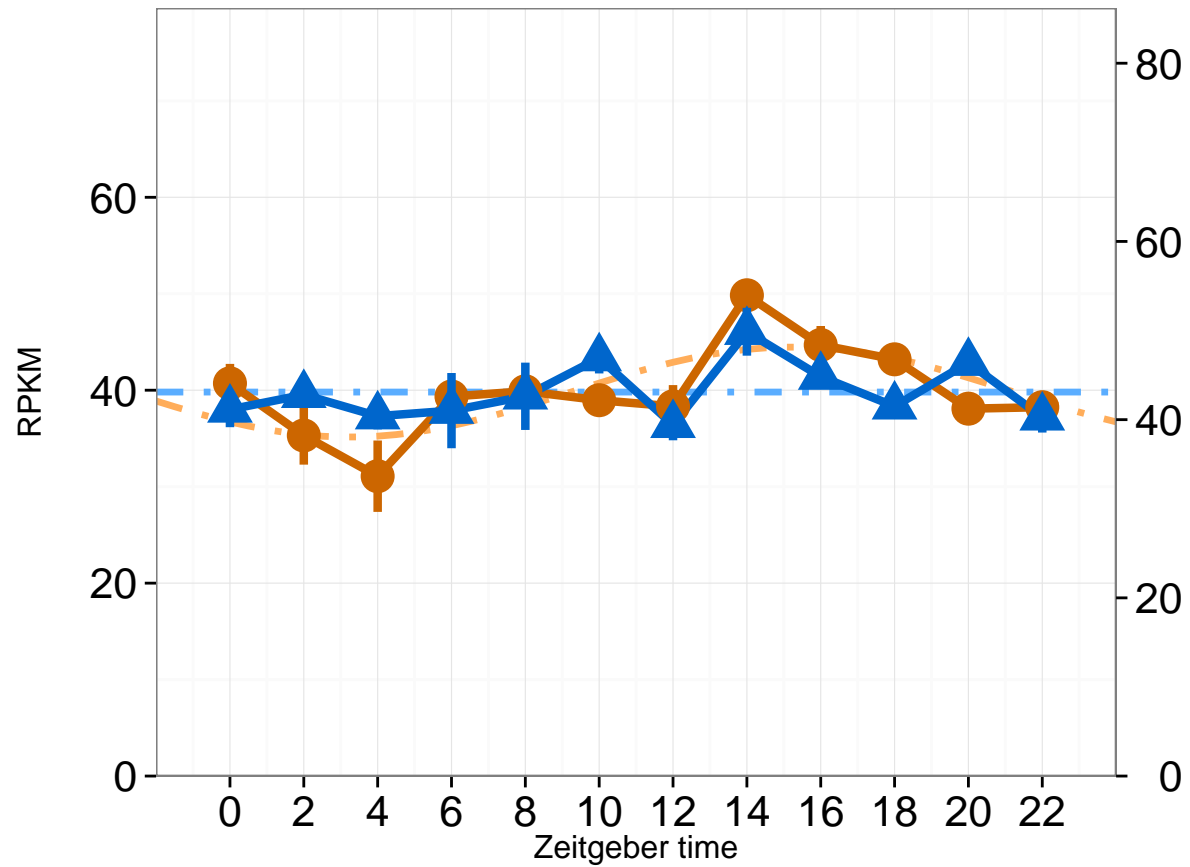

## Mavs

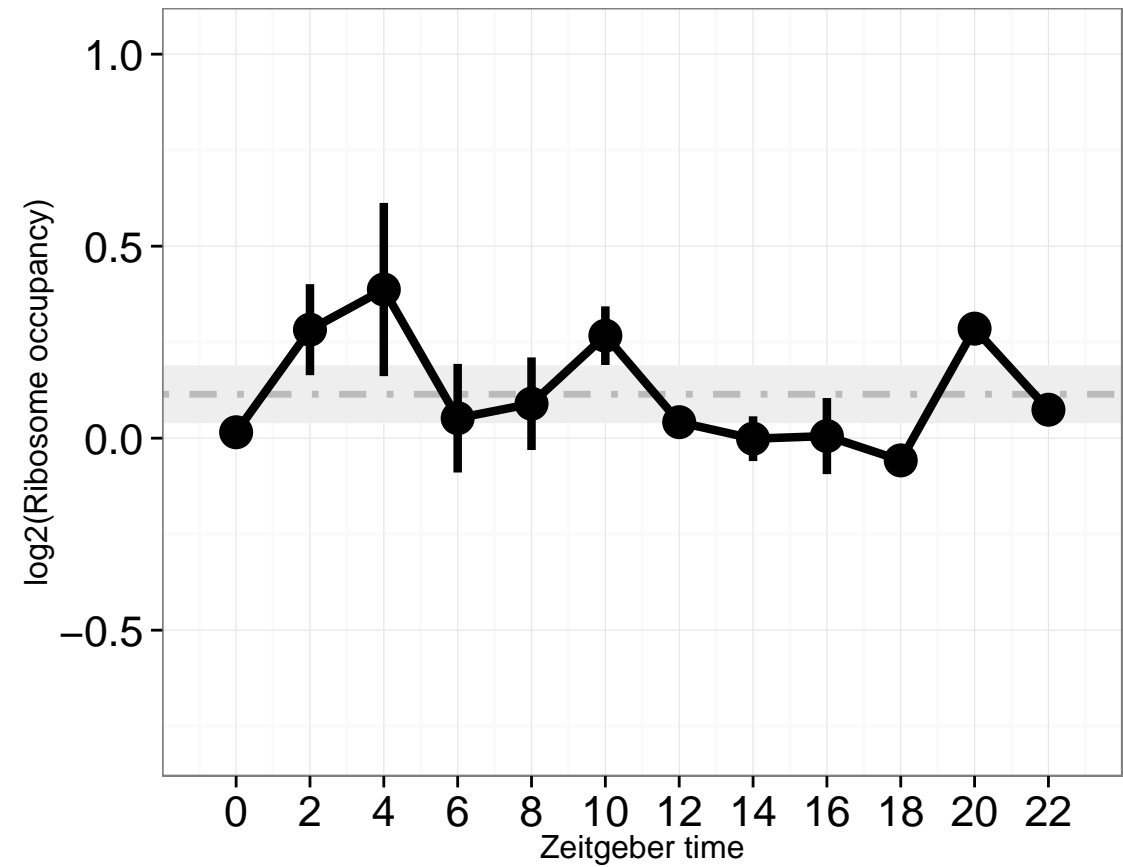

Supplement: Supplementary file 4261 [file 1]

## Msrb3

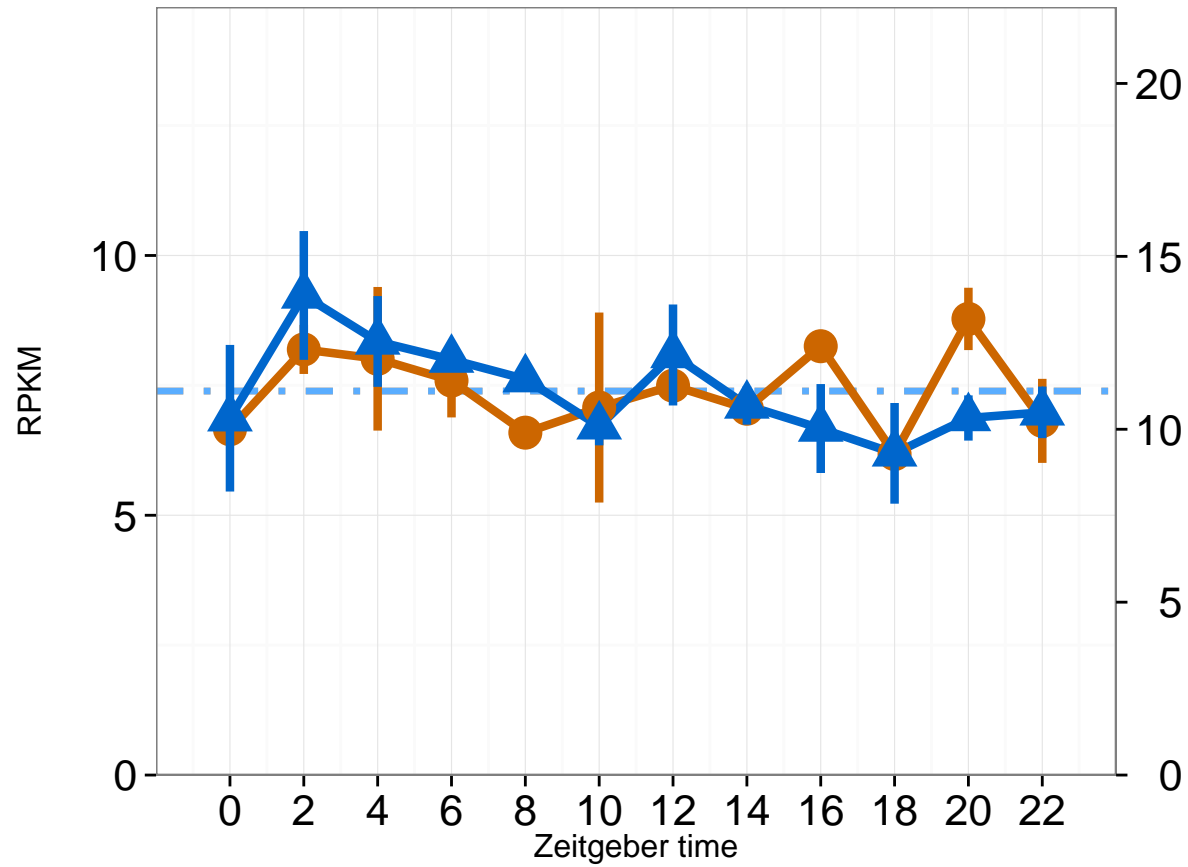

## Msrb3

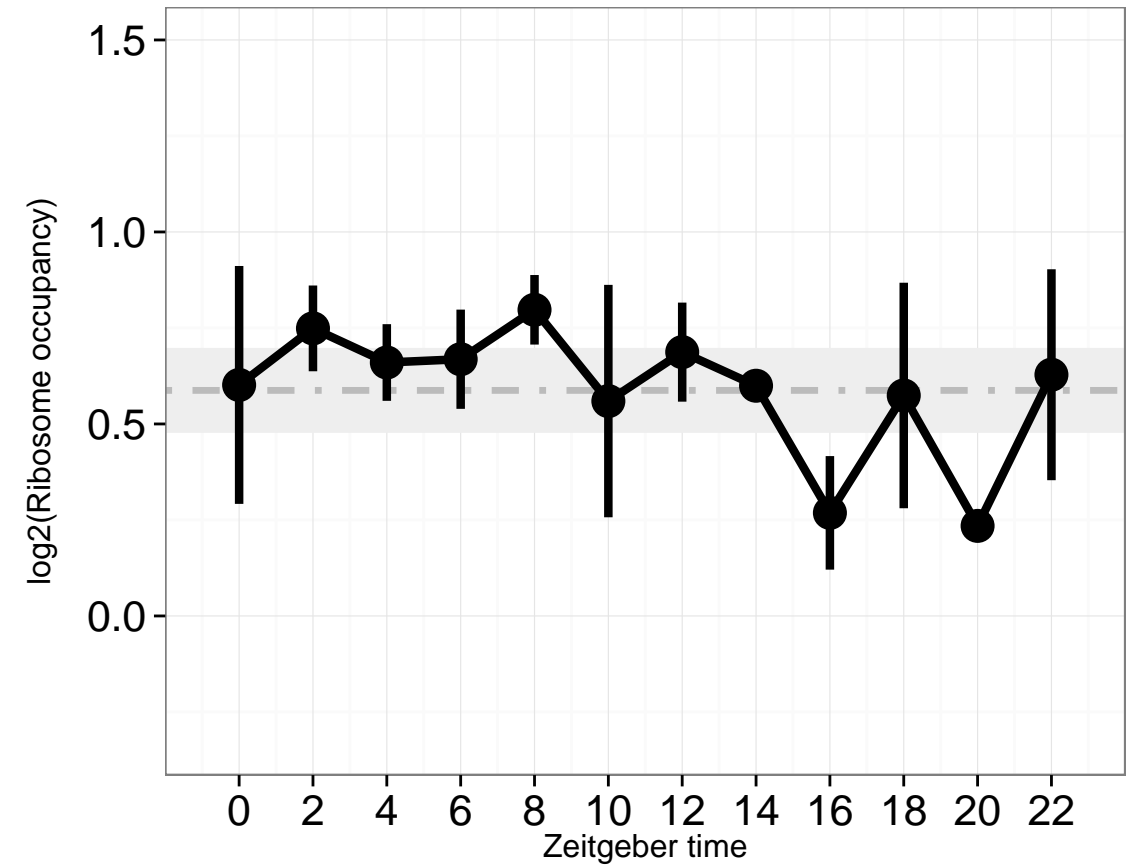

Supplement: Supplementary file 4262 [file 1]

# 2810025M15Rik

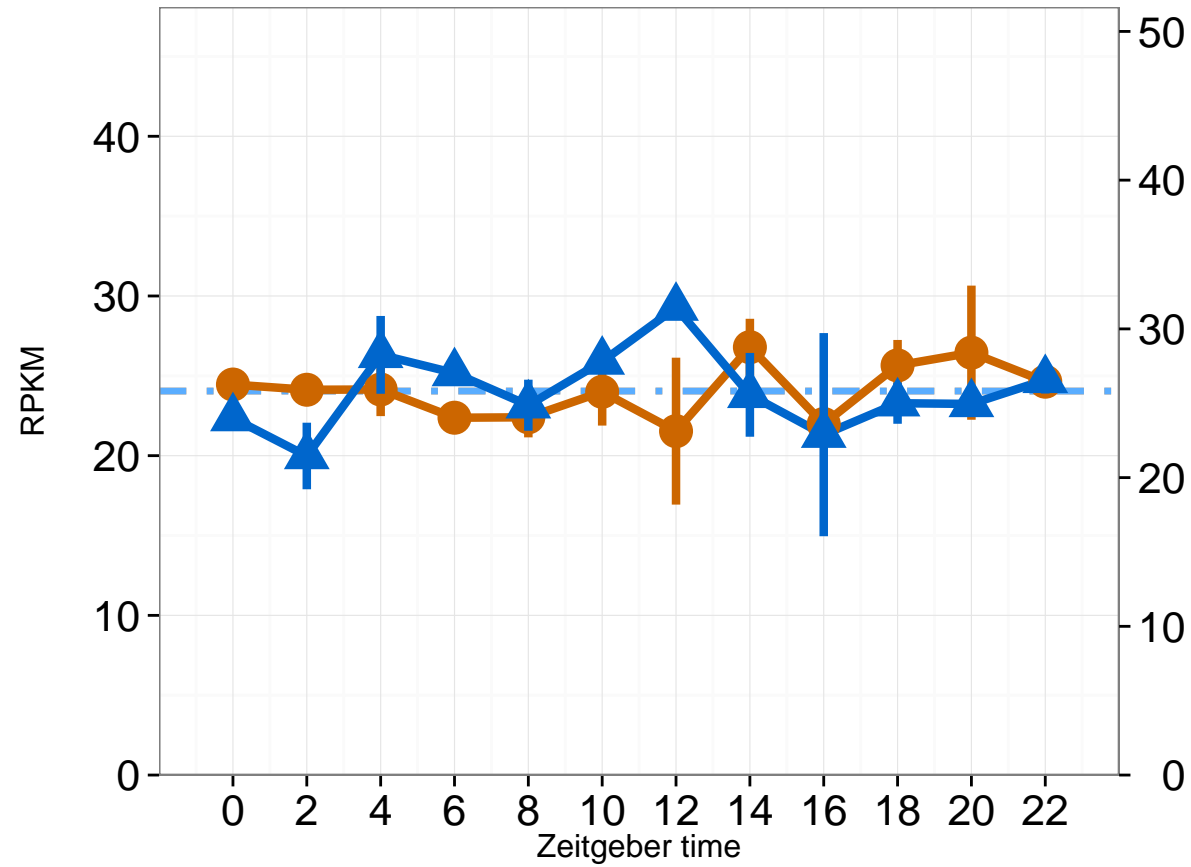

# 2810025M15Rik

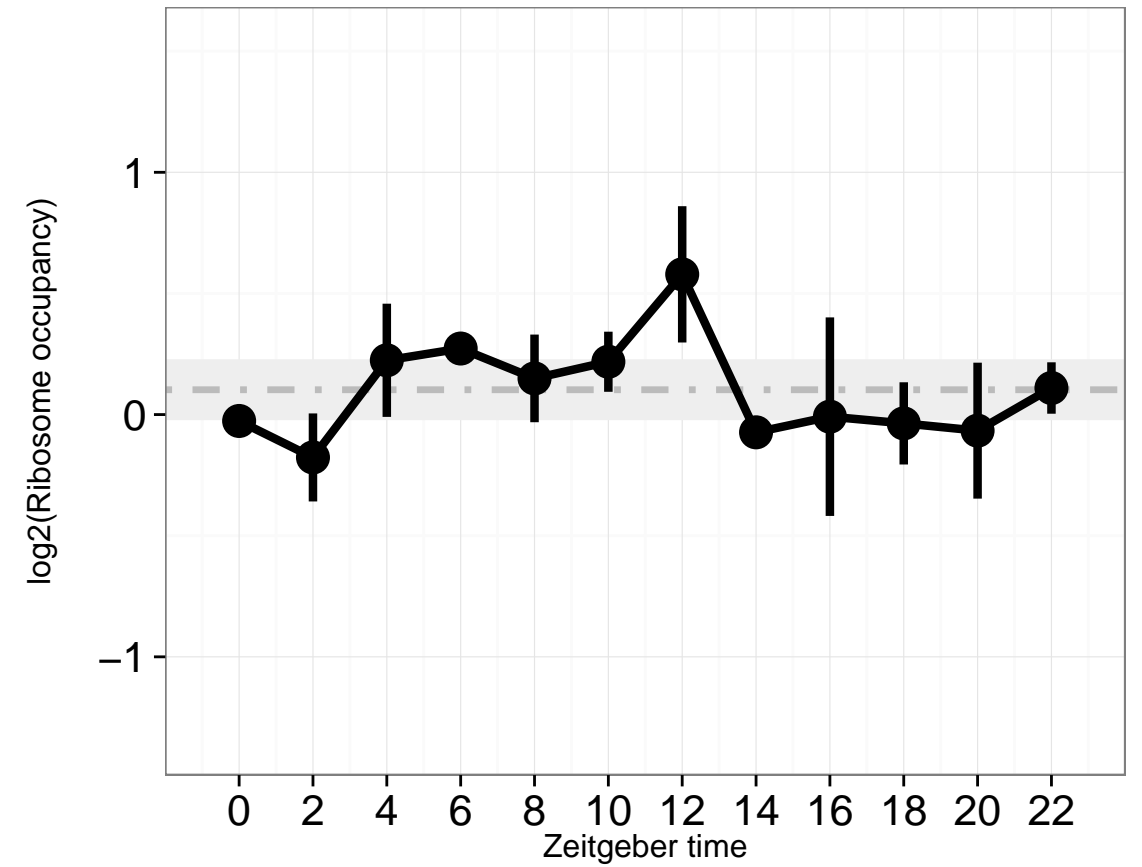

Supplement: Supplementary file 4263 [file 1]

# Tm9sf2

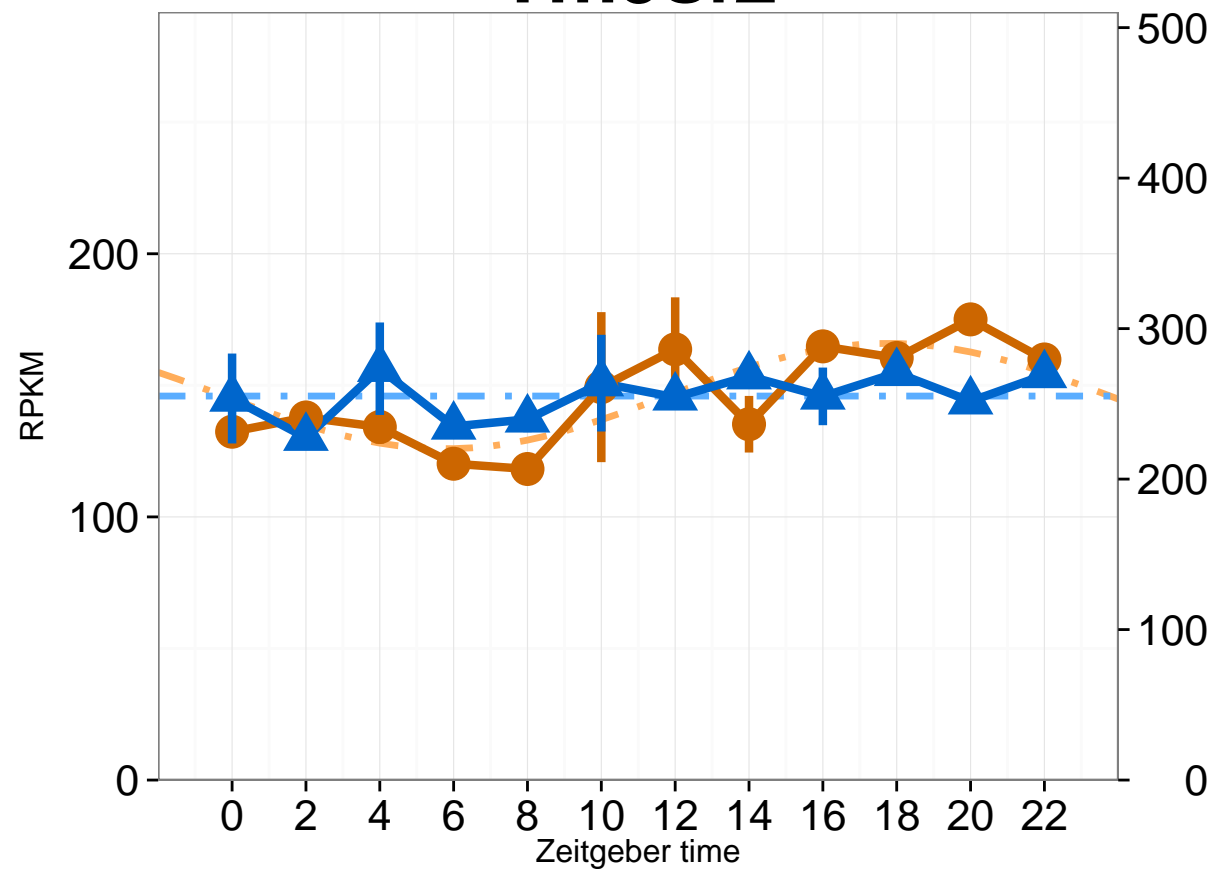

# Tm9sf2

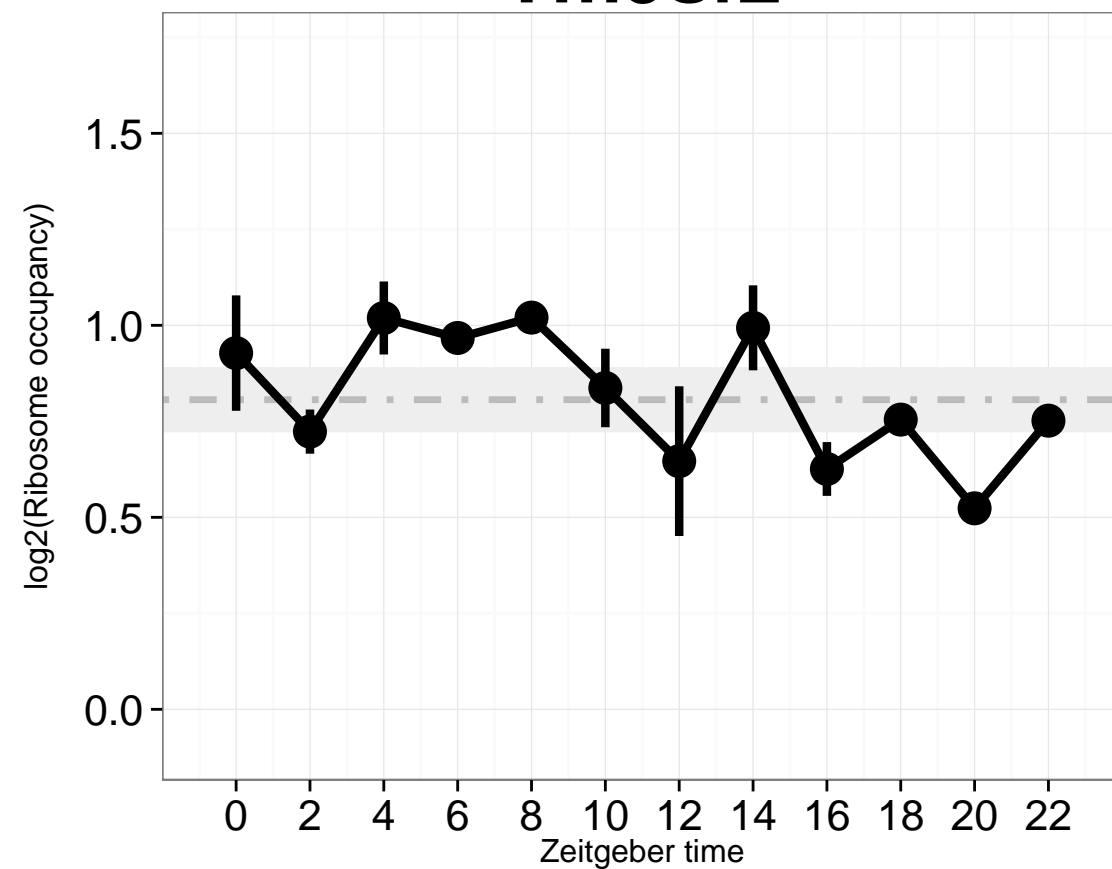

Supplement: Supplementary file 4264 [file 1]

## Angptl2

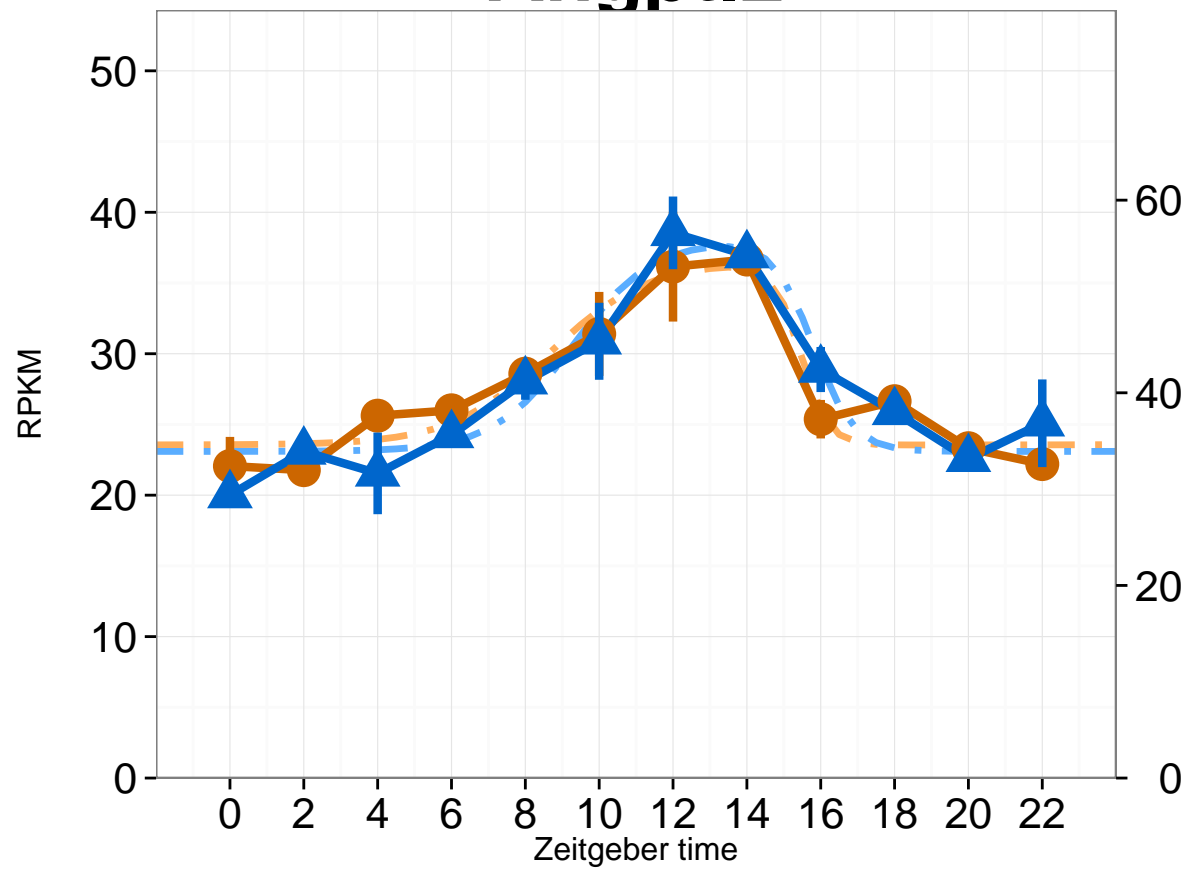

## Angptl2

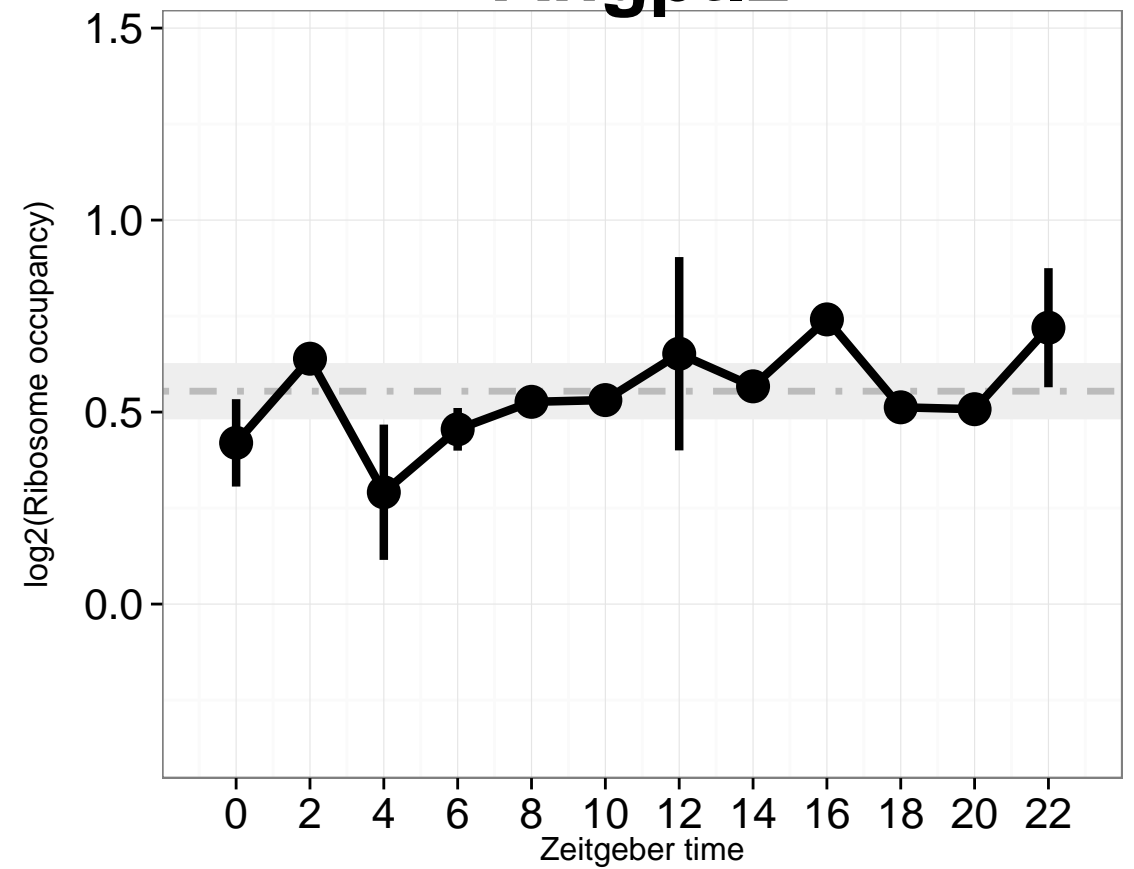

Supplement: Supplementary file 4265 [file 1]

# Ppapdc3

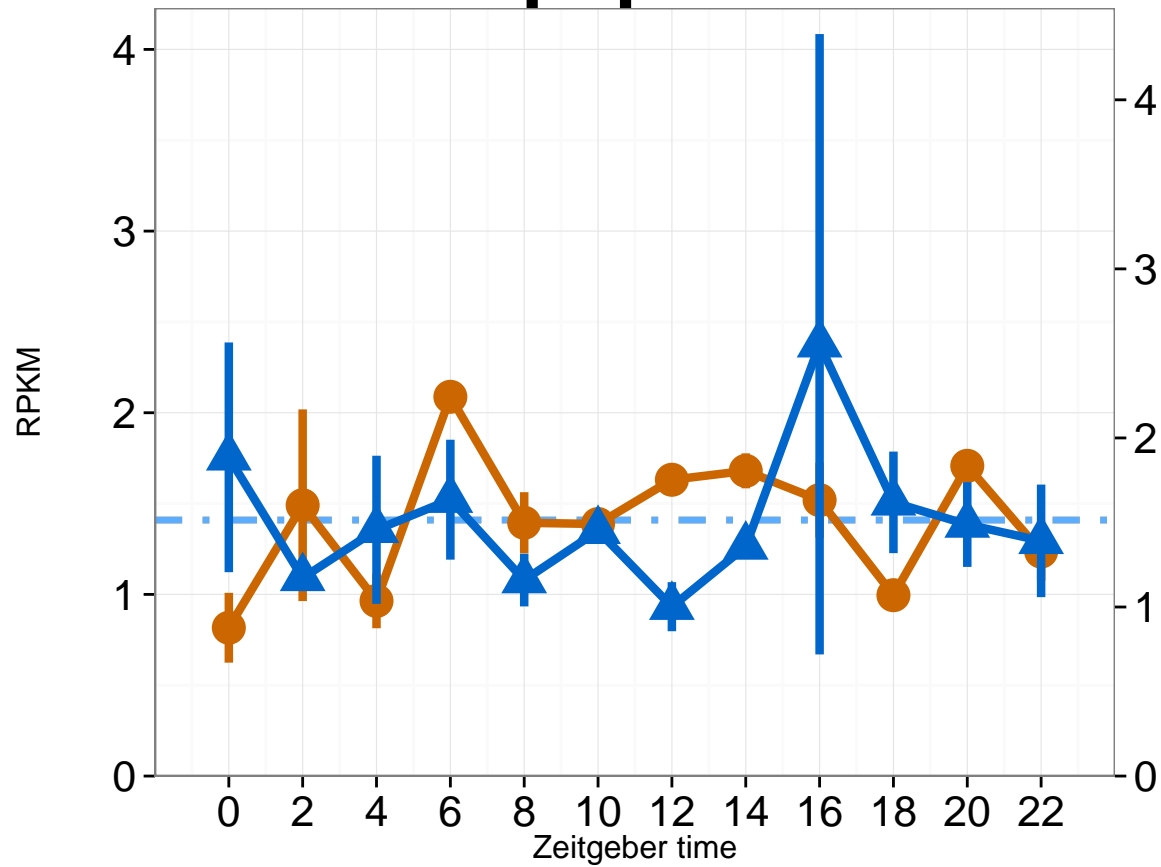

# Ppapdc3

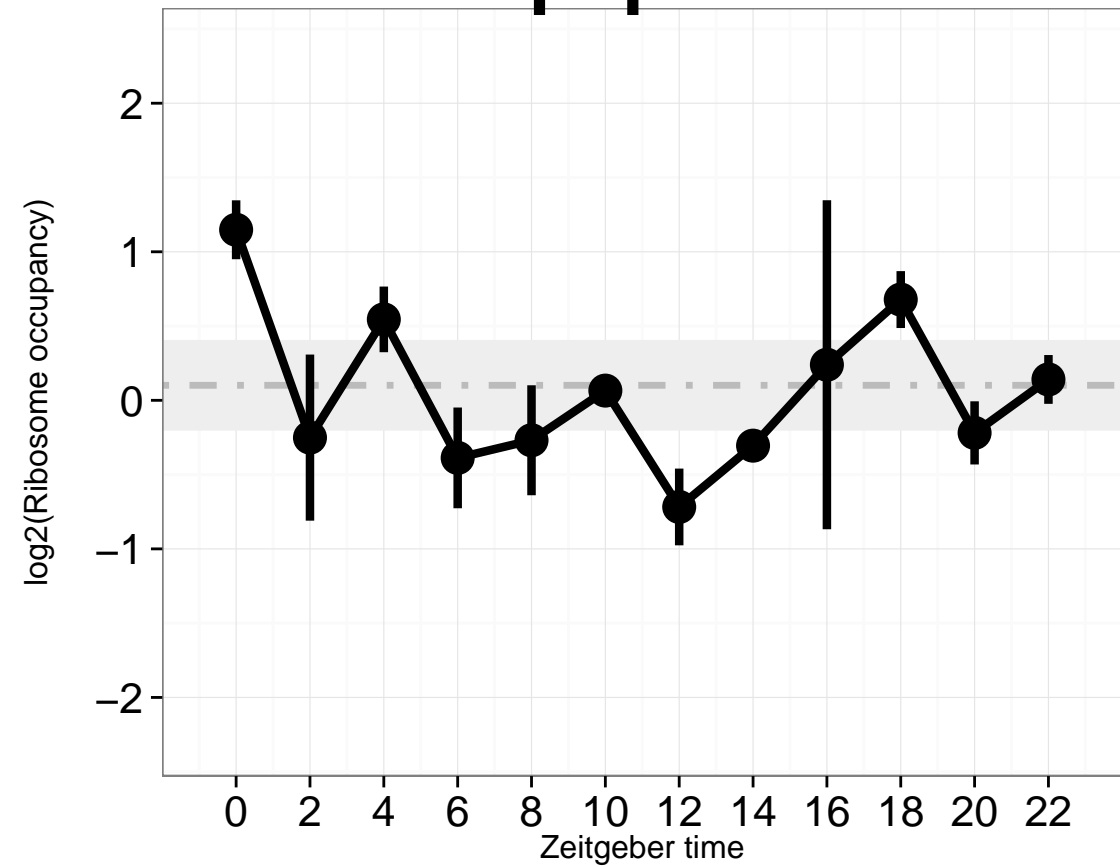

Supplement: Supplementary file 4266 [file 1]

# Tmem218

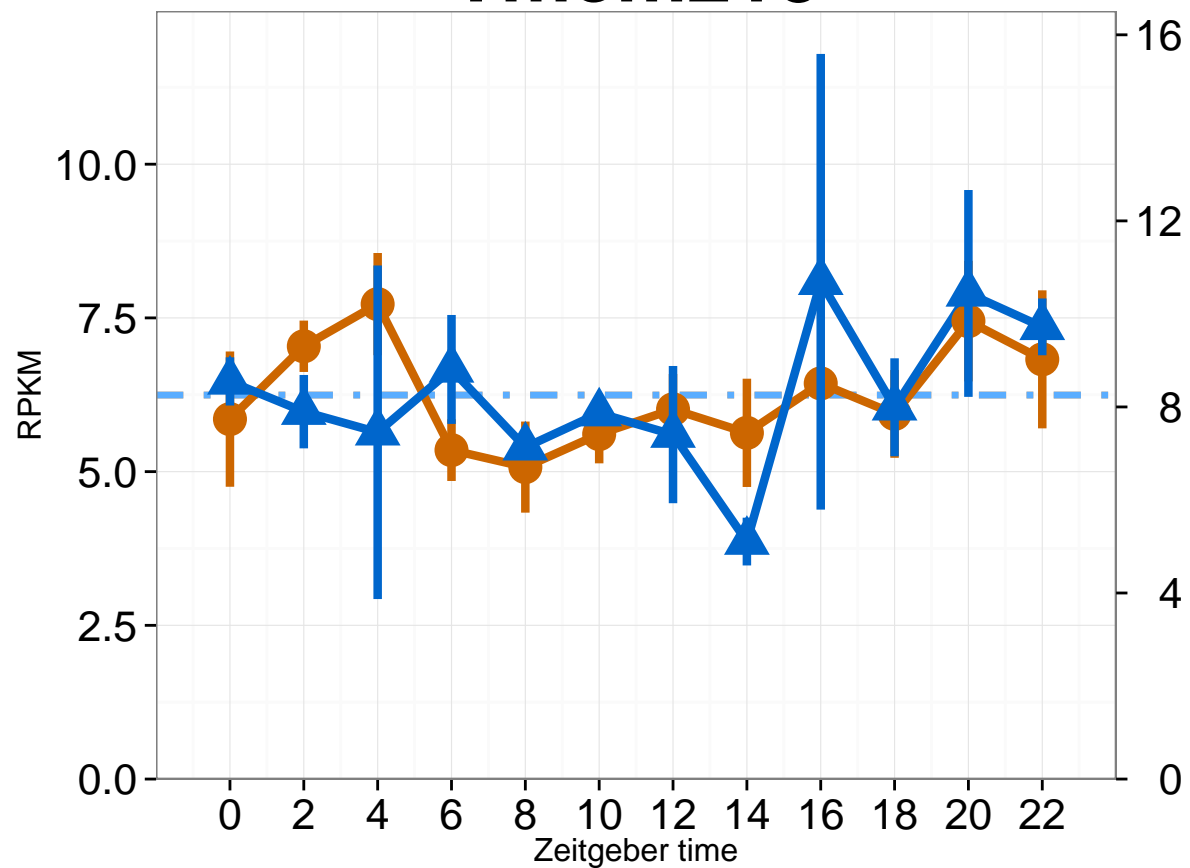

# Tmem218

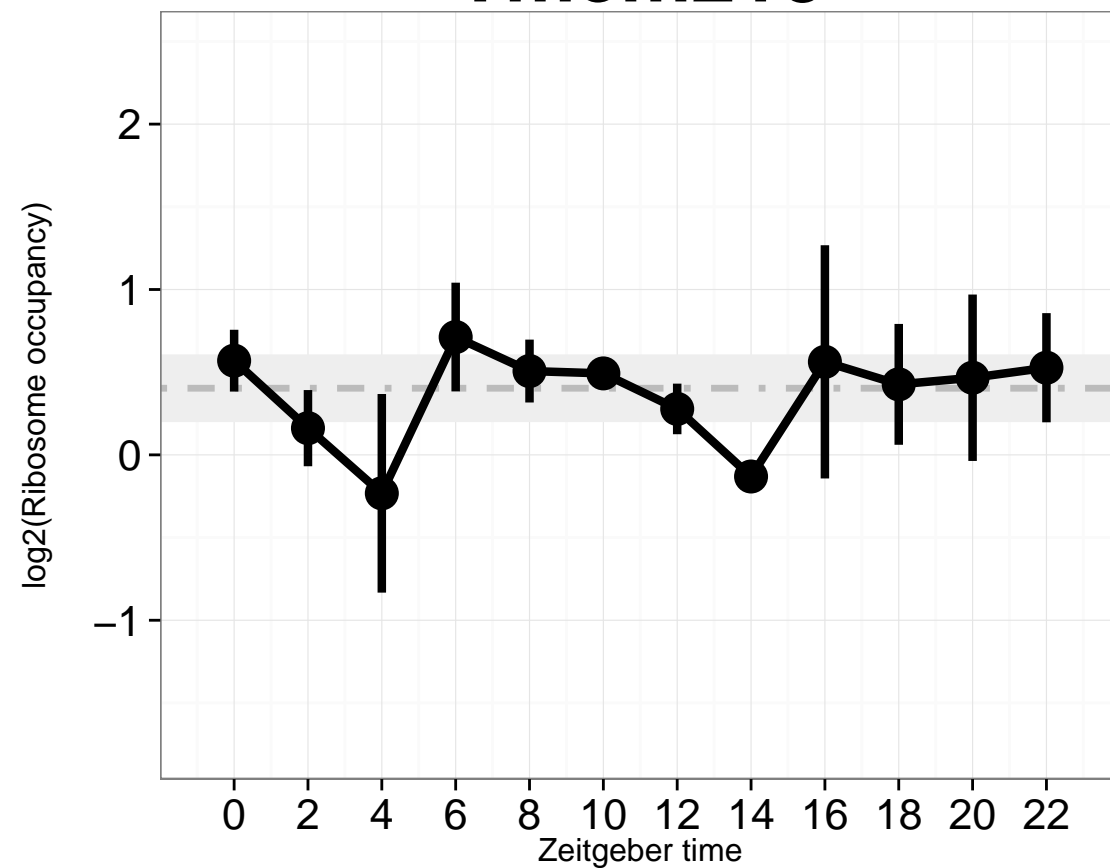

Supplement: Supplementary file 4267 [file 1]

# Chmp4b

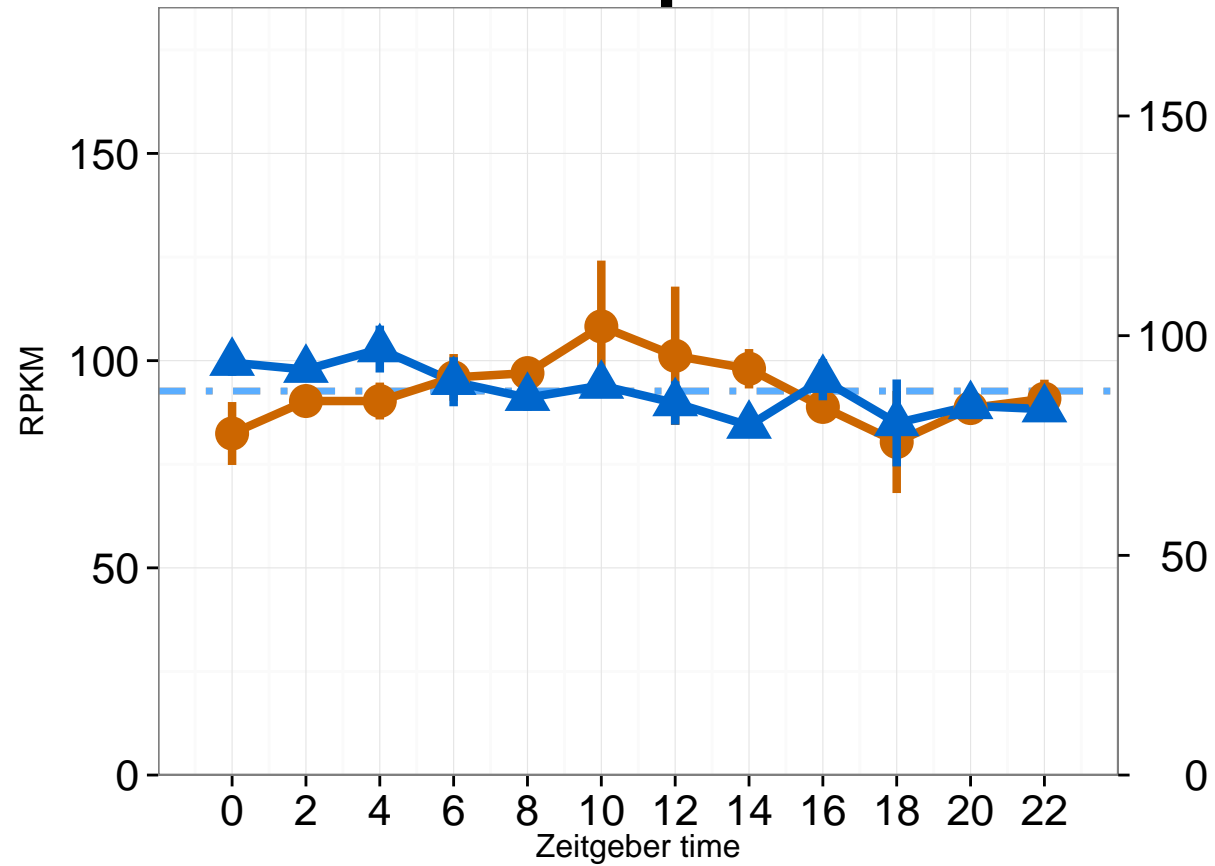

# Chmp4b

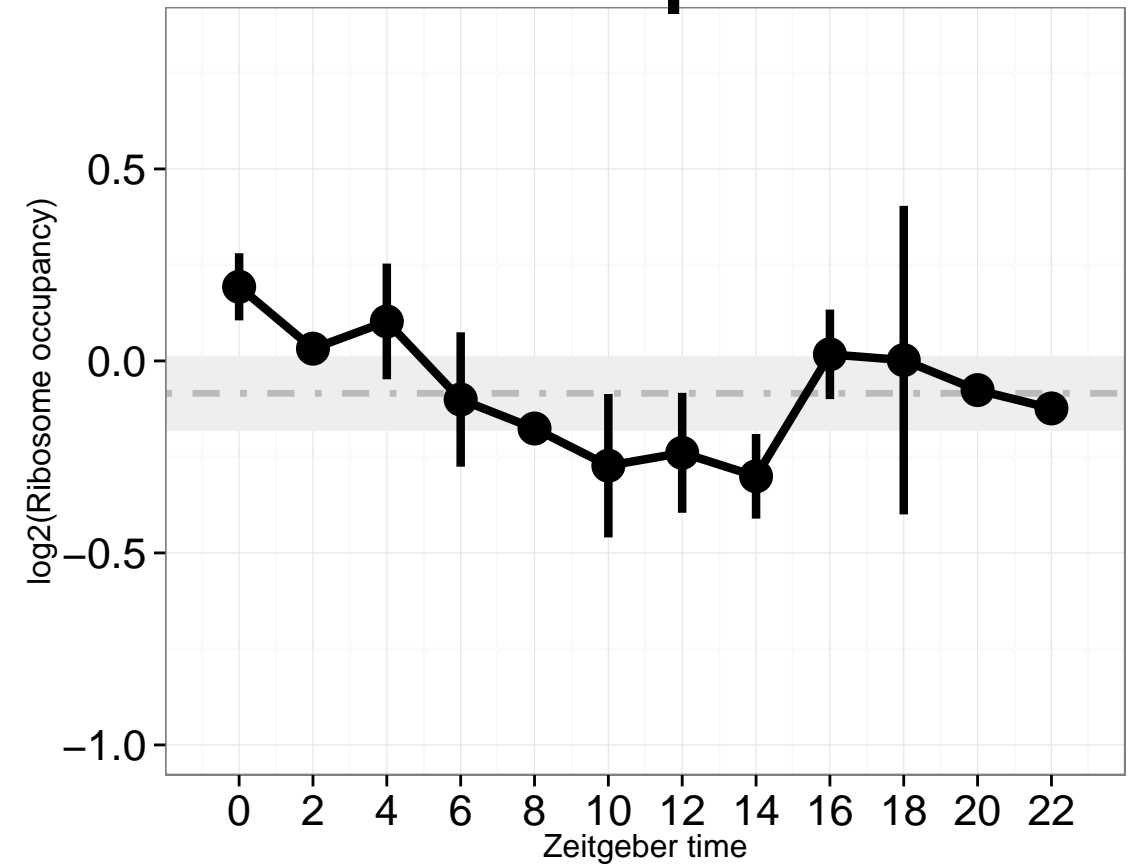

Supplement: Supplementary file 4268 [file 1]

# Prkaa1

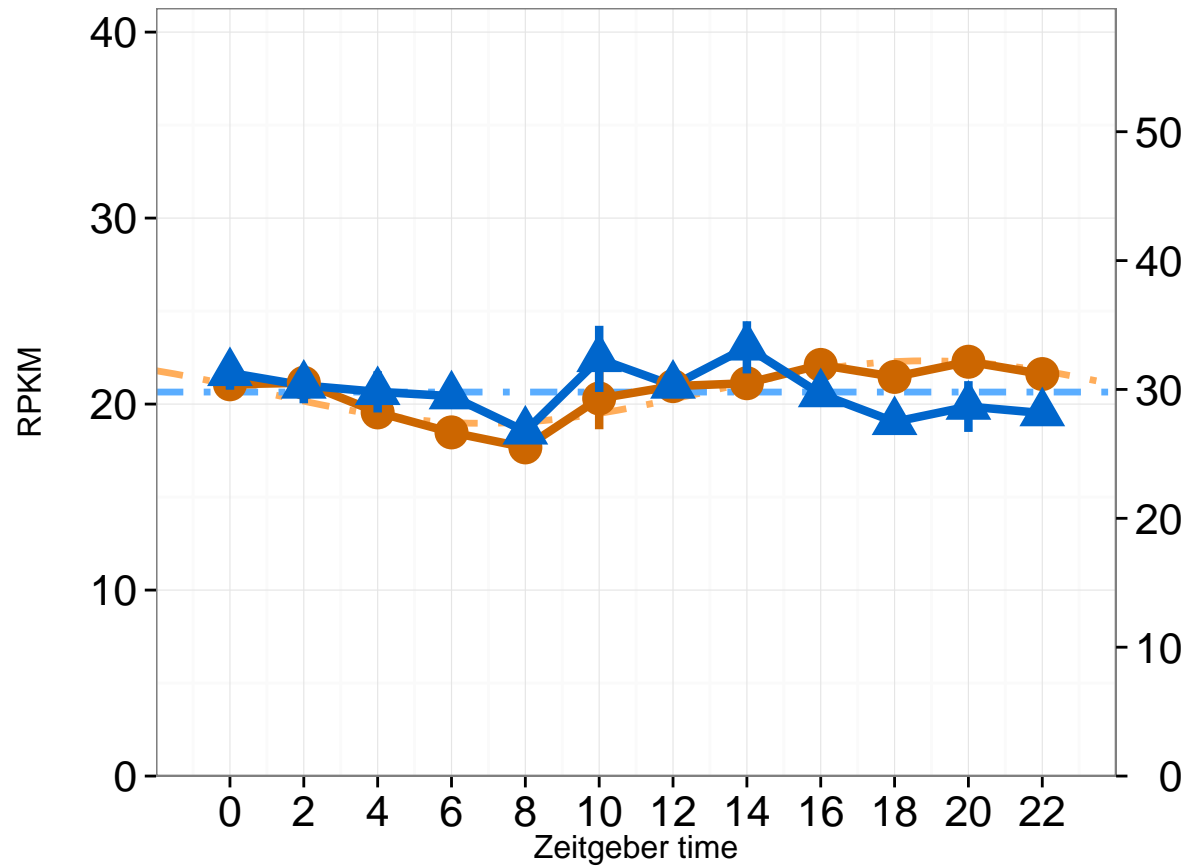

# Prkaa1

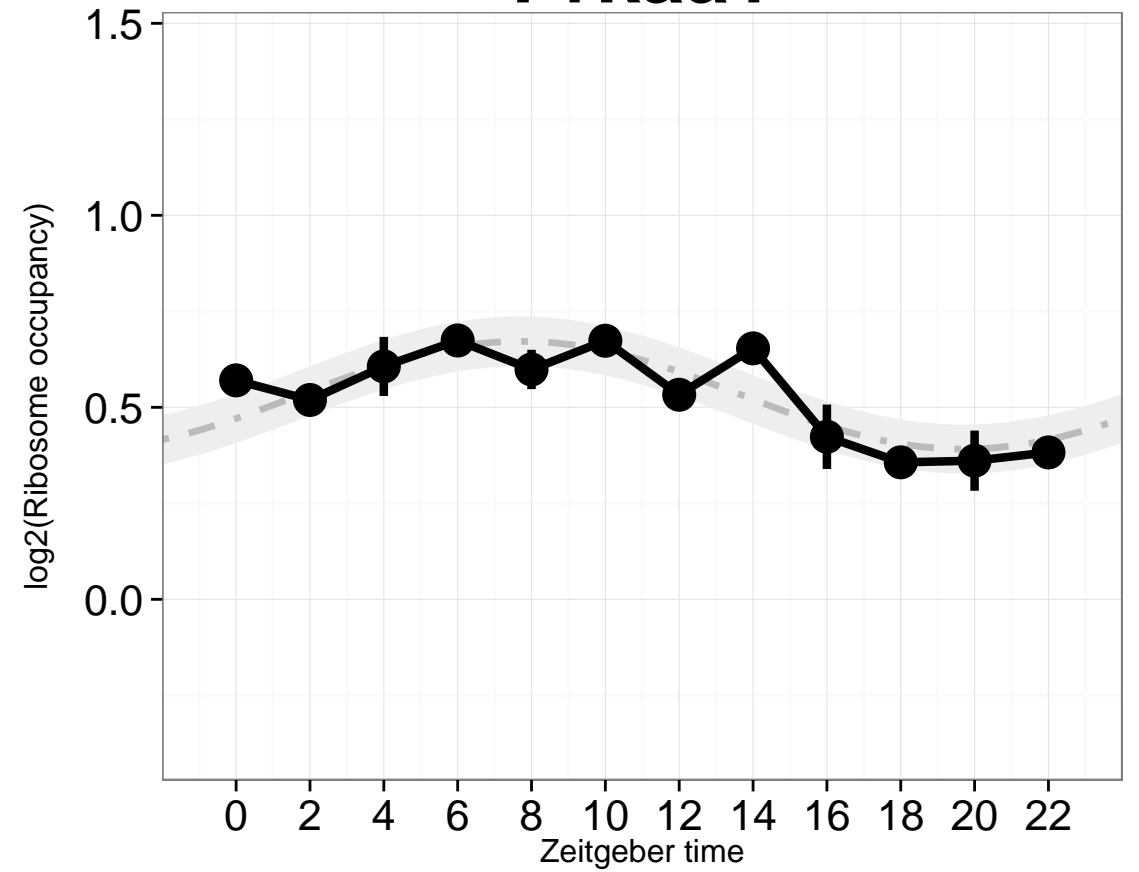

Supplement: Supplementary file 4269 [file 1]

## Pcnx

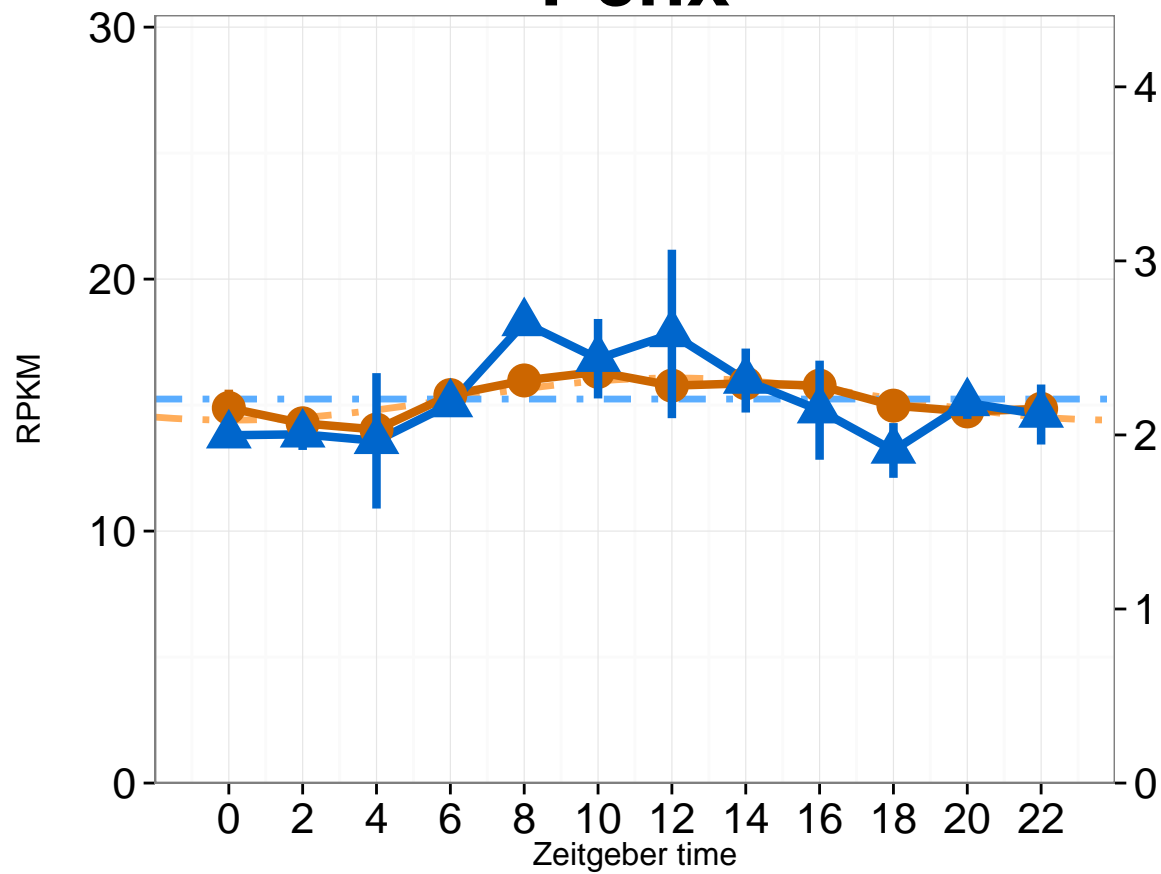

## Pcnx

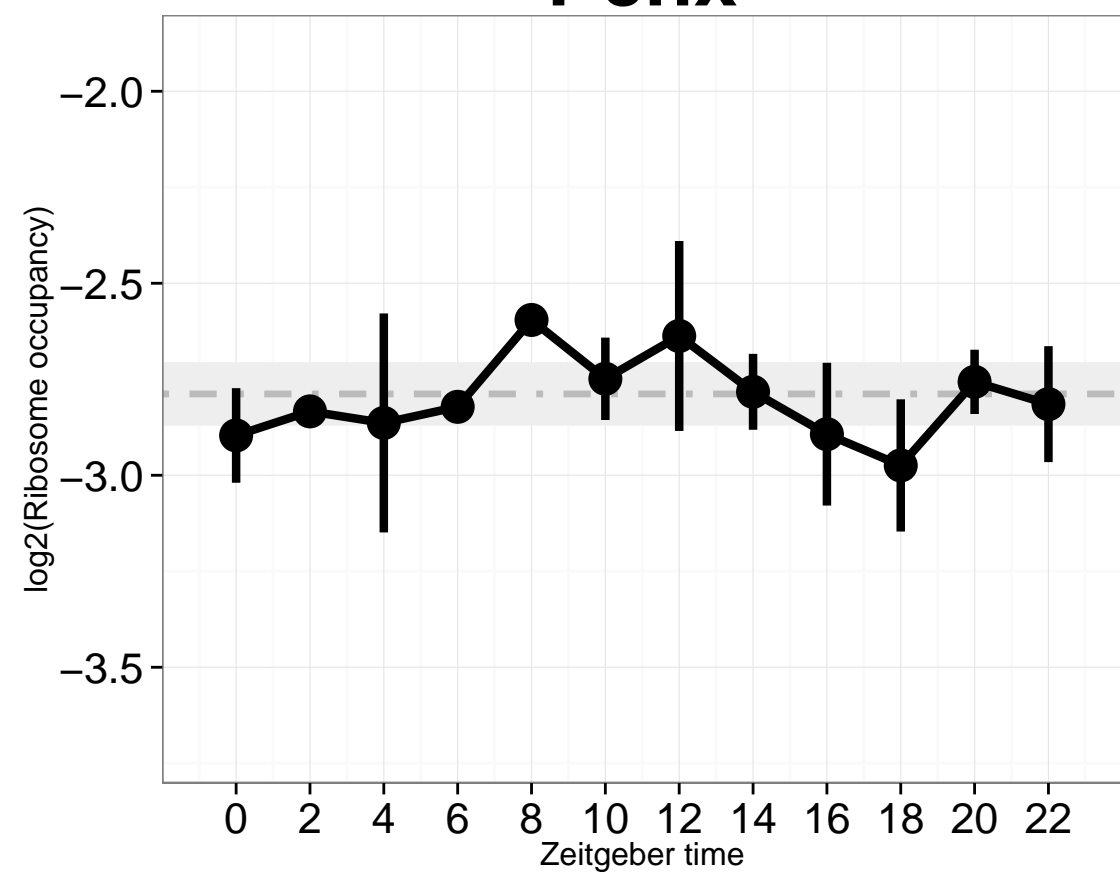

Supplement: Supplementary file 4270 [file 1]

# Pam16

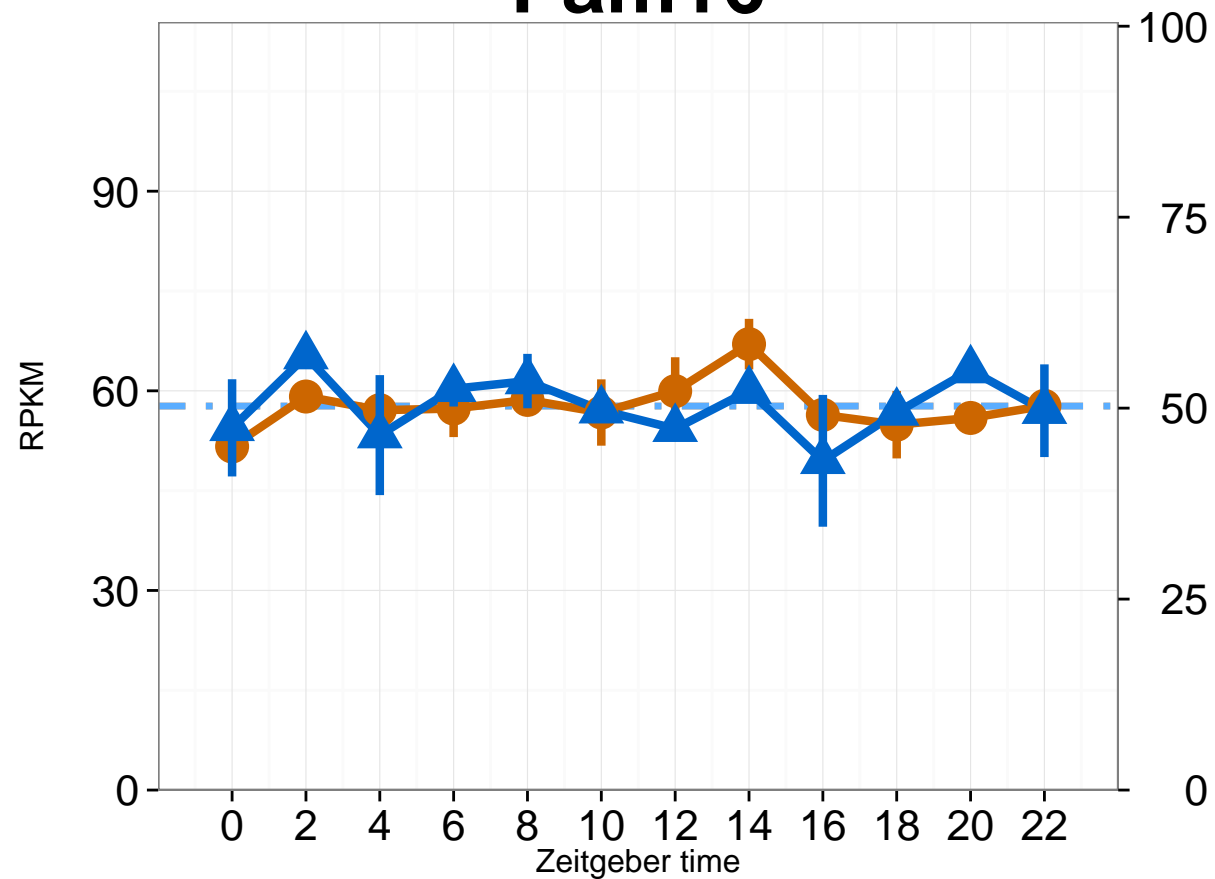

# Pam16

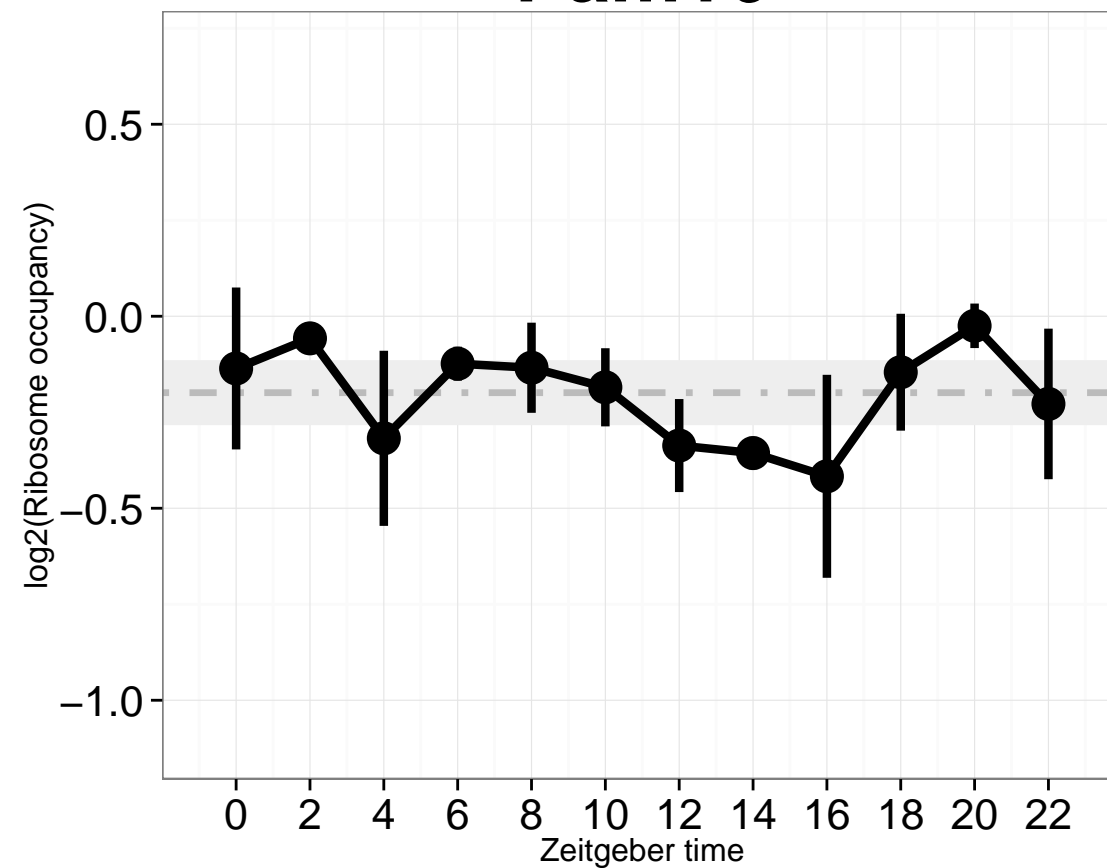

Supplement: Supplementary file 4271 [file 1]

# Gm10033

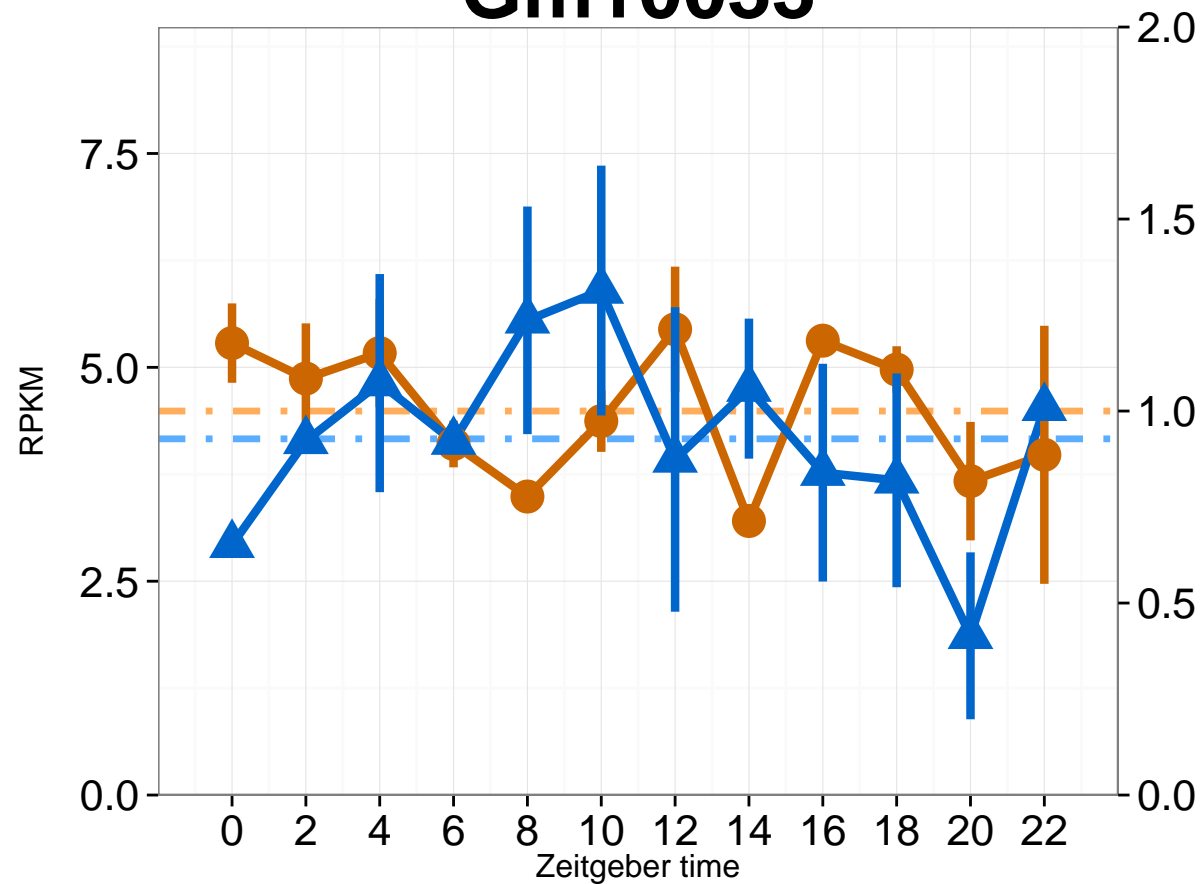

# Gm10033

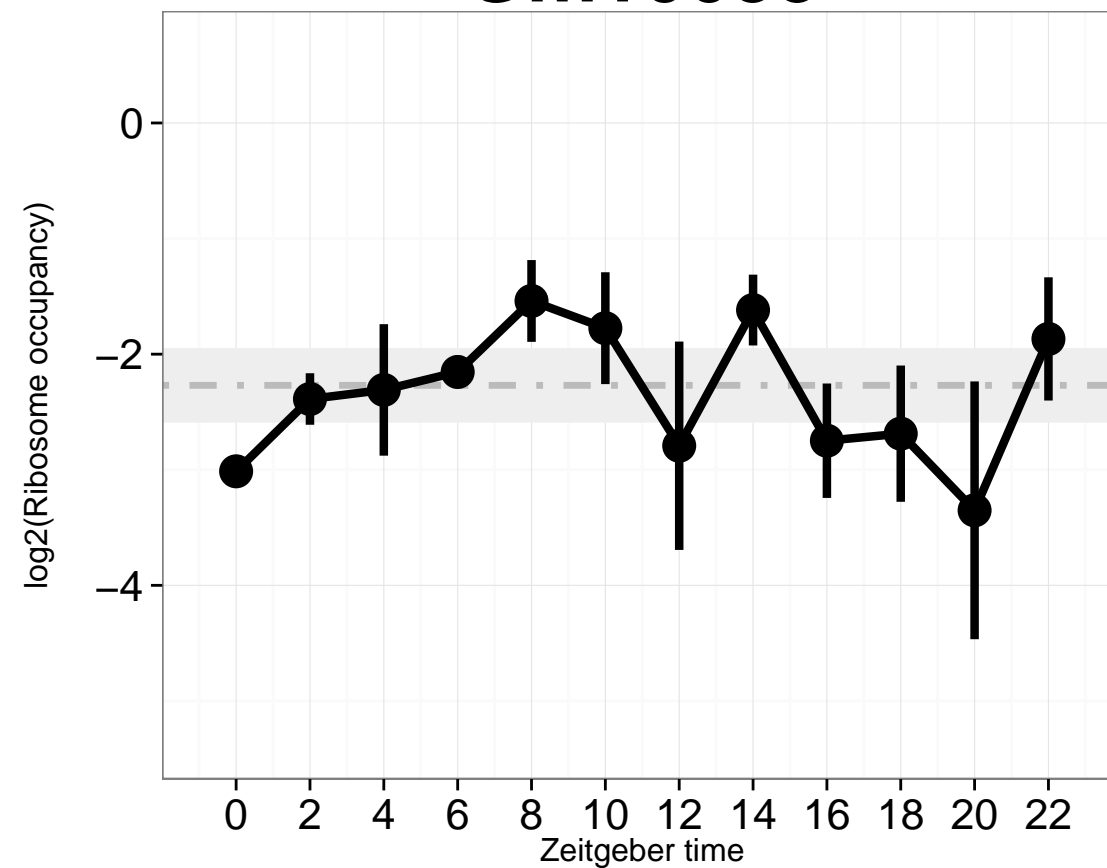

Supplement: Supplementary file 4272 [file 1]

## lfi35

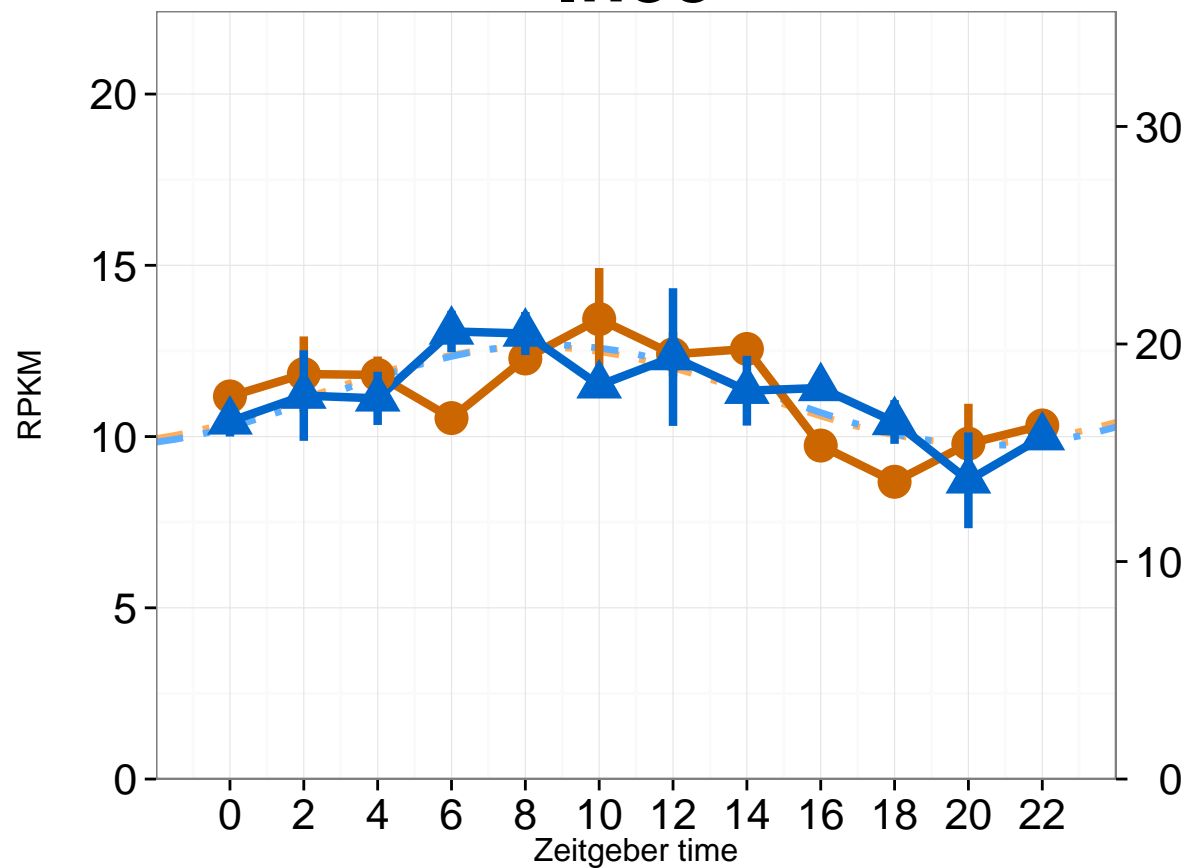

## lfi35

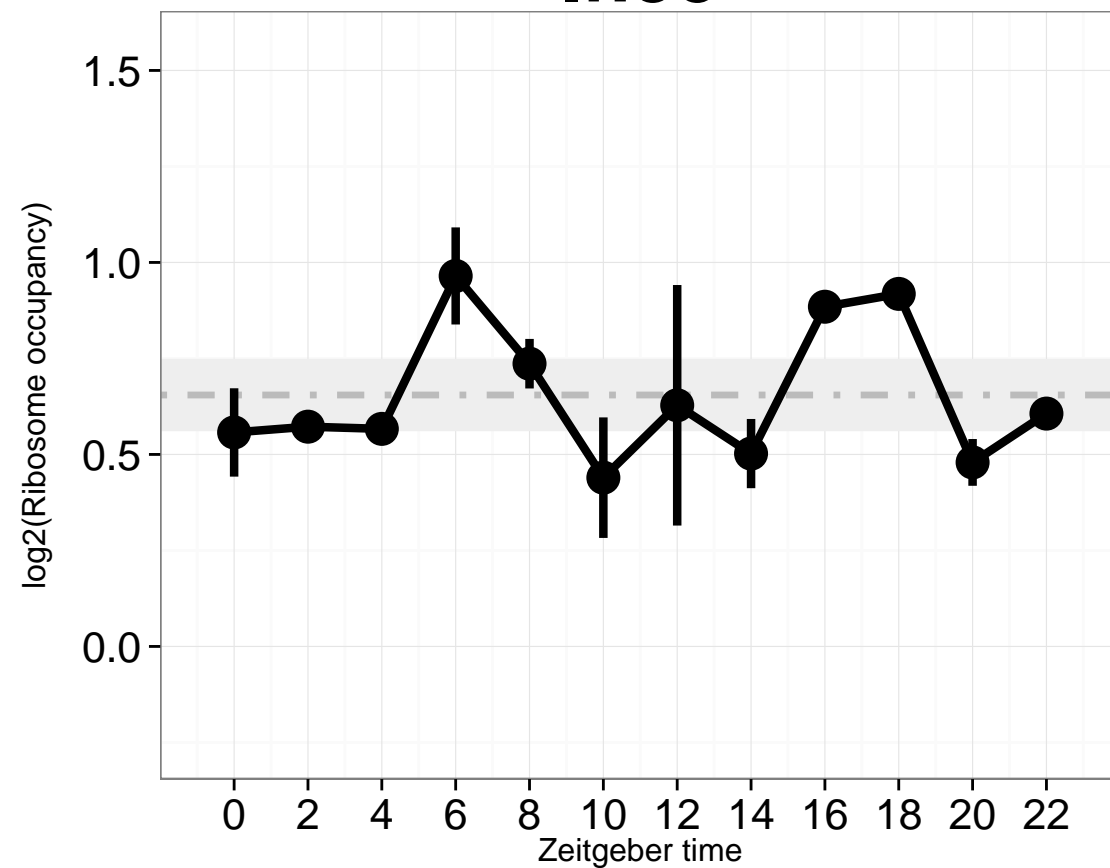

Supplement: Supplementary file 4273 [file 1]

## Treh

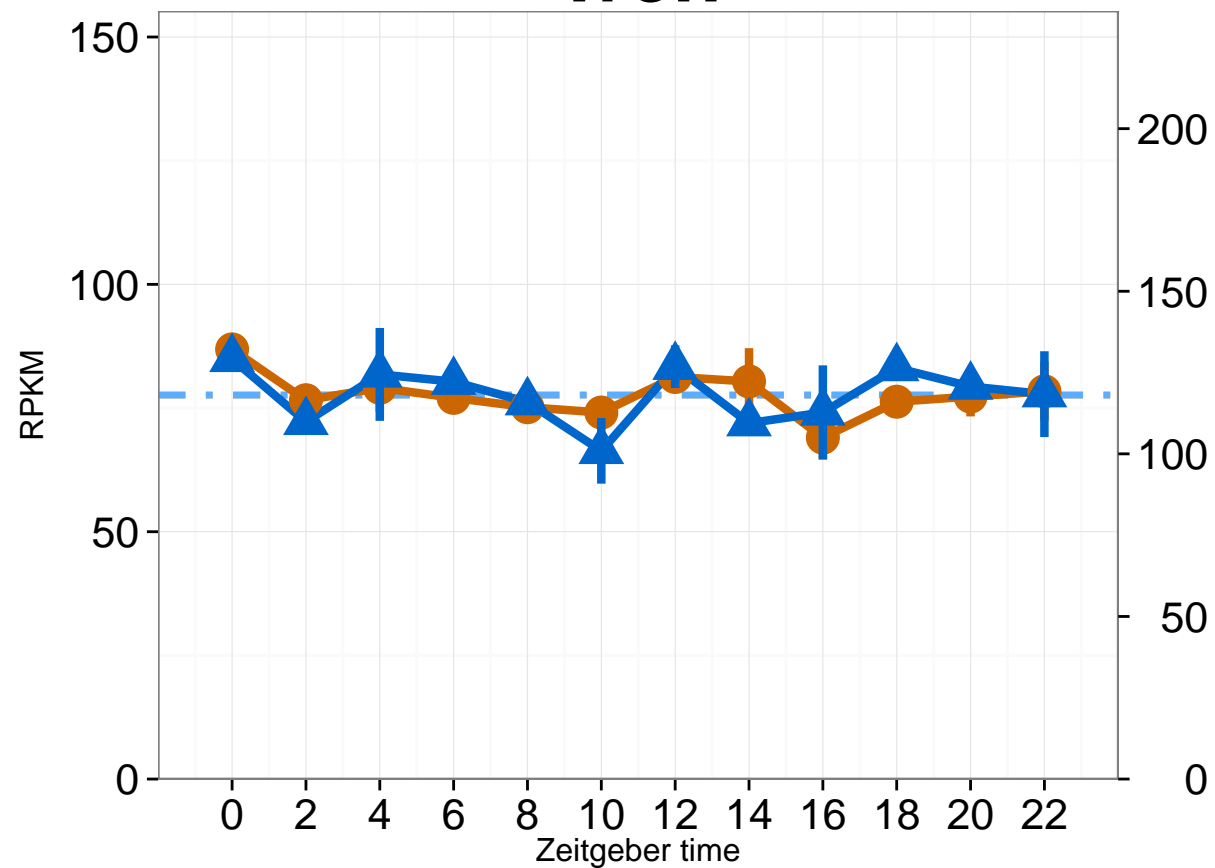

## Treh

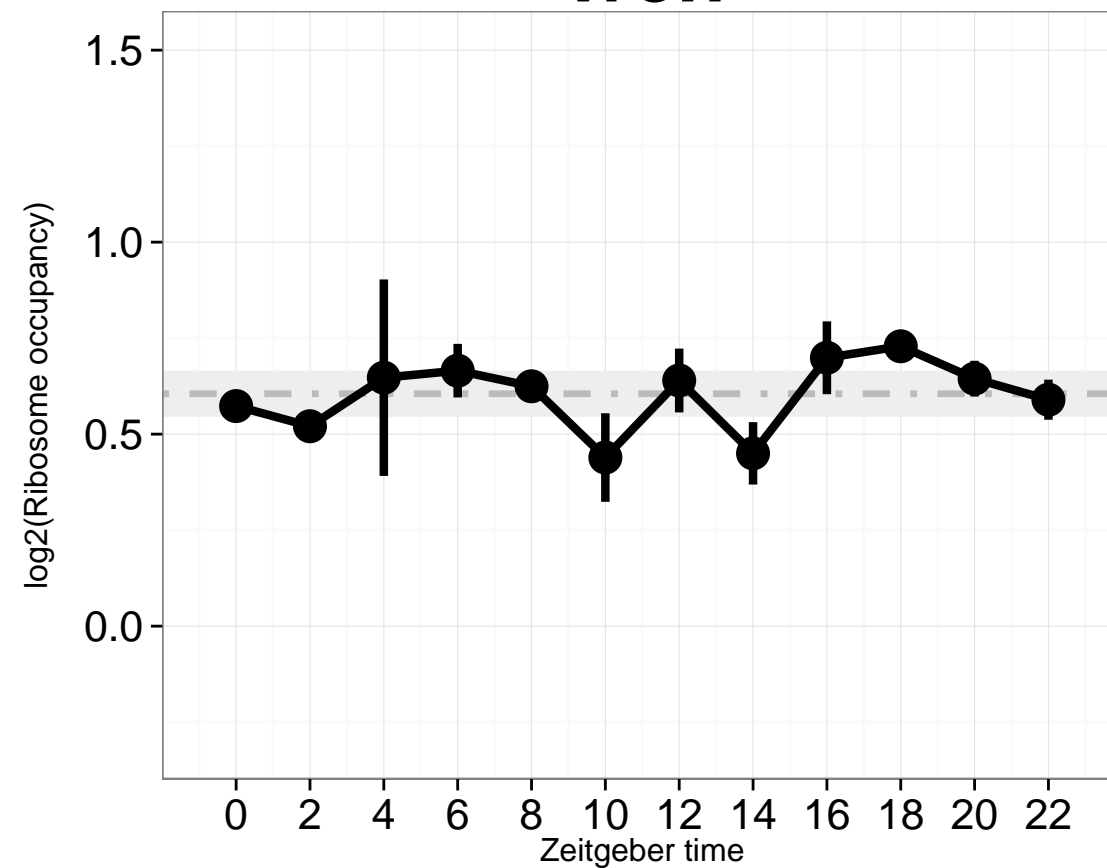

Supplement: Supplementary file 4274 [file 1]

## Adck4

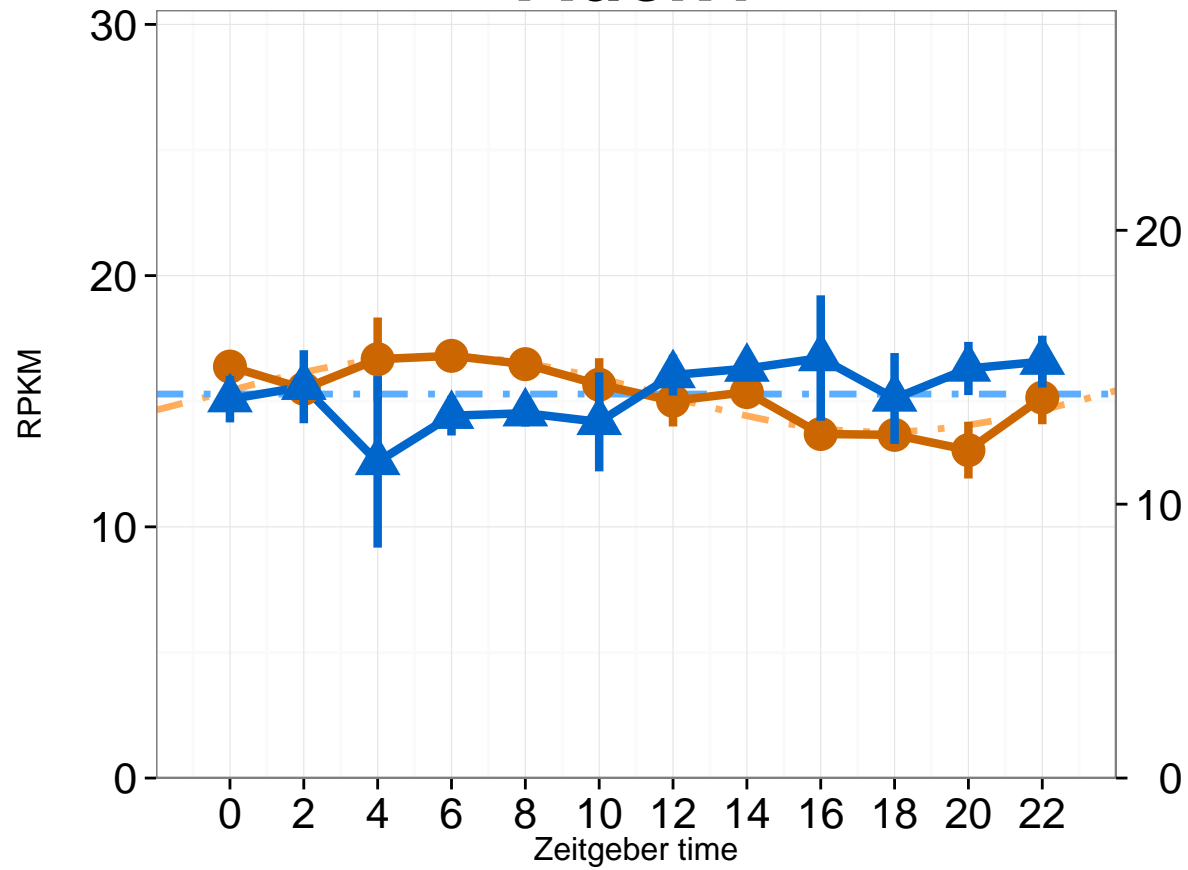

## Adck4

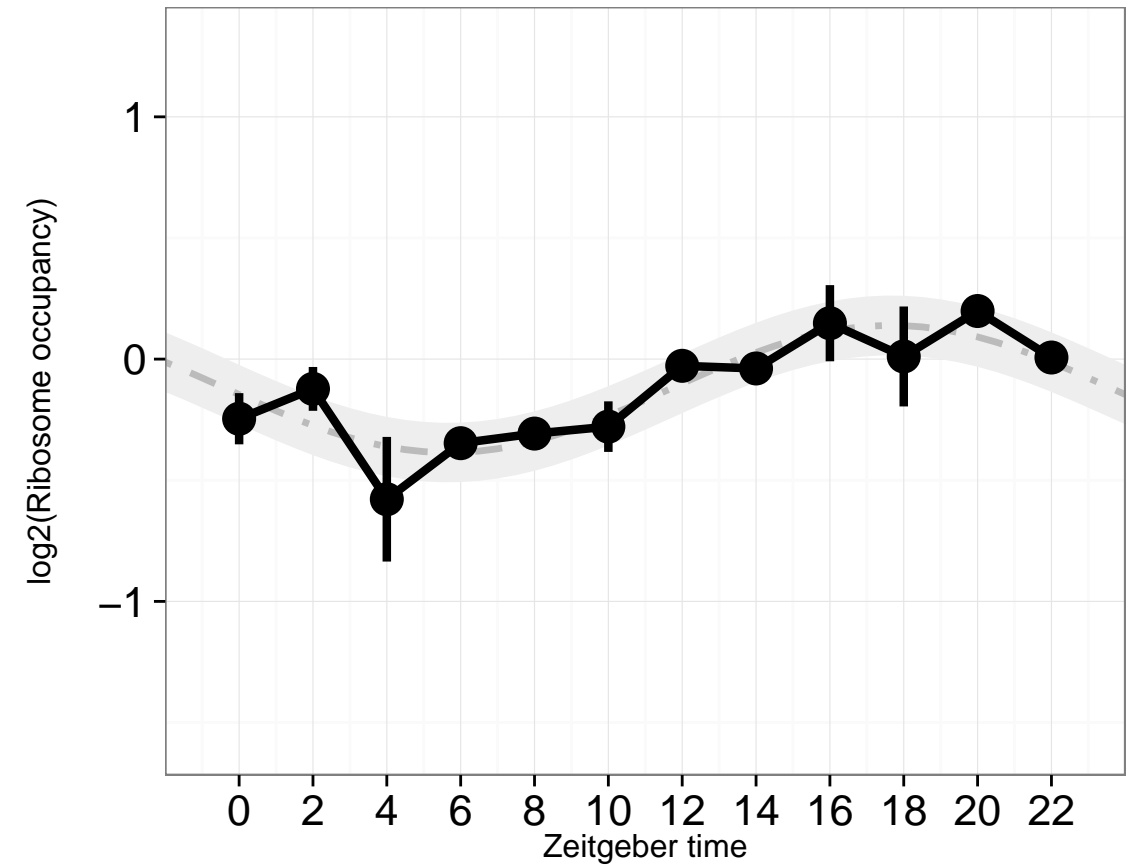

Supplement: Supplementary file 4275 [file 1]

# Otub2

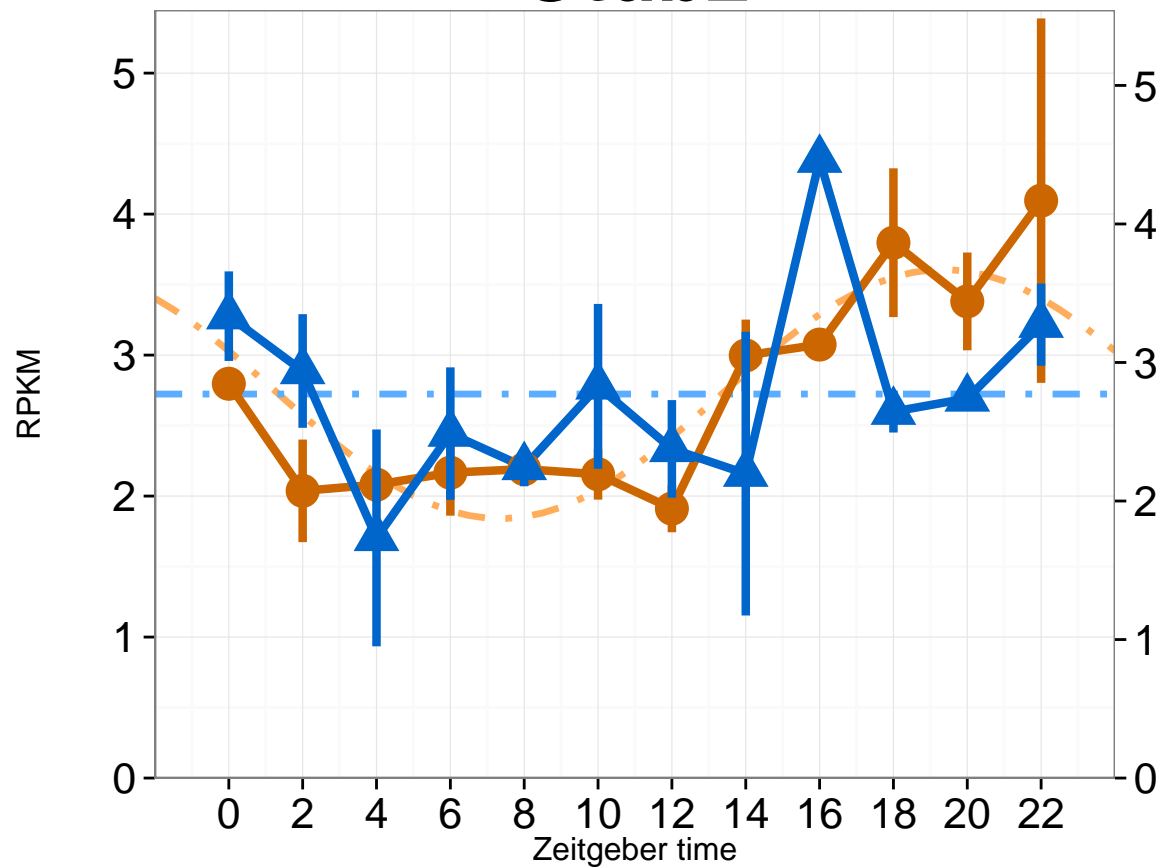

# Otub2

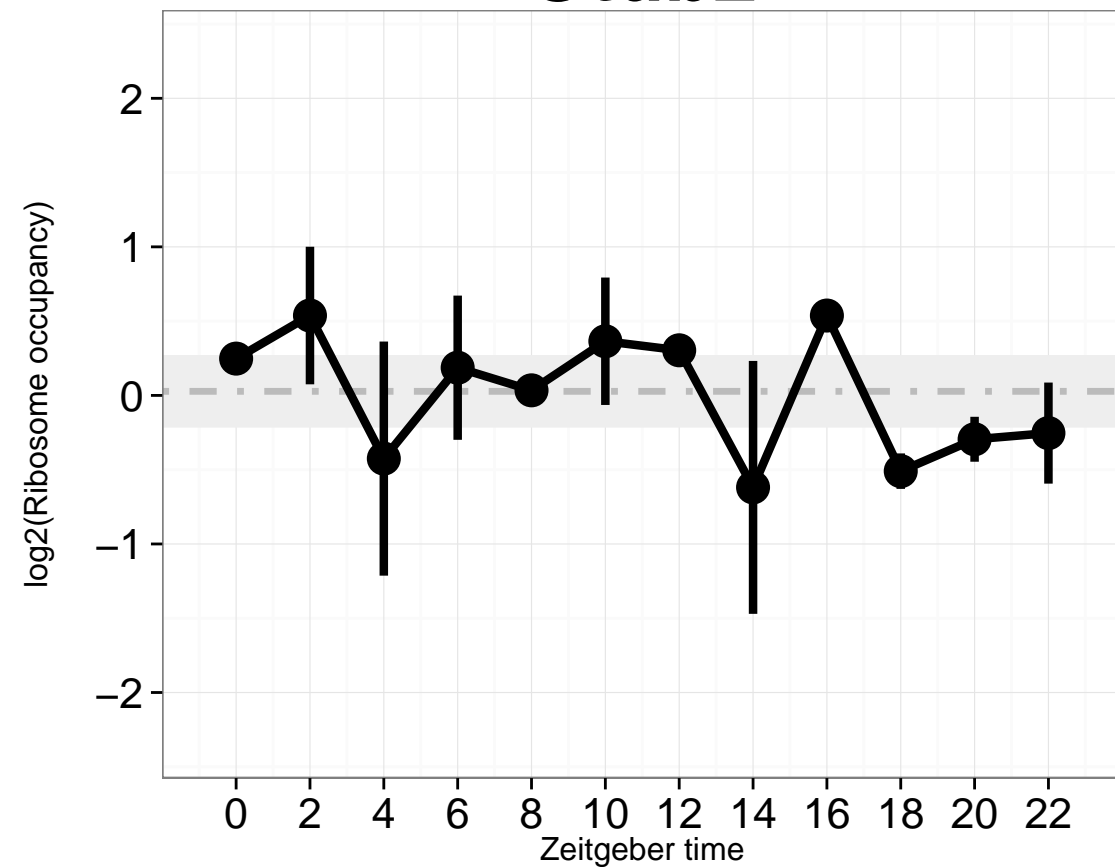

Supplement: Supplementary file 4276 [file 1]

# Mblac1

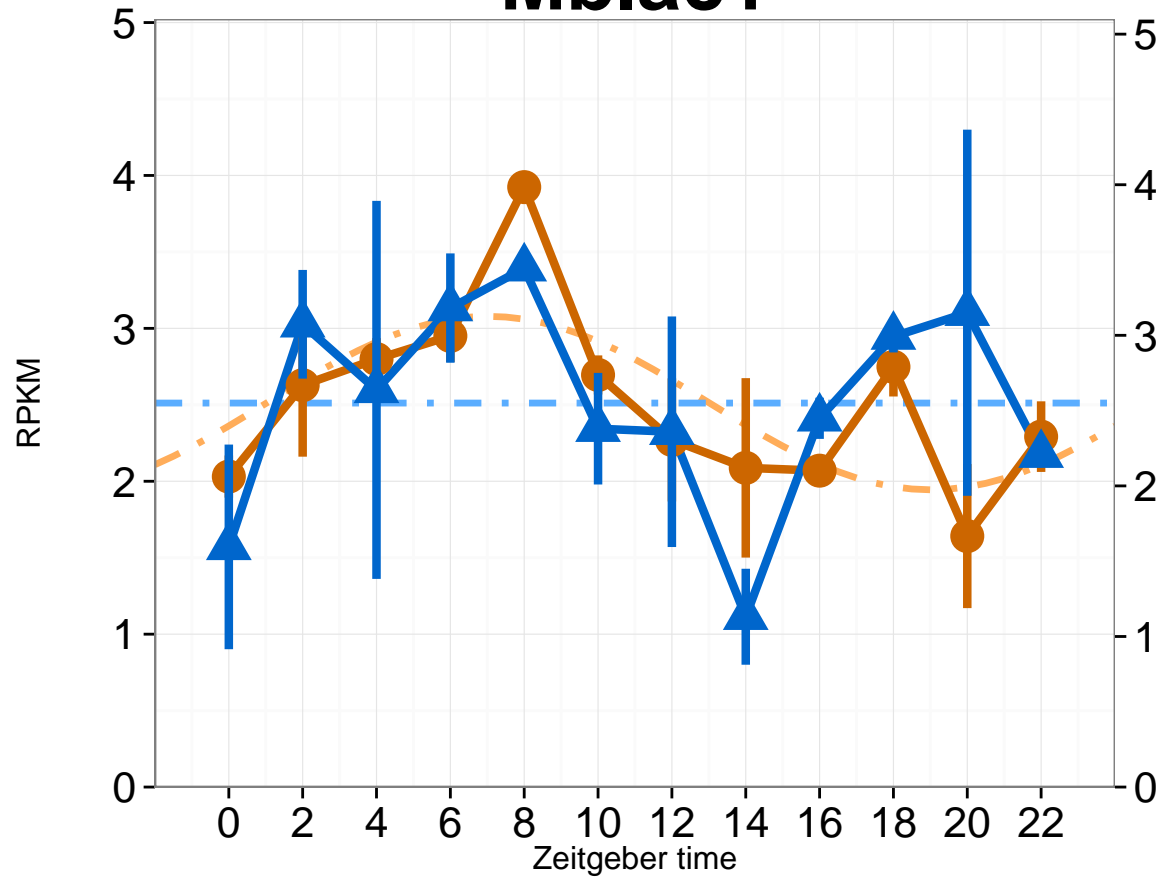

# Mblac1

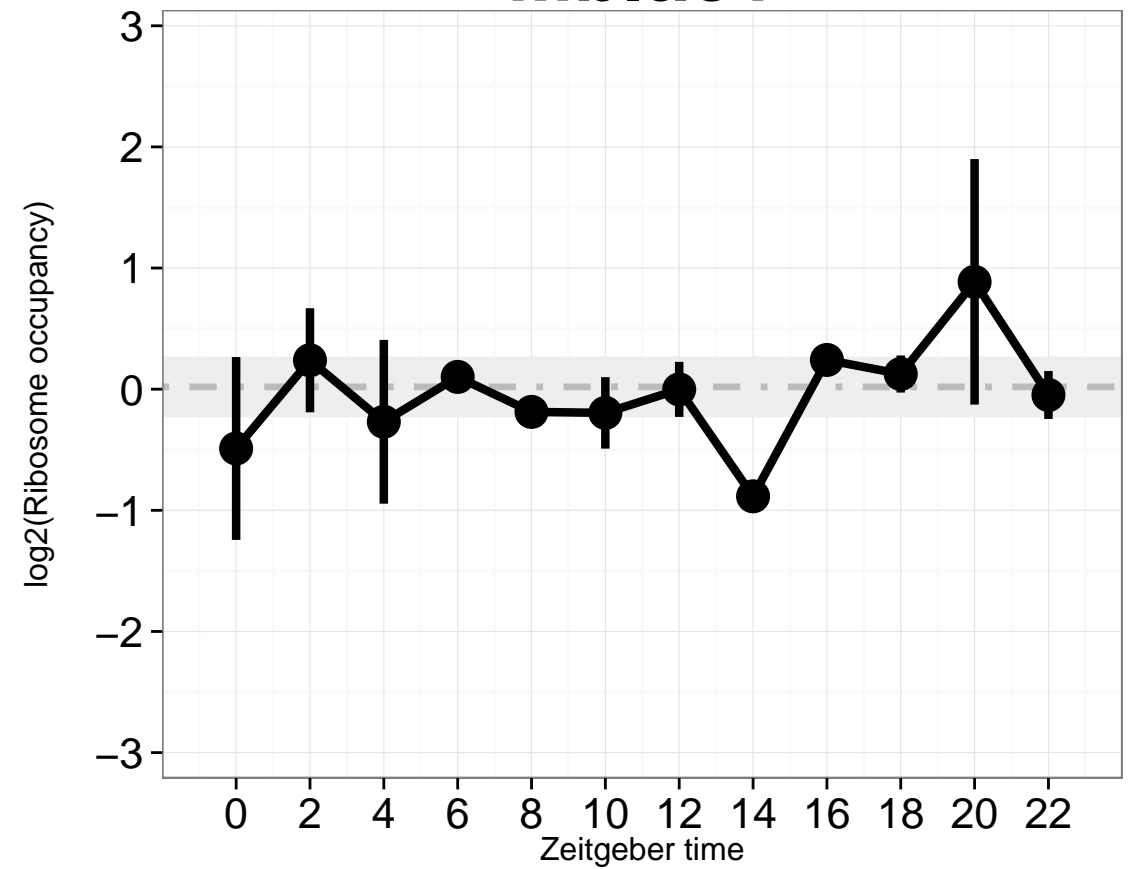

Supplement: Supplementary file 4277 [file 1]

## Tyw1

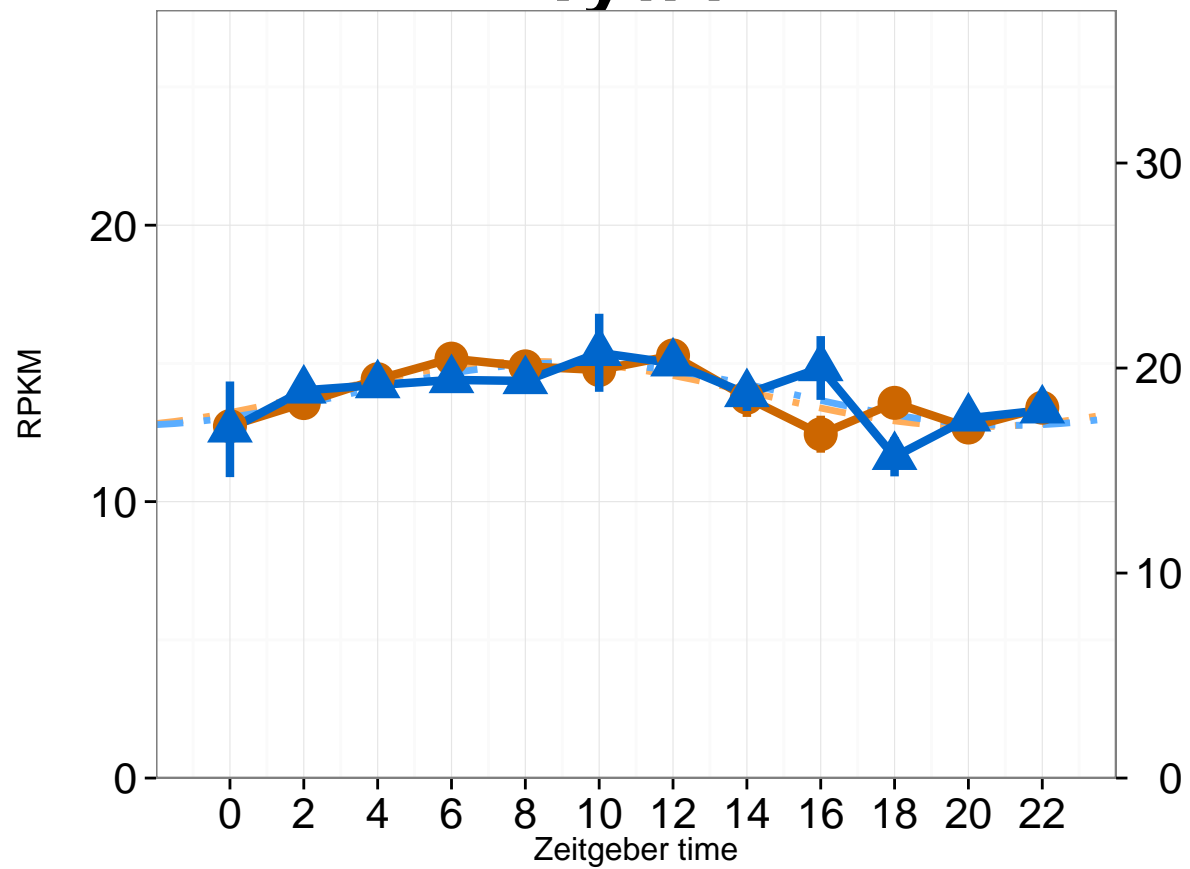

## Tyw1

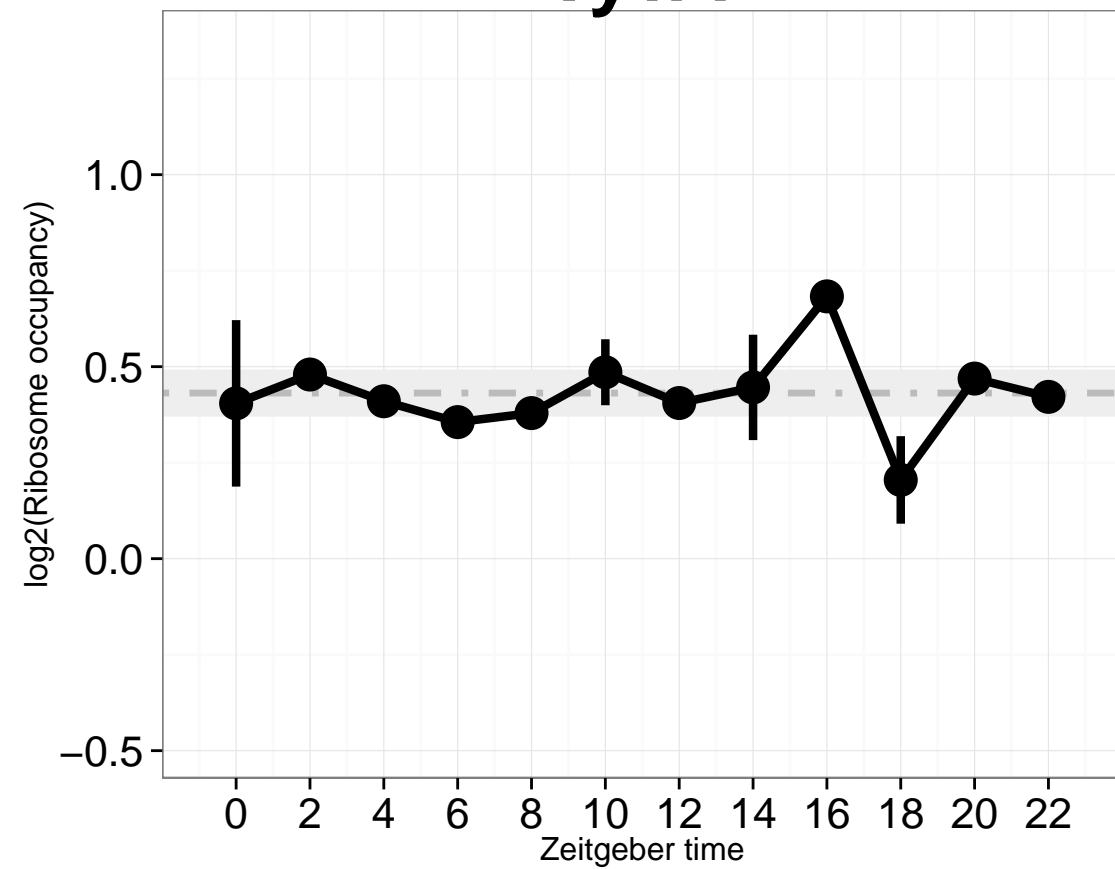

Supplement: Supplementary file 4278 [file 1]

## Rpl34

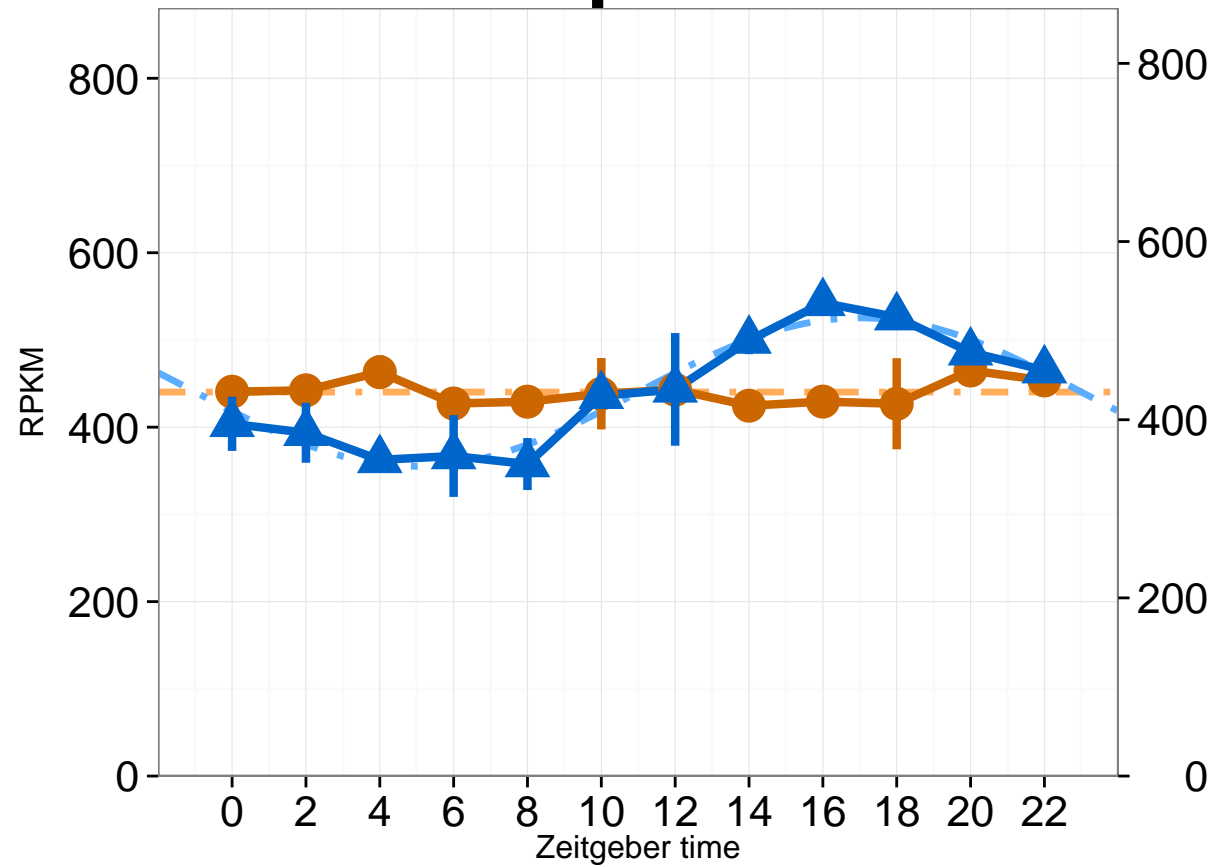

## Rpl34

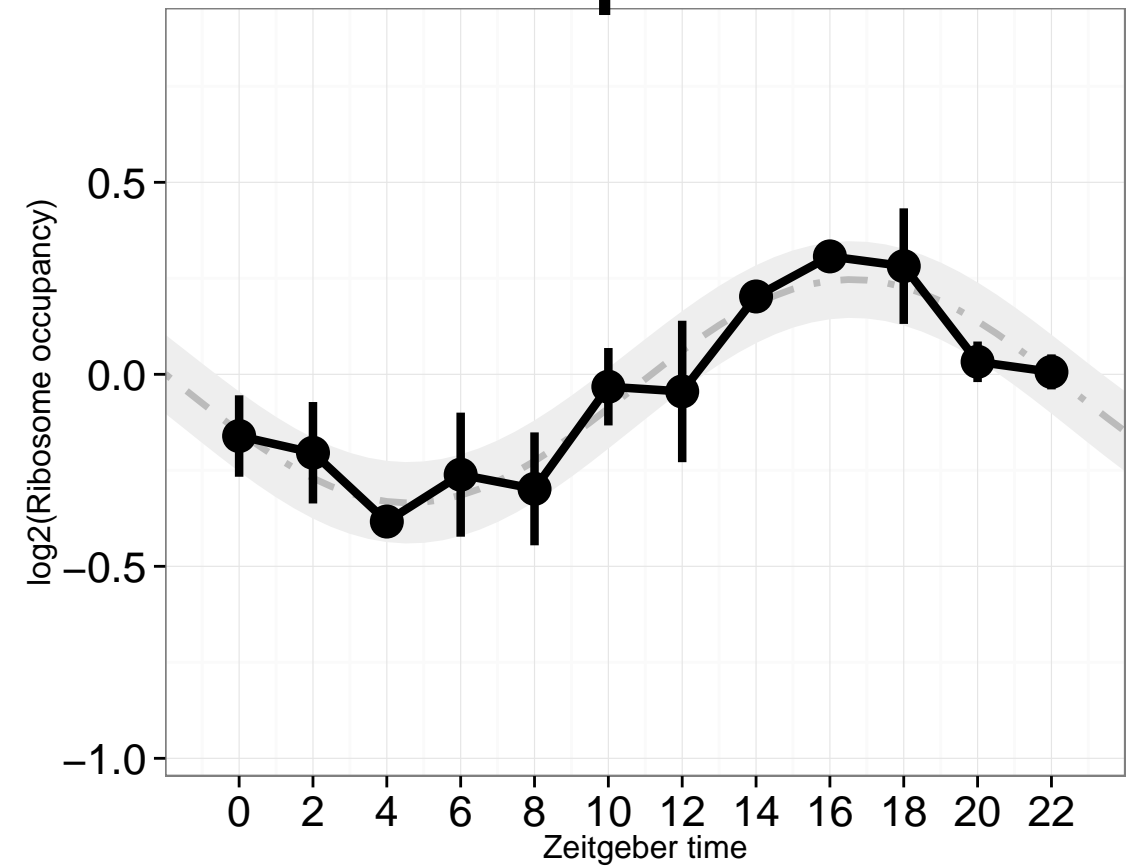

Supplement: Supplementary file 4279 [file 1]

## Nrtn

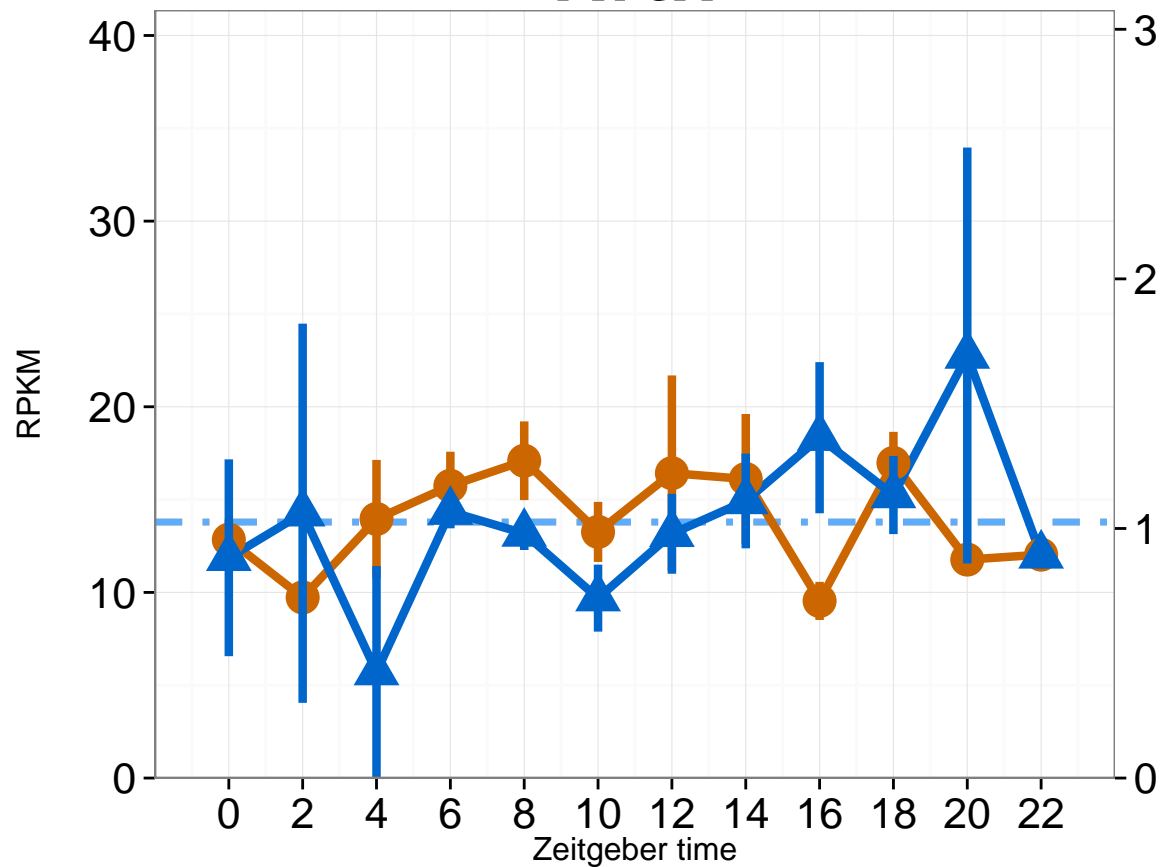

## Nrtn

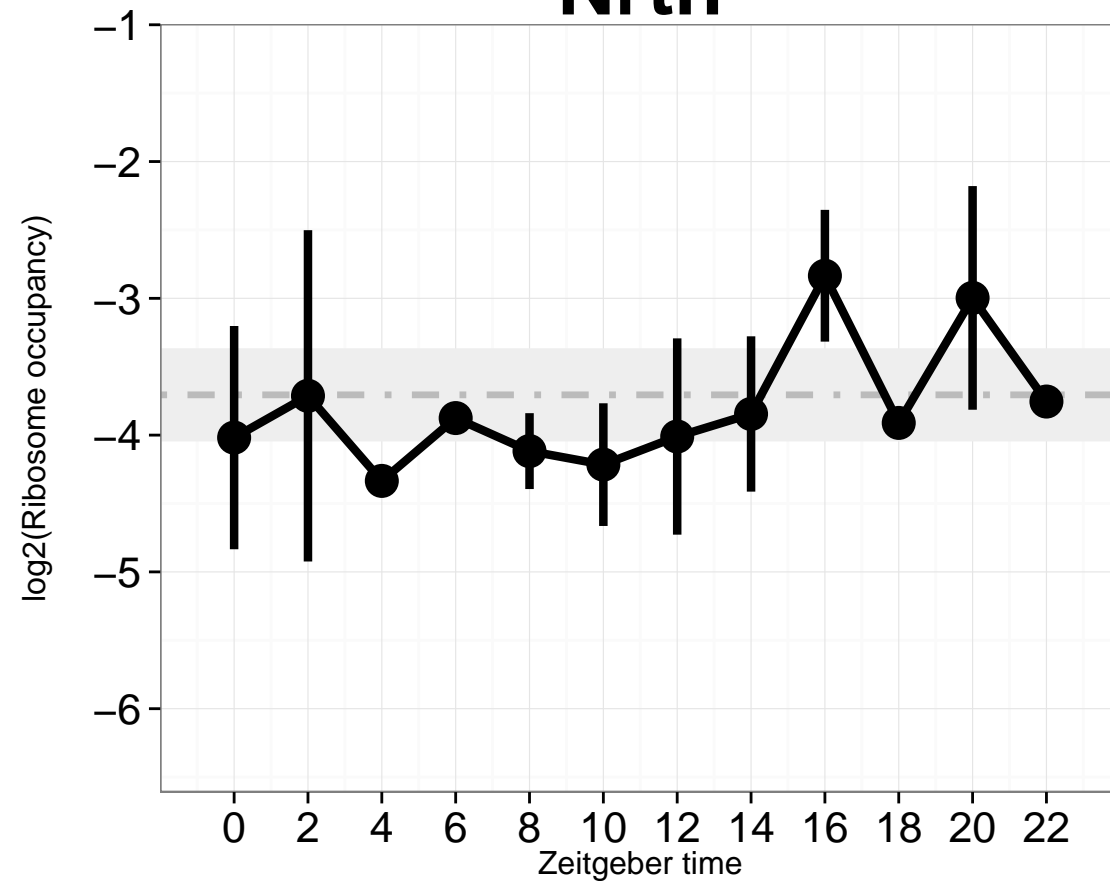

Supplement: Supplementary file 4280 [file 1]

## Nek3

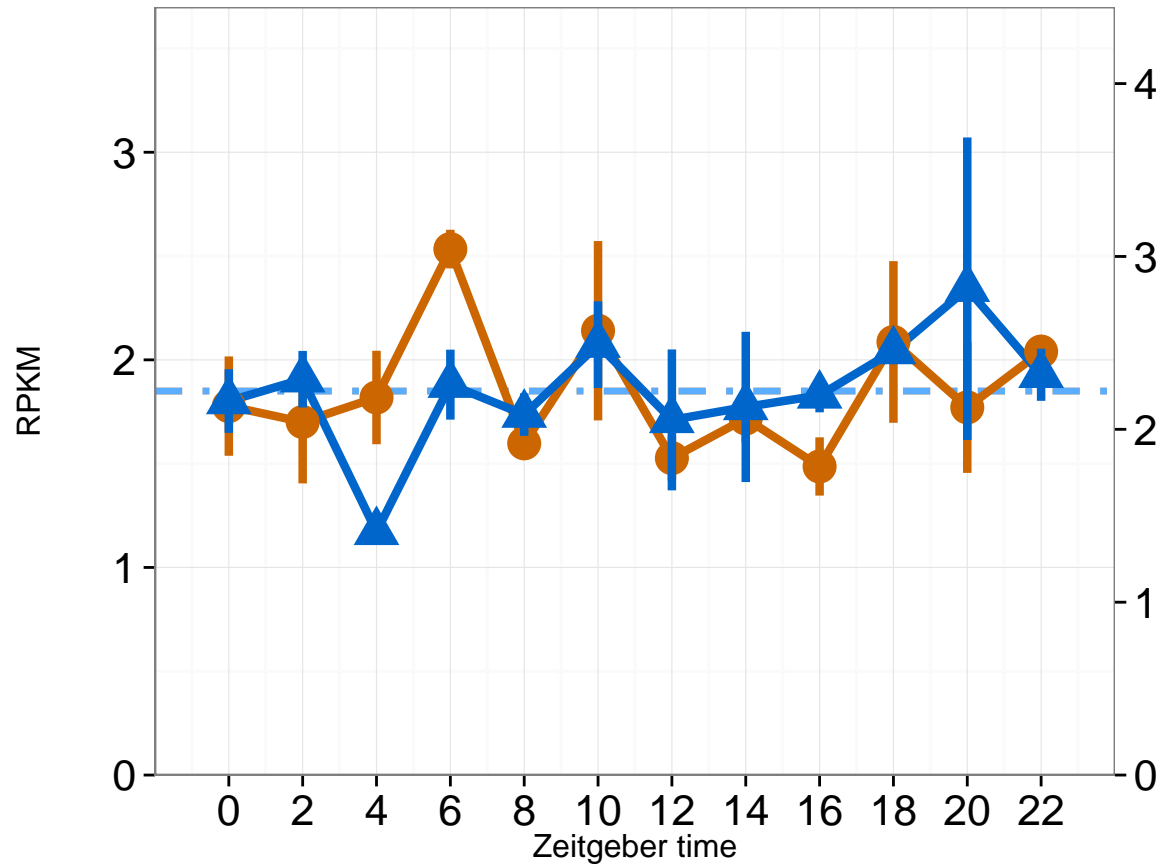

## Nek3

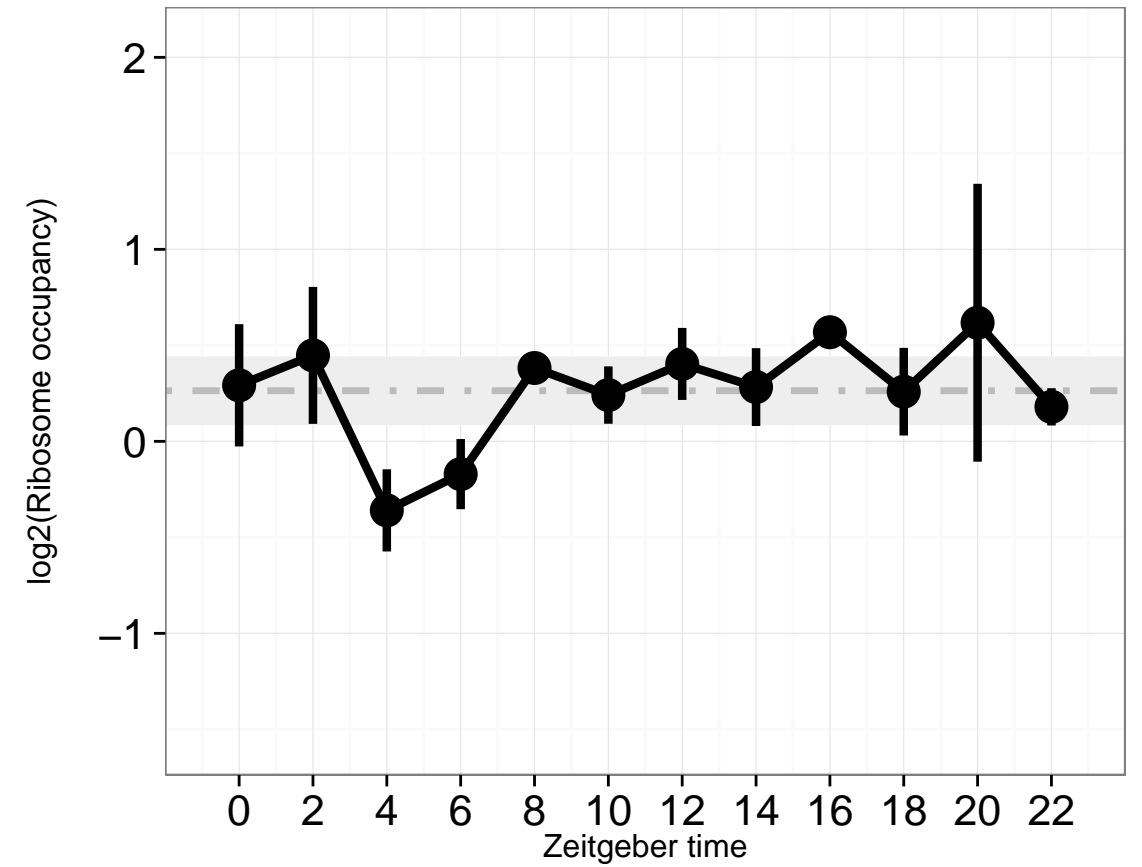

Supplement: Supplementary file 4281 [file 1]

## Acot12

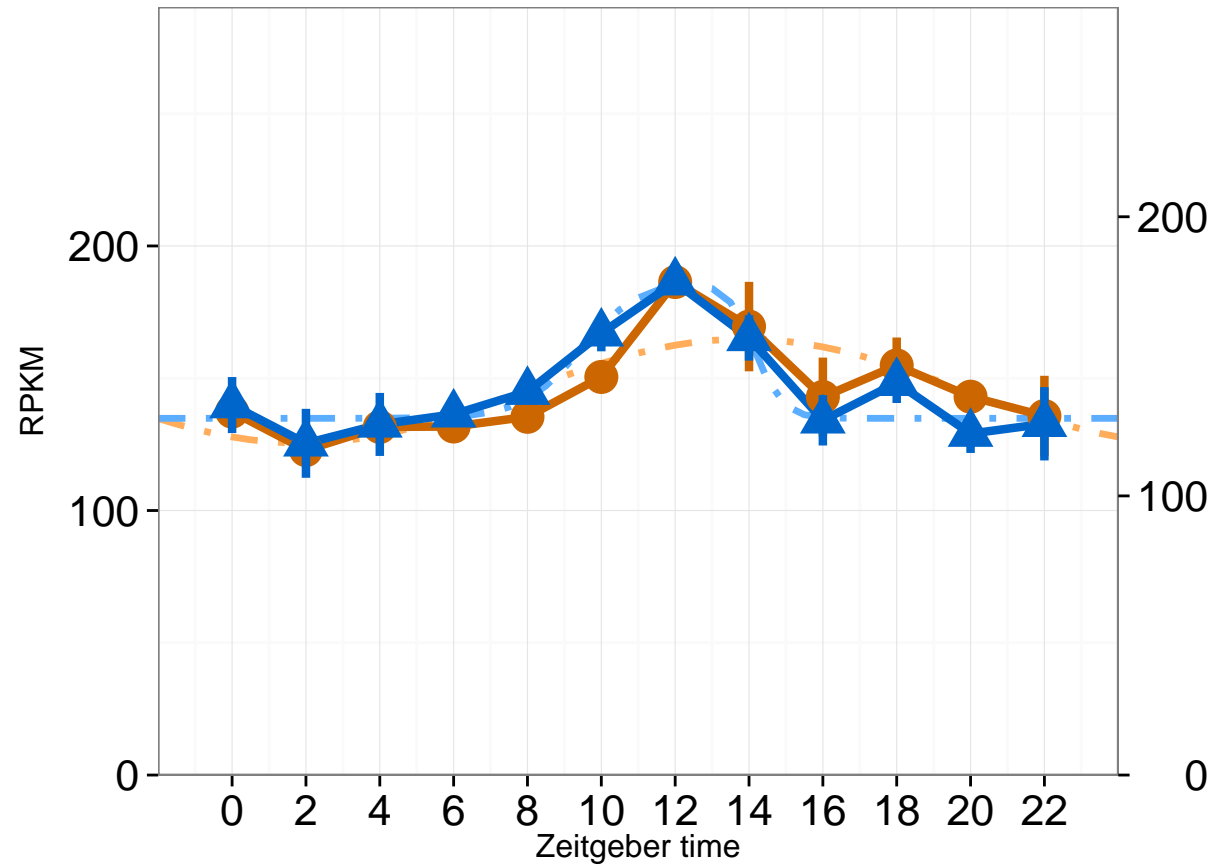

## Acot12

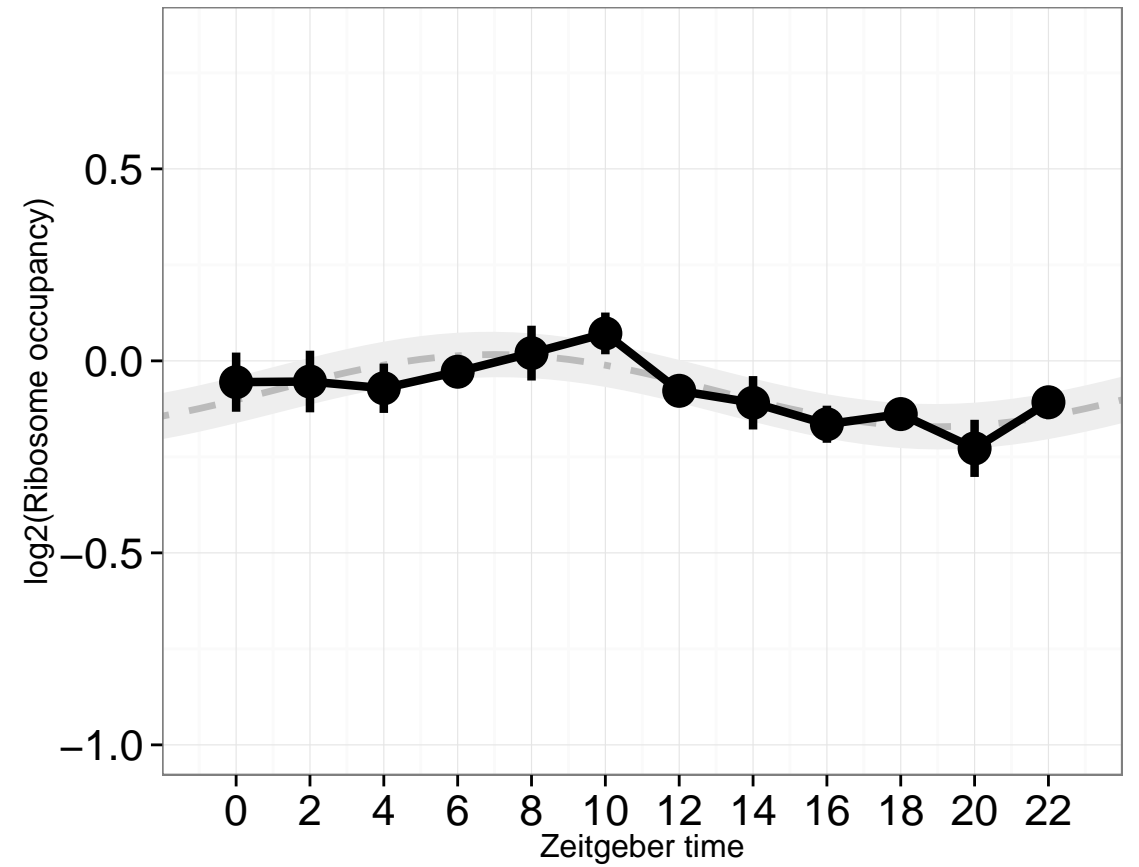

Supplement: Supplementary file 4282 [file 1]

# Sec61a2

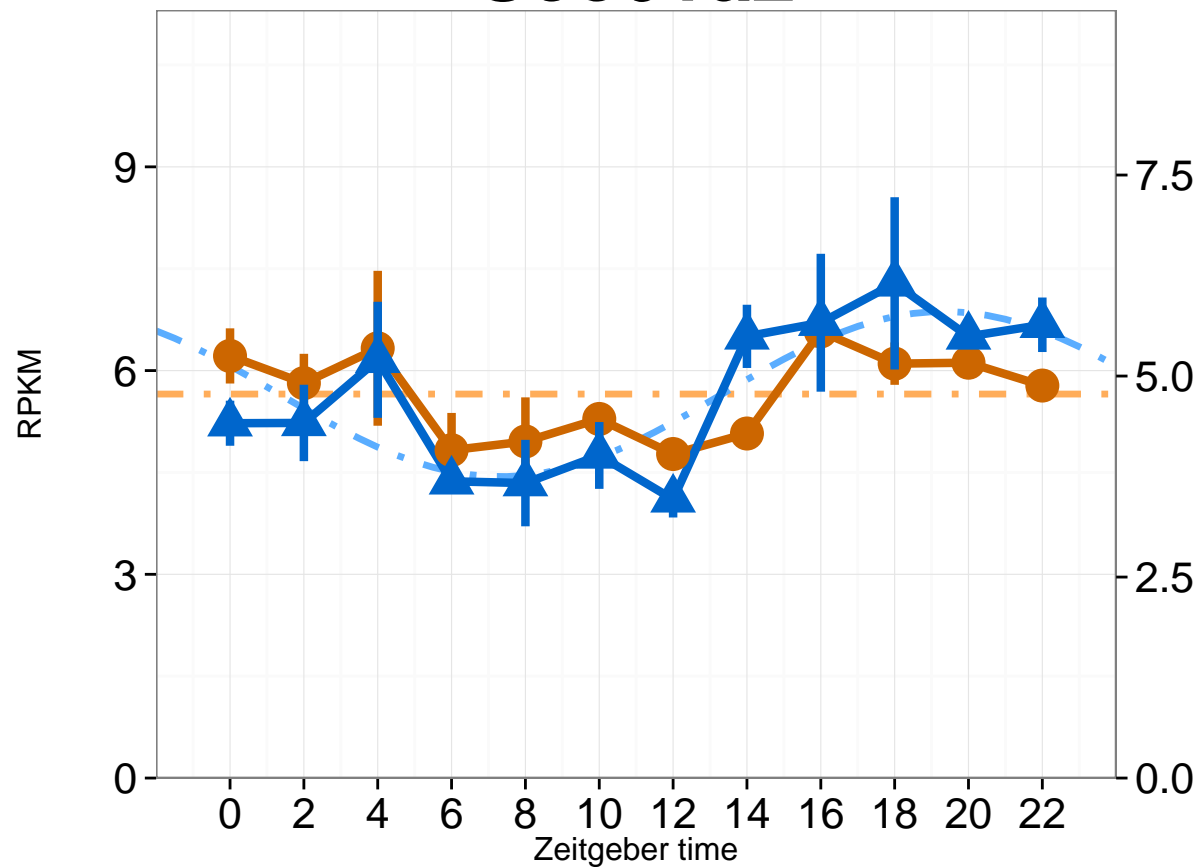

# Sec61a2

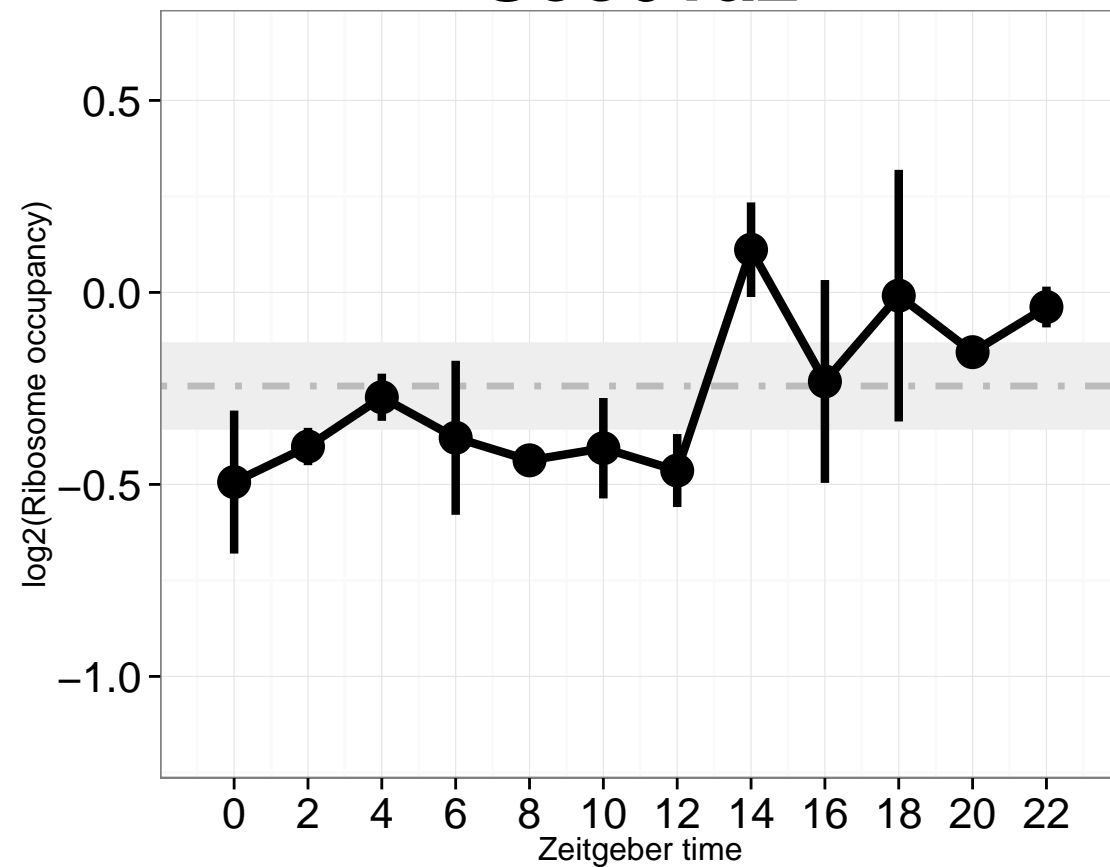

Supplement: Supplementary file 4283 [file 1]

## Bmp7

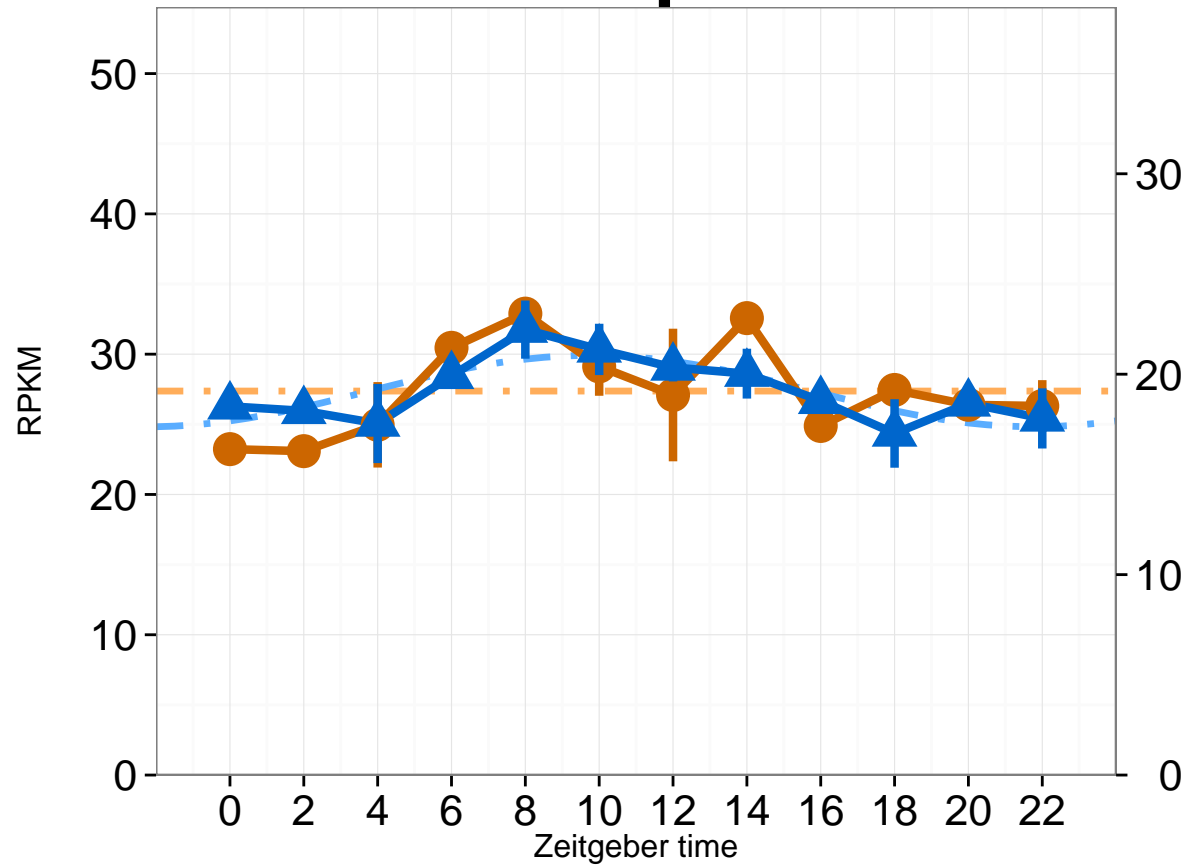

## Bmp7

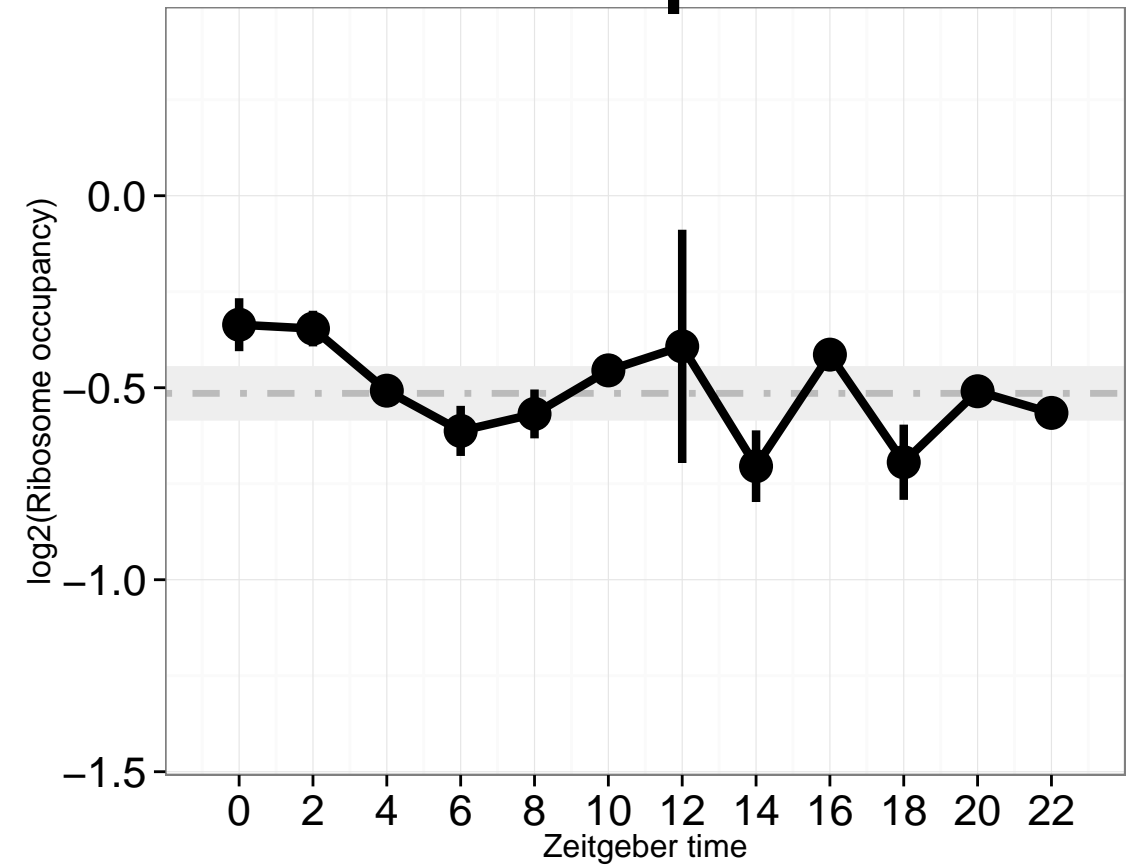

Supplement: Supplementary file 4284 [file 1]

# Prpf38a

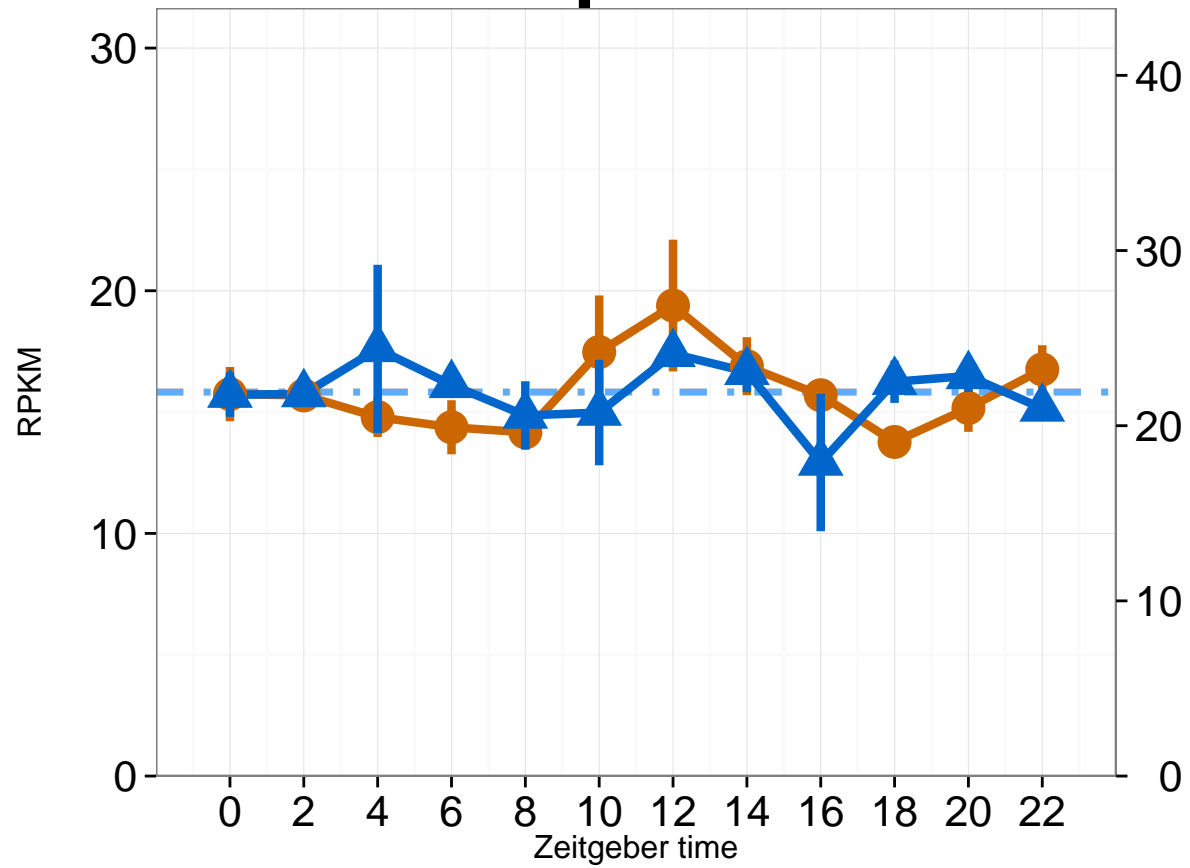

# Prpf38a

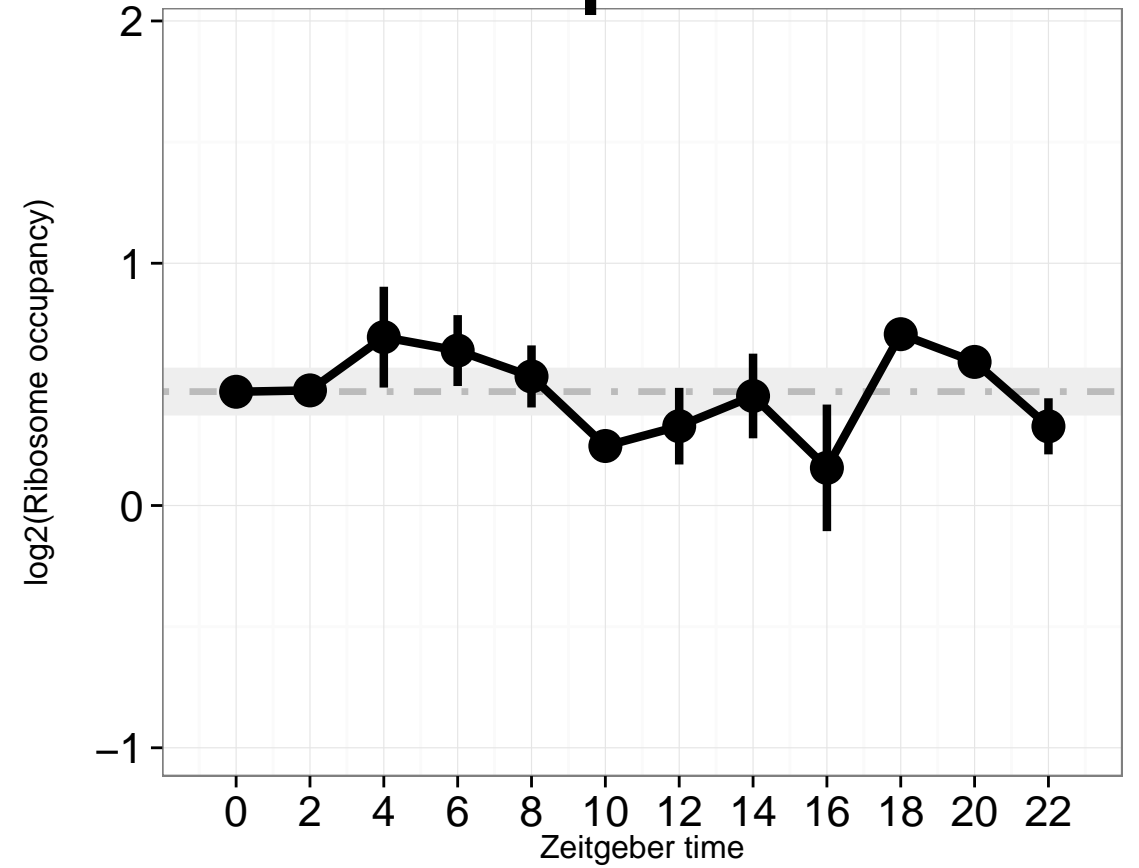

Supplement: Supplementary file 4285 [file 1]

# Cyp4b1

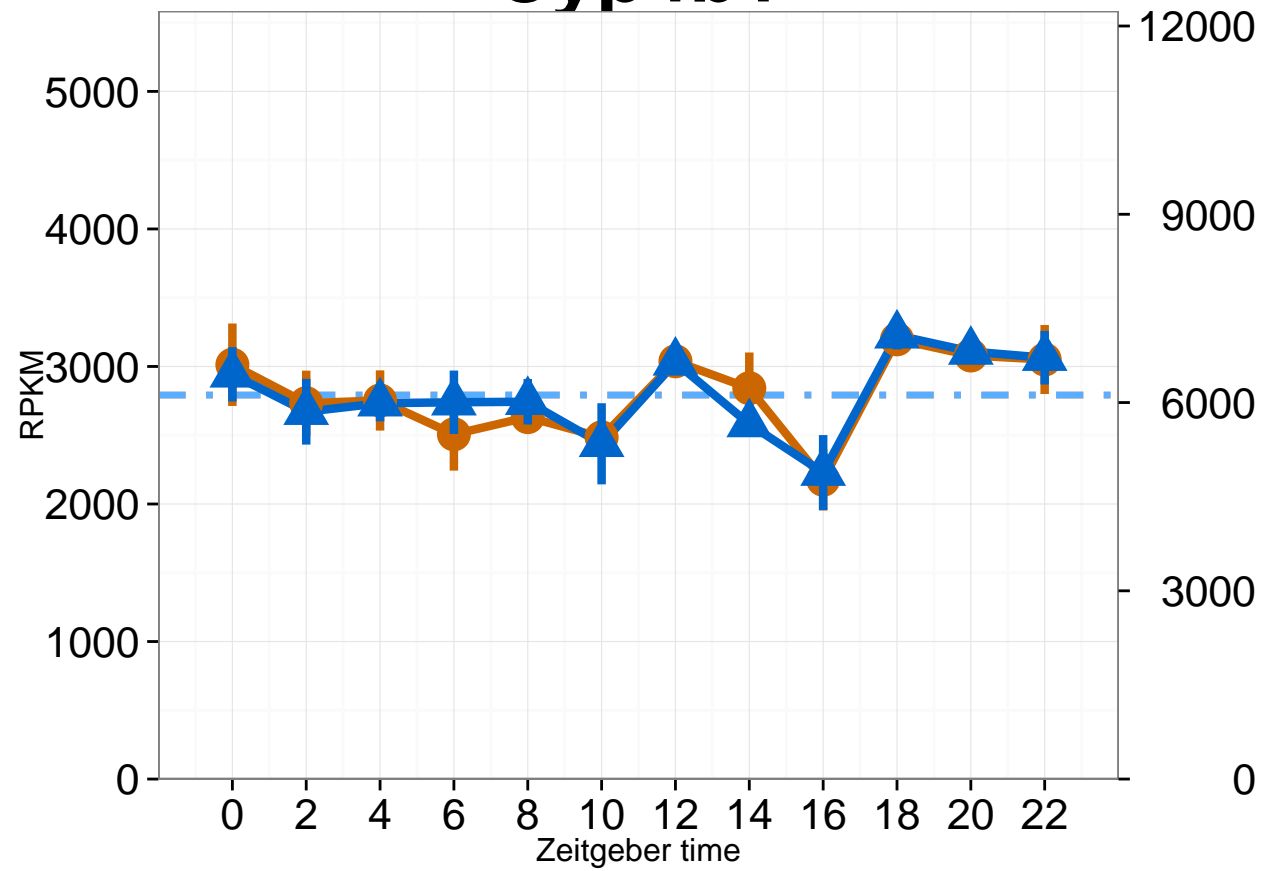

# Cyp4b1

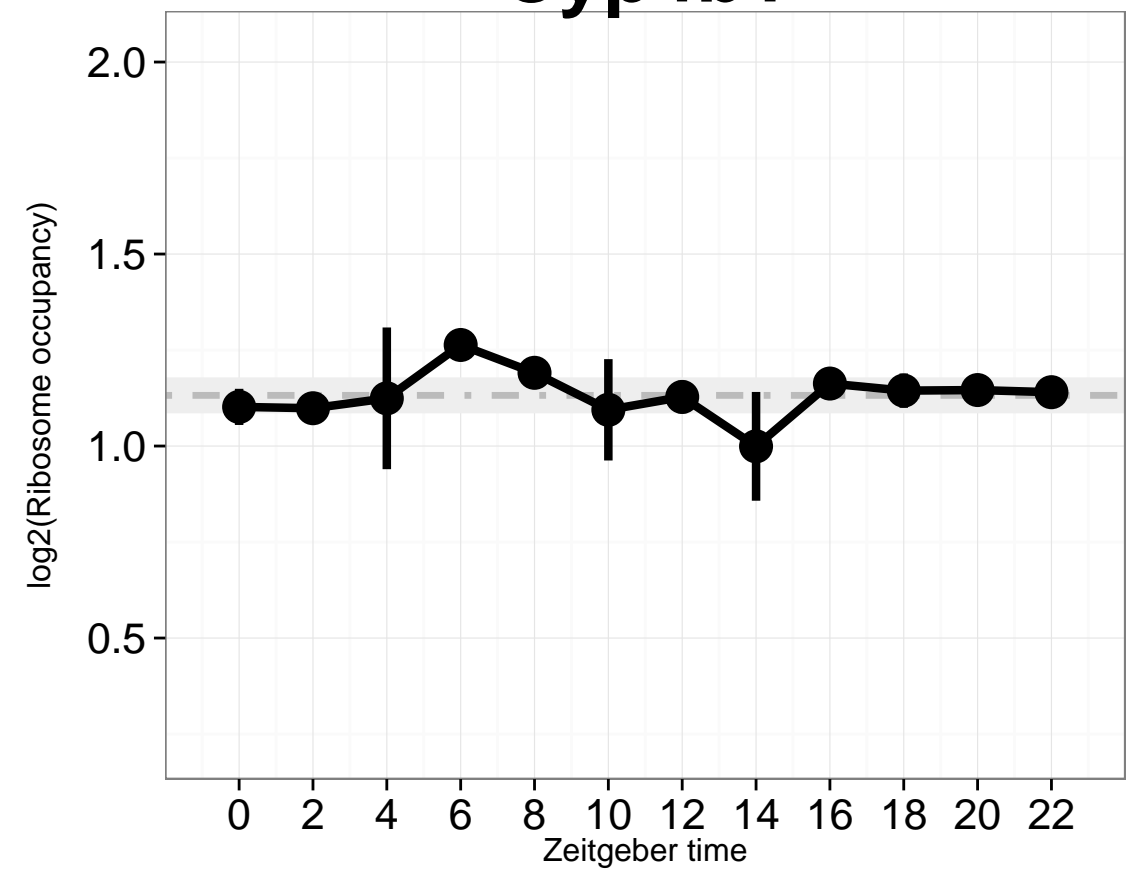

Supplement: Supplementary file 4286 [file 1]

# 1110058L19Rik

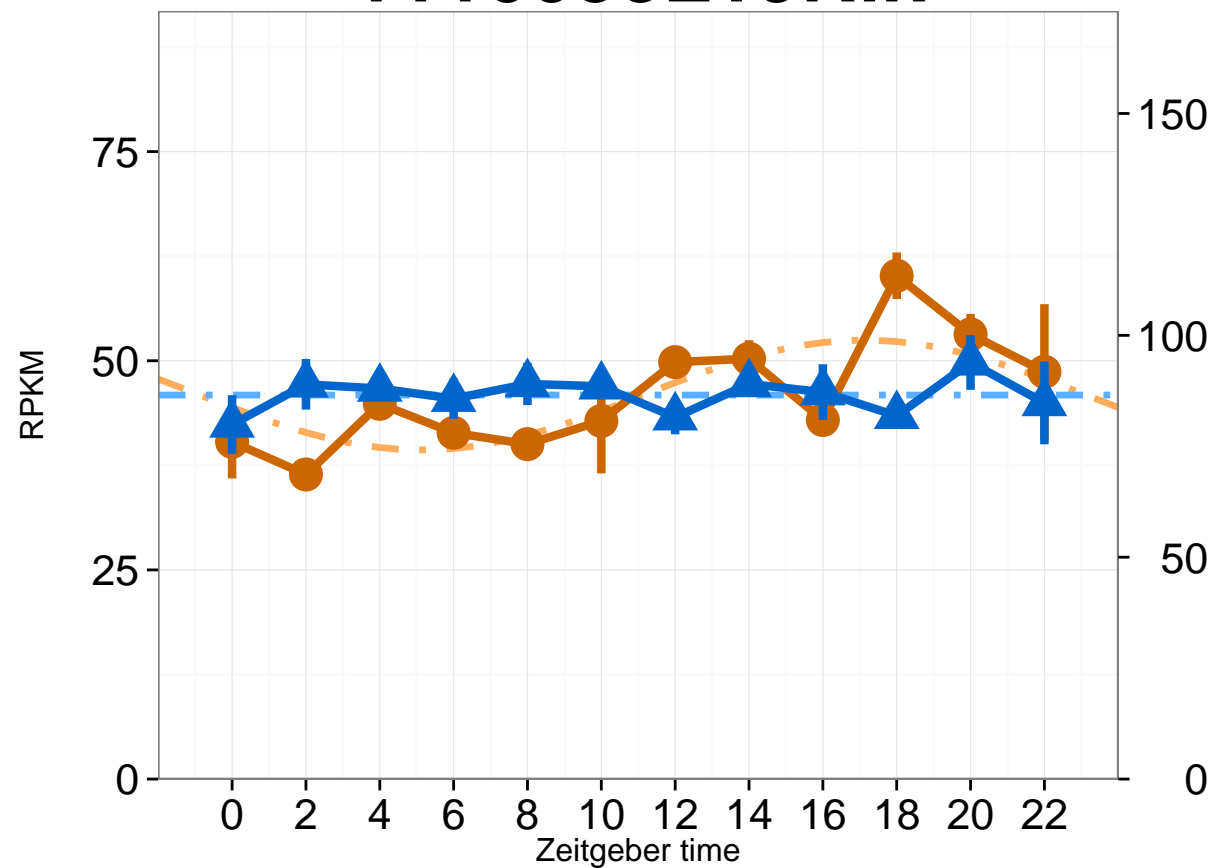

# 1110058L19Rik

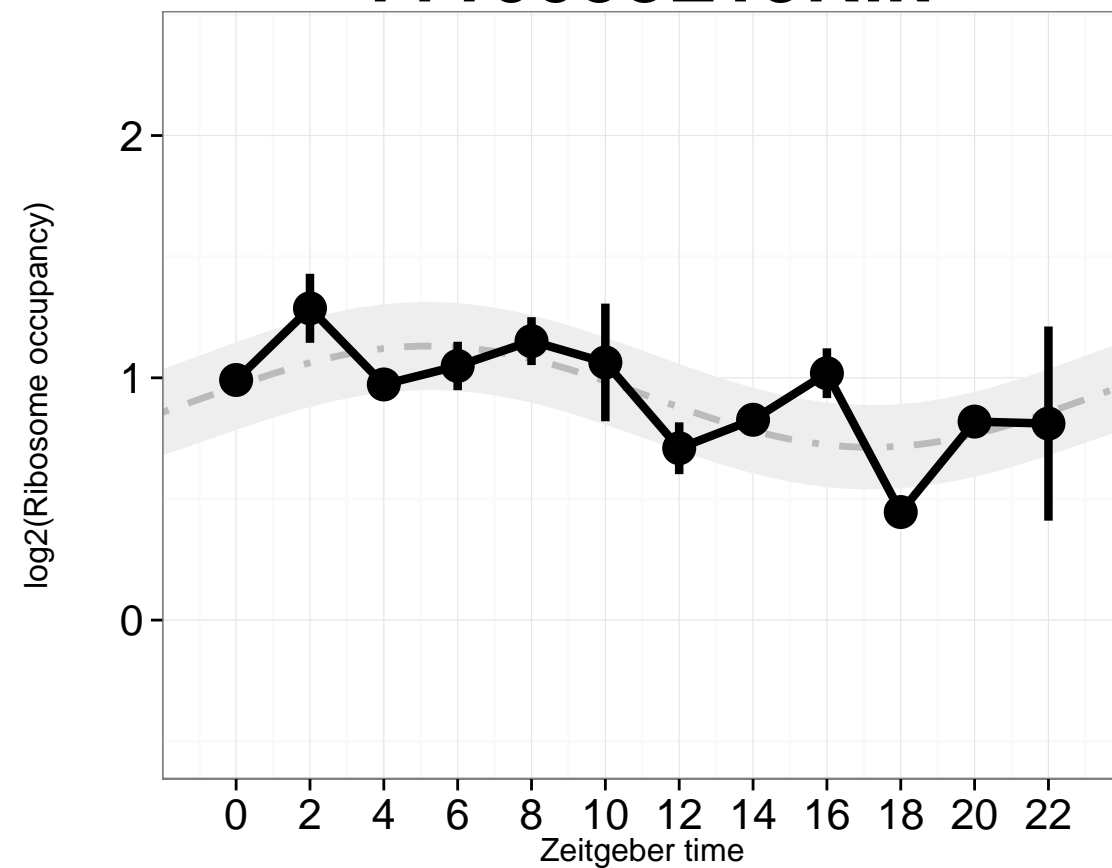

Supplement: Supplementary file 4287 [file 1]

**D5Ertd579e**

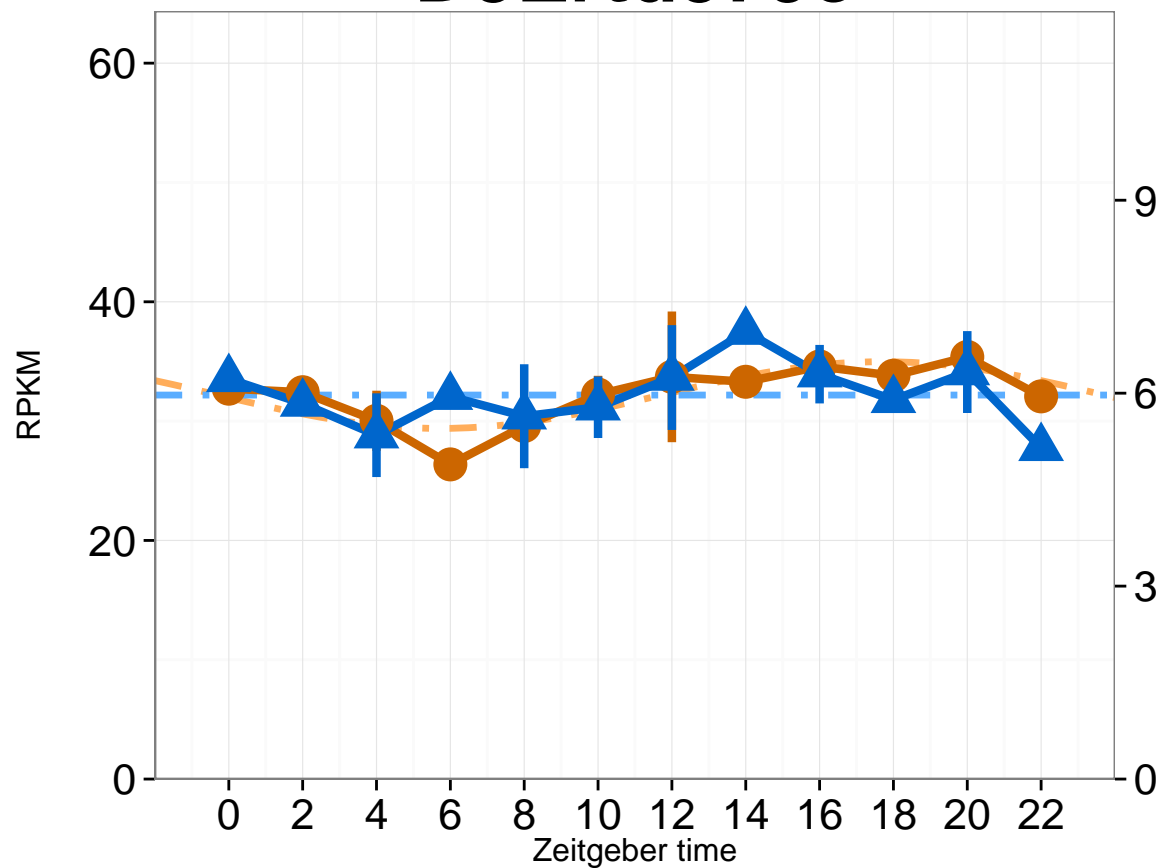

**D5Ertd579e**

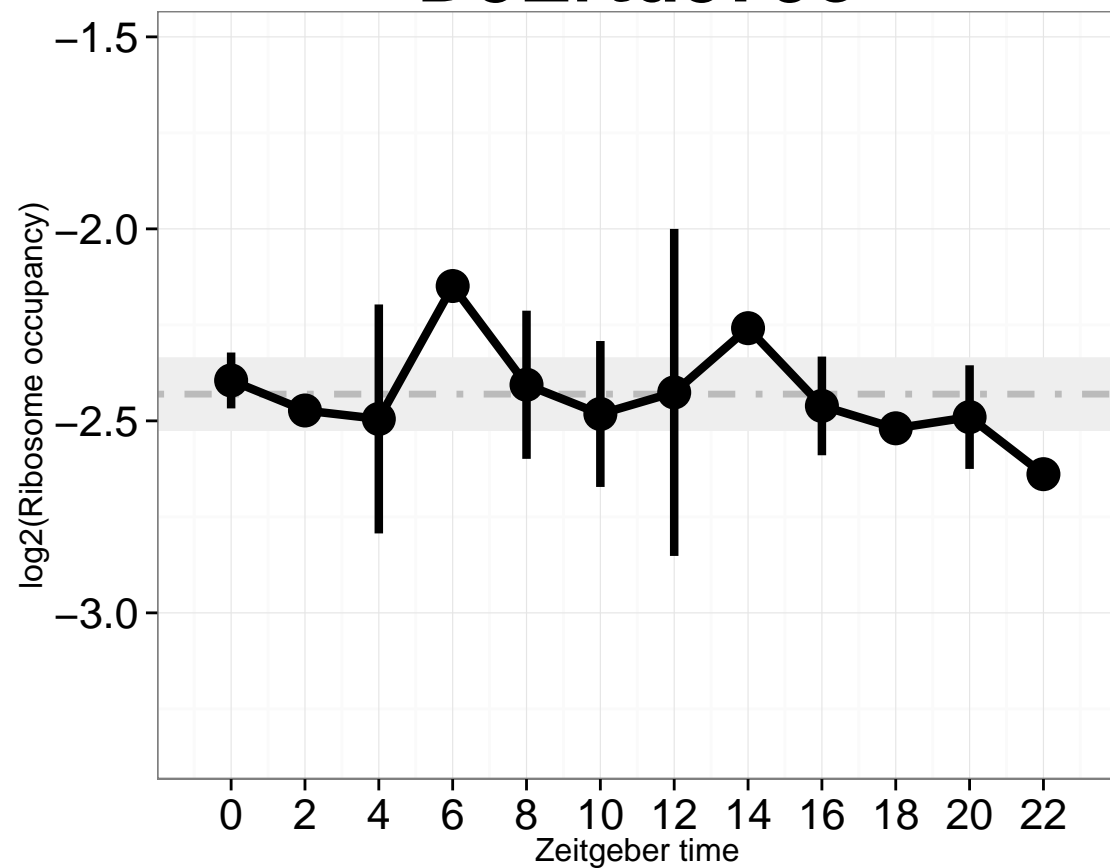

Supplement: Supplementary file 4288 [file 1]

## Calr

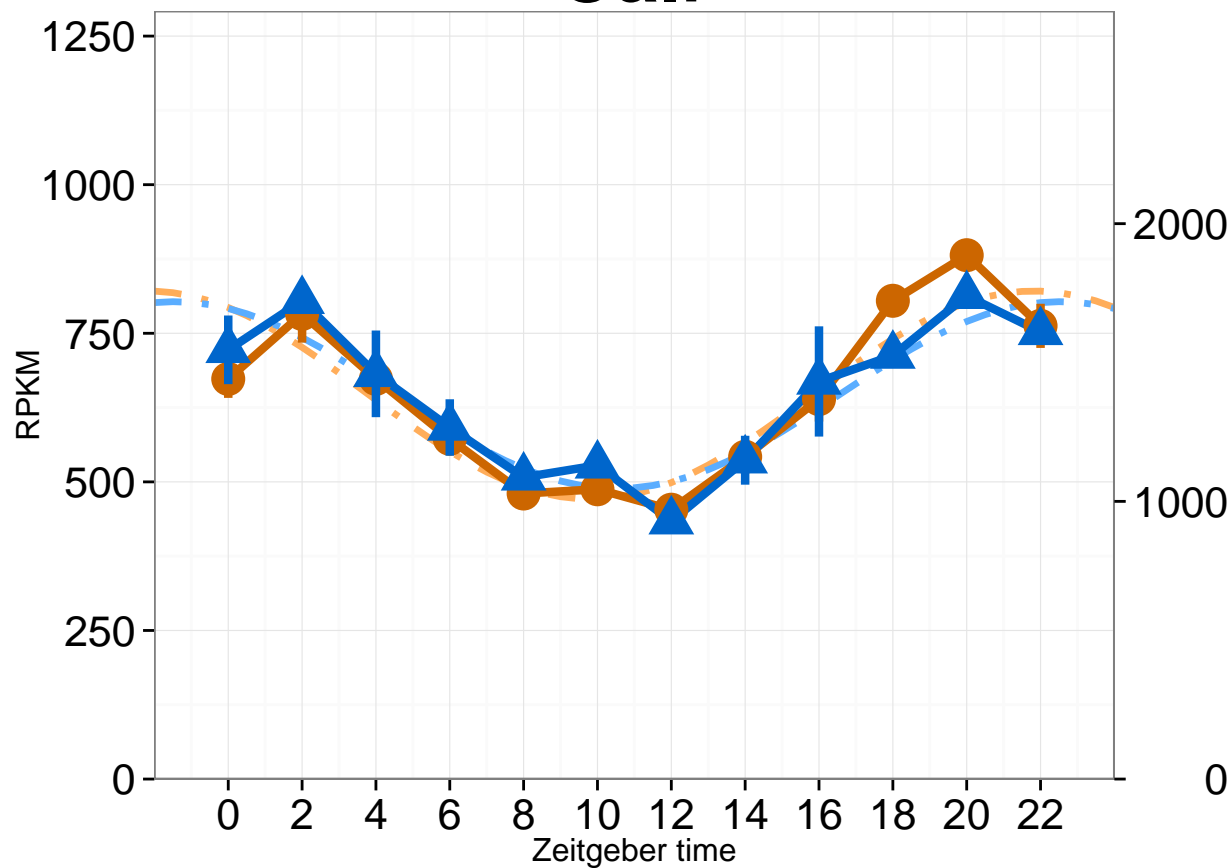

## Calr

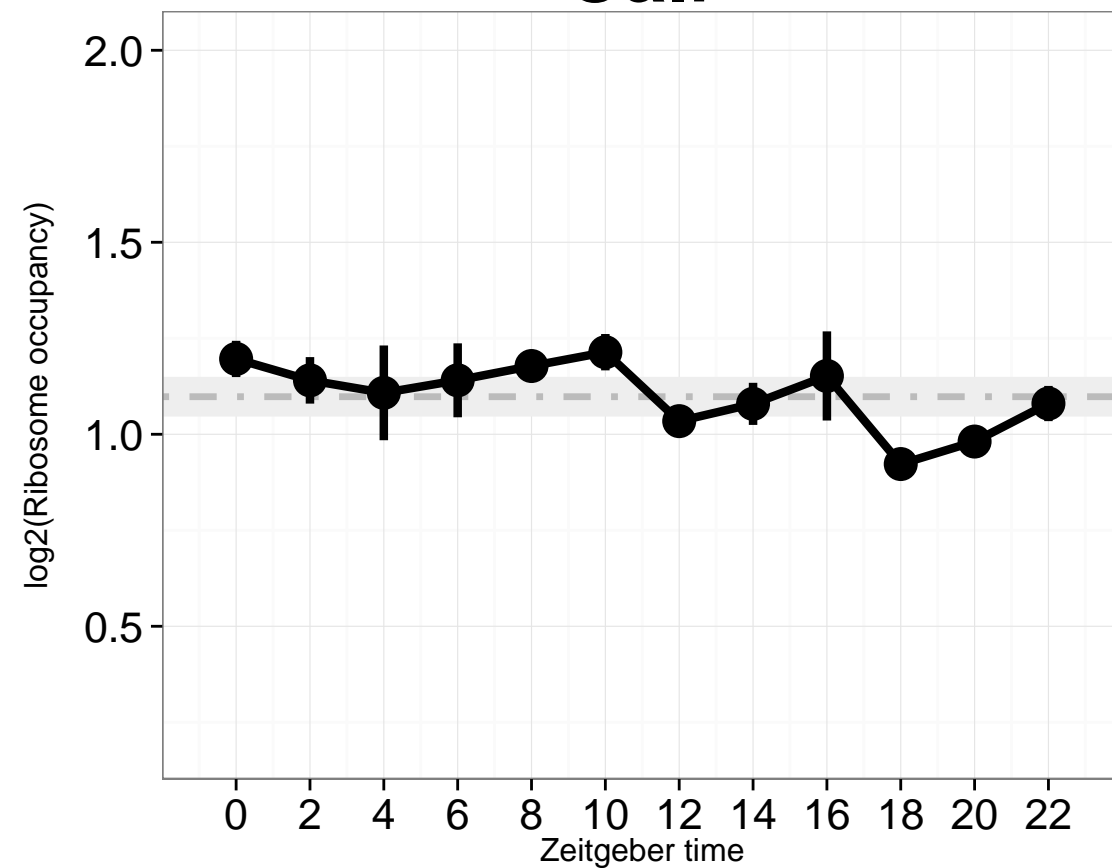

Supplement: Supplementary file 4289 [file 1]

# Prpf4b

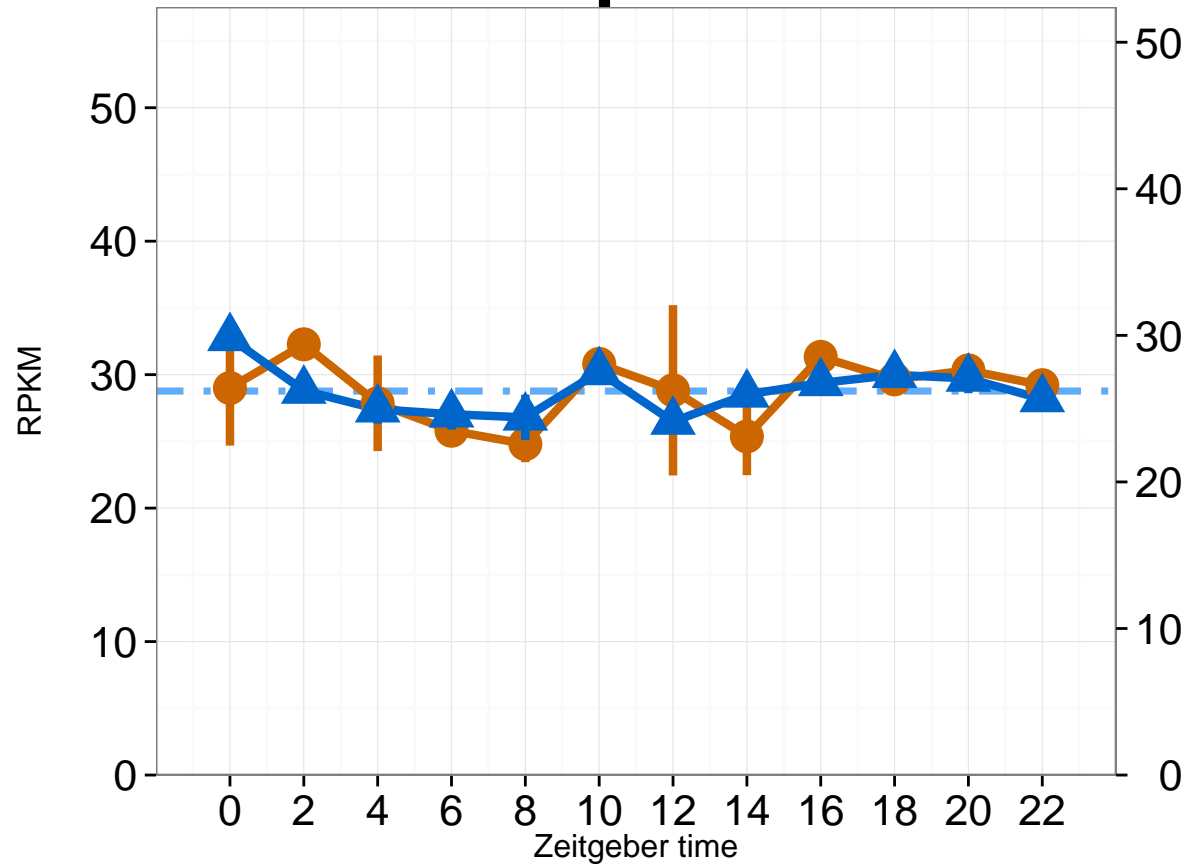

# Prpf4b

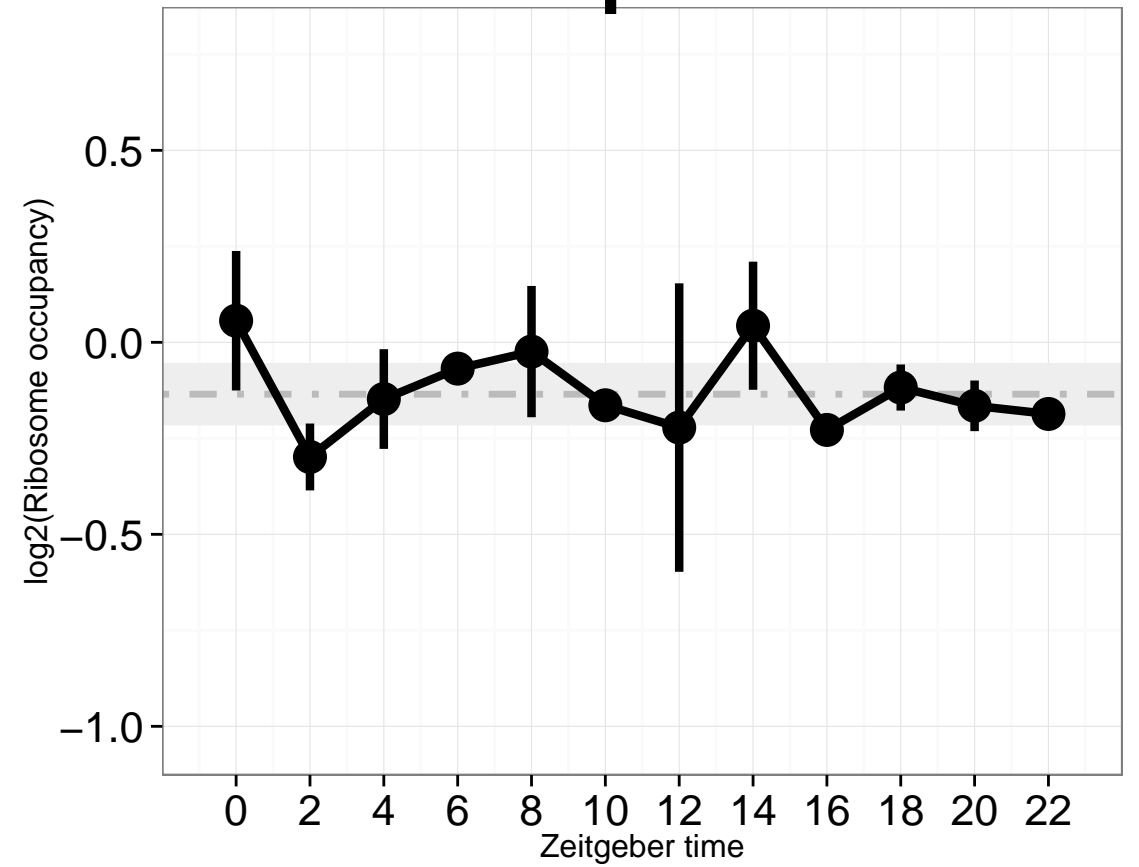

Supplement: Supplementary file 4290 [file 1]

# Dab2ip

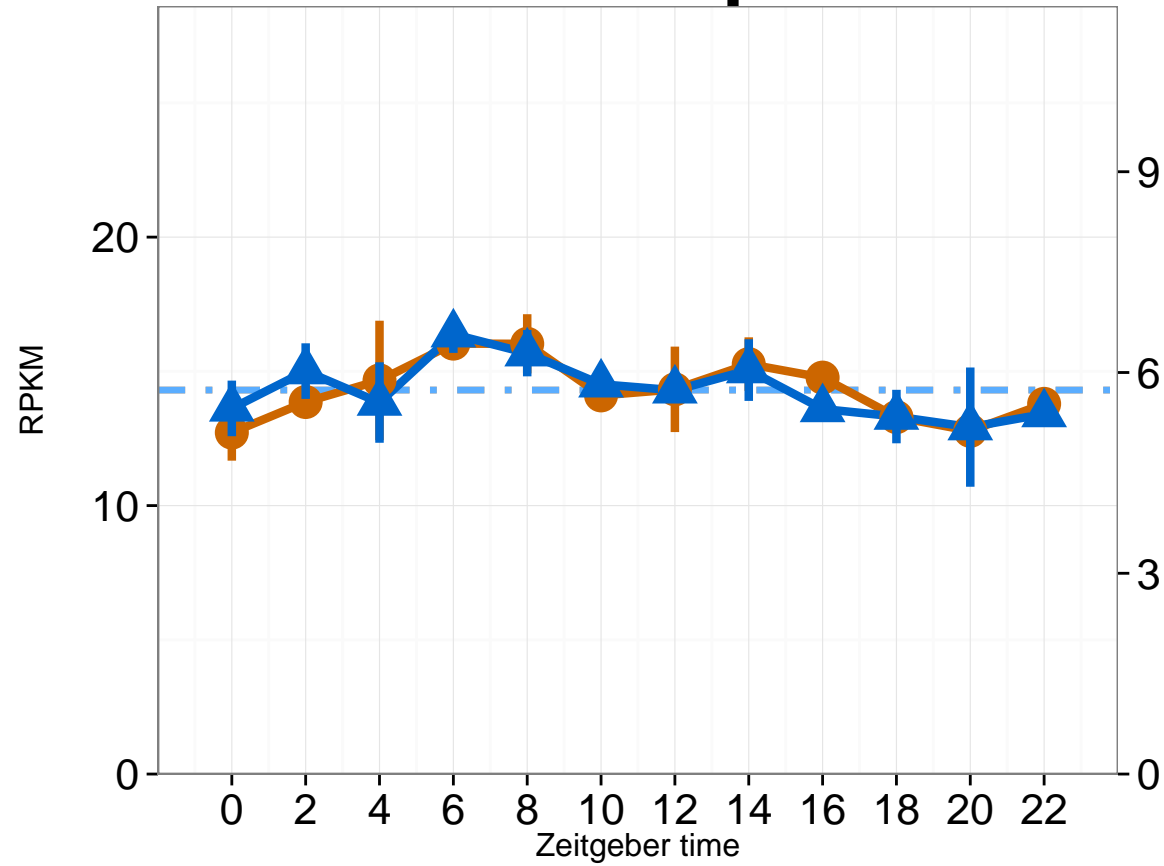

# Dab2ip

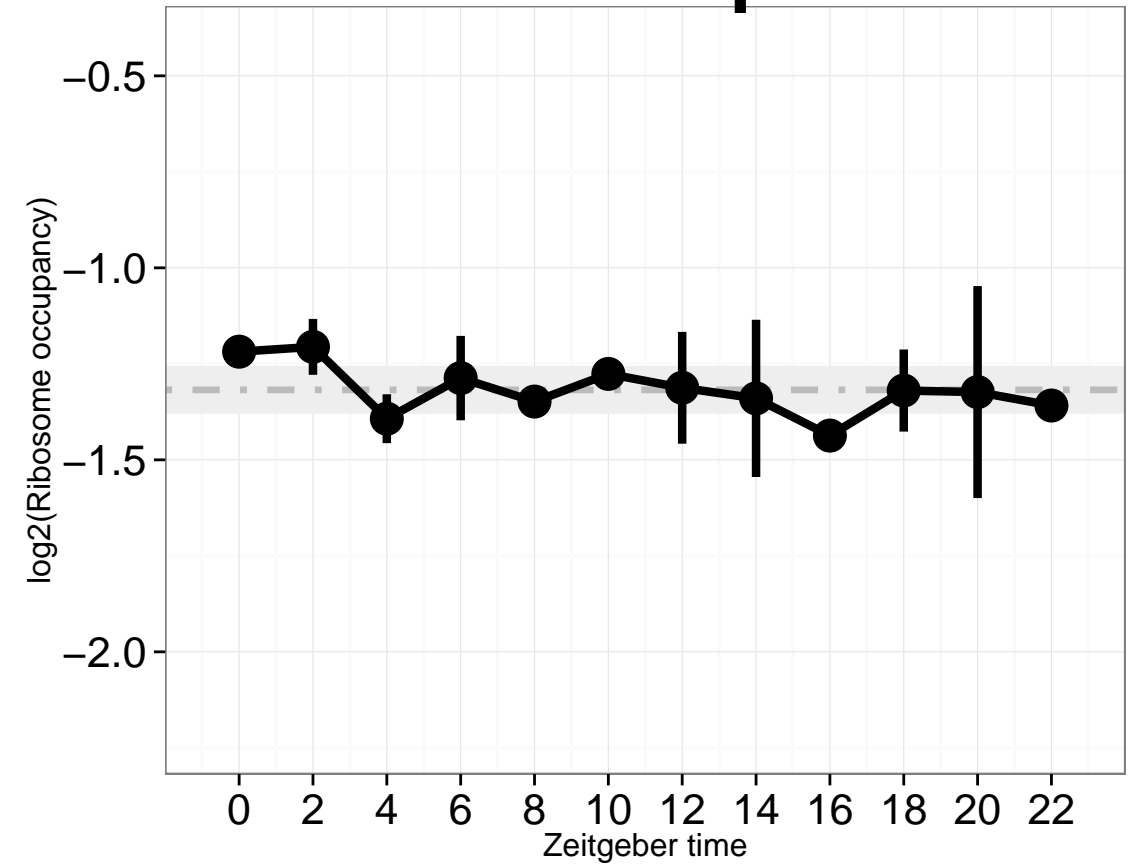

Supplement: Supplementary file 4291 [file 1]

## Cdk20

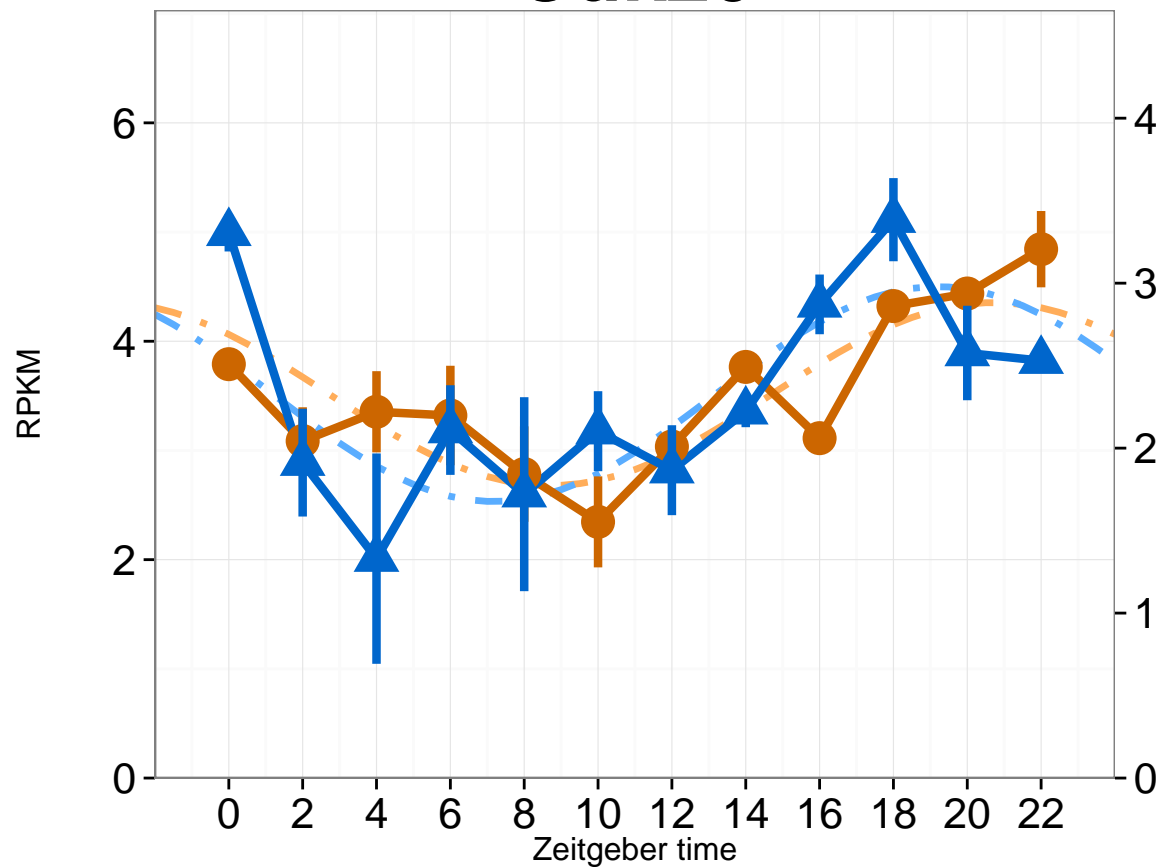

## Cdk20

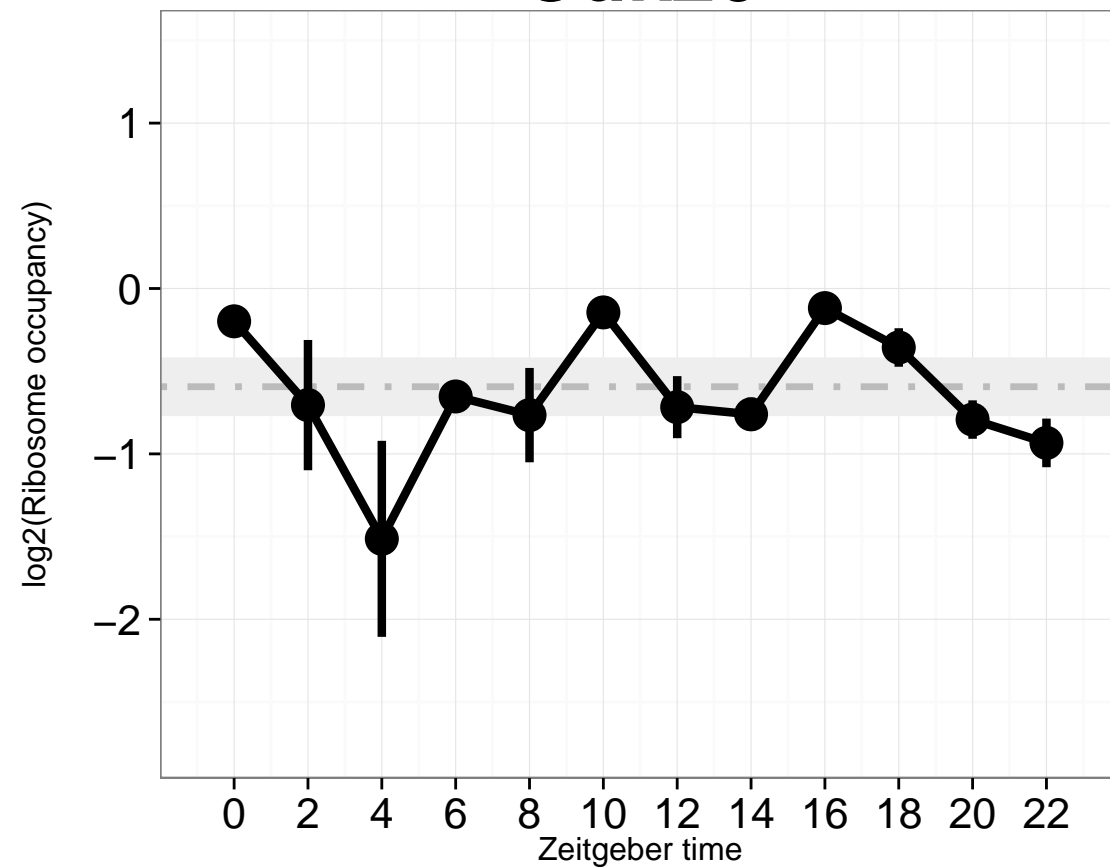

Supplement: Supplementary file 4292 [file 1]

# Aqp8

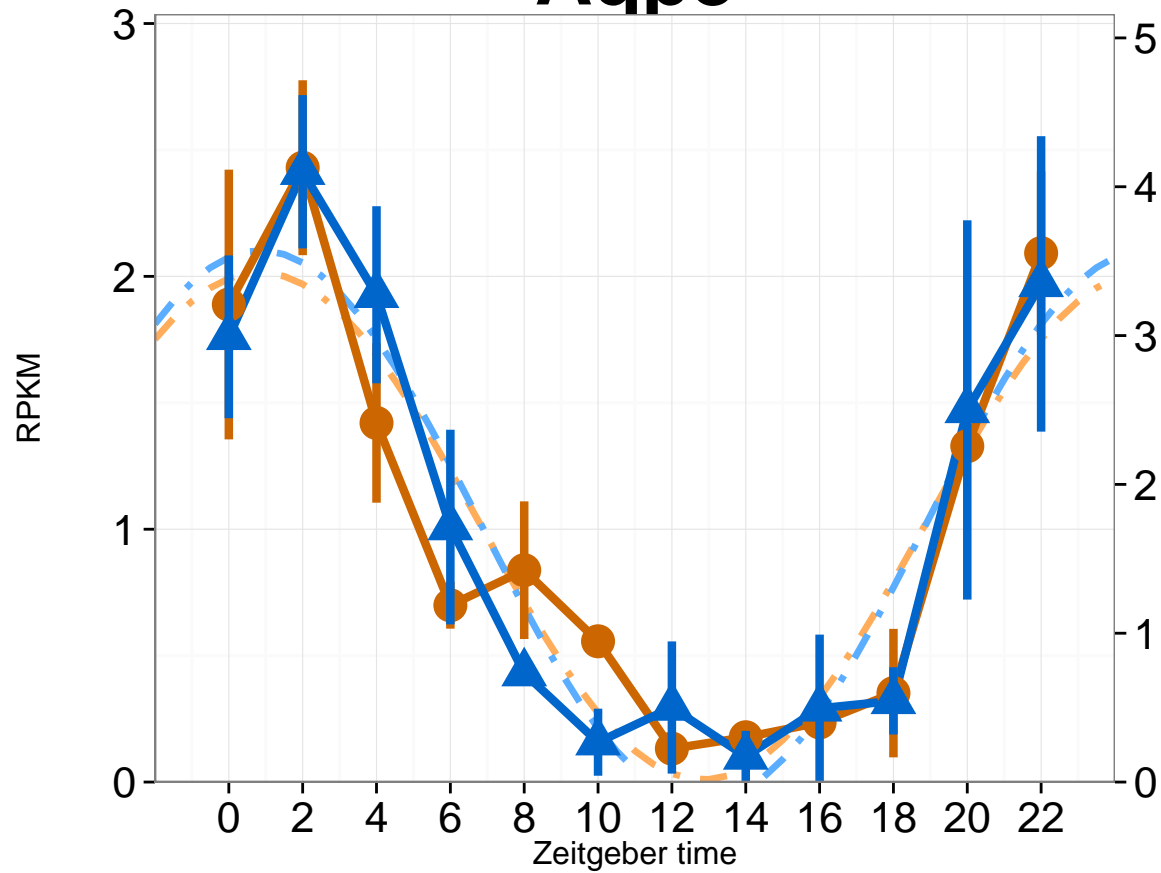

# Aqp8

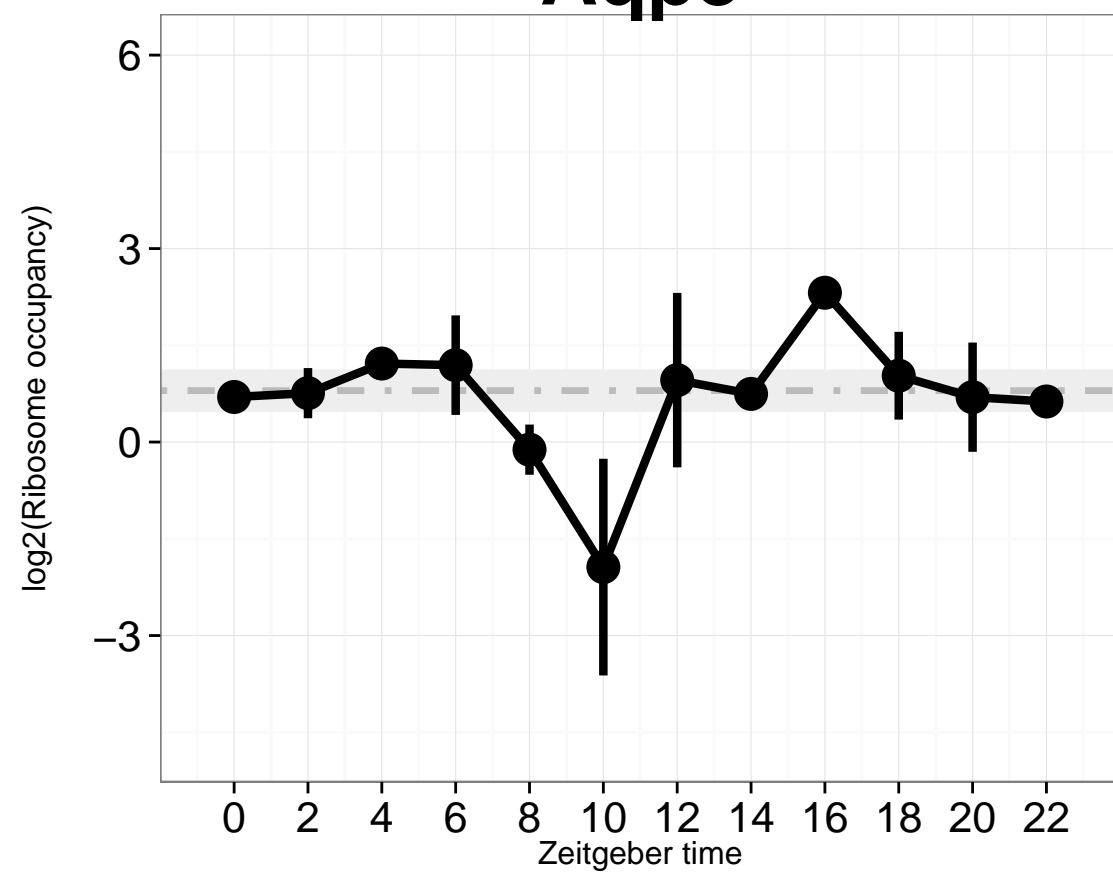

Supplement: Supplementary file 4293 [file 1]

# Ccdc122

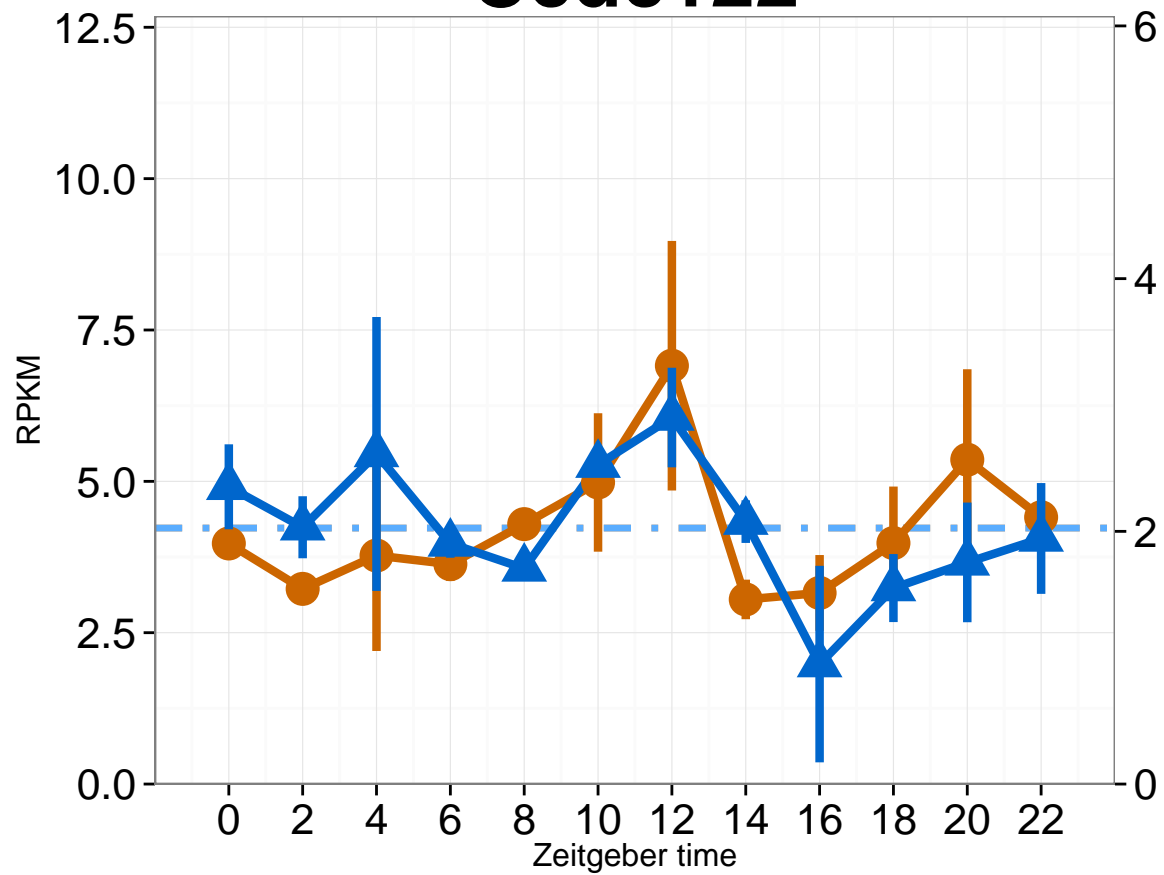

# Ccdc122

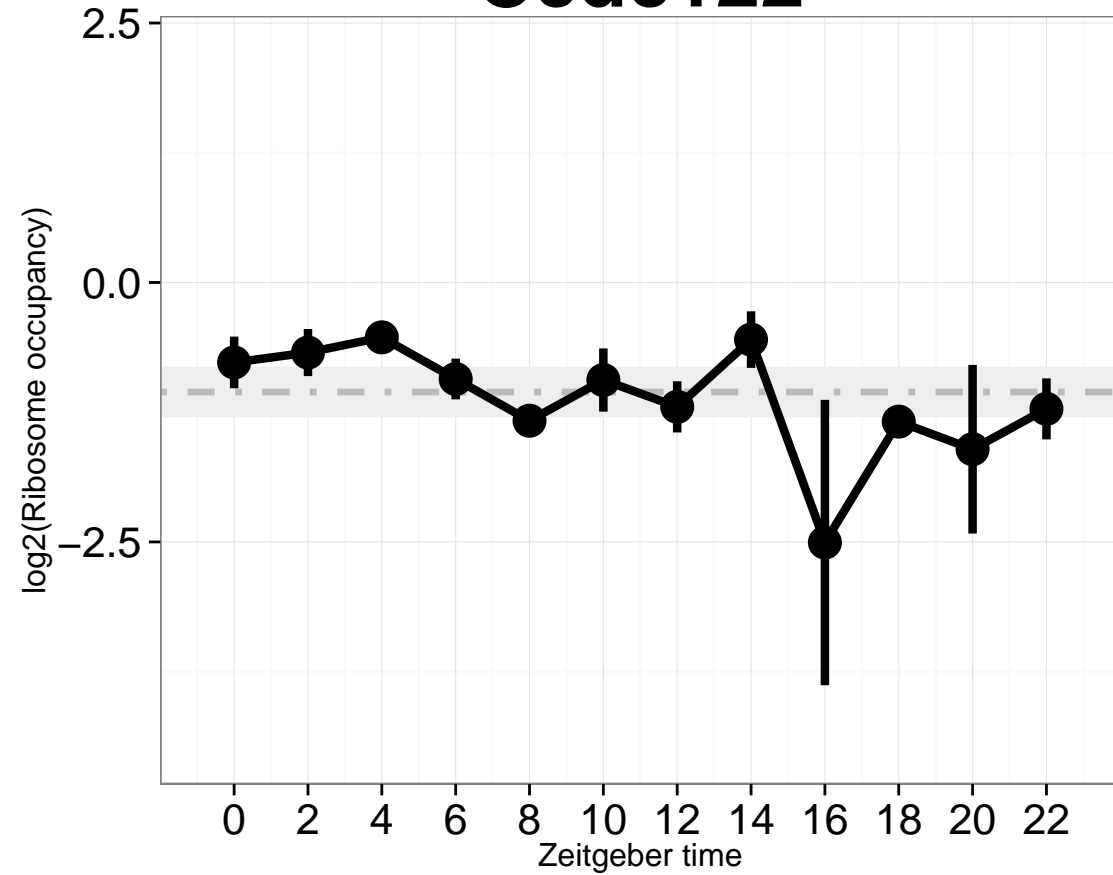

Supplement: Supplementary file 4294 [file 1]

# Dpp9

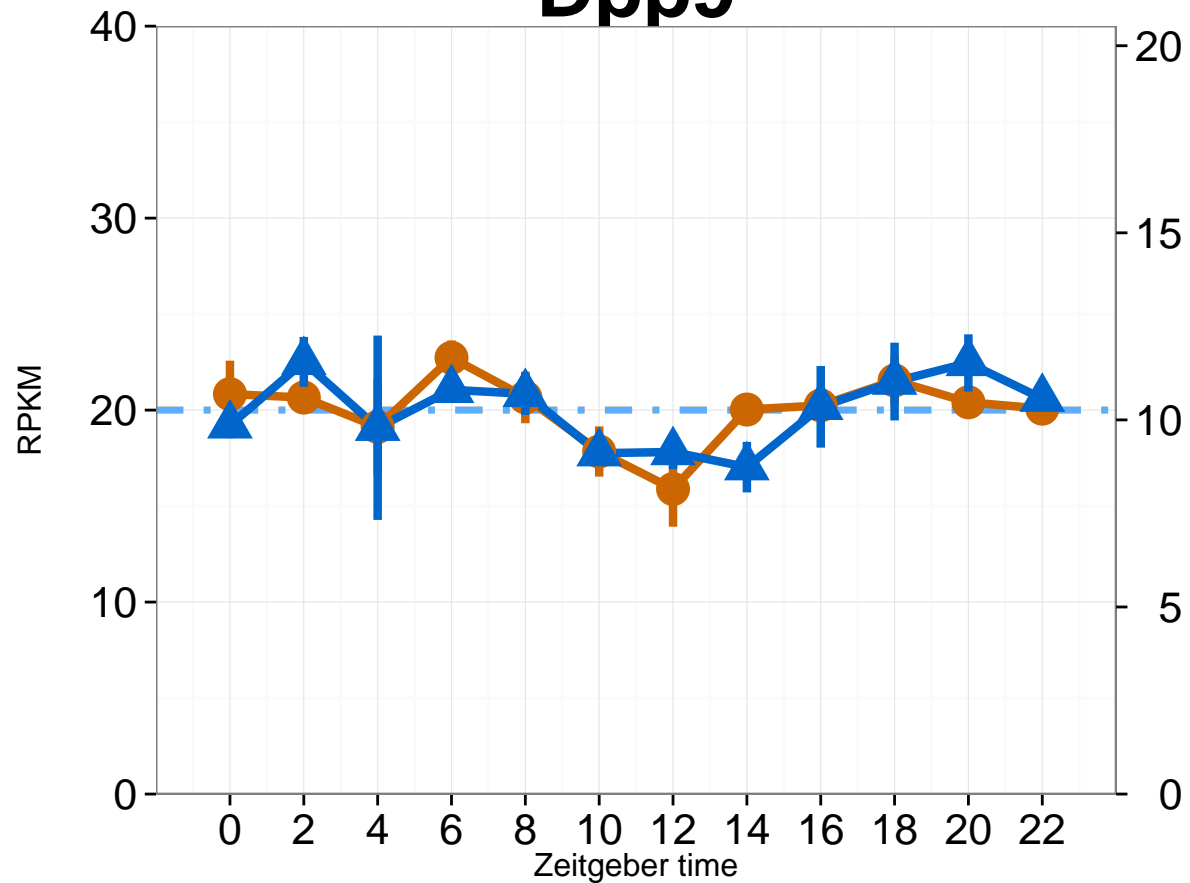

# Dpp9

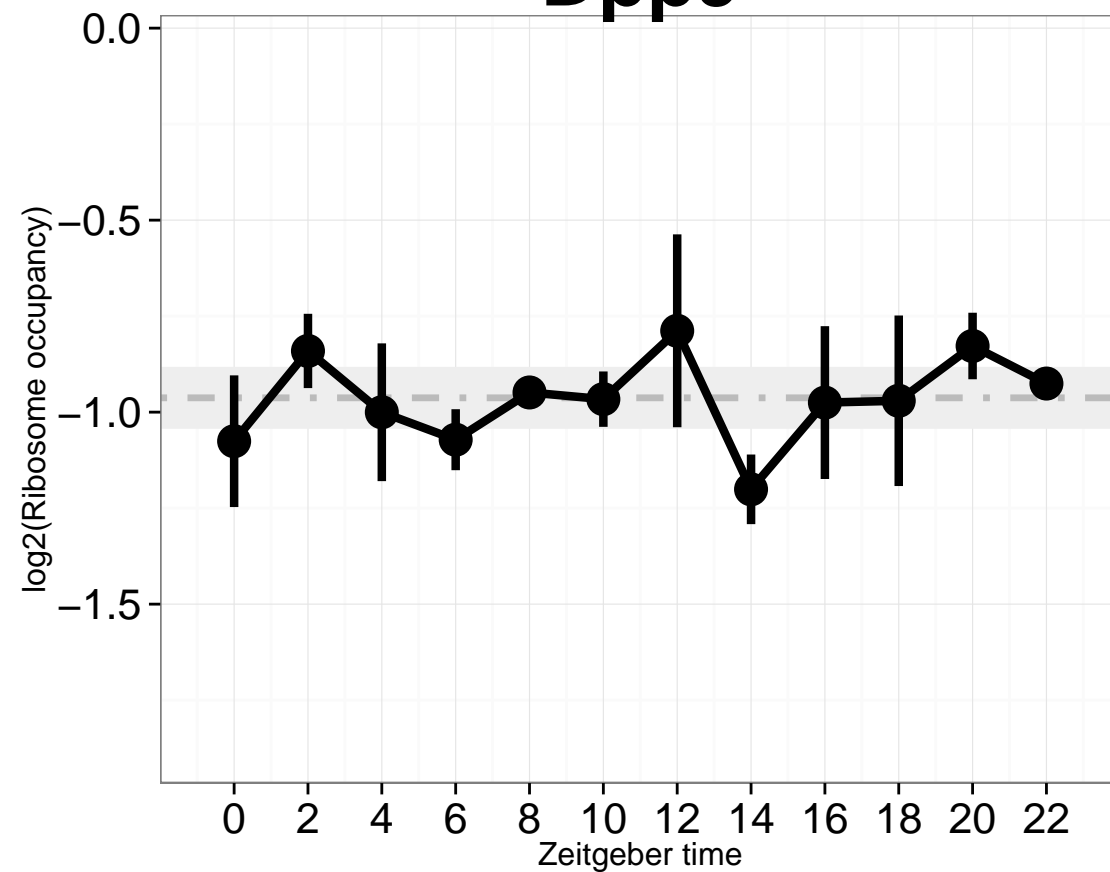

Supplement: Supplementary file 4295 [file 1]

# Fam69b

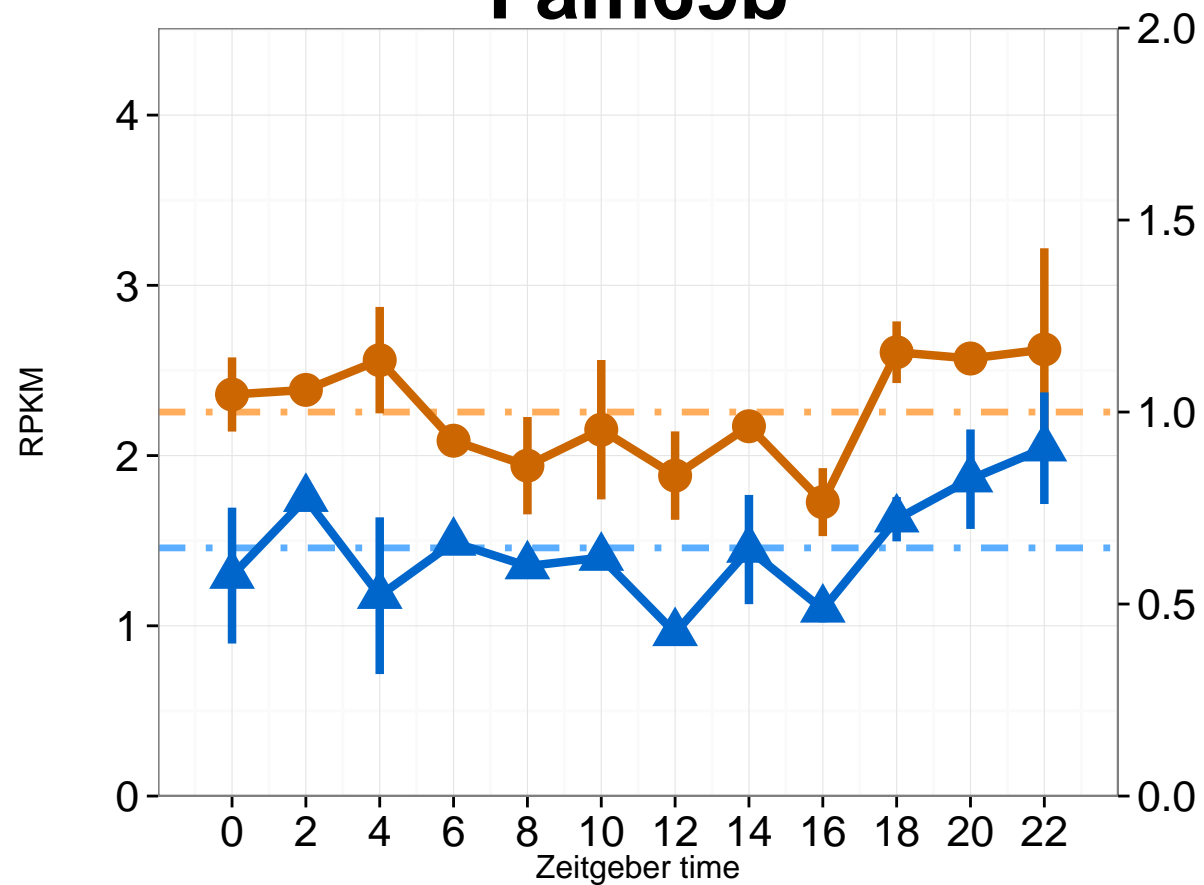

# Fam69b

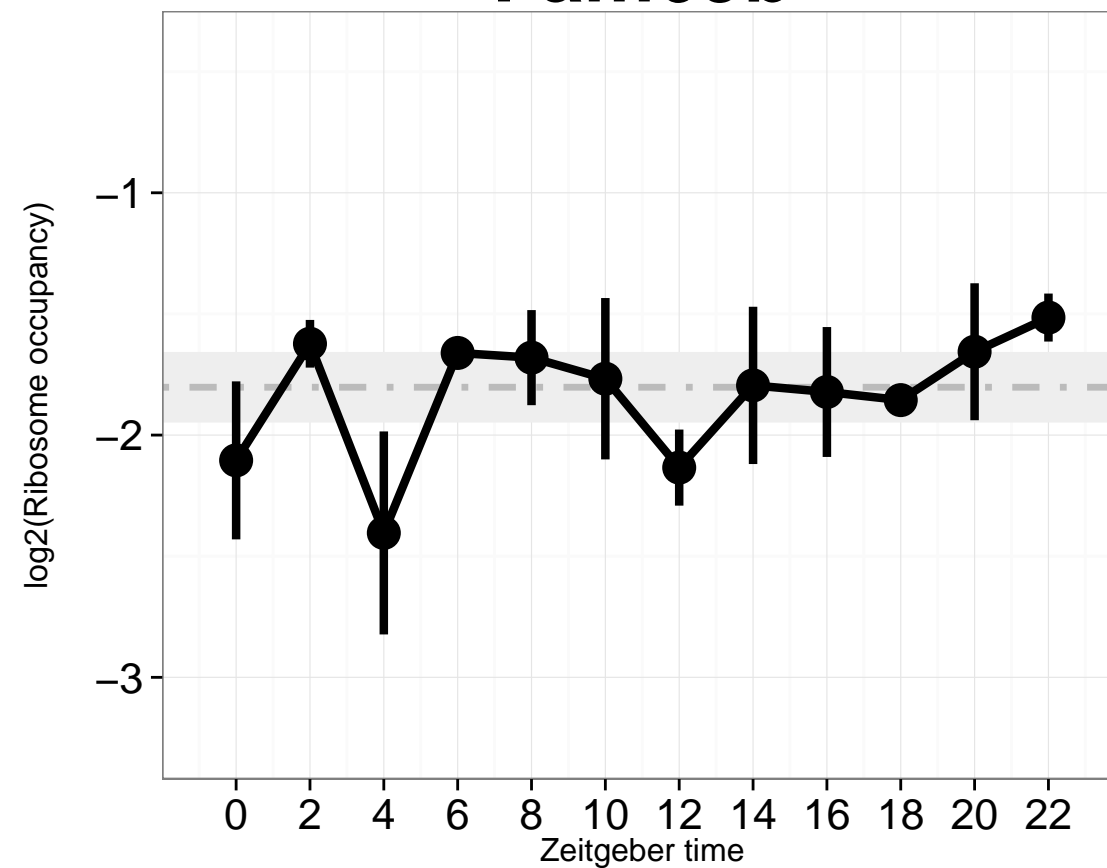

Supplement: Supplementary file 4296 [file 1]

# Baat

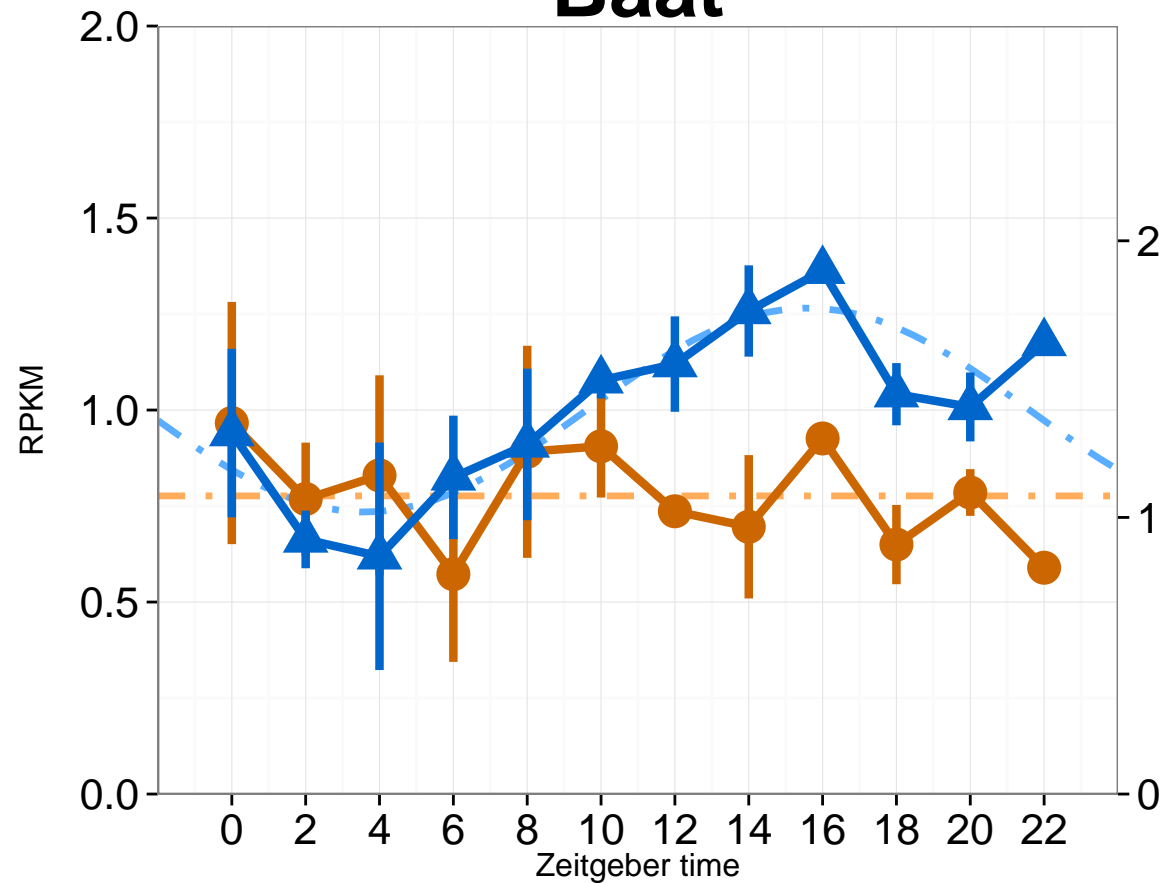

# Baat

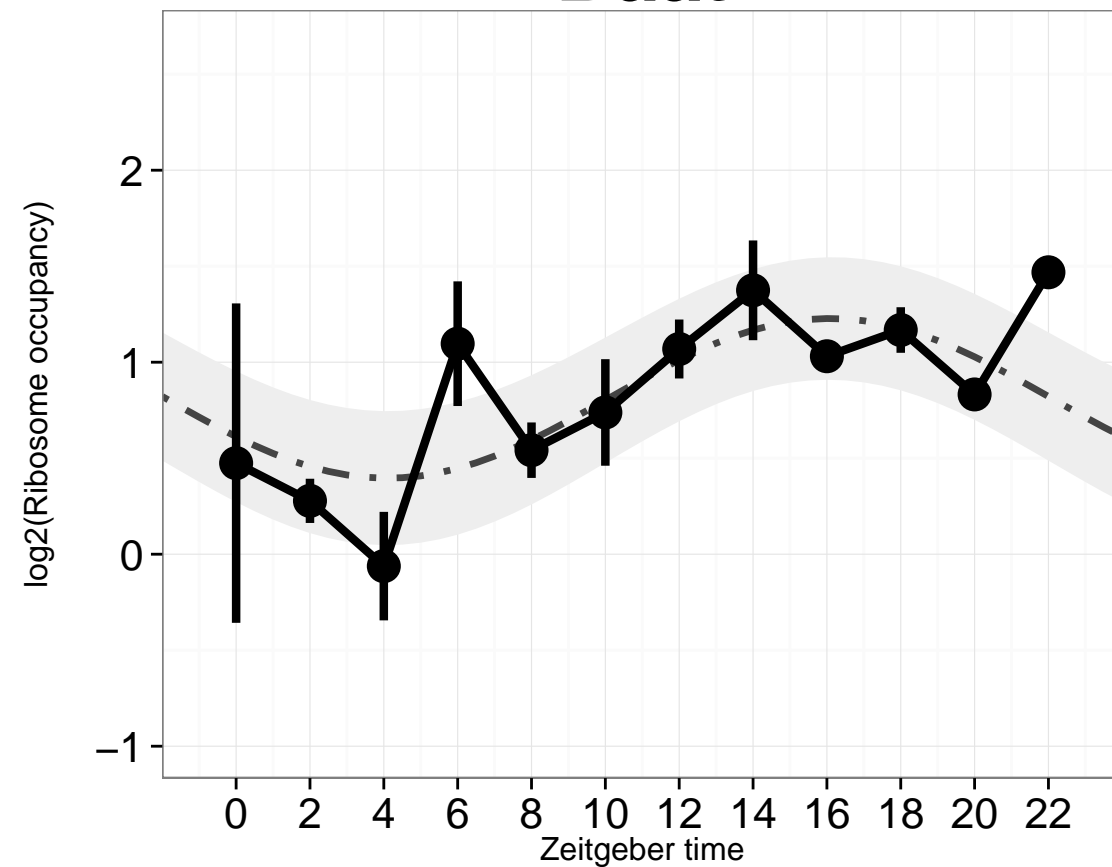

Supplement: Supplementary file 4297 [file 1]

# Kcnn1

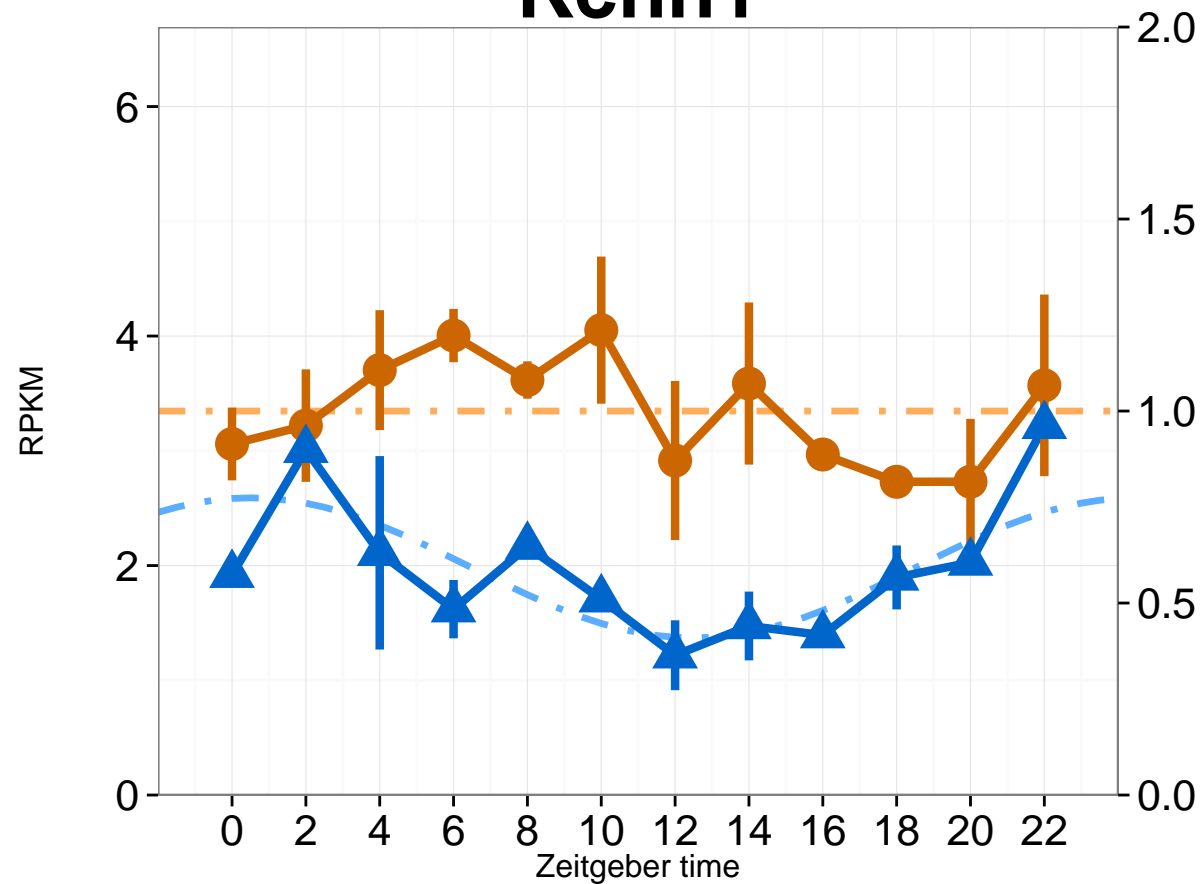

# Kcnn1

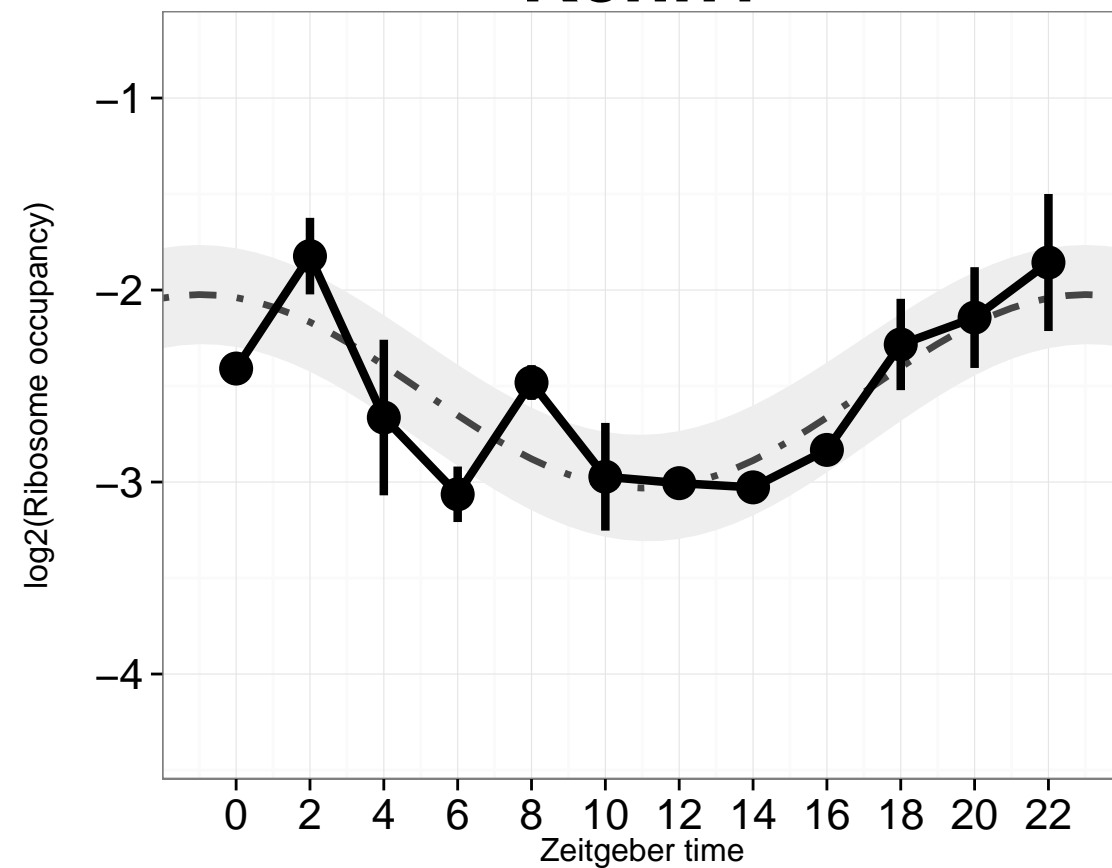

Supplement: Supplementary file 4298 [file 1]

## Nfkb1

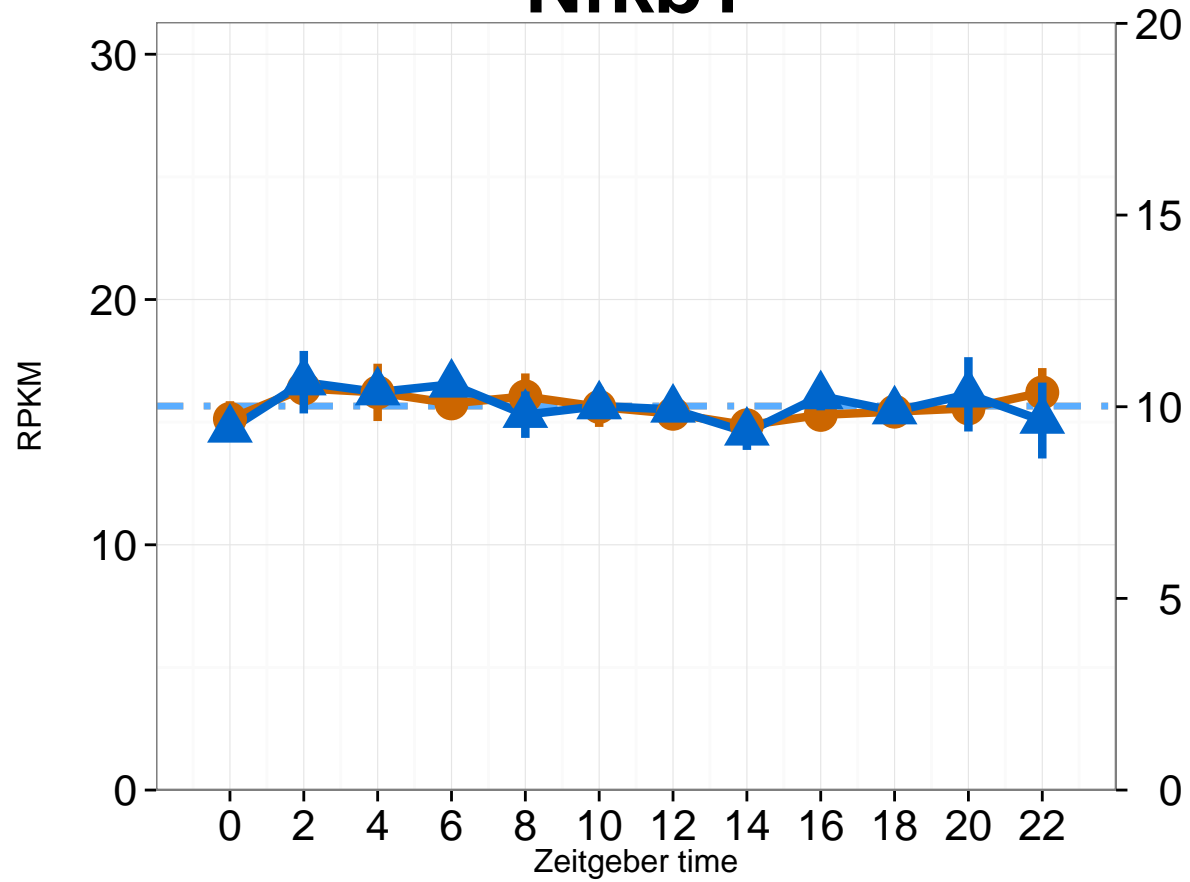

## Nfkb1

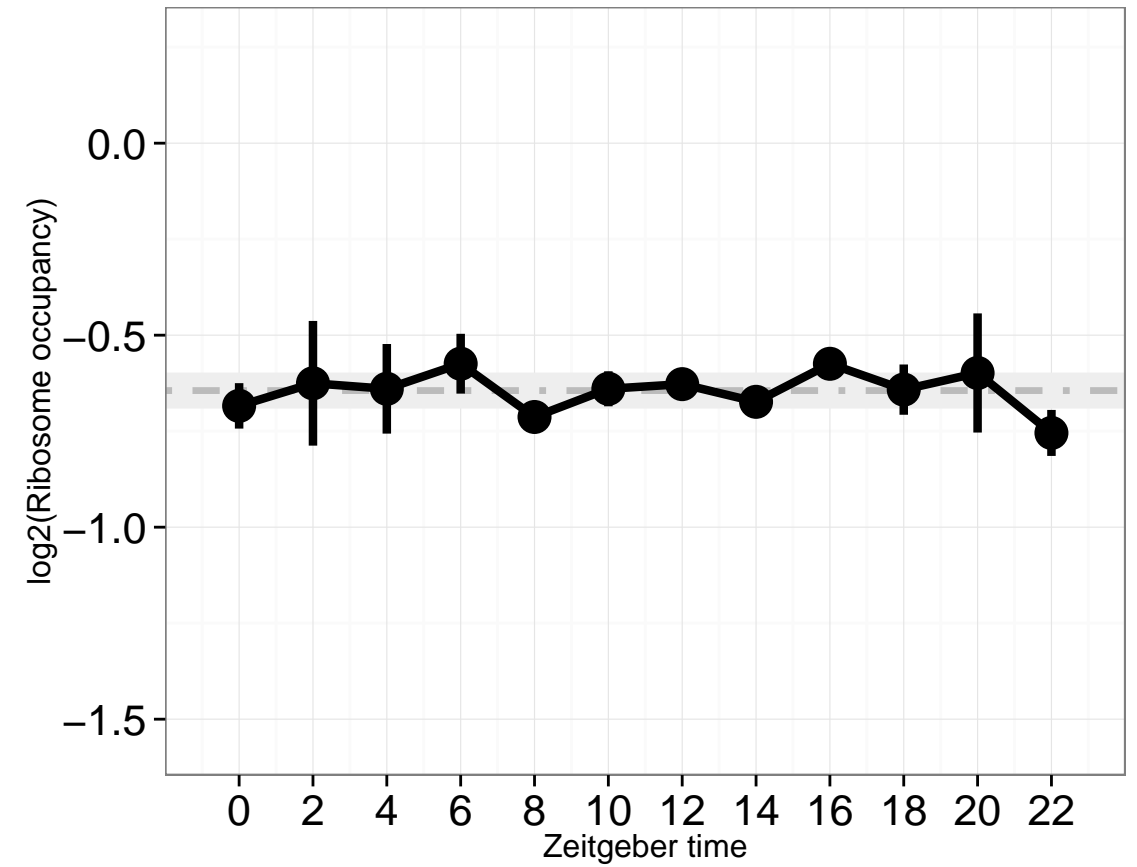

Supplement: Supplementary file 4299 [file 1]

## Vcan

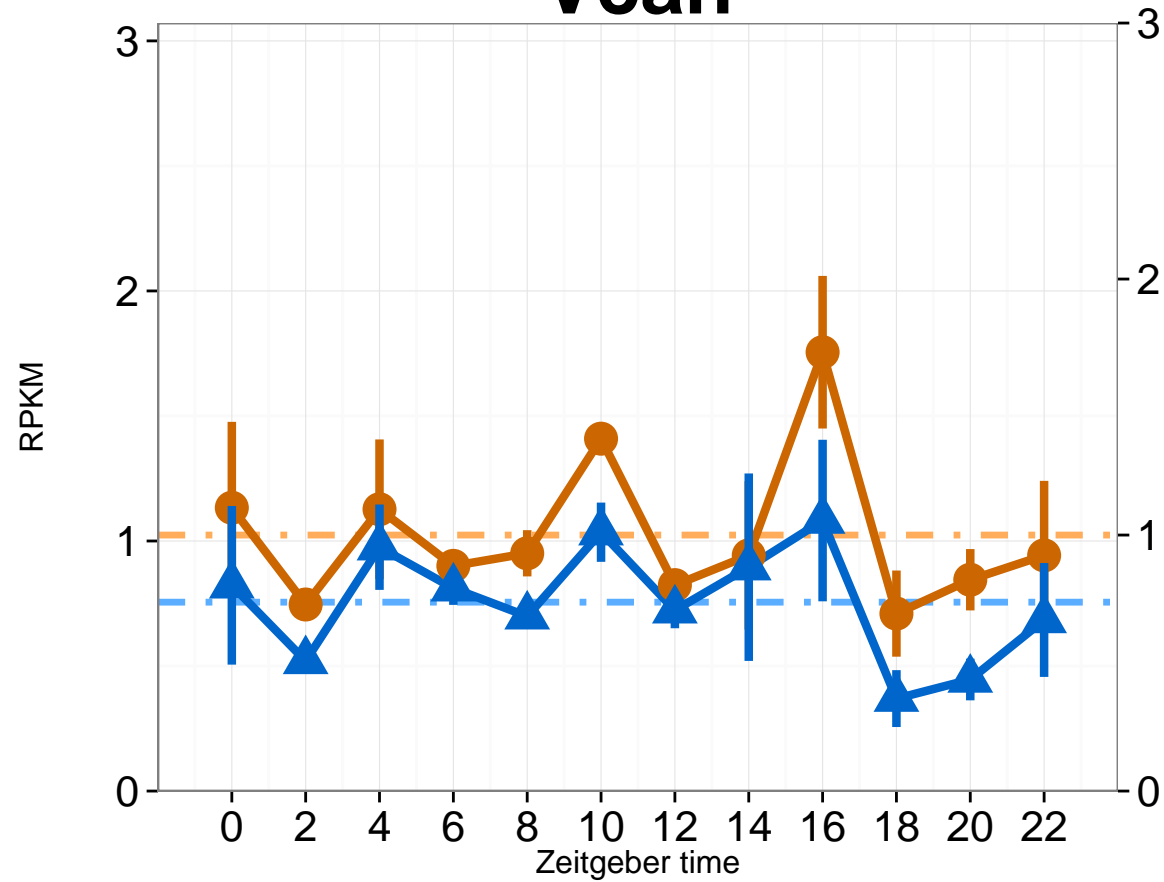

## Vcan

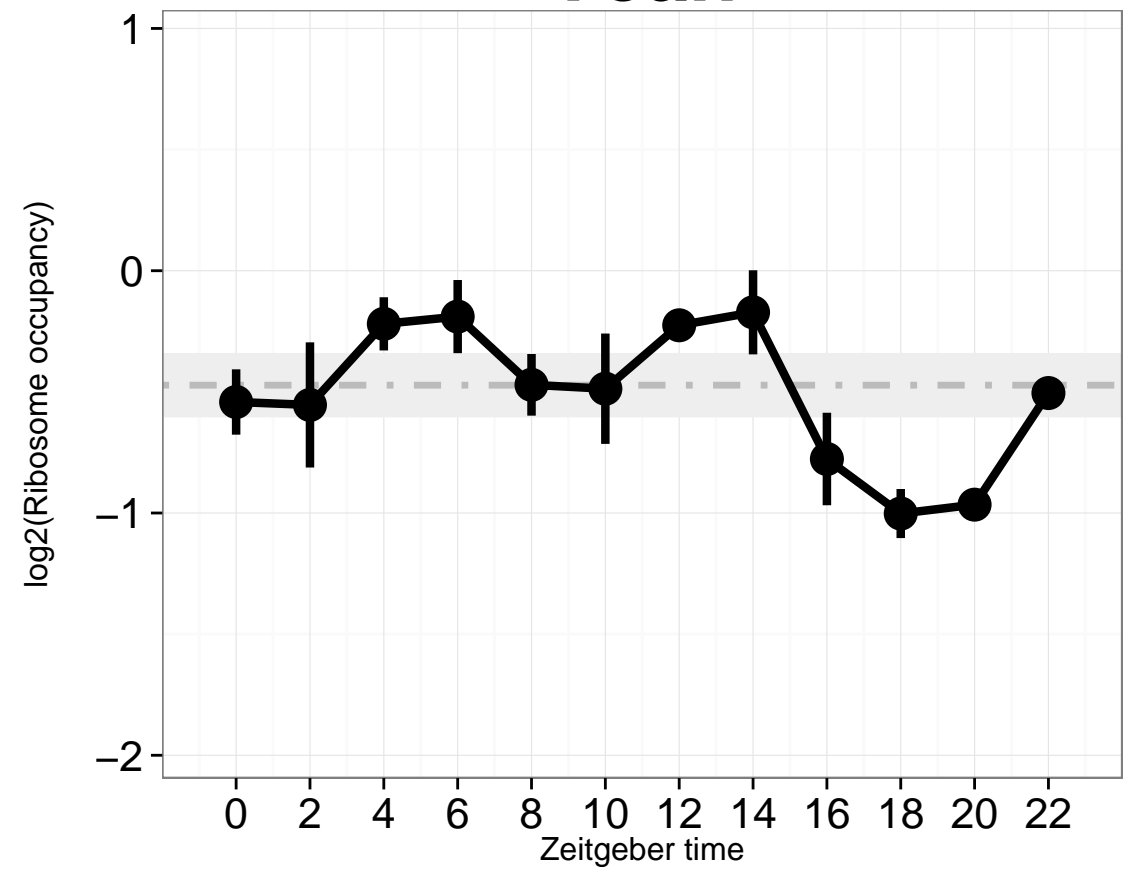

Supplement: Supplementary file 4300 [file 1]

## Gsg2

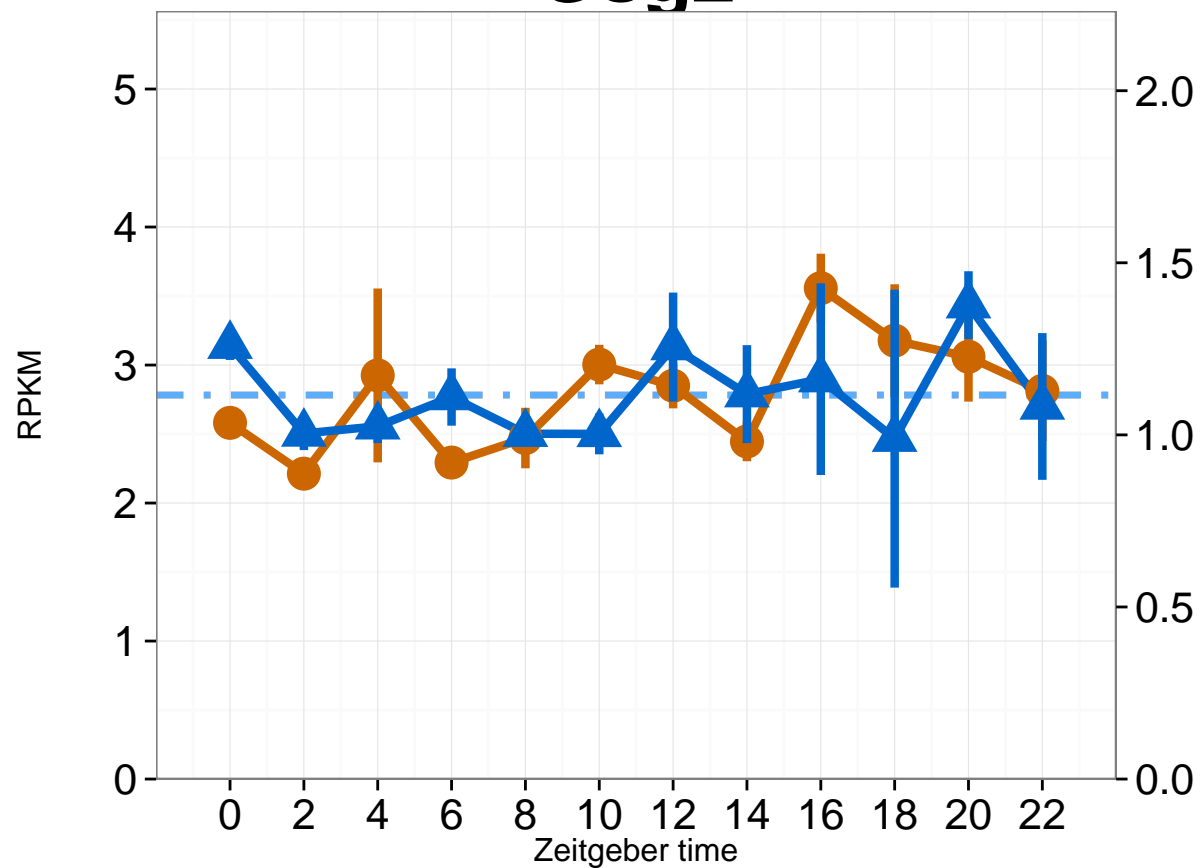

## Gsg2

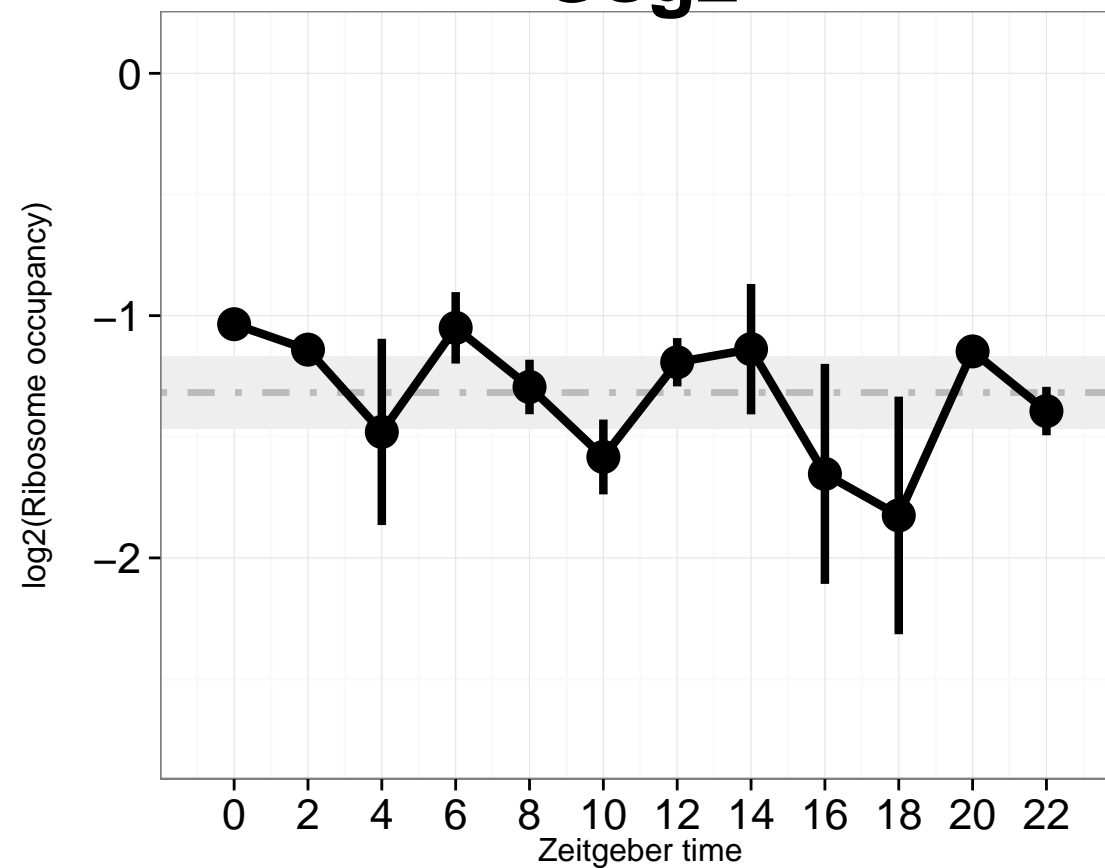

Supplement: Supplementary file 4301 [file 1]

# Tmem184b

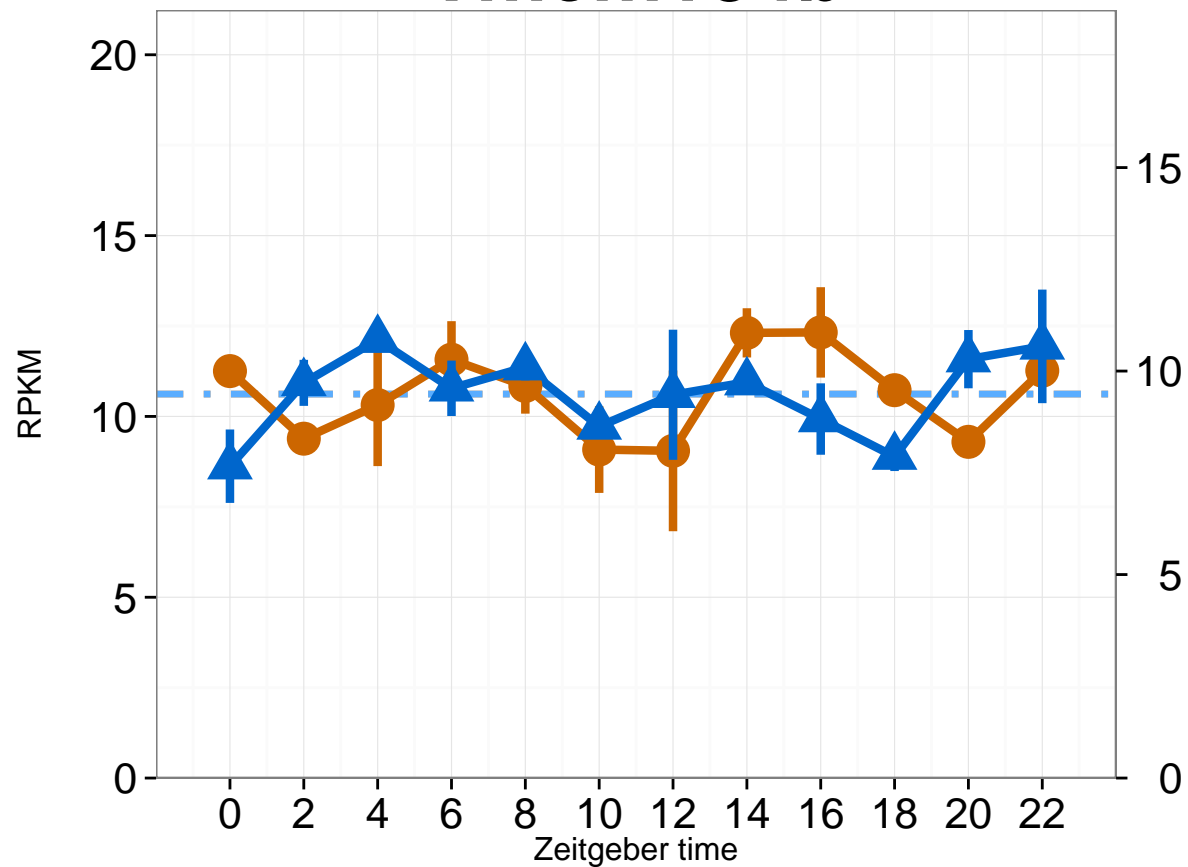

# Tmem184b

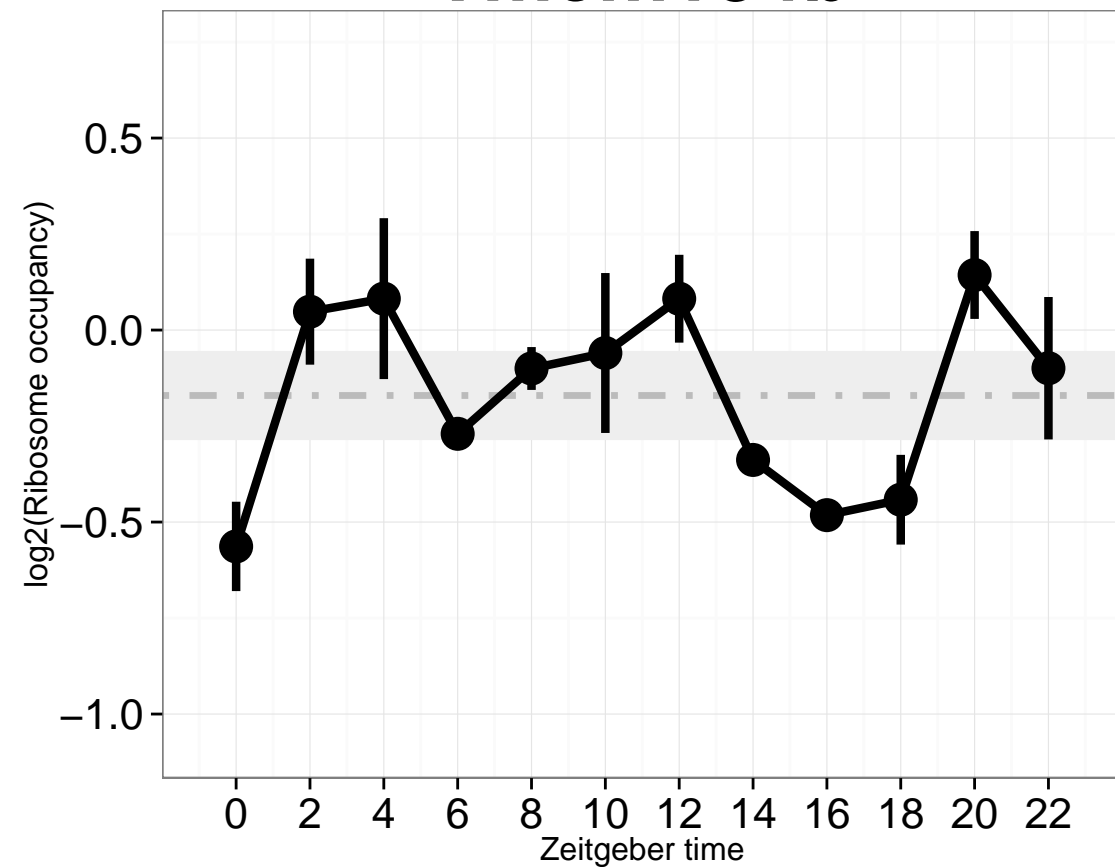

Supplement: Supplementary file 4302 [file 1]

## Pla2g16

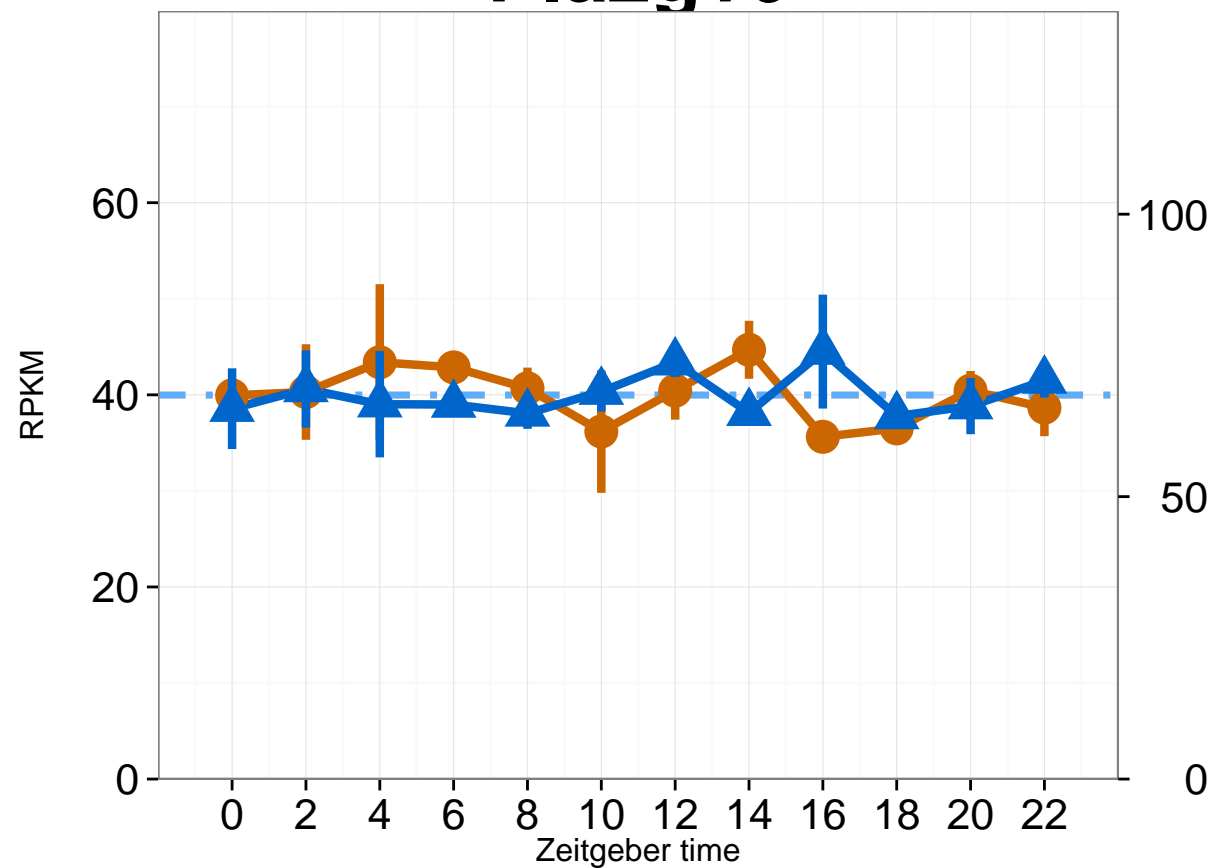

## Pla2g16

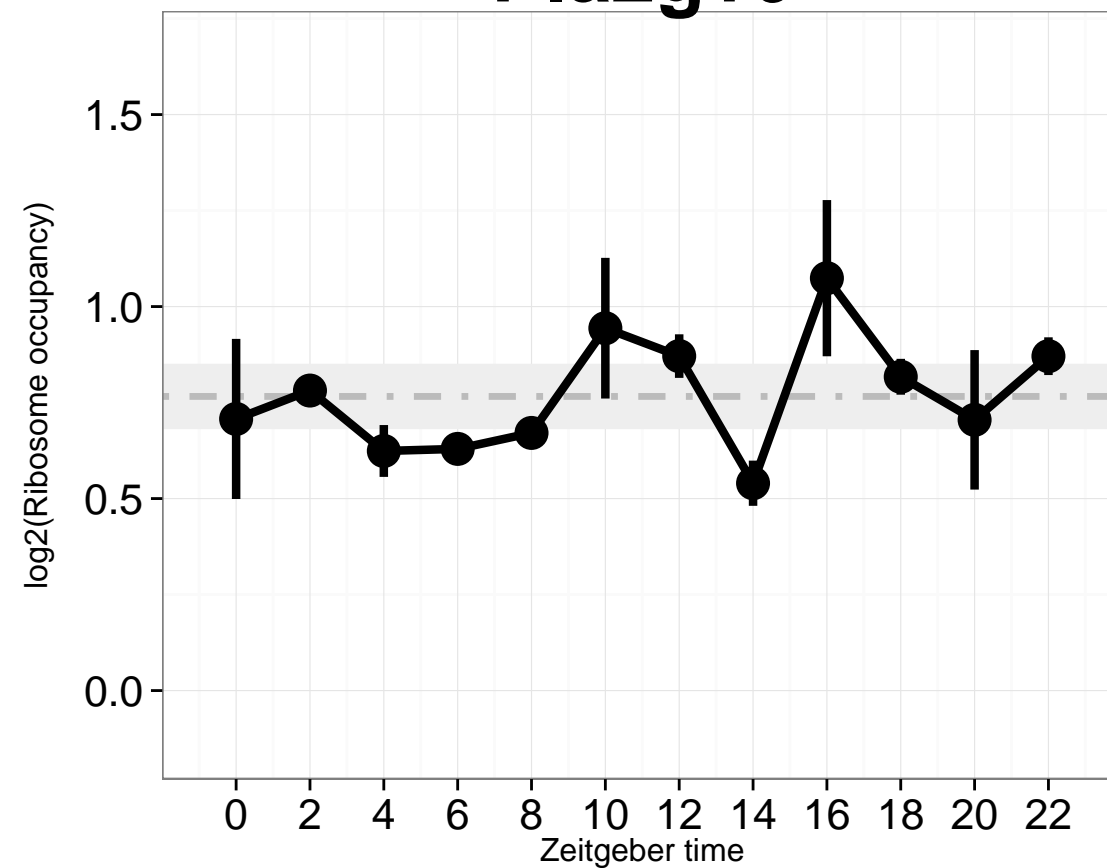

Supplement: Supplementary file 4303 [file 1]

# Galnt1

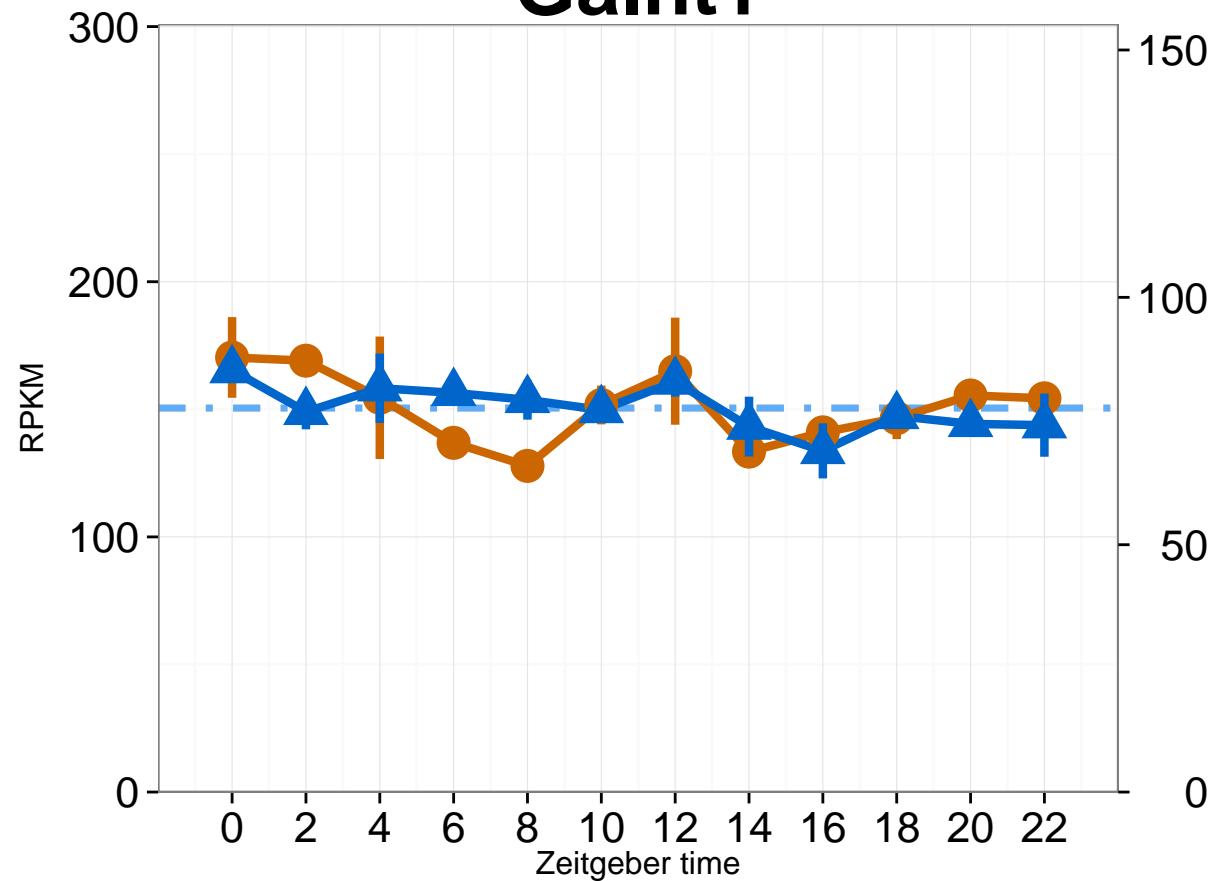

# Galnt1

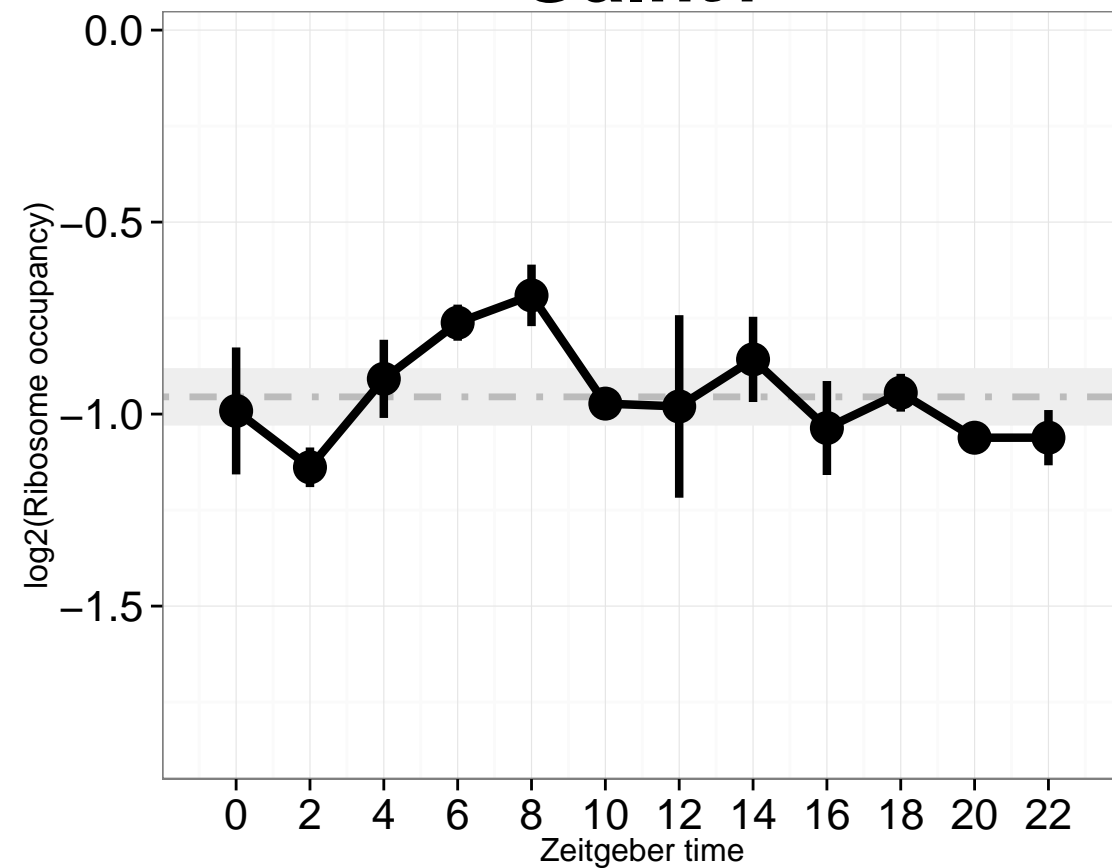

Supplement: Supplementary file 4304 [file 1]

## Dmwd

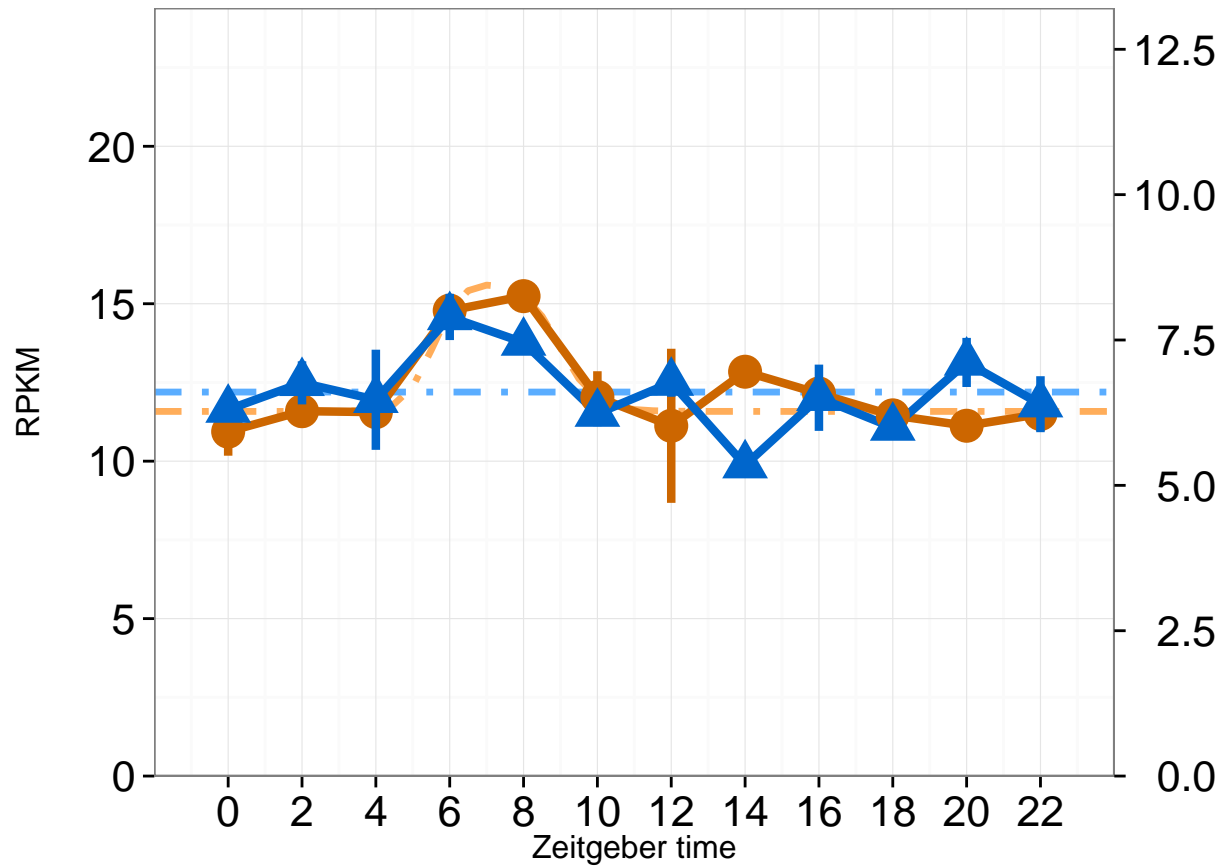

## Dmwd

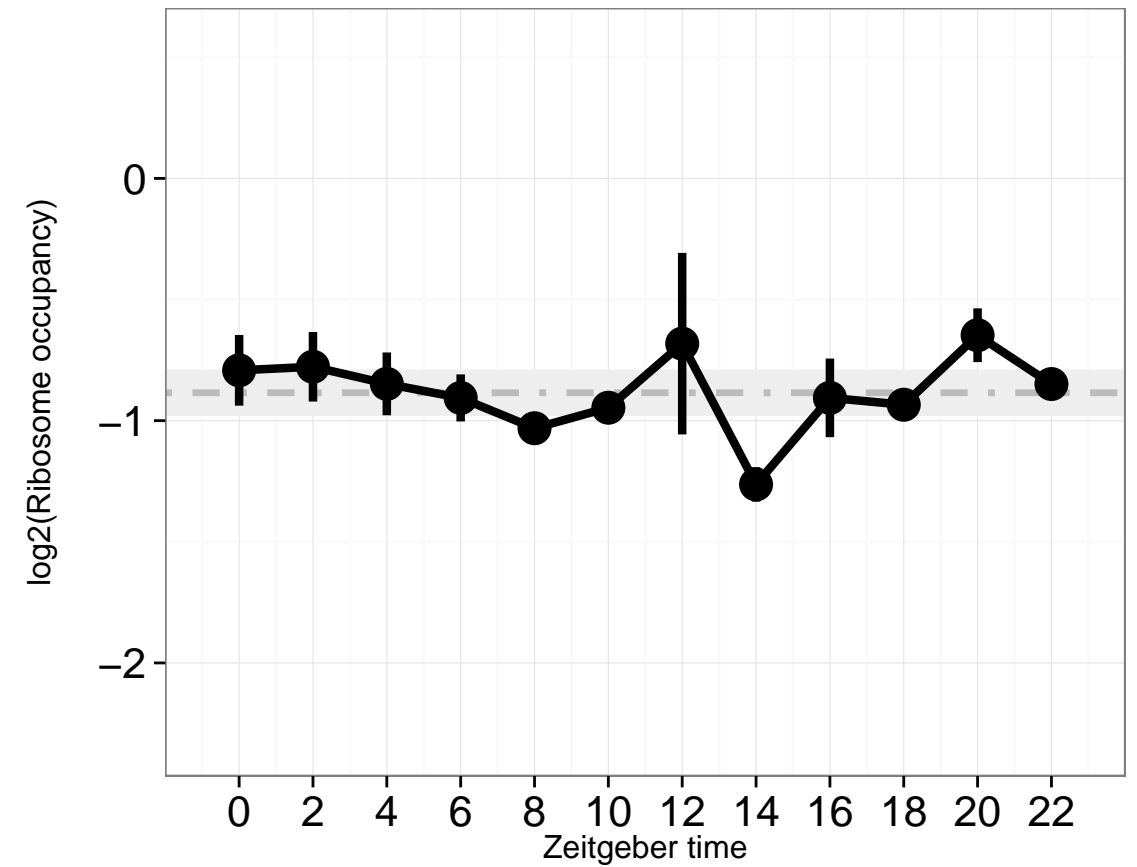

Supplement: Supplementary file 4305 [file 1]

# Mettl24

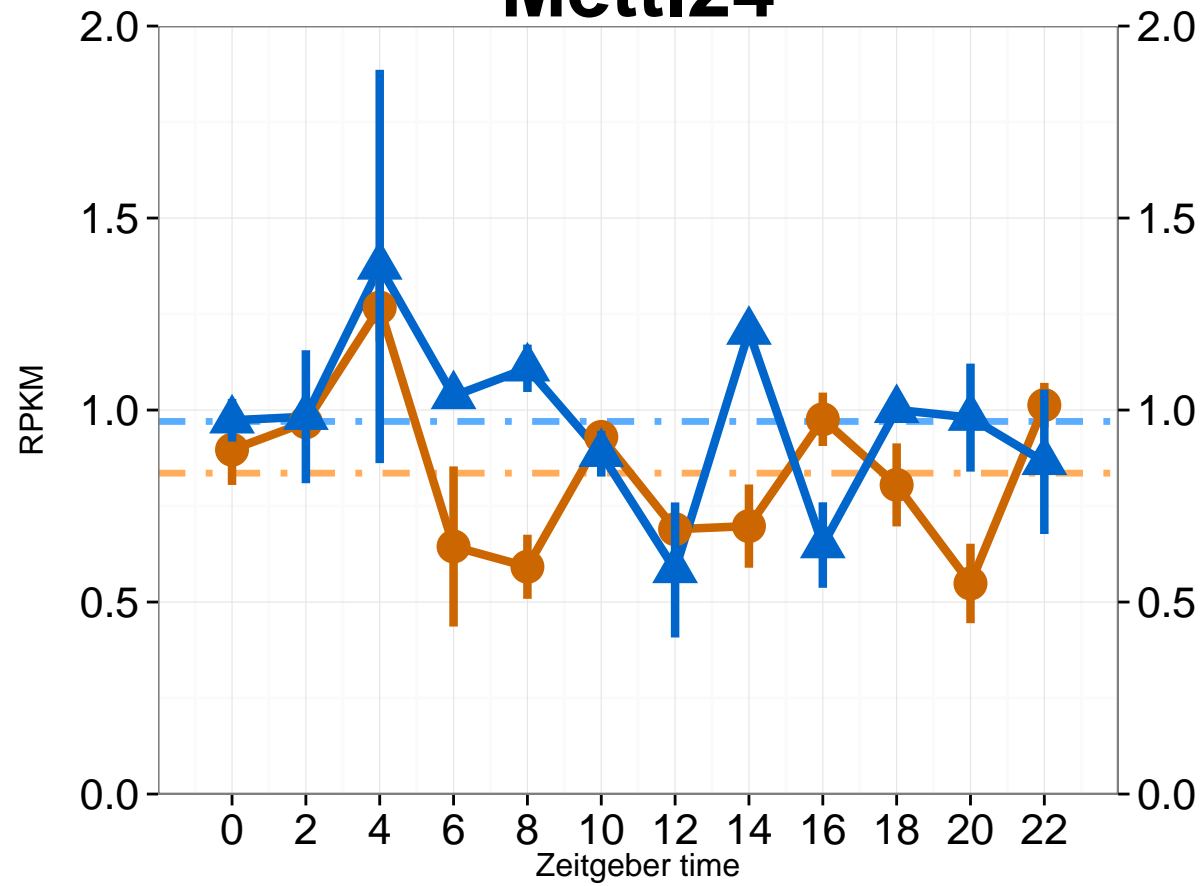

# Mettl24

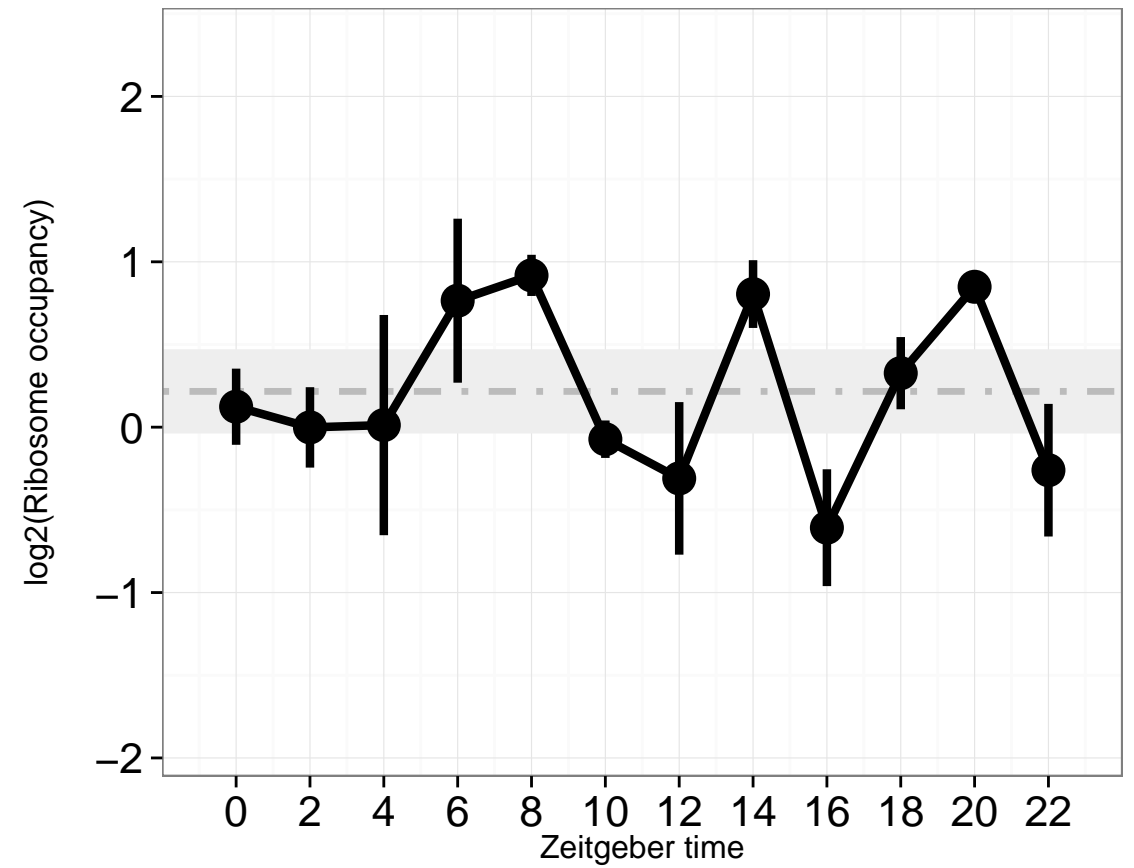

Supplement: Supplementary file 4306 [file 1]

# Ndufaf1

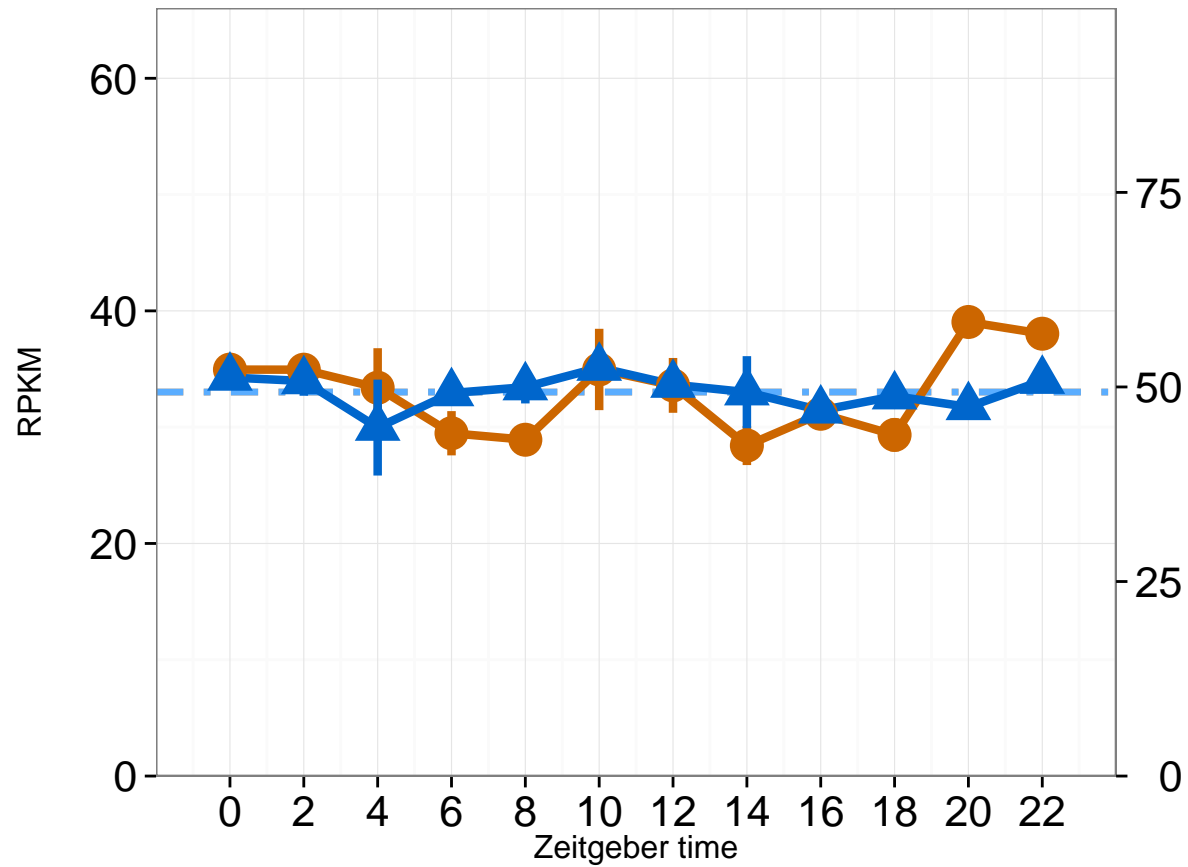

# Ndufaf1

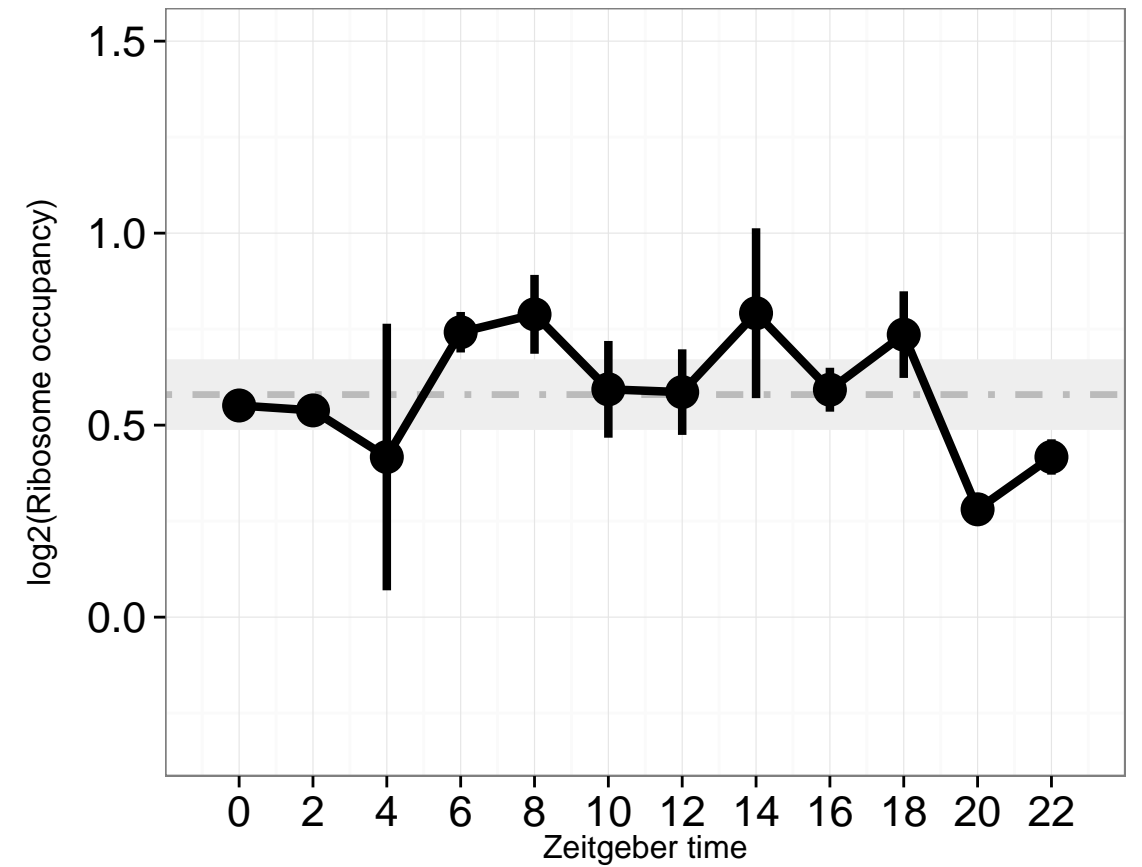

Supplement: Supplementary file 4308 [file 1]

**Tppp**

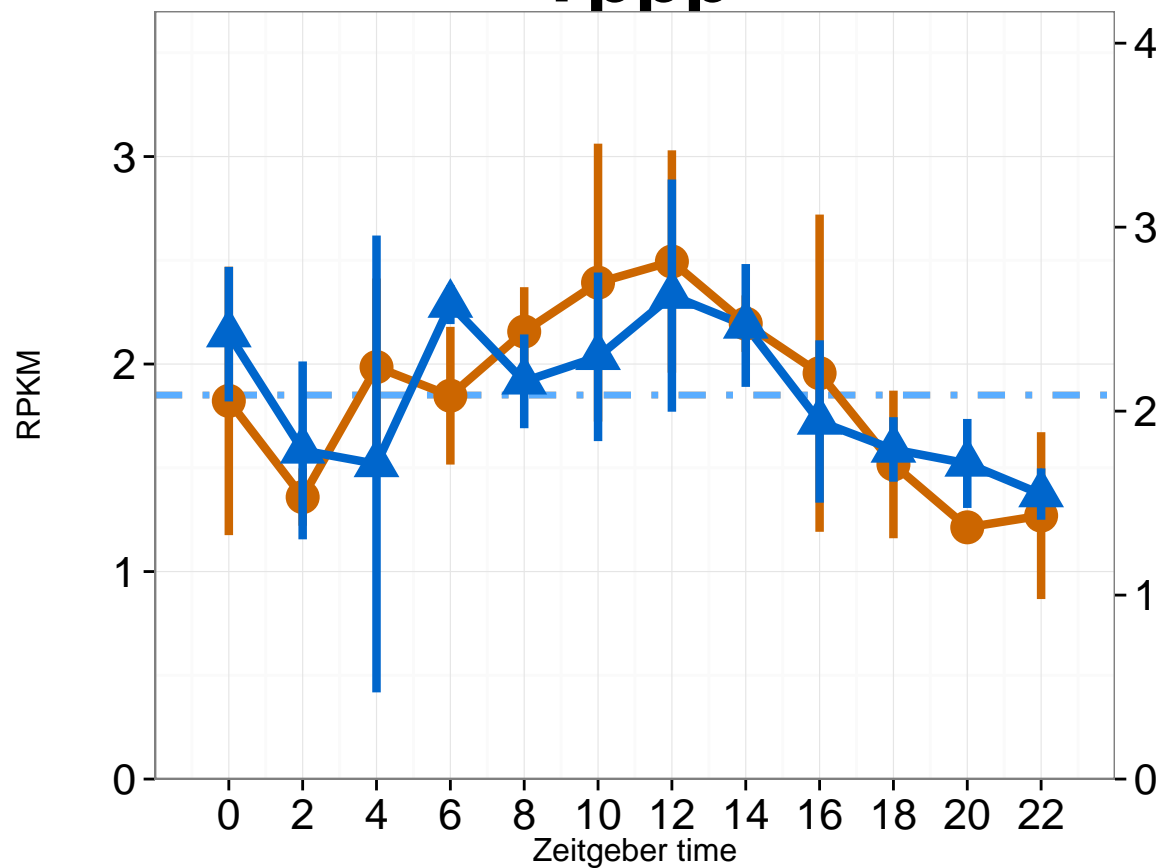

**Tppp**

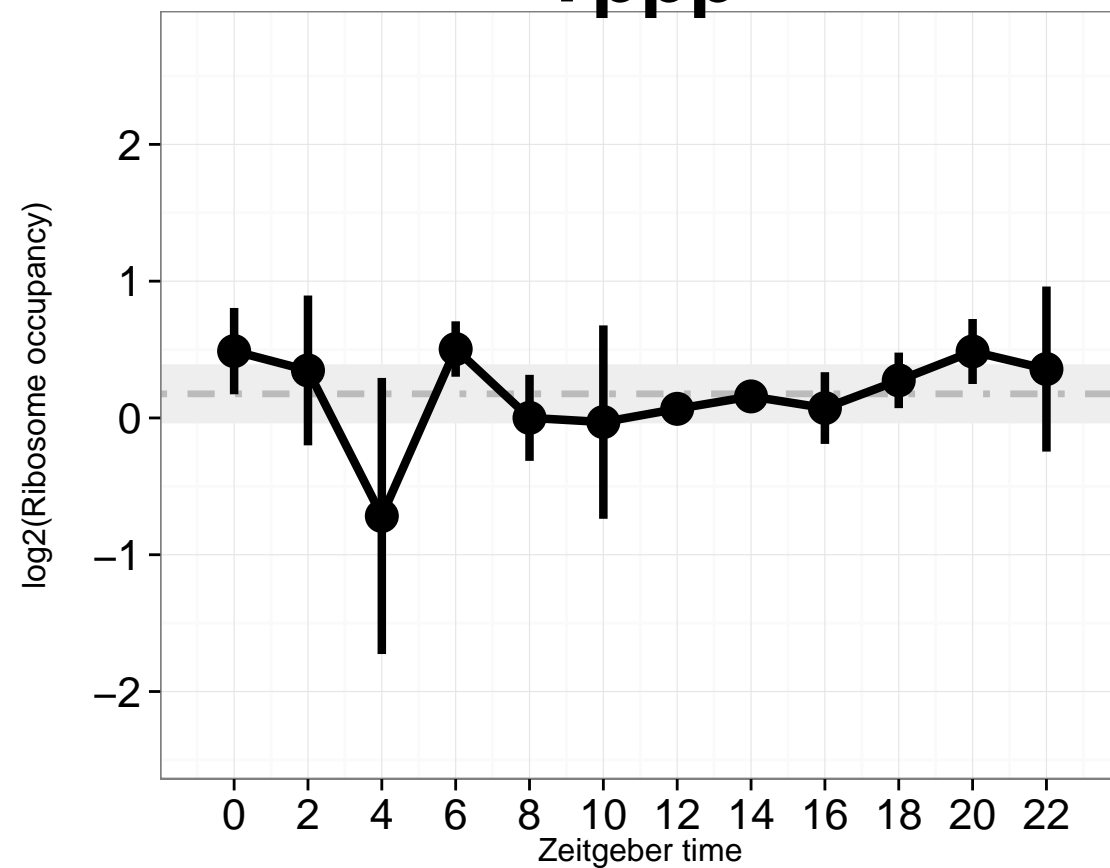

Supplement: Supplementary file 4309 [file 1]

## Dars2

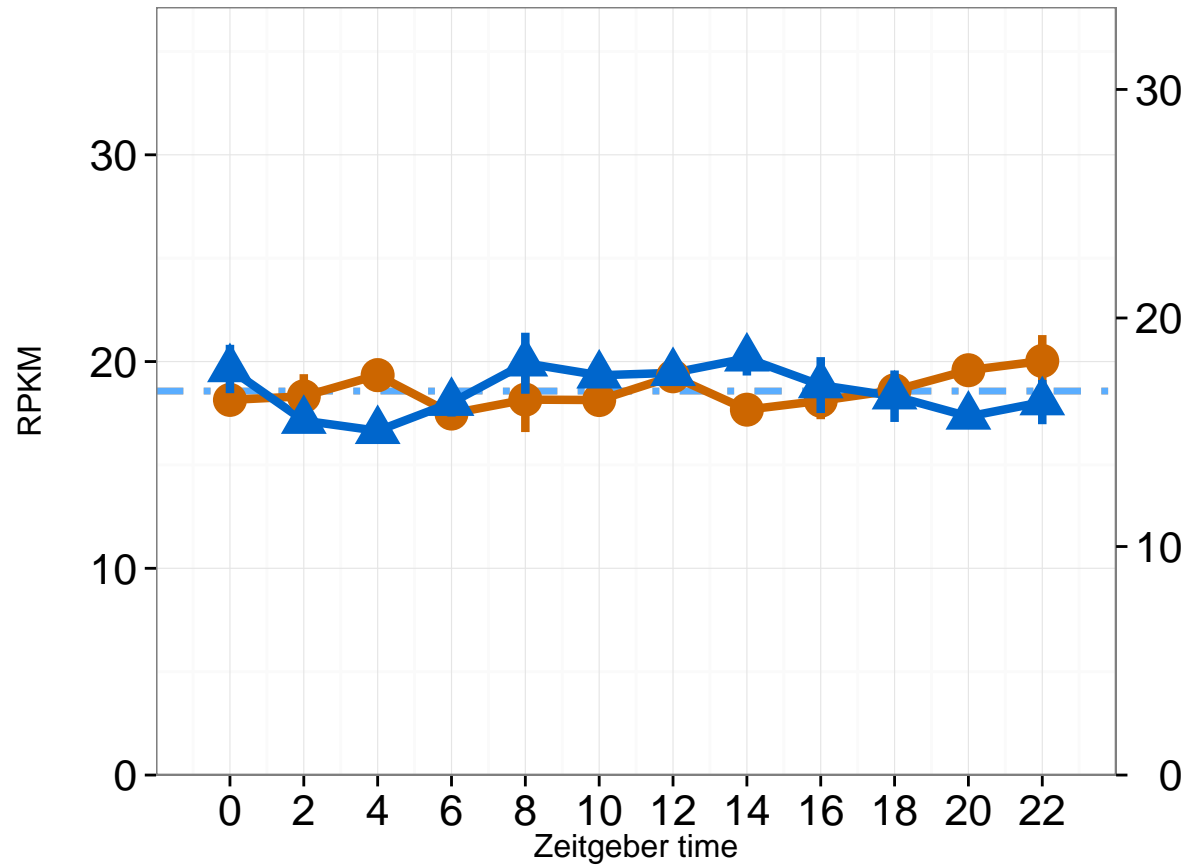

## Dars2

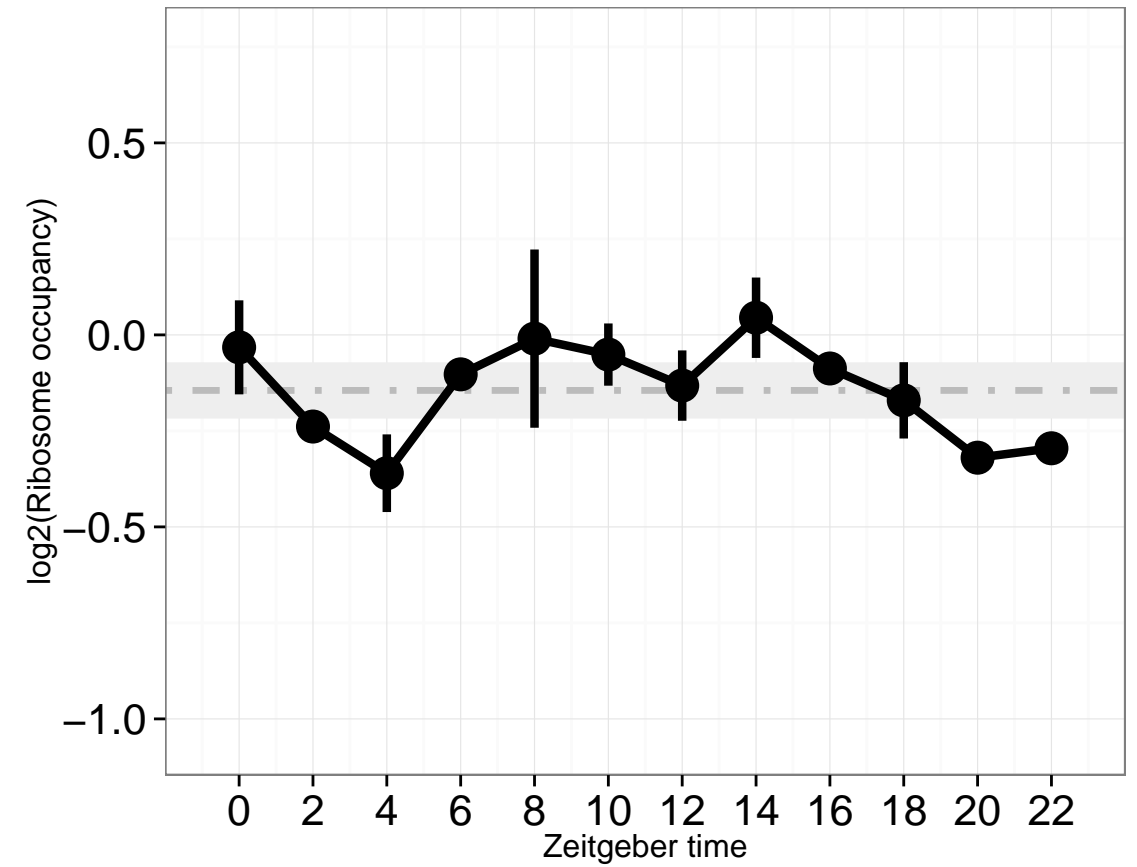

Supplement: Supplementary file 4310 [file 1]

# Sf3a3

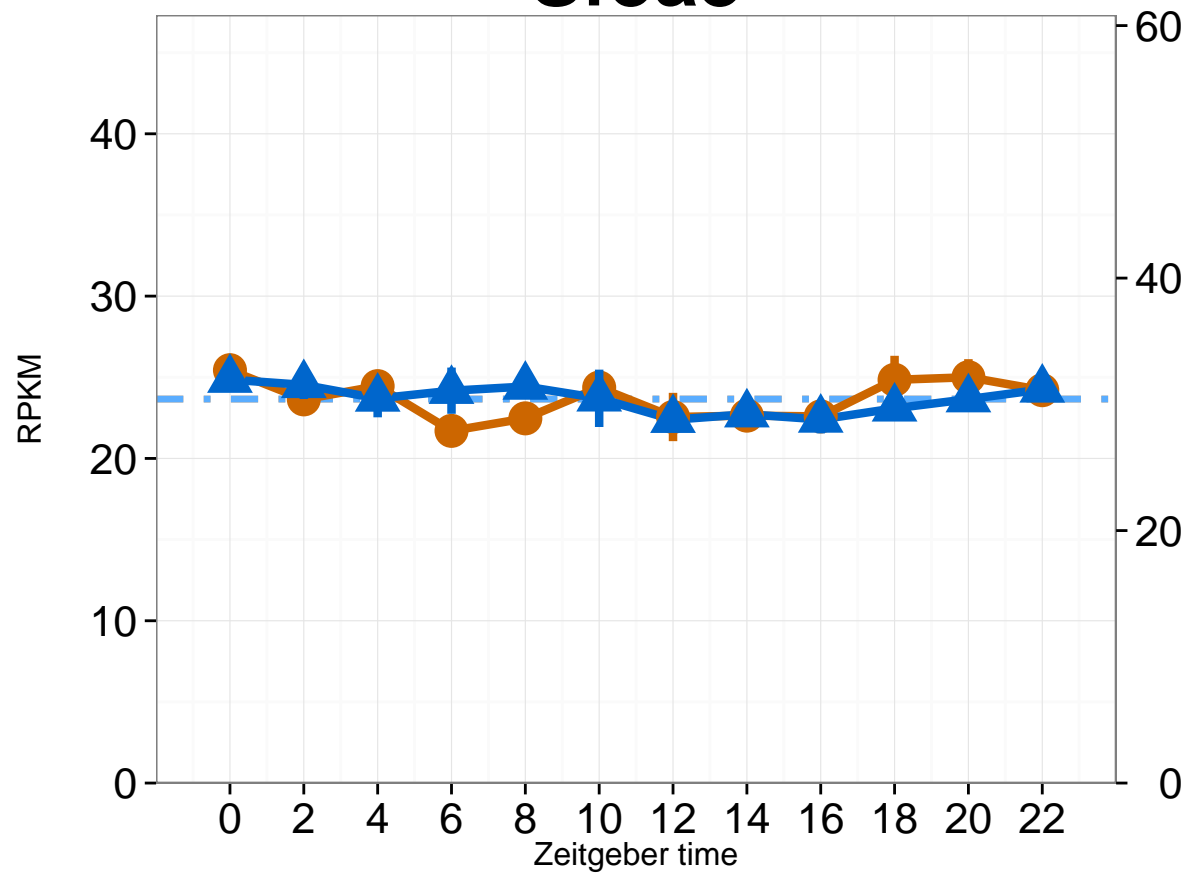

# Sf3a3

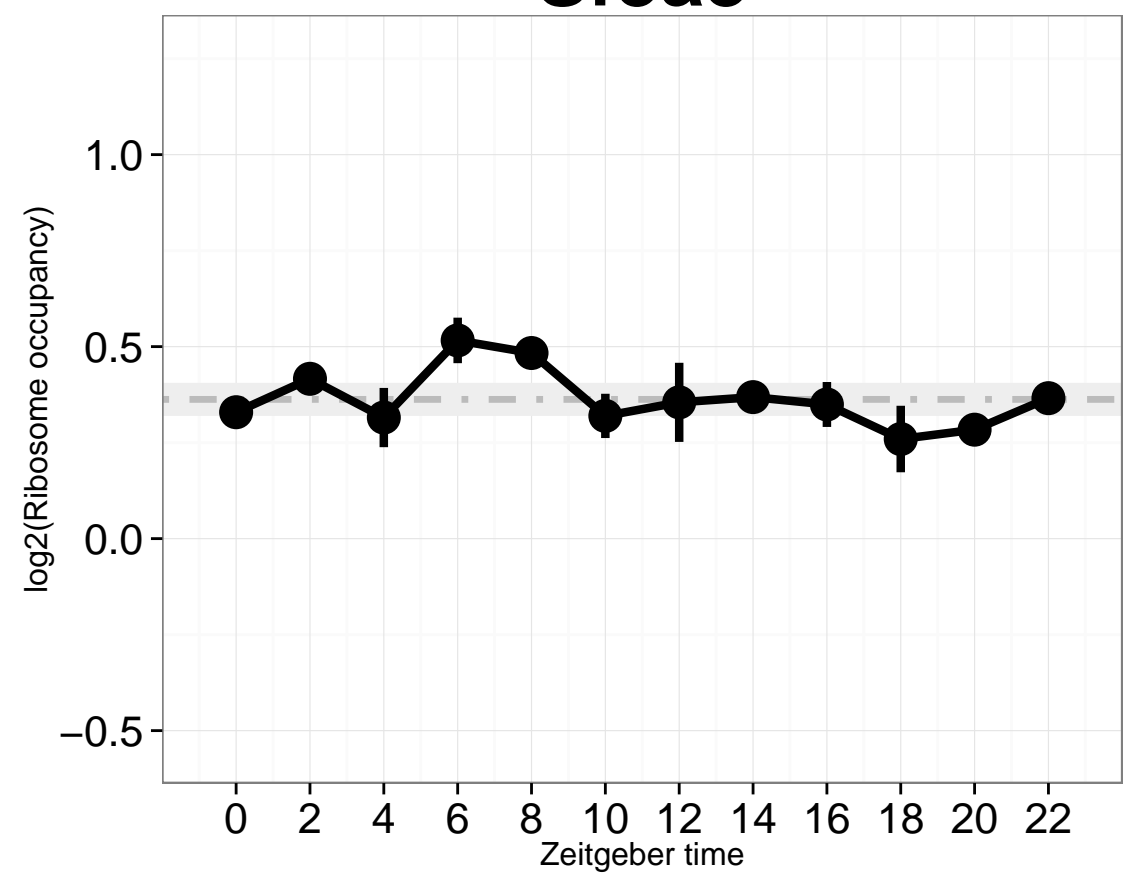

Supplement: Supplementary file 4311 [file 1]

## Btc

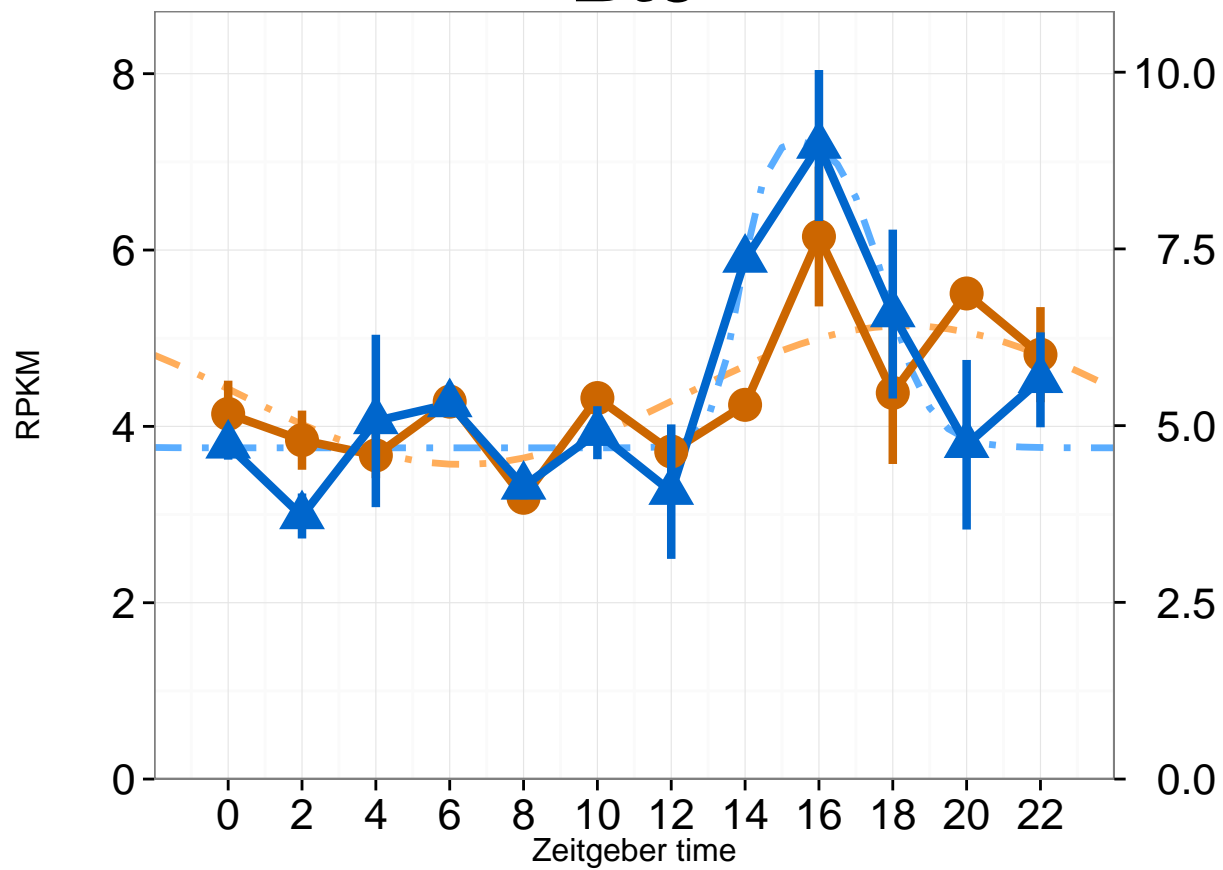

## Btc

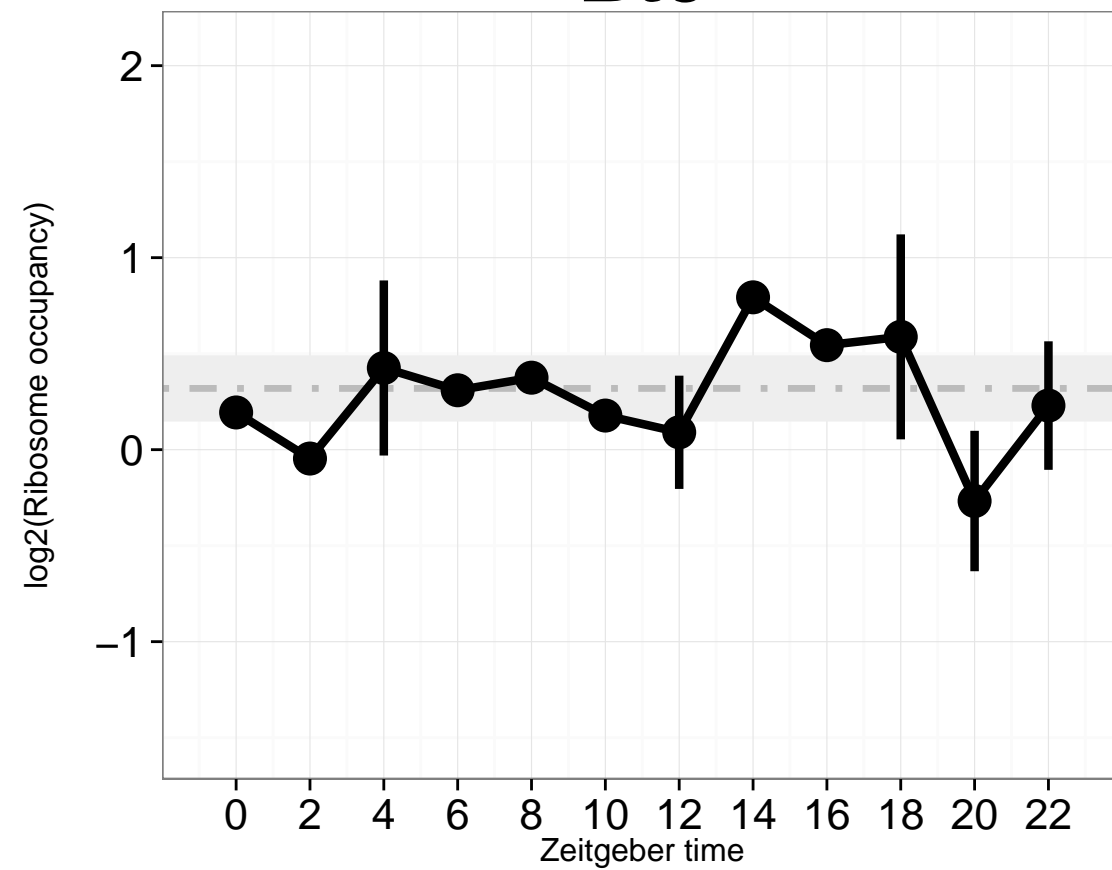

Supplement: Supplementary file 4312 [file 1]

## Prkx

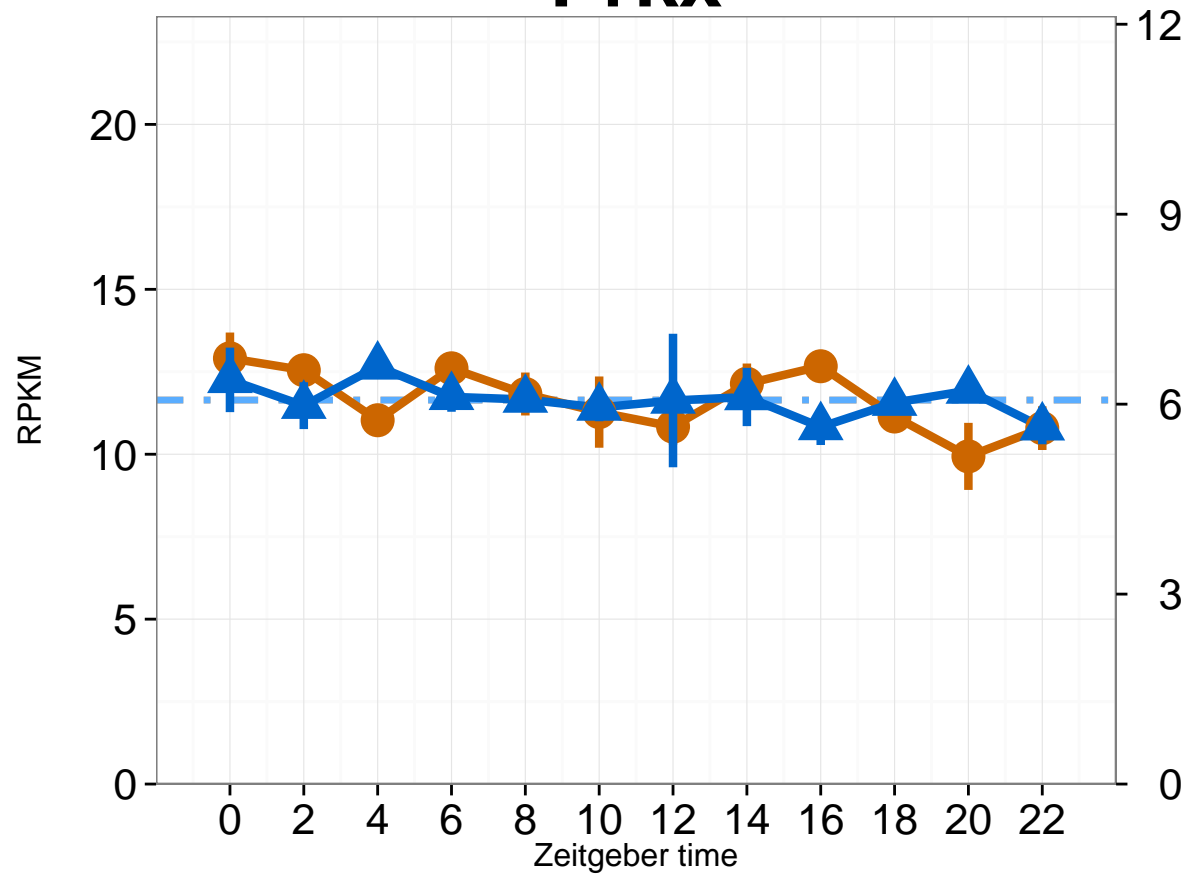

## Prkx

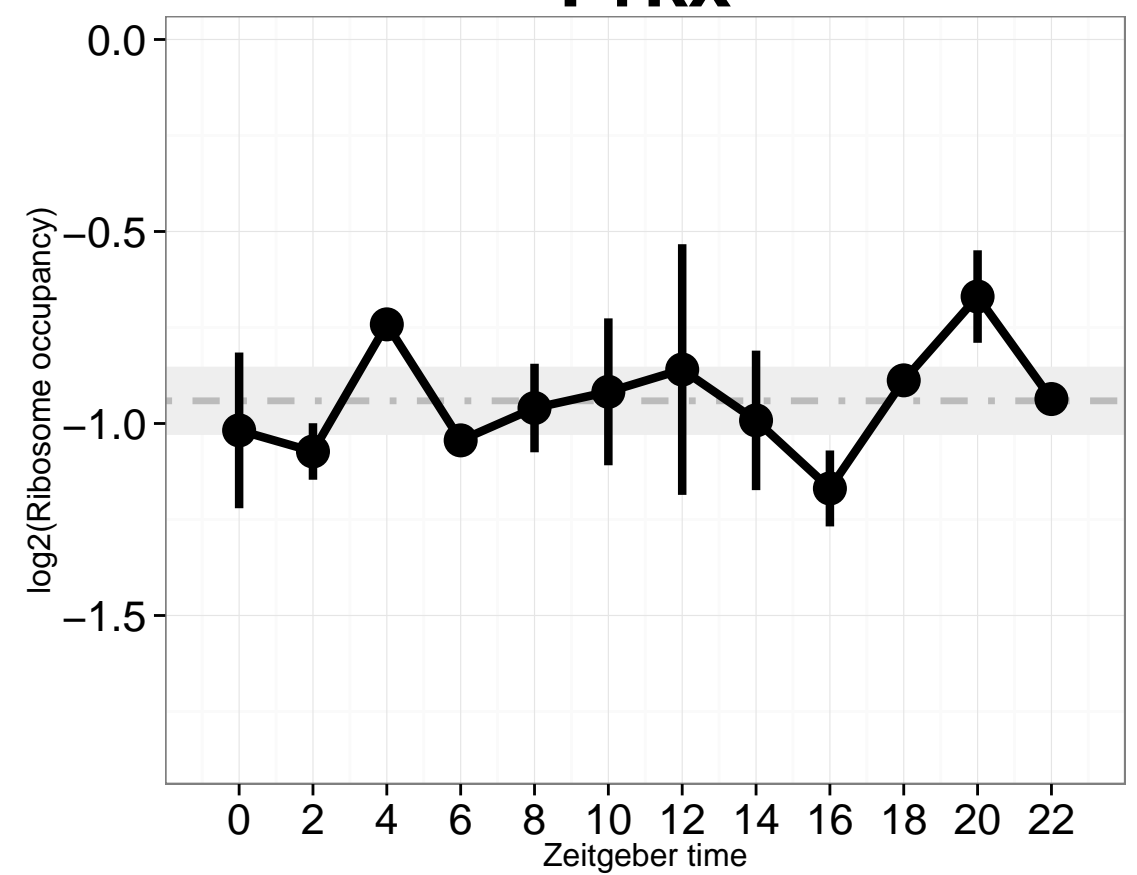

Supplement: Supplementary file 4313 [file 1]

## Esm1

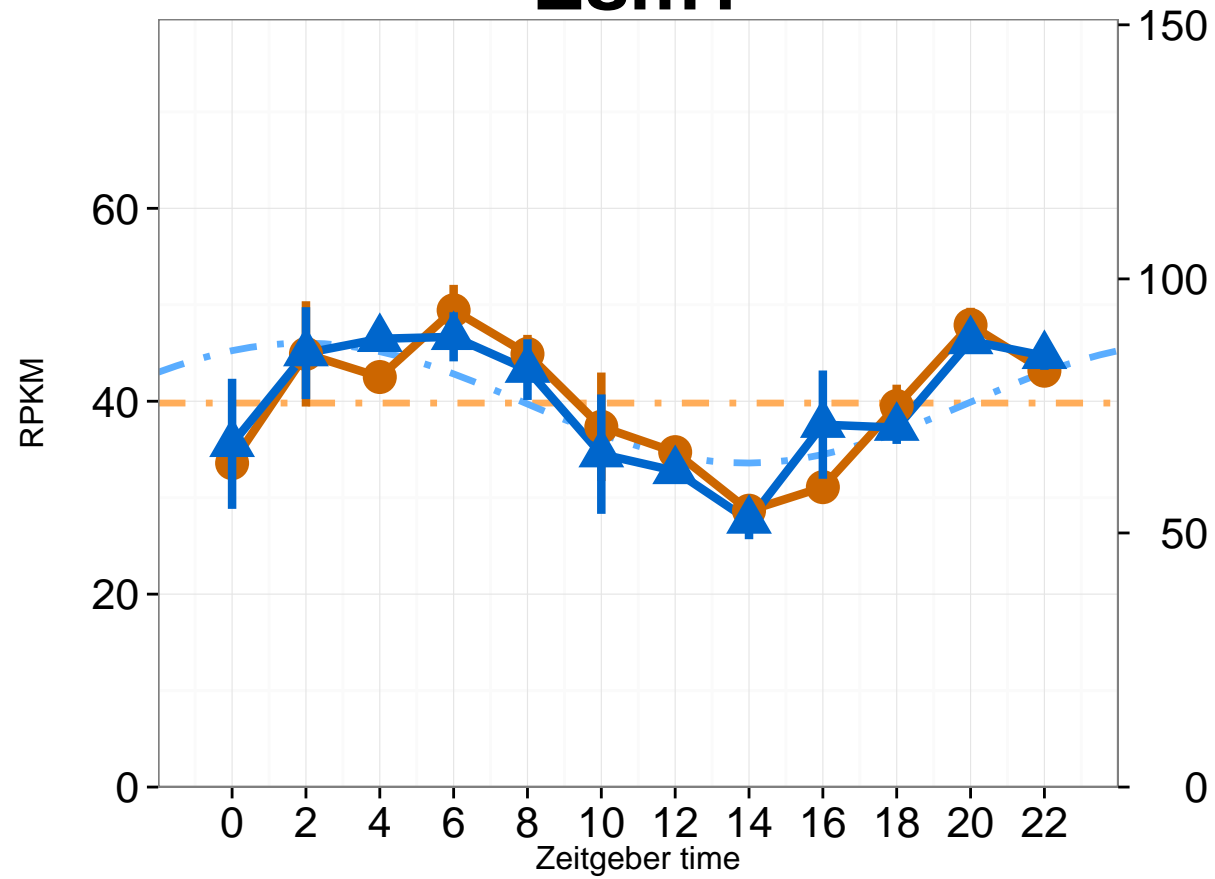

## Esm1

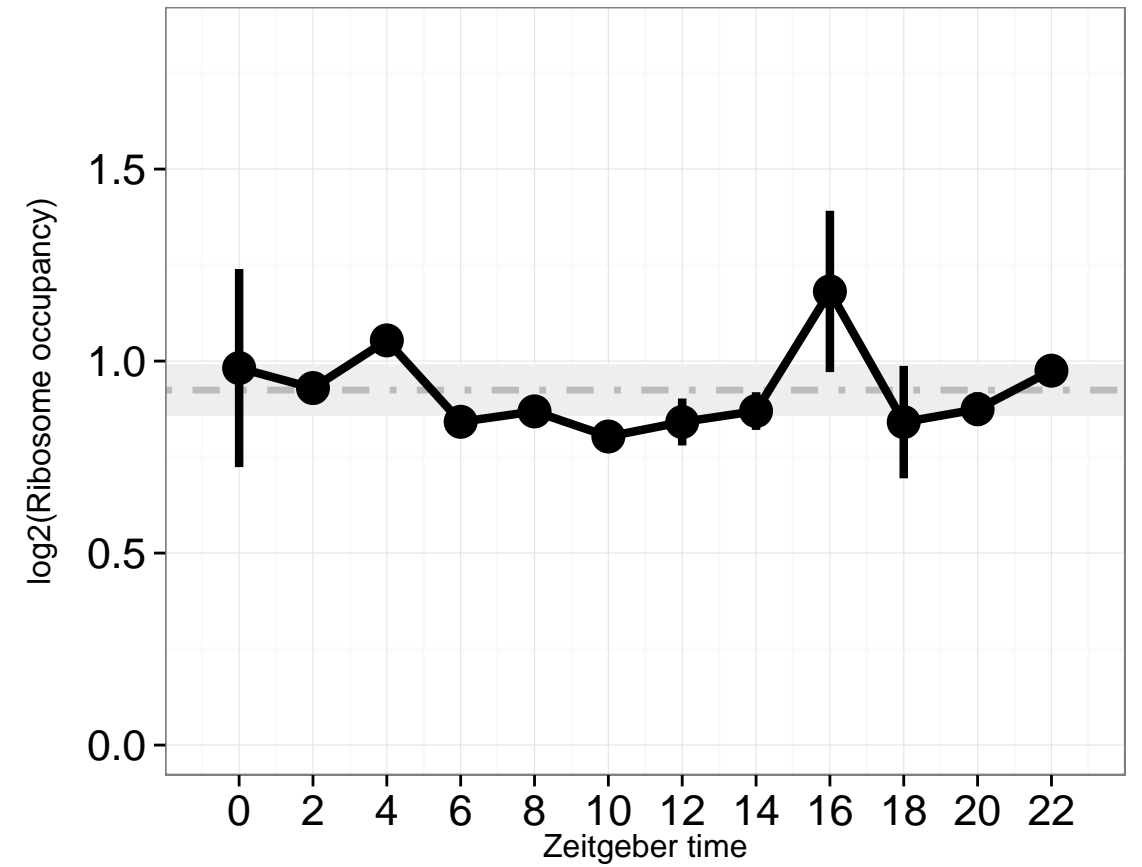

Supplement: Supplementary file 4314 [file 1]

## Cldn1

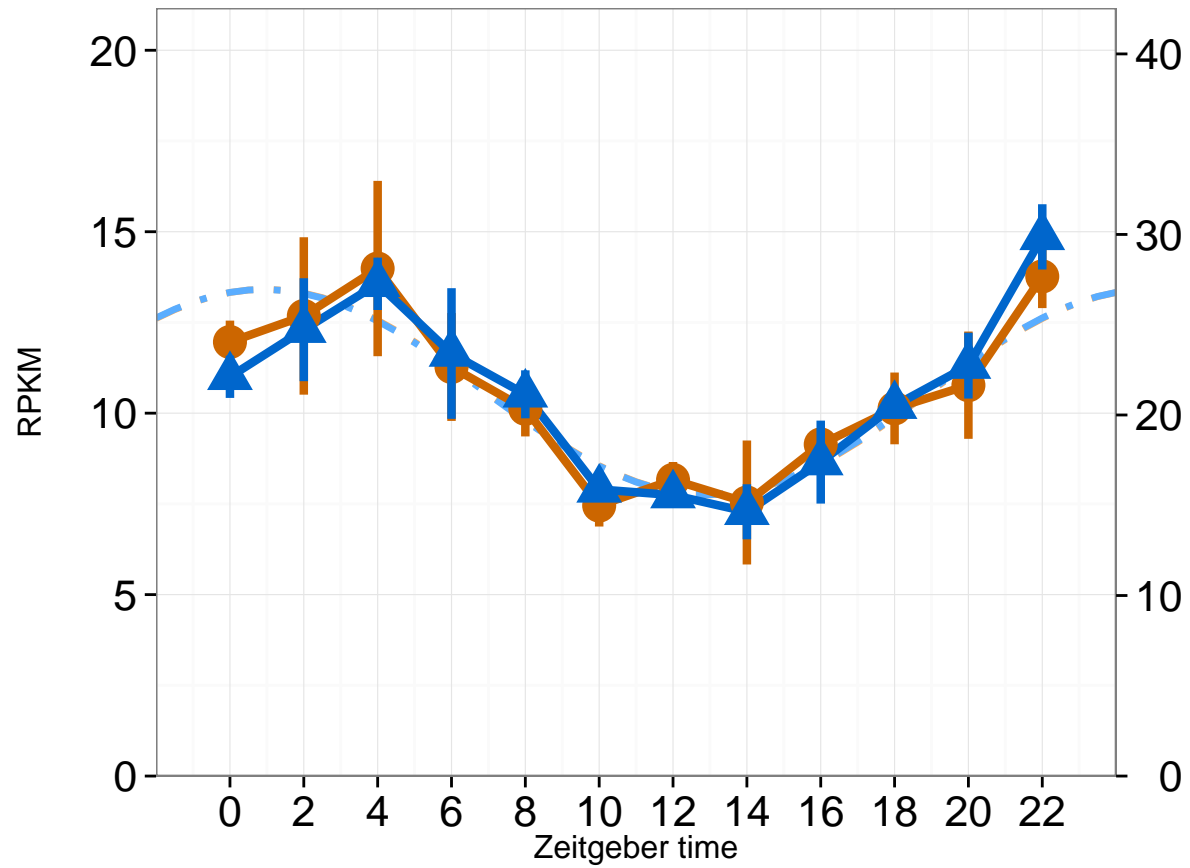

## Cldn1

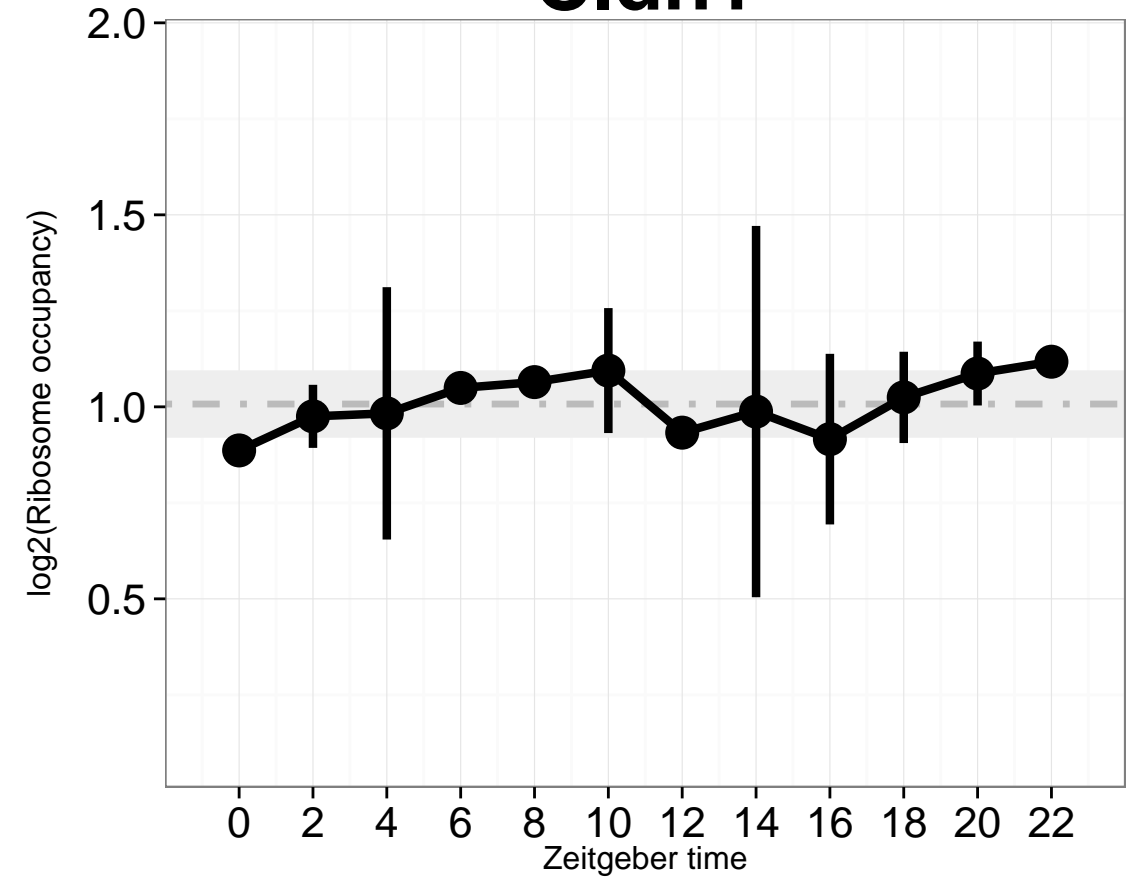

Supplement: Supplementary file 4315 [file 1]

# Rnf217

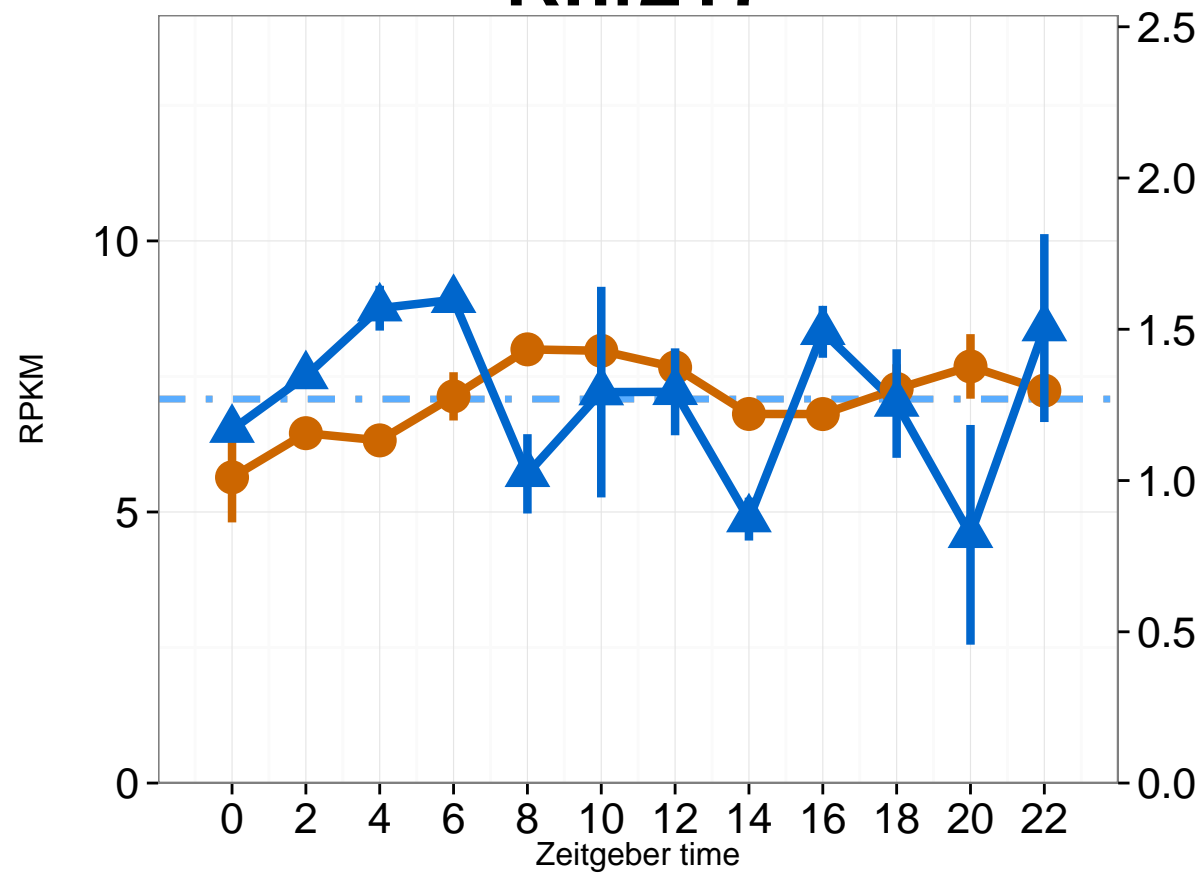

# Rnf217

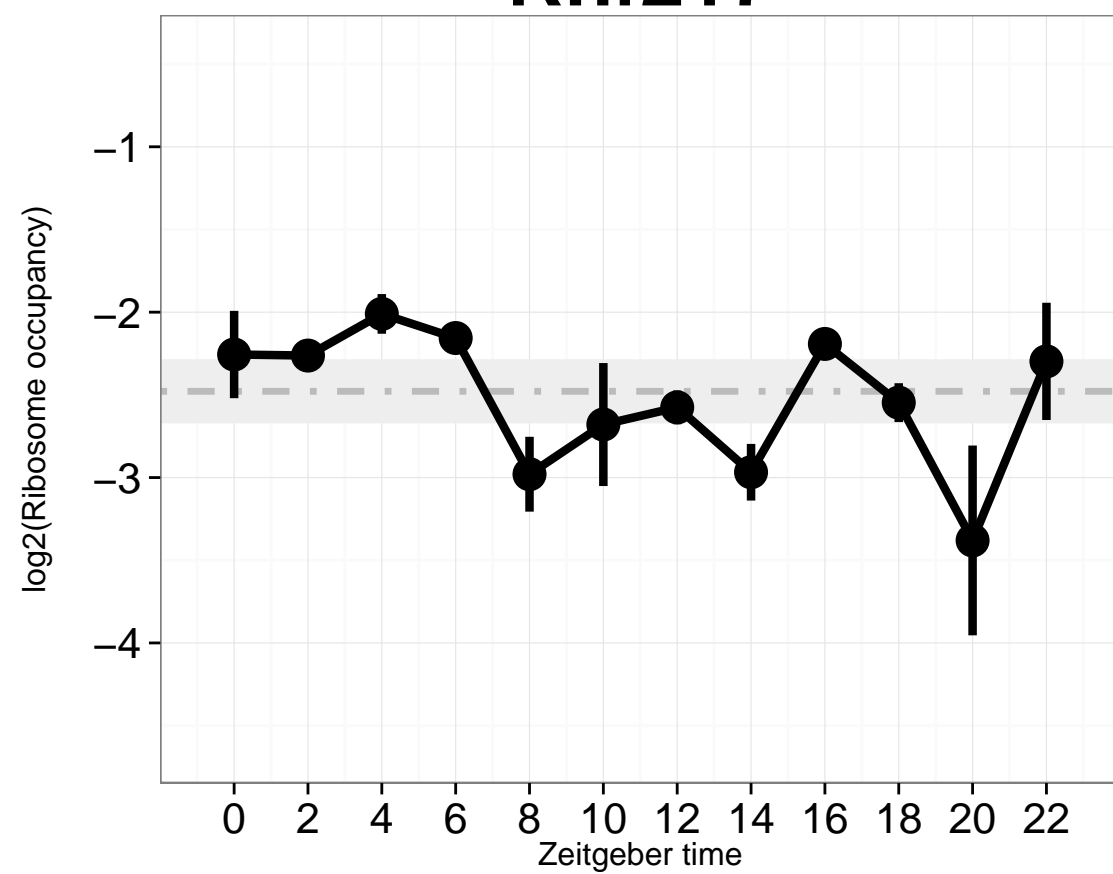

Supplement: Supplementary file 4316 [file 1]

## Commd5

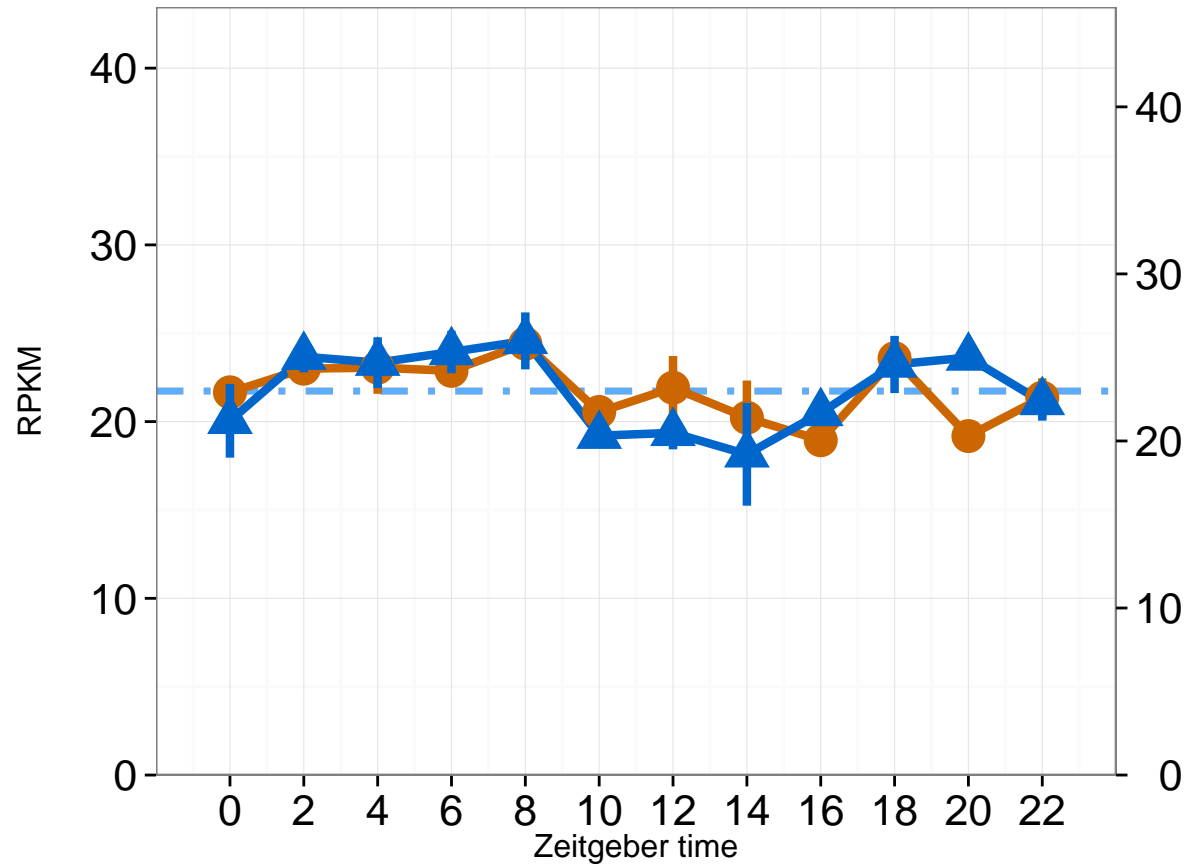

## Commd5

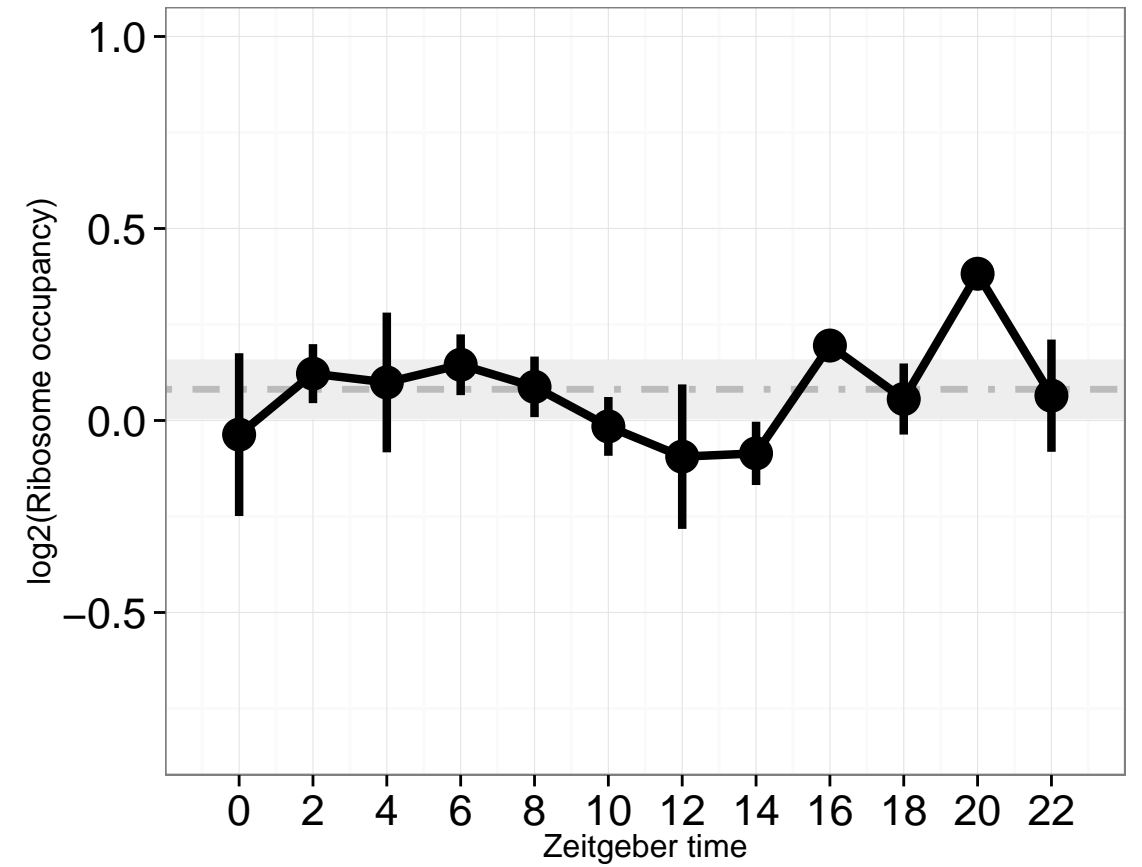

Supplement: Supplementary file 4317 [file 1]

# Pacsin1

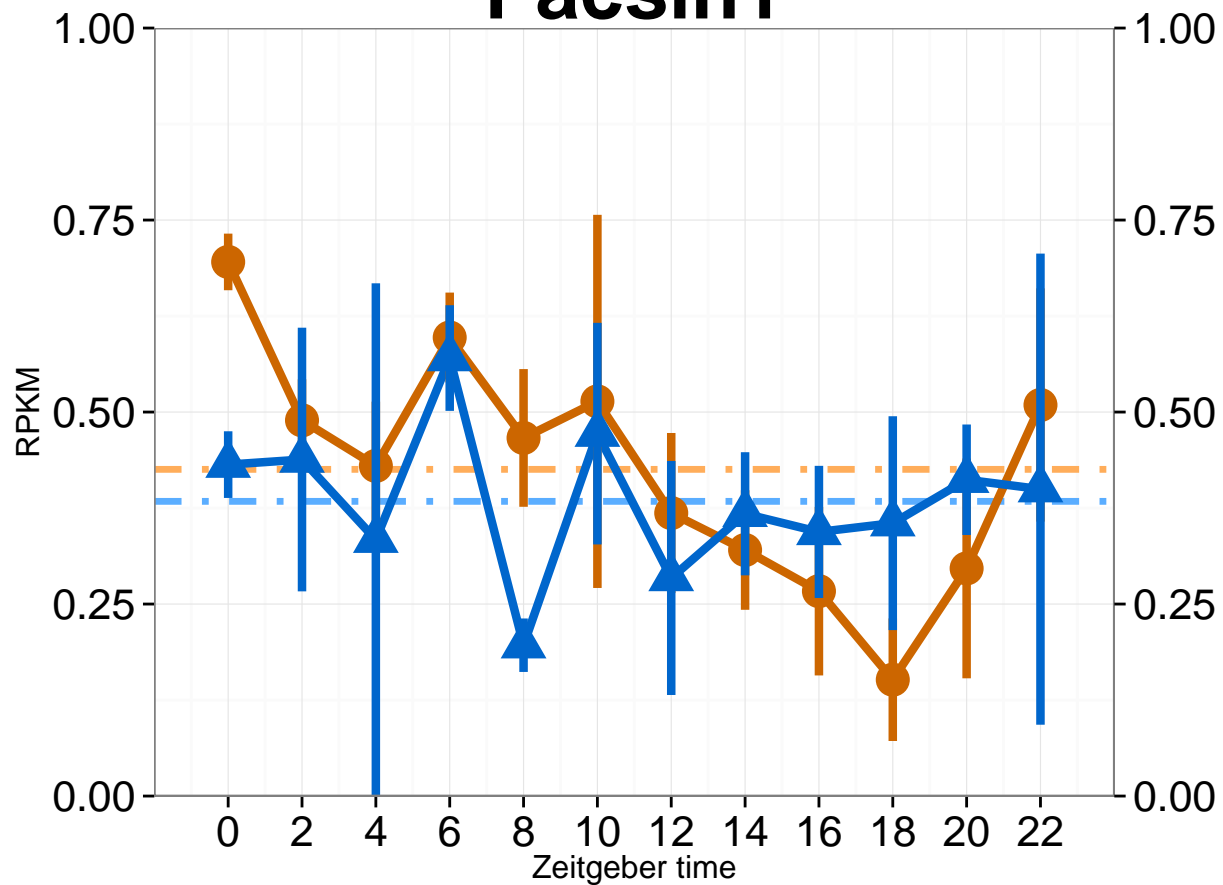

# Pacsin1

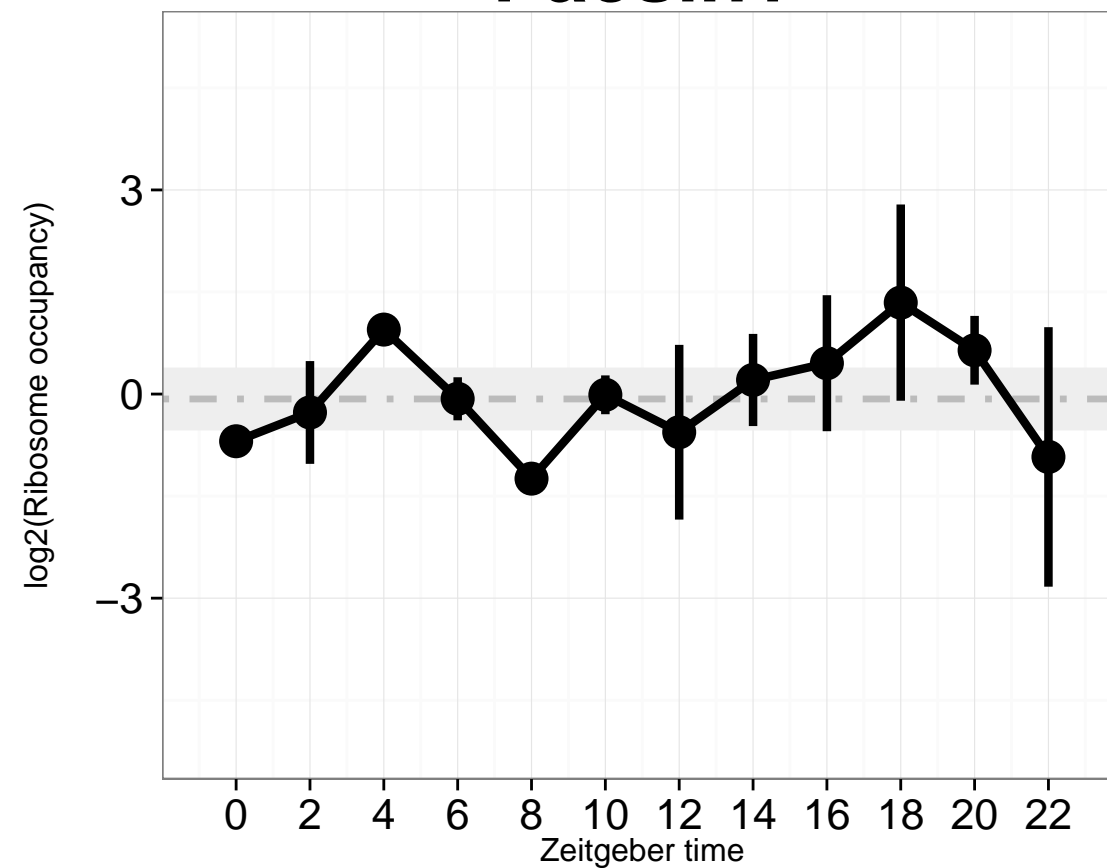

Supplement: Supplementary file 4318 [file 1]

## Gpatch4

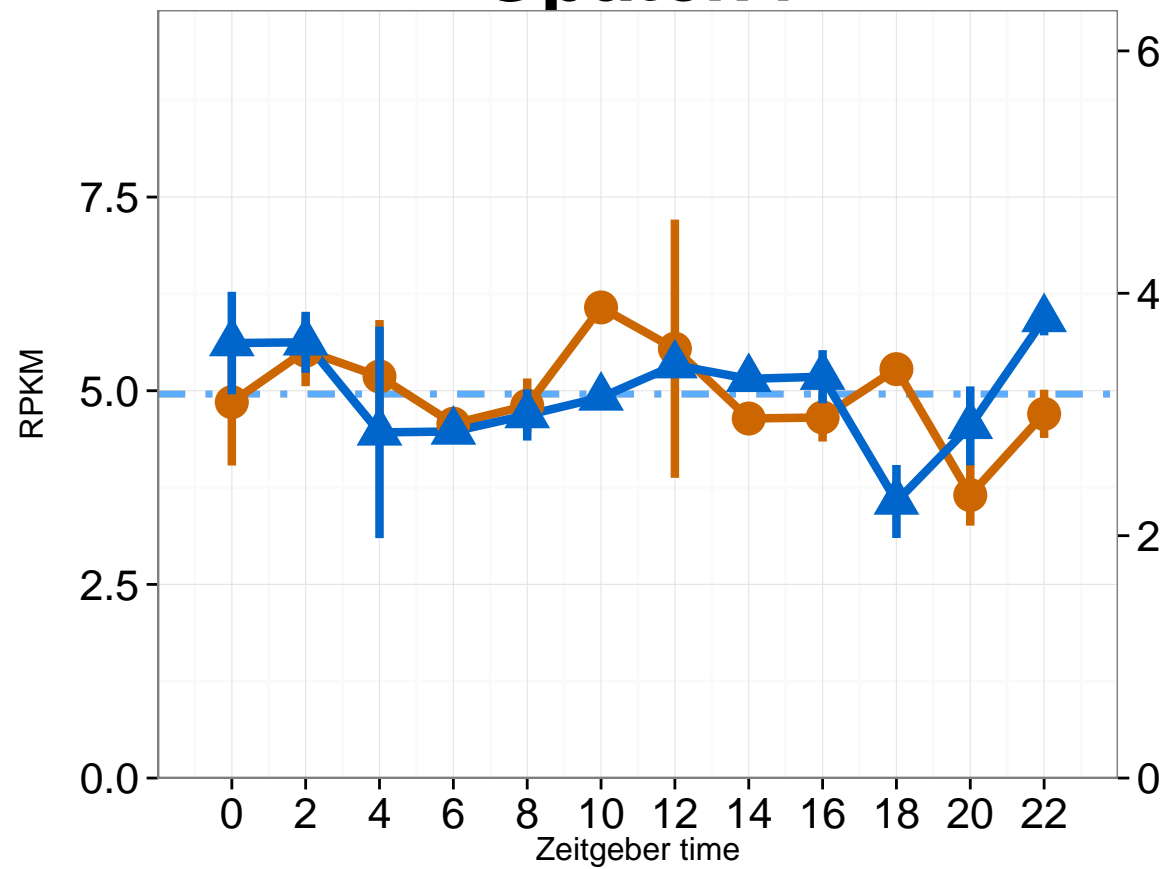

## Gpatch4

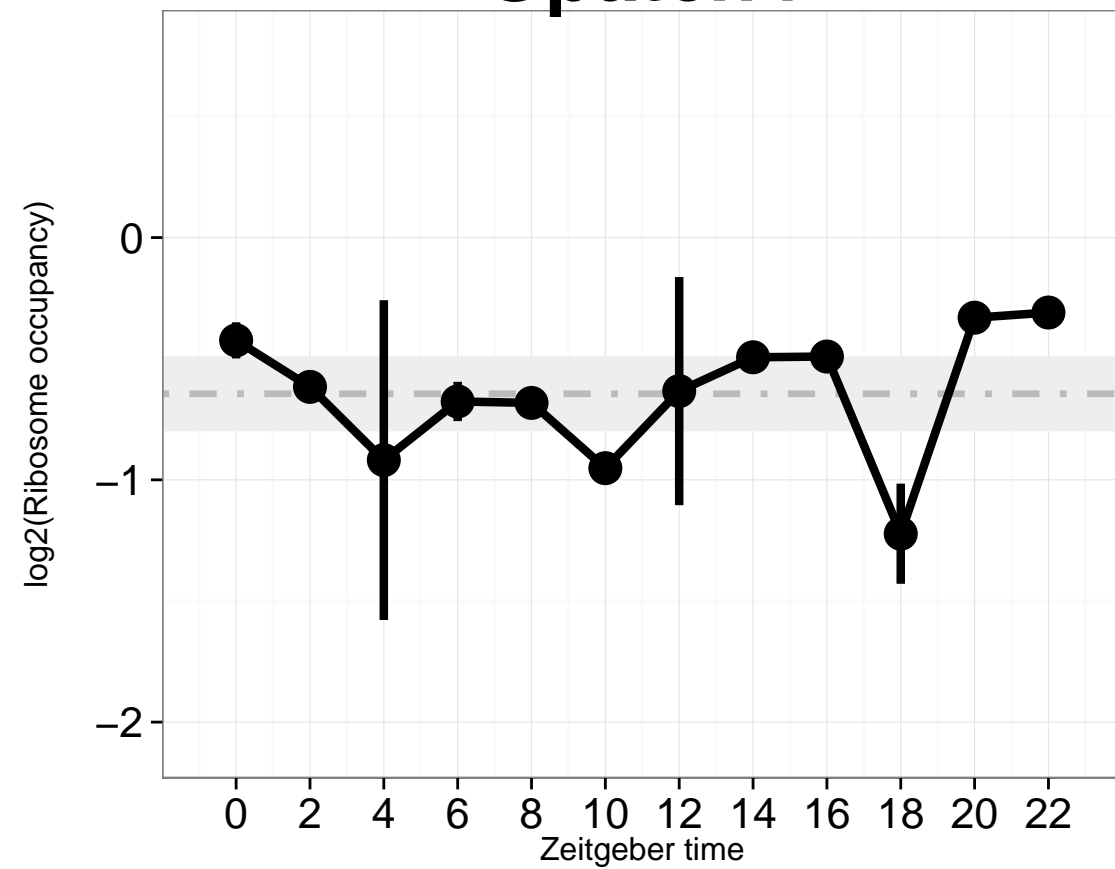

Supplement: Supplementary file 4319 [file 1]
