# Supplementary material (part 44 of 133)
Source: publisher figshare collection journal article supplement (https://springernature.figshare.com/articles/dataset/_/4903193)

# Rab3gap2

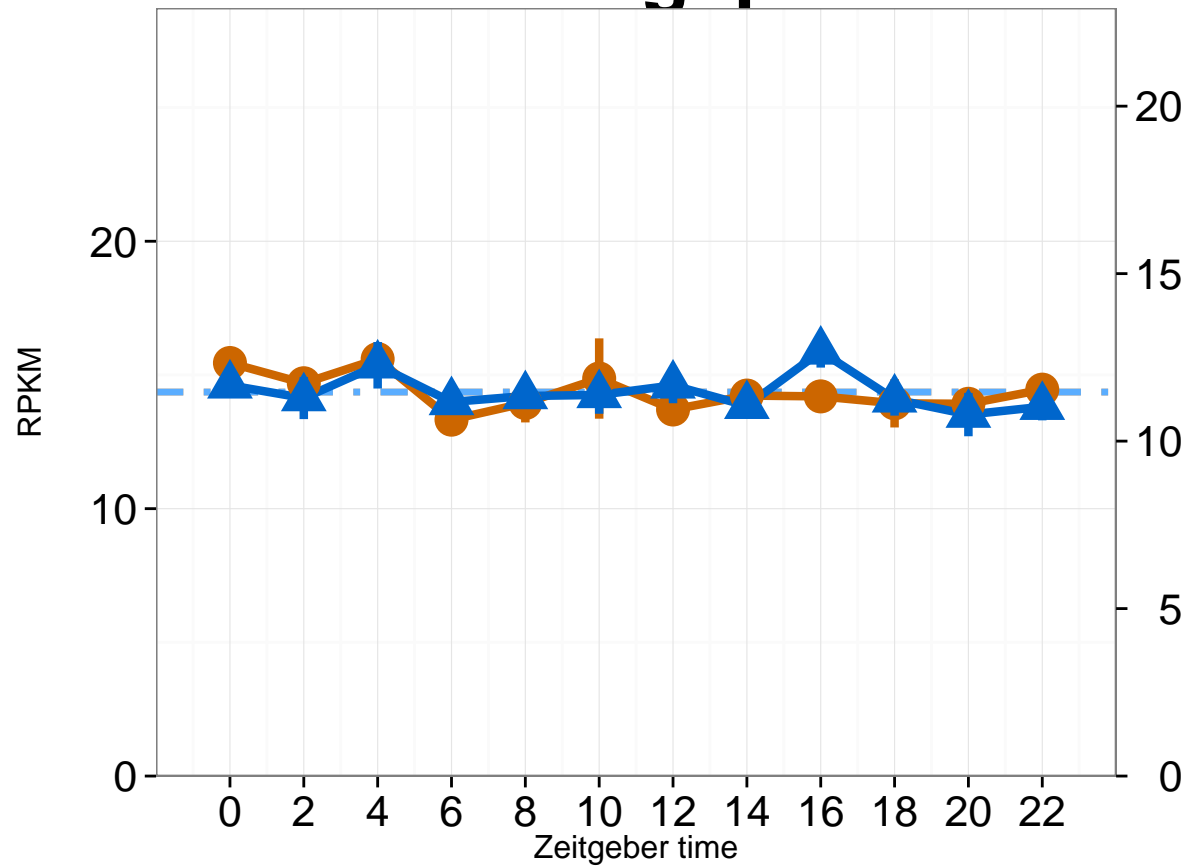

# Rab3gap2

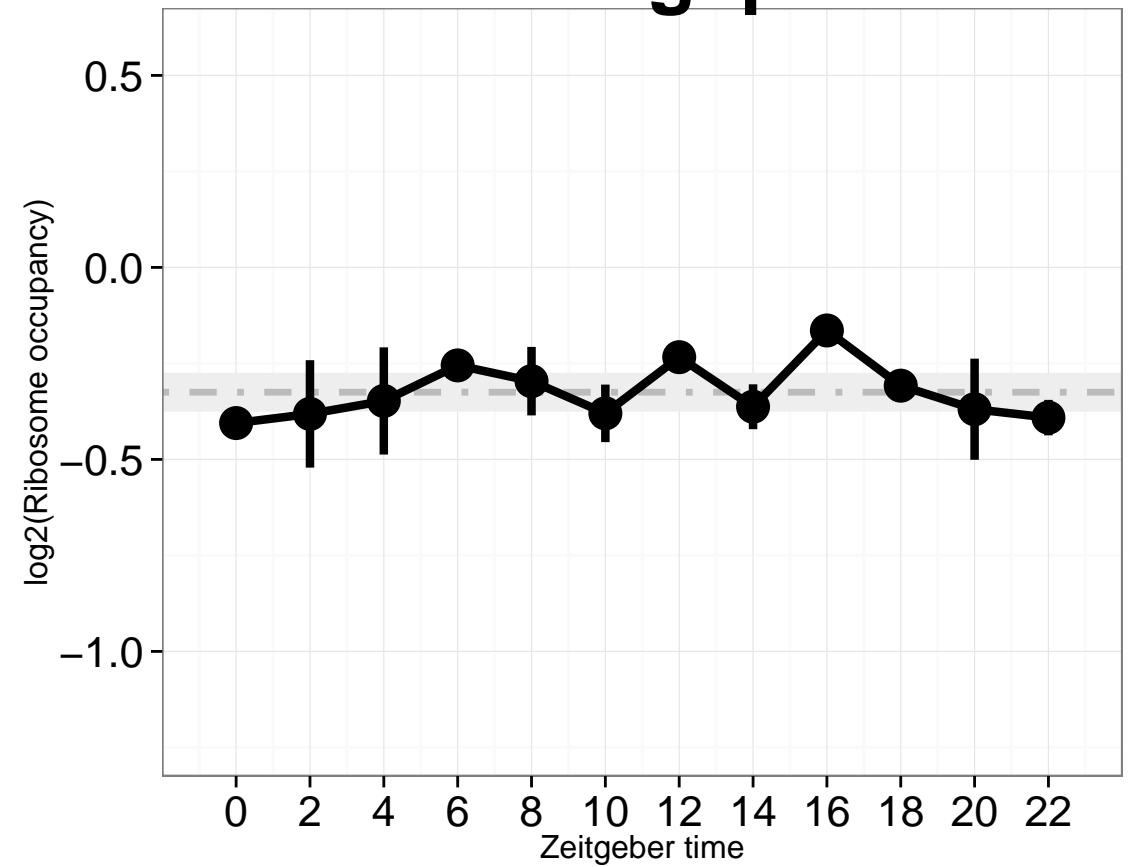

Supplement: Supplementary file 4320 [file 1]

## Kcnk1

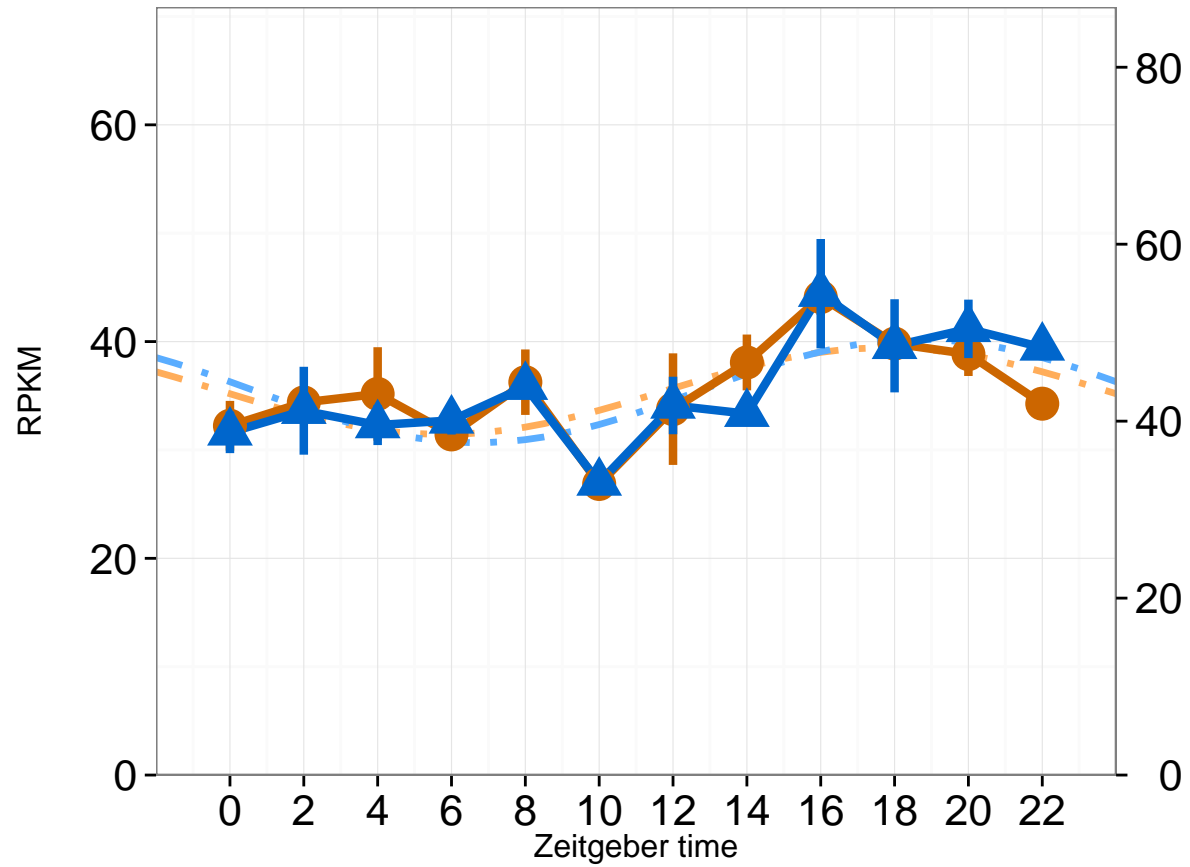

## Kcnk1

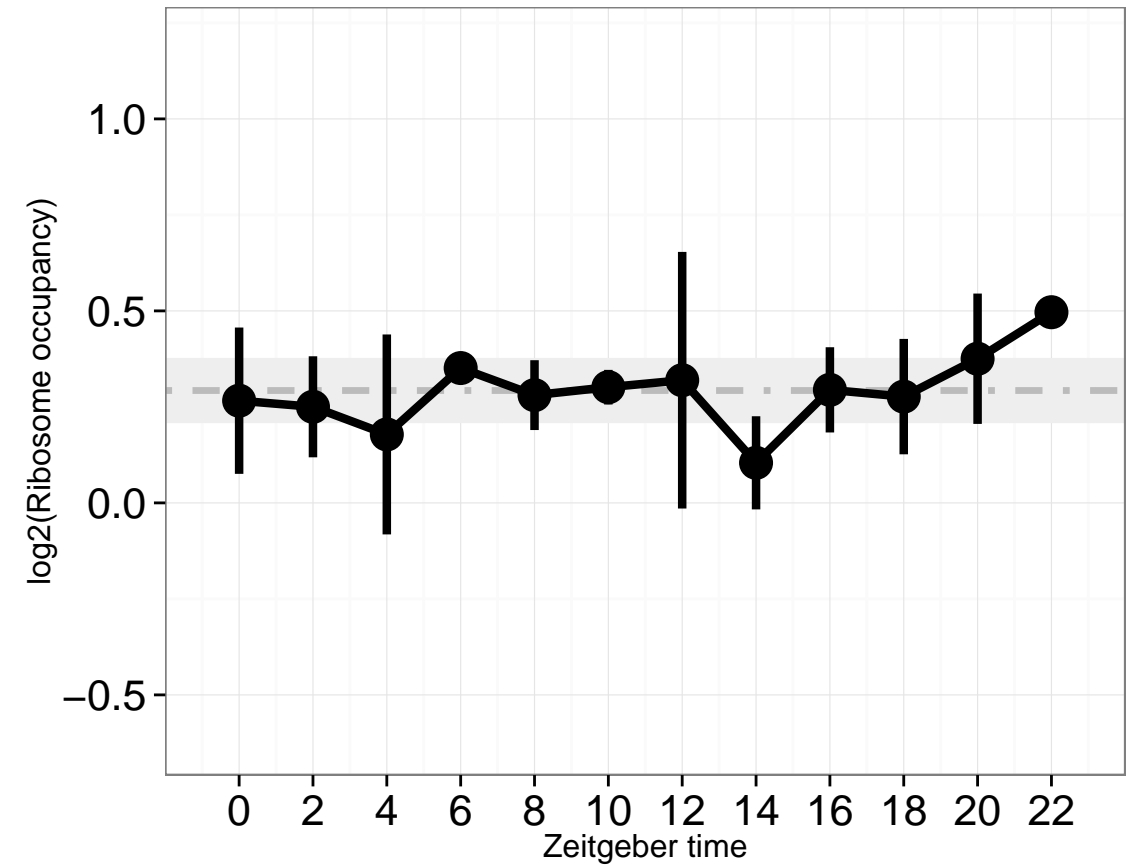

Supplement: Supplementary file 4321 [file 1]

## Pck2

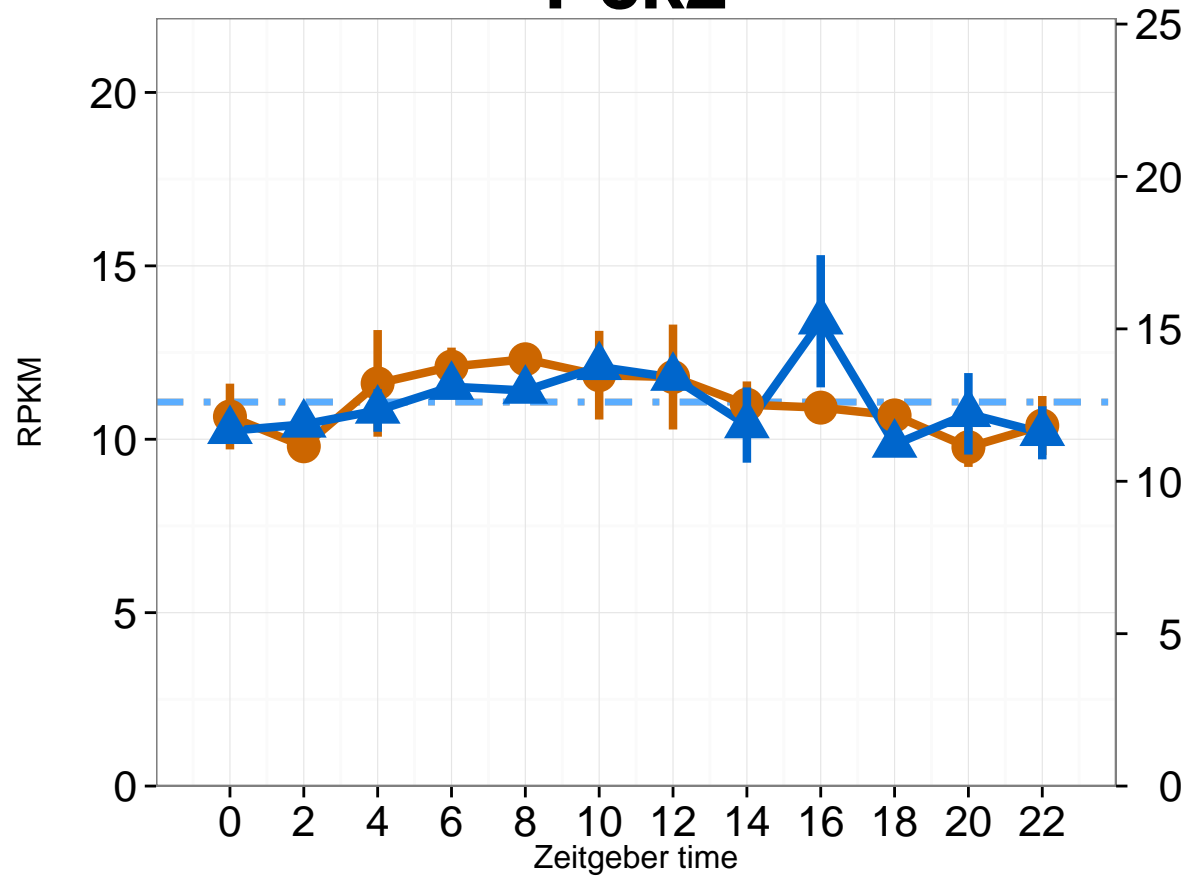

## Pck2

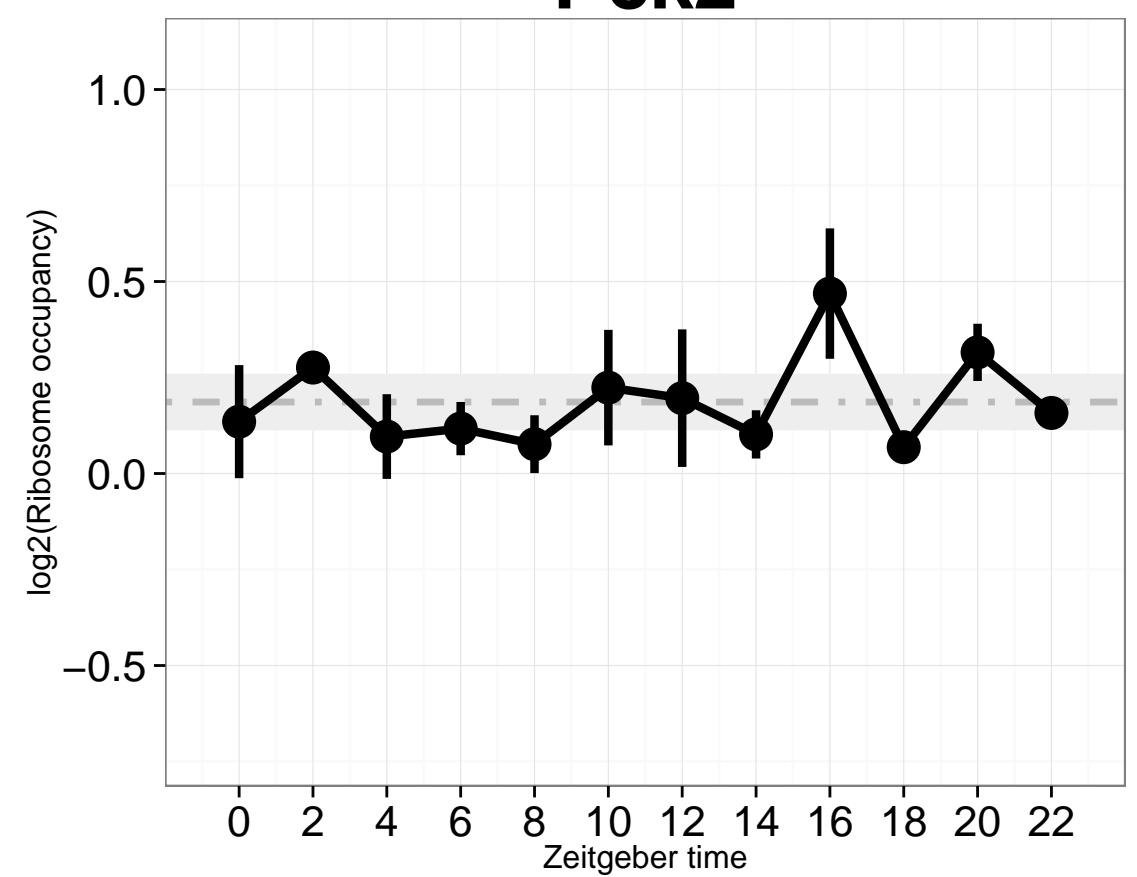

Supplement: Supplementary file 4322 [file 1]

## Sod2

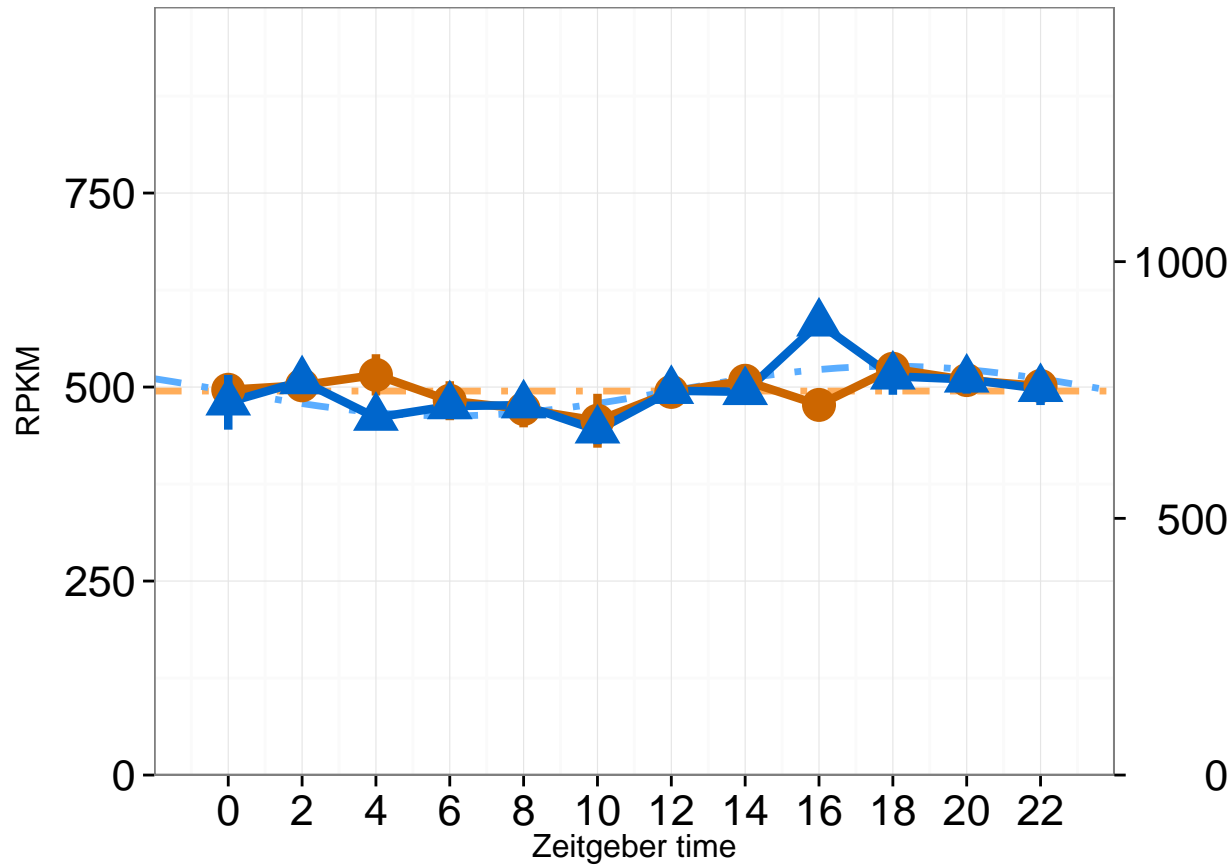

## Sod2

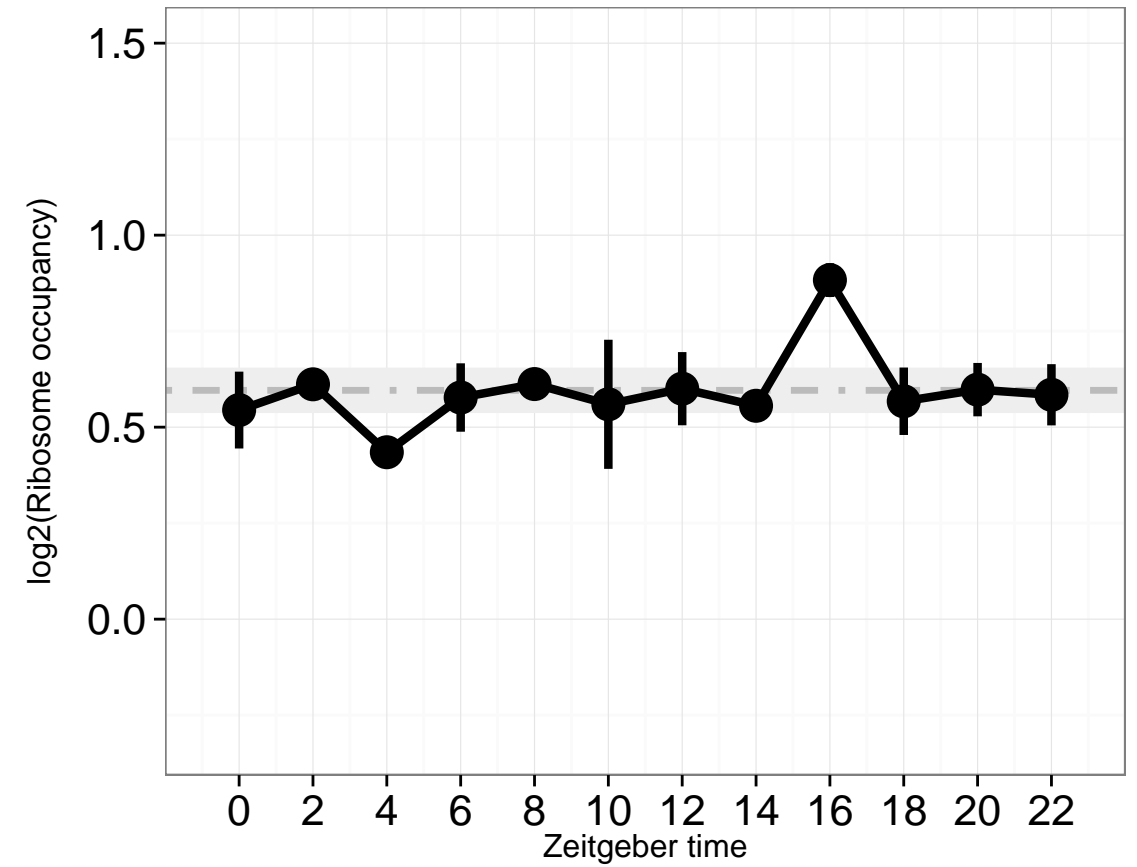

Supplement: Supplementary file 4323 [file 1]

## Ywhaq

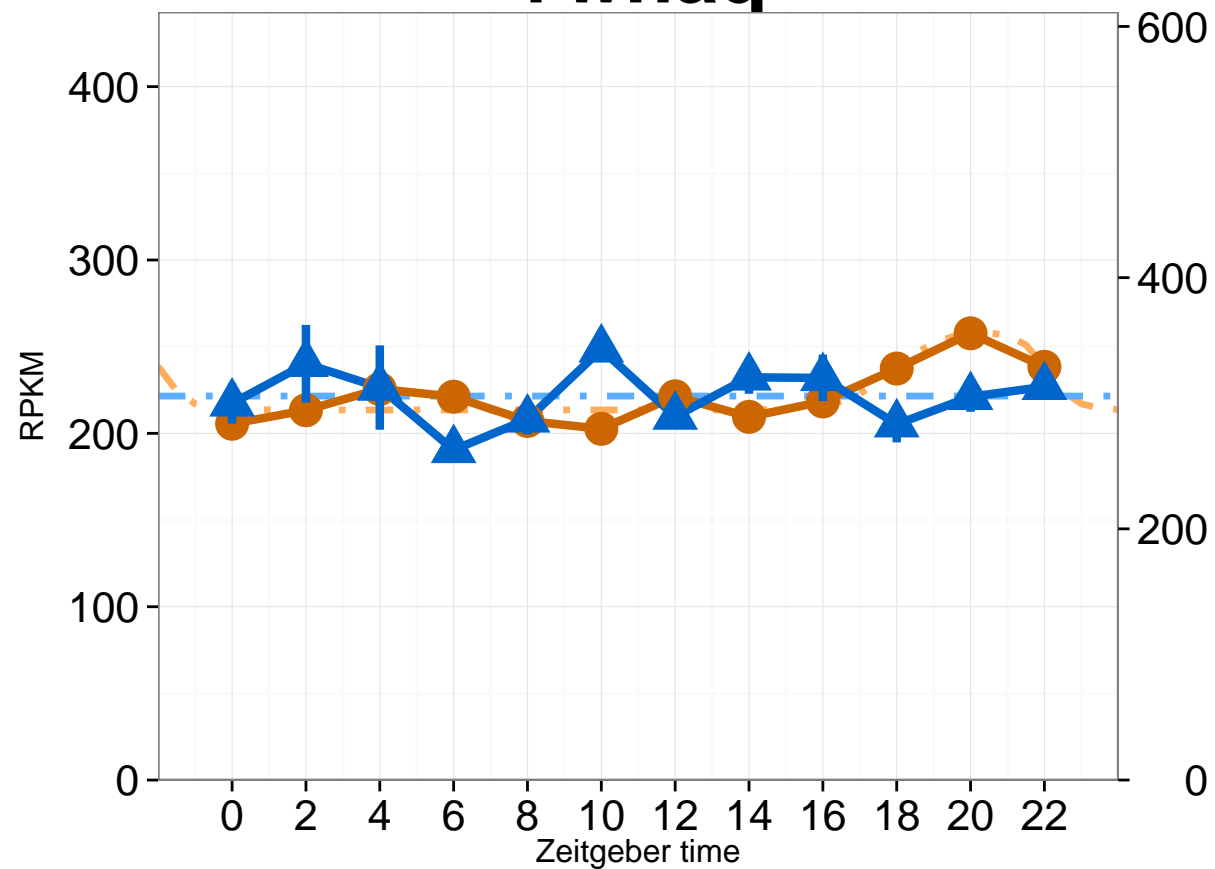

## Ywhaq

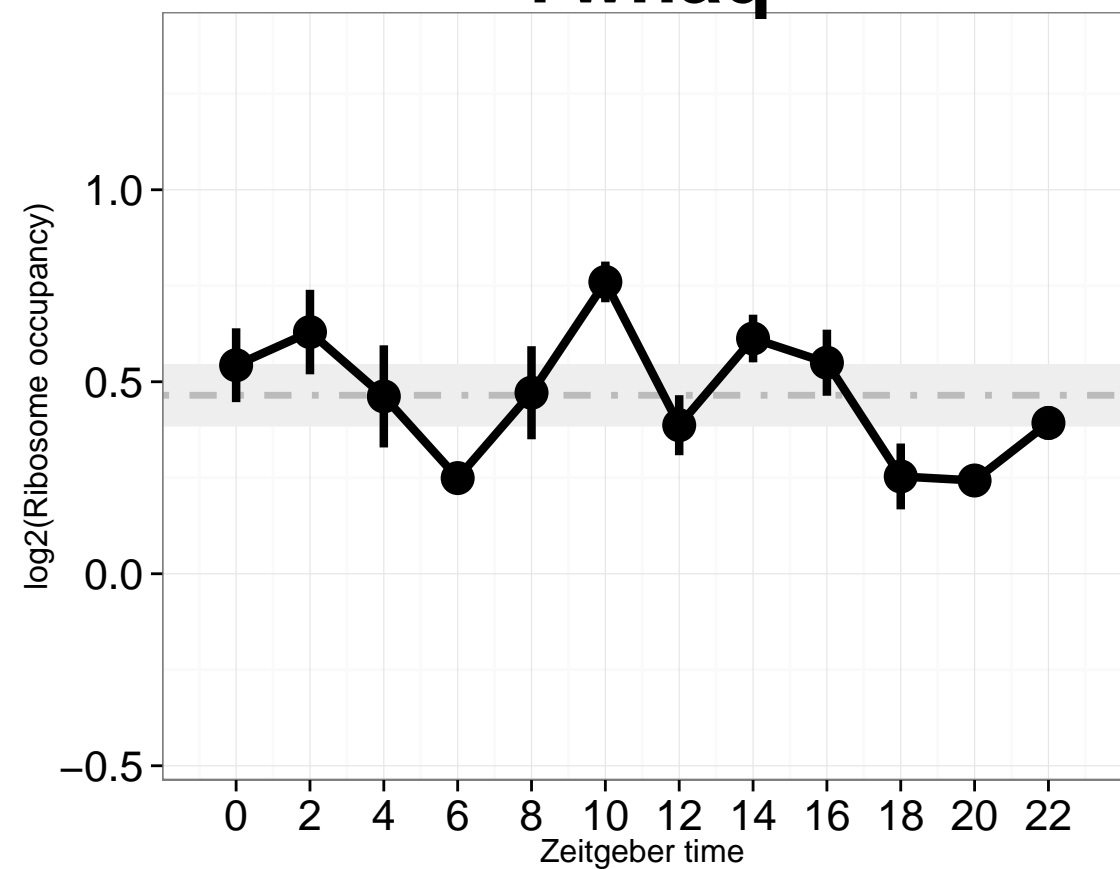

Supplement: Supplementary file 4324 [file 1]

# Nampt

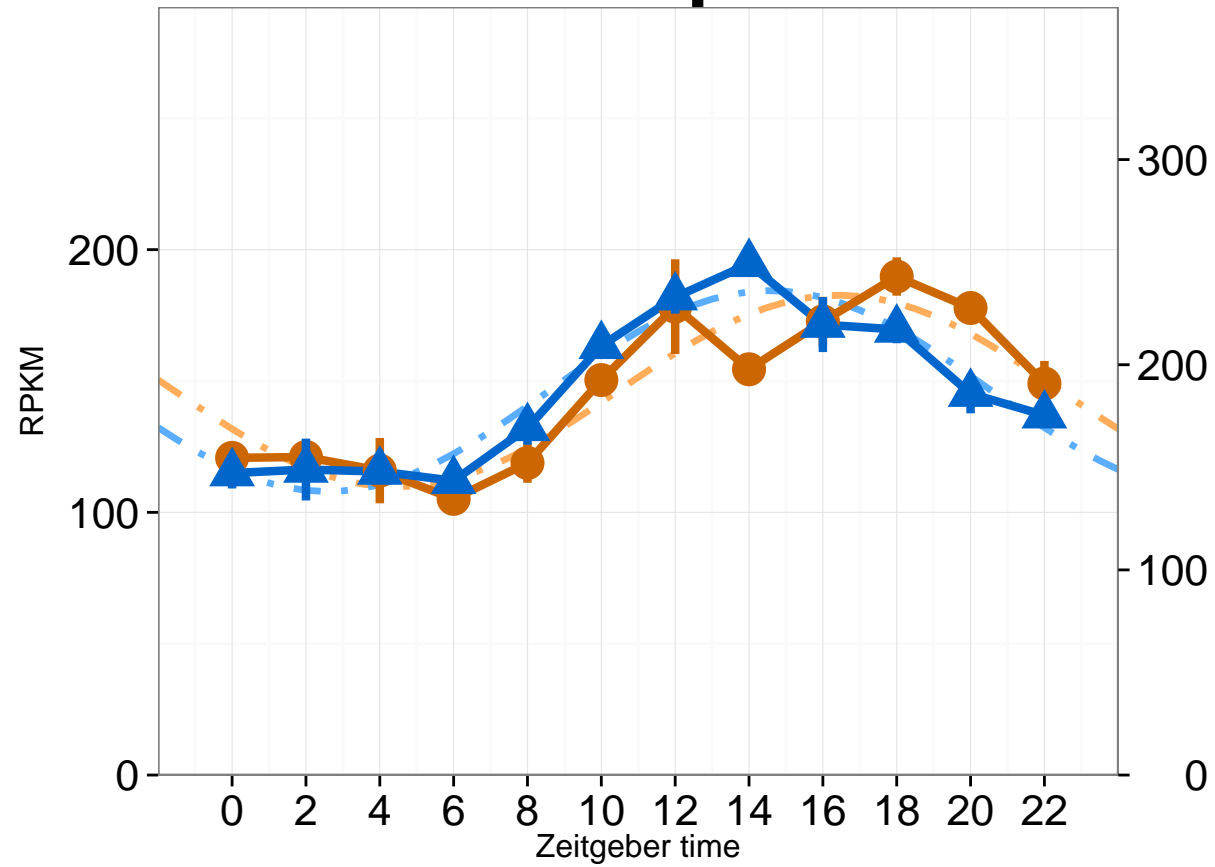

# Nampt

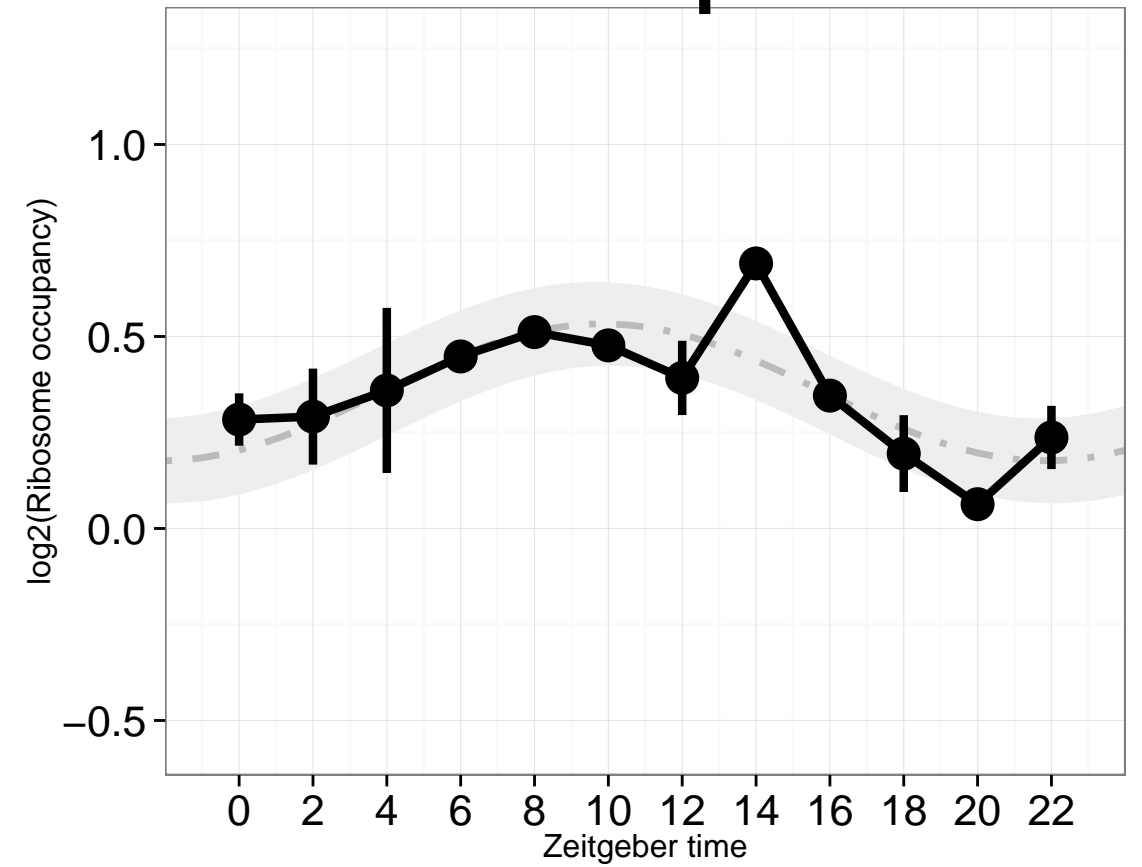

Supplement: Supplementary file 4325 [file 1]

# Trip12

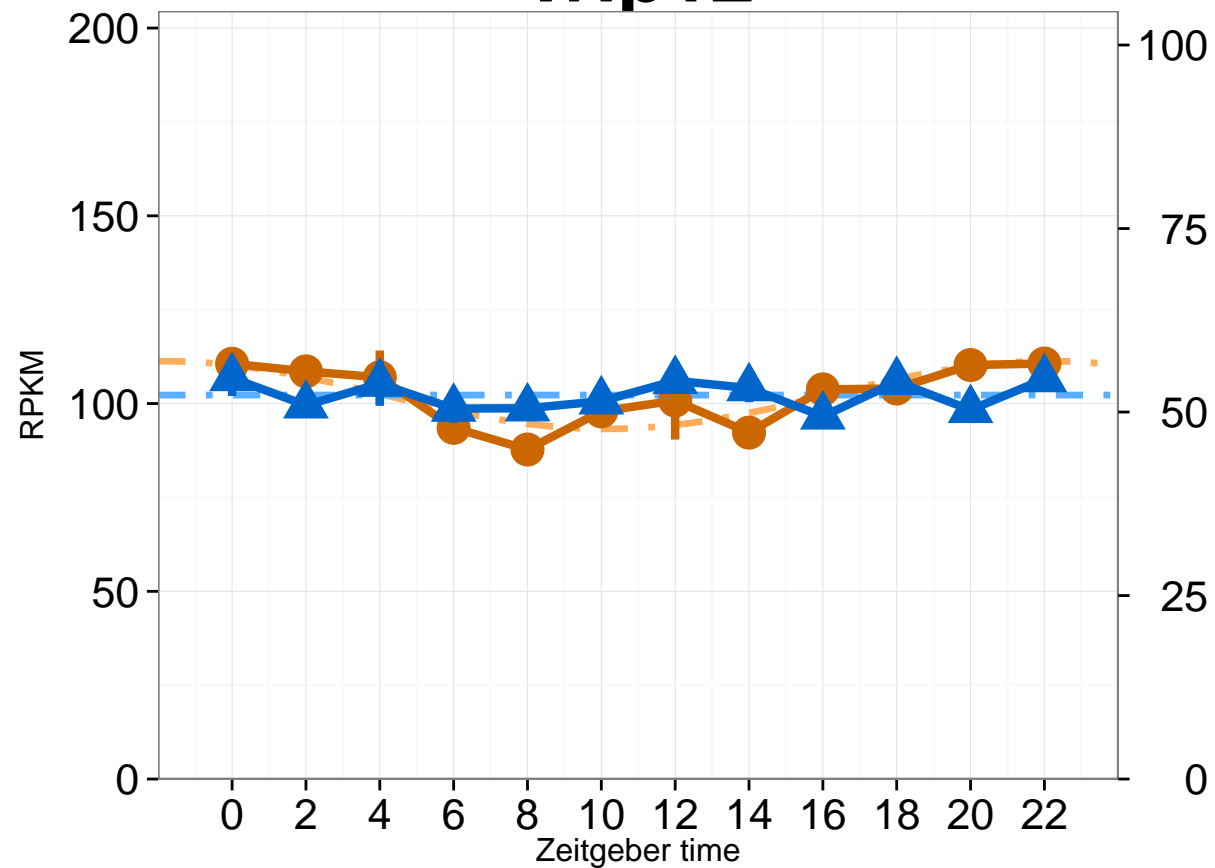

# Trip12

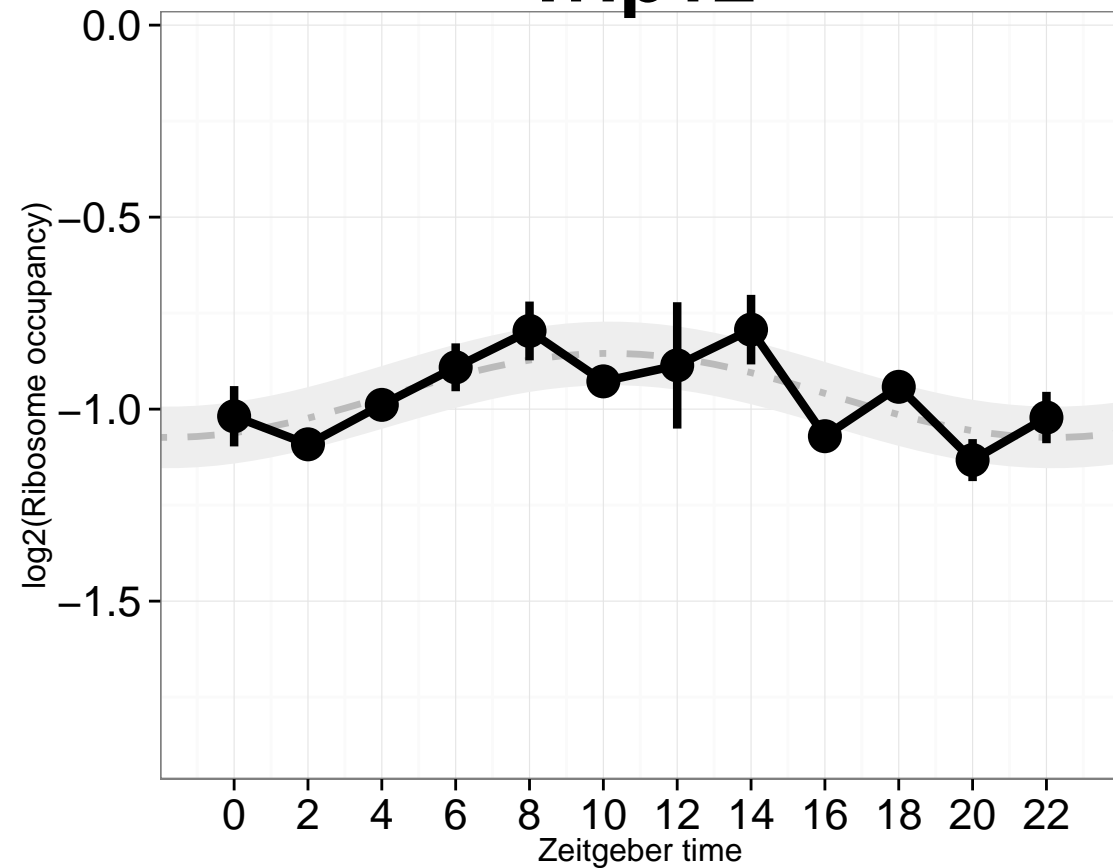

Supplement: Supplementary file 4326 [file 1]

## Fzd8

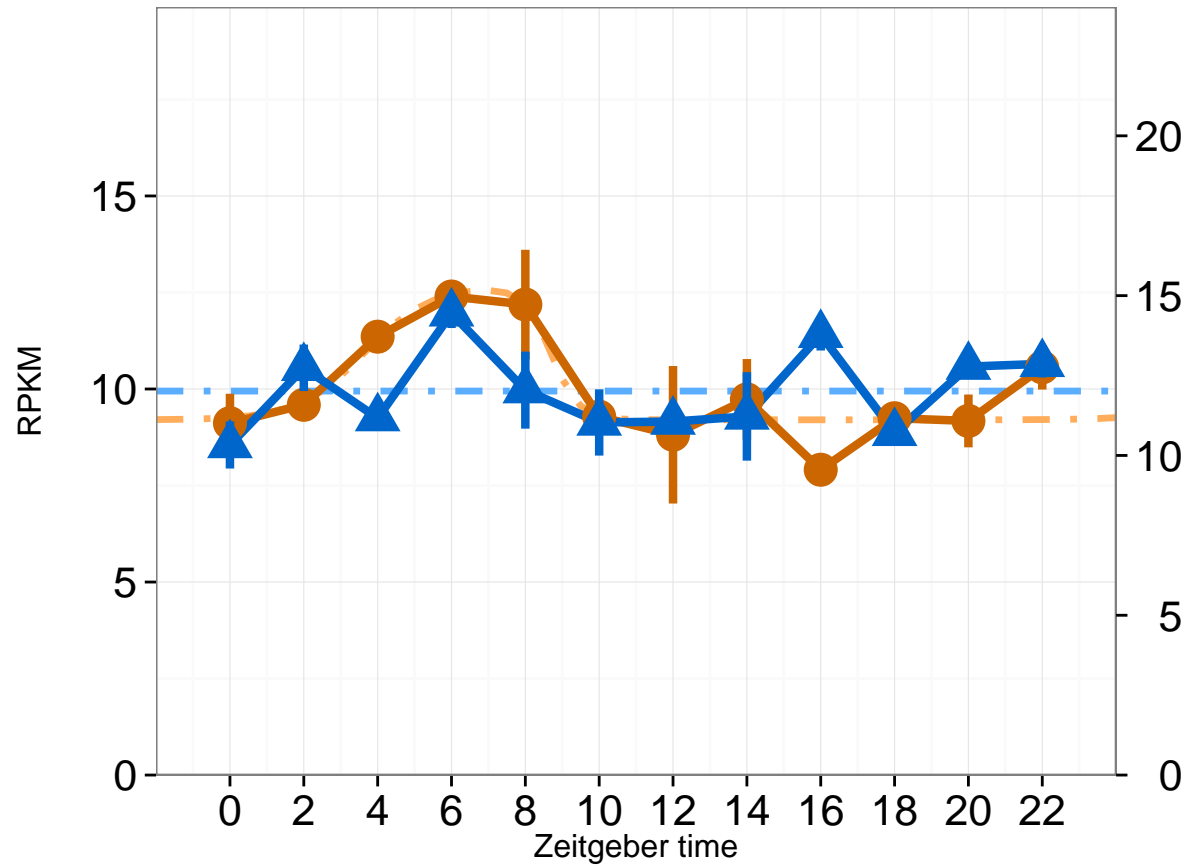

## Fzd8

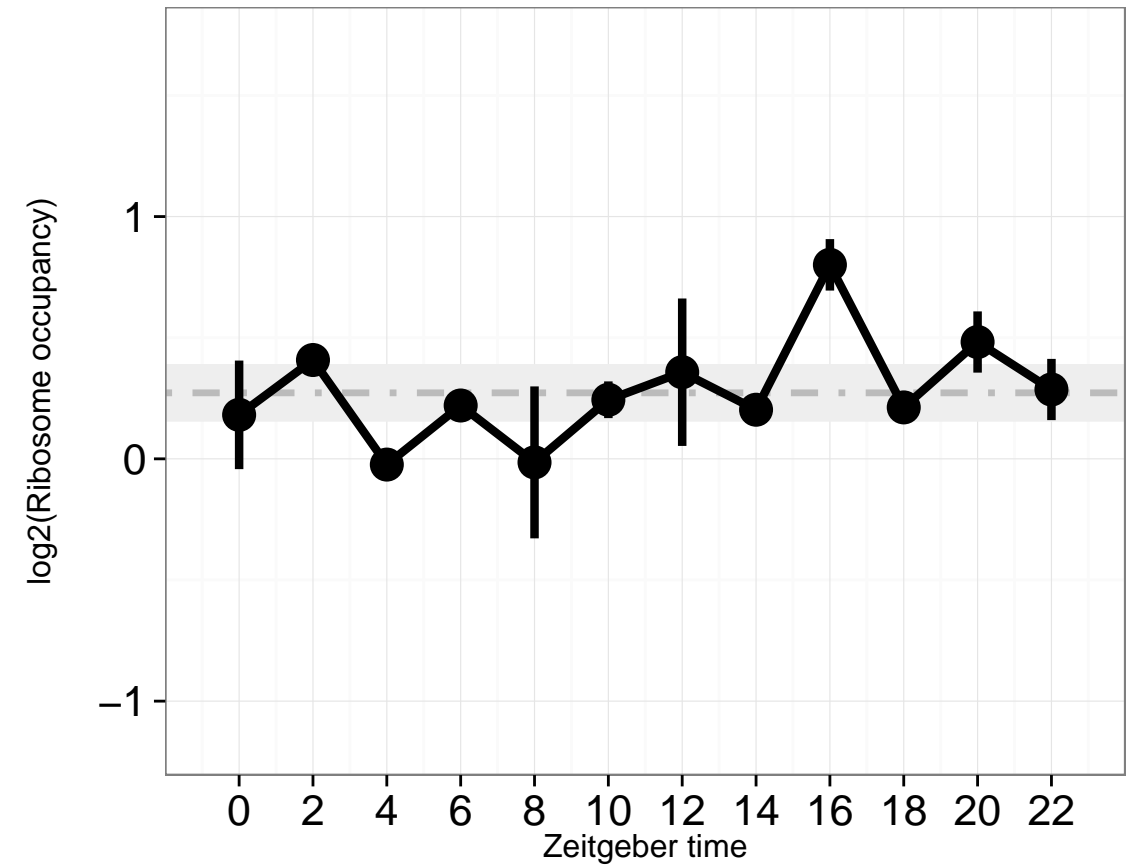

Supplement: Supplementary file 4327 [file 1]

## Abca4

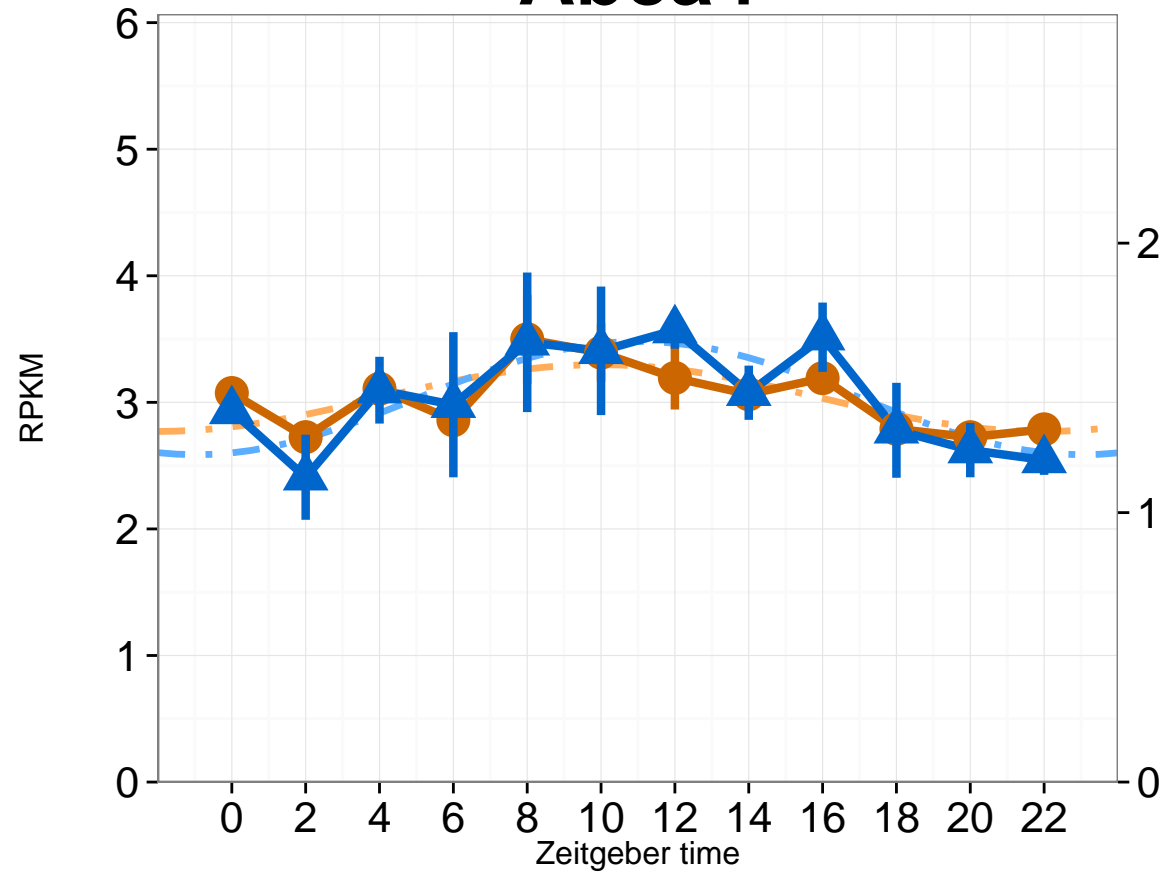

## Abca4

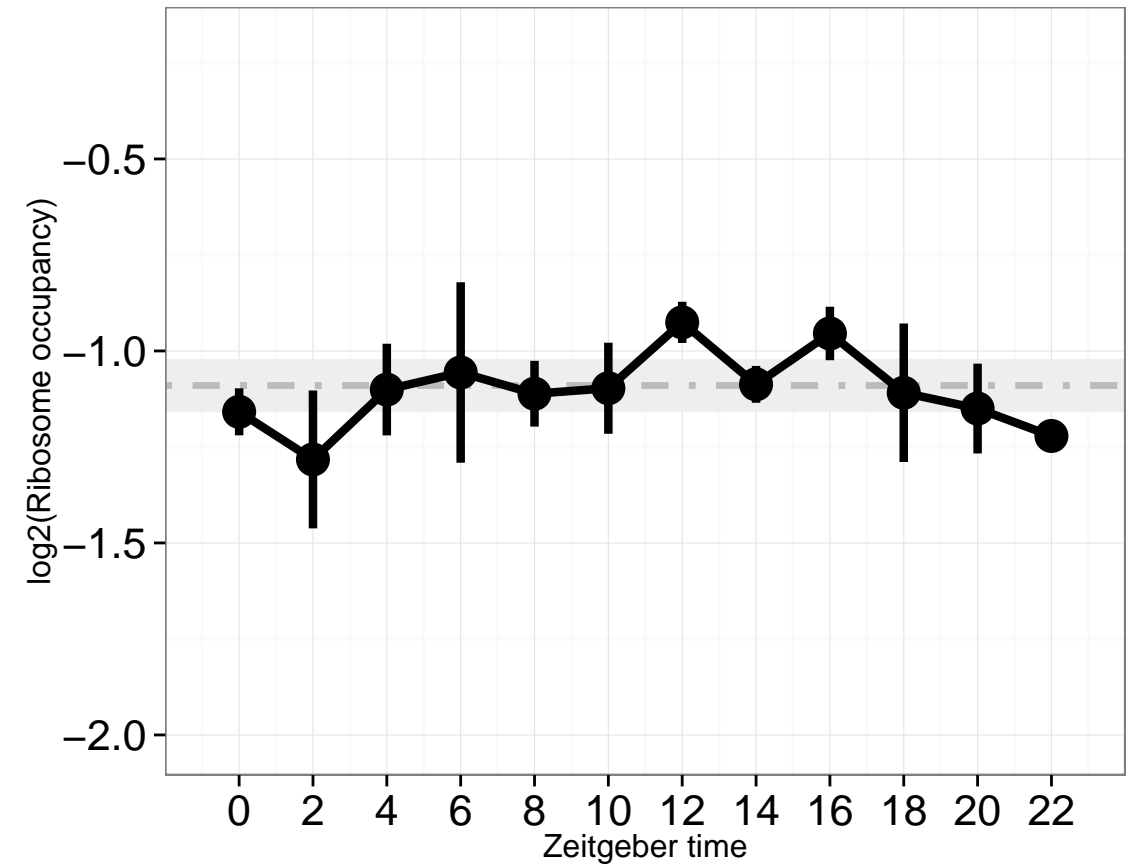

Supplement: Supplementary file 4328 [file 1]

# Zfp61

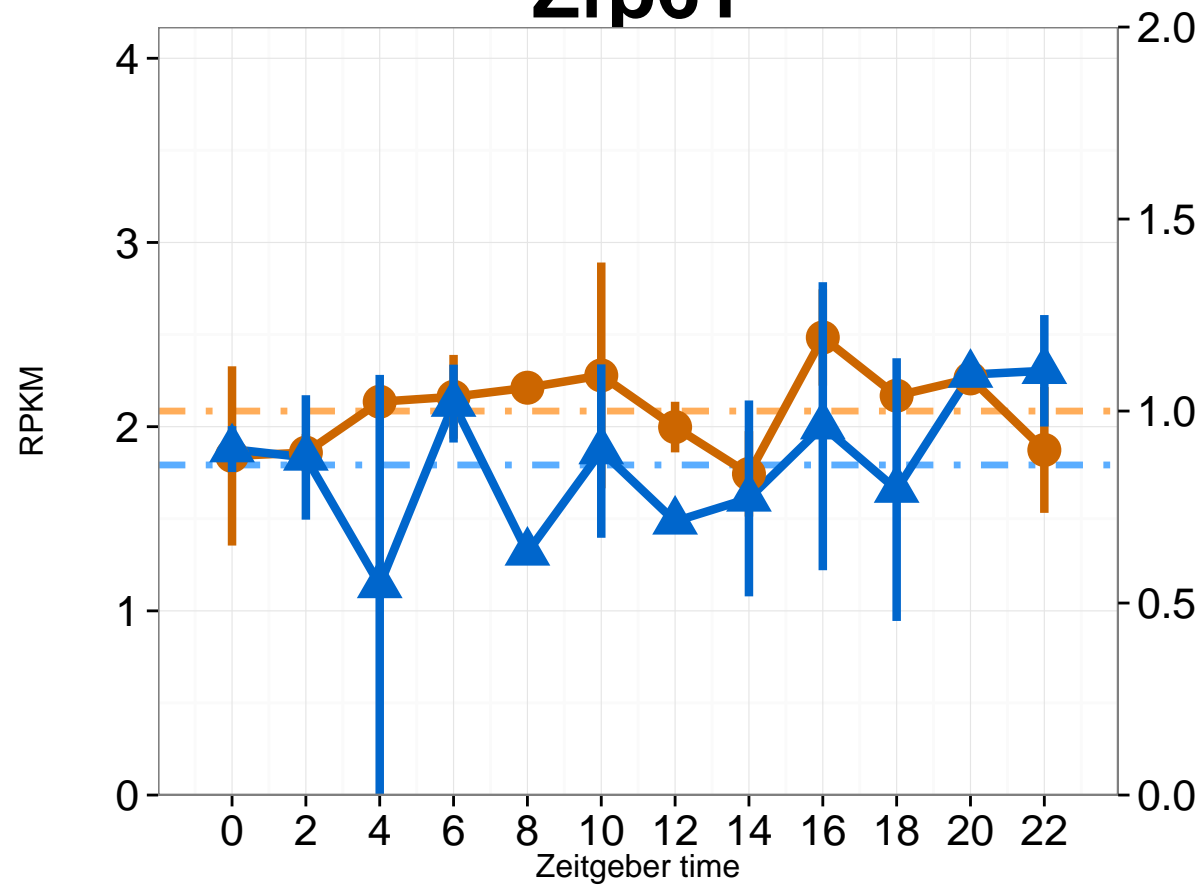

# Zfp61

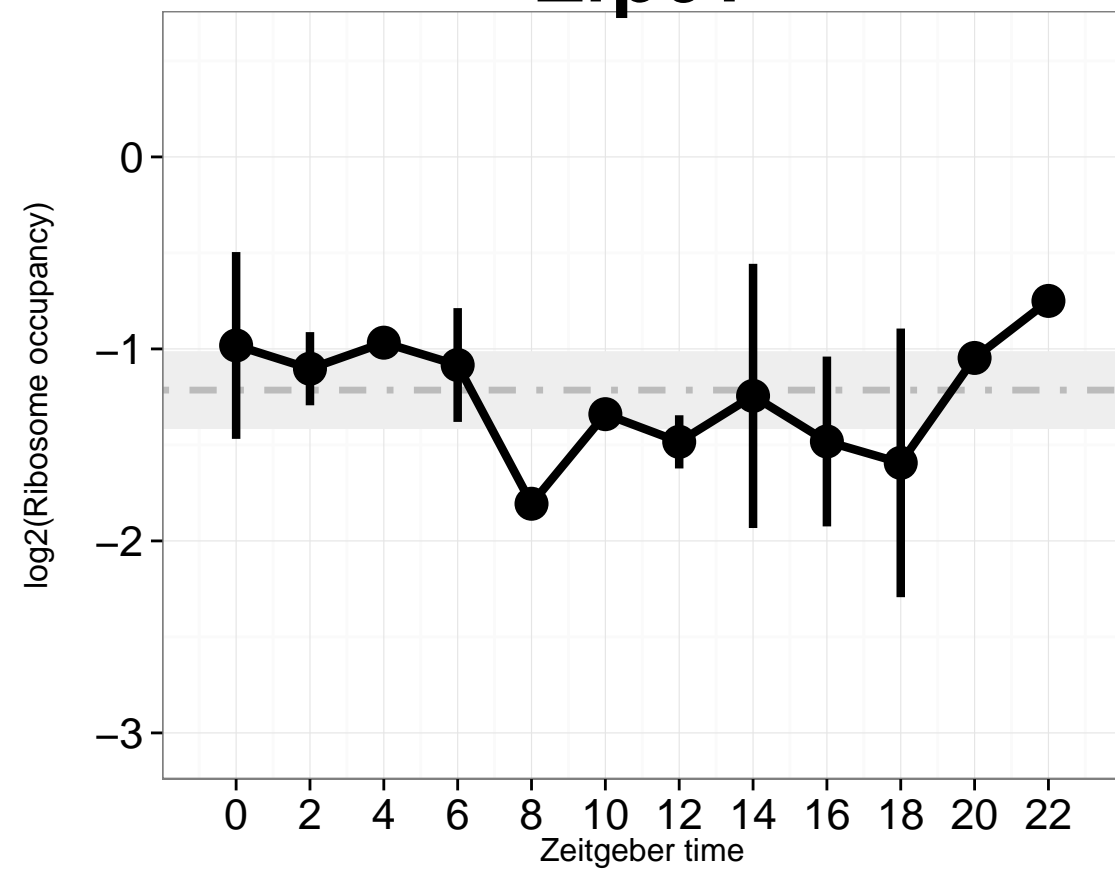

Supplement: Supplementary file 4329 [file 1]

## Carhsp1

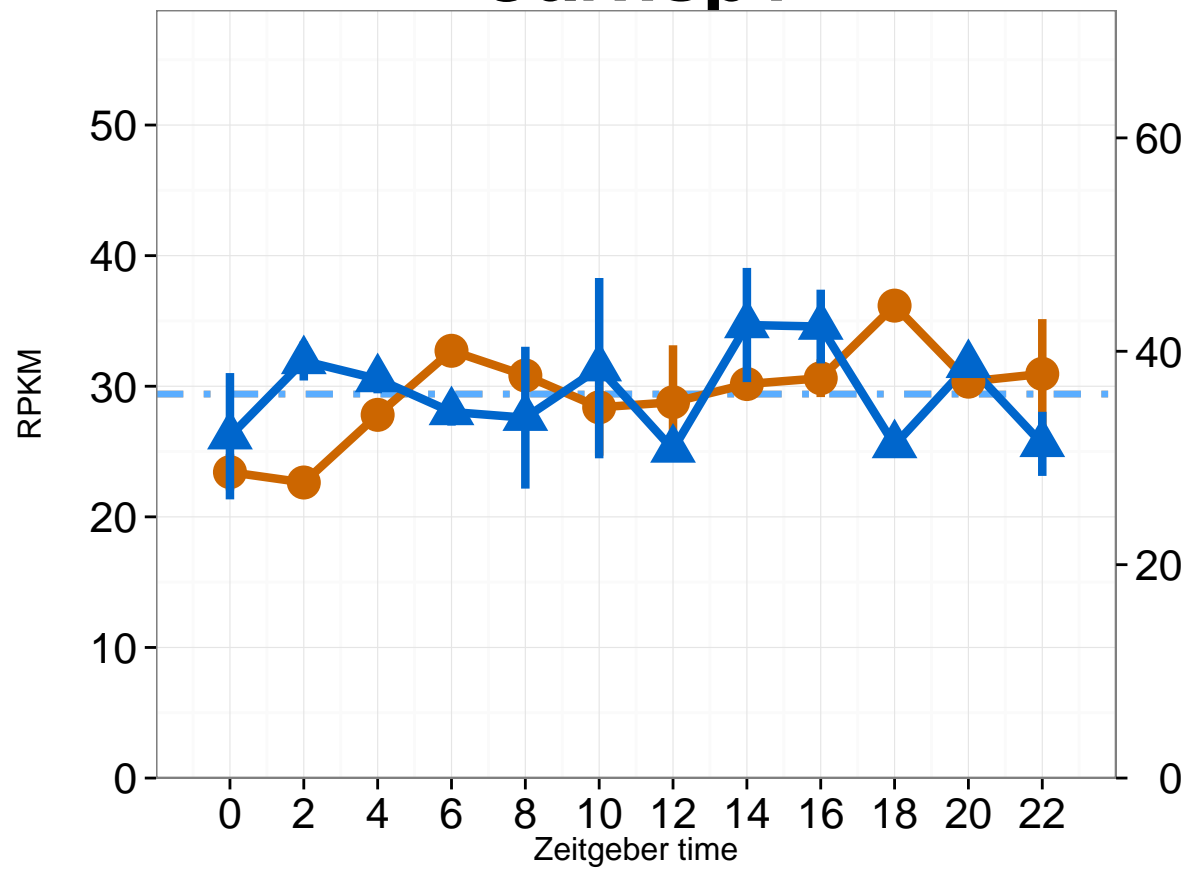

## Carhsp1

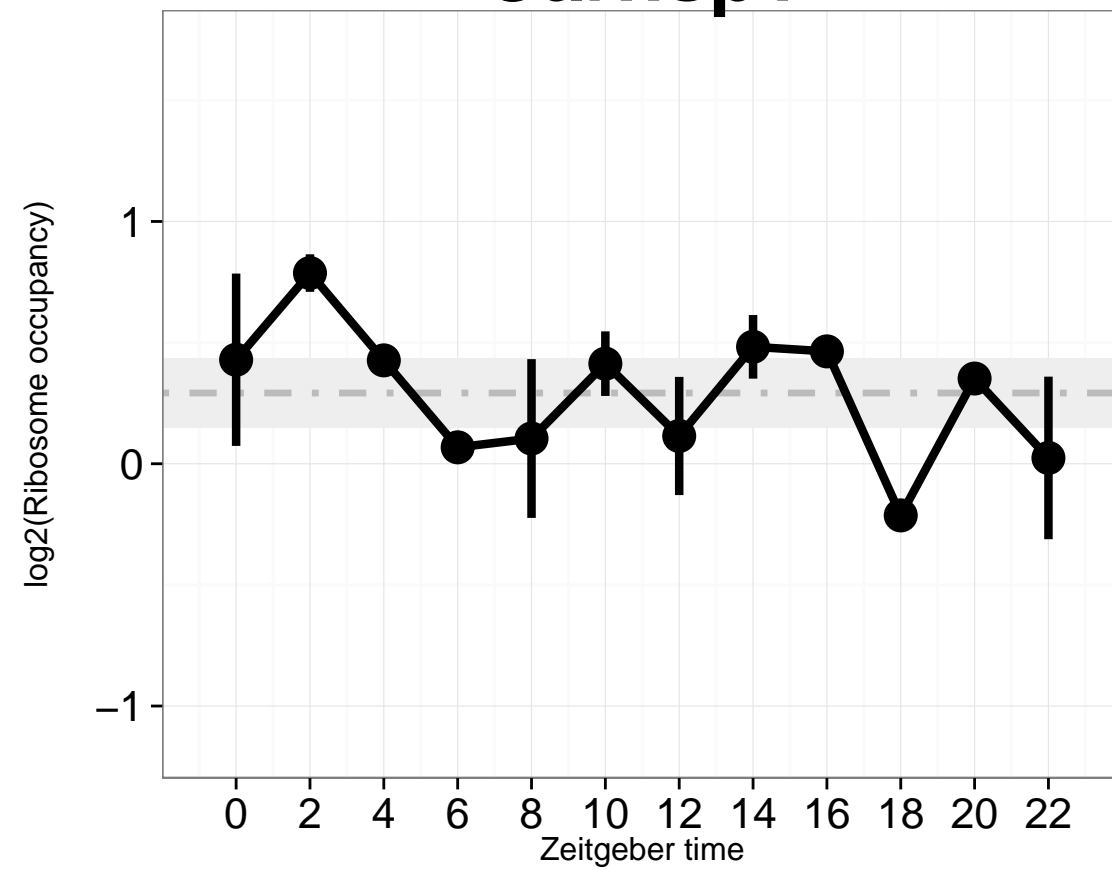

Supplement: Supplementary file 4330 [file 1]

# Fam49a

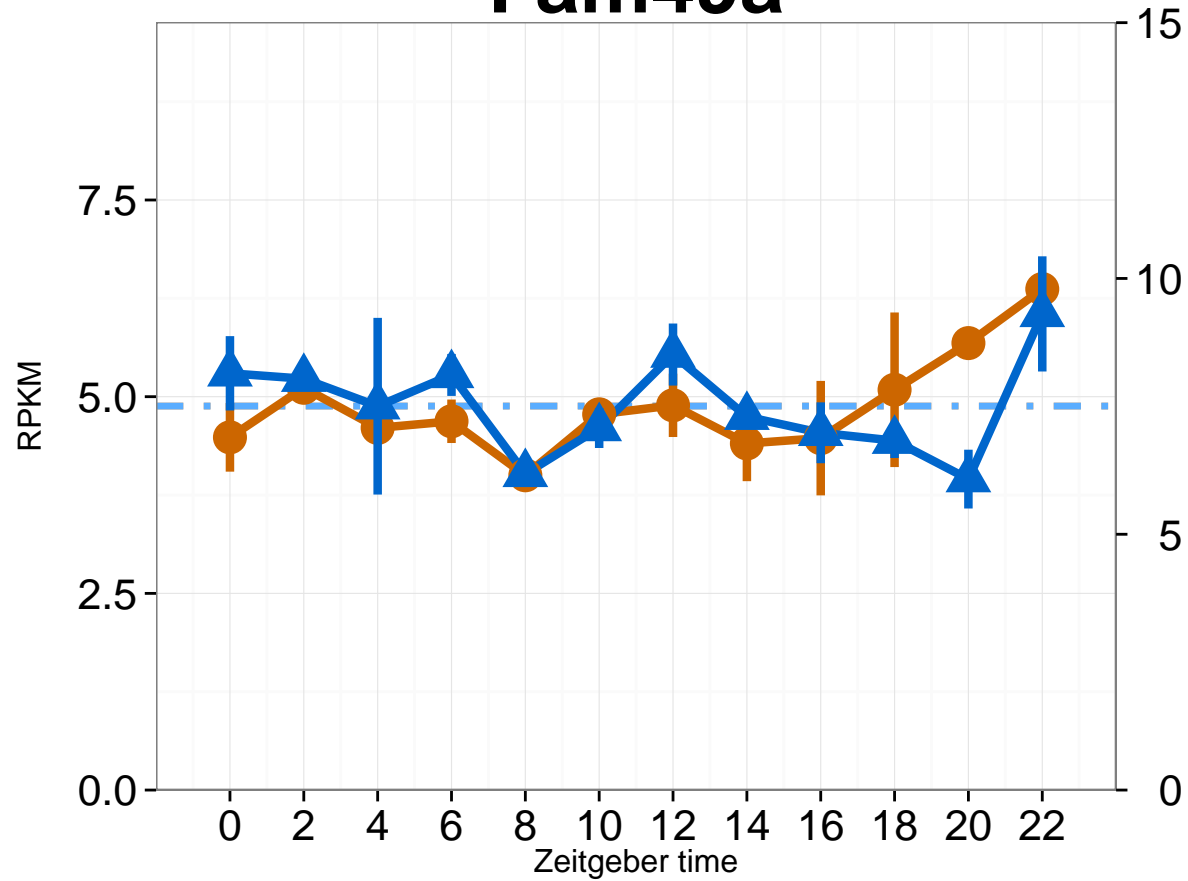

# Fam49a

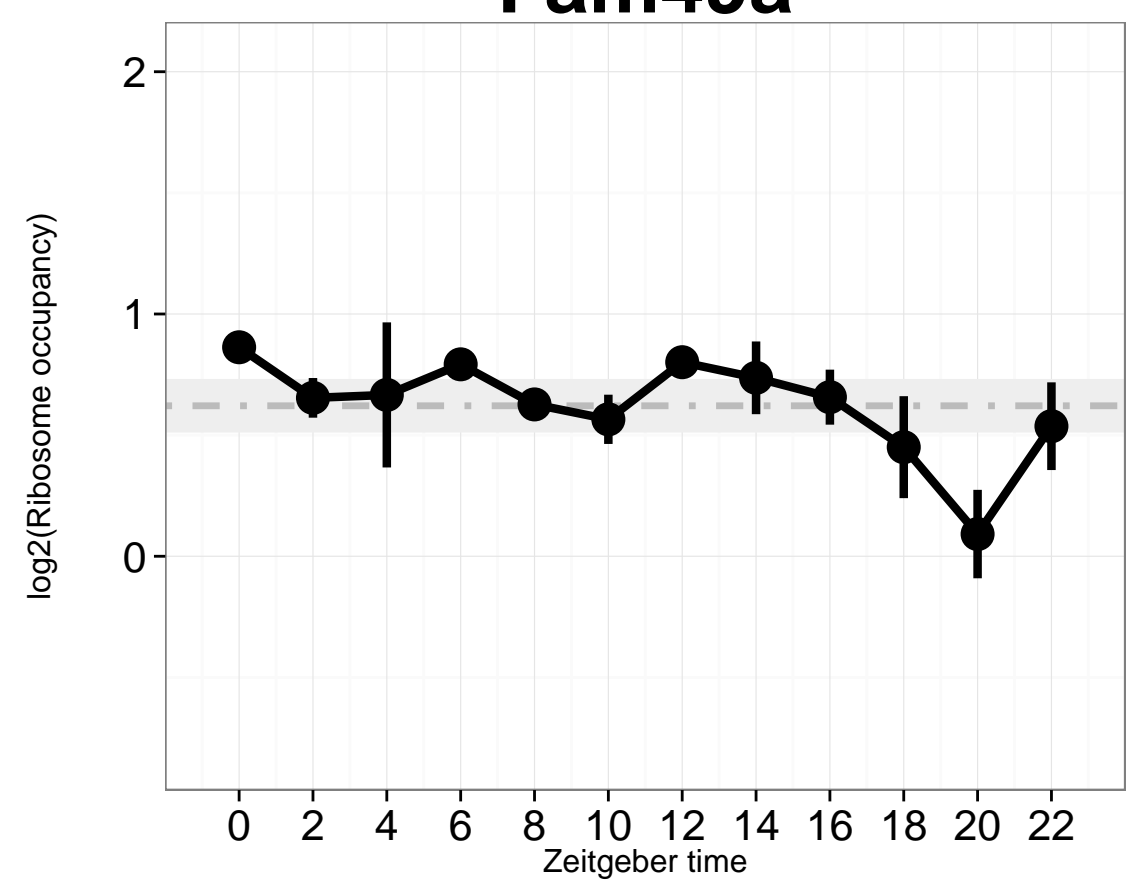

Supplement: Supplementary file 4331 [file 1]

## Wnt4

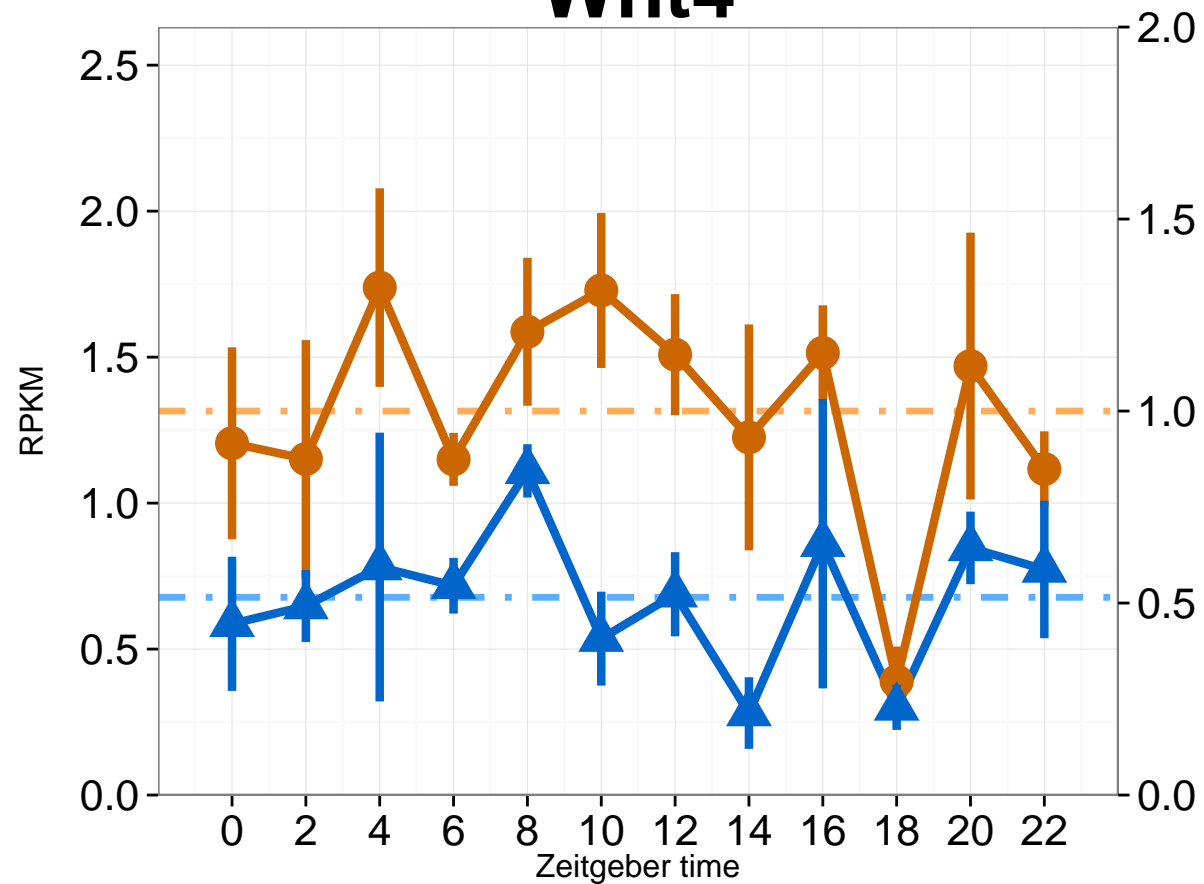

## Wnt4

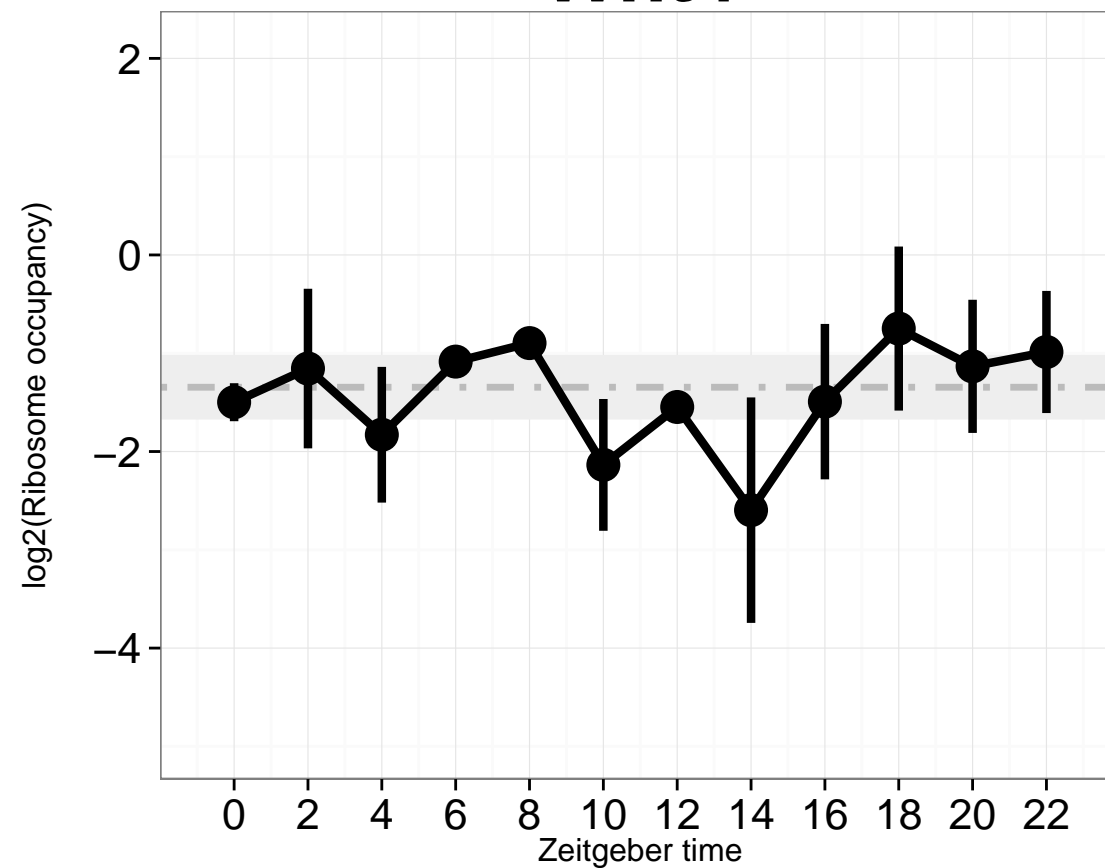

Supplement: Supplementary file 4332 [file 1]

## Rad50

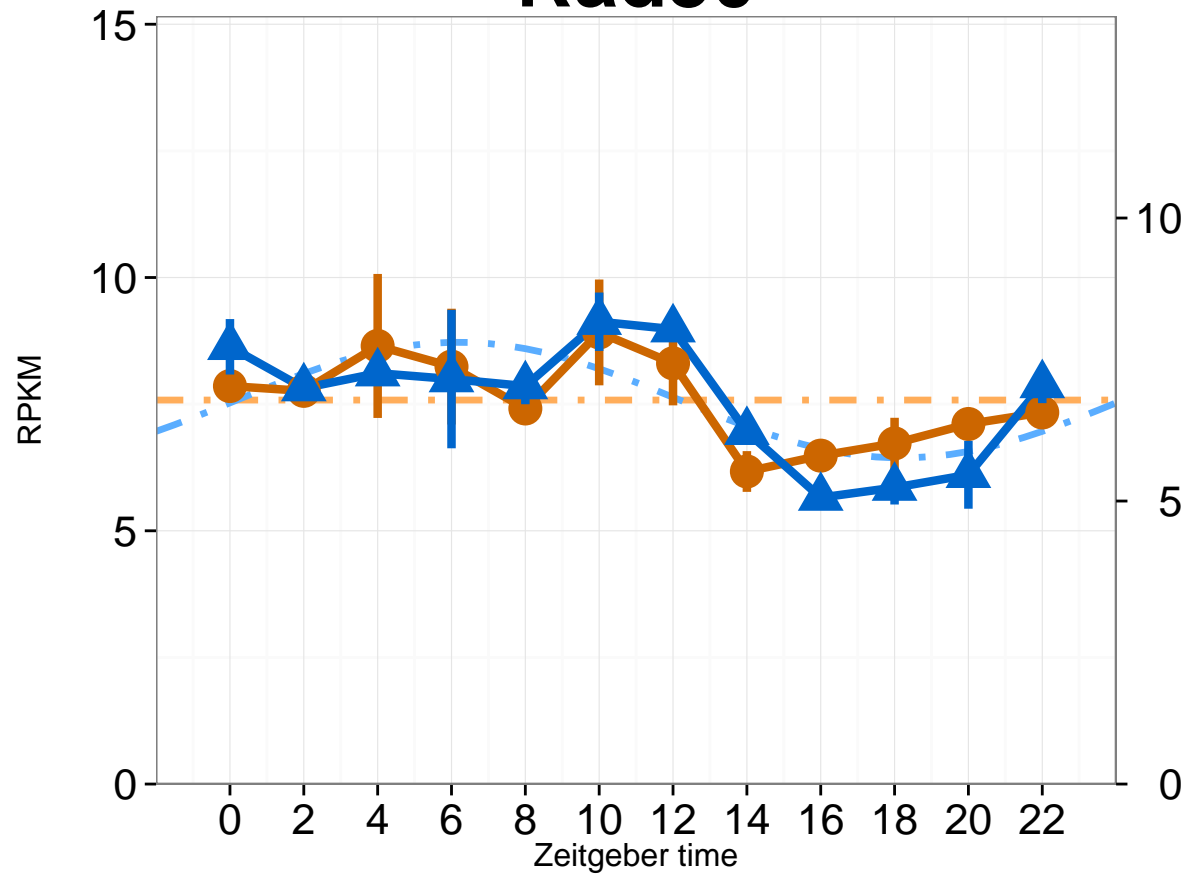

## Rad50

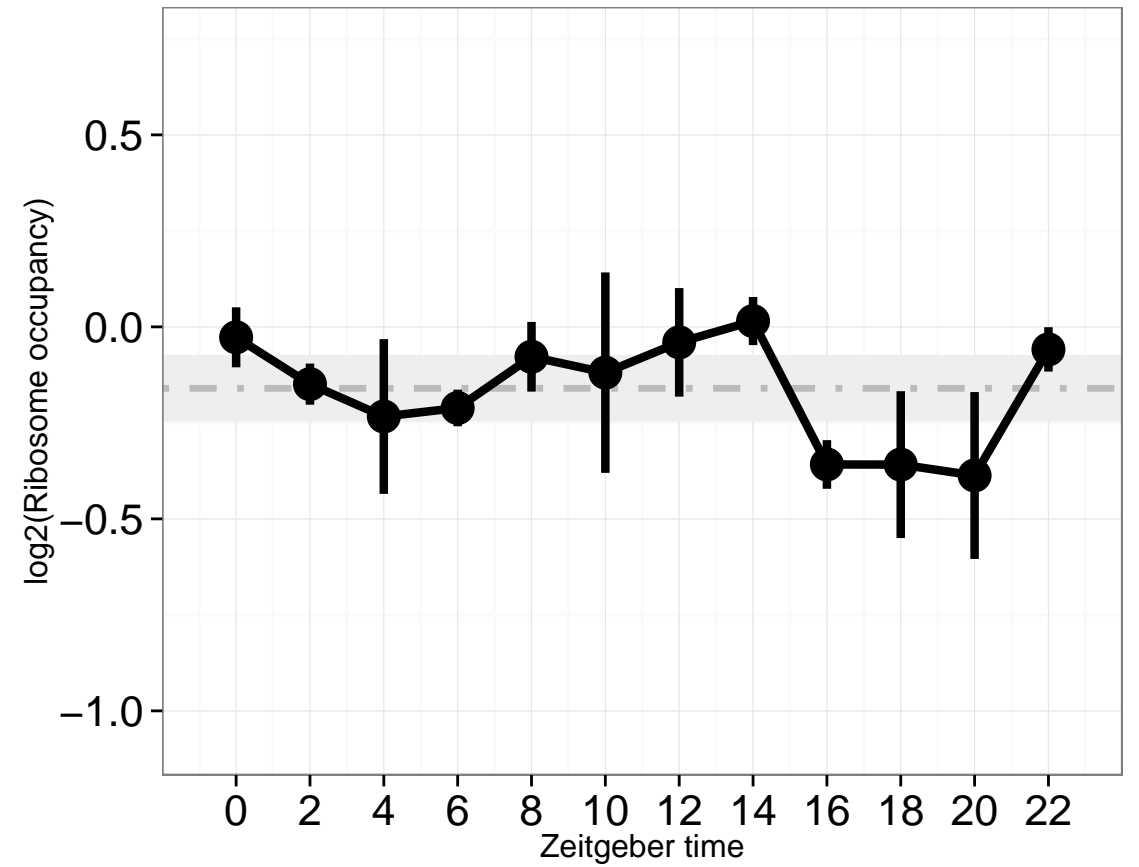

Supplement: Supplementary file 4333 [file 1]

# Map2k6

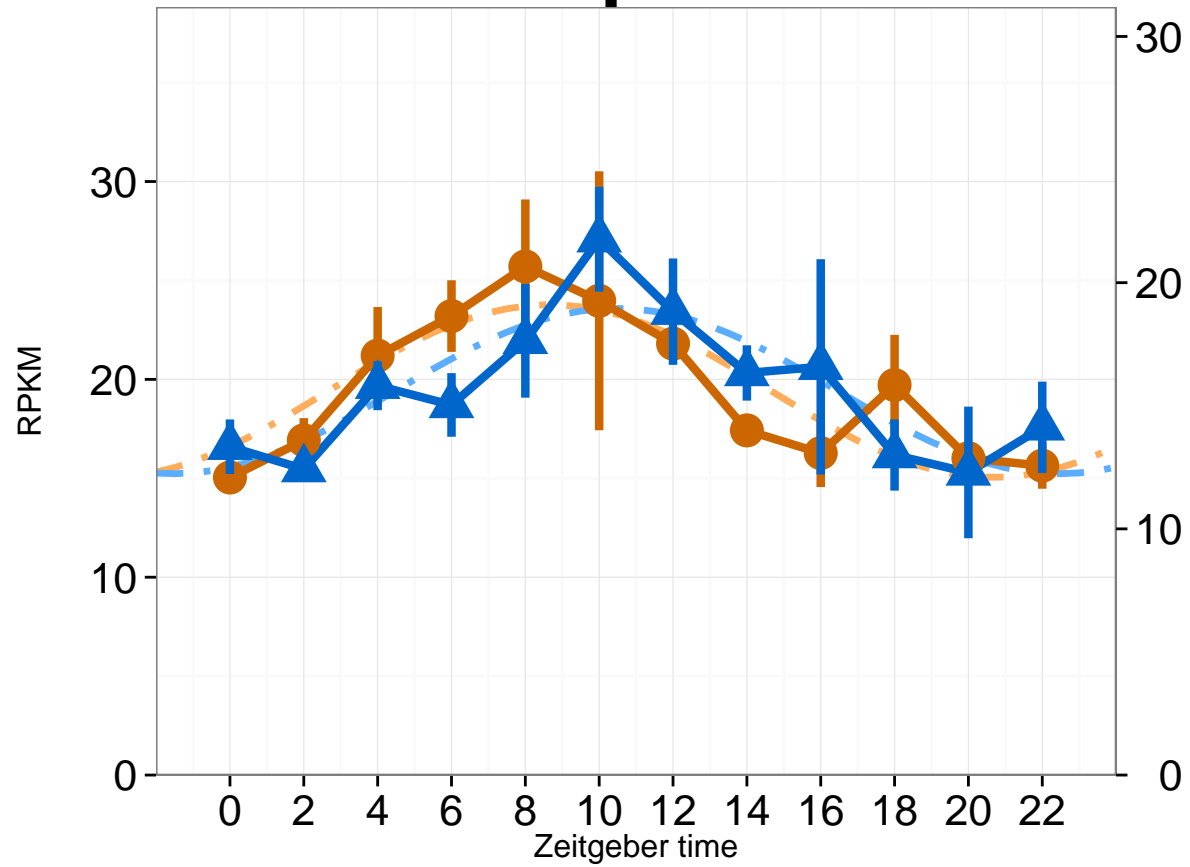

# Map2k6

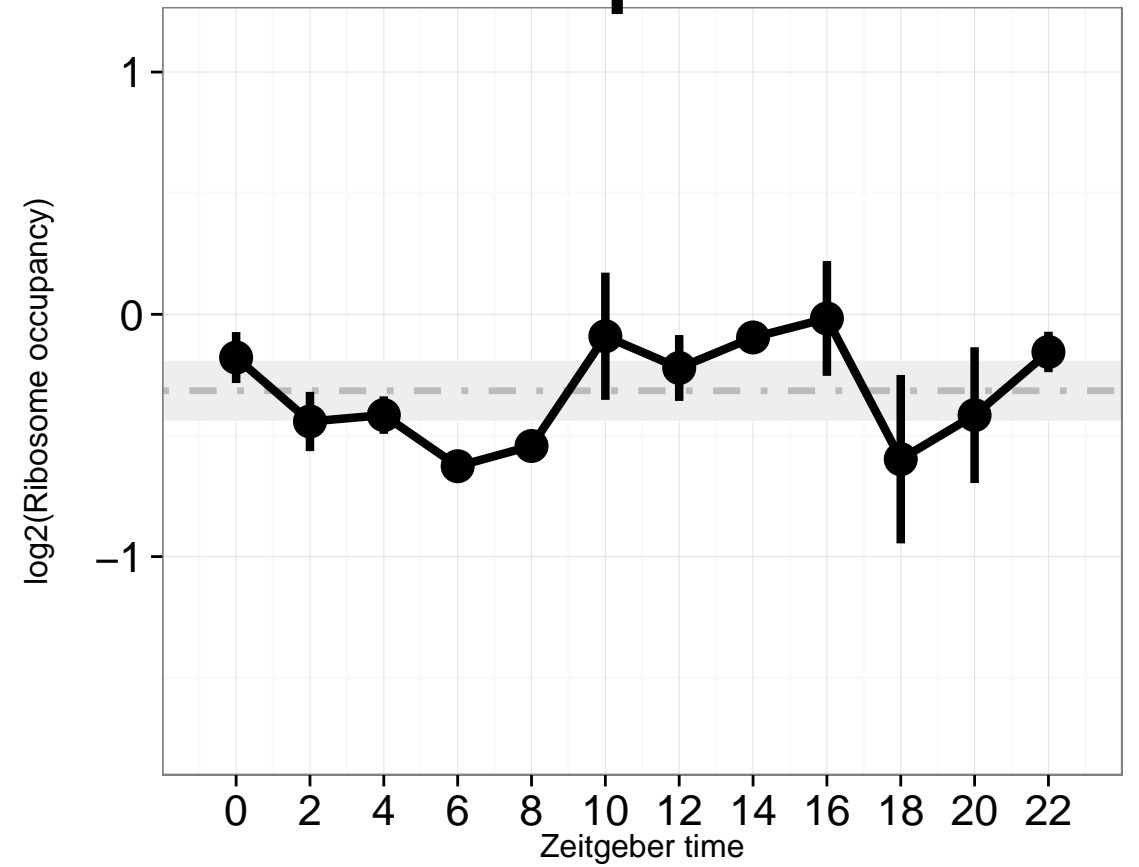

Supplement: Supplementary file 4334 [file 1]

# Frem1

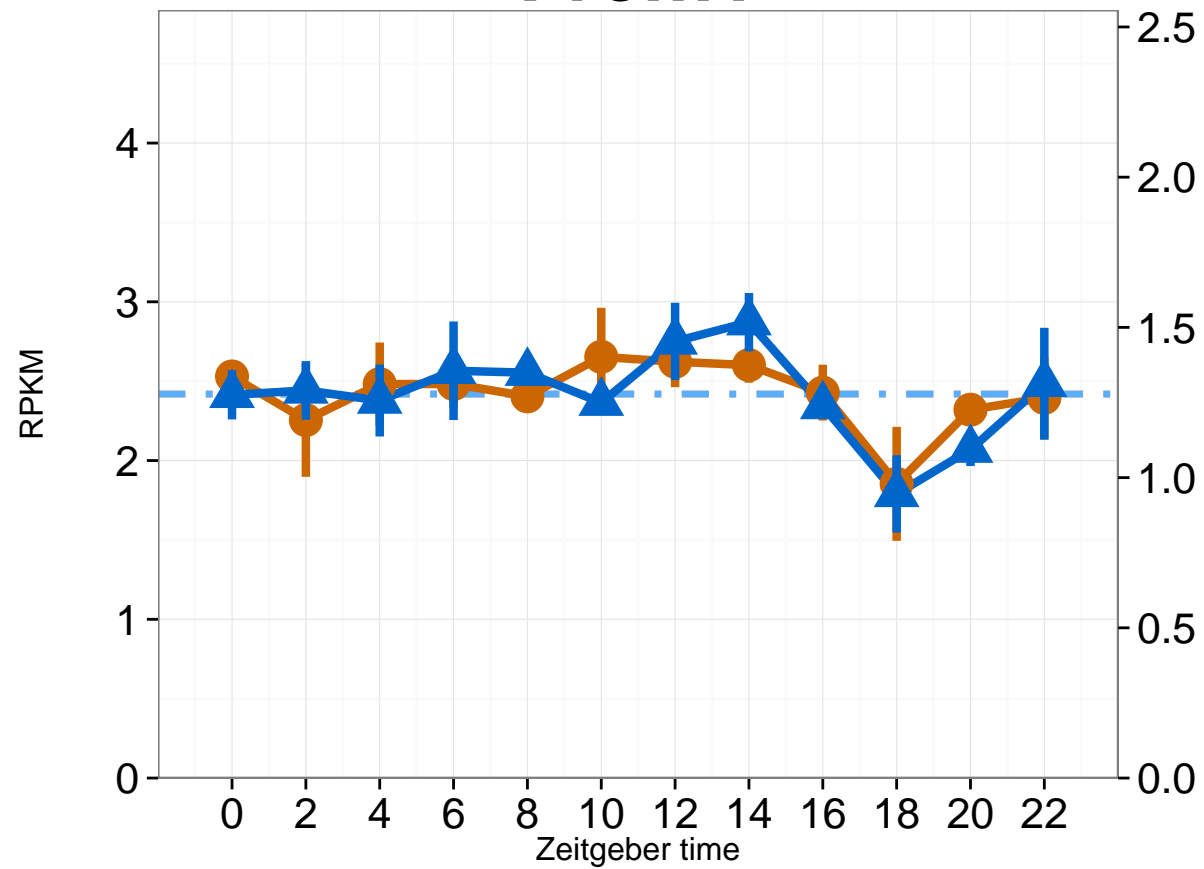

# Frem1

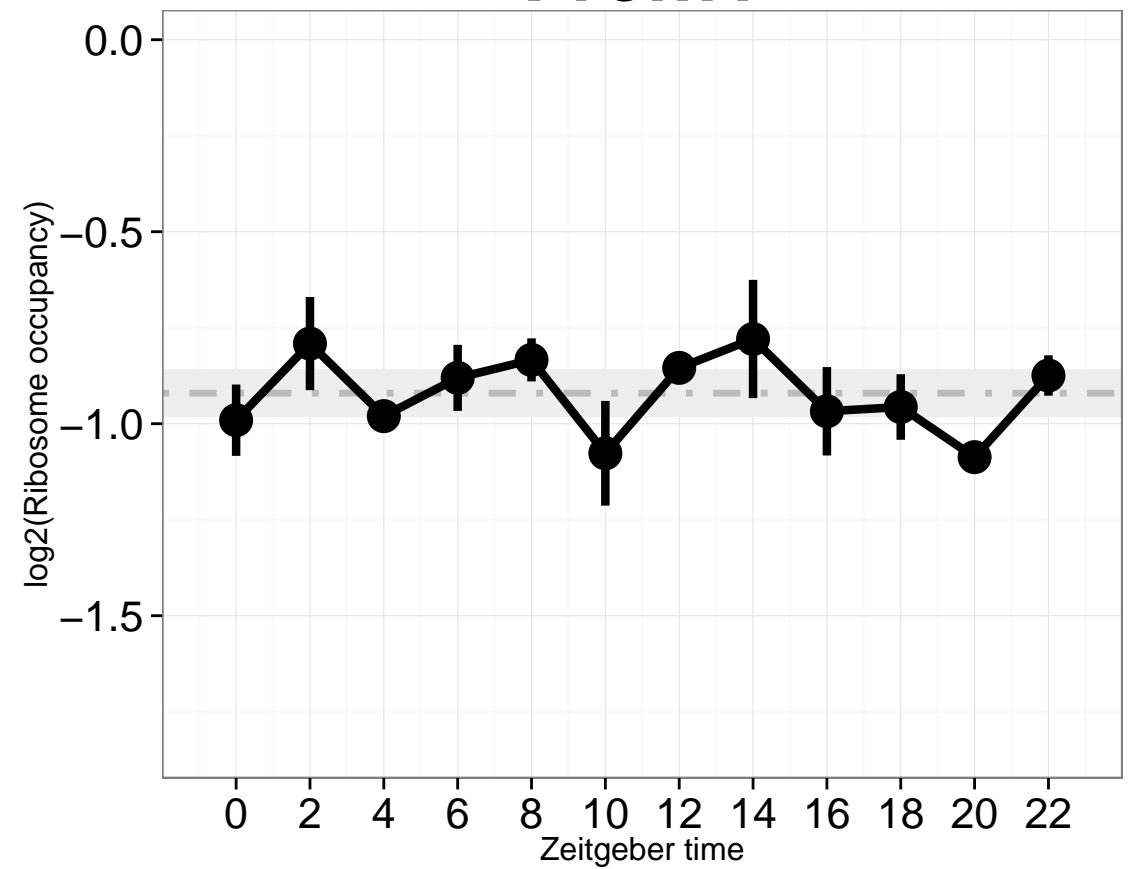

Supplement: Supplementary file 4335 [file 1]

# Gtpbp1

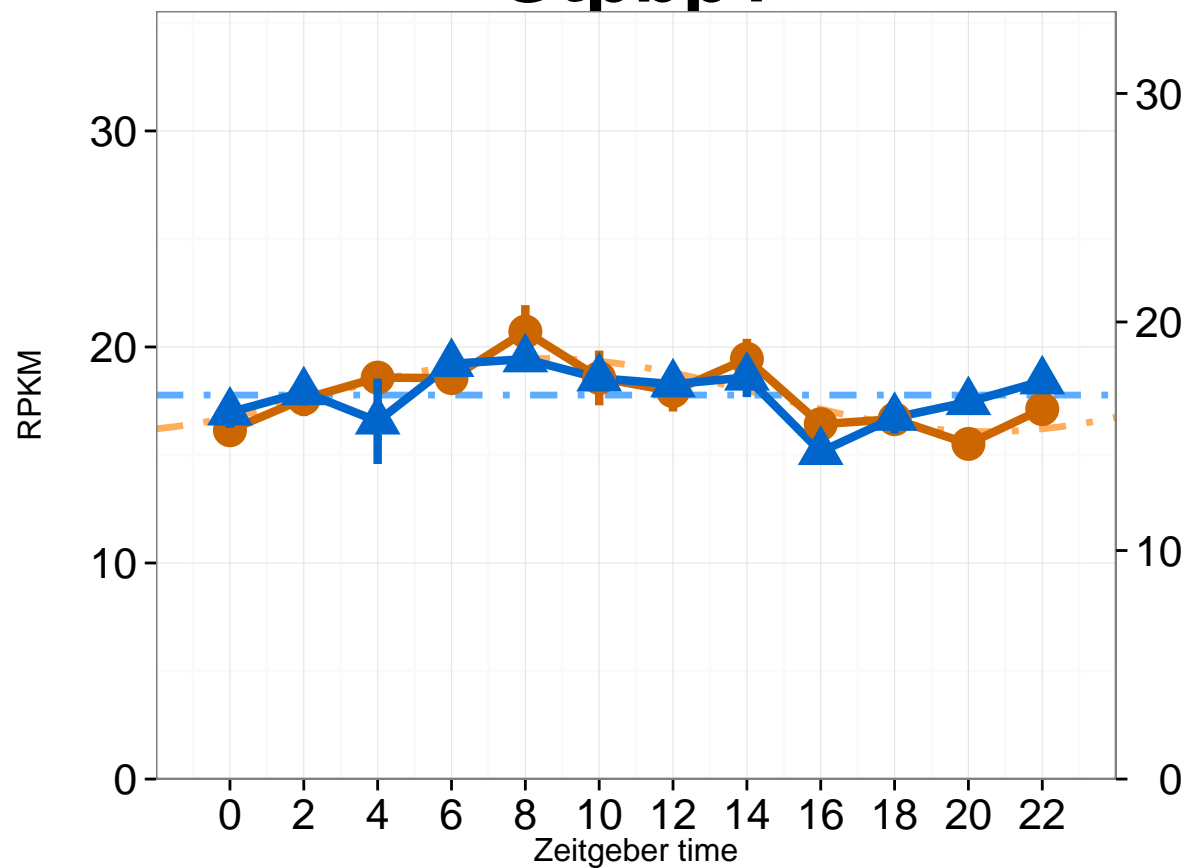

# Gtpbp1

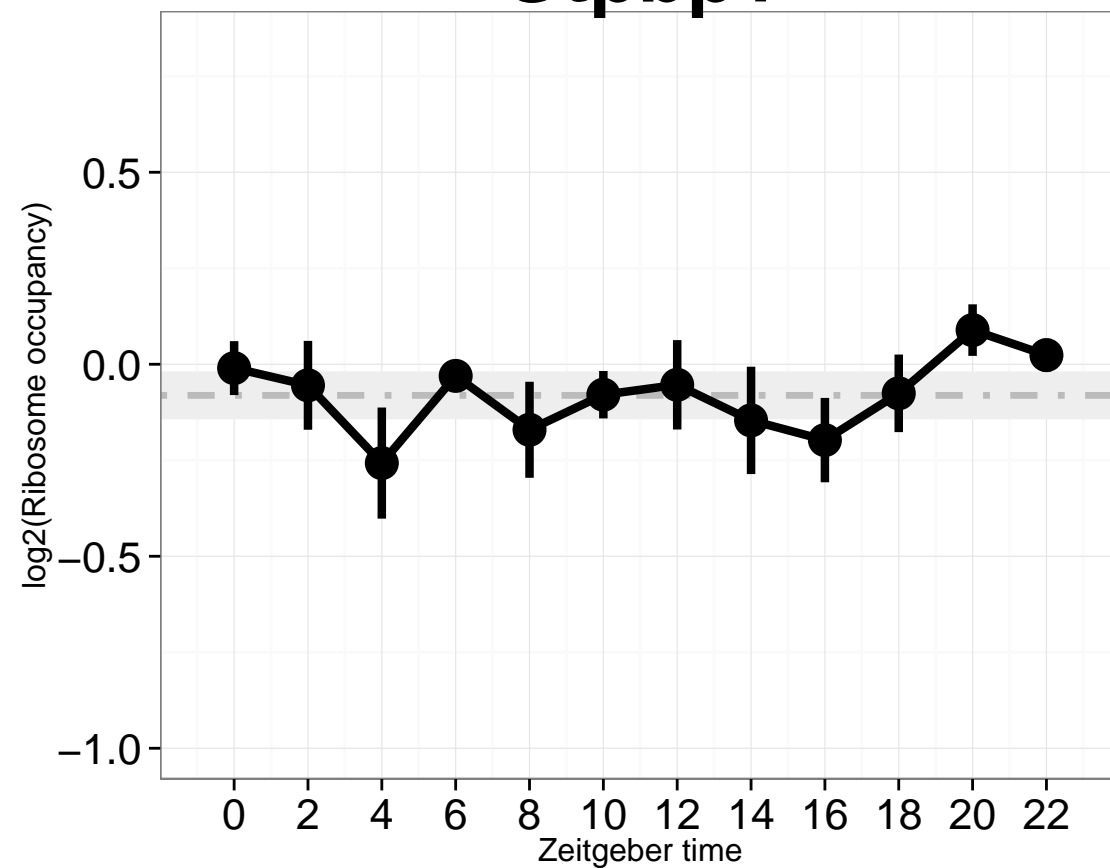

Supplement: Supplementary file 4336 [file 1]

## Rbbp9

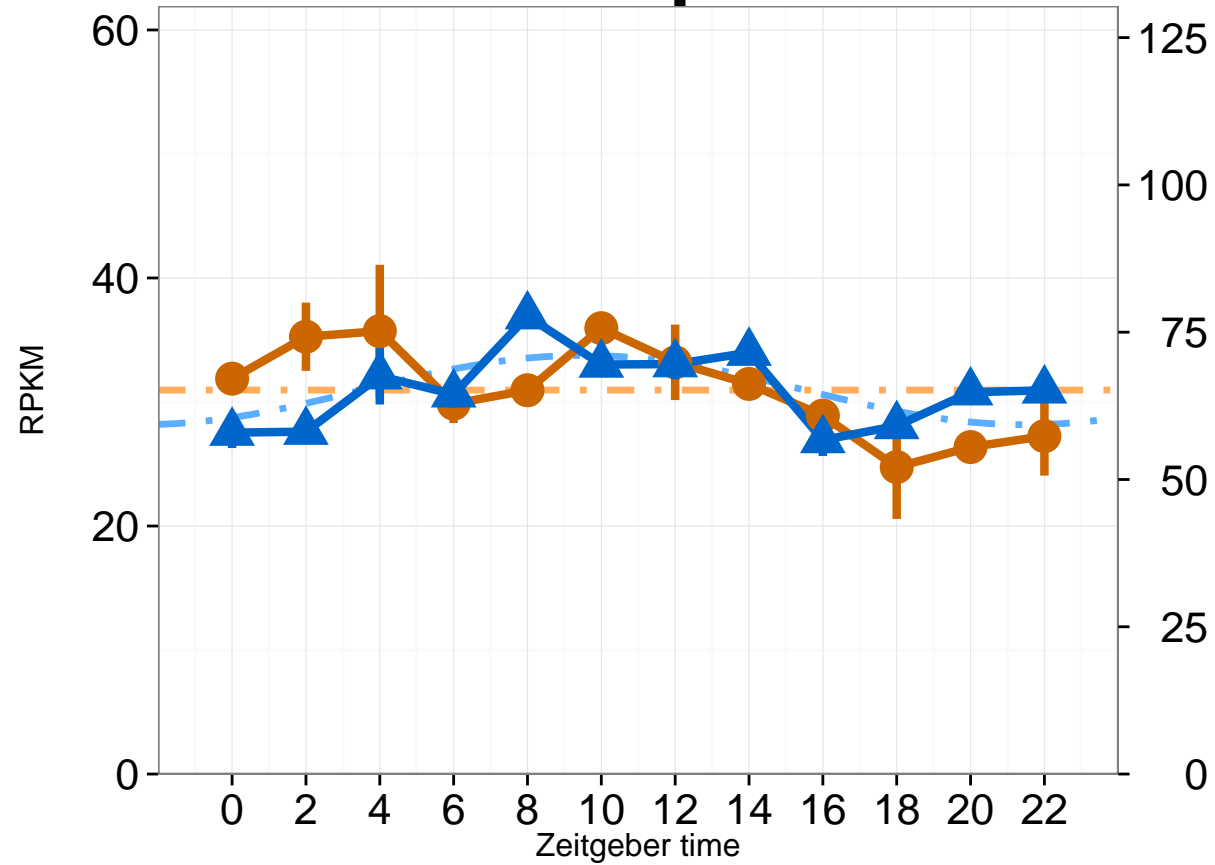

## Rbbp9

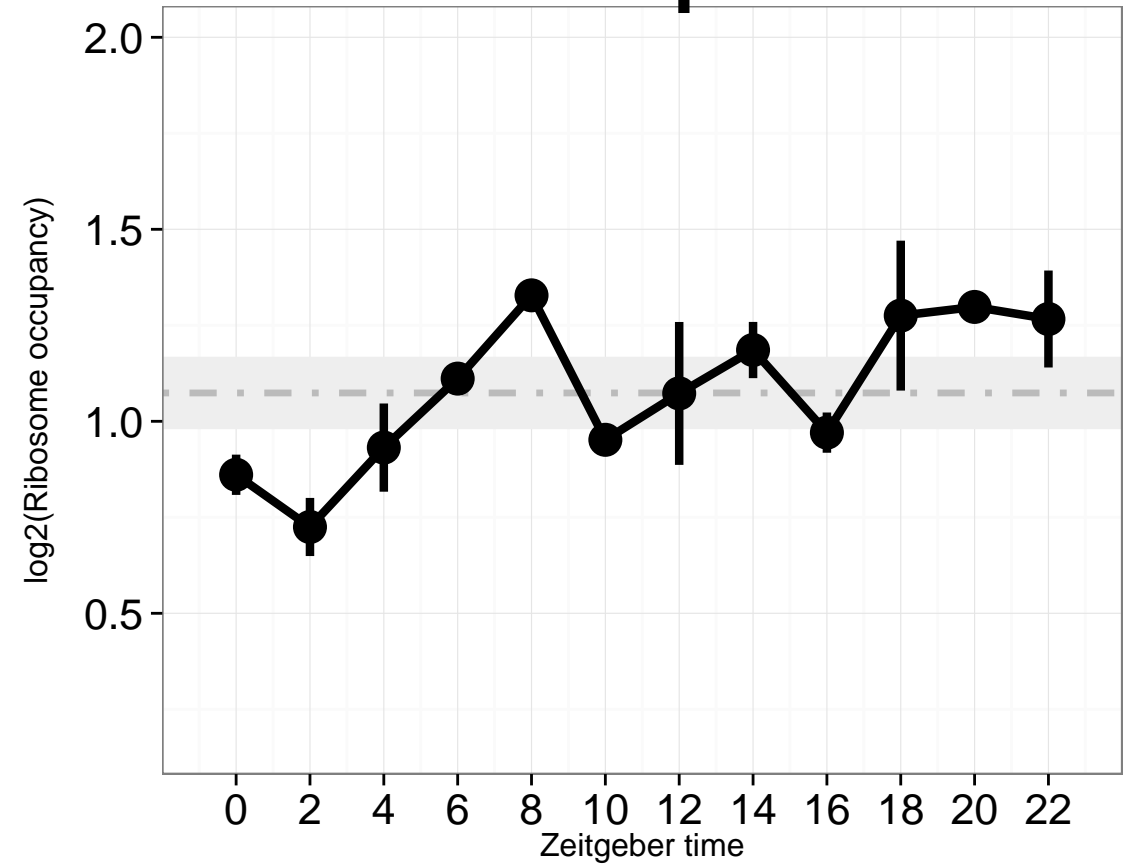

Supplement: Supplementary file 4337 [file 1]

# Tfdp1

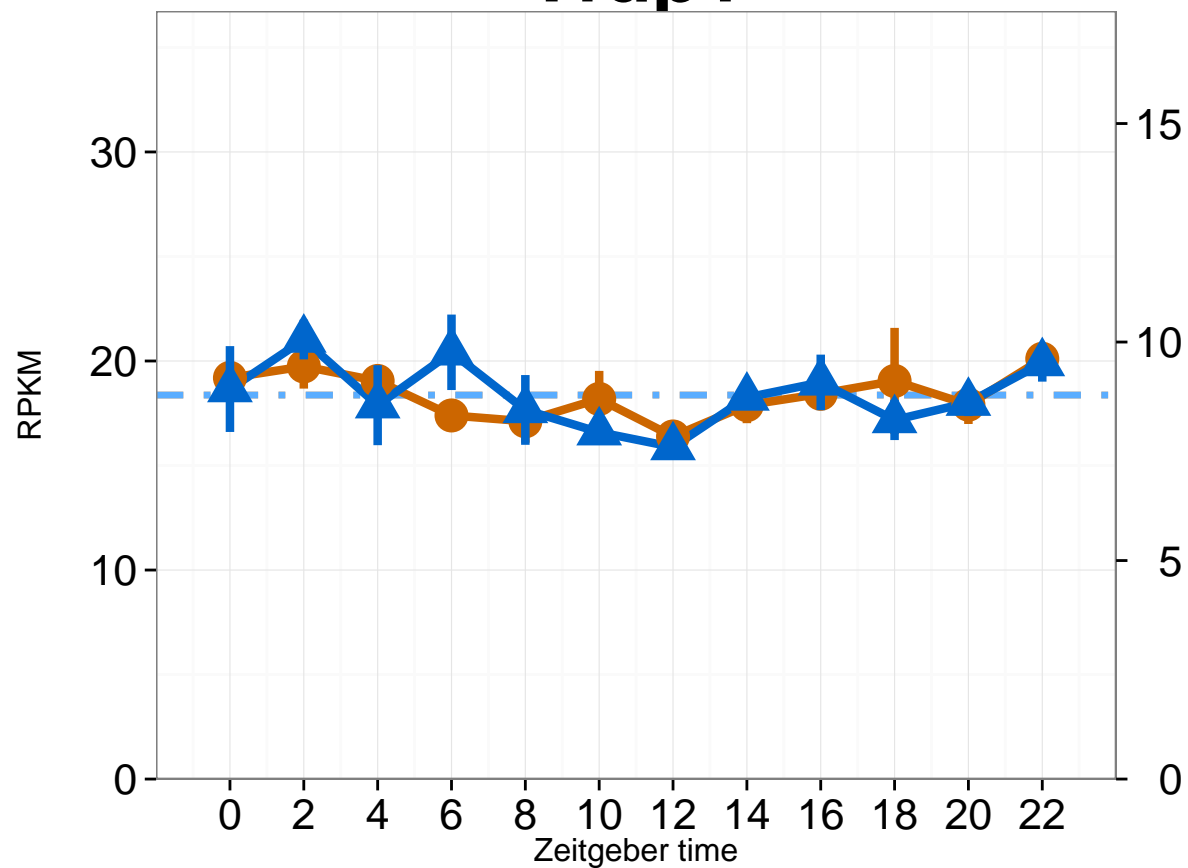

# Tfdp1

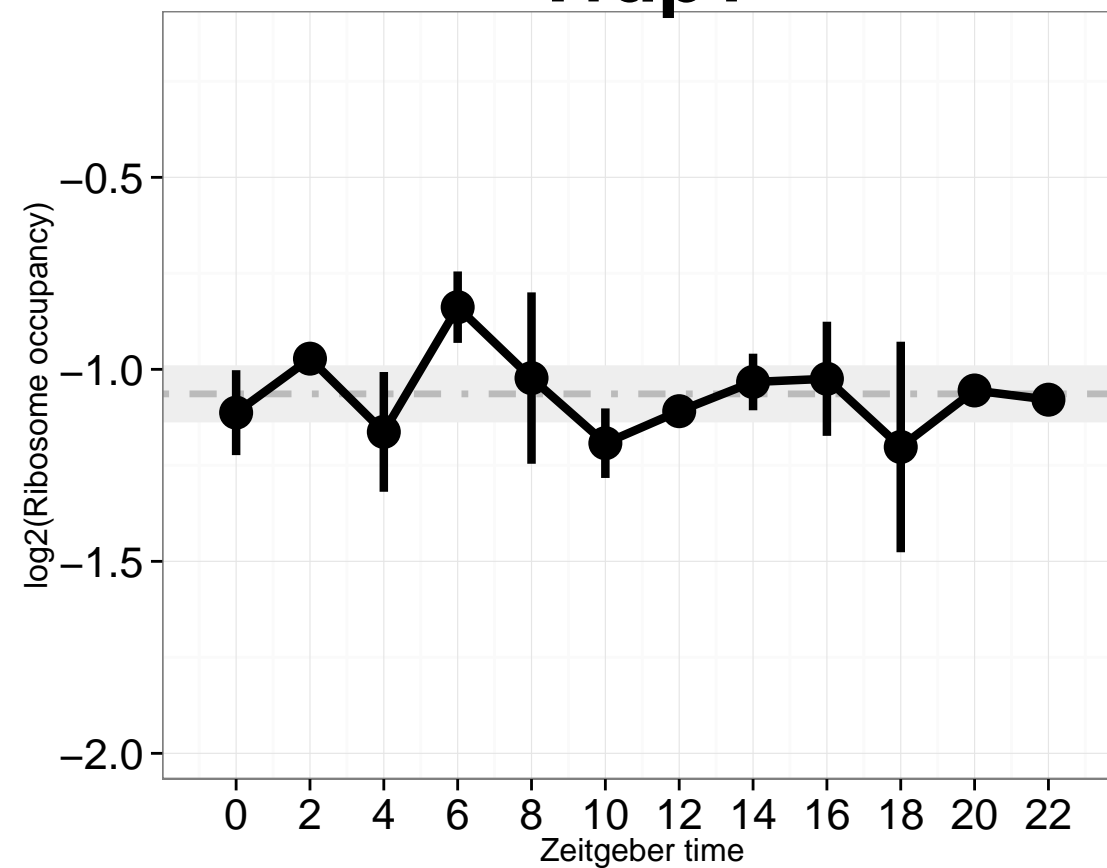

Supplement: Supplementary file 4338 [file 1]

## Med23

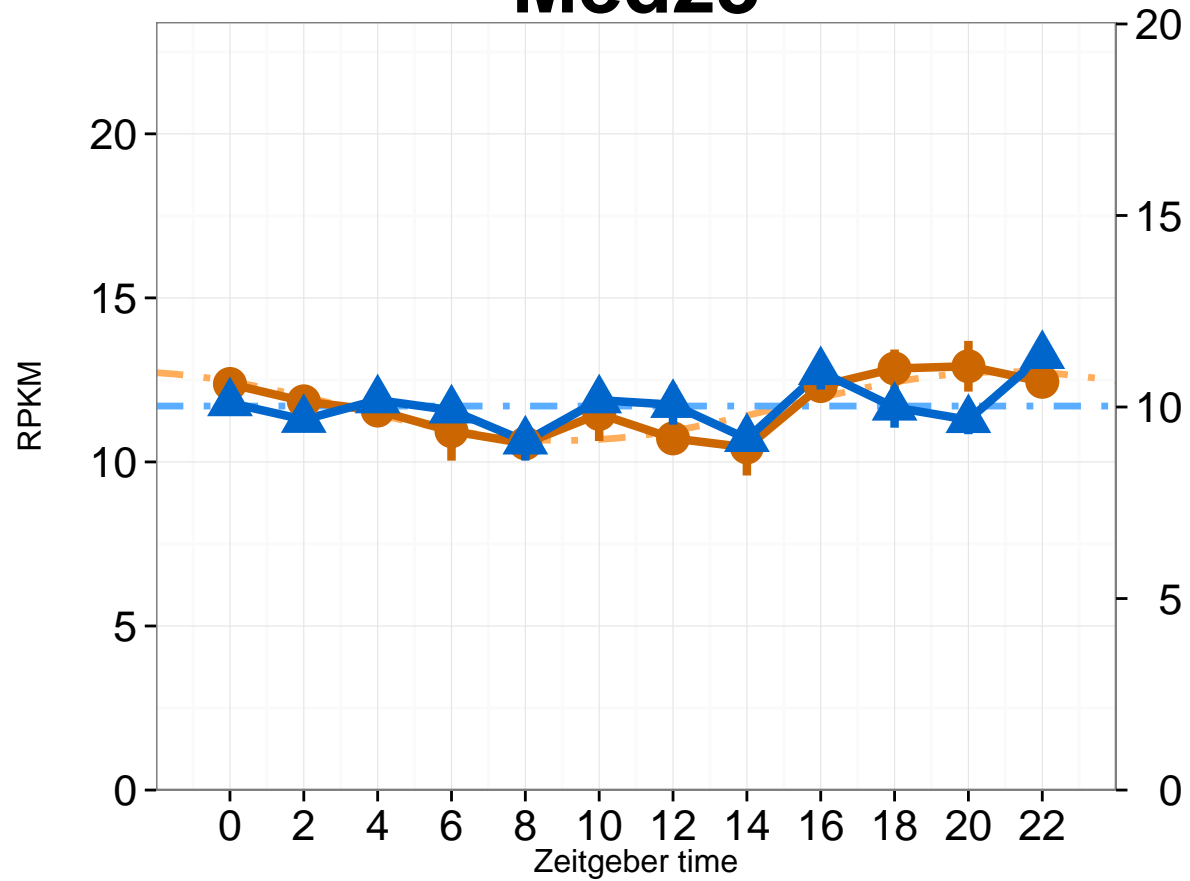

## Med23

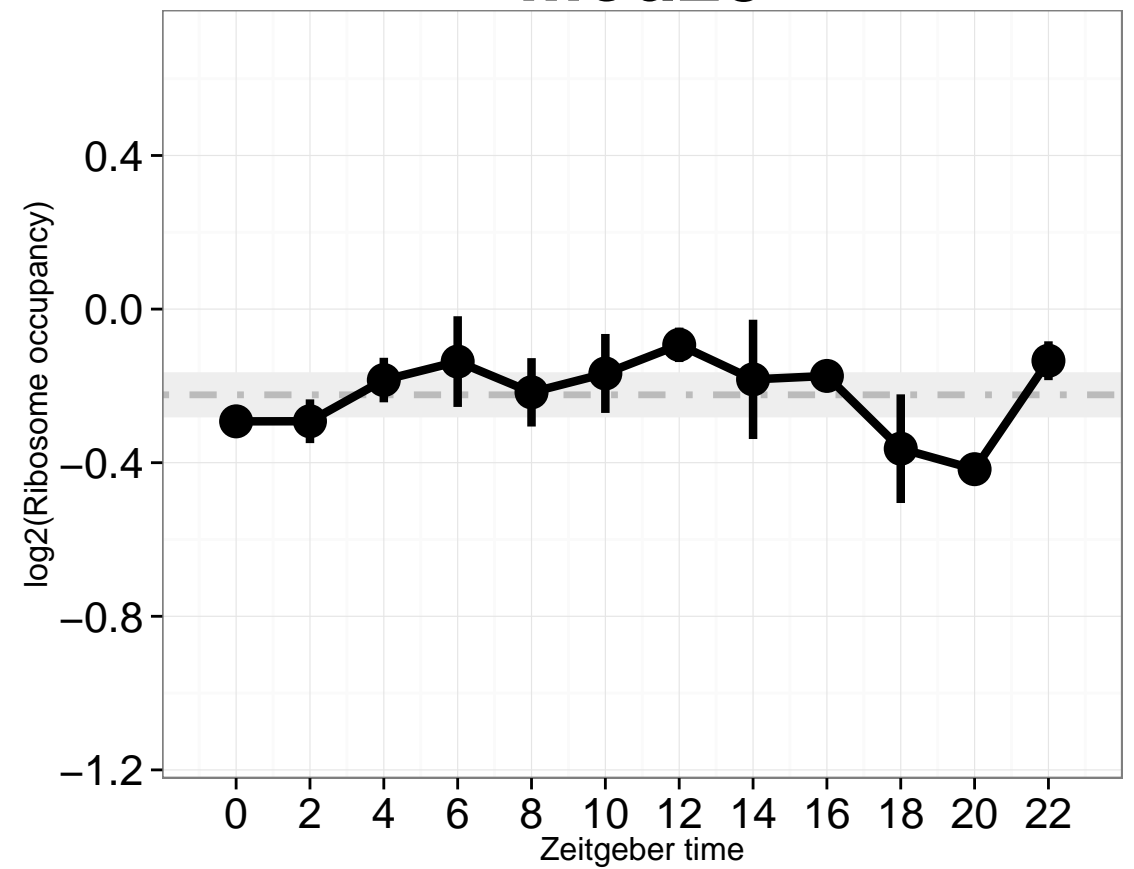

Supplement: Supplementary file 4339 [file 1]

## Zdhhc4

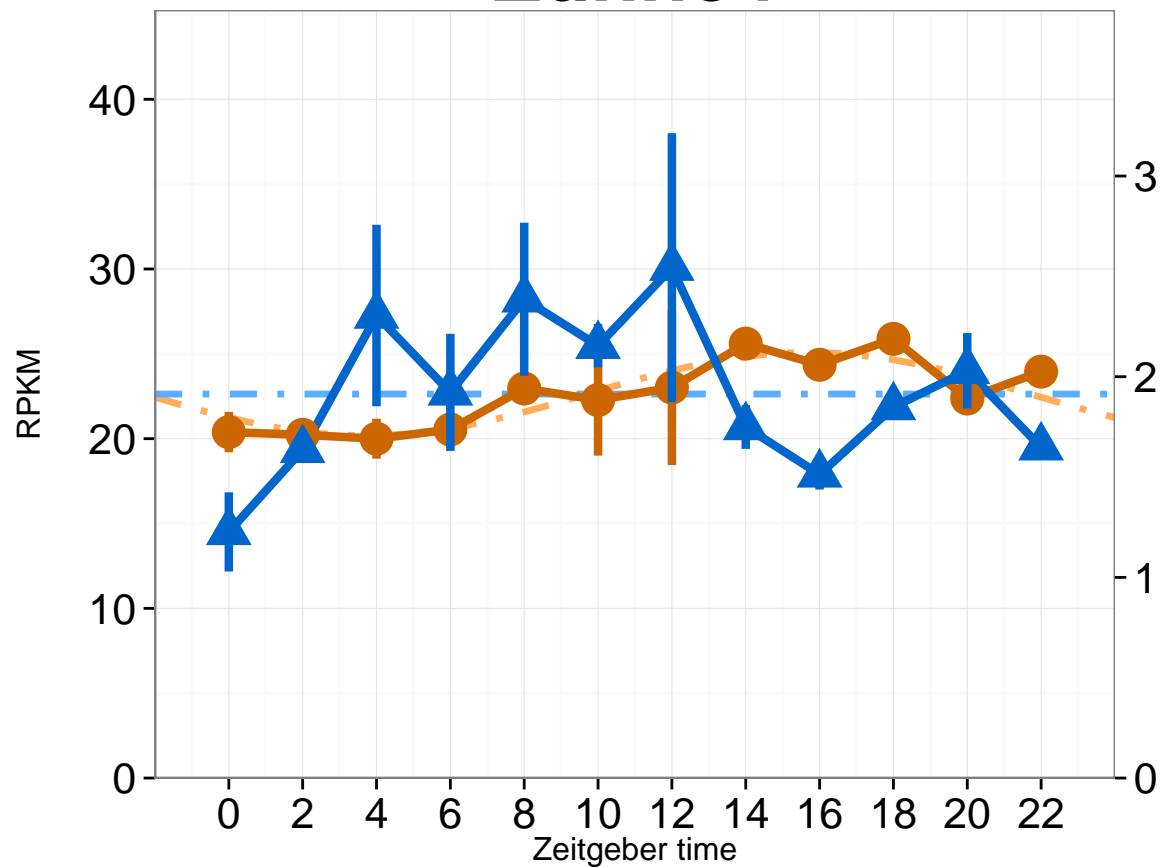

## Zdhhc4

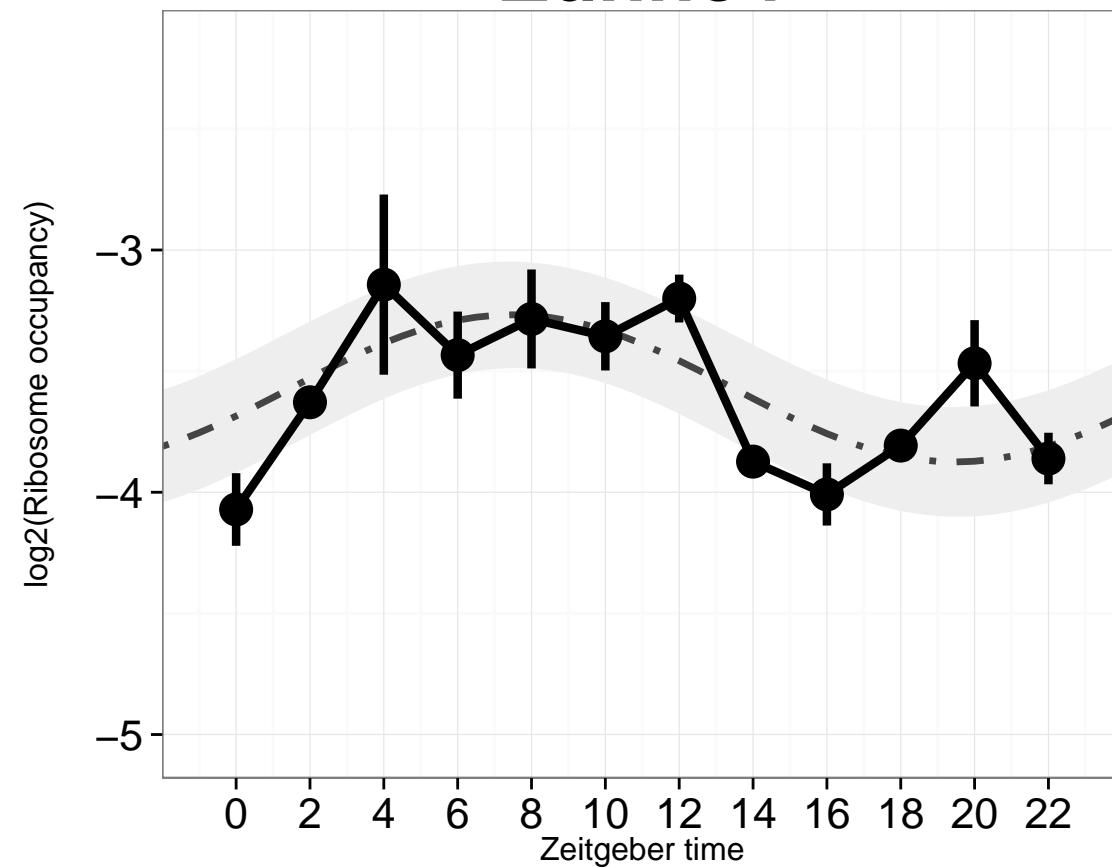

Supplement: Supplementary file 4340 [file 1]

## Rraga

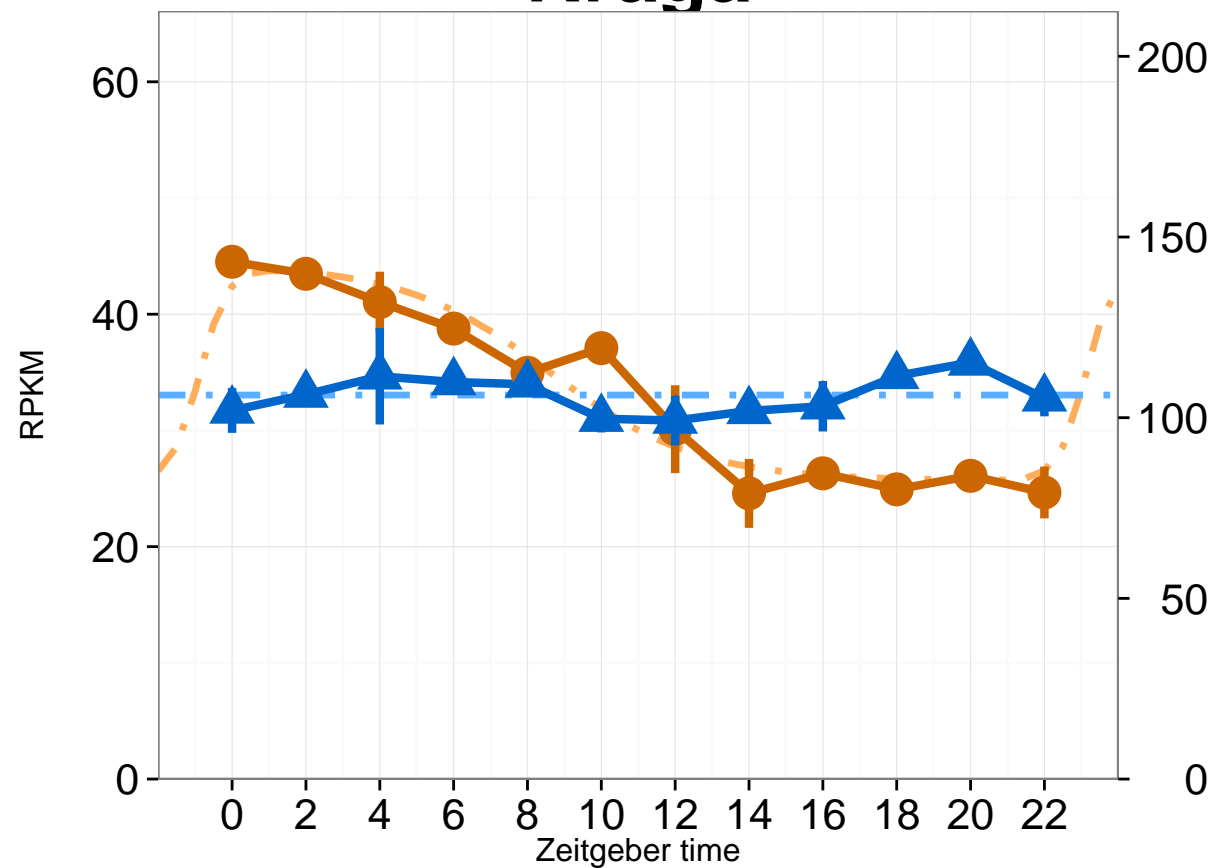

## Rraga

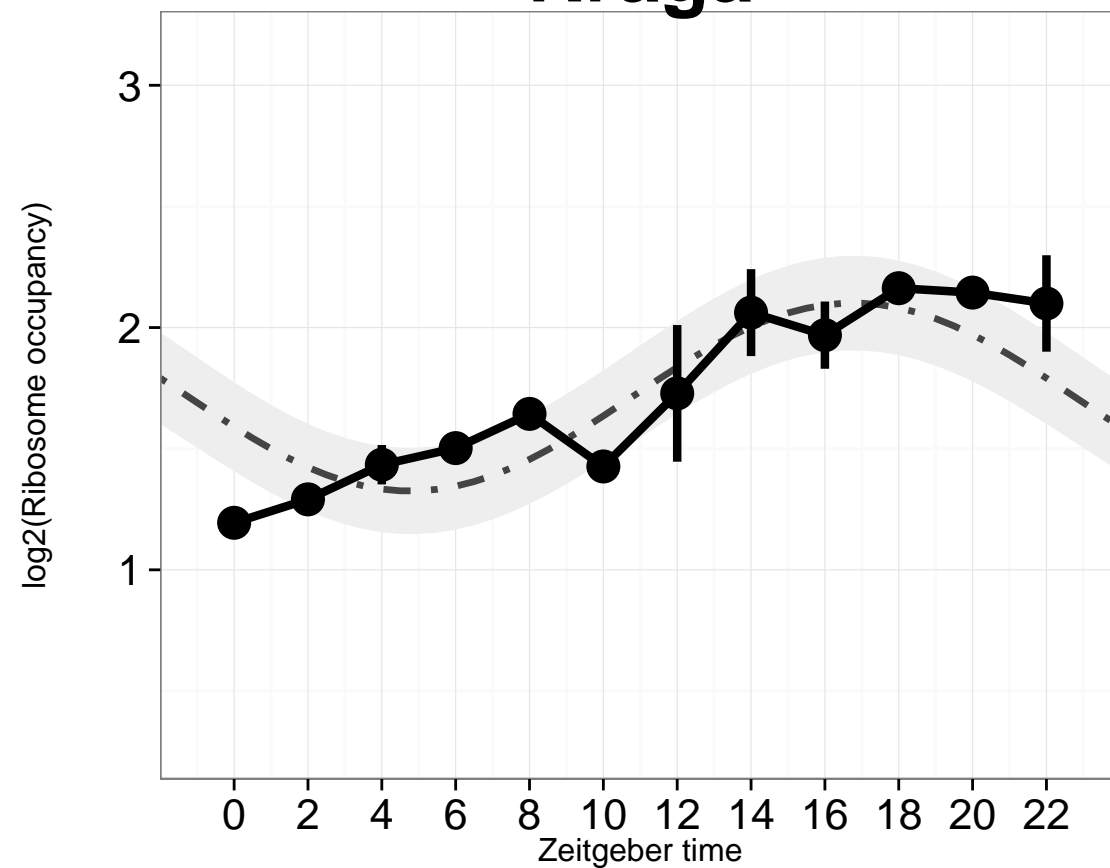

Supplement: Supplementary file 4341 [file 1]

# Slc39a8

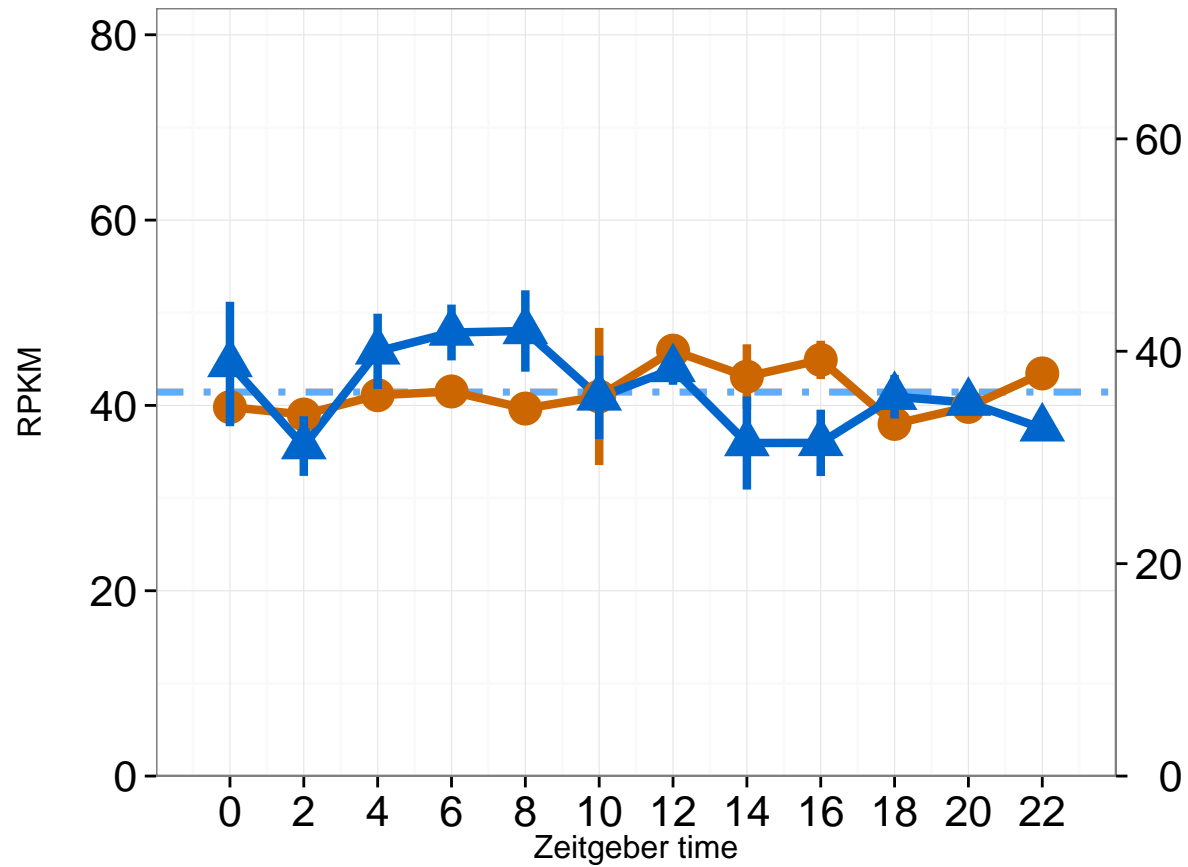

# Slc39a8

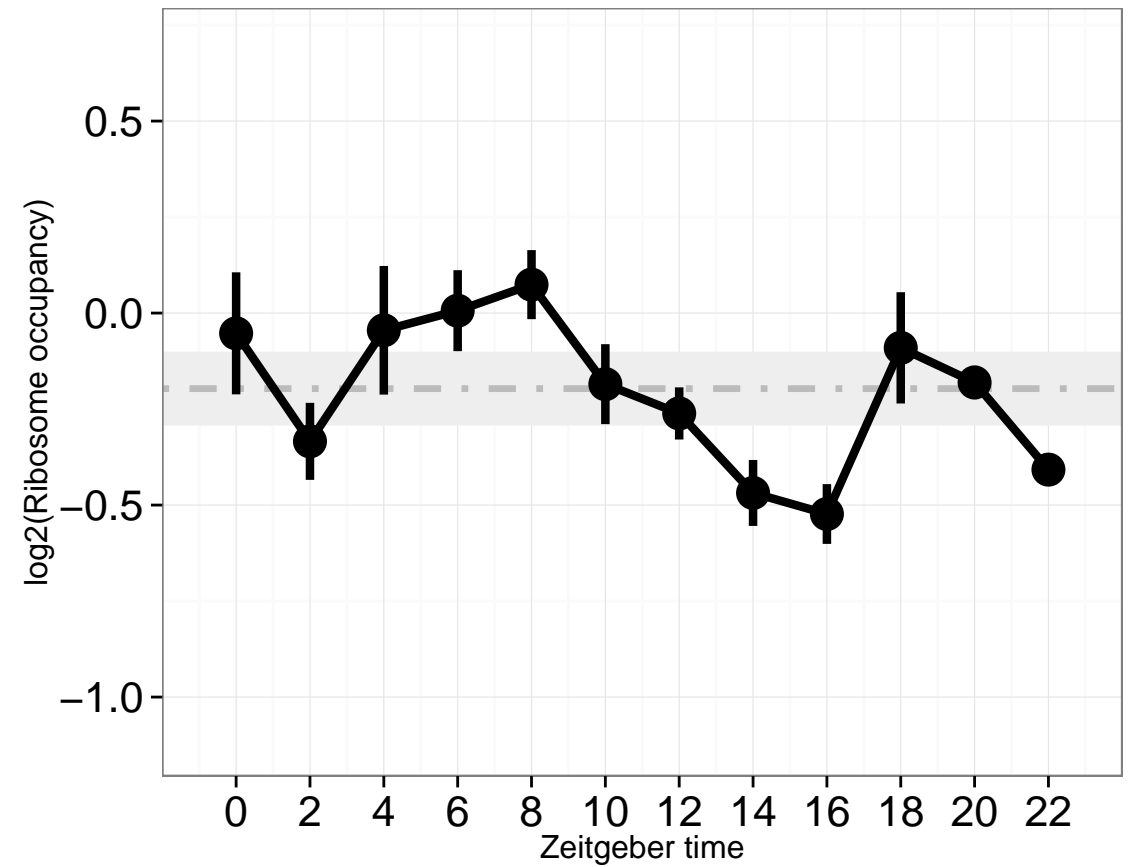

Supplement: Supplementary file 4342 [file 1]

# Atad2

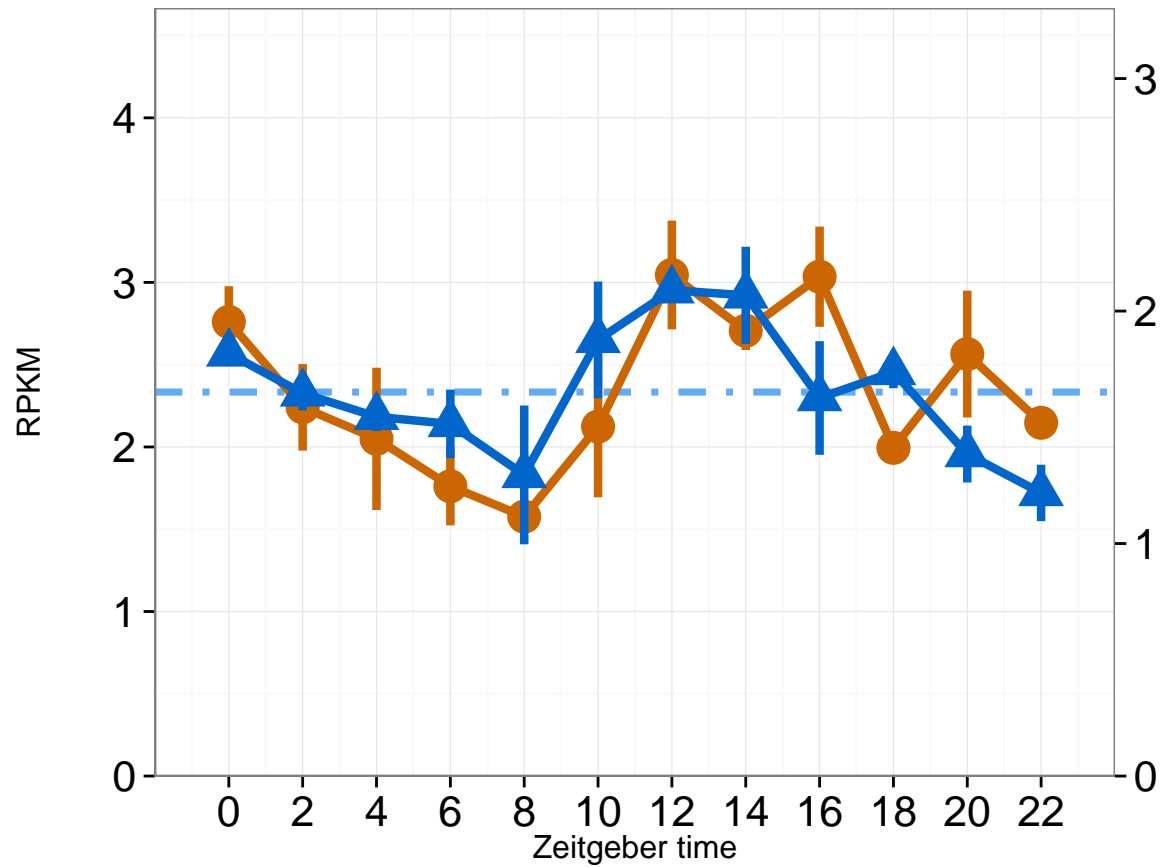

# Atad2

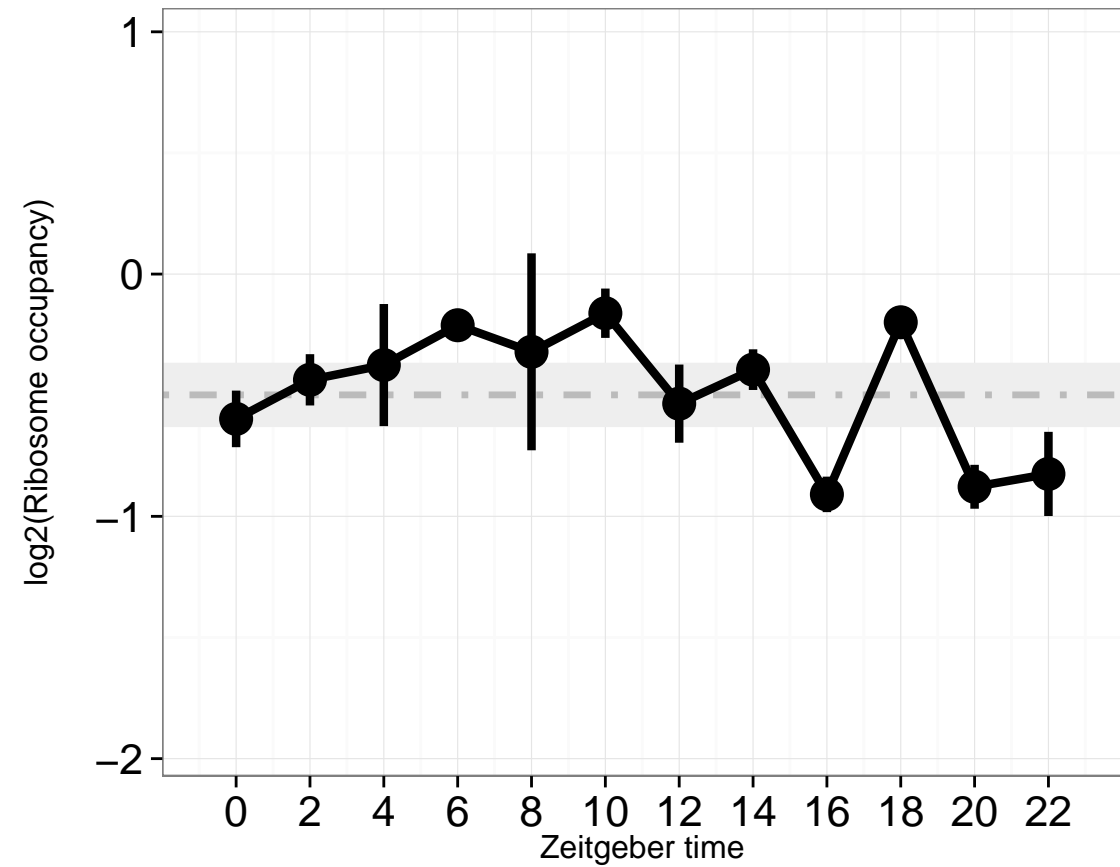

Supplement: Supplementary file 4343 [file 1]

# Mup20

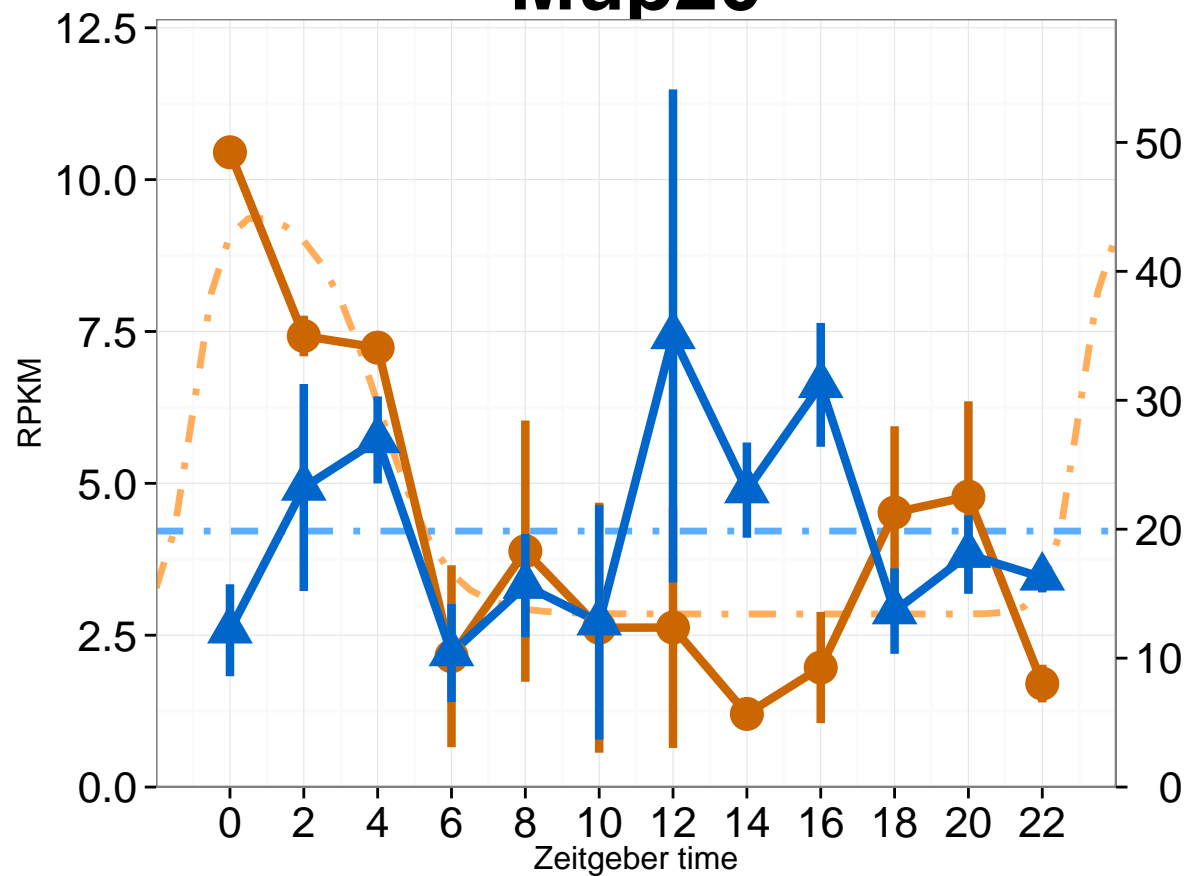

# Mup20

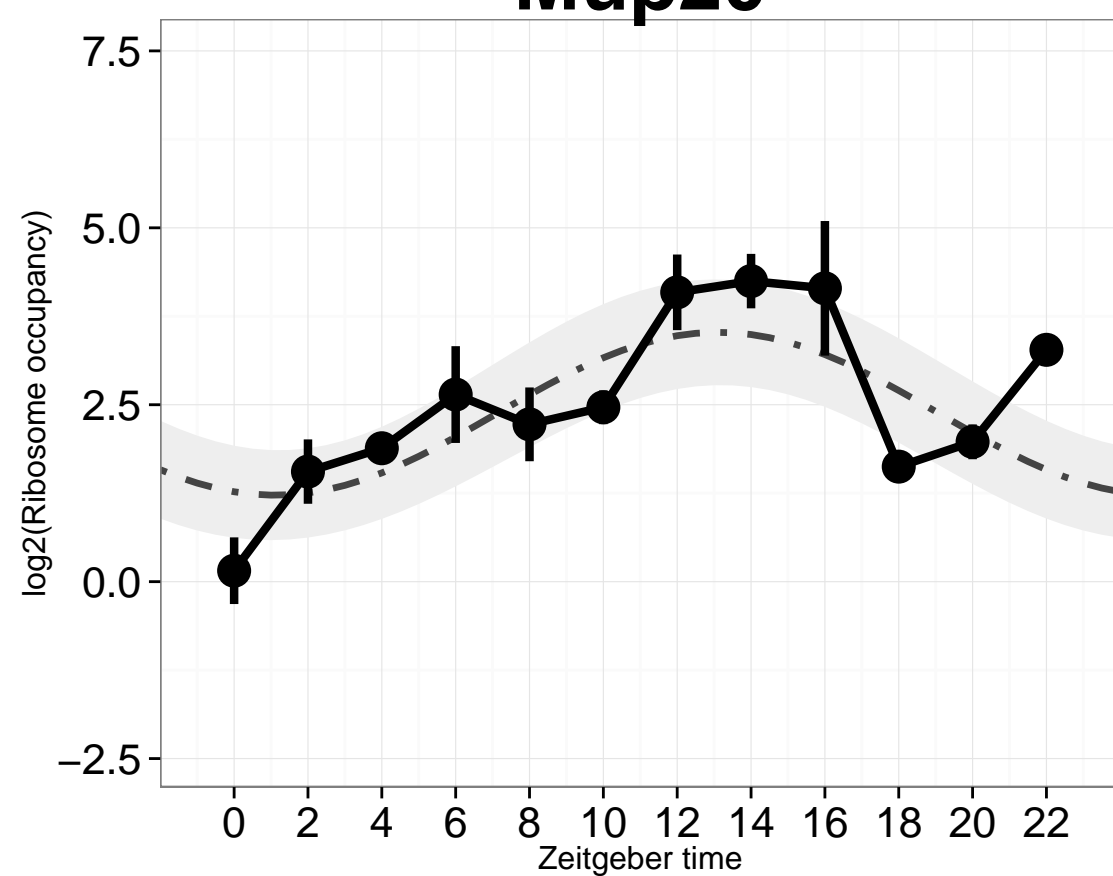

Supplement: Supplementary file 4344 [file 1]

**Ly6c2 TR**

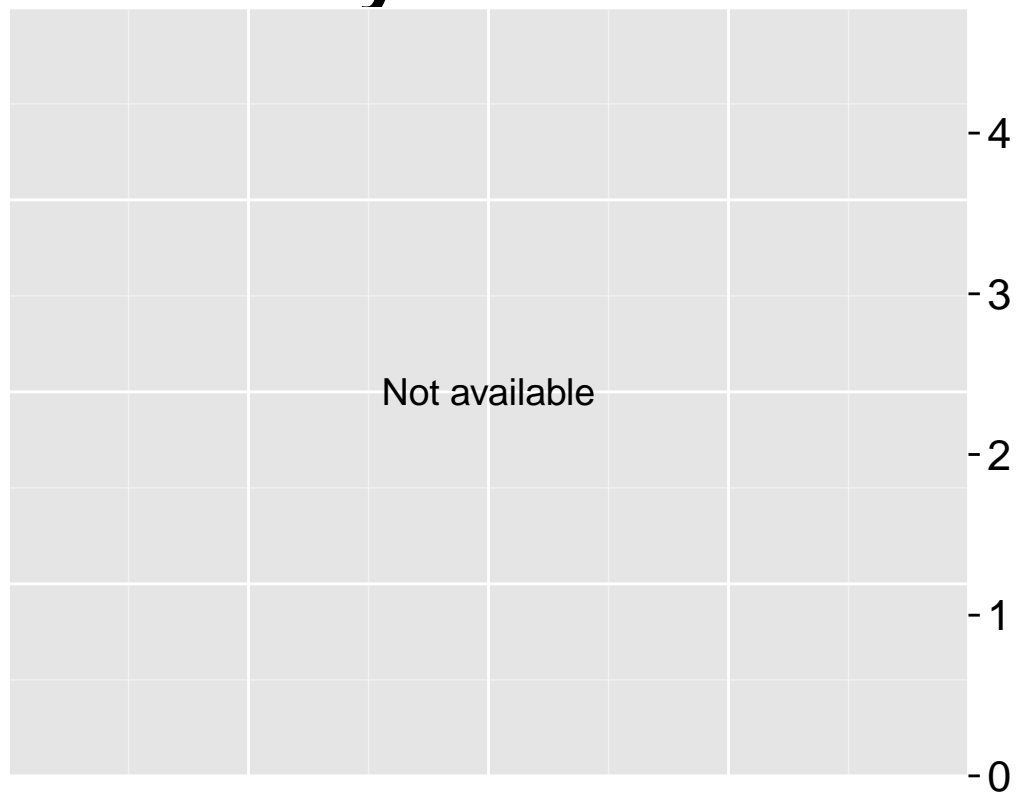

**Ly6c2 log2(Ribosome occupancy**

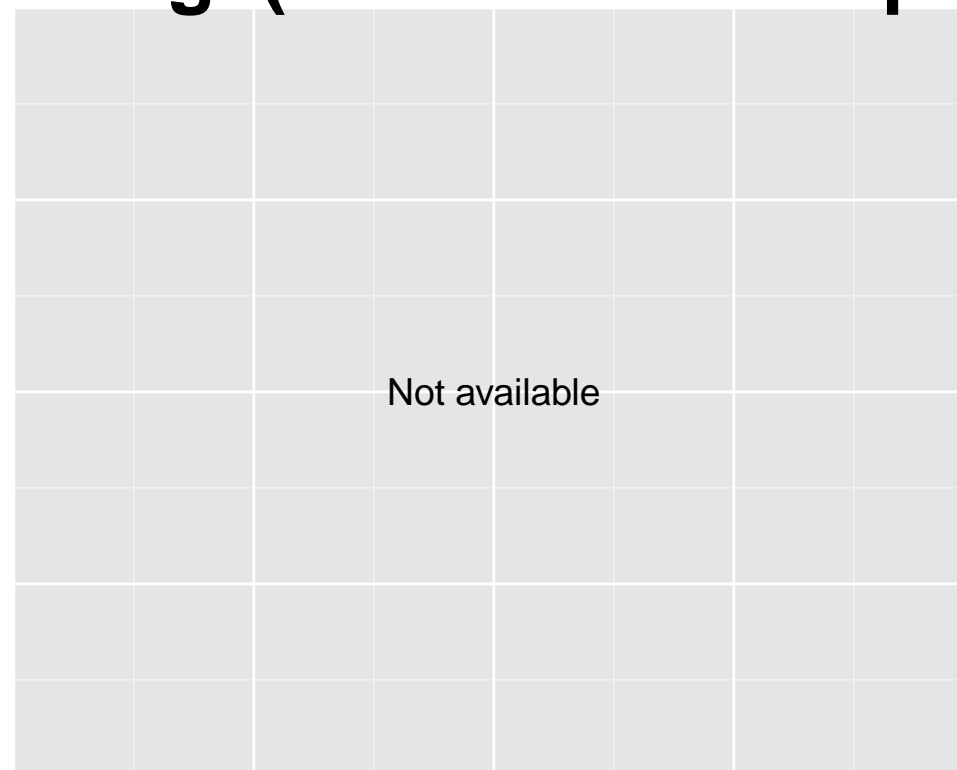

Supplement: Supplementary file 4345 [file 1]

## Clcn5

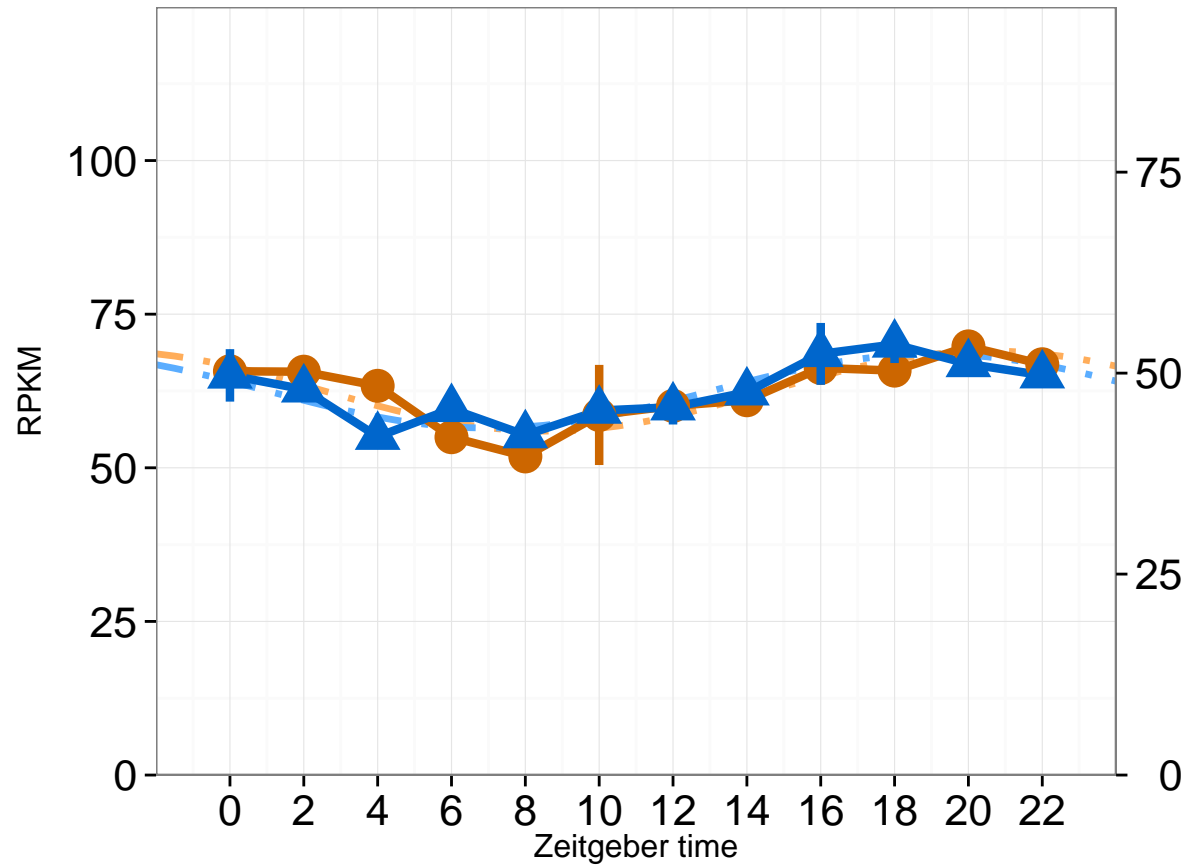

## Clcn5

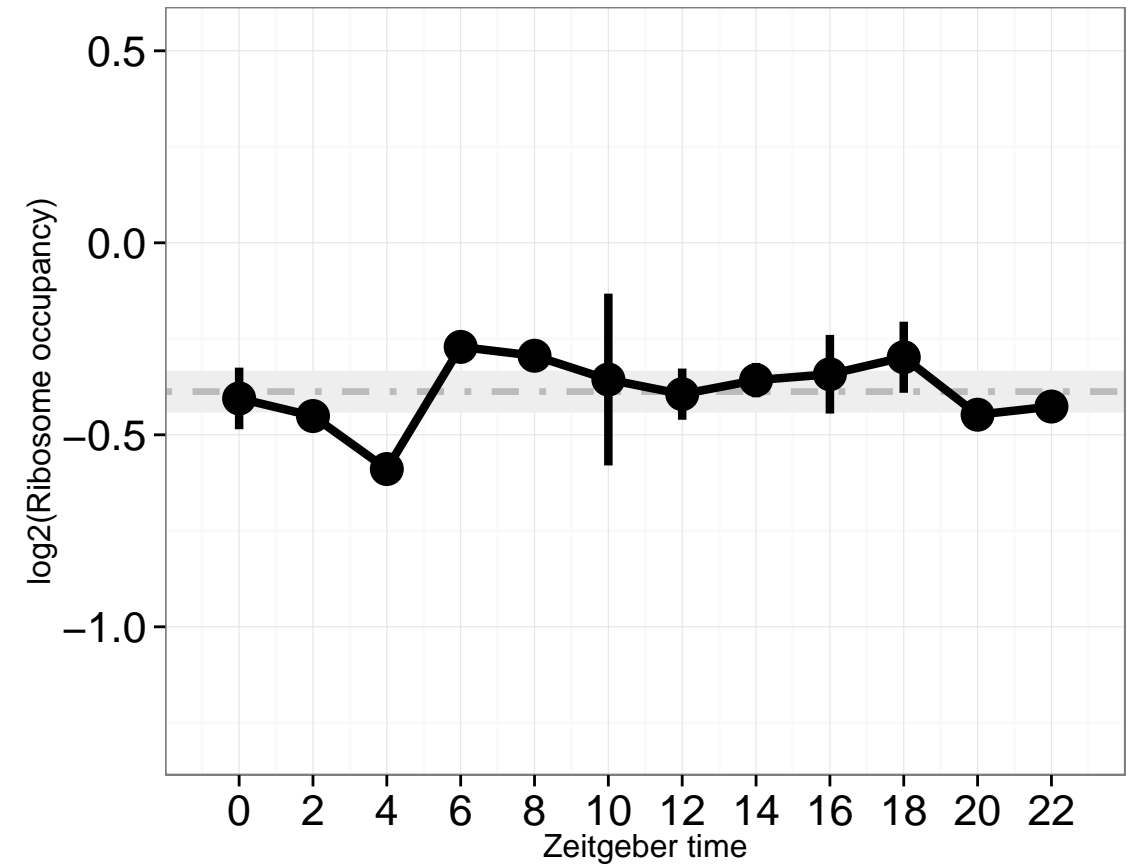

Supplement: Supplementary file 4346 [file 1]

## Jam2

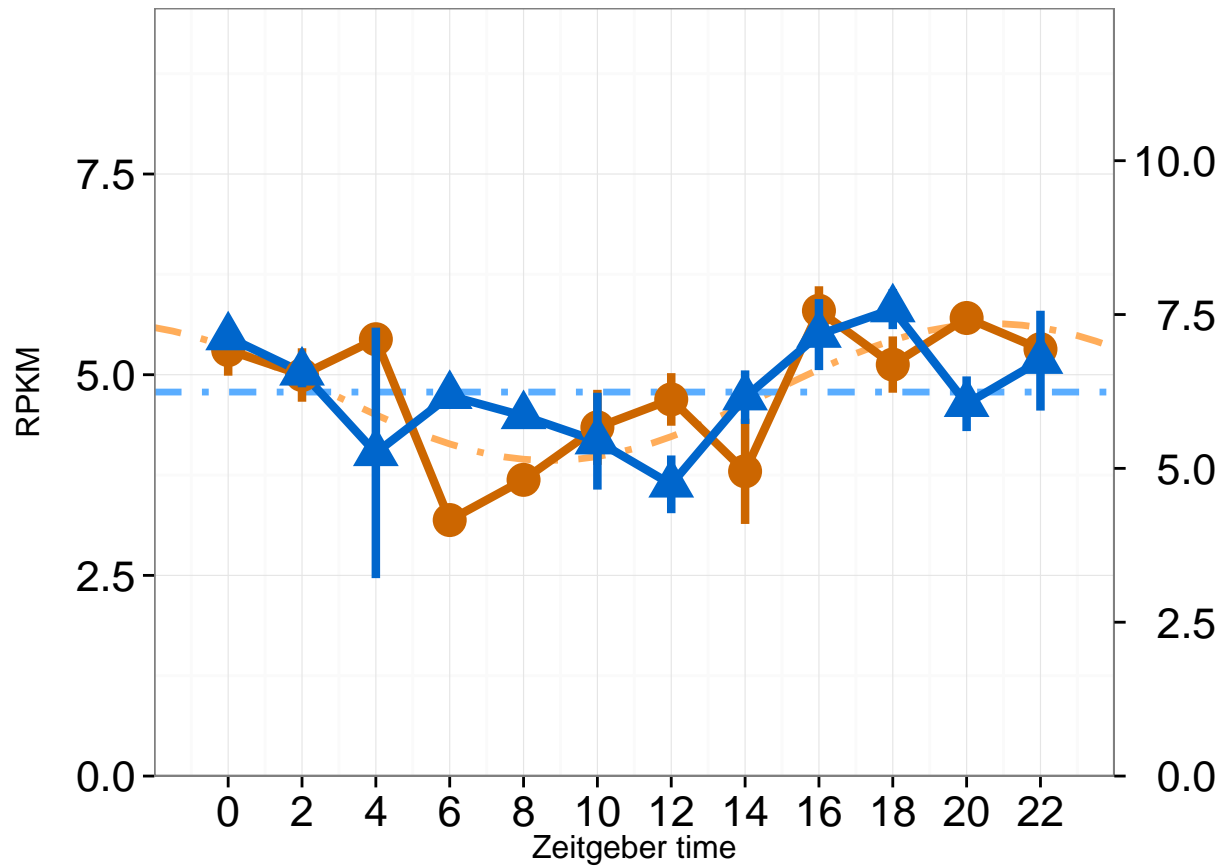

## Jam2

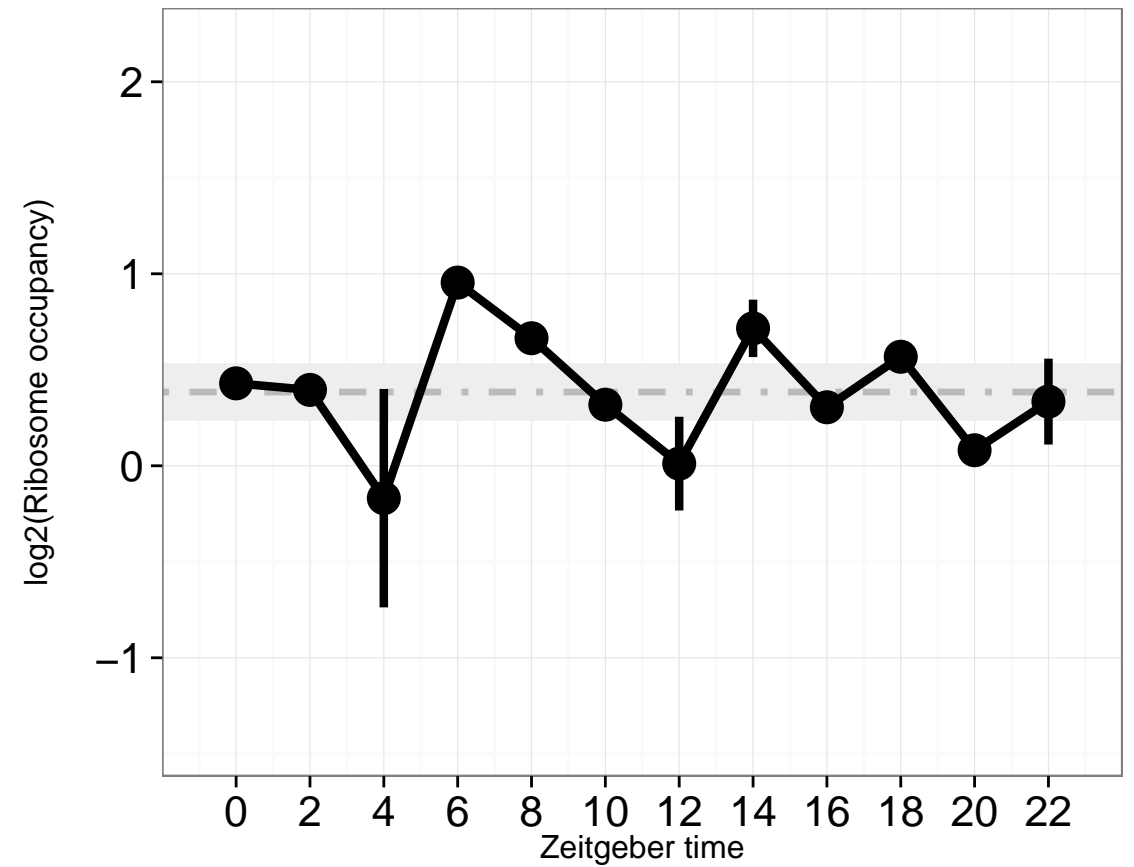

Supplement: Supplementary file 4347 [file 1]

## Hao

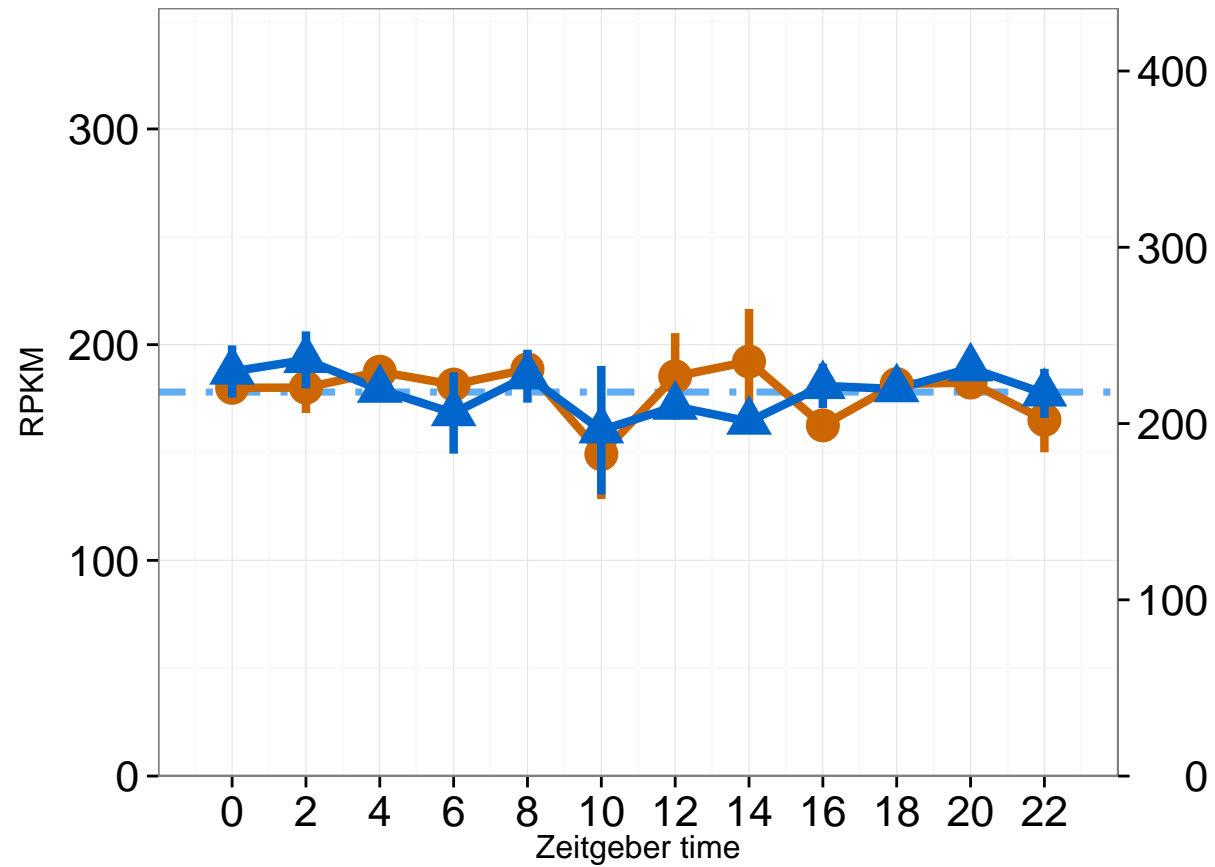

## Hao

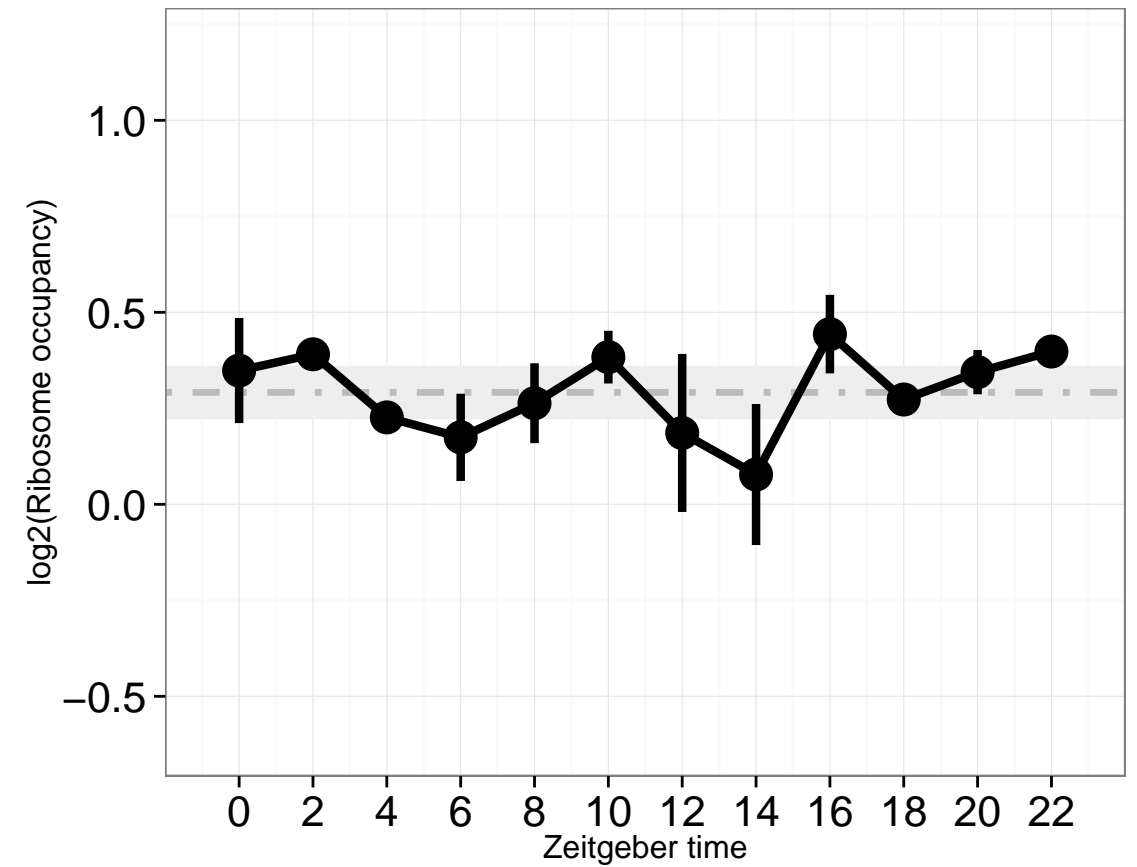

Supplement: Supplementary file 4348 [file 1]

## Phf3

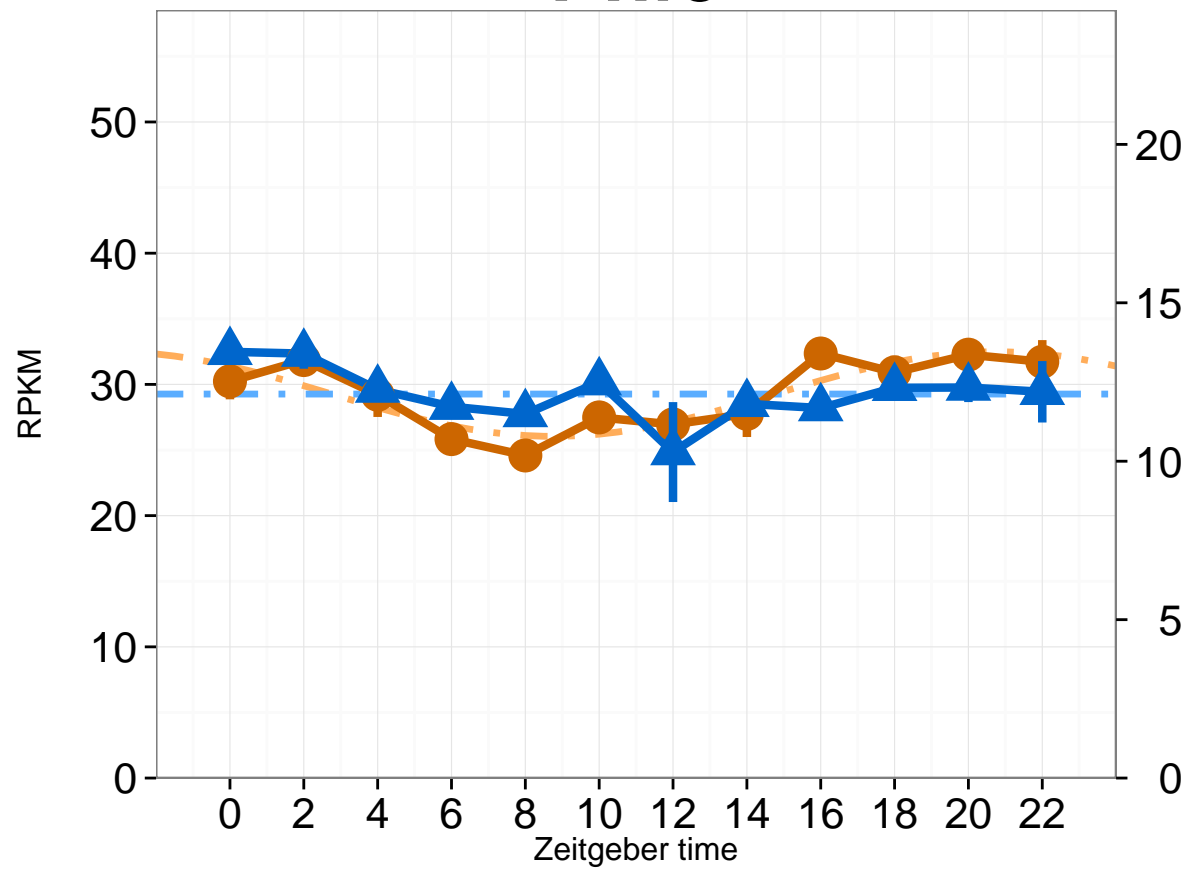

## Phf3

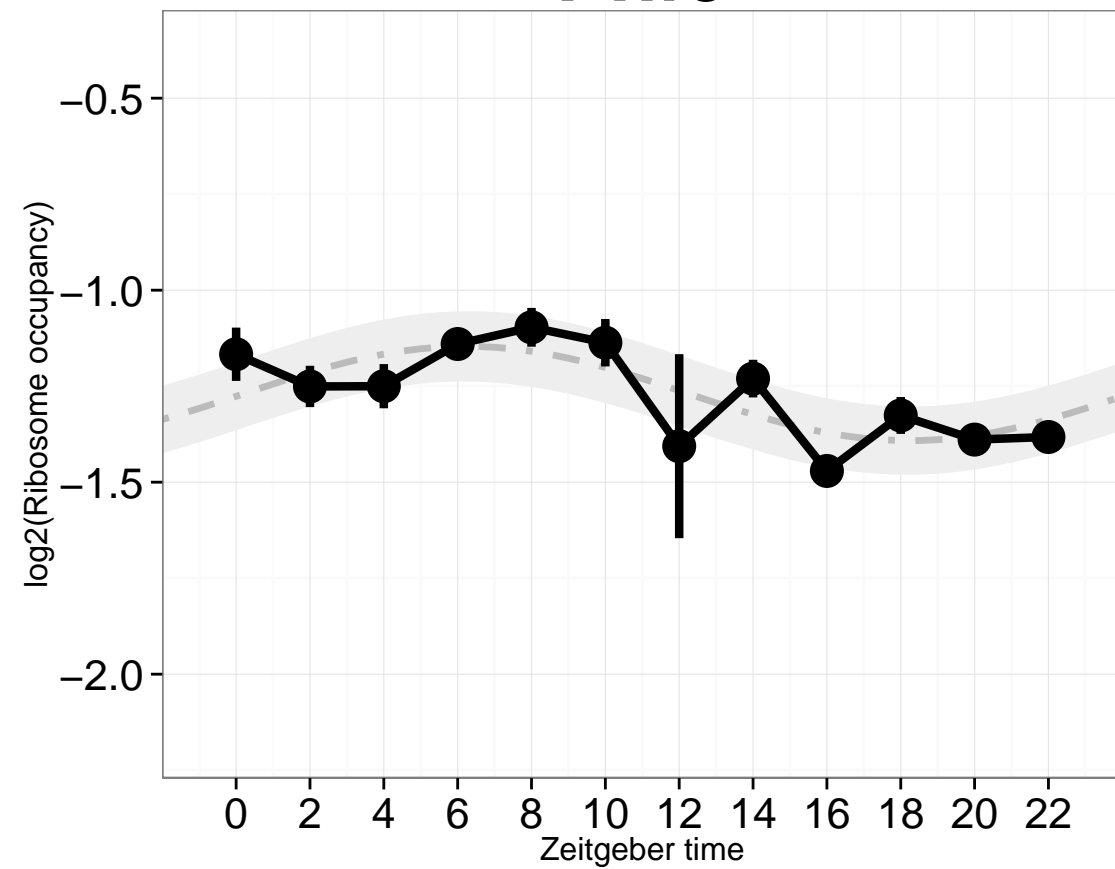

Supplement: Supplementary file 4349 [file 1]

# Pex11g

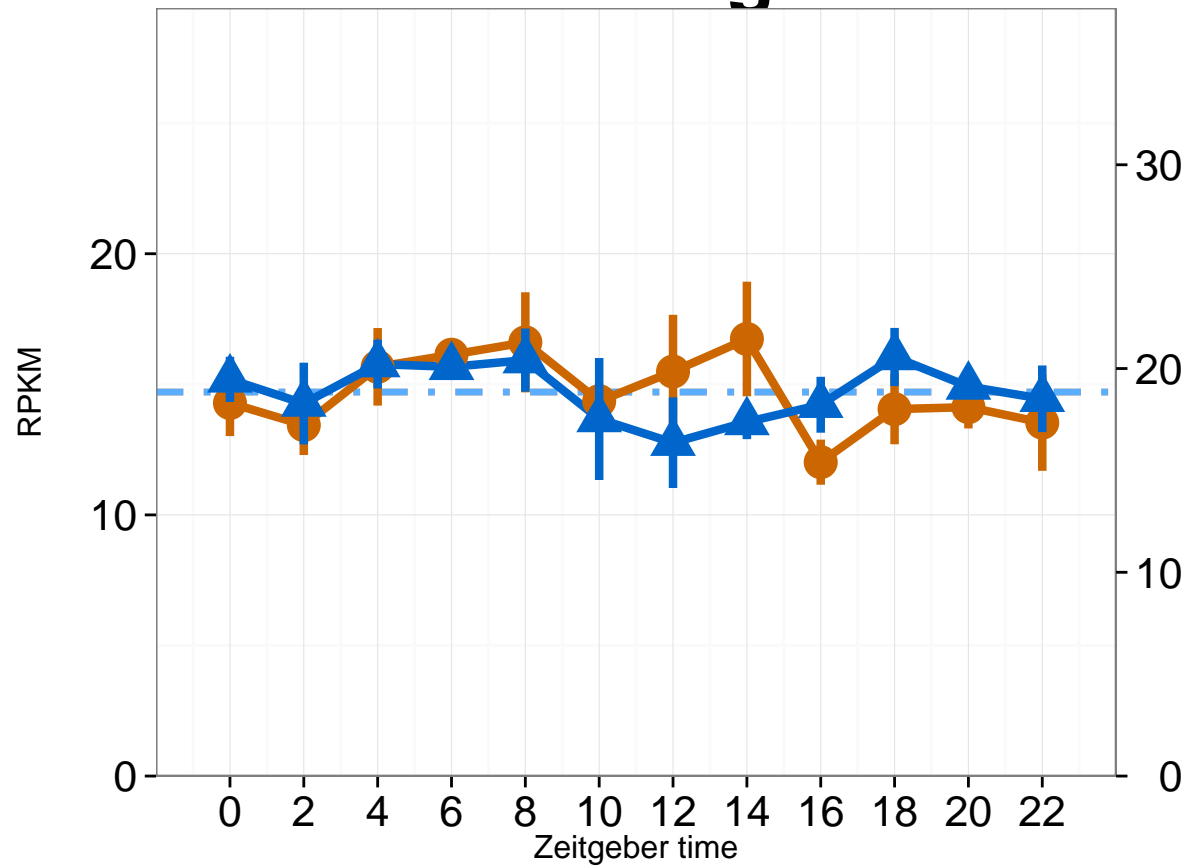

# Pex11g

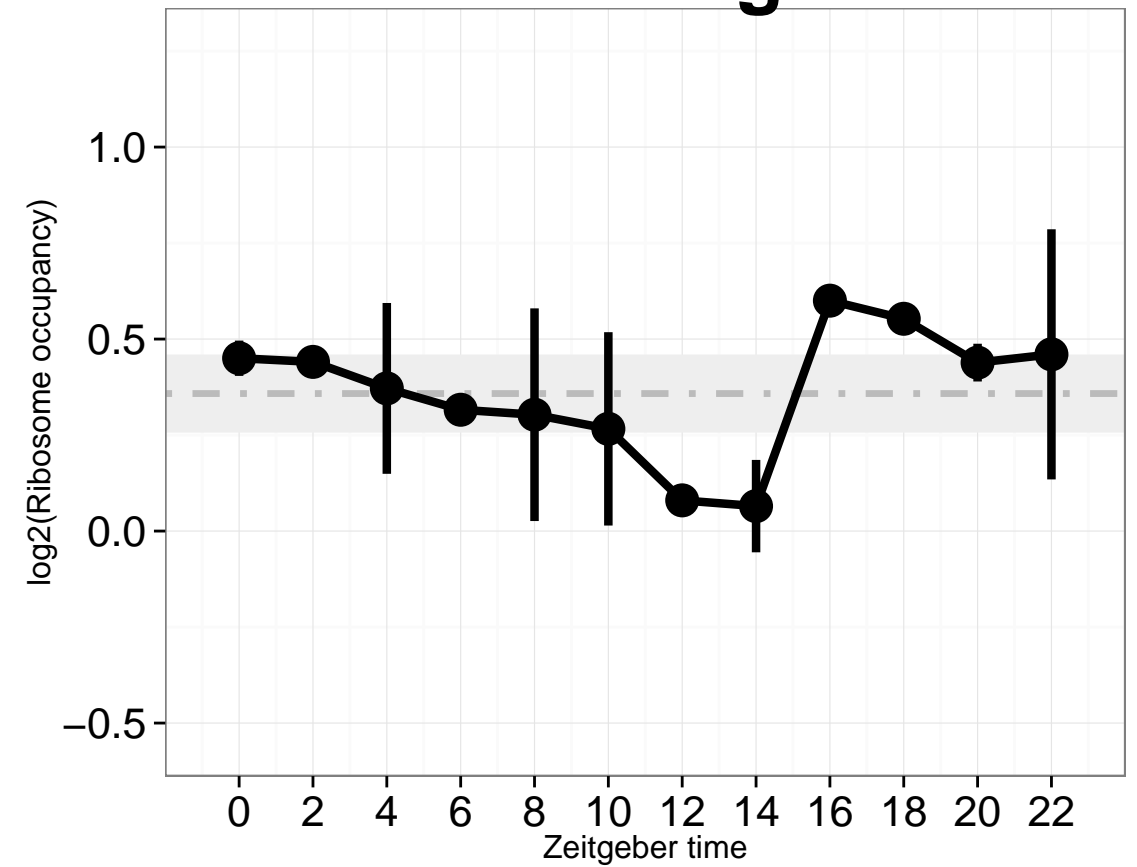

Supplement: Supplementary file 4350 [file 1]

# Pkmyt1

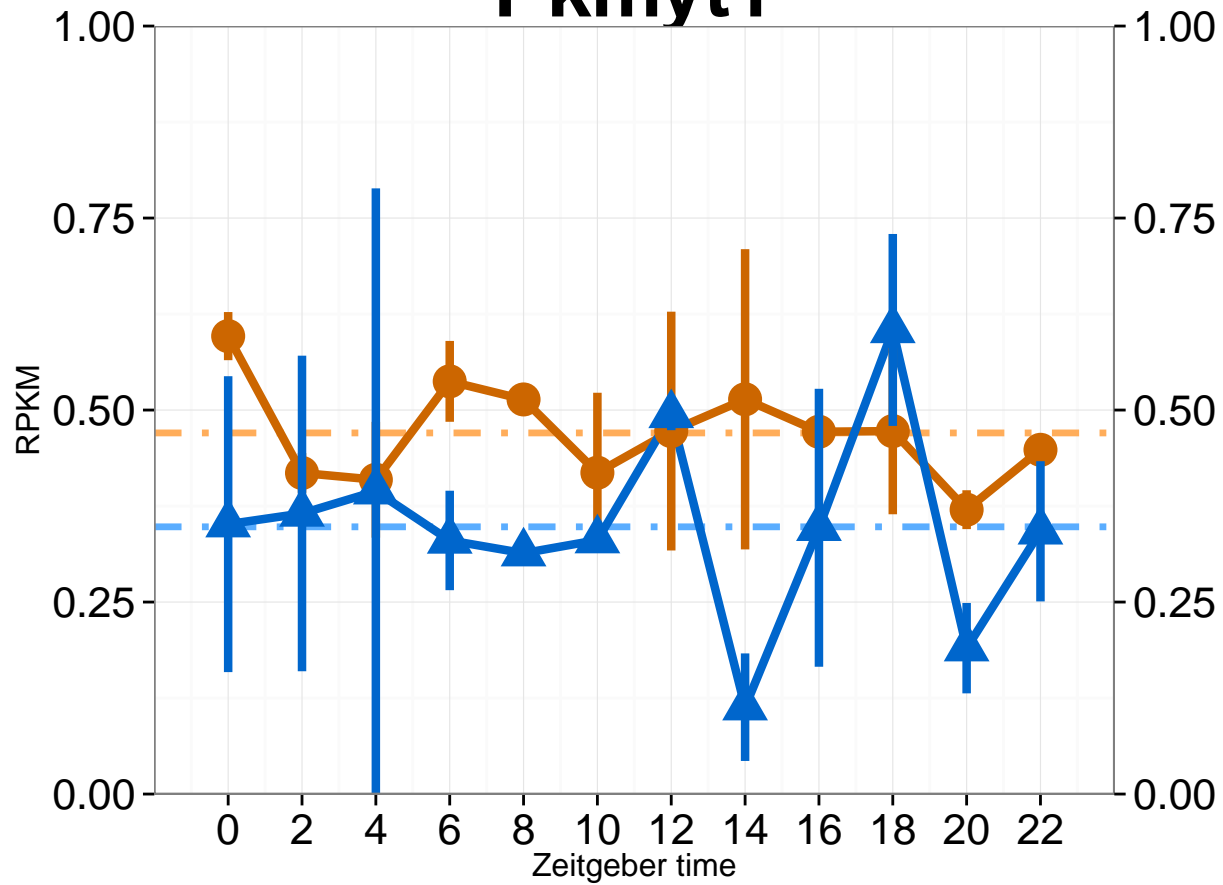

# Pkmyt1

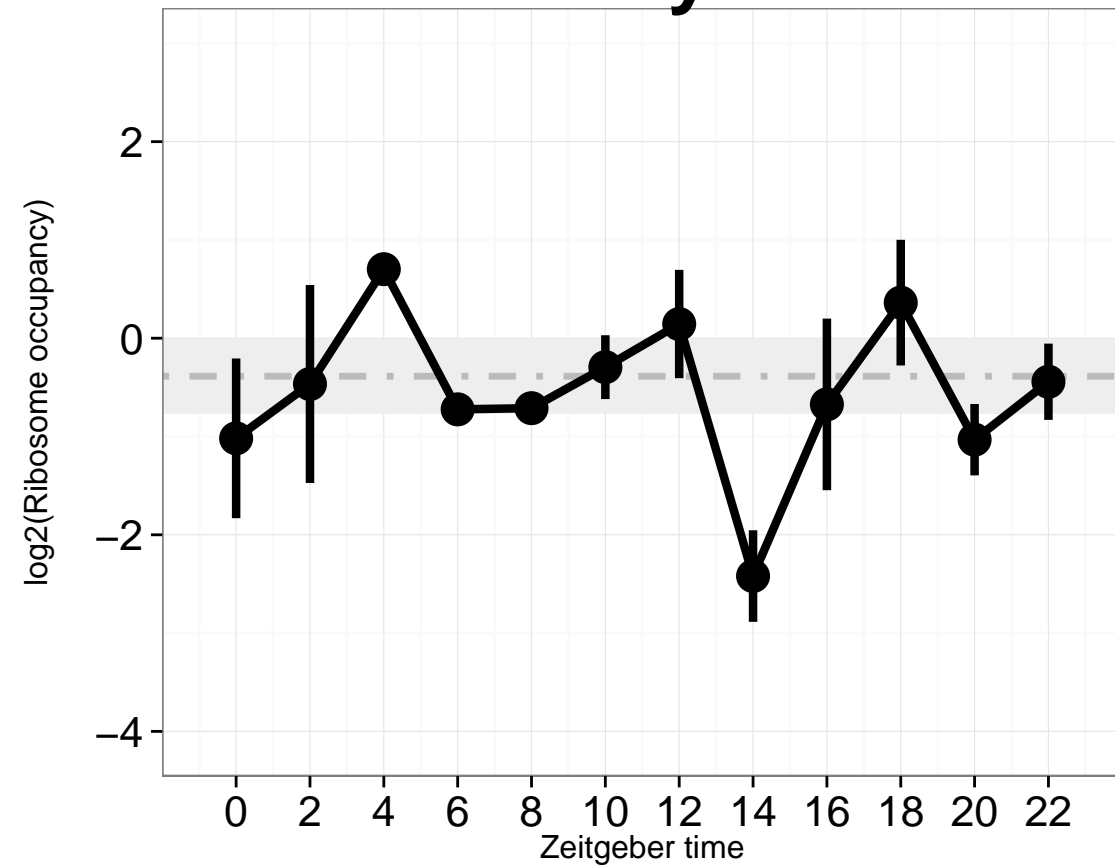

Supplement: Supplementary file 4351 [file 1]

## Efhd2

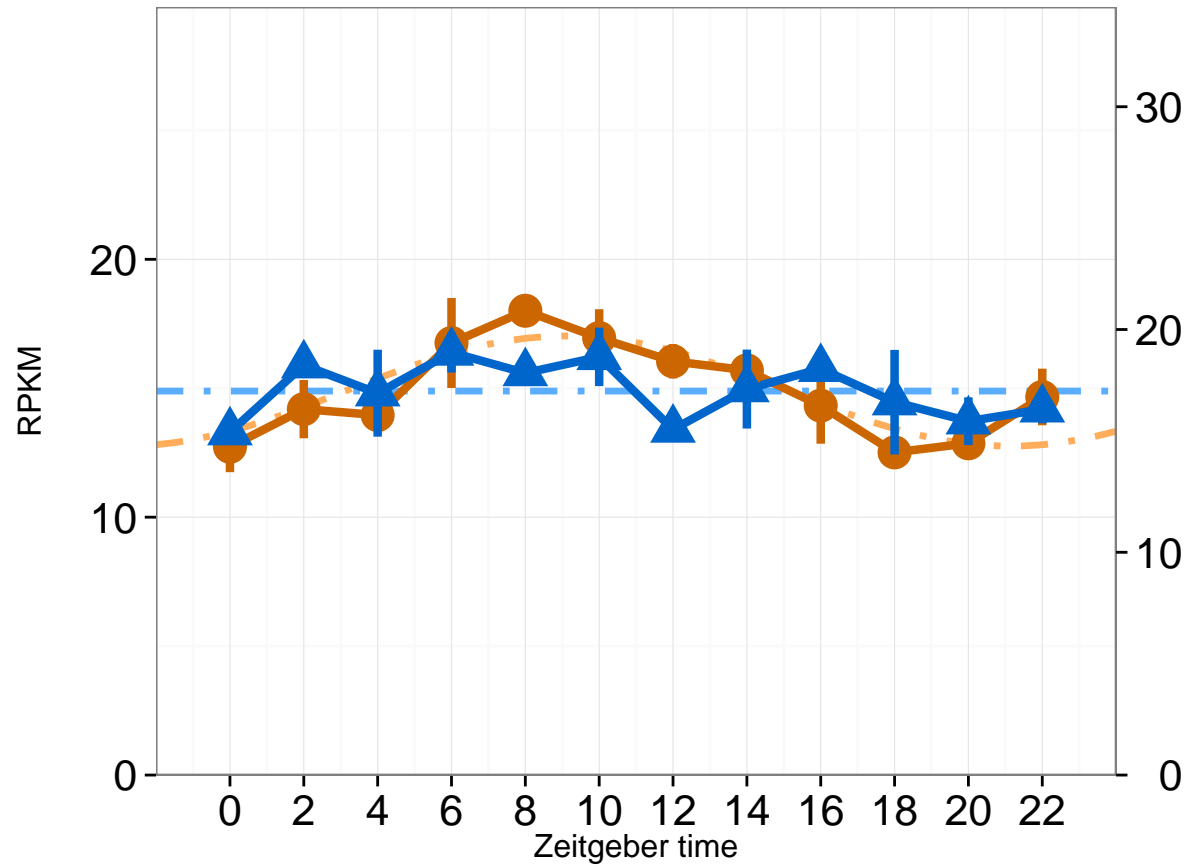

## Efhd2

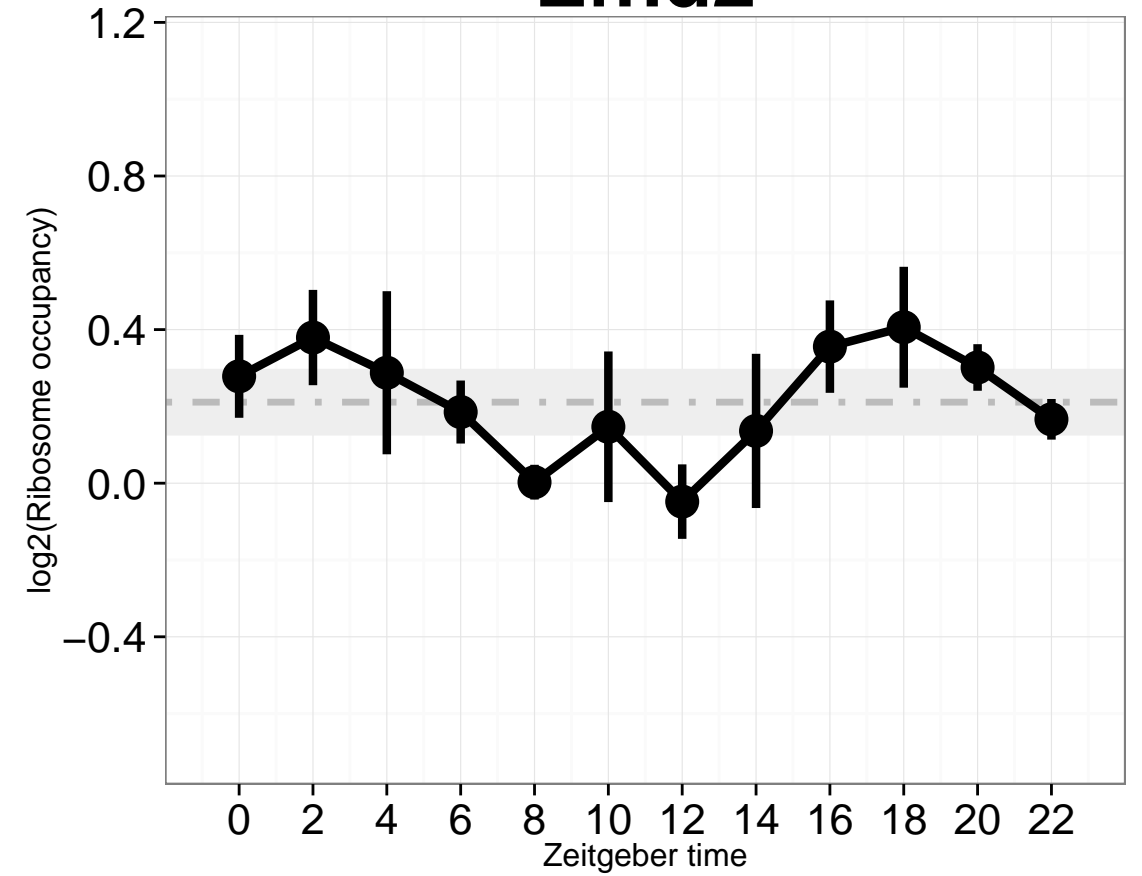

Supplement: Supplementary file 4352 [file 1]

# Pcmt1

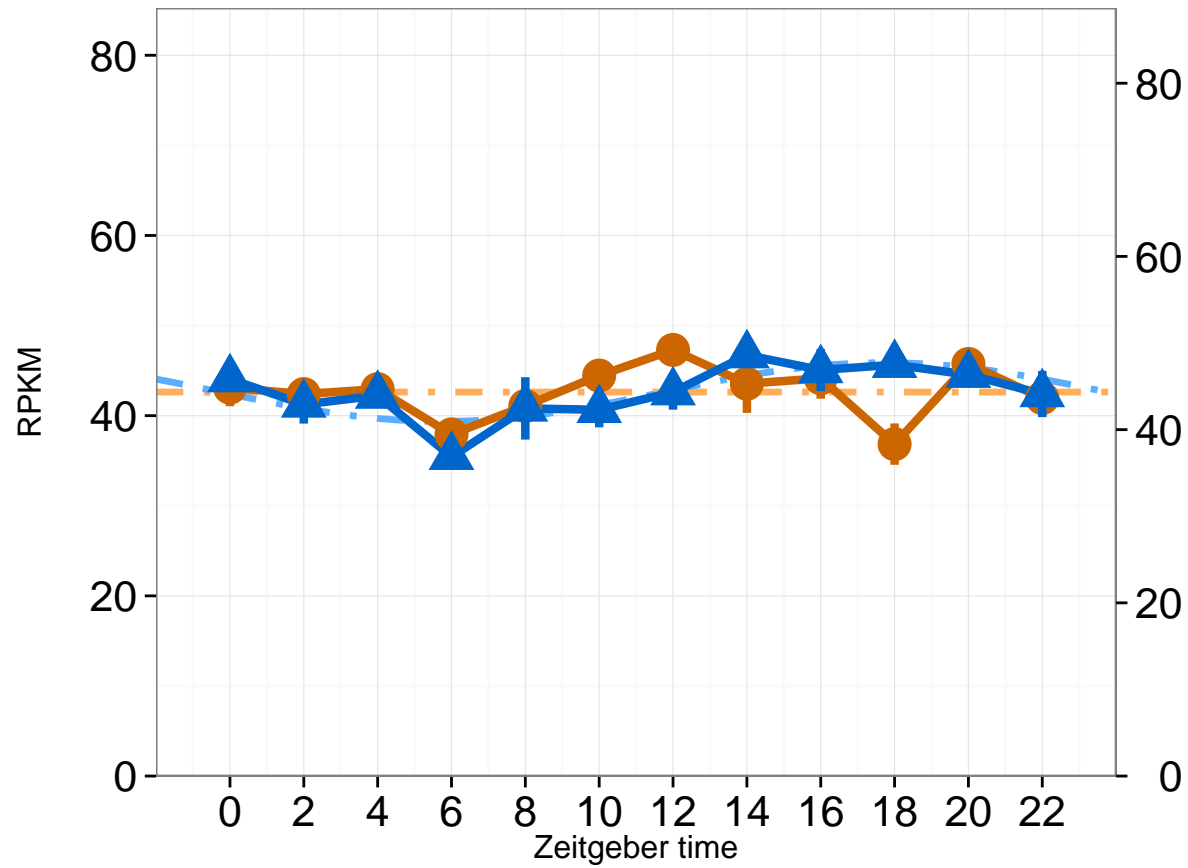

# Pcmt1

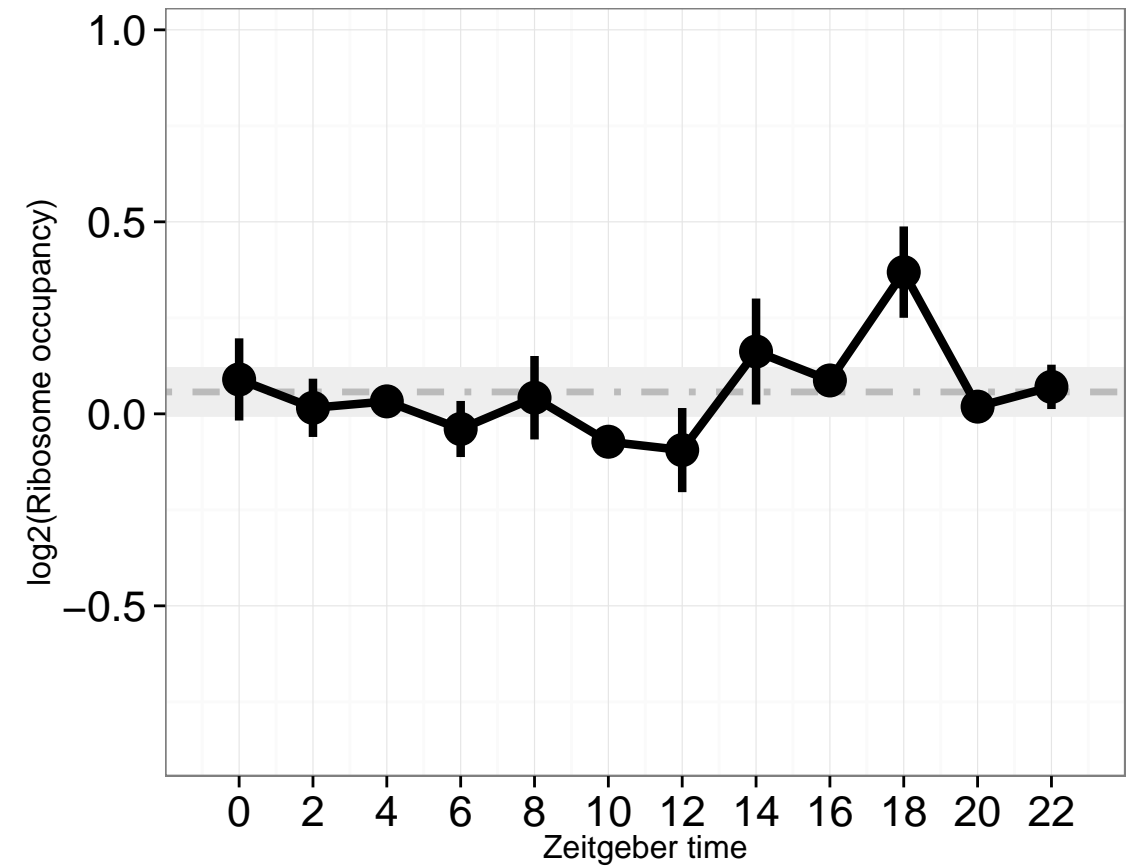

Supplement: Supplementary file 4353 [file 1]

# Mrpl52

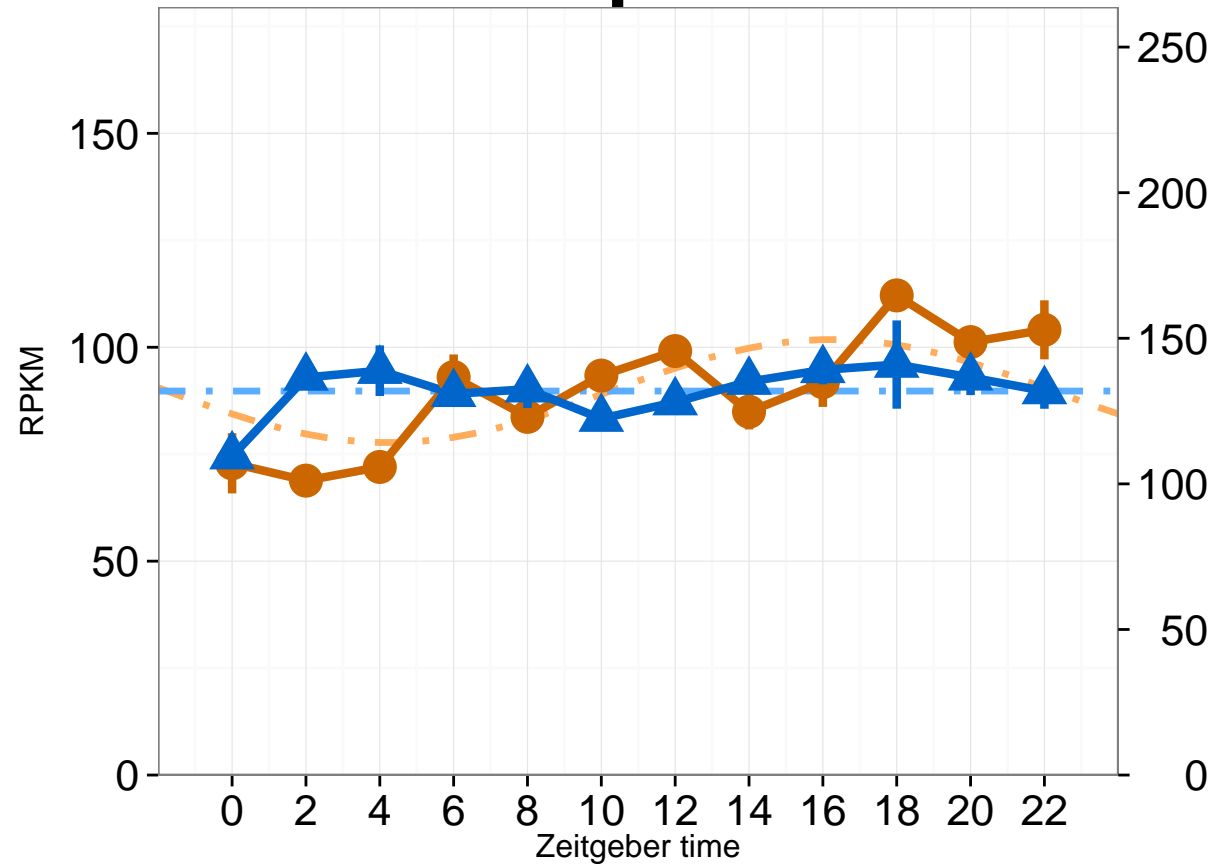

# Mrpl52

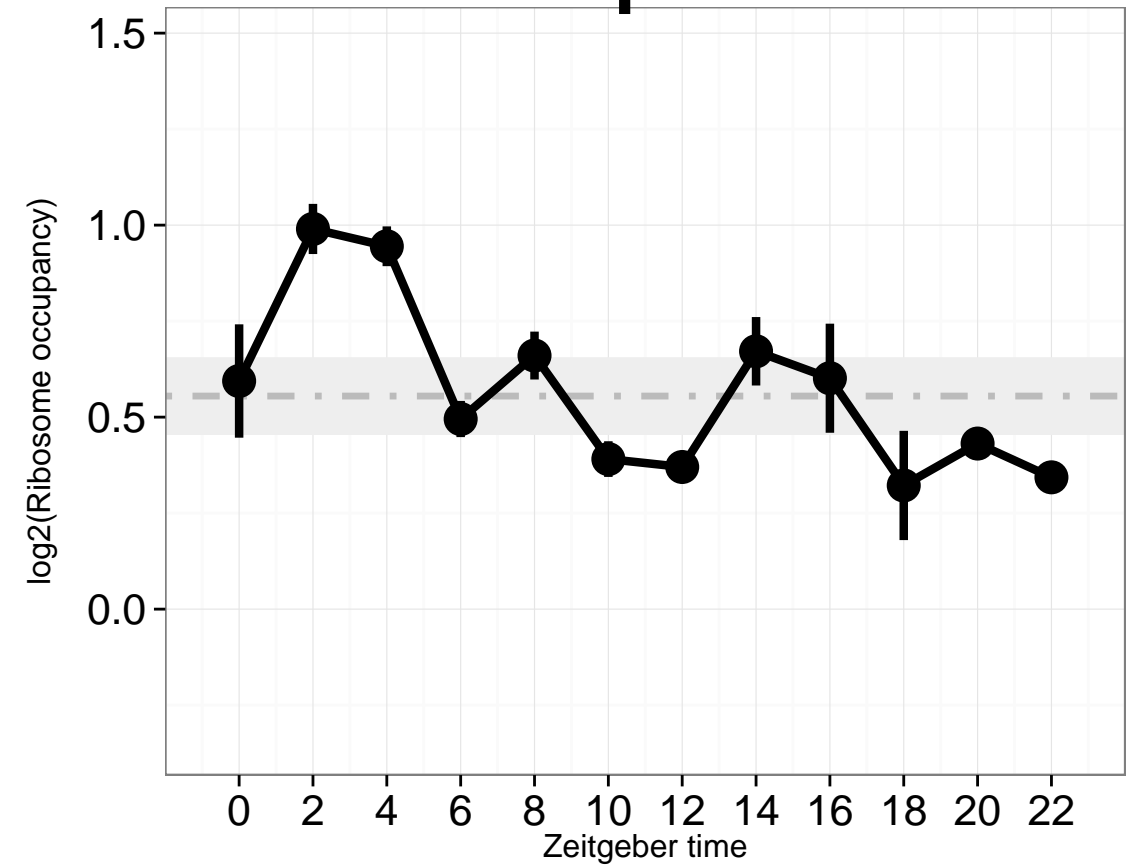

Supplement: Supplementary file 4354 [file 1]

# Obsl1

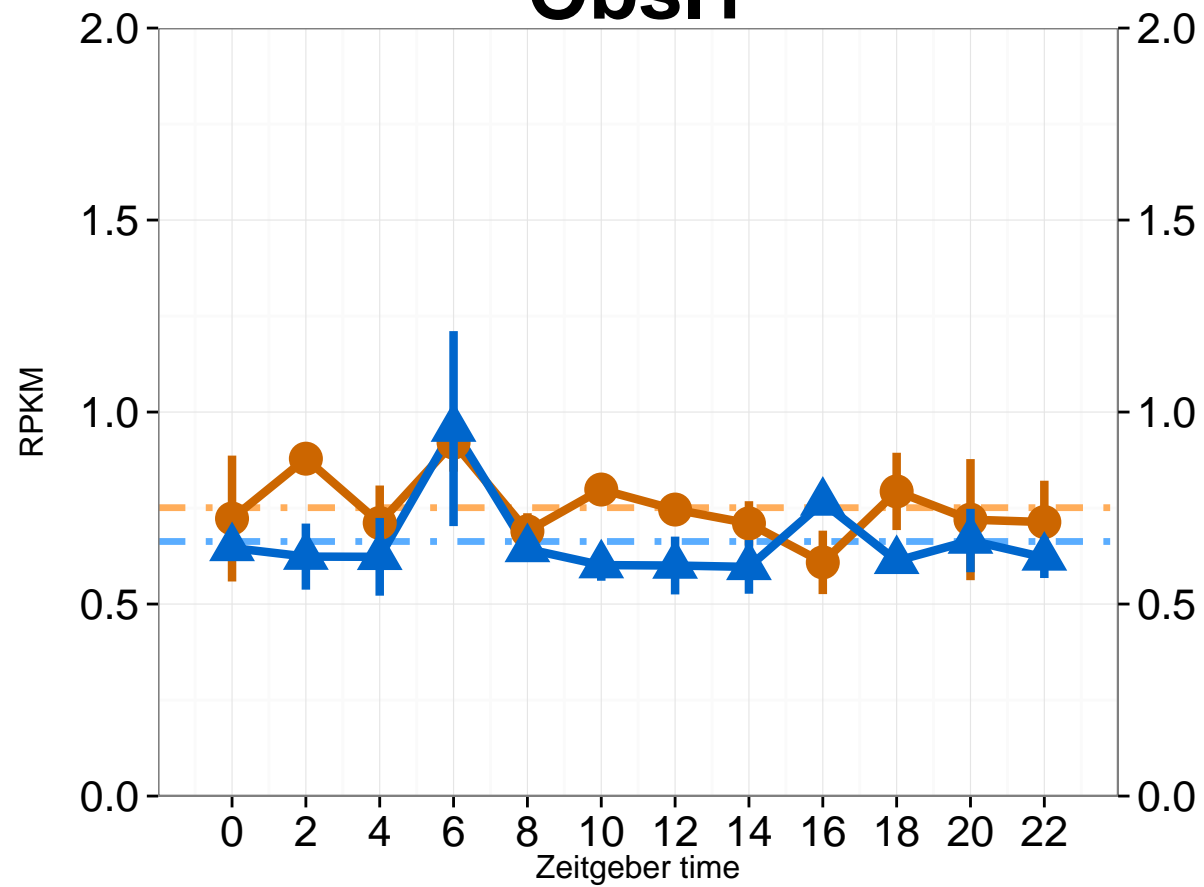

# Obsl1

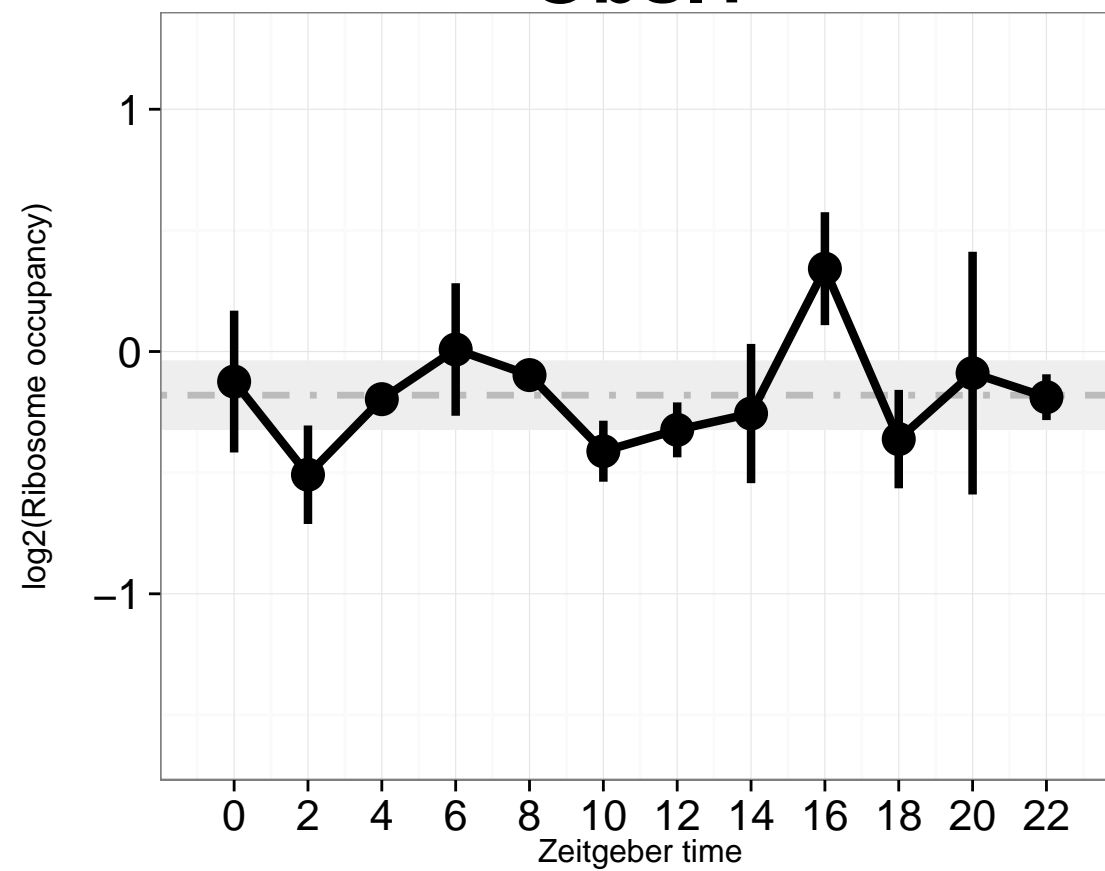

Supplement: Supplementary file 4355 [file 1]

## Nek2

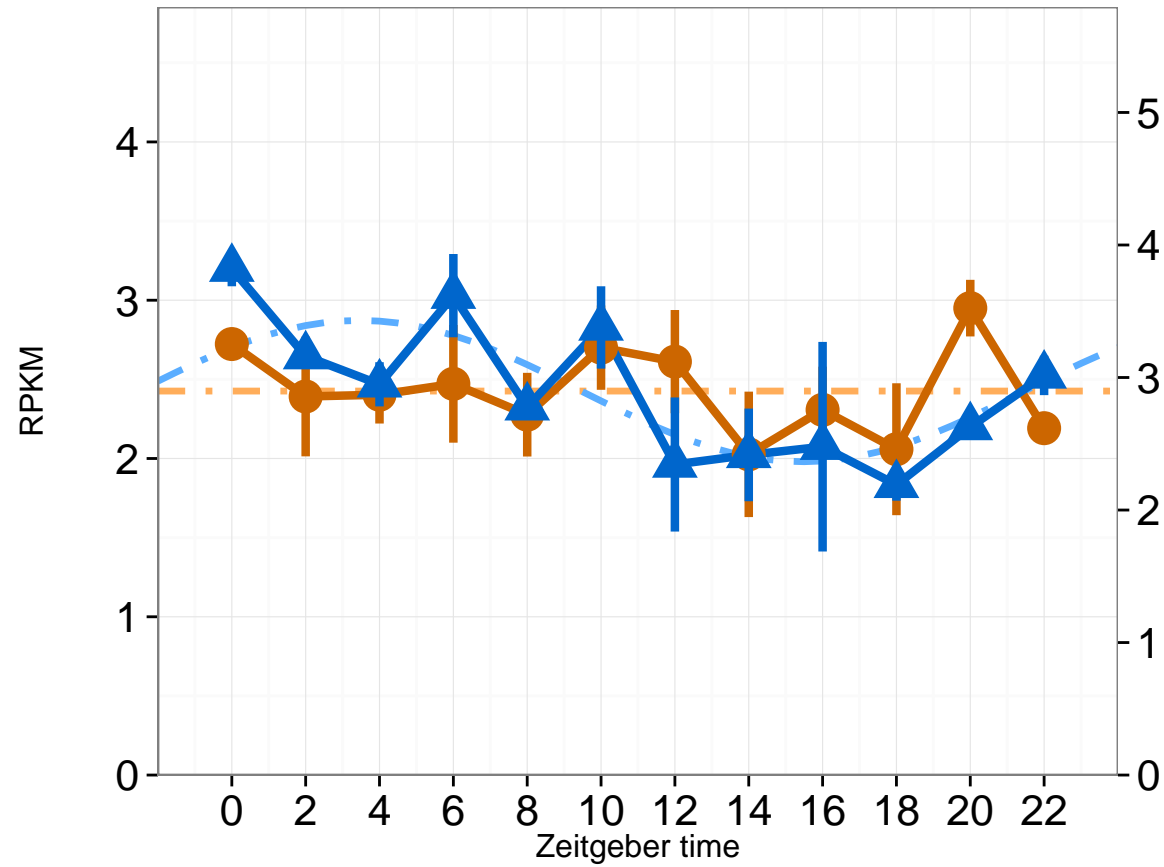

## Nek2

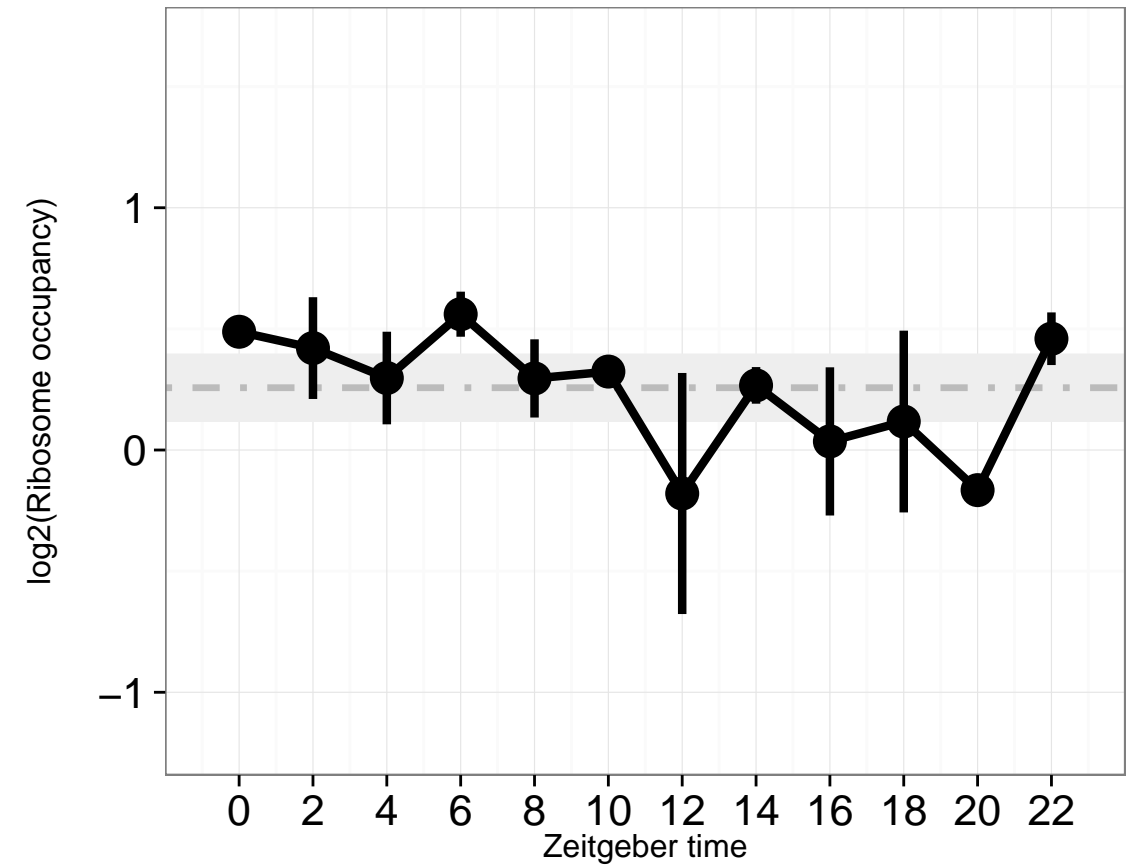

Supplement: Supplementary file 4357 [file 1]

## 0610030E20Rik

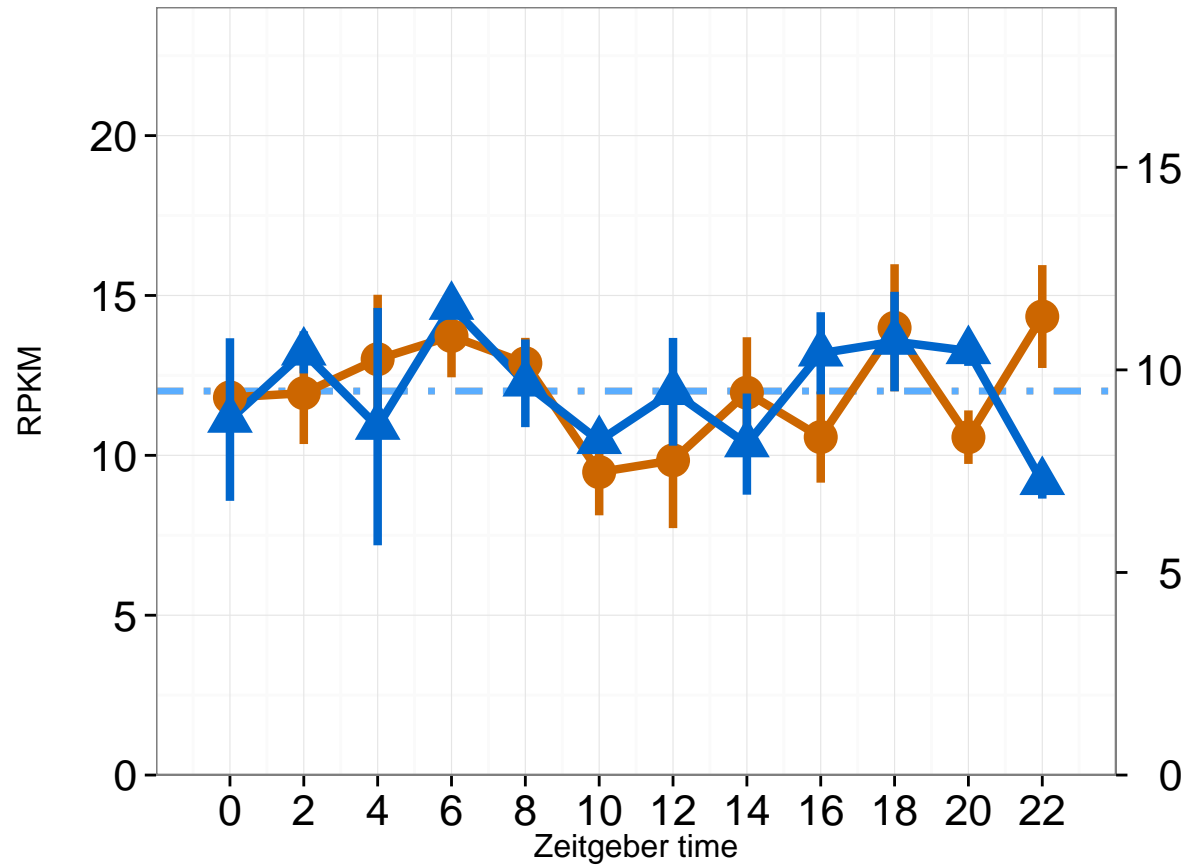

## 0610030E20Rik

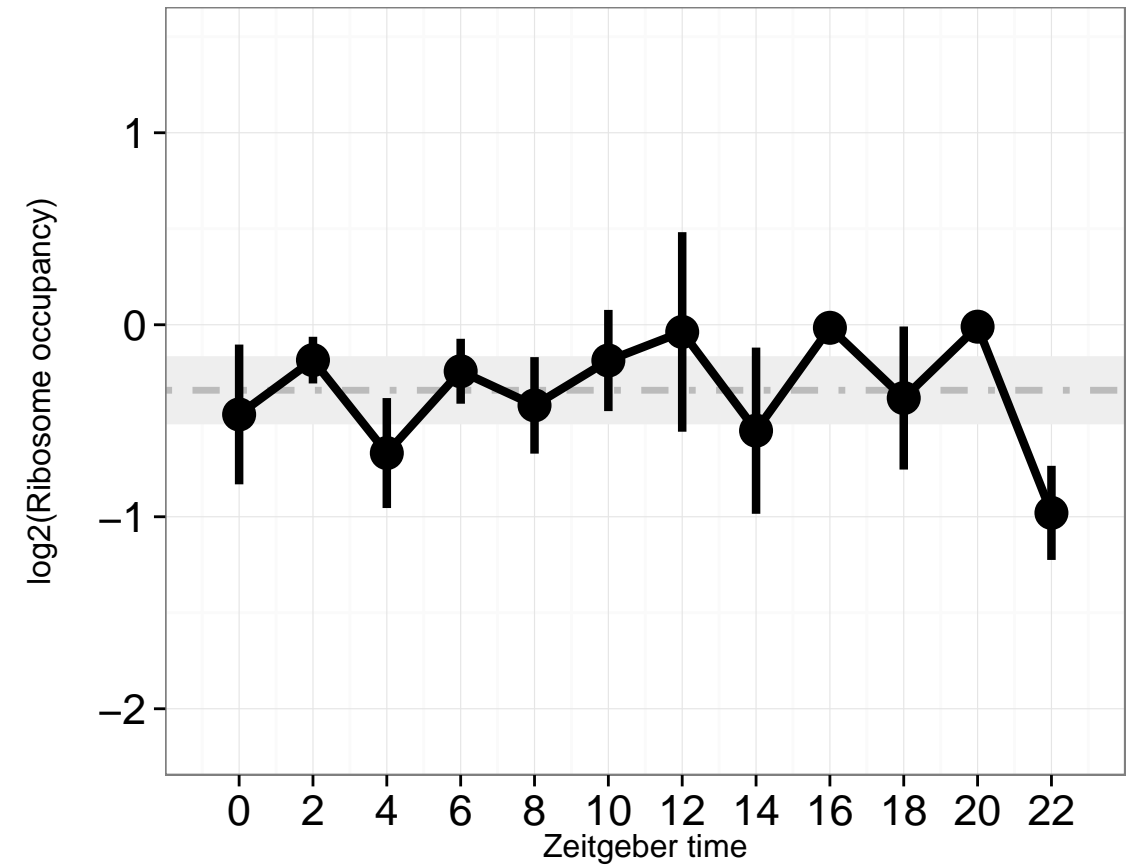

Supplement: Supplementary file 4358 [file 1]

## Mttp

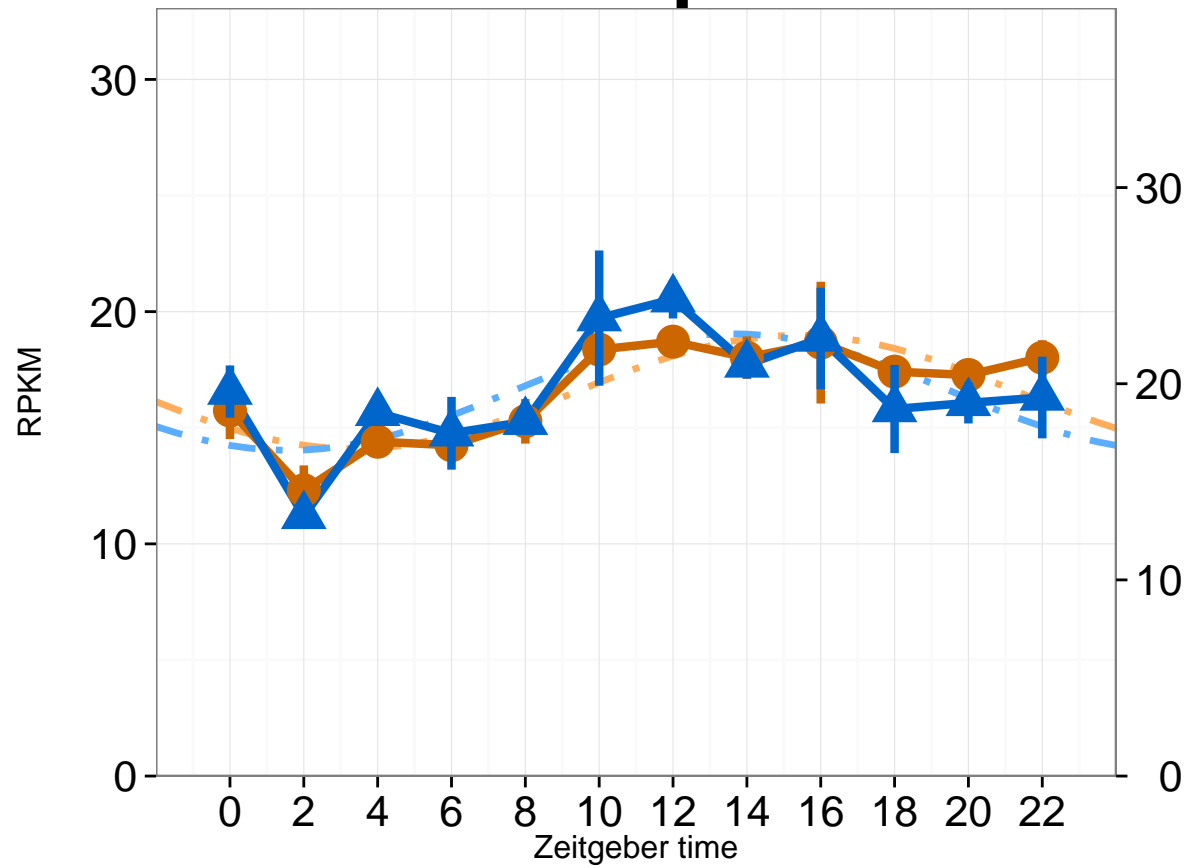

## Mttp

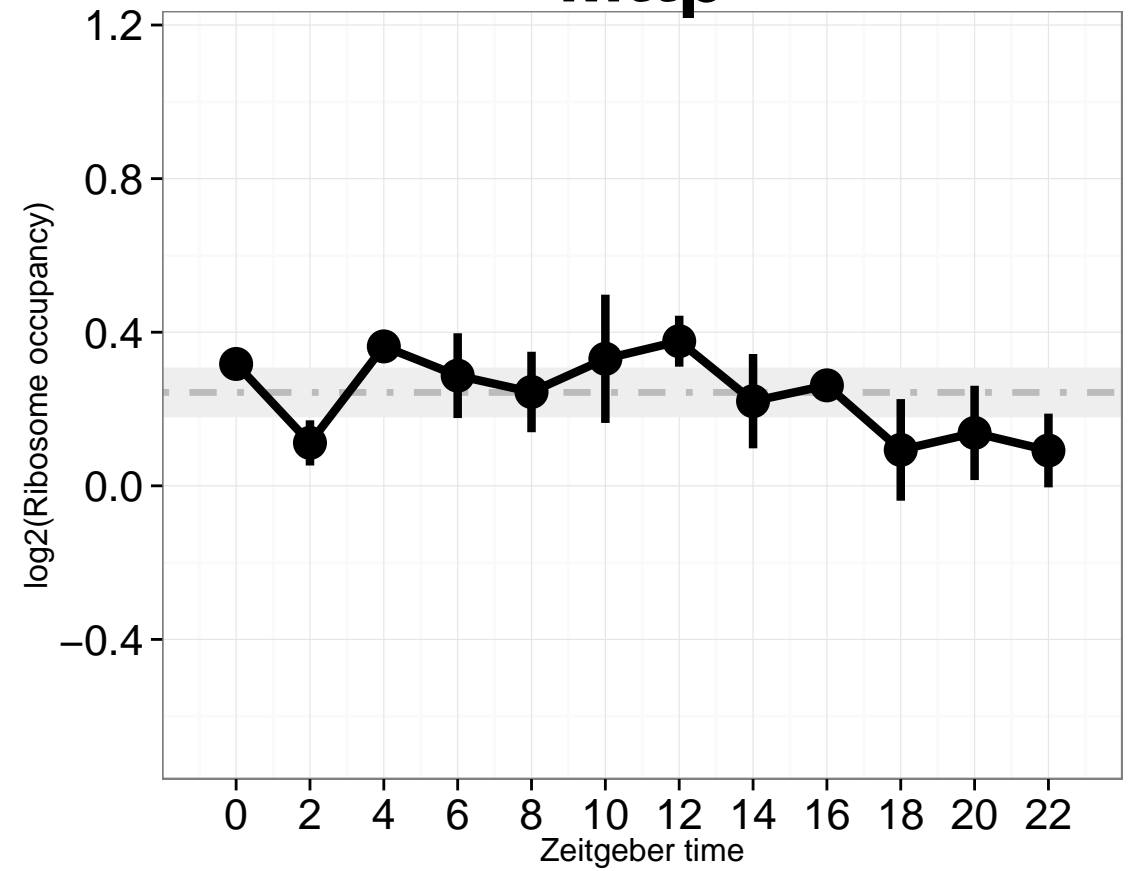

Supplement: Supplementary file 4359 [file 1]

## 2410127L17Rik

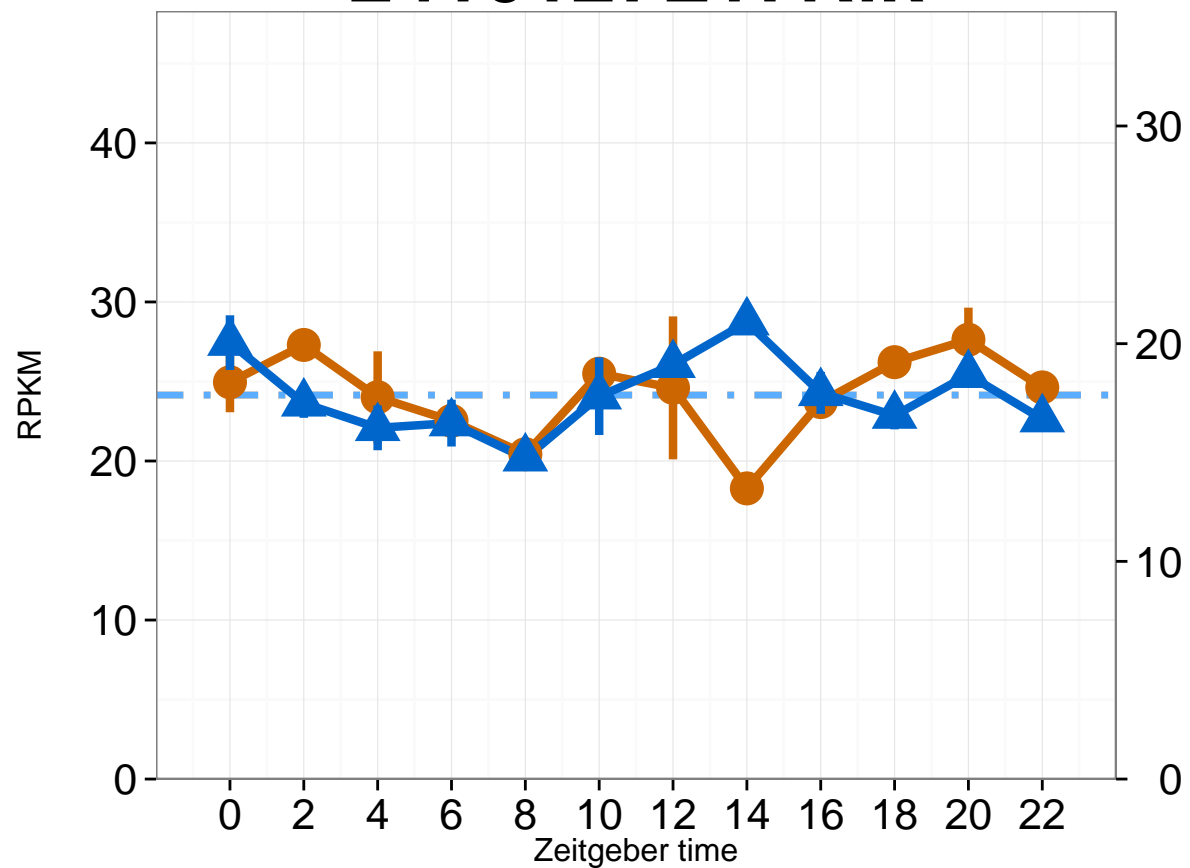

## 2410127L17Rik

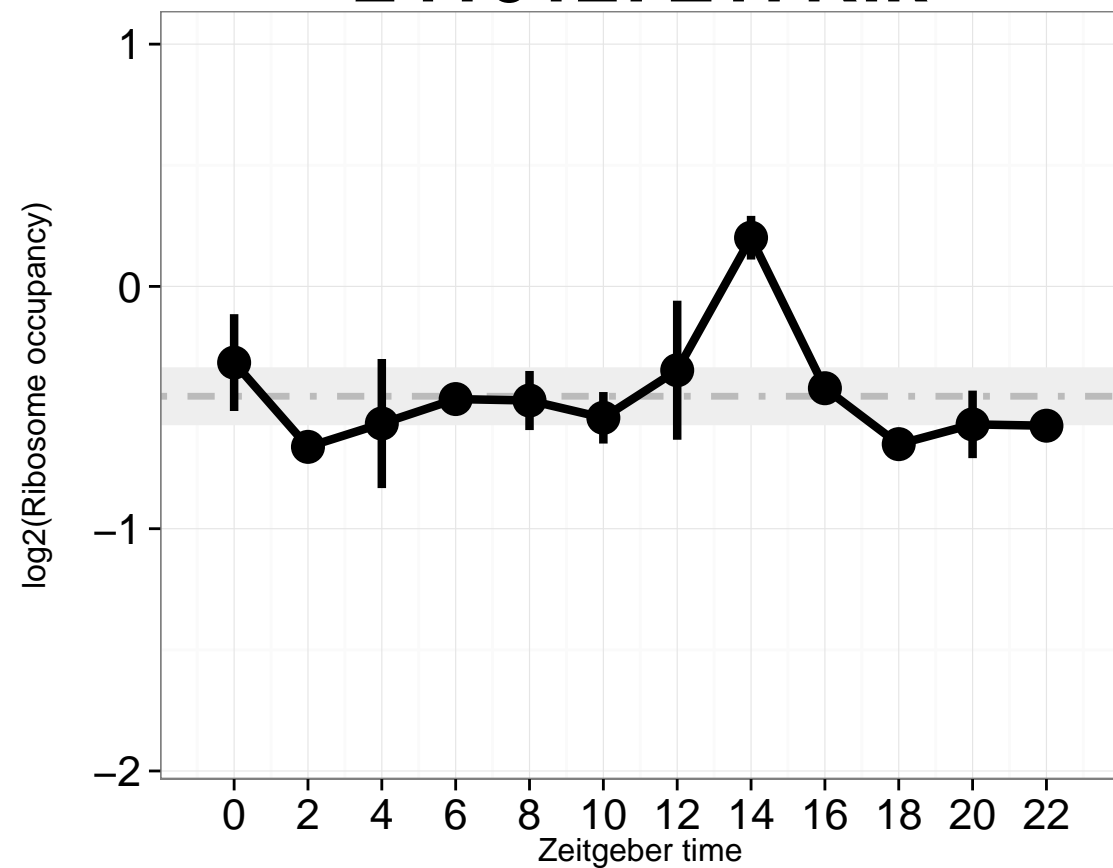

Supplement: Supplementary file 4360 [file 1]

# Grin3a

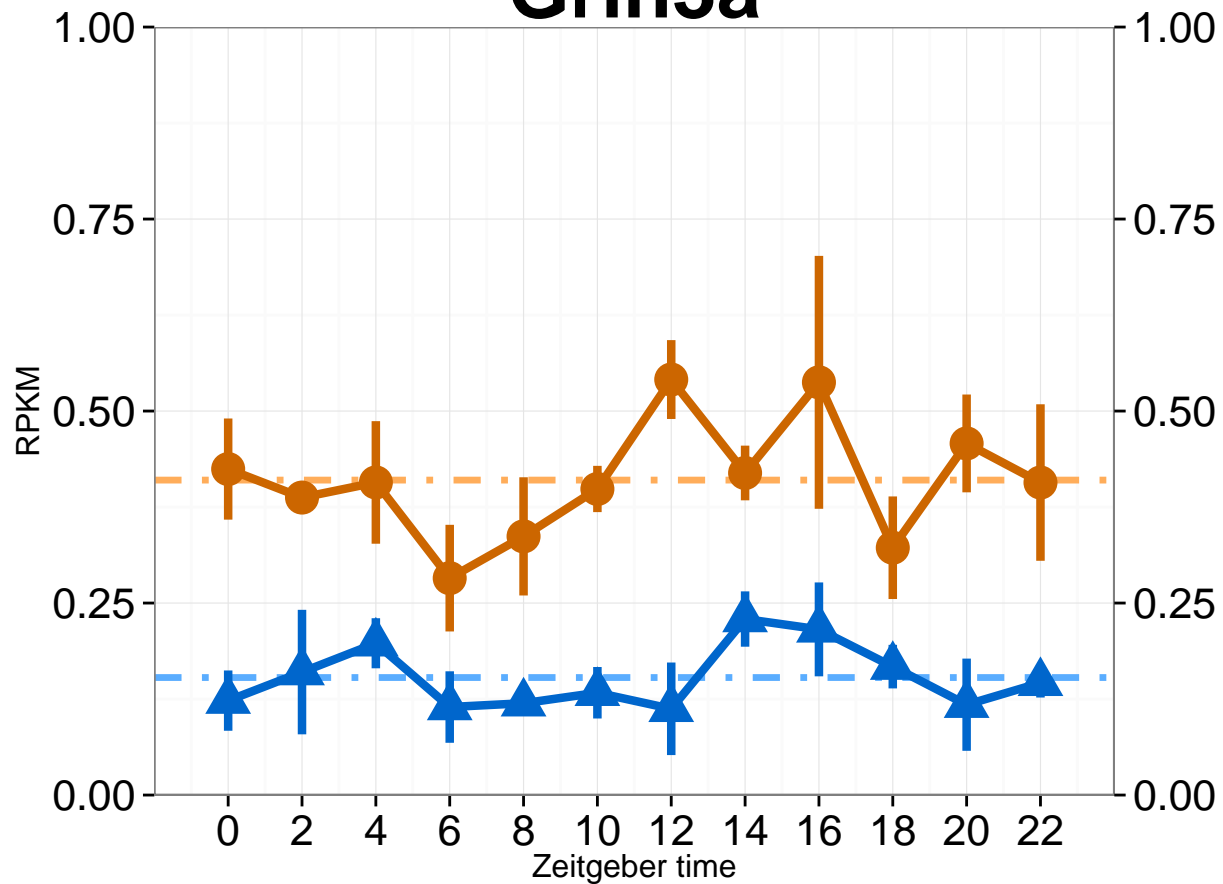

# Grin3a

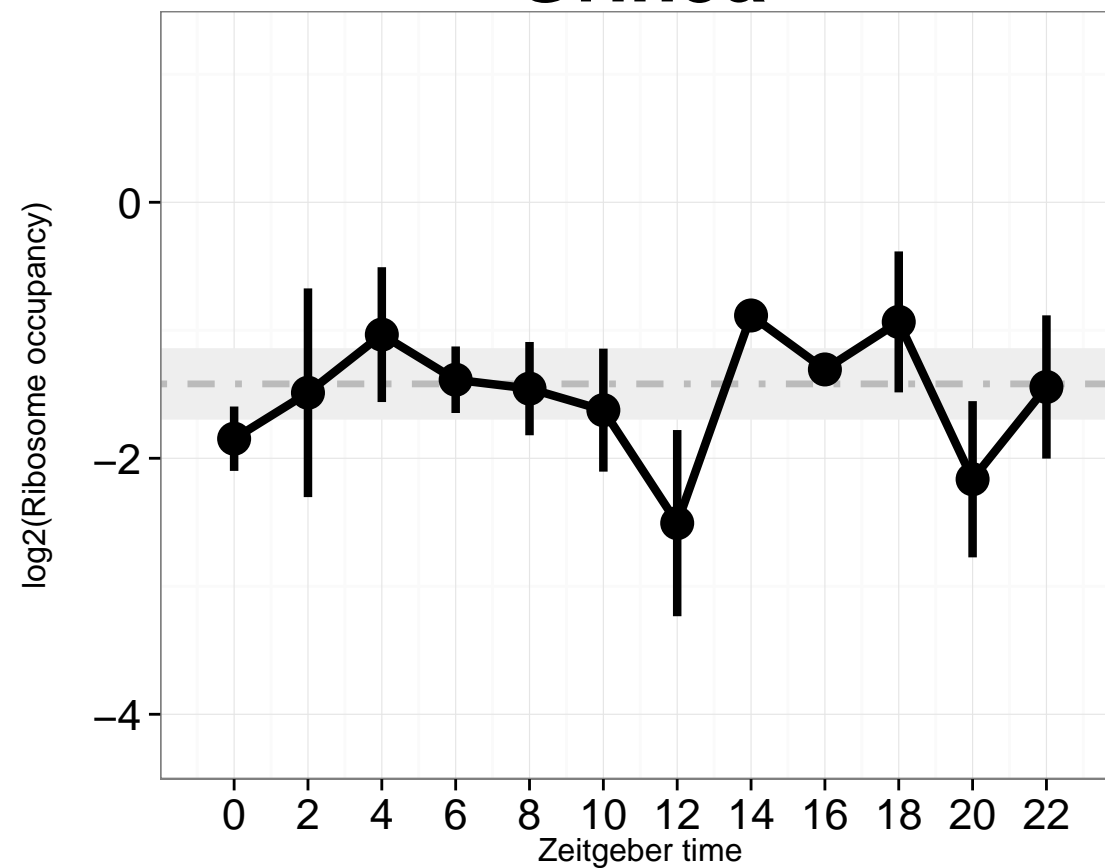

Supplement: Supplementary file 4361 [file 1]

## Ctns

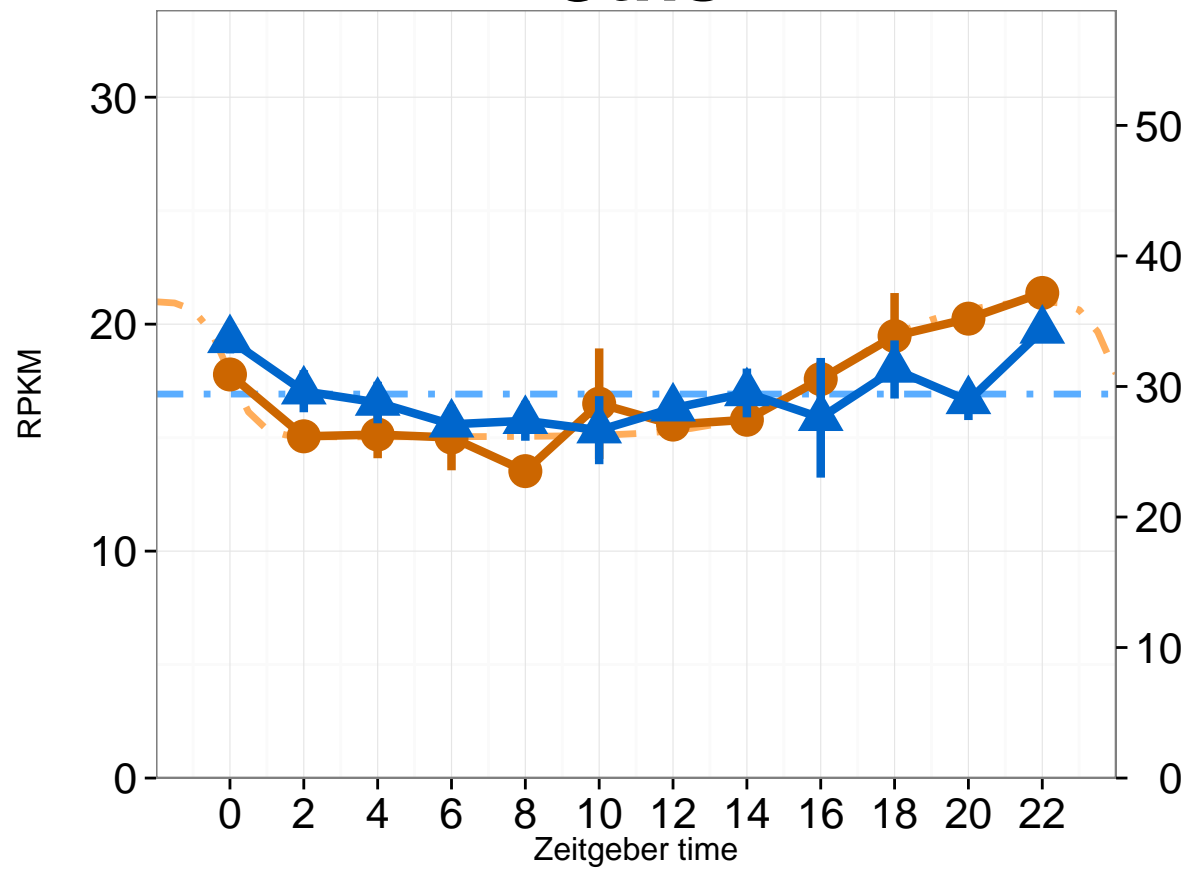

## Ctns

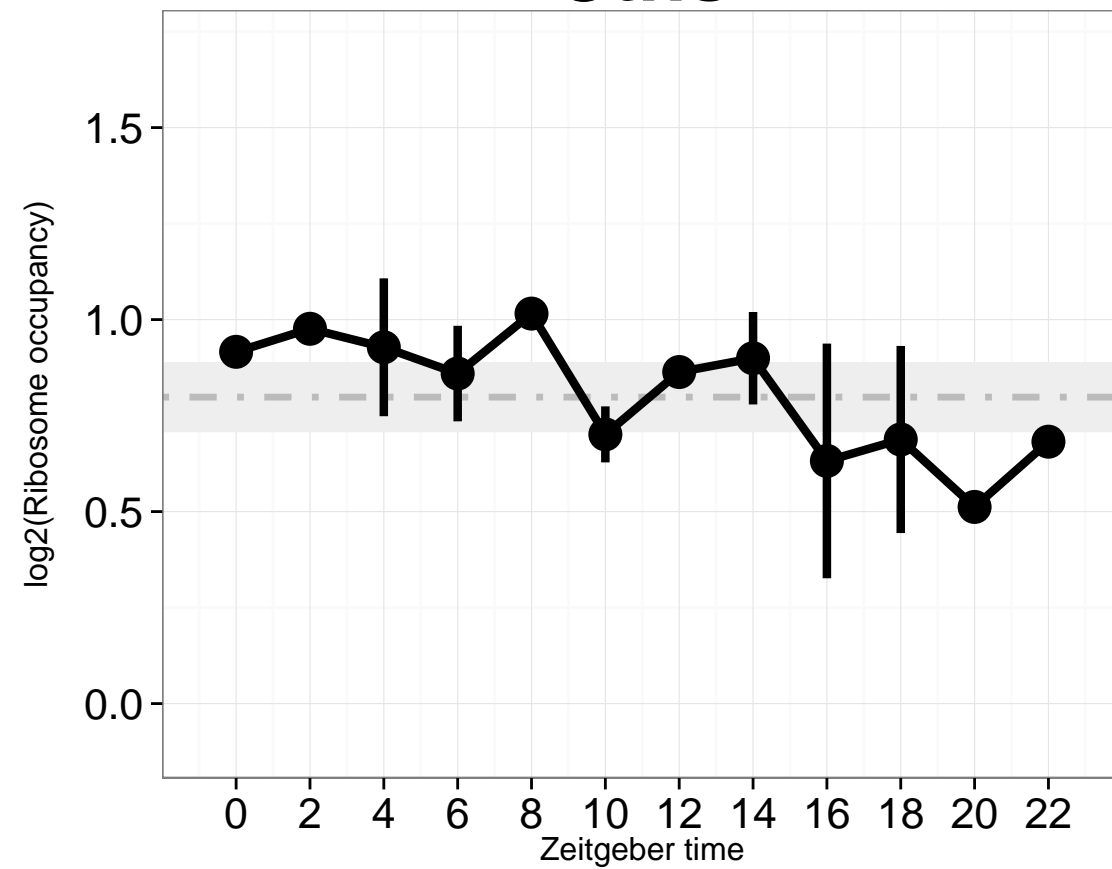

Supplement: Supplementary file 4362 [file 1]

**Tnfaip8l1 TR**

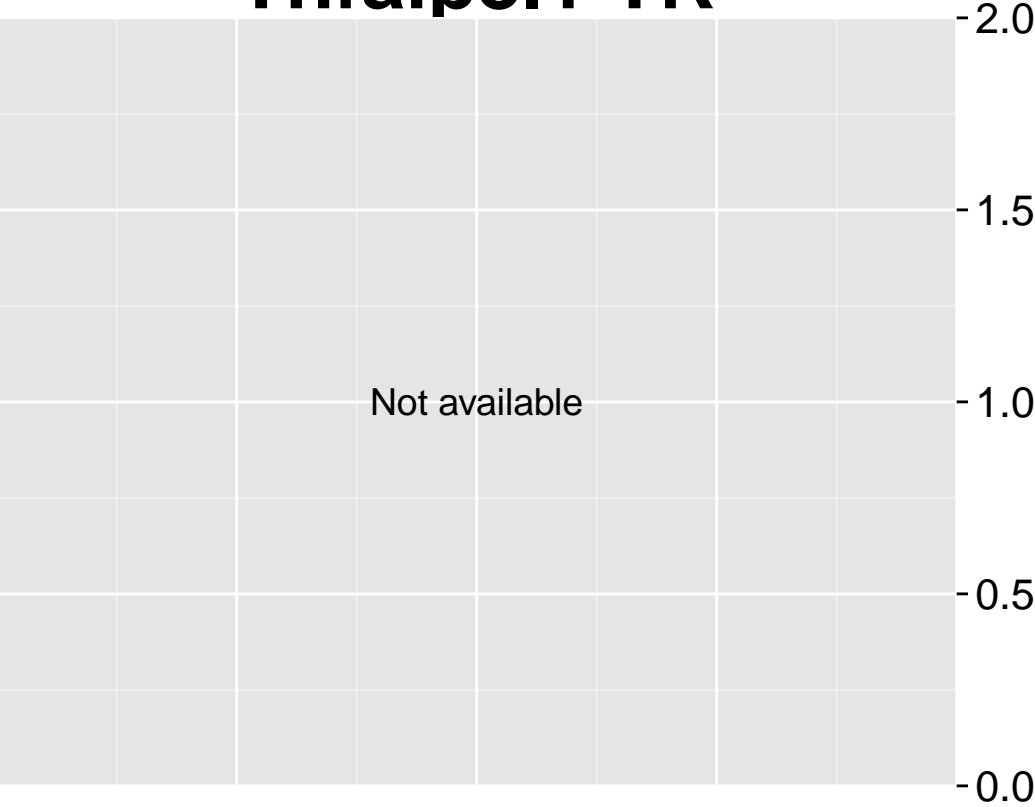

**Tnfaip8l1 log2(Ribosome occupanc**

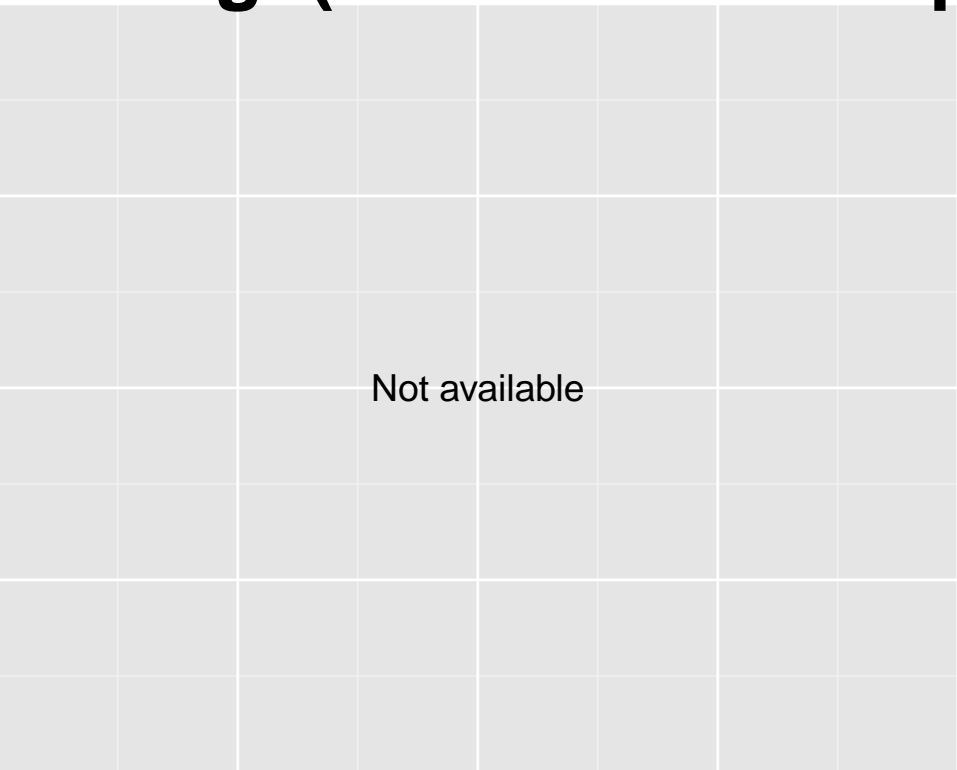

Supplement: Supplementary file 4363 [file 1]

## Prss8

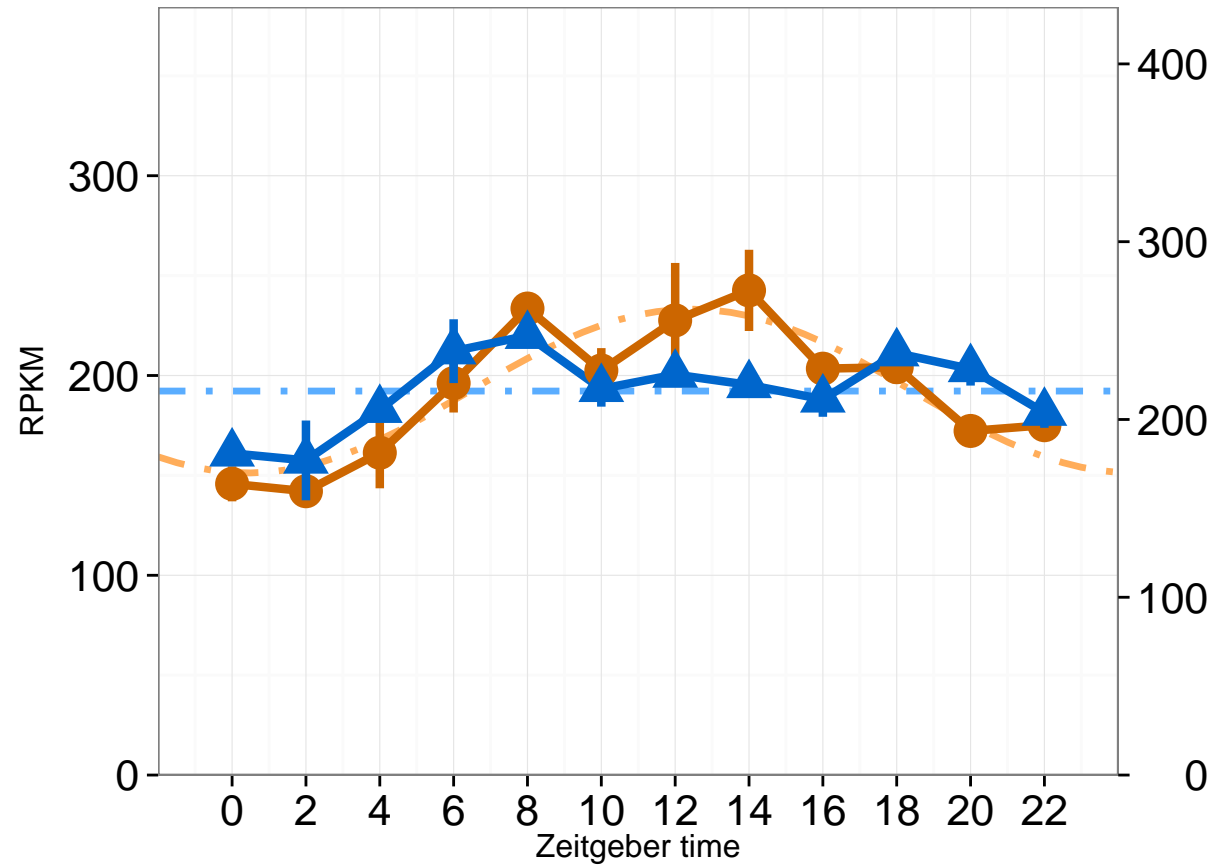

## Prss8

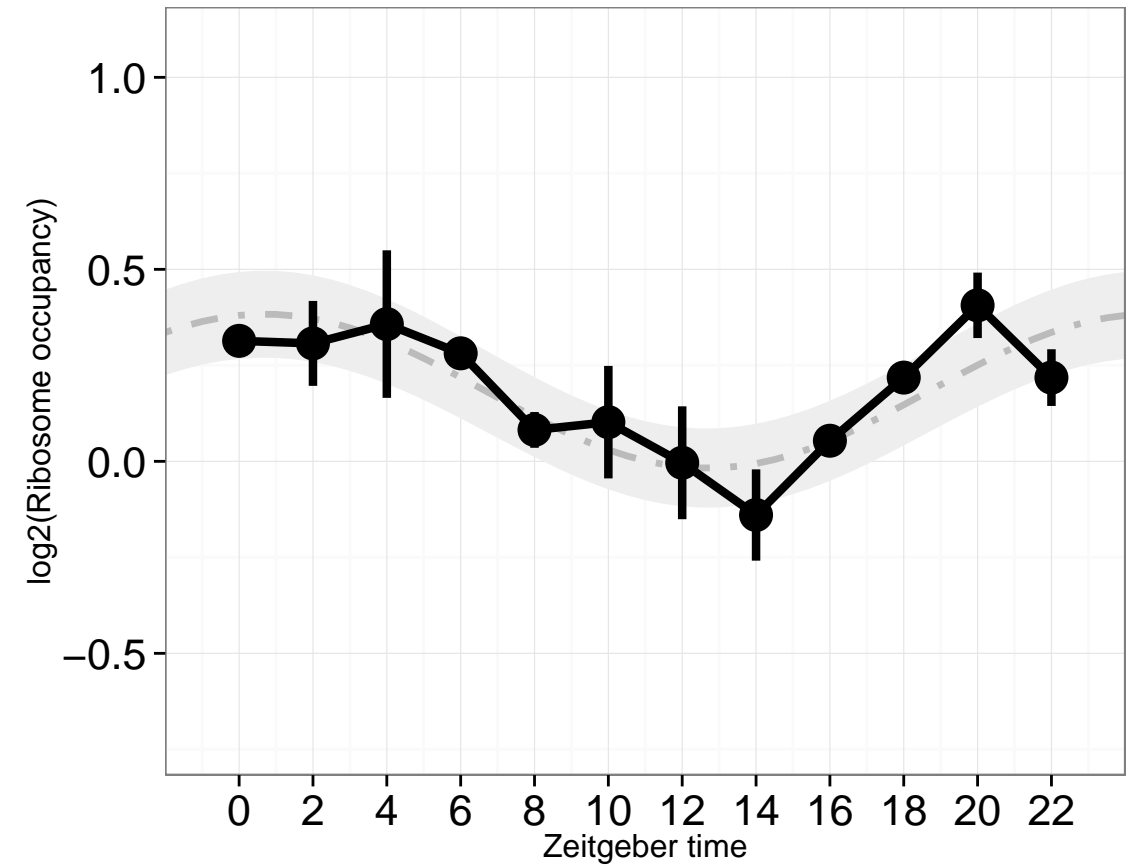

Supplement: Supplementary file 4364 [file 1]

# Rspo3

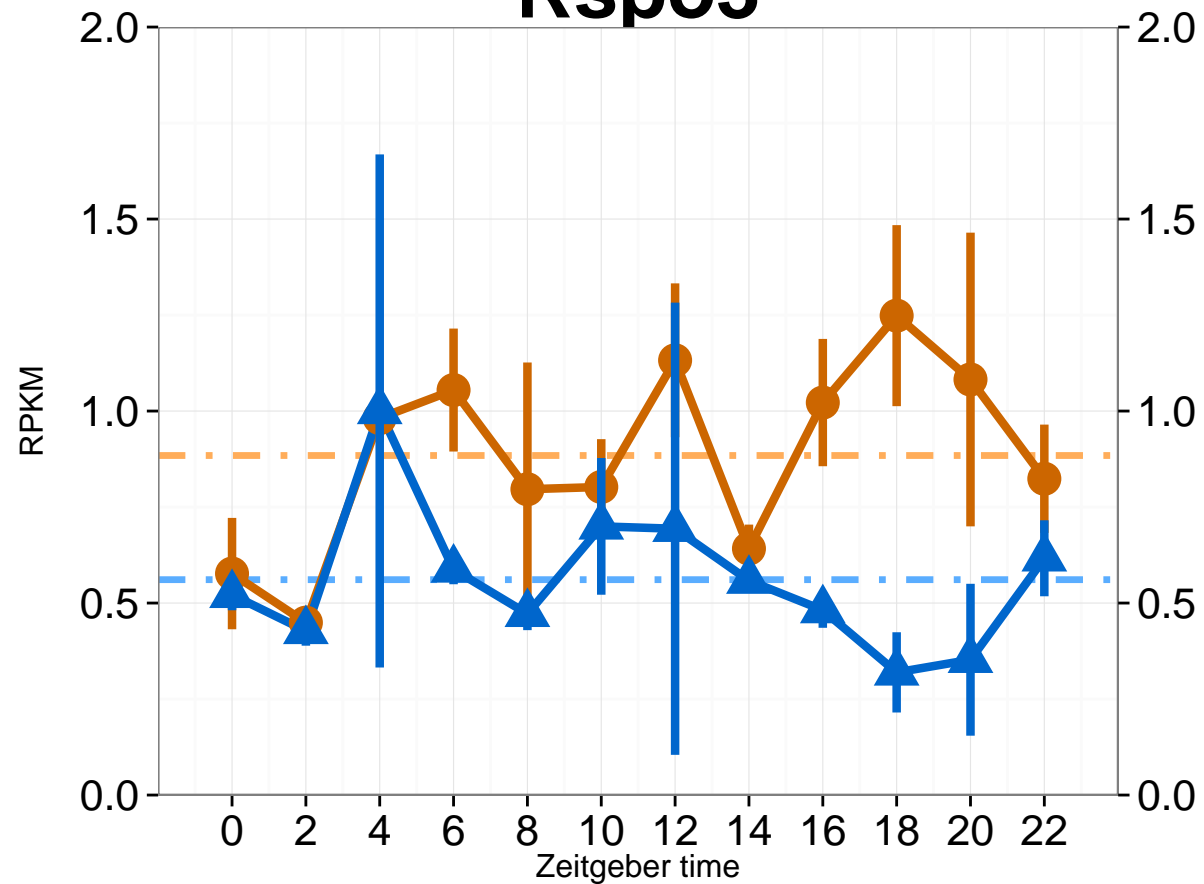

# Rspo3

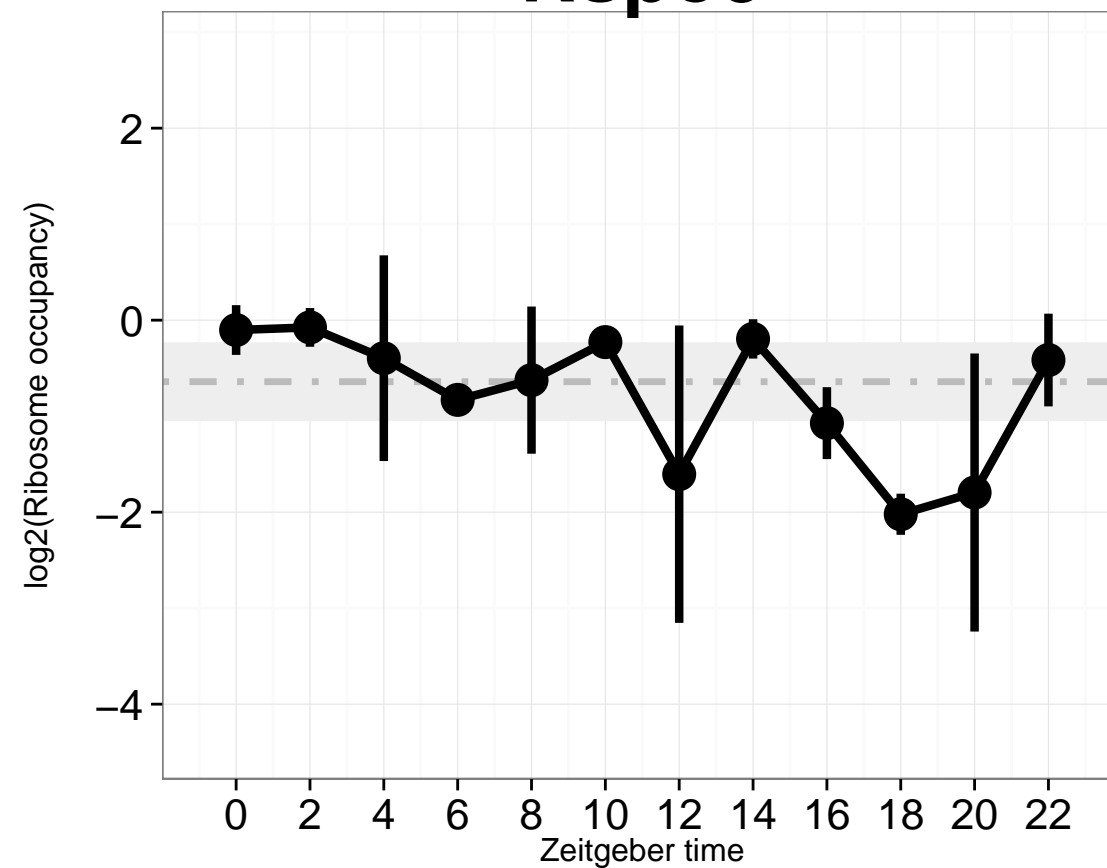

Supplement: Supplementary file 4365 [file 1]

# Apcdd1

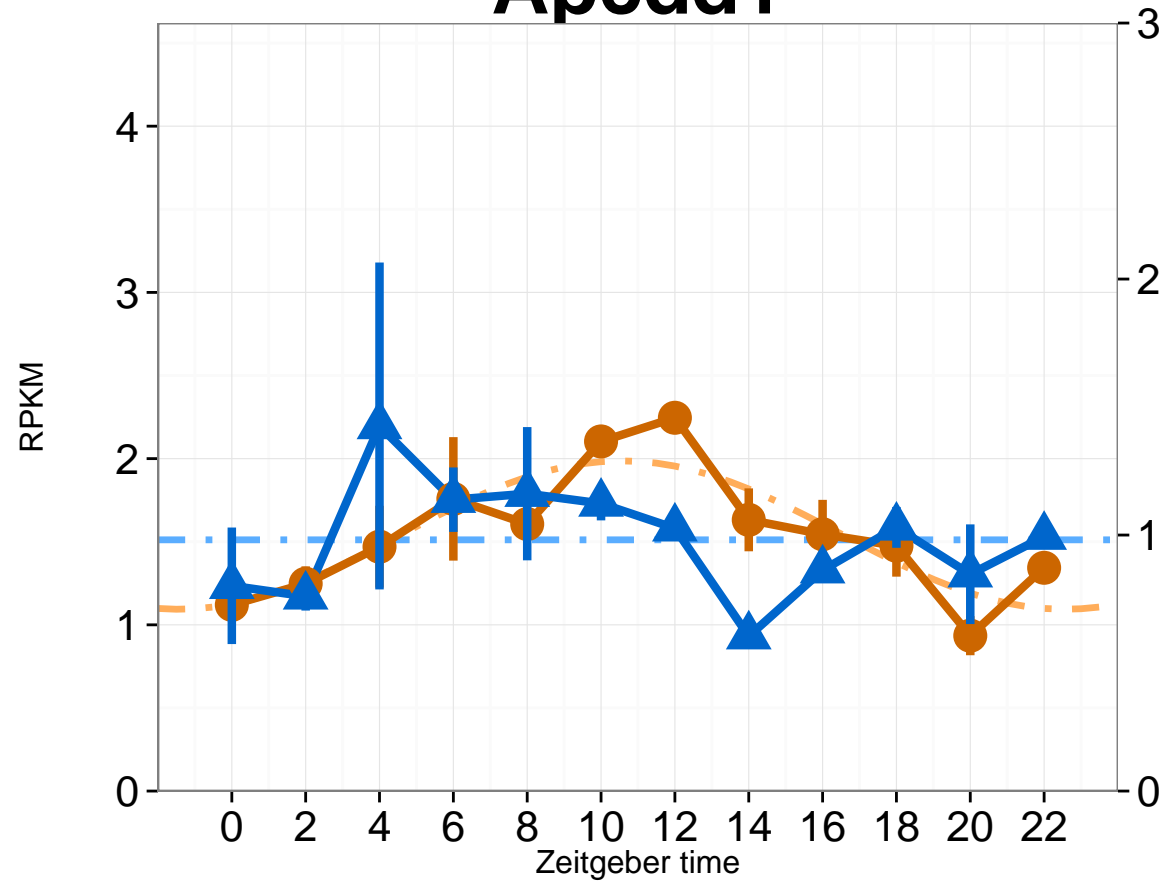

# Apcdd1

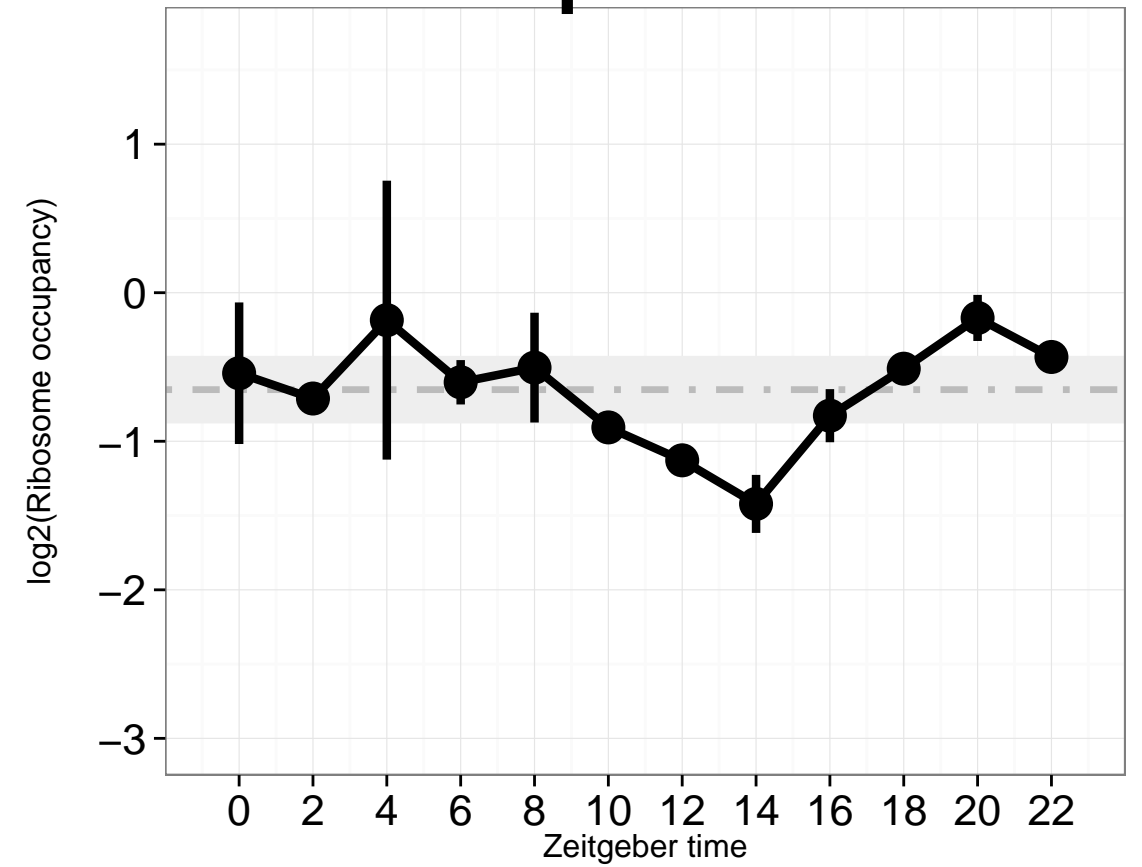

Supplement: Supplementary file 4366 [file 1]

# Ccdc62

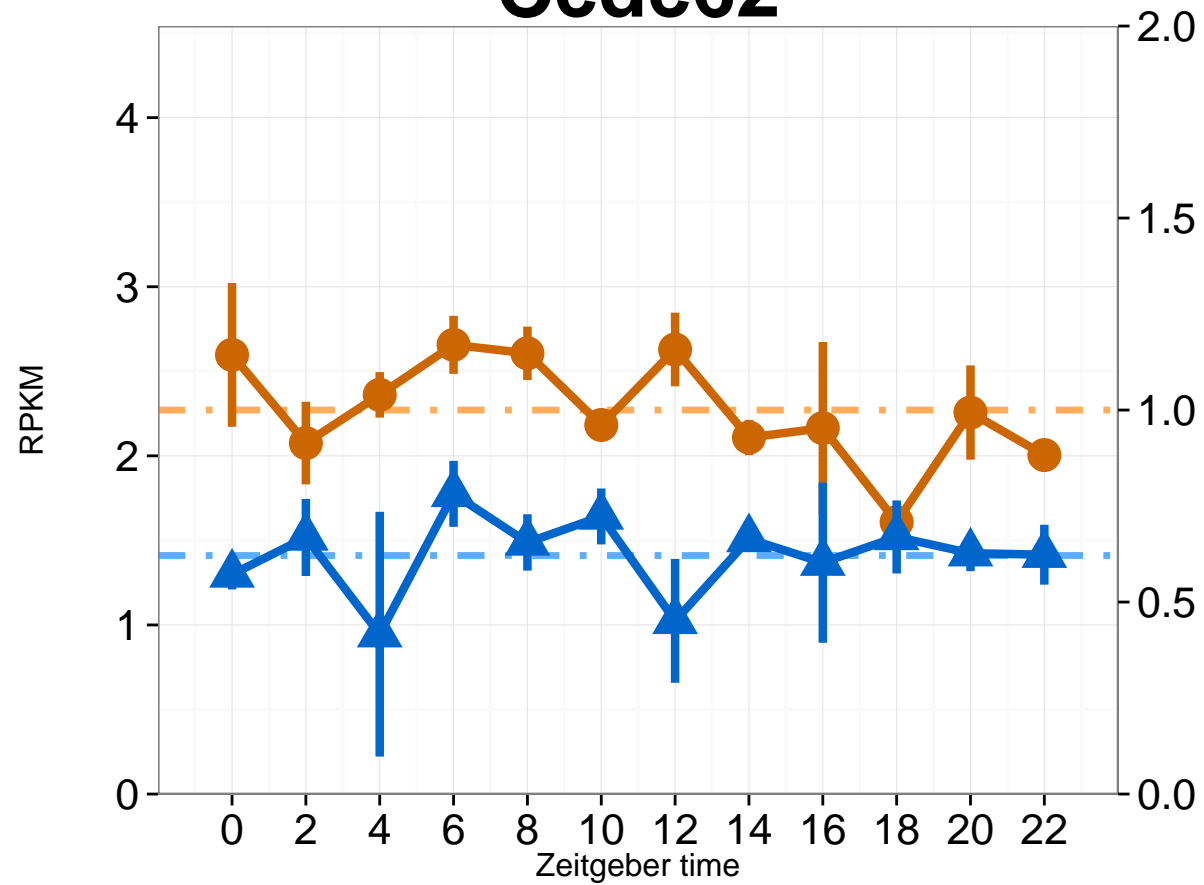

# Ccdc62

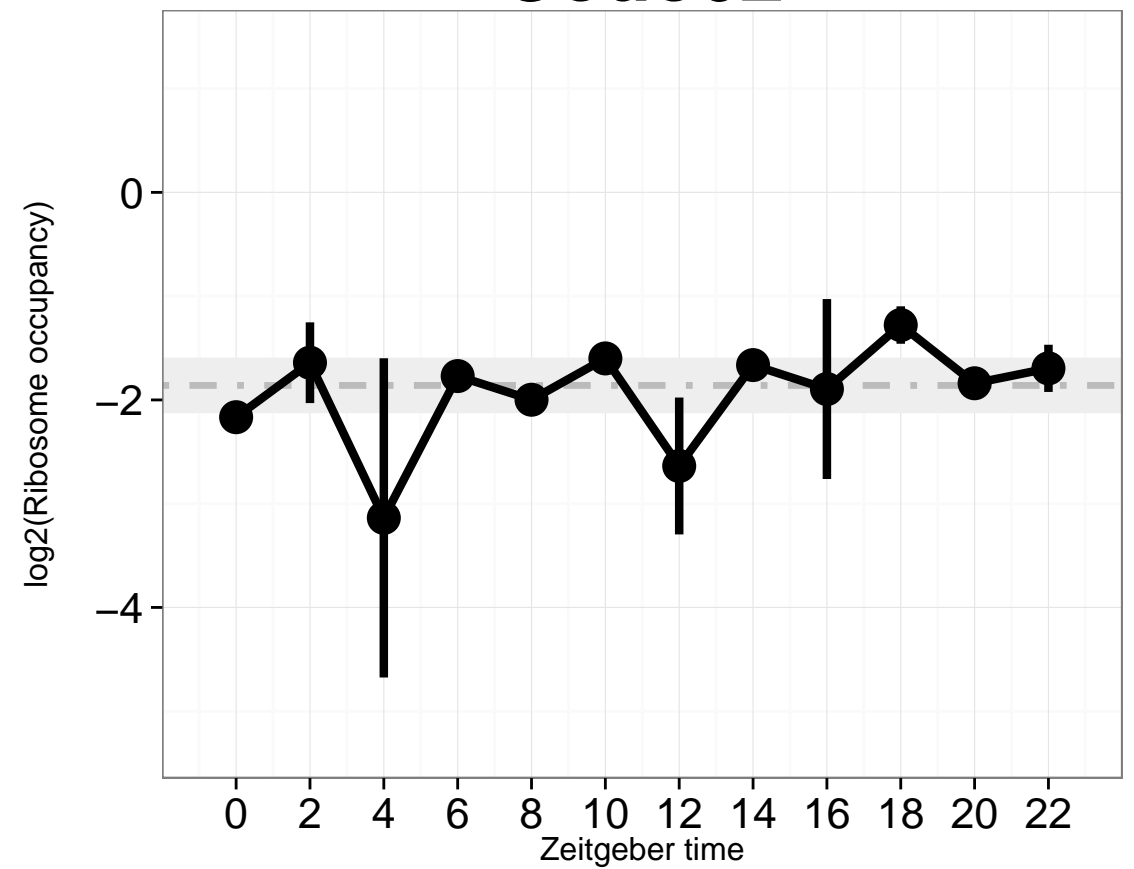

Supplement: Supplementary file 4367 [file 1]

## Mxd4

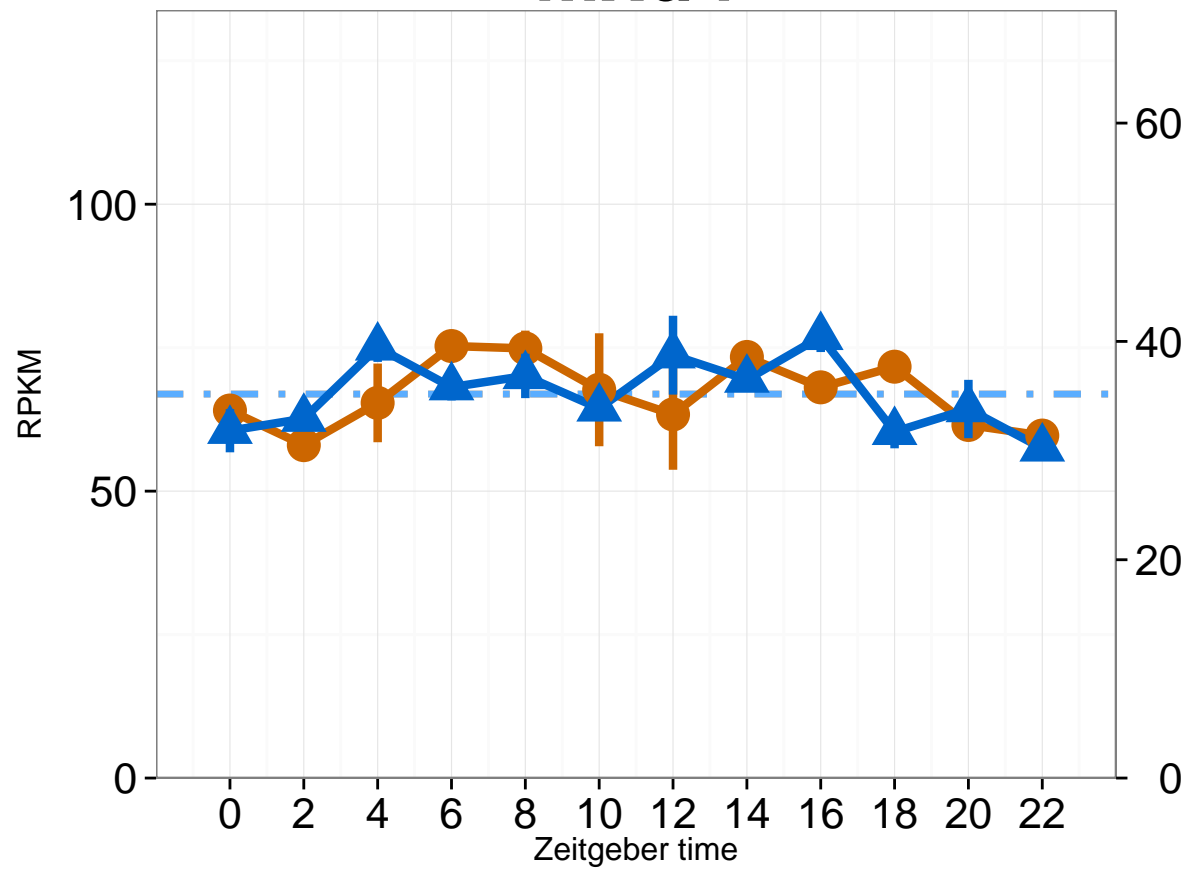

## Mxd4

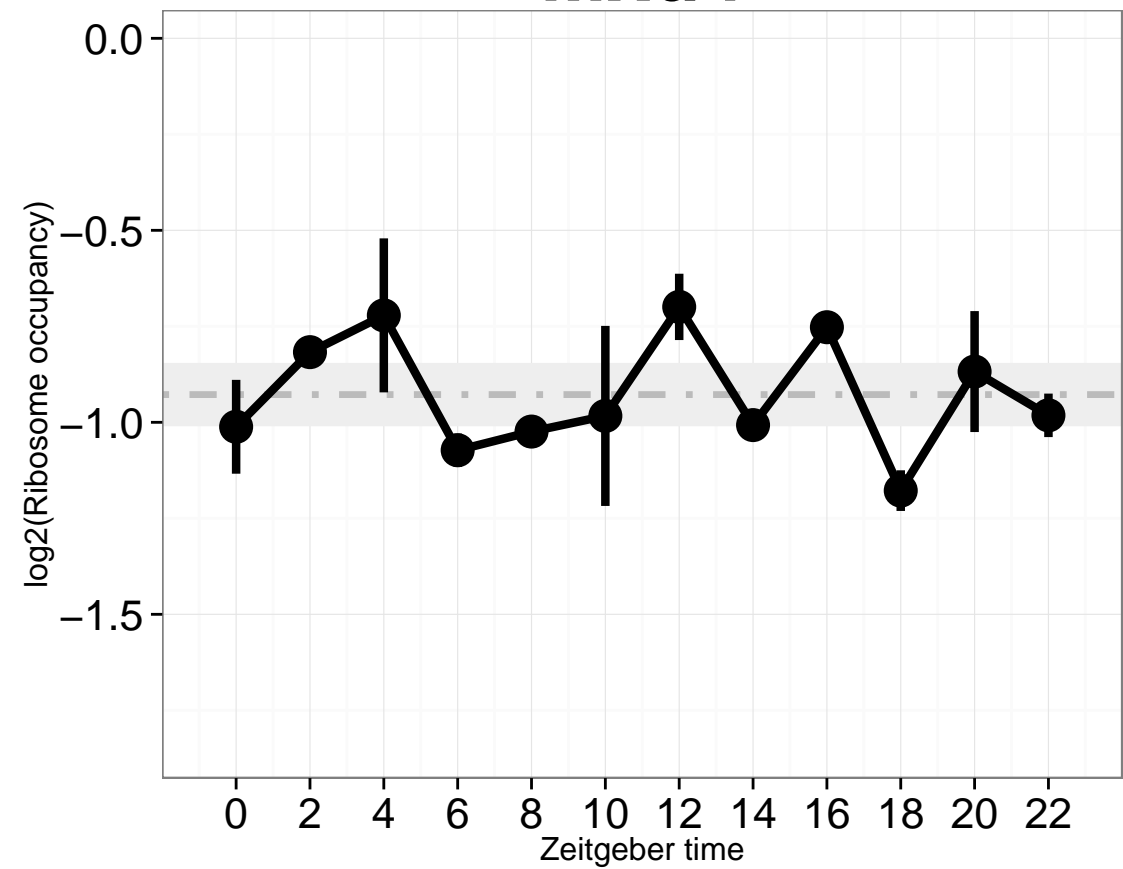

Supplement: Supplementary file 4368 [file 1]

# Sft2d2

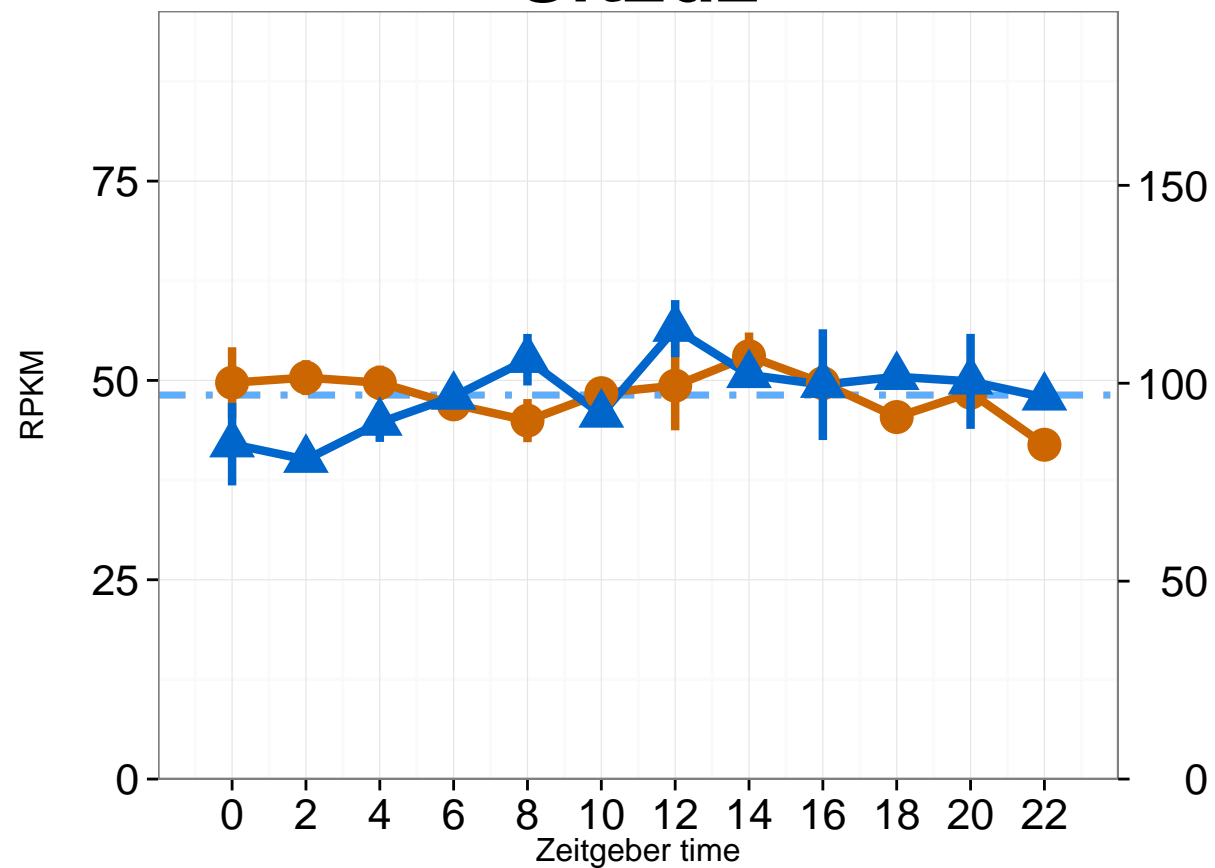

# Sft2d2

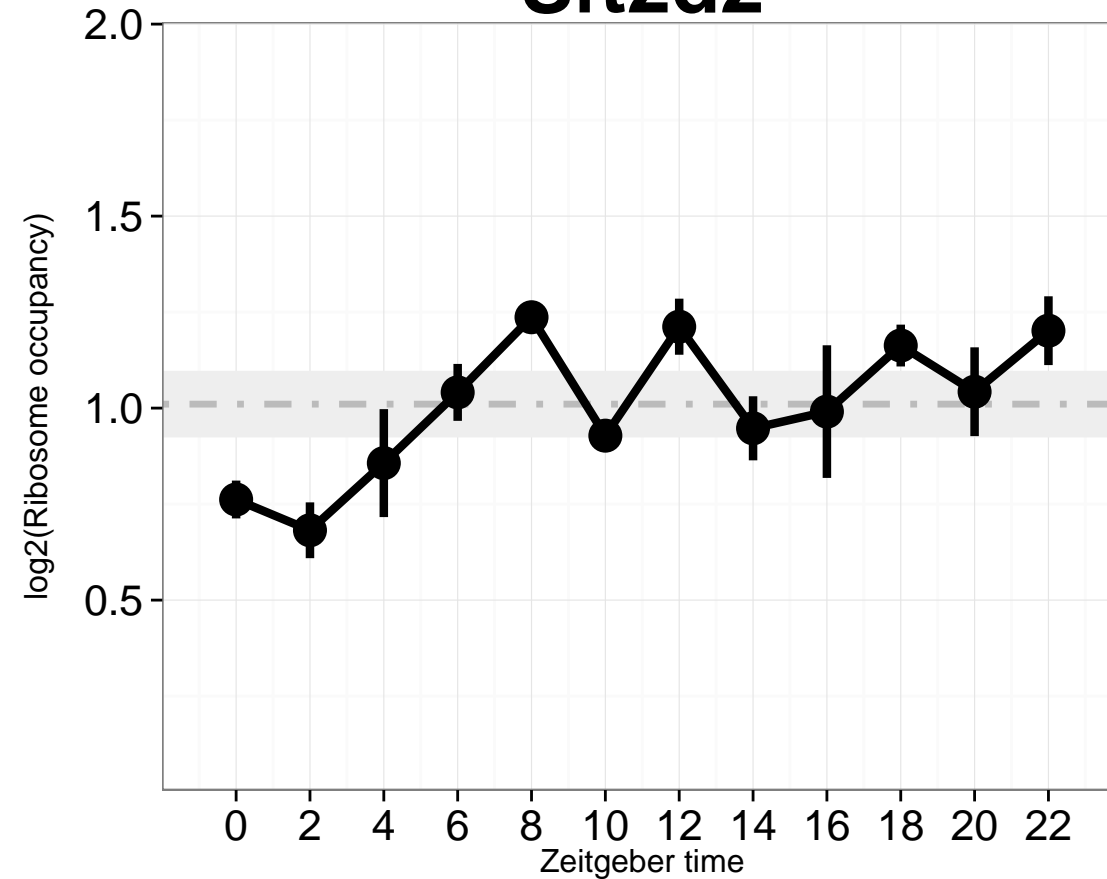

Supplement: Supplementary file 4369 [file 1]

## Plxnb1

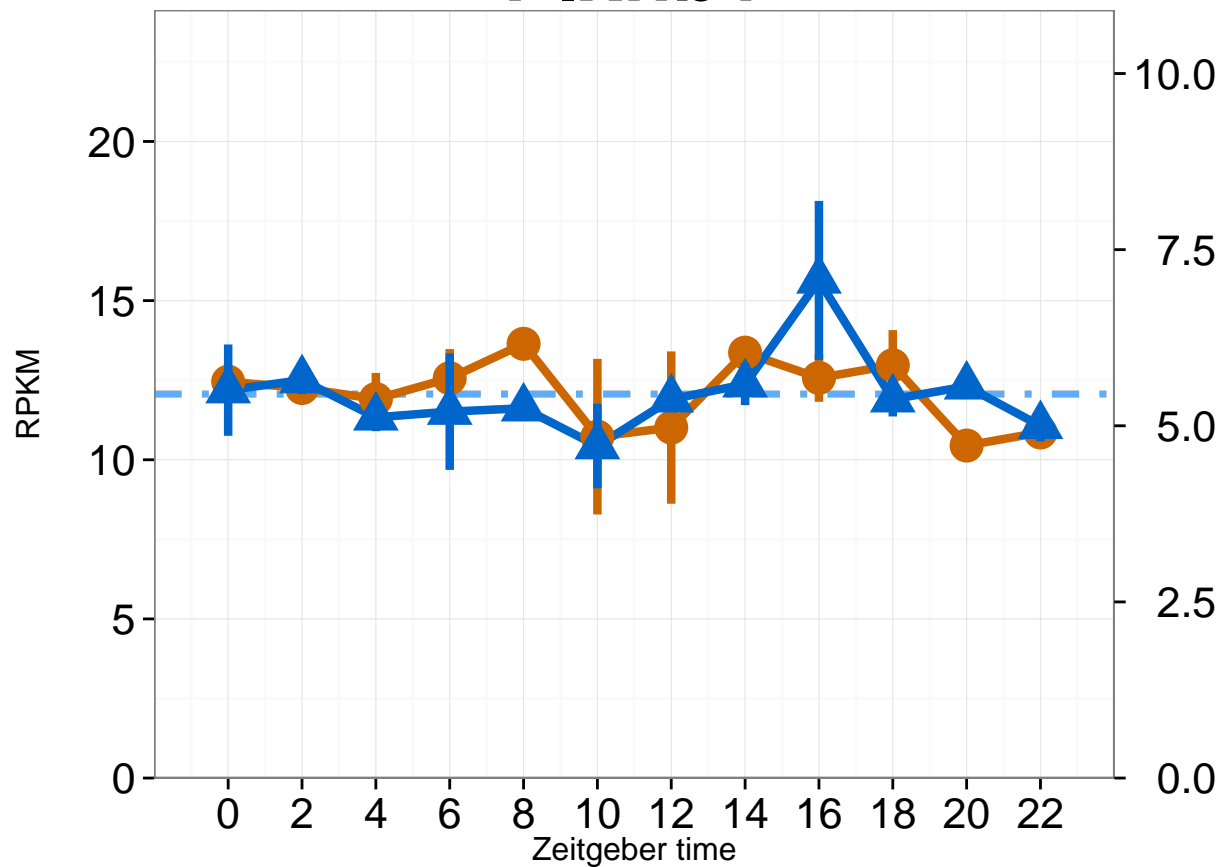

## Plxnb1

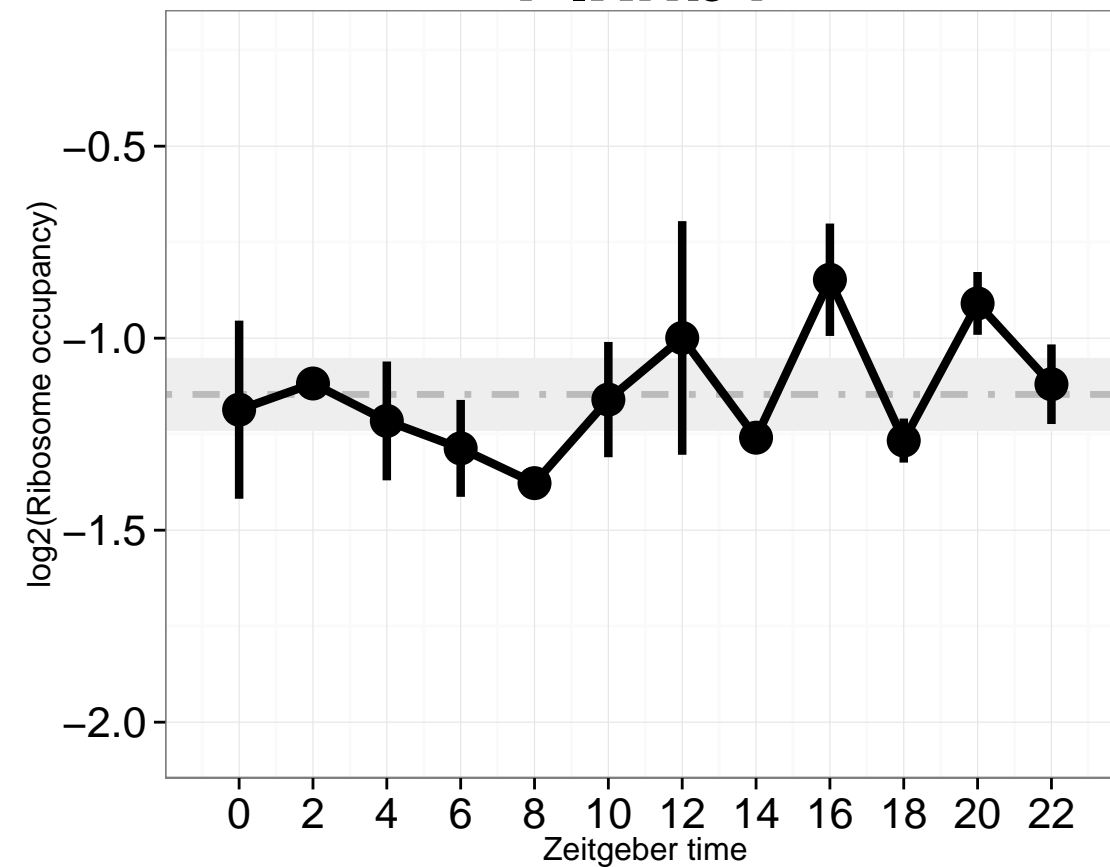

Supplement: Supplementary file 4370 [file 1]

## PIk1

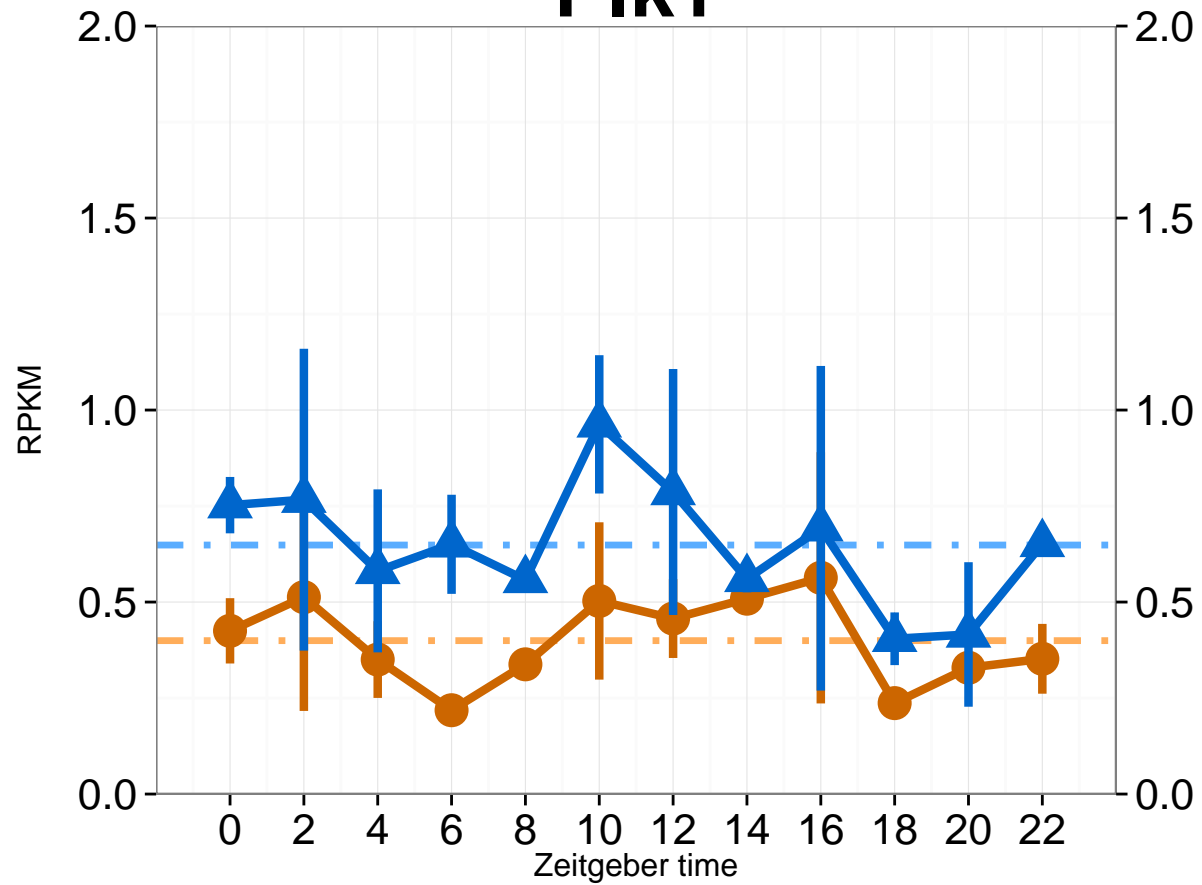

## PIk1

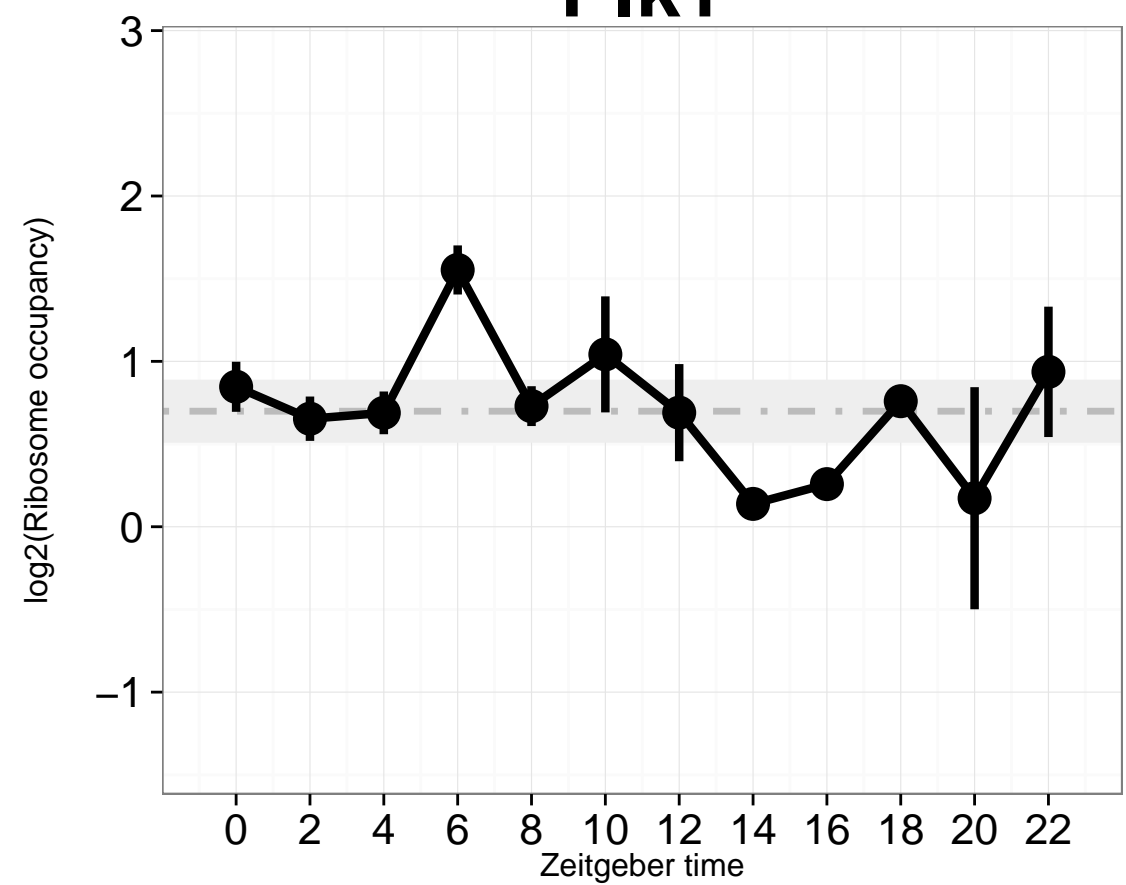

Supplement: Supplementary file 4371 [file 1]

## Tmem110

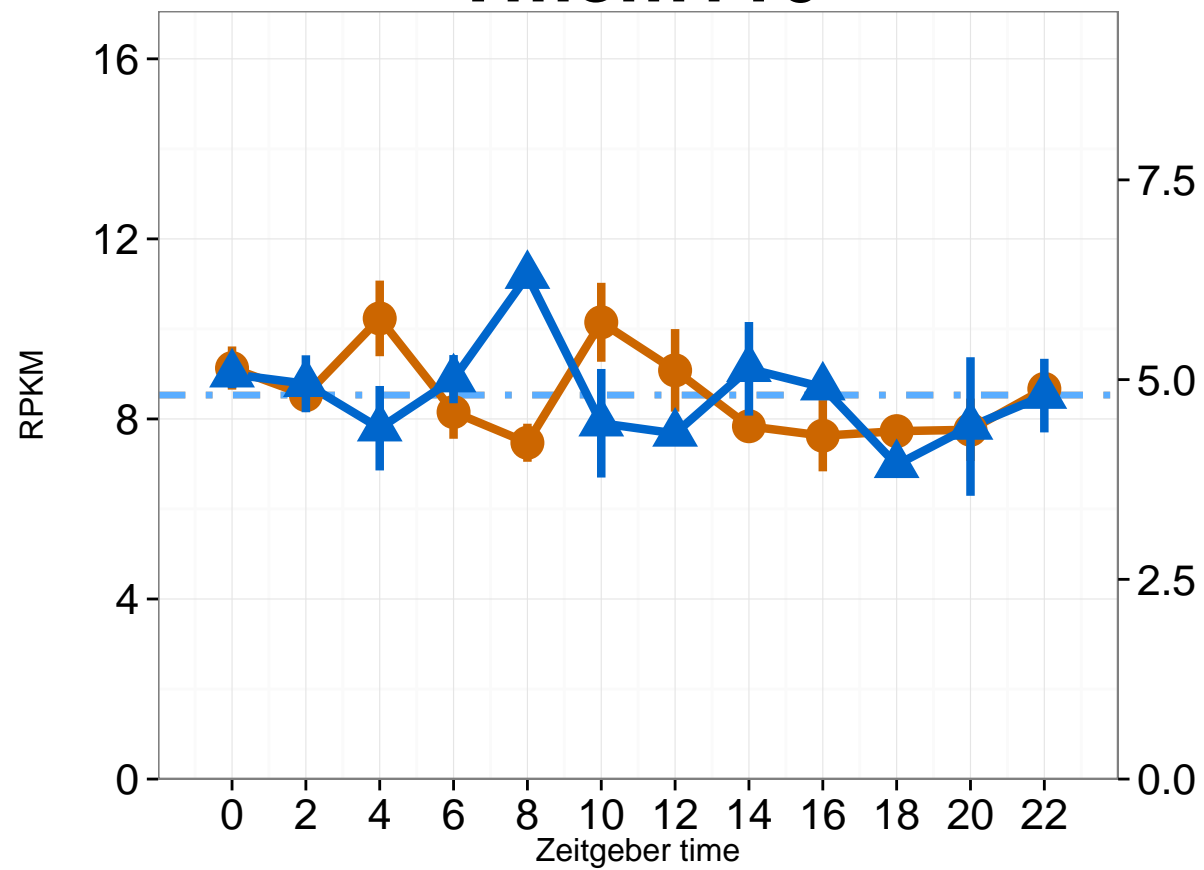

## Tmem110

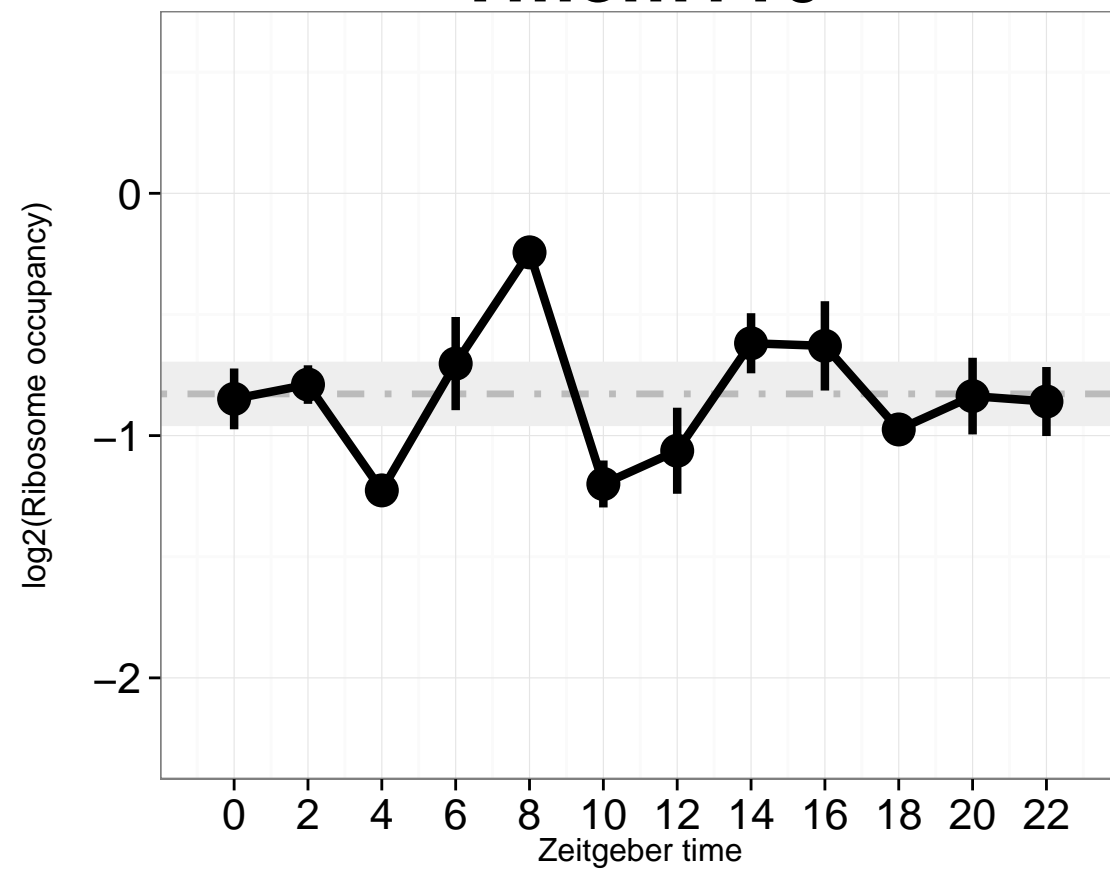

Supplement: Supplementary file 4372 [file 1]

# Txndc16

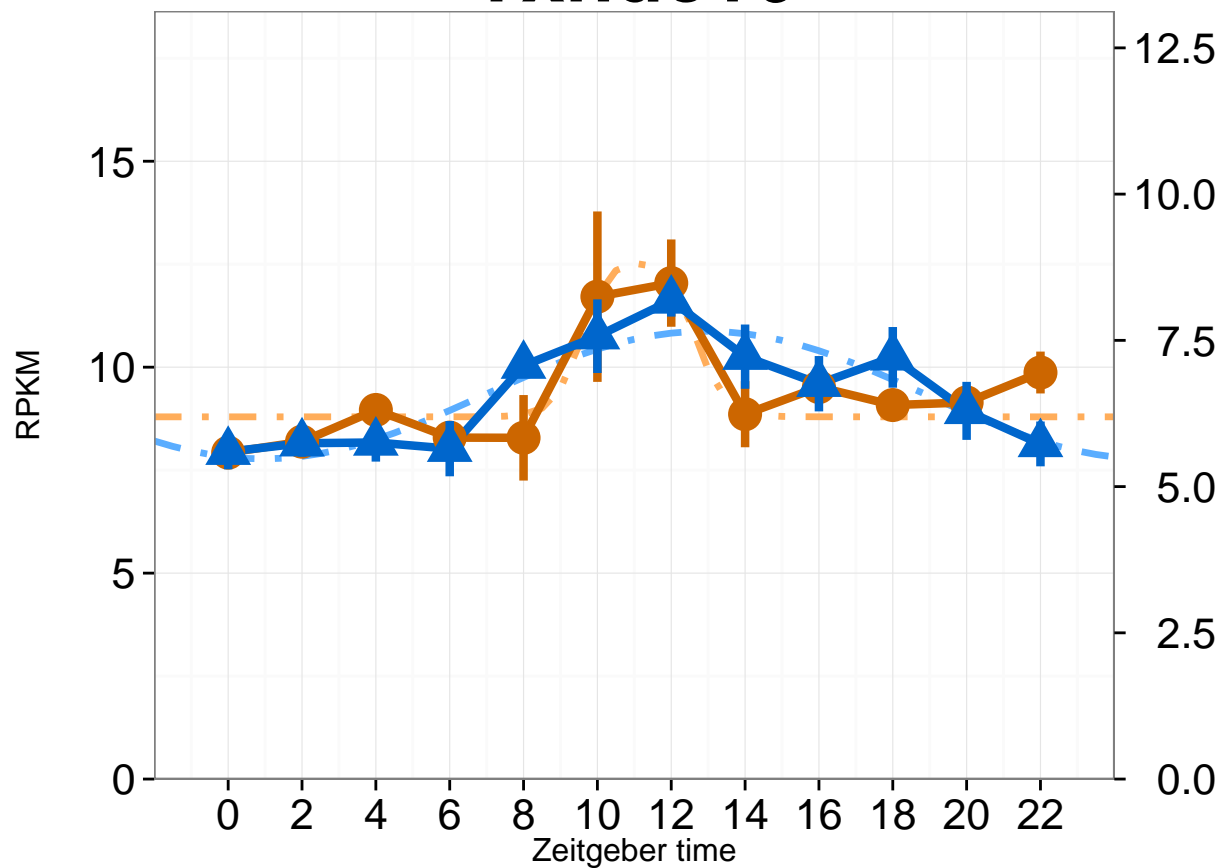

# Txndc16

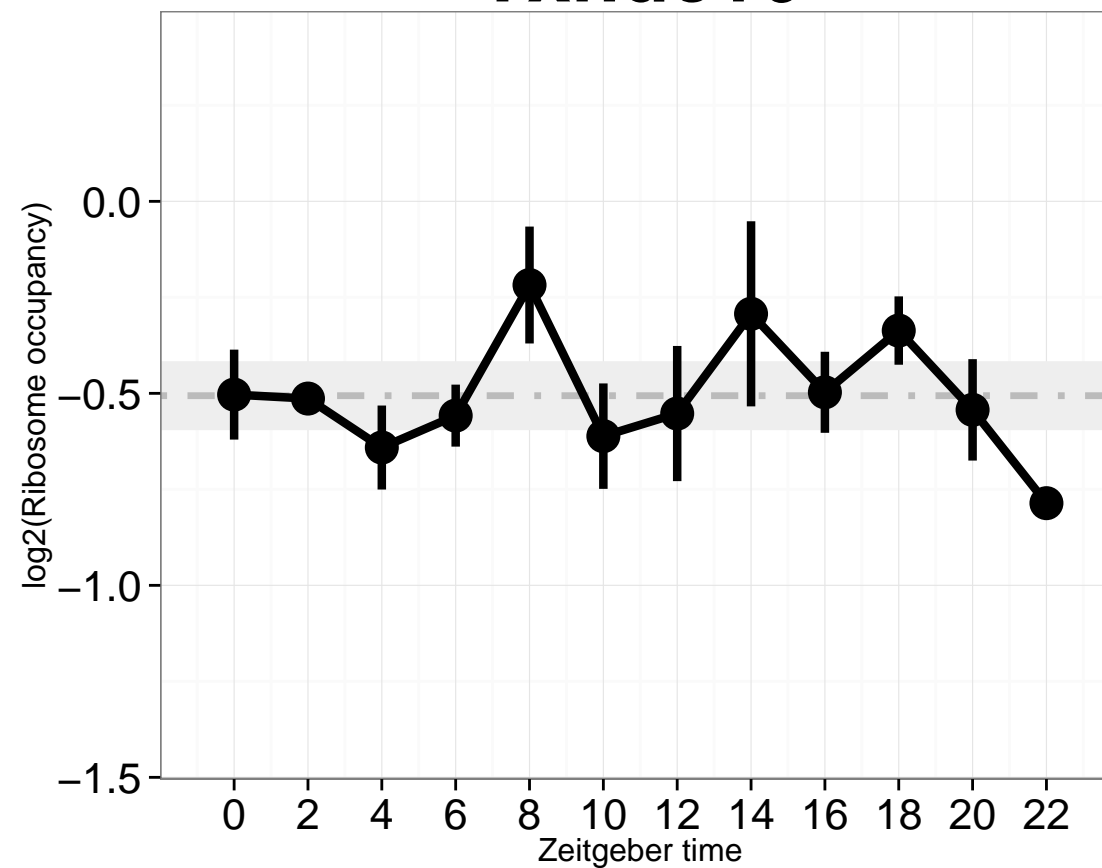

Supplement: Supplementary file 4373 [file 1]

# Tubb4b

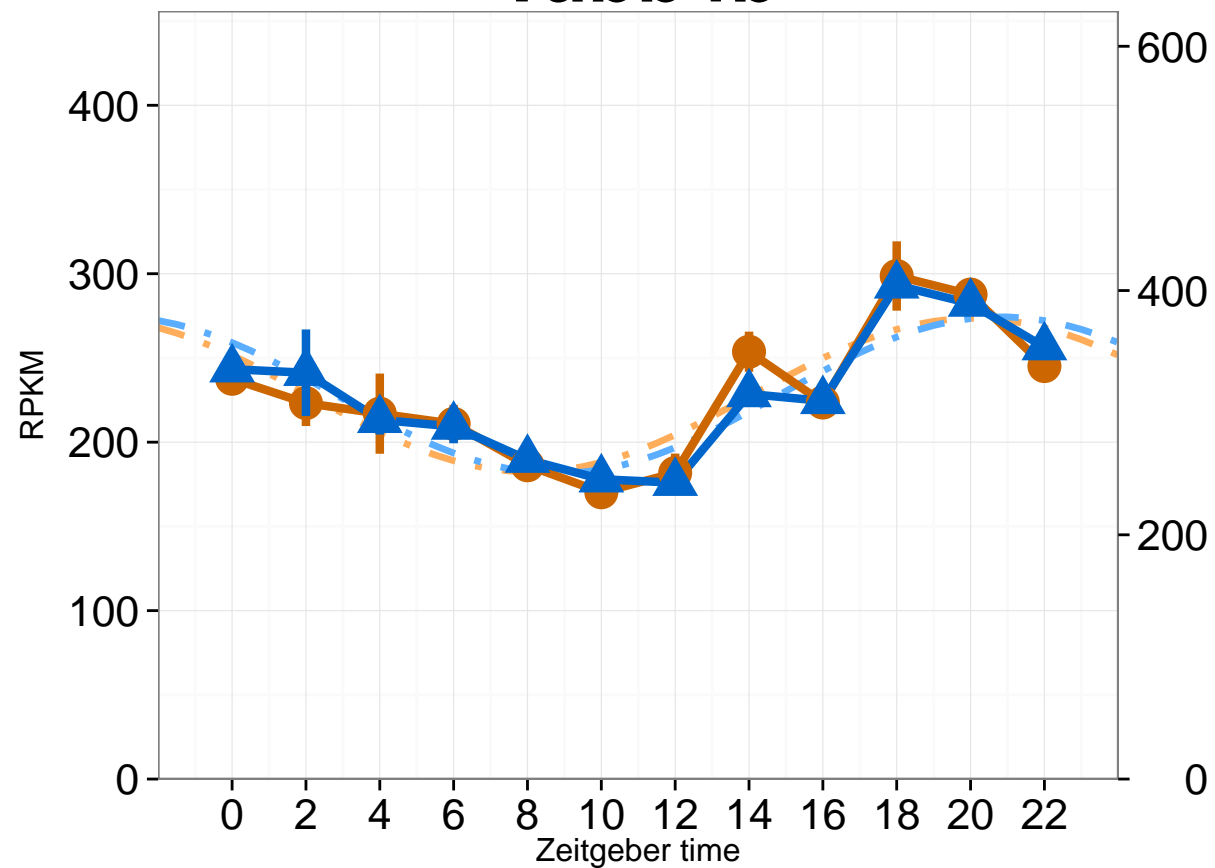

# Tubb4b

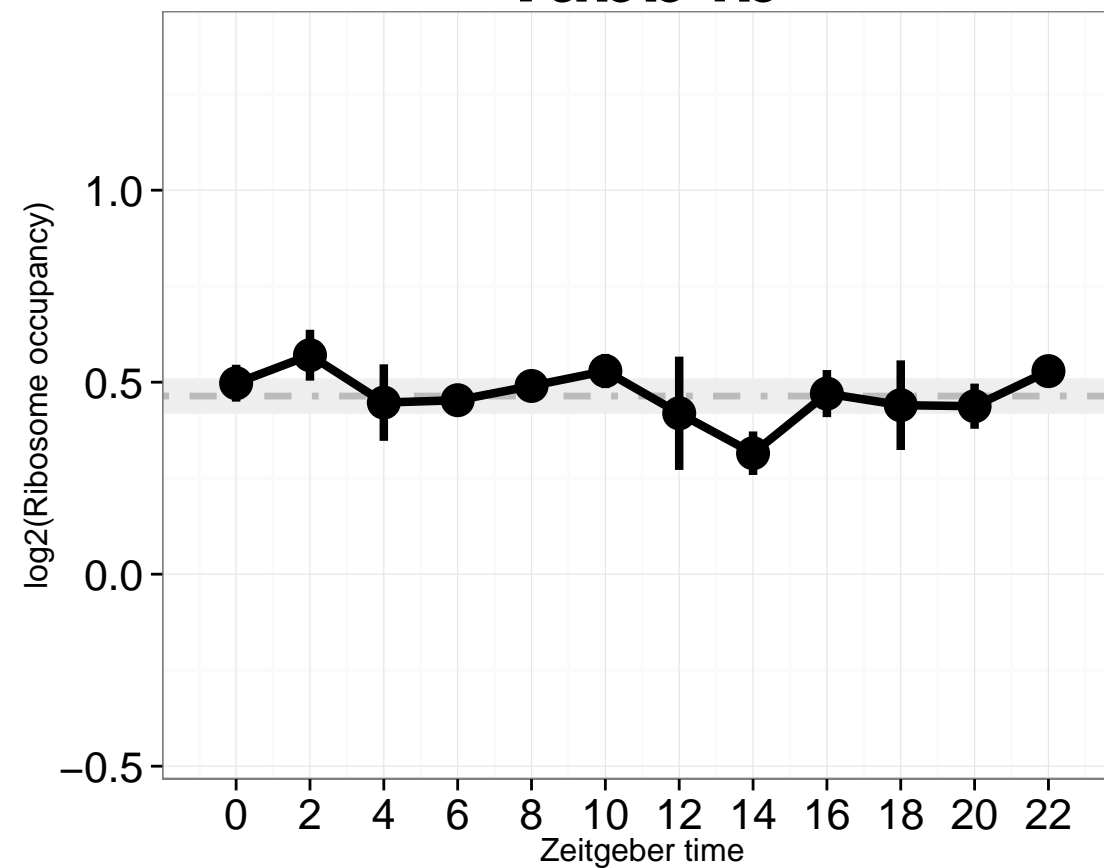

Supplement: Supplementary file 4374 [file 1]

# Rufy1

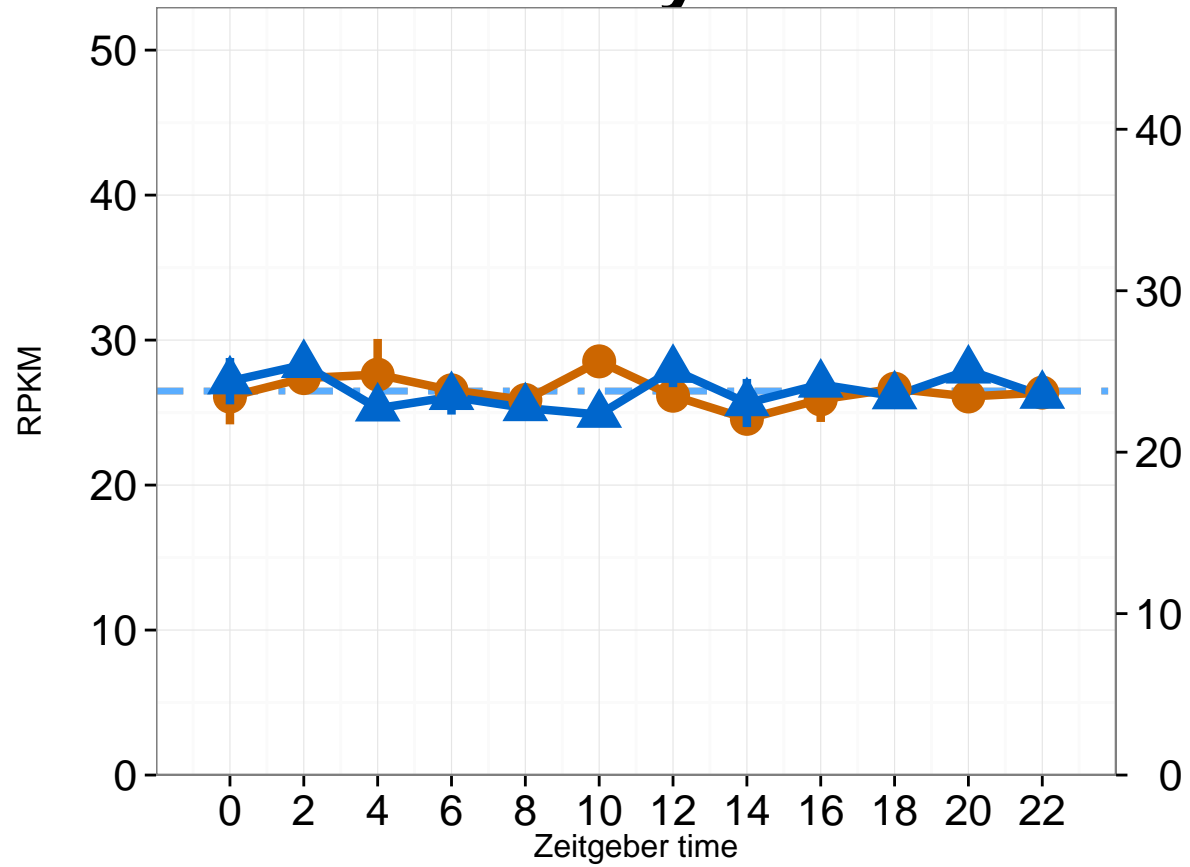

# Rufy1

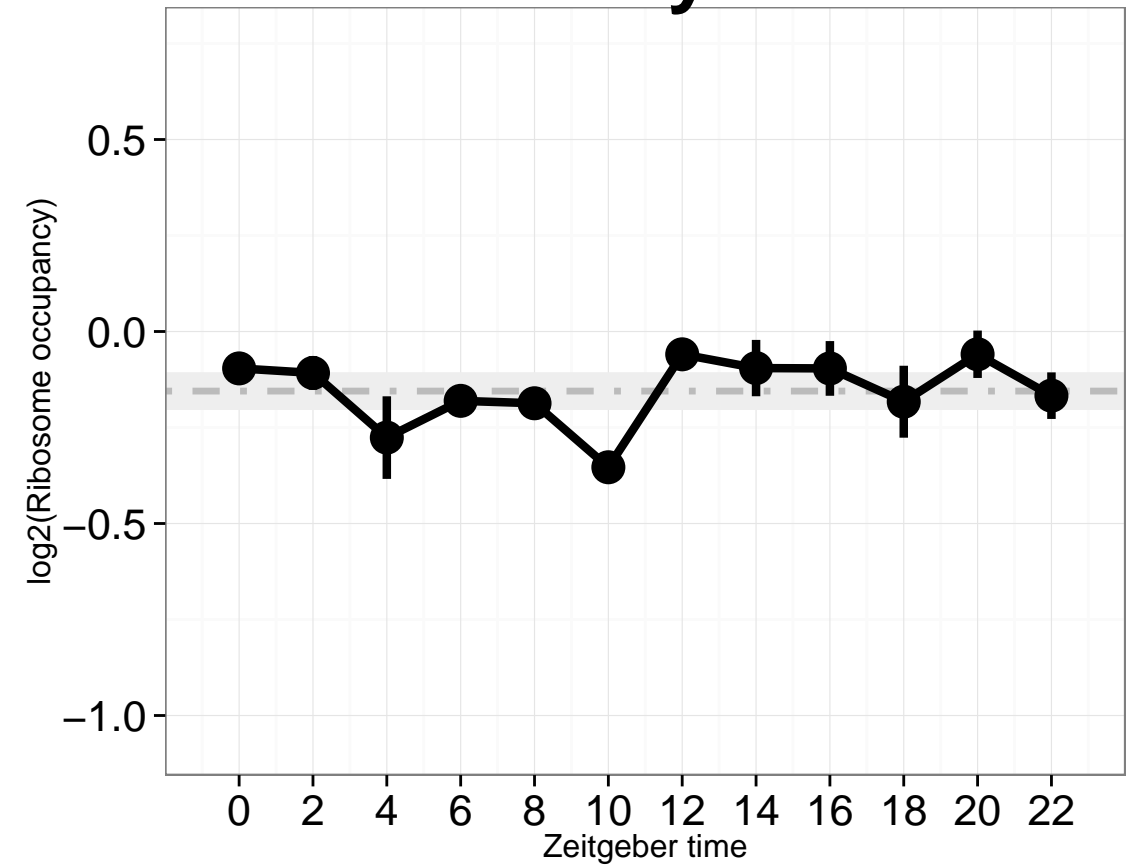

Supplement: Supplementary file 4375 [file 1]

# Ccdc126

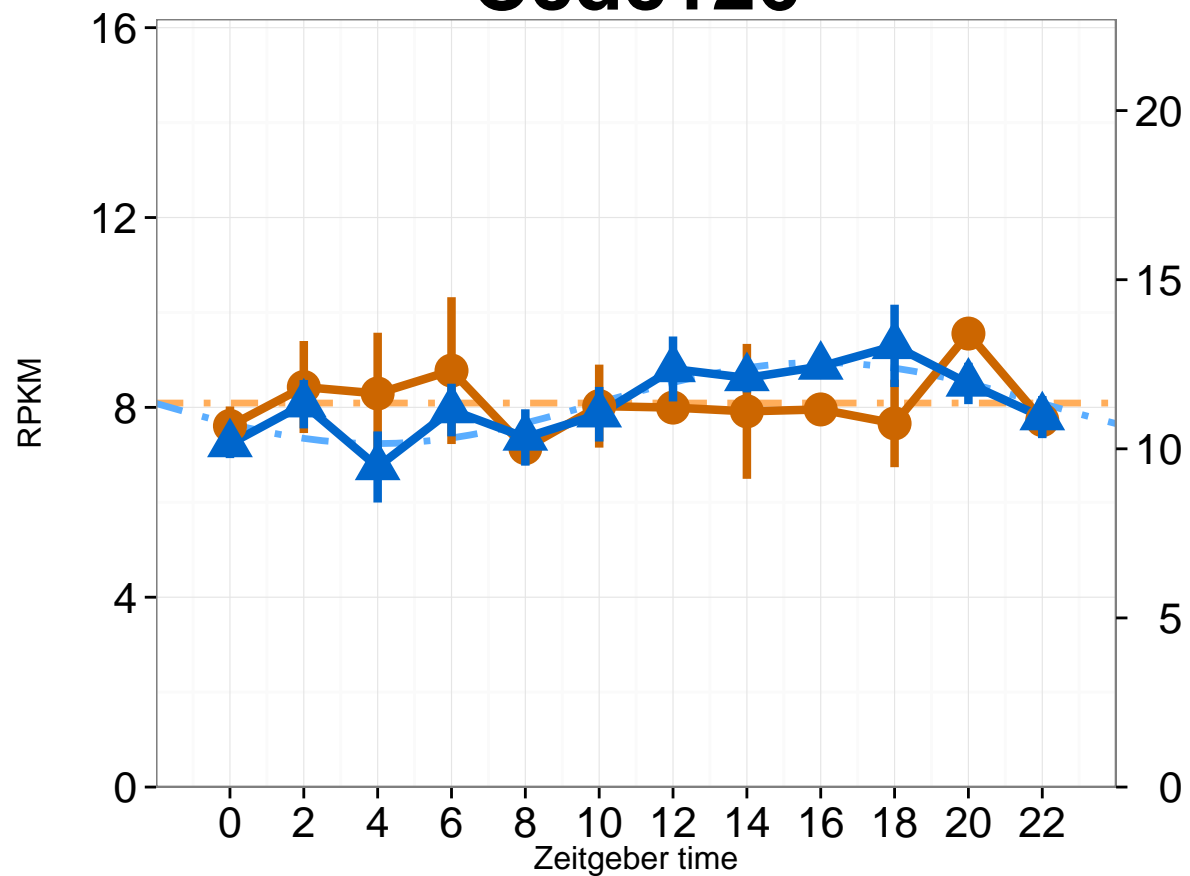

# Ccdc126

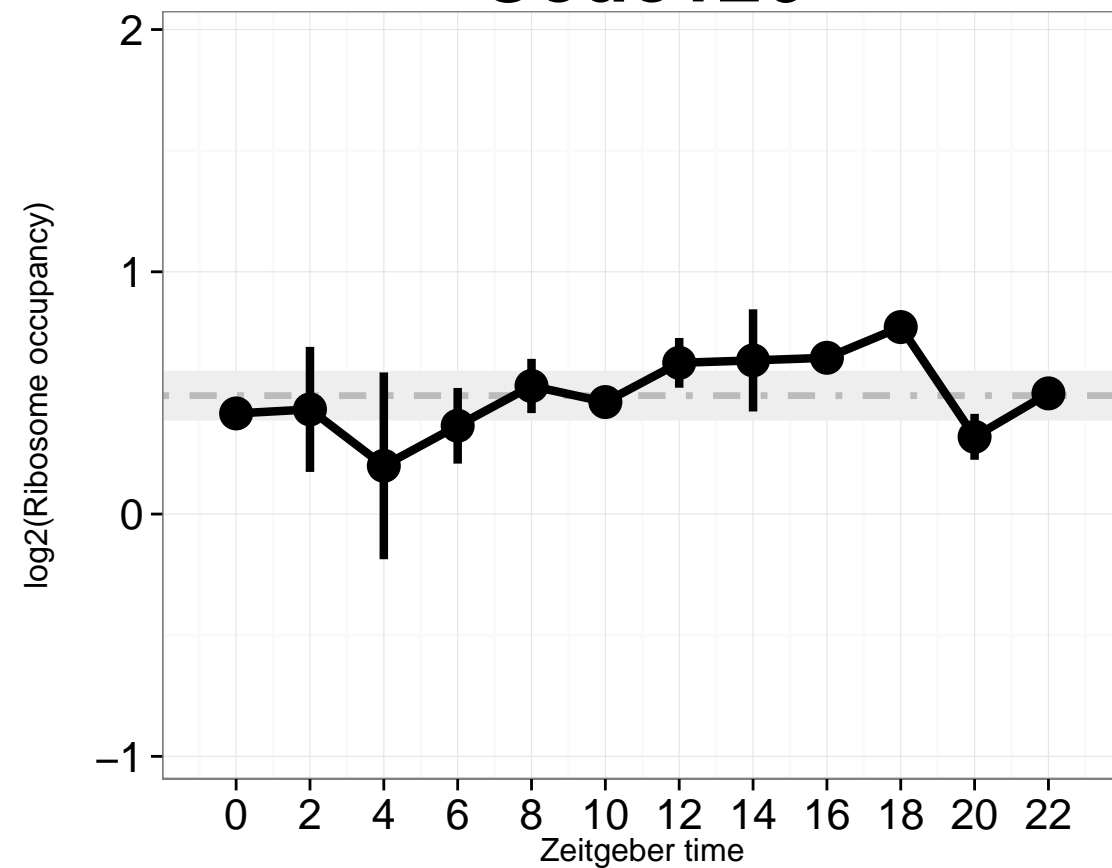

Supplement: Supplementary file 4376 [file 1]

## Rras2

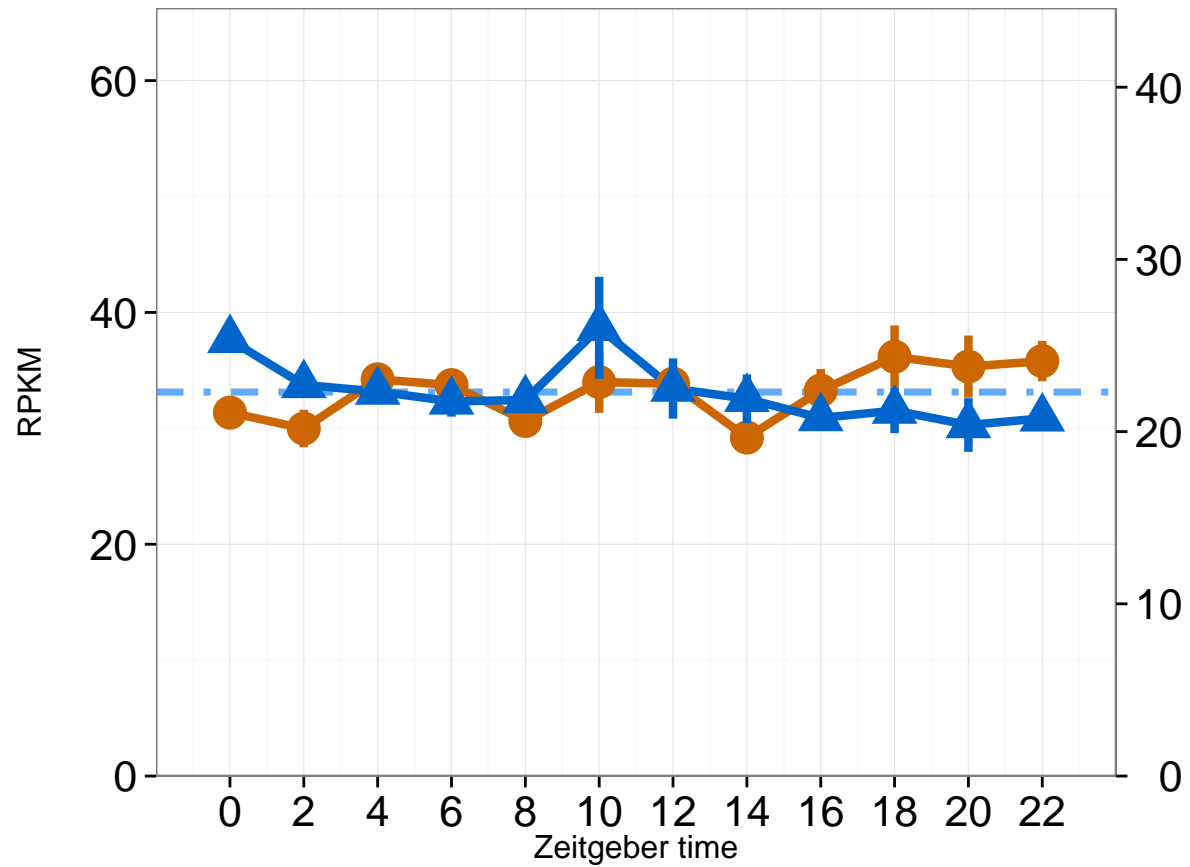

## Rras2

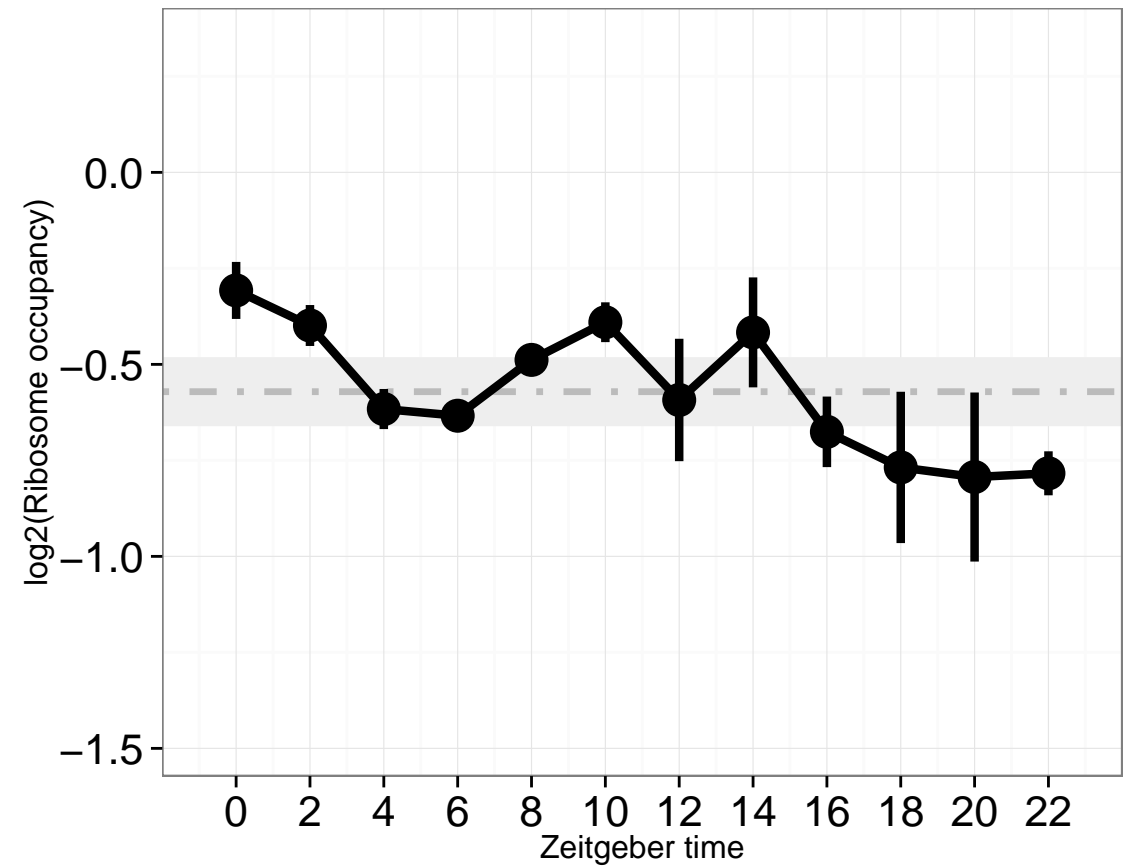

Supplement: Supplementary file 4377 [file 1]

## Osbpl2

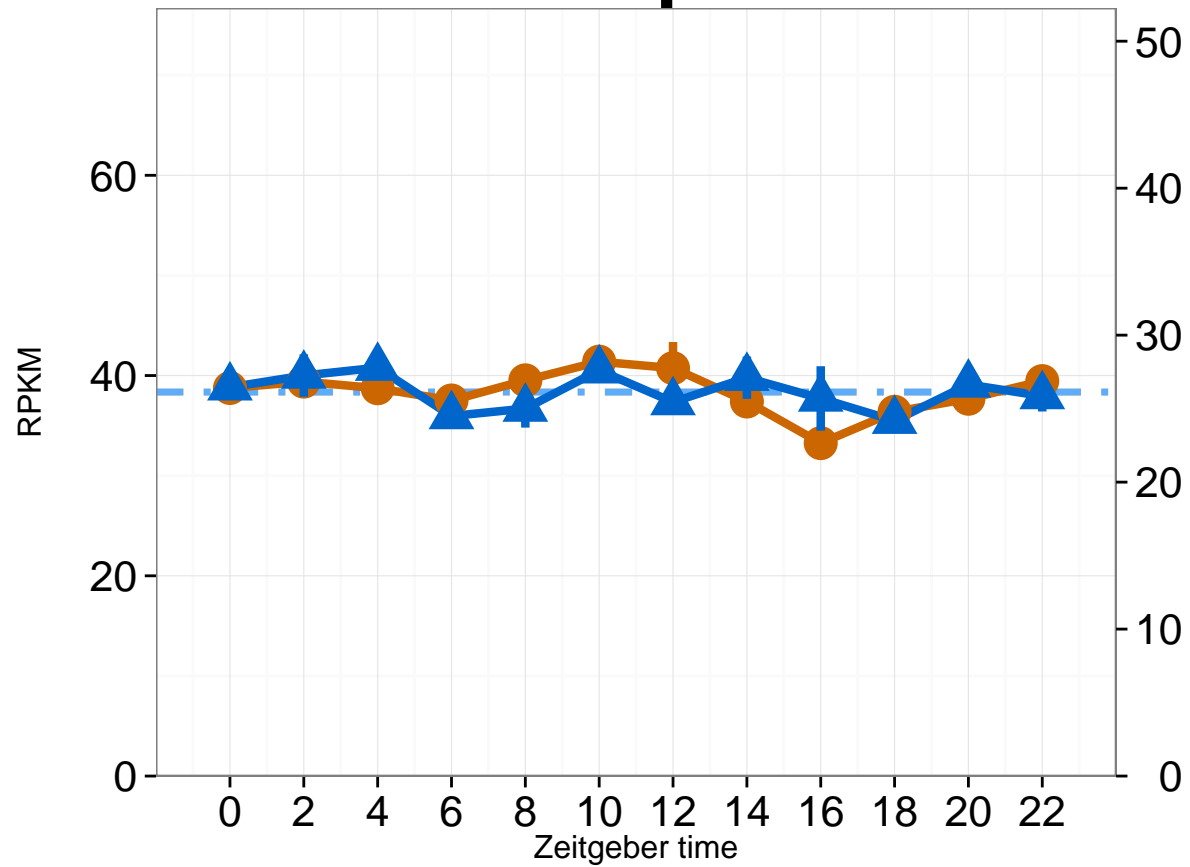

## Osbpl2

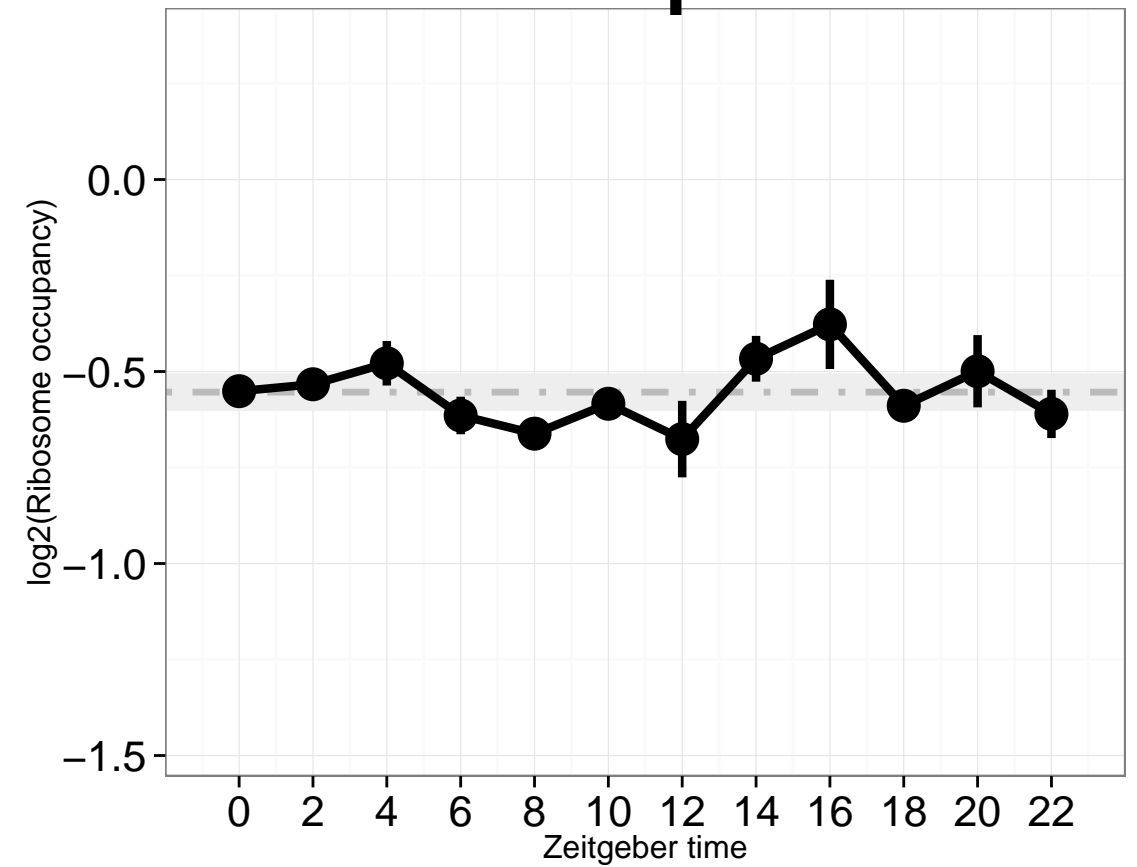

Supplement: Supplementary file 4378 [file 1]

## Cmpk2

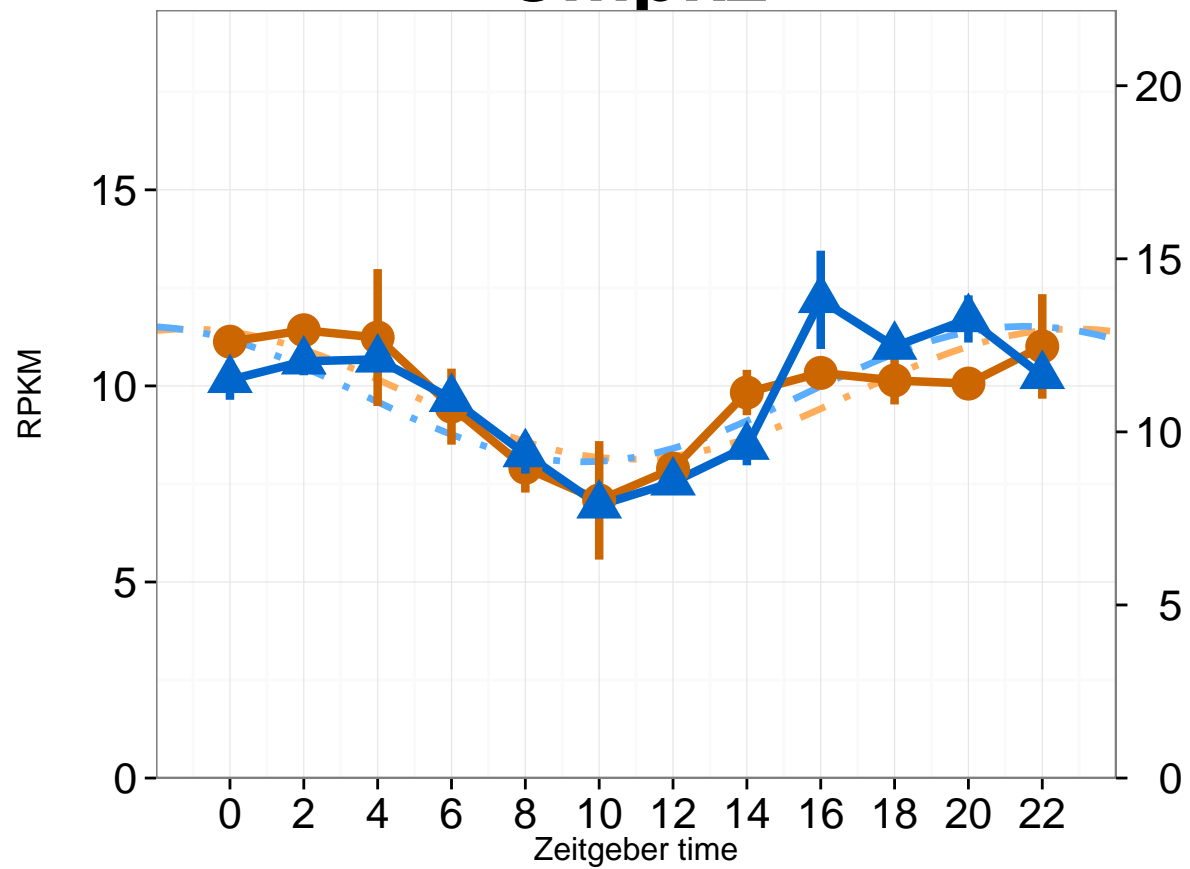

## Cmpk2

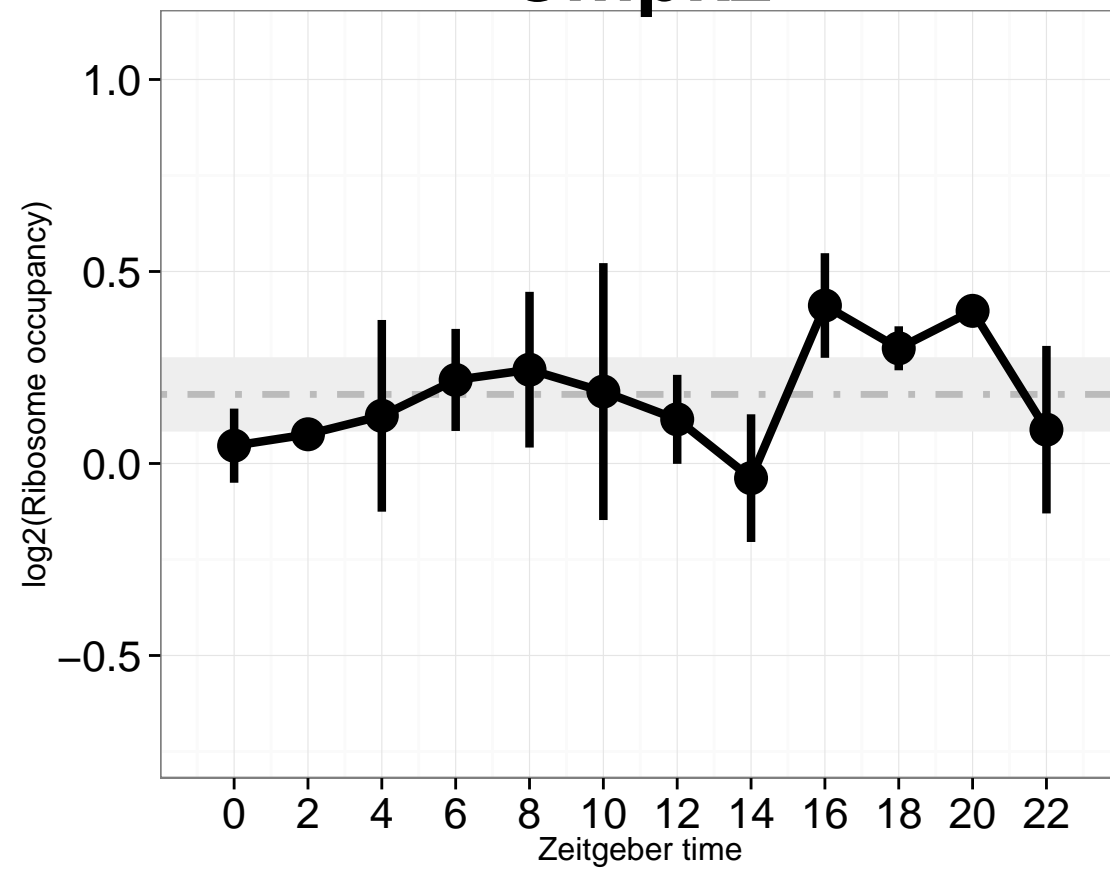

Supplement: Supplementary file 4379 [file 1]

# H3f3a

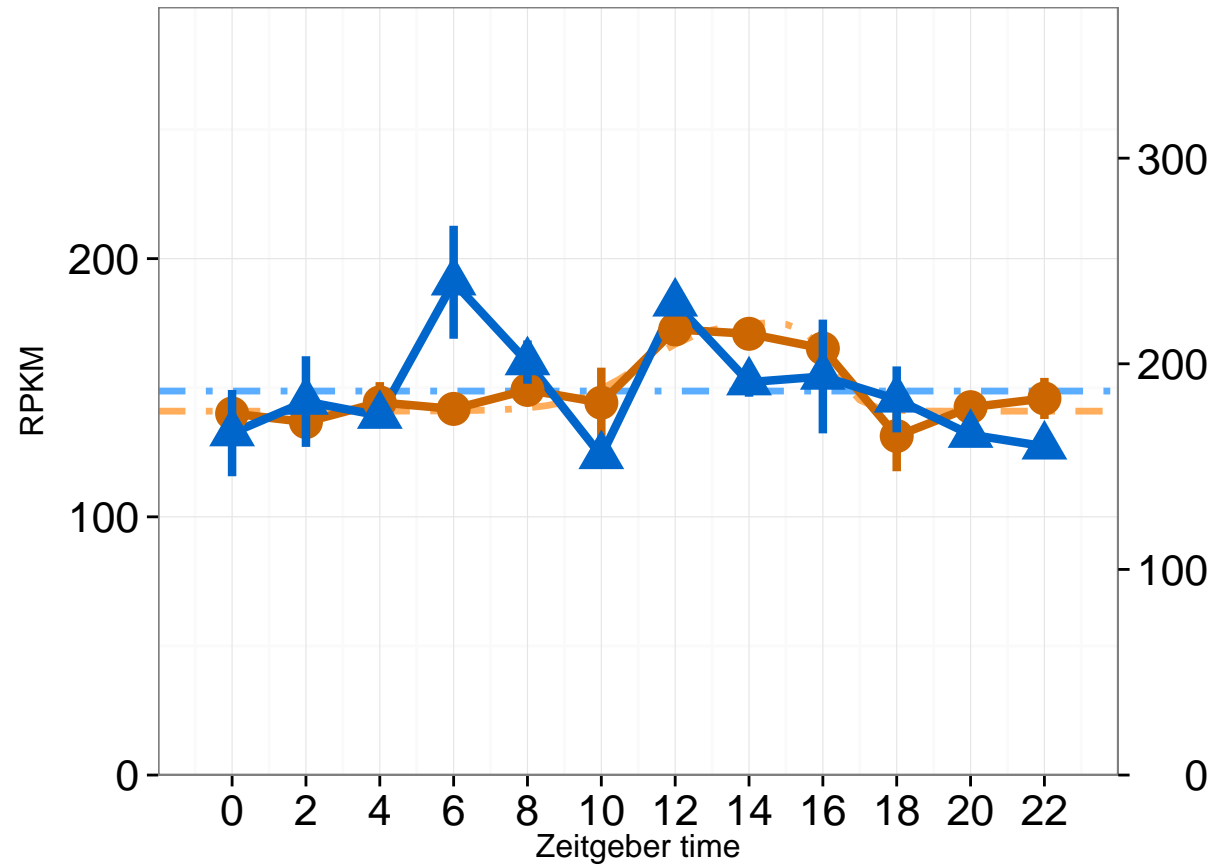

# H3f3a

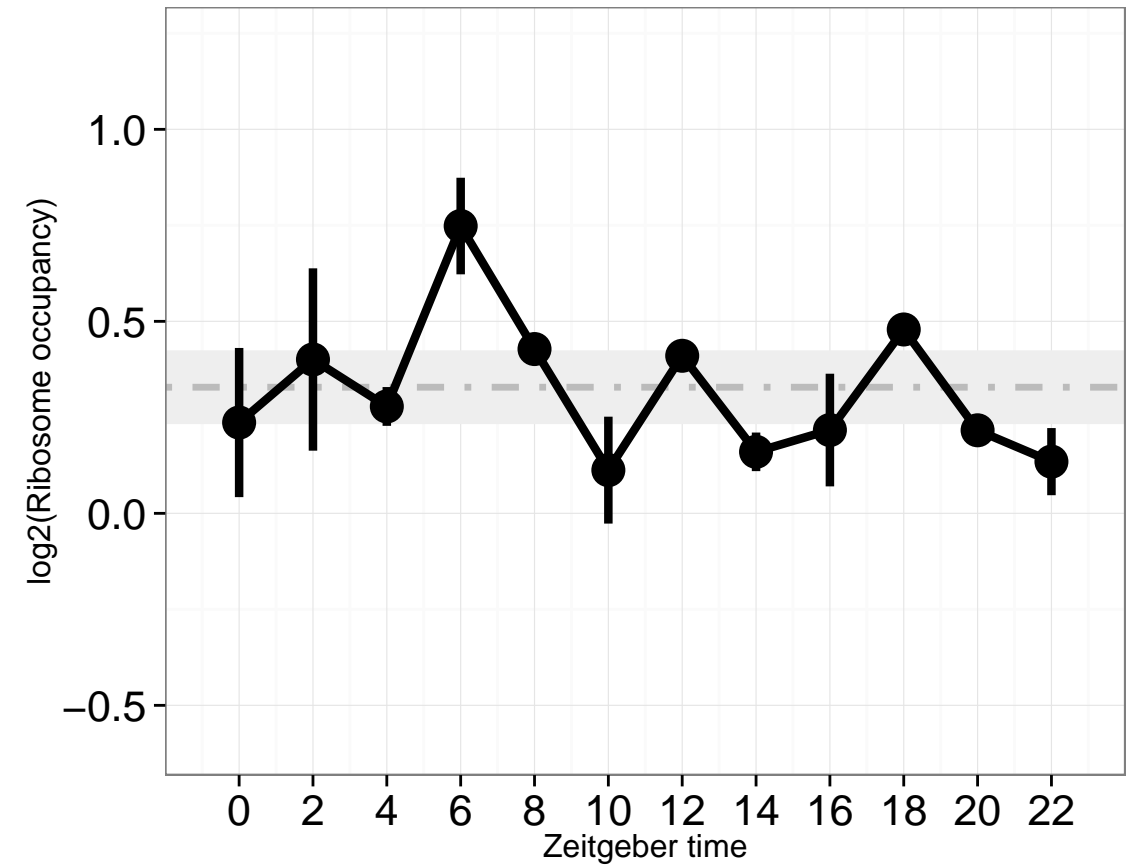

Supplement: Supplementary file 4380 [file 1]

## Rras

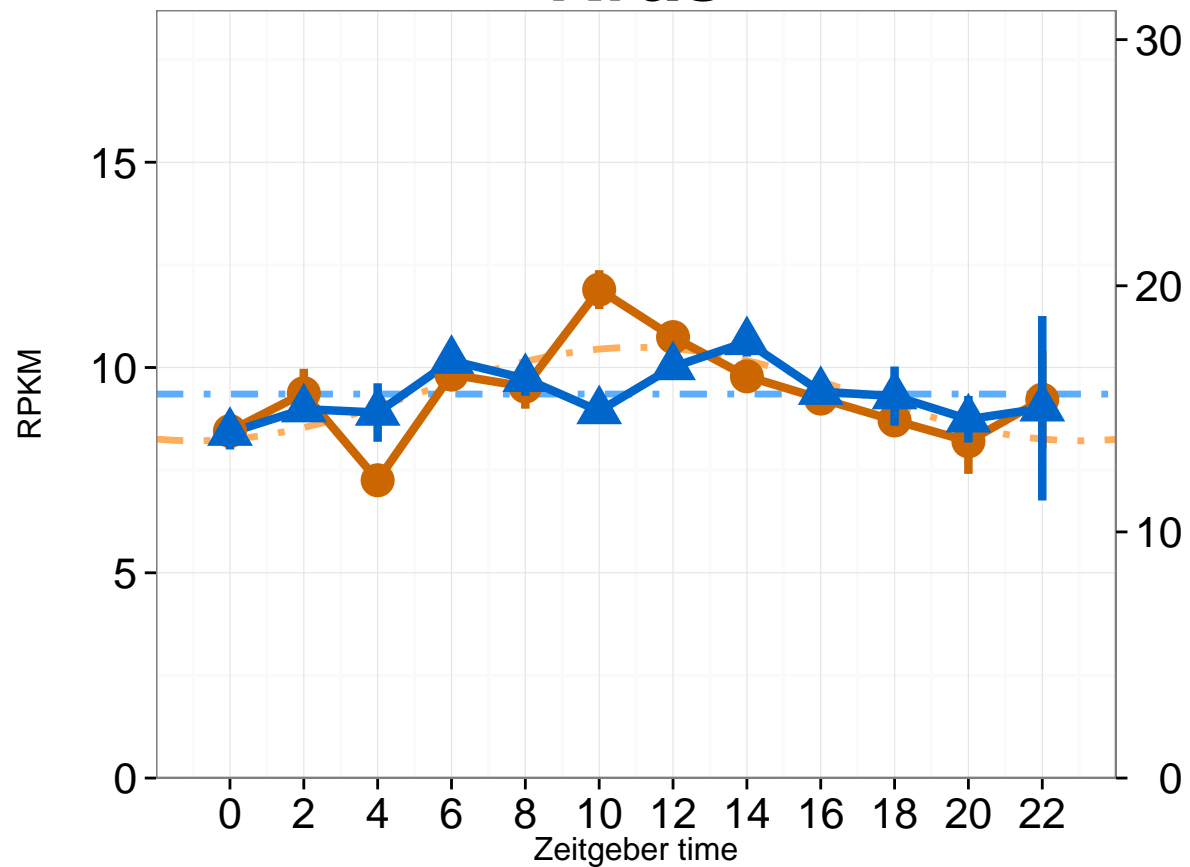

## Rras

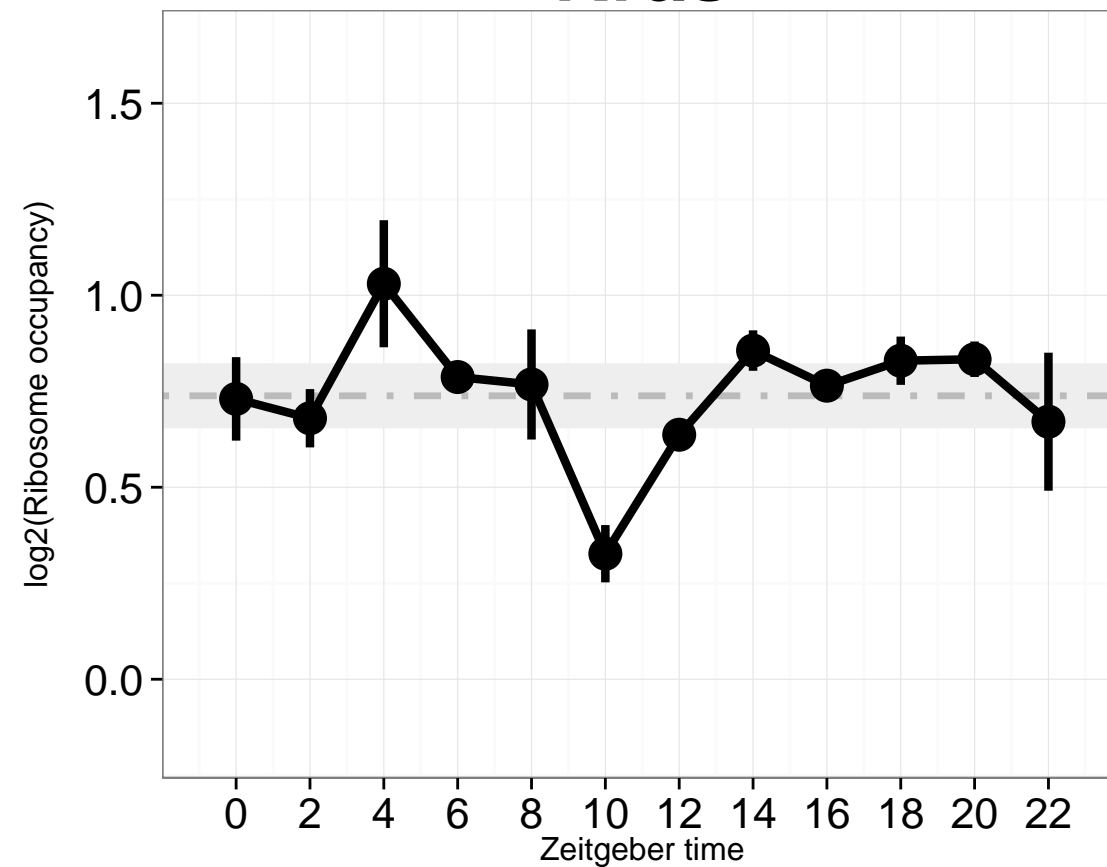

Supplement: Supplementary file 4381 [file 1]

# Sntg2

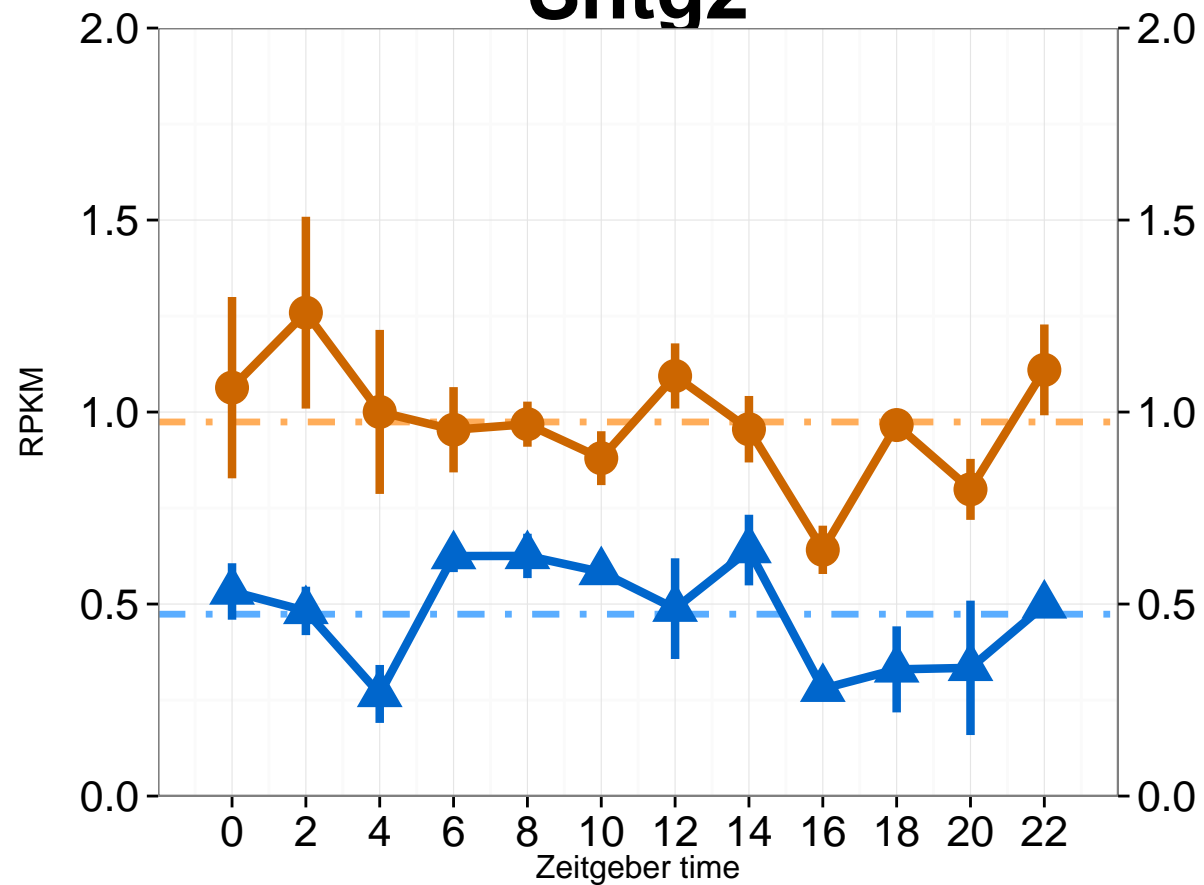

# Sntg2

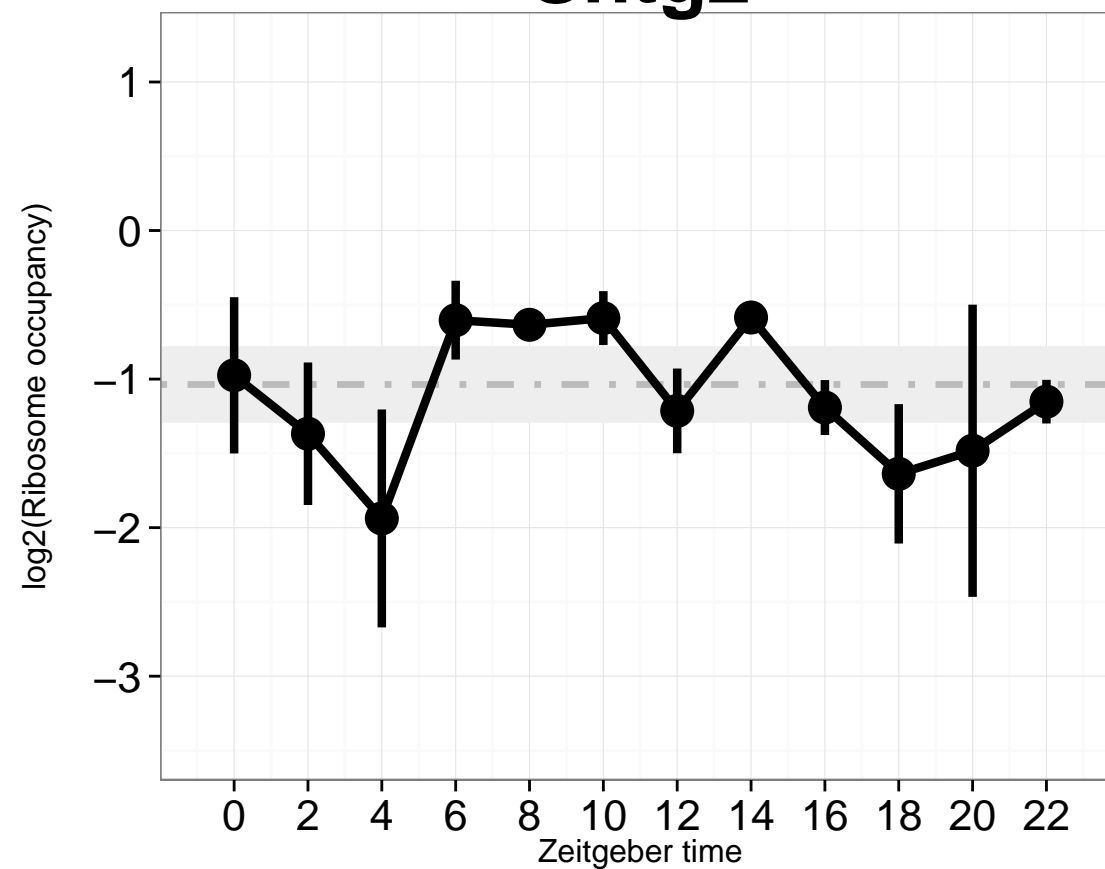

Supplement: Supplementary file 4382 [file 1]

## Cpq

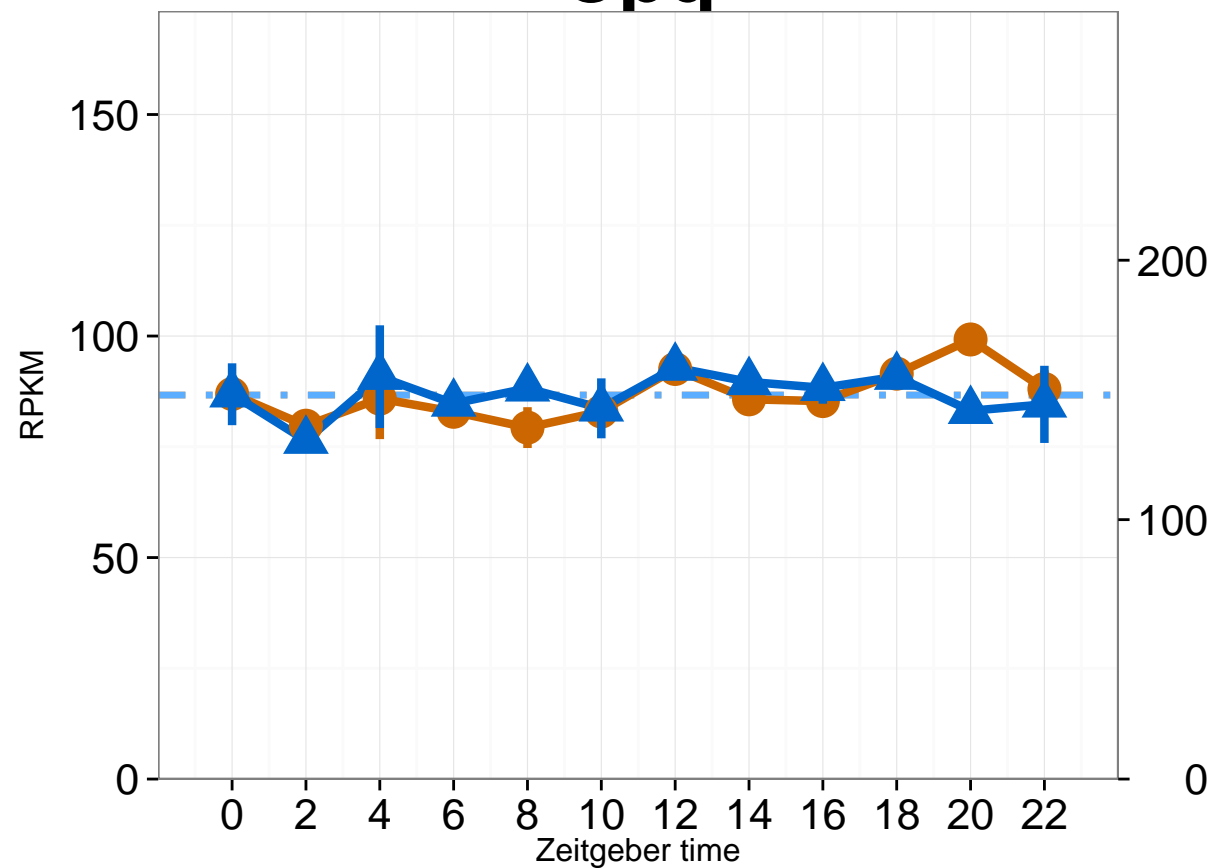

## Cpq

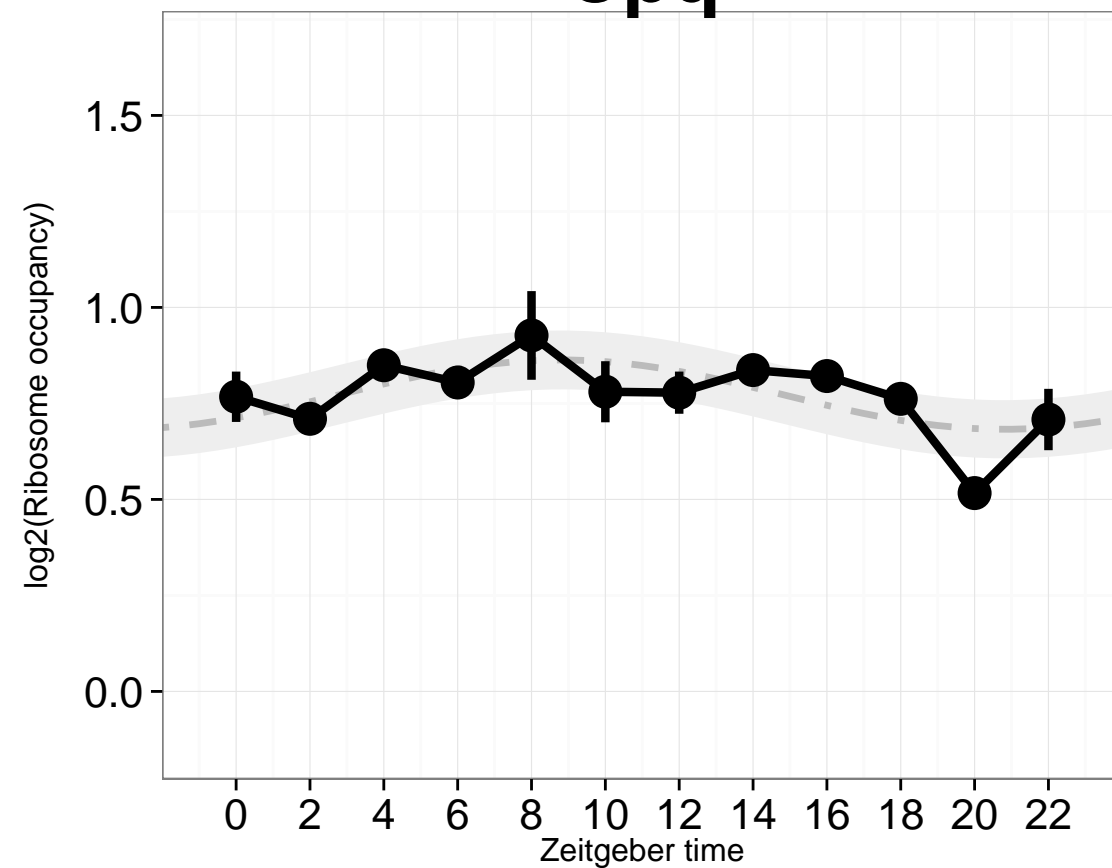

Supplement: Supplementary file 4383 [file 1]

# Tuba8

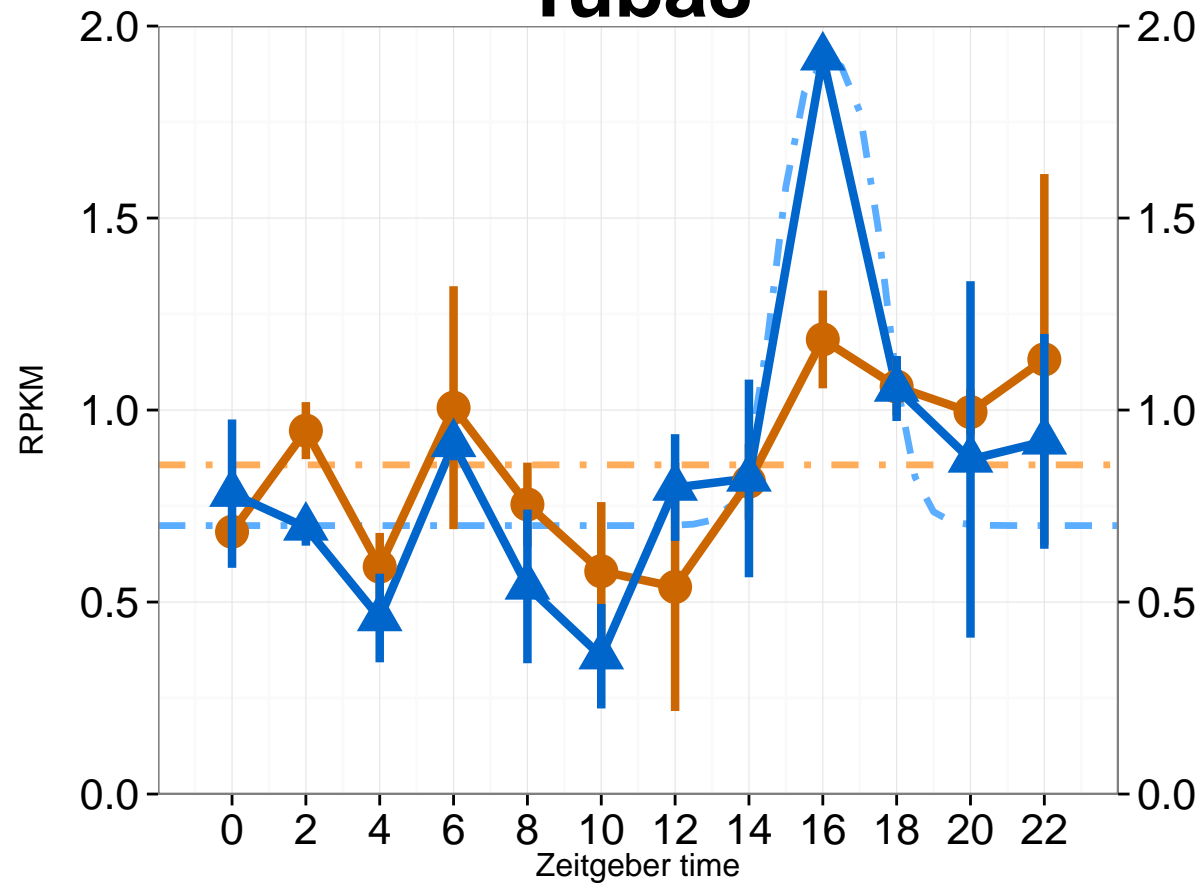

# Tuba8

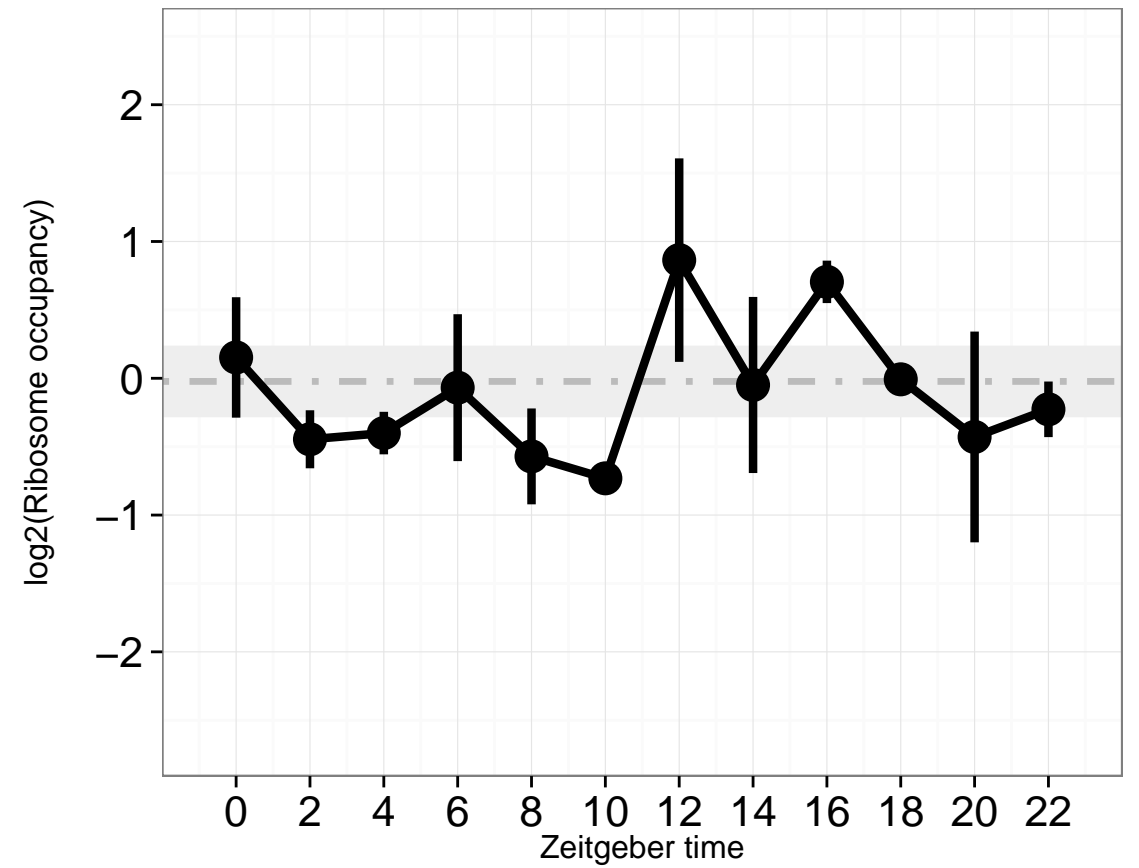

Supplement: Supplementary file 4384 [file 1]

## Hook2

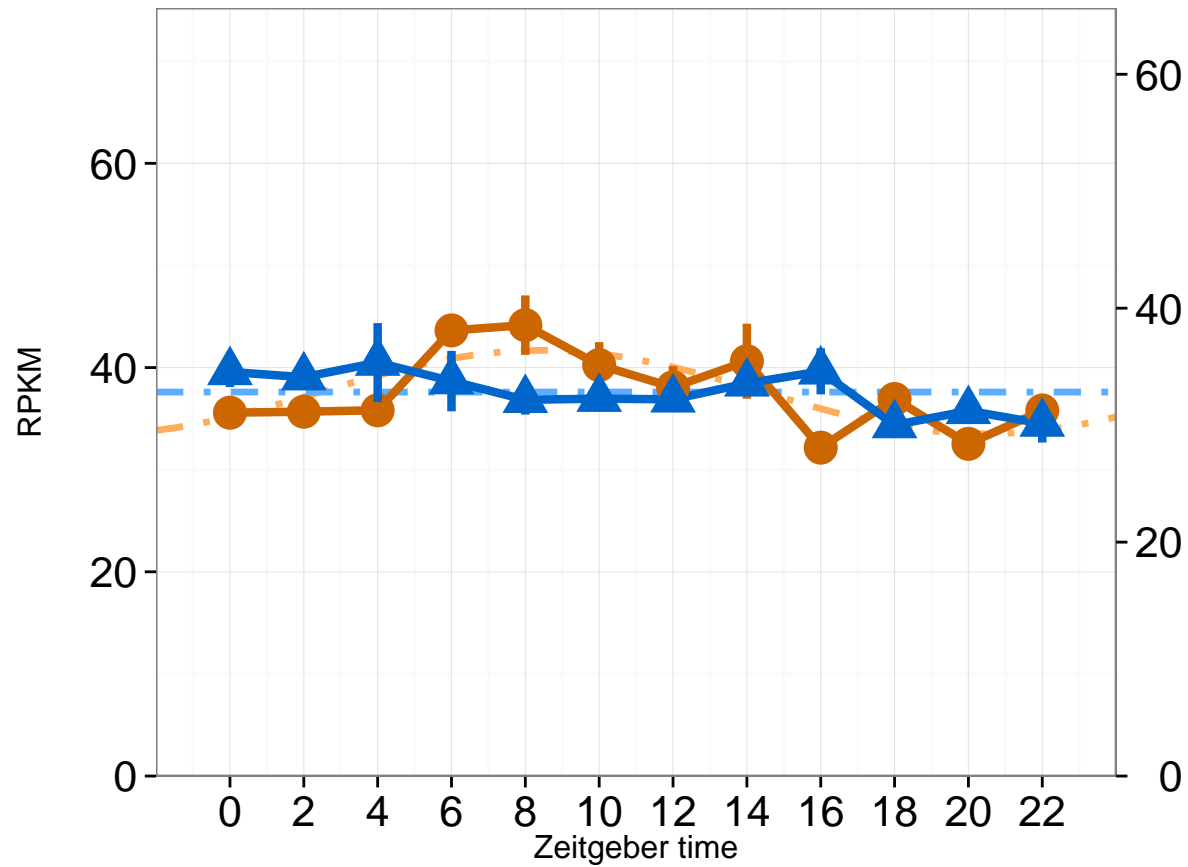

## Hook2

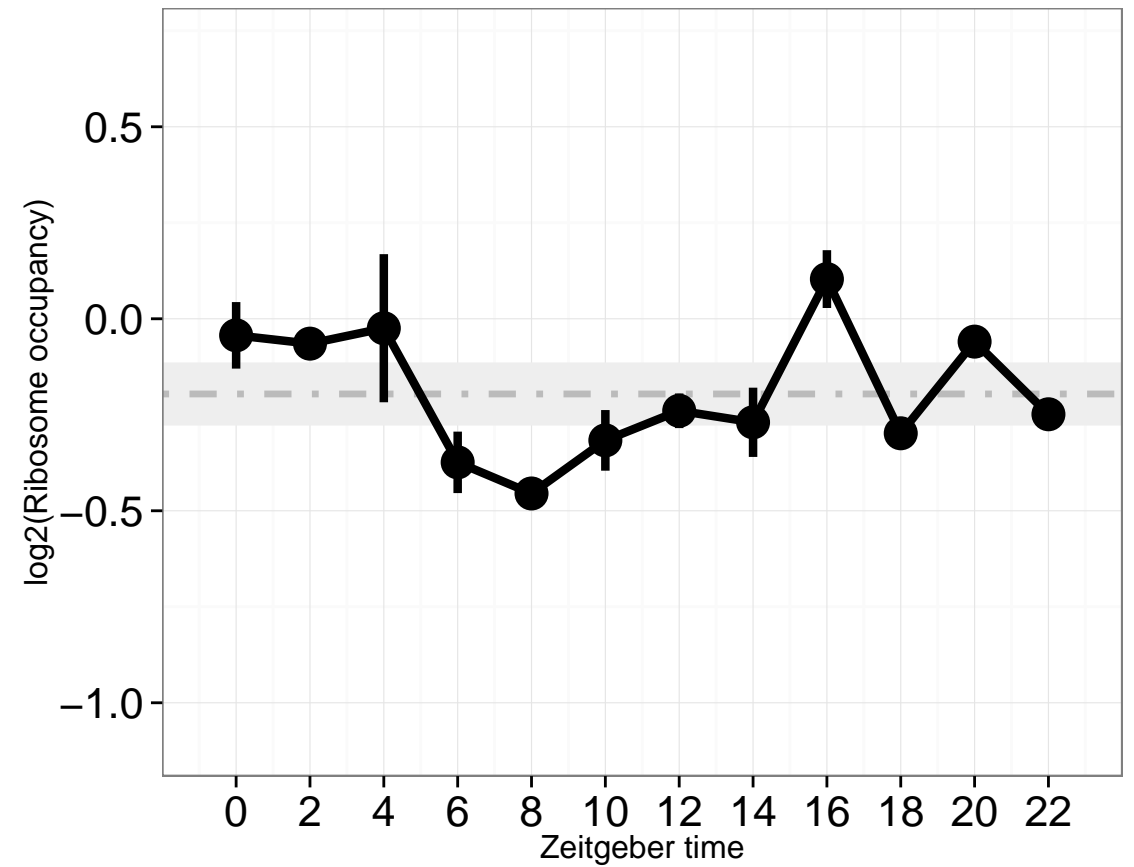

Supplement: Supplementary file 4385 [file 1]

## Tjp2

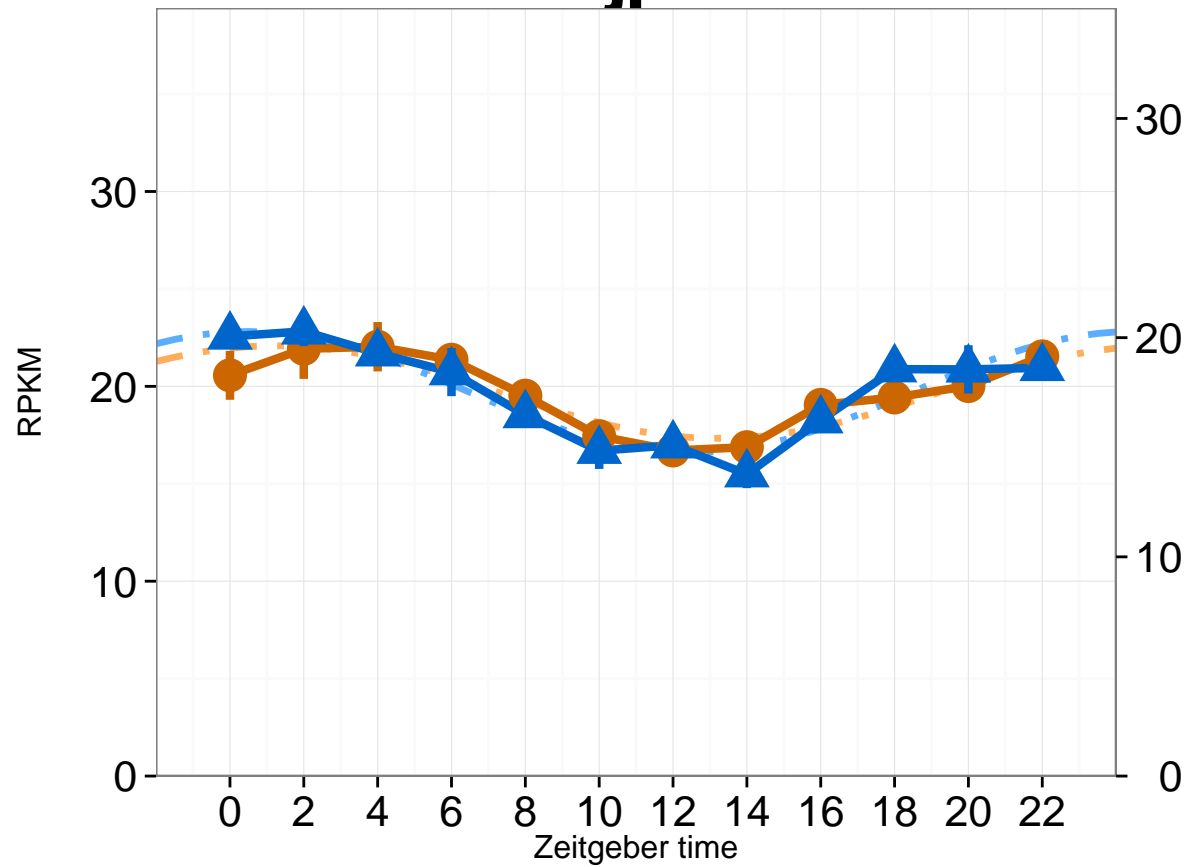

## Tjp2

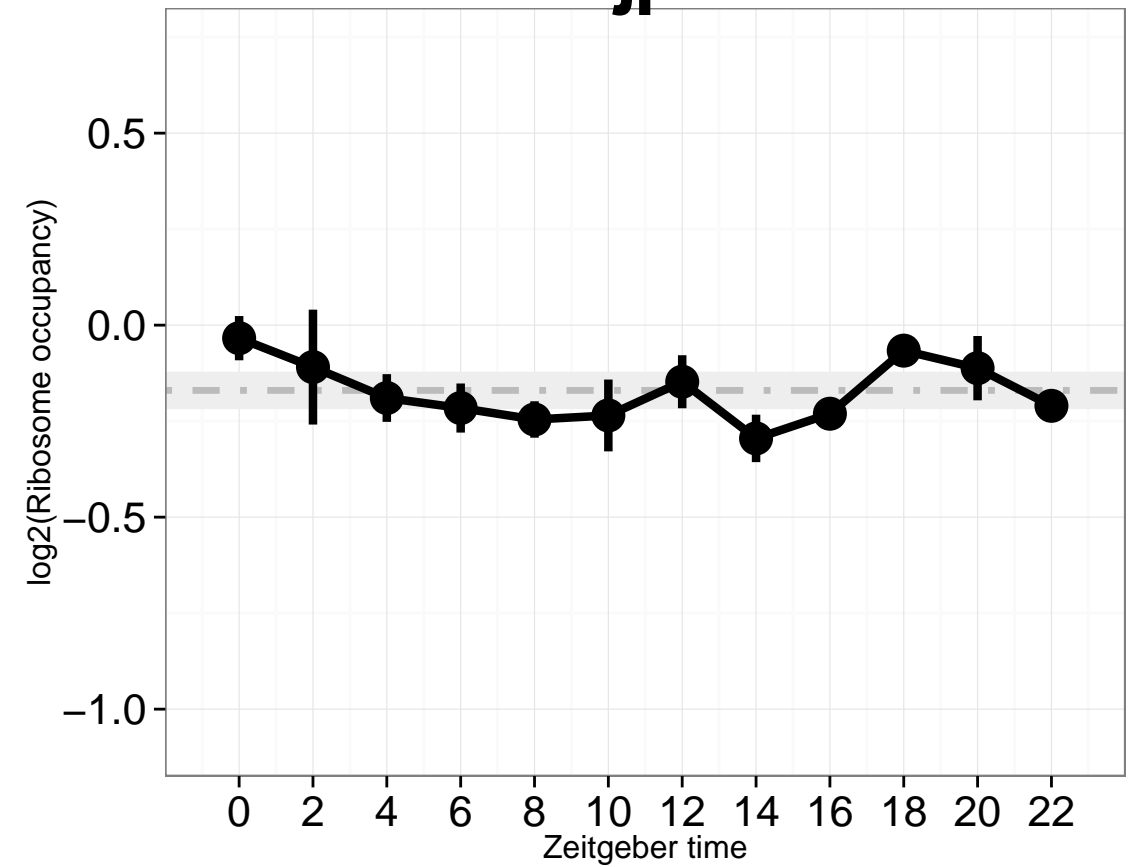

Supplement: Supplementary file 4386 [file 1]

# Atp6v0a2

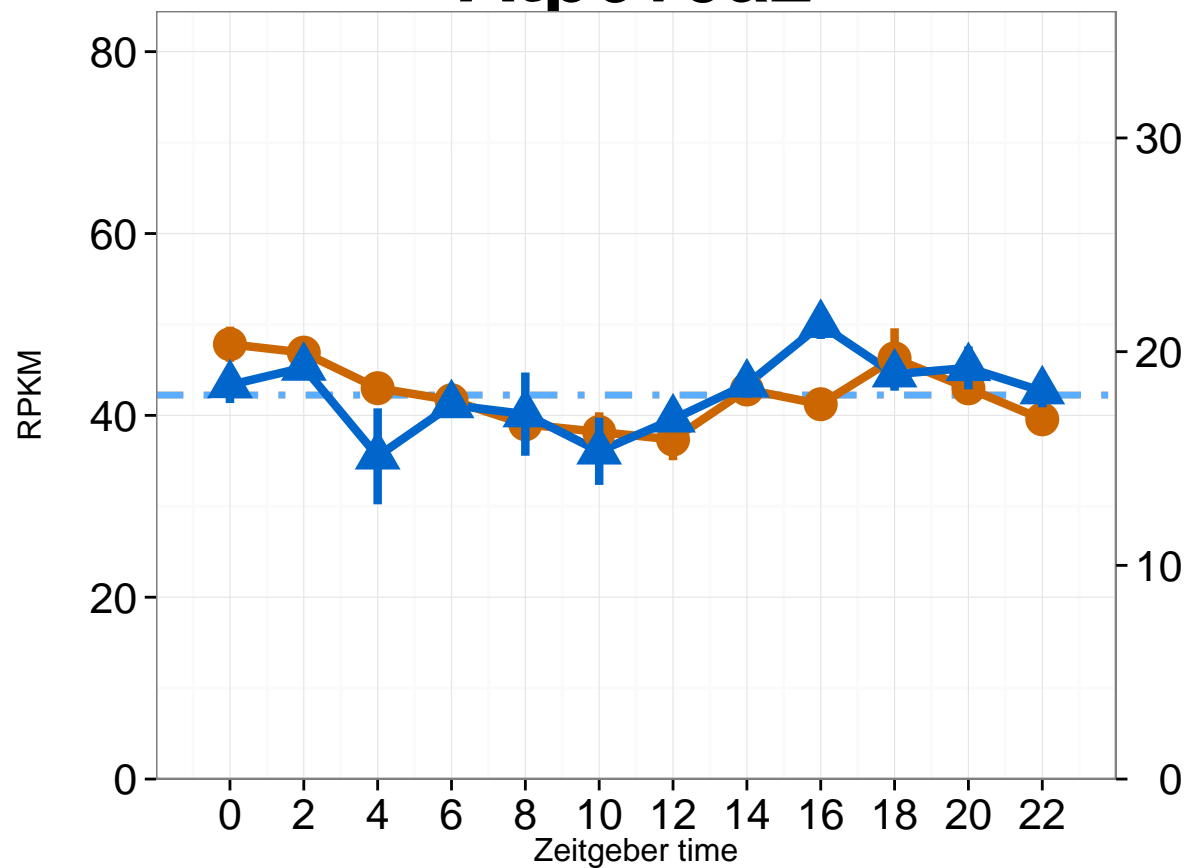

# Atp6v0a2

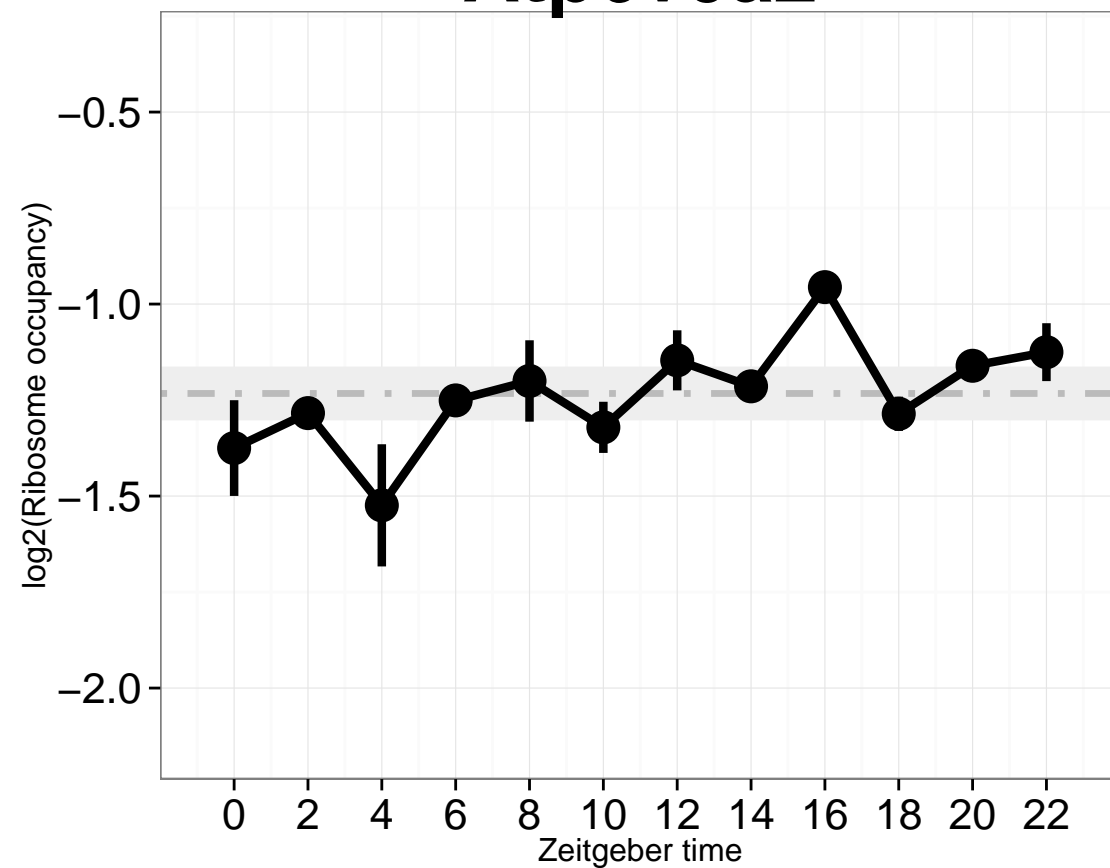

Supplement: Supplementary file 4387 [file 1]

# Cyc1

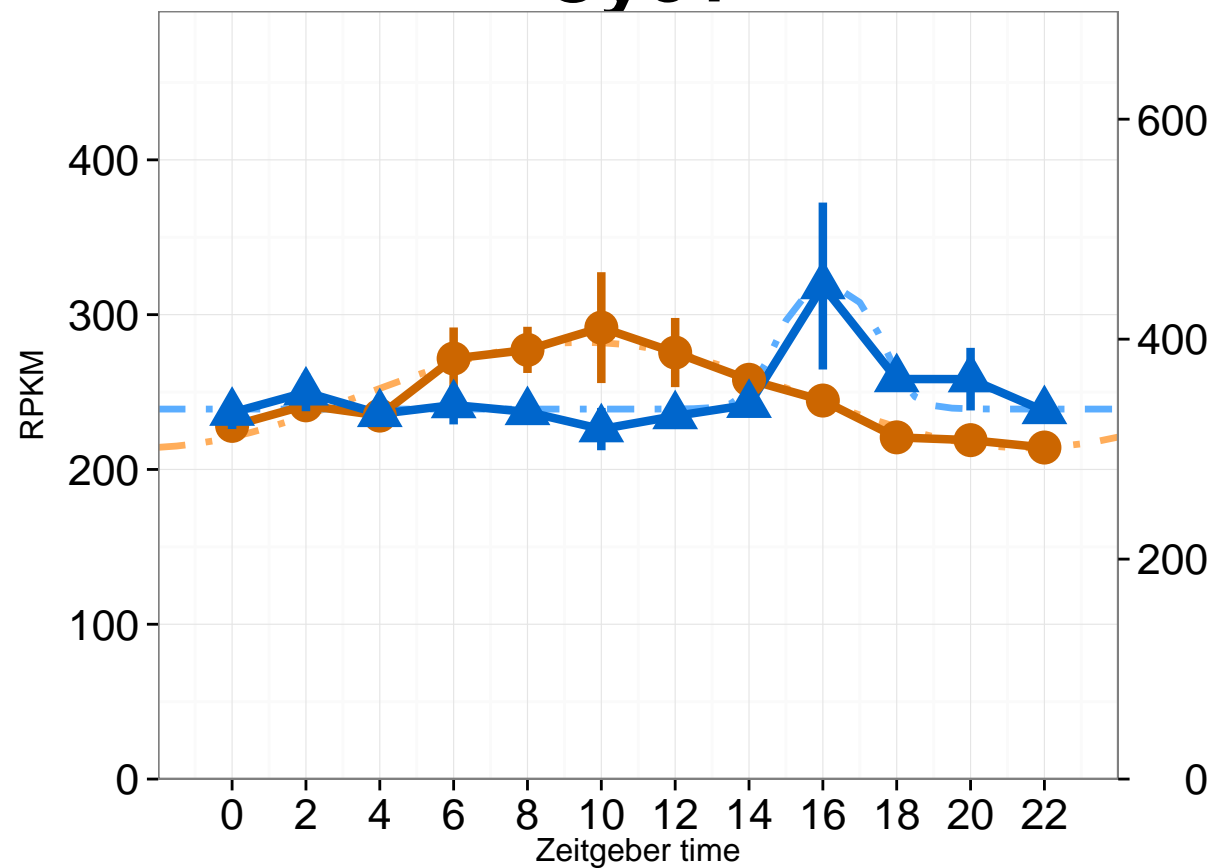

# Cyc1

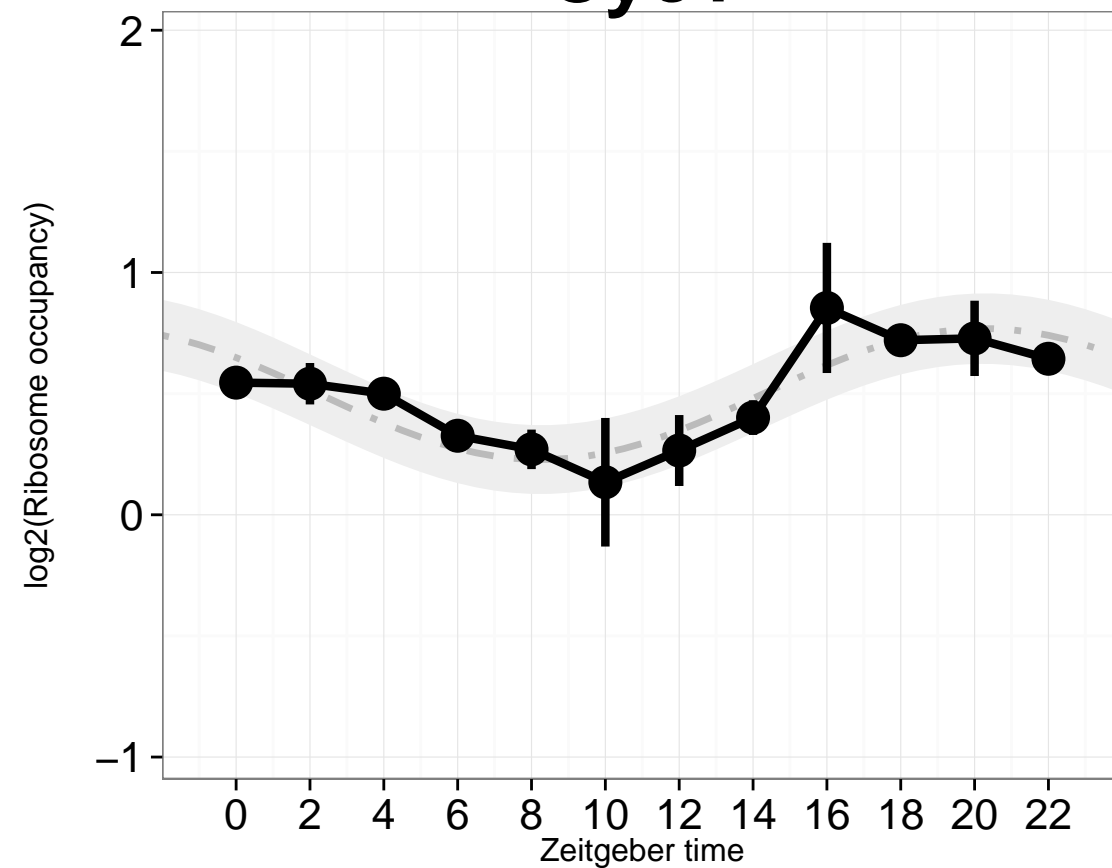

Supplement: Supplementary file 4388 [file 1]

## Rfc2

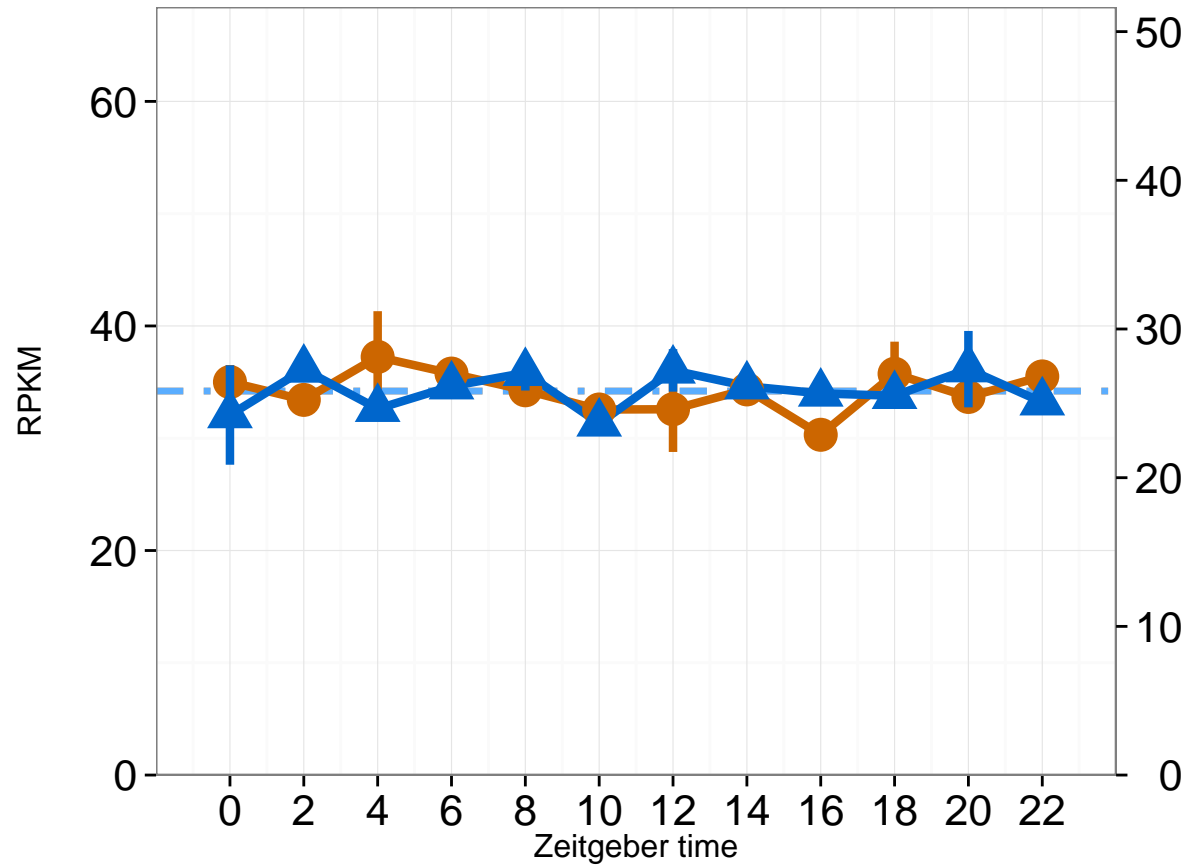

## Rfc2

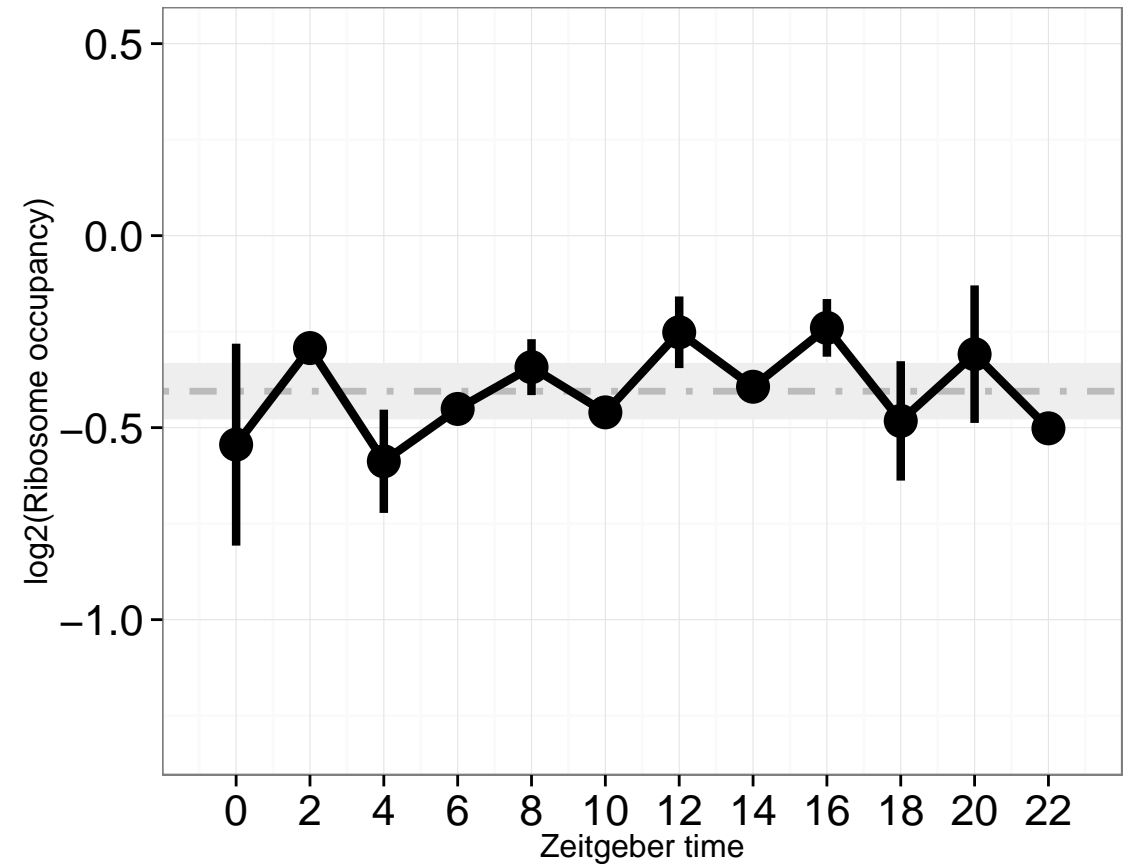

Supplement: Supplementary file 4389 [file 1]

## Txn1l1

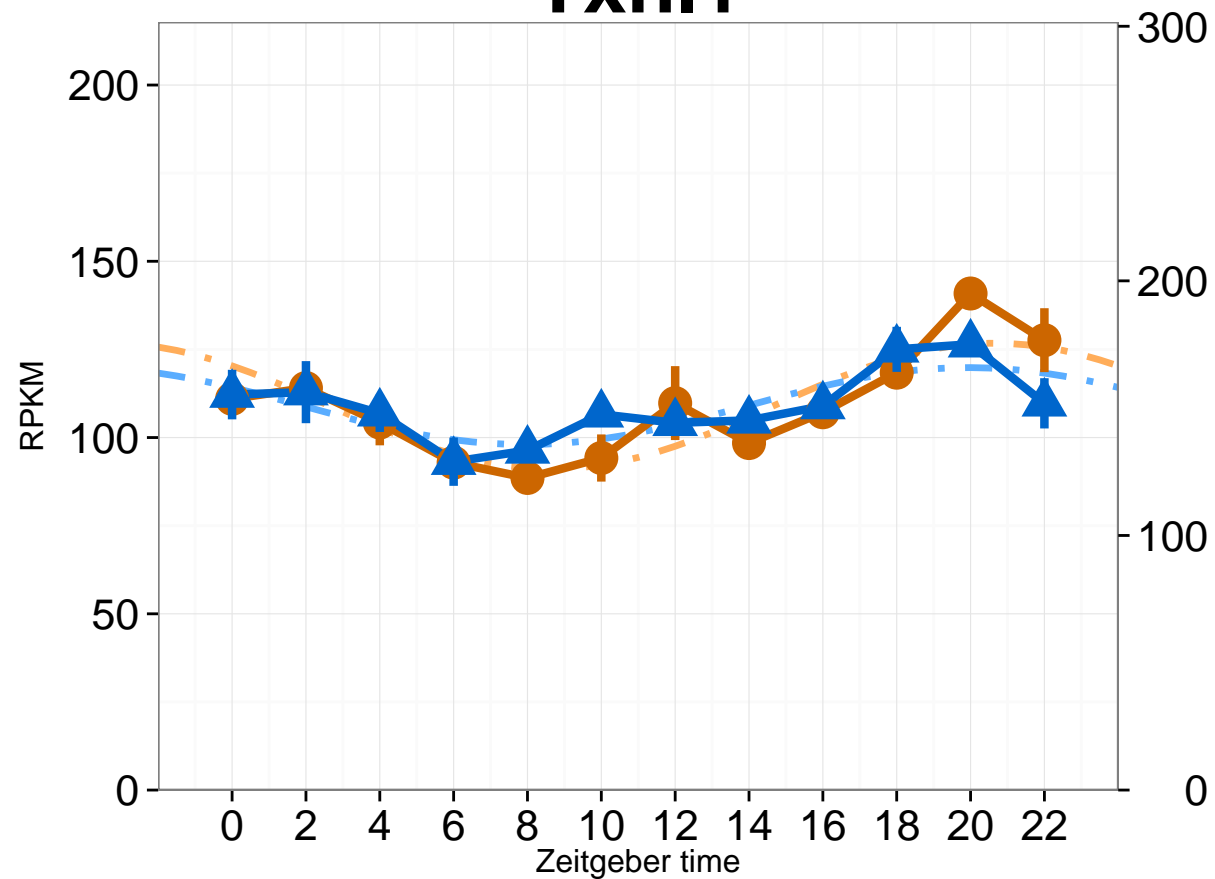

## Txn1l1

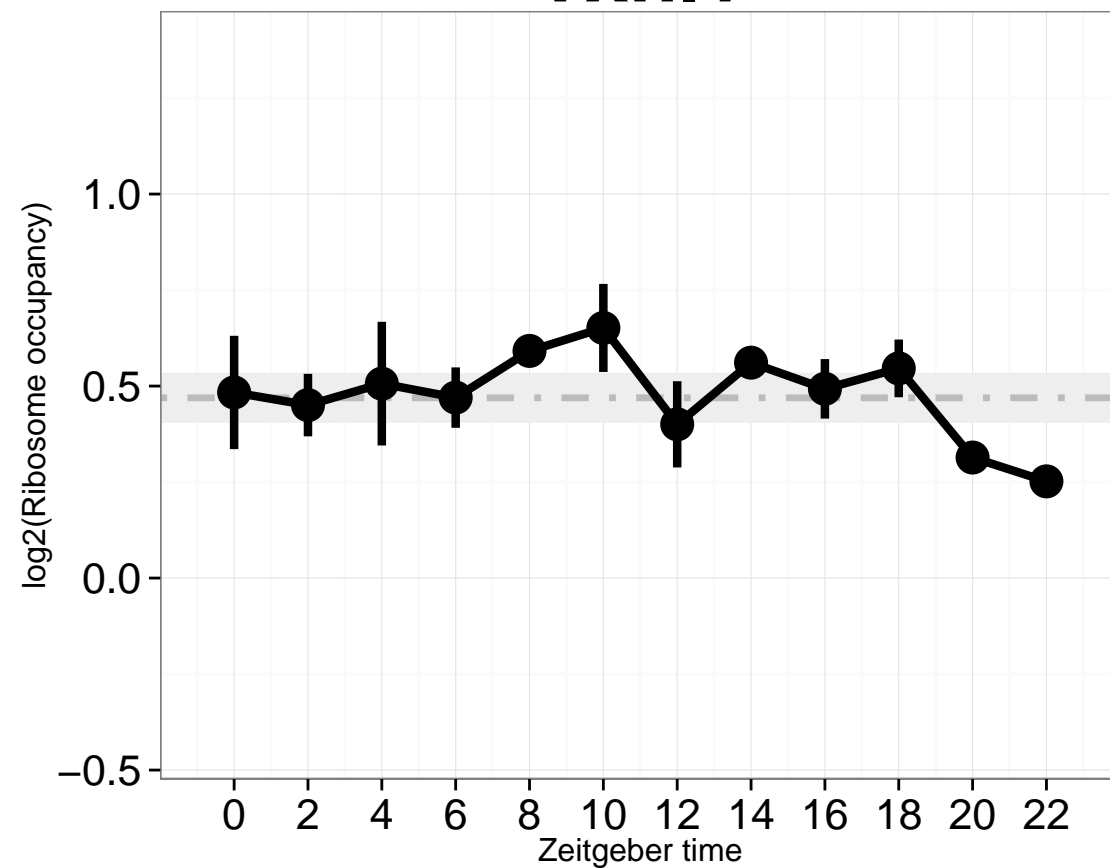

Supplement: Supplementary file 4390 [file 1]

# Lta4h

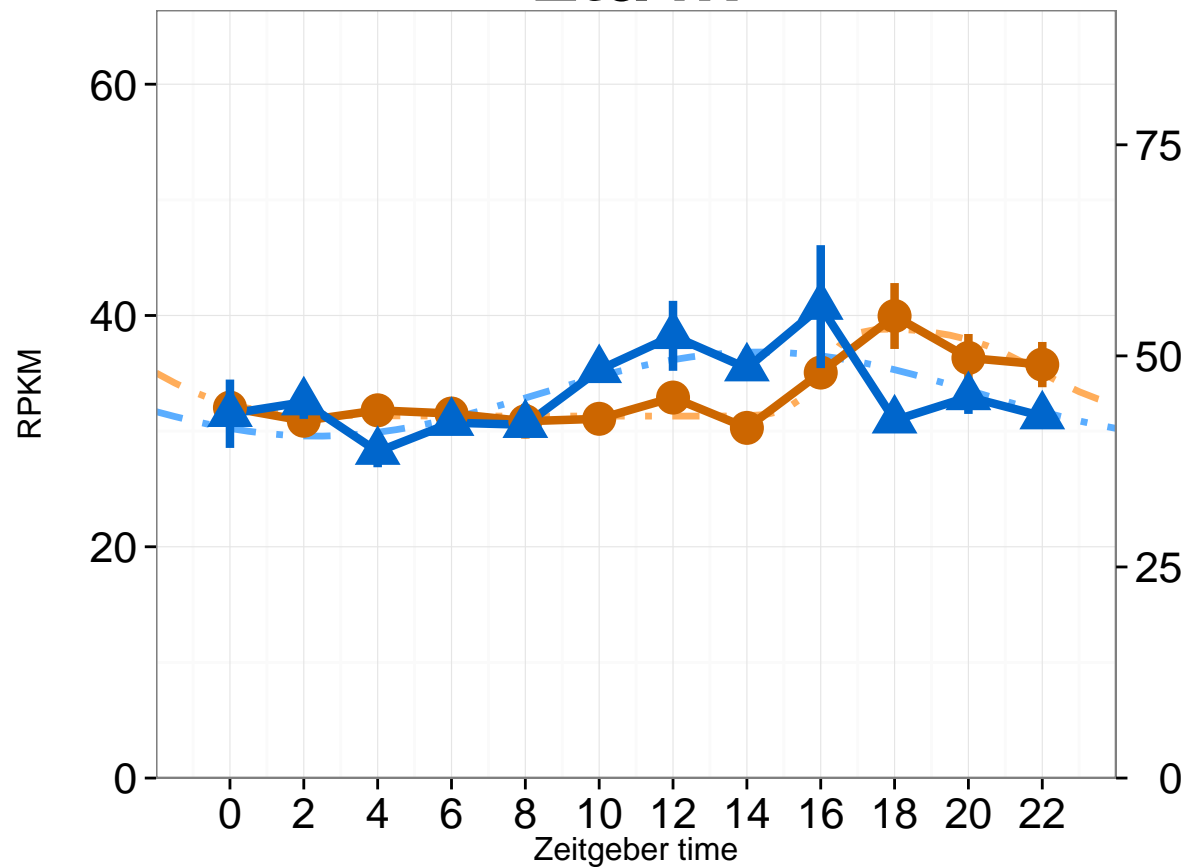

# Lta4h

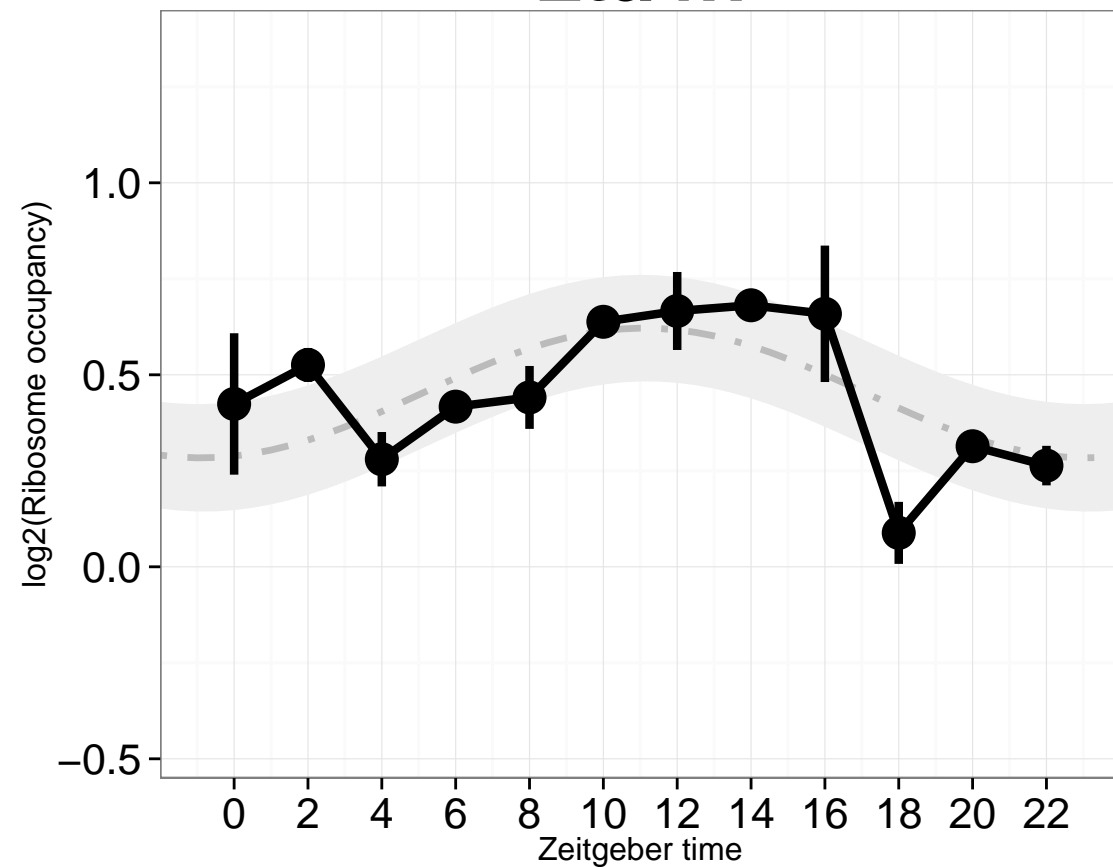

Supplement: Supplementary file 4391 [file 1]

## Rab31

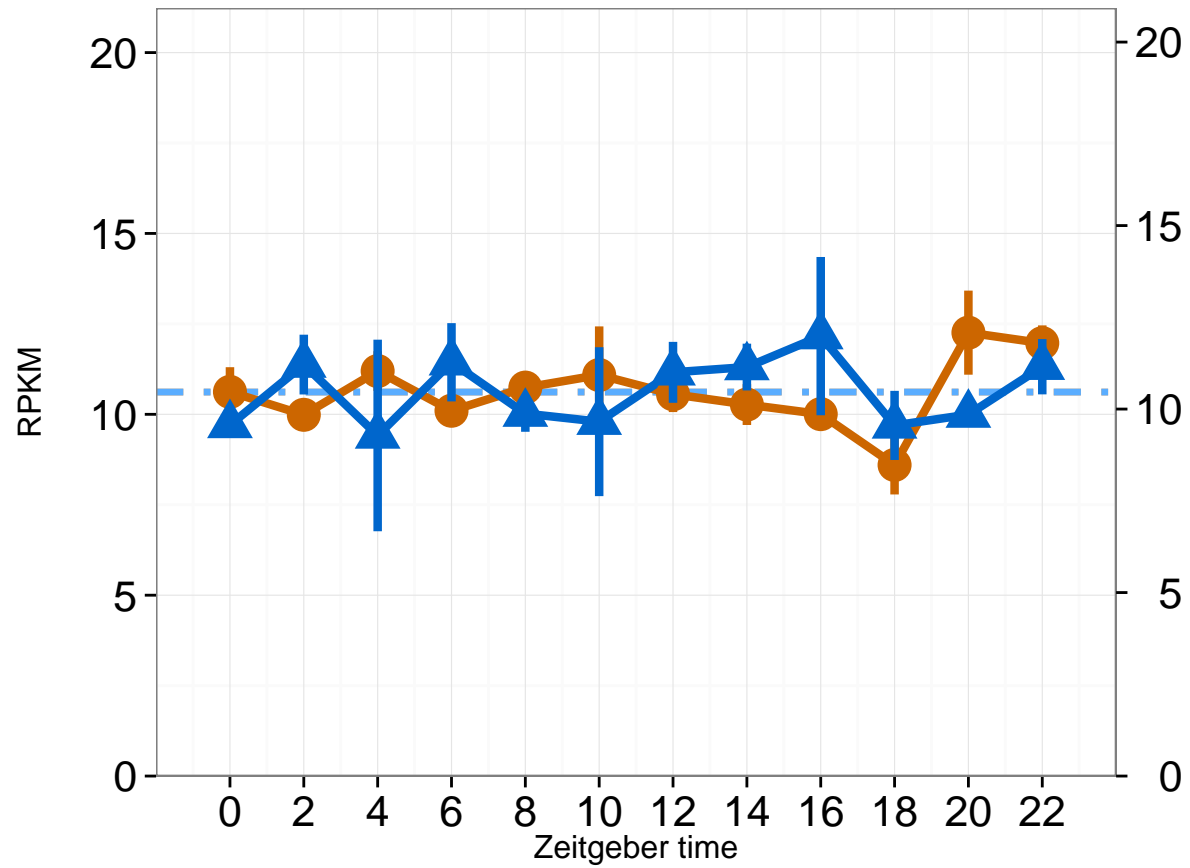

## Rab31

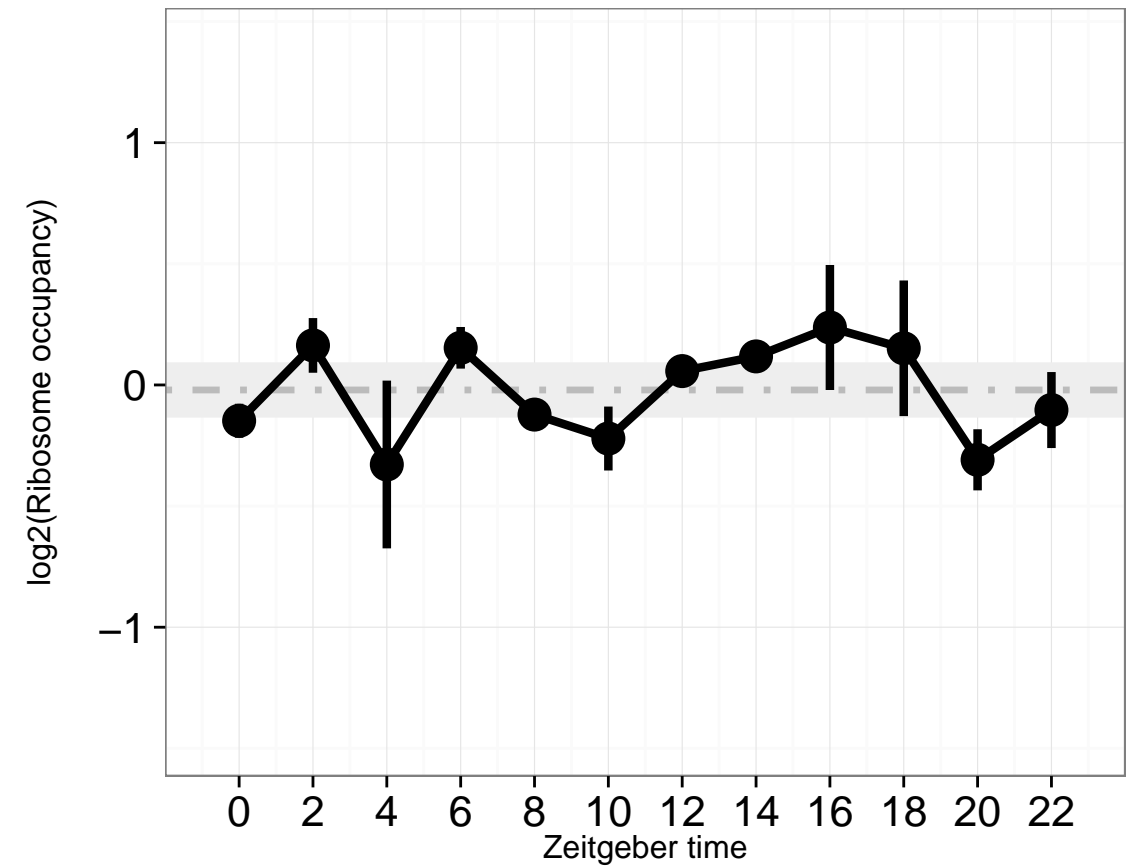

Supplement: Supplementary file 4392 [file 1]

# Ccdc41

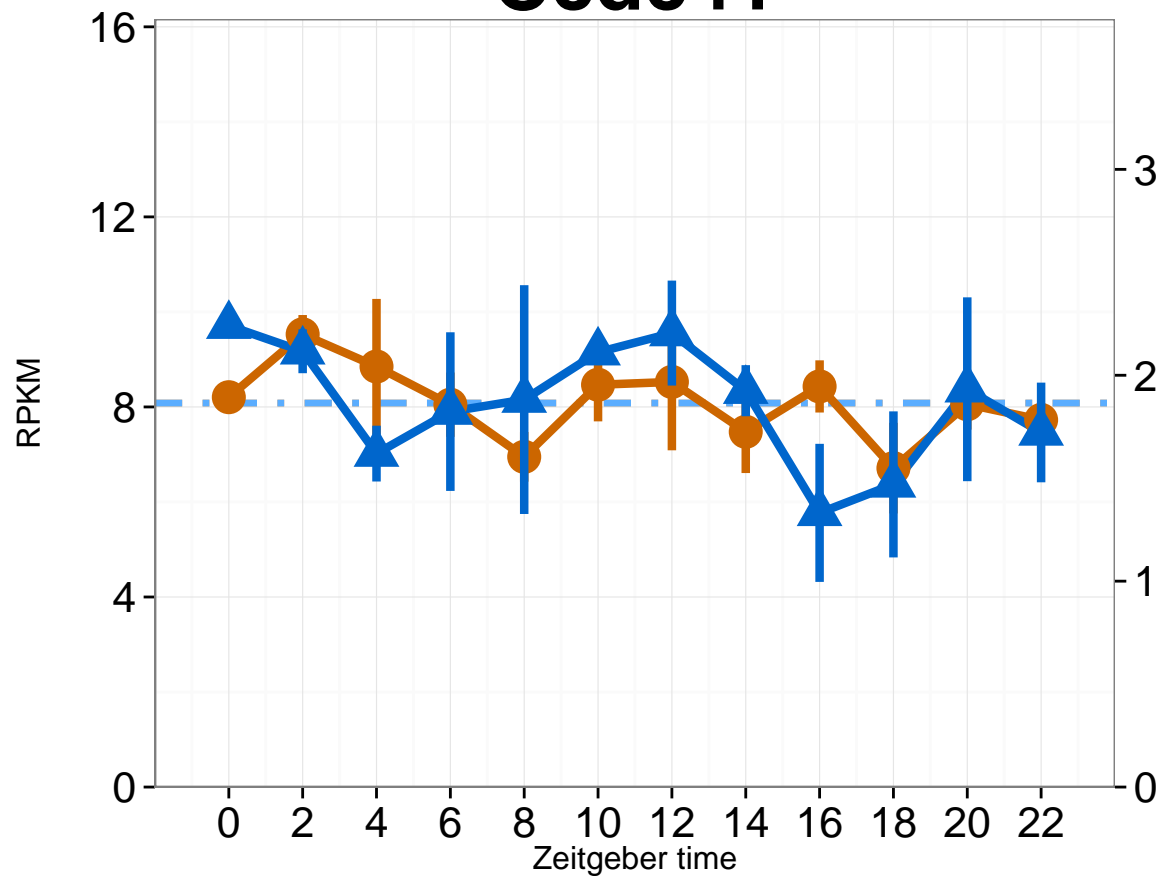

# Ccdc41

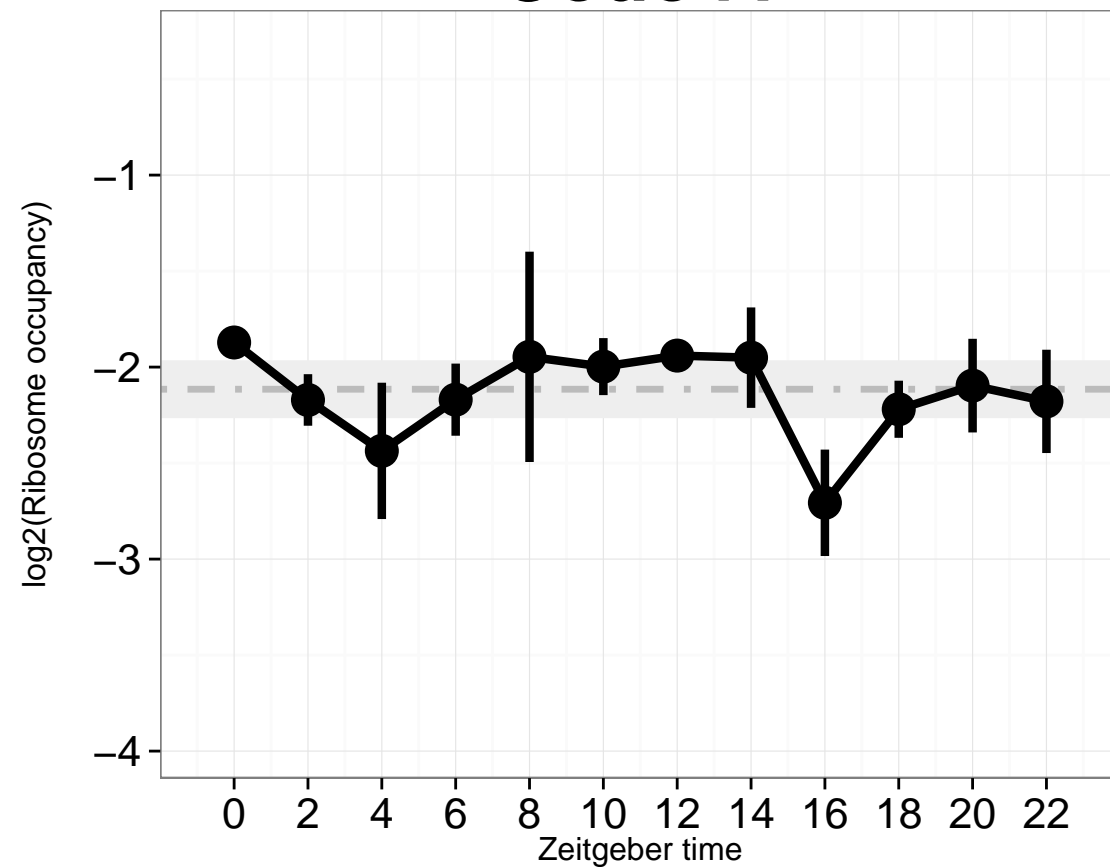

Supplement: Supplementary file 4393 [file 1]

# Hoxa6

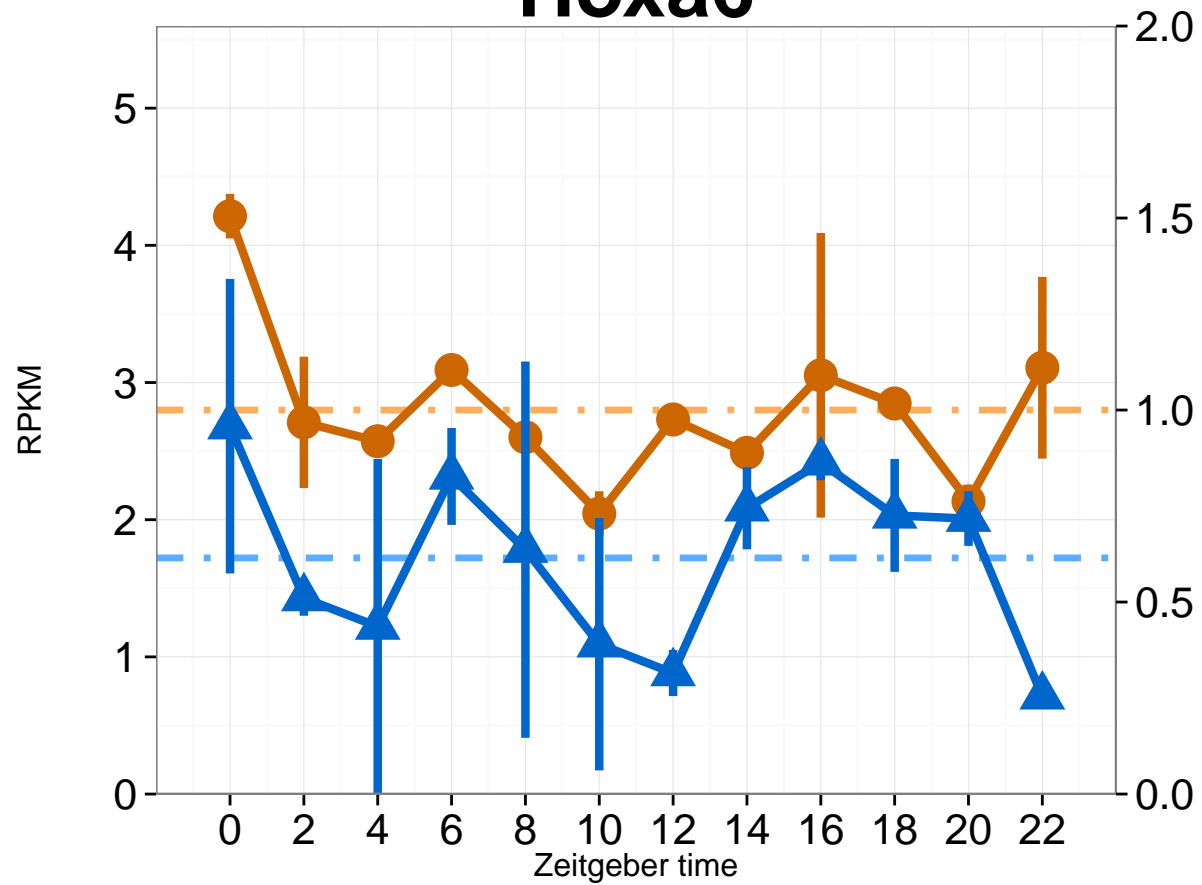

# Hoxa6

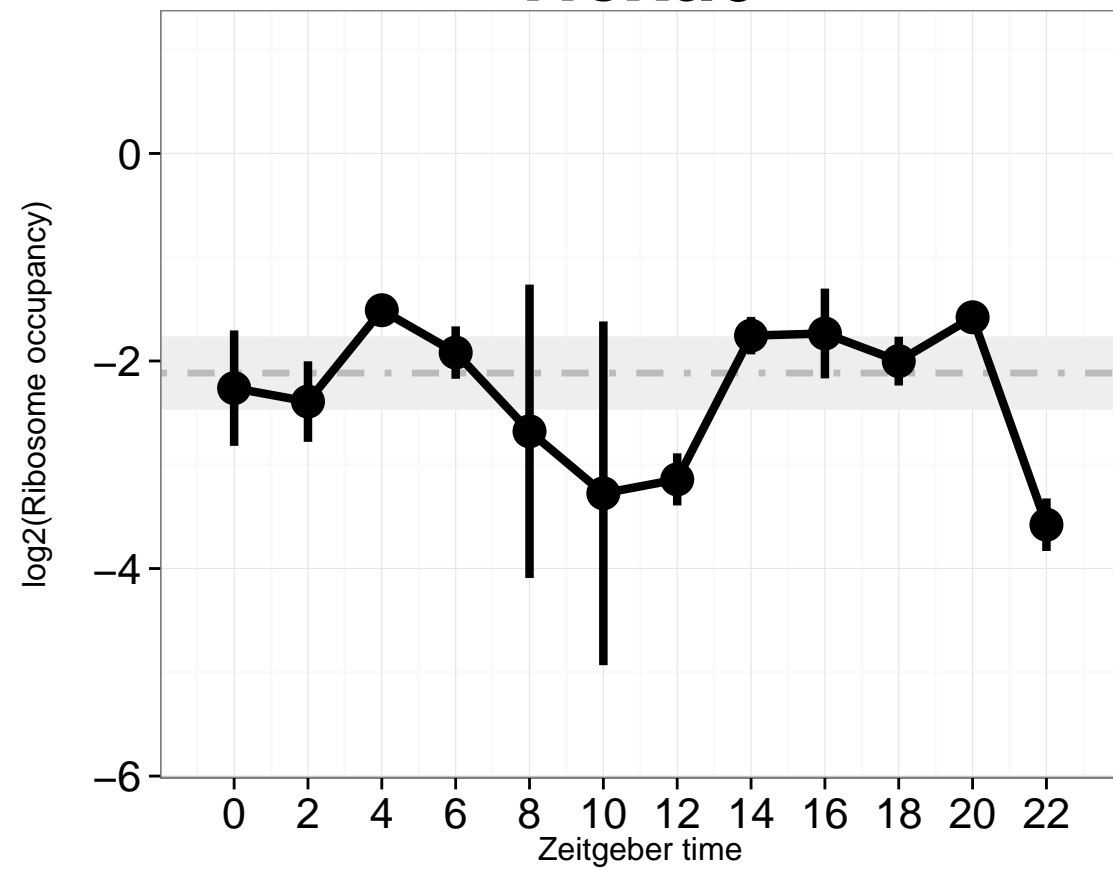

Supplement: Supplementary file 4394 [file 1]

## Spp2

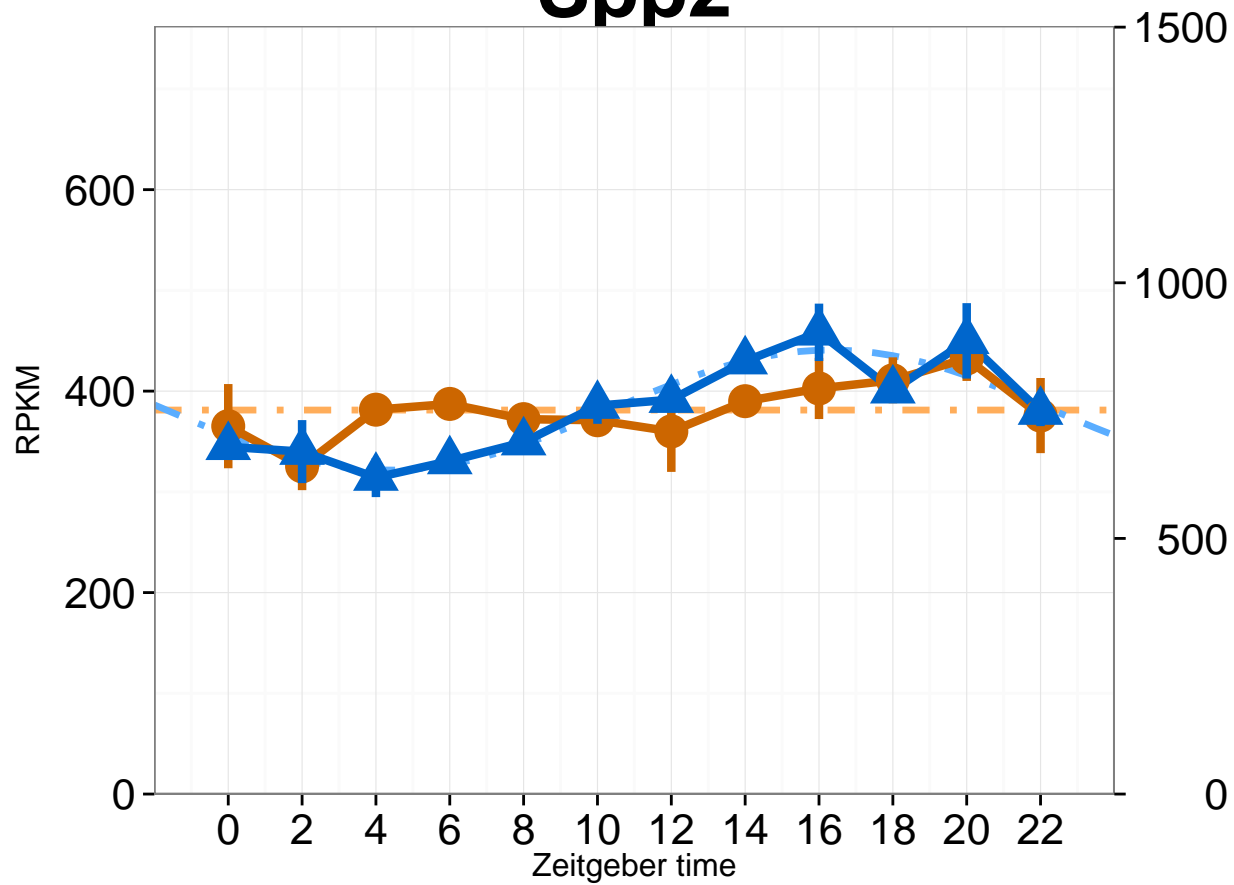

## Spp2

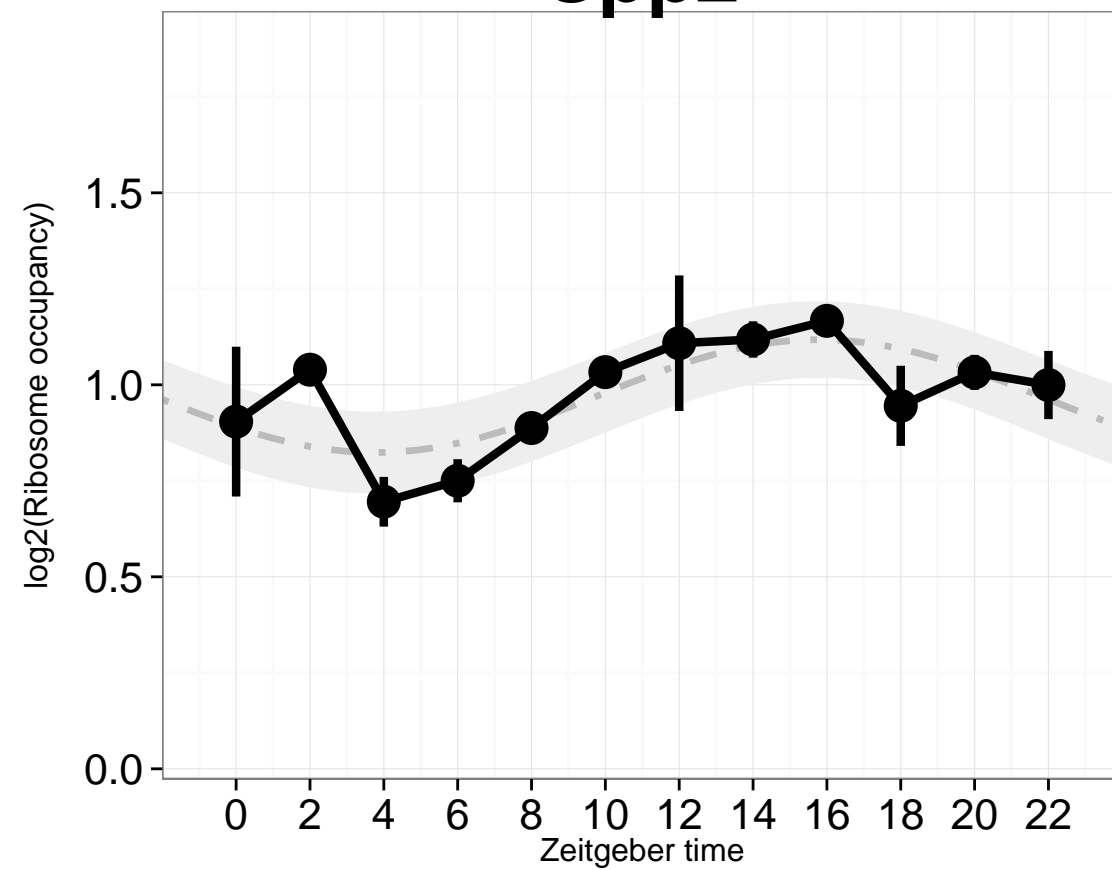

Supplement: Supplementary file 4395 [file 1]

# Mms22l

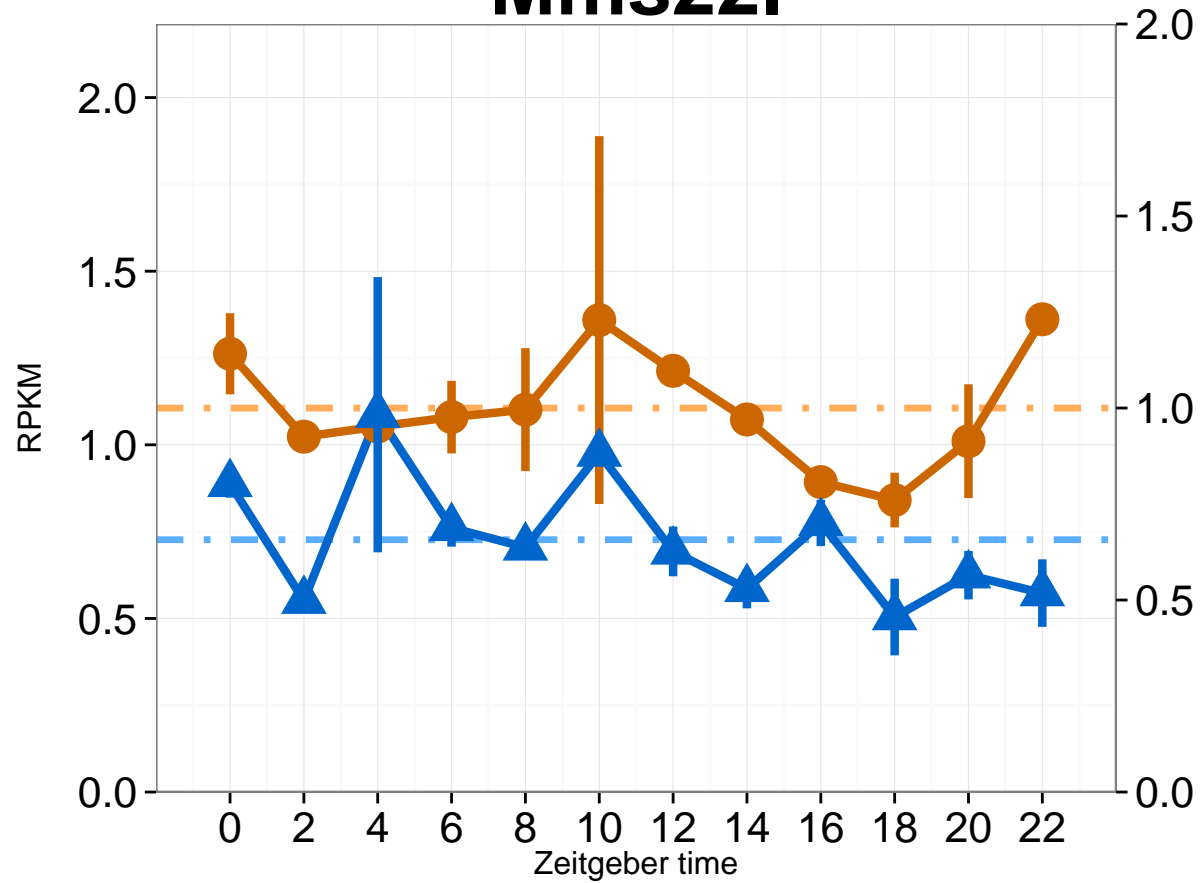

# Mms22l

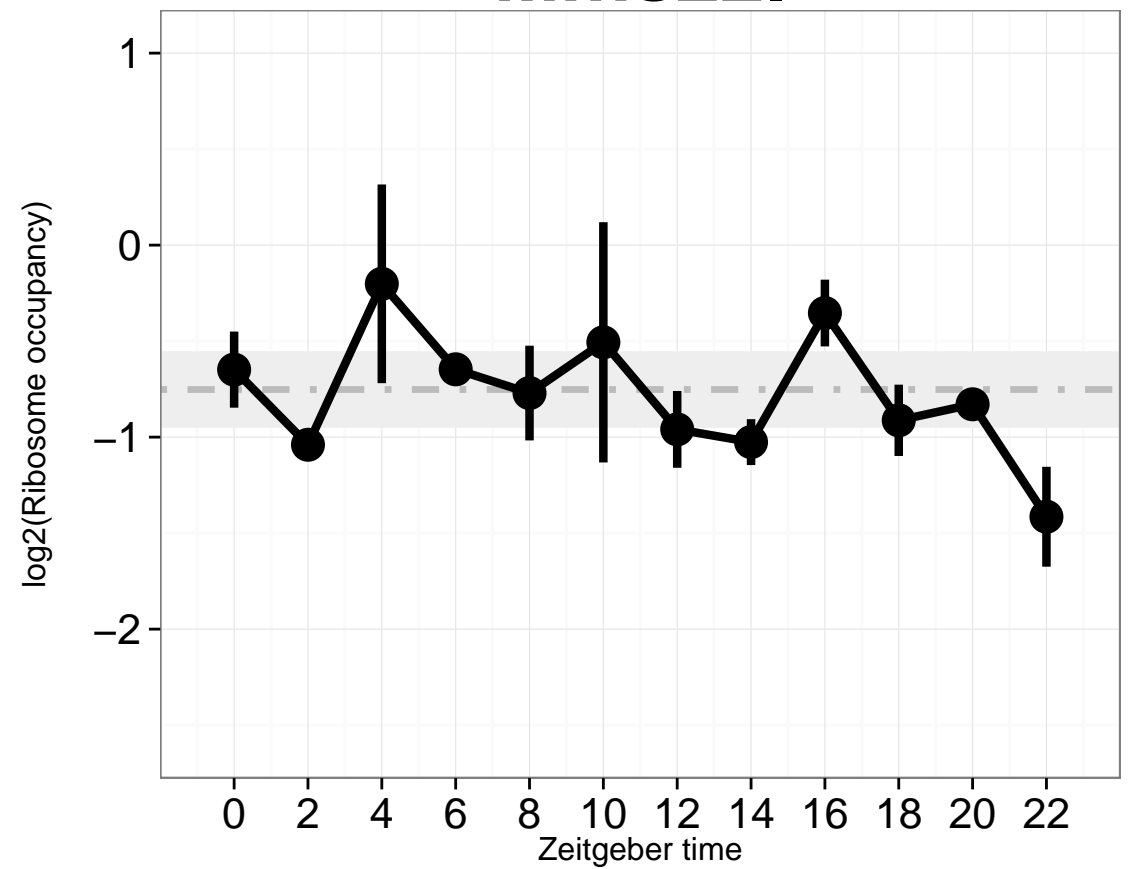

Supplement: Supplementary file 4396 [file 1]

## Cog2

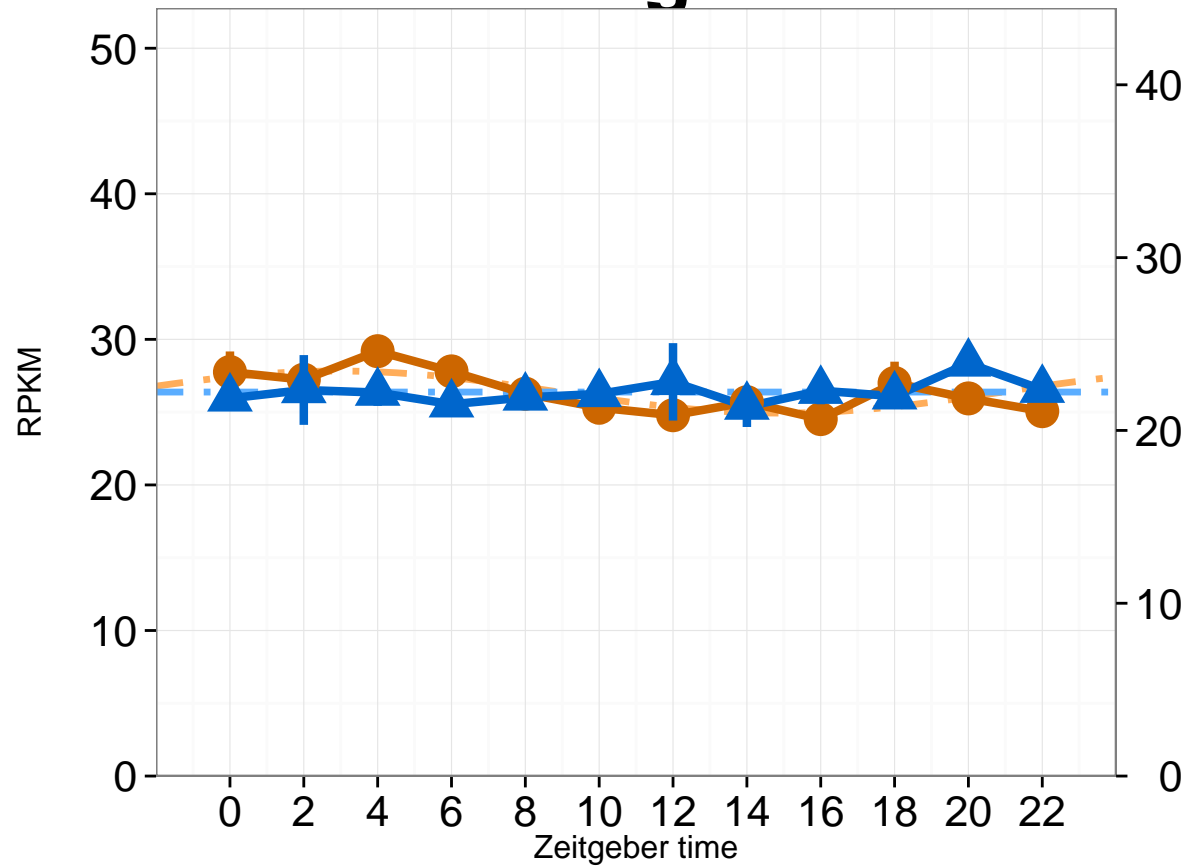

## Cog2

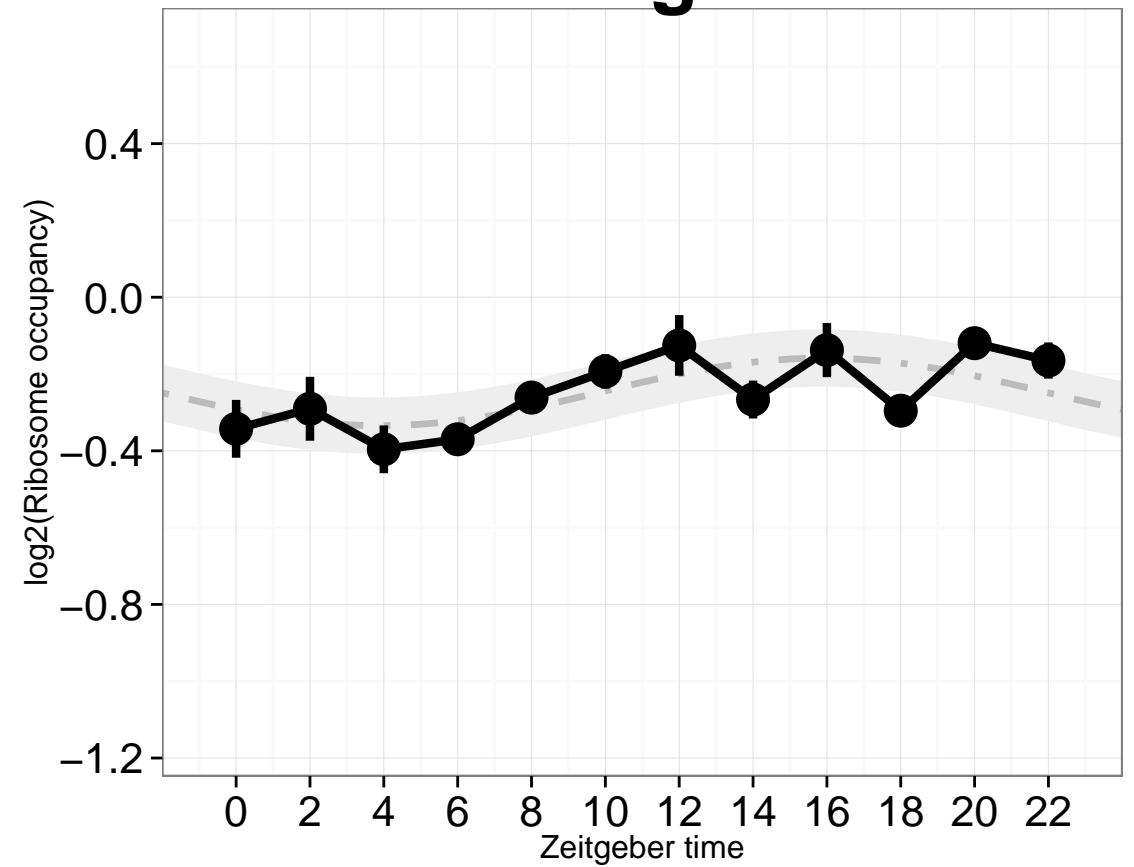

Supplement: Supplementary file 4397 [file 1]

## Rmdn2

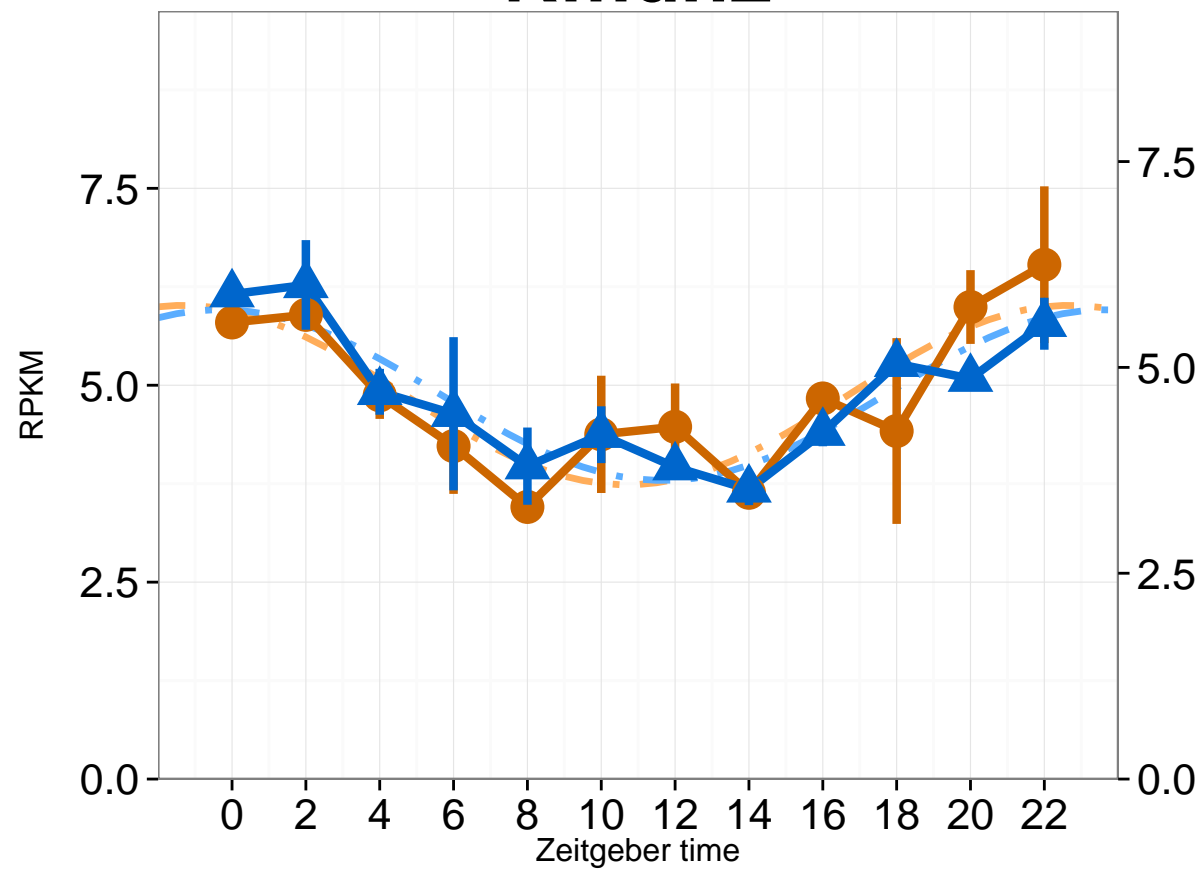

## Rmdn2

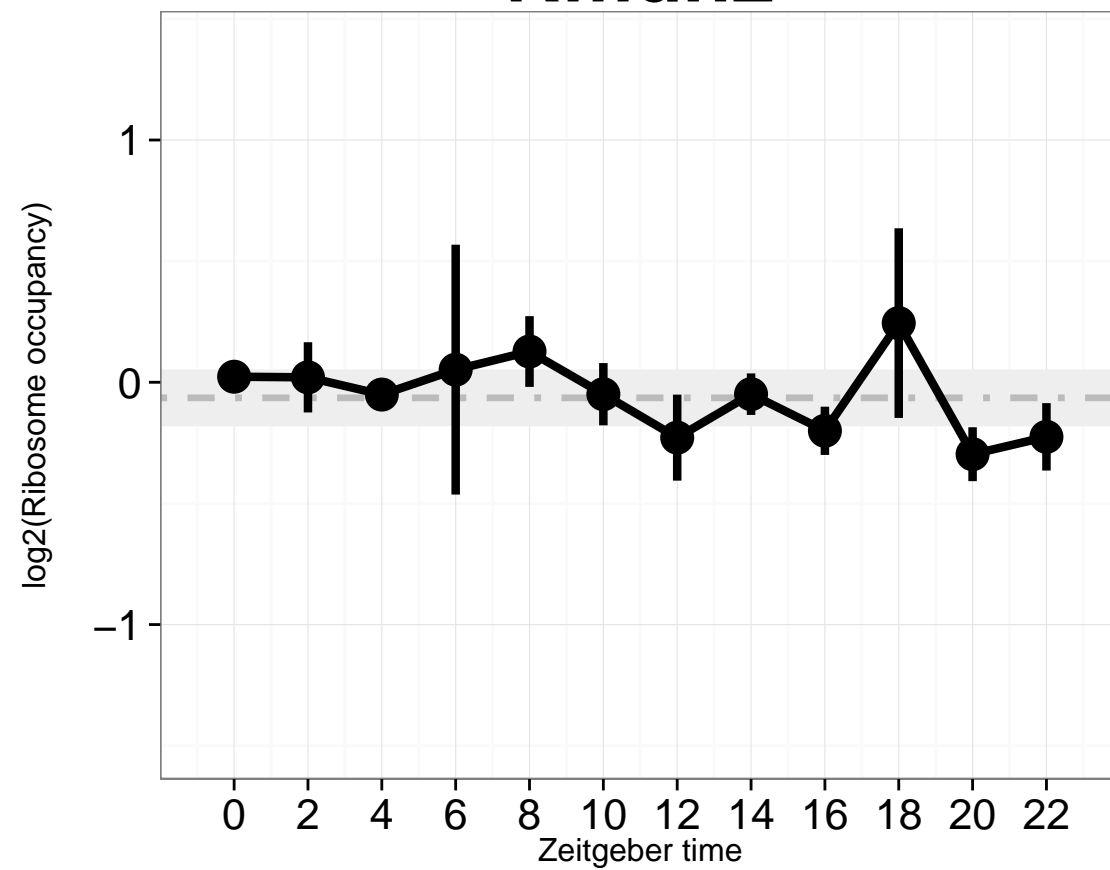

Supplement: Supplementary file 4398 [file 1]

## Loxl1

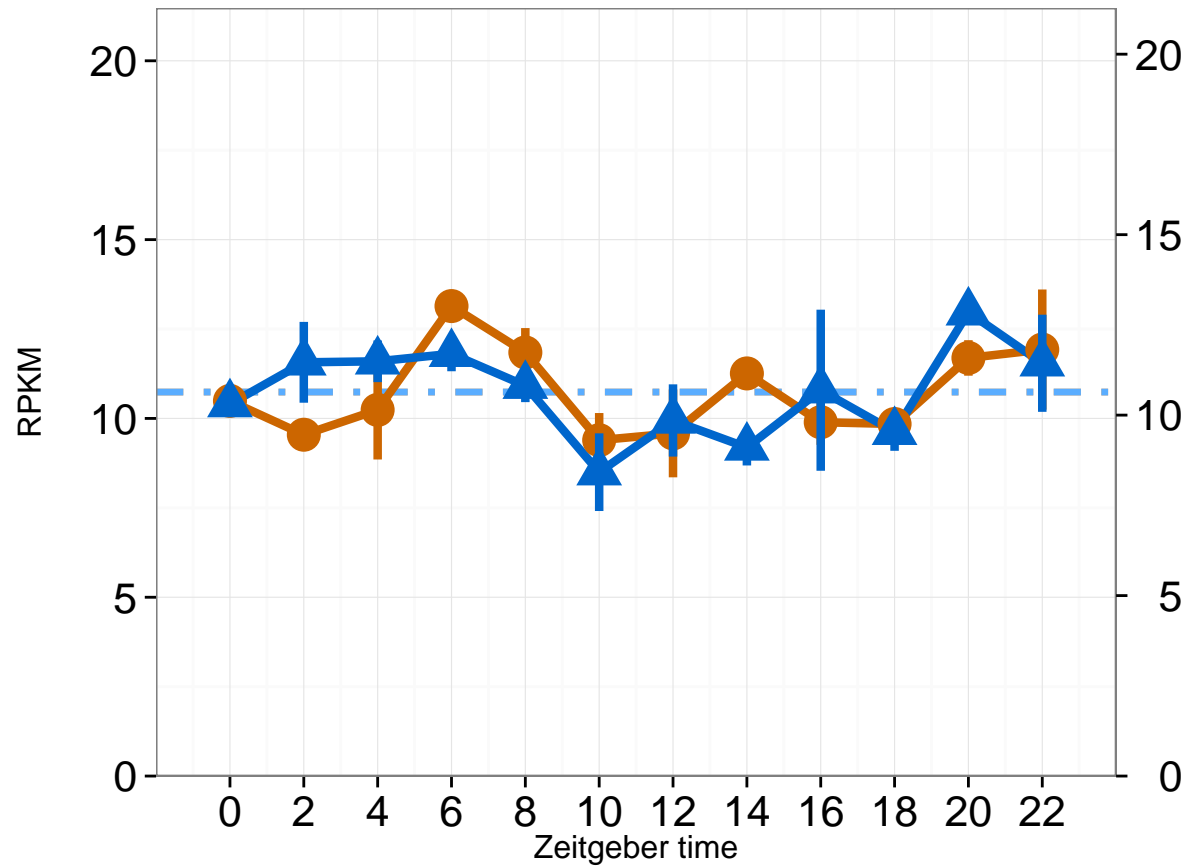

## Loxl1

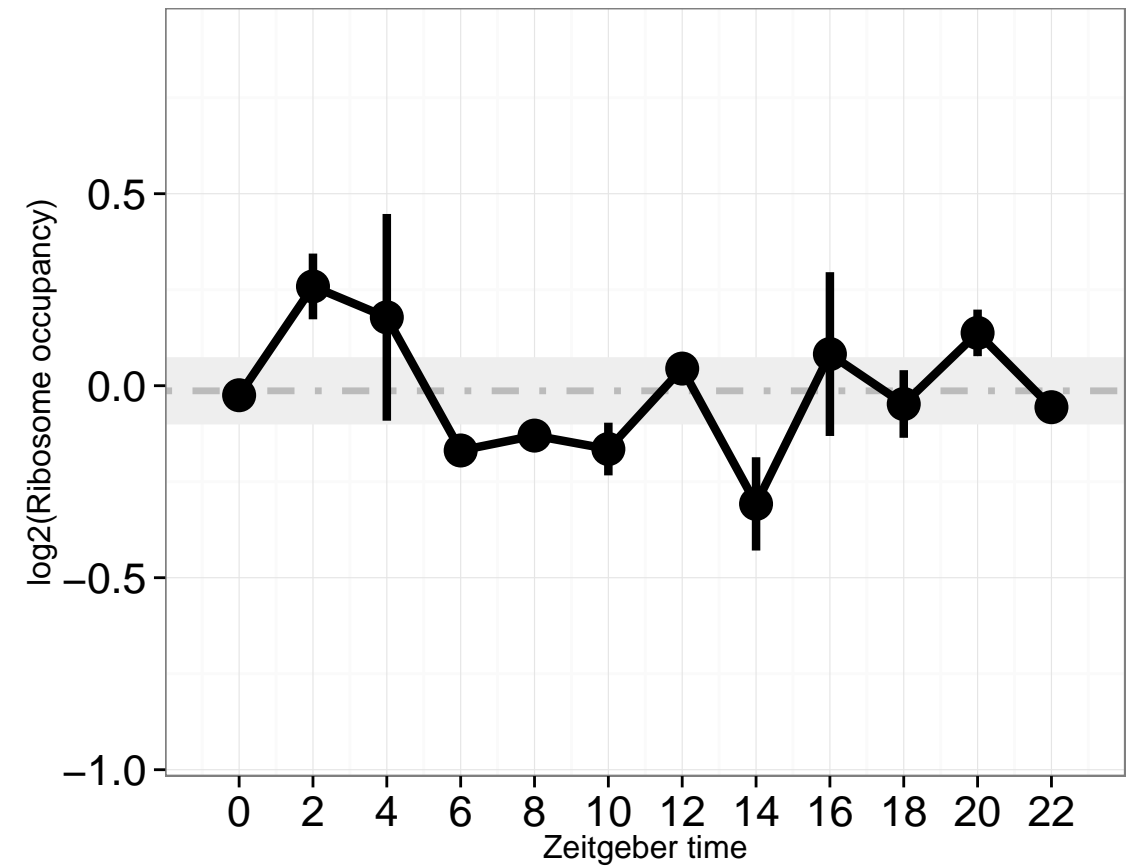

Supplement: Supplementary file 4399 [file 1]

## NIK

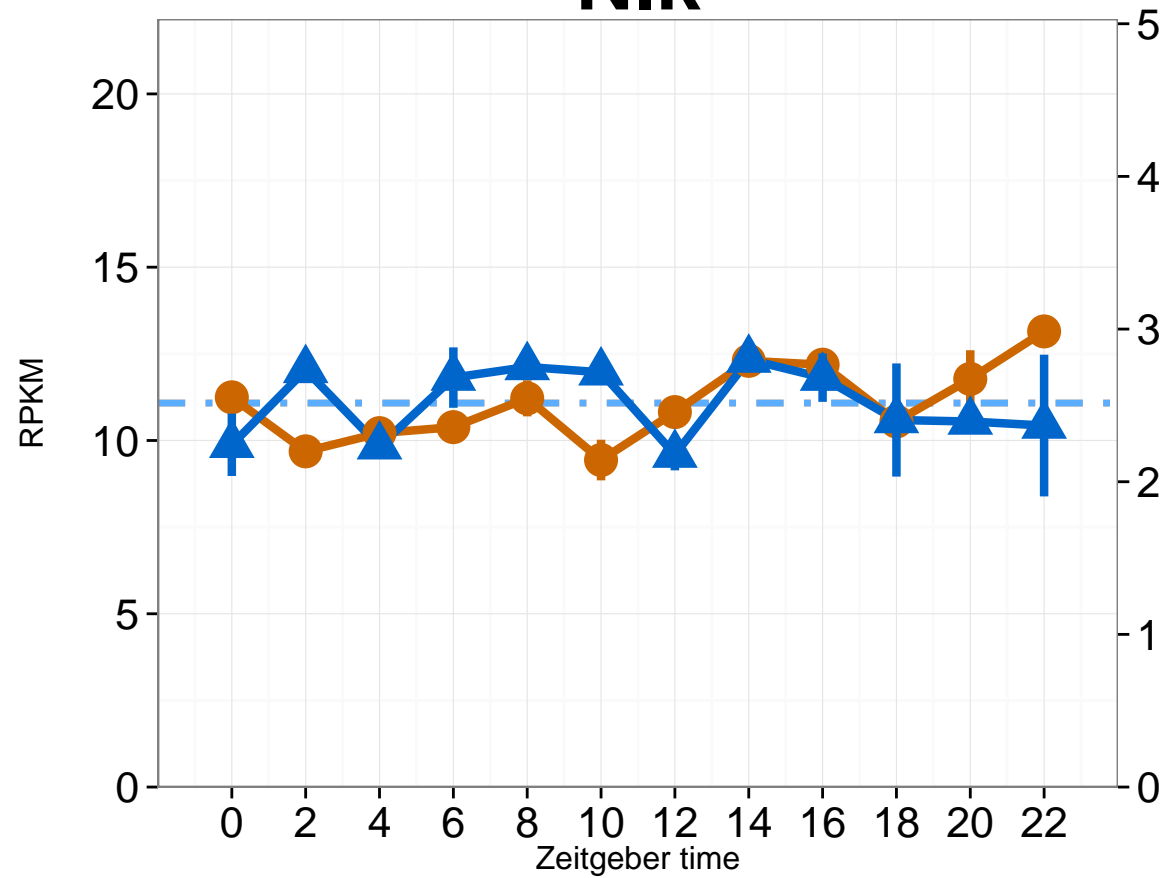

## NIK

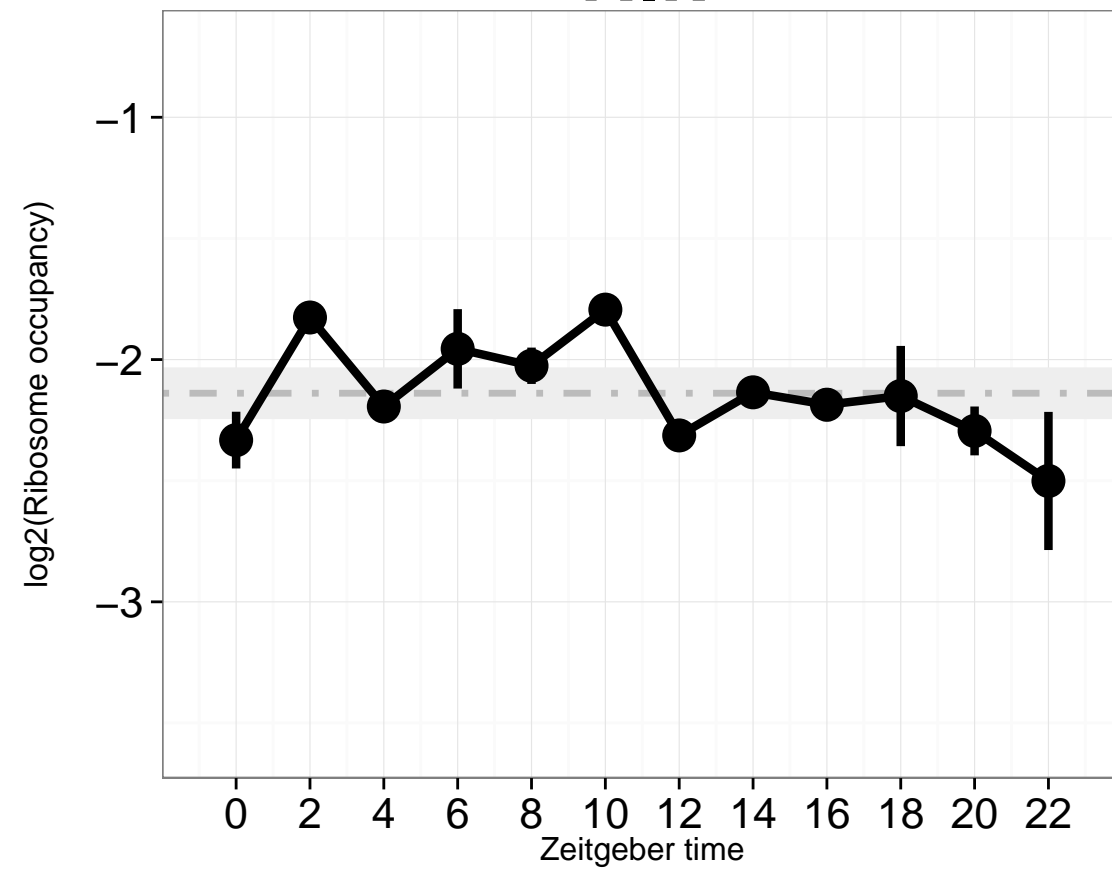

Supplement: Supplementary file 4400 [file 1]

## Vamp5

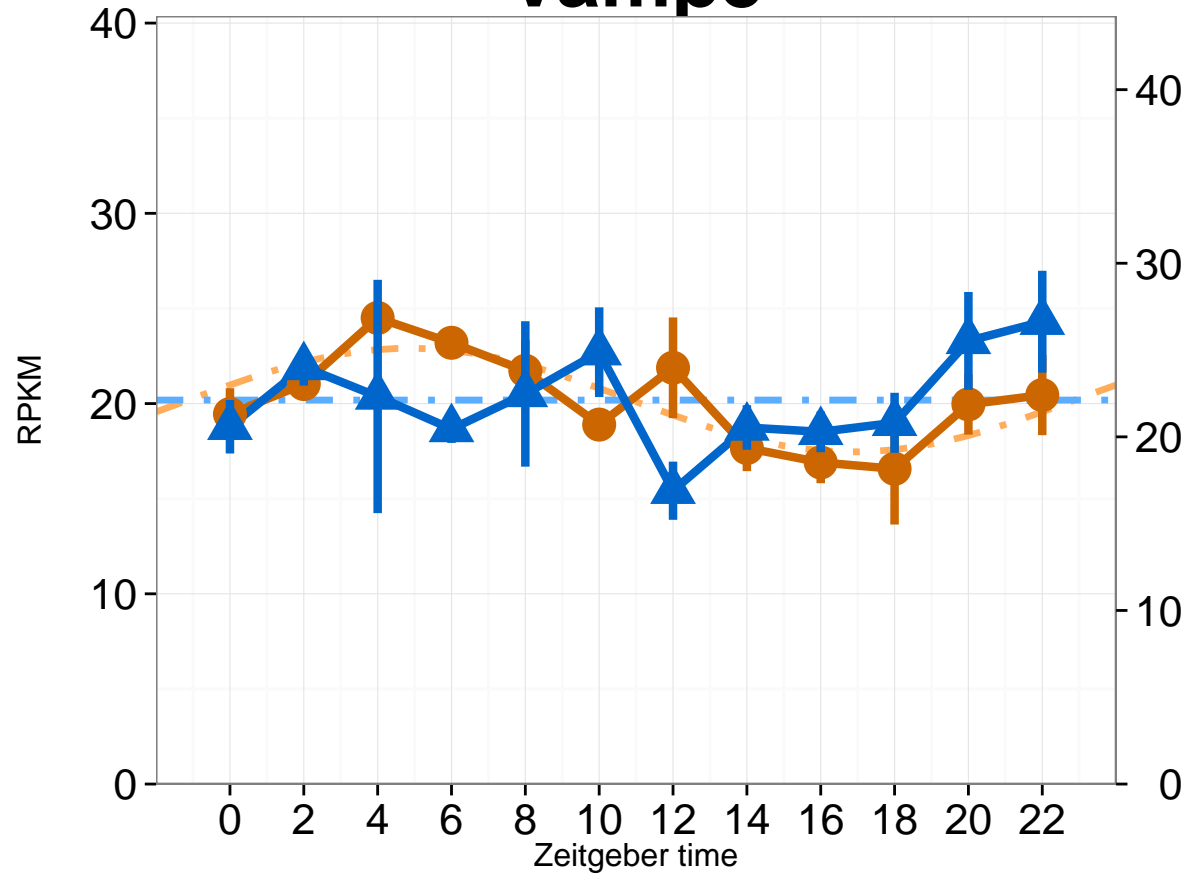

## Vamp5

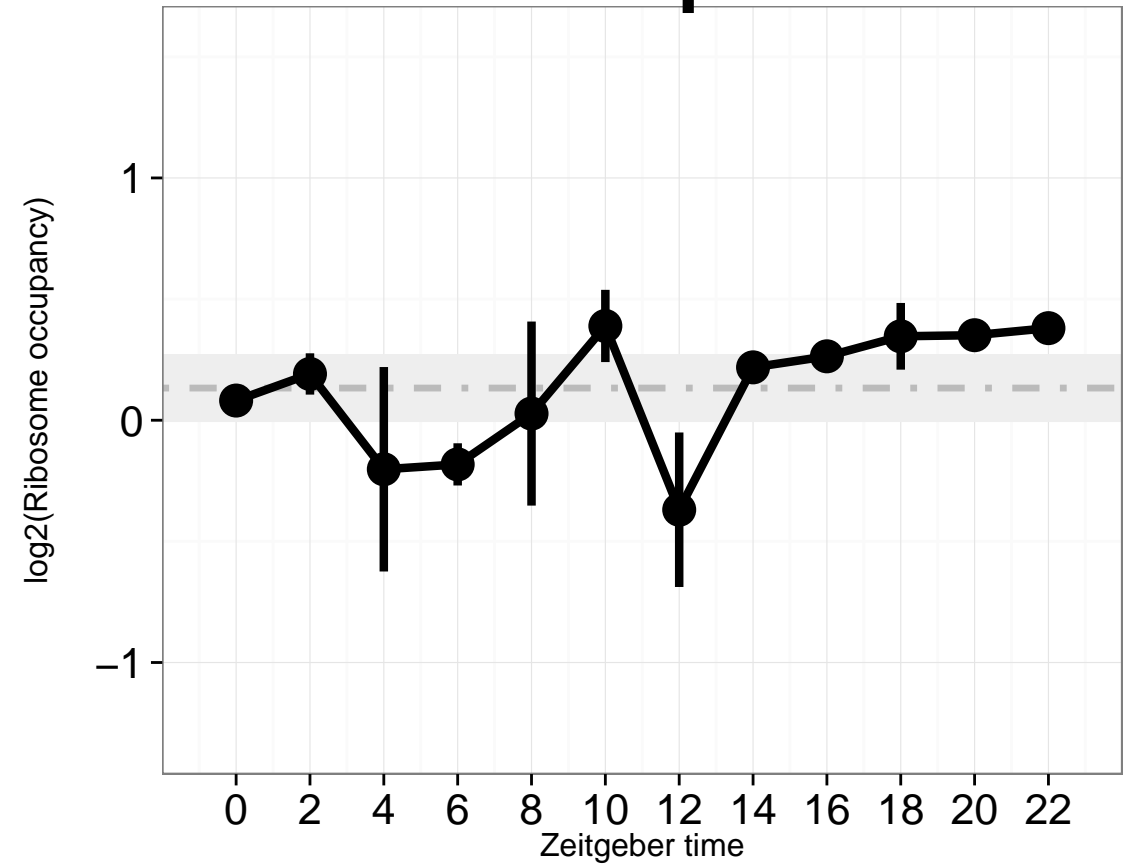

Supplement: Supplementary file 4401 [file 1]

# Arpc1a

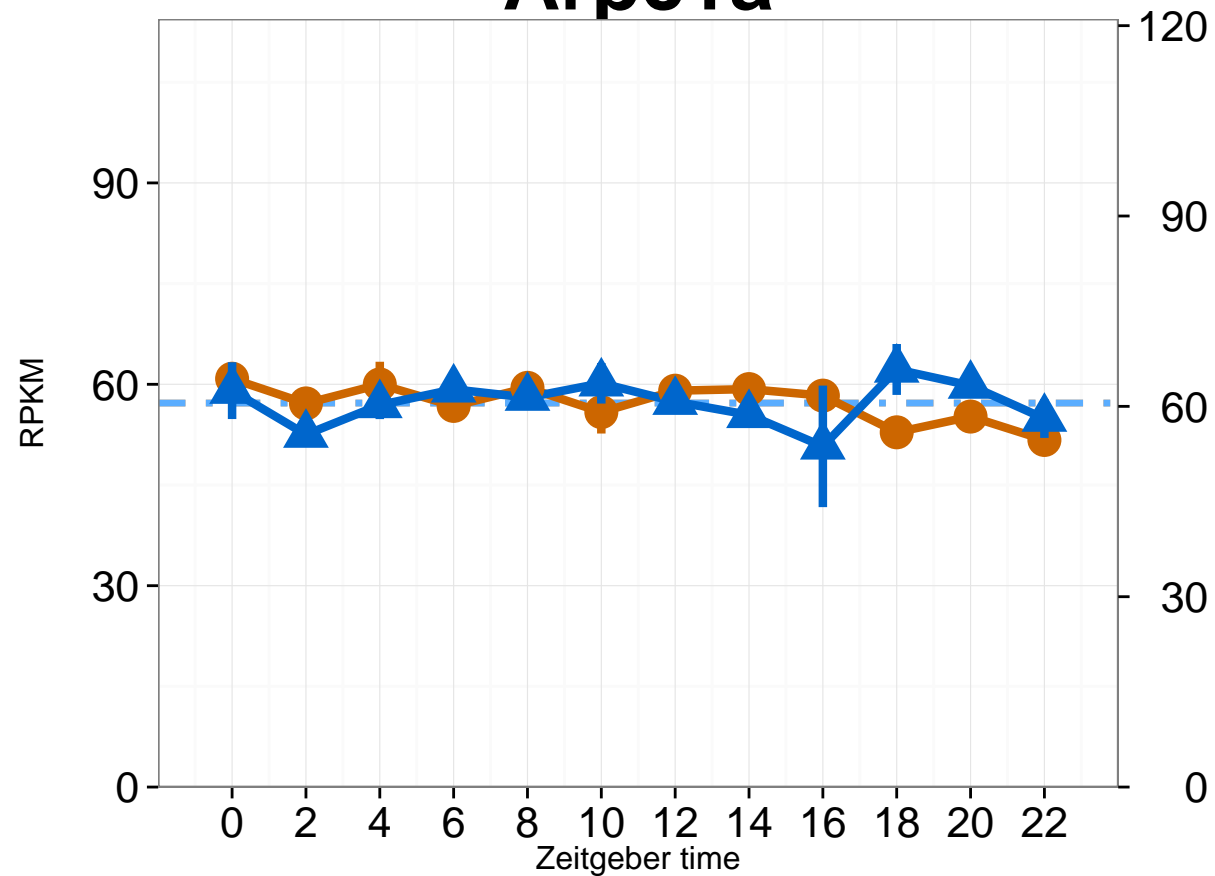

# Arpc1a

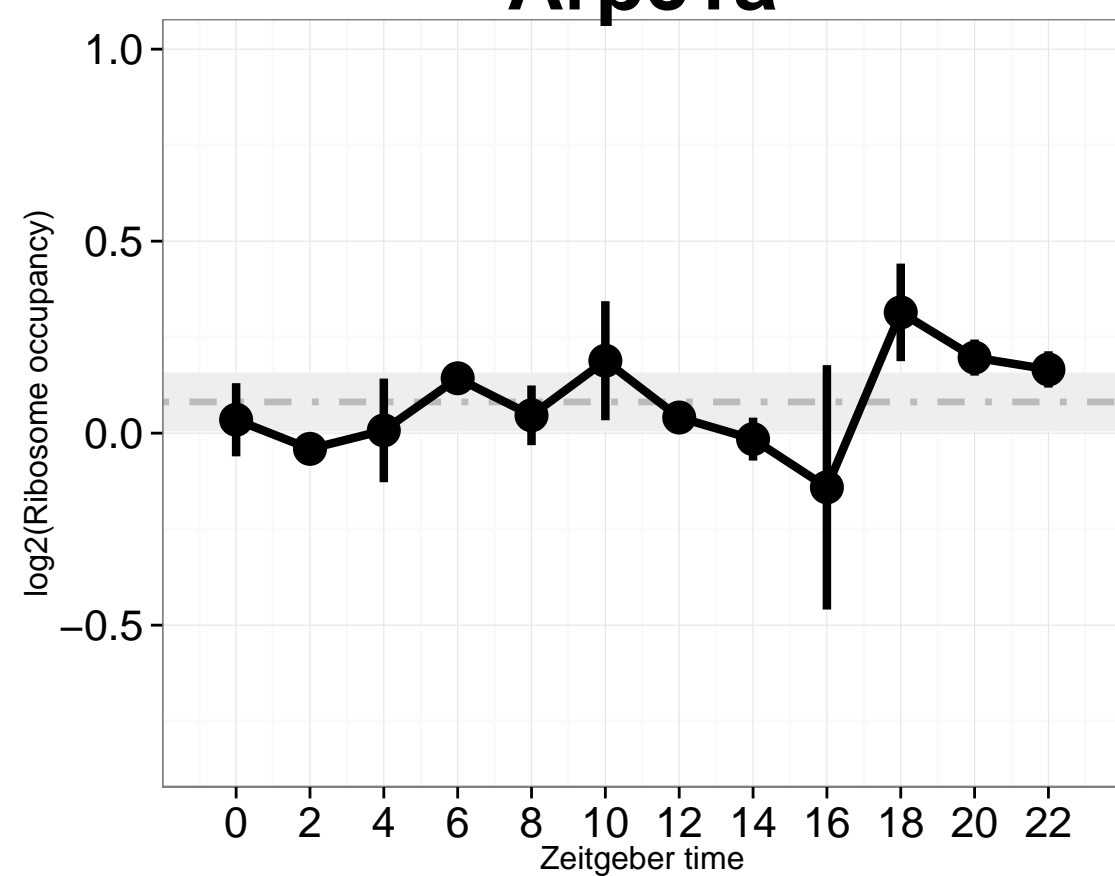

Supplement: Supplementary file 4402 [file 1]

## 2700089E24Rik

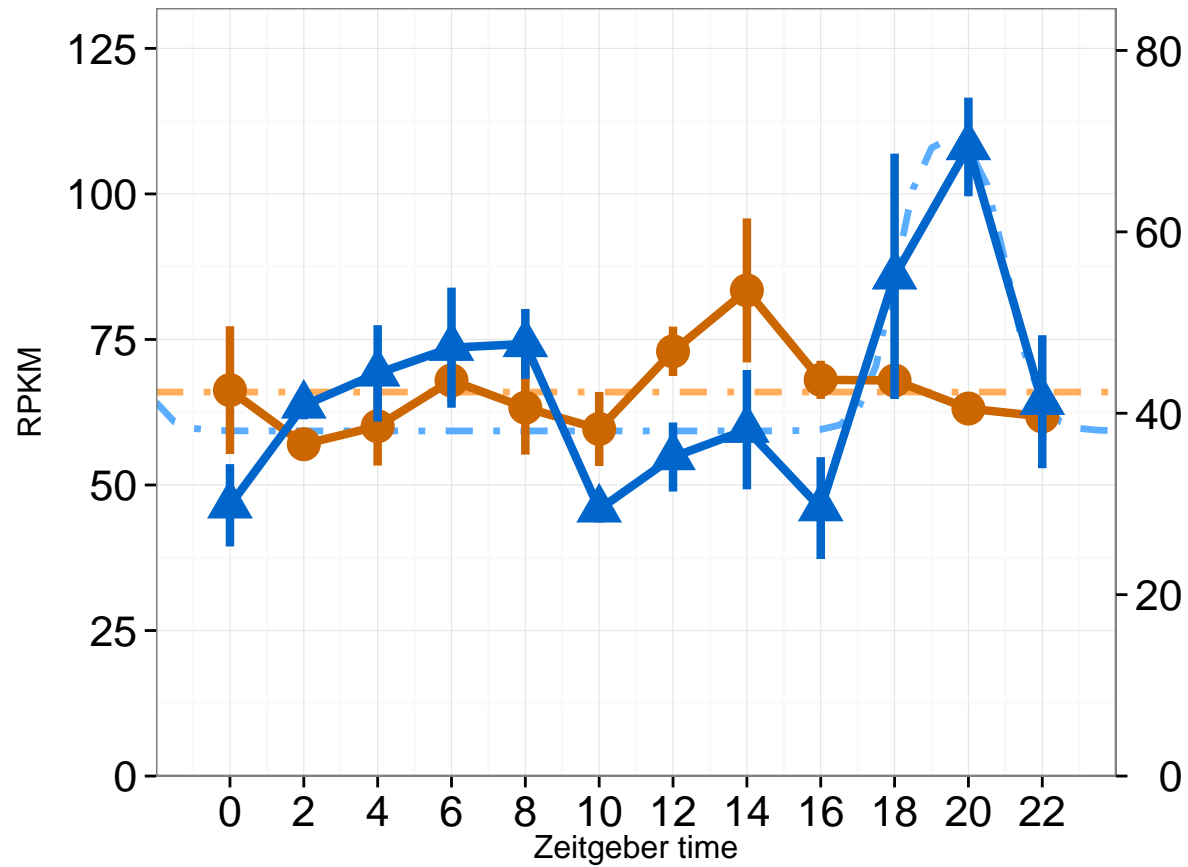

## 2700089E24Rik

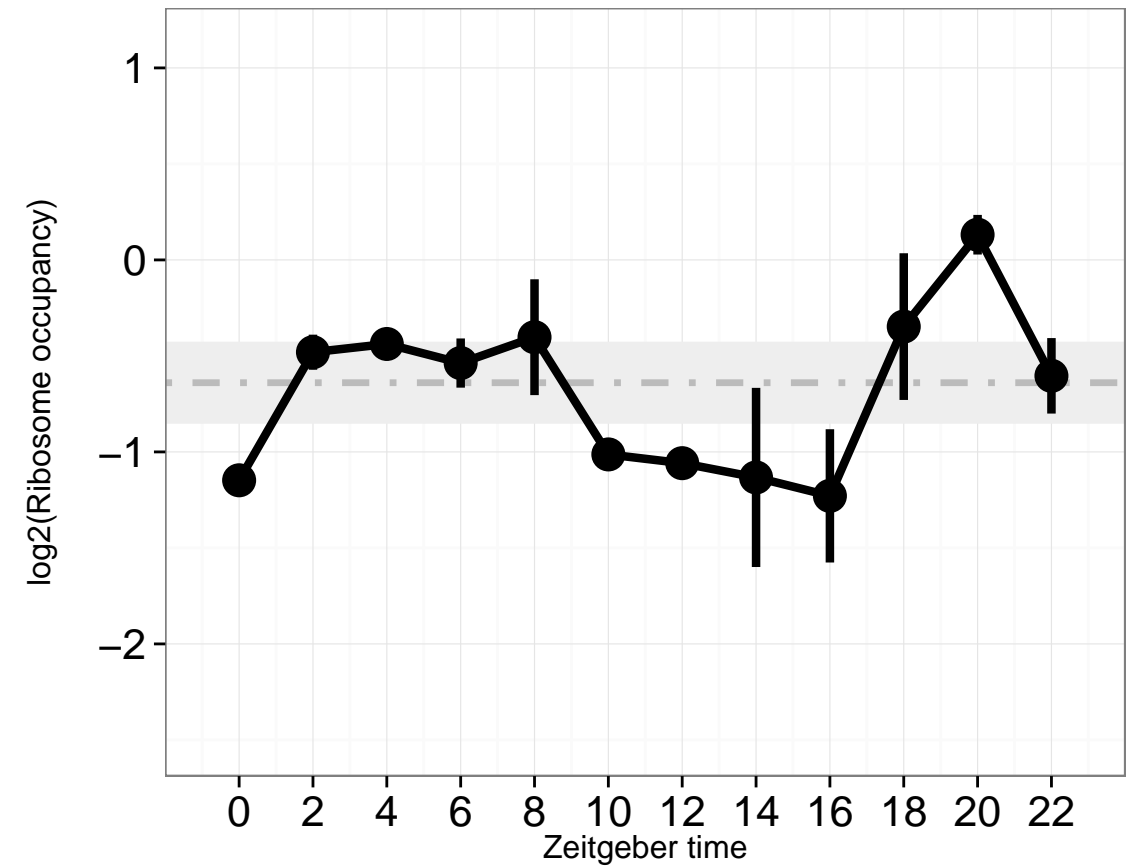

Supplement: Supplementary file 4403 [file 1]

## Ube2m

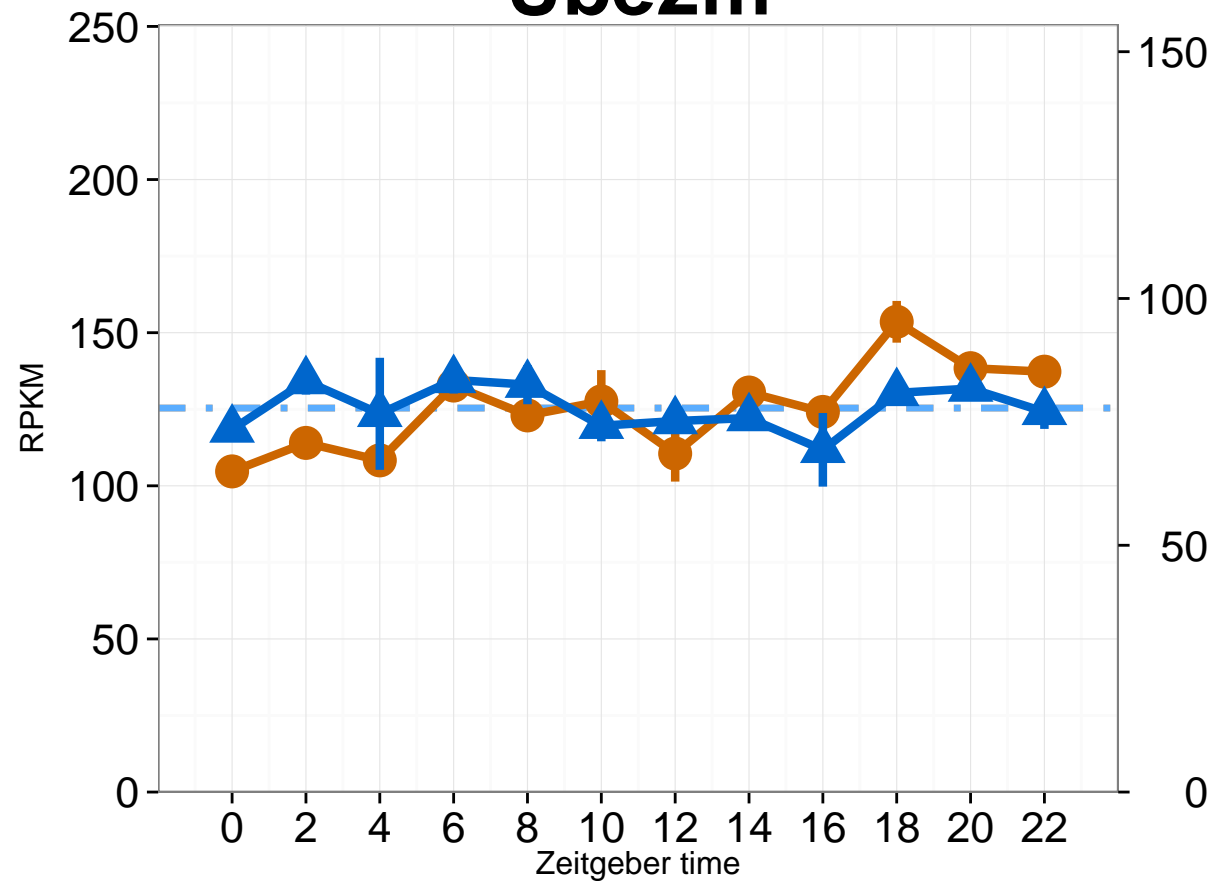

## Ube2m

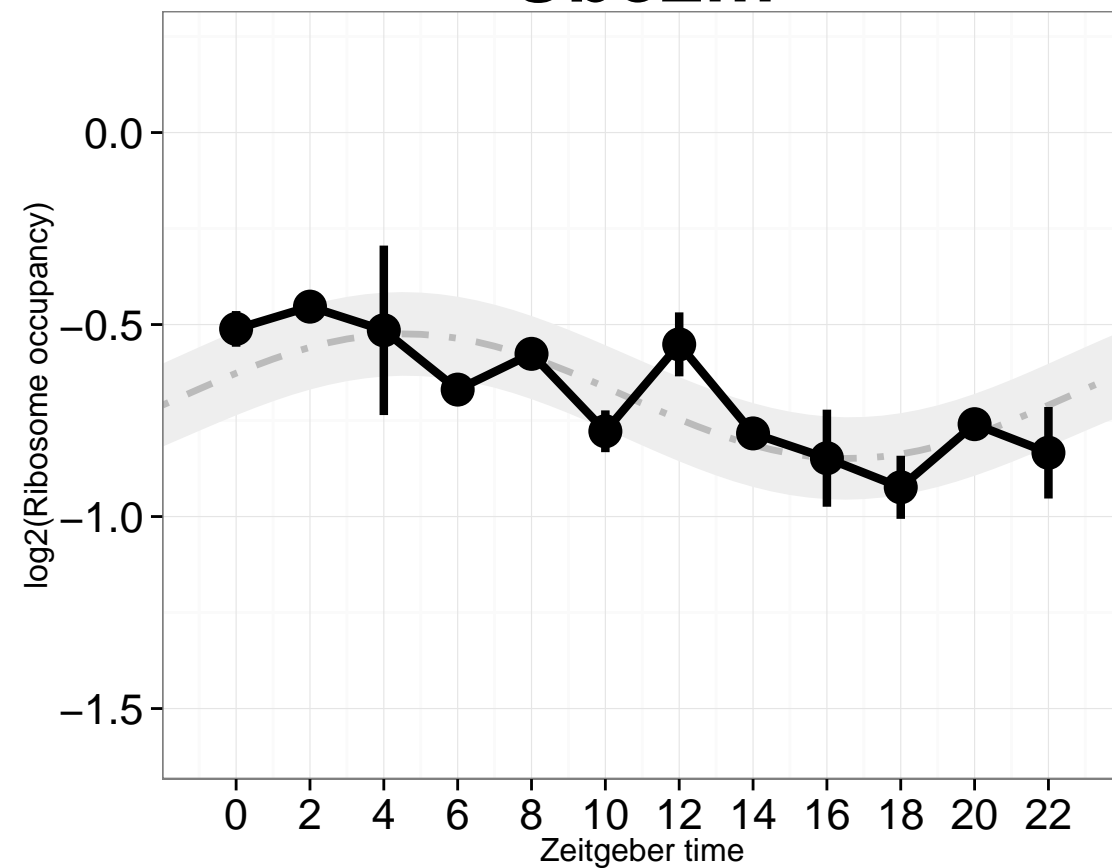

Supplement: Supplementary file 4404 [file 1]

# Stag1

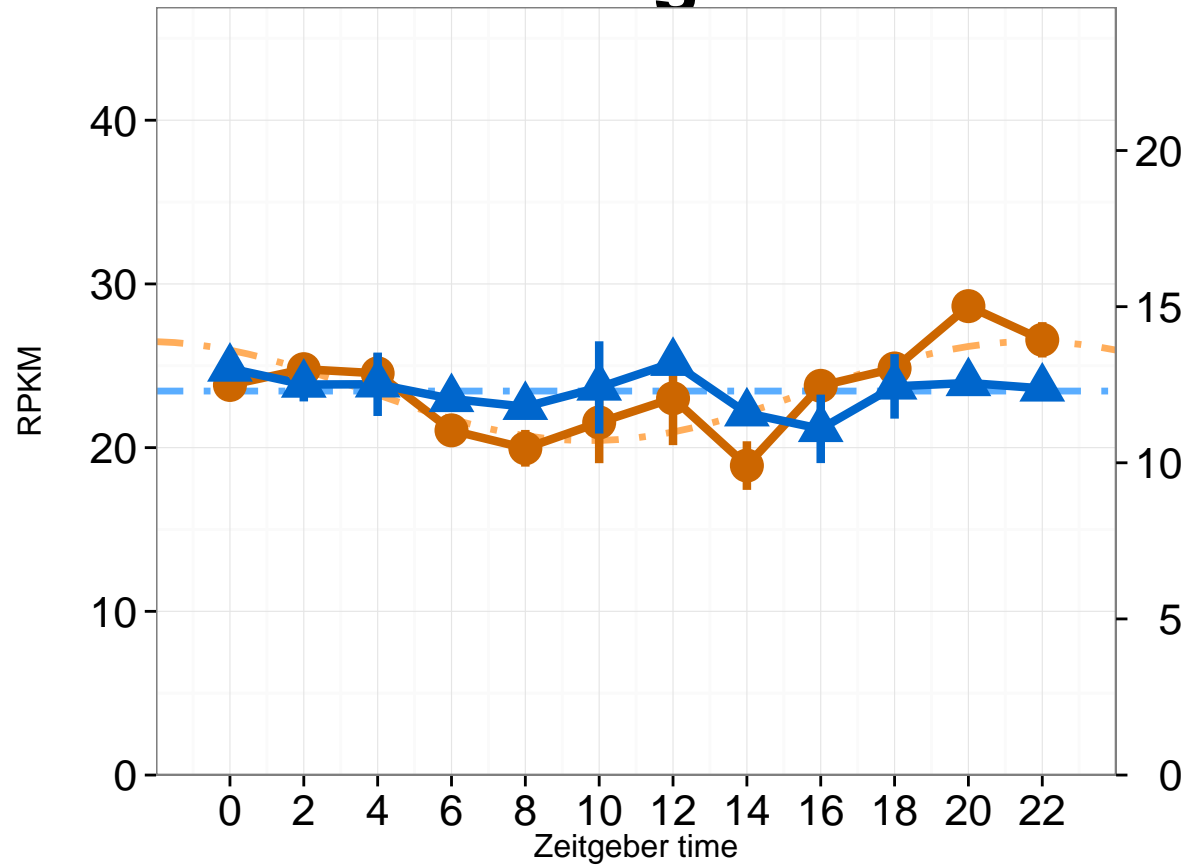

# Stag1

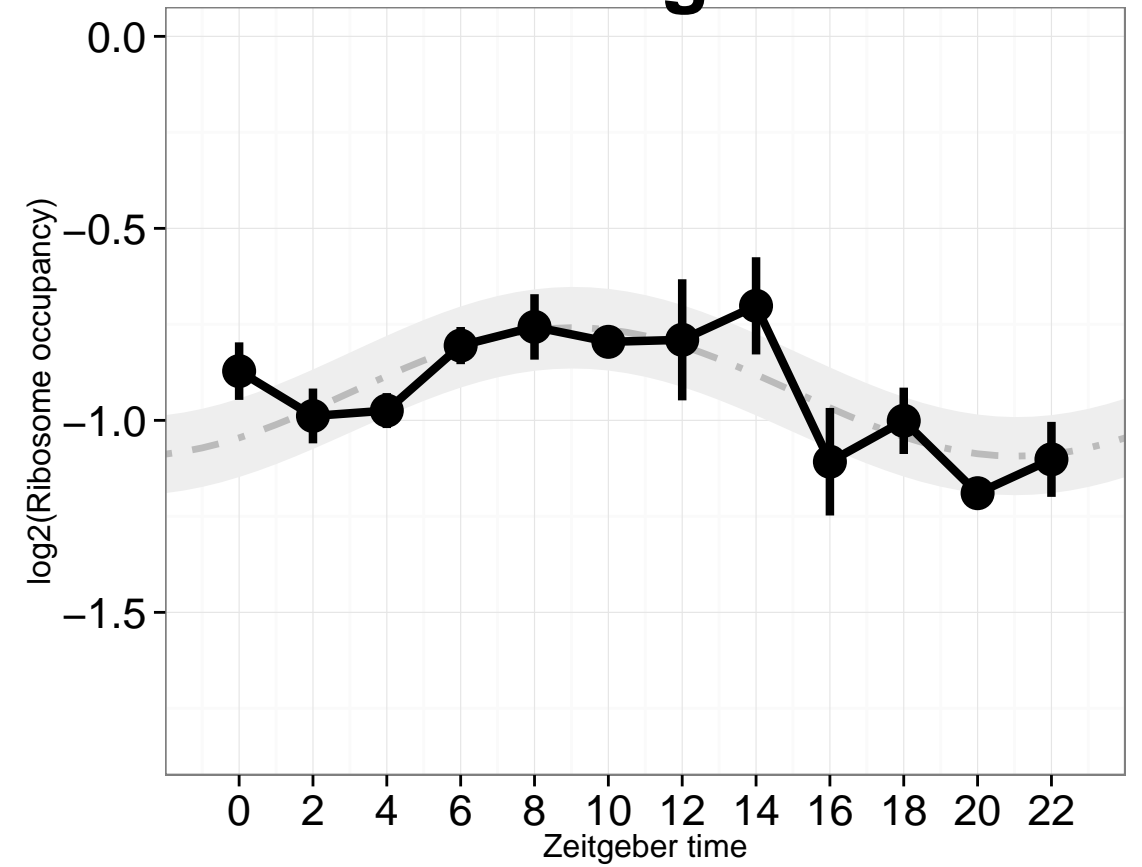

Supplement: Supplementary file 4405 [file 1]

## Gpcpd1

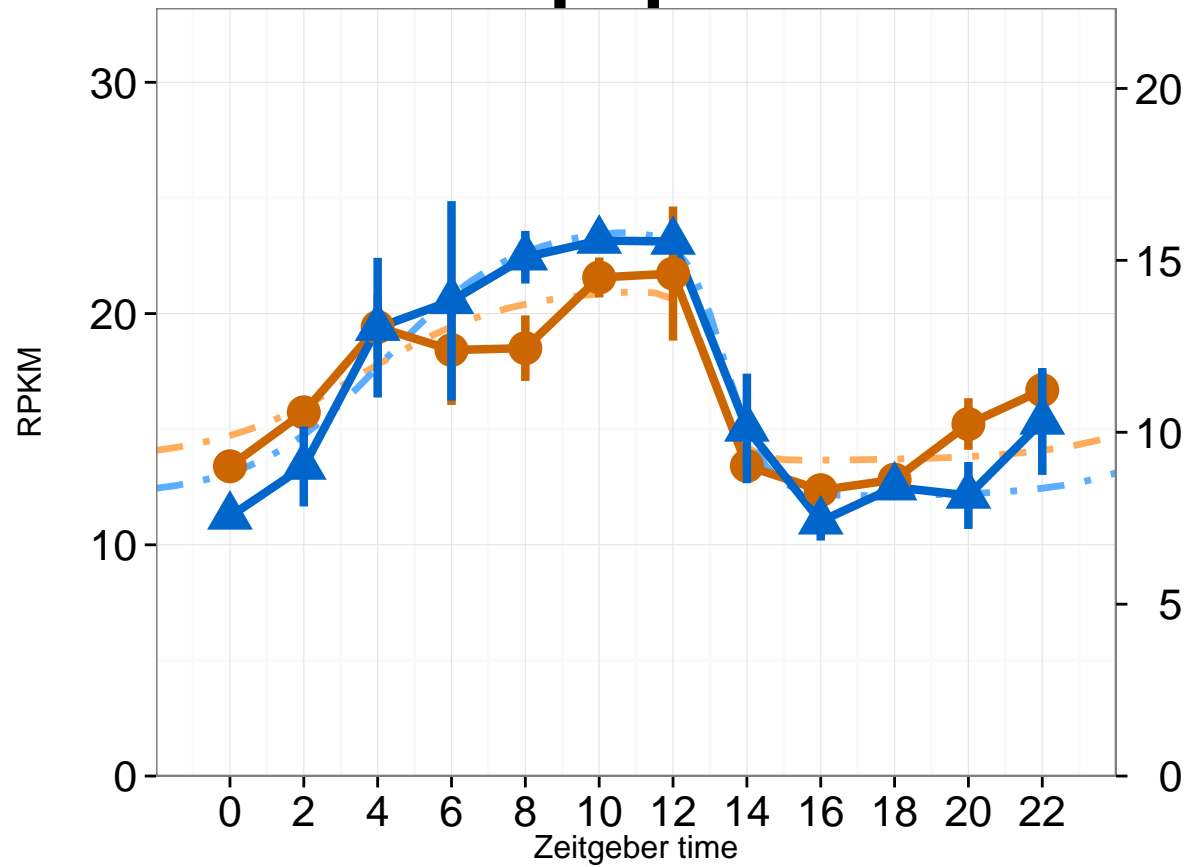

## Gpcpd1

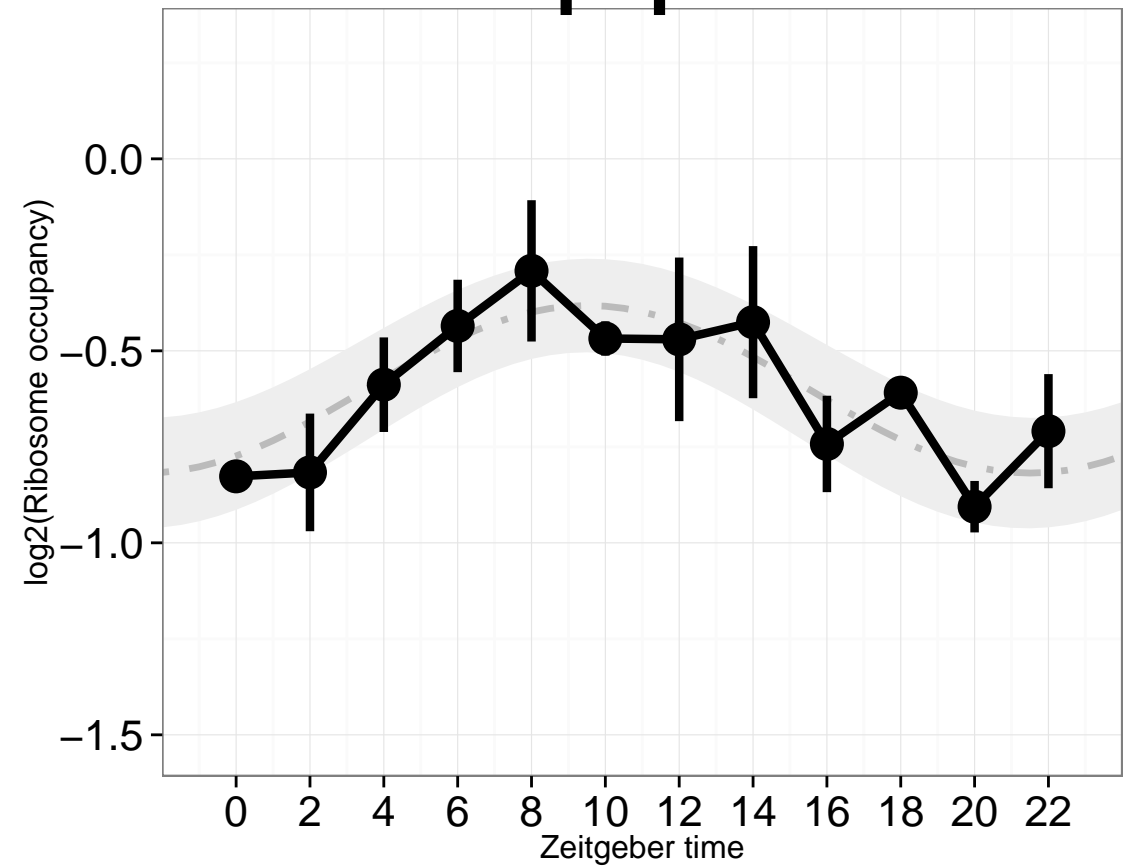

Supplement: Supplementary file 4406 [file 1]

## Rnf167

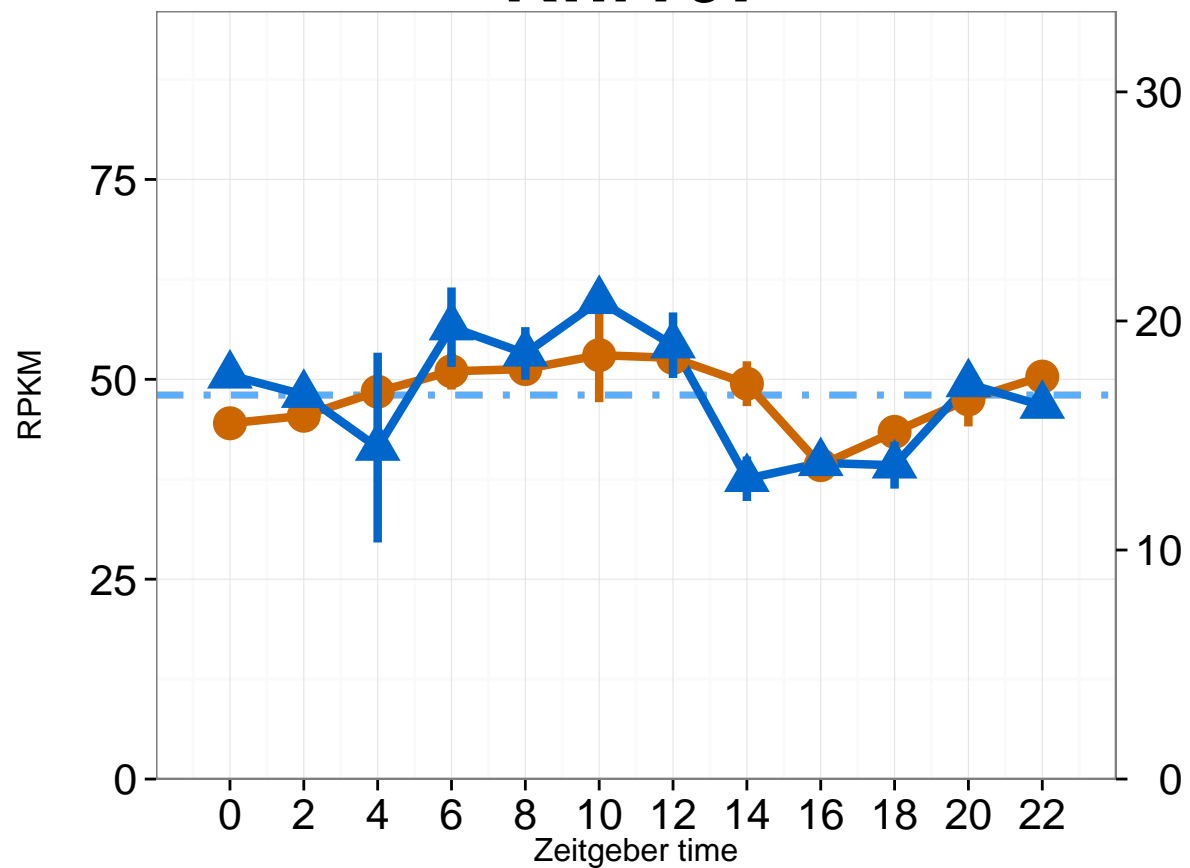

## Rnf167

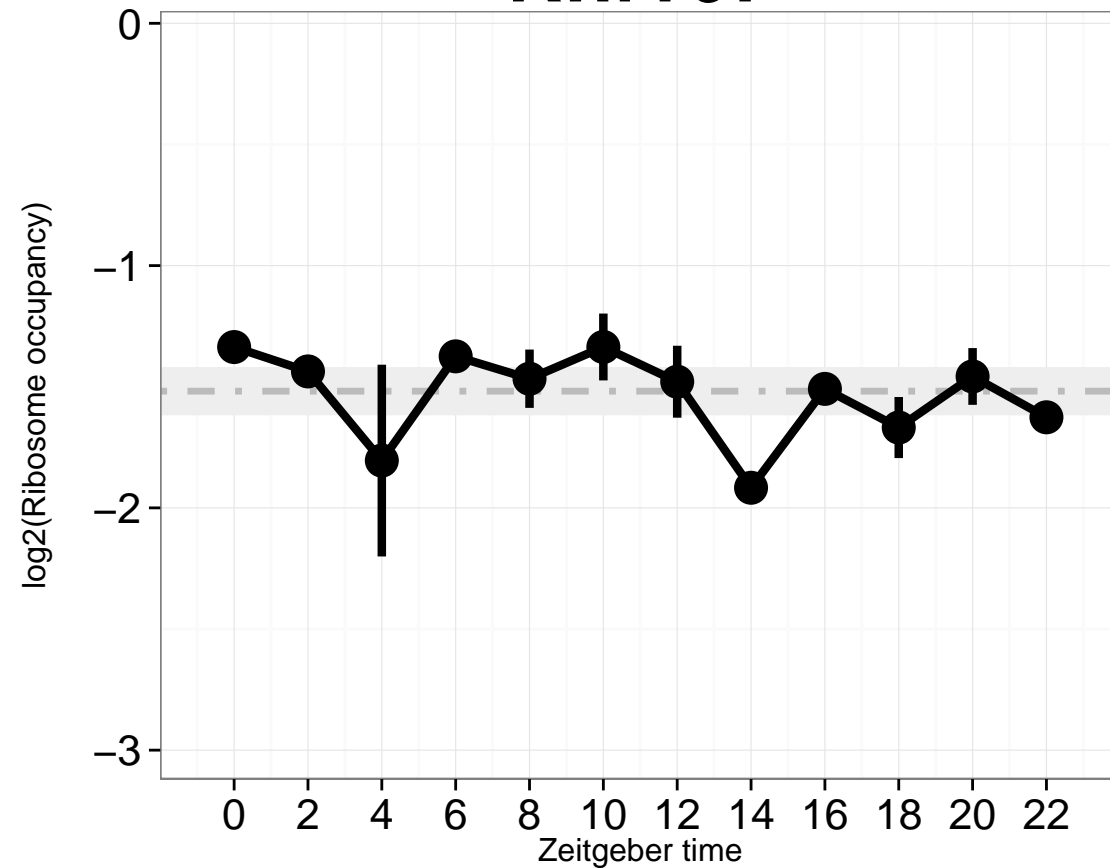

Supplement: Supplementary file 4407 [file 1]

# Tab1

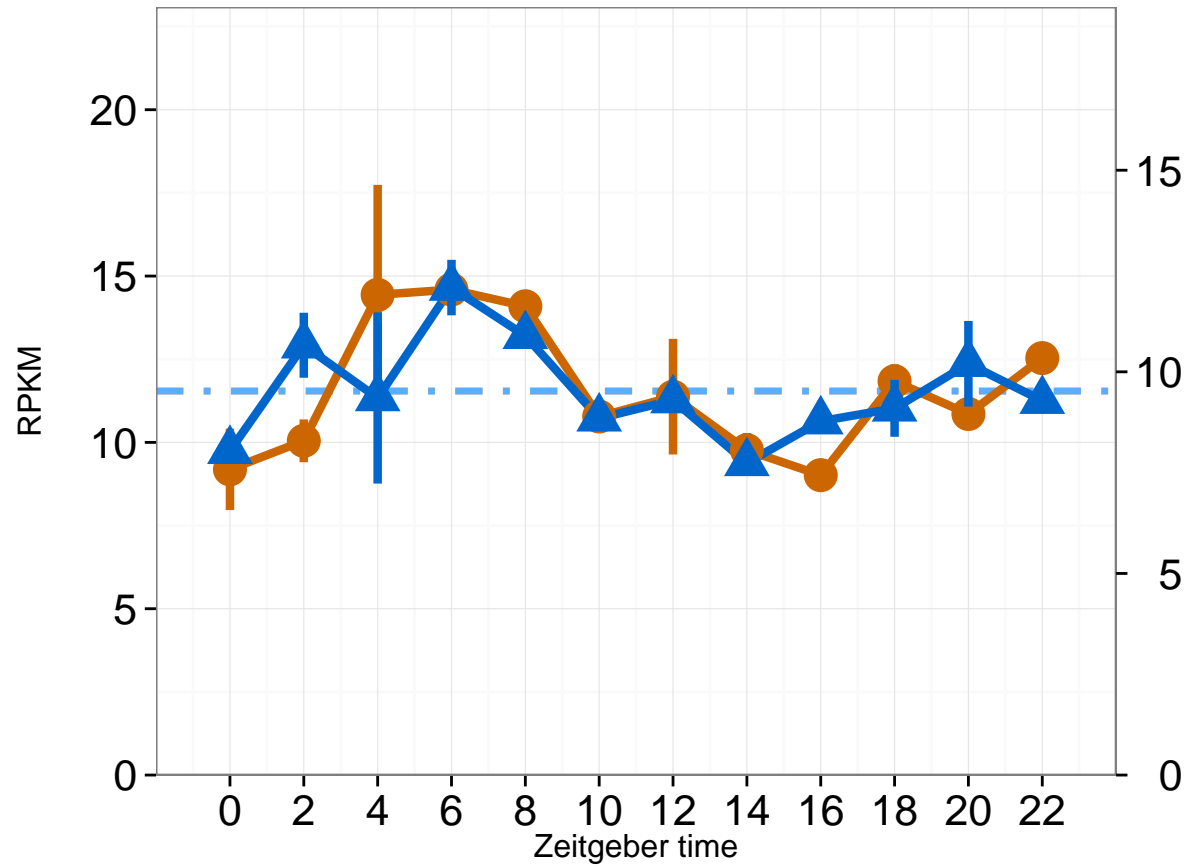

# Tab1

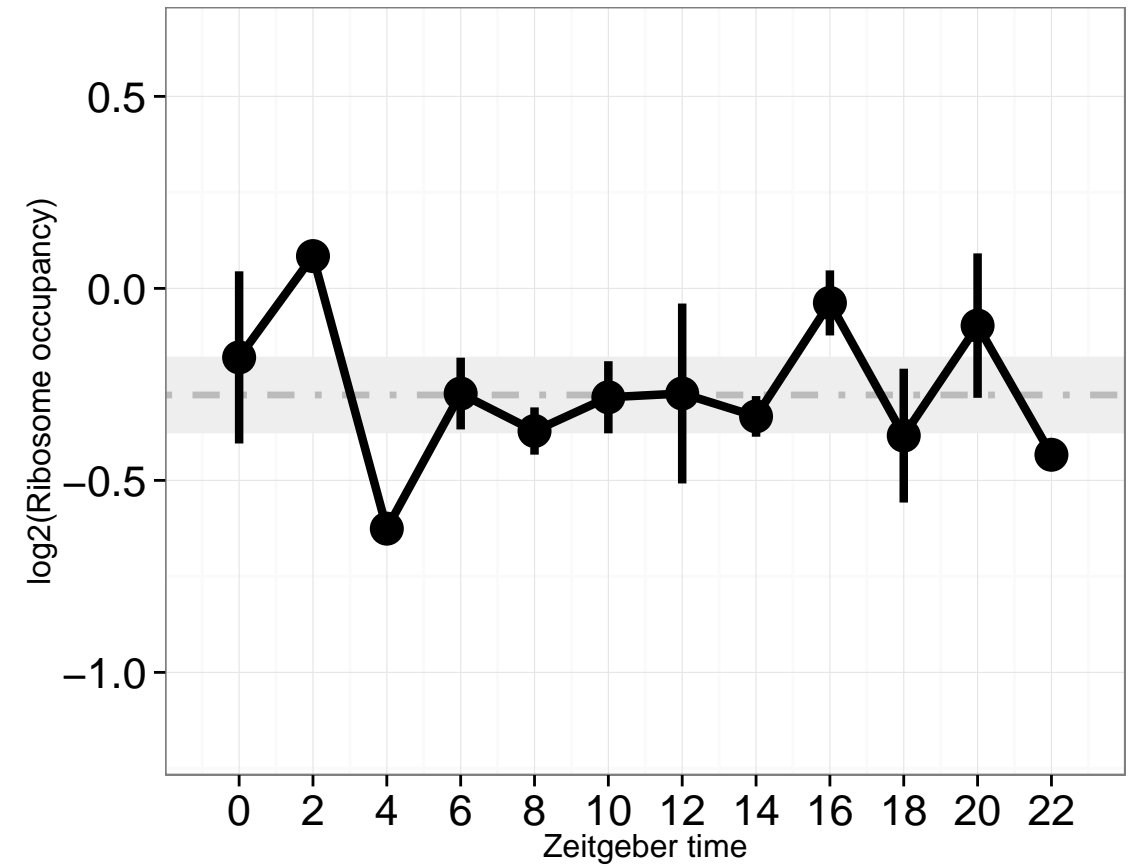

Supplement: Supplementary file 4408 [file 1]

## Rnf150

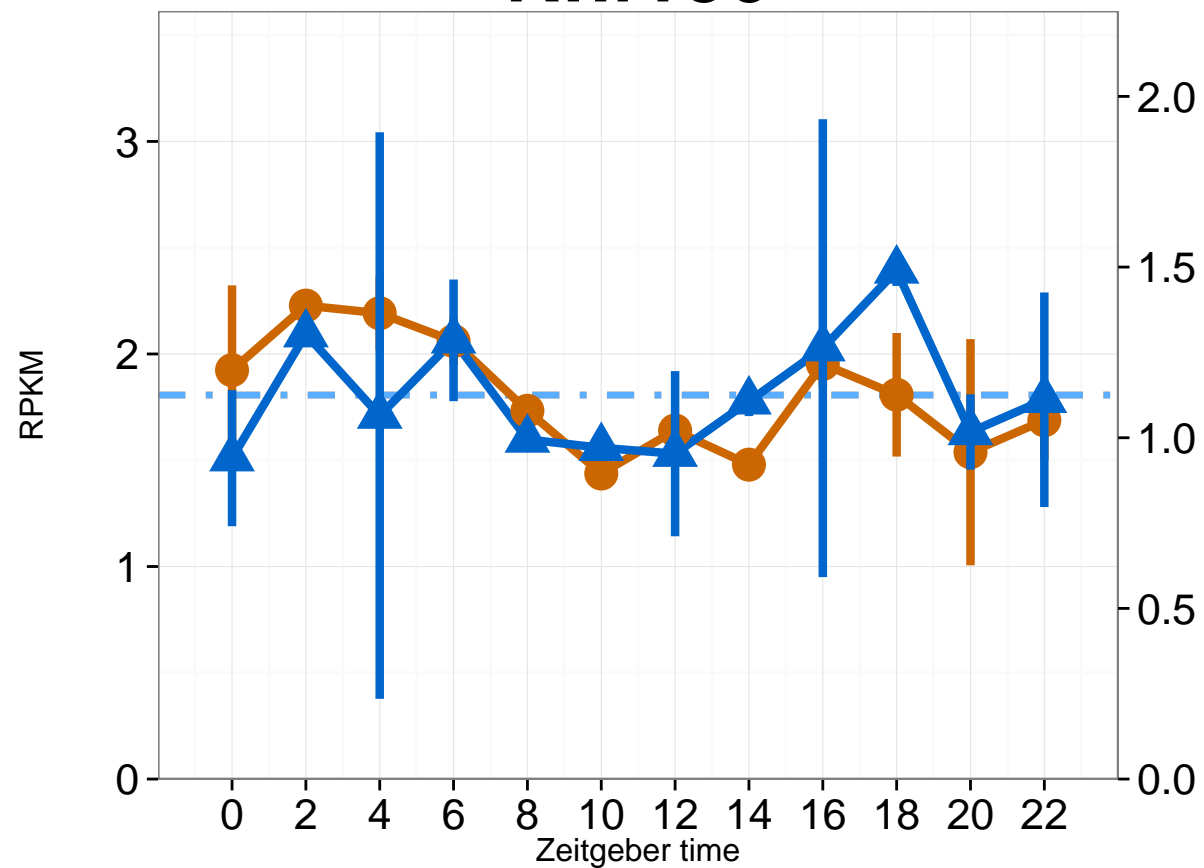

## Rnf150

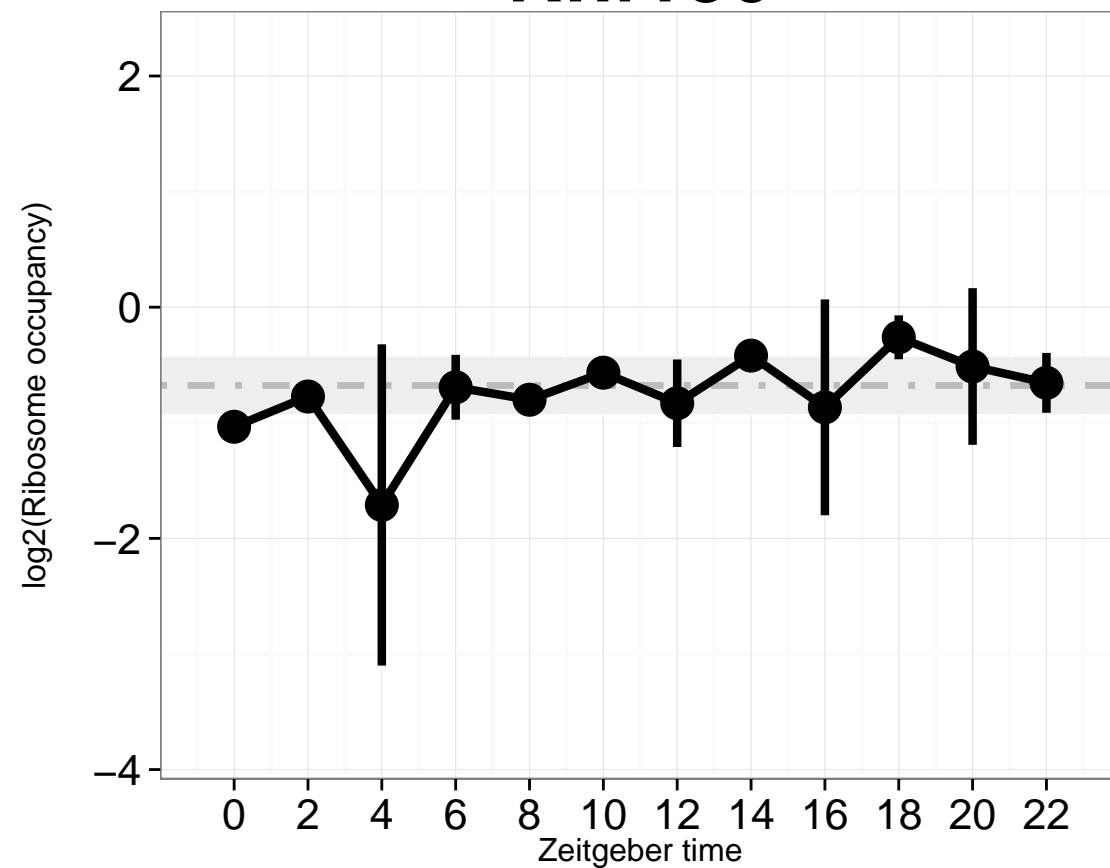

Supplement: Supplementary file 4409 [file 1]

# Hsd17b2

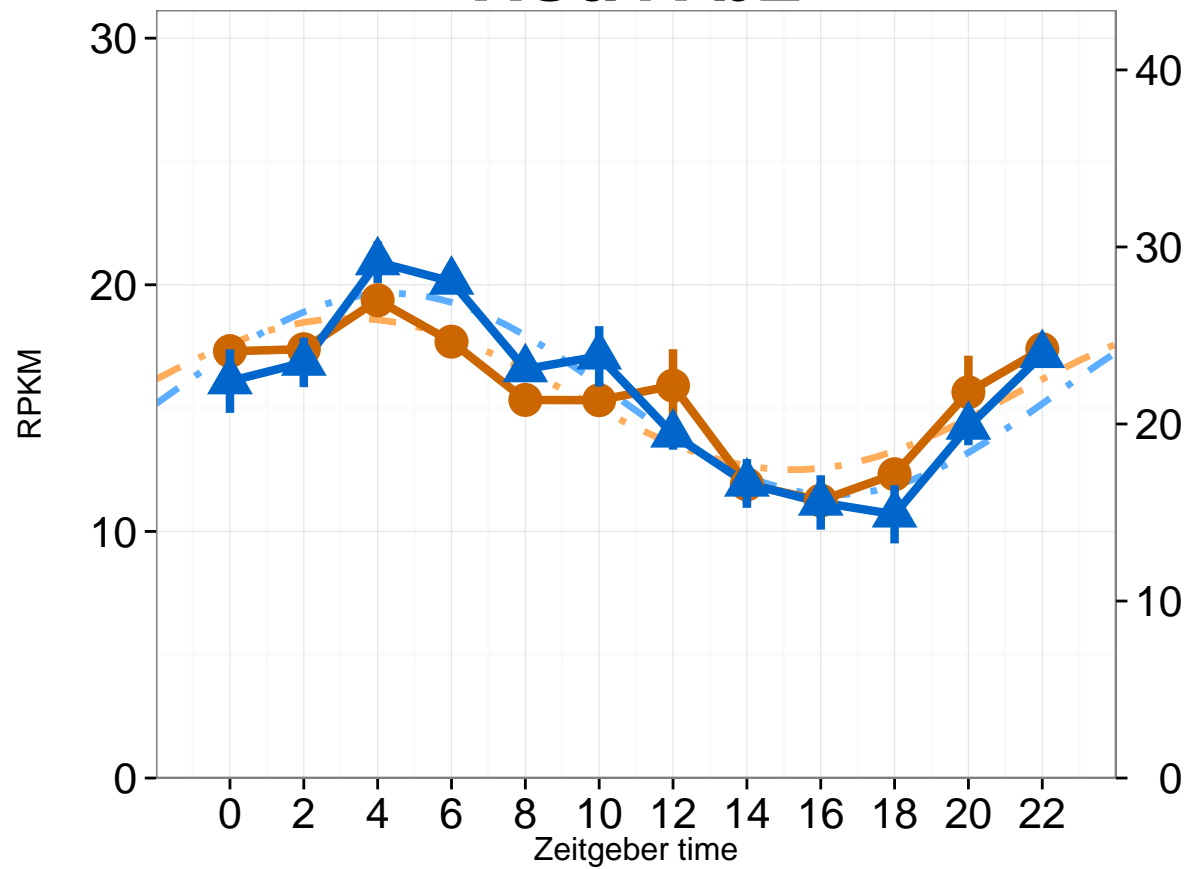

# Hsd17b2

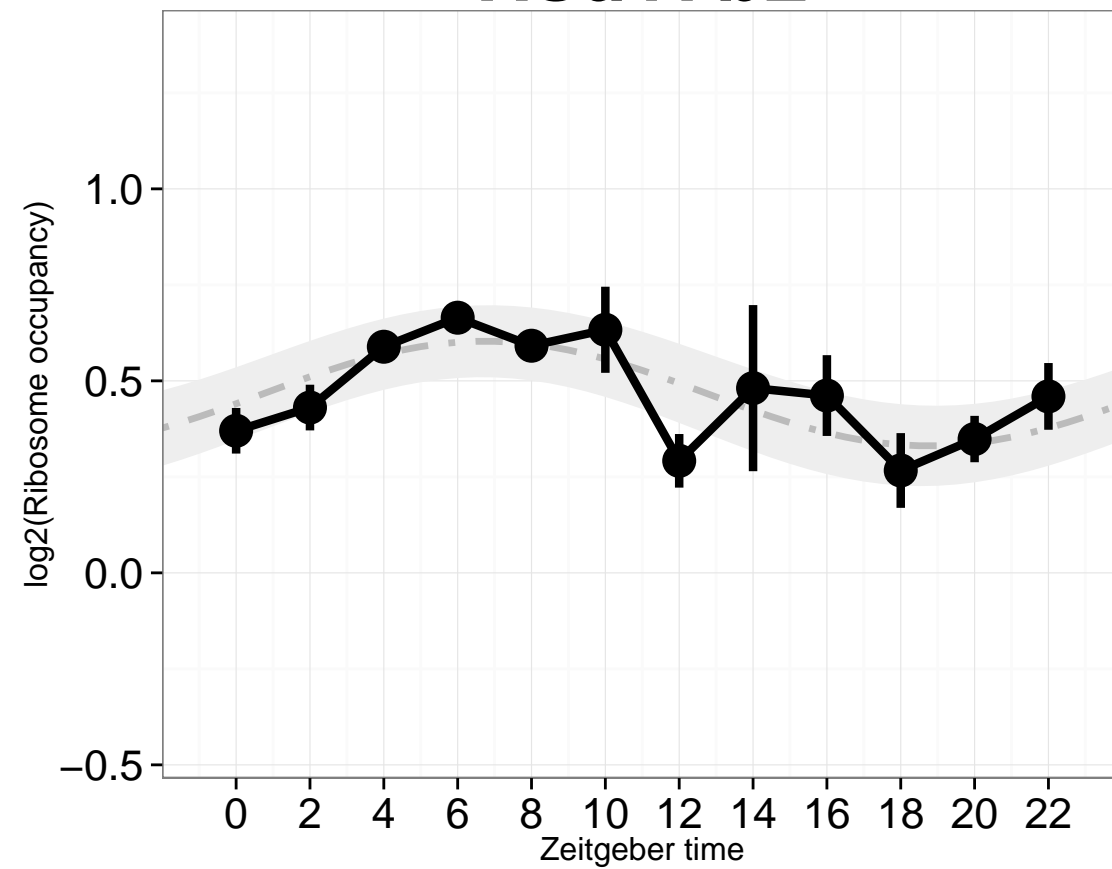

Supplement: Supplementary file 4410 [file 1]

# Arhgap31

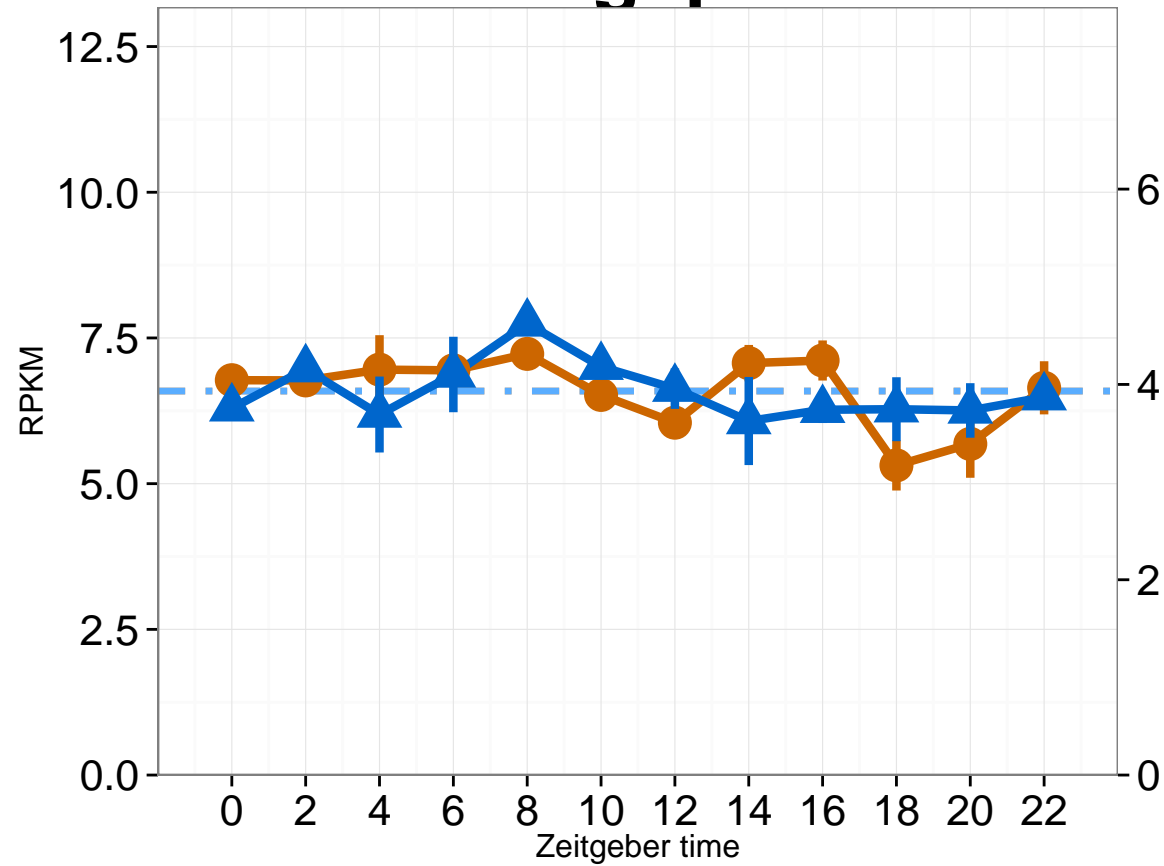

# Arhgap31

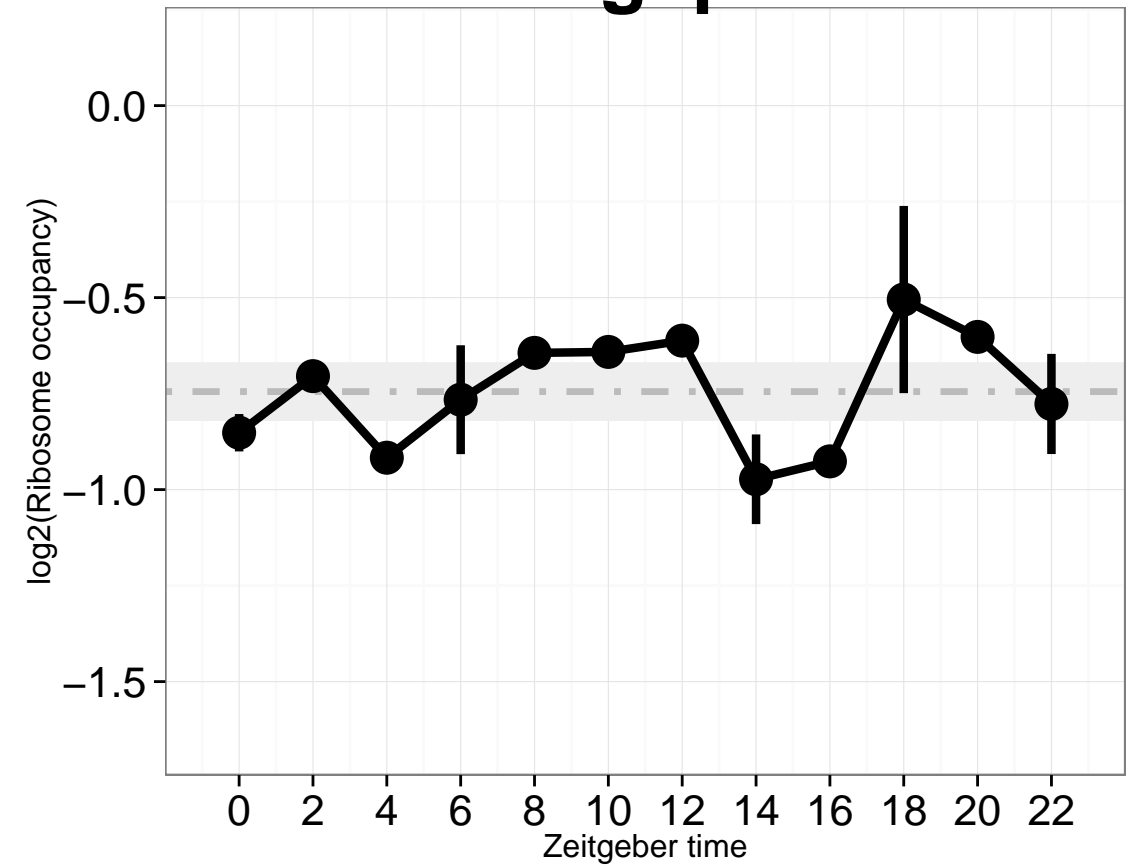

Supplement: Supplementary file 4411 [file 1]

# Dnttip1

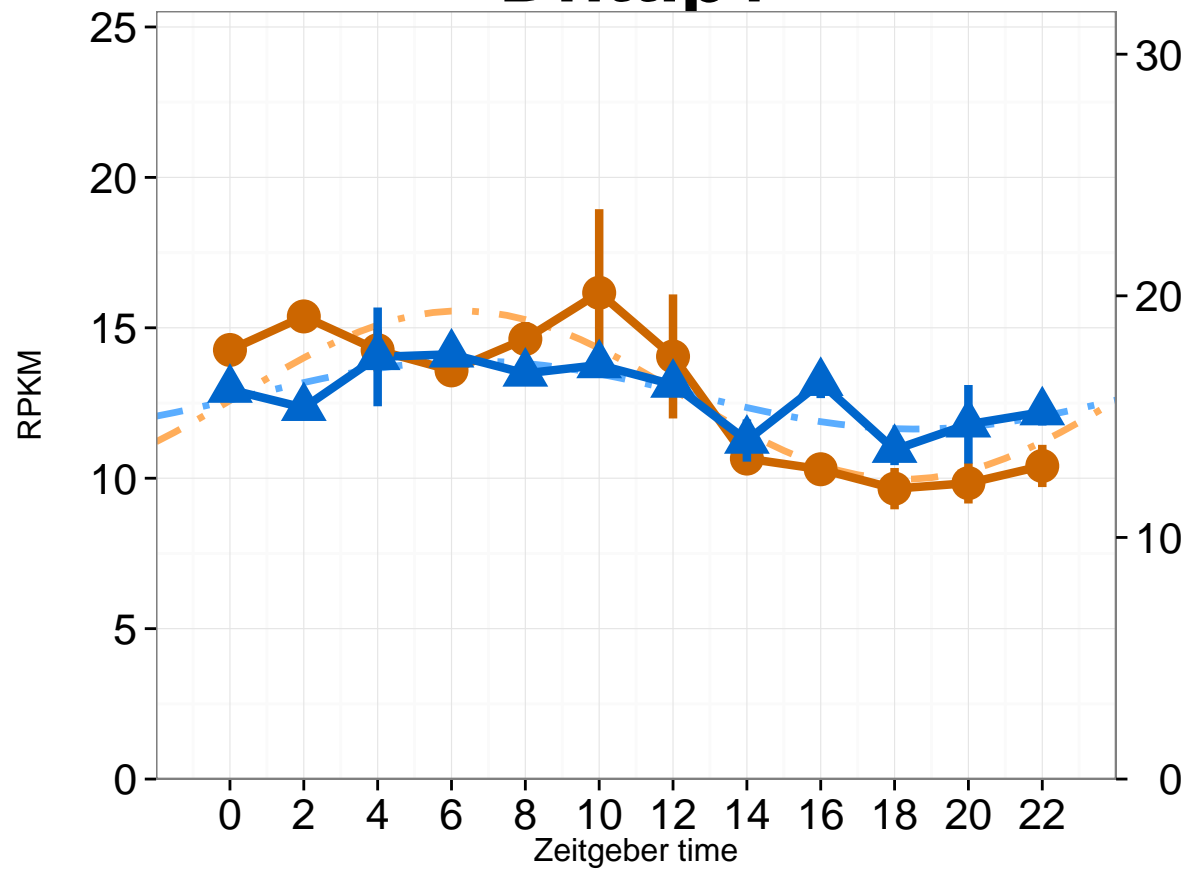

# Dnttip1

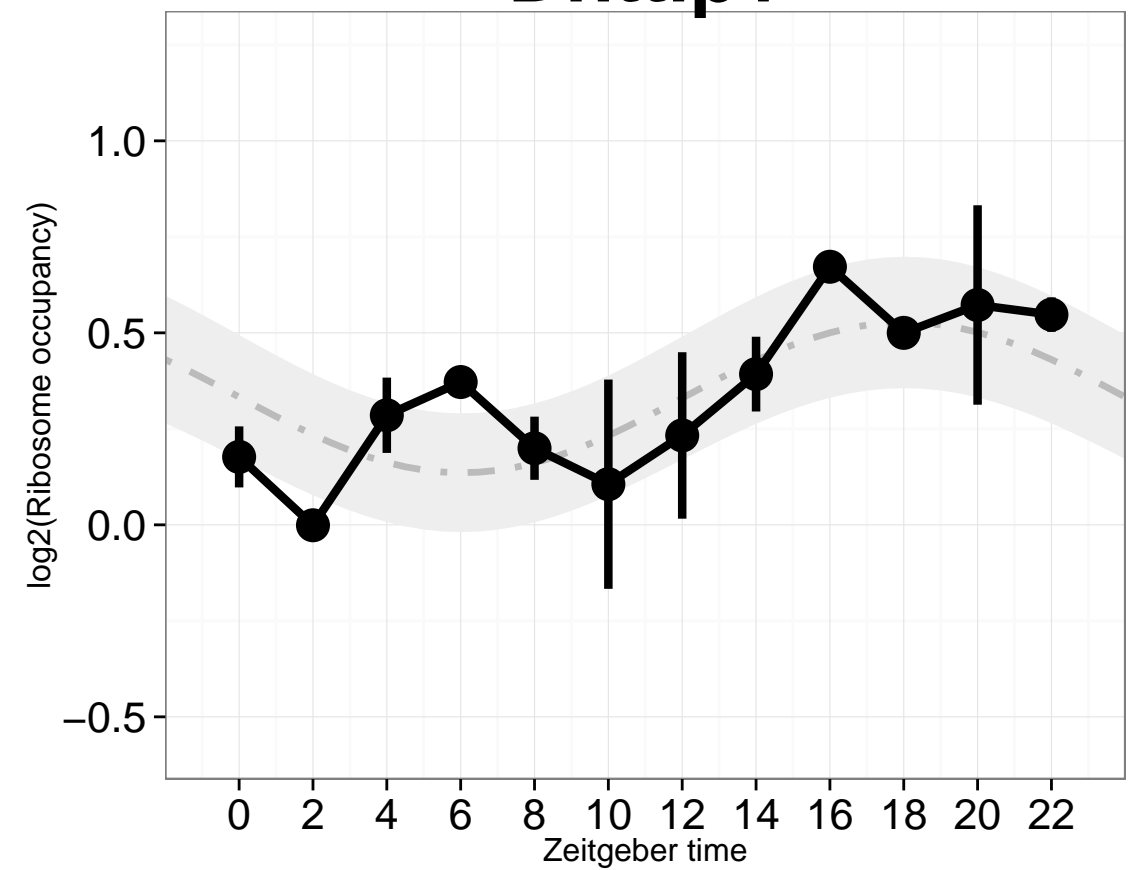

Supplement: Supplementary file 4412 [file 1]

# Ugt1a6a

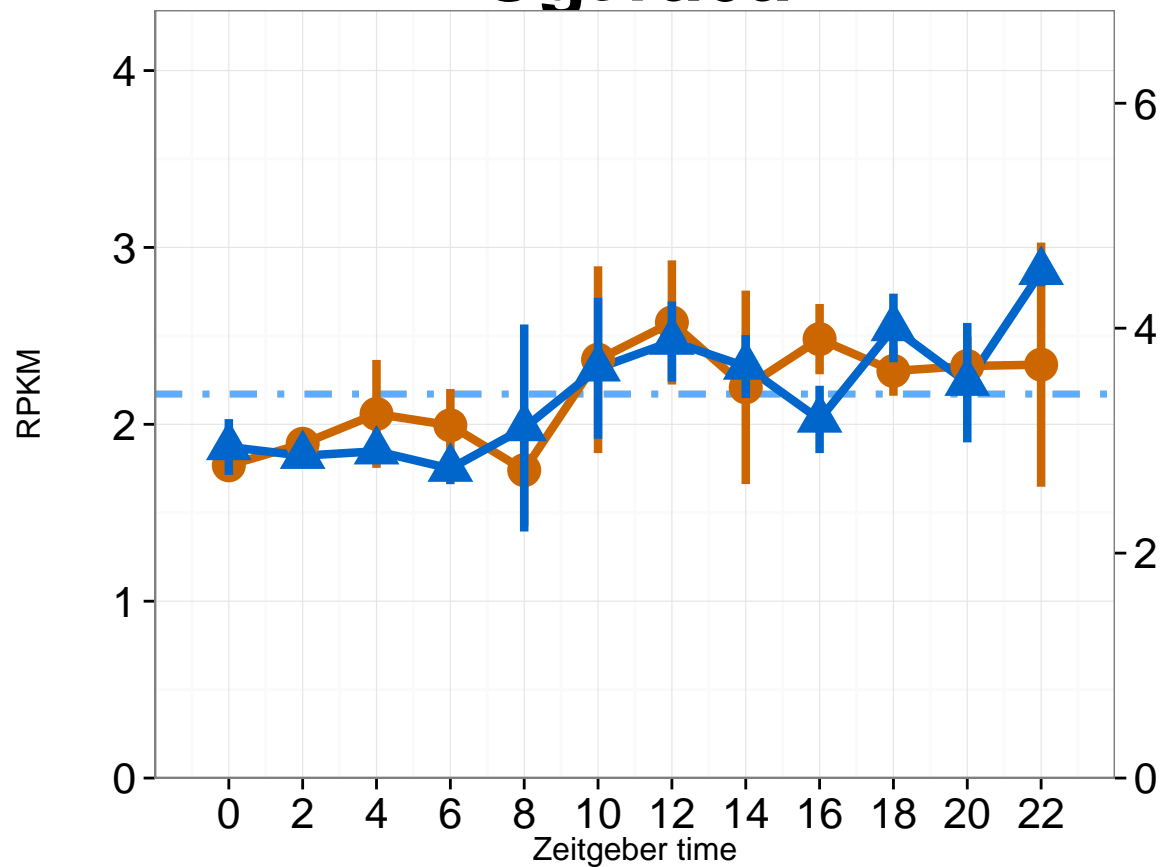

# Ugt1a6a

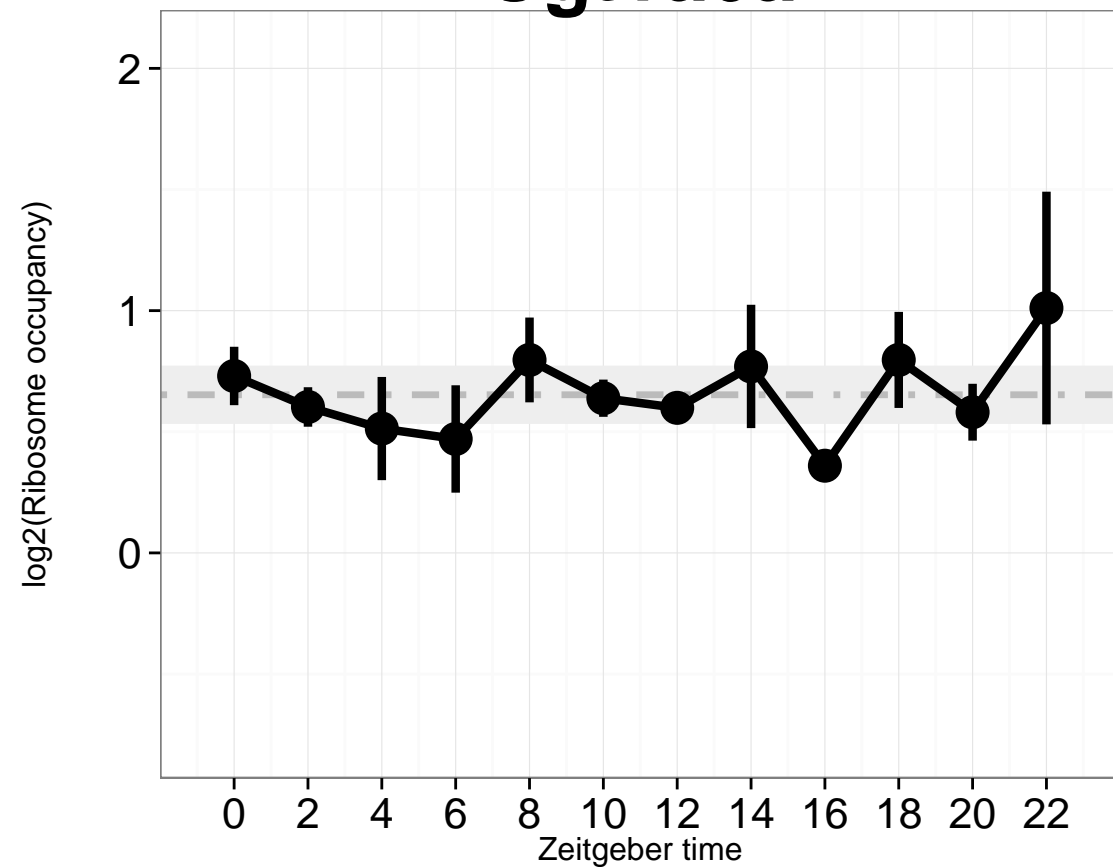

Supplement: Supplementary file 4413 [file 1]

# Polk

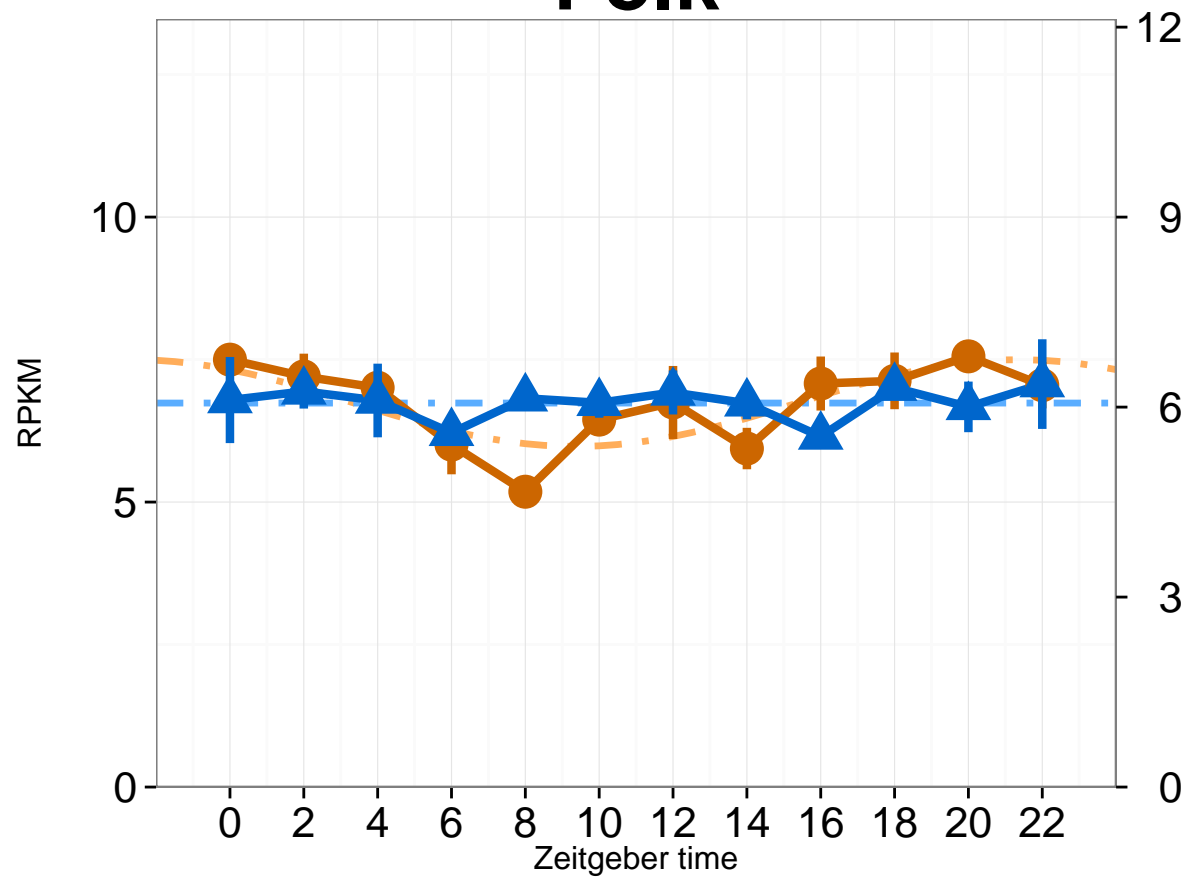

# Polk

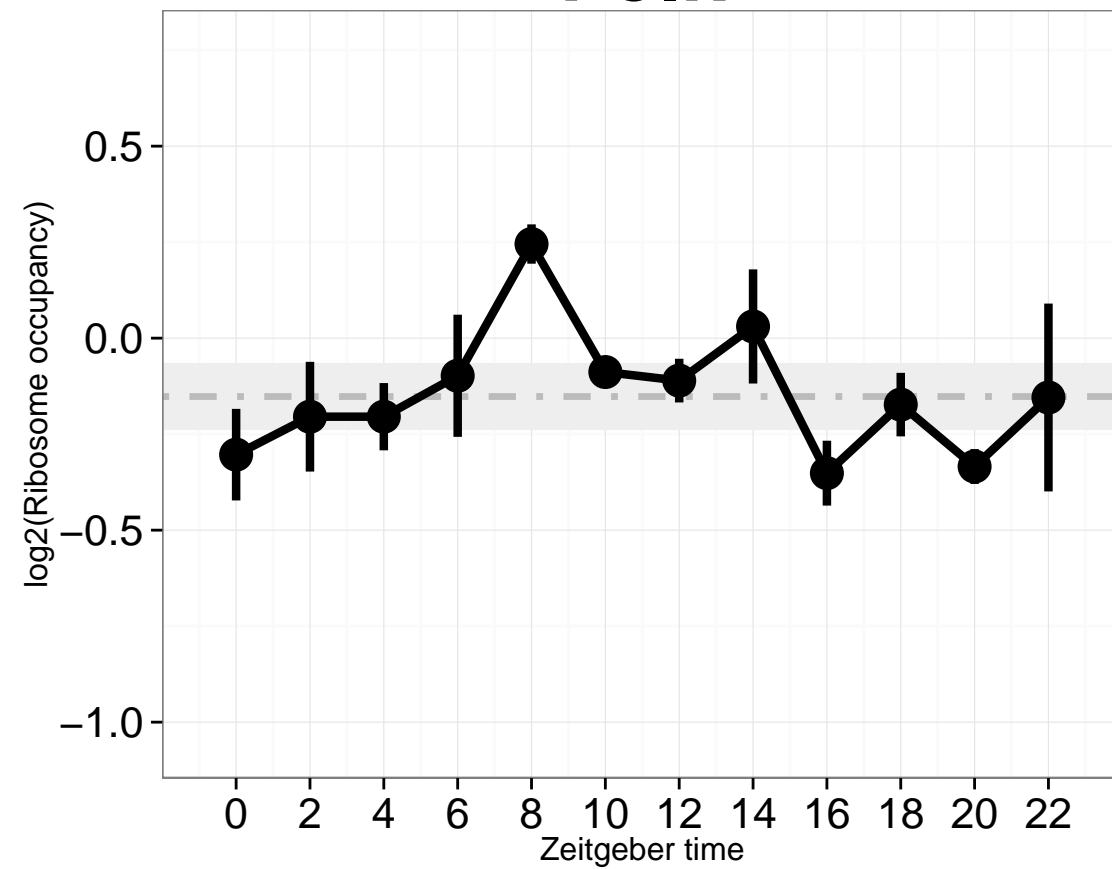

Supplement: Supplementary file 4414 [file 1]

## Gfer

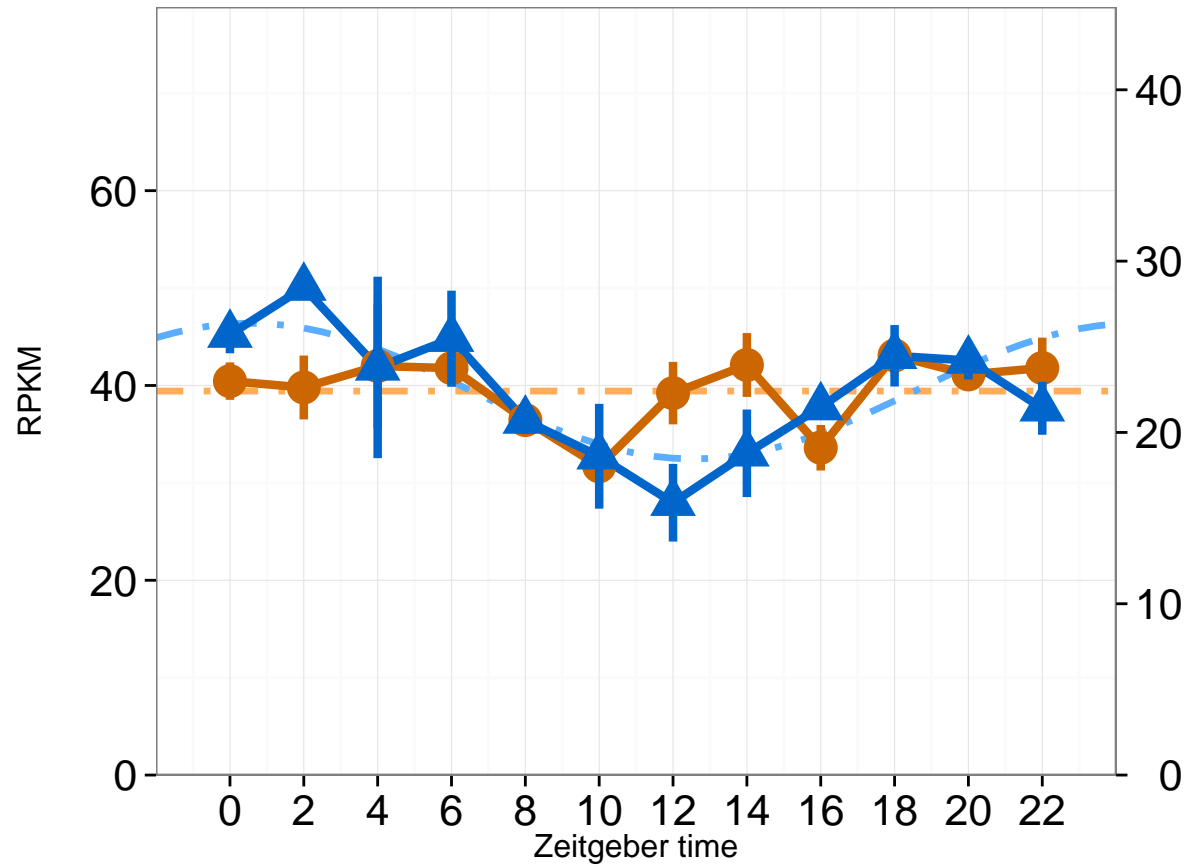

## Gfer

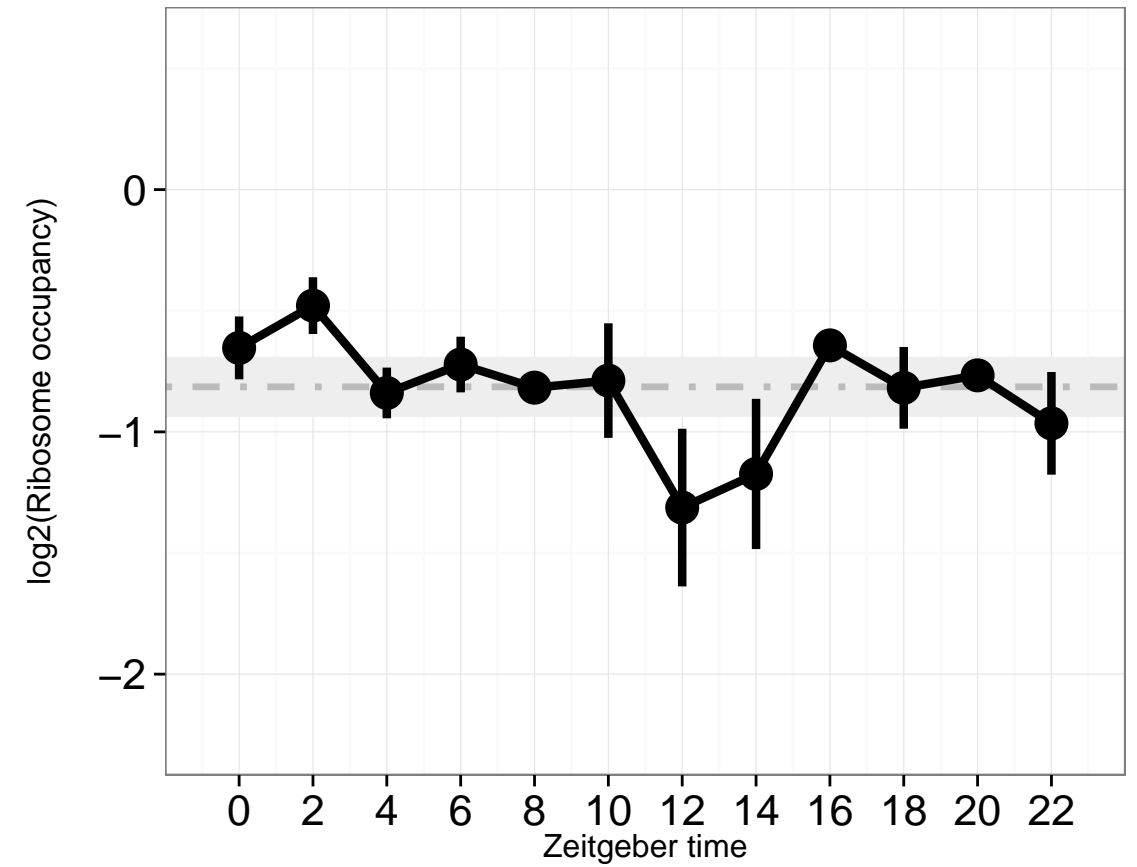

Supplement: Supplementary file 4415 [file 1]

## Clpx

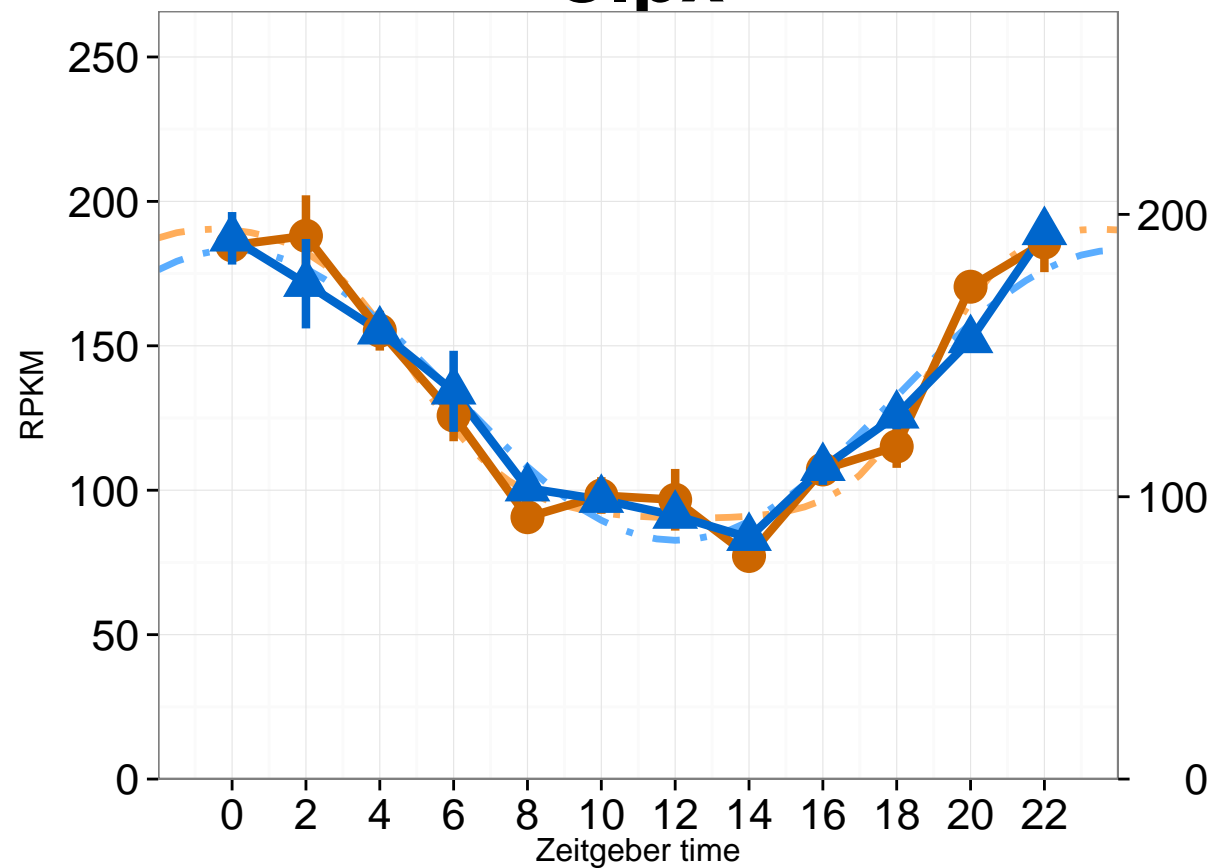

## Clpx

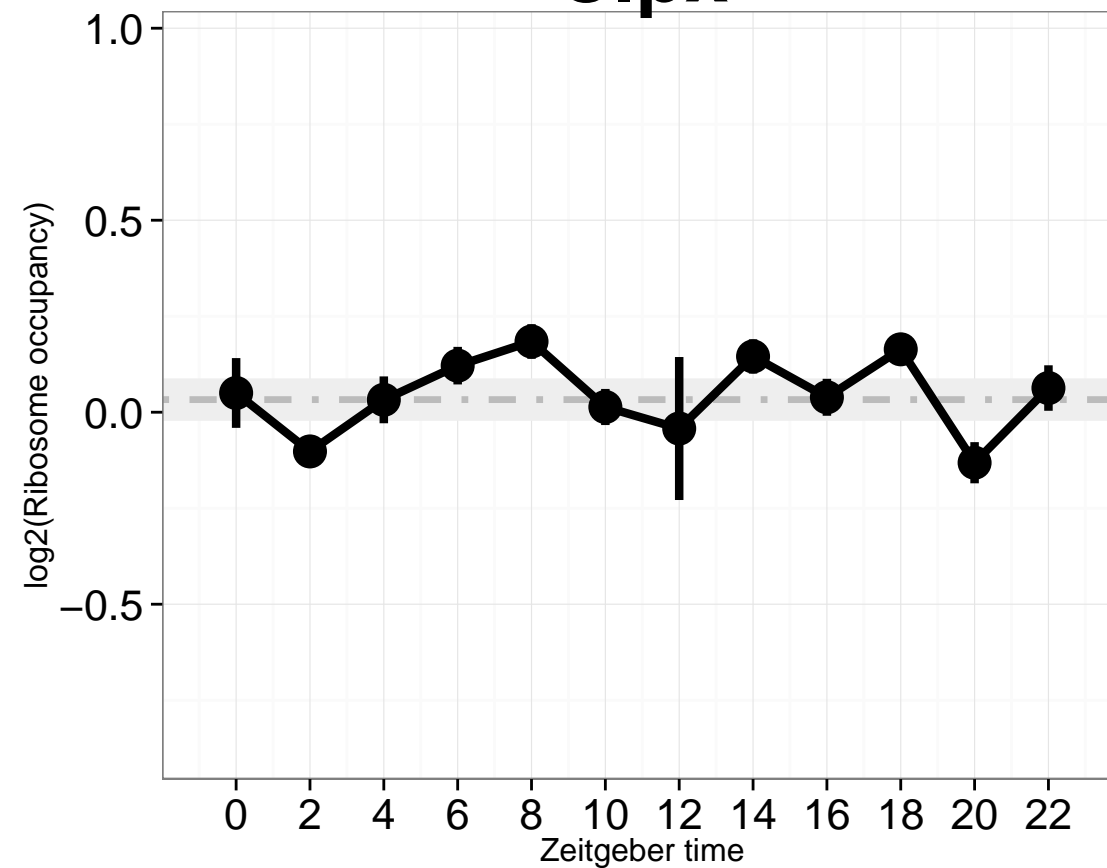

Supplement: Supplementary file 4416 [file 1]

## Eif3f

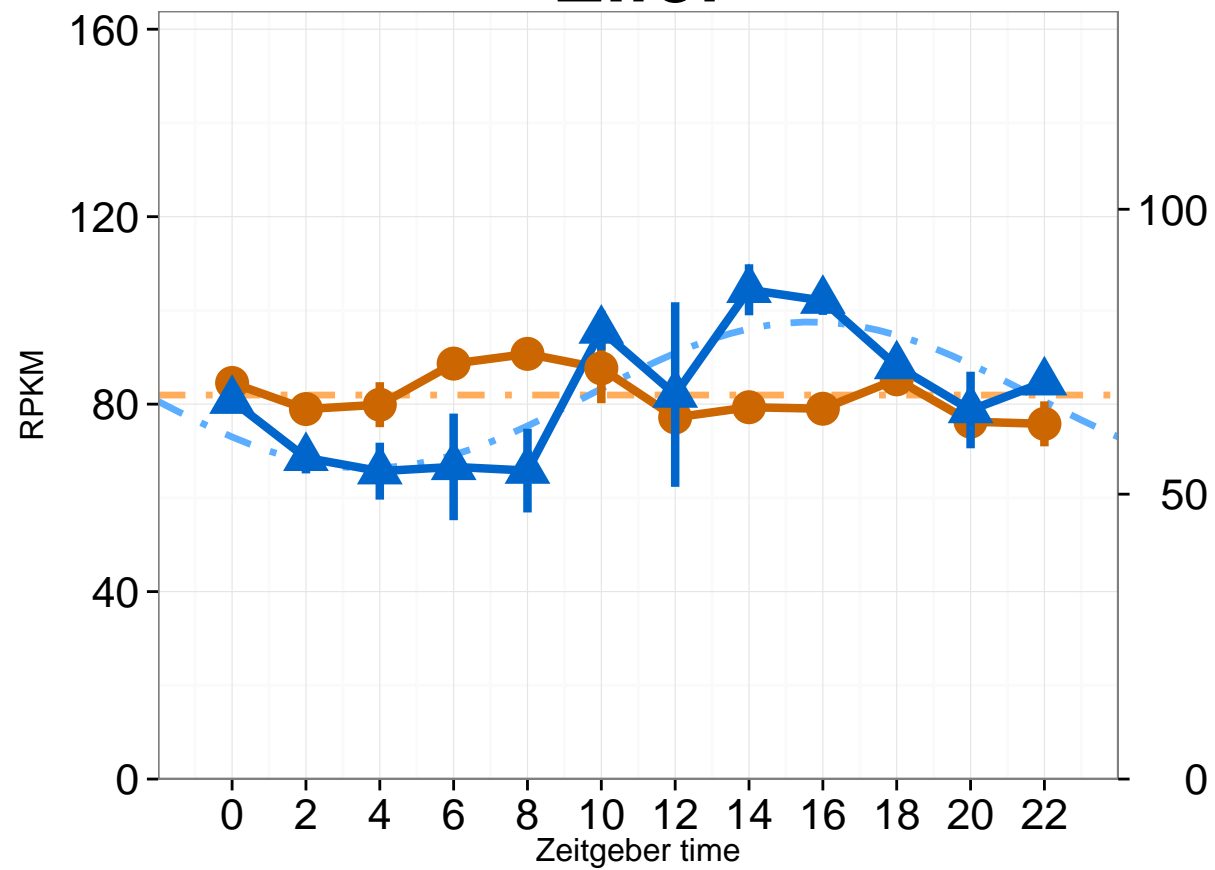

## Eif3f

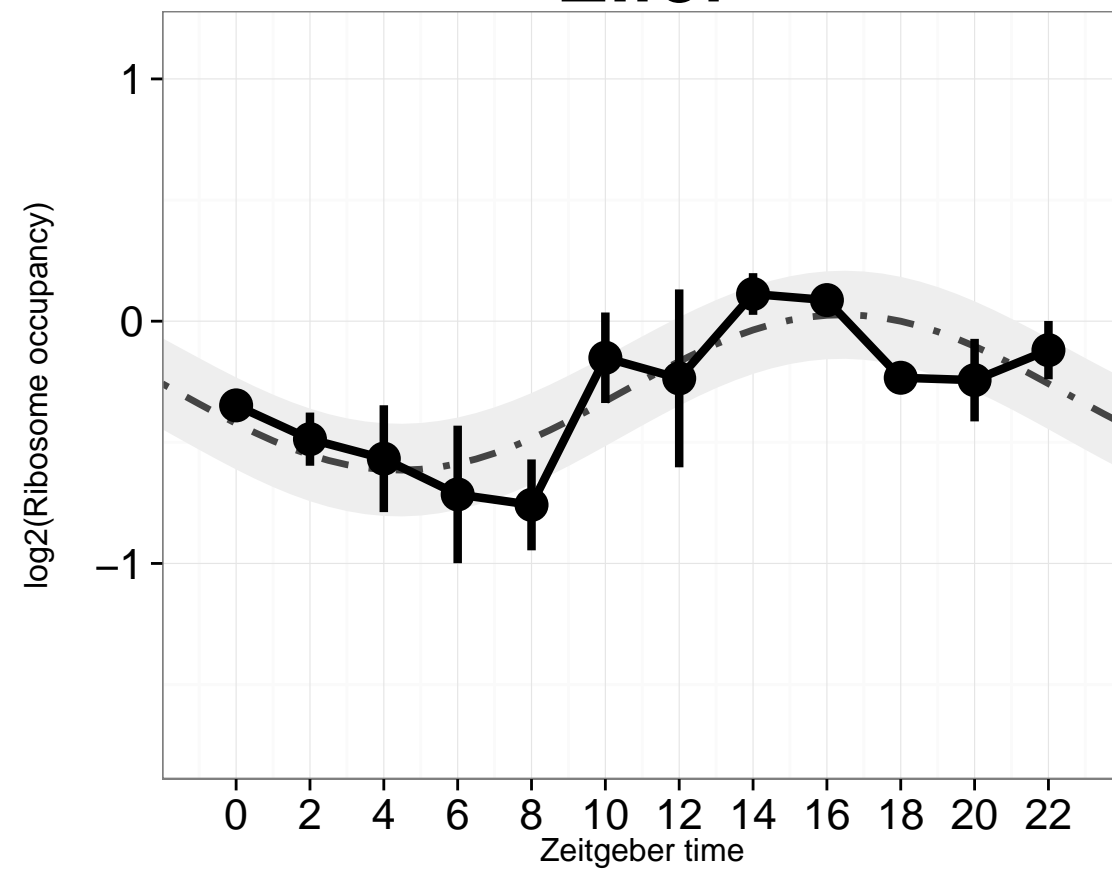

Supplement: Supplementary file 4417 [file 1]

## Plaa

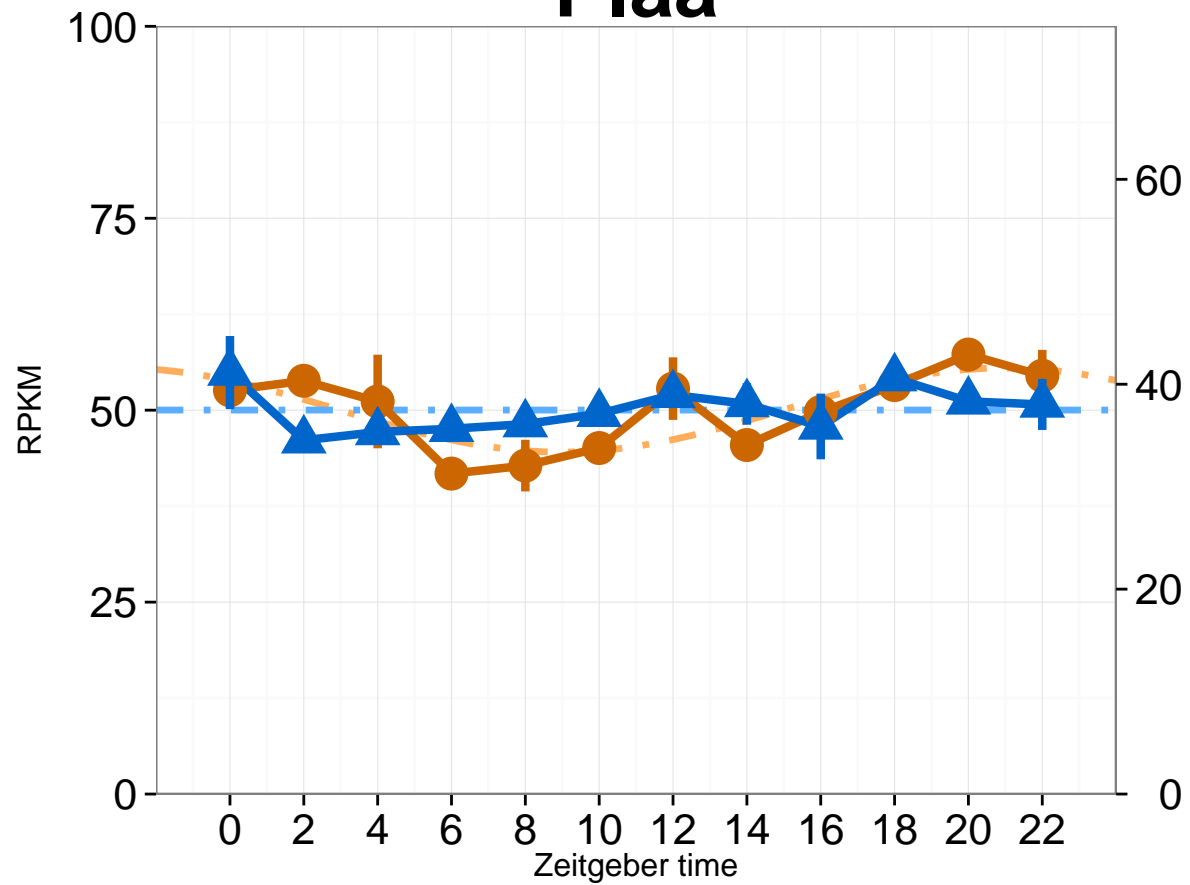

## Plaa

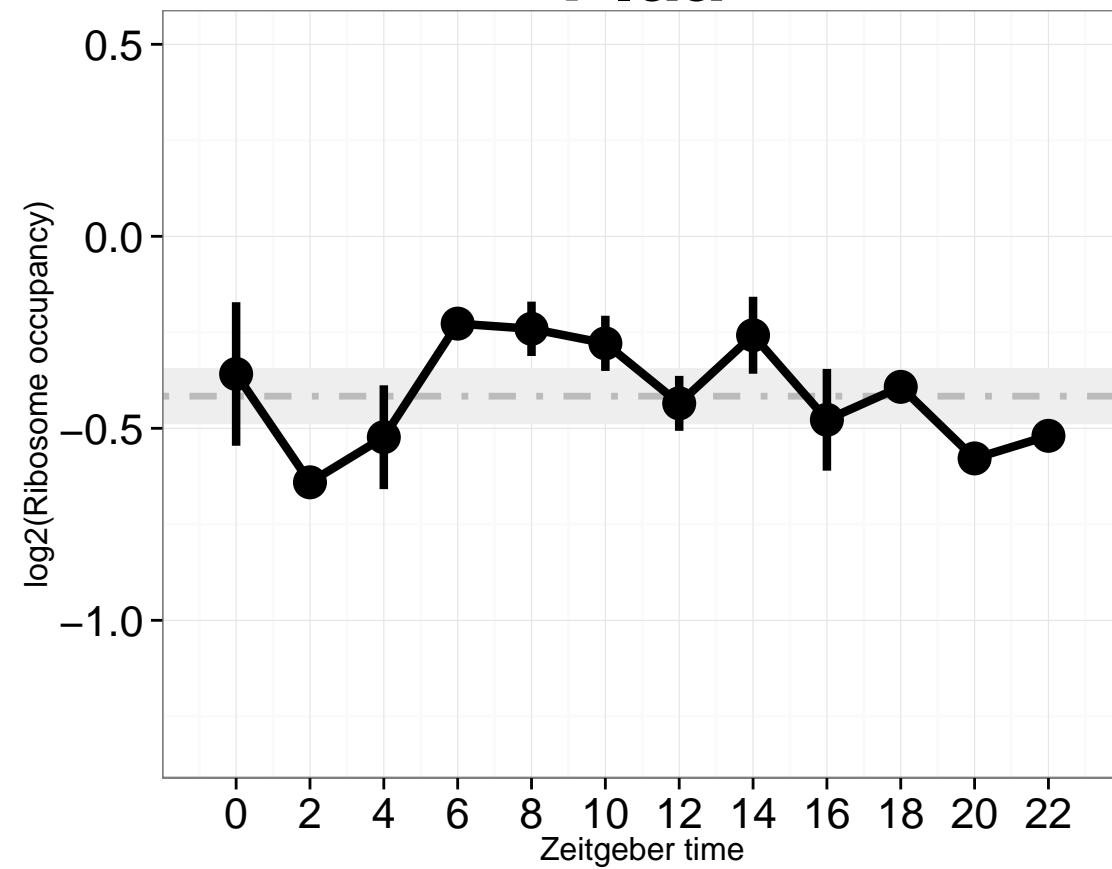

Supplement: Supplementary file 4418 [file 1]

## Mfap3

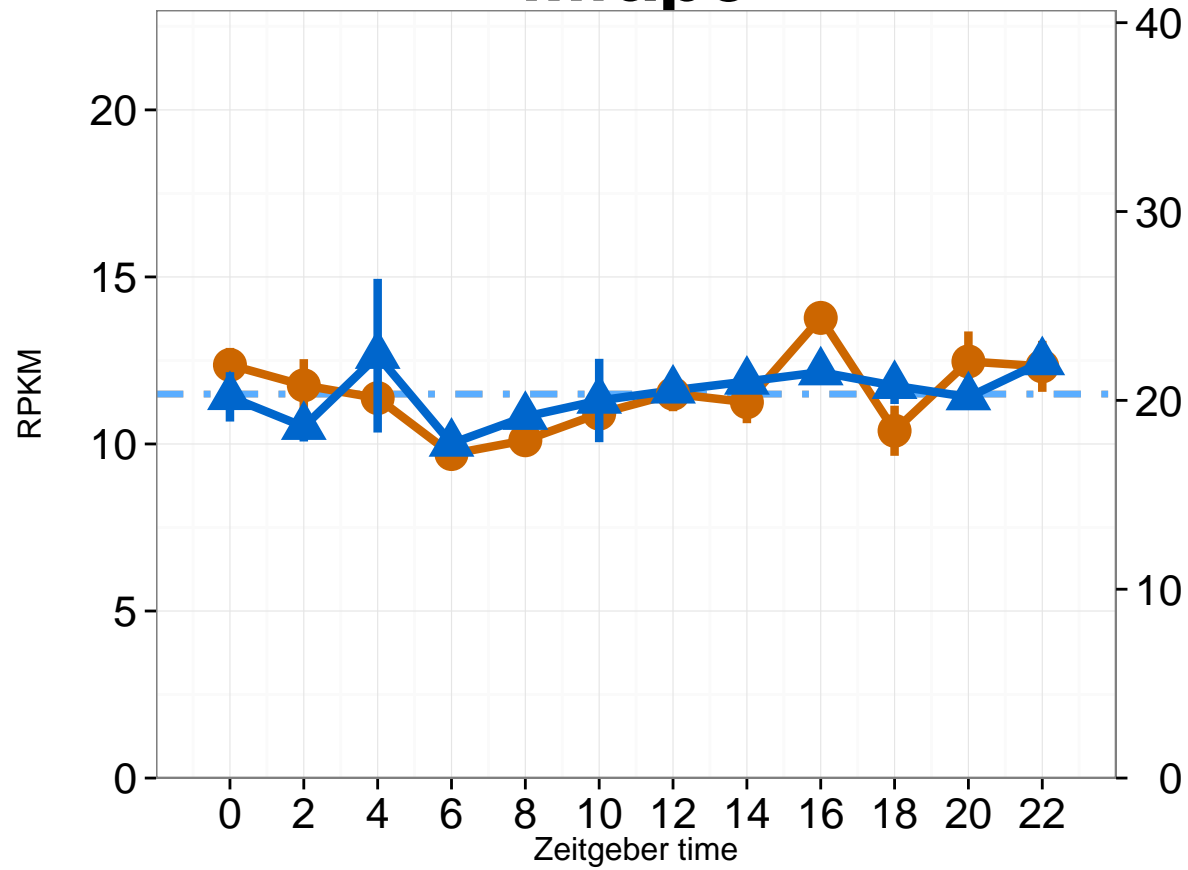

## Mfap3

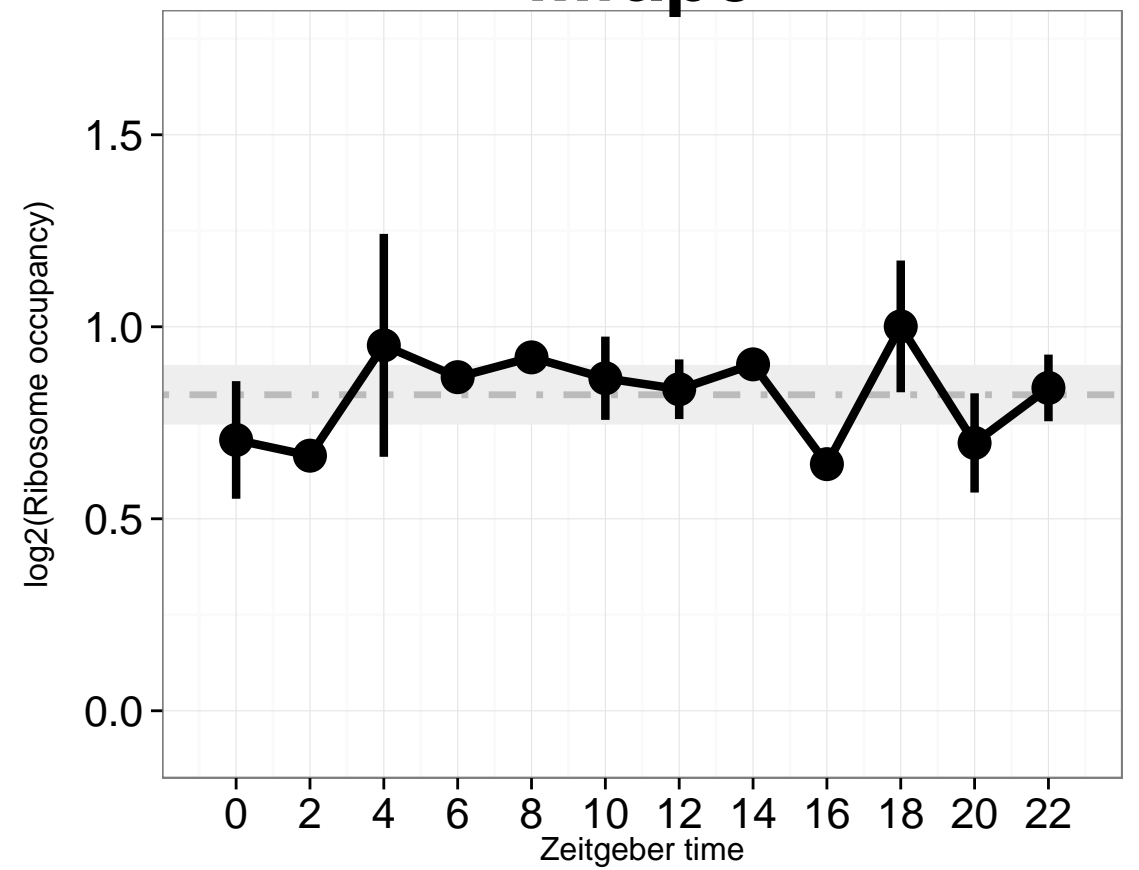

Supplement: Supplementary file 4419 [file 1]

## Tet2

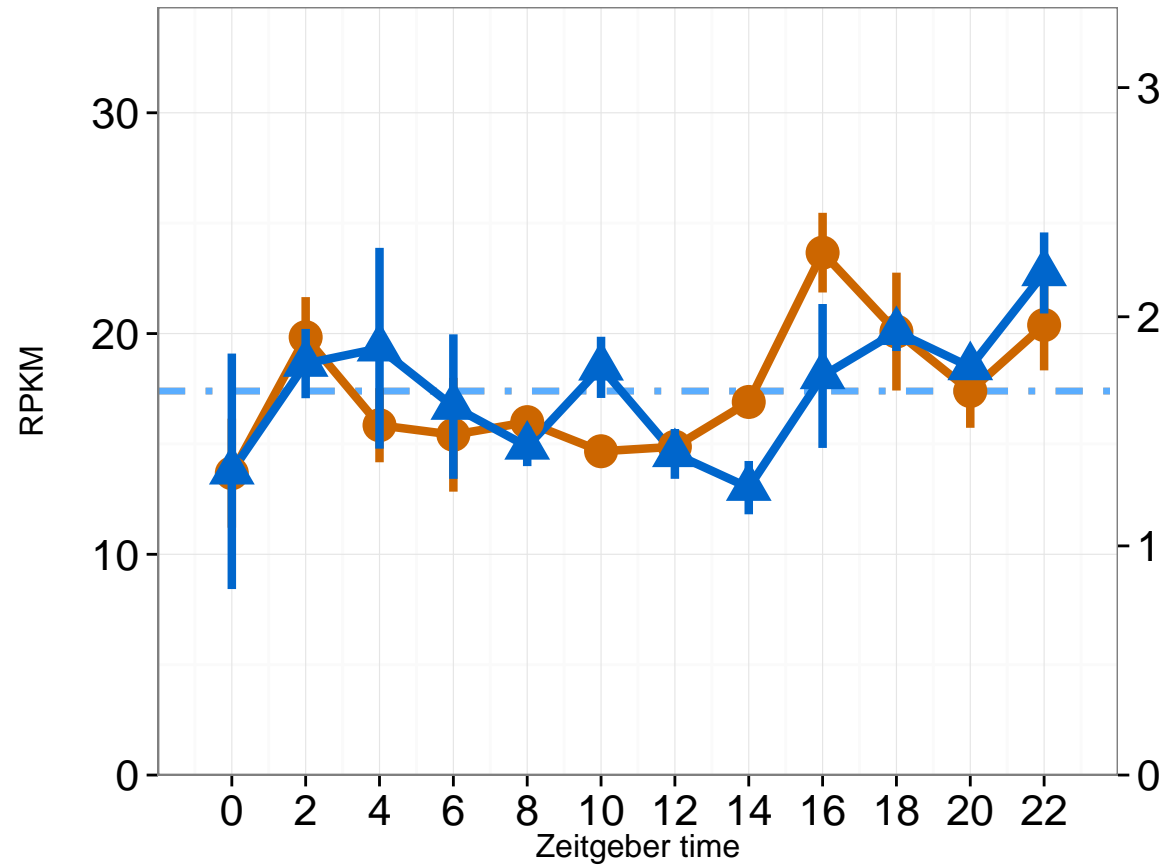

## Tet2

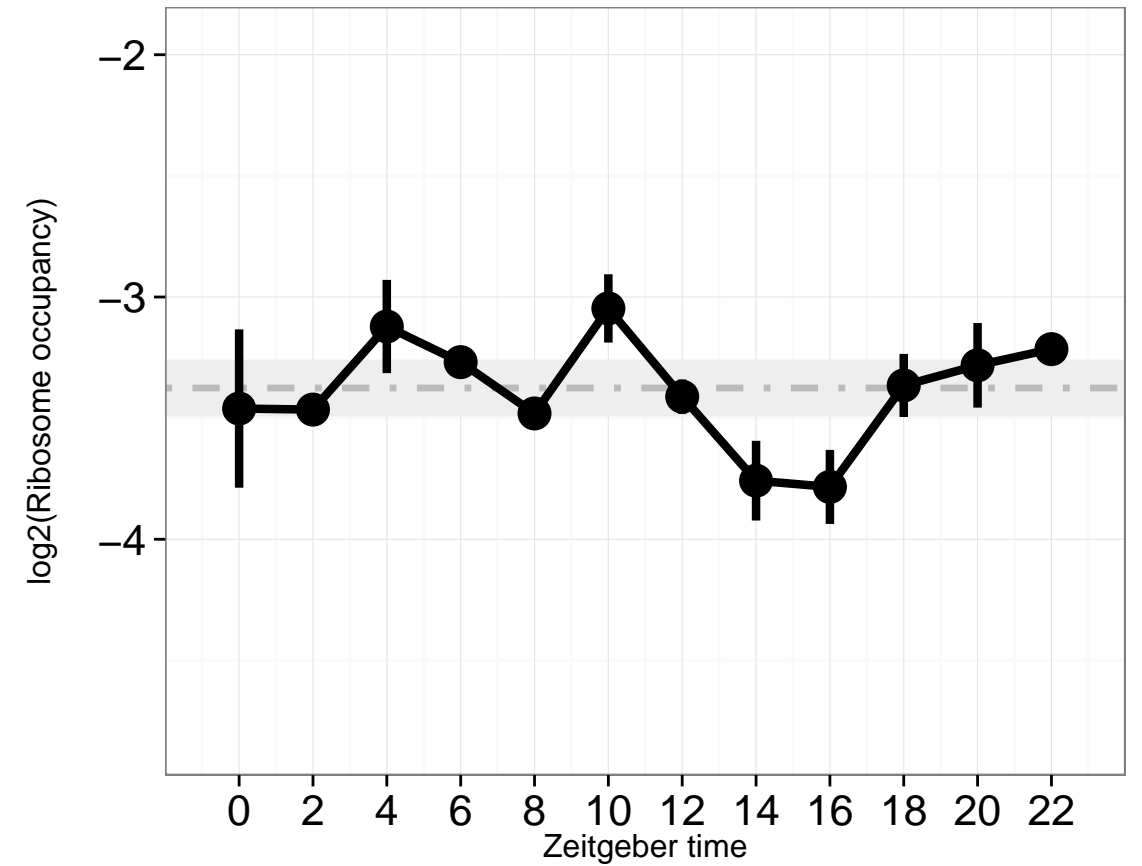

Supplement: Supplementary file 4420 [file 1]
