# Supplementary material (part 45 of 133)
Source: publisher figshare collection journal article supplement (https://springernature.figshare.com/articles/dataset/_/4903193)

# Plod2

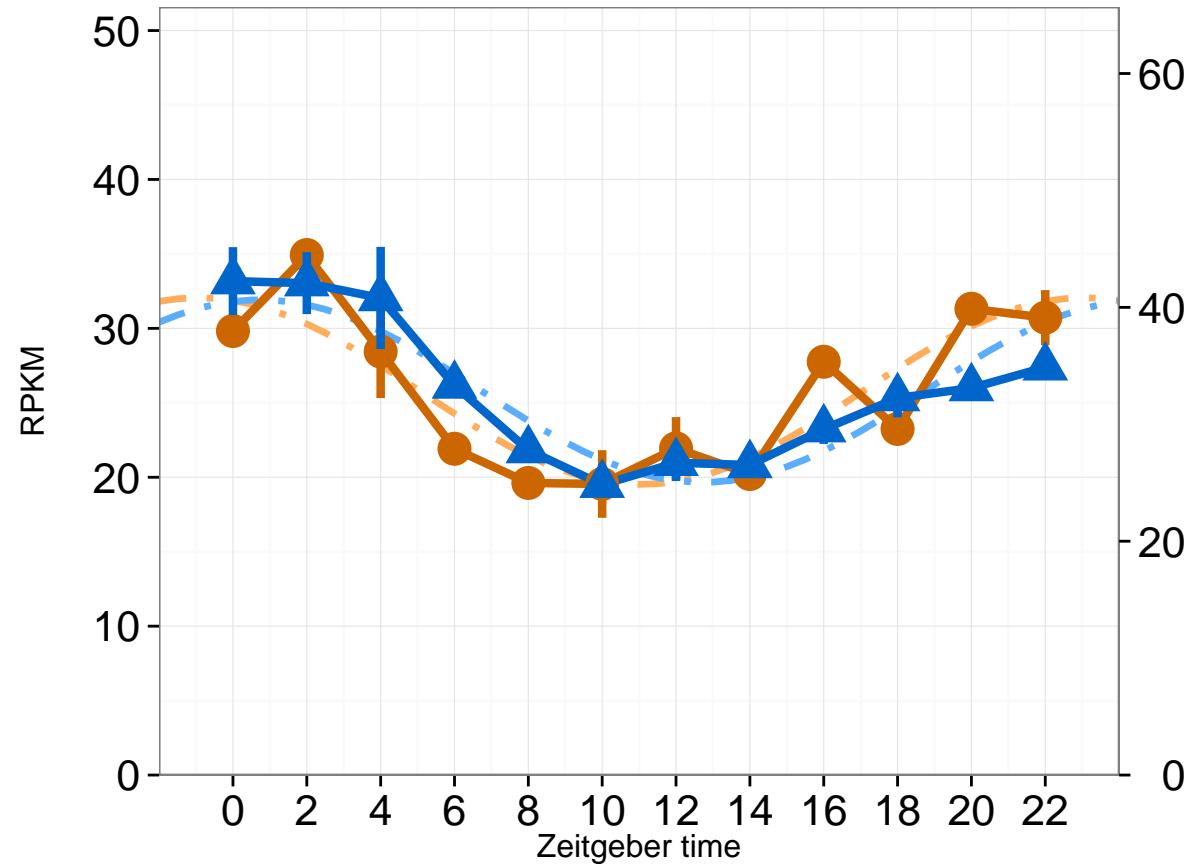

# Plod2

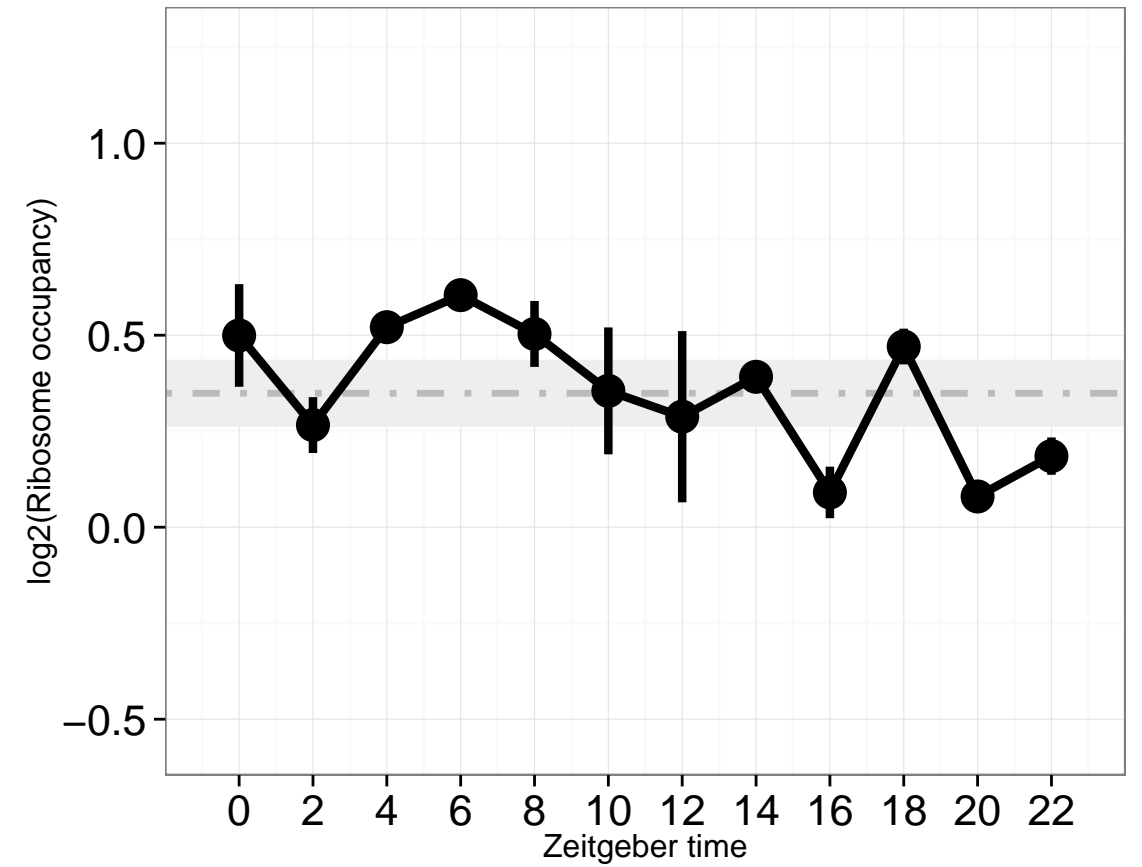

Supplement: Supplementary file 4421 [file 1]

## KlhI5

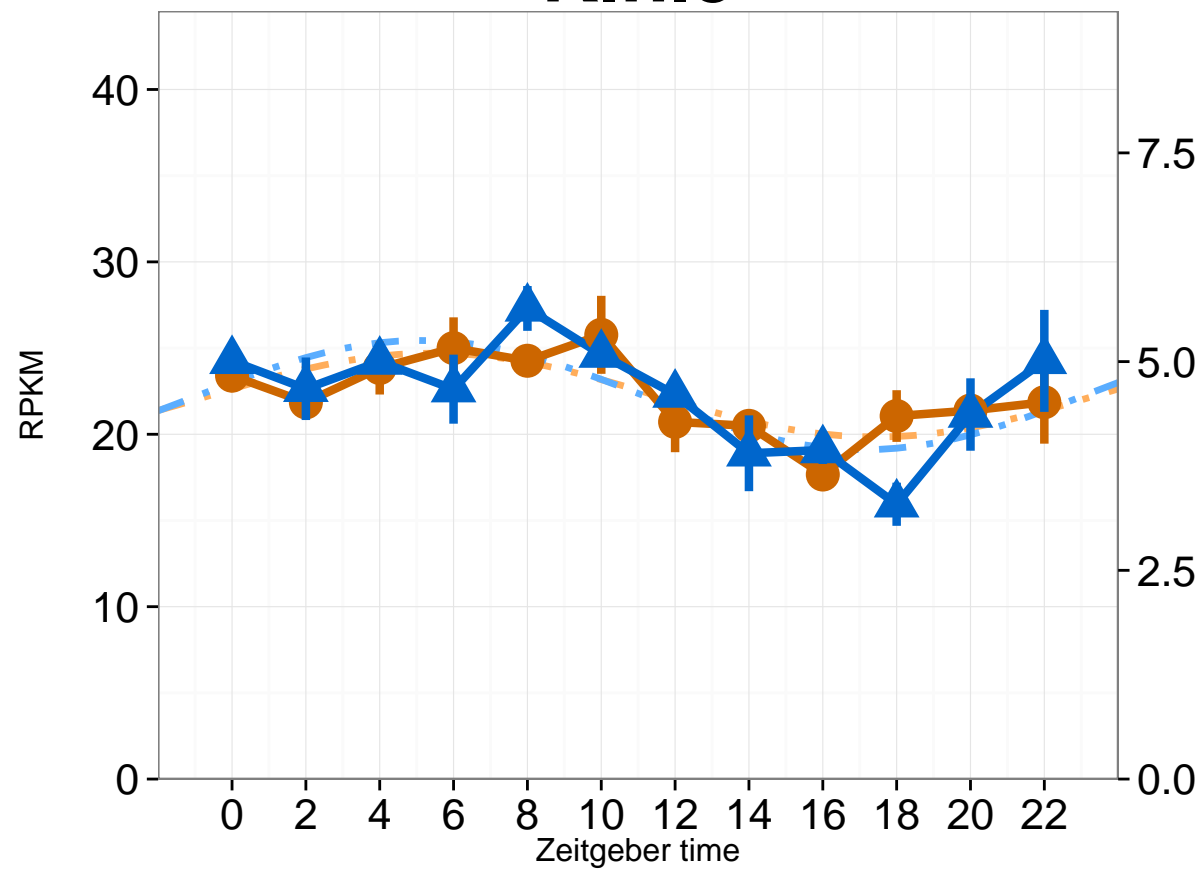

## KlhI5

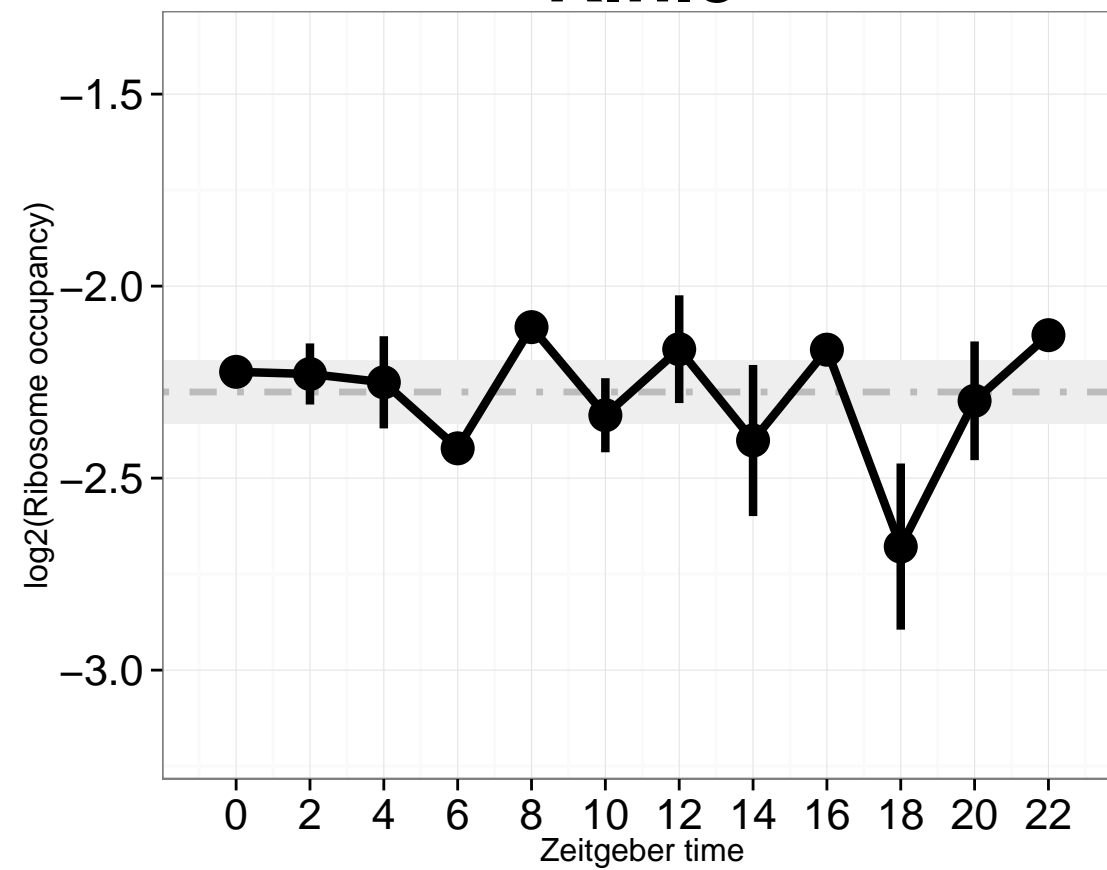

Supplement: Supplementary file 4422 [file 1]

## Kif5c

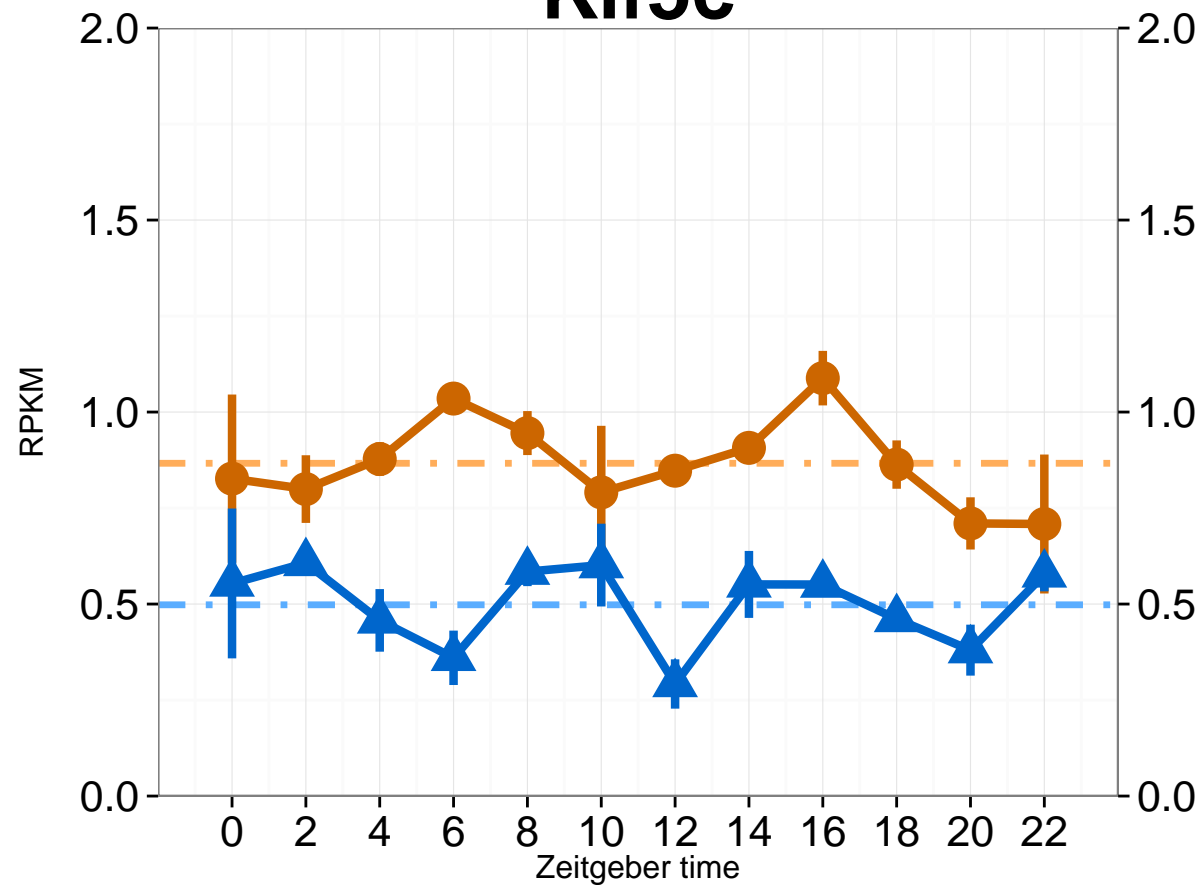

## Kif5c

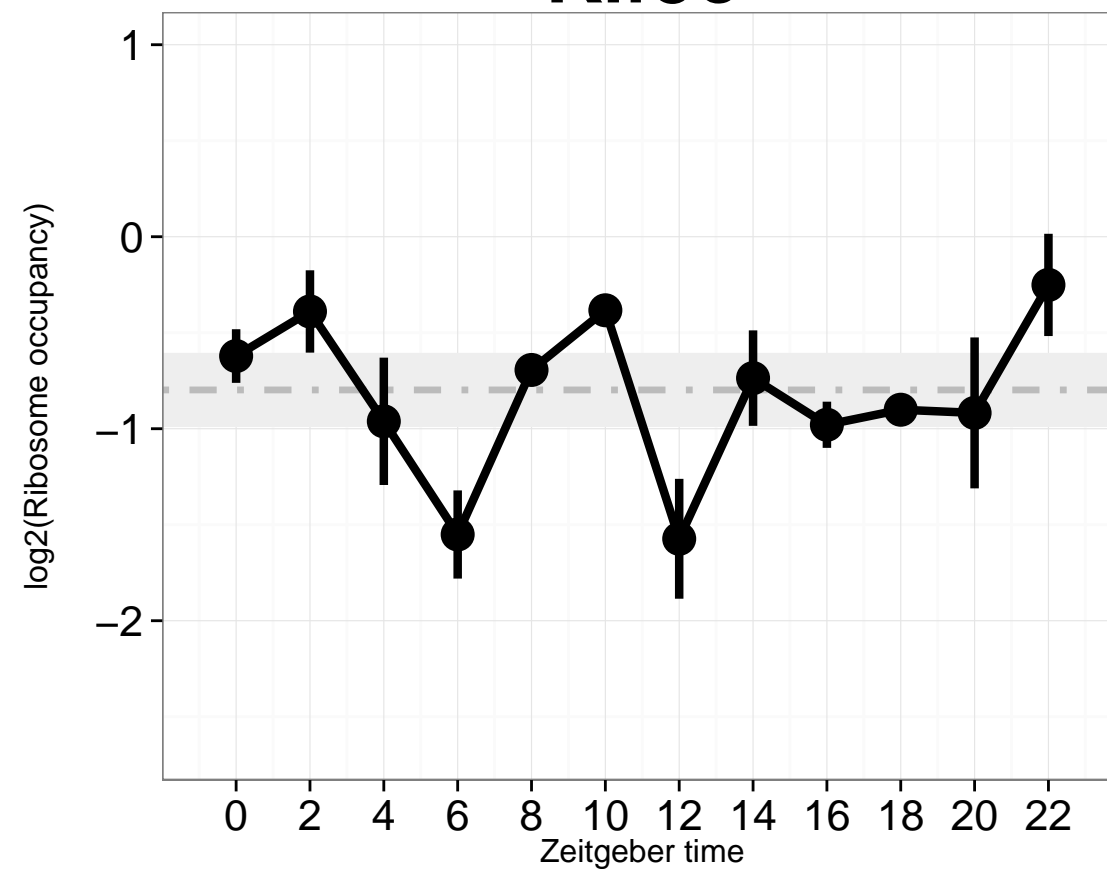

Supplement: Supplementary file 4423 [file 1]

## Fasn

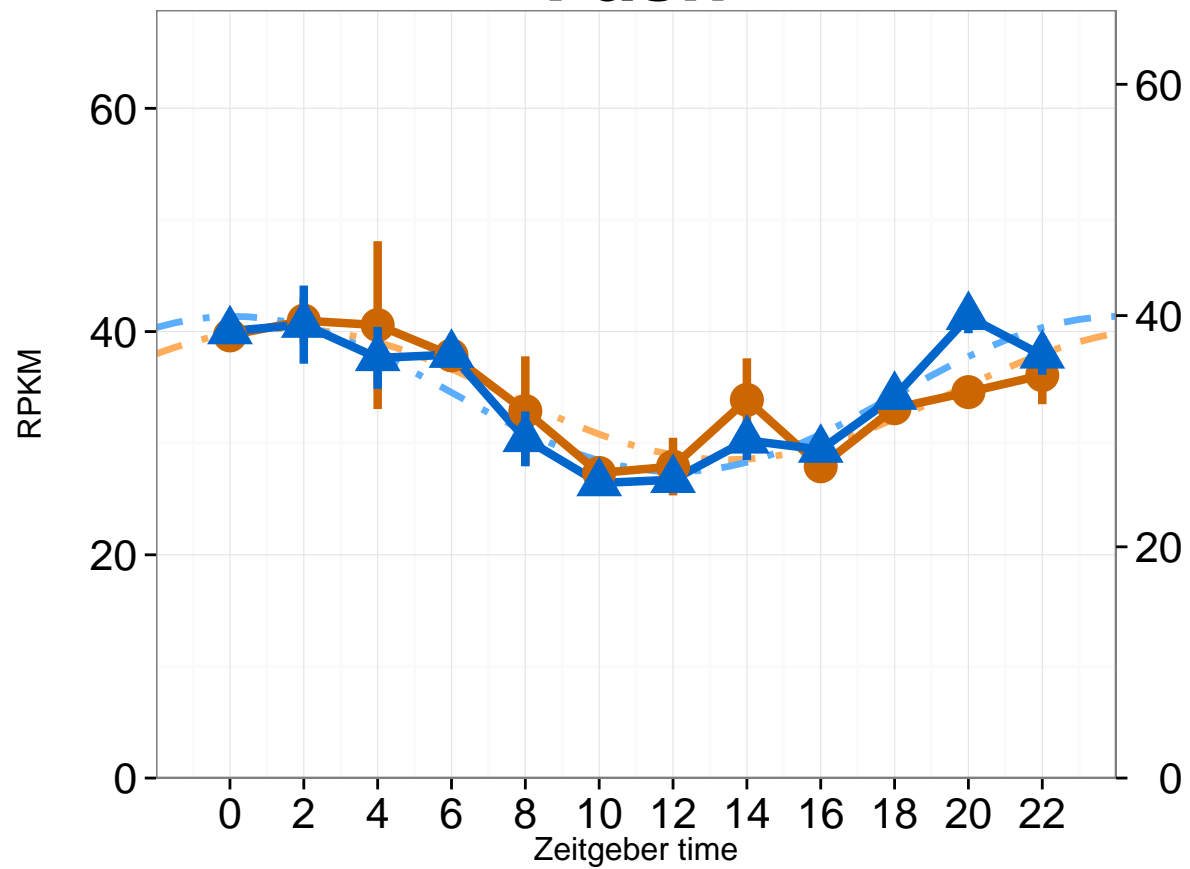

## Fasn

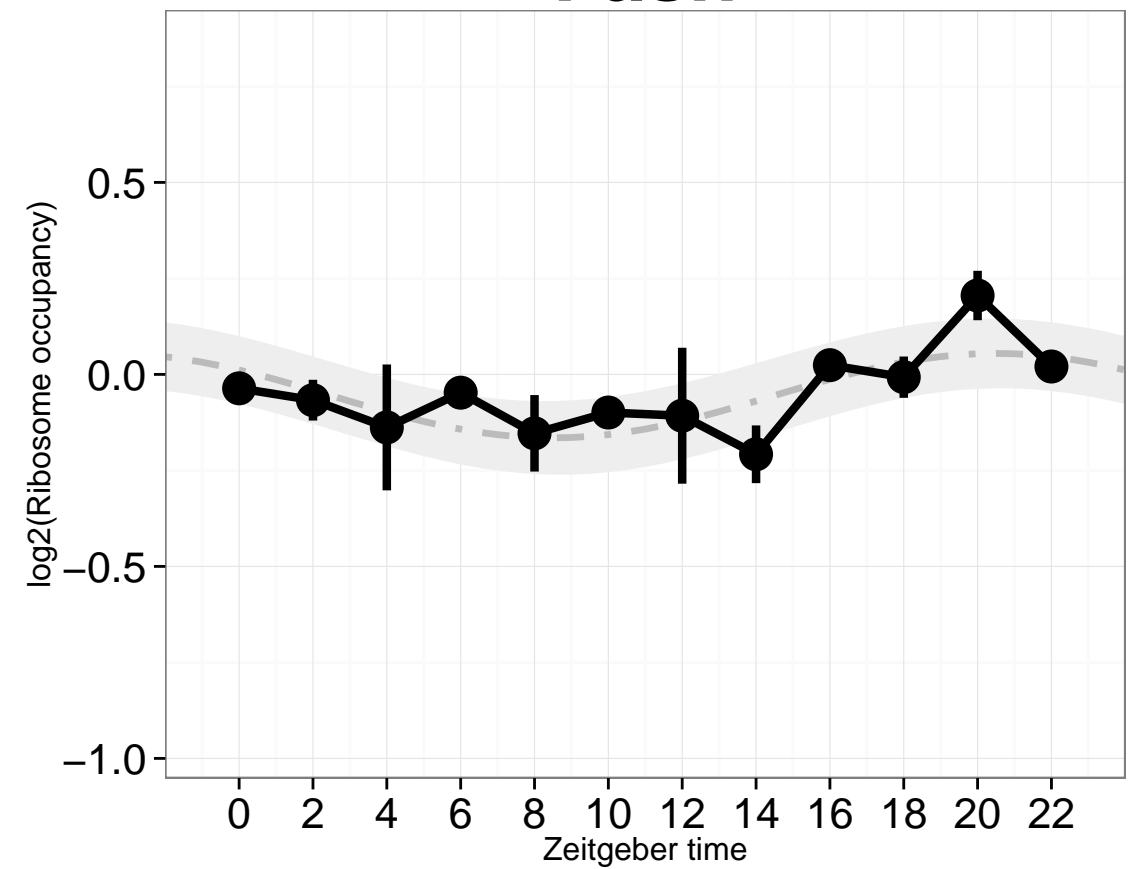

Supplement: Supplementary file 4424 [file 1]

# Zdhhc20

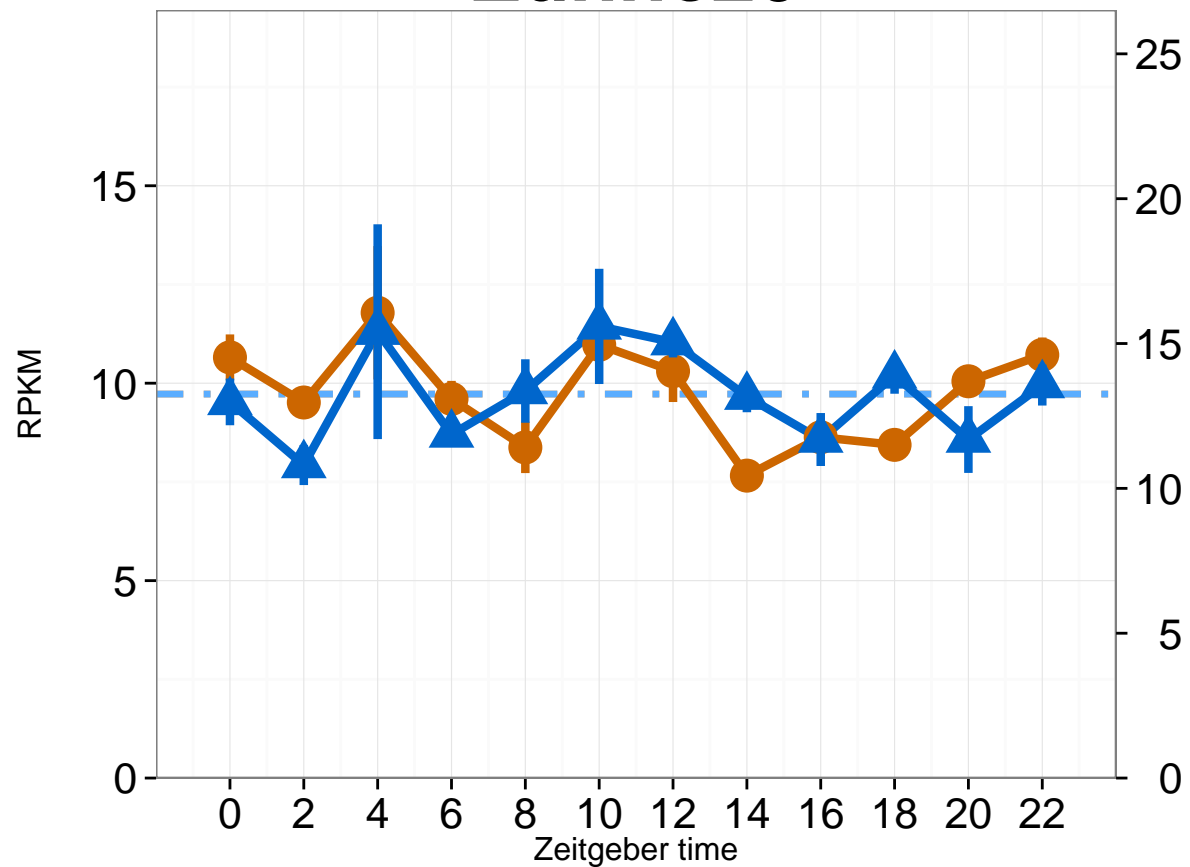

# Zdhhc20

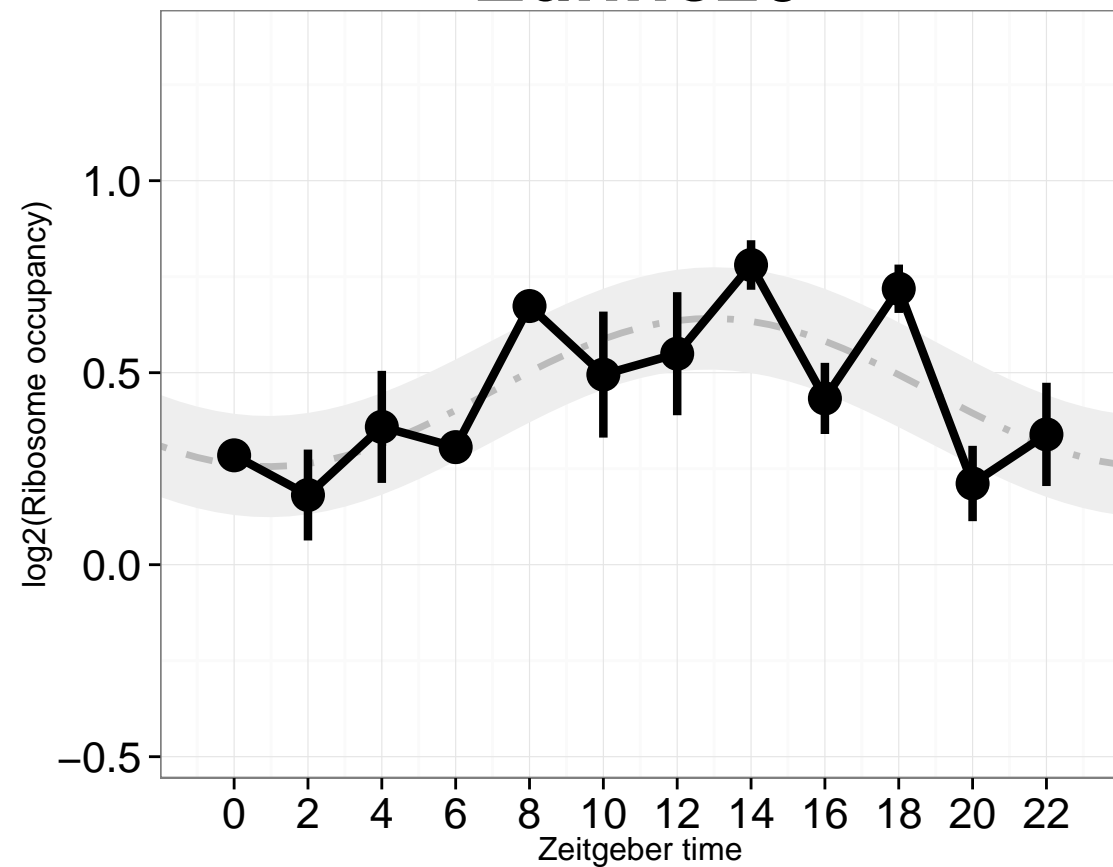

Supplement: Supplementary file 4425 [file 1]

# Capn15

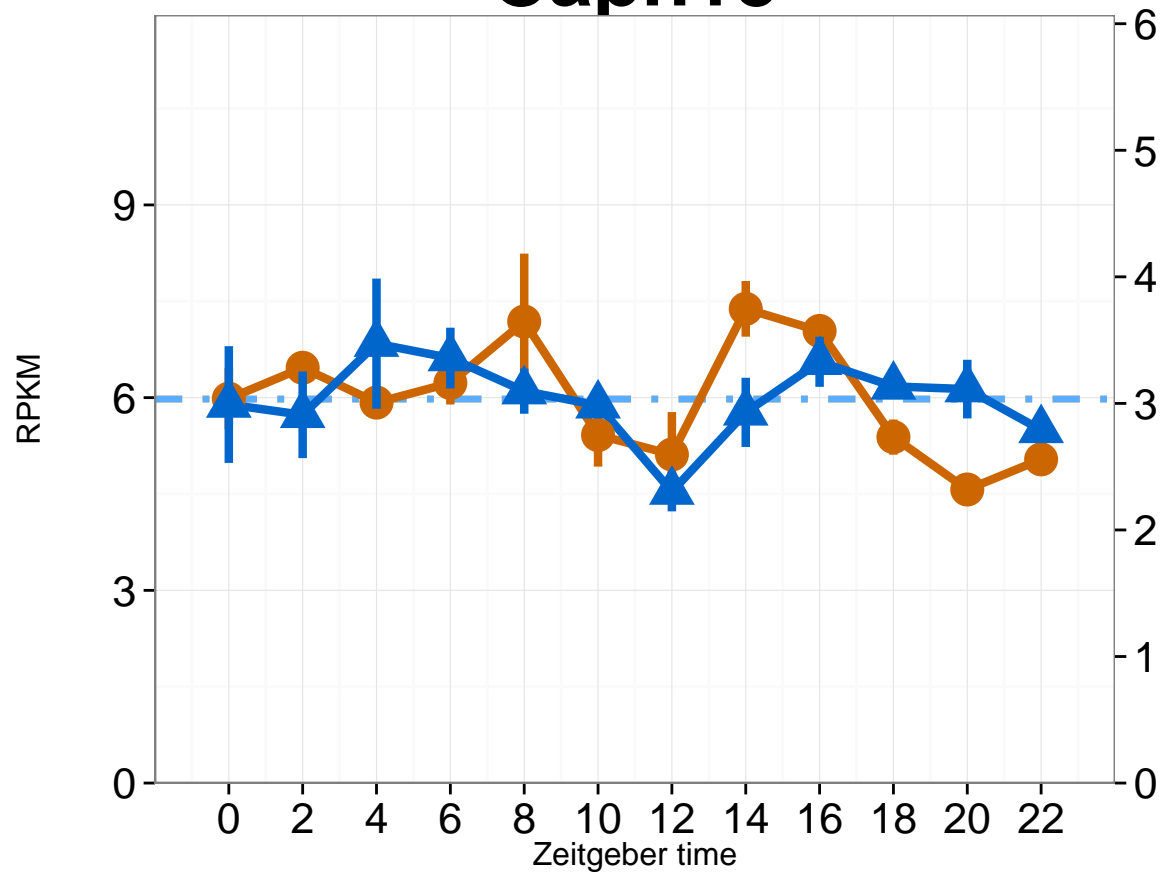

# Capn15

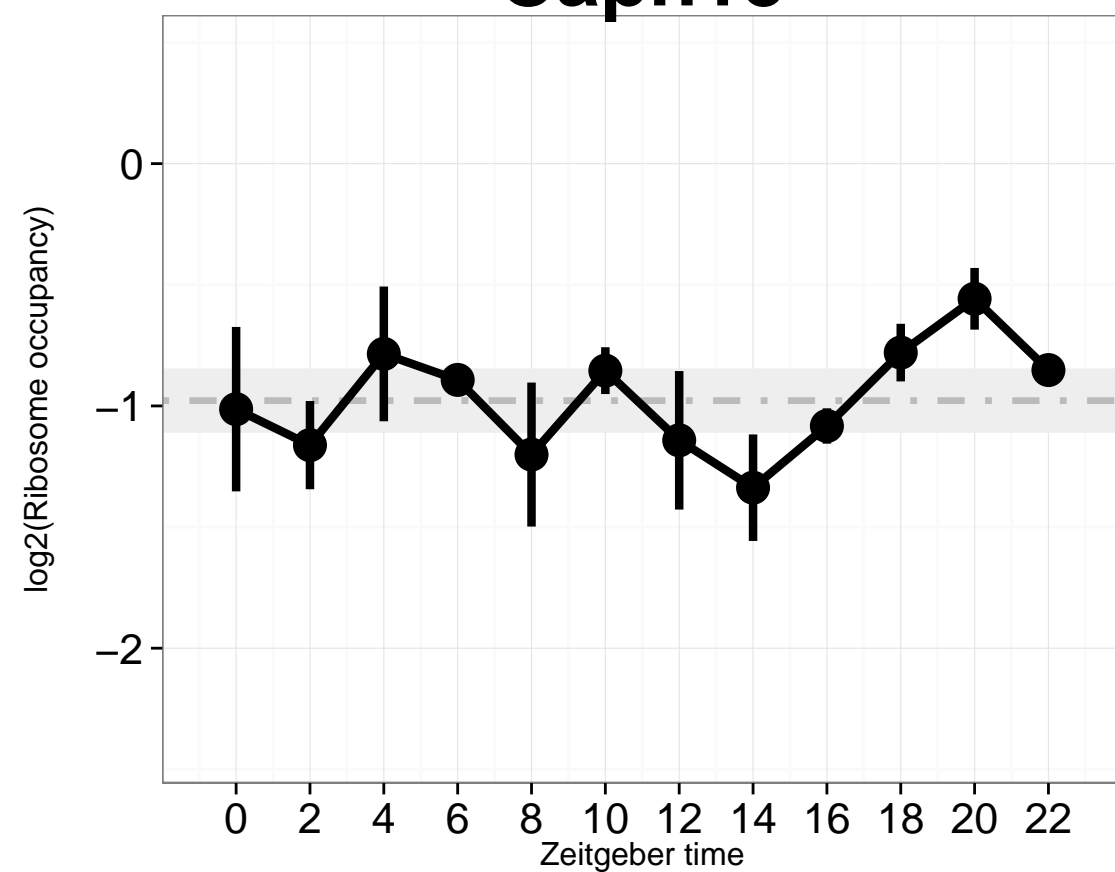

Supplement: Supplementary file 4426 [file 1]

# Yars

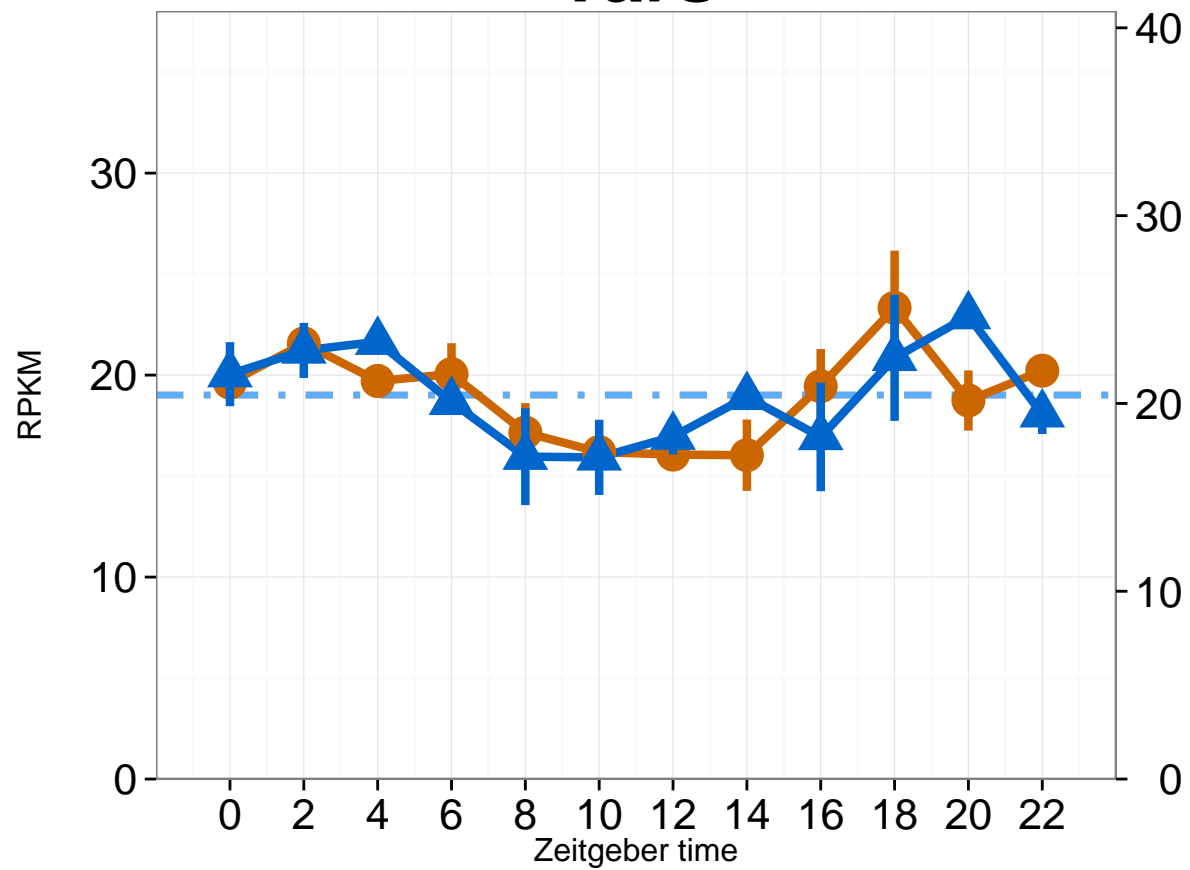

# Yars

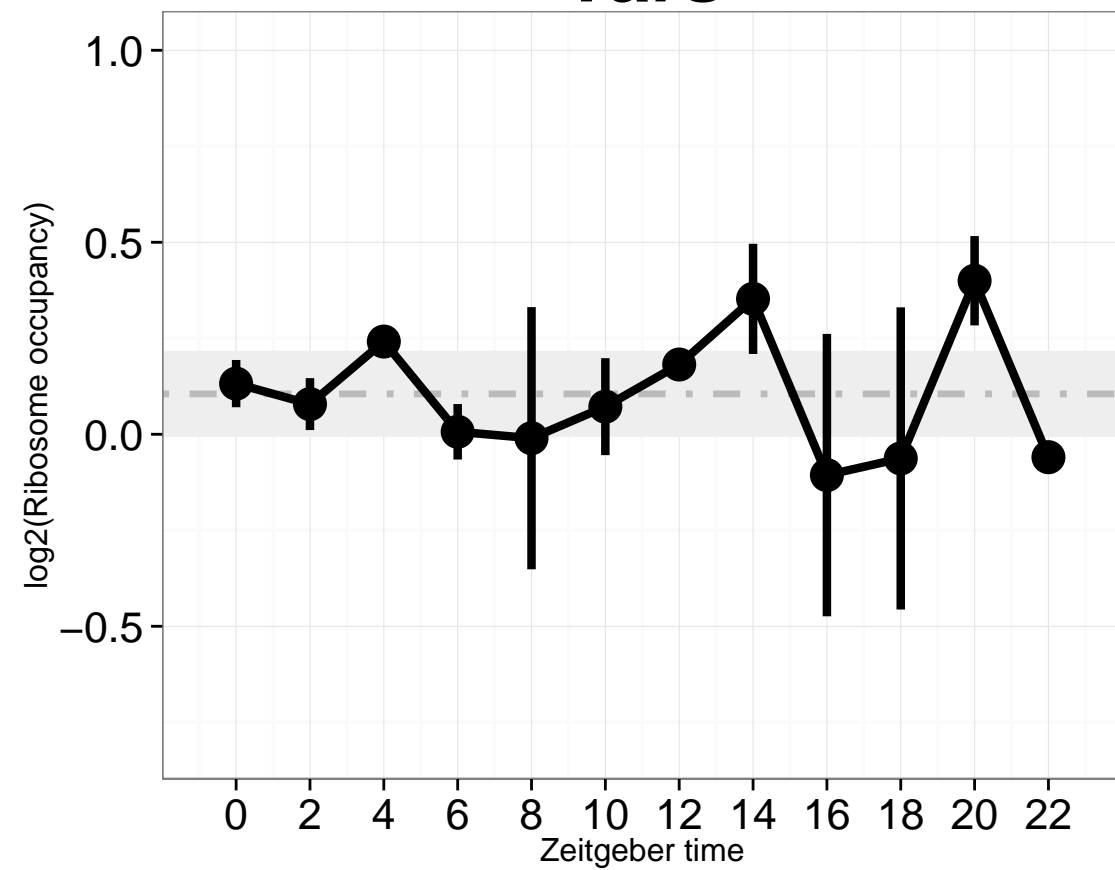

Supplement: Supplementary file 4427 [file 1]

# Atp6v0a4

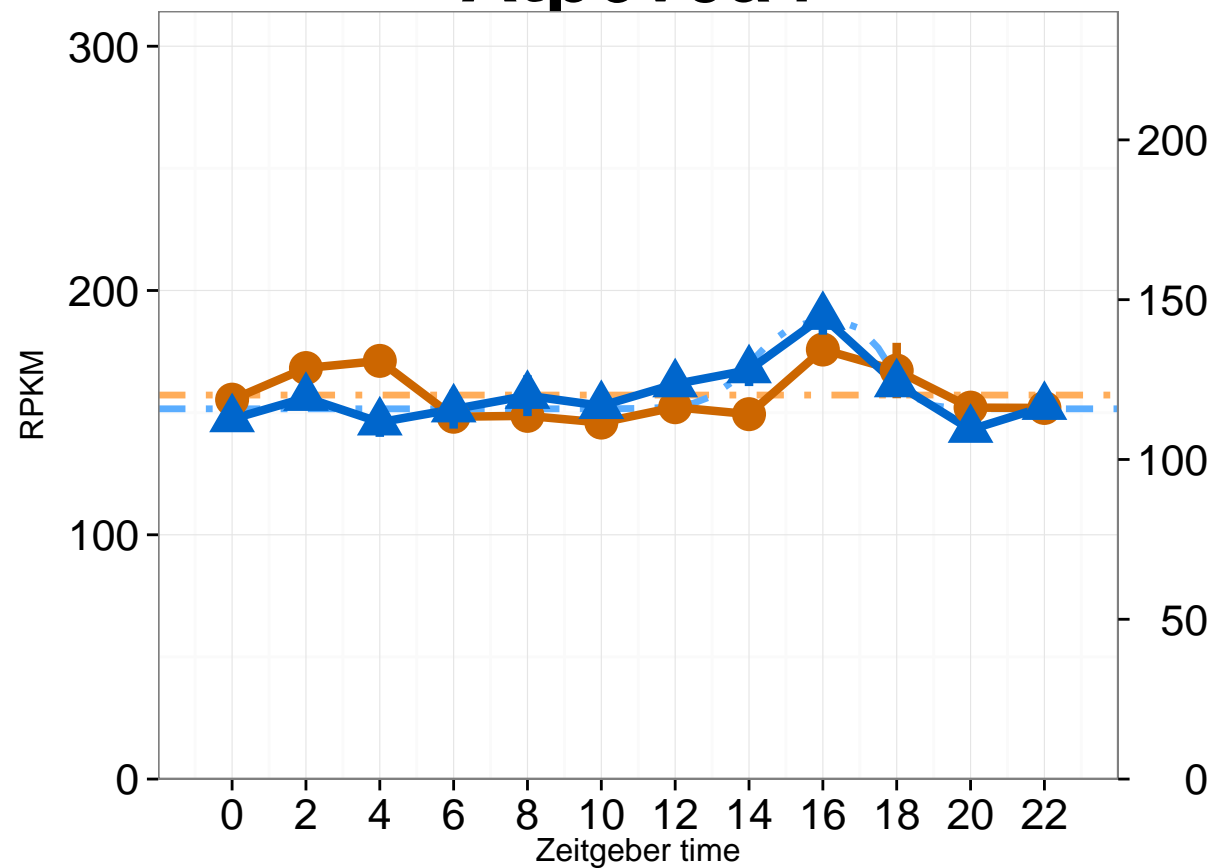

# Atp6v0a4

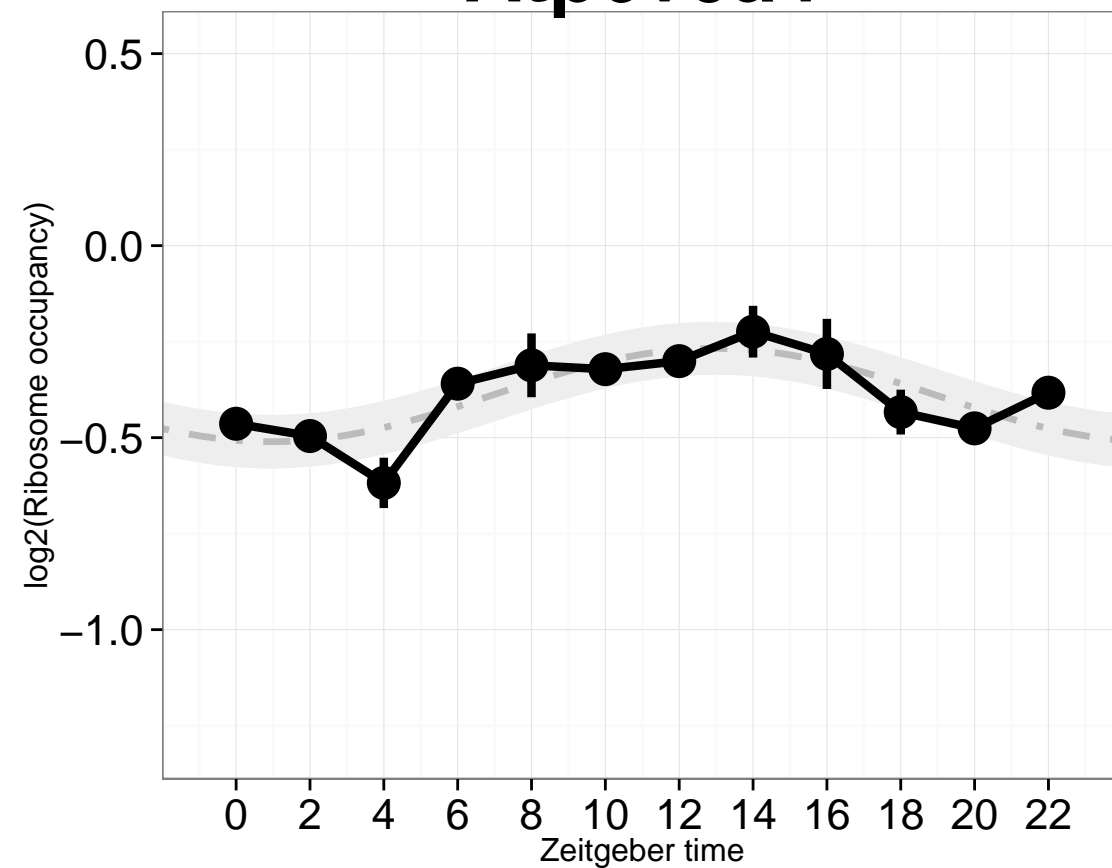

Supplement: Supplementary file 4428 [file 1]

# 1700066M21Rik

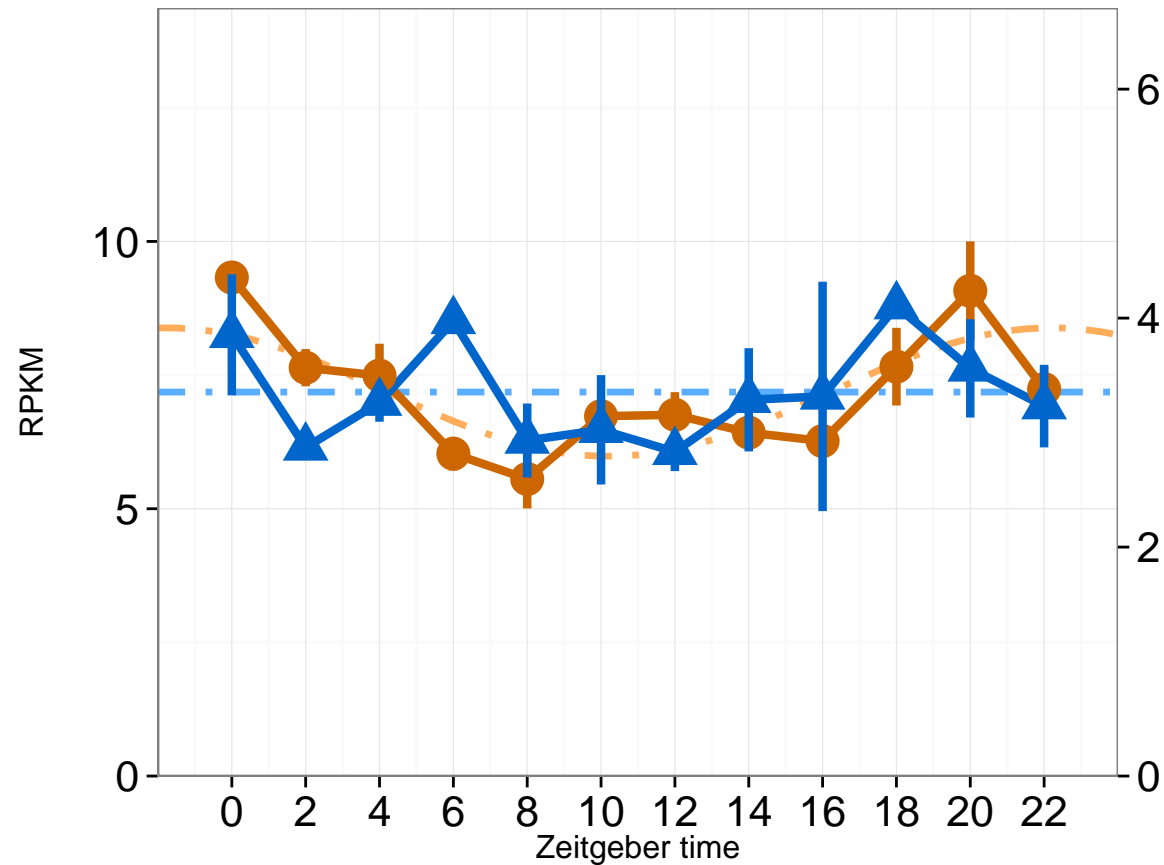

# 1700066M21Rik

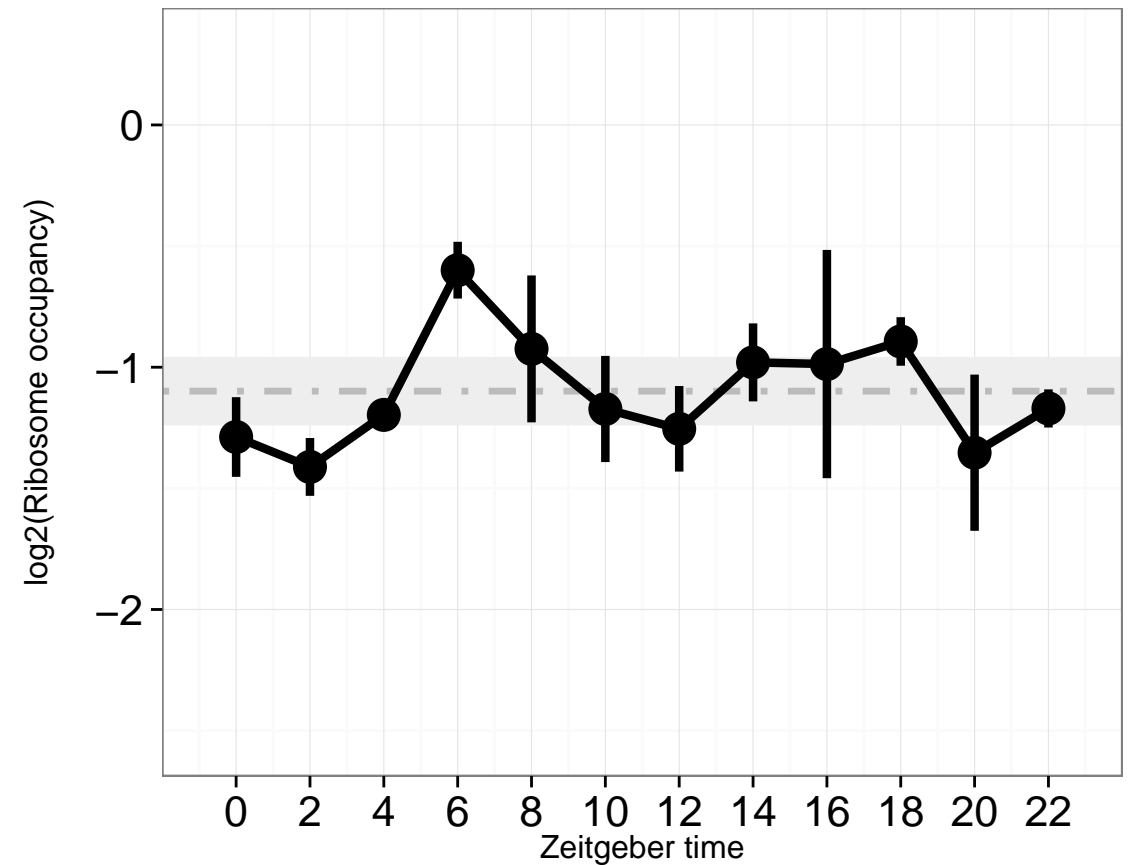

Supplement: Supplementary file 4429 [file 1]

## Bax

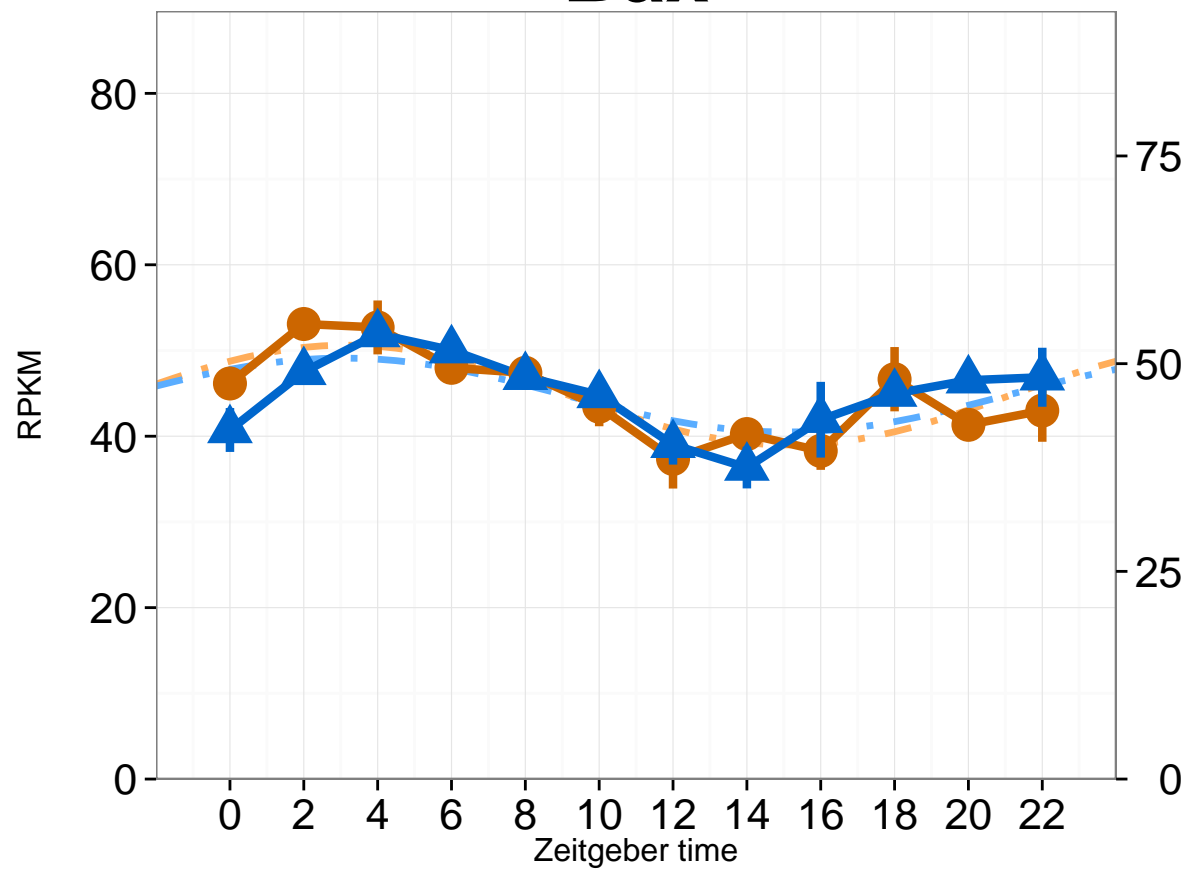

## Bax

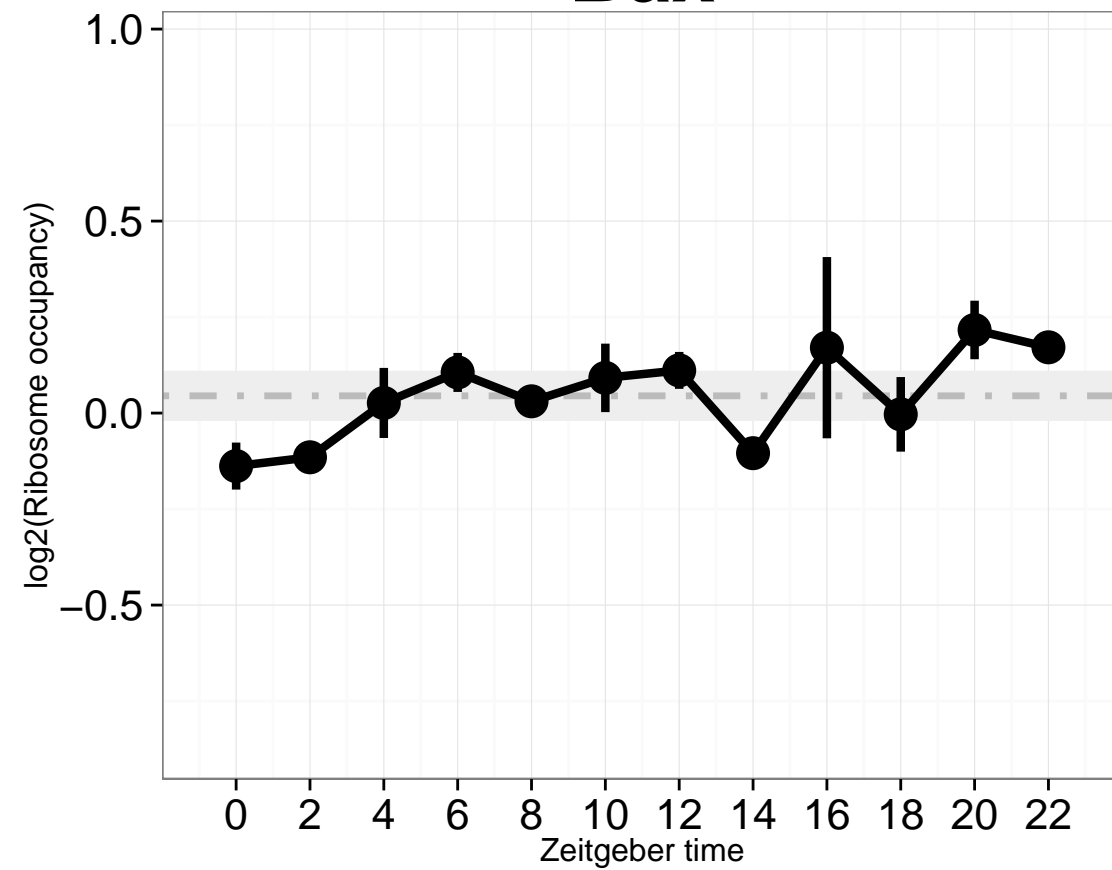

Supplement: Supplementary file 4430 [file 1]

## 2610002J02Rik

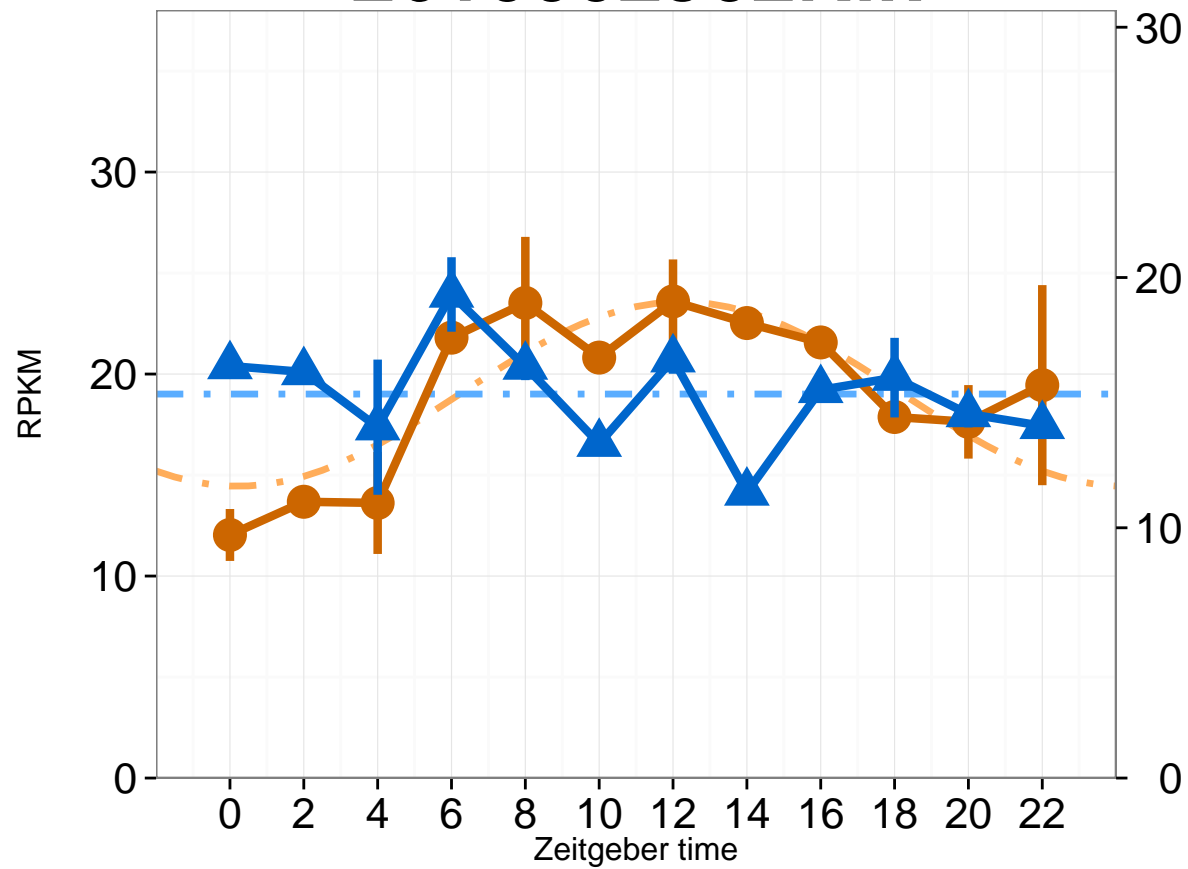

## 2610002J02Rik

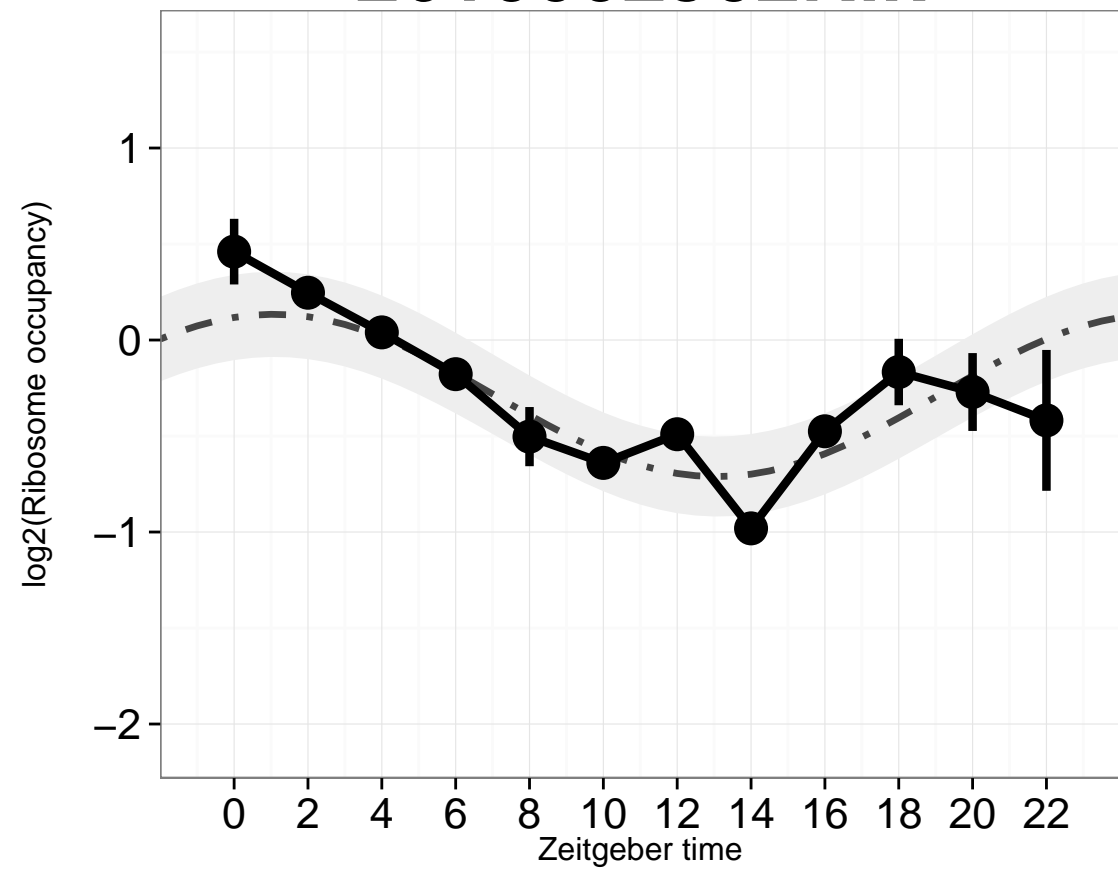

Supplement: Supplementary file 4431 [file 1]

## Dcaf4

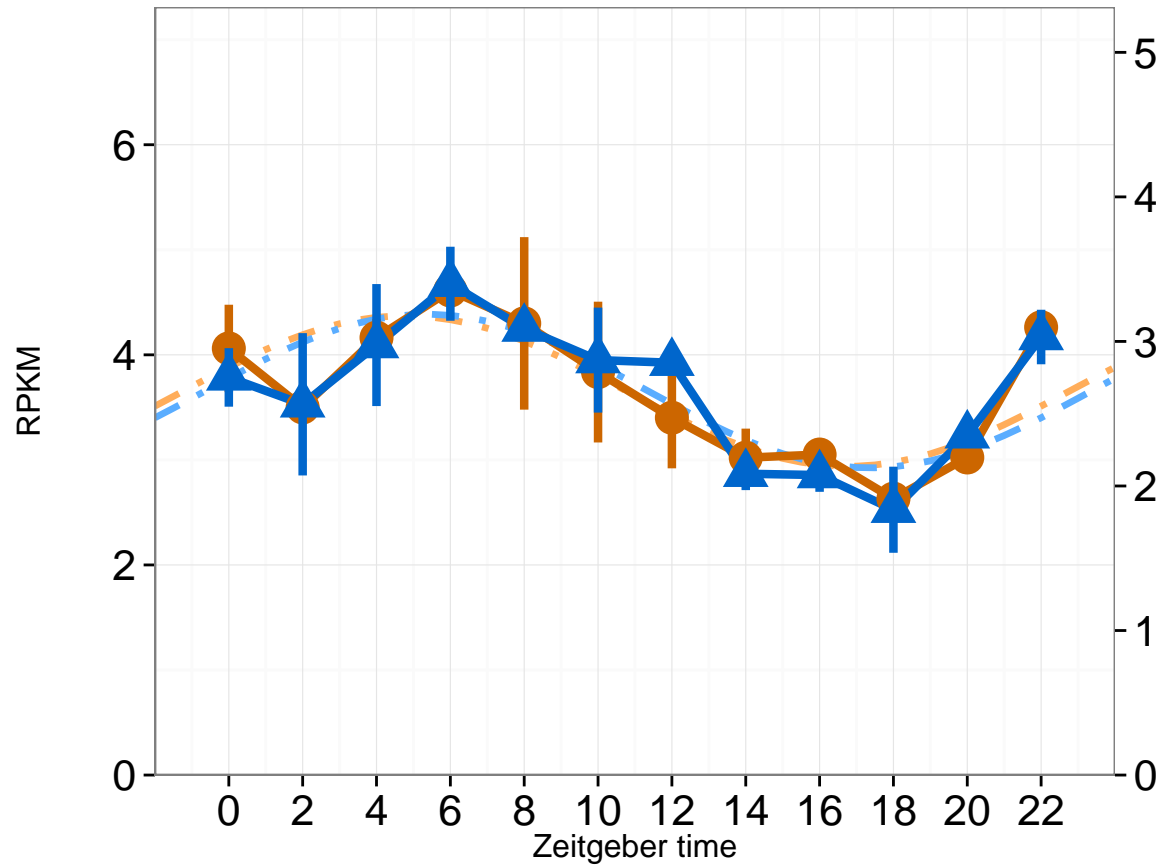

## Dcaf4

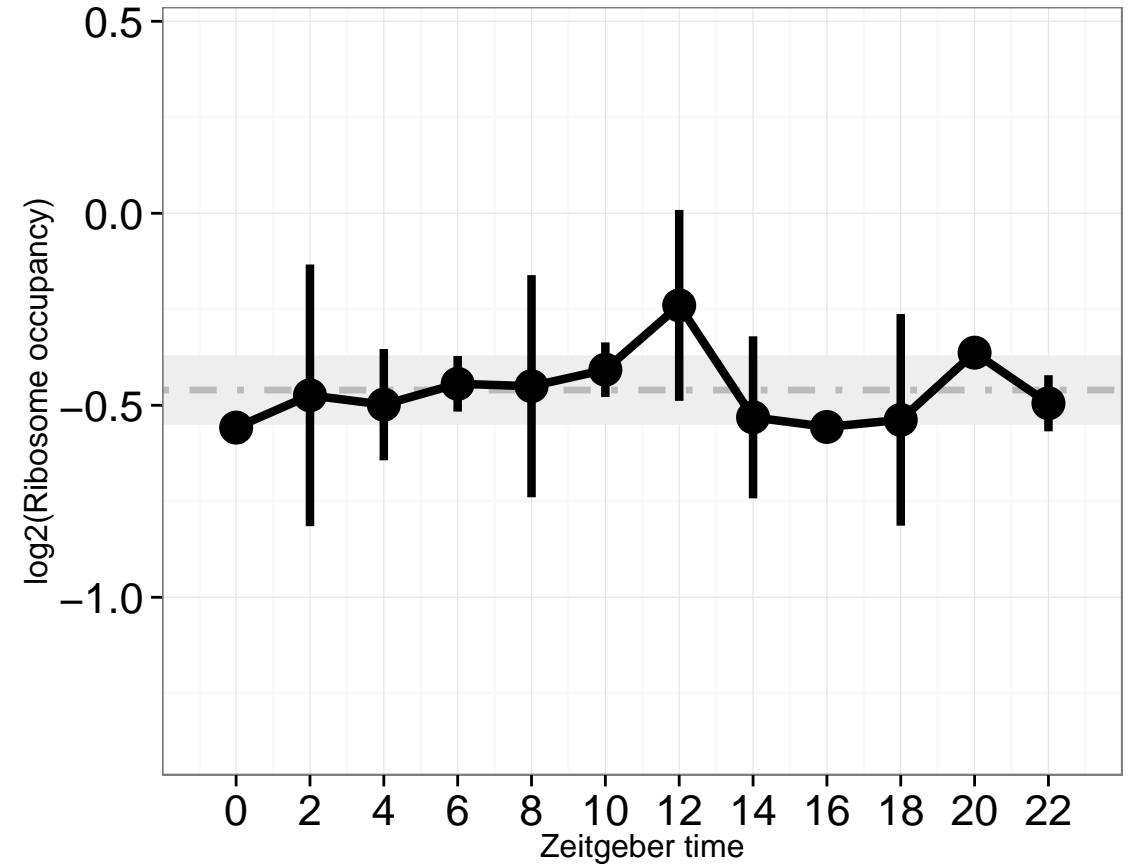

Supplement: Supplementary file 4432 [file 1]

## Esrrb

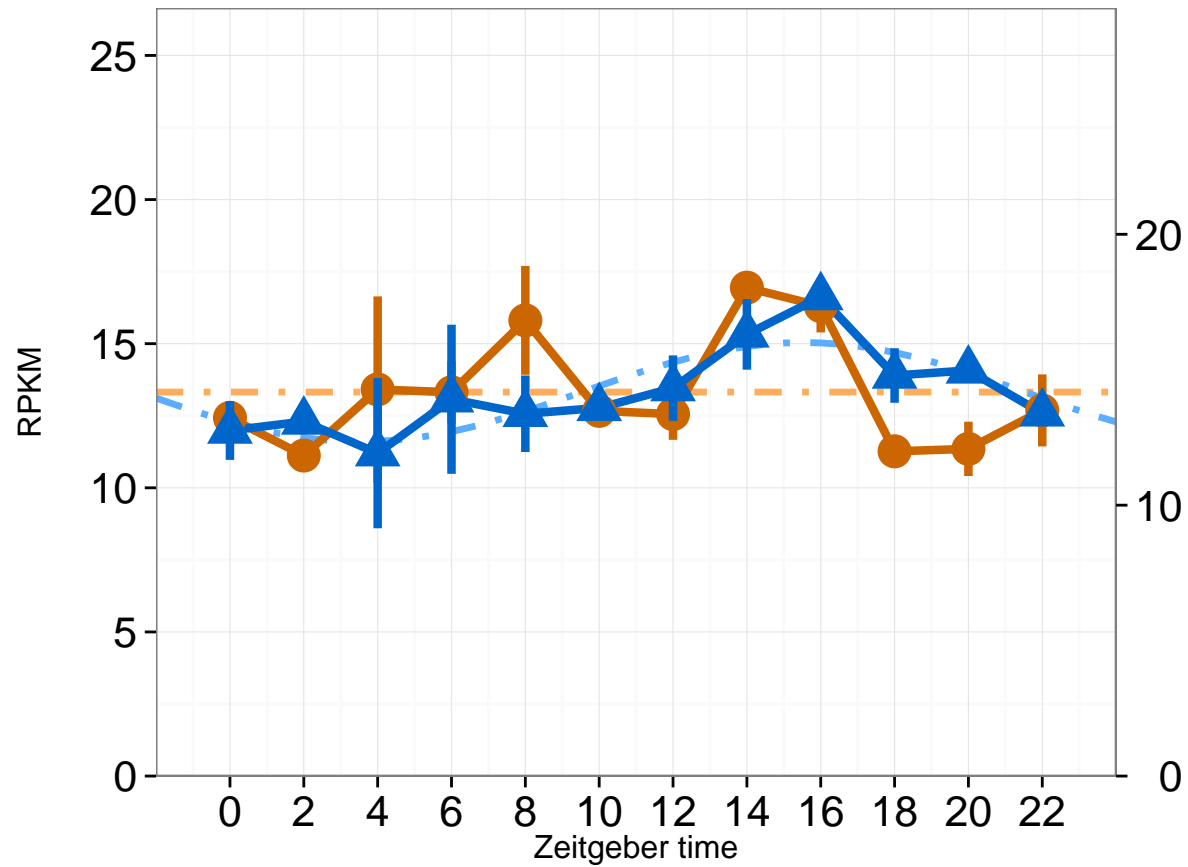

## Esrrb

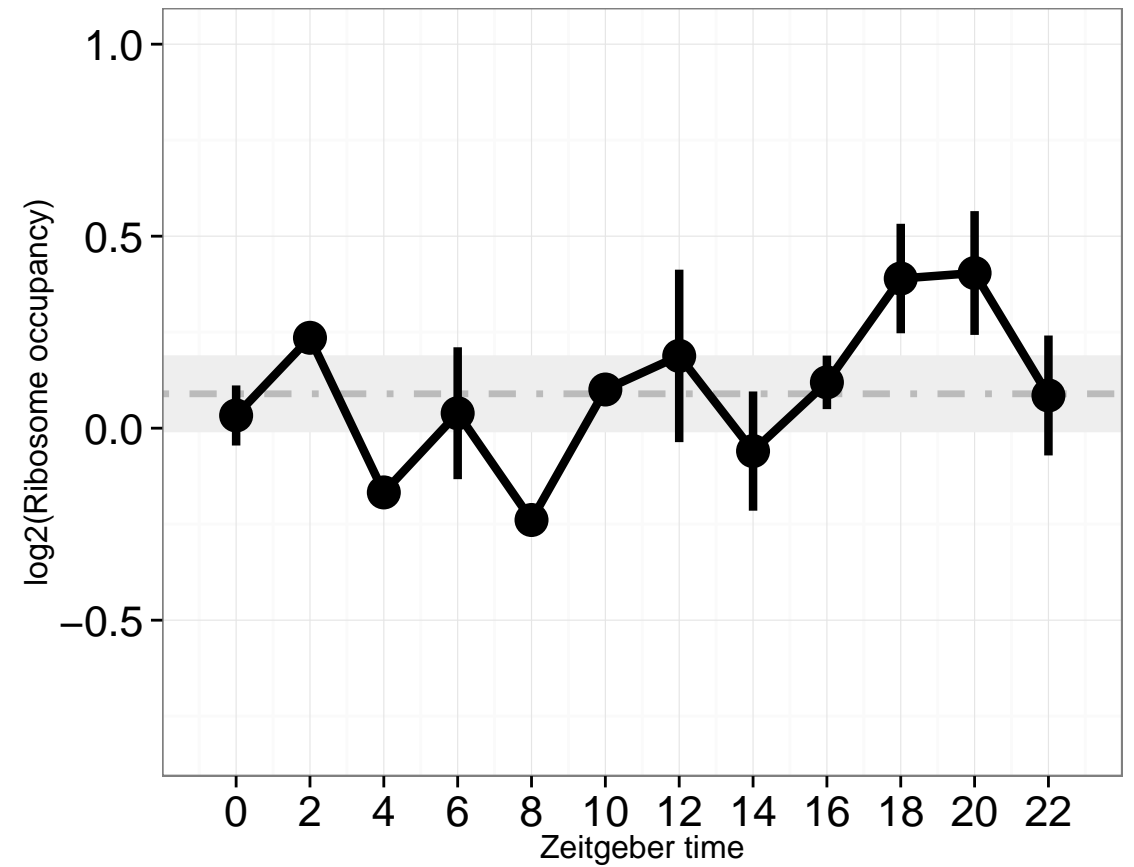

Supplement: Supplementary file 4433 [file 1]

## Arih1

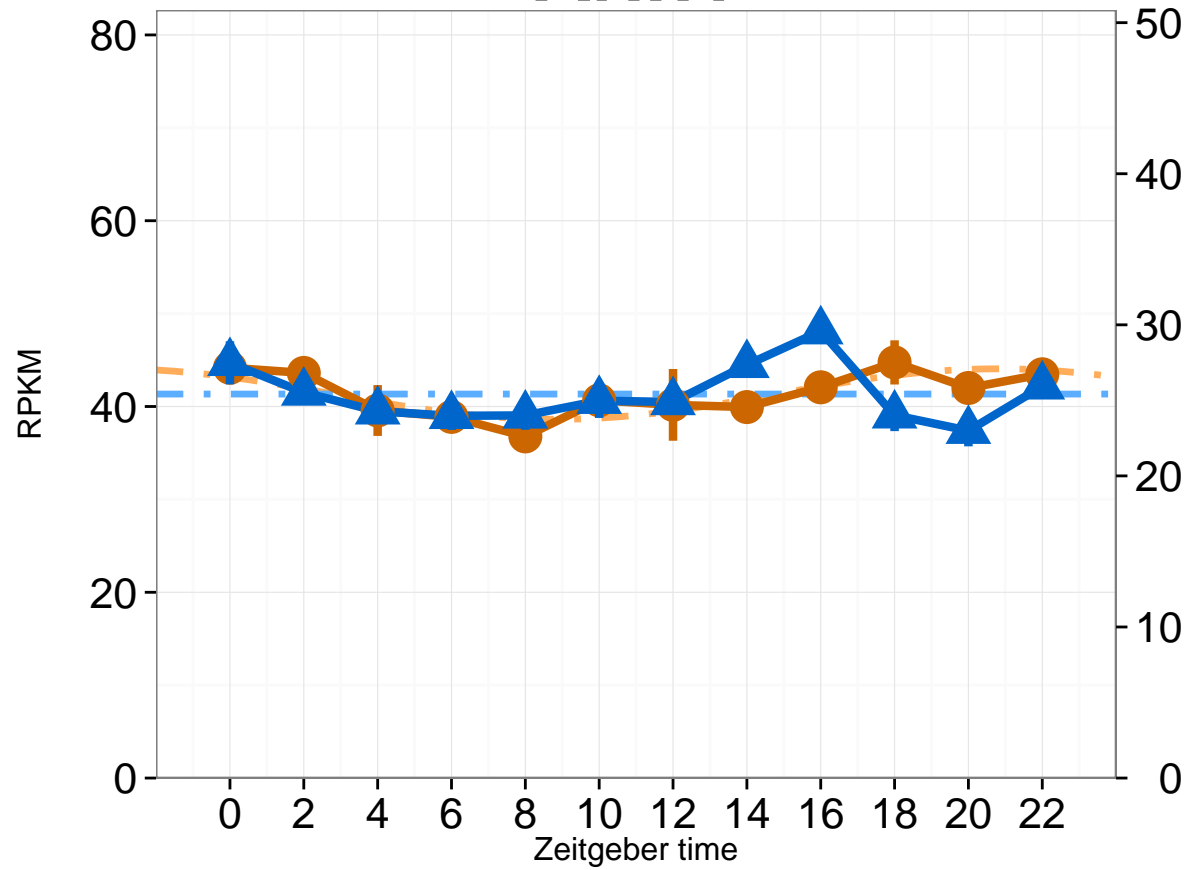

## Arih1

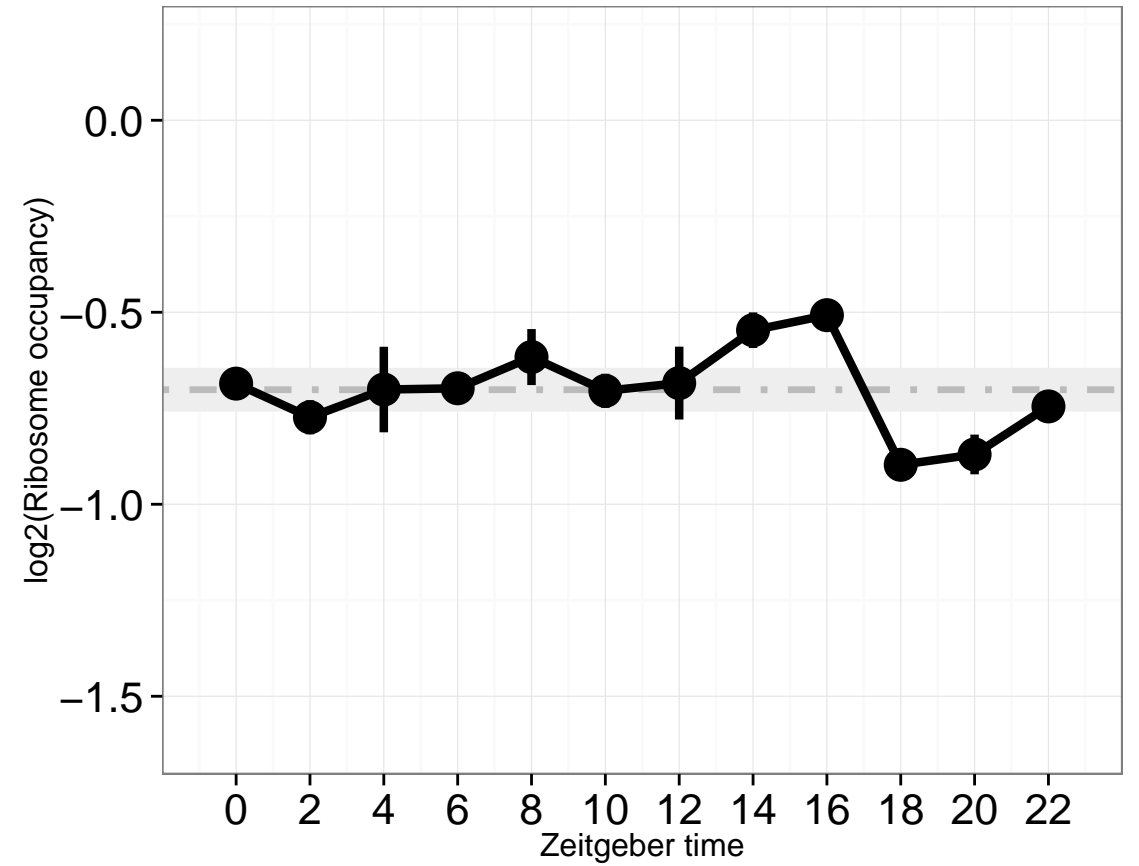

Supplement: Supplementary file 4434 [file 1]

## Glrx5

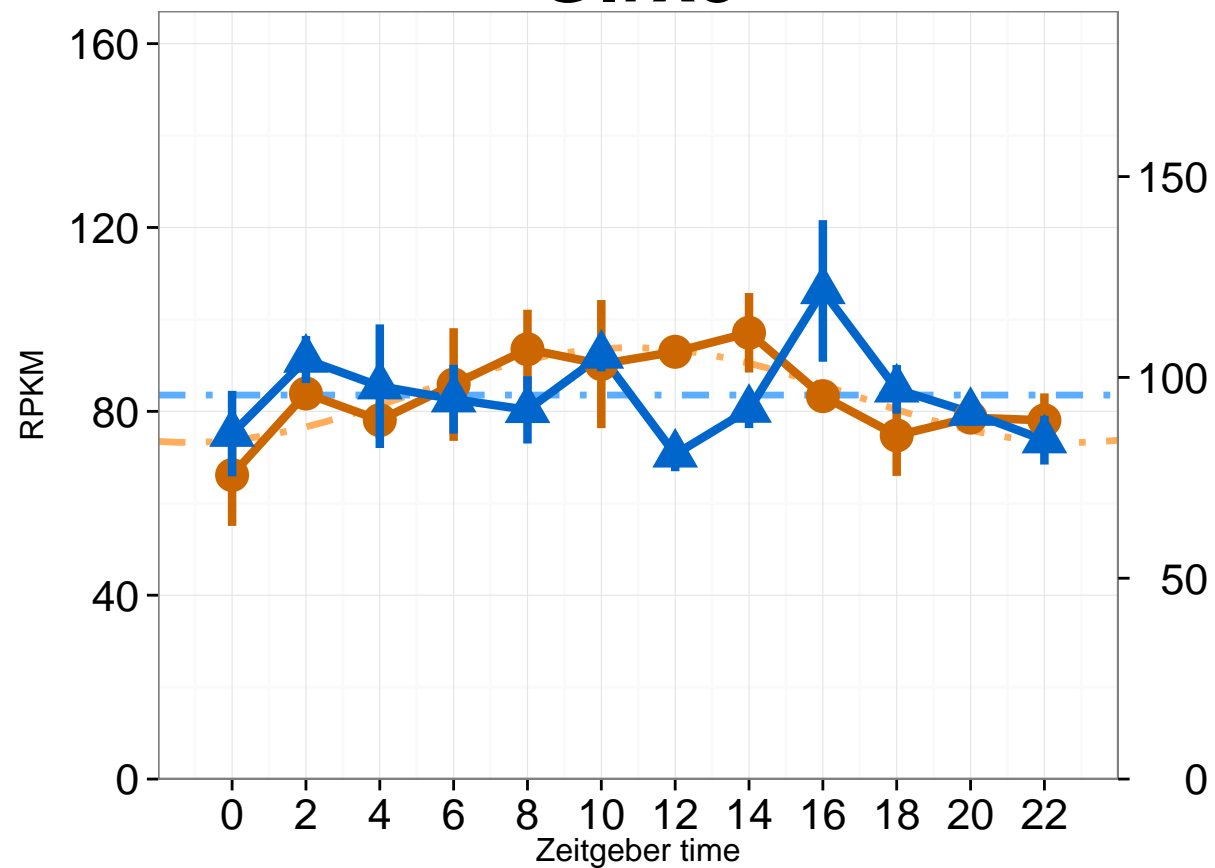

## Glrx5

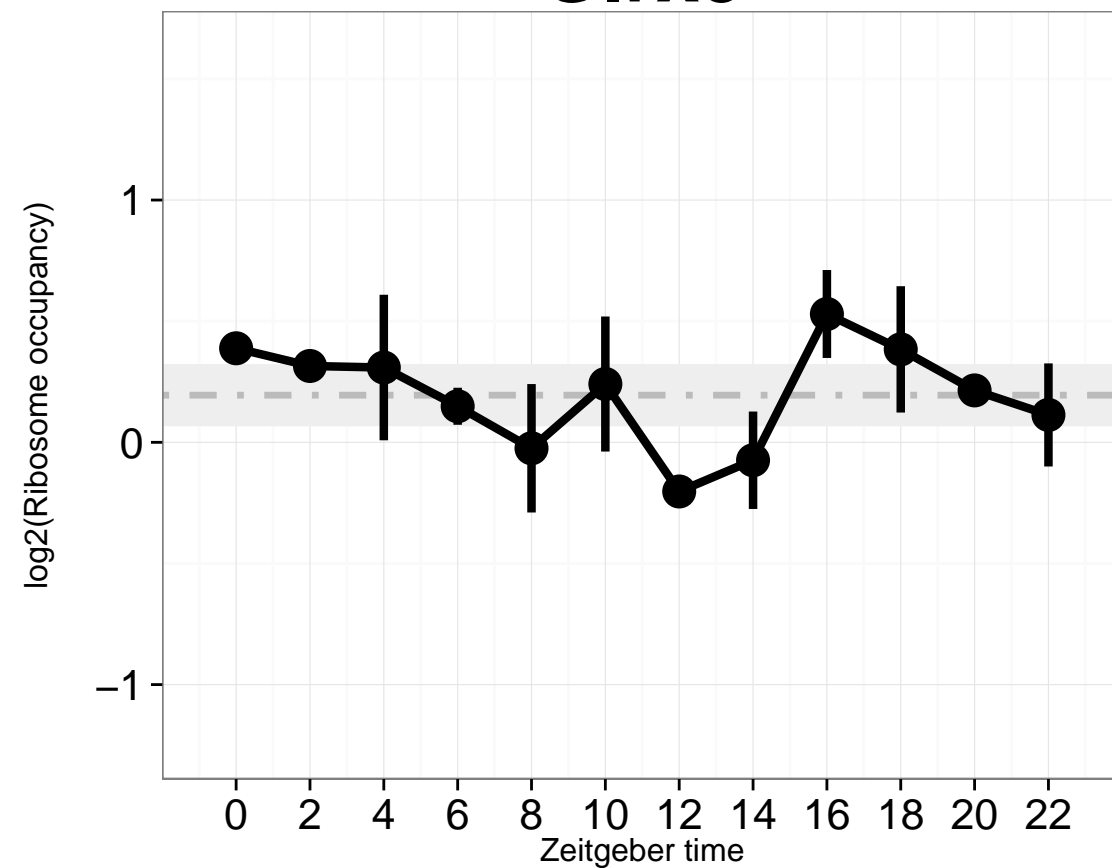

Supplement: Supplementary file 4435 [file 1]

## Per3

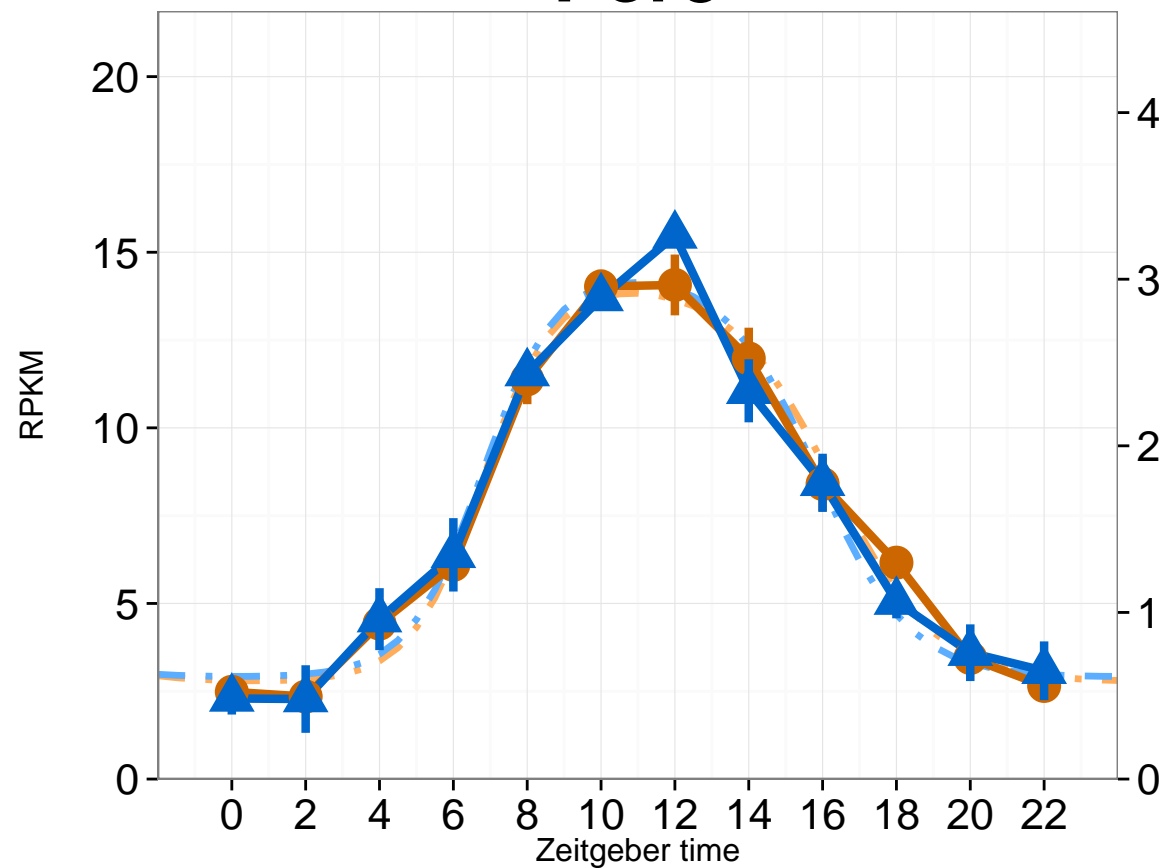

## Per3

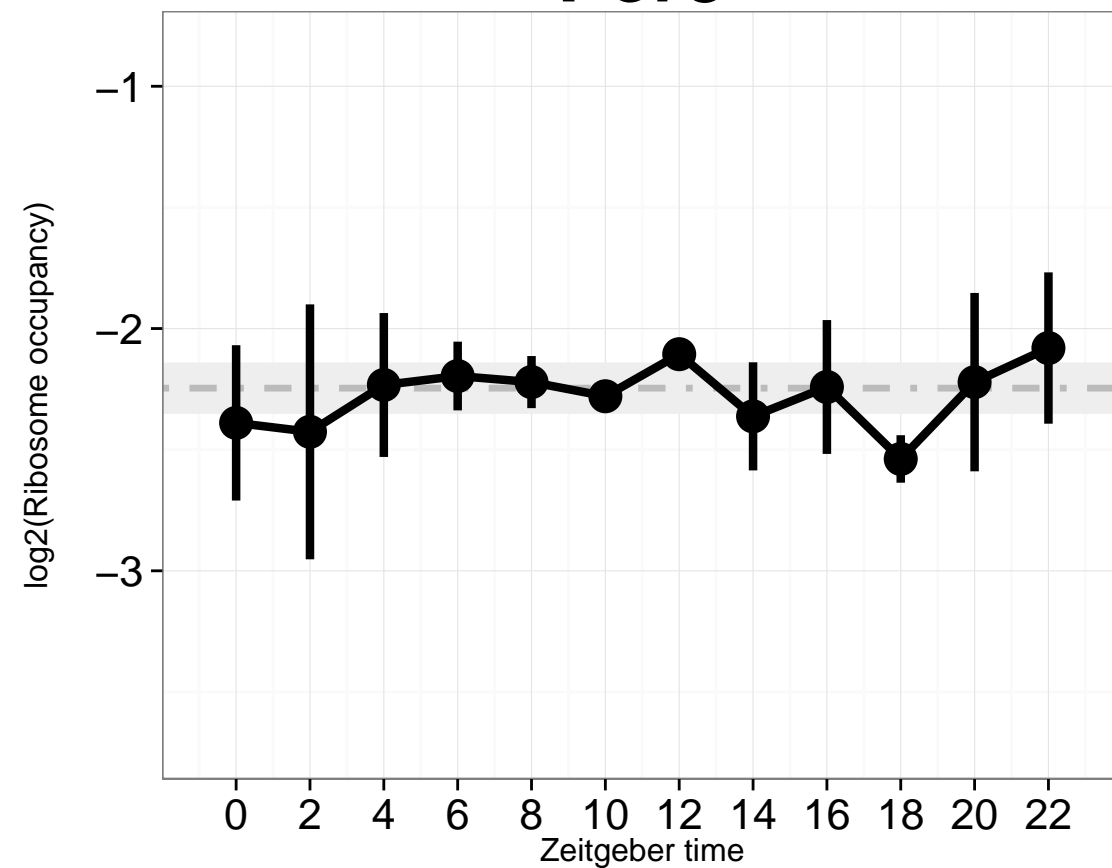

Supplement: Supplementary file 4436 [file 1]

## Afap1

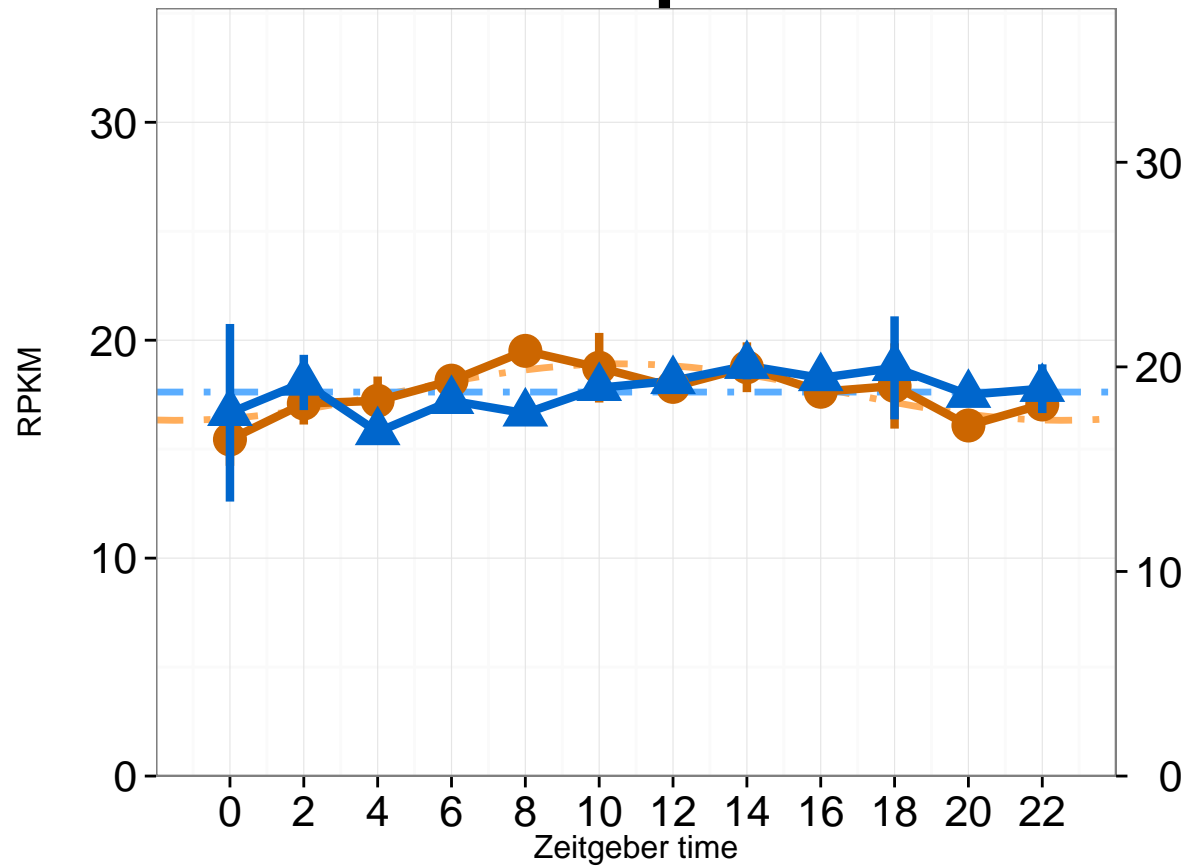

## Afap1

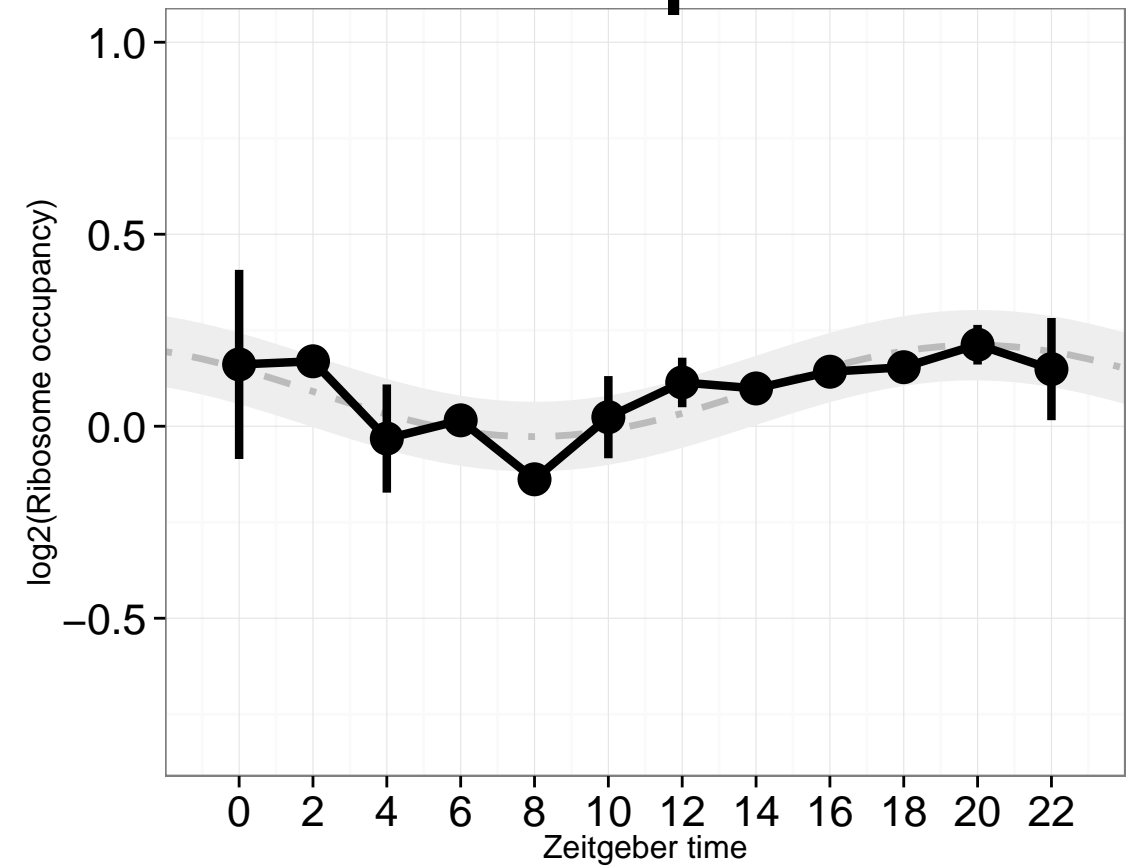

Supplement: Supplementary file 4437 [file 1]

## lrx1

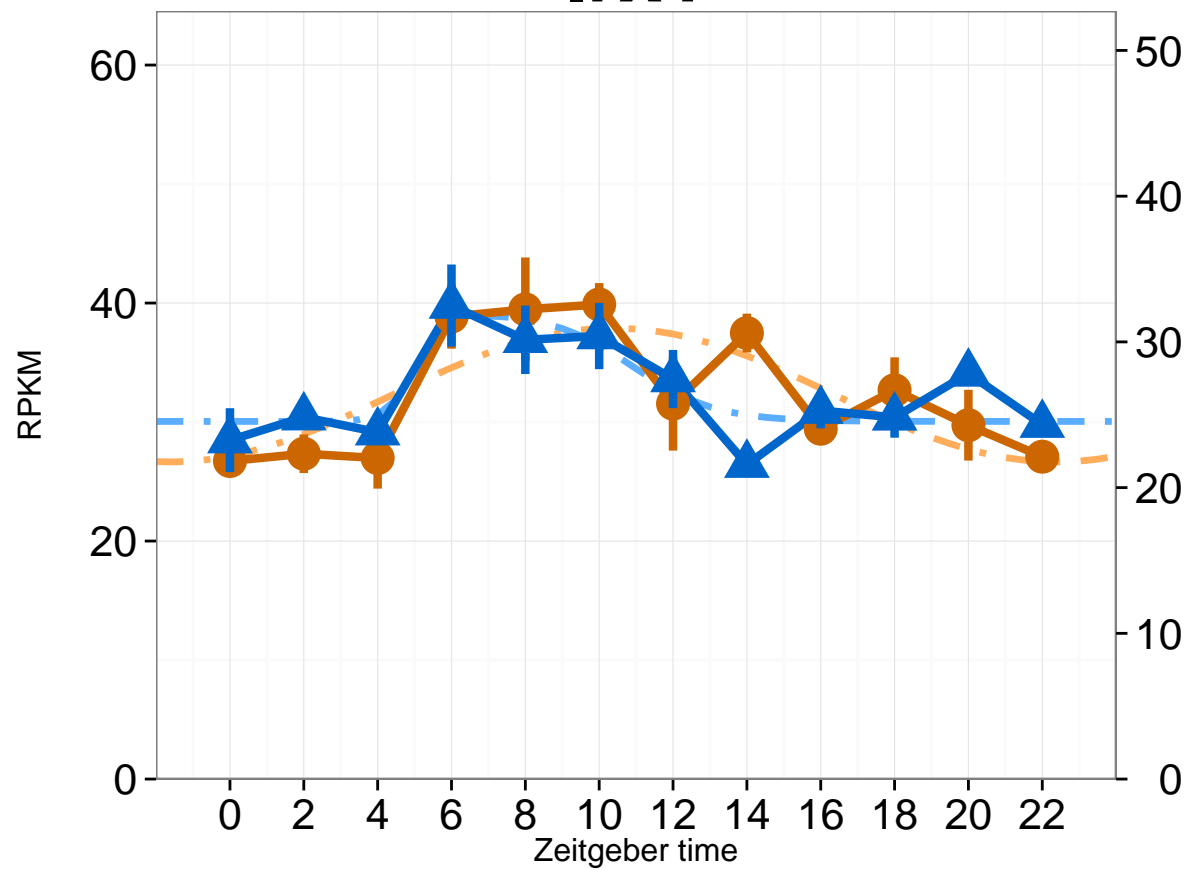

## lrx1

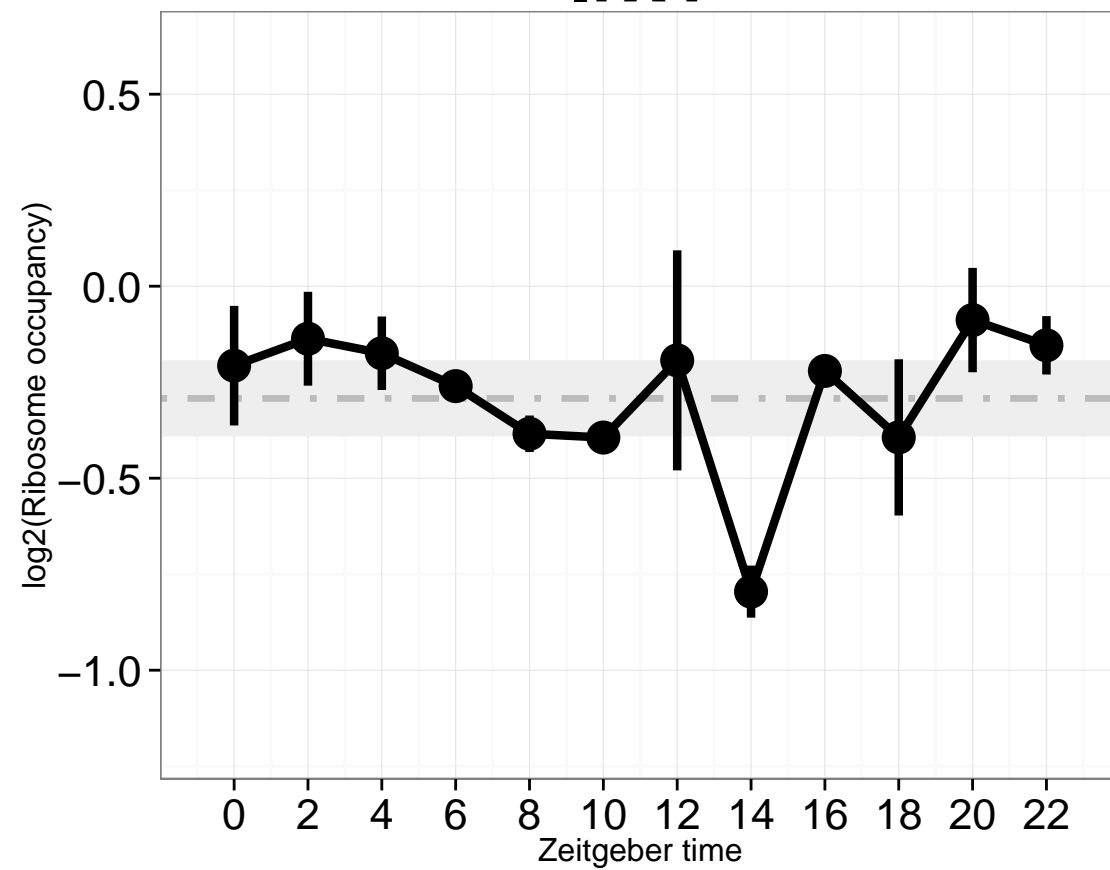

Supplement: Supplementary file 4438 [file 1]

# Dact3

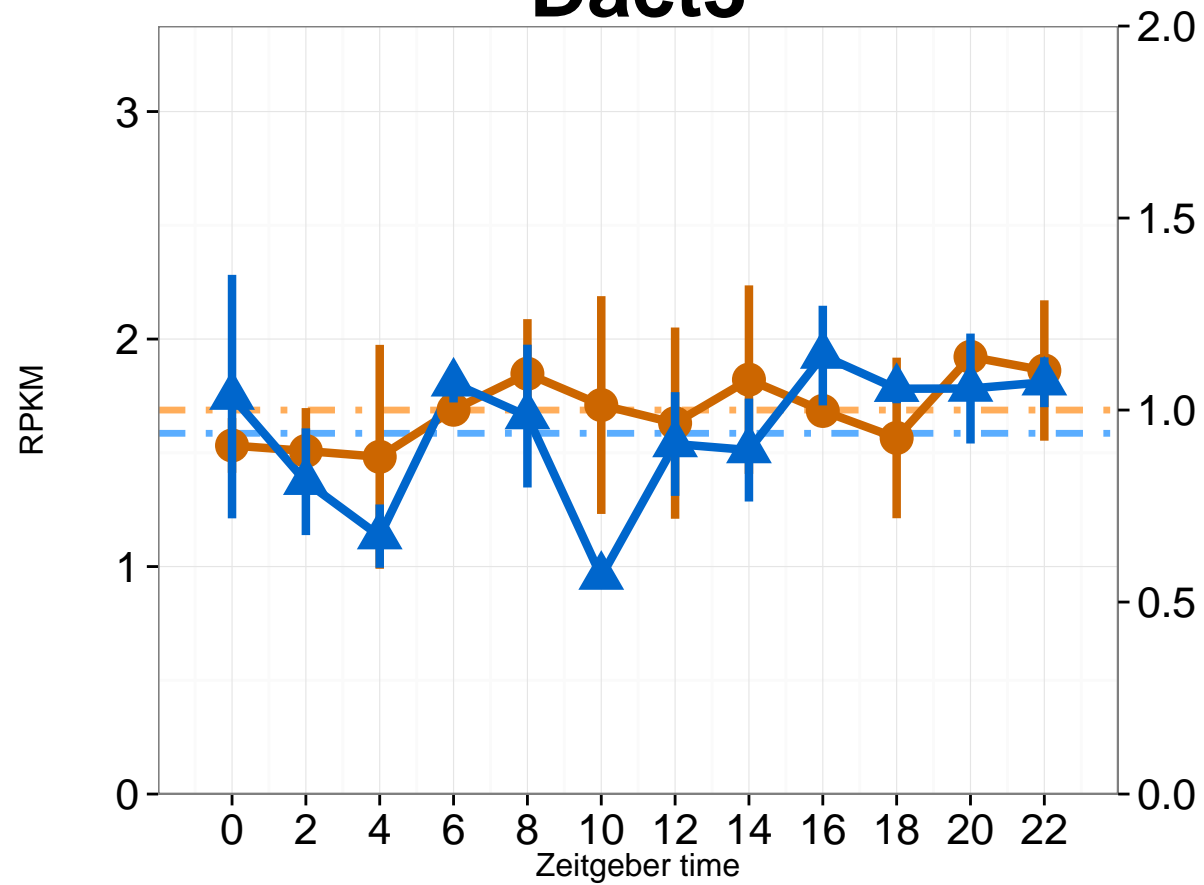

# Dact3

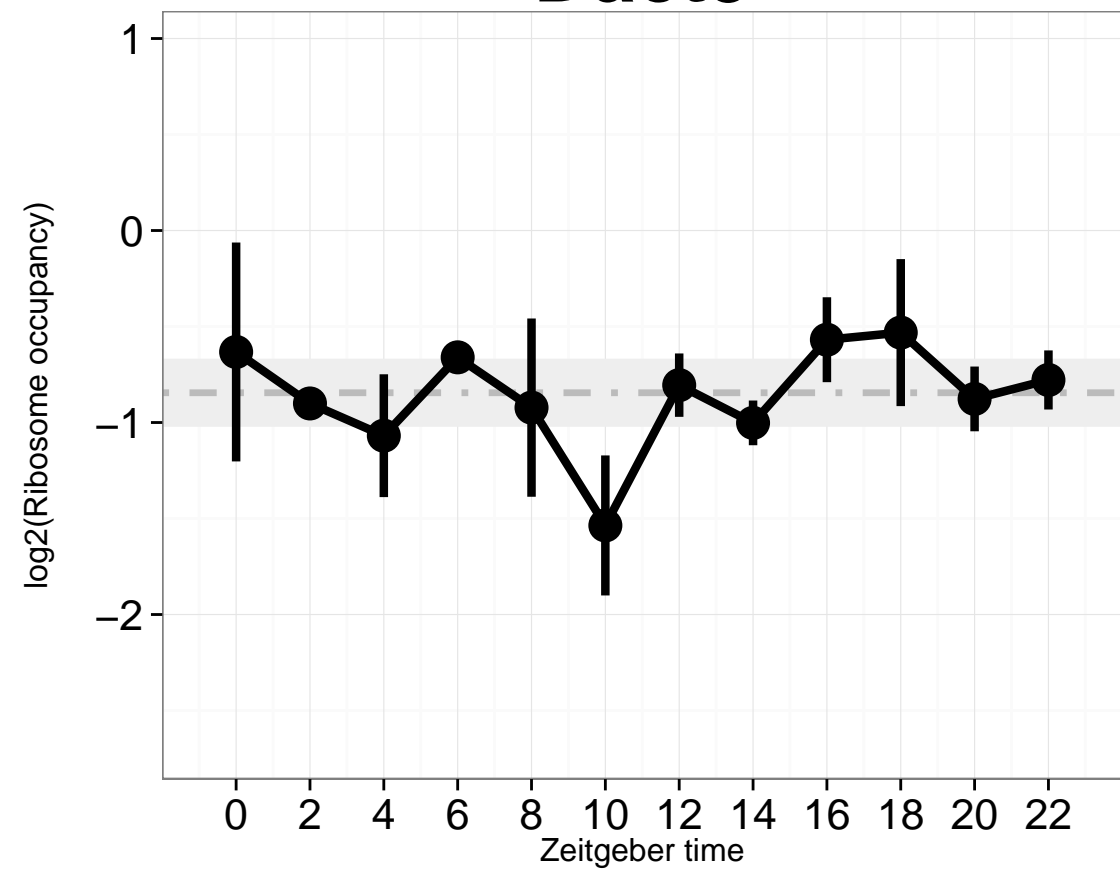

Supplement: Supplementary file 4439 [file 1]

# Zfp334

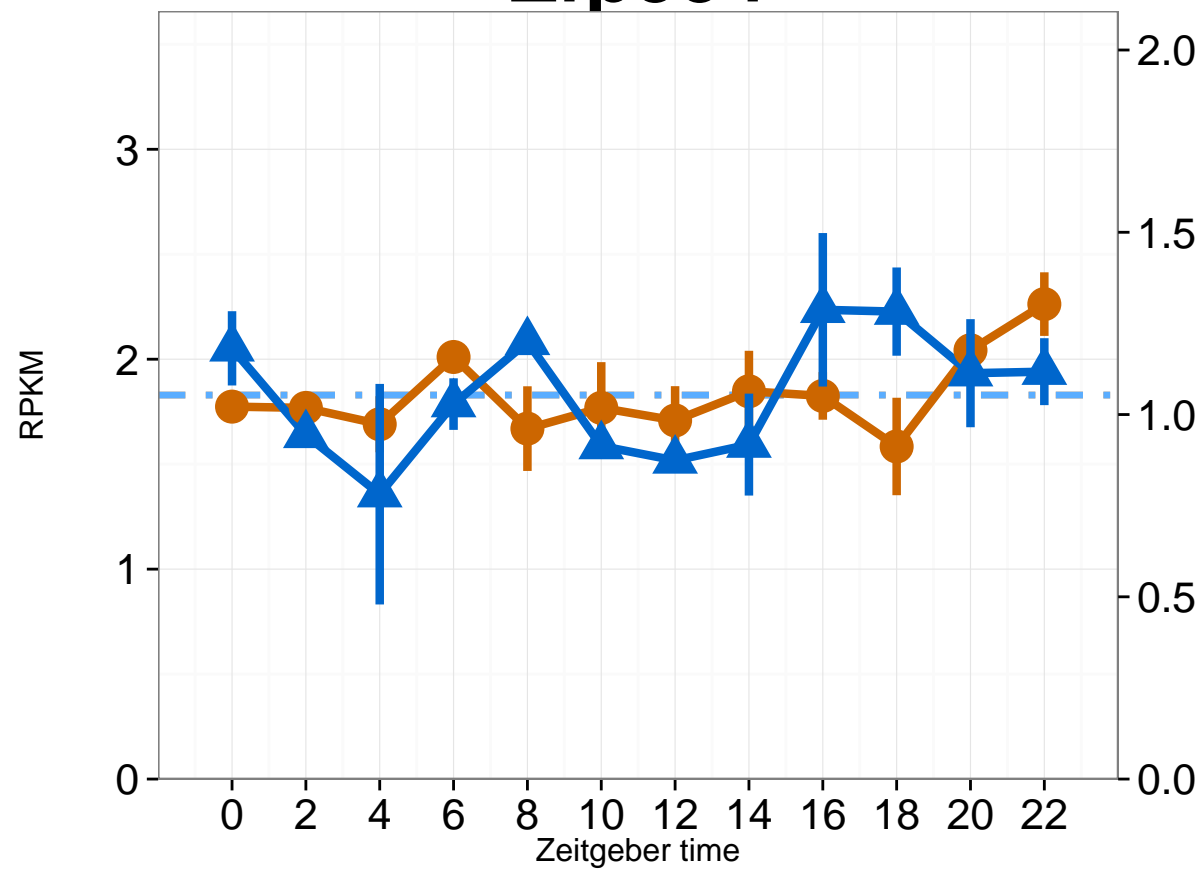

# Zfp334

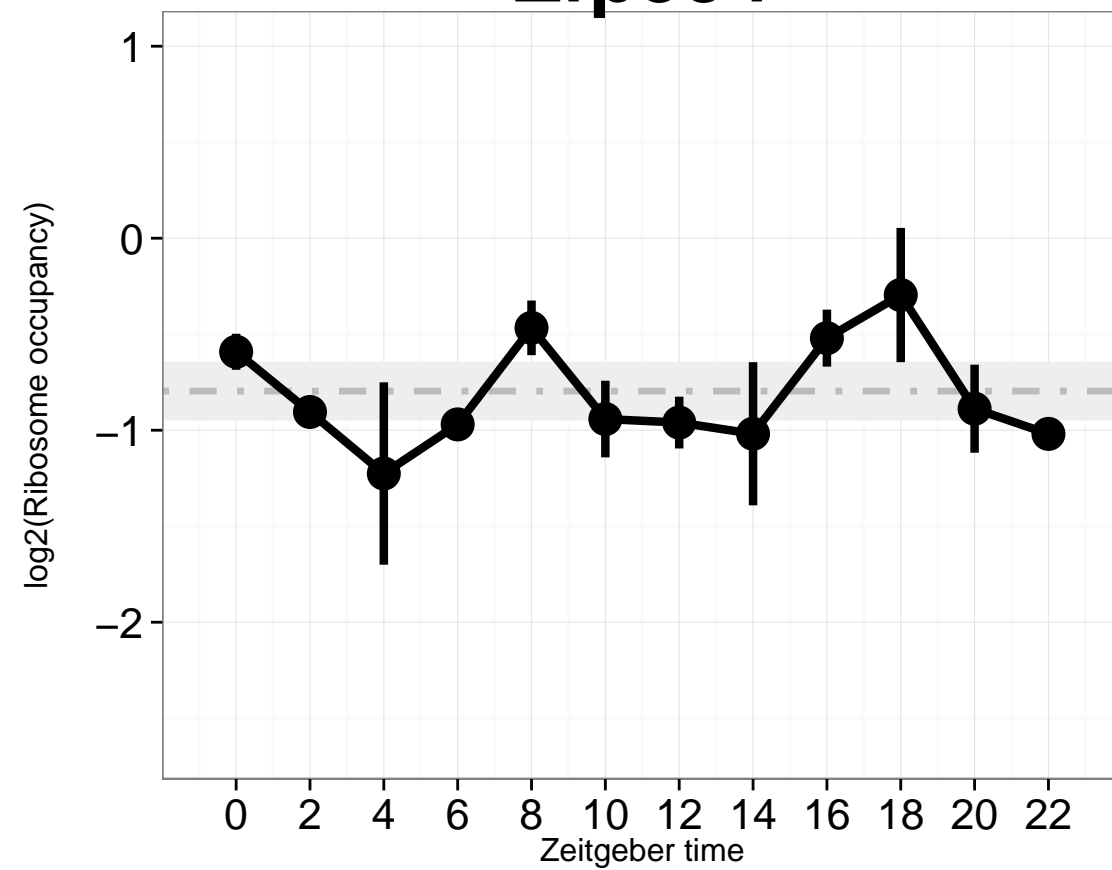

Supplement: Supplementary file 4440 [file 1]

## Lmo2

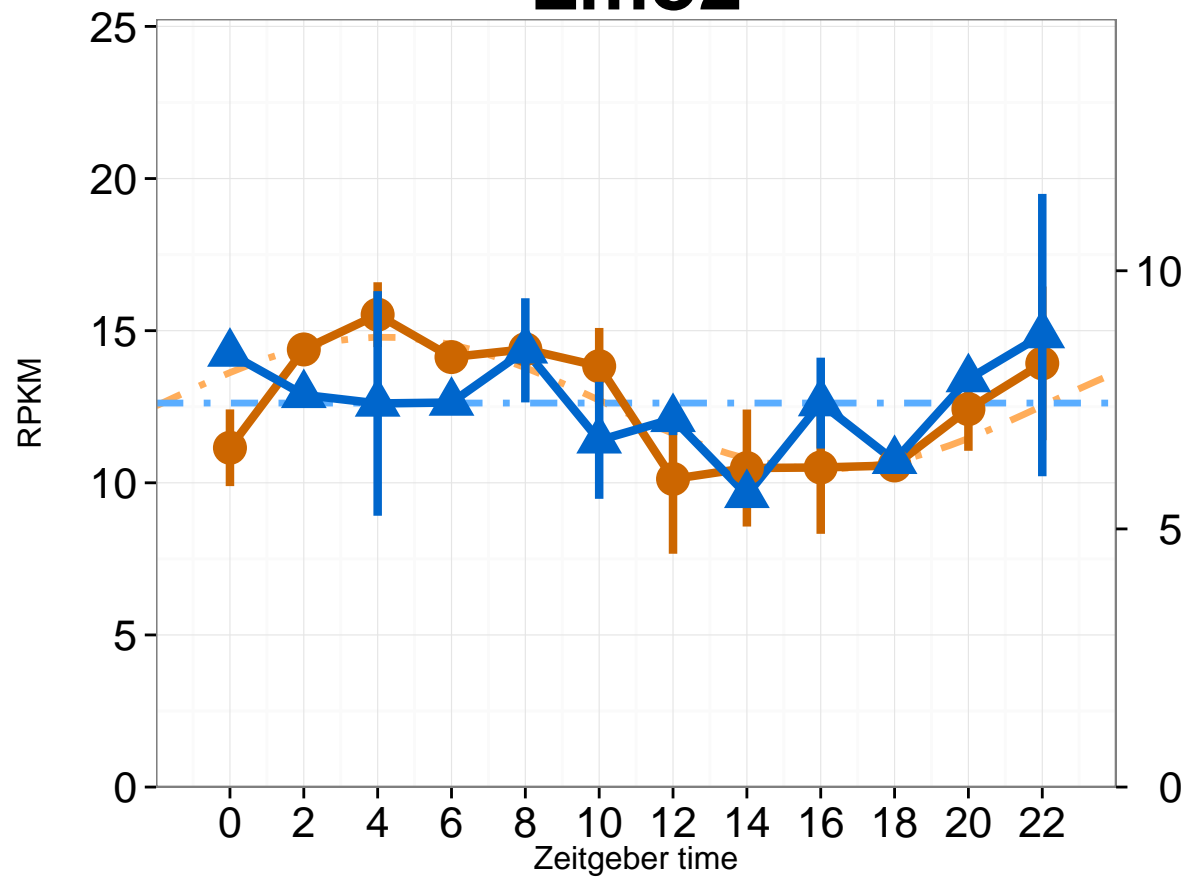

## Lmo2

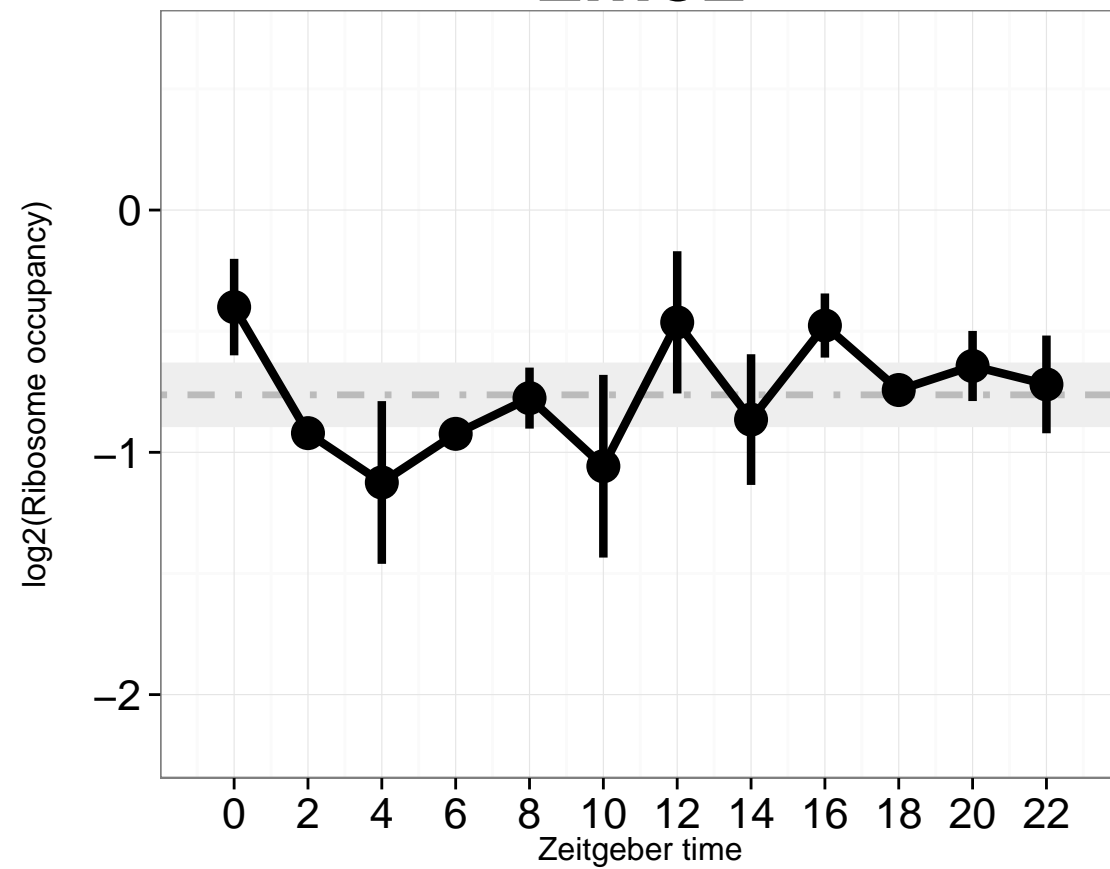

Supplement: Supplementary file 4441 [file 1]

## Fchsd2

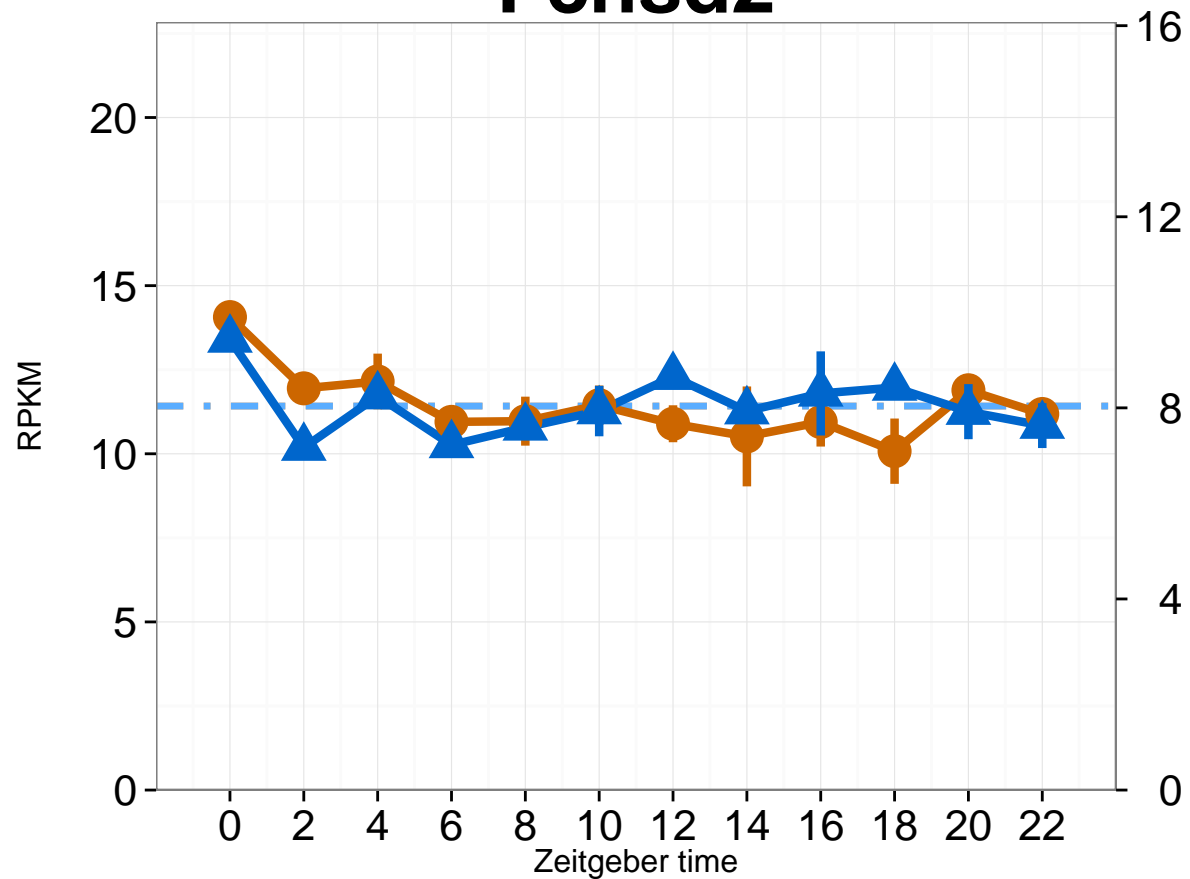

## Fchsd2

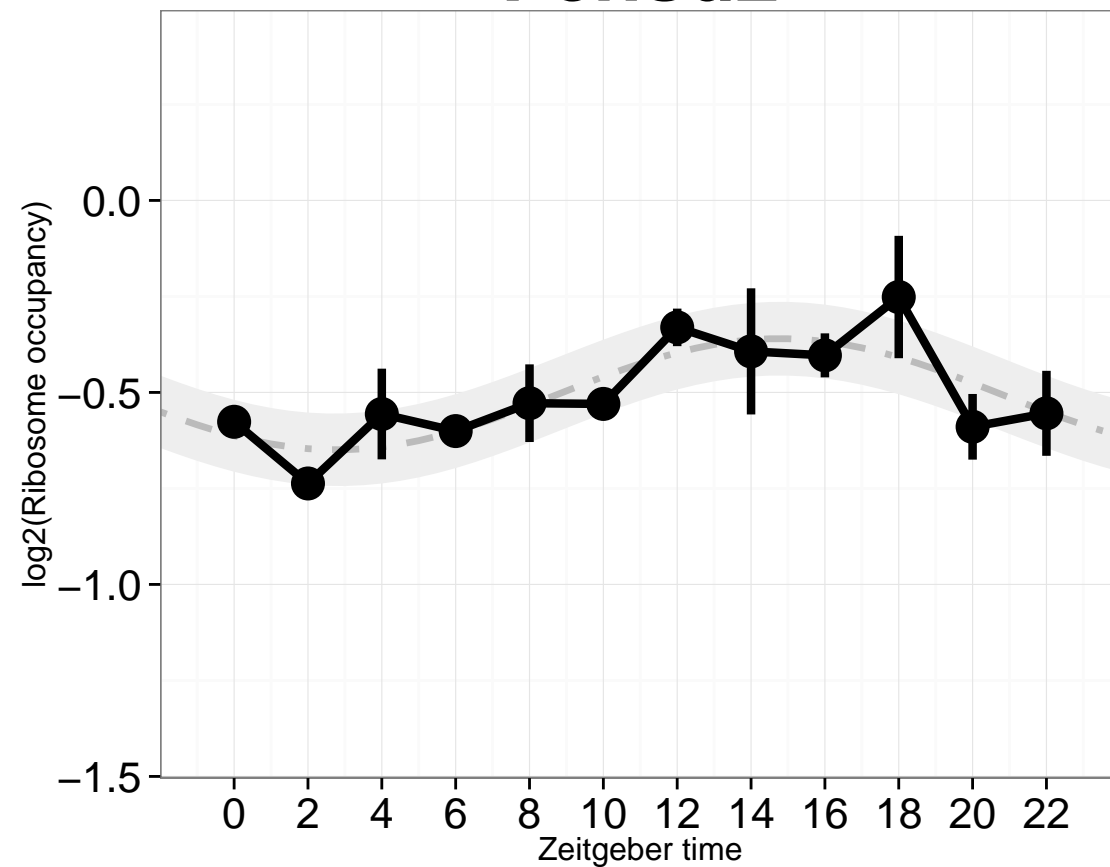

Supplement: Supplementary file 4442 [file 1]

## Dock4

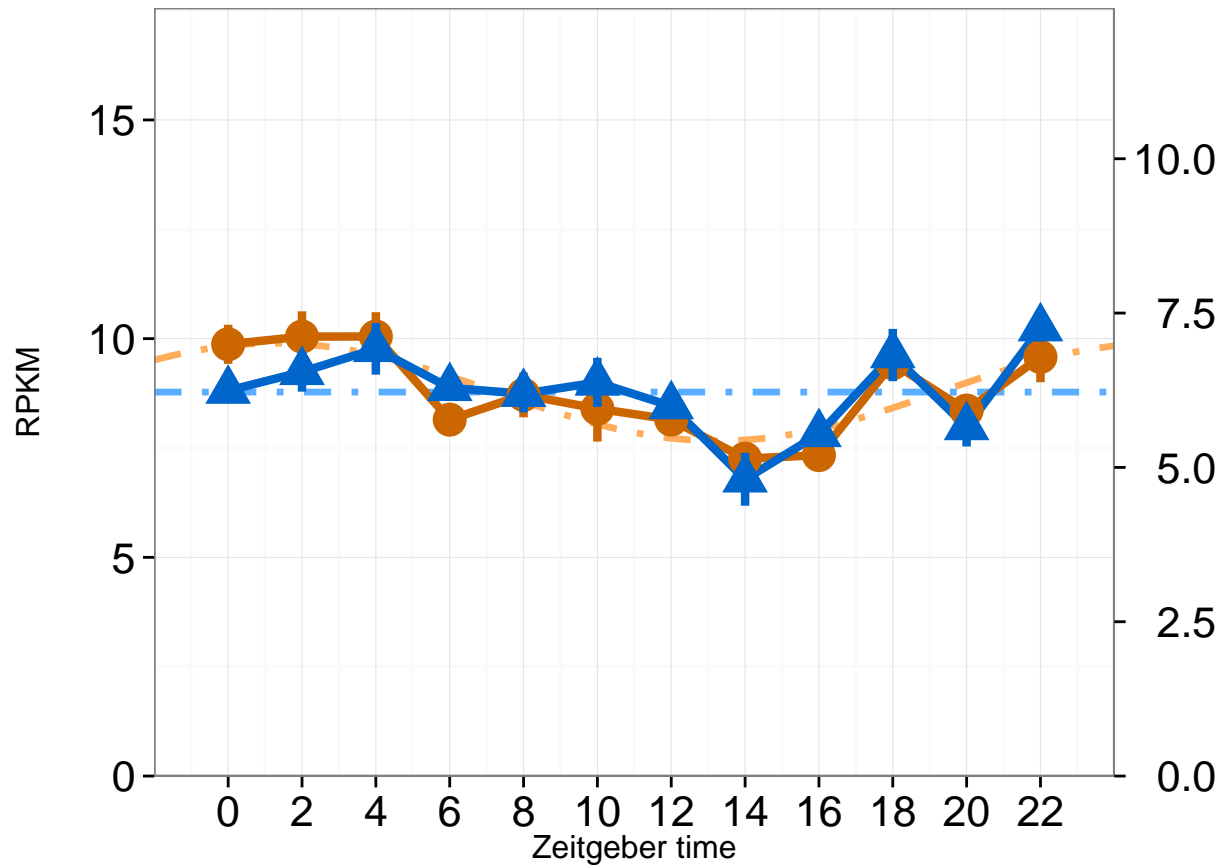

## Dock4

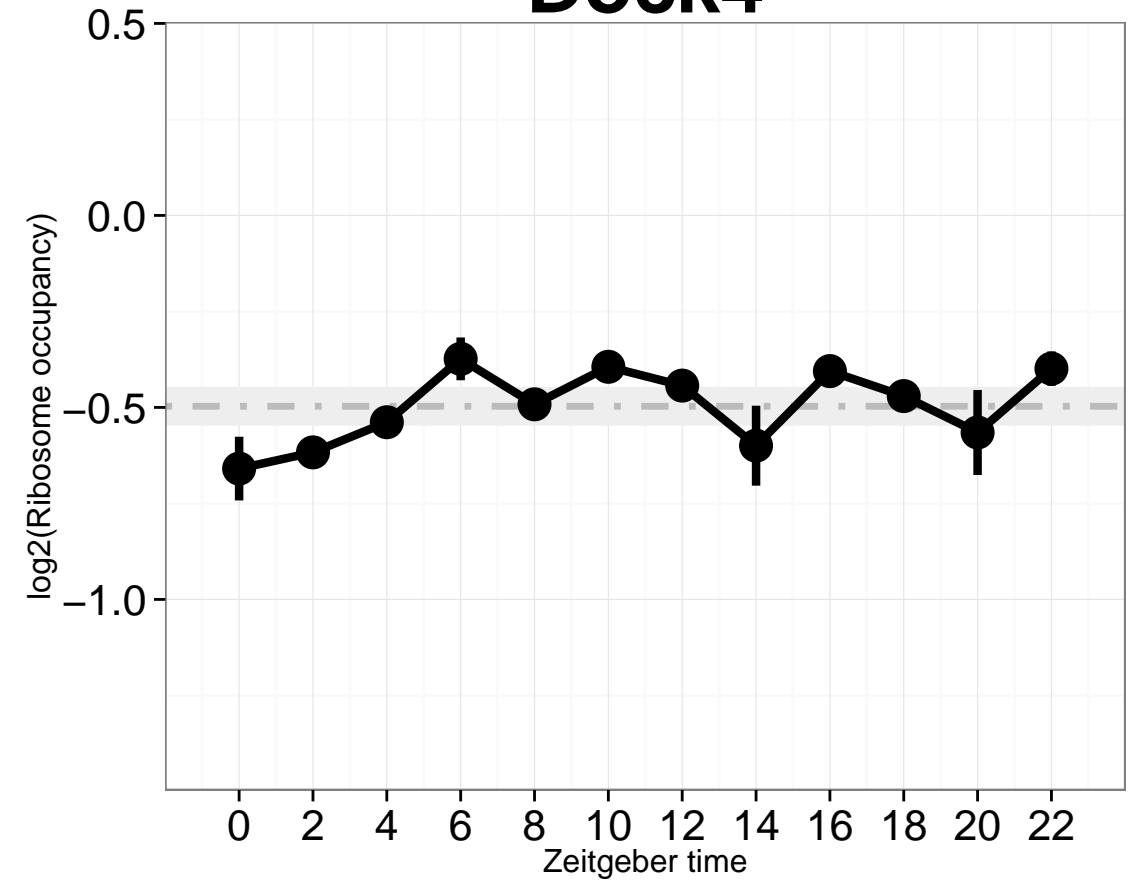

Supplement: Supplementary file 4443 [file 1]

## Stil

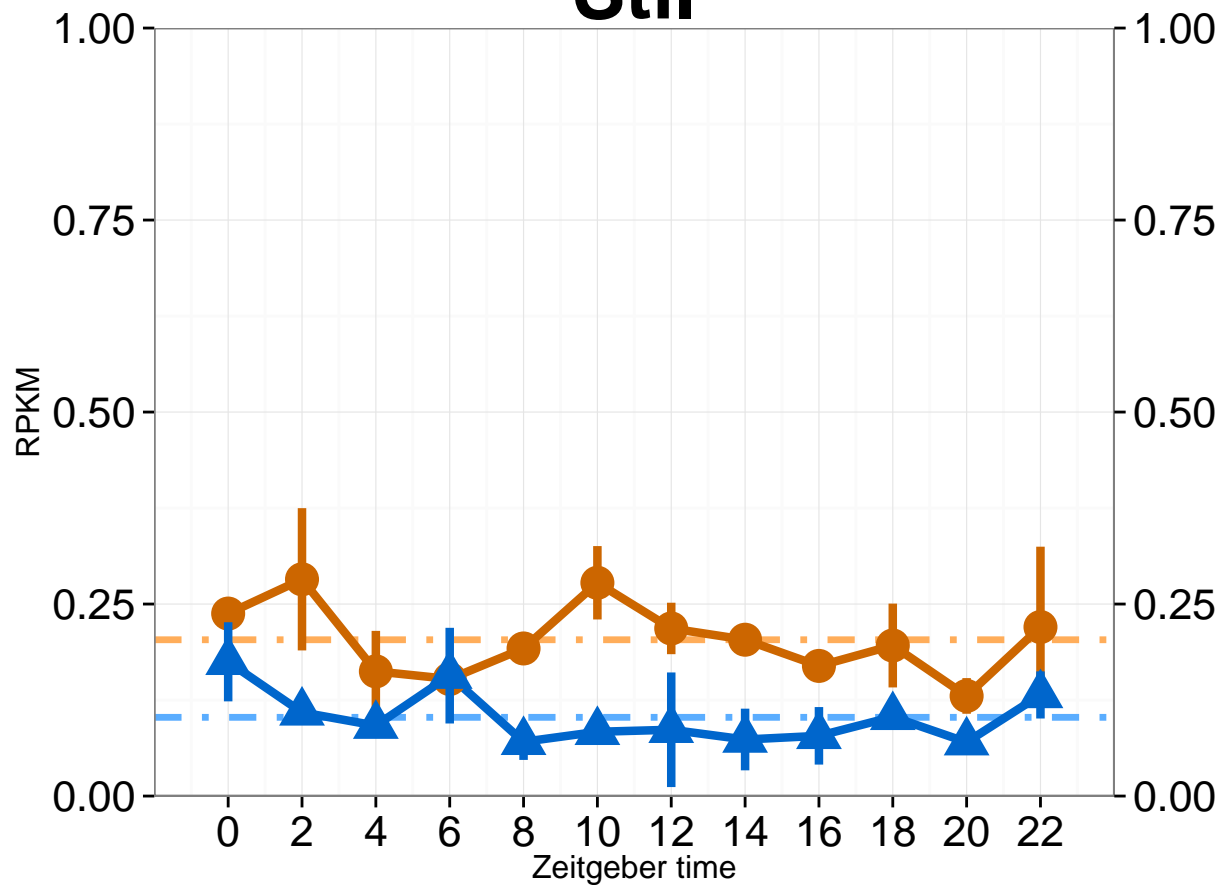

## Stil

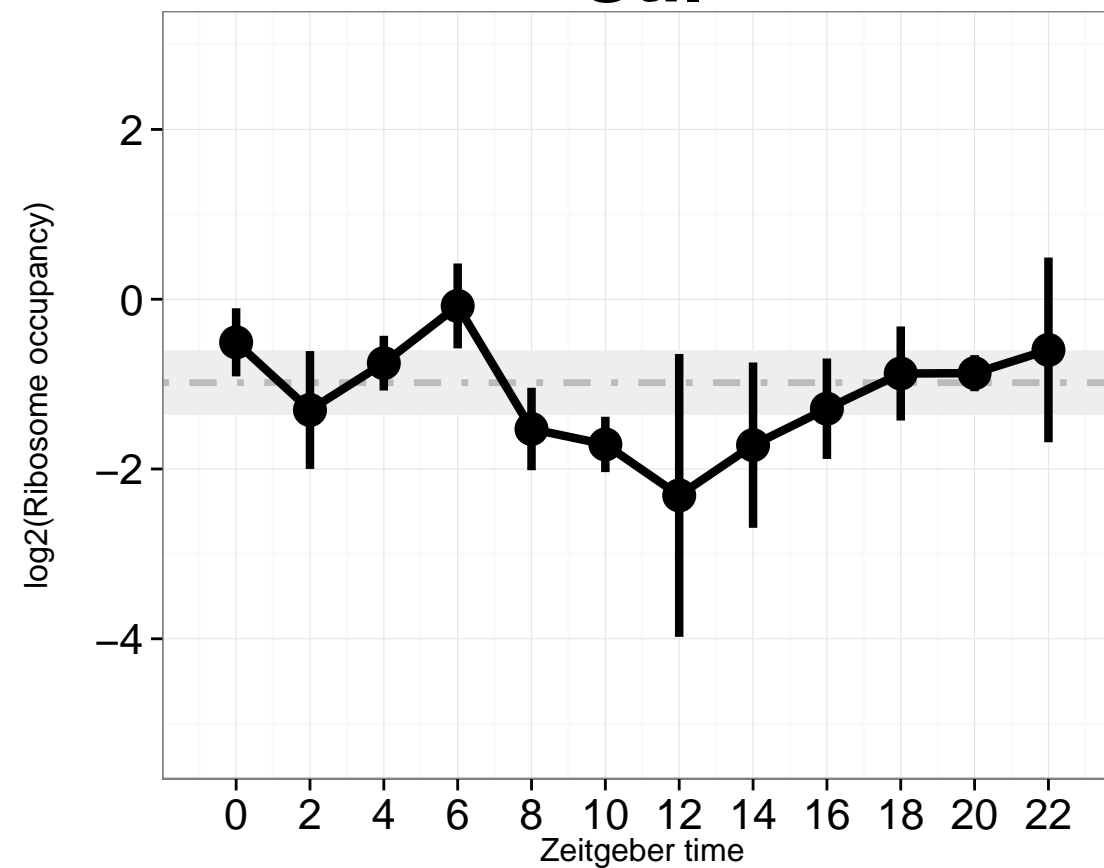

Supplement: Supplementary file 4444 [file 1]

# Exoc6b

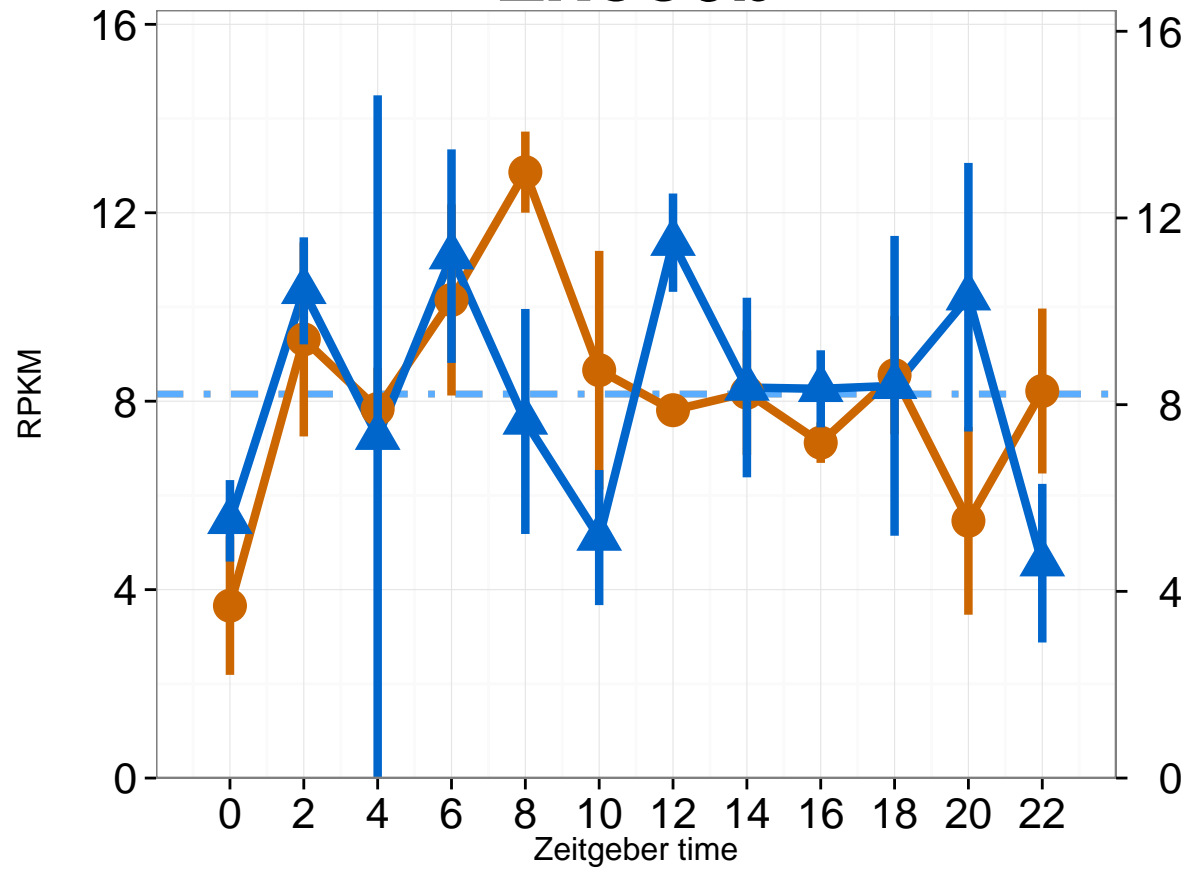

# Exoc6b

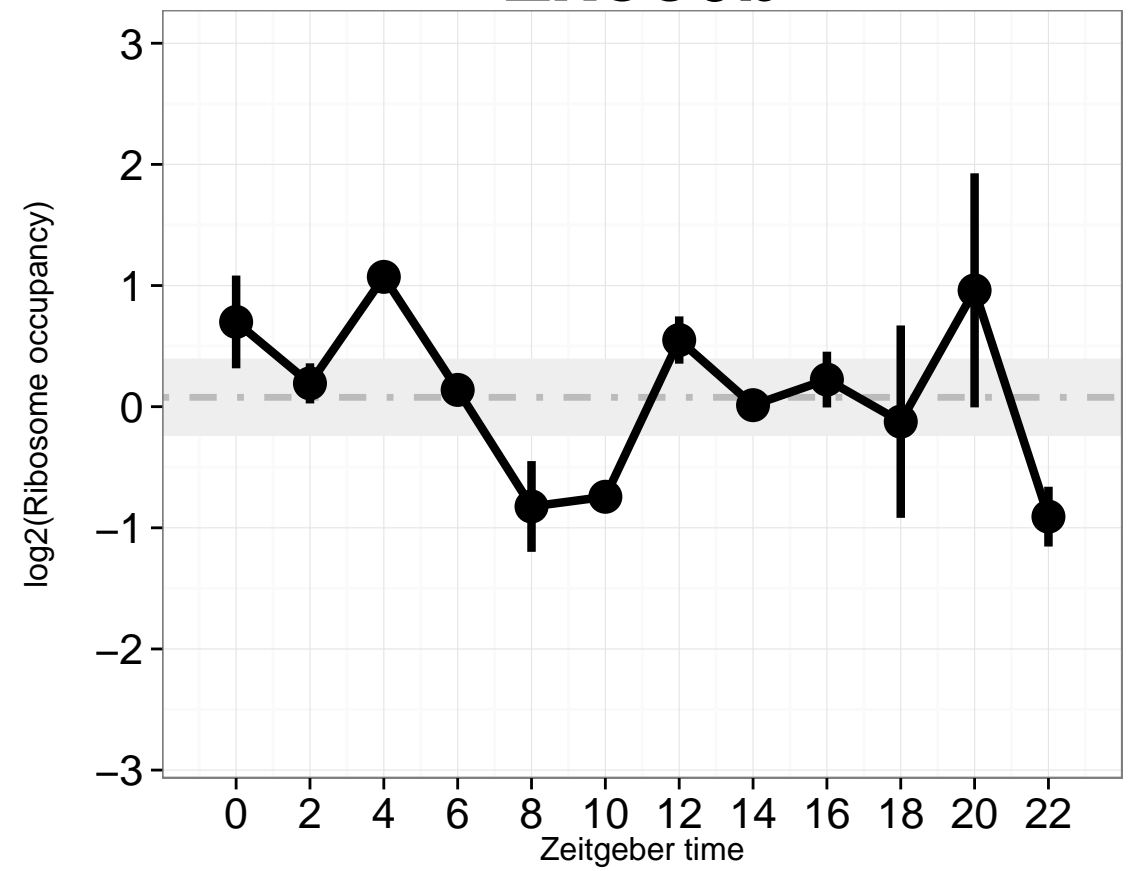

Supplement: Supplementary file 4445 [file 1]

## Mri1

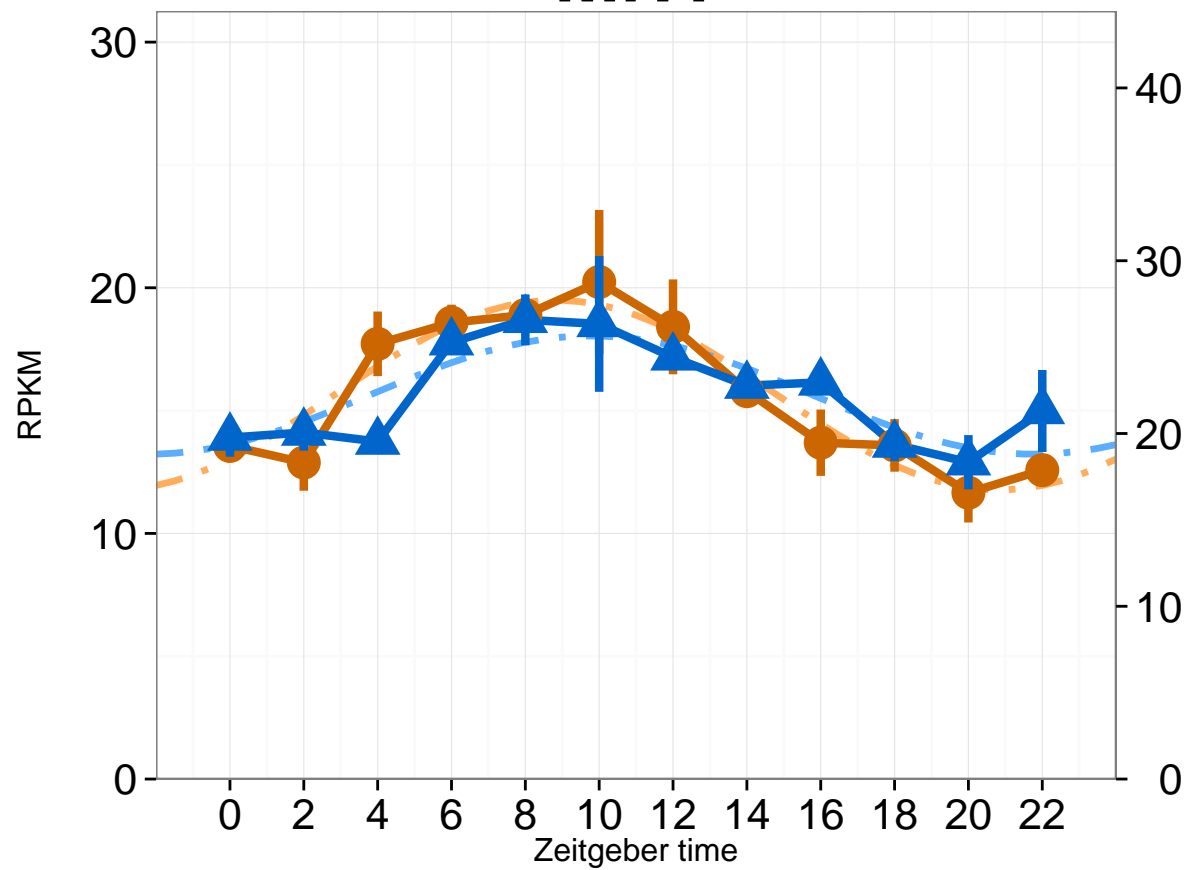

## Mri1

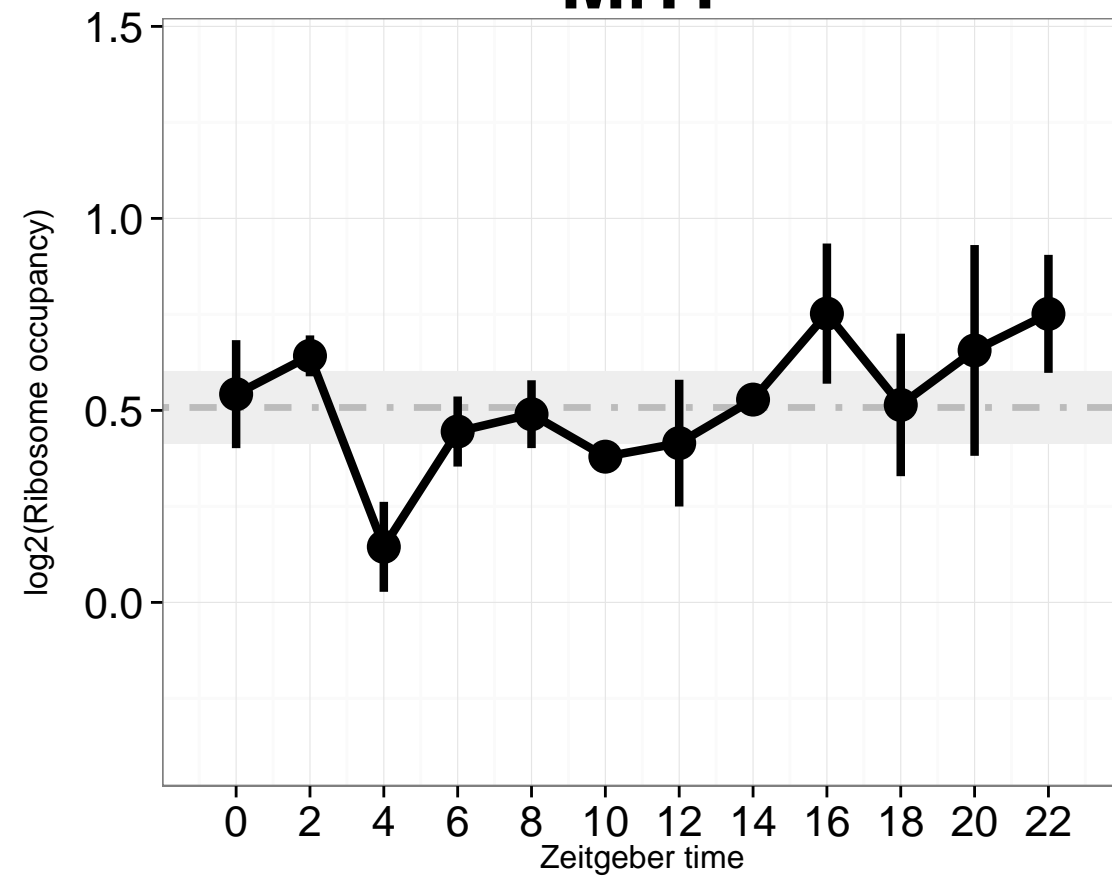

Supplement: Supplementary file 4446 [file 1]

## Ube2e1

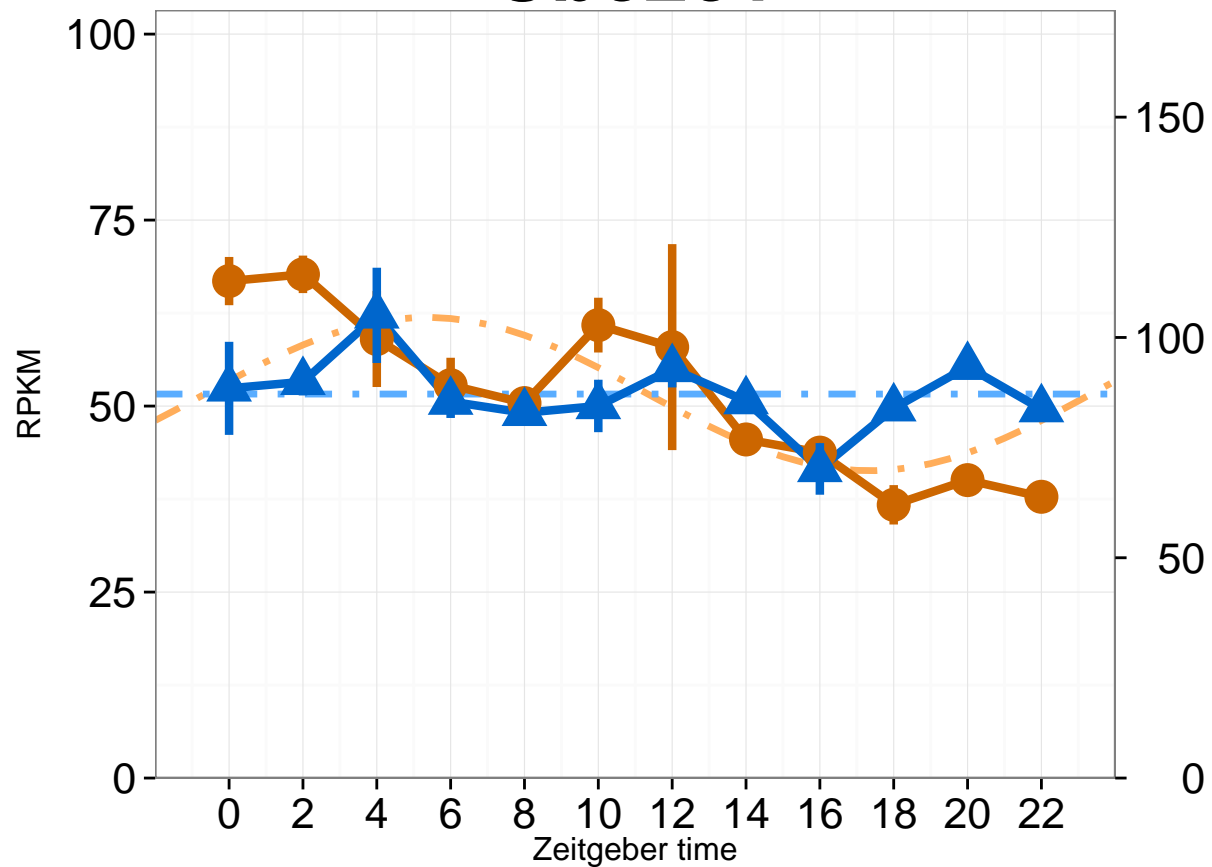

## Ube2e1

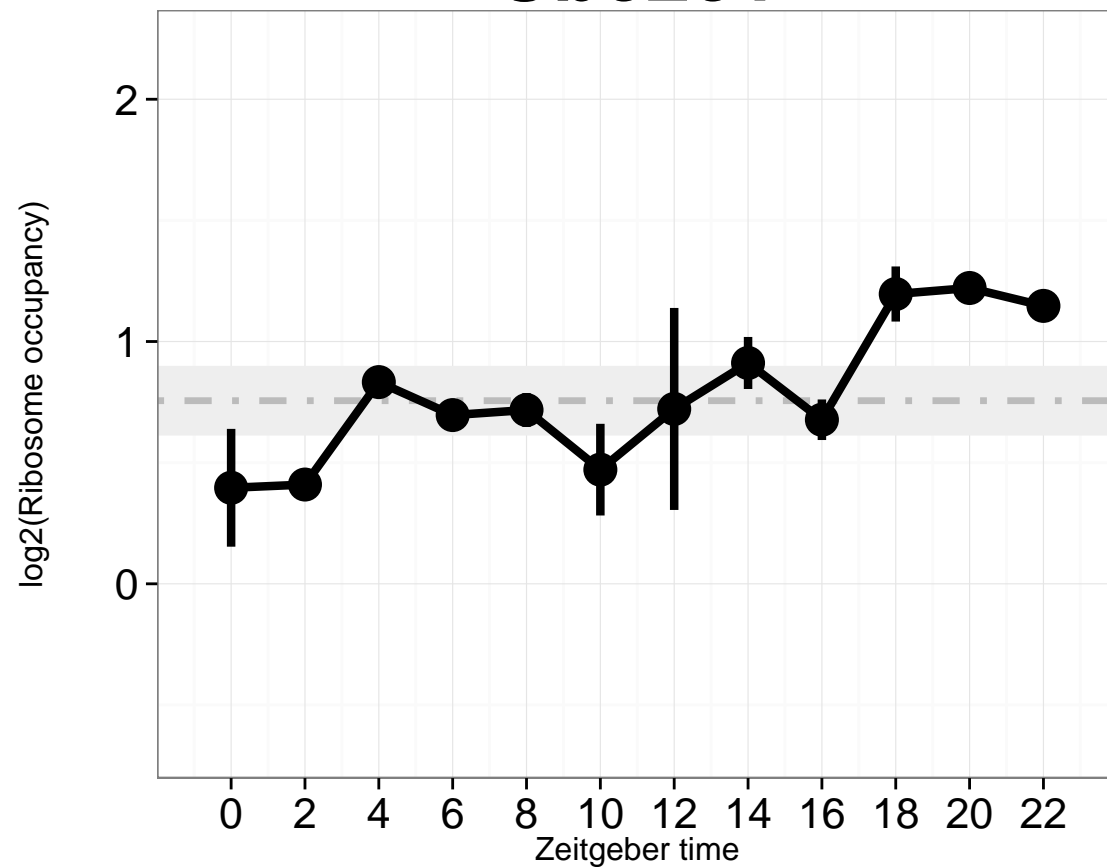

Supplement: Supplementary file 4447 [file 1]

# Deaf1

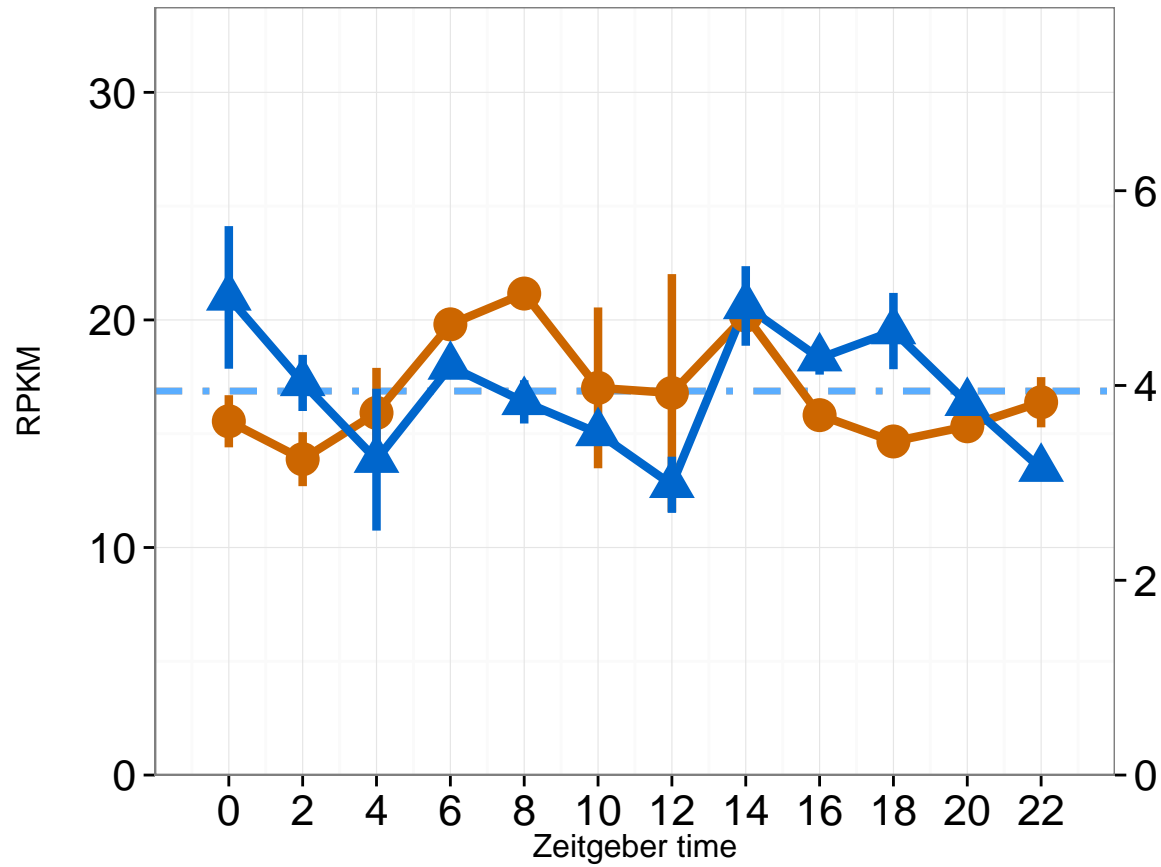

# Deaf1

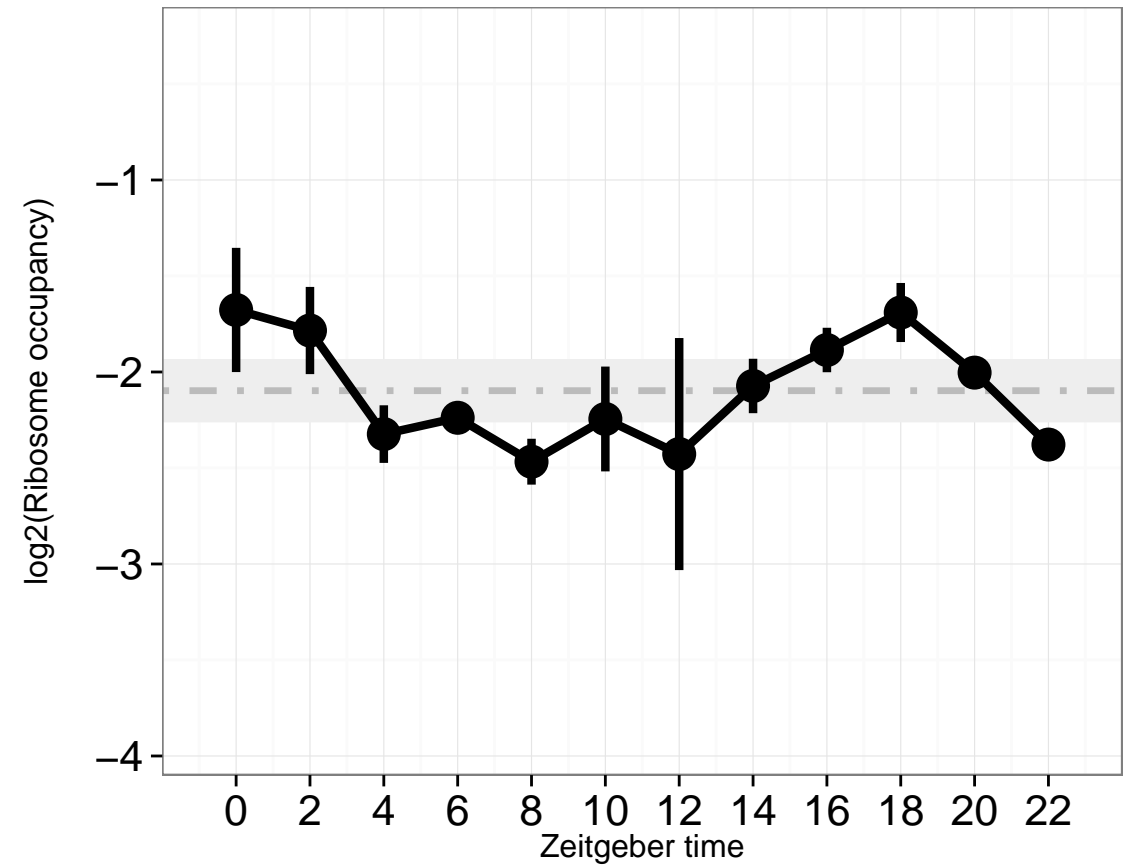

Supplement: Supplementary file 4448 [file 1]

## Myef2

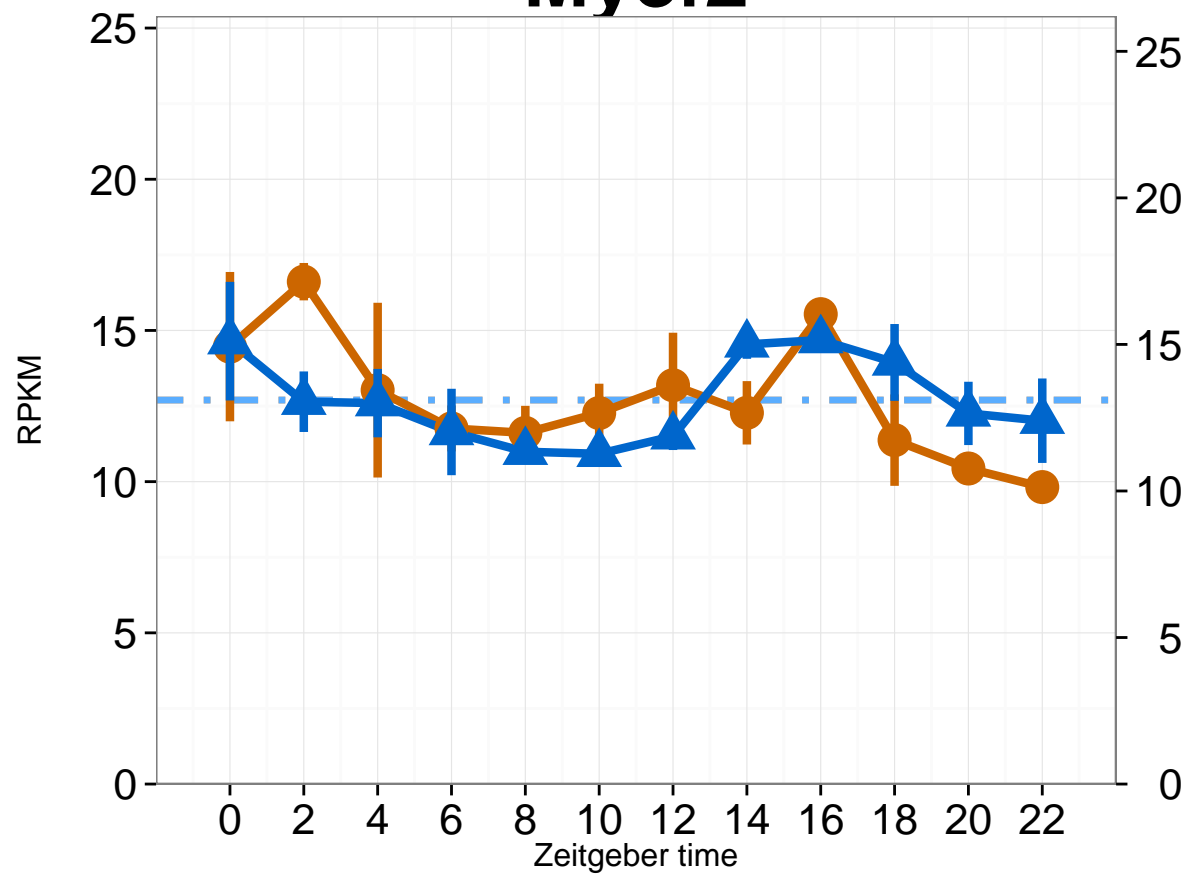

## Myef2

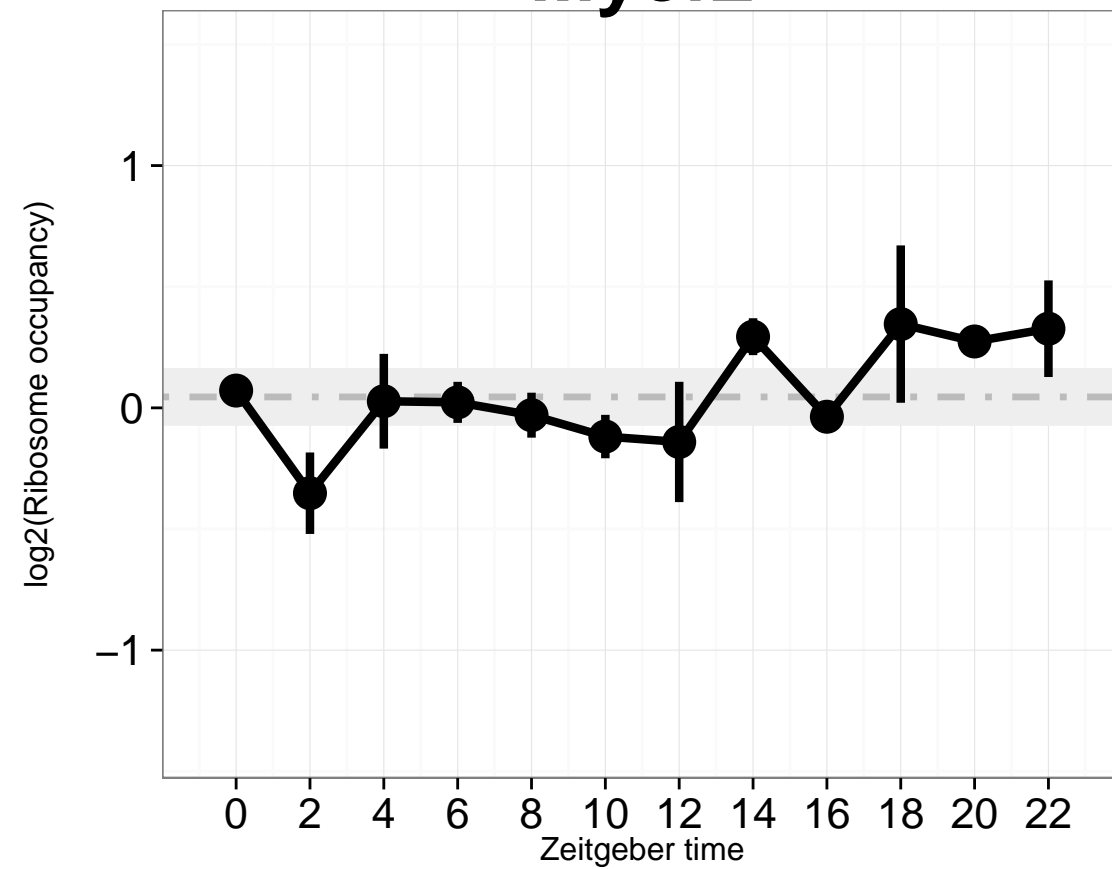

Supplement: Supplementary file 4449 [file 1]

## EmI4

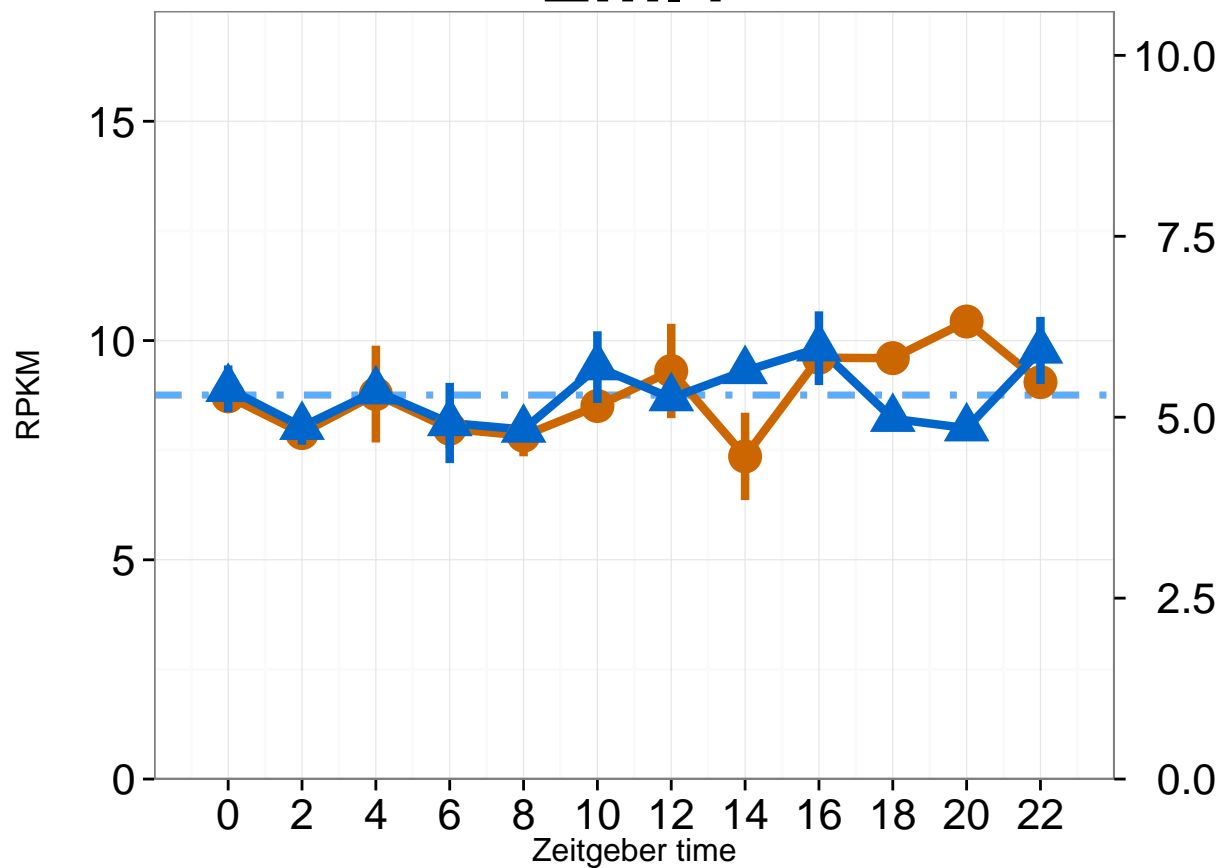

## EmI4

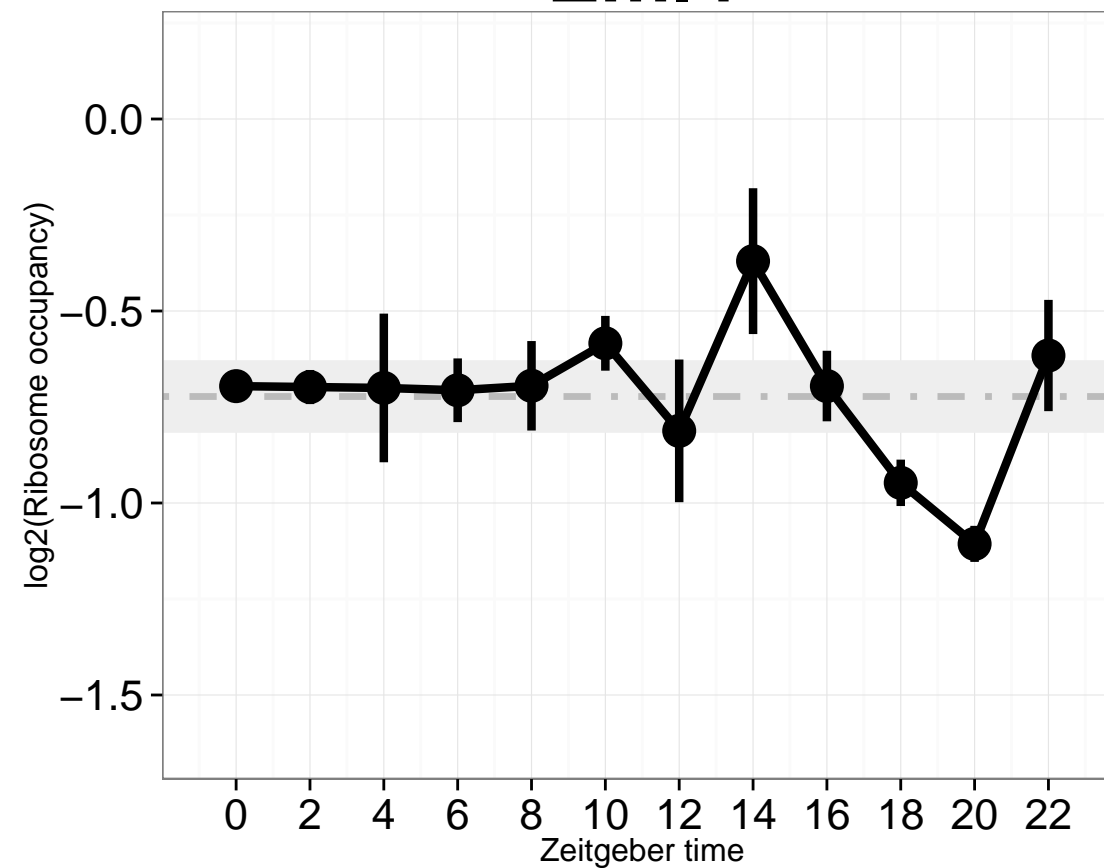

Supplement: Supplementary file 4450 [file 1]

## Mettl20

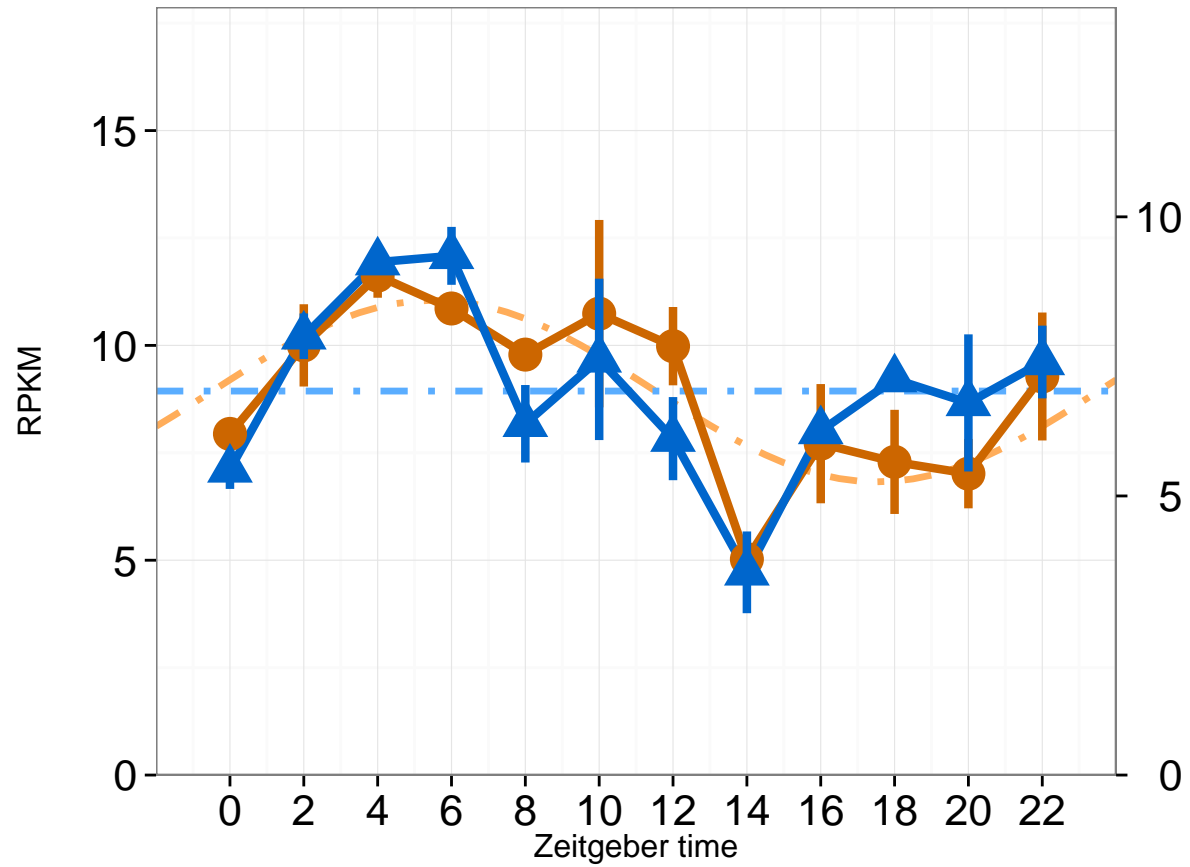

## Mettl20

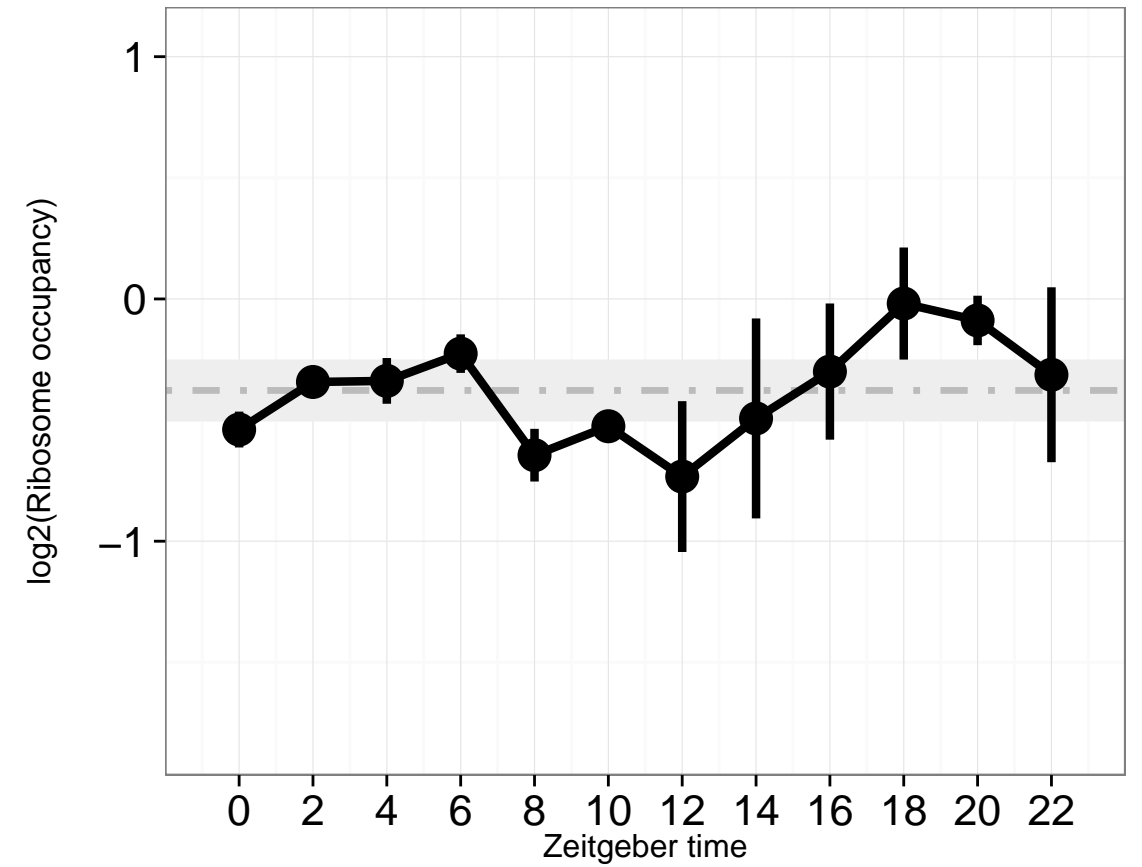

Supplement: Supplementary file 4451 [file 1]

# Lrig2

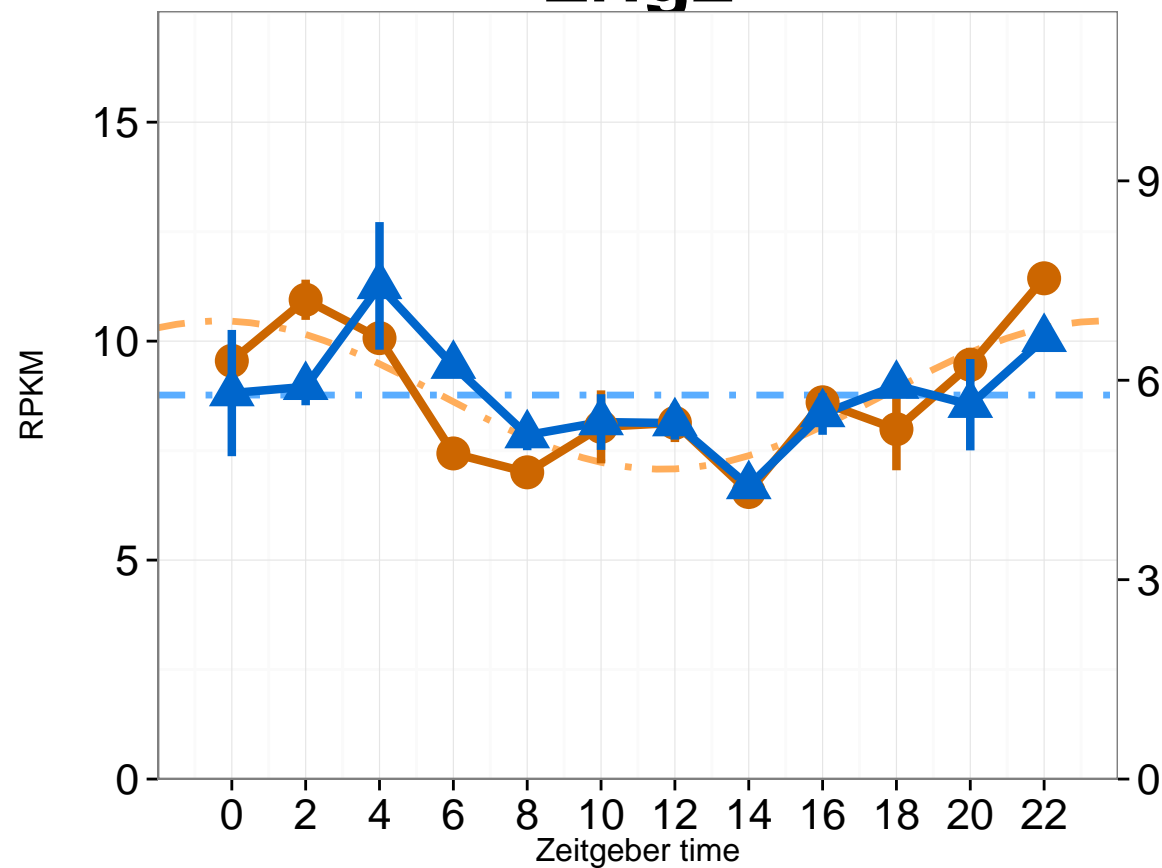

# Lrig2

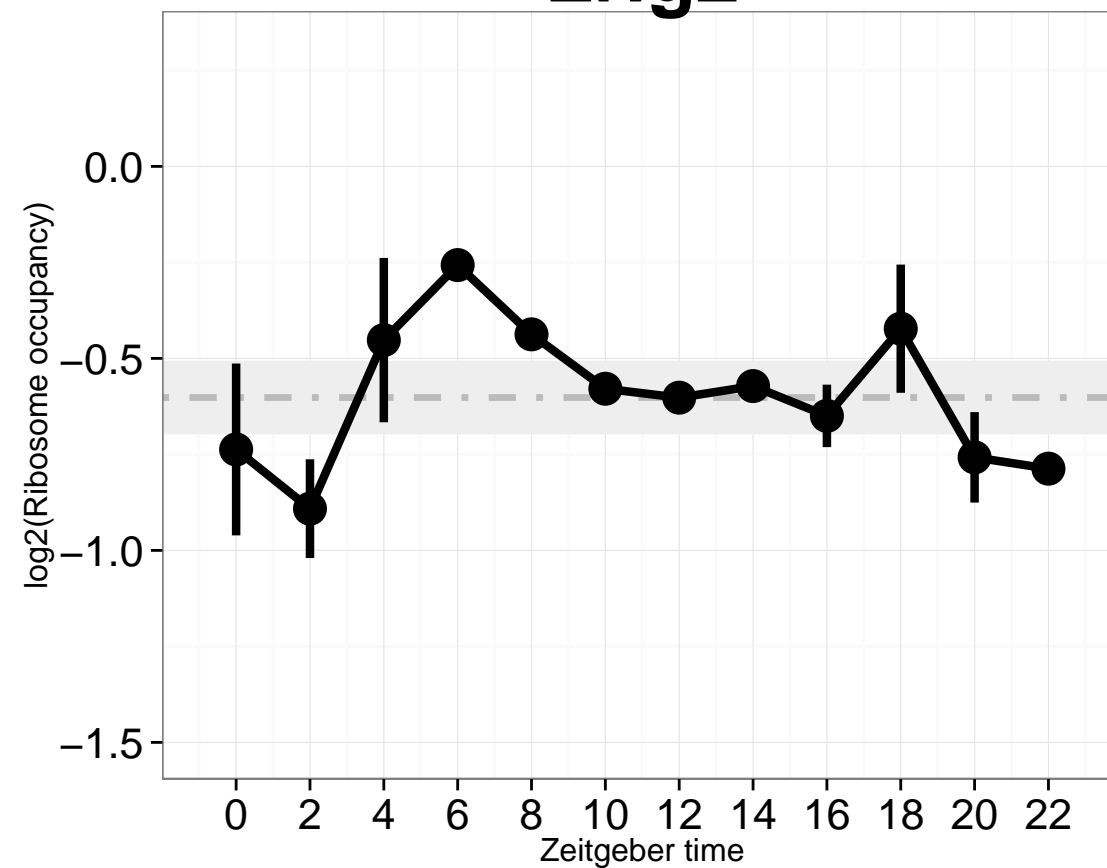

Supplement: Supplementary file 4452 [file 1]

# Tmem168

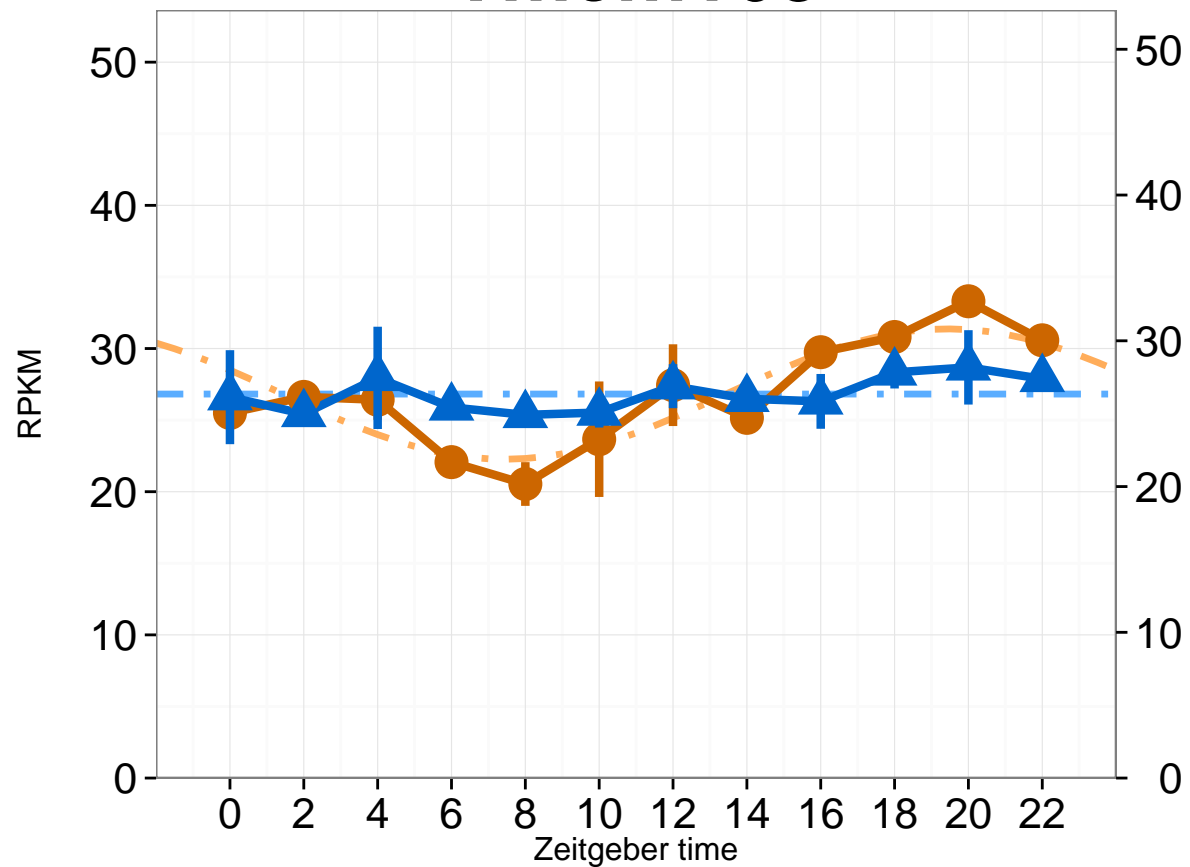

# Tmem168

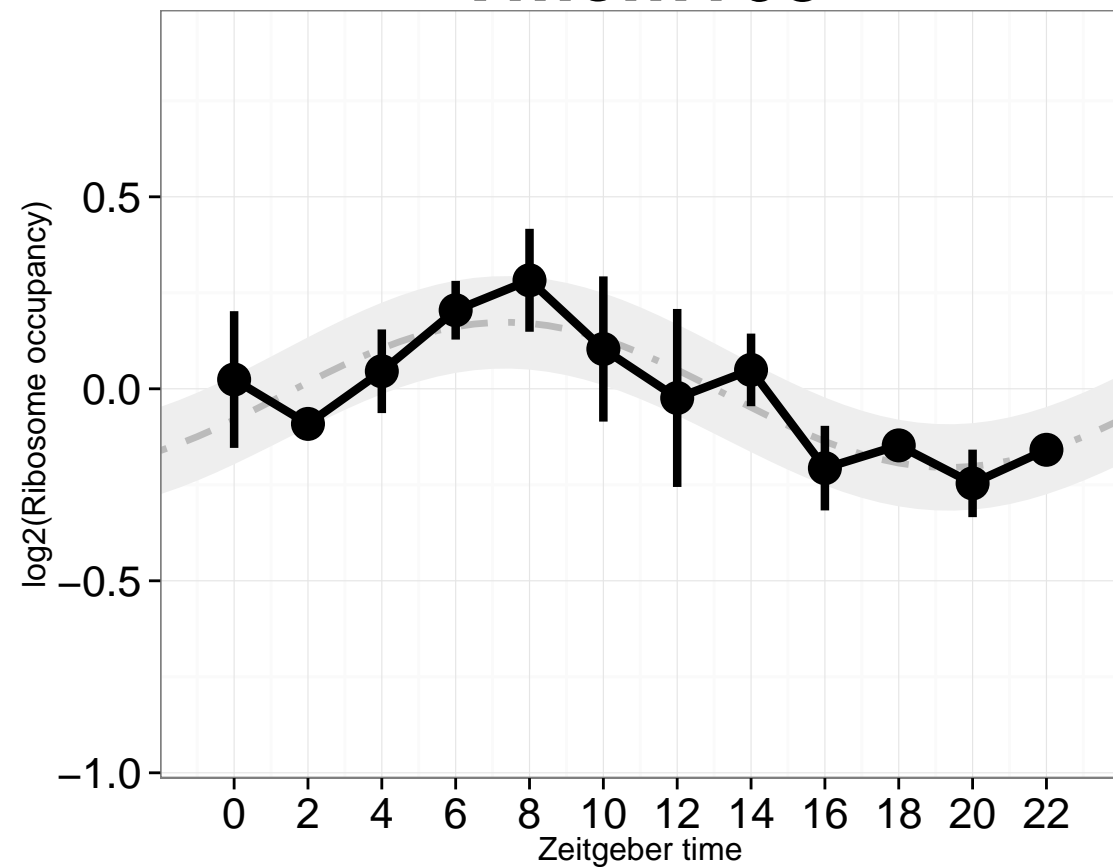

Supplement: Supplementary file 4453 [file 1]

## St8sia6

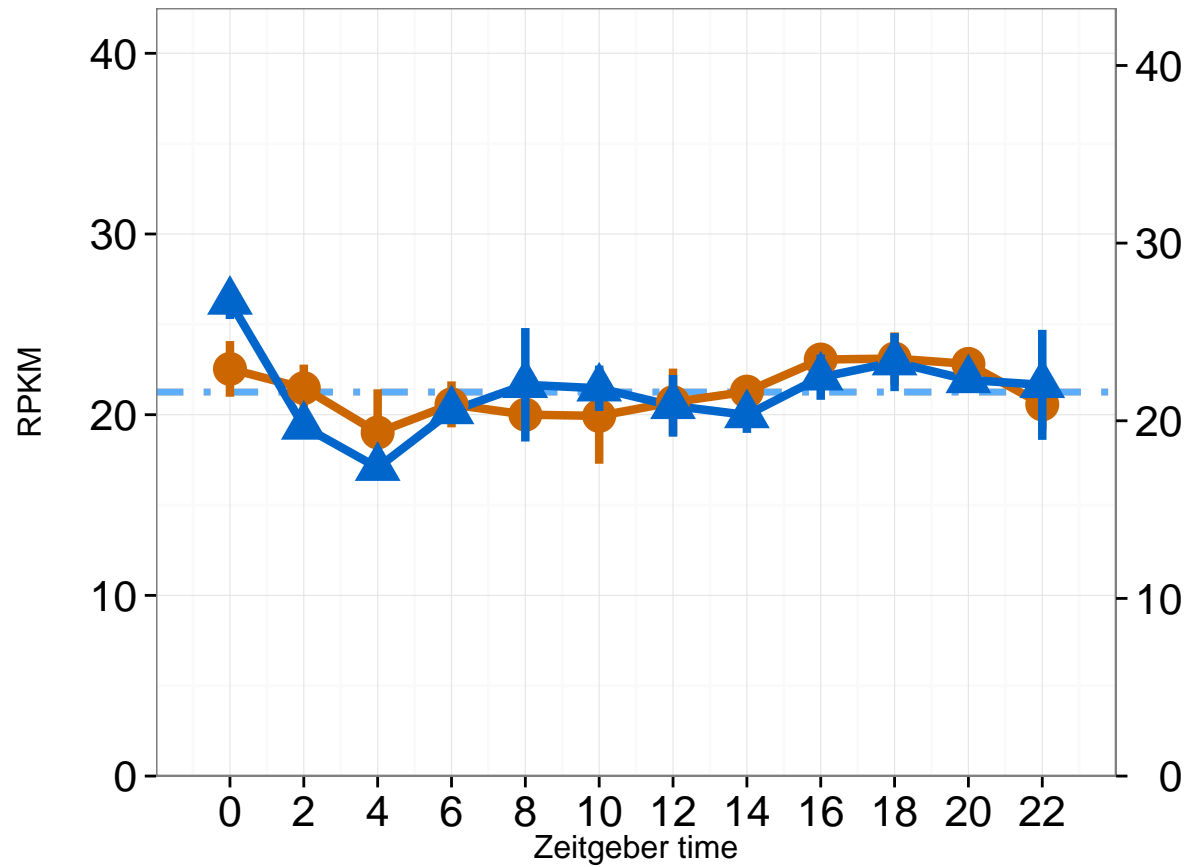

## St8sia6

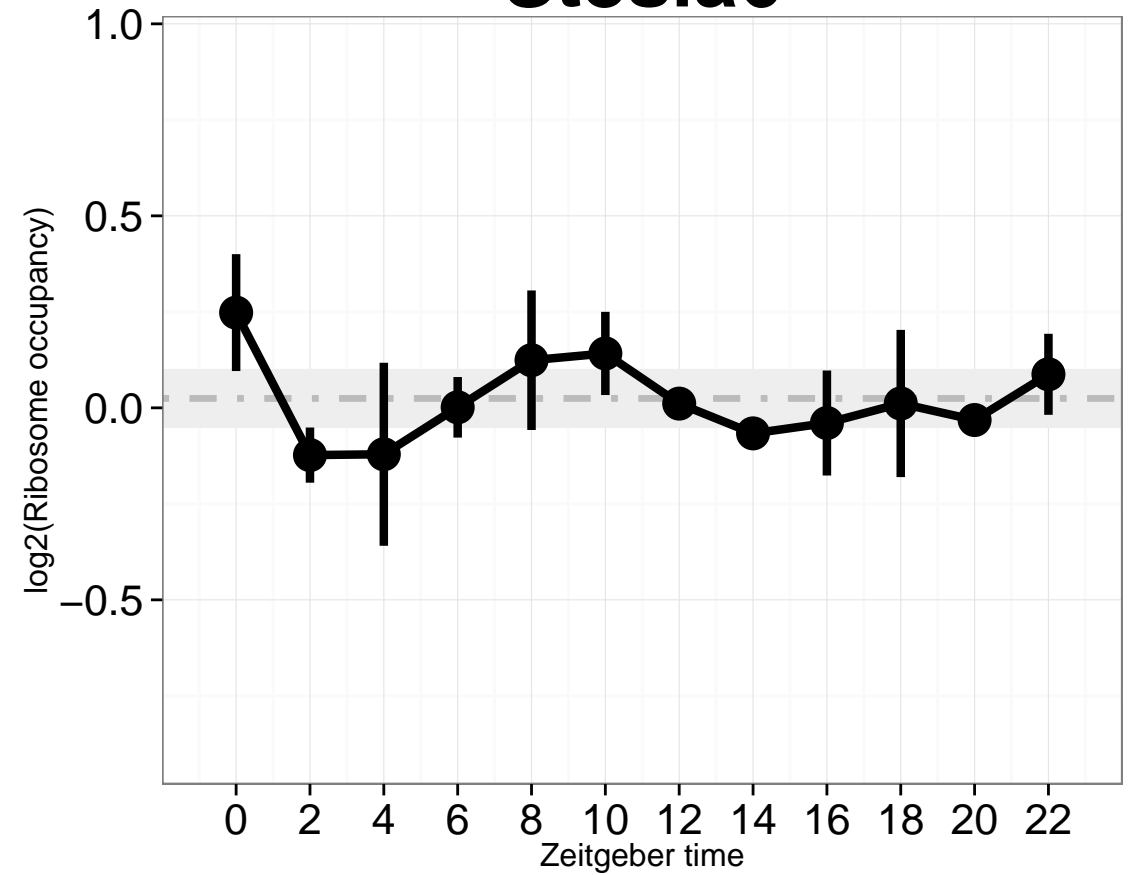

Supplement: Supplementary file 4454 [file 1]

# Dock2

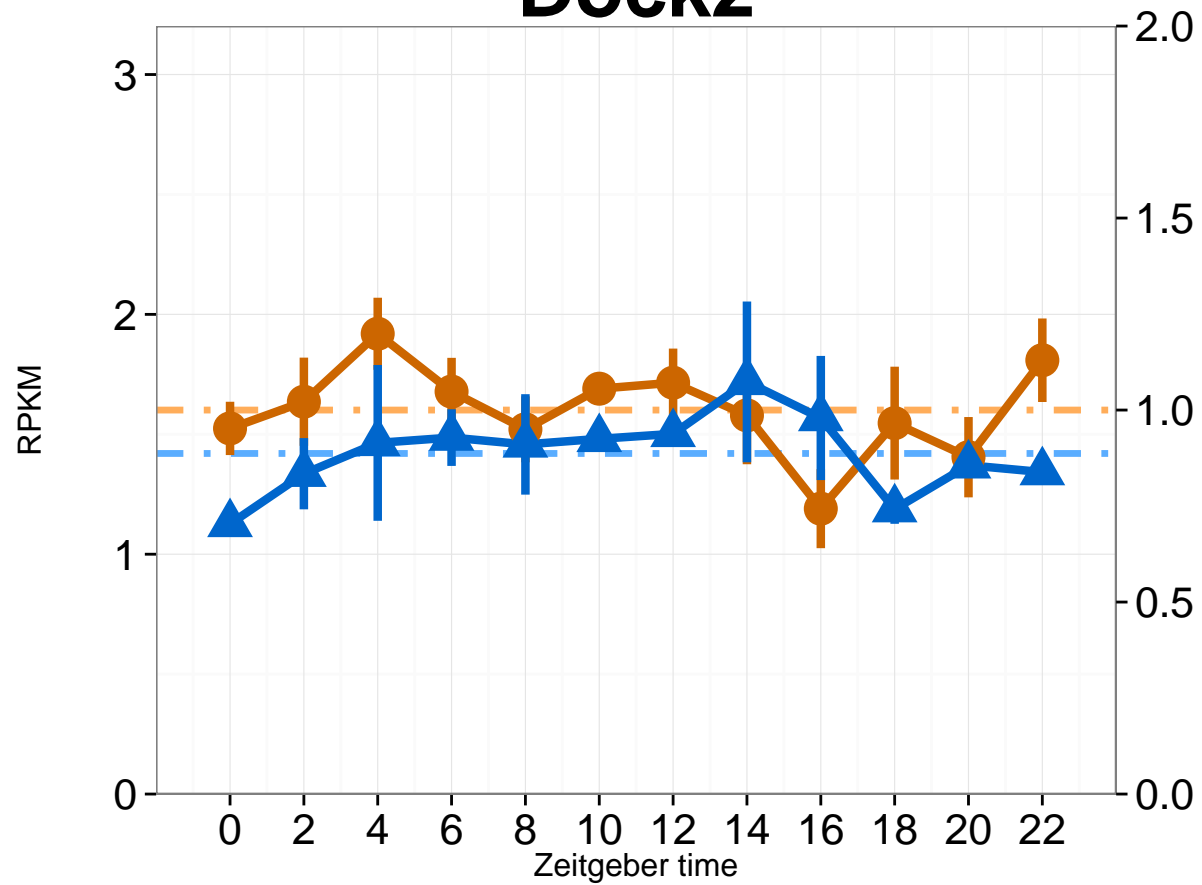

# Dock2

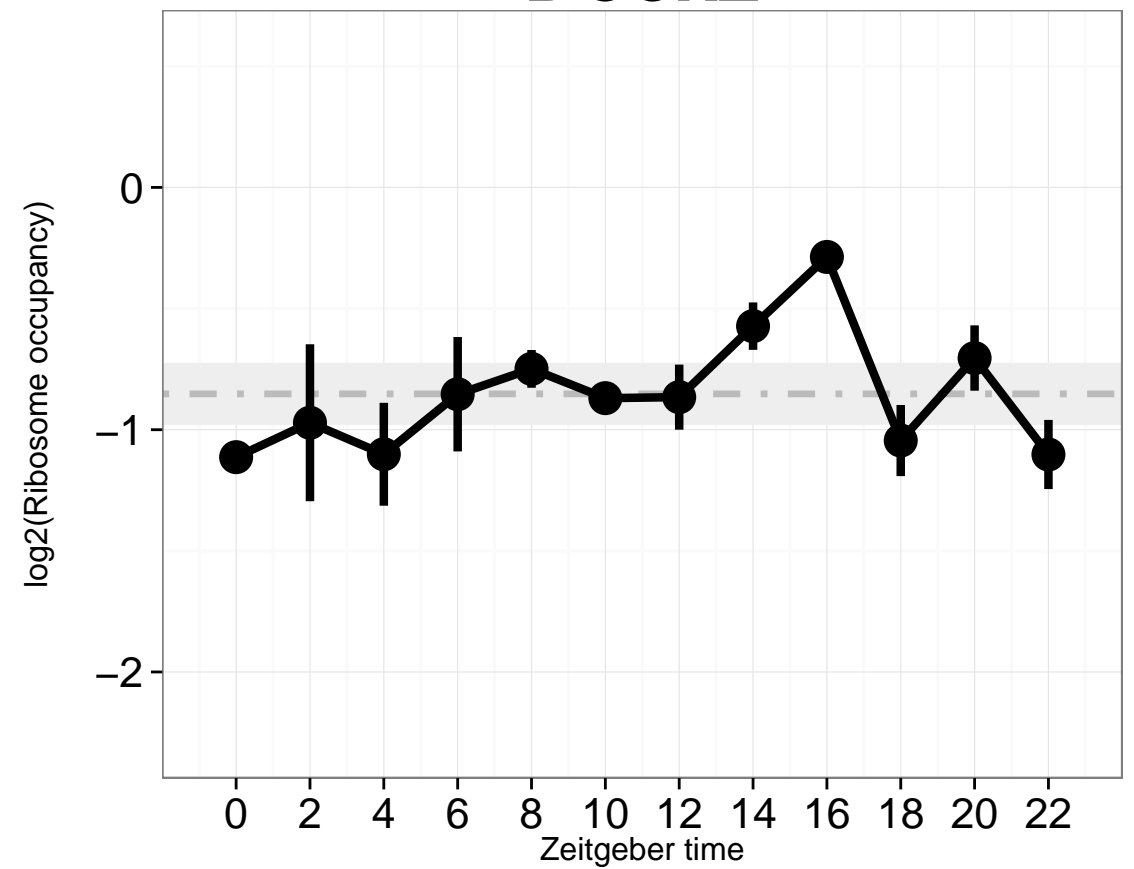

Supplement: Supplementary file 4455 [file 1]

## Slc35b3

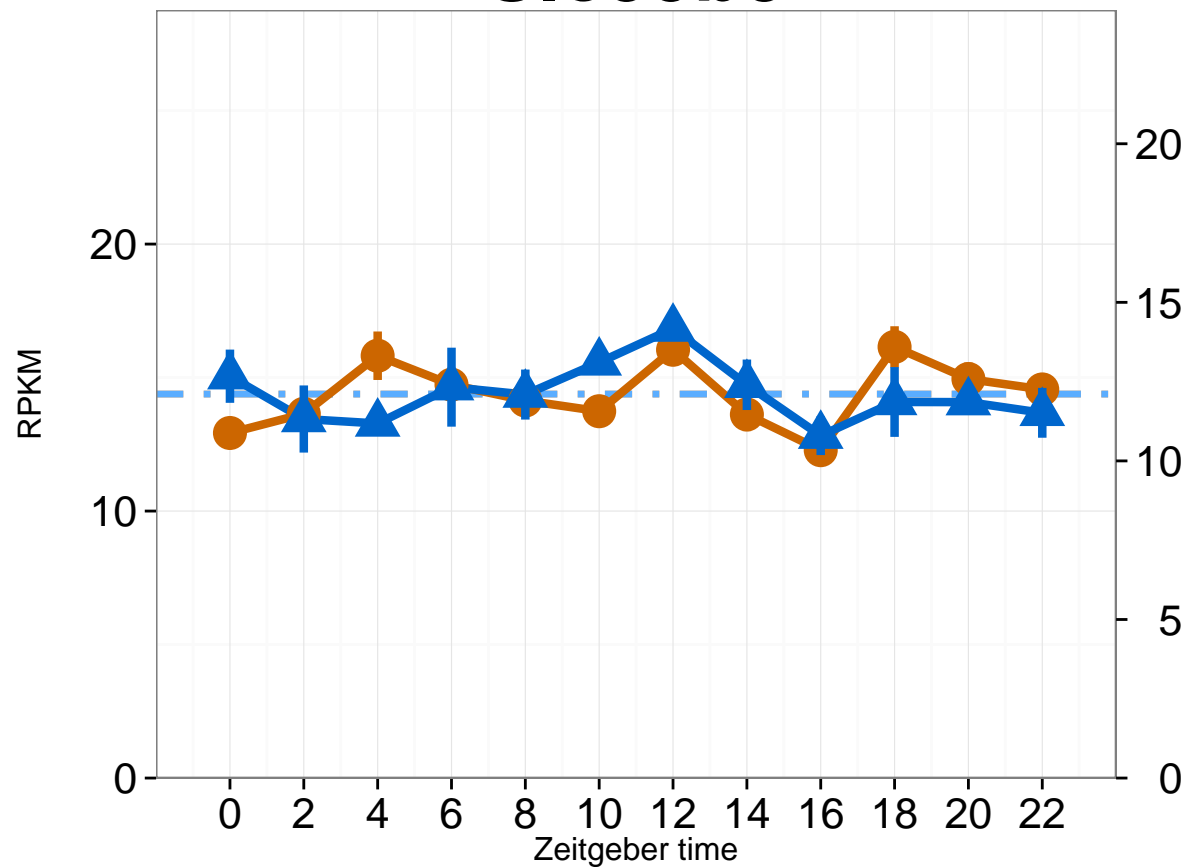

## Slc35b3

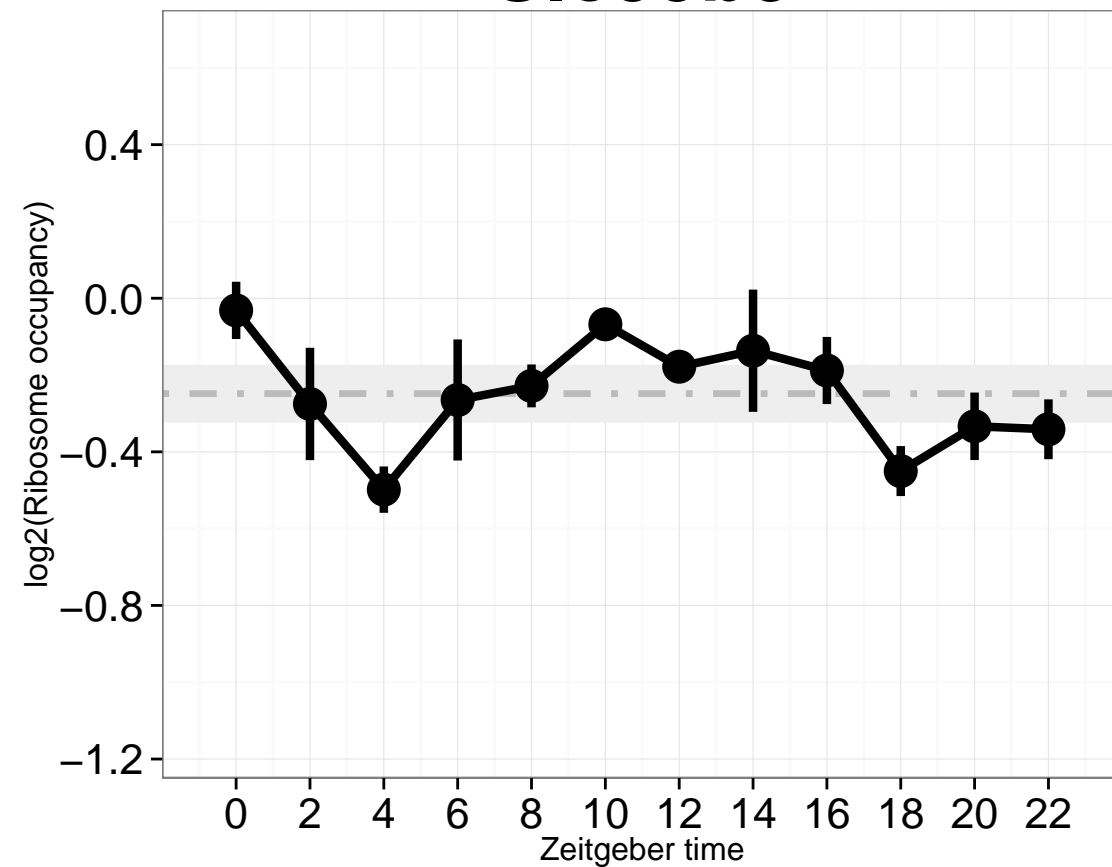

Supplement: Supplementary file 4456 [file 1]

# Kcnh1

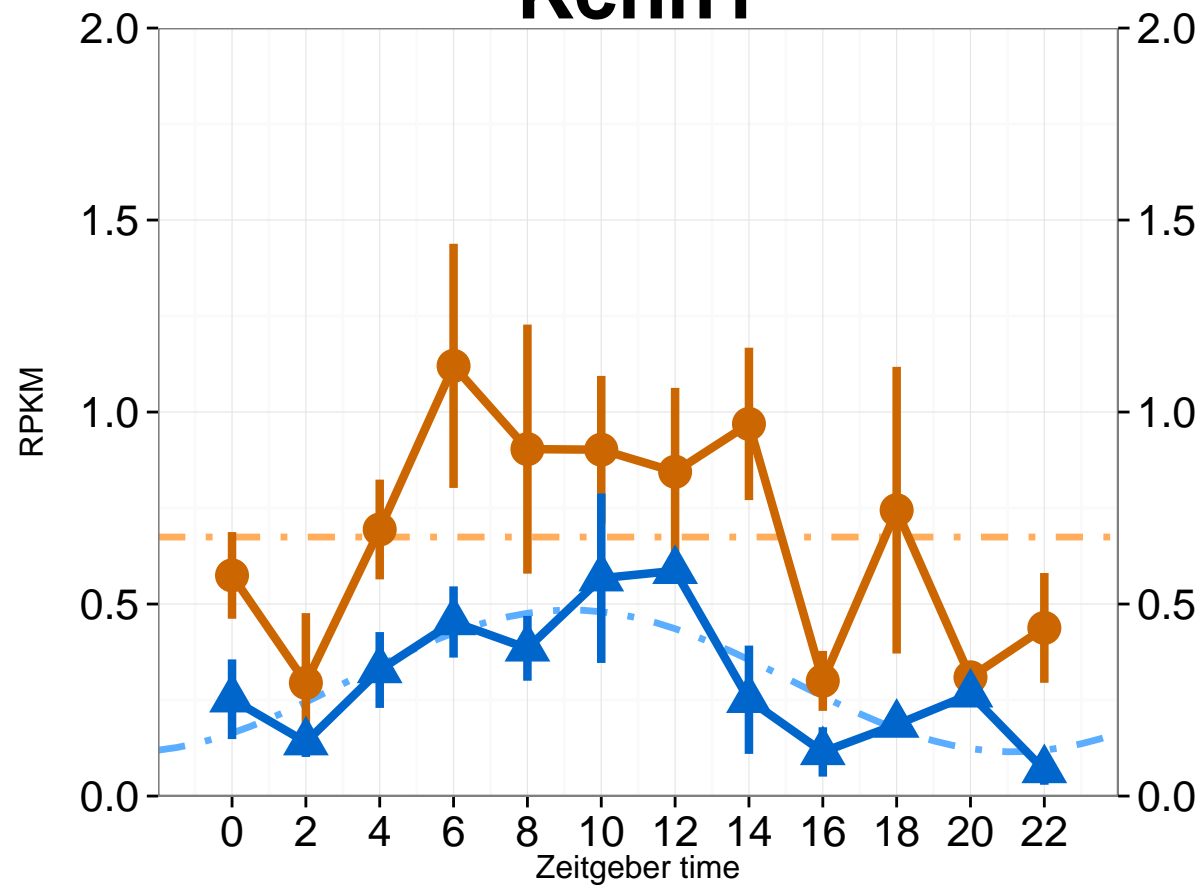

# Kcnh1

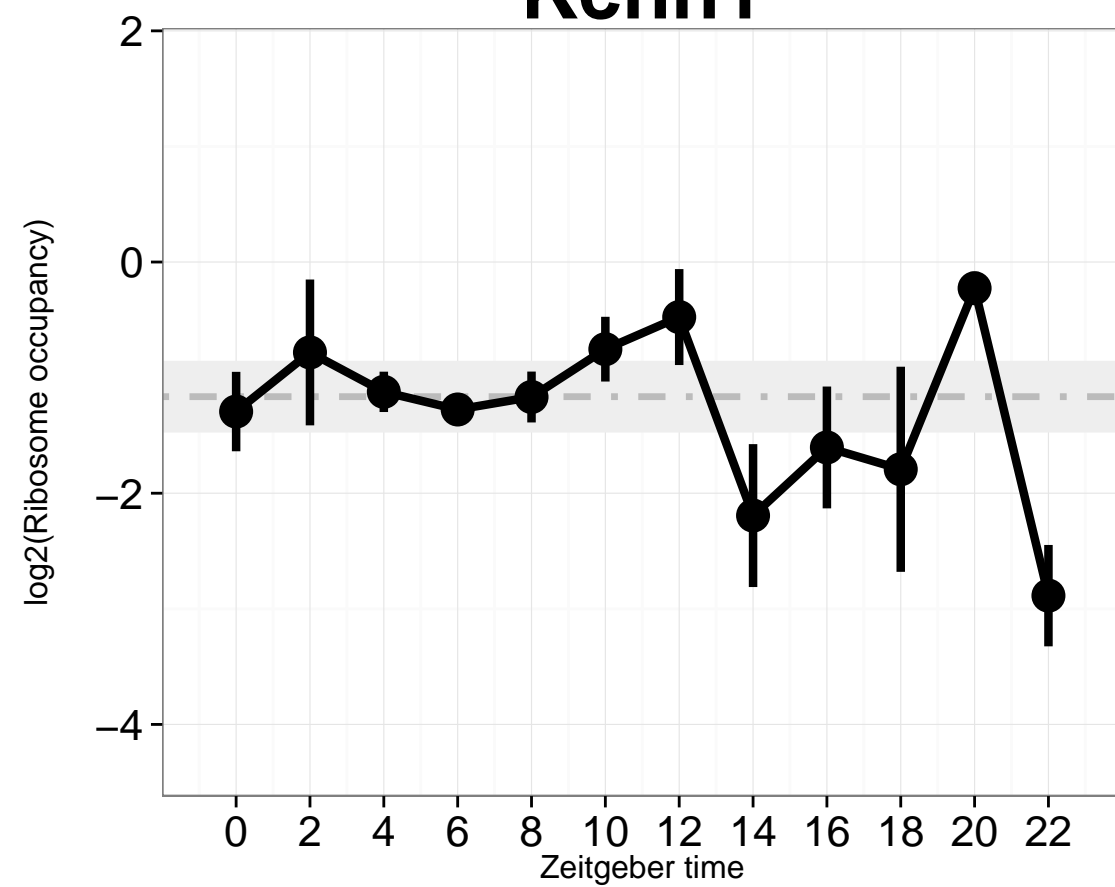

Supplement: Supplementary file 4457 [file 1]

# Plekhg1

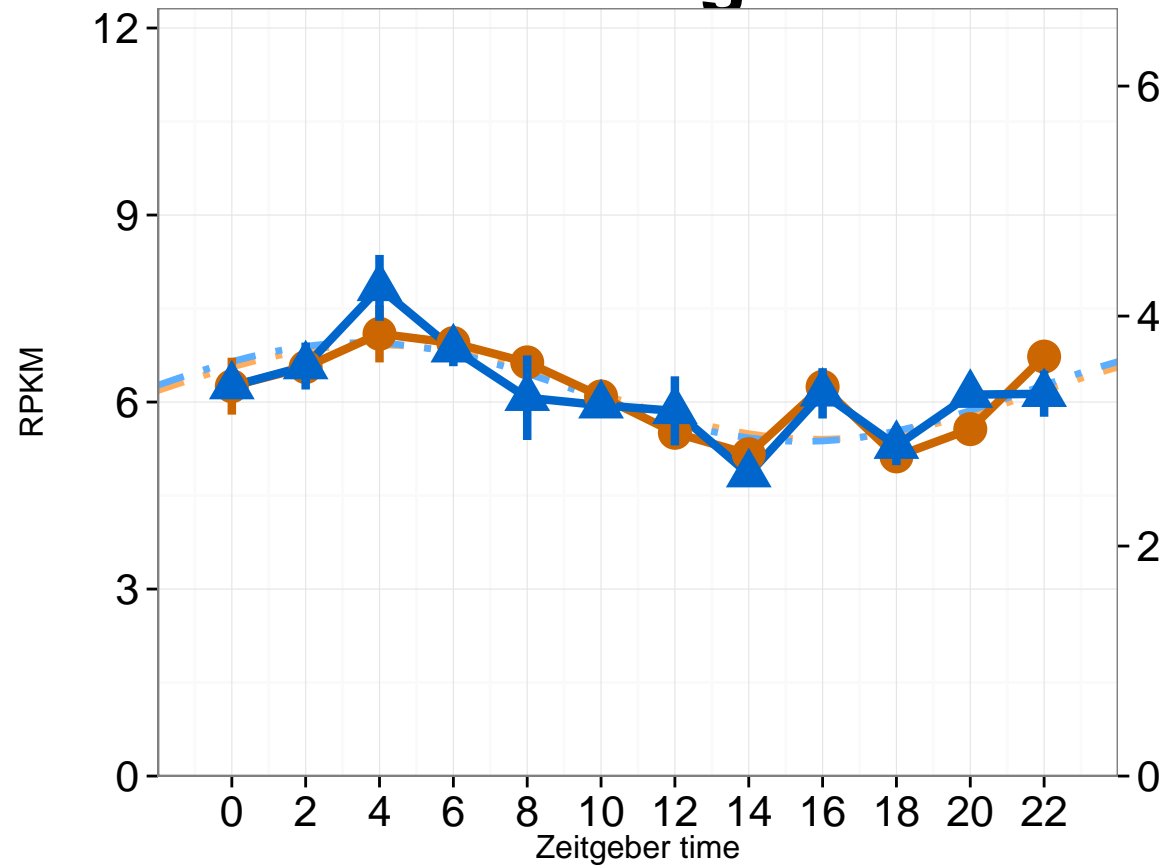

# Plekhg1

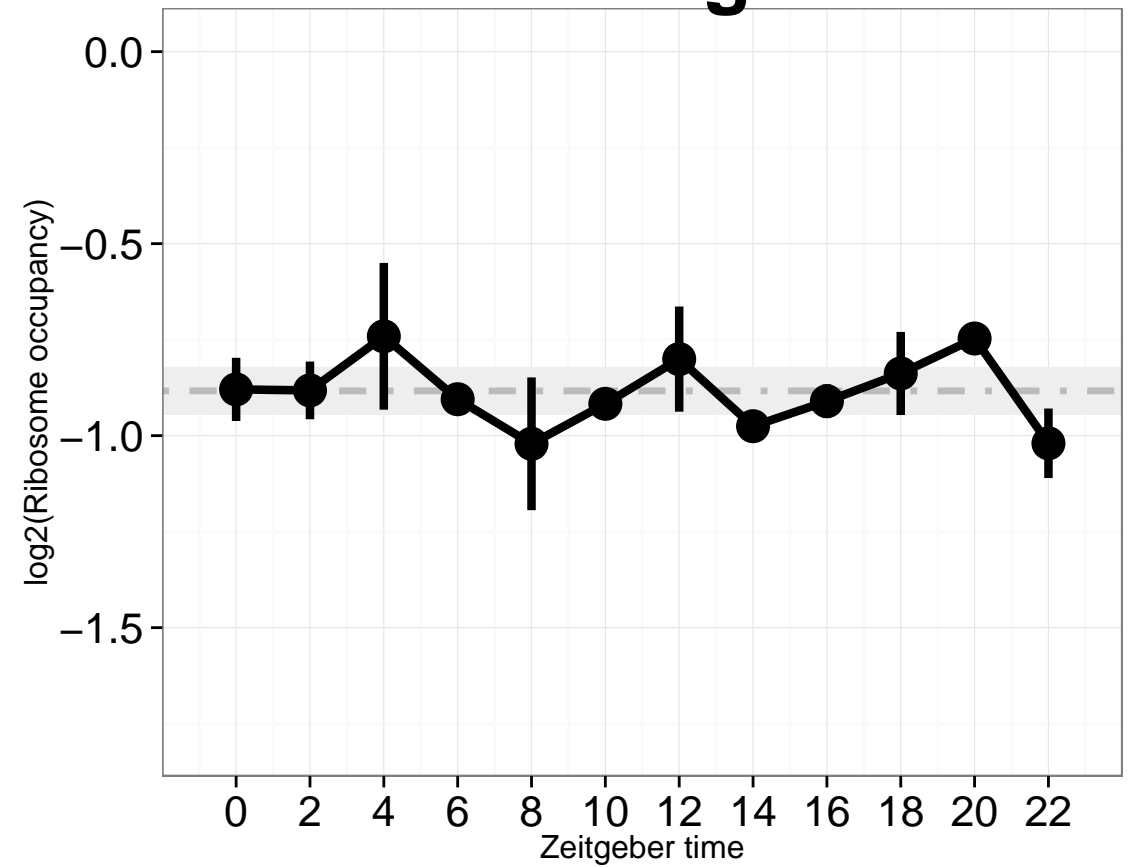

Supplement: Supplementary file 4458 [file 1]

**Npb TR**

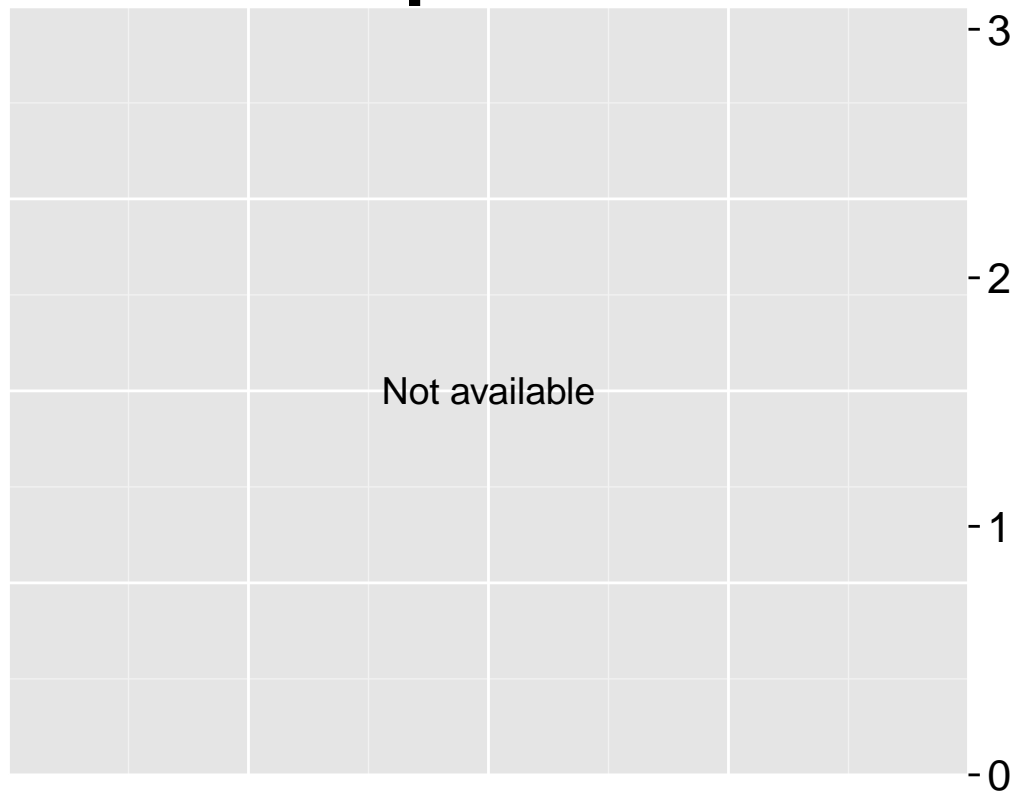

**Npb log2(Ribosome occupancy)**

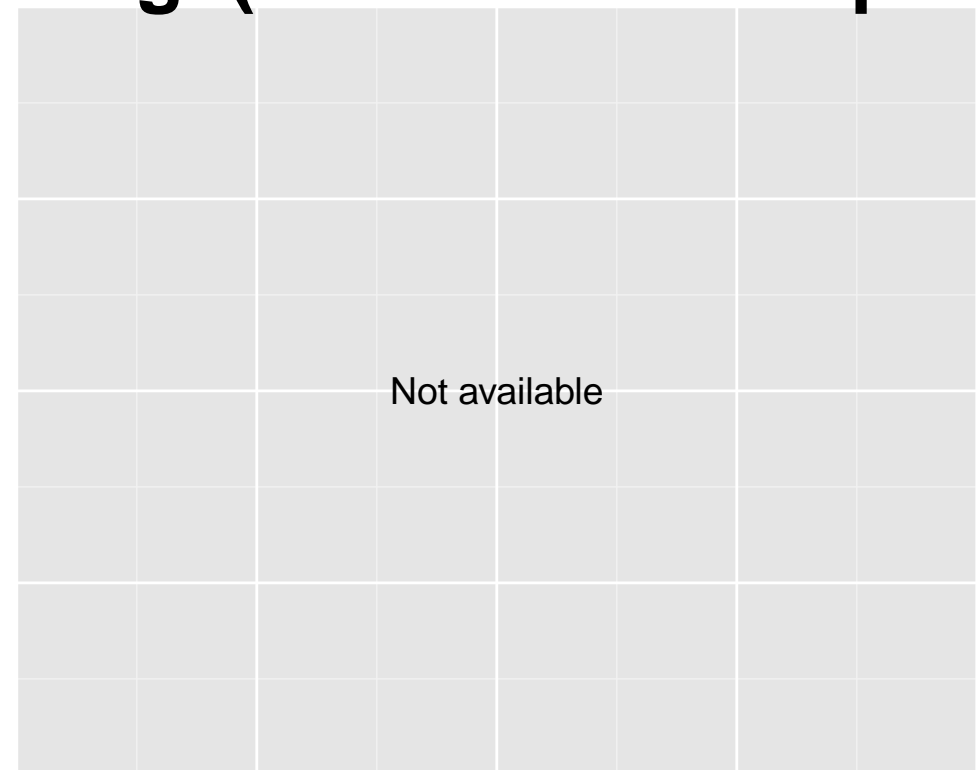

Supplement: Supplementary file 4459 [file 1]

# Tmed9

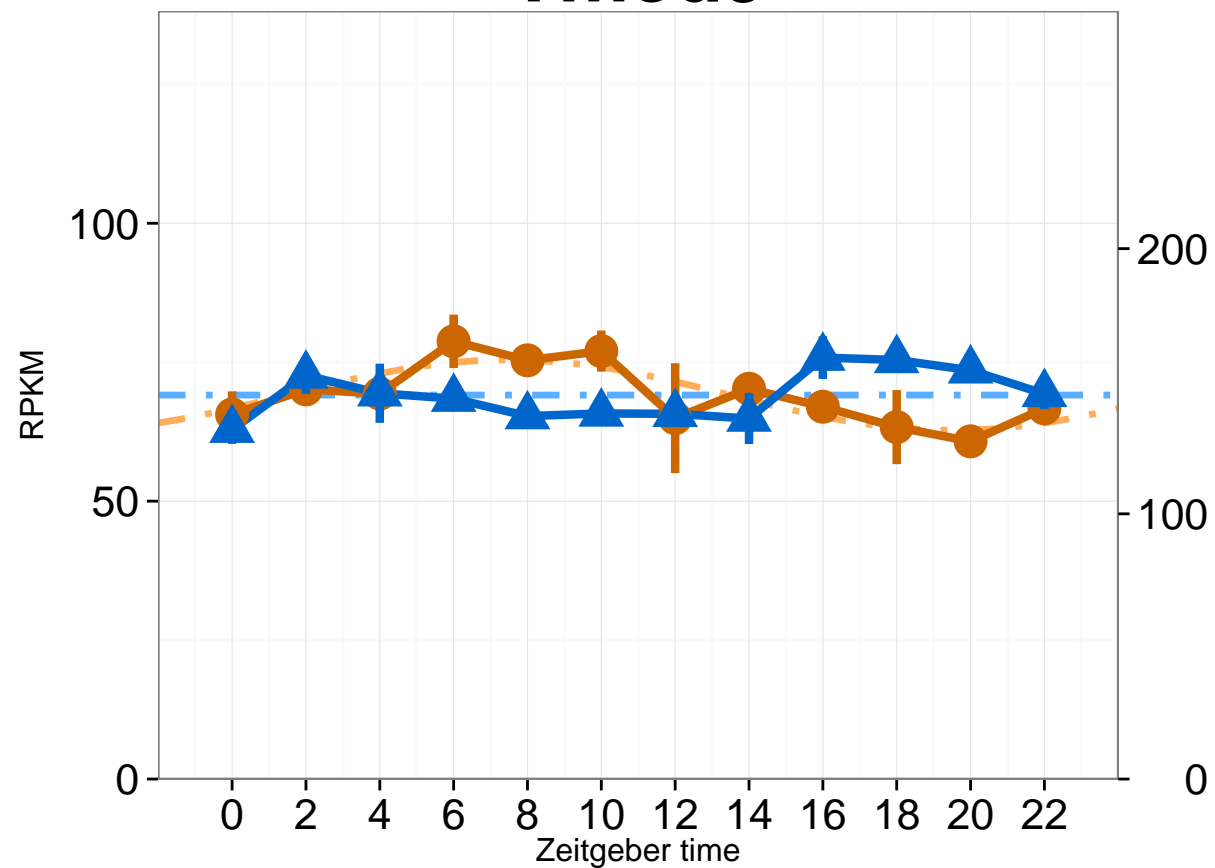

# Tmed9

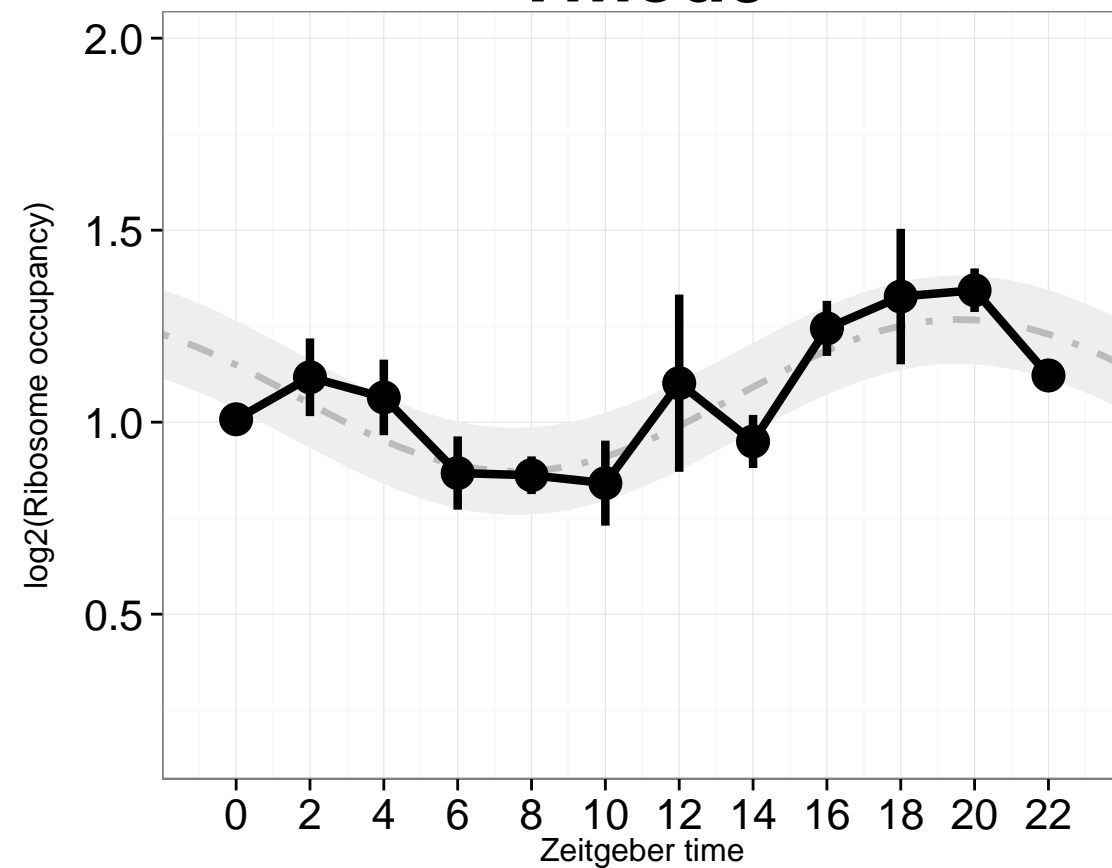

Supplement: Supplementary file 4460 [file 1]

# Lrrc70

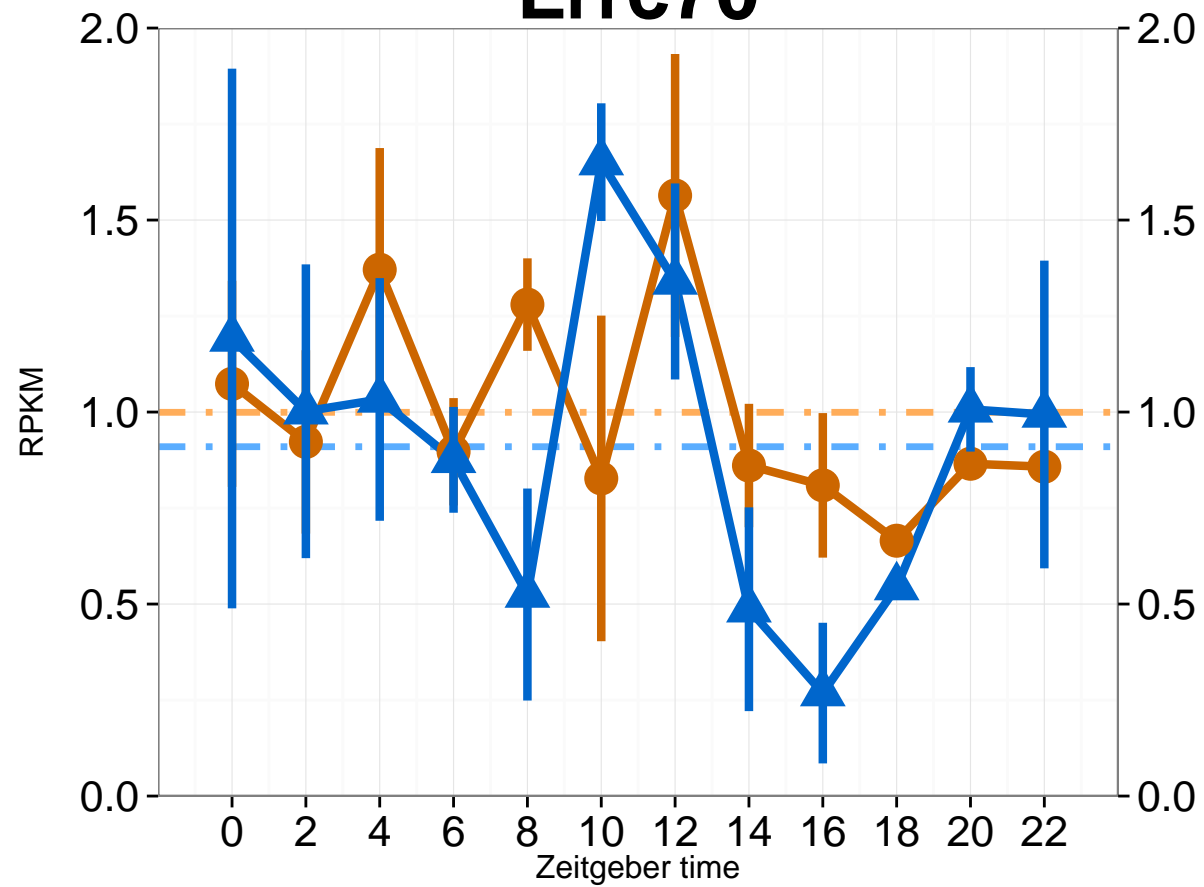

# Lrrc70

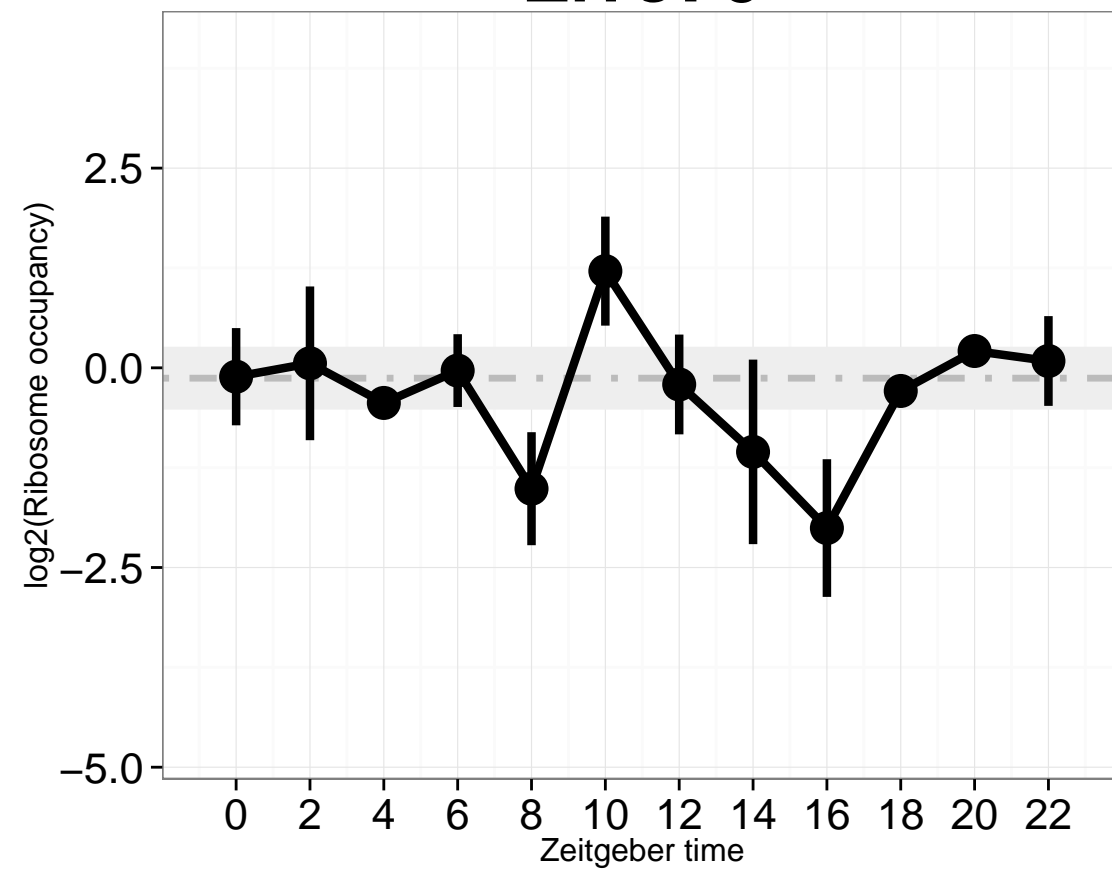

Supplement: Supplementary file 4461 [file 1]

# Vps13a

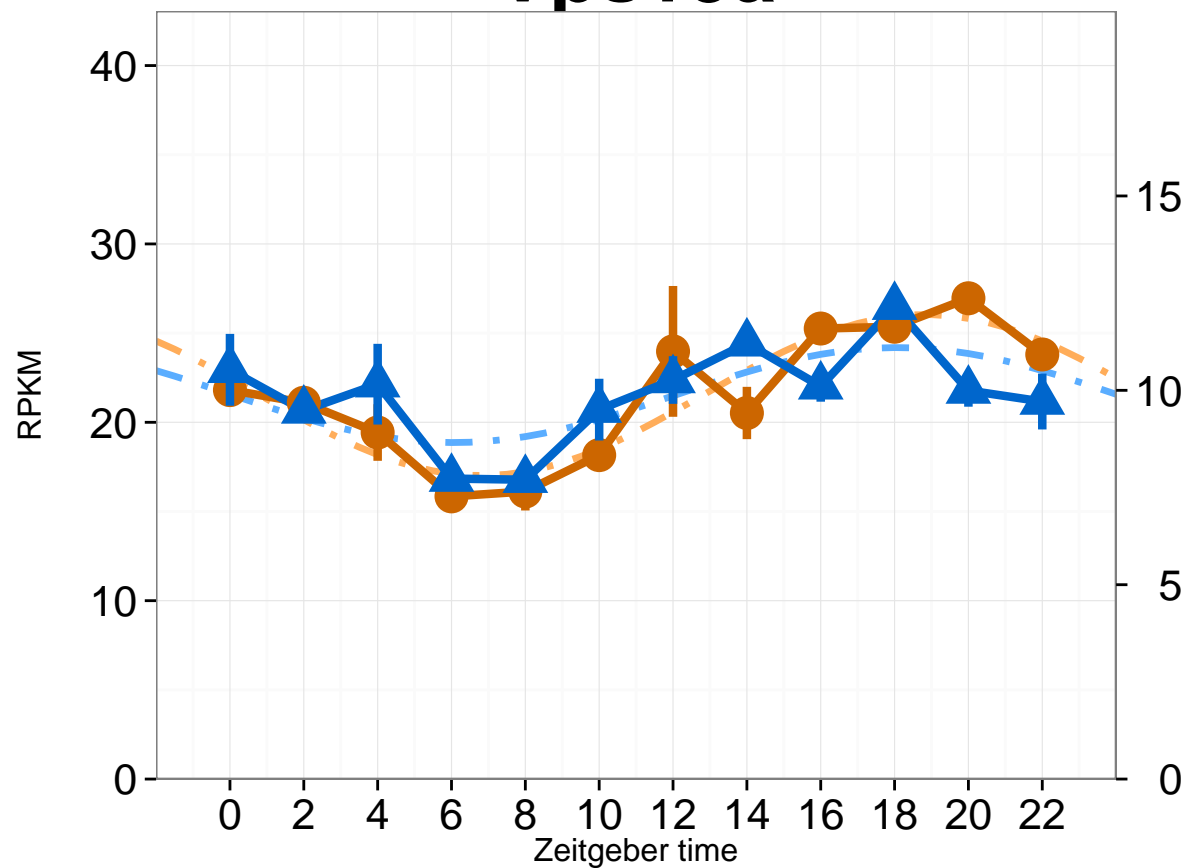

# Vps13a

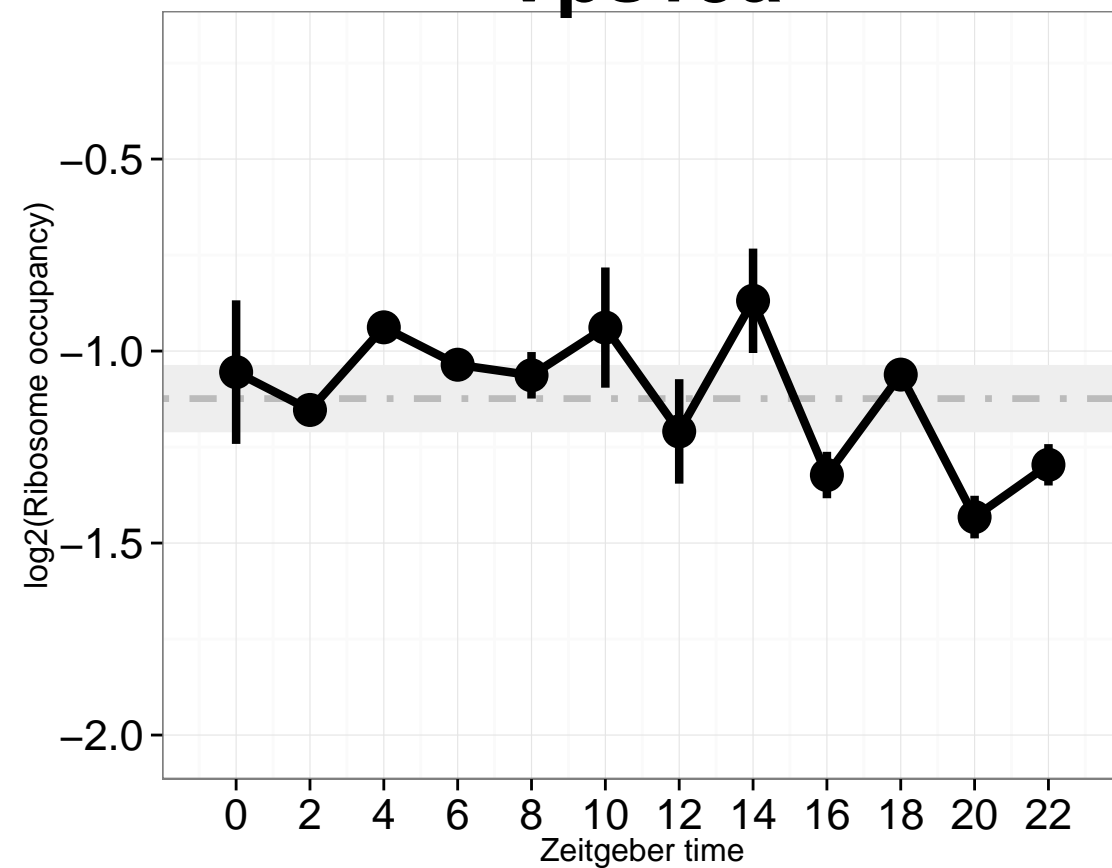

Supplement: Supplementary file 4462 [file 1]

## Htra2

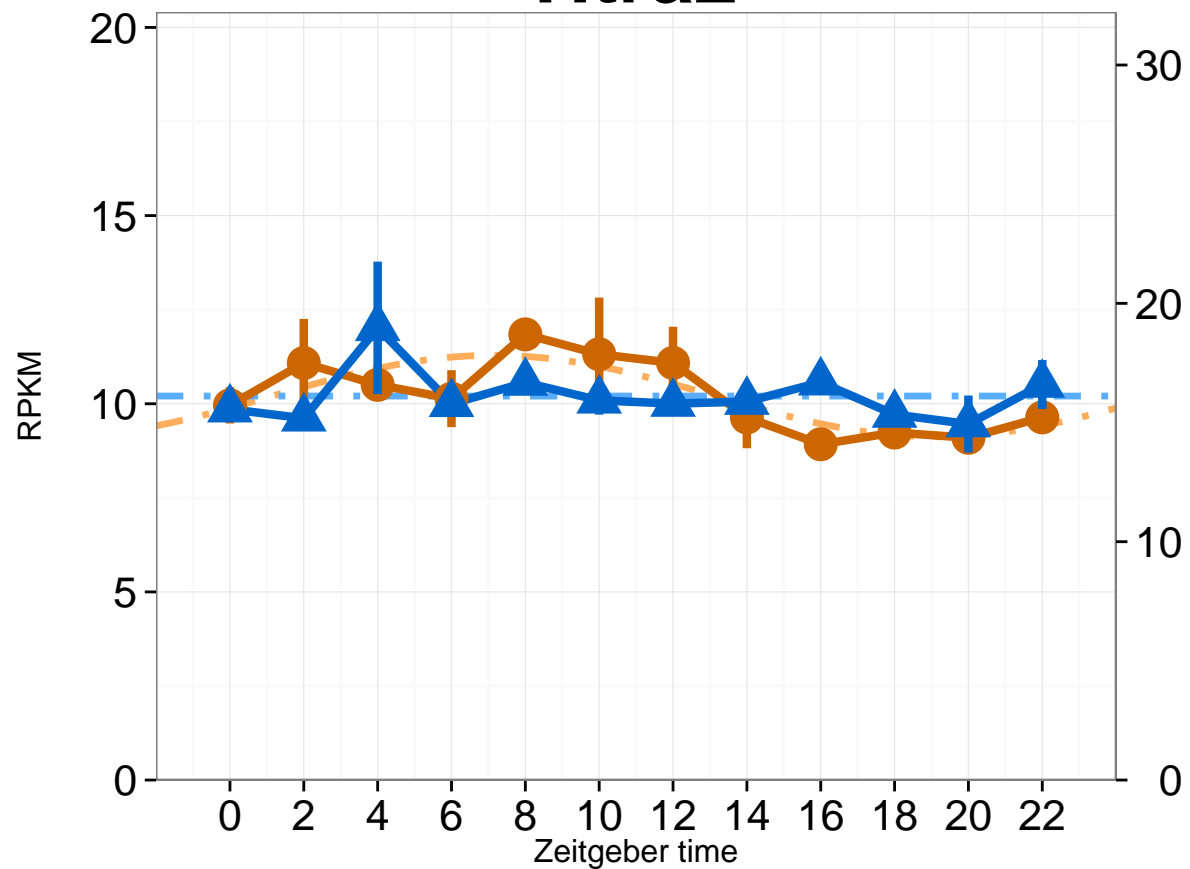

## Htra2

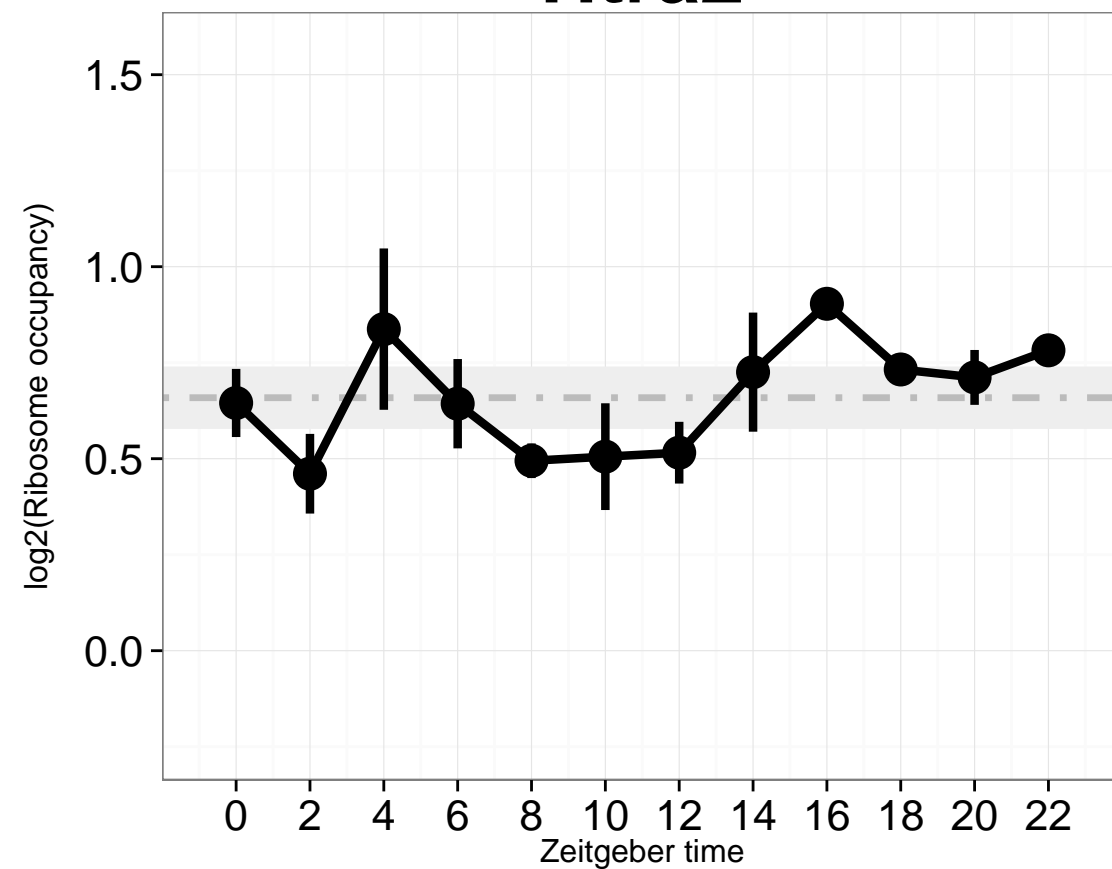

Supplement: Supplementary file 4463 [file 1]

## C330011M18Rik

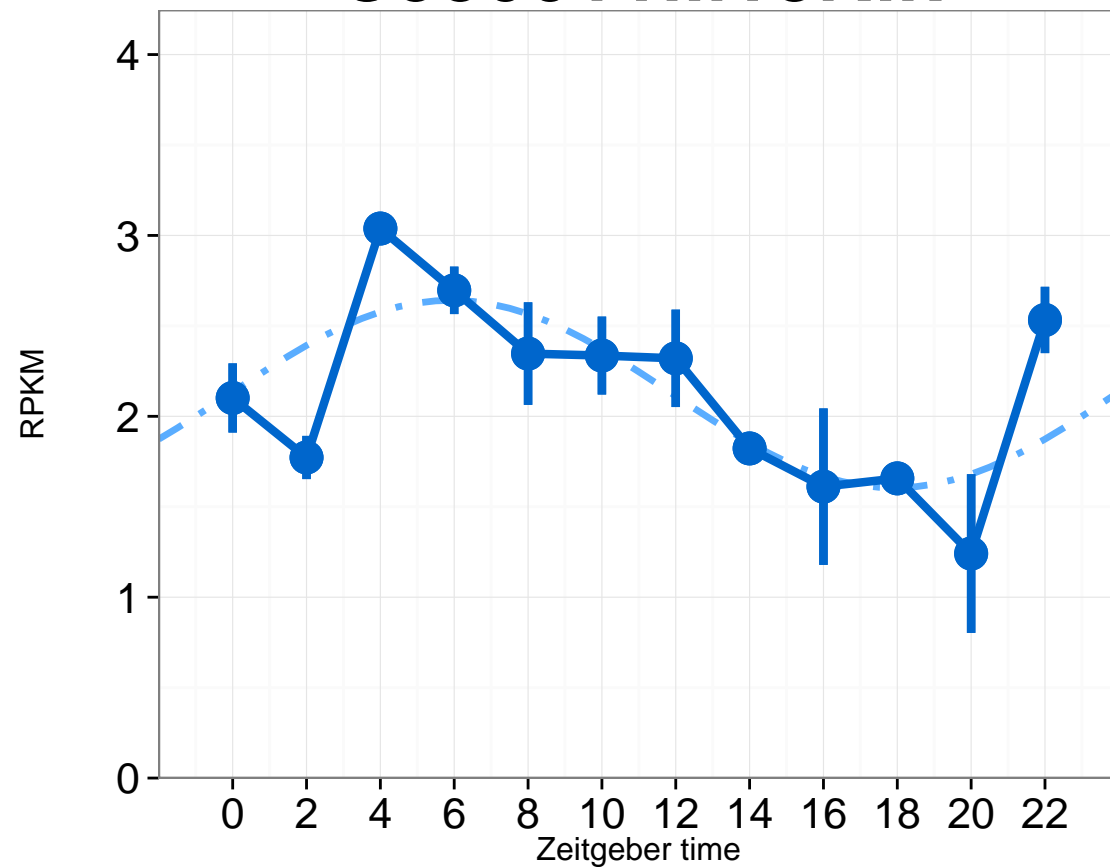

## C330011M18Rik log2(Ribosome occup

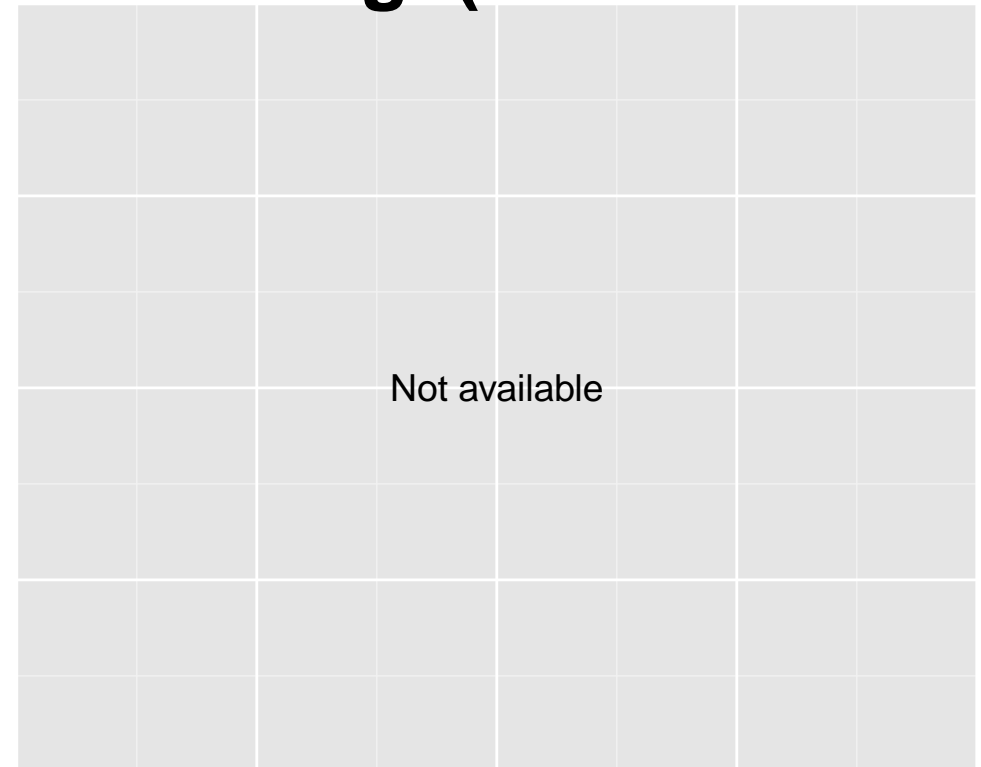

Supplement: Supplementary file 4464 [file 1]

# Fip1l1

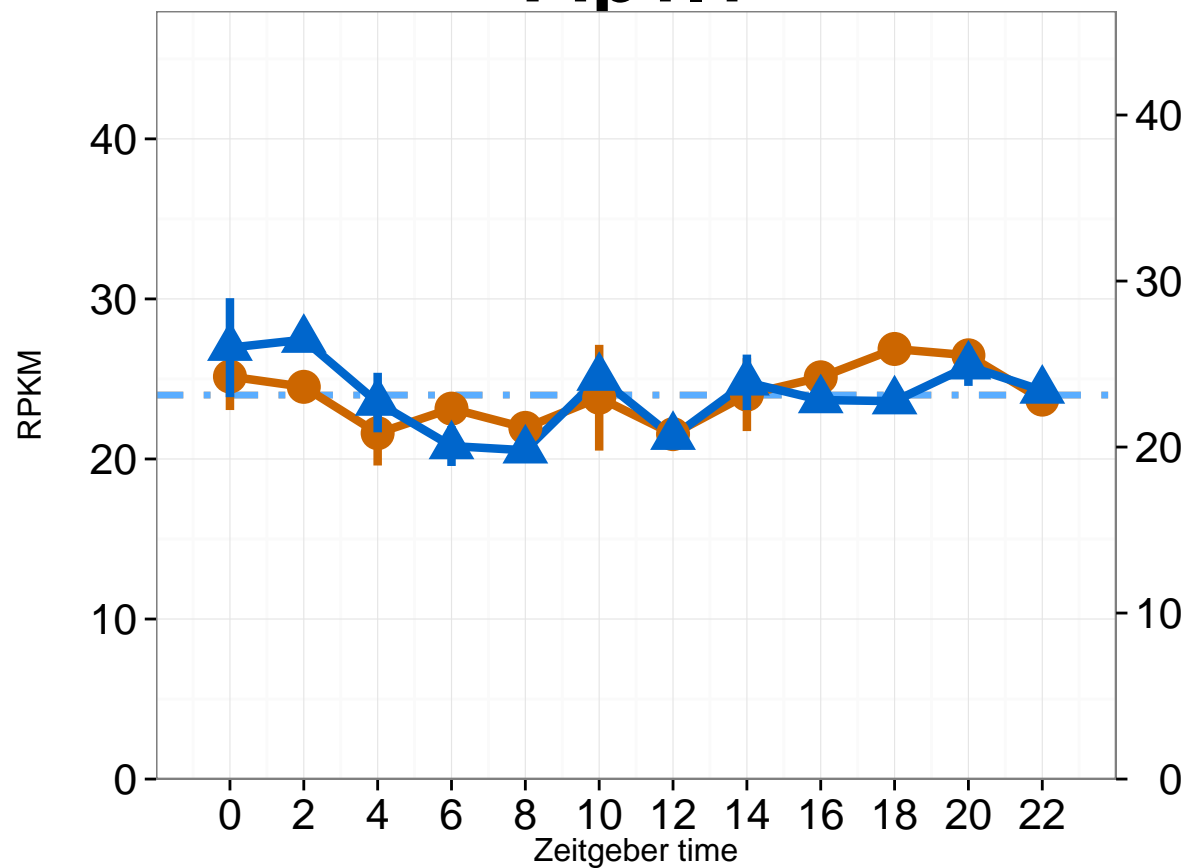

# Fip1l1

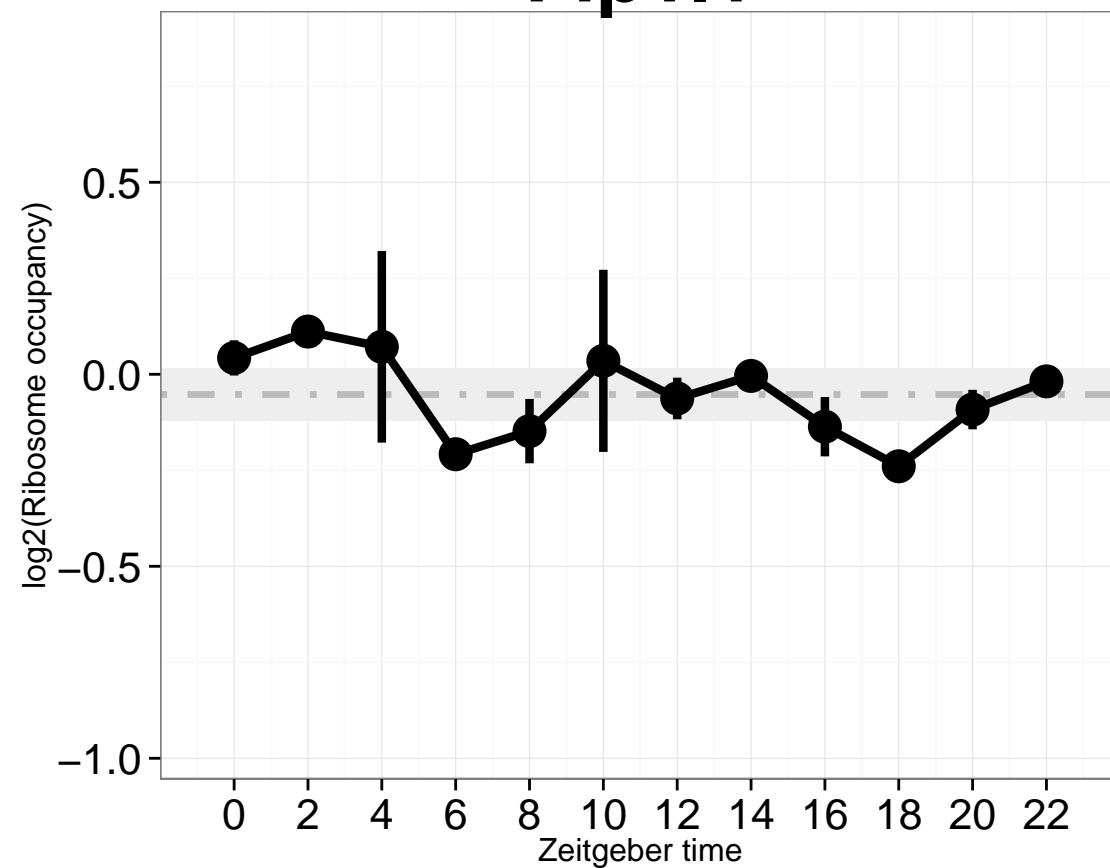

Supplement: Supplementary file 4465 [file 1]

# Pard3b

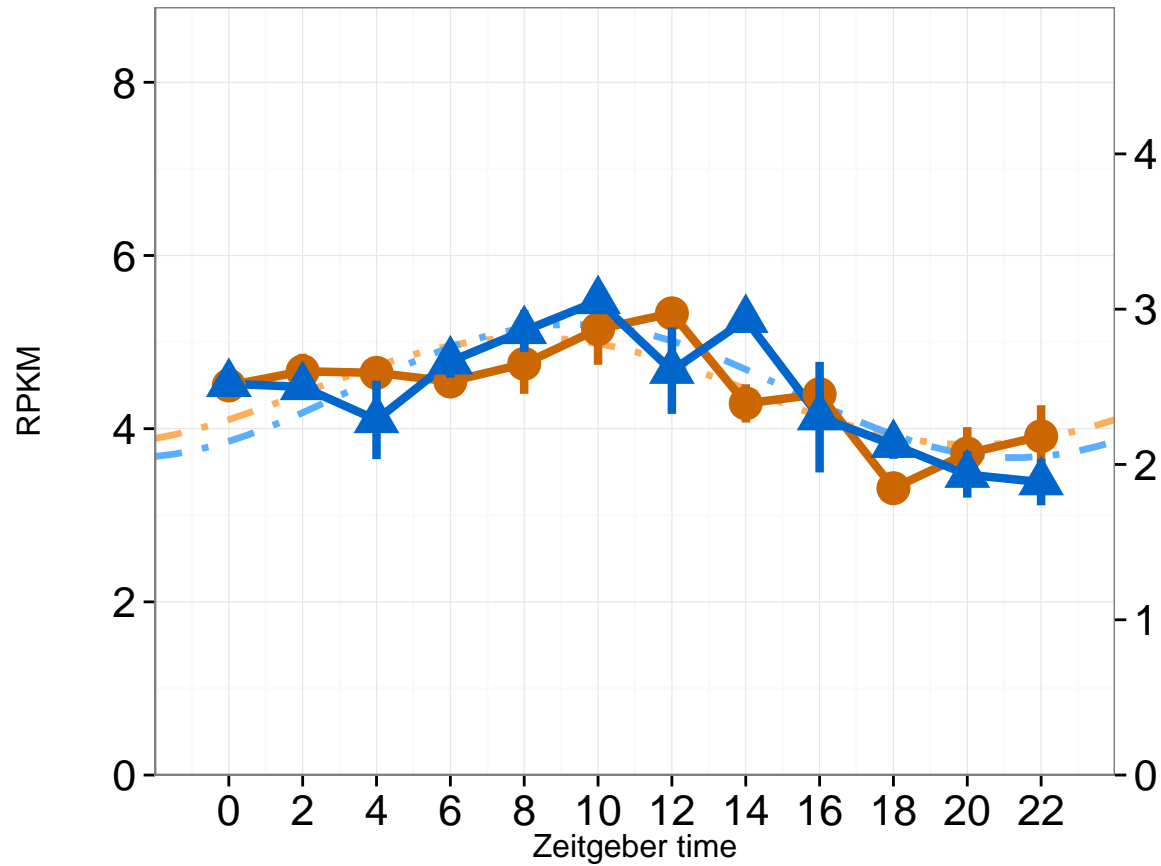

# Pard3b

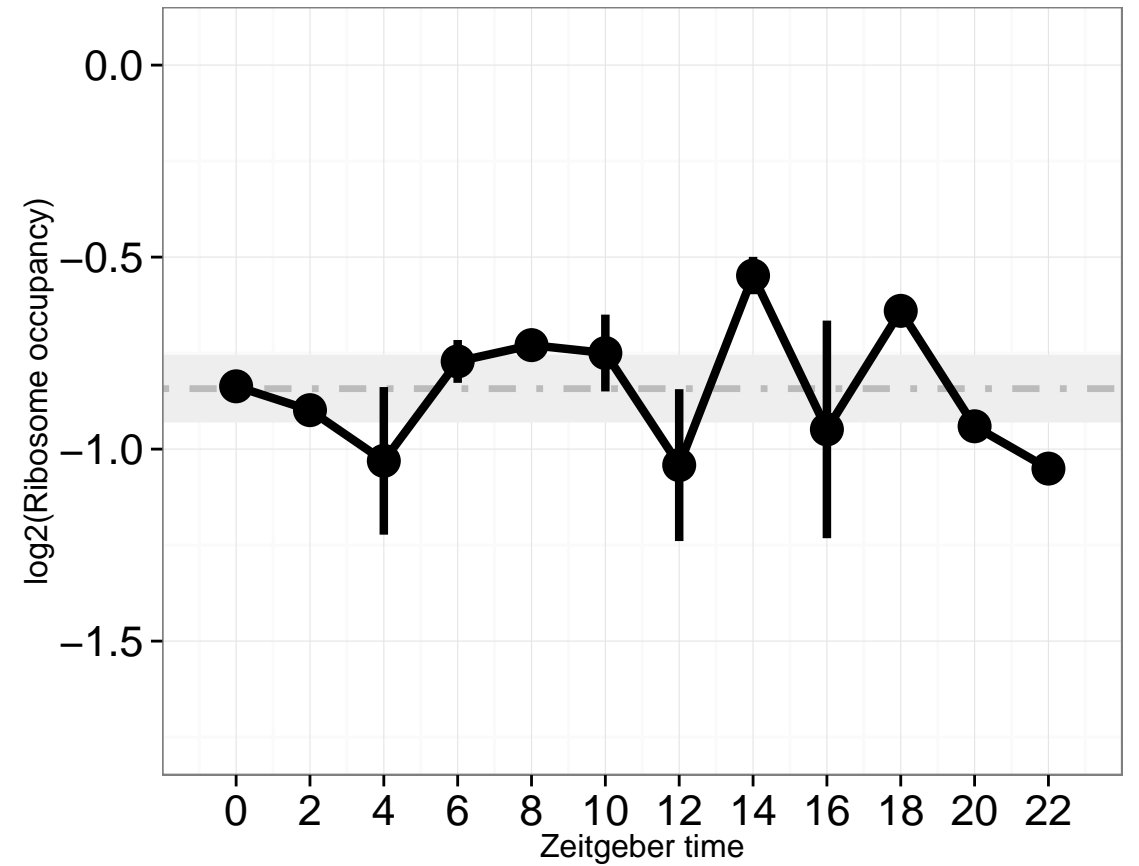

Supplement: Supplementary file 4466 [file 1]

## Dnaja4

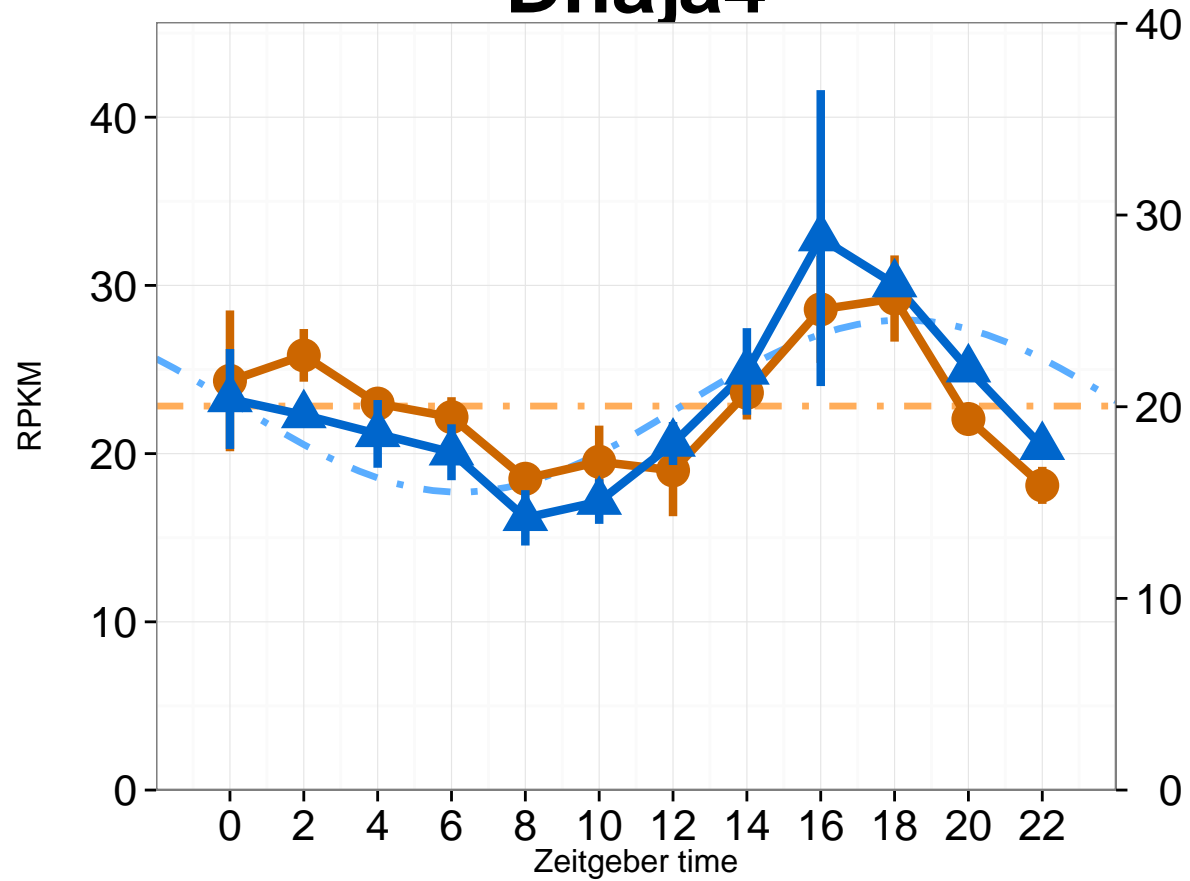

## Dnaja4

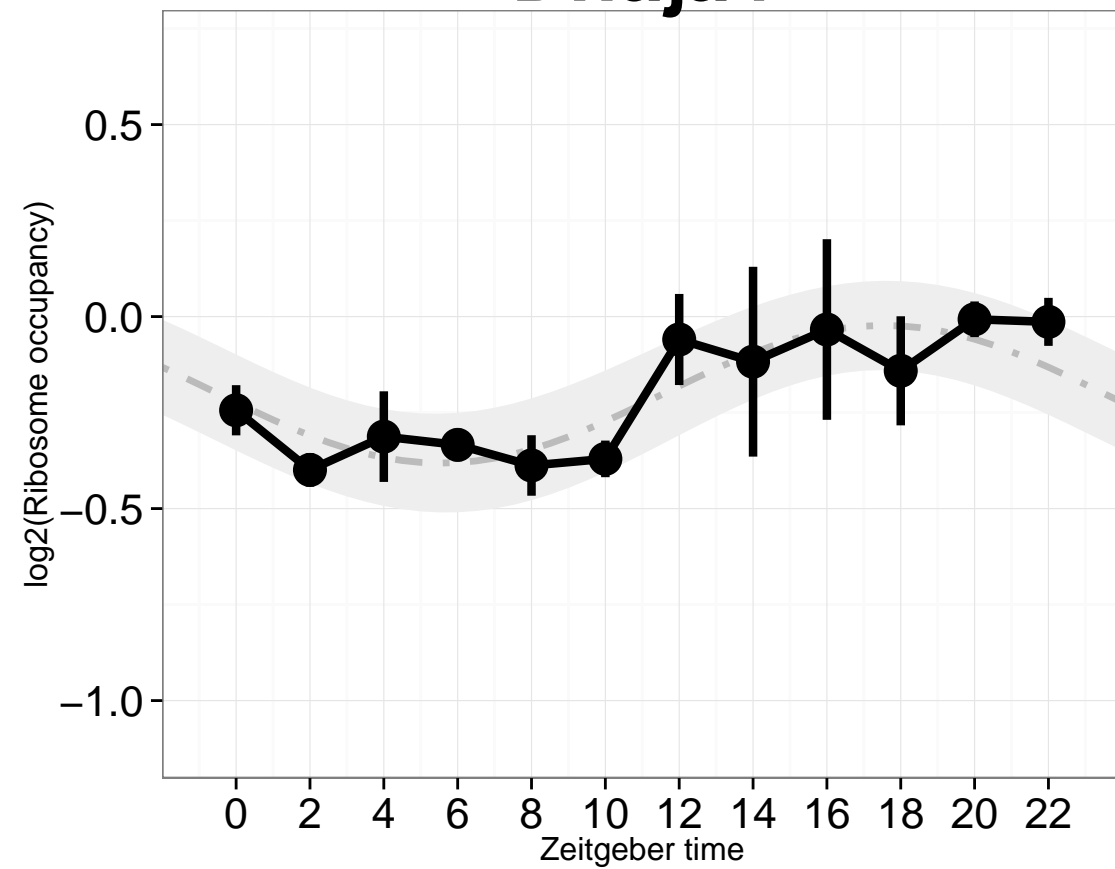

Supplement: Supplementary file 4467 [file 1]

# Ints3

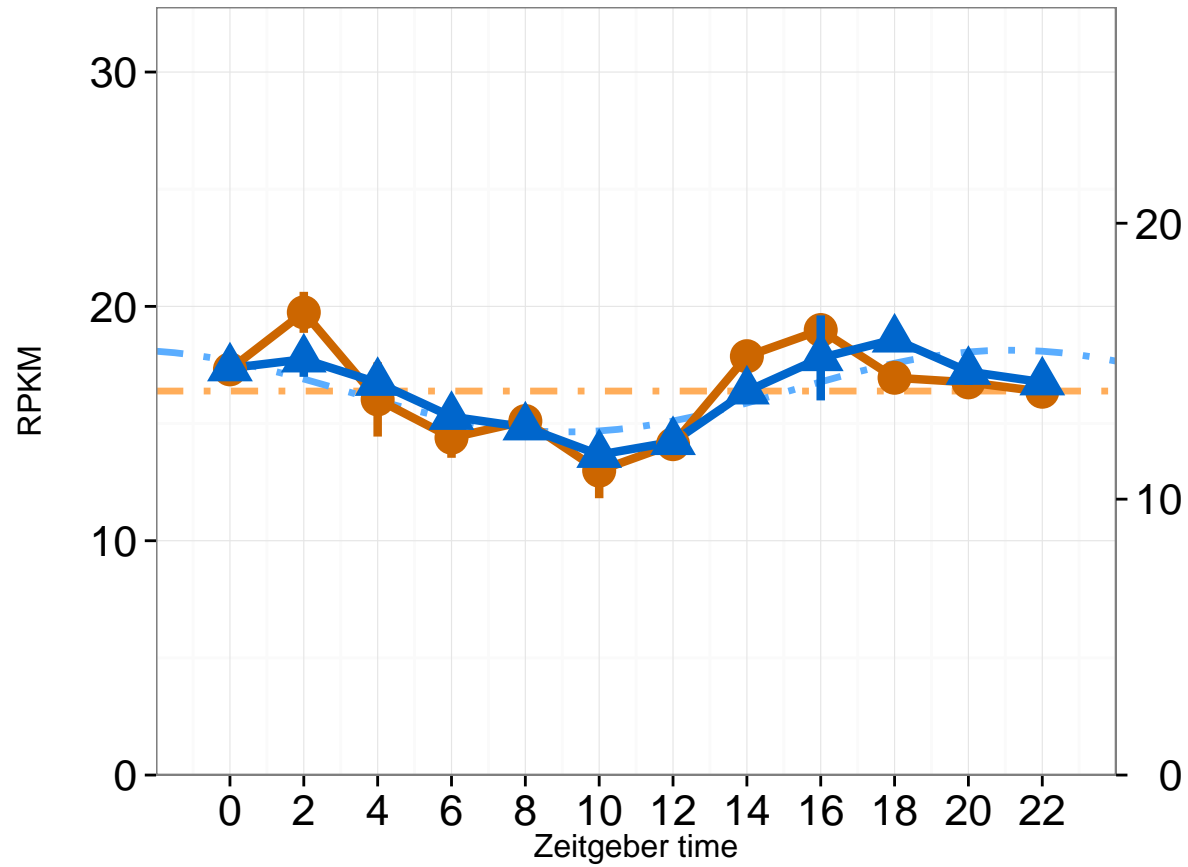

# Ints3

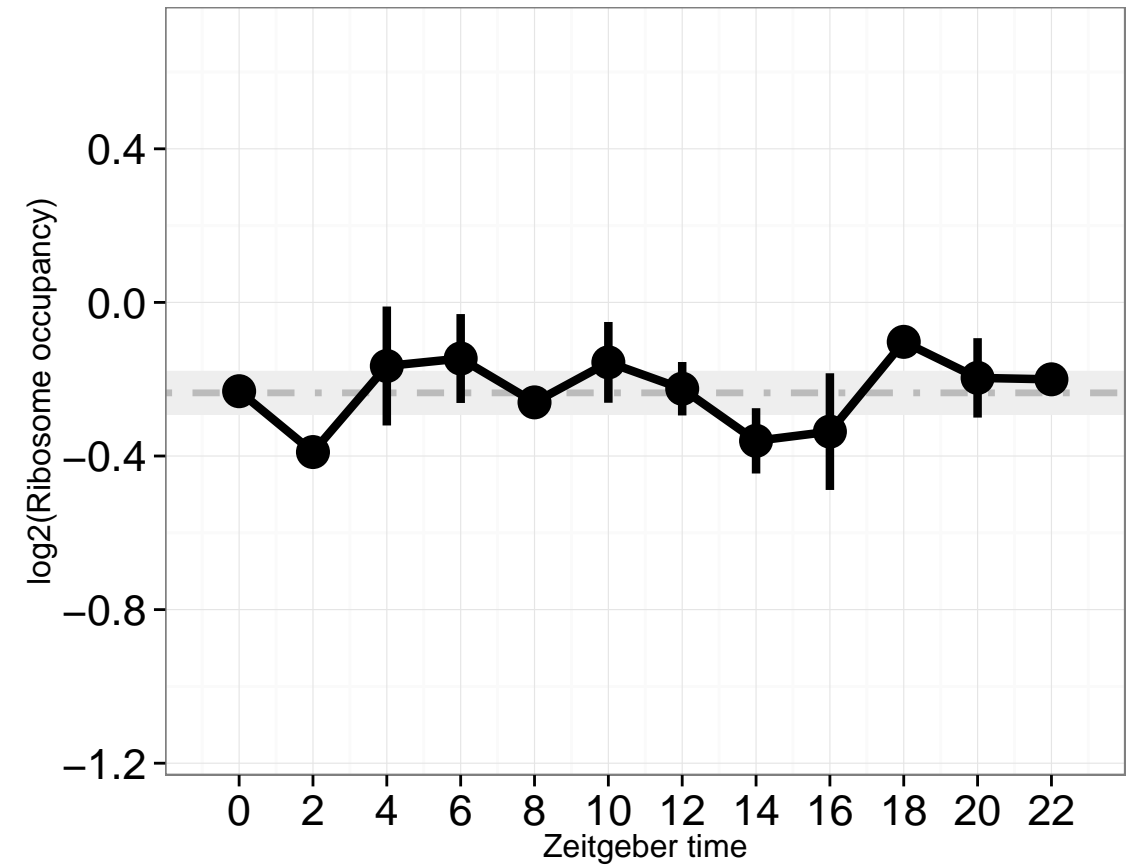

Supplement: Supplementary file 4468 [file 1]

**Chrna2 TR**

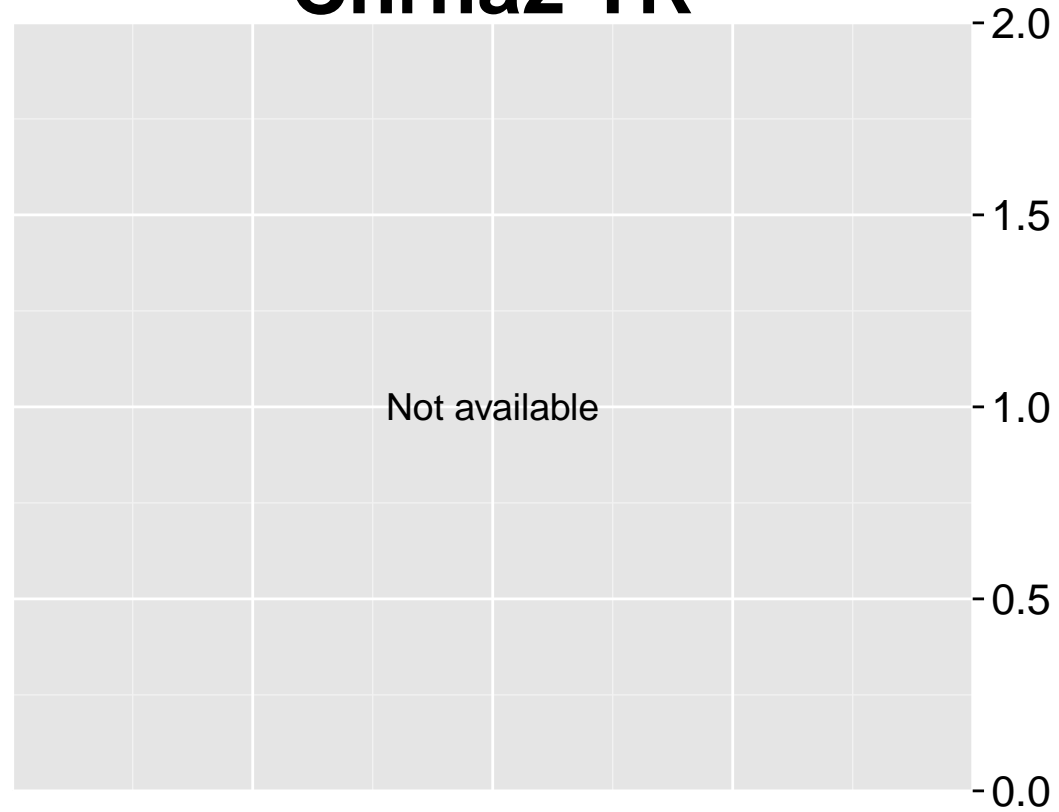

**Chrna2 log2(Ribosome occupancy**

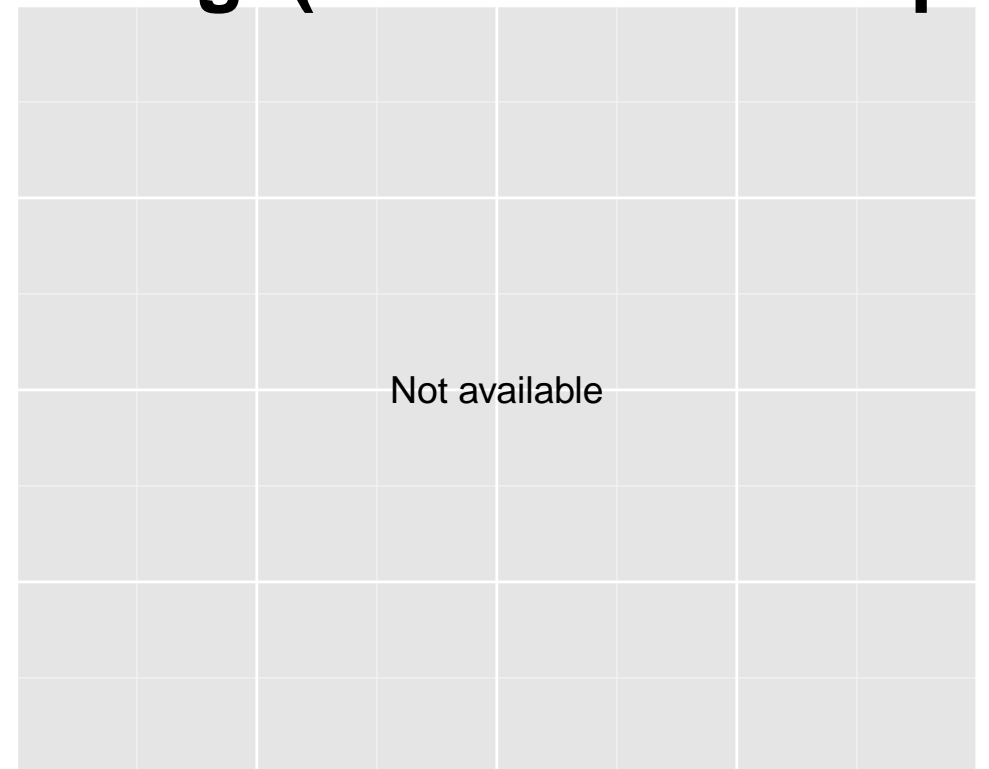

Supplement: Supplementary file 4469 [file 1]

# Rab40c

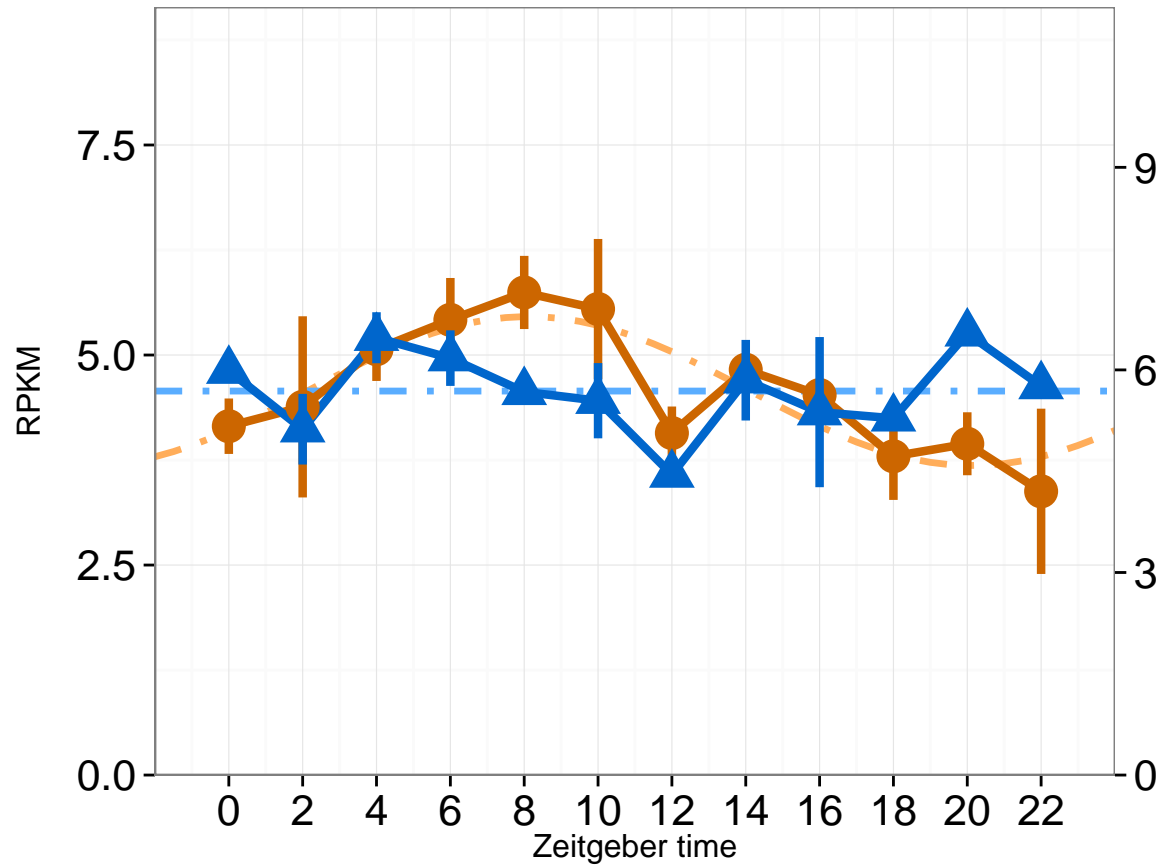

# Rab40c

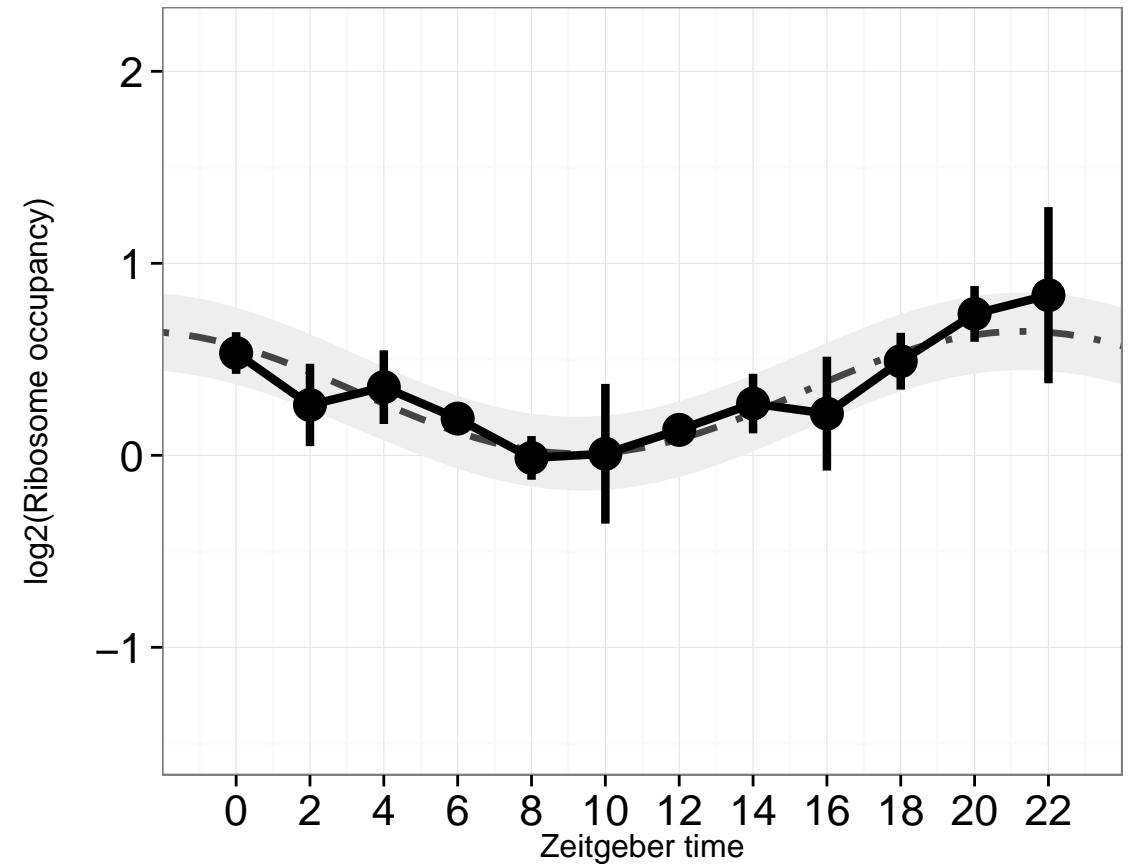

Supplement: Supplementary file 4470 [file 1]

## Rasa3

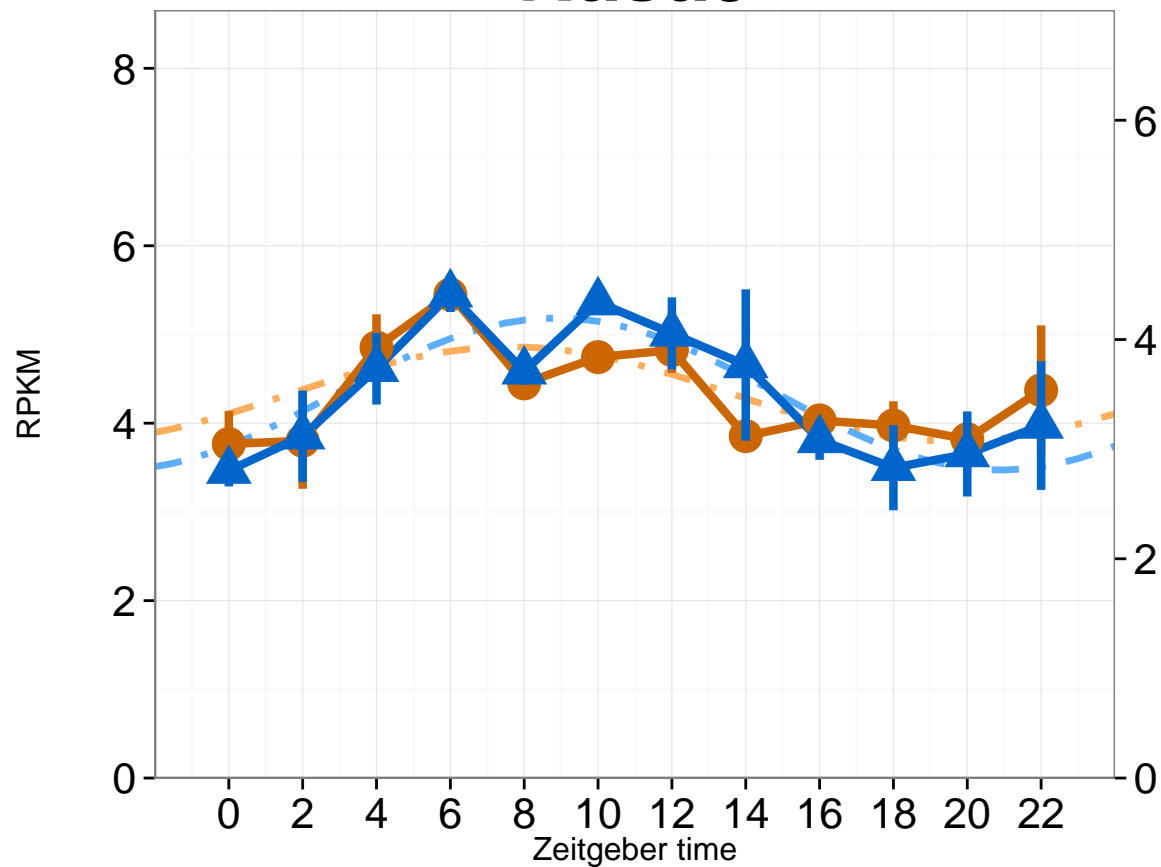

## Rasa3

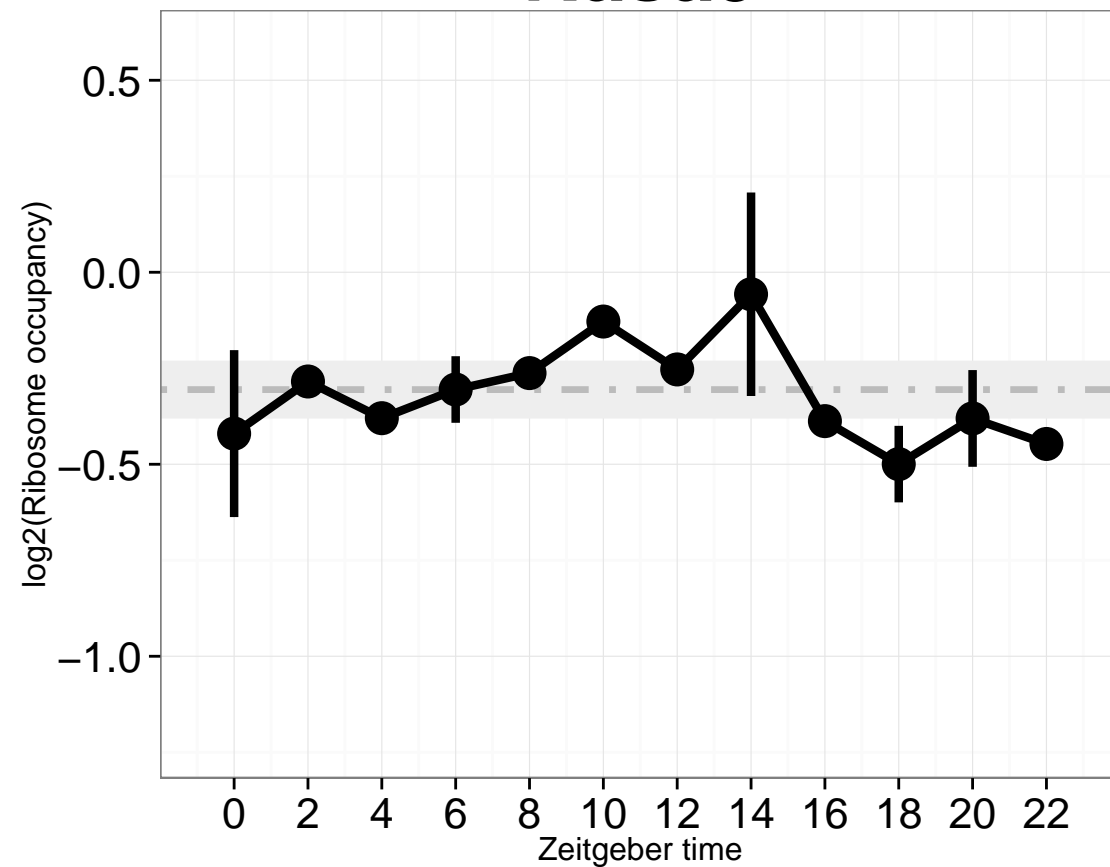

Supplement: Supplementary file 4471 [file 1]

## Copz2

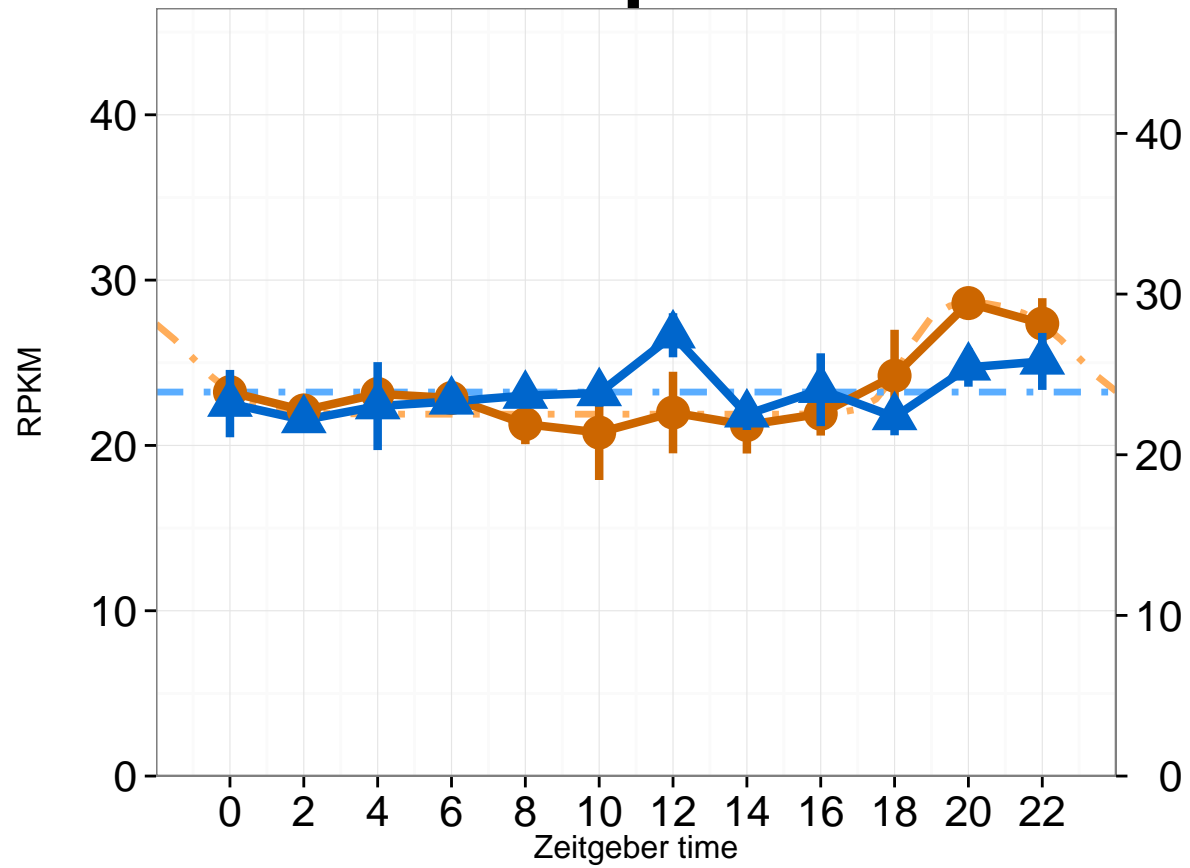

## Copz2

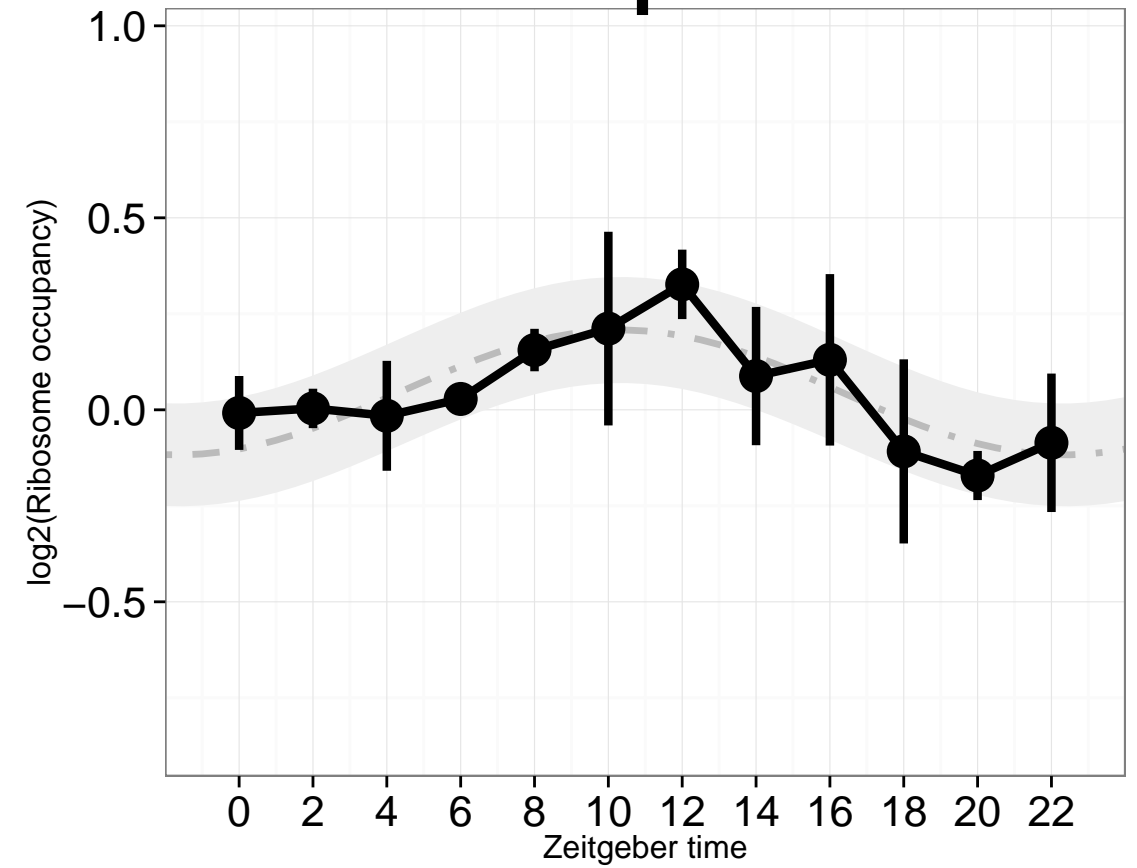

Supplement: Supplementary file 4472 [file 1]

**Rab11a**

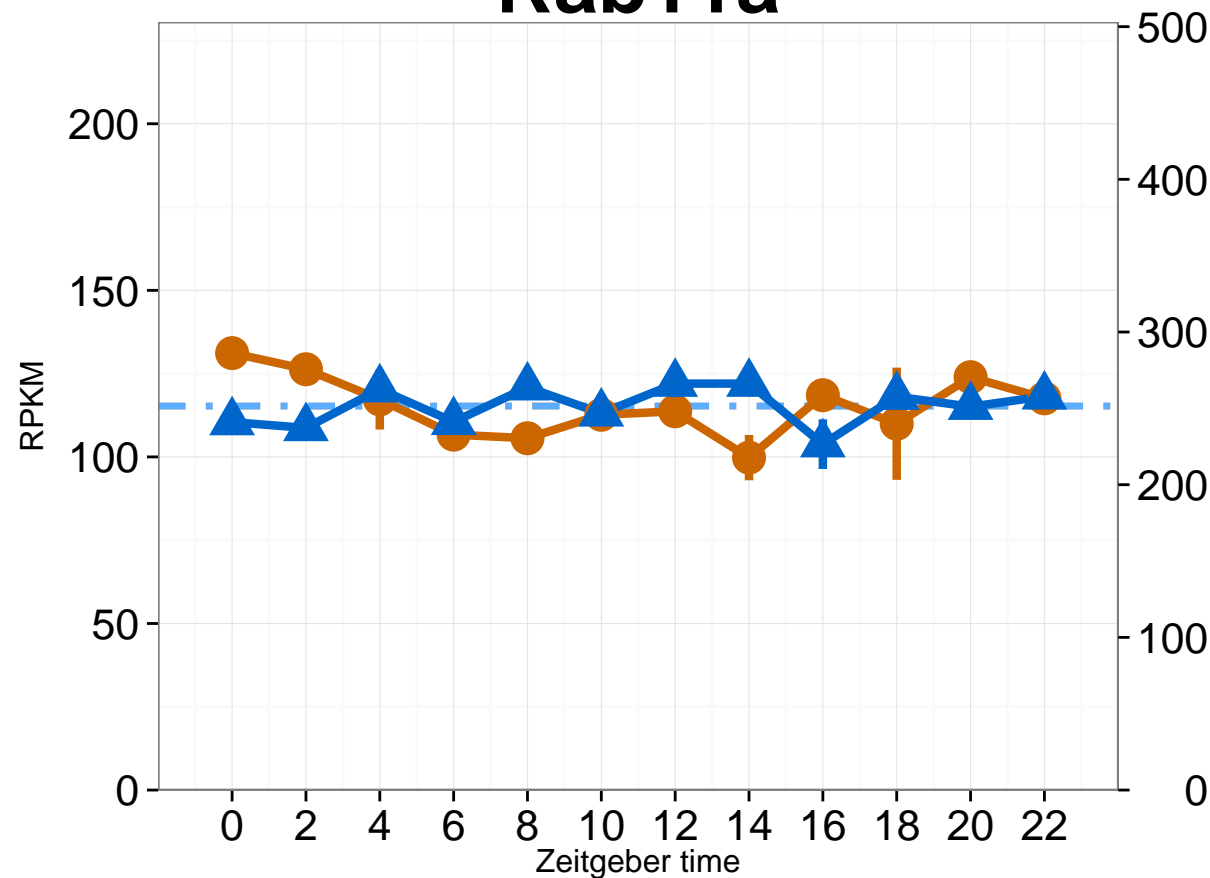

**Rab11a**

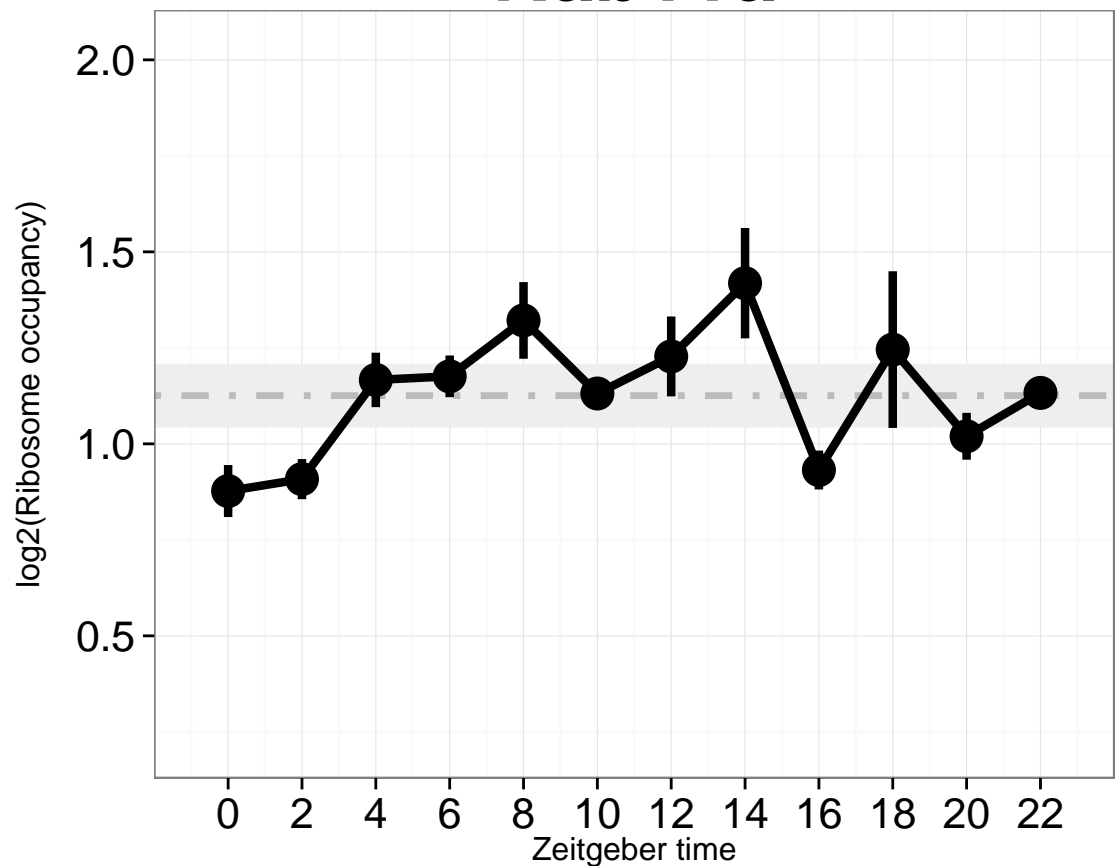

Supplement: Supplementary file 4473 [file 1]

**Wnt2b TR**

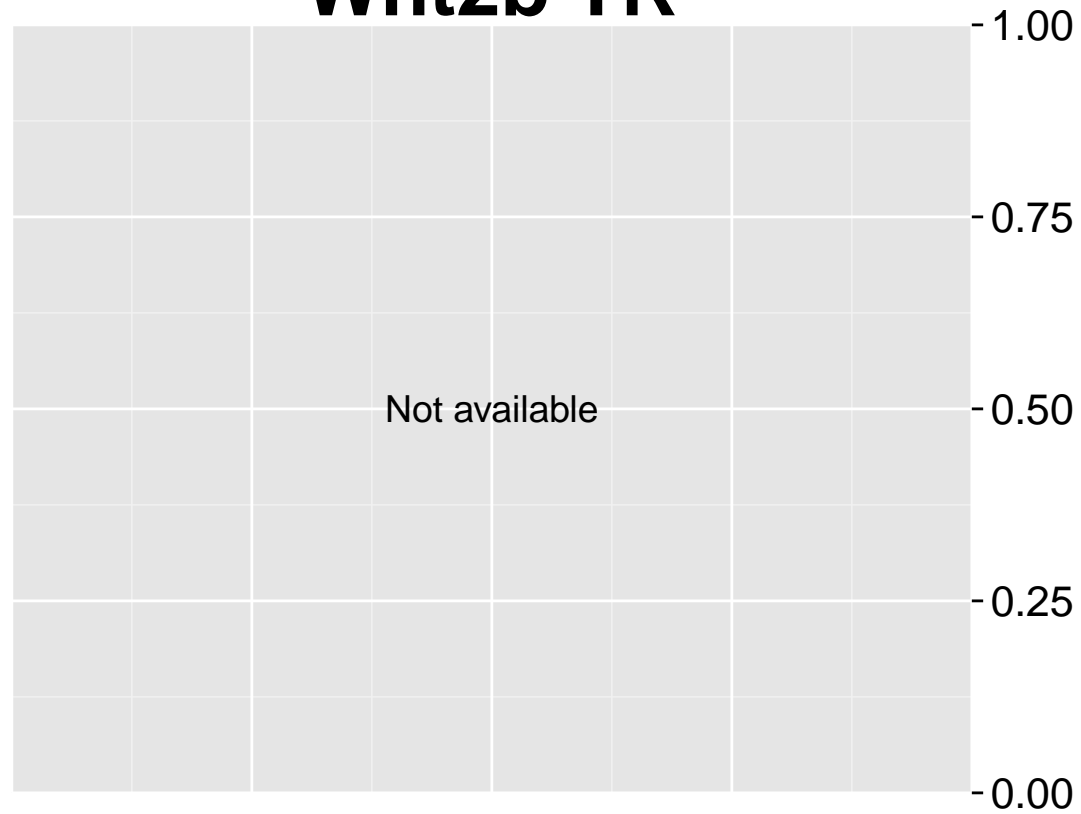

**Wnt2b log2(Ribosome occupancy**

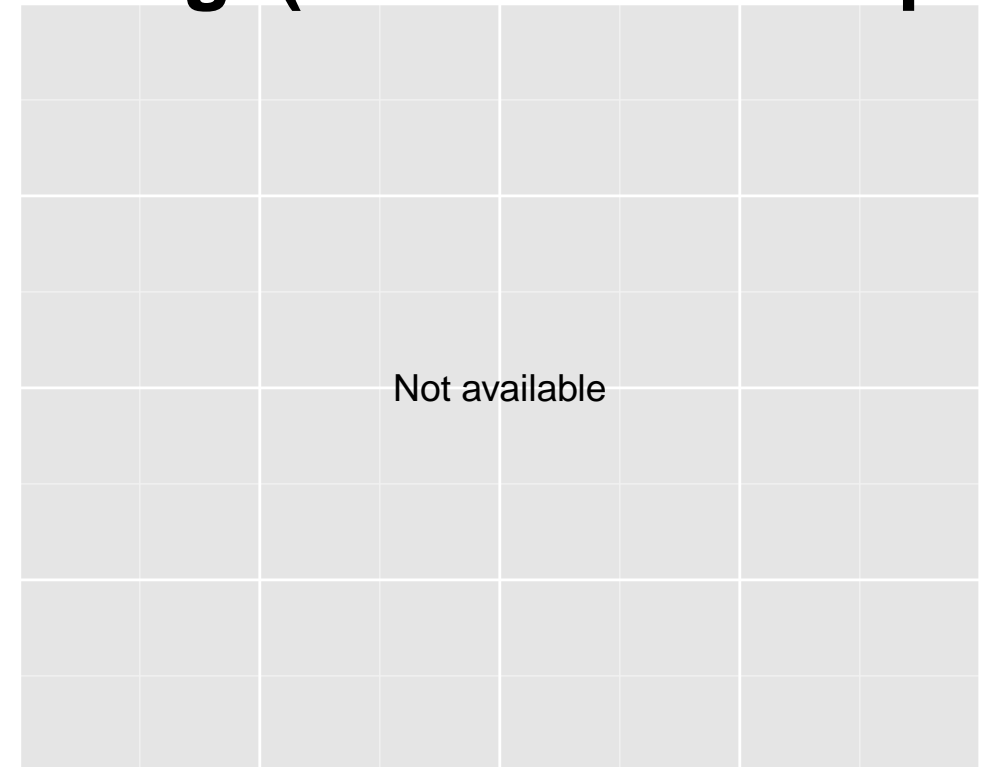

Supplement: Supplementary file 4474 [file 1]

**Parpbp TR**

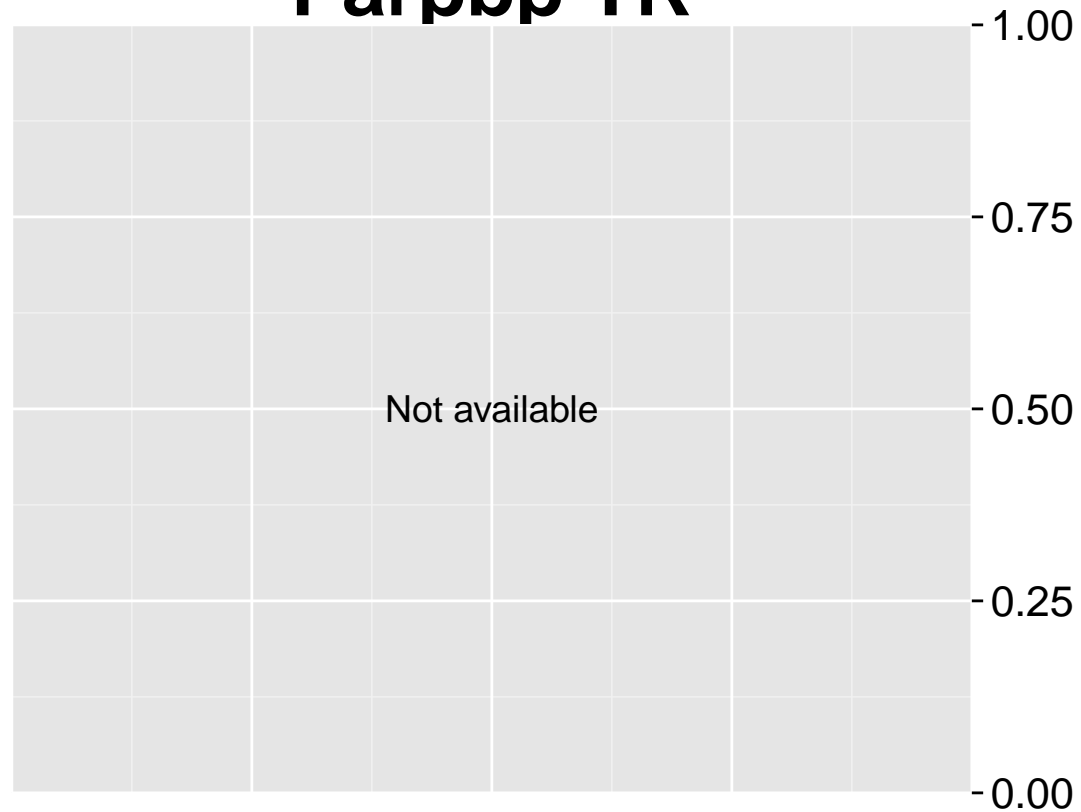

**Parpbp log2(Ribosome occupancy**

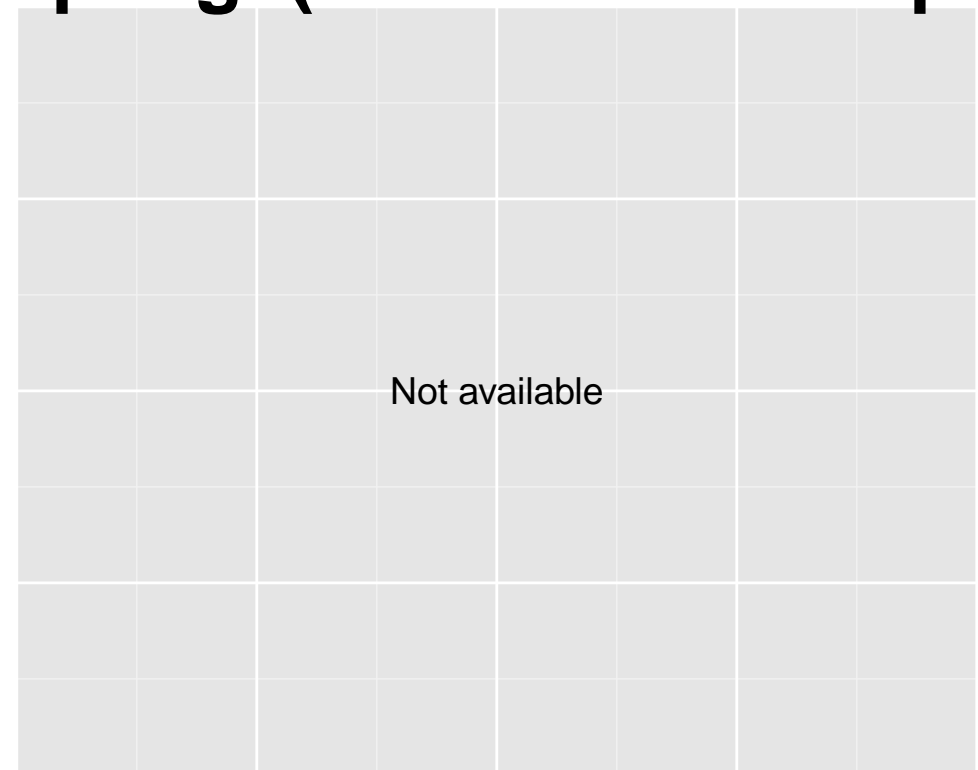

Supplement: Supplementary file 4475 [file 1]

## Ccdc132

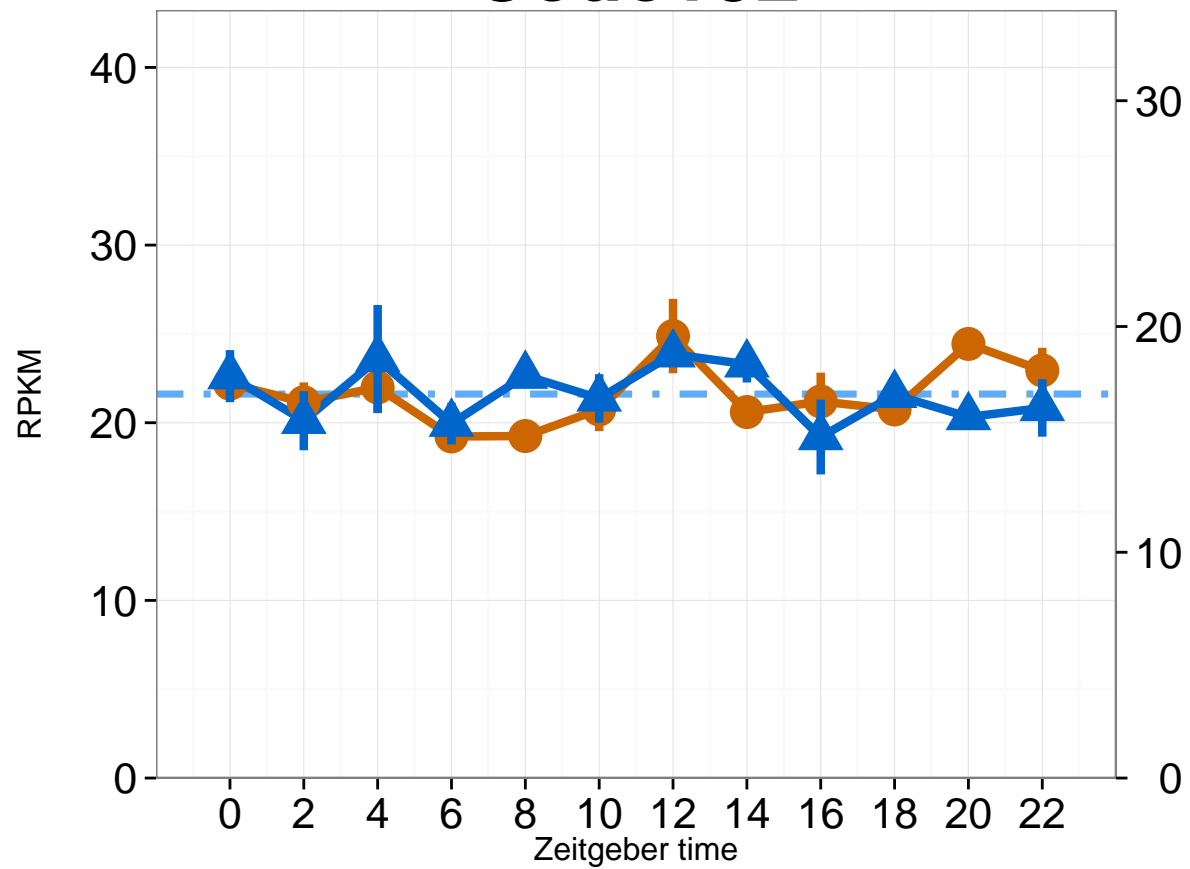

## Ccdc132

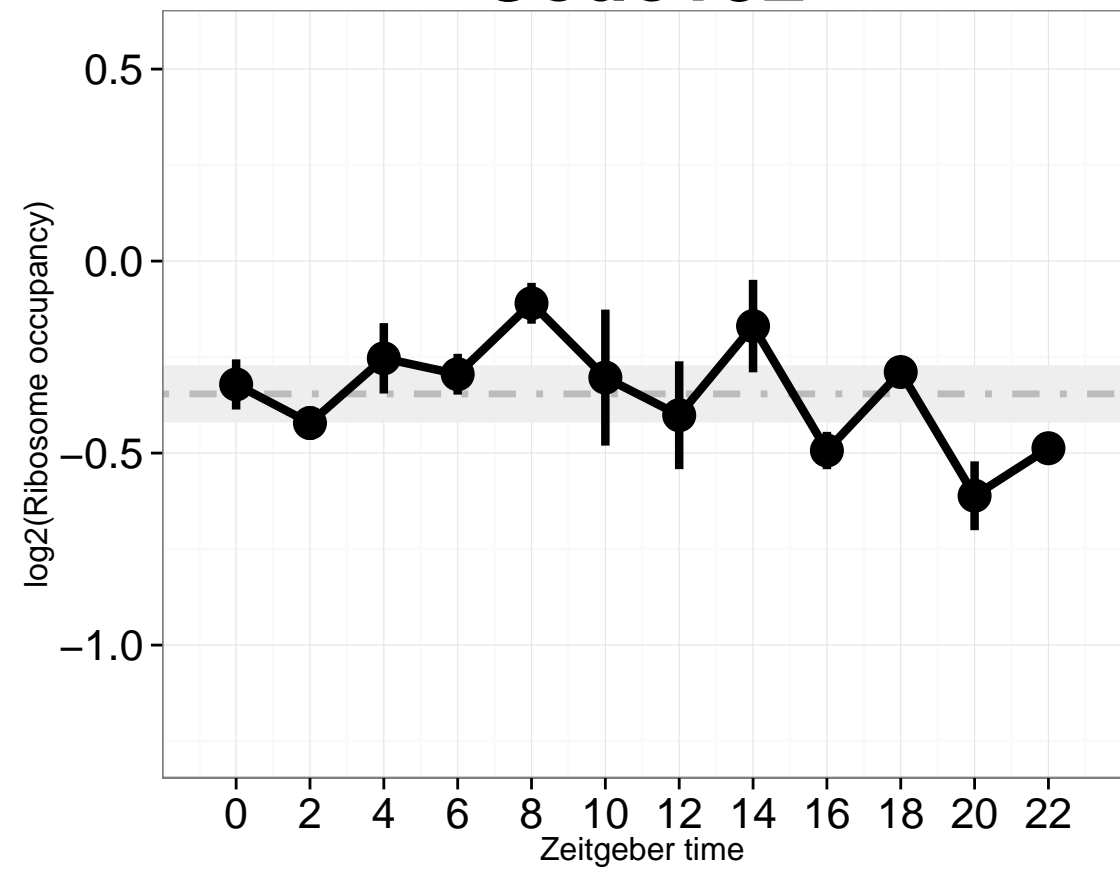

Supplement: Supplementary file 4476 [file 1]

## Acsl3

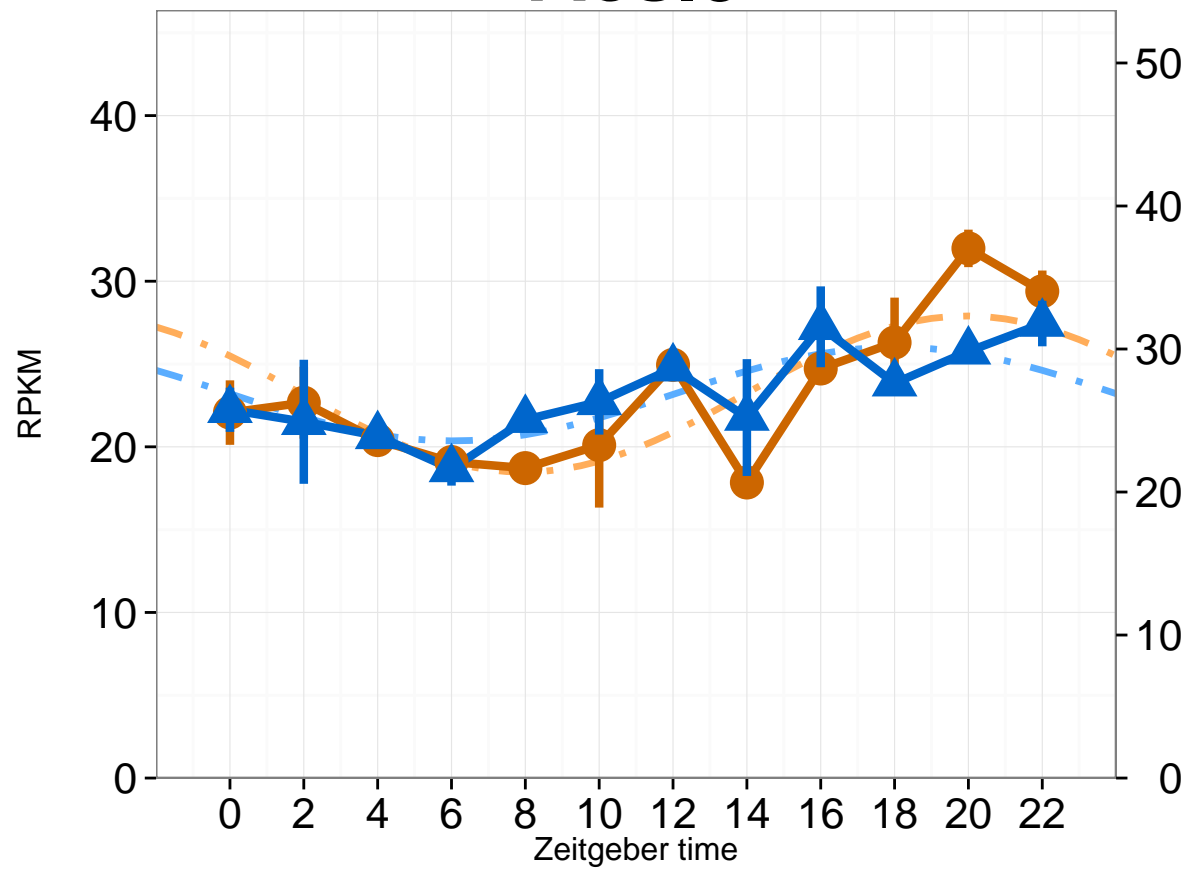

## Acsl3

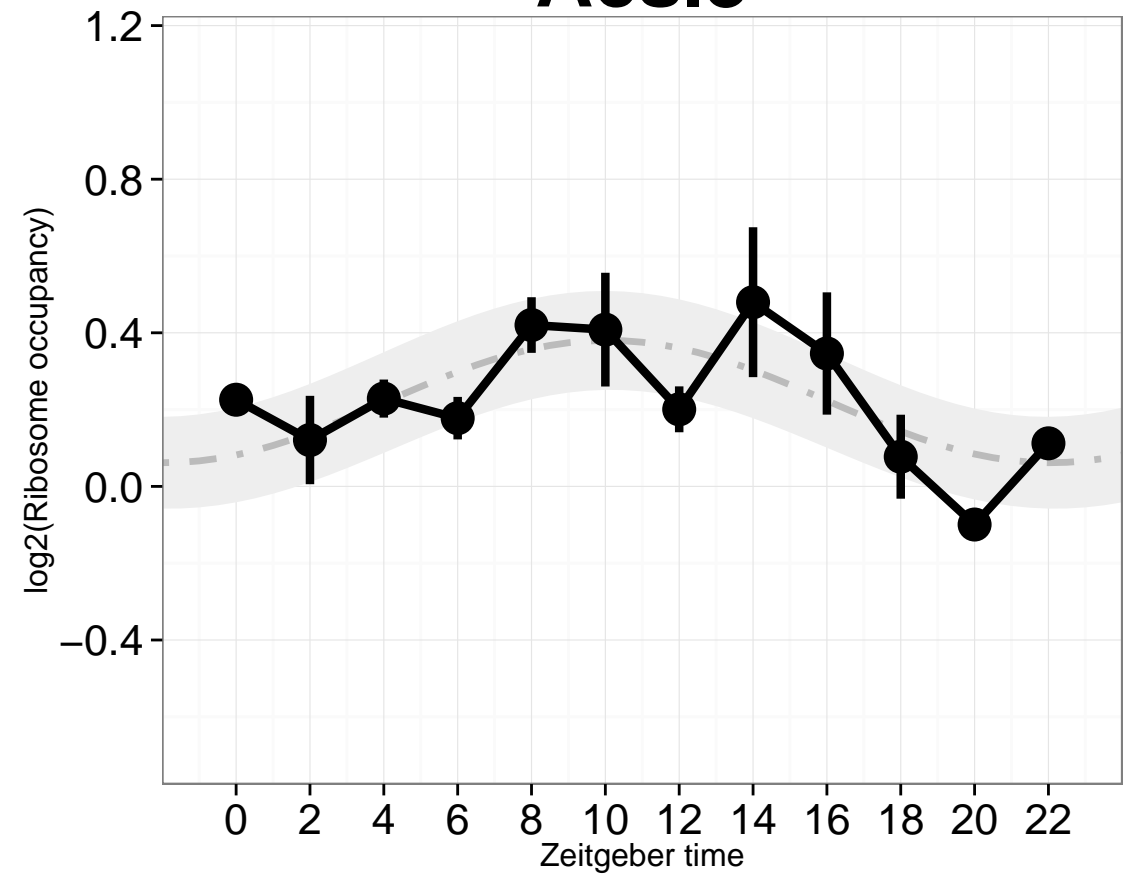

Supplement: Supplementary file 4477 [file 1]

# Fam63b

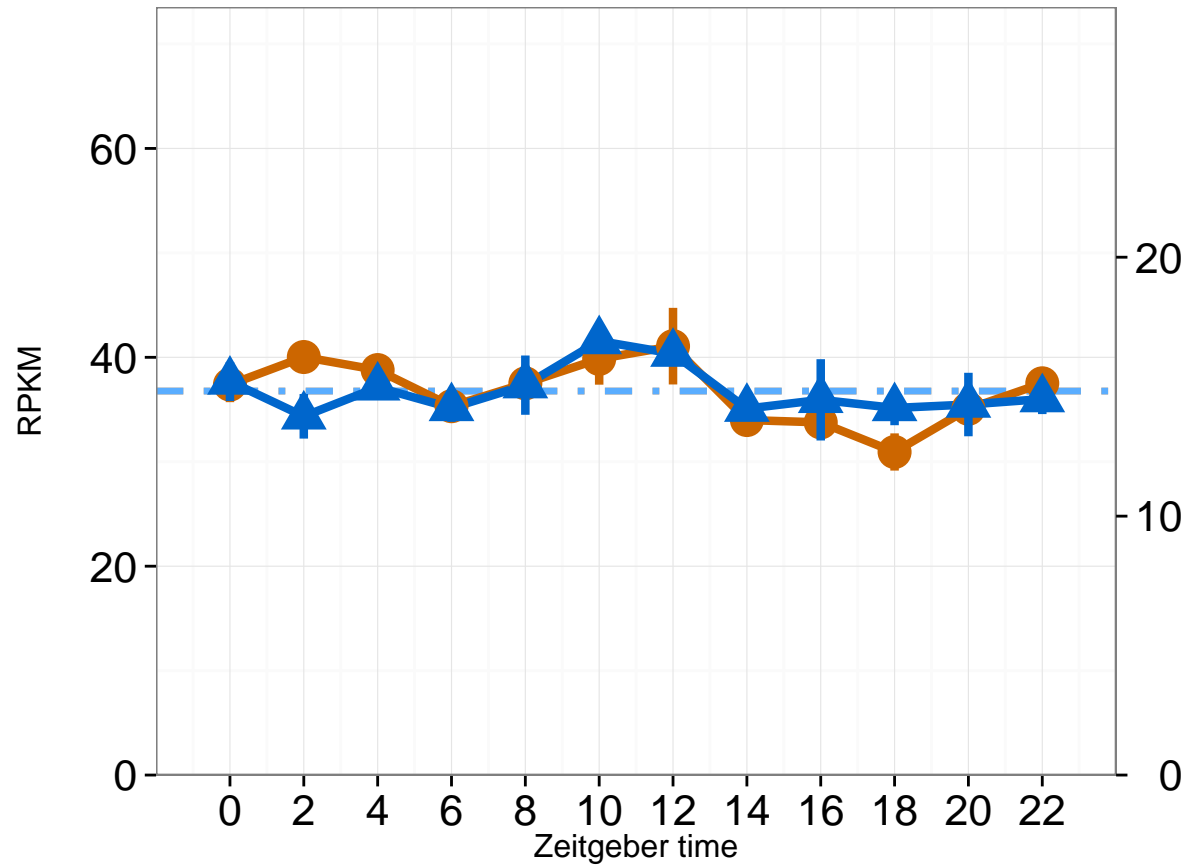

# Fam63b

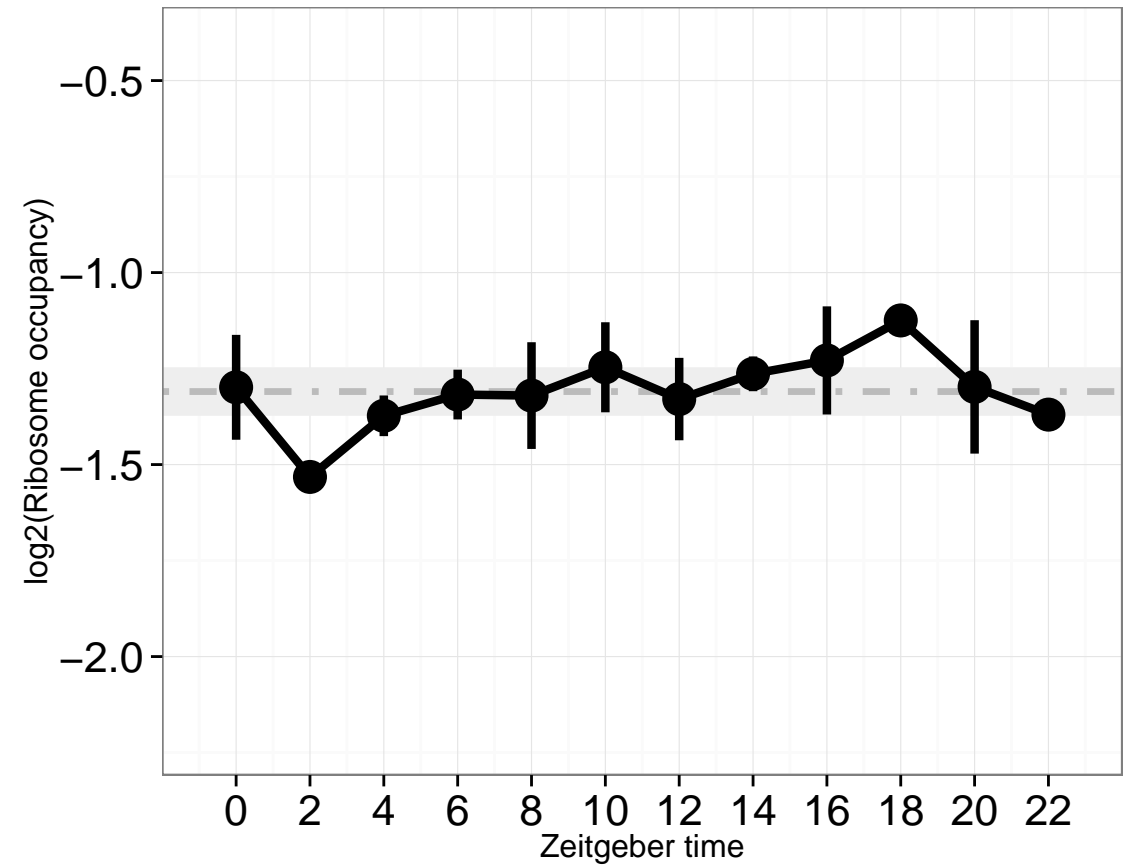

Supplement: Supplementary file 4478 [file 1]

## Prdx3

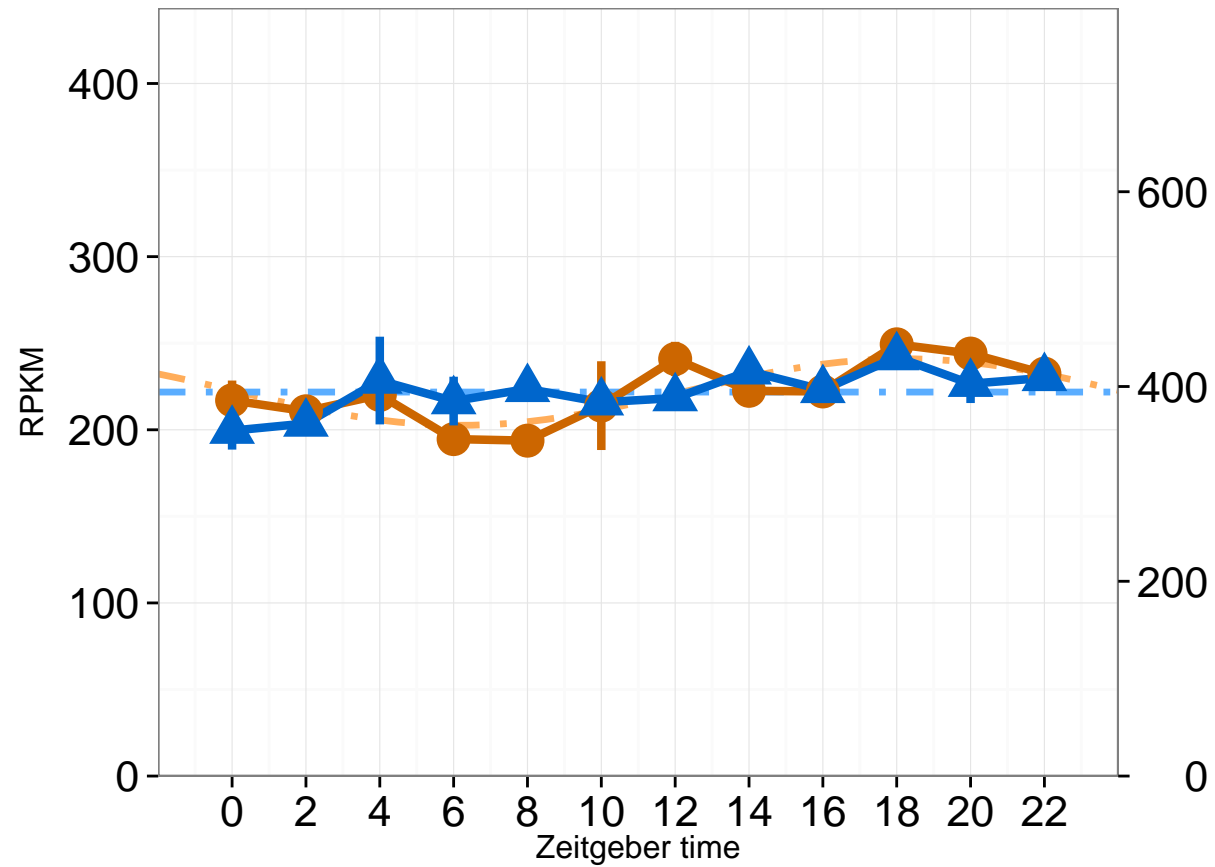

## Prdx3

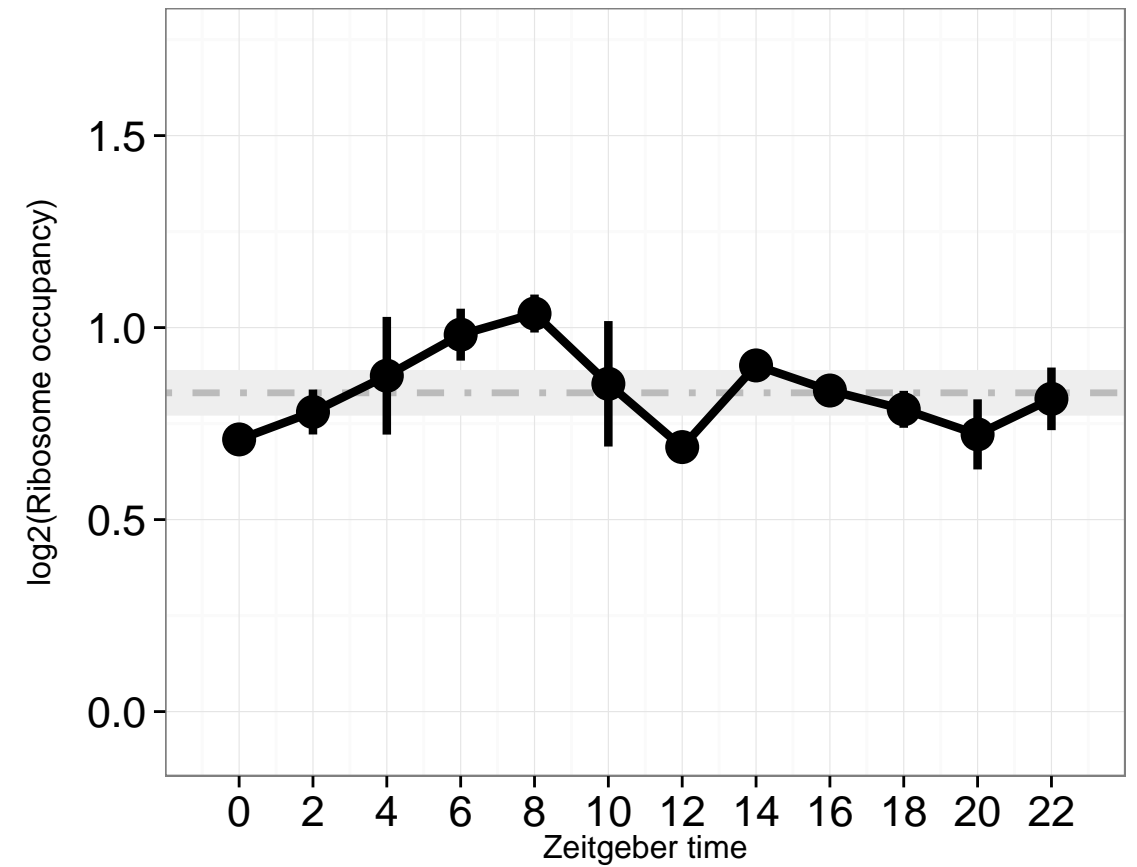

Supplement: Supplementary file 4479 [file 1]

## Vldlr

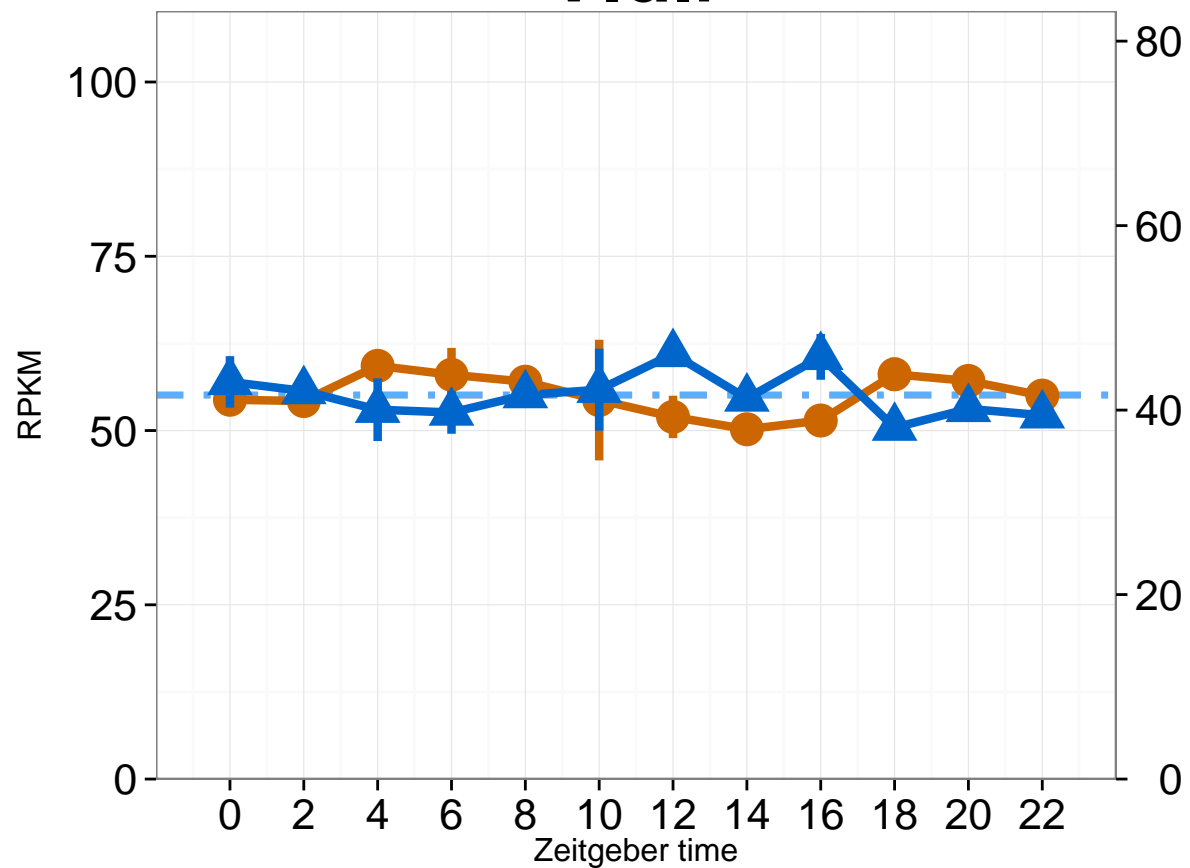

## Vldlr

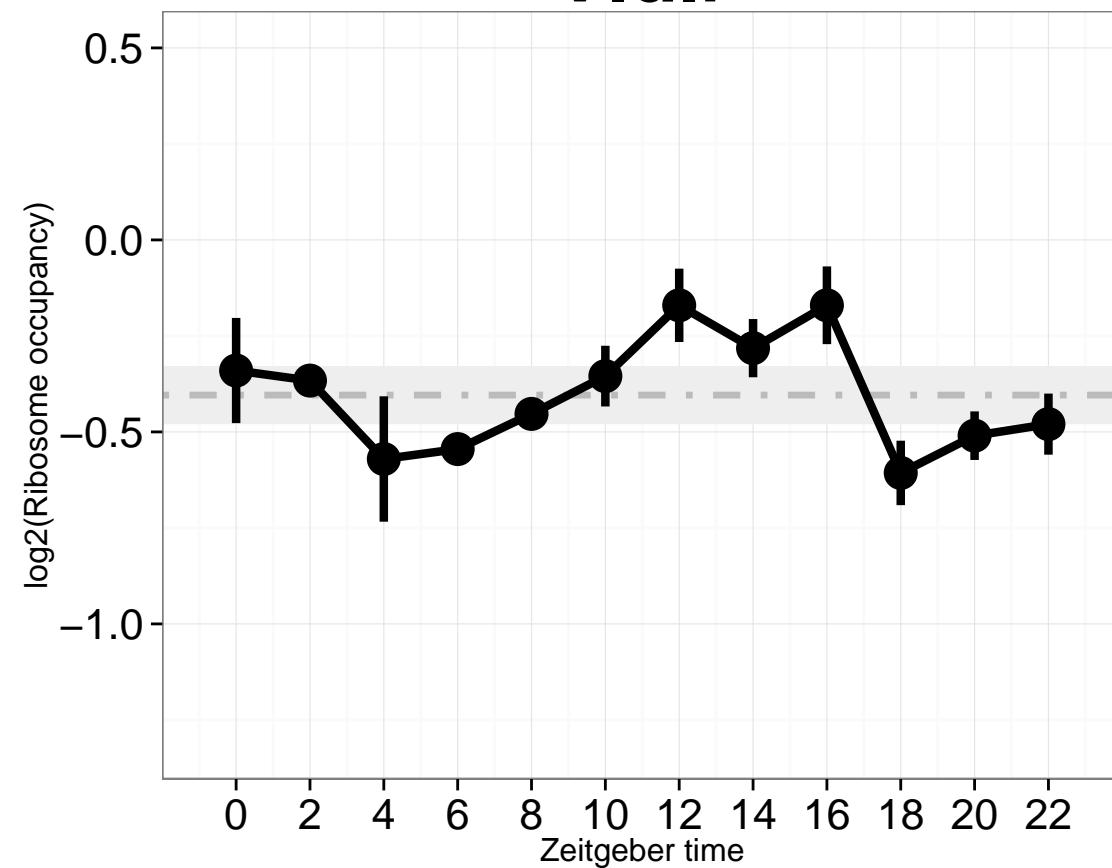

Supplement: Supplementary file 4480 [file 1]

## Car14

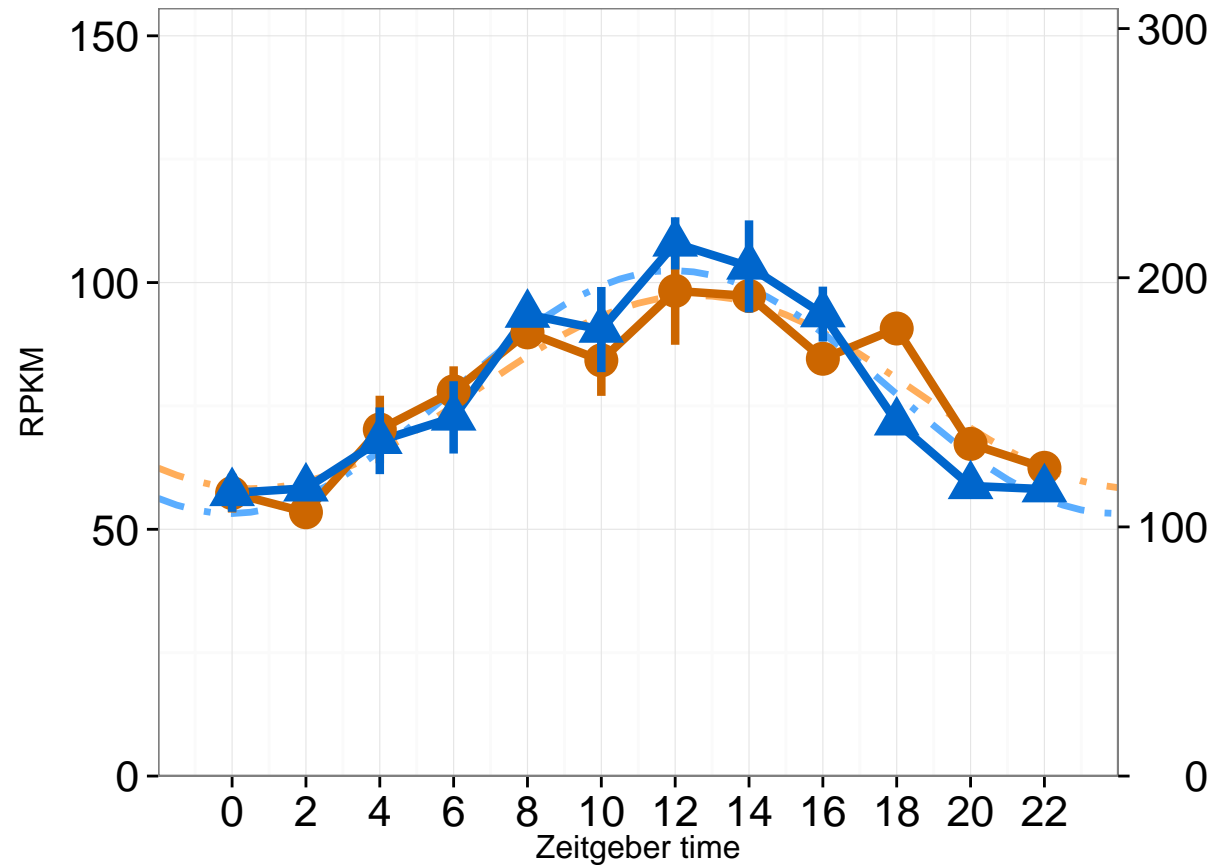

## Car14

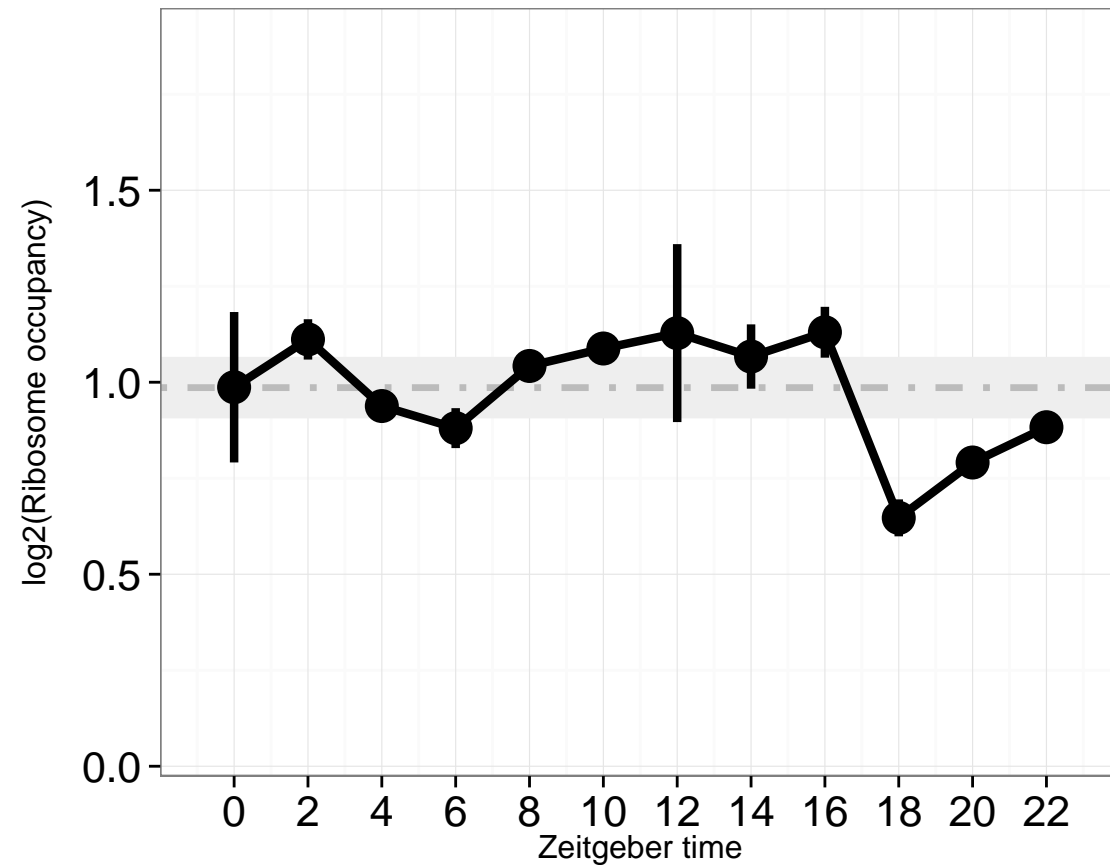

Supplement: Supplementary file 4481 [file 1]

## Cdh4

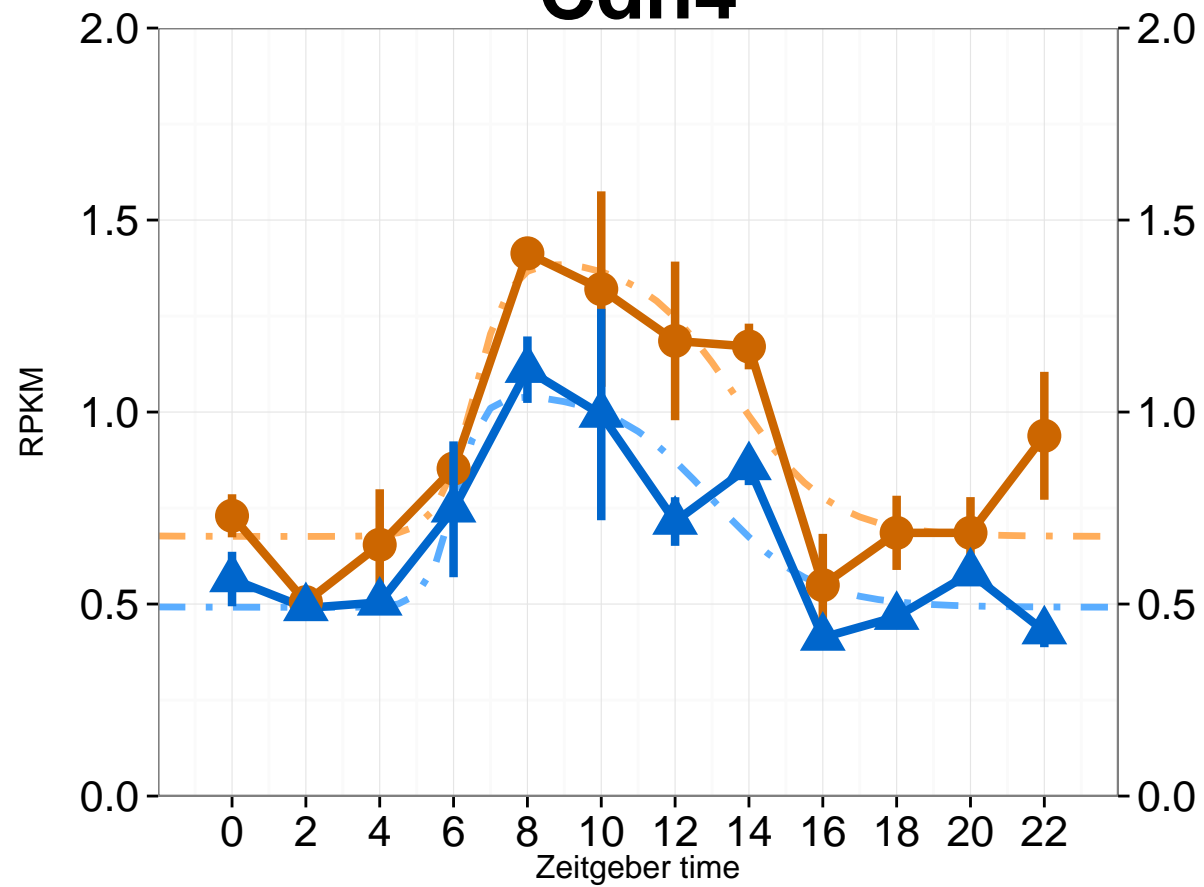

## Cdh4

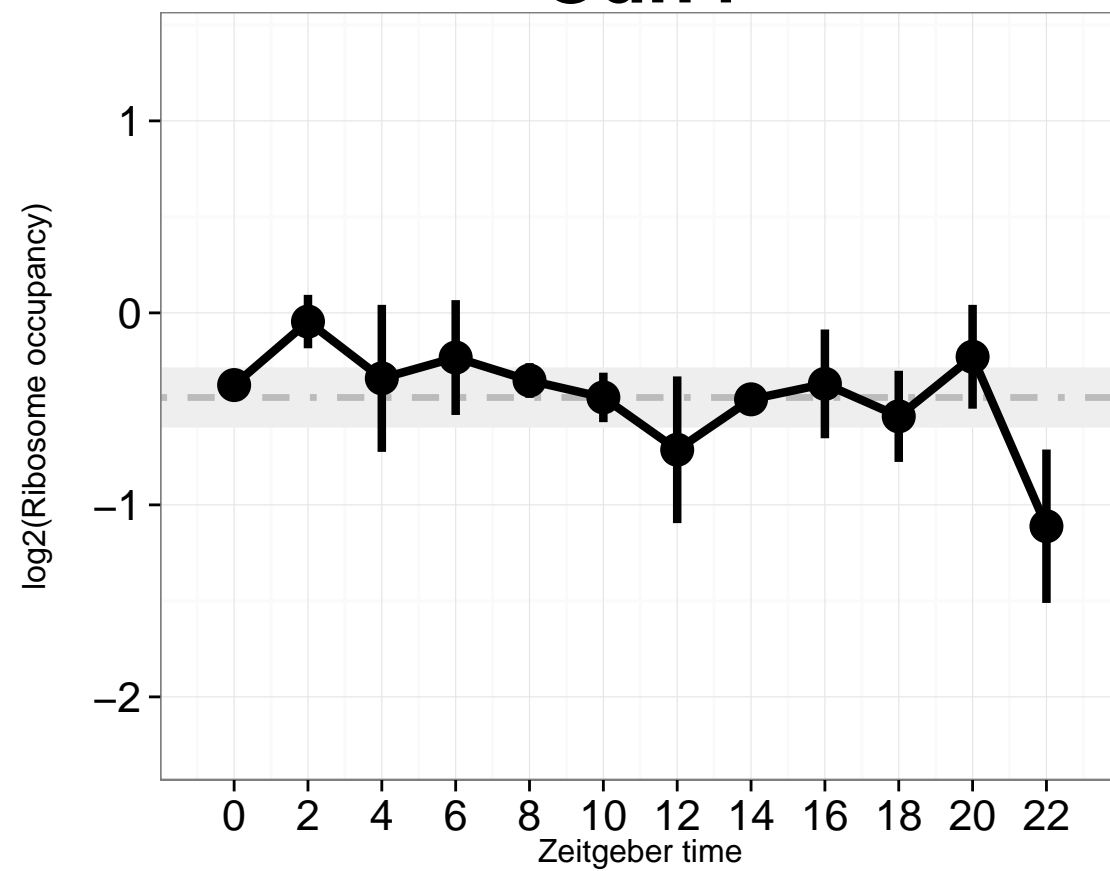

Supplement: Supplementary file 4482 [file 1]

## Mapk15

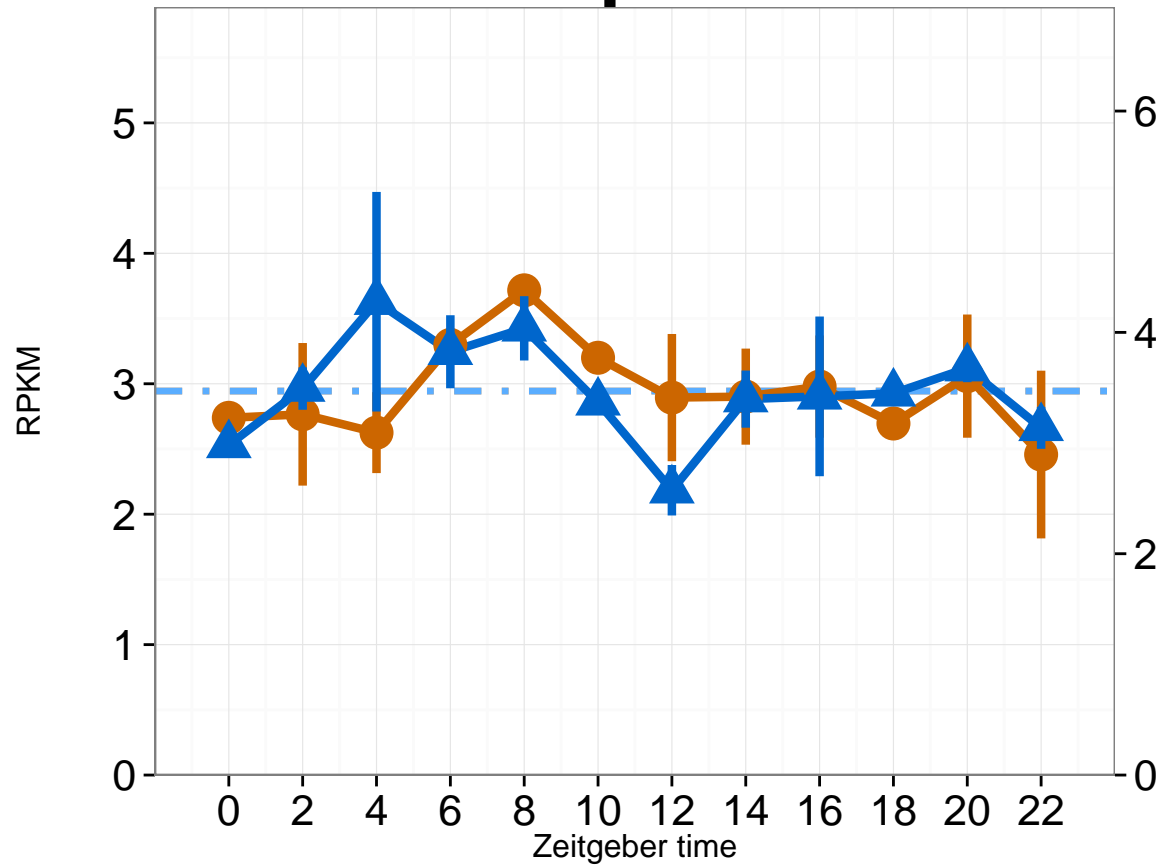

## Mapk15

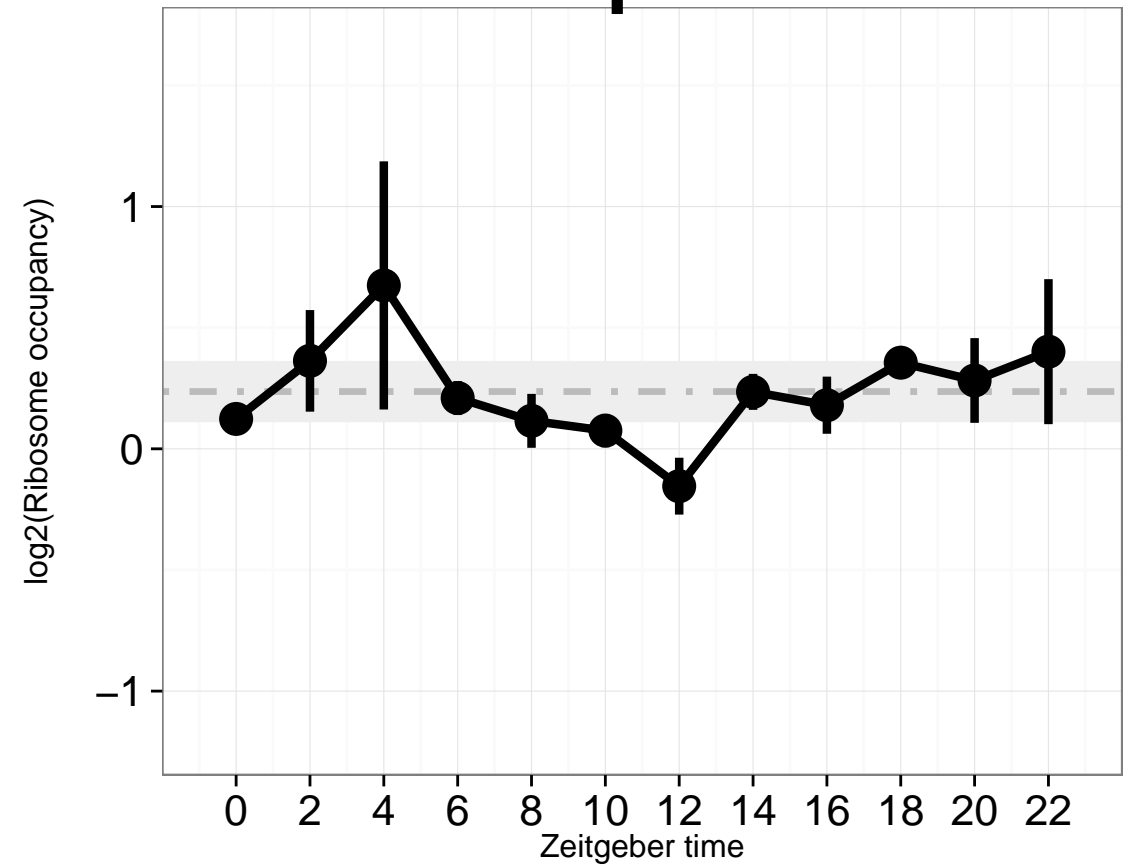

Supplement: Supplementary file 4483 [file 1]

## Pura

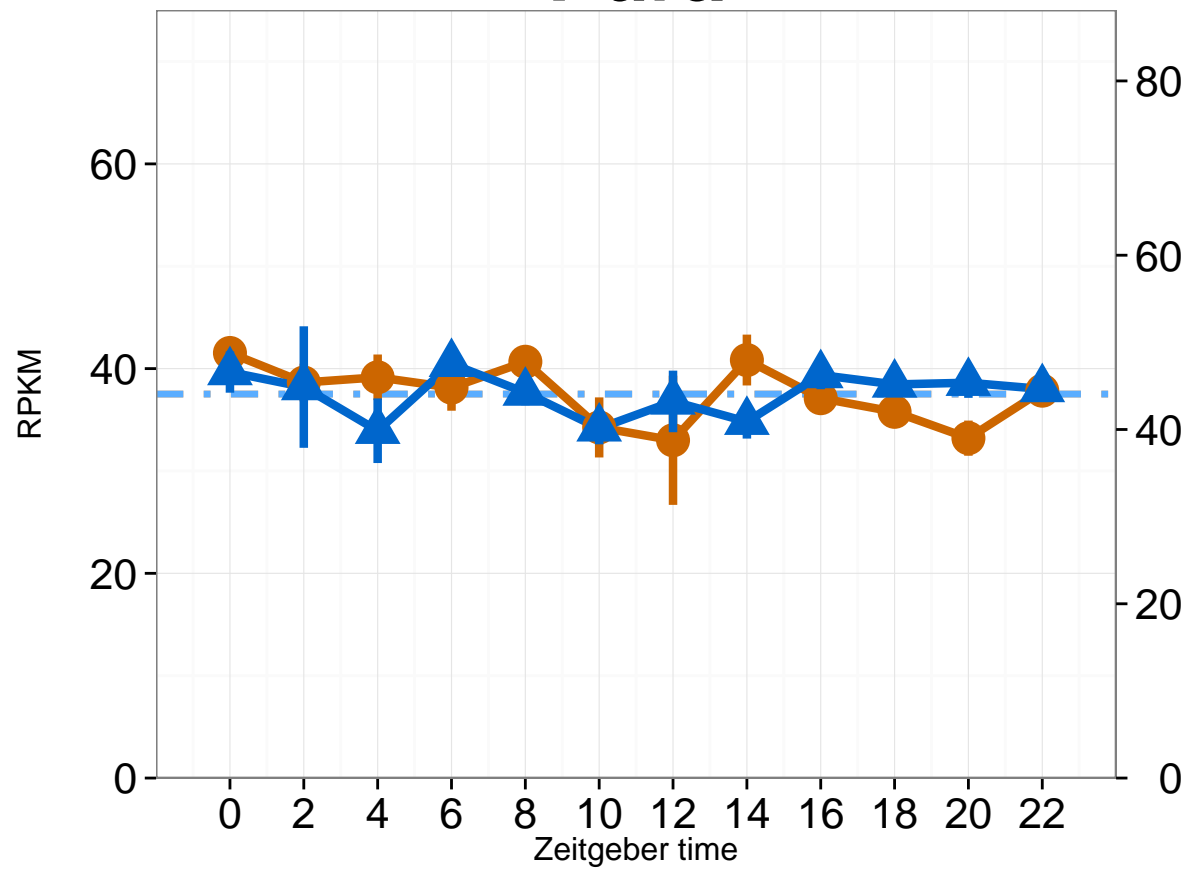

## Pura

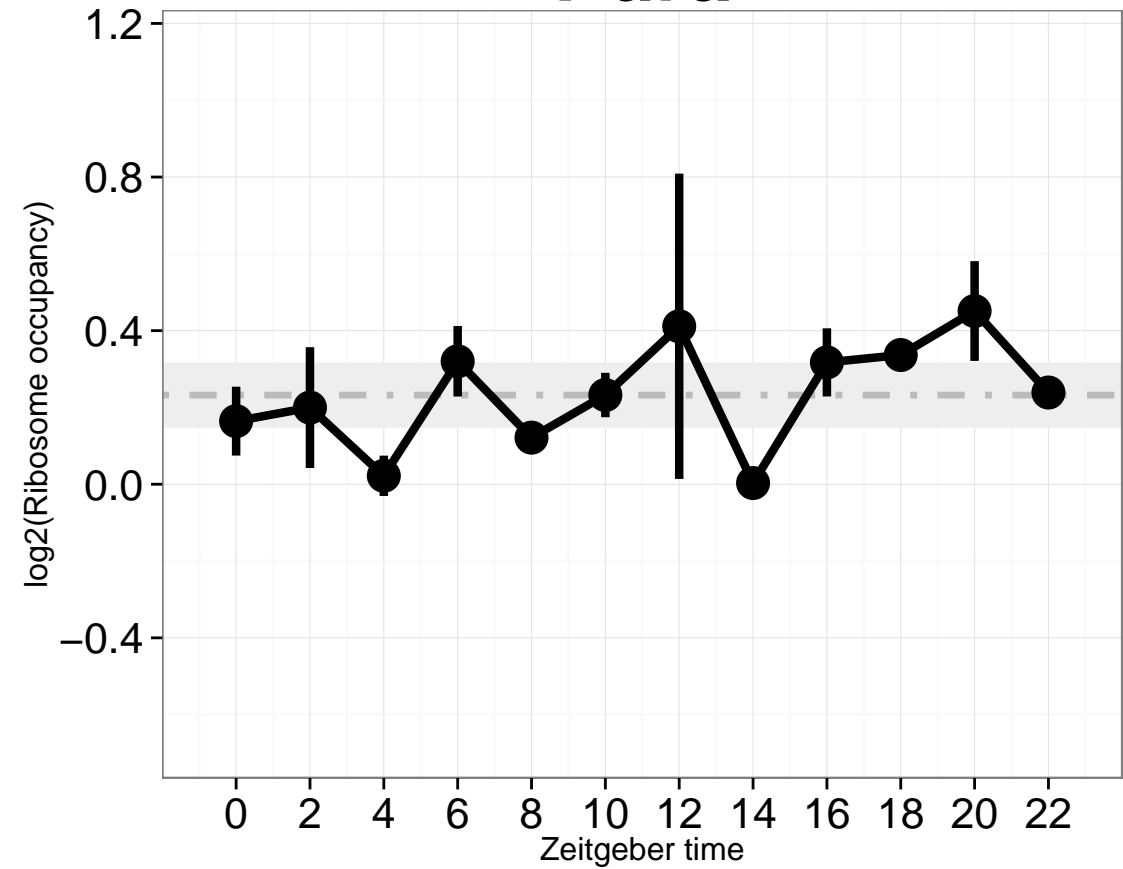

Supplement: Supplementary file 4484 [file 1]

# Col1a1

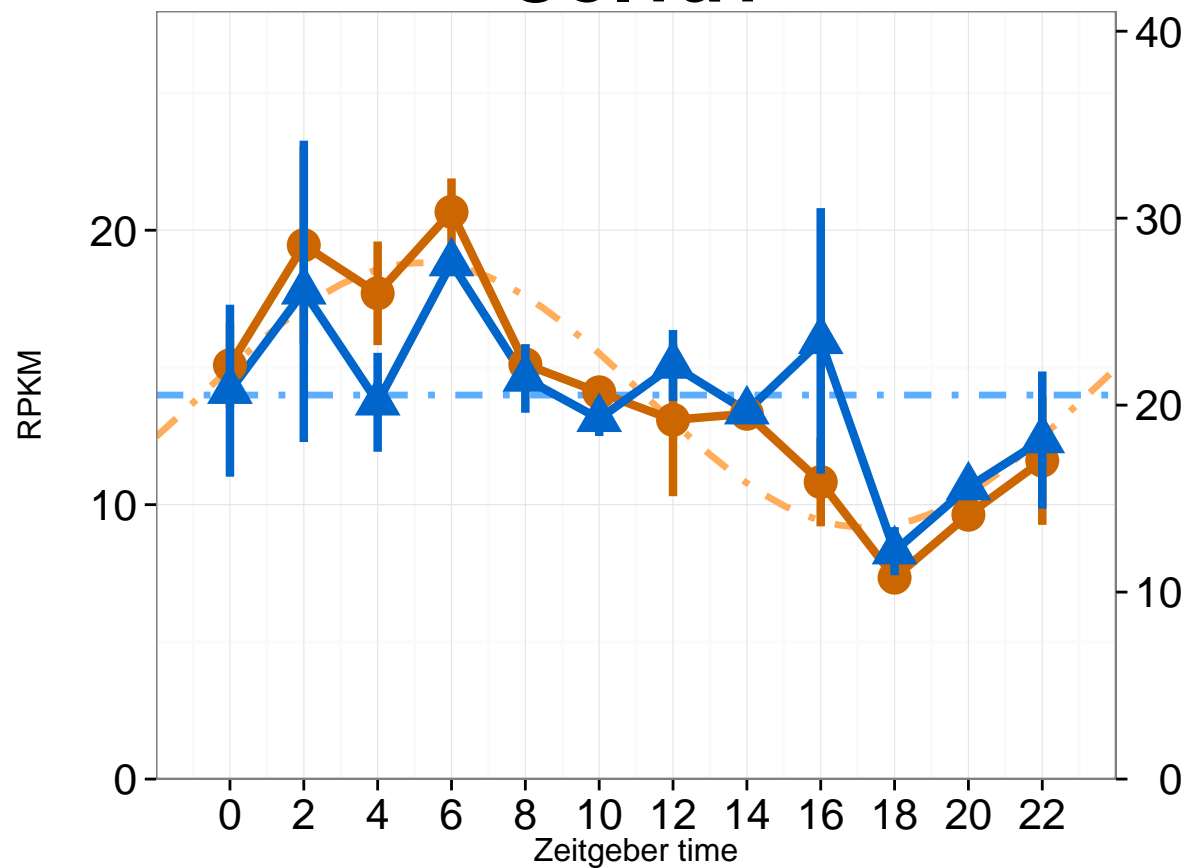

# Col1a1

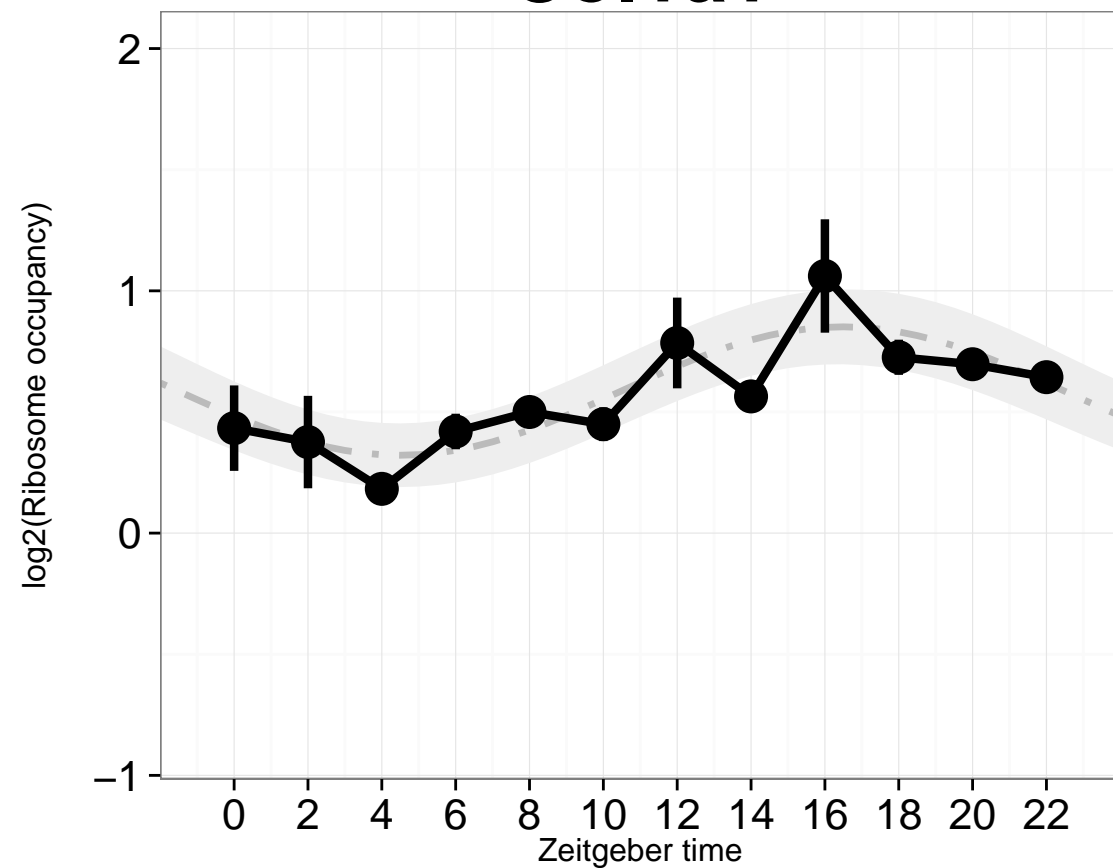

Supplement: Supplementary file 4485 [file 1]

## Cgn

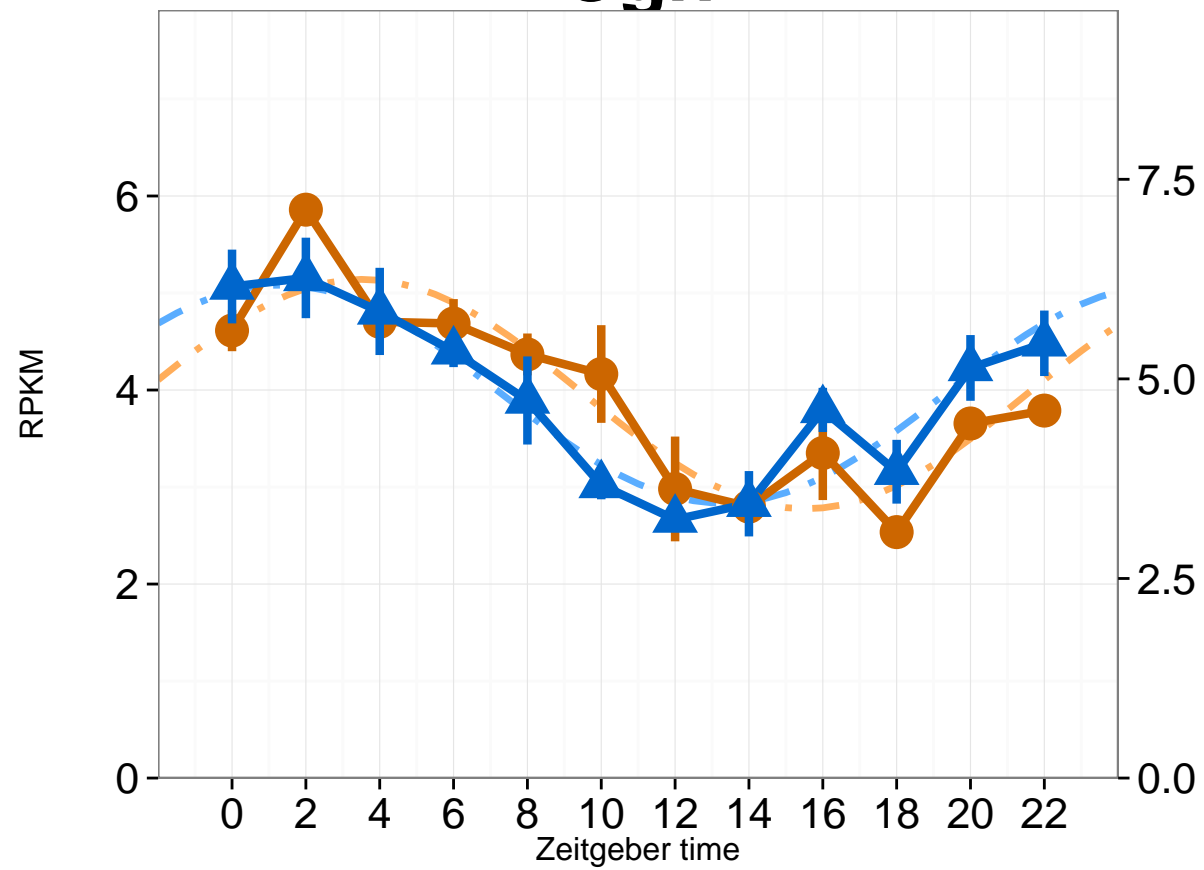

## Cgn

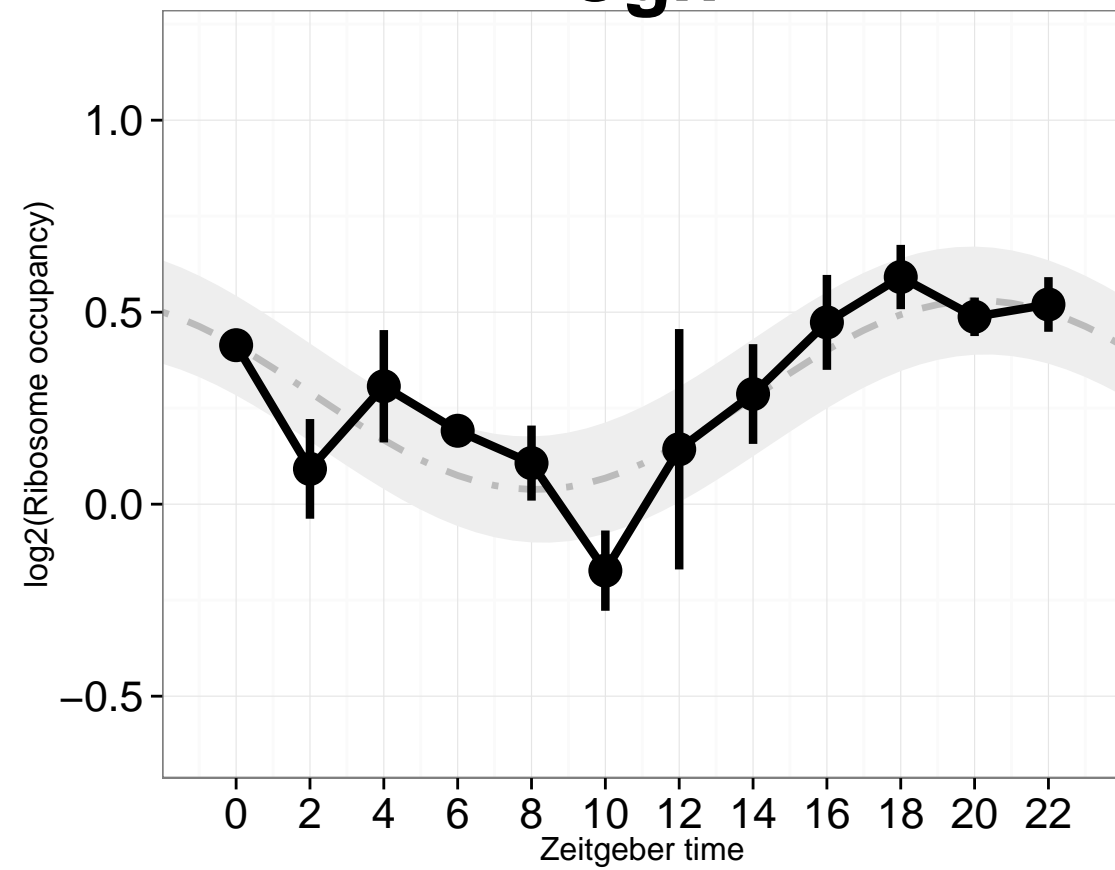

Supplement: Supplementary file 4486 [file 1]

## Adss

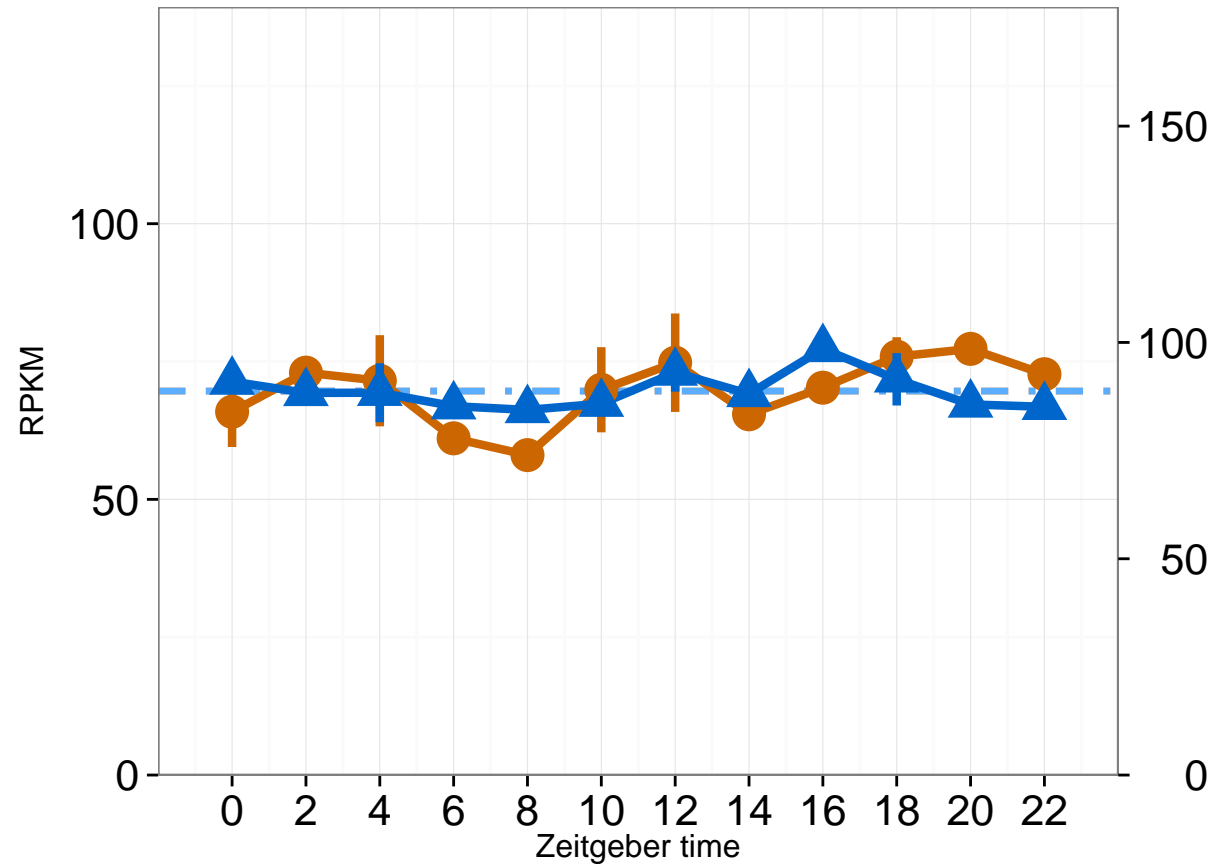

## Adss

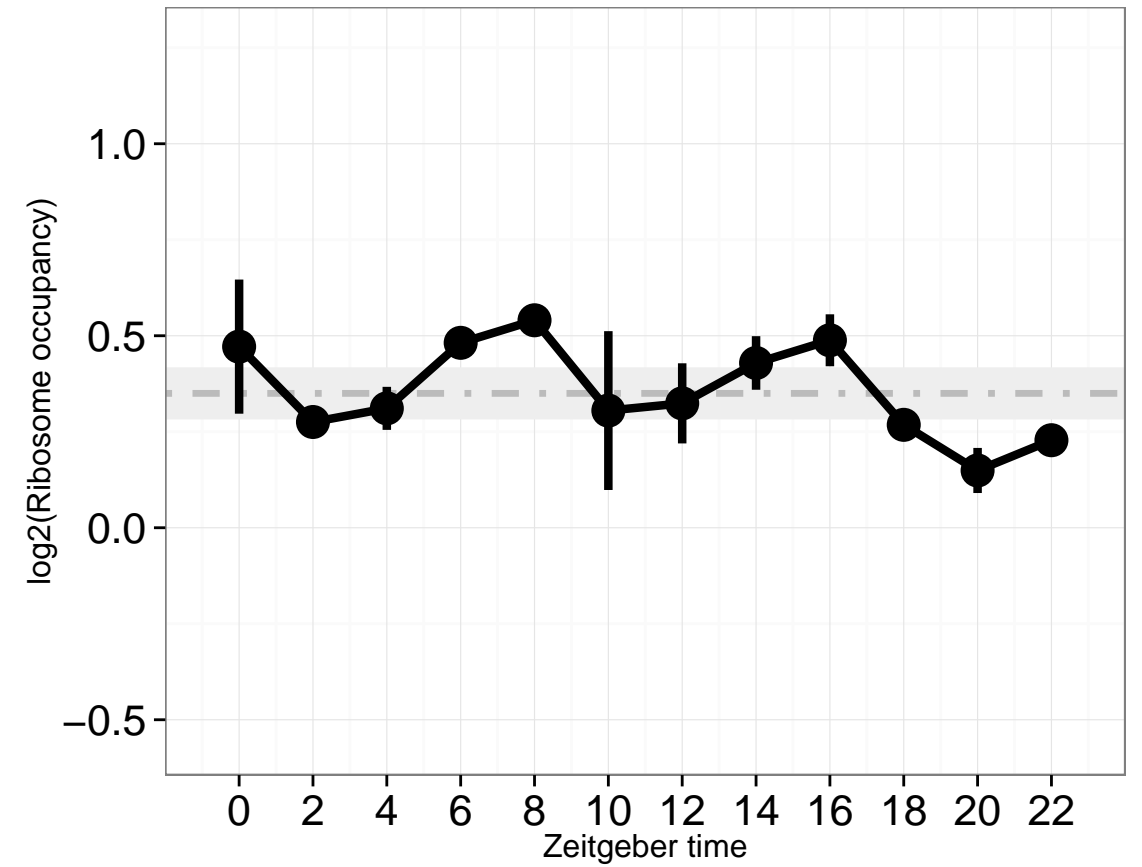

Supplement: Supplementary file 4487 [file 1]

## Rnmtl1

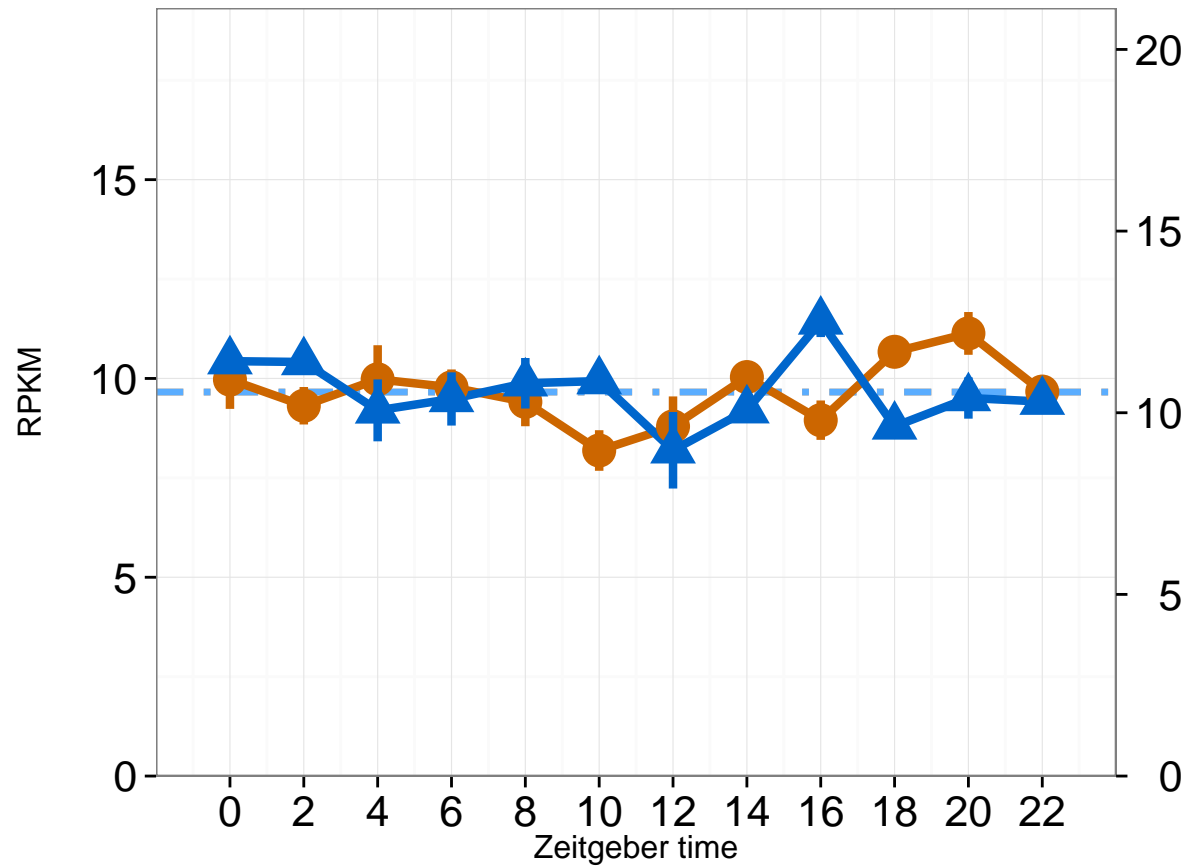

## Rnmtl1

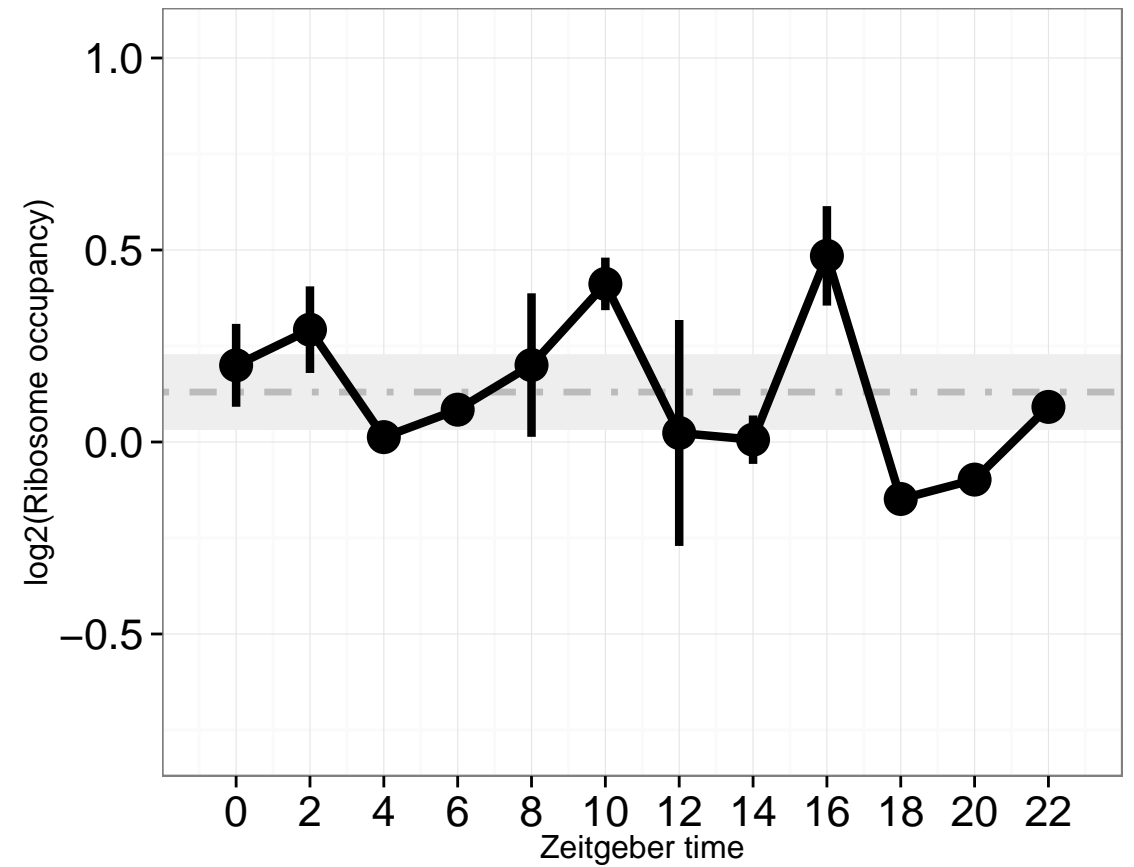

Supplement: Supplementary file 4488 [file 1]

## Abcf1

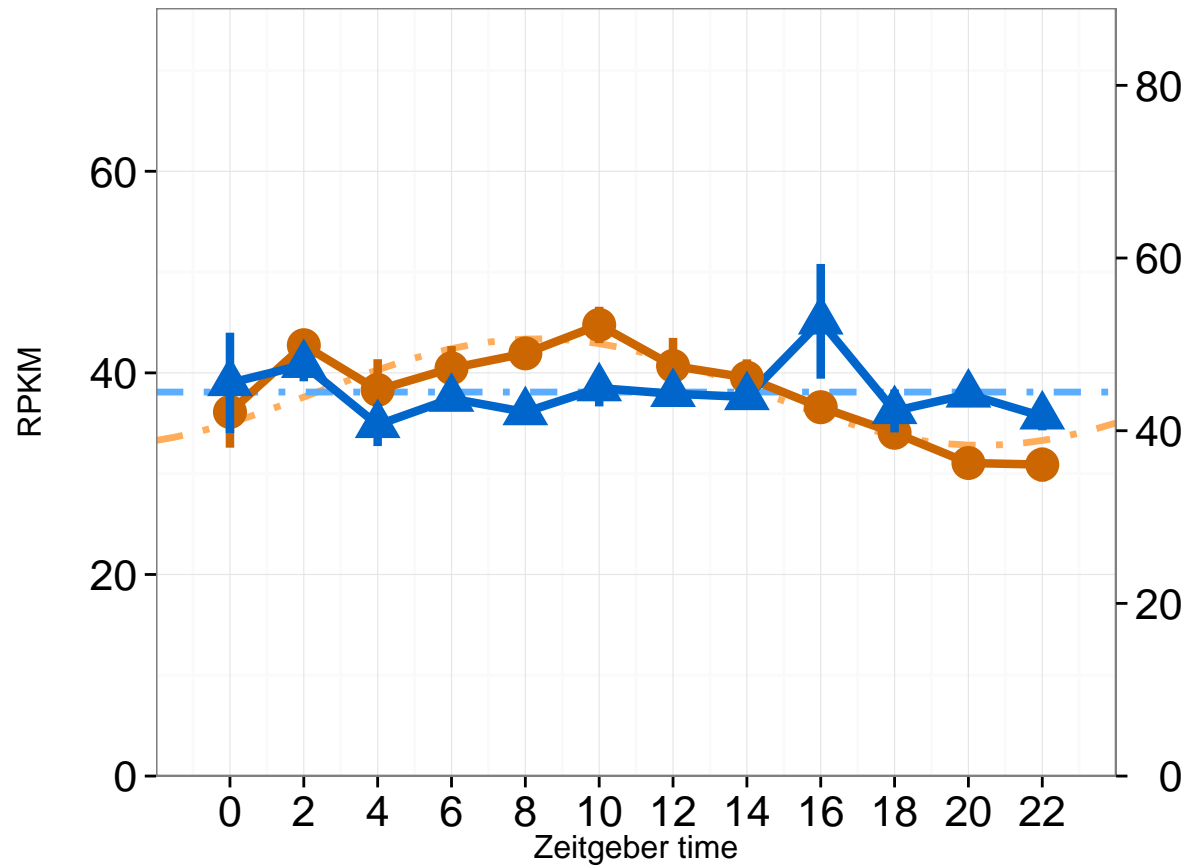

## Abcf1

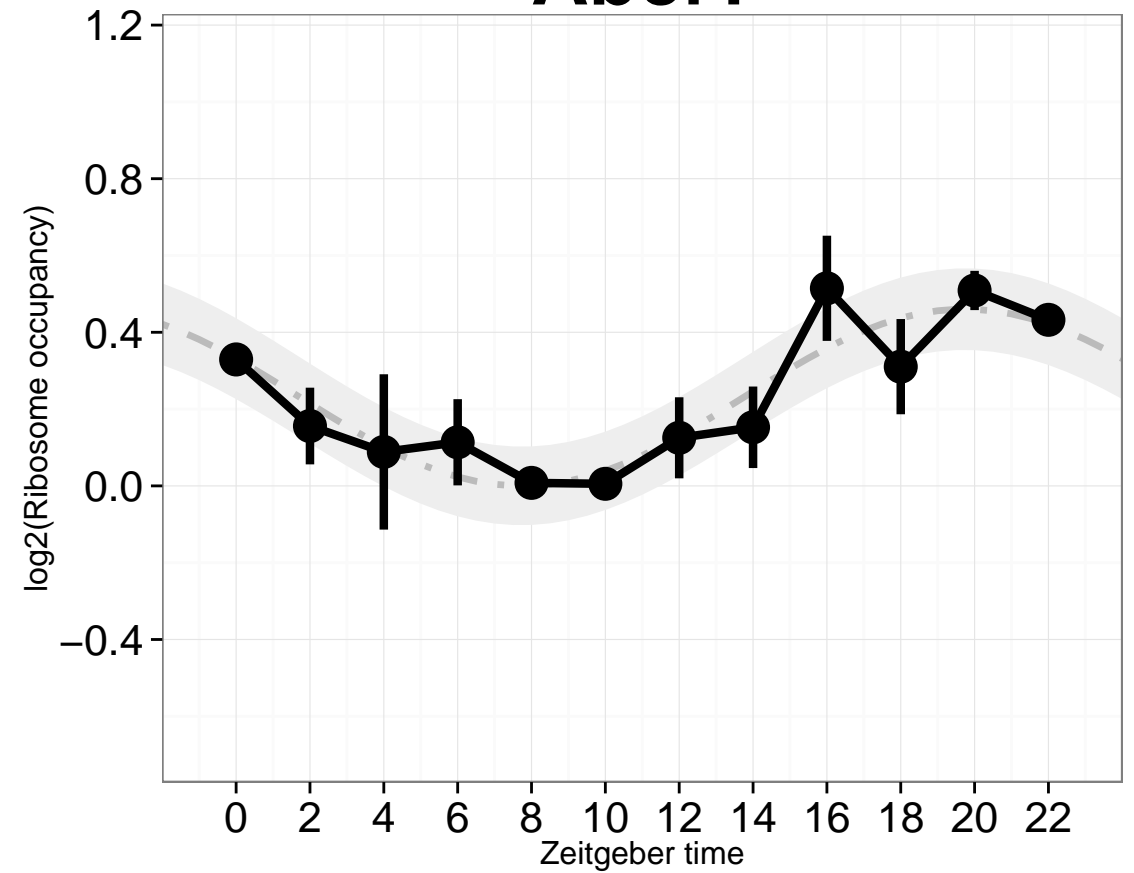

Supplement: Supplementary file 4489 [file 1]

# Rfesd

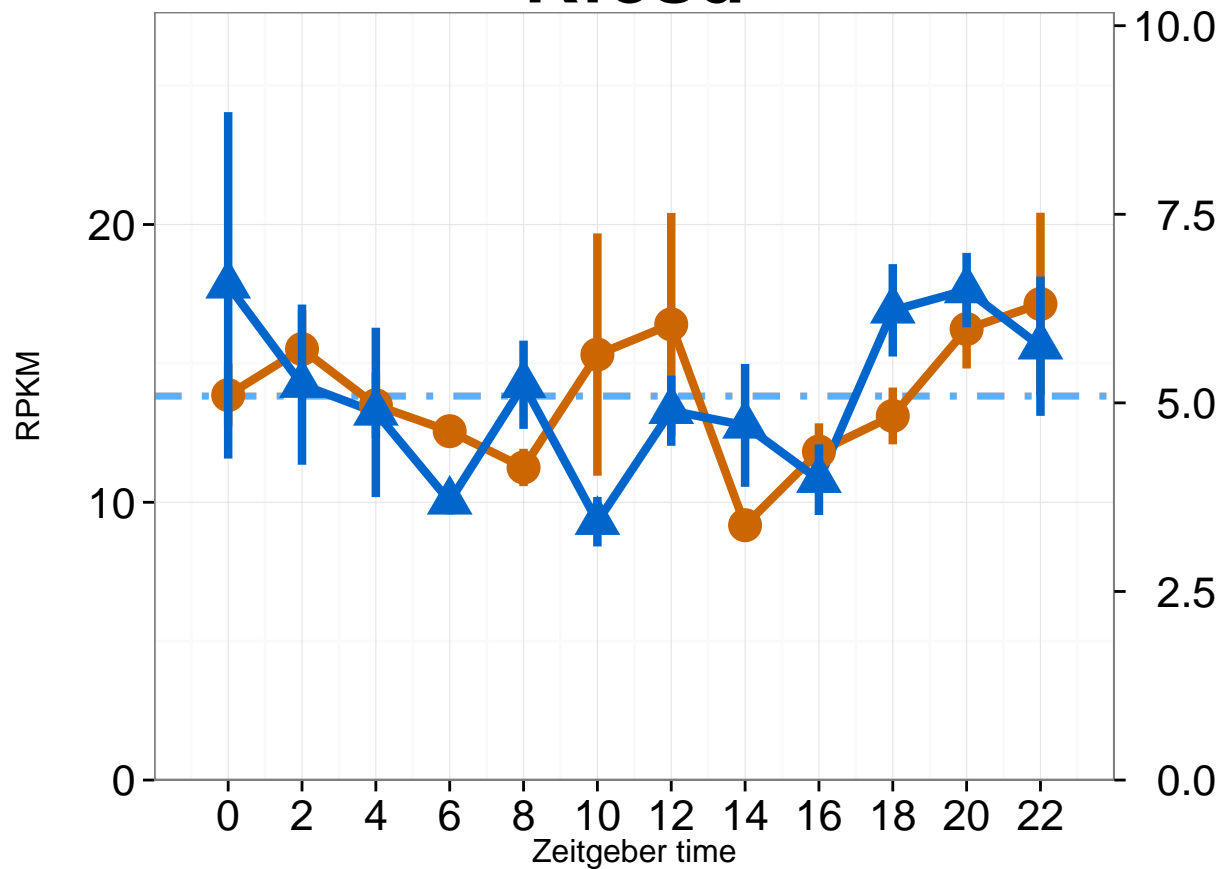

# Rfesd

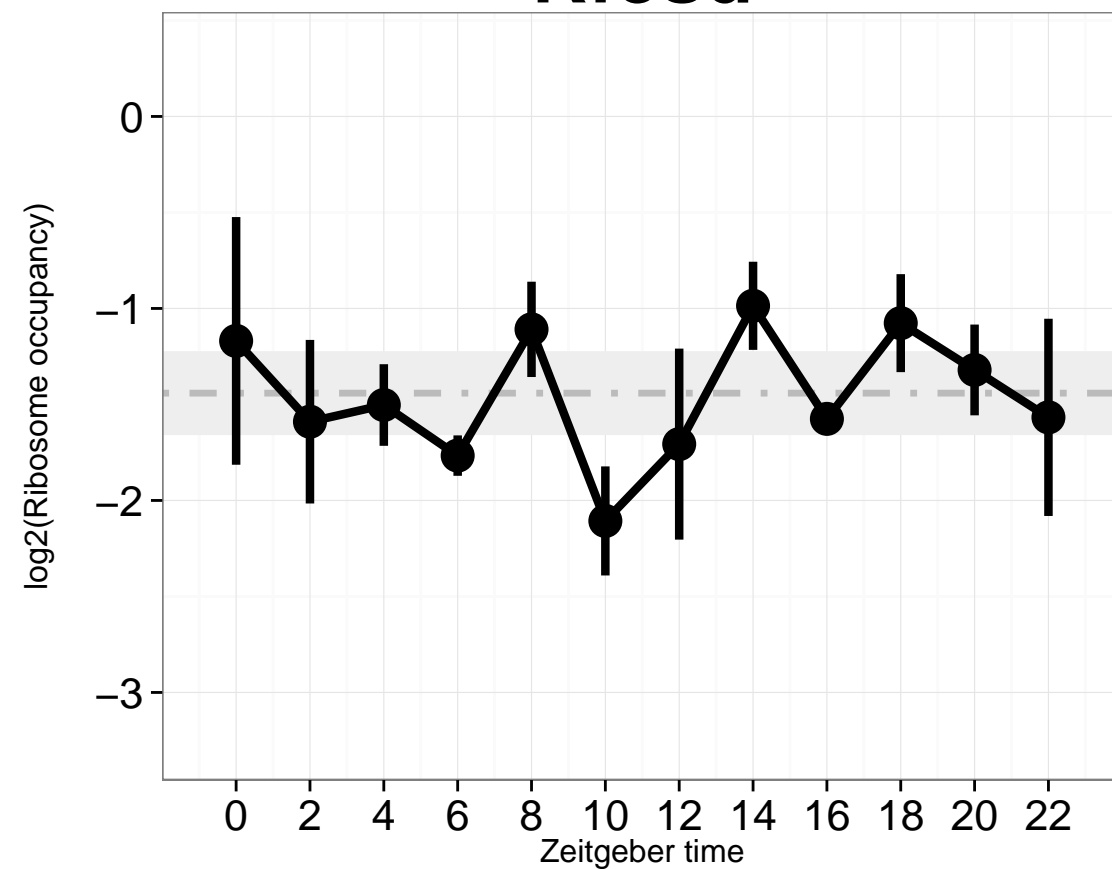

Supplement: Supplementary file 4490 [file 1]

# Zc3hc1

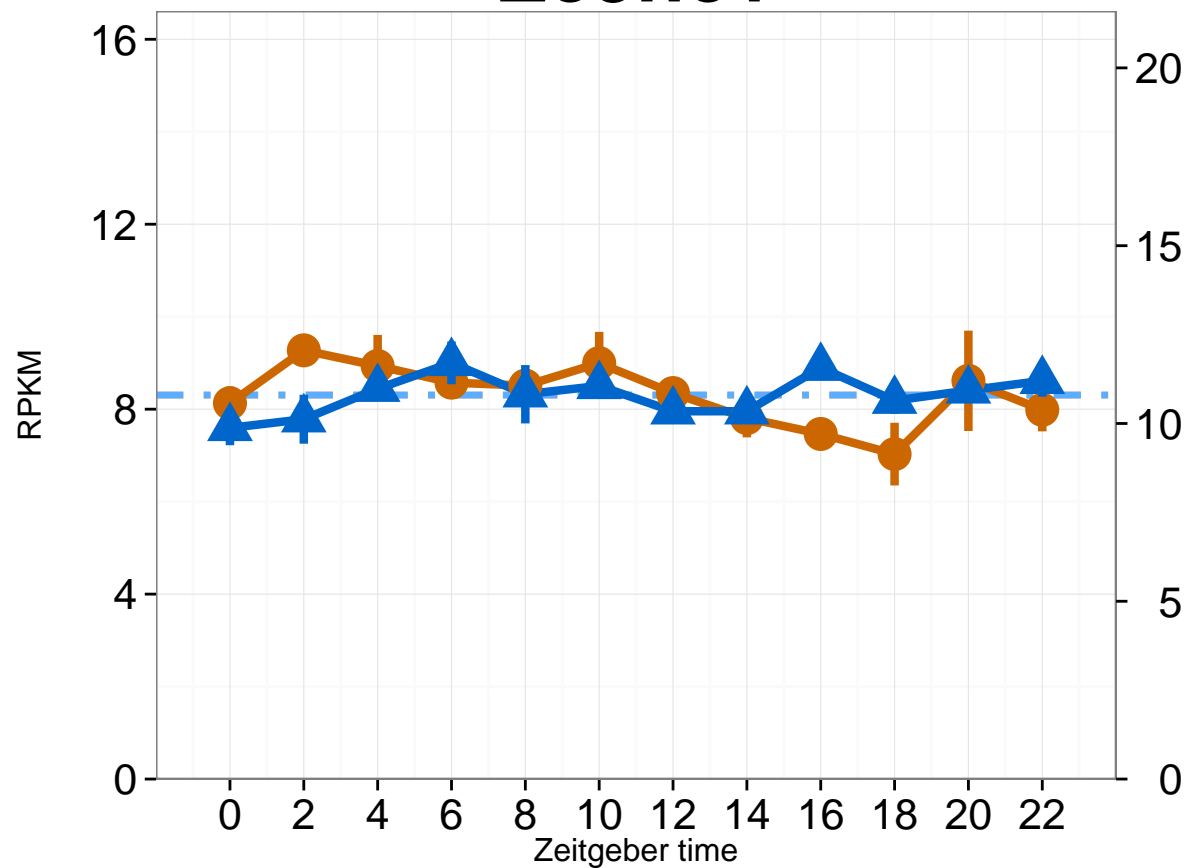

# Zc3hc1

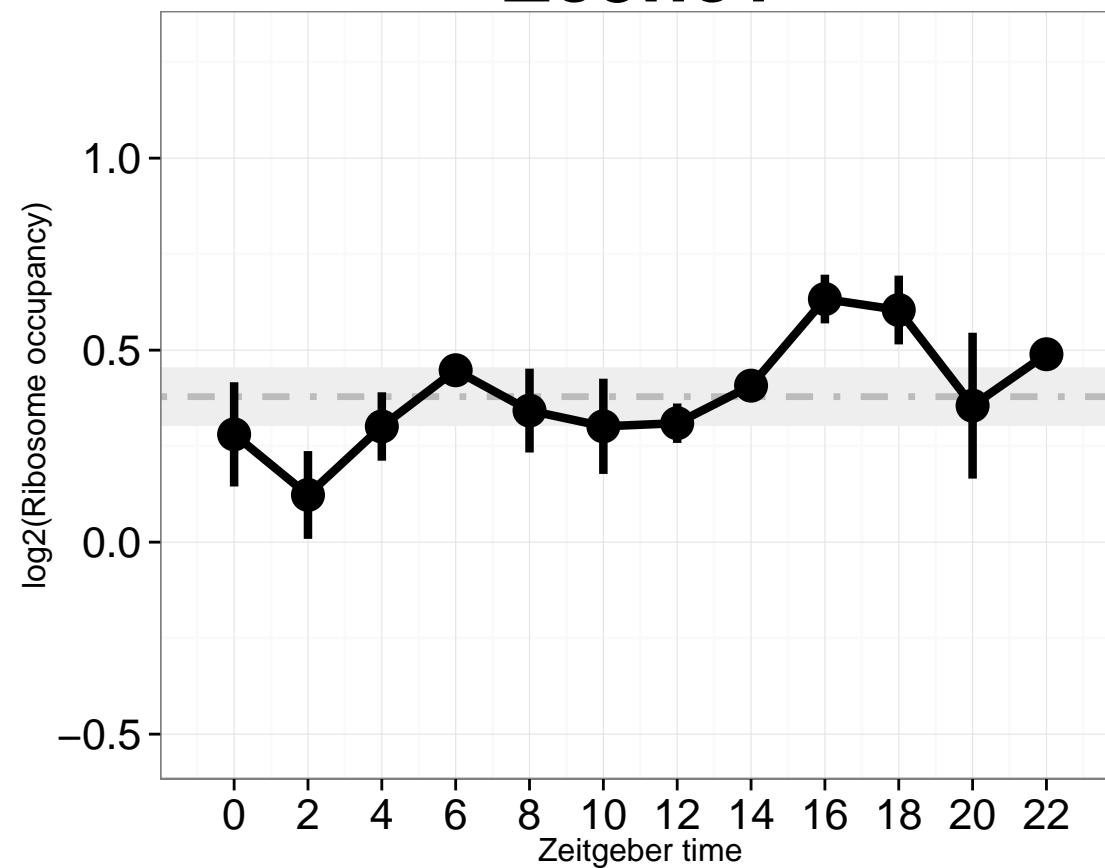

Supplement: Supplementary file 4491 [file 1]

**Samhd1**

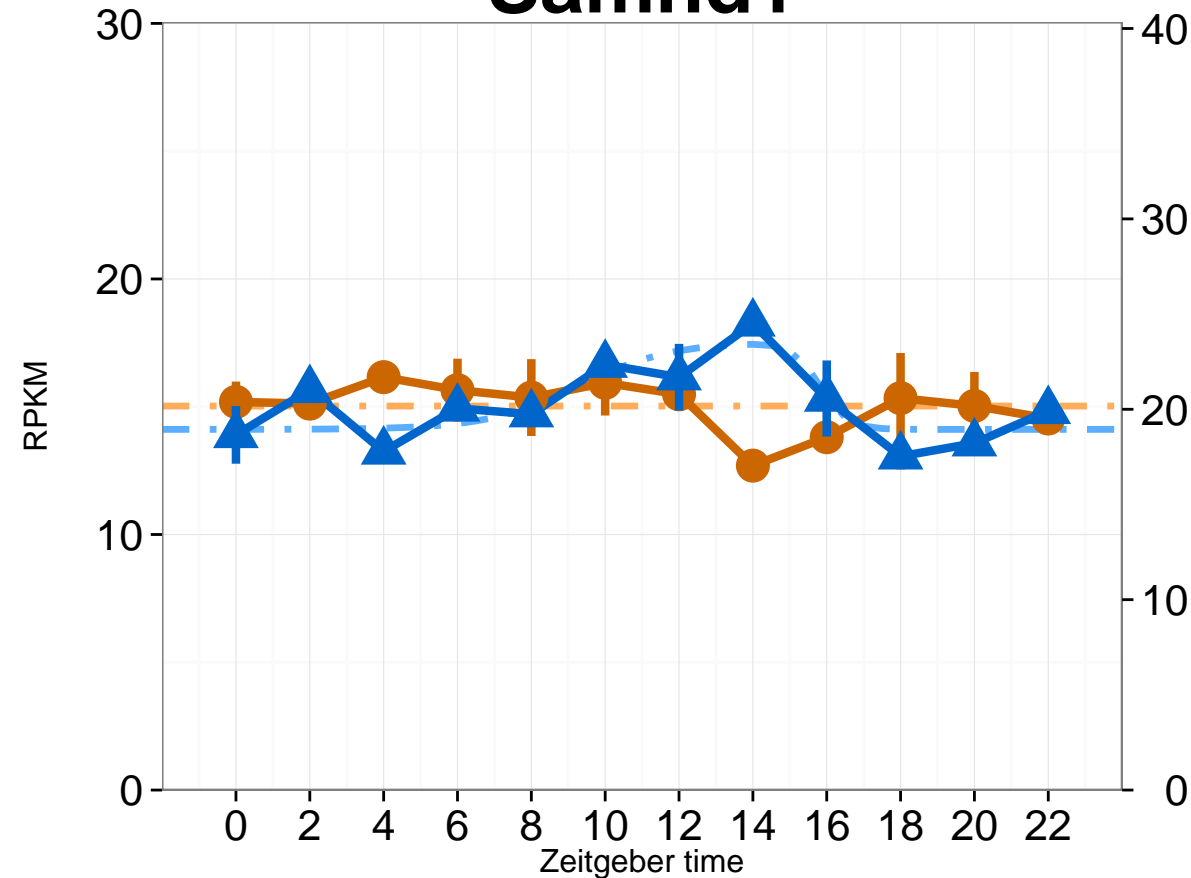

**Samhd1**

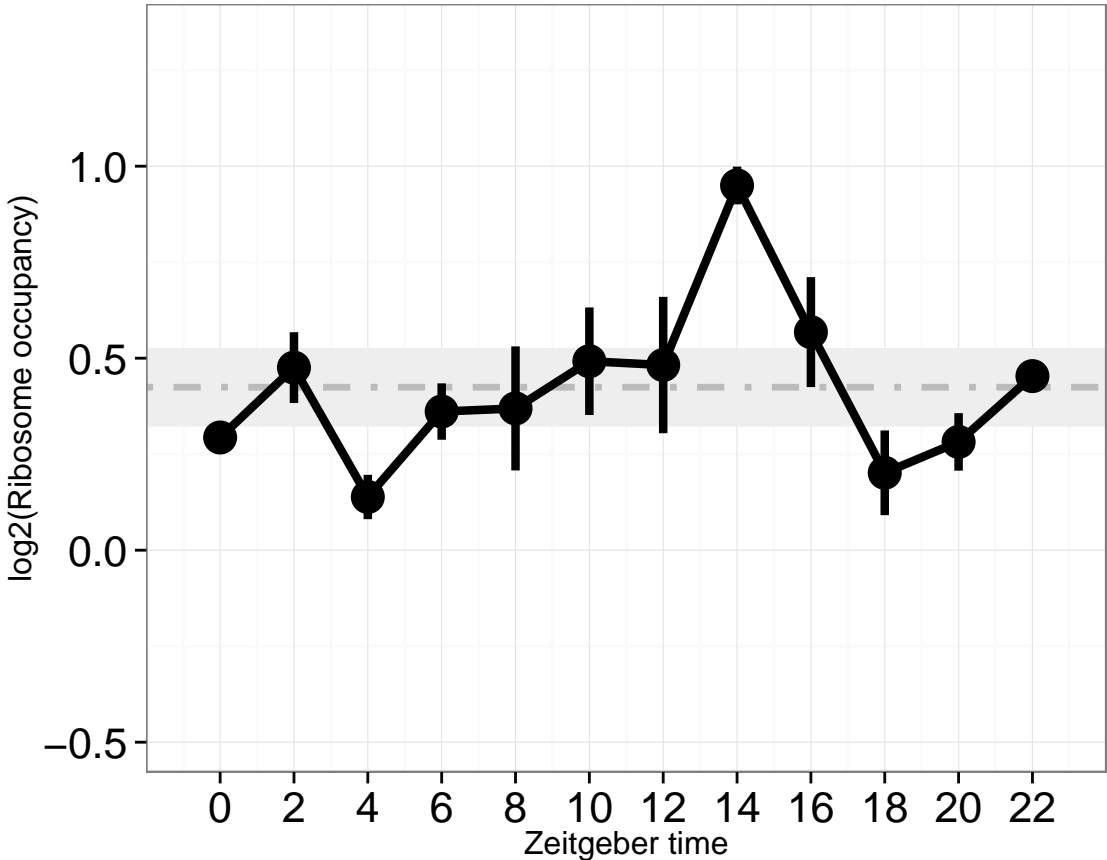

Supplement: Supplementary file 4492 [file 1]

## Ola1

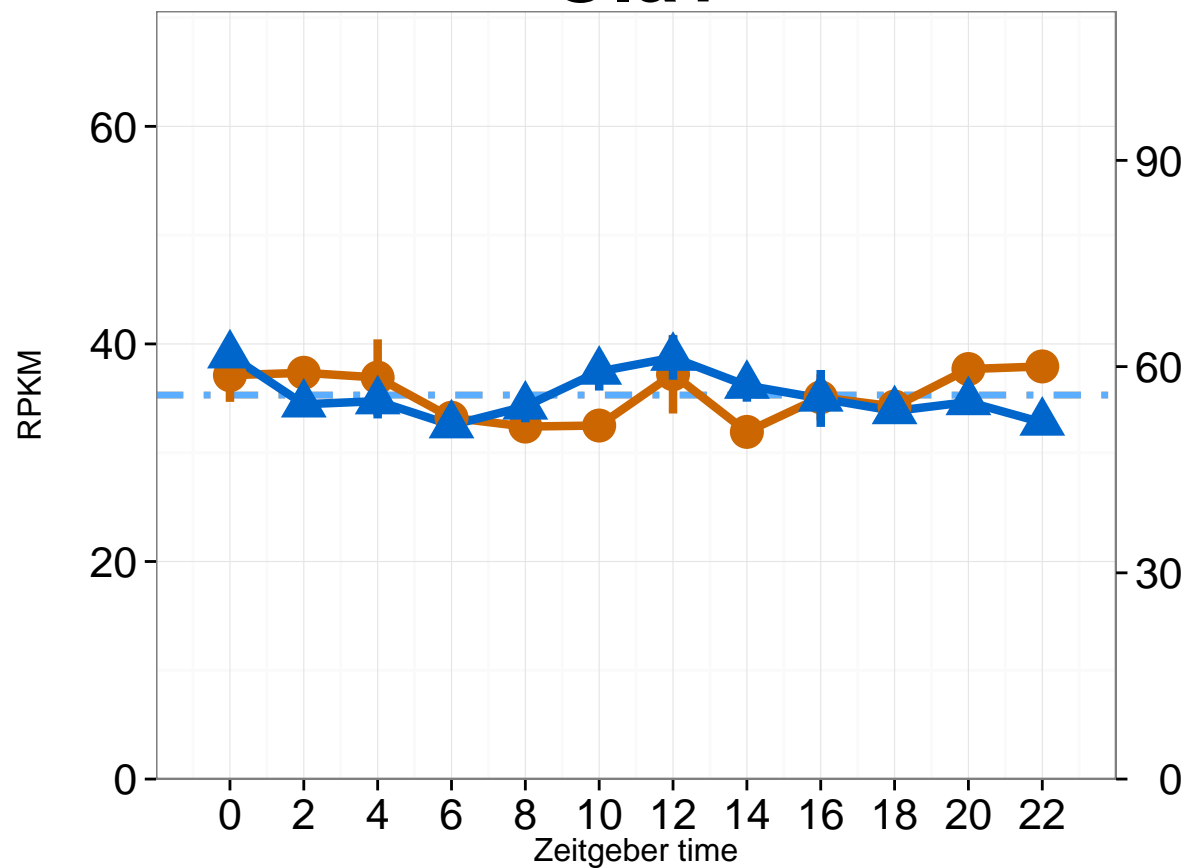

## Ola1

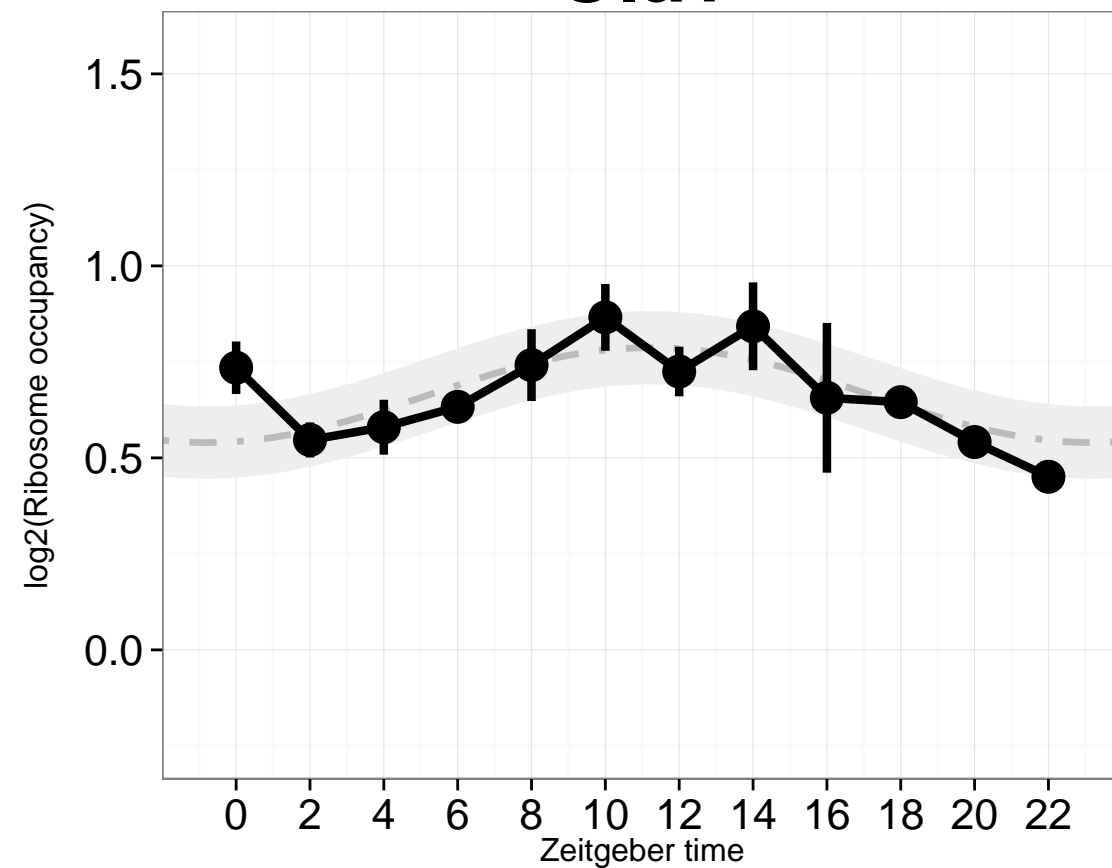

Supplement: Supplementary file 4493 [file 1]

# Zfp768

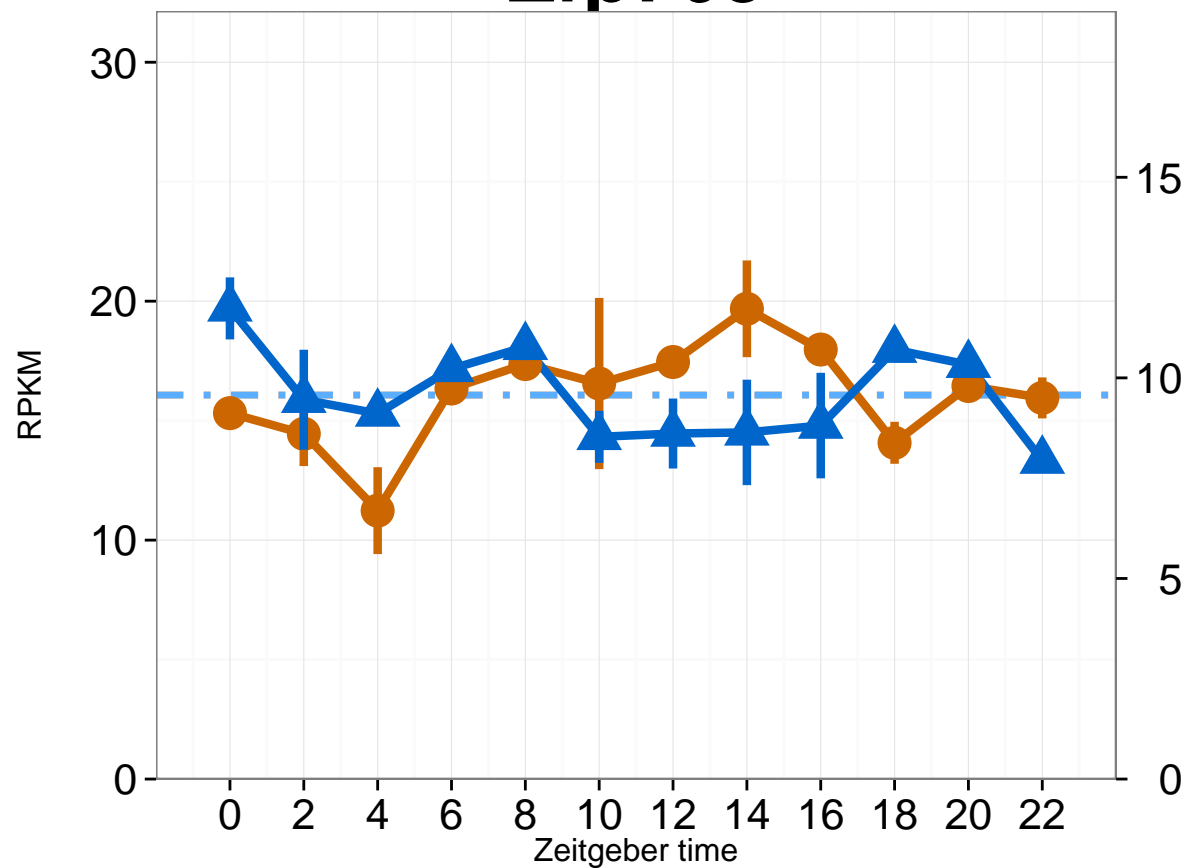

# Zfp768

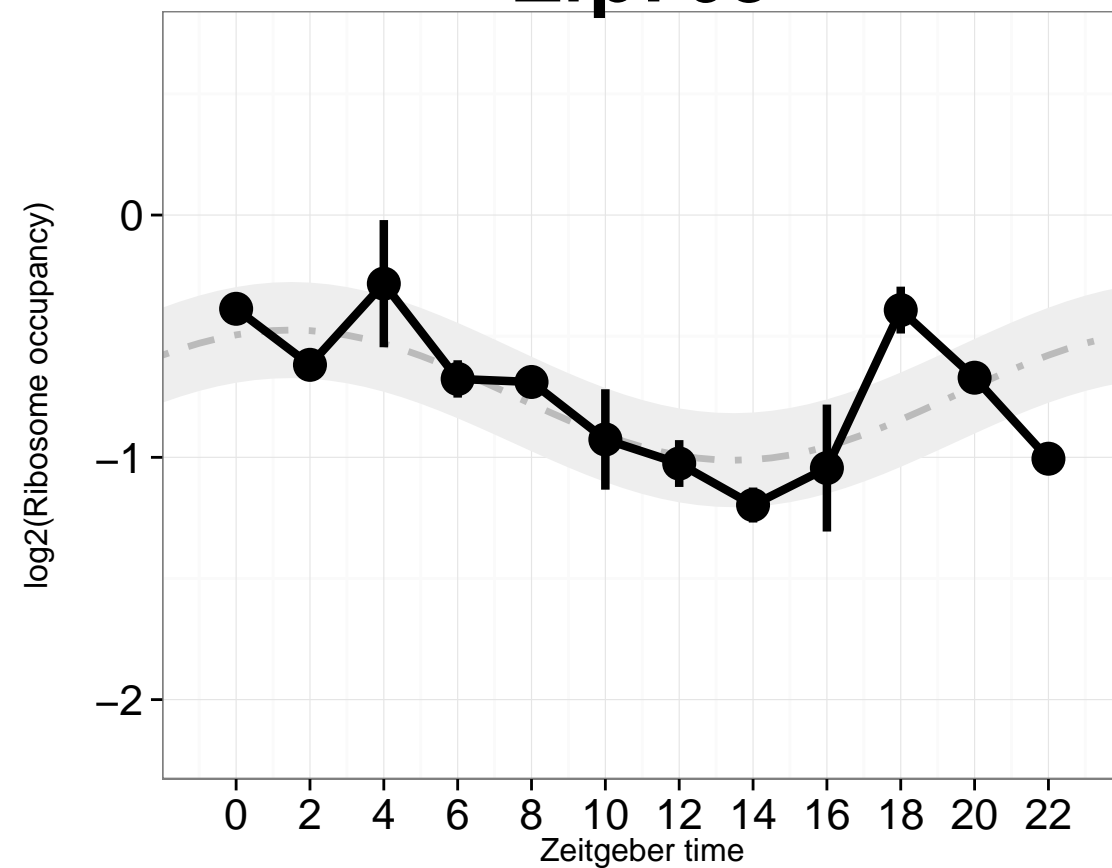

Supplement: Supplementary file 4494 [file 1]

## Nphs2

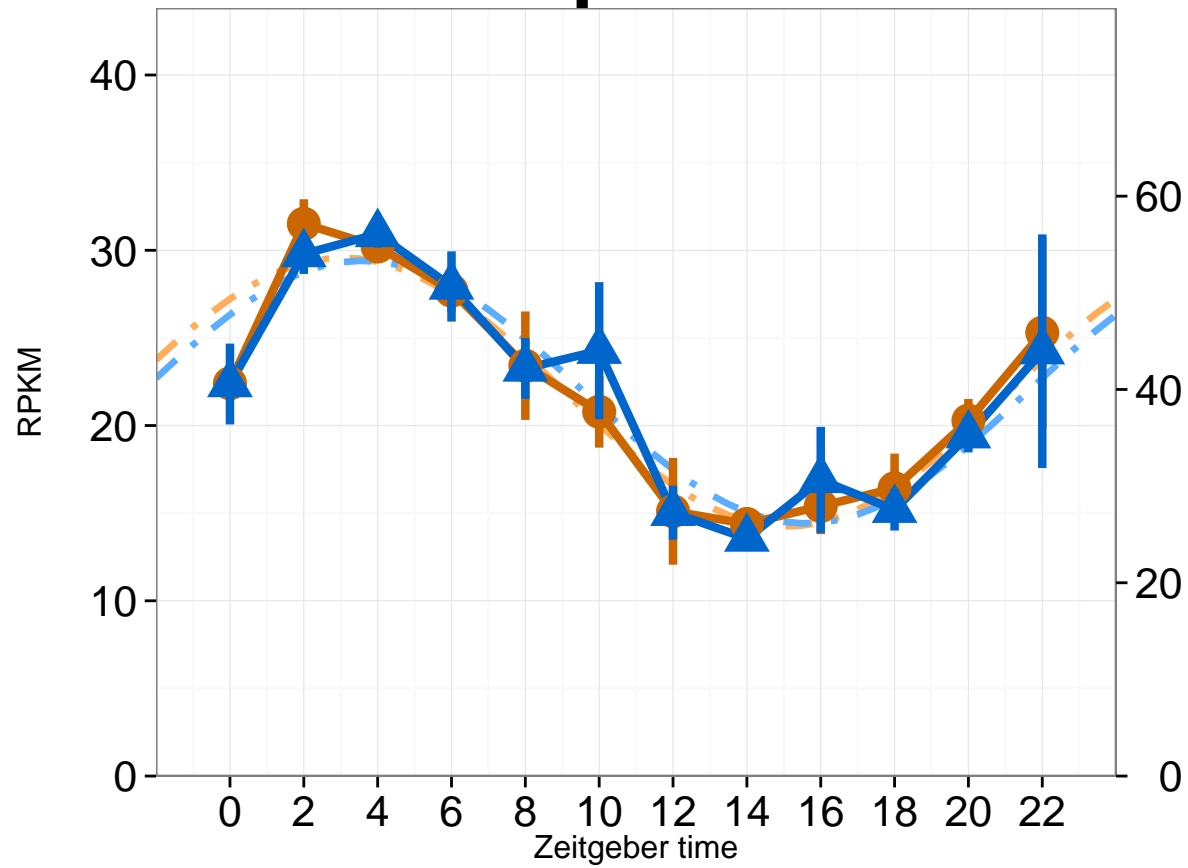

## Nphs2

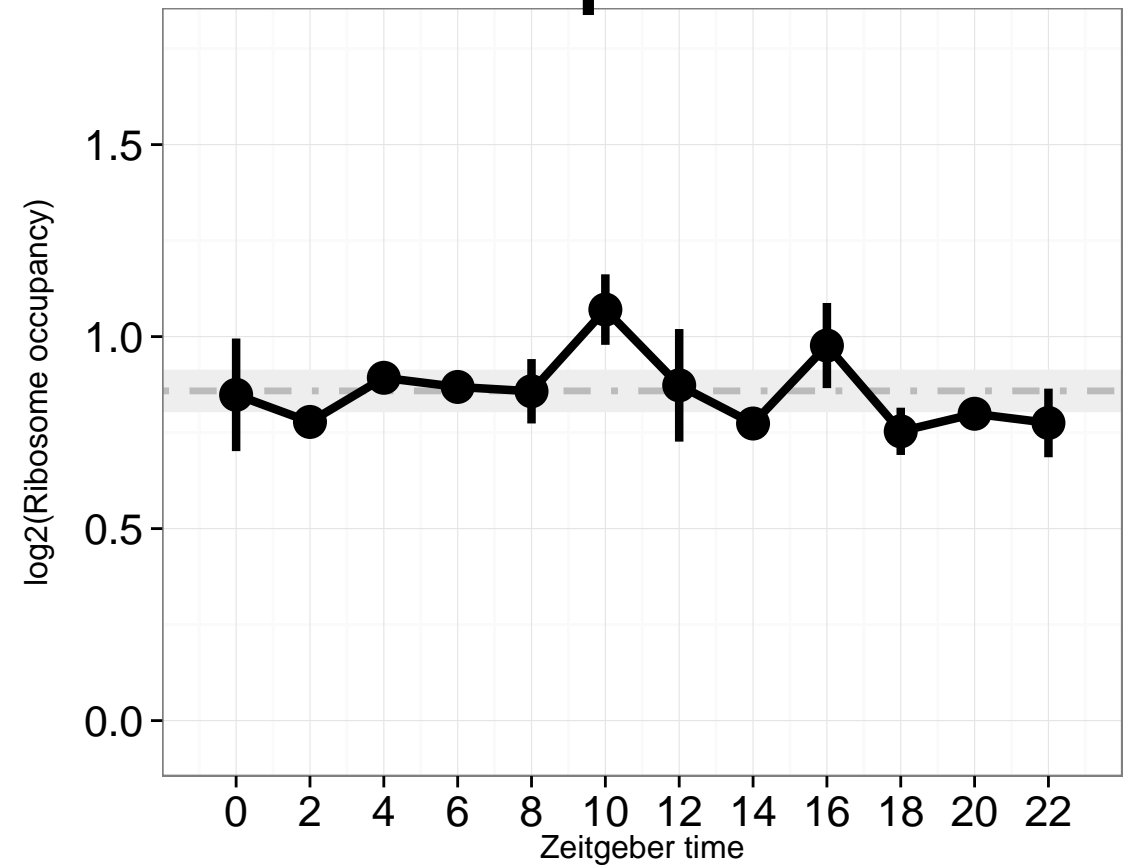

Supplement: Supplementary file 4495 [file 1]

# Dennd1c

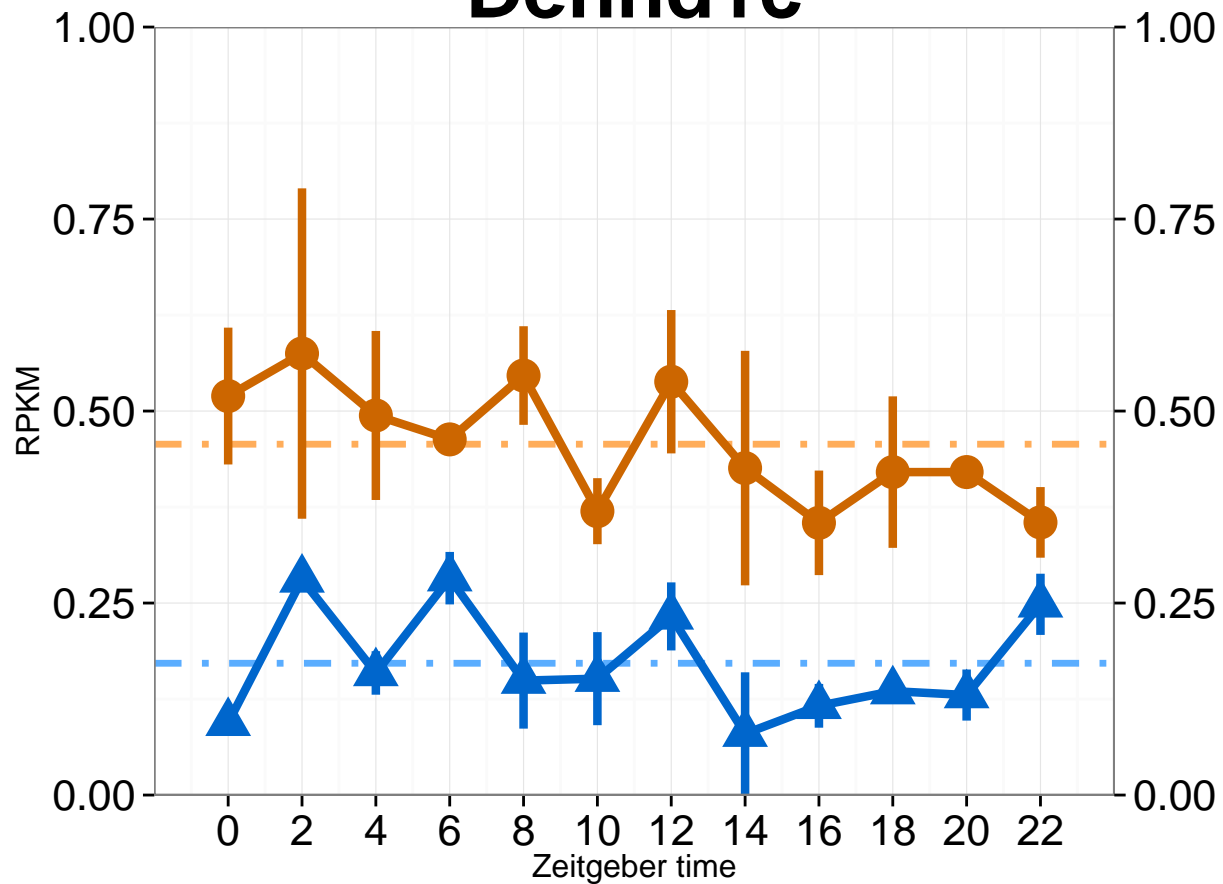

# Dennd1c

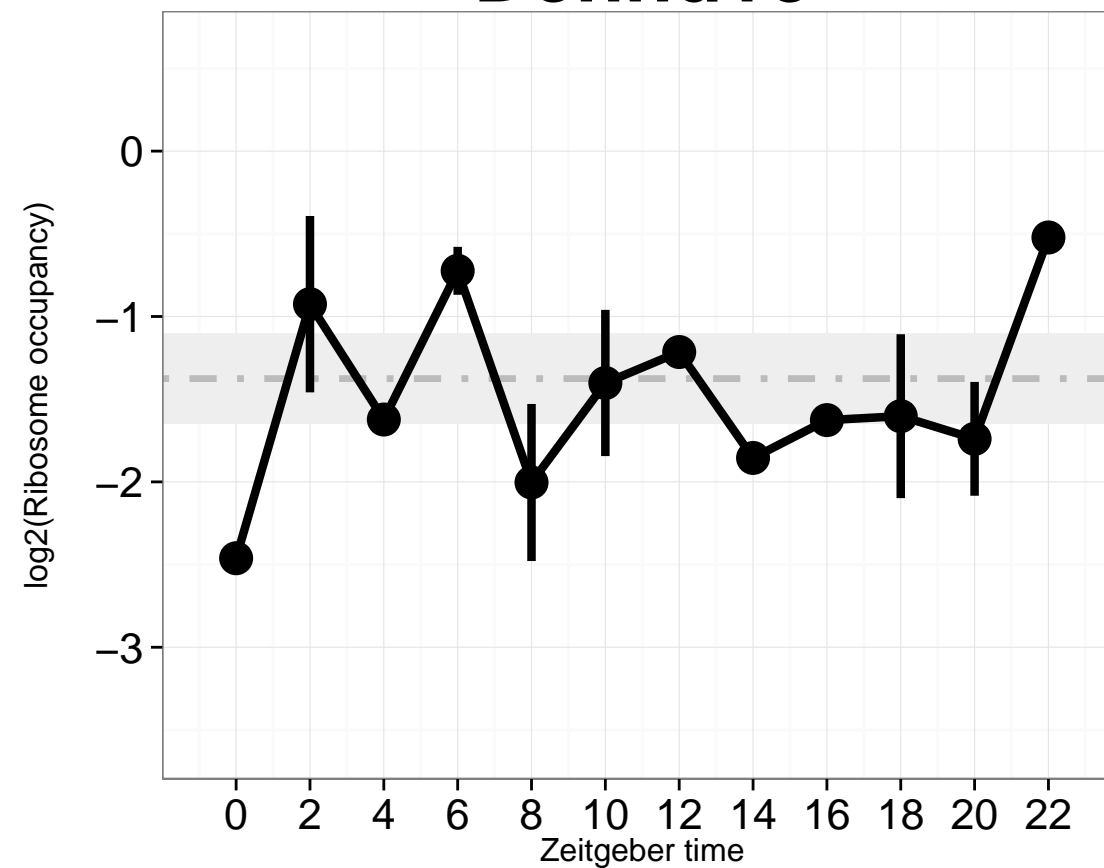

Supplement: Supplementary file 4496 [file 1]

# Zfp526

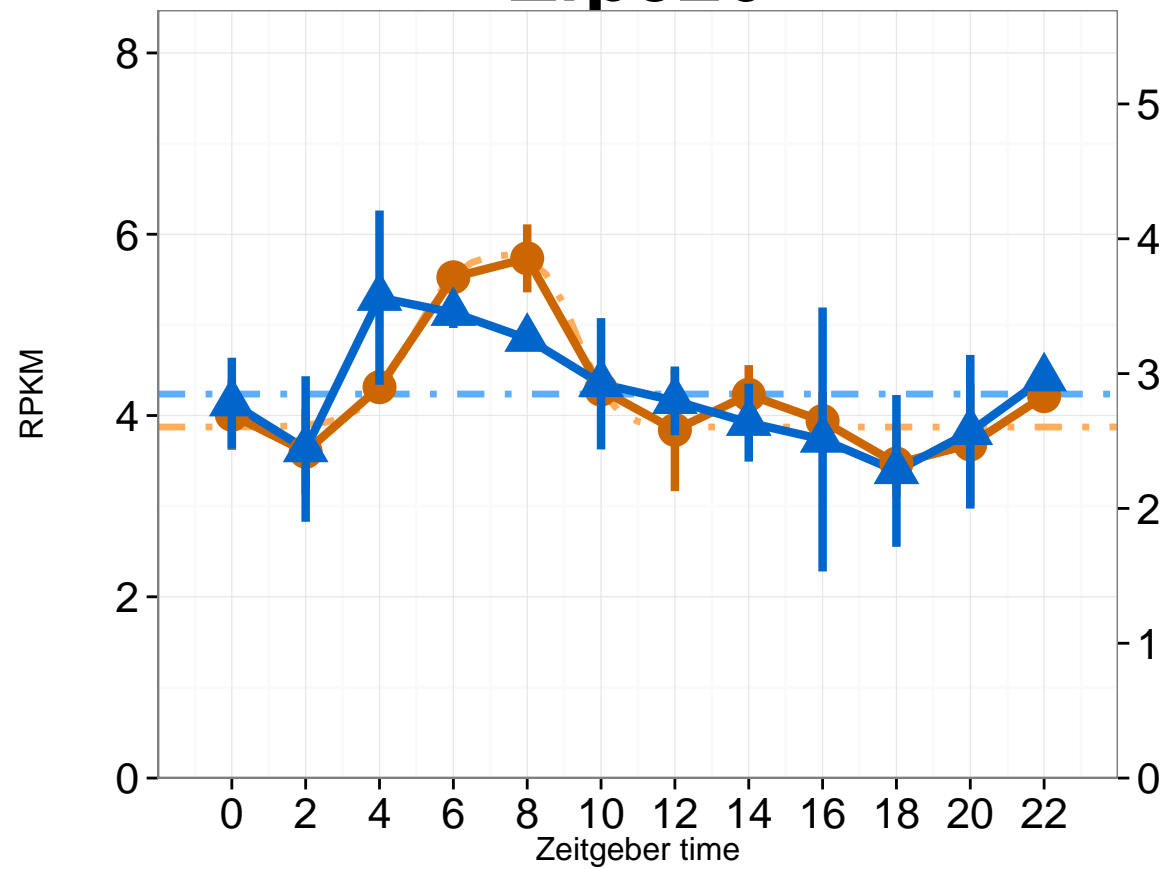

# Zfp526

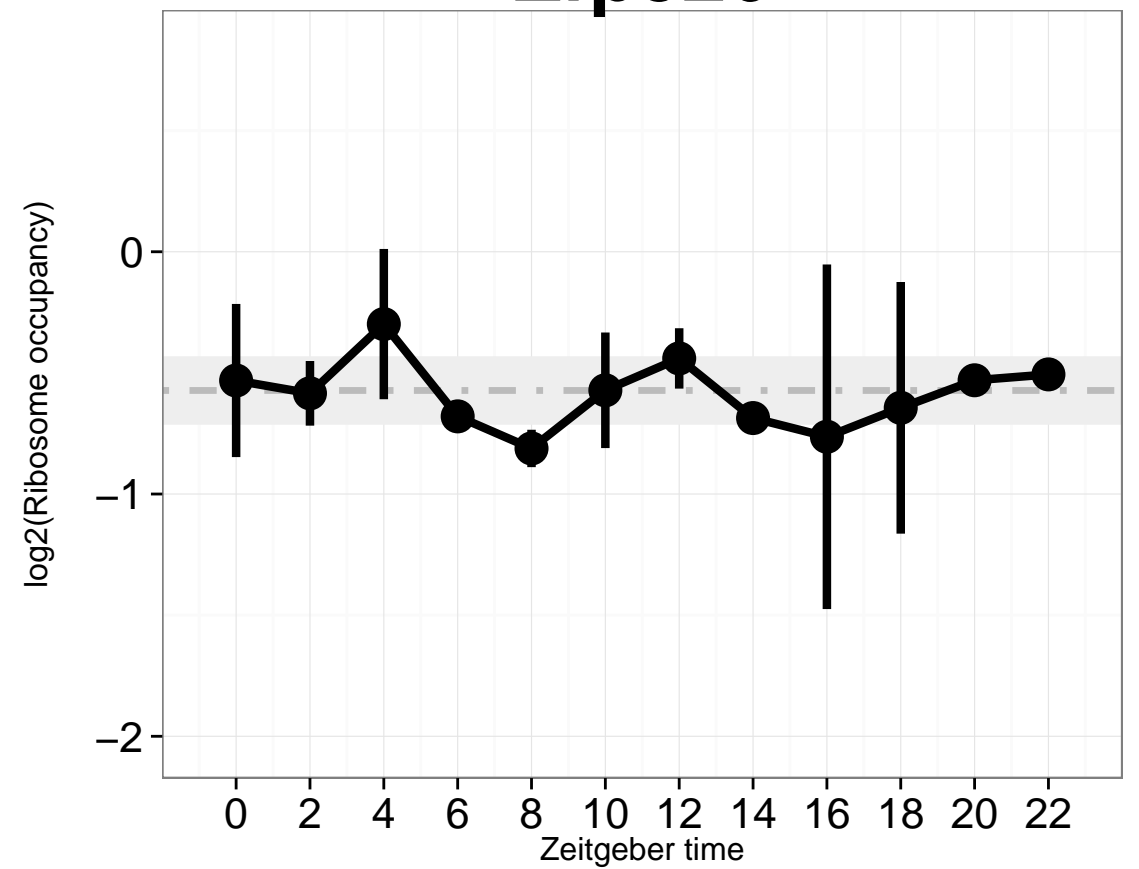

Supplement: Supplementary file 4497 [file 1]

## Atf7ip

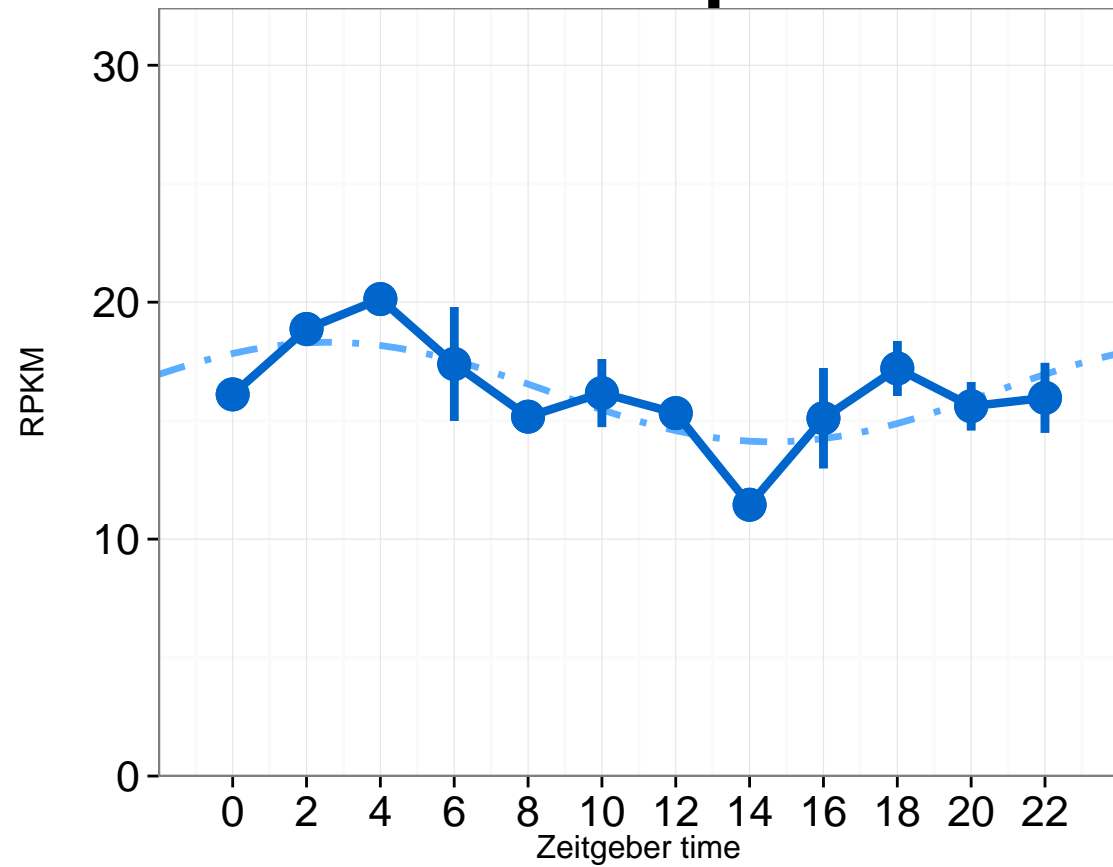

## Atf7ip log2(Ribosome occupancy

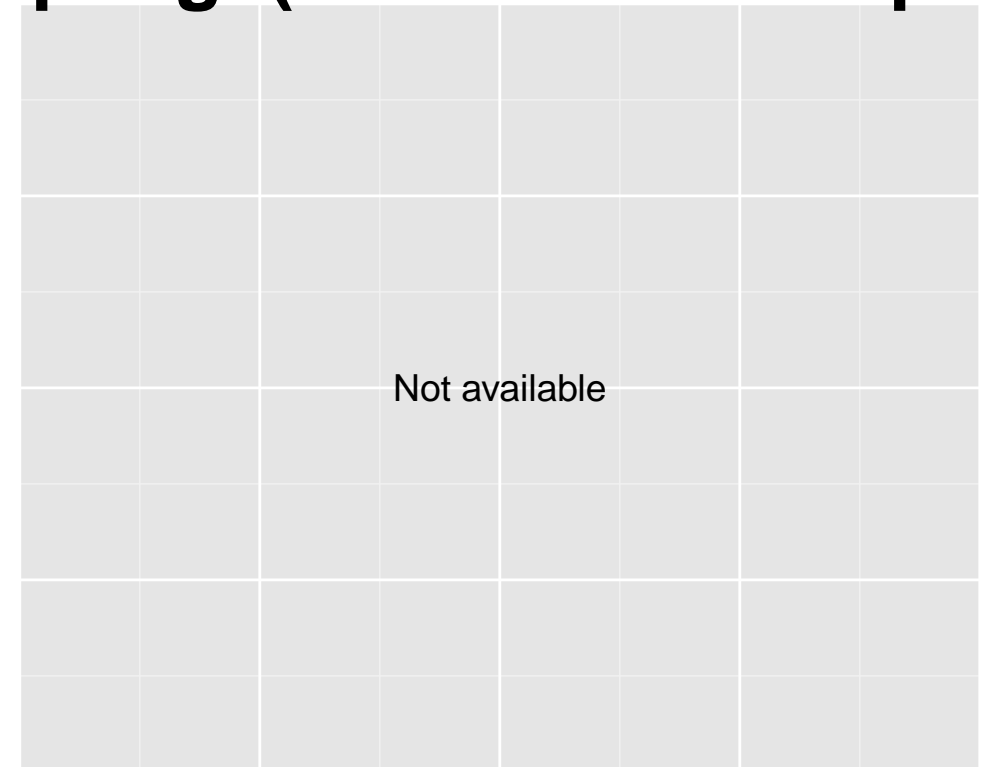

Supplement: Supplementary file 4498 [file 1]

## Hnrnpdl

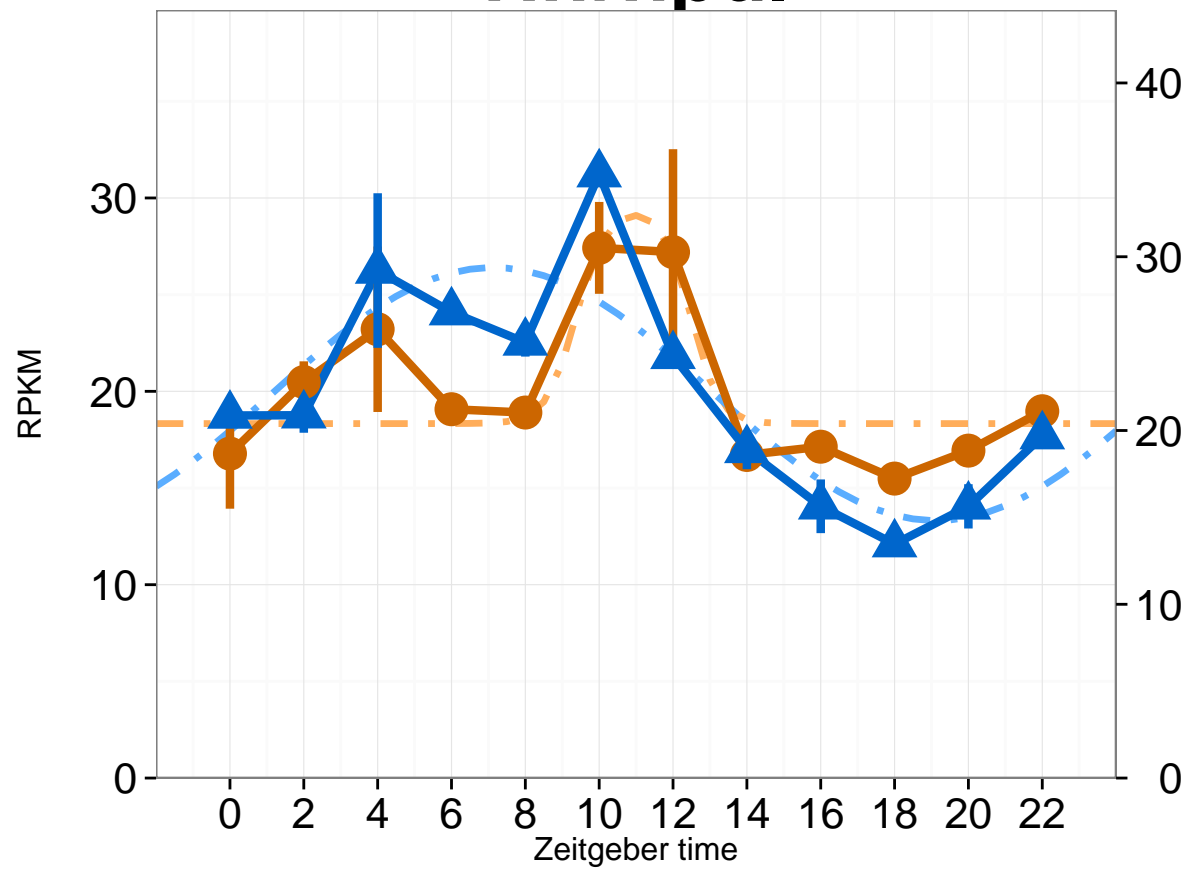

## Hnrnpdl

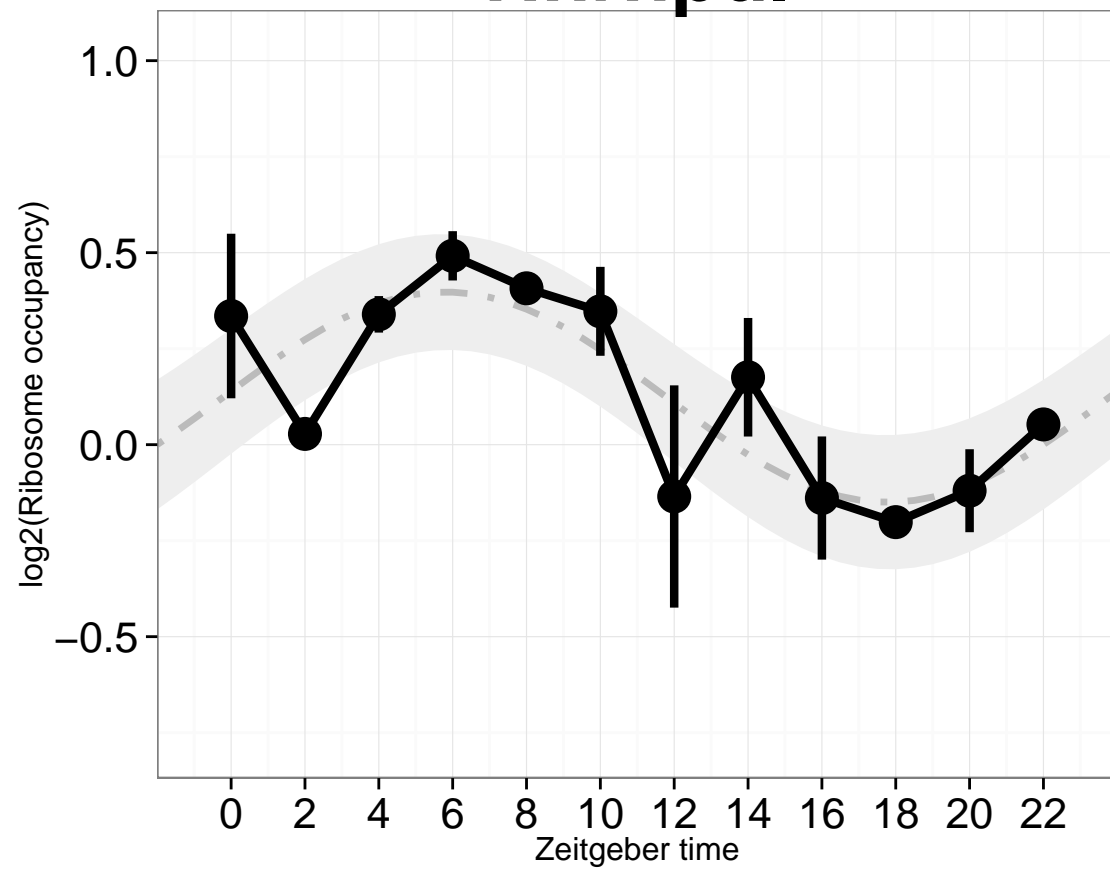

Supplement: Supplementary file 4499 [file 1]

# Mgst1

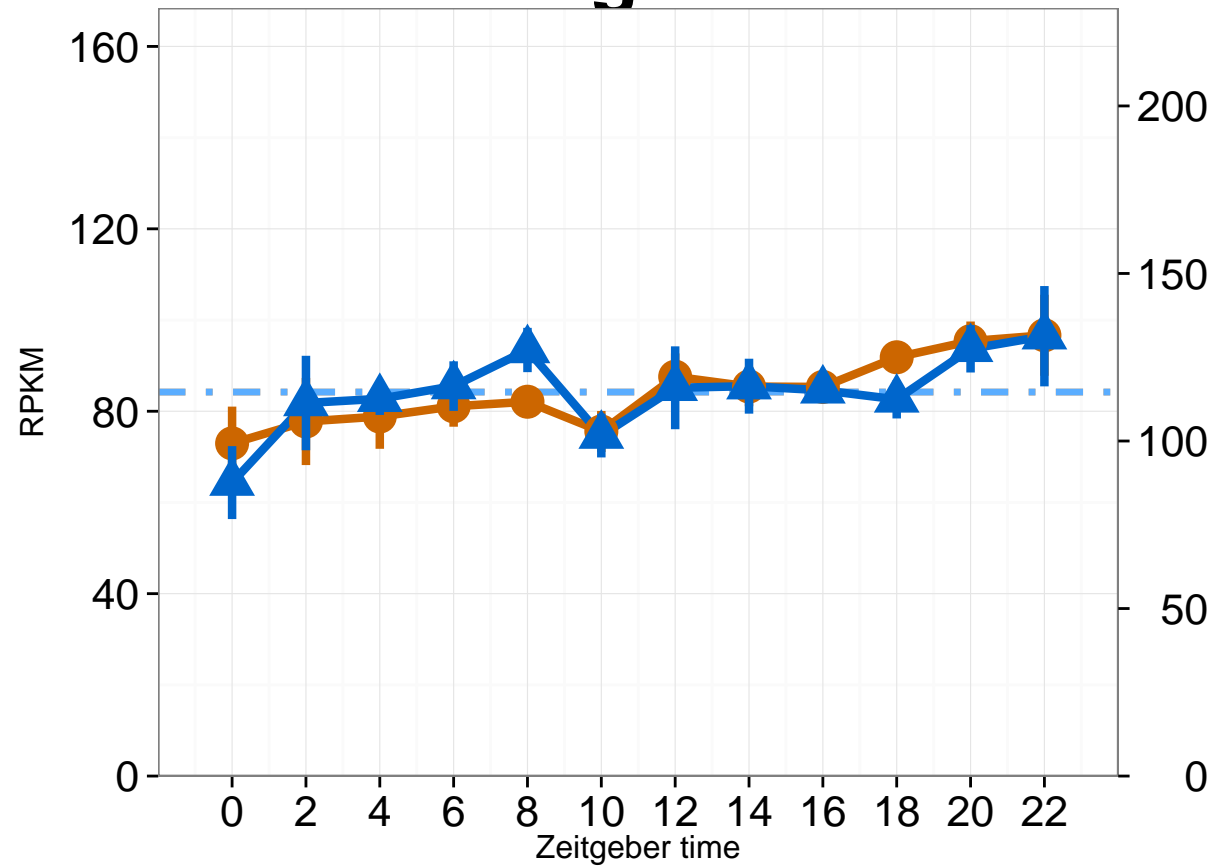

# Mgst1

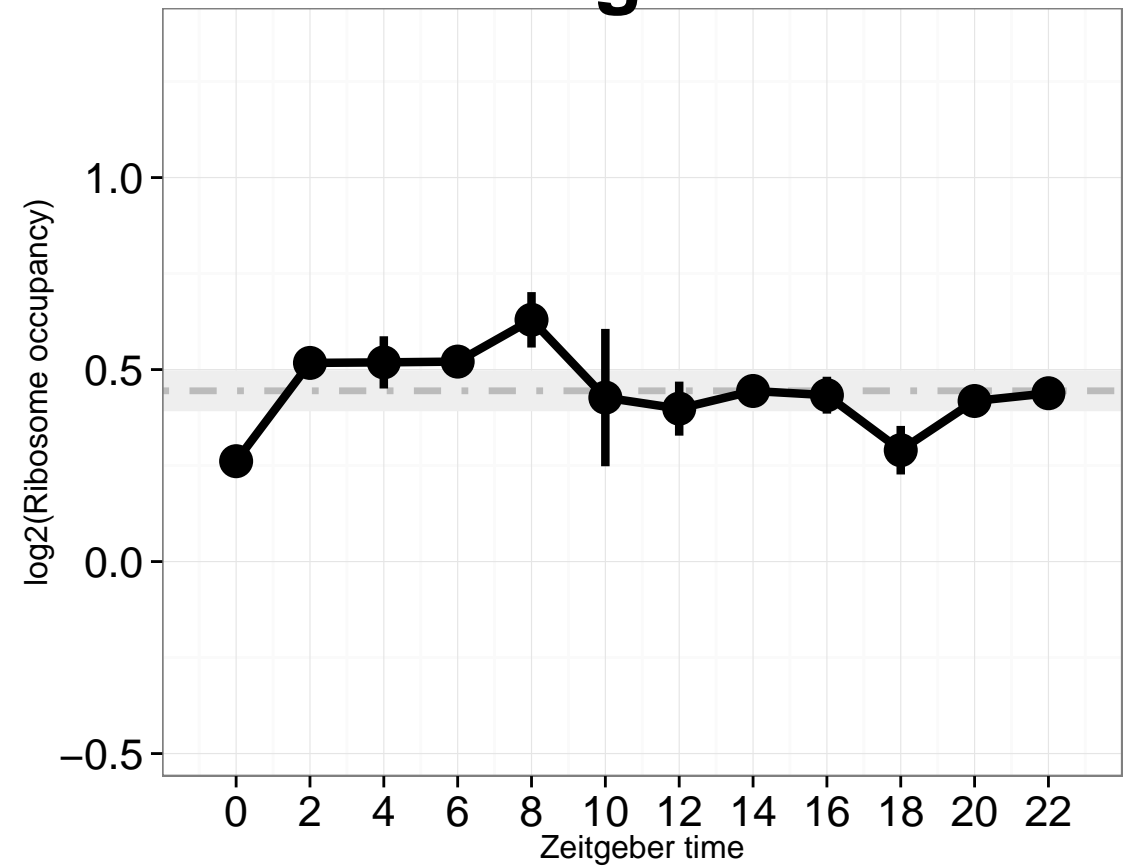

Supplement: Supplementary file 4500 [file 1]

# Clec4a3

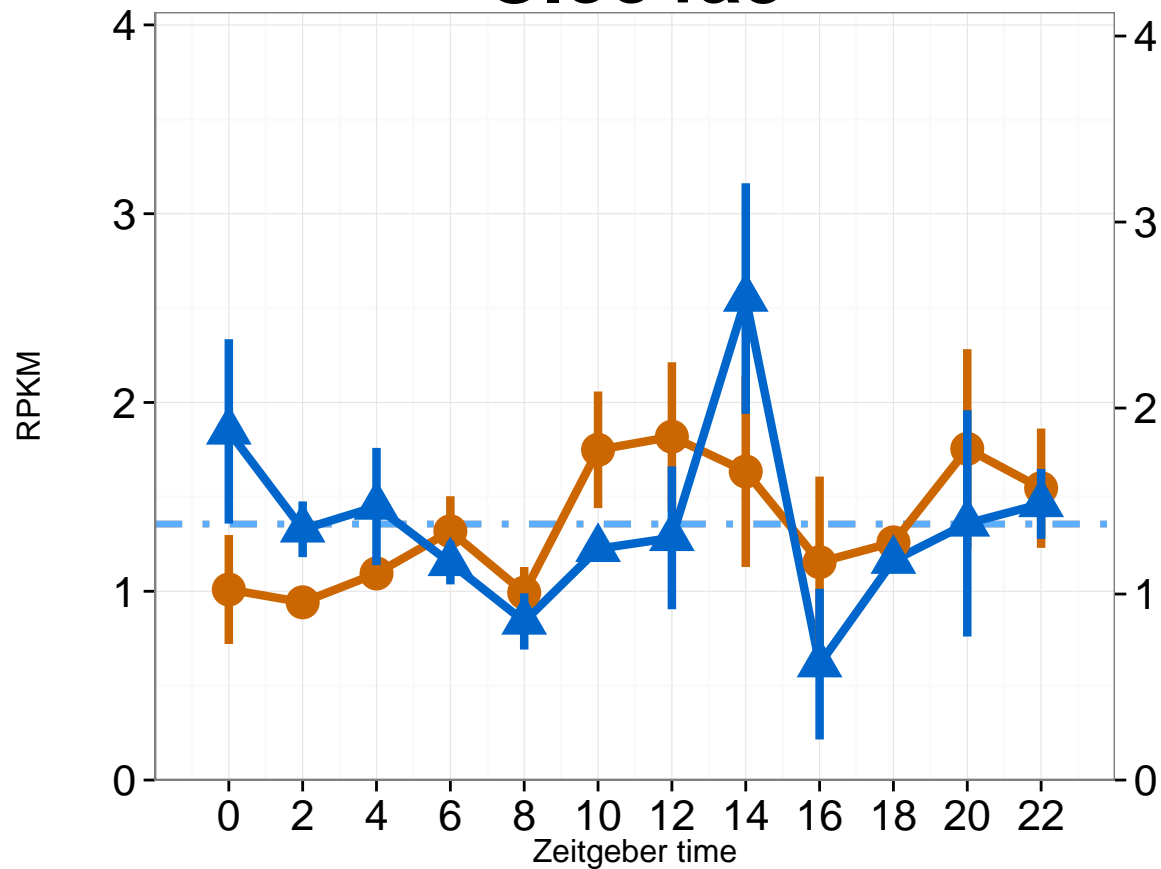

# Clec4a3

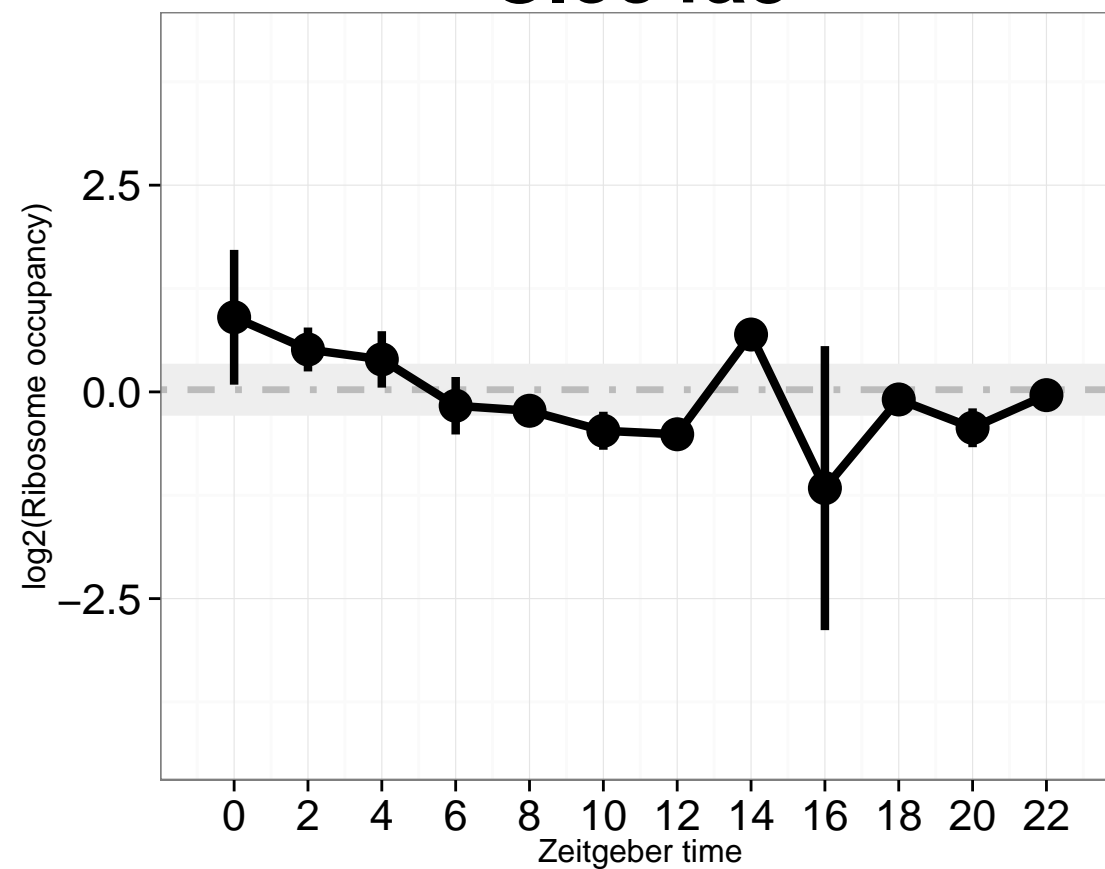

Supplement: Supplementary file 4501 [file 1]

## Ctse

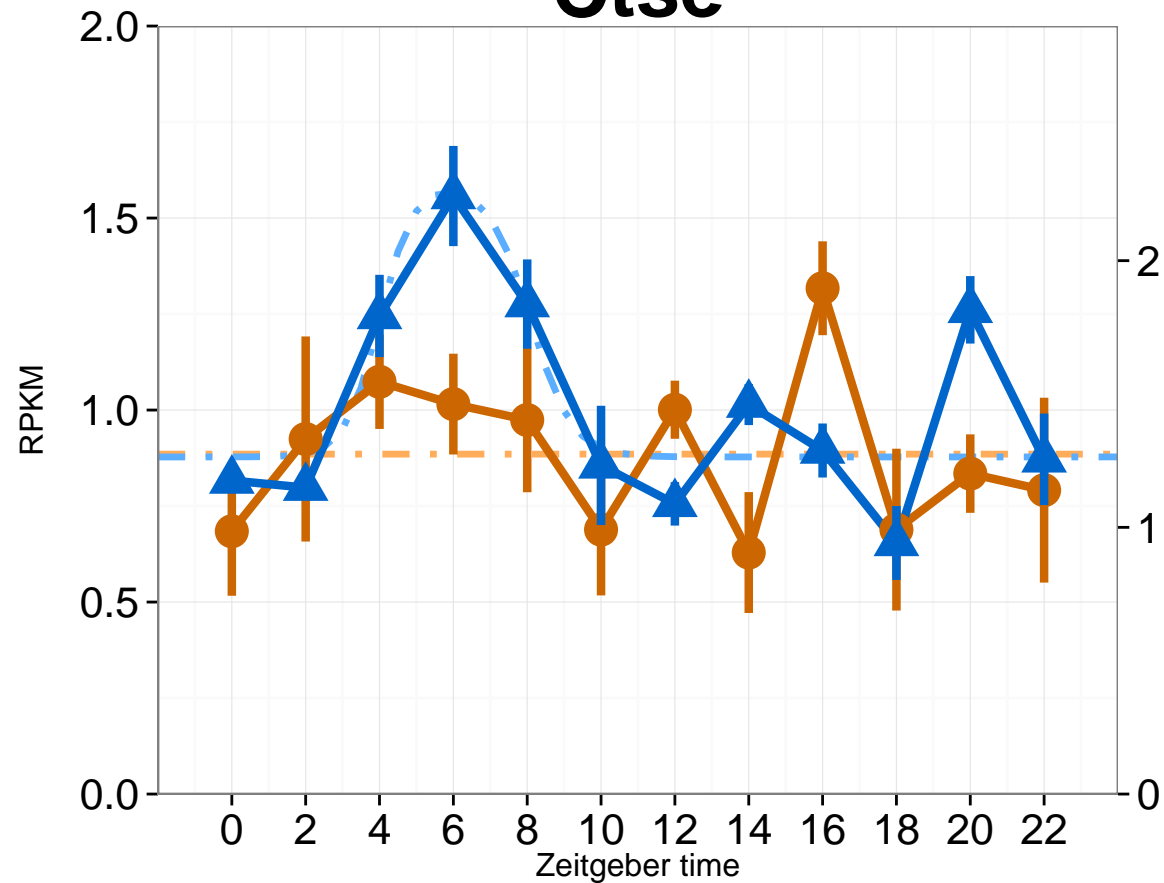

## Ctse

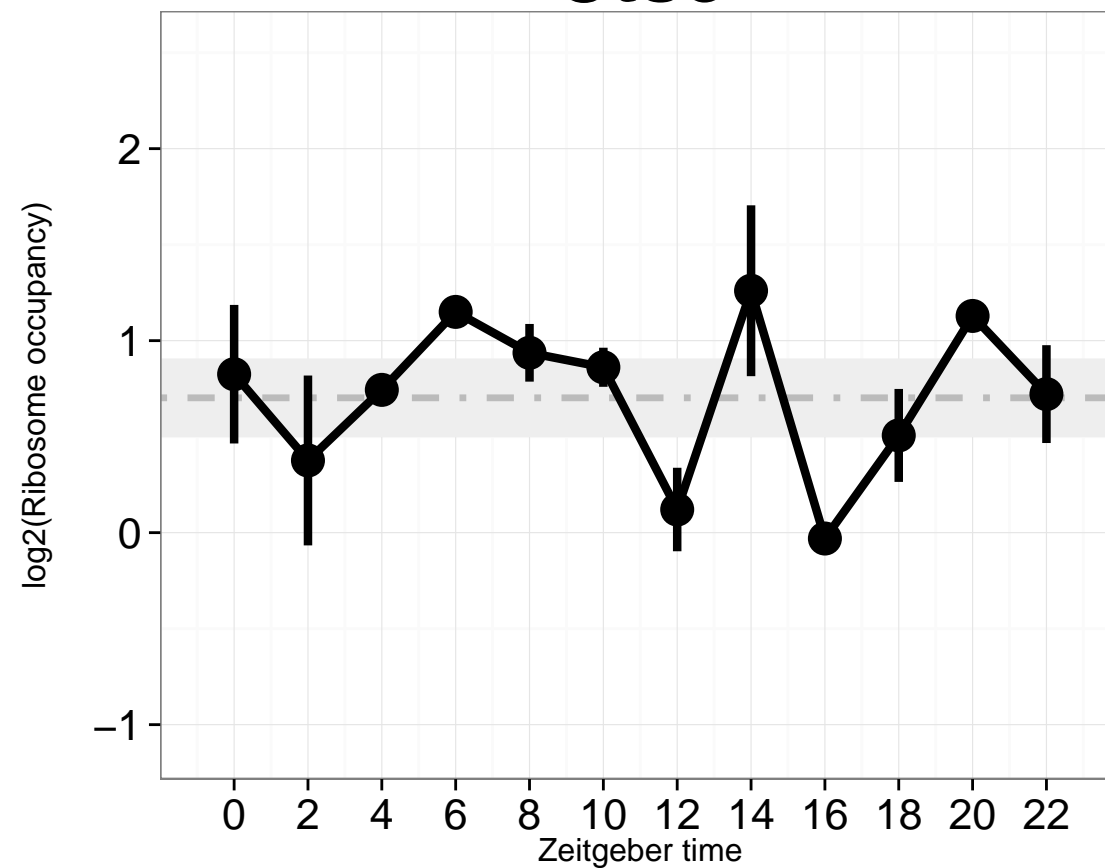

Supplement: Supplementary file 4502 [file 1]

# Mki67ip

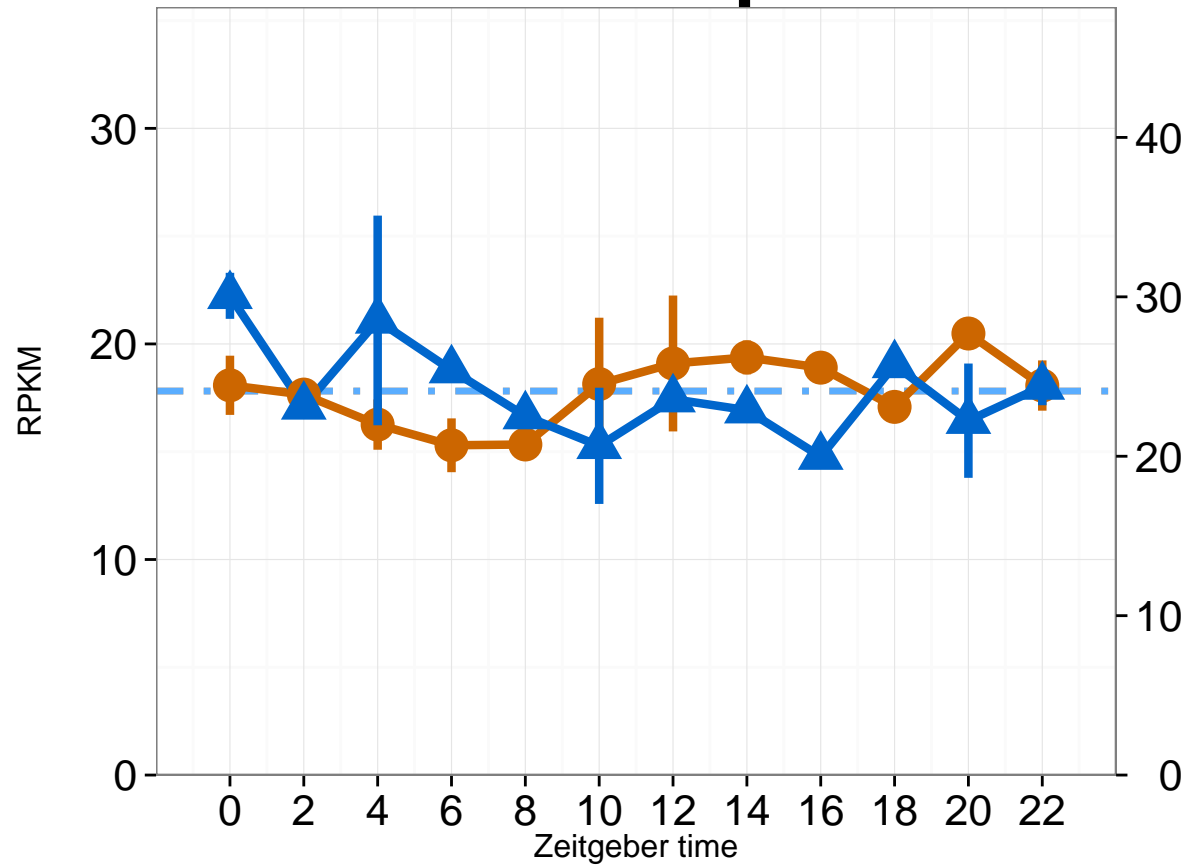

# Mki67ip

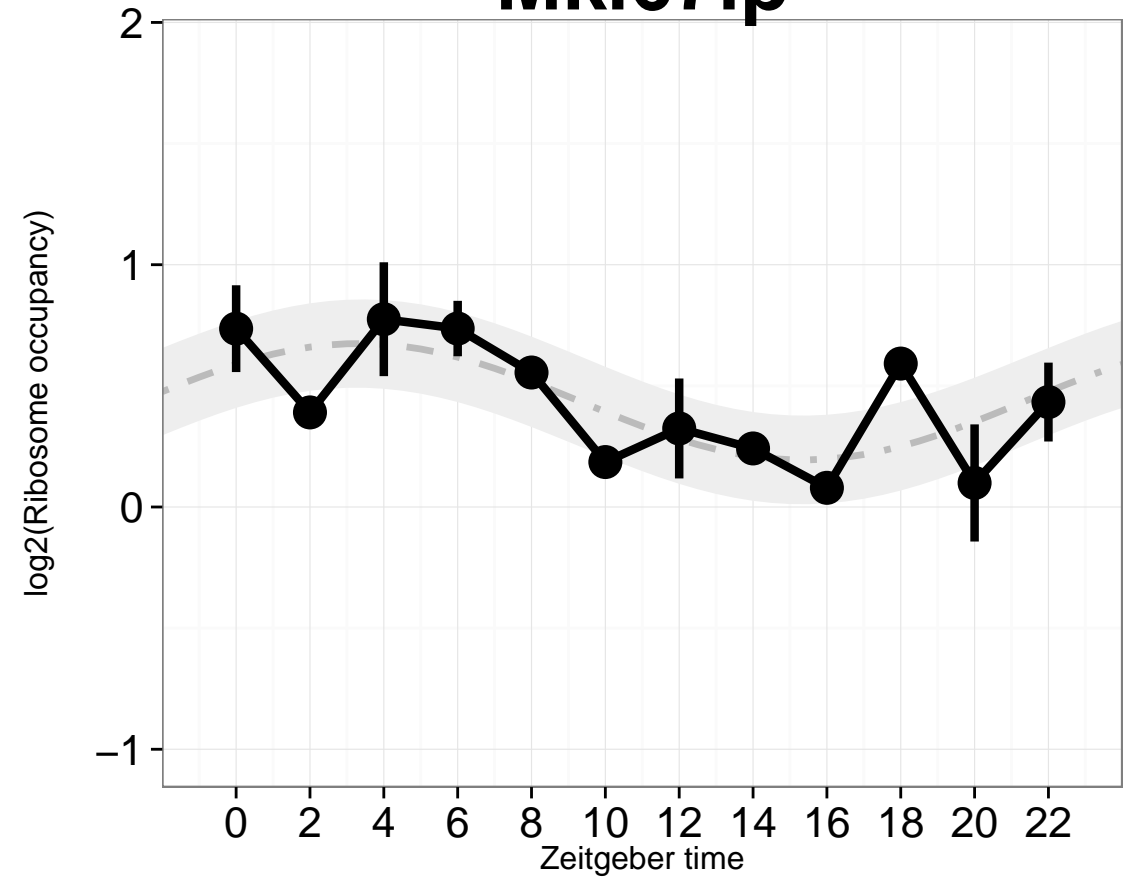

Supplement: Supplementary file 4503 [file 1]

## Sp1

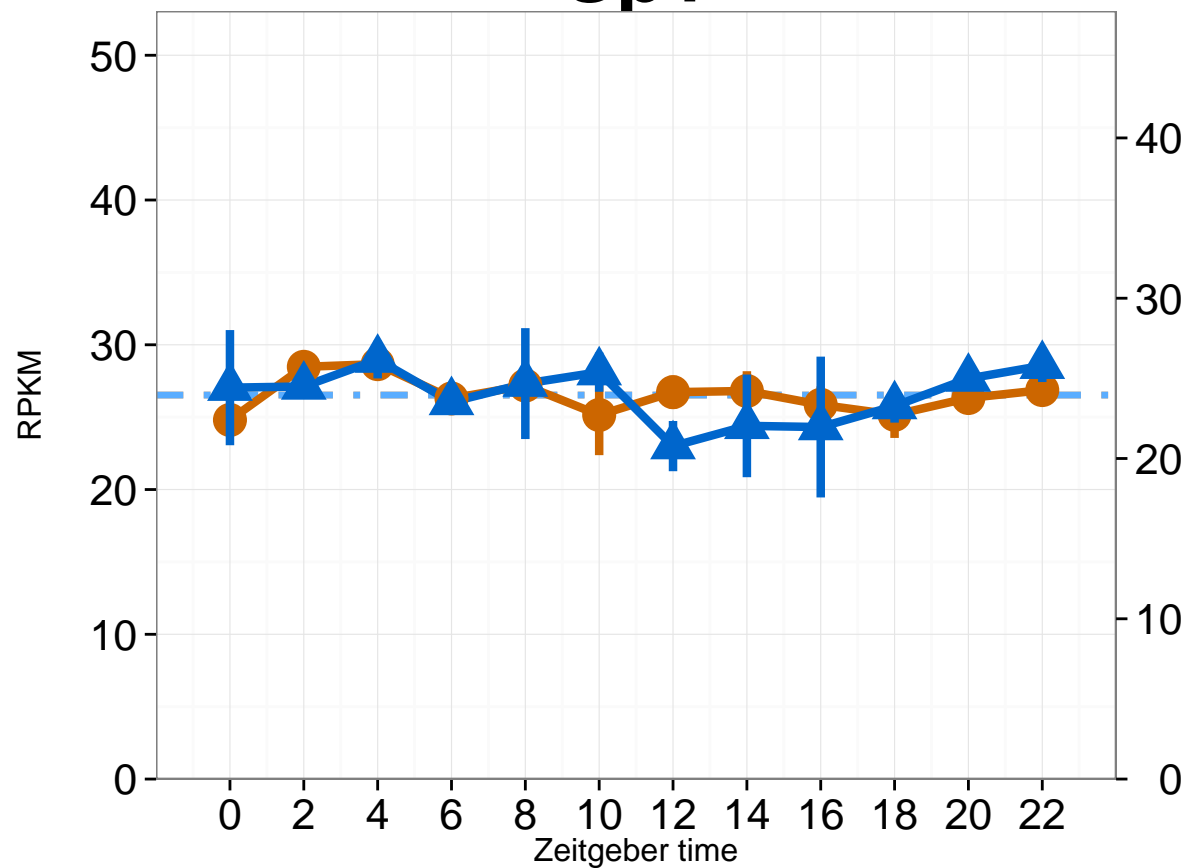

## Sp1

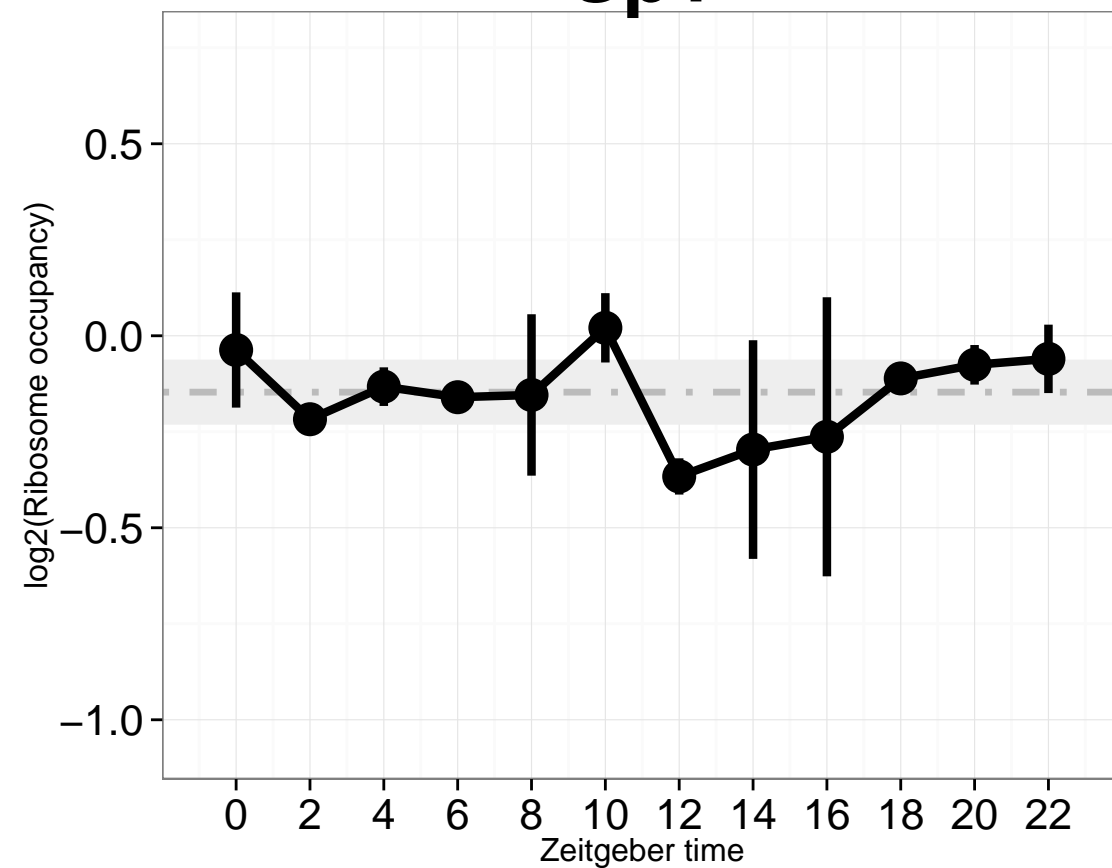

Supplement: Supplementary file 4504 [file 1]

# Cnot11

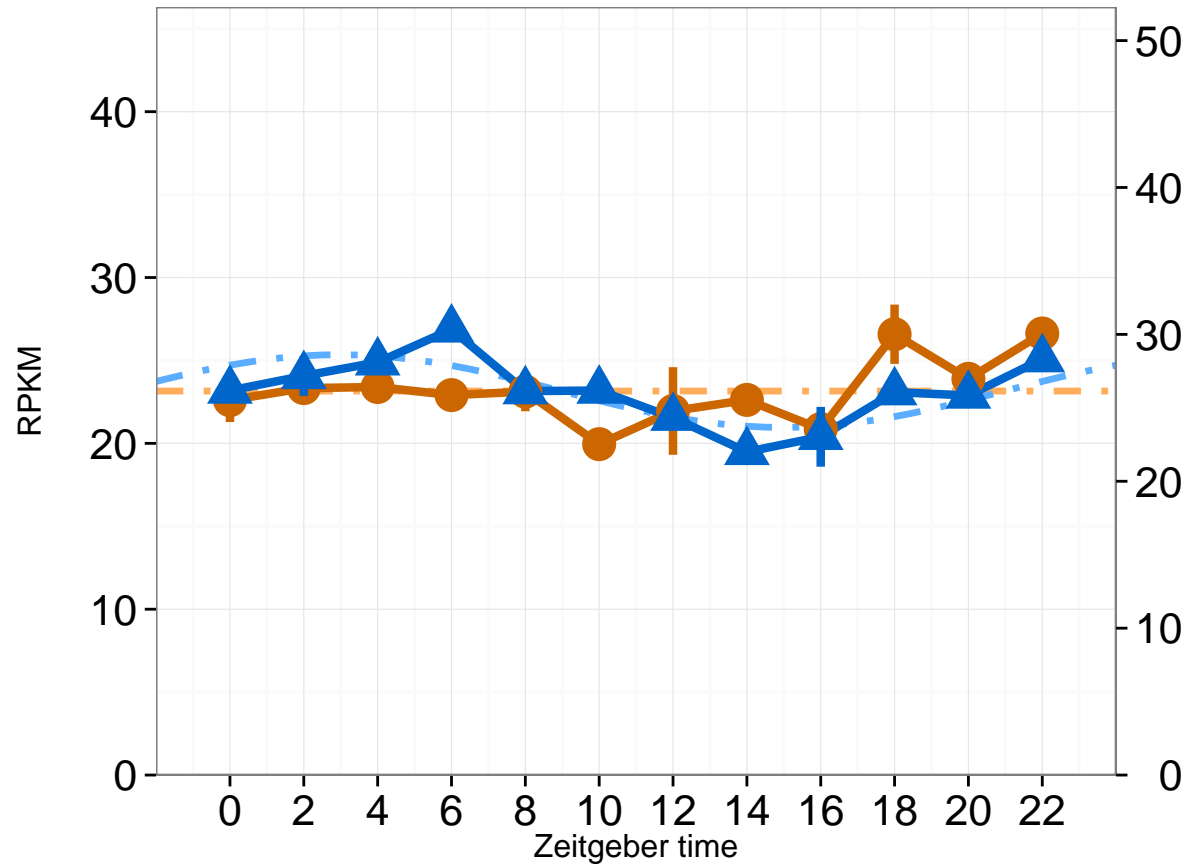

# Cnot11

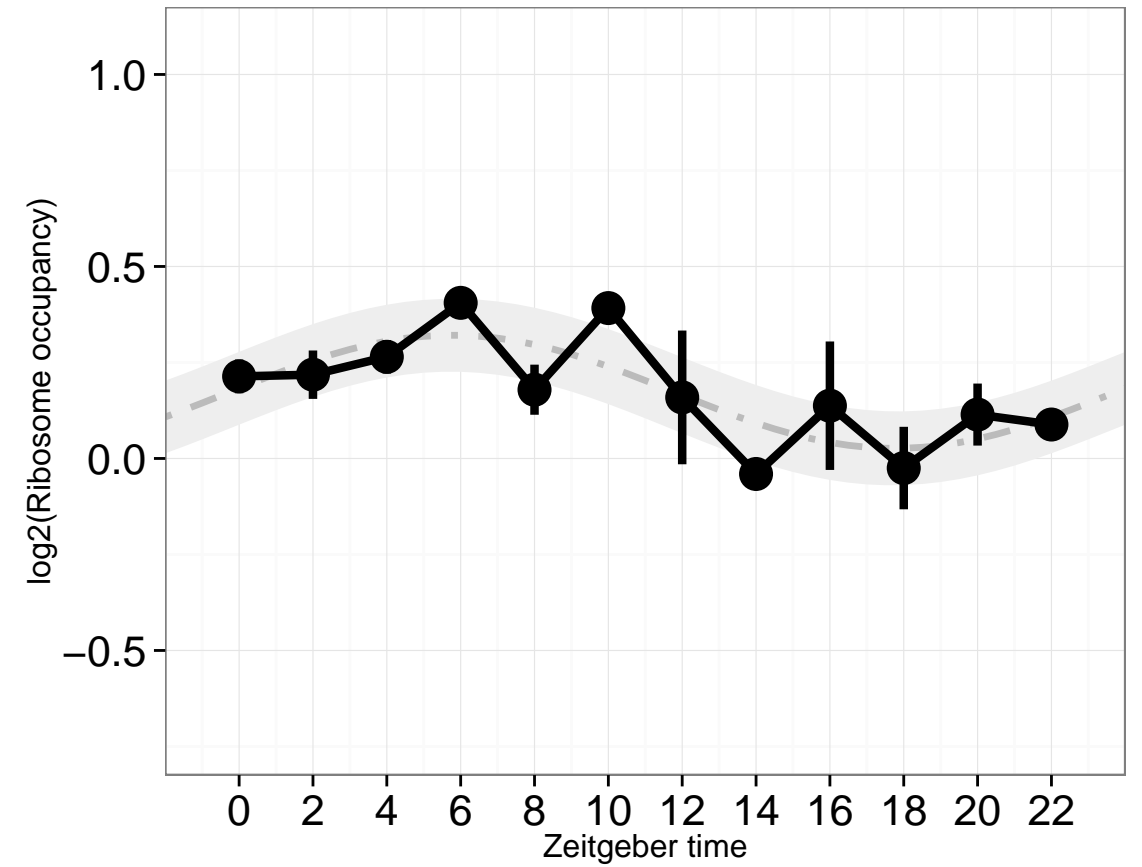

Supplement: Supplementary file 4505 [file 1]

# Arhgap11a

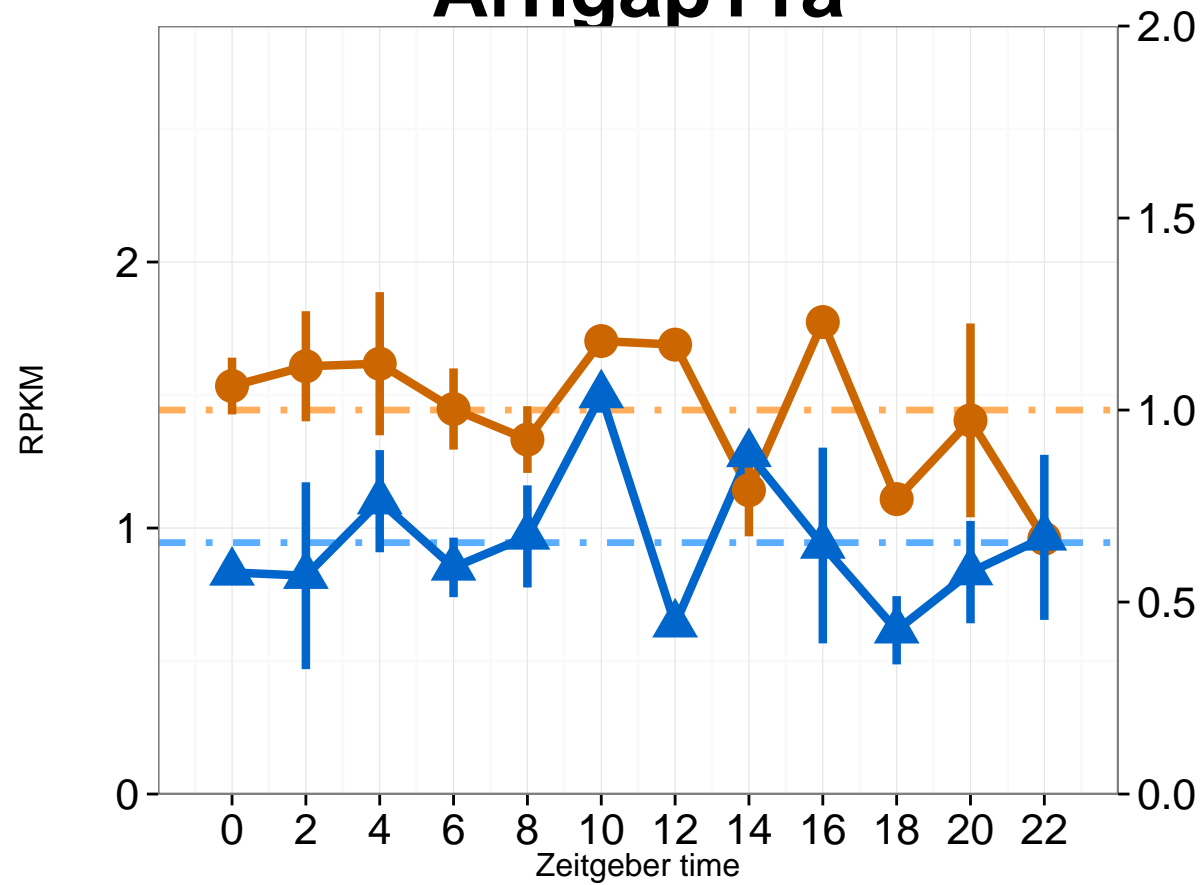

# Arhgap11a

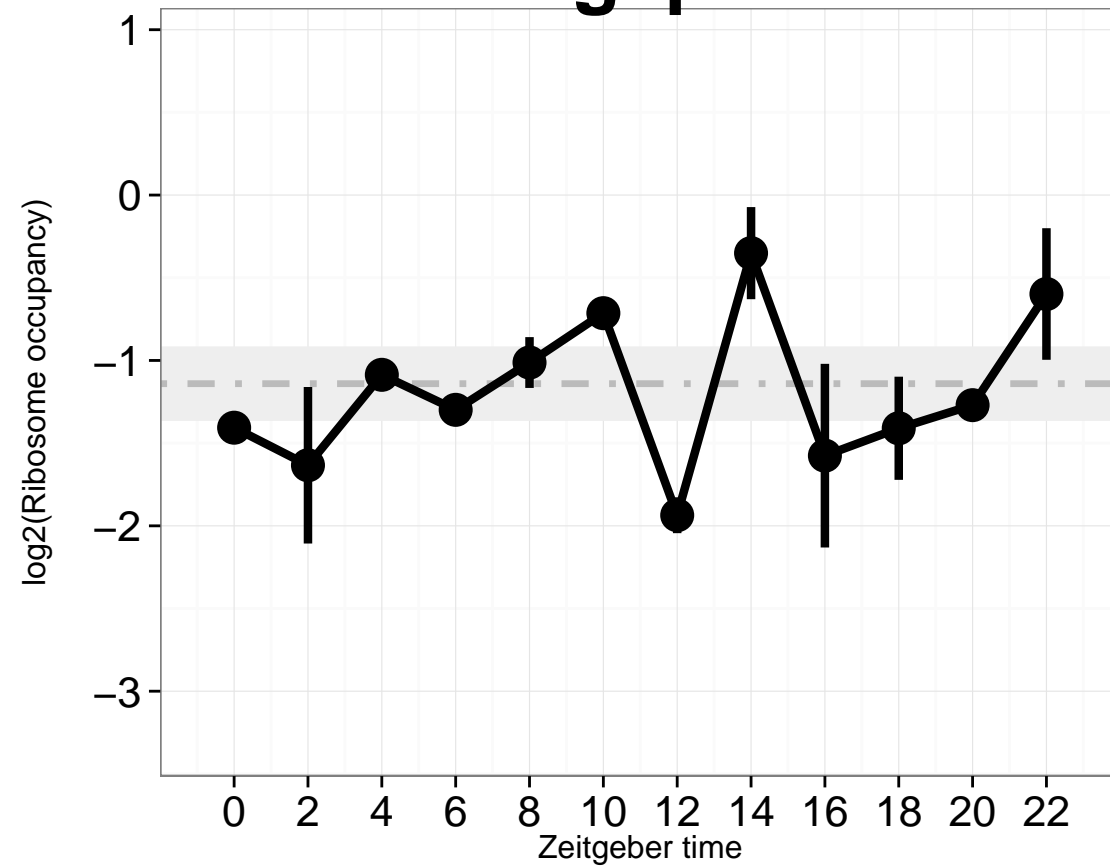

Supplement: Supplementary file 4506 [file 1]

## Sgk1

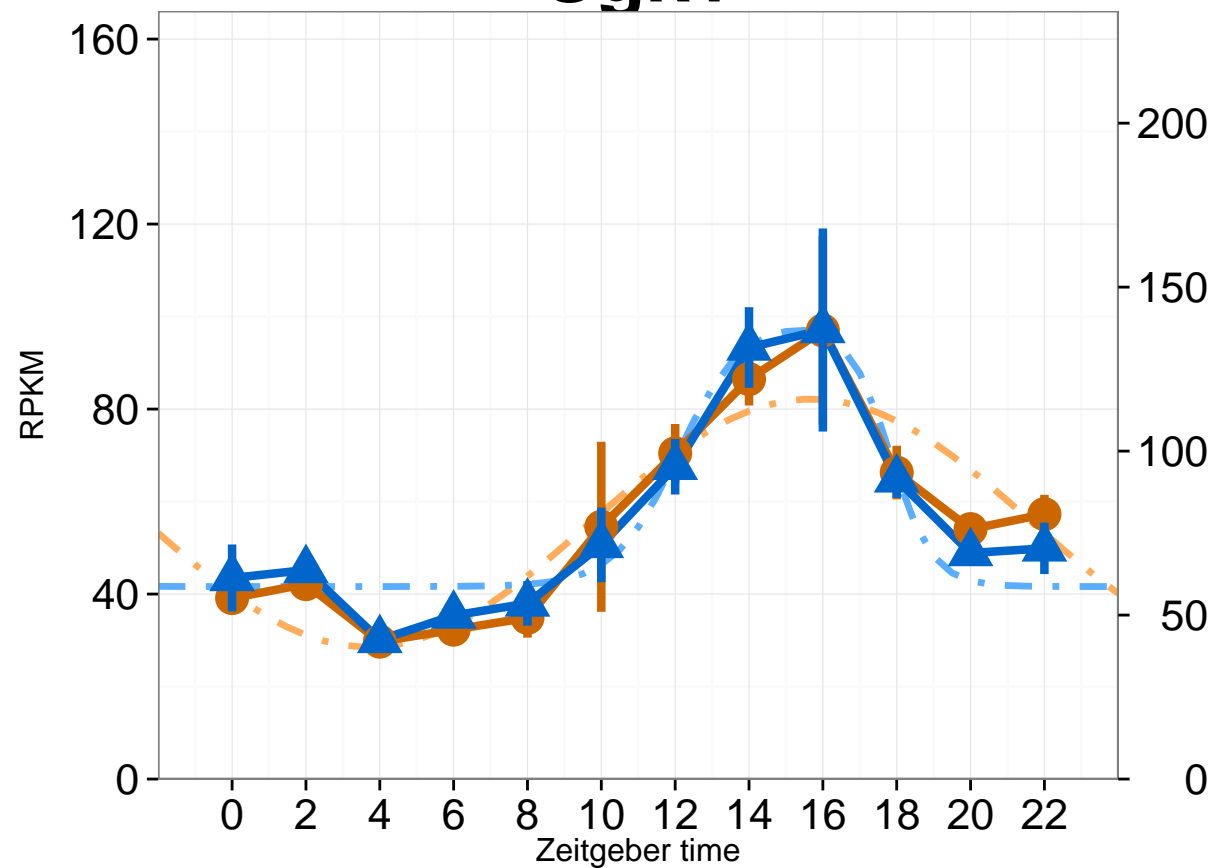

## Sgk1

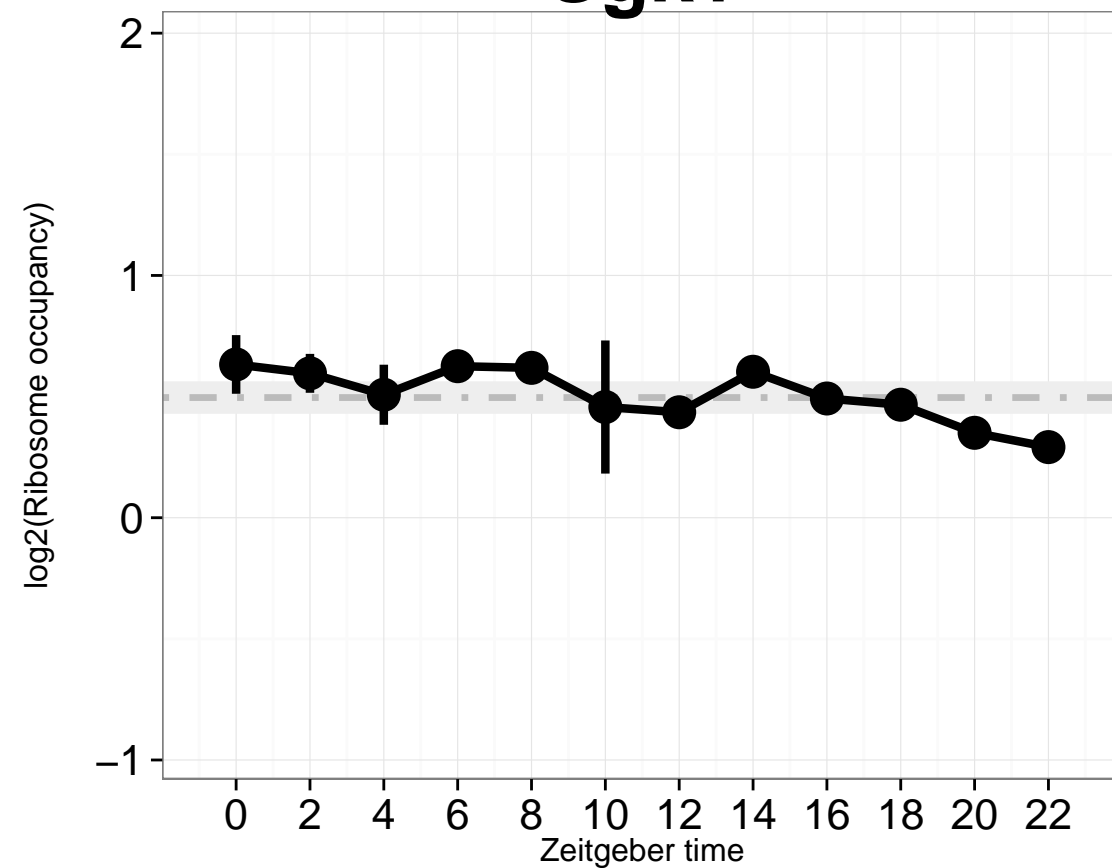

Supplement: Supplementary file 4507 [file 1]

## Eif3c

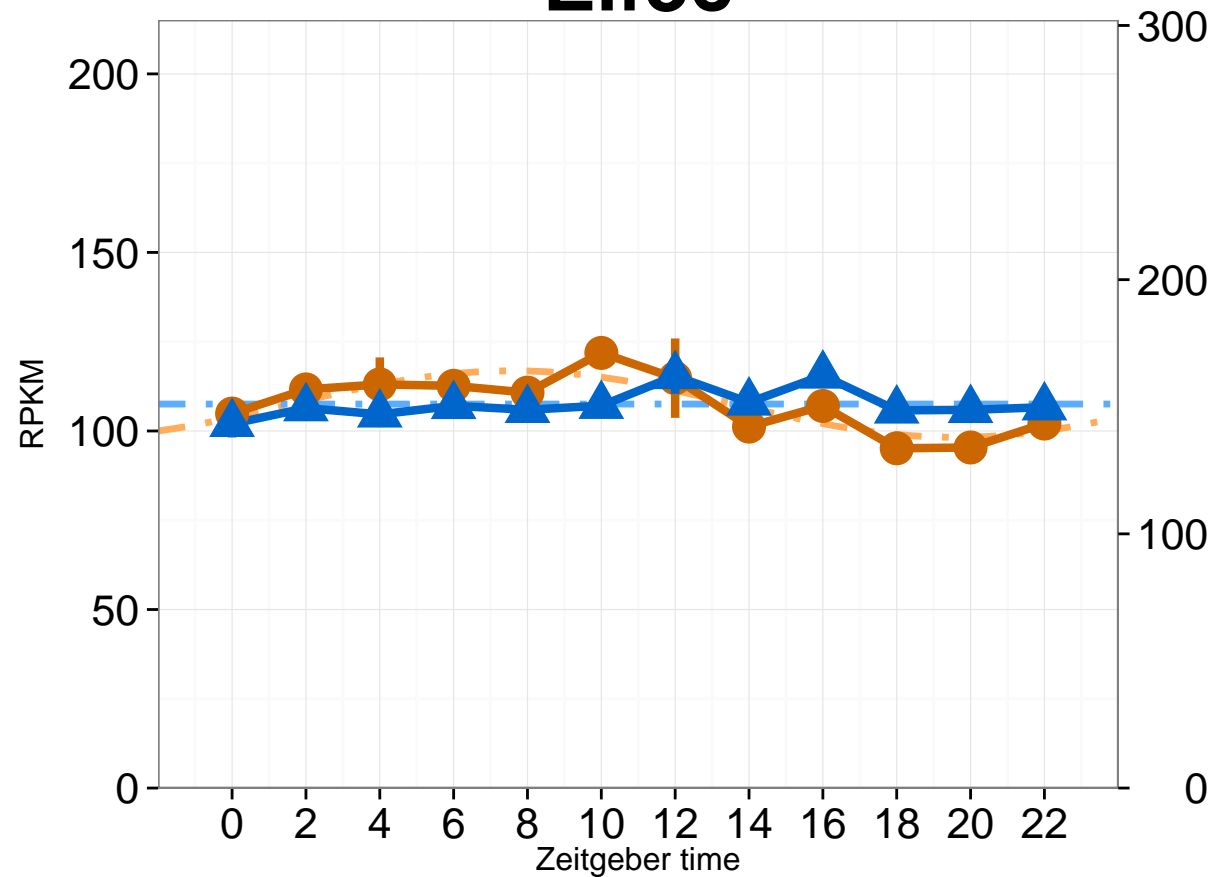

## Eif3c

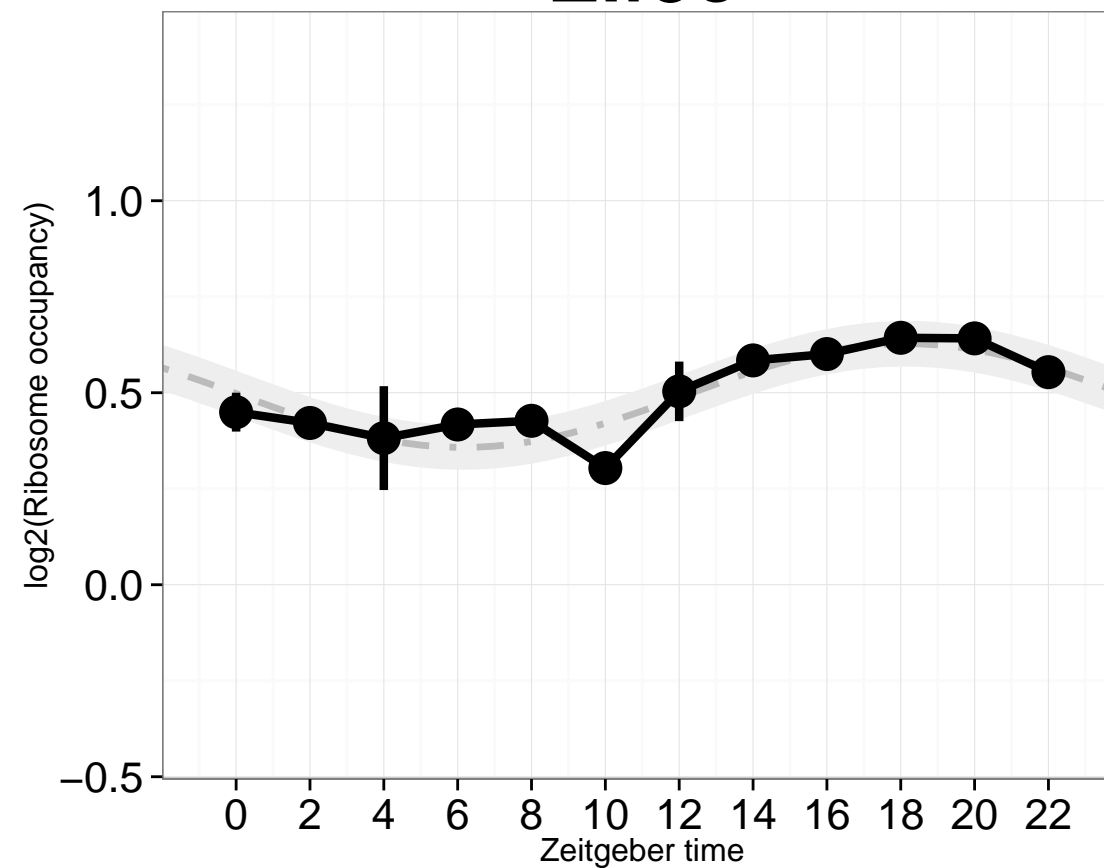

Supplement: Supplementary file 4508 [file 1]

## Adarb1

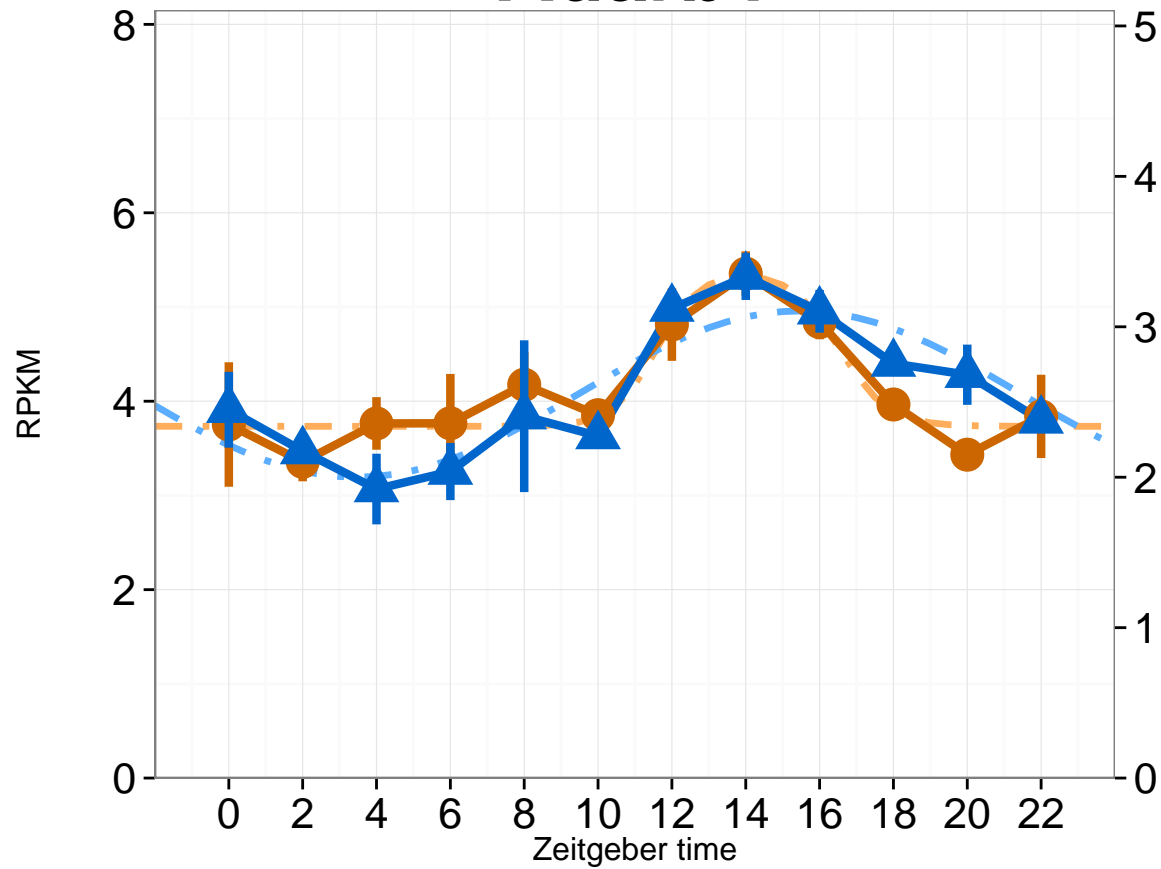

## Adarb1

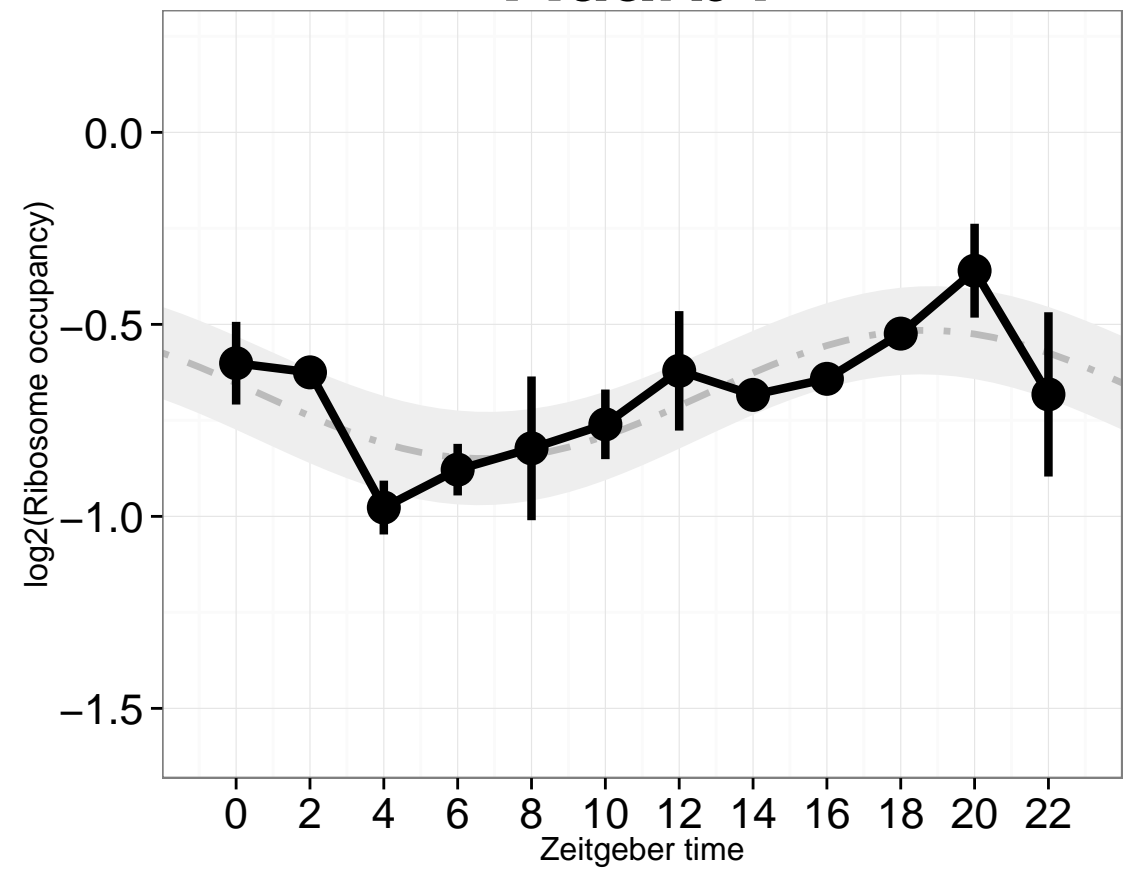

Supplement: Supplementary file 4509 [file 1]

## Tchhl1

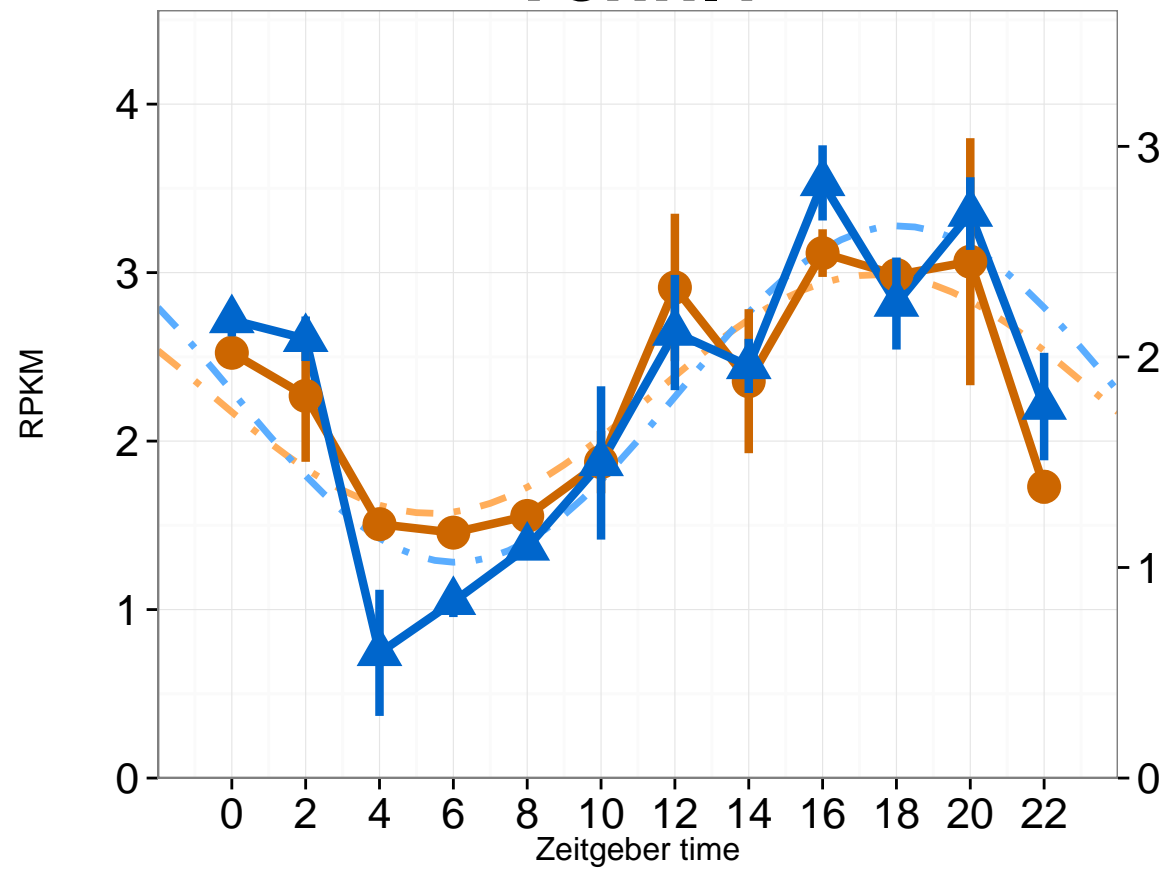

## Tchhl1

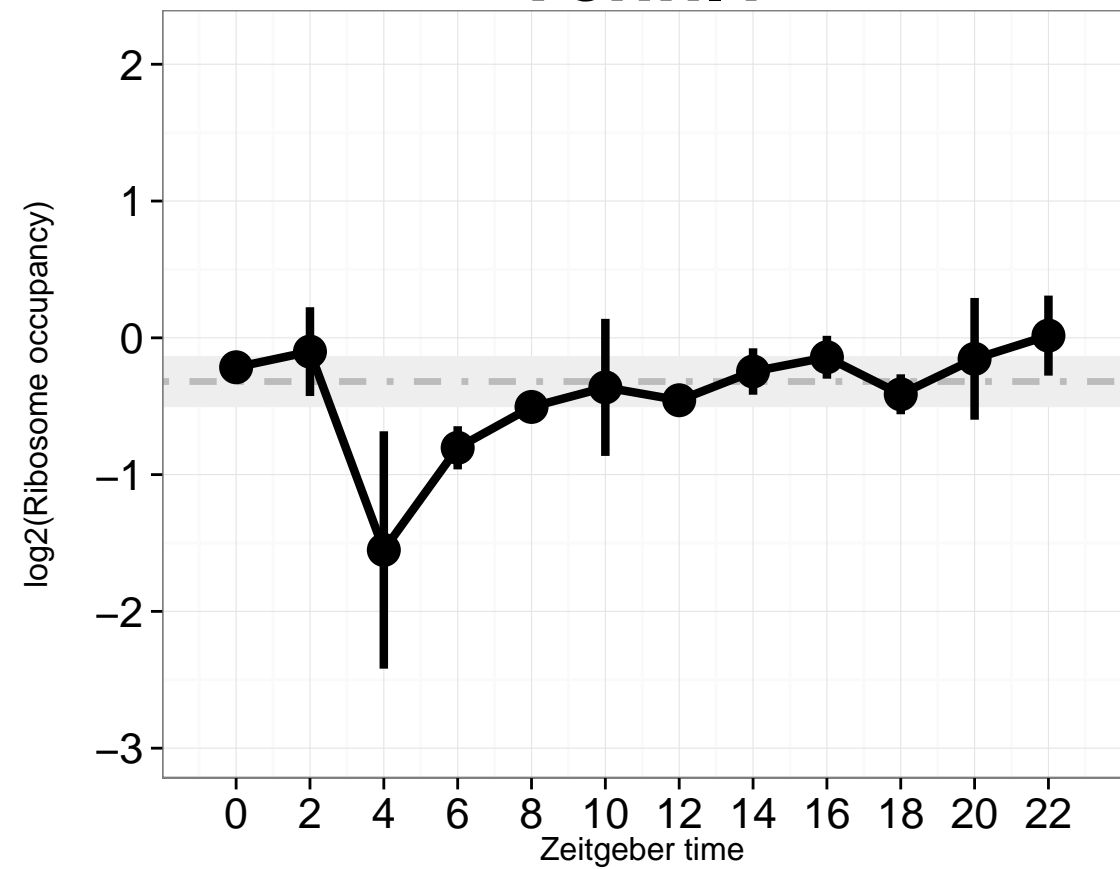

Supplement: Supplementary file 4510 [file 1]

## Acs1

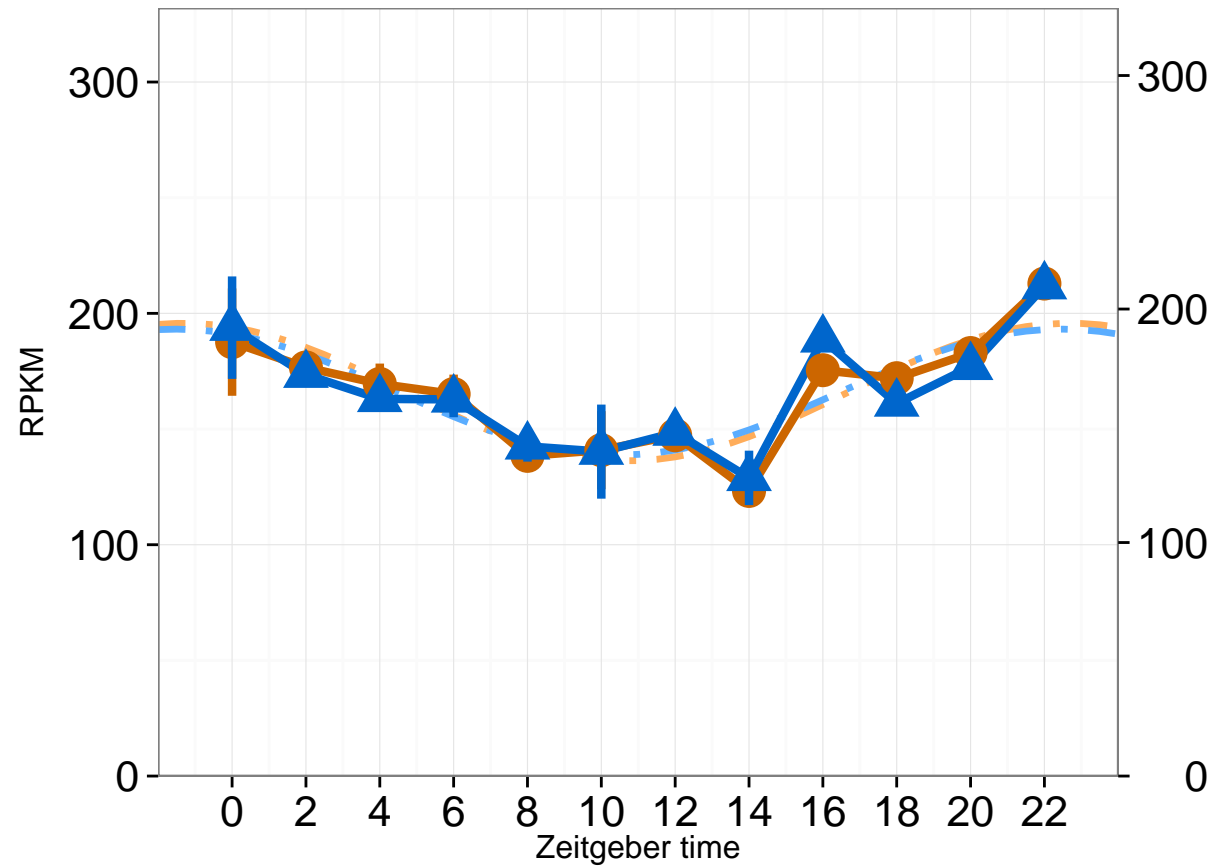

## Acs1

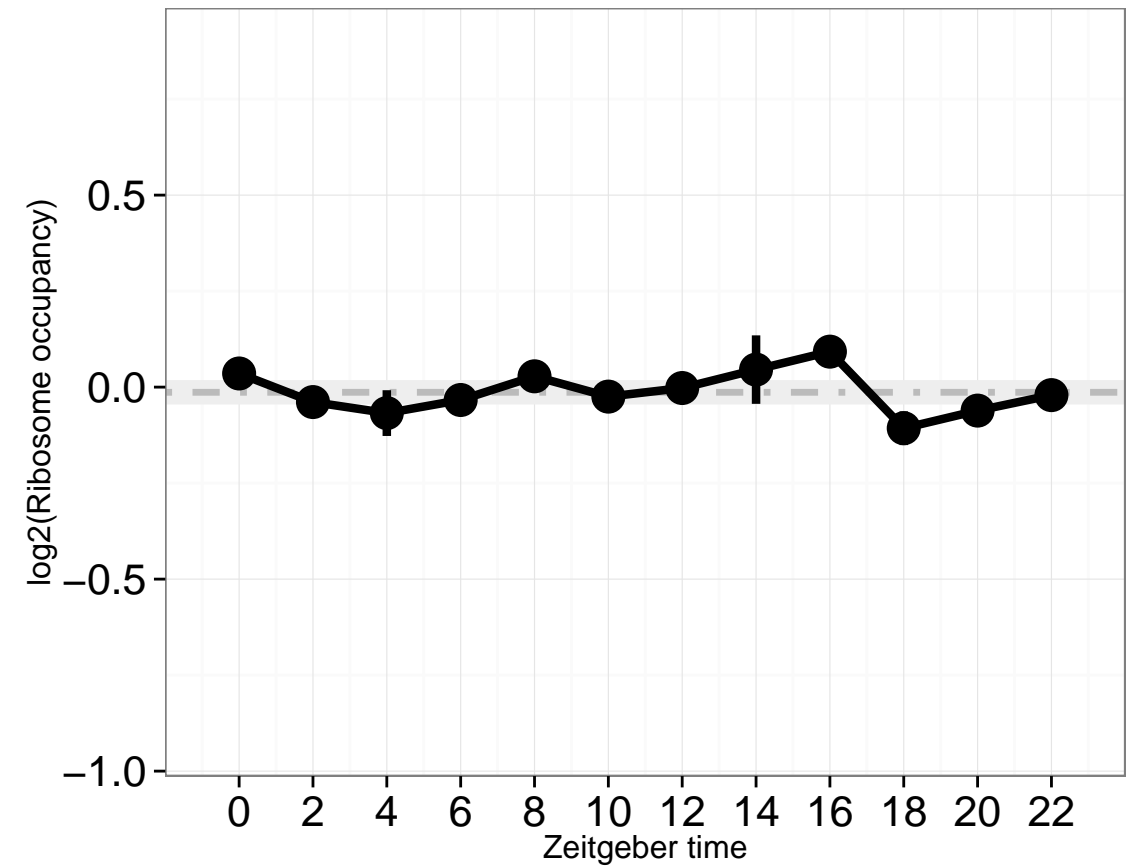

Supplement: Supplementary file 4511 [file 1]

# Tubgcp5

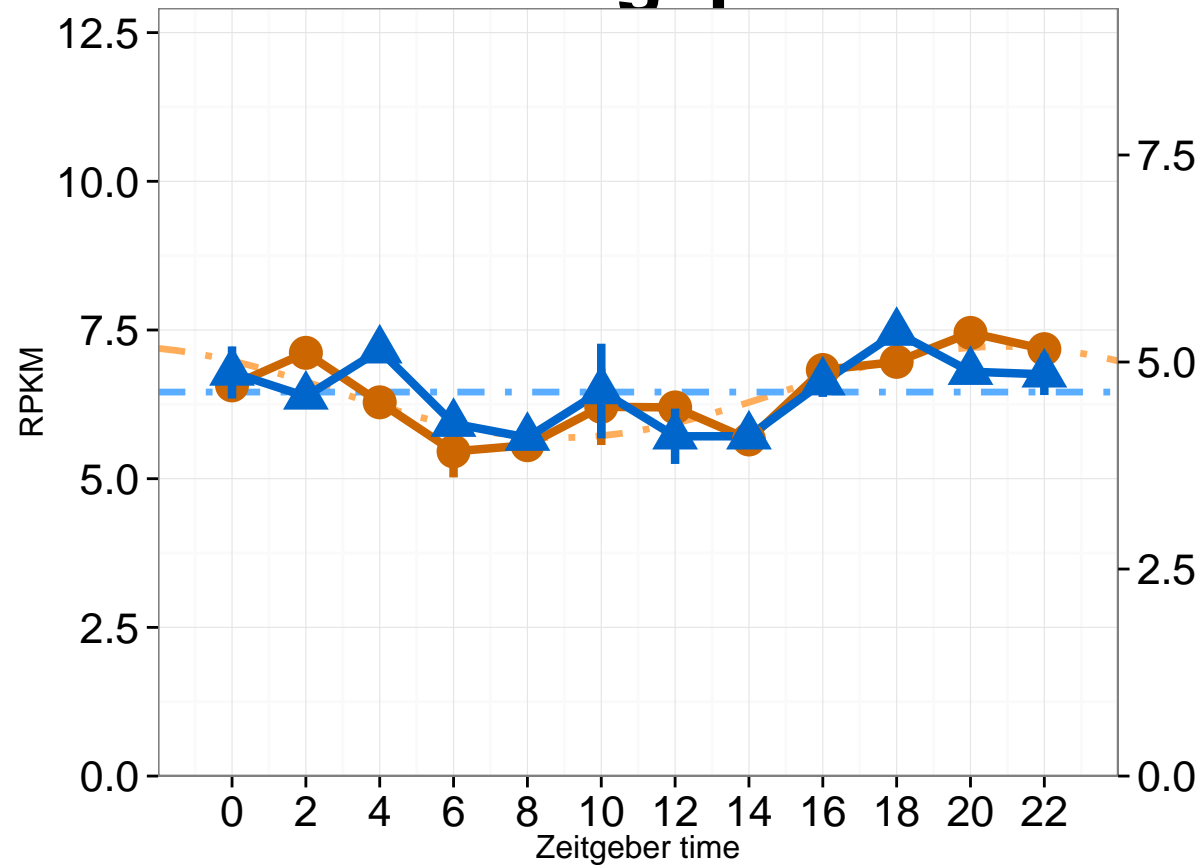

# Tubgcp5

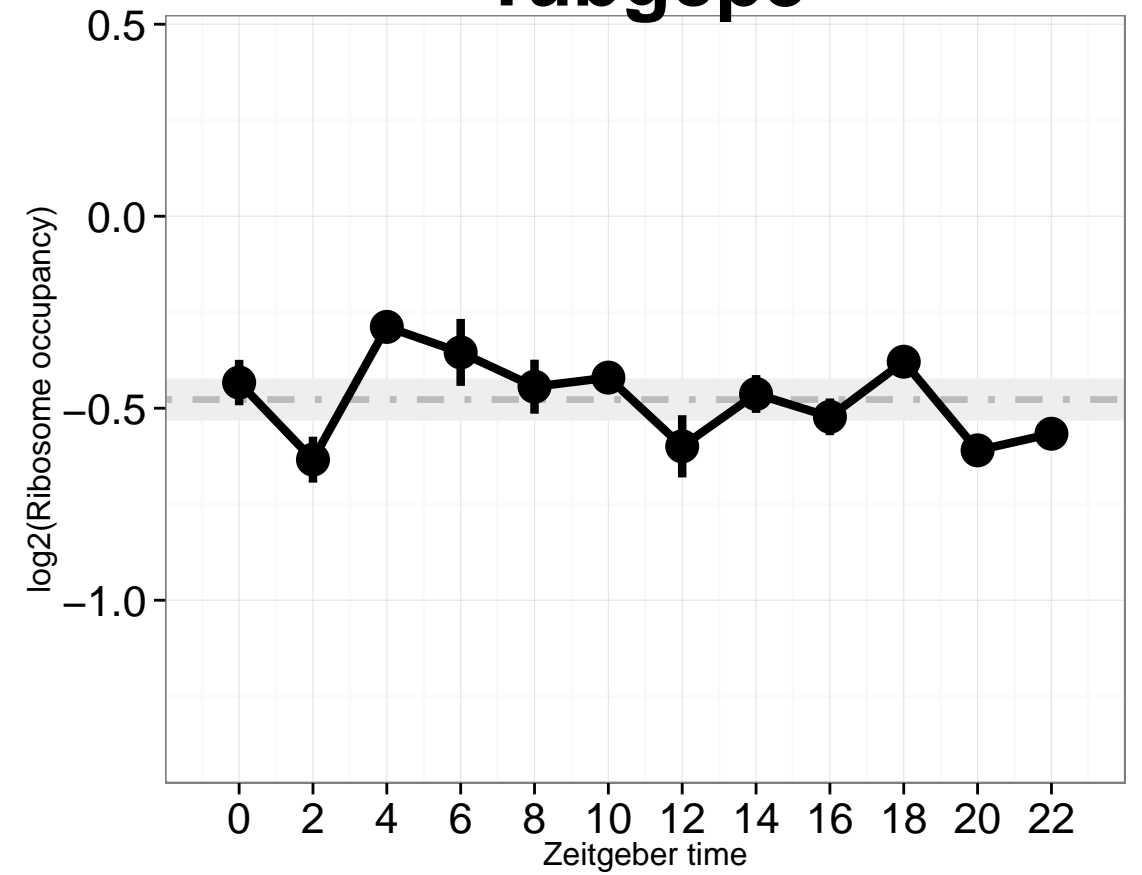

Supplement: Supplementary file 4512 [file 1]

# Degs1

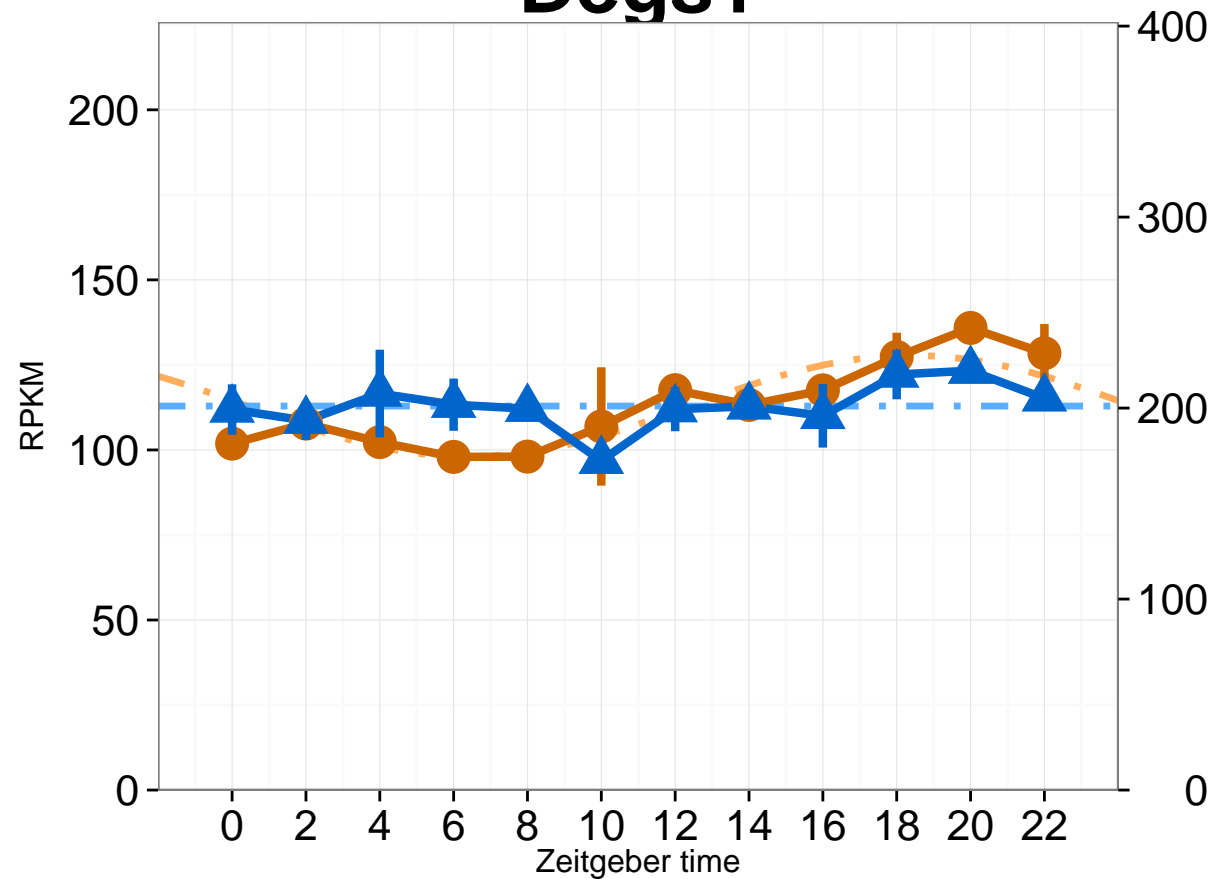

# Degs1

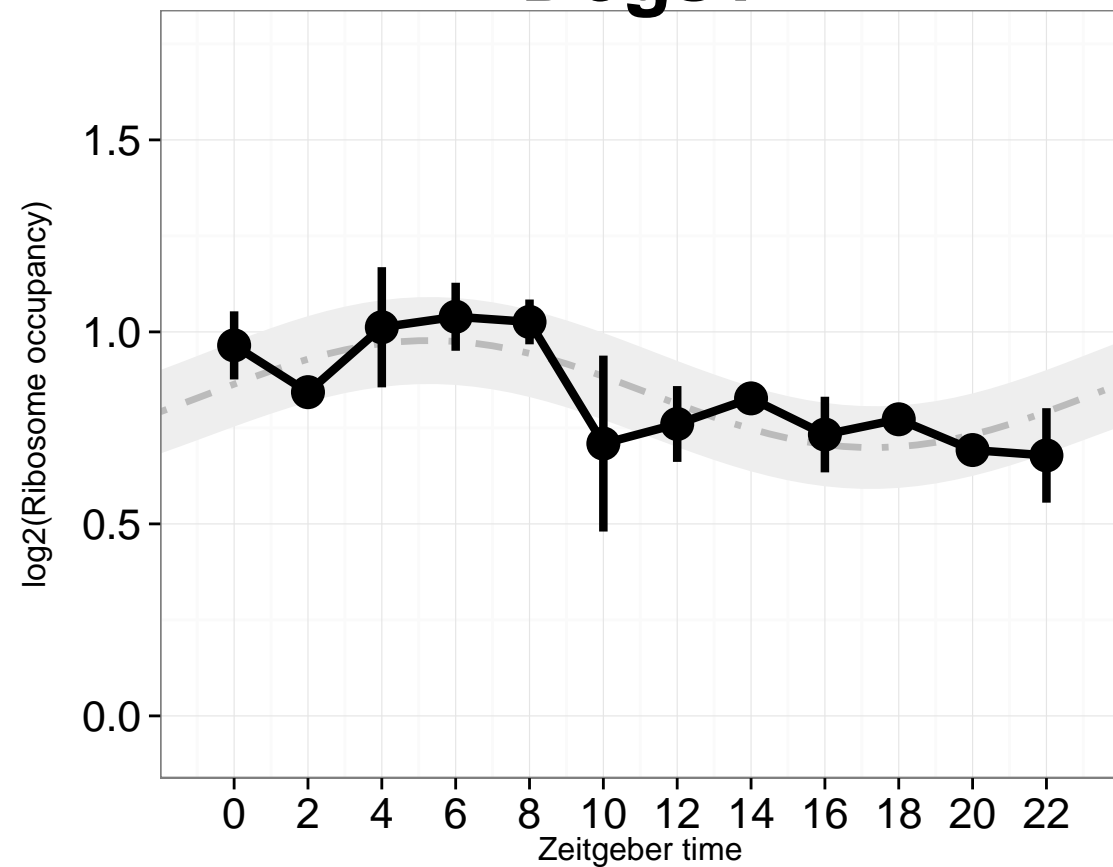

Supplement: Supplementary file 4513 [file 1]

## Naaladl1

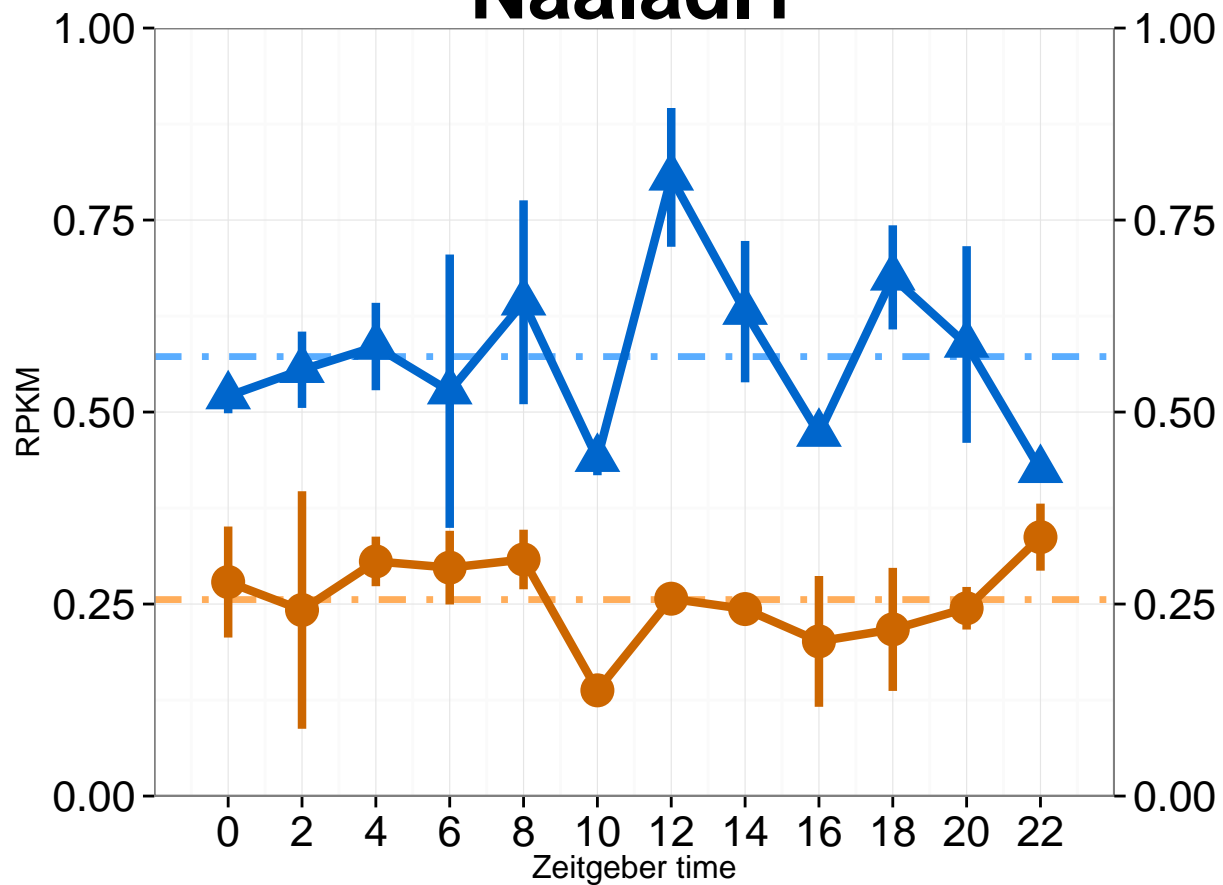

## Naaladl1

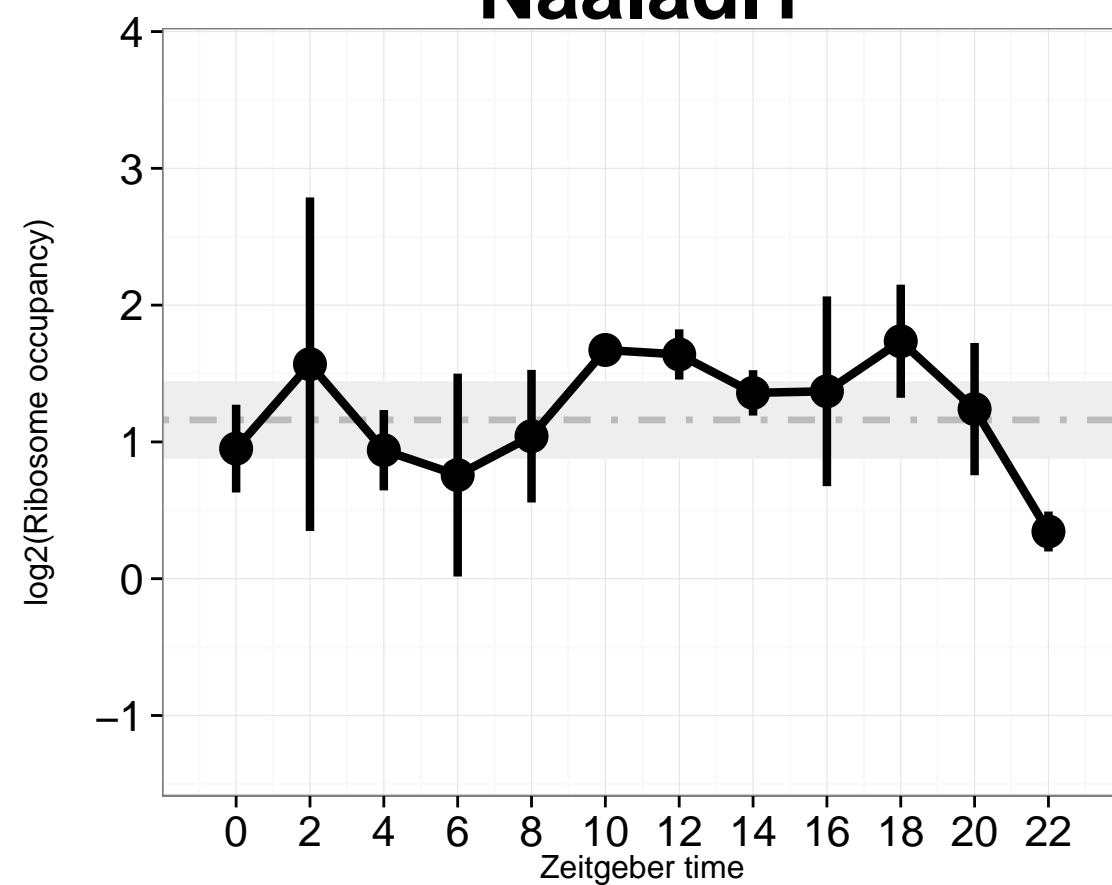

Supplement: Supplementary file 4514 [file 1]

## Dgkq

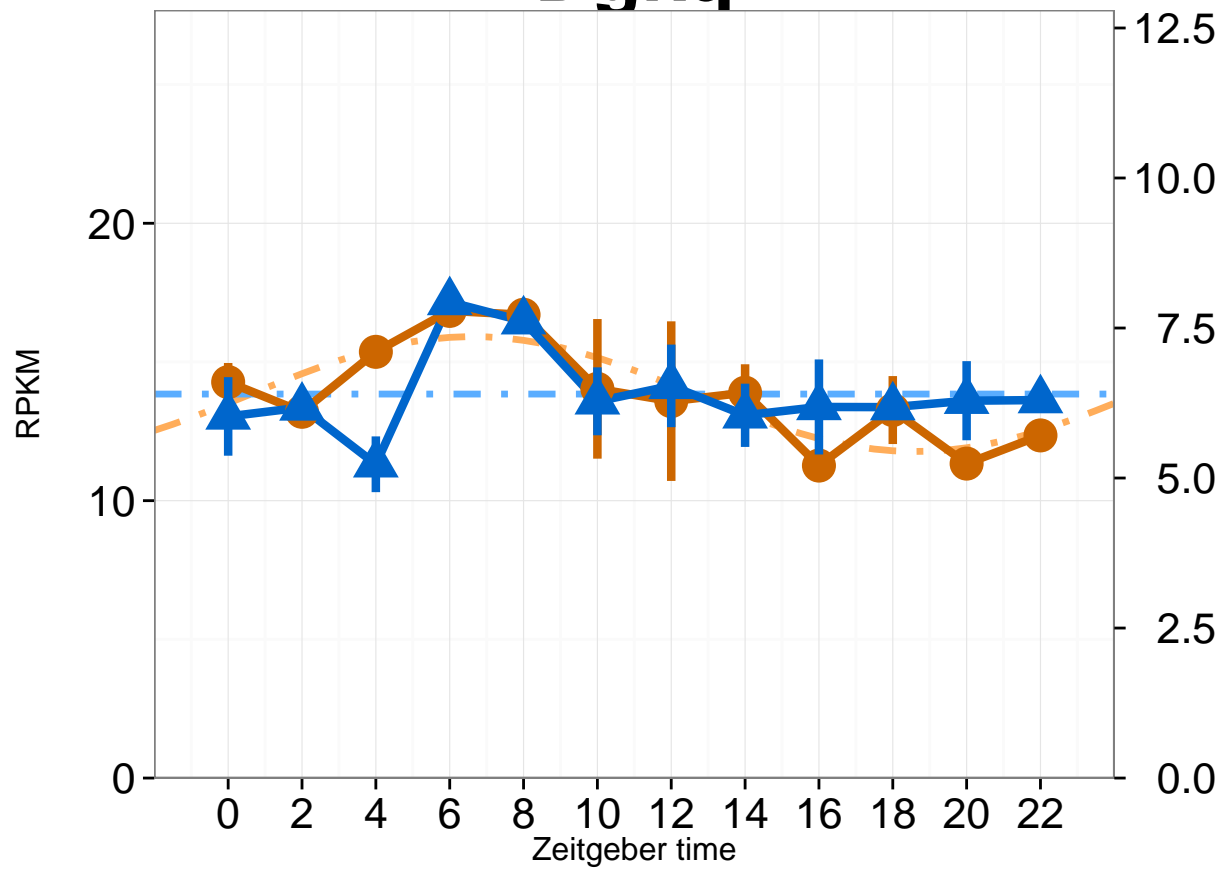

## Dgkq

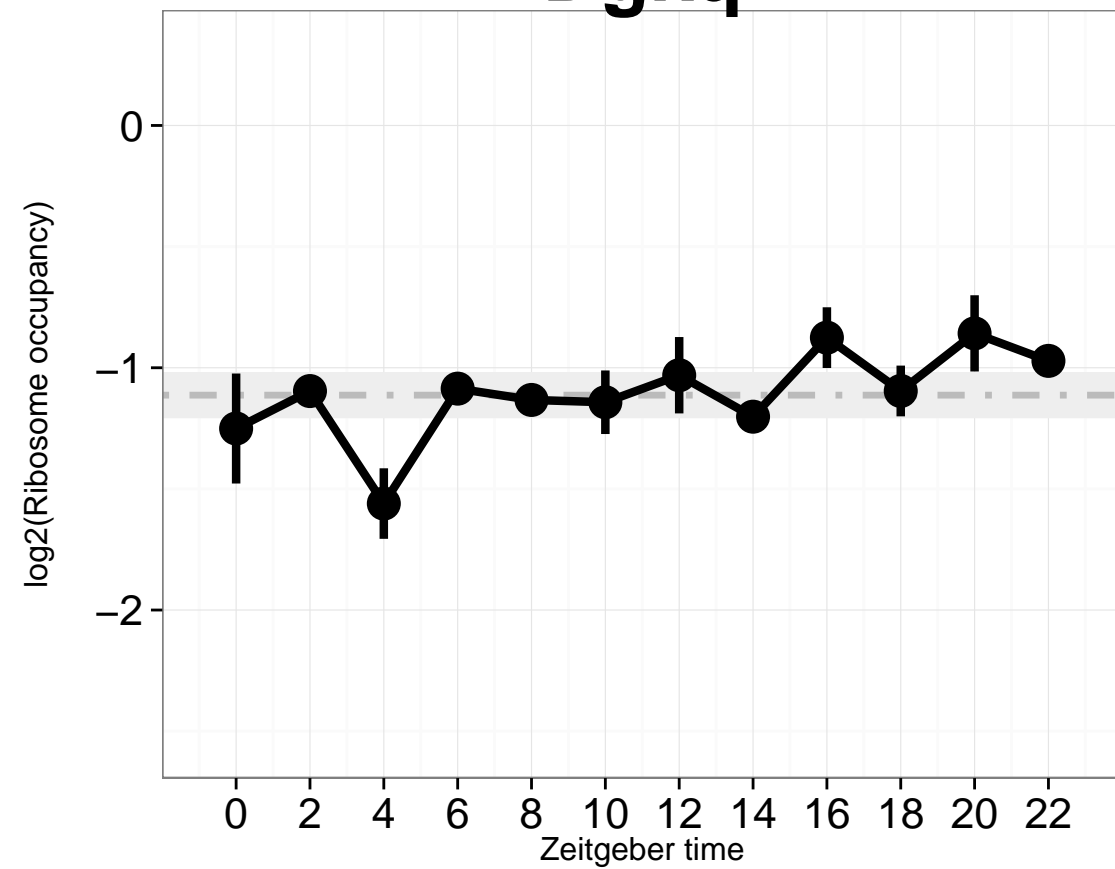

Supplement: Supplementary file 4515 [file 1]

# Mrpl3

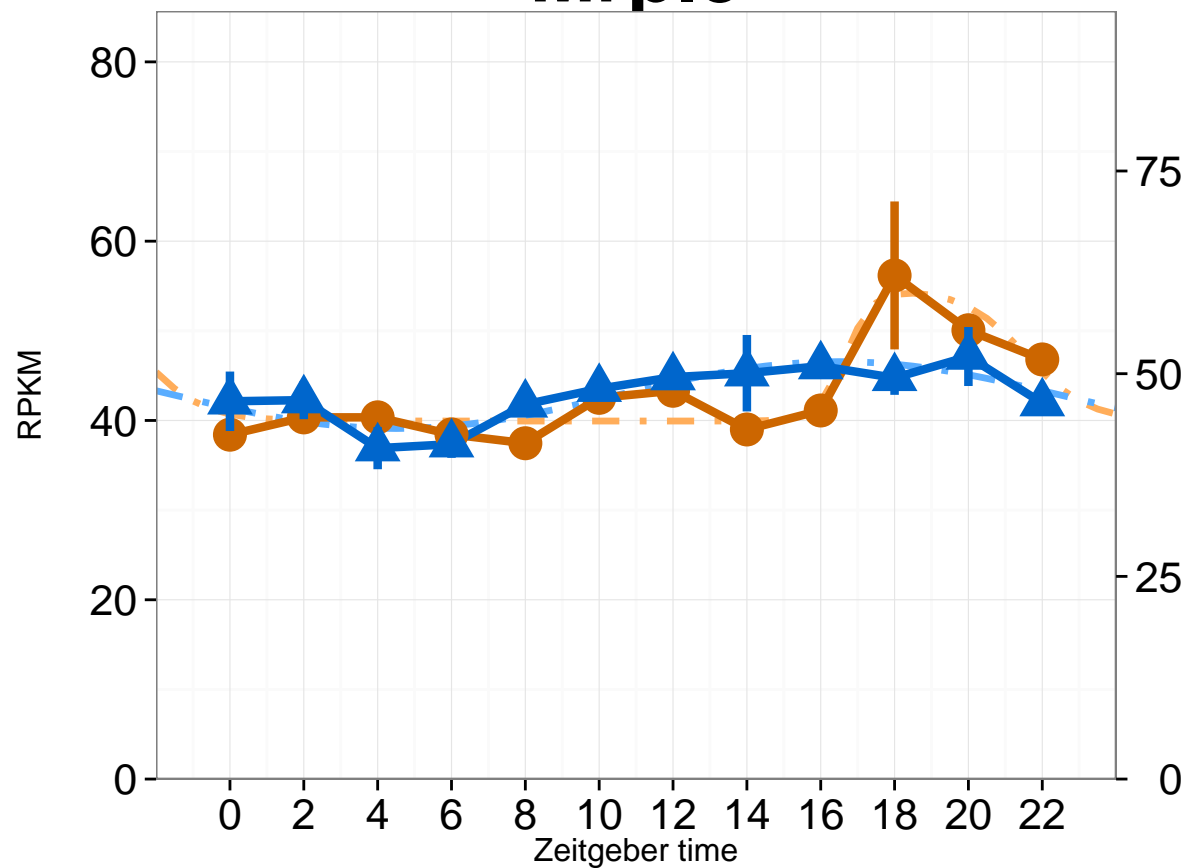

# Mrpl3

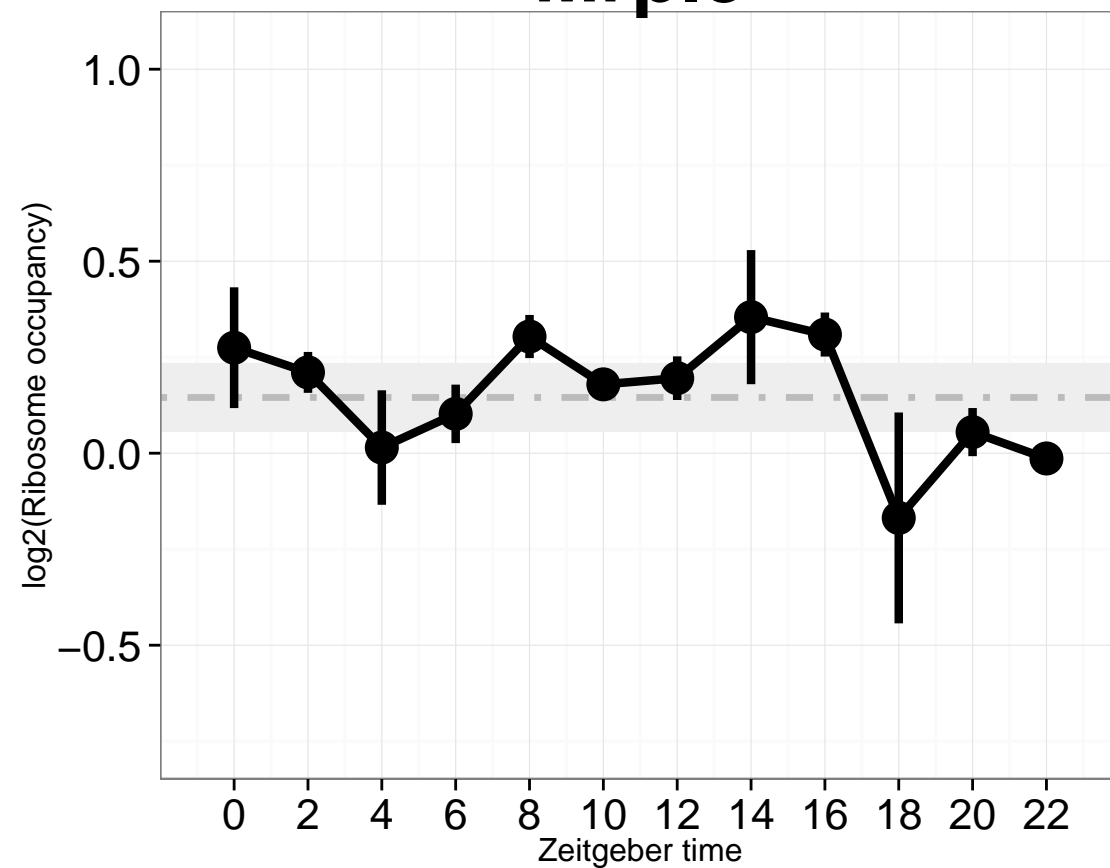

Supplement: Supplementary file 4516 [file 1]

## Noa1

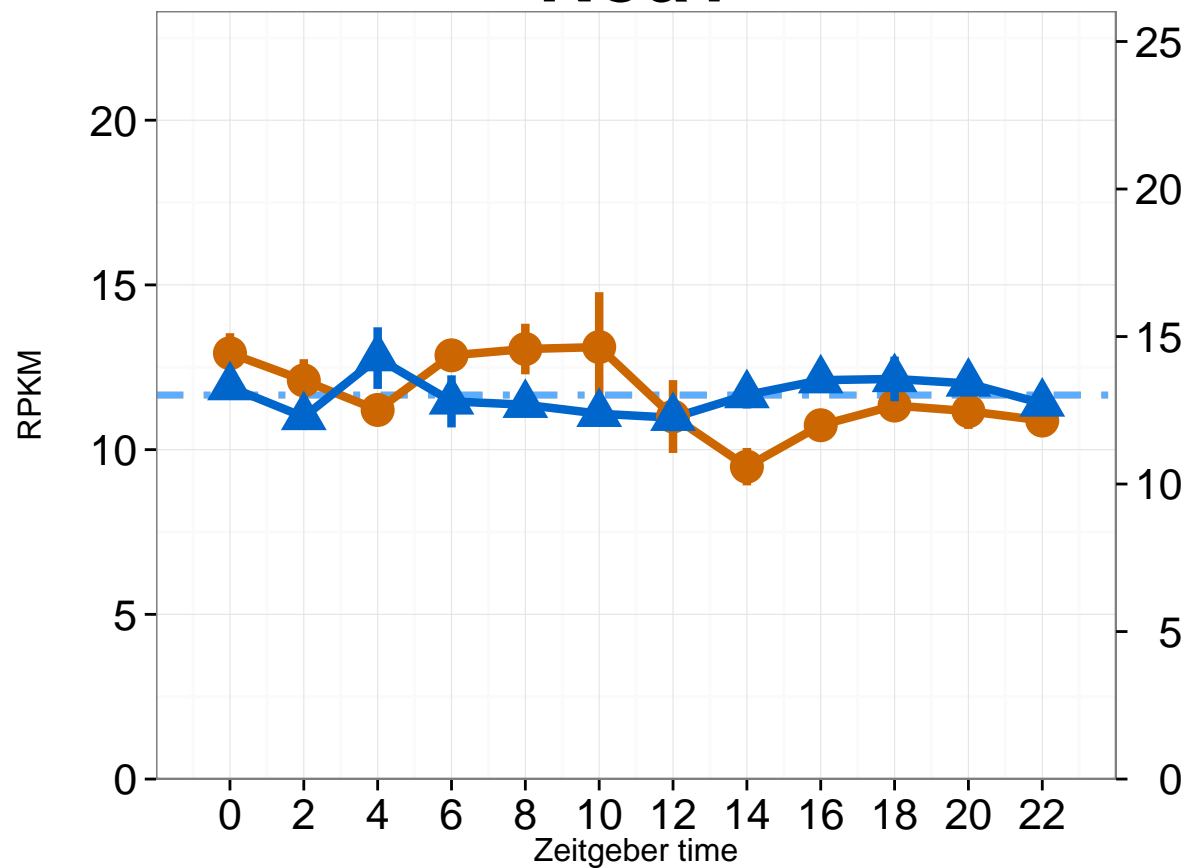

## Noa1

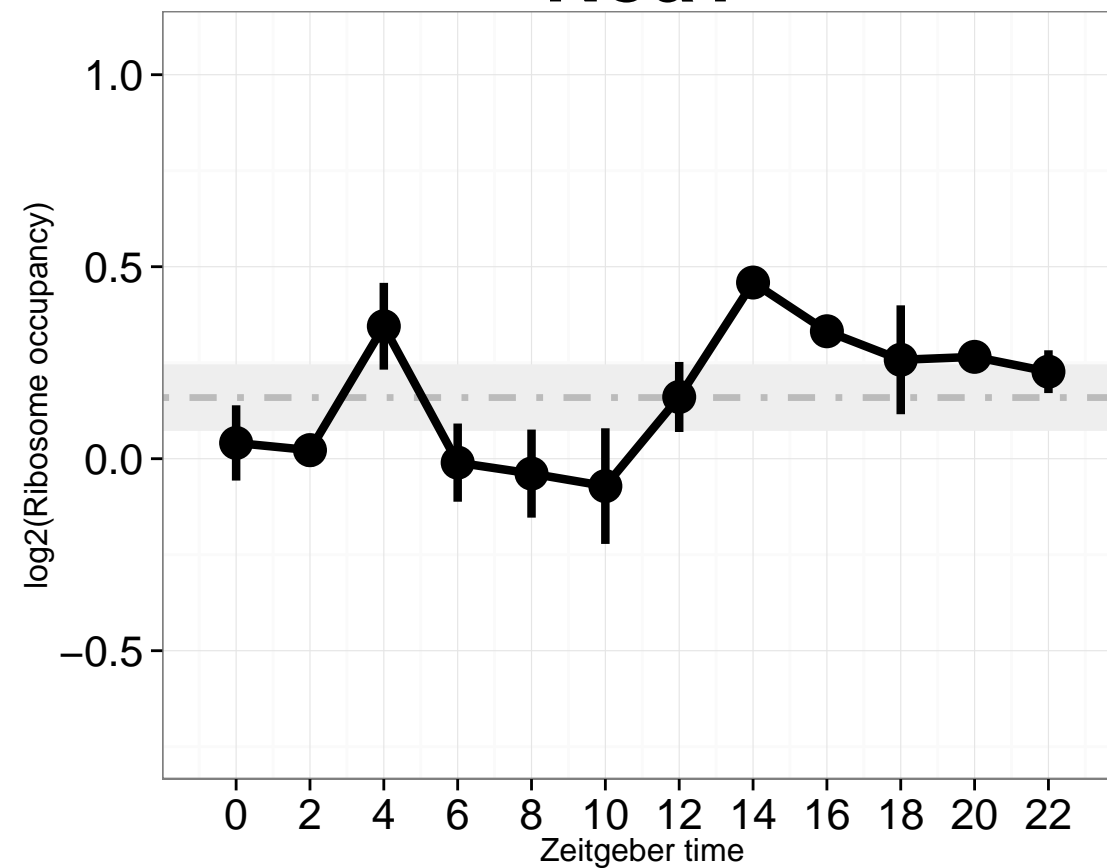

Supplement: Supplementary file 4517 [file 1]

# Aqp8

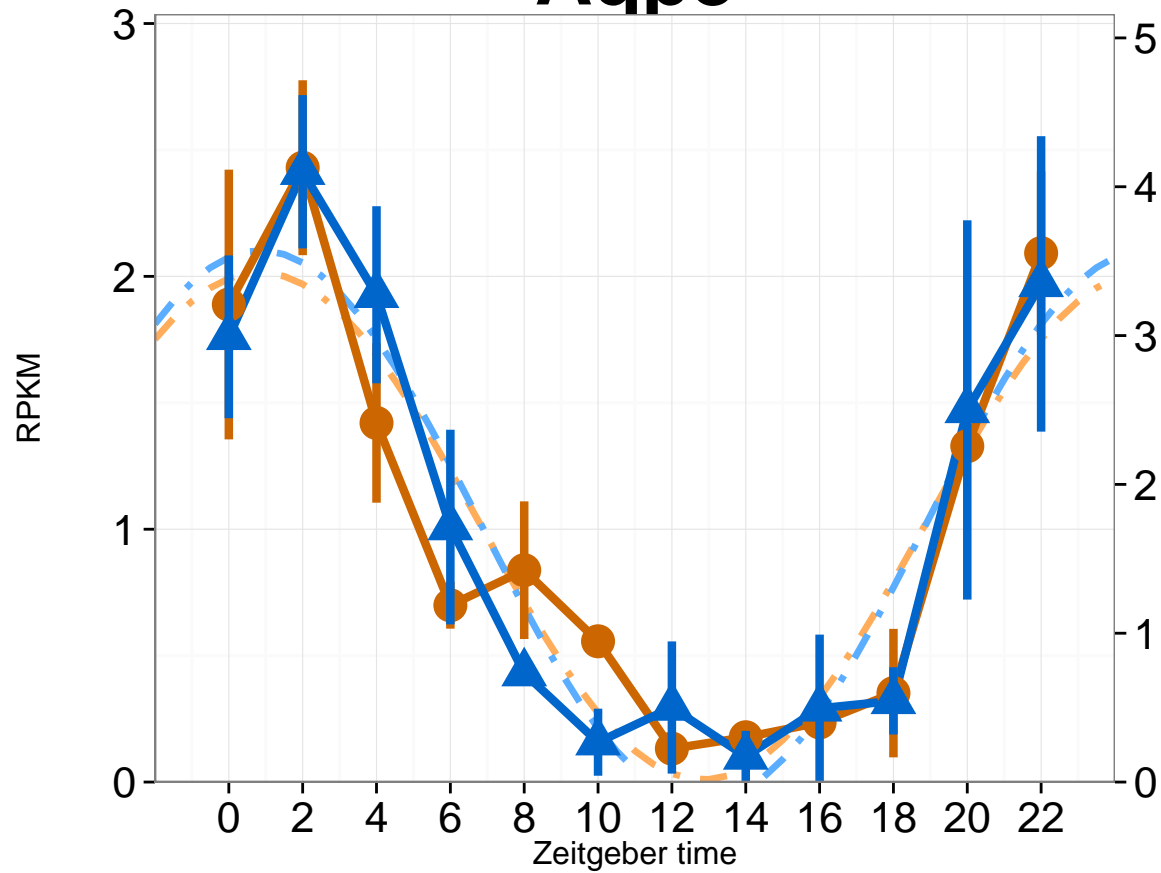

# Aqp8

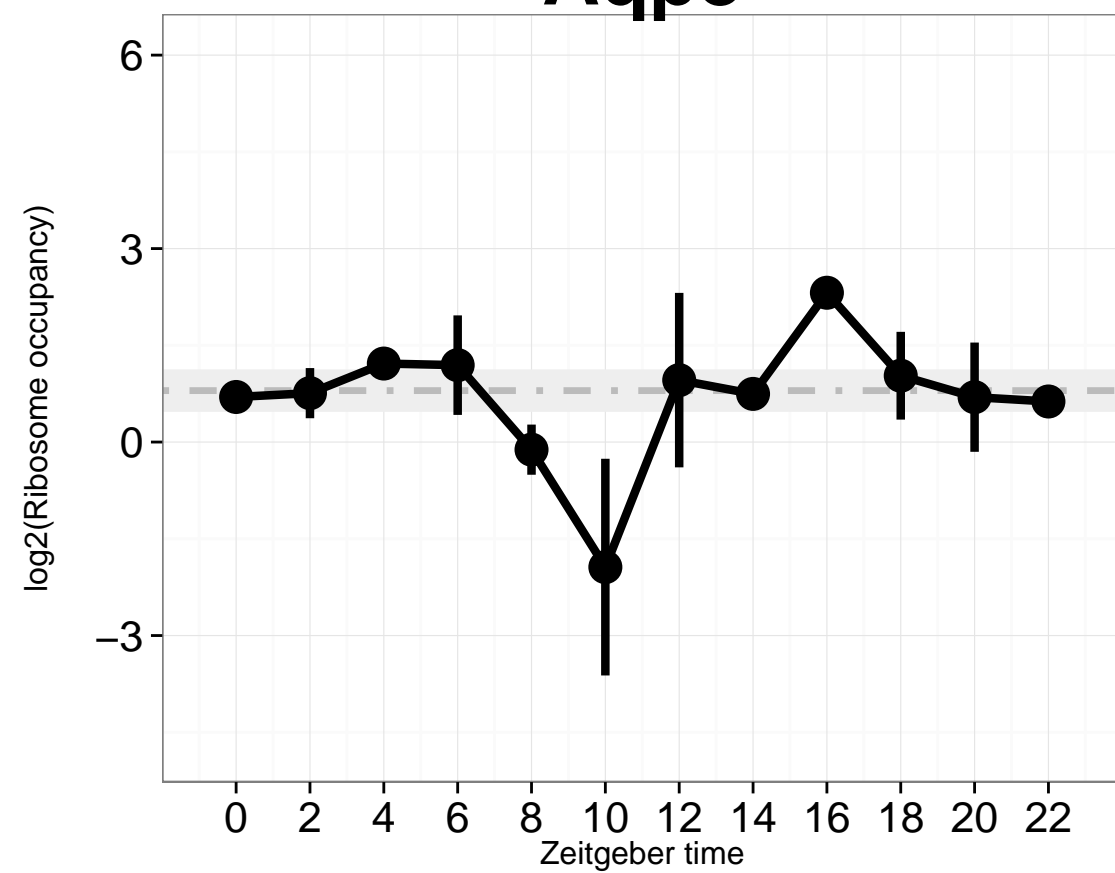

Supplement: Supplementary file 4518 [file 1]

# Rpl37a

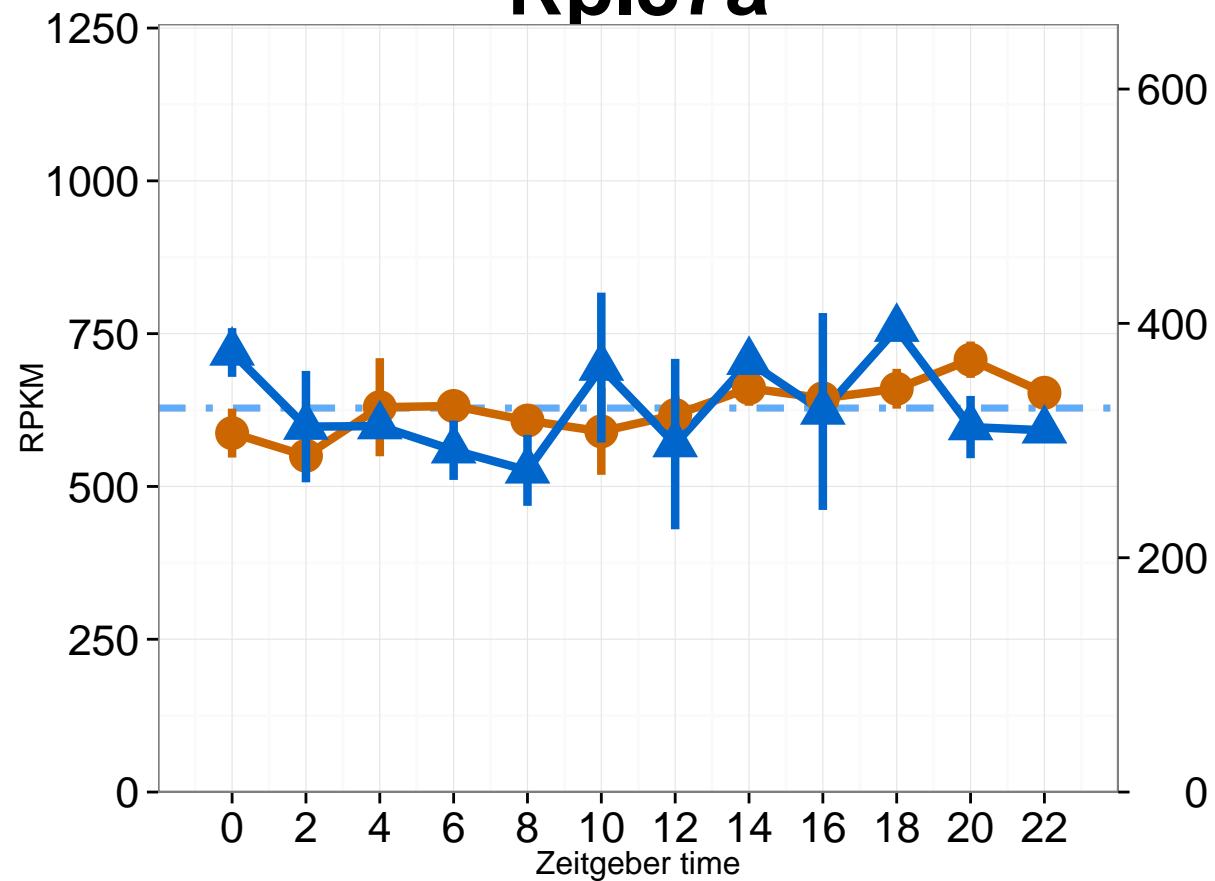

# Rpl37a

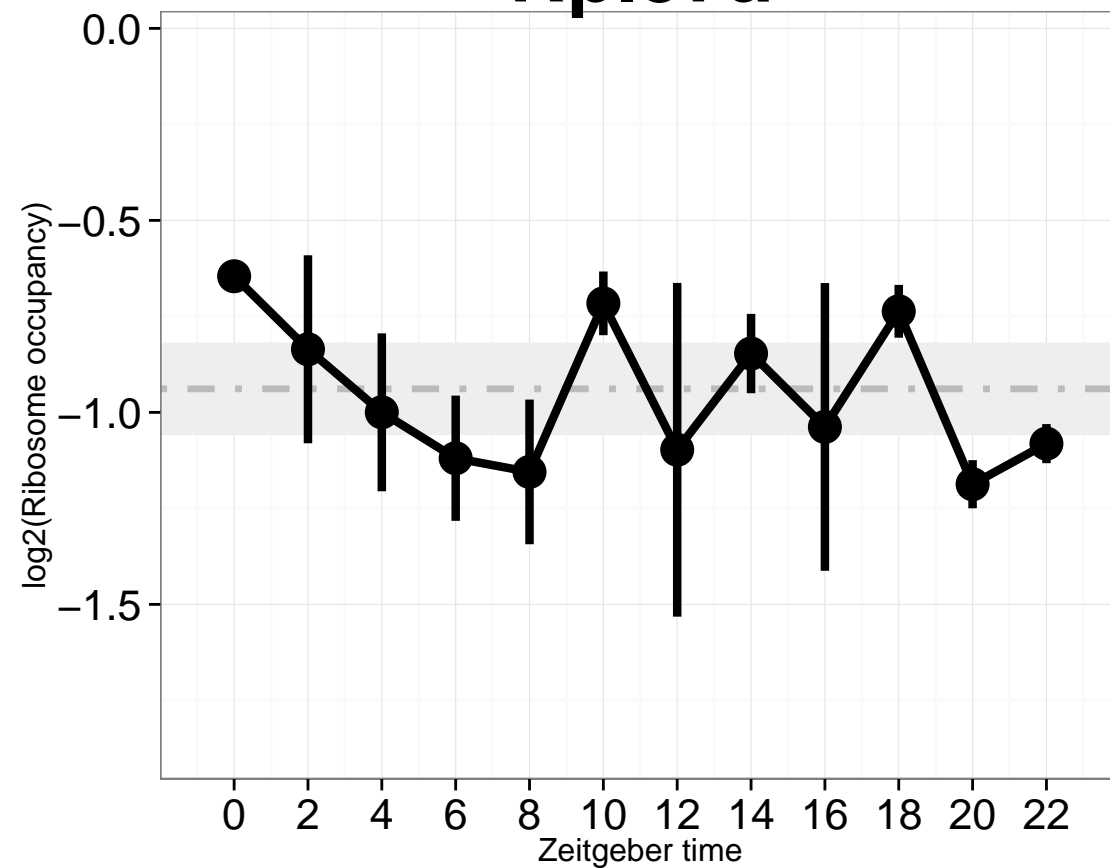

Supplement: Supplementary file 4519 [file 1]

# Masp1

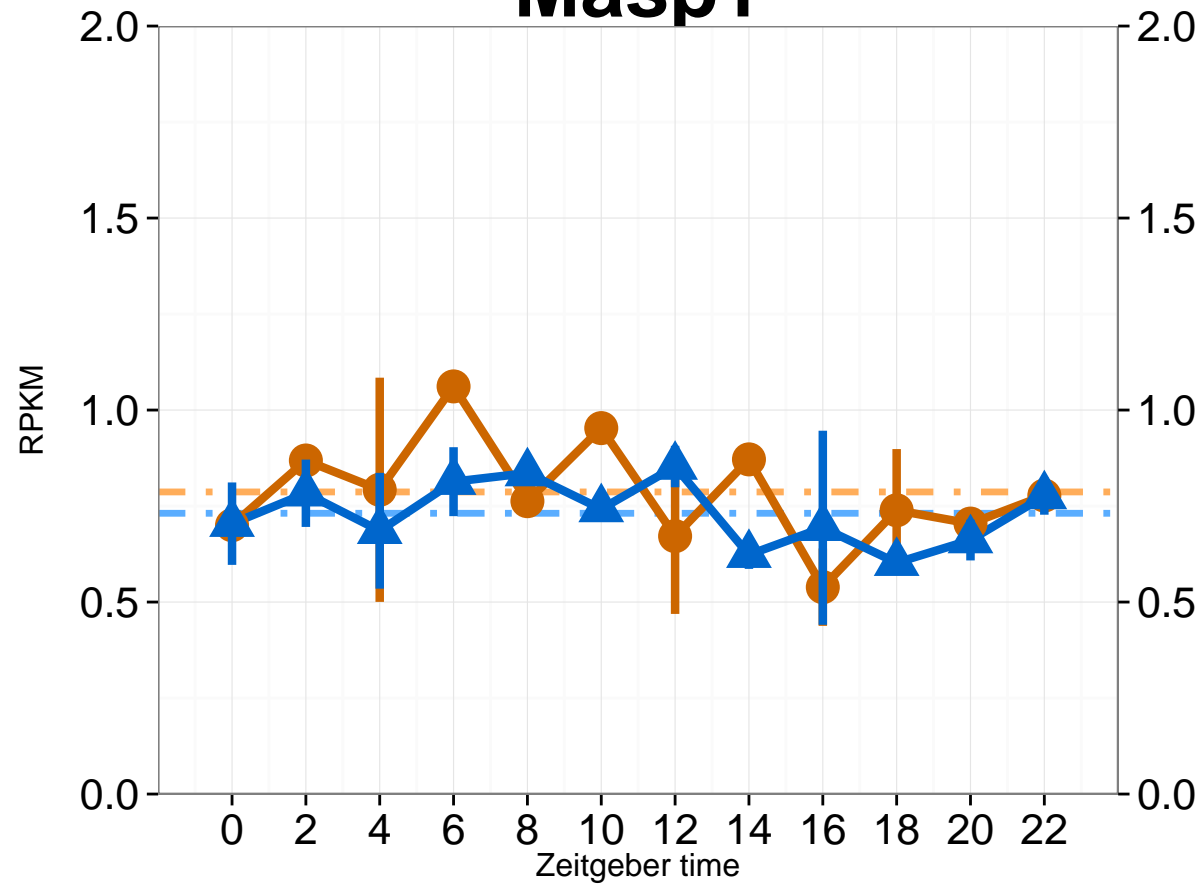

# Masp1

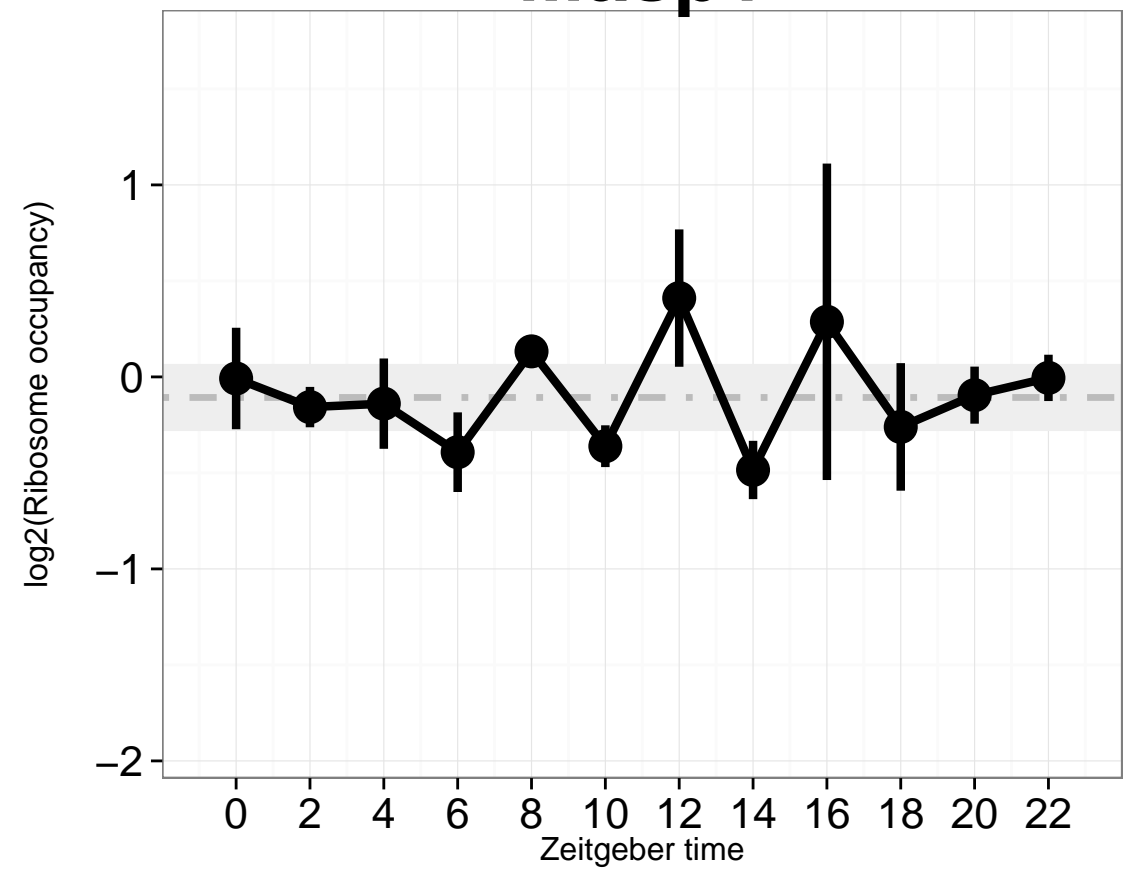

Supplement: Supplementary file 4520 [file 1]
