# Supplementary material (part 46 of 133)
Source: publisher figshare collection journal article supplement (https://springernature.figshare.com/articles/dataset/_/4903193)

## Smad1

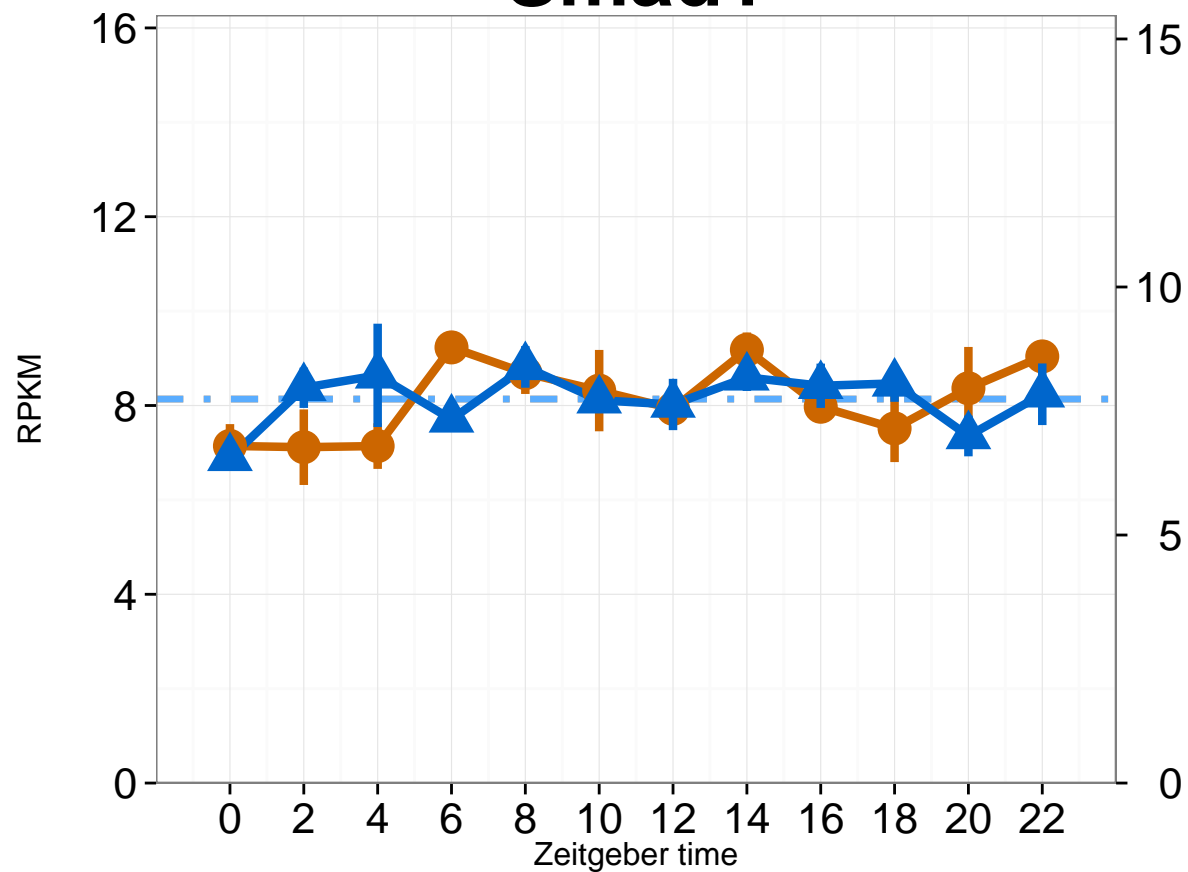

## Smad1

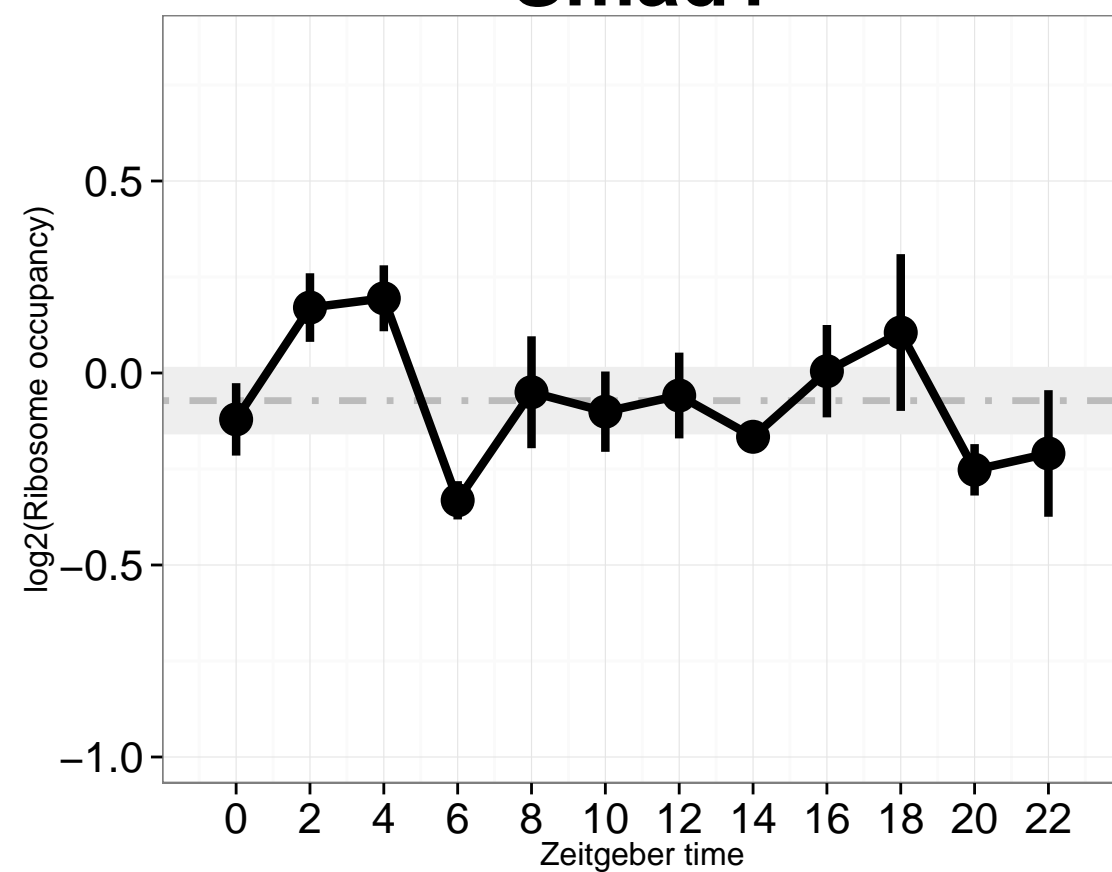

Supplement: Supplementary file 4521 [file 1]

# Plekha1

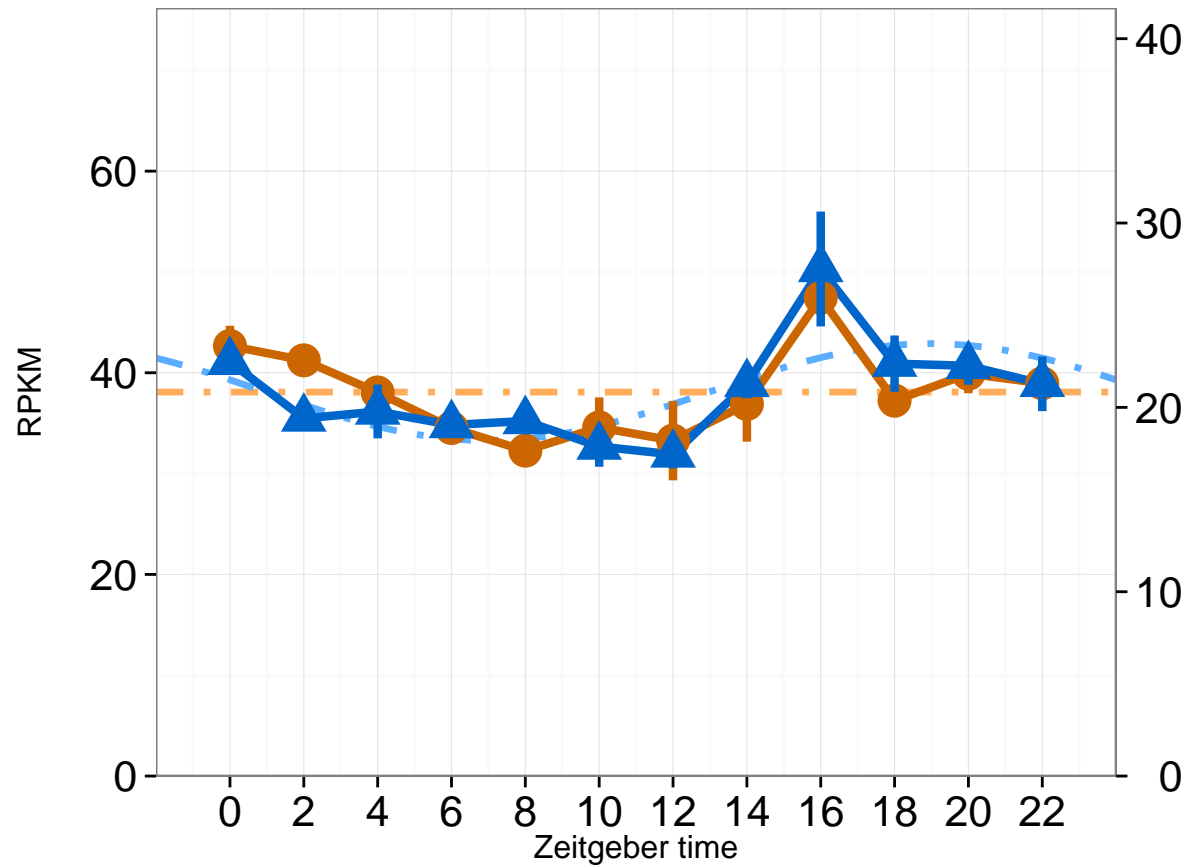

# Plekha1

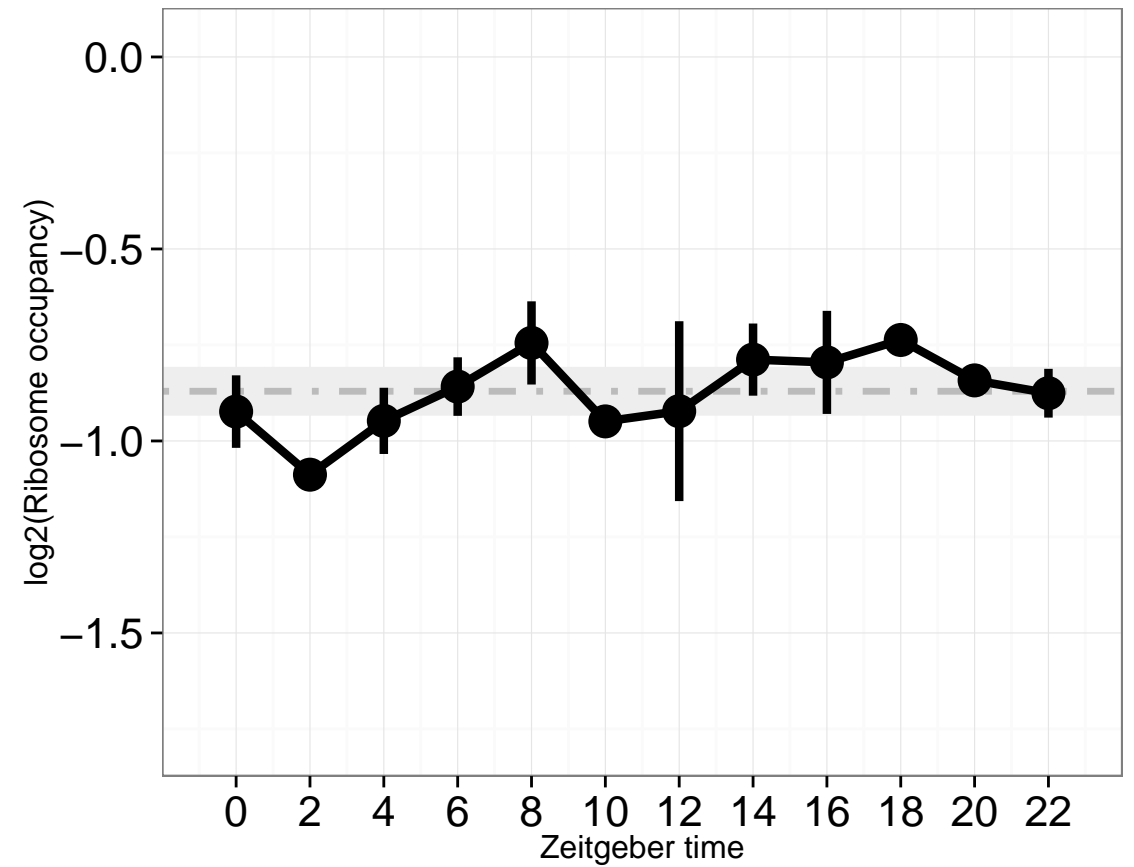

Supplement: Supplementary file 4522 [file 1]

## Rsf1

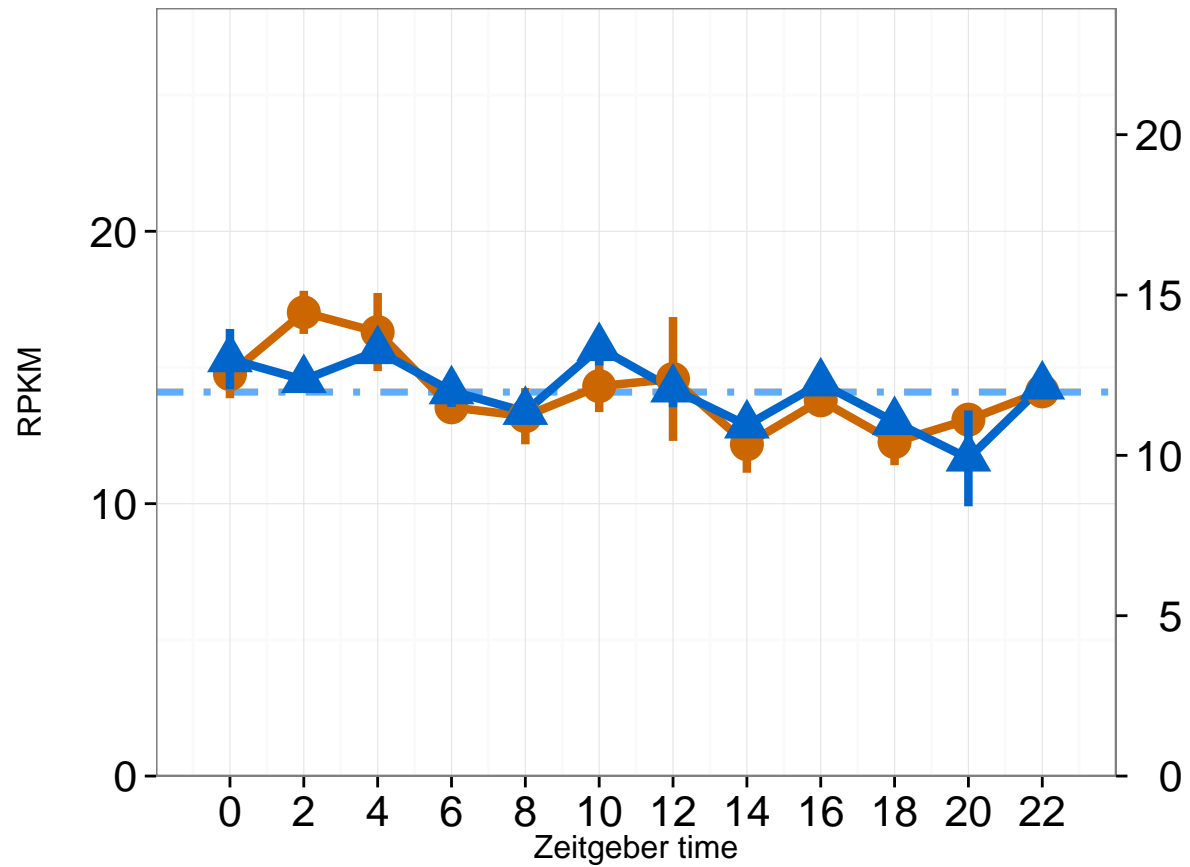

## Rsf1

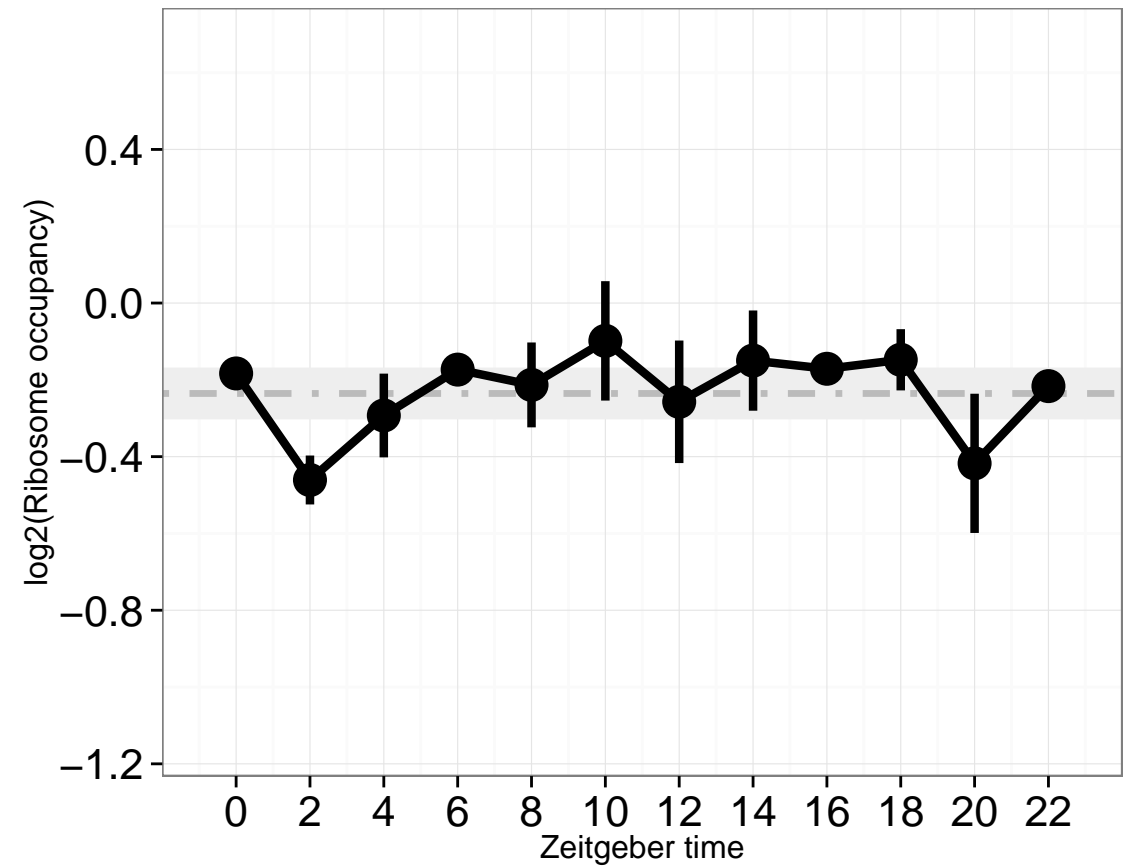

Supplement: Supplementary file 4523 [file 1]

## Gzf1

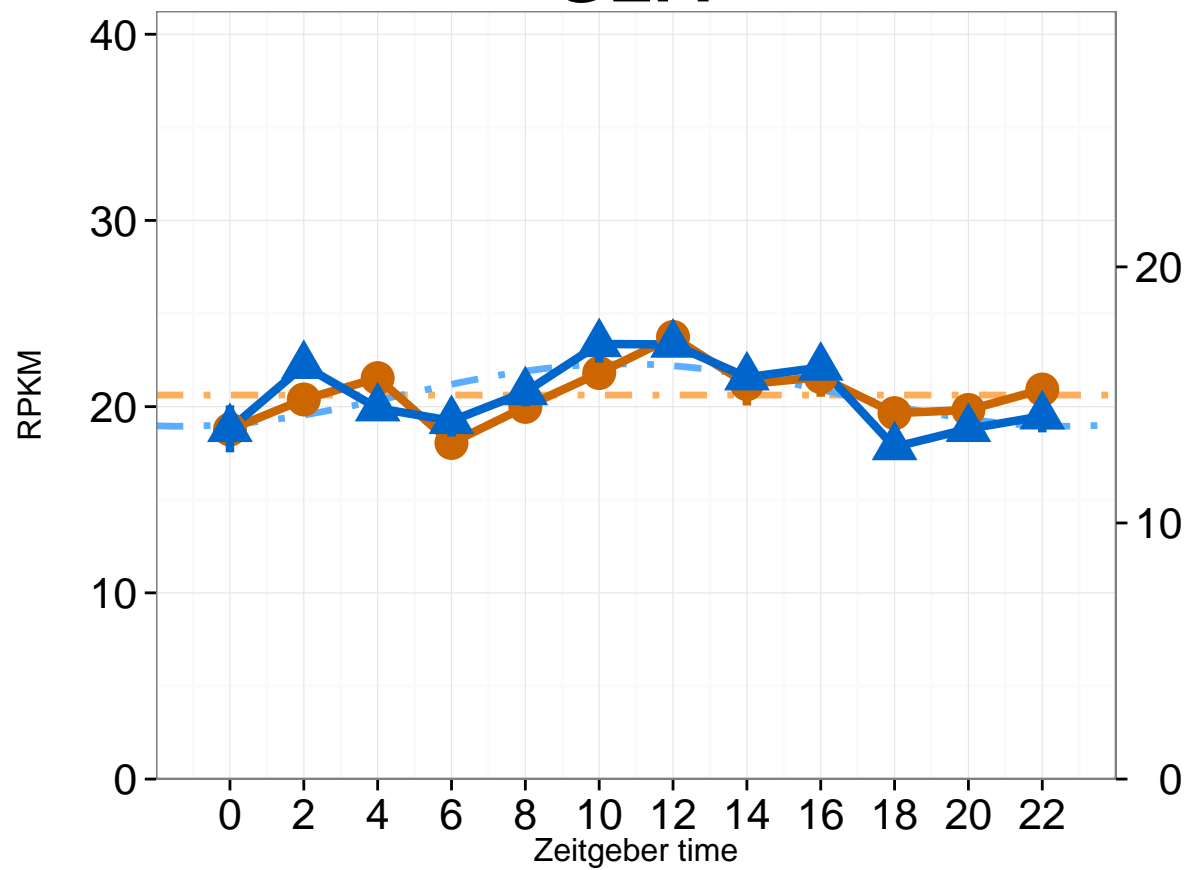

## Gzf1

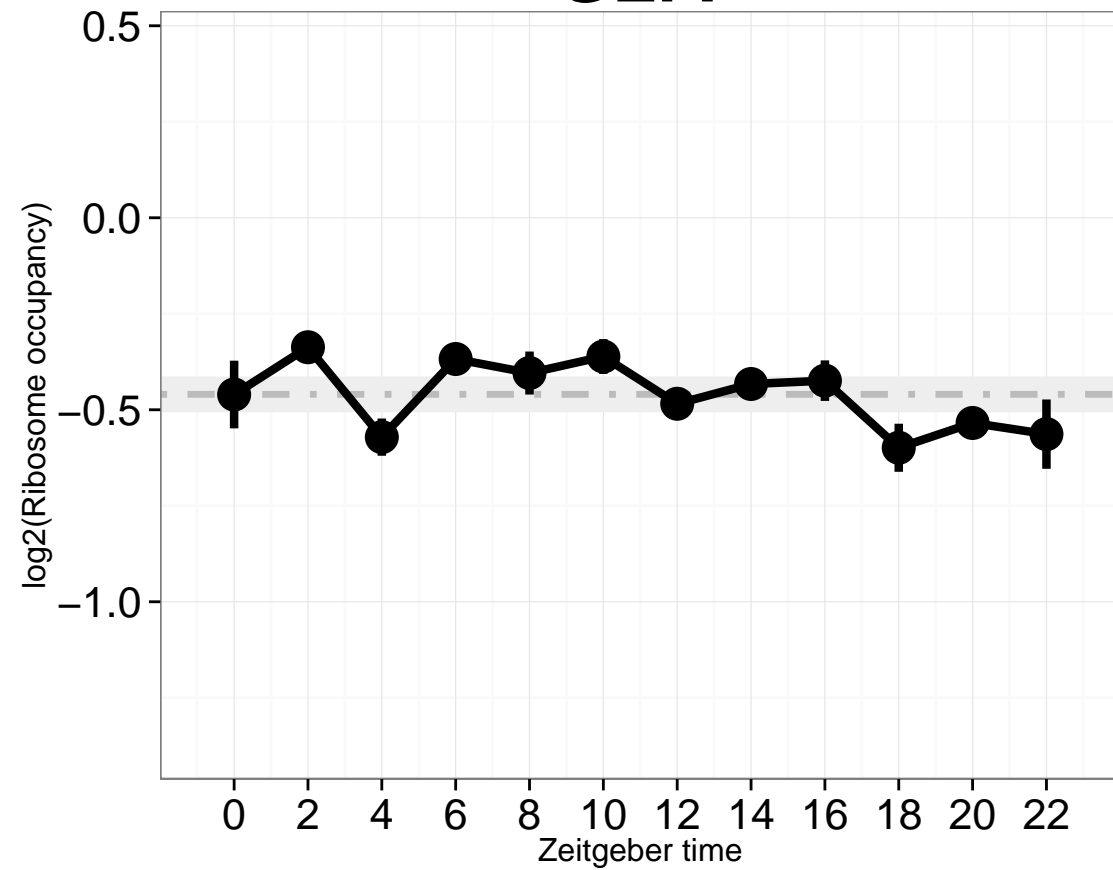

Supplement: Supplementary file 4524 [file 1]

## Sp140

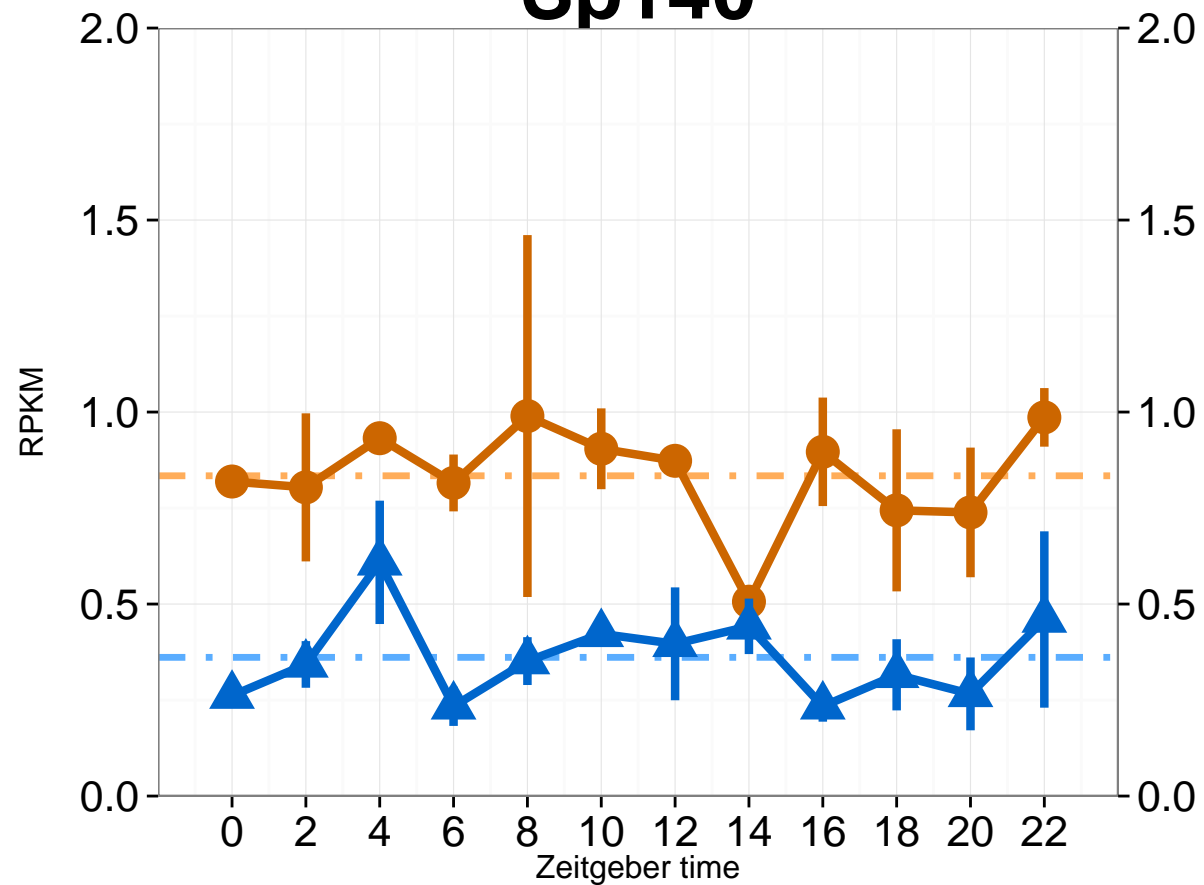

## Sp140

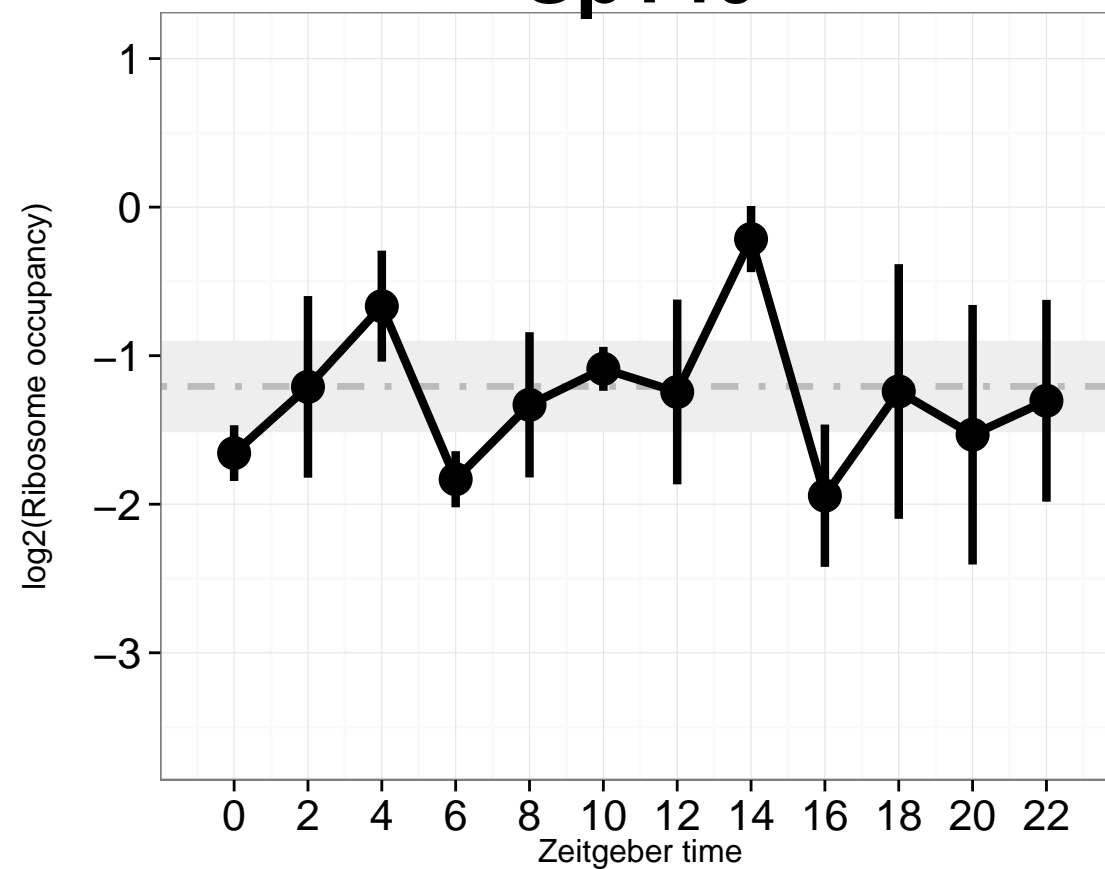

Supplement: Supplementary file 4525 [file 1]

# Zfp180

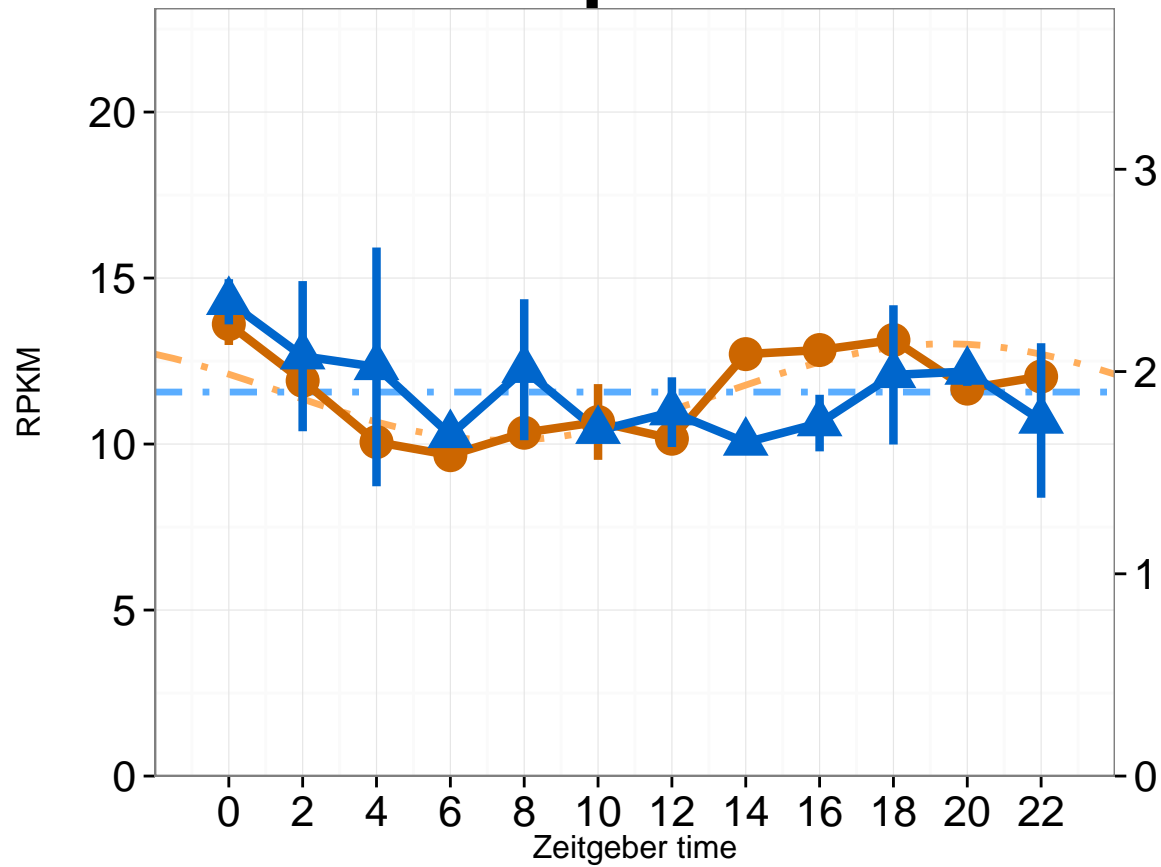

# Zfp180

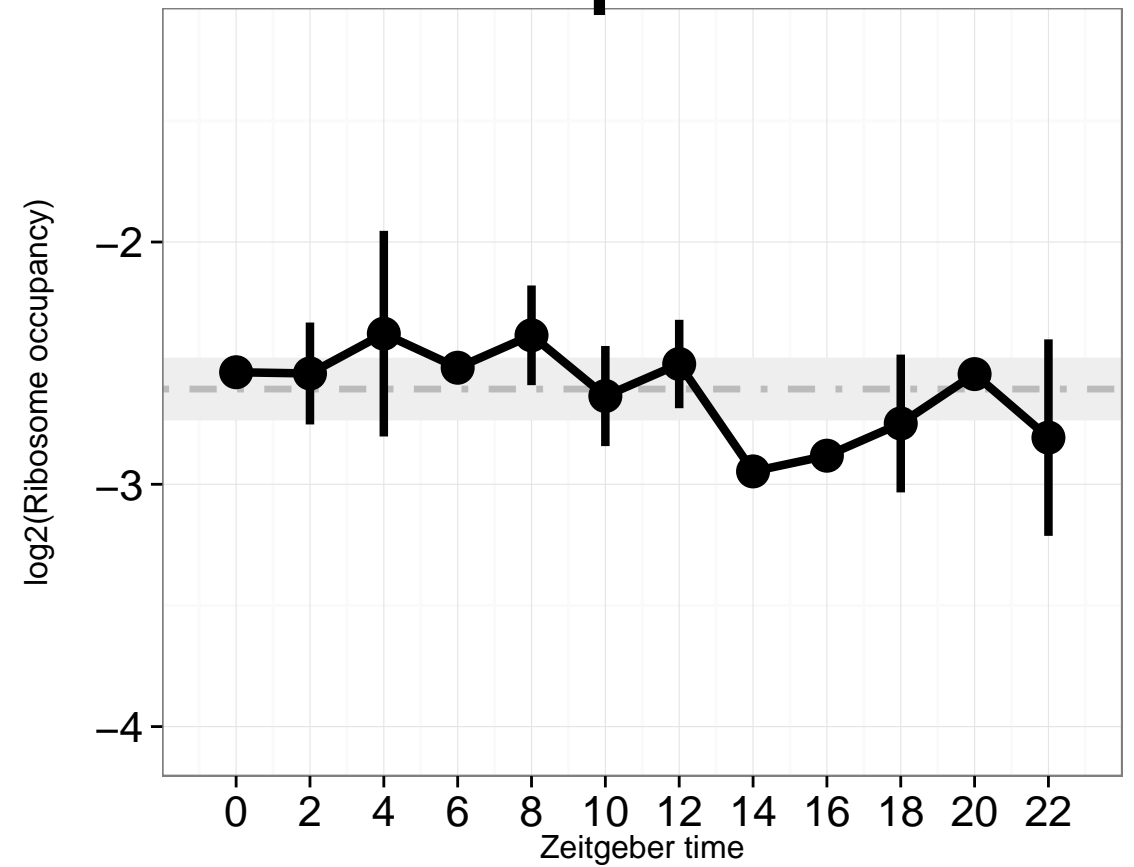

Supplement: Supplementary file 4526 [file 1]

## Plk1s1

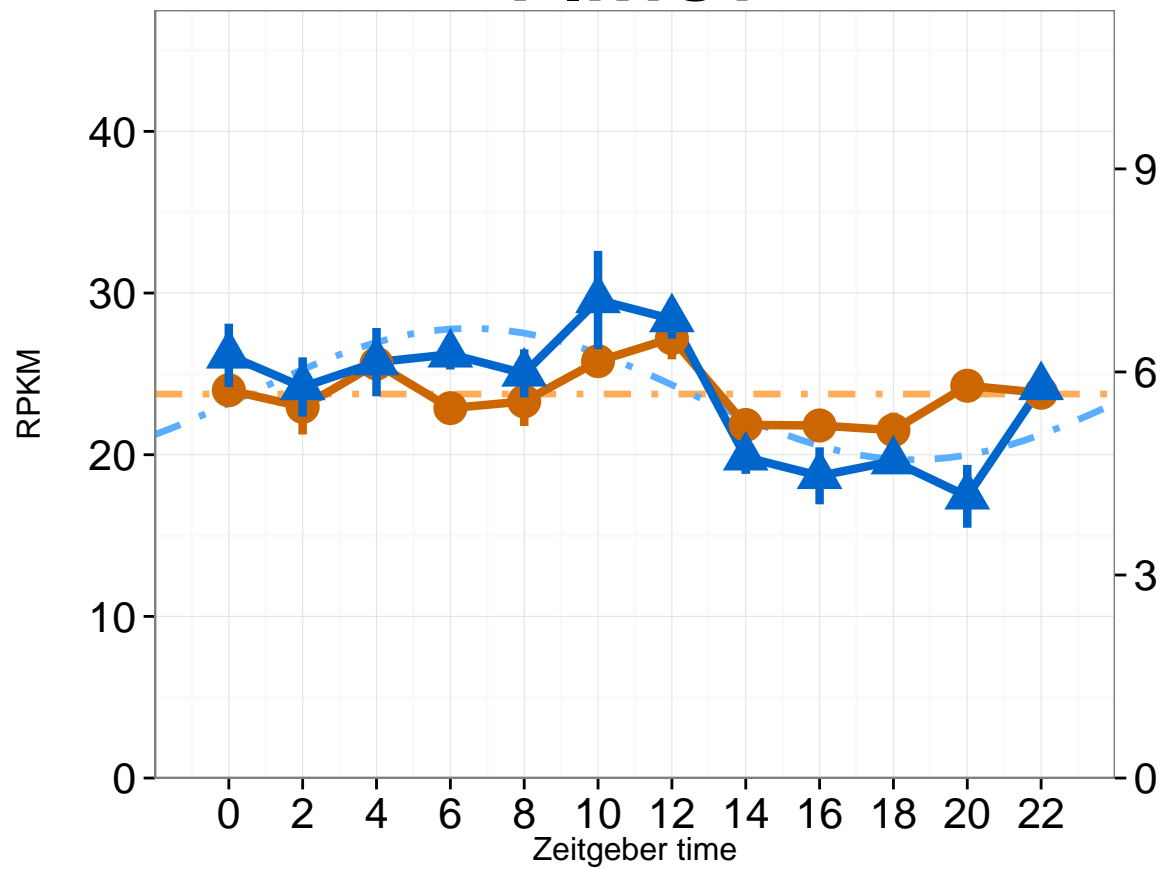

## Plk1s1

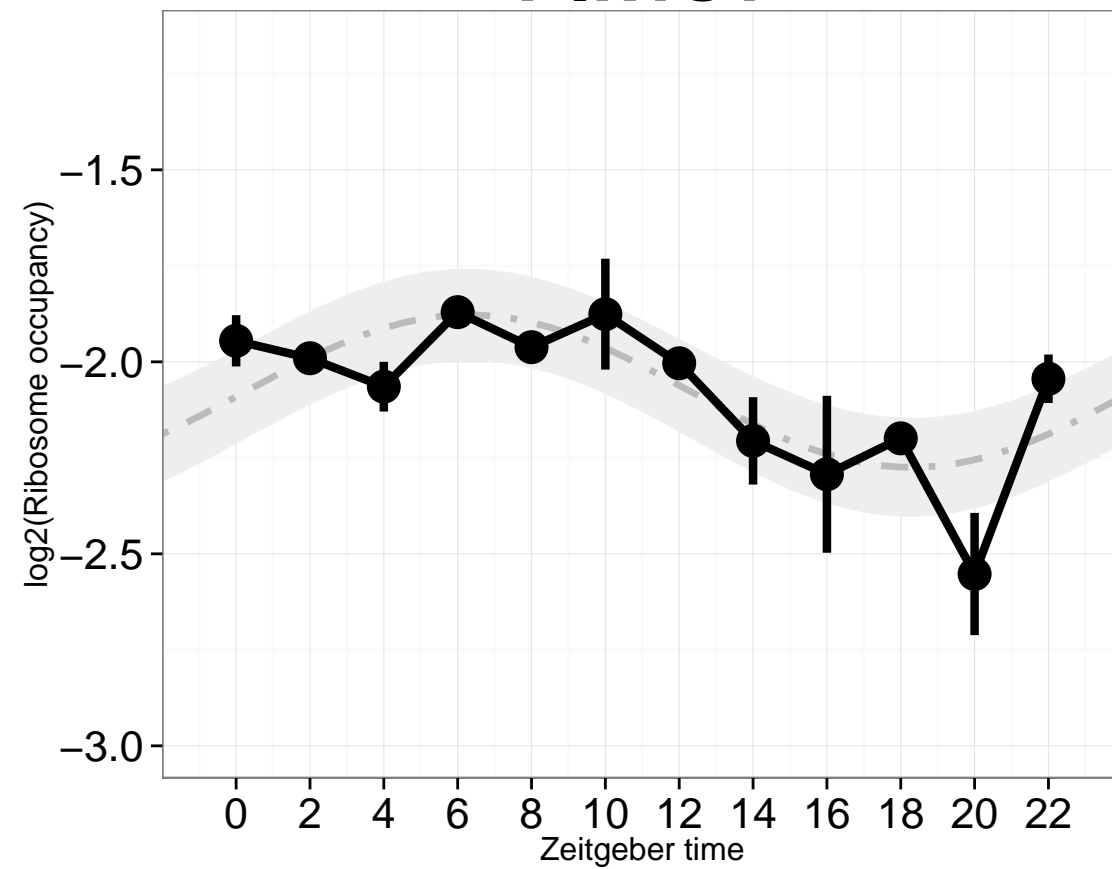

Supplement: Supplementary file 4527 [file 1]

# Zrsr1

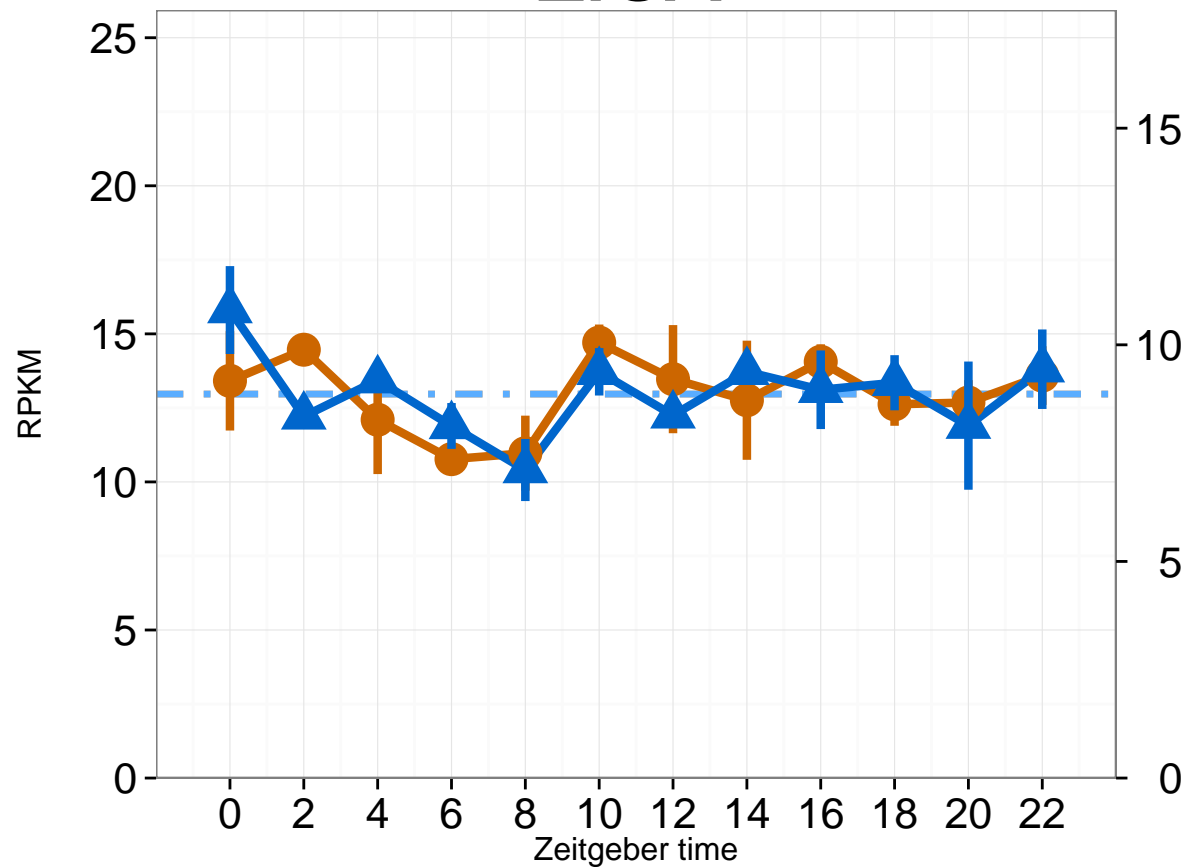

# Zrsr1

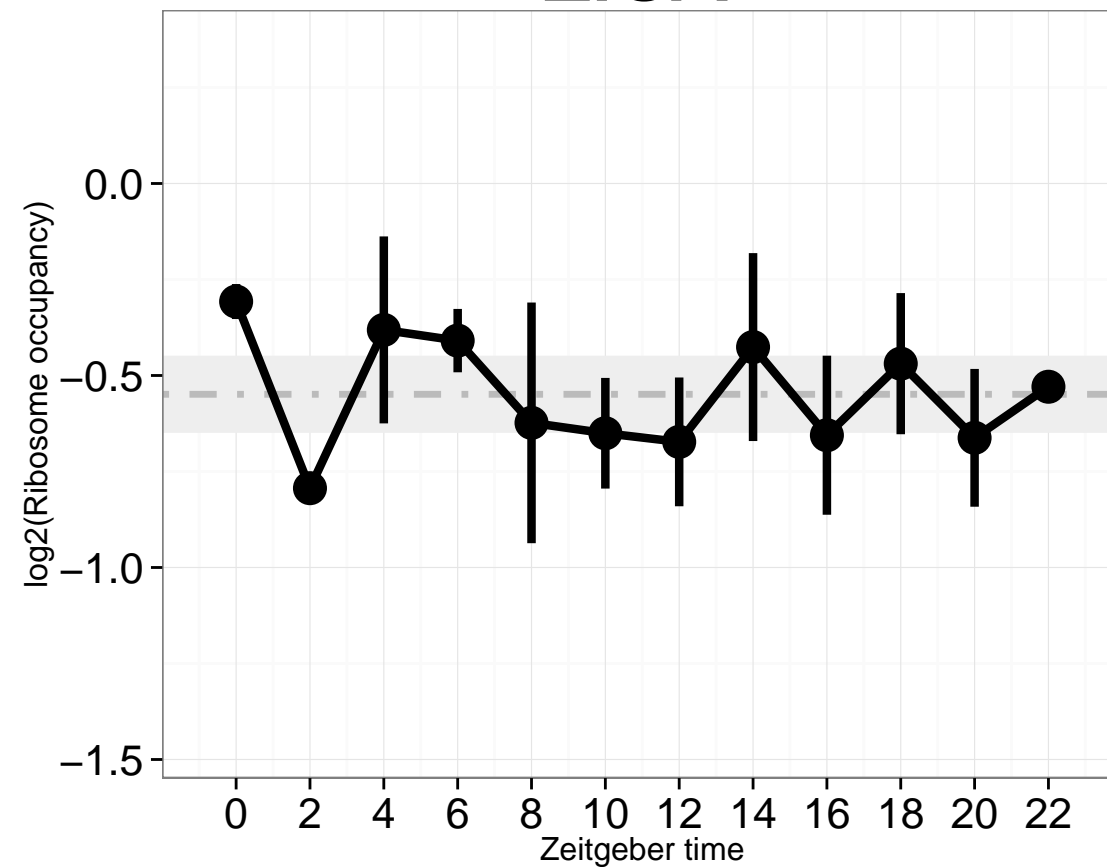

Supplement: Supplementary file 4528 [file 1]

# Gab3

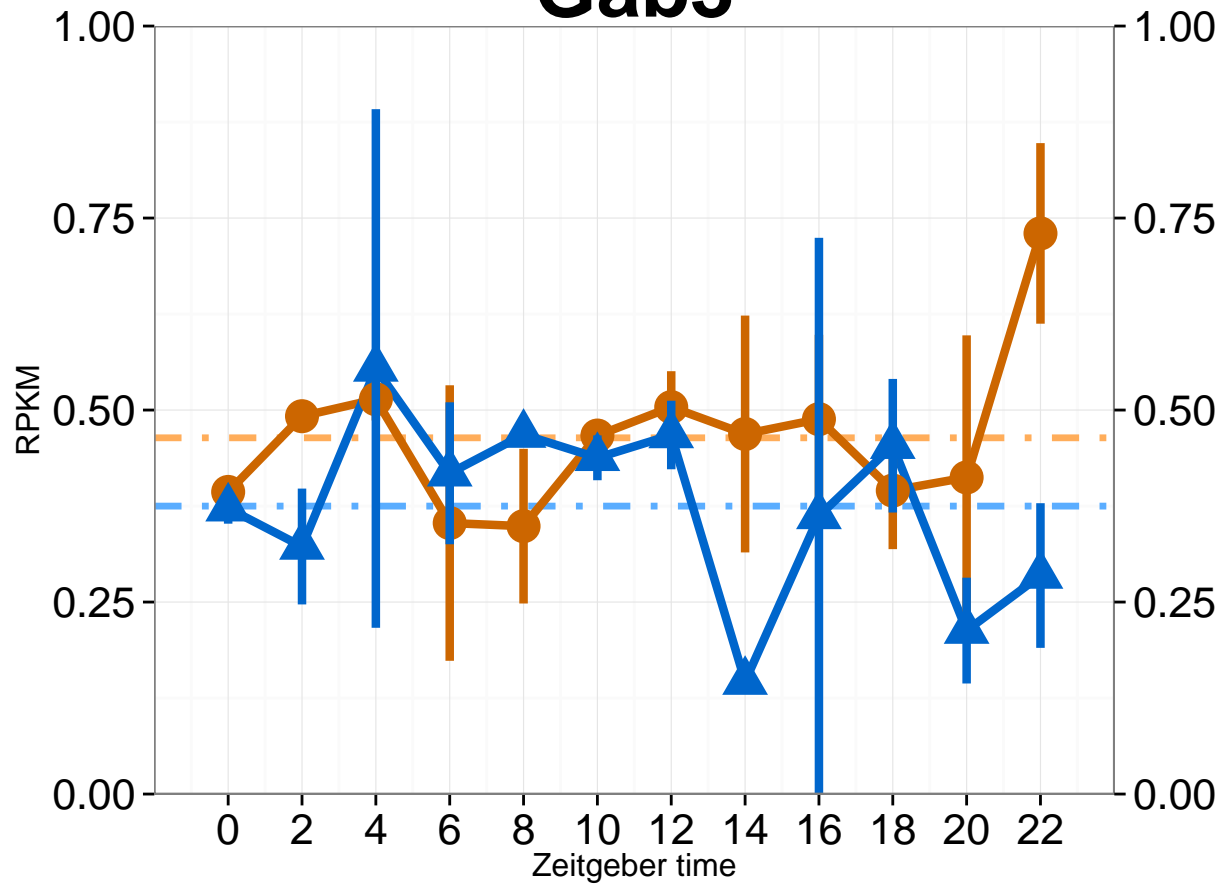

# Gab3

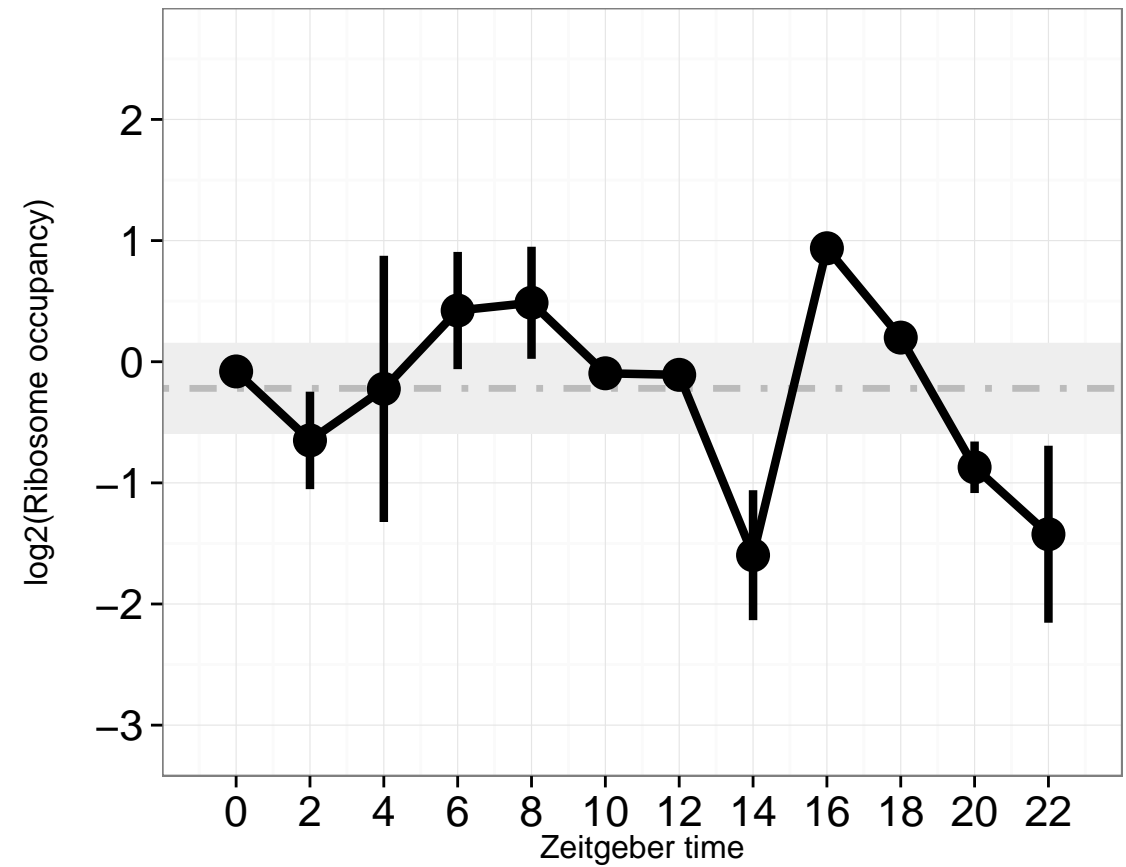

Supplement: Supplementary file 4529 [file 1]

## Bivm

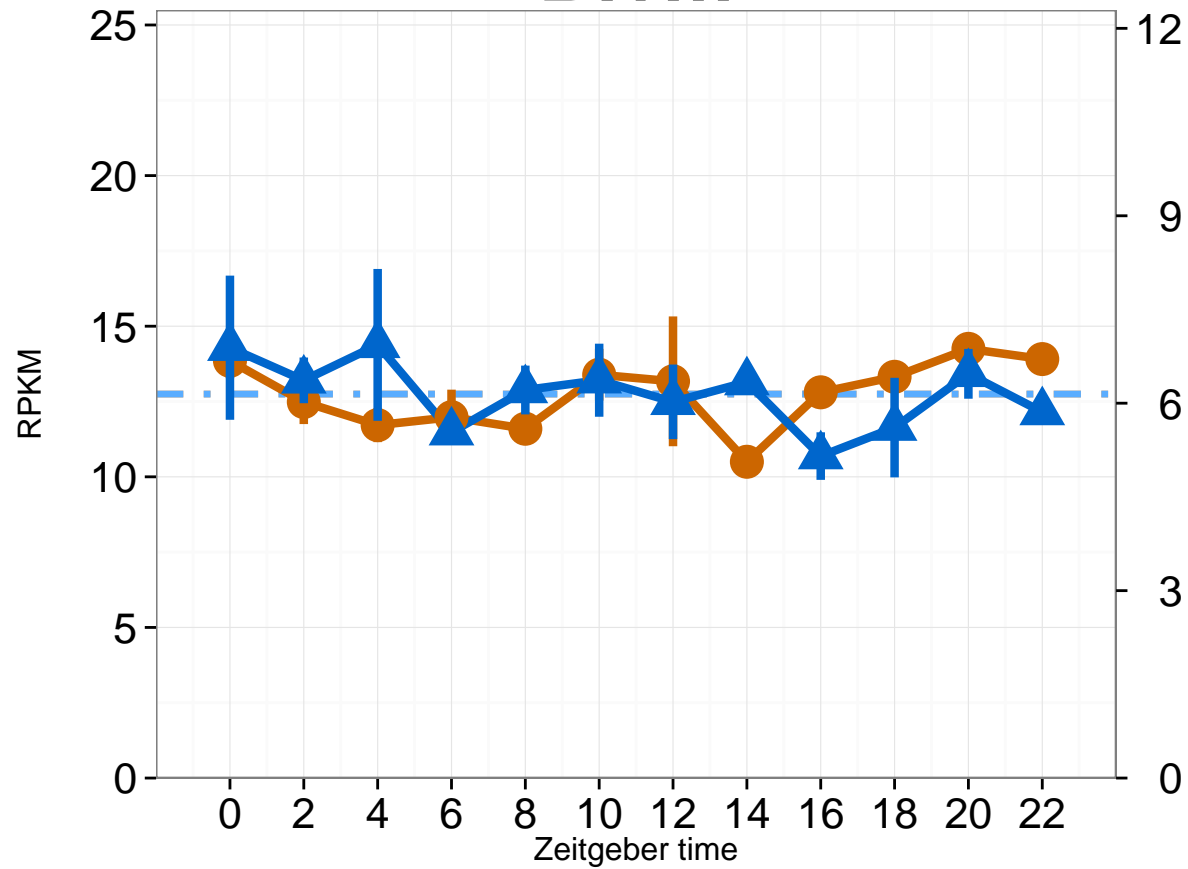

## Bivm

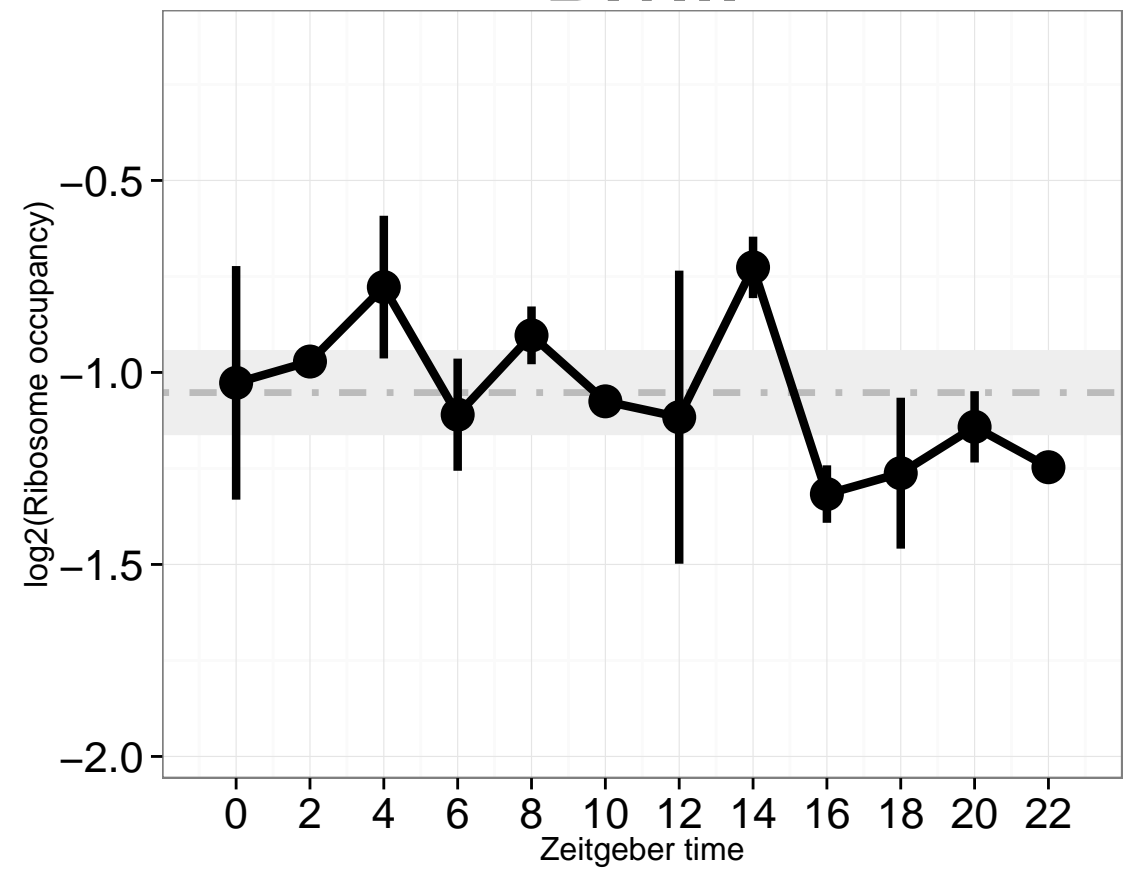

Supplement: Supplementary file 4530 [file 1]

# Zfp868

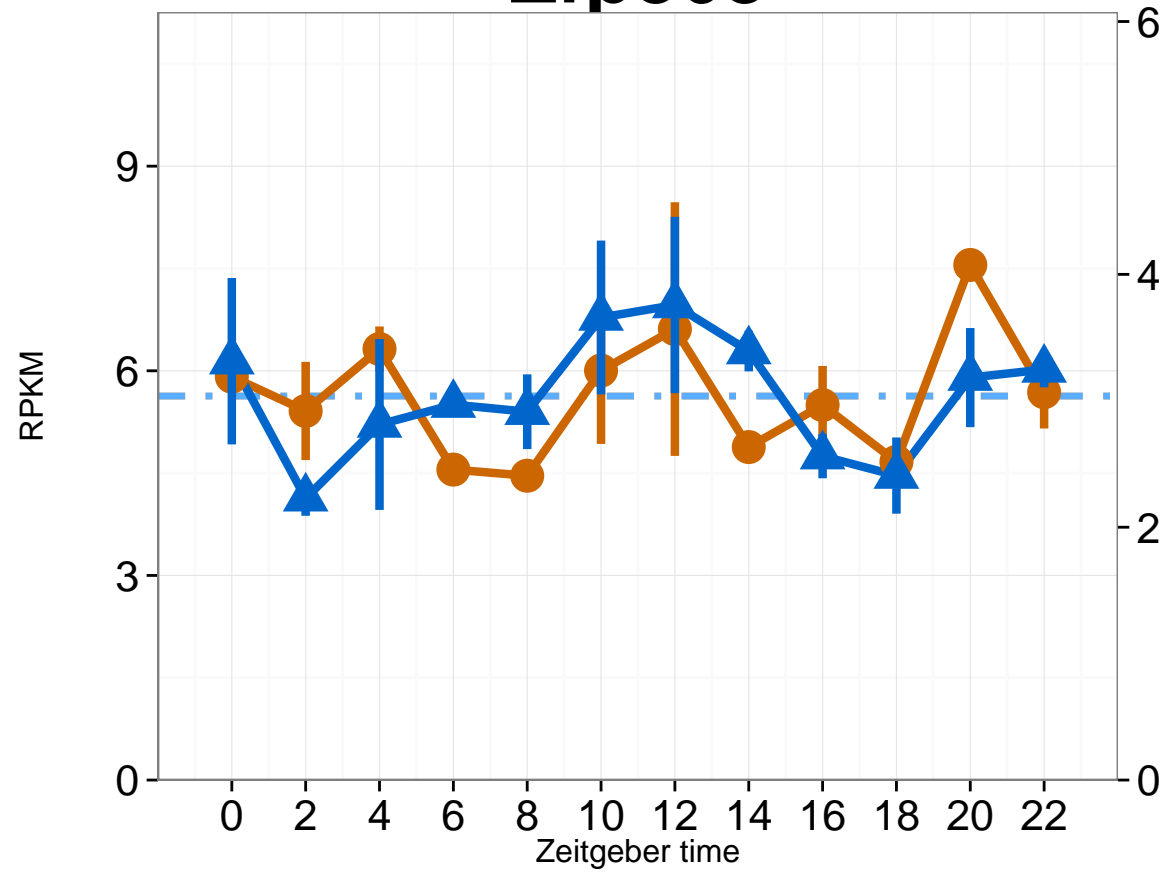

# Zfp868

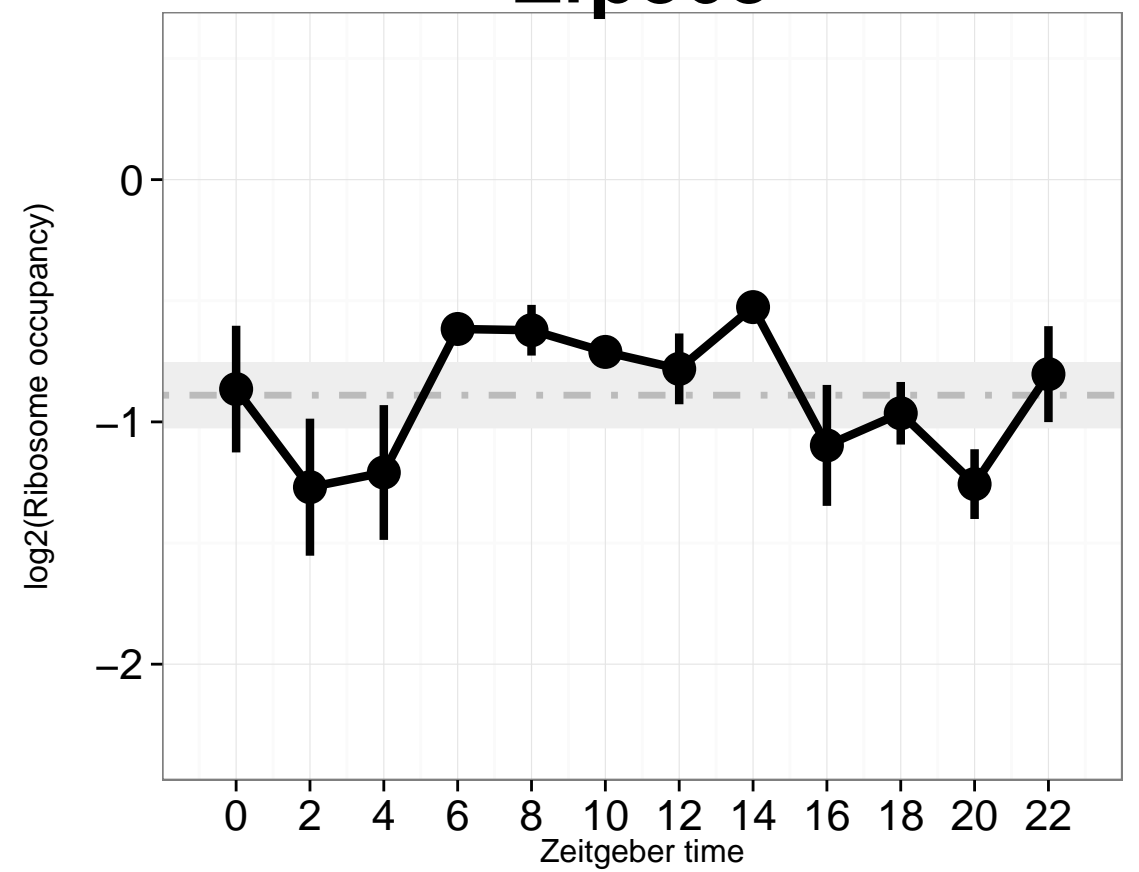

Supplement: Supplementary file 4531 [file 1]

## Gdpd3

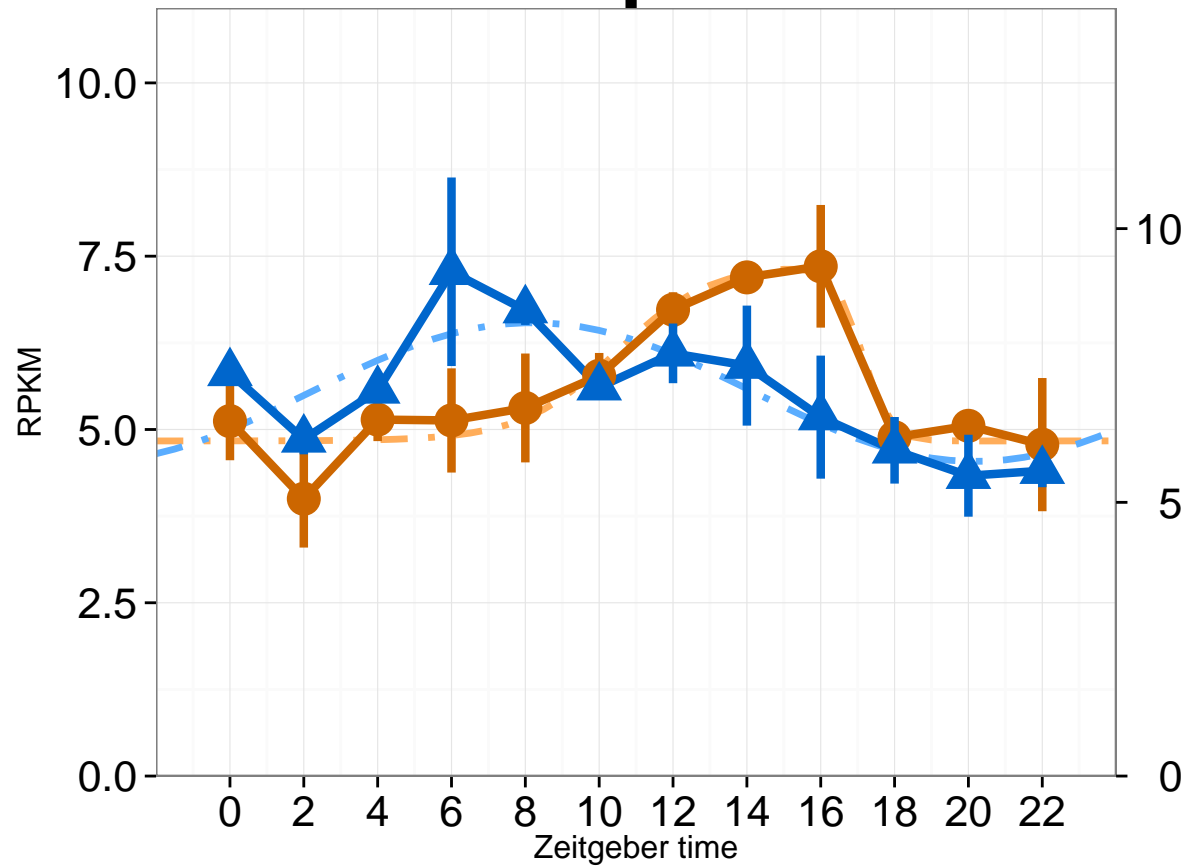

## Gdpd3

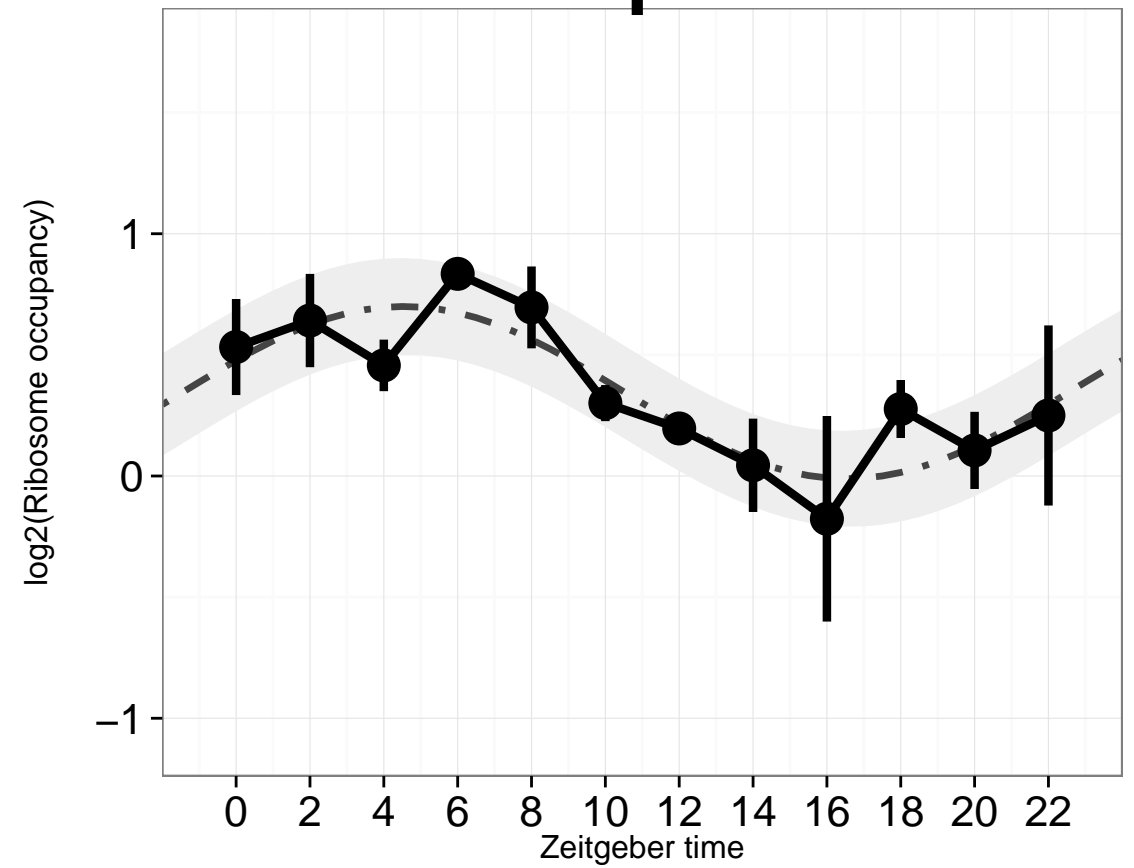

Supplement: Supplementary file 4532 [file 1]

# Stat5a

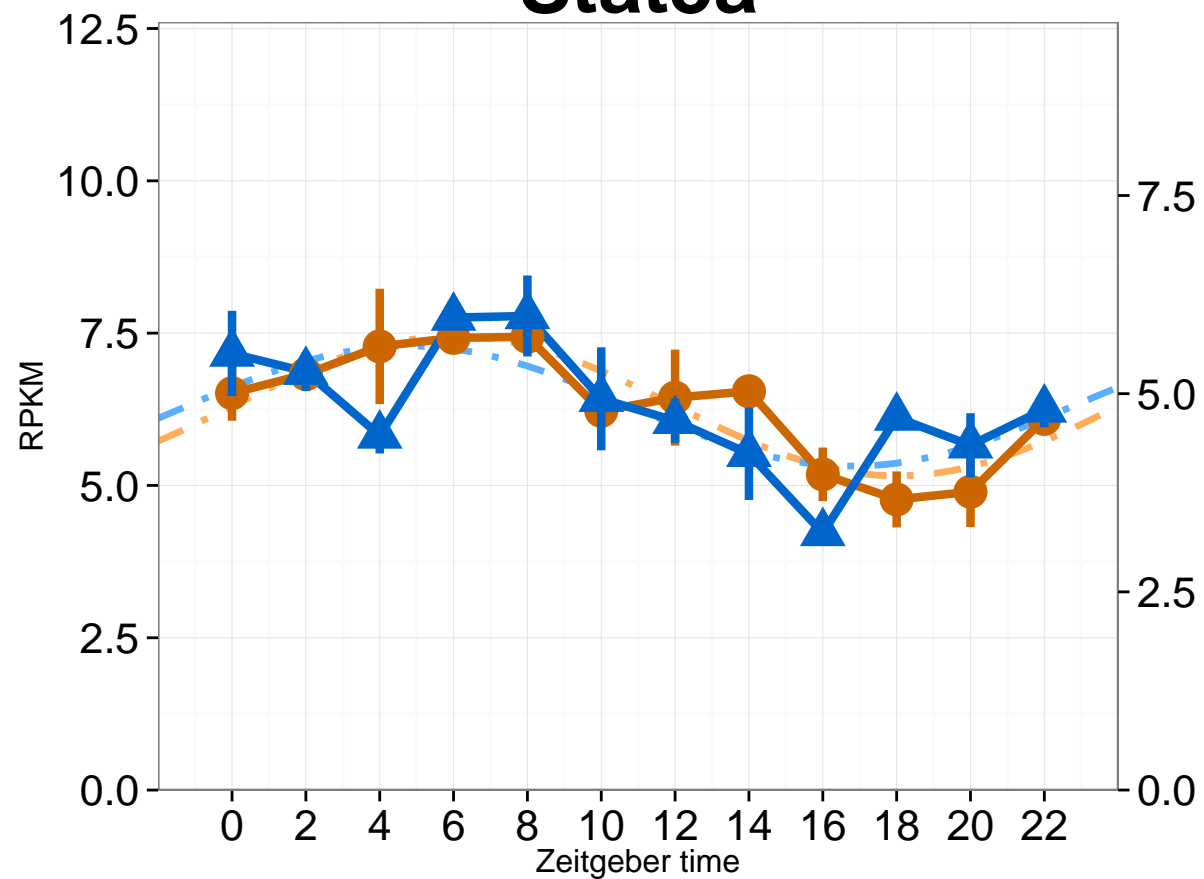

# Stat5a

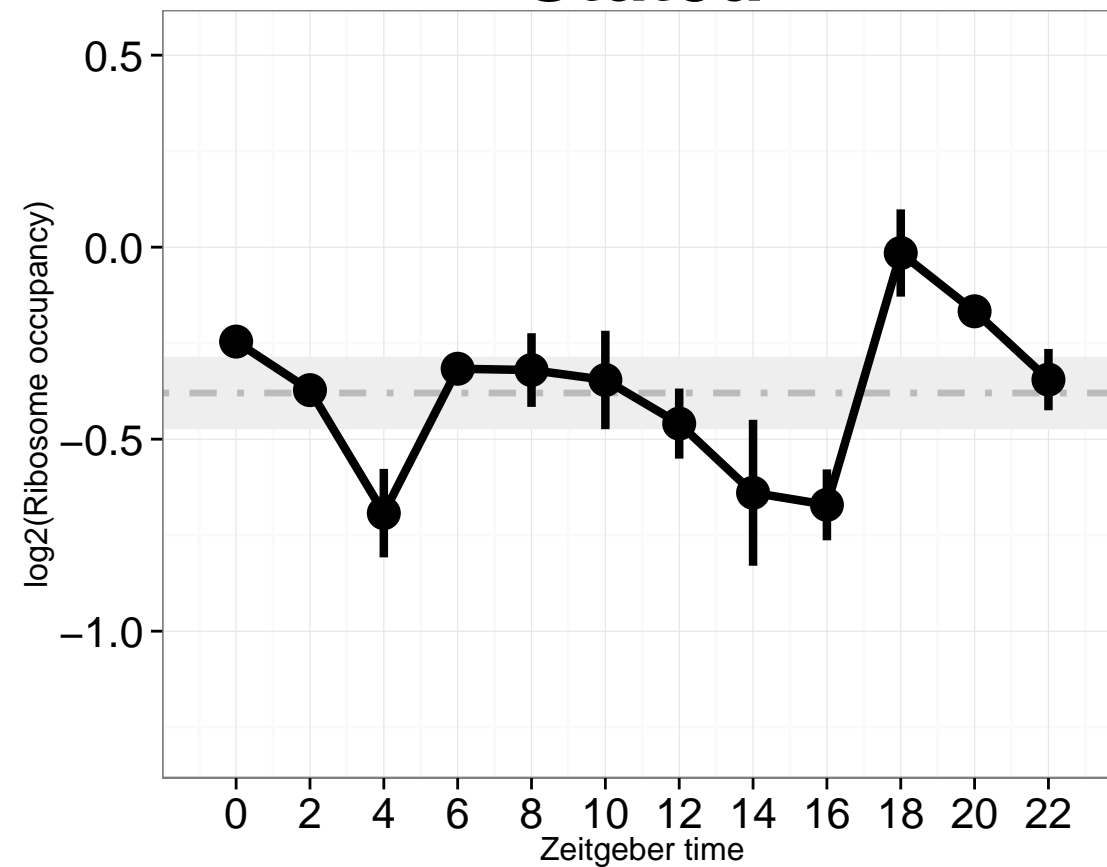

Supplement: Supplementary file 4533 [file 1]

## Kcnj2

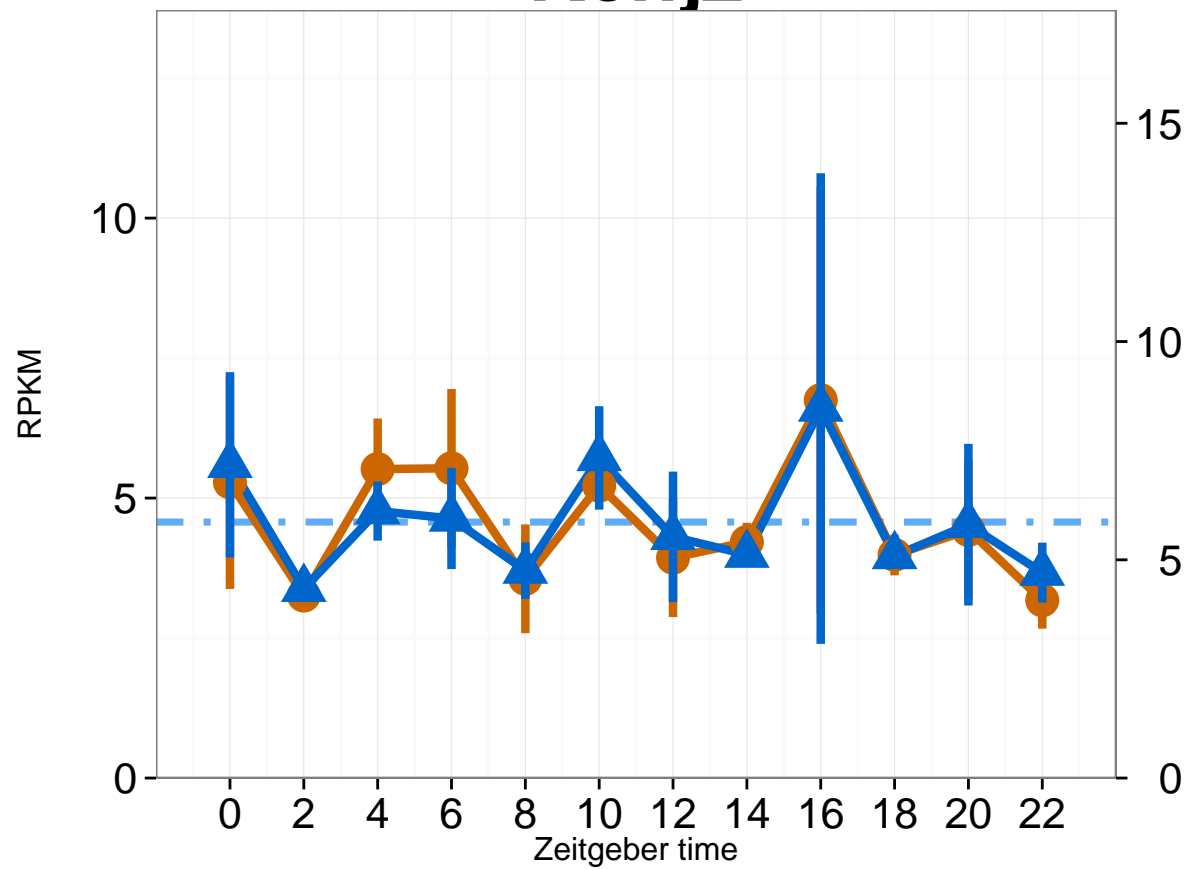

## Kcnj2

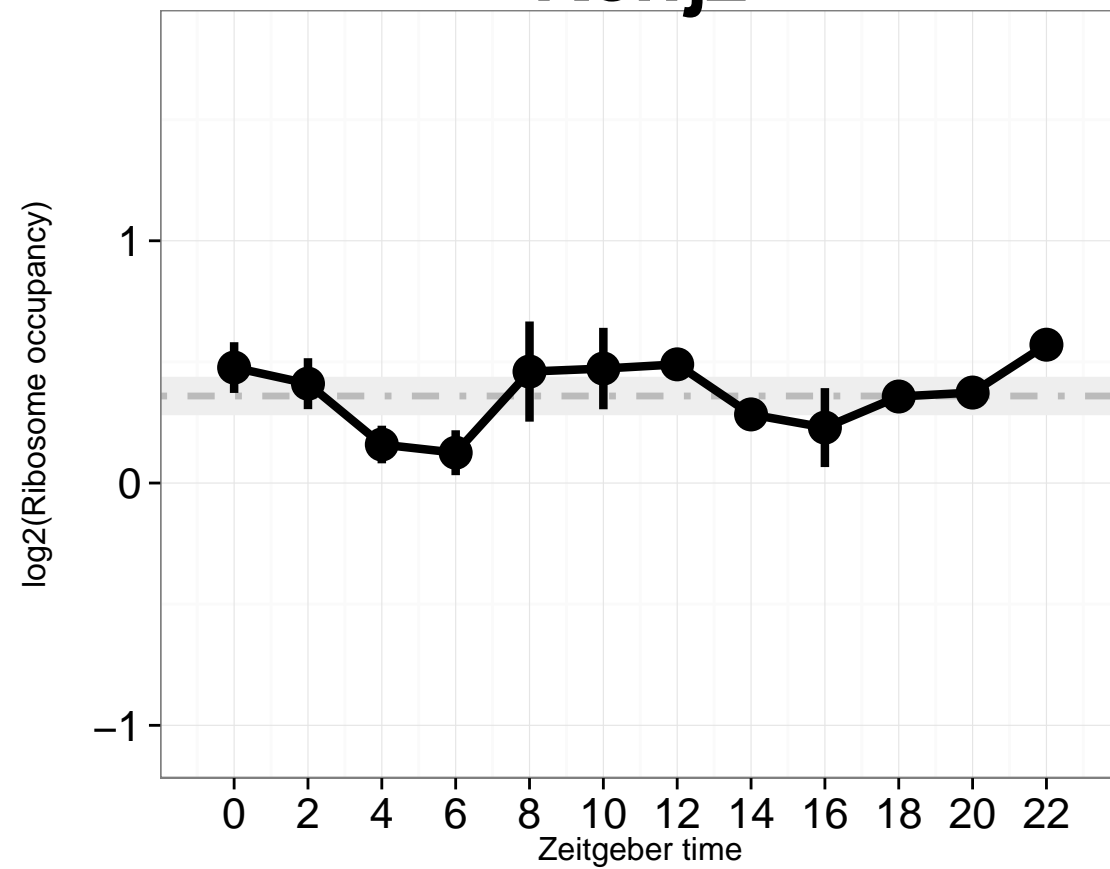

Supplement: Supplementary file 4534 [file 1]

## Nudt22

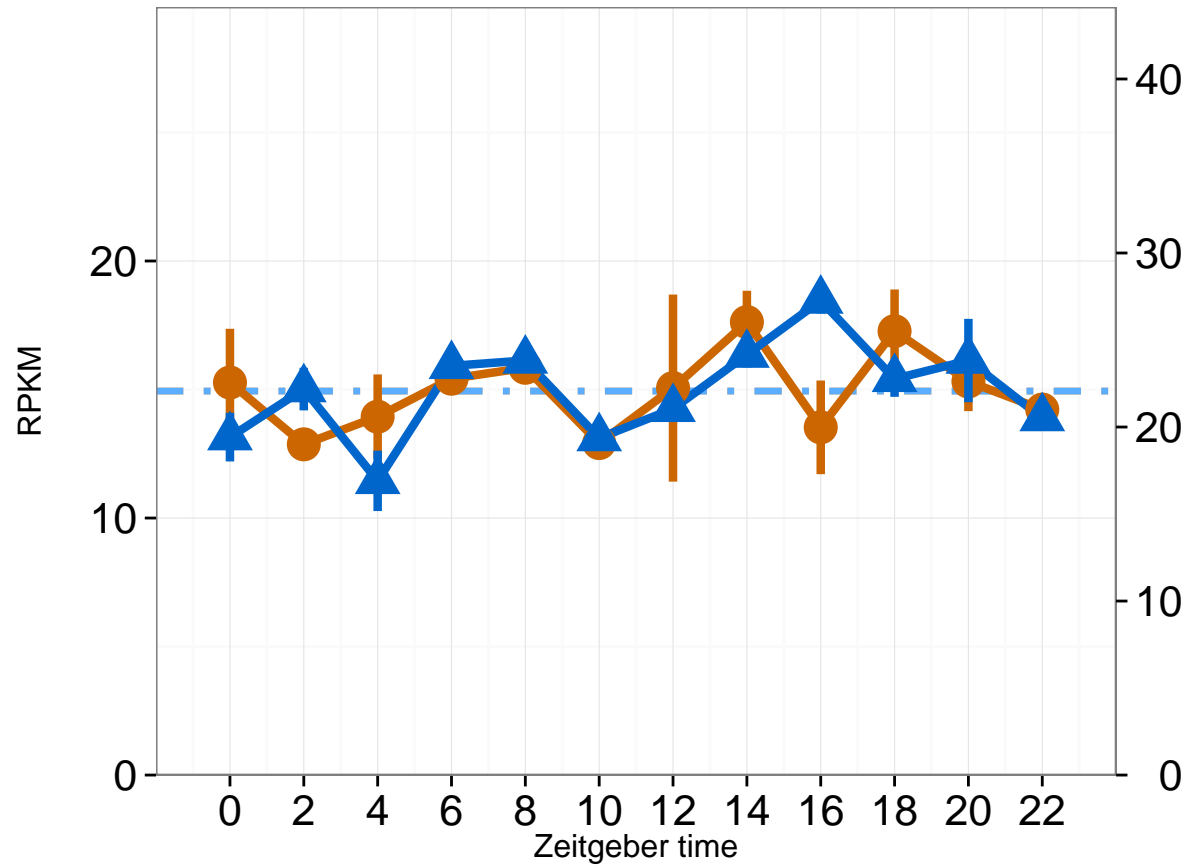

## Nudt22

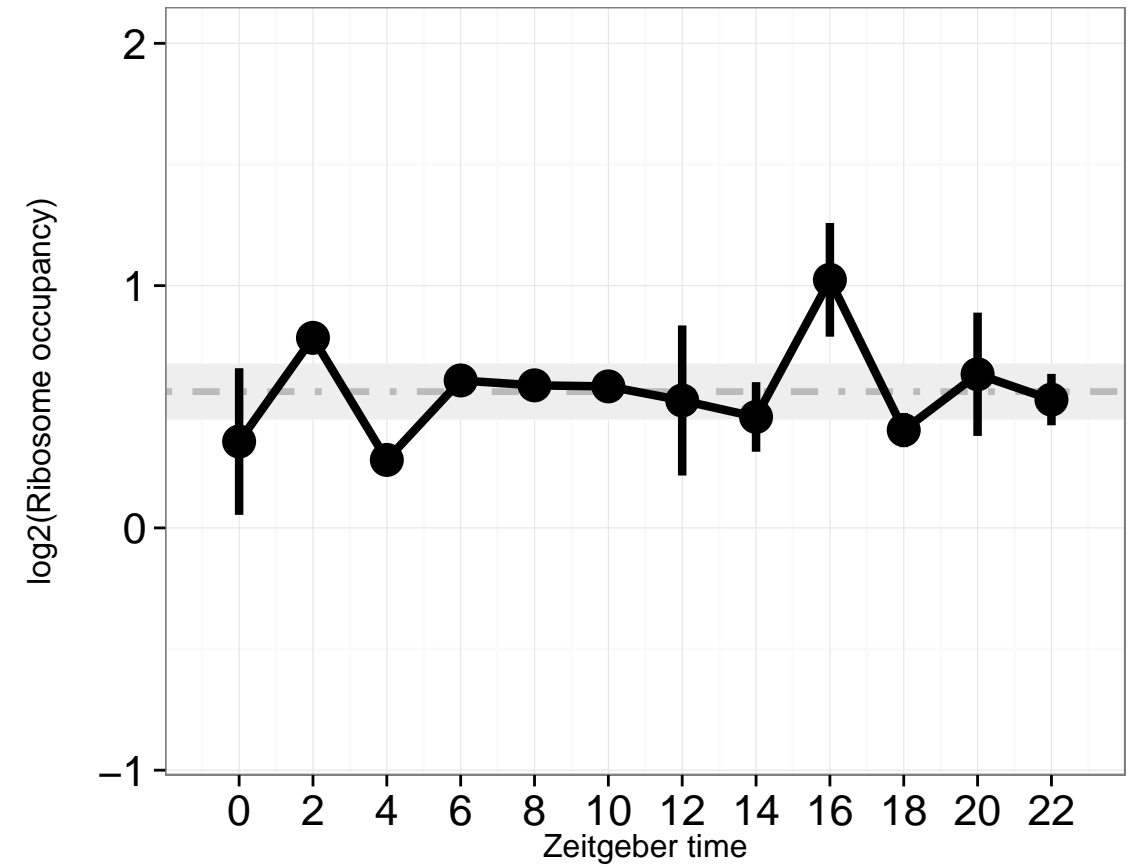

Supplement: Supplementary file 4535 [file 1]

## Nbr1

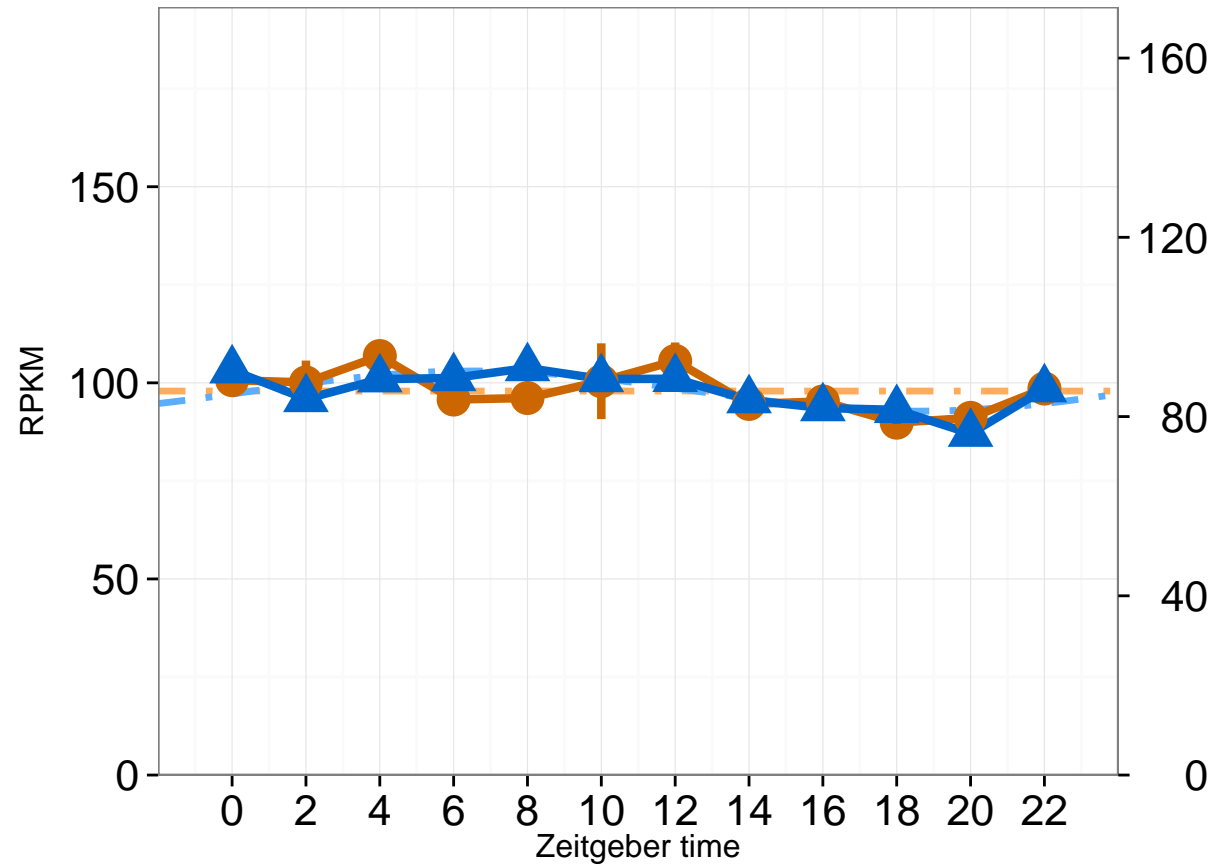

## Nbr1

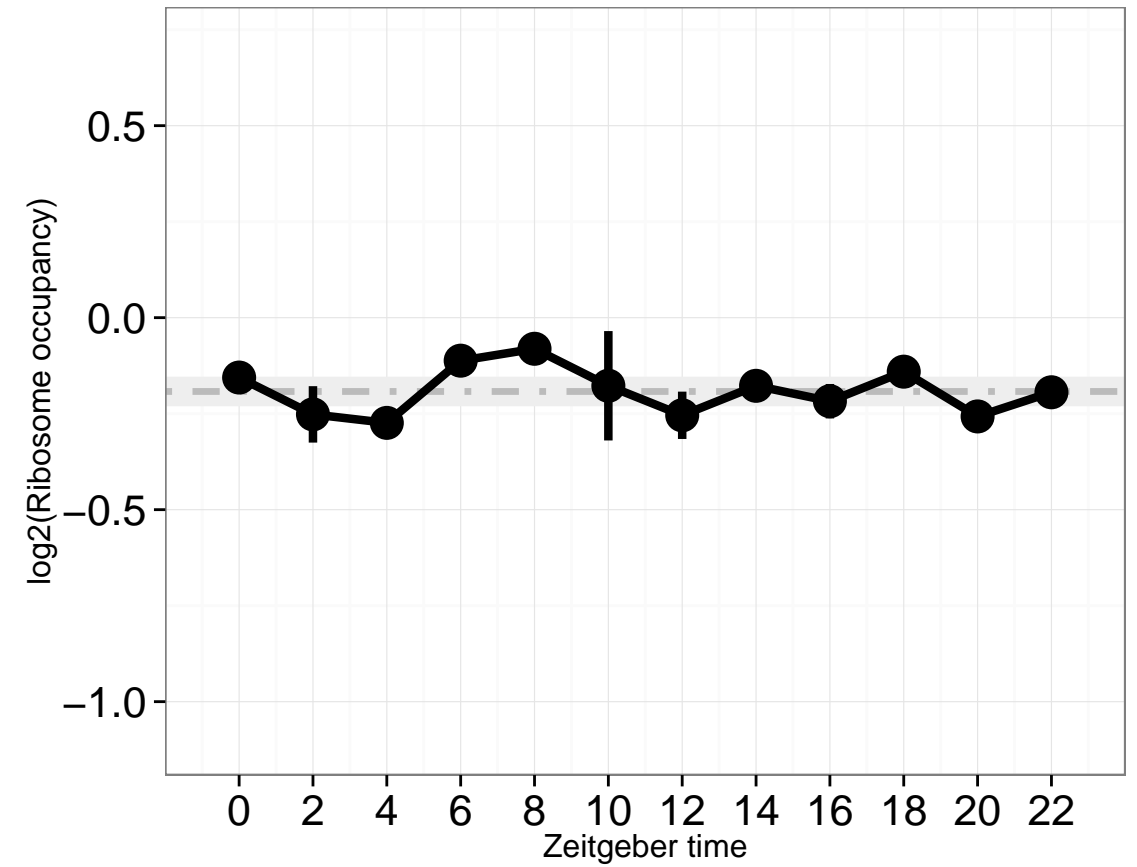

Supplement: Supplementary file 4536 [file 1]

# Hspbap1

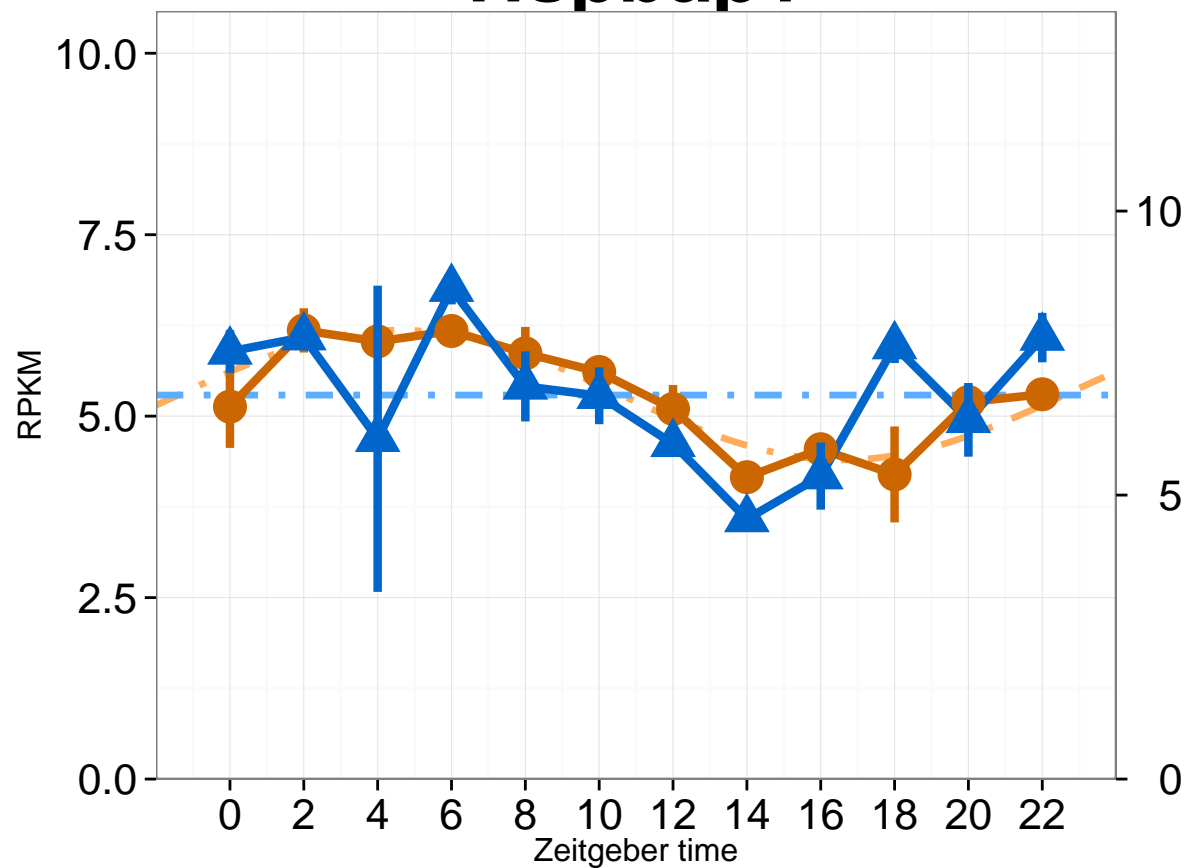

# Hspbap1

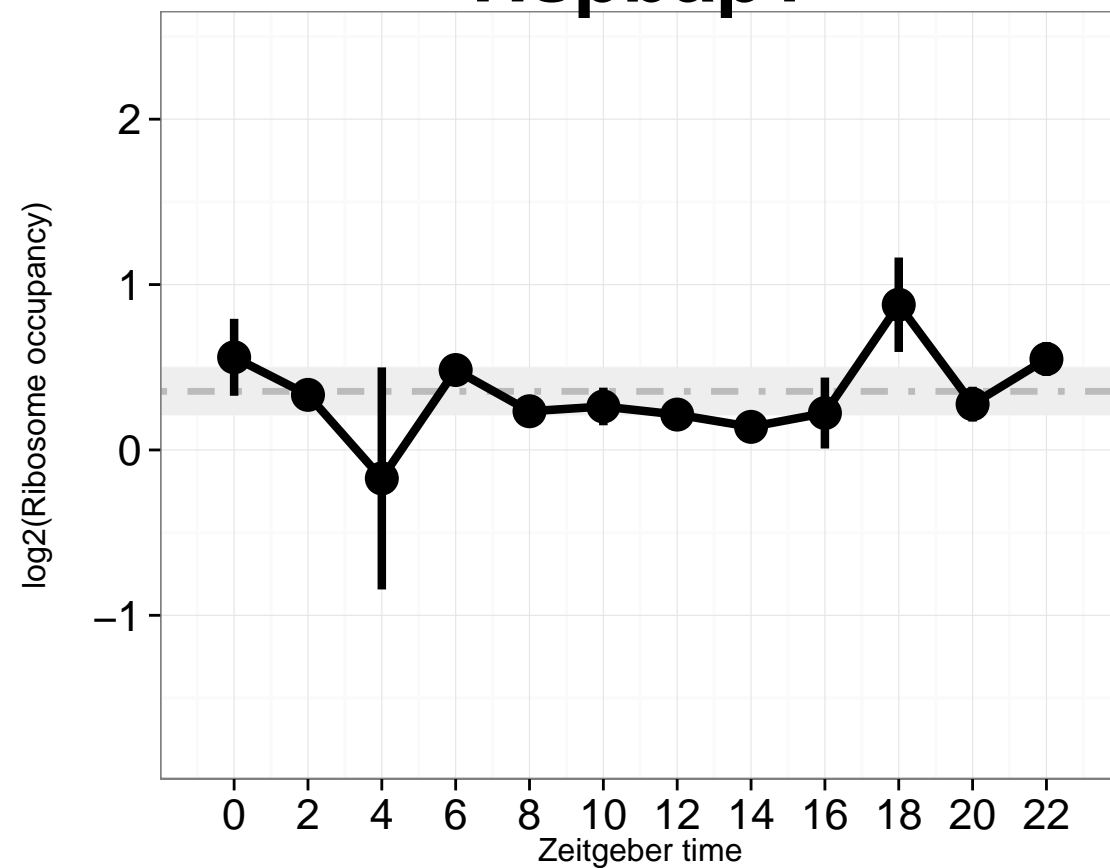

Supplement: Supplementary file 4537 [file 1]

# Tinagl1

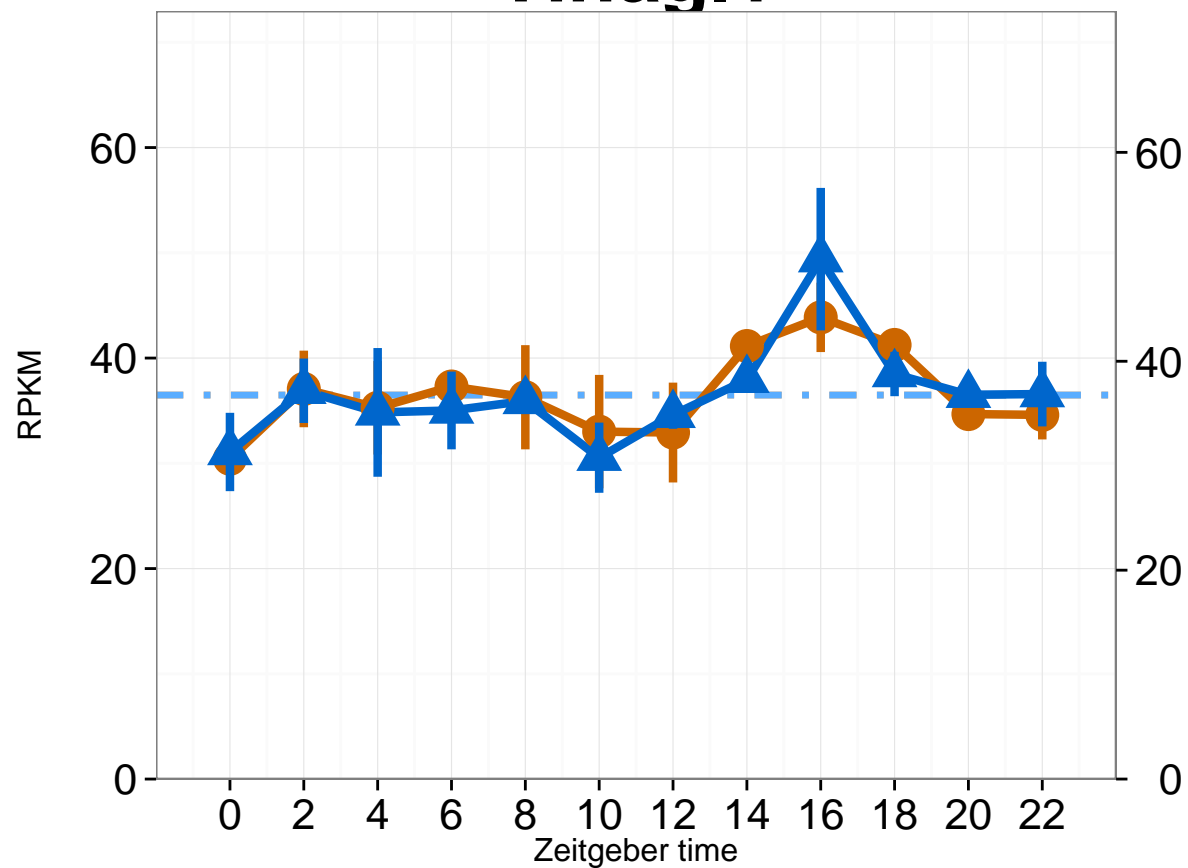

# Tinagl1

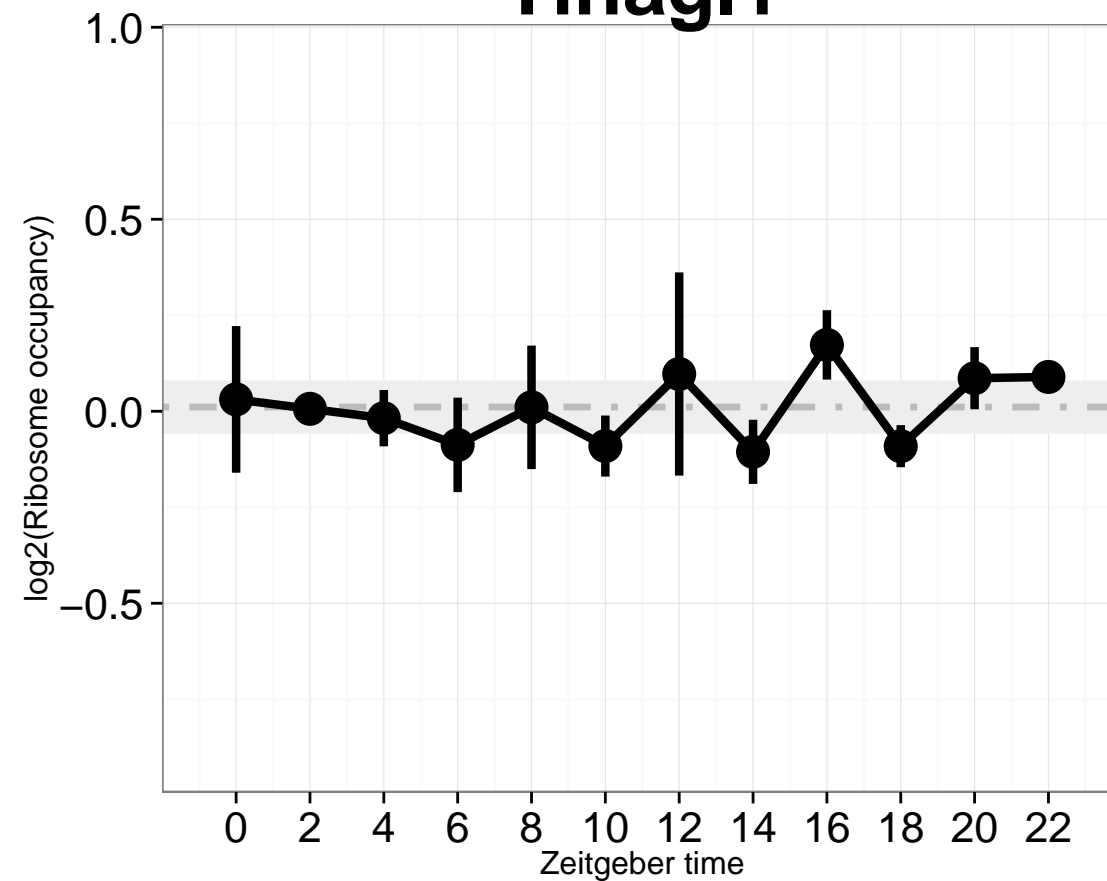

Supplement: Supplementary file 4538 [file 1]

# Fut10

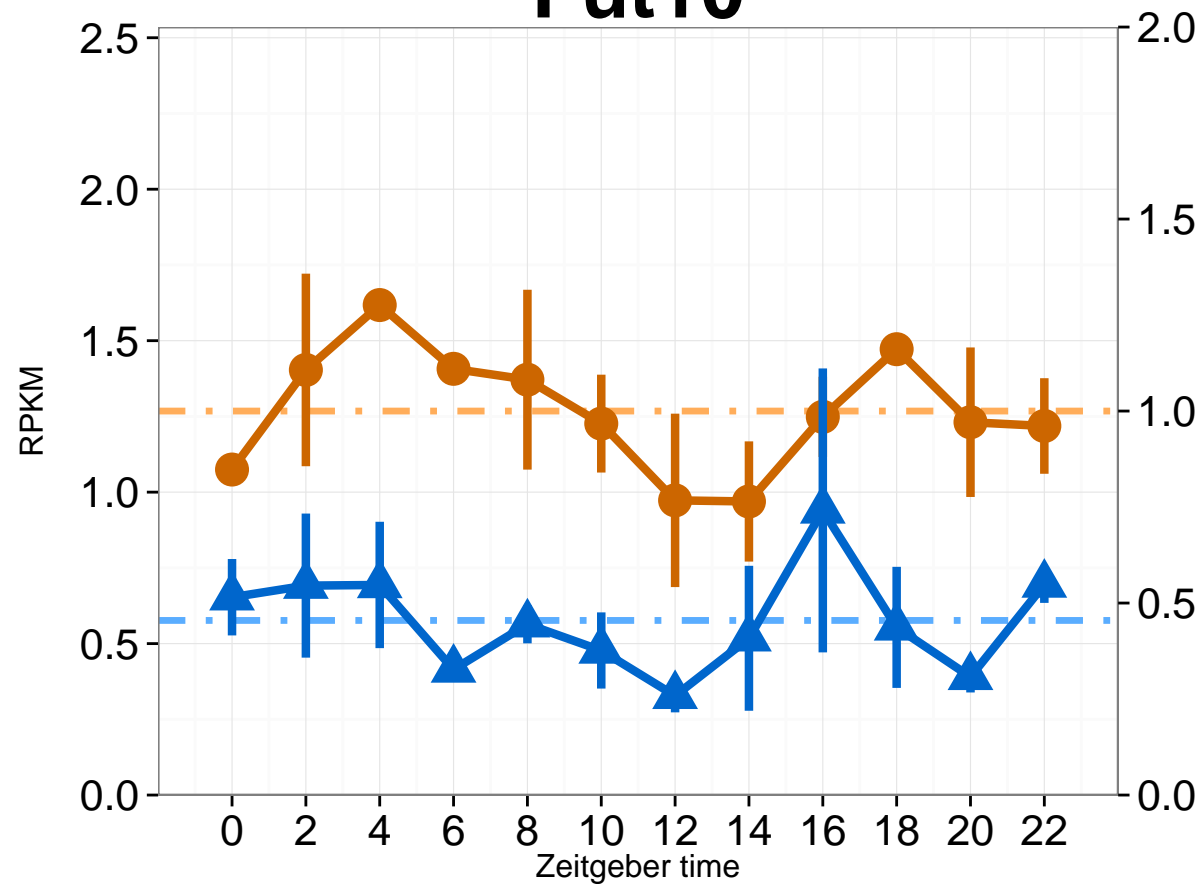

# Fut10

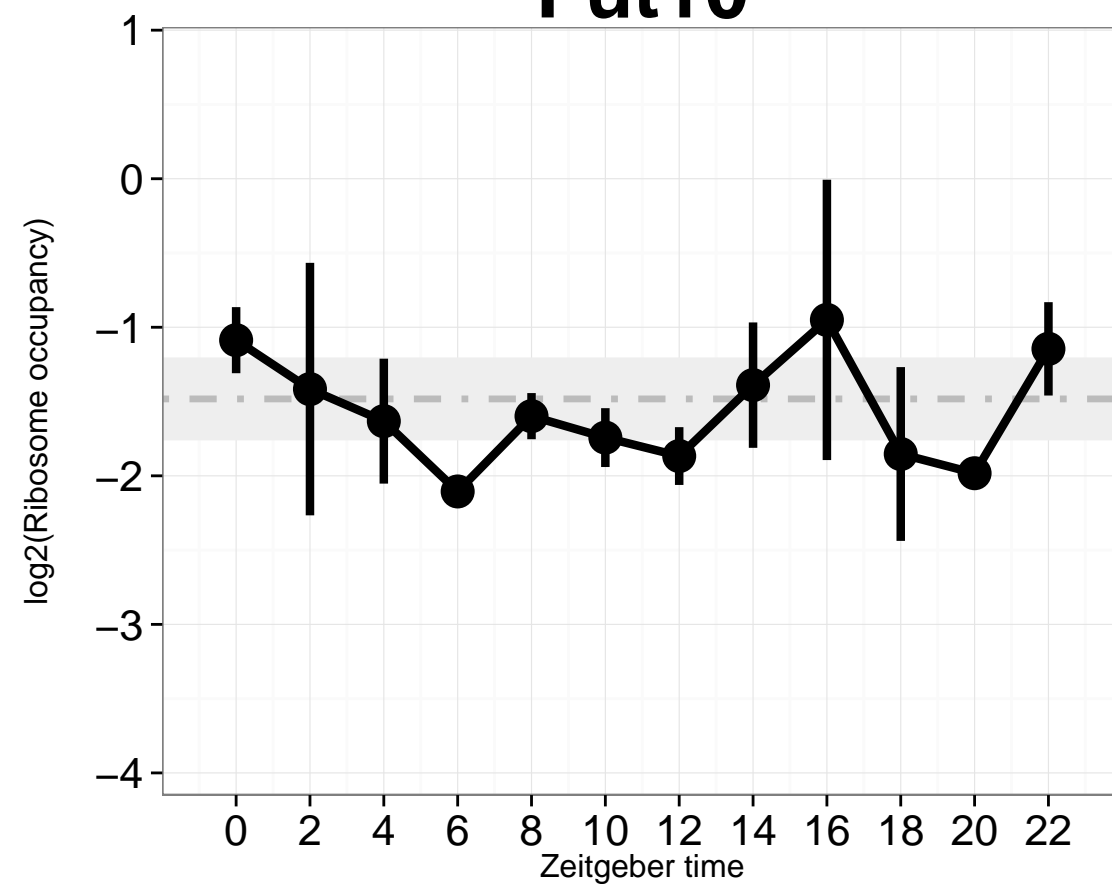

Supplement: Supplementary file 4539 [file 1]

## Kctd3

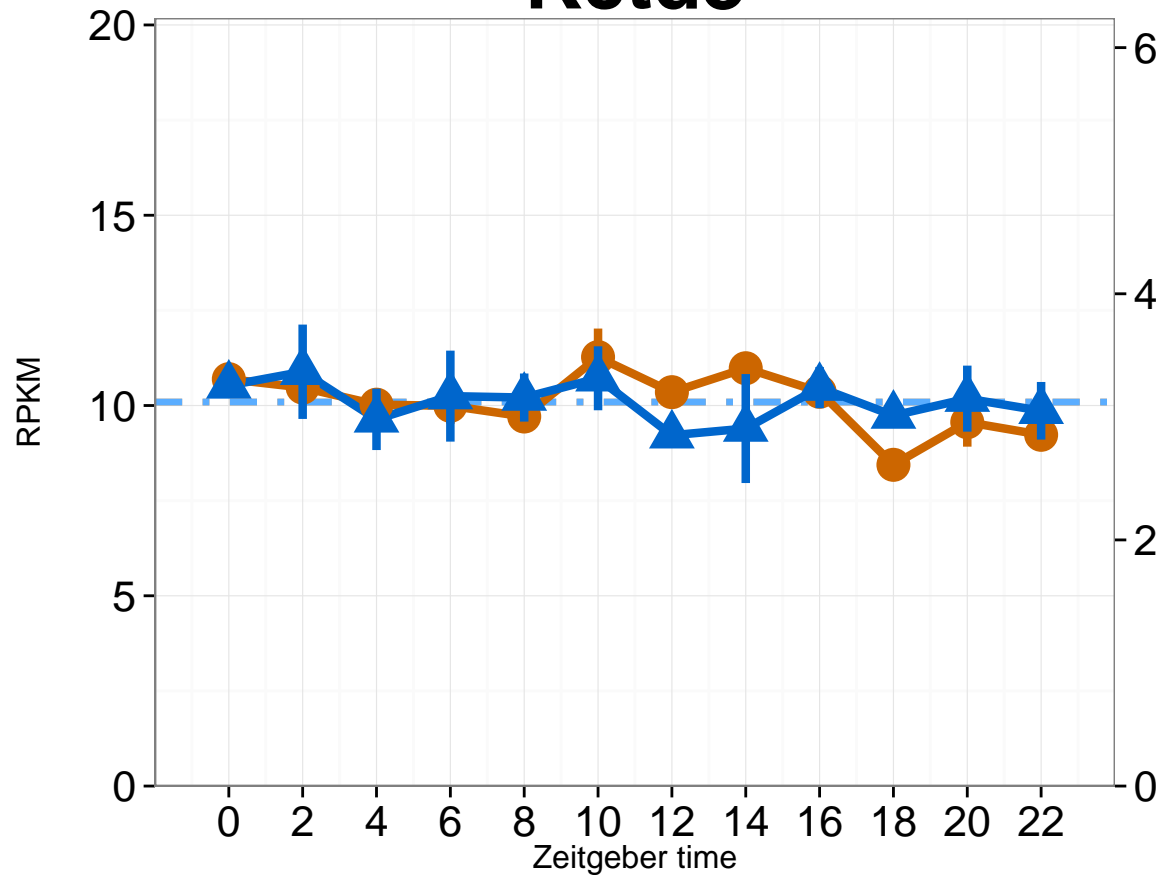

## Kctd3

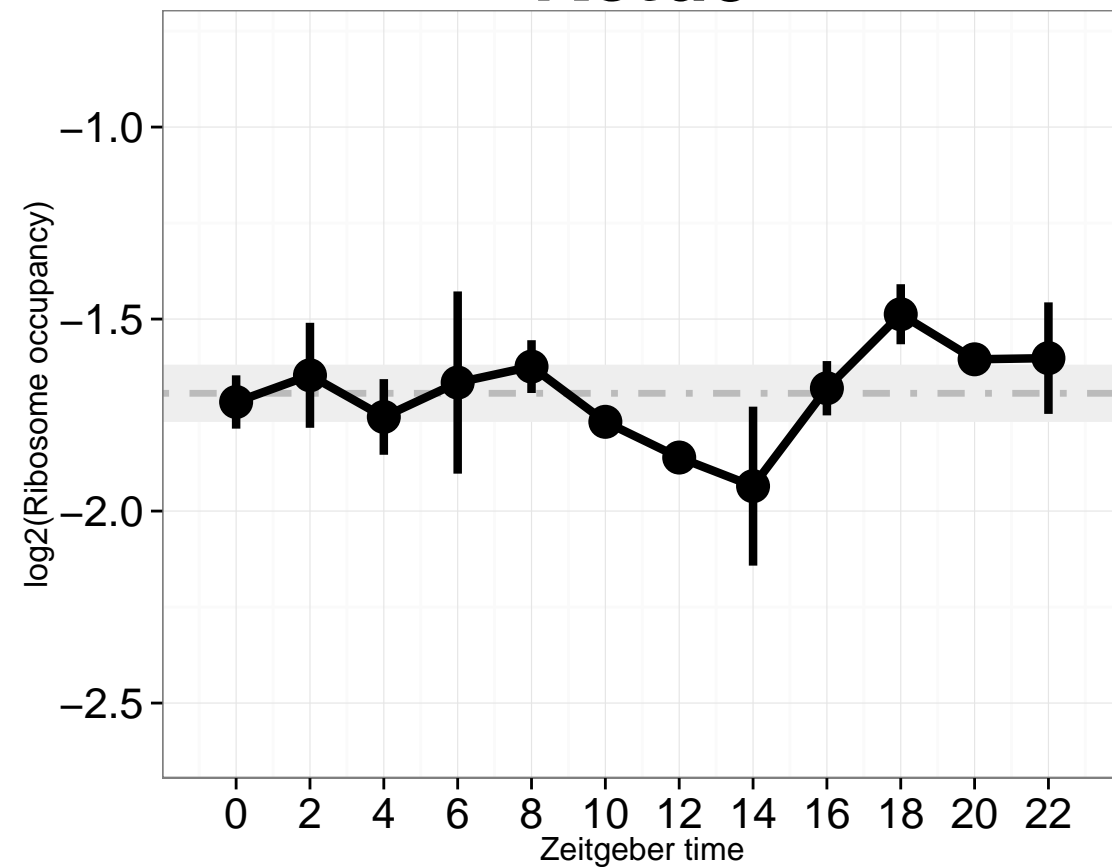

Supplement: Supplementary file 4540 [file 1]

# Sox17

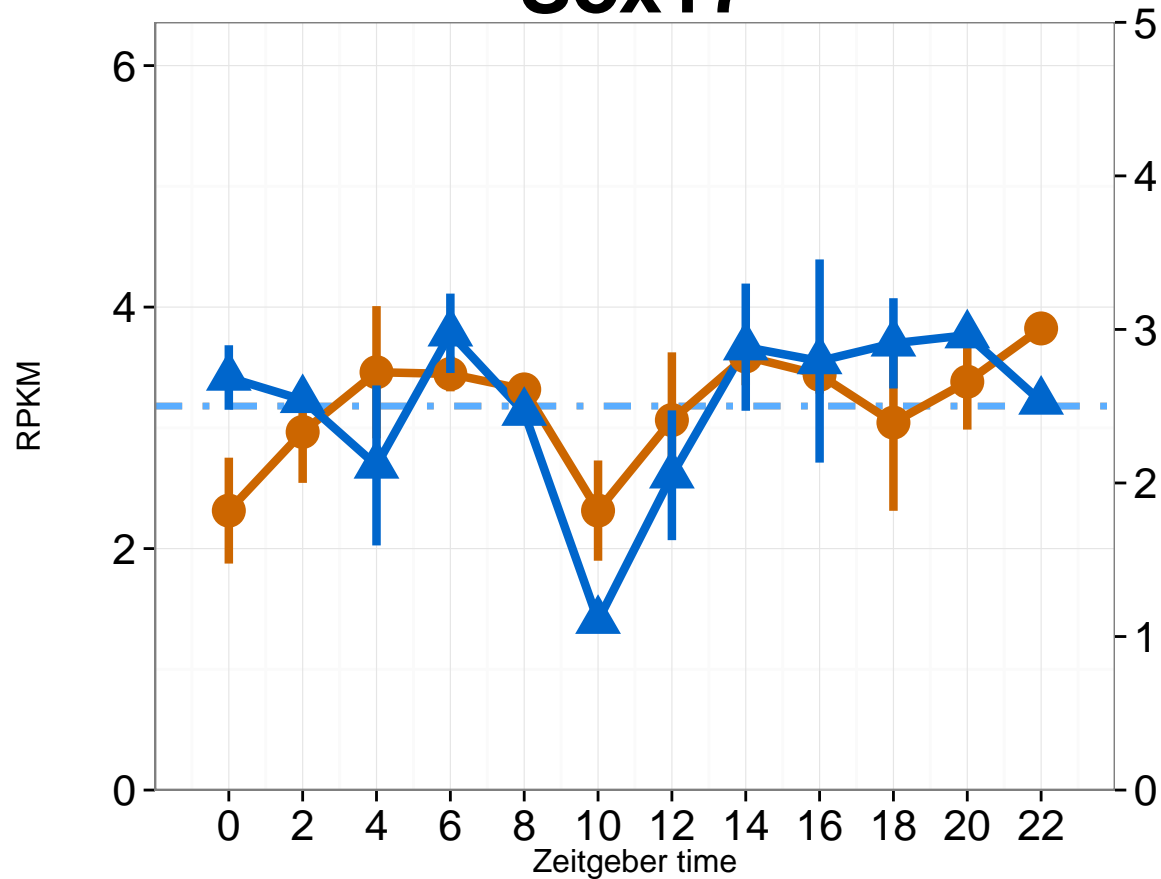

# Sox17

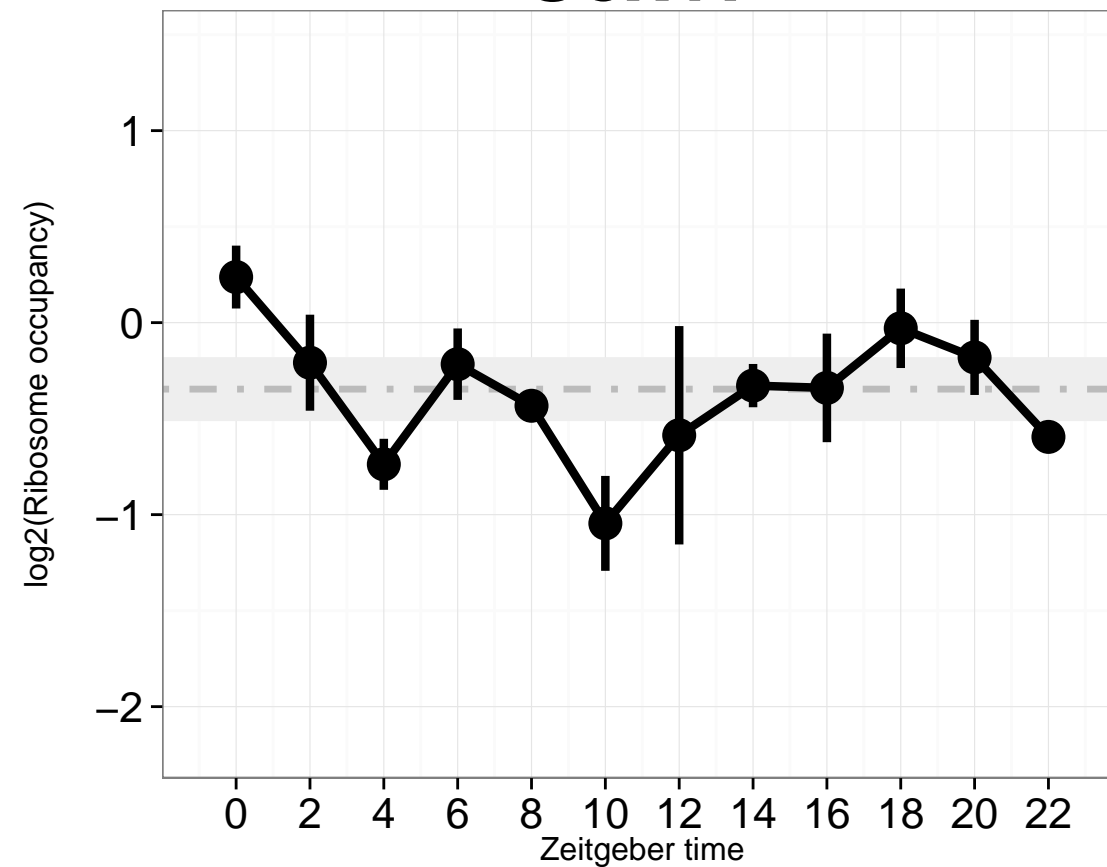

Supplement: Supplementary file 4541 [file 1]

## Spint2

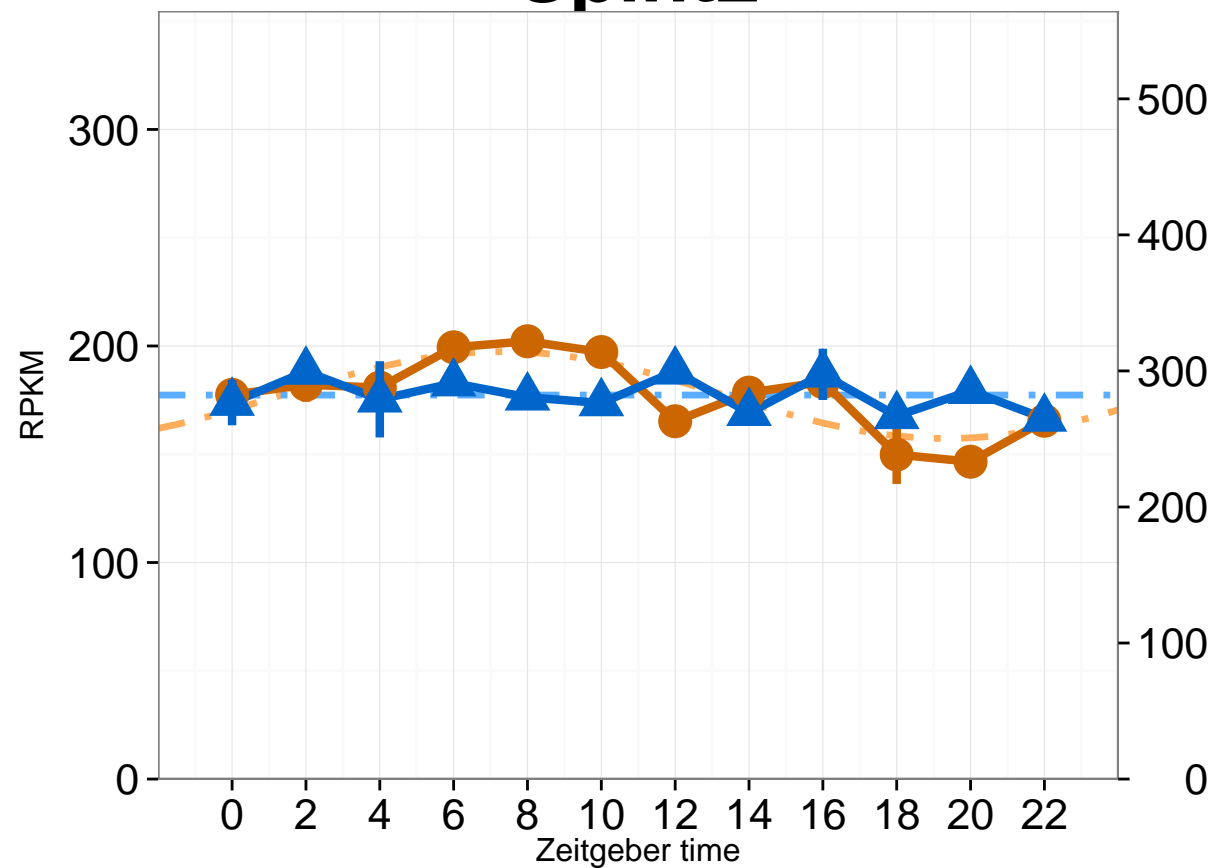

## Spint2

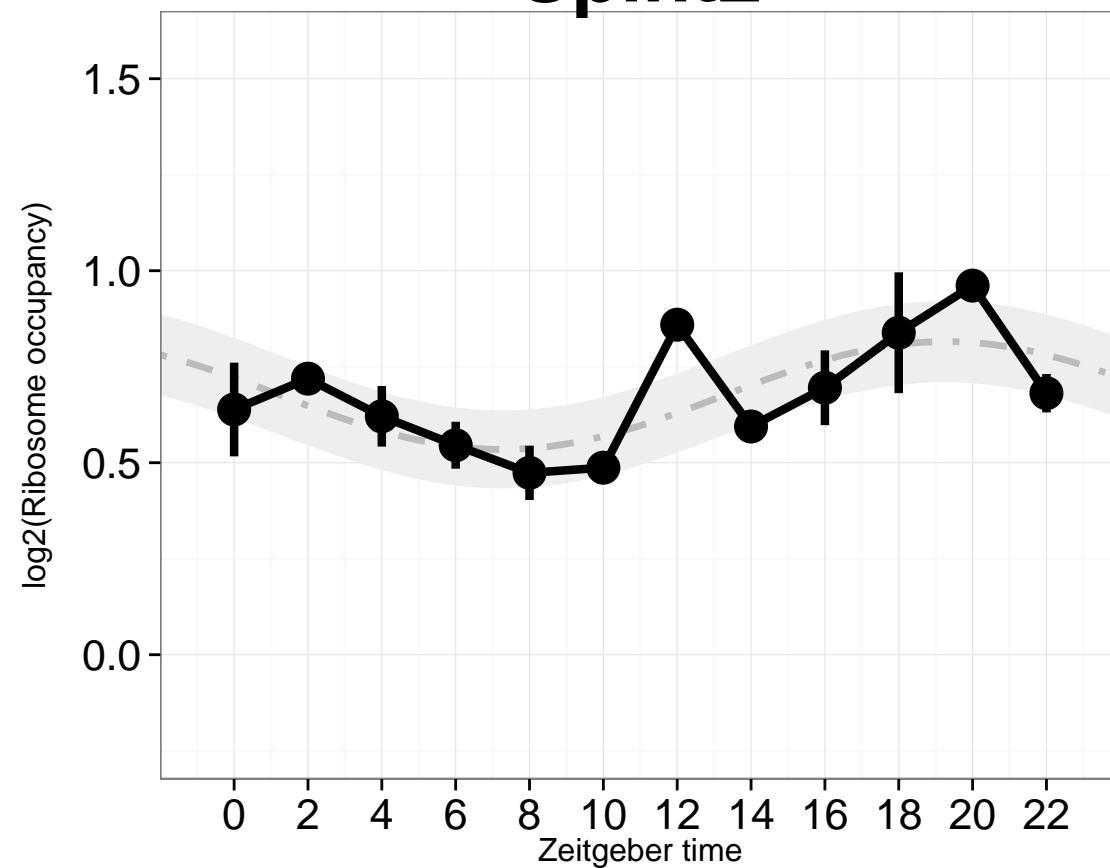

Supplement: Supplementary file 4542 [file 1]

## Frrs1

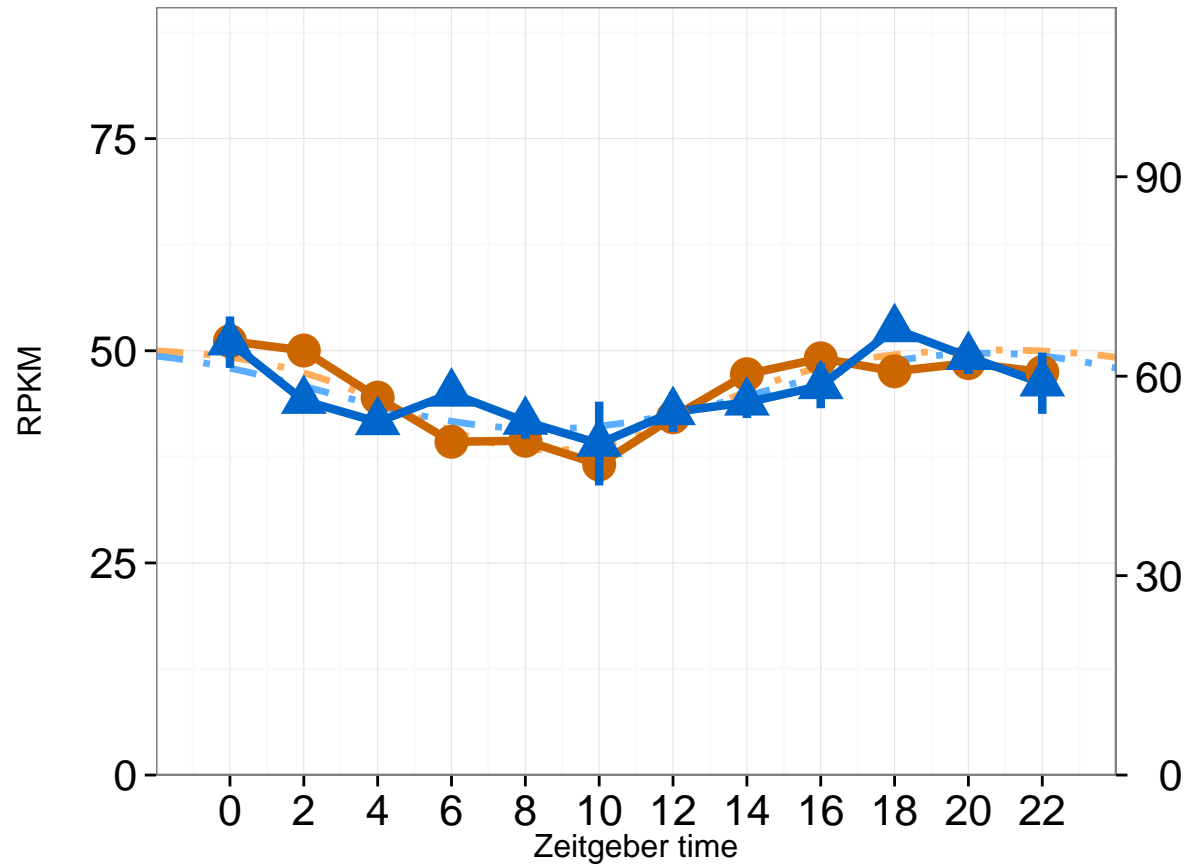

## Frrs1

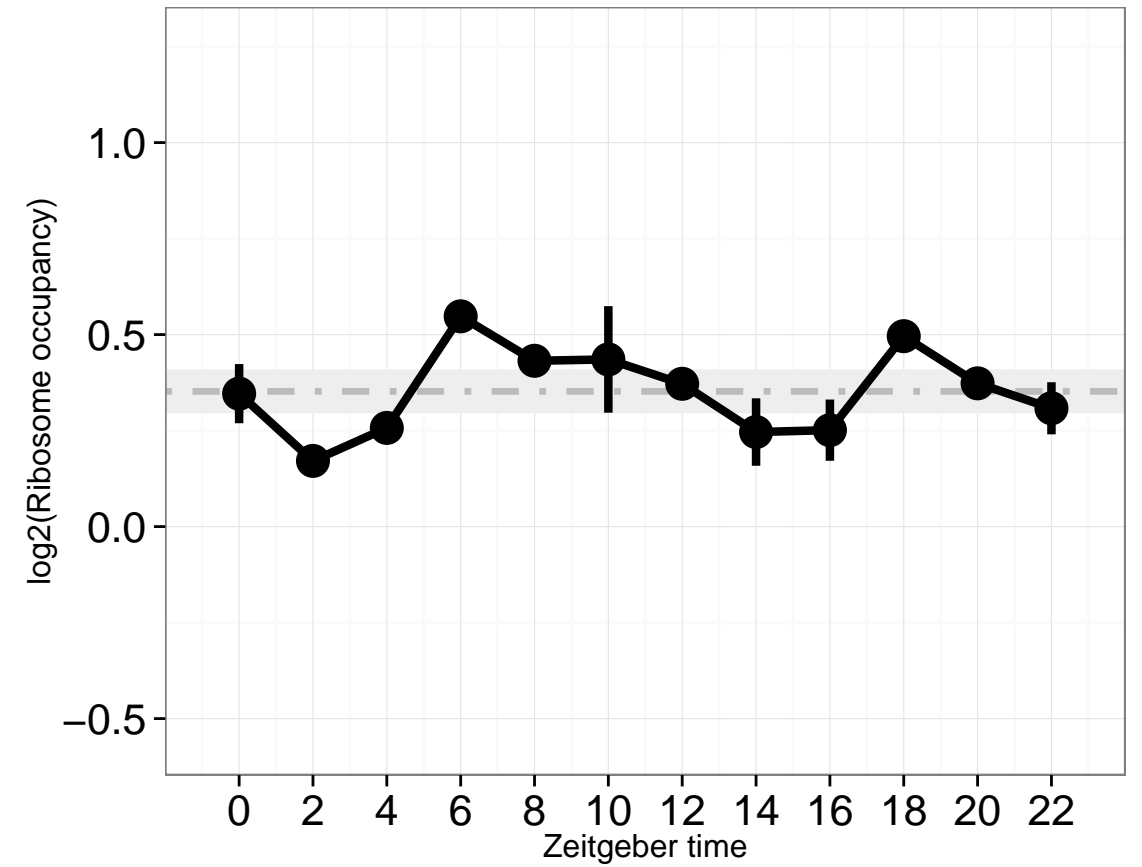

Supplement: Supplementary file 4543 [file 1]

# Bag6

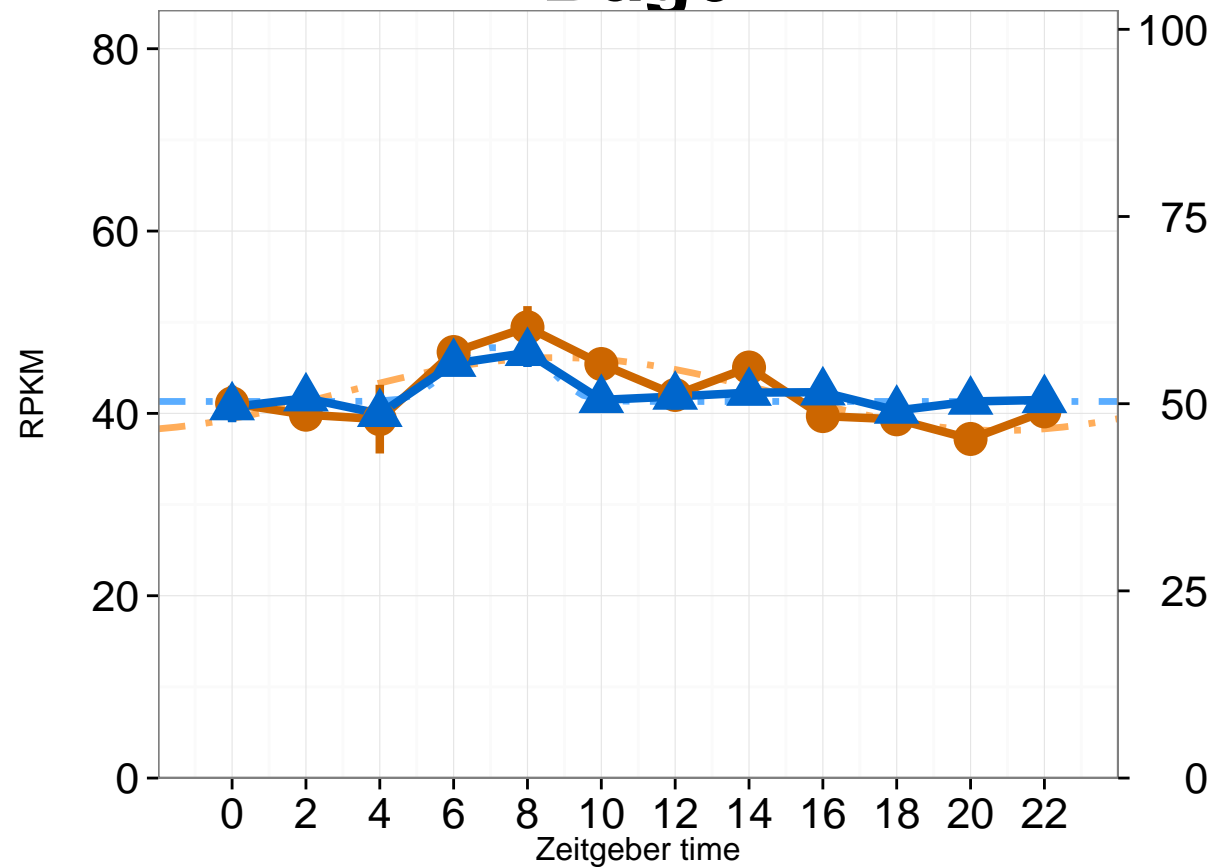

# Bag6

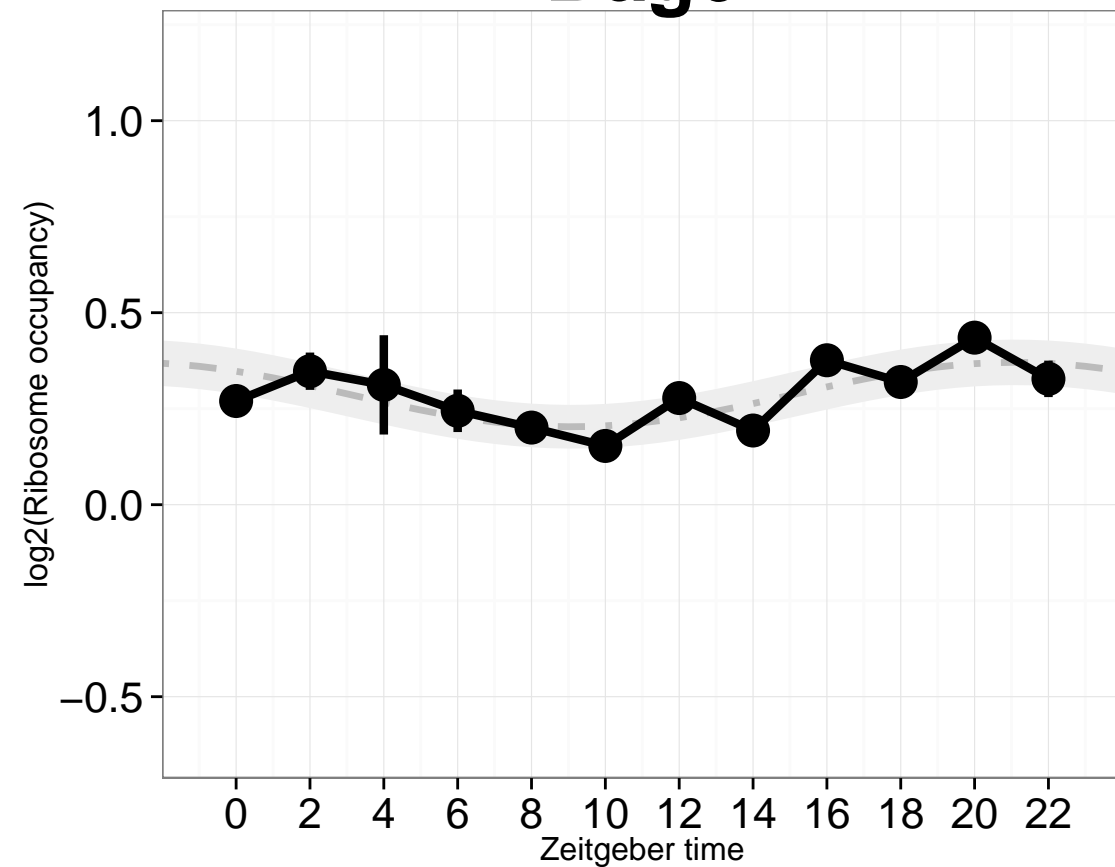

Supplement: Supplementary file 4544 [file 1]

## Vps41

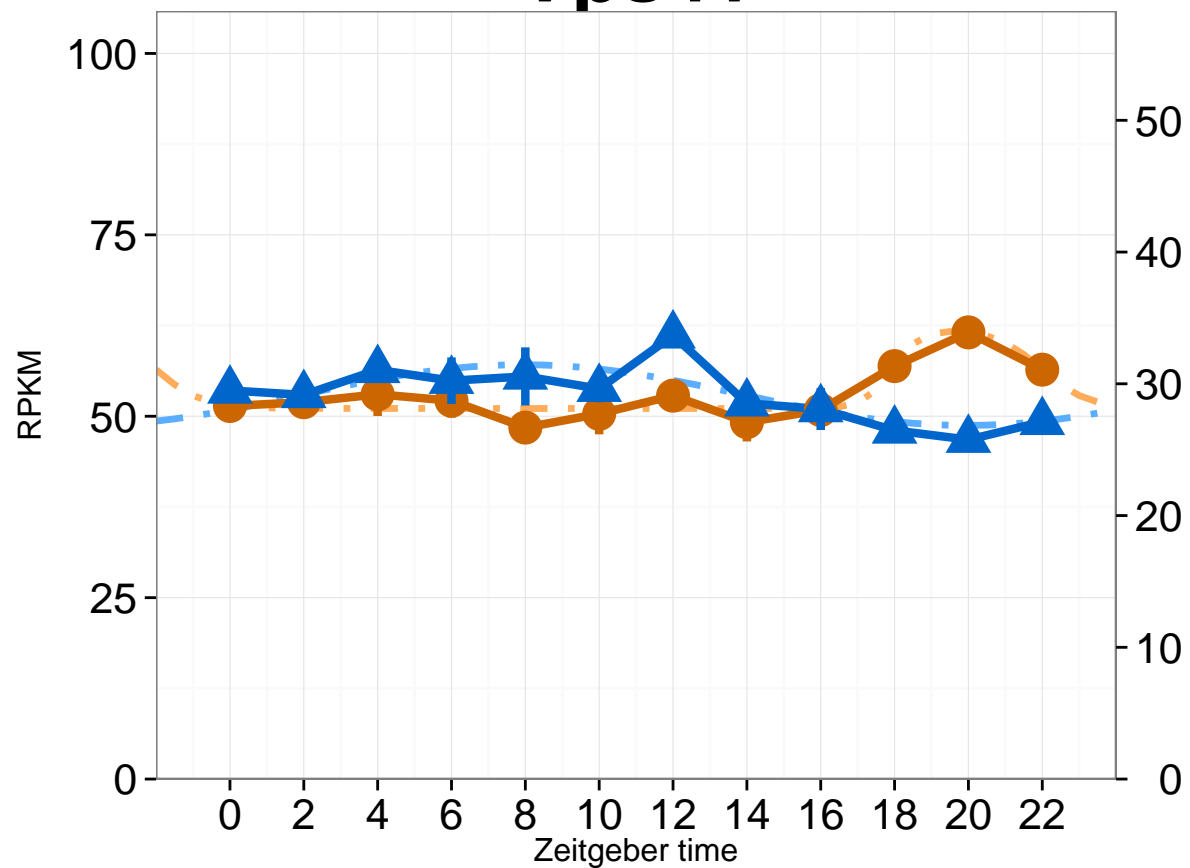

## Vps41

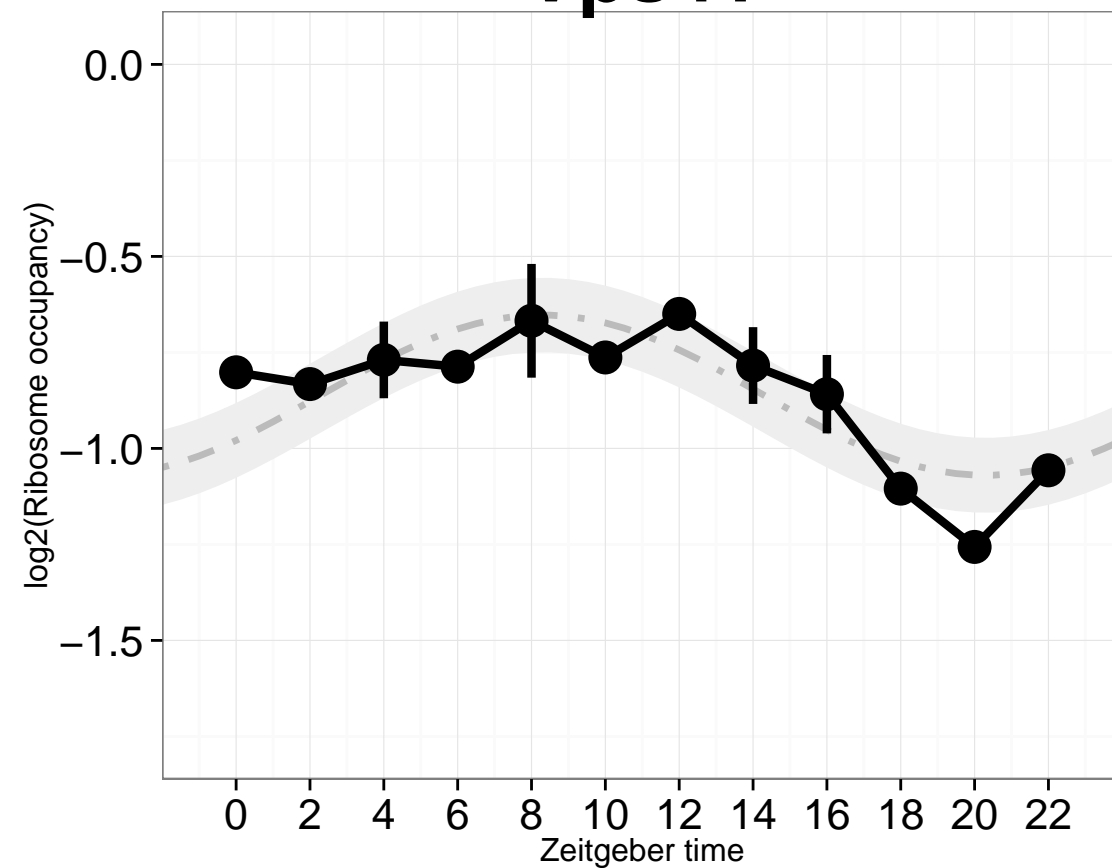

Supplement: Supplementary file 4545 [file 1]

## Apex1

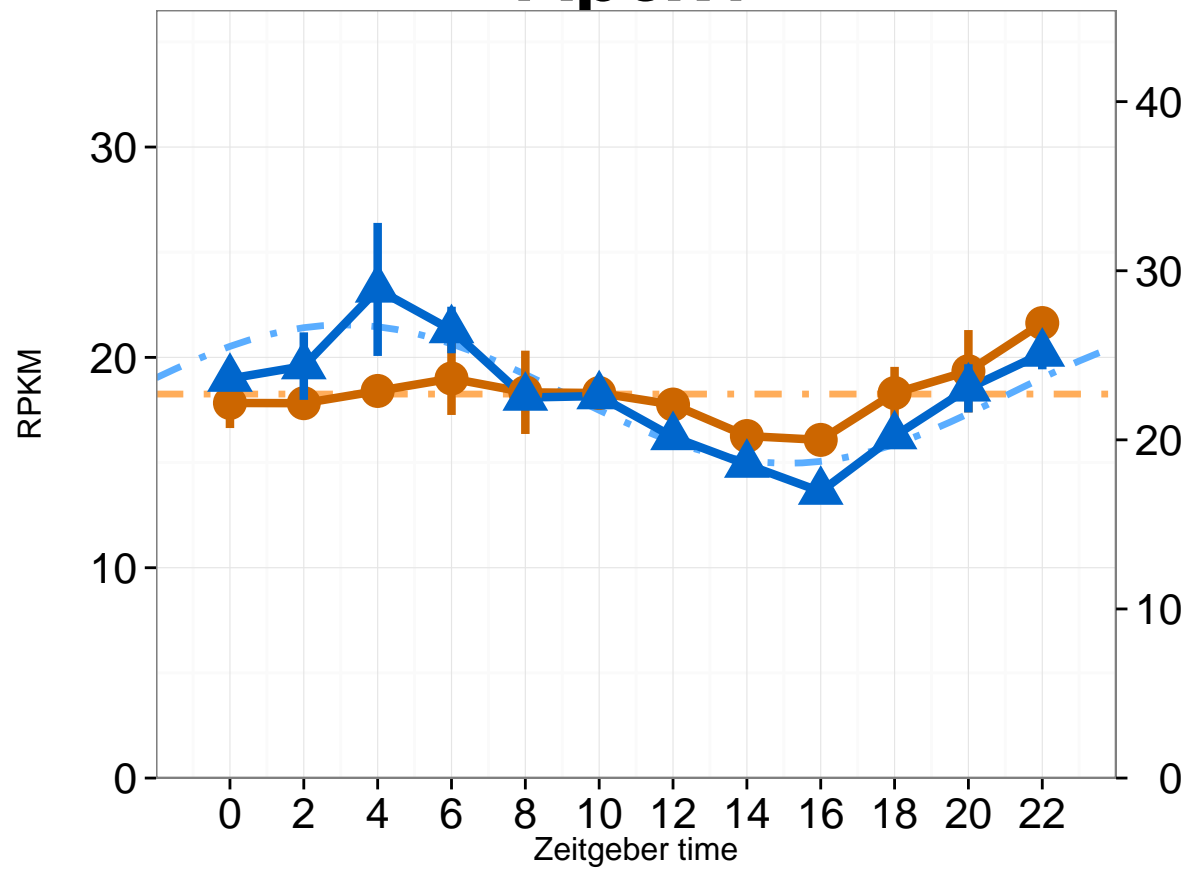

## Apex1

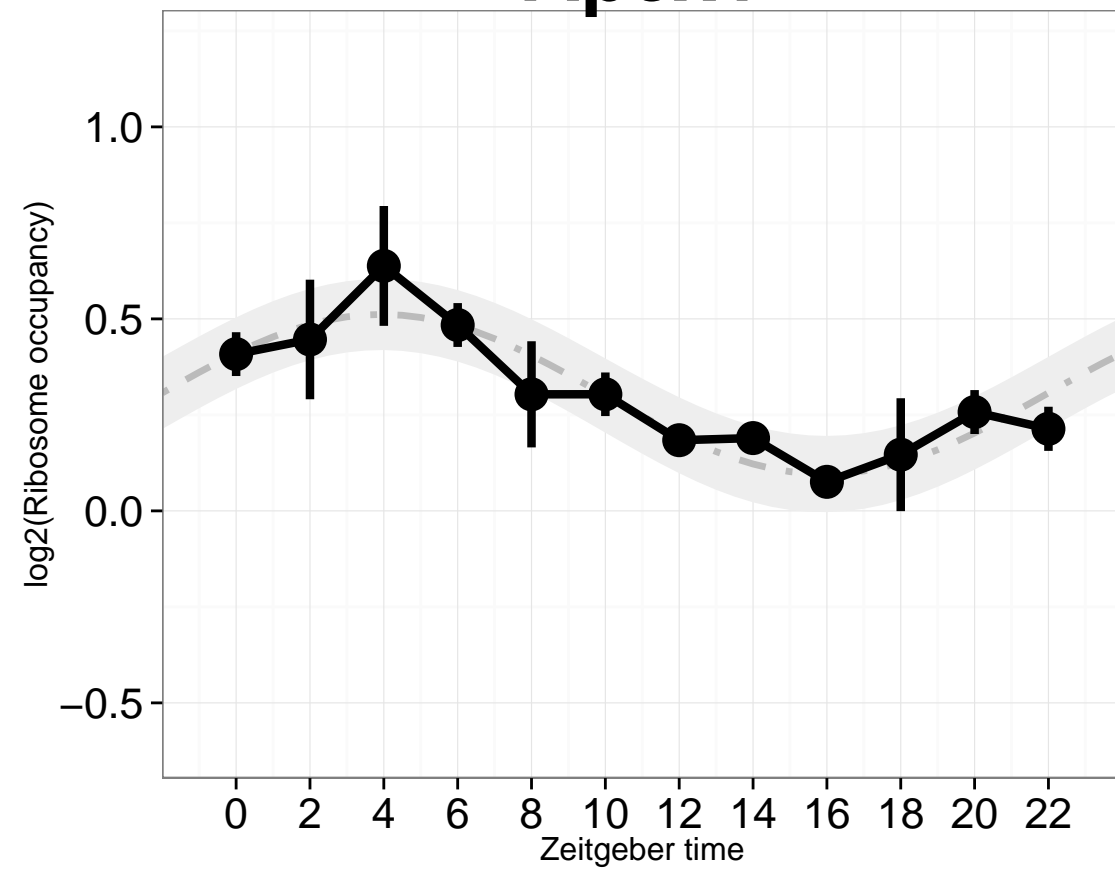

Supplement: Supplementary file 4546 [file 1]

## Elovl5

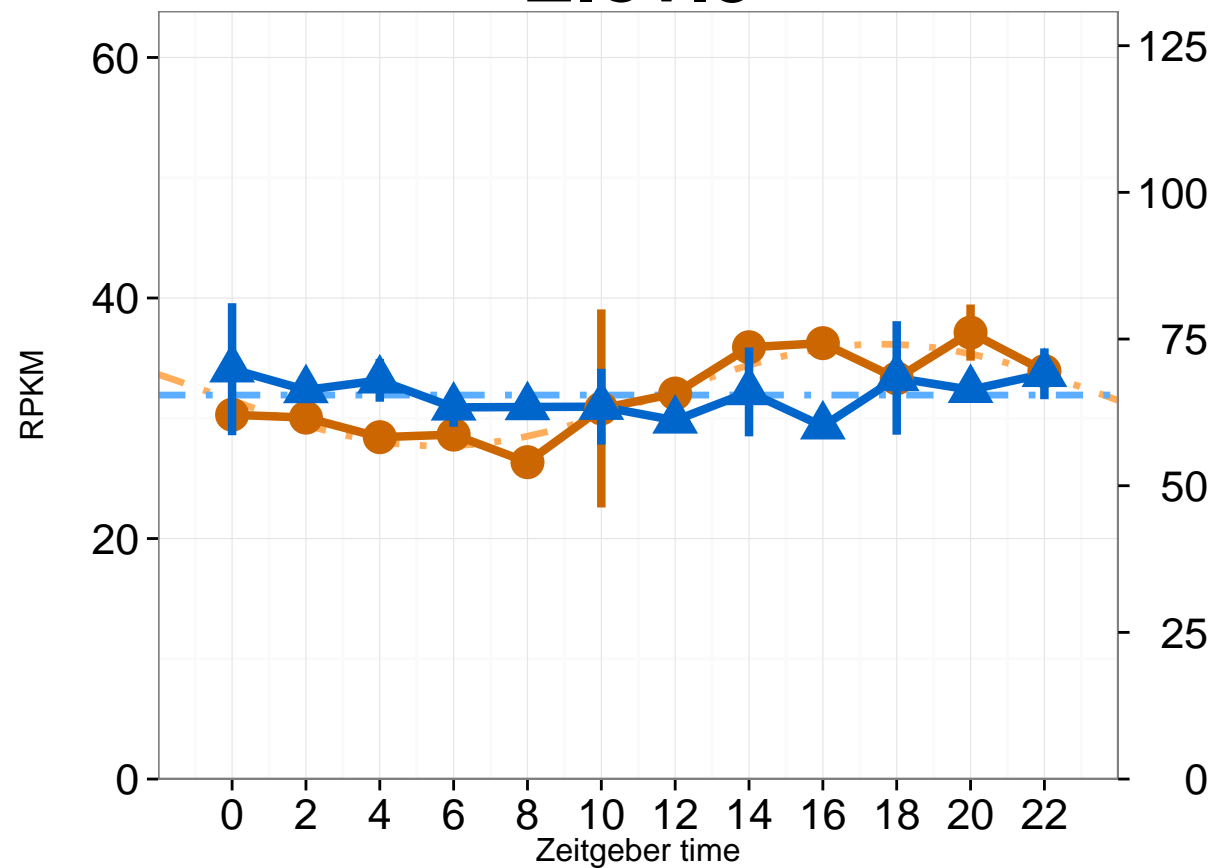

## Elovl5

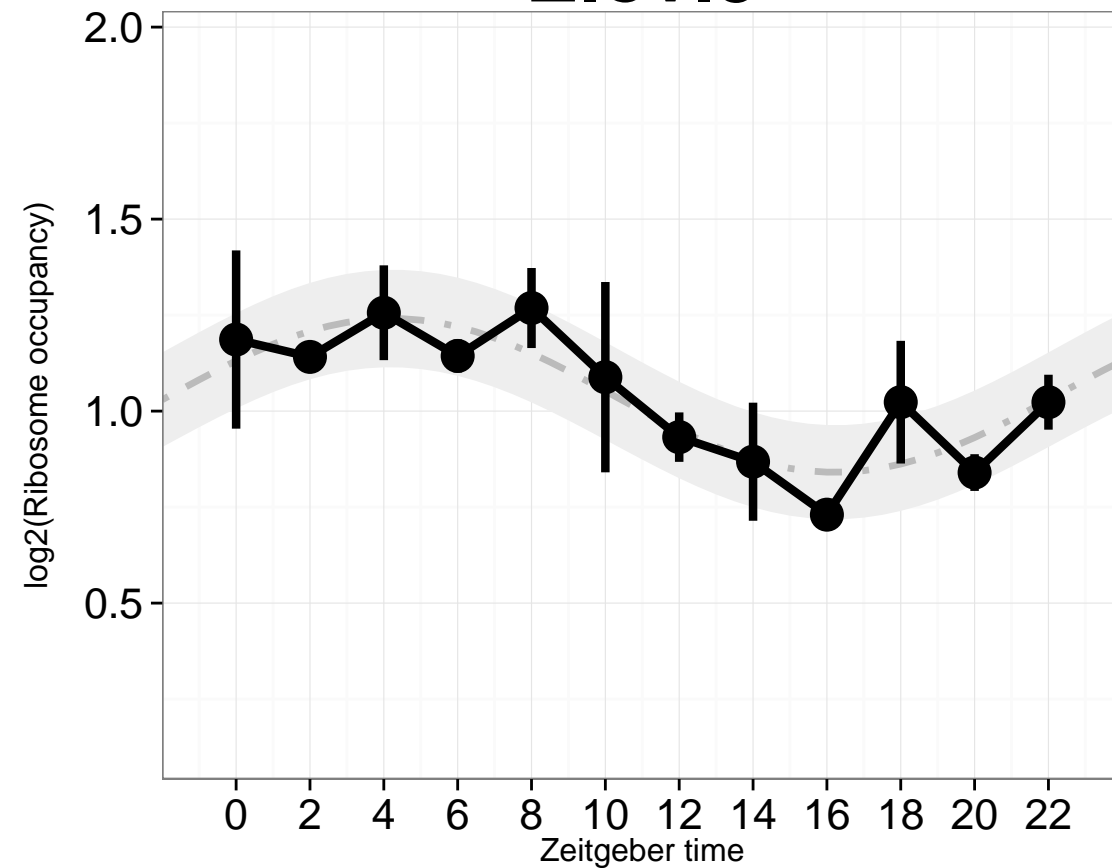

Supplement: Supplementary file 4547 [file 1]

## G2e3

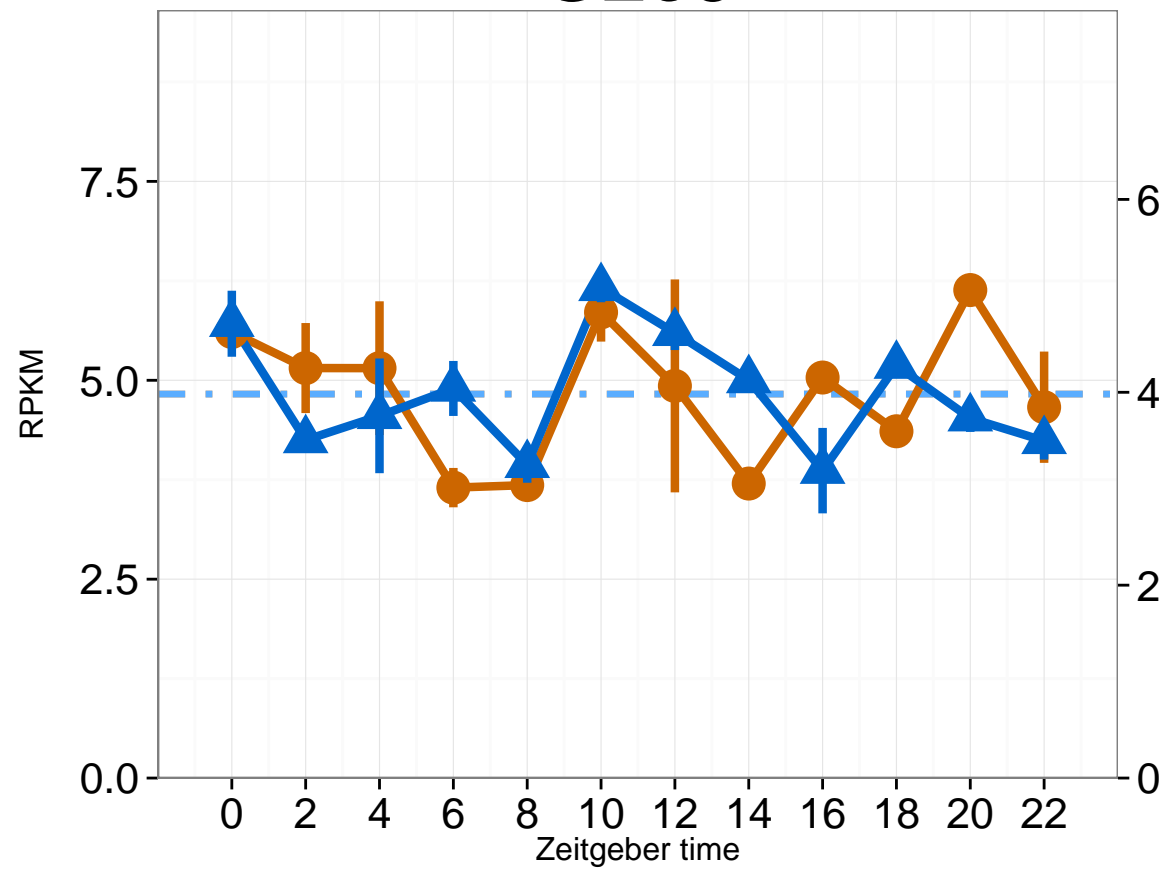

## G2e3

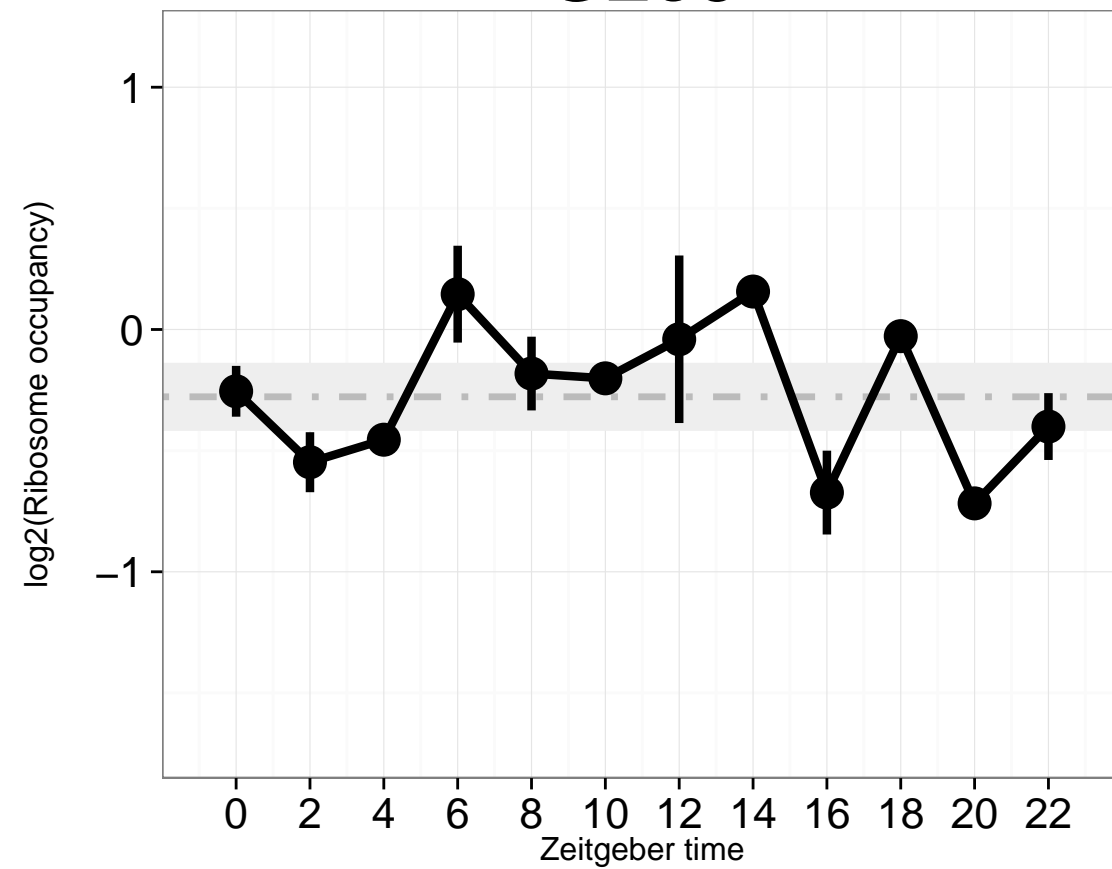

Supplement: Supplementary file 4548 [file 1]

# Mboat1

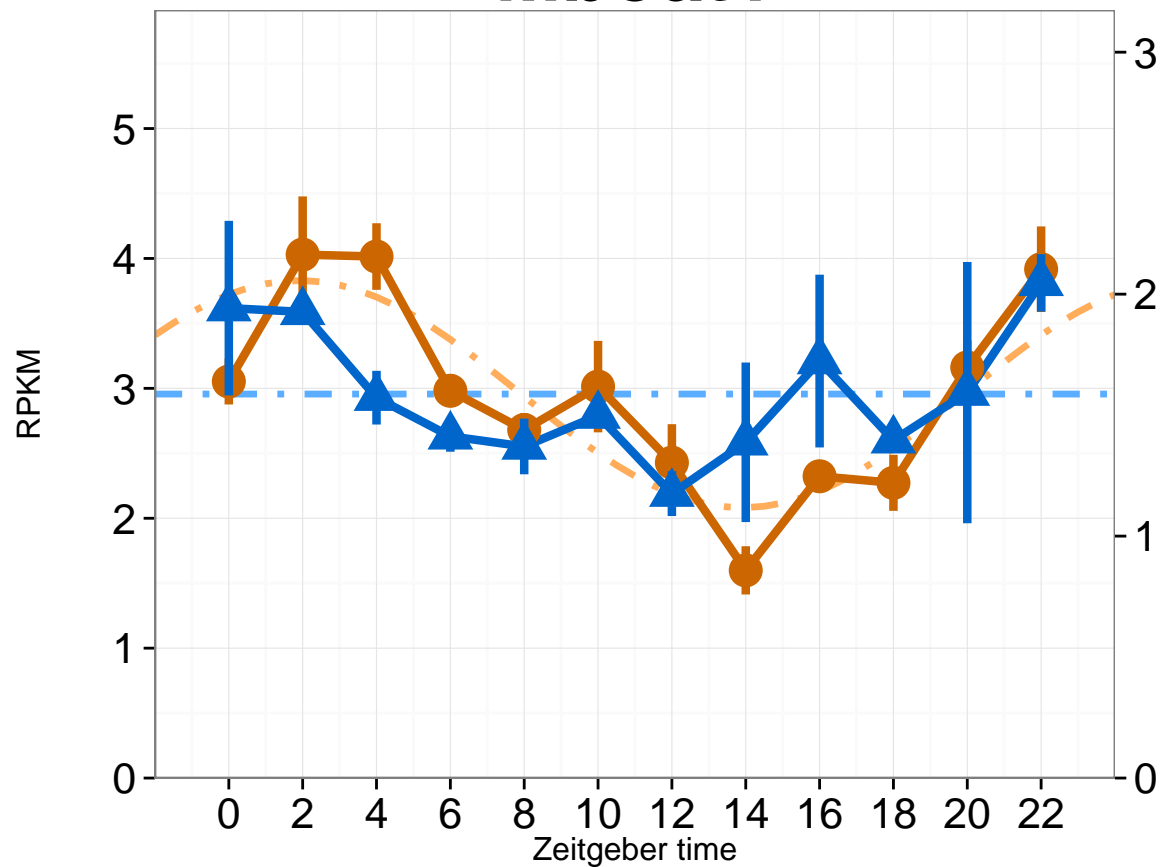

# Mboat1

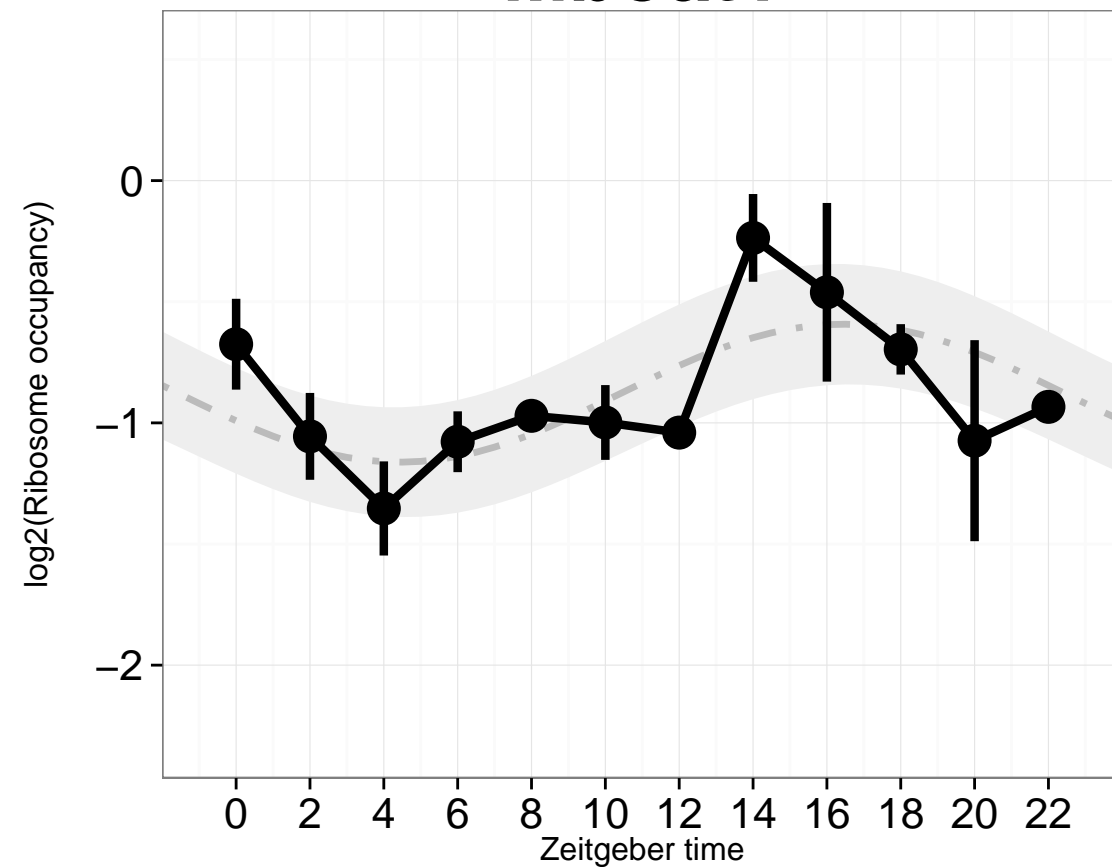

Supplement: Supplementary file 4549 [file 1]

## Phykpl

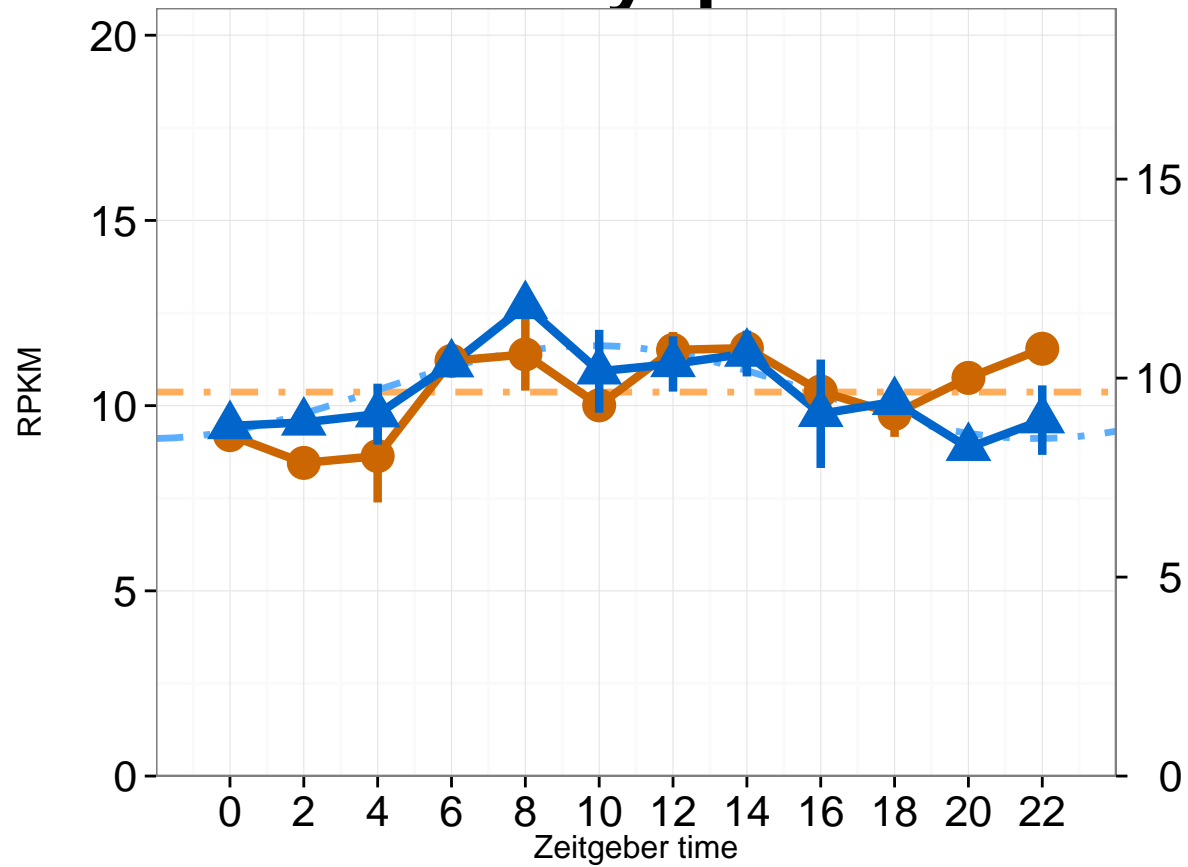

## Phykpl

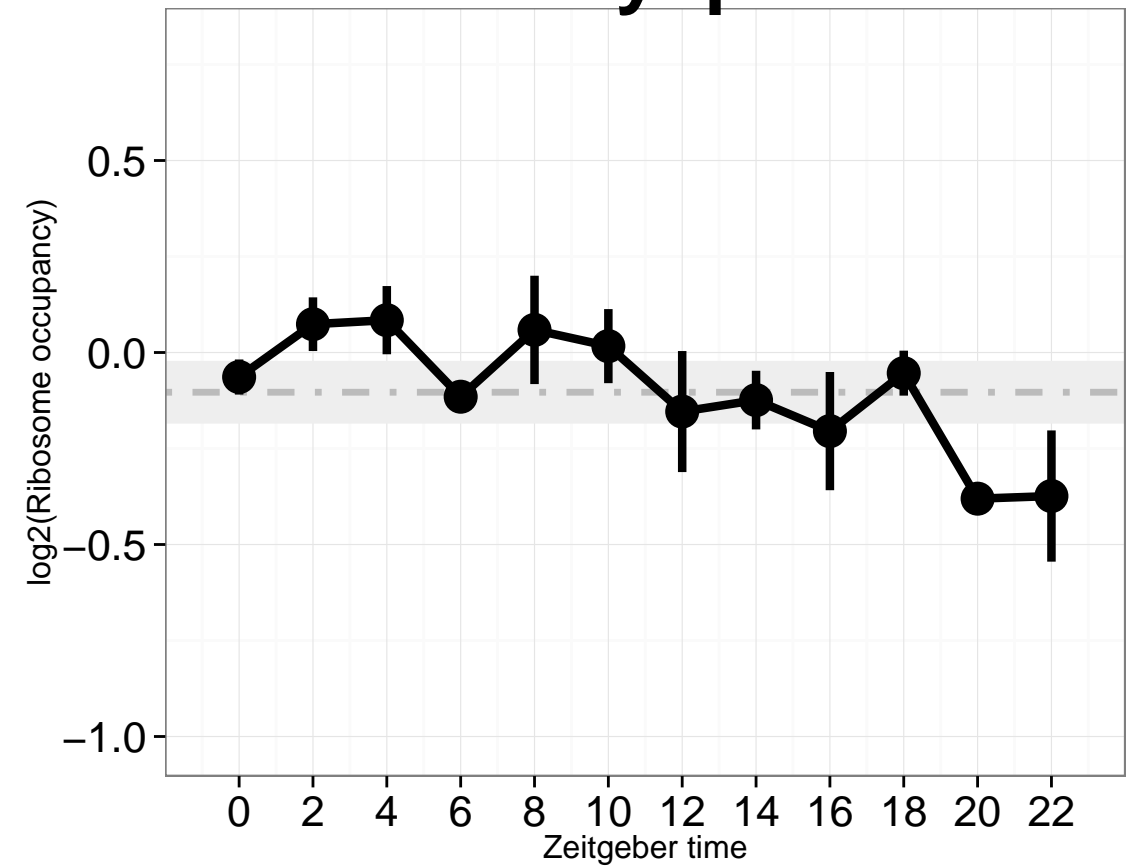

Supplement: Supplementary file 4550 [file 1]

## Pi16

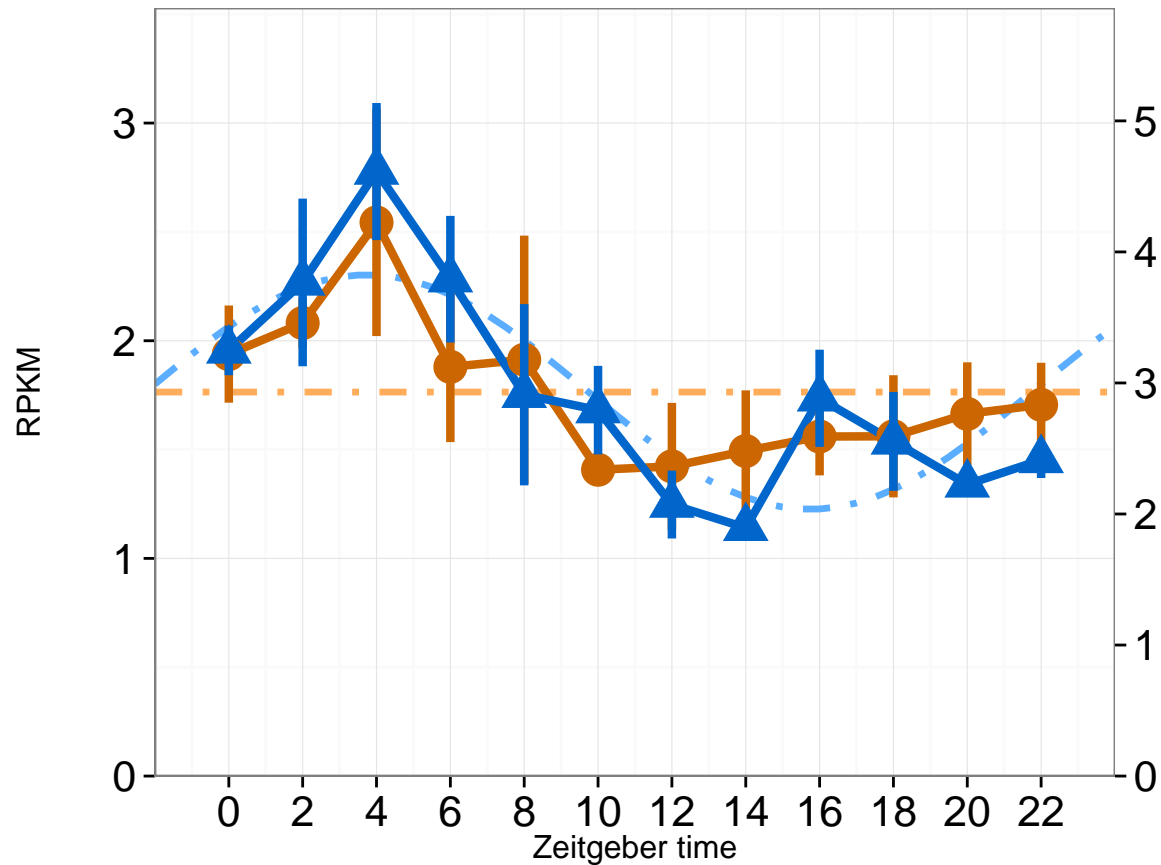

## Pi16

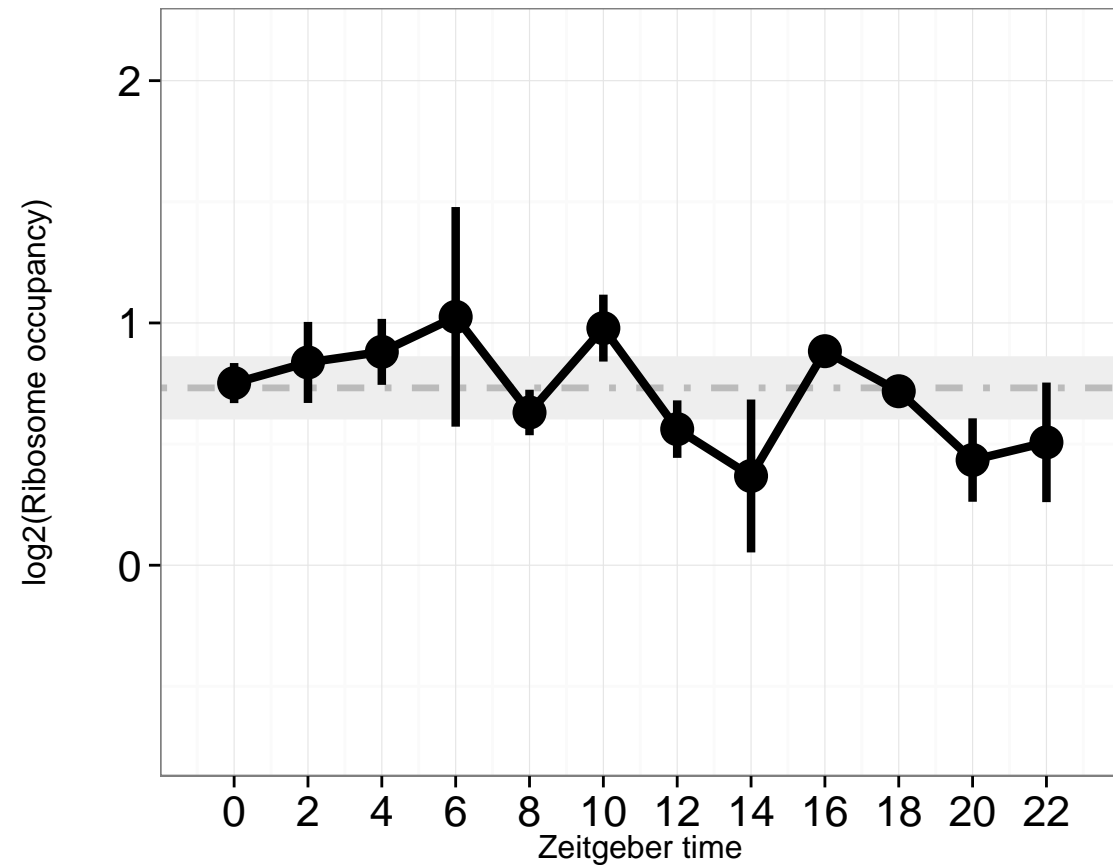

Supplement: Supplementary file 4551 [file 1]

# Egr1

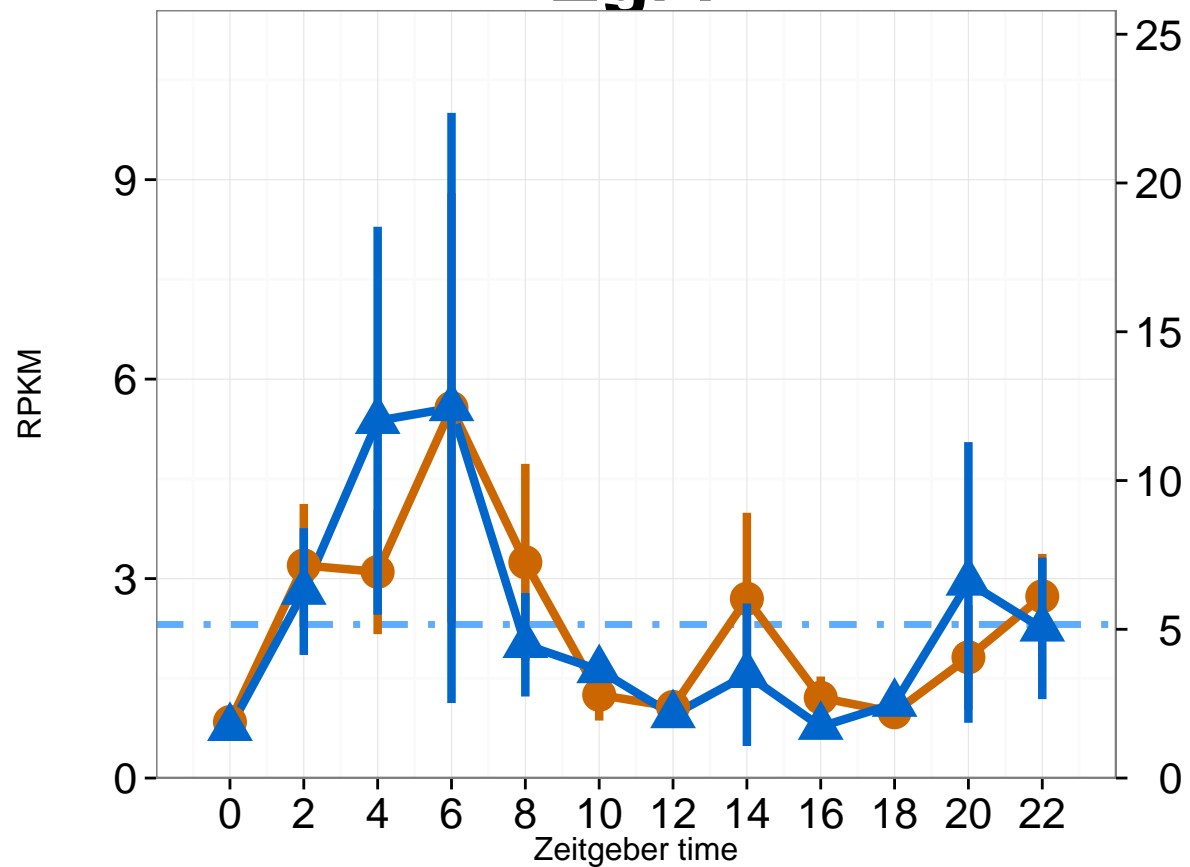

# Egr1

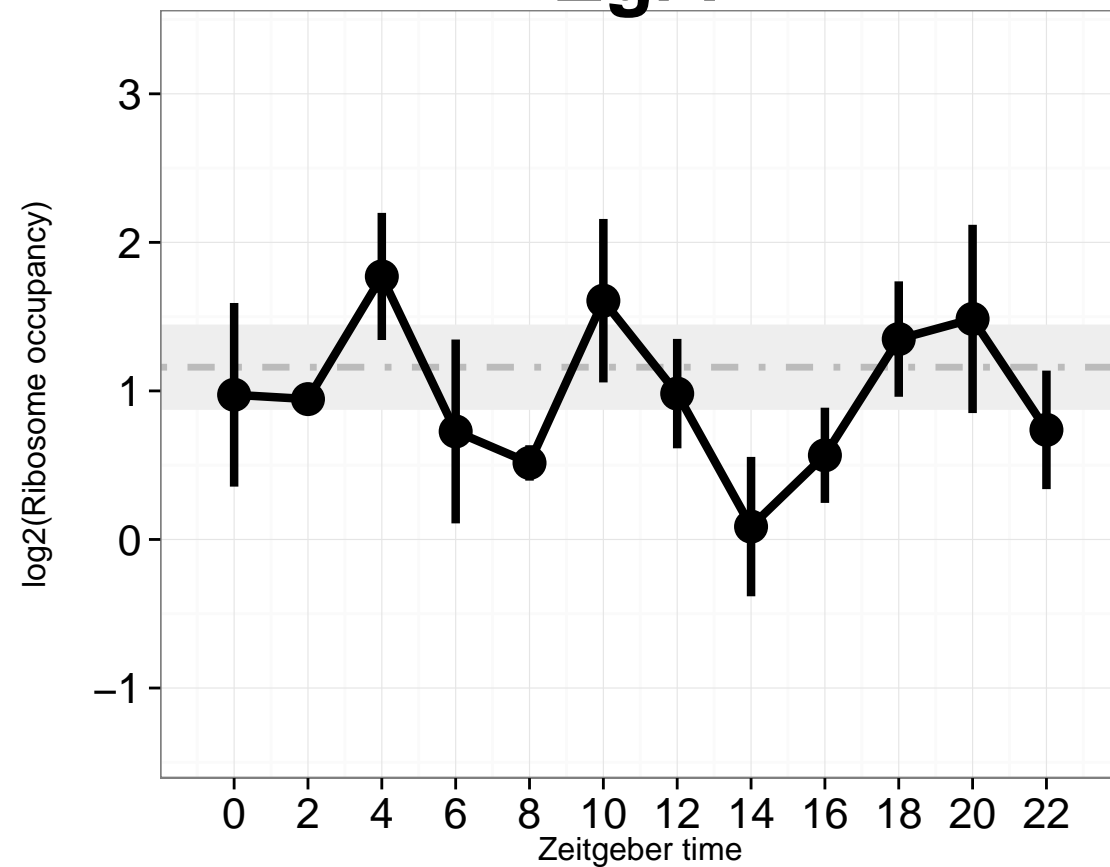

Supplement: Supplementary file 4552 [file 1]

# Serpinc1

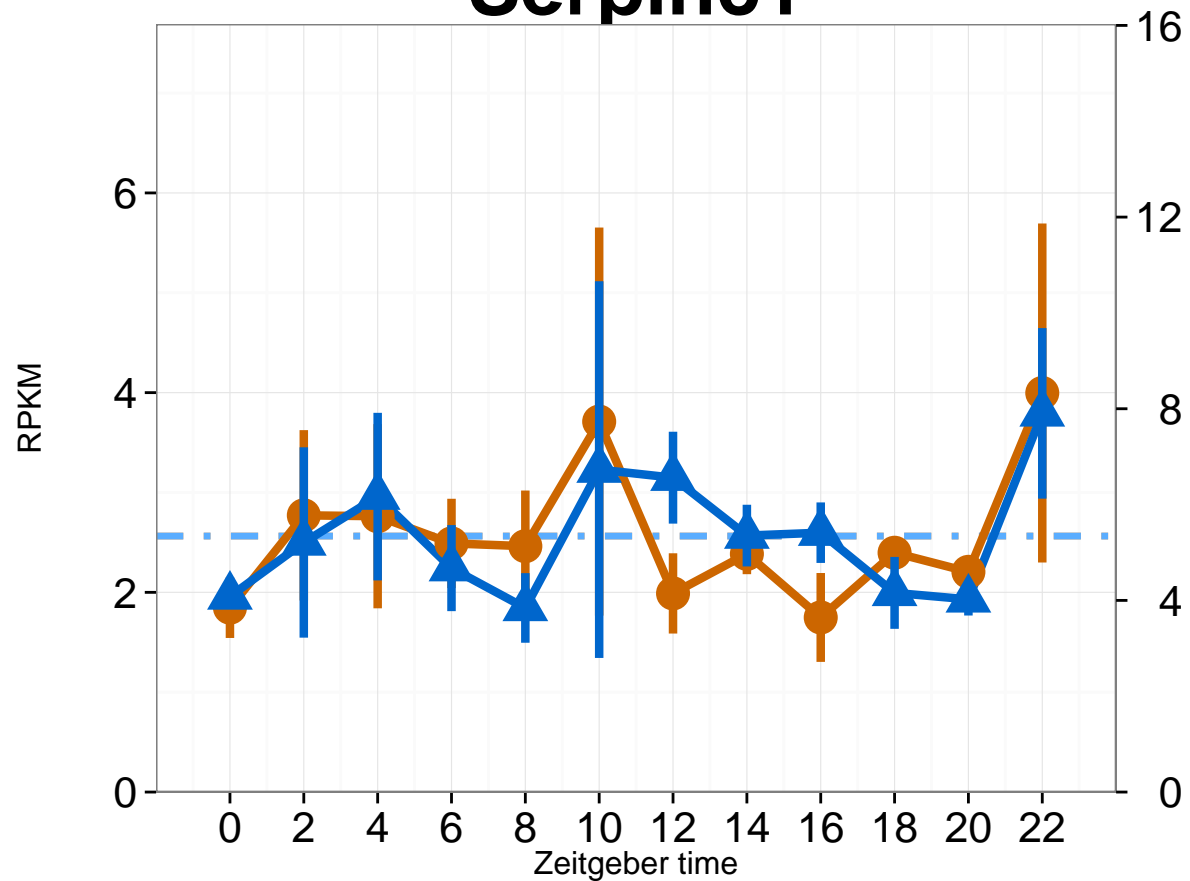

# Serpinc1

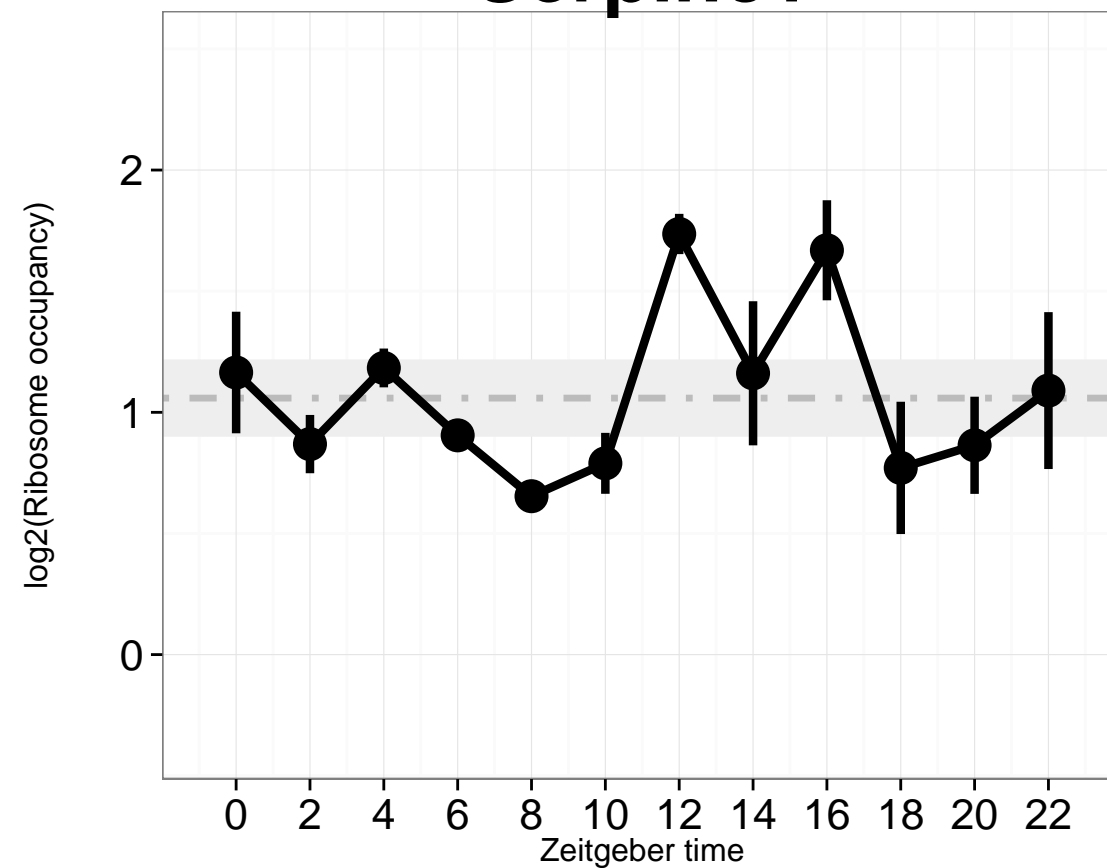

Supplement: Supplementary file 4553 [file 1]

# Mrpl16

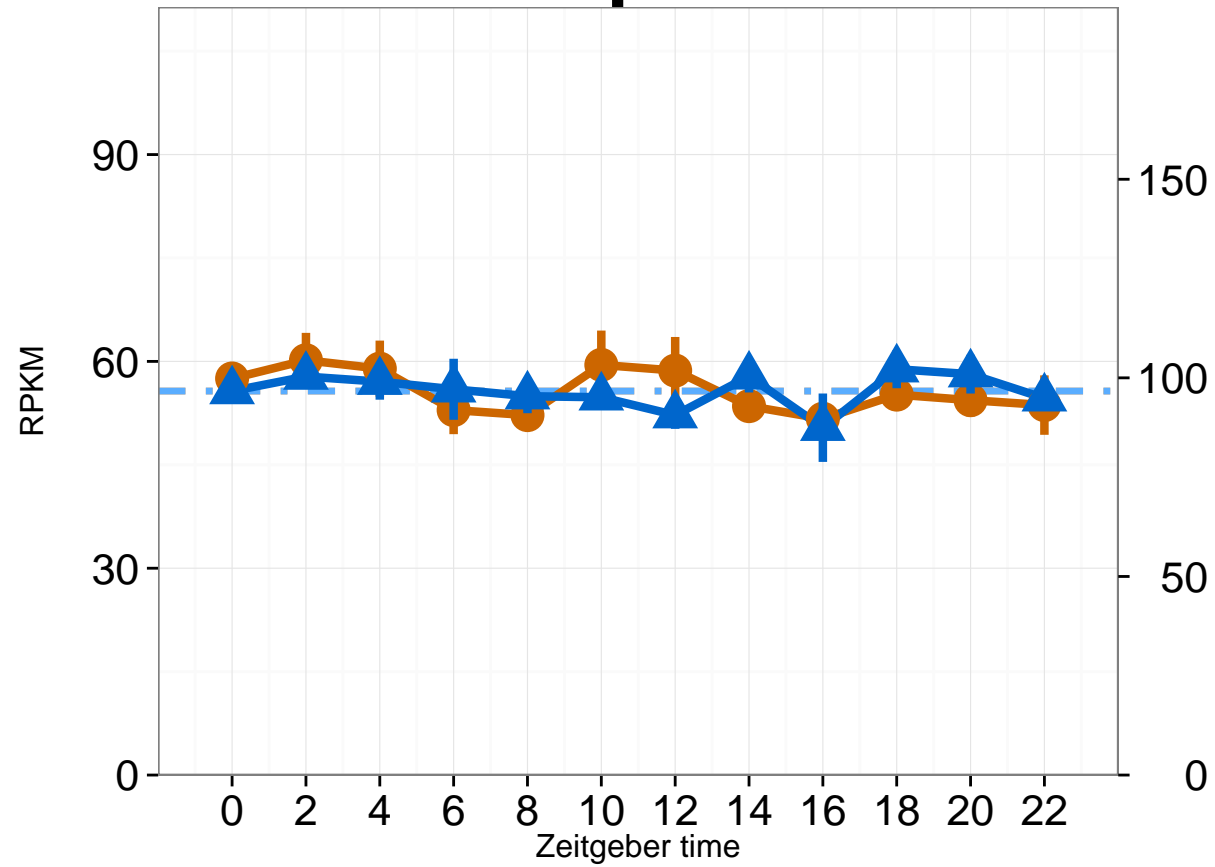

# Mrpl16

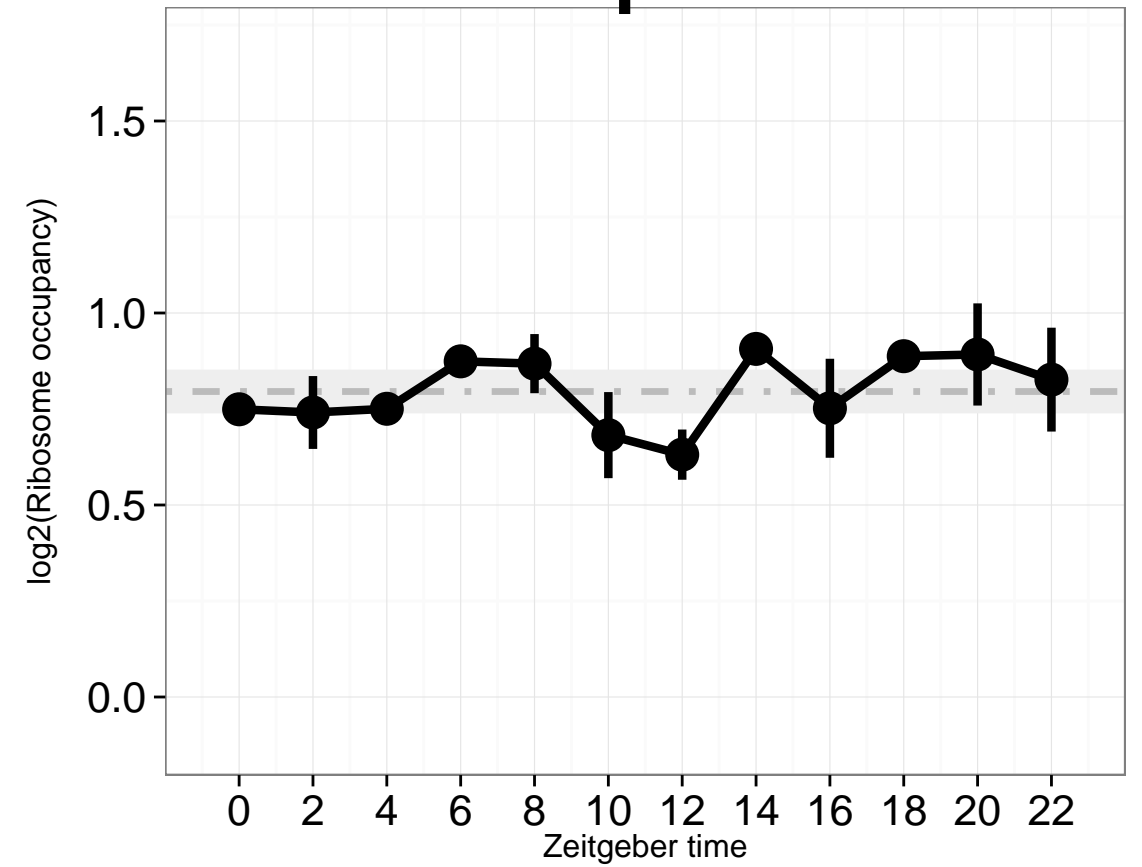

Supplement: Supplementary file 4554 [file 1]

# Casp1

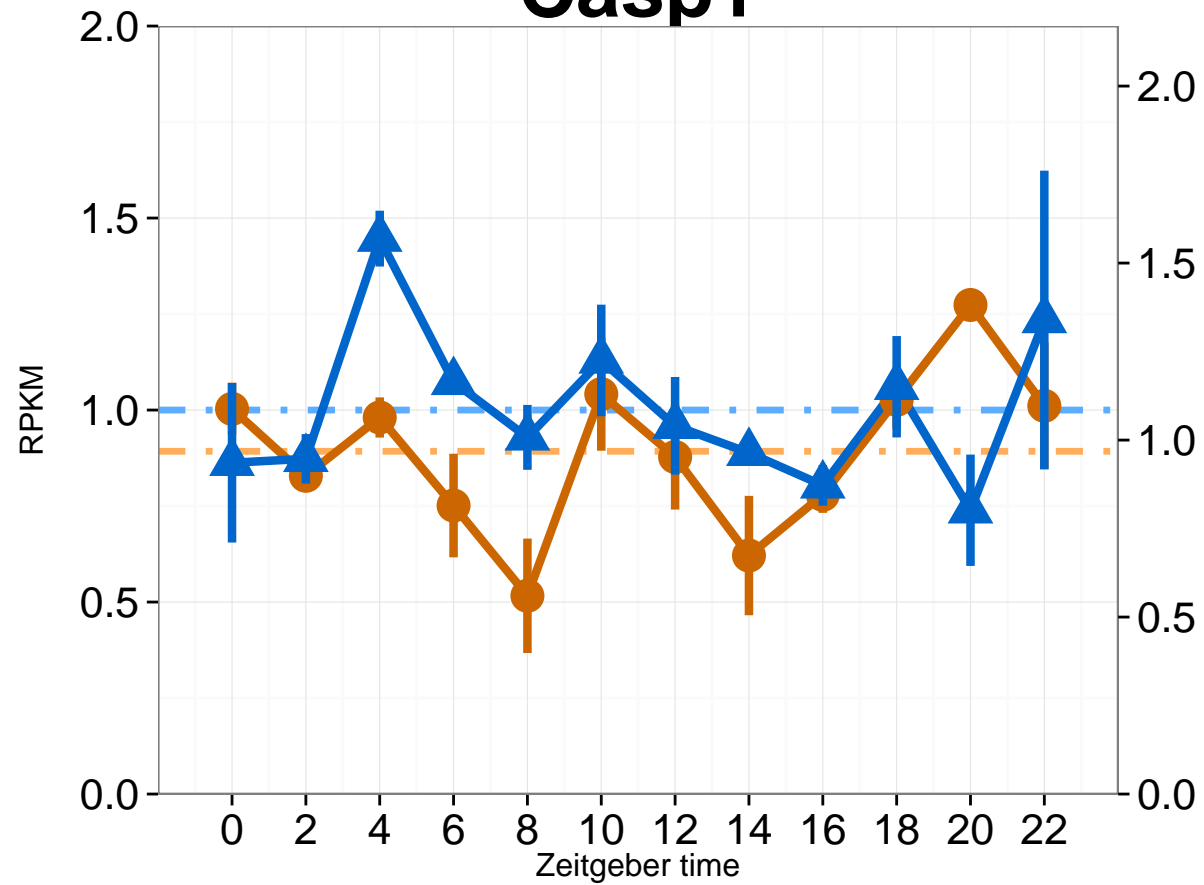

# Casp1

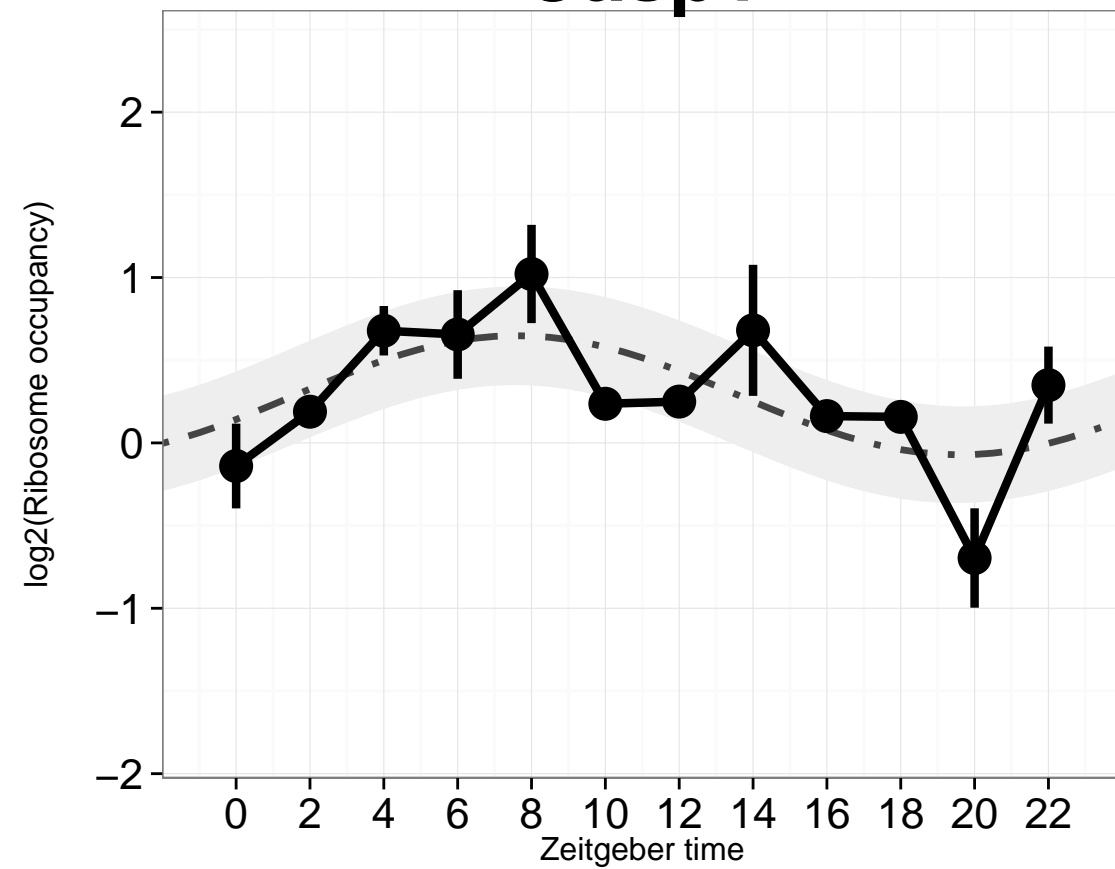

Supplement: Supplementary file 4555 [file 1]

## Ak4

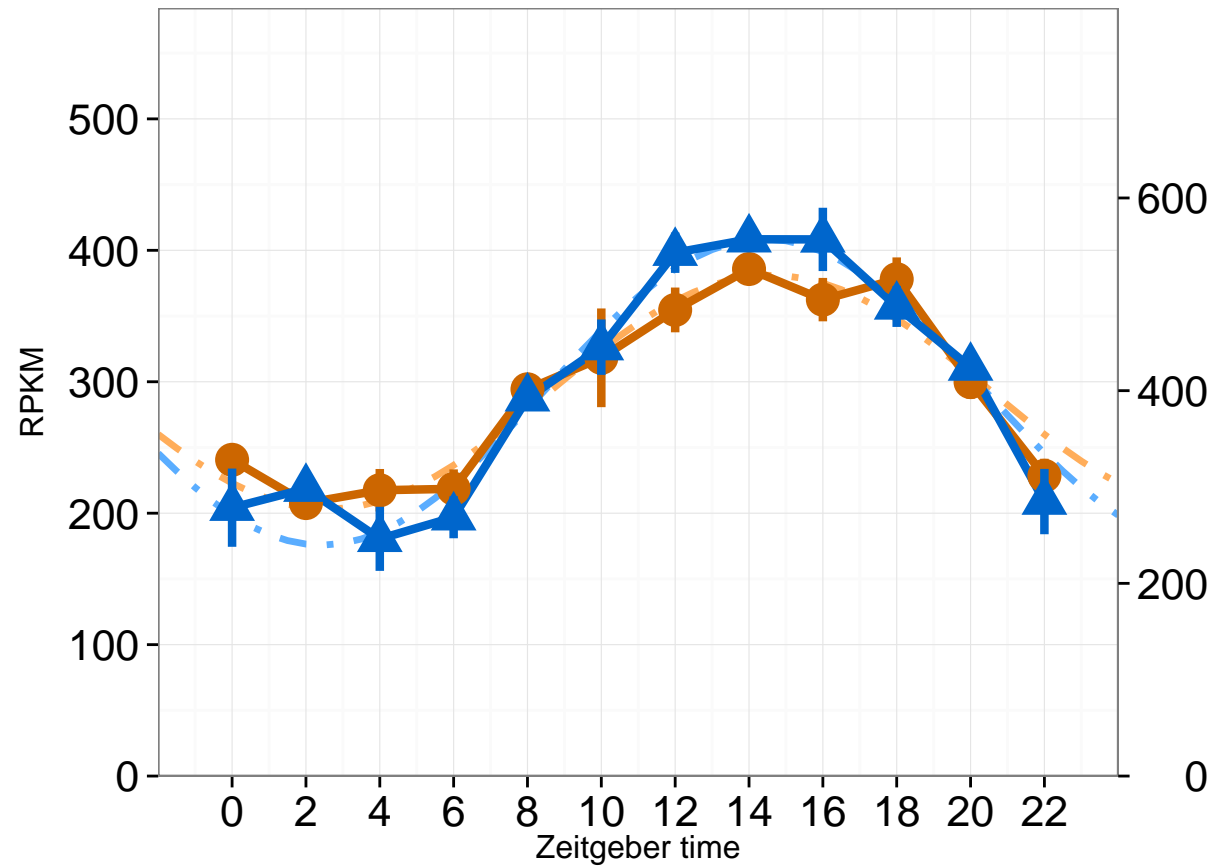

## Ak4

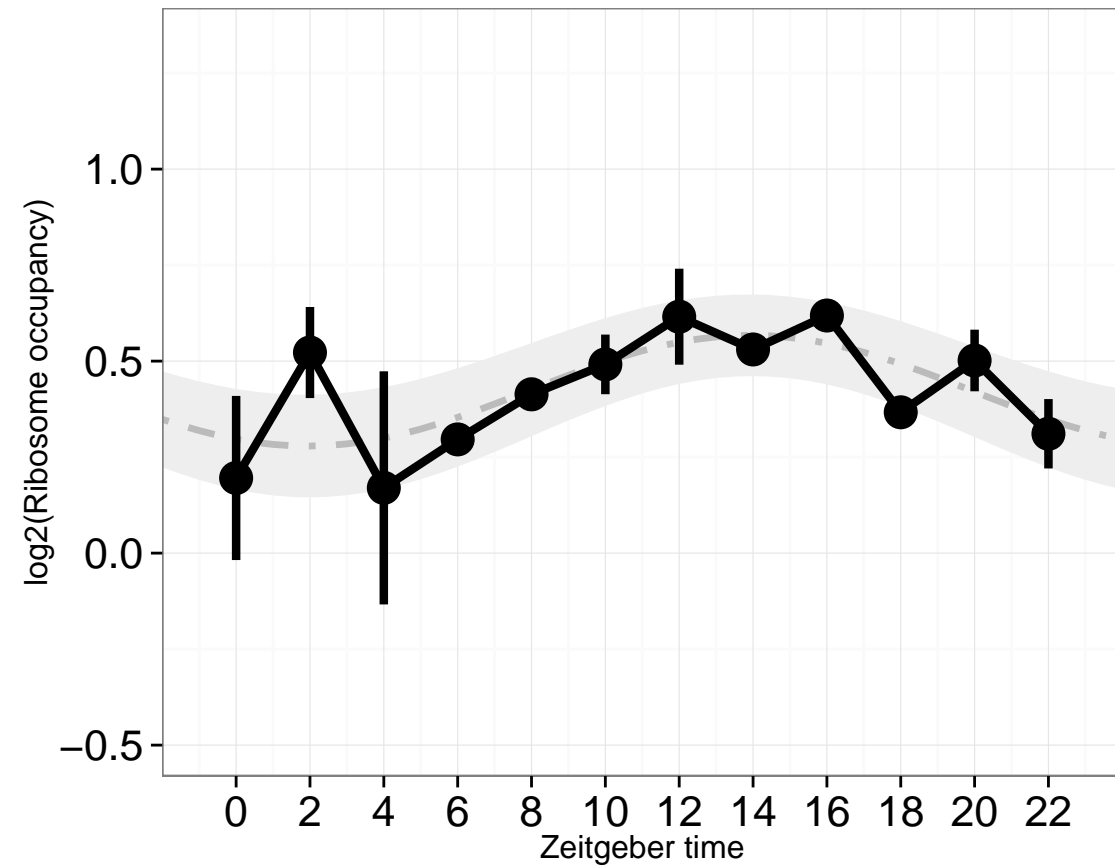

Supplement: Supplementary file 4556 [file 1]

# Usp48

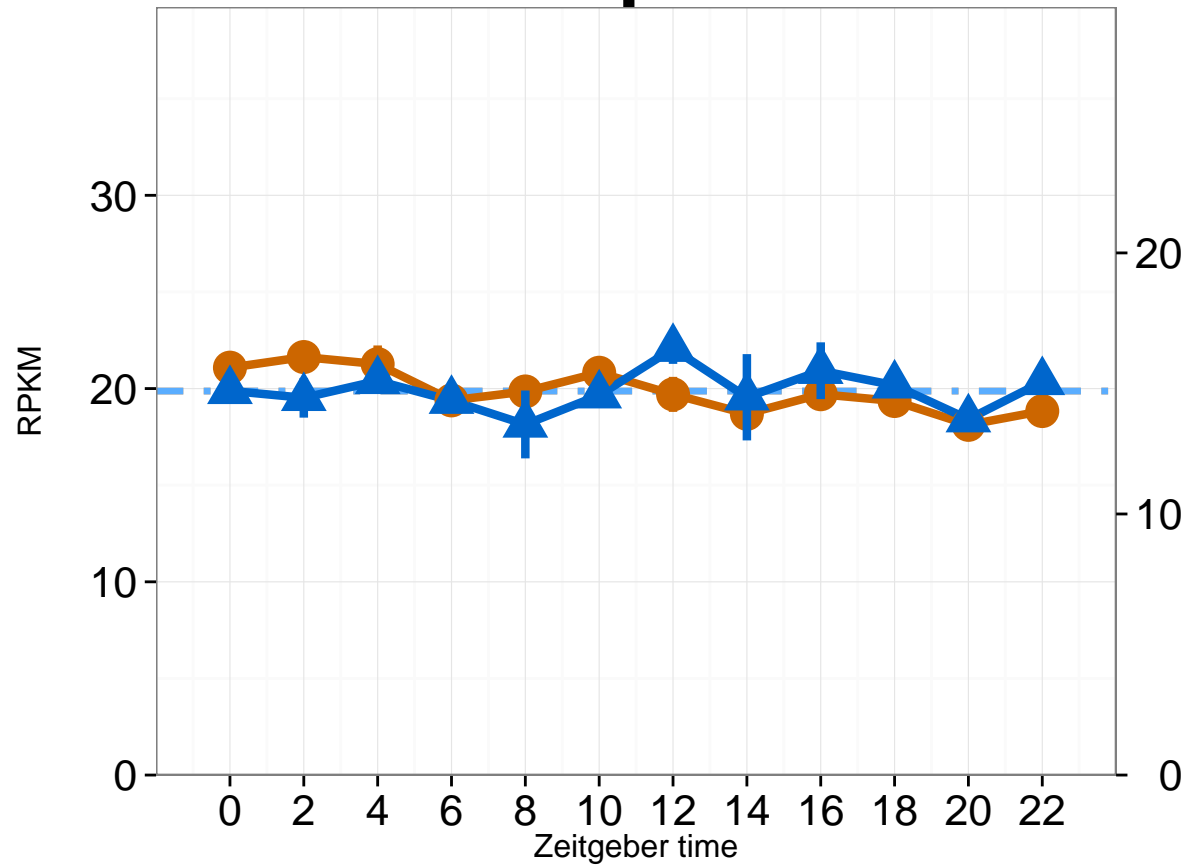

# Usp48

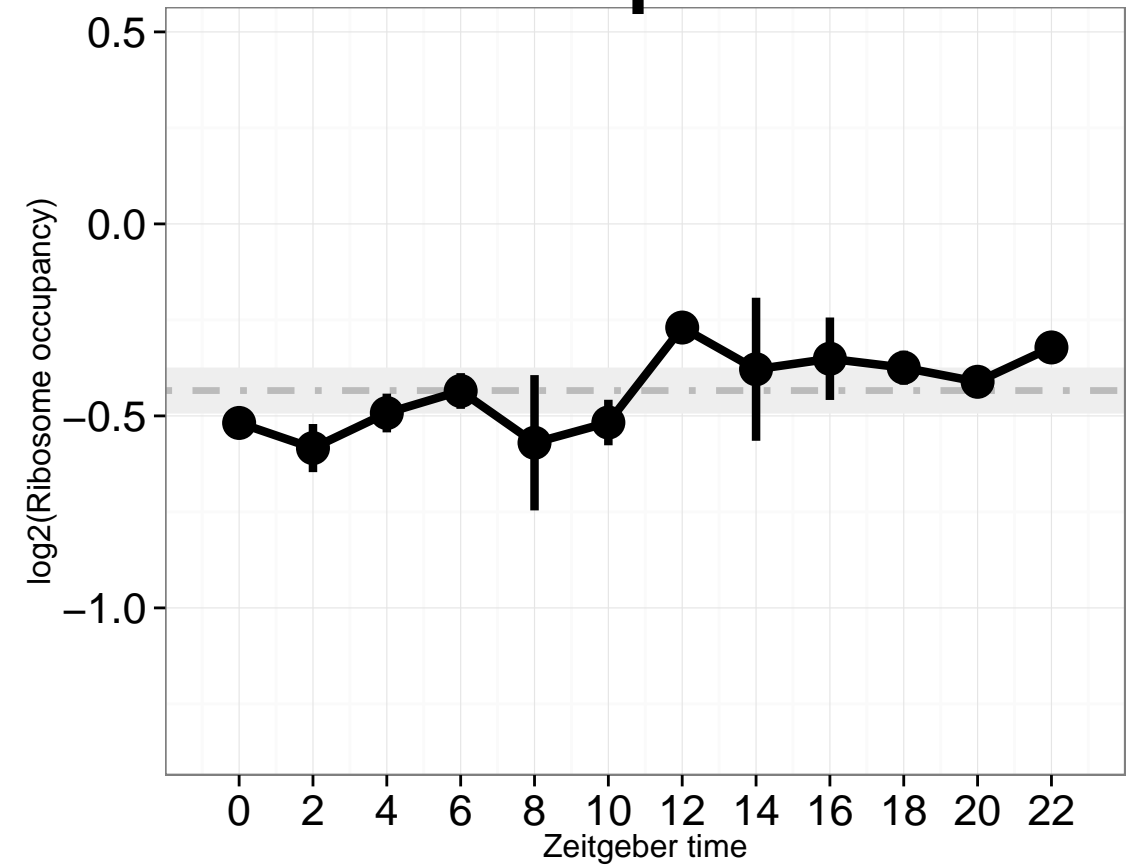

Supplement: Supplementary file 4557 [file 1]

# Slc6a20a

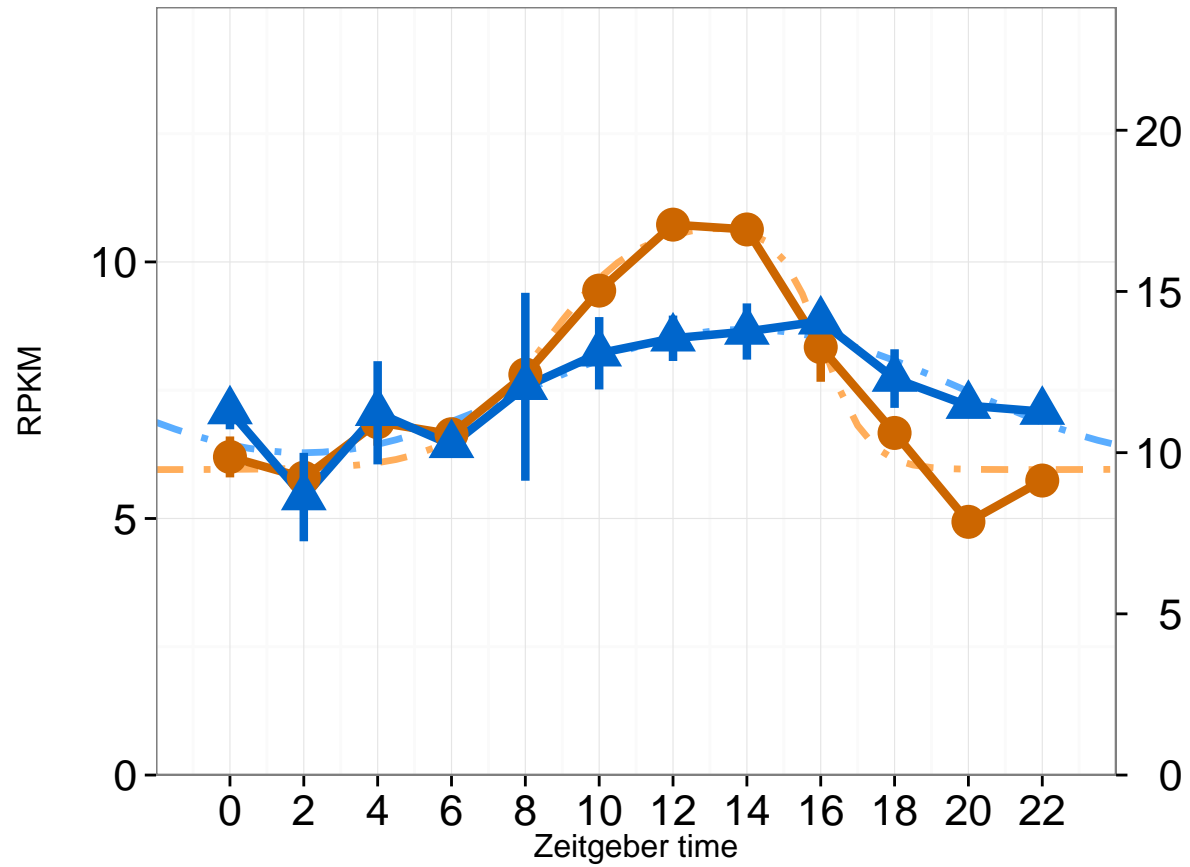

# Slc6a20a

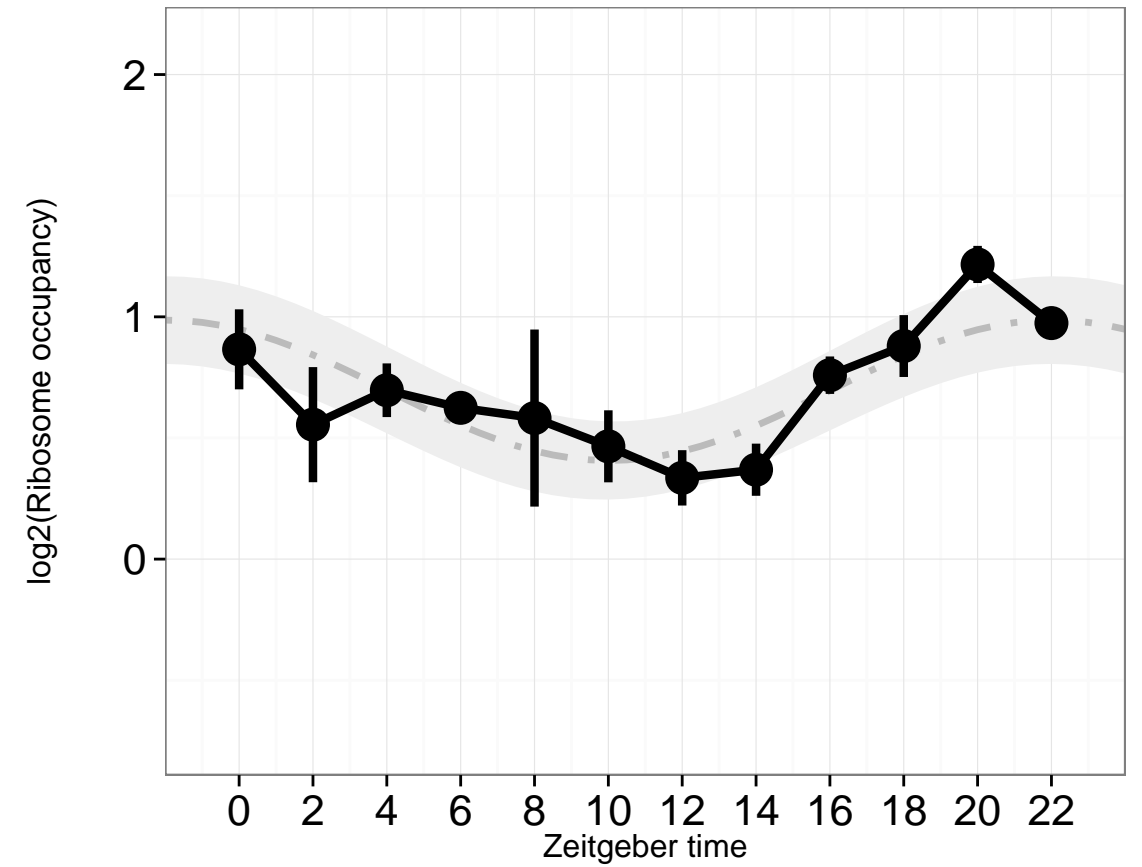

Supplement: Supplementary file 4558 [file 1]

# Pknox1

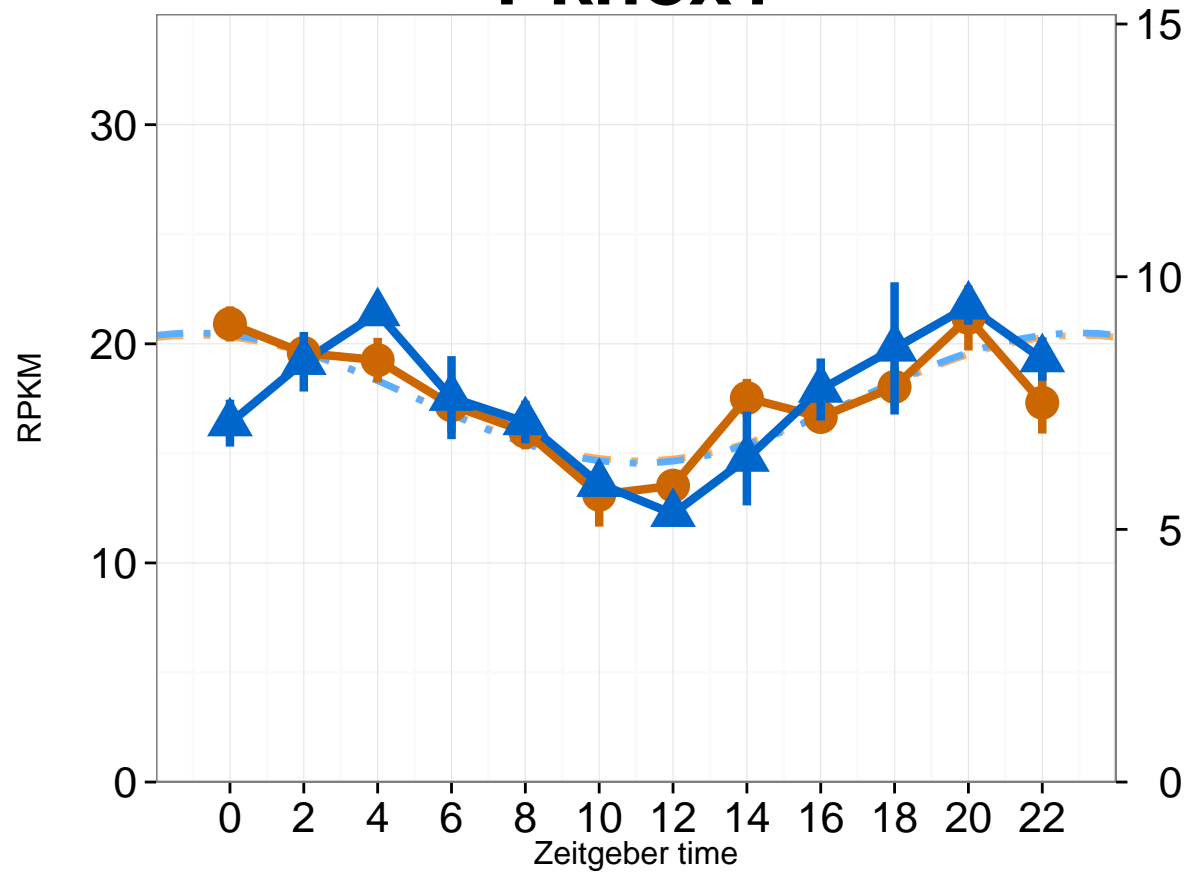

# Pknox1

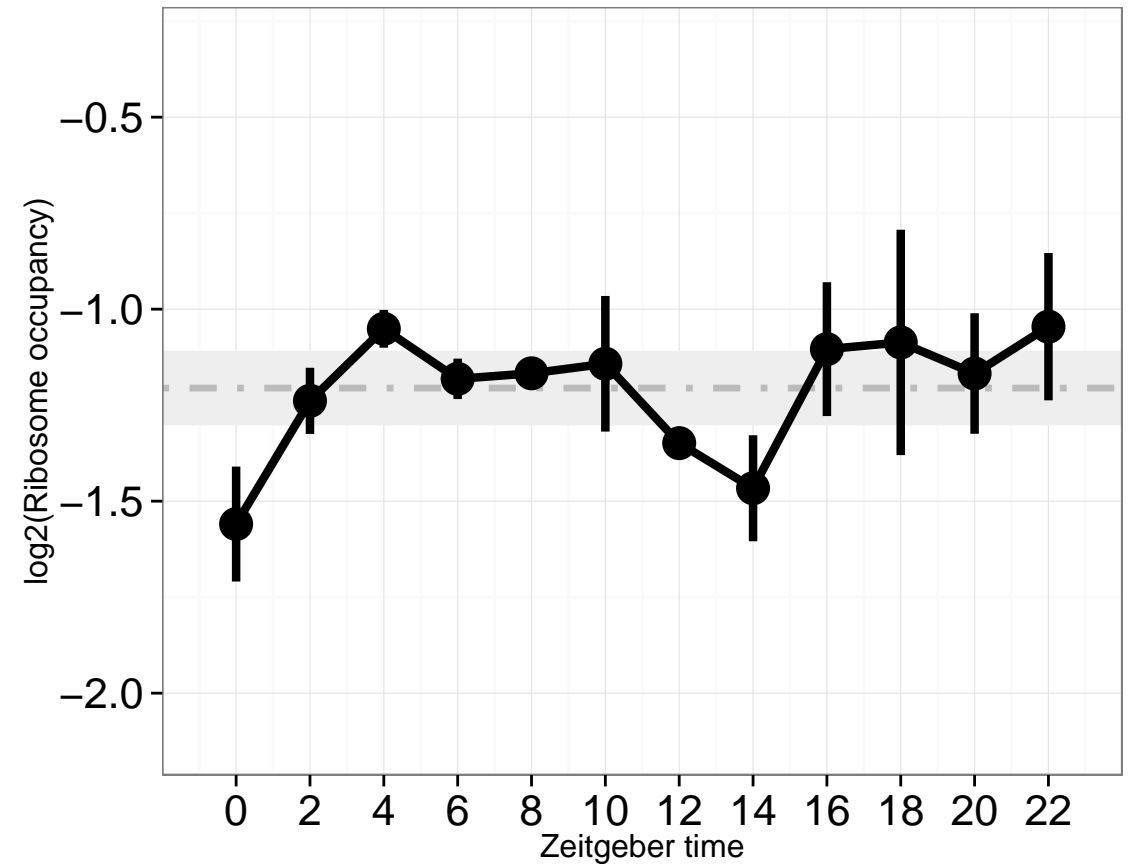

Supplement: Supplementary file 4559 [file 1]

# Ndufa12

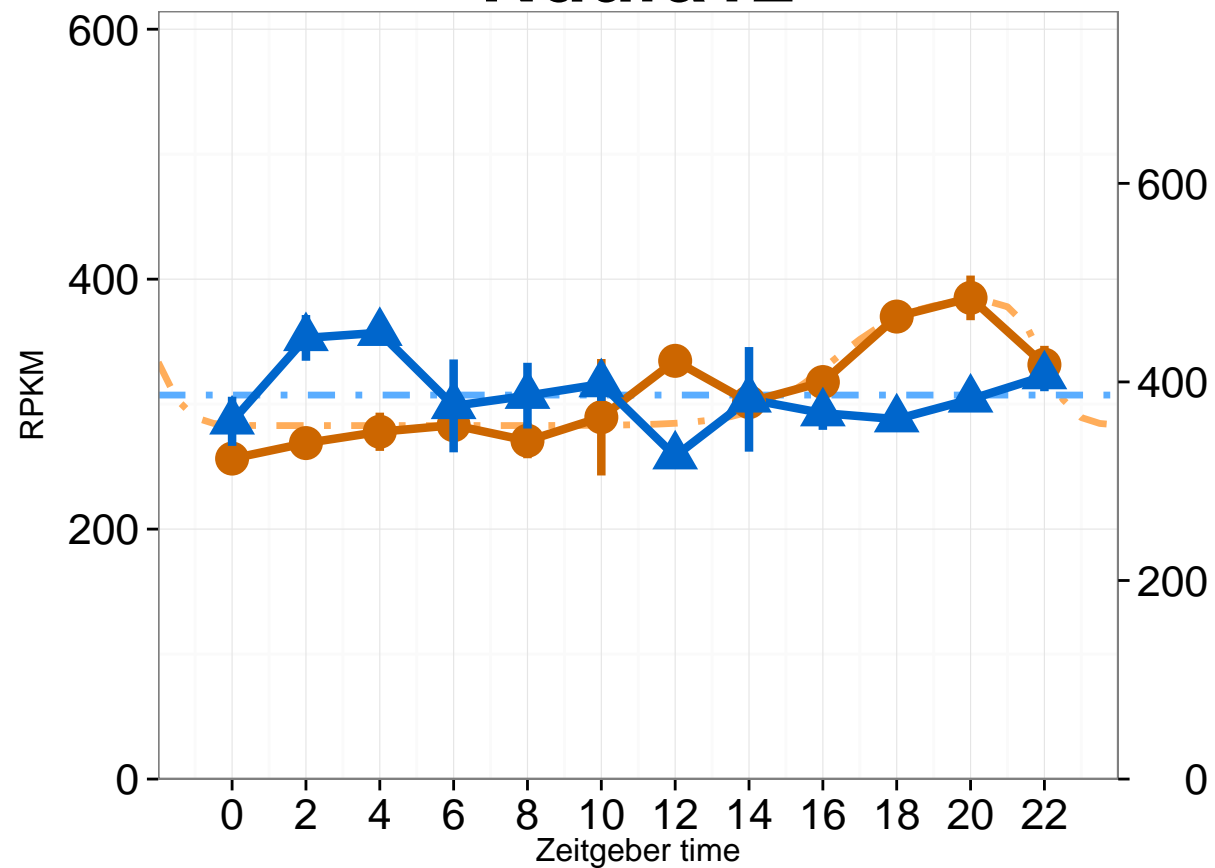

# Ndufa12

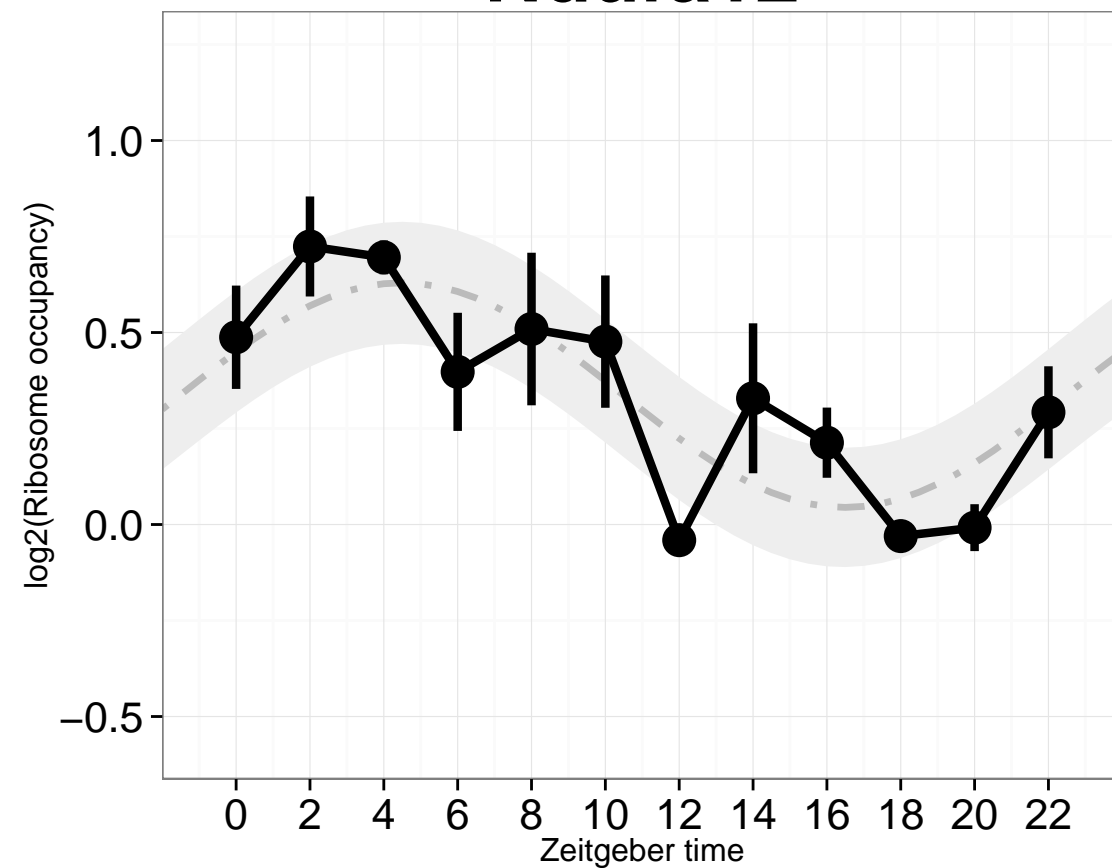

Supplement: Supplementary file 4560 [file 1]

# Tbc1d9b

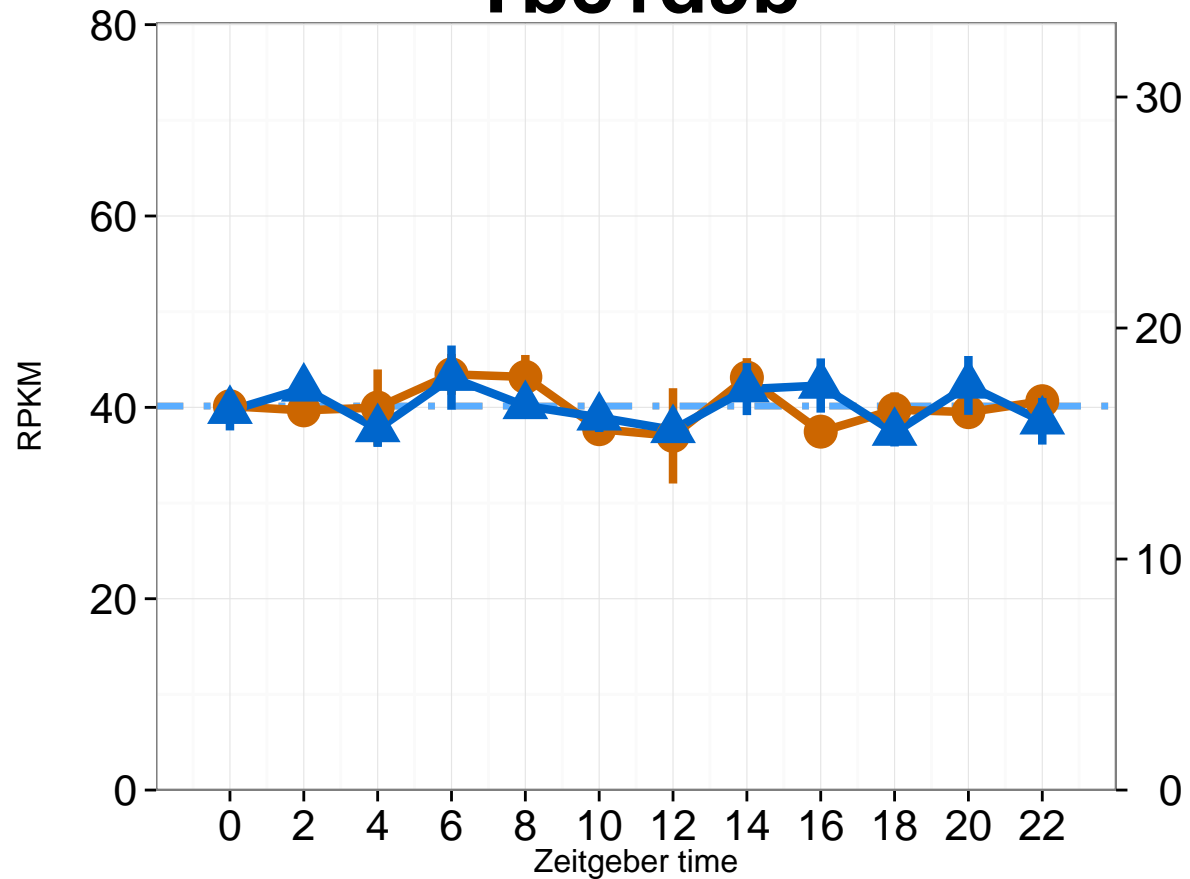

# Tbc1d9b

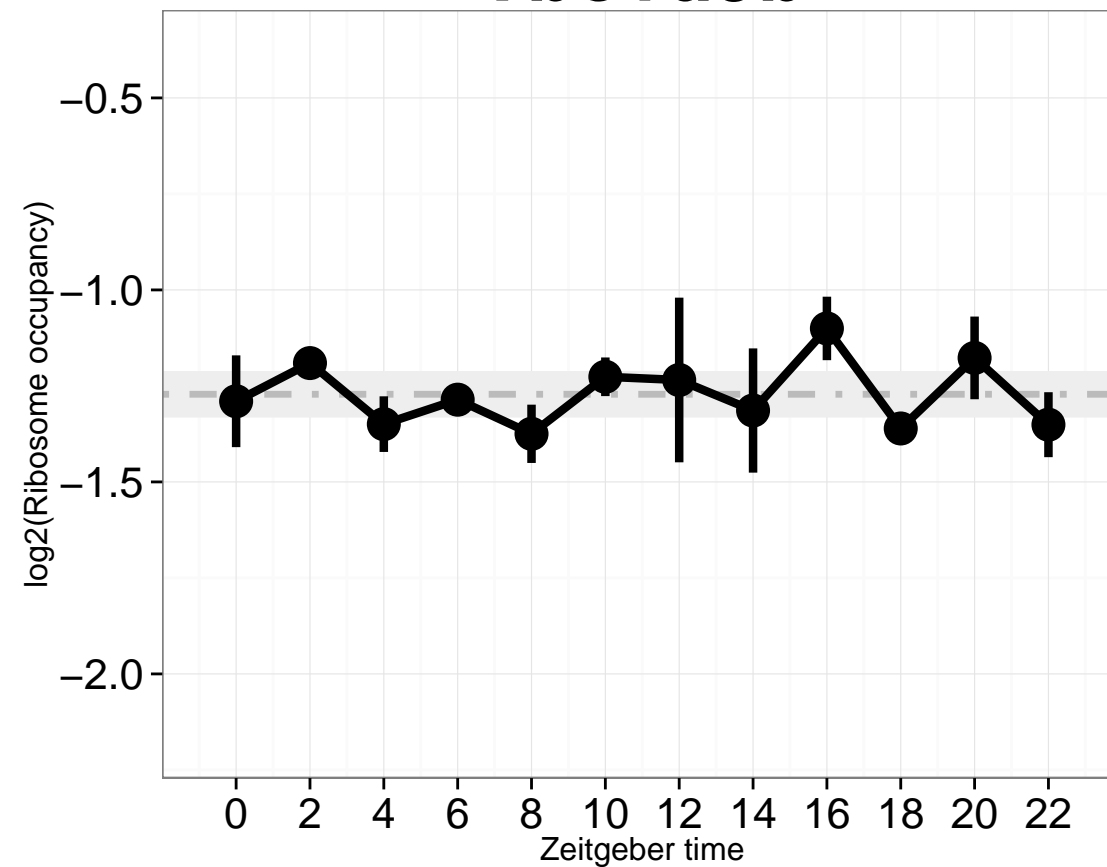

Supplement: Supplementary file 4561 [file 1]

## Slc22a29

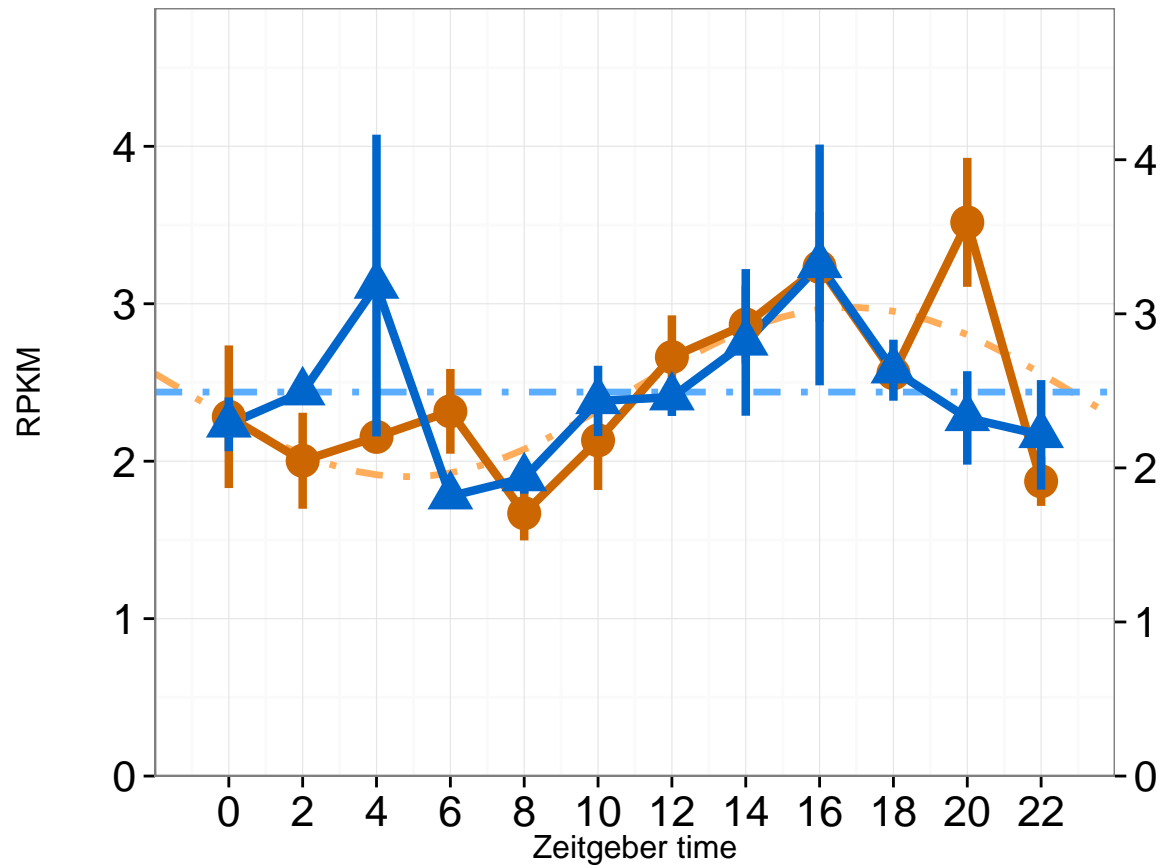

## Slc22a29

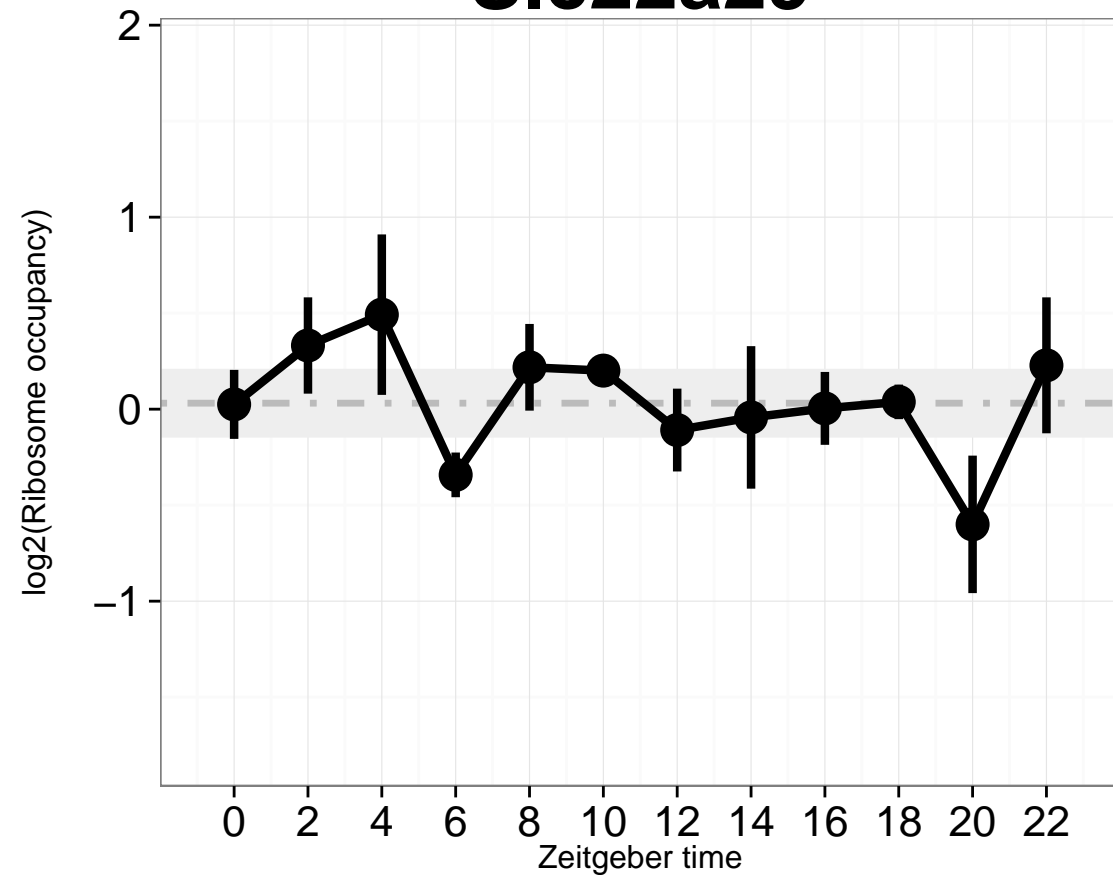

Supplement: Supplementary file 4562 [file 1]

## Blzf1

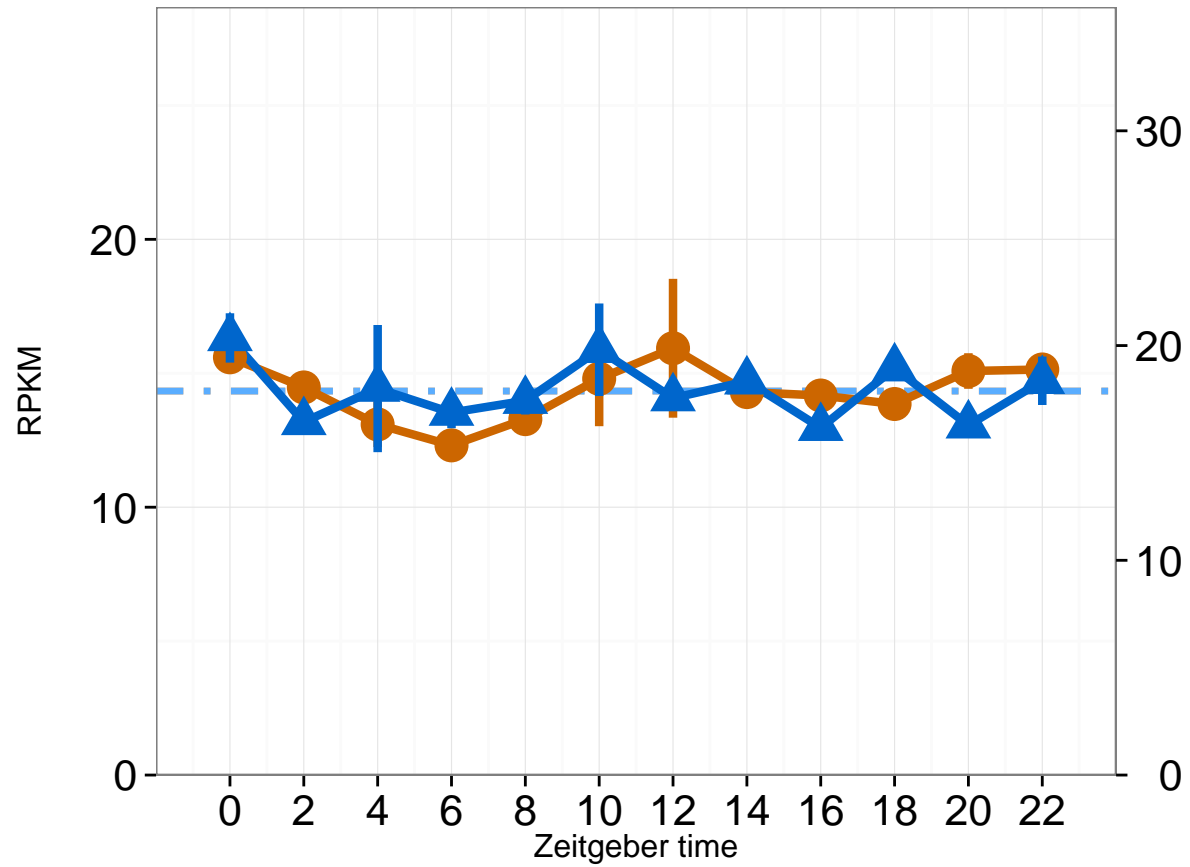

## Blzf1

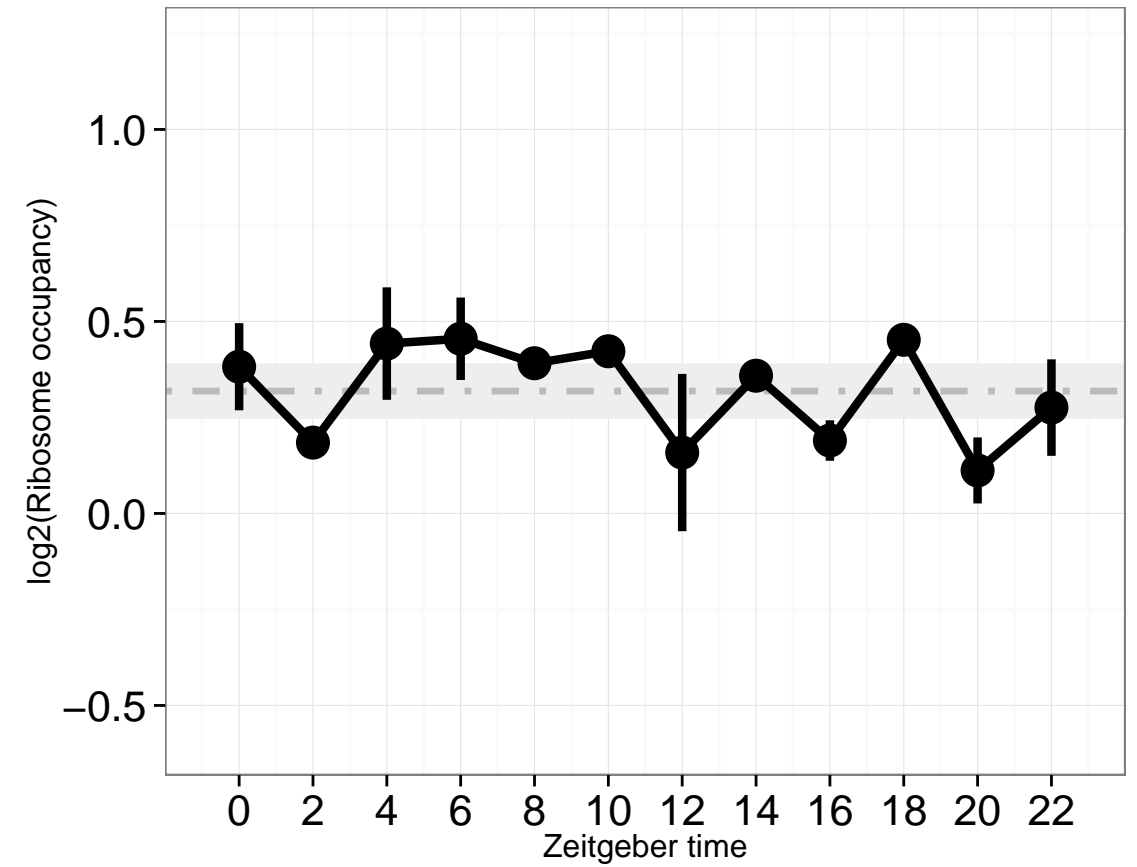

Supplement: Supplementary file 4563 [file 1]

# Gimap9

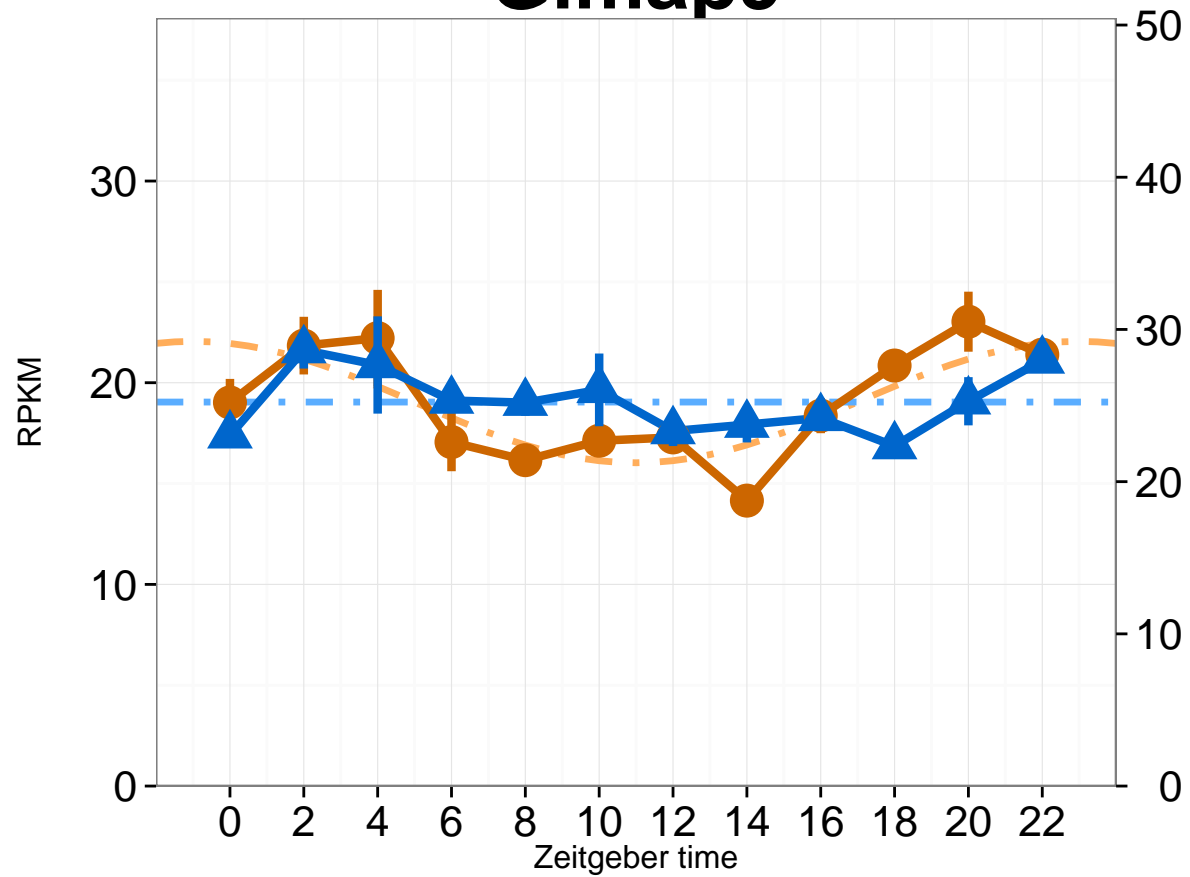

# Gimap9

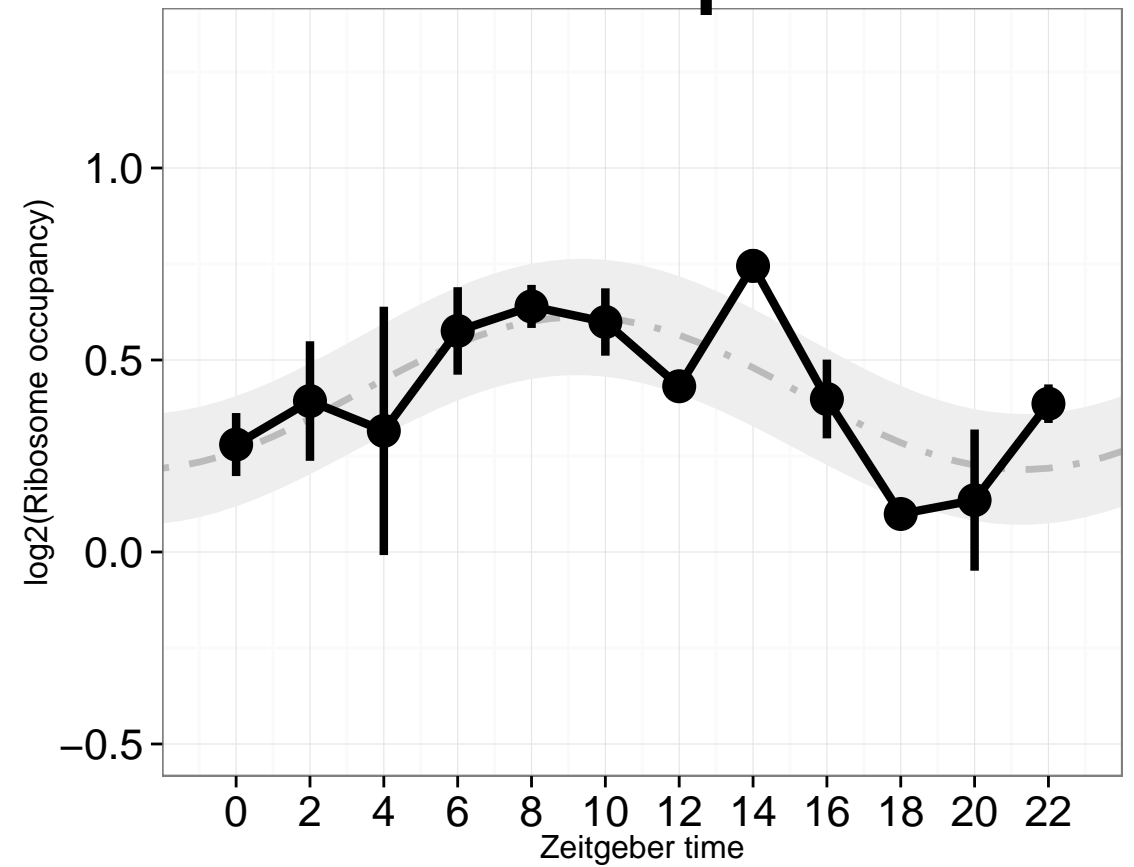

Supplement: Supplementary file 4564 [file 1]

## Gapdh

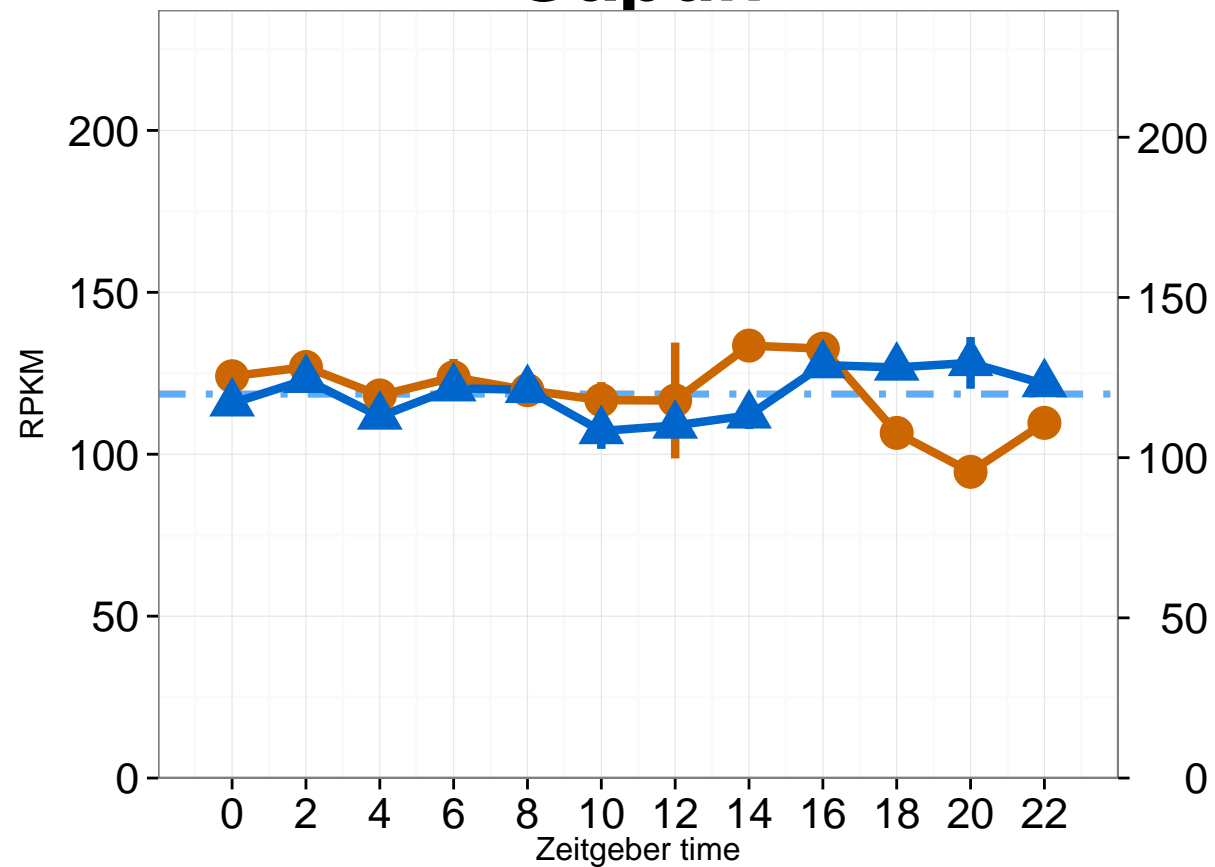

## Gapdh

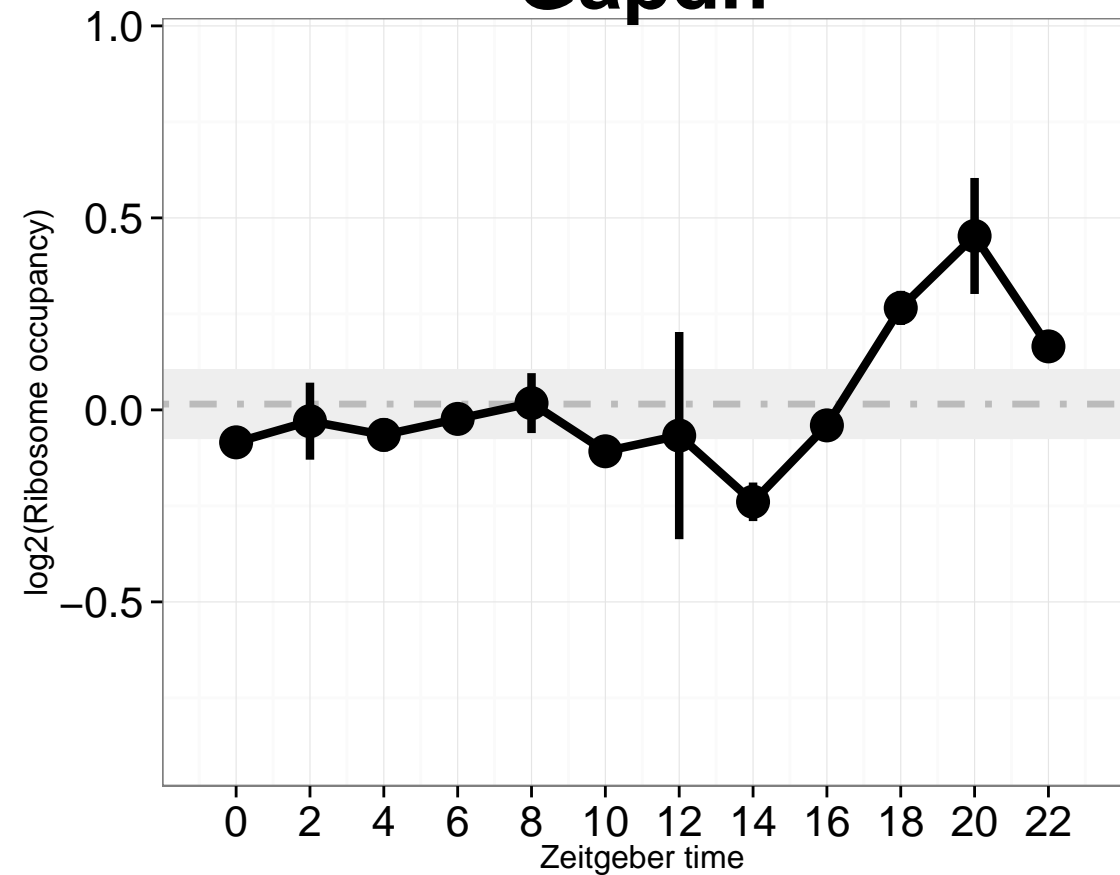

Supplement: Supplementary file 4565 [file 1]

# Mus81

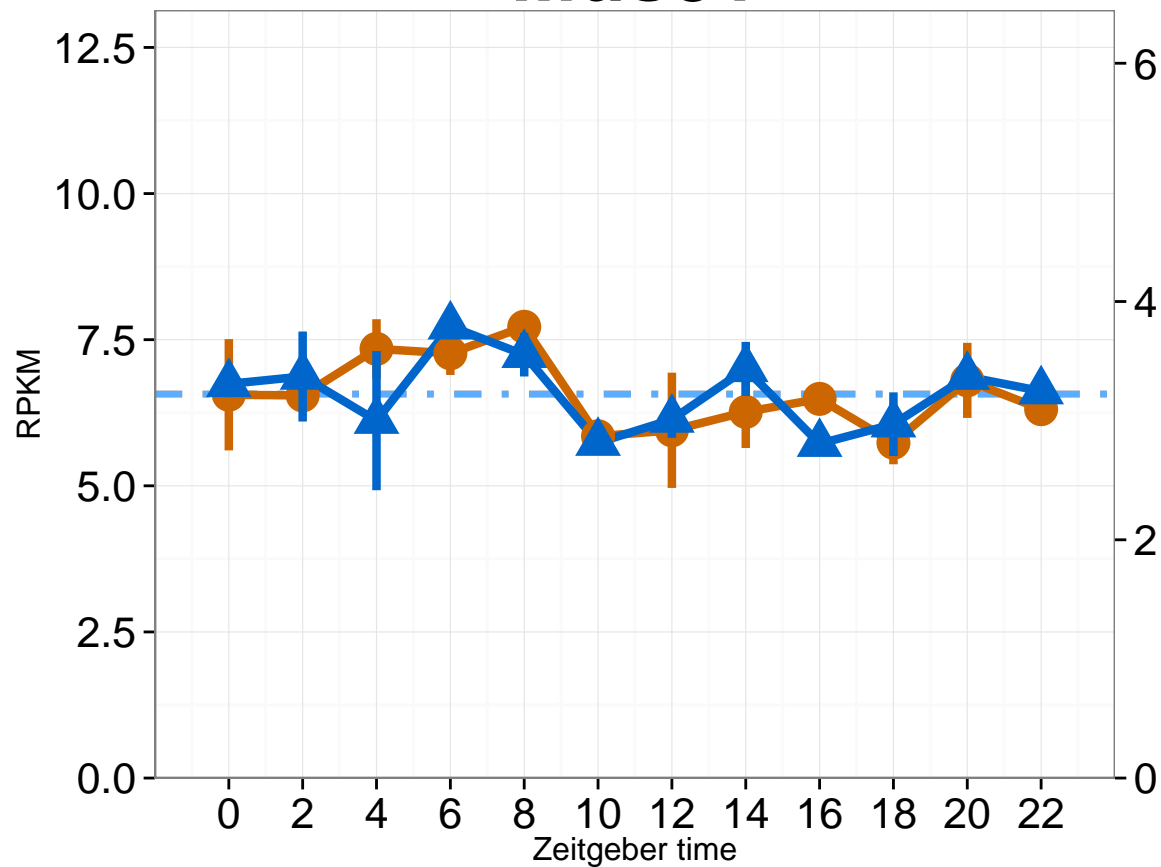

# Mus81

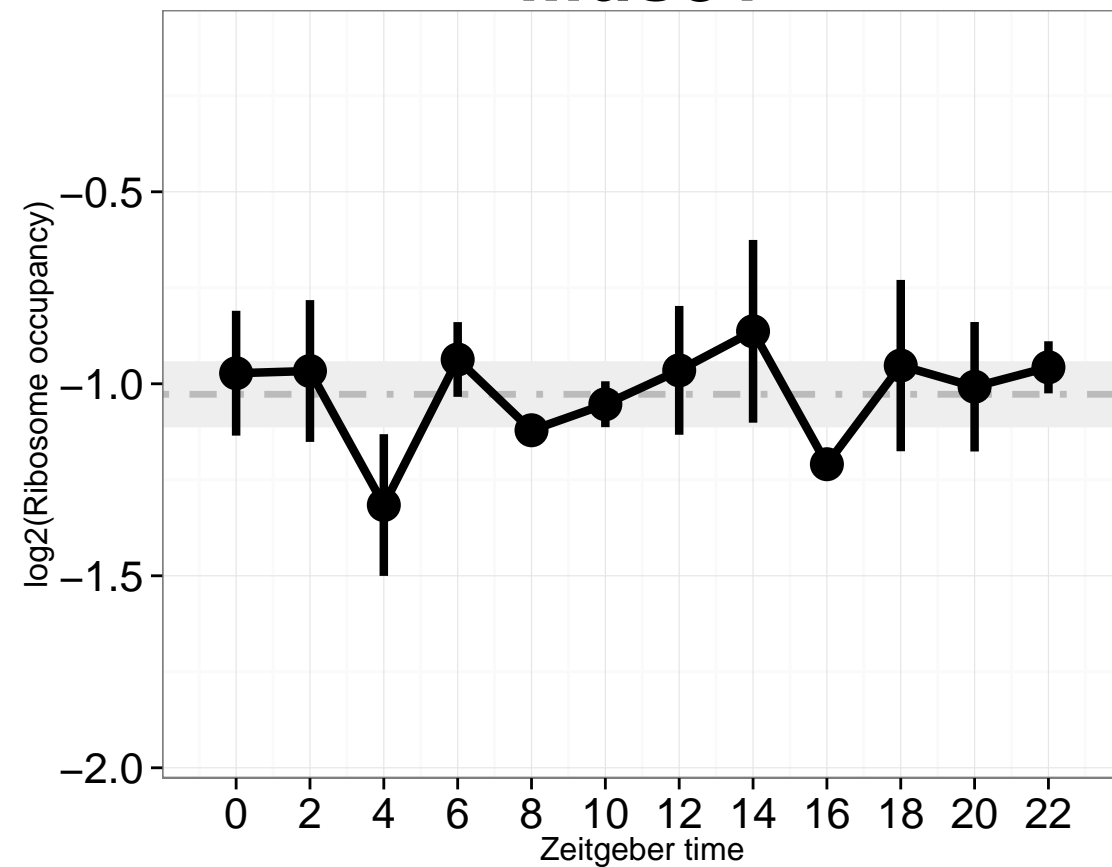

Supplement: Supplementary file 4566 [file 1]

## Rxrb

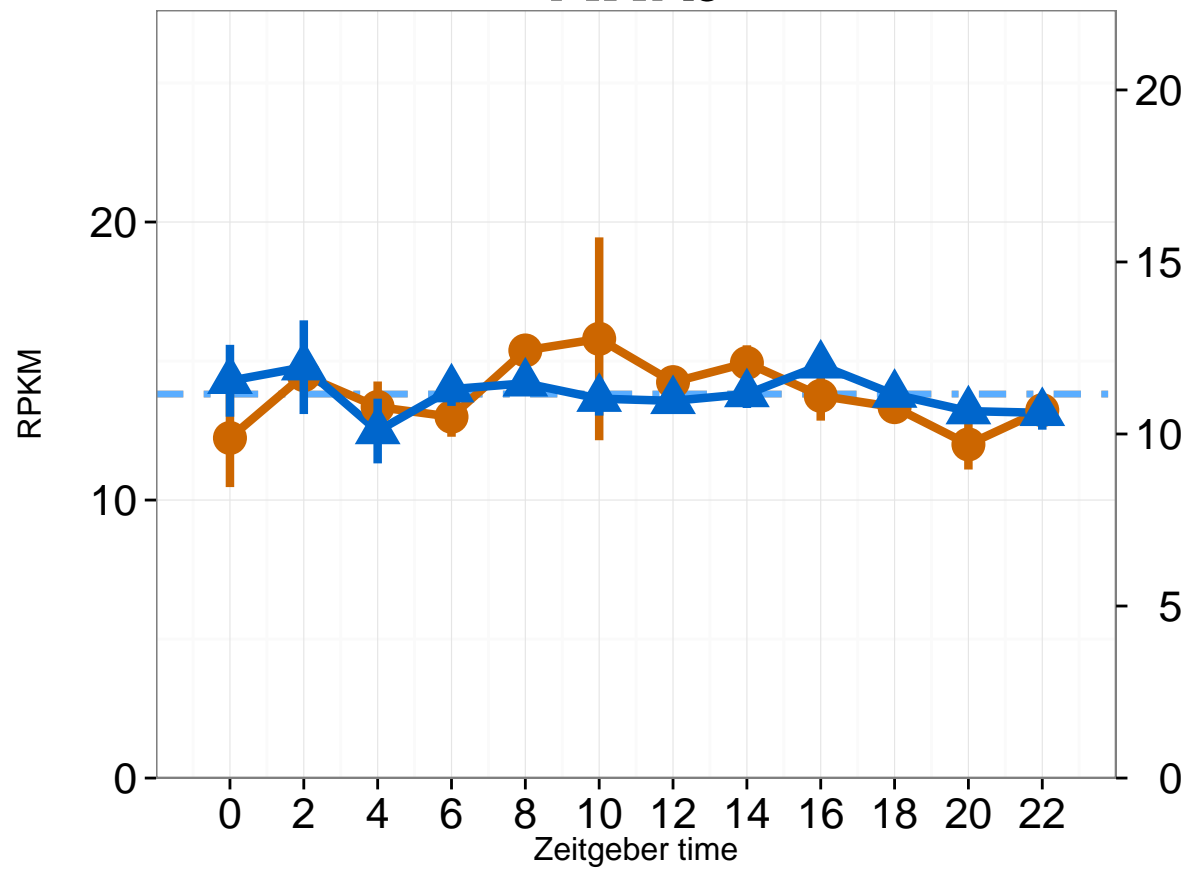

## Rxrb

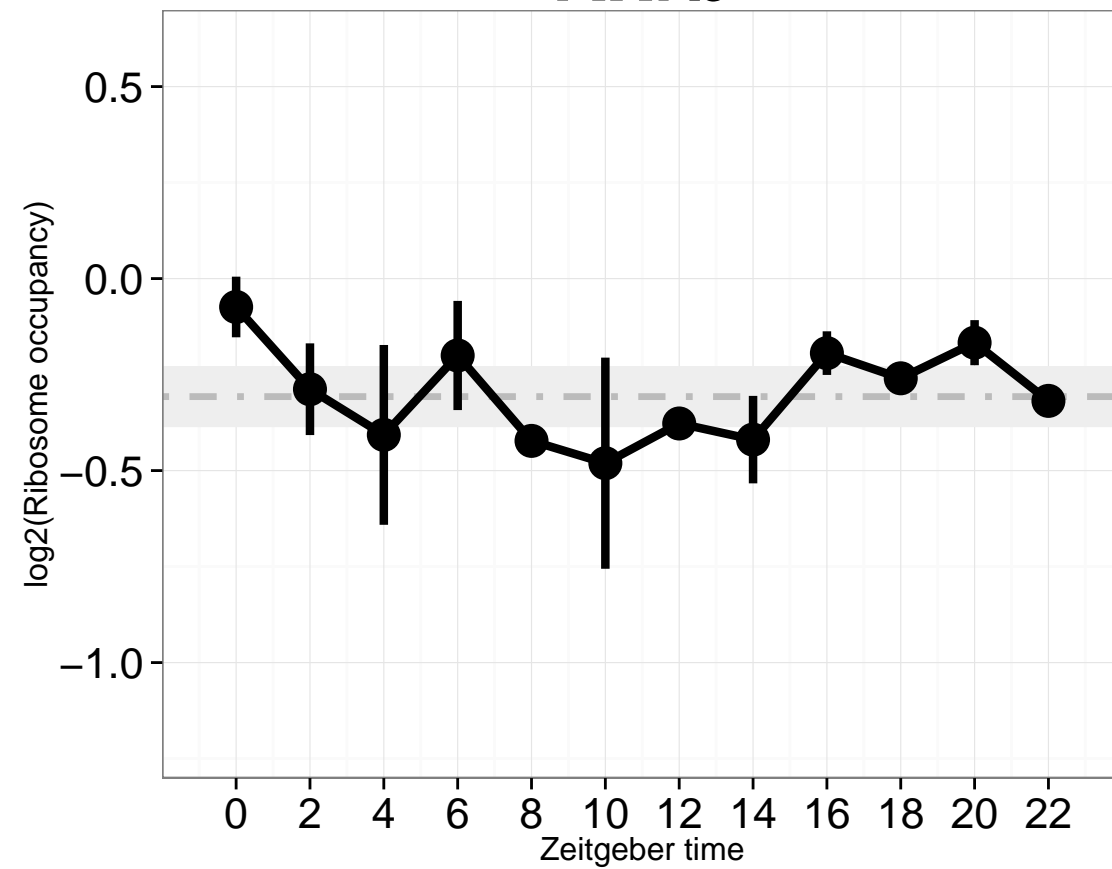

Supplement: Supplementary file 4567 [file 1]

## Rasal2

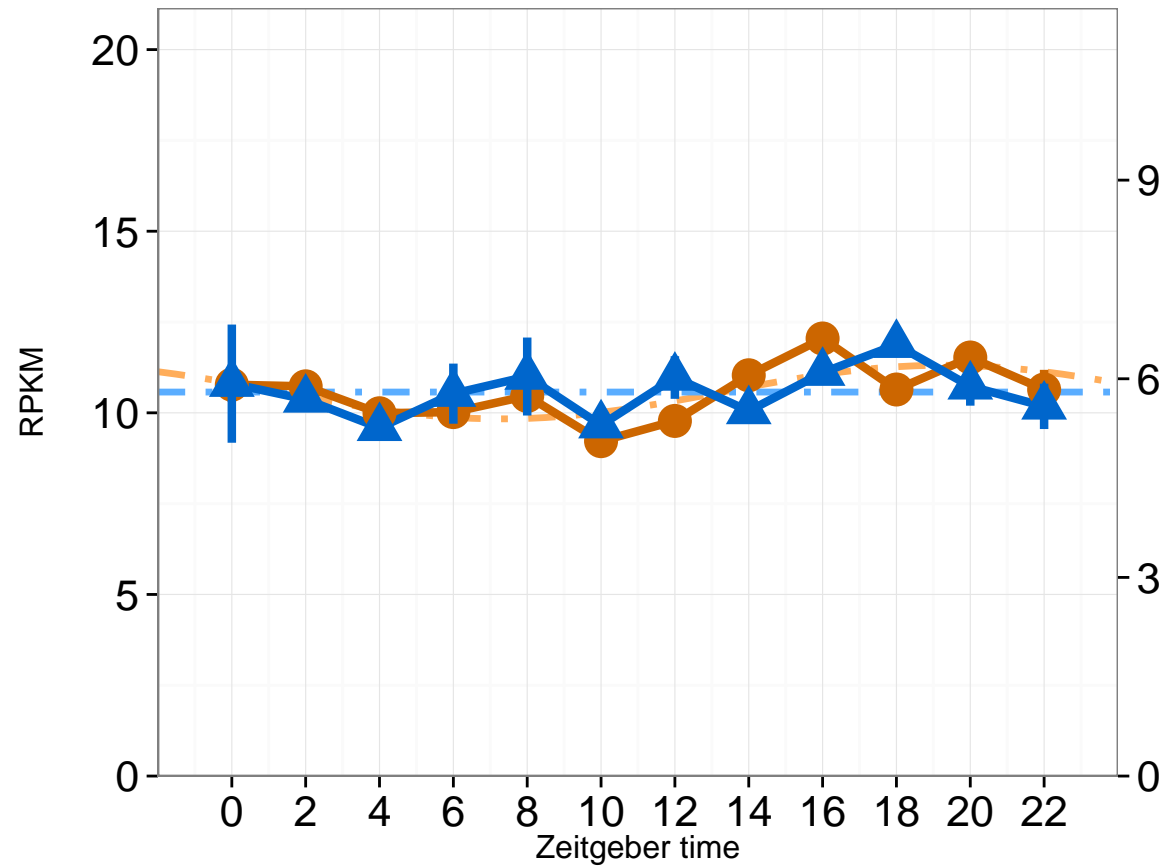

## Rasal2

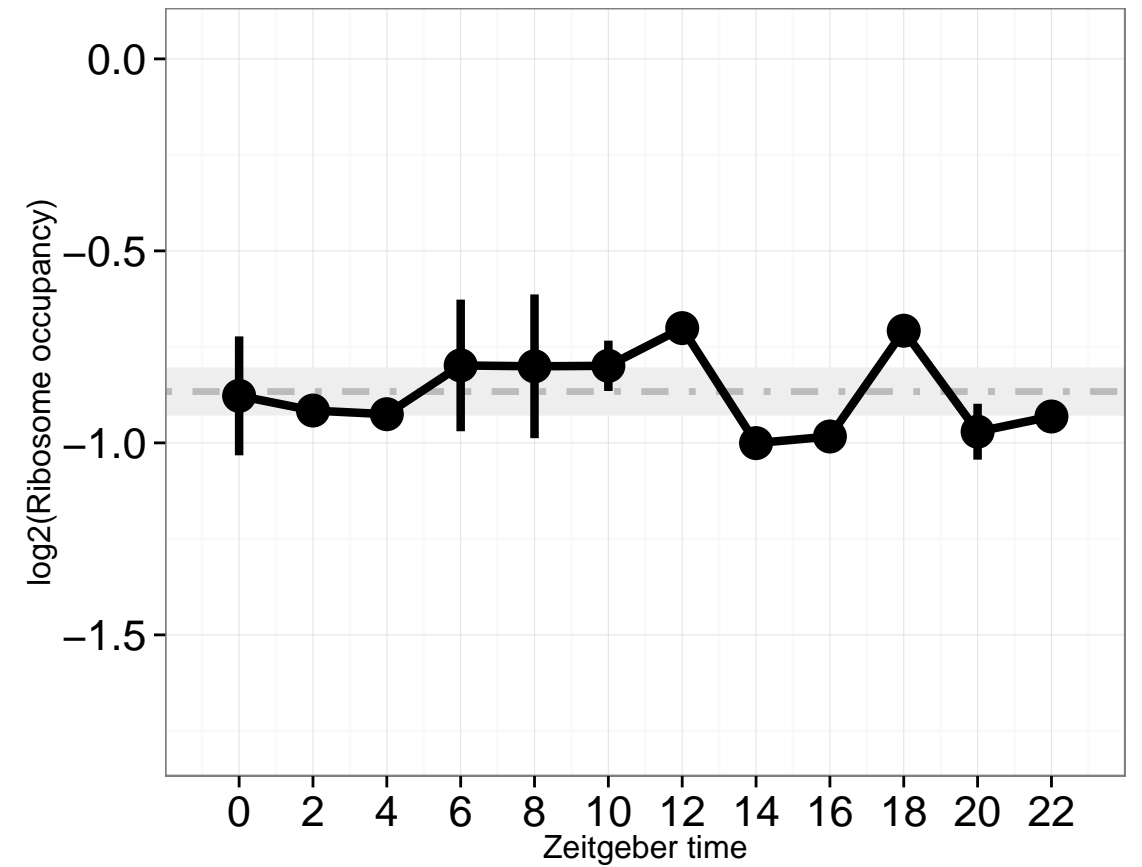

Supplement: Supplementary file 4568 [file 1]

# Wfs1

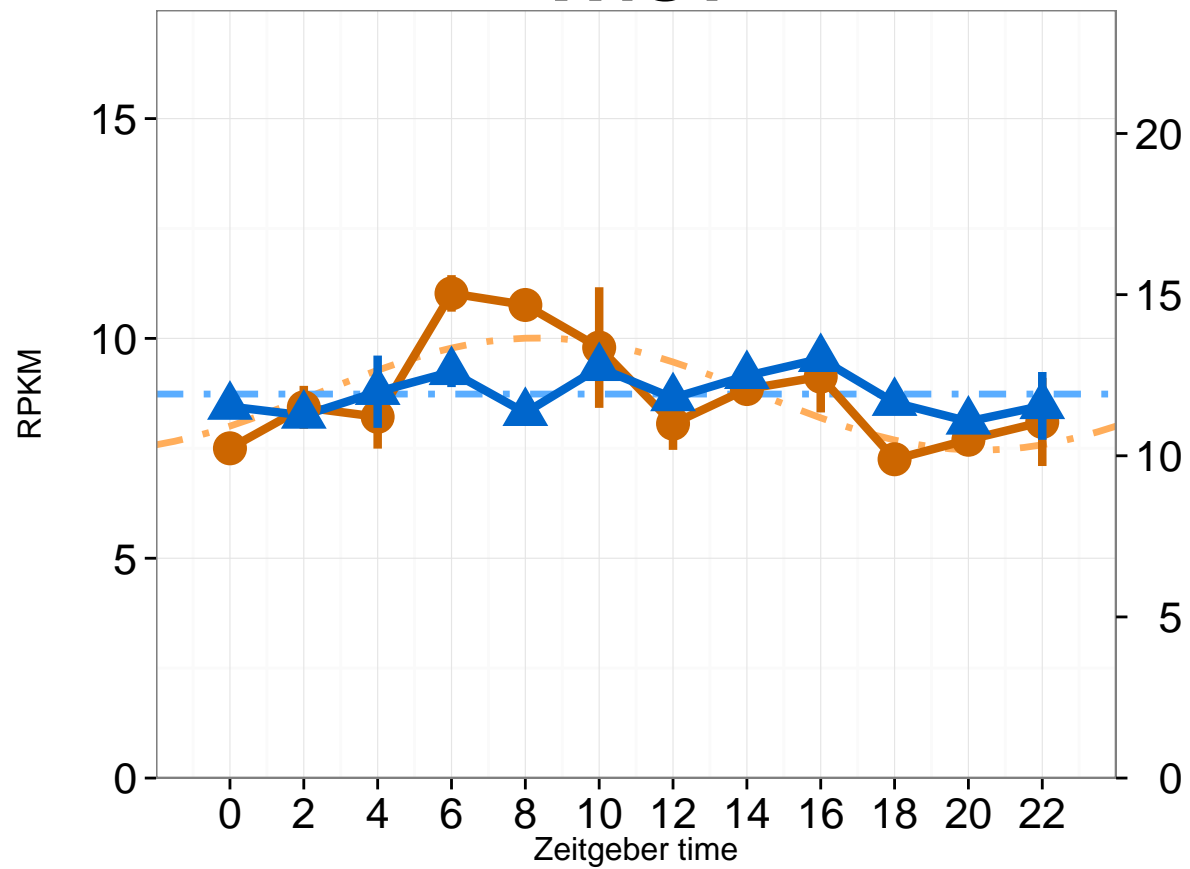

# Wfs1

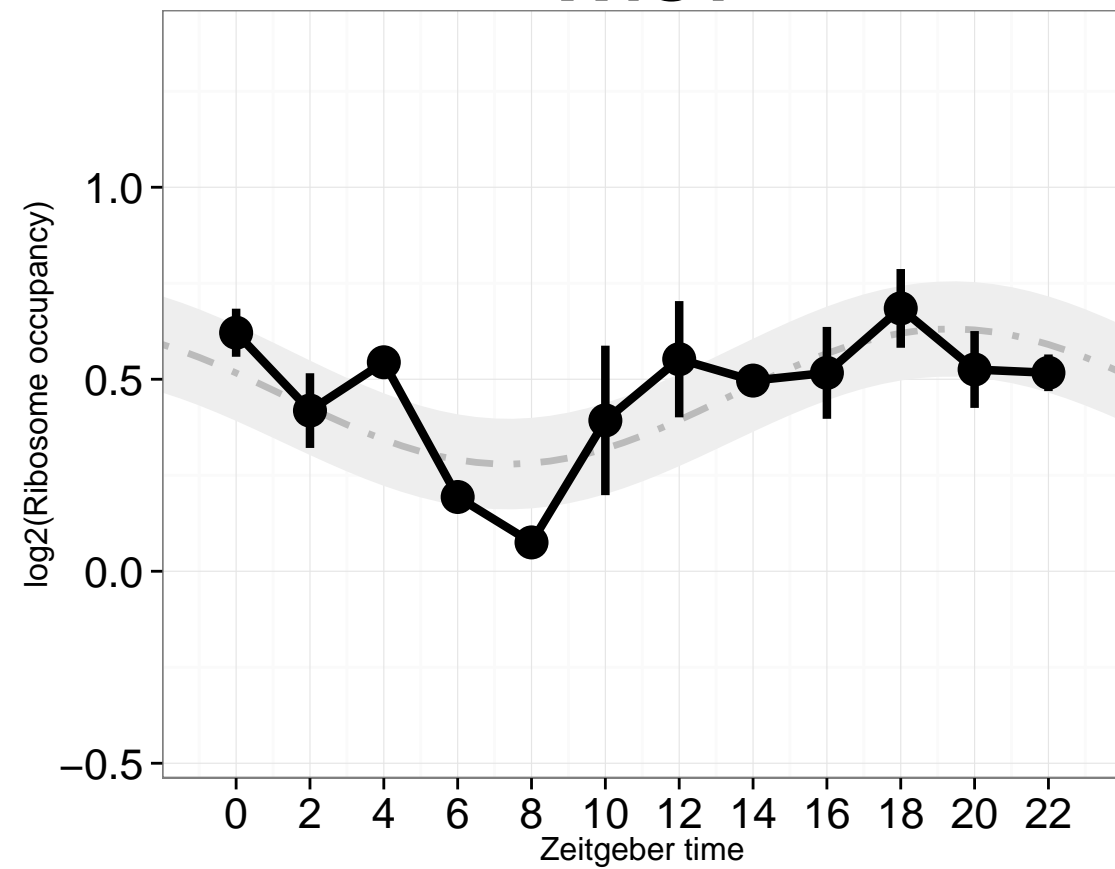

Supplement: Supplementary file 4569 [file 1]

## Kctd21

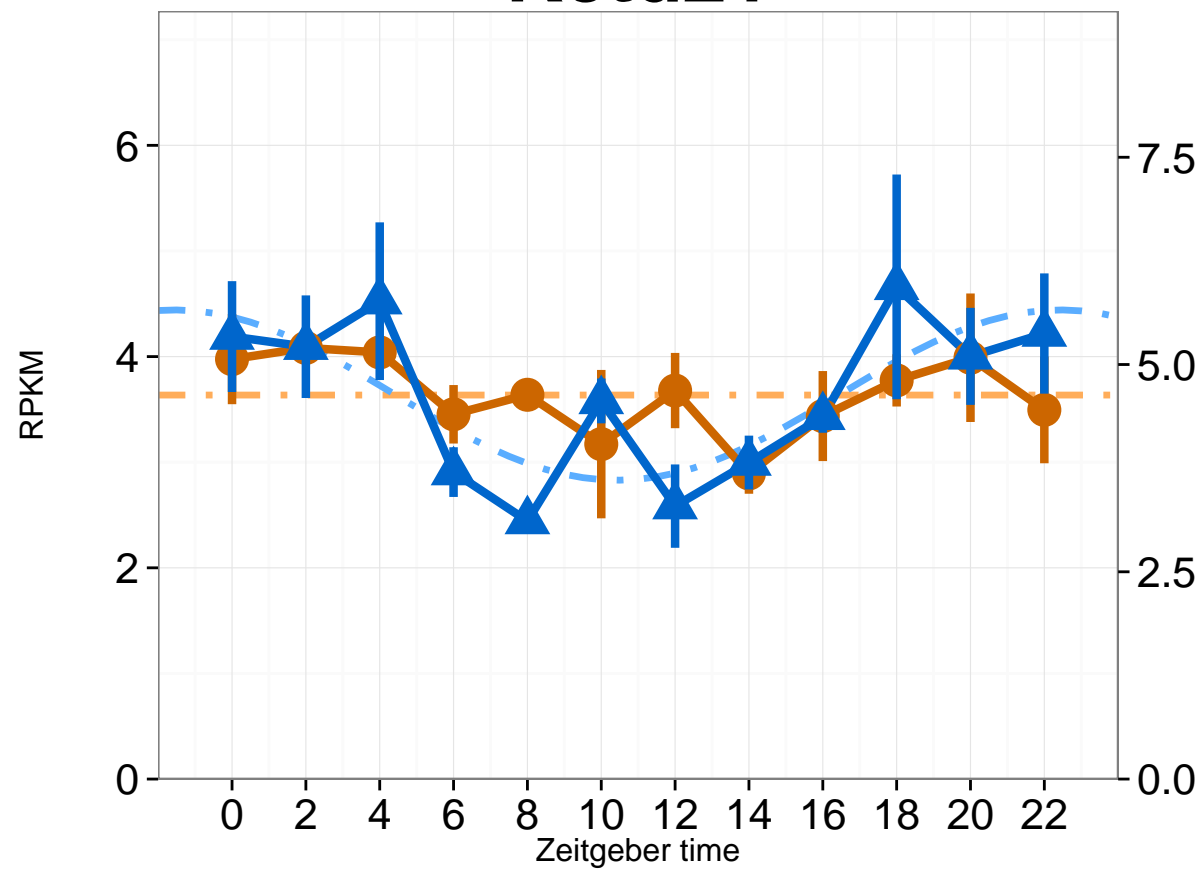

## Kctd21

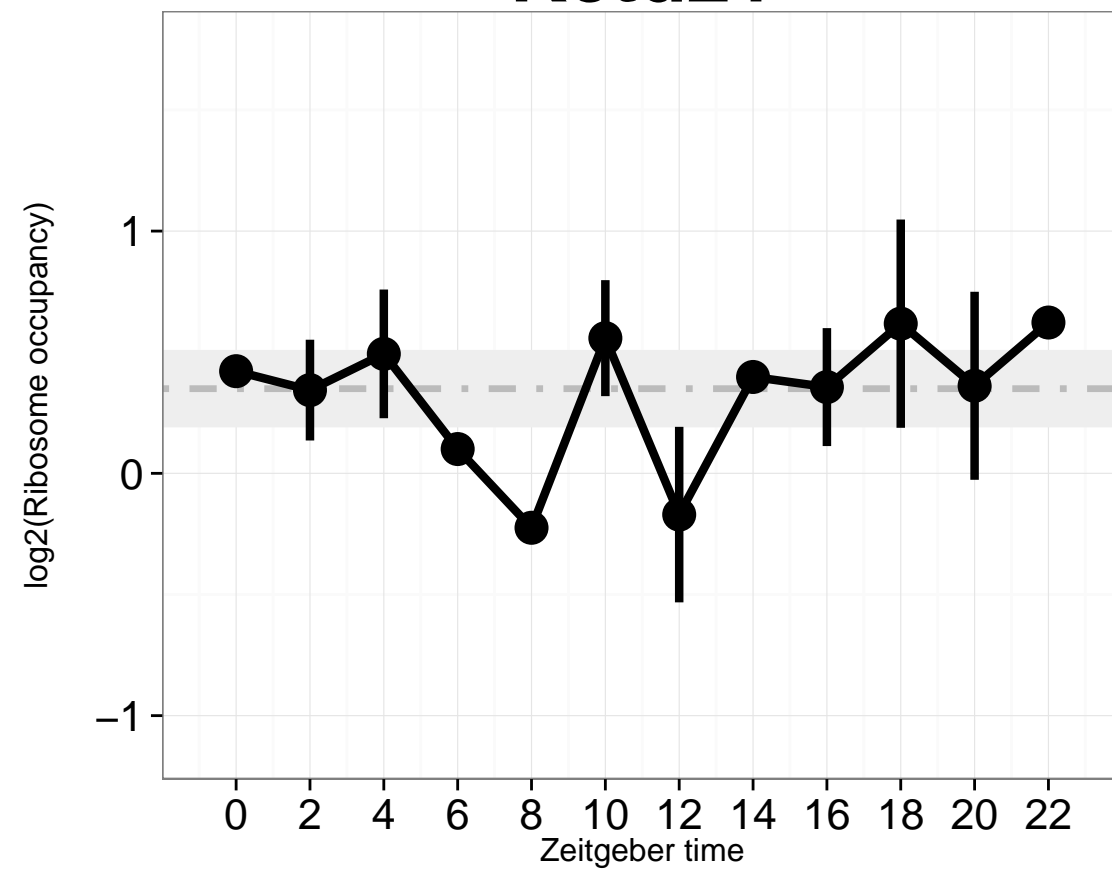

Supplement: Supplementary file 4570 [file 1]

## Tkt

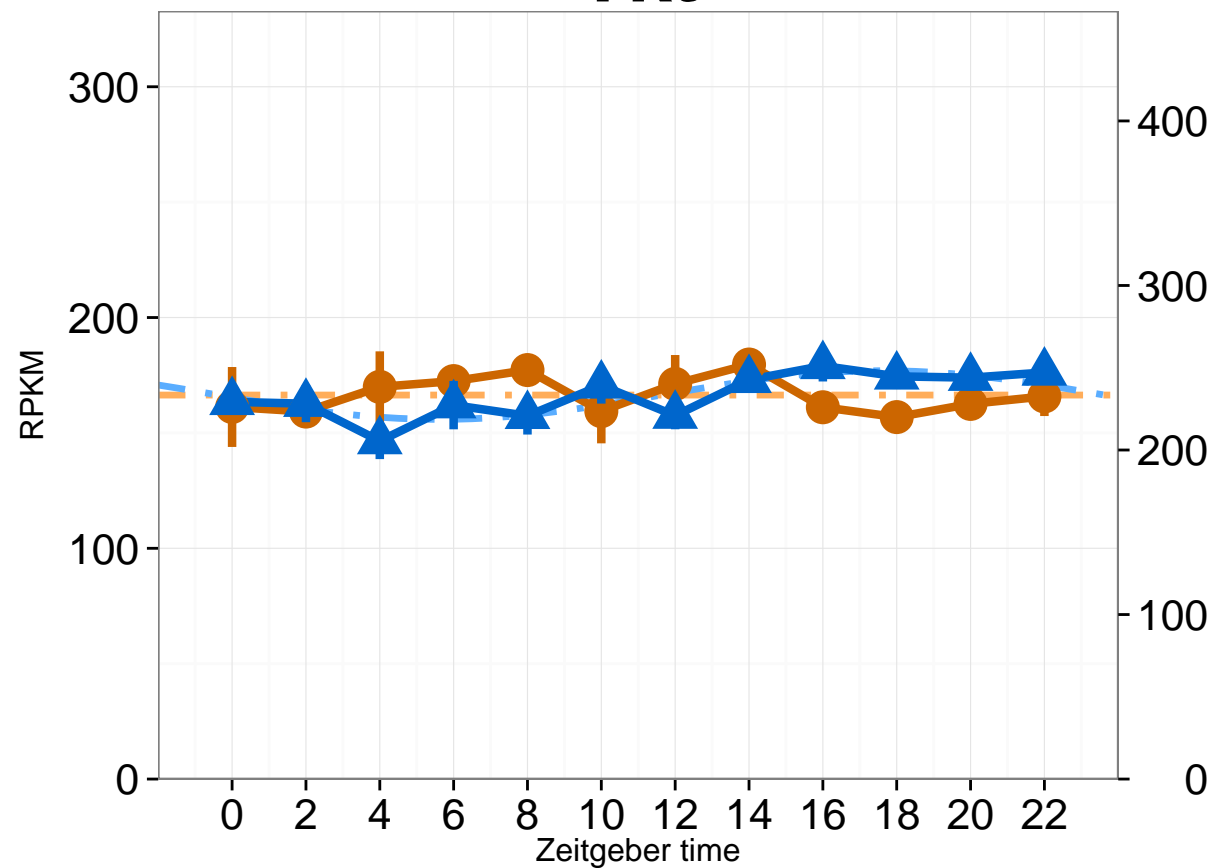

## Tkt

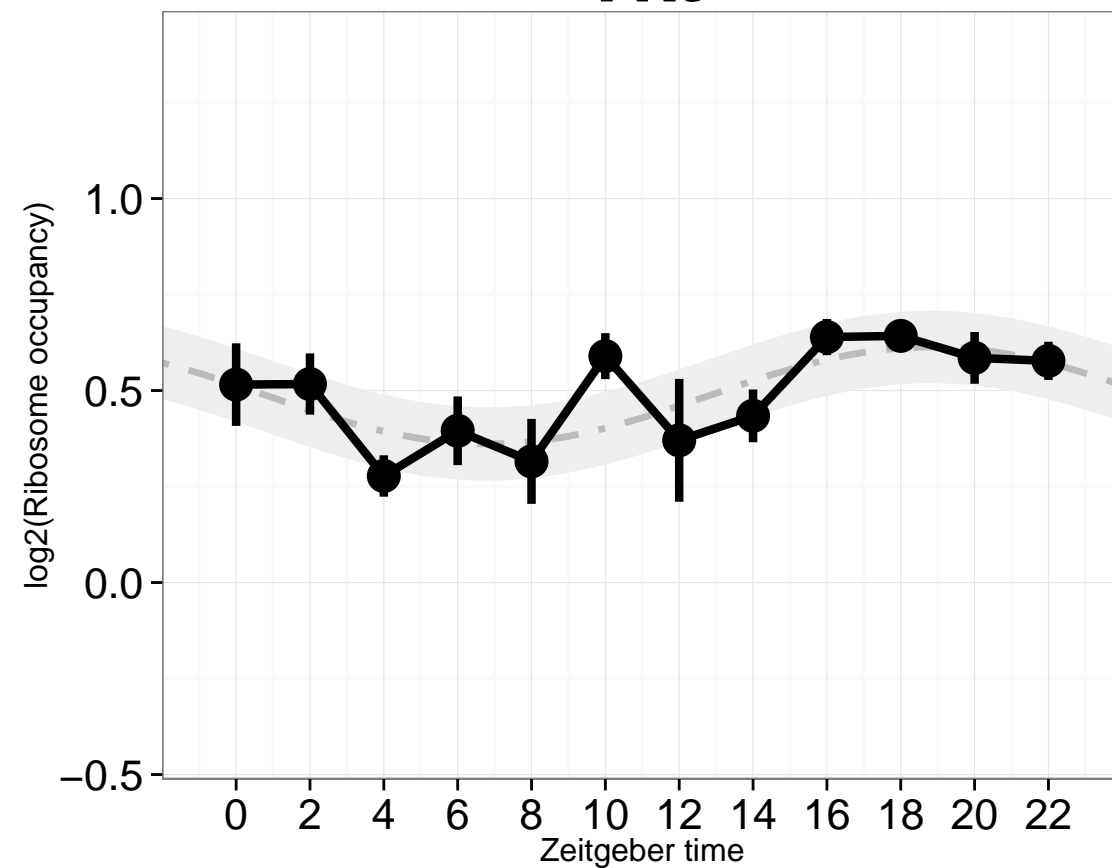

Supplement: Supplementary file 4571 [file 1]

## Osgep

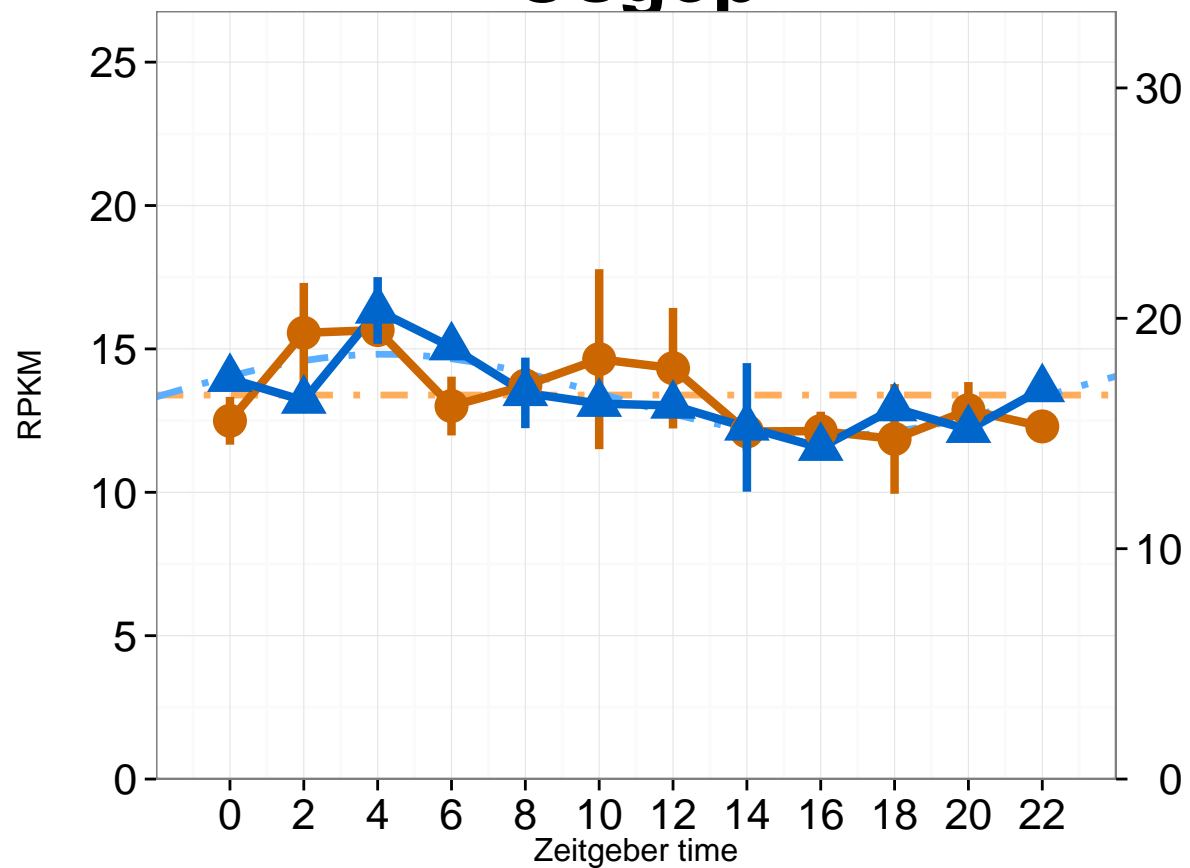

## Osgep

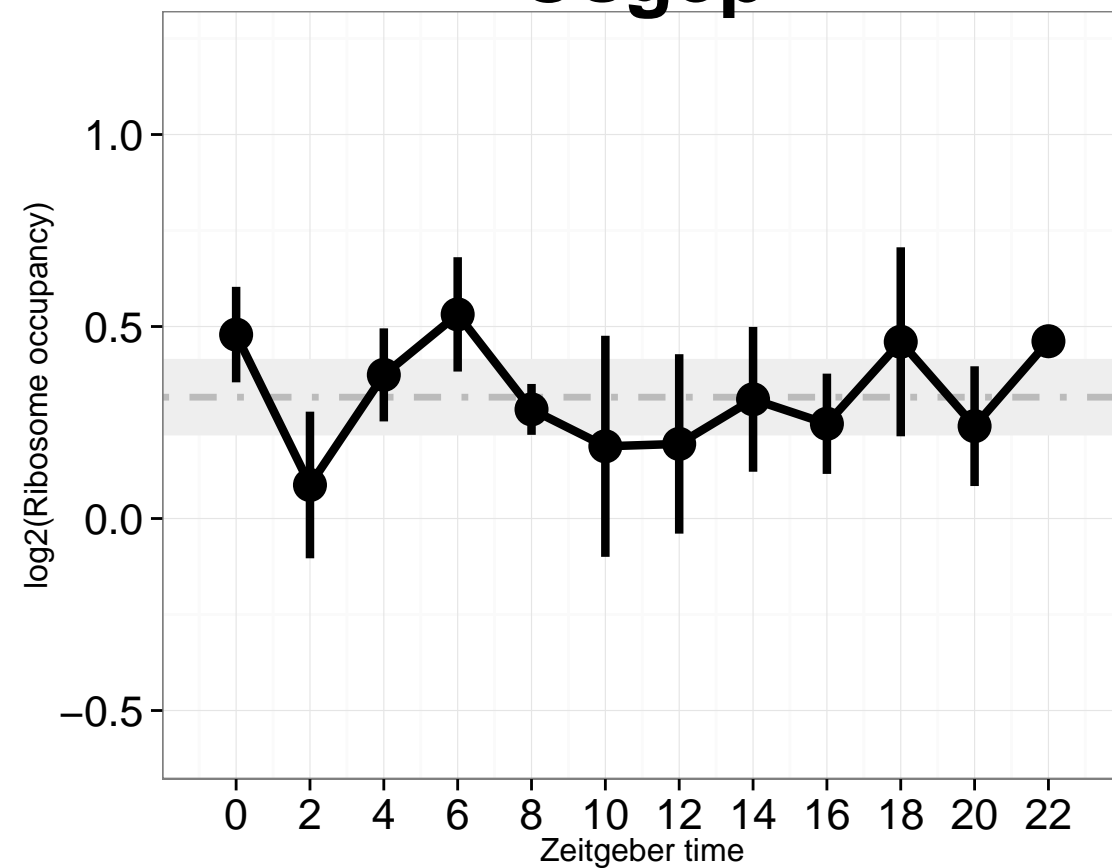

Supplement: Supplementary file 4572 [file 1]

# Sh3d19

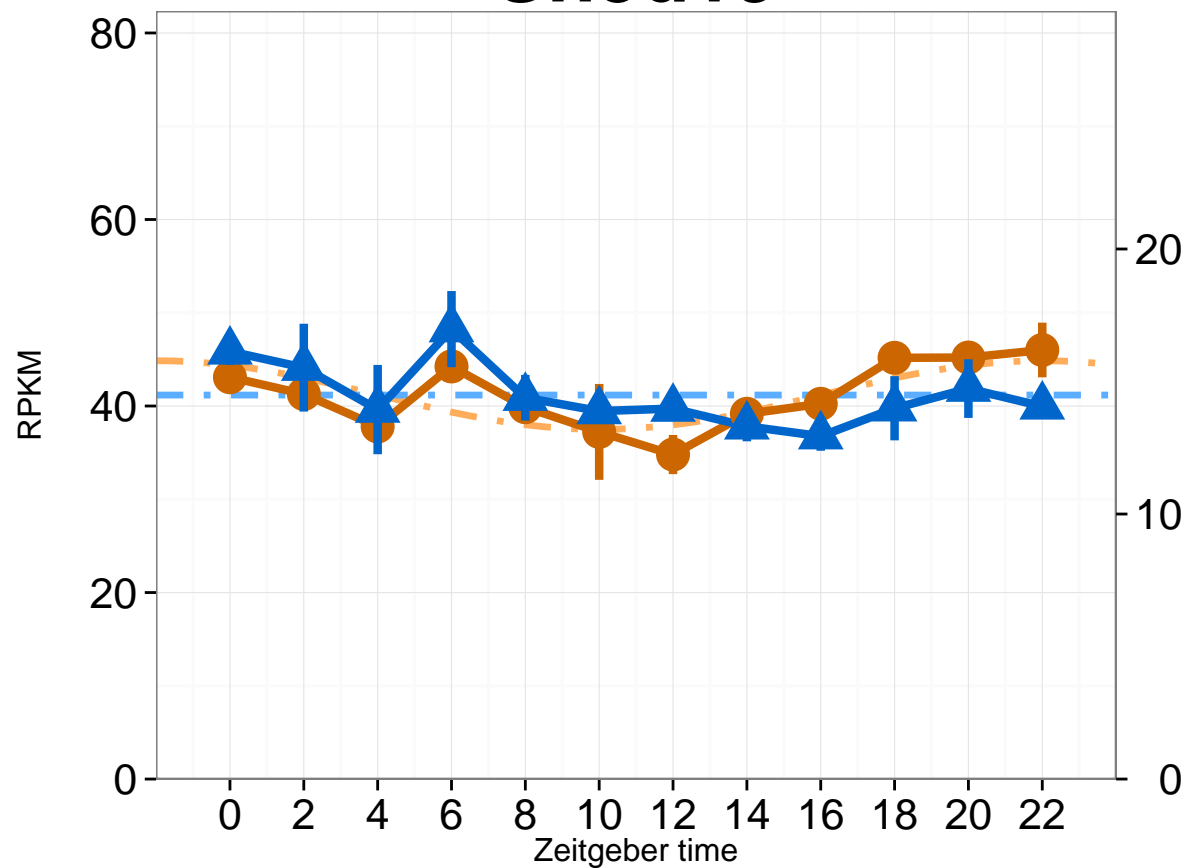

# Sh3d19

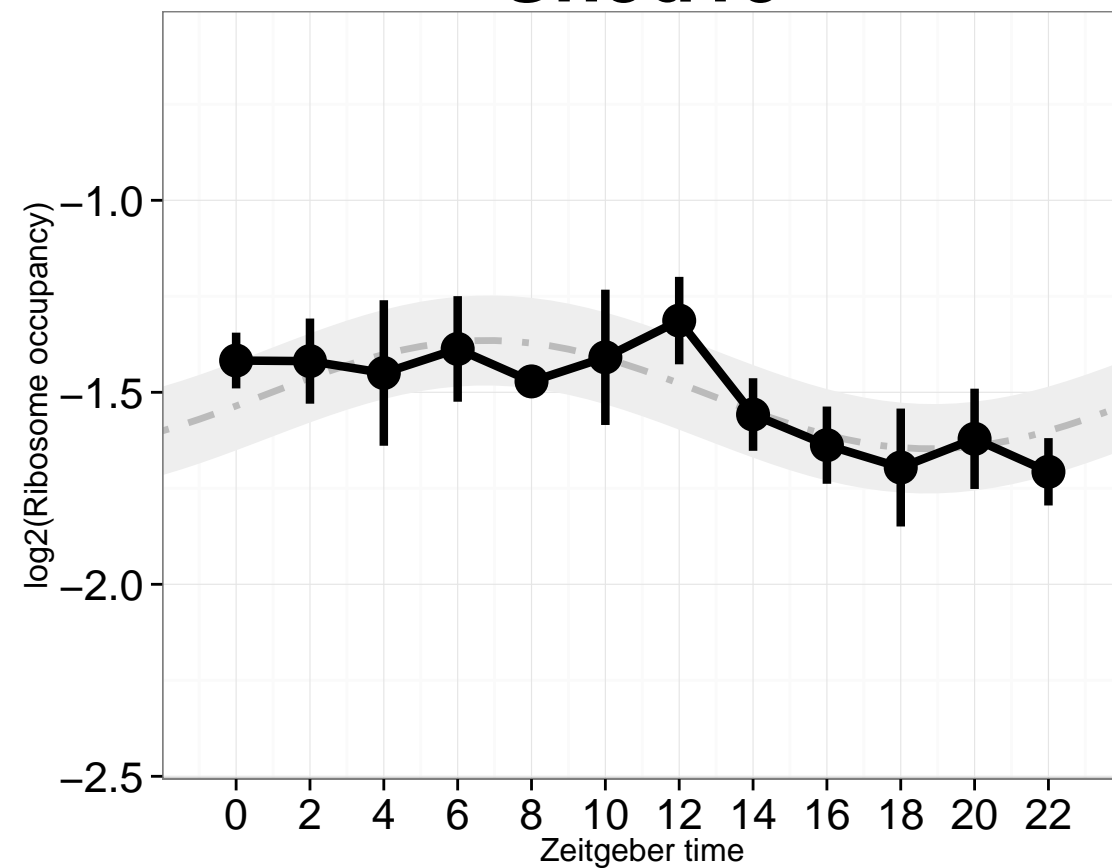

Supplement: Supplementary file 4573 [file 1]

## Fuk

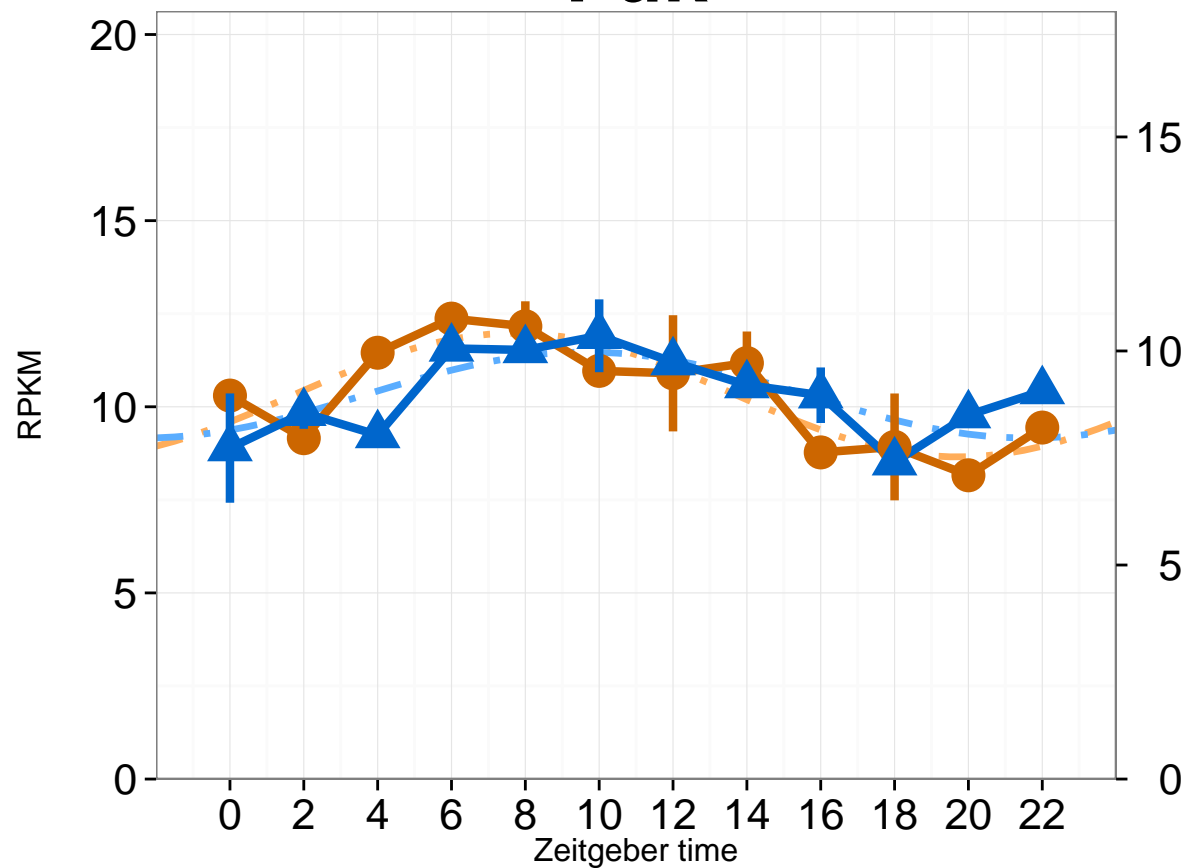

## Fuk

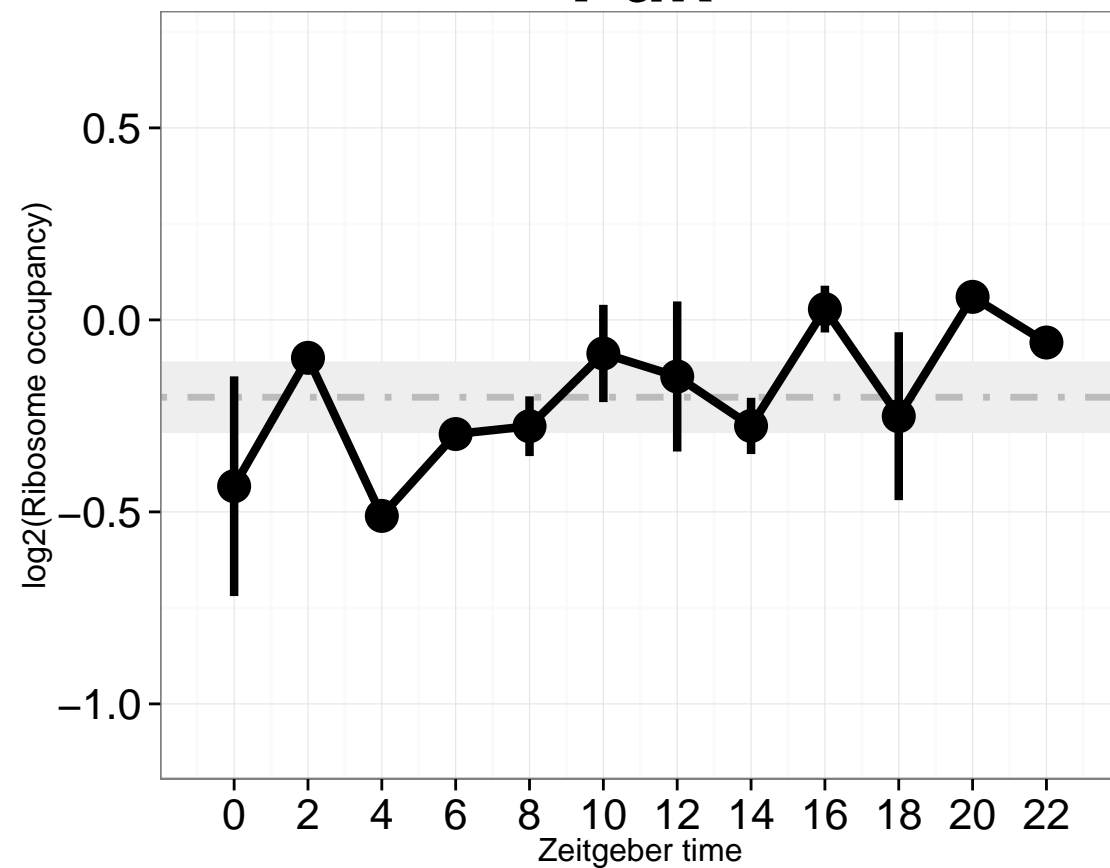

Supplement: Supplementary file 4574 [file 1]

## Sbk1

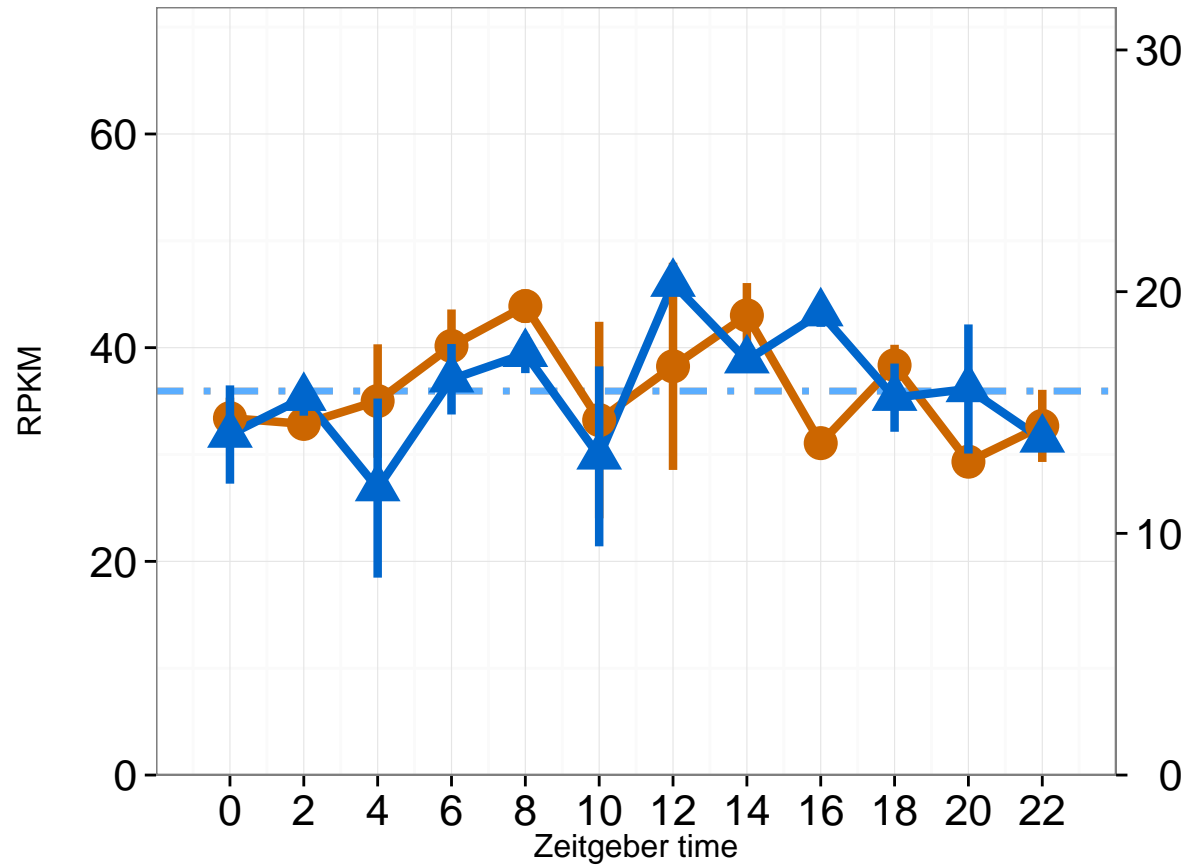

## Sbk1

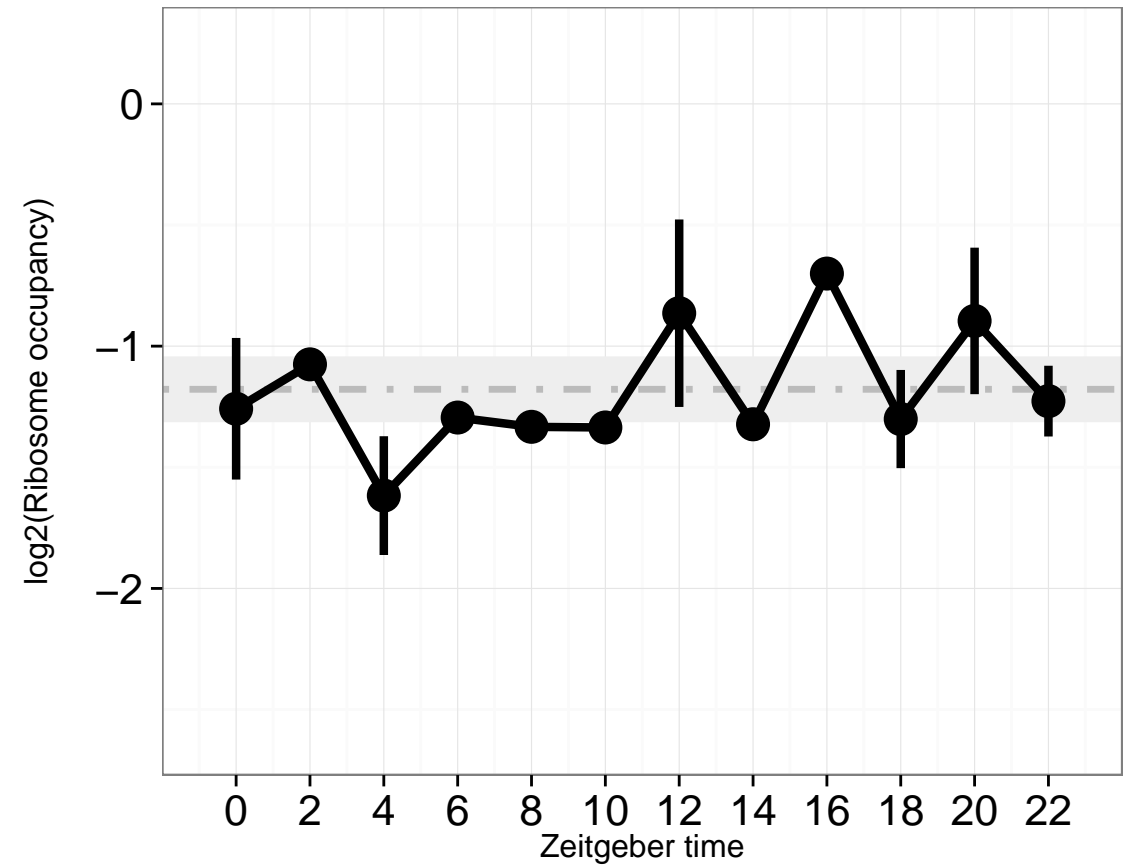

Supplement: Supplementary file 4575 [file 1]

## Szt2

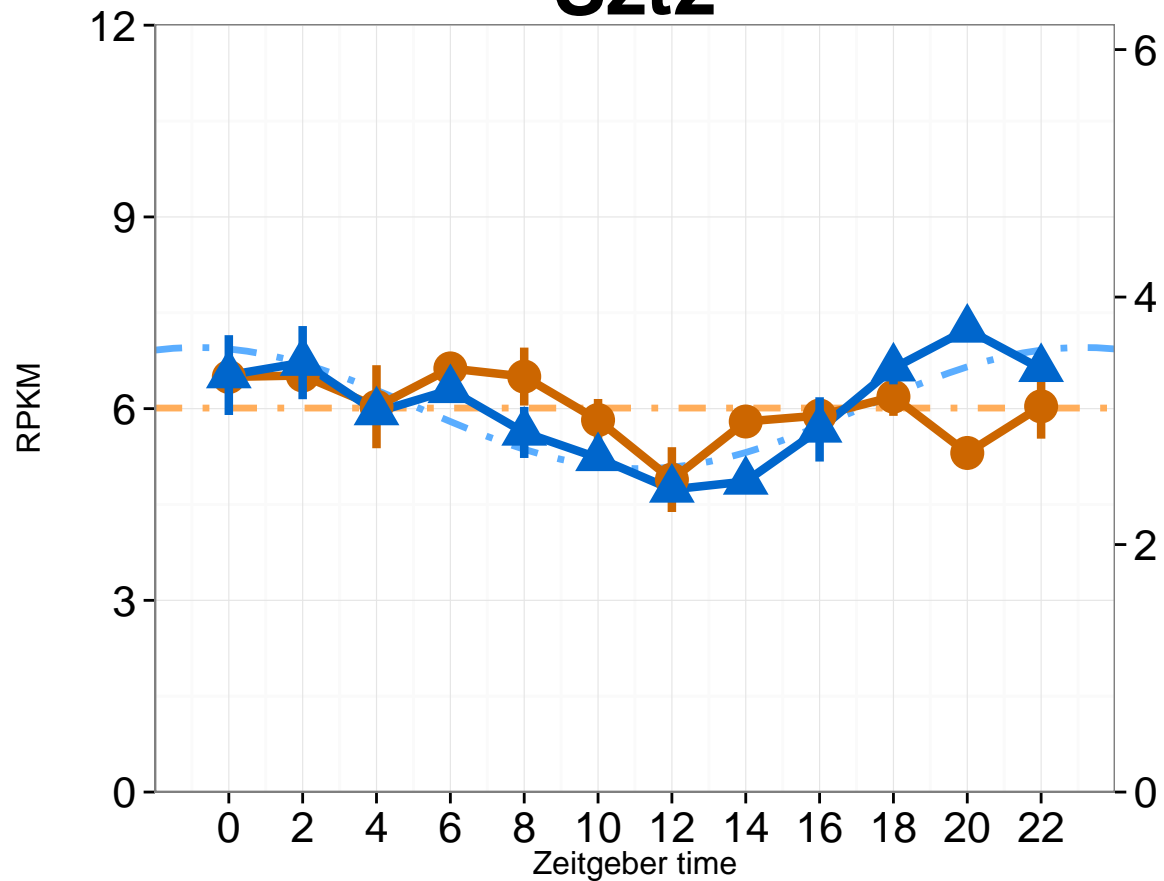

## Szt2

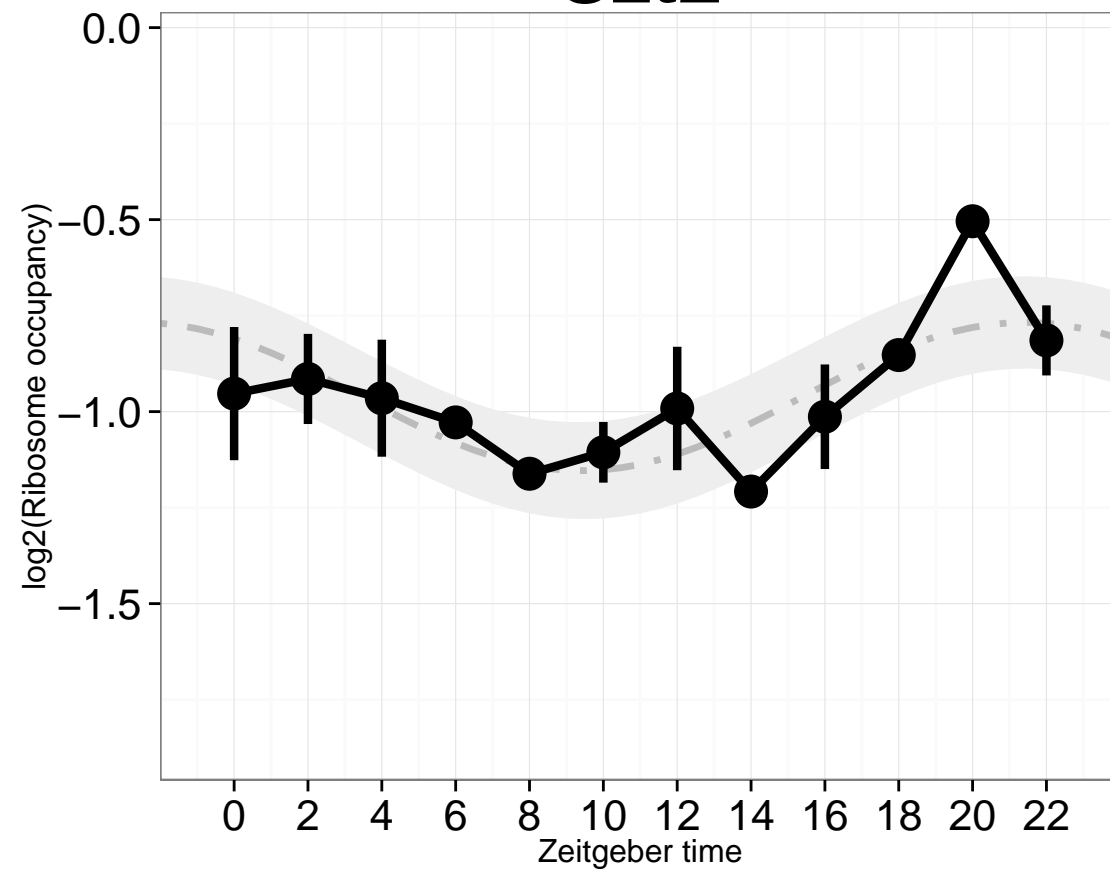

Supplement: Supplementary file 4576 [file 1]

## Per3

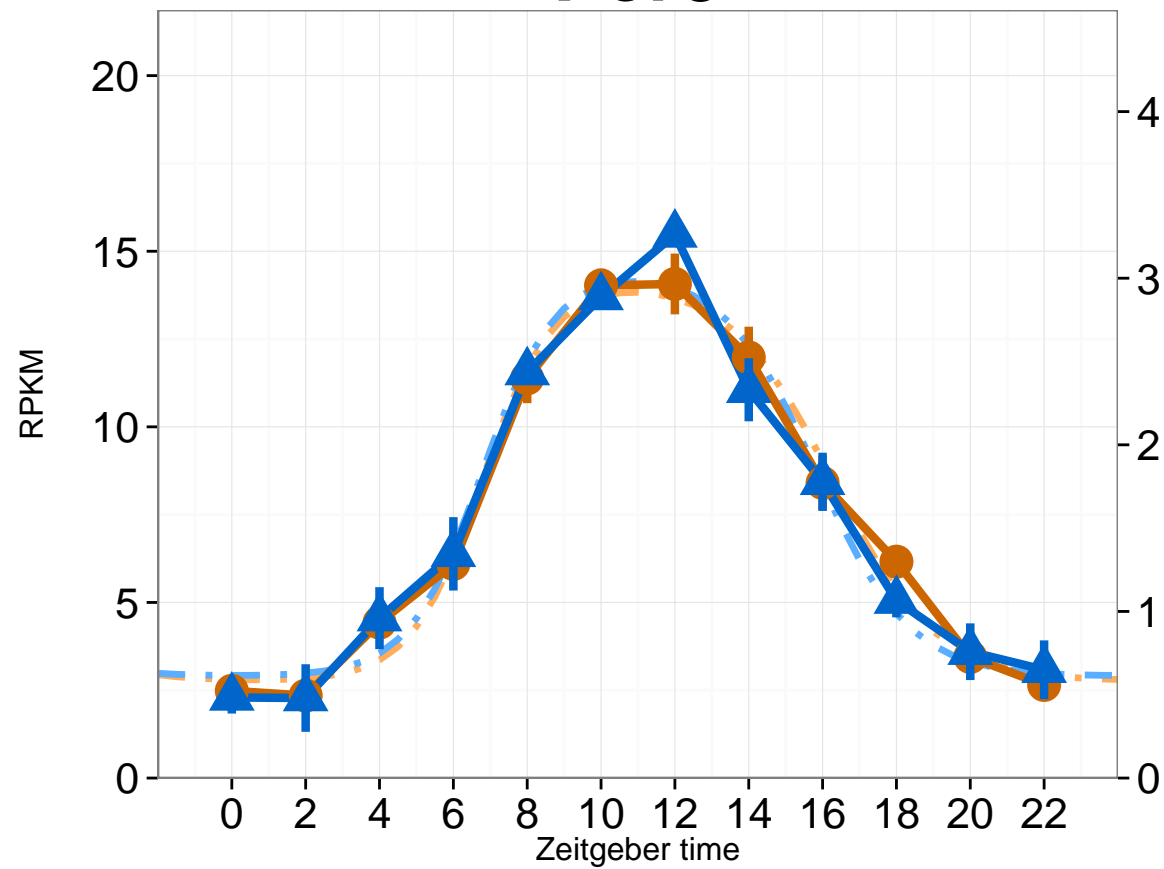

## Per3

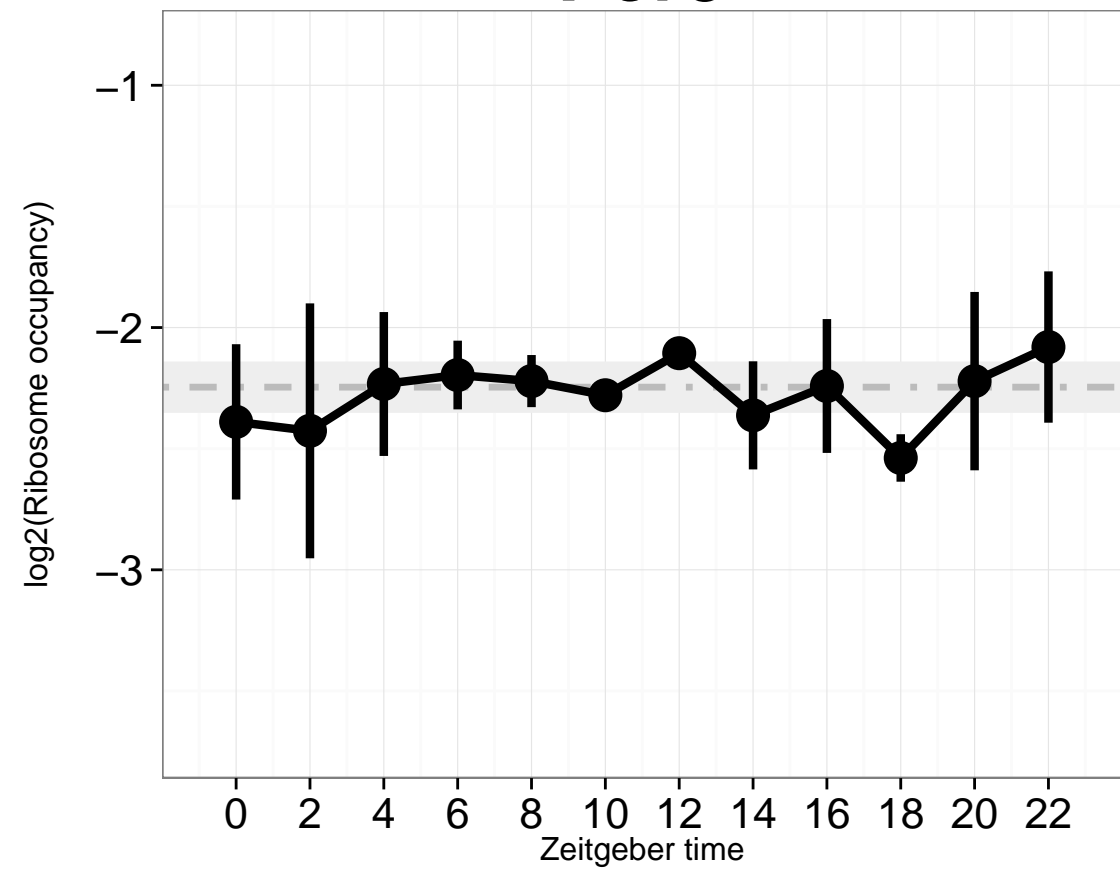

Supplement: Supplementary file 4577 [file 1]

## Rpl4

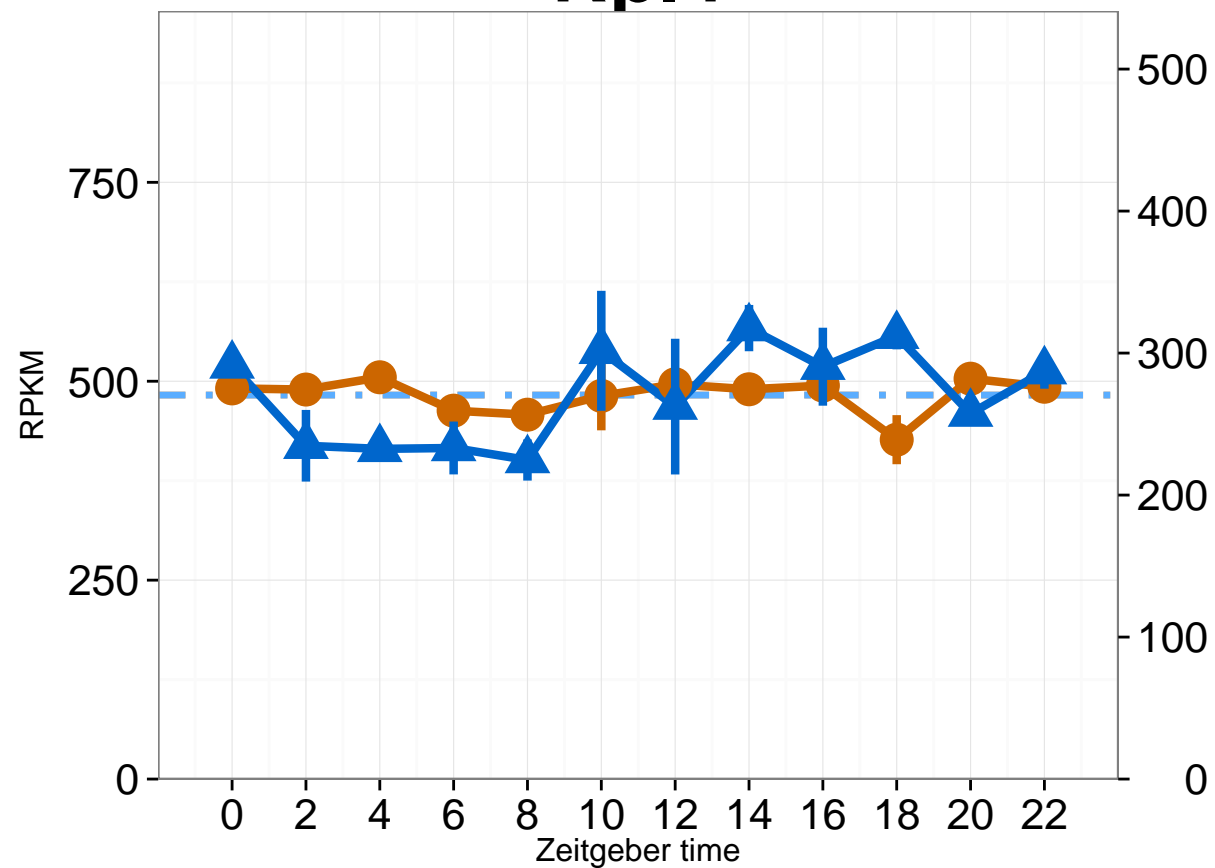

## Rpl4

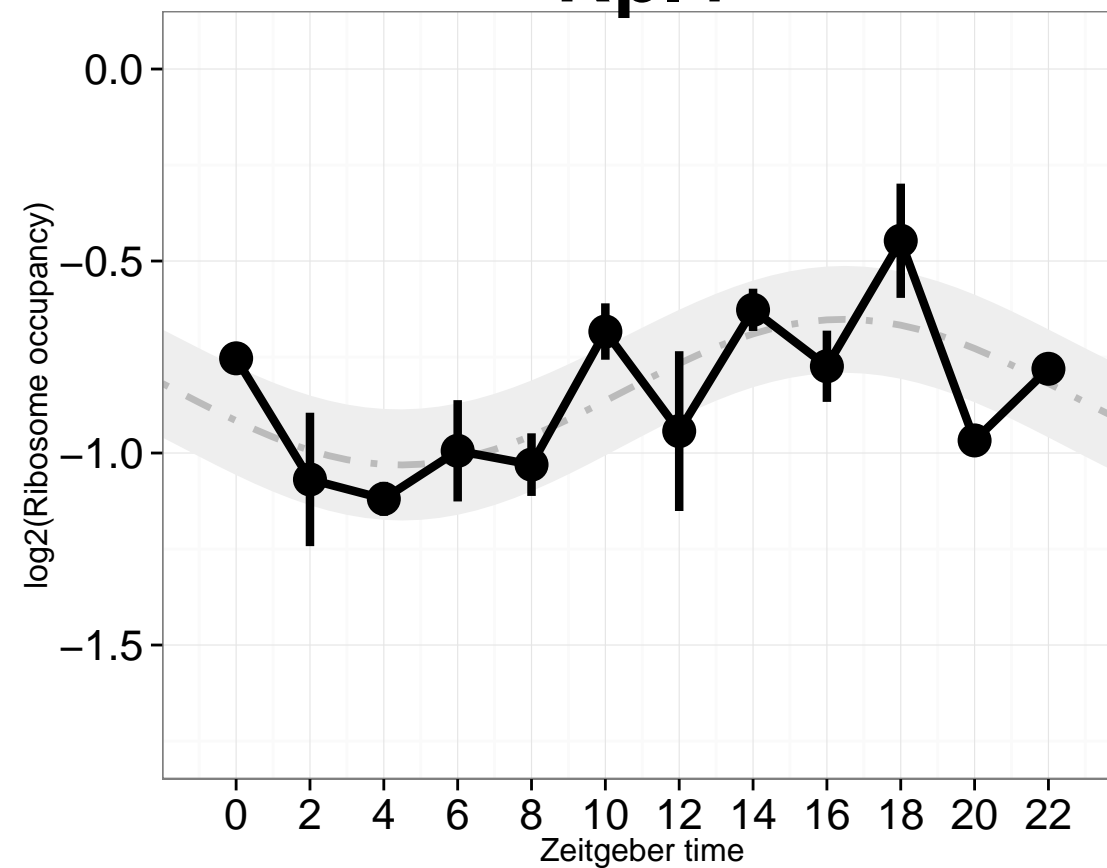

Supplement: Supplementary file 4578 [file 1]

## Spock3

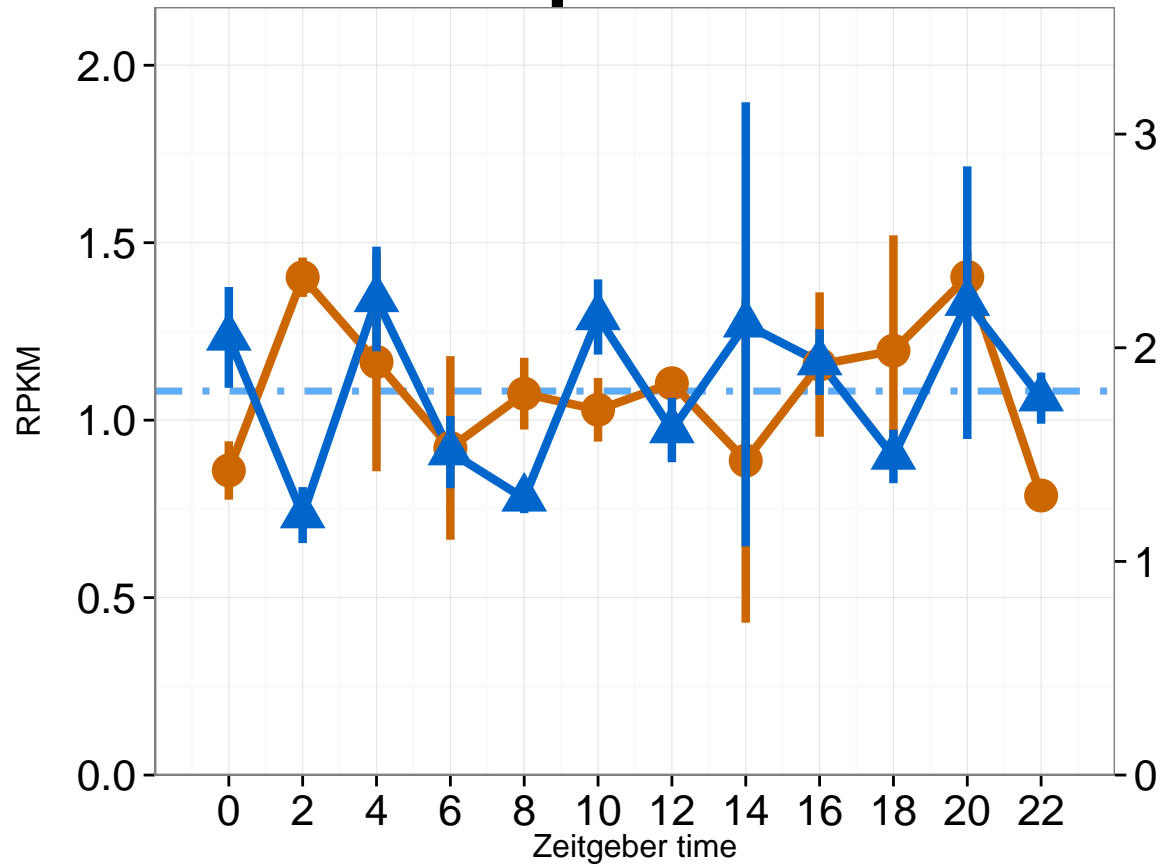

## Spock3

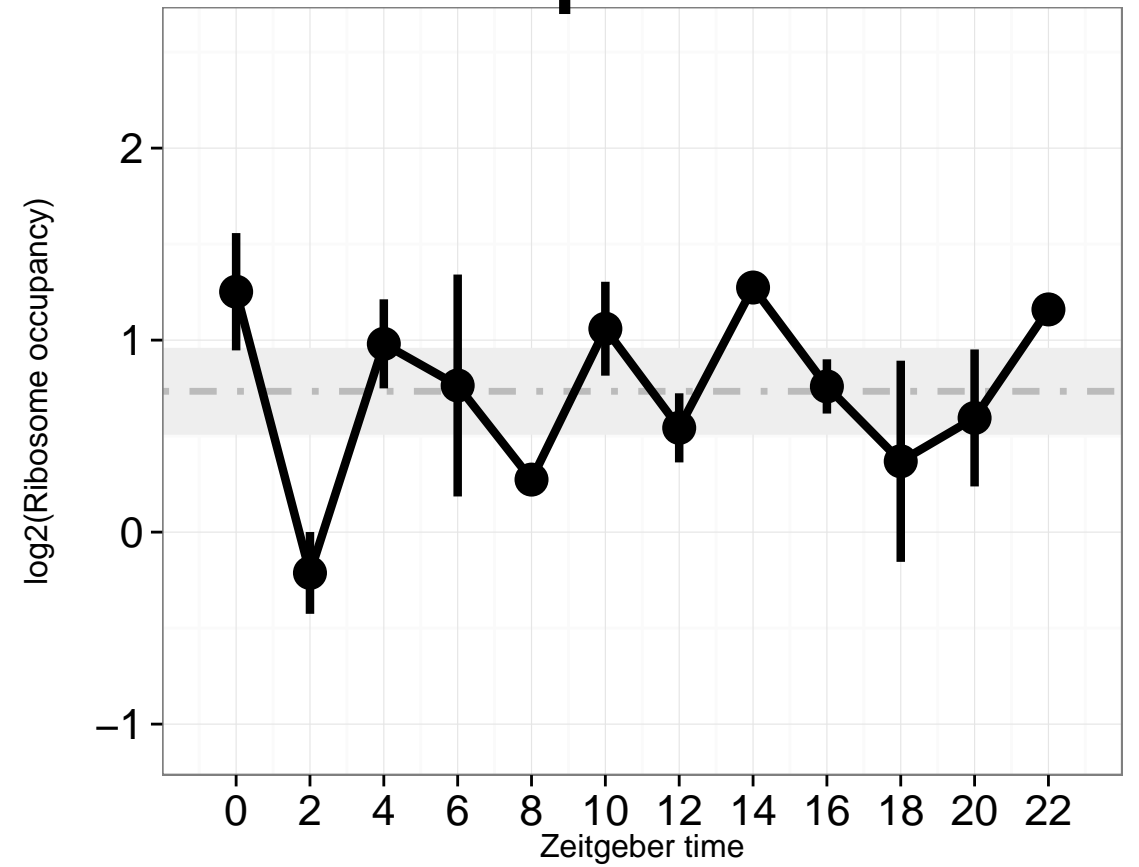

Supplement: Supplementary file 4579 [file 1]

## Ubl7

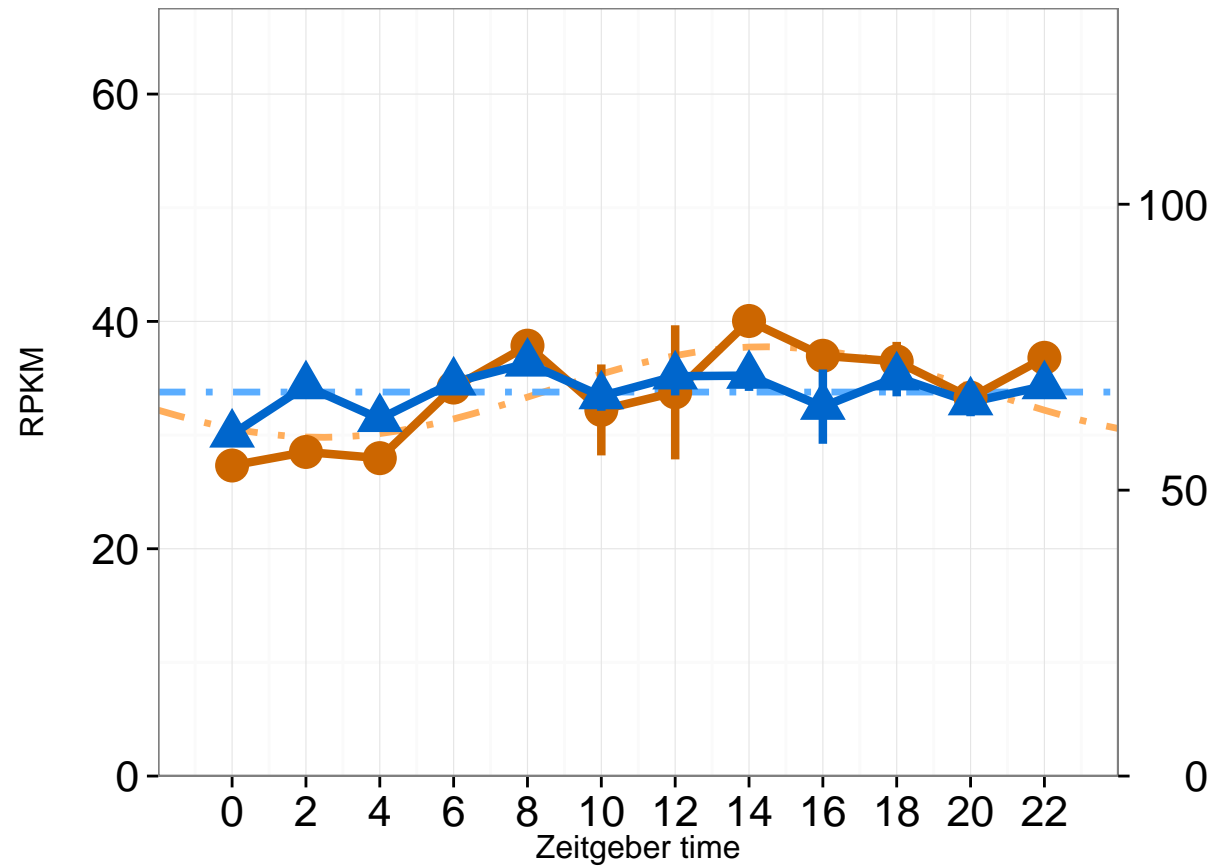

## Ubl7

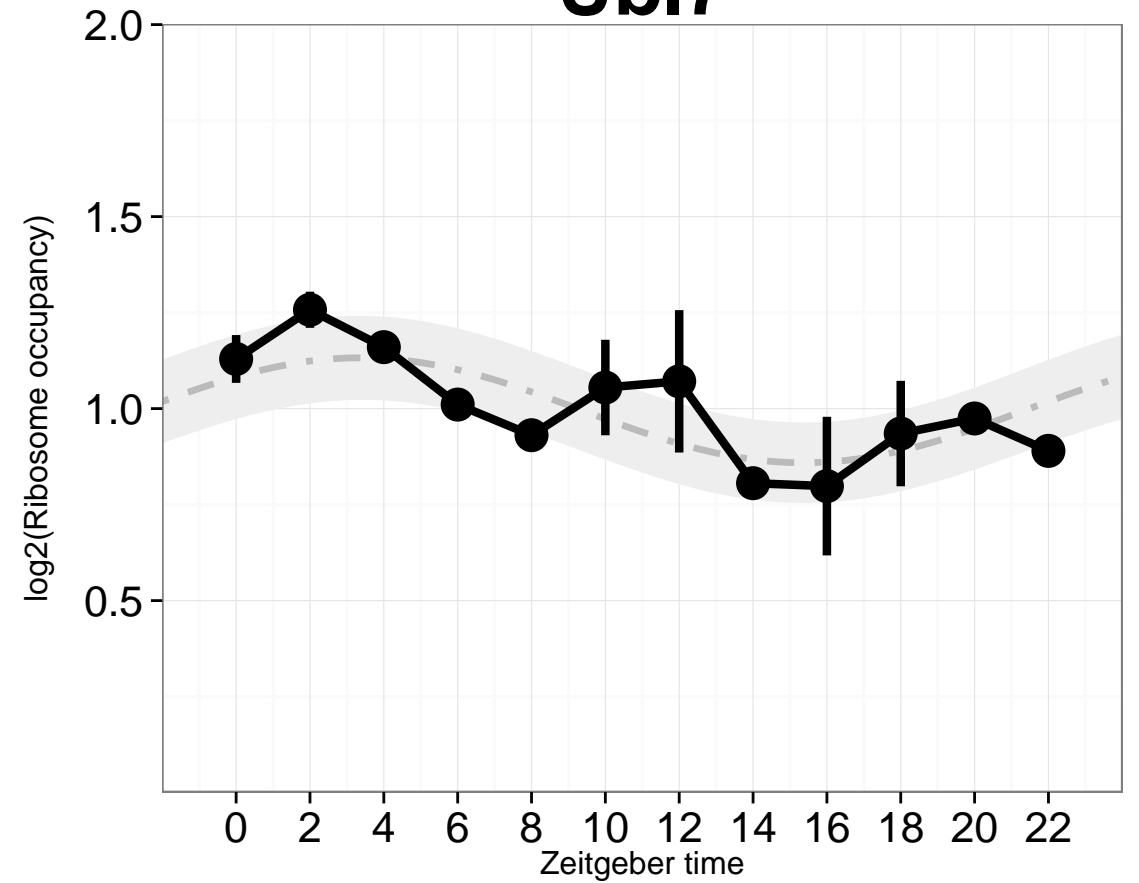

Supplement: Supplementary file 4580 [file 1]

## Myo1c

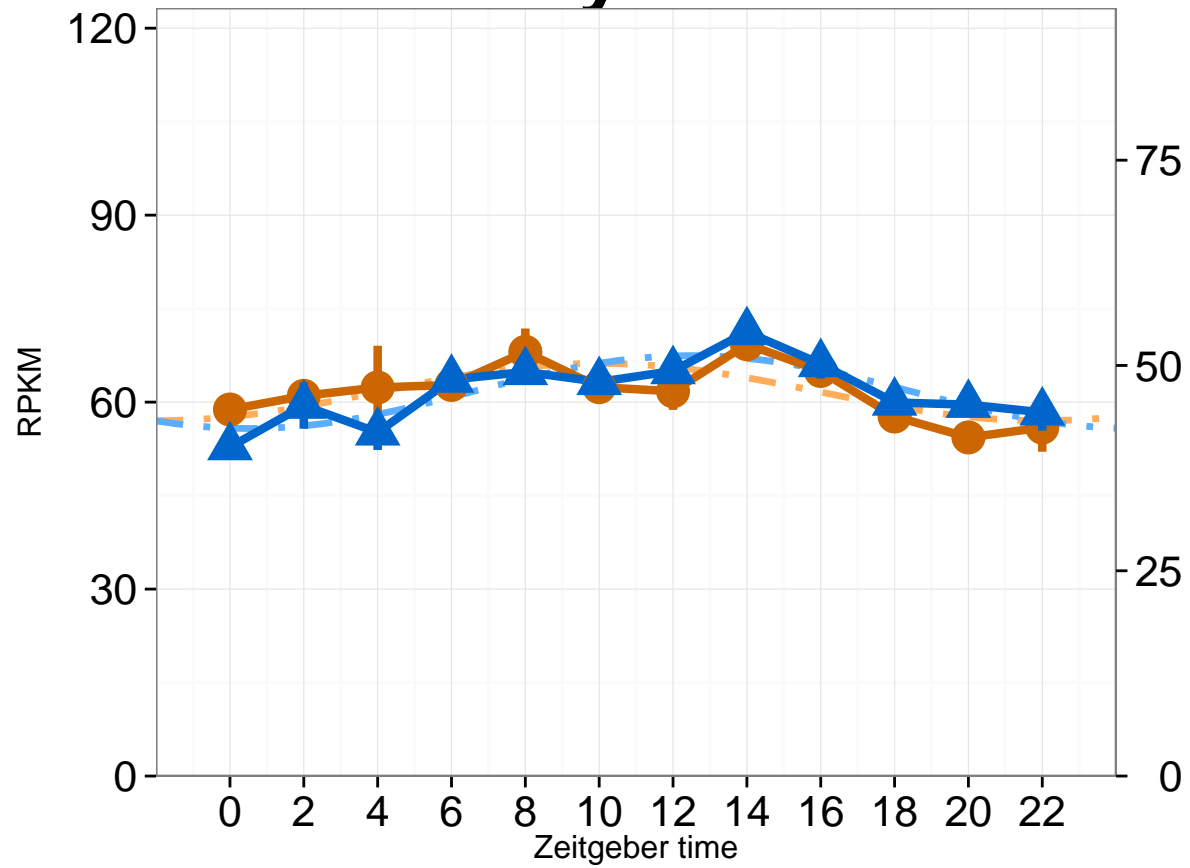

## Myo1c

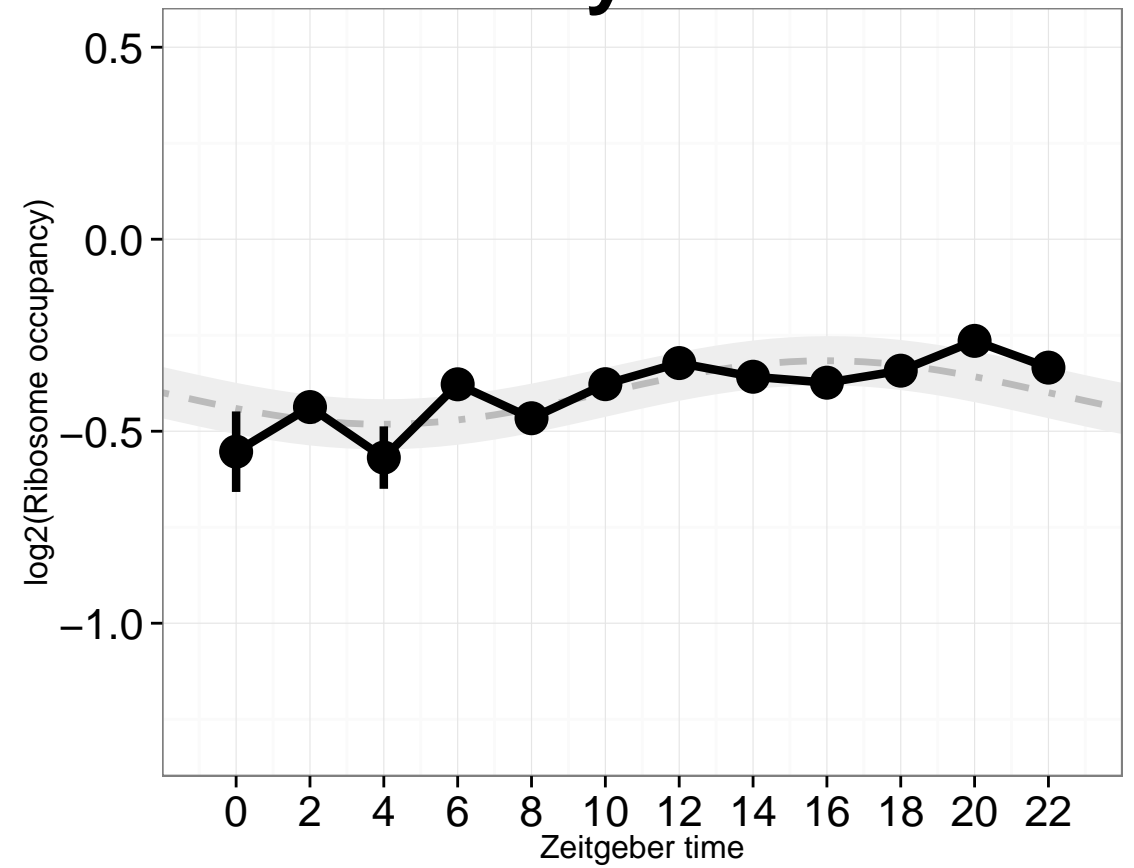

Supplement: Supplementary file 4581 [file 1]

# Trim11

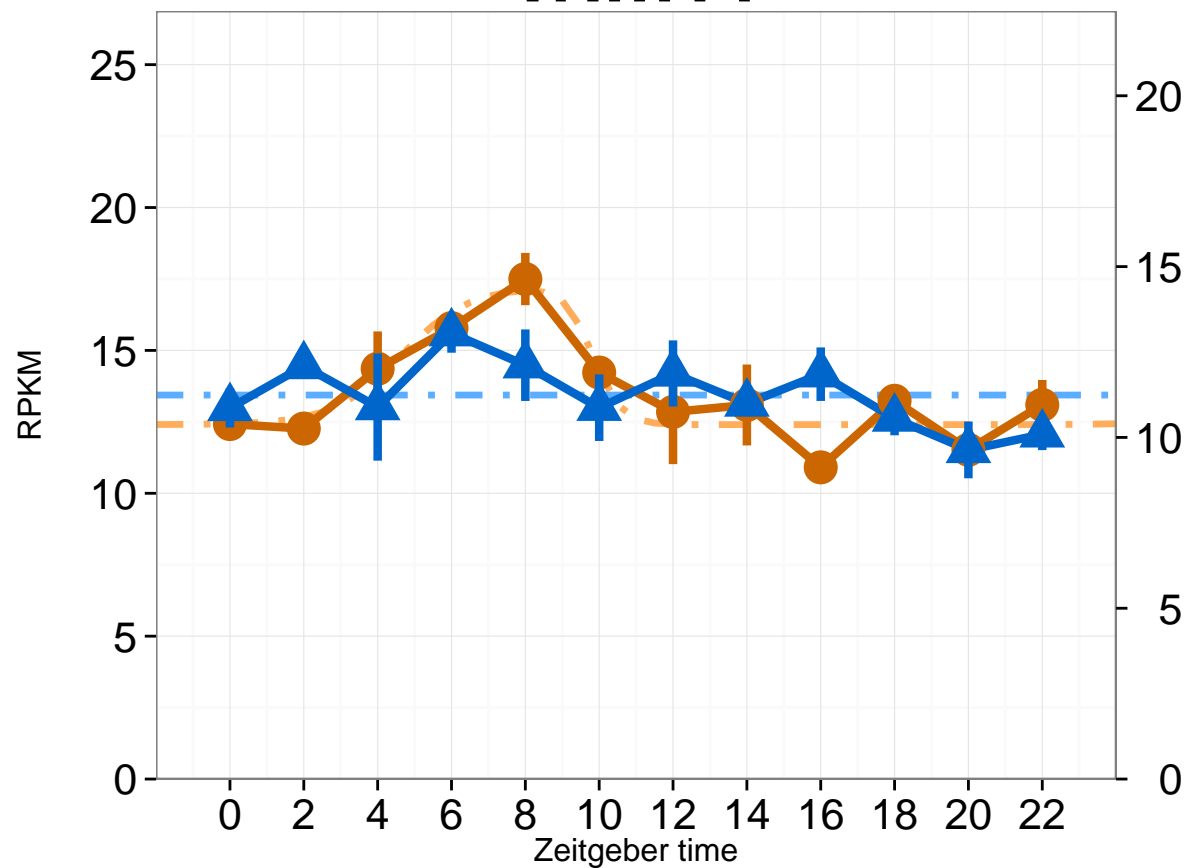

# Trim11

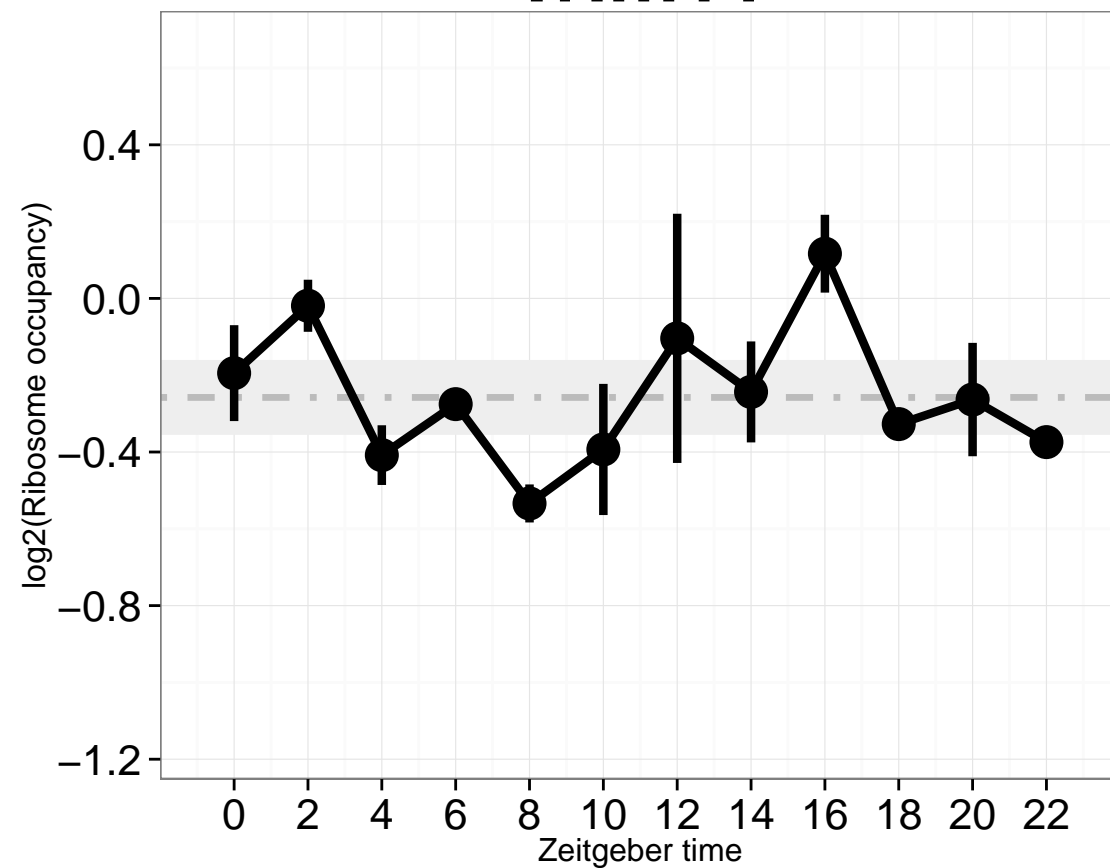

Supplement: Supplementary file 4582 [file 1]

## Lypd6

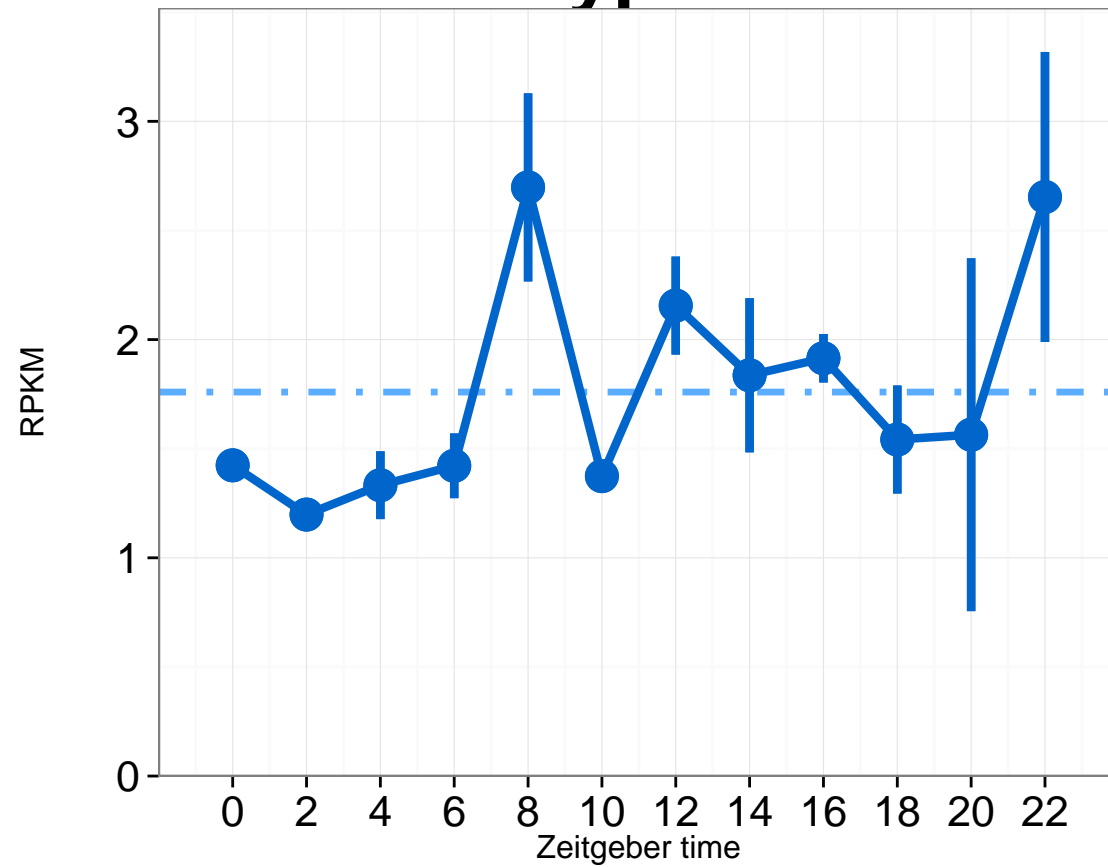

## Lypd6 log2(Ribosome occupancy

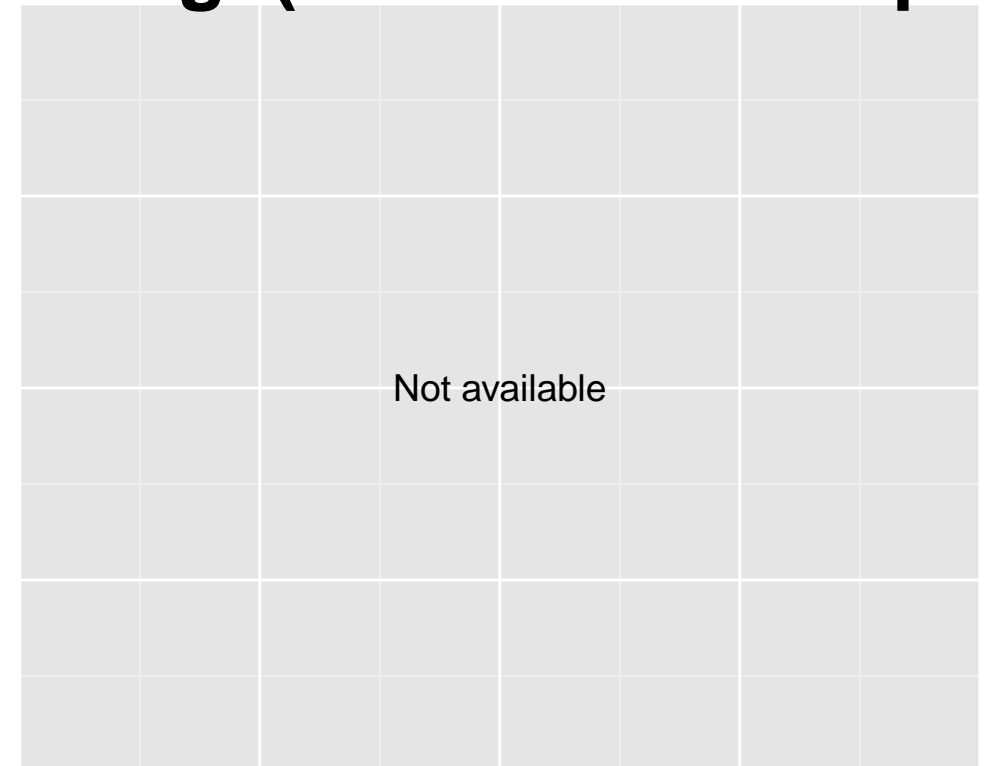

Supplement: Supplementary file 4583 [file 1]

# Syt15

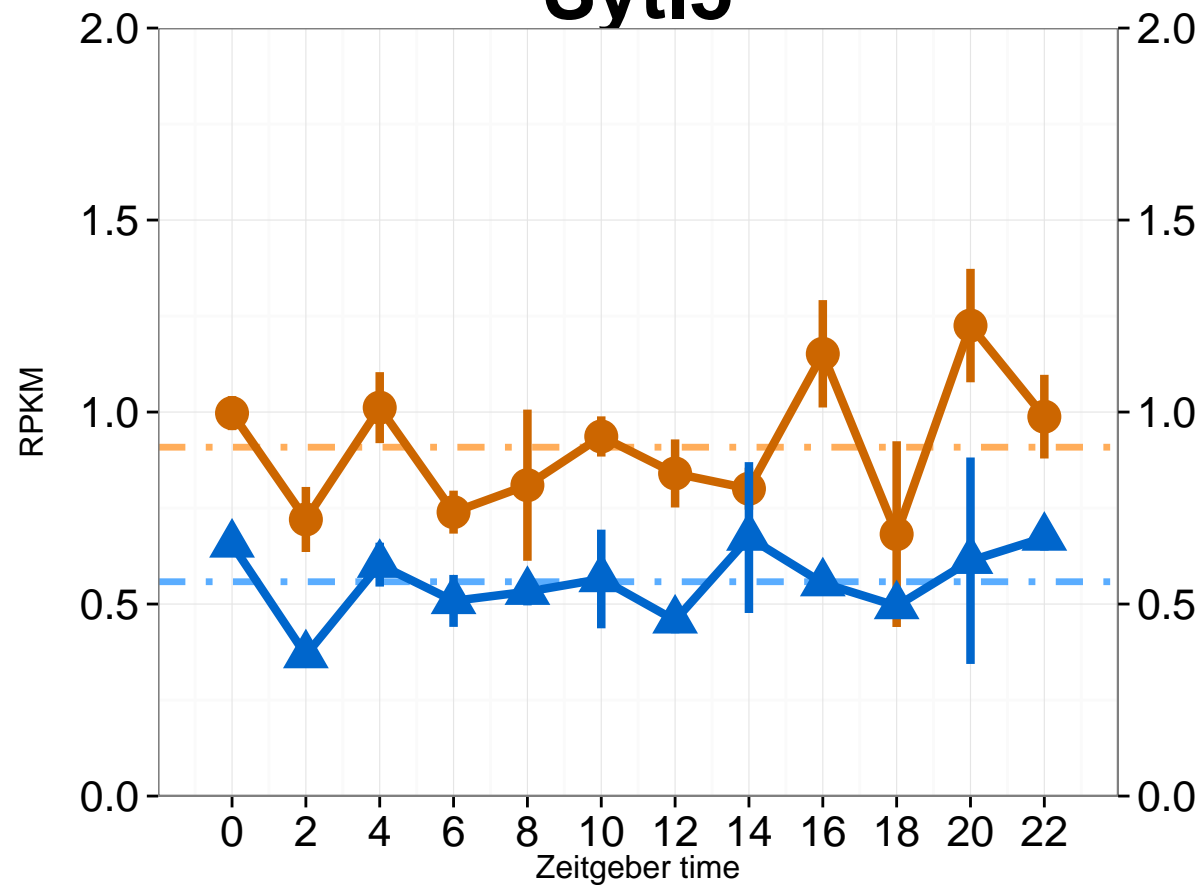

# Syt15

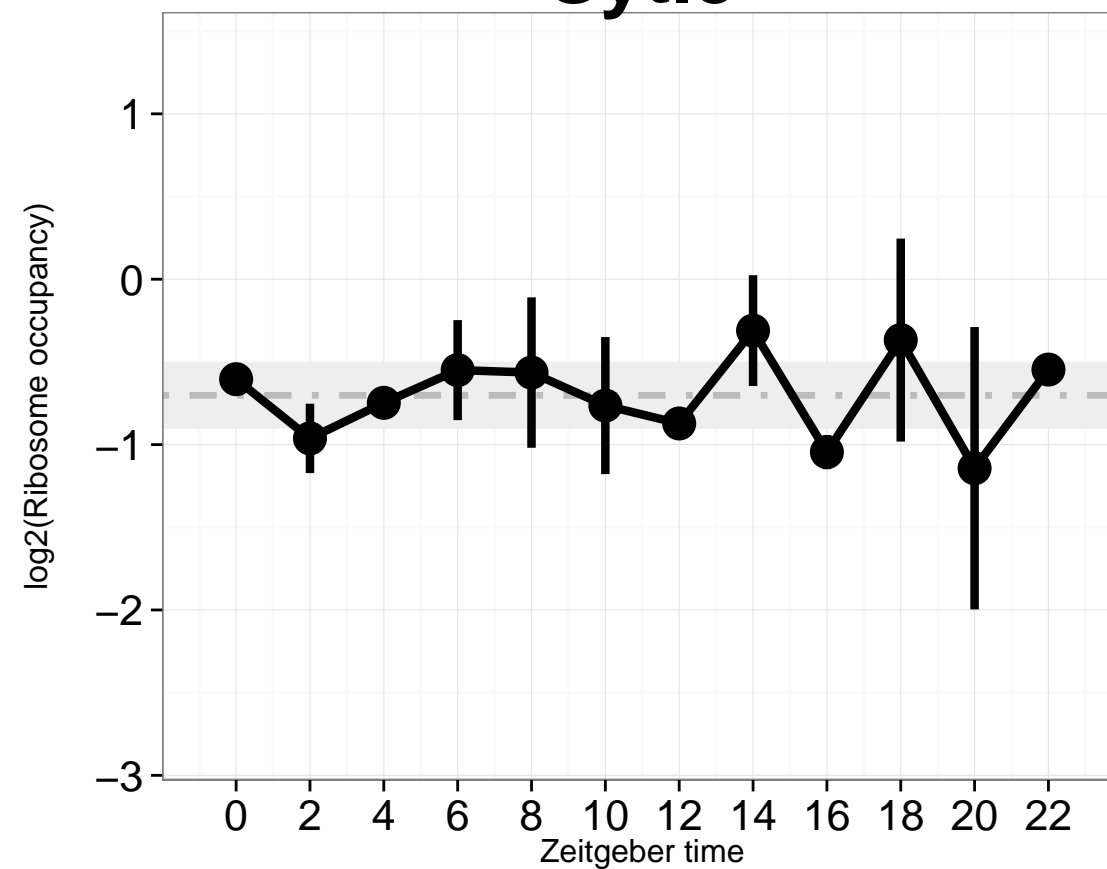

Supplement: Supplementary file 4584 [file 1]

# Mertk

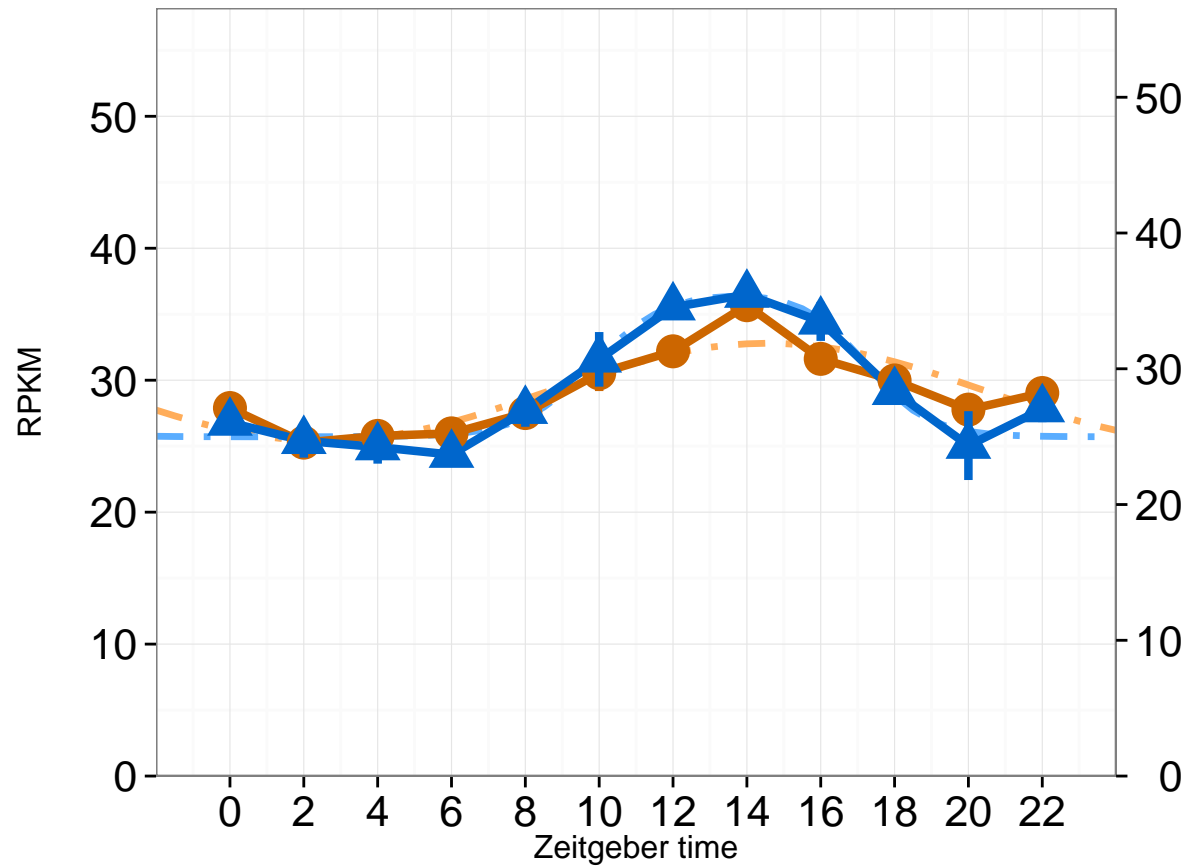

# Mertk

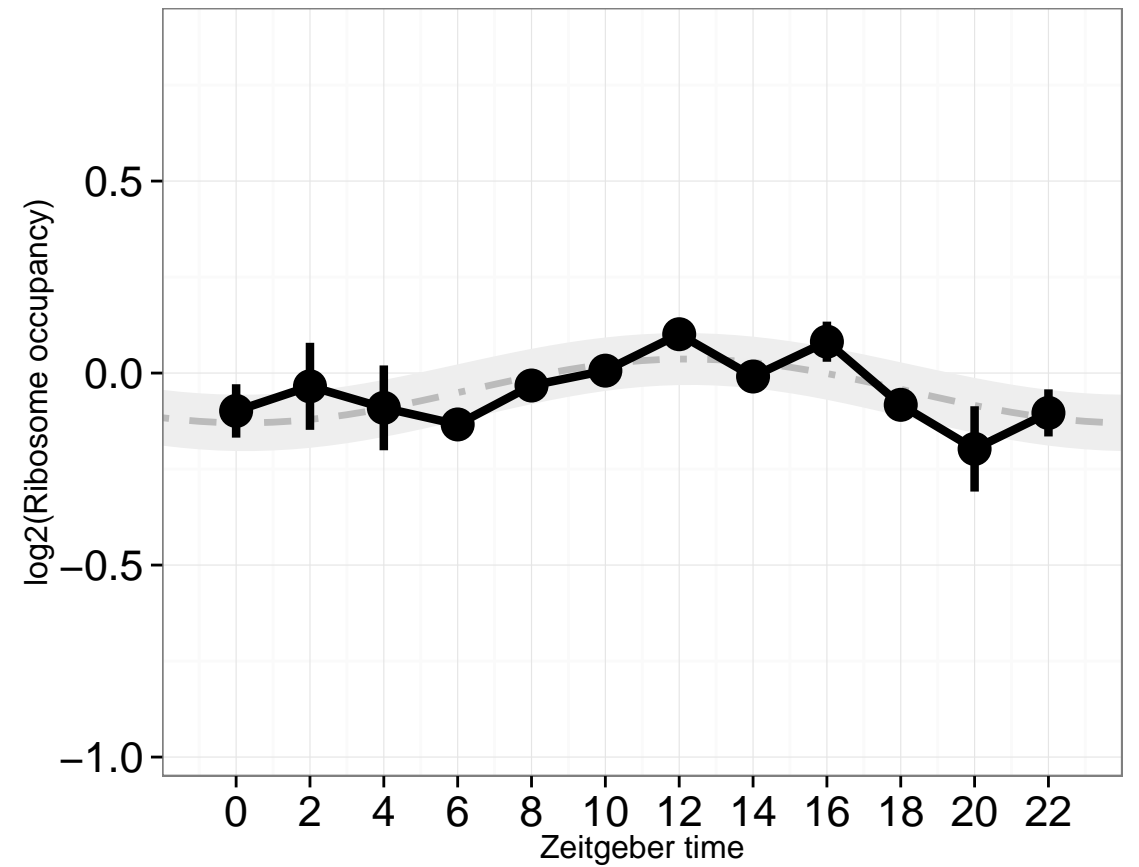

Supplement: Supplementary file 4585 [file 1]

## Vamp1

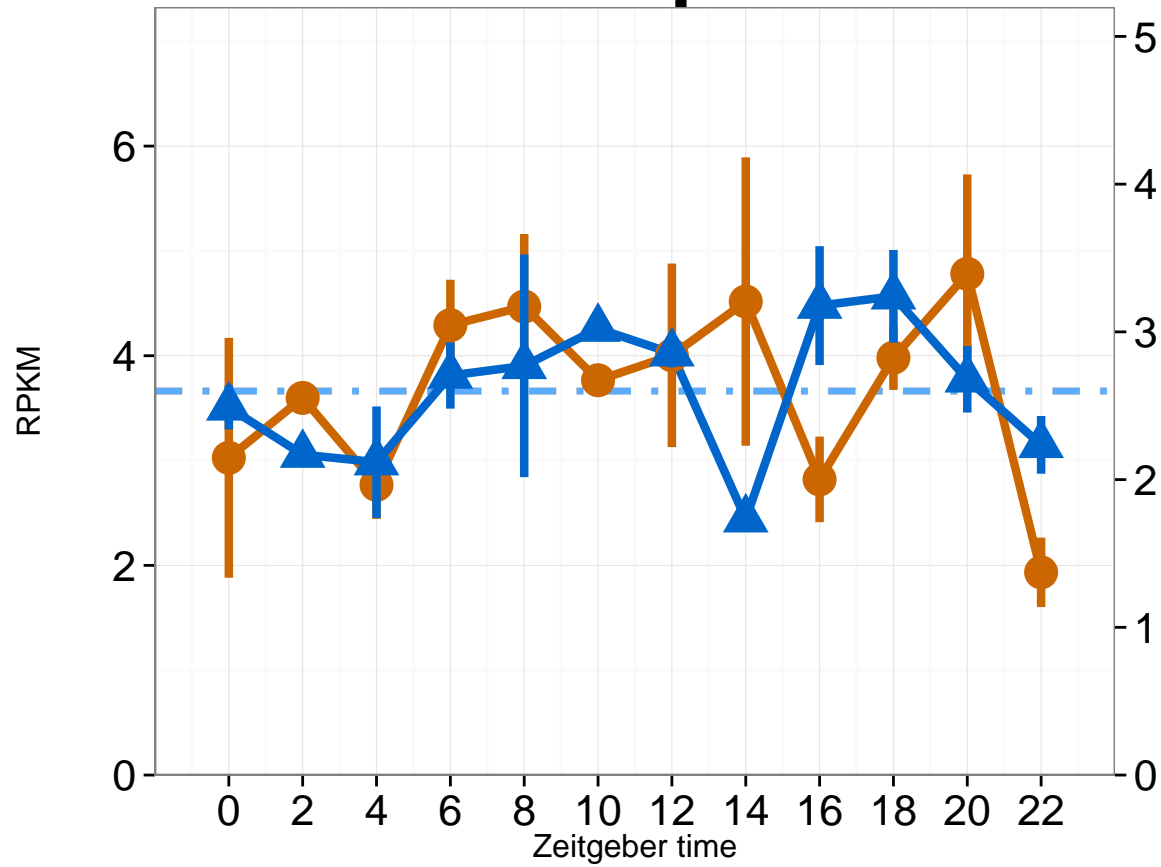

## Vamp1

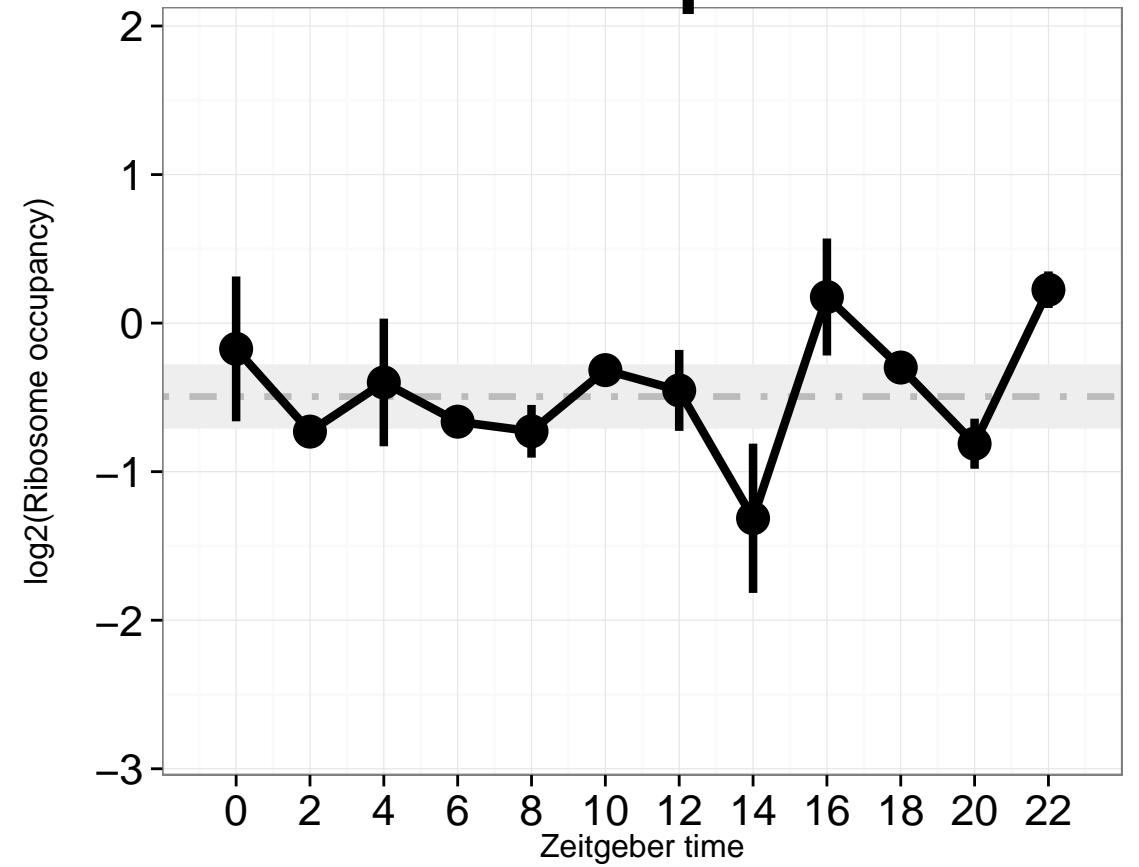

Supplement: Supplementary file 4586 [file 1]

# Tenm2

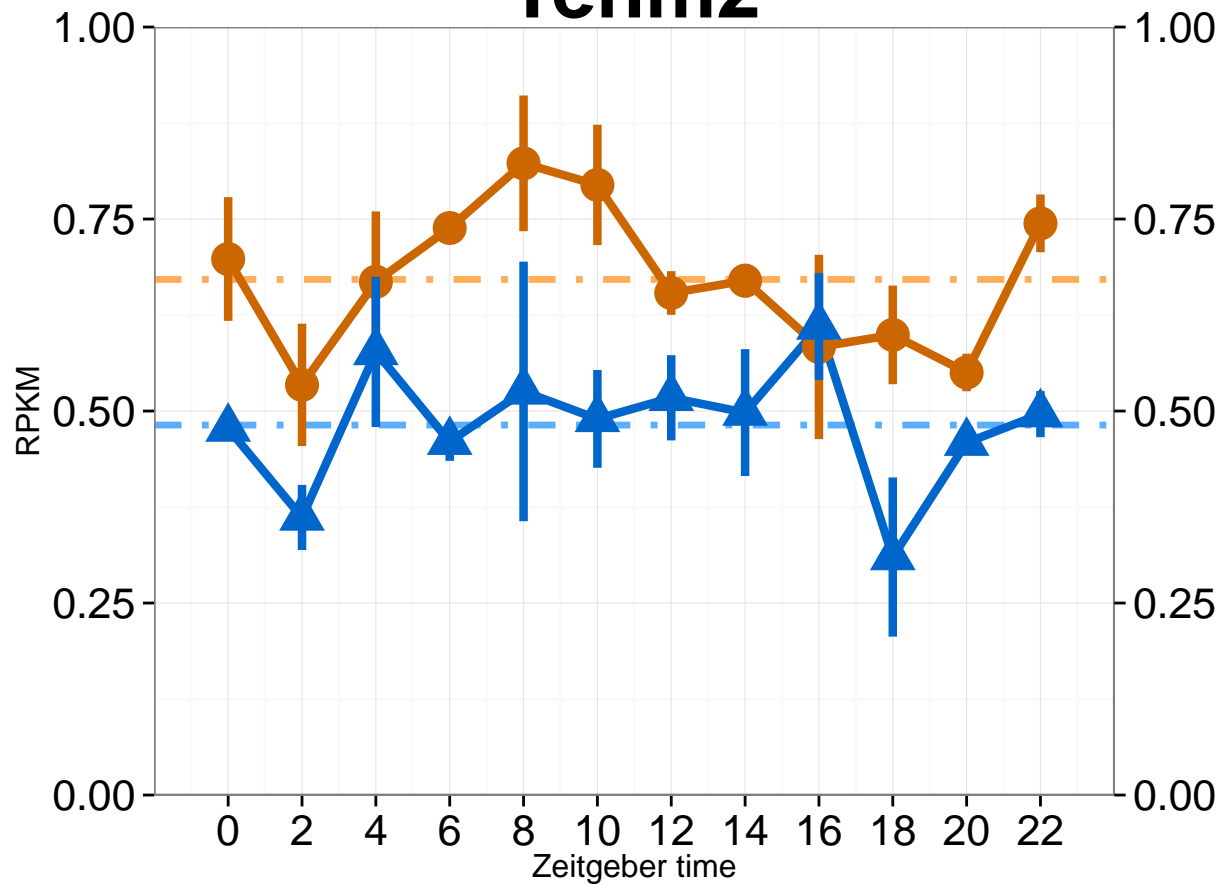

# Tenm2

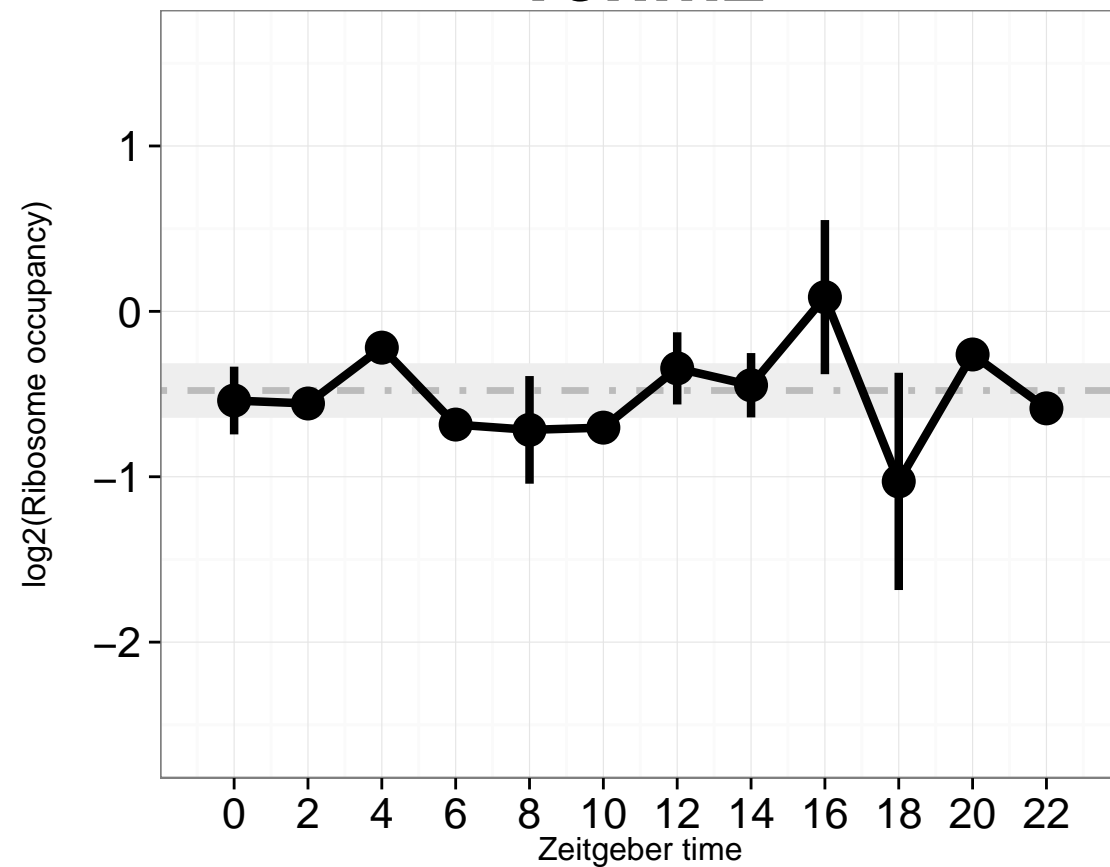

Supplement: Supplementary file 4587 [file 1]

## Slc10a5

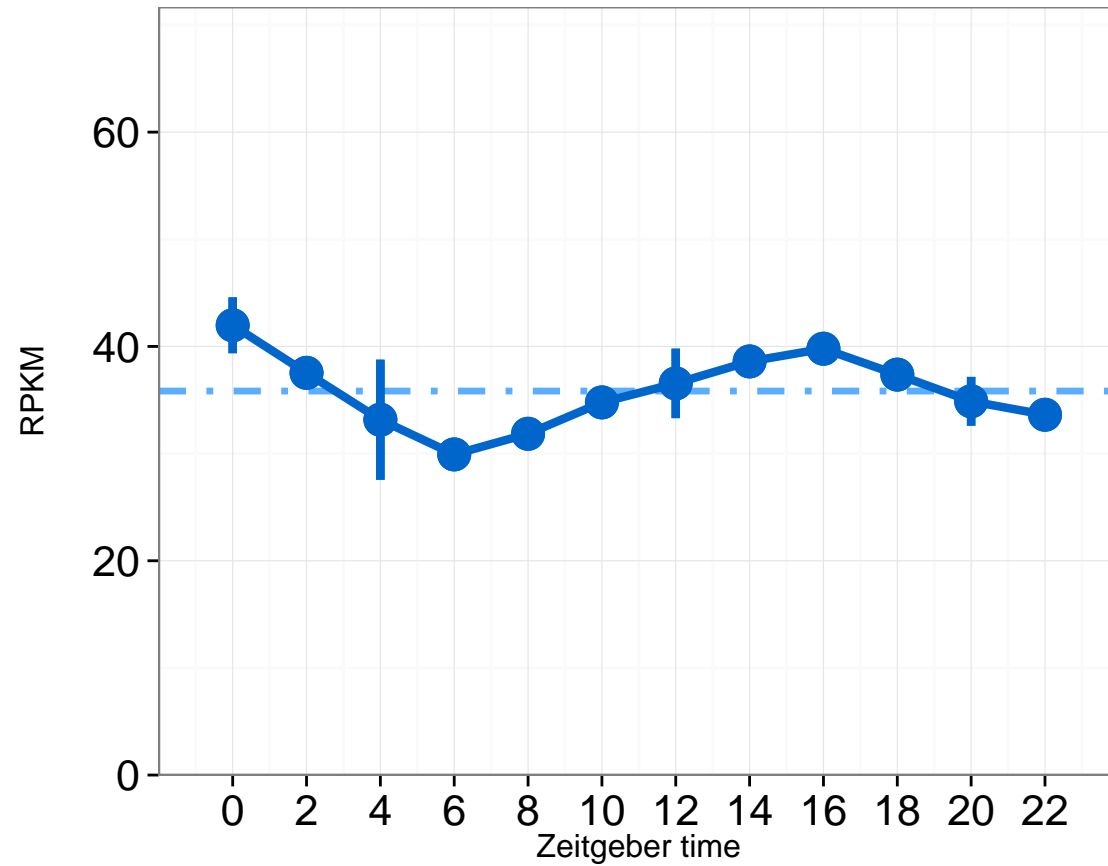

## Slc10a5 log2(Ribosome occupancy)

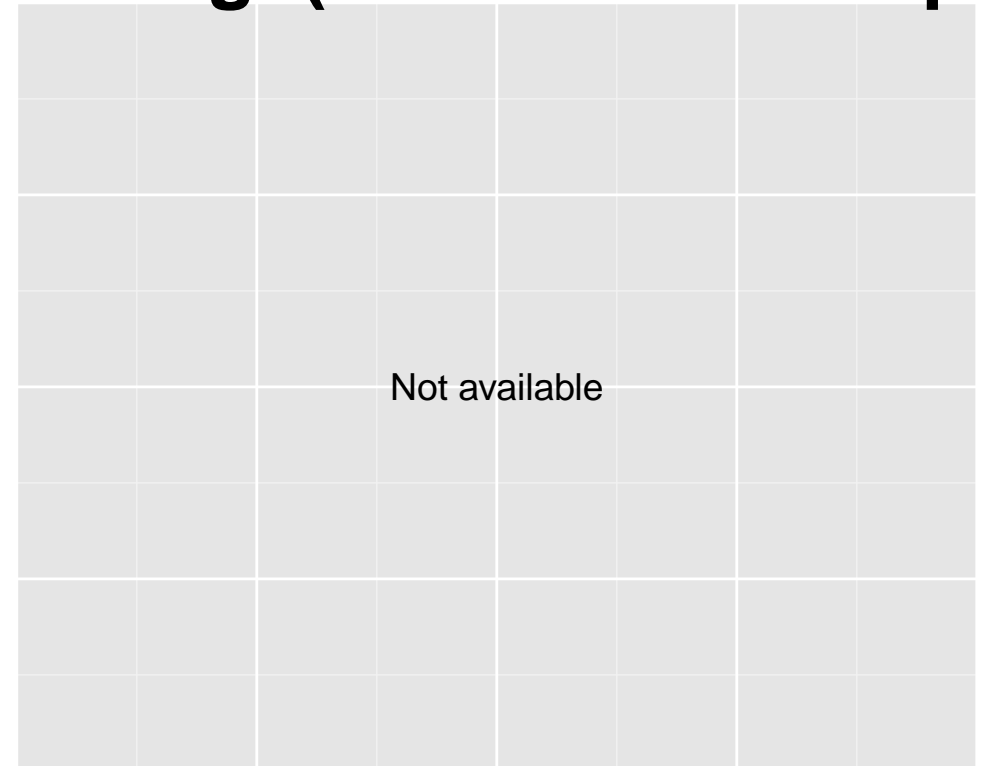

Supplement: Supplementary file 4588 [file 1]

# Trim46

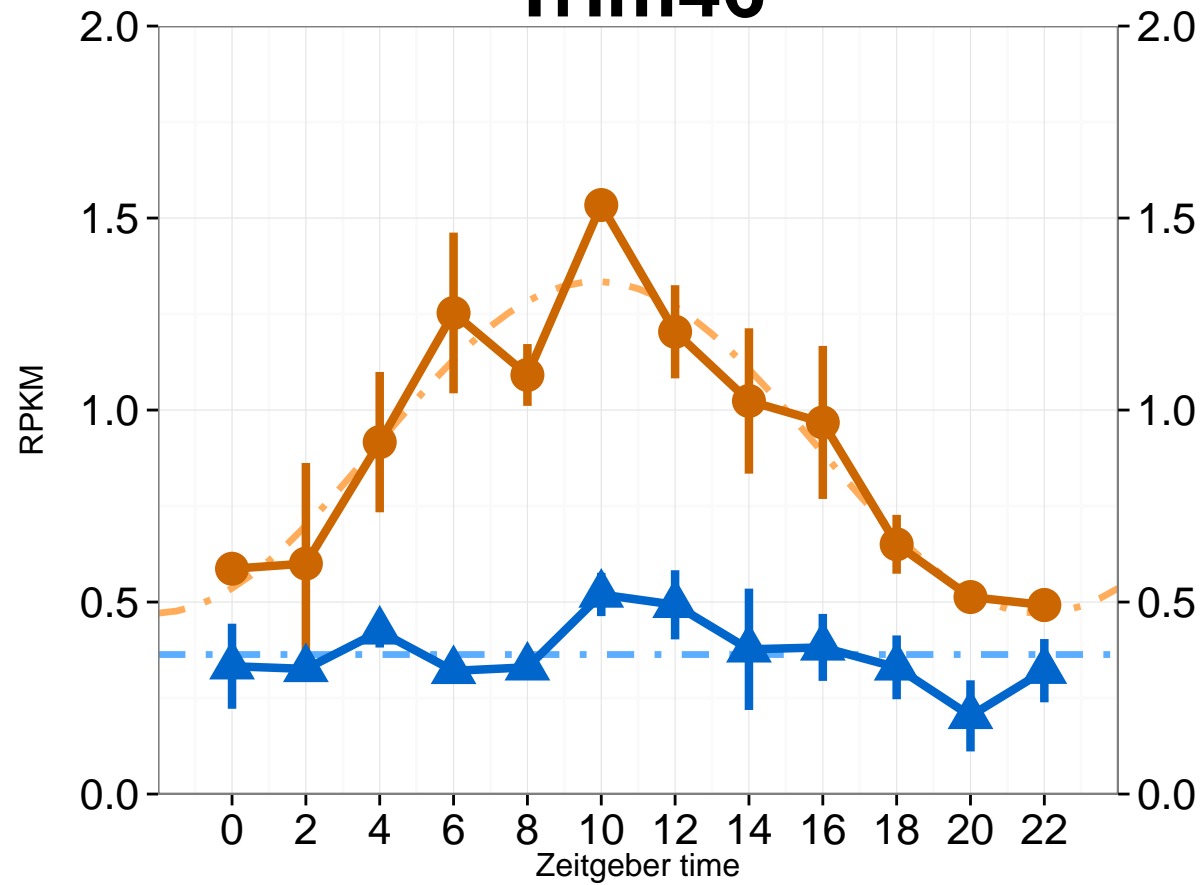

# Trim46

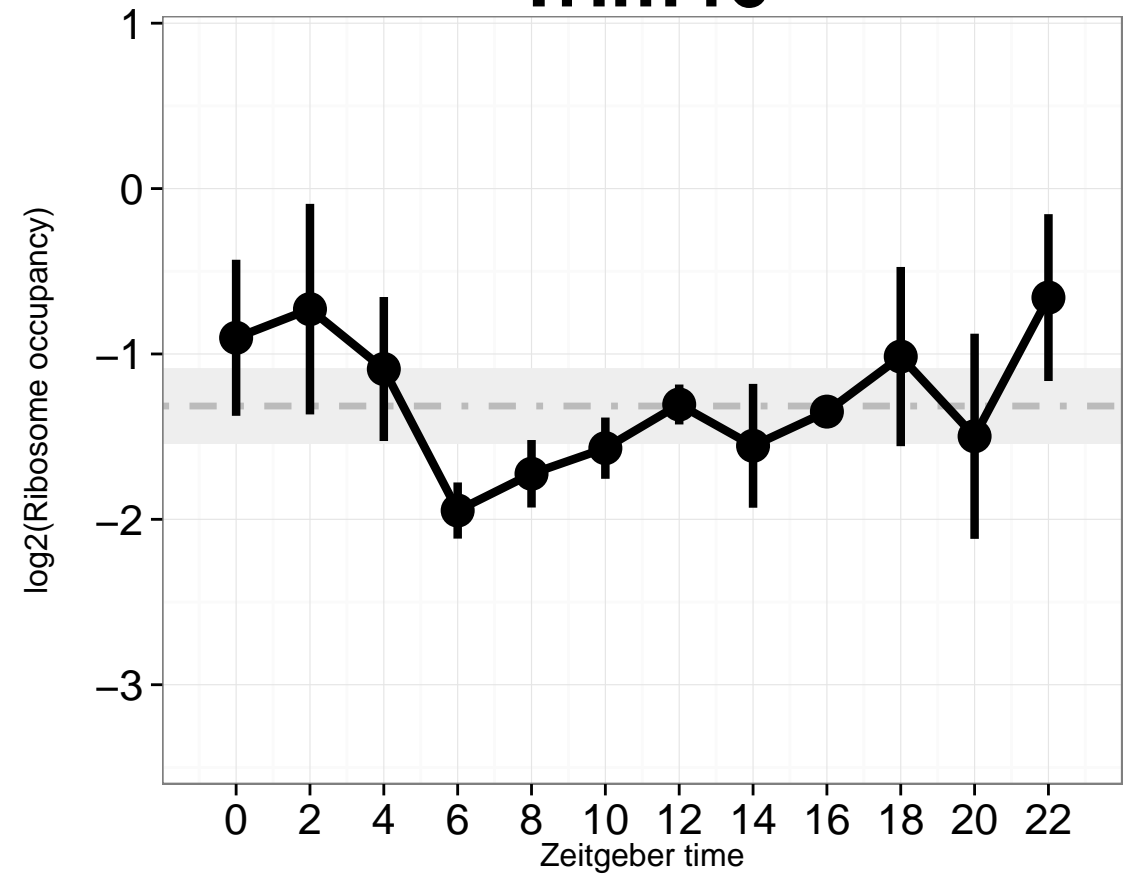

Supplement: Supplementary file 4589 [file 1]

## Glcci1

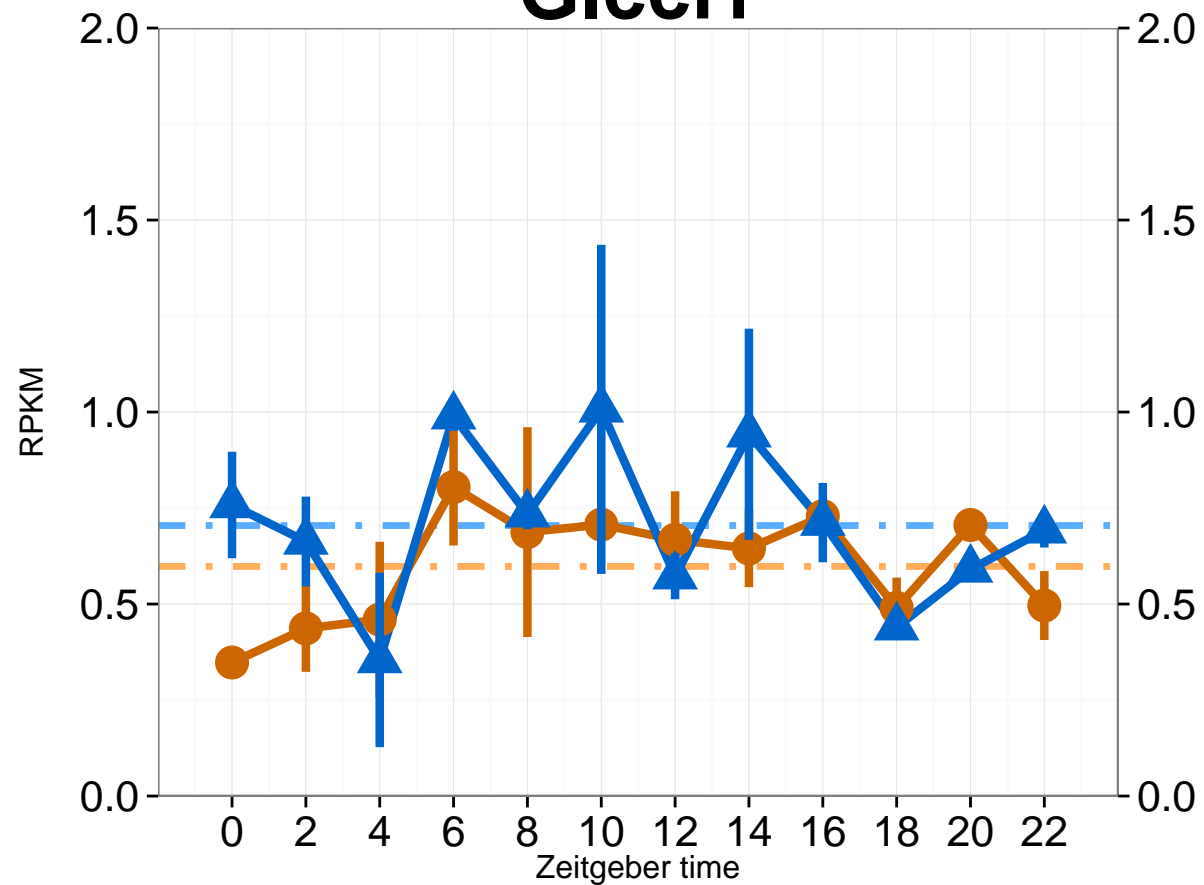

## Glcci1

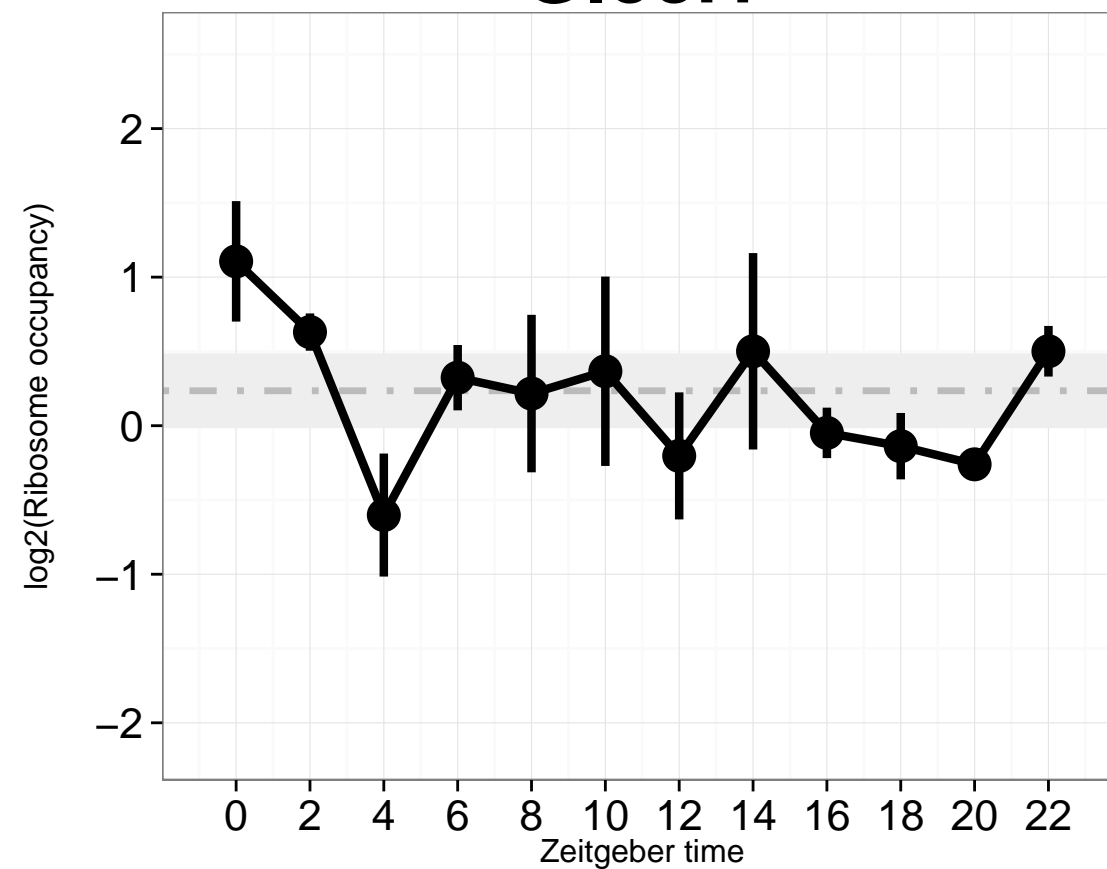

Supplement: Supplementary file 4590 [file 1]

## Ctc1

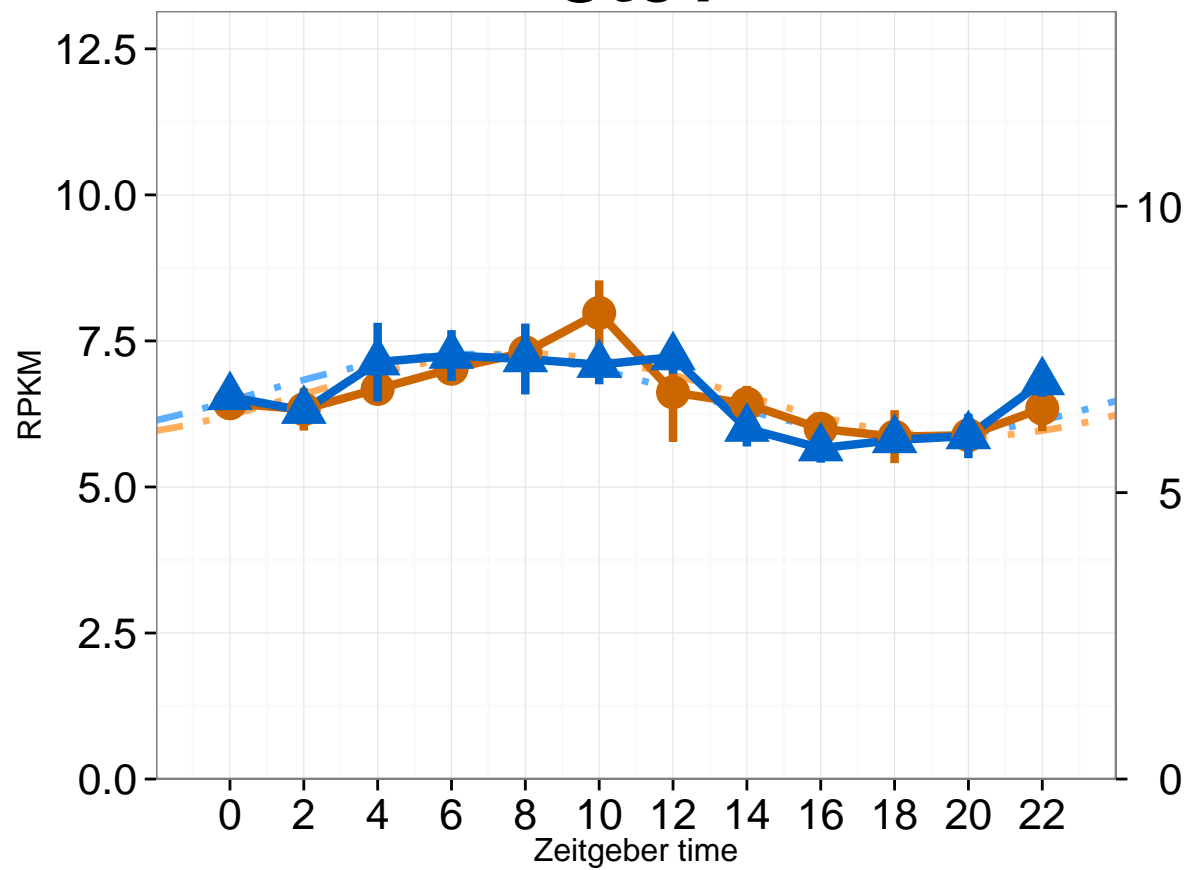

## Ctc1

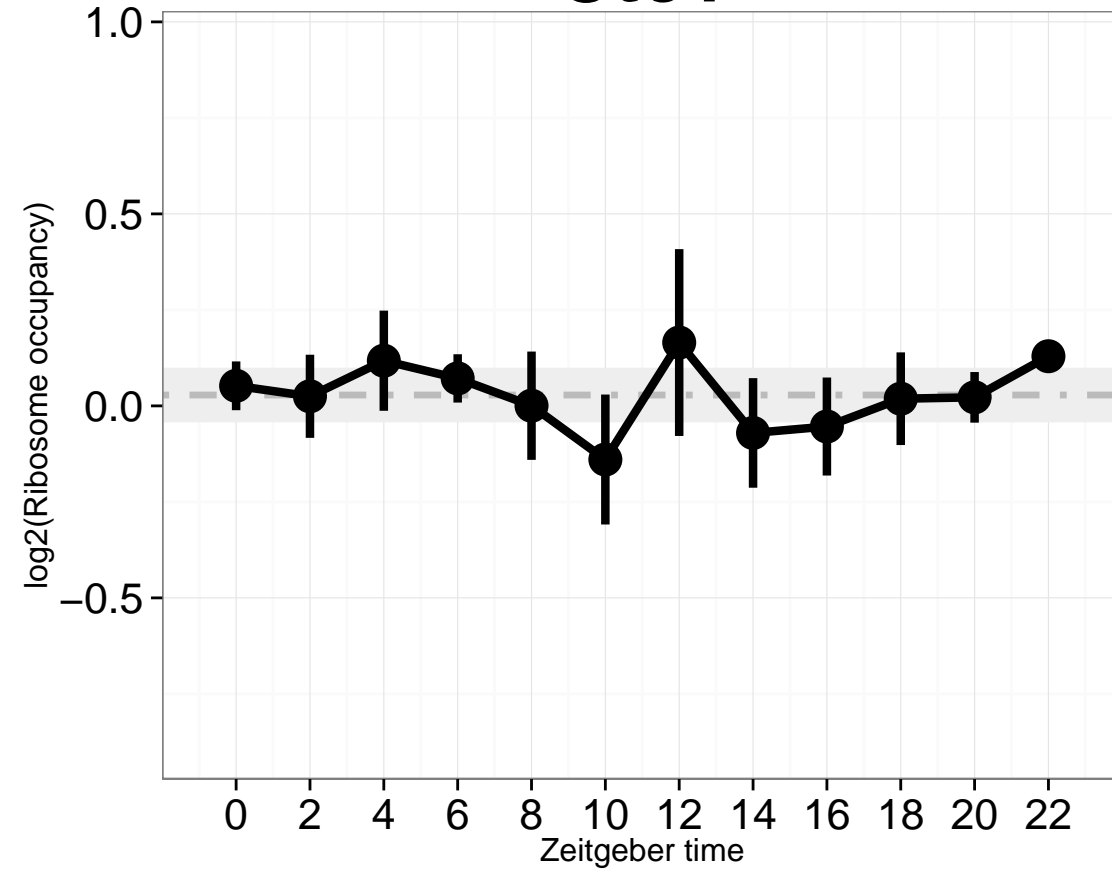

Supplement: Supplementary file 4591 [file 1]

## Mastl

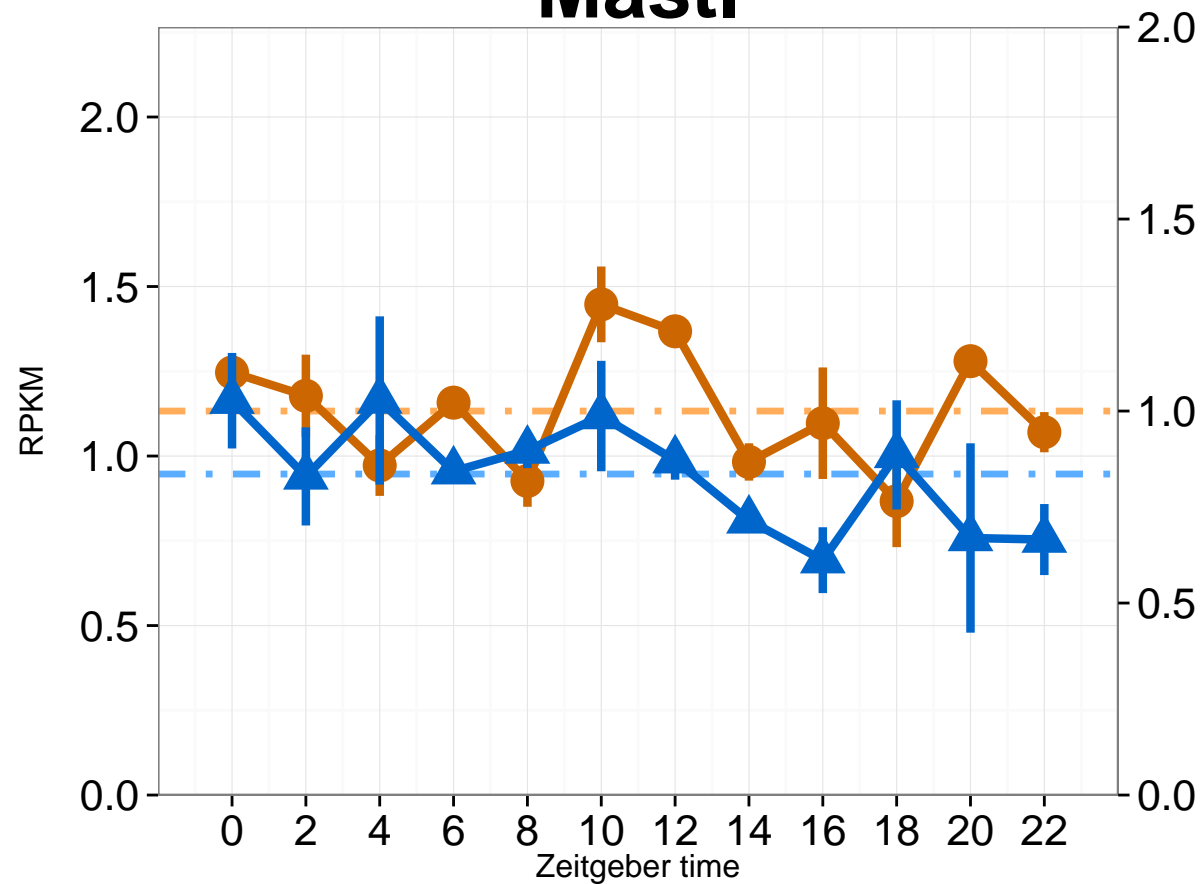

## Mastl

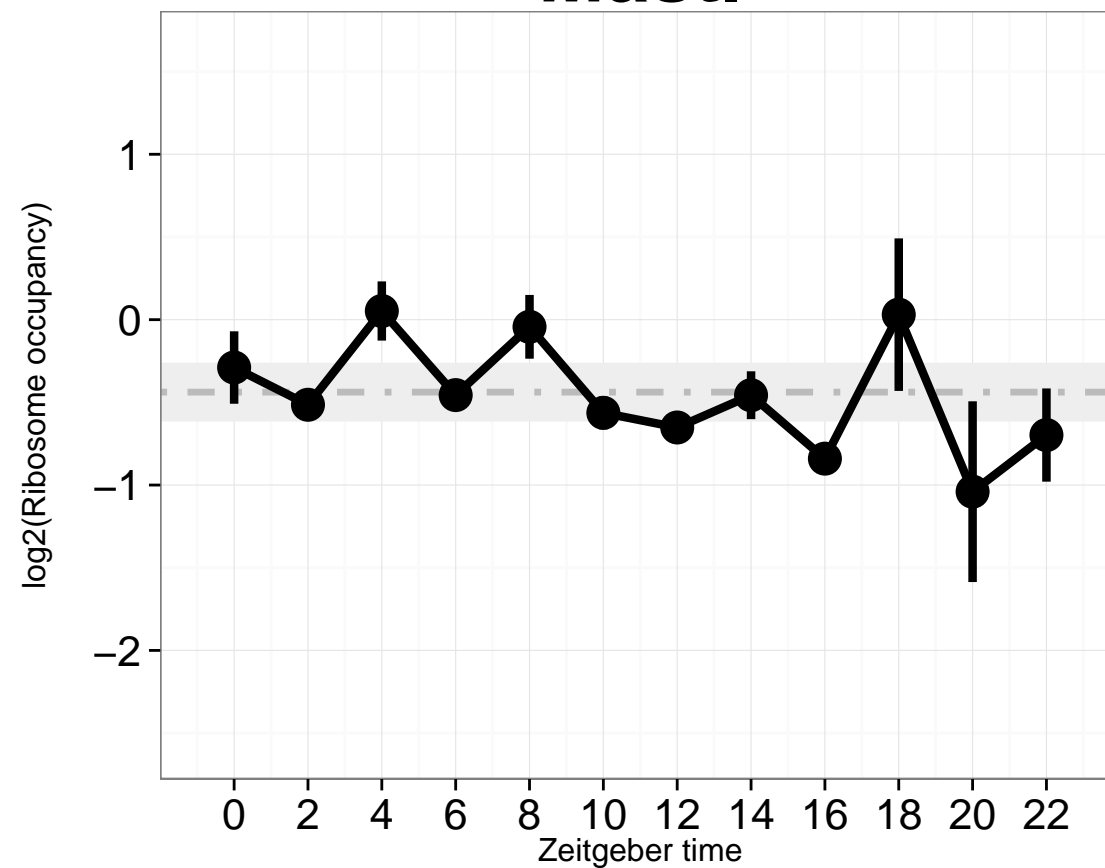

Supplement: Supplementary file 4592 [file 1]

## Six5

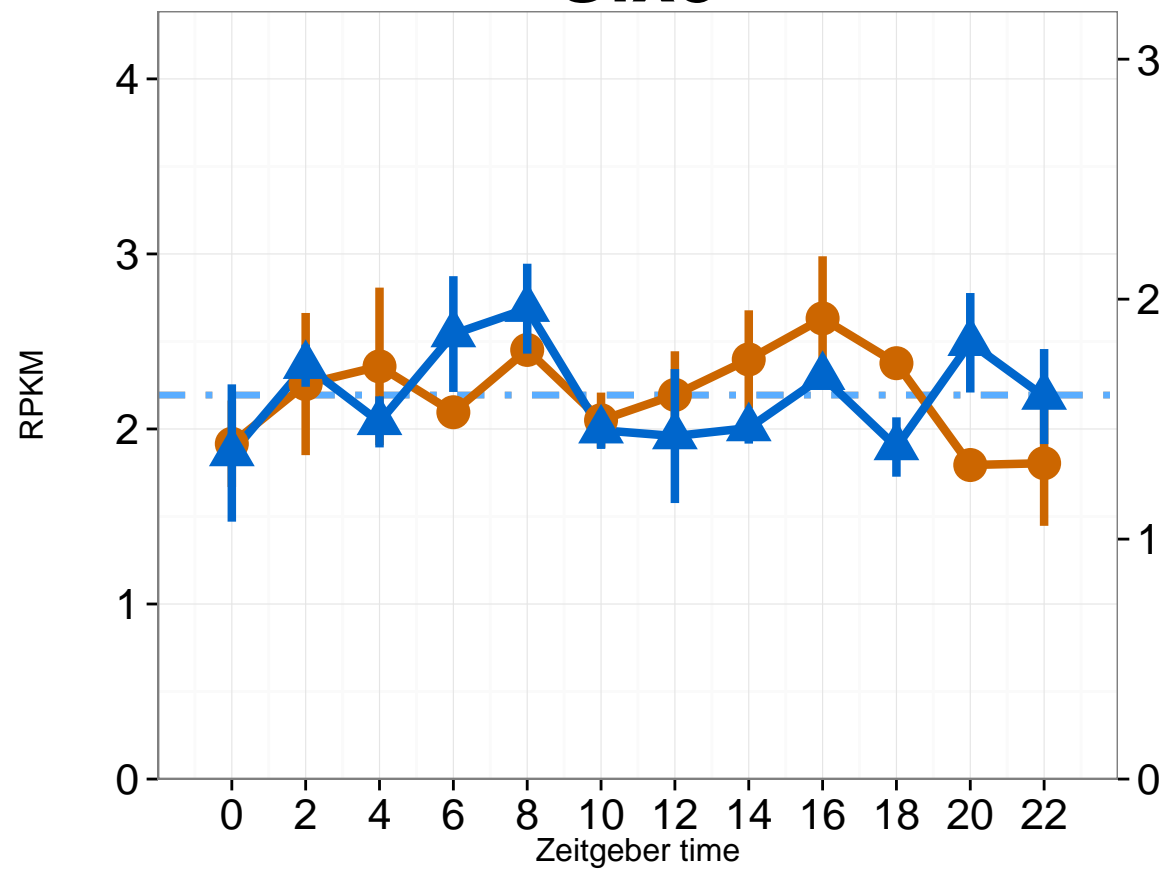

## Six5

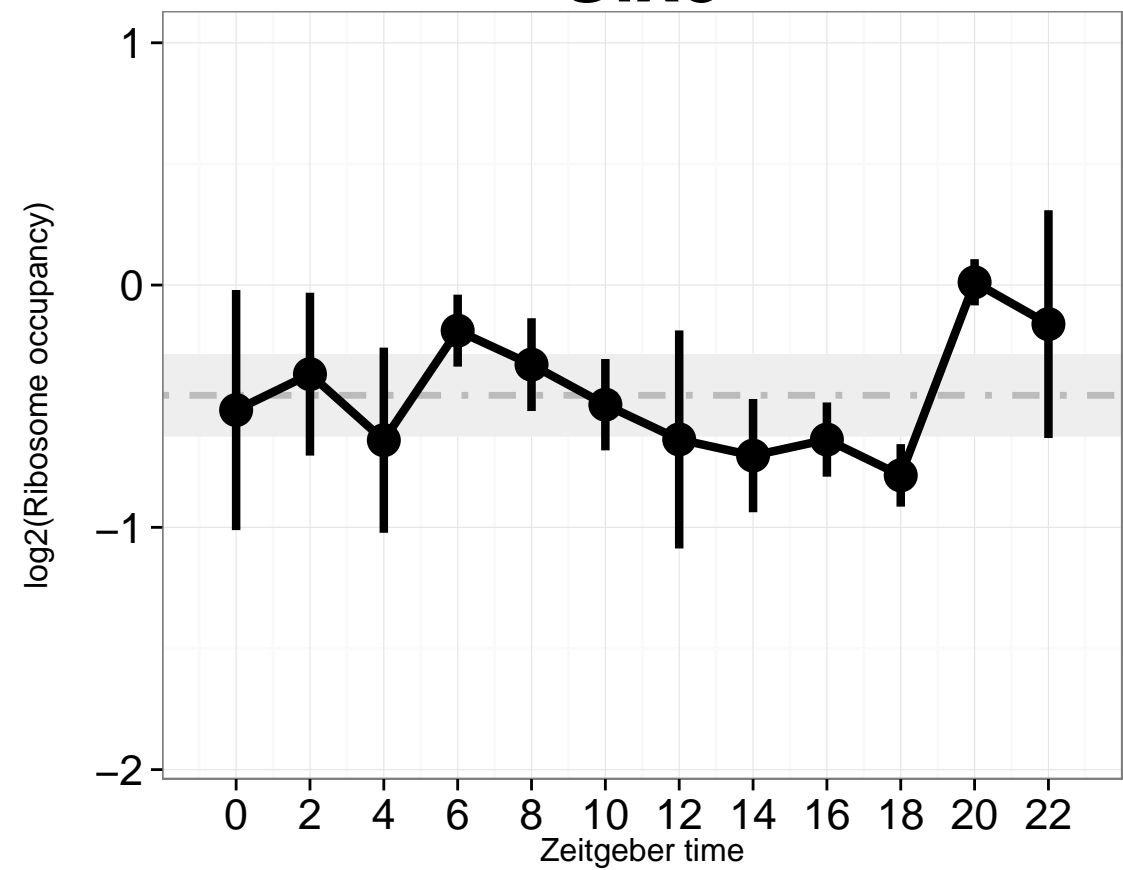

Supplement: Supplementary file 4593 [file 1]

# Sfxn4

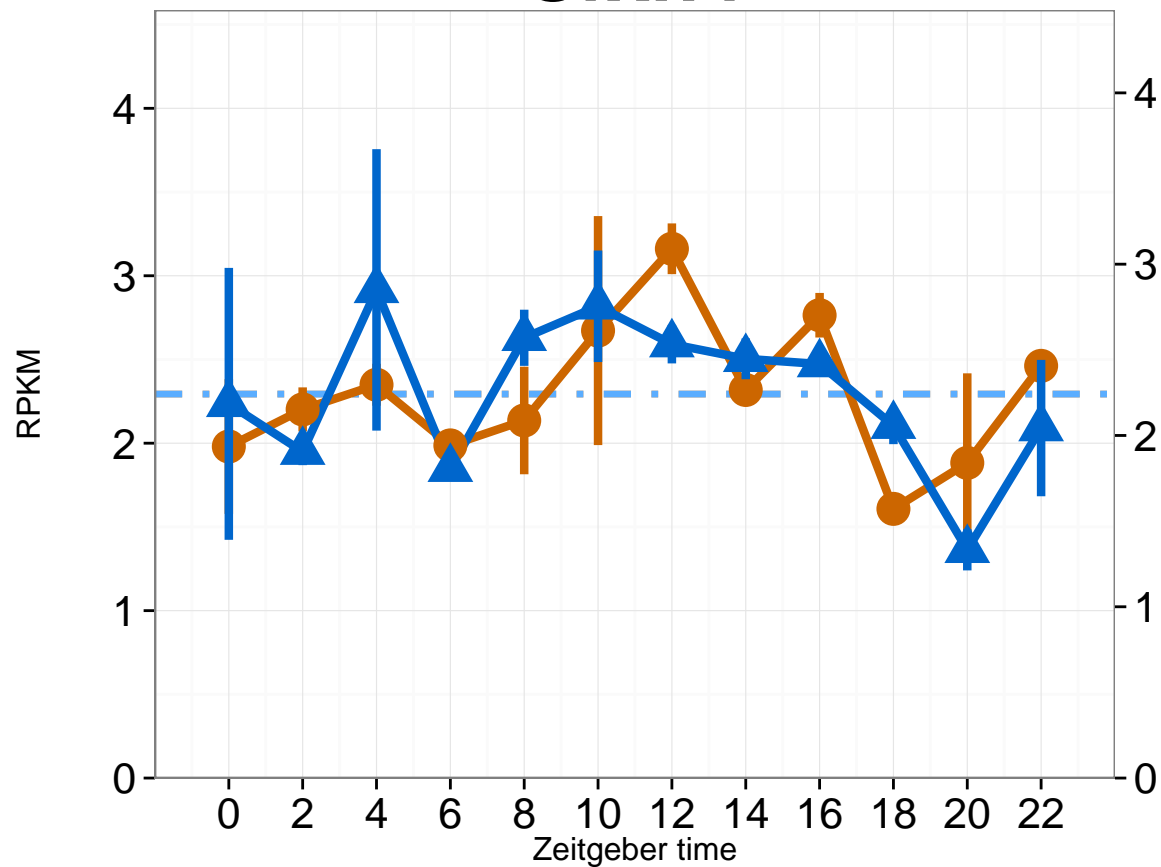

# Sfxn4

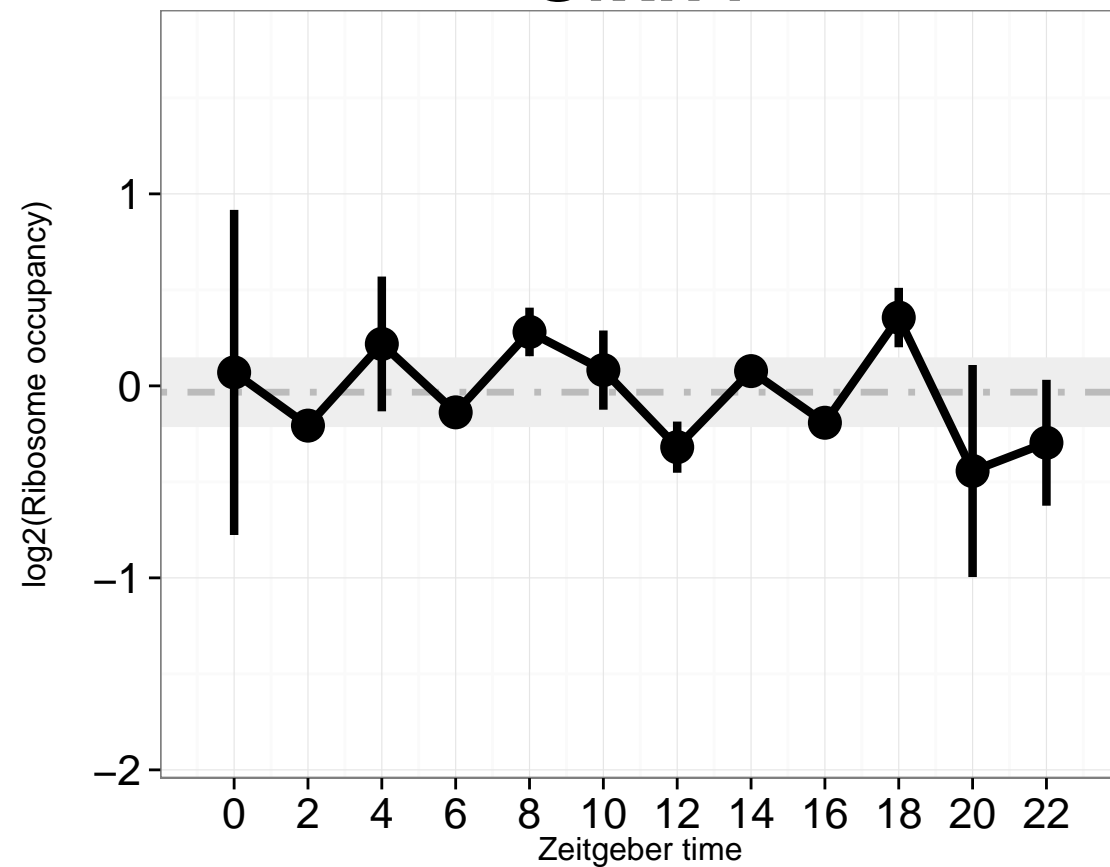

Supplement: Supplementary file 4594 [file 1]

# Entpd1

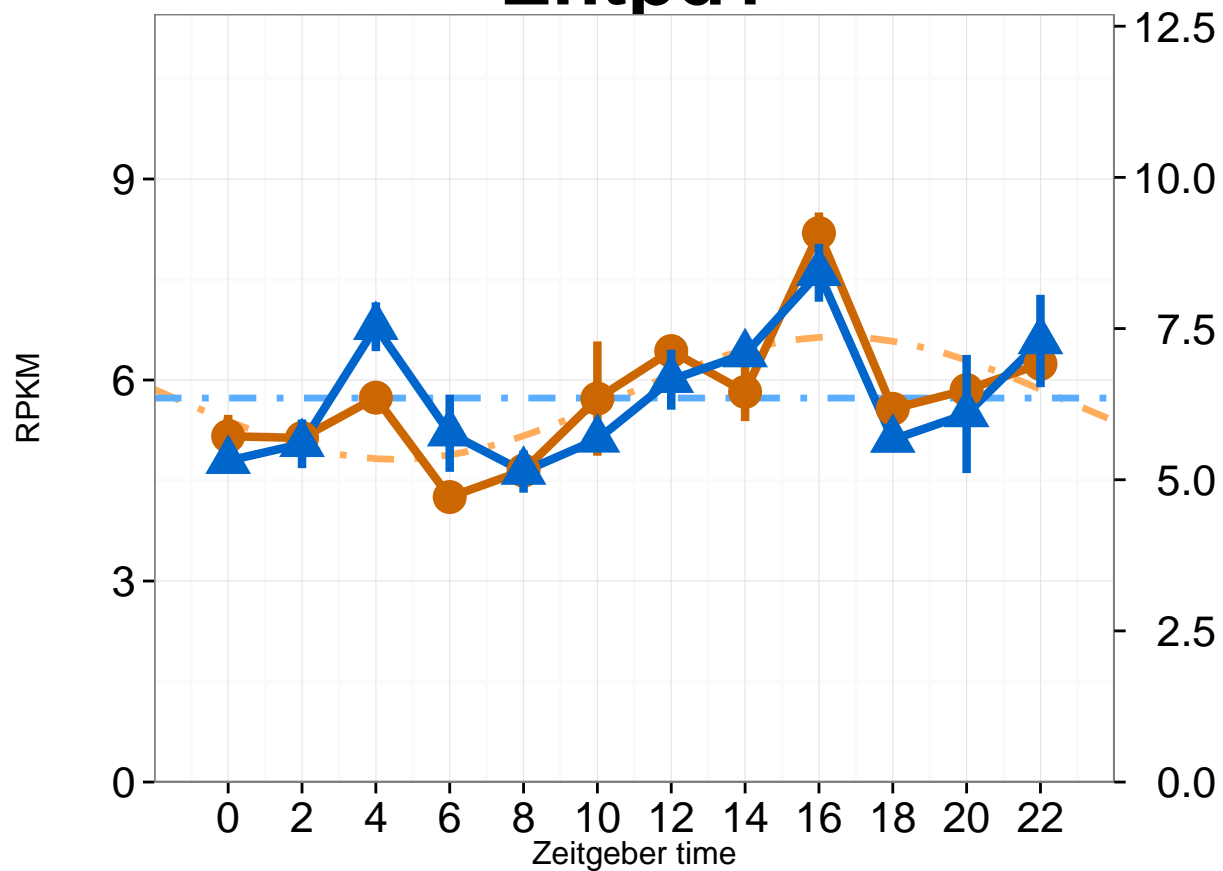

# Entpd1

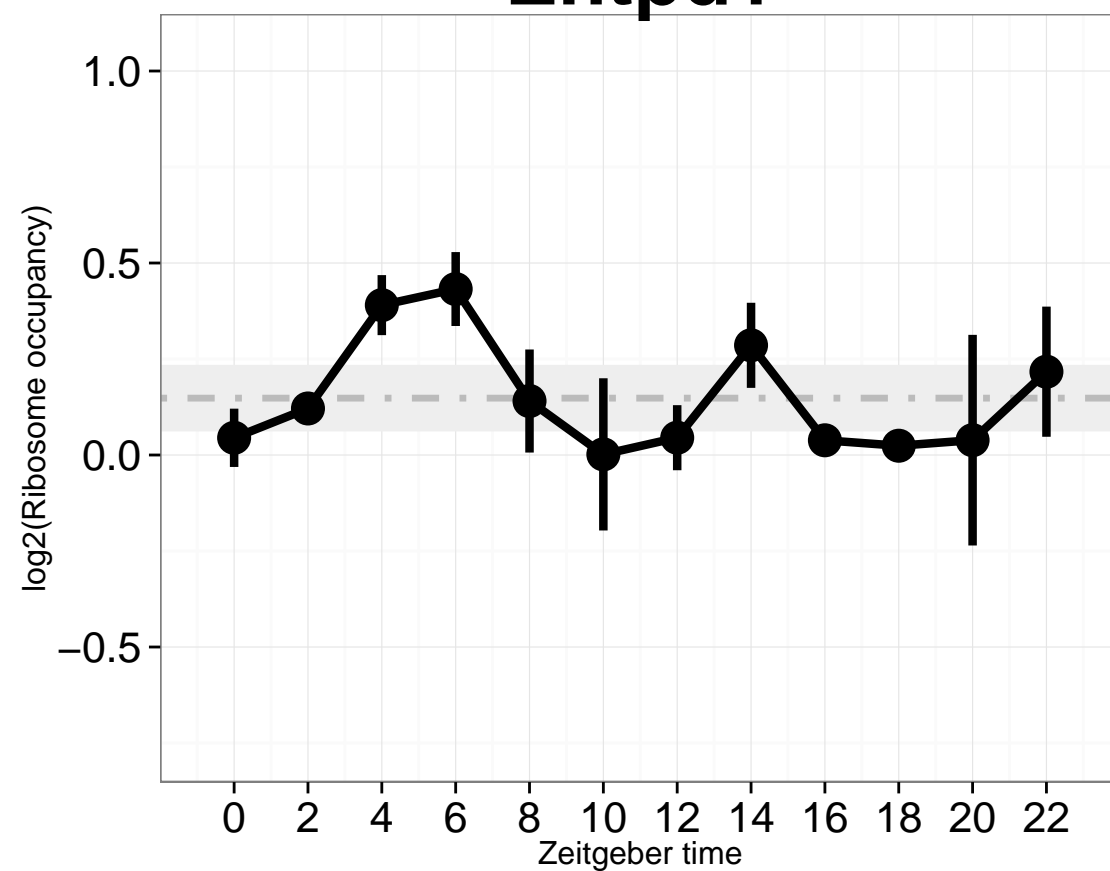

Supplement: Supplementary file 4595 [file 1]

## Cd99l2

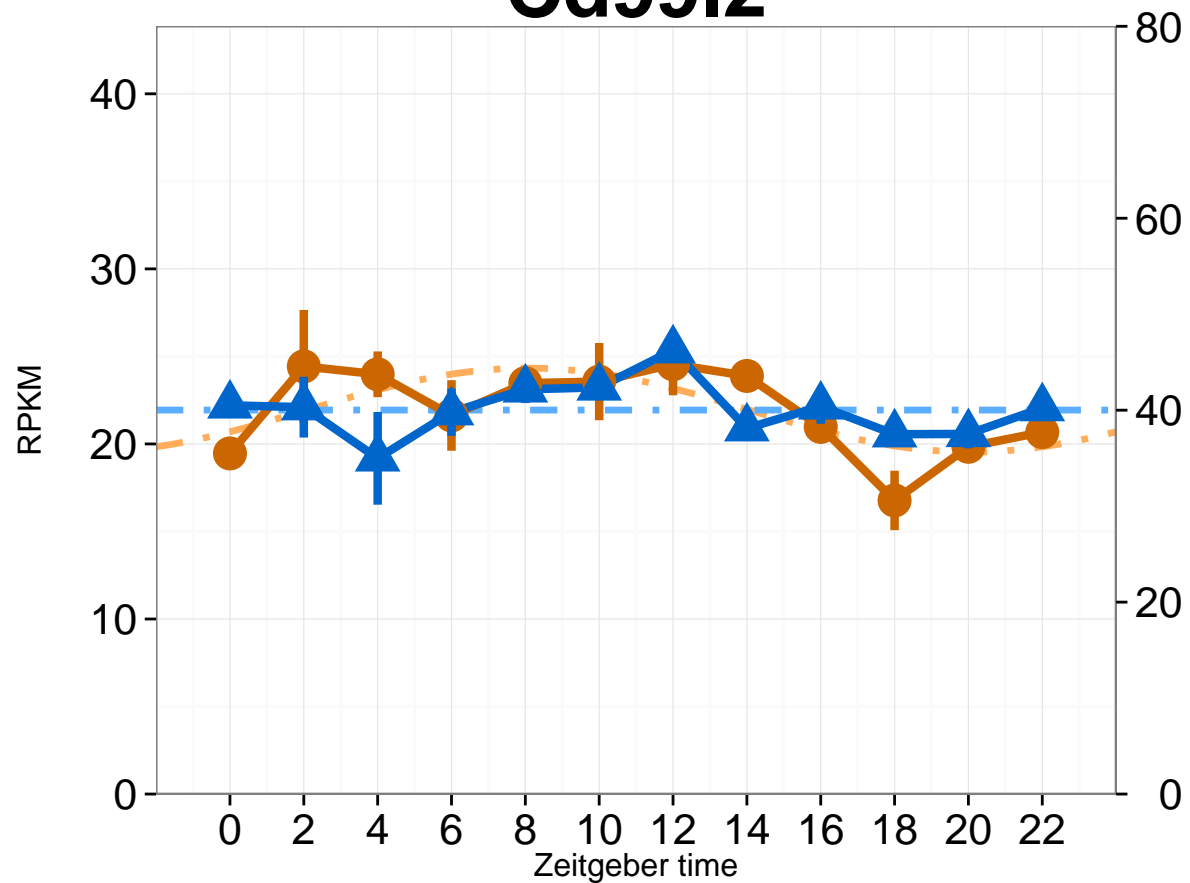

## Cd99l2

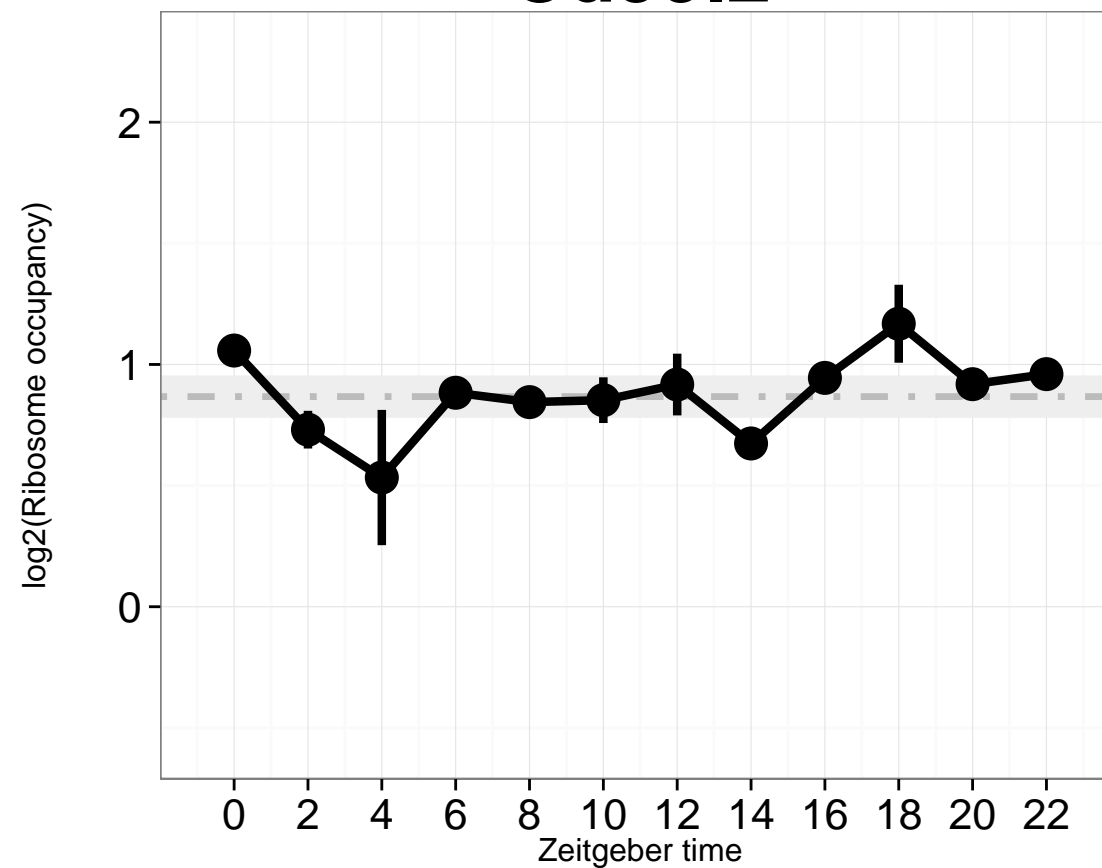

Supplement: Supplementary file 4596 [file 1]

## Anxa5

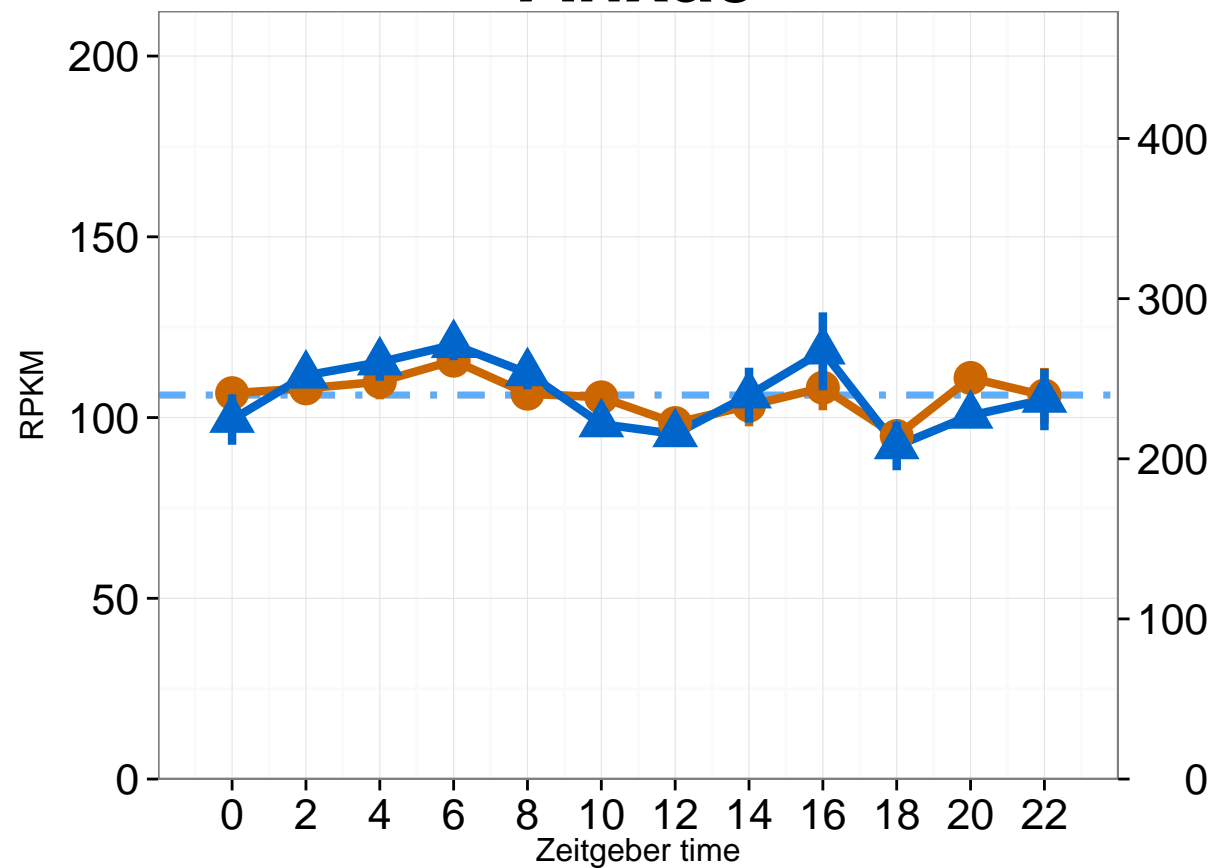

## Anxa5

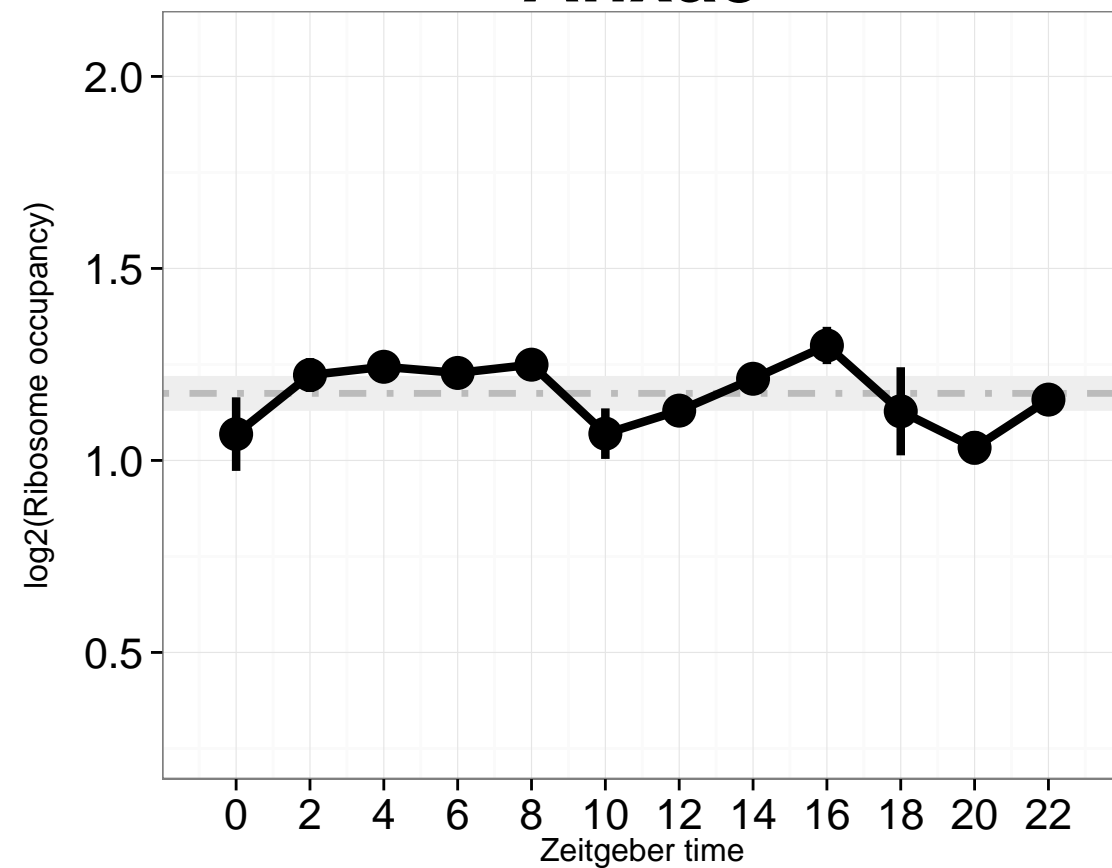

Supplement: Supplementary file 4597 [file 1]

## Pmel

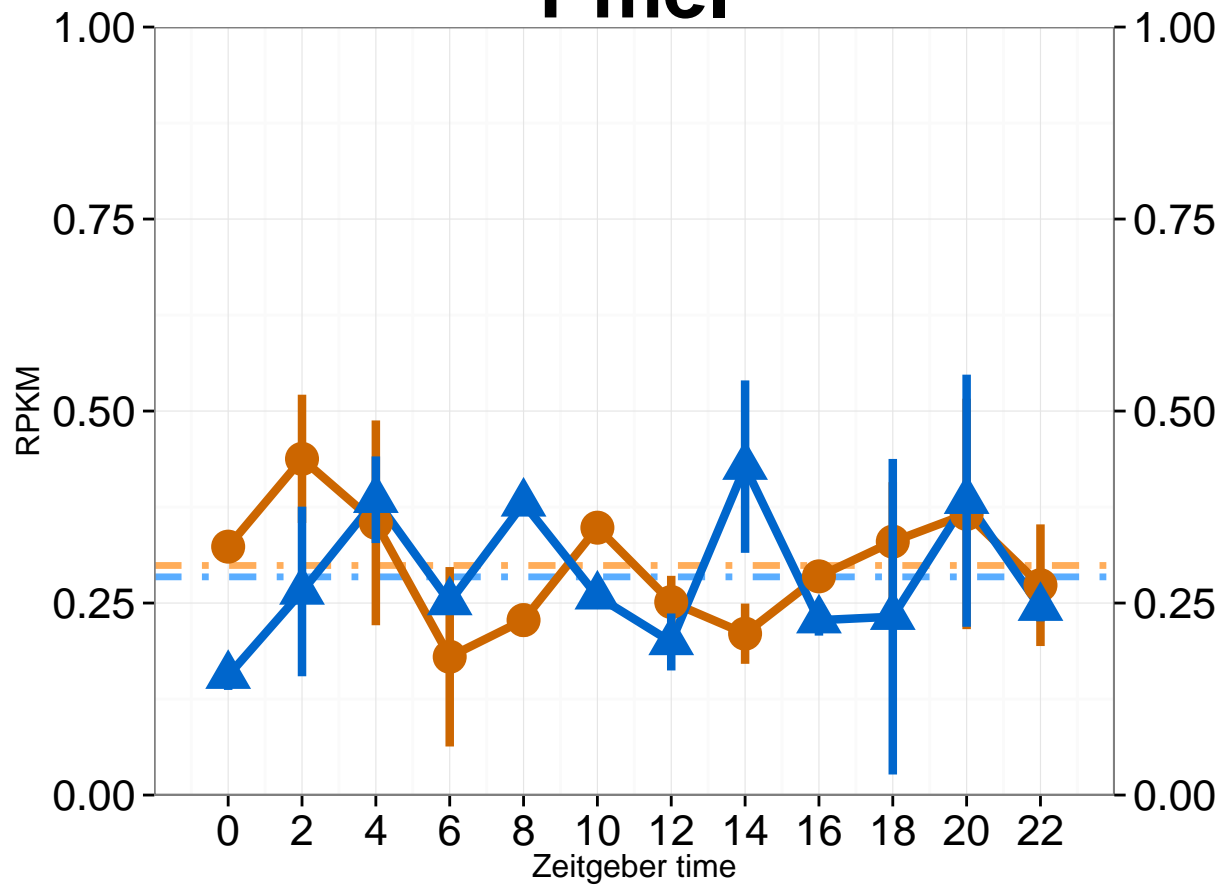

## Pmel

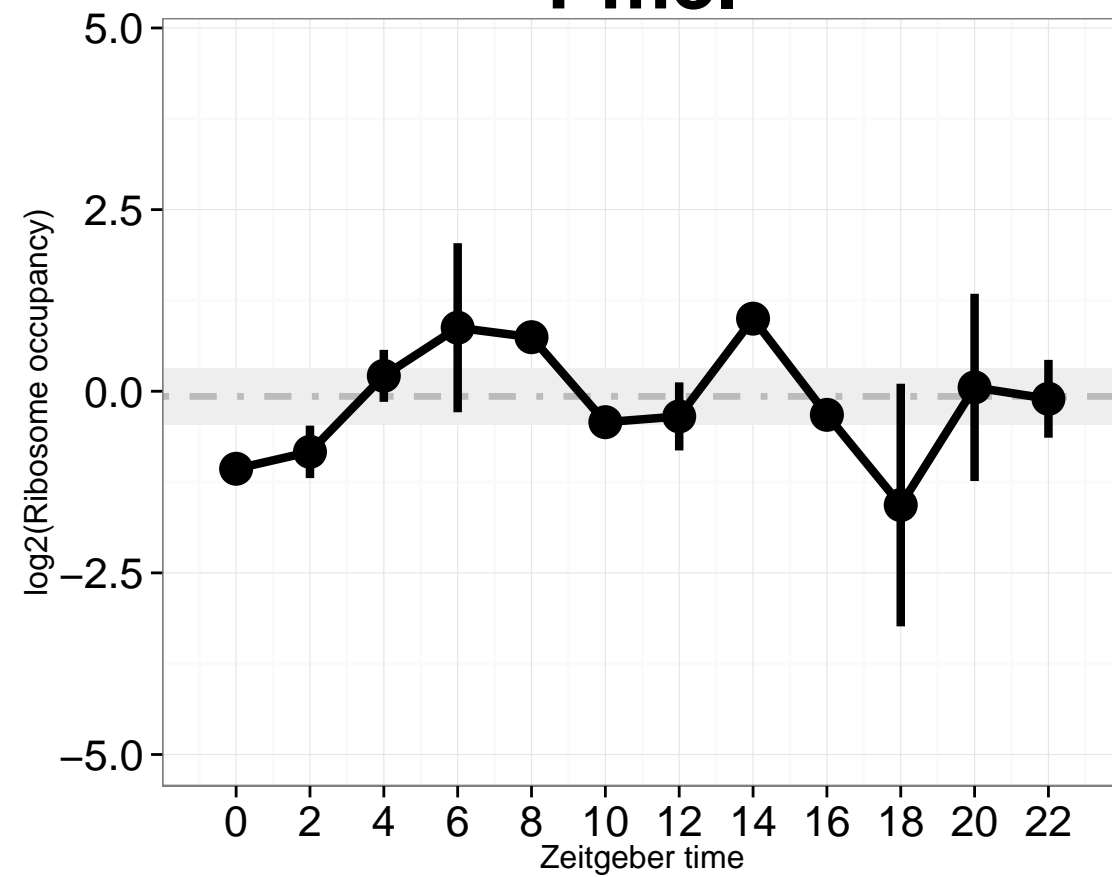

Supplement: Supplementary file 4598 [file 1]

## Kctd11

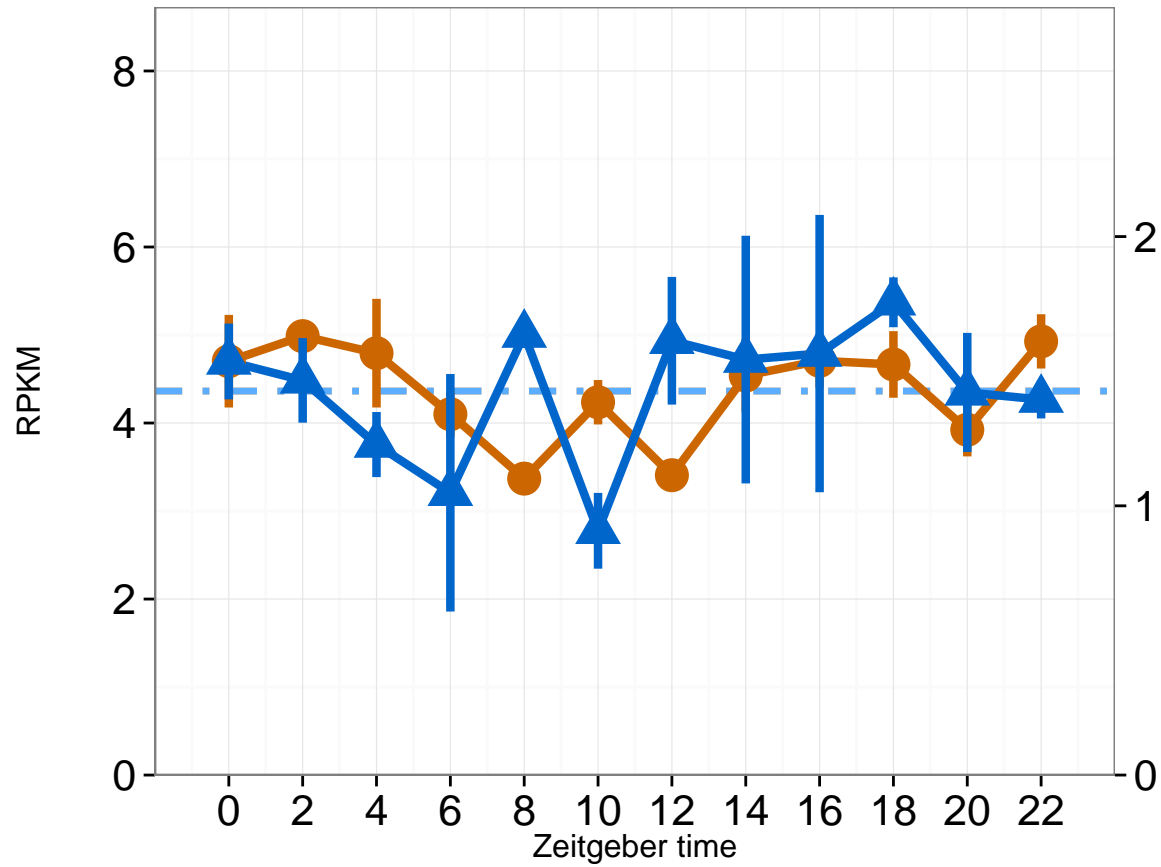

## Kctd11

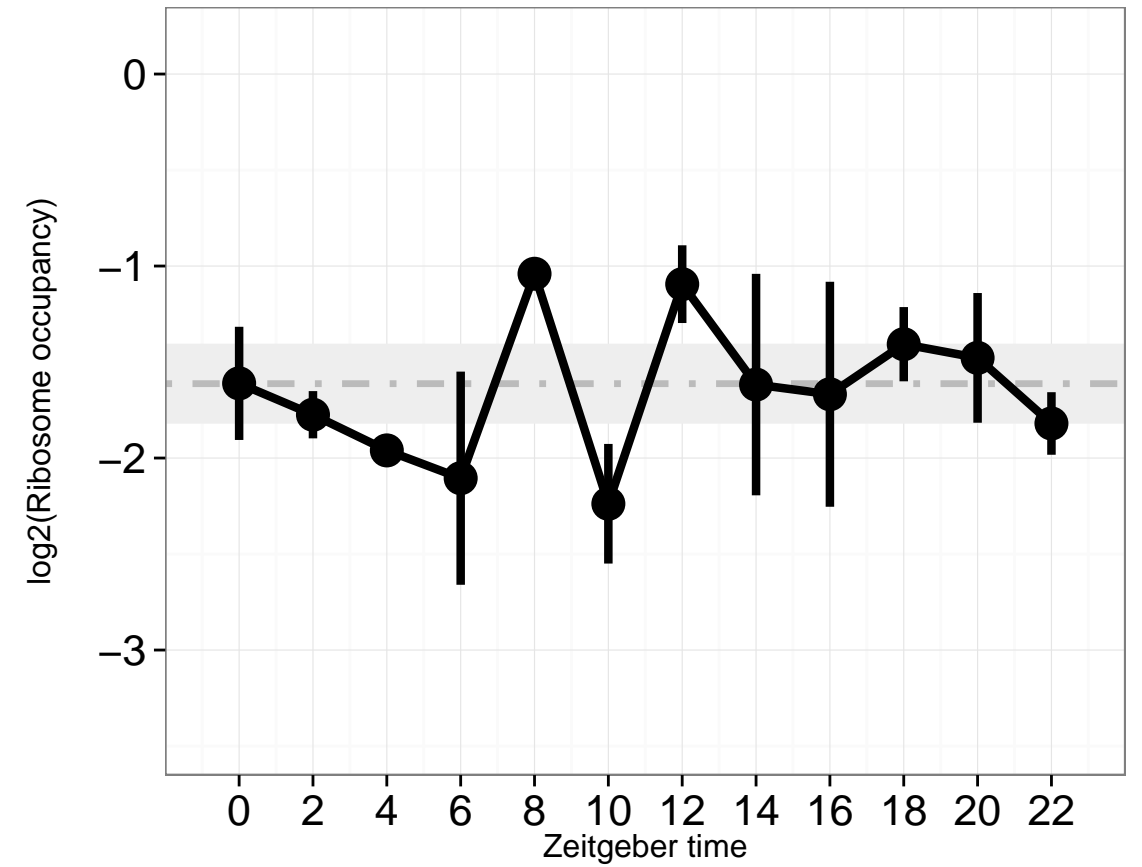

Supplement: Supplementary file 4599 [file 1]

## Sacs

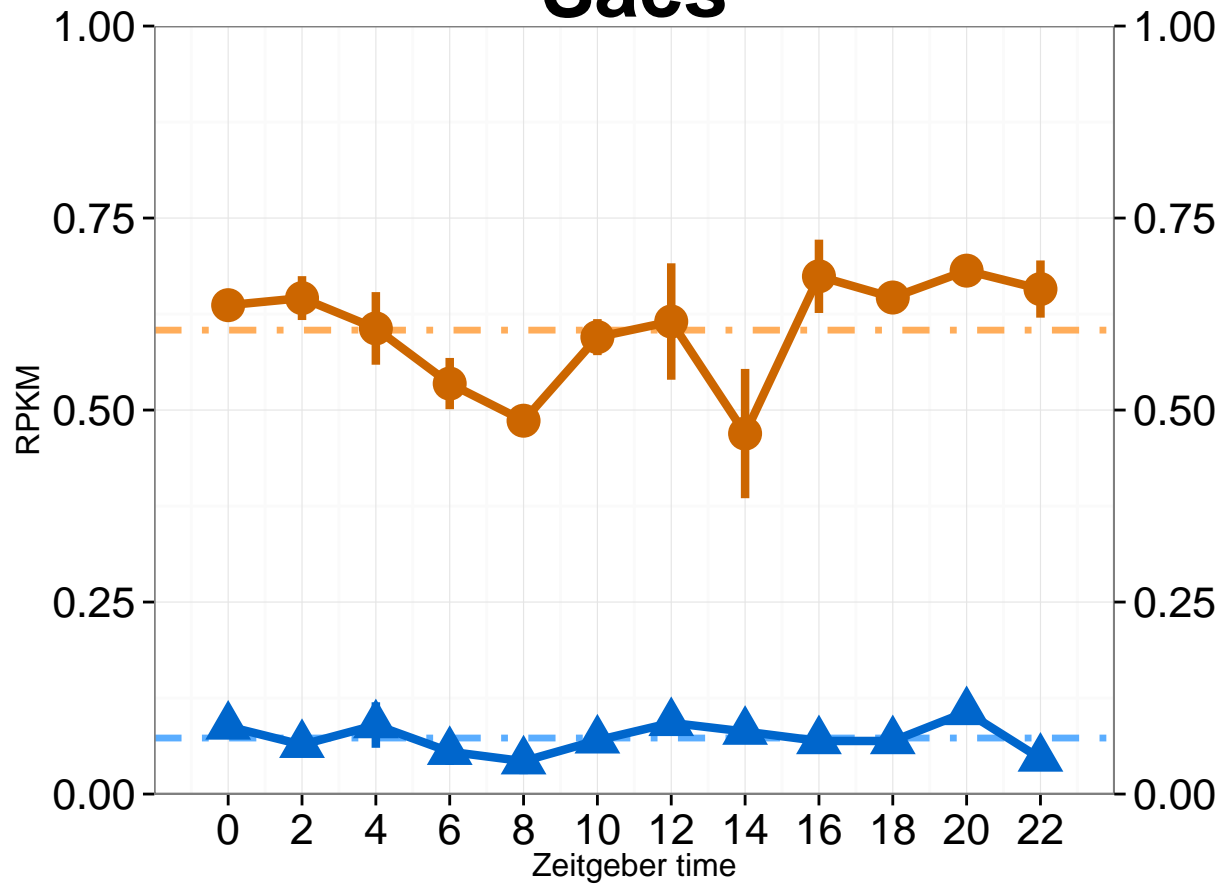

## Sacs

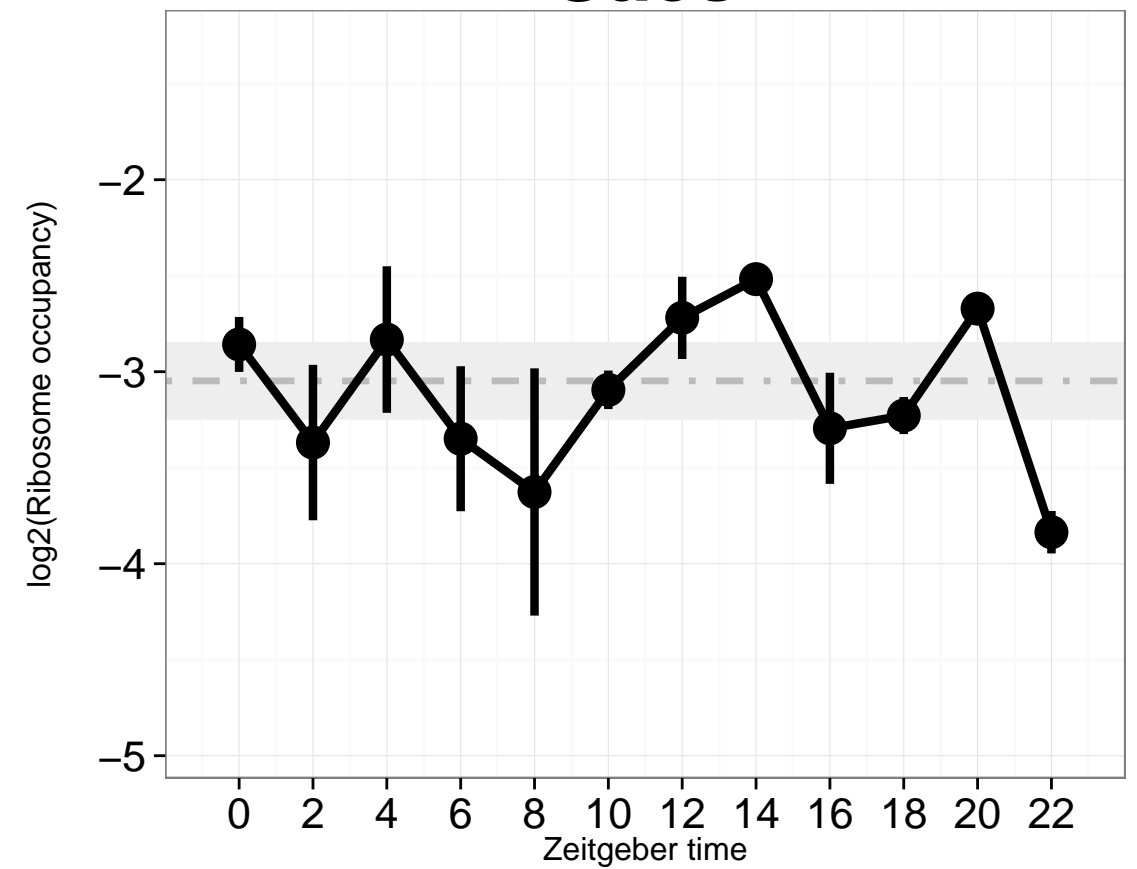

Supplement: Supplementary file 4600 [file 1]

# Suc1g2

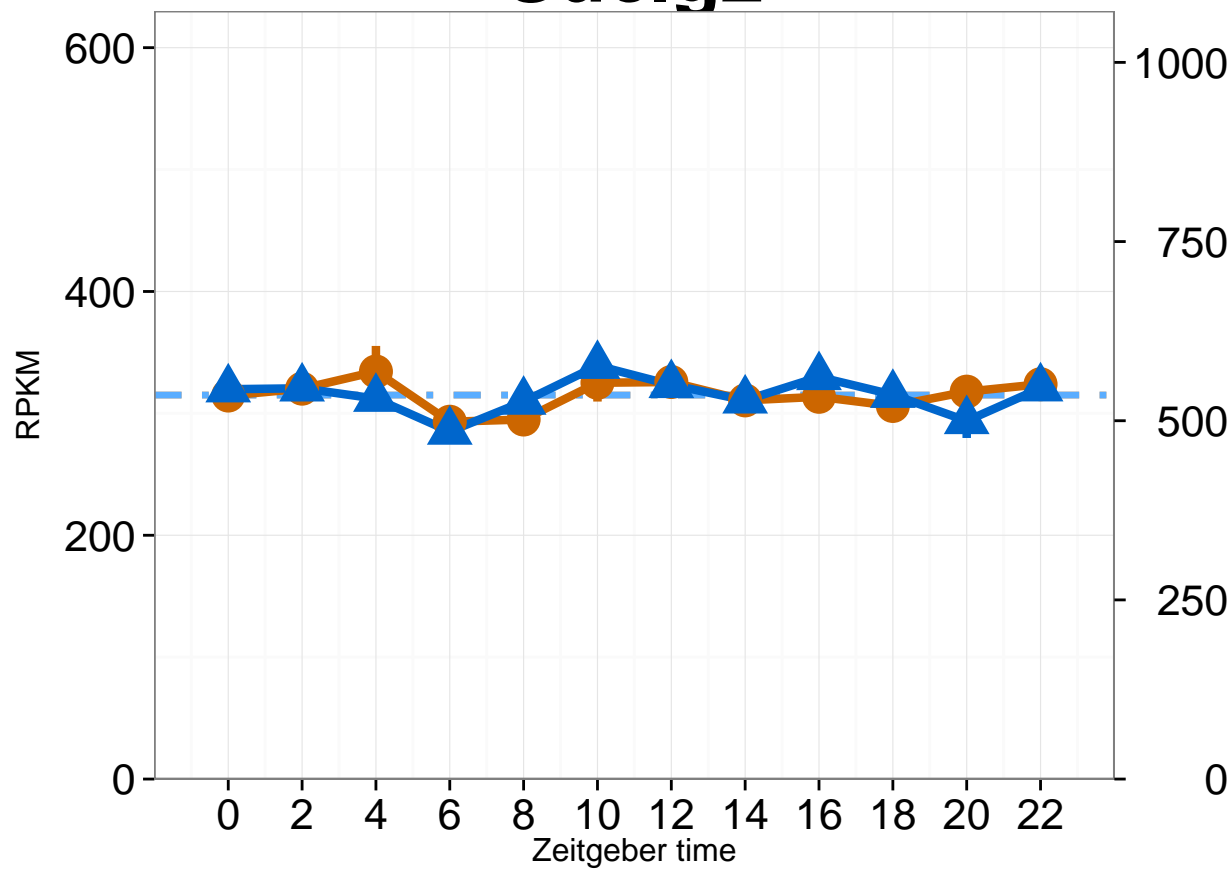

# Suc1g2

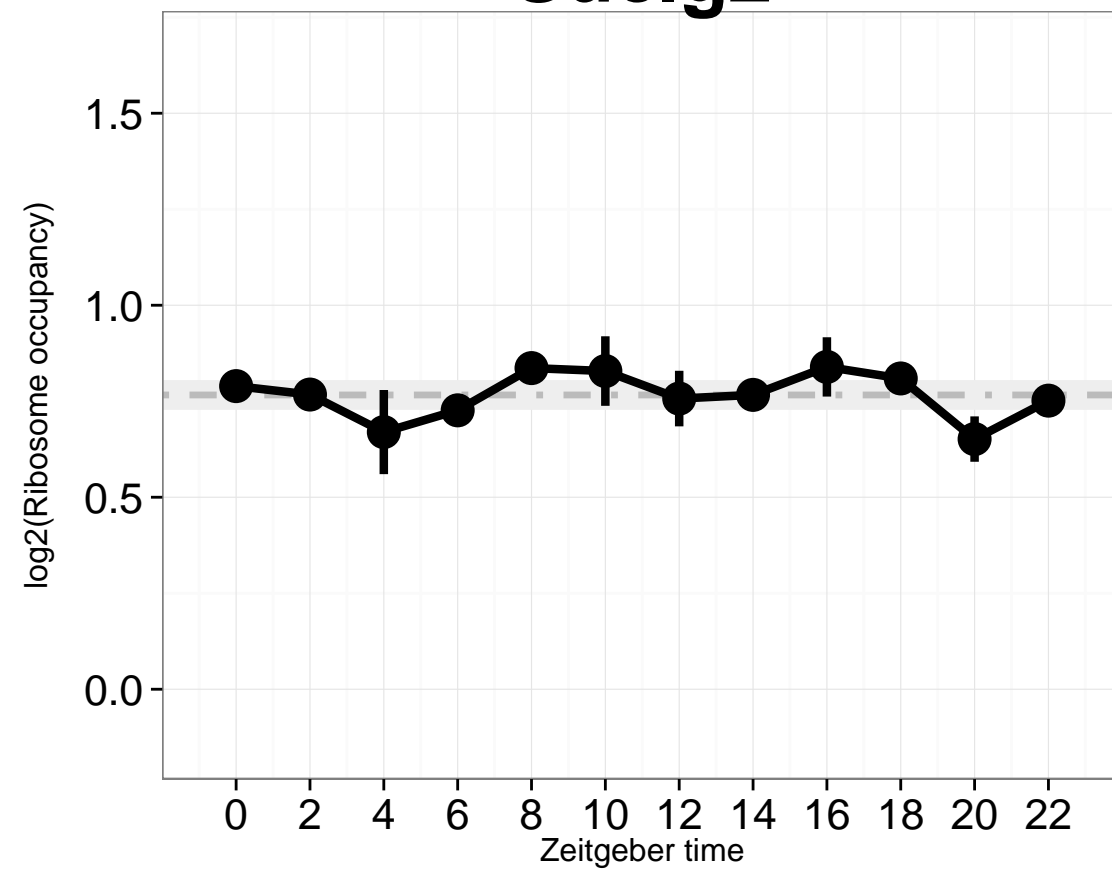

Supplement: Supplementary file 4601 [file 1]

# Ugt1a6b

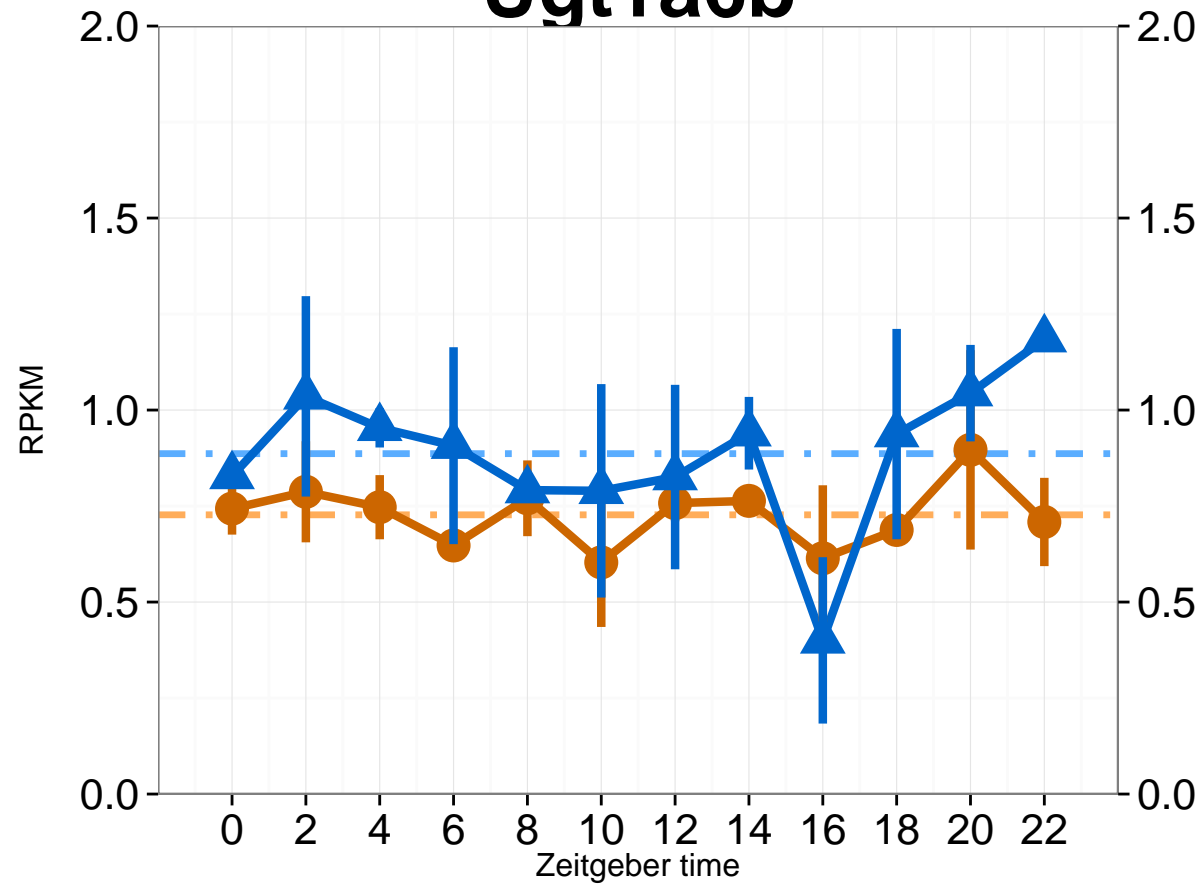

# Ugt1a6b

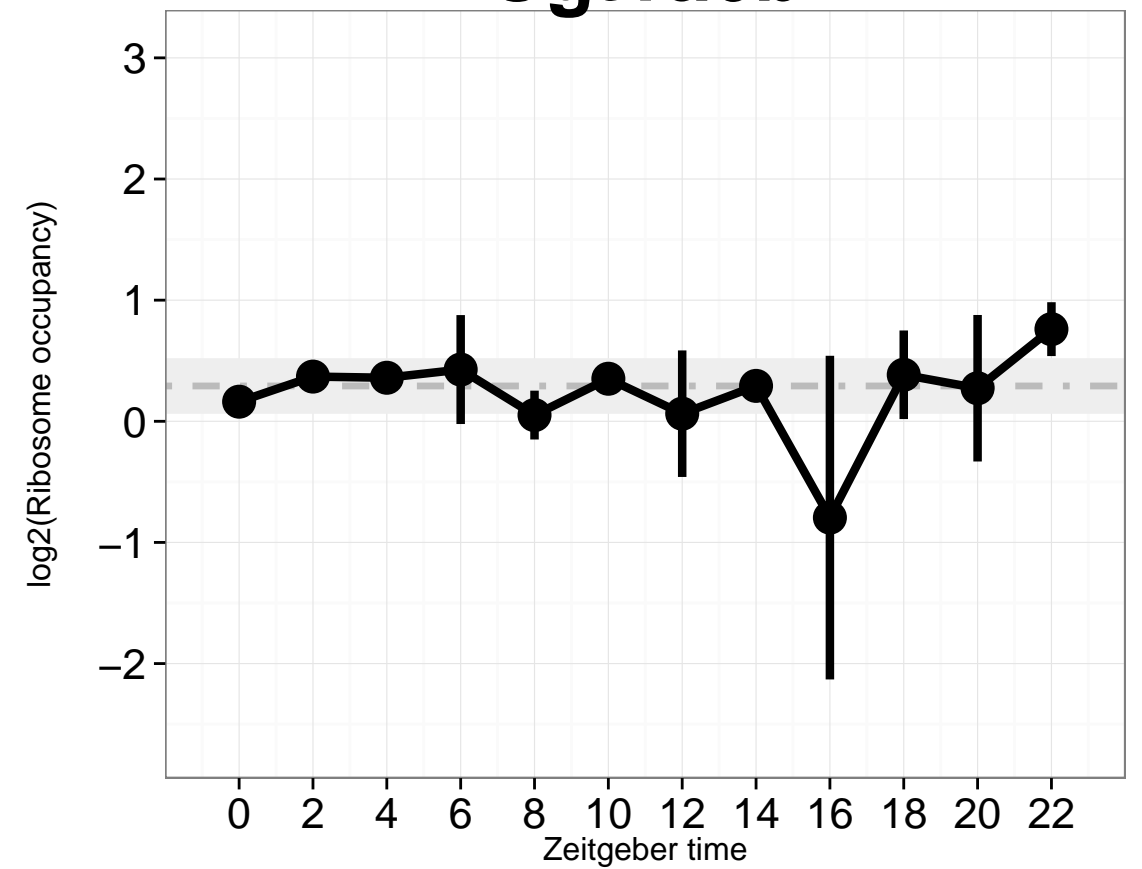

Supplement: Supplementary file 4602 [file 1]

# Fancb

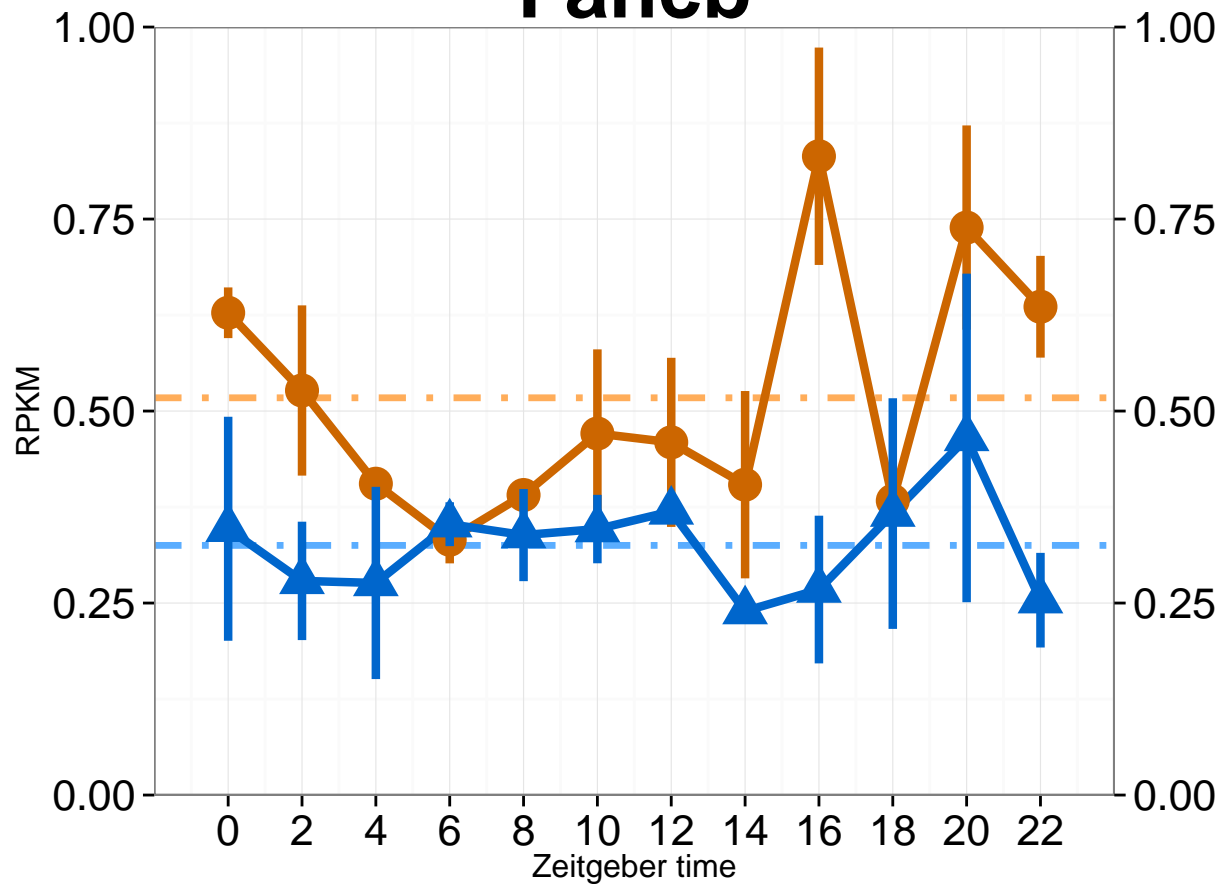

# Fancb

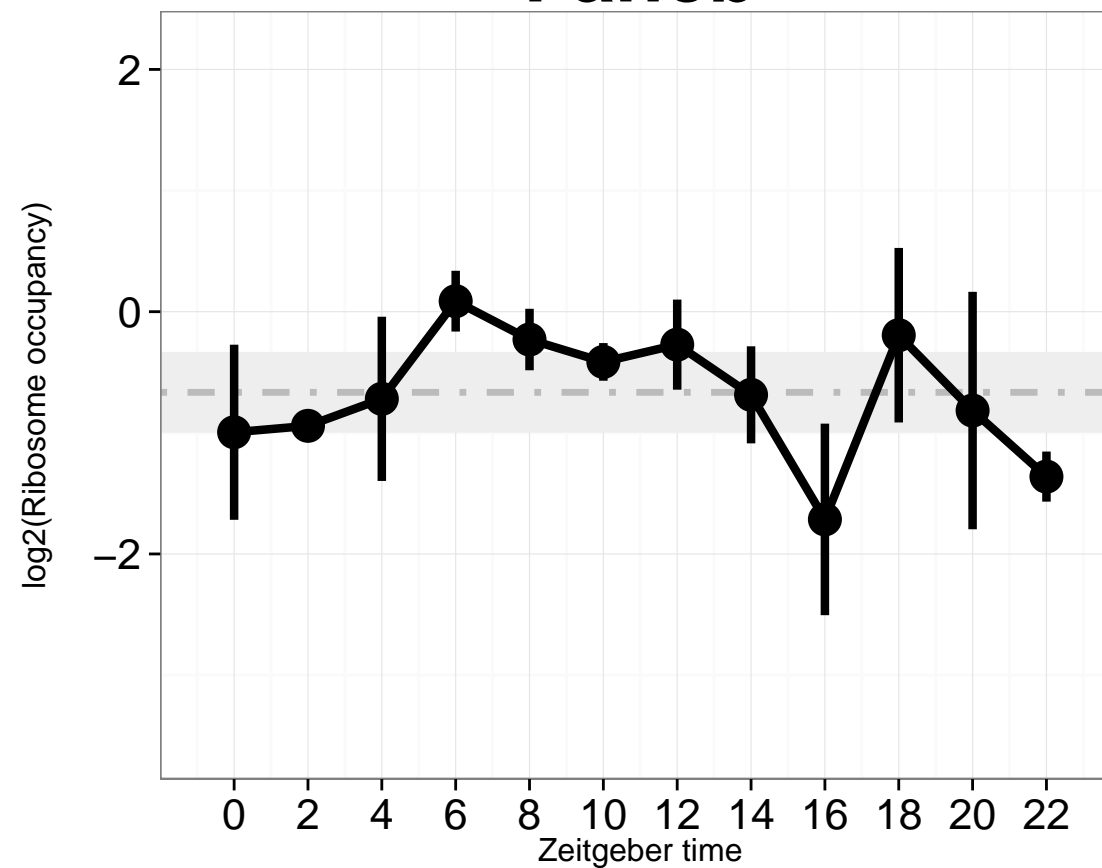

Supplement: Supplementary file 4603 [file 1]

# Itgb1bp1

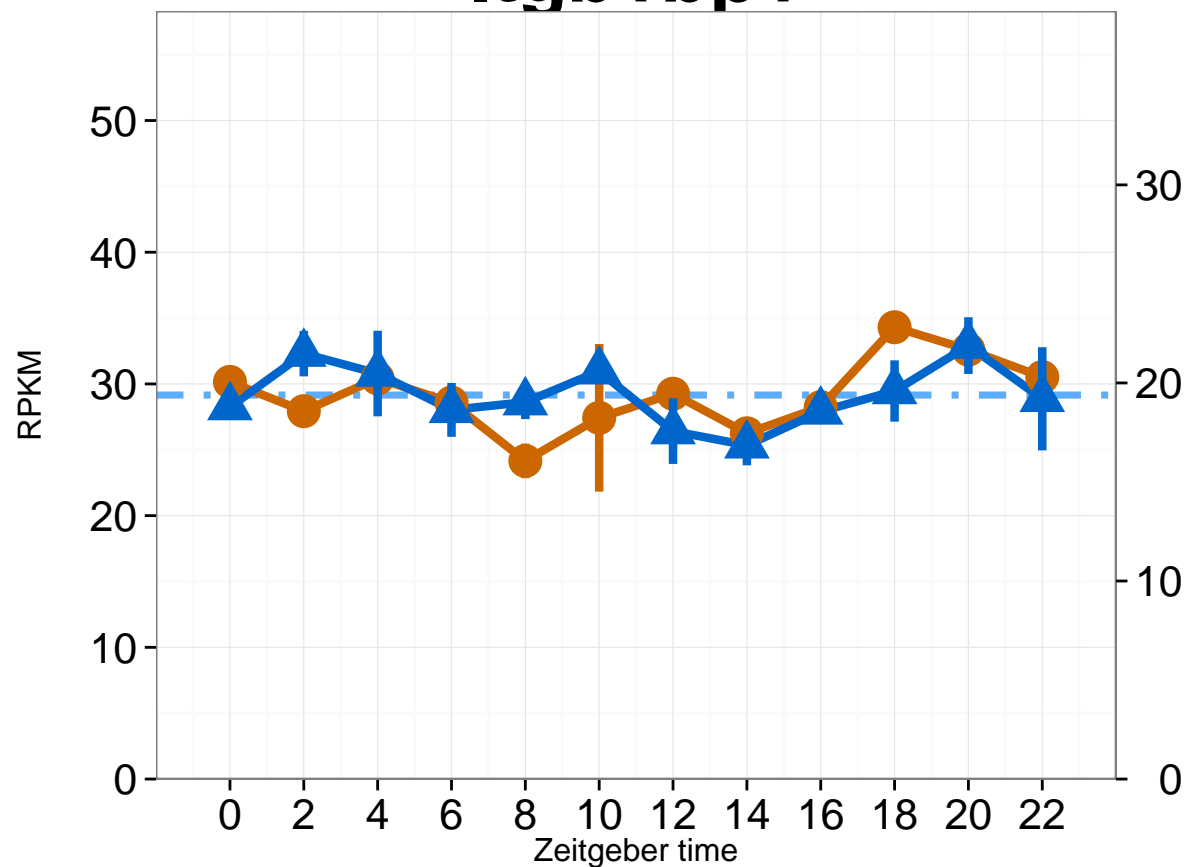

# Itgb1bp1

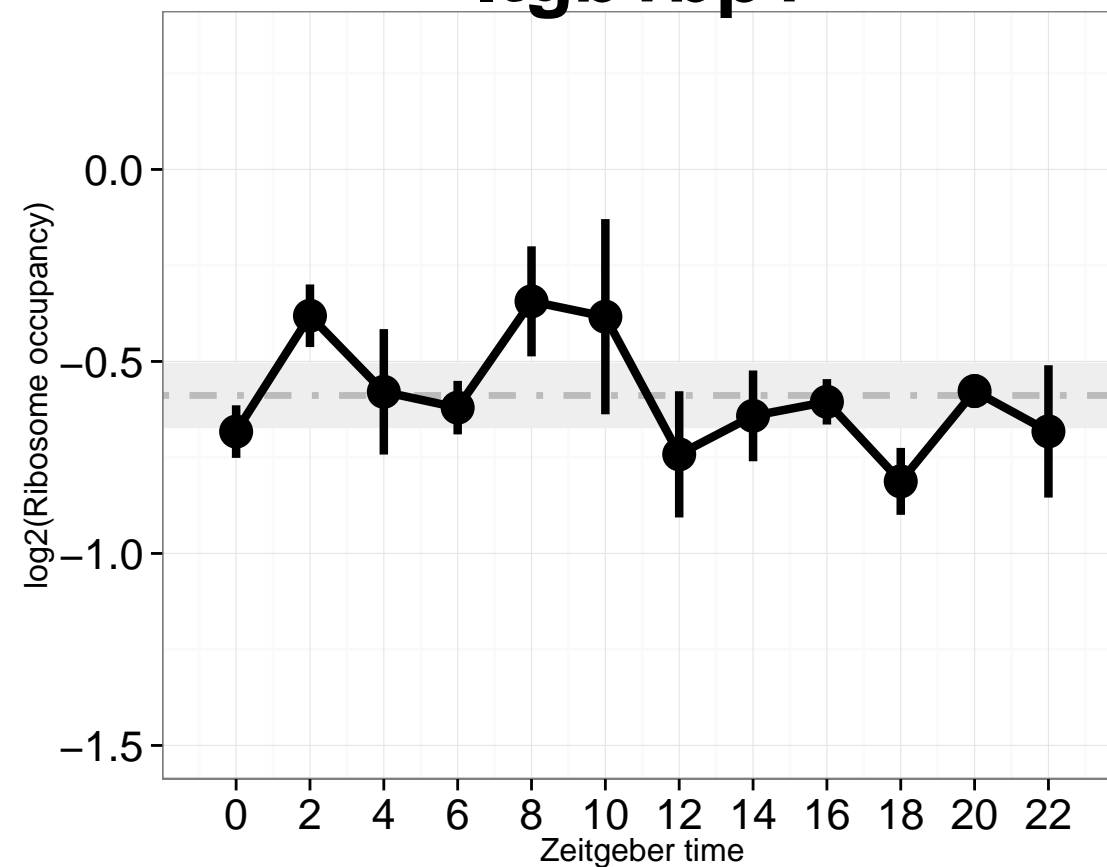

Supplement: Supplementary file 4604 [file 1]

# Ppp1r3c

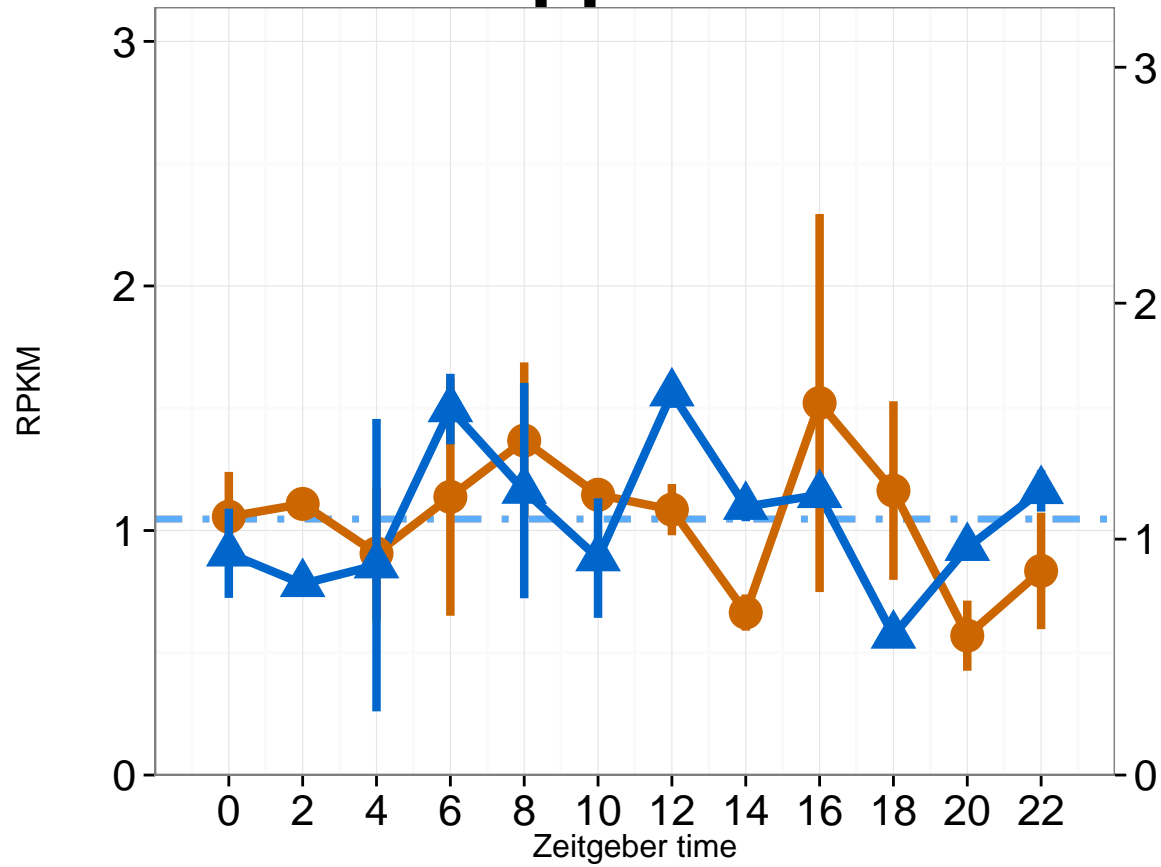

# Ppp1r3c

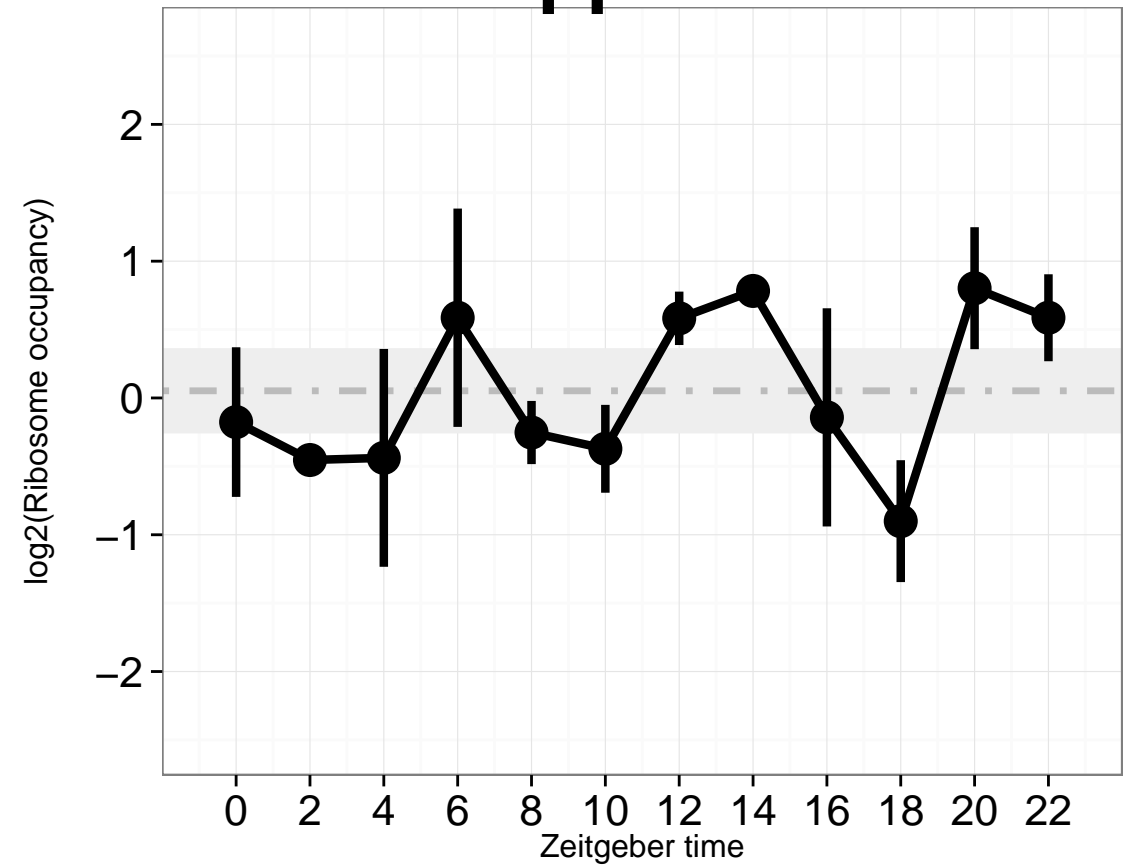

Supplement: Supplementary file 4605 [file 1]

# EmI5

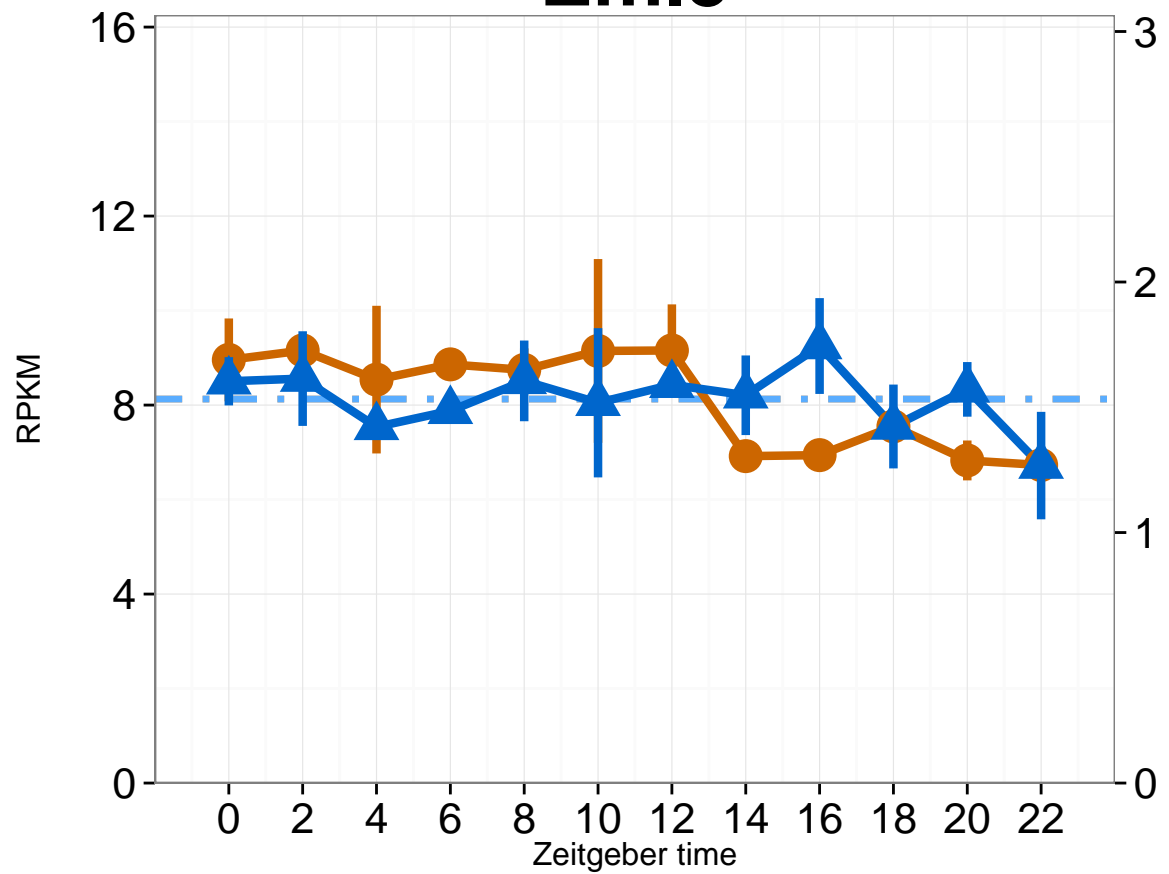

# EmI5

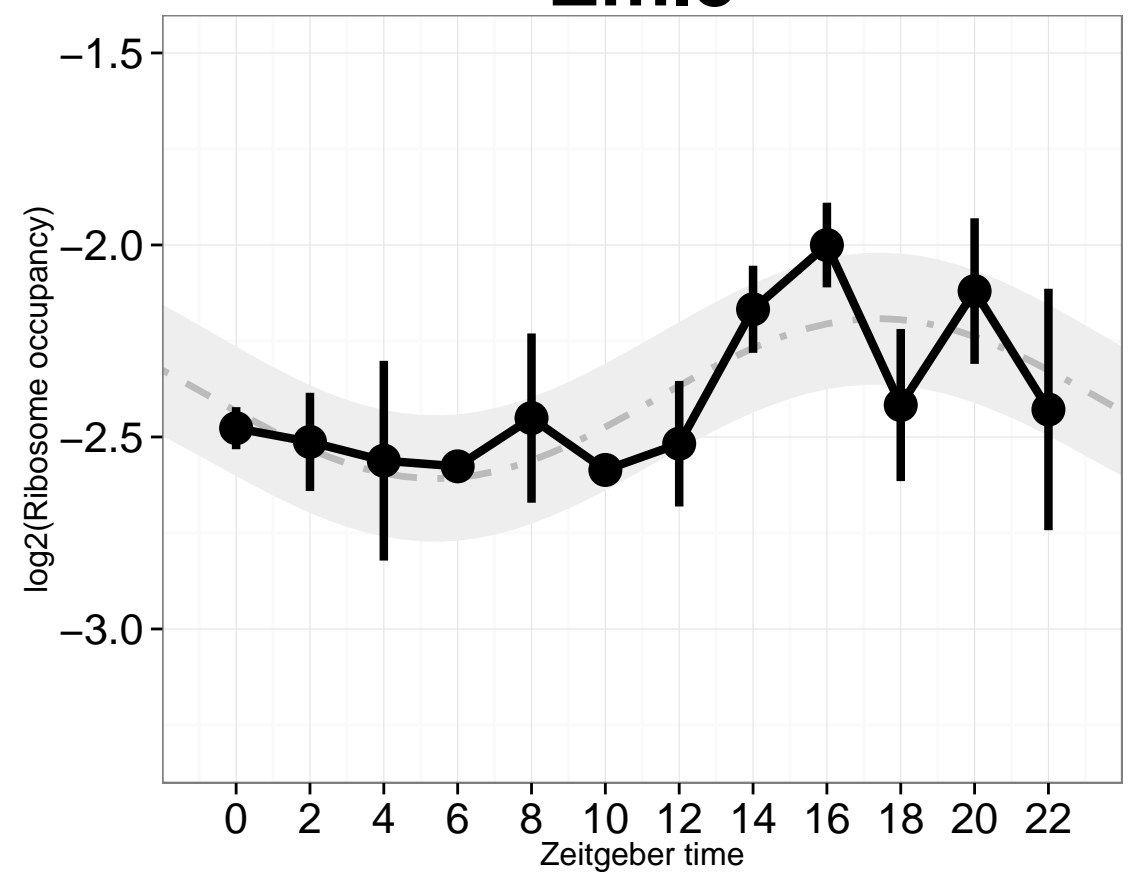

Supplement: Supplementary file 4606 [file 1]

## Dguok

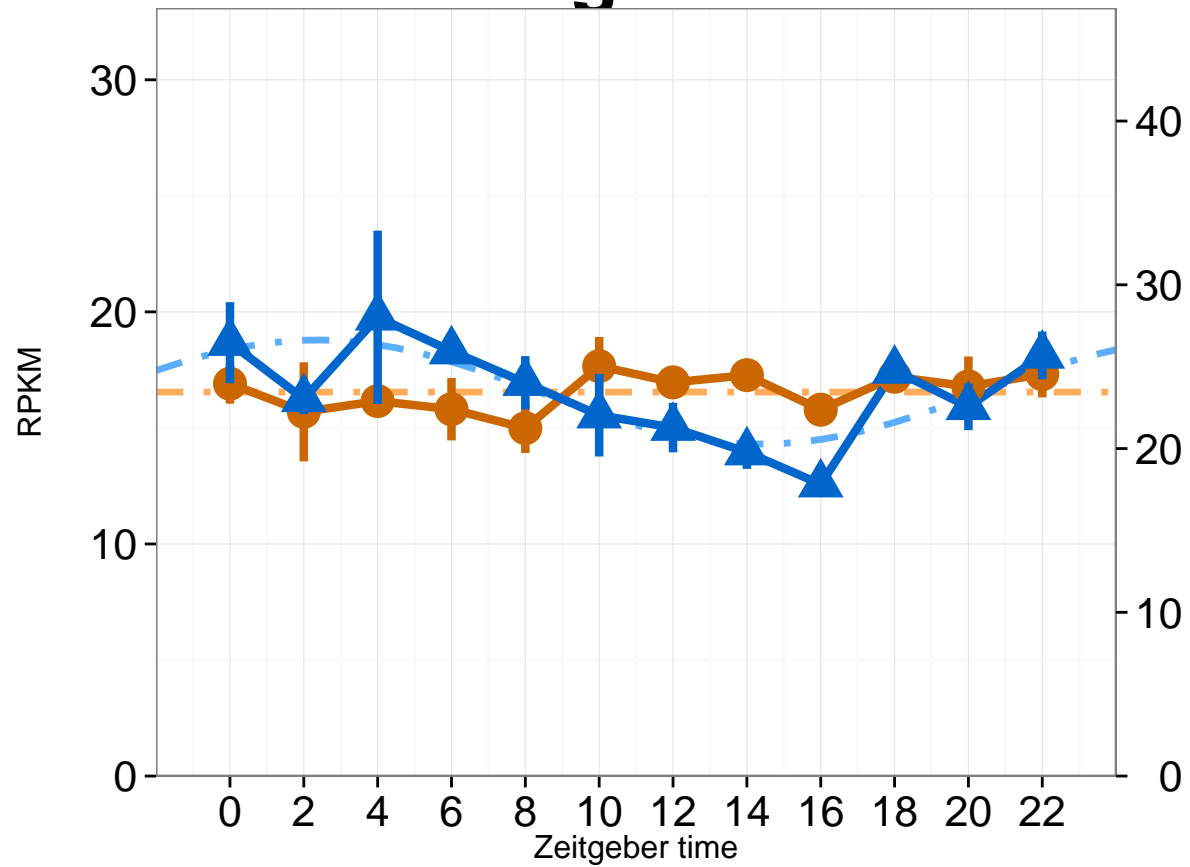

## Dguok

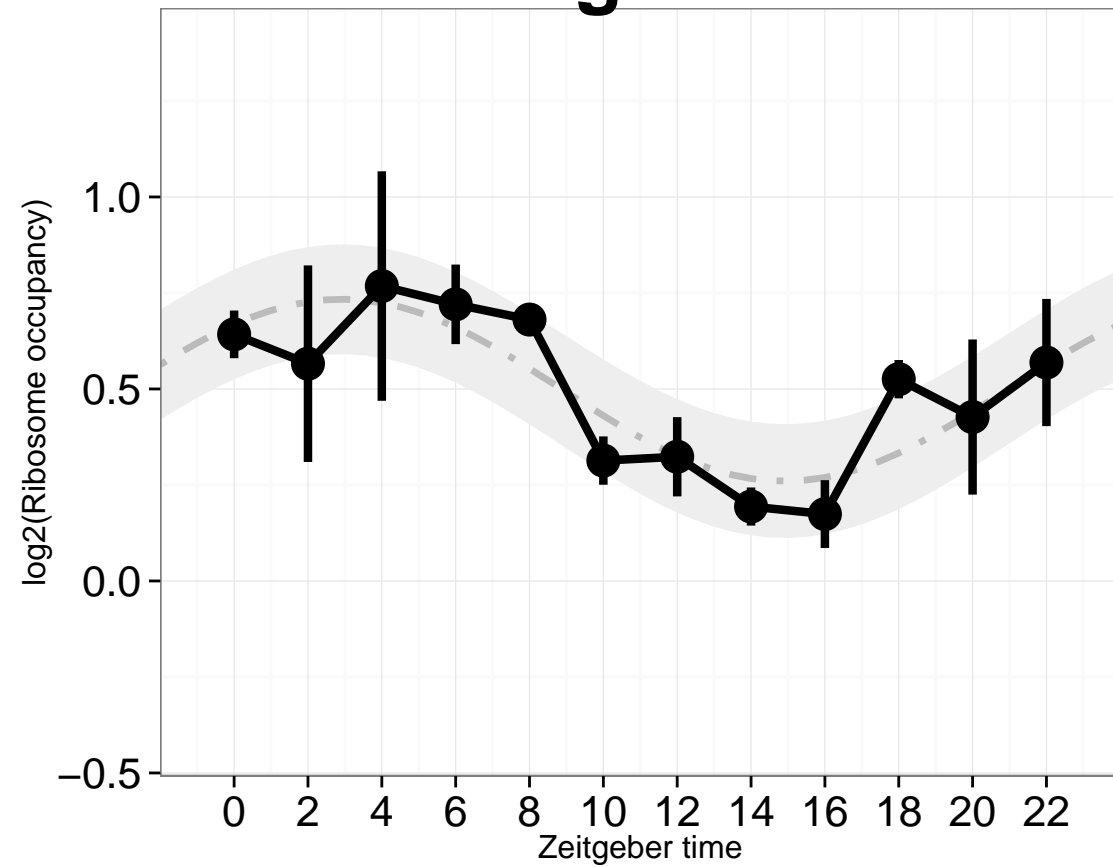

Supplement: Supplementary file 4607 [file 1]

## Bscl2

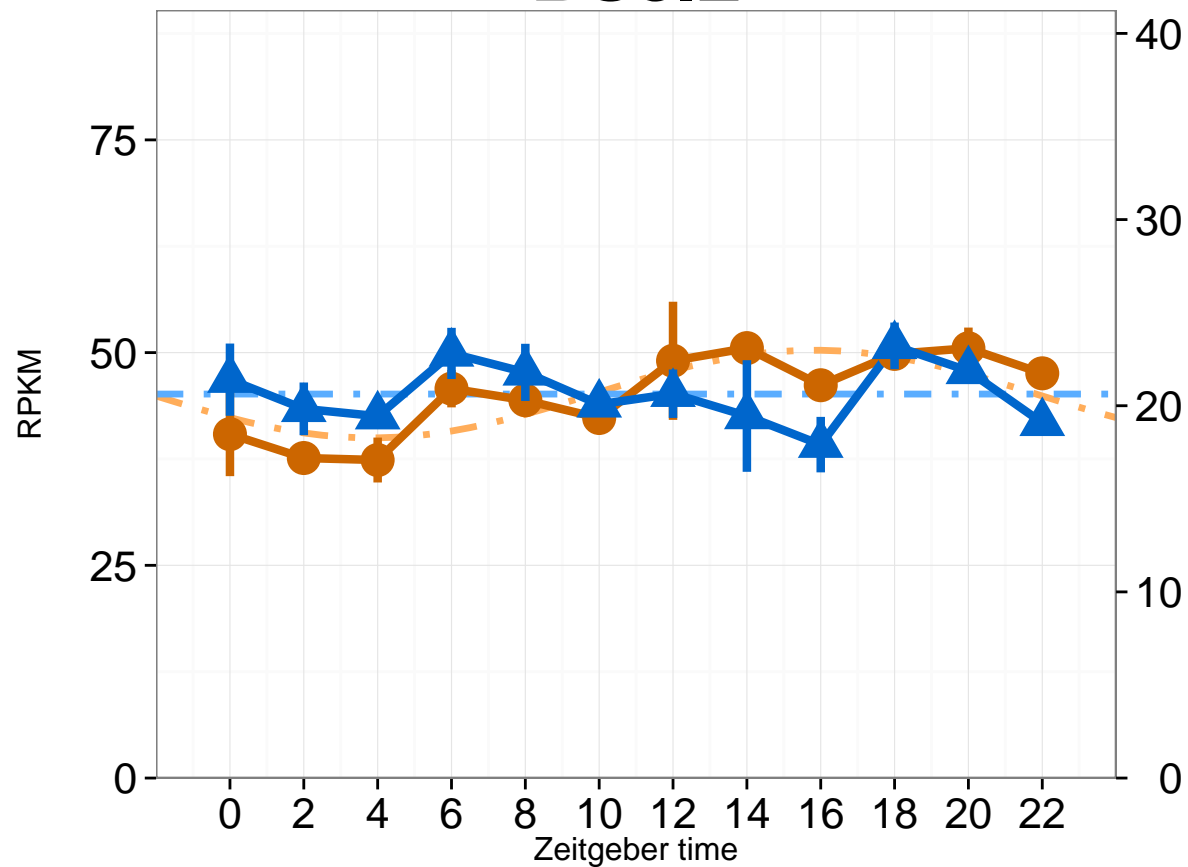

## Bscl2

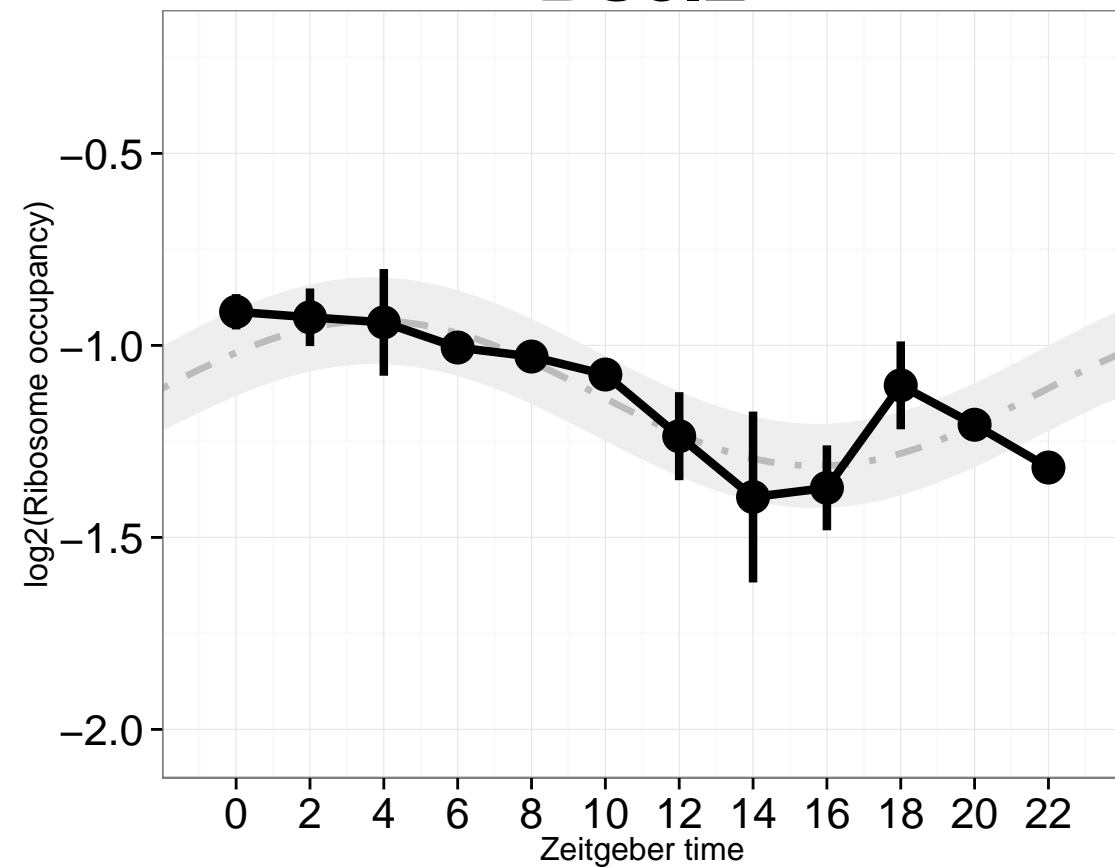

Supplement: Supplementary file 4608 [file 1]

# Tnip1

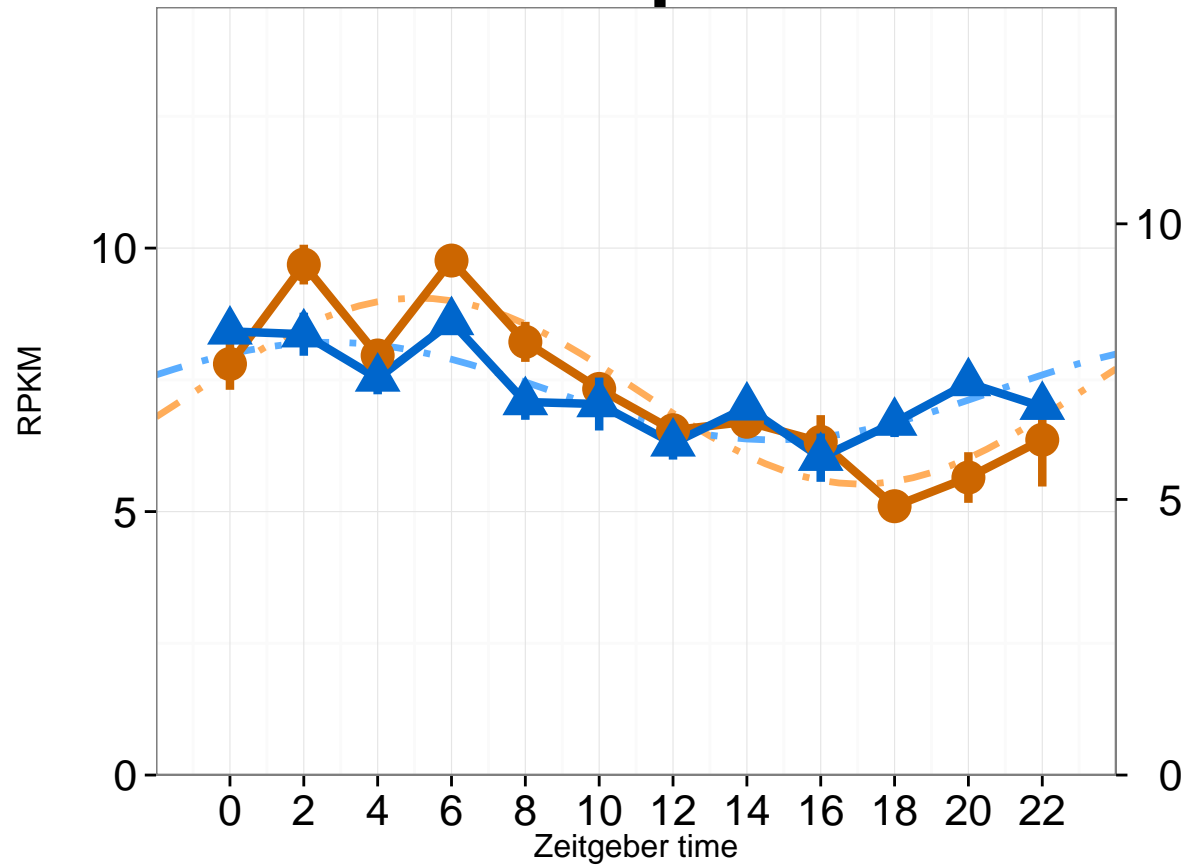

# Tnip1

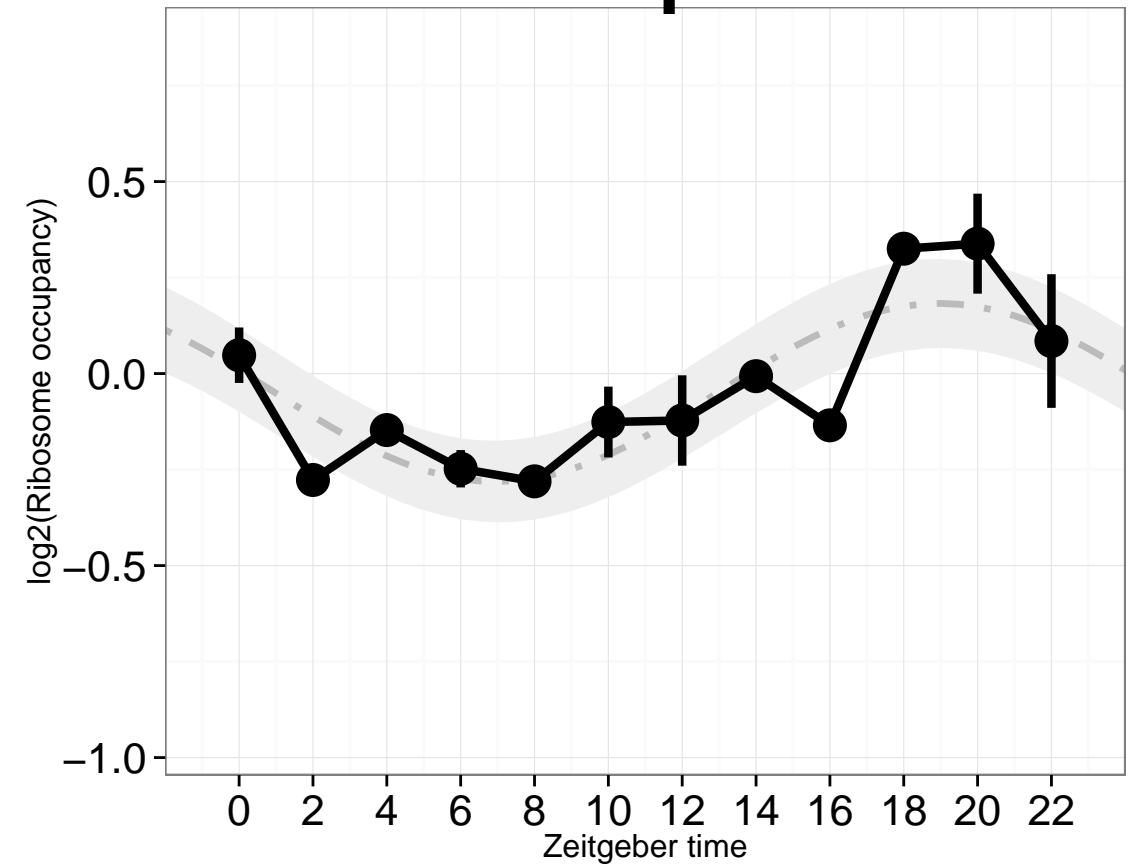

Supplement: Supplementary file 4609 [file 1]

## Pus7l

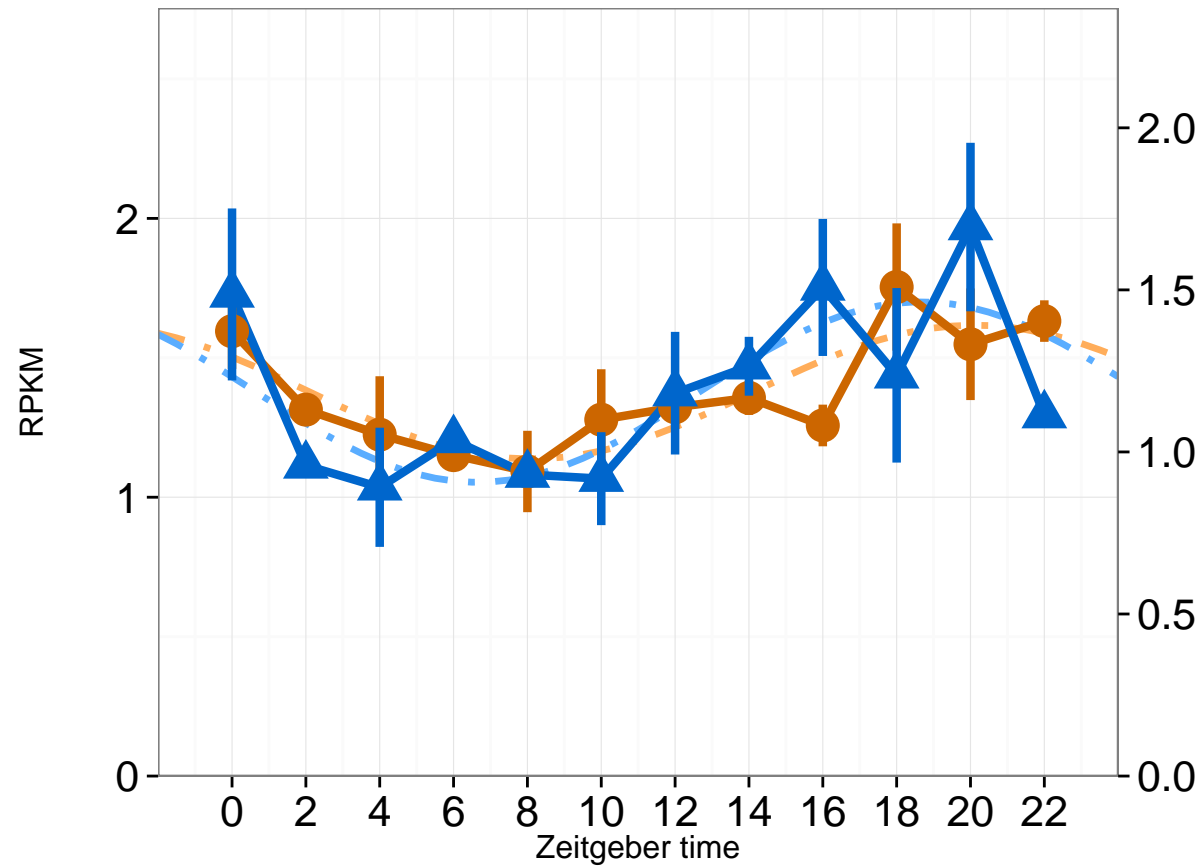

## Pus7l

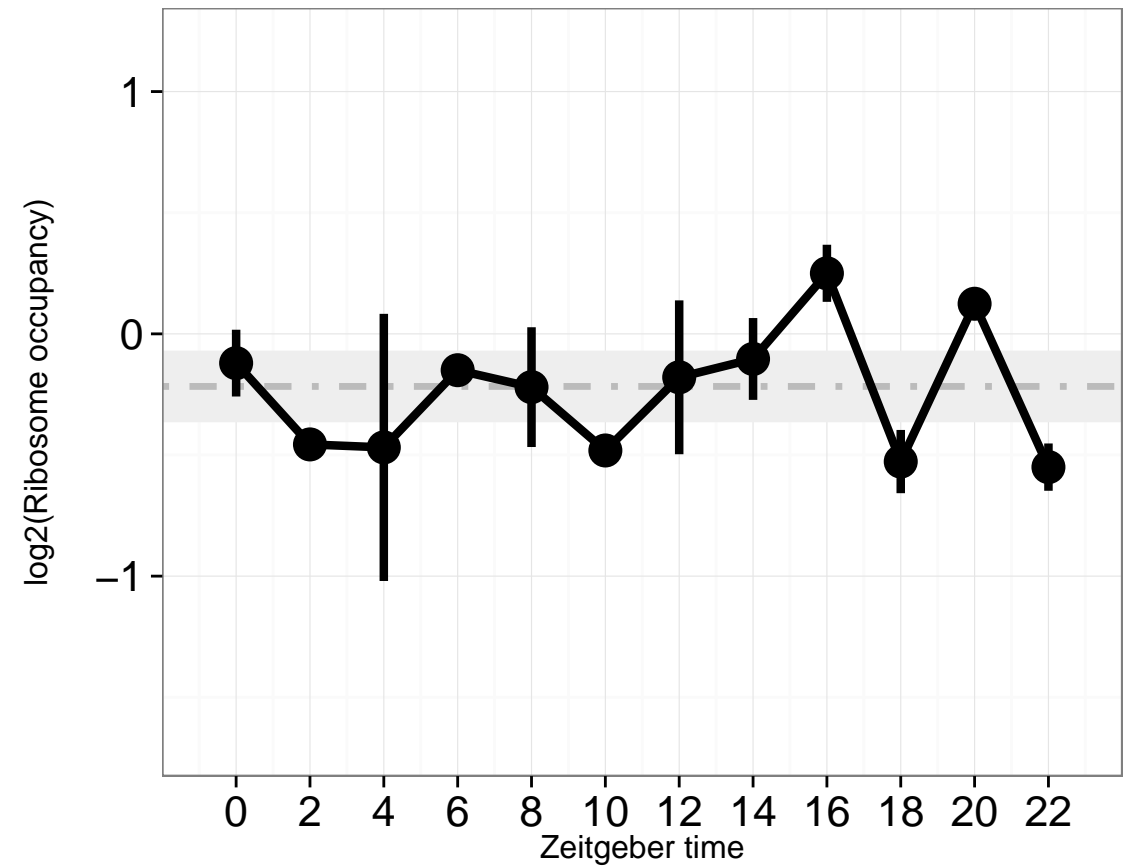

Supplement: Supplementary file 4610 [file 1]

## Ipo9

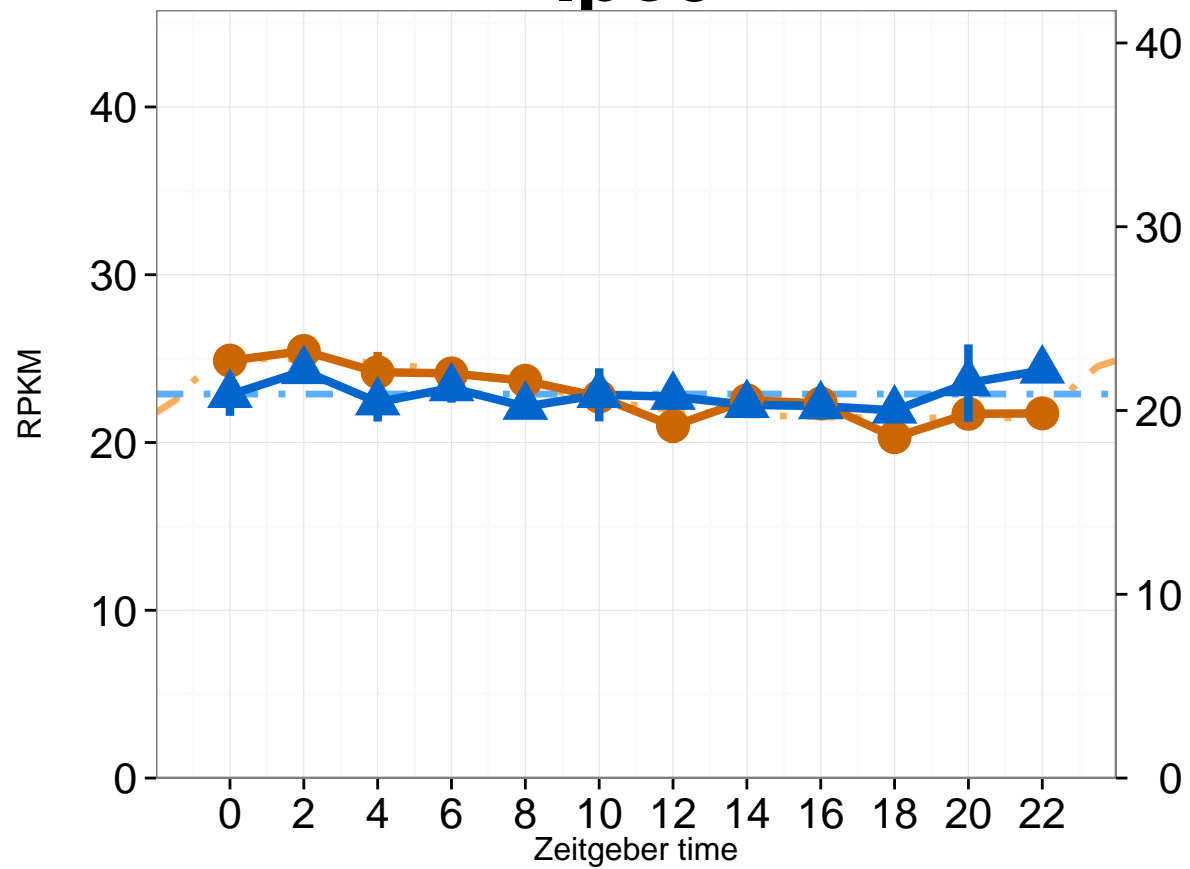

## Ipo9

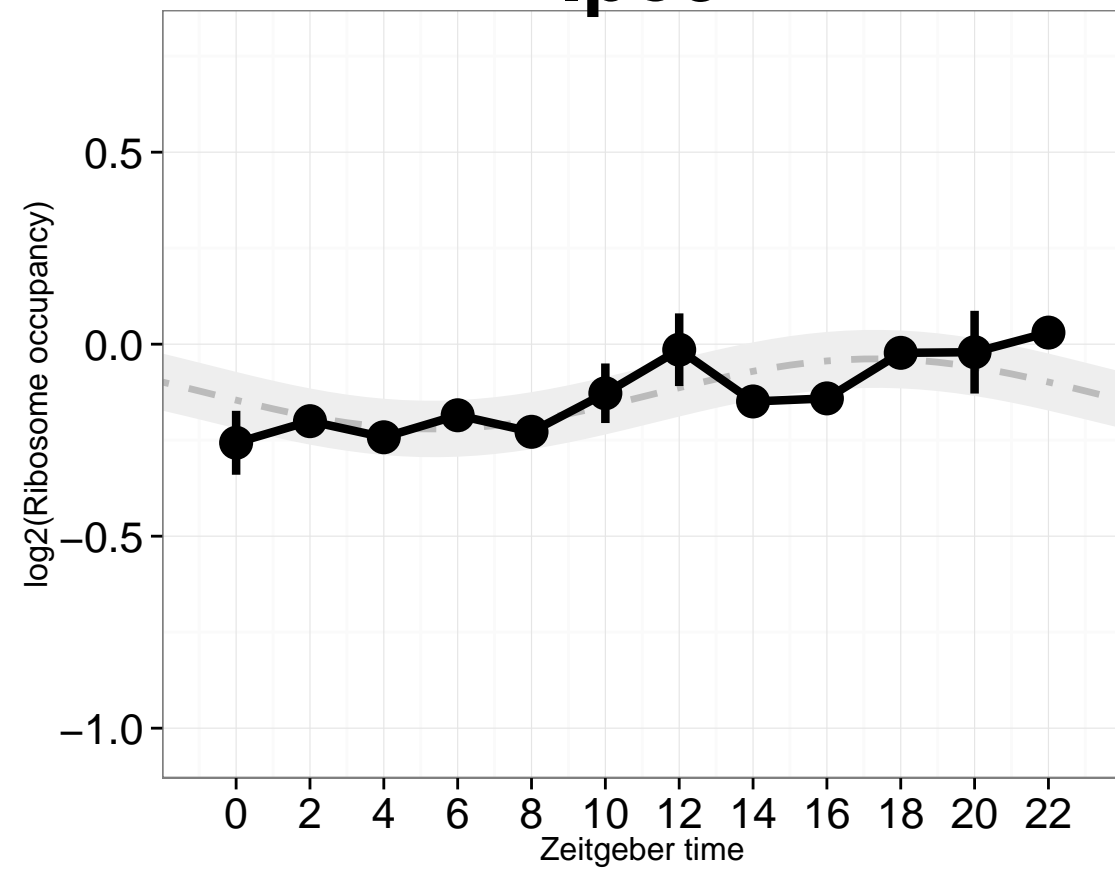

Supplement: Supplementary file 4611 [file 1]

## Dusp15

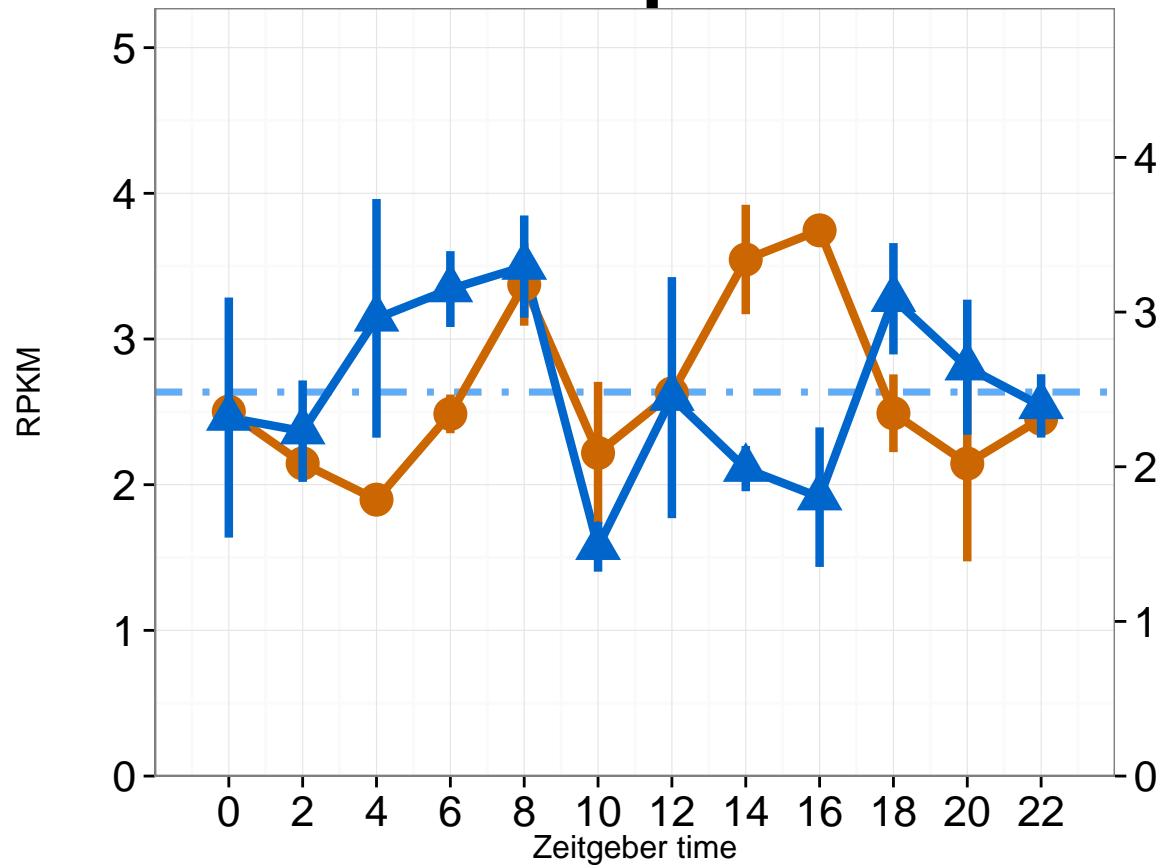

## Dusp15

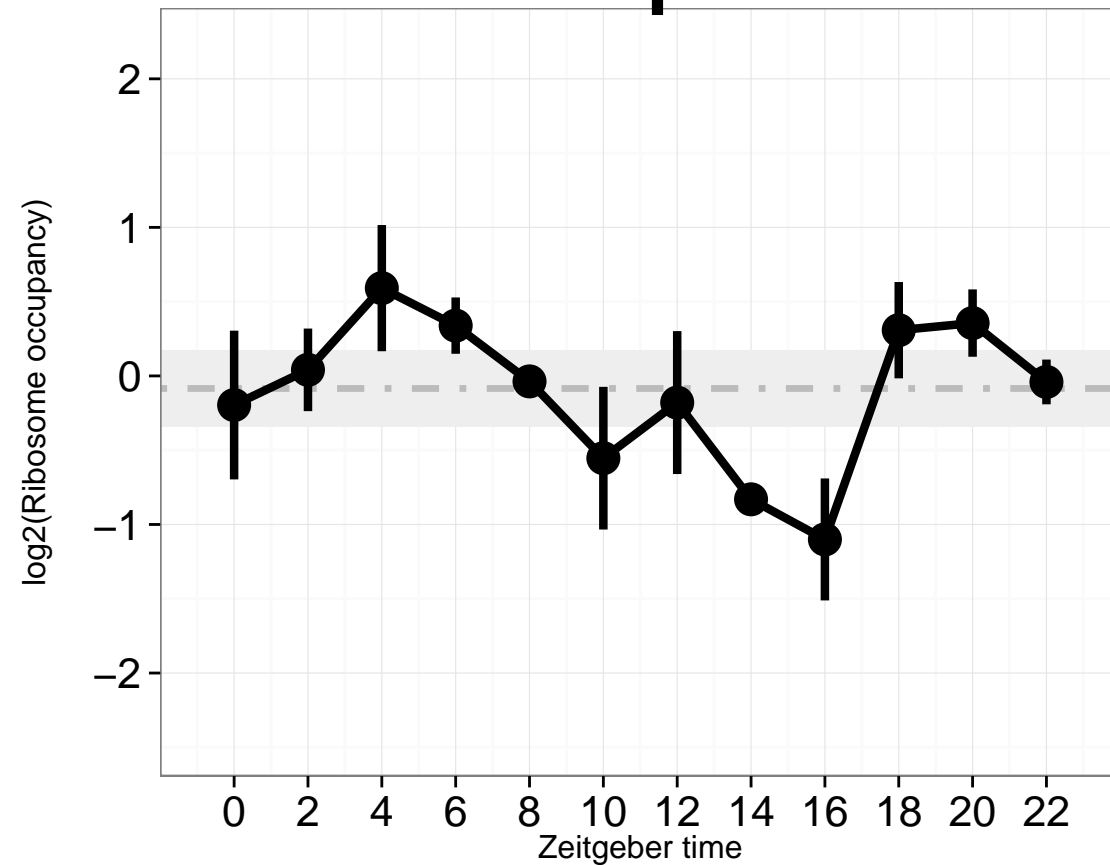

Supplement: Supplementary file 4612 [file 1]

# Gata6

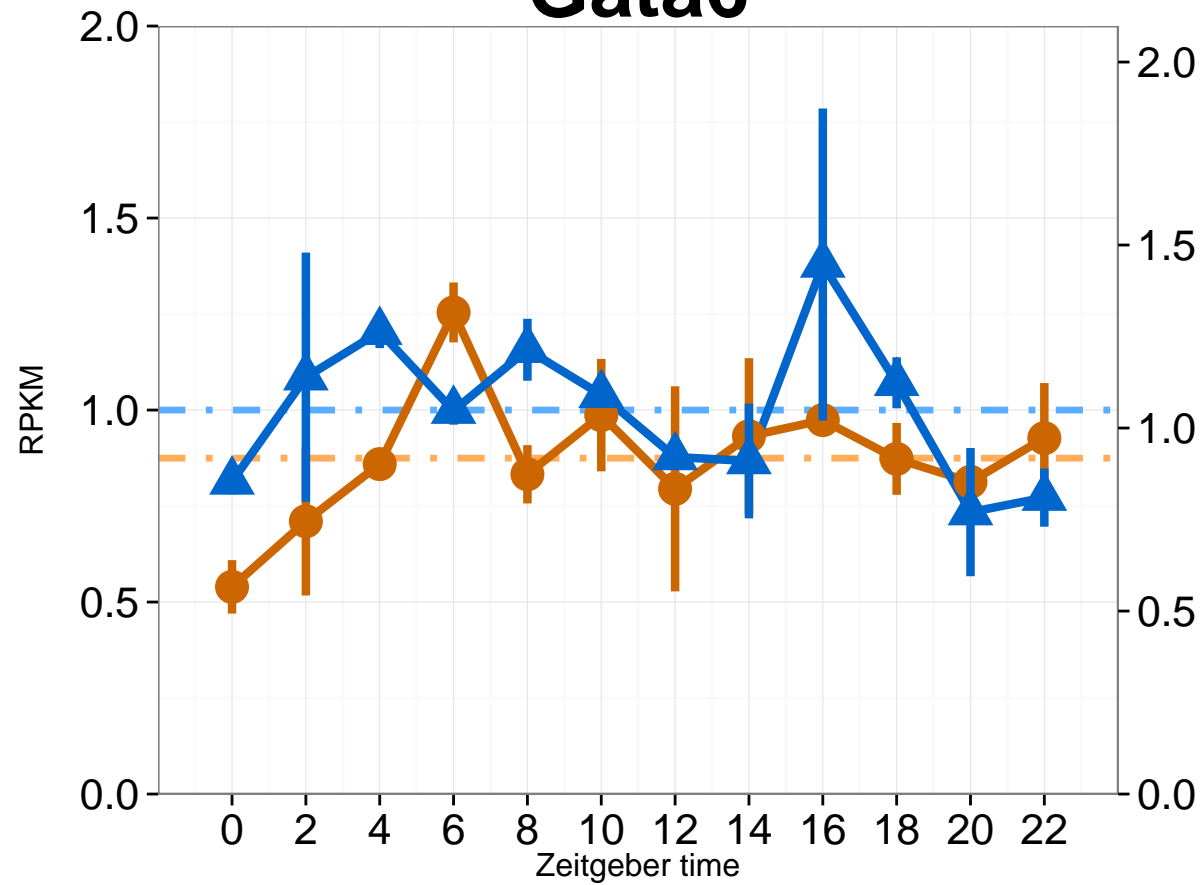

# Gata6

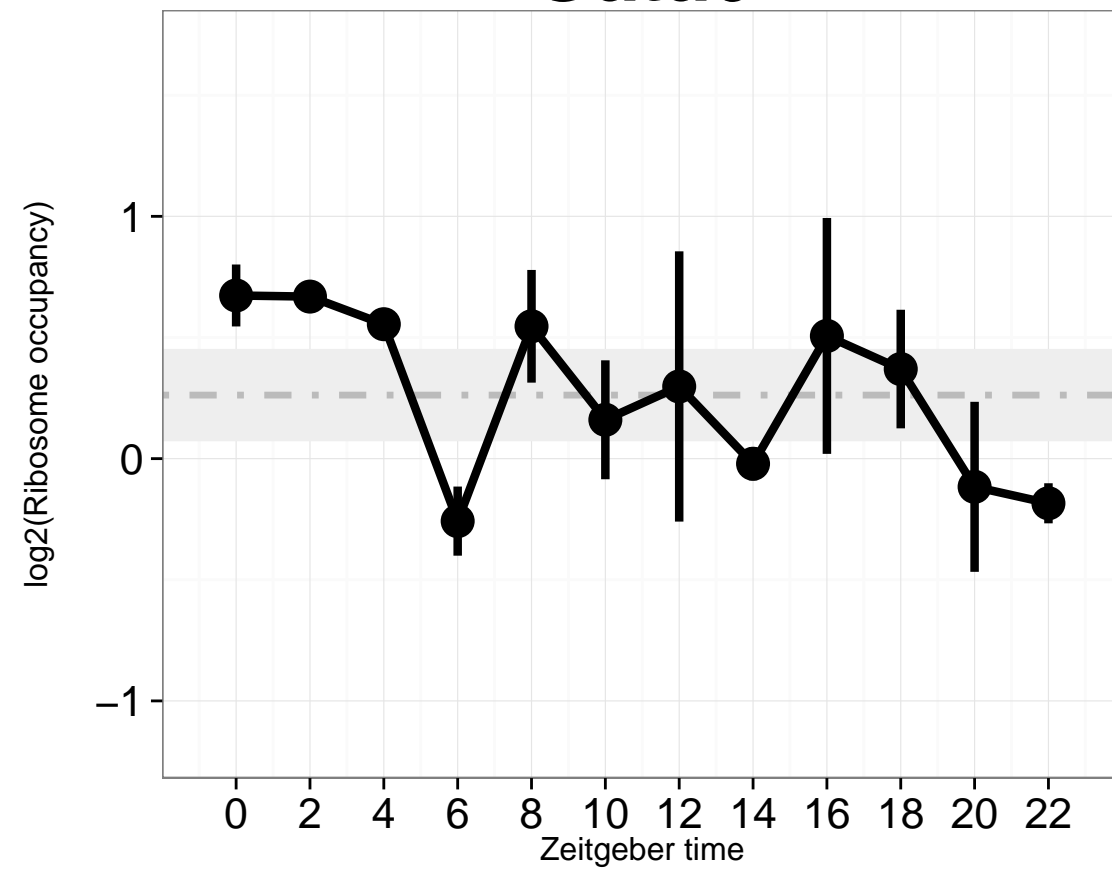

Supplement: Supplementary file 4613 [file 1]

## Lum

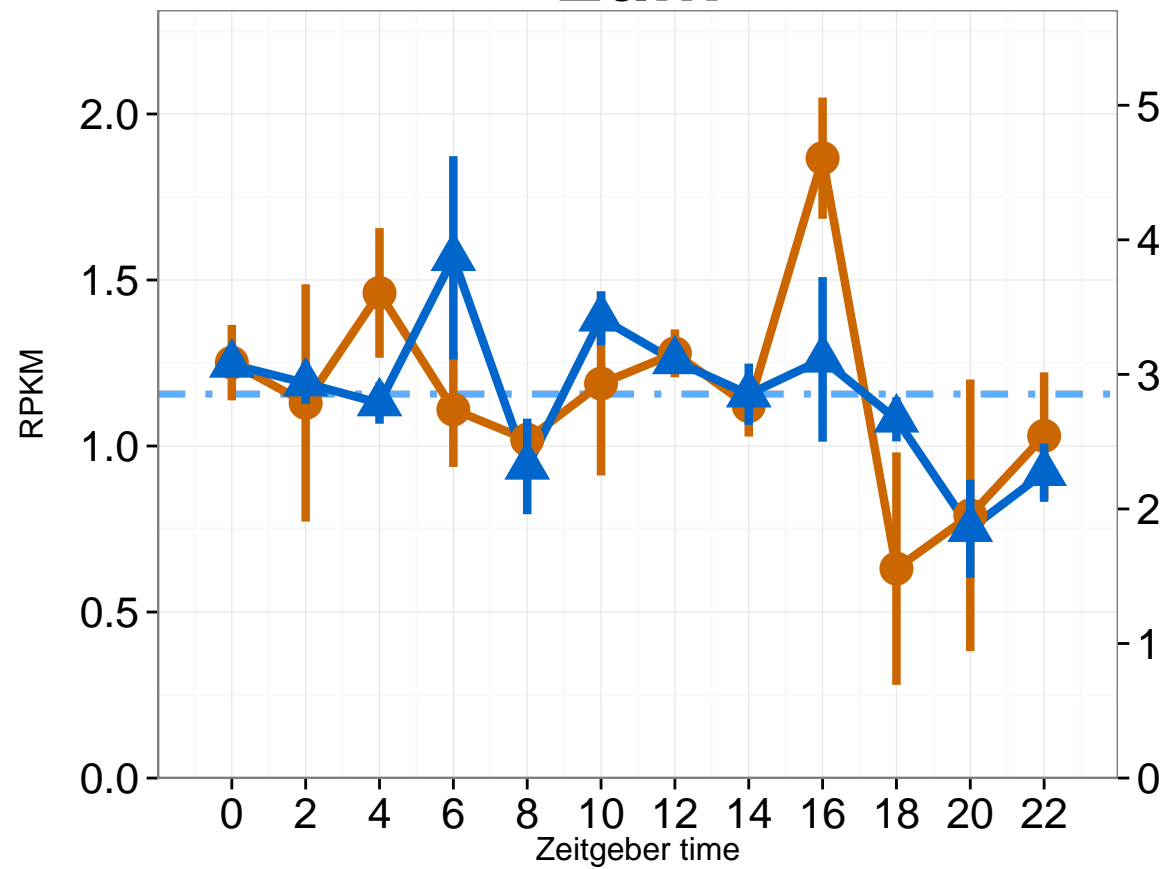

## Lum

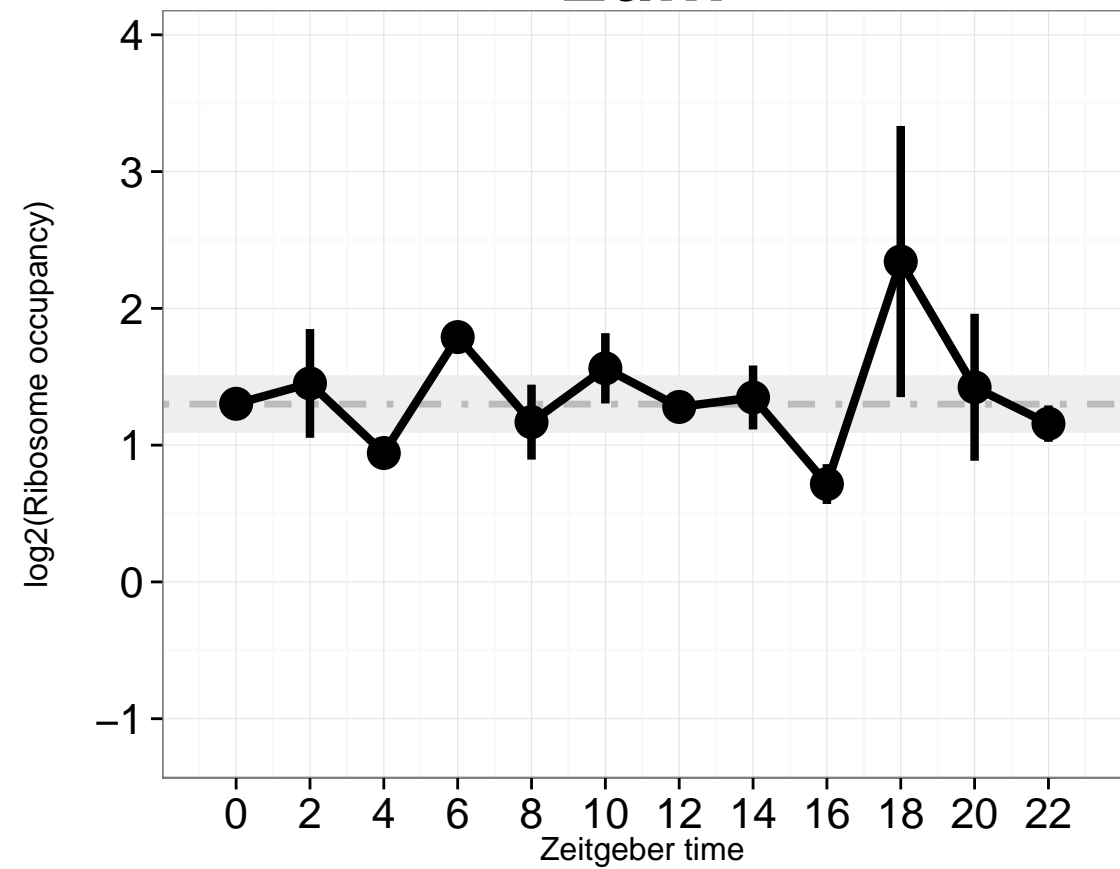

Supplement: Supplementary file 4614 [file 1]

## Gigyf2

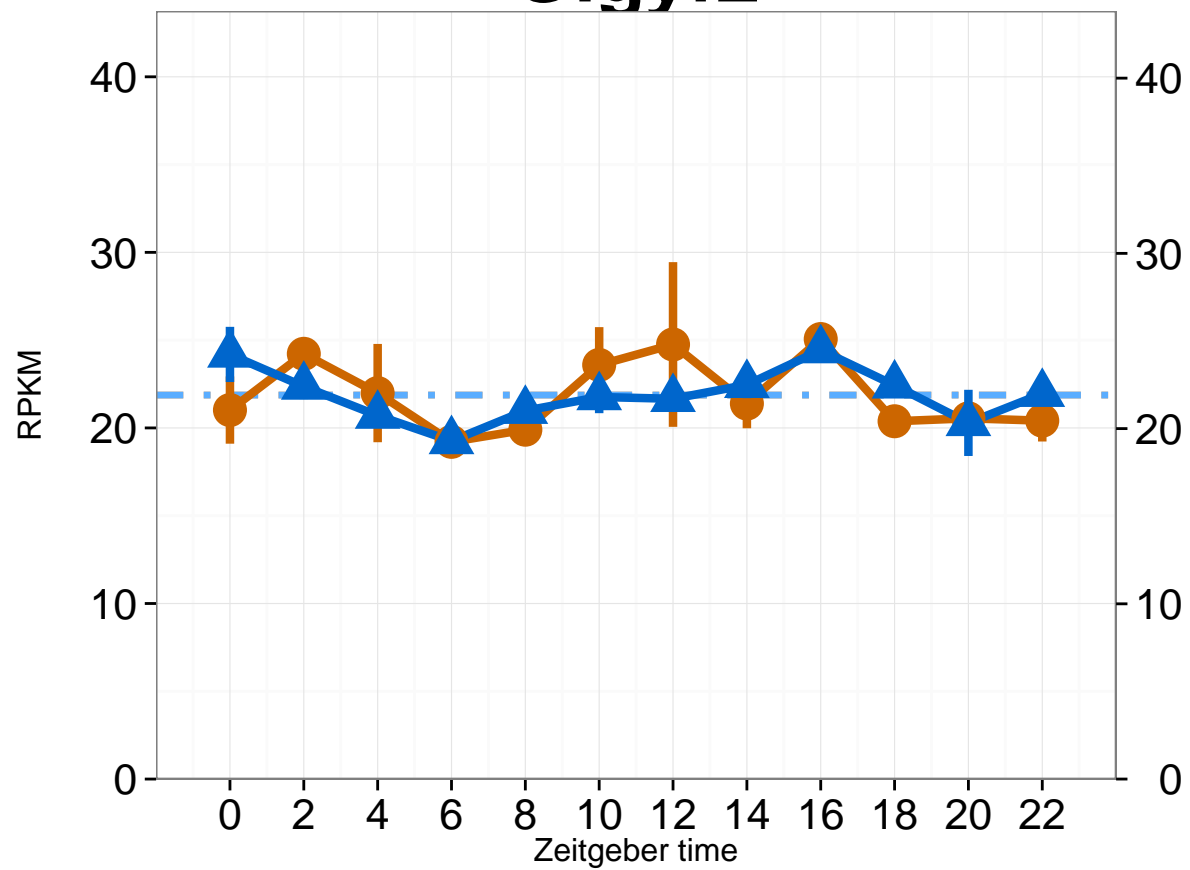

## Gigyf2

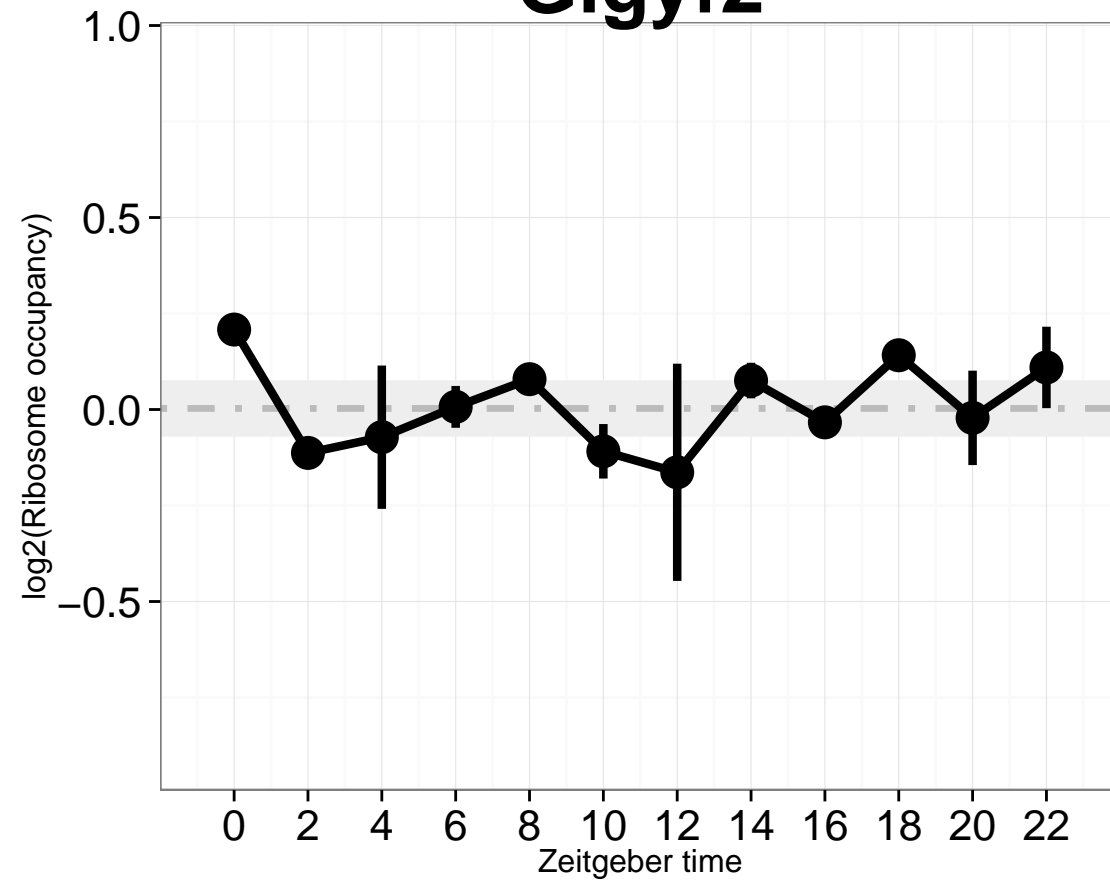

Supplement: Supplementary file 4615 [file 1]

## Smyd5

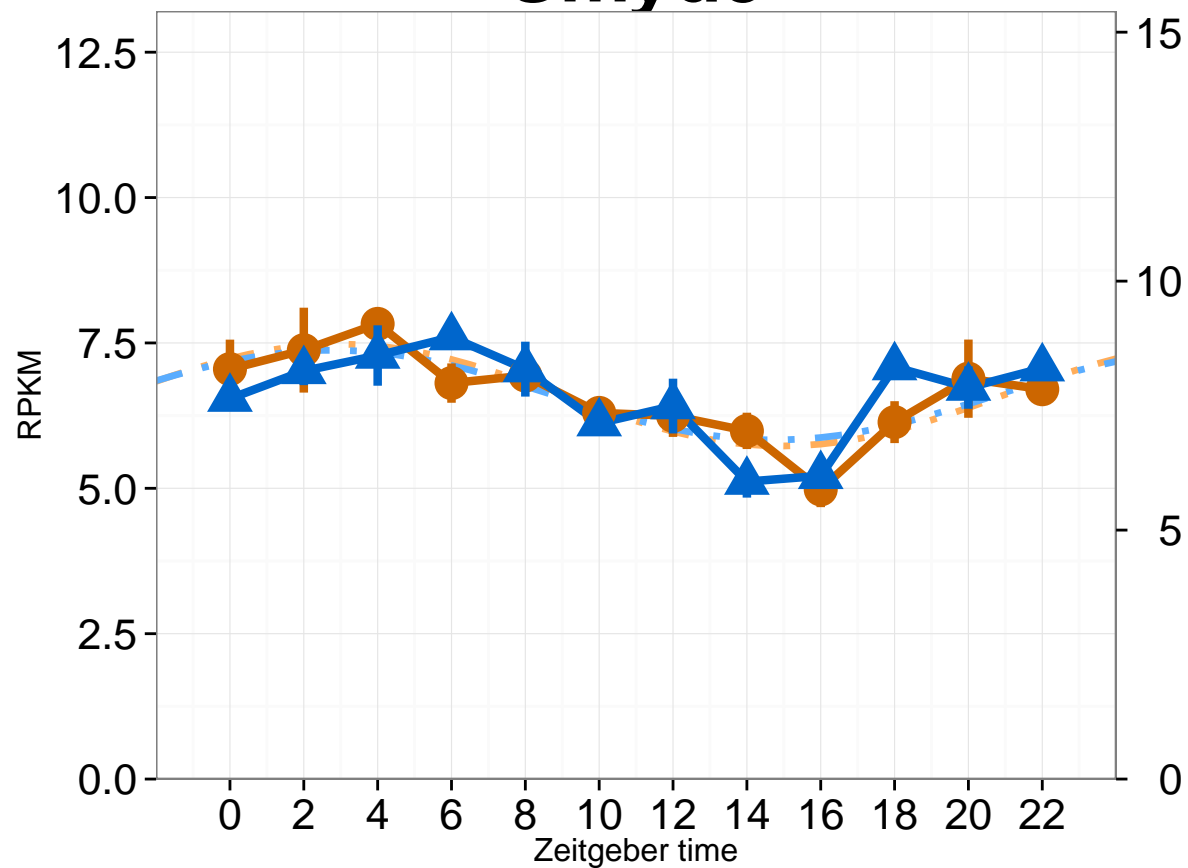

## Smyd5

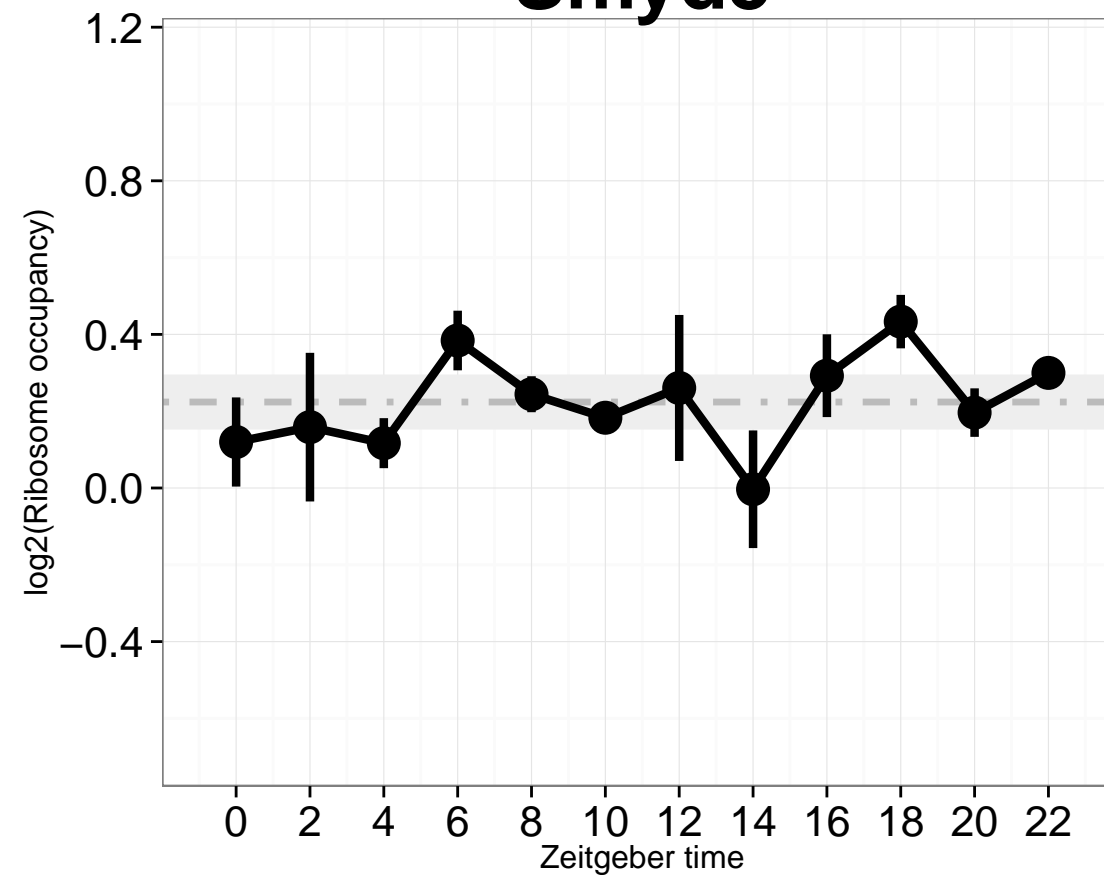

Supplement: Supplementary file 4616 [file 1]

# C1qa

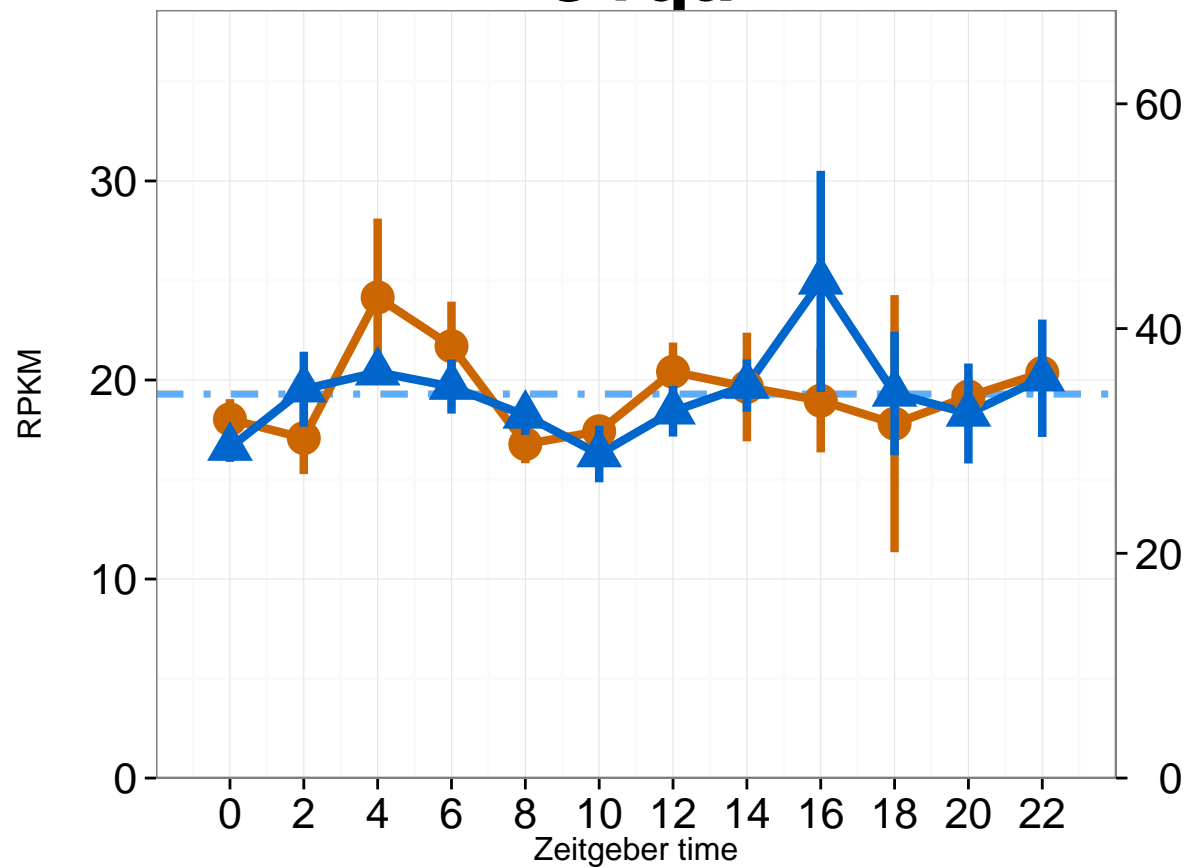

# C1qa

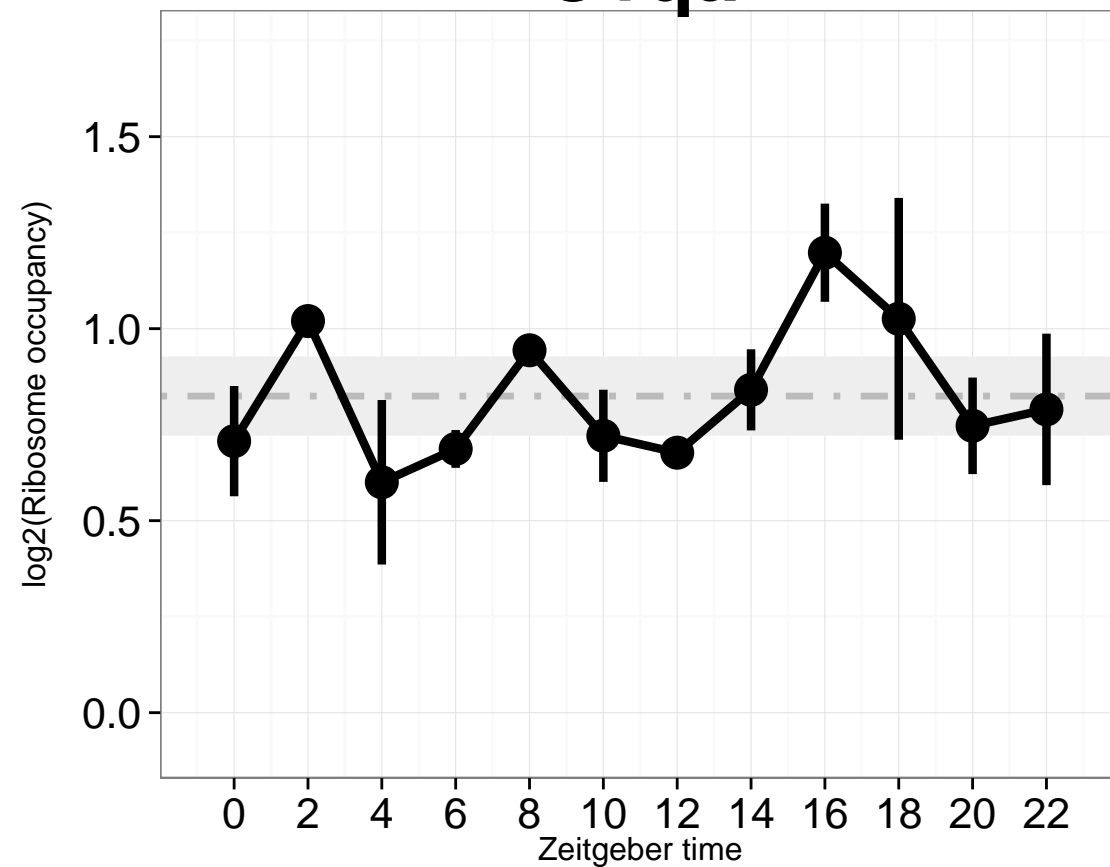

Supplement: Supplementary file 4617 [file 1]

# Acot6

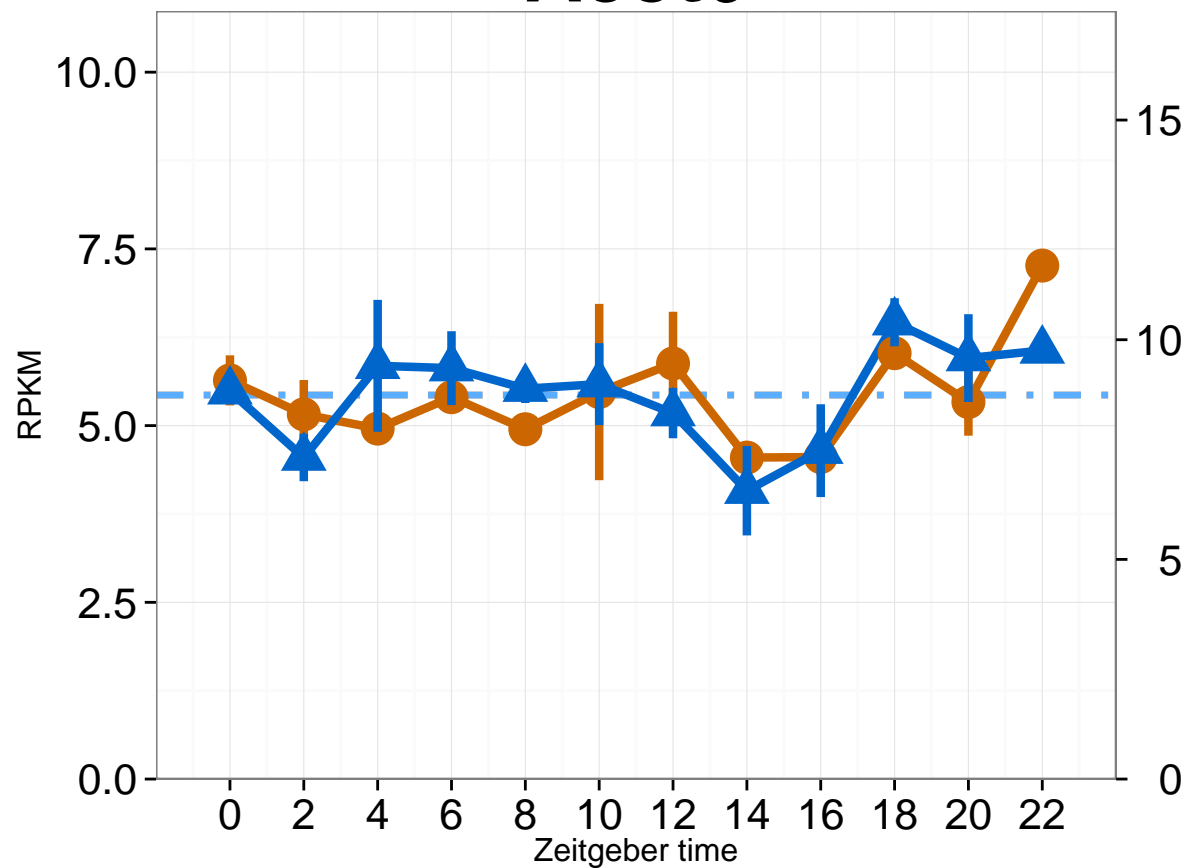

# Acot6

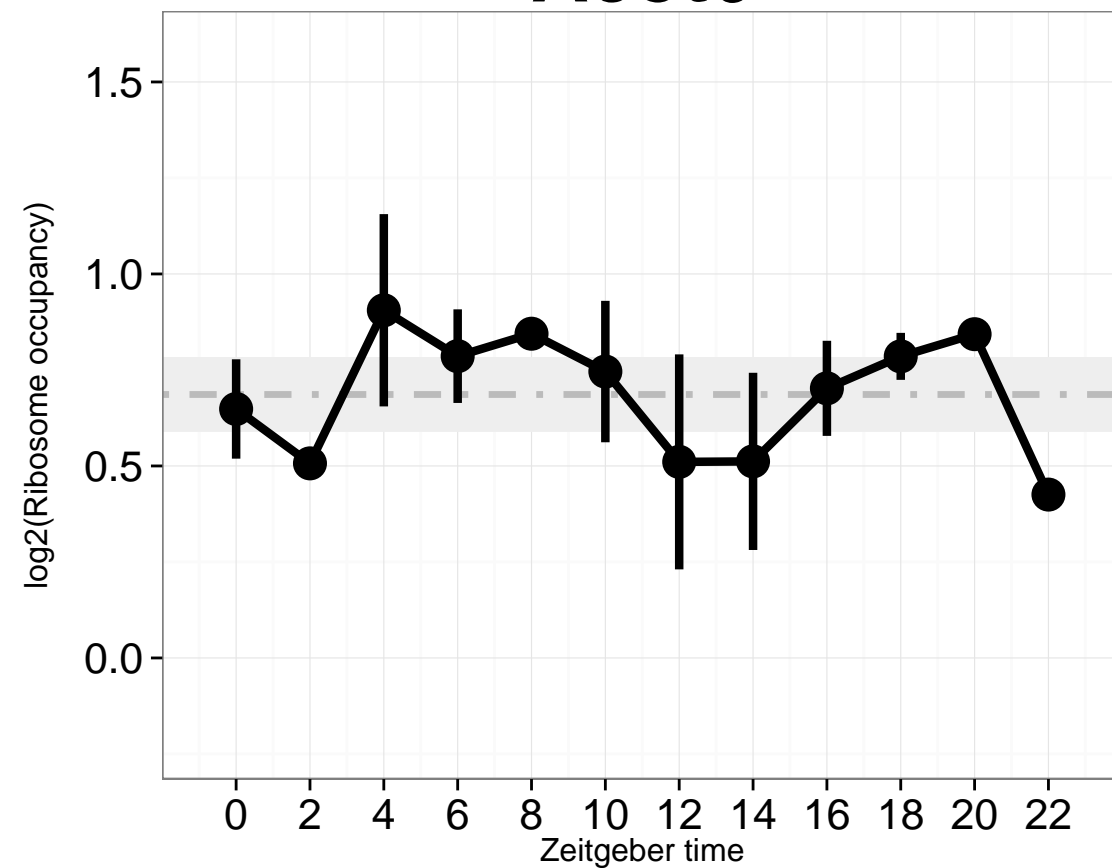

Supplement: Supplementary file 4618 [file 1]

## Rpp14

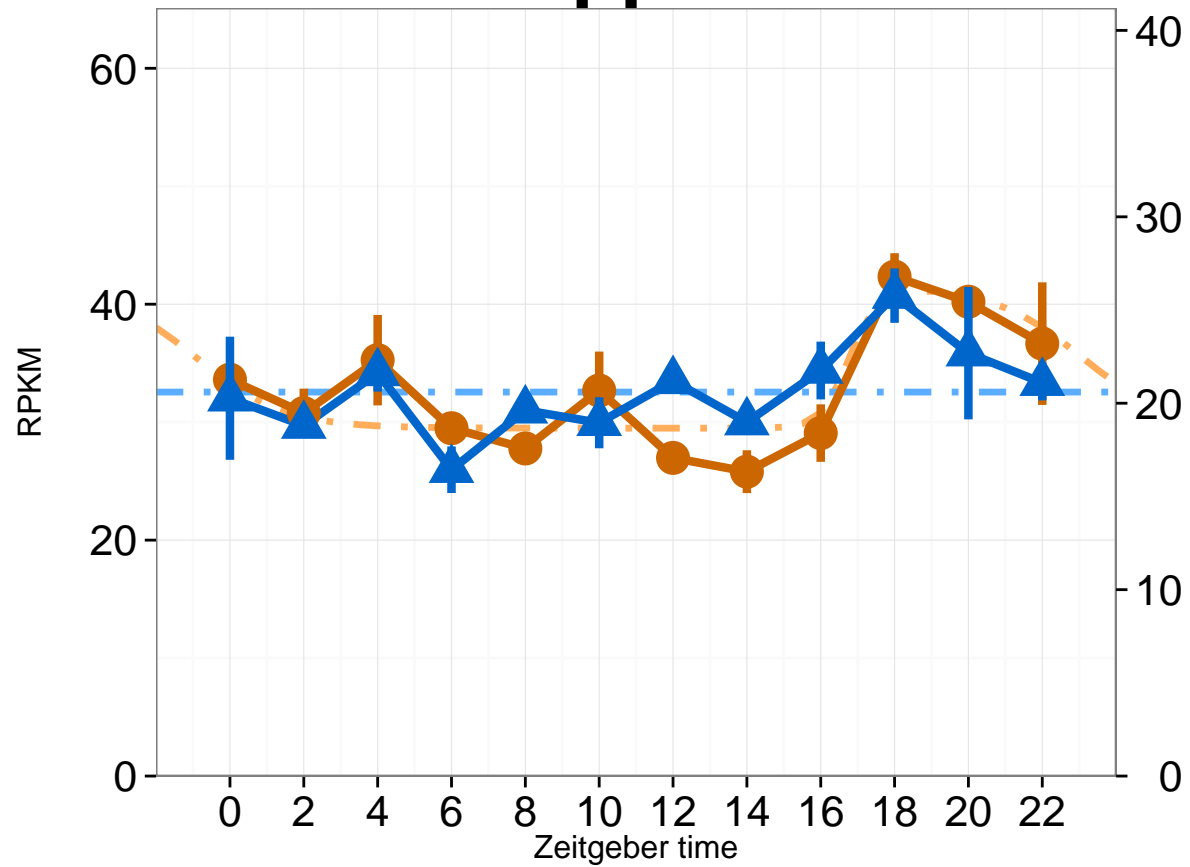

## Rpp14

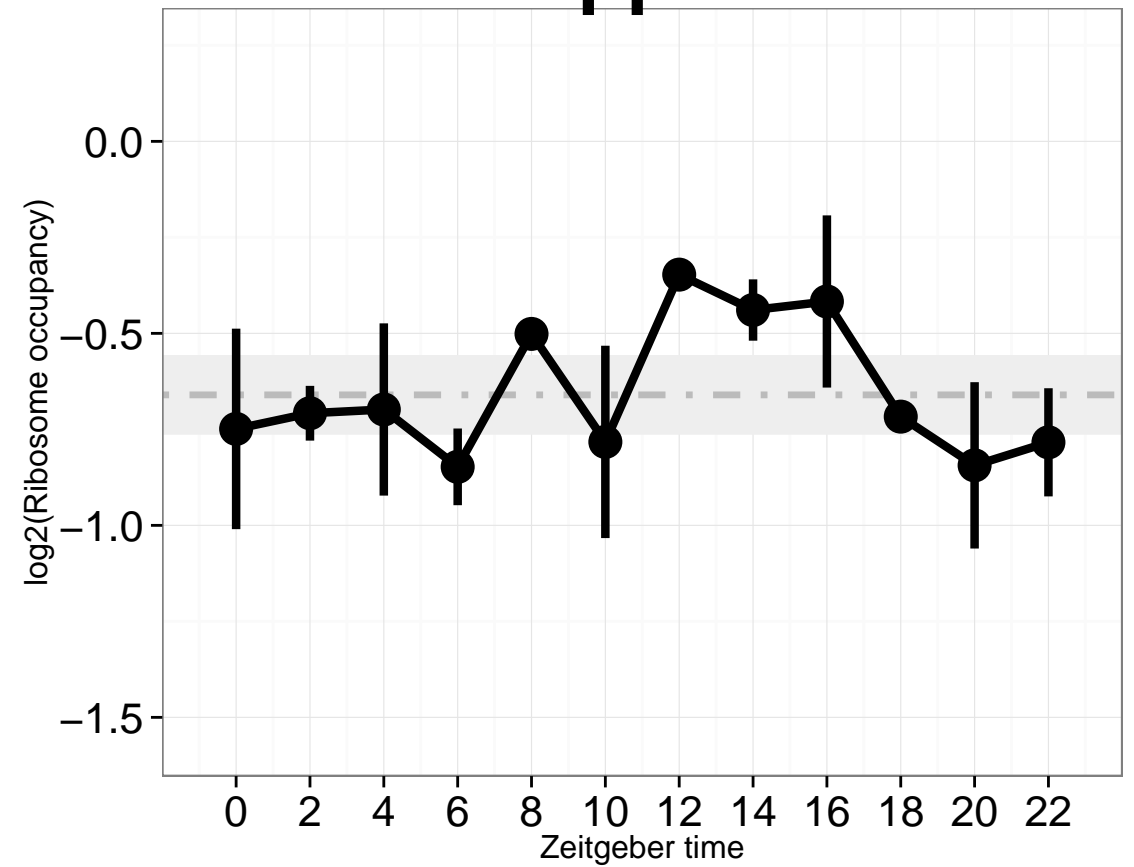

Supplement: Supplementary file 4619 [file 1]

## Snx25

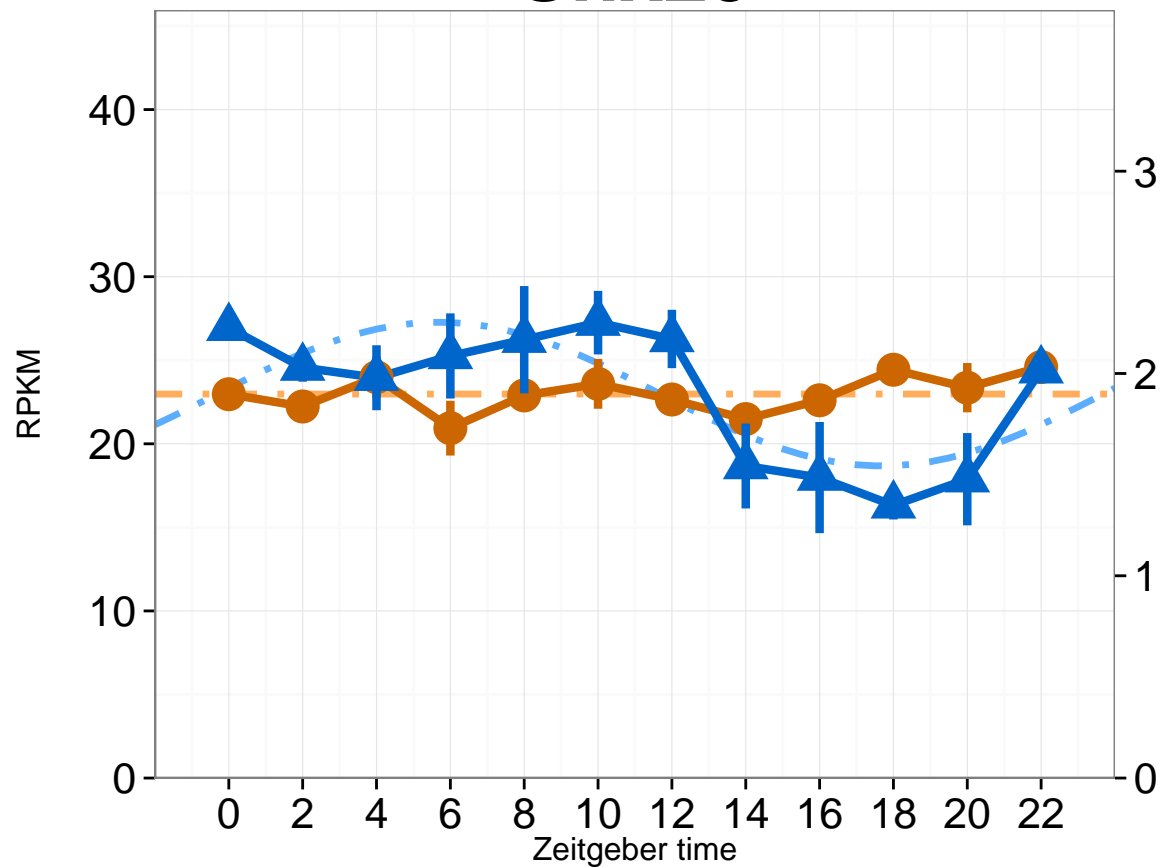

## Snx25

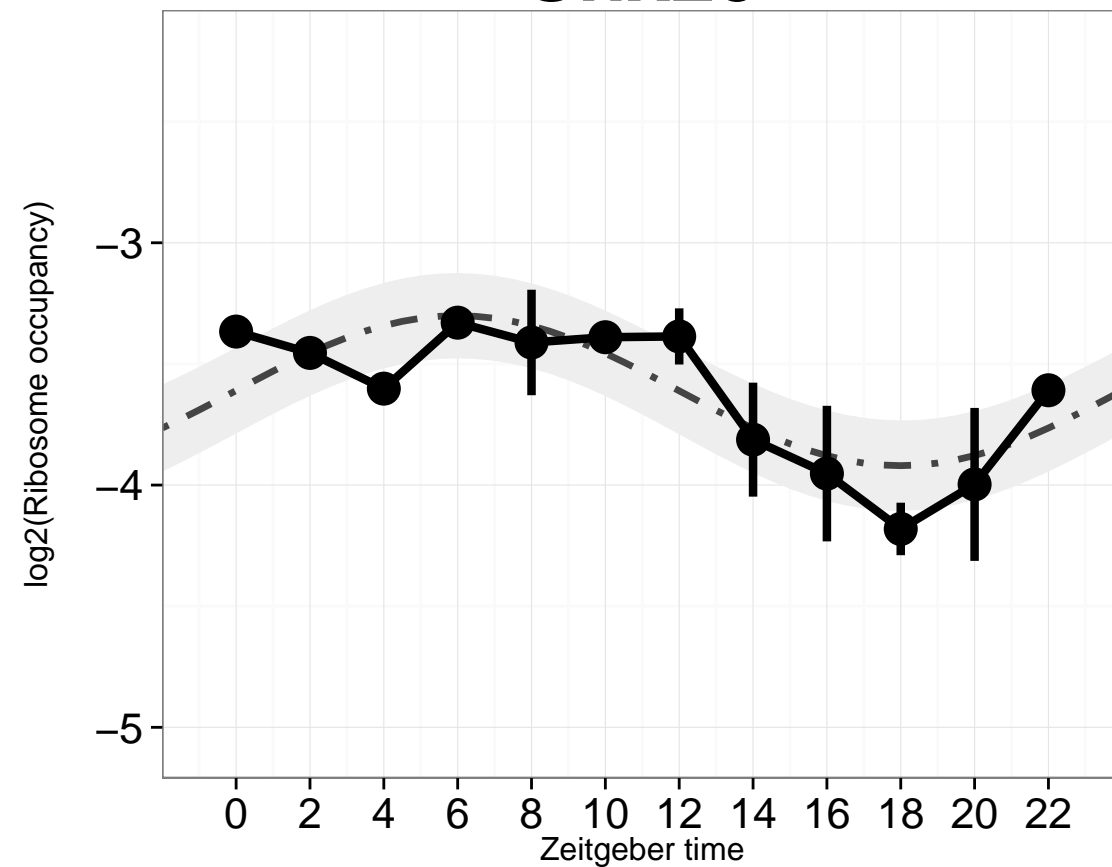

Supplement: Supplementary file 4620 [file 1]
