# Supplementary material (part 47 of 133)
Source: publisher figshare collection journal article supplement (https://springernature.figshare.com/articles/dataset/_/4903193)

## Fbxo25

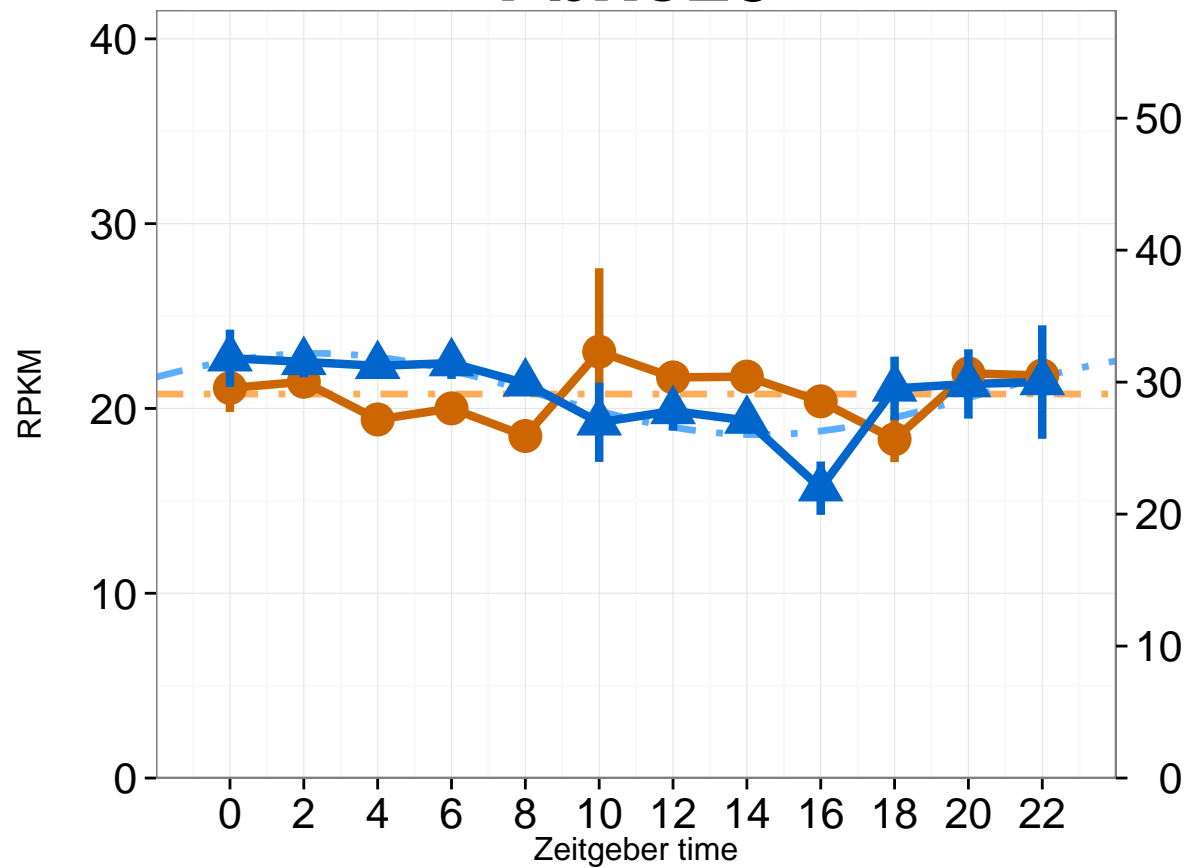

## Fbxo25

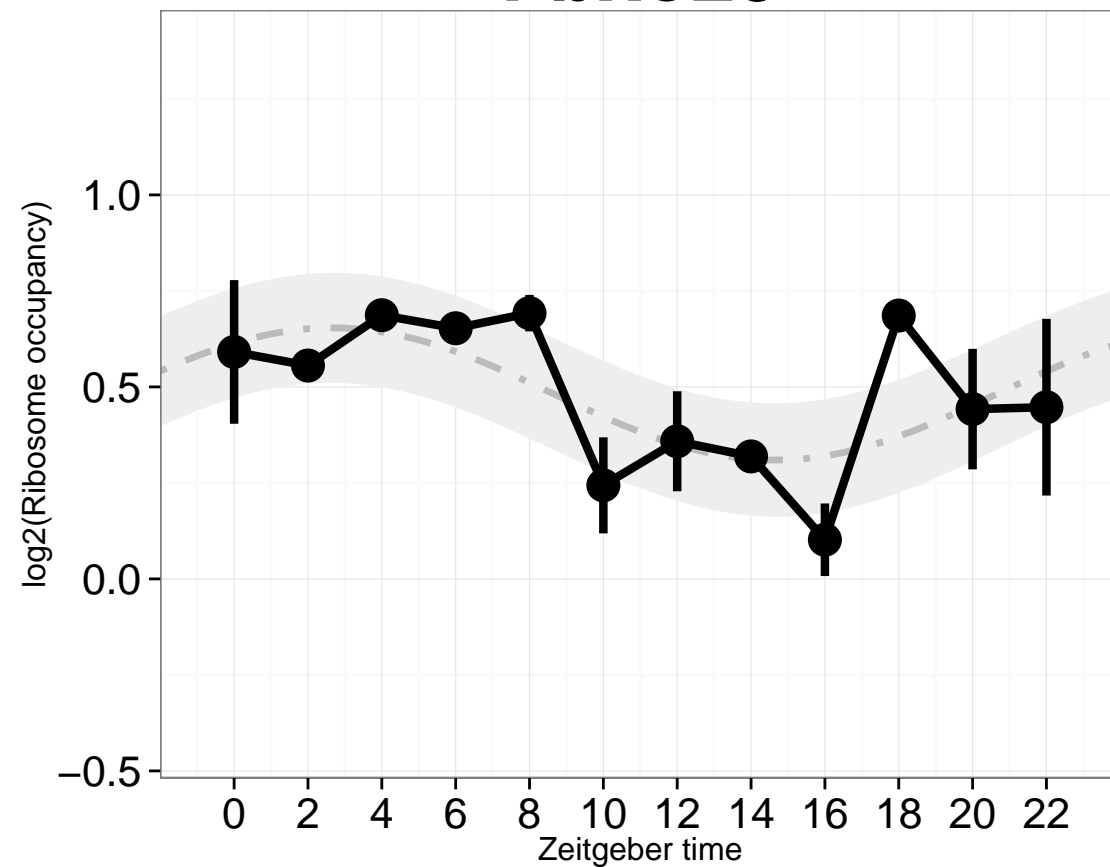

Supplement: Supplementary file 4621 [file 1]

## Snrrnp48

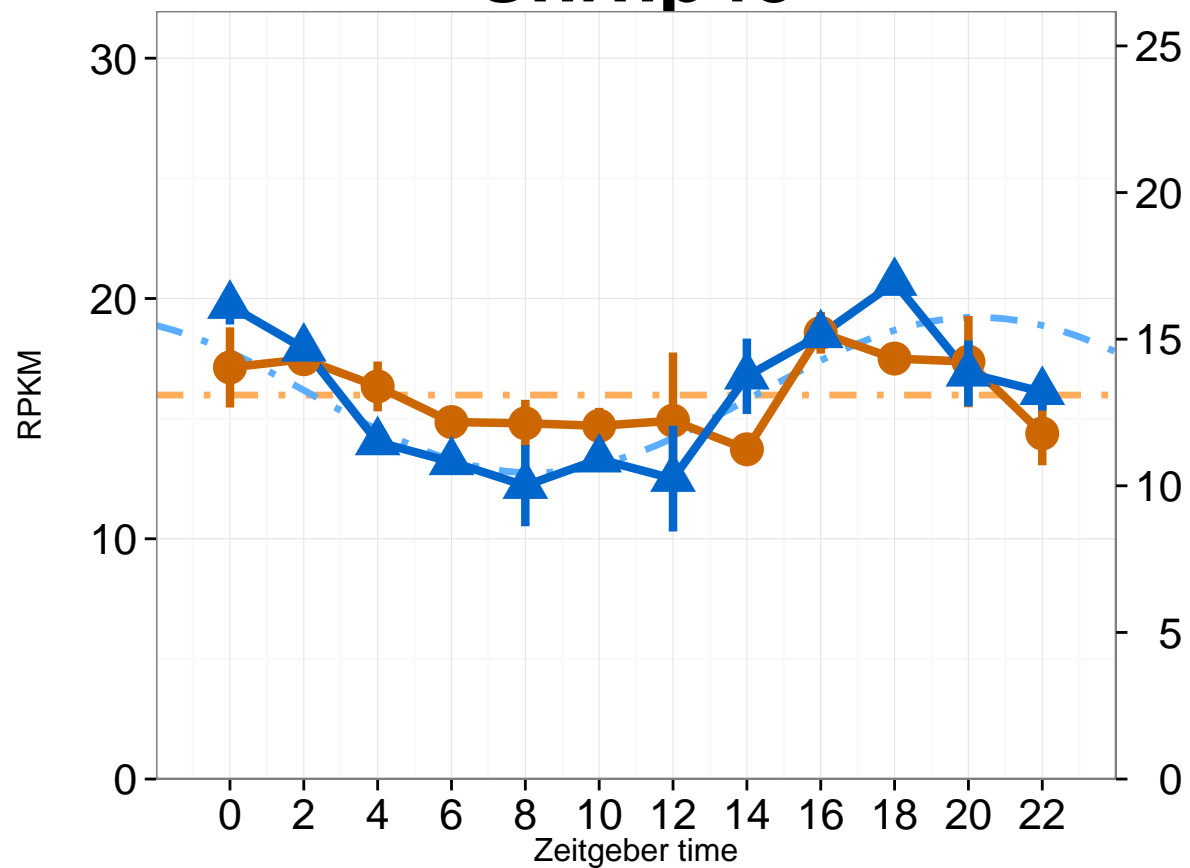

## Snrrnp48

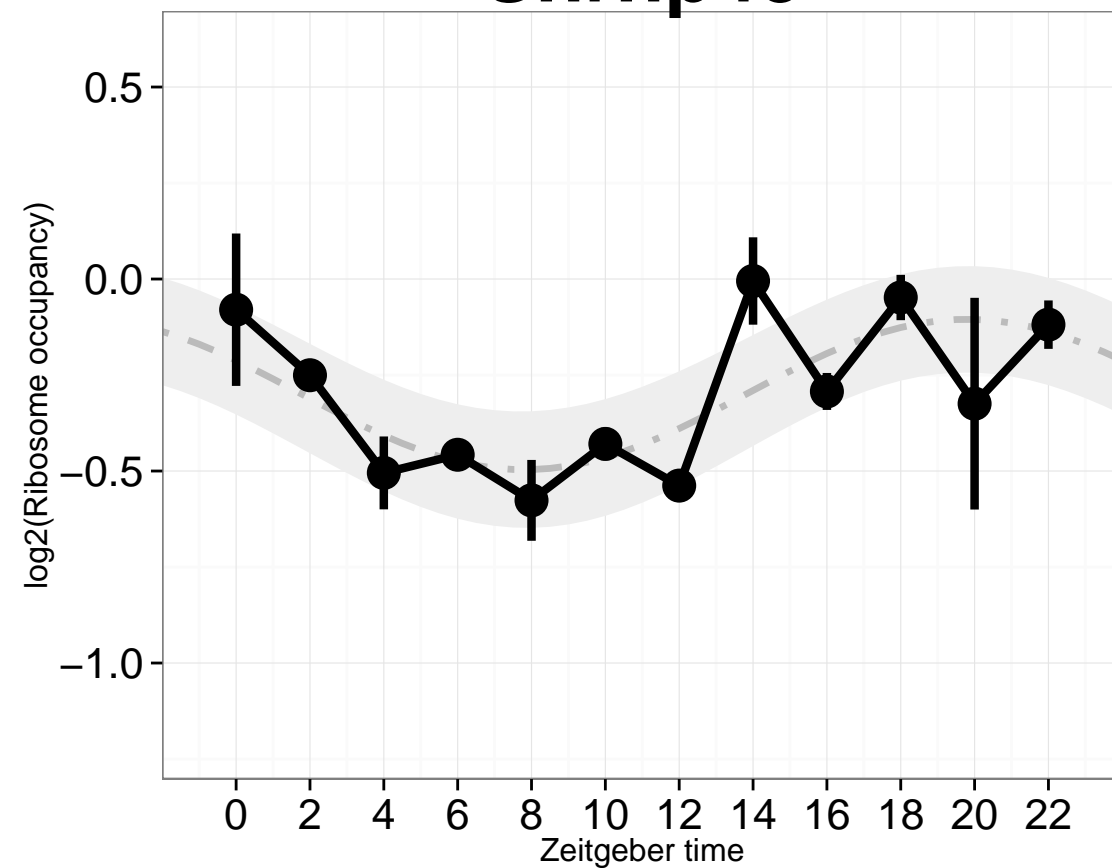

Supplement: Supplementary file 4622 [file 1]

## Bag3

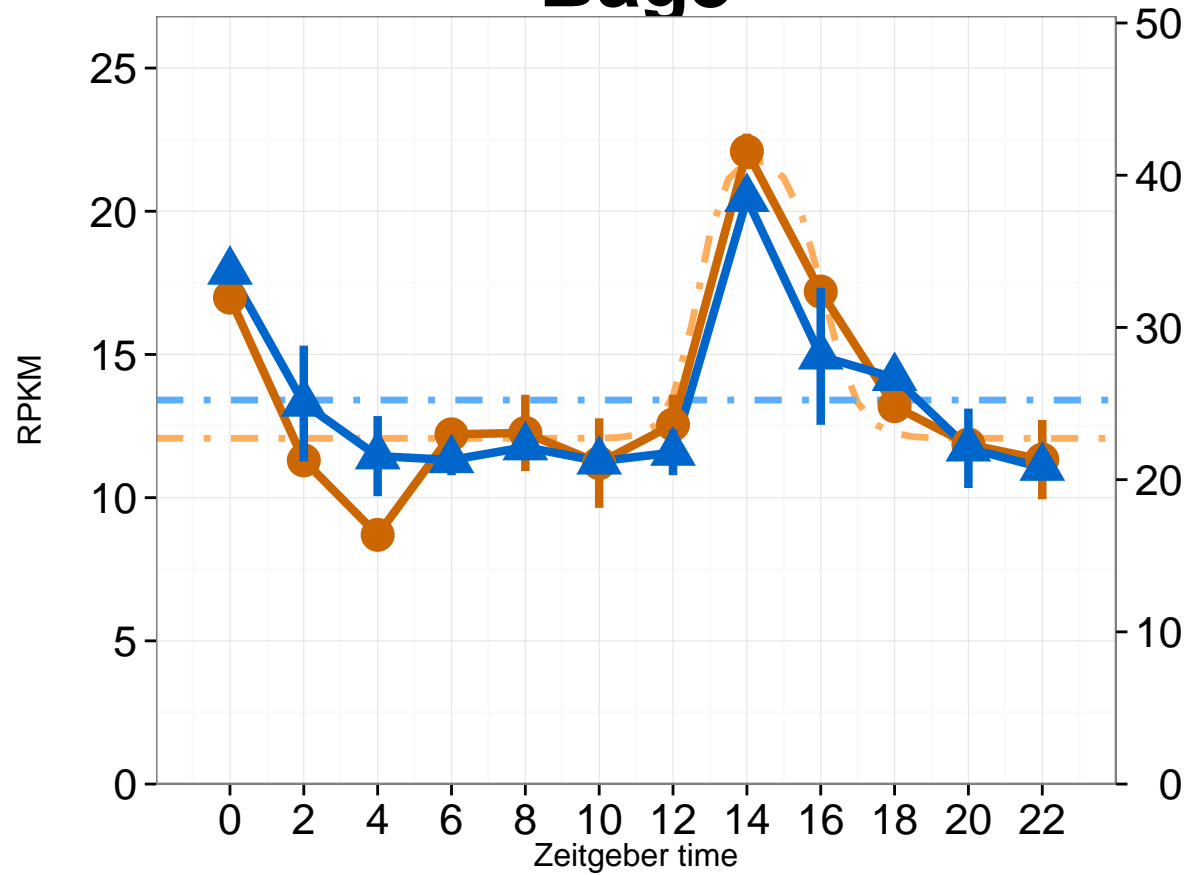

## Bag3

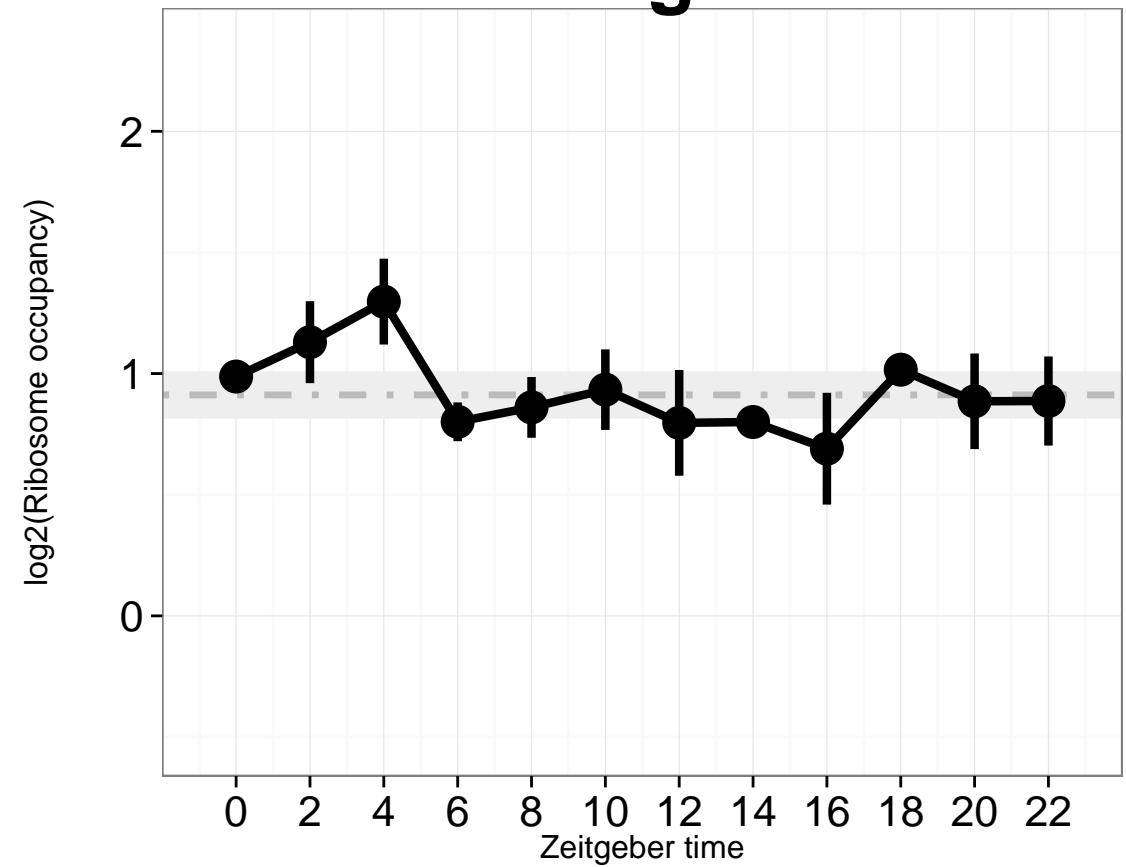

Supplement: Supplementary file 4623 [file 1]

# Emid1

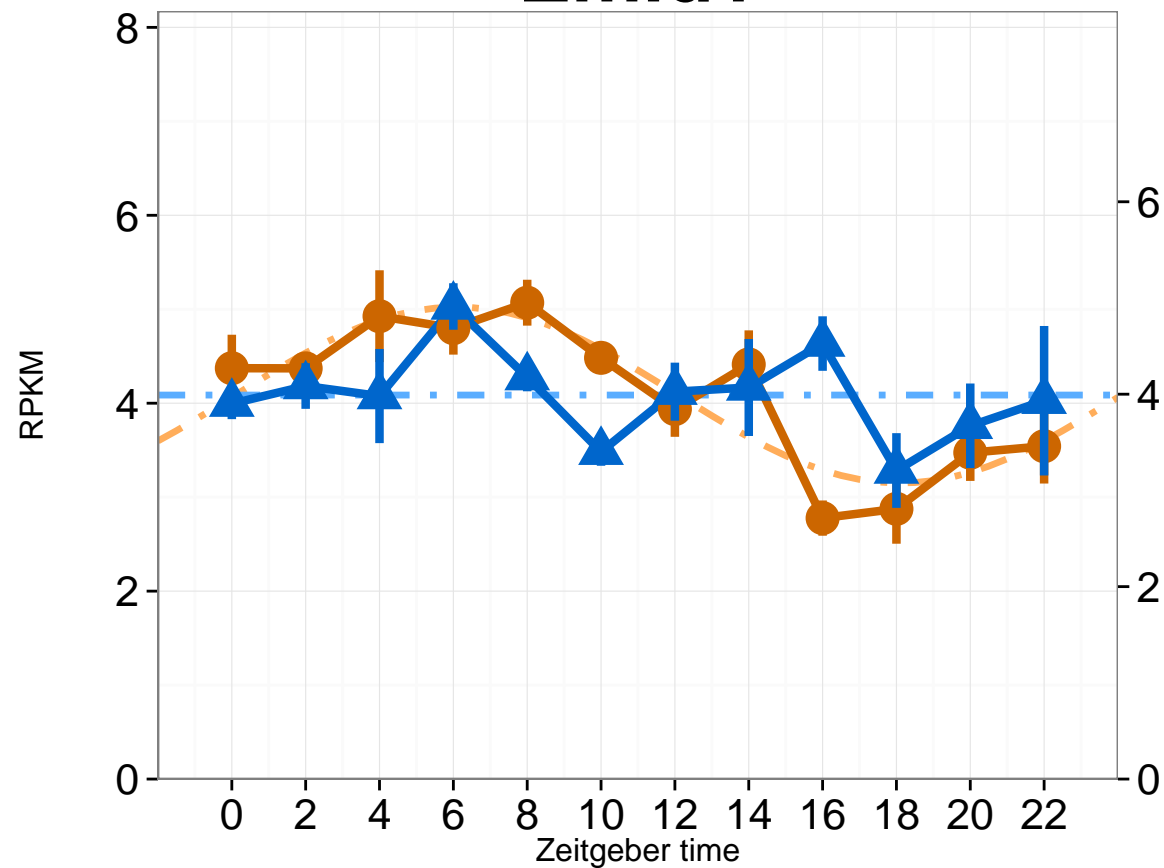

# Emid1

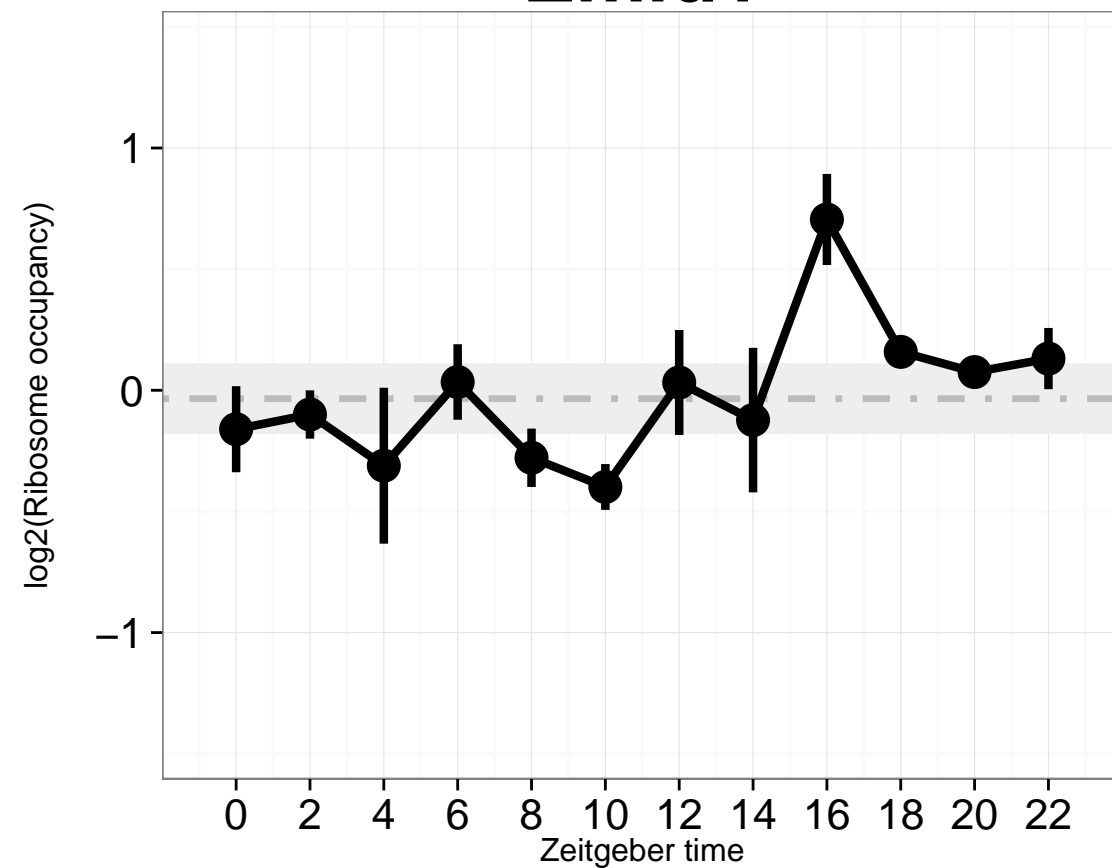

Supplement: Supplementary file 4624 [file 1]

# Rqcd1

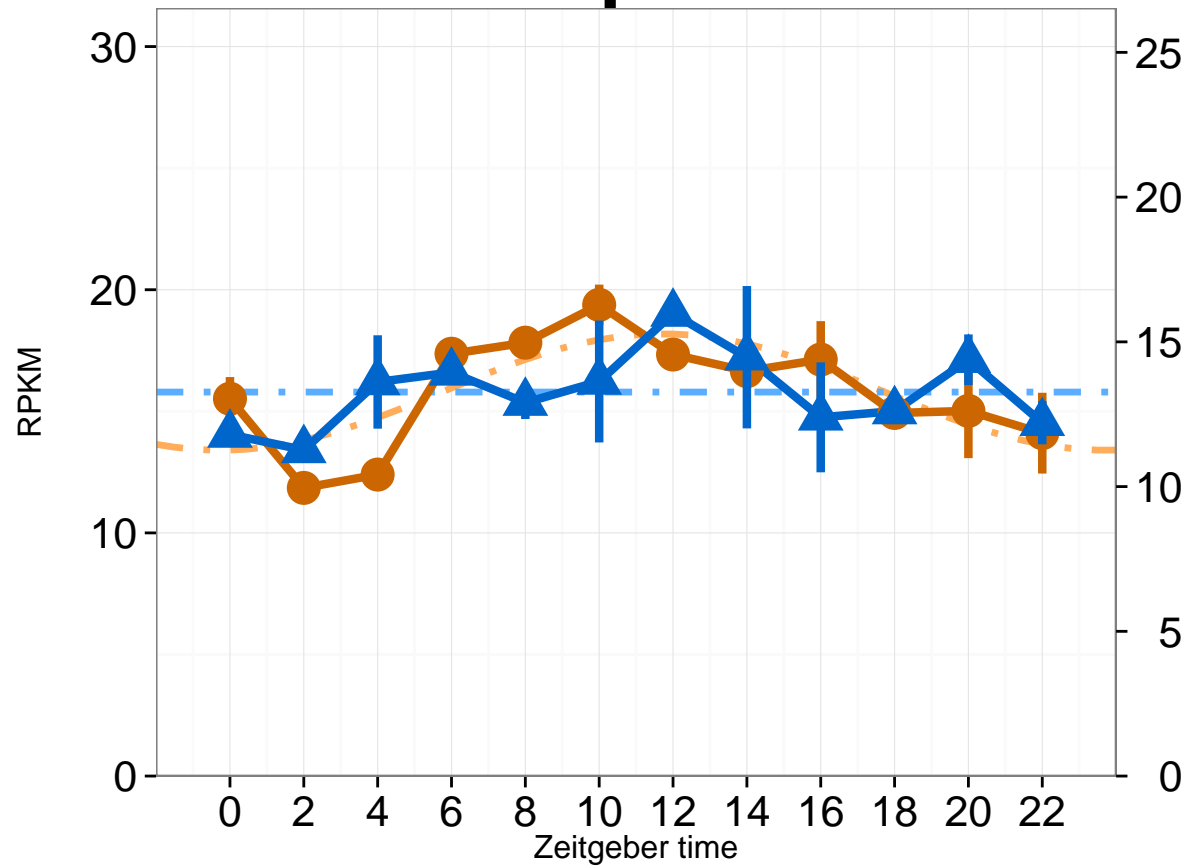

# Rqcd1

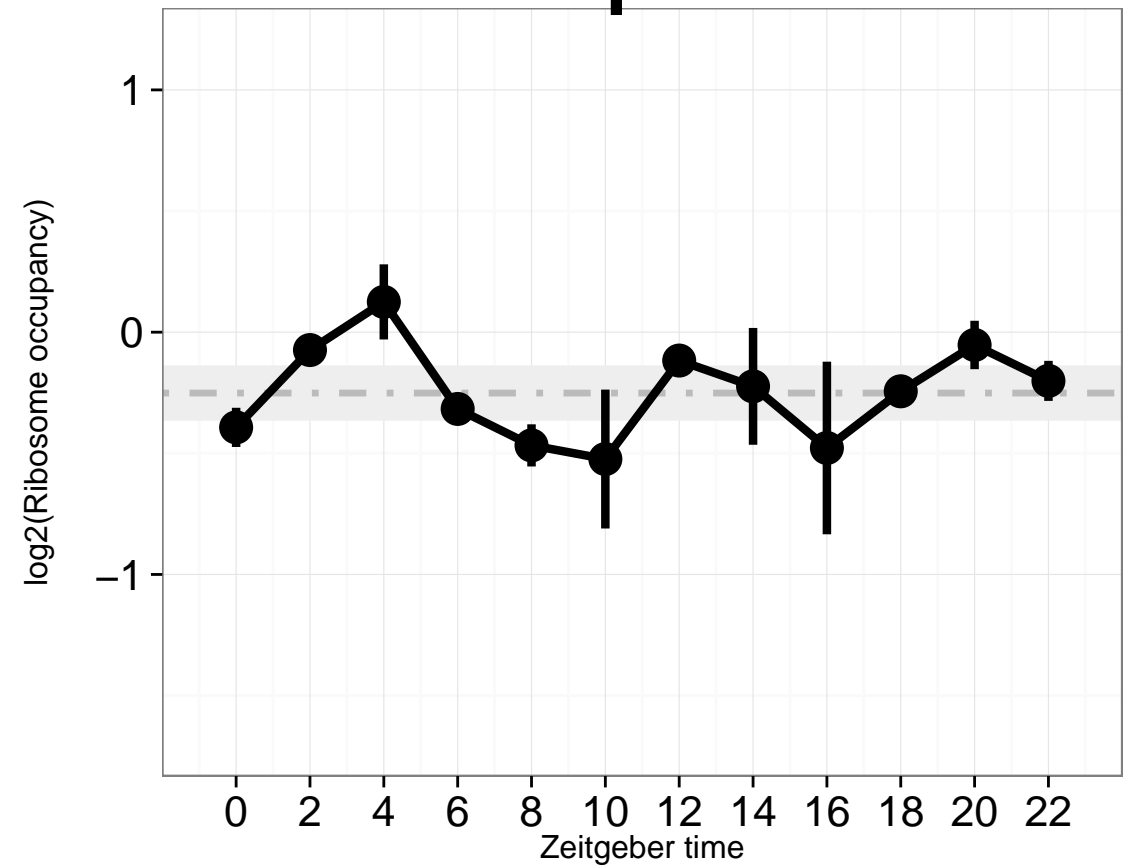

Supplement: Supplementary file 4625 [file 1]

## Arhgef1

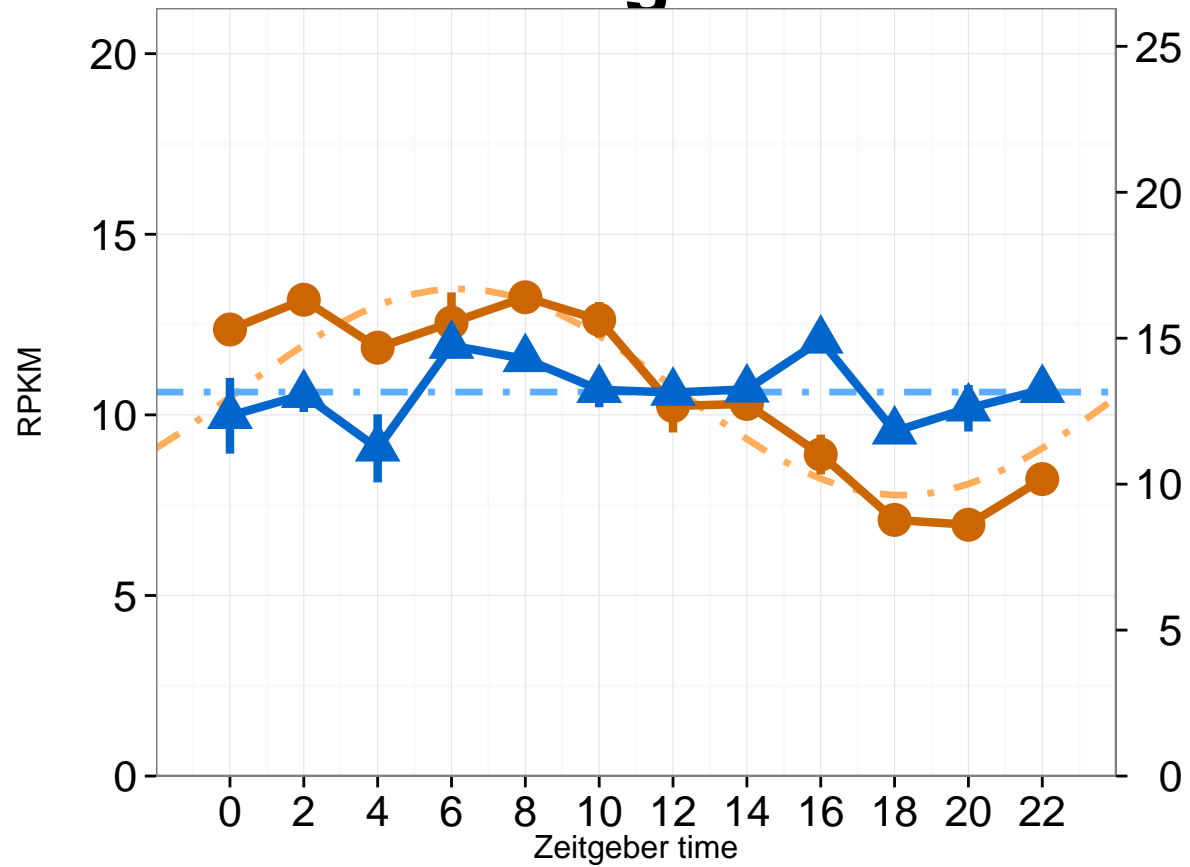

## Arhgef1

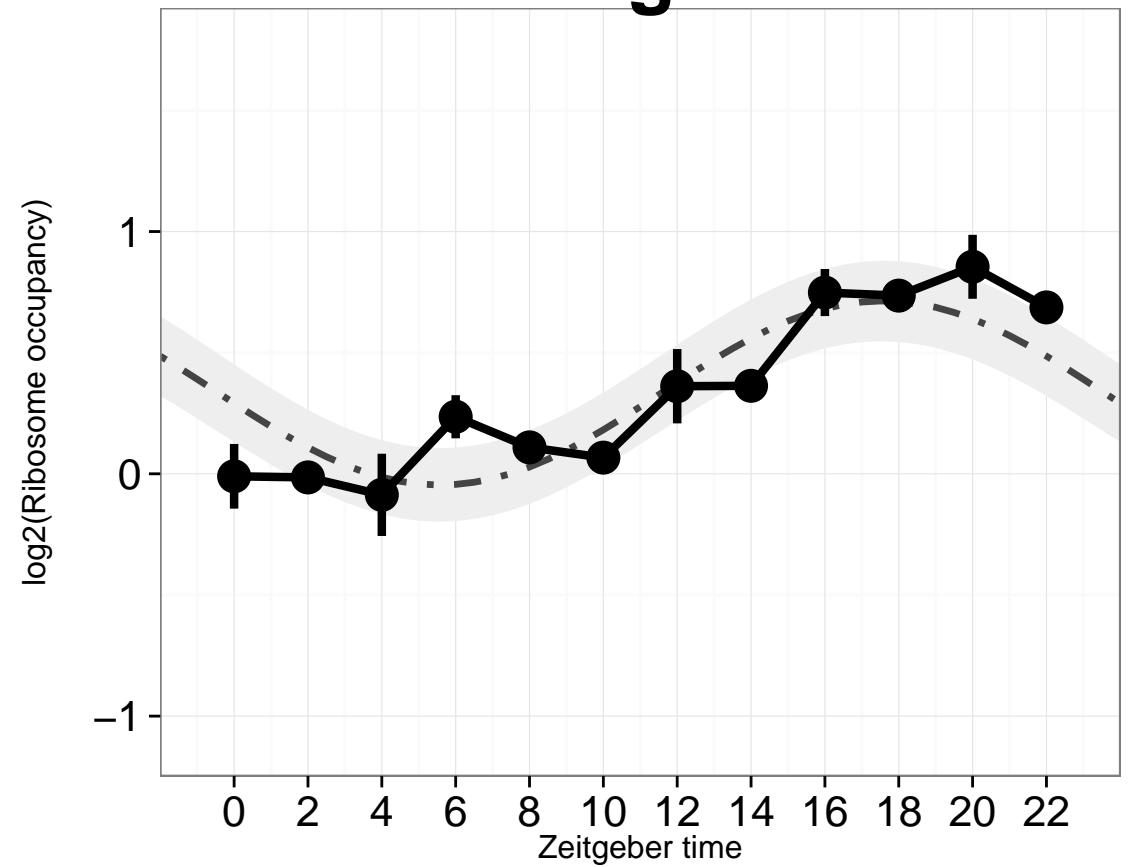

Supplement: Supplementary file 4626 [file 1]

## Ipo7

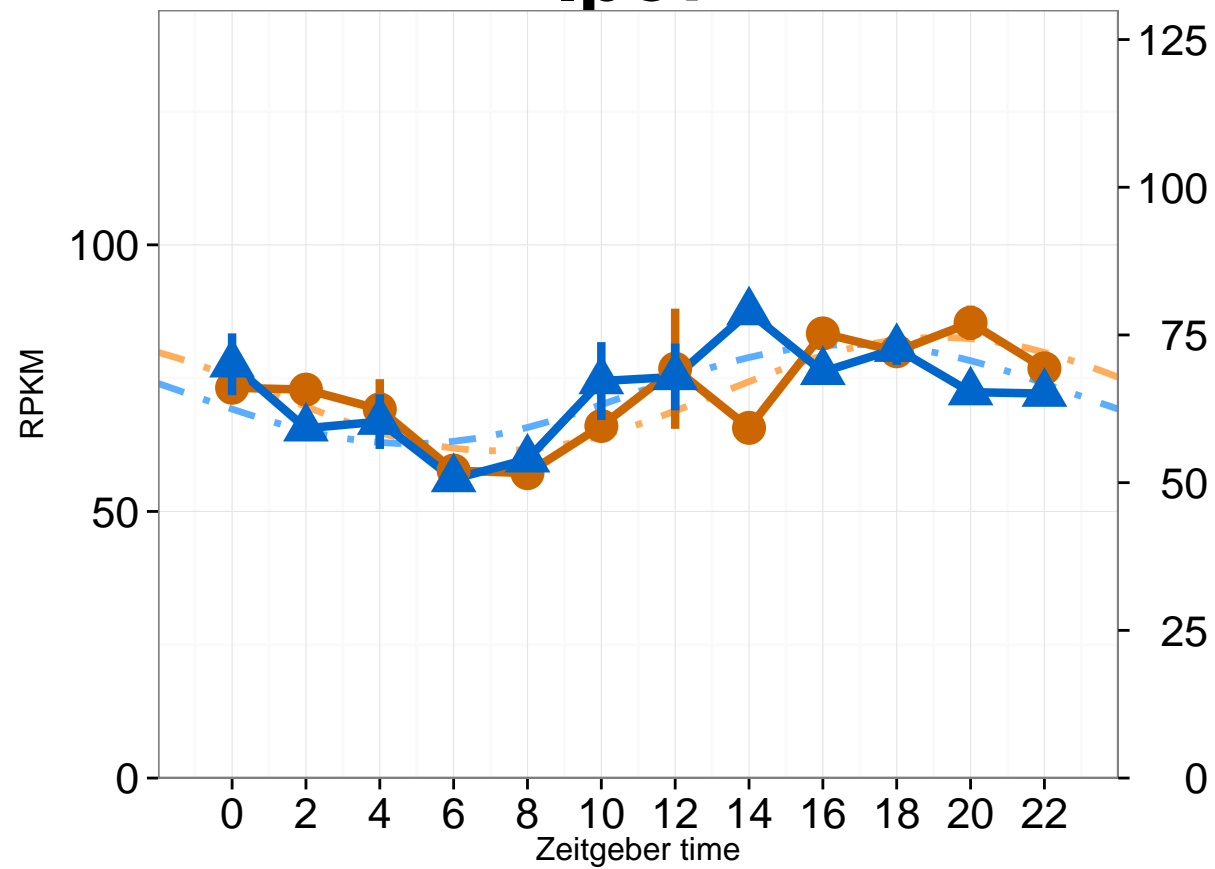

## Ipo7

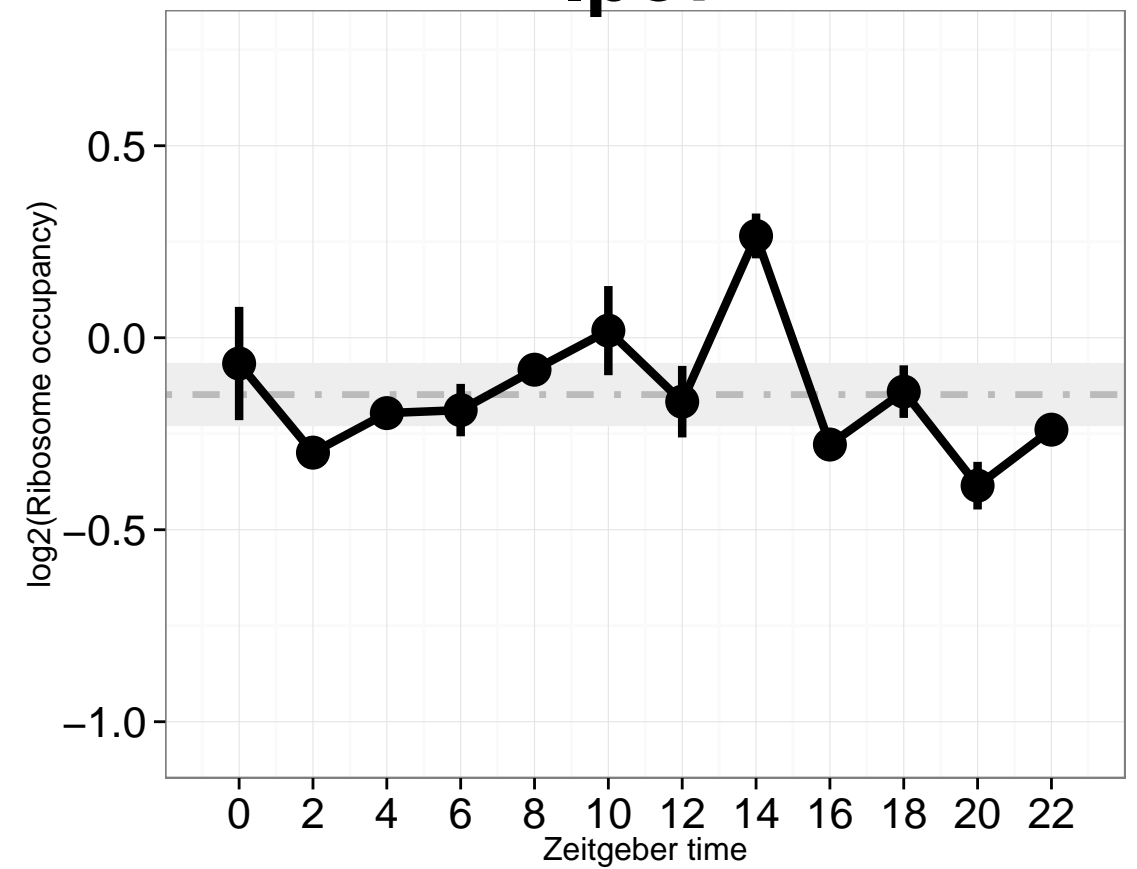

Supplement: Supplementary file 4627 [file 1]

# Tmtc1

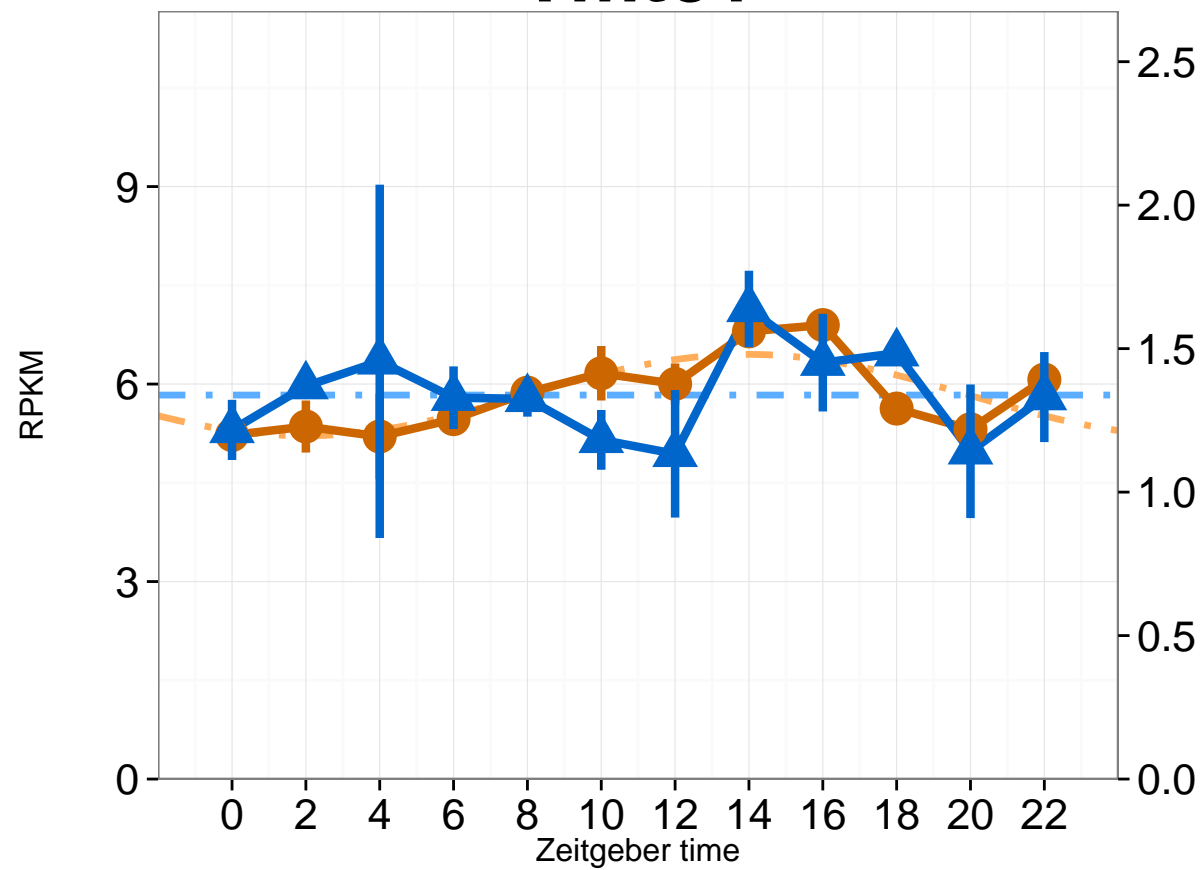

# Tmtc1

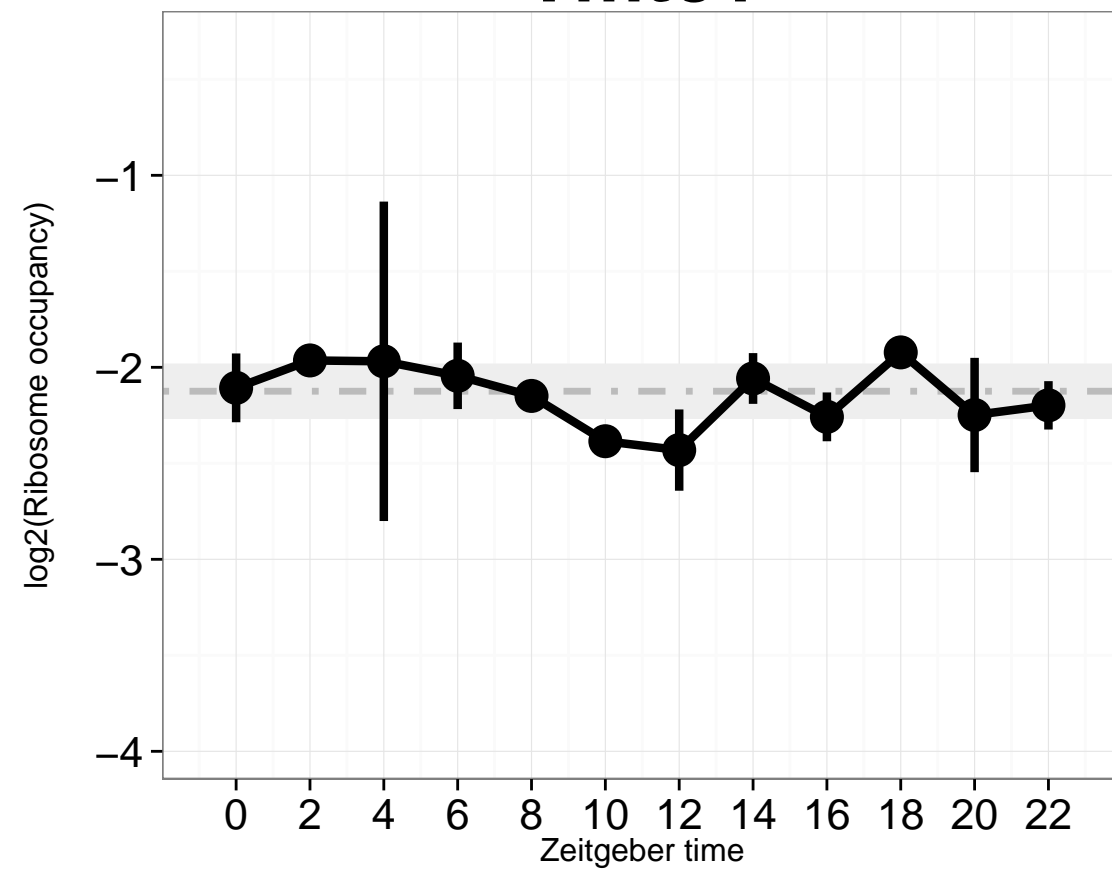

Supplement: Supplementary file 4628 [file 1]

## Gmcl1

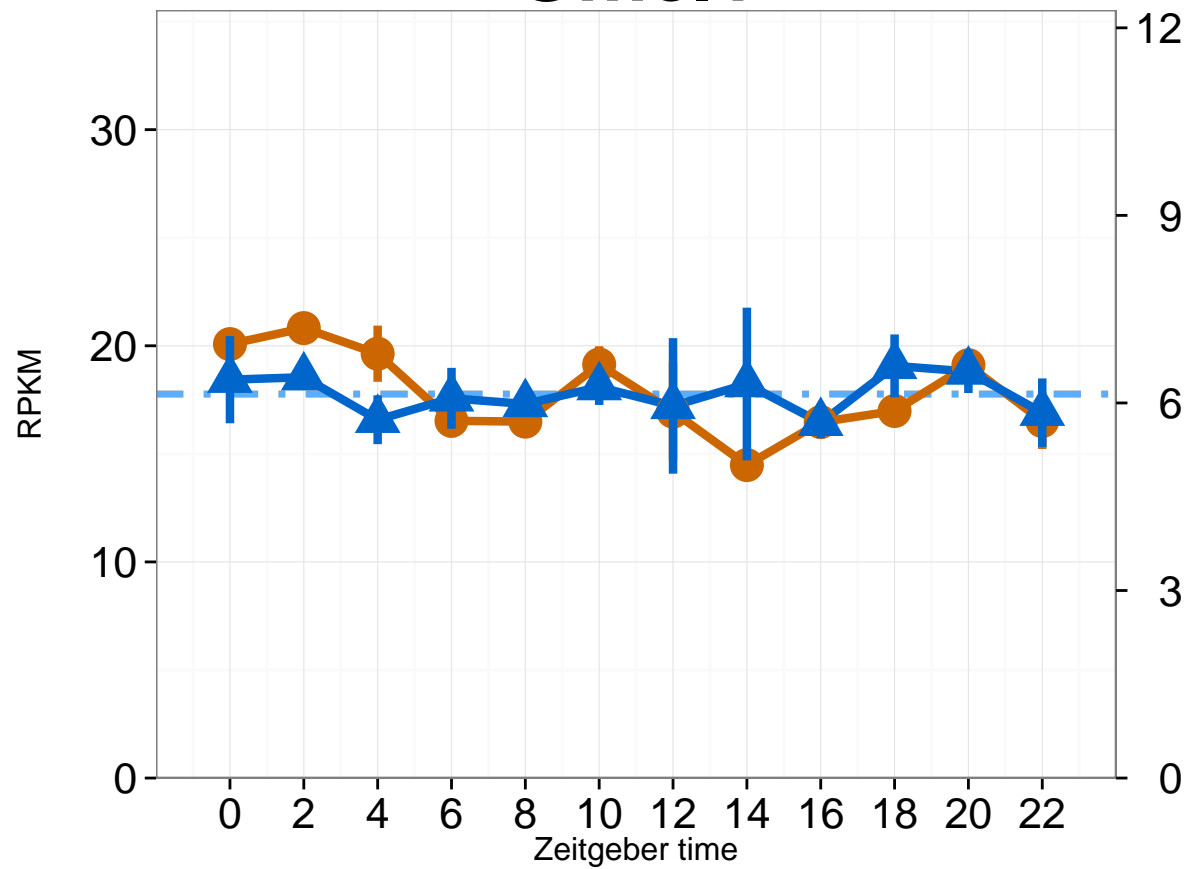

## Gmcl1

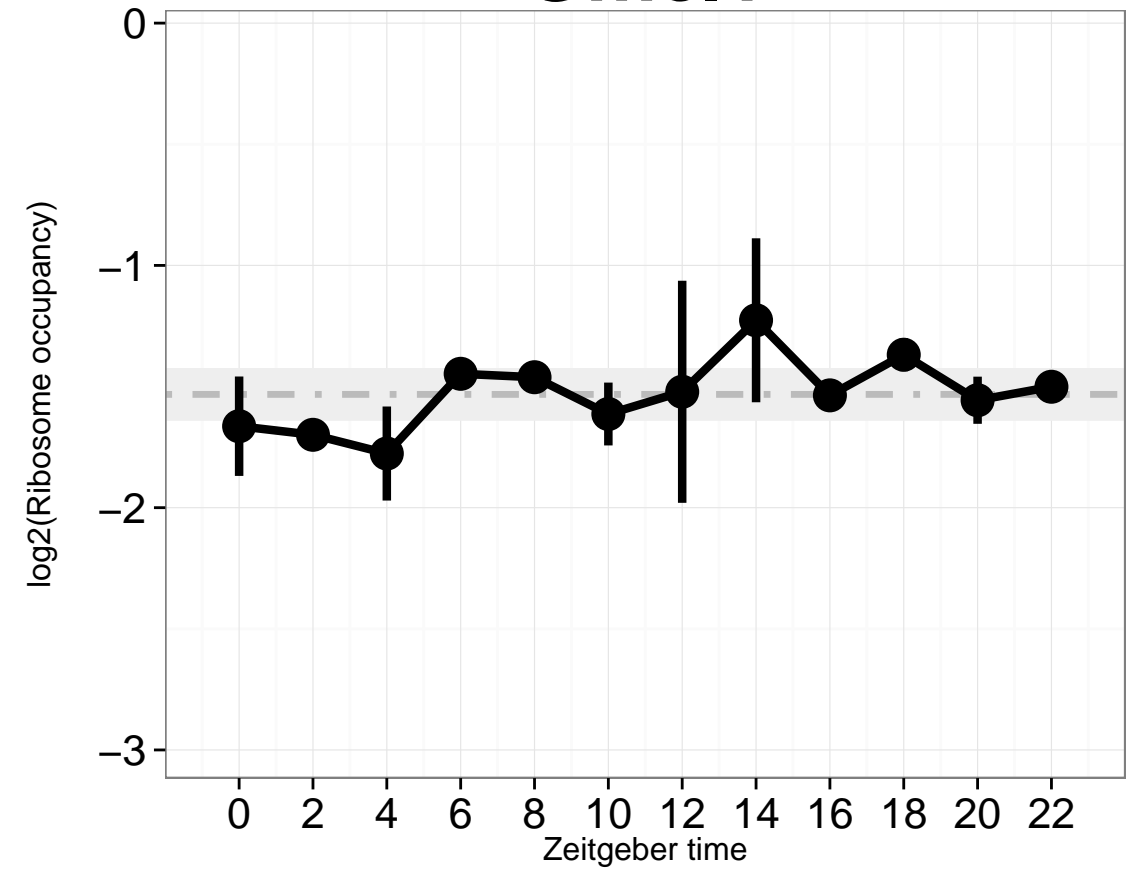

Supplement: Supplementary file 4629 [file 1]

# Mob3c

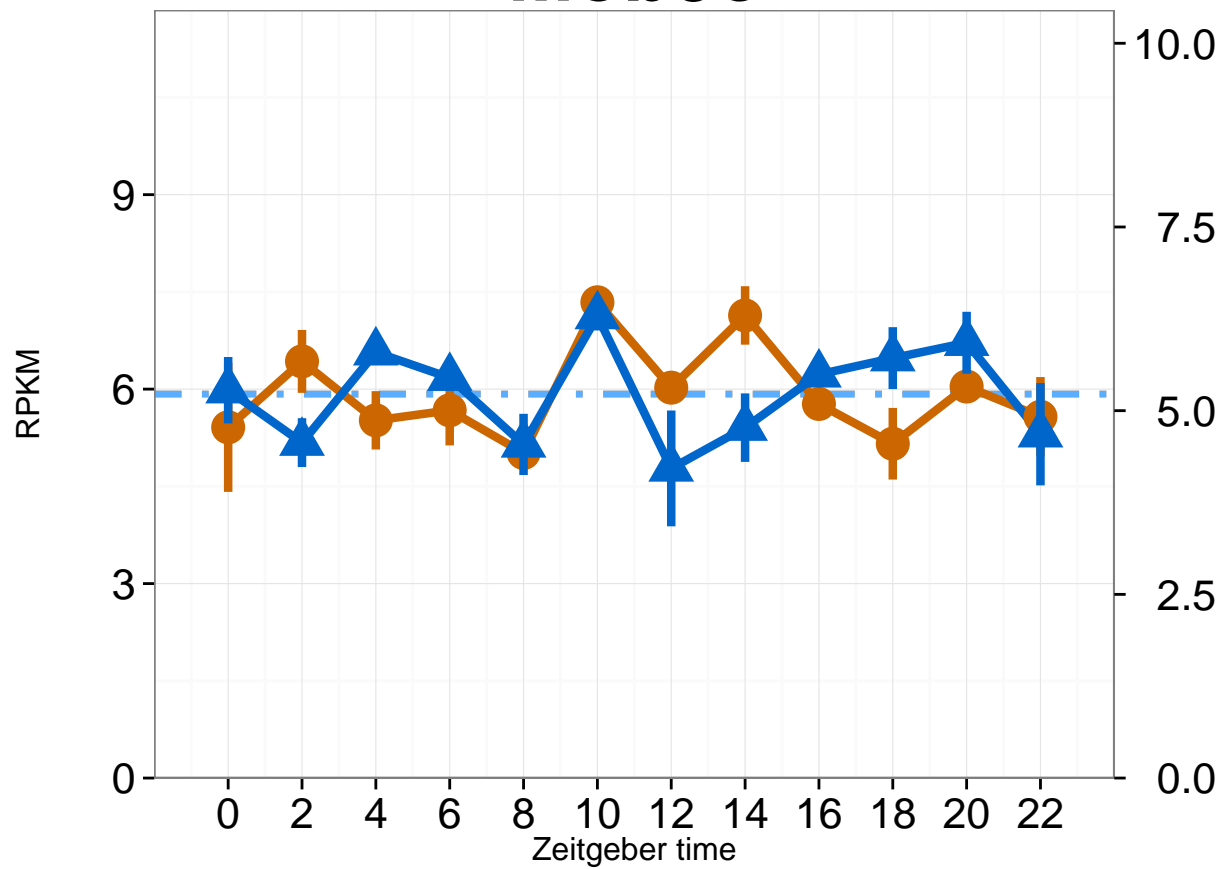

# Mob3c

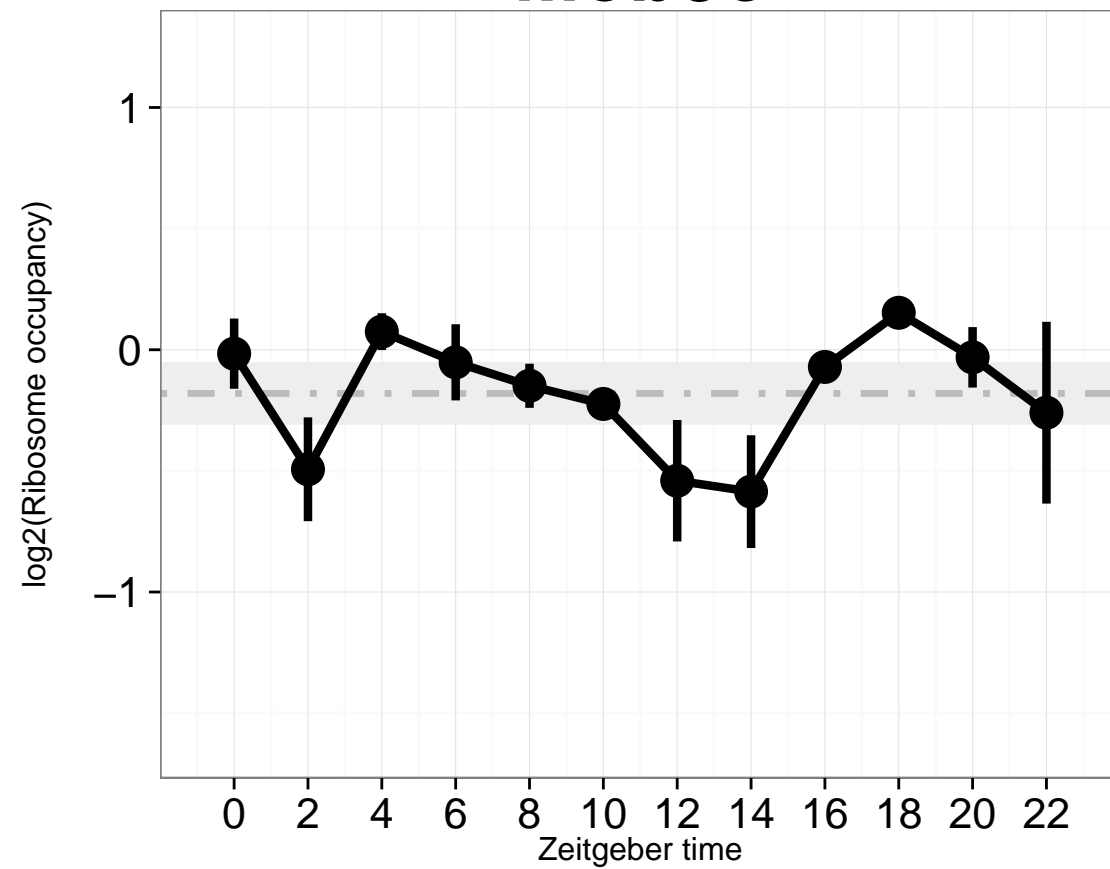

Supplement: Supplementary file 4630 [file 1]

## Acad11

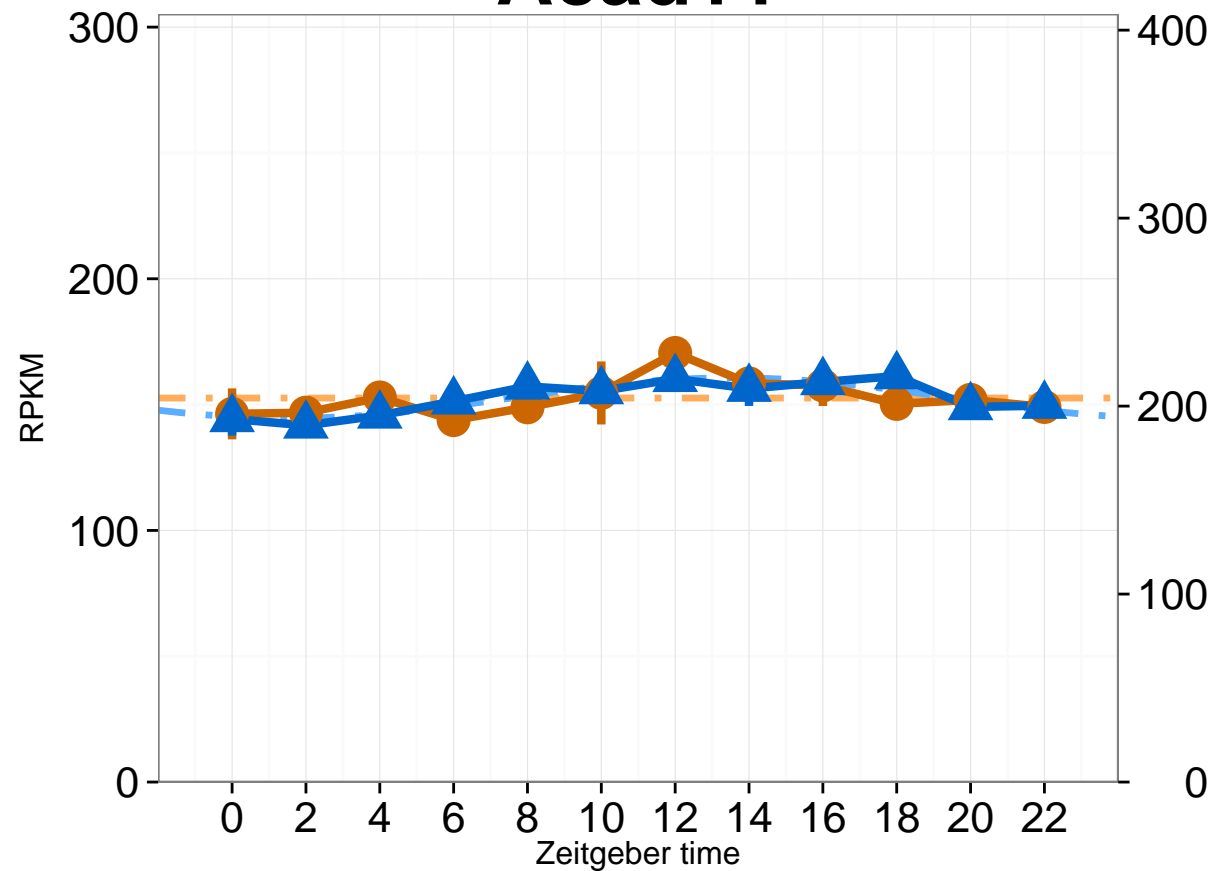

## Acad11

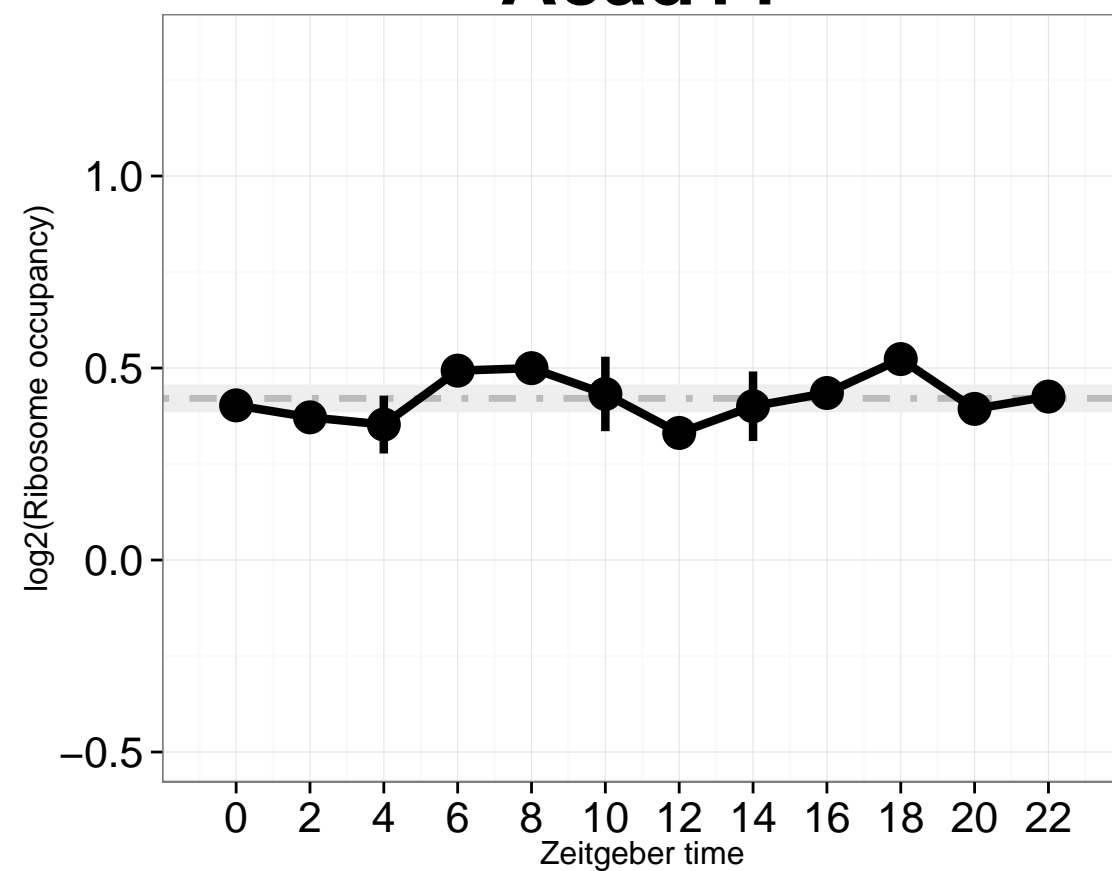

Supplement: Supplementary file 4631 [file 1]

## Nr2c2

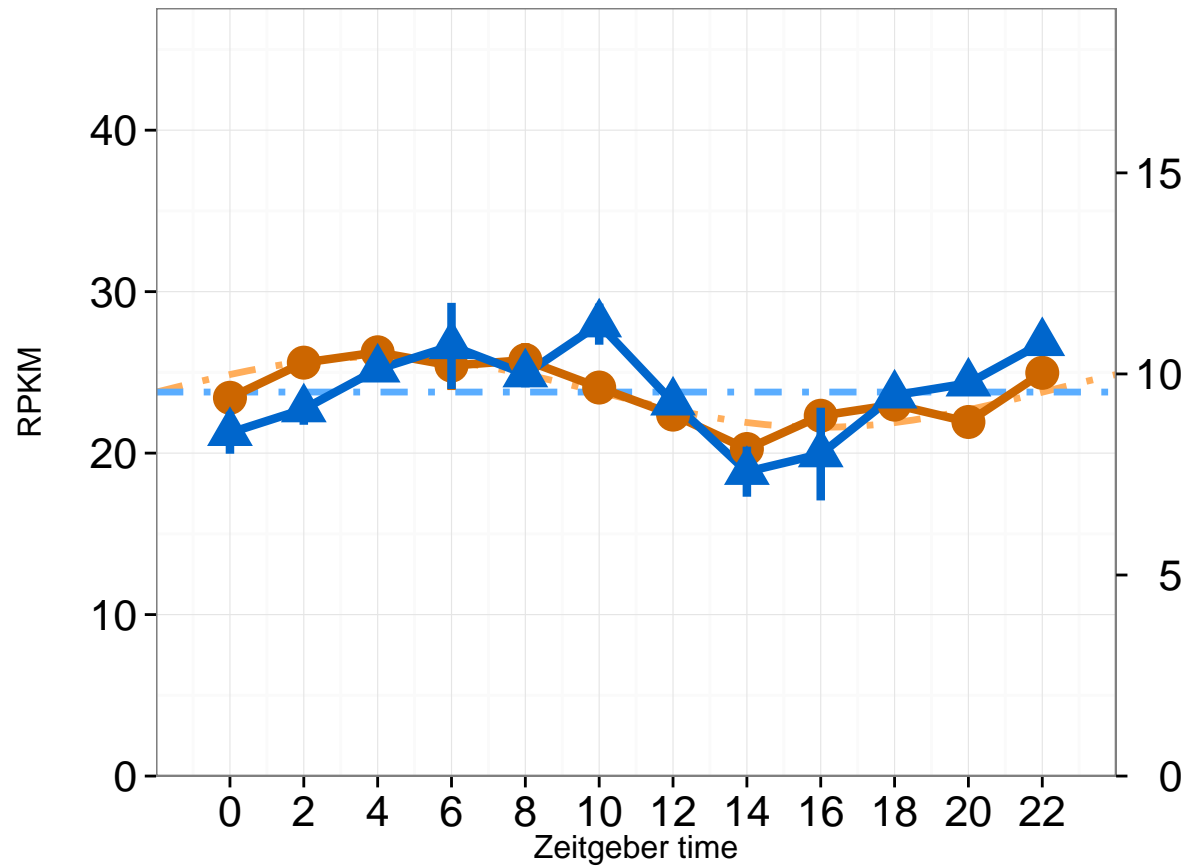

## Nr2c2

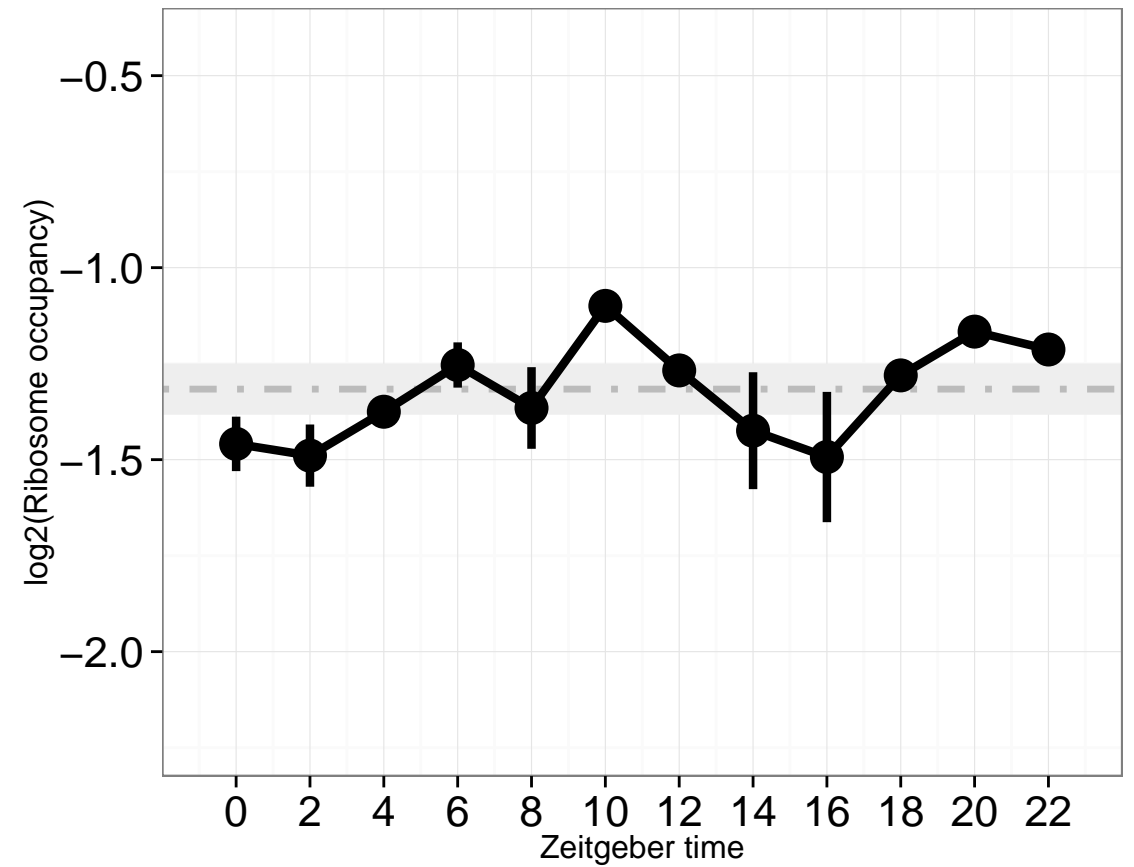

Supplement: Supplementary file 4632 [file 1]

## 9130023H24Rik

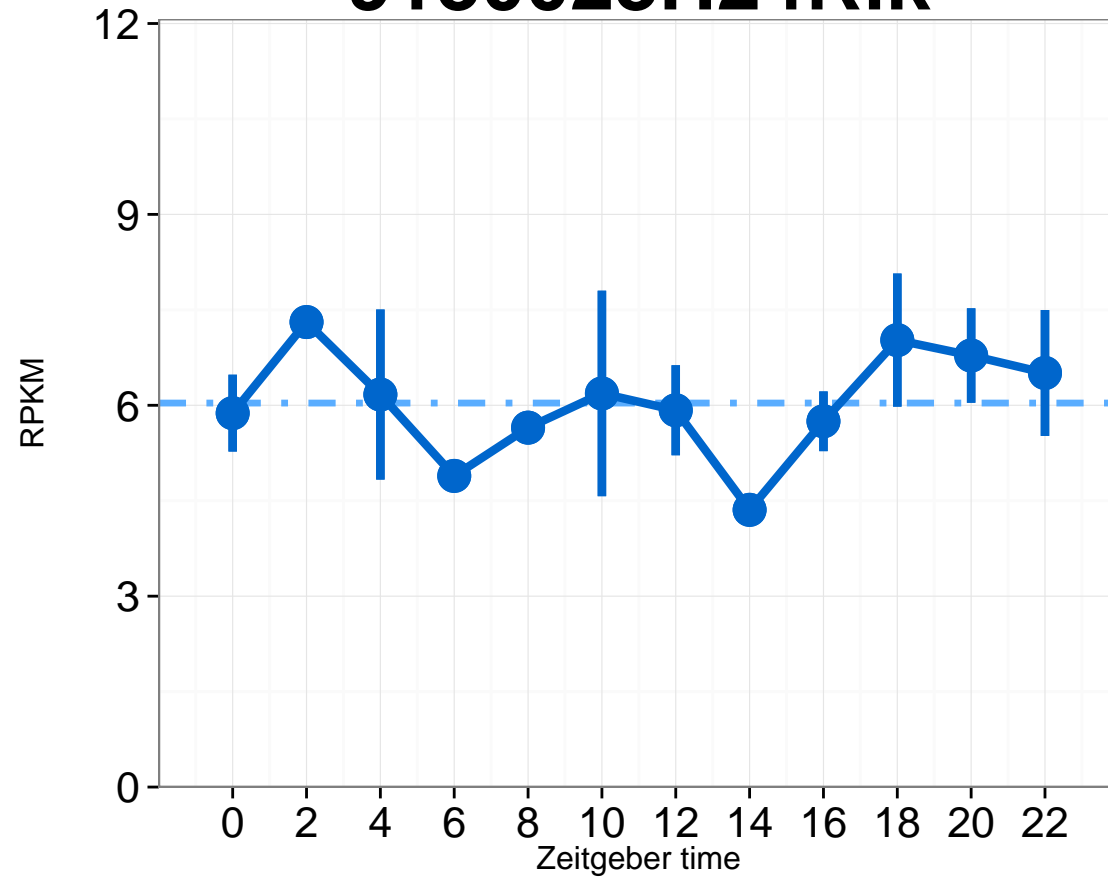

## 9130023H24Rik log2(Ribosome occup

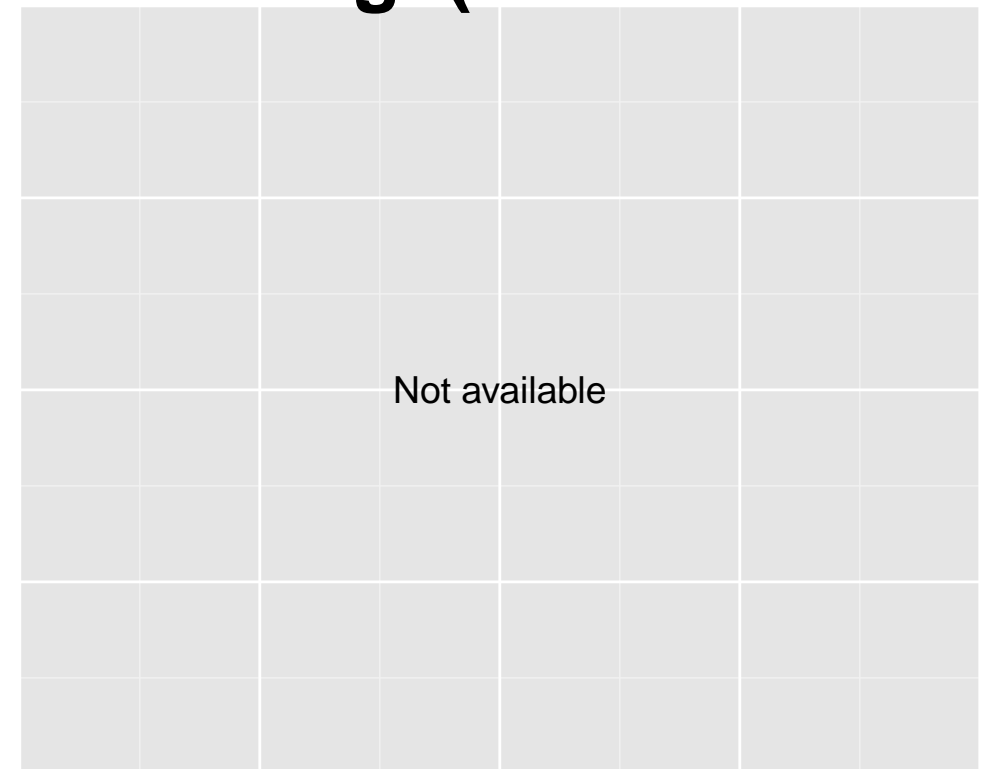

Supplement: Supplementary file 4633 [file 1]

## Pak1ip1

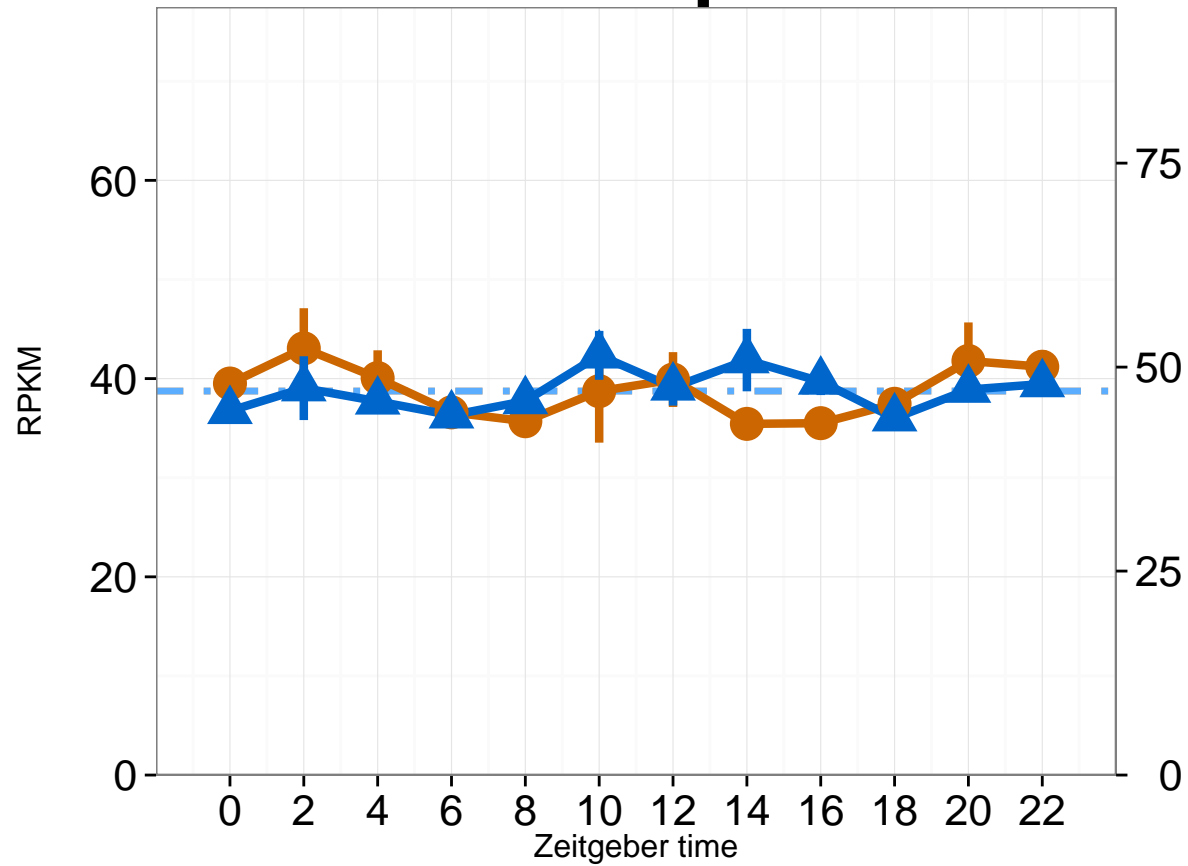

## Pak1ip1

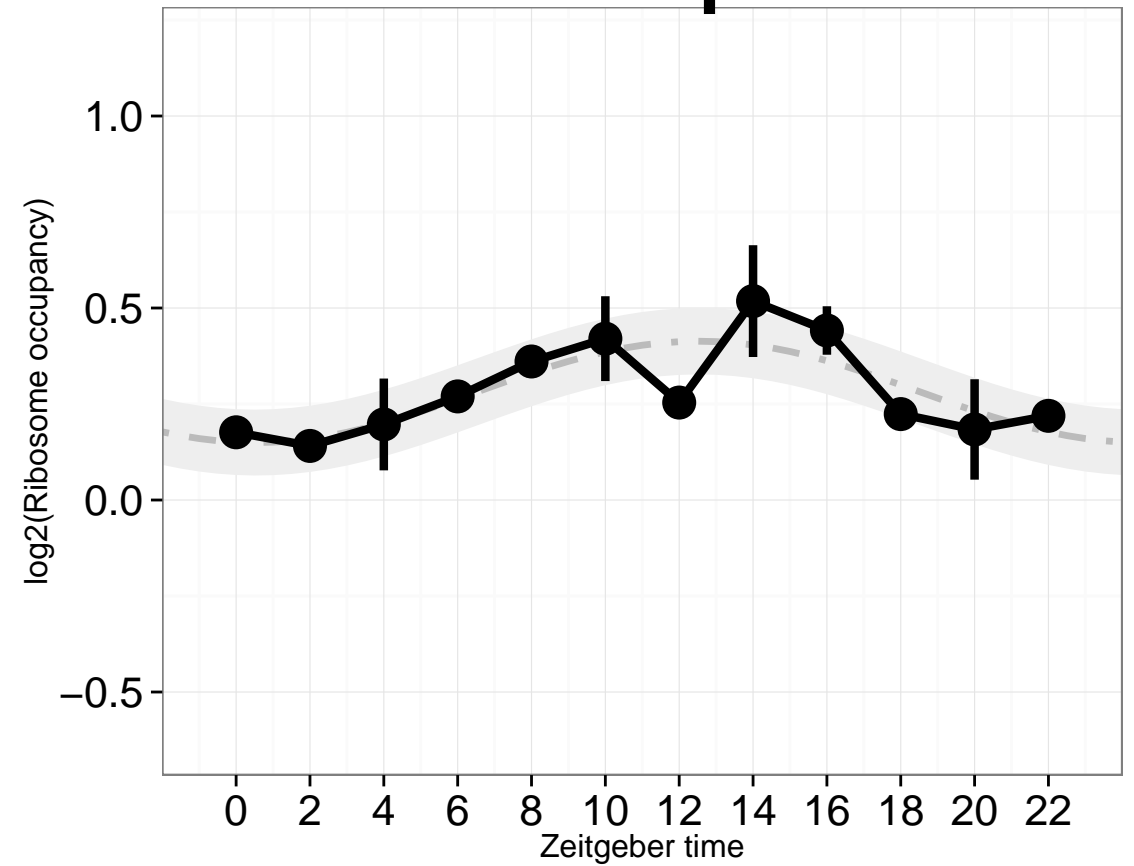

Supplement: Supplementary file 4634 [file 1]

# Tmc3

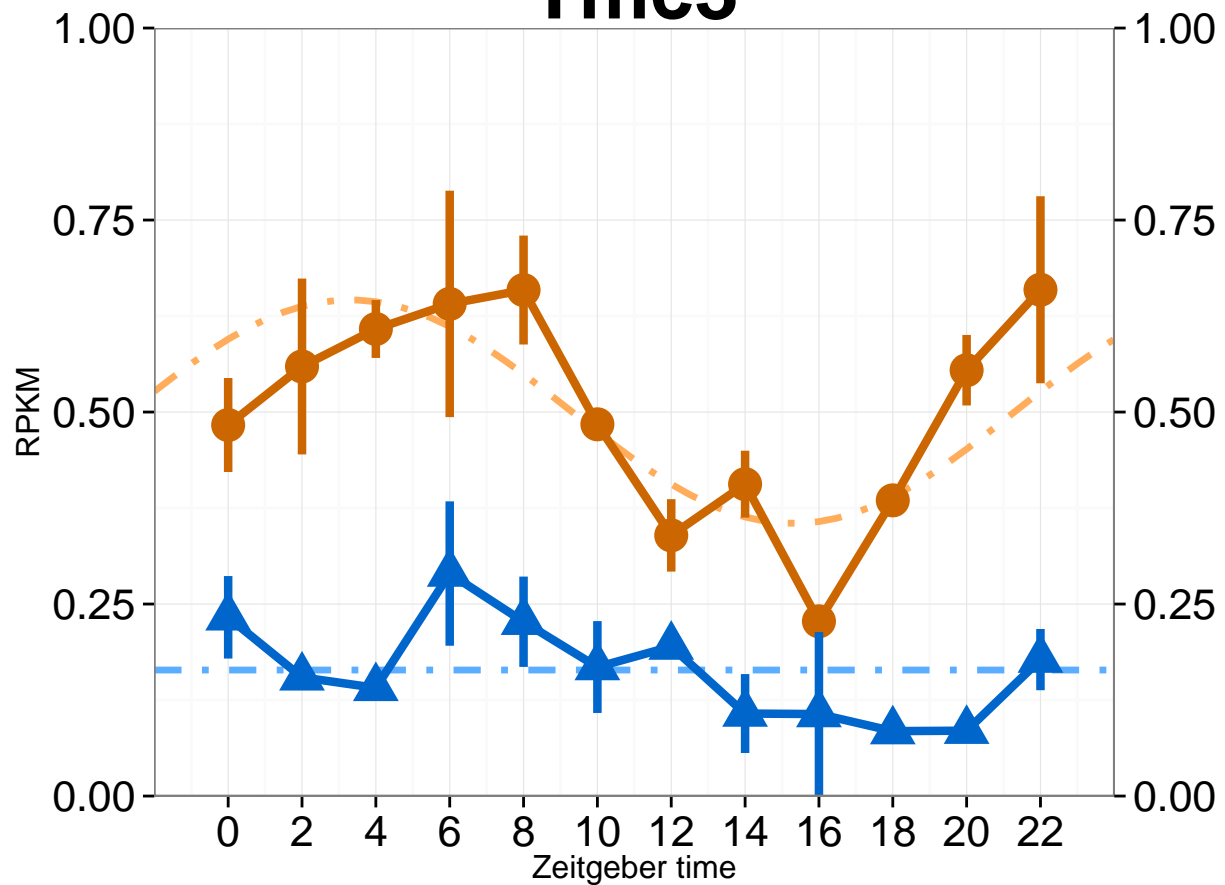

# Tmc3

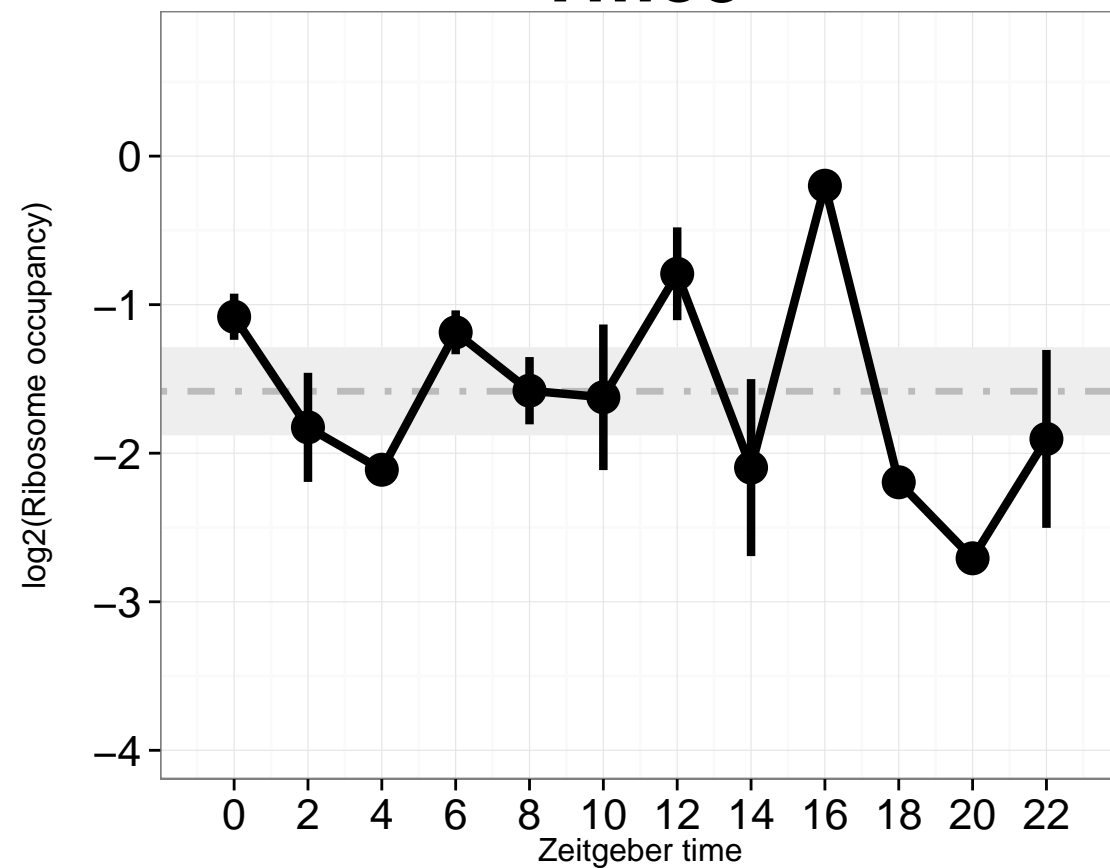

Supplement: Supplementary file 4635 [file 1]

# Slco1a1

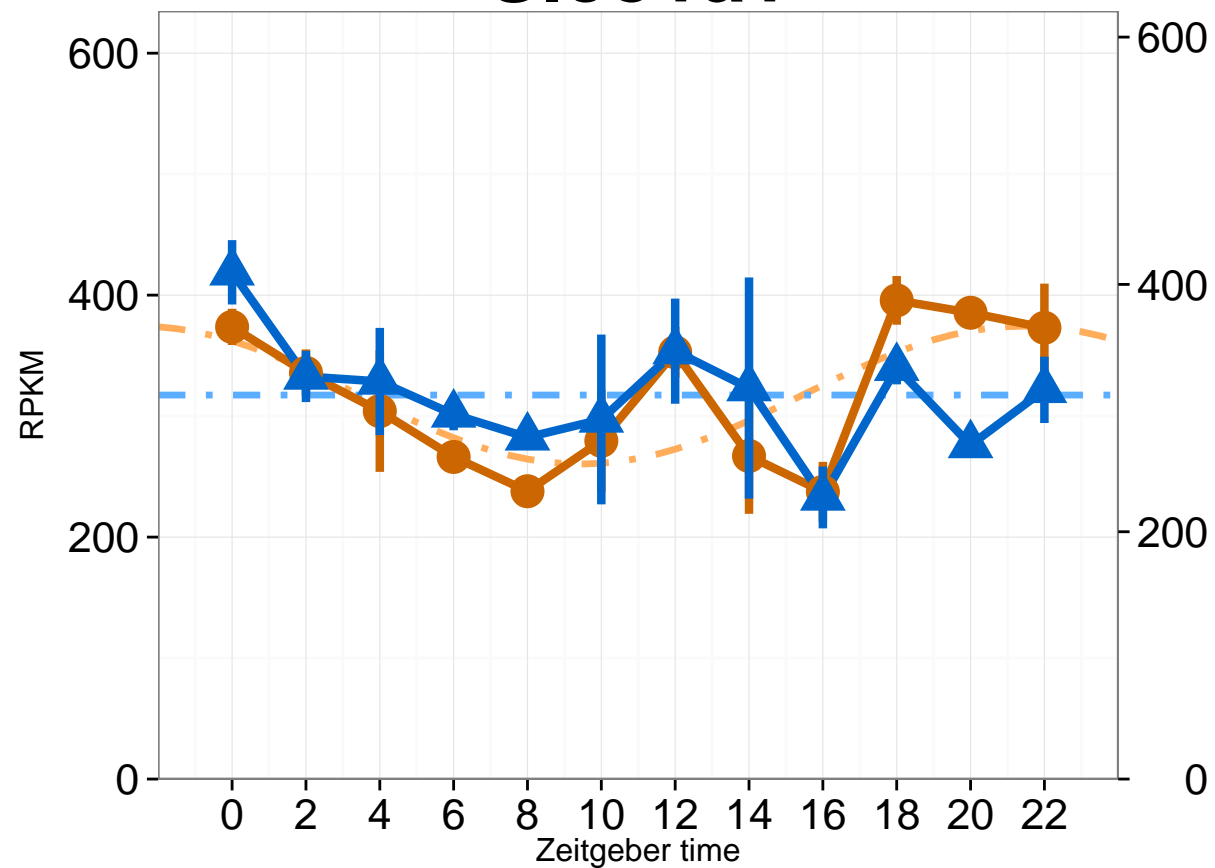

# Slco1a1

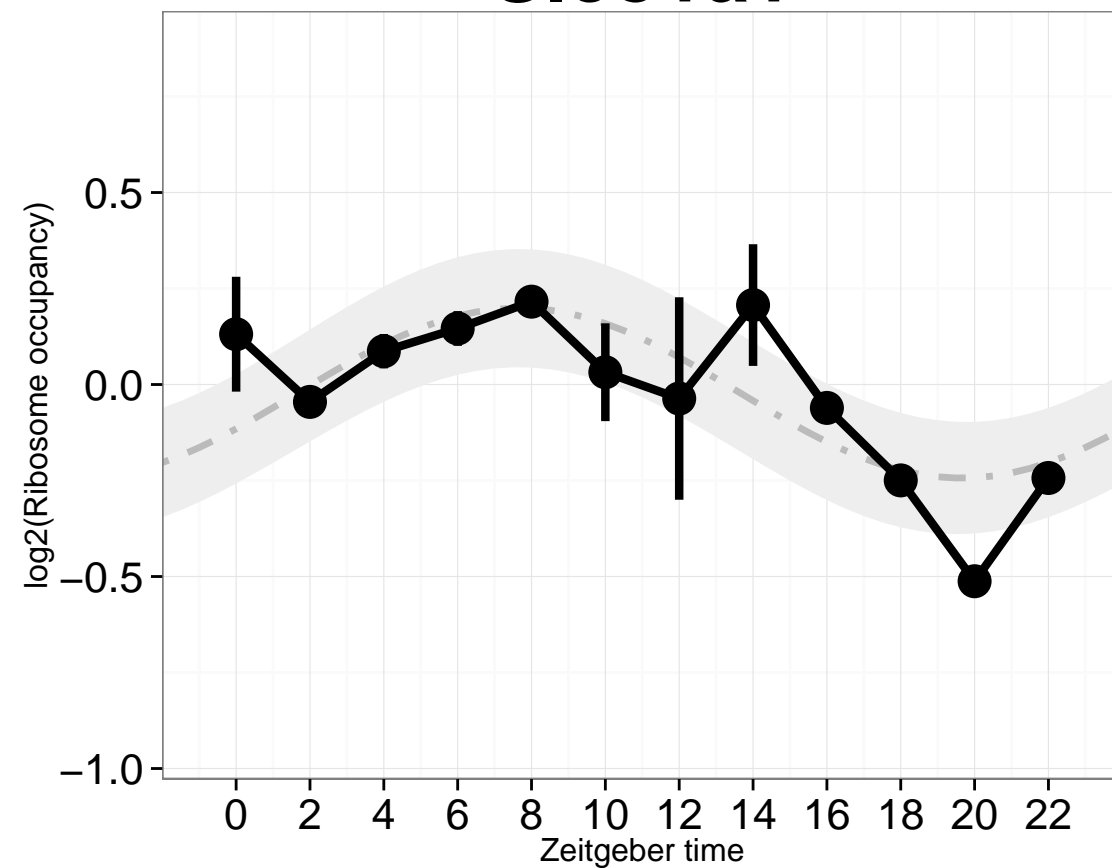

Supplement: Supplementary file 4636 [file 1]

## Cryz1

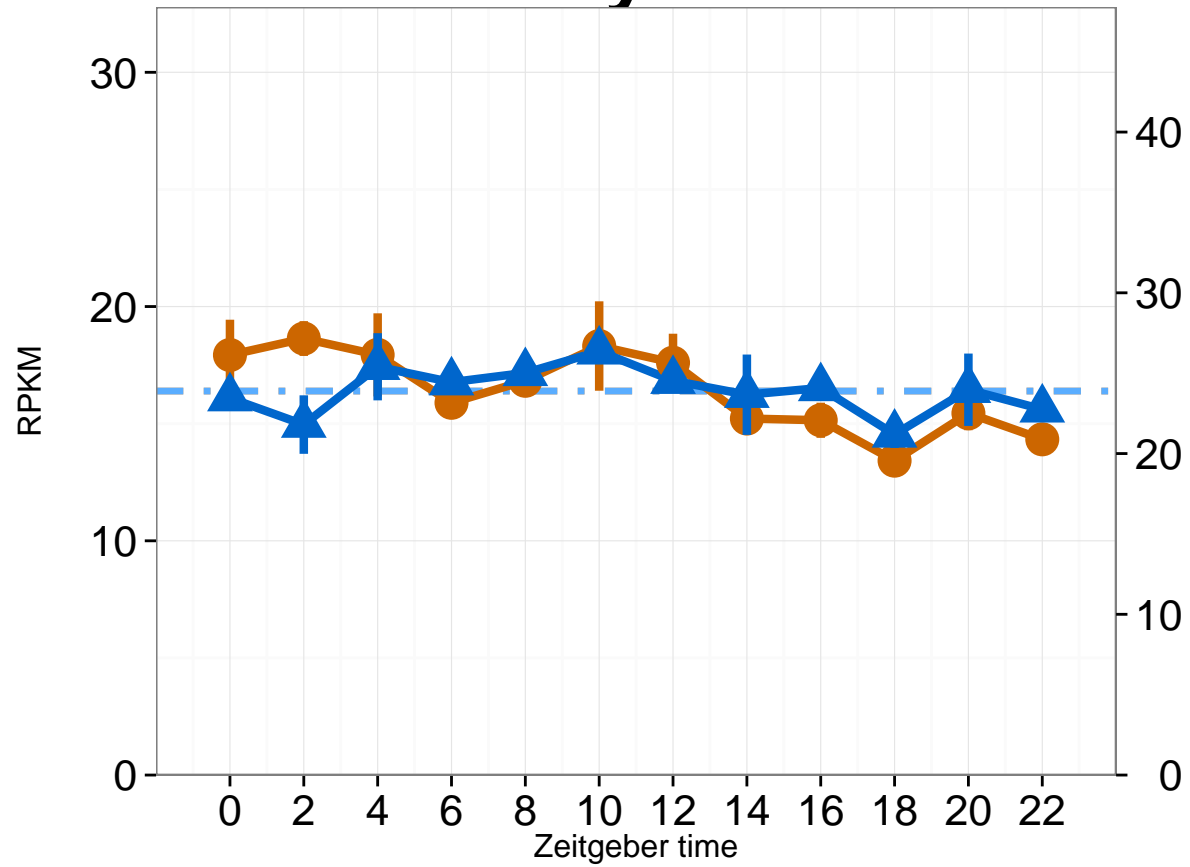

## Cryz1

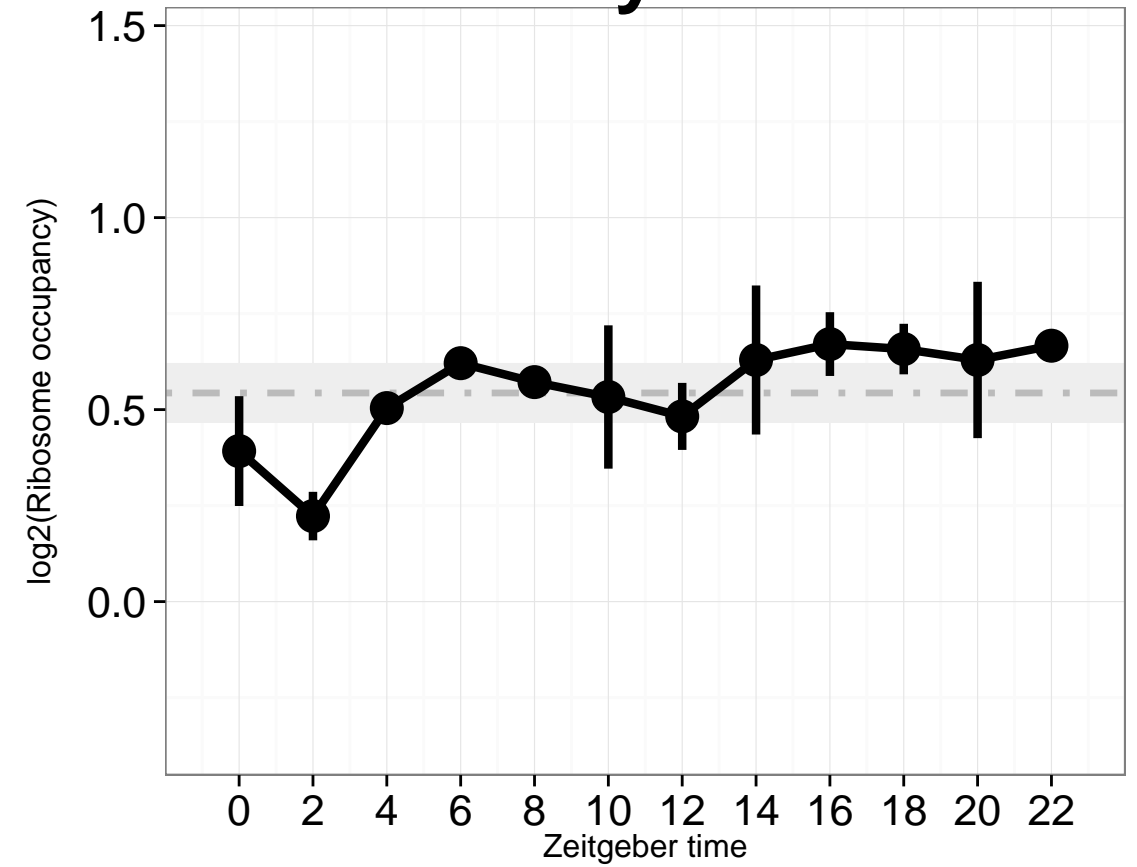

Supplement: Supplementary file 4637 [file 1]

## Nid2

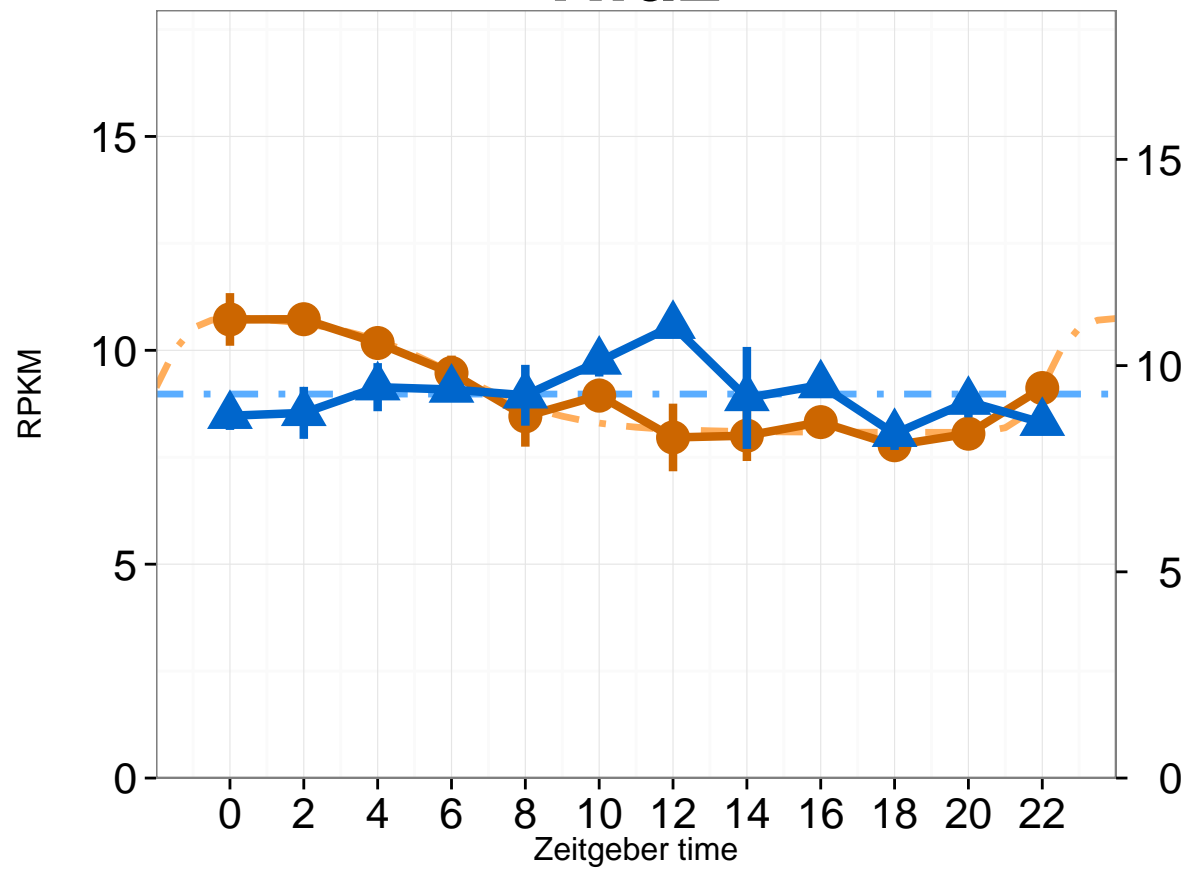

## Nid2

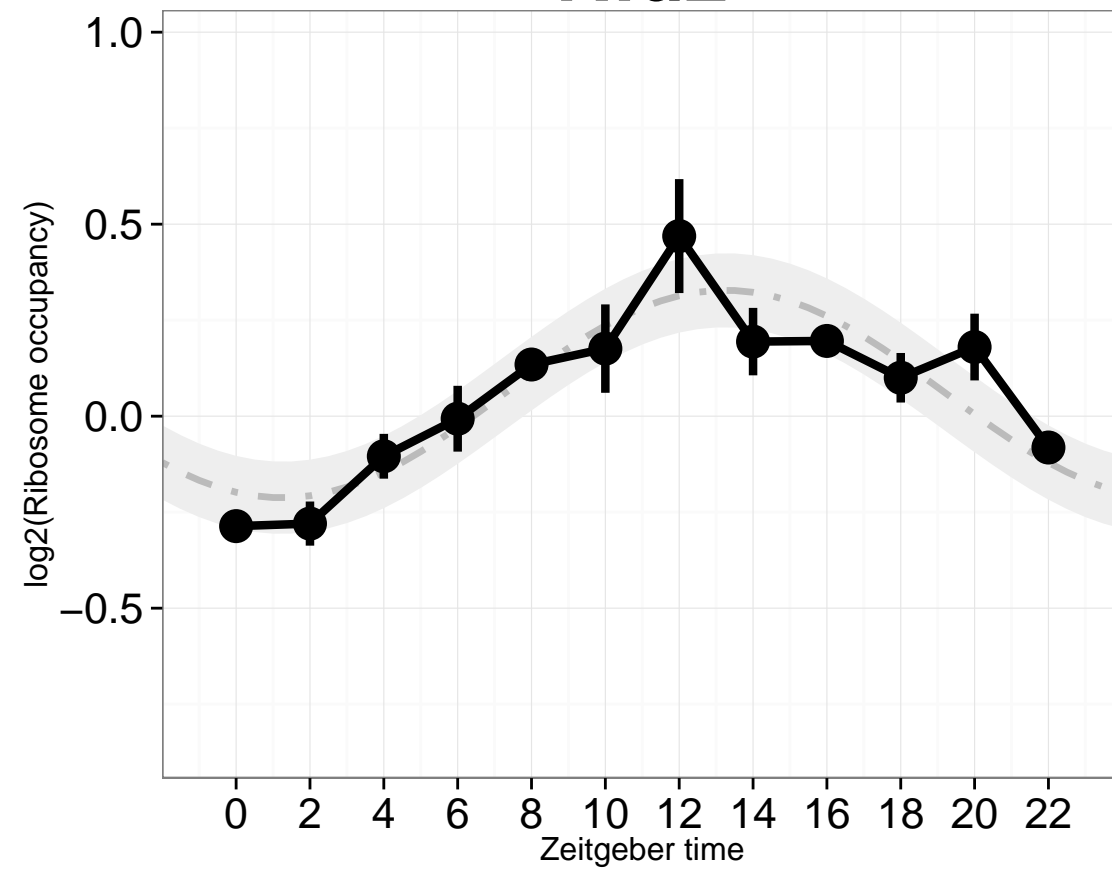

Supplement: Supplementary file 4638 [file 1]

## Adamtsl2

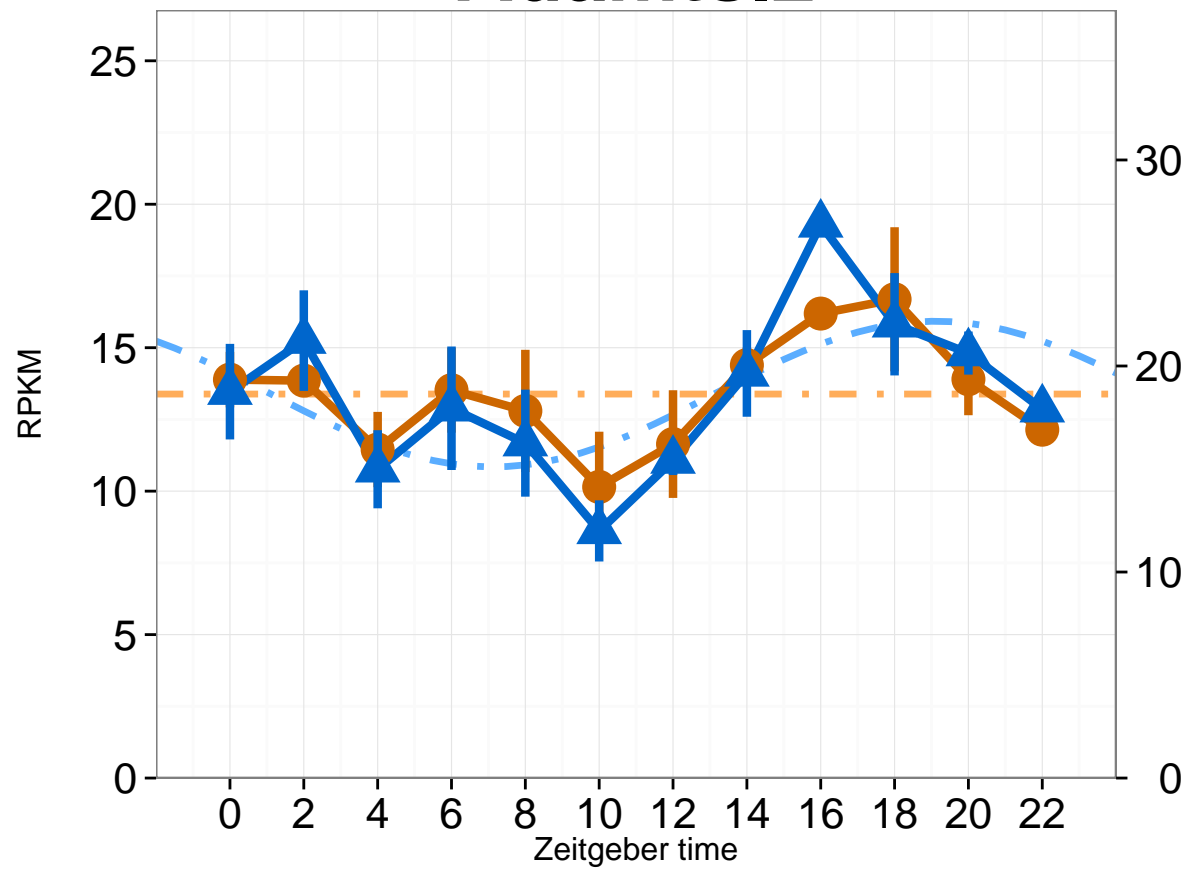

## Adamtsl2

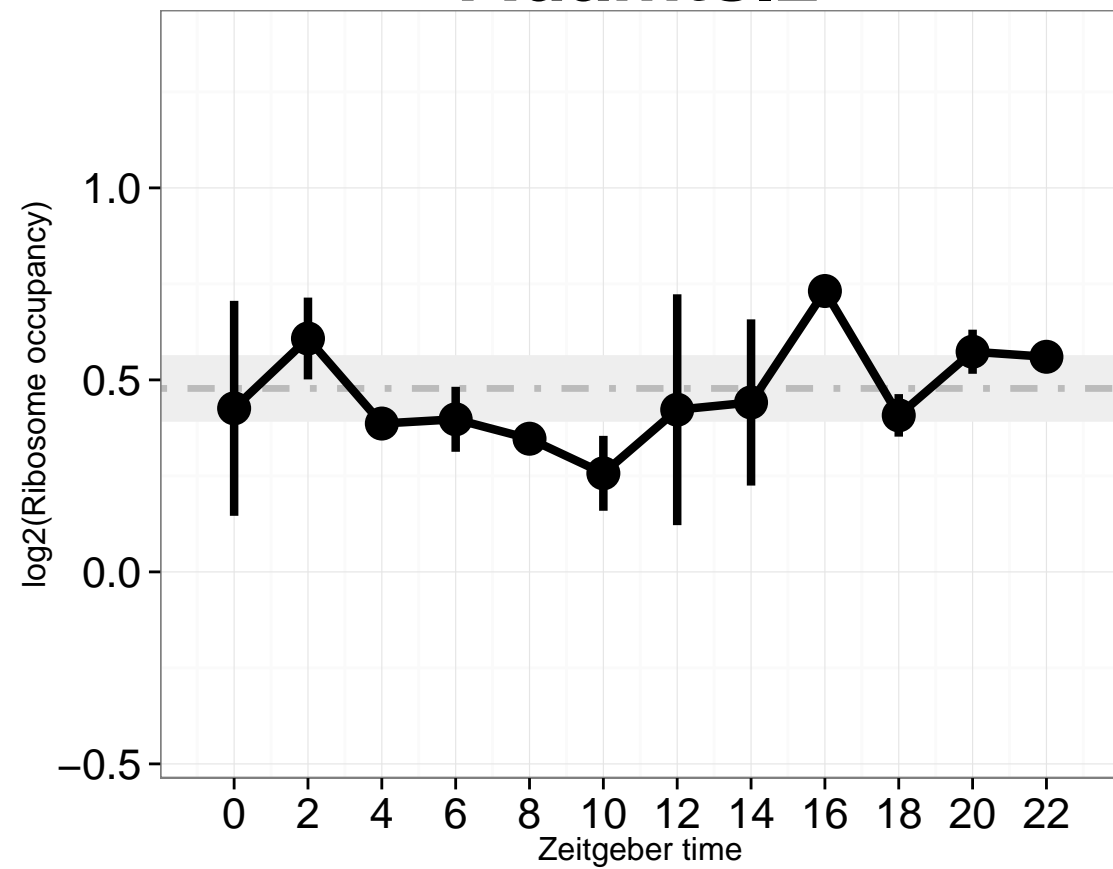

Supplement: Supplementary file 4639 [file 1]

# Hmgn3

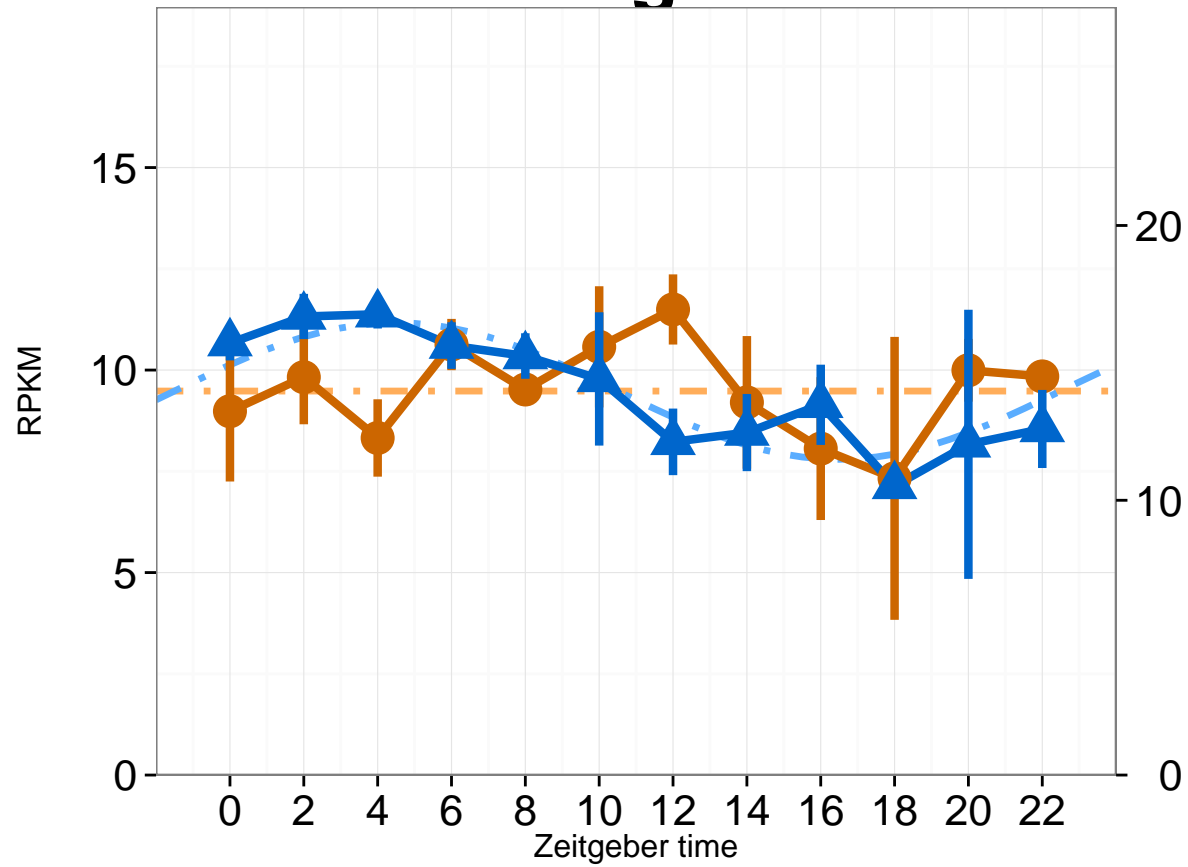

# Hmgn3

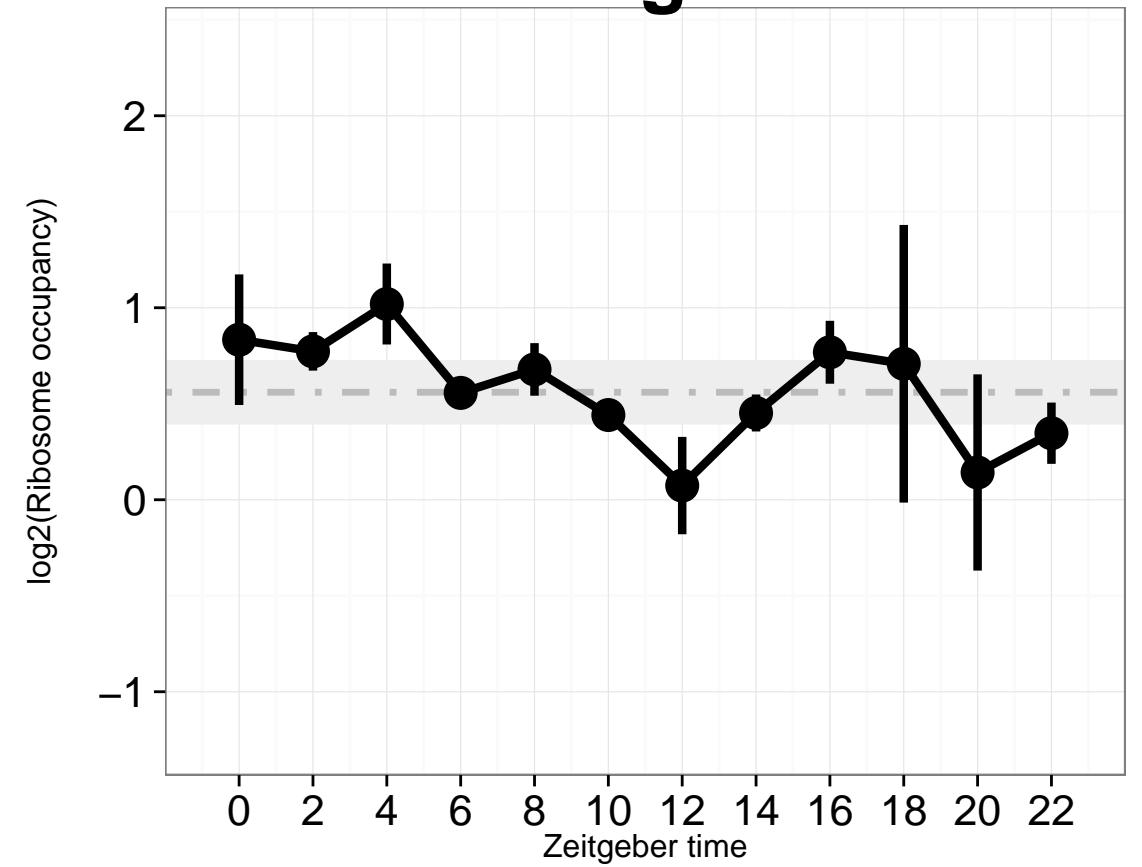

Supplement: Supplementary file 4640 [file 1]

# Mif4gd

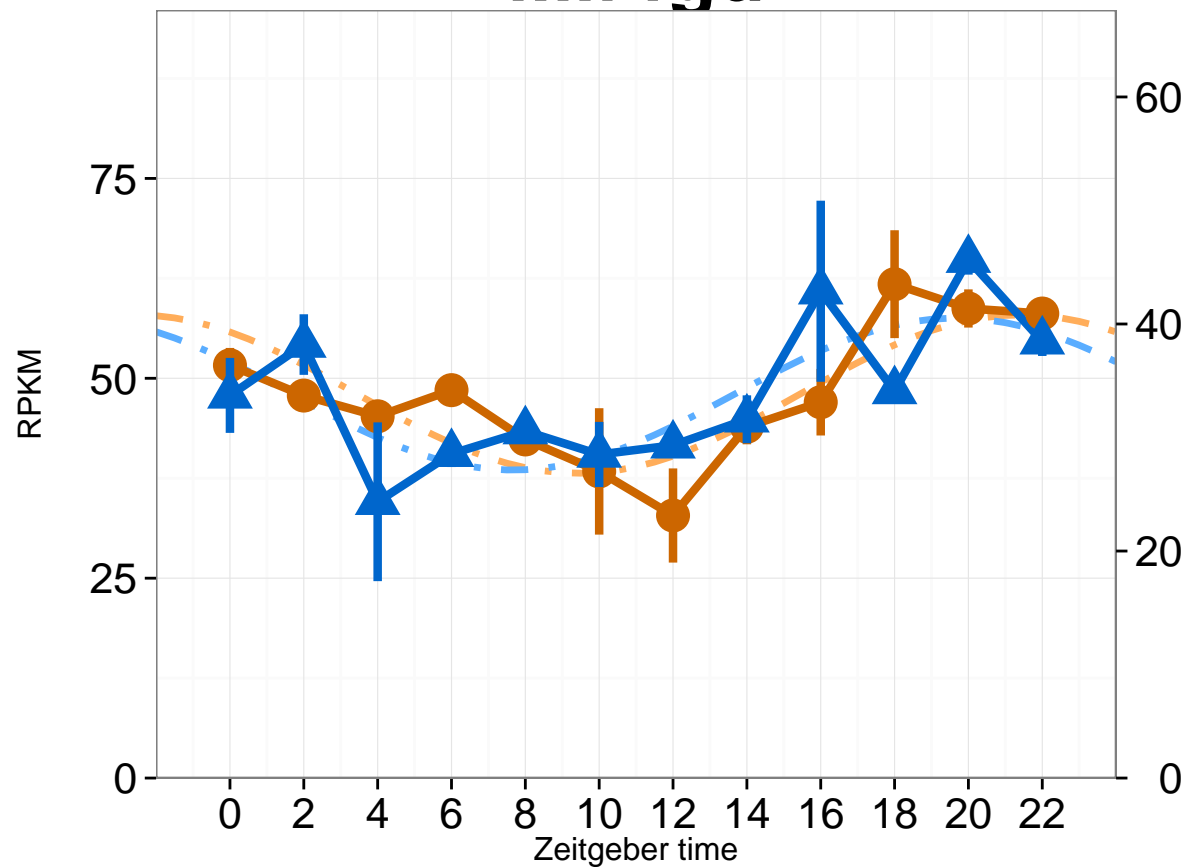

# Mif4gd

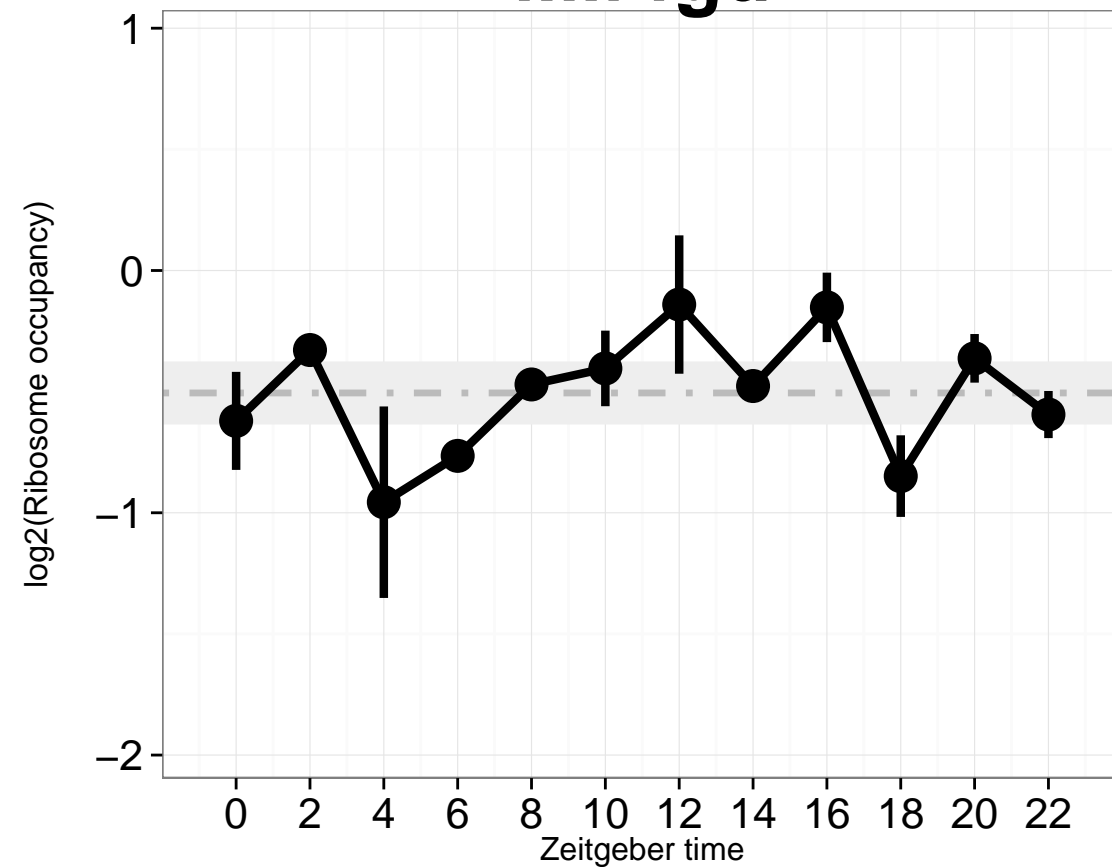

Supplement: Supplementary file 4641 [file 1]

## Ccnd2

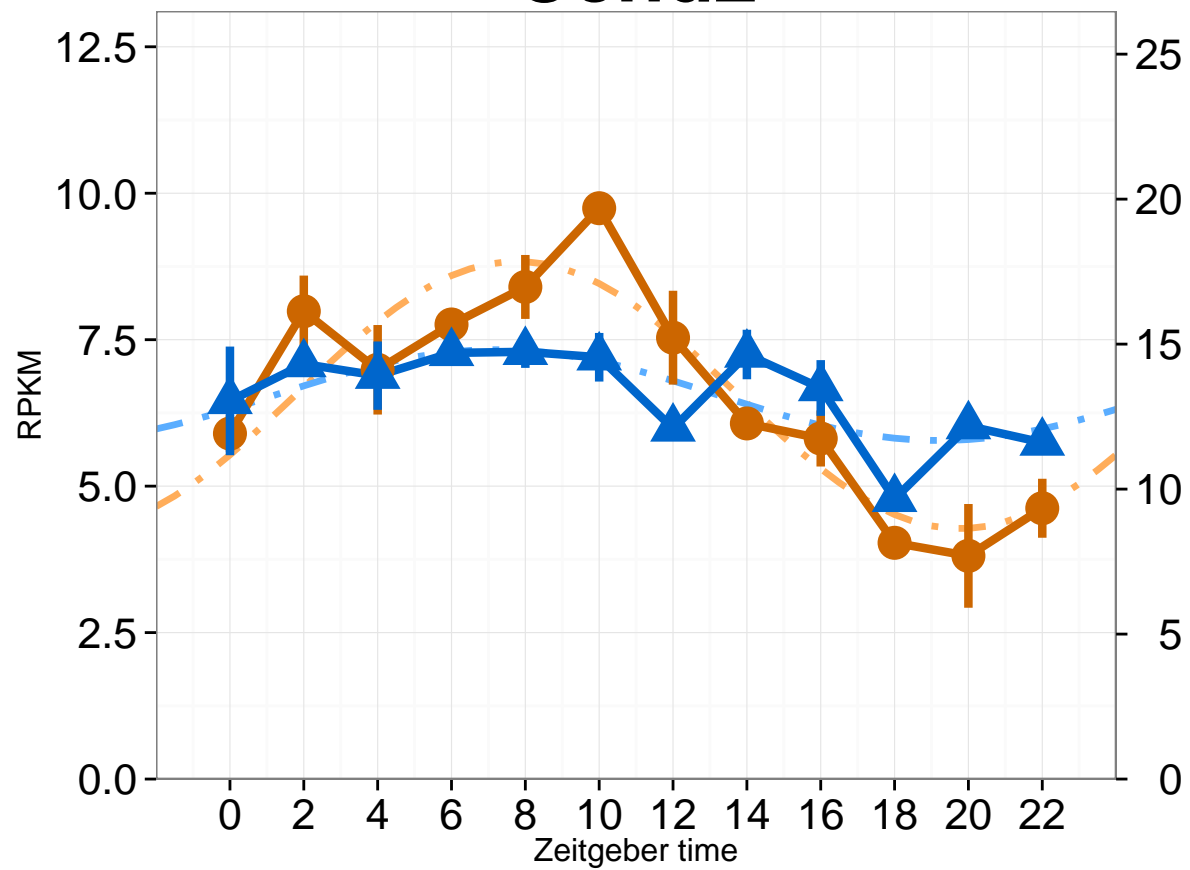

## Ccnd2

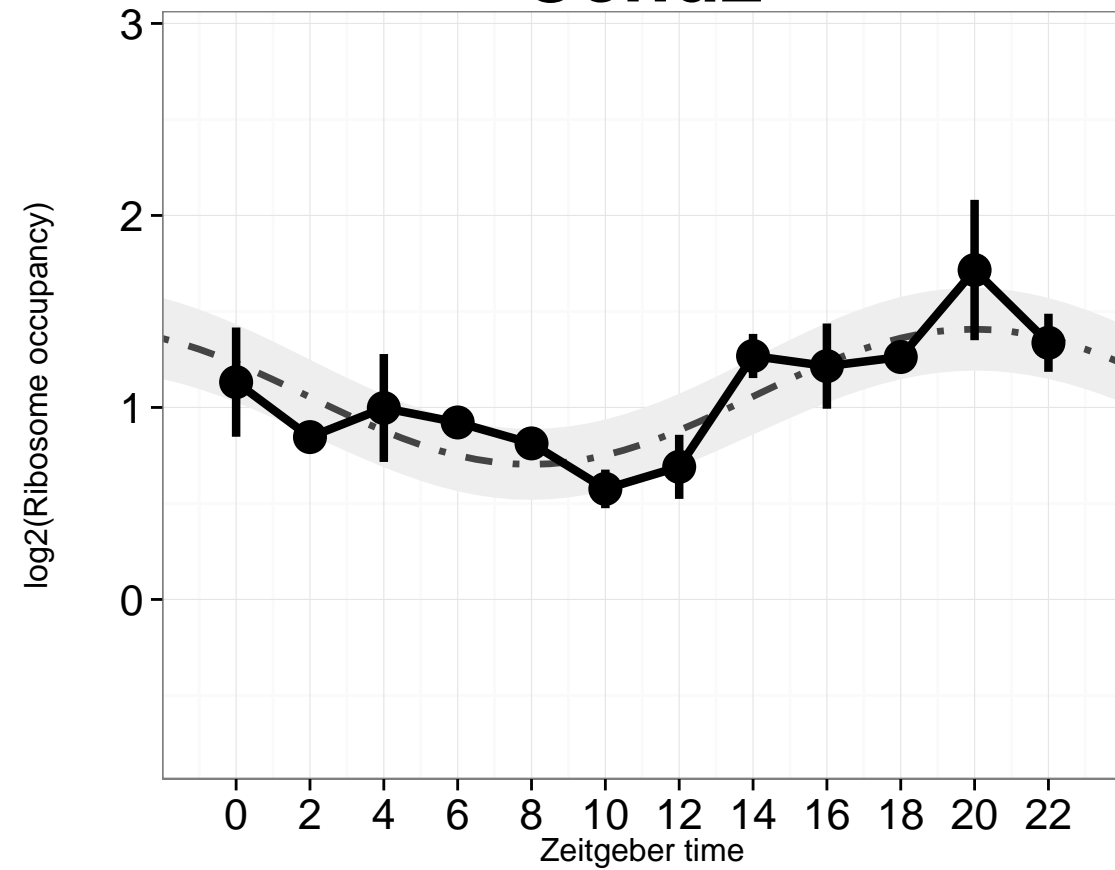

Supplement: Supplementary file 4642 [file 1]

## Hes1

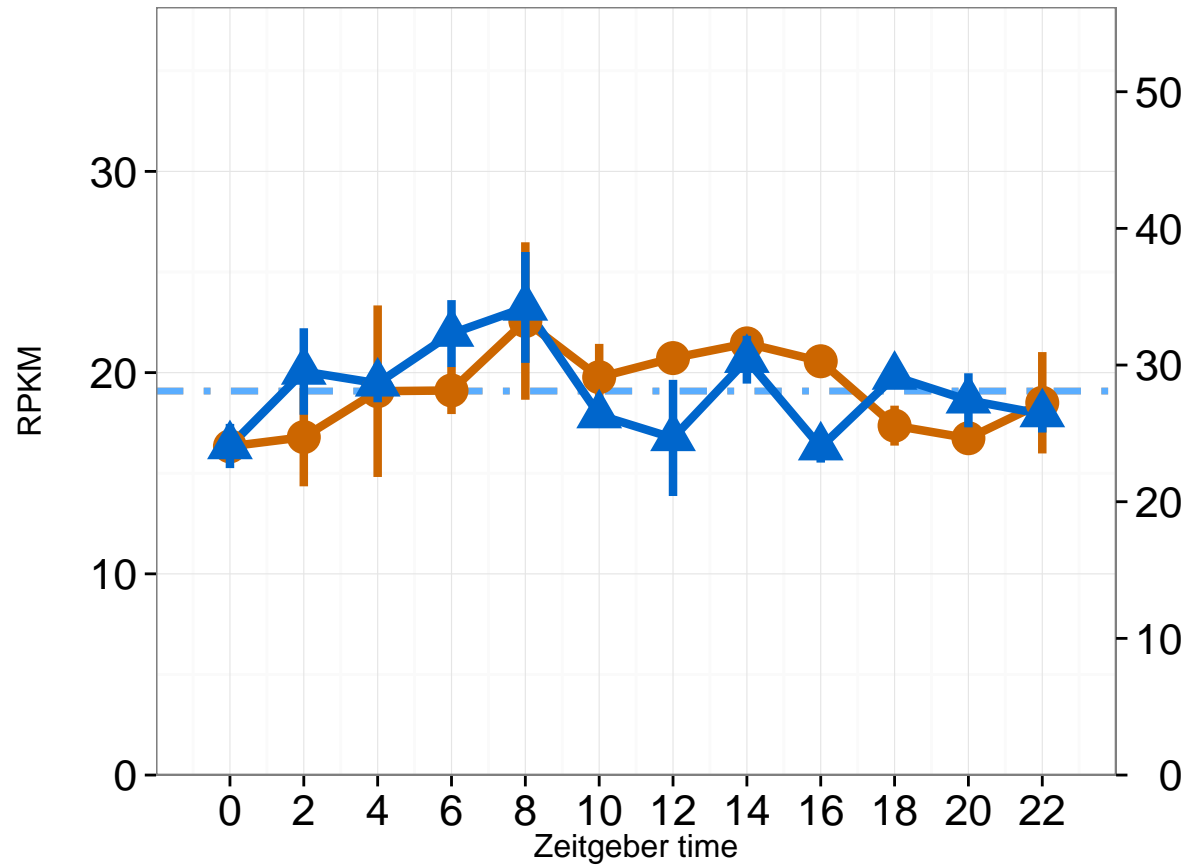

## Hes1

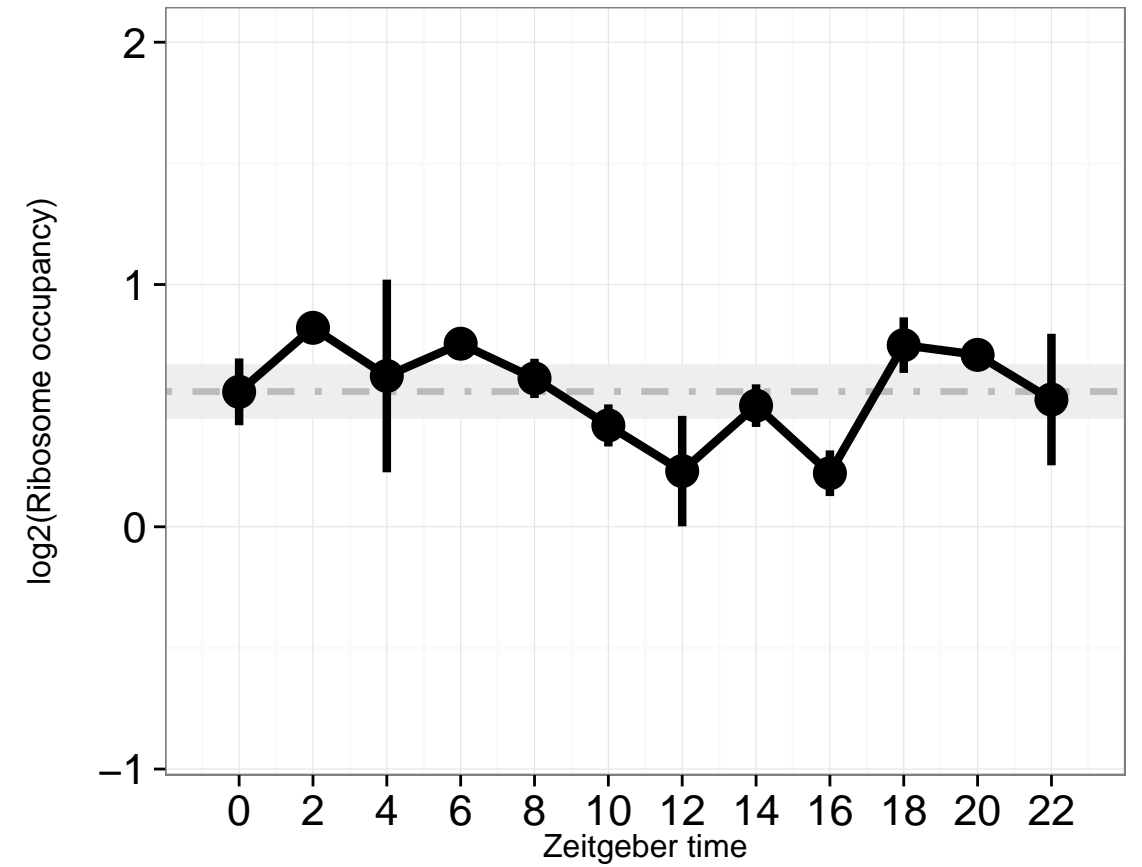

Supplement: Supplementary file 4643 [file 1]

## Gcdh

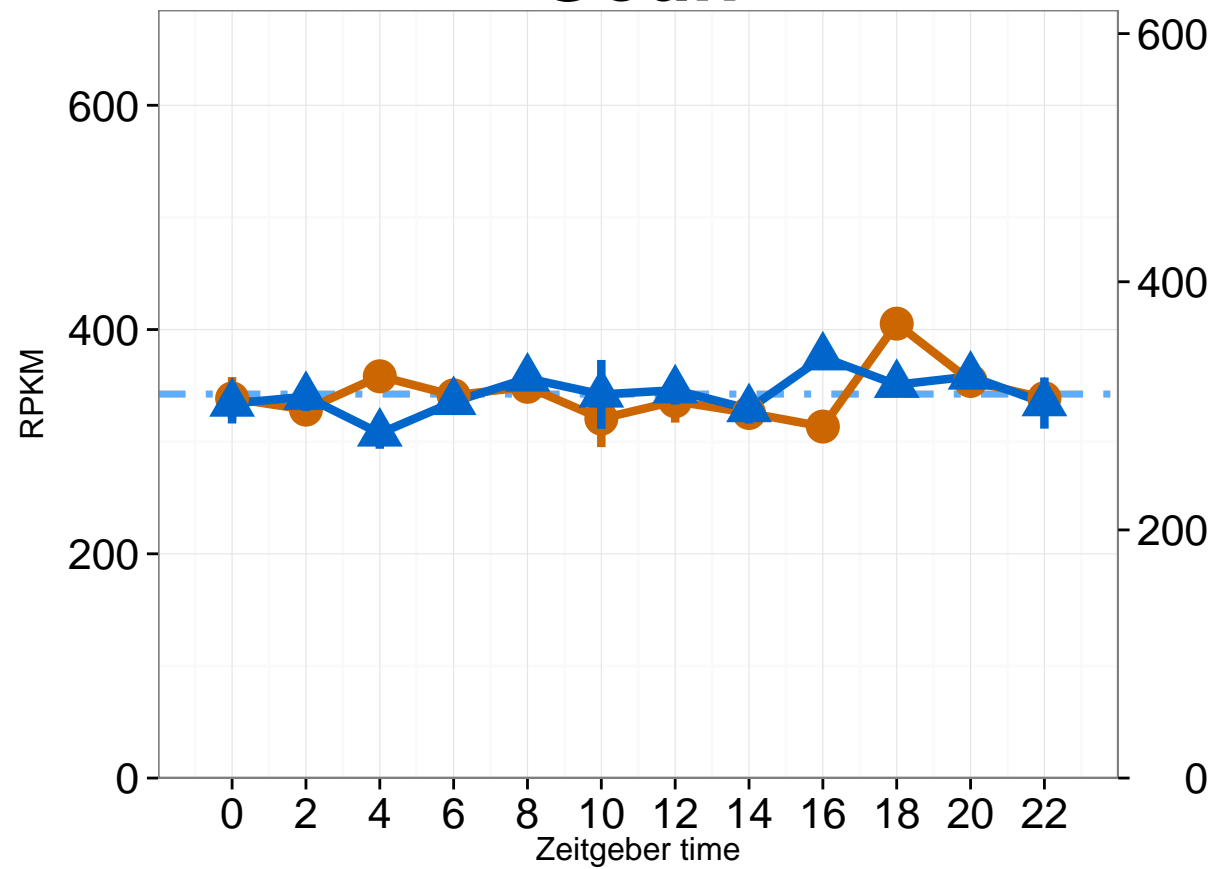

## Gcdh

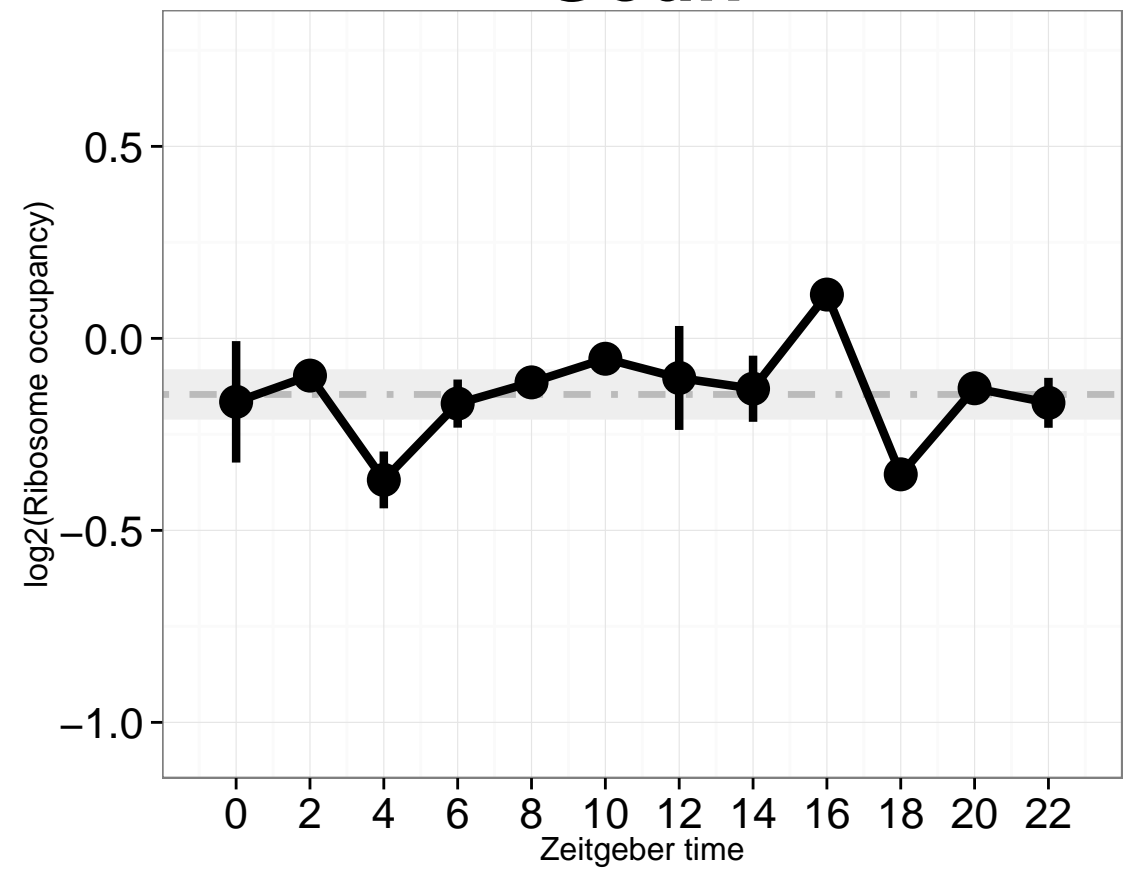

Supplement: Supplementary file 4644 [file 1]

## Btd

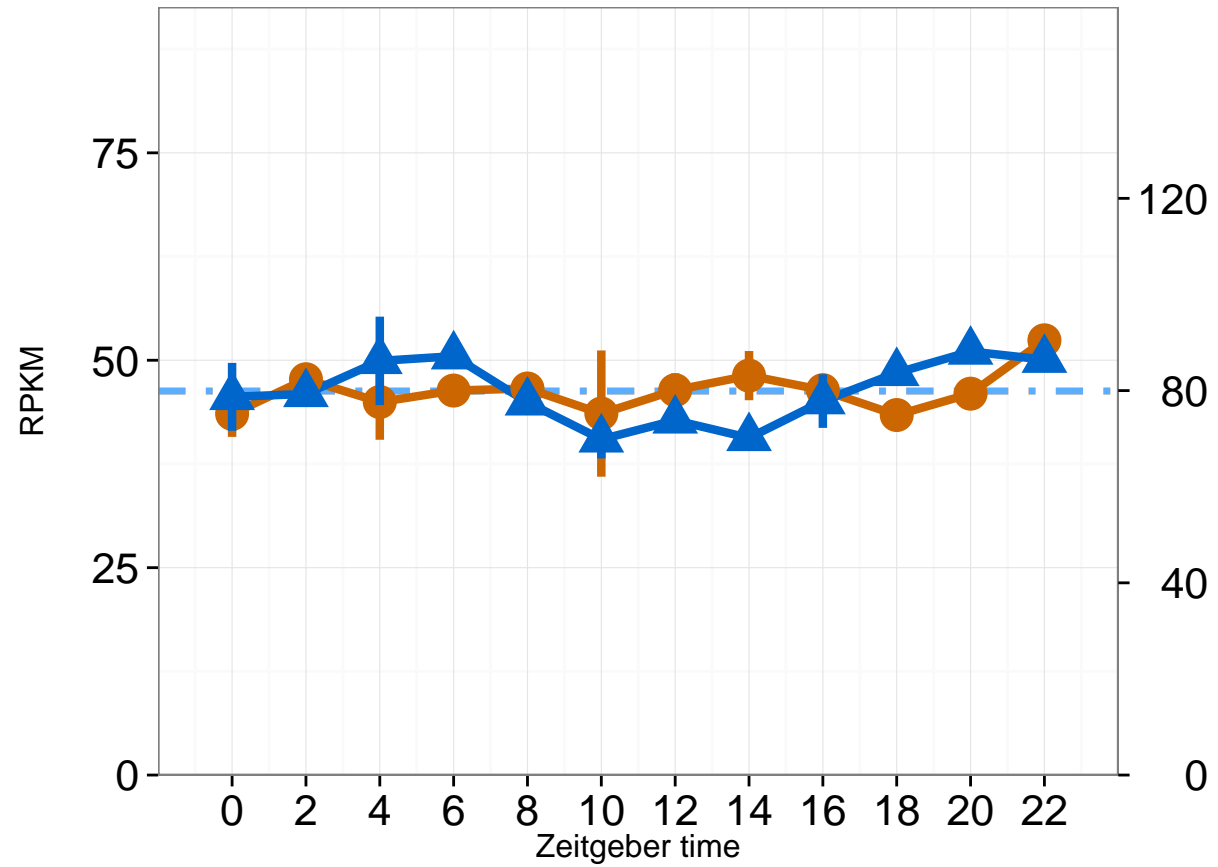

## Btd

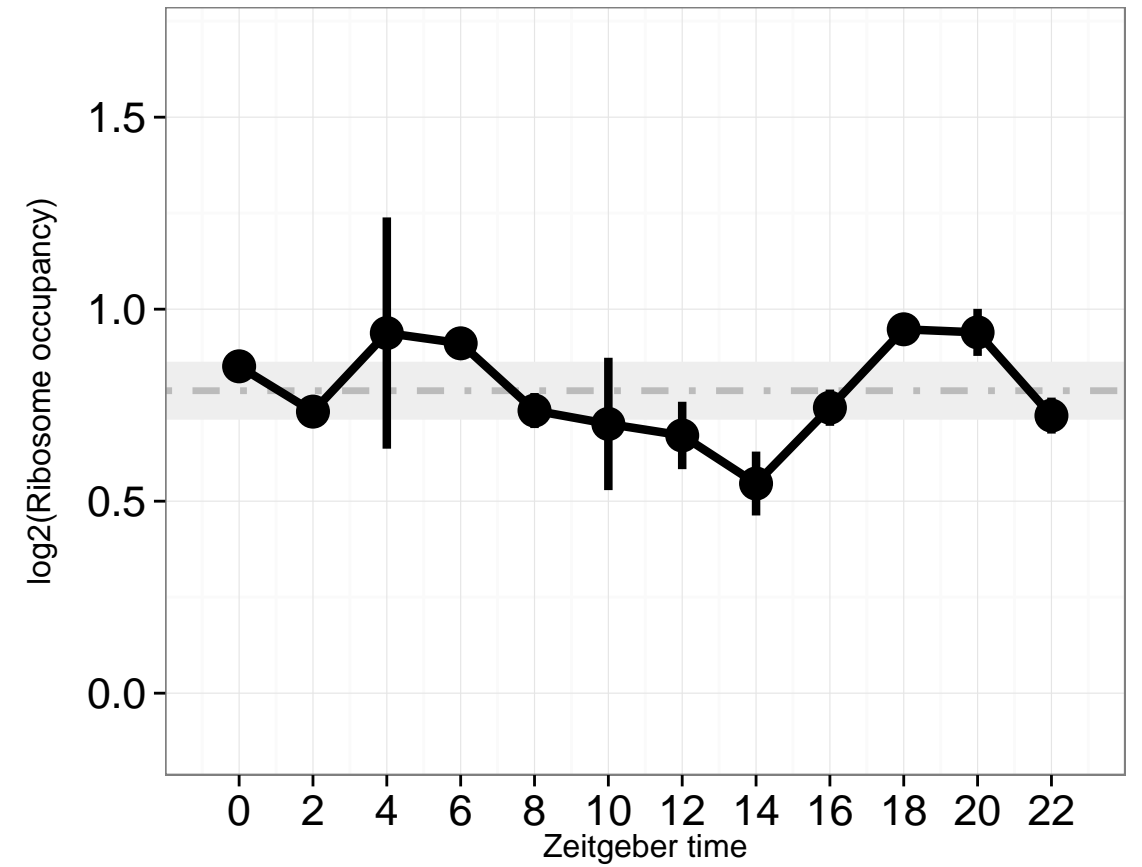

Supplement: Supplementary file 4645 [file 1]

## Ddx54

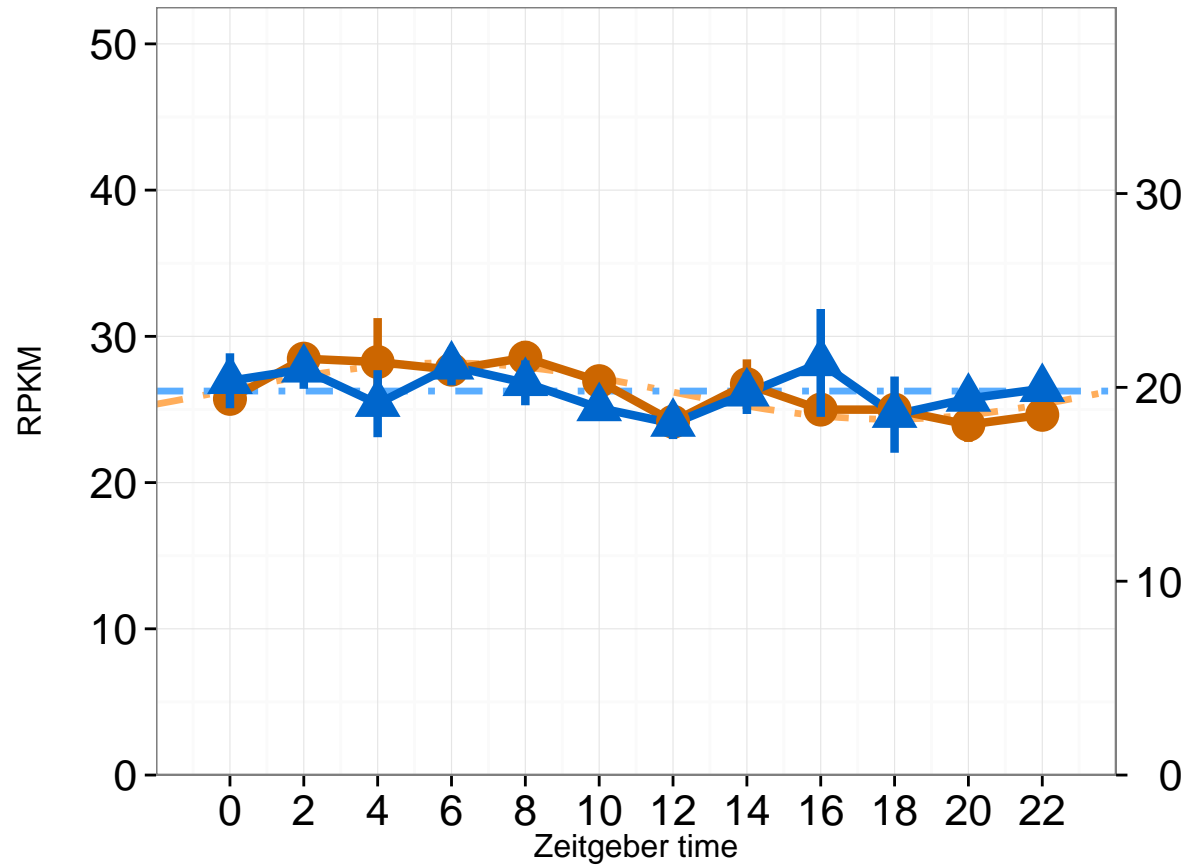

## Ddx54

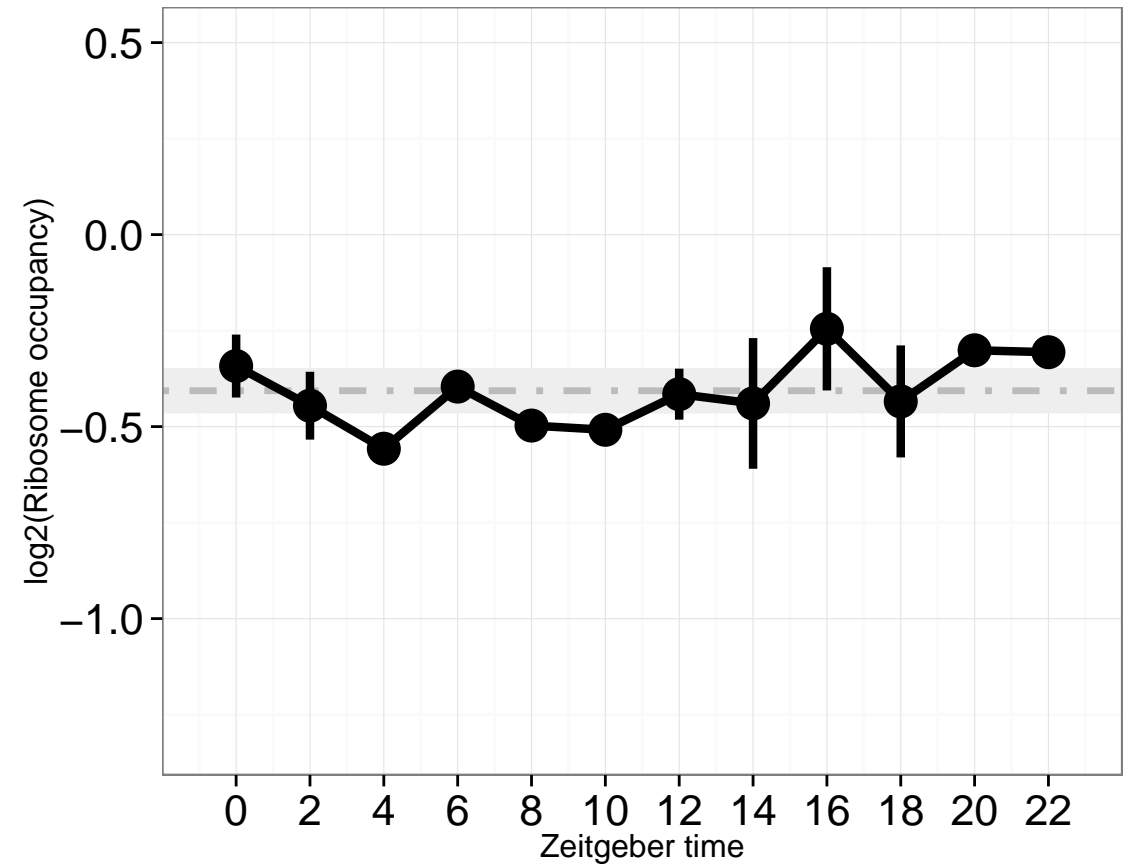

Supplement: Supplementary file 4646 [file 1]

## Adamts6

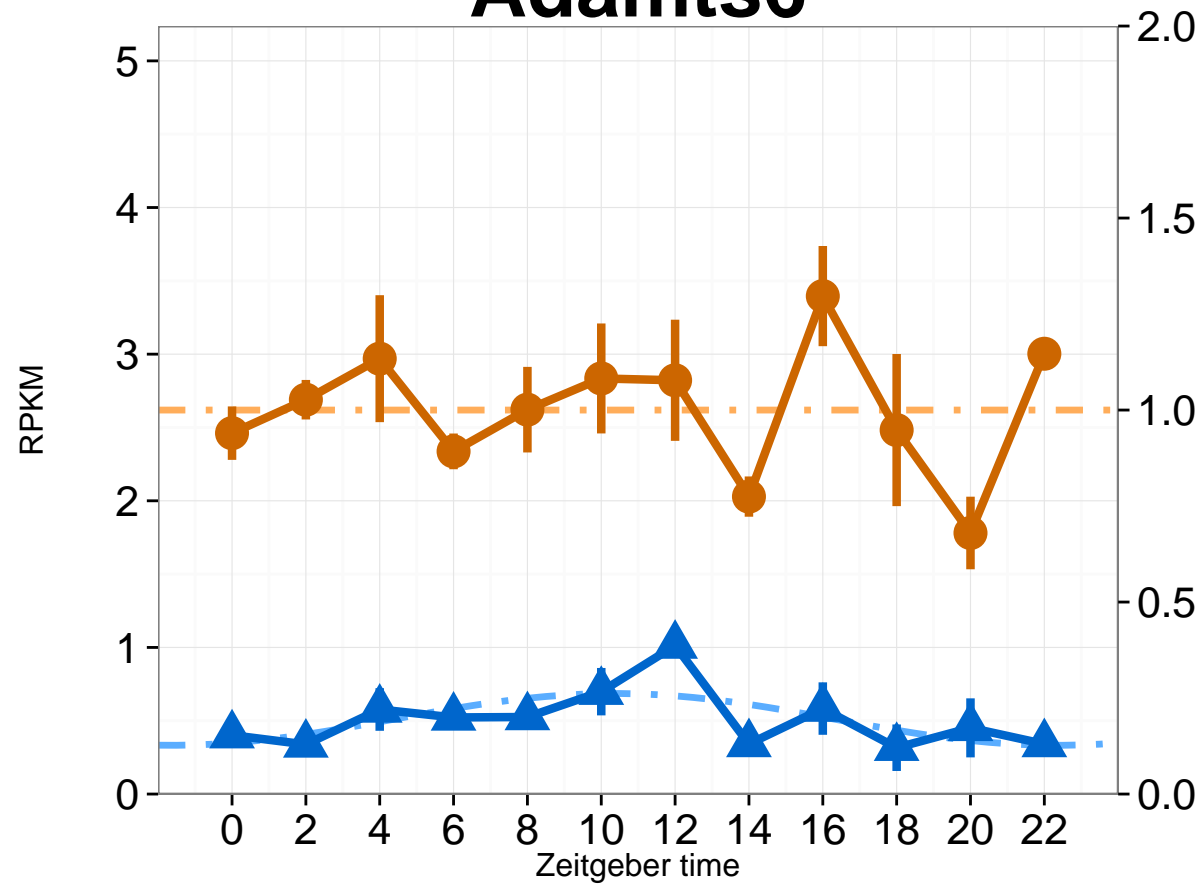

## Adamts6

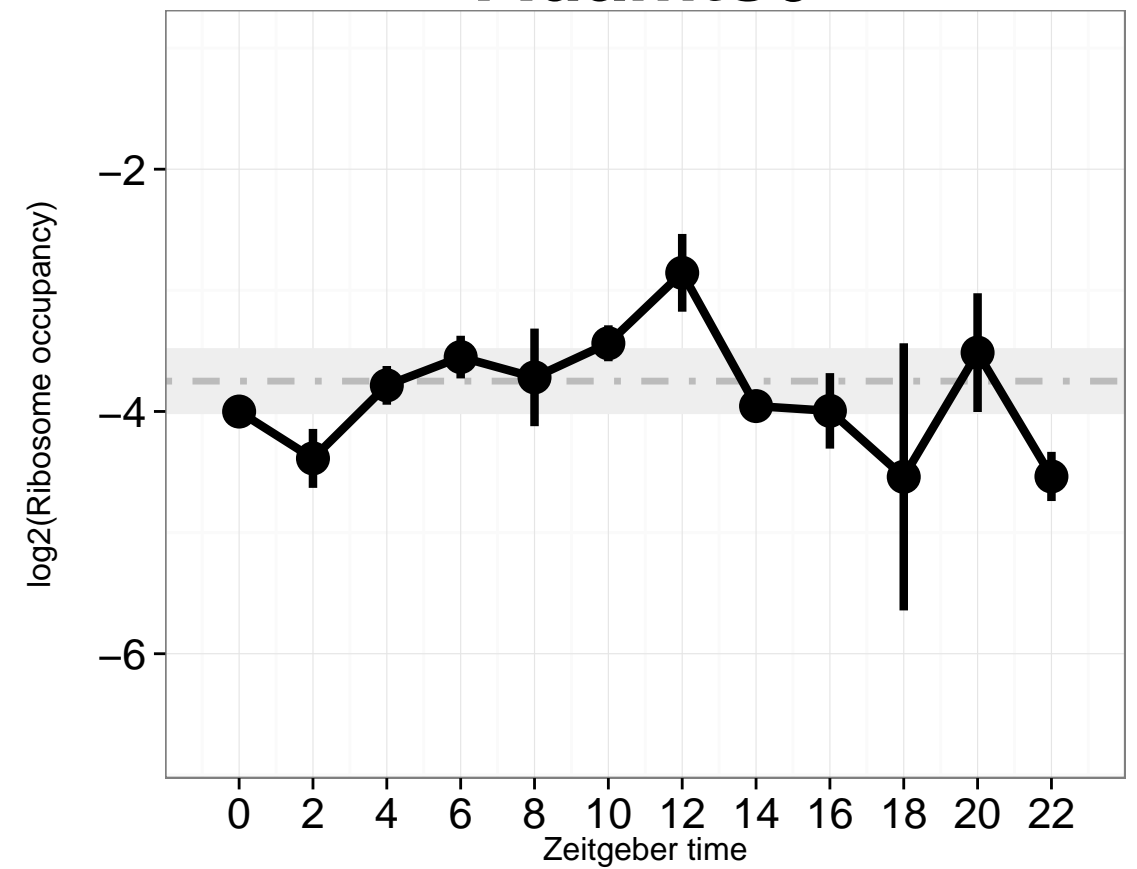

Supplement: Supplementary file 4647 [file 1]

# Zfp867

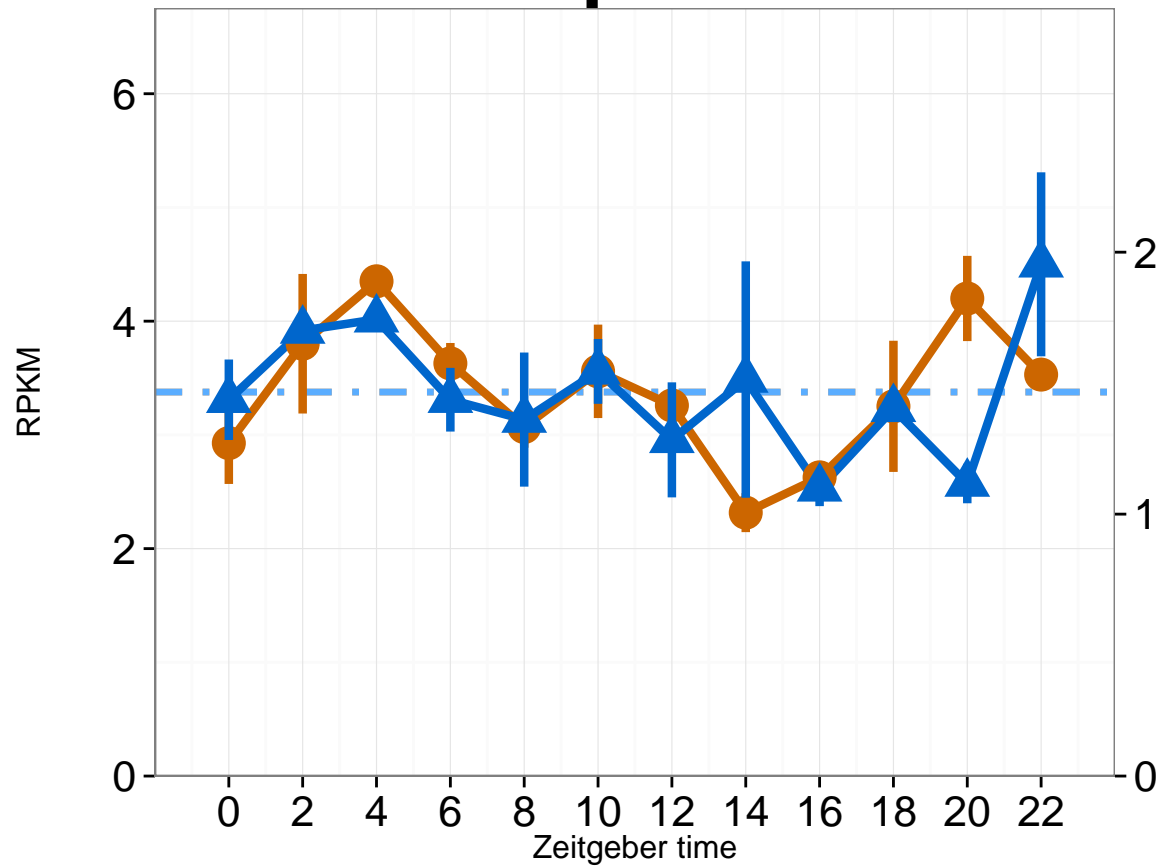

# Zfp867

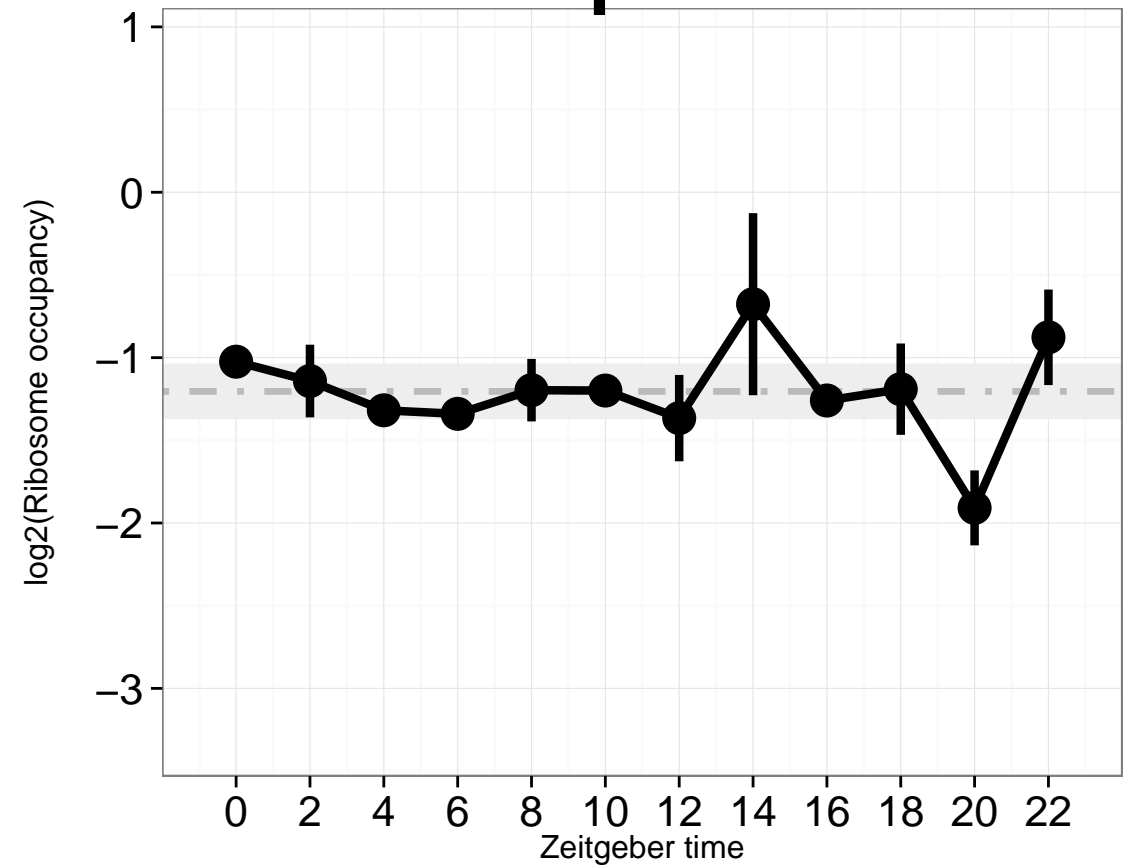

Supplement: Supplementary file 4648 [file 1]

# Gipc1

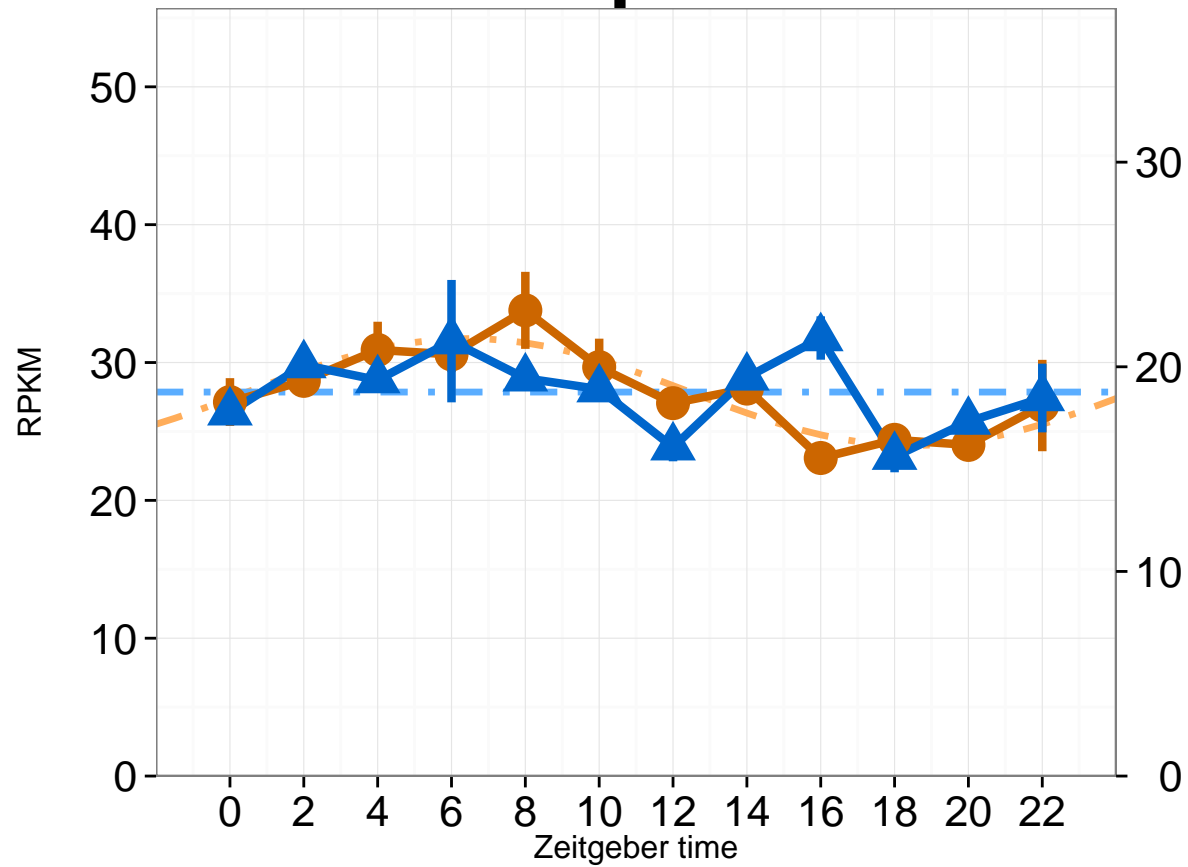

# Gipc1

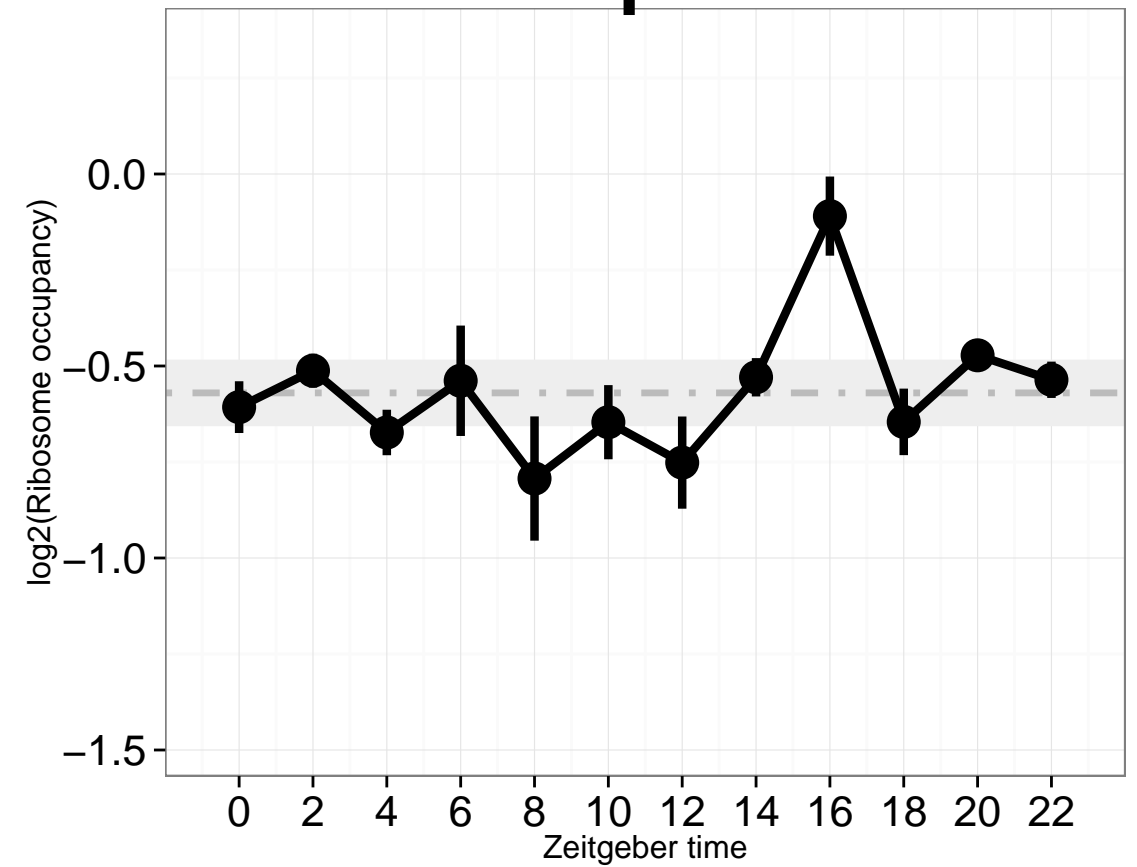

Supplement: Supplementary file 4649 [file 1]

# Chsy1

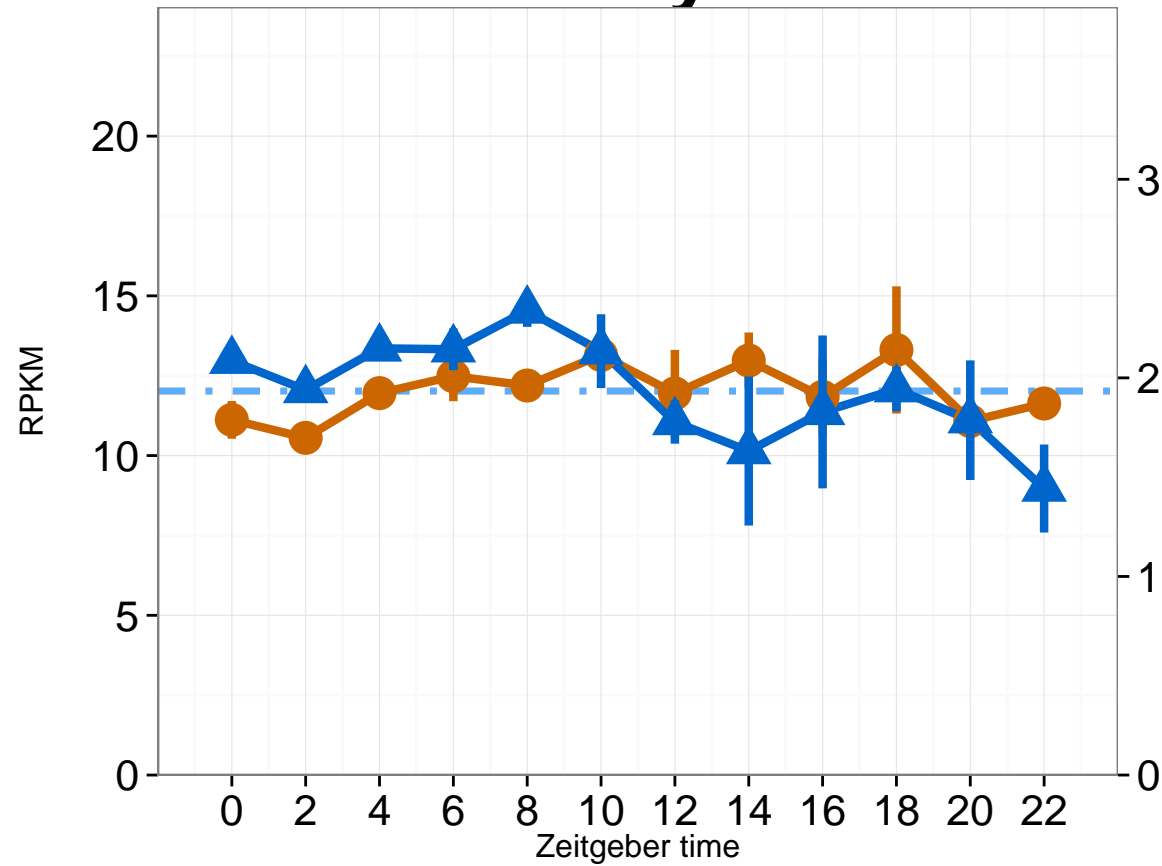

# Chsy1

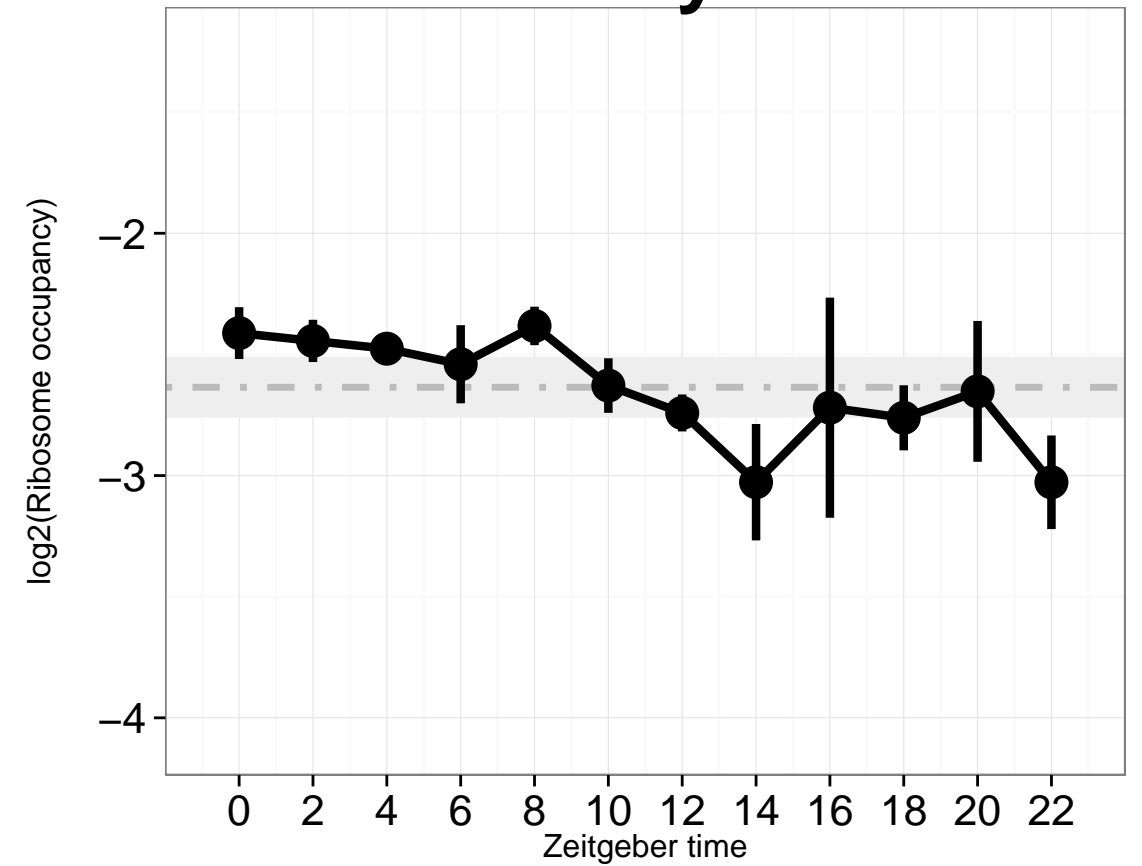

Supplement: Supplementary file 4650 [file 1]

# 1700028J19Rik

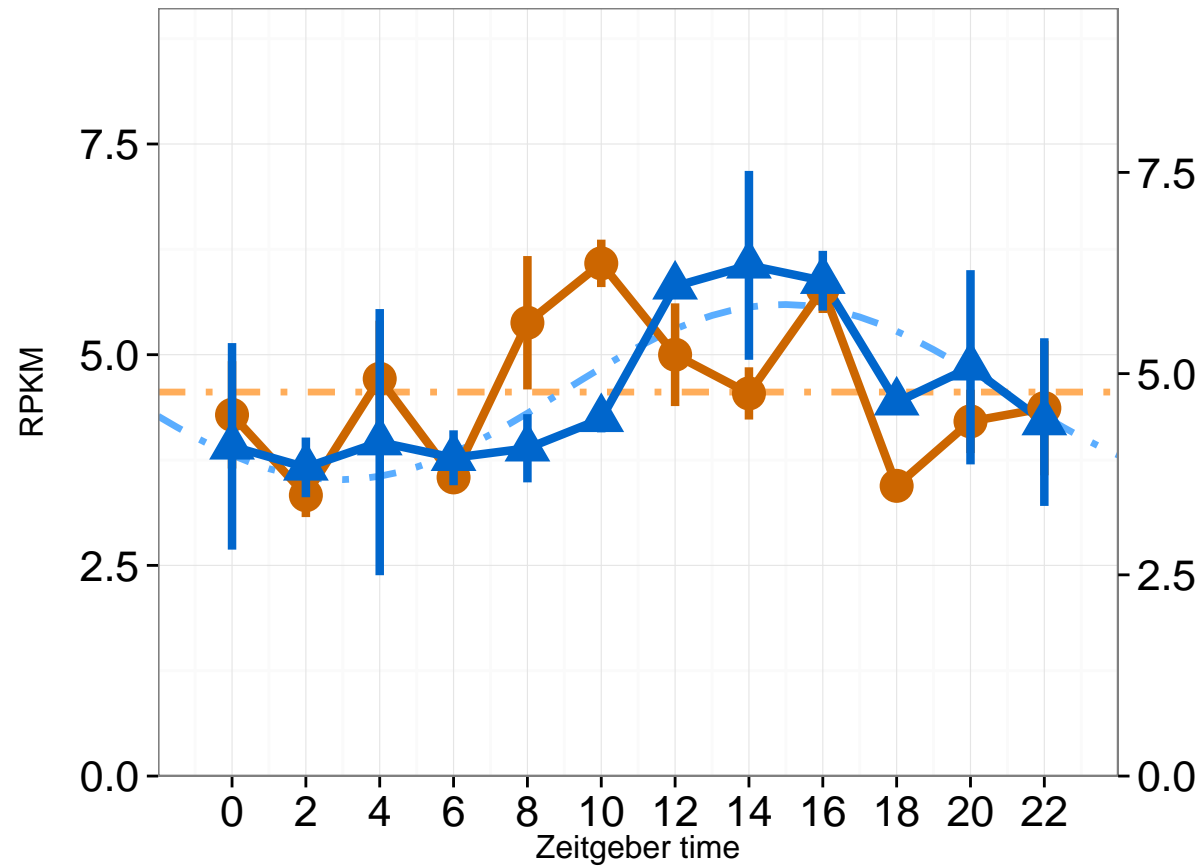

# 1700028J19Rik

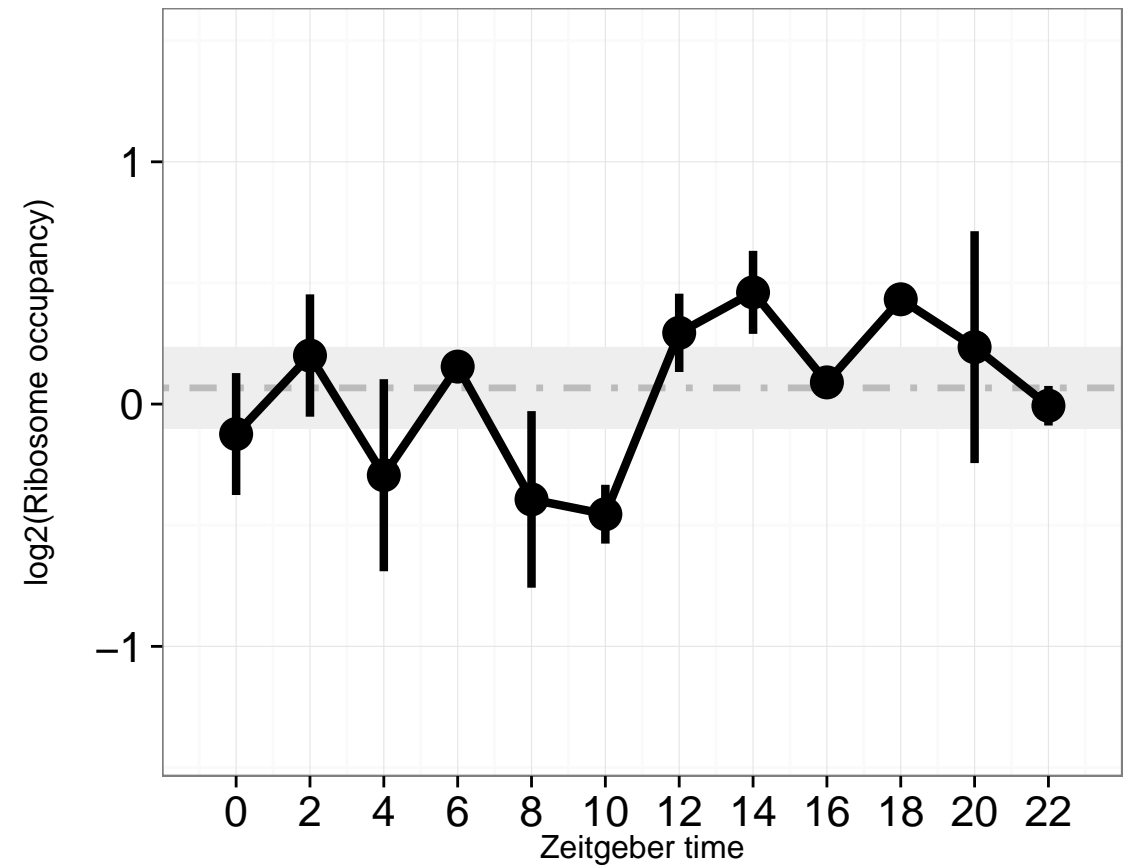

Supplement: Supplementary file 4651 [file 1]

# Pea15a

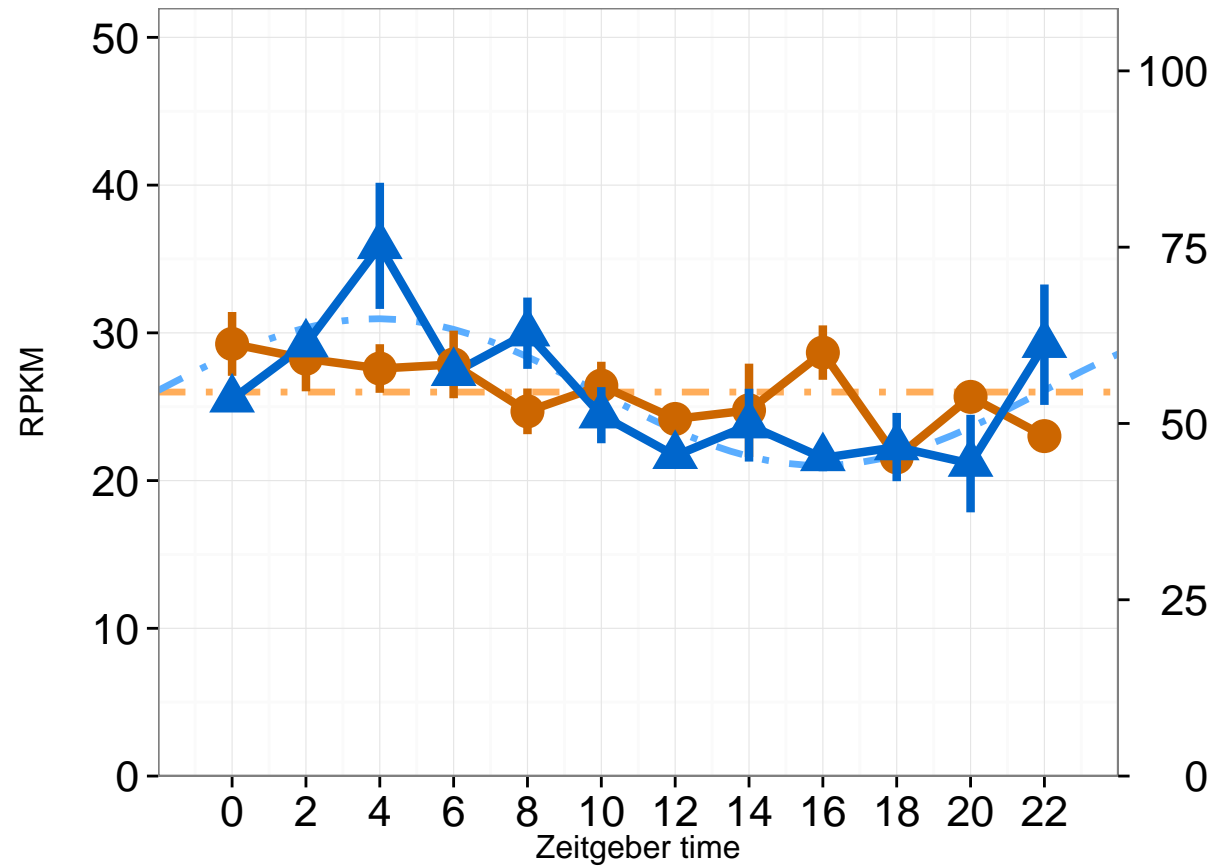

# Pea15a

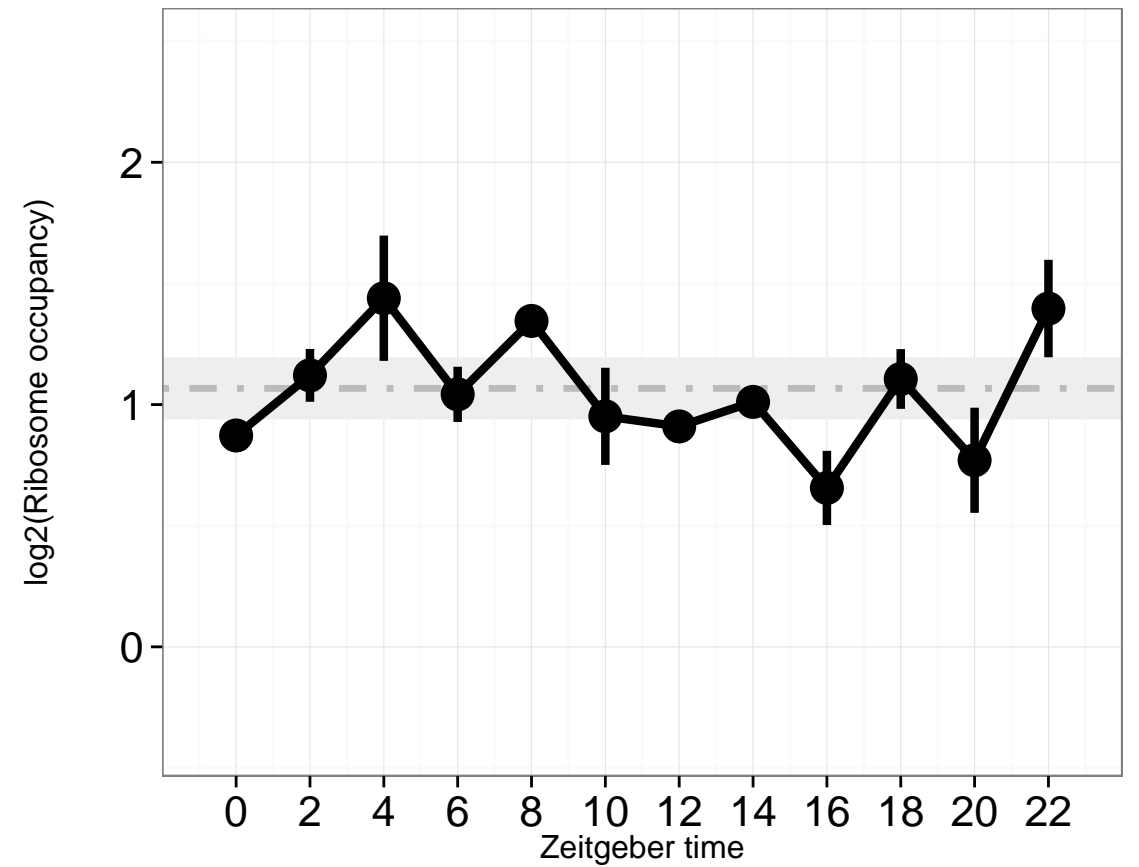

Supplement: Supplementary file 4652 [file 1]

# Smndc1

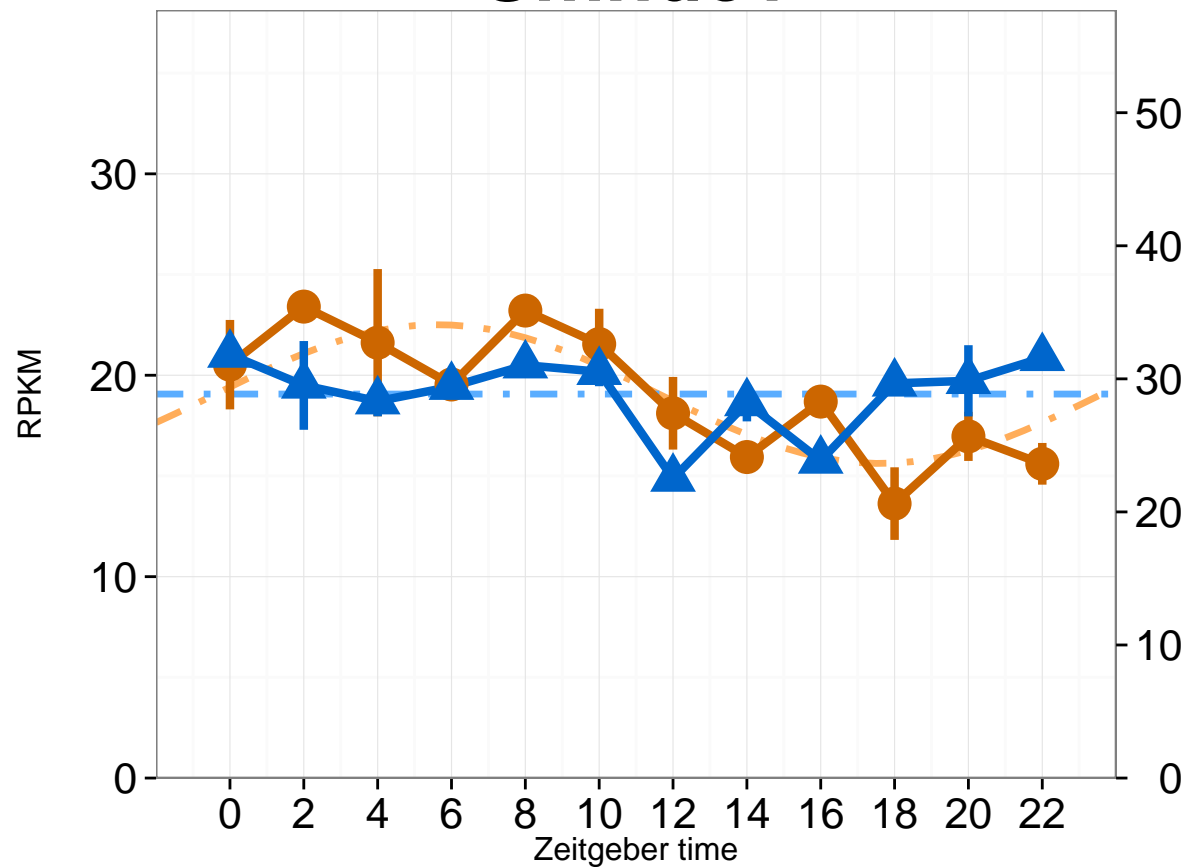

# Smndc1

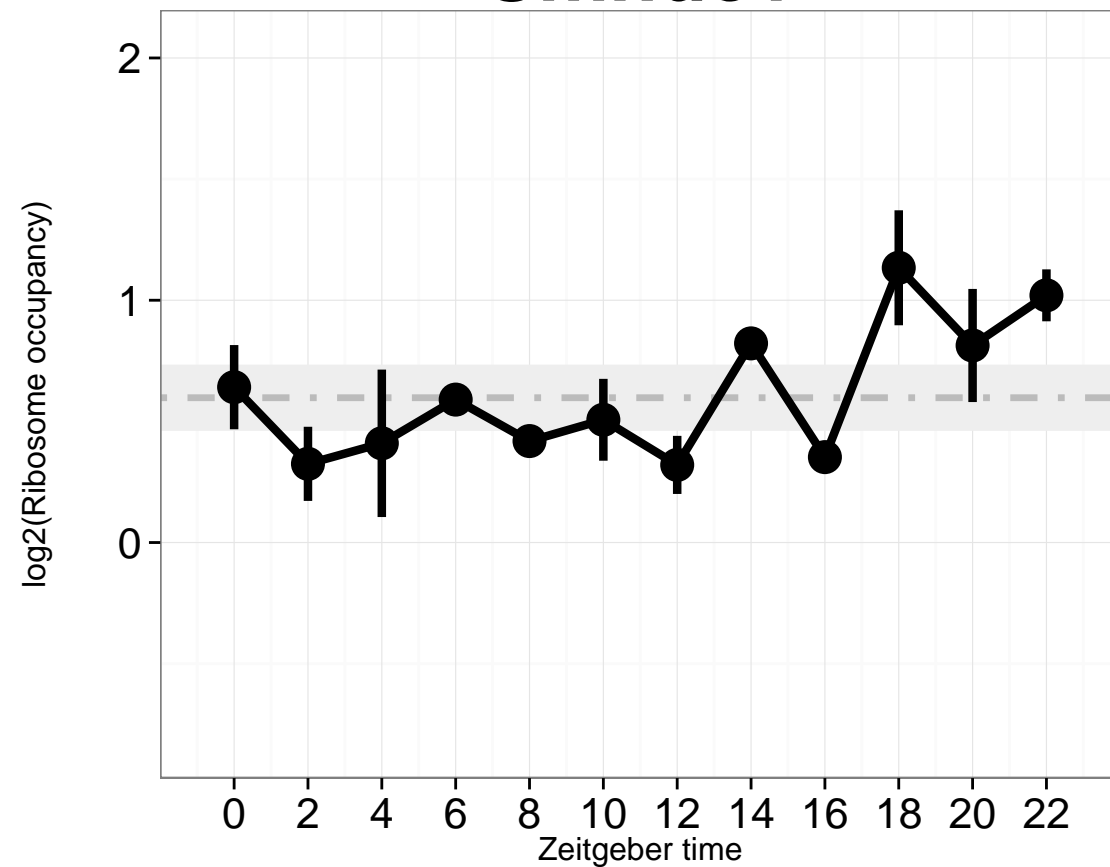

Supplement: Supplementary file 4653 [file 1]

## Msl3l2

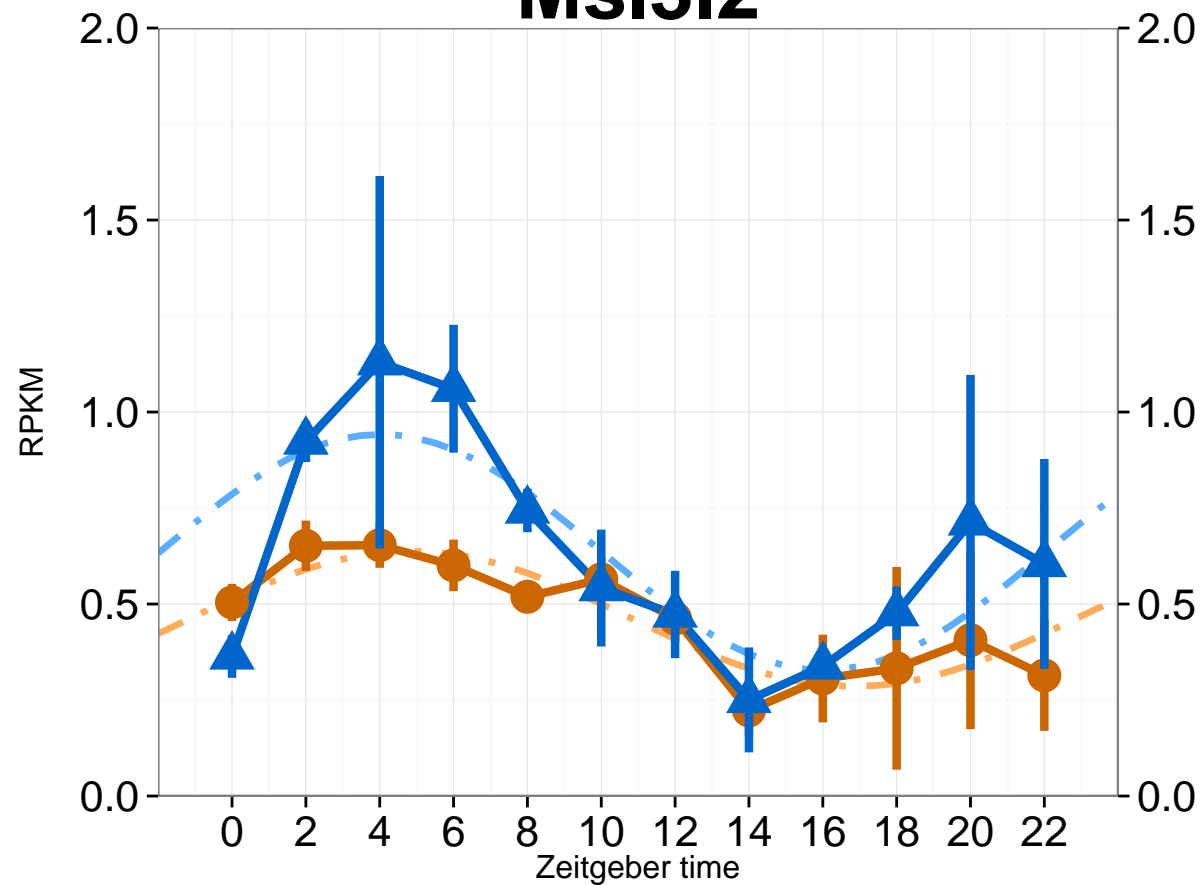

## Msl3l2

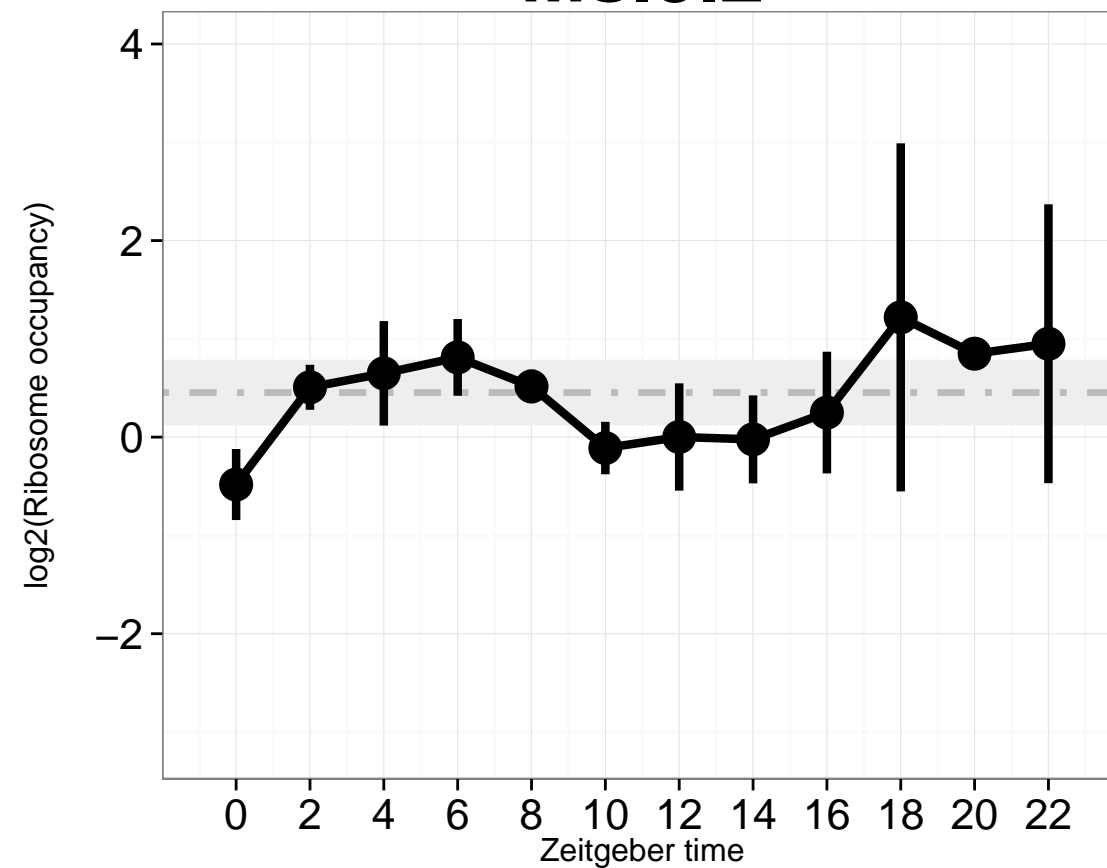

Supplement: Supplementary file 4654 [file 1]

Kazald1

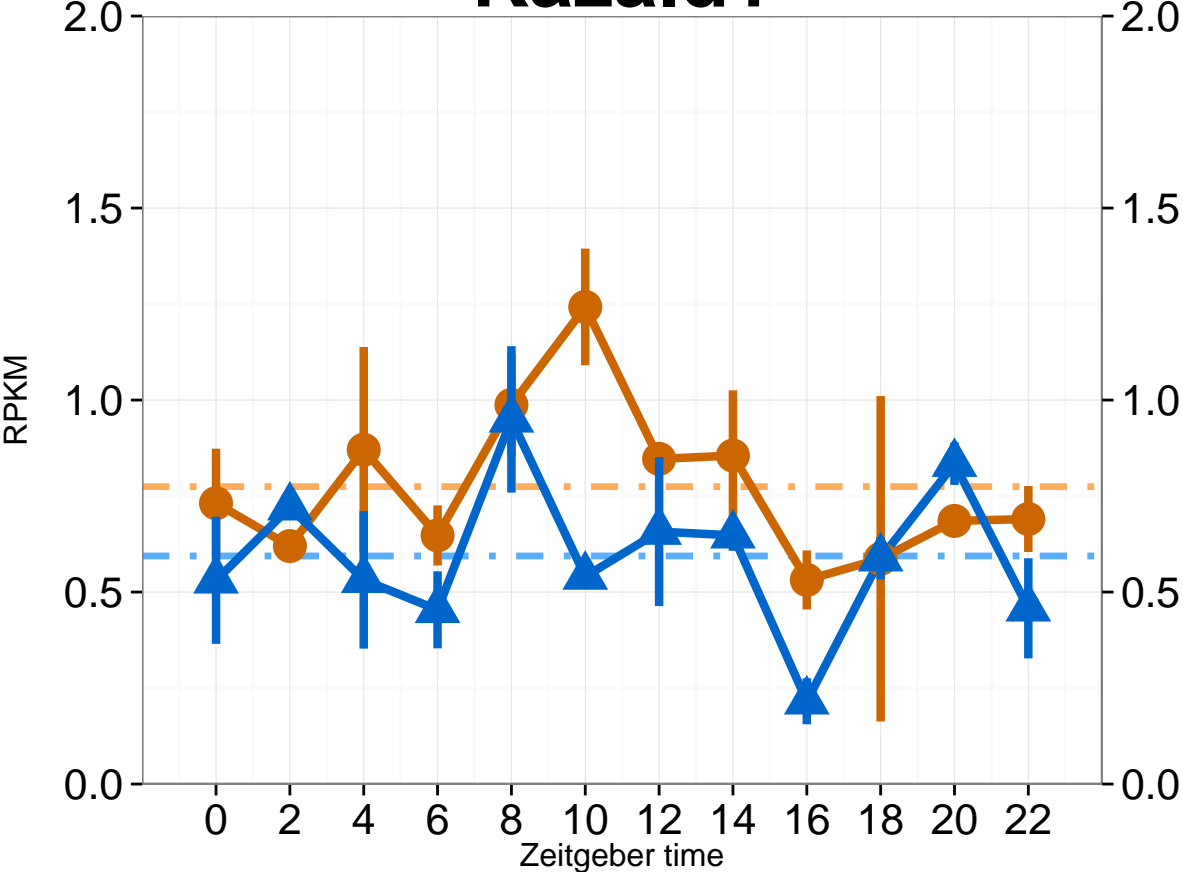

Kazald1

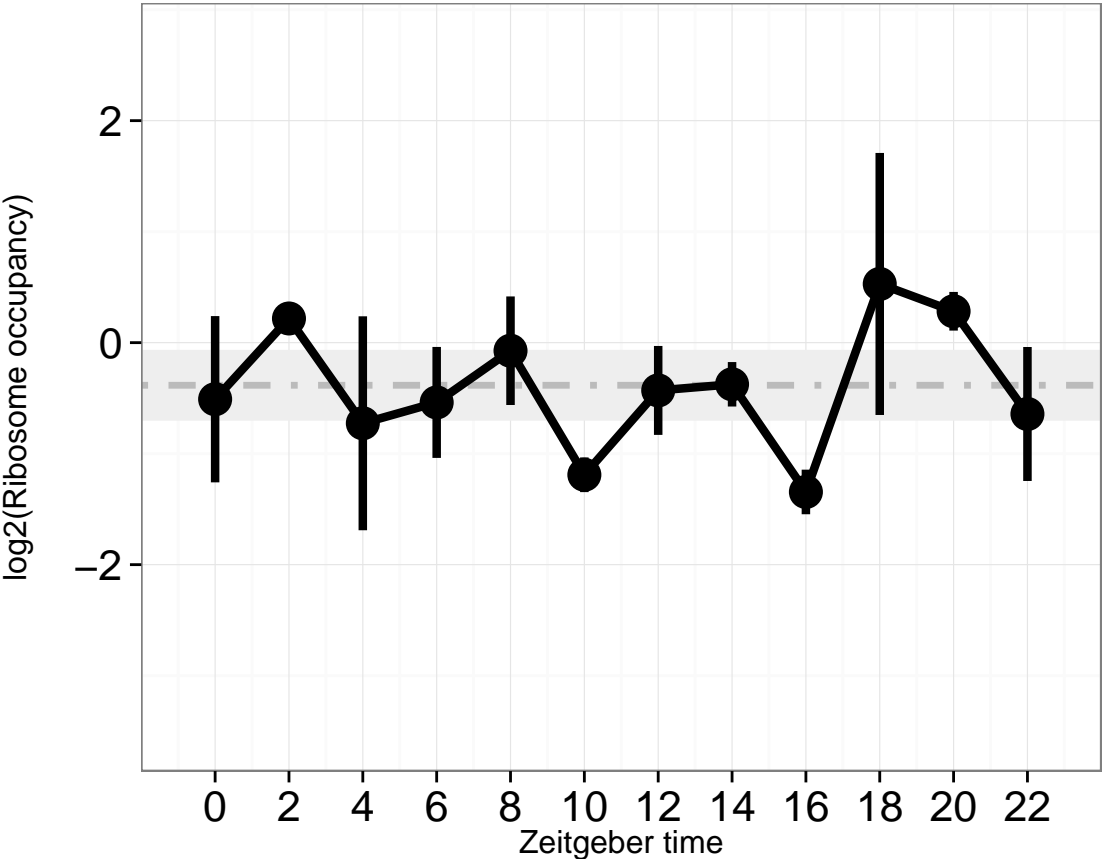

Supplement: Supplementary file 4655 [file 1]

# Trit1

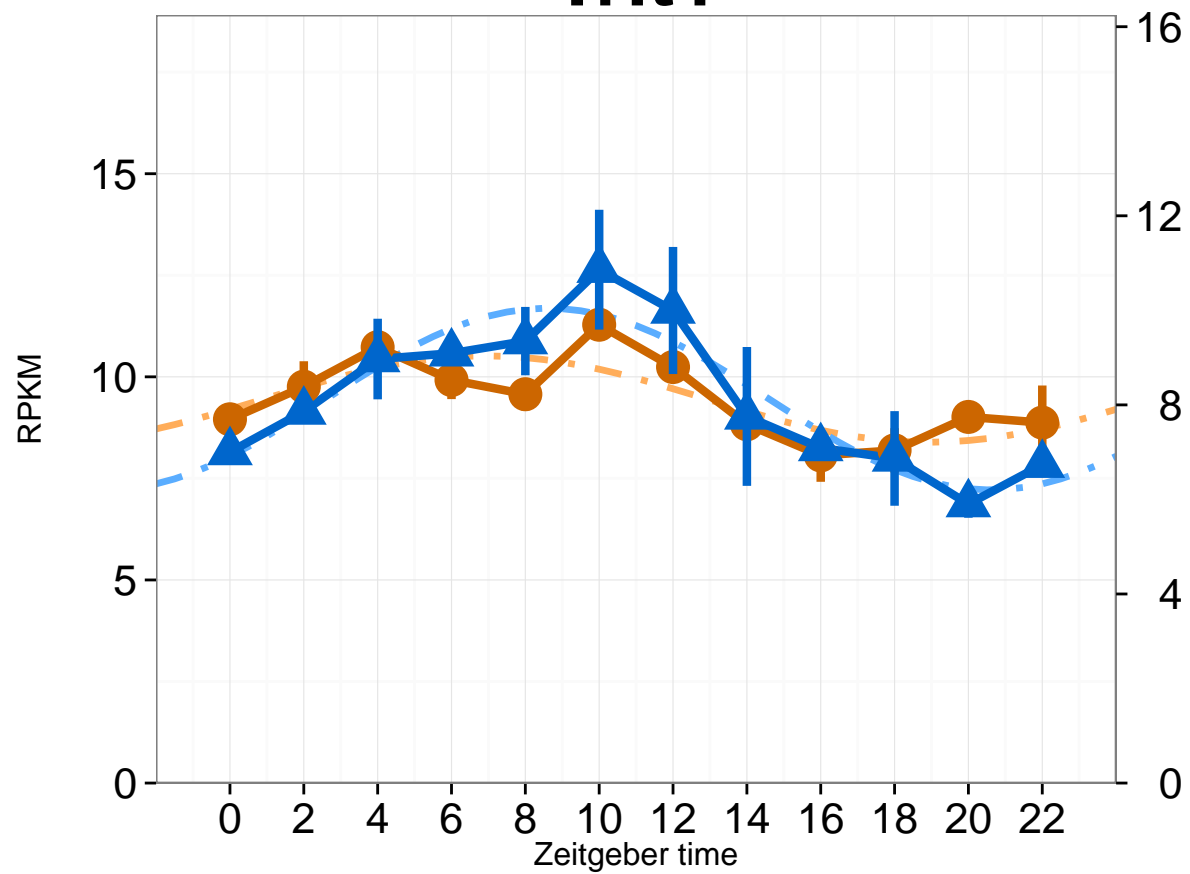

# Trit1

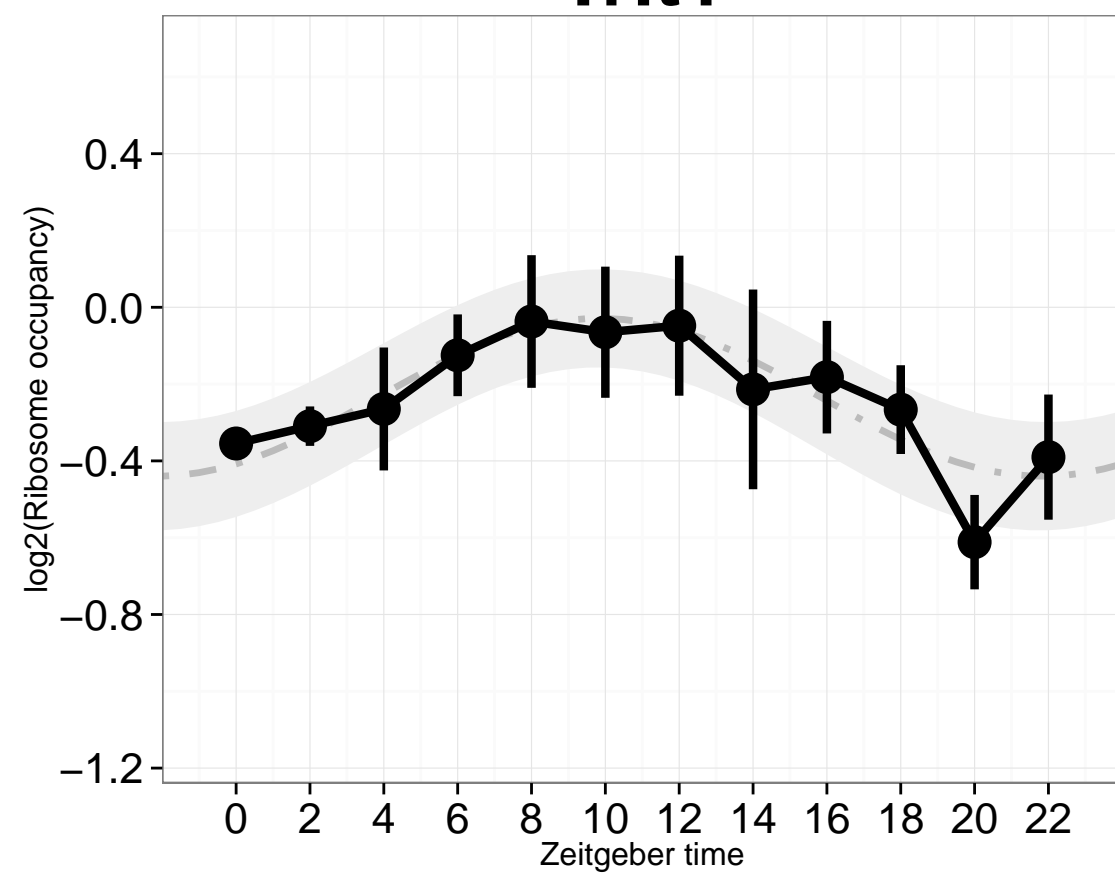

Supplement: Supplementary file 4656 [file 1]

## Tbl1xr1

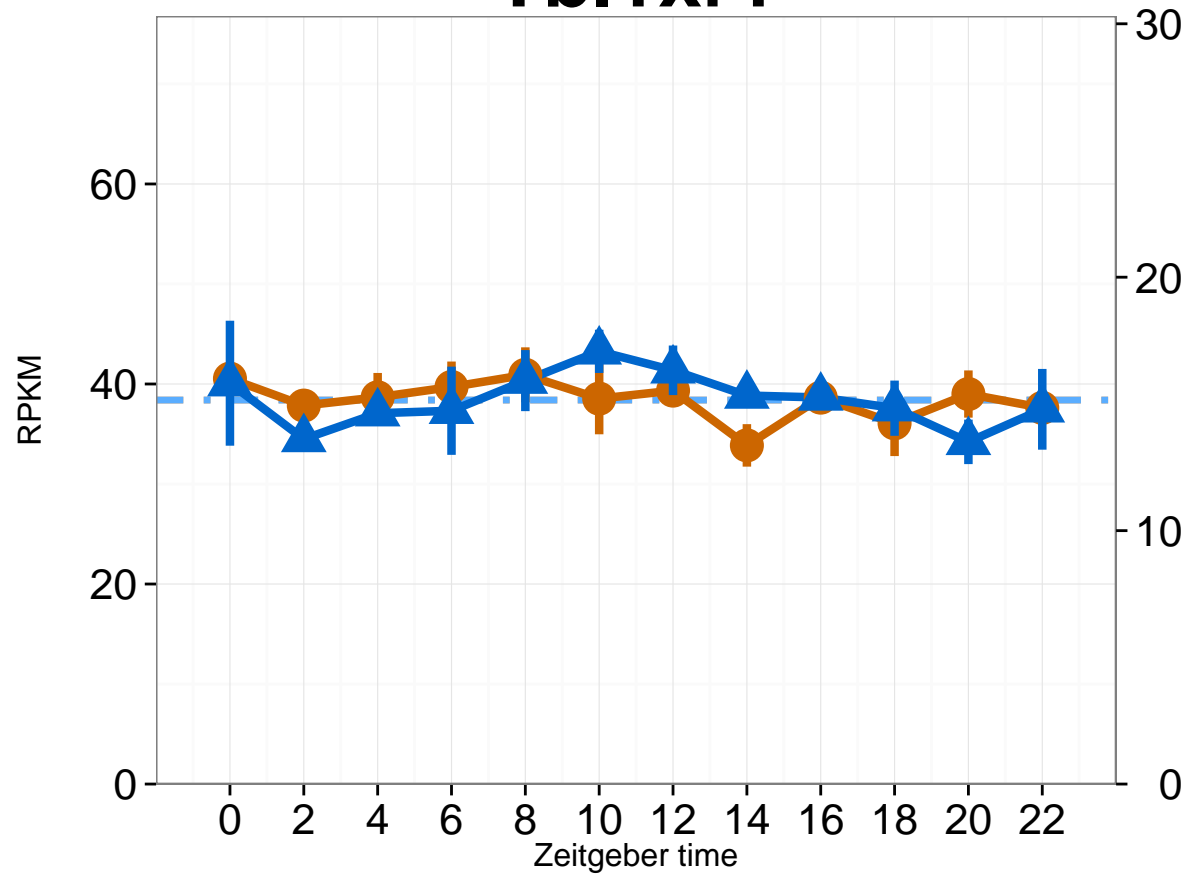

## Tbl1xr1

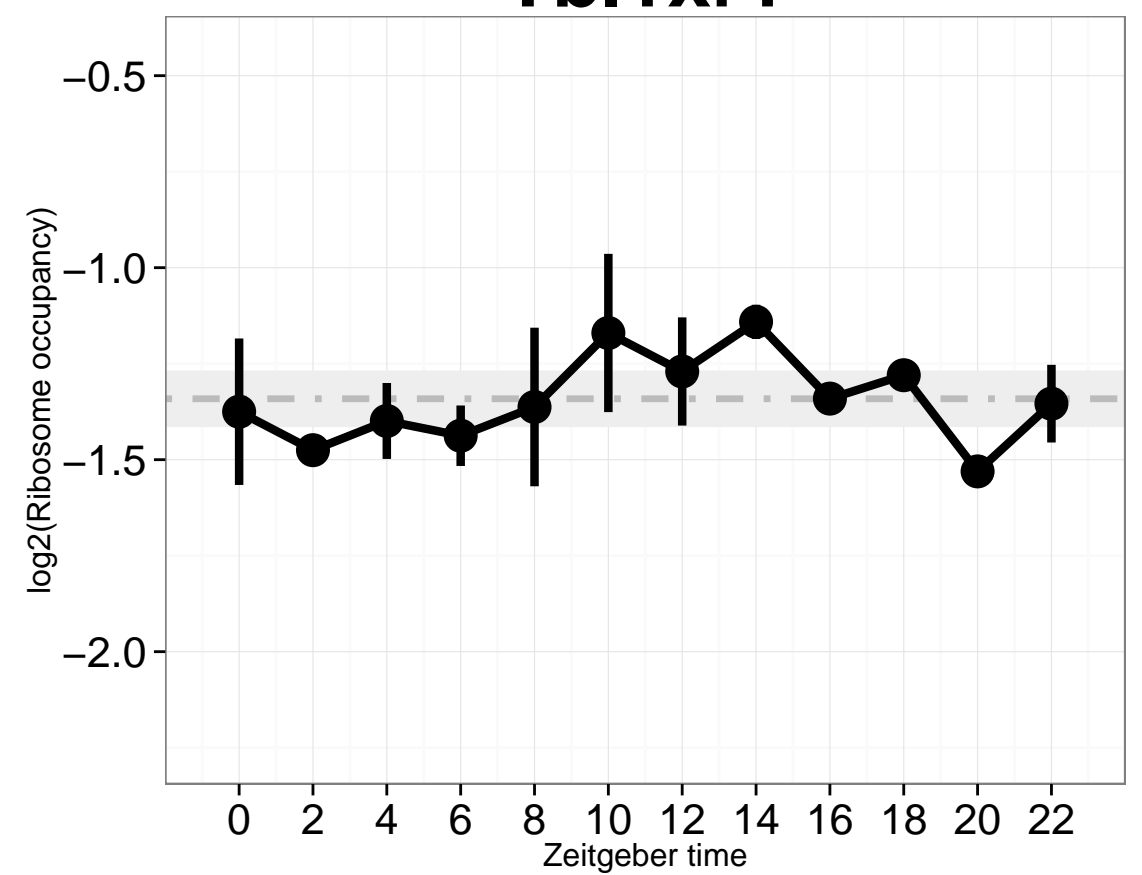

Supplement: Supplementary file 4657 [file 1]

## Etv1

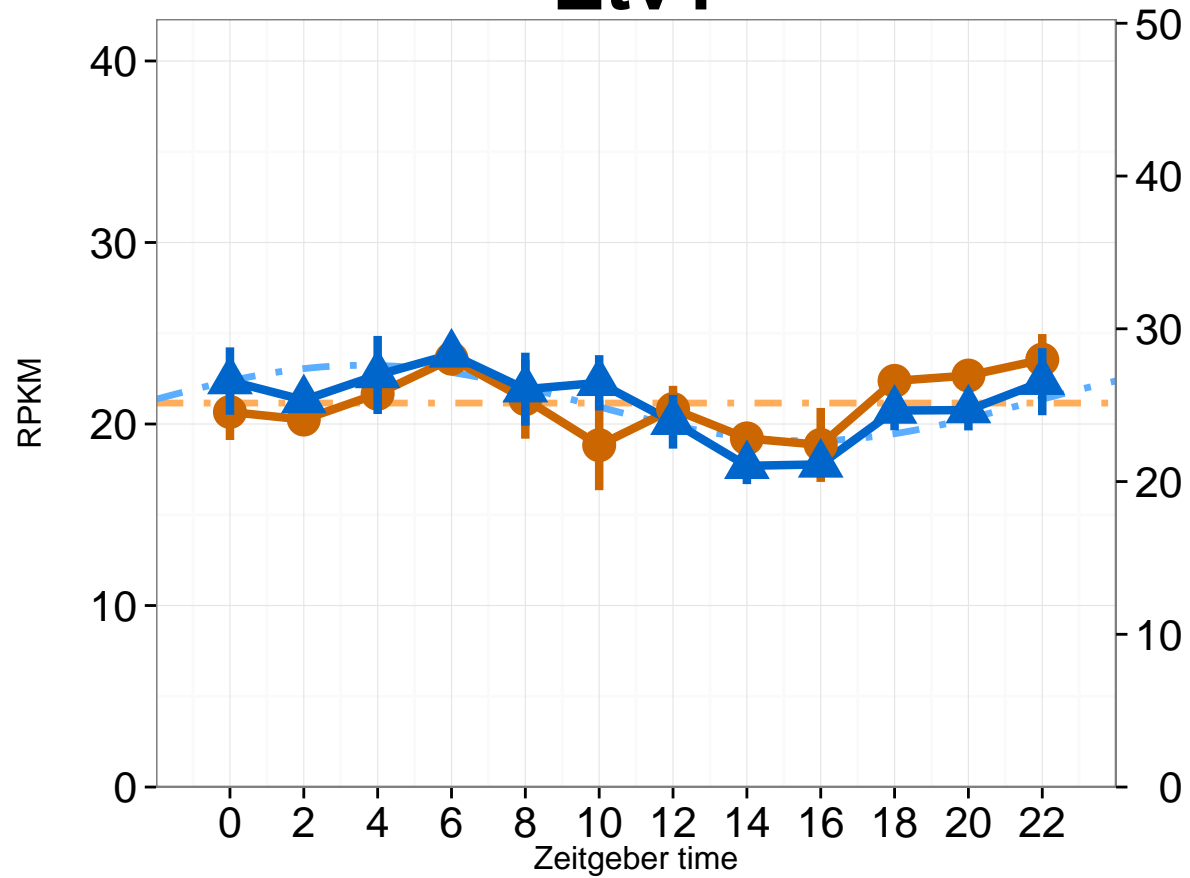

## Etv1

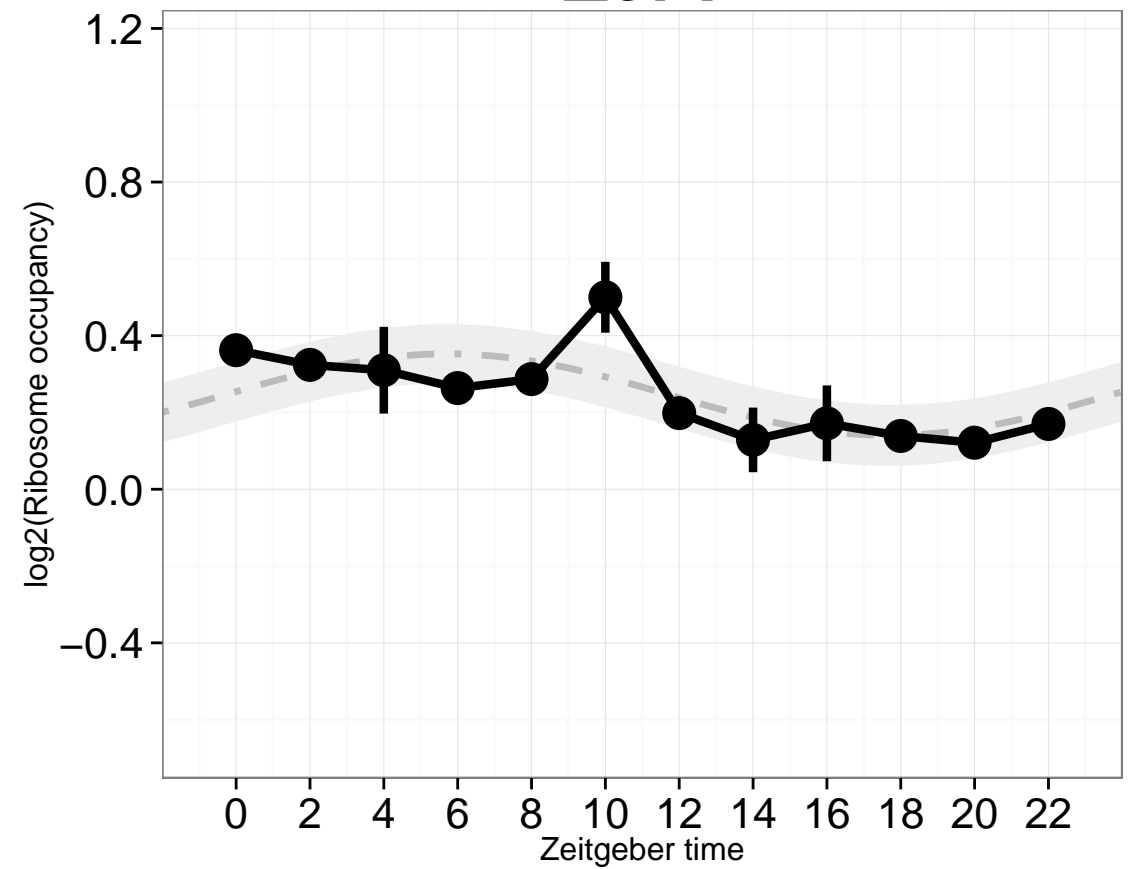

Supplement: Supplementary file 4658 [file 1]

## Pcnxl4

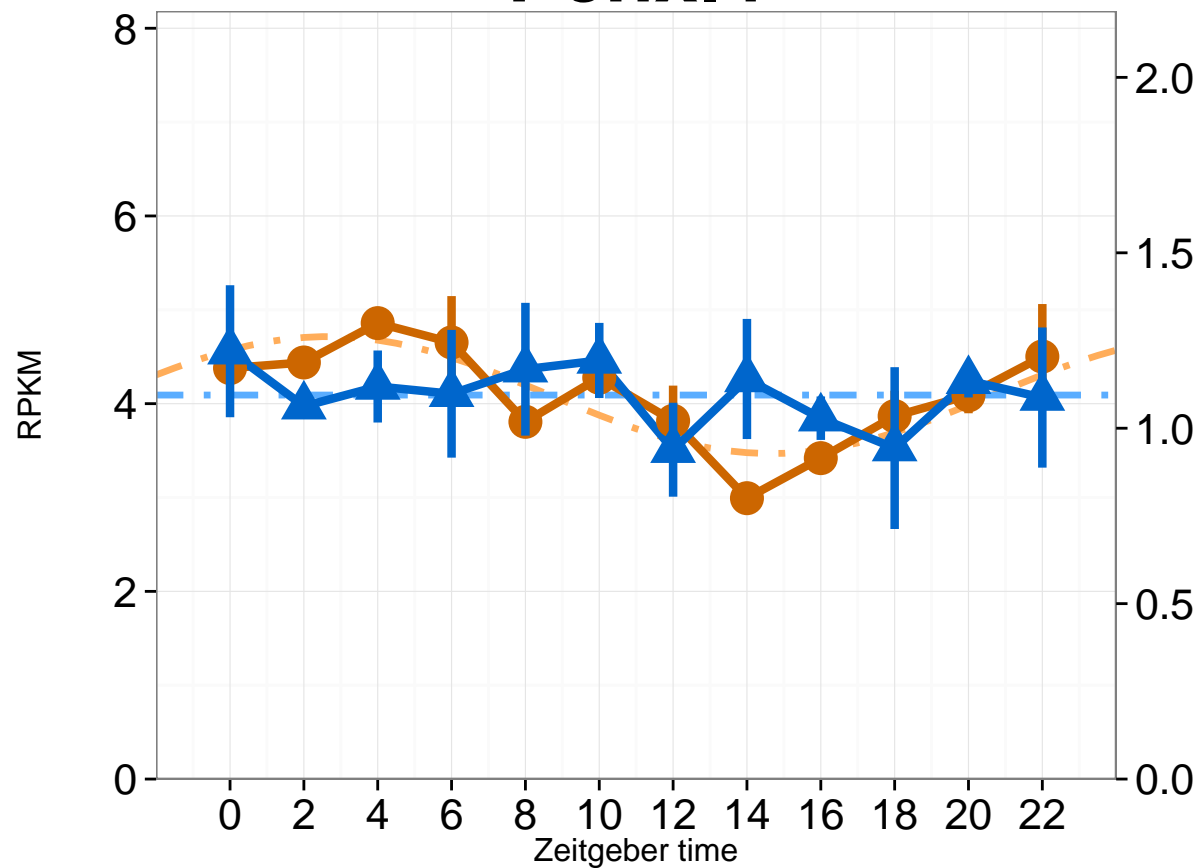

## Pcnxl4

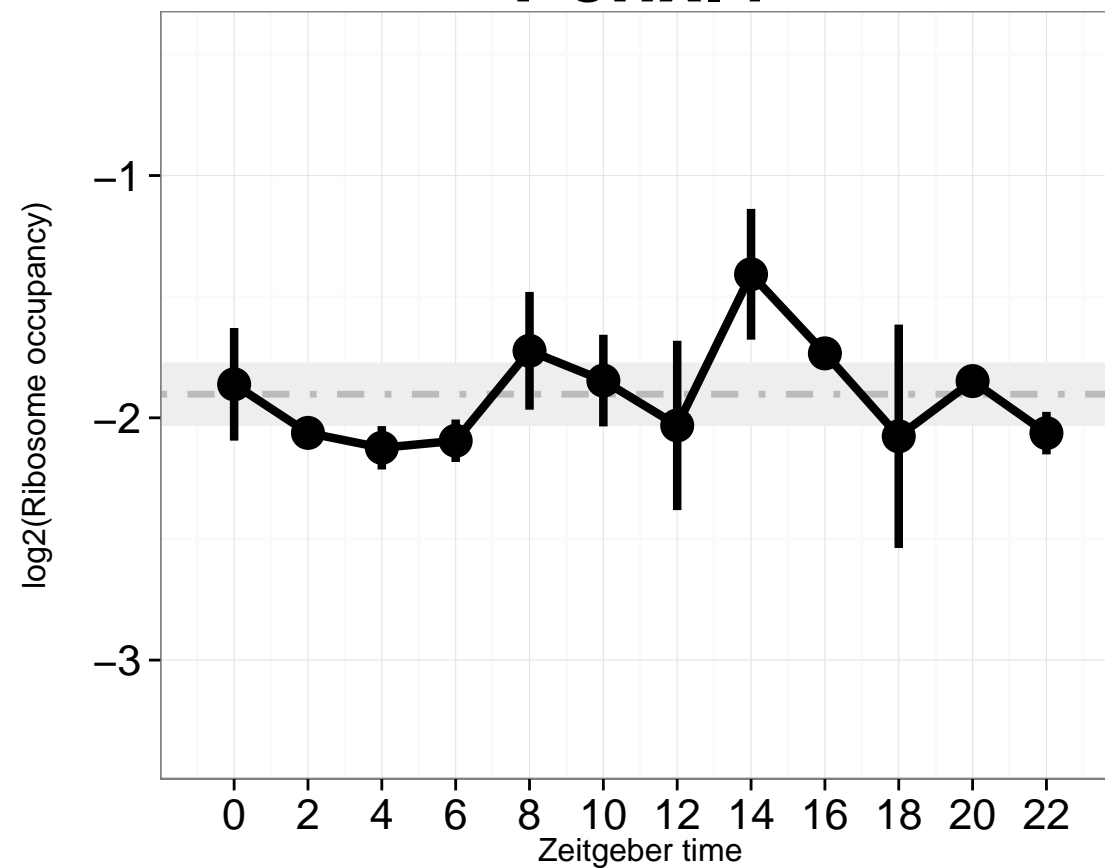

Supplement: Supplementary file 4659 [file 1]

# Mrpl19

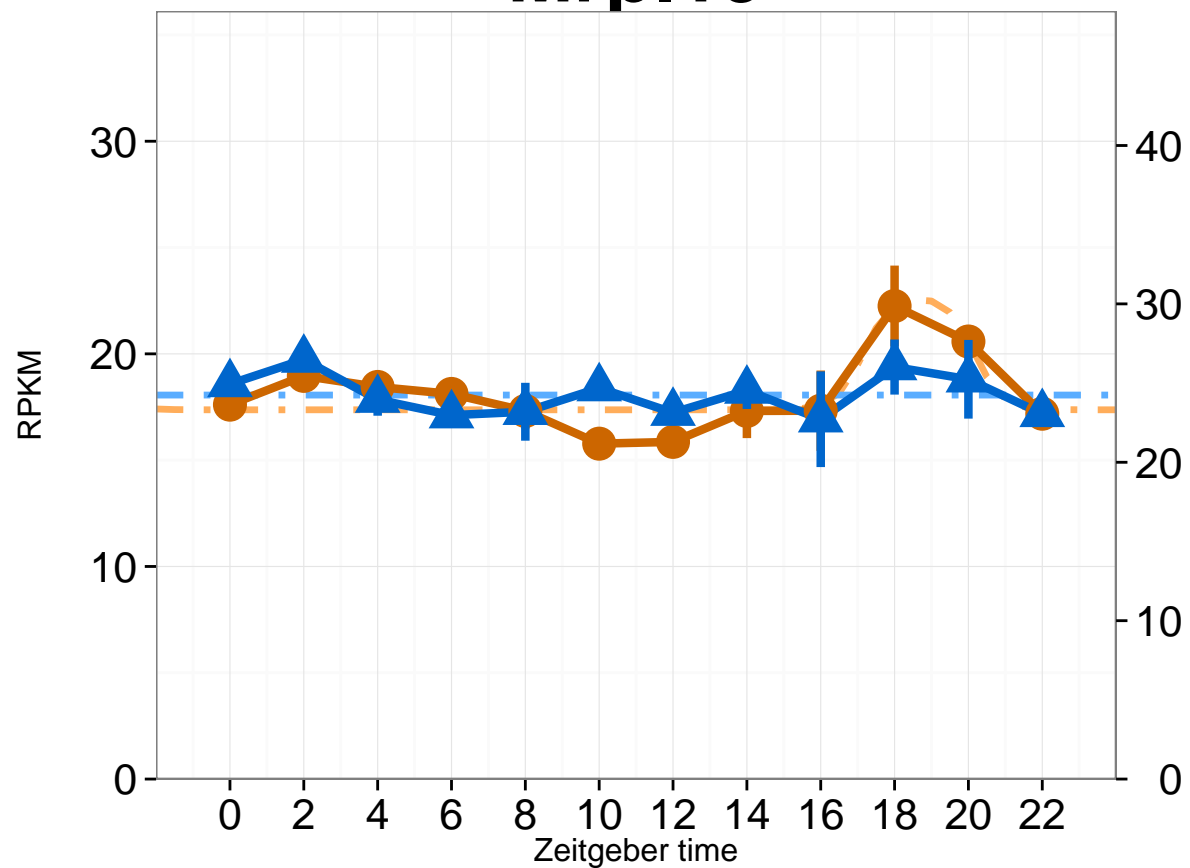

# Mrpl19

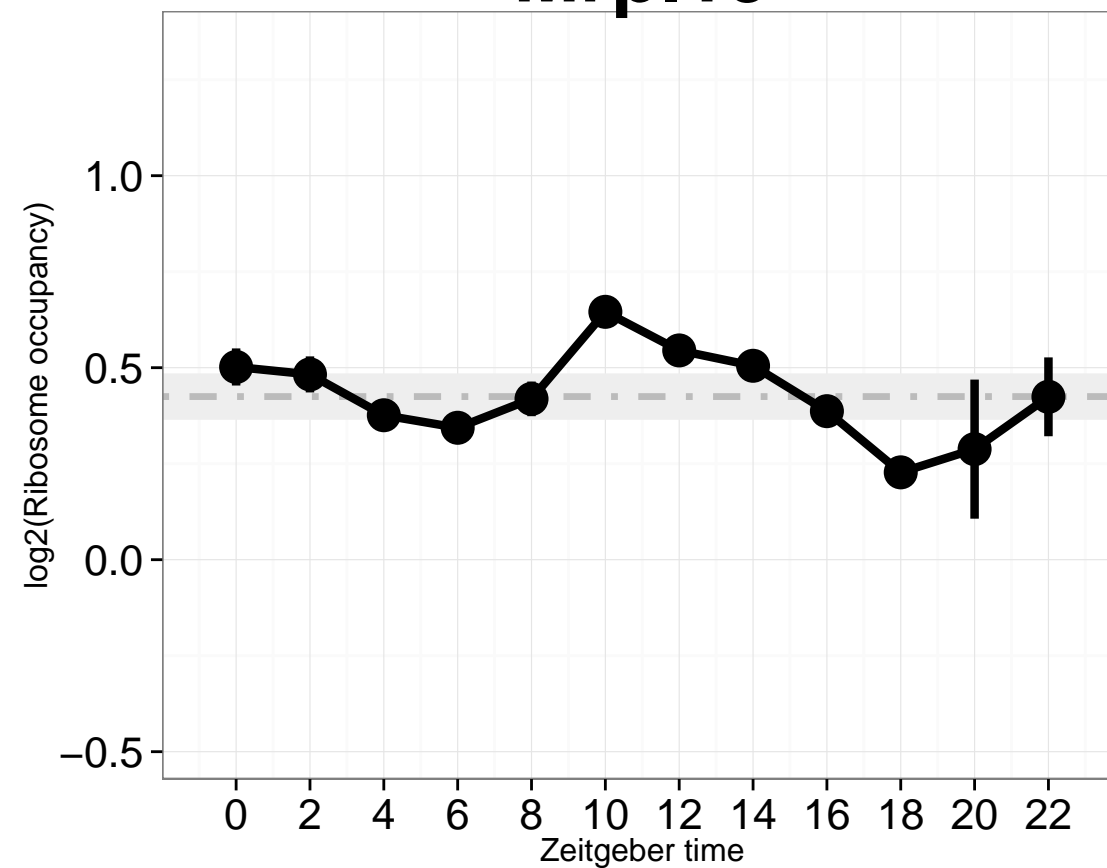

Supplement: Supplementary file 4660 [file 1]

# Ndufa13

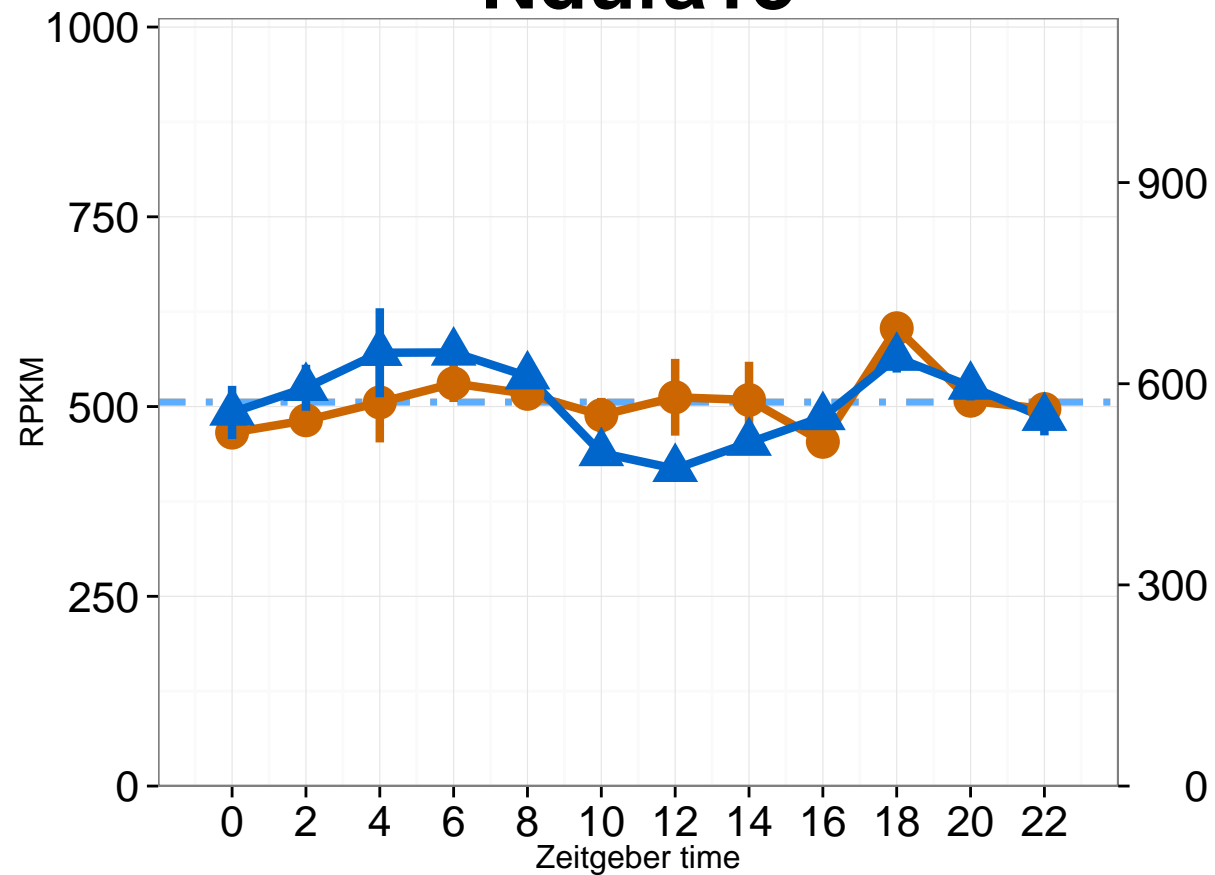

# Ndufa13

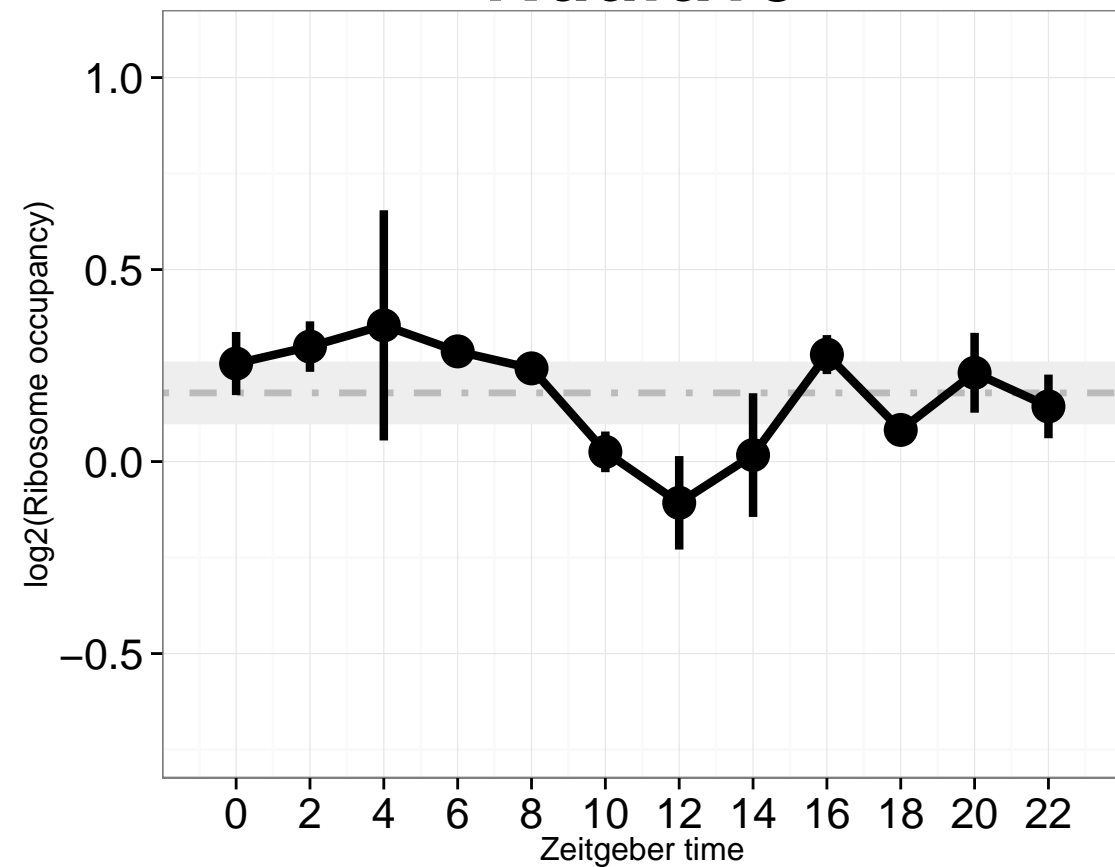

Supplement: Supplementary file 4661 [file 1]

# Lin7a

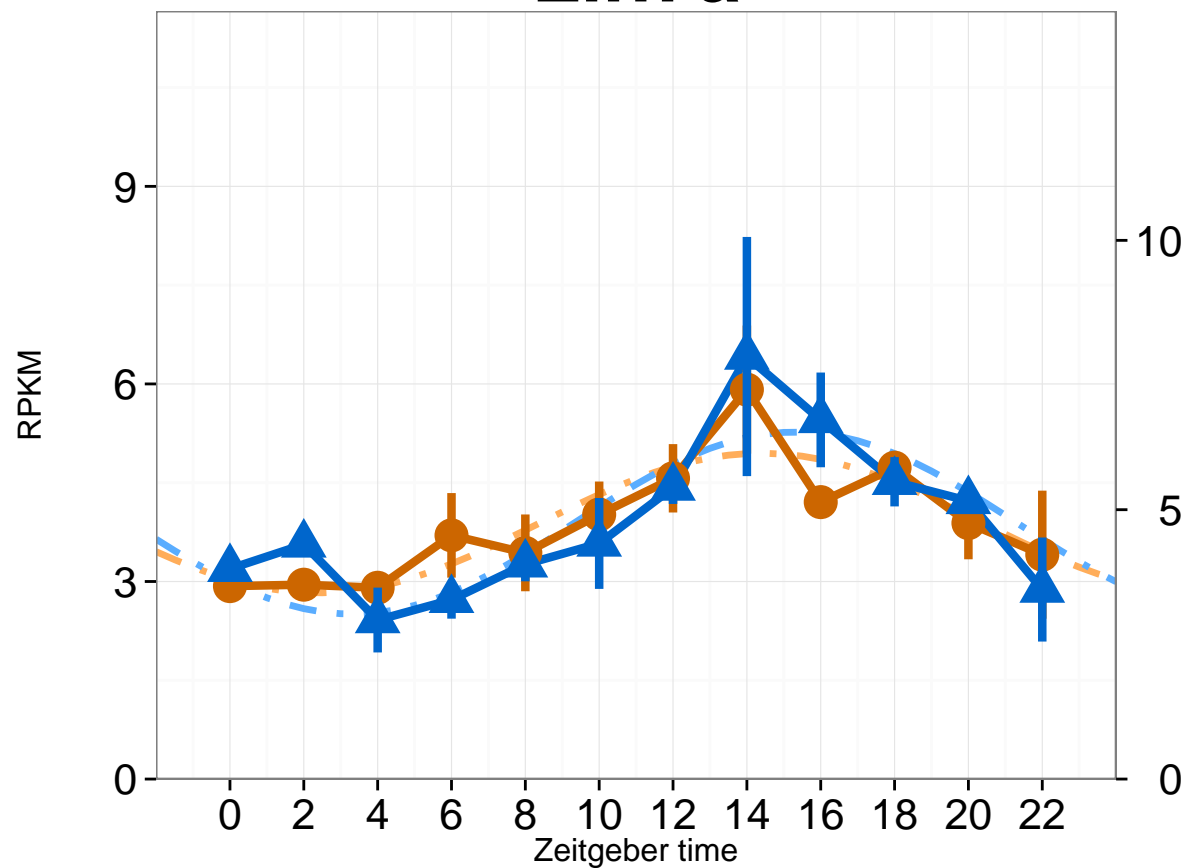

# Lin7a

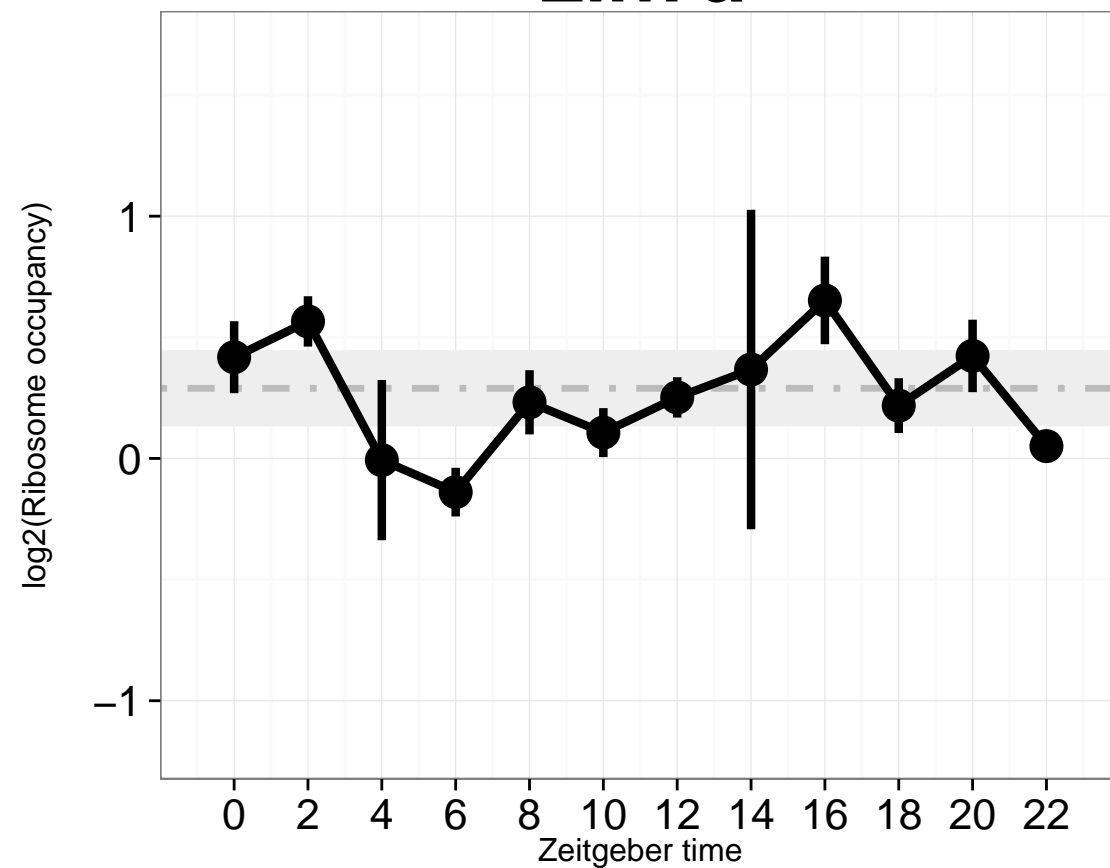

Supplement: Supplementary file 4662 [file 1]

# Atp5k

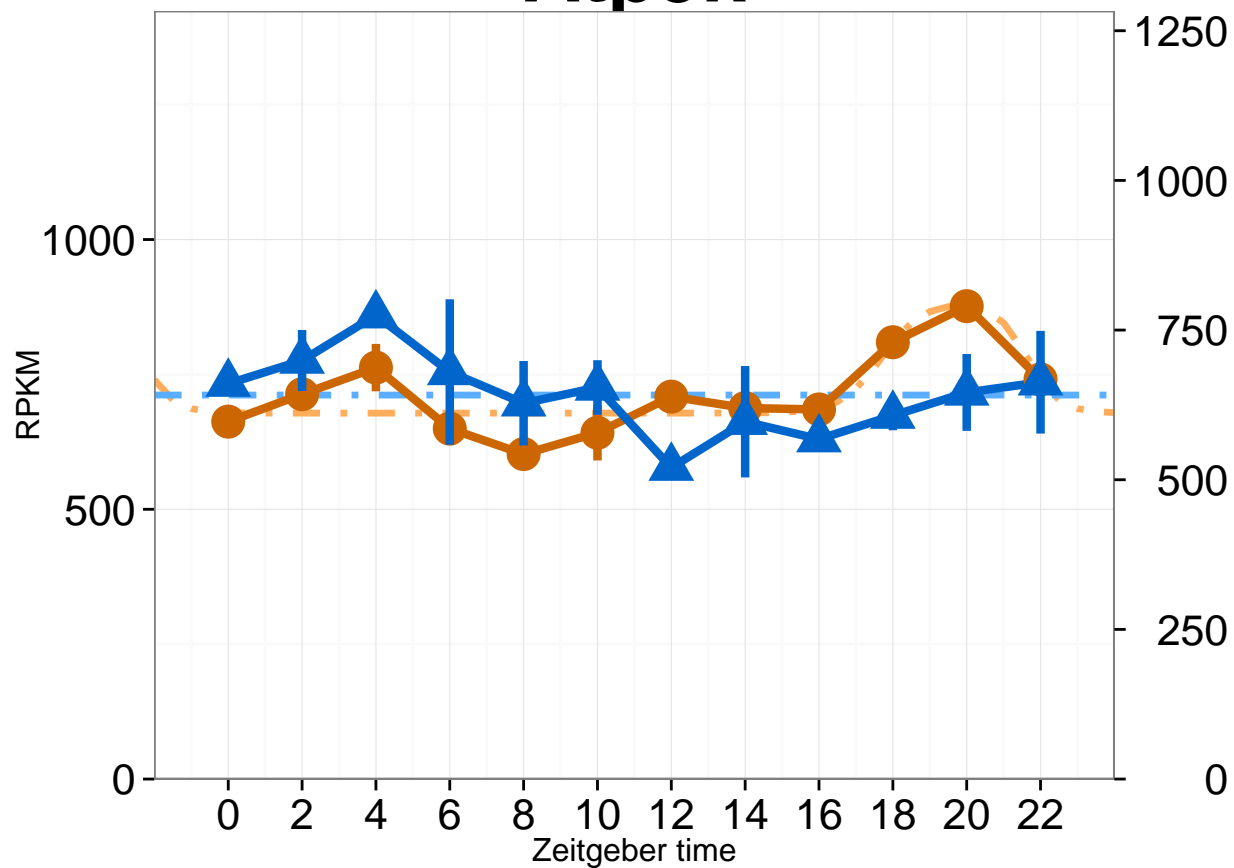

# Atp5k

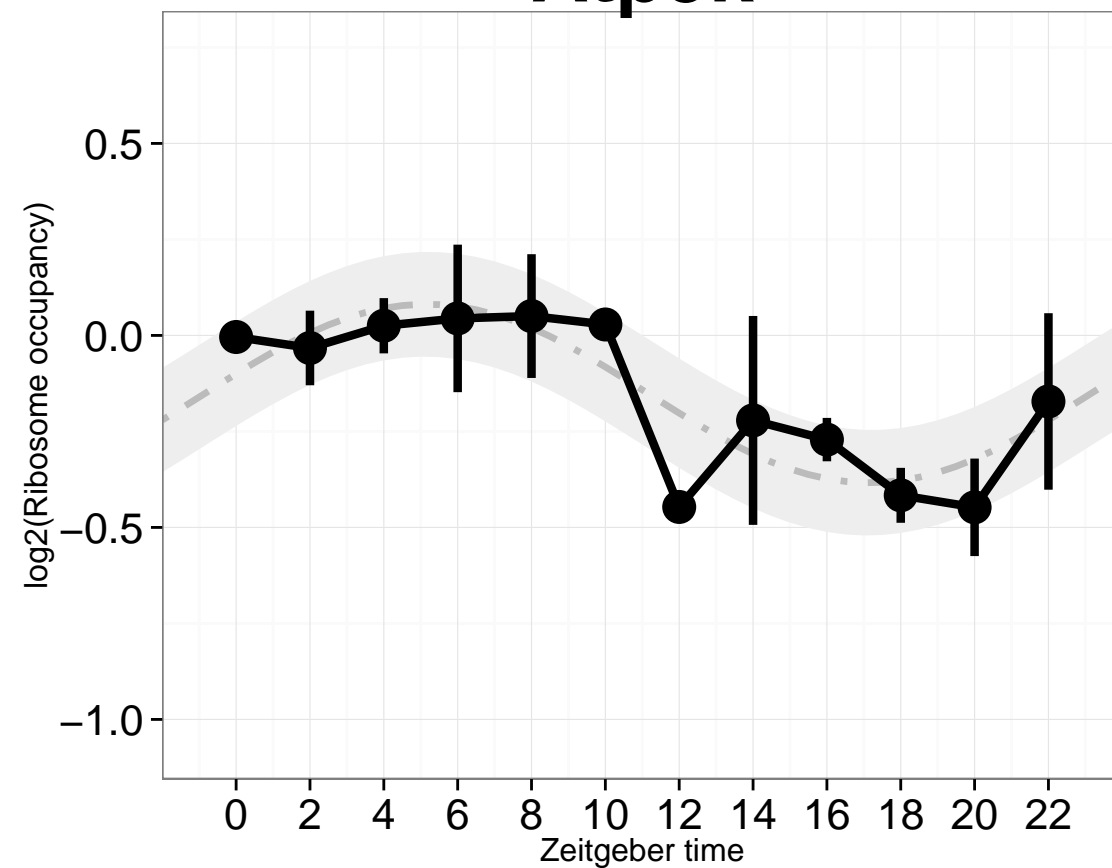

Supplement: Supplementary file 4663 [file 1]

# Nudt13

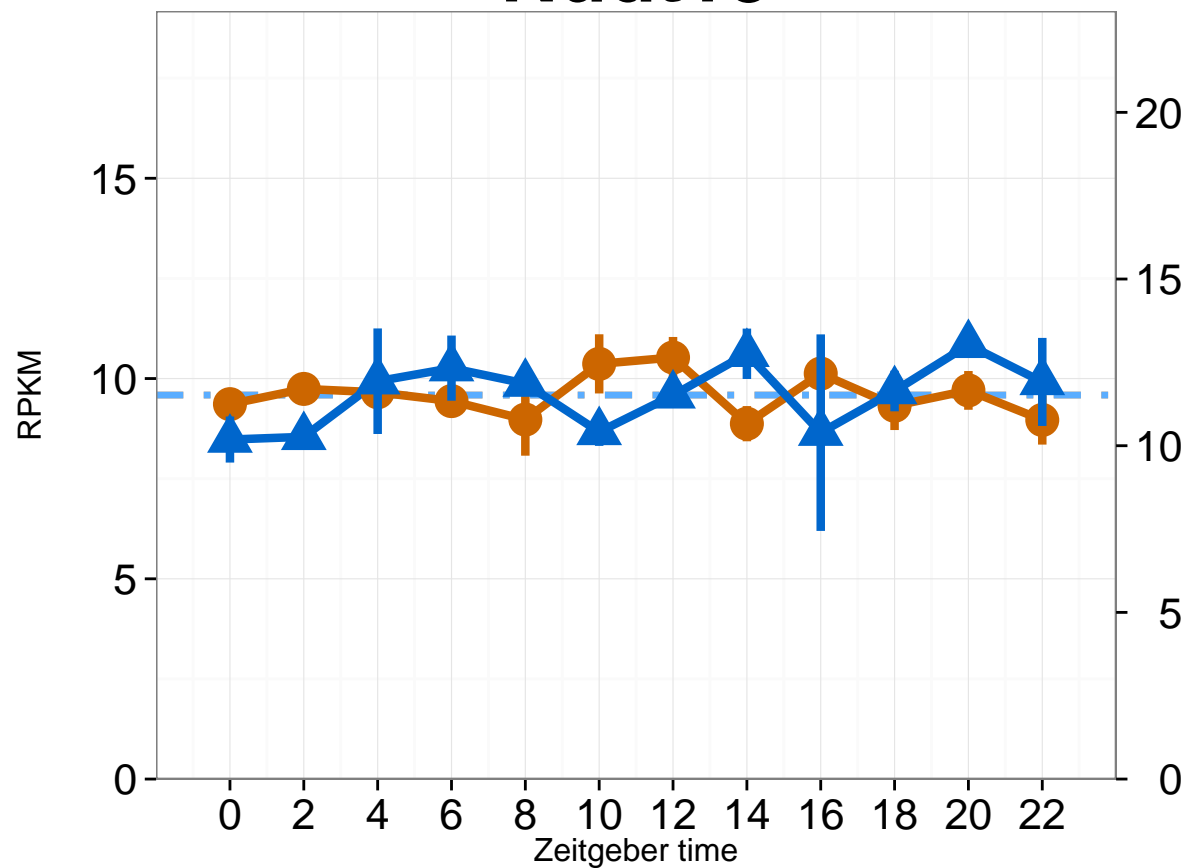

# Nudt13

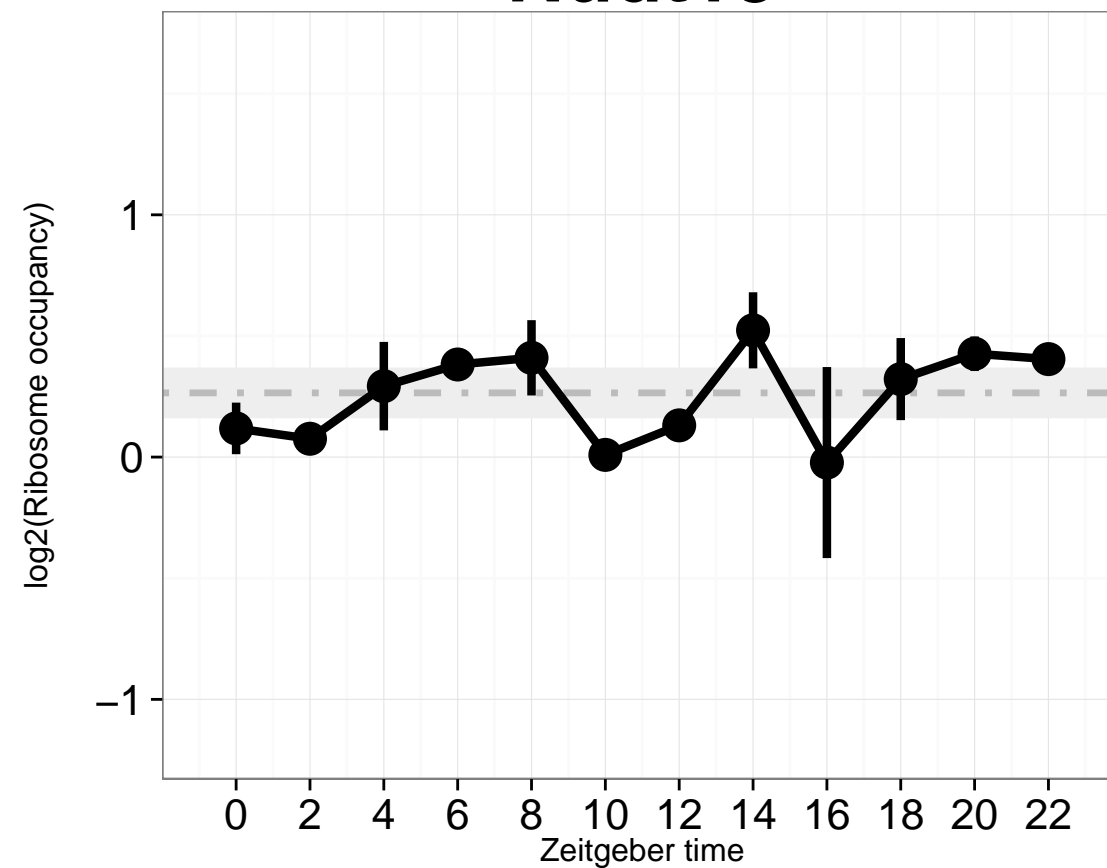

Supplement: Supplementary file 4664 [file 1]

## Kcne1

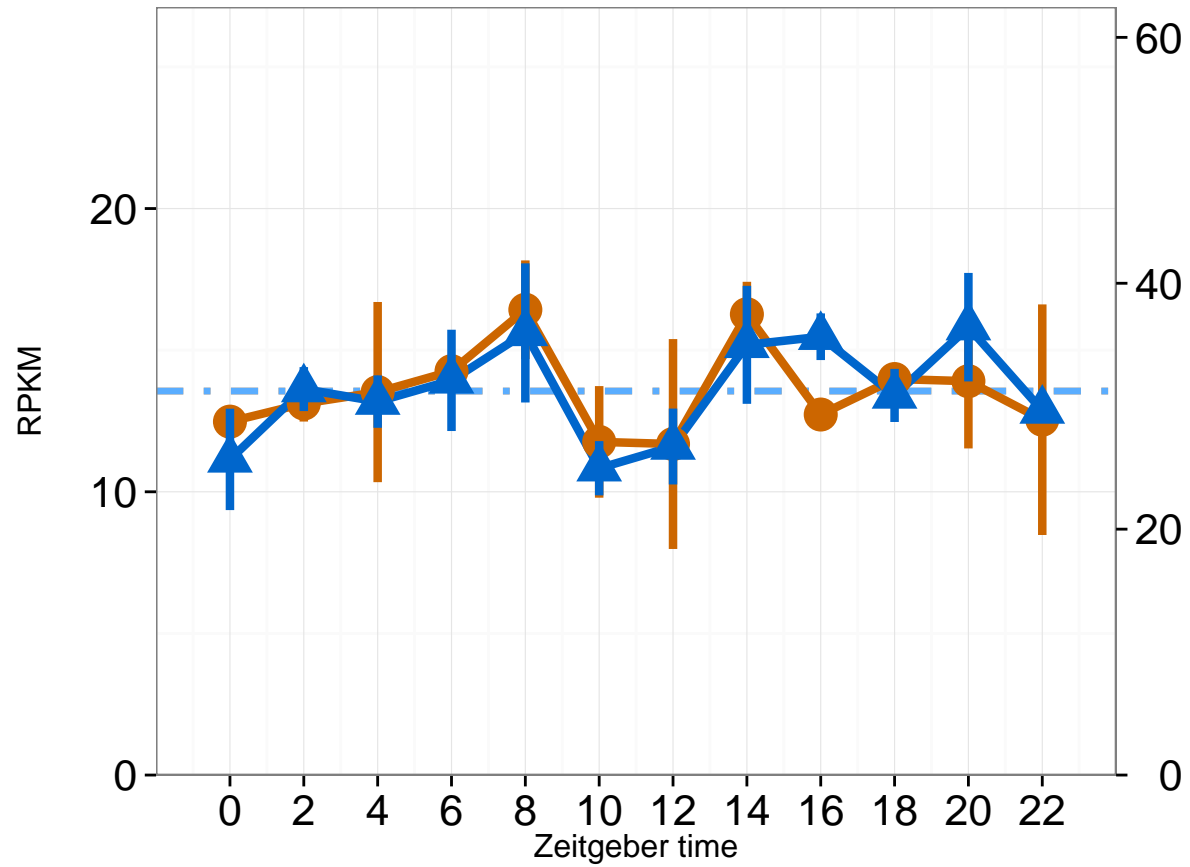

## Kcne1

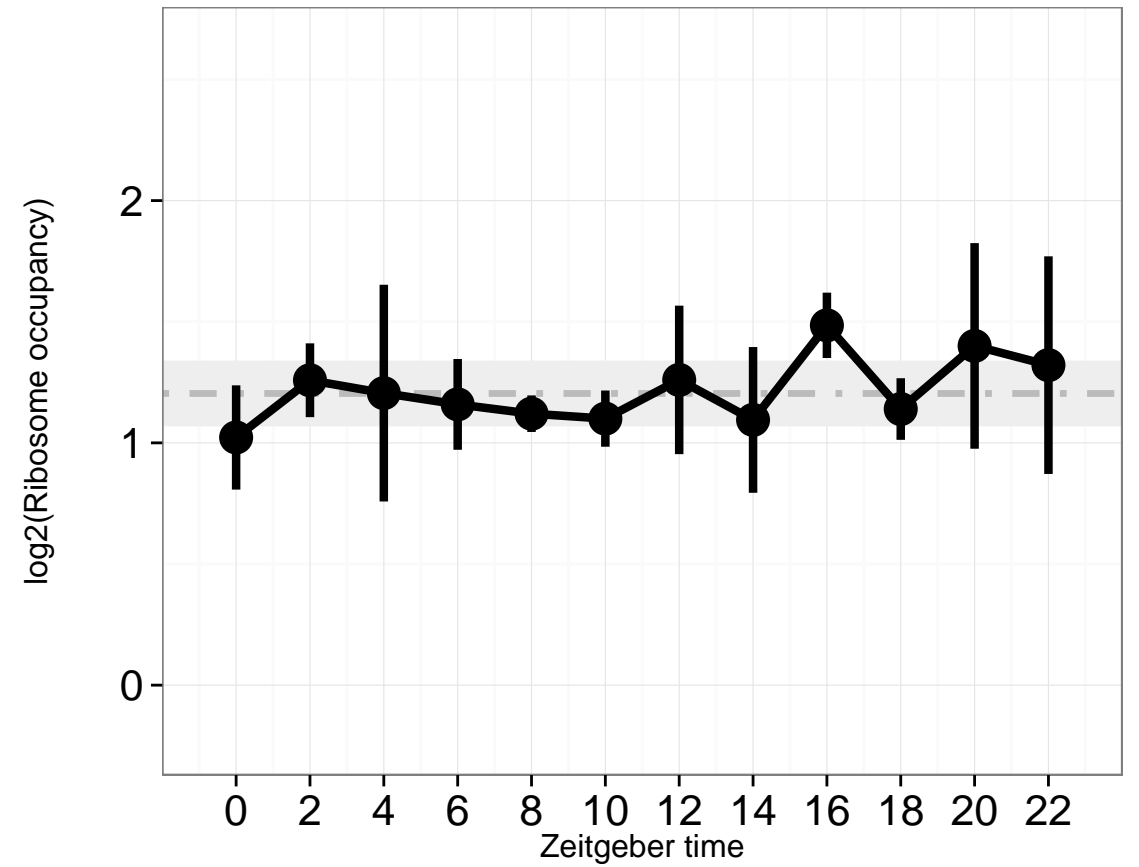

Supplement: Supplementary file 4665 [file 1]

# Defb1

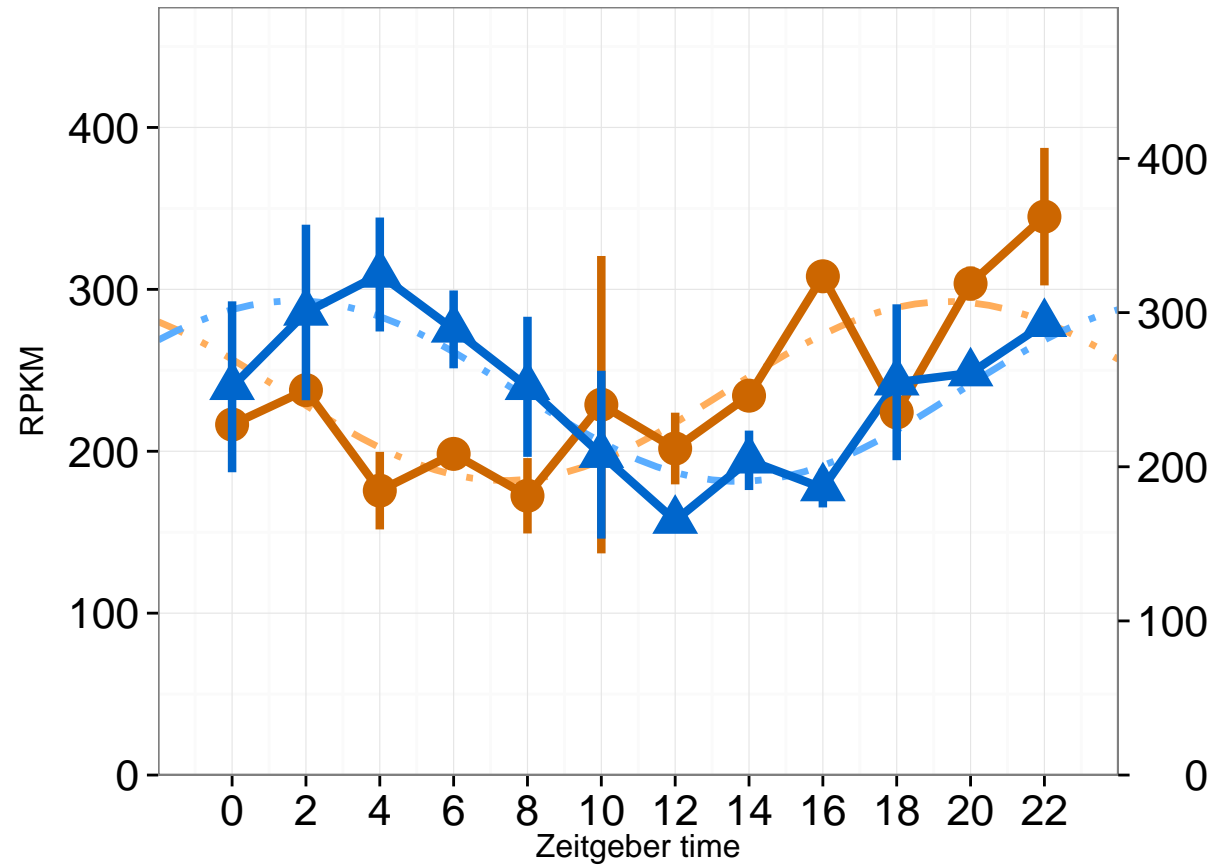

# Defb1

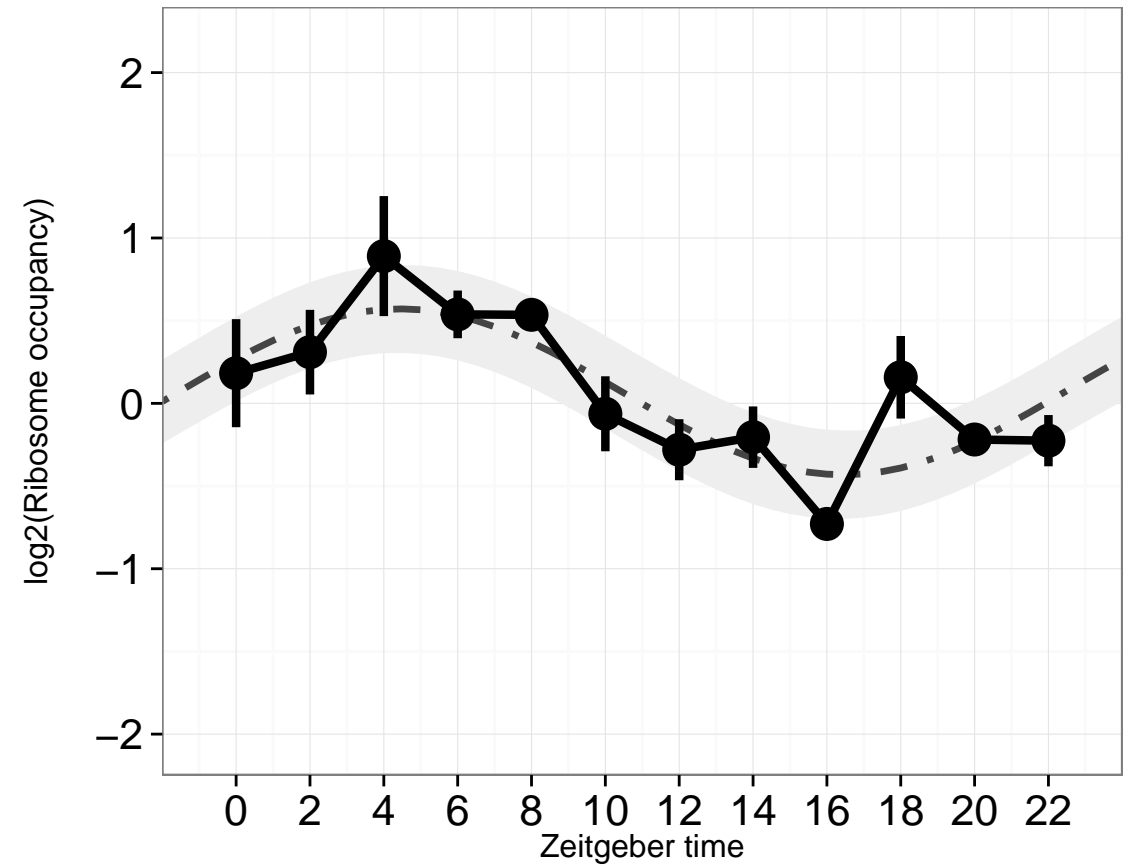

Supplement: Supplementary file 4666 [file 1]

## Exoc3l2

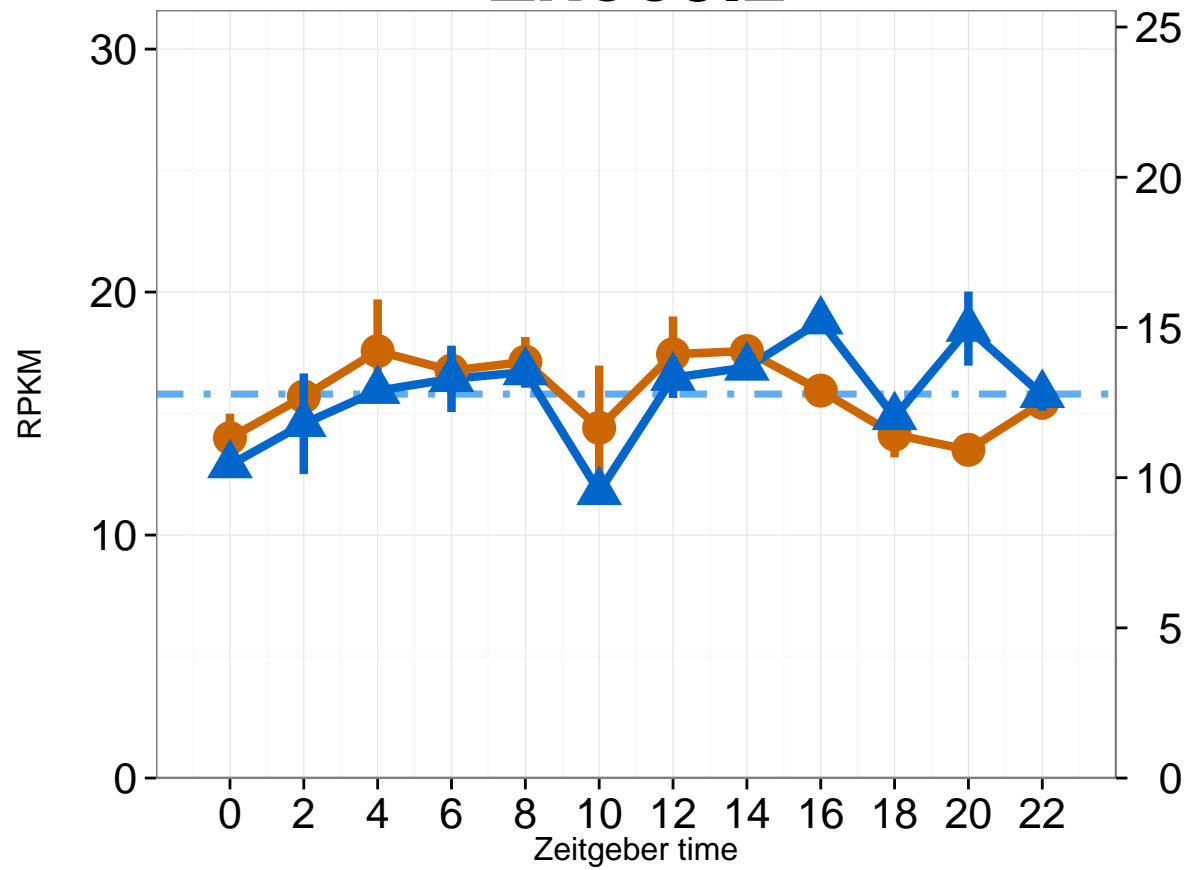

## Exoc3l2

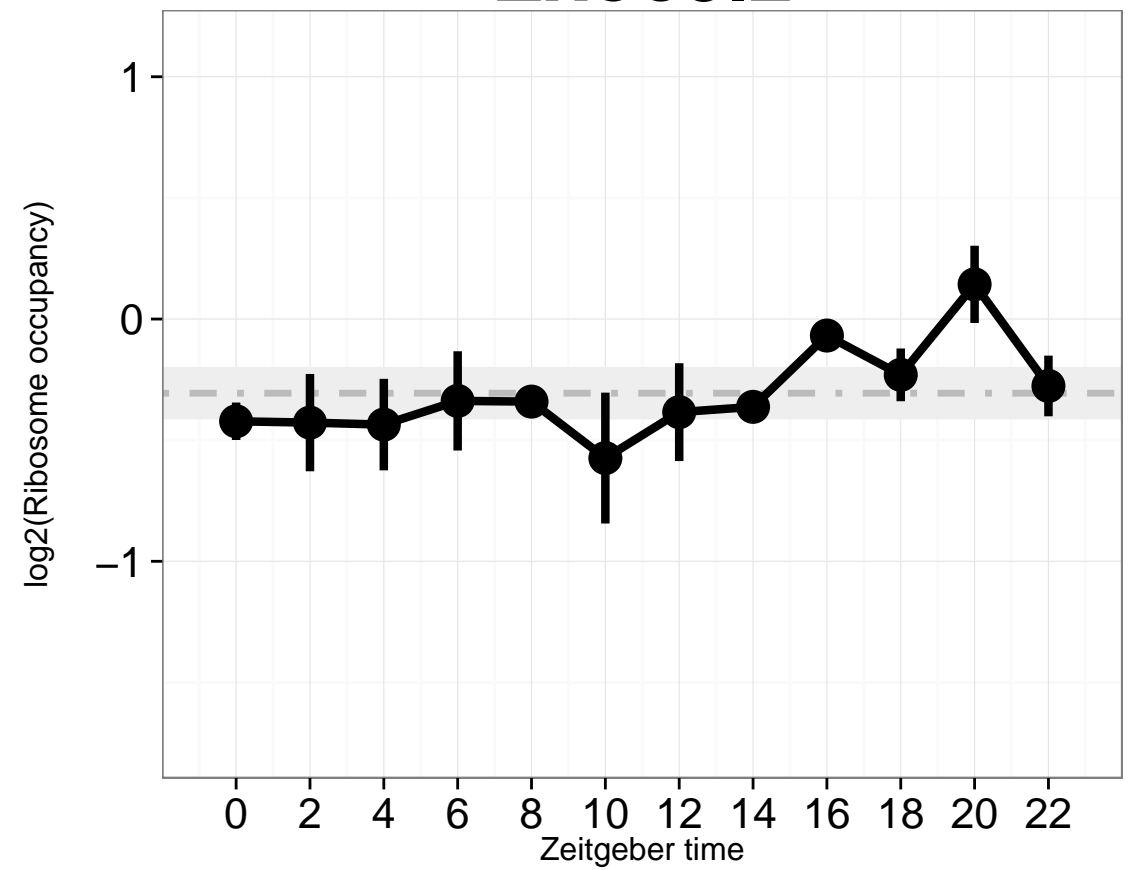

Supplement: Supplementary file 4667 [file 1]

# 1810026J23Rik

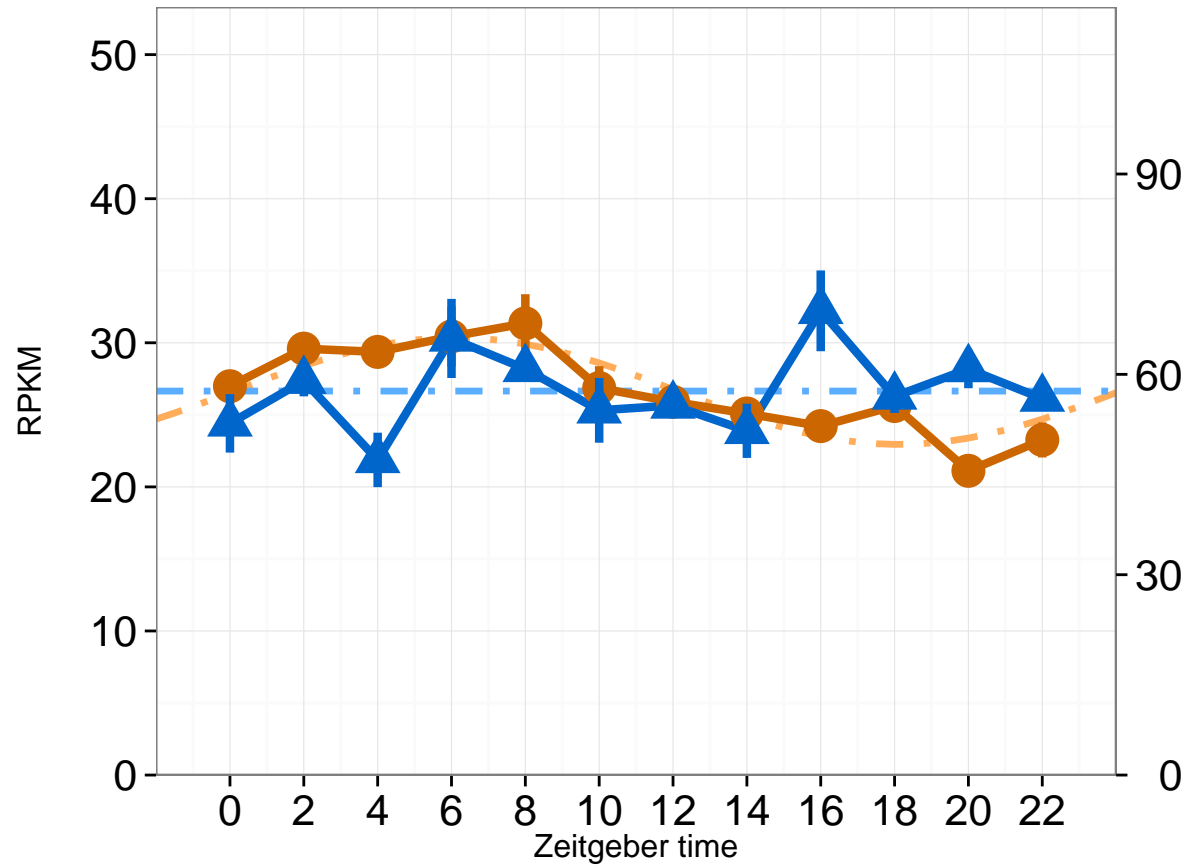

# 1810026J23Rik

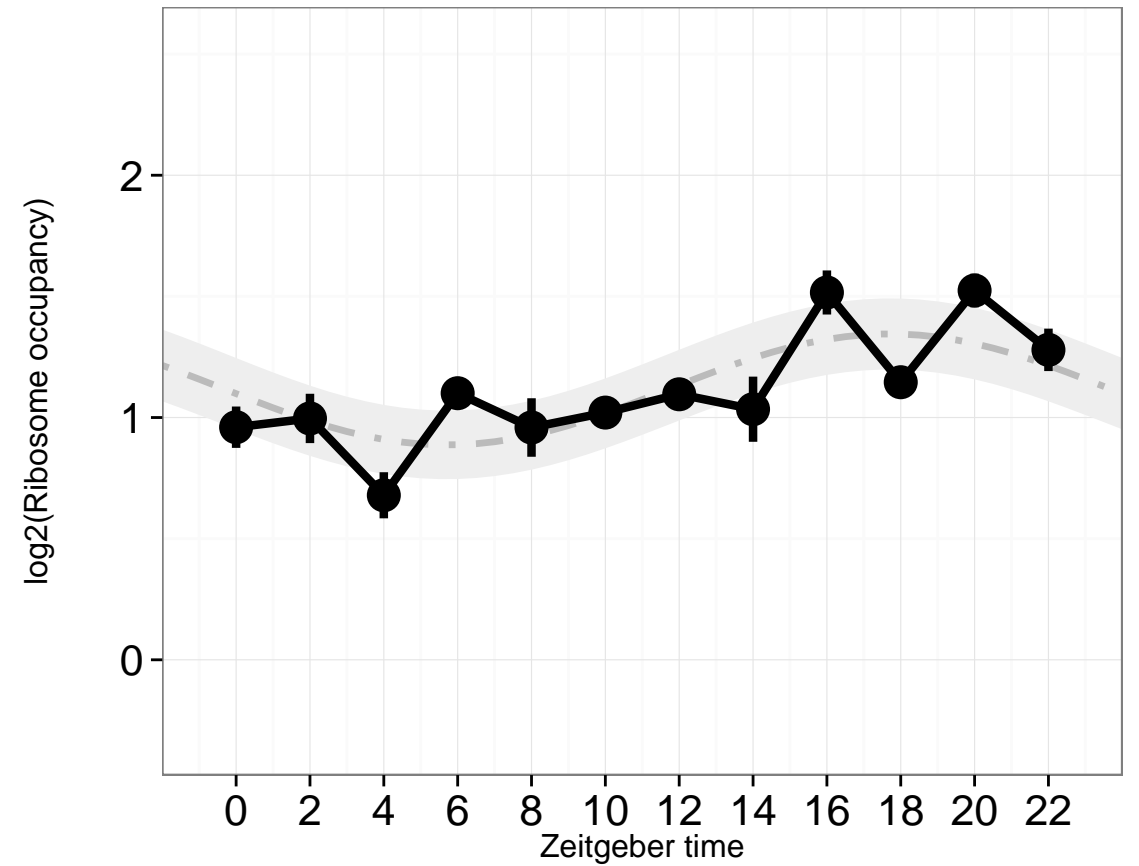

Supplement: Supplementary file 4668 [file 1]

## Rbms3

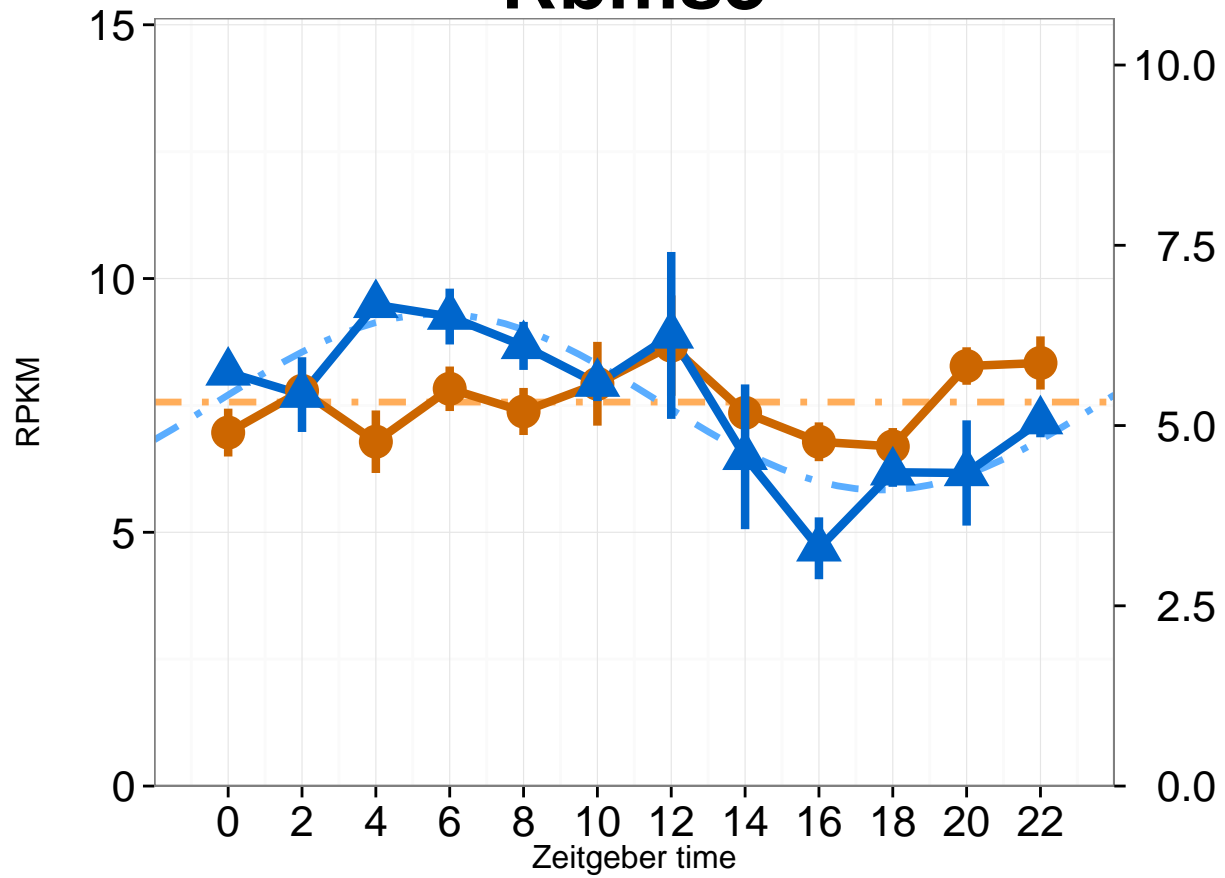

## Rbms3

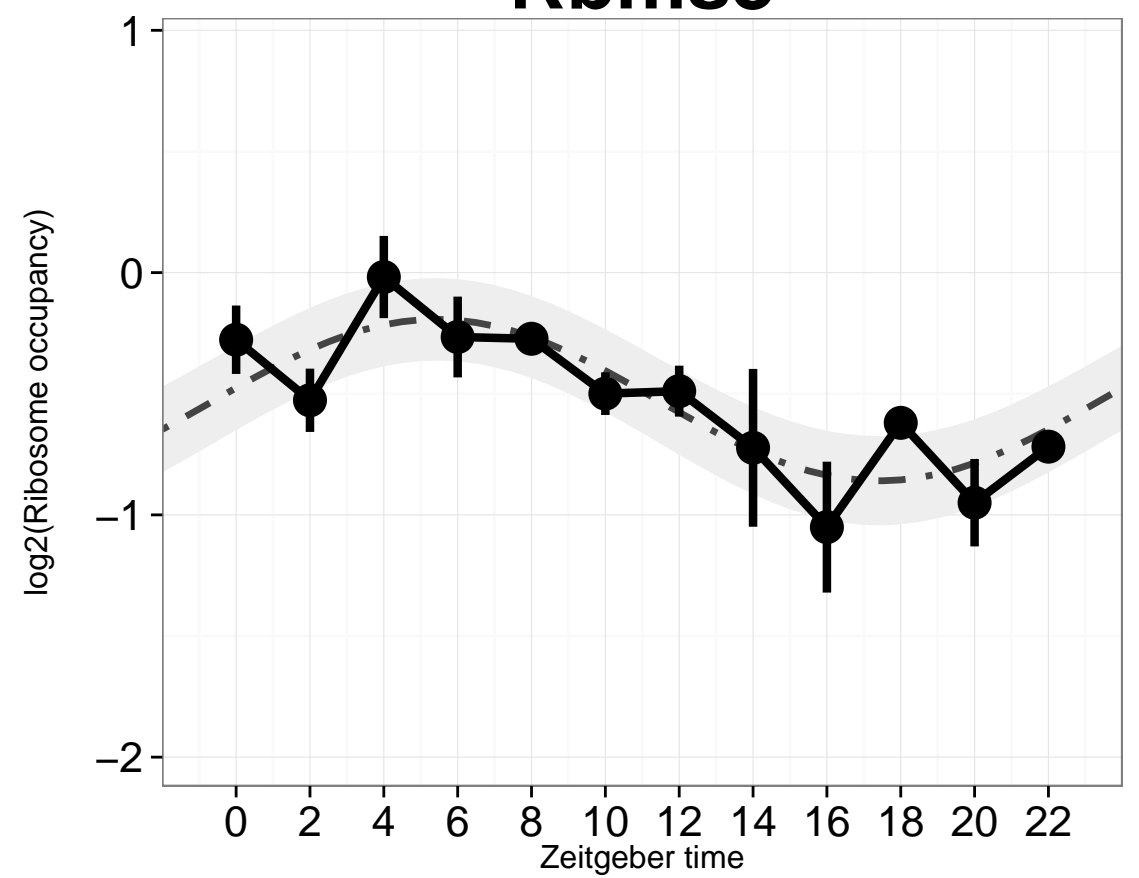

Supplement: Supplementary file 4669 [file 1]

# Zfp558

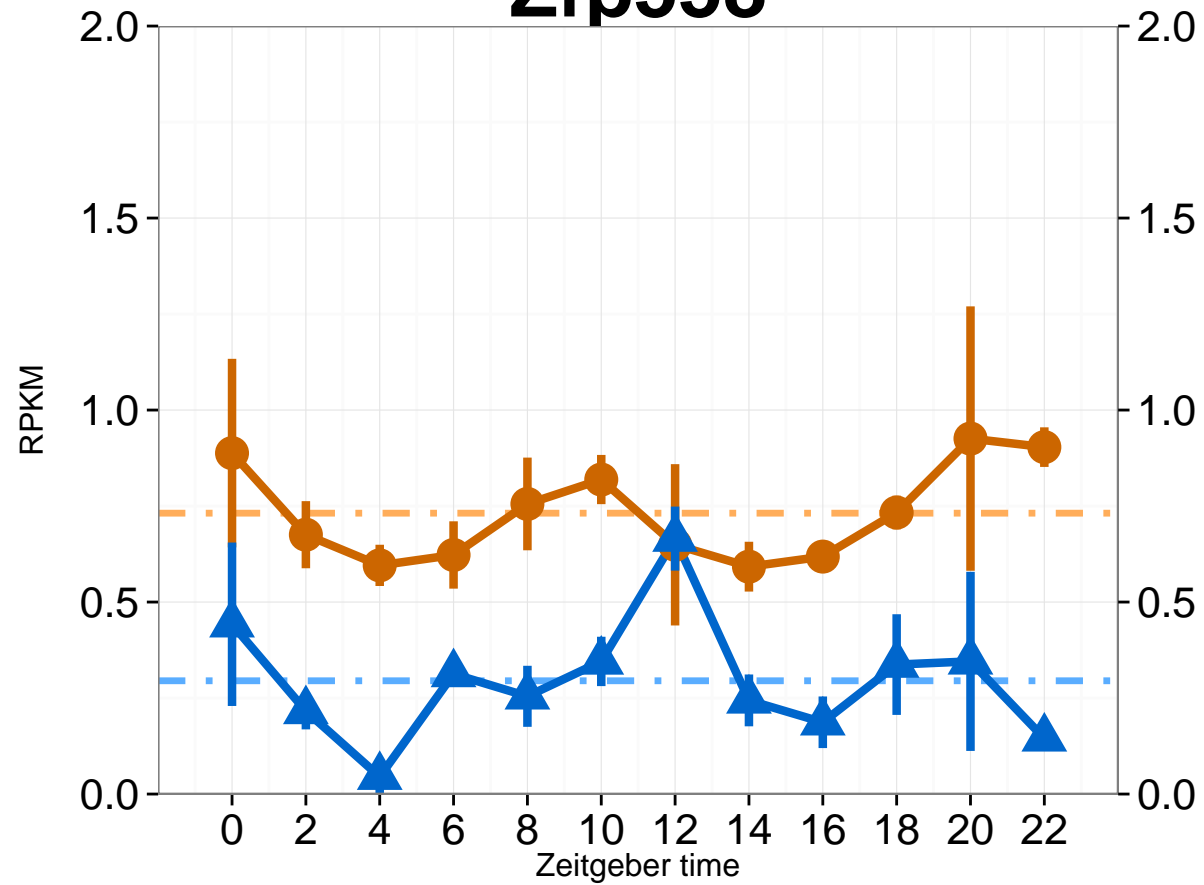

# Zfp558

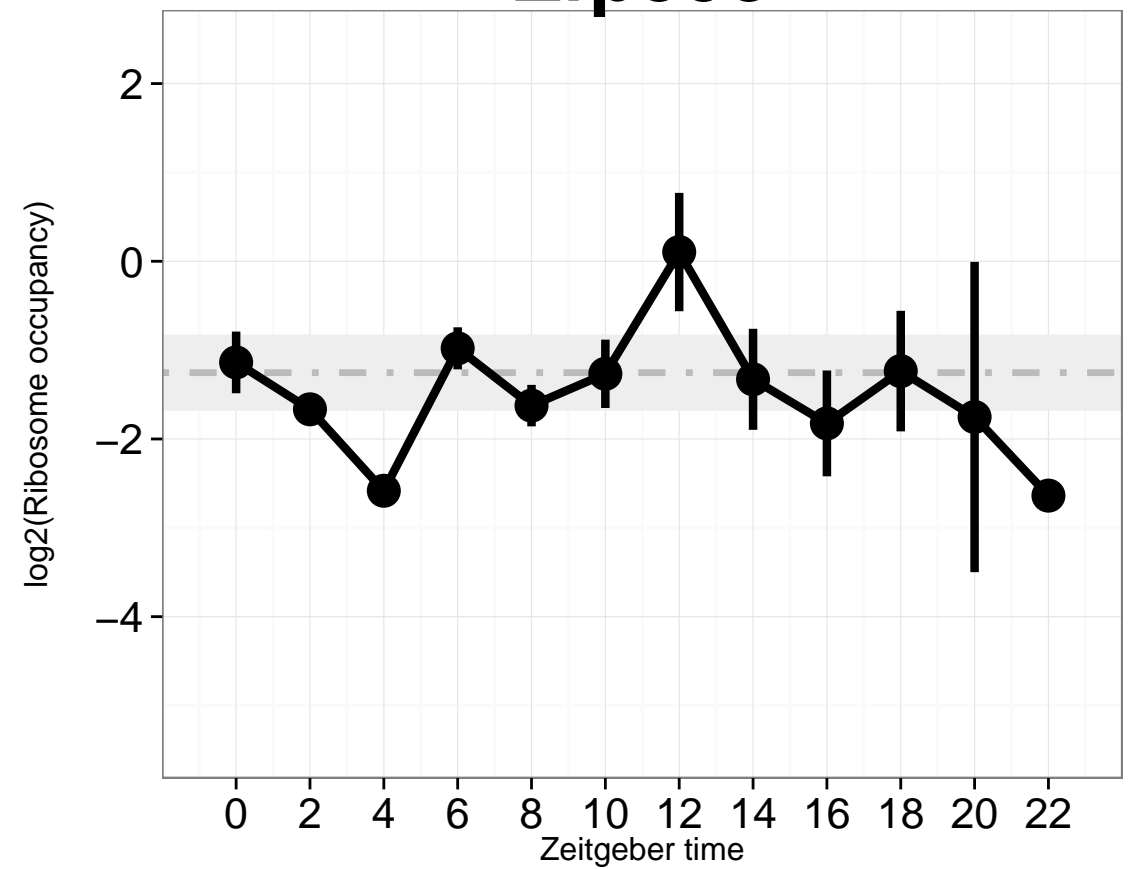

Supplement: Supplementary file 4670 [file 1]

## Pyroxd2

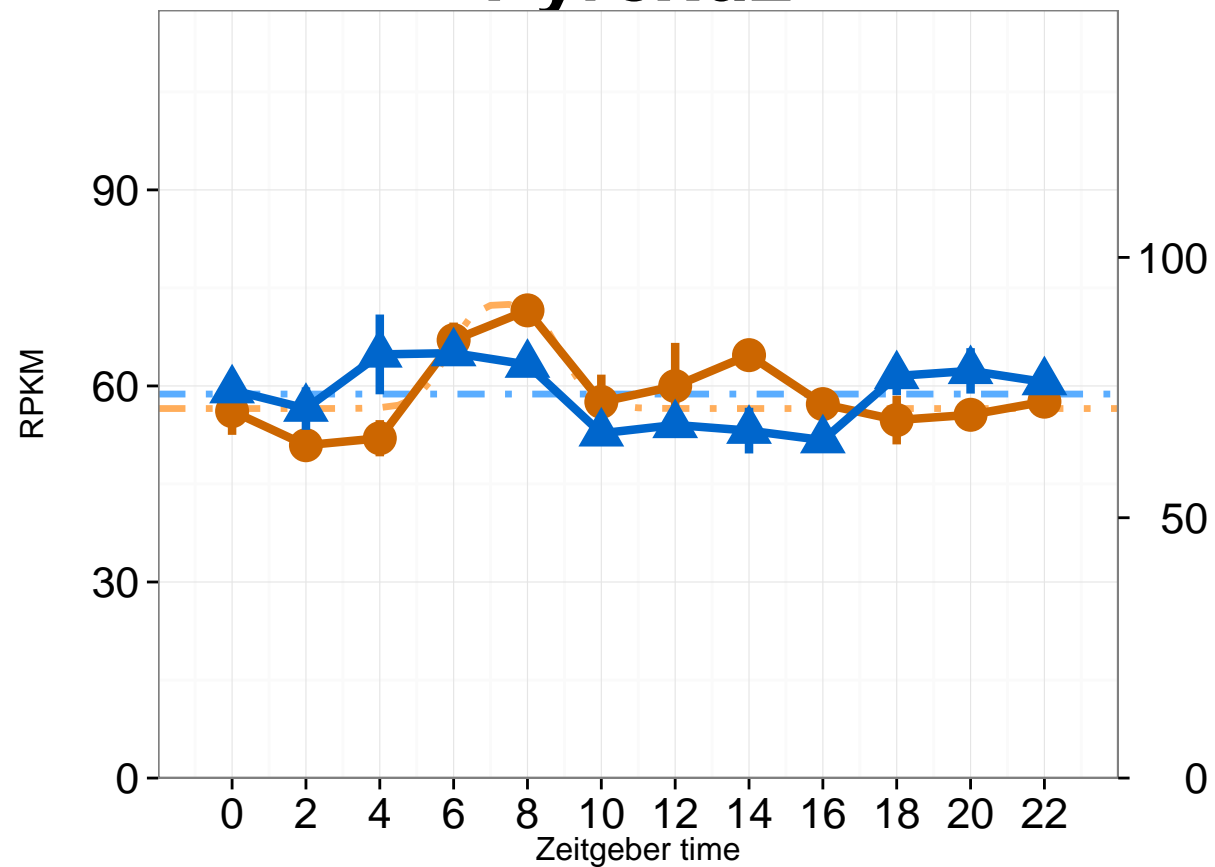

## Pyroxd2

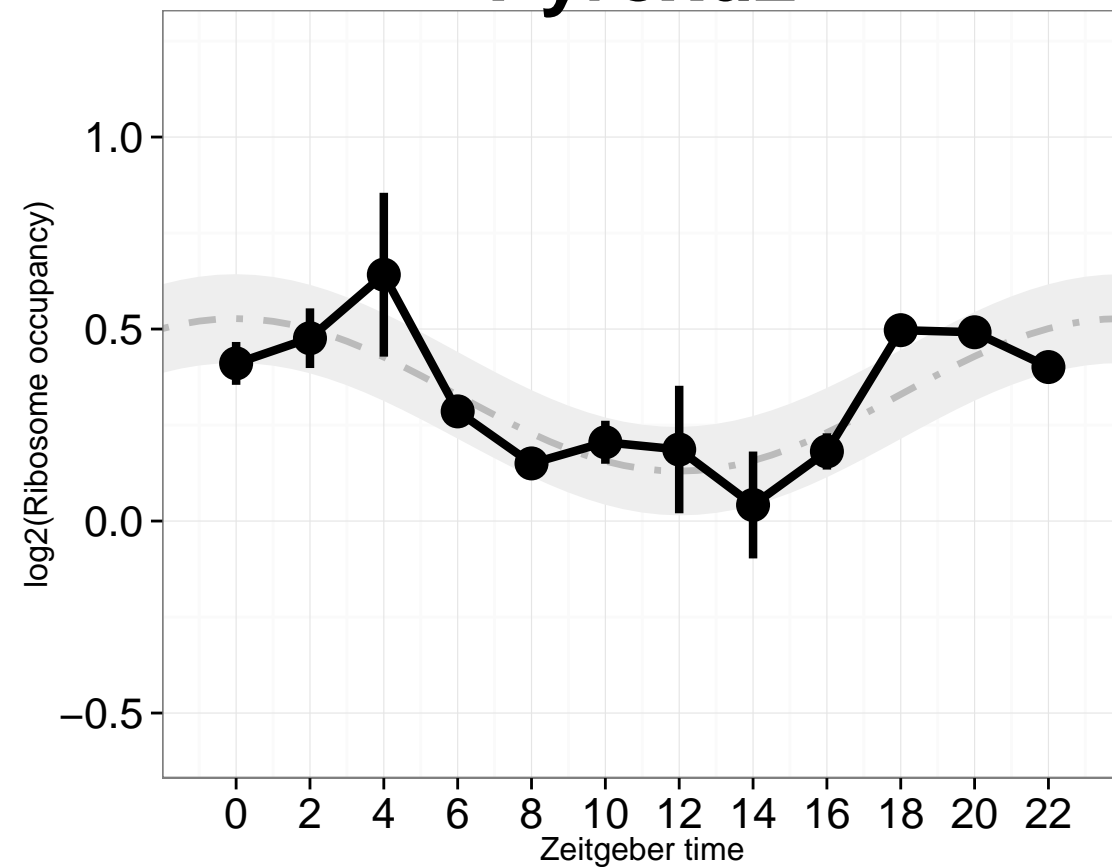

Supplement: Supplementary file 4671 [file 1]

# Hist1h1e

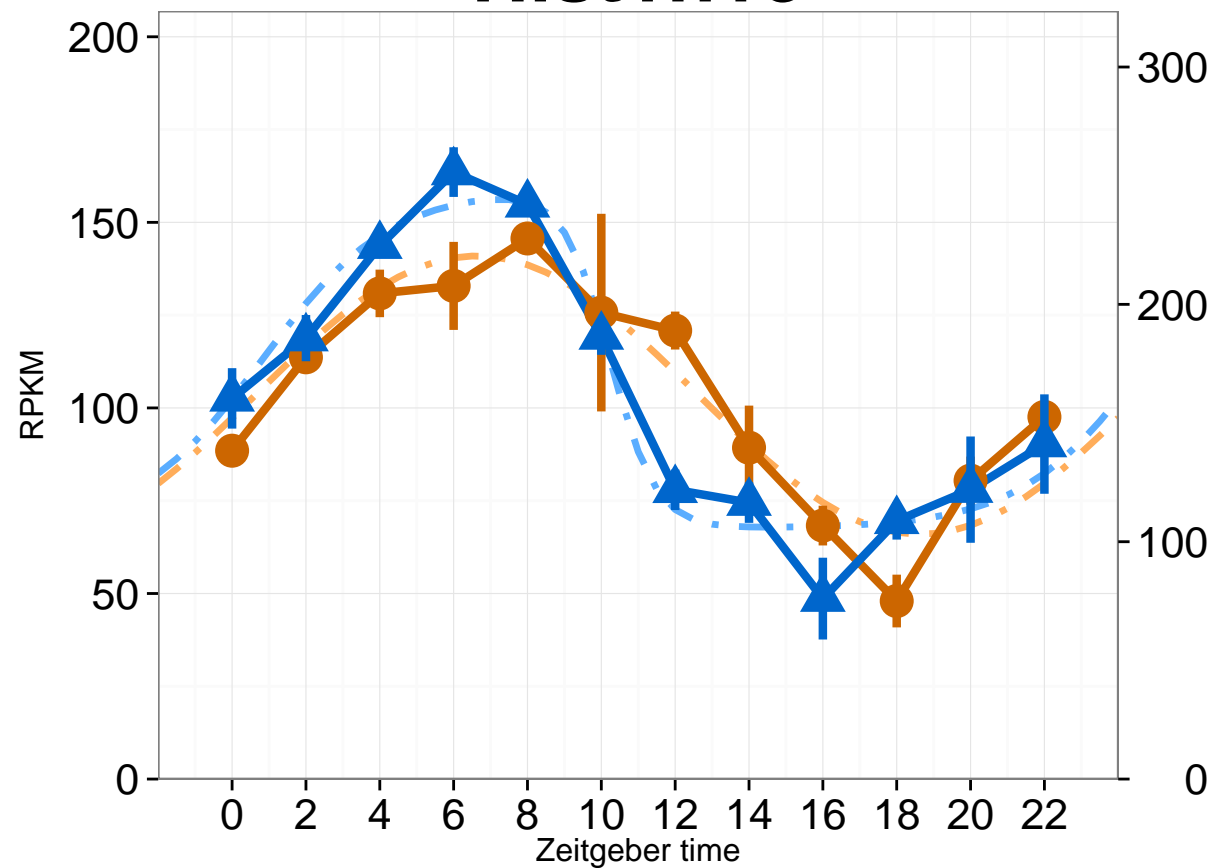

# Hist1h1e

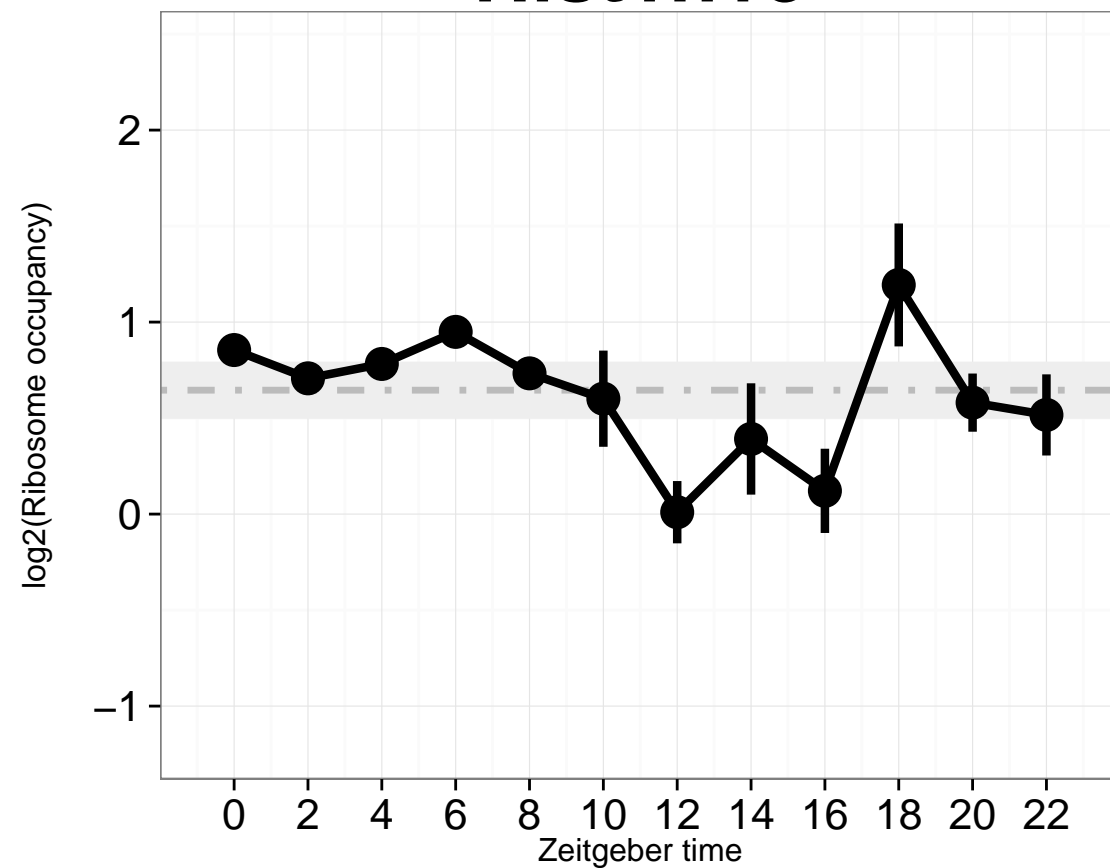

Supplement: Supplementary file 4672 [file 1]

## ler3

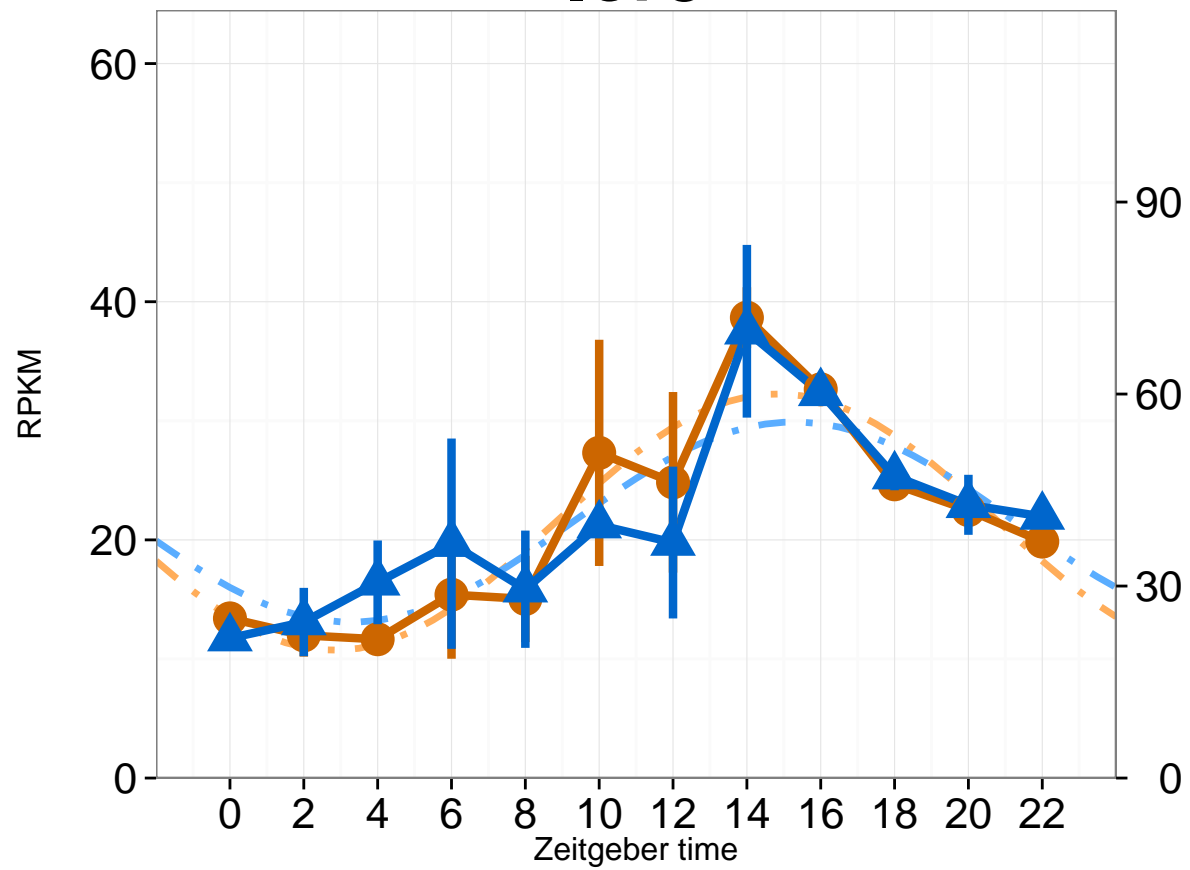

## ler3

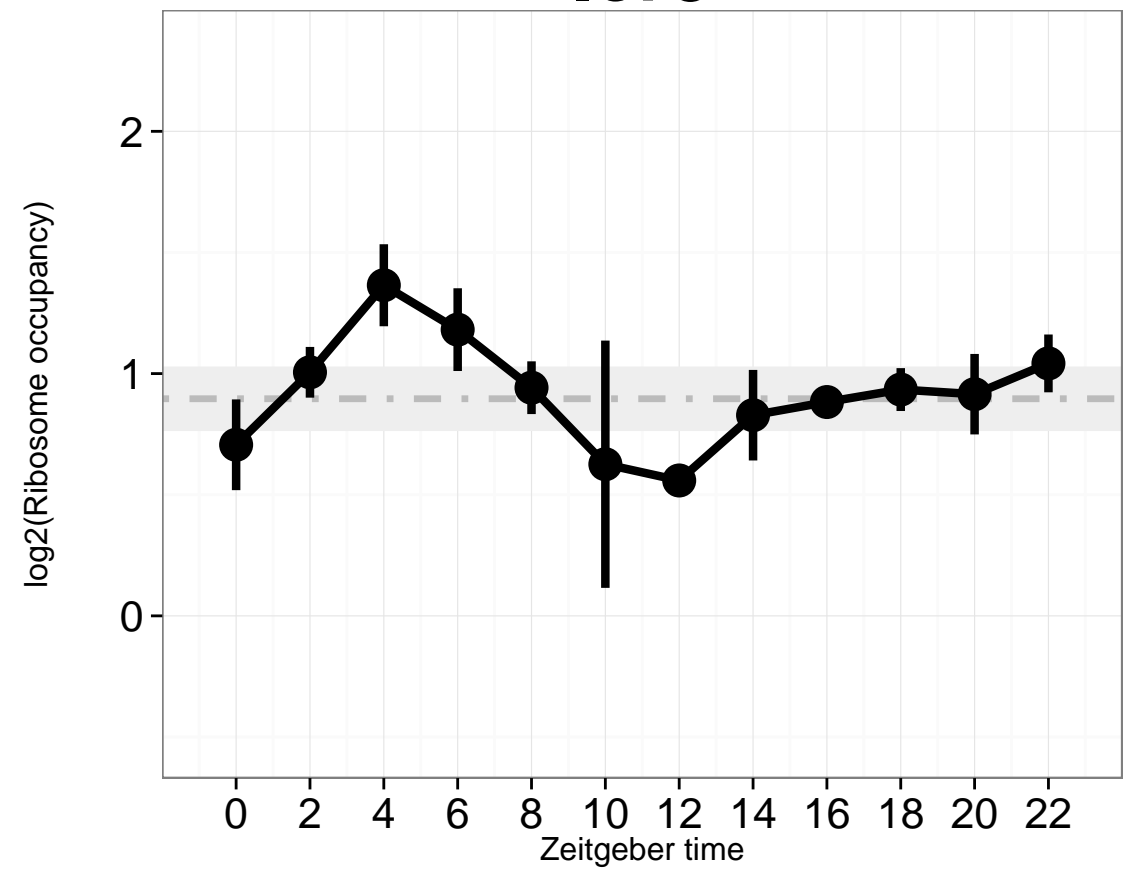

Supplement: Supplementary file 4673 [file 1]

# Itgb5

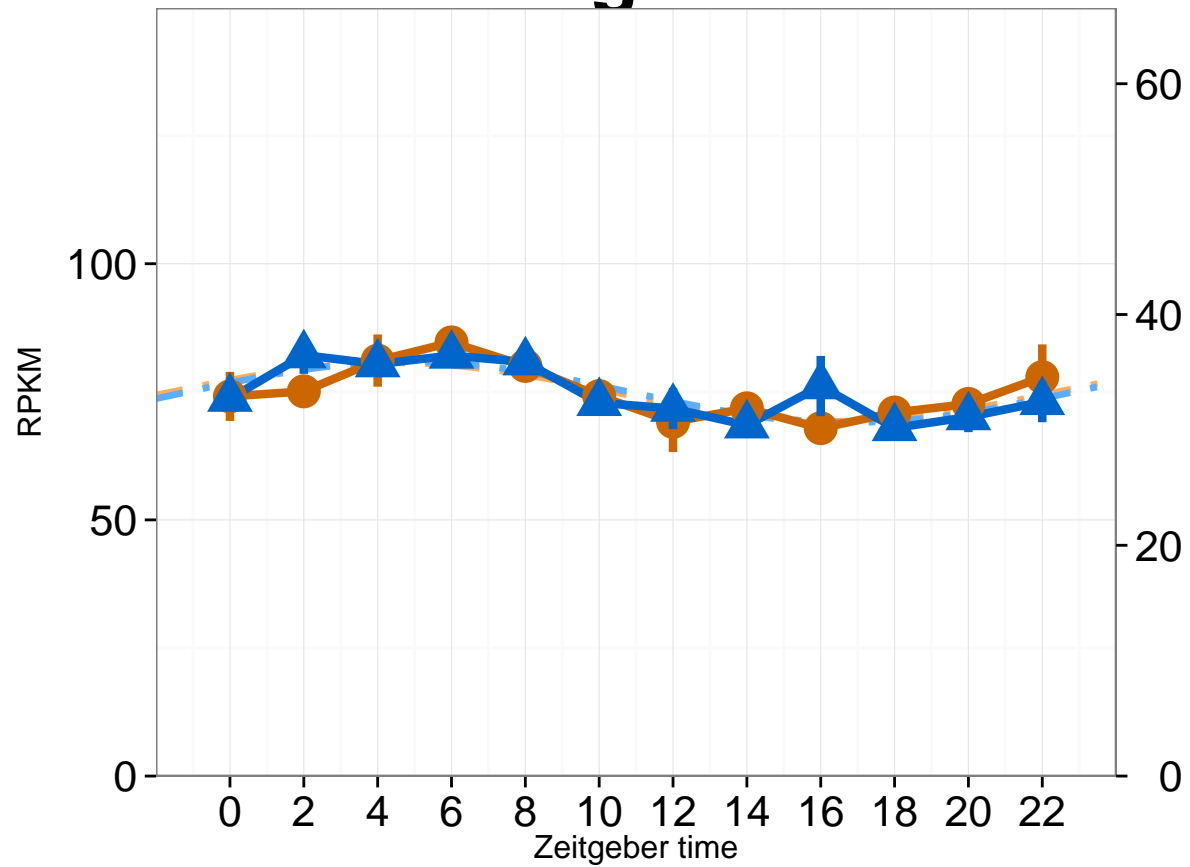

# Itgb5

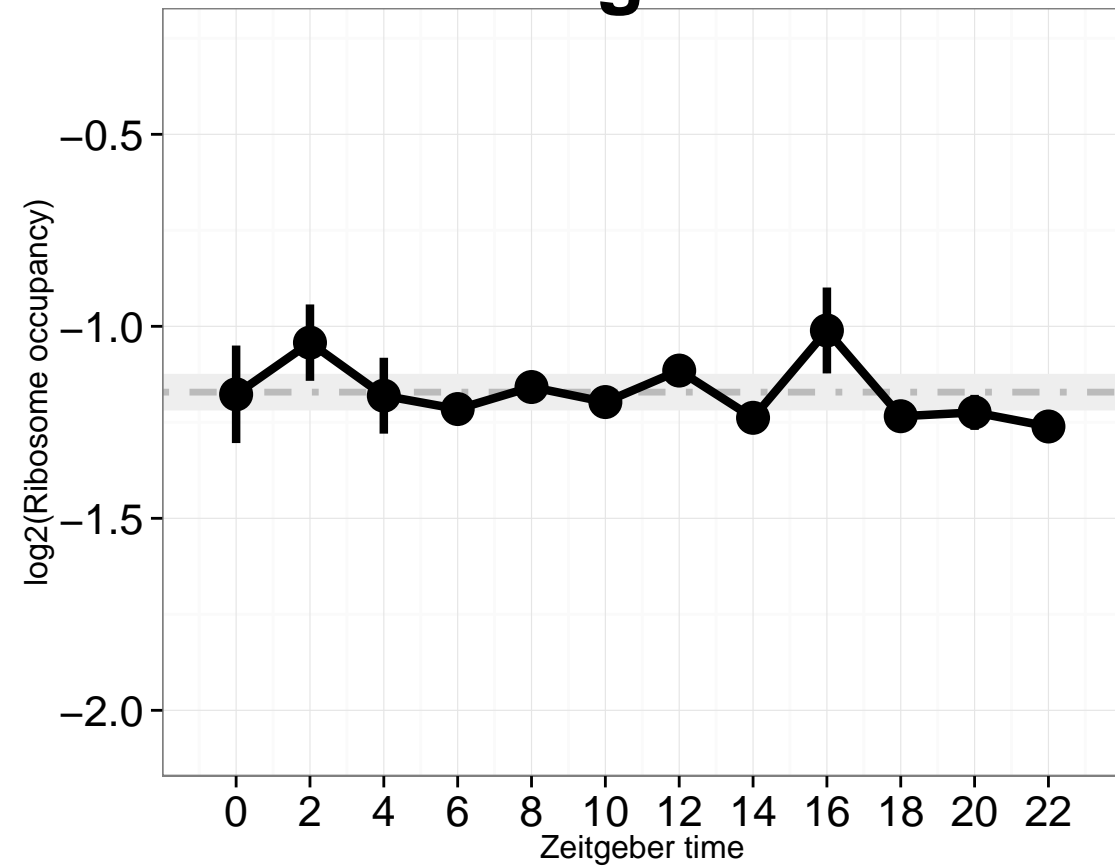

Supplement: Supplementary file 4674 [file 1]

# Cyp4a14

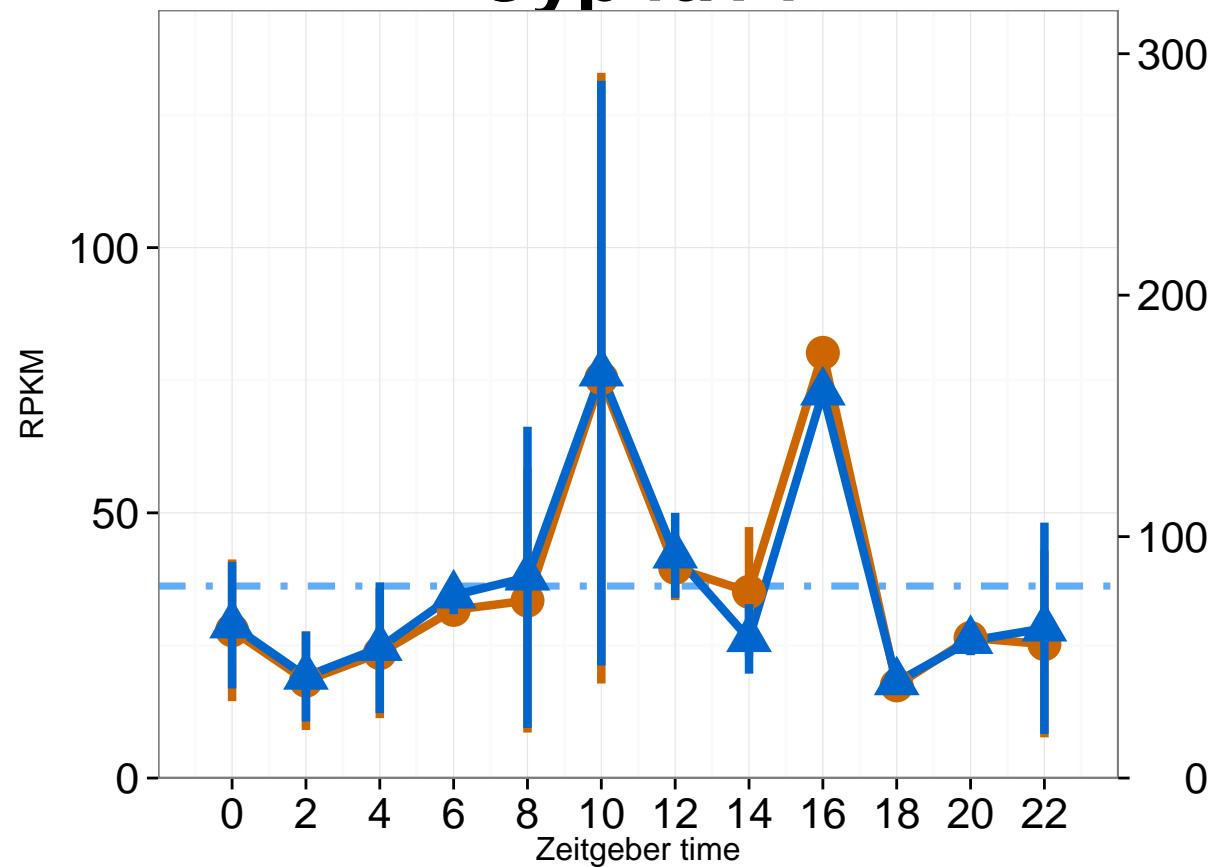

# Cyp4a14

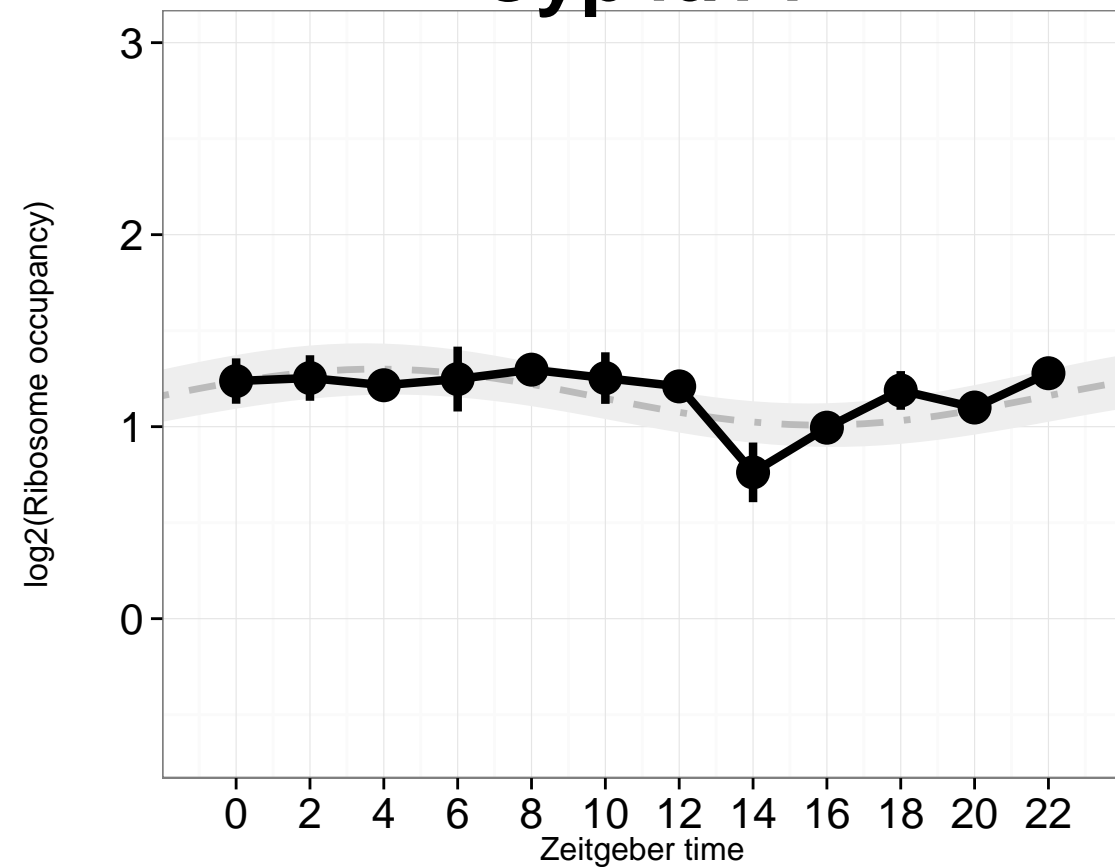

Supplement: Supplementary file 4675 [file 1]

## Sdhc

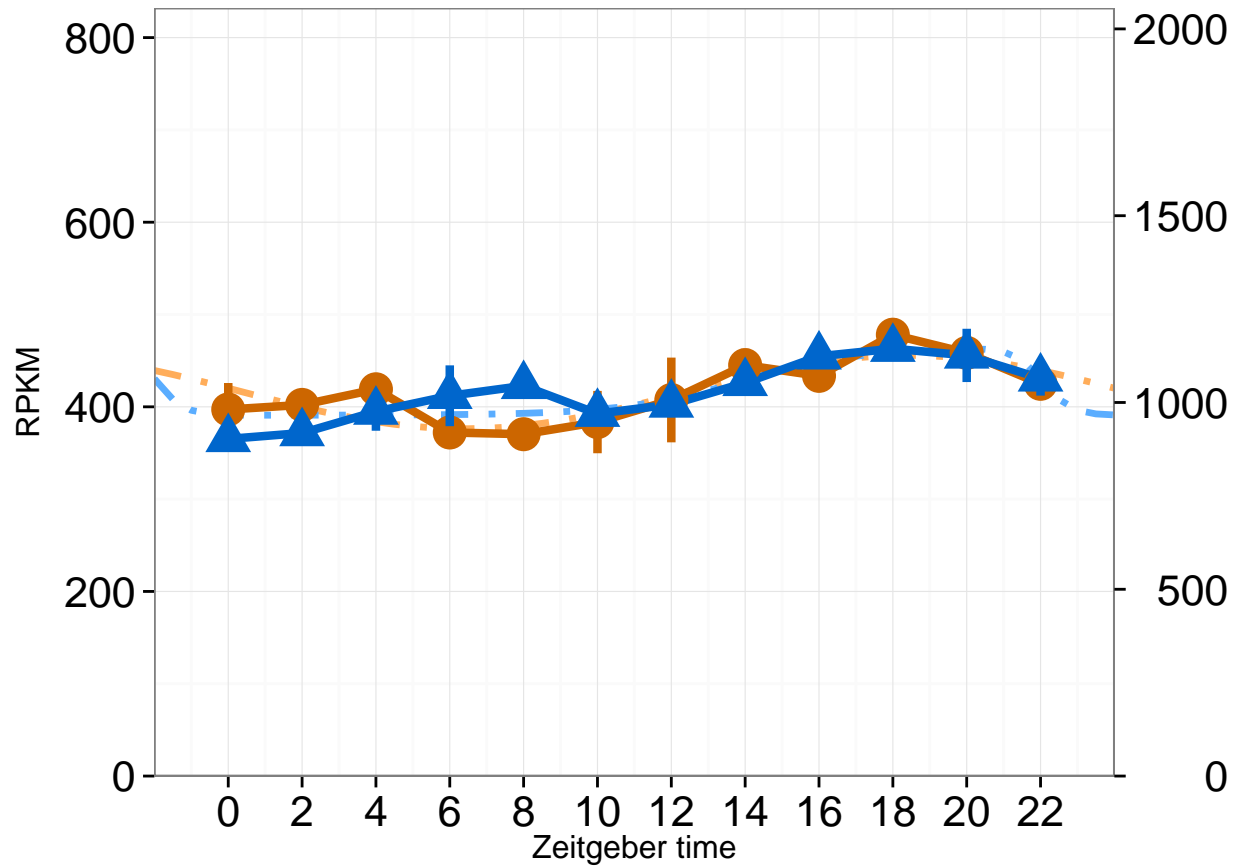

## Sdhc

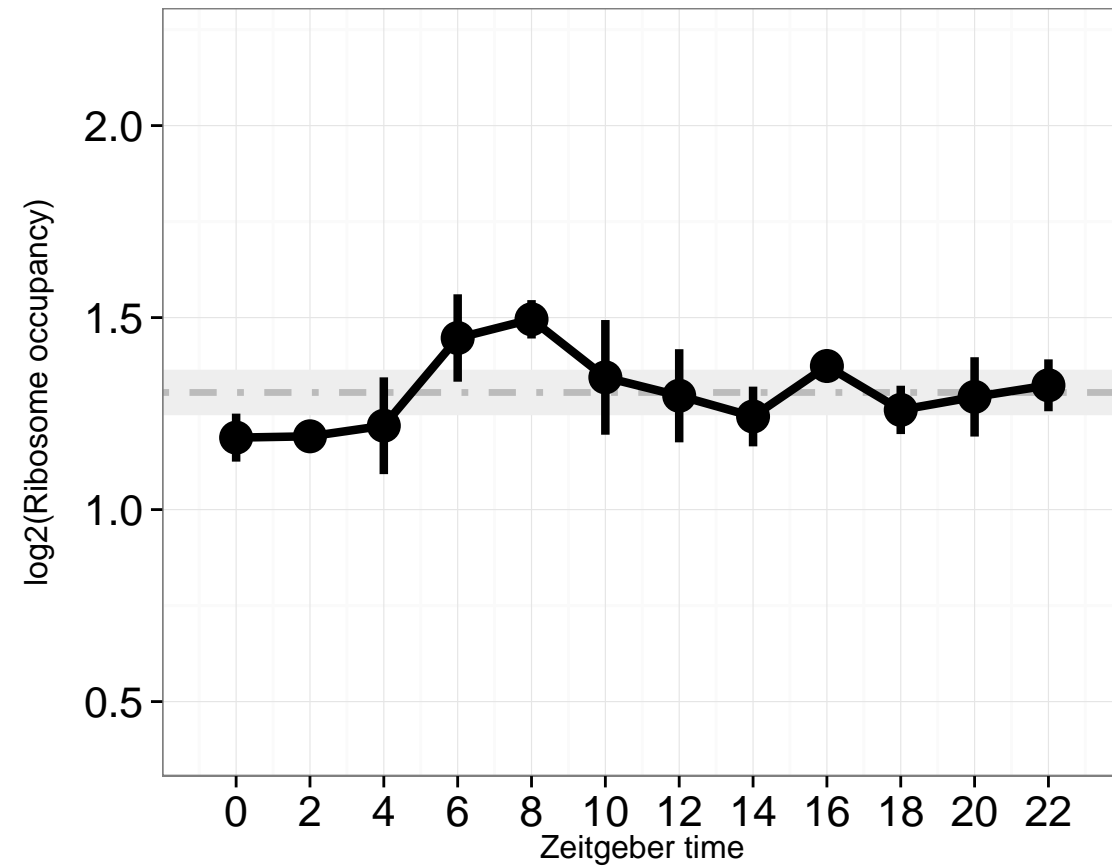

Supplement: Supplementary file 4676 [file 1]

## Sh3bp4

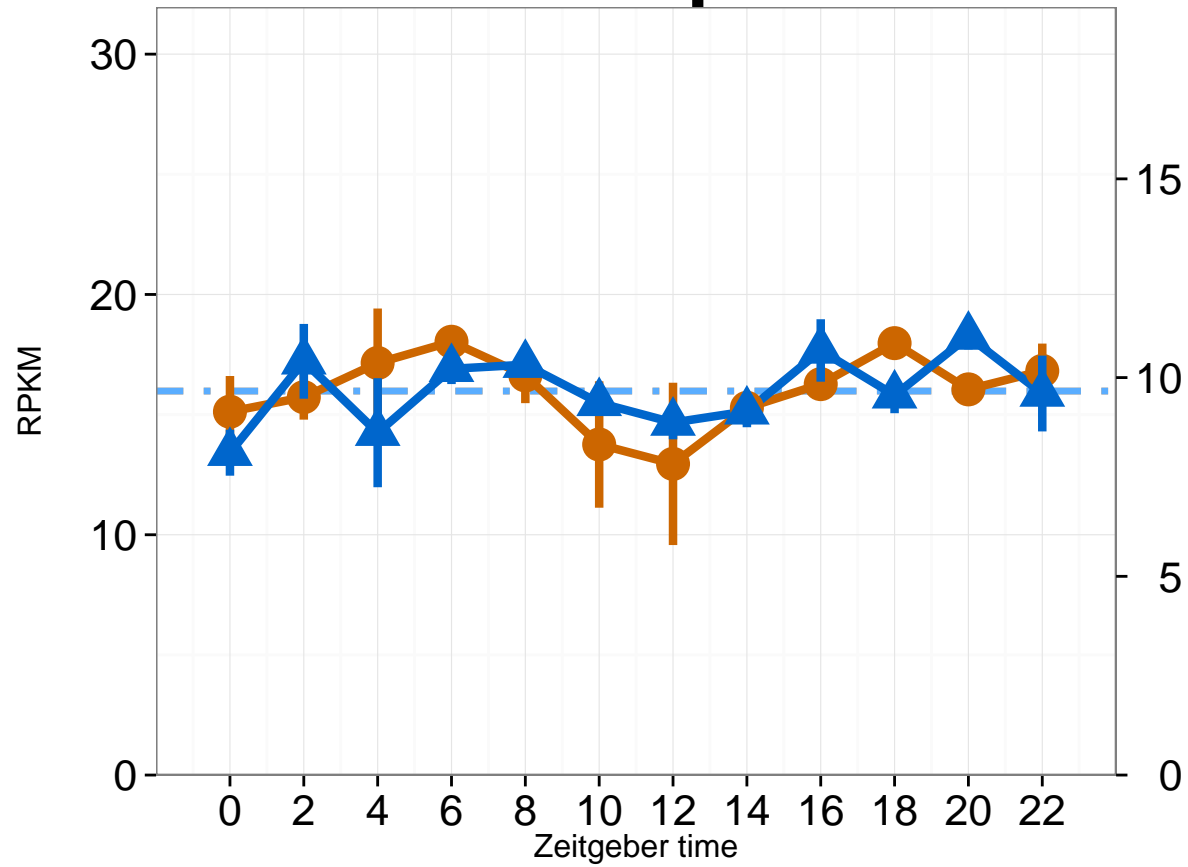

## Sh3bp4

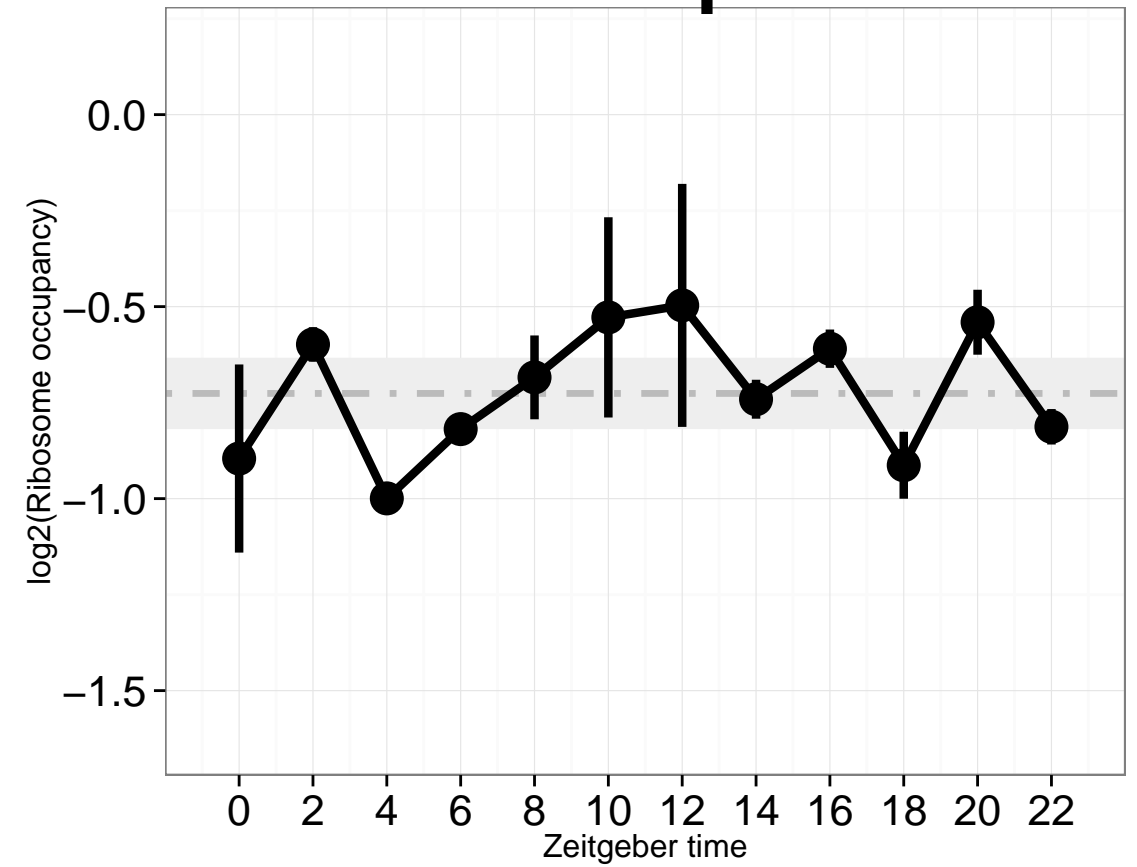

Supplement: Supplementary file 4677 [file 1]

# Tspan4

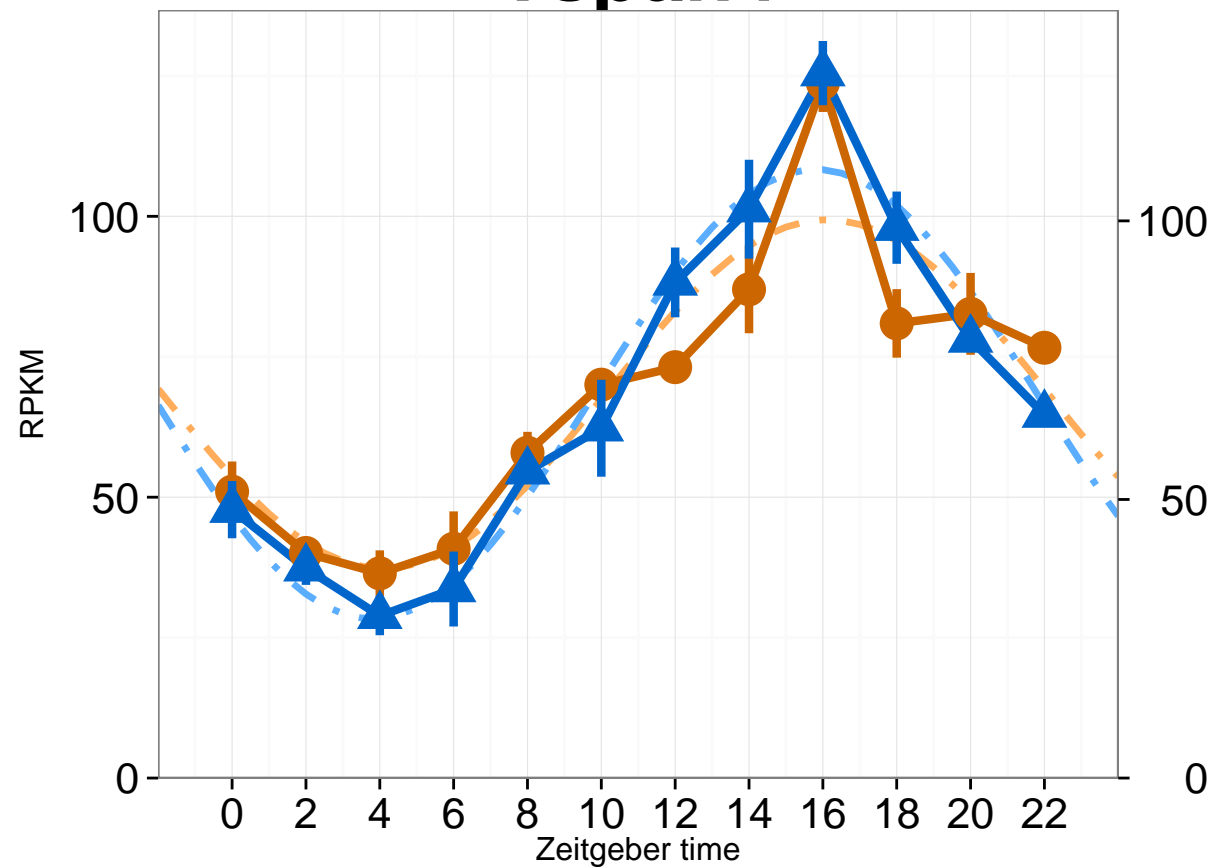

# Tspan4

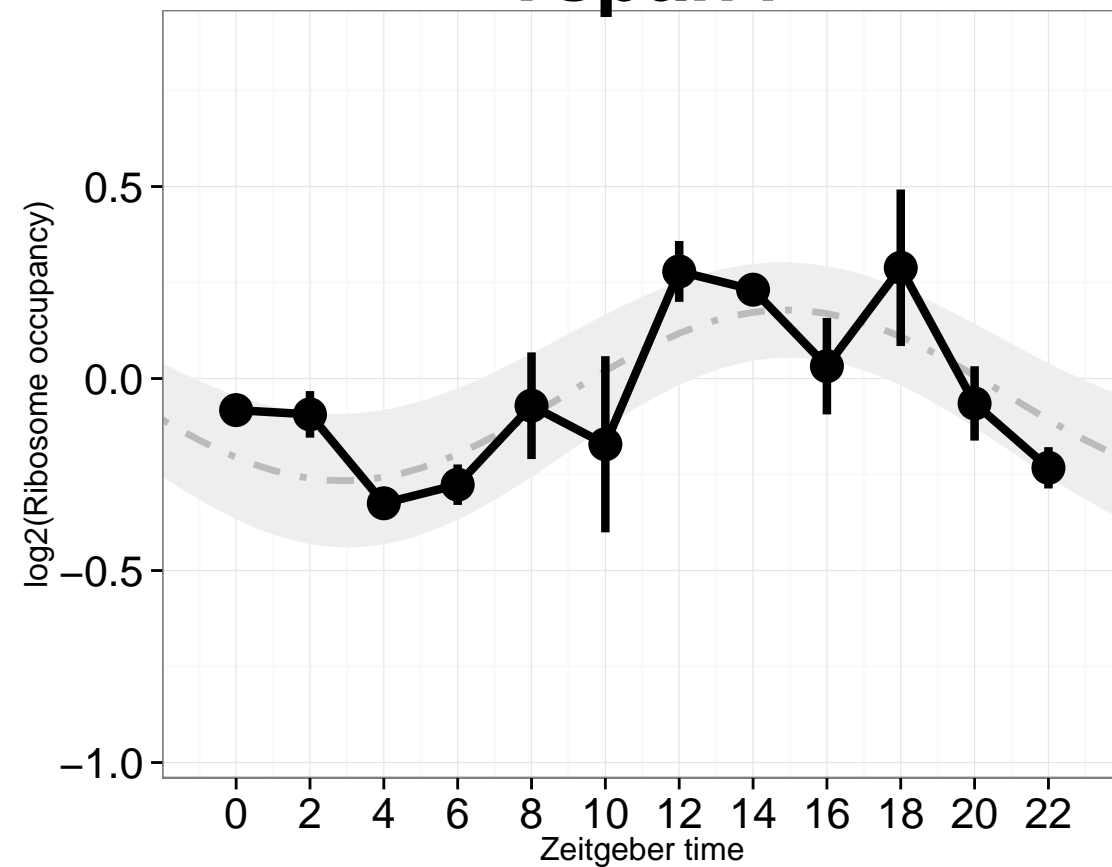

Supplement: Supplementary file 4678 [file 1]

## Ephx1

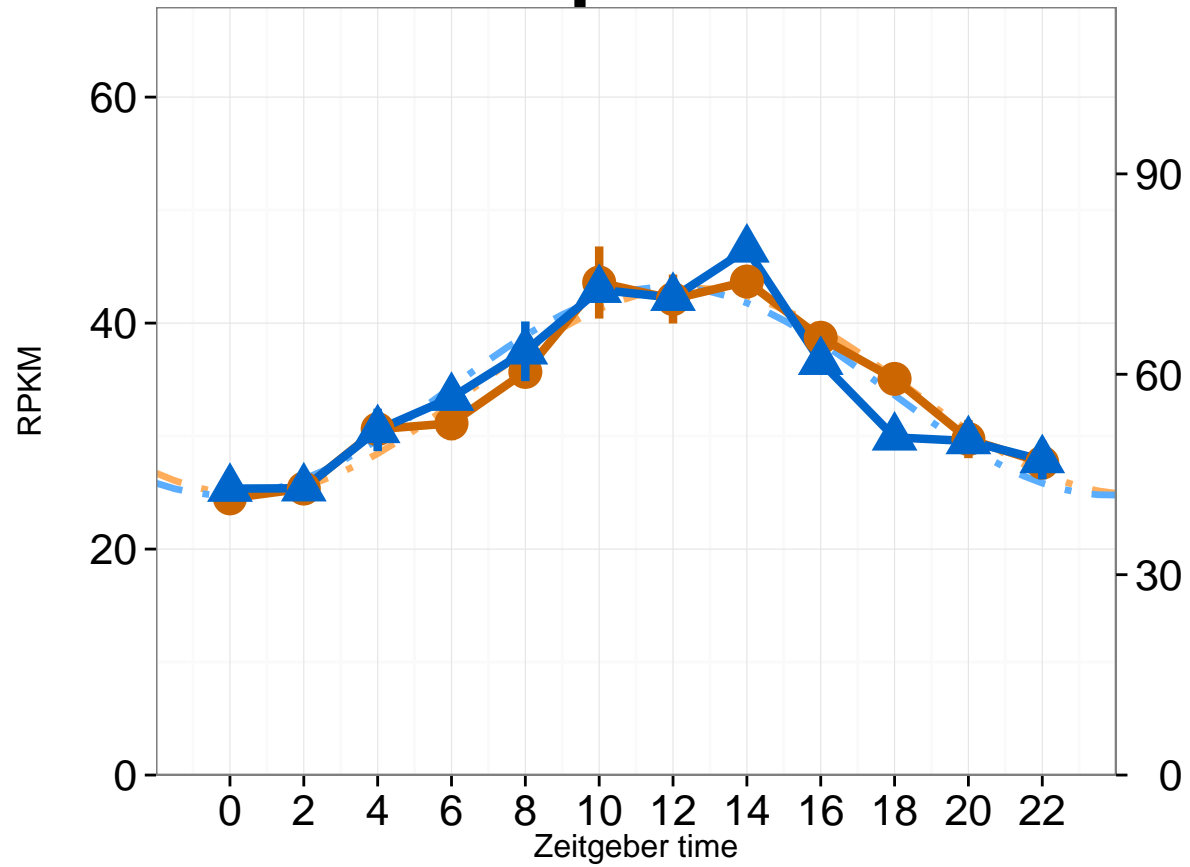

## Ephx1

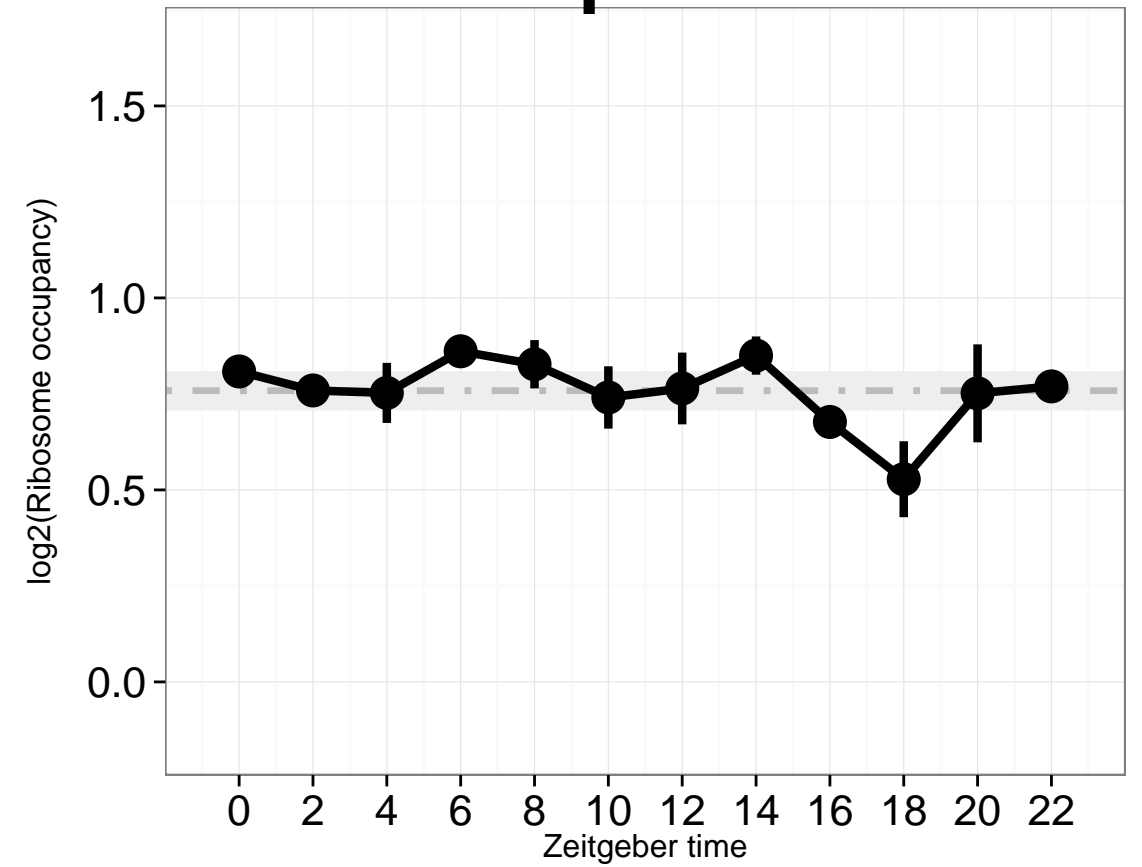

Supplement: Supplementary file 4679 [file 1]

## Ssr4

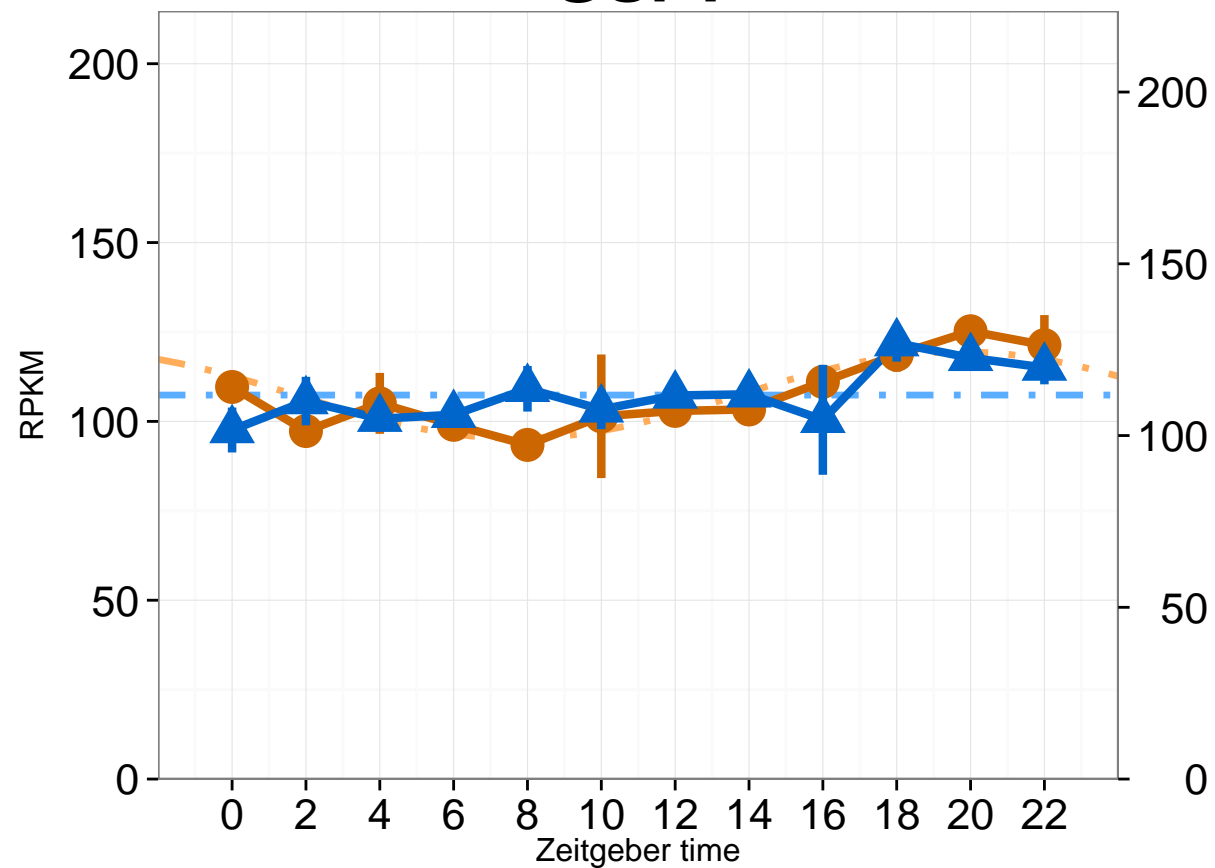

## Ssr4

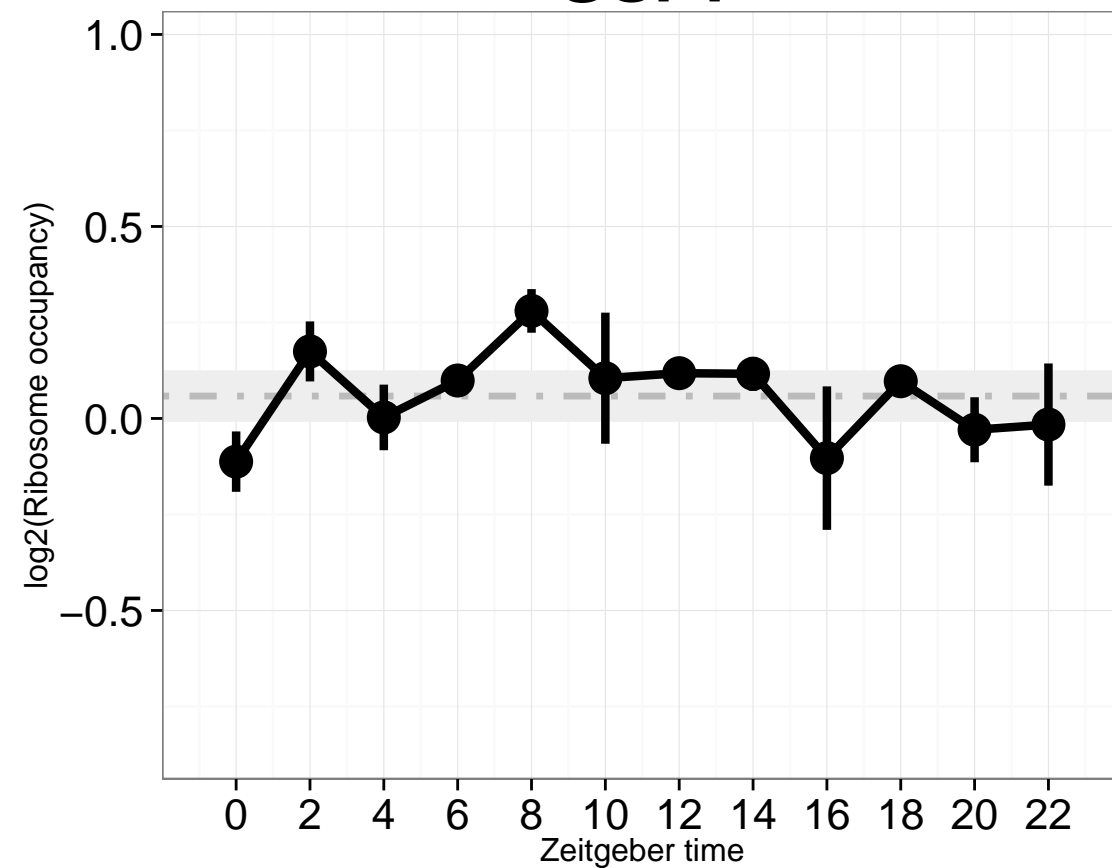

Supplement: Supplementary file 4680 [file 1]

## Samd9l

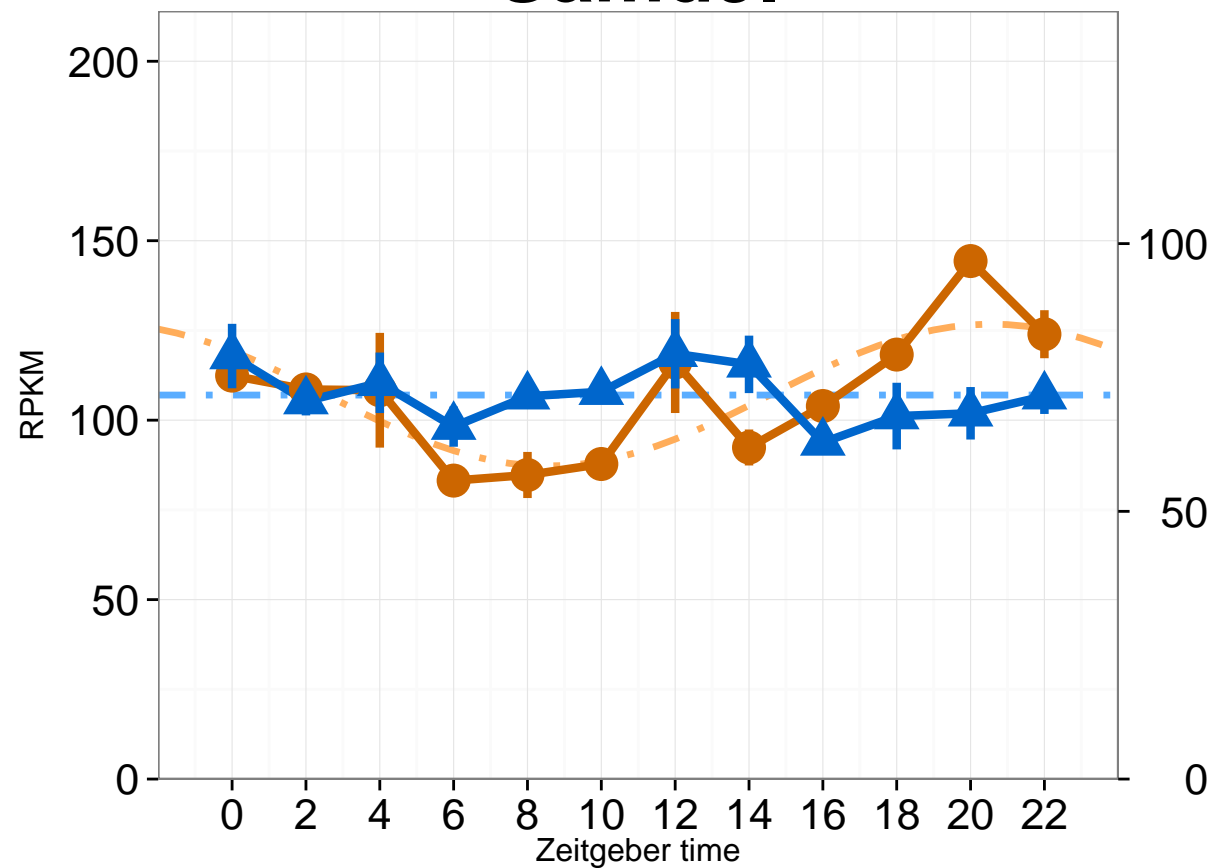

## Samd9l

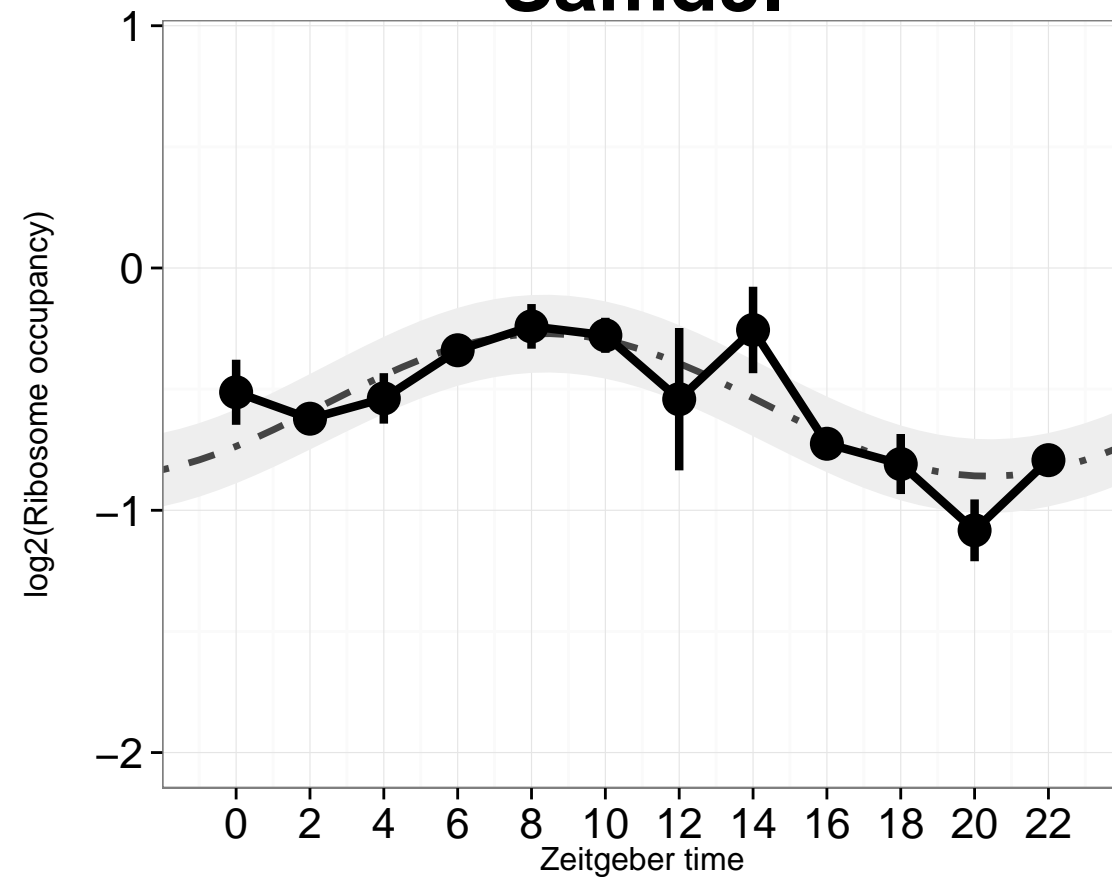

Supplement: Supplementary file 4681 [file 1]

# Zmat5

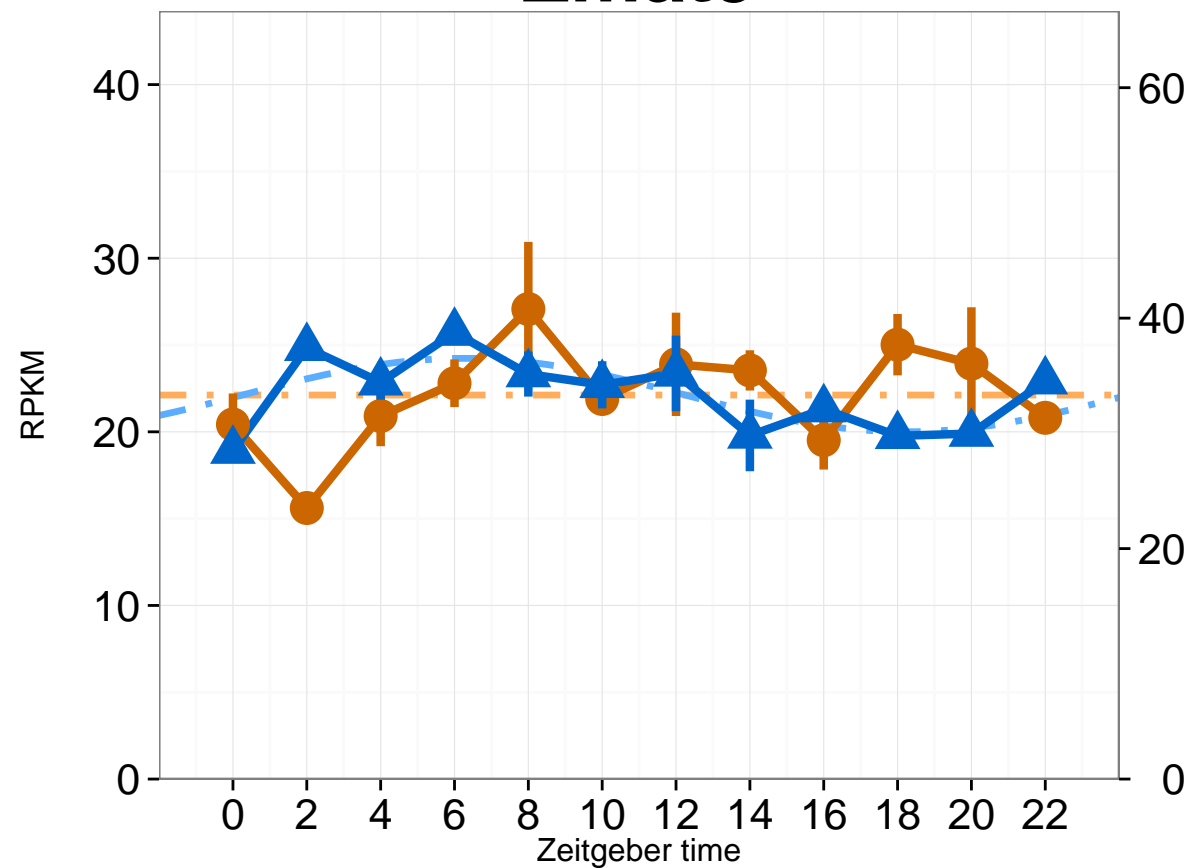

# Zmat5

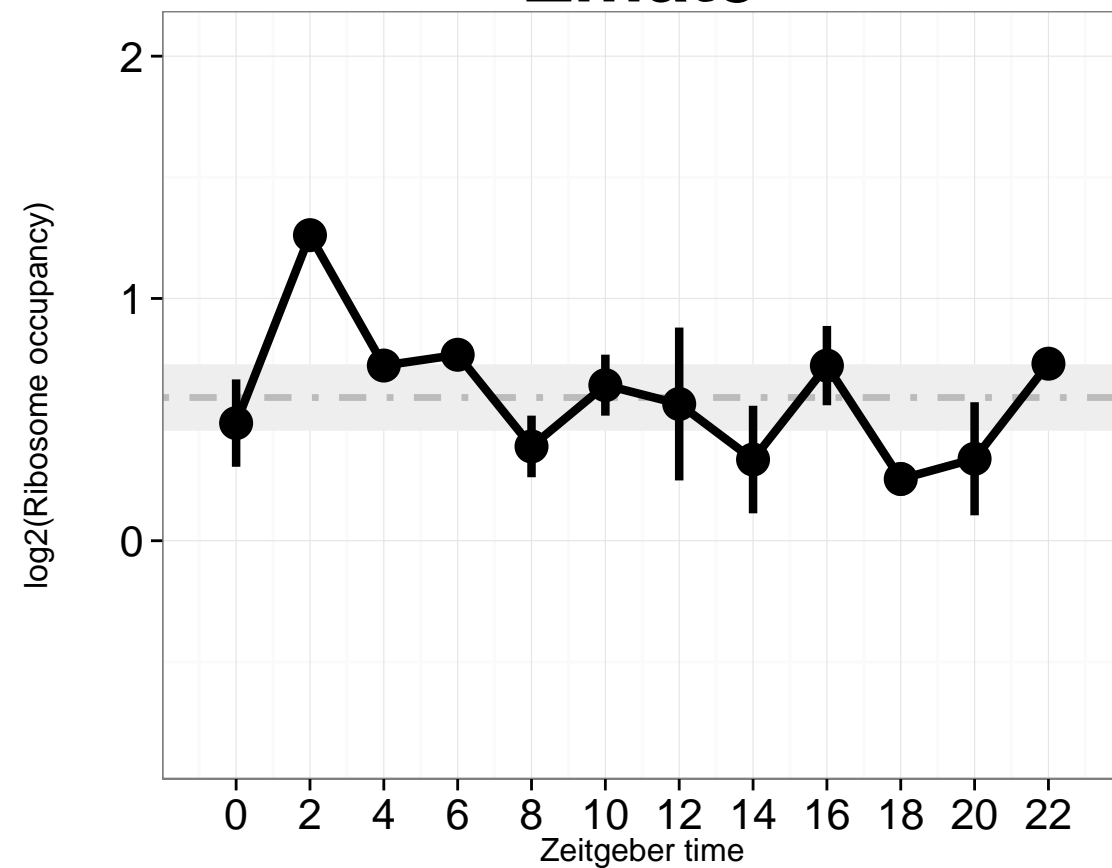

Supplement: Supplementary file 4682 [file 1]

## Akirin2

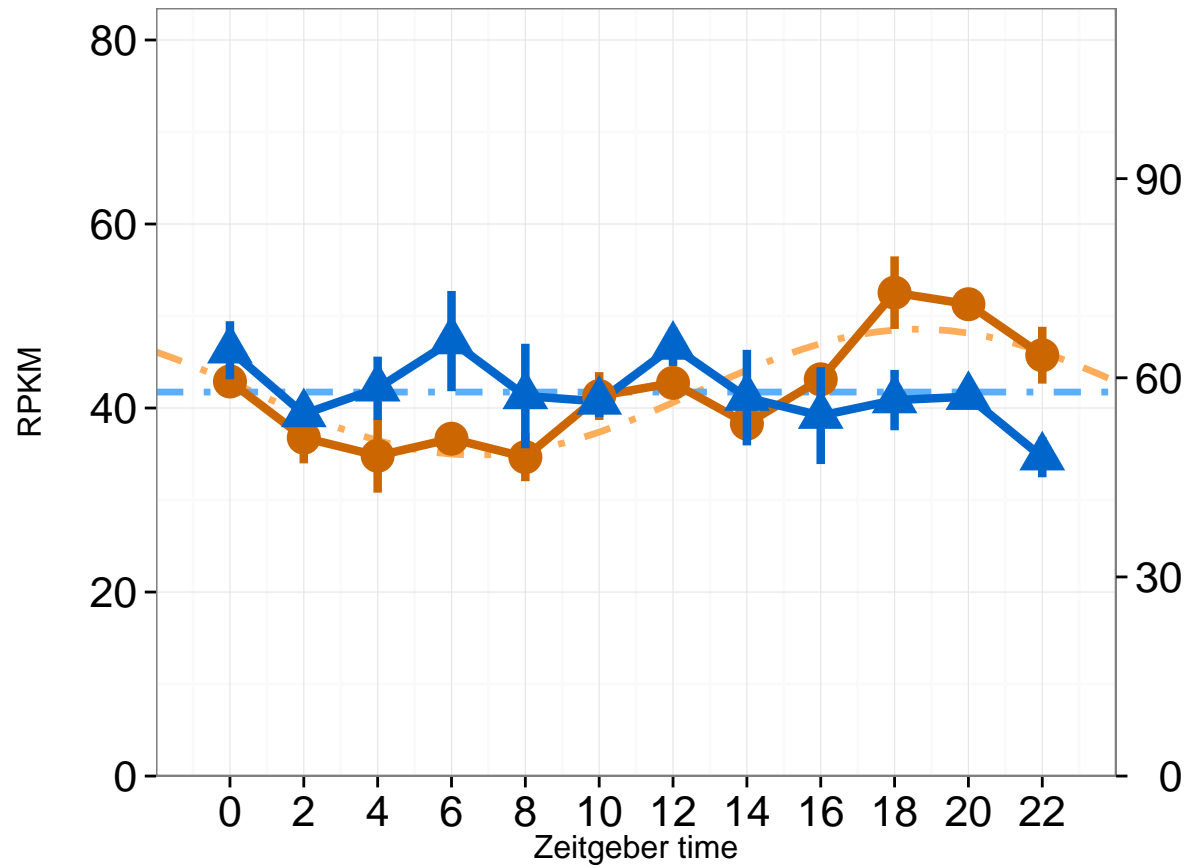

## Akirin2

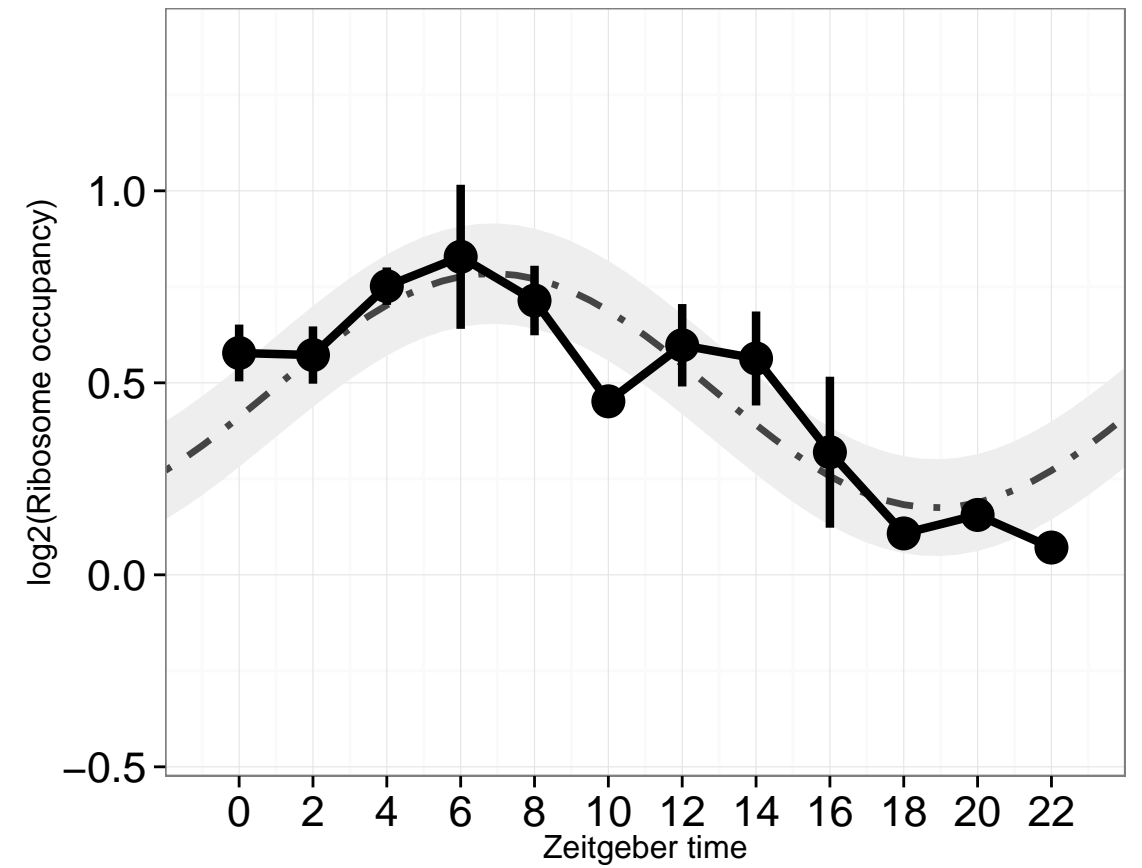

Supplement: Supplementary file 4683 [file 1]

## Melk

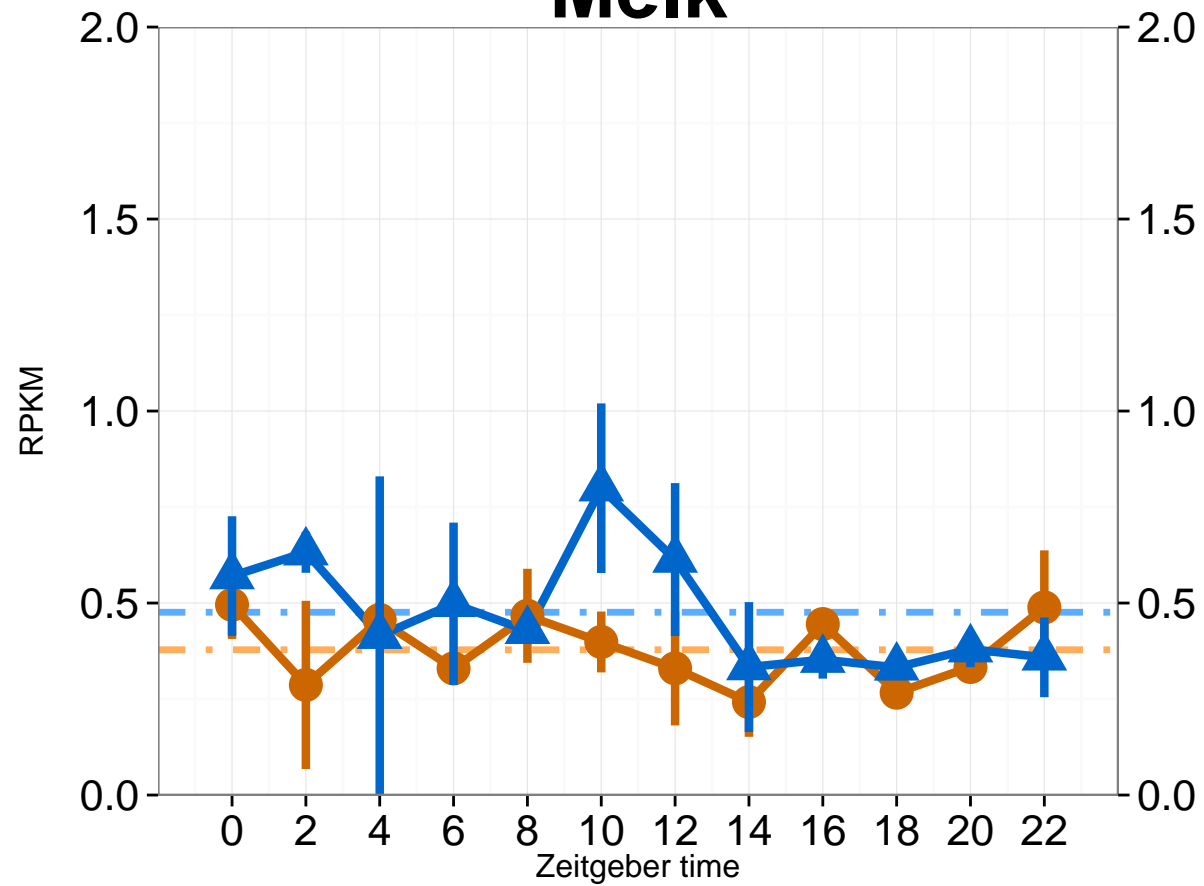

## Melk

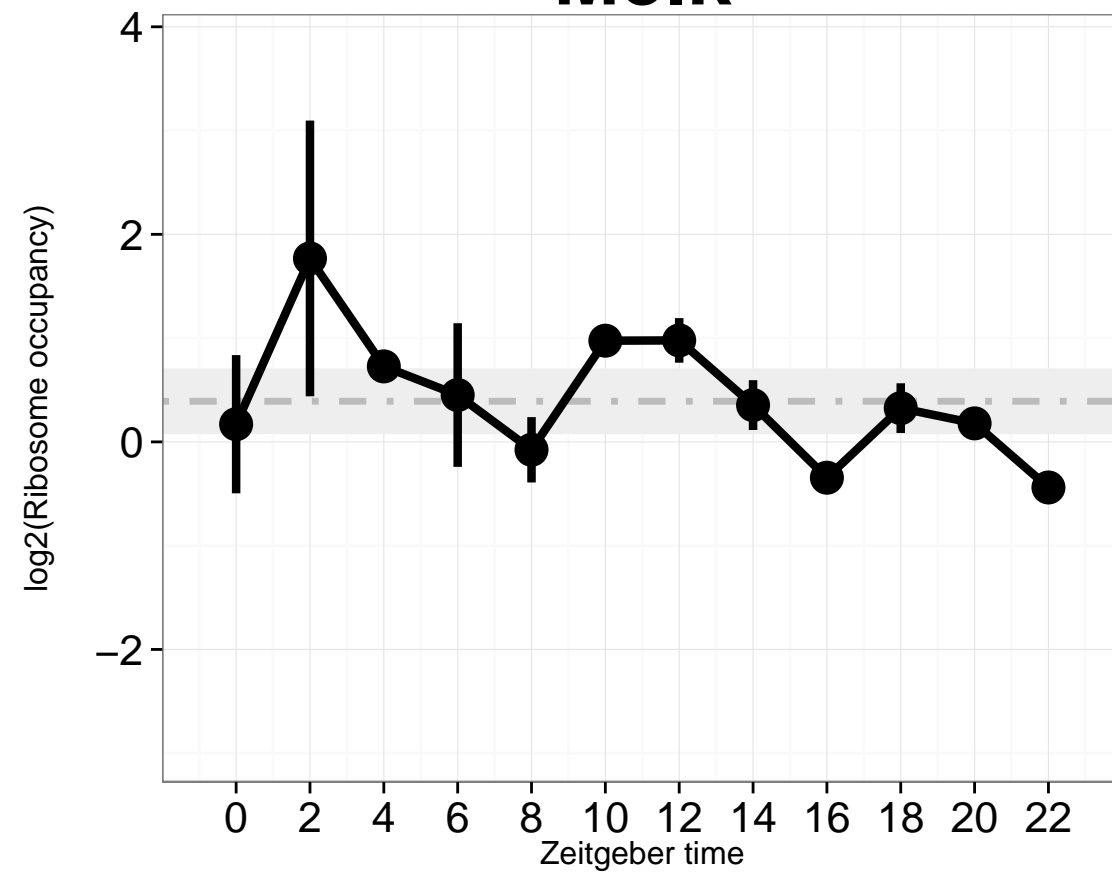

Supplement: Supplementary file 4684 [file 1]

## Rbm14

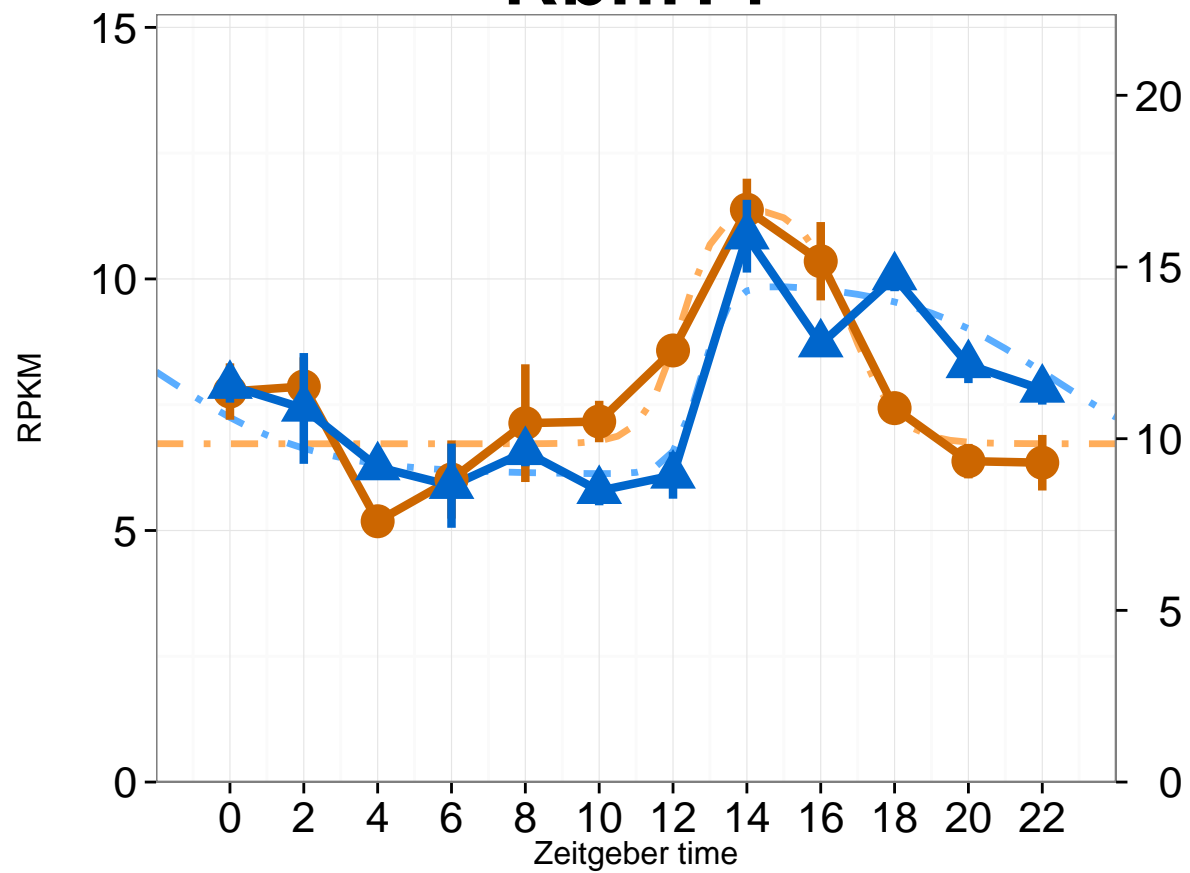

## Rbm14

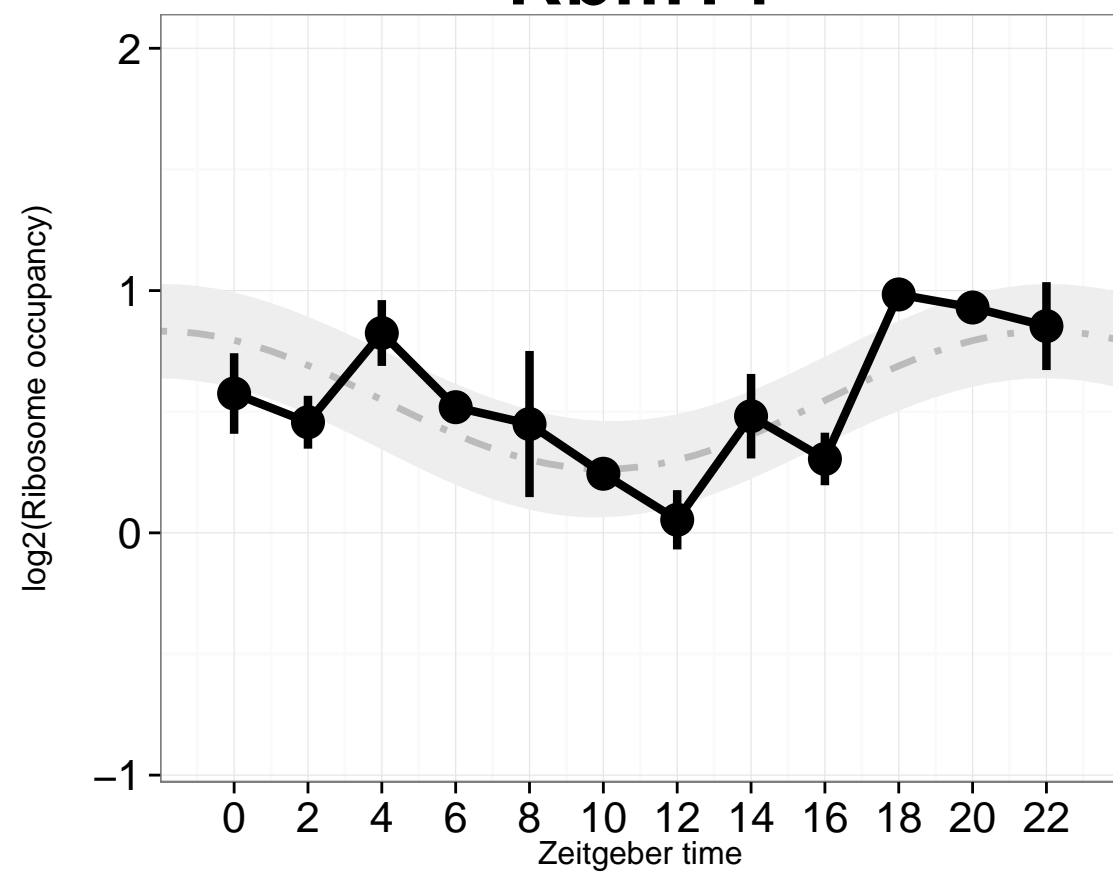

Supplement: Supplementary file 4685 [file 1]

## Amigo2

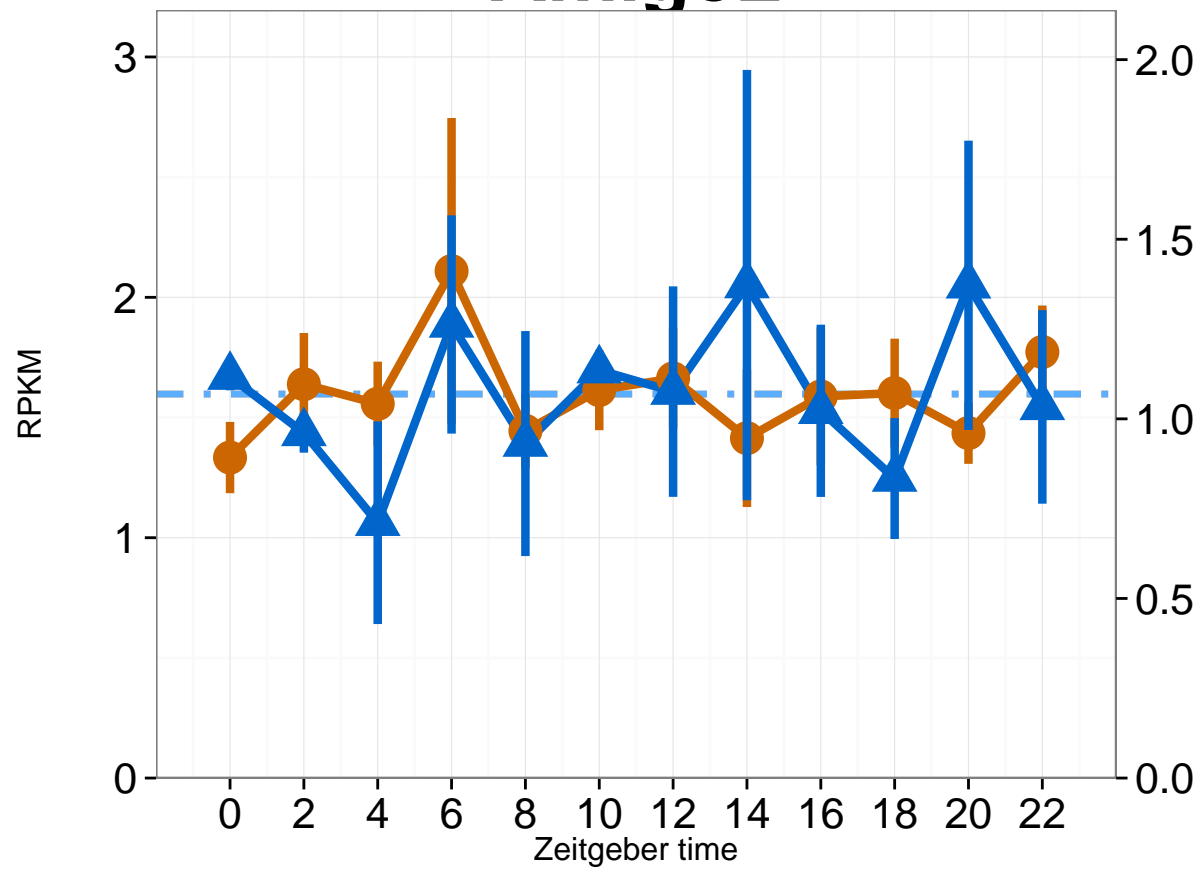

## Amigo2

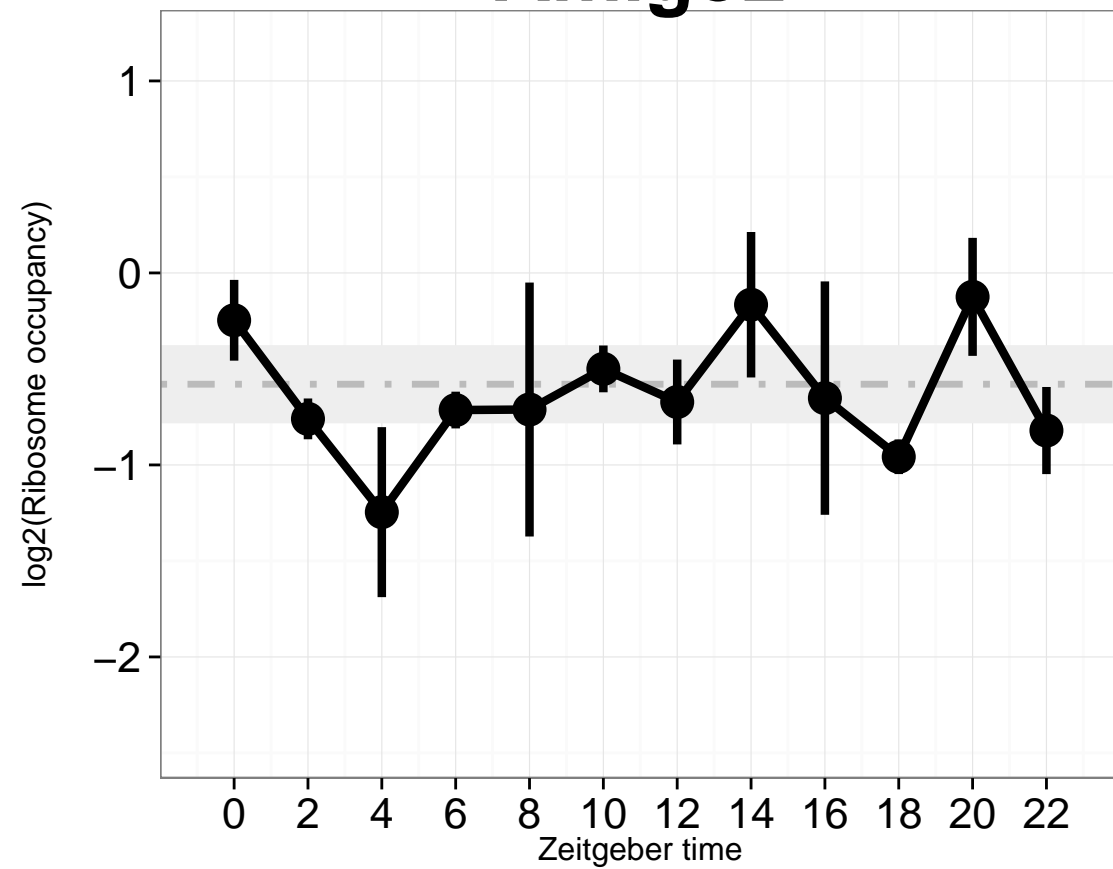

Supplement: Supplementary file 4686 [file 1]

# Ndufs6

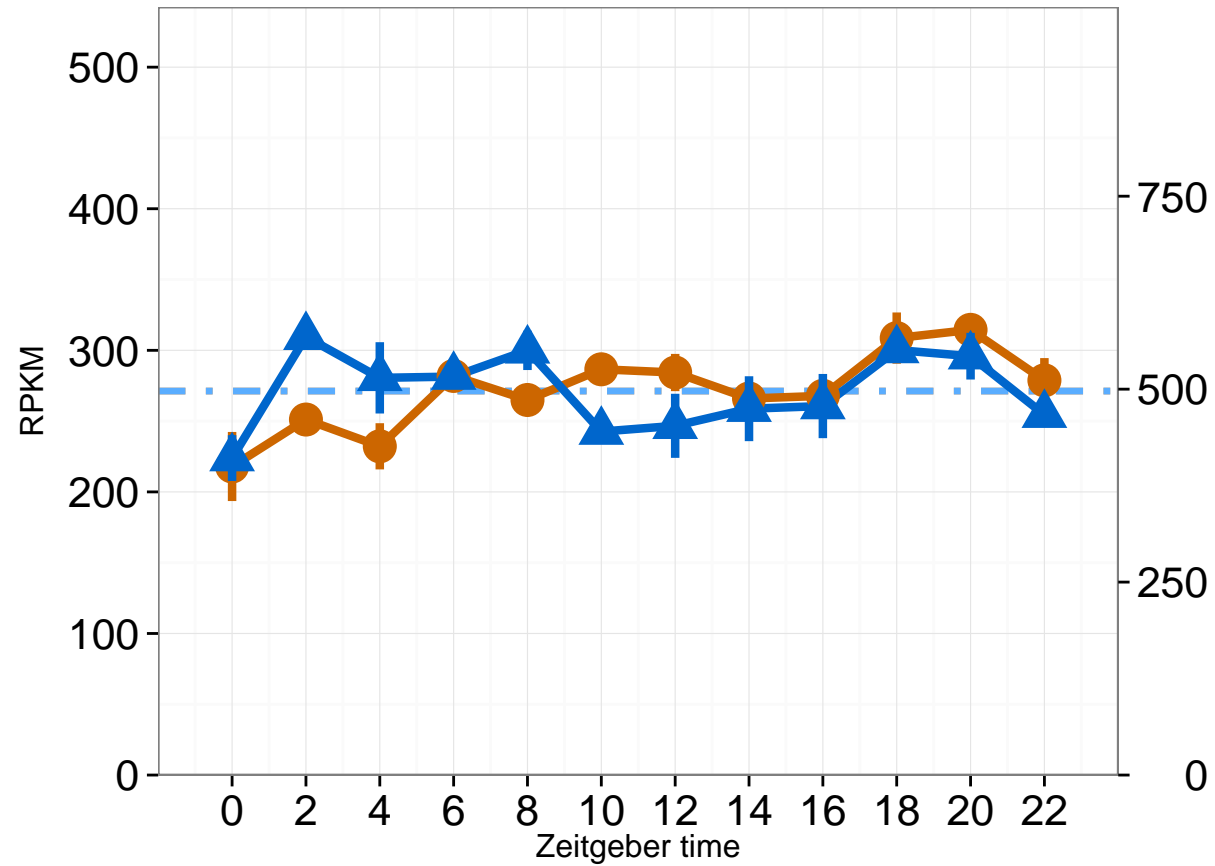

# Ndufs6

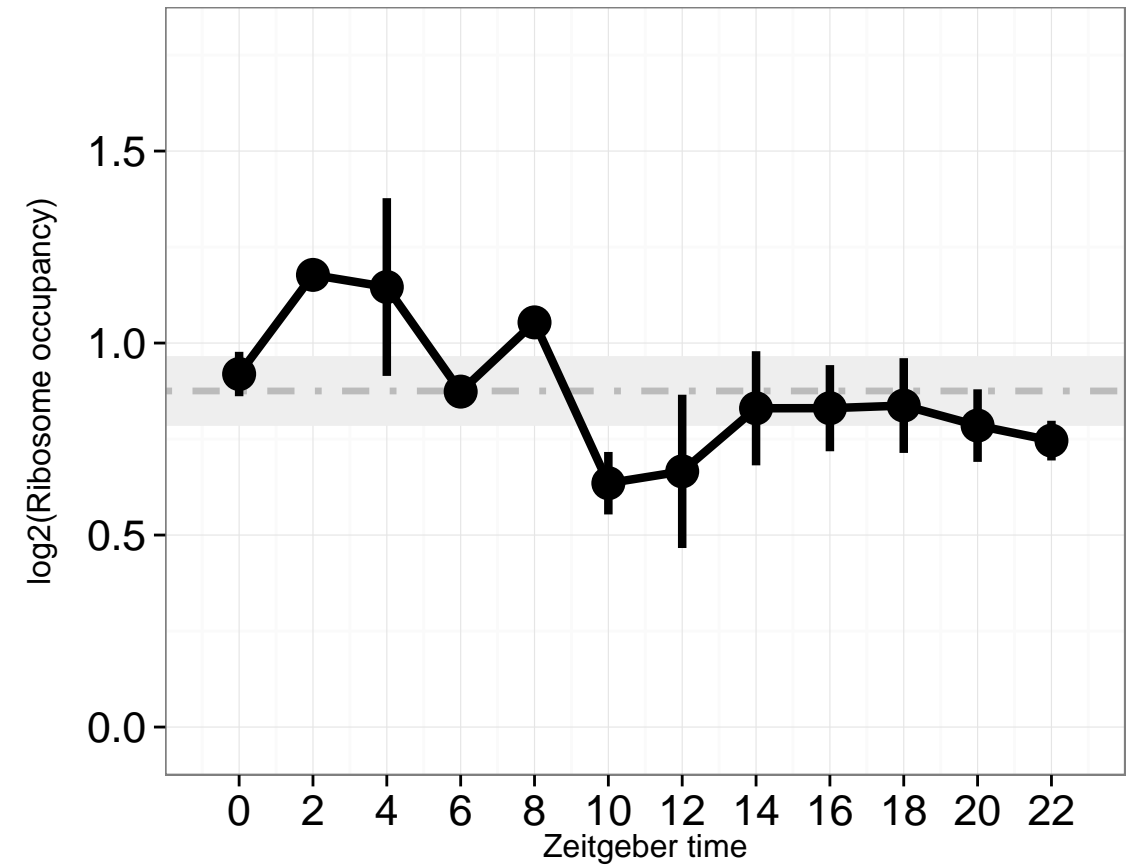

Supplement: Supplementary file 4687 [file 1]

## Sdf4

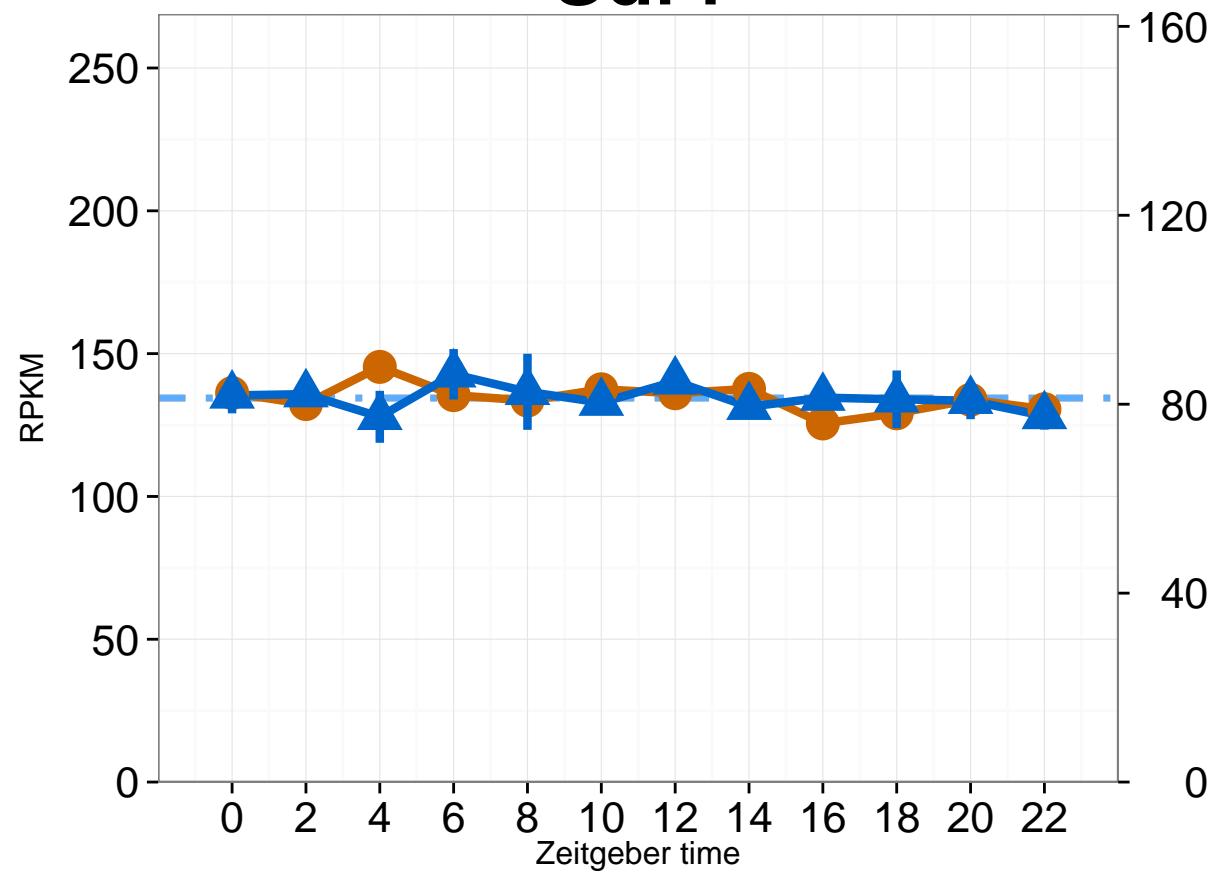

## Sdf4

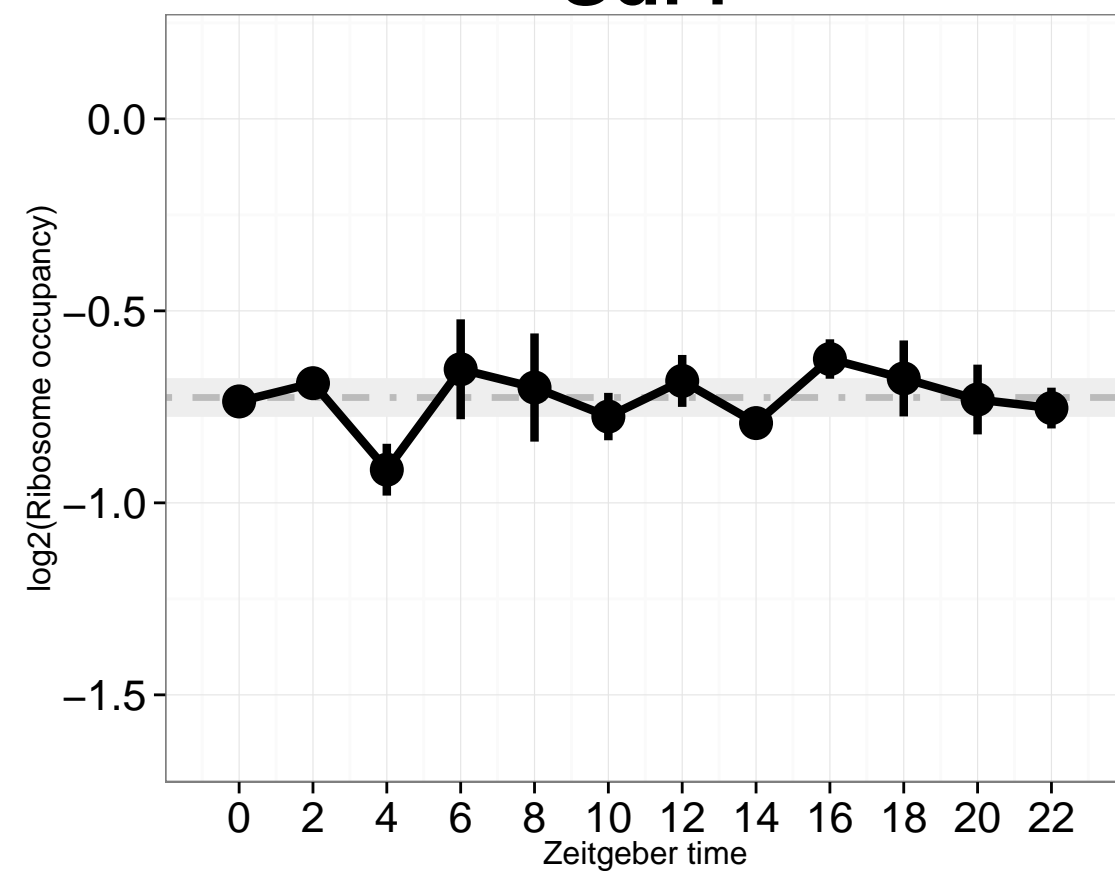

Supplement: Supplementary file 4688 [file 1]

## Ethe1

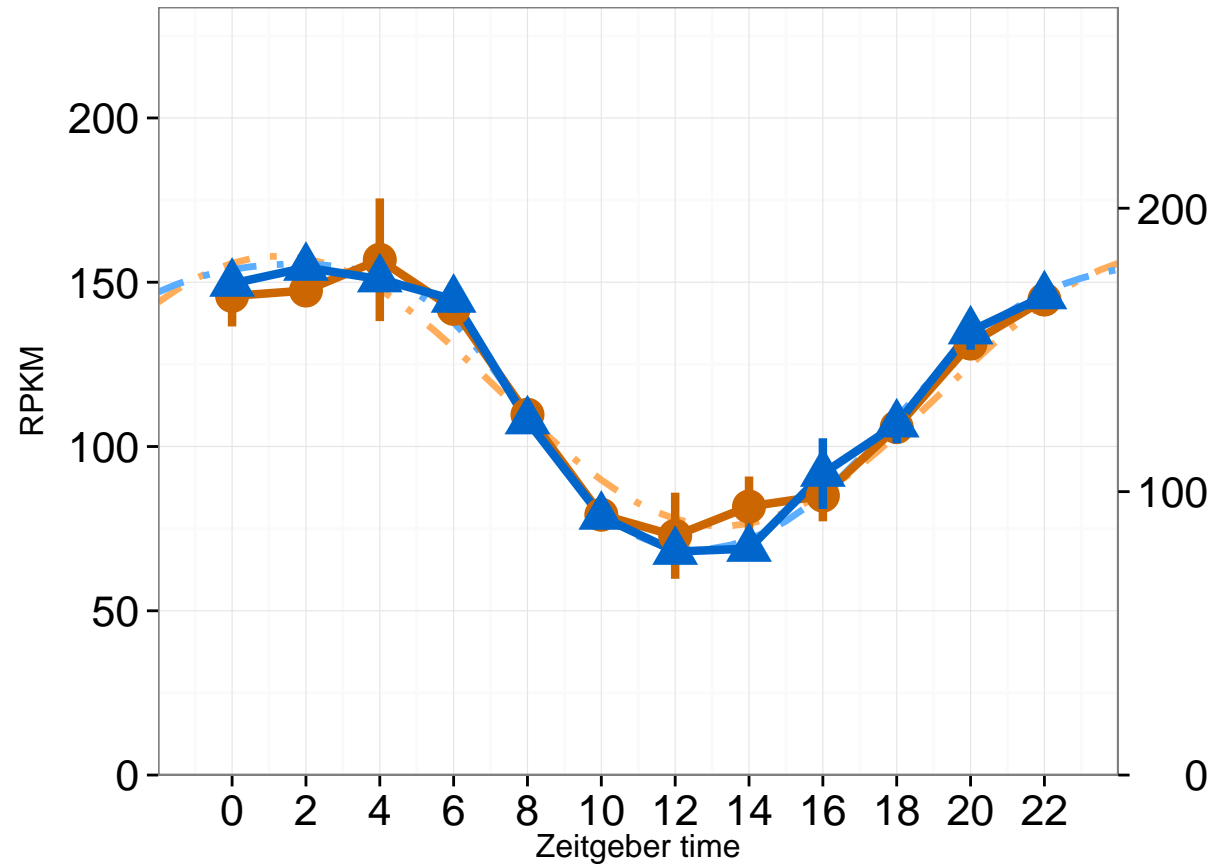

## Ethe1

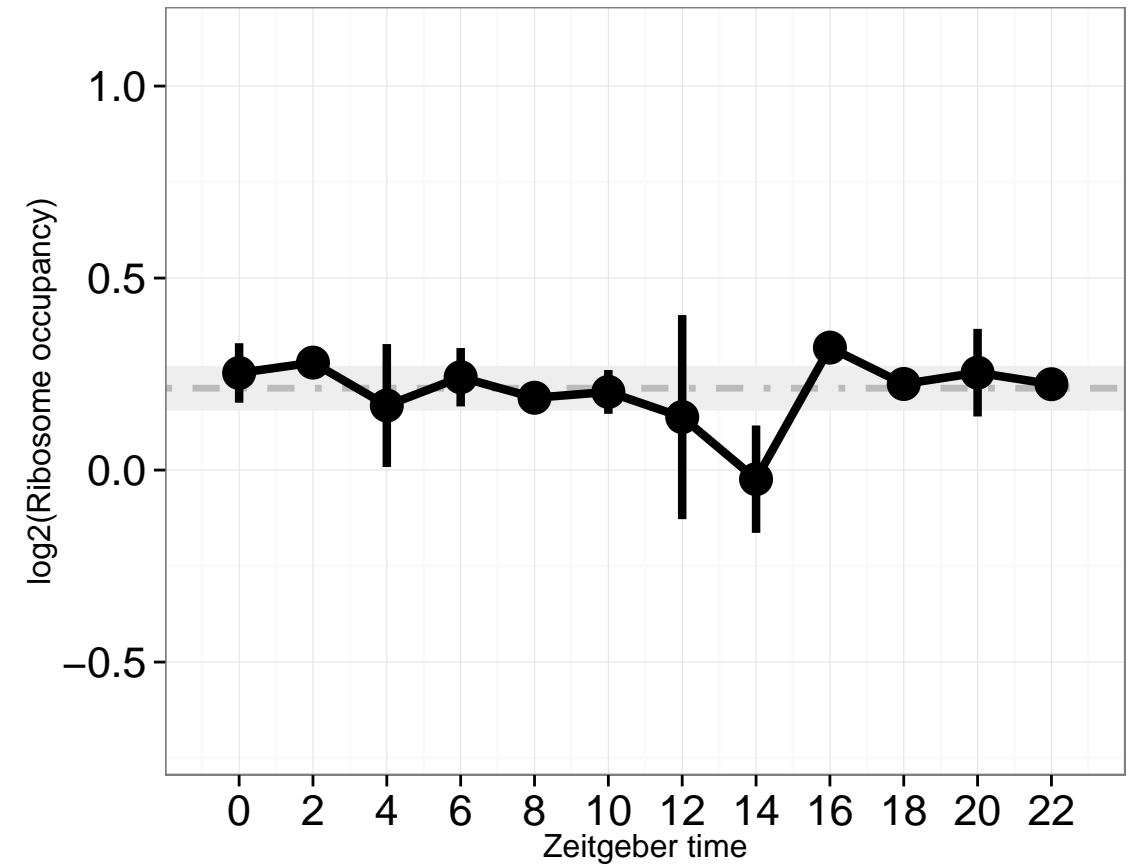

Supplement: Supplementary file 4689 [file 1]

## Klf15

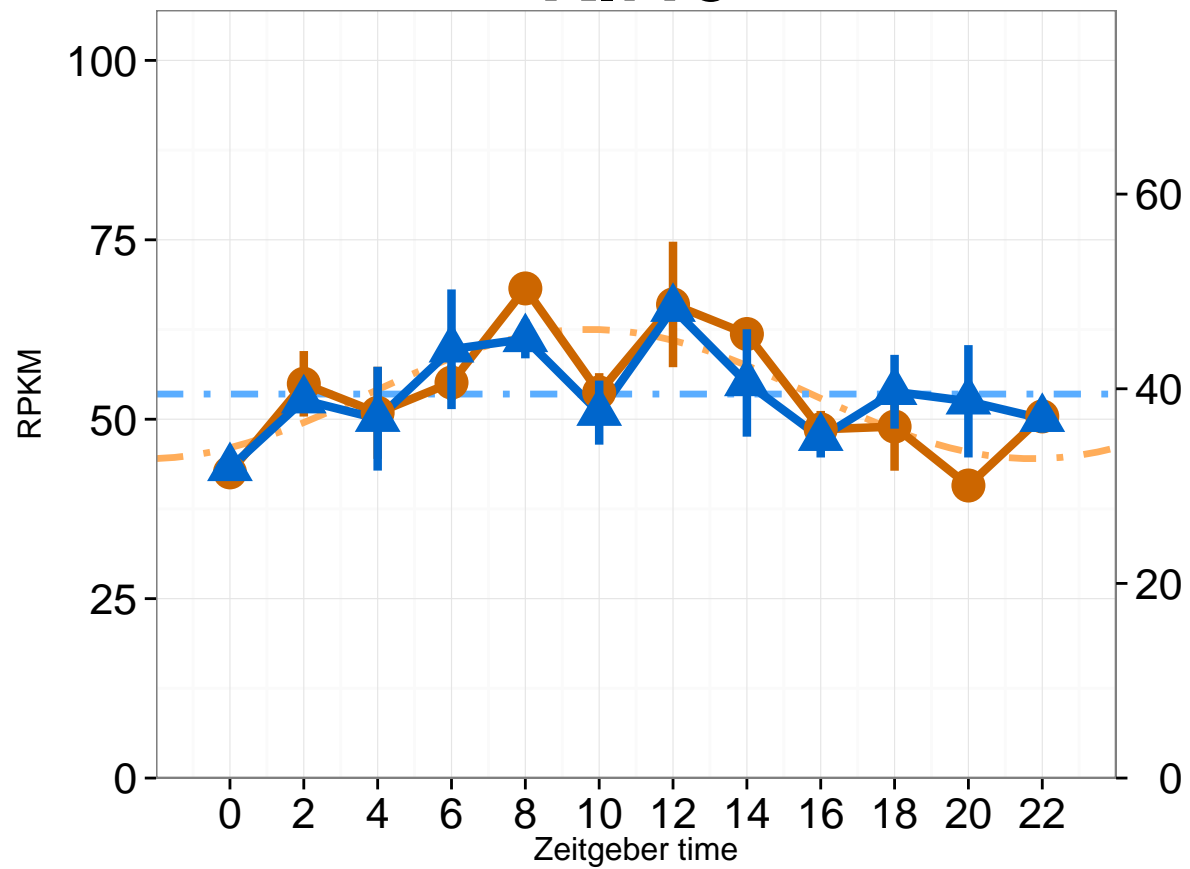

## Klf15

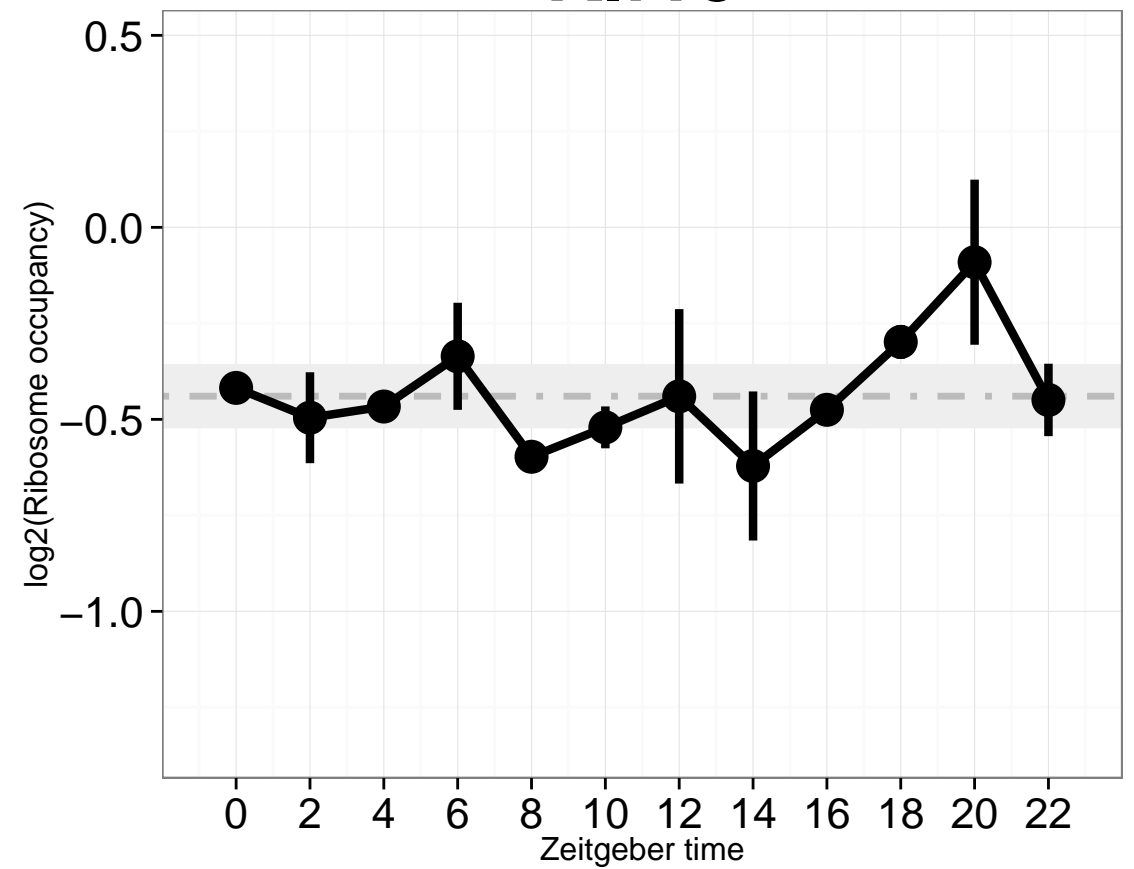

Supplement: Supplementary file 4690 [file 1]

## 2310035C23Rik

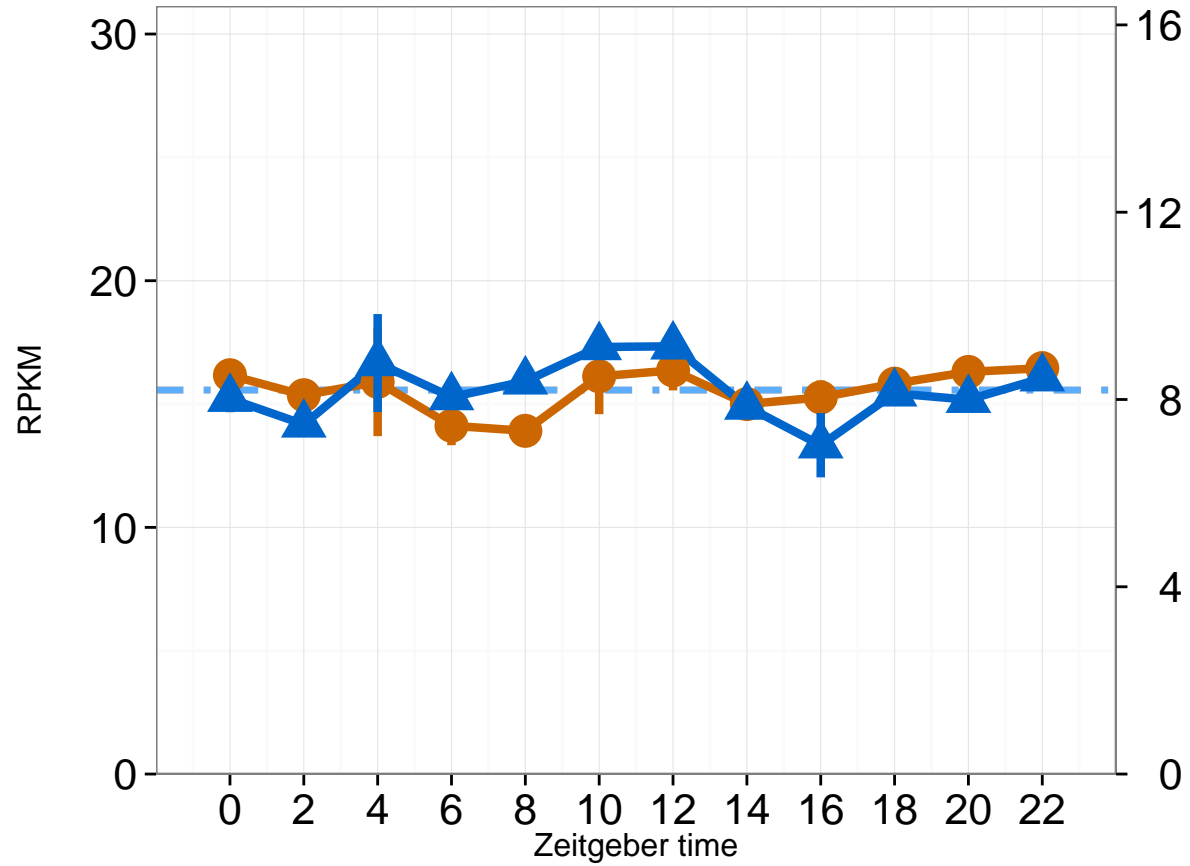

## 2310035C23Rik

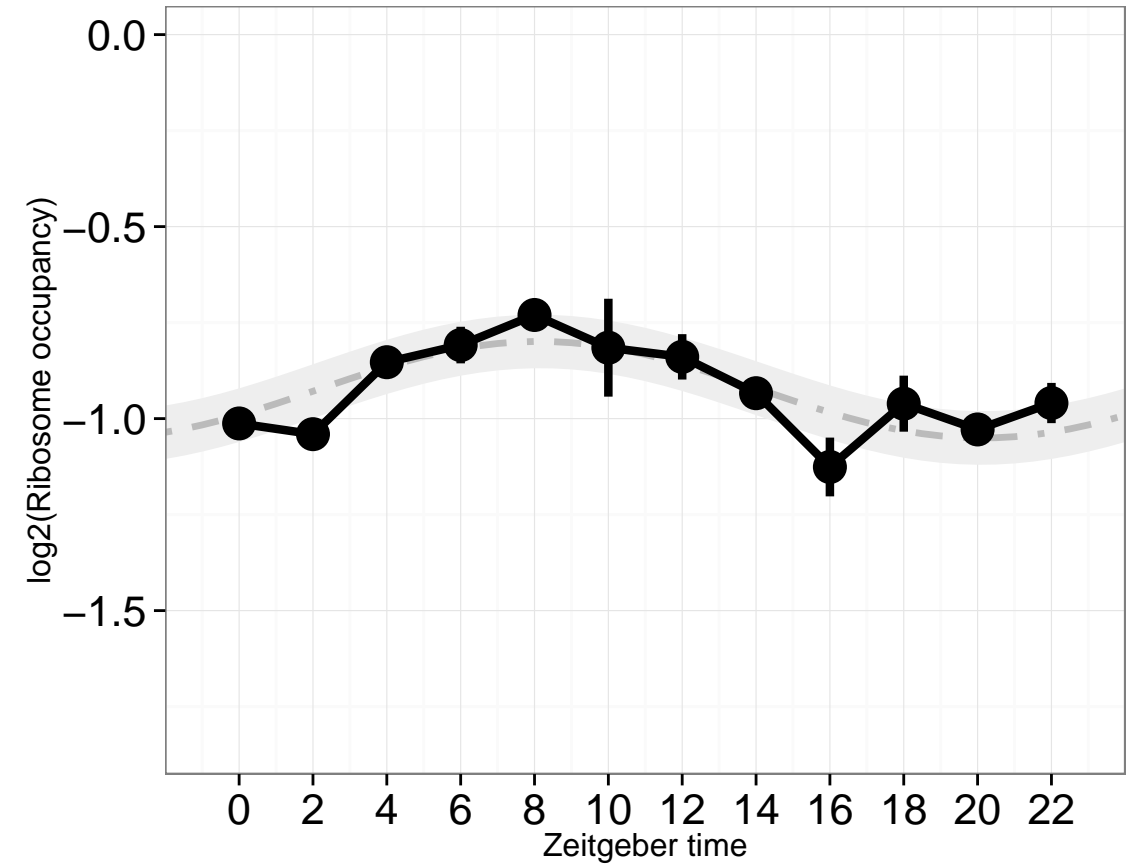

Supplement: Supplementary file 4691 [file 1]

## Arntl

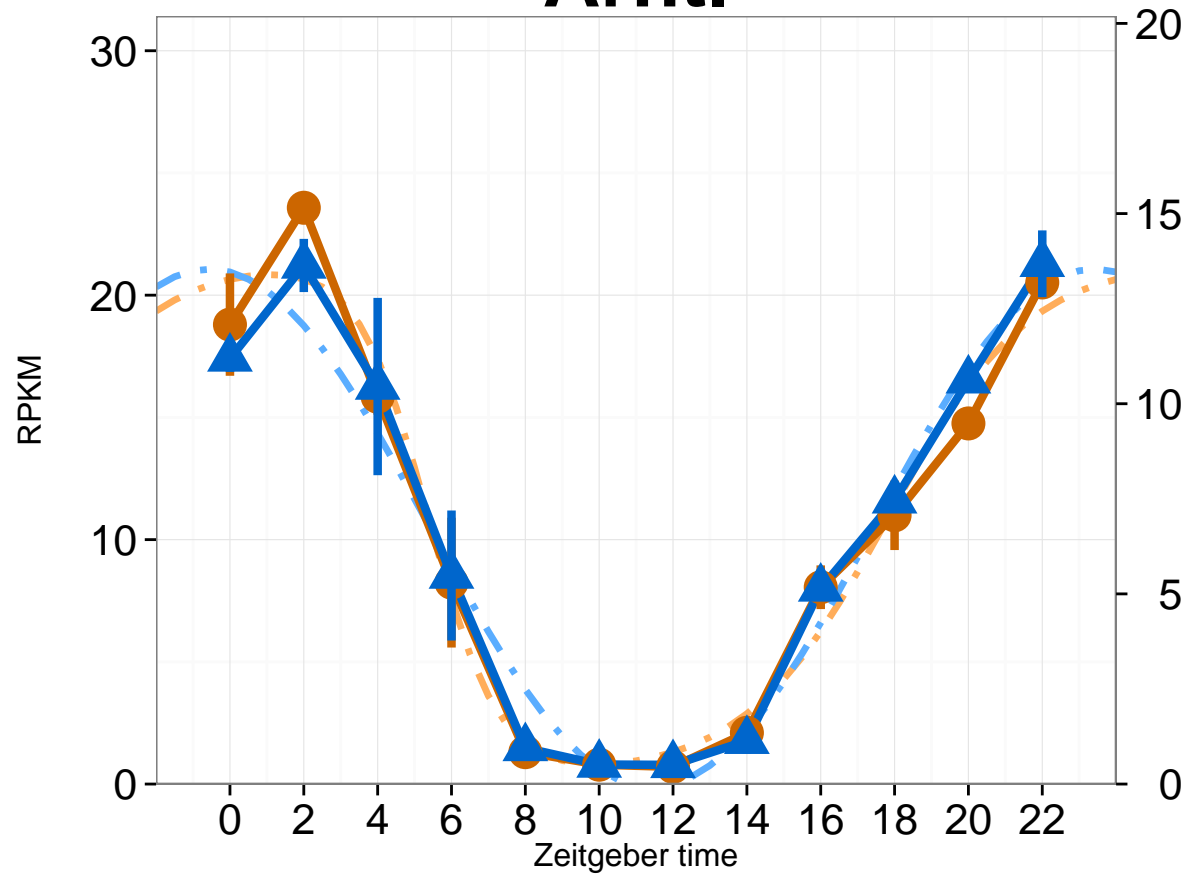

## Arntl

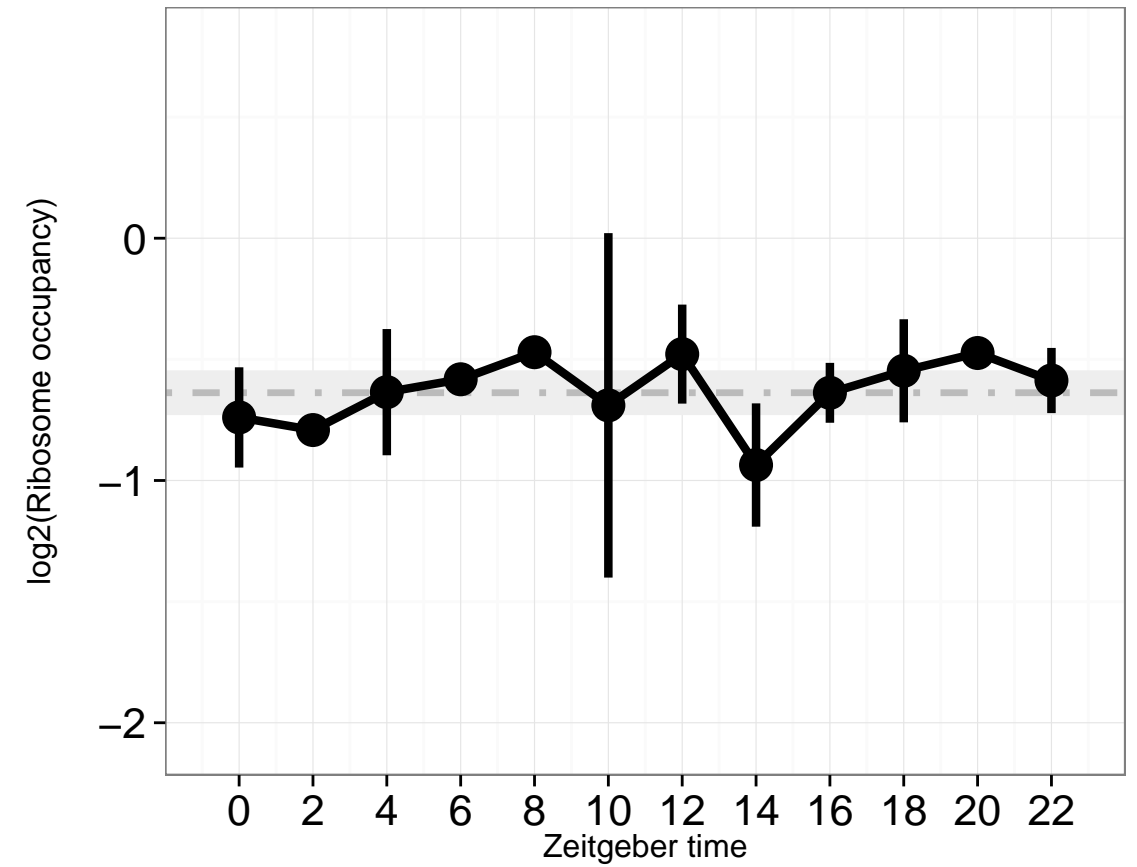

Supplement: Supplementary file 4692 [file 1]

# Elmod3

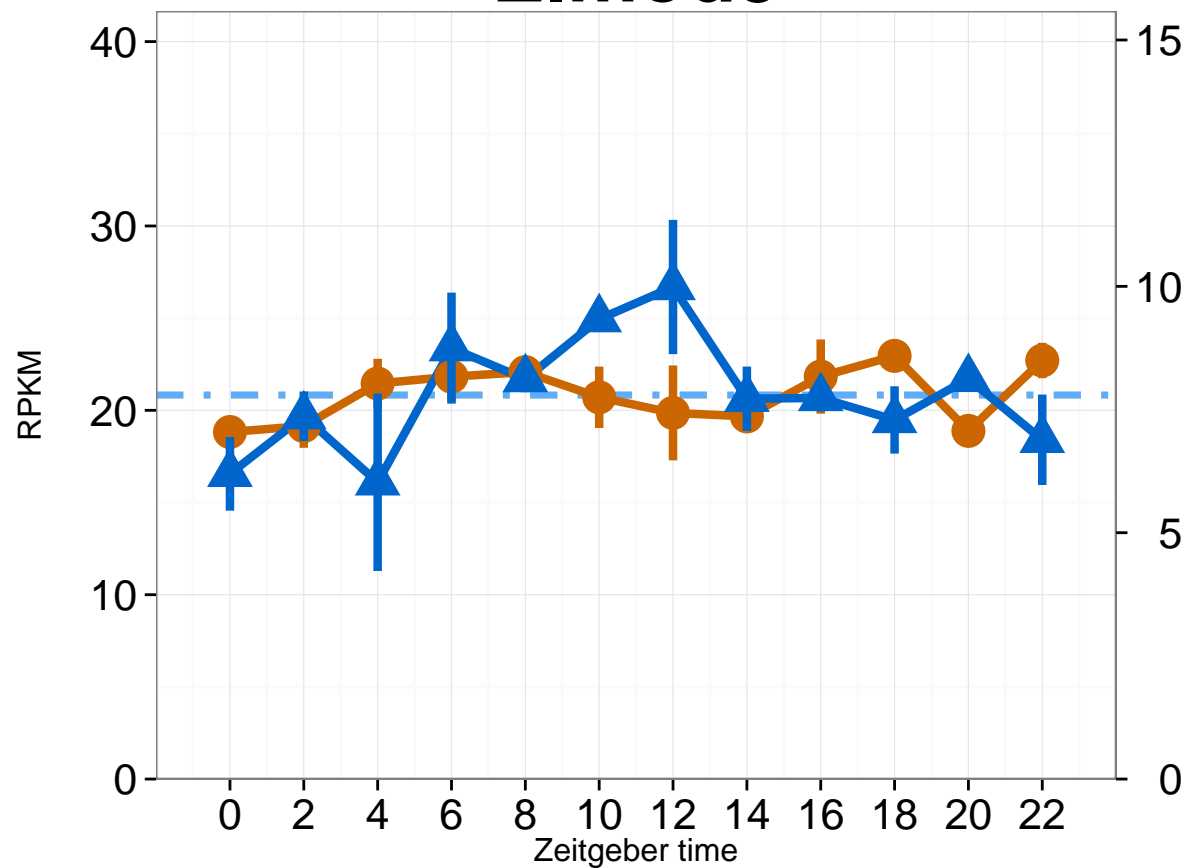

# Elmod3

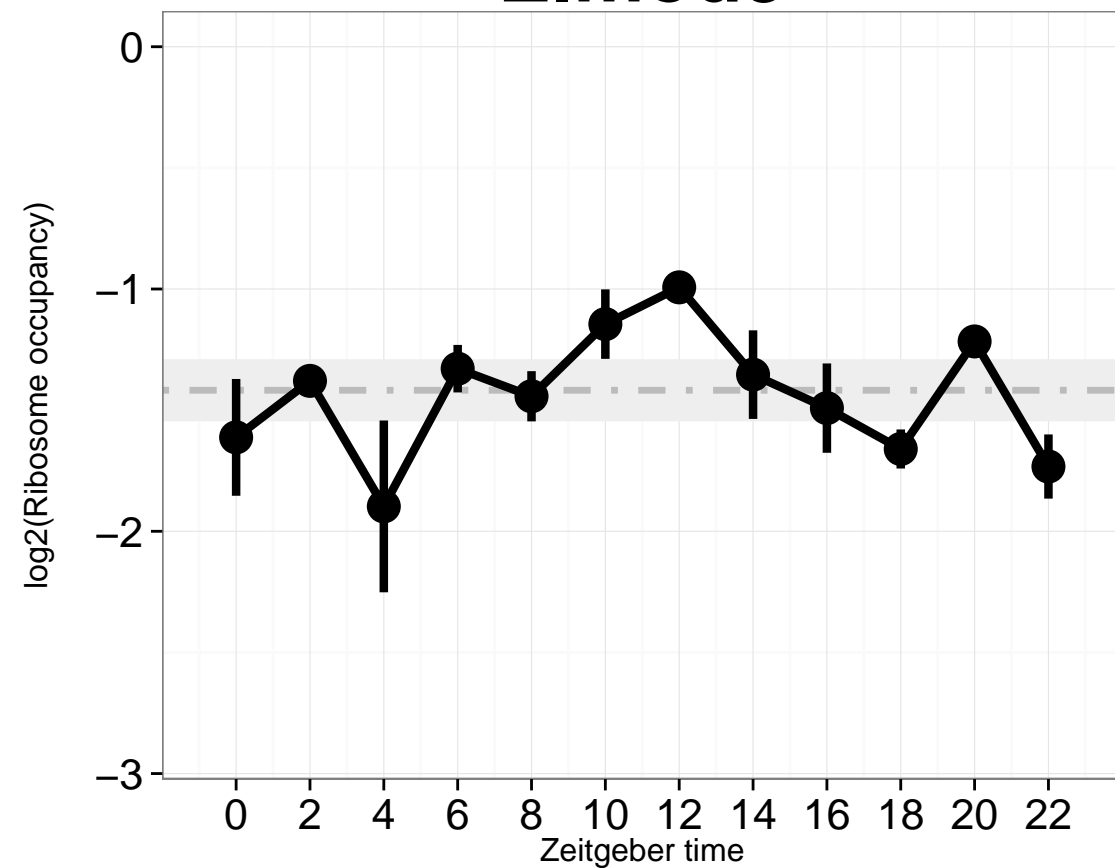

Supplement: Supplementary file 4693 [file 1]

## Rgmb

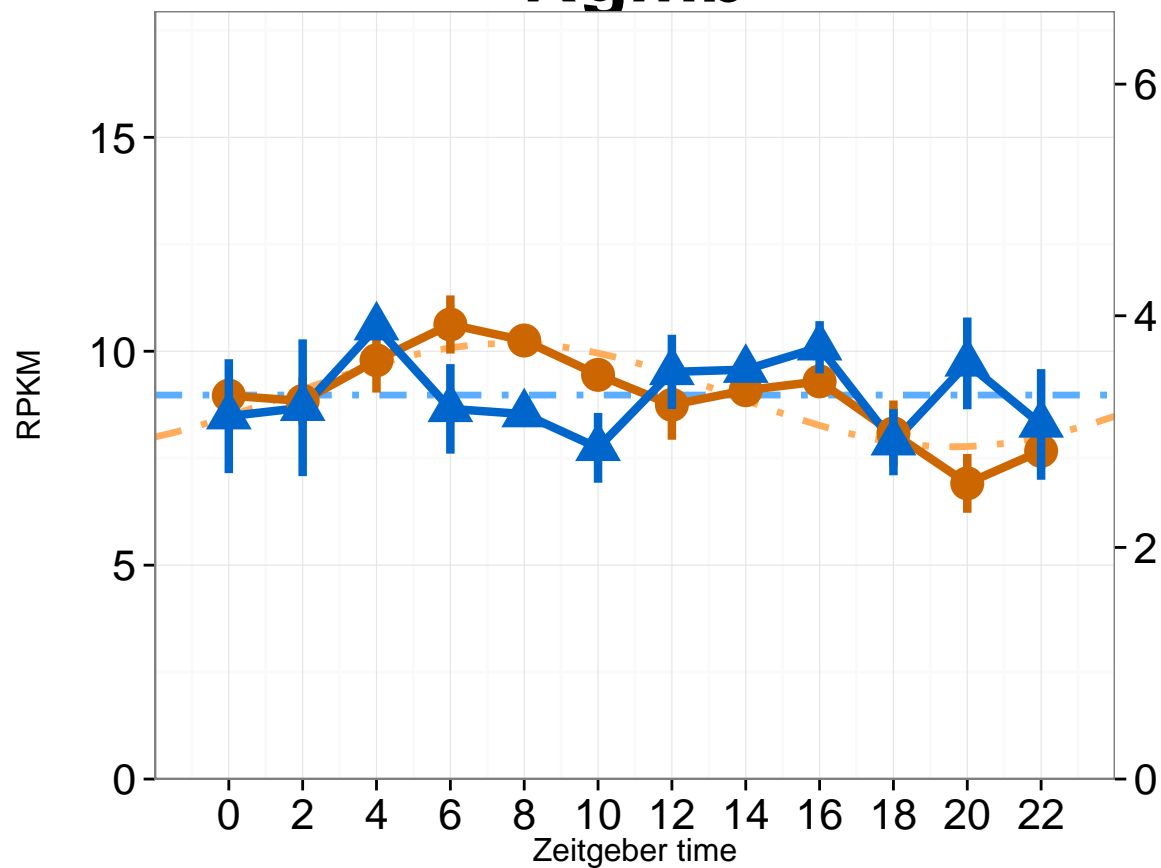

## Rgmb

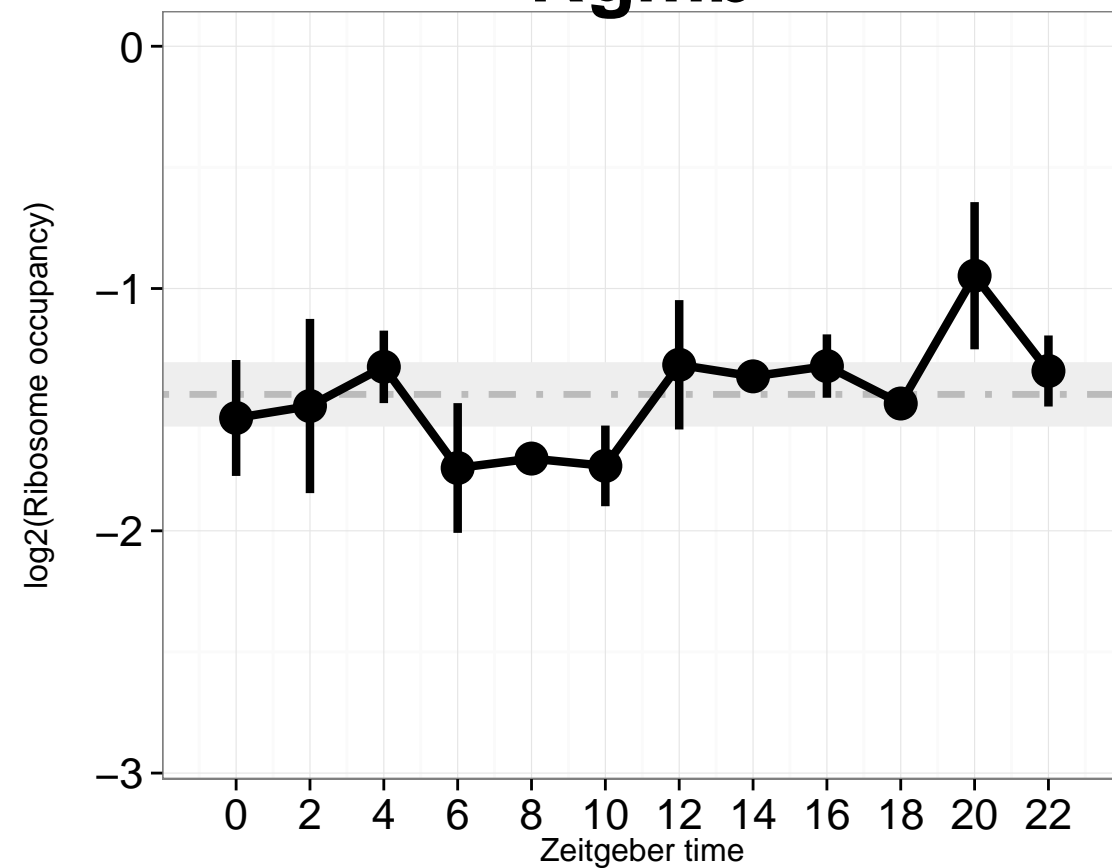

Supplement: Supplementary file 4694 [file 1]

## Vac14

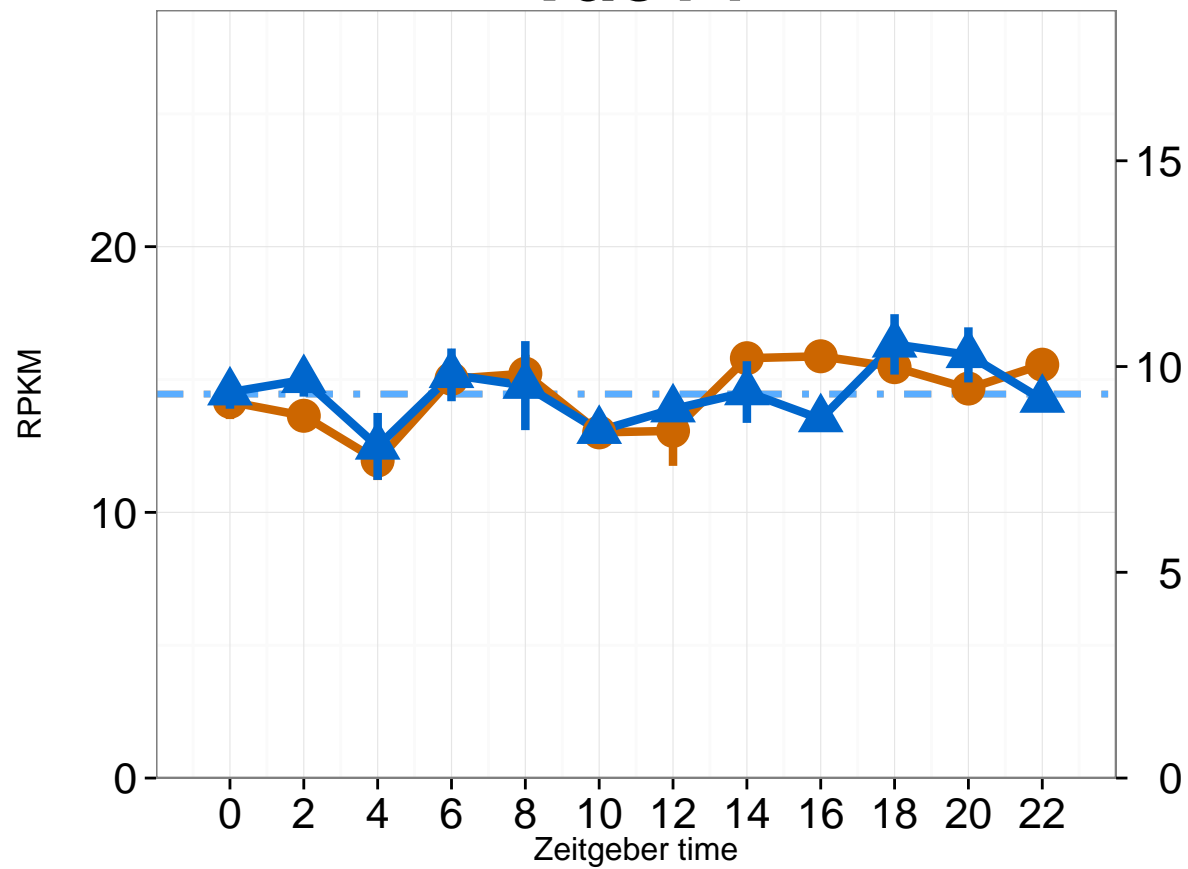

## Vac14

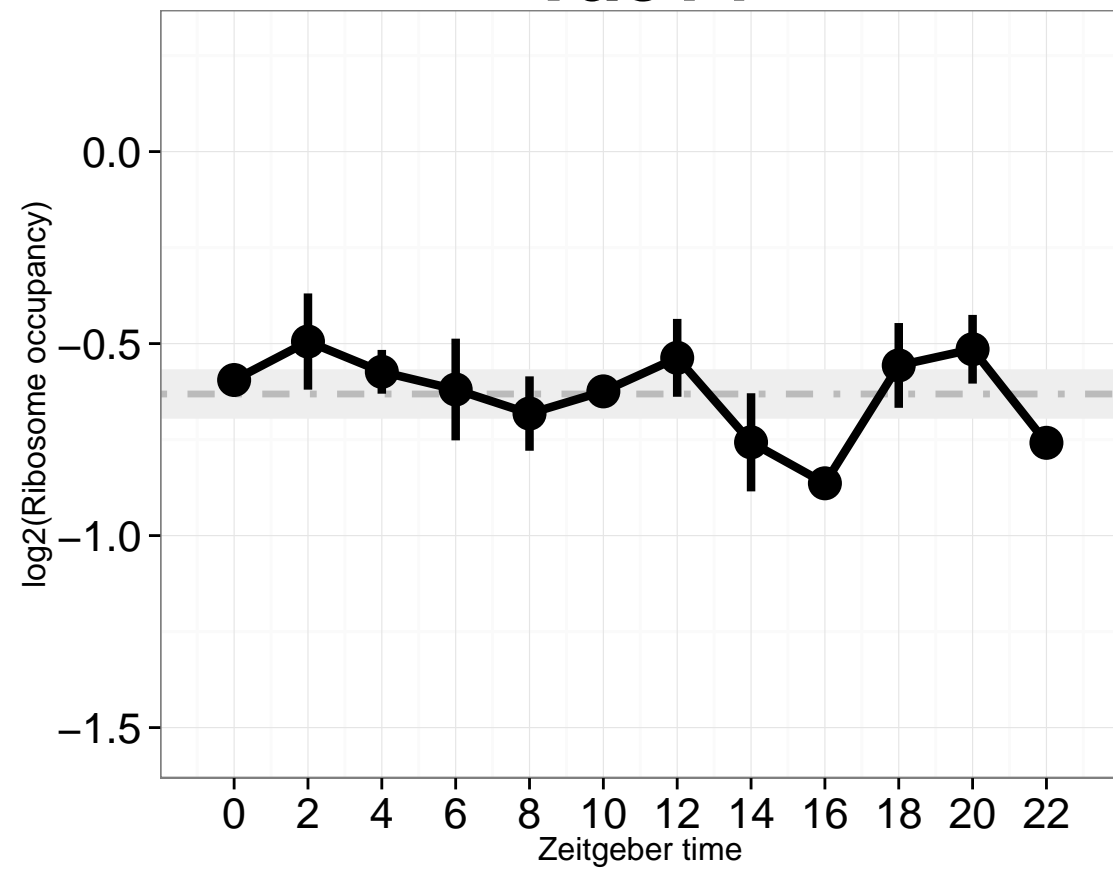

Supplement: Supplementary file 4695 [file 1]

# Rnf126

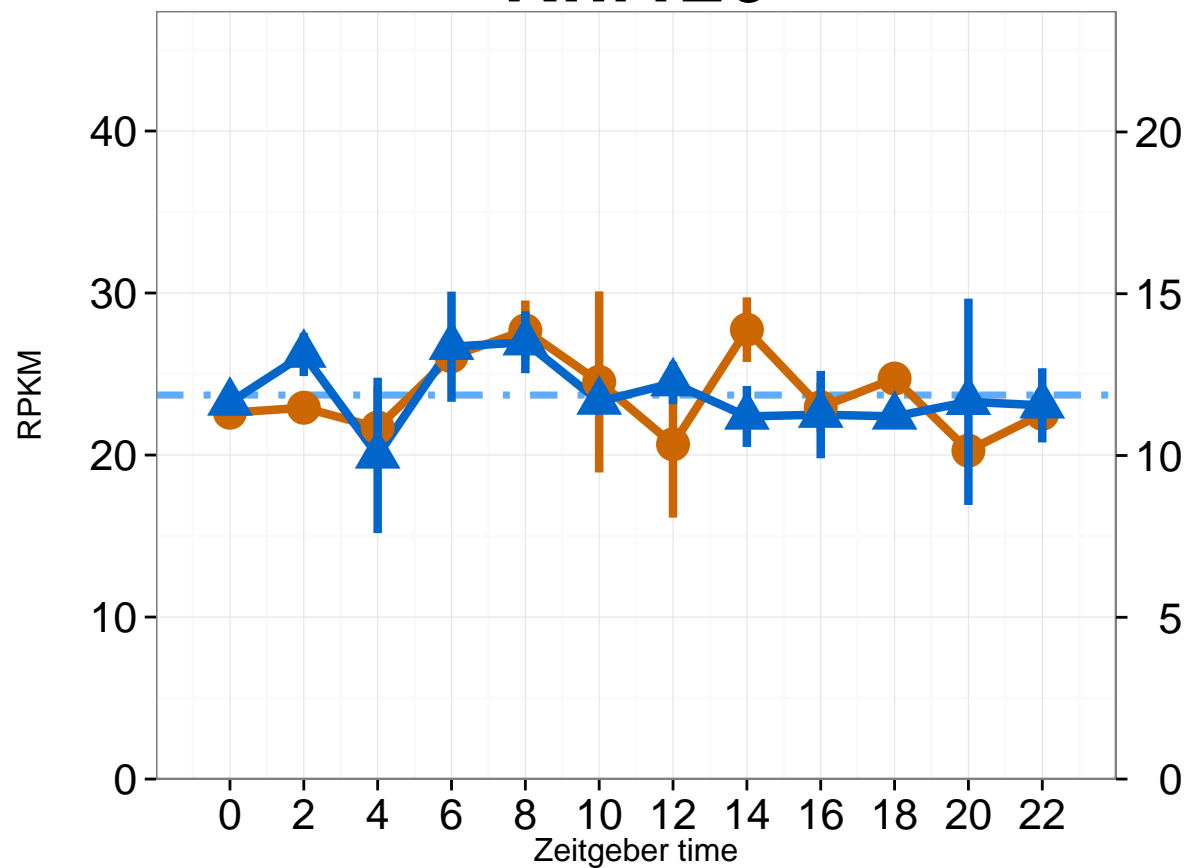

# Rnf126

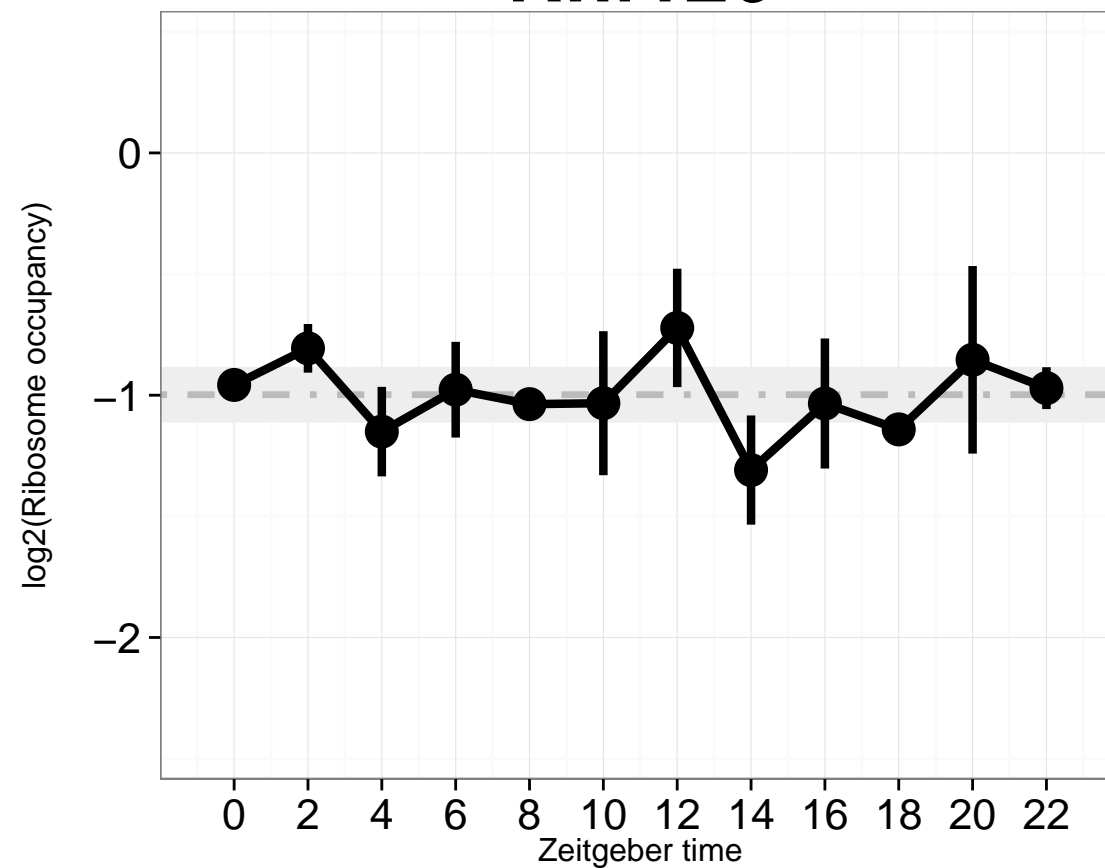

Supplement: Supplementary file 4696 [file 1]

# Tmem56

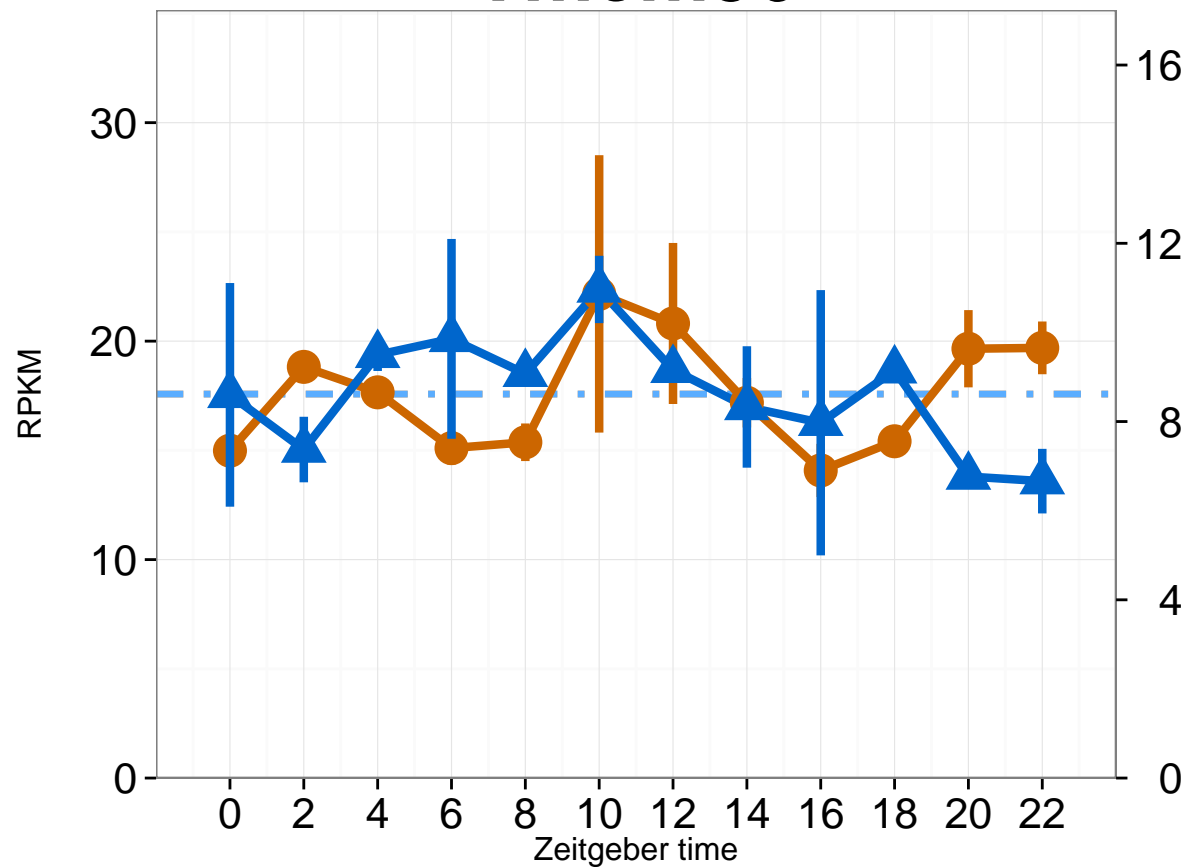

# Tmem56

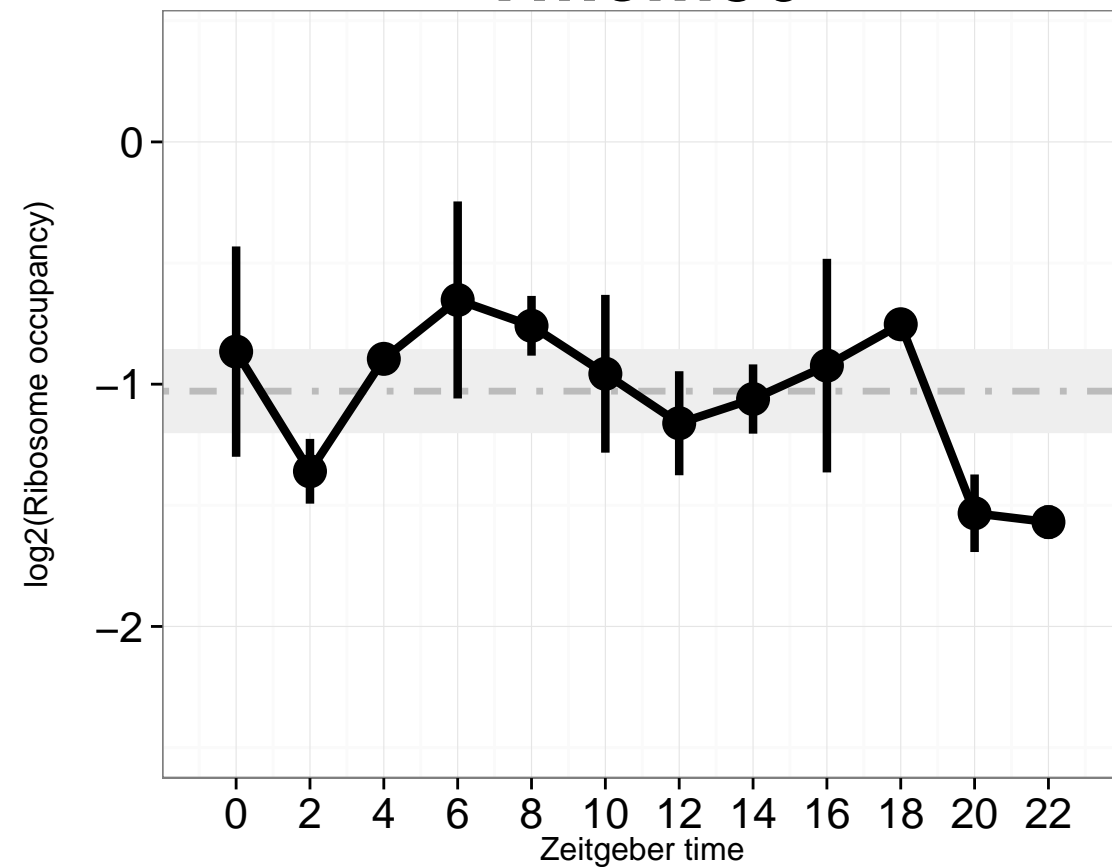

Supplement: Supplementary file 4697 [file 1]

## Ptdss1

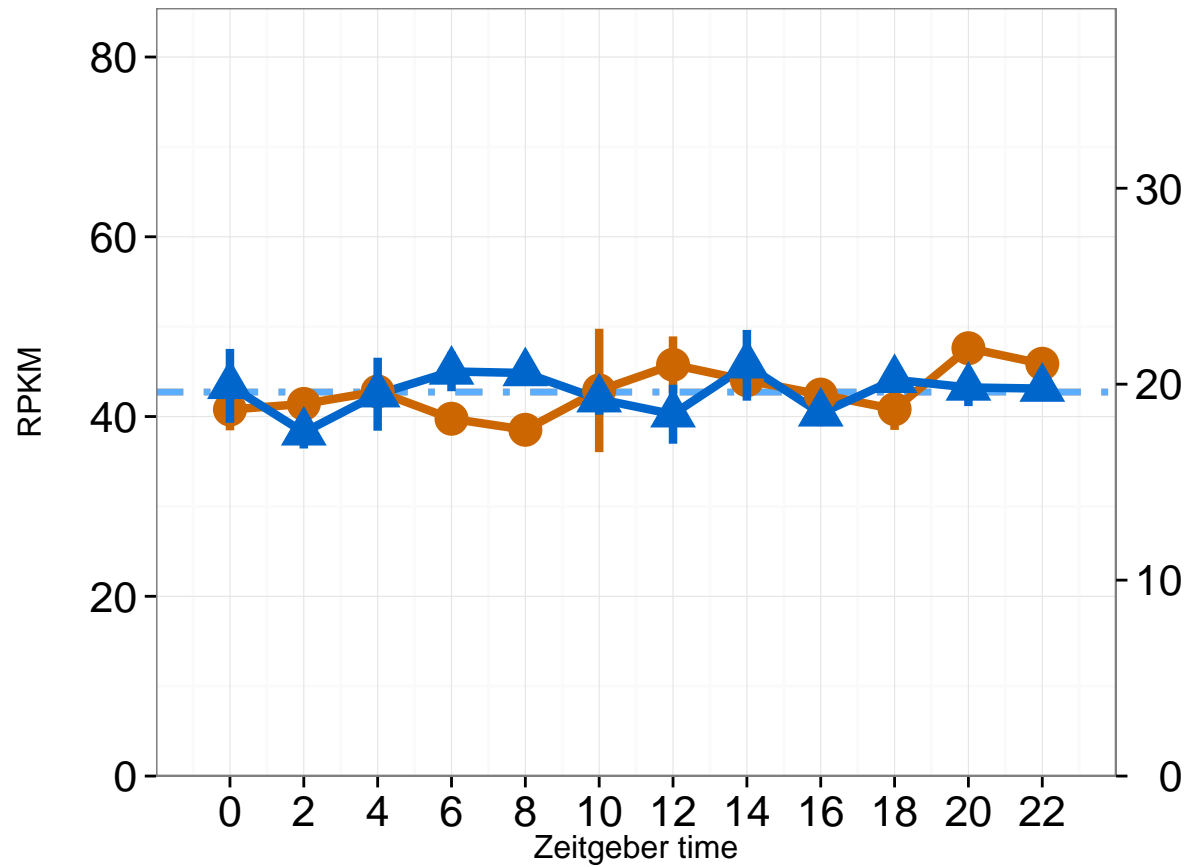

## Ptdss1

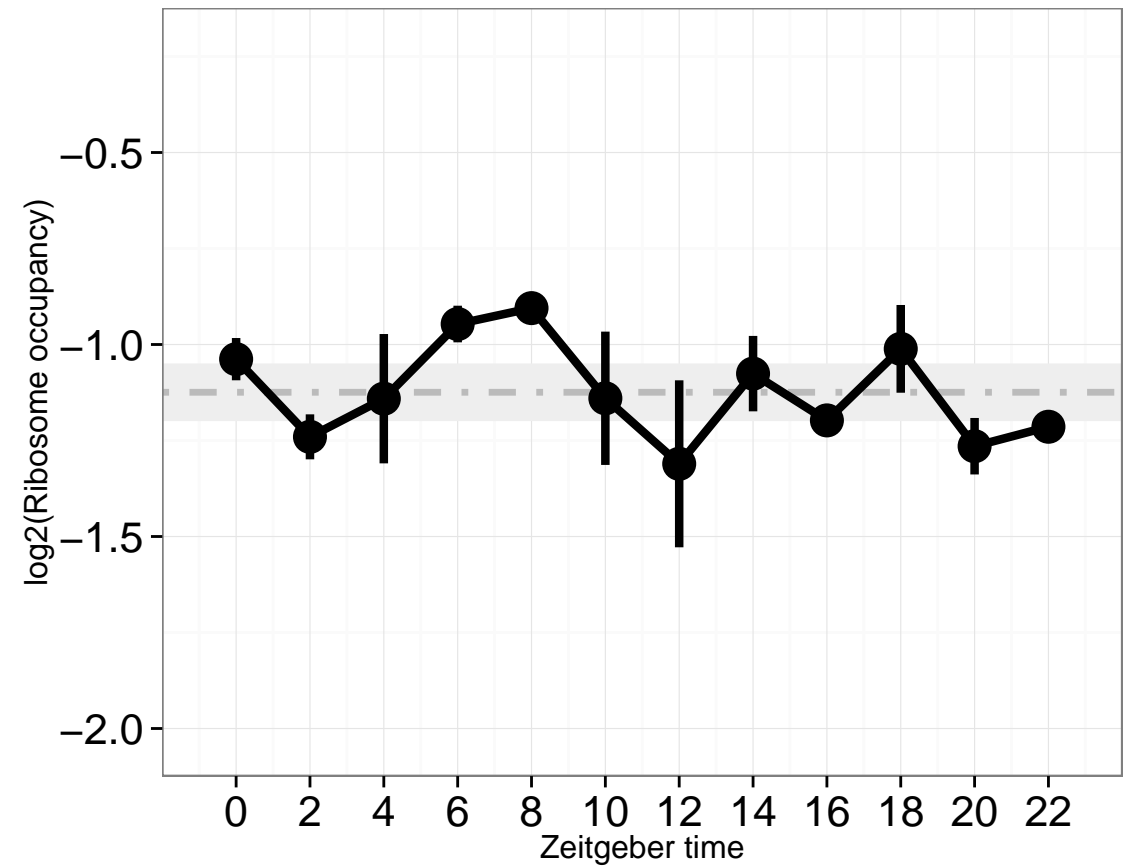

Supplement: Supplementary file 4698 [file 1]

## Daam1

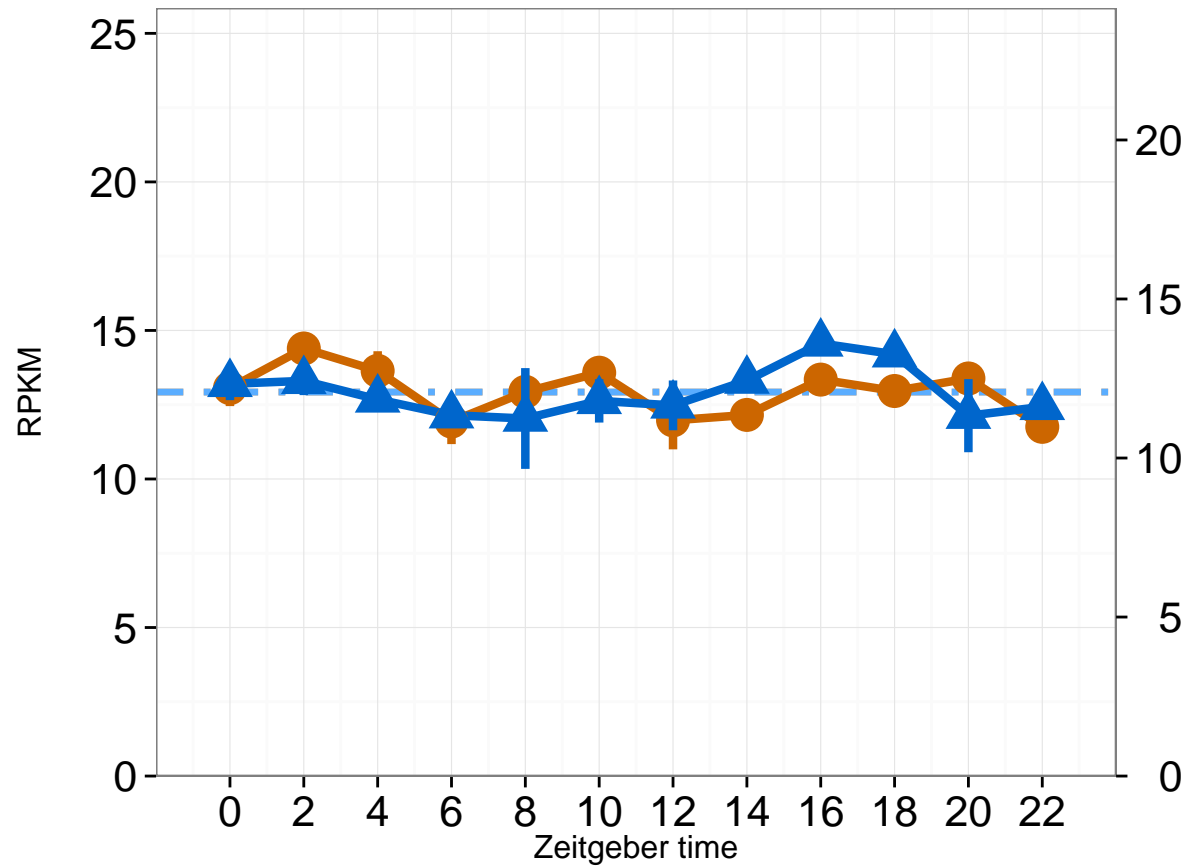

## Daam1

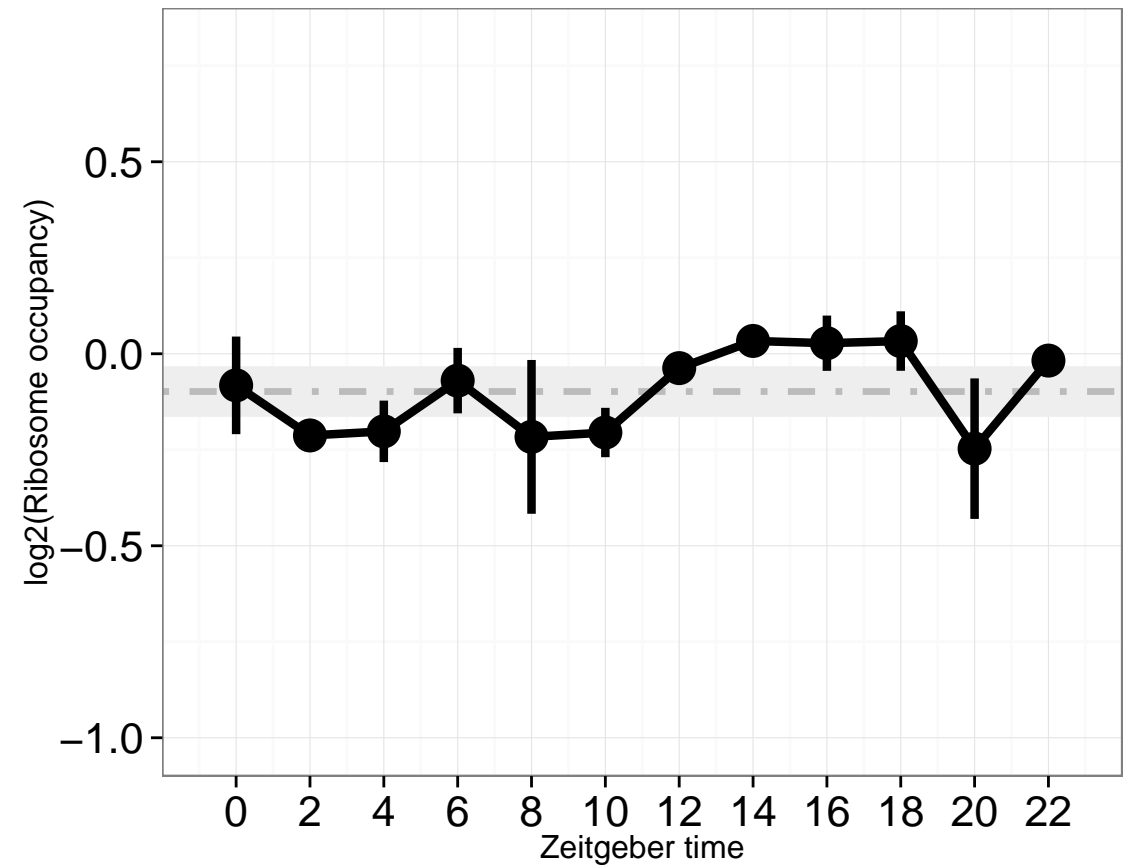

Supplement: Supplementary file 4699 [file 1]

# Gcfc2

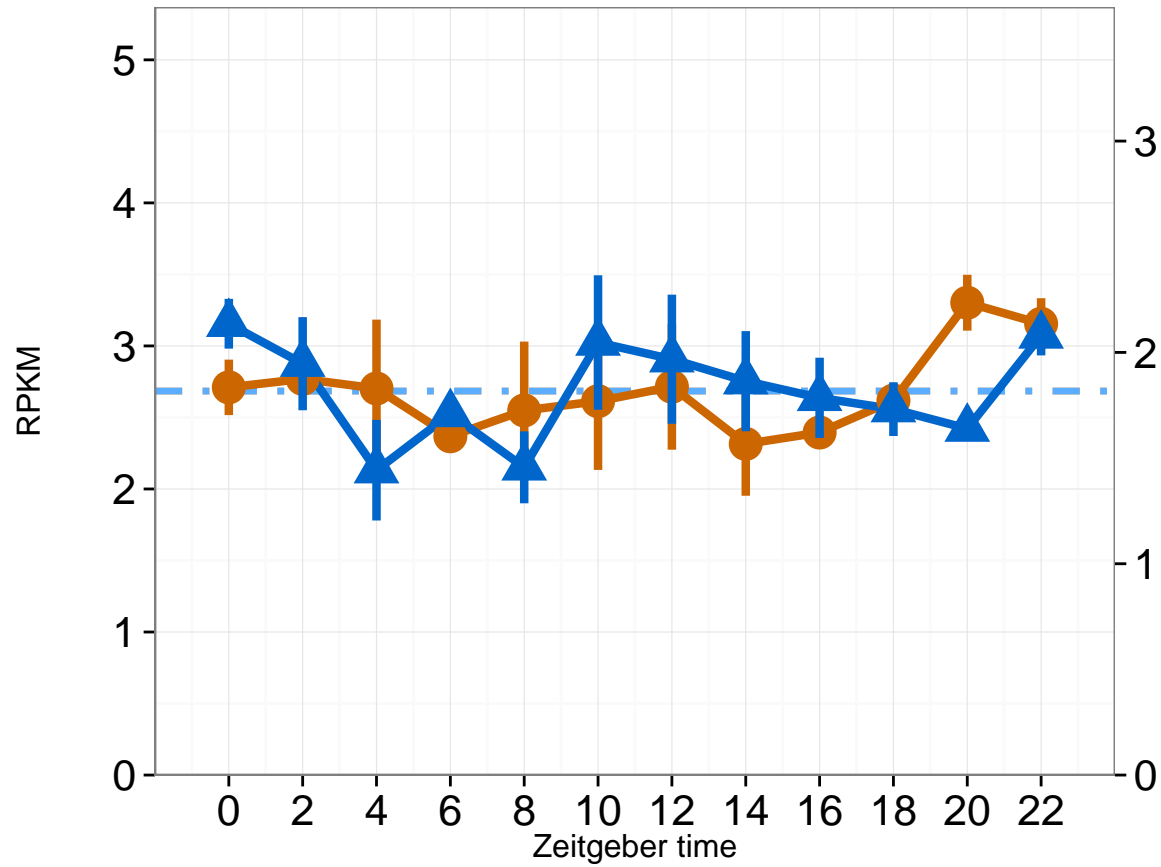

# Gcfc2

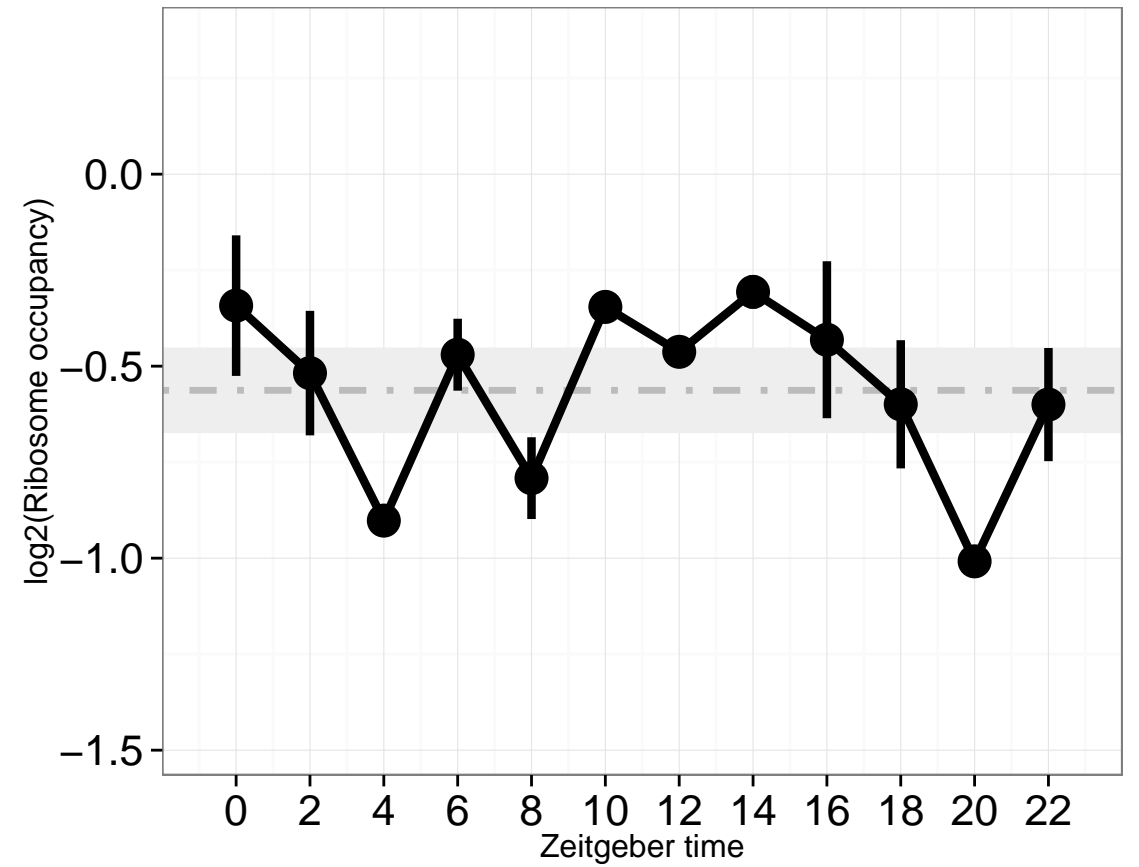

Supplement: Supplementary file 4700 [file 1]

# Zfp521

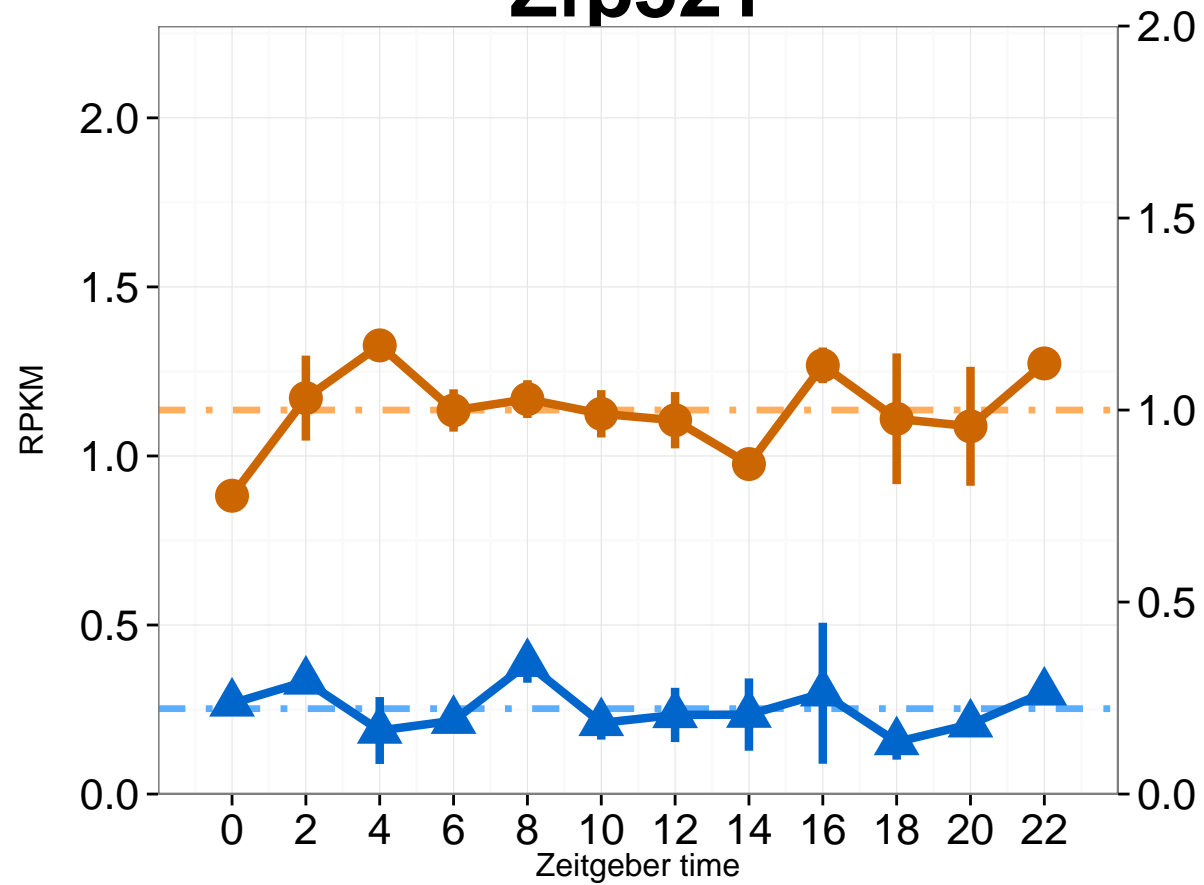

# Zfp521

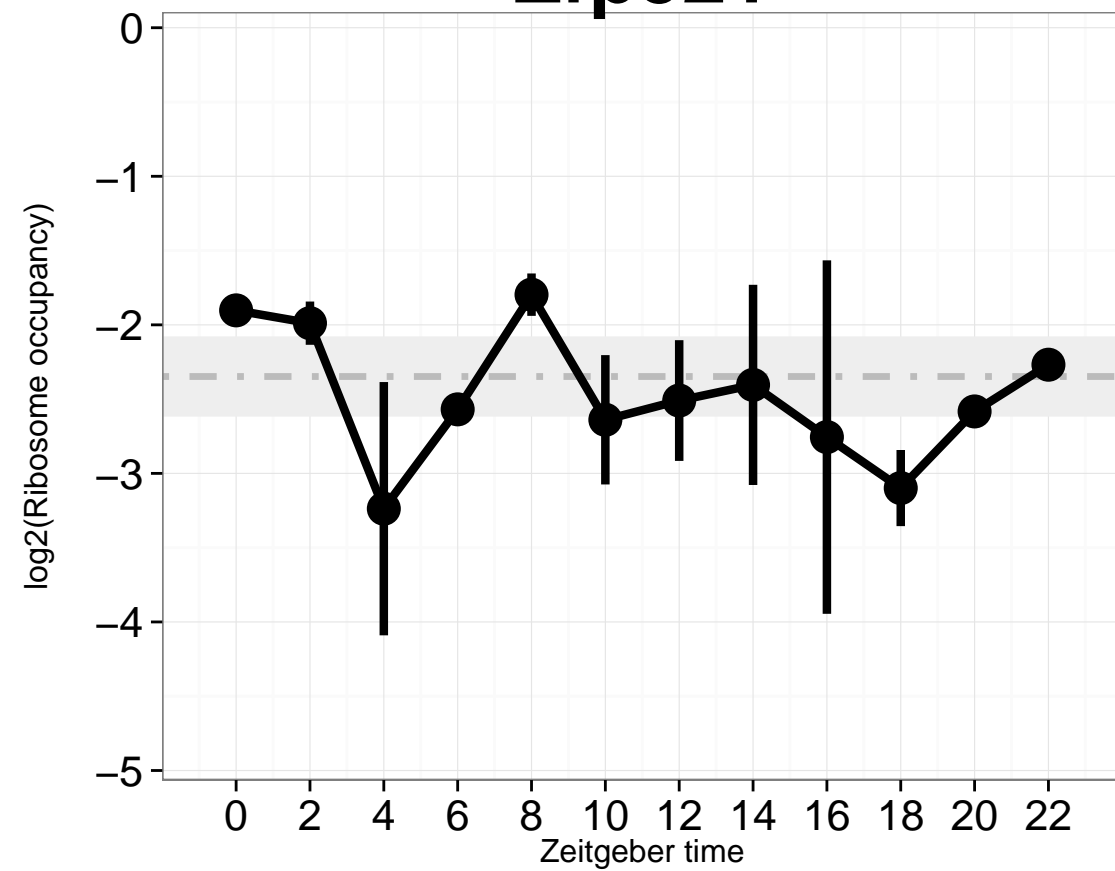

Supplement: Supplementary file 4701 [file 1]

## Ifi30

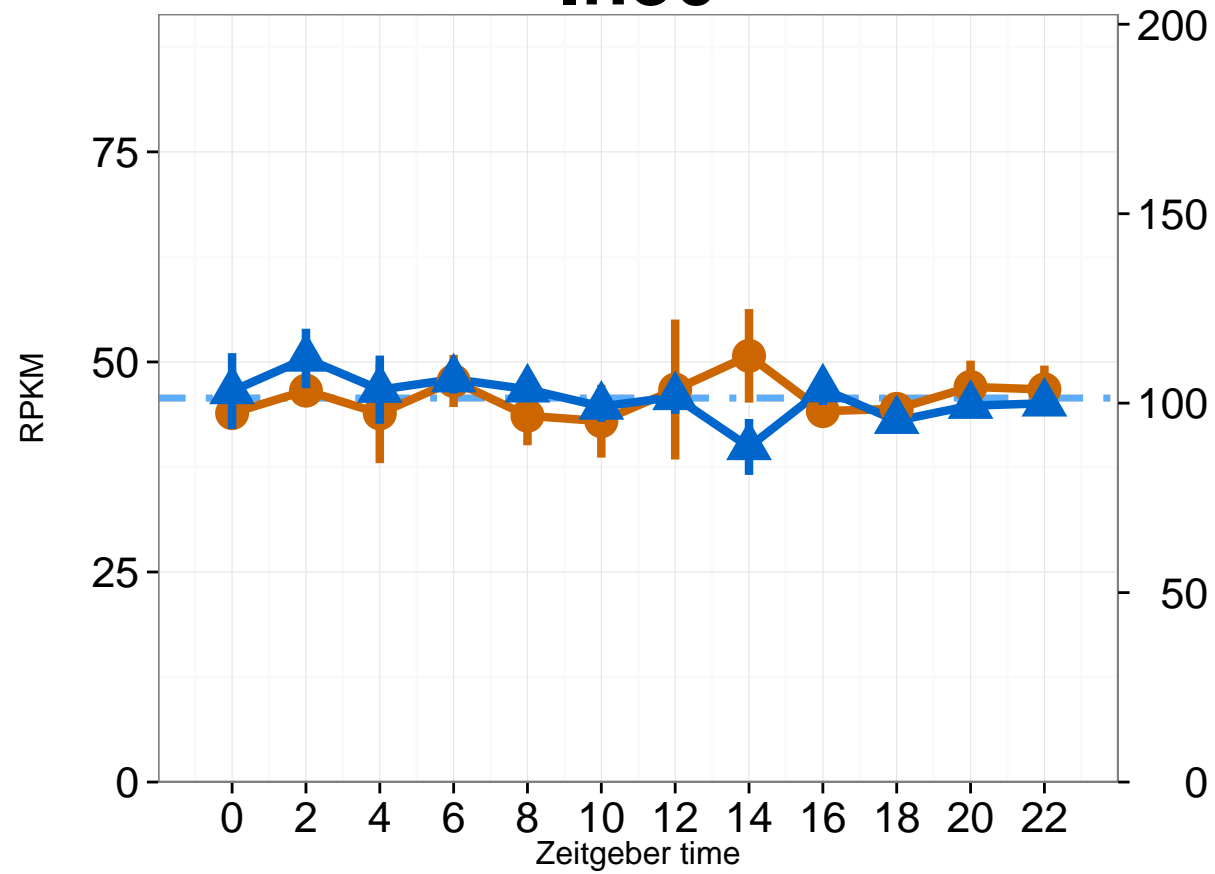

## Ifi30

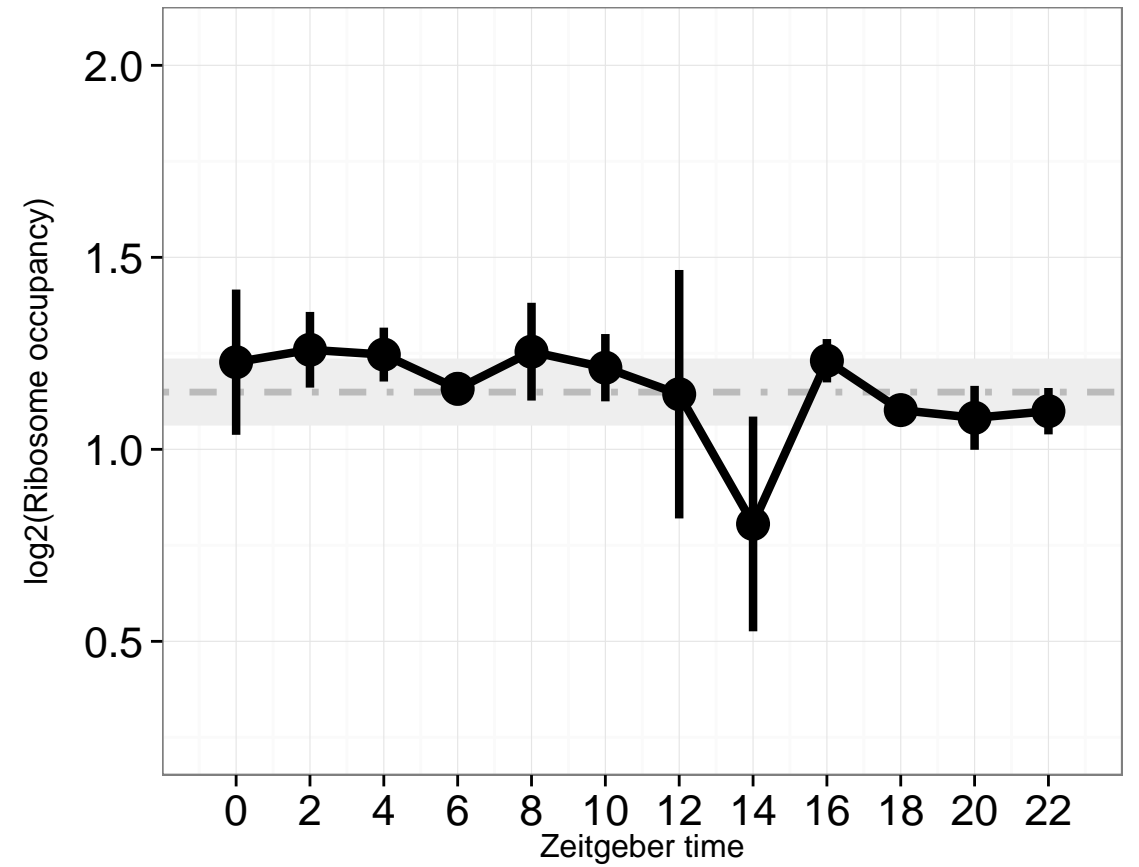

Supplement: Supplementary file 4702 [file 1]

# Atg9a

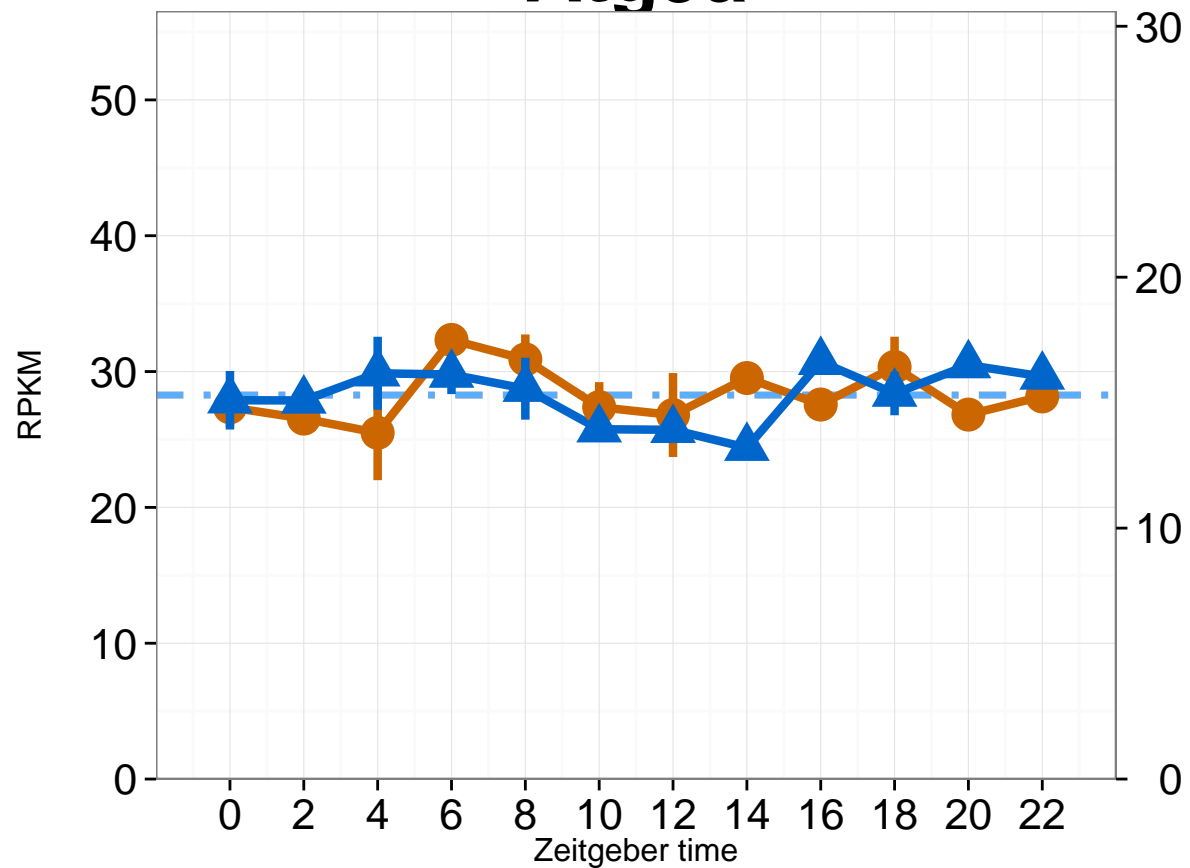

# Atg9a

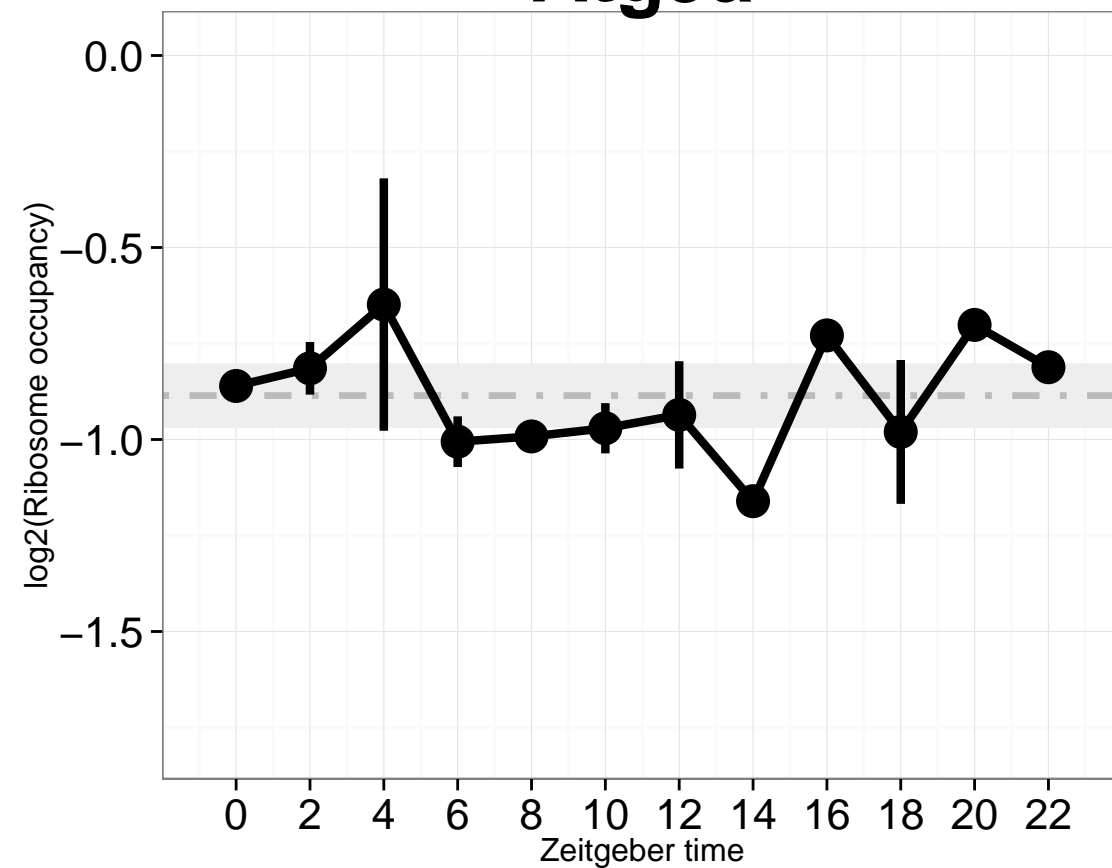

Supplement: Supplementary file 4703 [file 1]

# Txndc12

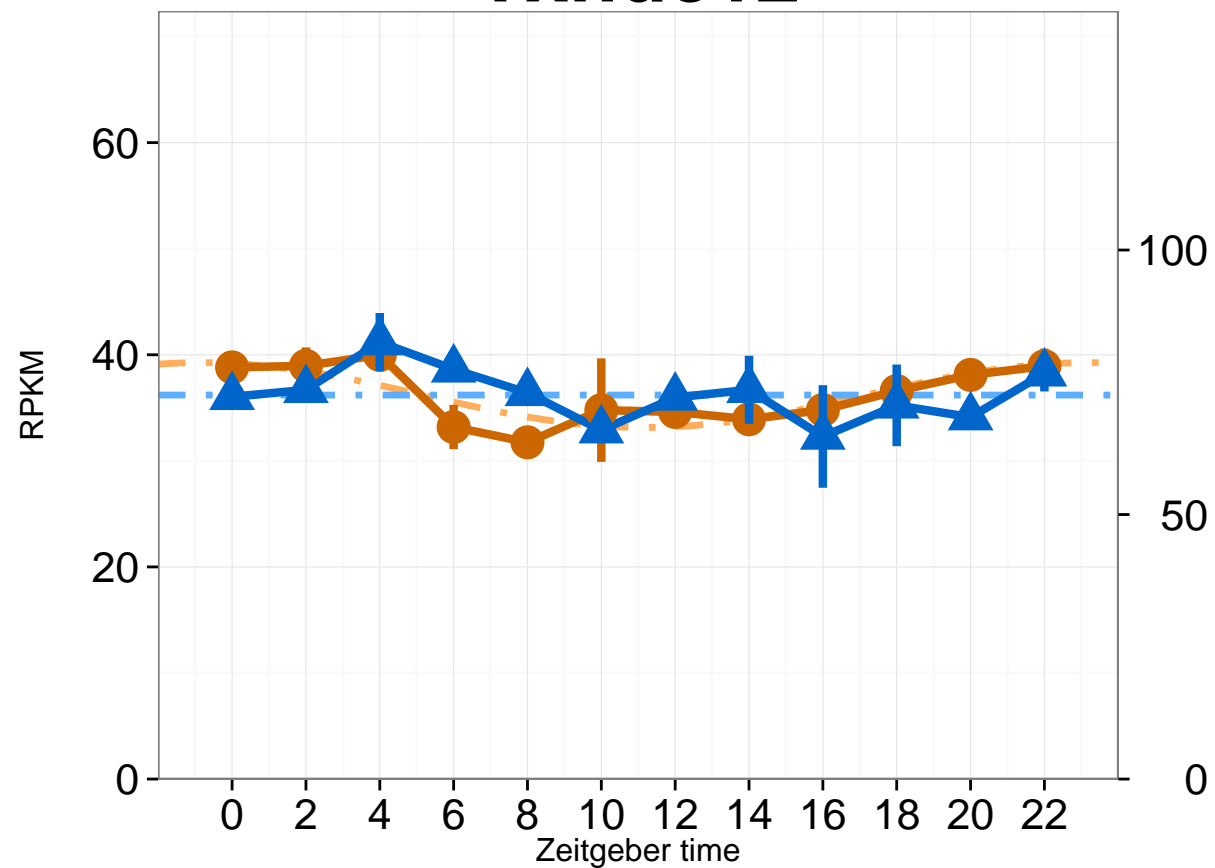

# Txndc12

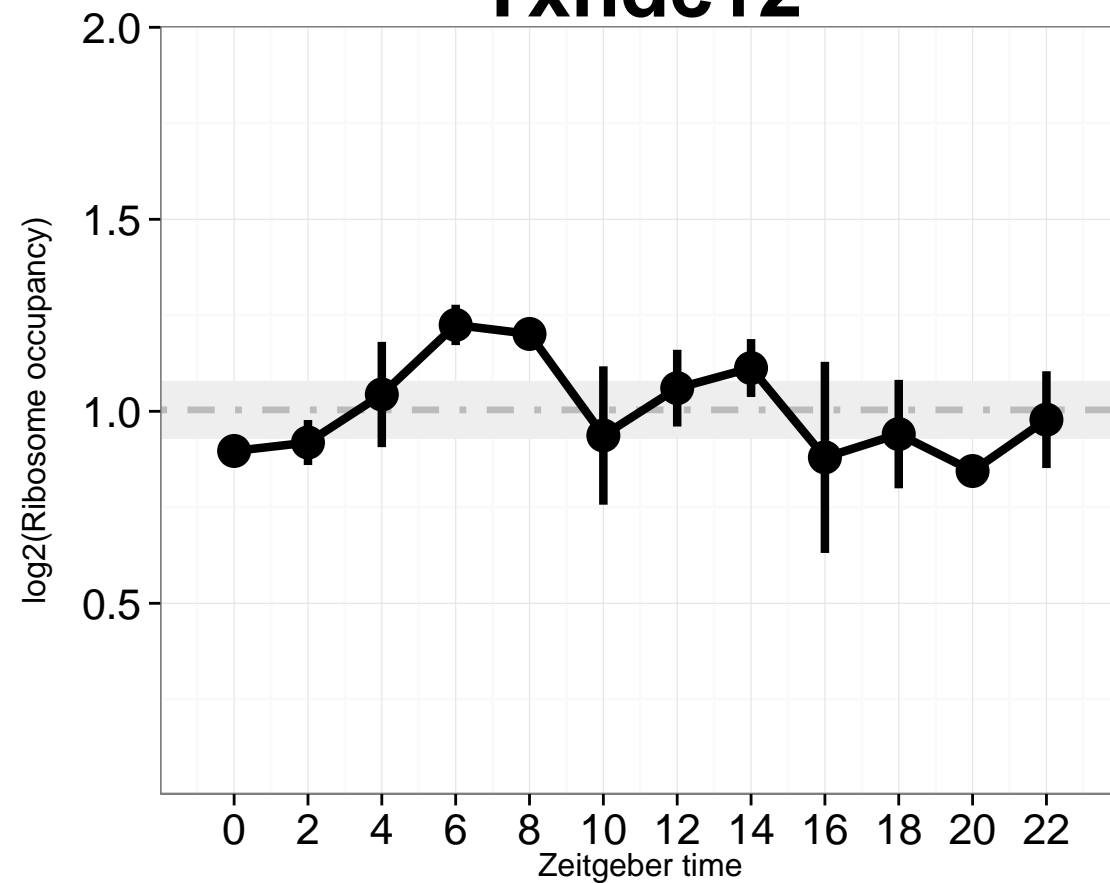

Supplement: Supplementary file 4704 [file 1]

## Arntl

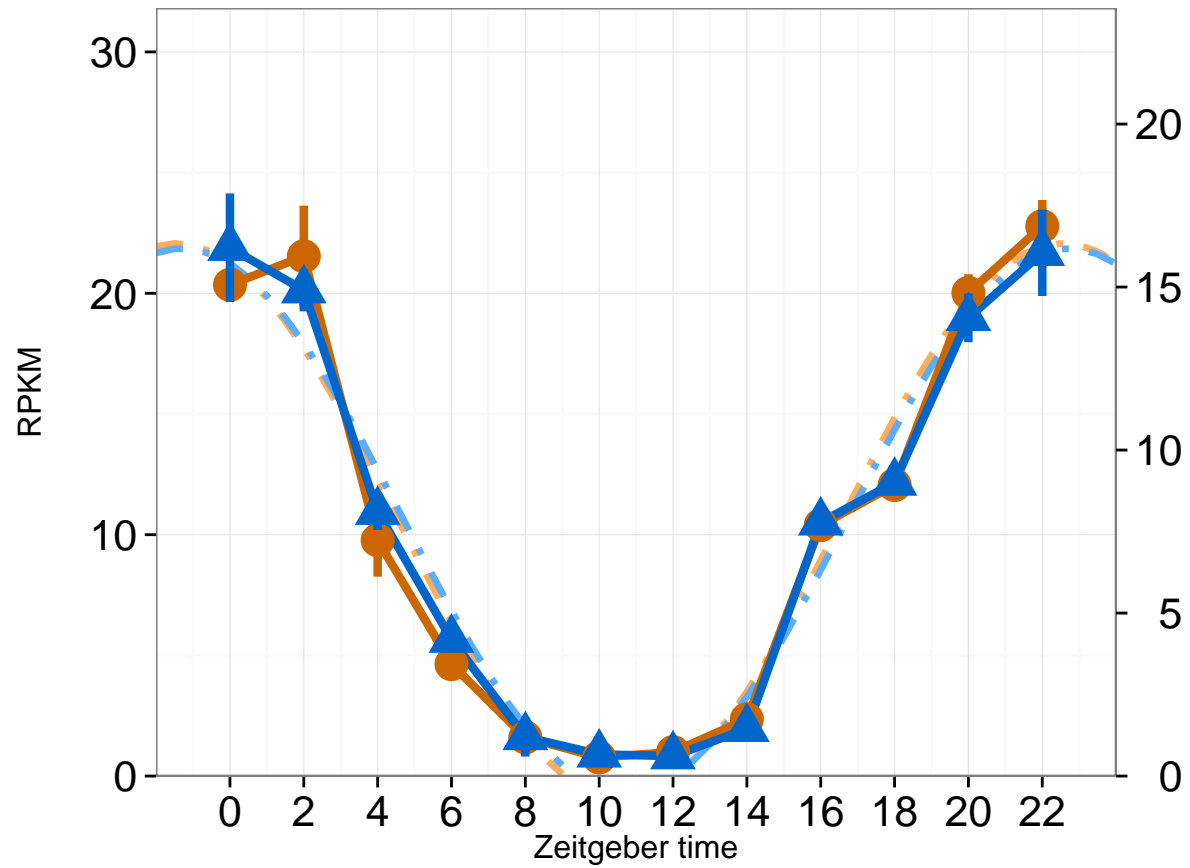

## Arntl

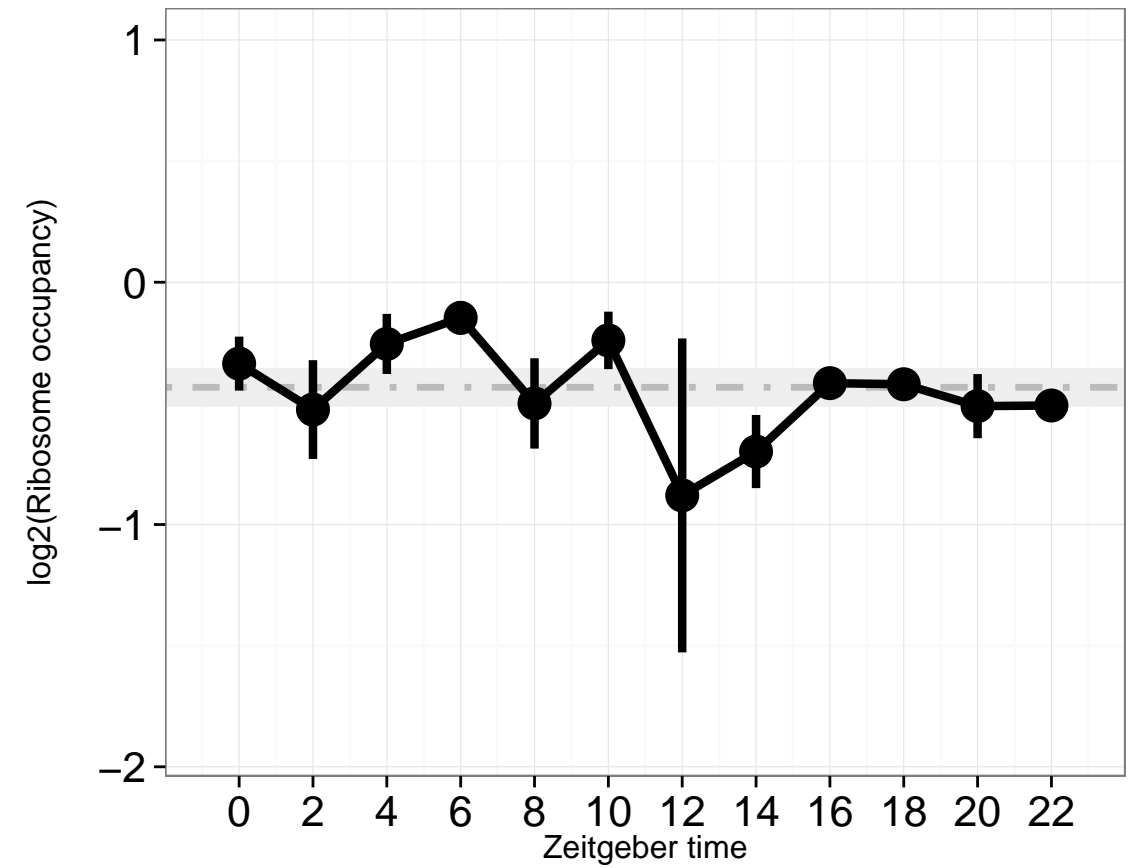

Supplement: Supplementary file 4705 [file 1]

## Ccdc141

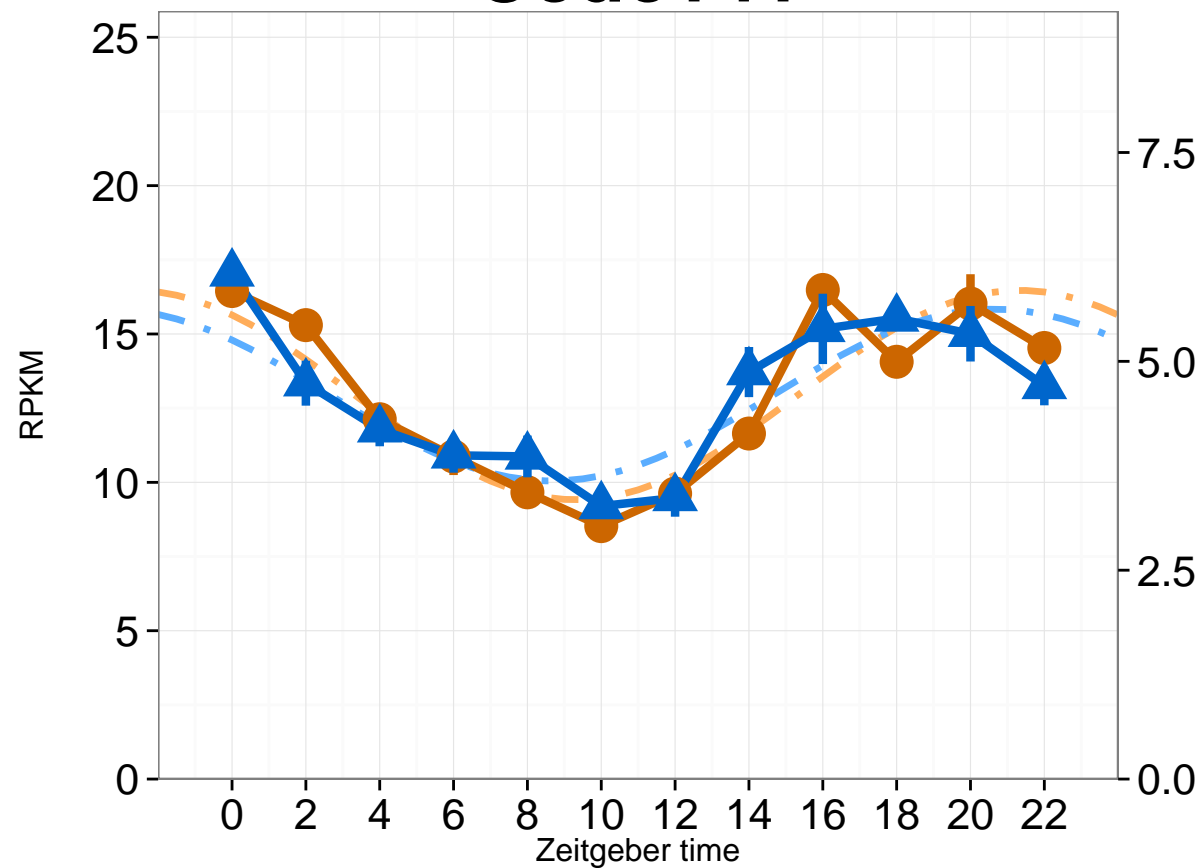

## Ccdc141

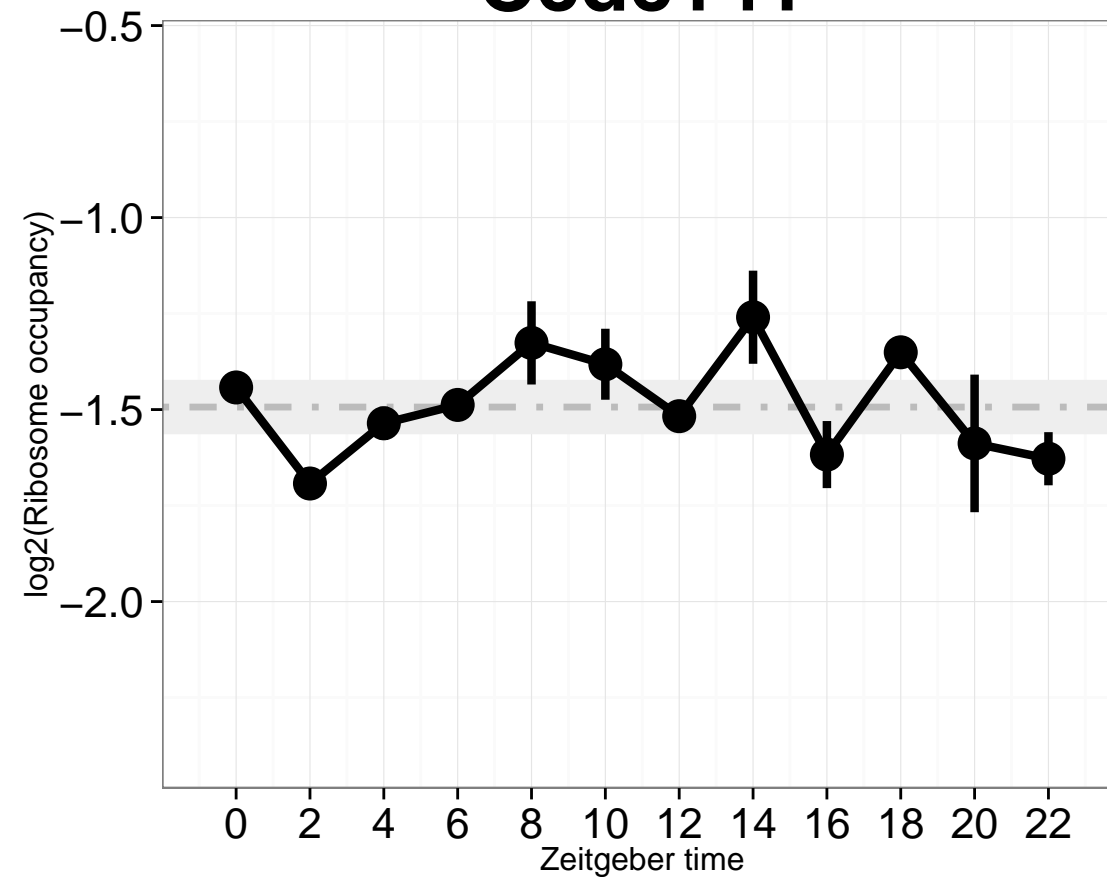

Supplement: Supplementary file 4706 [file 1]

## Nudc

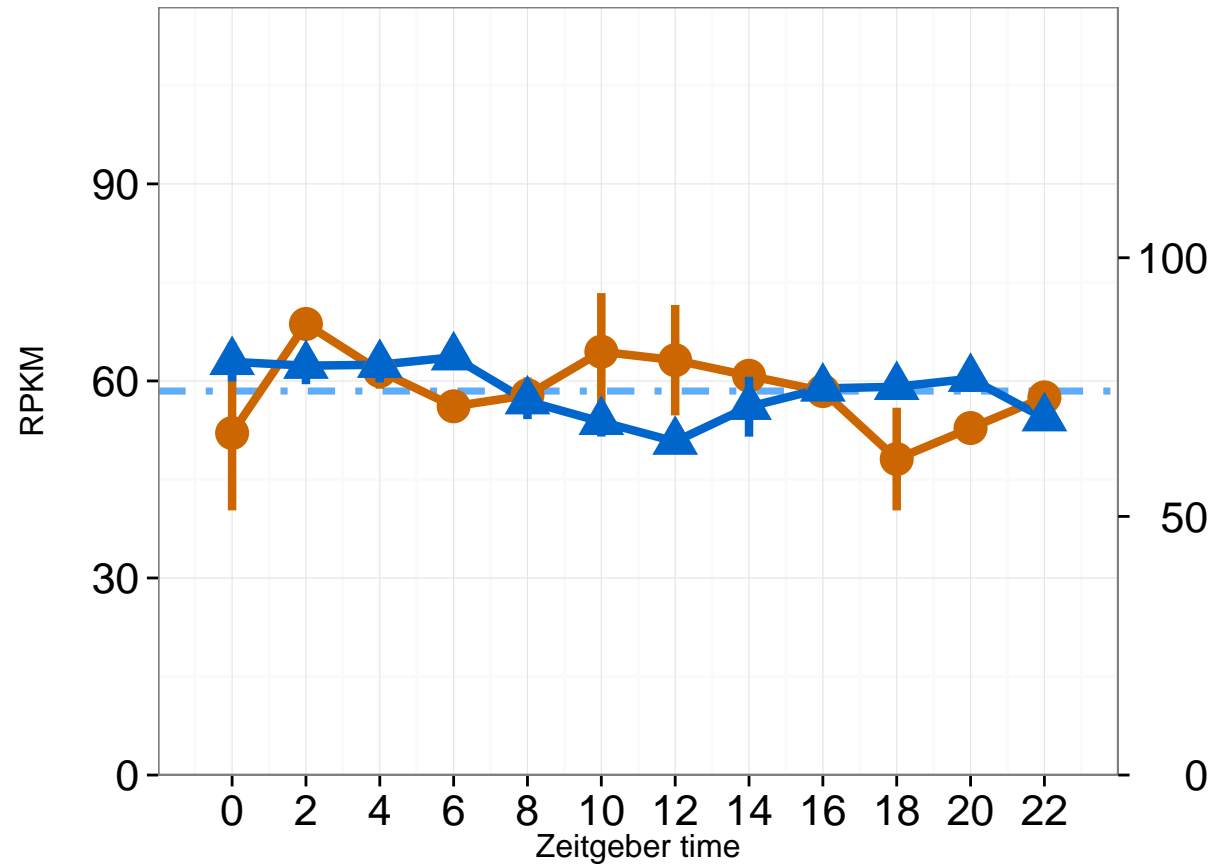

## Nudc

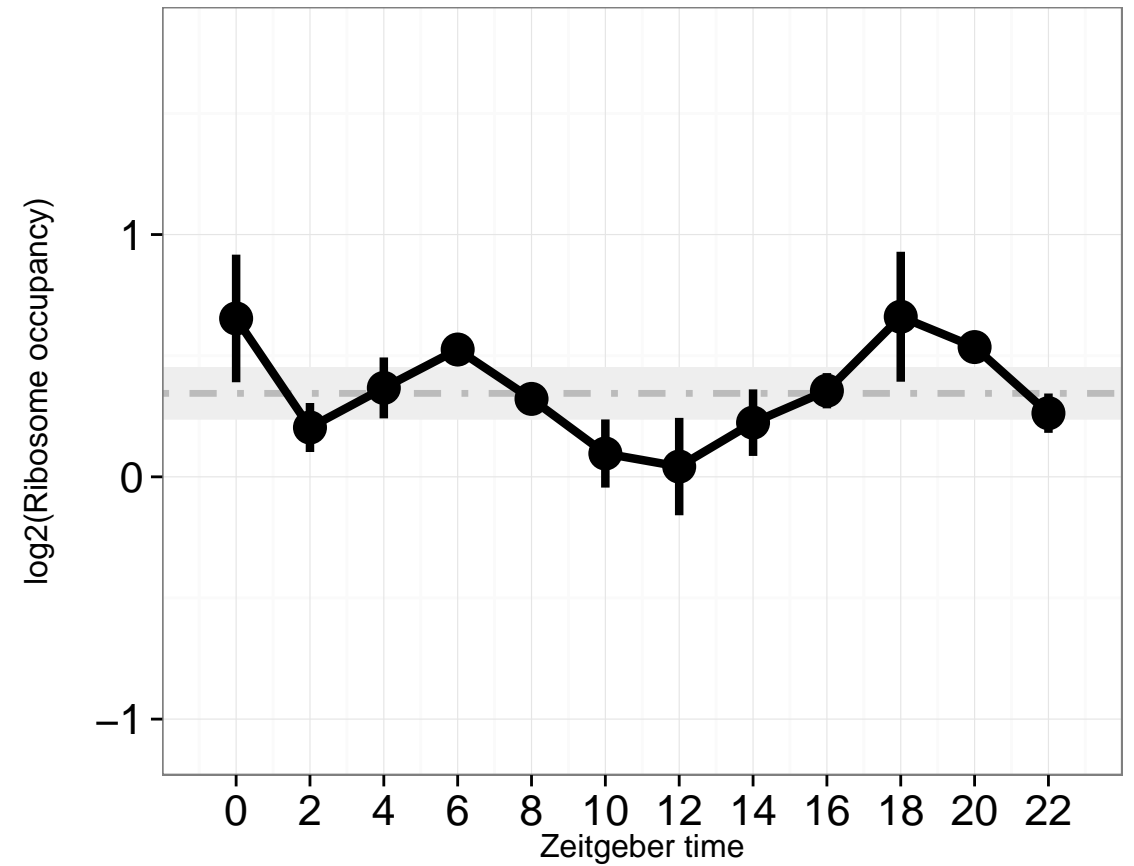

Supplement: Supplementary file 4707 [file 1]

# Gucd1

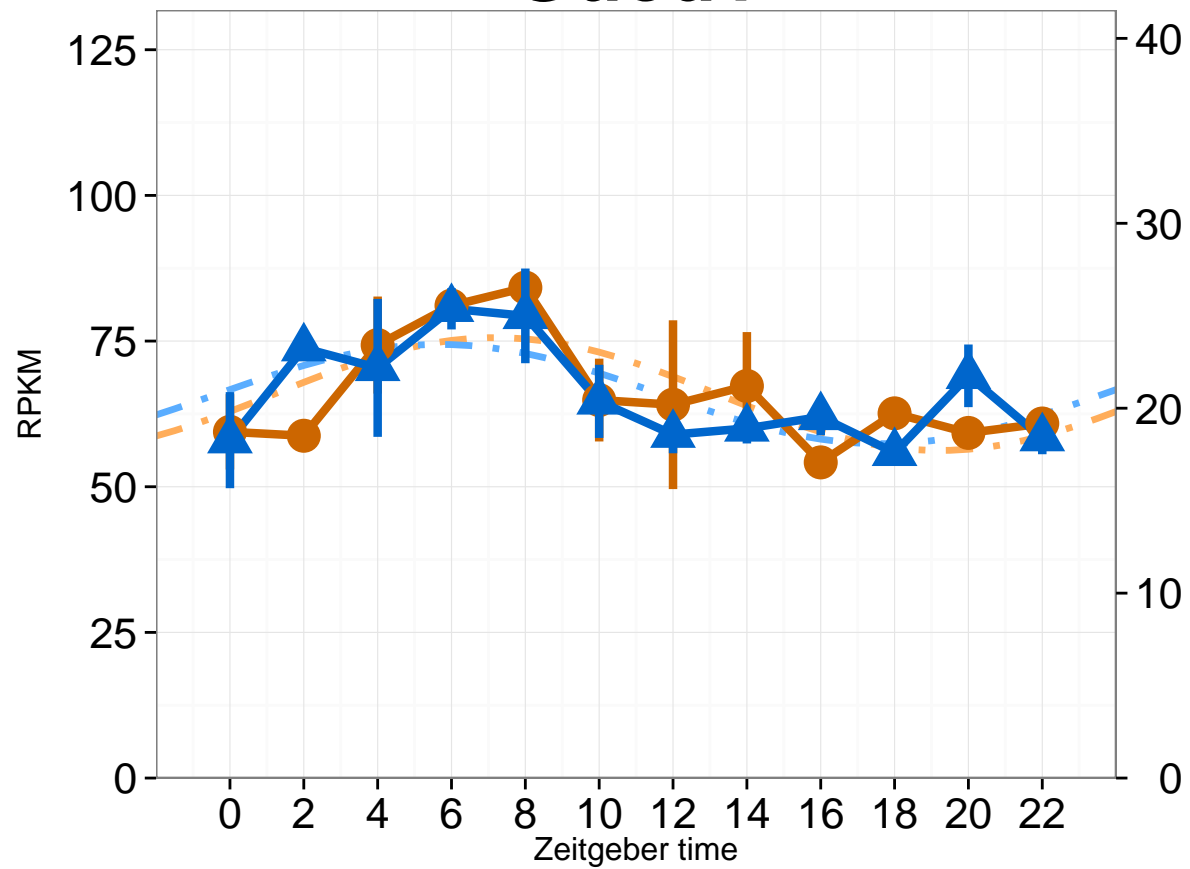

# Gucd1

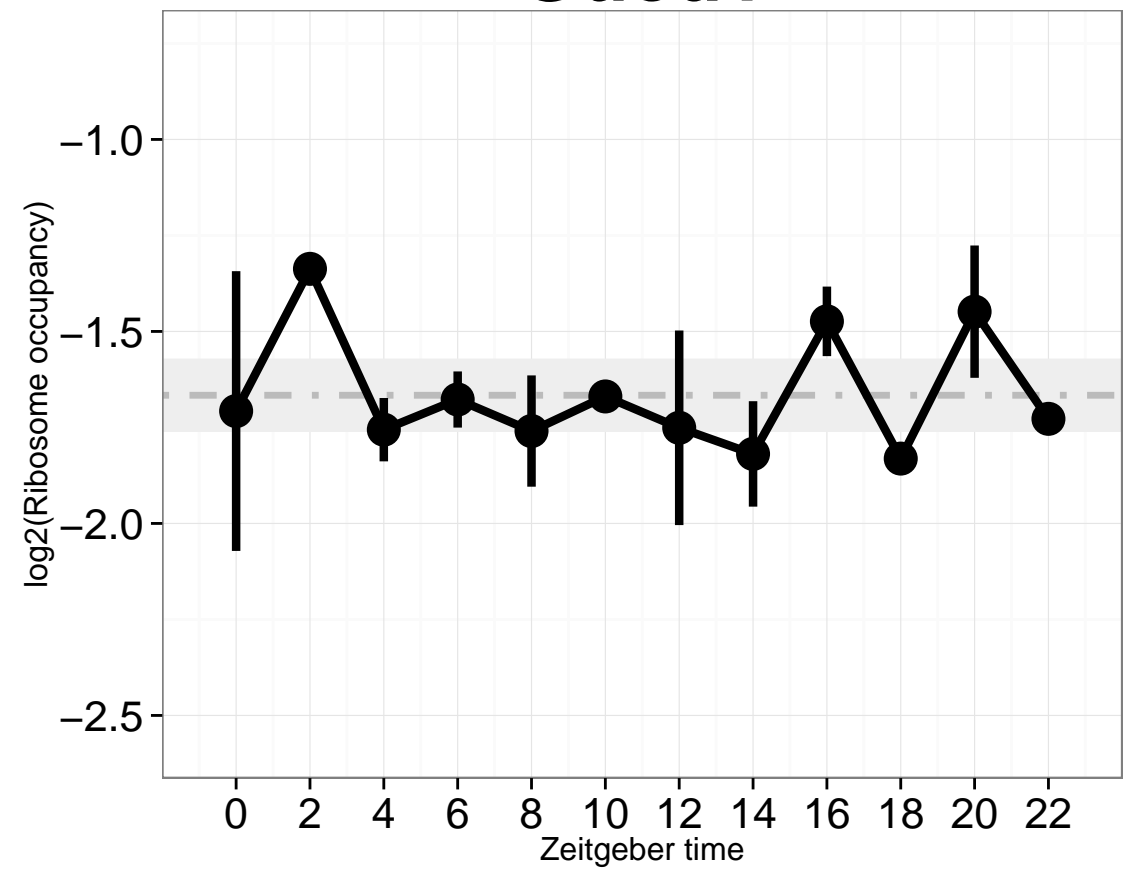

Supplement: Supplementary file 4708 [file 1]

## Pcbp1

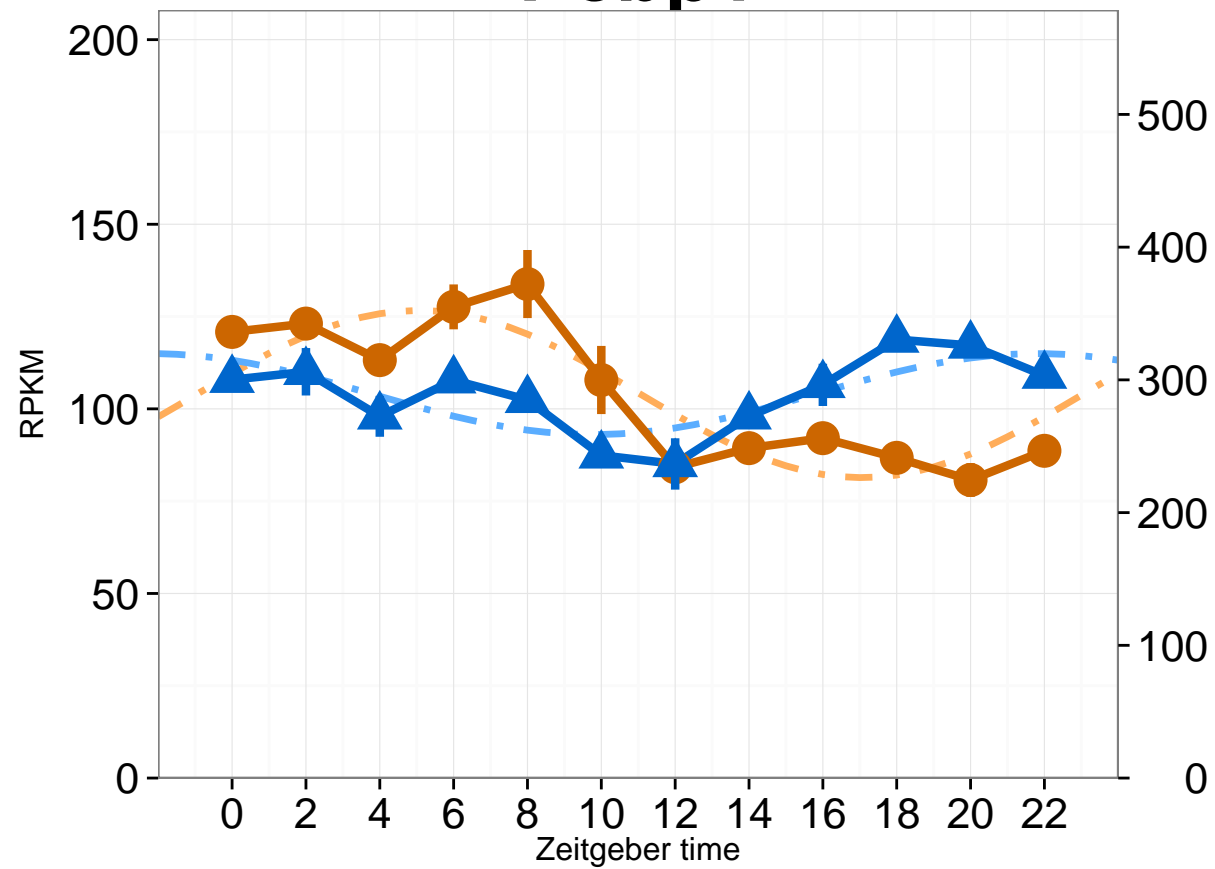

## Pcbp1

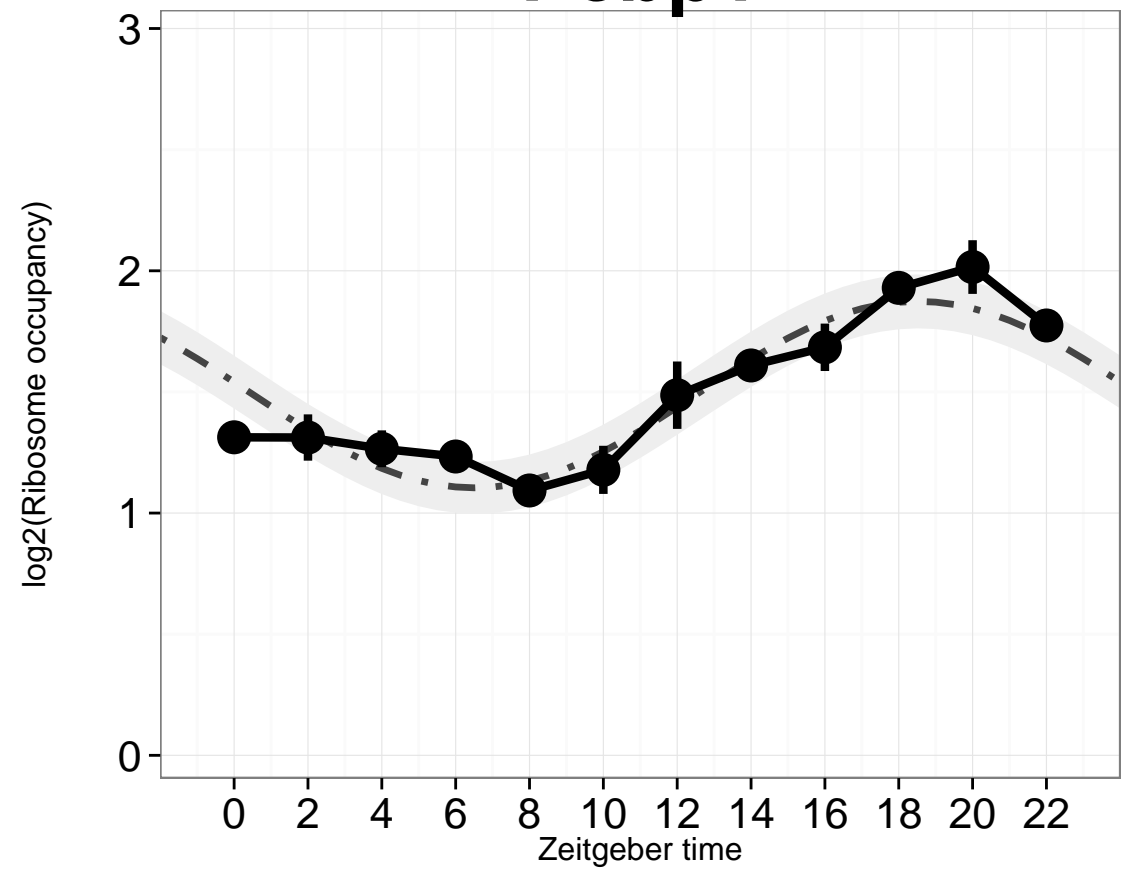

Supplement: Supplementary file 4709 [file 1]

## Xkr8

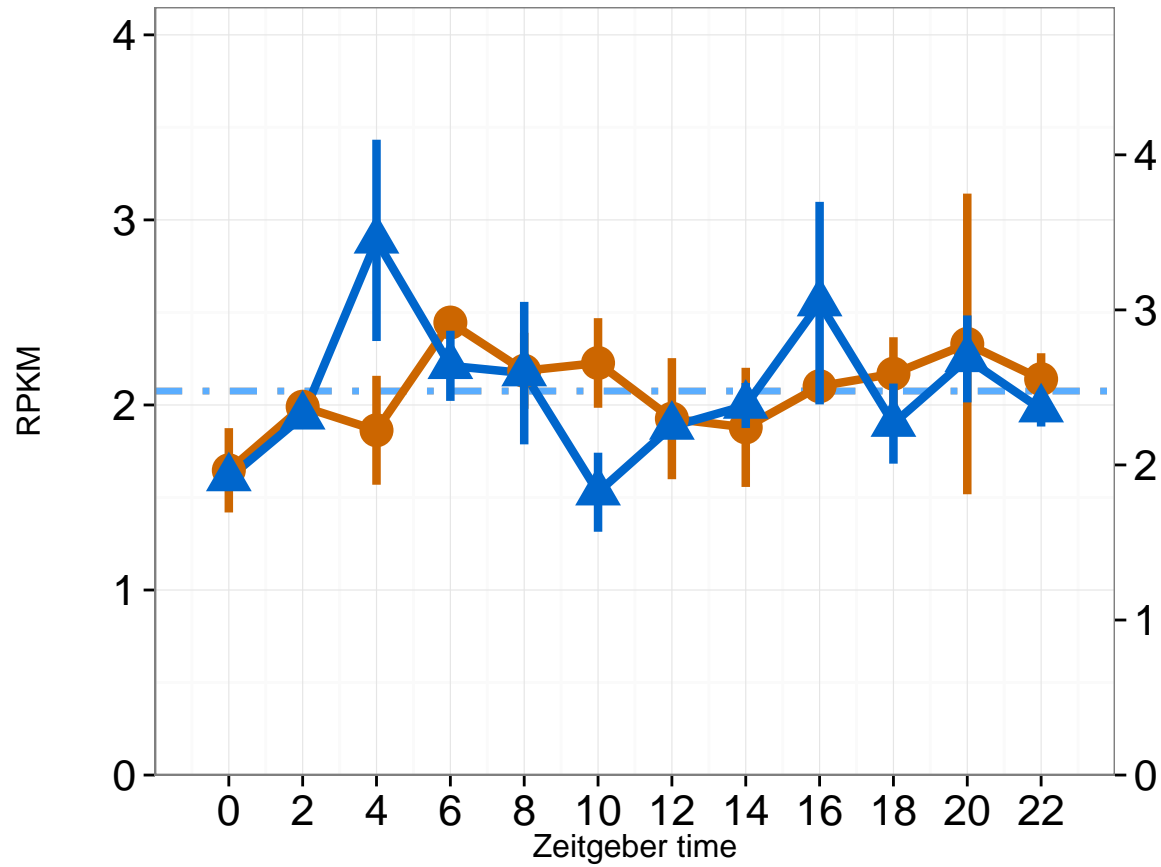

## Xkr8

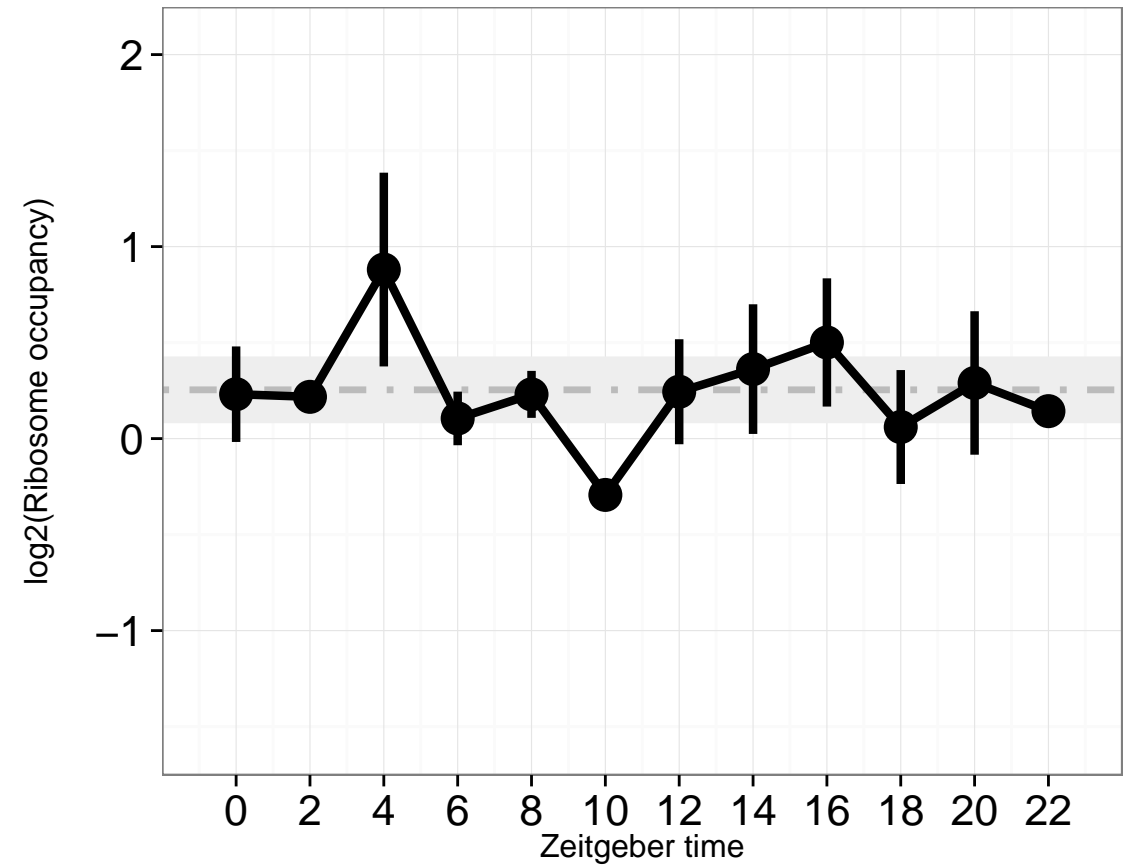

Supplement: Supplementary file 4710 [file 1]

# 4930427A07Rik

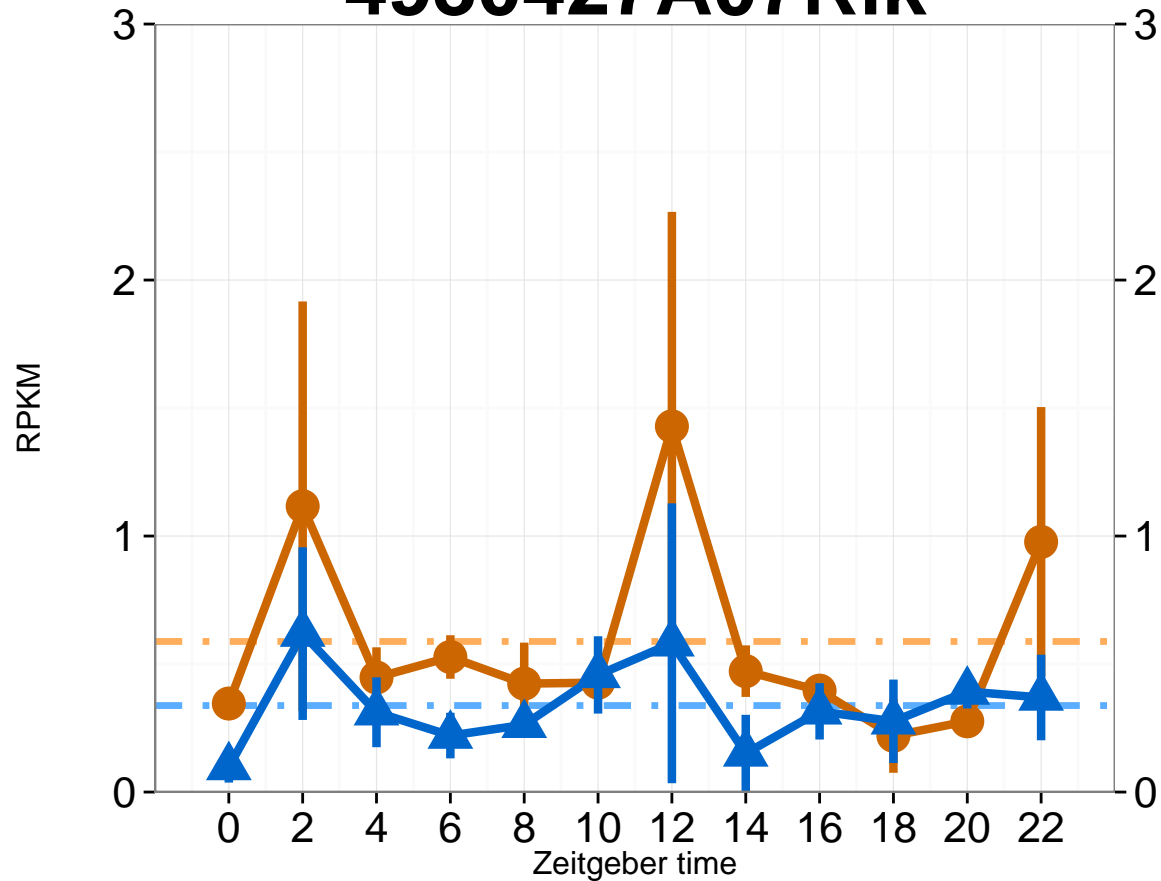

# 4930427A07Rik

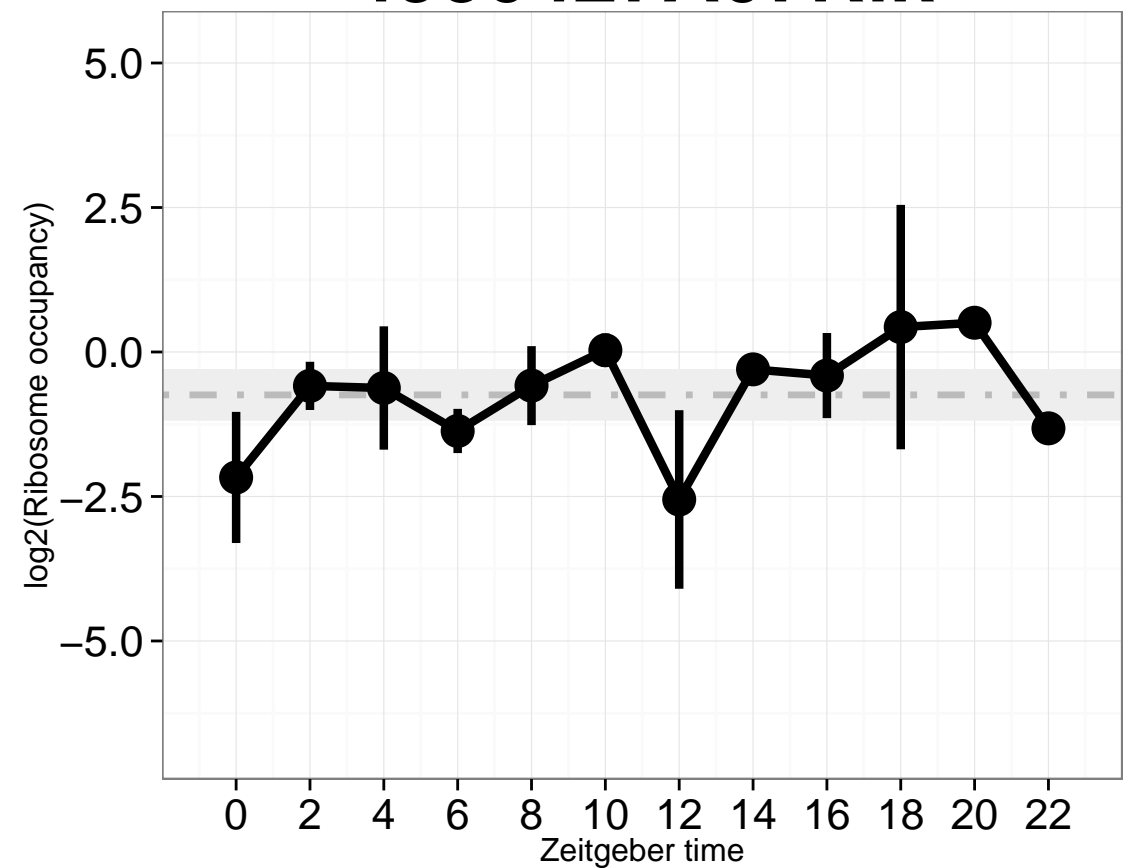

Supplement: Supplementary file 4711 [file 1]

## Gar1

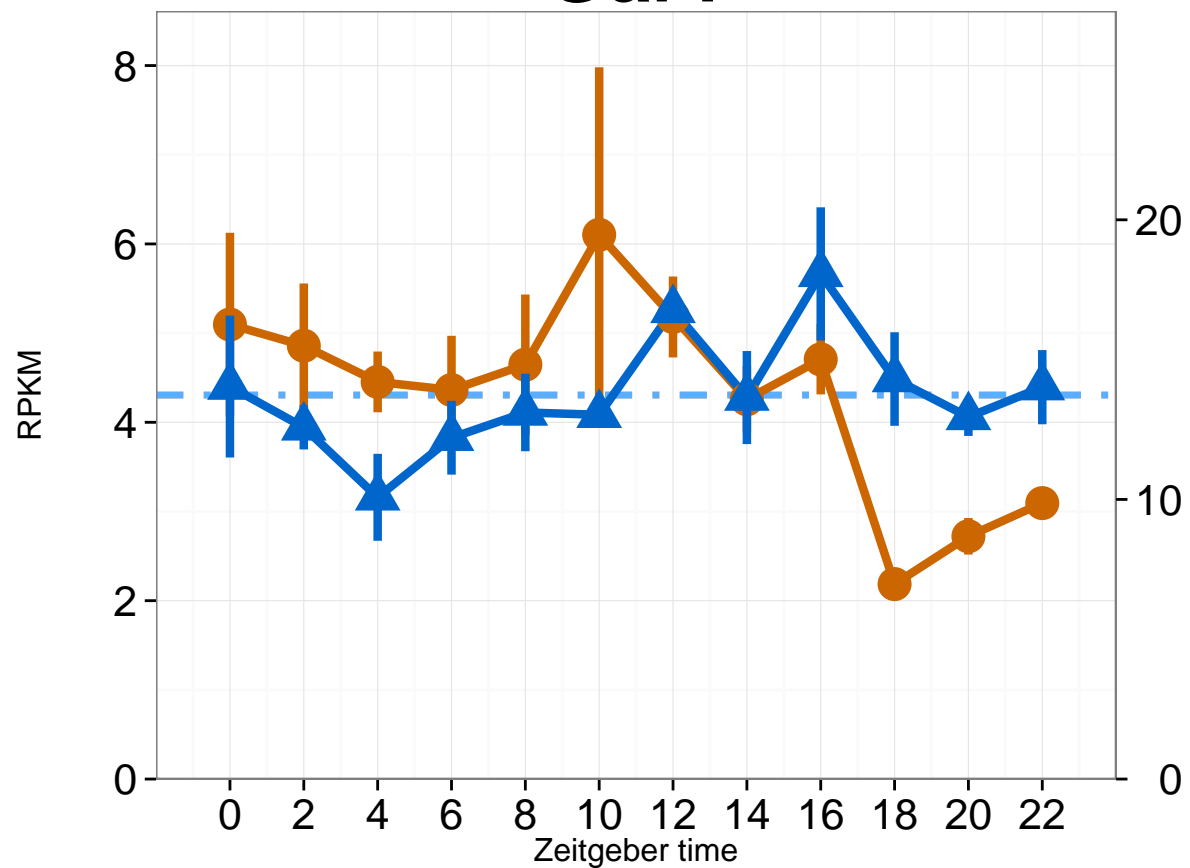

## Gar1

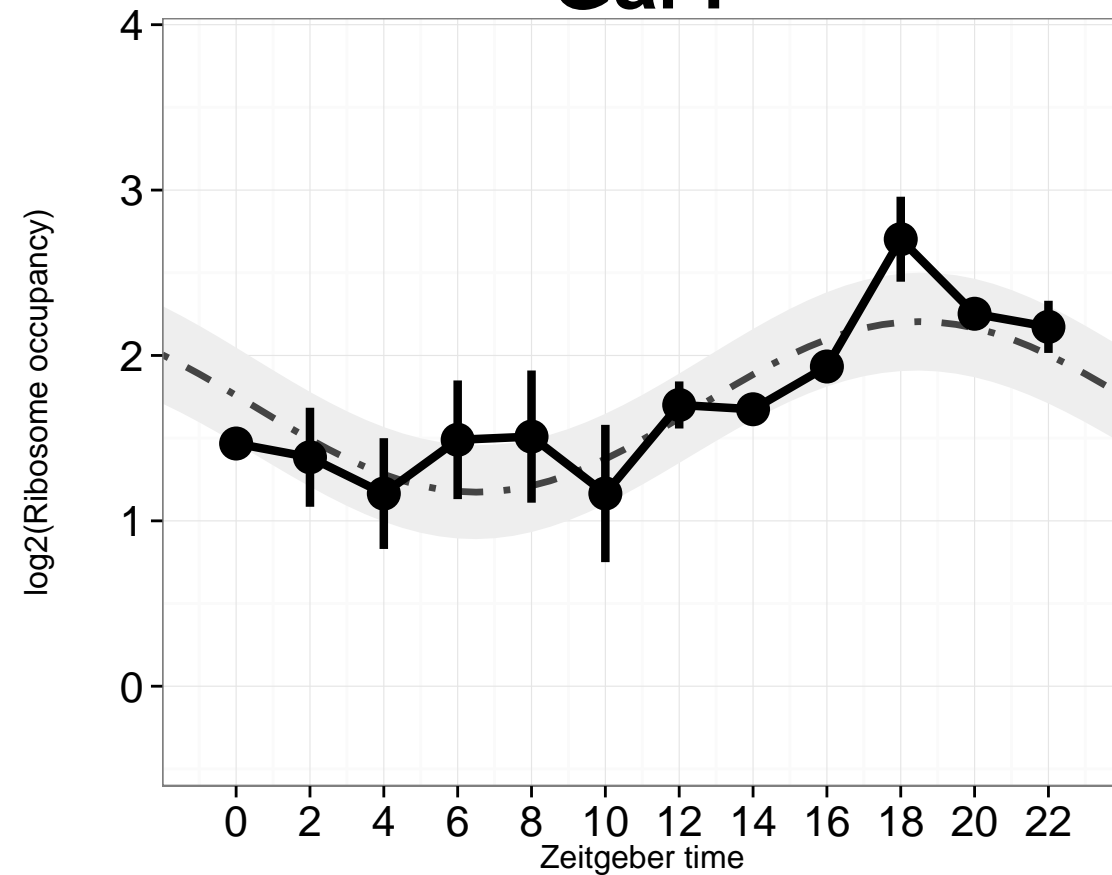

Supplement: Supplementary file 4712 [file 1]

## Pomc

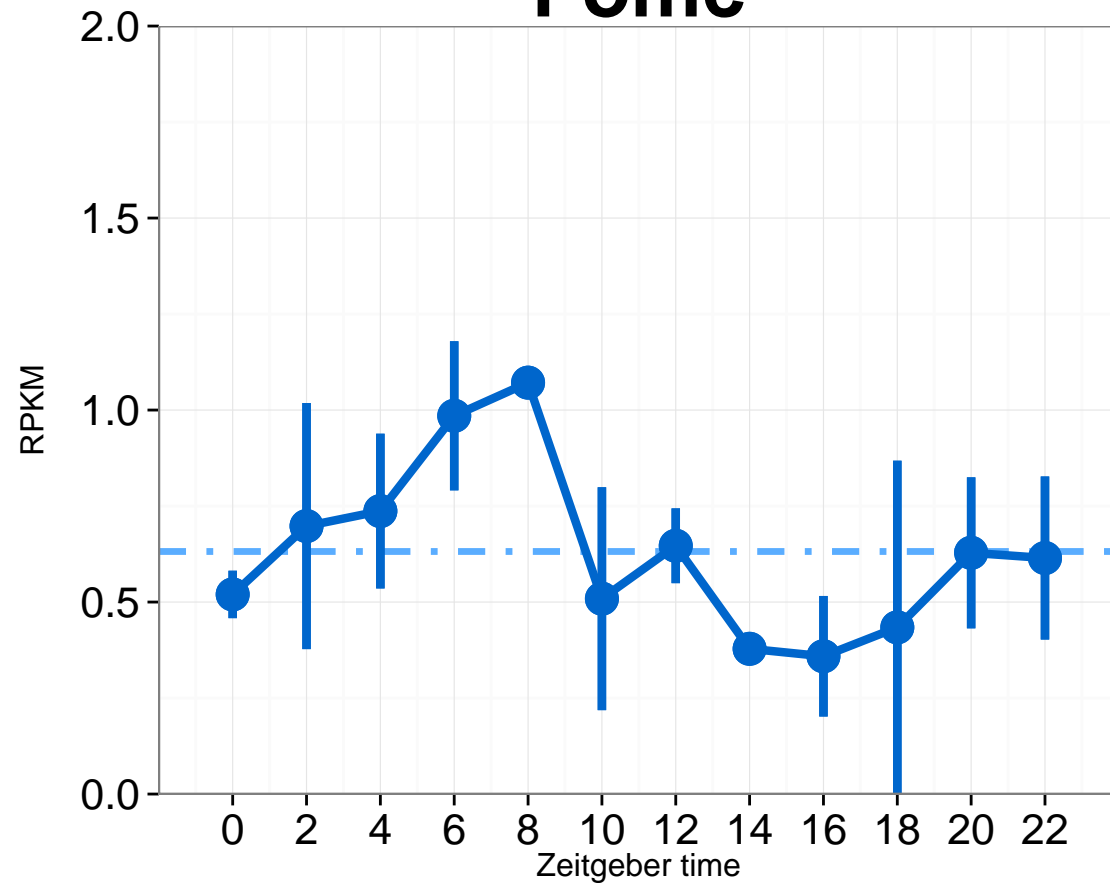

## Pomc log2(Ribosome occupancy)

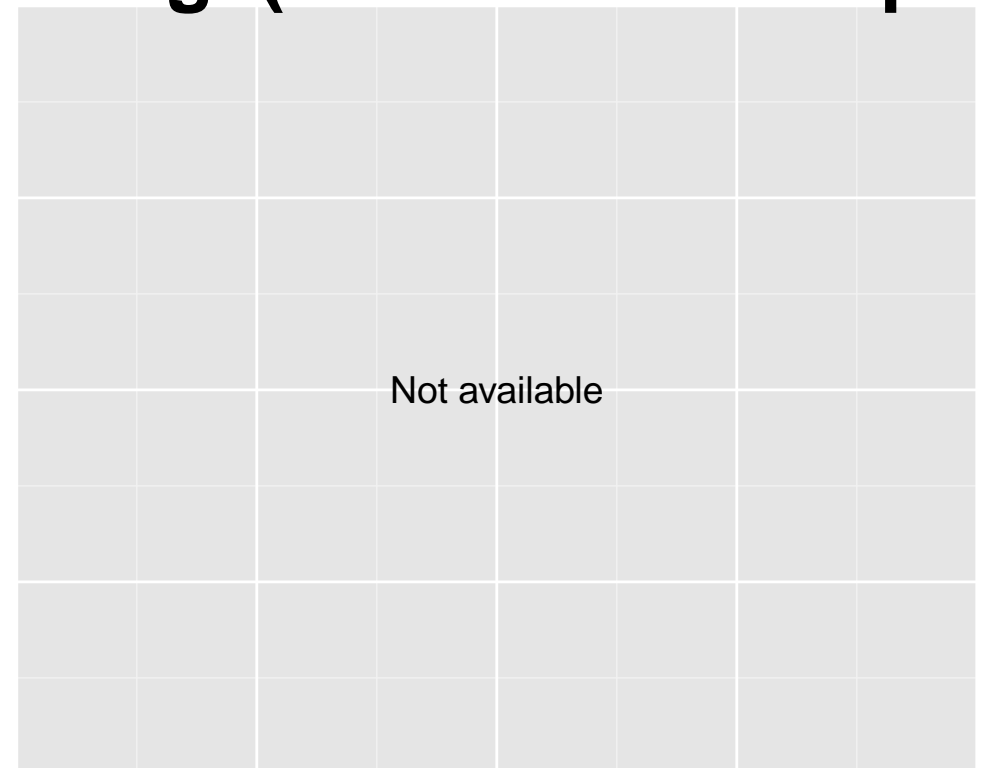

Supplement: Supplementary file 4713 [file 1]

# 3300002I08Rik

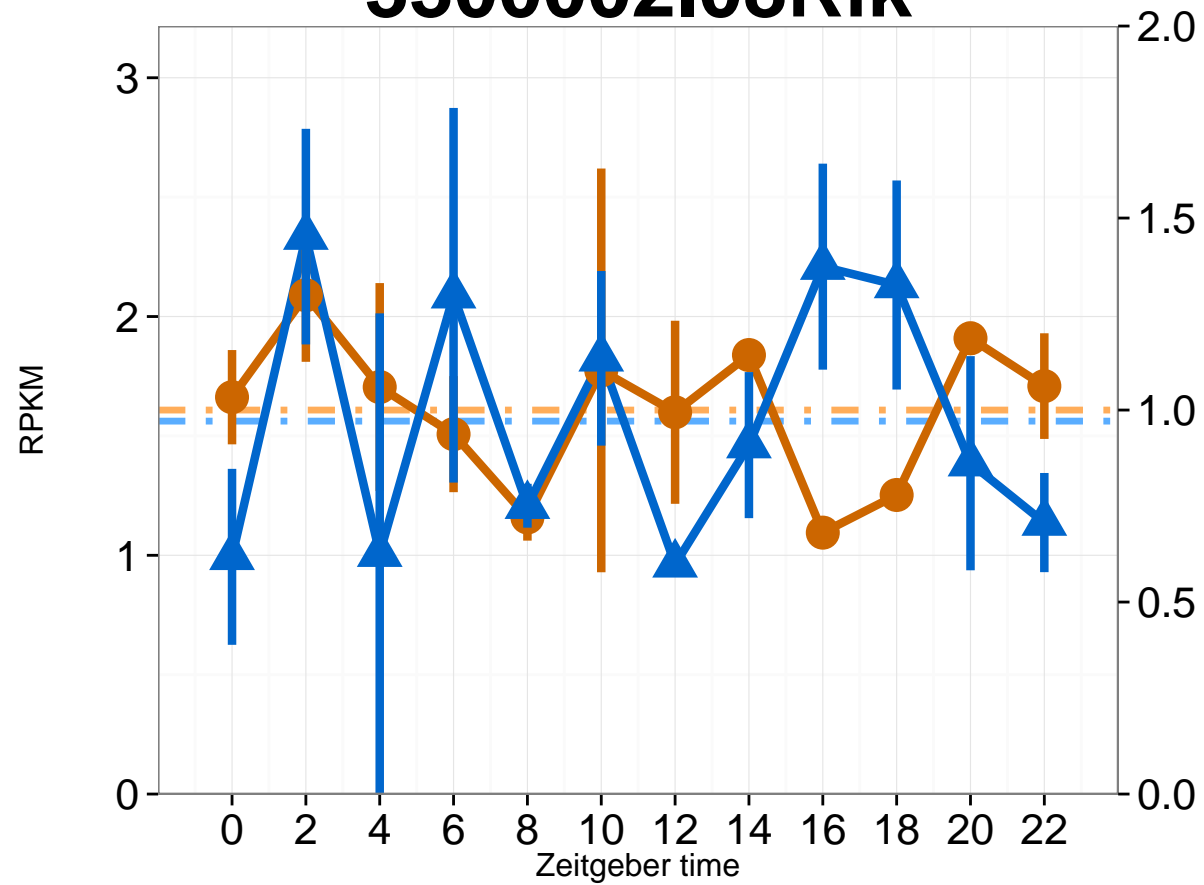

# 3300002I08Rik

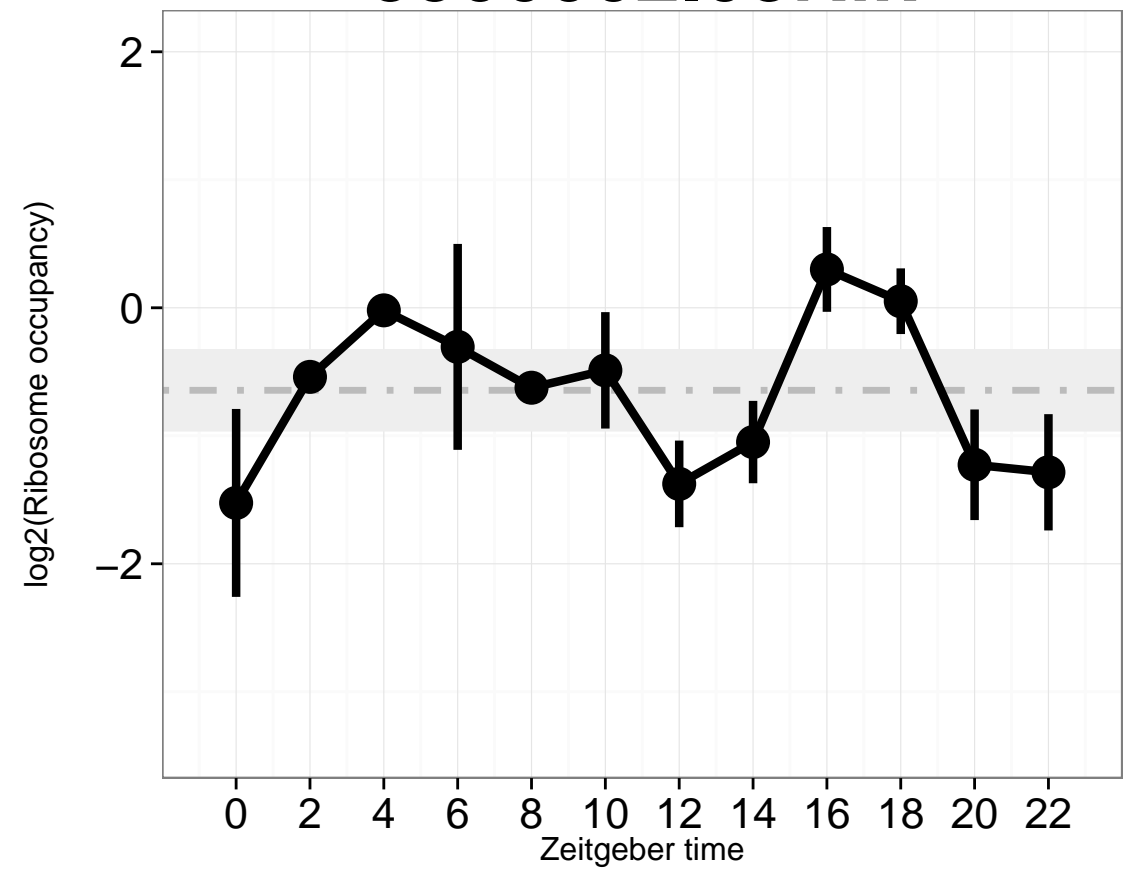

Supplement: Supplementary file 4714 [file 1]

## Hdac5

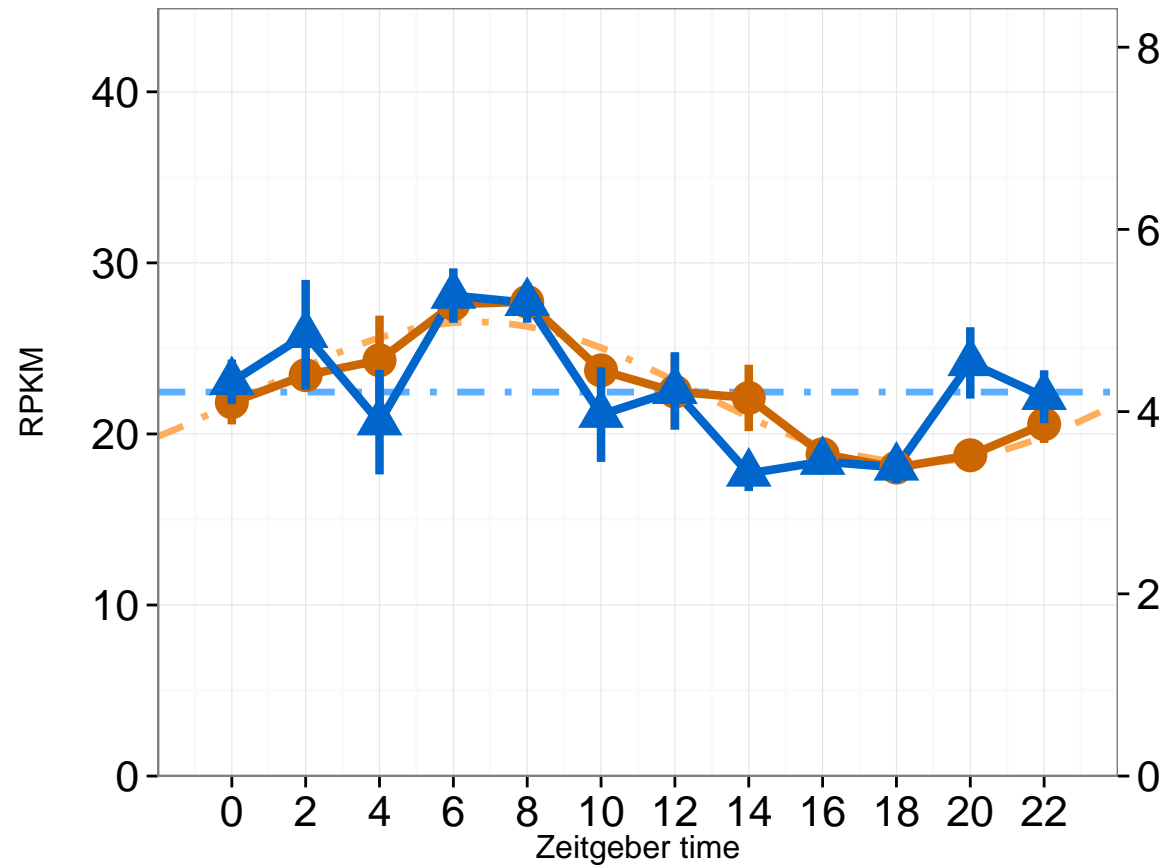

## Hdac5

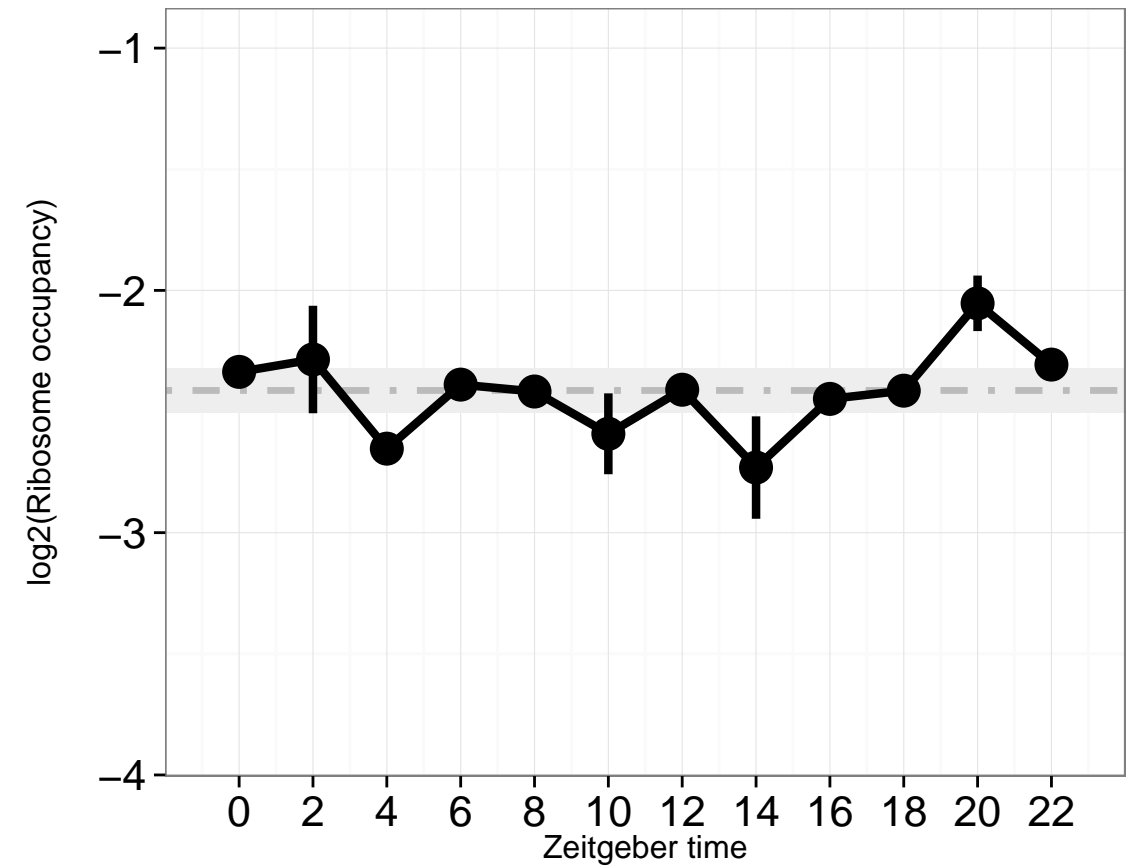

Supplement: Supplementary file 4715 [file 1]

## Dvl1

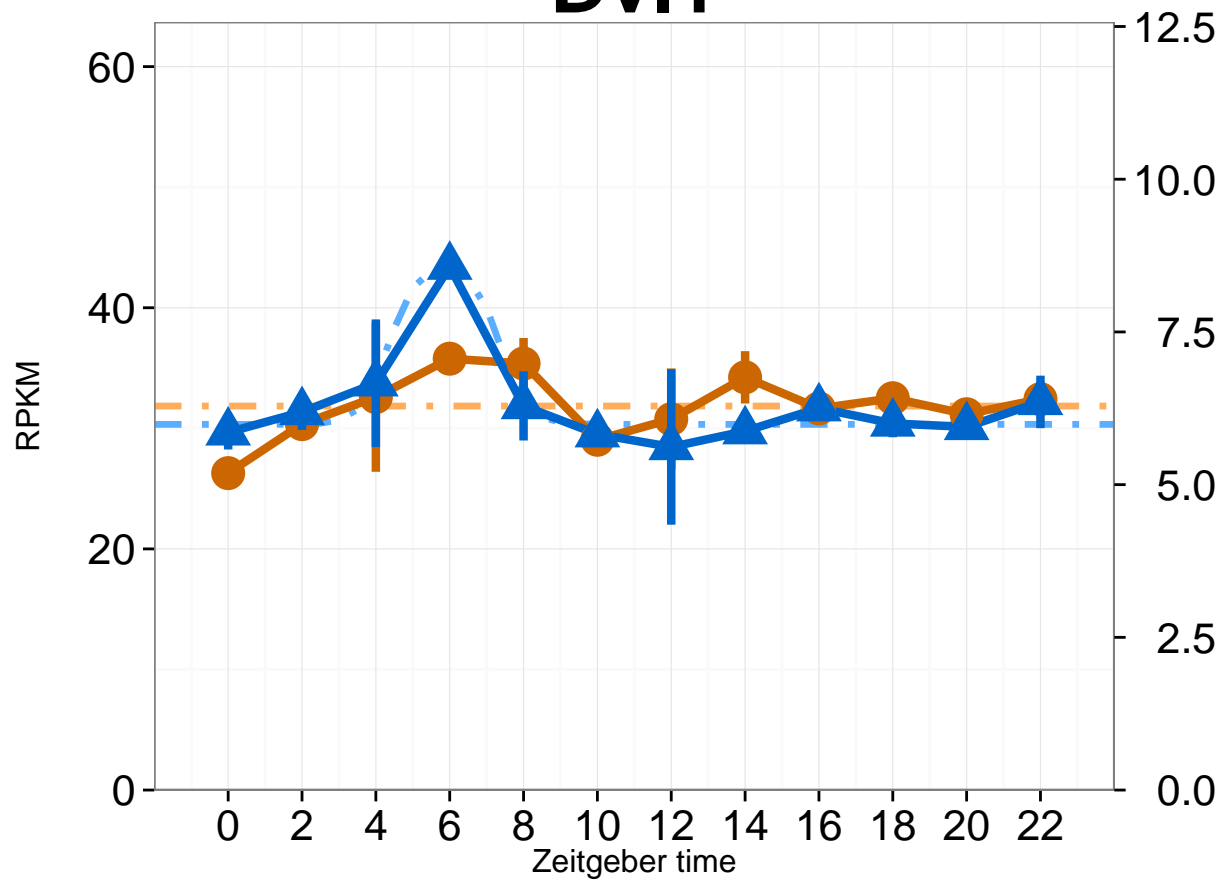

## Dvl1

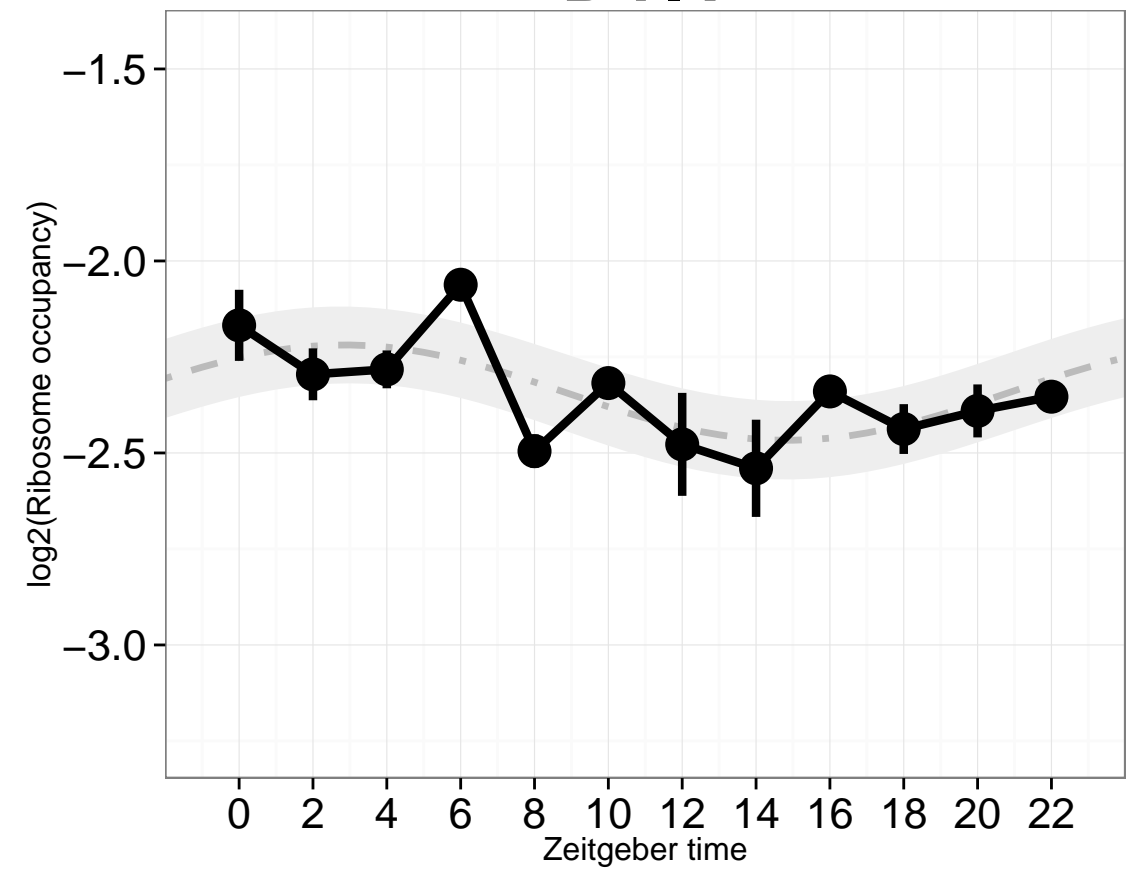

Supplement: Supplementary file 4716 [file 1]

## Thrb

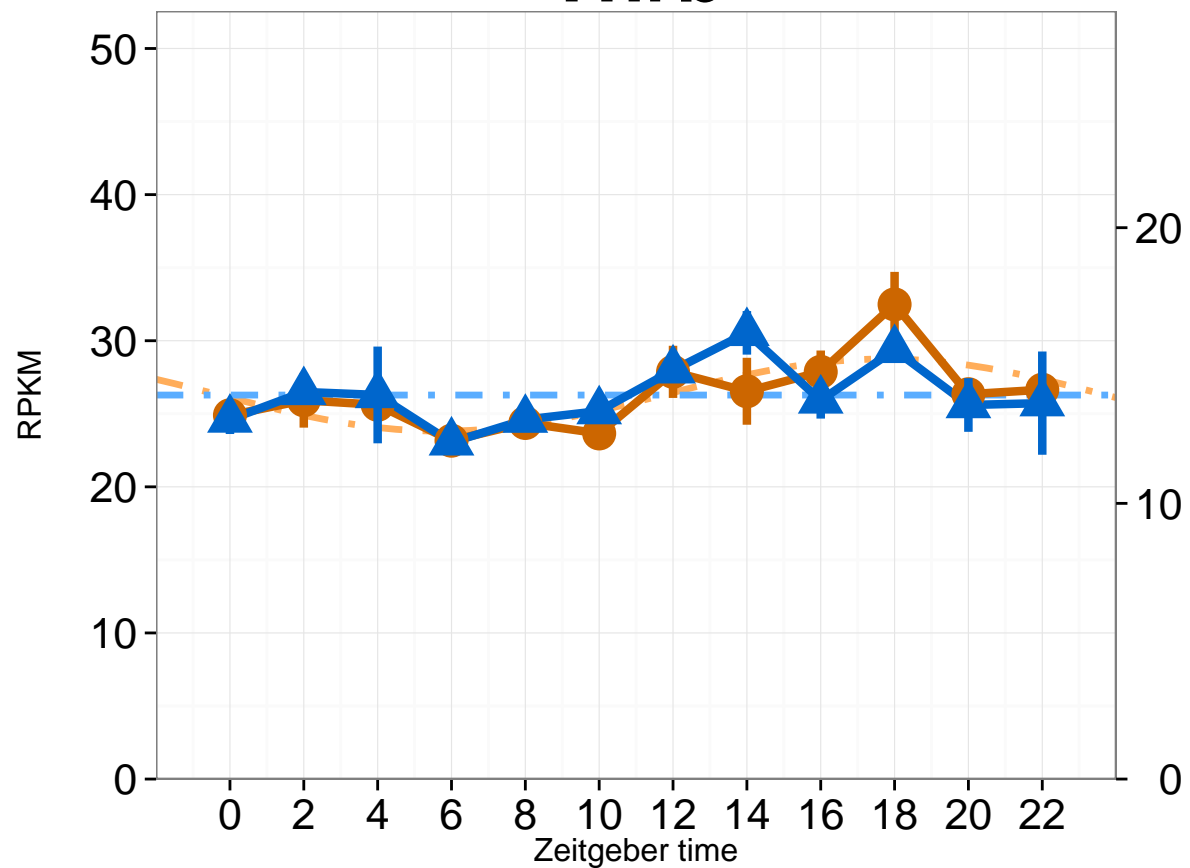

## Thrb

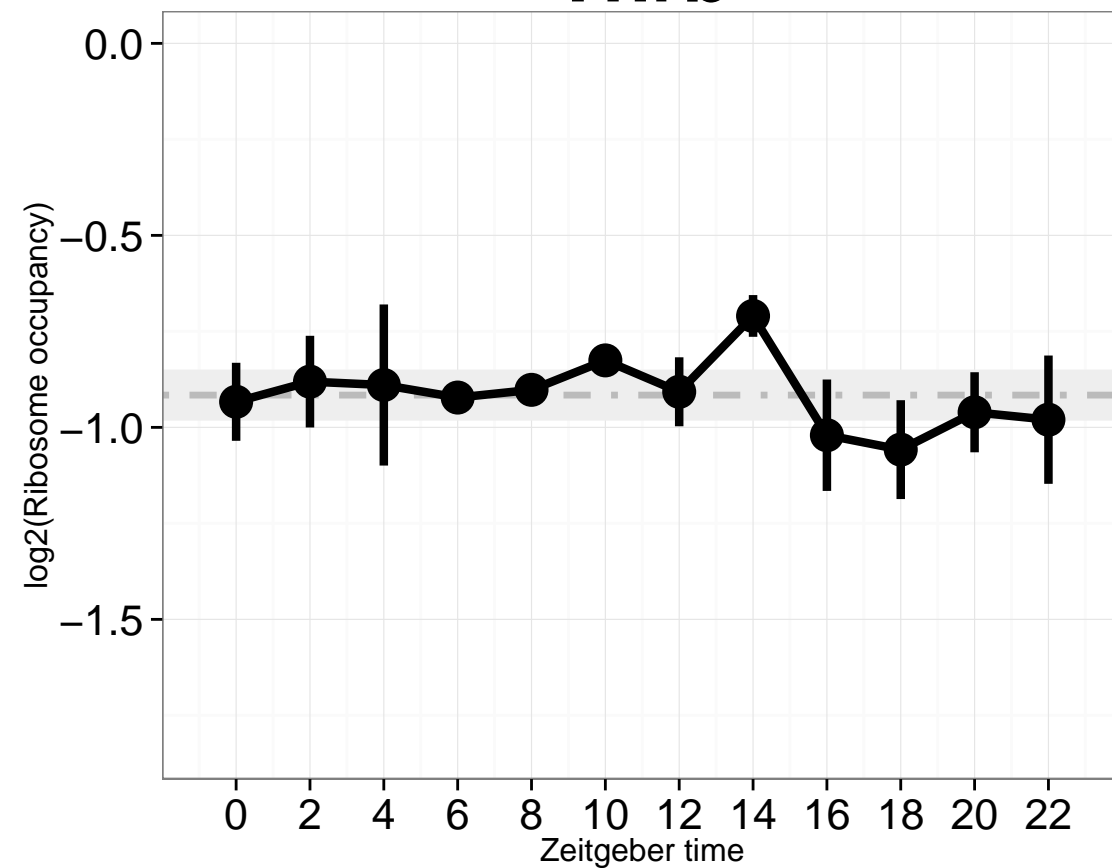

Supplement: Supplementary file 4717 [file 1]

## Tifab

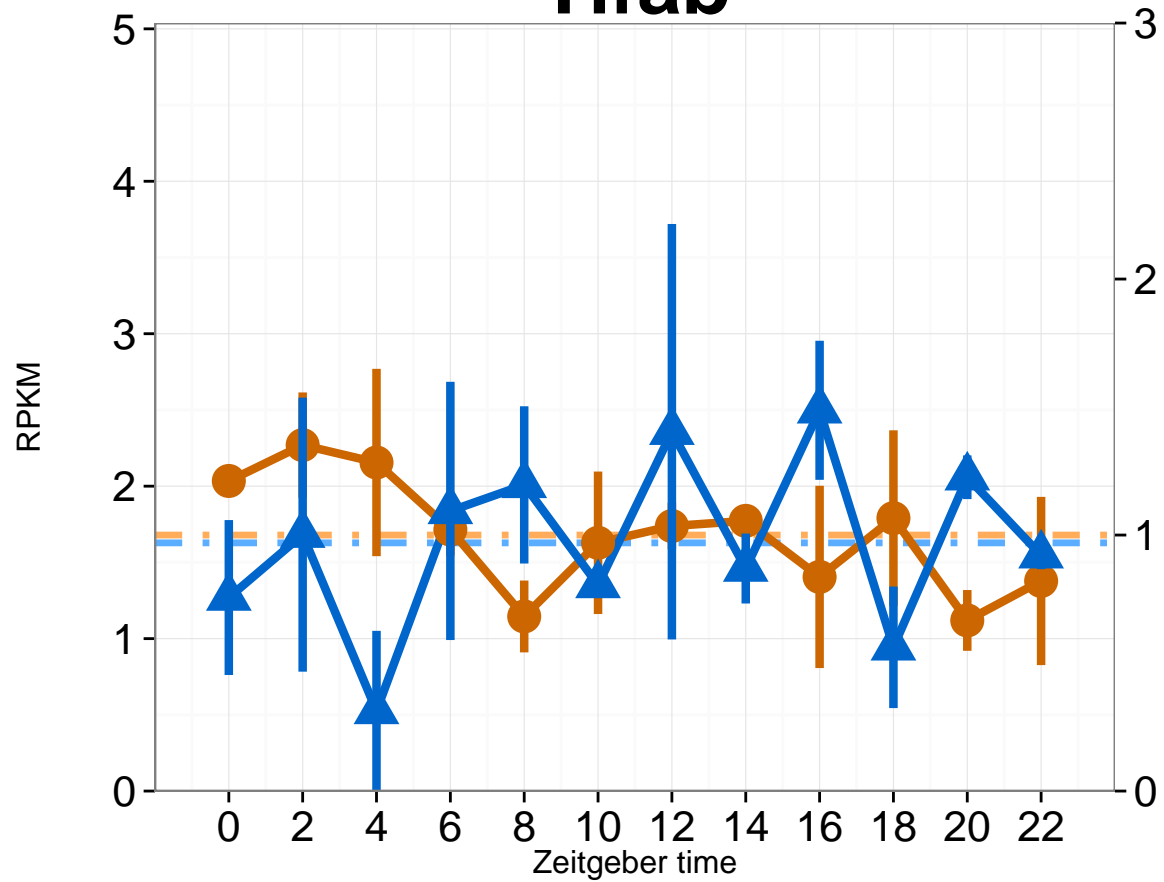

## Tifab

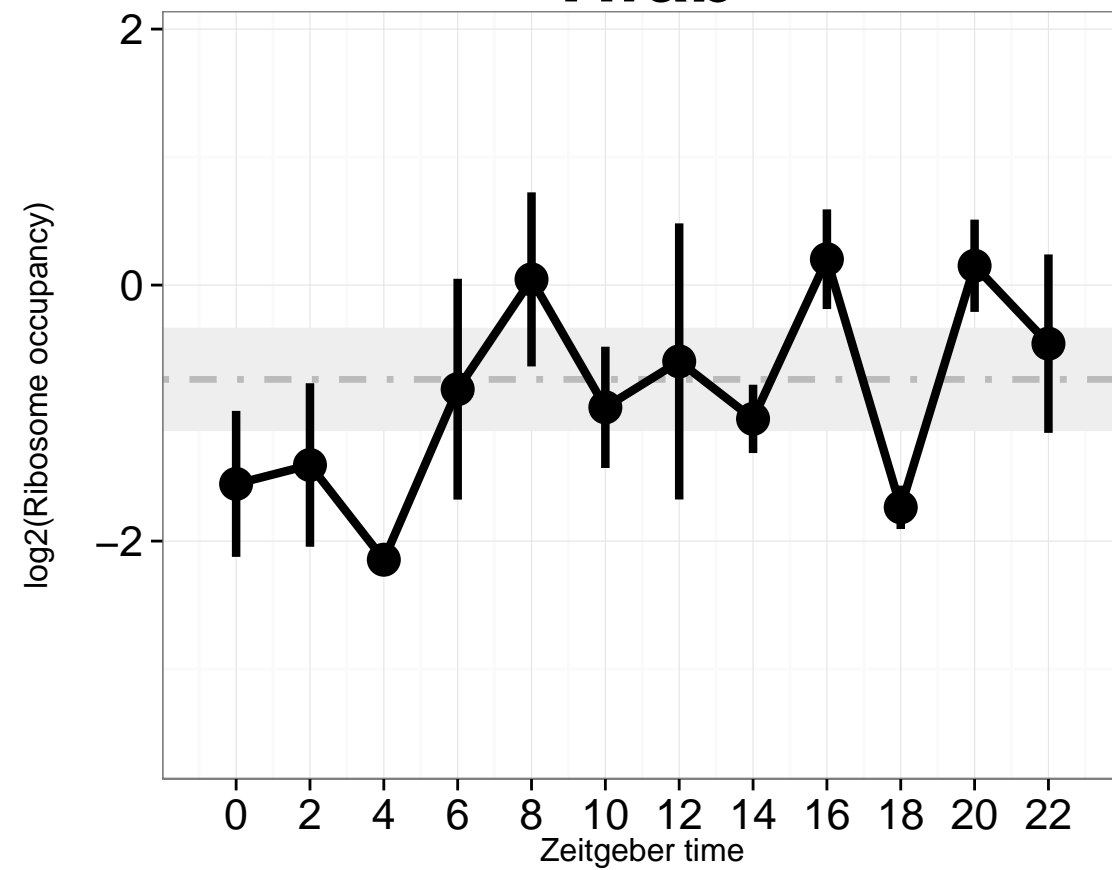

Supplement: Supplementary file 4718 [file 1]

## Bnip3l

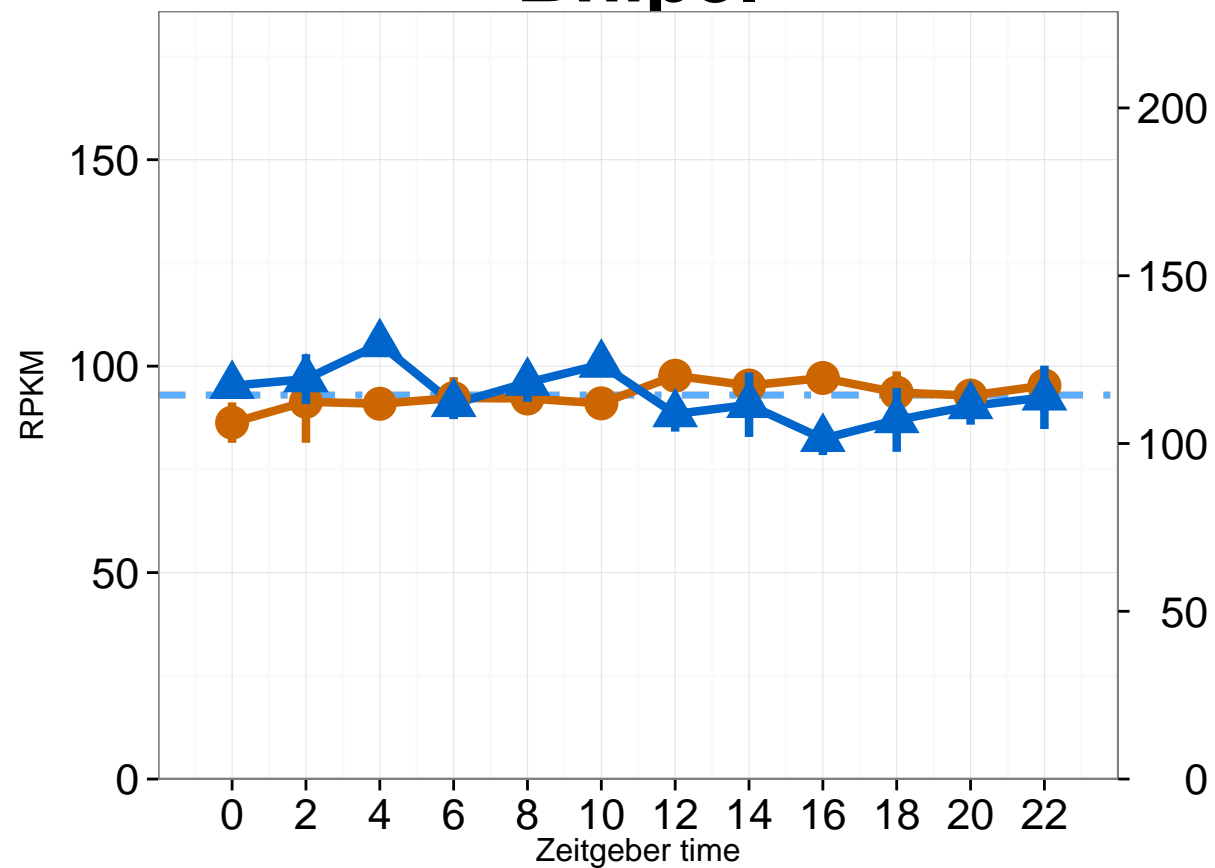

## Bnip3l

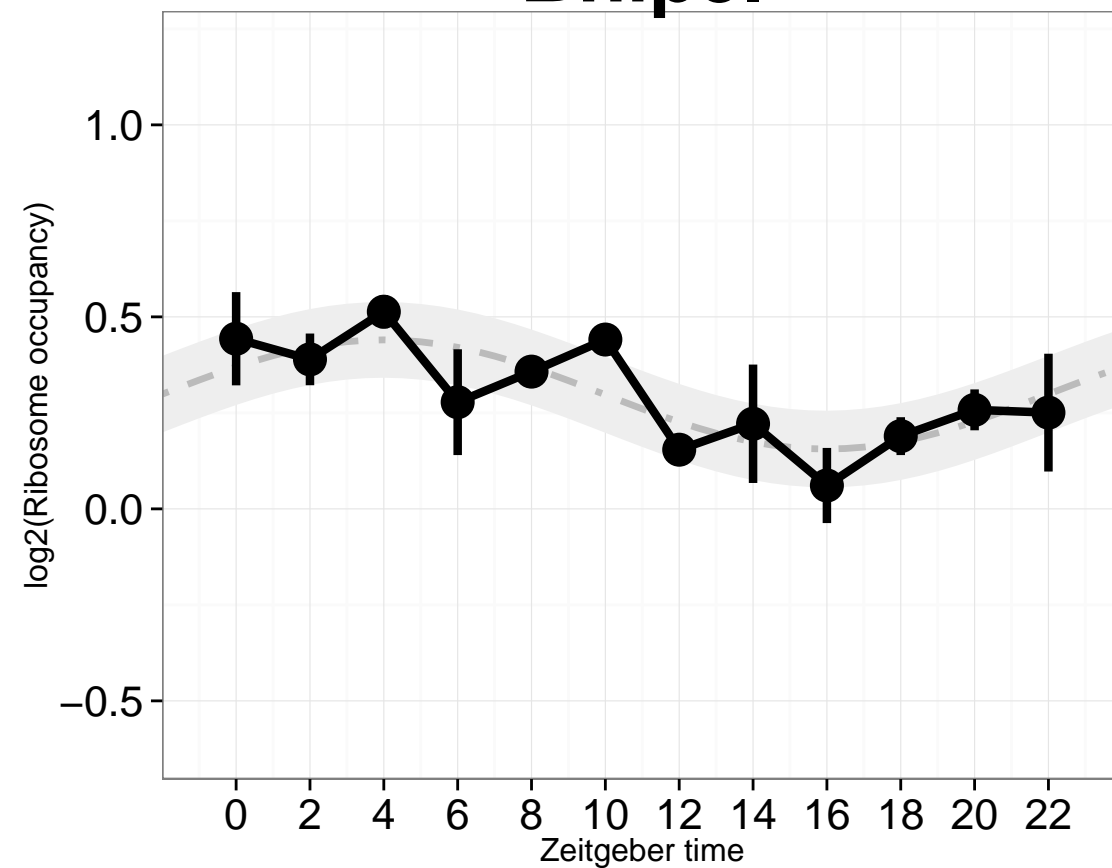

Supplement: Supplementary file 4719 [file 1]

## Ifnar1

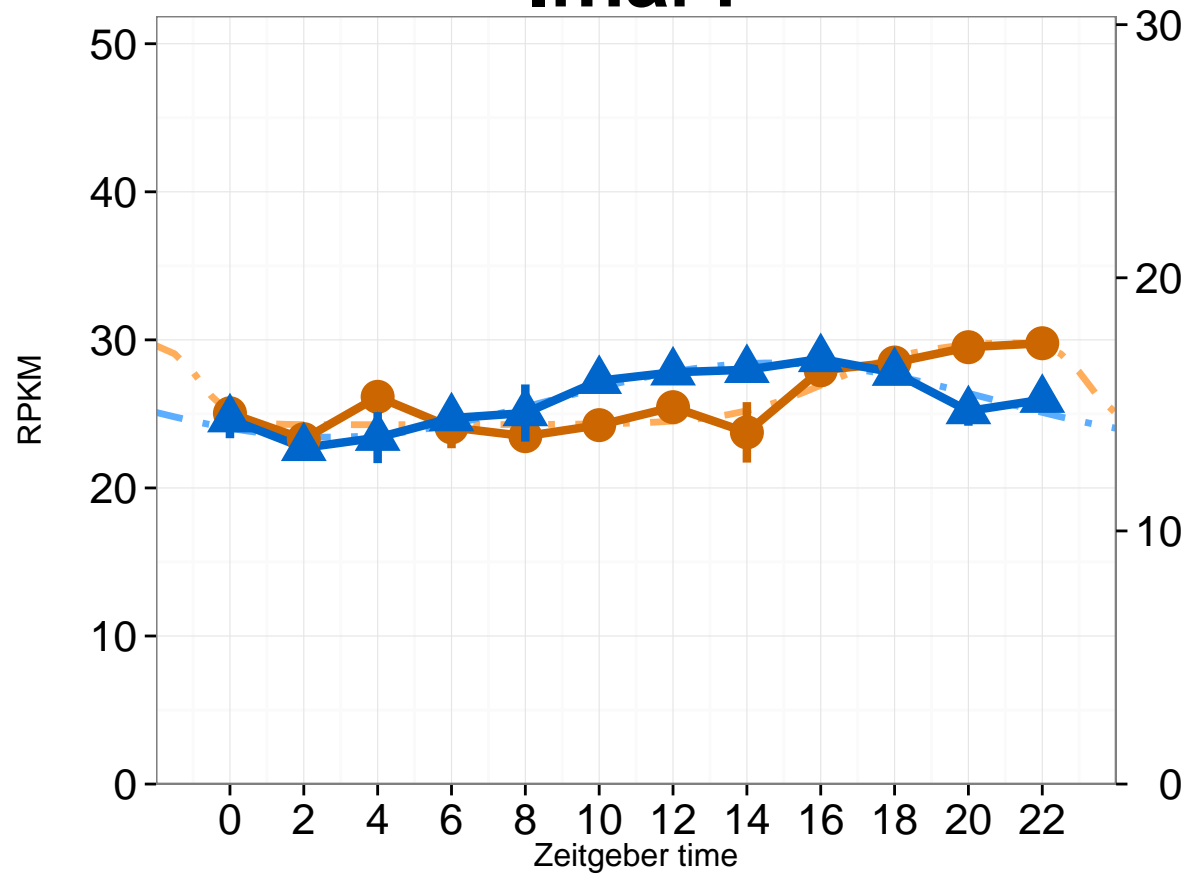

## Ifnar1

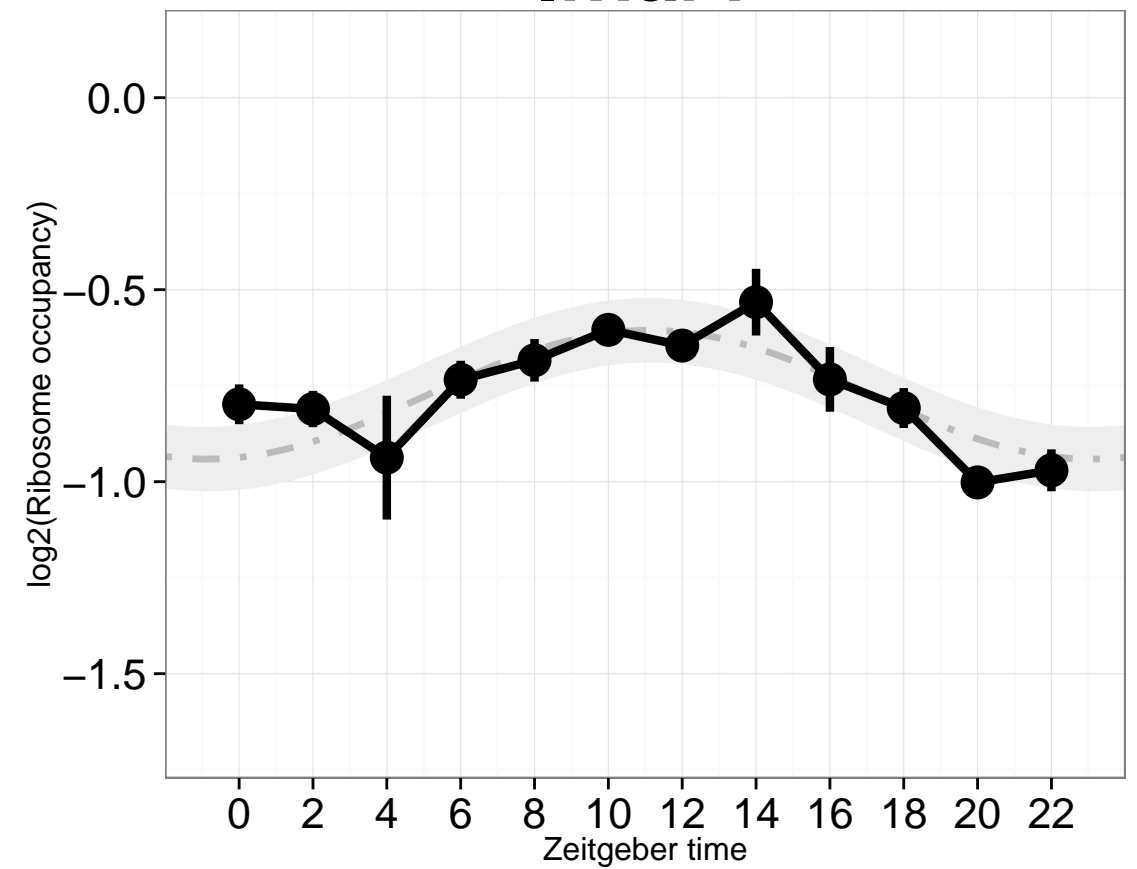

Supplement: Supplementary file 4720 [file 1]
