# Supplementary material (part 48 of 133)
Source: publisher figshare collection journal article supplement (https://springernature.figshare.com/articles/dataset/_/4903193)

# Dgkb

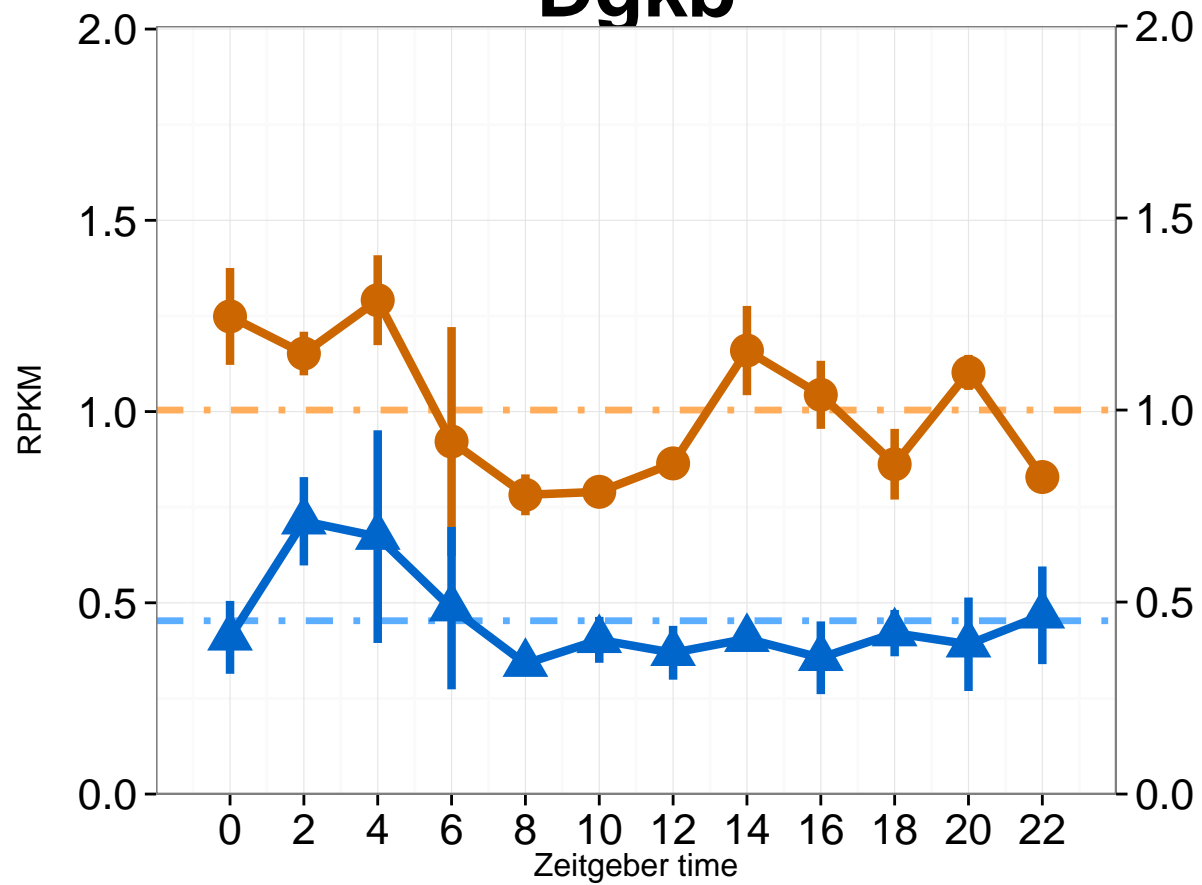

# Dgkb

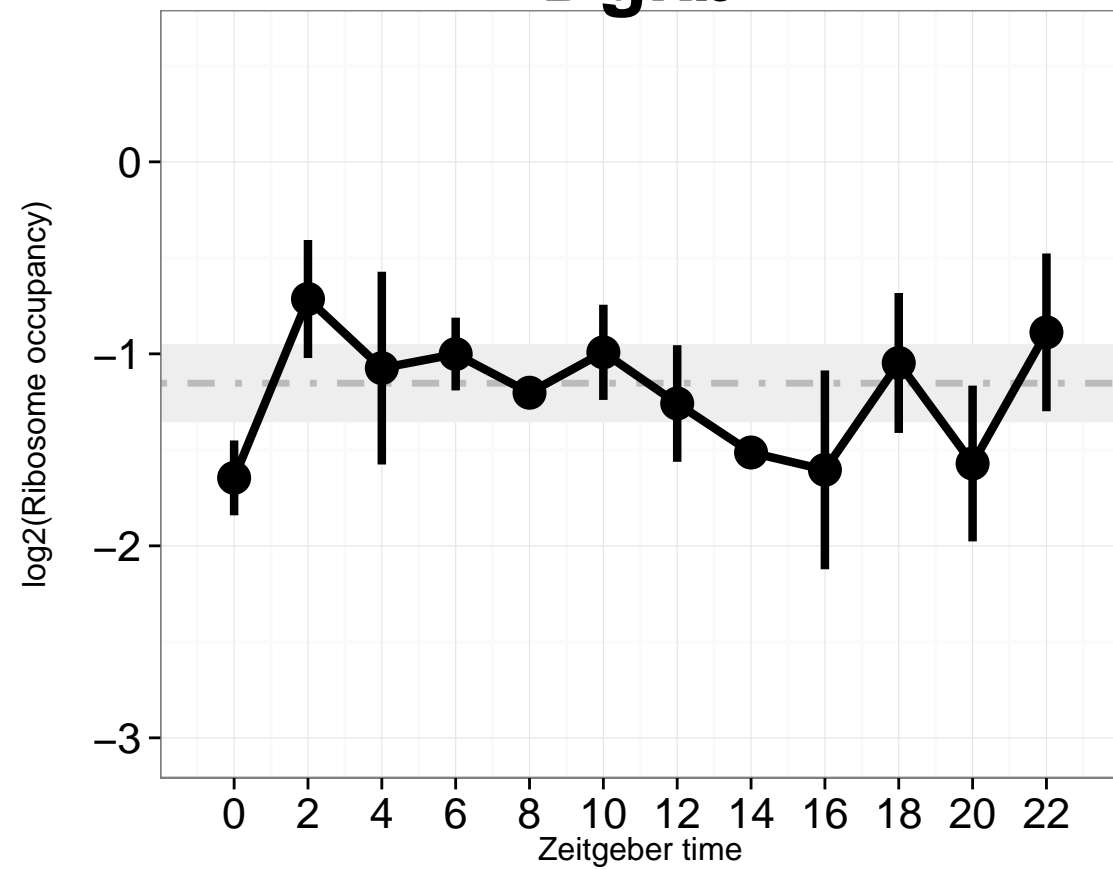

Supplement: Supplementary file 4721 [file 1]

## Bud31

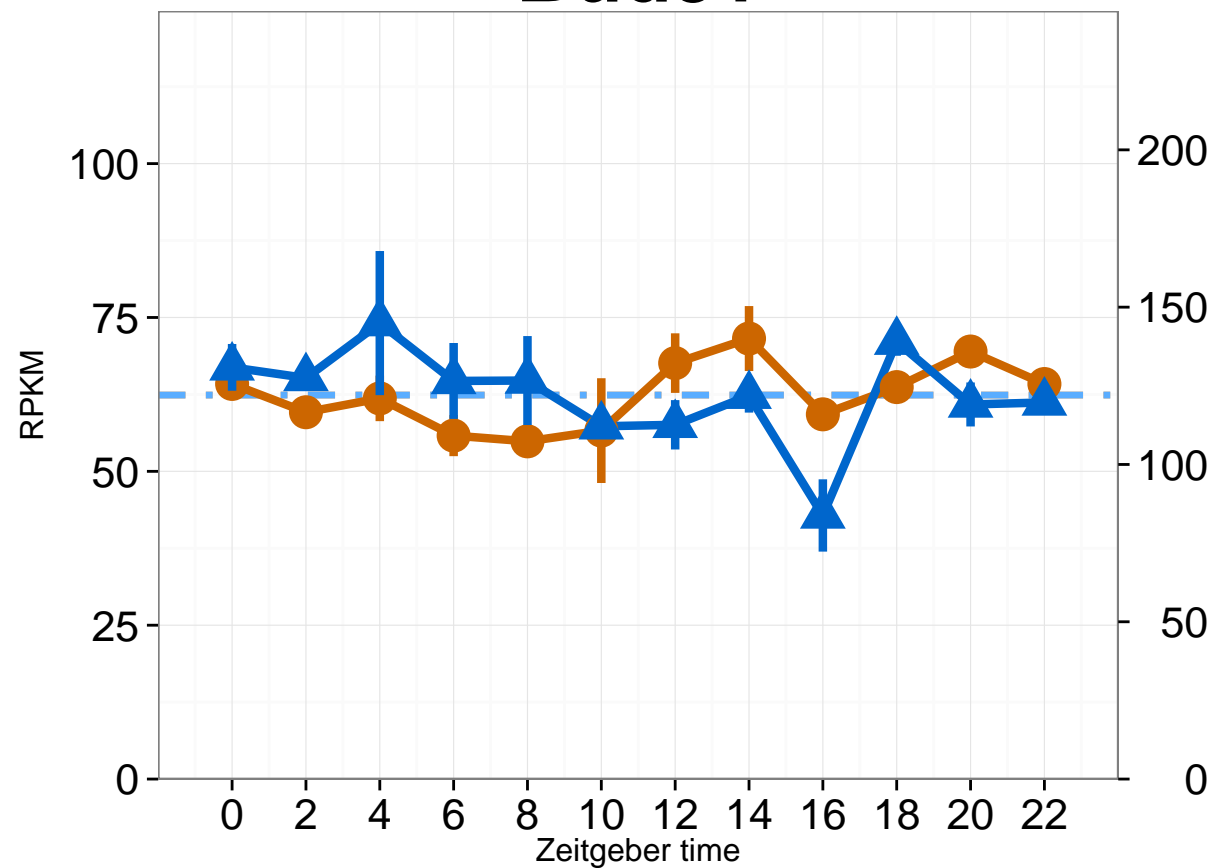

## Bud31

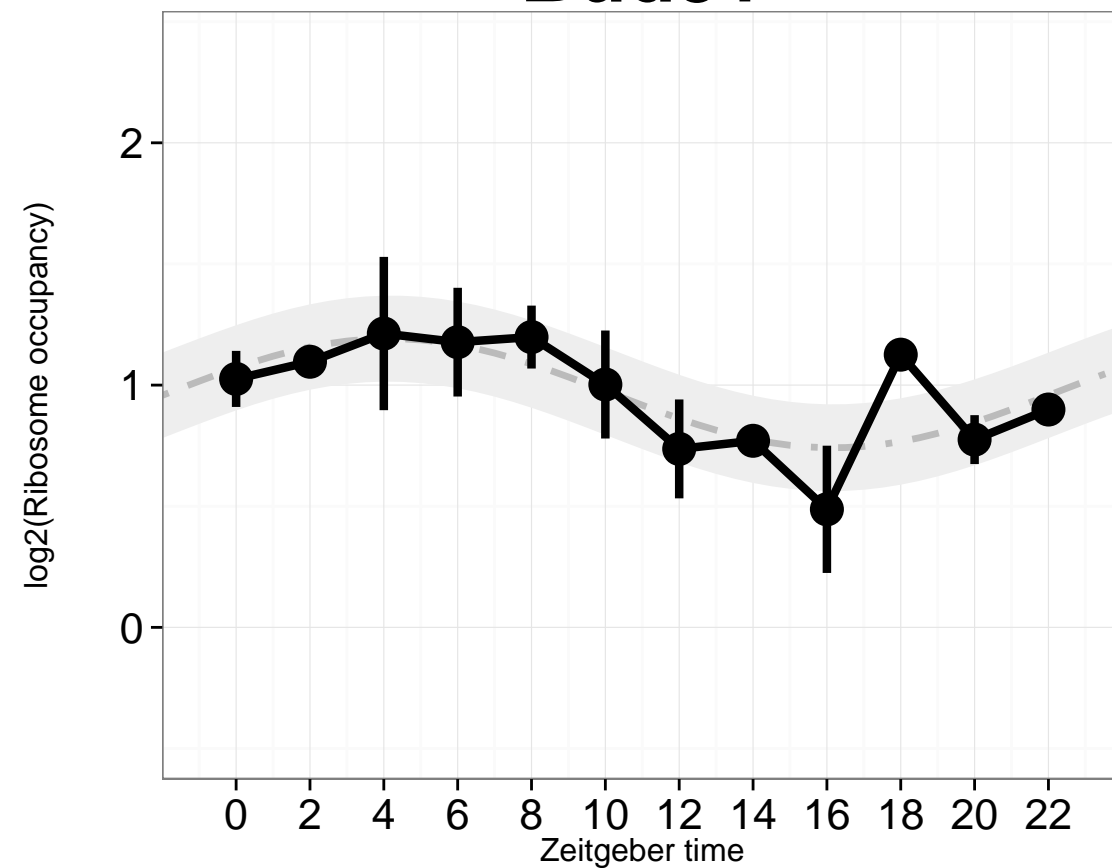

Supplement: Supplementary file 4722 [file 1]

## Pygb

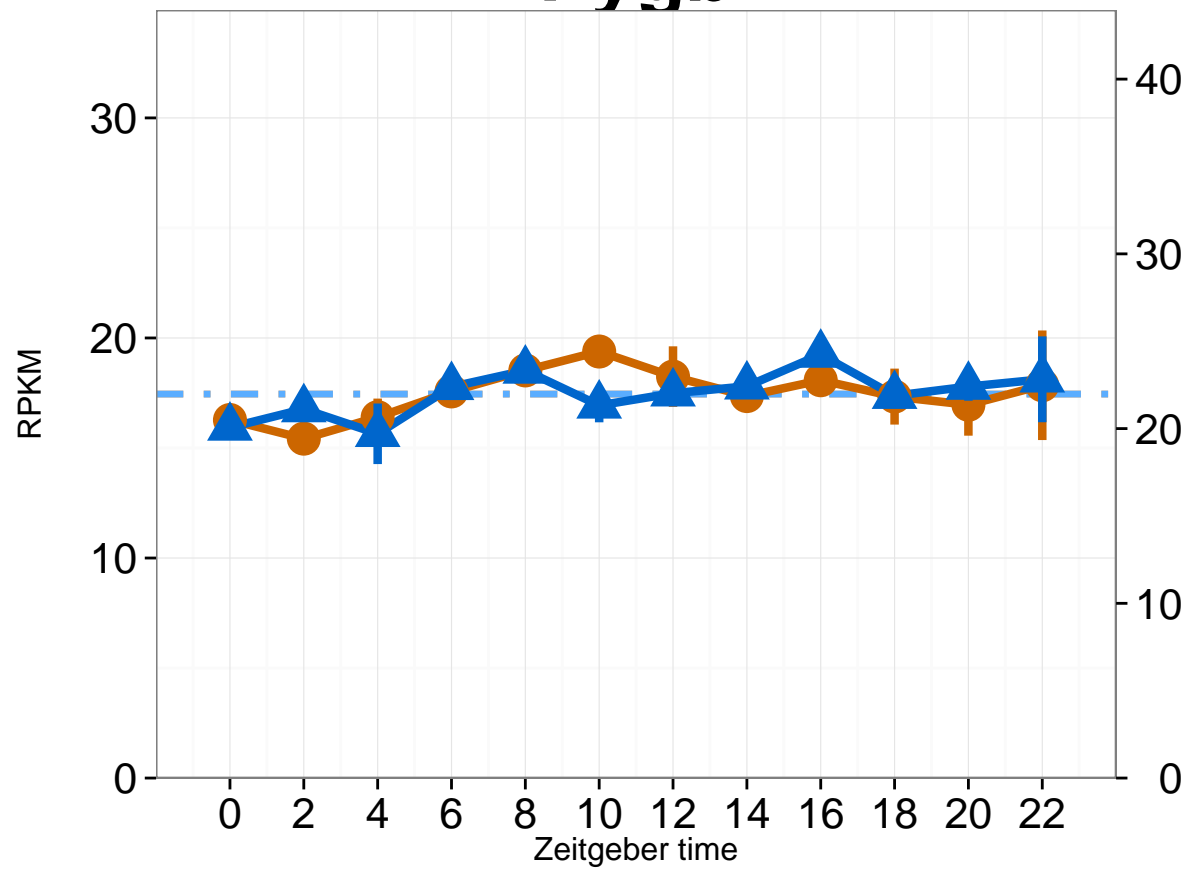

## Pygb

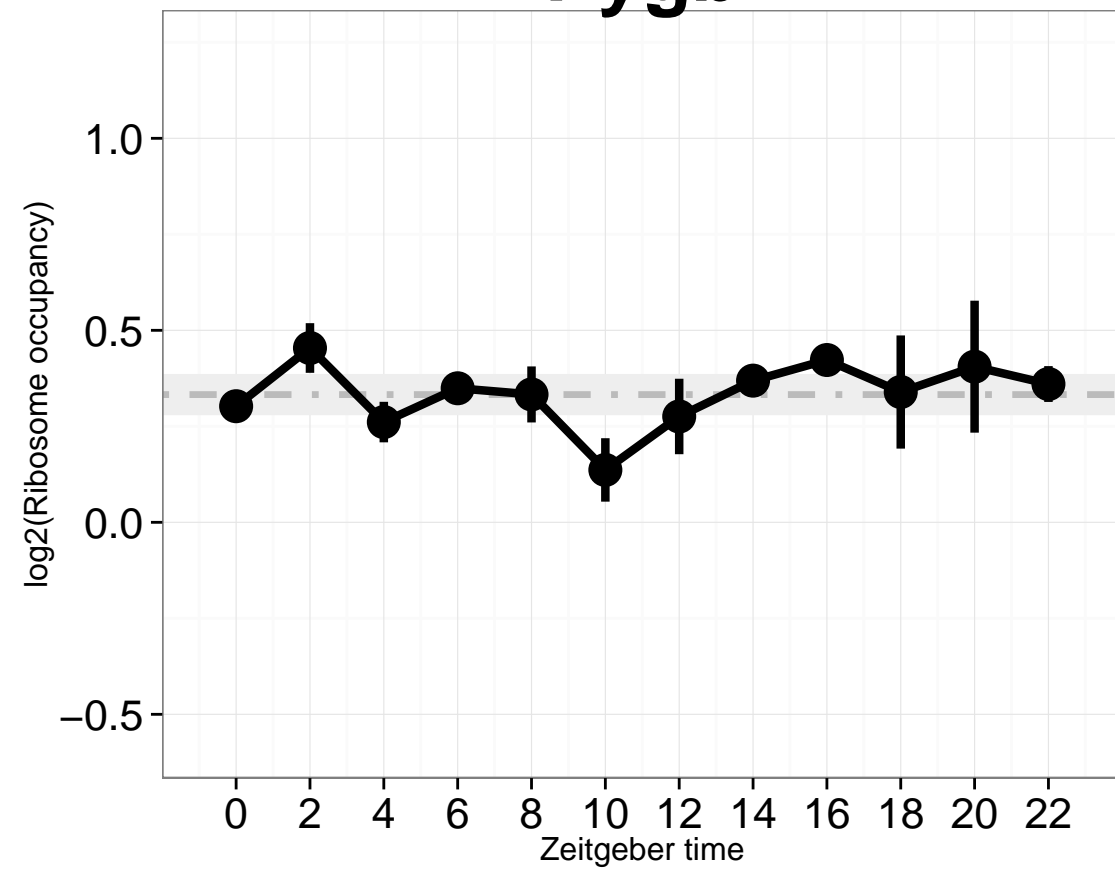

Supplement: Supplementary file 4723 [file 1]

# Inpp5j

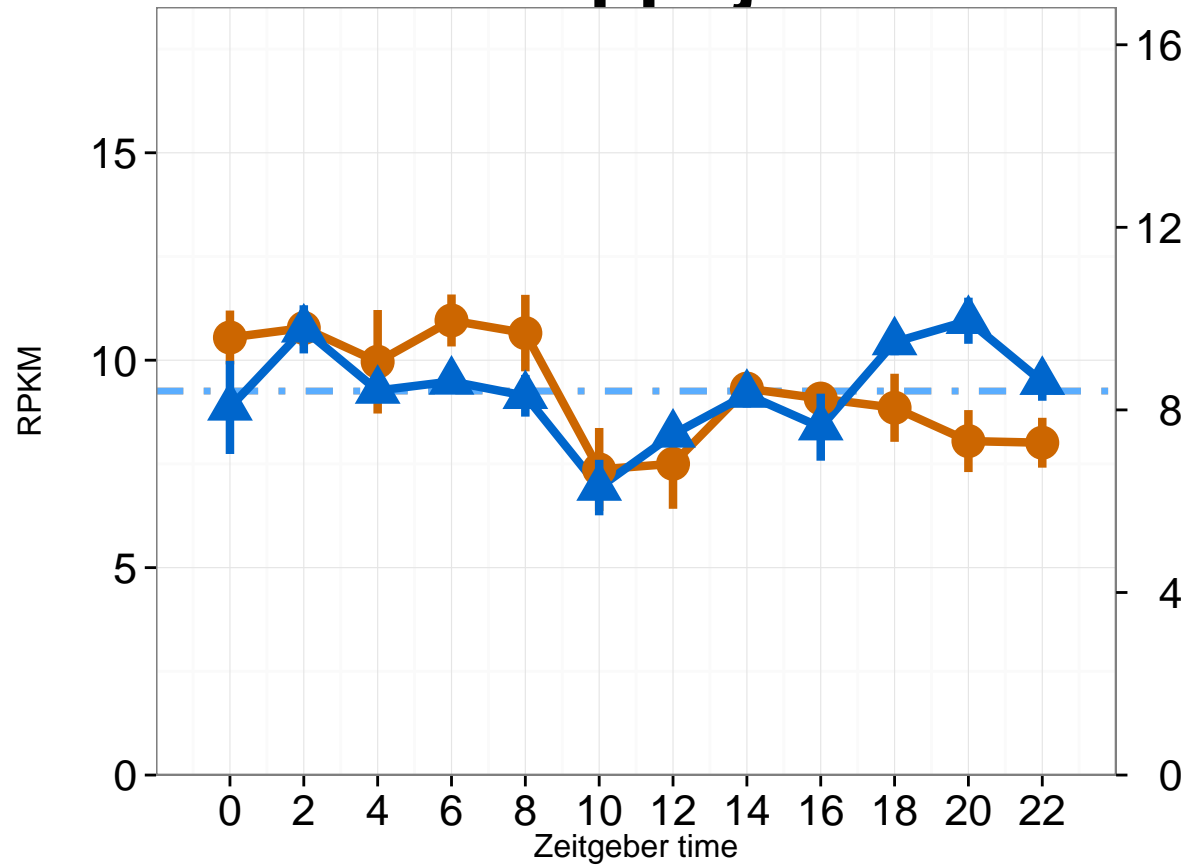

# Inpp5j

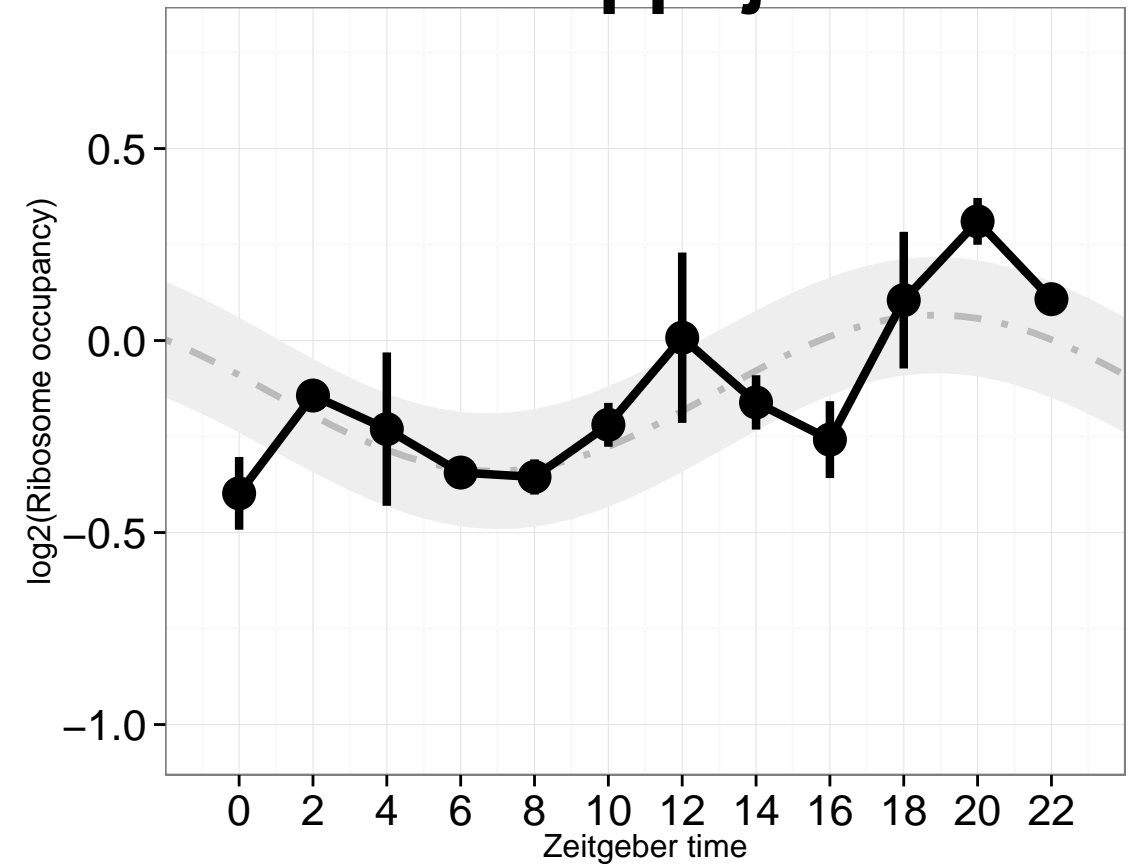

Supplement: Supplementary file 4724 [file 1]

# Syne1

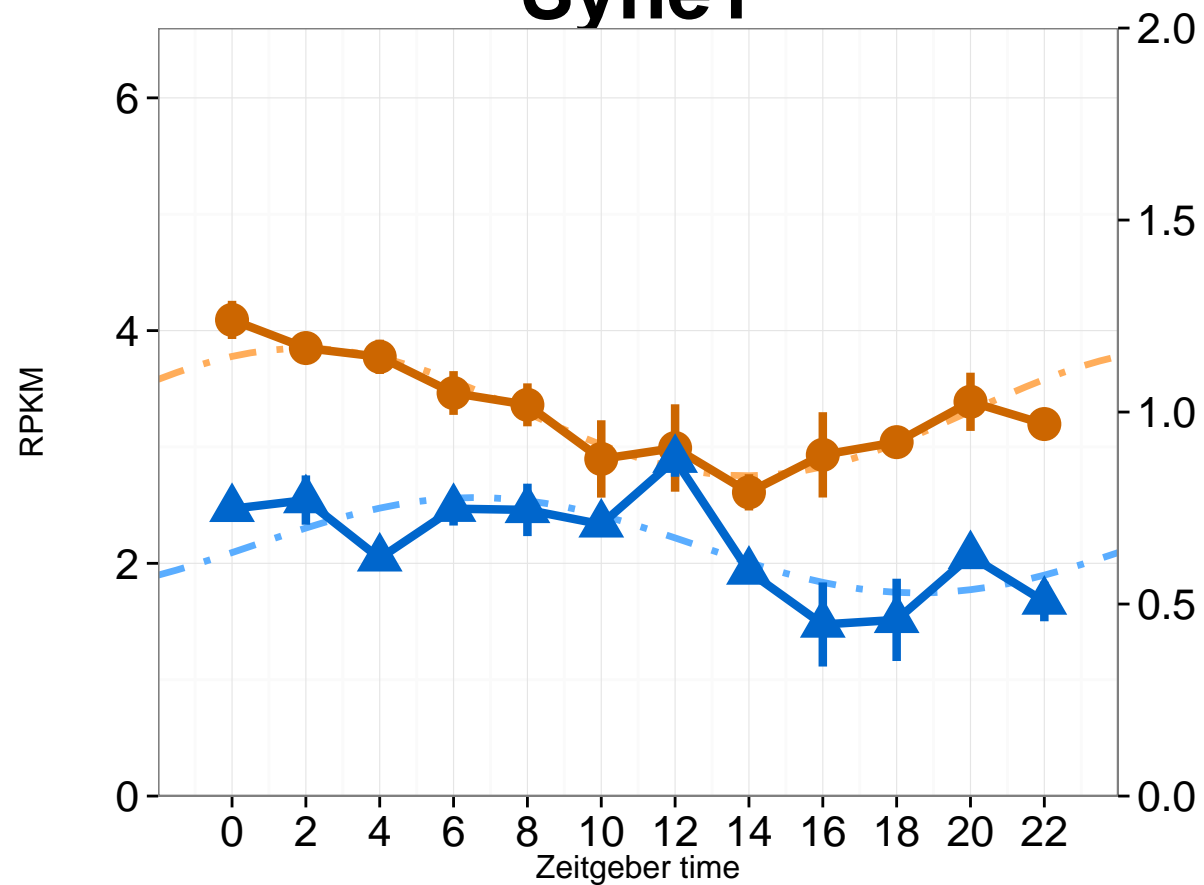

# Syne1

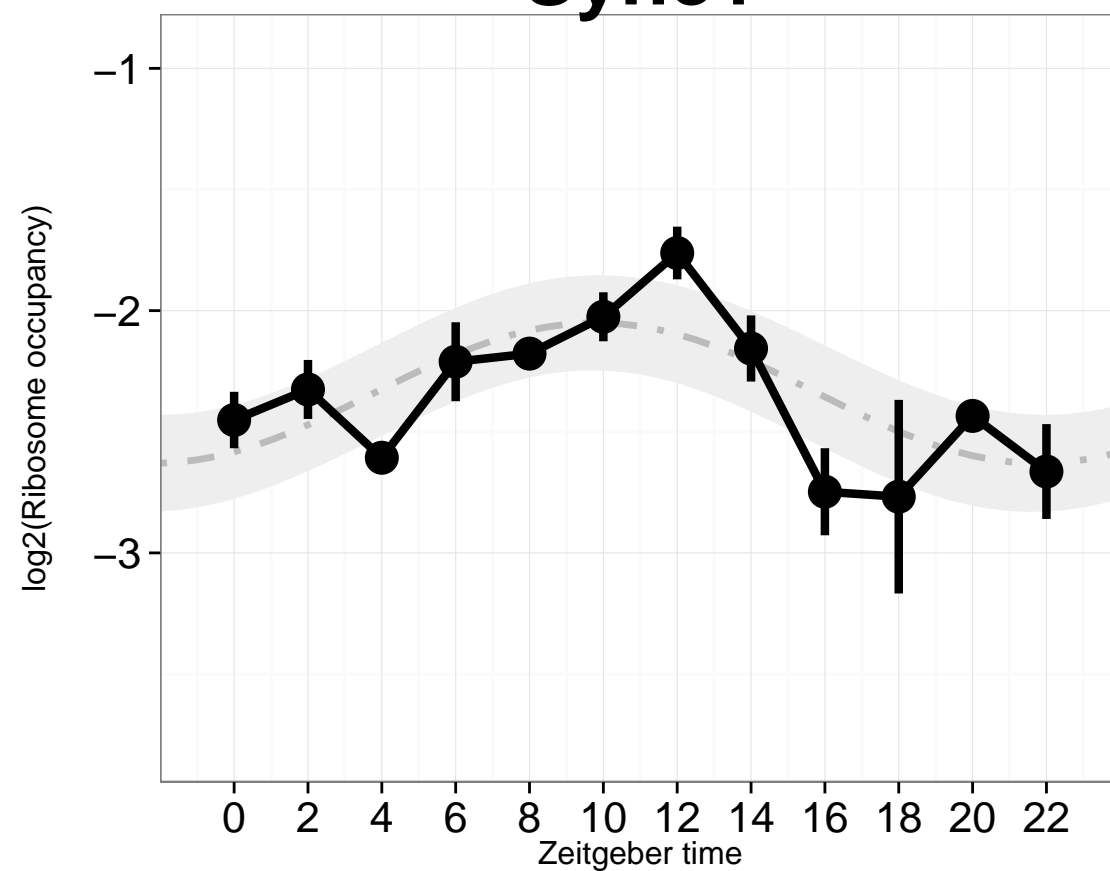

Supplement: Supplementary file 4725 [file 1]

# Oard1

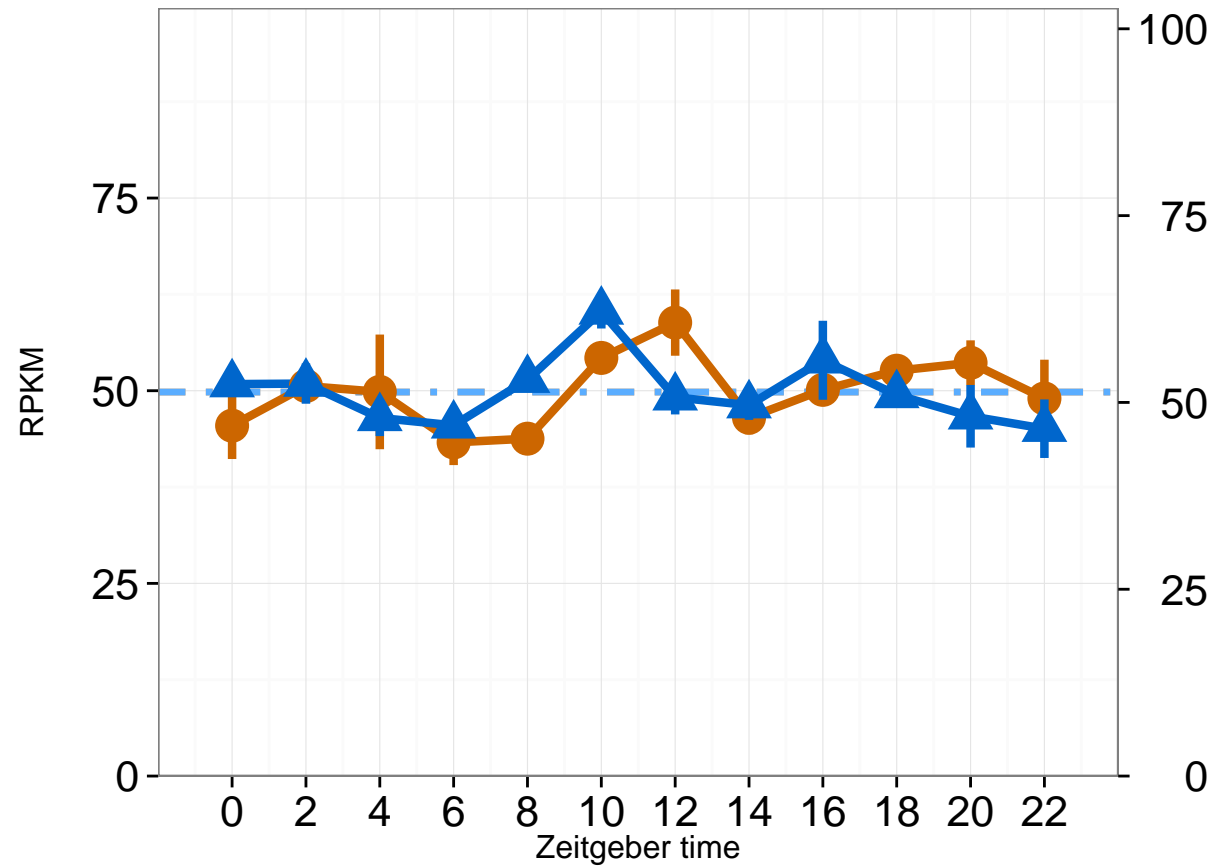

# Oard1

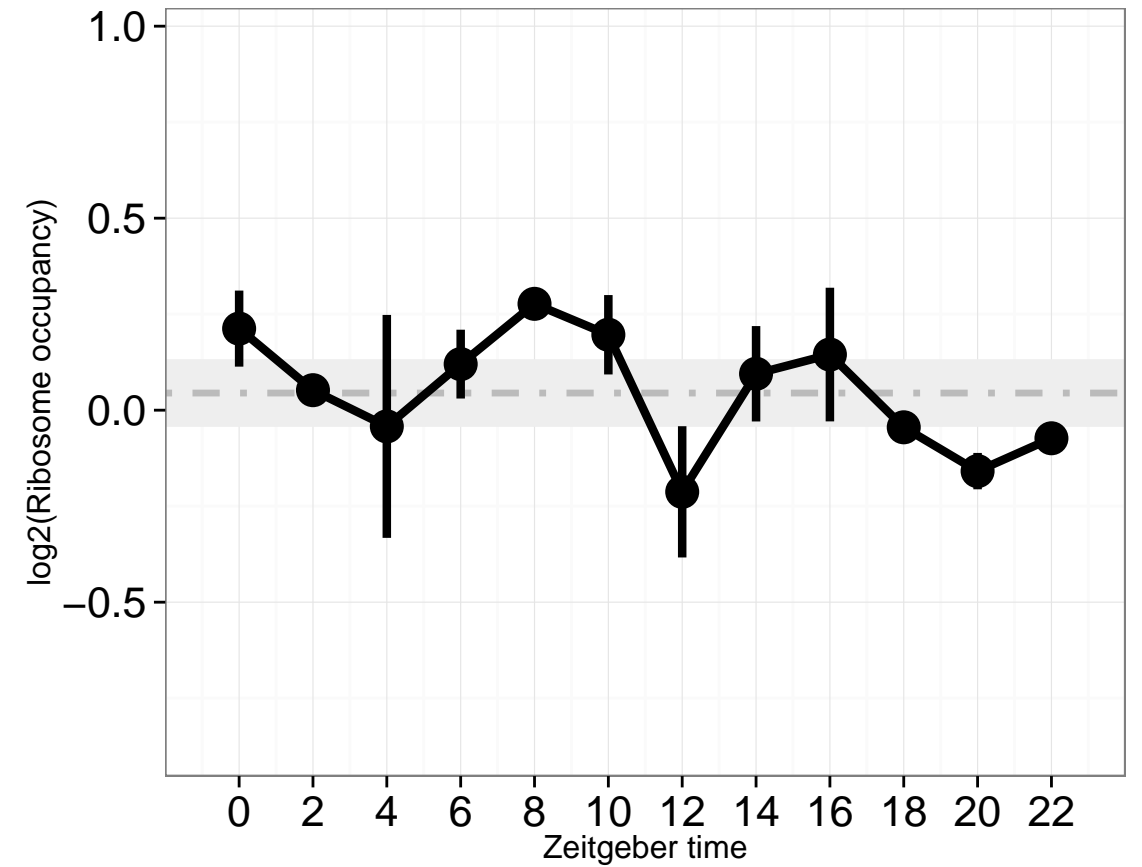

Supplement: Supplementary file 4726 [file 1]

# Slc4a9

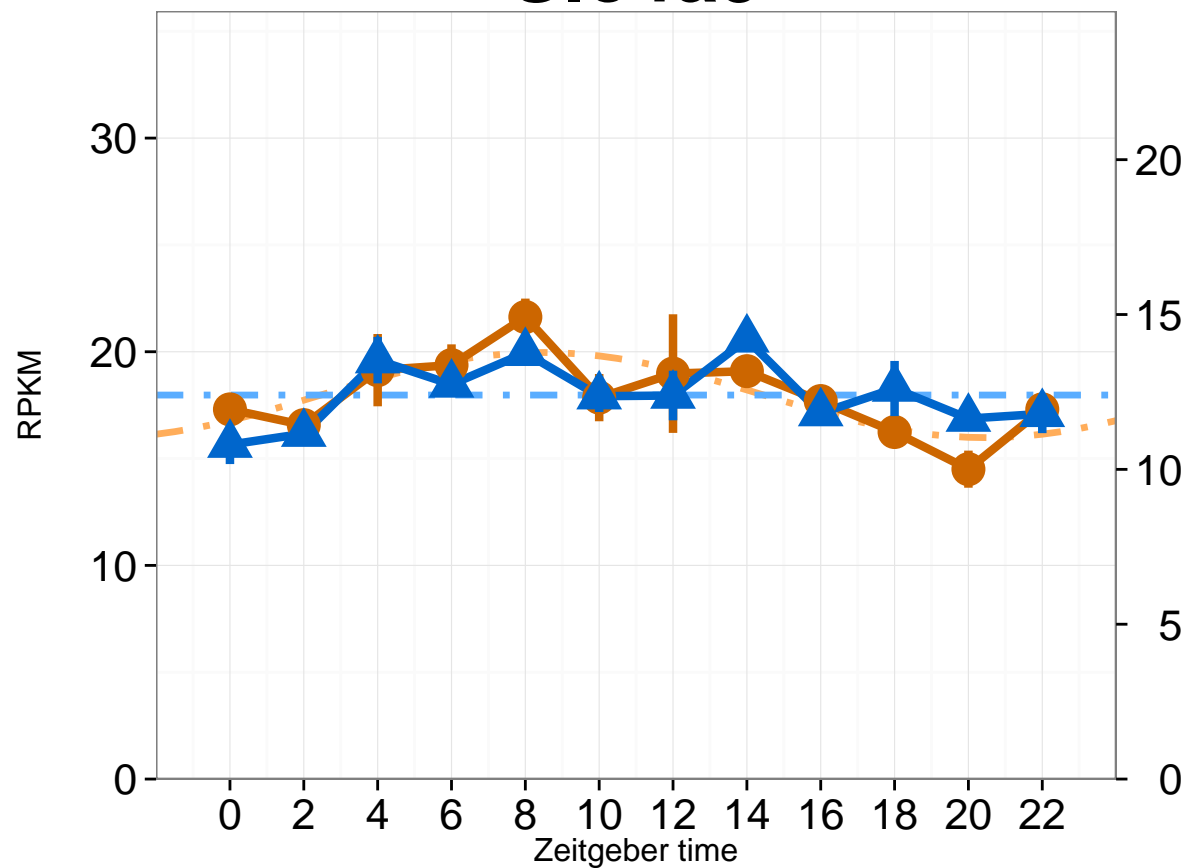

# Slc4a9

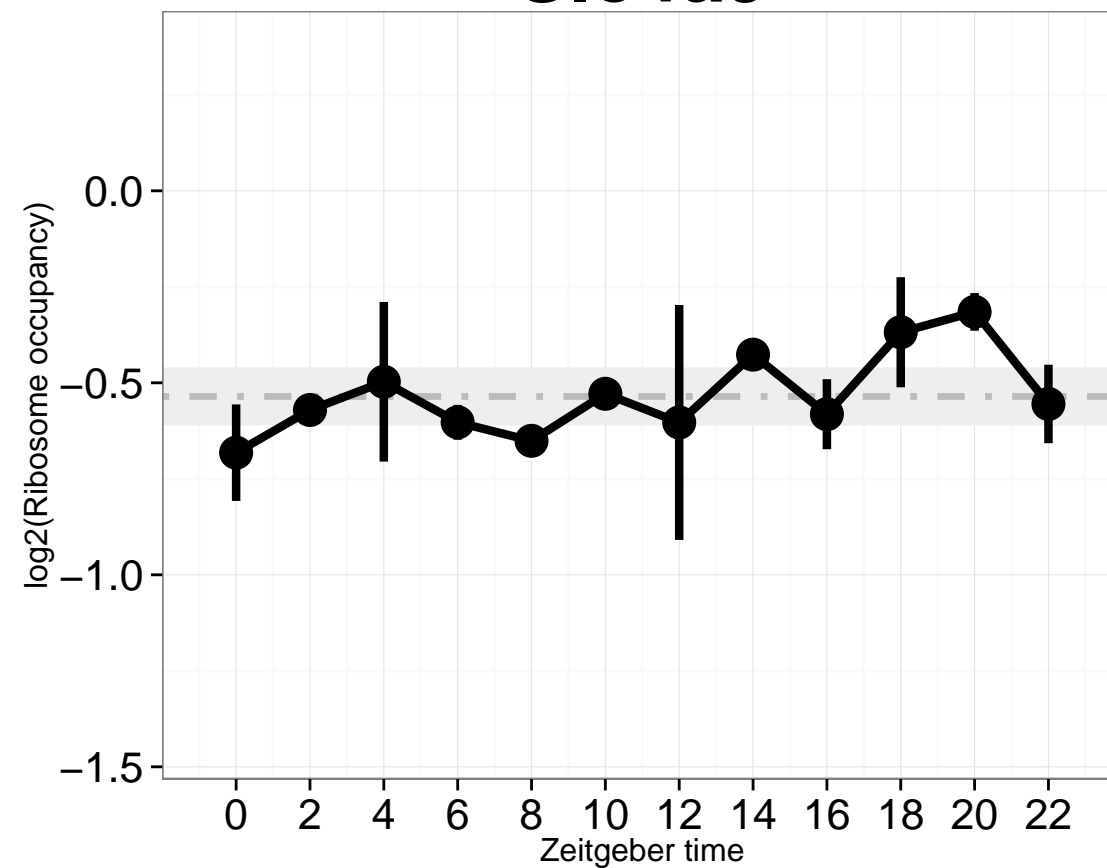

Supplement: Supplementary file 4727 [file 1]

# Nr3c2

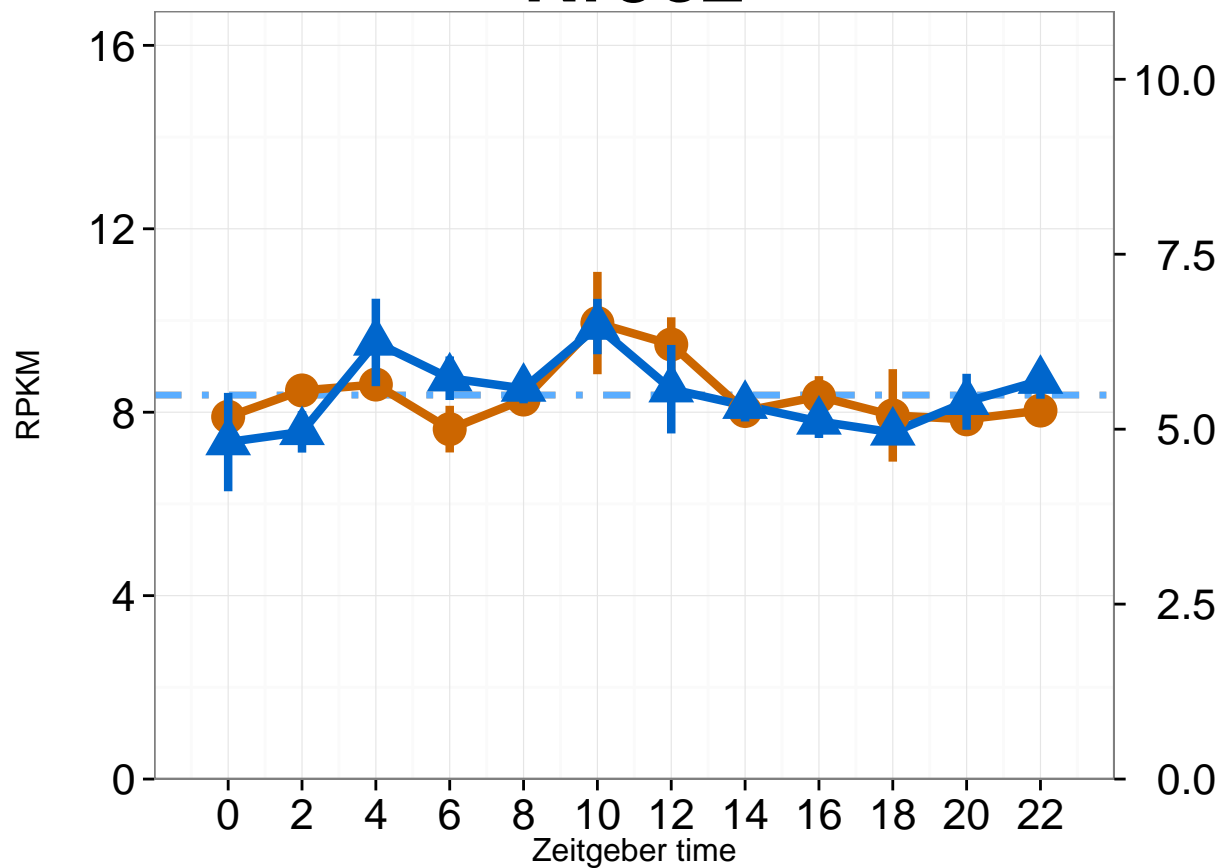

# Nr3c2

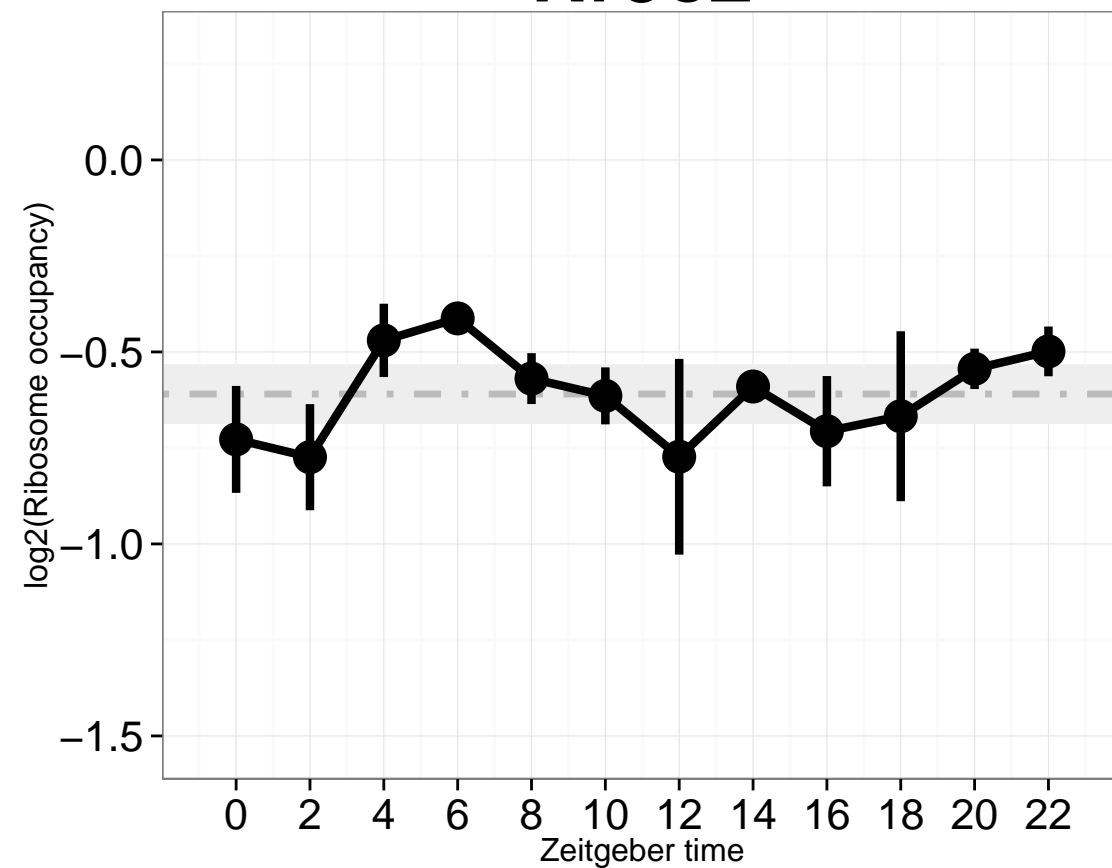

Supplement: Supplementary file 4728 [file 1]

## Pdcl3

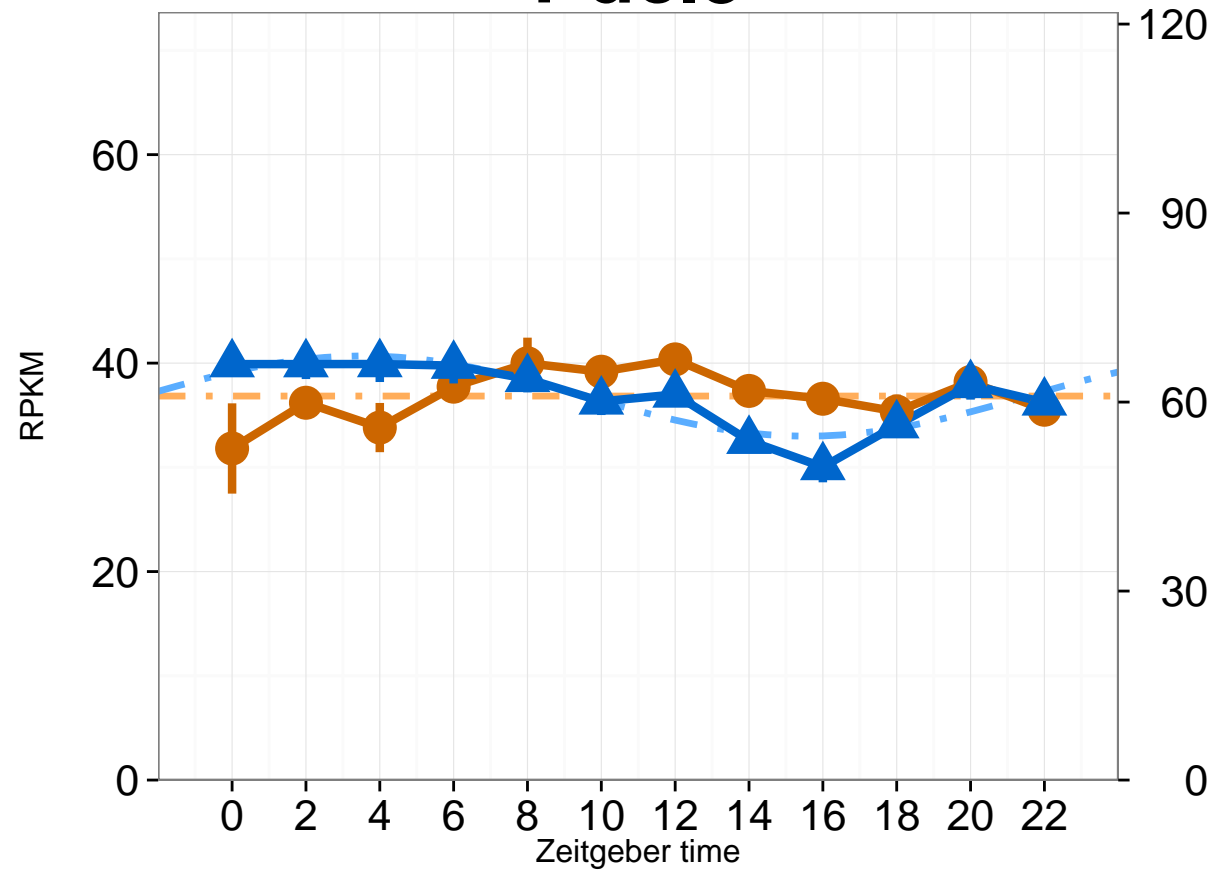

## Pdcl3

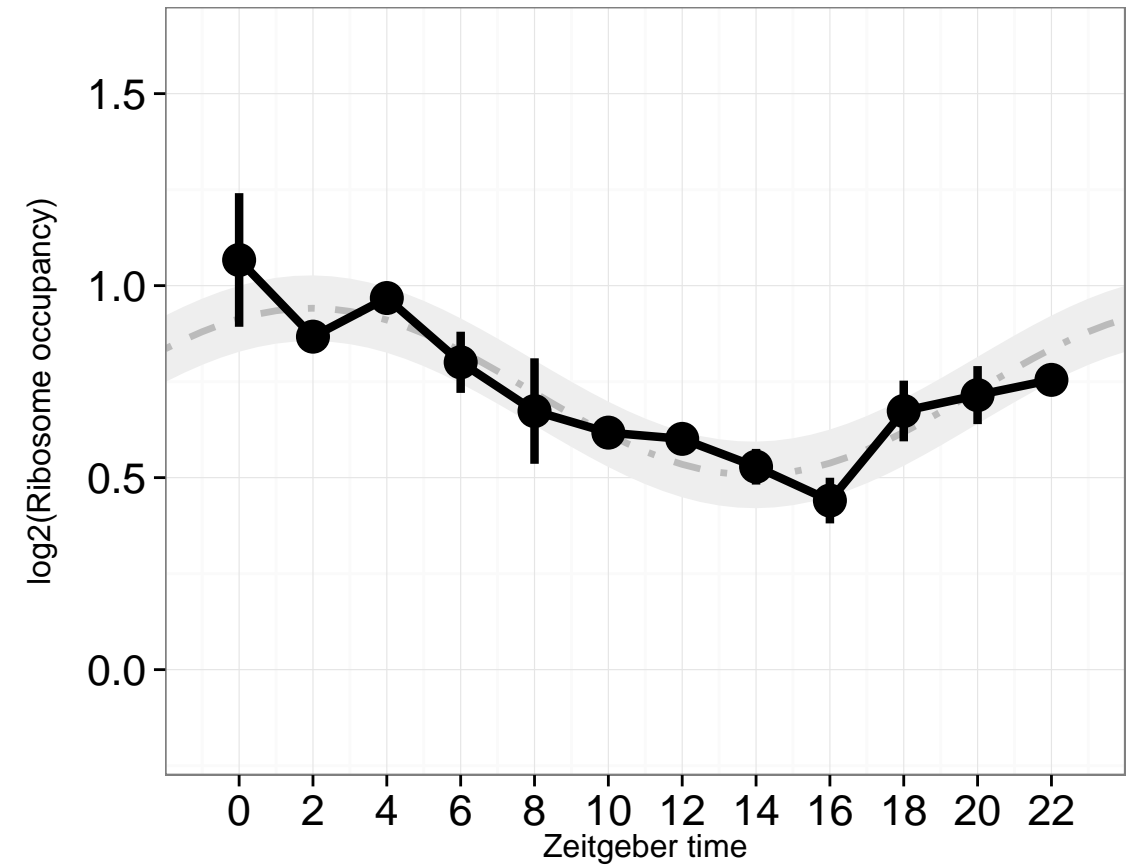

Supplement: Supplementary file 4729 [file 1]

# Slc25a39

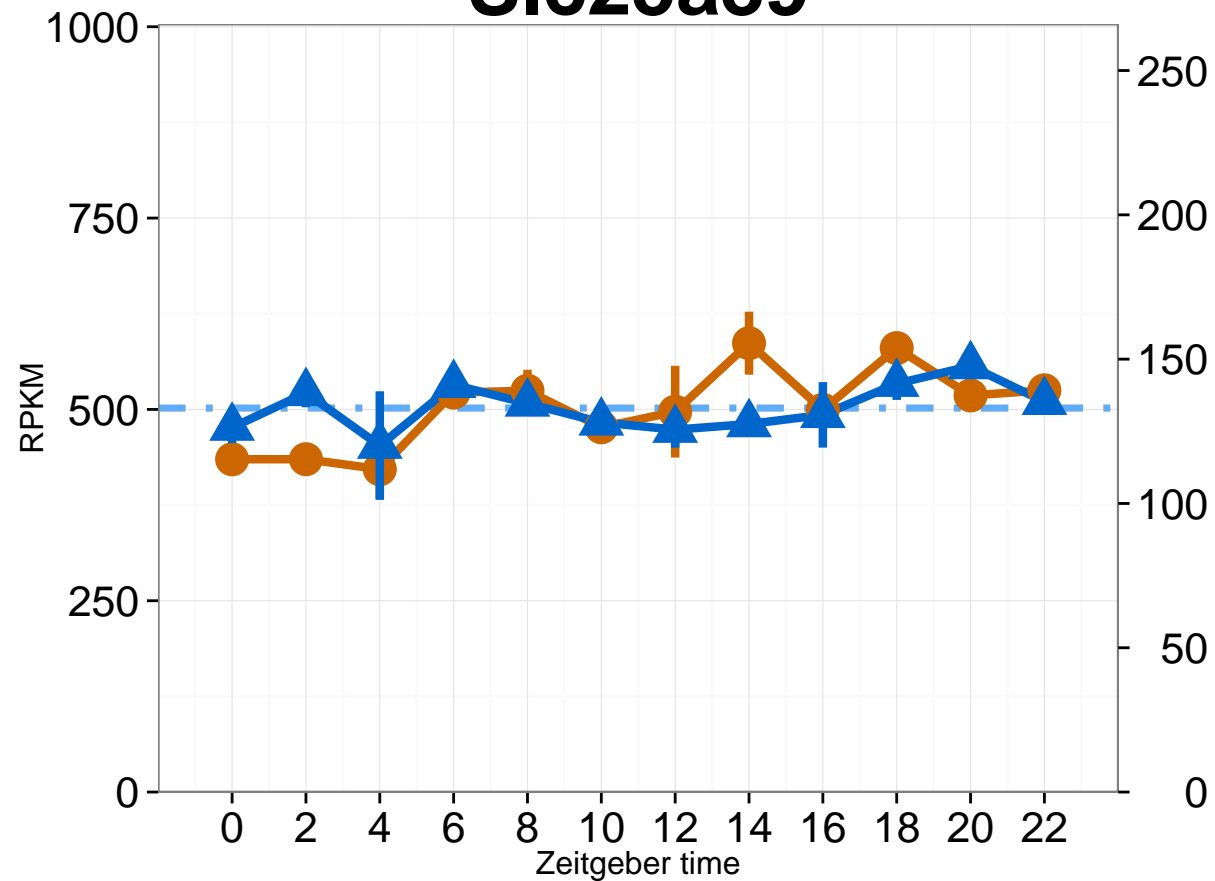

# Slc25a39

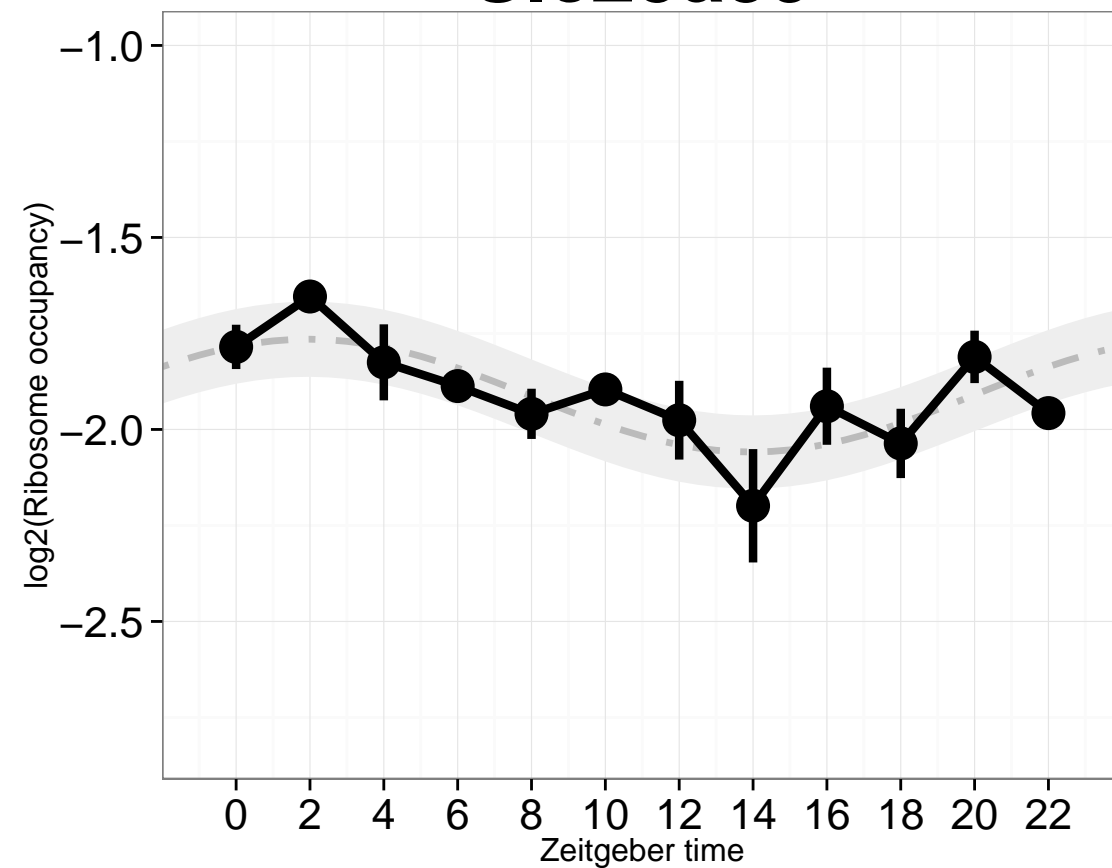

Supplement: Supplementary file 4730 [file 1]

## Tspyl4

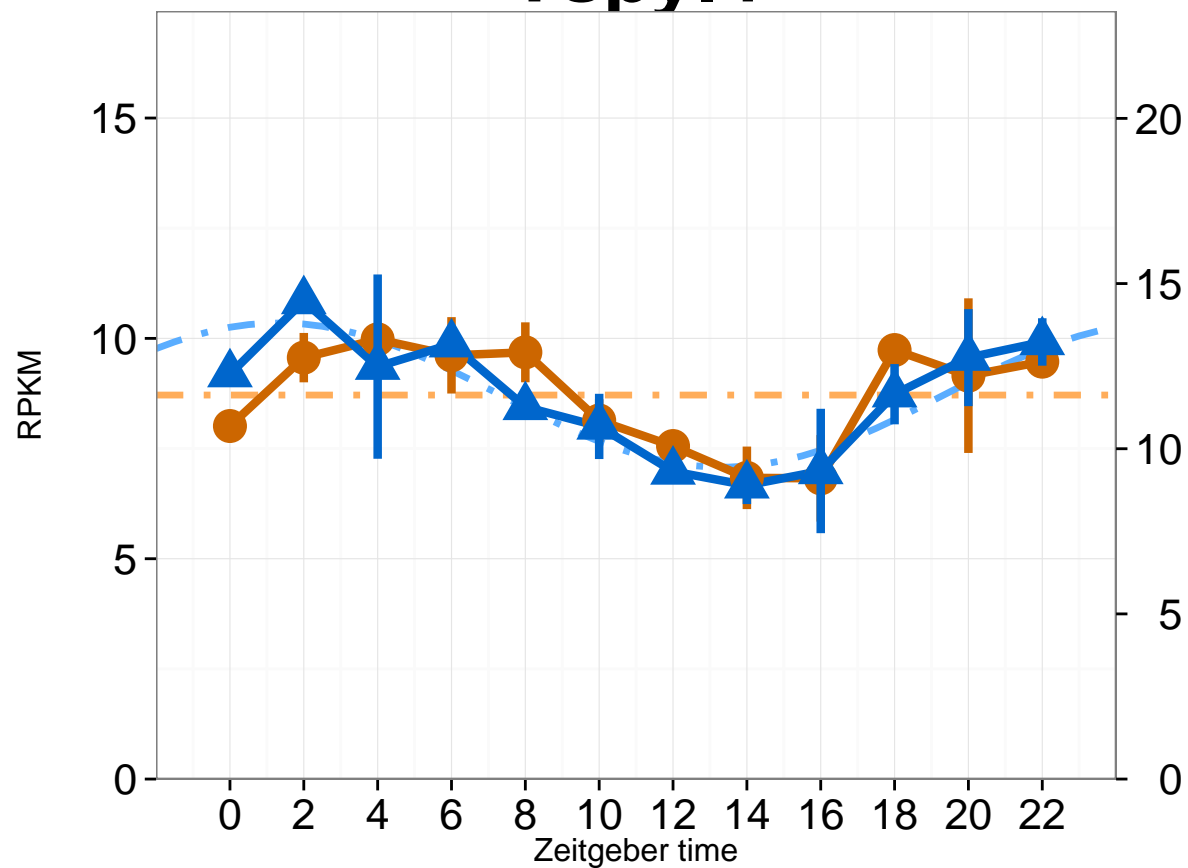

## Tspyl4

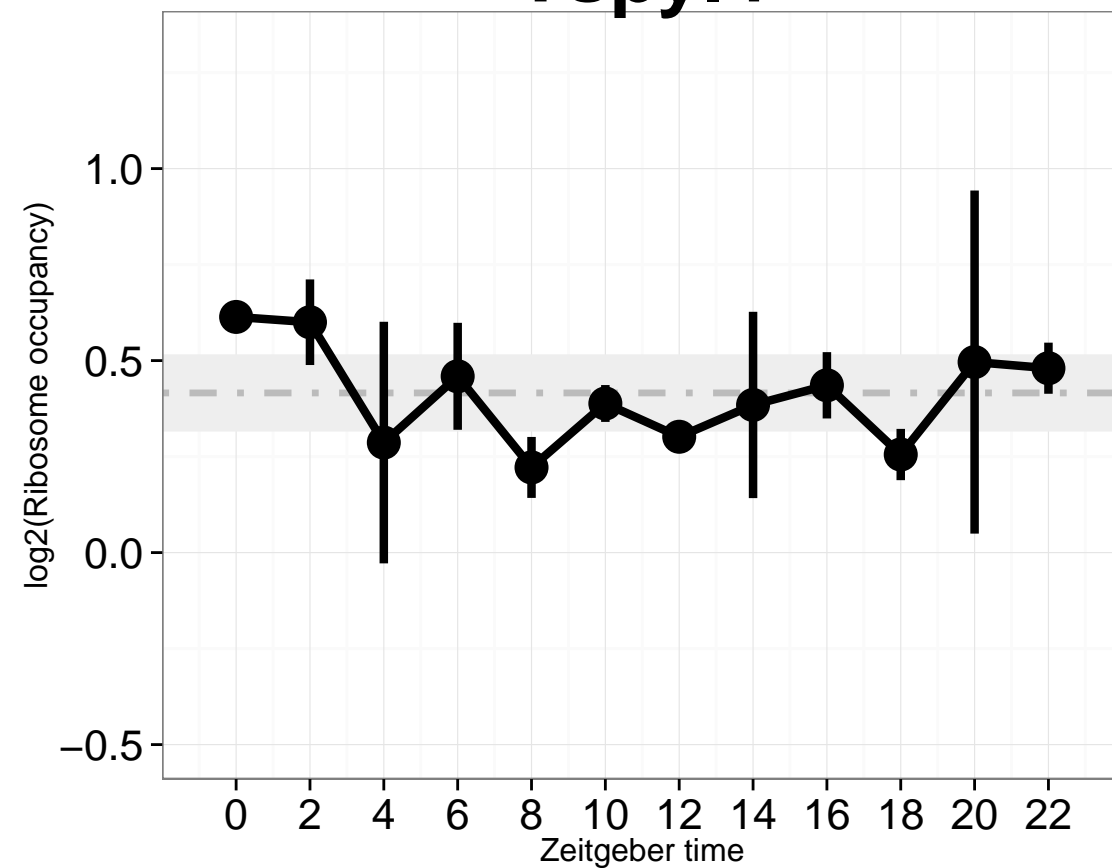

Supplement: Supplementary file 4731 [file 1]

## Smarcad1

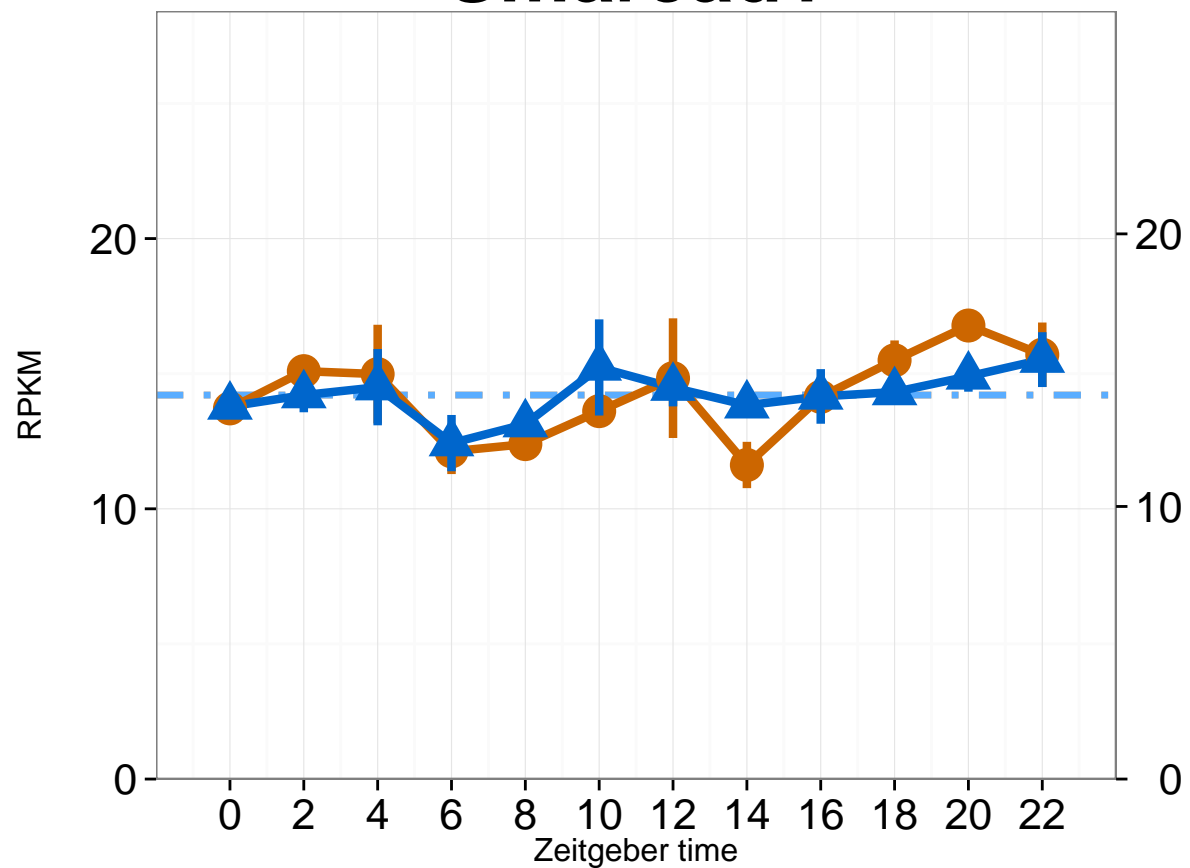

## Smarcad1

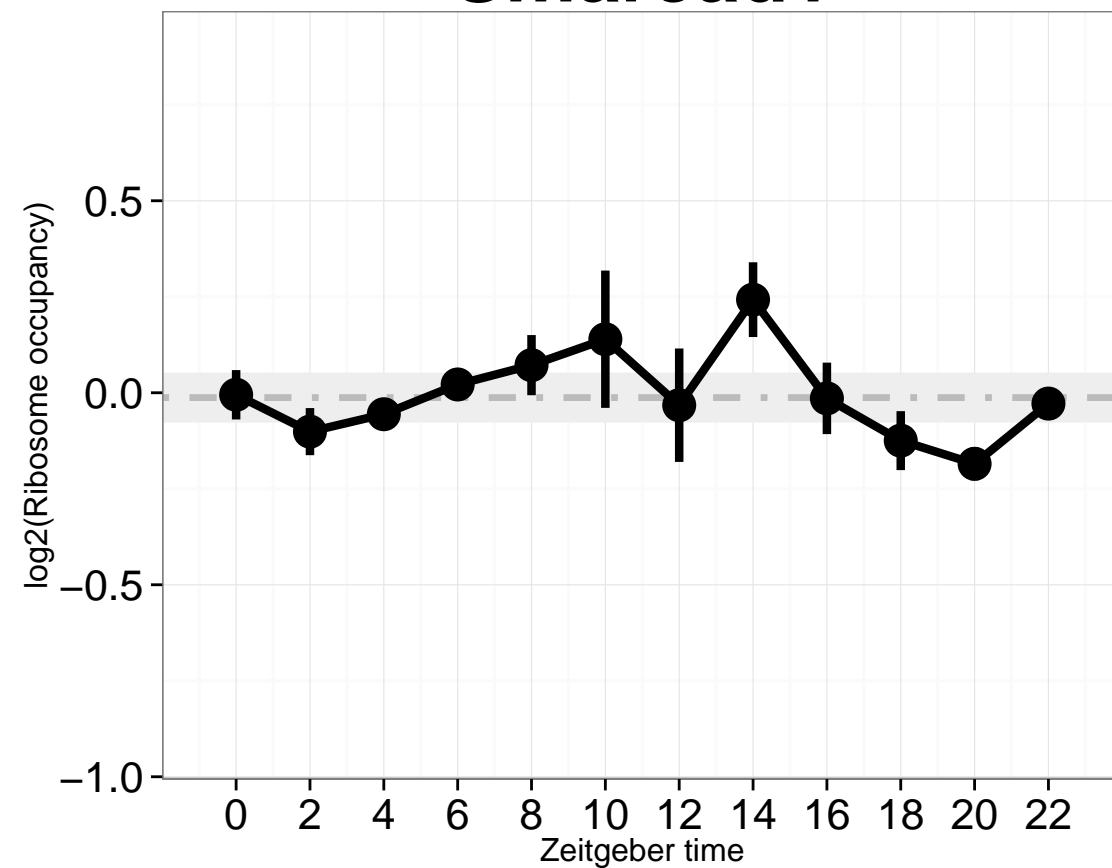

Supplement: Supplementary file 4732 [file 1]

## Slc25a16

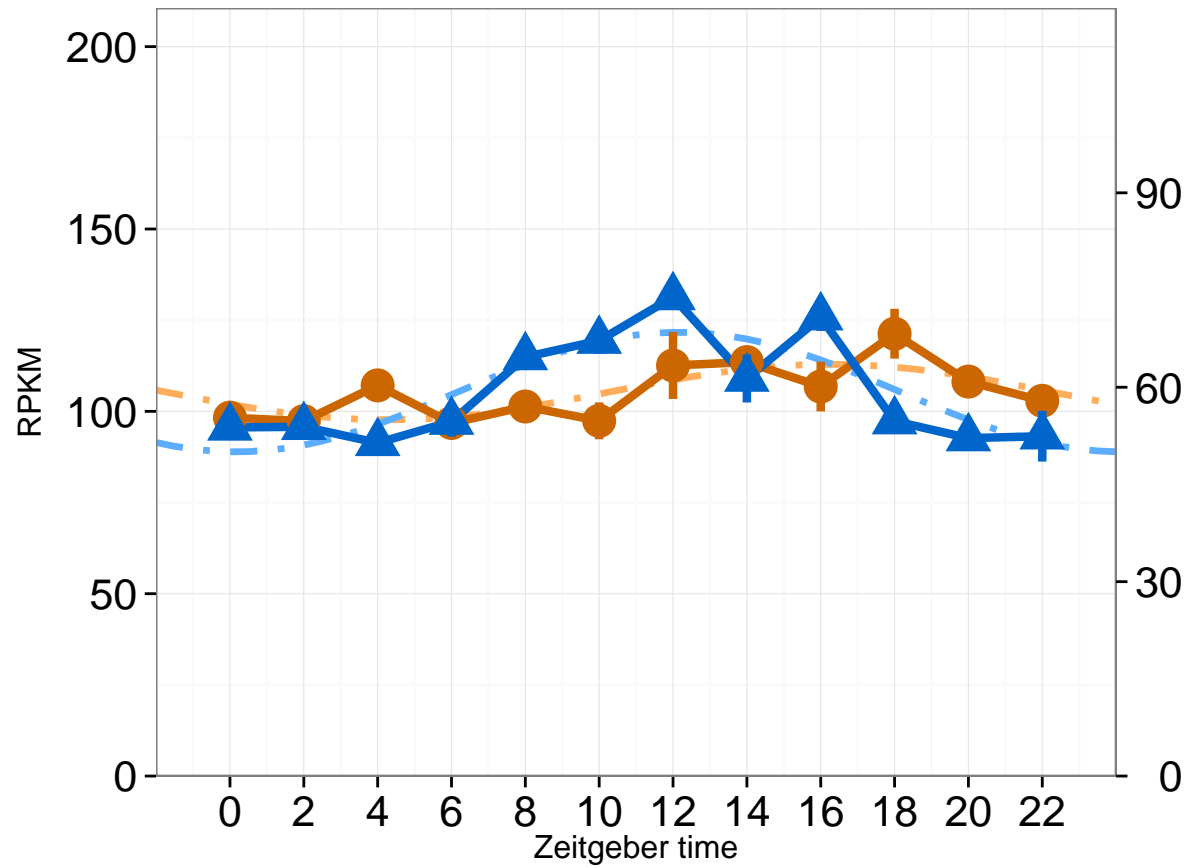

## Slc25a16

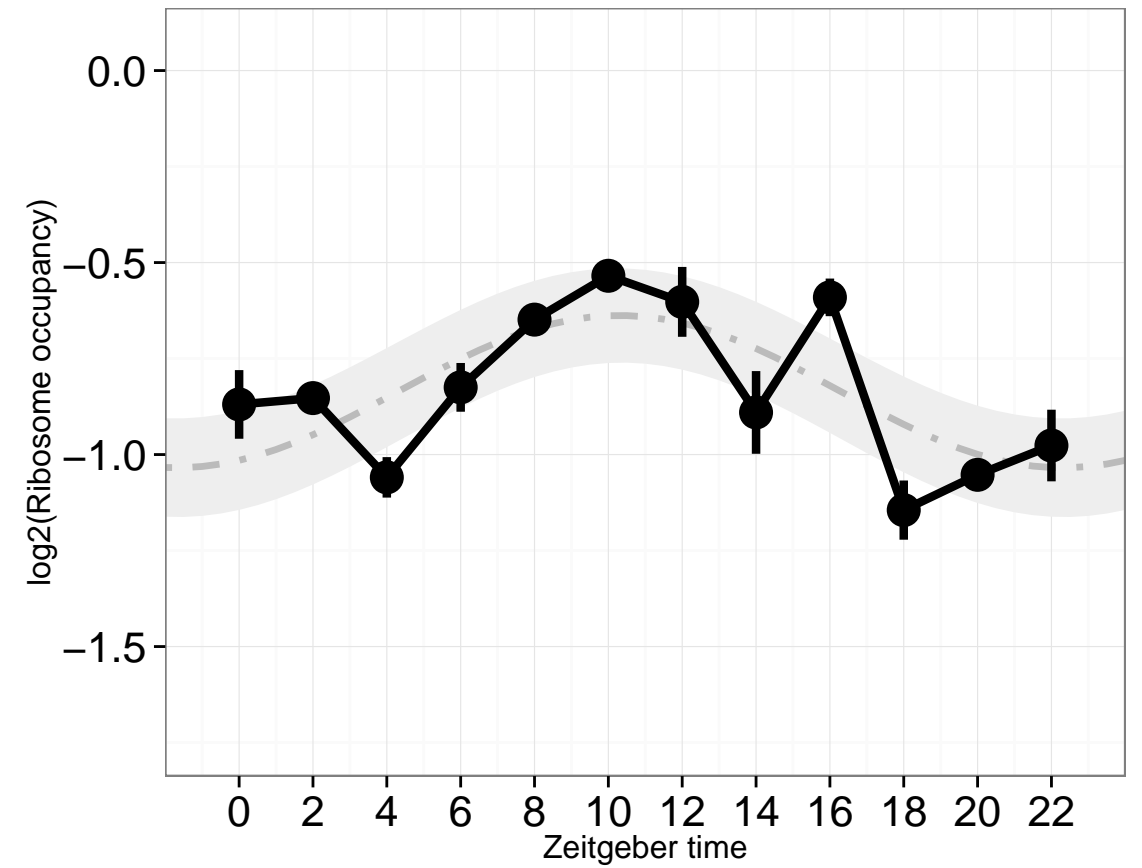

Supplement: Supplementary file 4733 [file 1]

## Ncor1

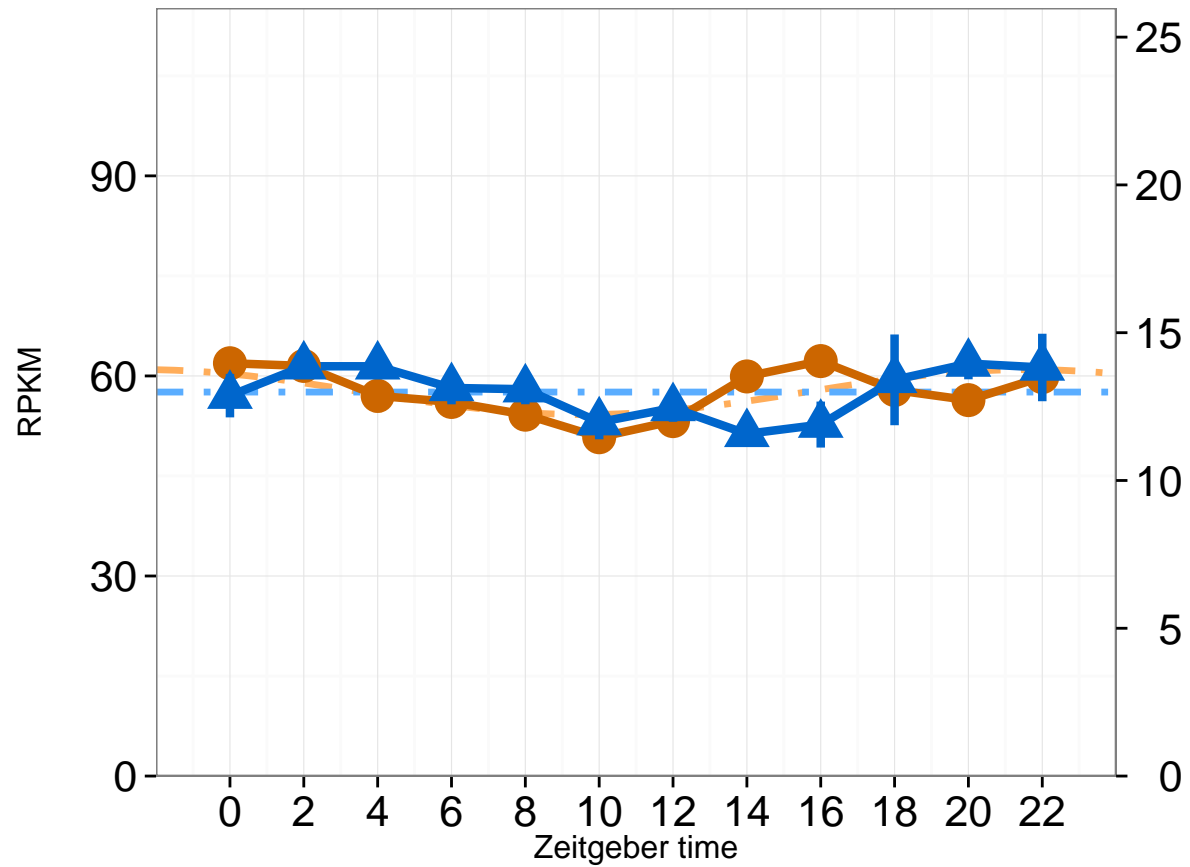

## Ncor1

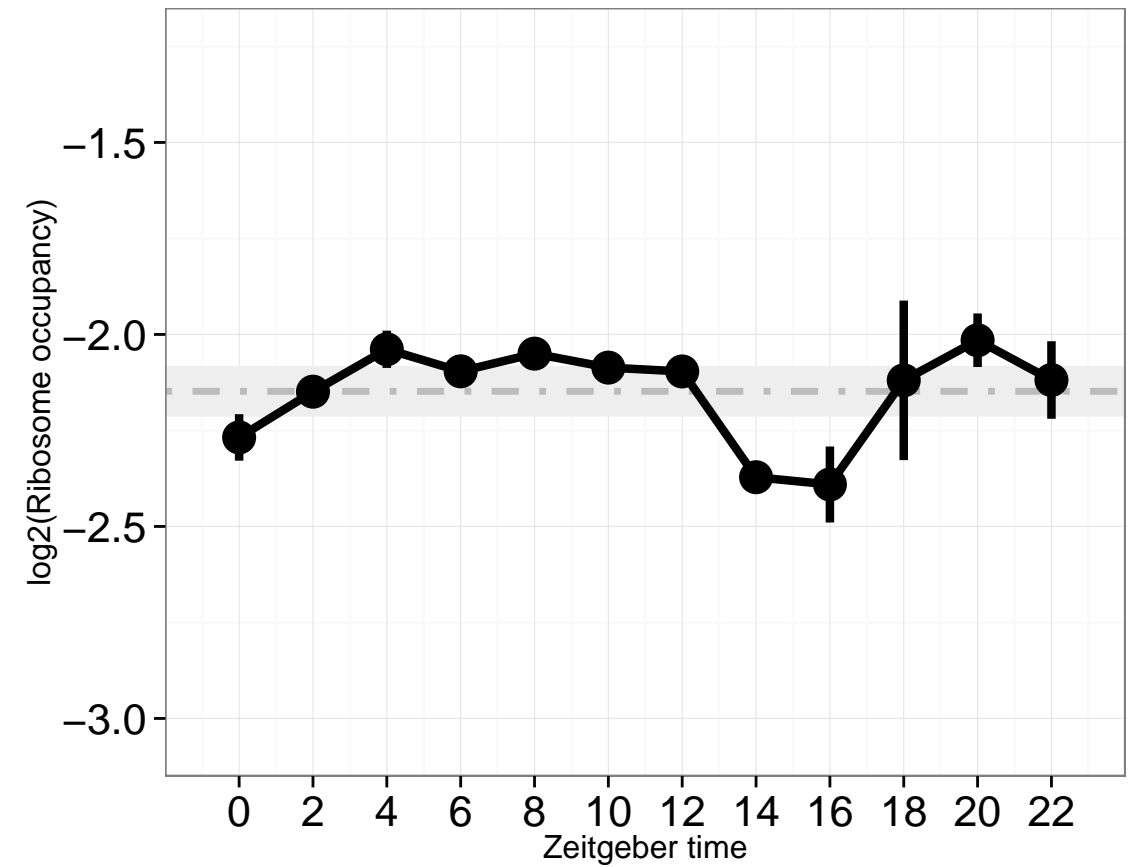

Supplement: Supplementary file 4734 [file 1]

# Fam46b

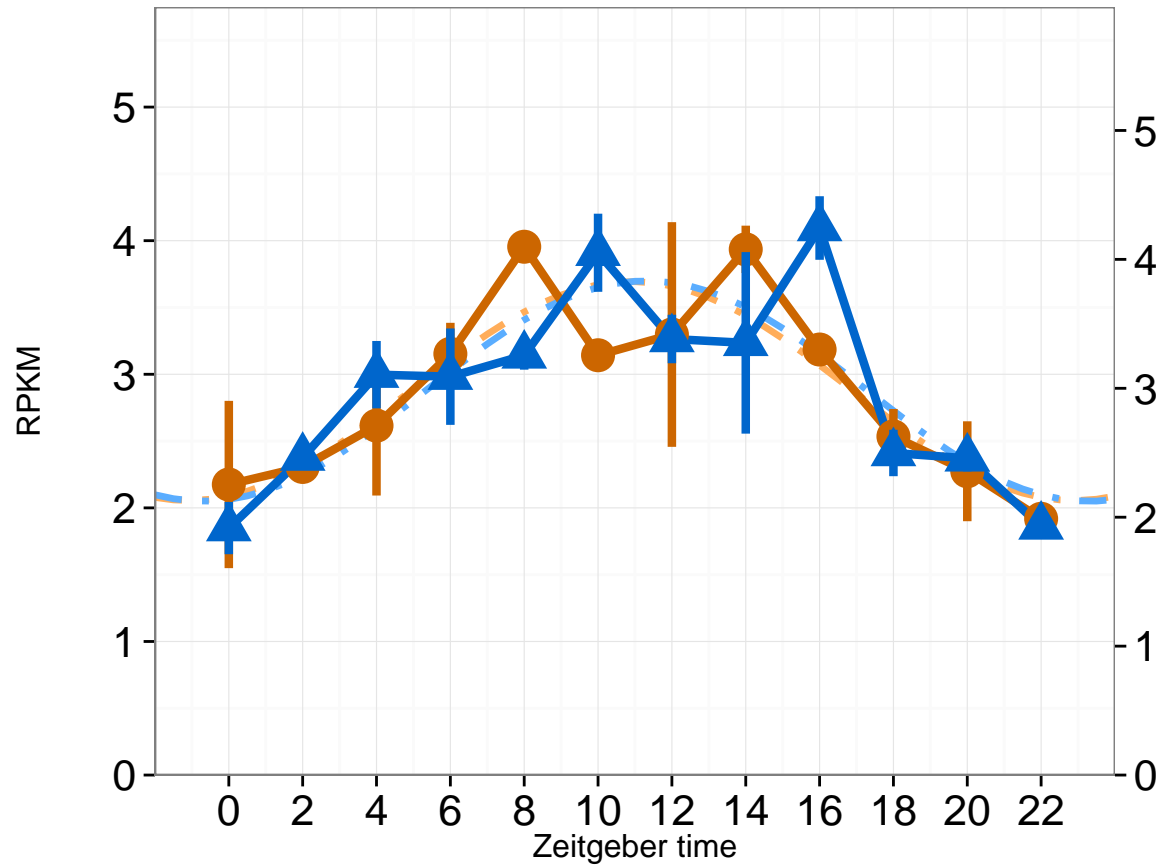

# Fam46b

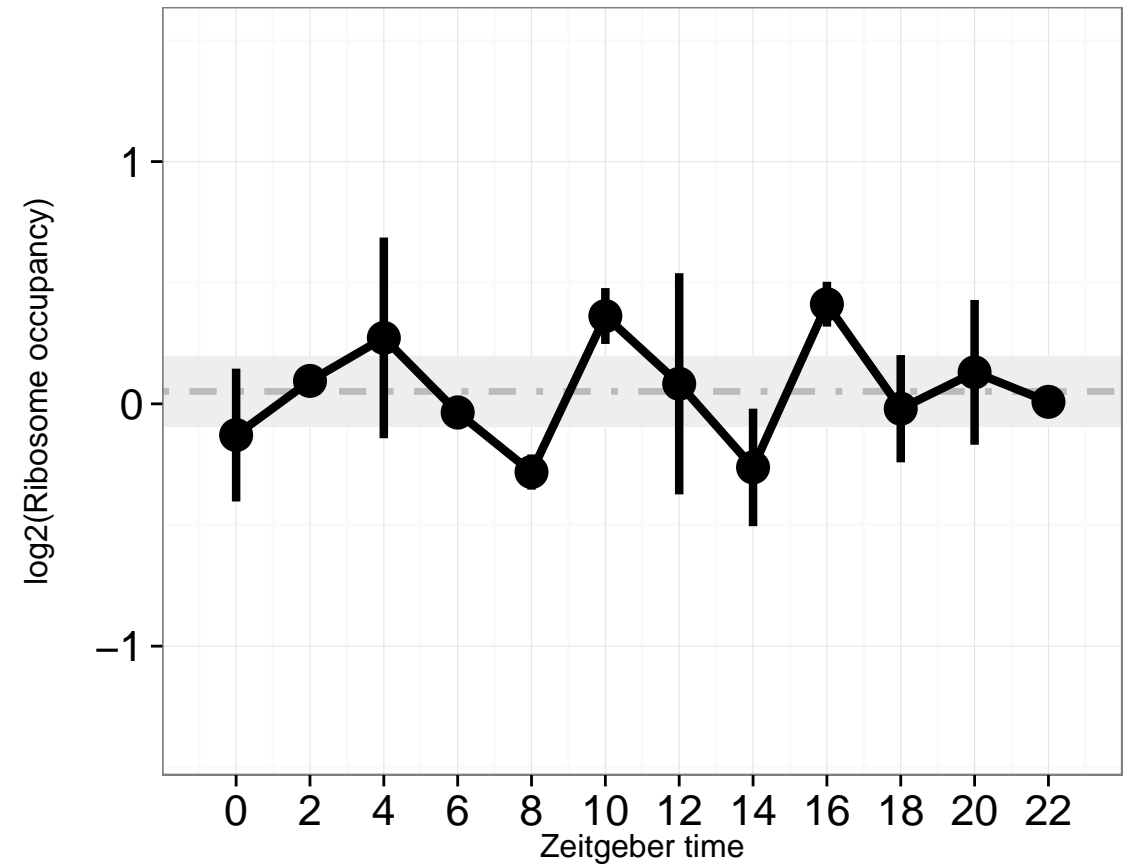

Supplement: Supplementary file 4735 [file 1]

## Ppcdc

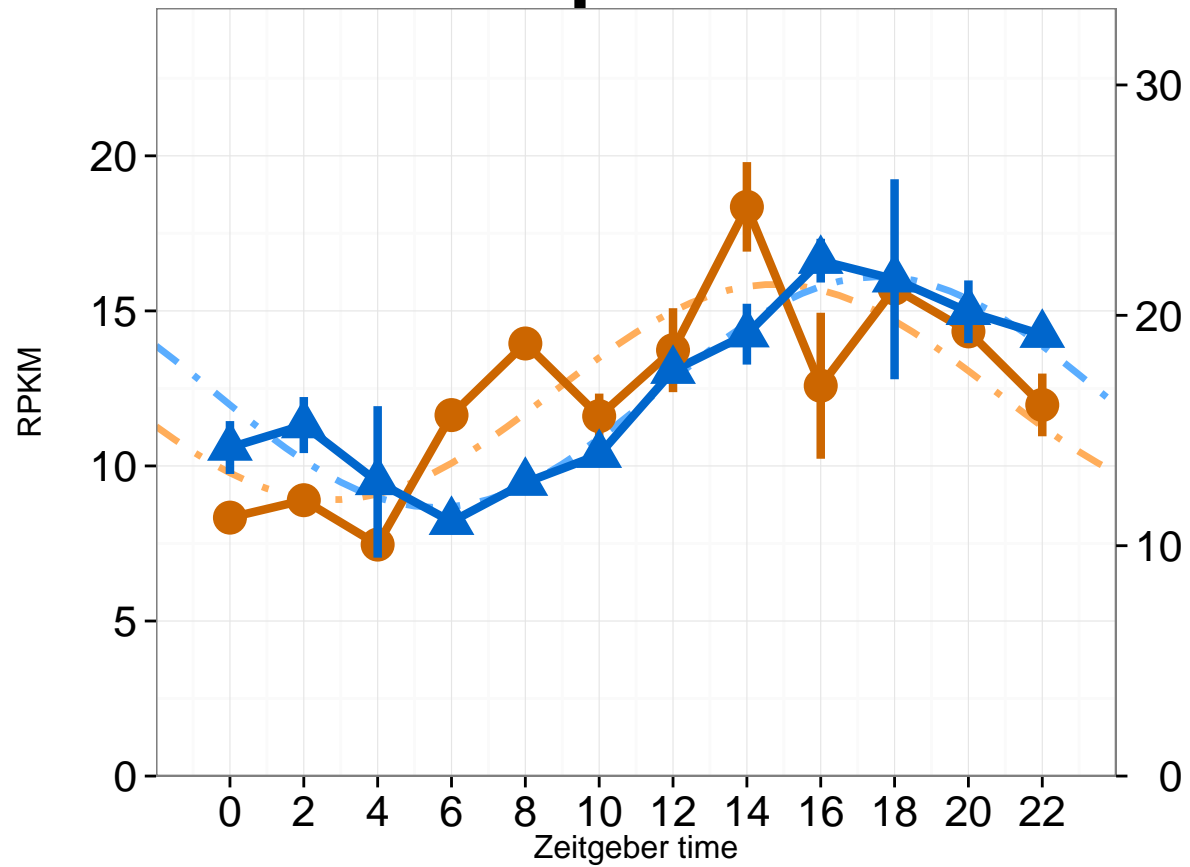

## Ppcdc

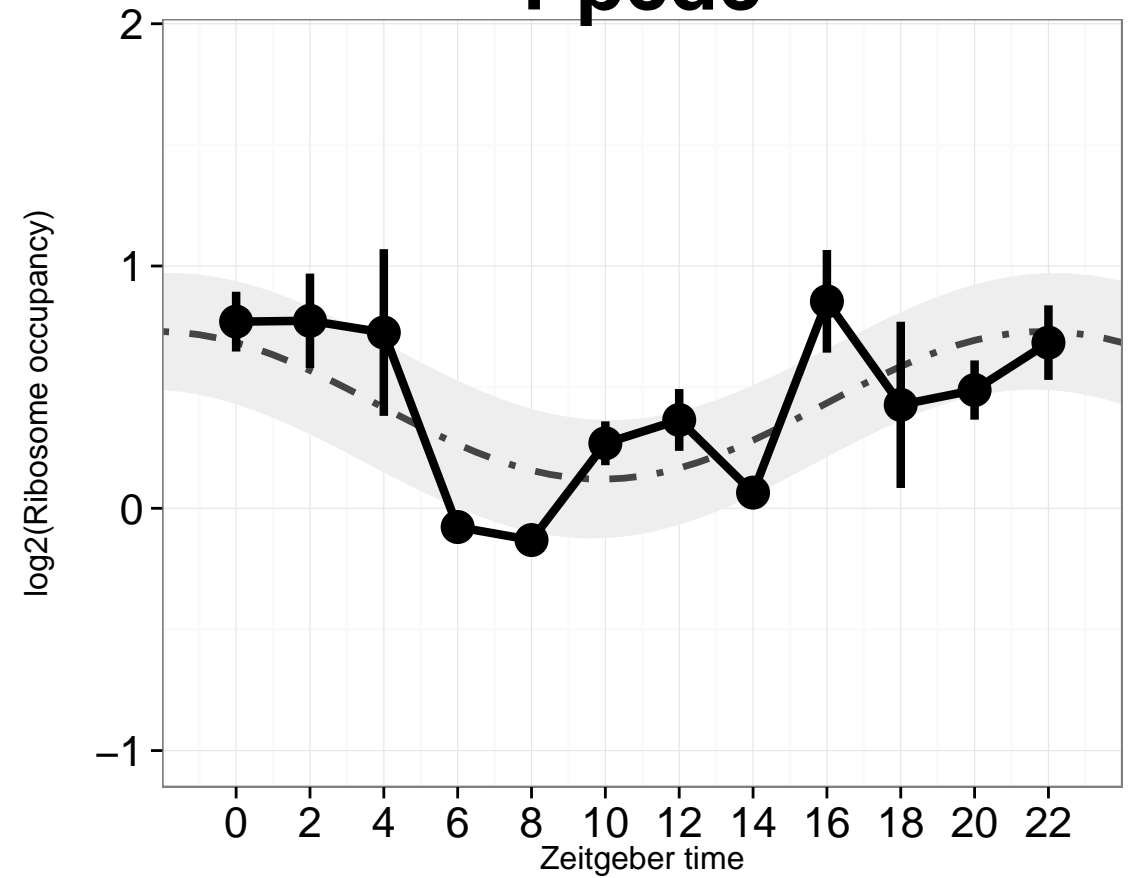

Supplement: Supplementary file 4736 [file 1]

## Xpo4

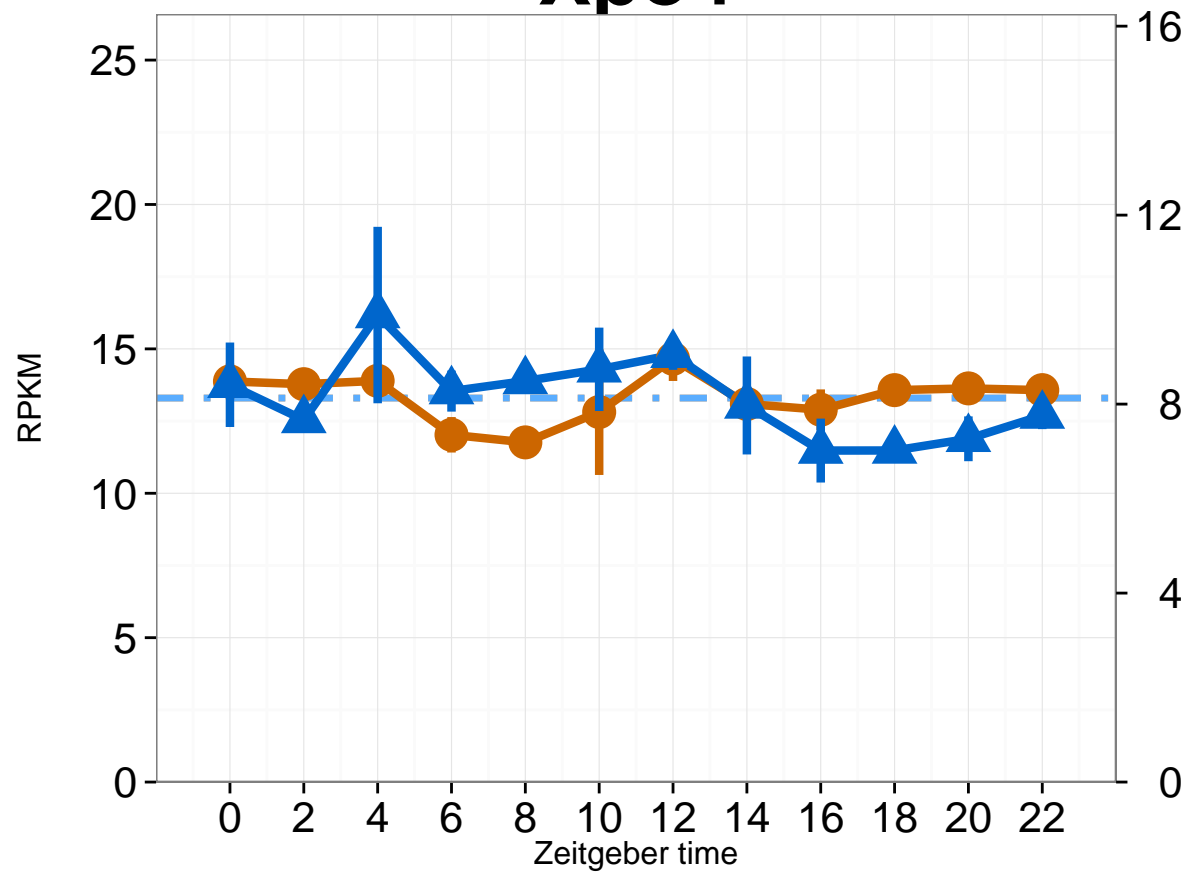

## Xpo4

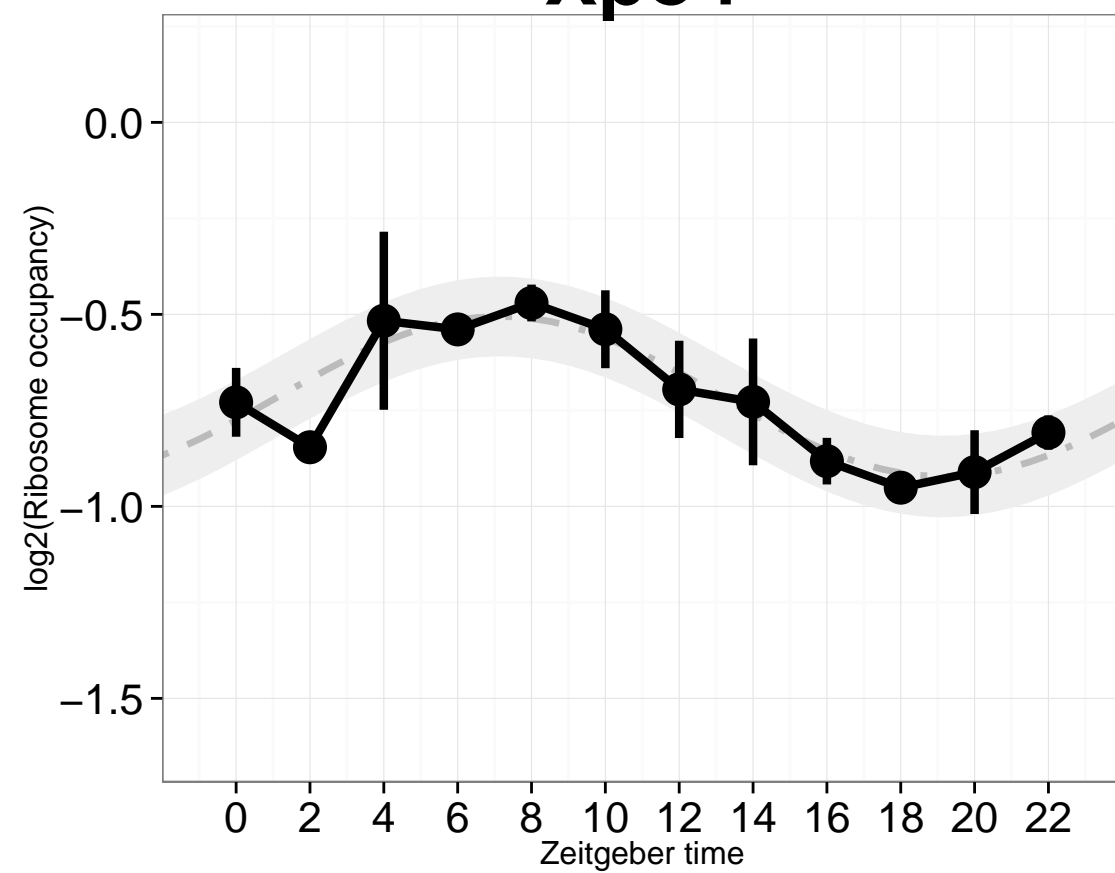

Supplement: Supplementary file 4737 [file 1]

# Col4a4

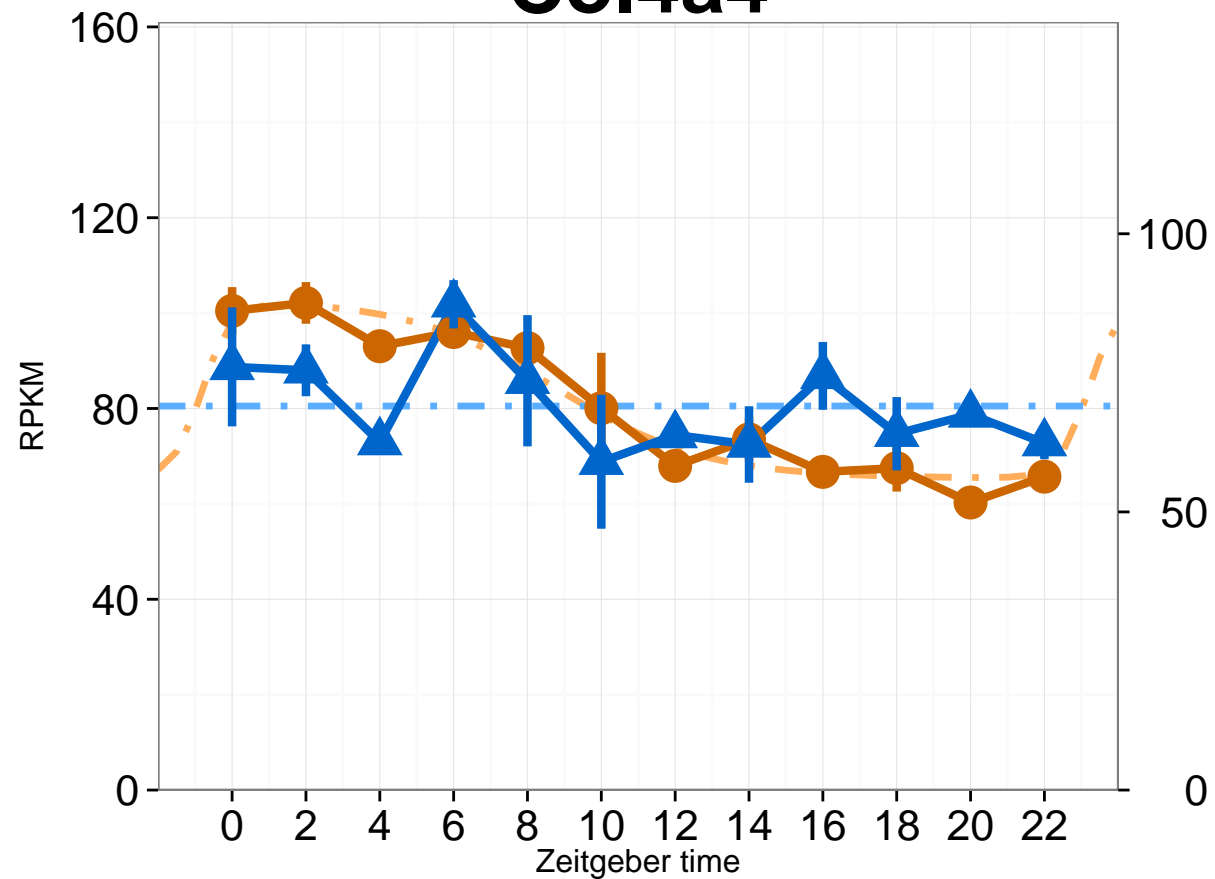

# Col4a4

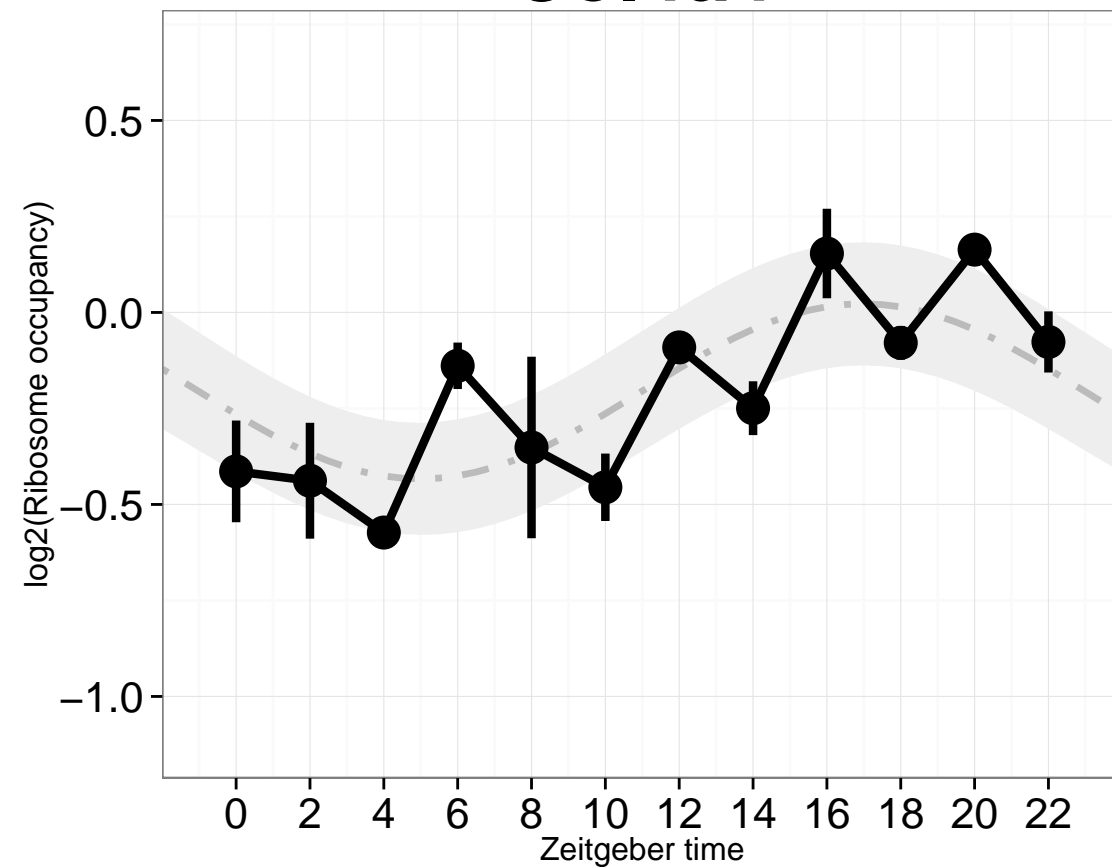

Supplement: Supplementary file 4738 [file 1]

## Clpx

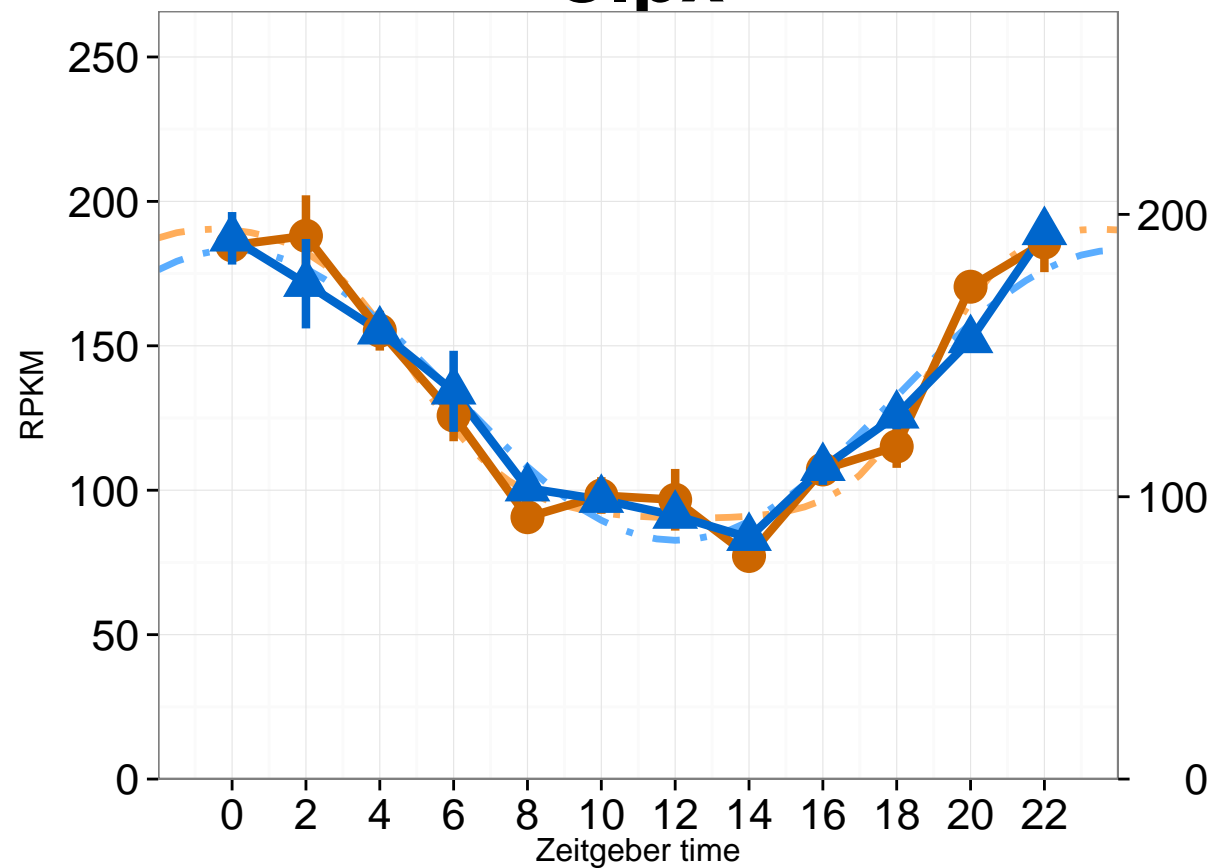

## Clpx

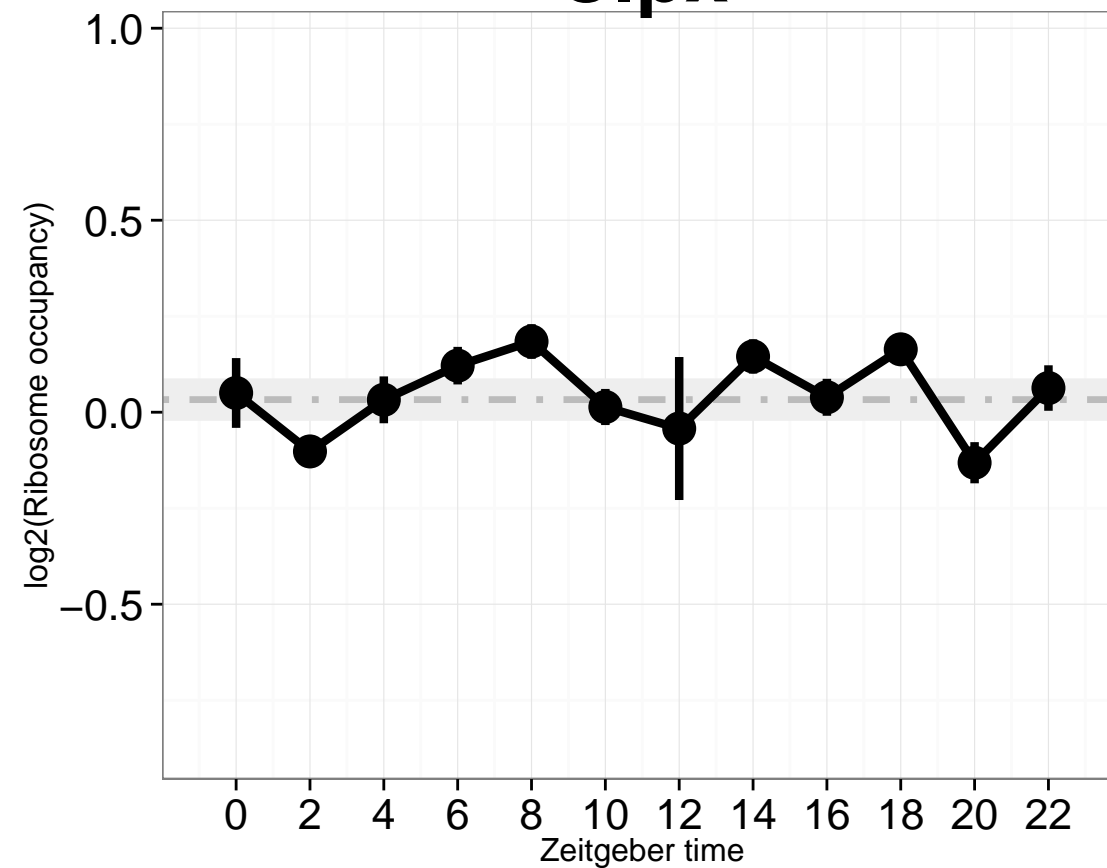

Supplement: Supplementary file 4739 [file 1]

## Ints2

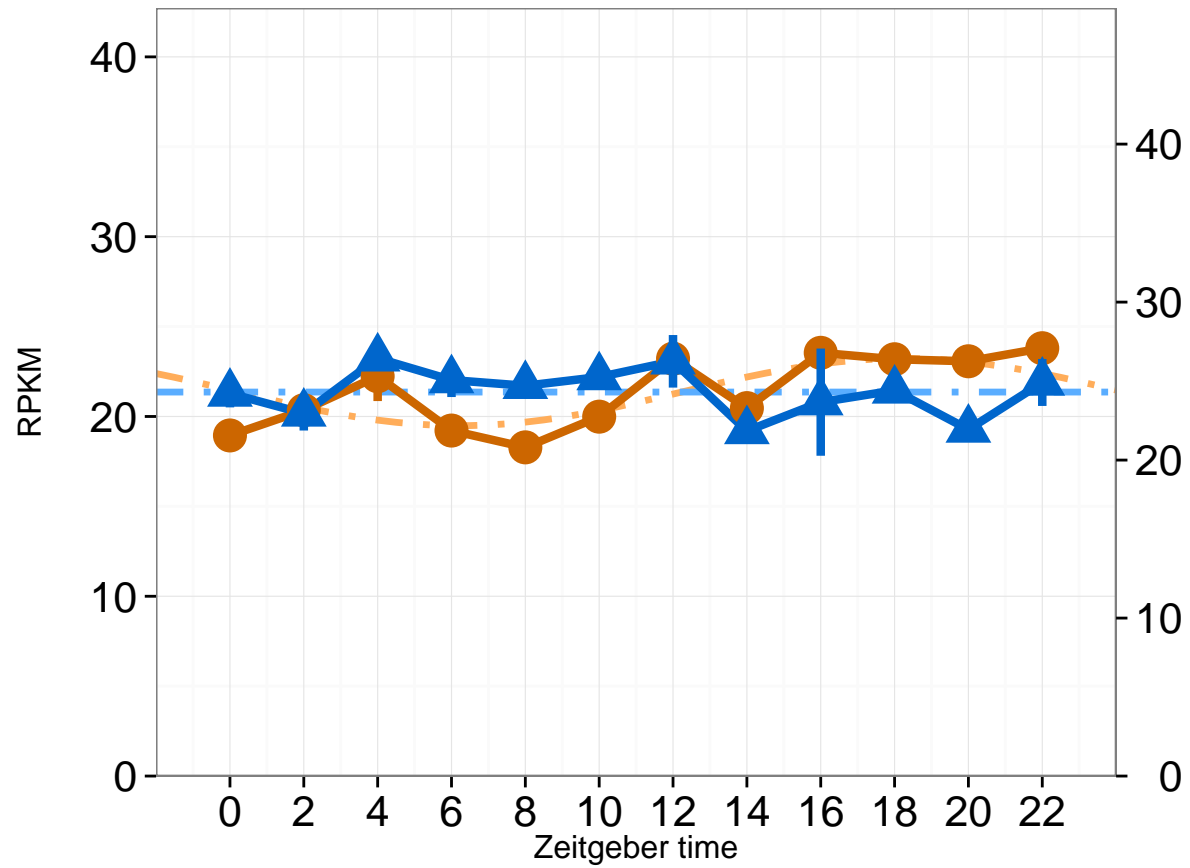

## Ints2

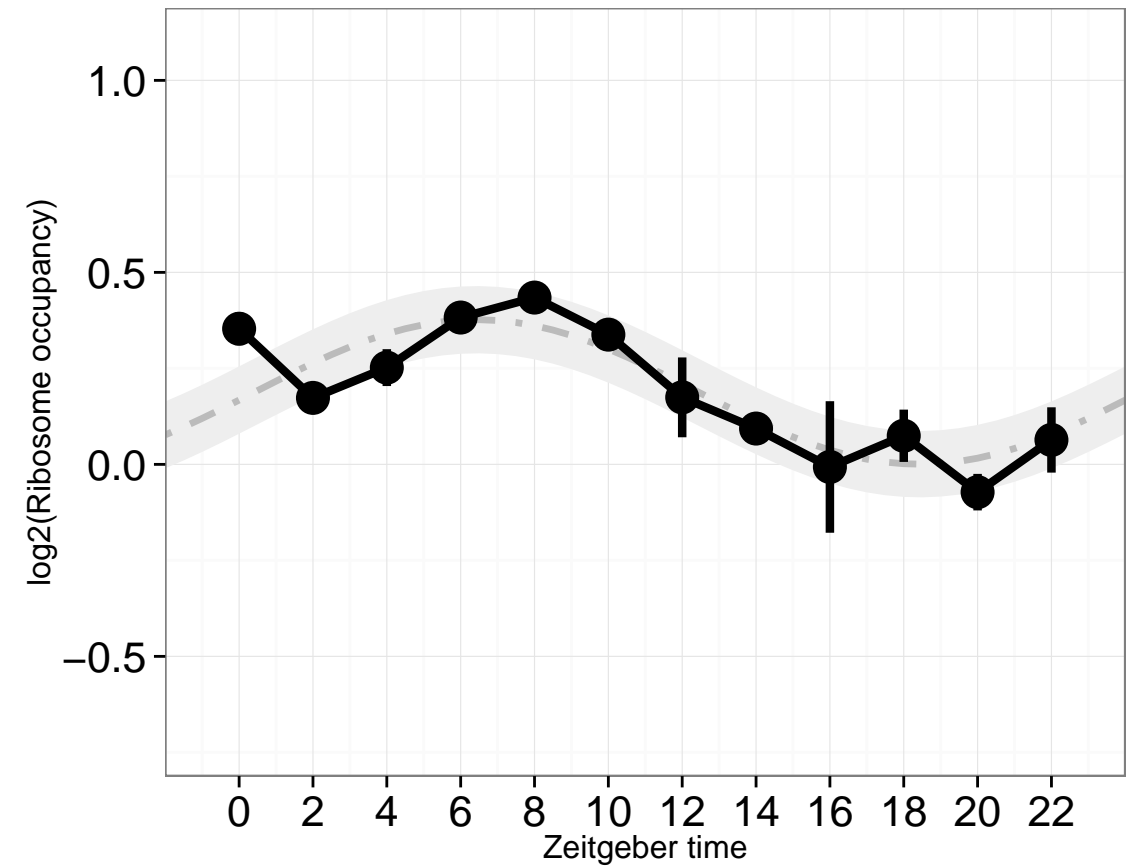

Supplement: Supplementary file 4740 [file 1]

# Paf1

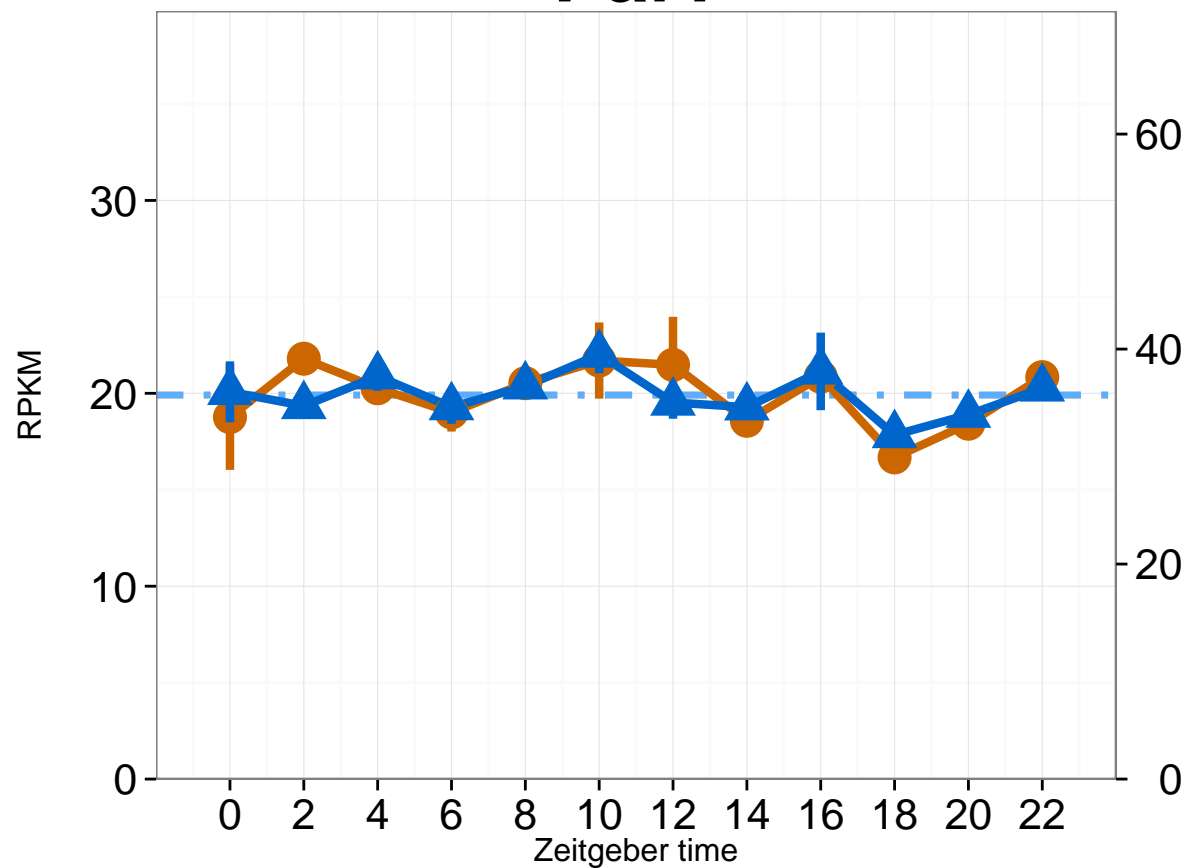

# Paf1

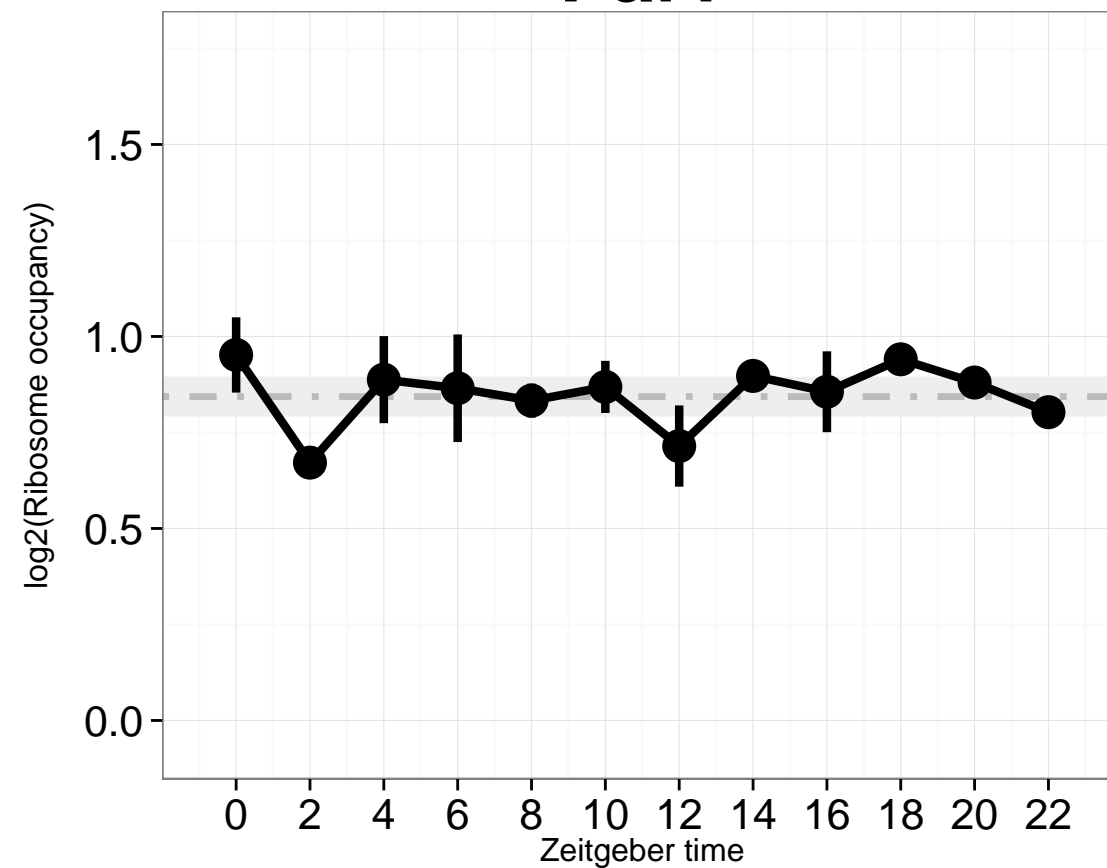

Supplement: Supplementary file 4741 [file 1]

## Rnf135

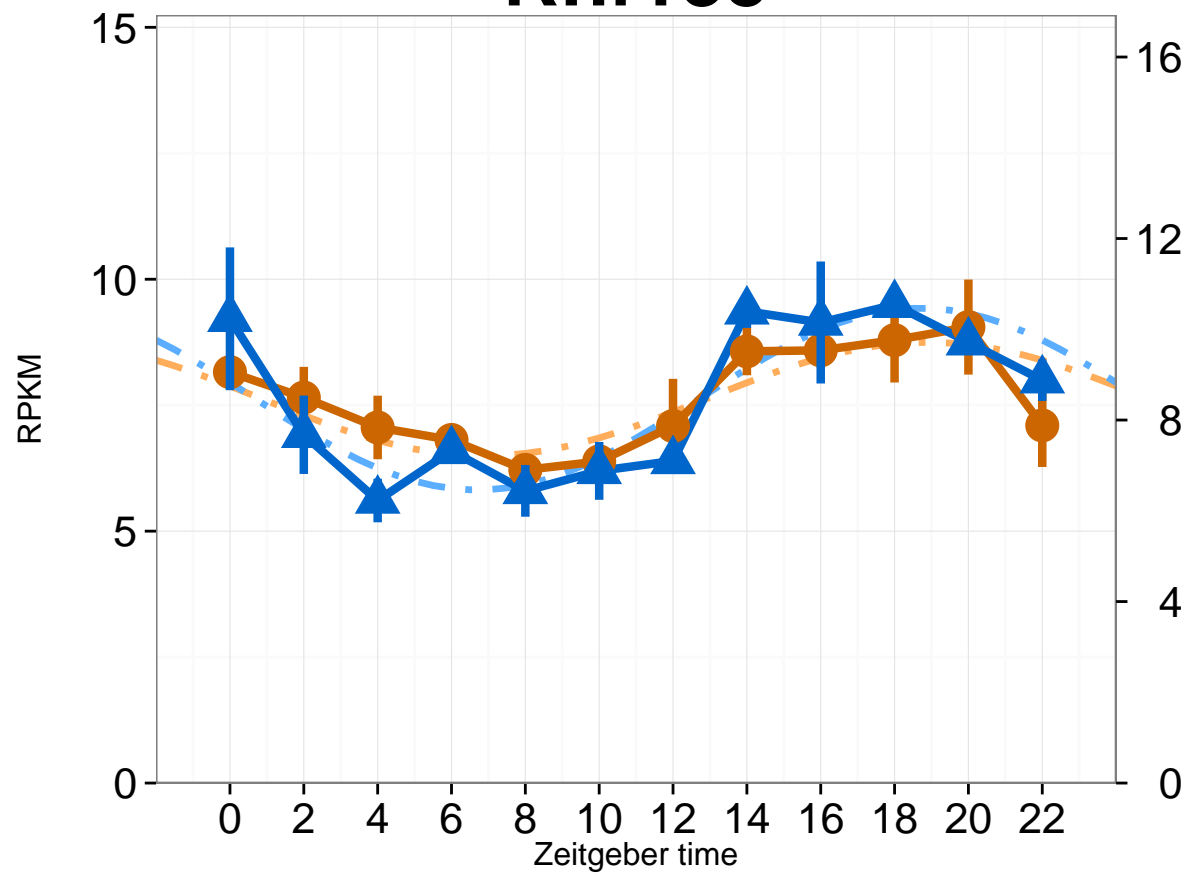

## Rnf135

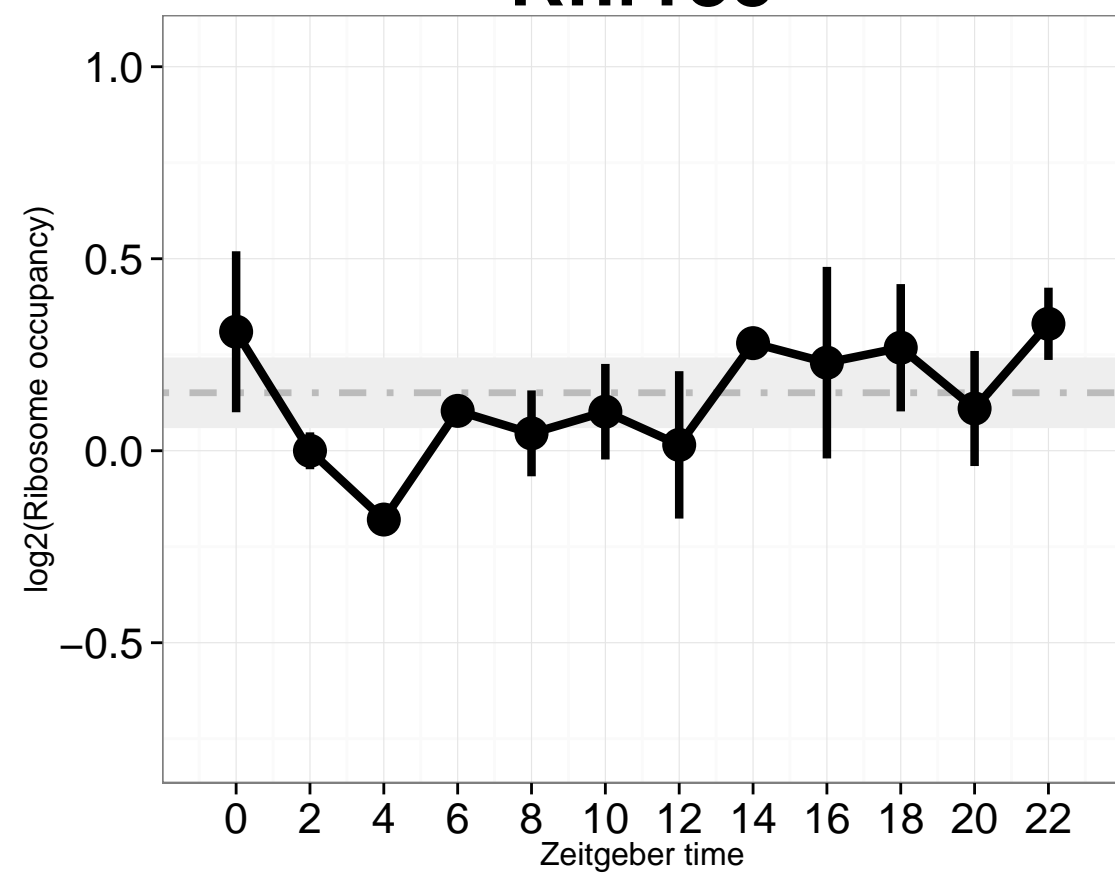

Supplement: Supplementary file 4742 [file 1]

# Rpgr

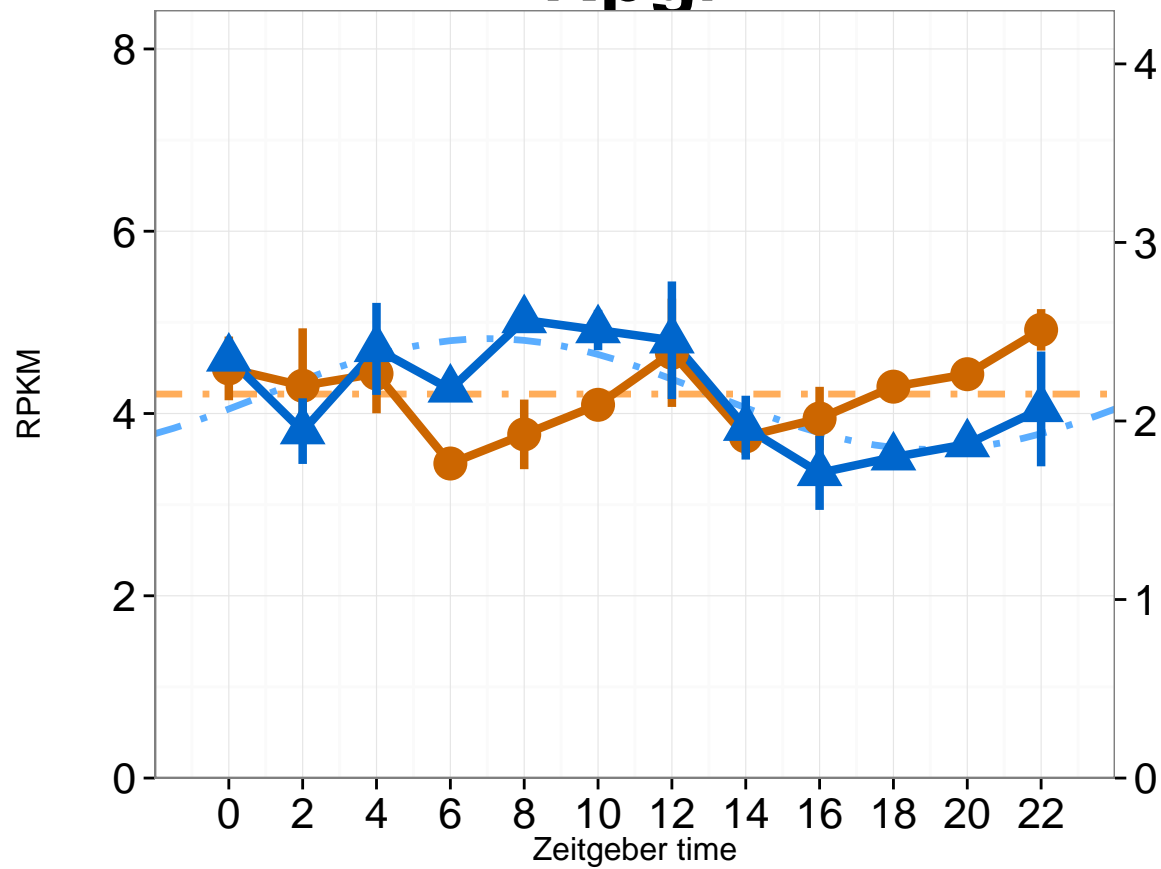

# Rpgr

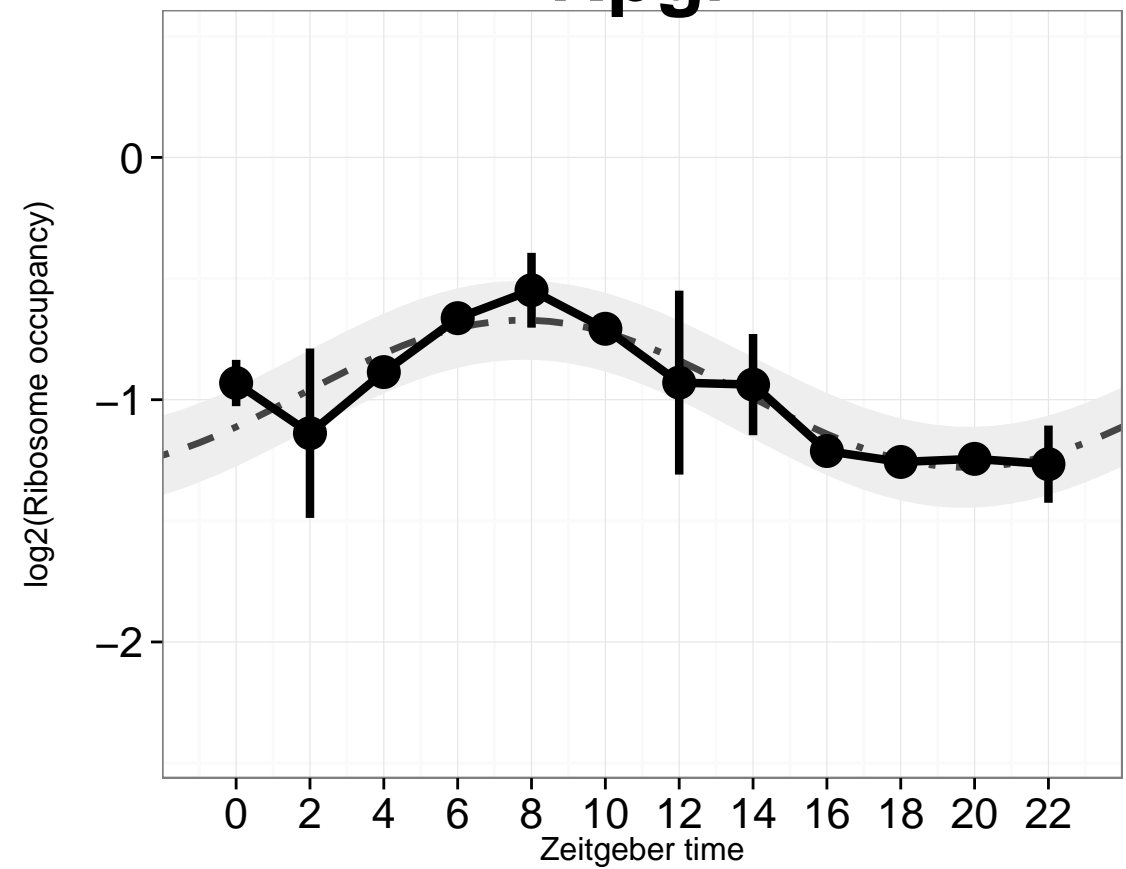

Supplement: Supplementary file 4743 [file 1]

# Tpgs1

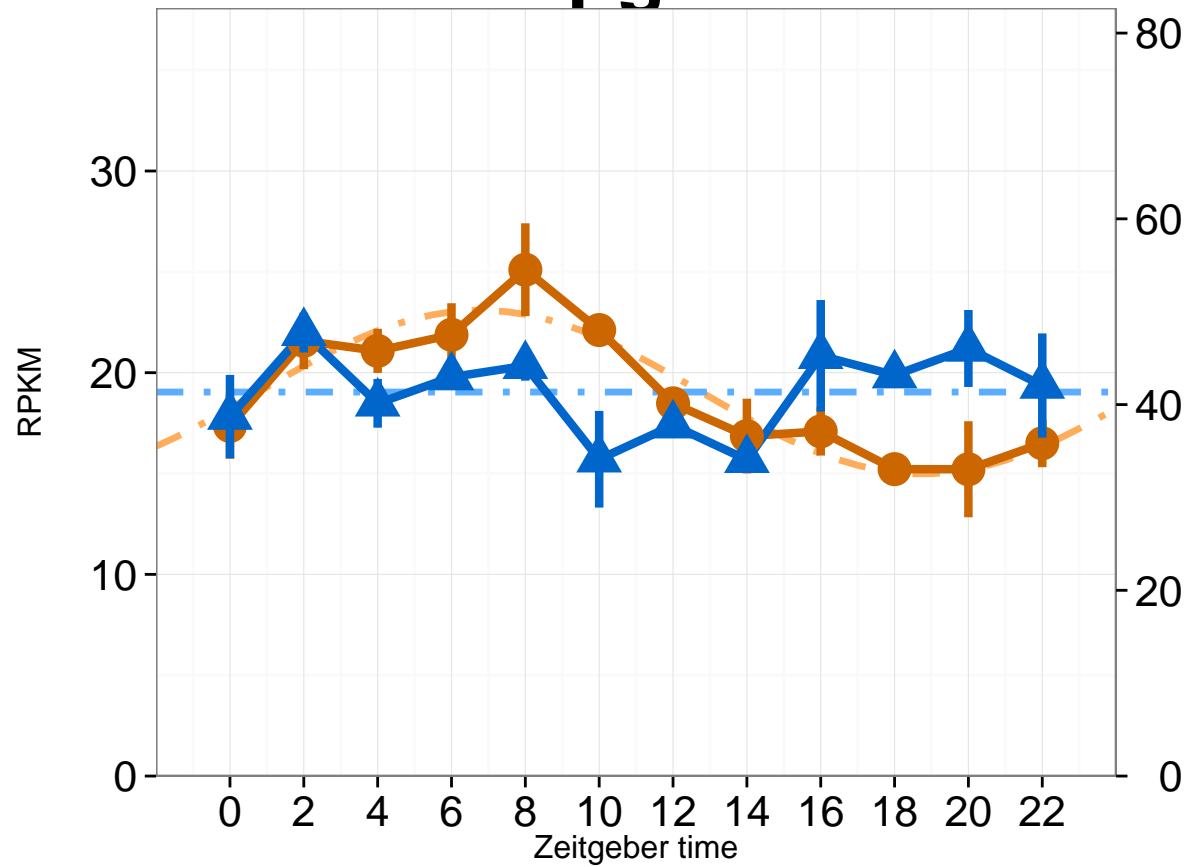

# Tpgs1

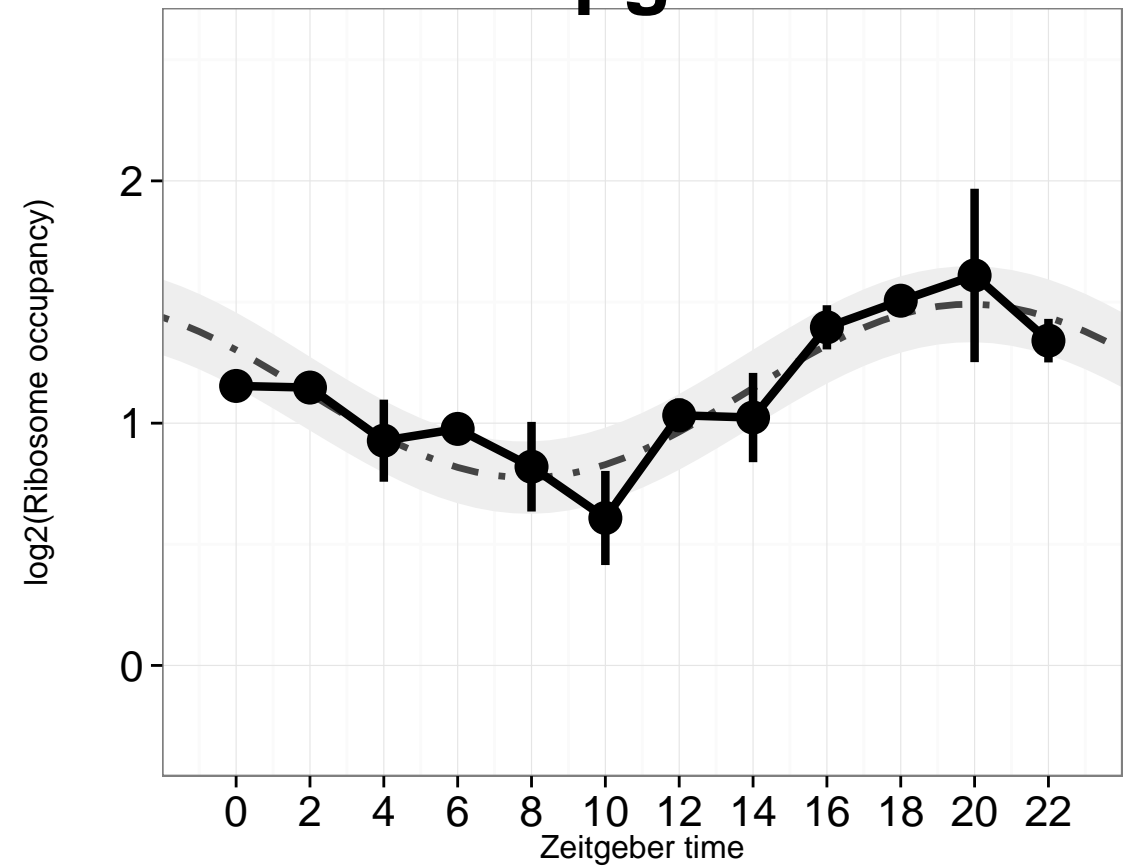

Supplement: Supplementary file 4744 [file 1]

## Sae1

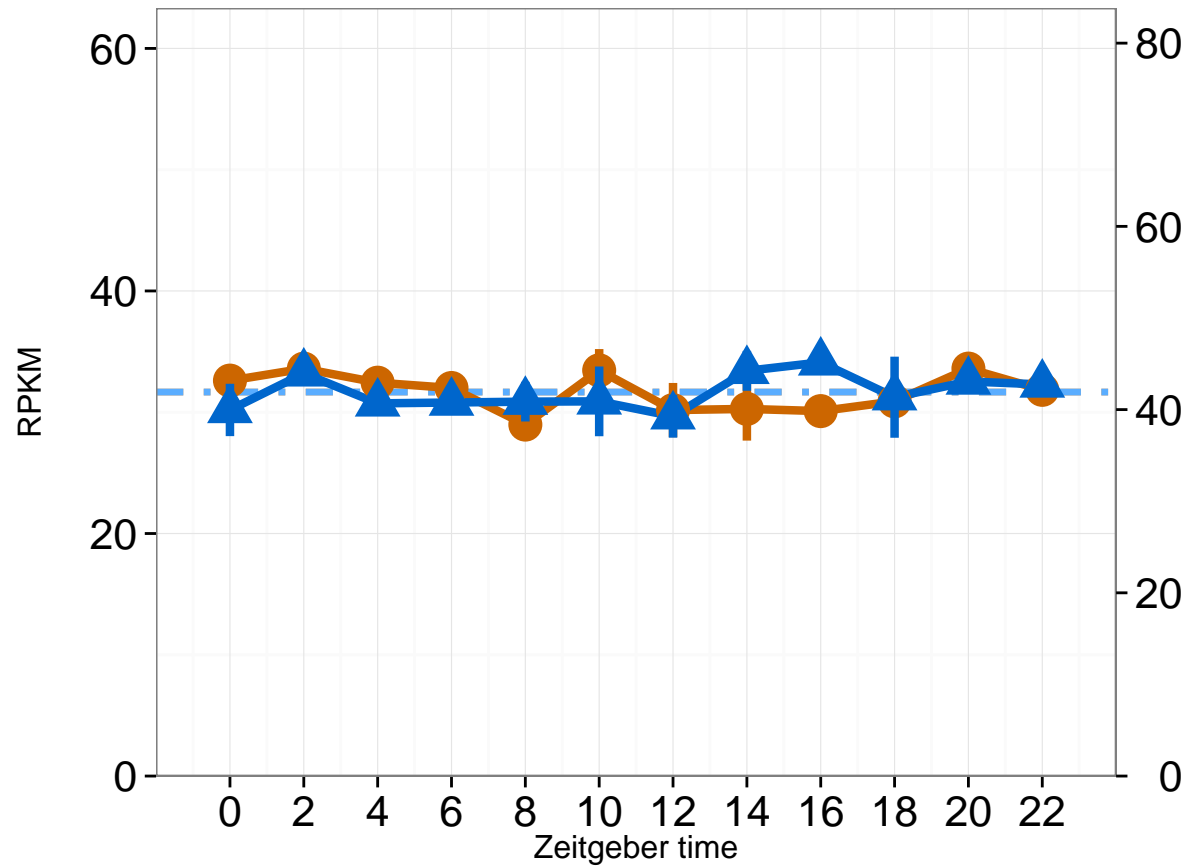

## Sae1

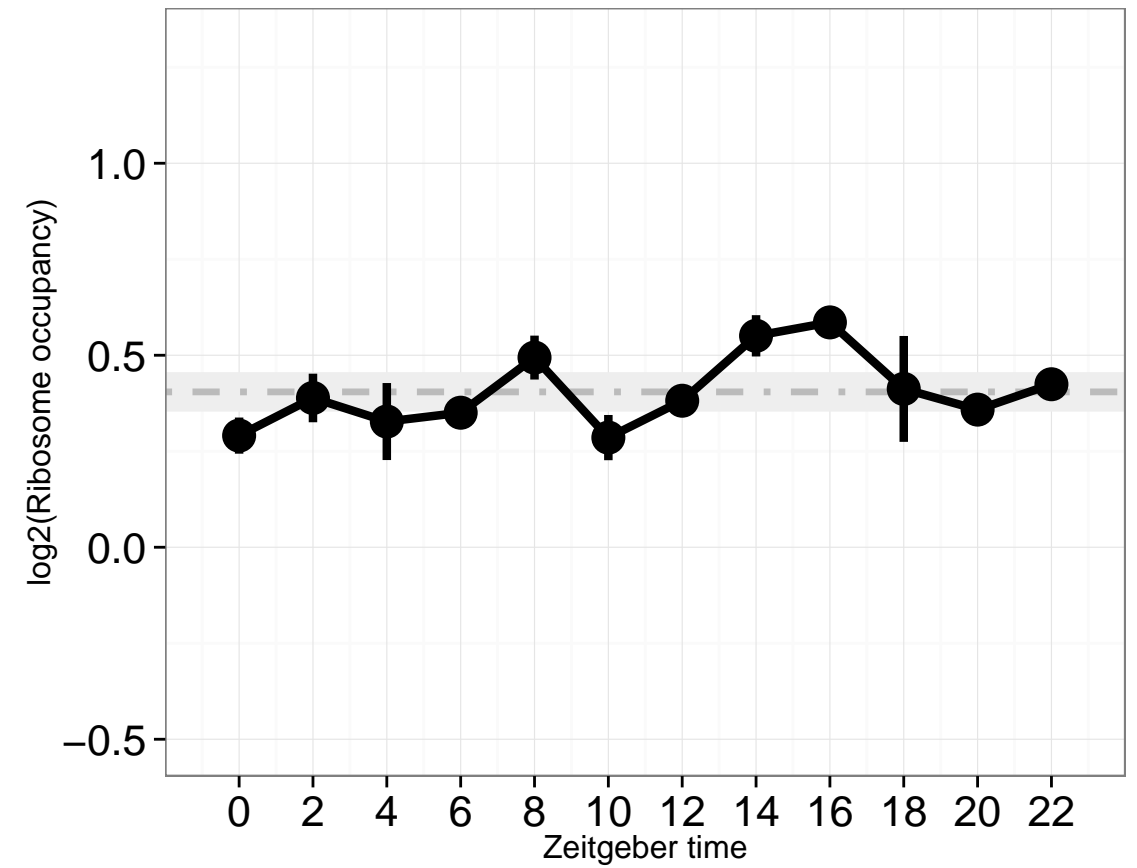

Supplement: Supplementary file 4745 [file 1]

## Zfp51

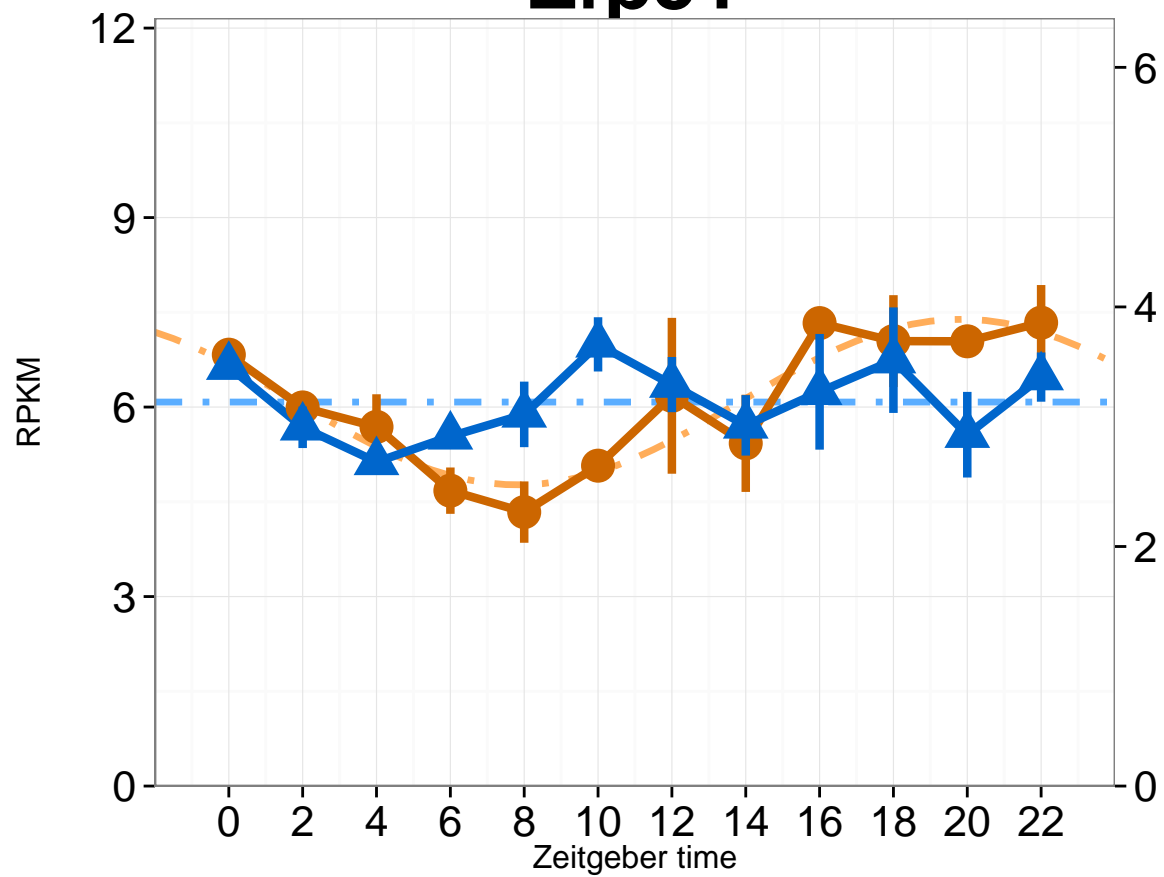

## Zfp51

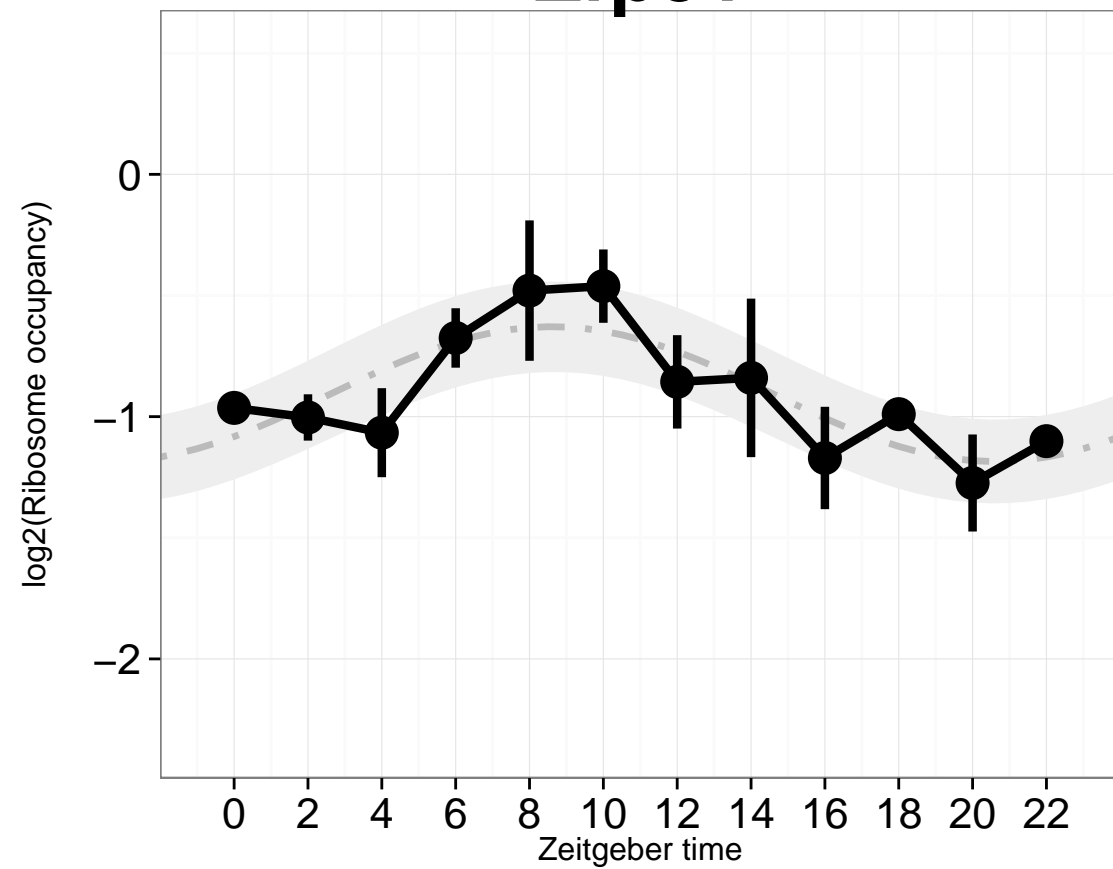

Supplement: Supplementary file 4746 [file 1]

# Adam11

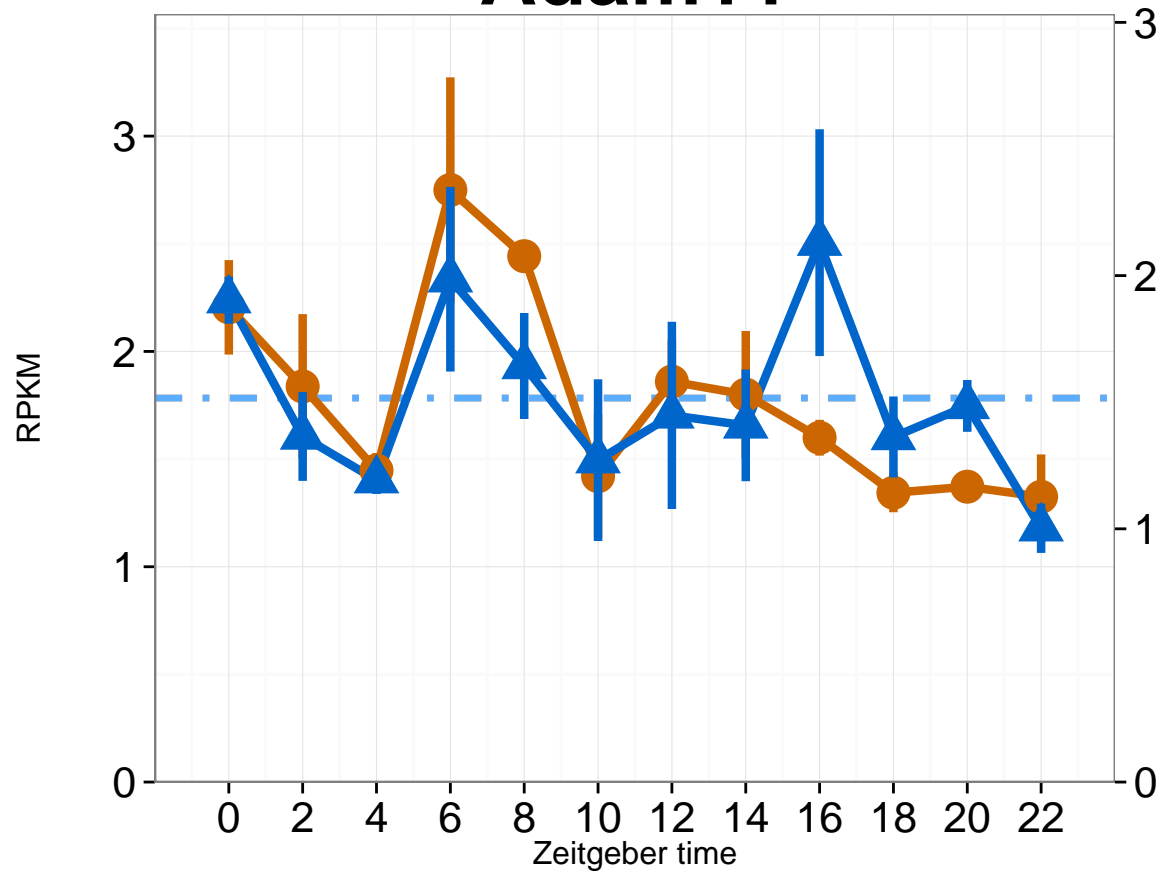

# Adam11

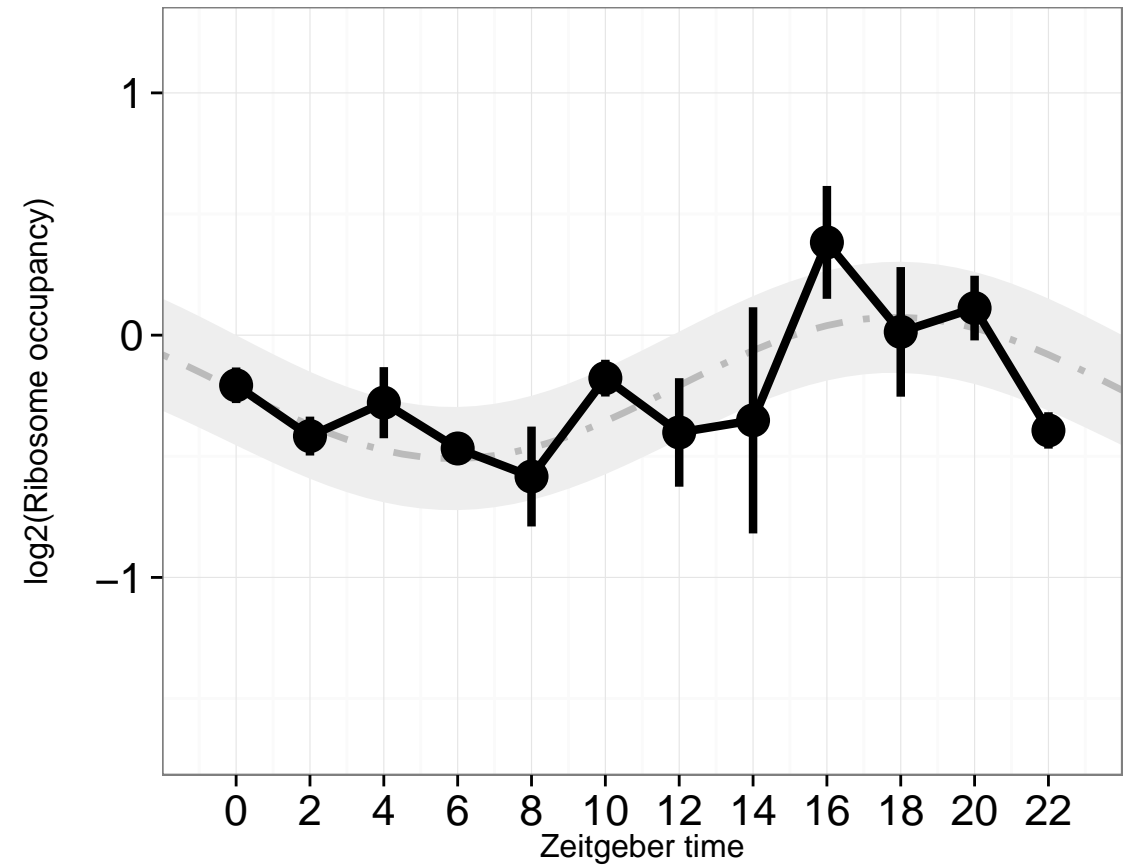

Supplement: Supplementary file 4747 [file 1]

## Bmf

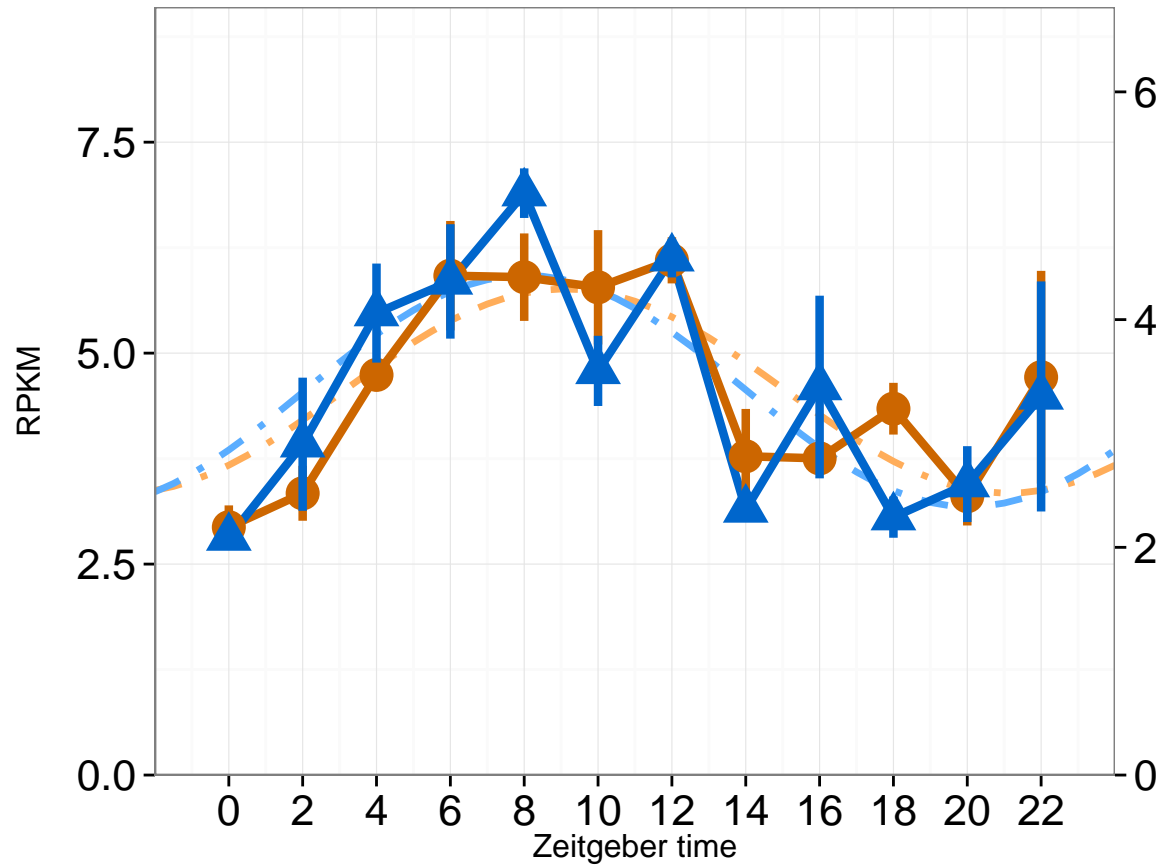

## Bmf

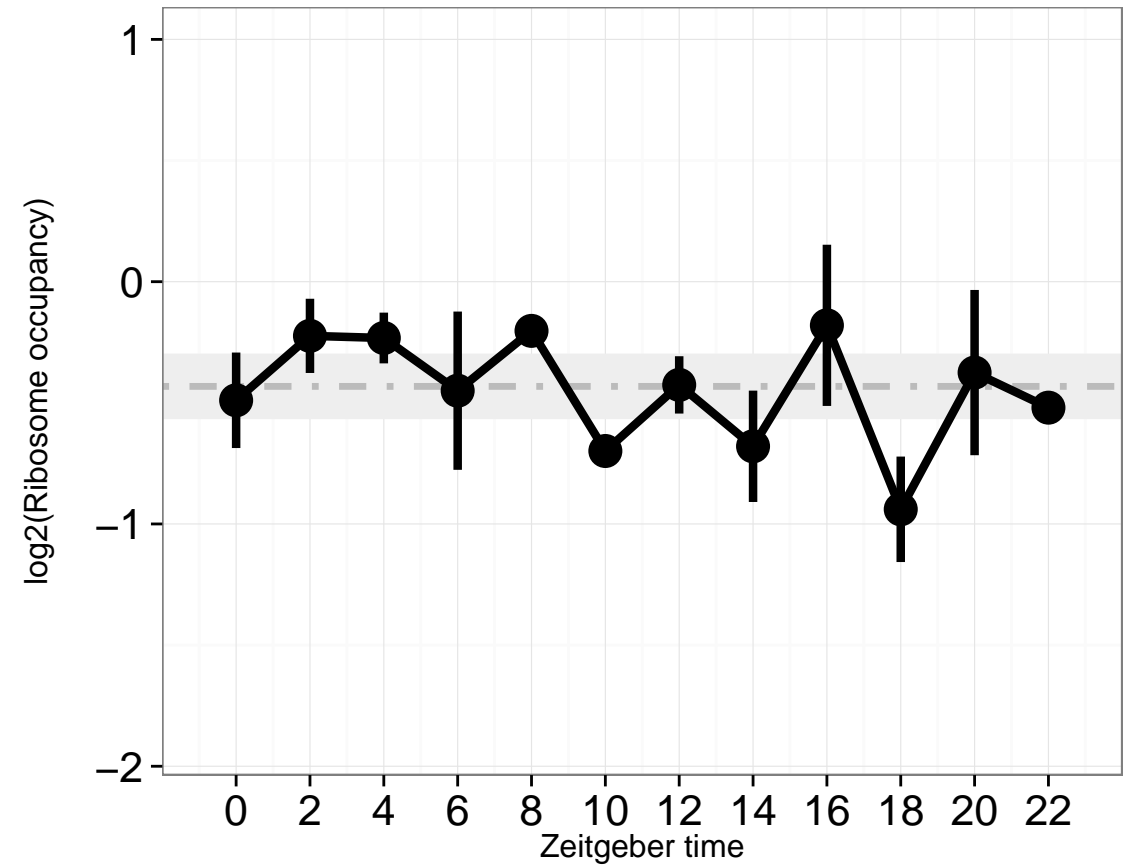

Supplement: Supplementary file 4748 [file 1]

# Mapk6

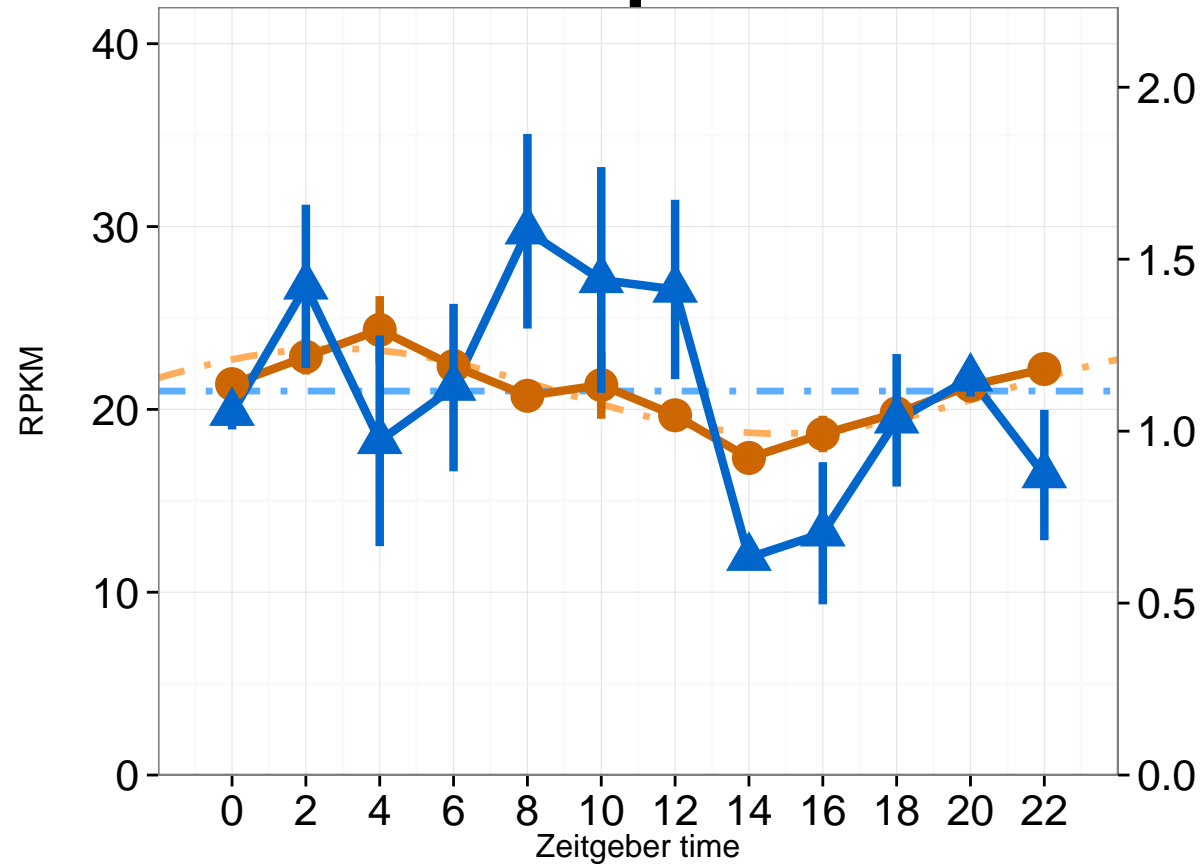

# Mapk6

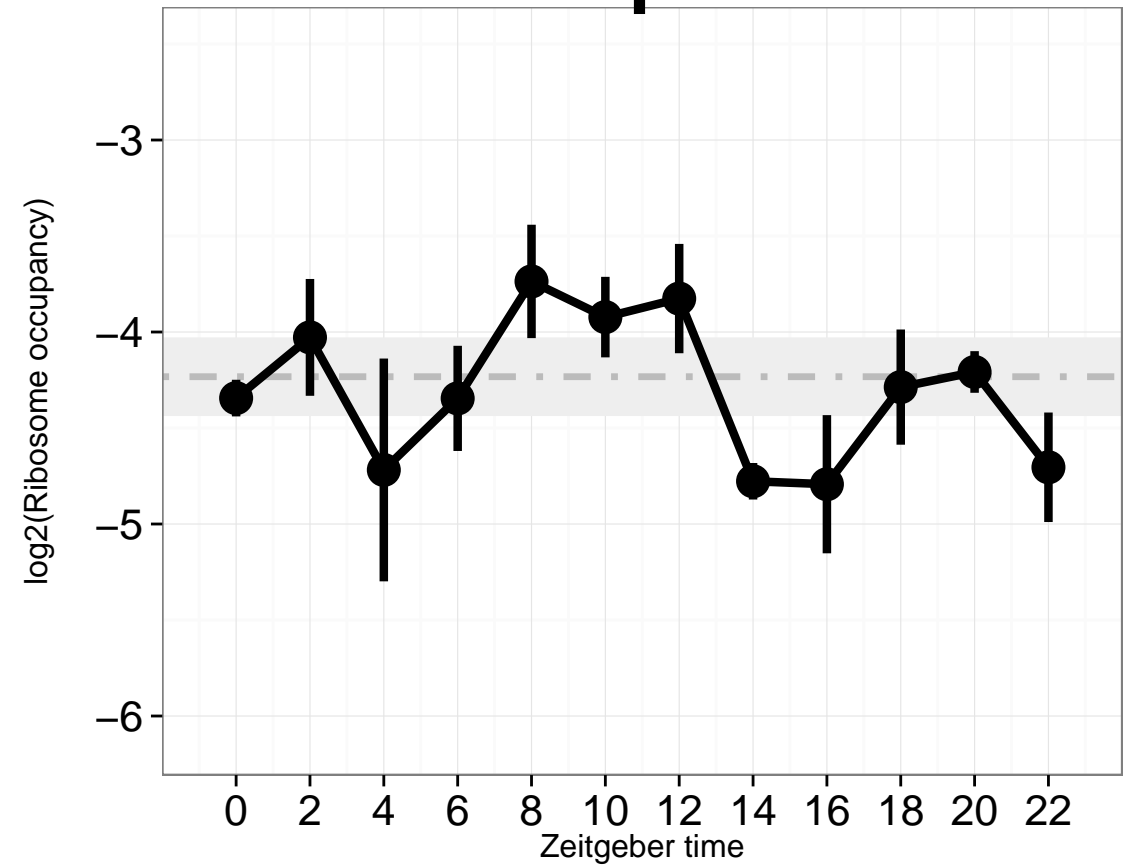

Supplement: Supplementary file 4749 [file 1]

## Lpar4

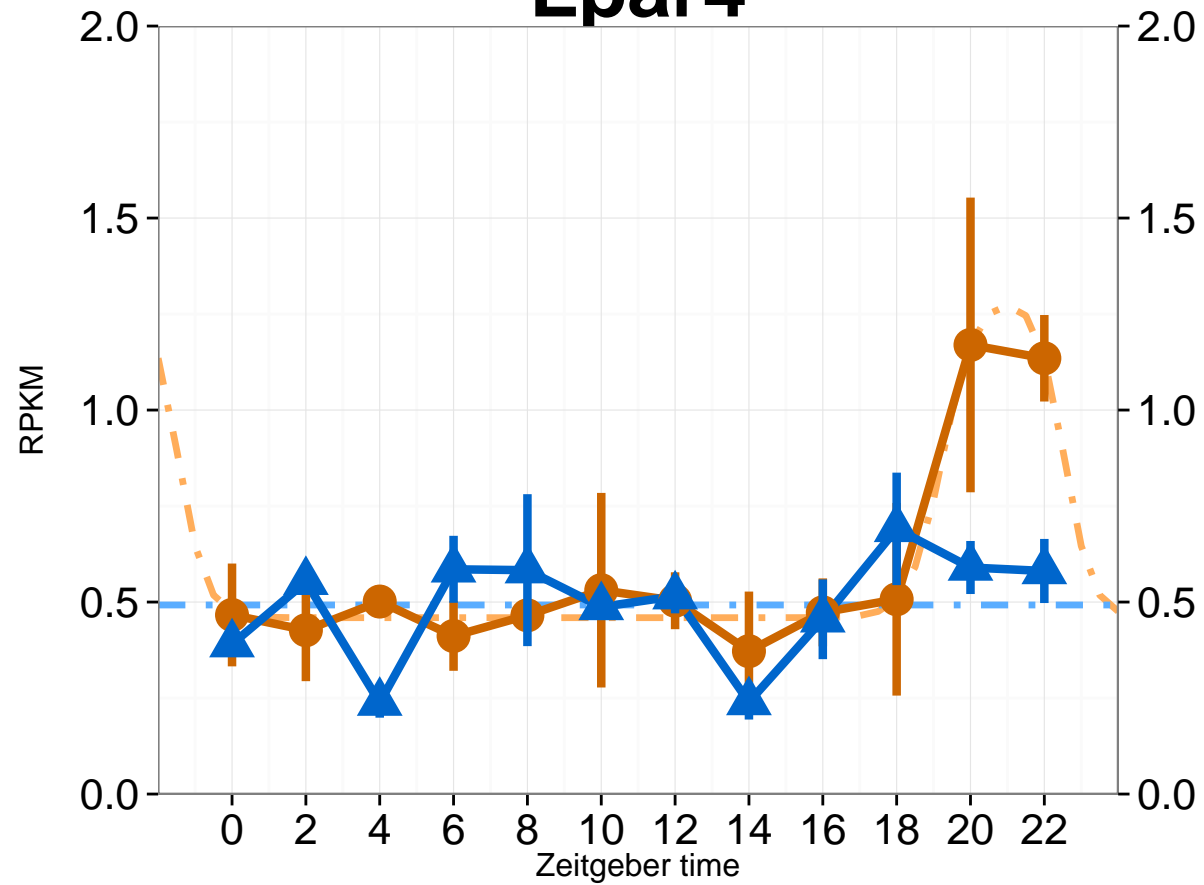

## Lpar4

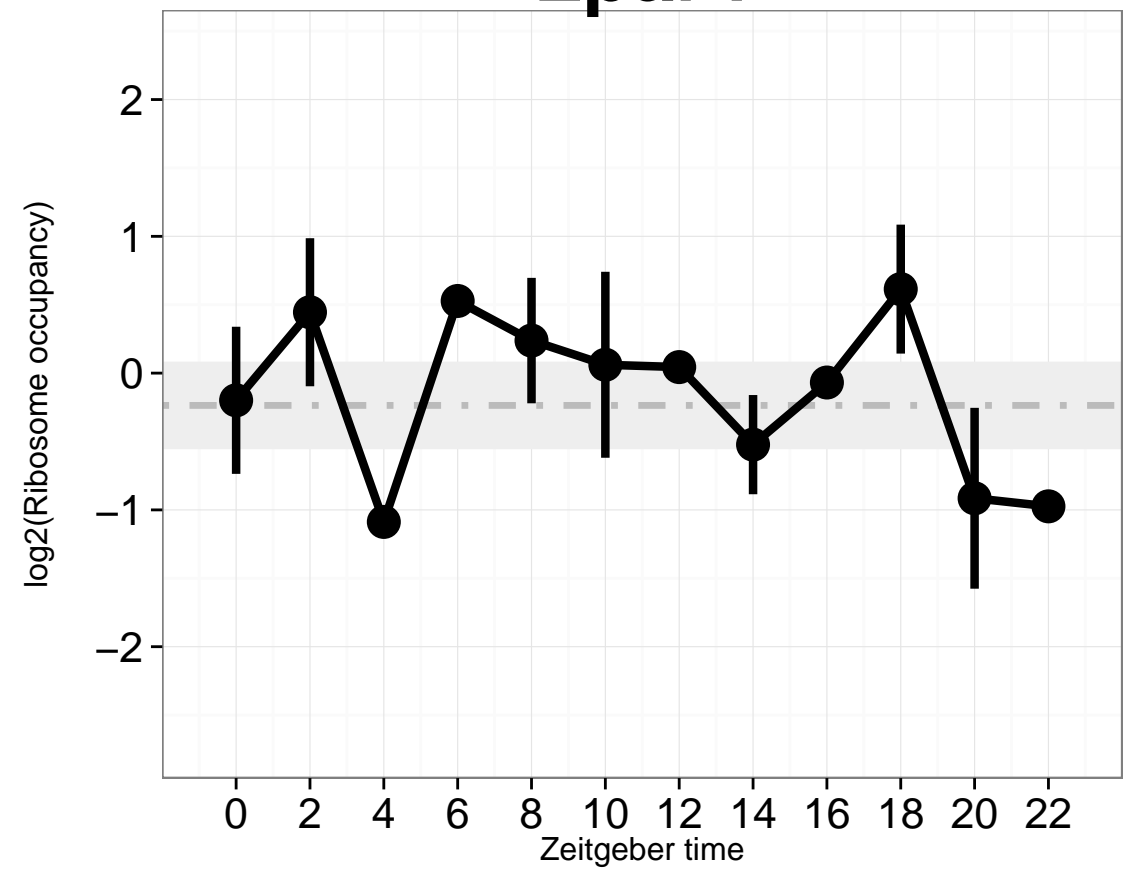

Supplement: Supplementary file 4750 [file 1]

## Il22ra1

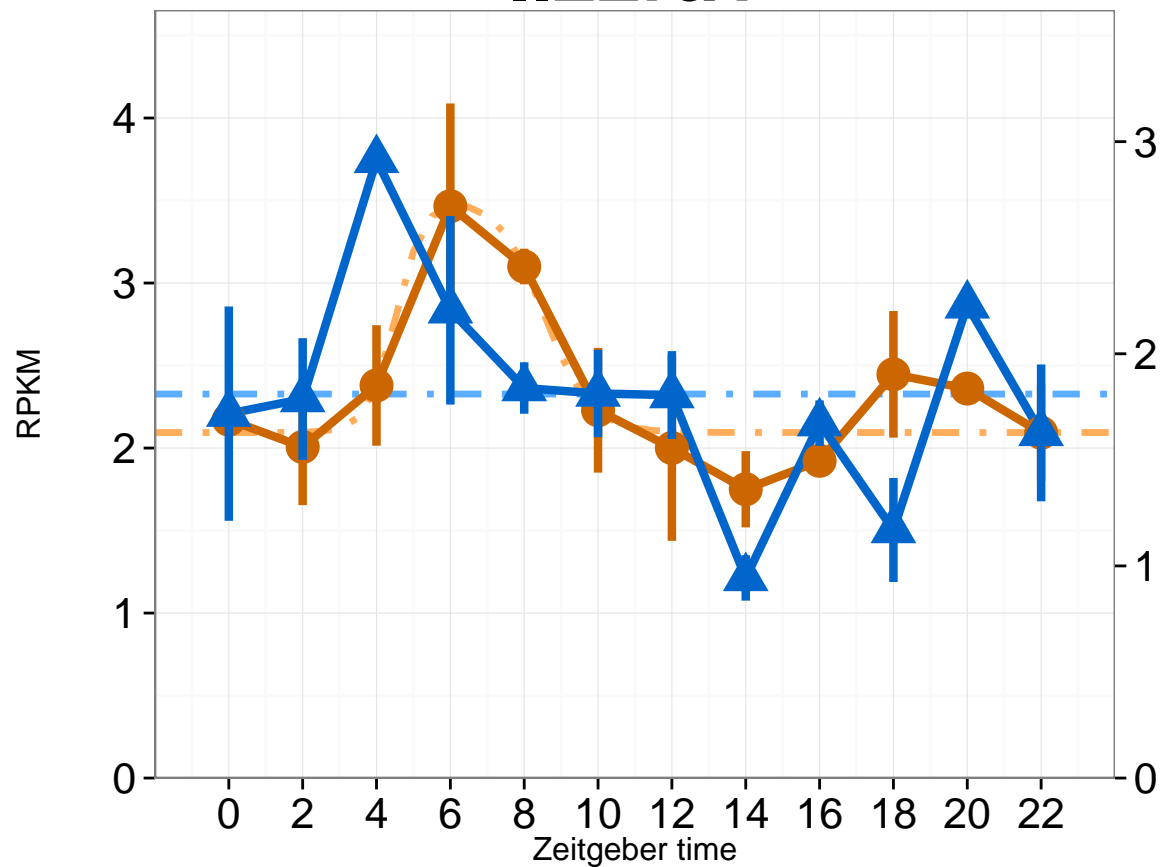

## Il22ra1

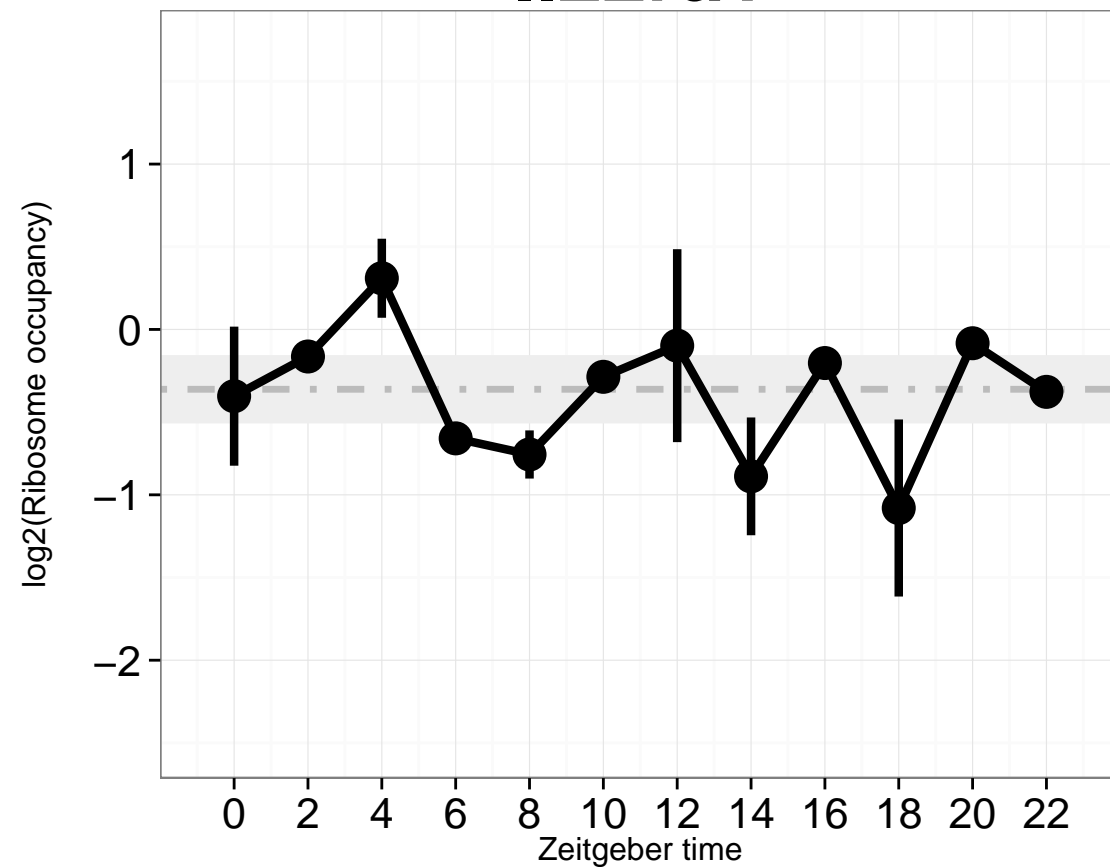

Supplement: Supplementary file 4751 [file 1]

# Col5a3

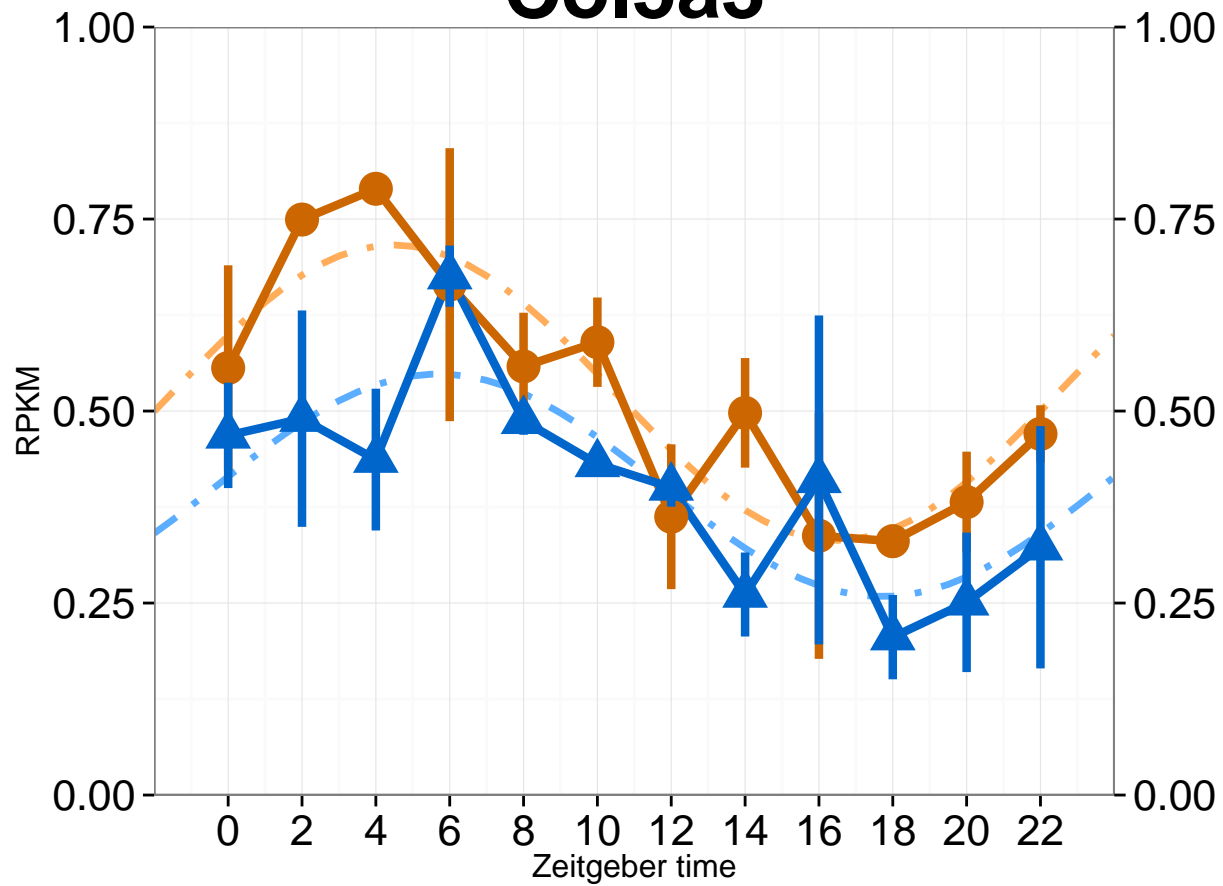

# Col5a3

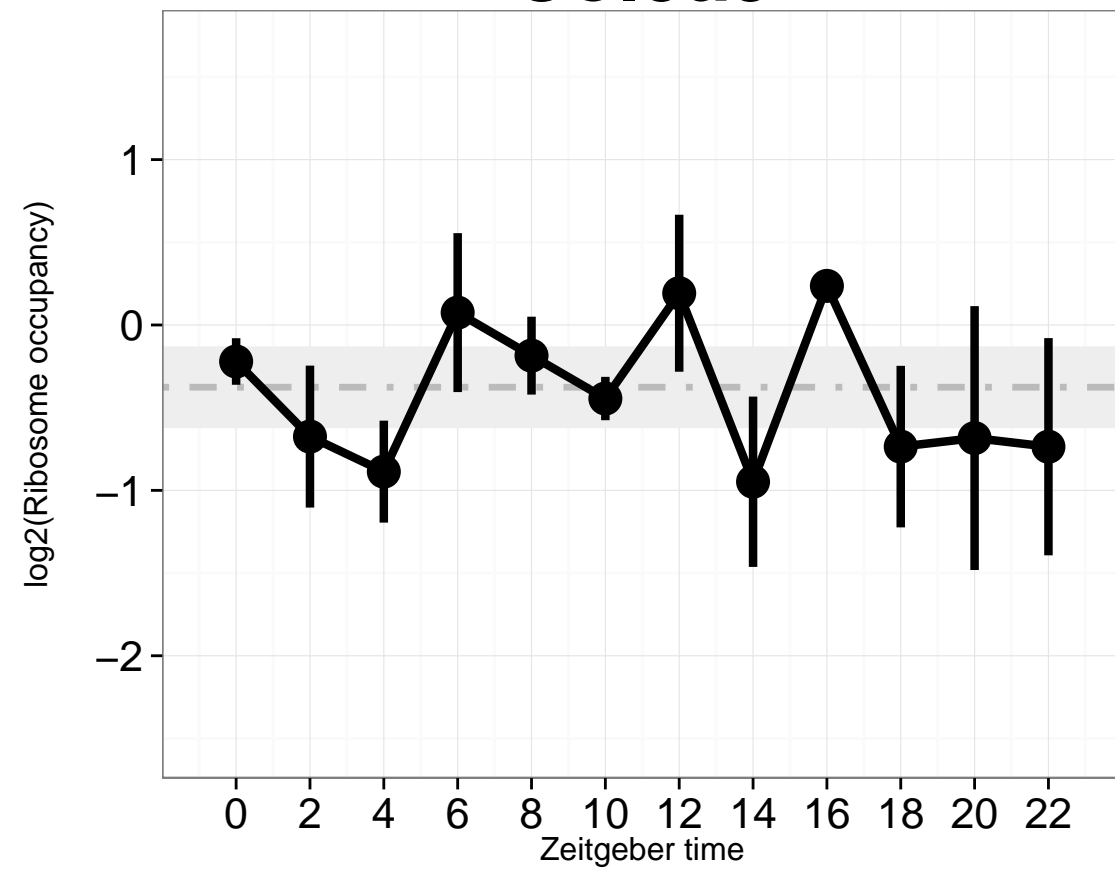

Supplement: Supplementary file 4752 [file 1]

## Abca5

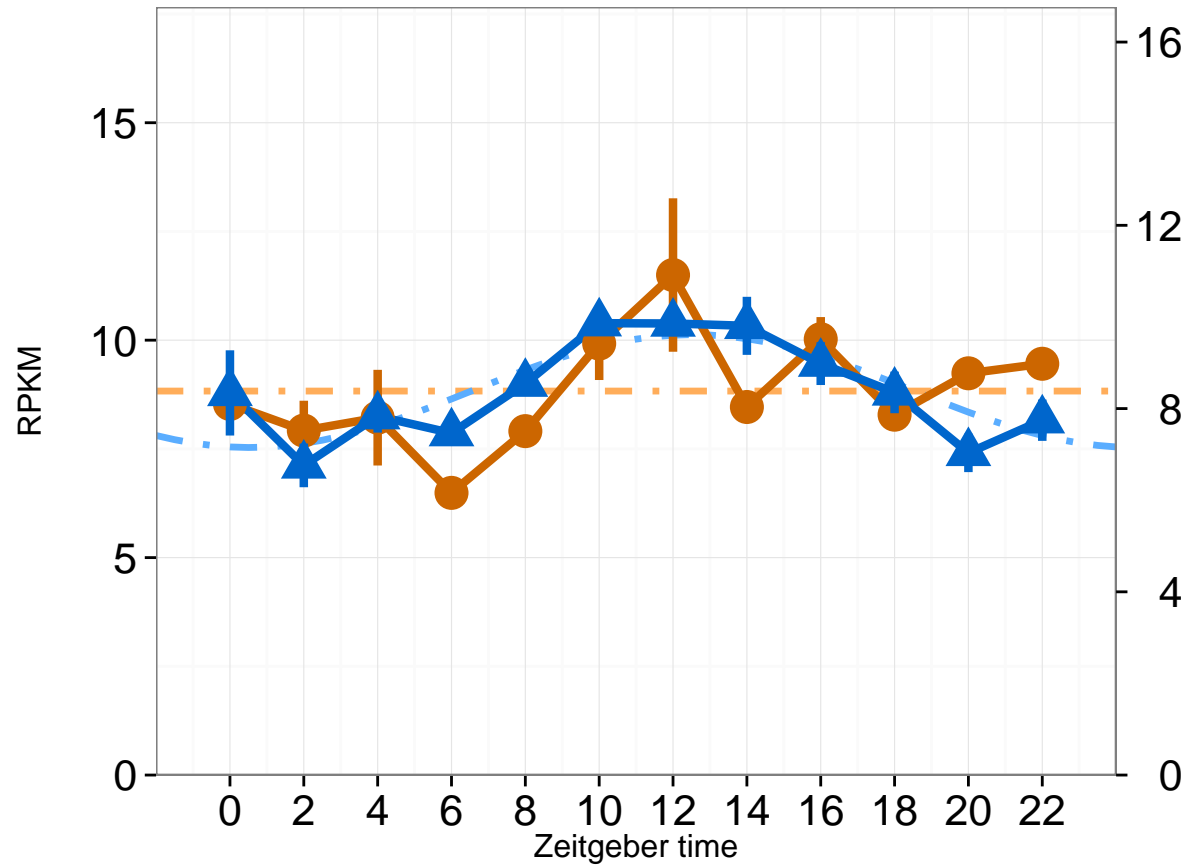

## Abca5

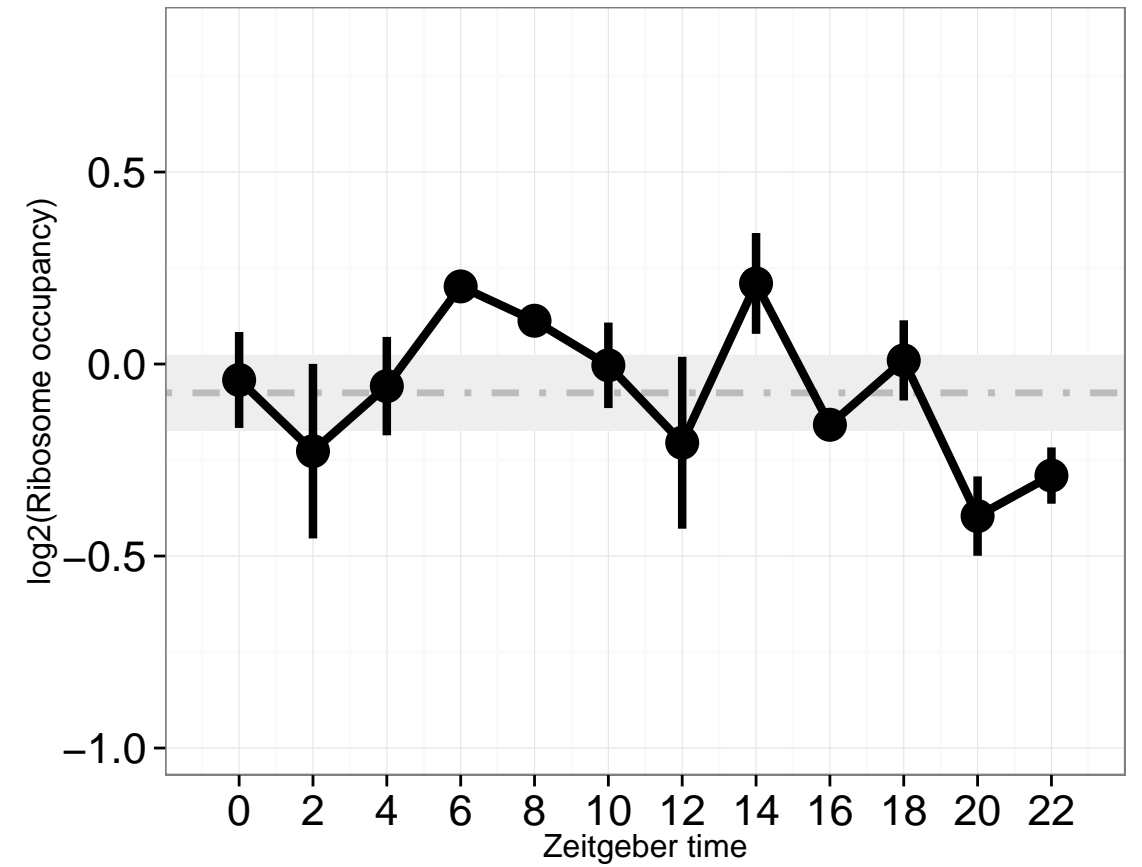

Supplement: Supplementary file 4753 [file 1]

# D3Bwg0562e

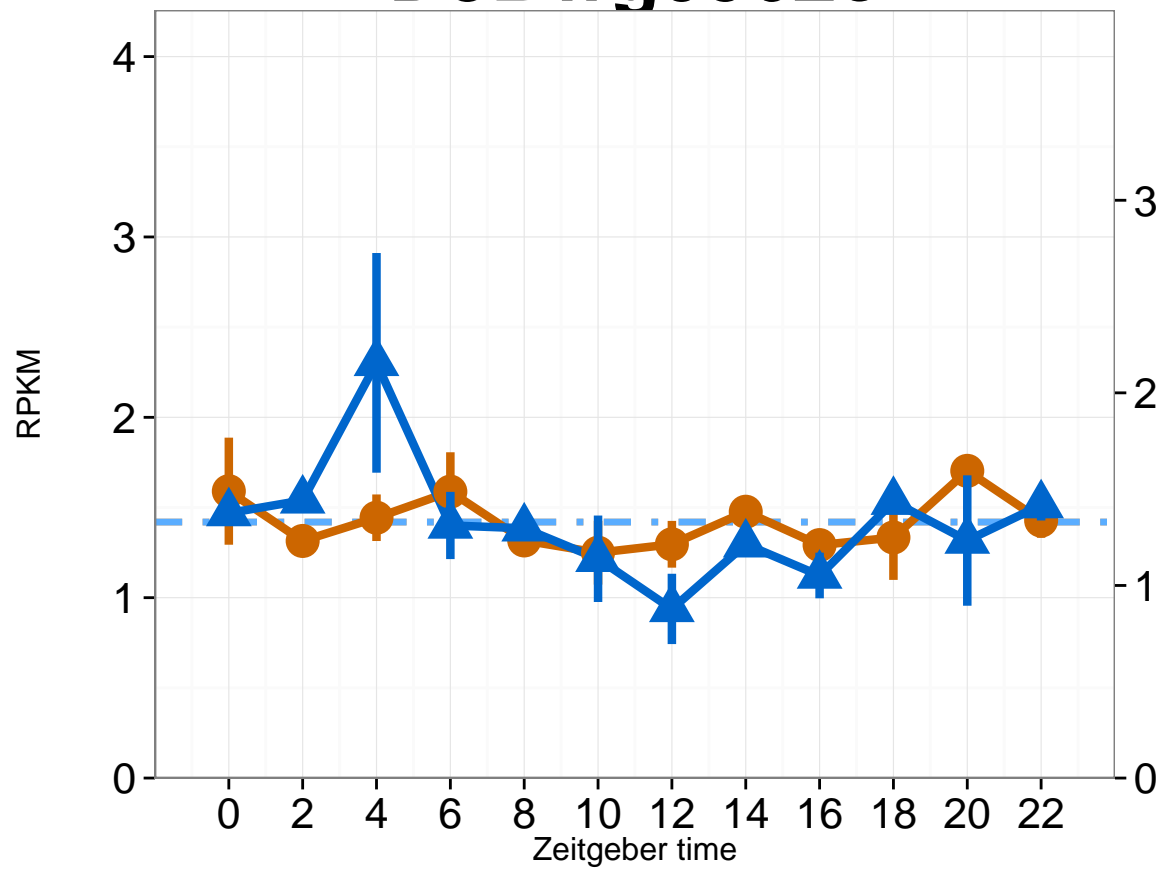

# D3Bwg0562e

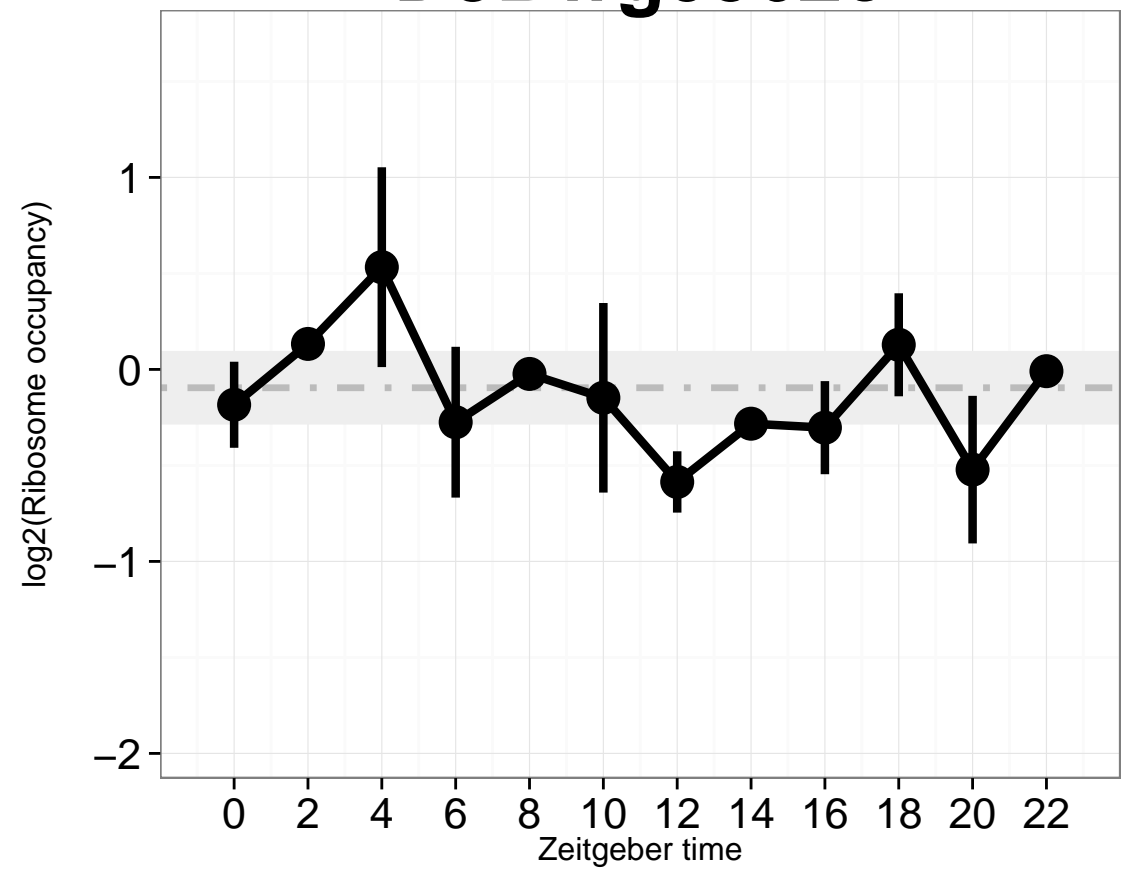

Supplement: Supplementary file 4754 [file 1]

# Zfp523

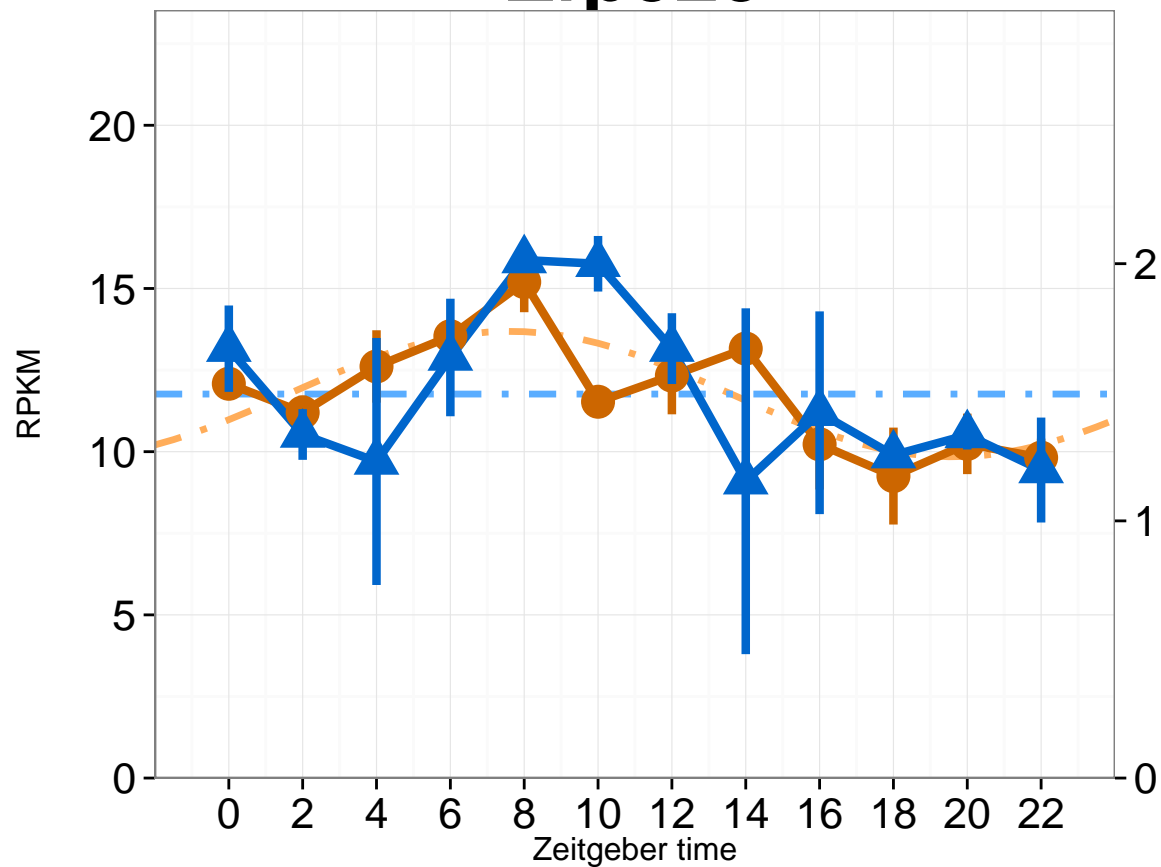

# Zfp523

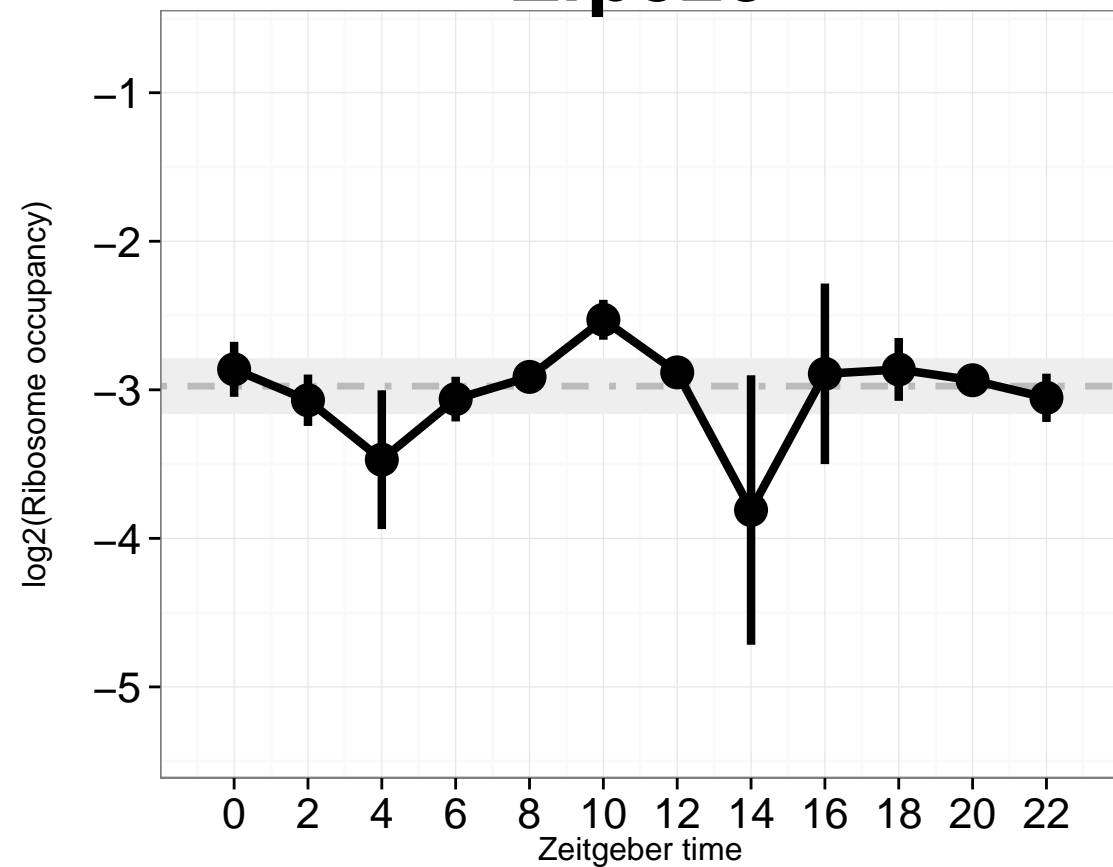

Supplement: Supplementary file 4755 [file 1]

# Wnt10a

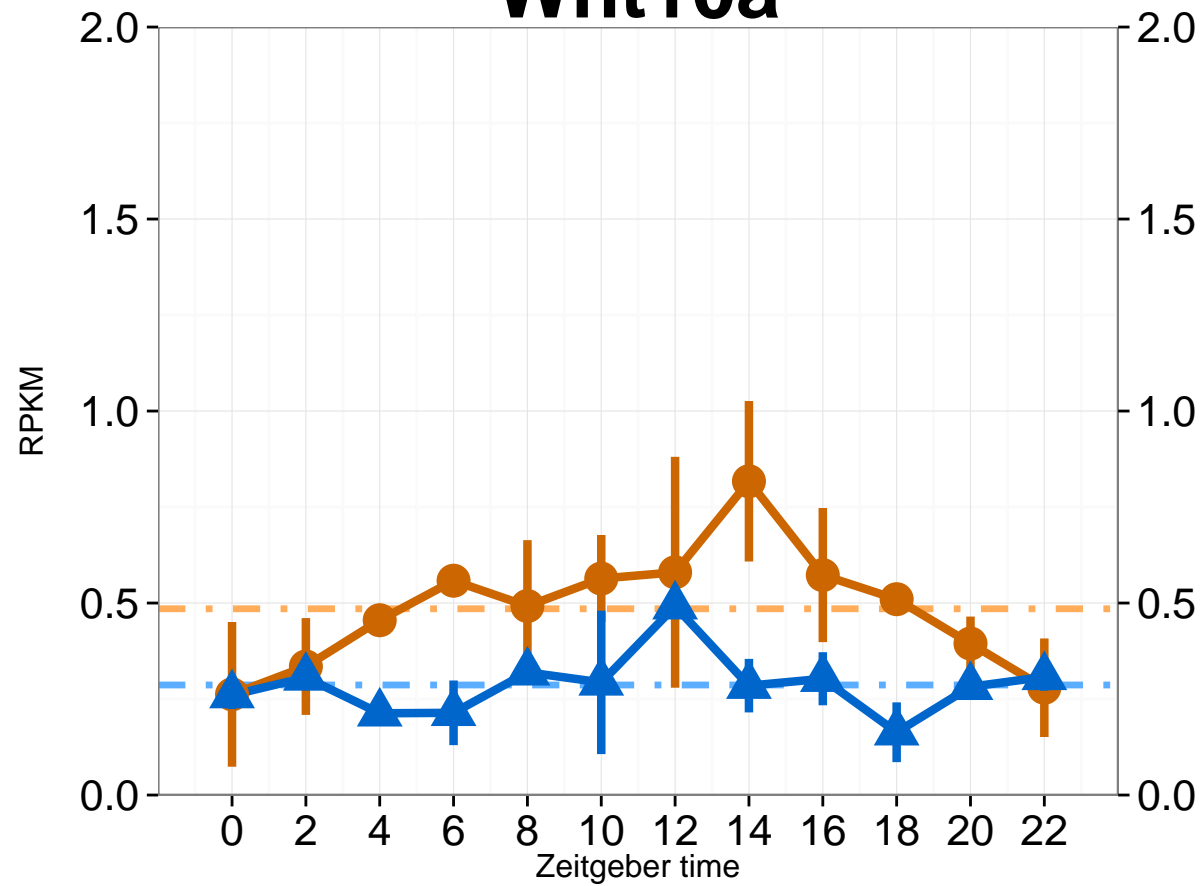

# Wnt10a

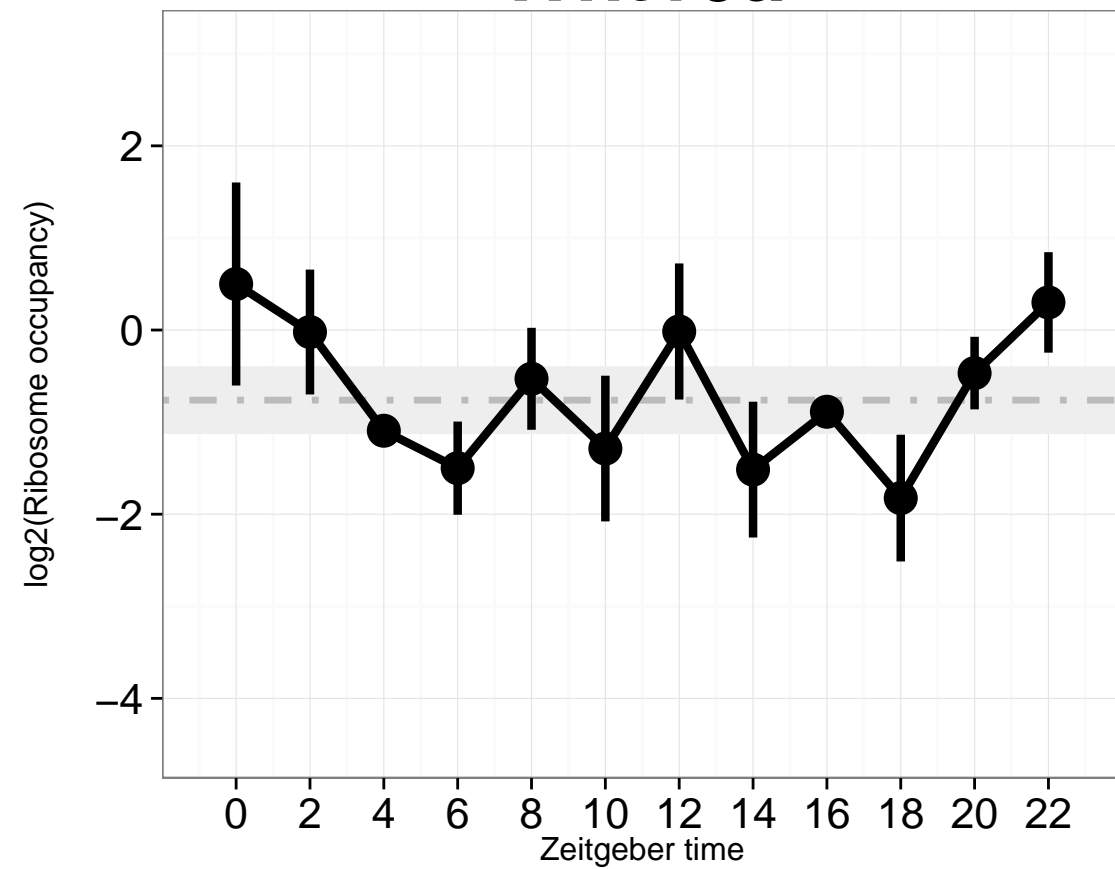

Supplement: Supplementary file 4756 [file 1]

## Ubr3

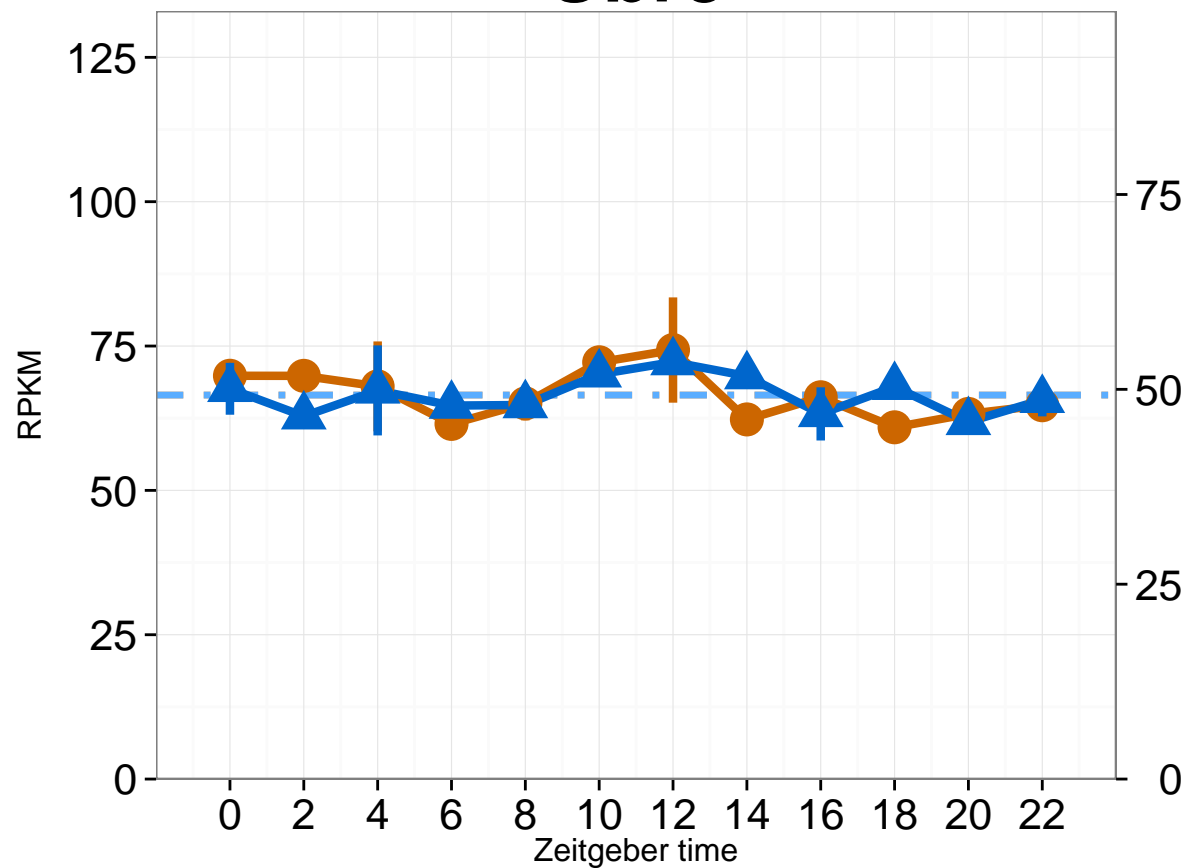

## Ubr3

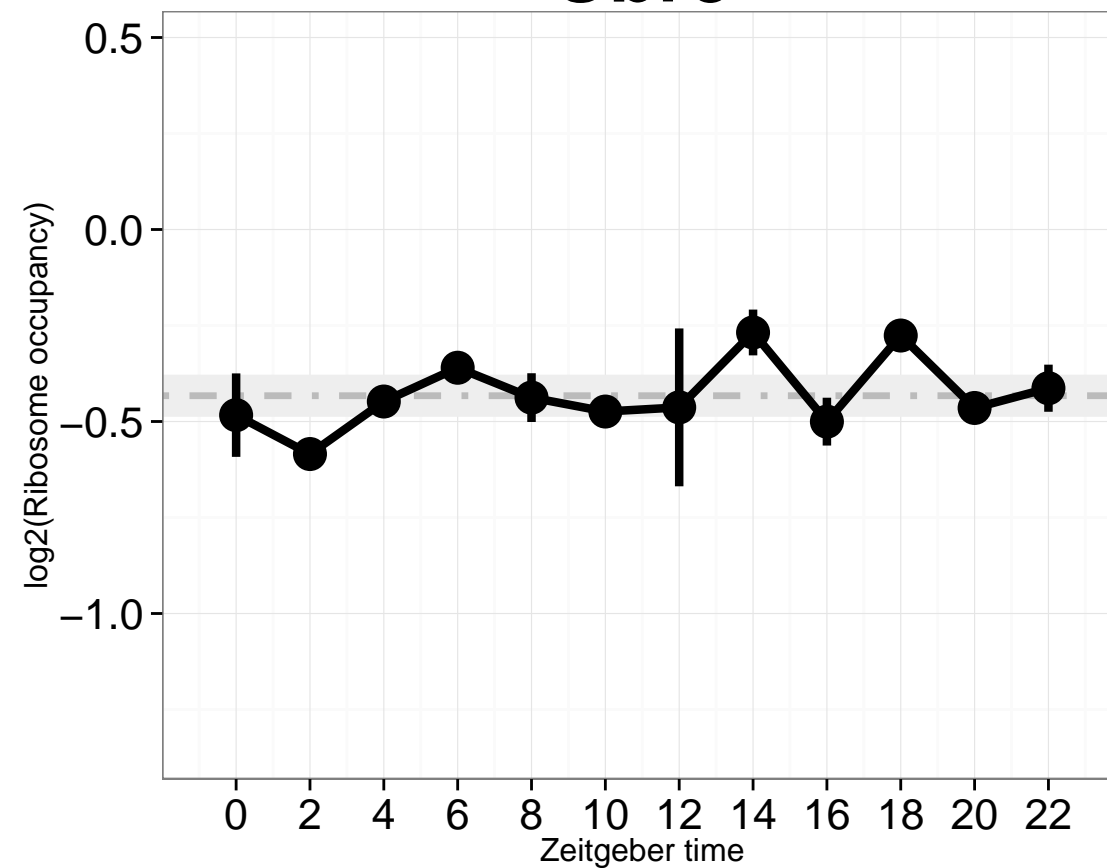

Supplement: Supplementary file 4757 [file 1]

## Rfk

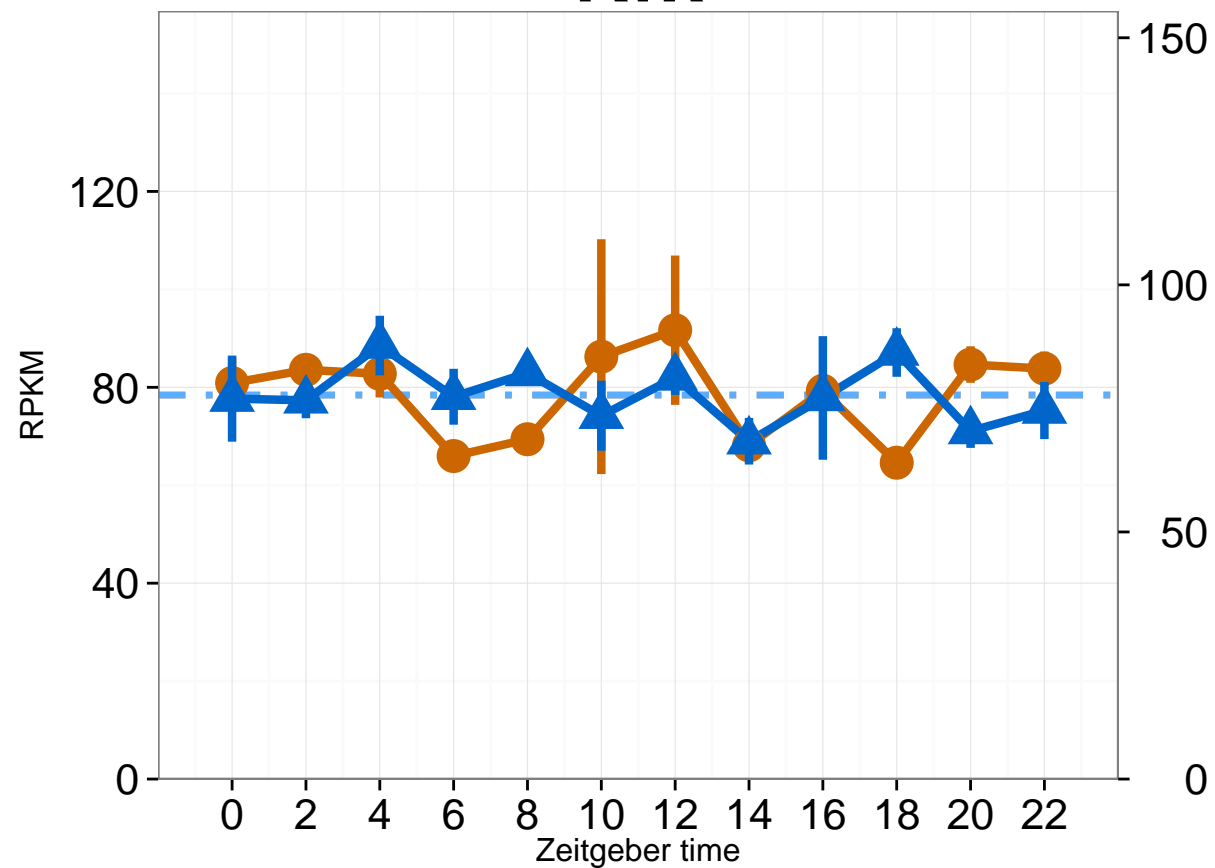

## Rfk

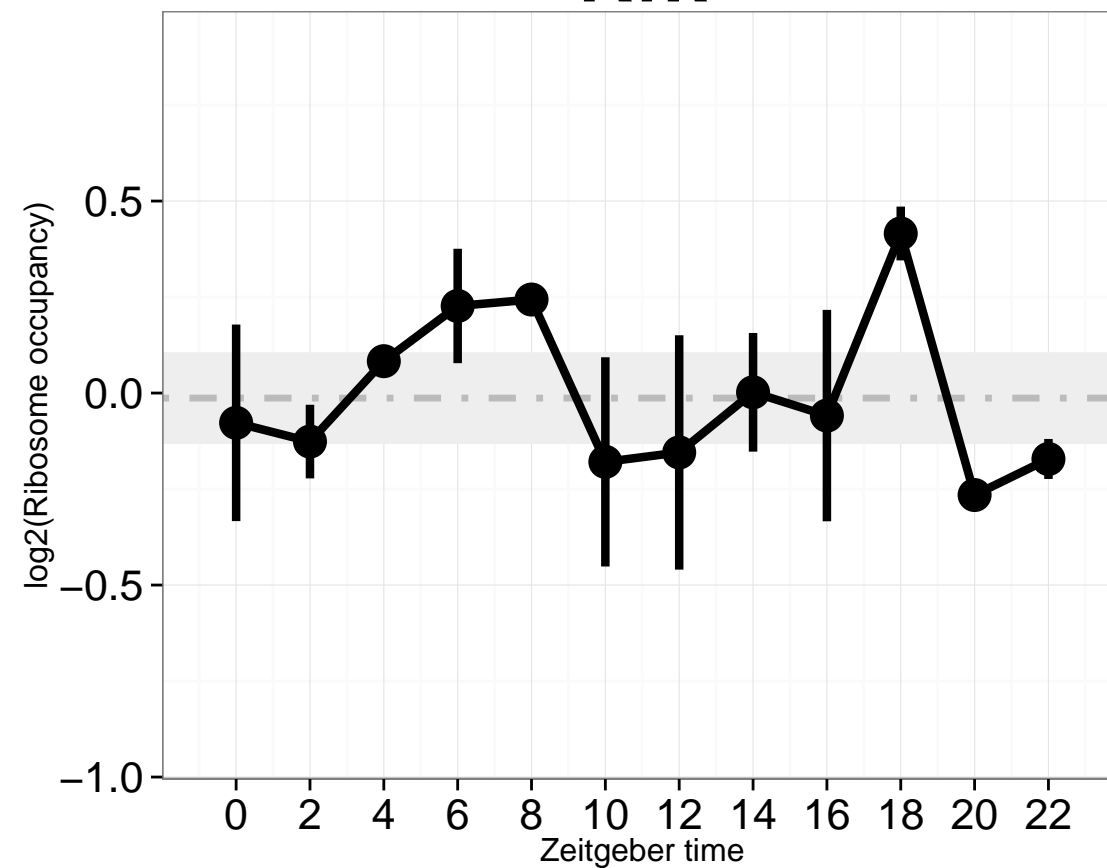

Supplement: Supplementary file 4758 [file 1]

## Itih1

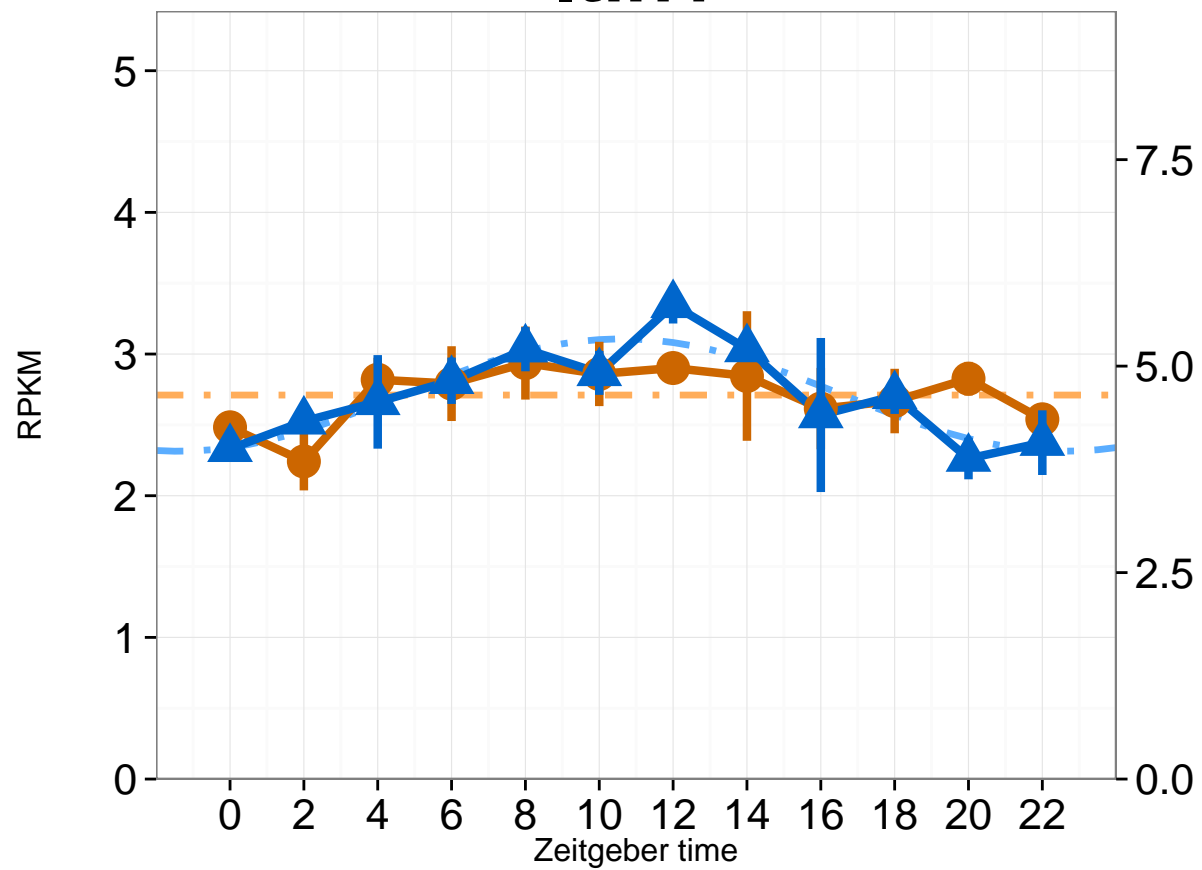

## Itih1

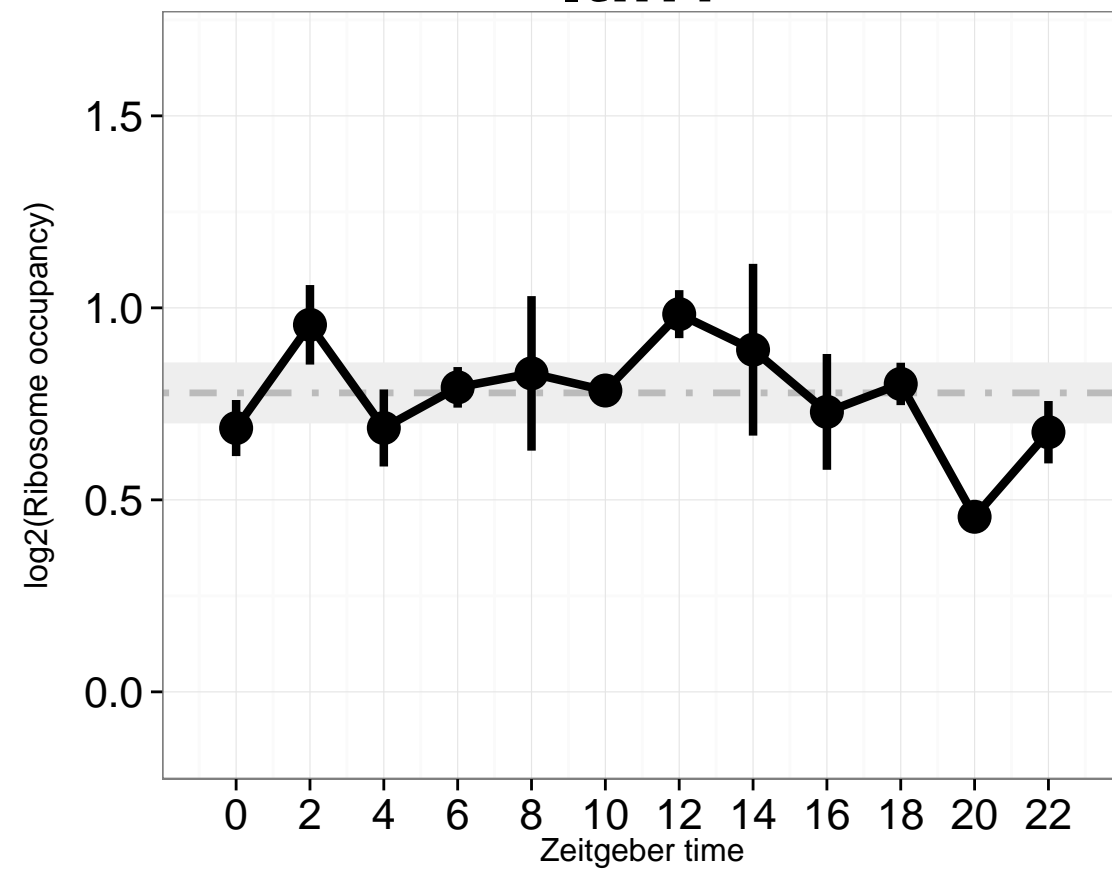

Supplement: Supplementary file 4759 [file 1]

## Zbtb5

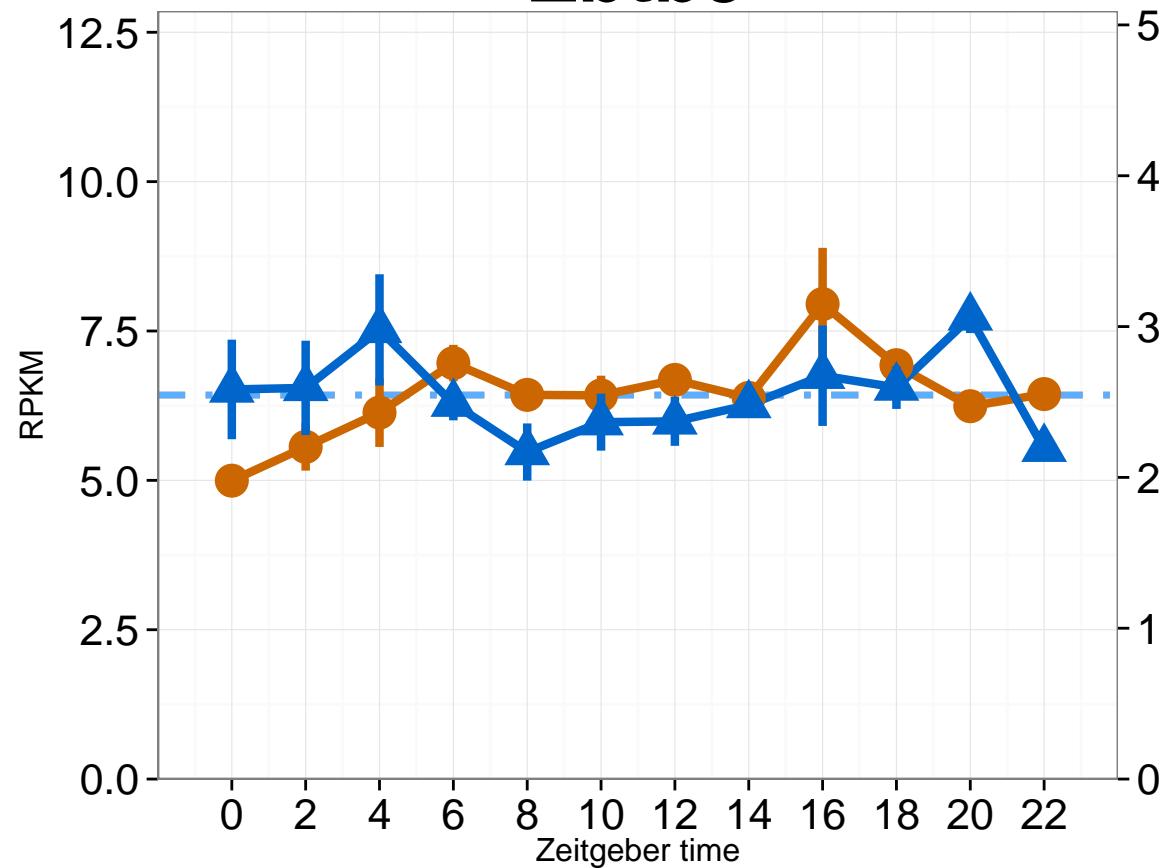

## Zbtb5

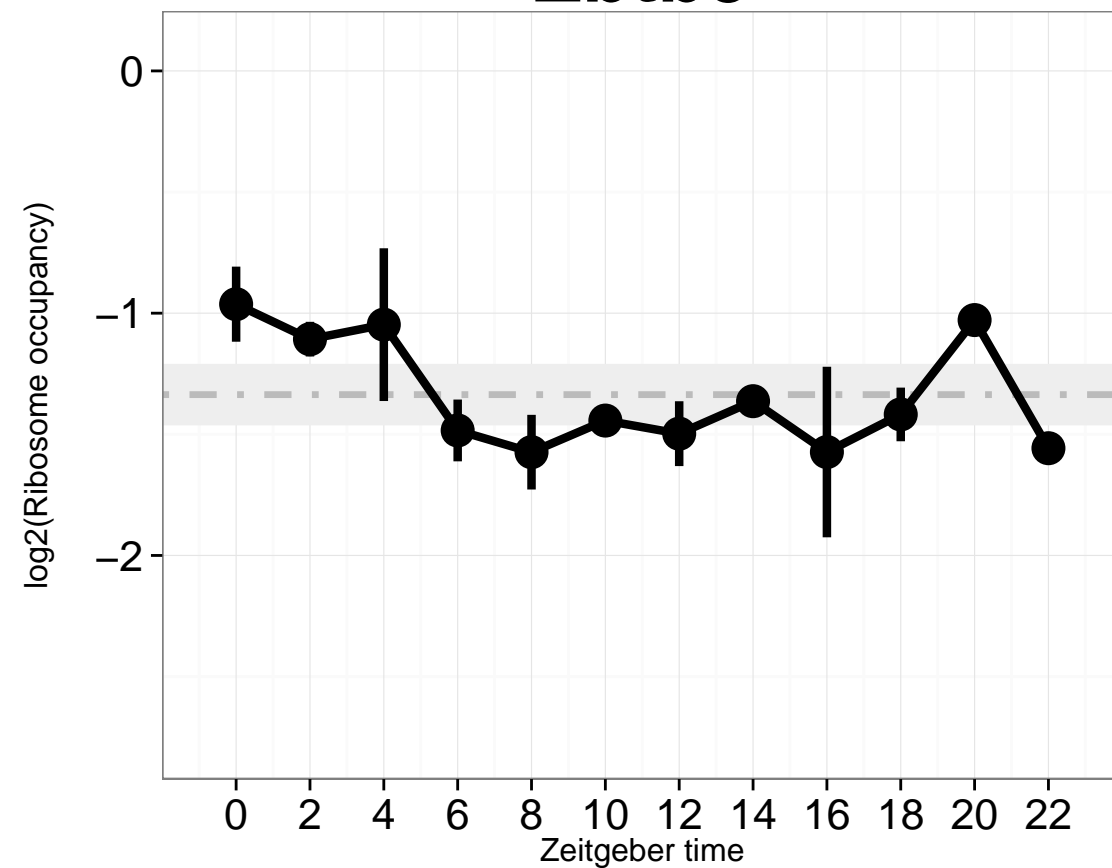

Supplement: Supplementary file 4760 [file 1]

# Hist1h2bg

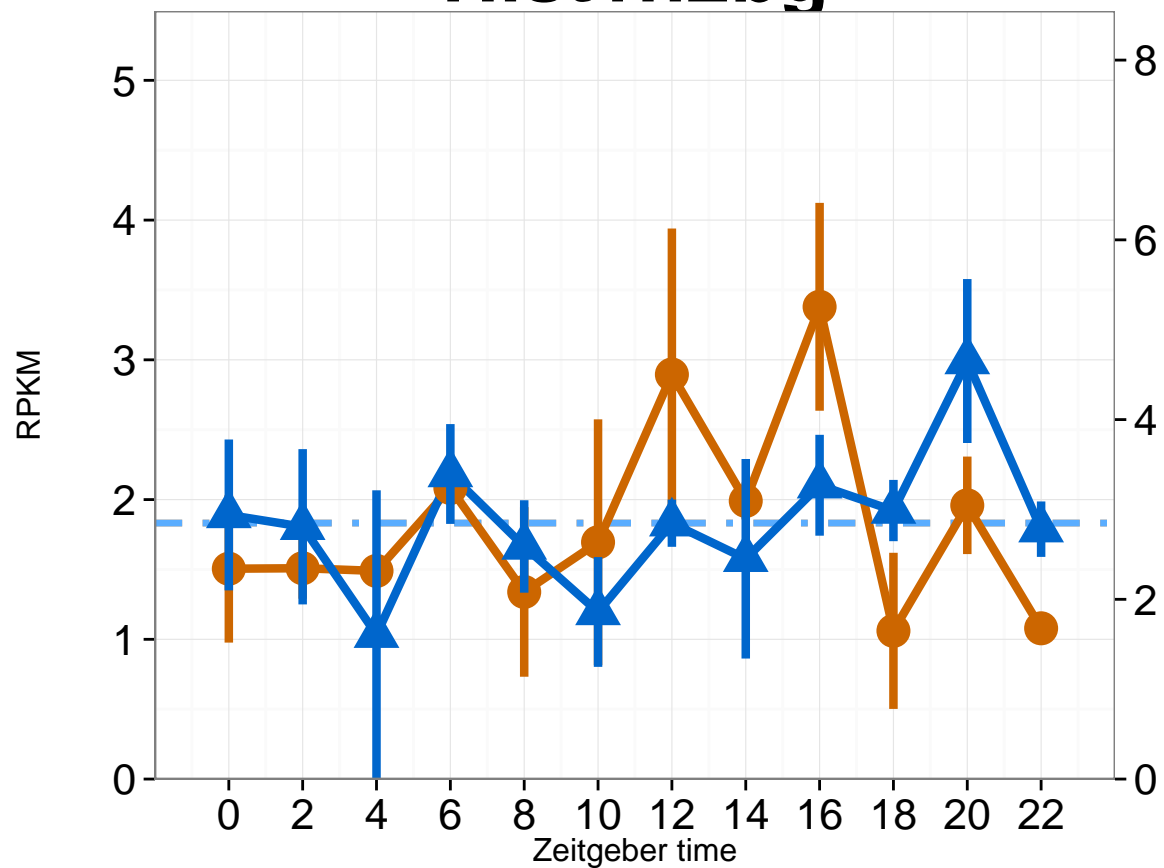

# Hist1h2bg

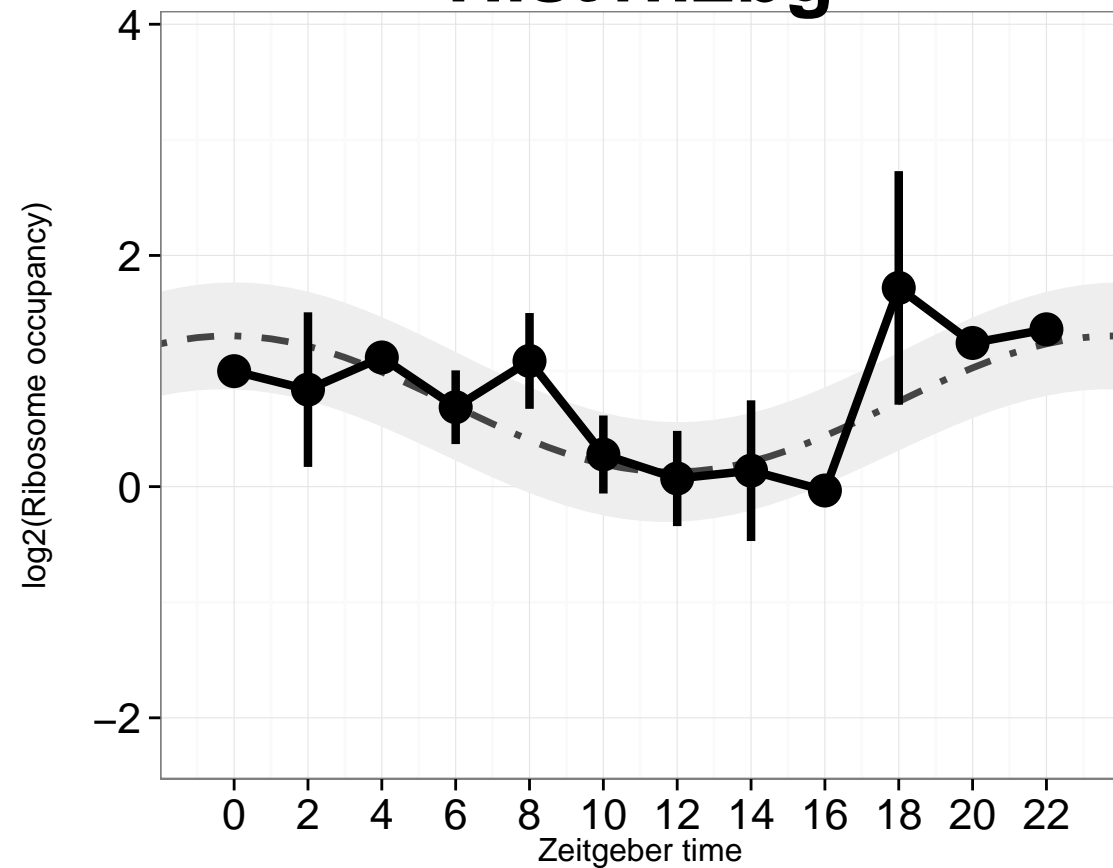

Supplement: Supplementary file 4761 [file 1]

# Rpf2

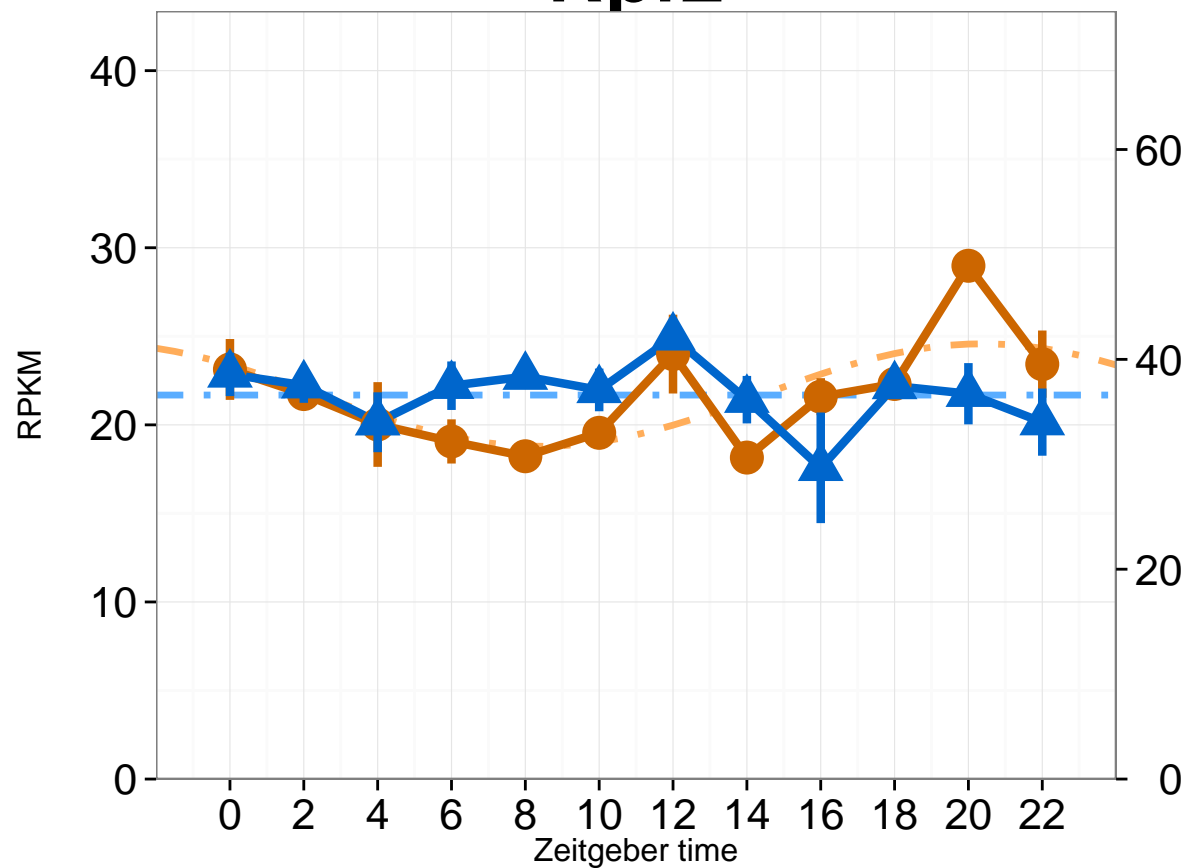

# Rpf2

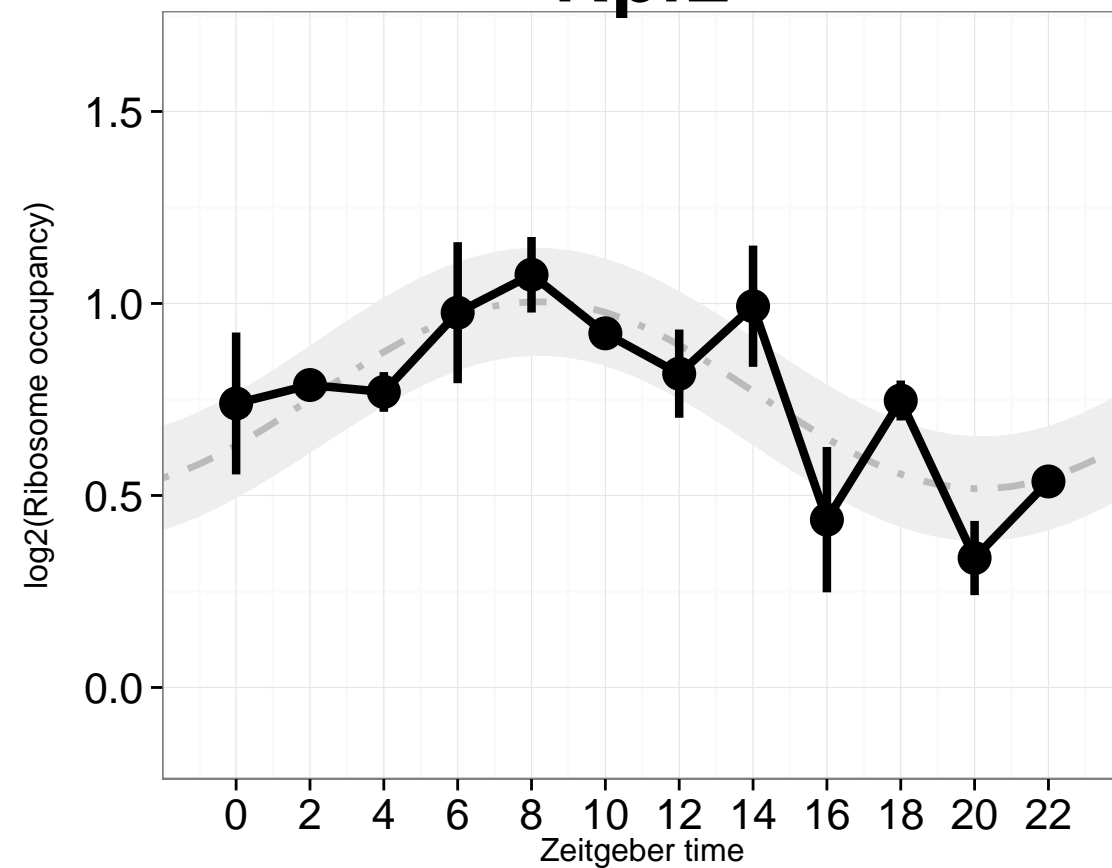

Supplement: Supplementary file 4762 [file 1]

# Clec4a2

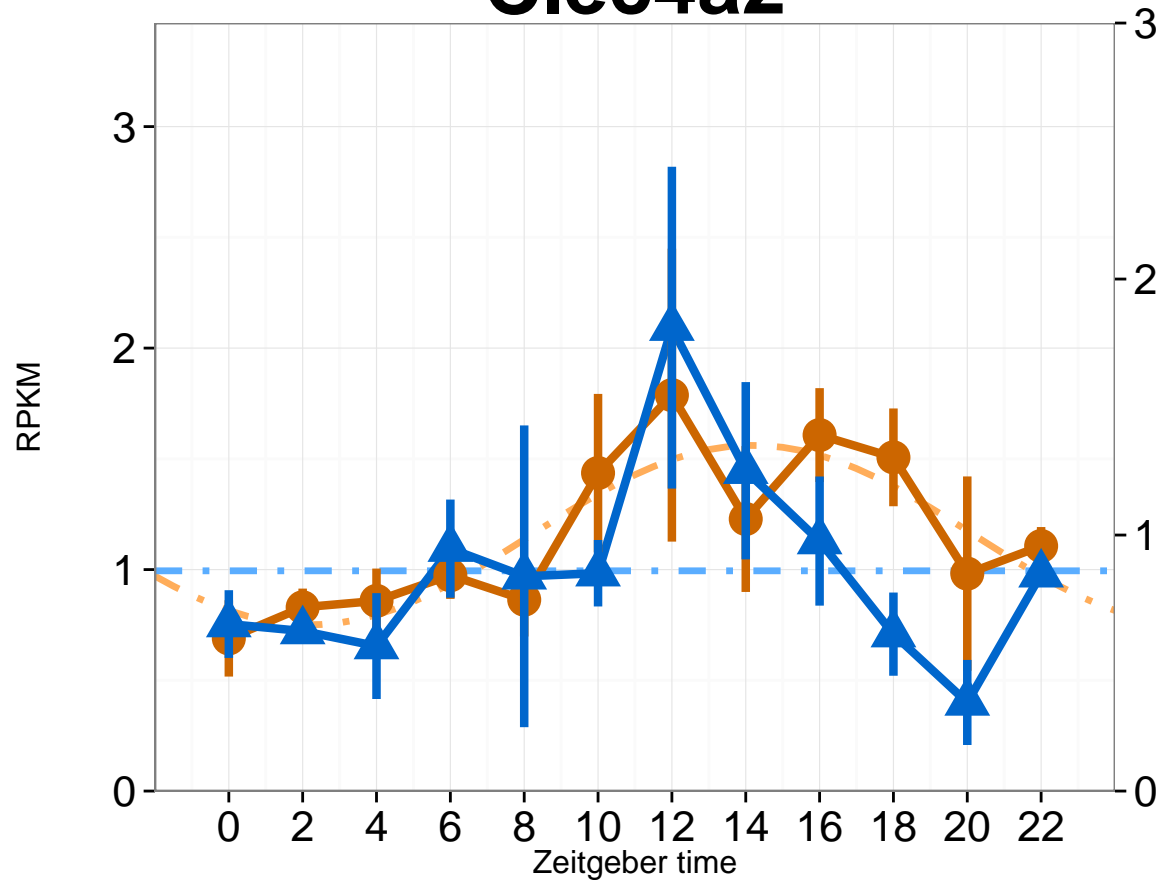

# Clec4a2

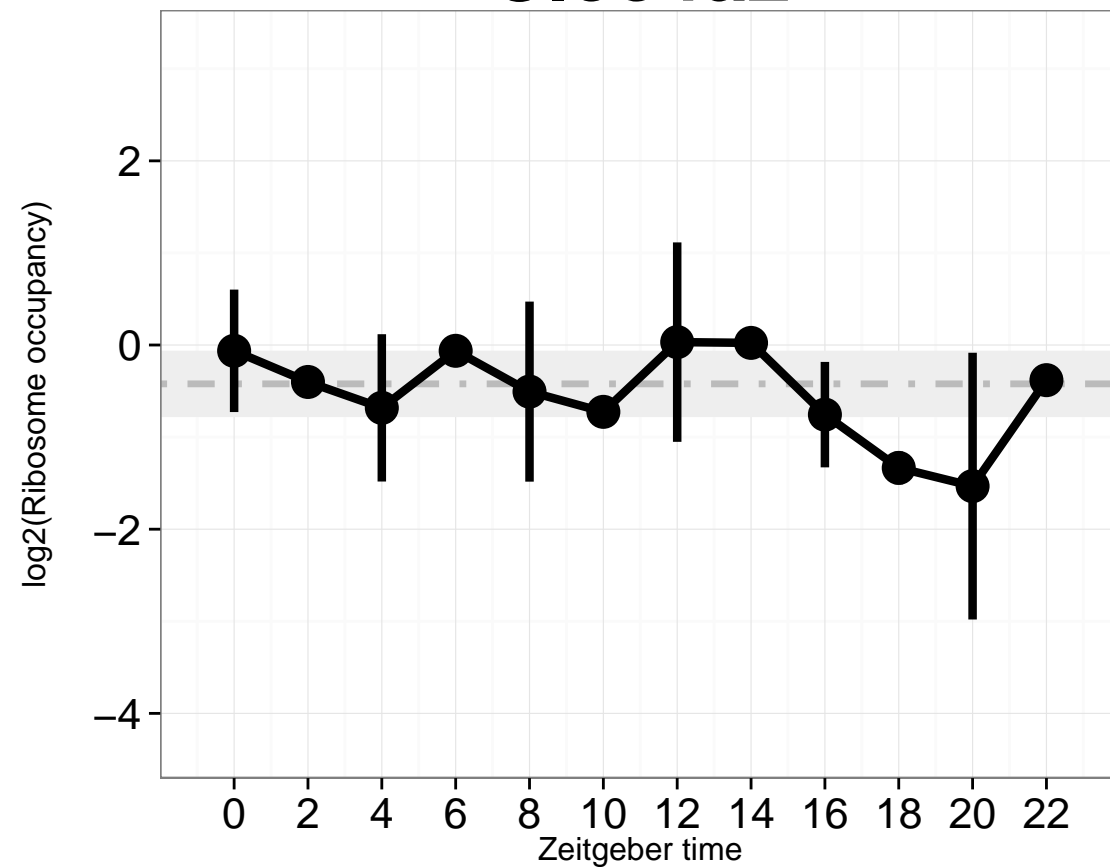

Supplement: Supplementary file 4763 [file 1]

# Ap1m1

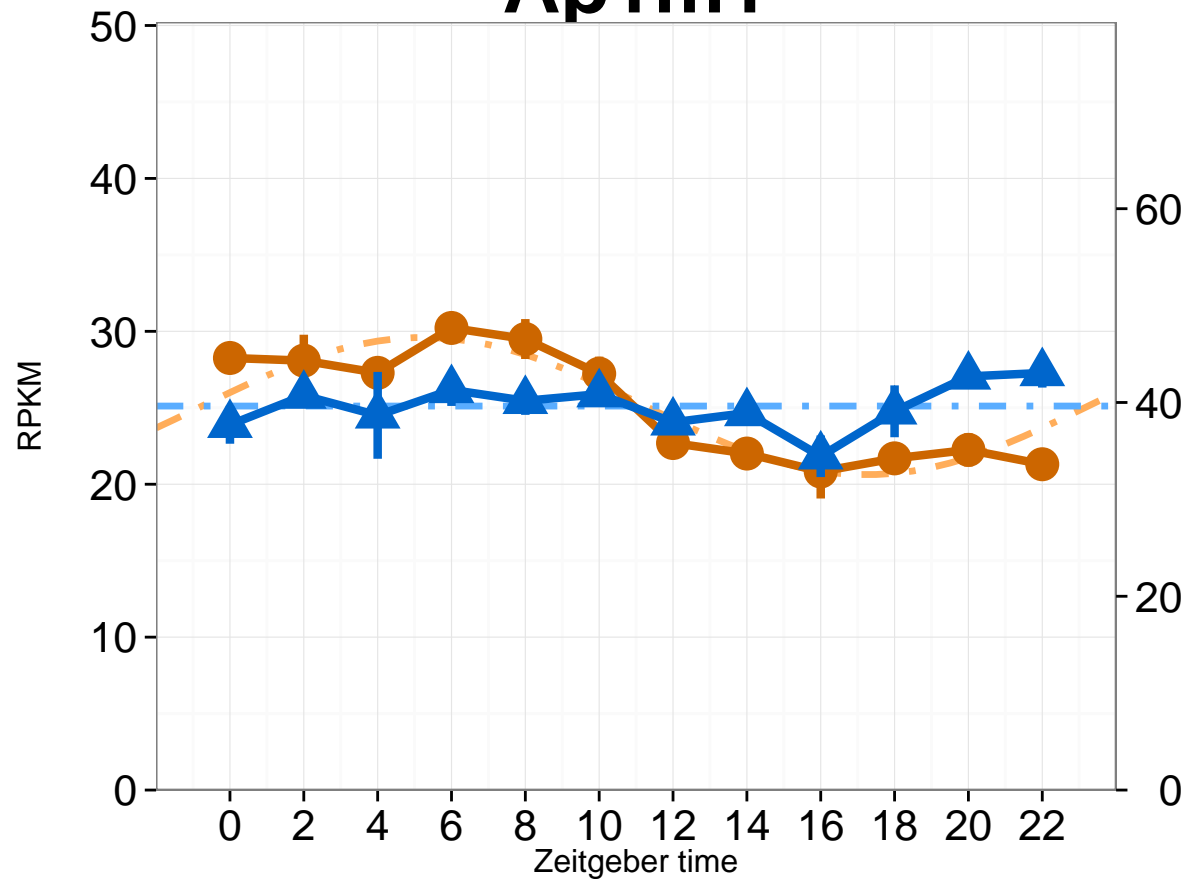

# Ap1m1

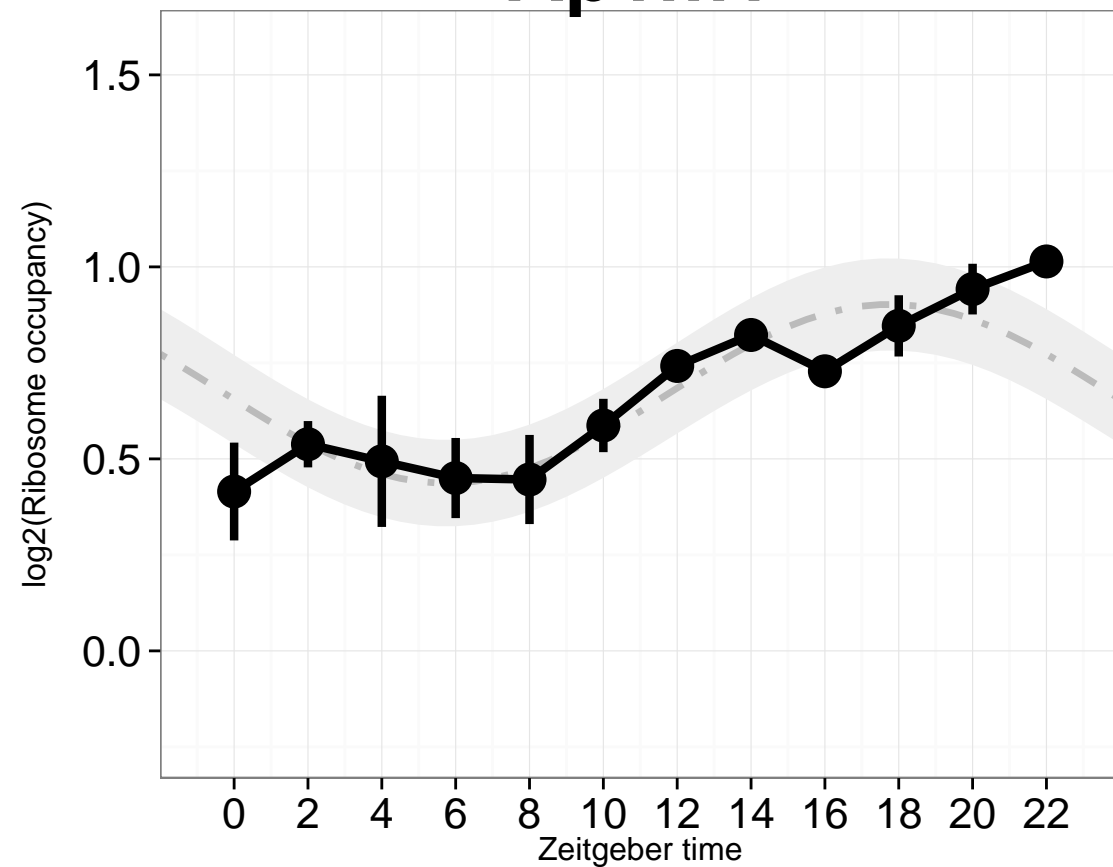

Supplement: Supplementary file 4764 [file 1]

# Arhgap39

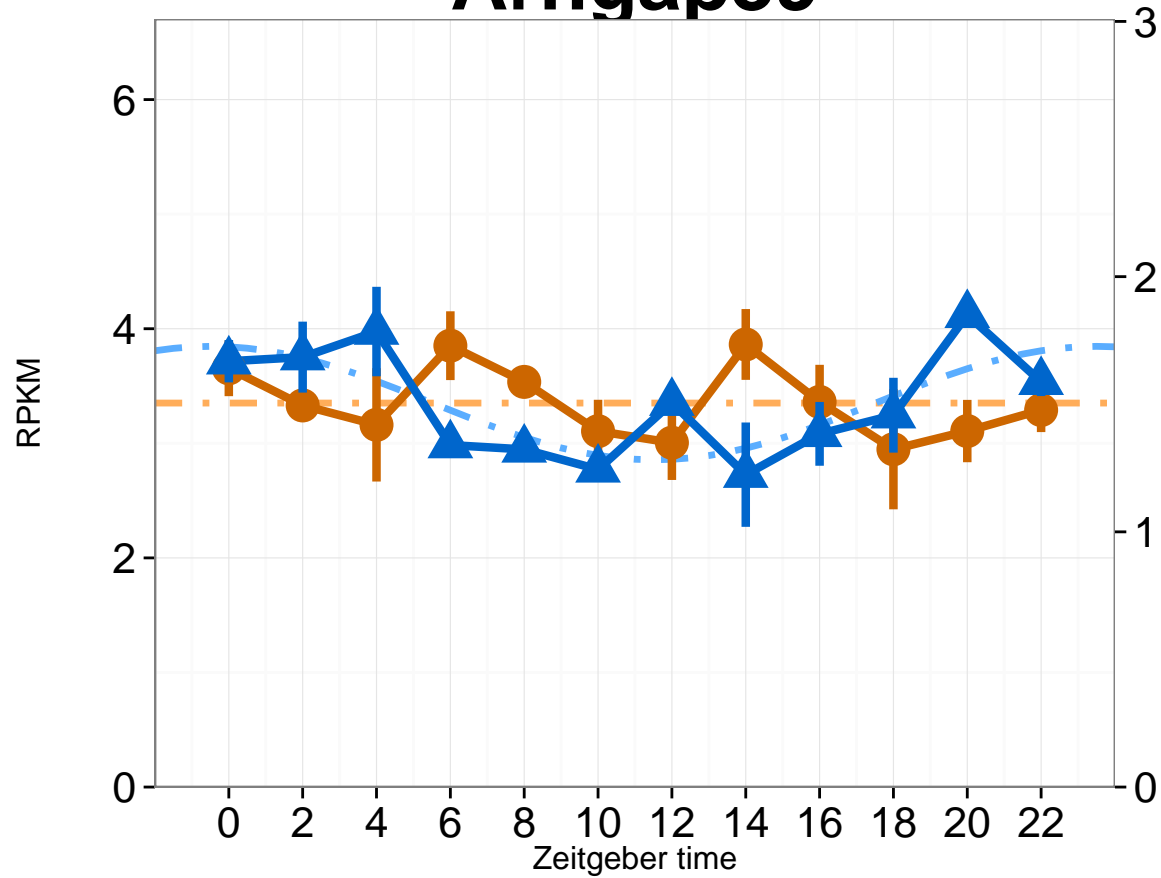

# Arhgap39

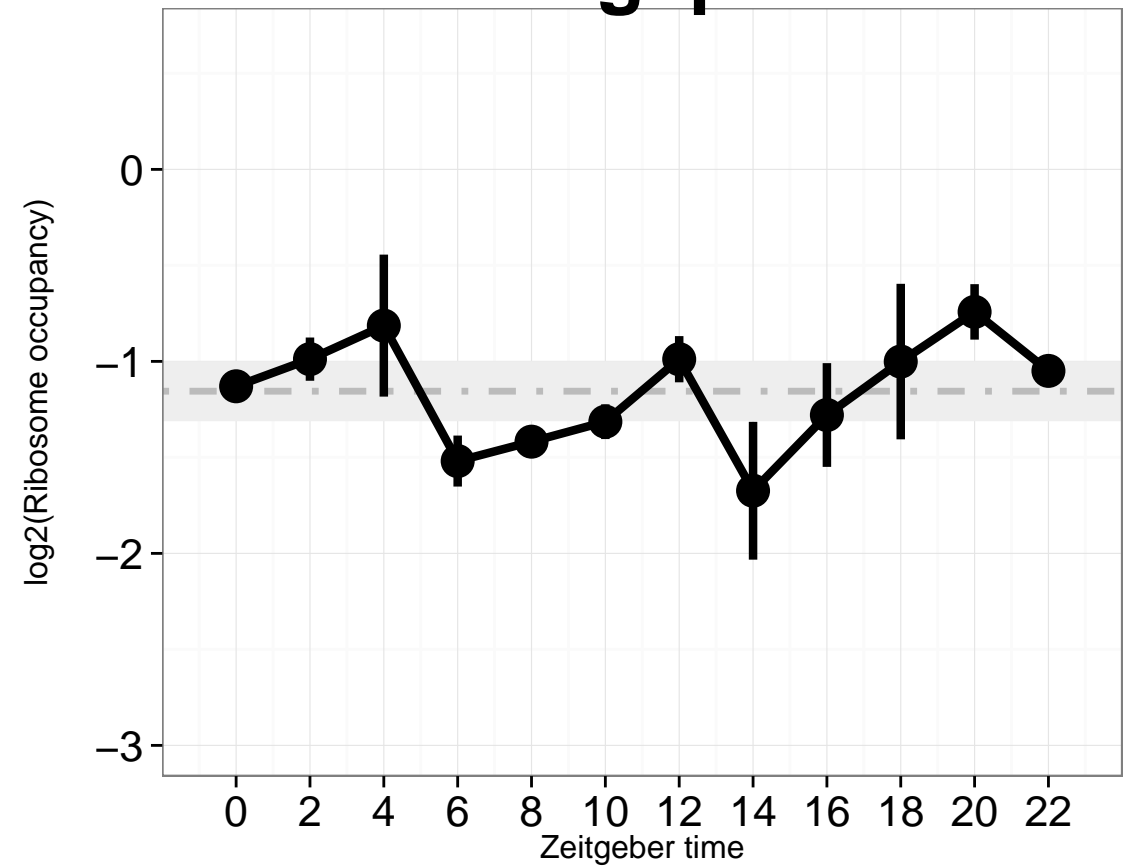

Supplement: Supplementary file 4765 [file 1]

## Shisa2

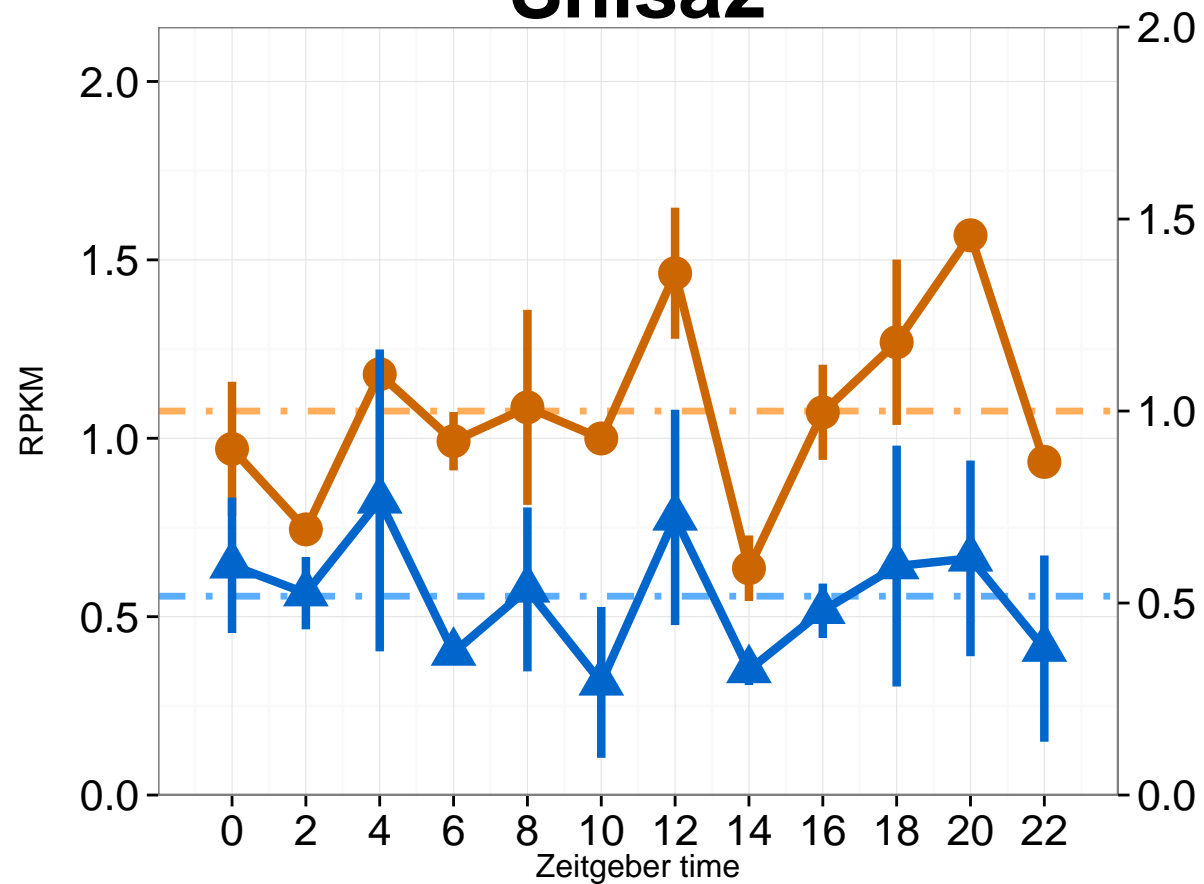

## Shisa2

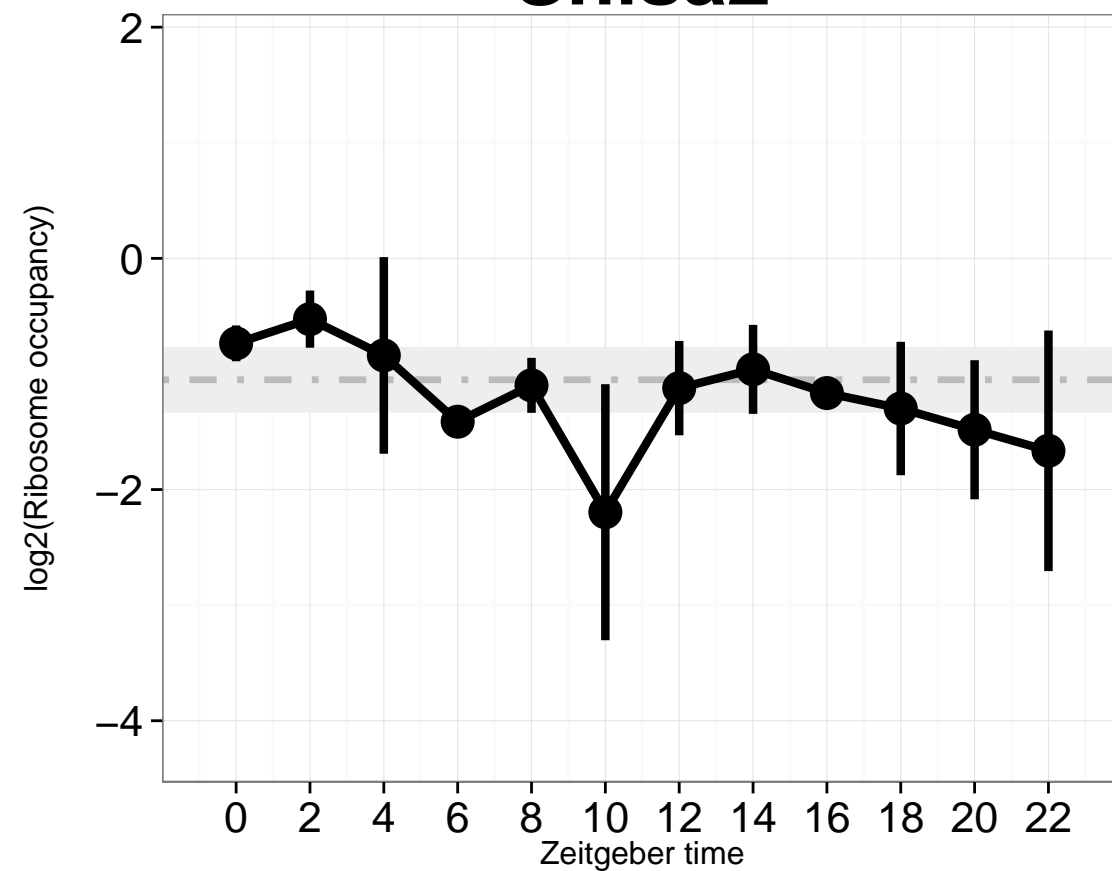

Supplement: Supplementary file 4766 [file 1]

## Arid1b

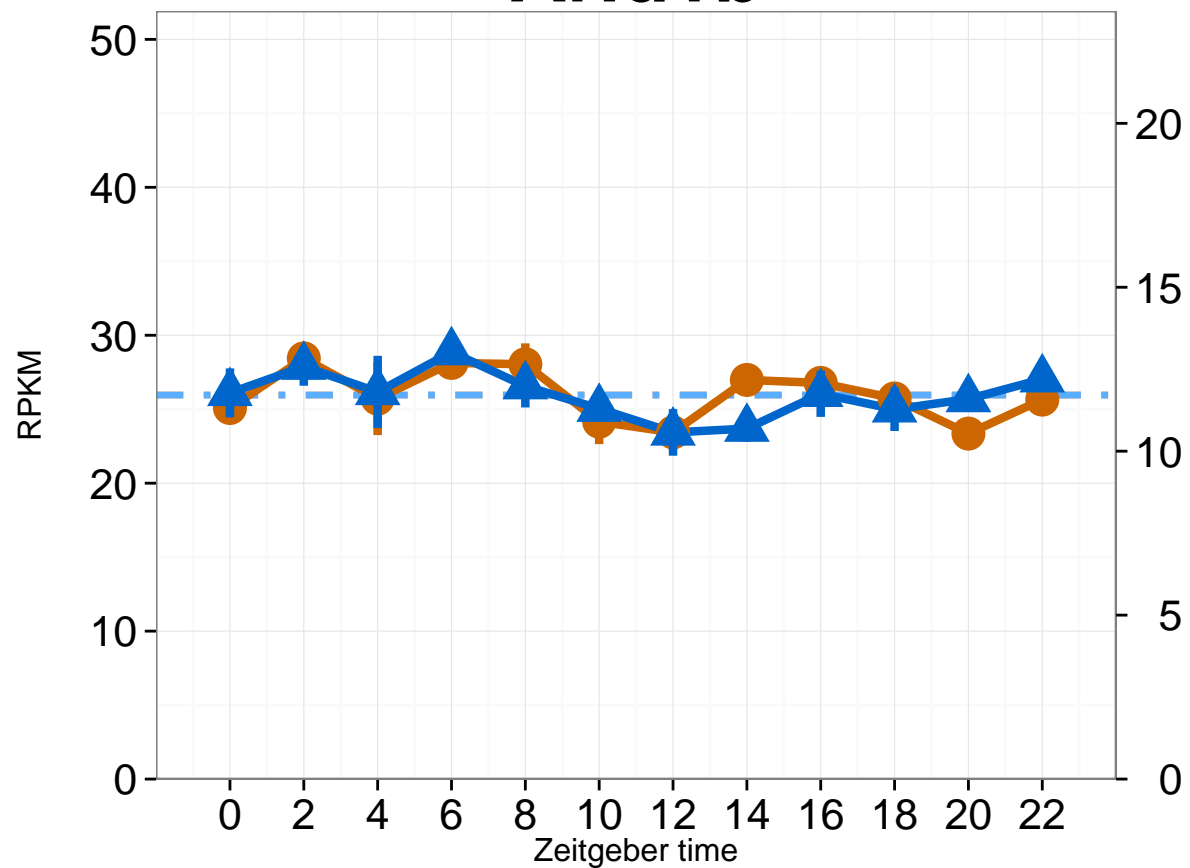

## Arid1b

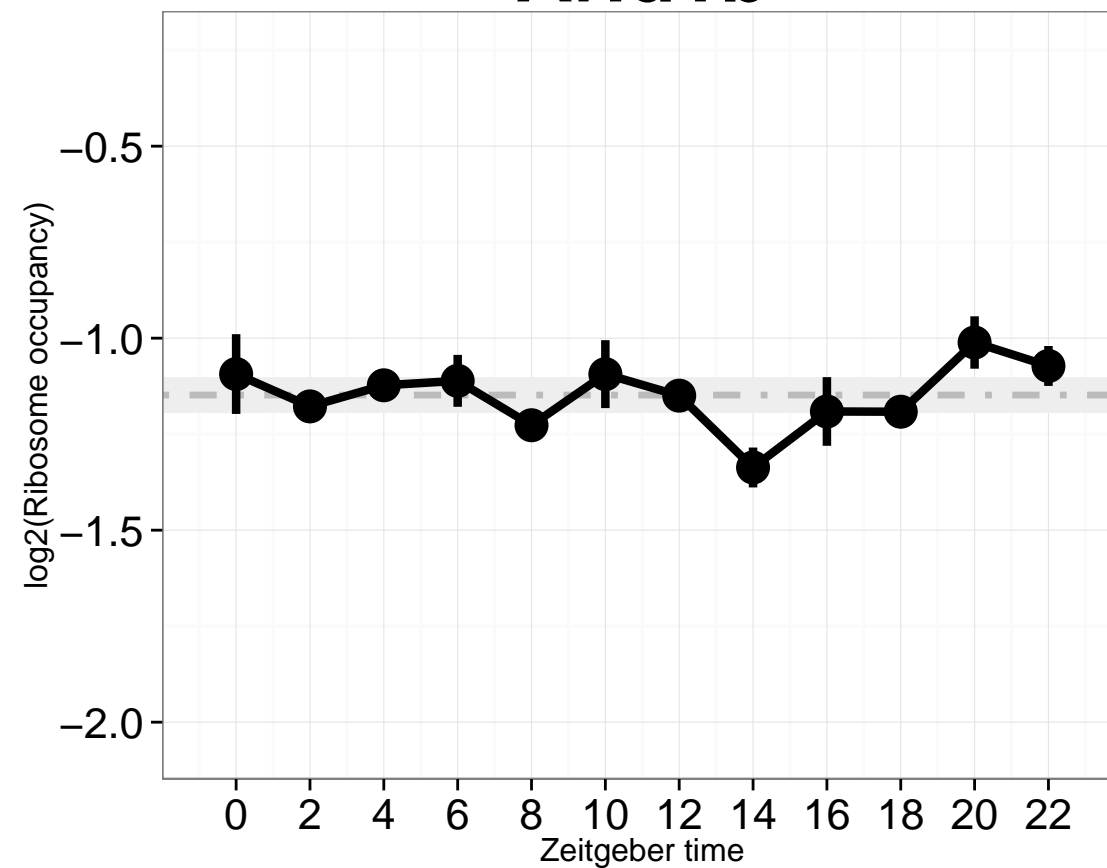

Supplement: Supplementary file 4767 [file 1]

## Polr3b

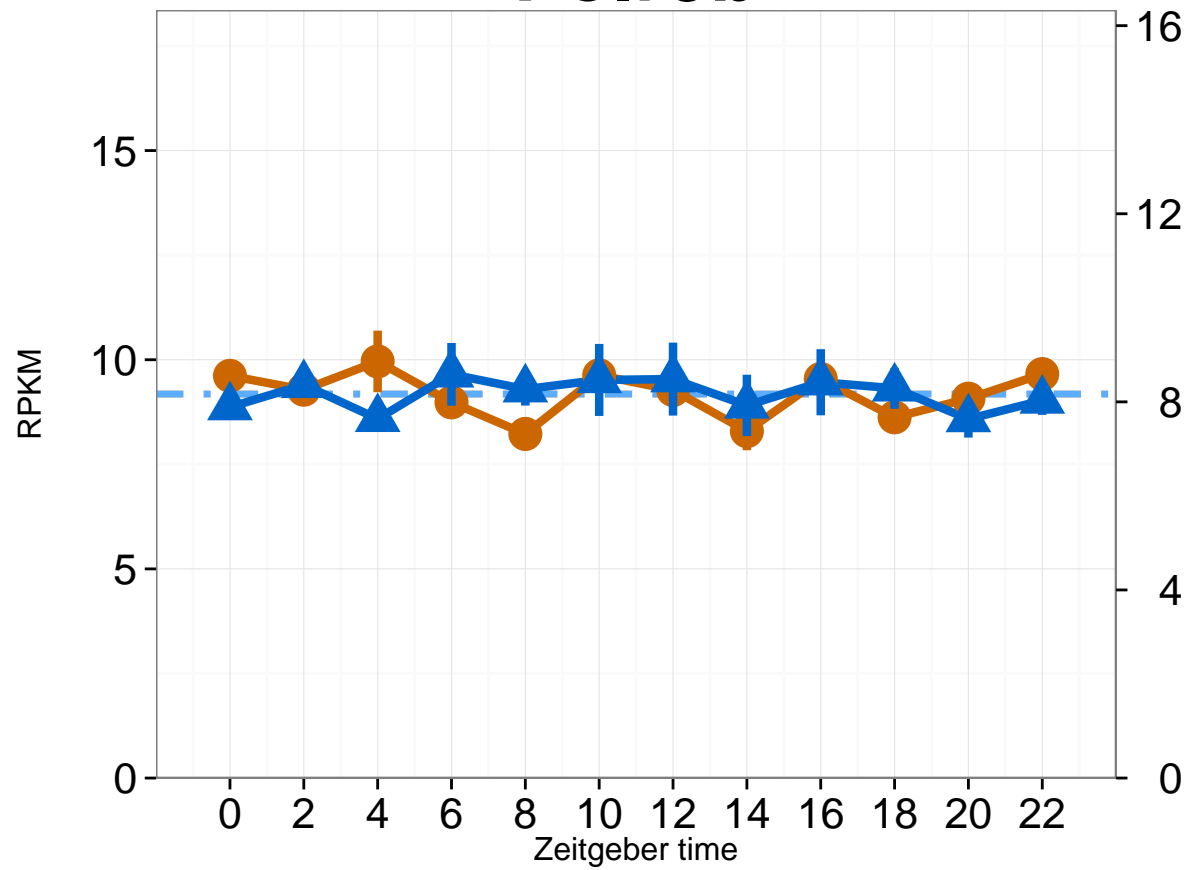

## Polr3b

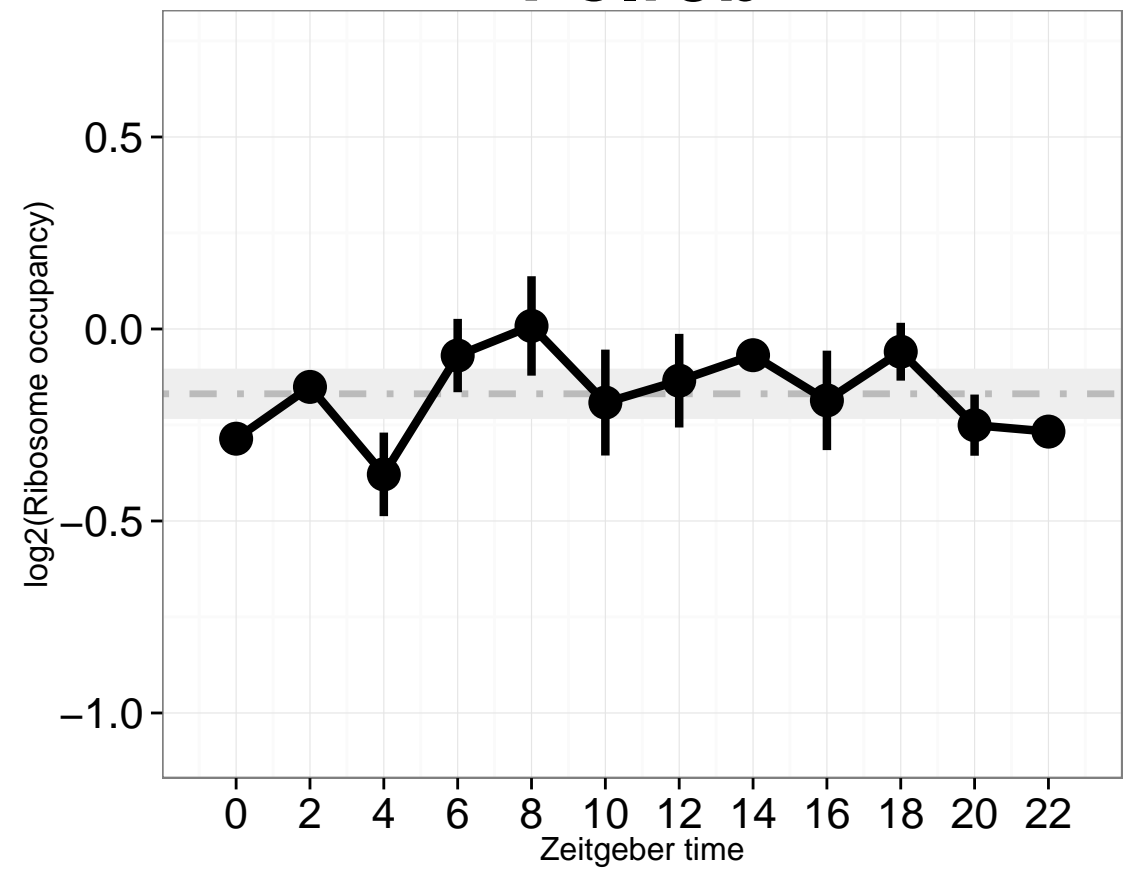

Supplement: Supplementary file 4768 [file 1]

## Srek1ip1

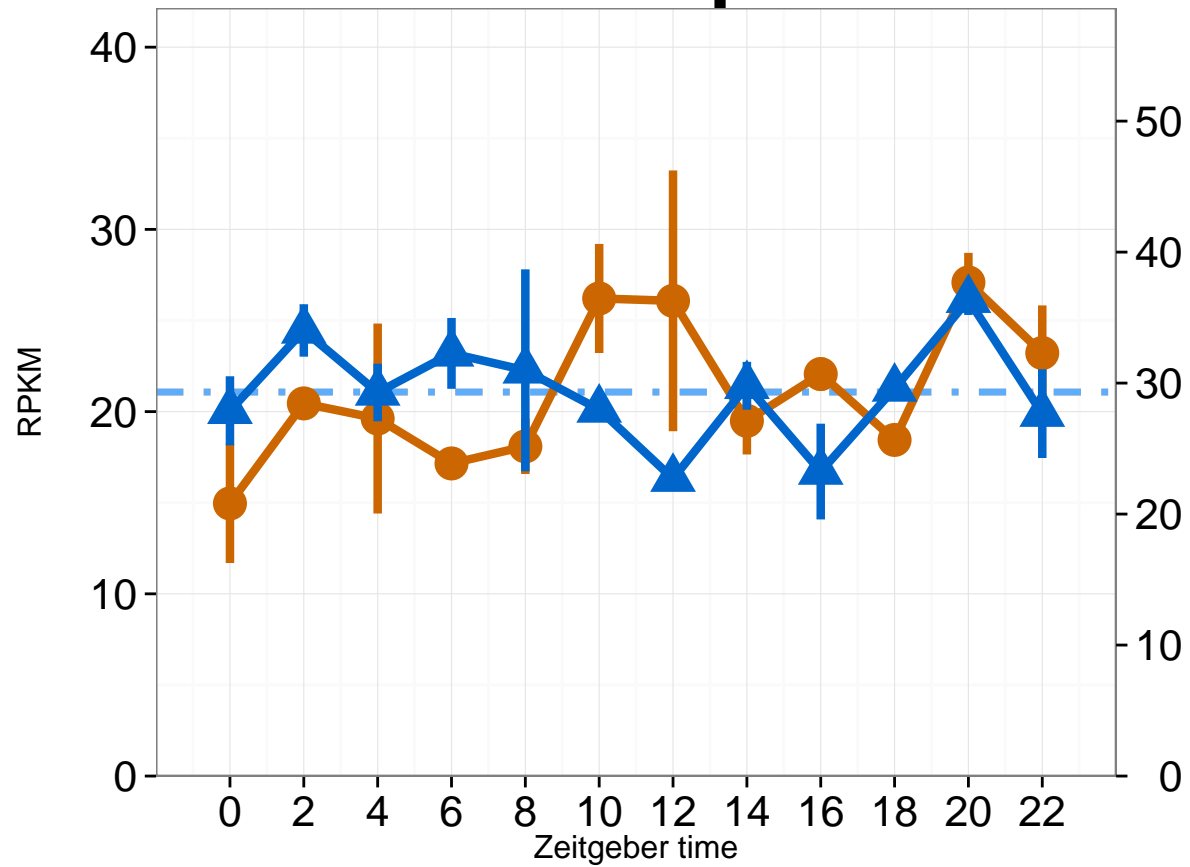

## Srek1ip1

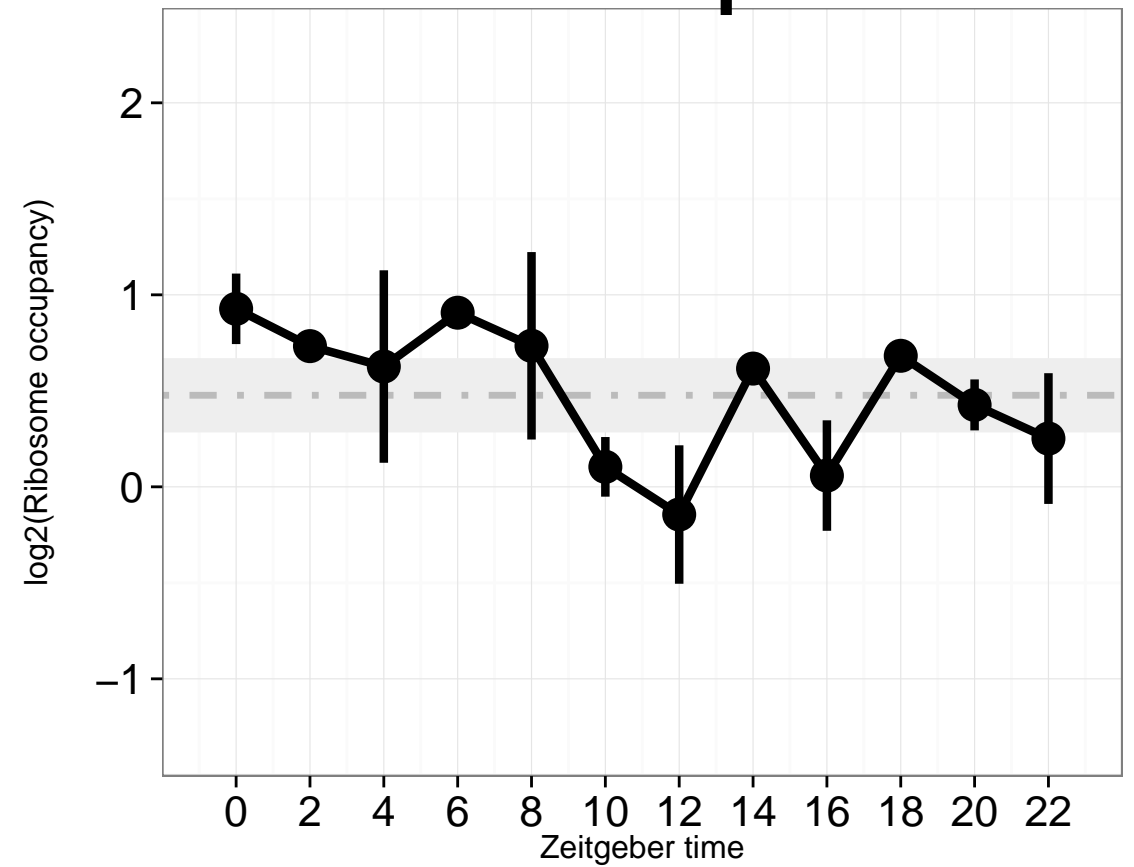

Supplement: Supplementary file 4769 [file 1]

## Ogdh

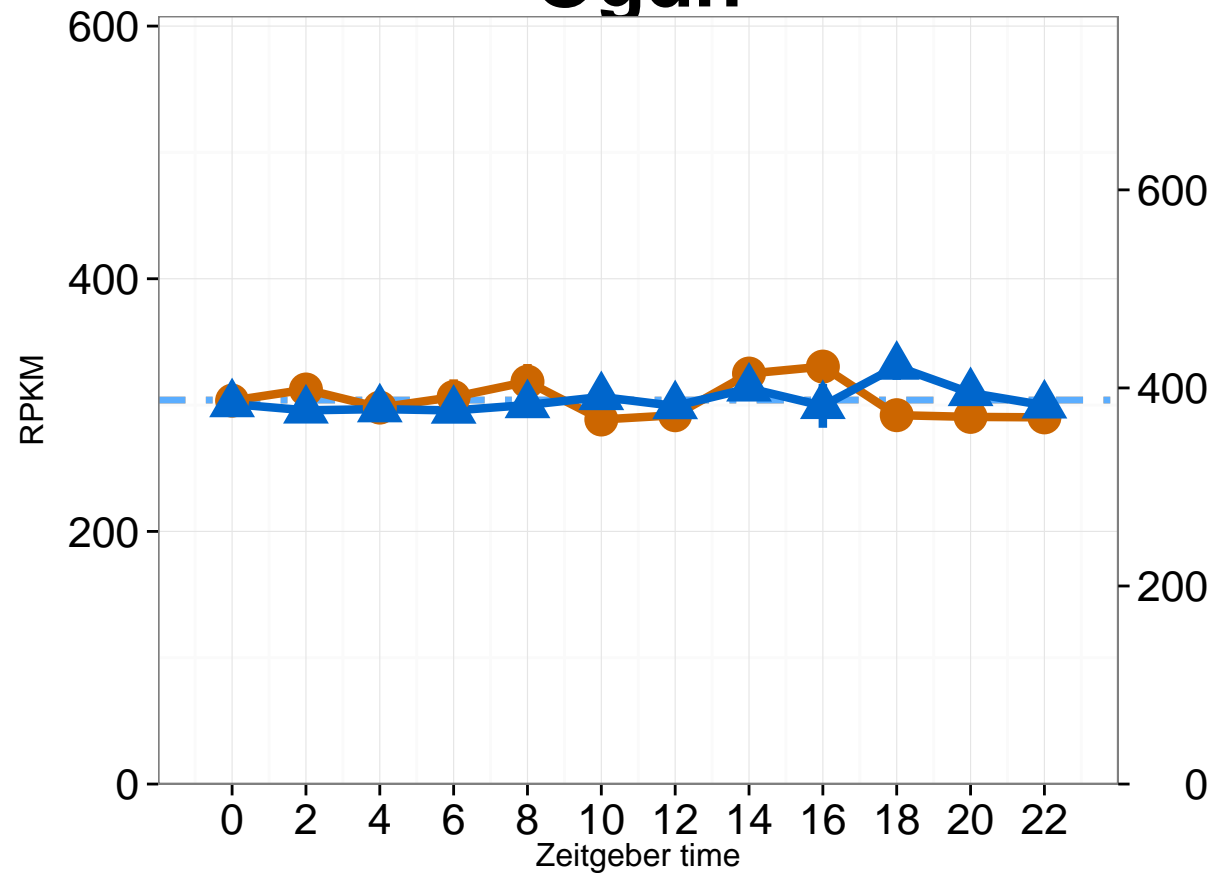

## Ogdh

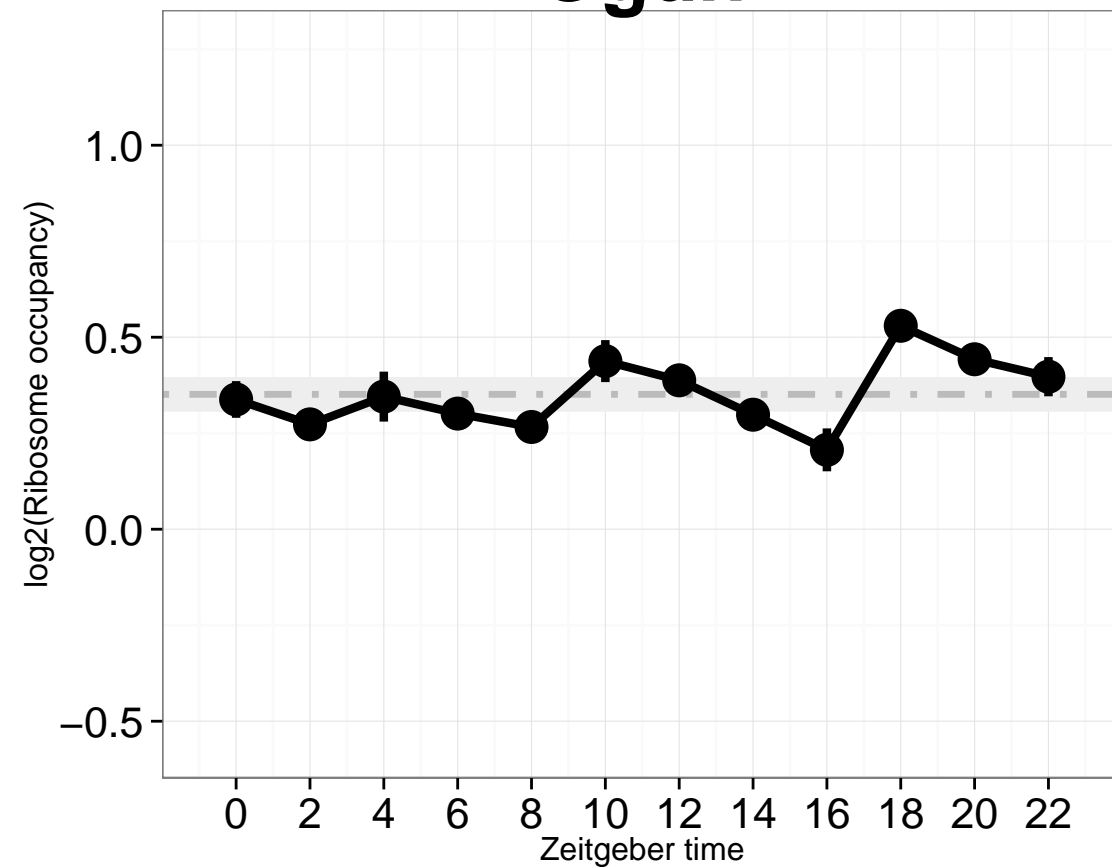

Supplement: Supplementary file 4770 [file 1]

# Cinp

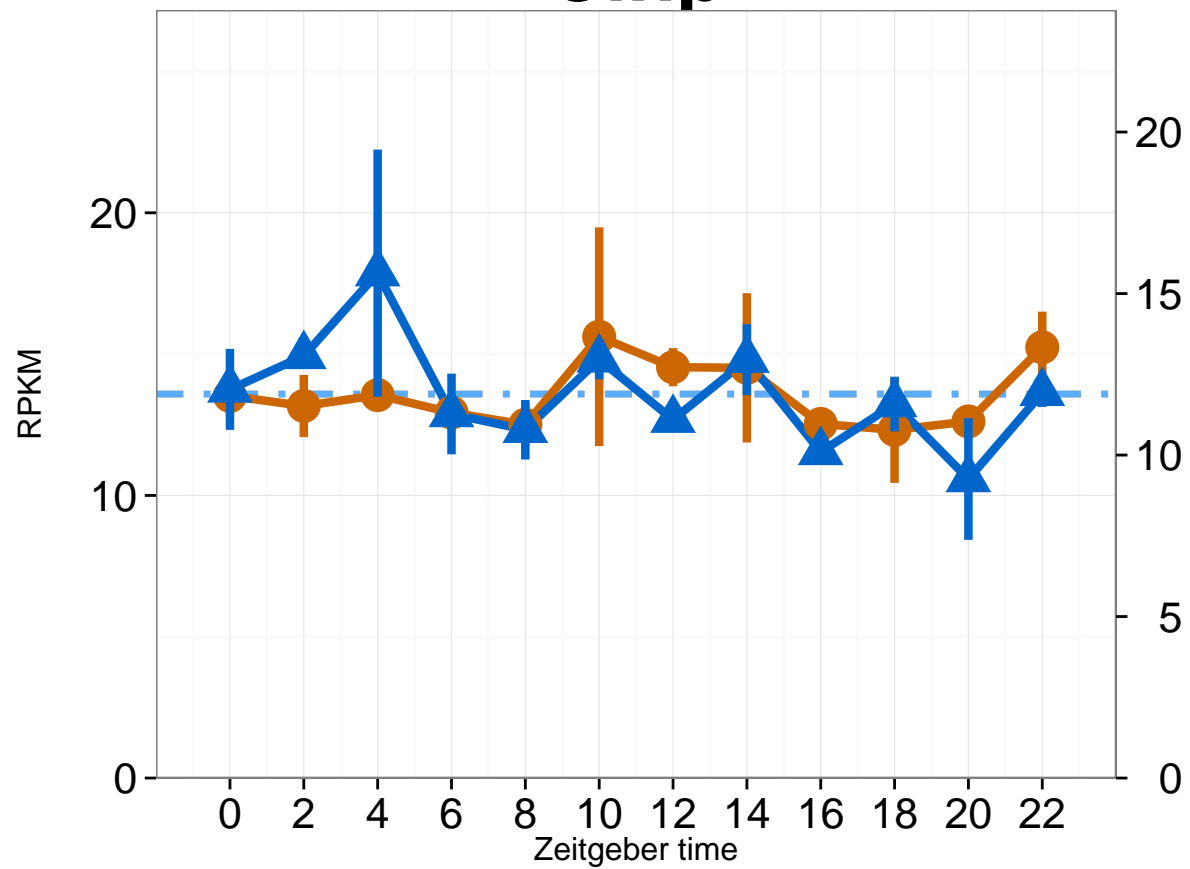

# Cinp

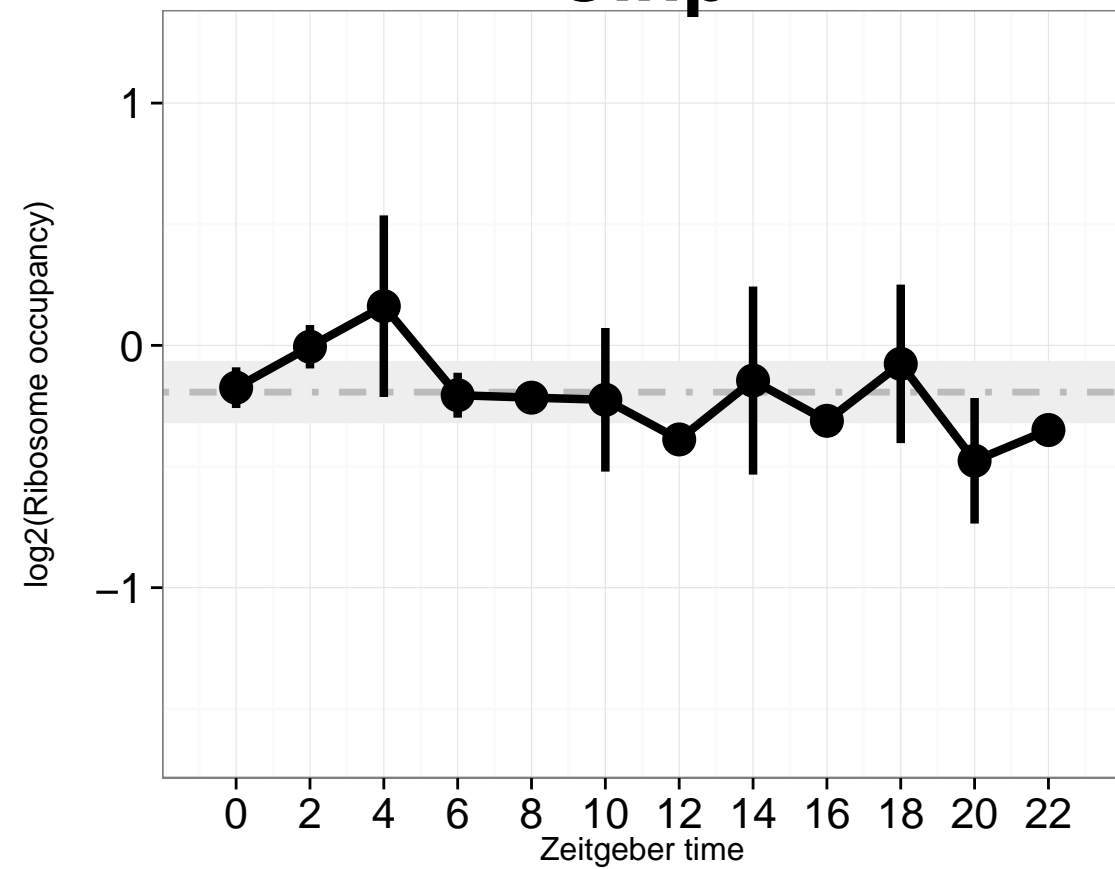

Supplement: Supplementary file 4771 [file 1]

## Son

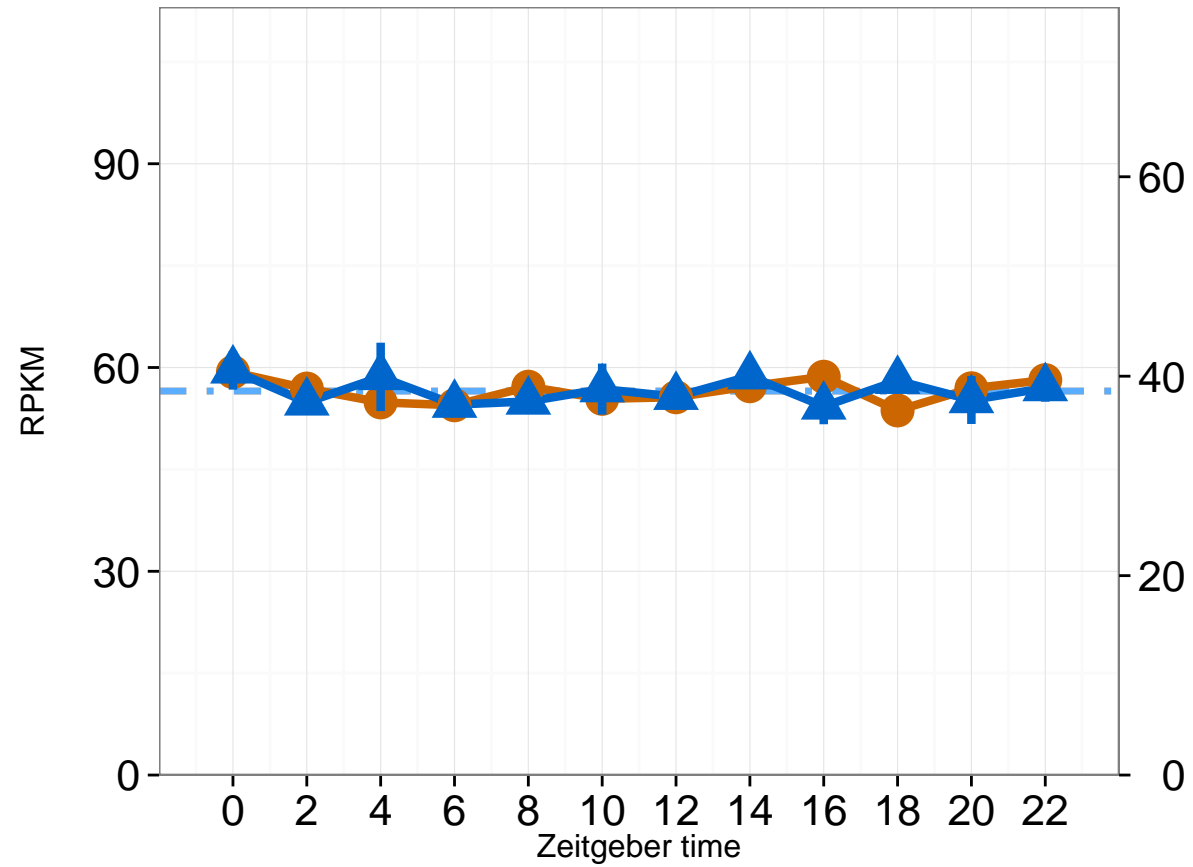

## Son

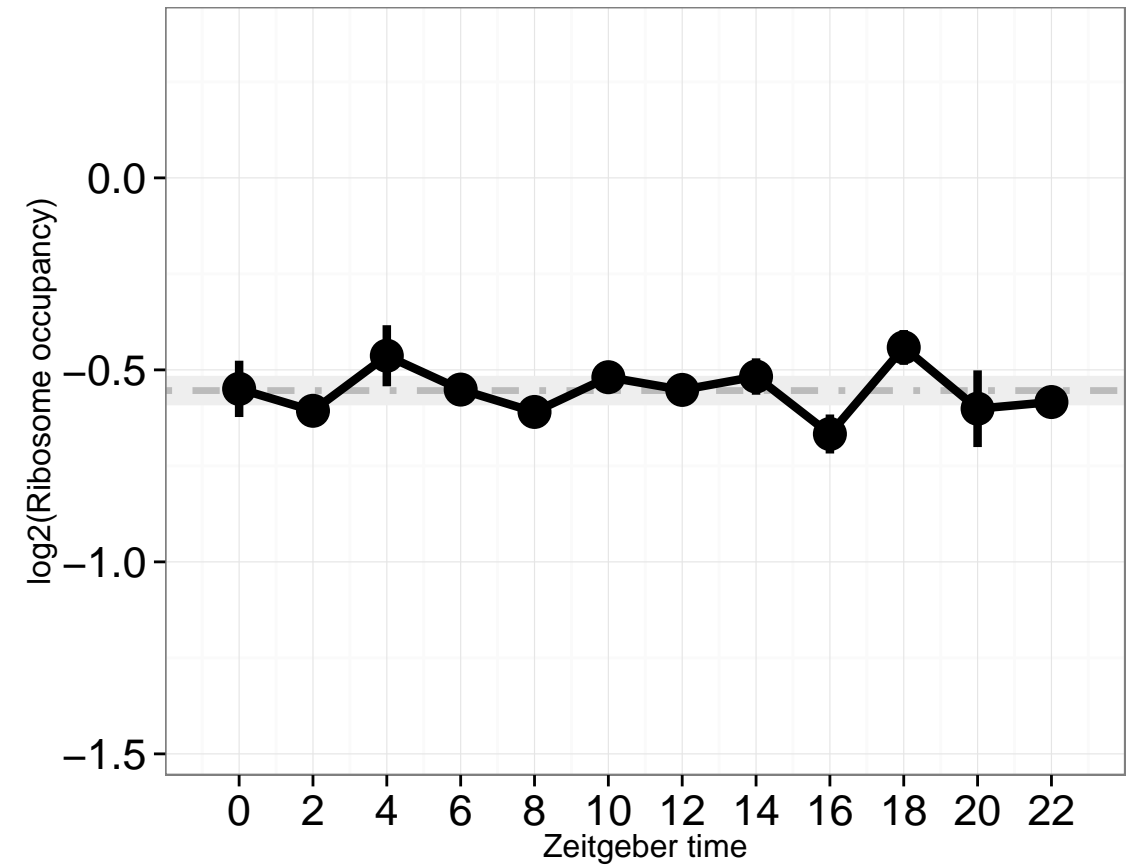

Supplement: Supplementary file 4772 [file 1]

# Ttbk2

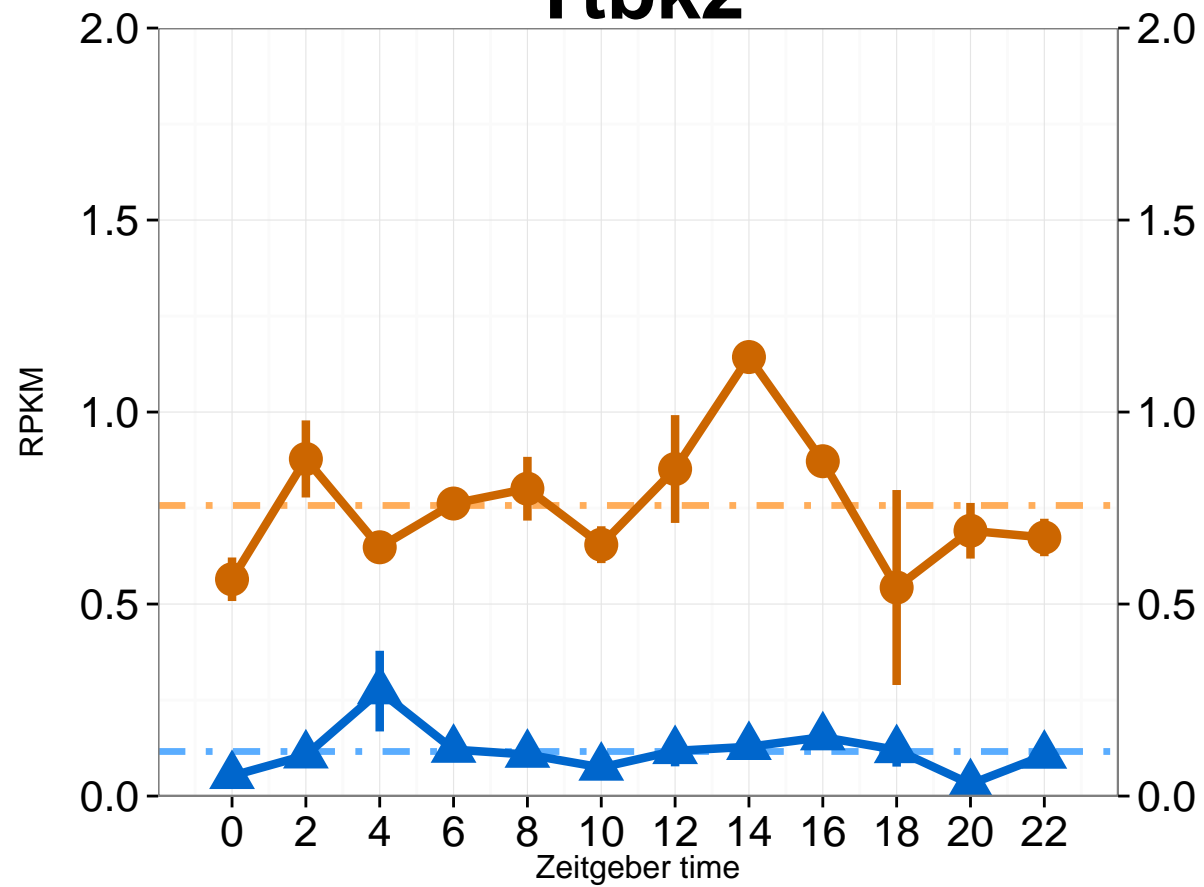

# Ttbk2

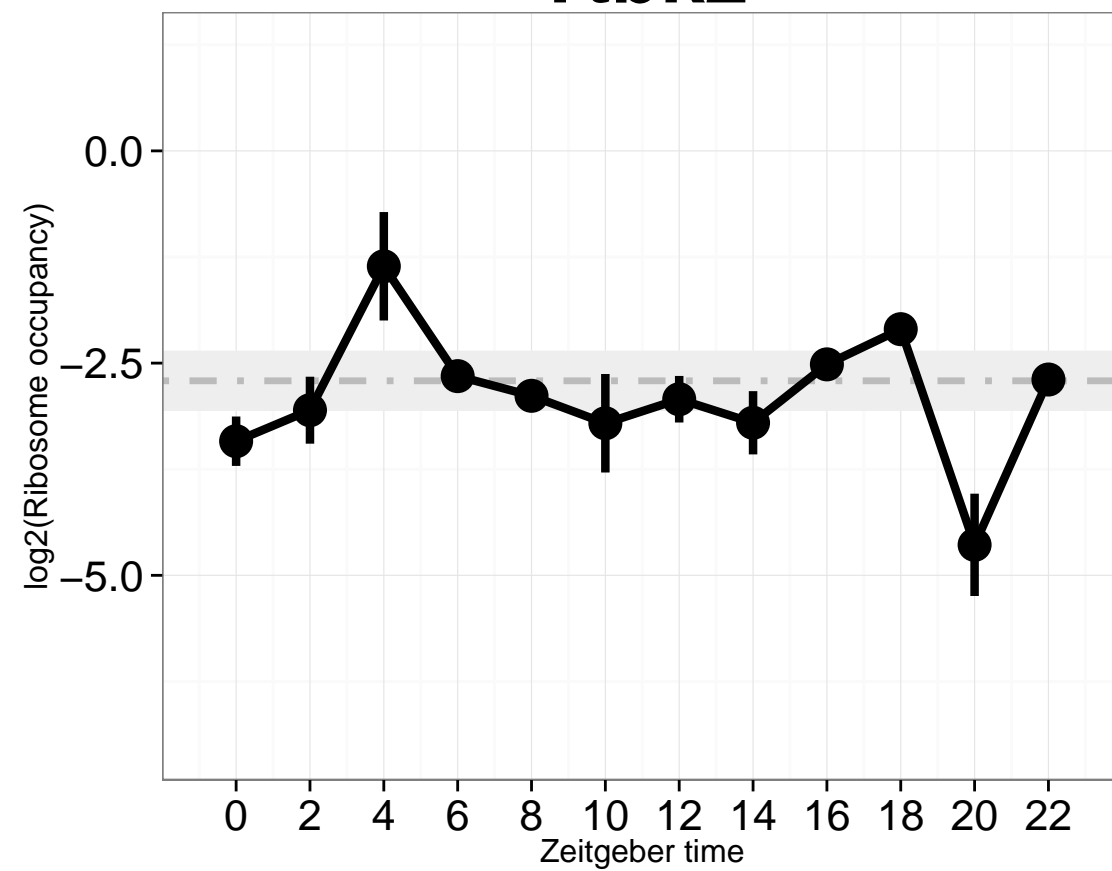

Supplement: Supplementary file 4773 [file 1]

## Clybl

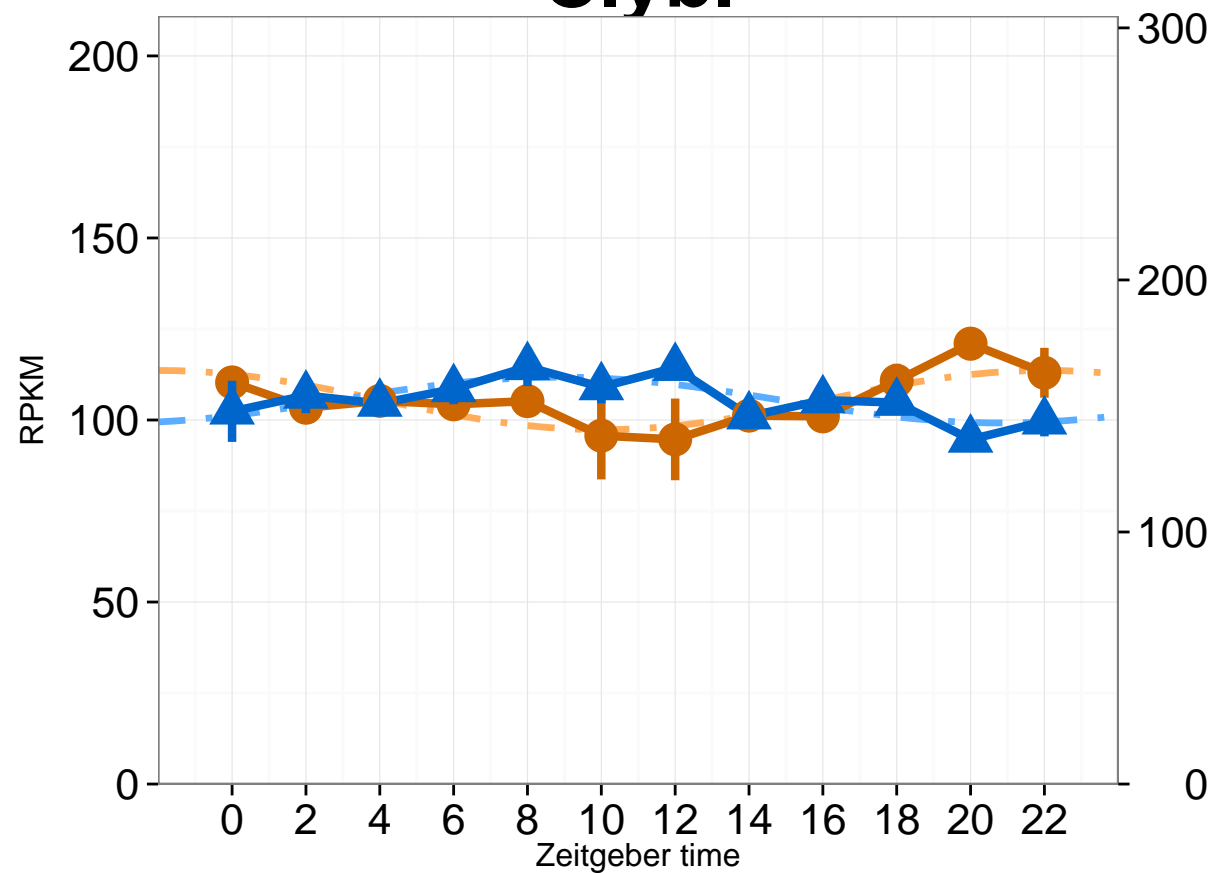

## Clybl

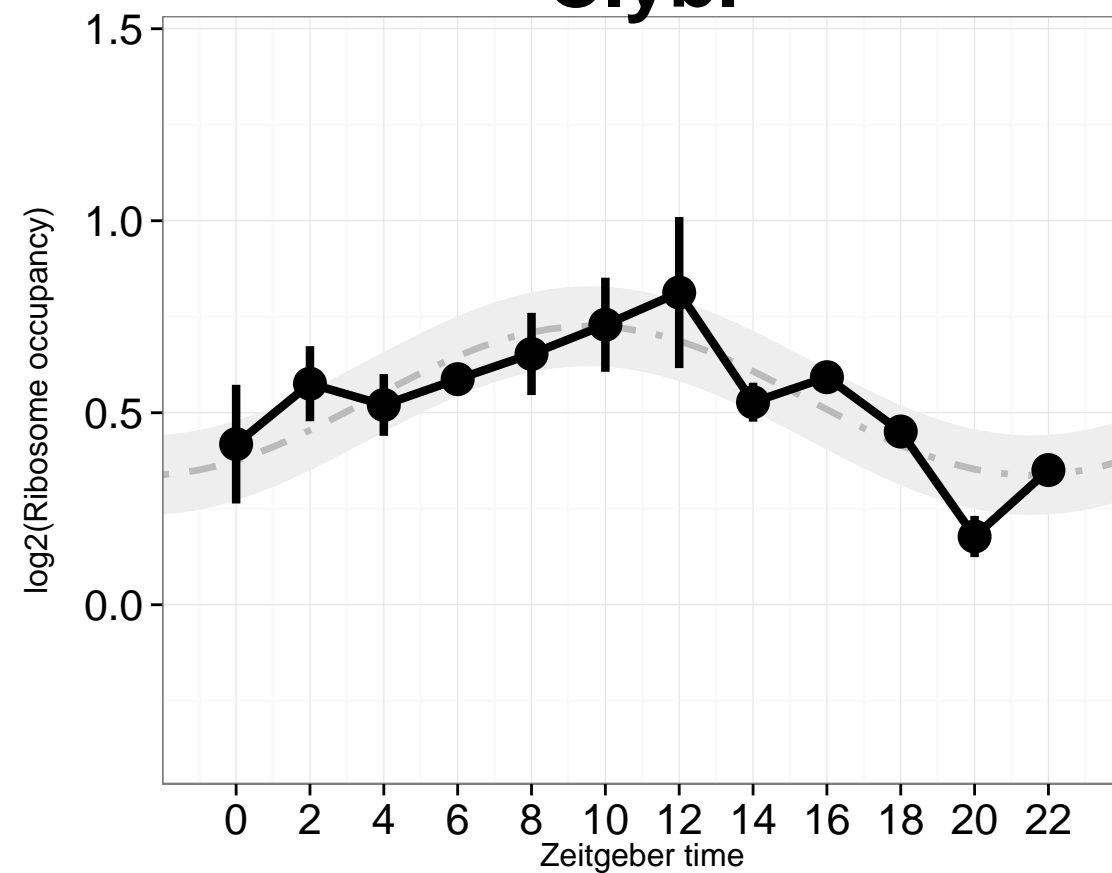

Supplement: Supplementary file 4774 [file 1]

# Spata24

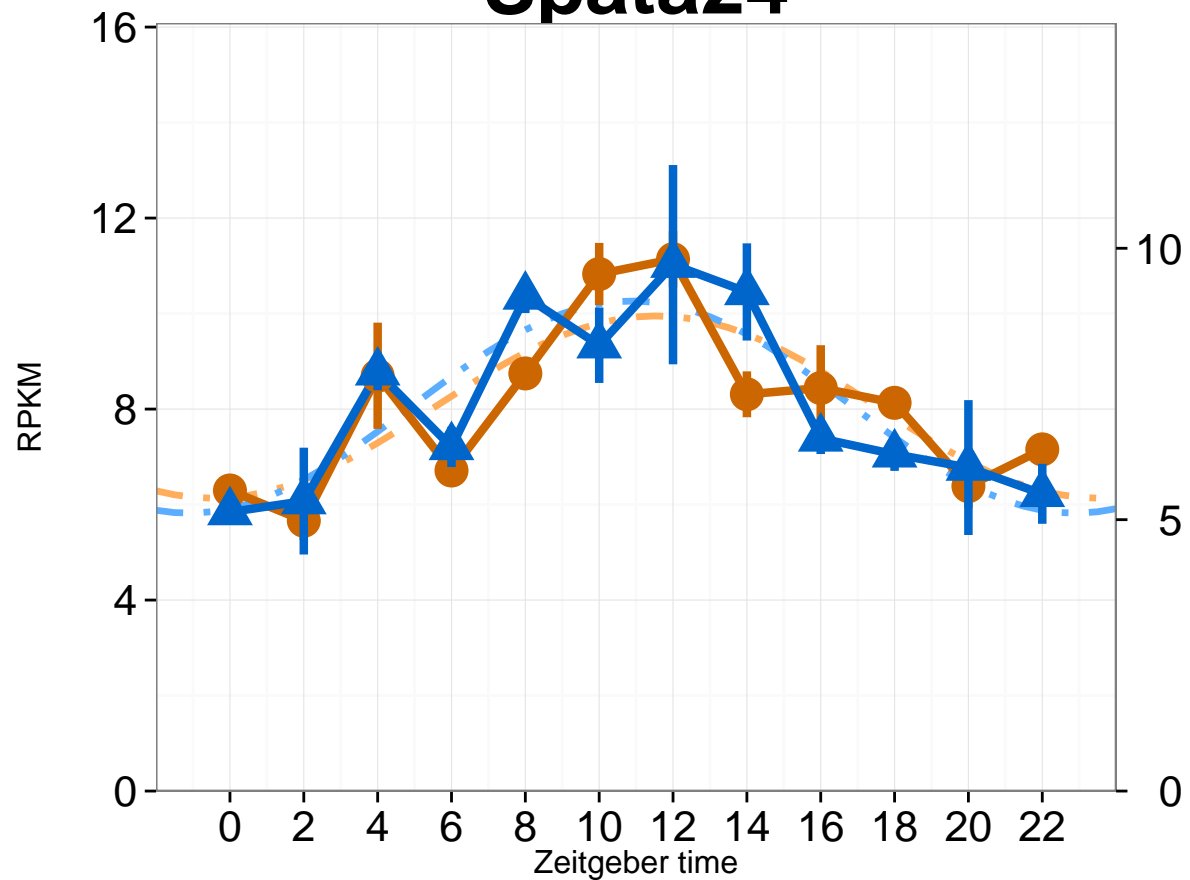

# Spata24

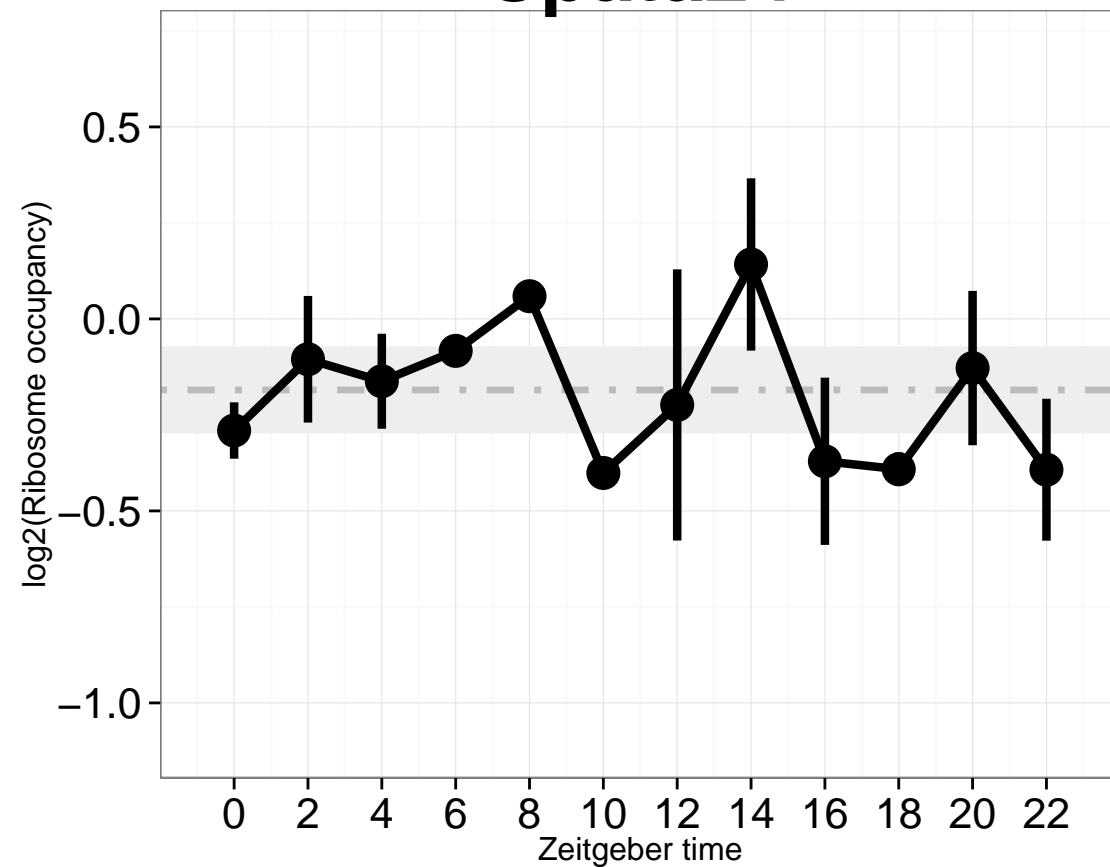

Supplement: Supplementary file 4775 [file 1]

# Phospho2

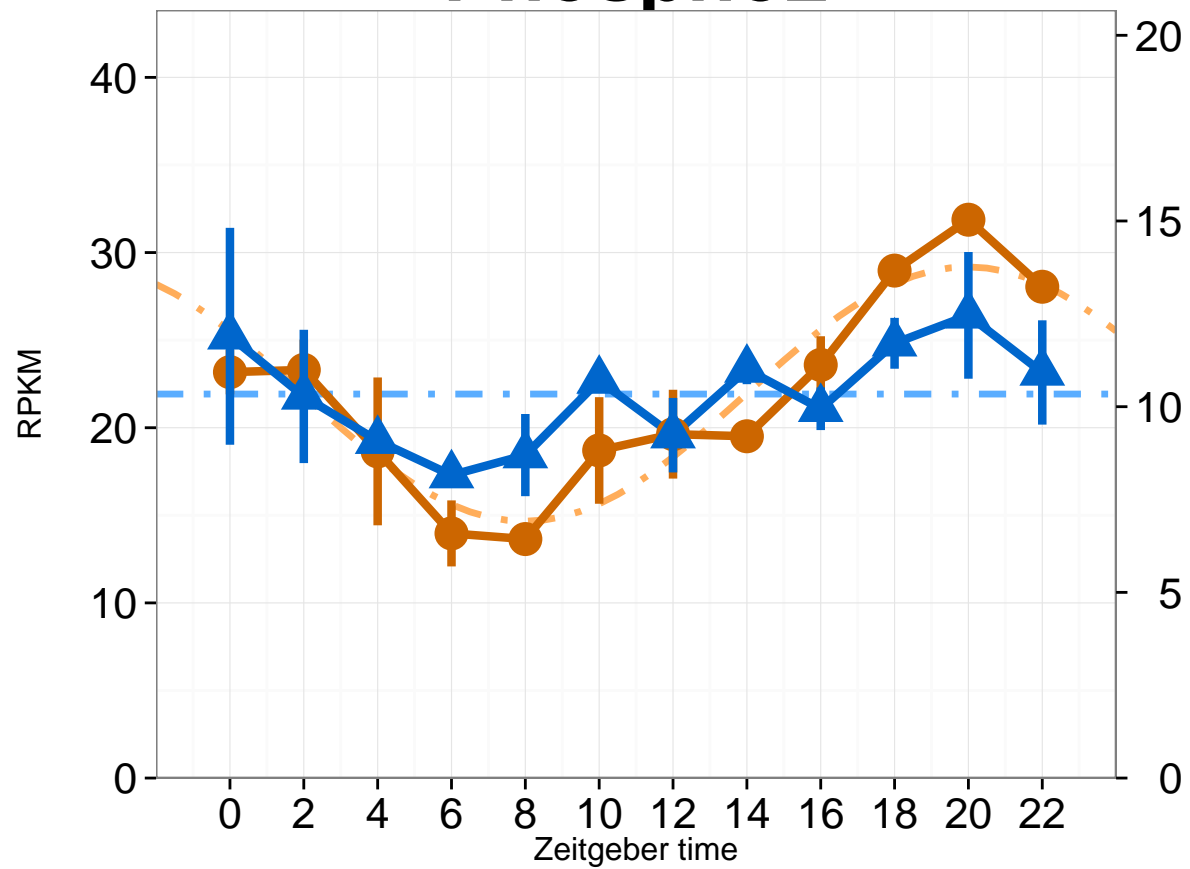

# Phospho2

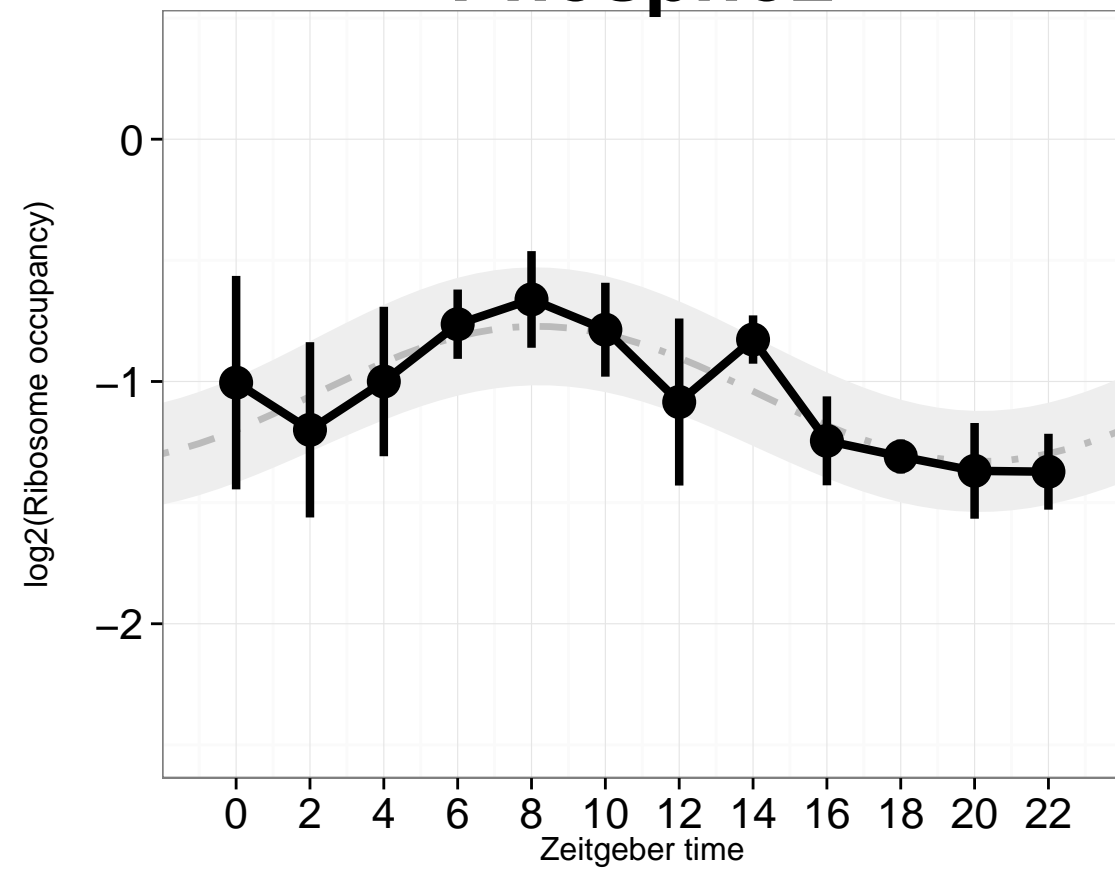

Supplement: Supplementary file 4776 [file 1]

# Gja4

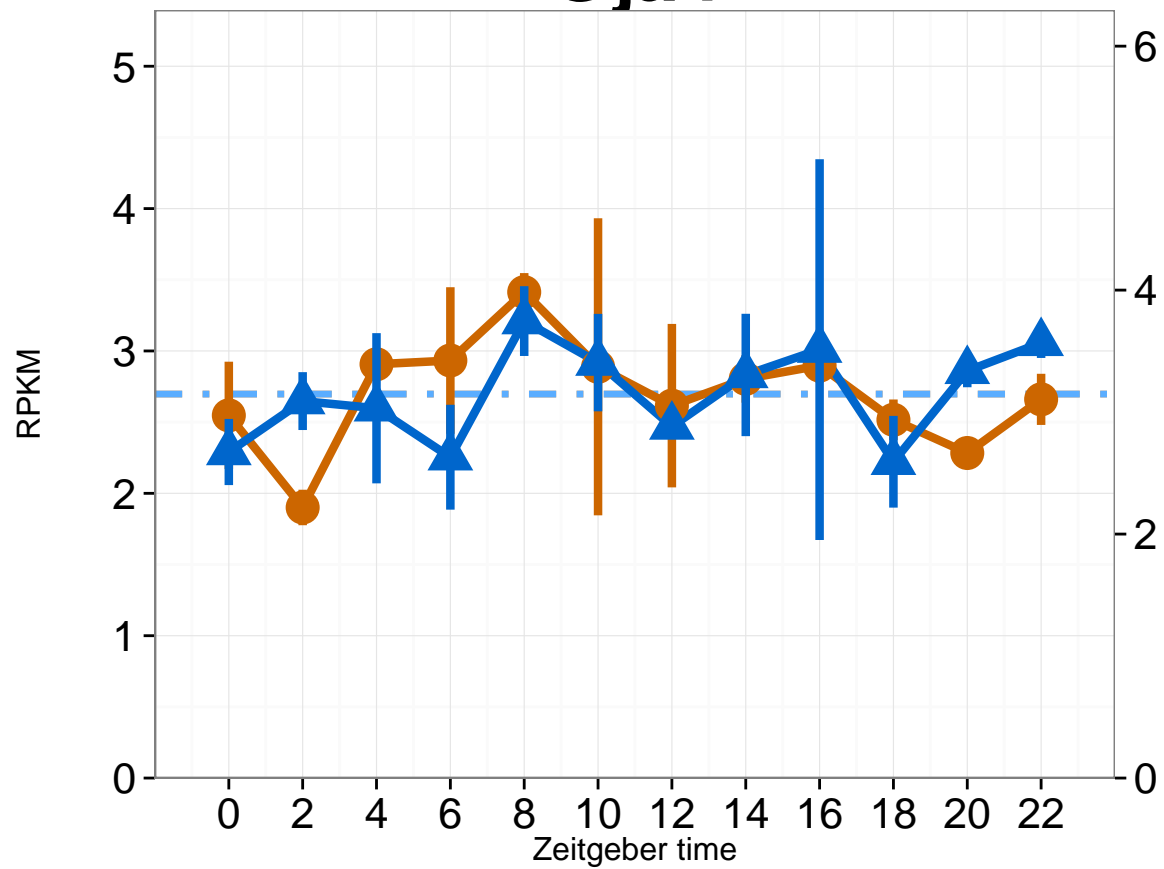

# Gja4

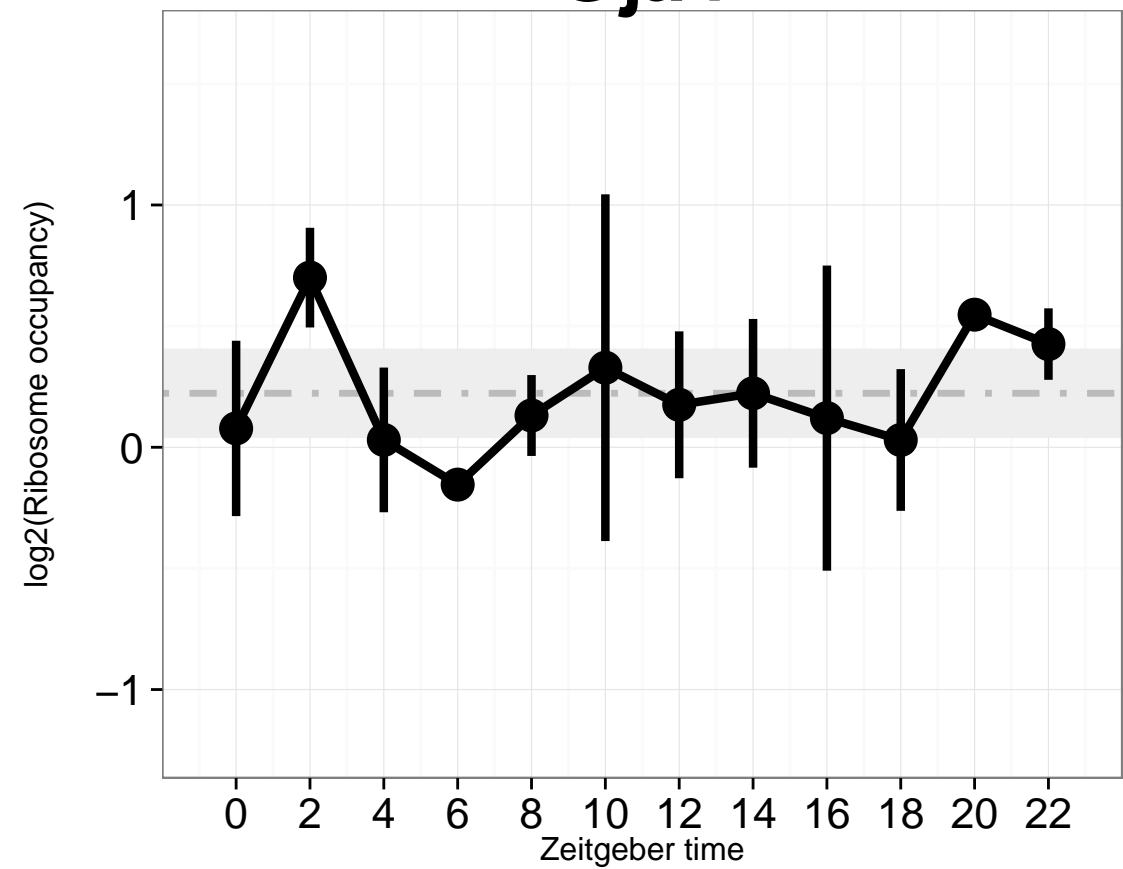

Supplement: Supplementary file 4777 [file 1]

## Wdr66

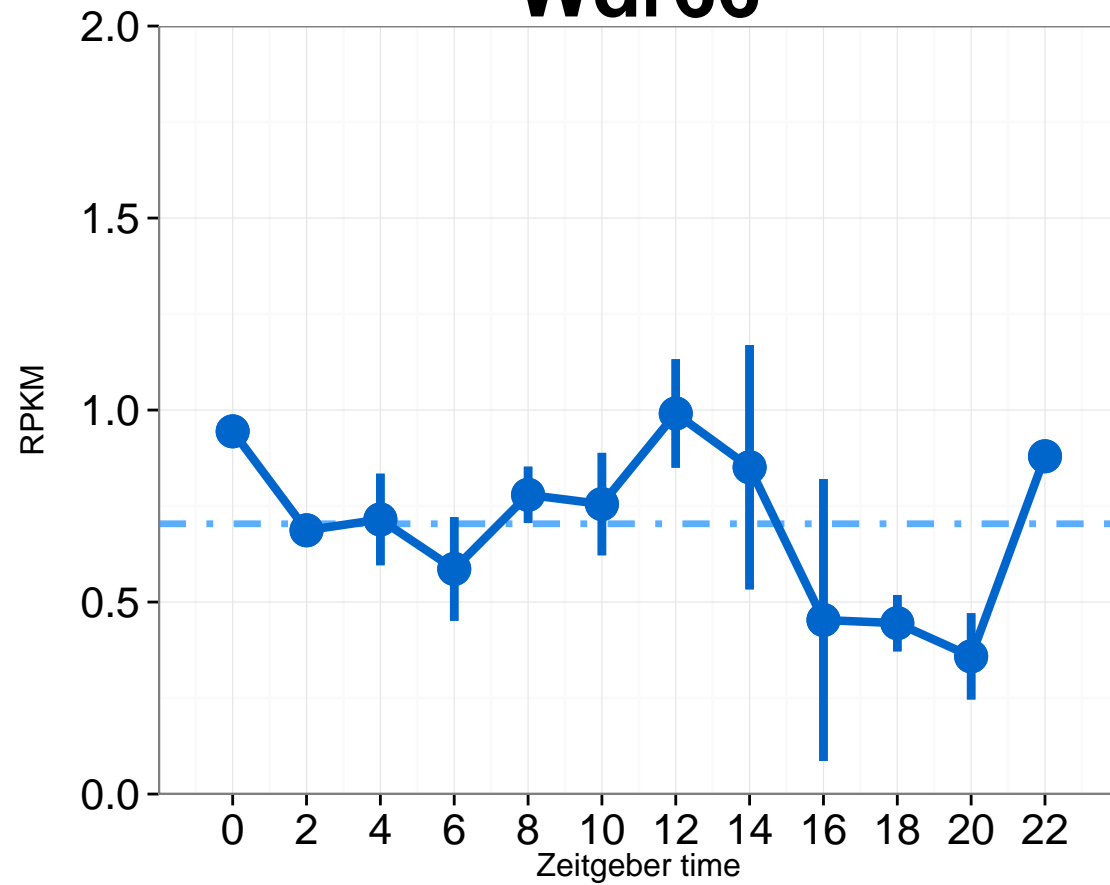

## Wdr66 log2(Ribosome occupancy

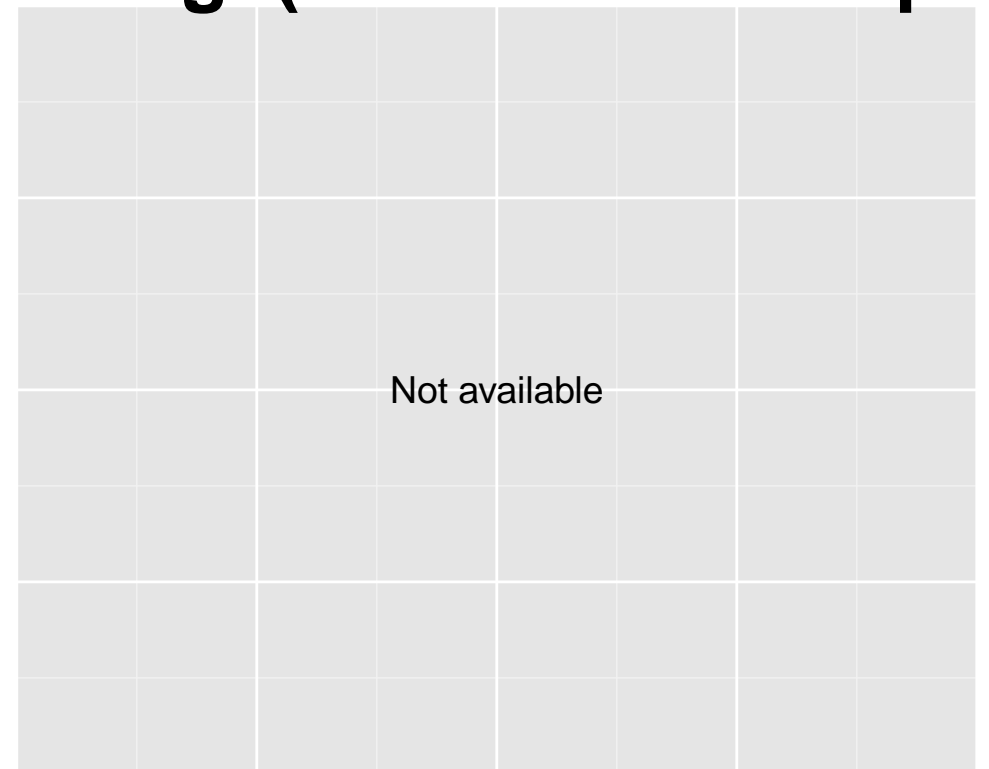

Supplement: Supplementary file 4778 [file 1]

## Mrps36

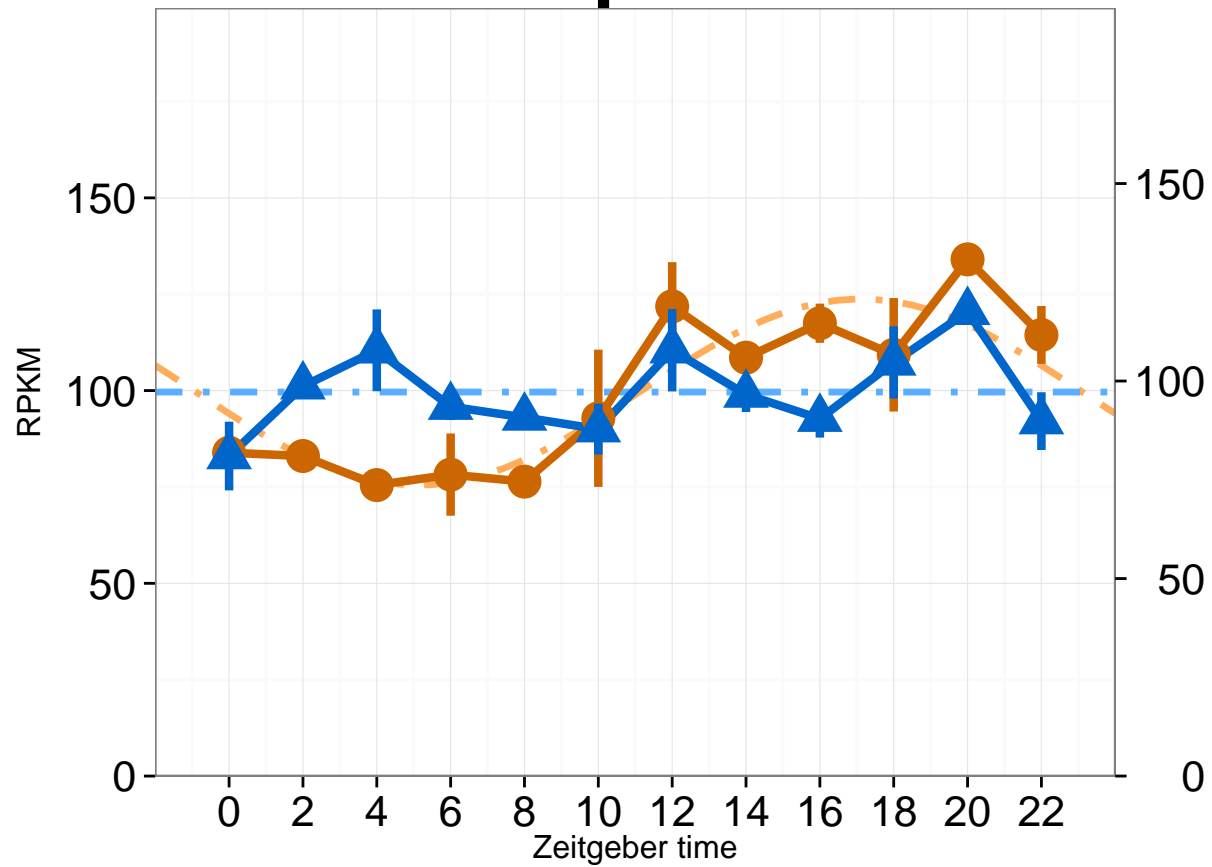

## Mrps36

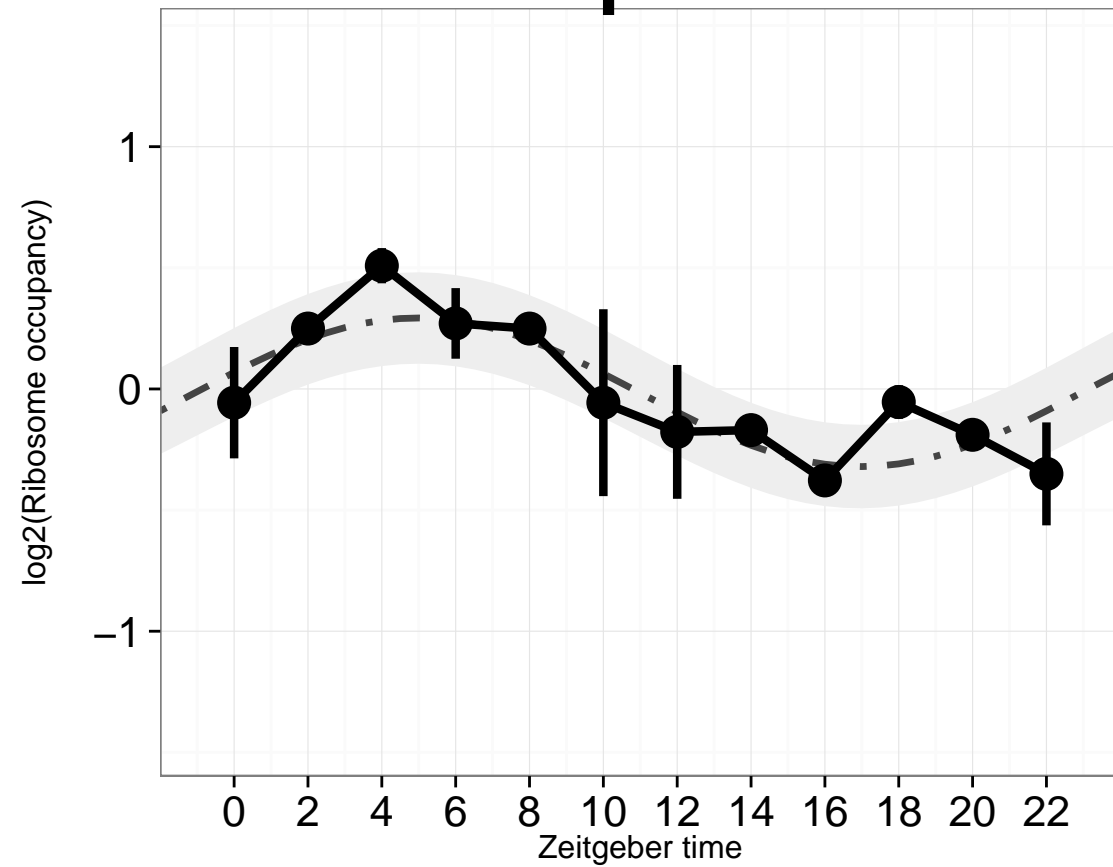

Supplement: Supplementary file 4779 [file 1]

# Scml4

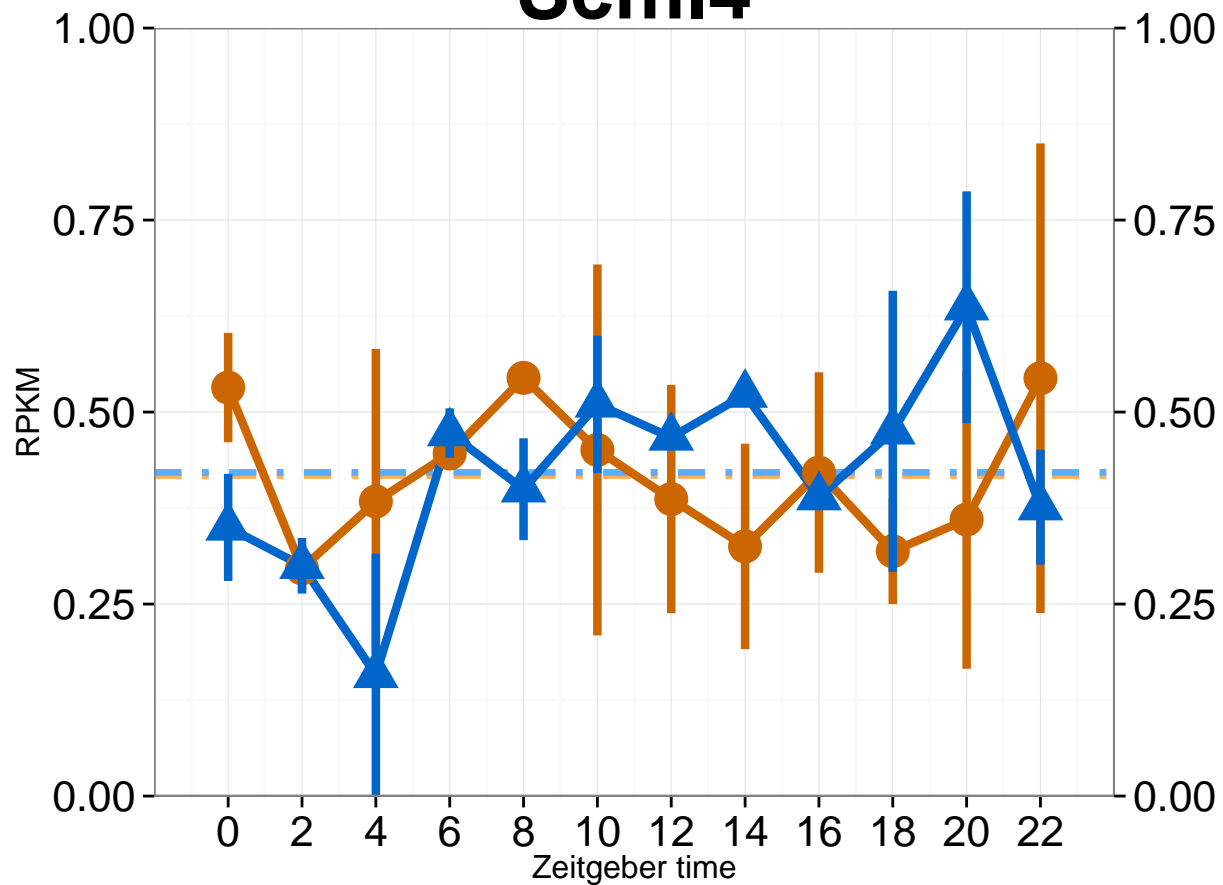

# Scml4

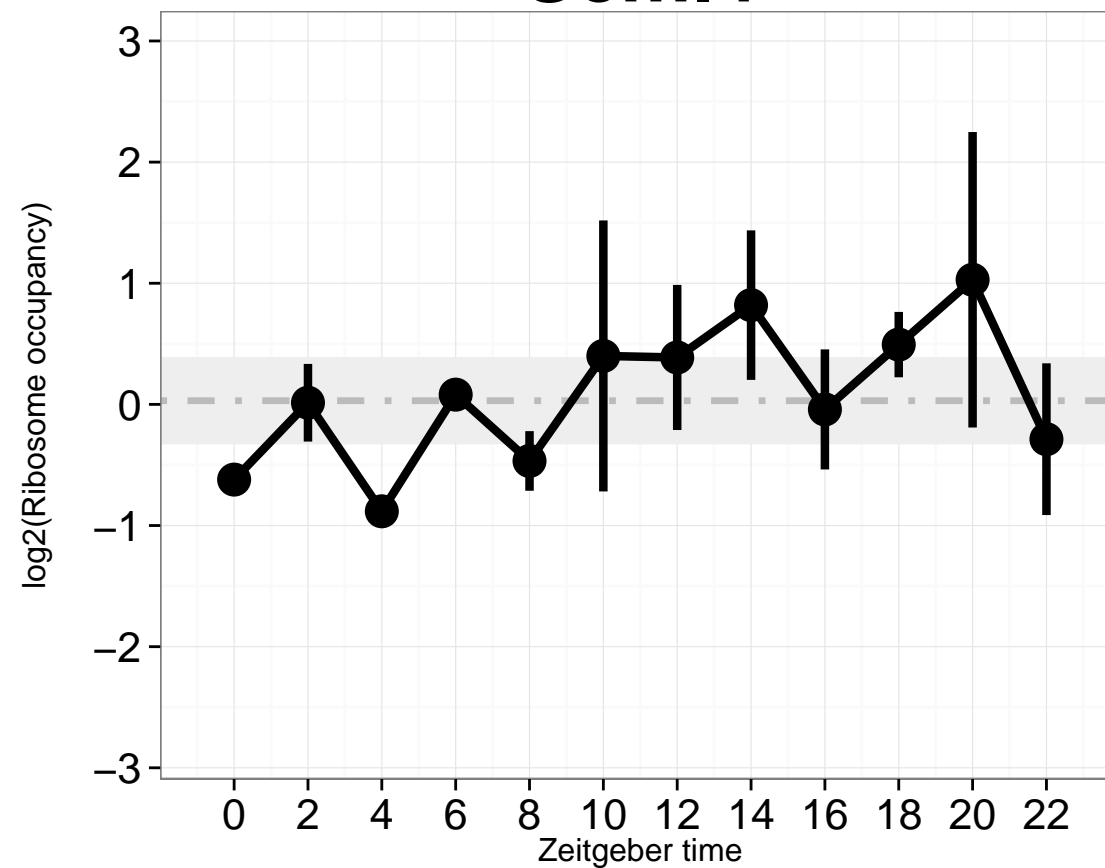

Supplement: Supplementary file 4780 [file 1]

## Ormdl1

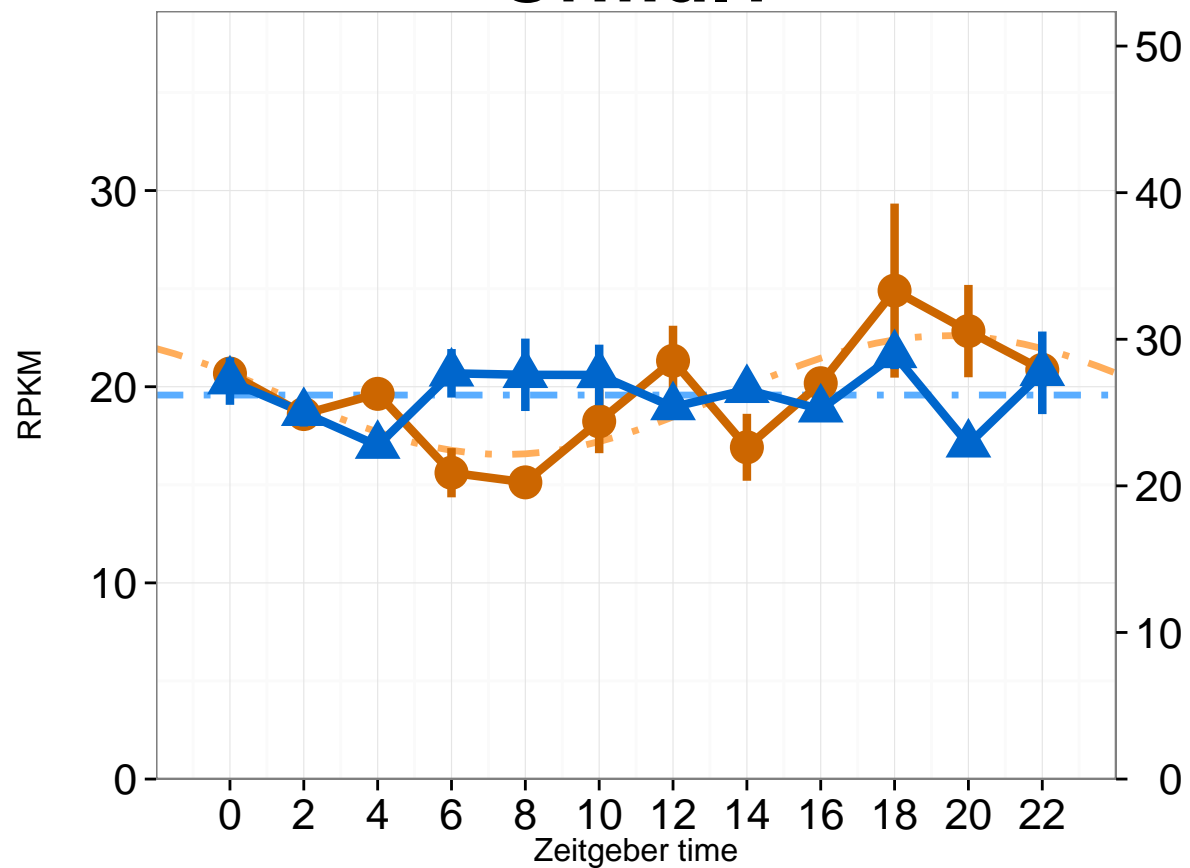

## Ormdl1

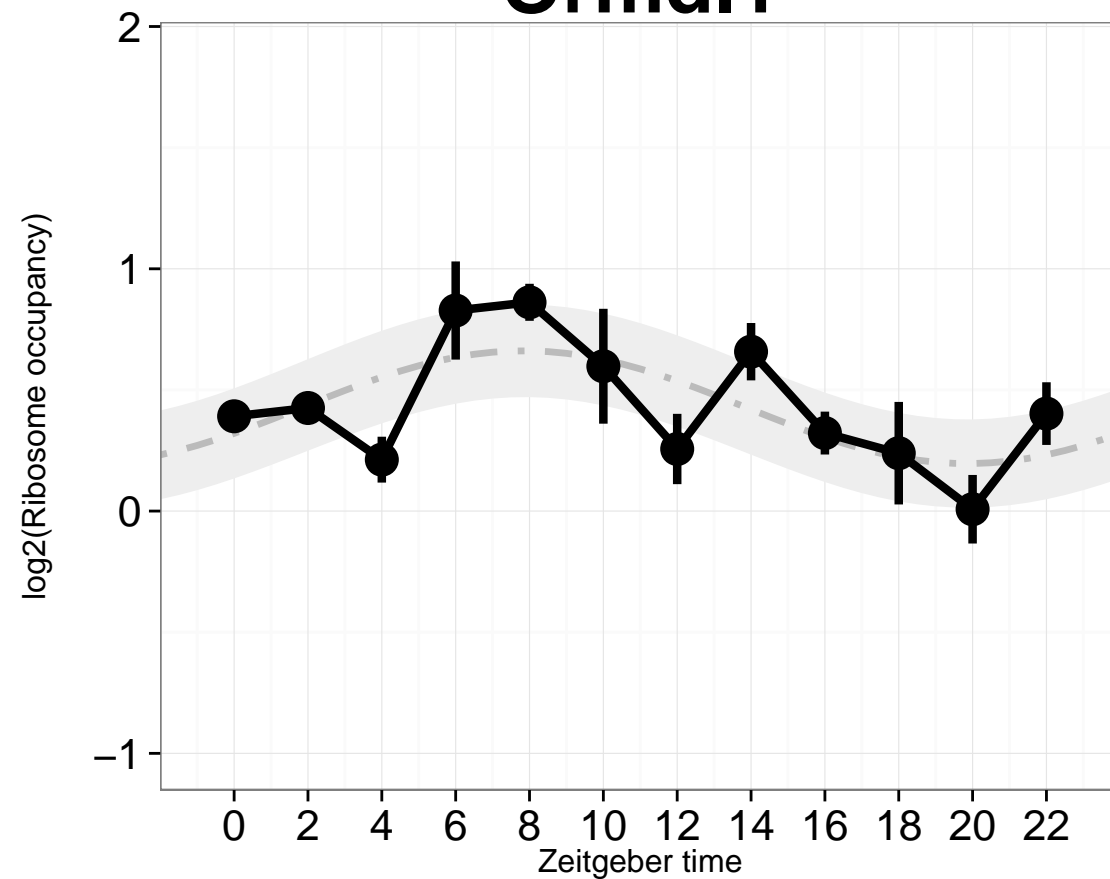

Supplement: Supplementary file 4781 [file 1]

## Zranb1

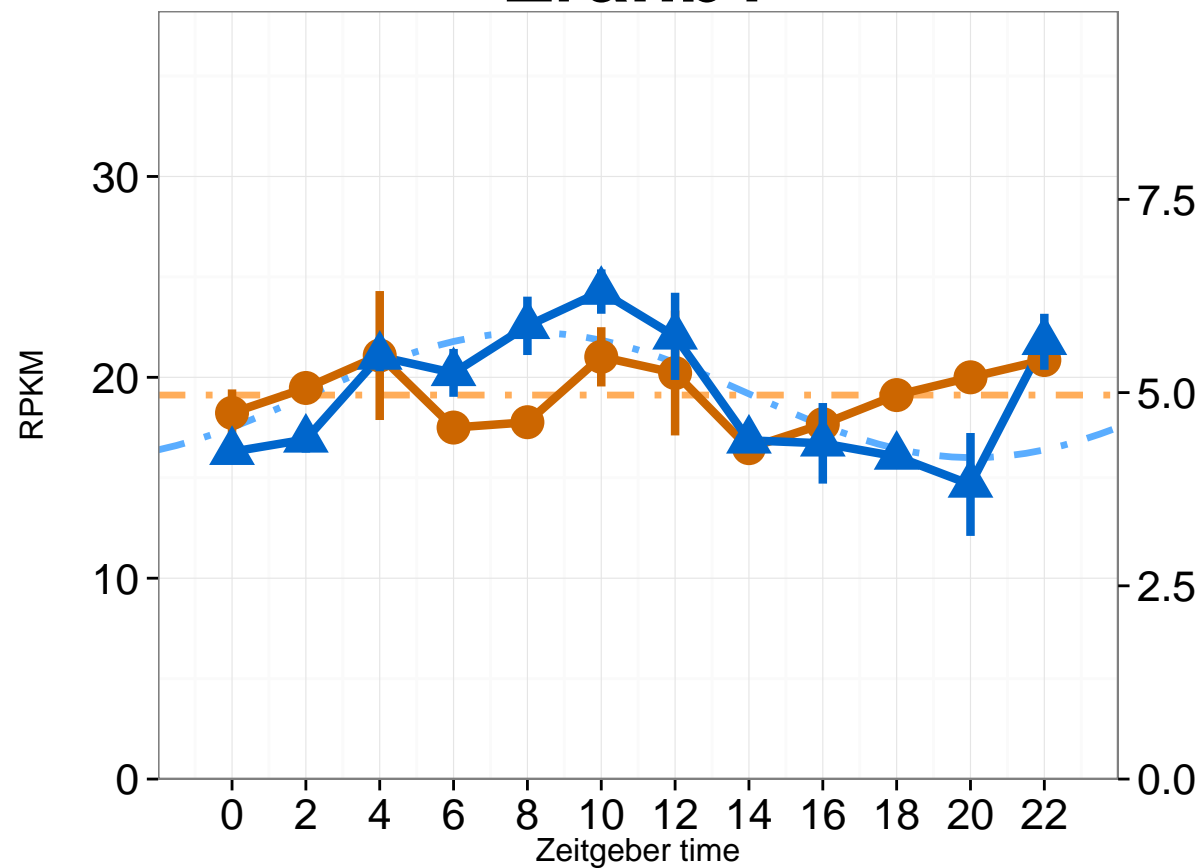

## Zranb1

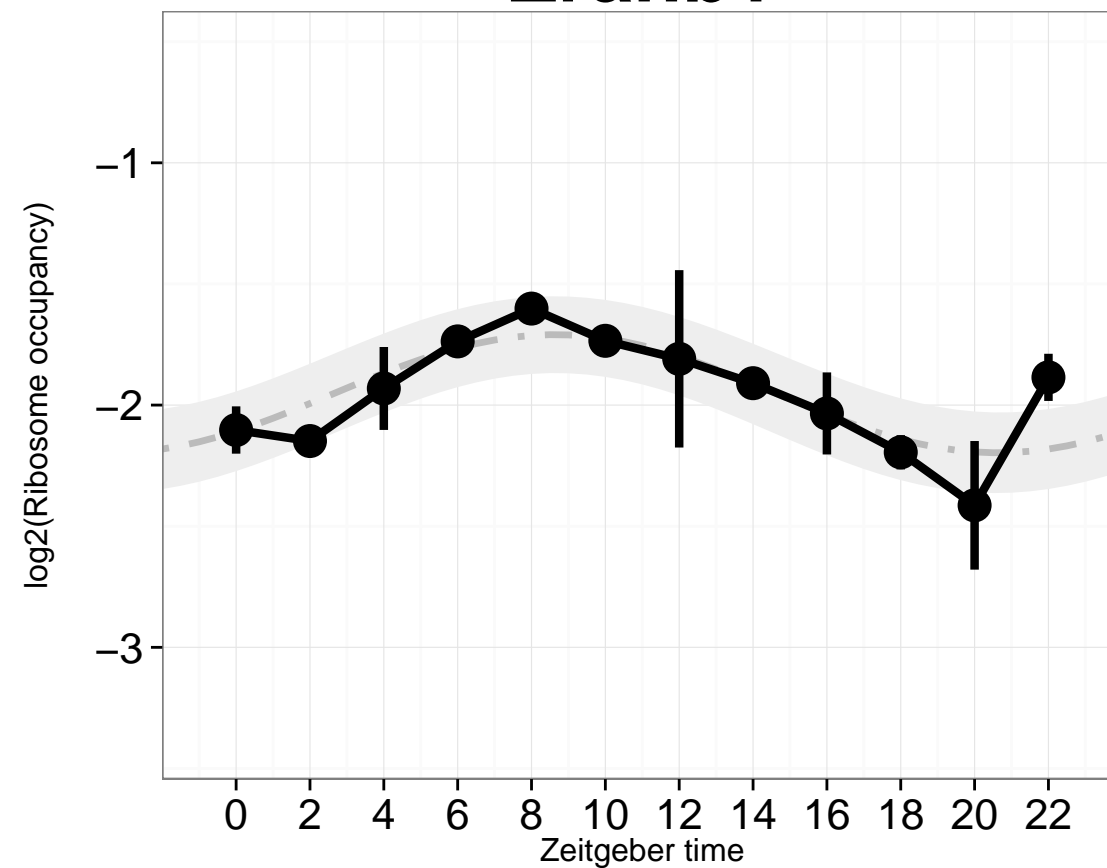

Supplement: Supplementary file 4782 [file 1]

## Rnmt

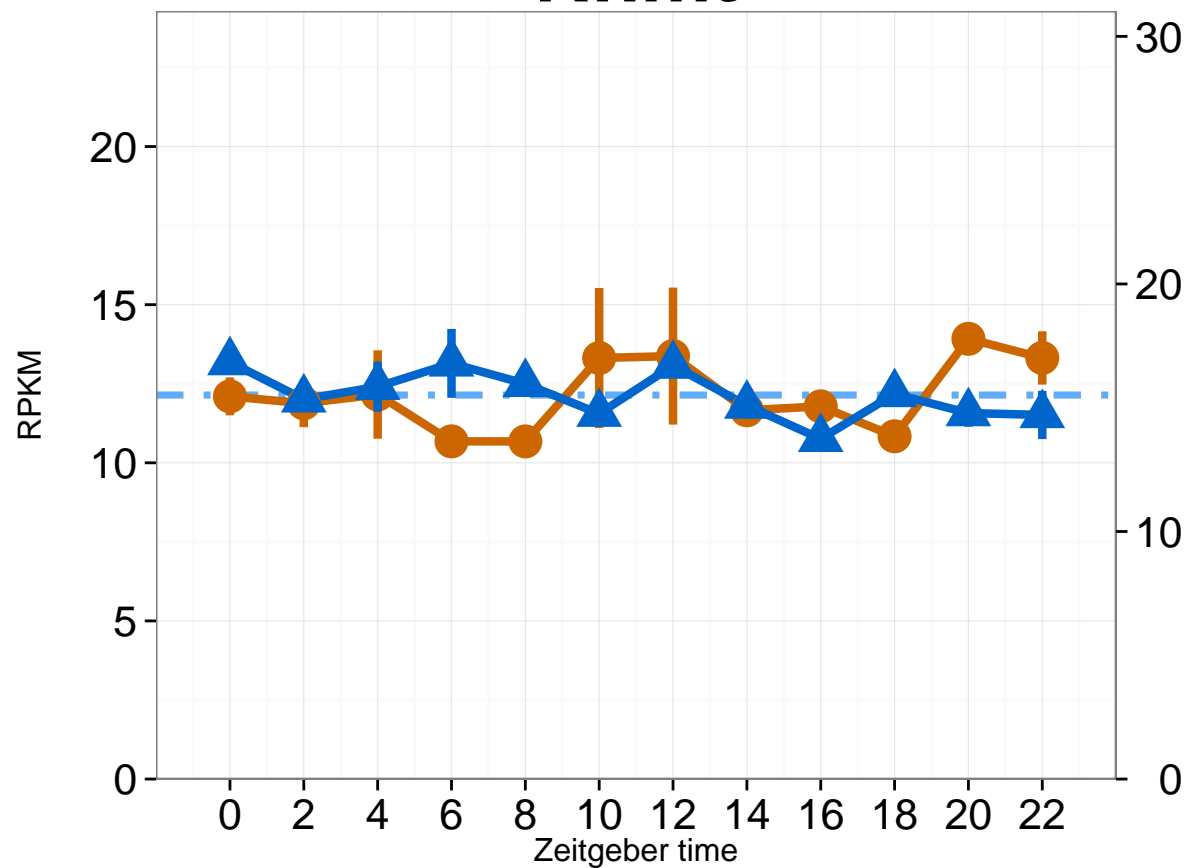

## Rnmt

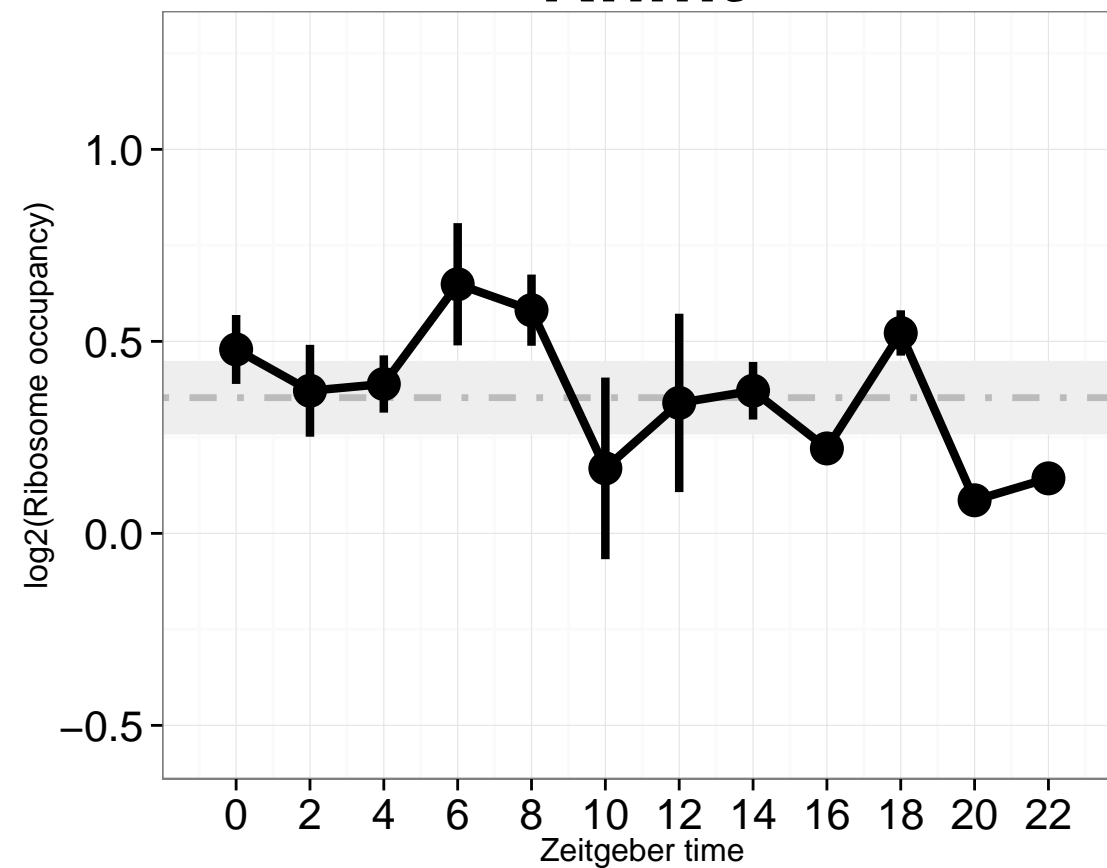

Supplement: Supplementary file 4783 [file 1]

## Pdgfa

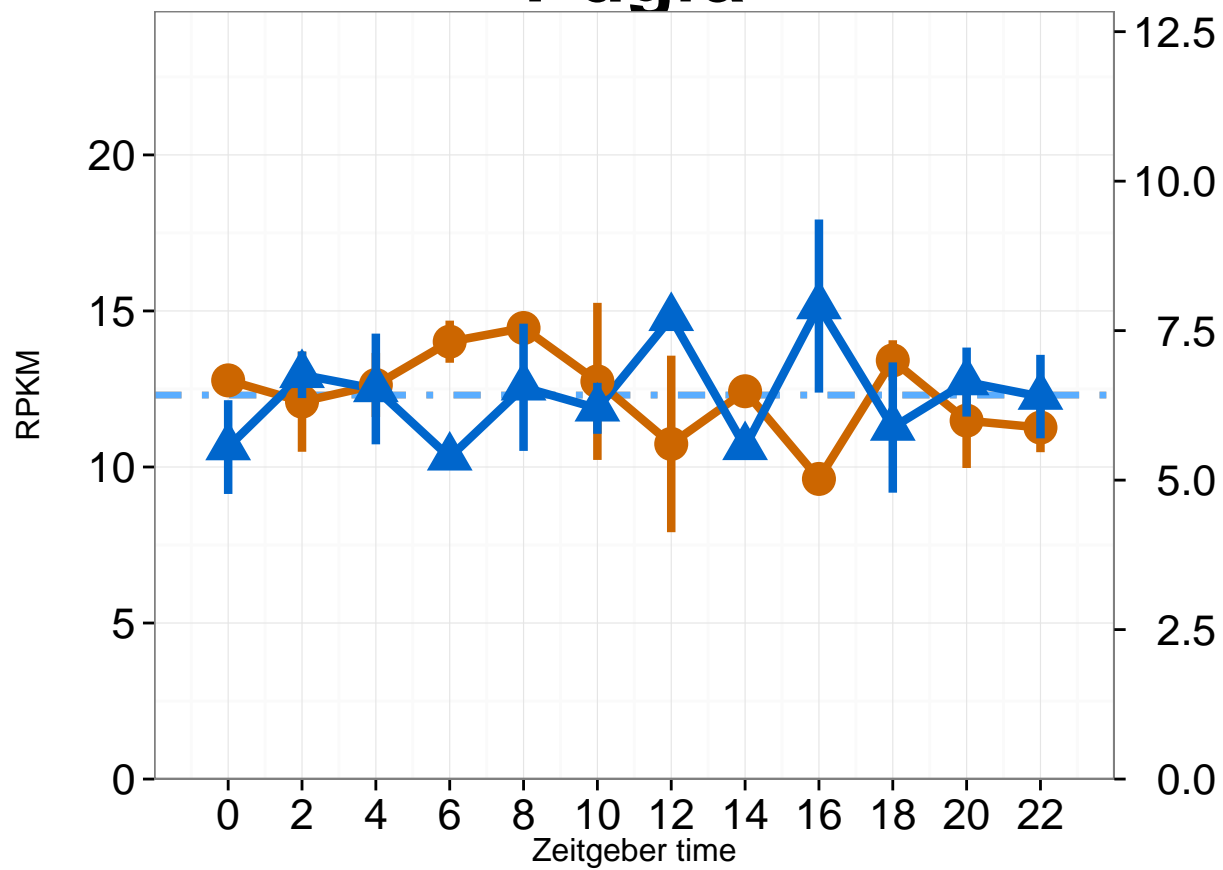

## Pdgfa

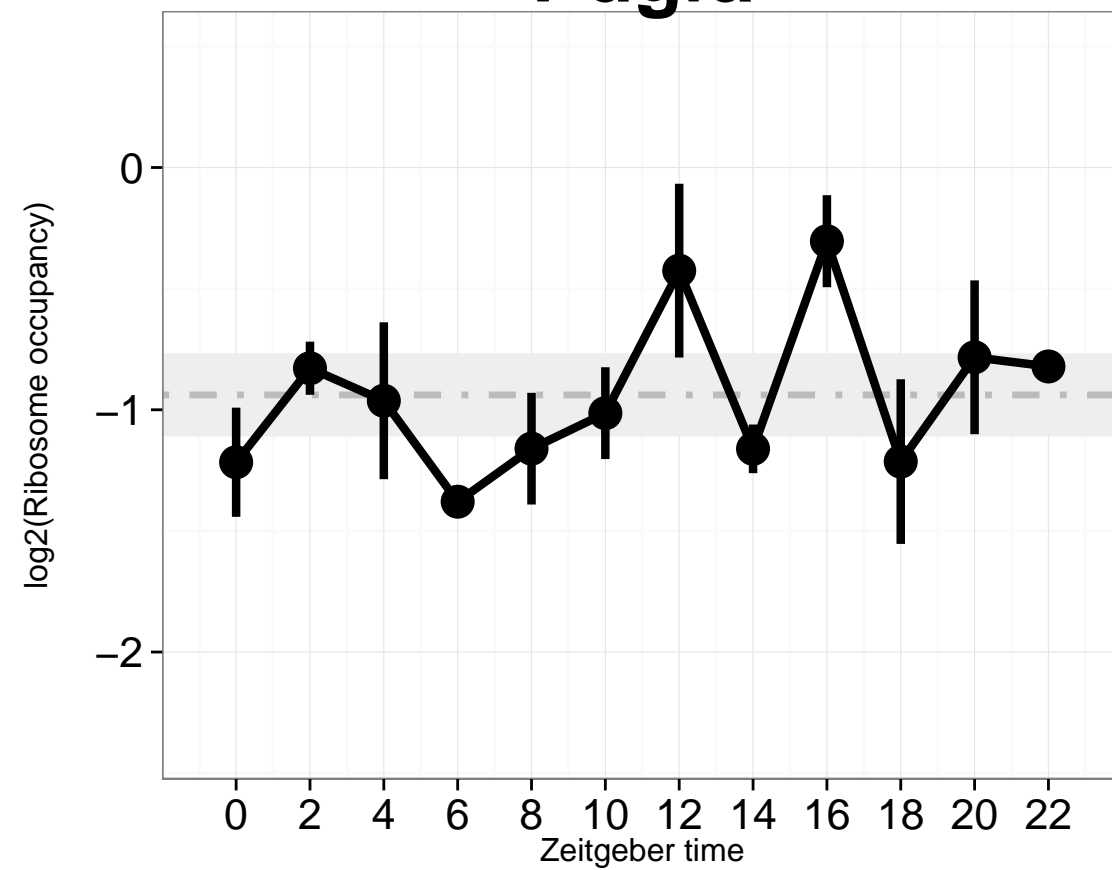

Supplement: Supplementary file 4784 [file 1]

## Cul5

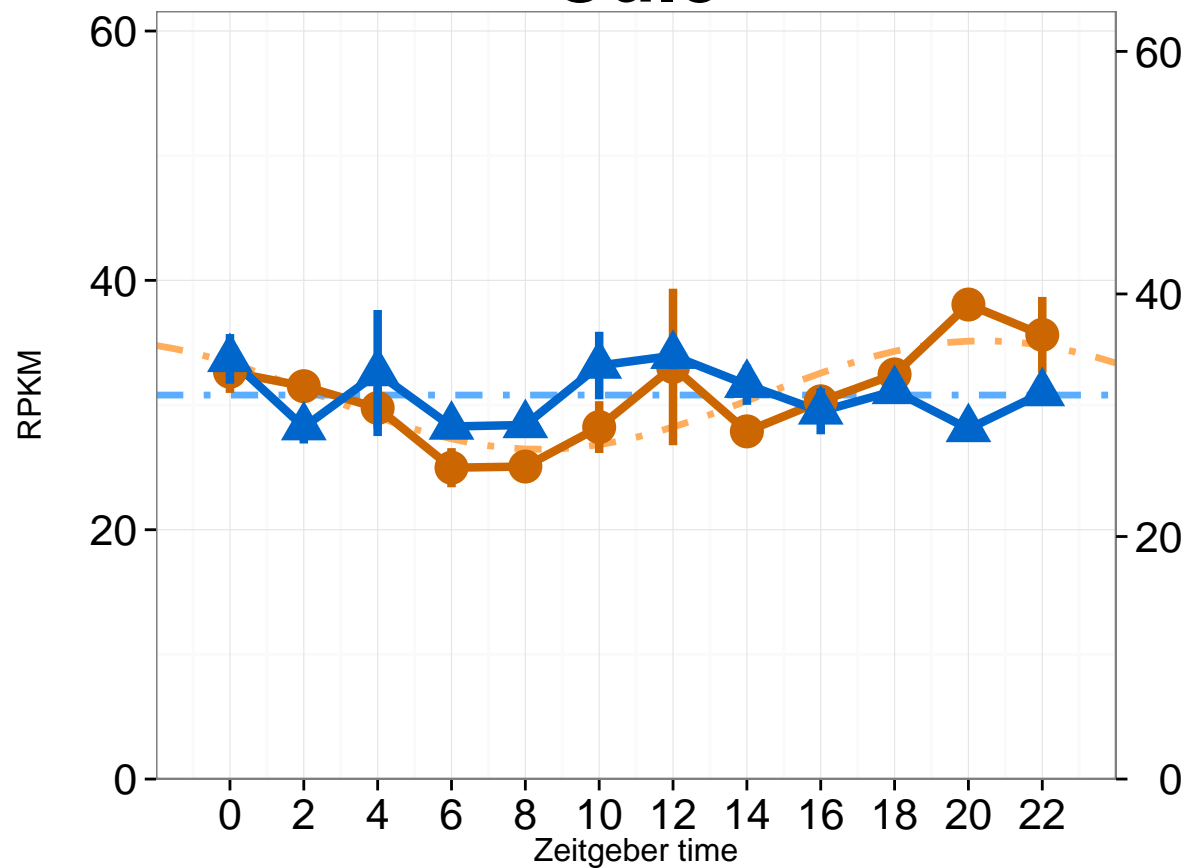

## Cul5

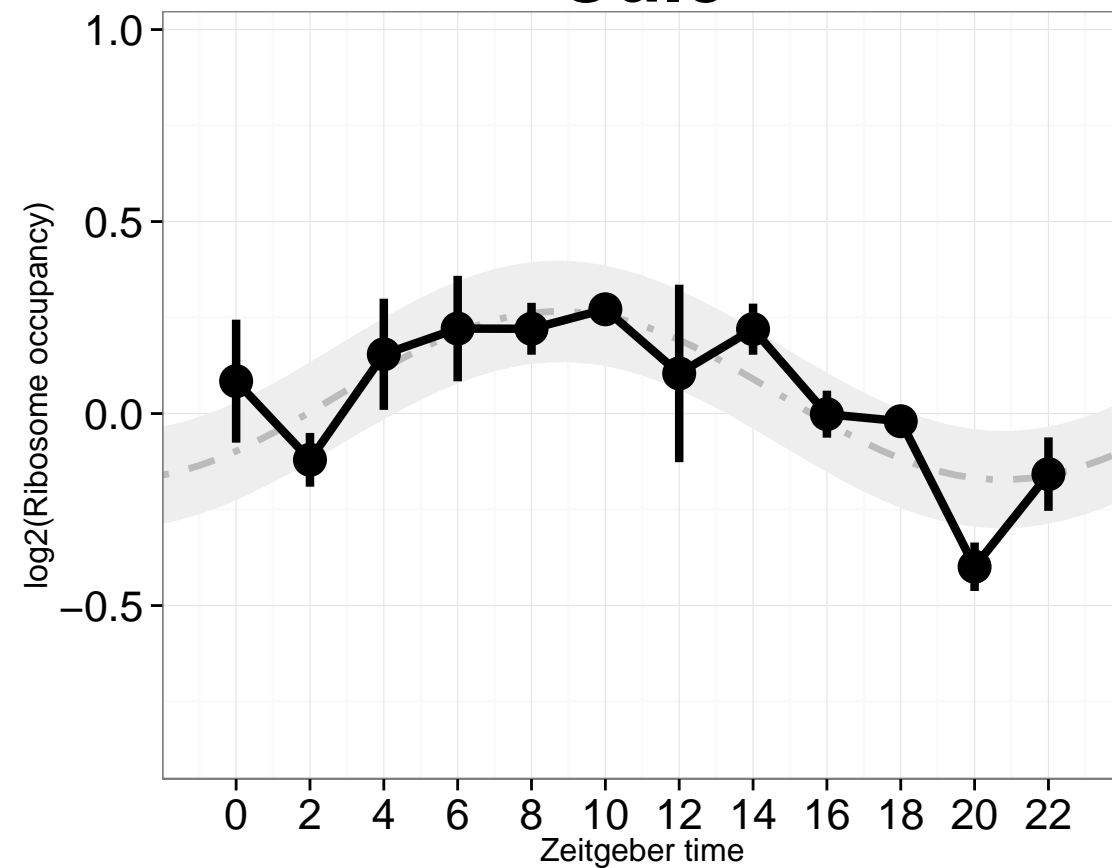

Supplement: Supplementary file 4785 [file 1]

## Aptx

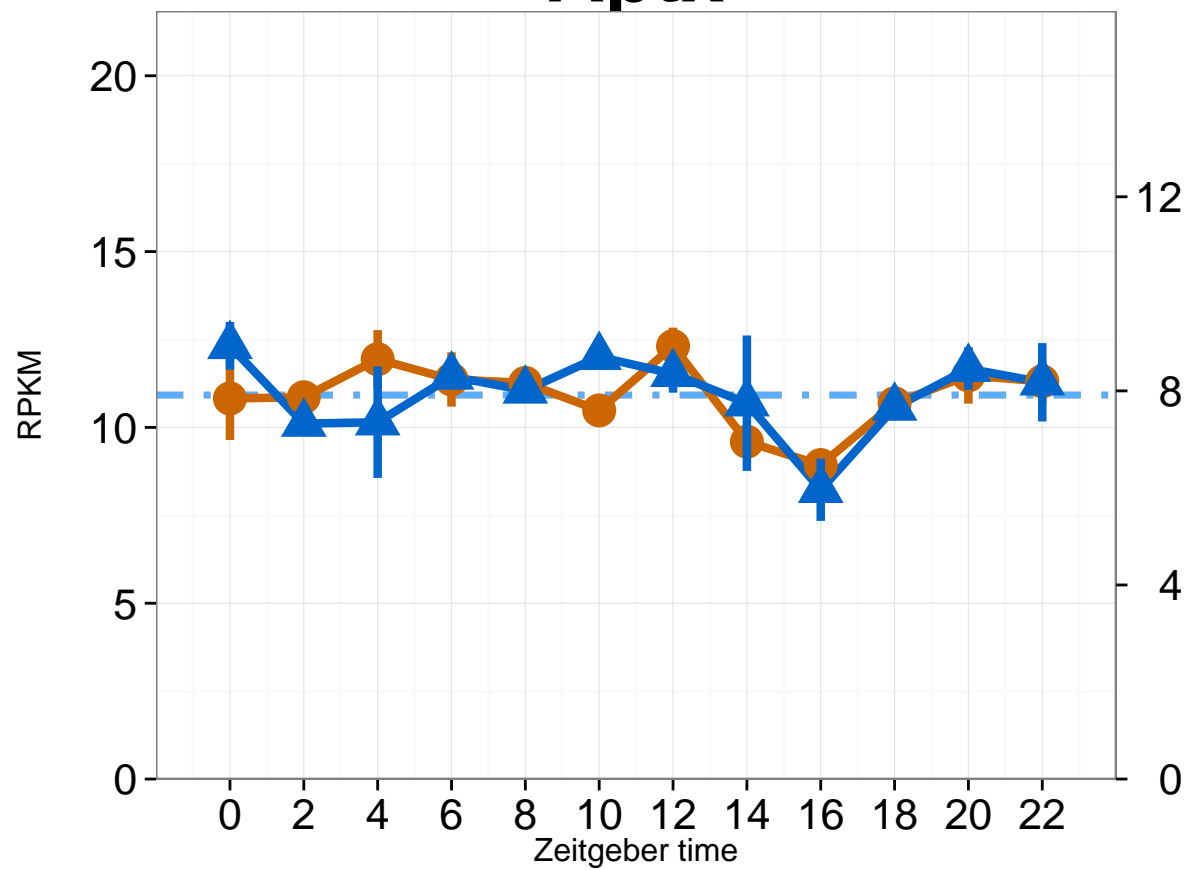

## Aptx

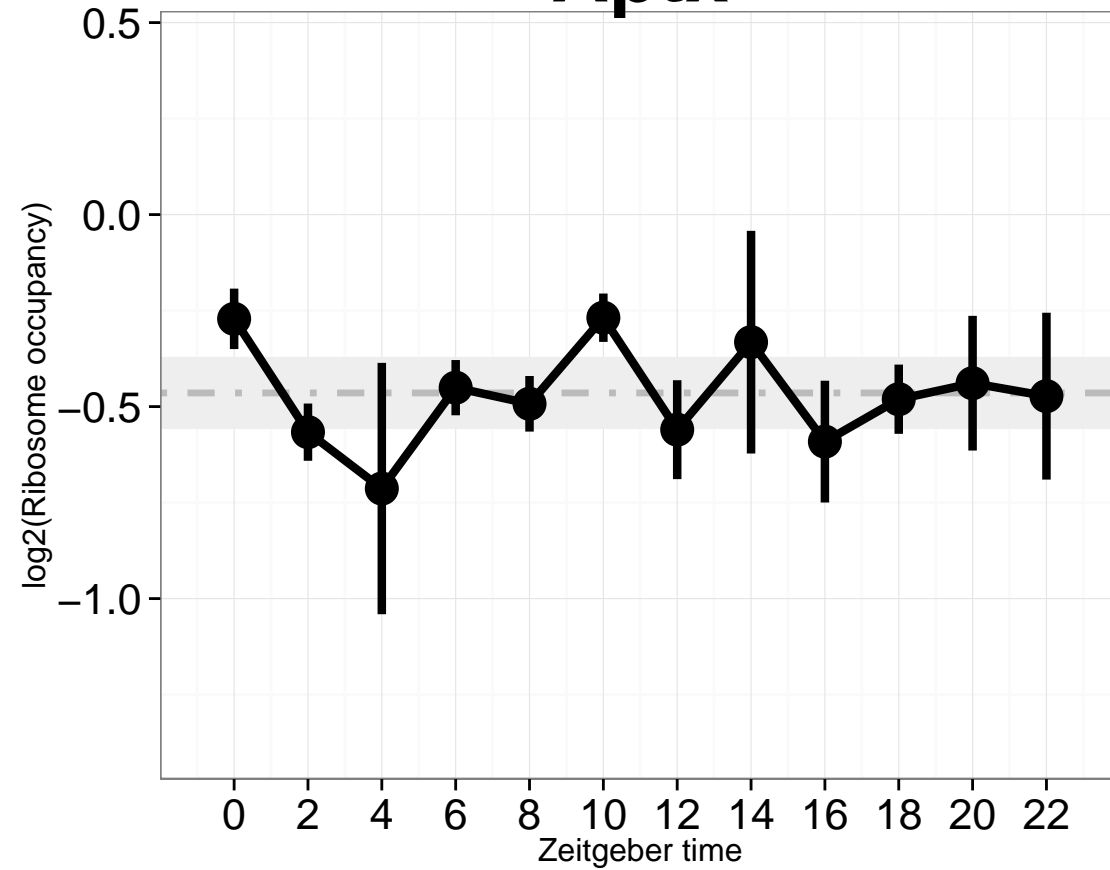

Supplement: Supplementary file 4786 [file 1]

# Ppp2r5b

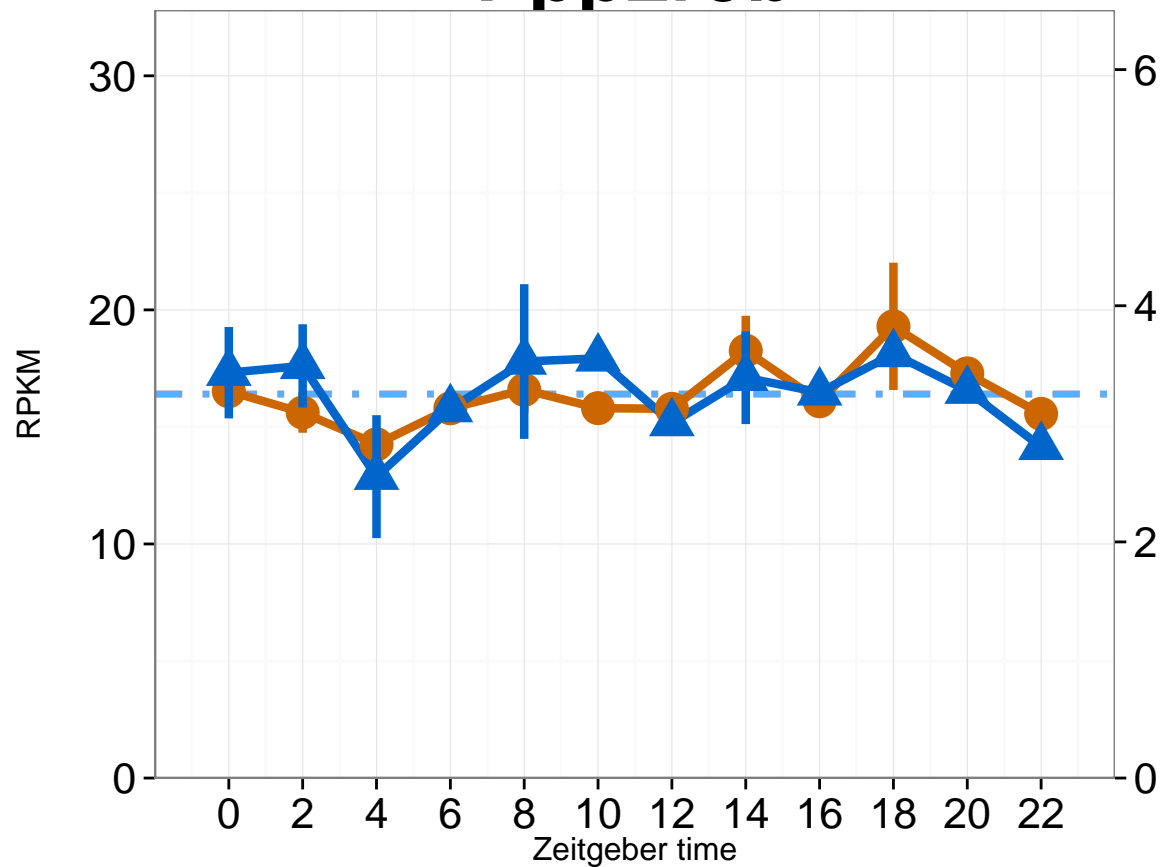

# Ppp2r5b

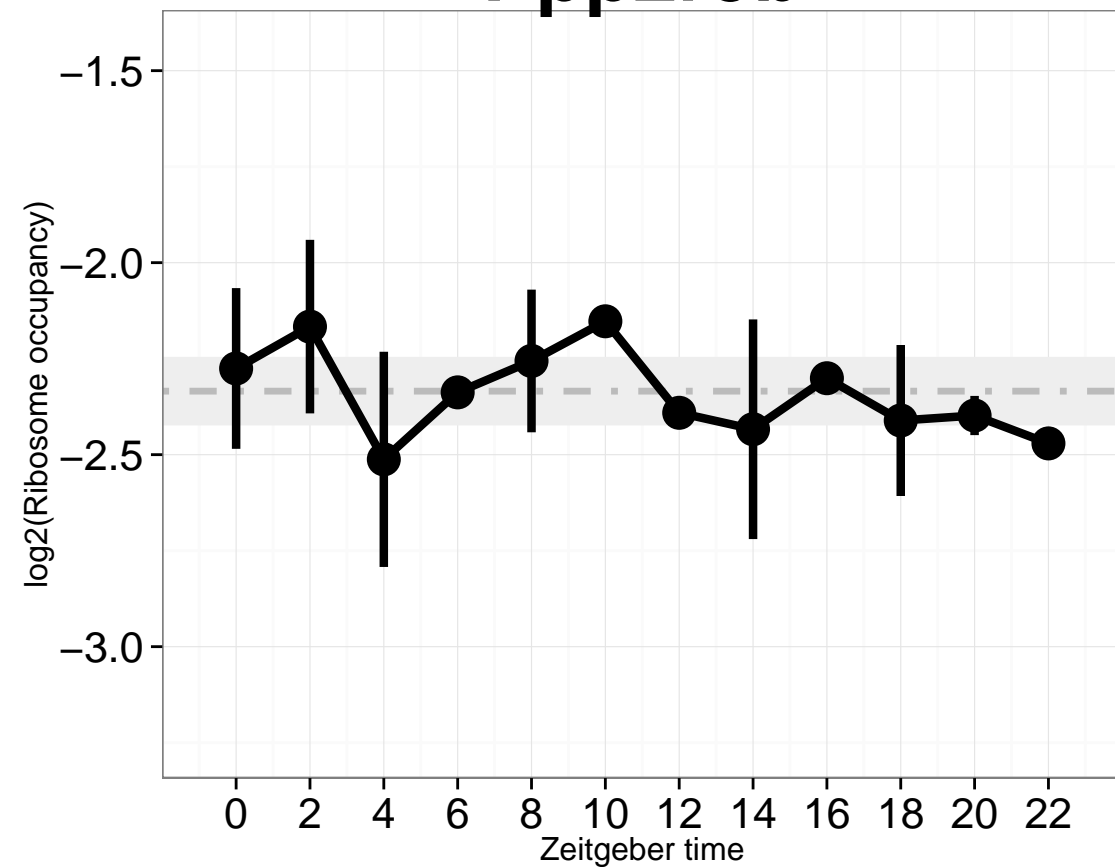

Supplement: Supplementary file 4787 [file 1]

# Akap12

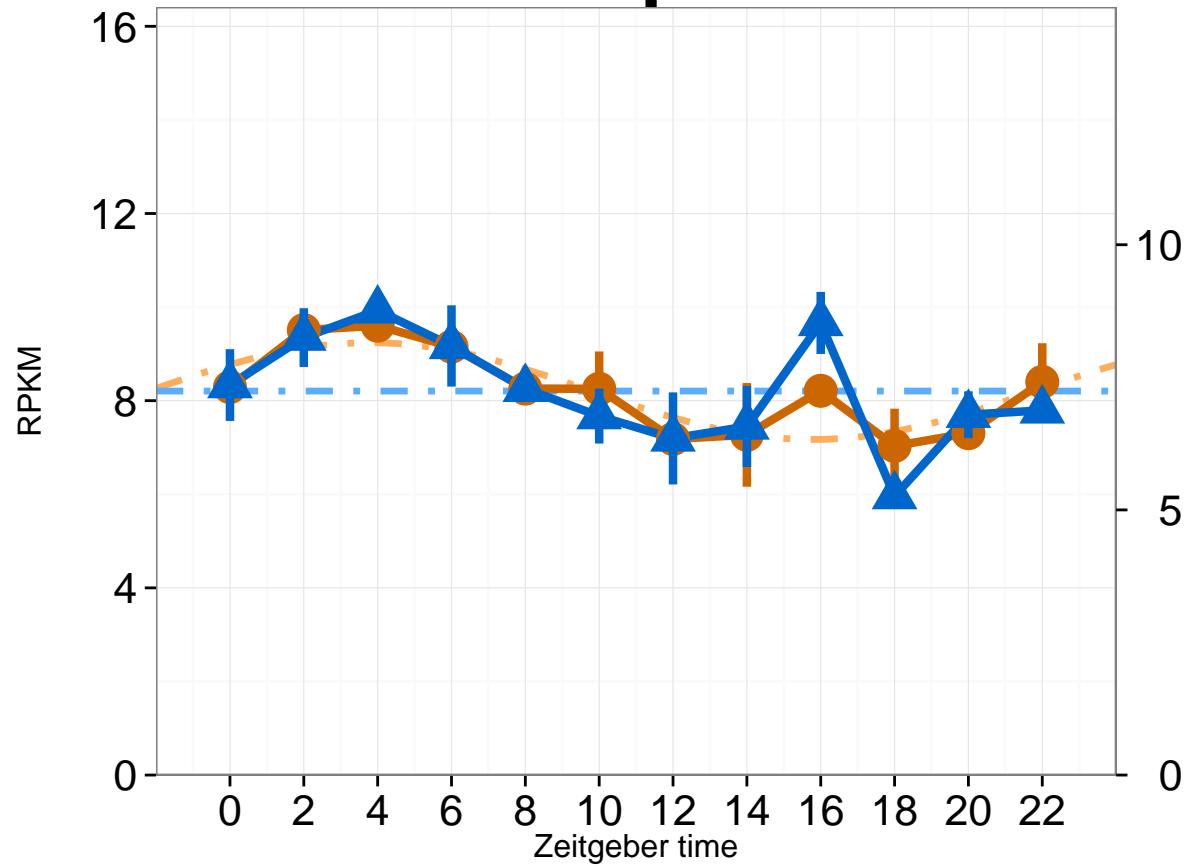

# Akap12

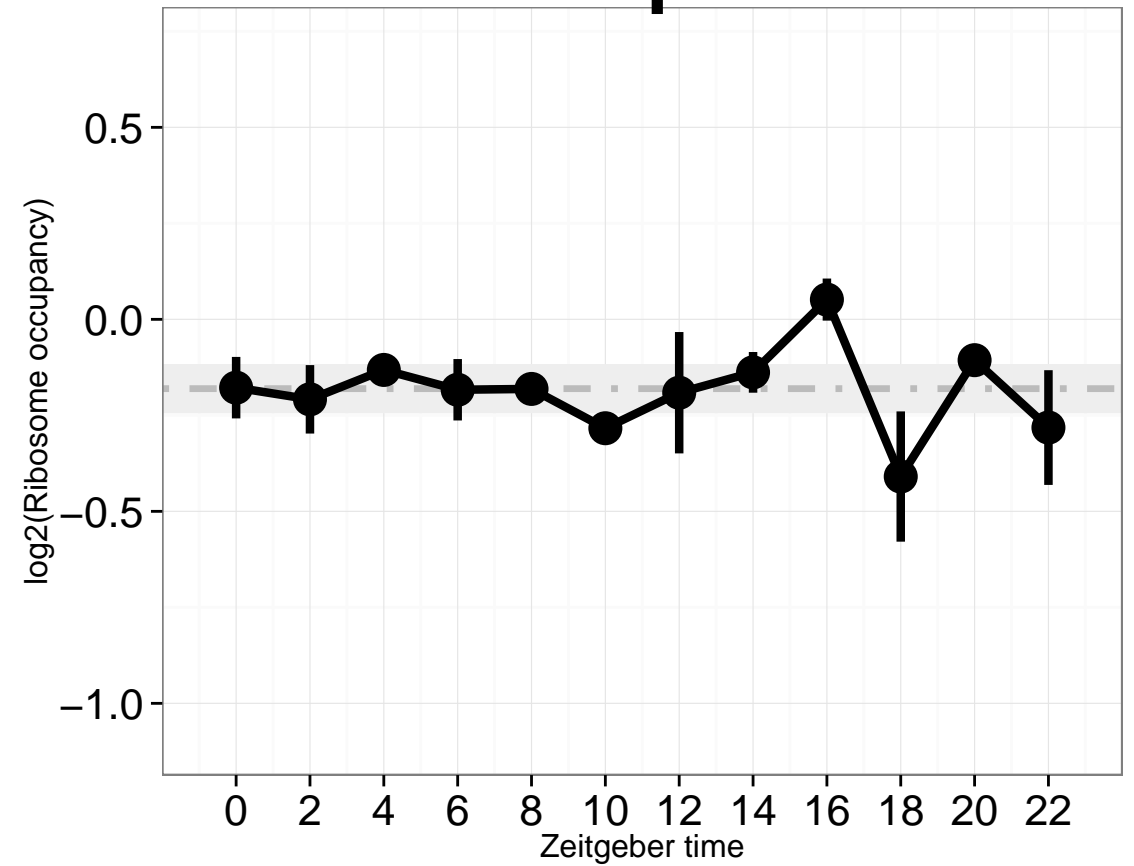

Supplement: Supplementary file 4788 [file 1]

## Fxr2

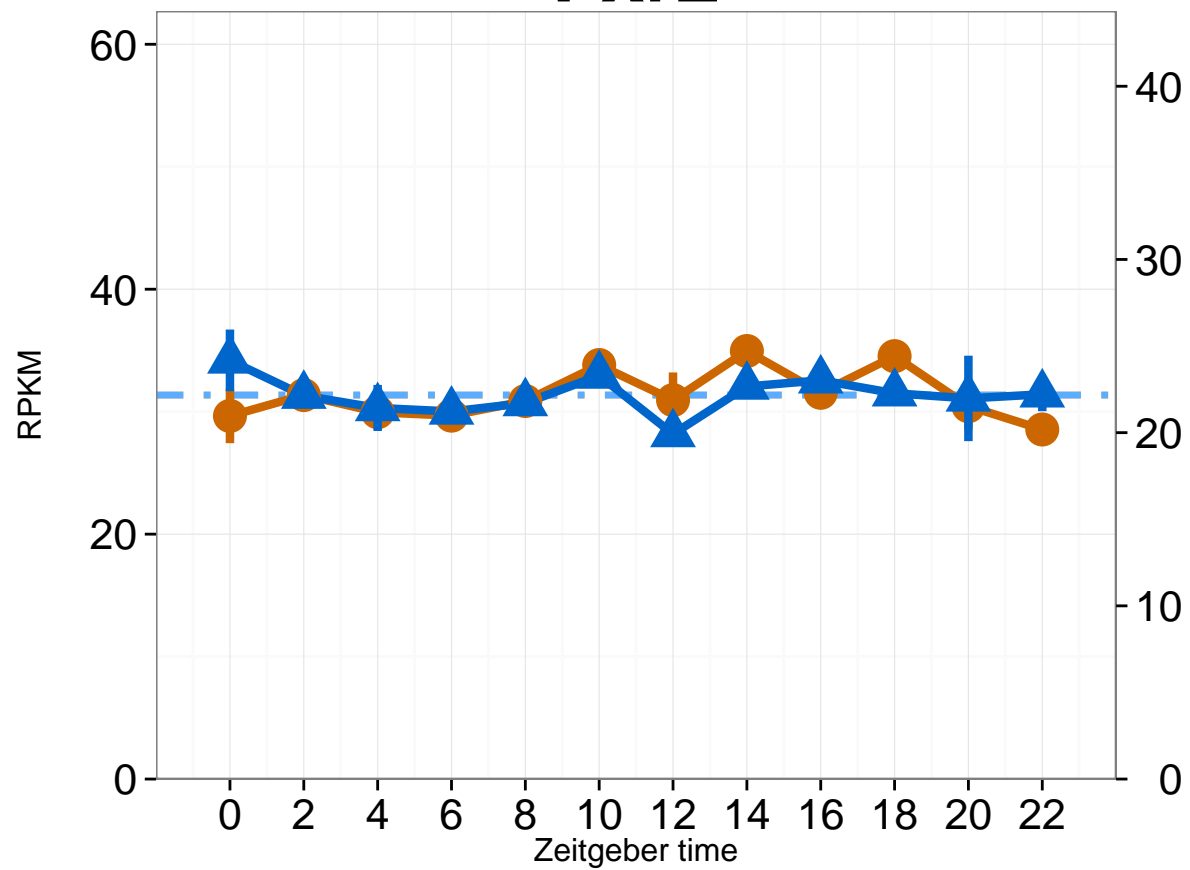

## Fxr2

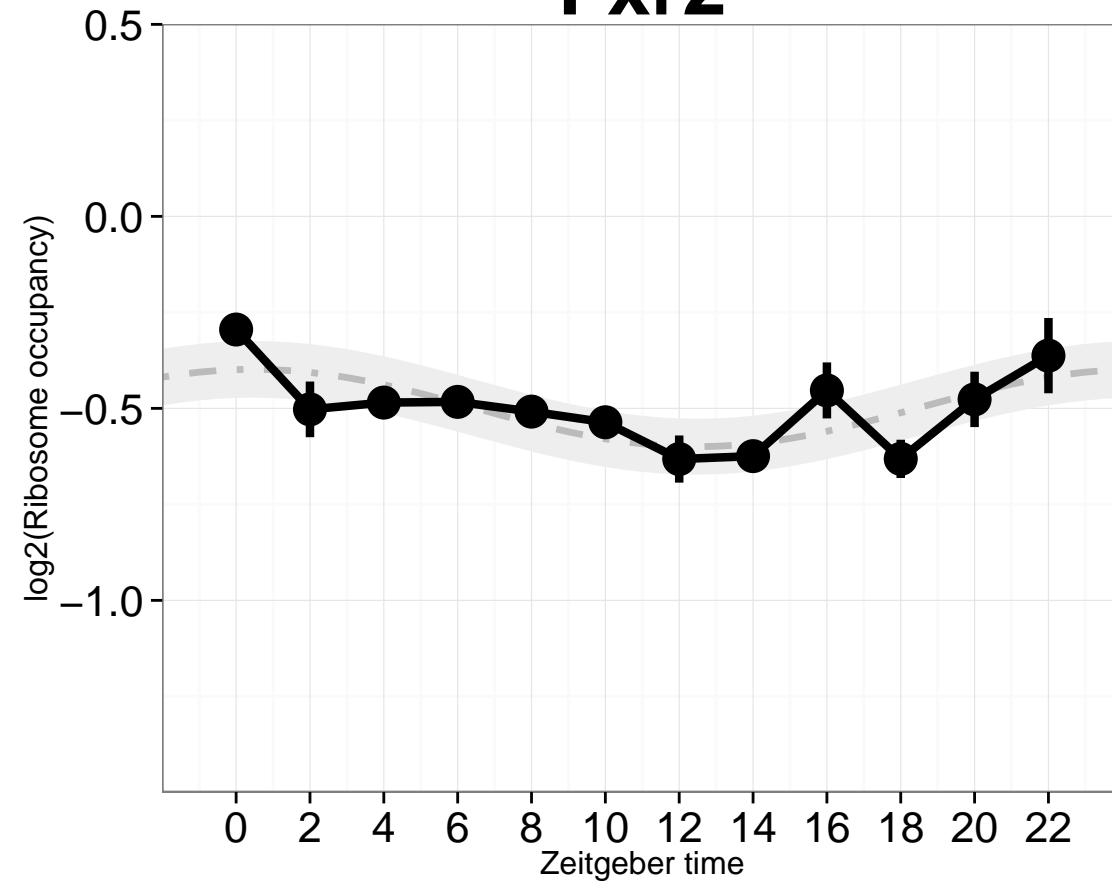

Supplement: Supplementary file 4789 [file 1]

## Tie1

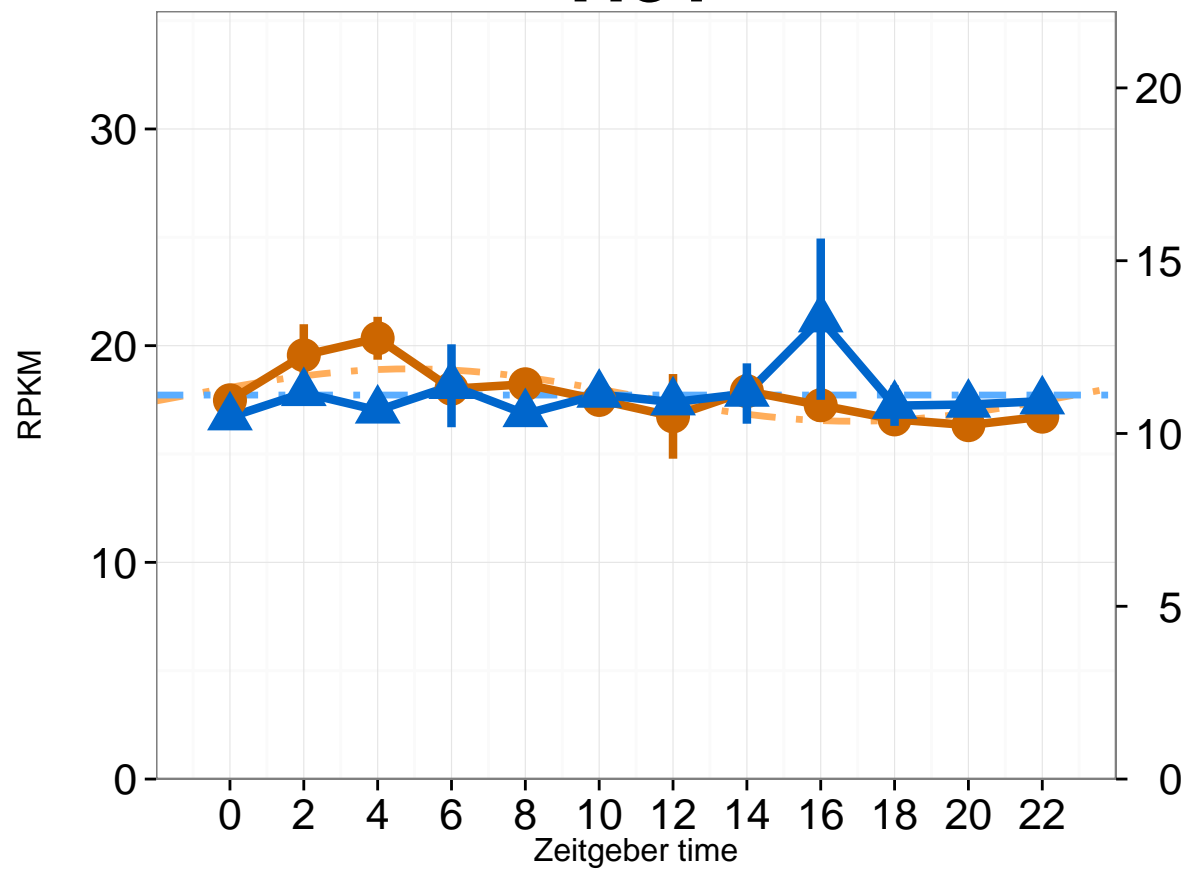

## Tie1

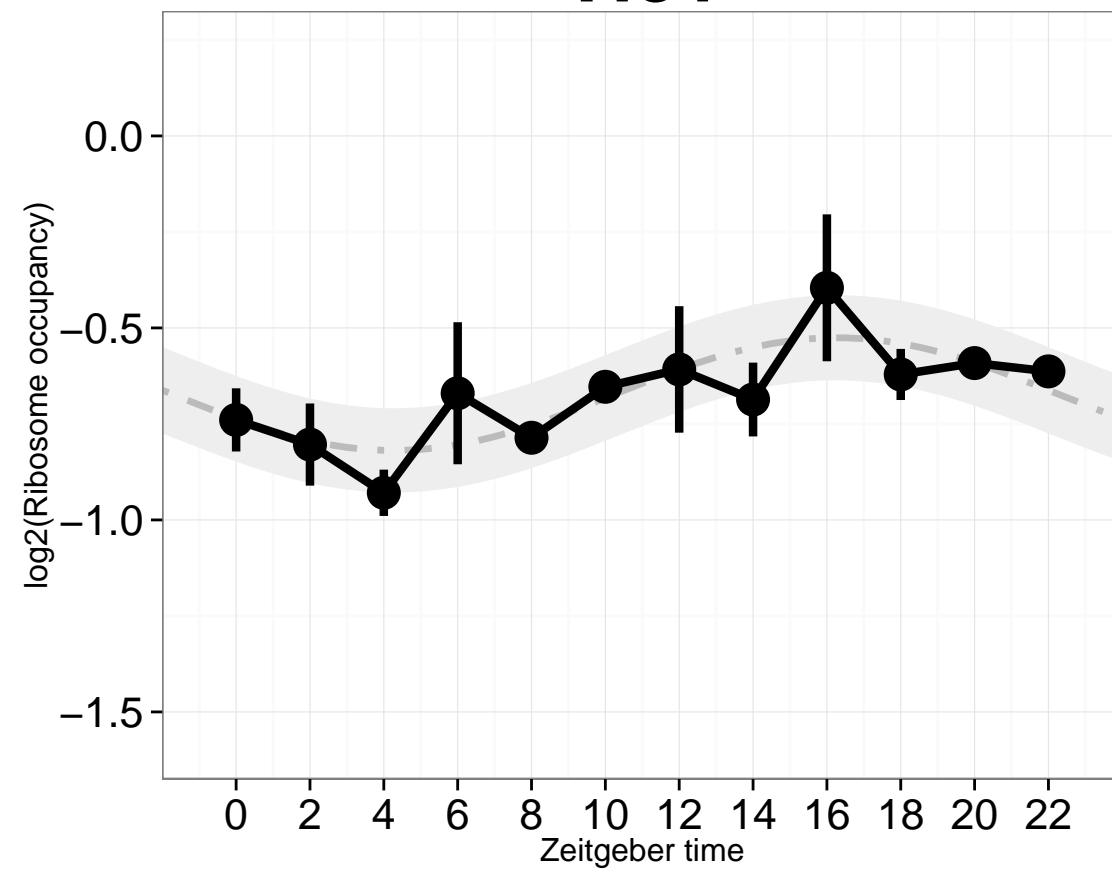

Supplement: Supplementary file 4790 [file 1]

# Rnf5

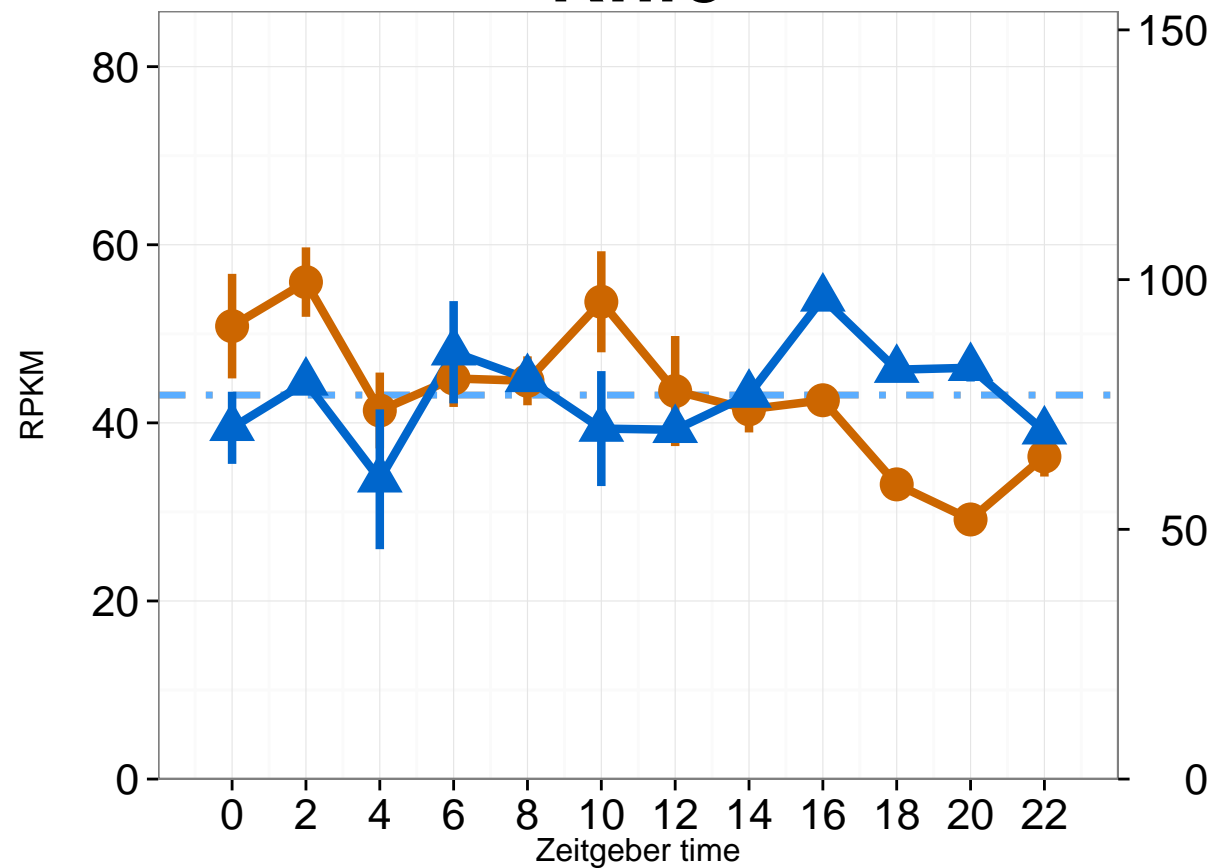

# Rnf5

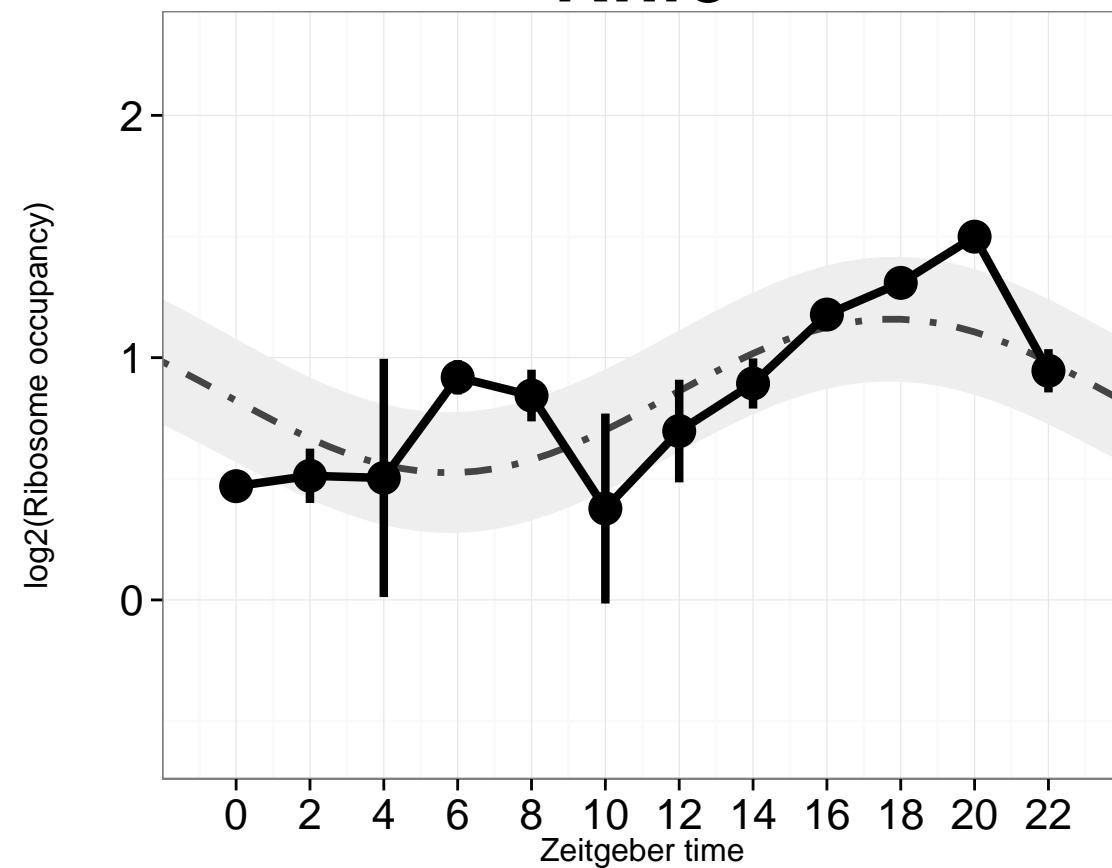

Supplement: Supplementary file 4791 [file 1]

# BC004004

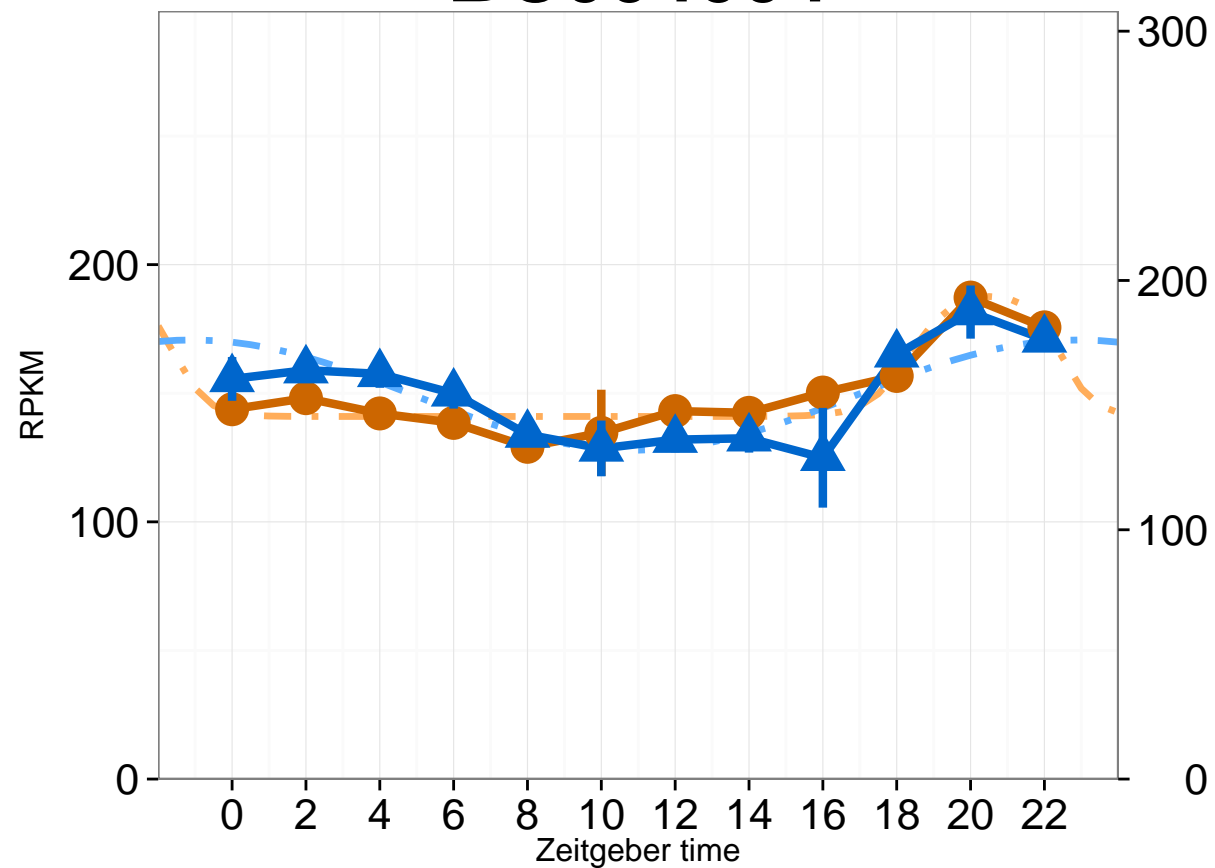

# BC004004

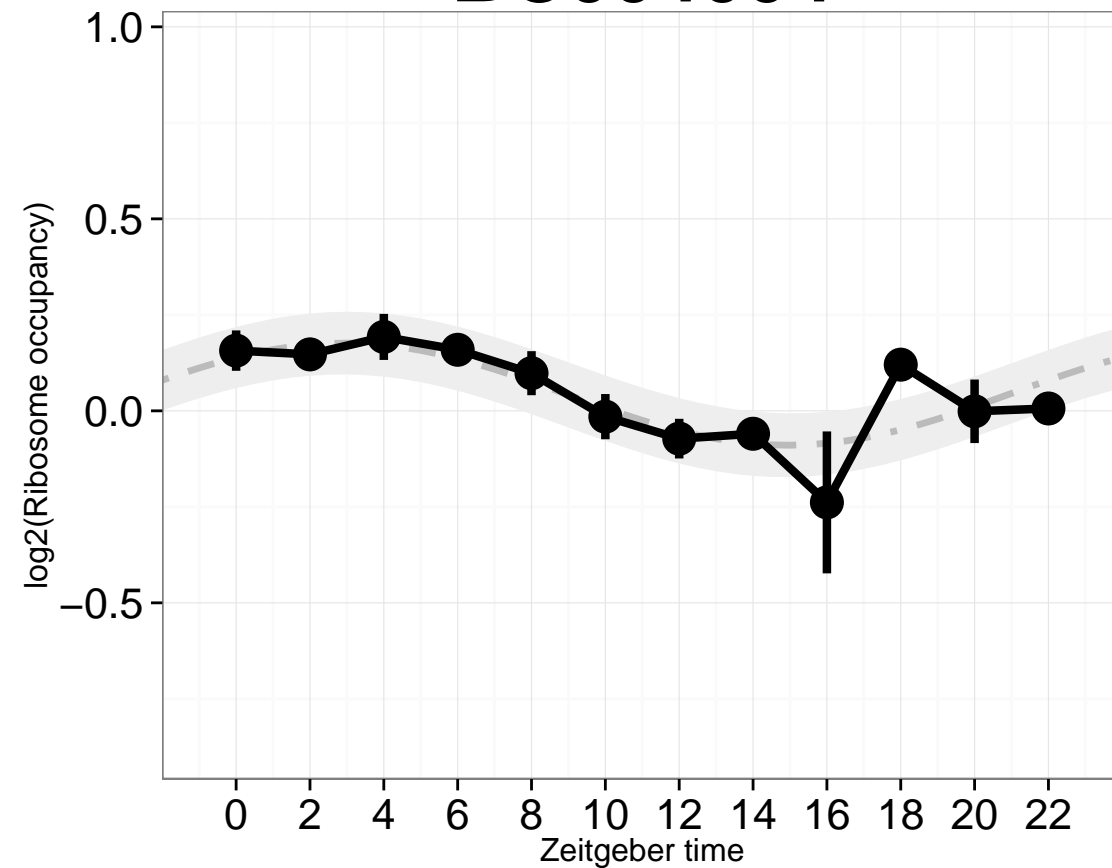

Supplement: Supplementary file 4792 [file 1]

# Arhgef15

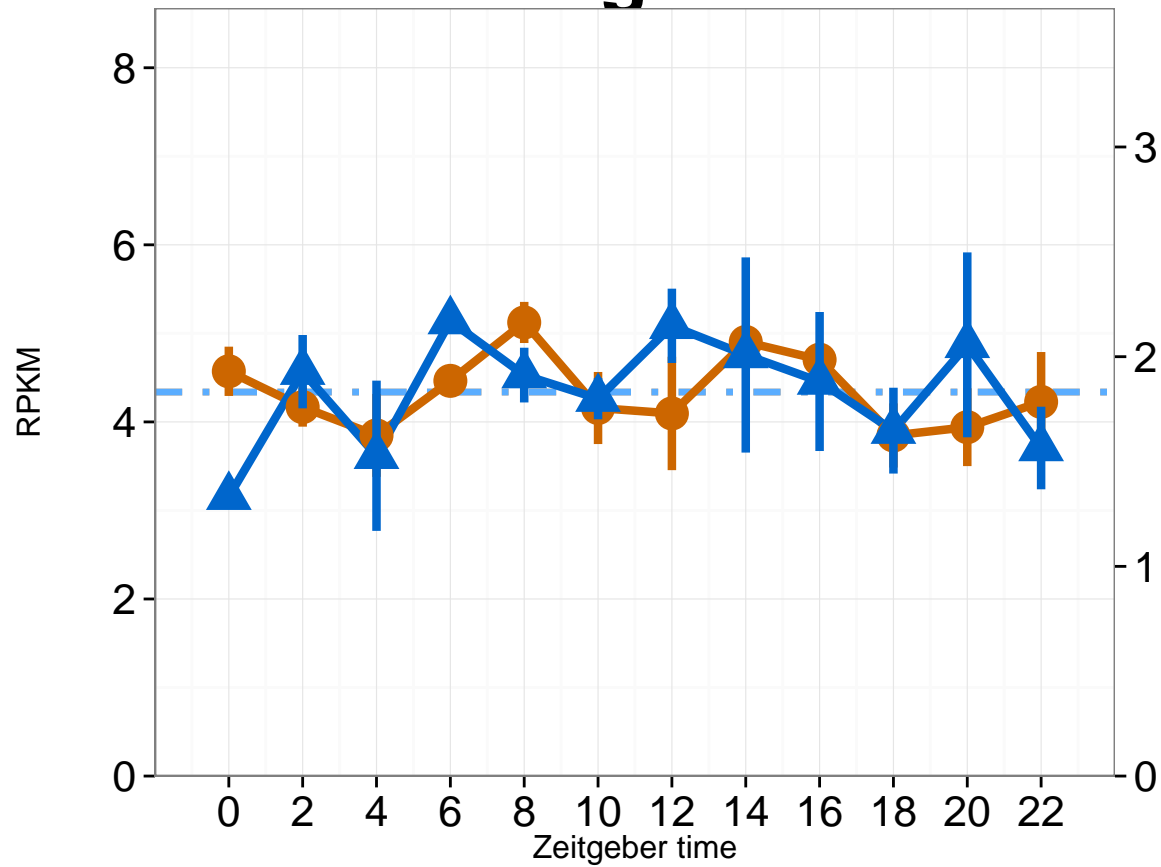

# Arhgef15

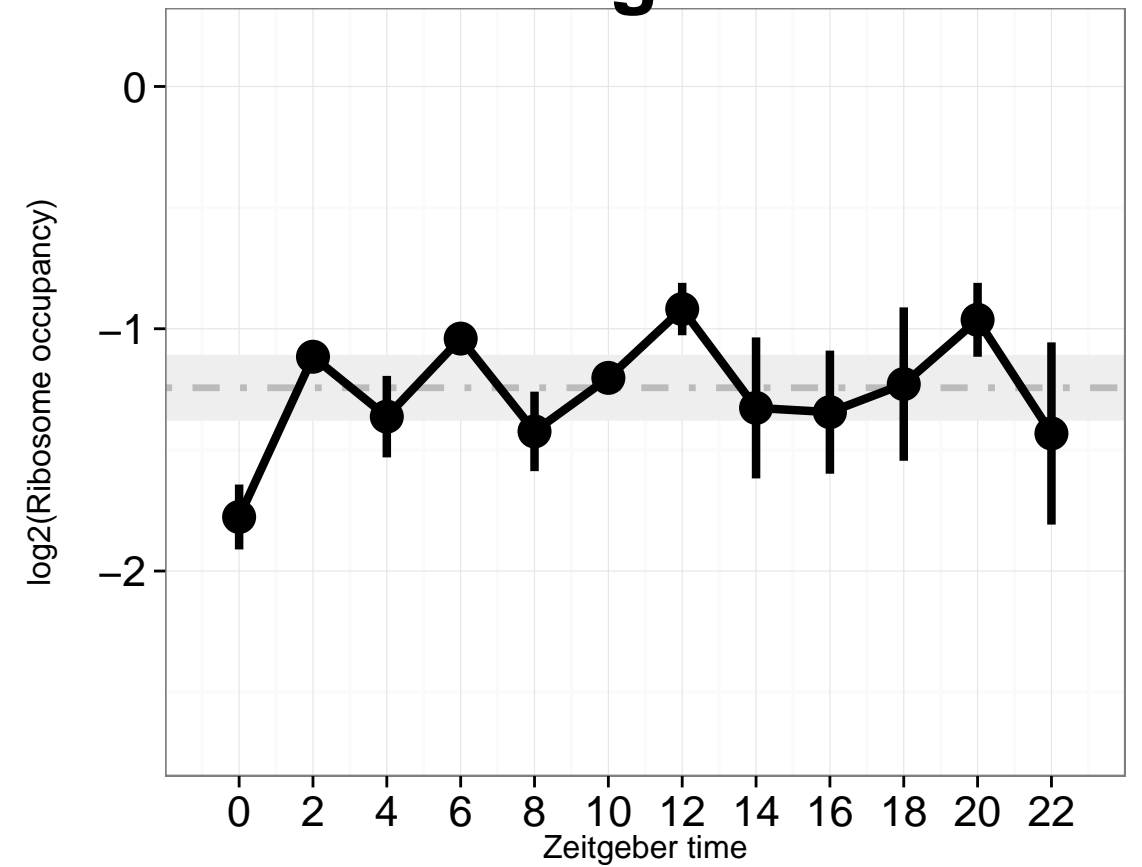

Supplement: Supplementary file 4793 [file 1]

## Lin9

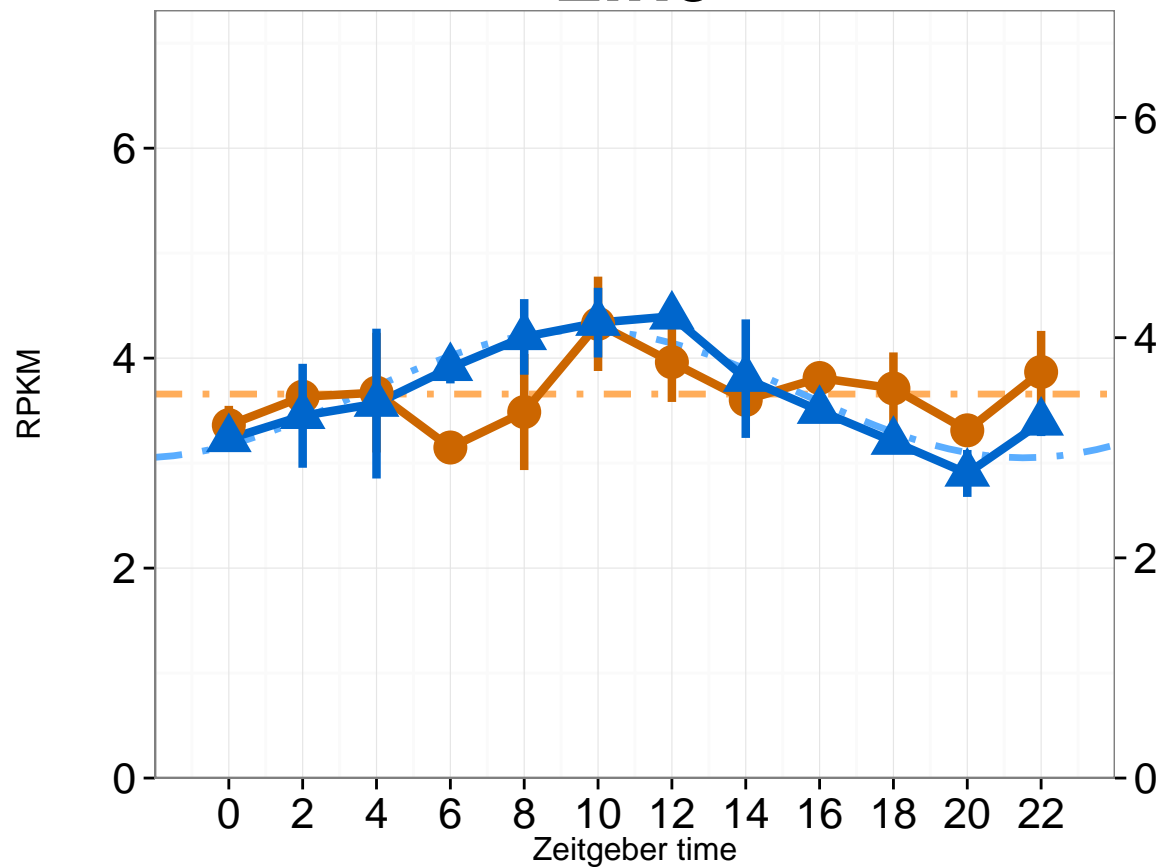

## Lin9

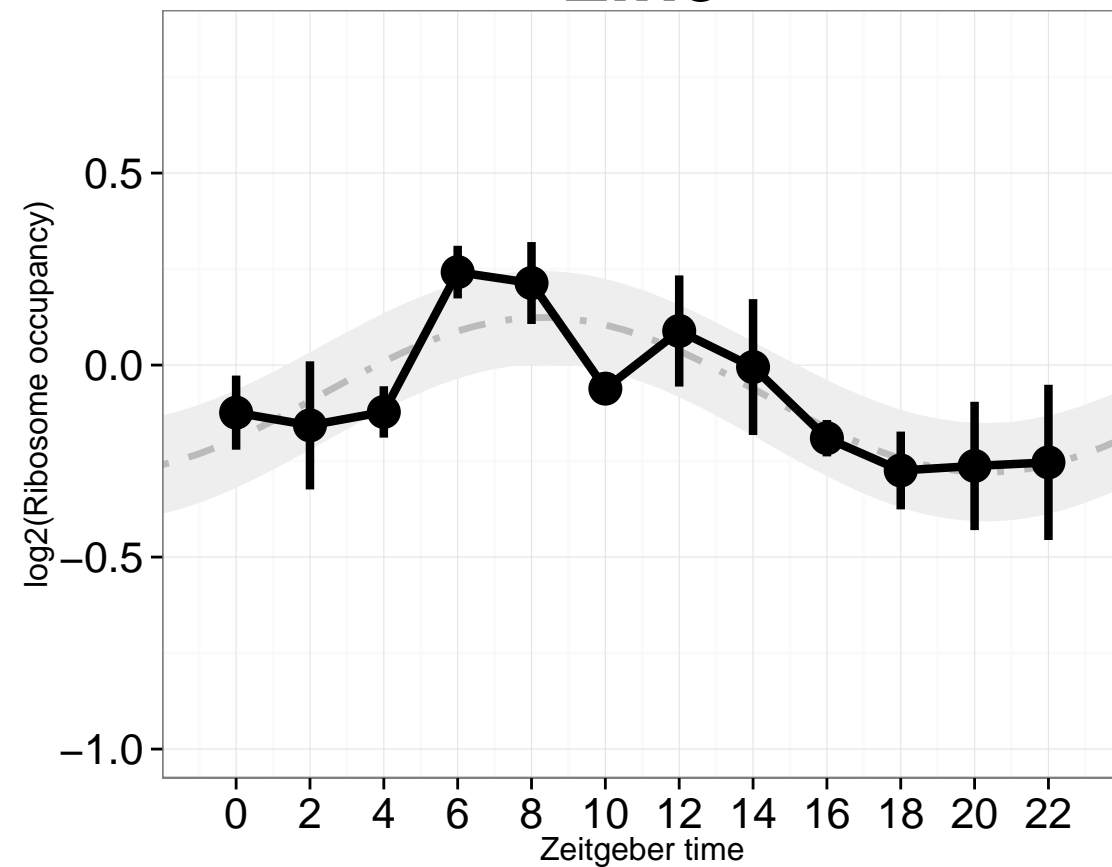

Supplement: Supplementary file 4794 [file 1]

## Tsc22d1

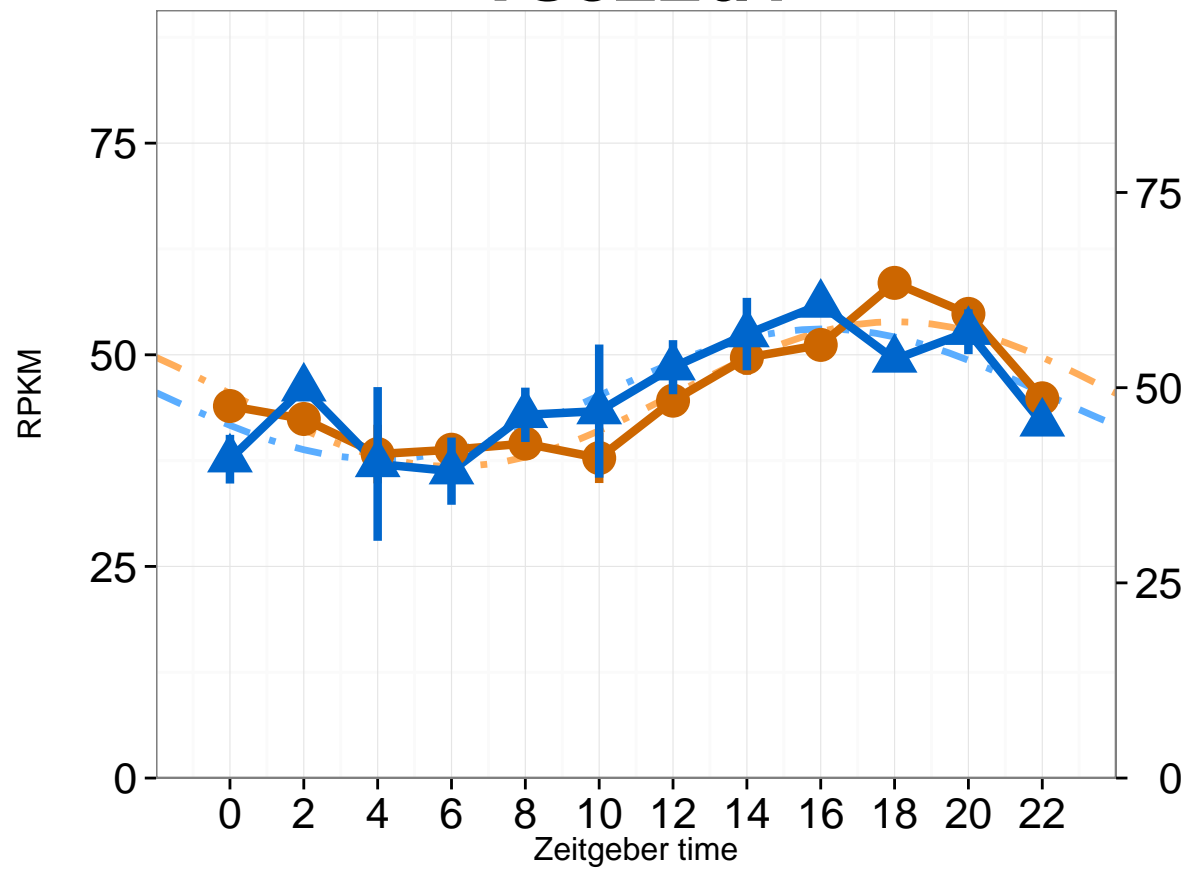

## Tsc22d1

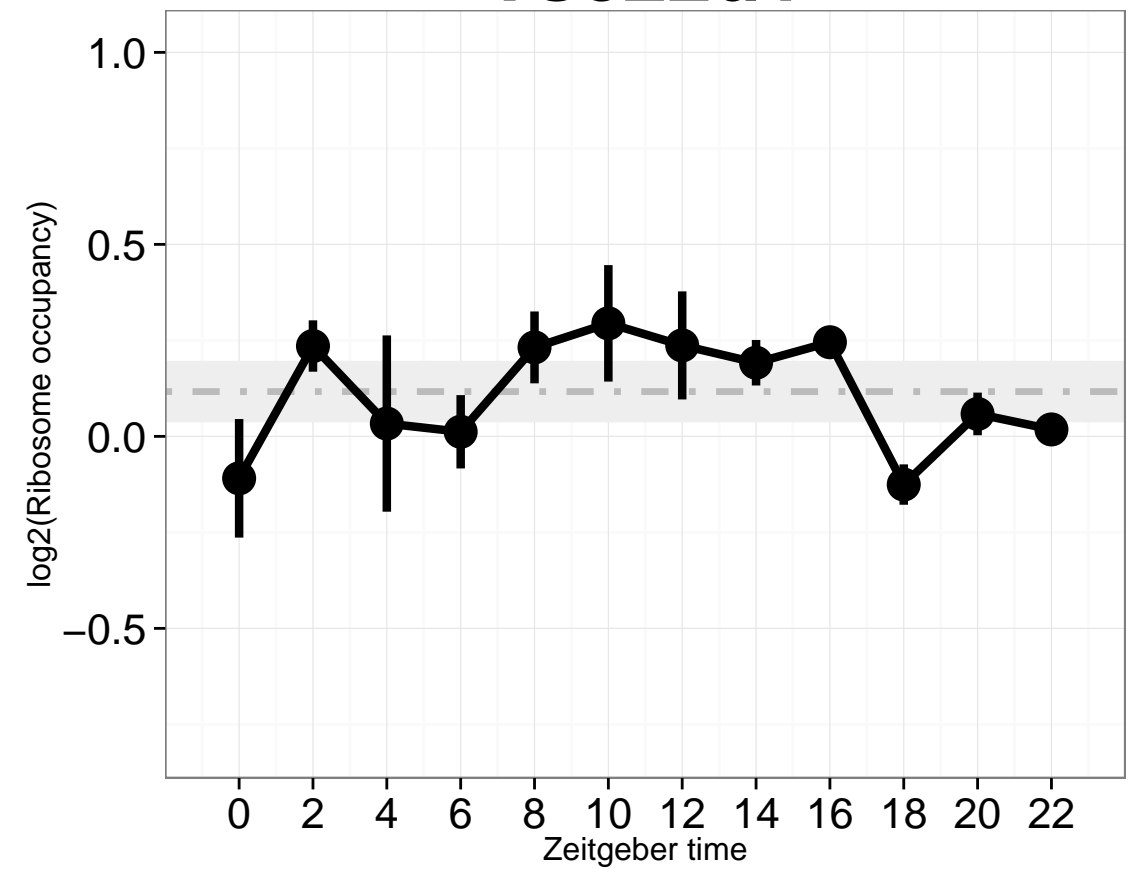

Supplement: Supplementary file 4795 [file 1]

## Aspa

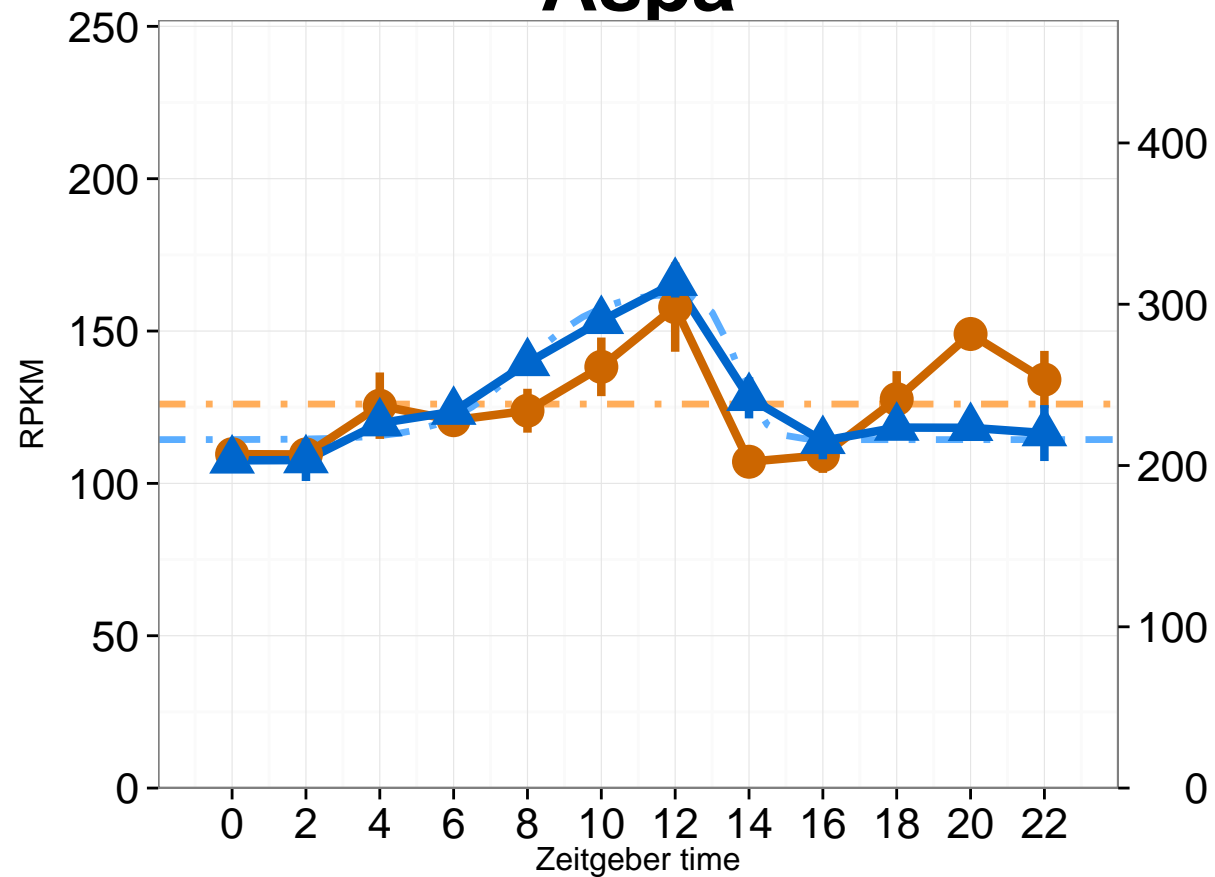

## Aspa

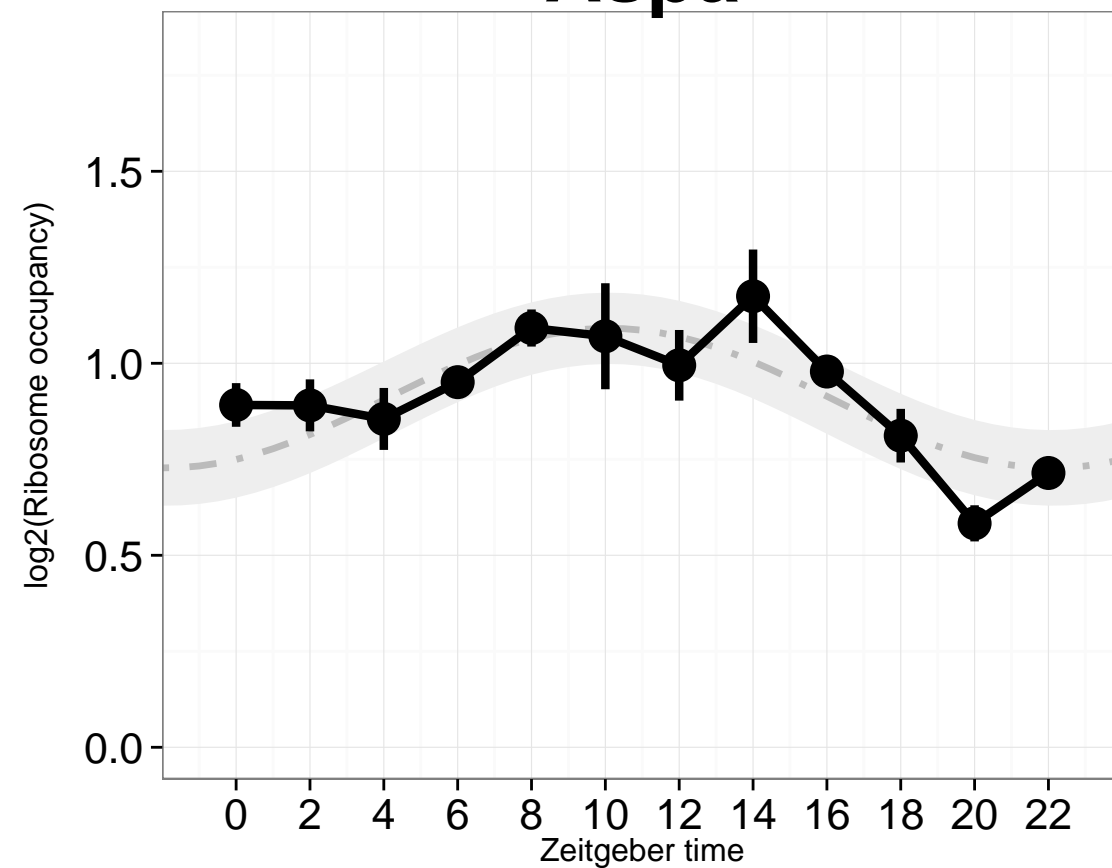

Supplement: Supplementary file 4796 [file 1]

# Sugp2

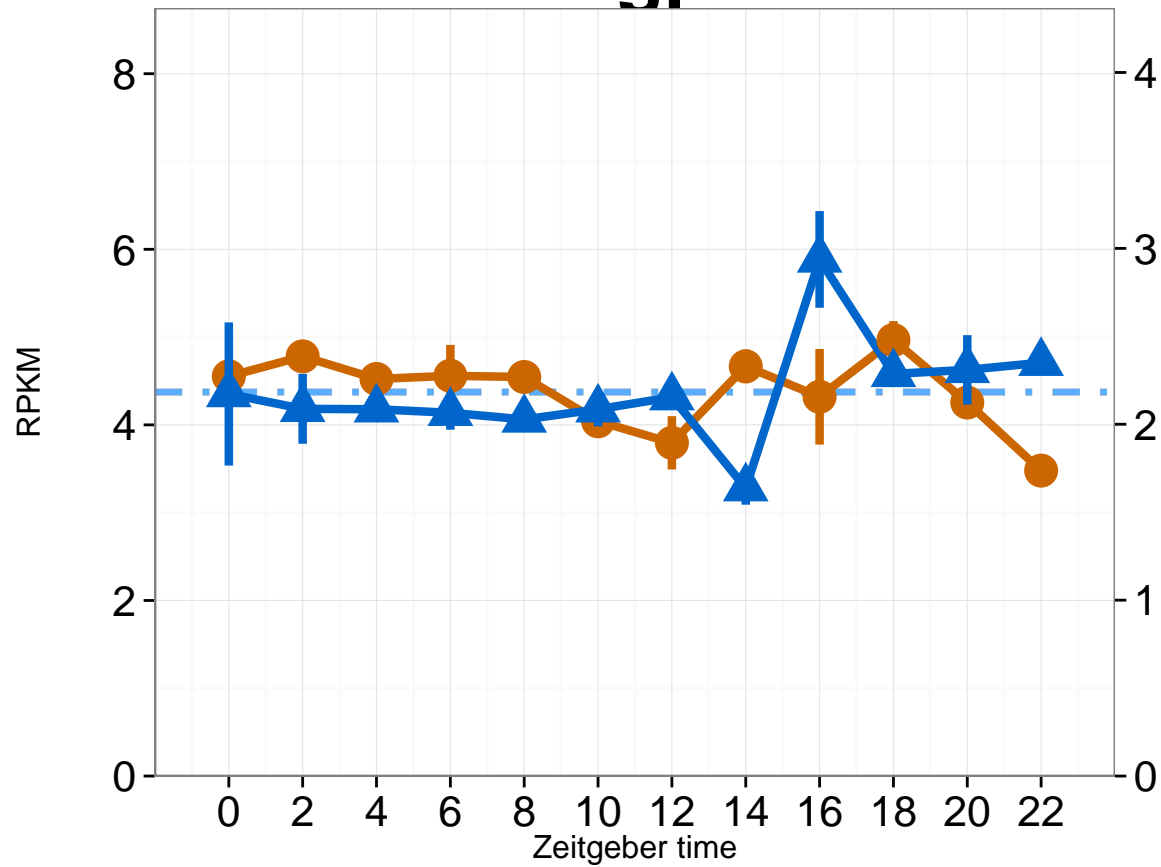

# Sugp2

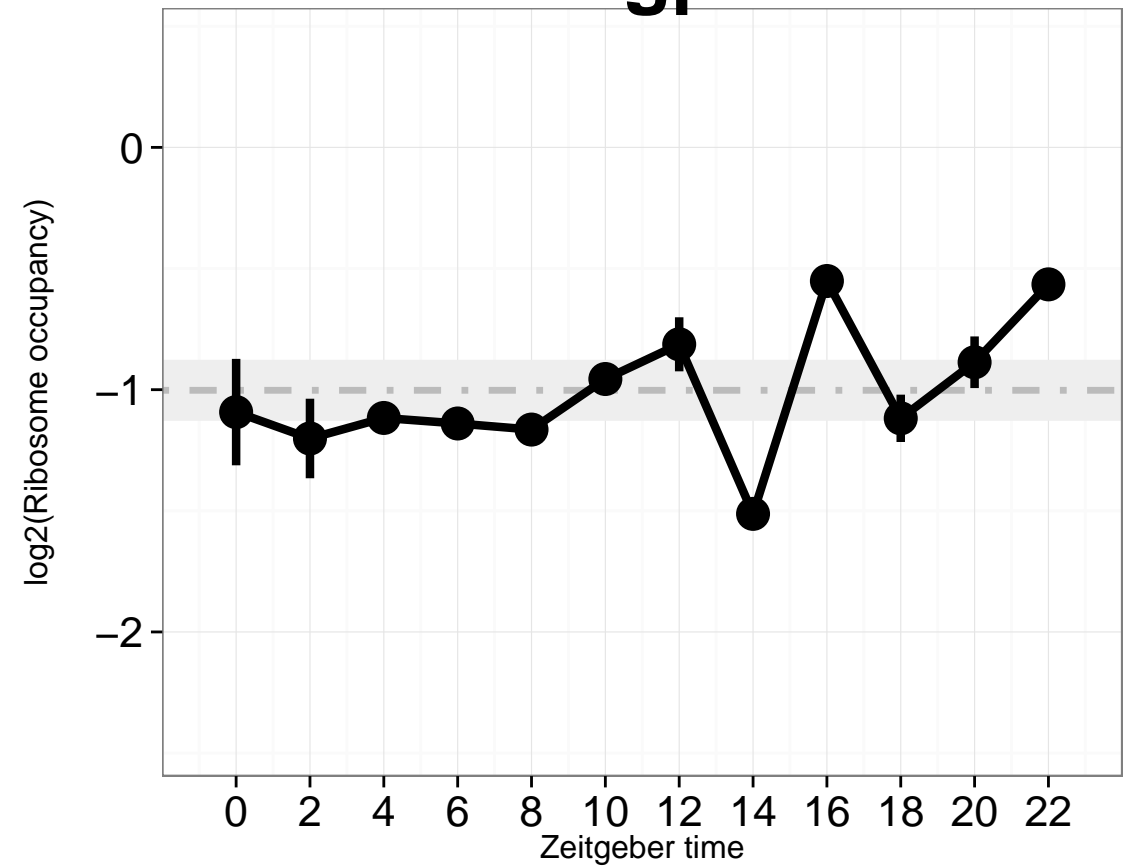

Supplement: Supplementary file 4797 [file 1]

# Map3k5

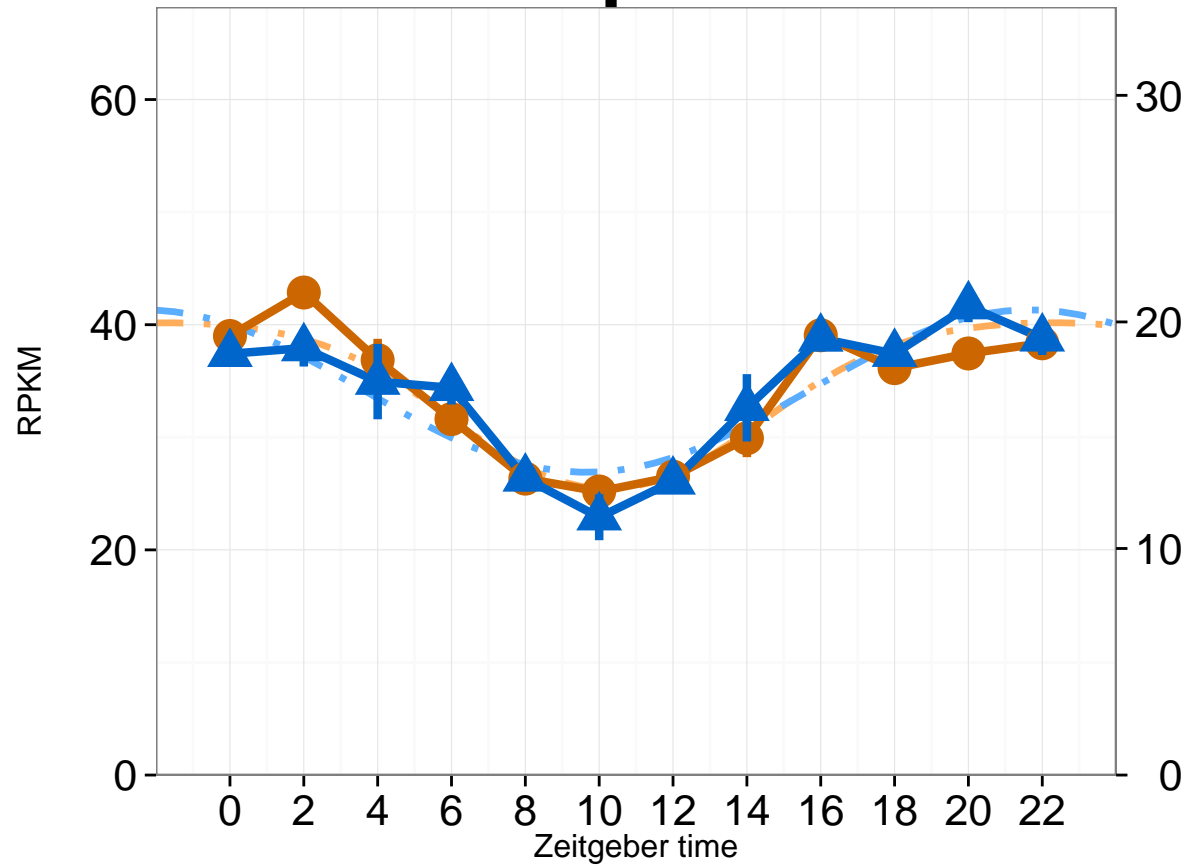

# Map3k5

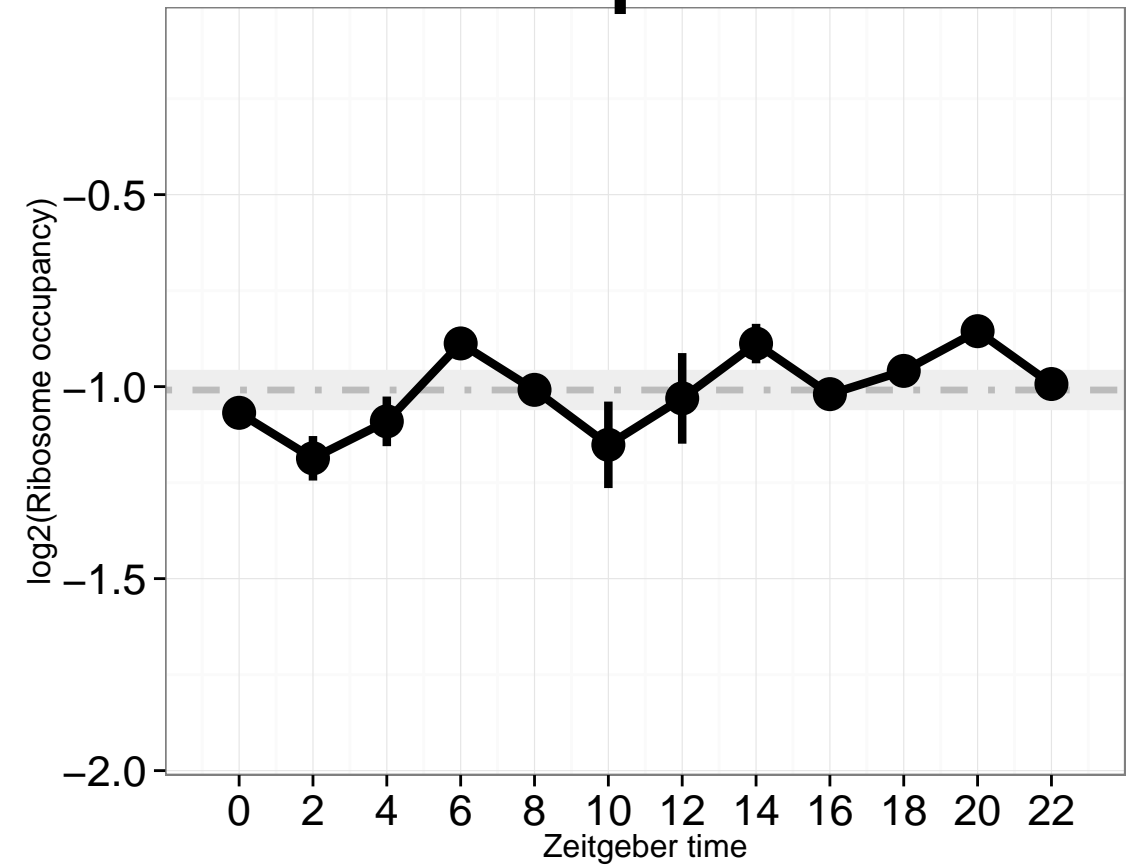

Supplement: Supplementary file 4798 [file 1]

## Unc45a

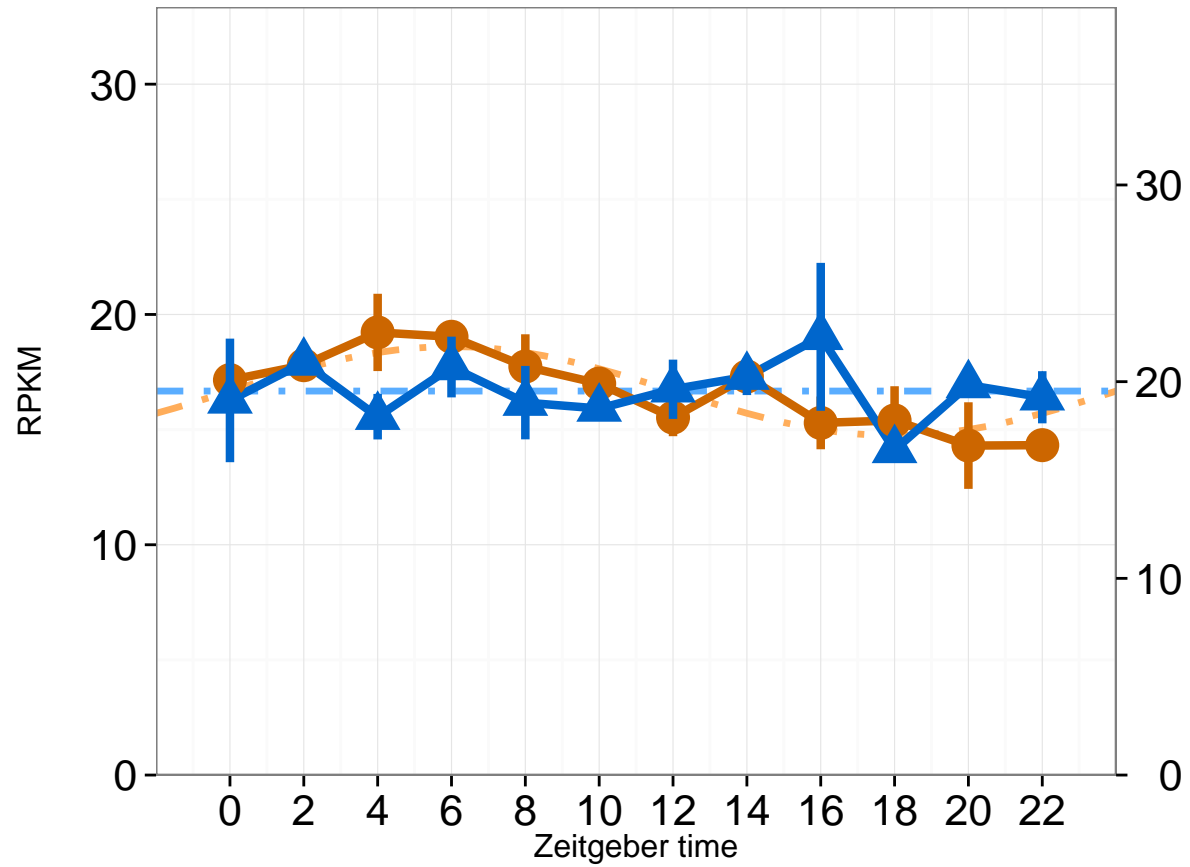

## Unc45a

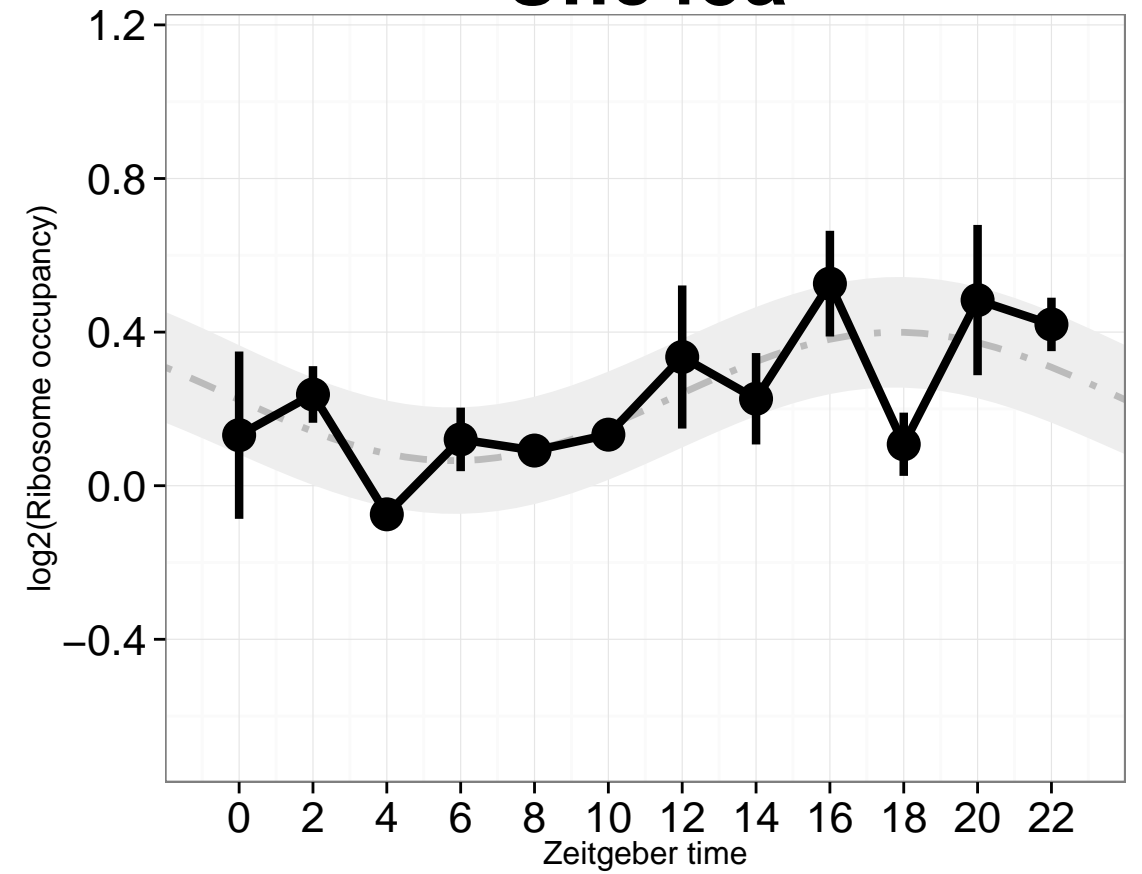

Supplement: Supplementary file 4799 [file 1]

# Tax1bp1

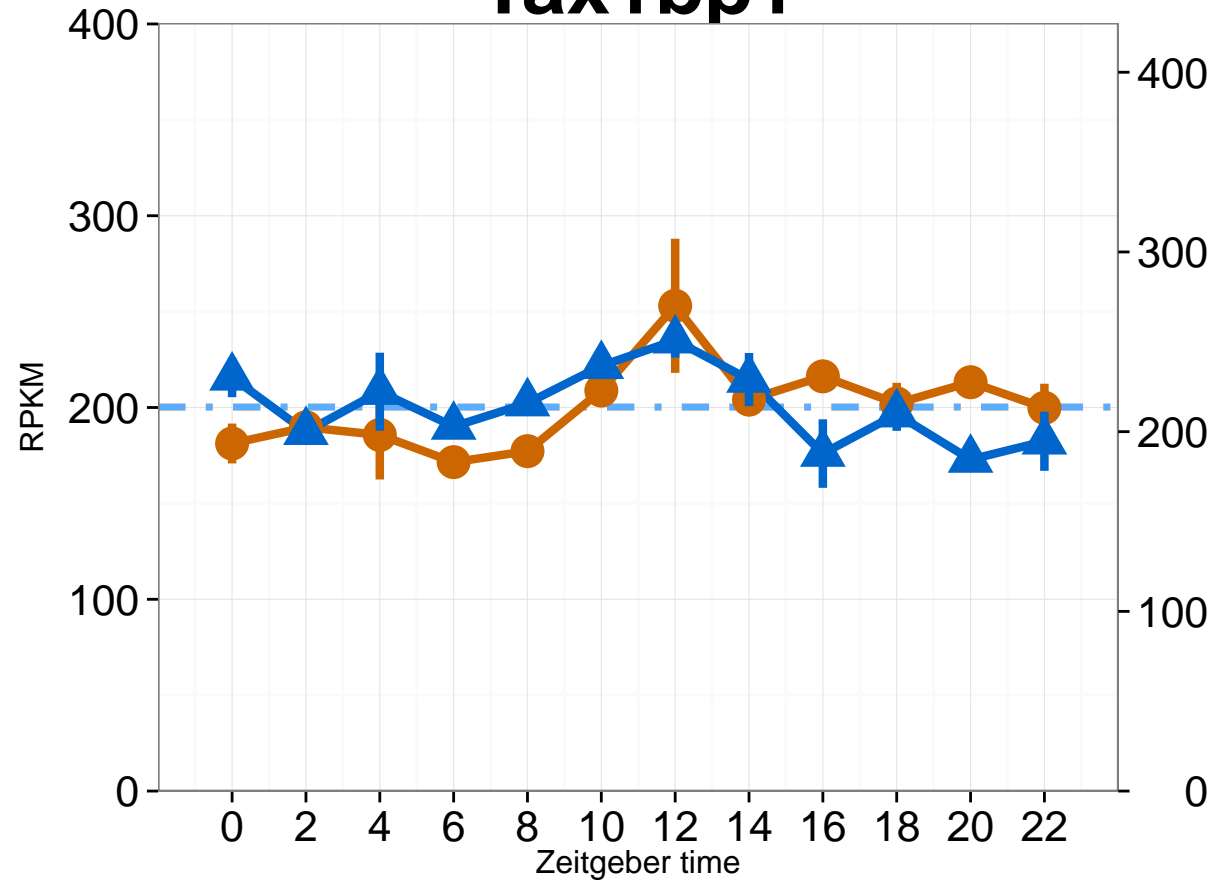

# Tax1bp1

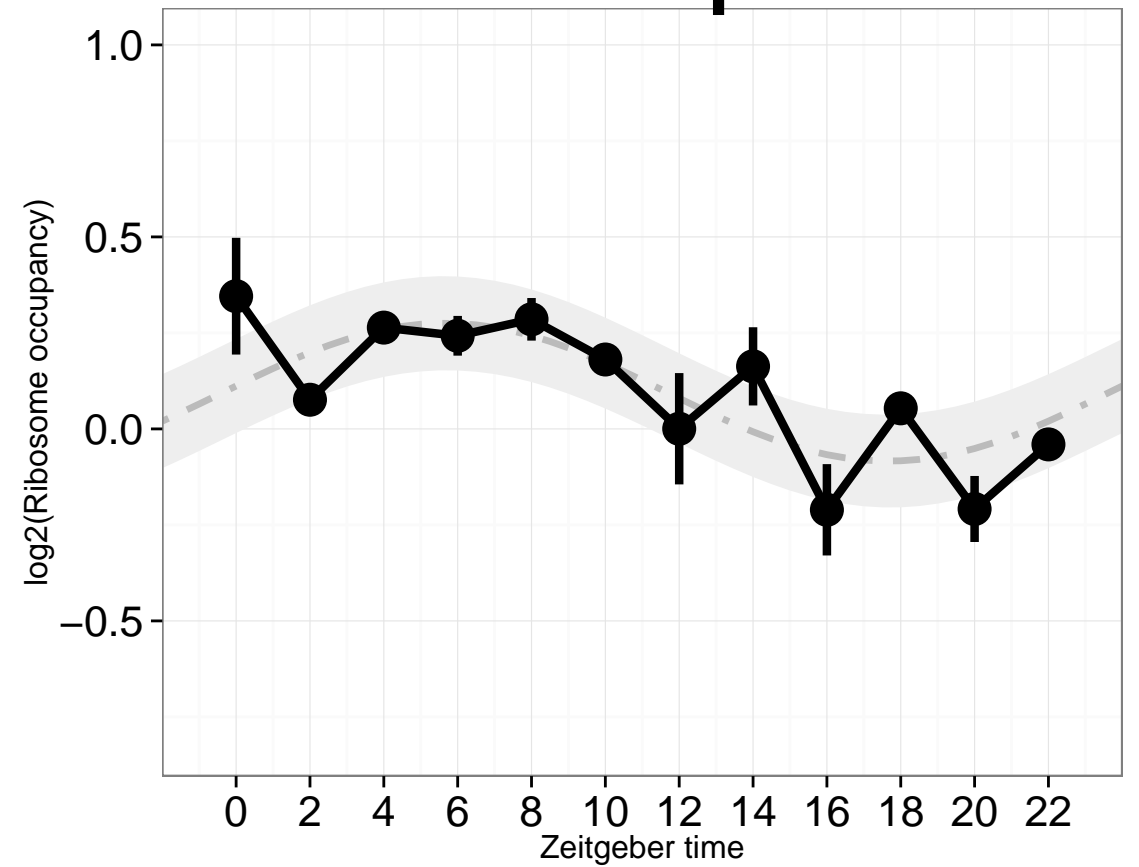

Supplement: Supplementary file 4800 [file 1]

**Nsmce2**

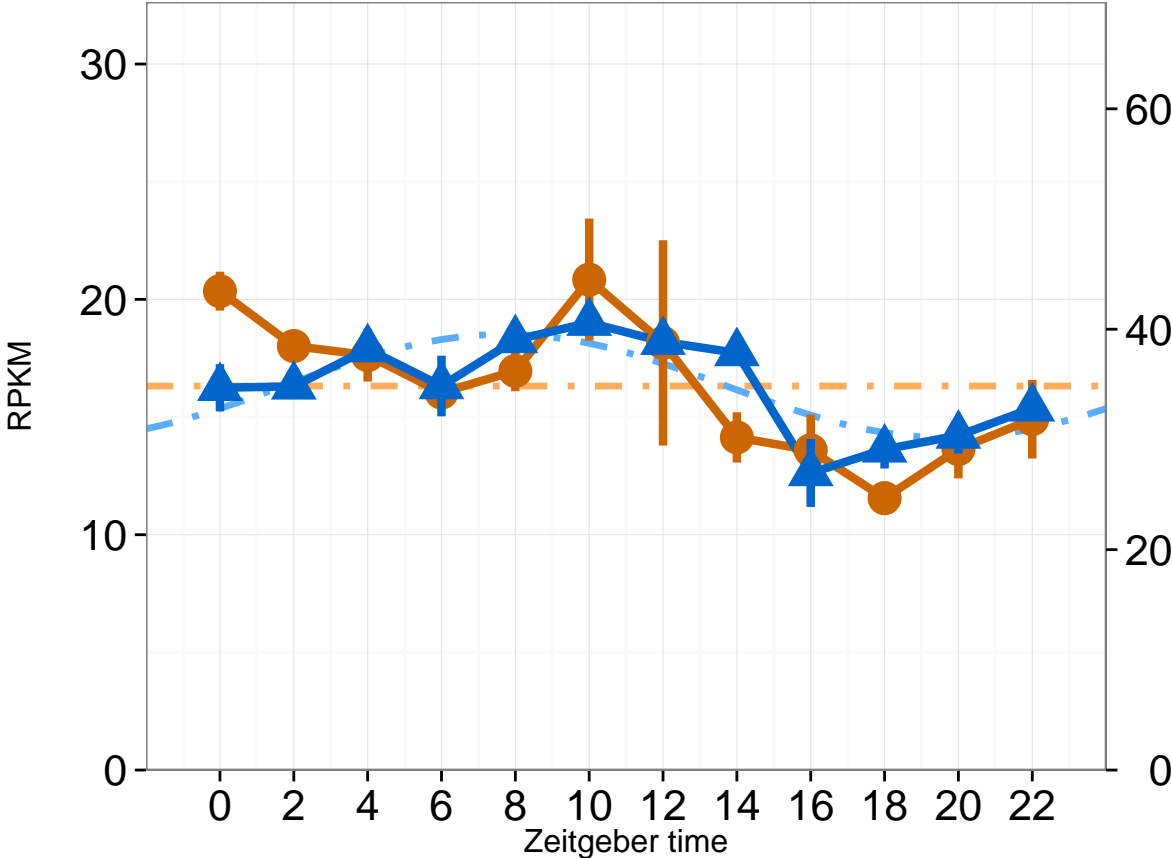

**Nsmce2**

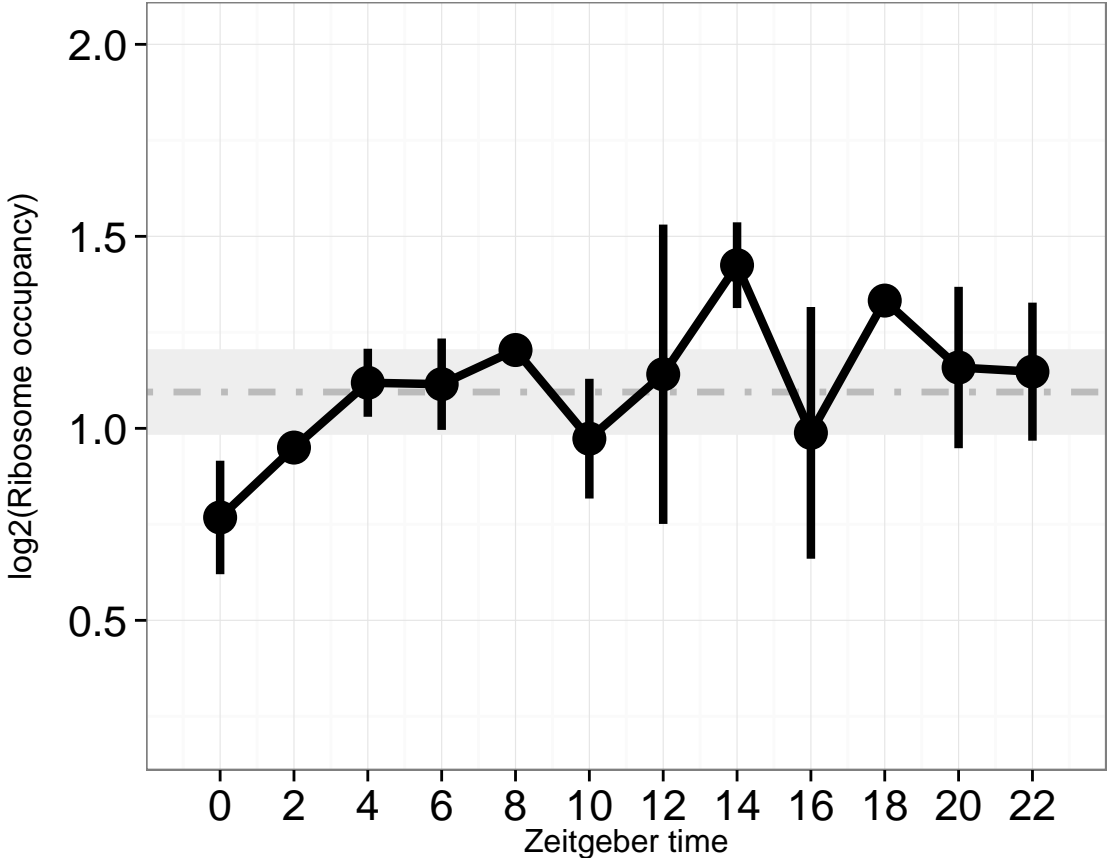

Supplement: Supplementary file 4801 [file 1]

## Hk2

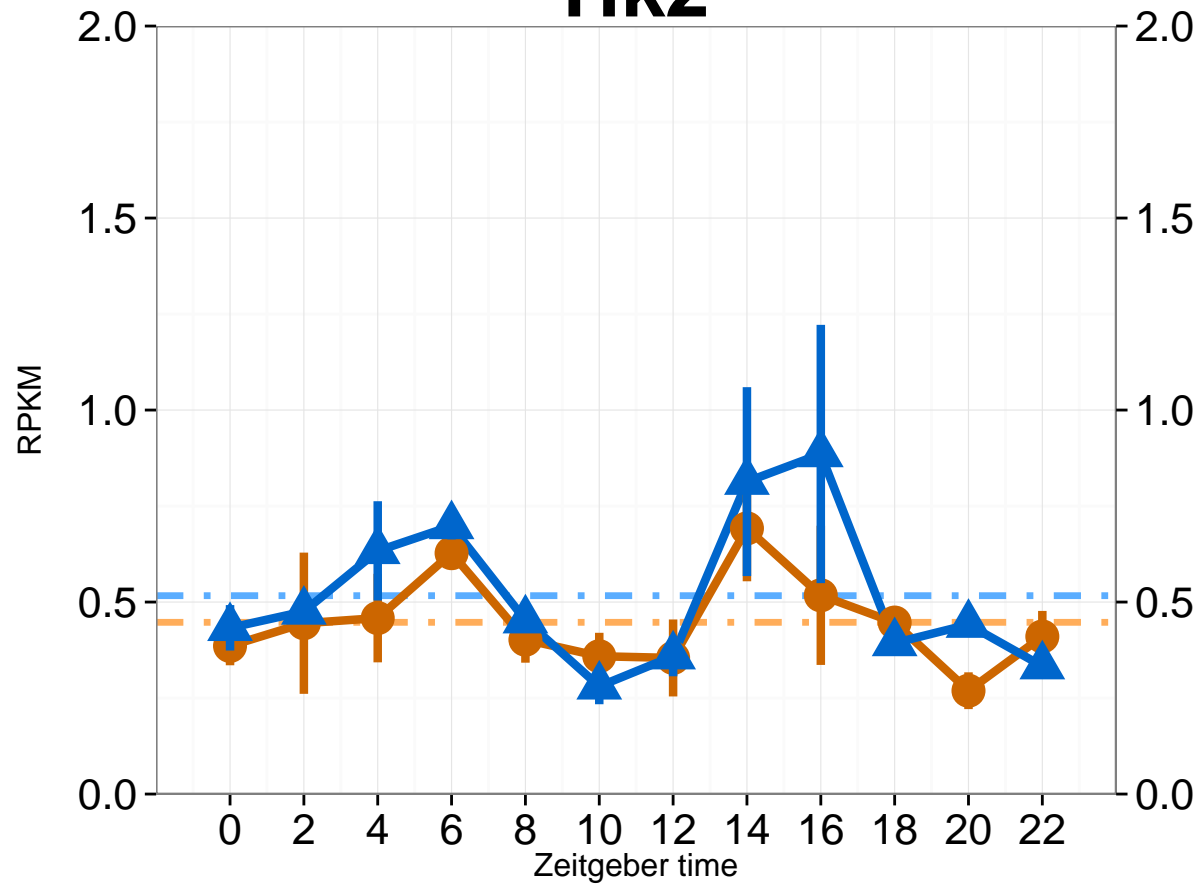

## Hk2

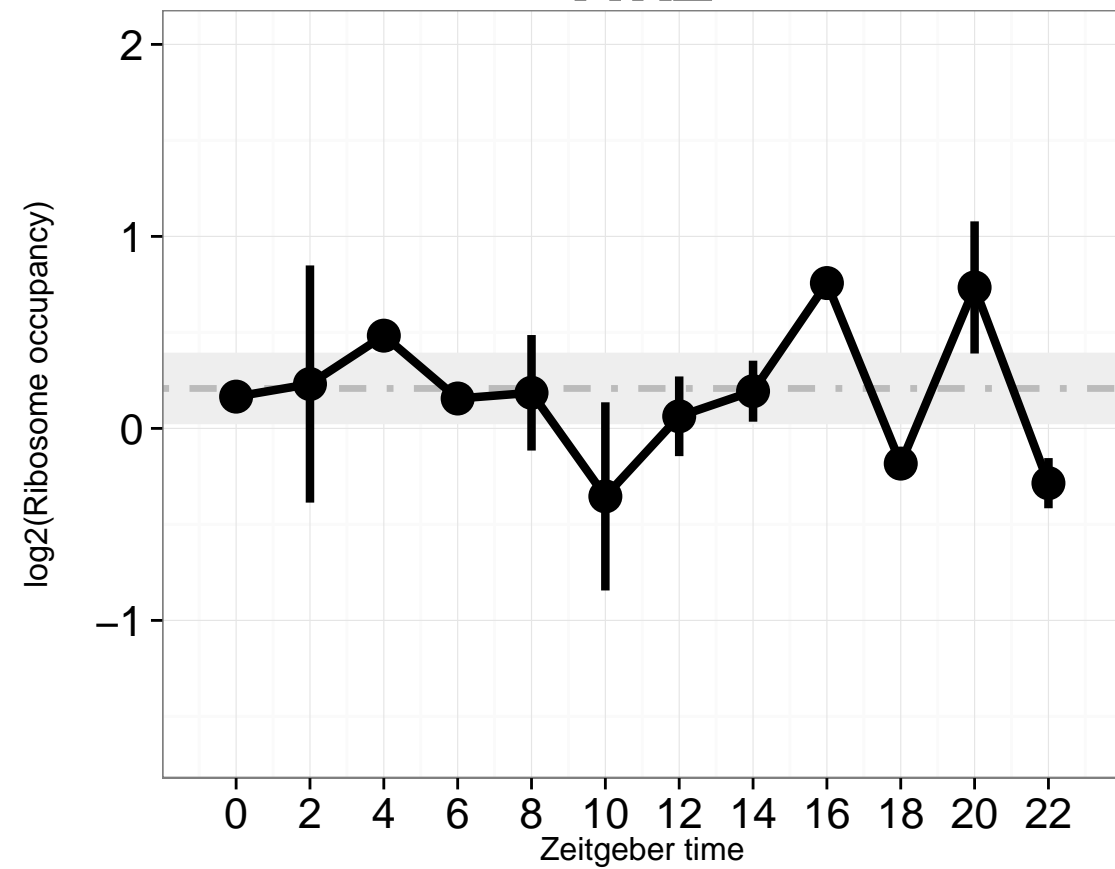

Supplement: Supplementary file 4802 [file 1]

## Pappa

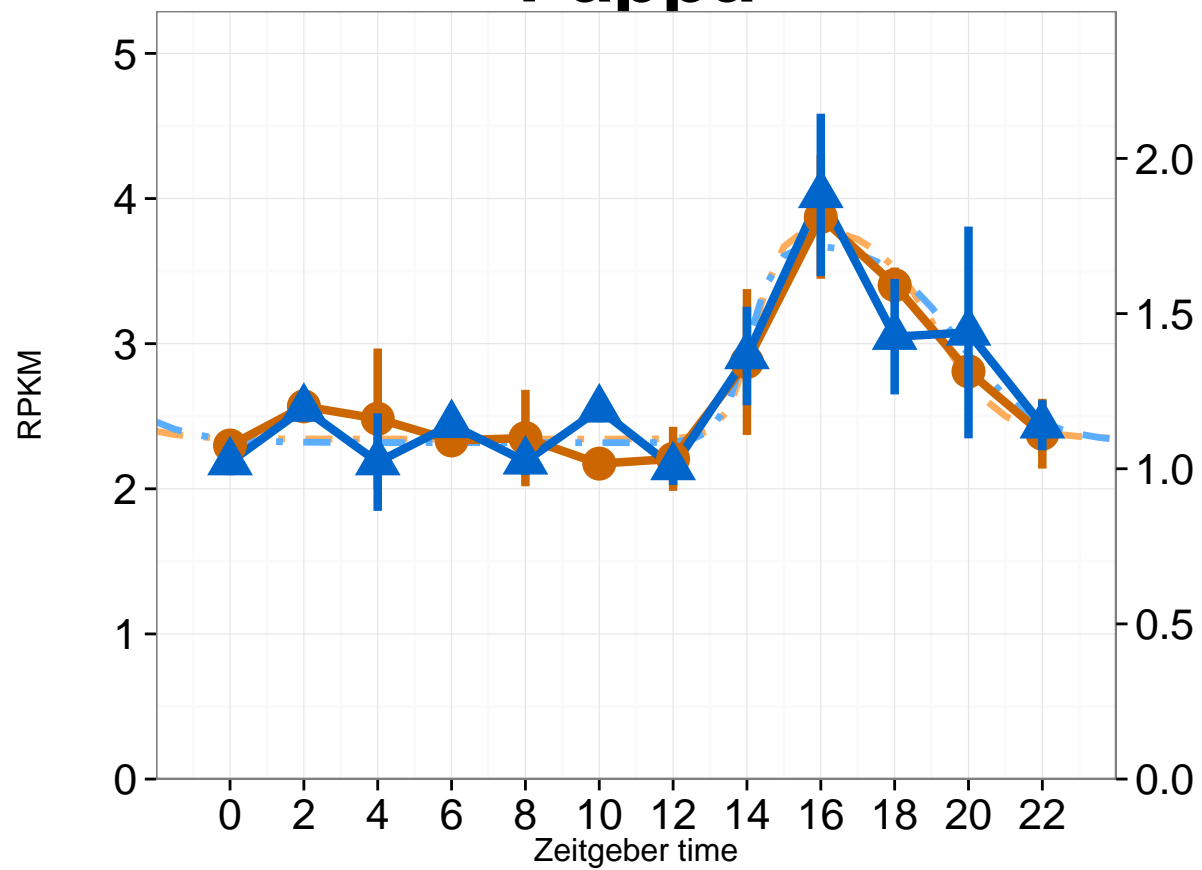

## Pappa

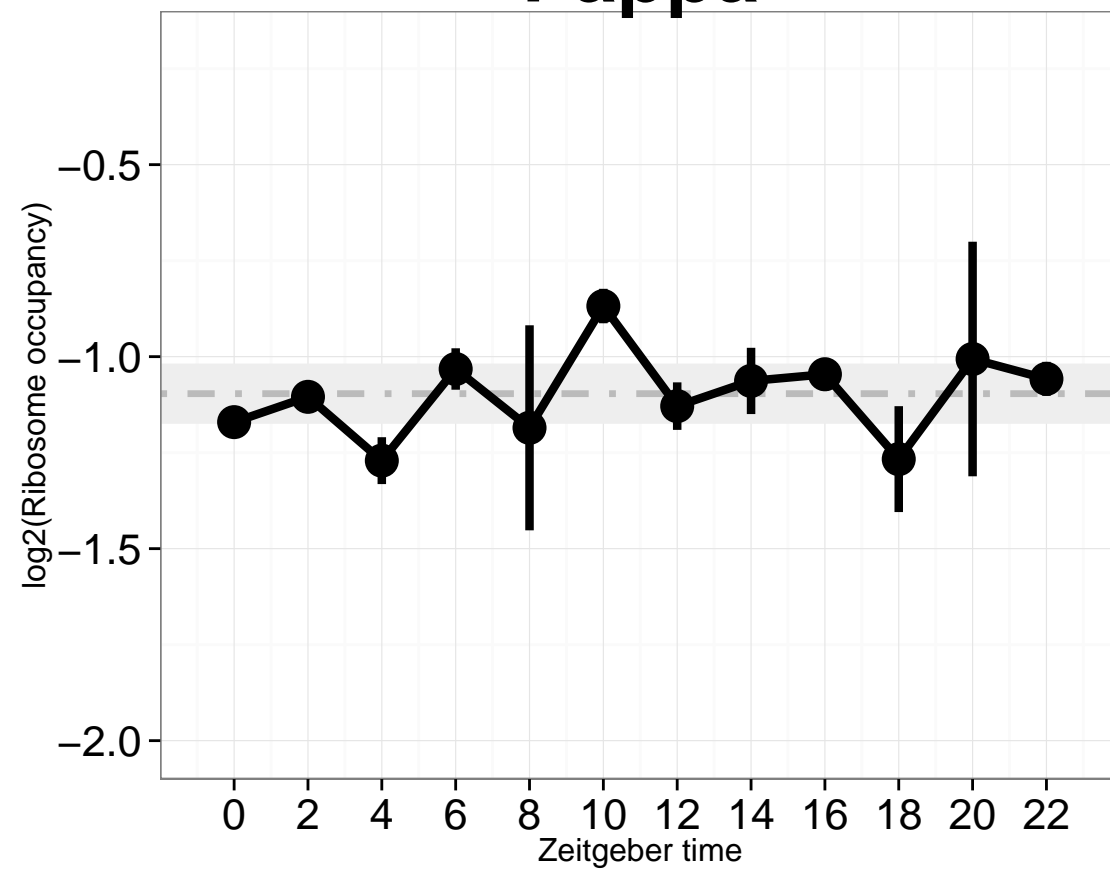

Supplement: Supplementary file 4803 [file 1]

# Tenm3

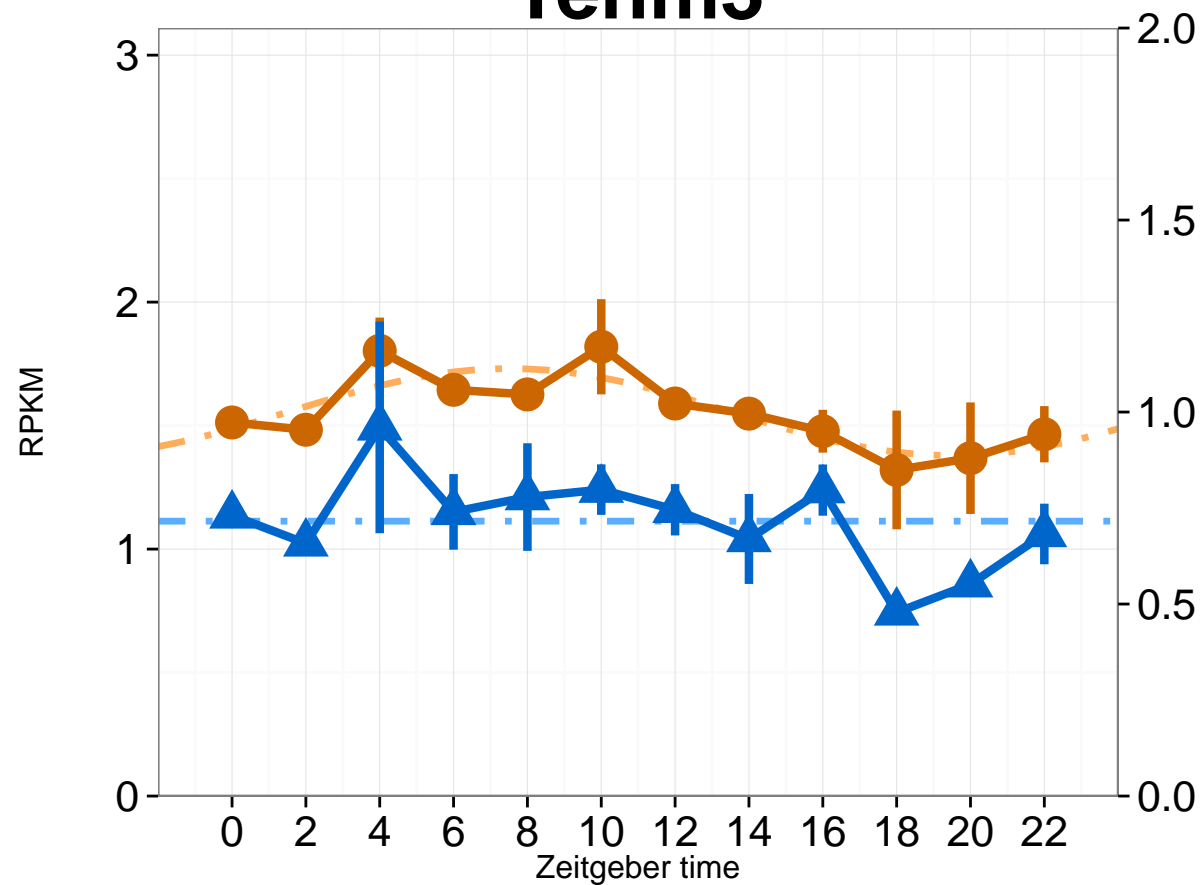

# Tenm3

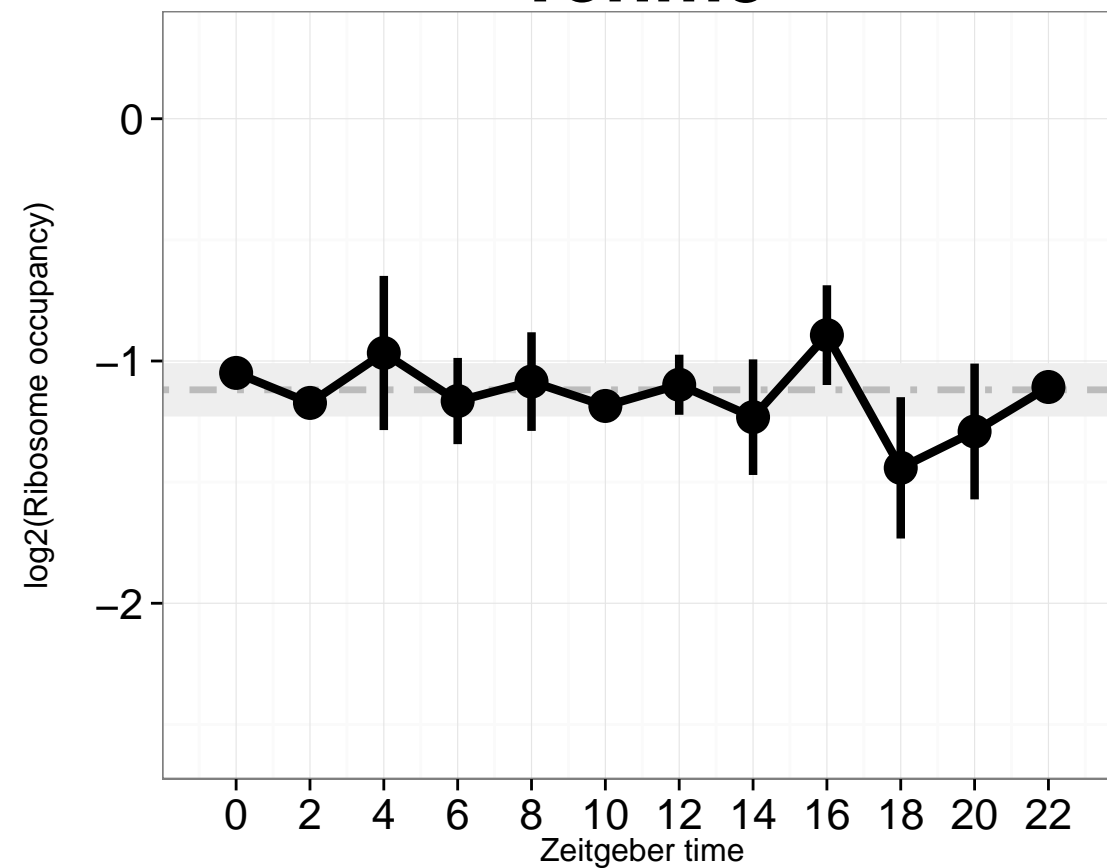

Supplement: Supplementary file 4804 [file 1]

## Adpgk

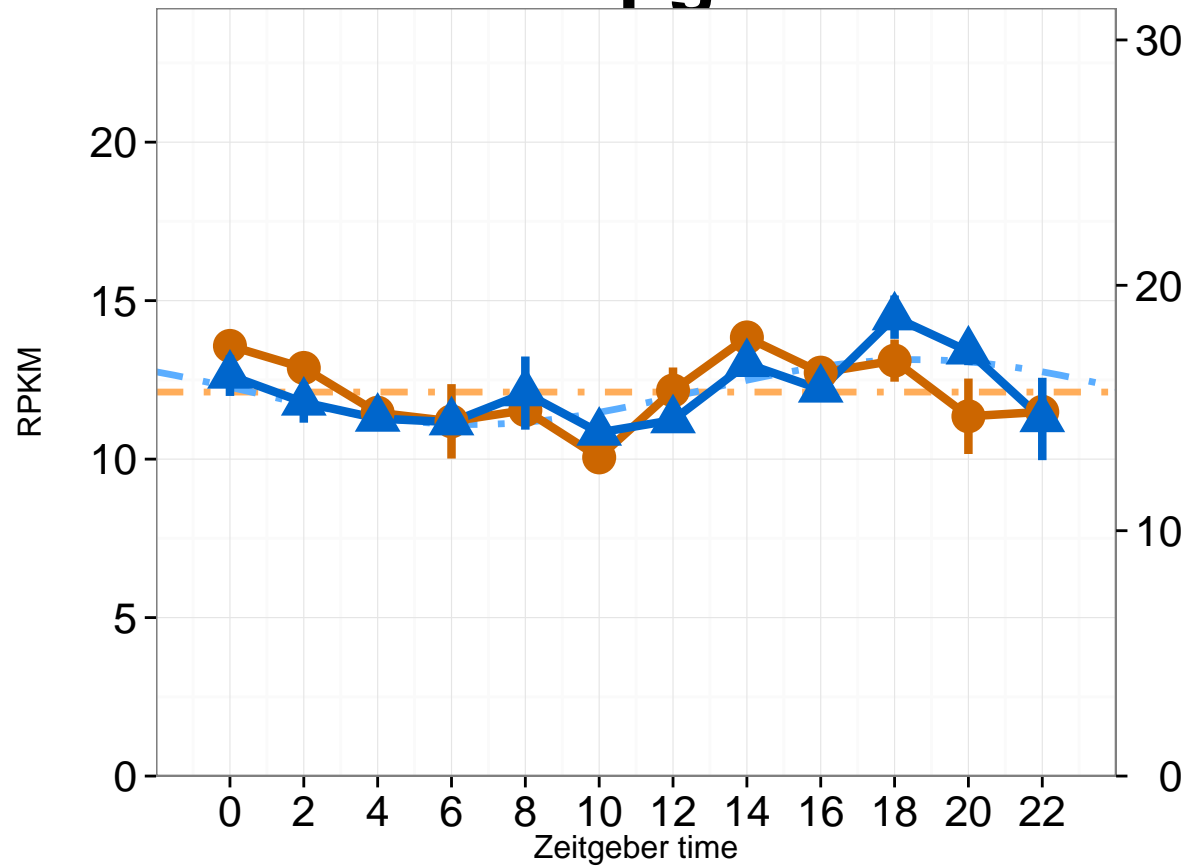

## Adpgk

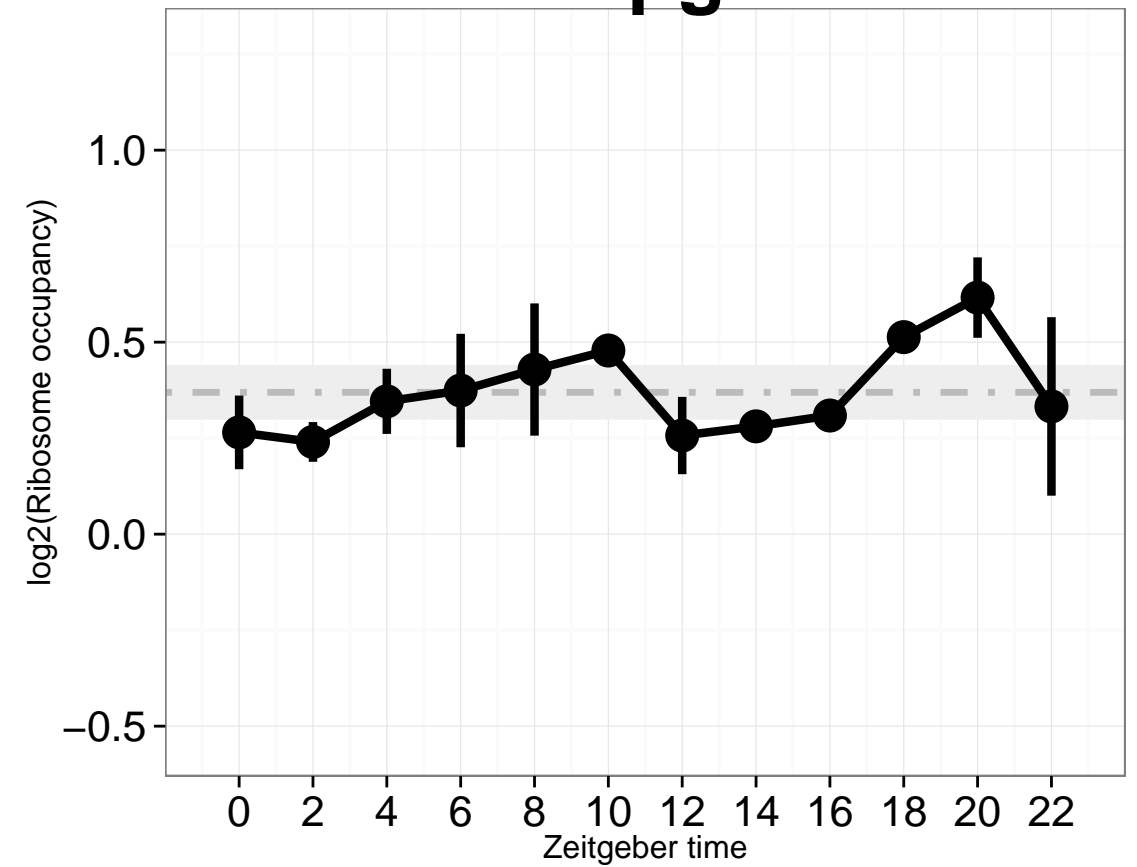

Supplement: Supplementary file 4805 [file 1]

# Pgap1

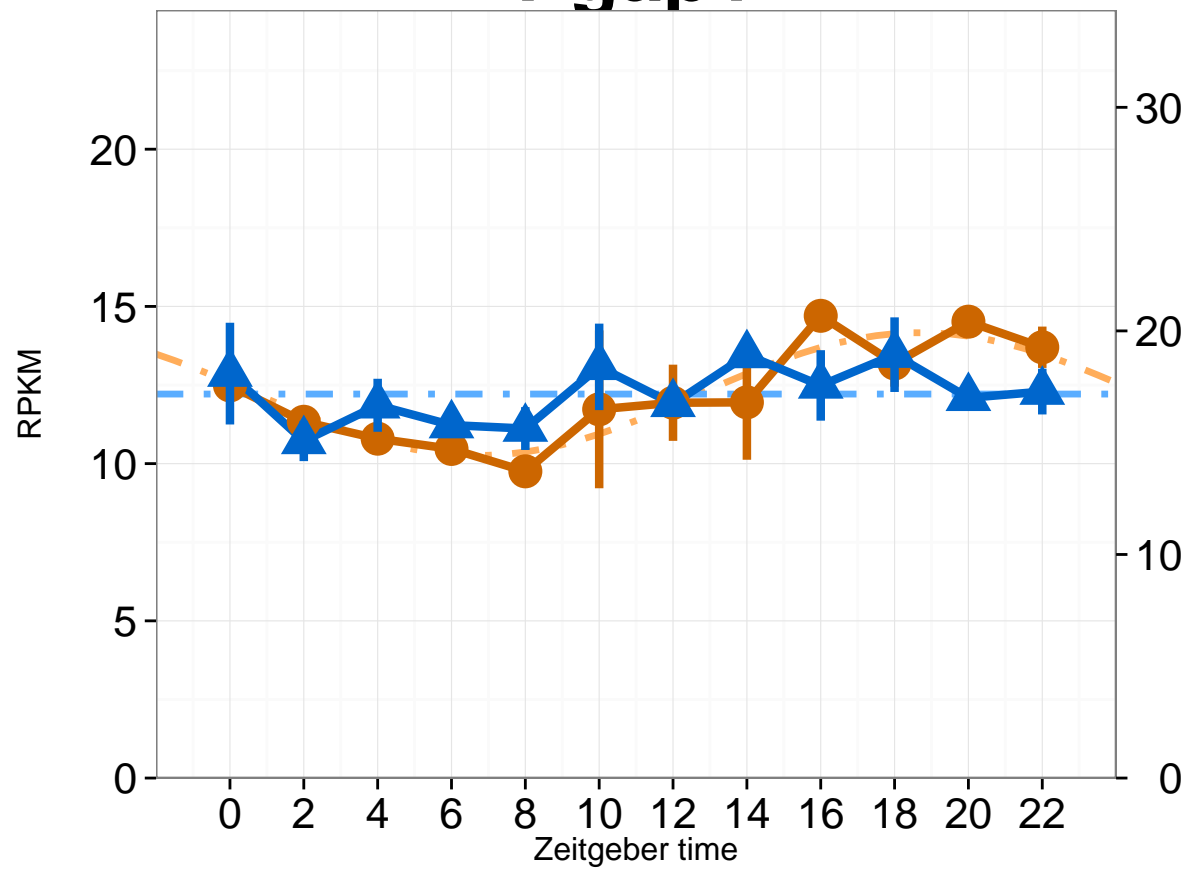

# Pgap1

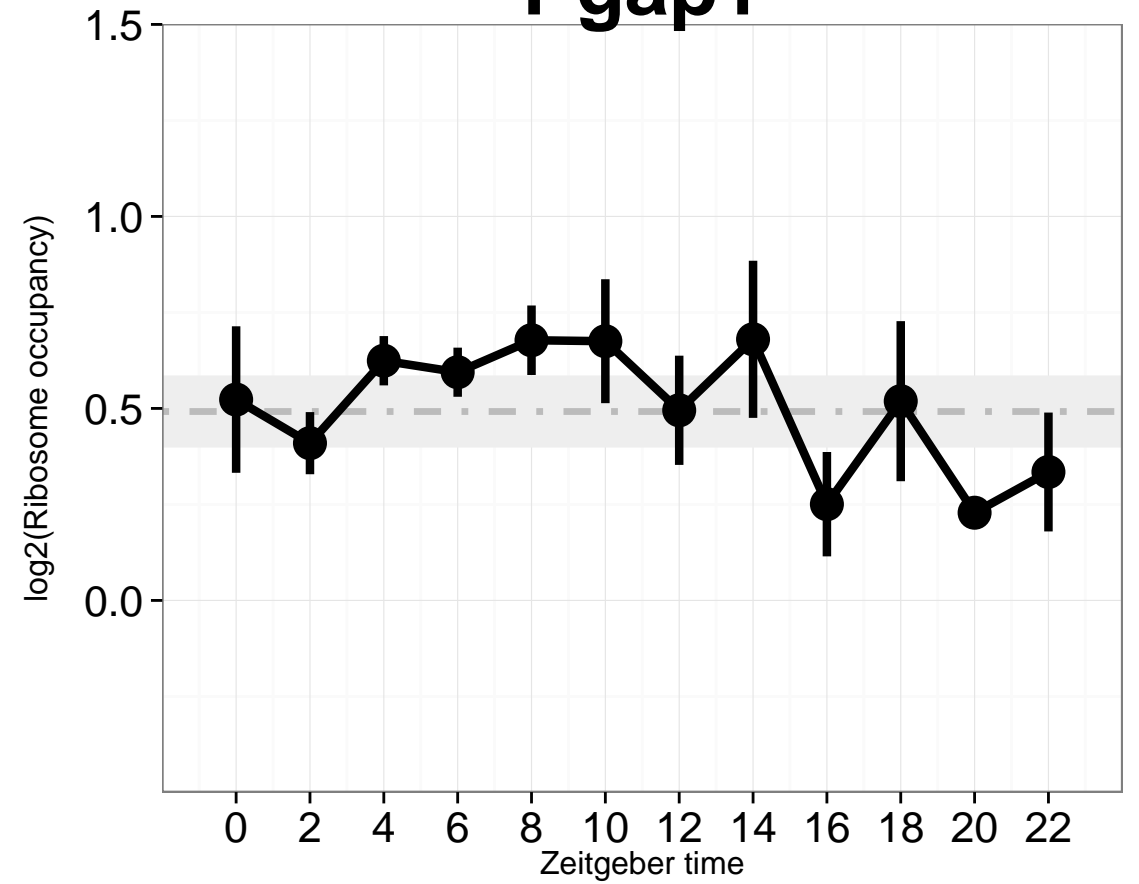

Supplement: Supplementary file 4806 [file 1]

## Phf23

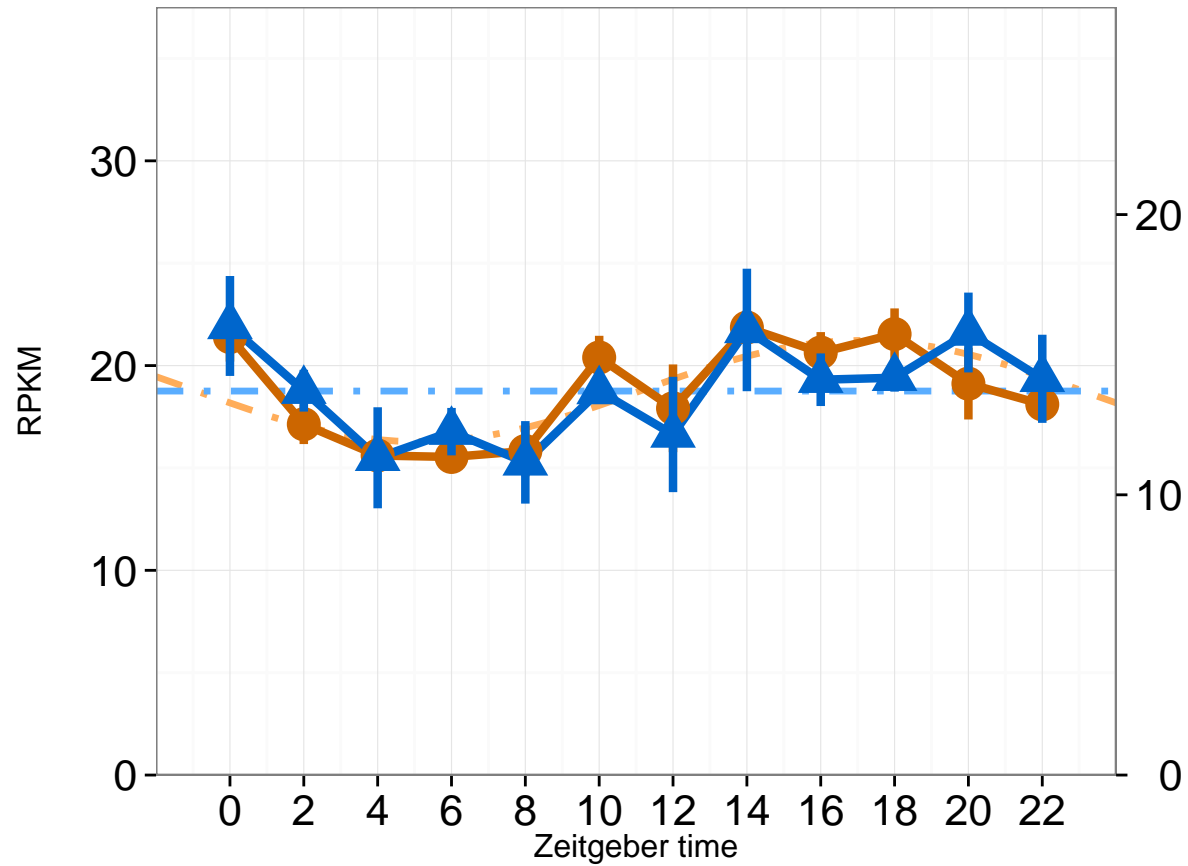

## Phf23

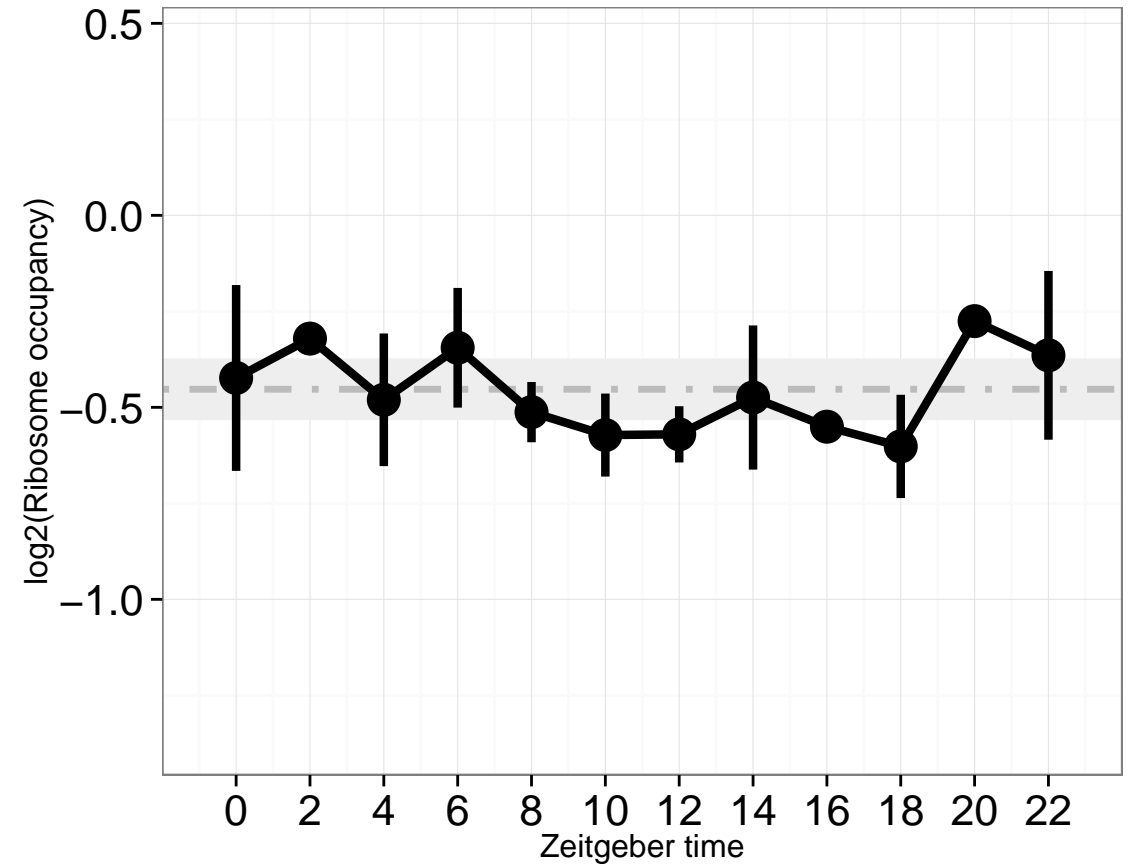

Supplement: Supplementary file 4807 [file 1]

# Map9

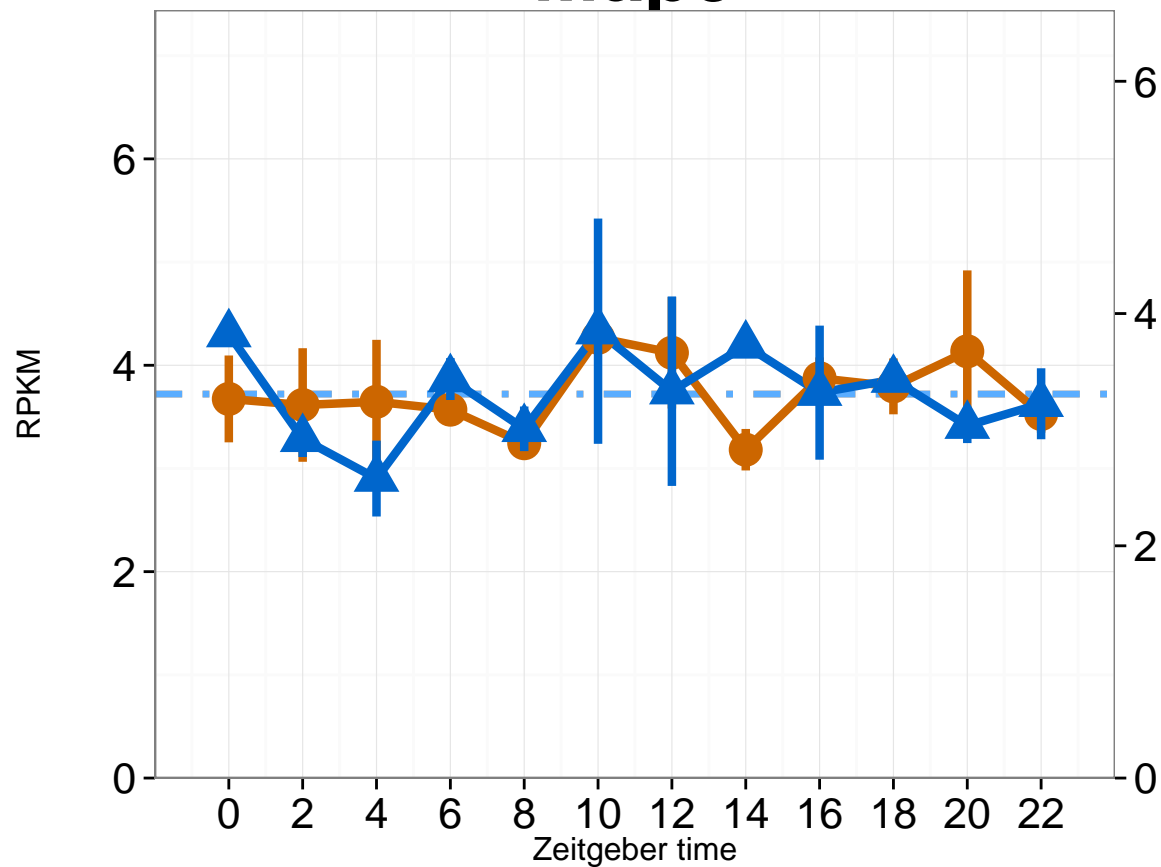

# Map9

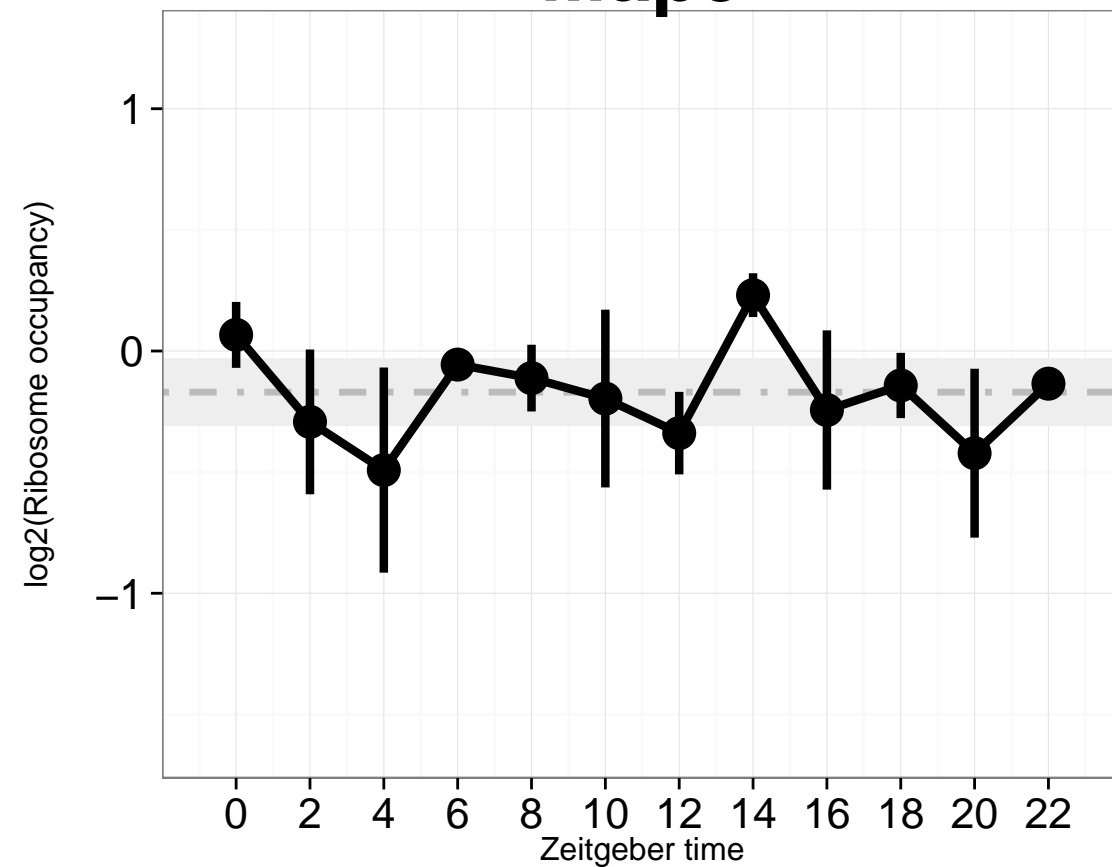

Supplement: Supplementary file 4808 [file 1]

**Itfg2**

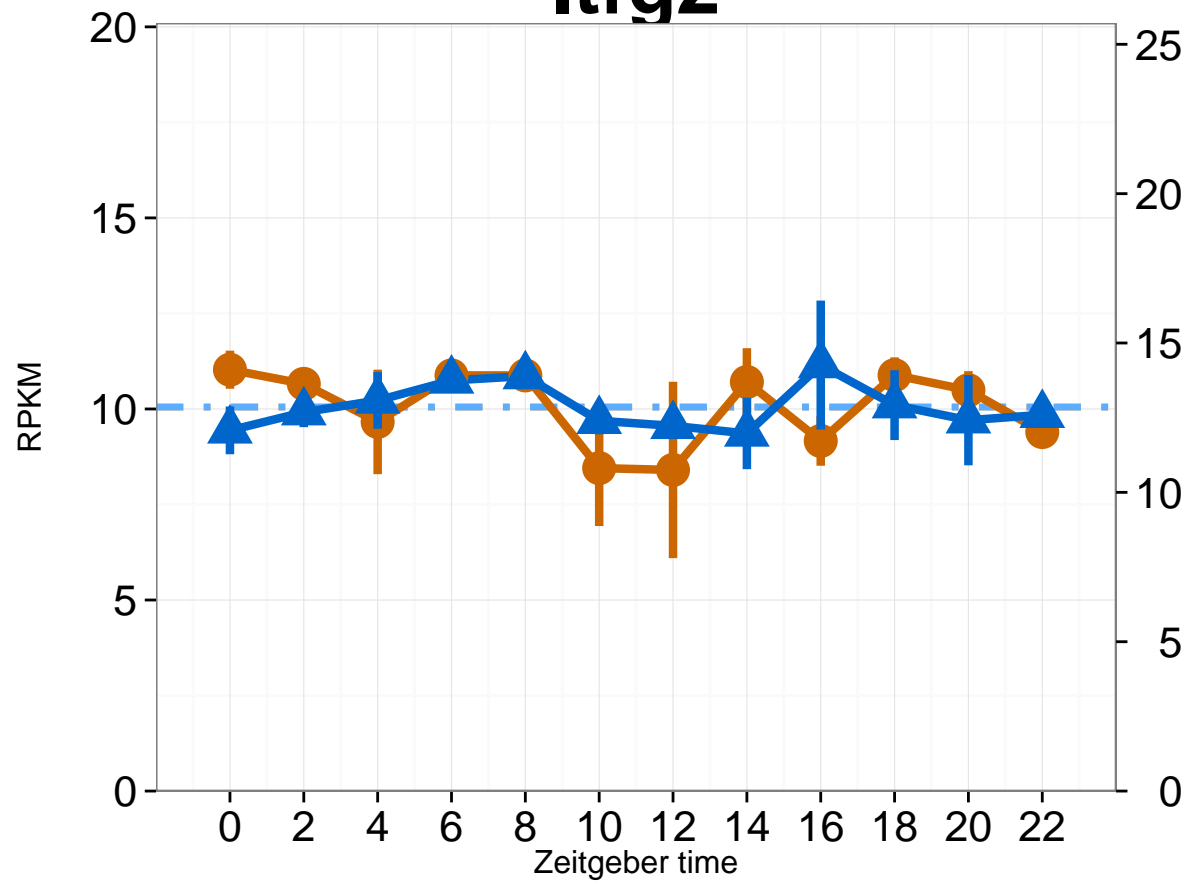

**Itfg2**

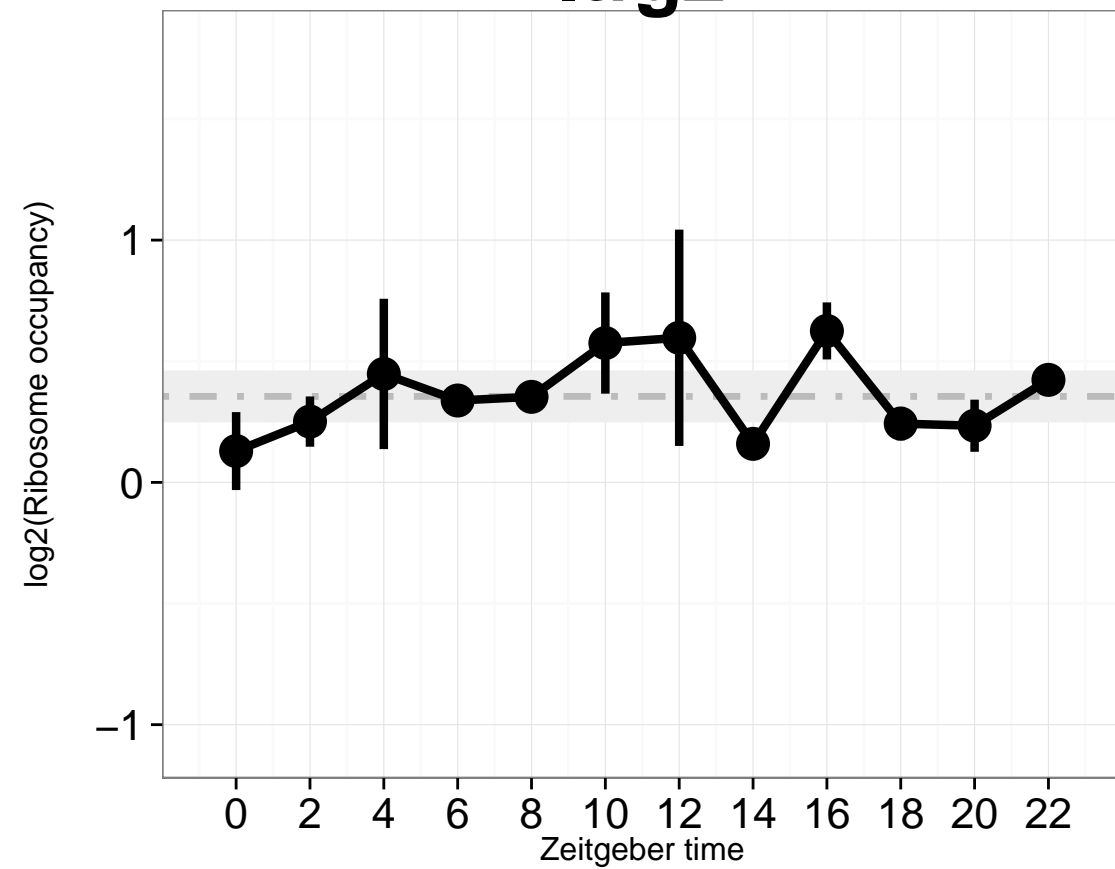

Supplement: Supplementary file 4809 [file 1]

# Eif1a

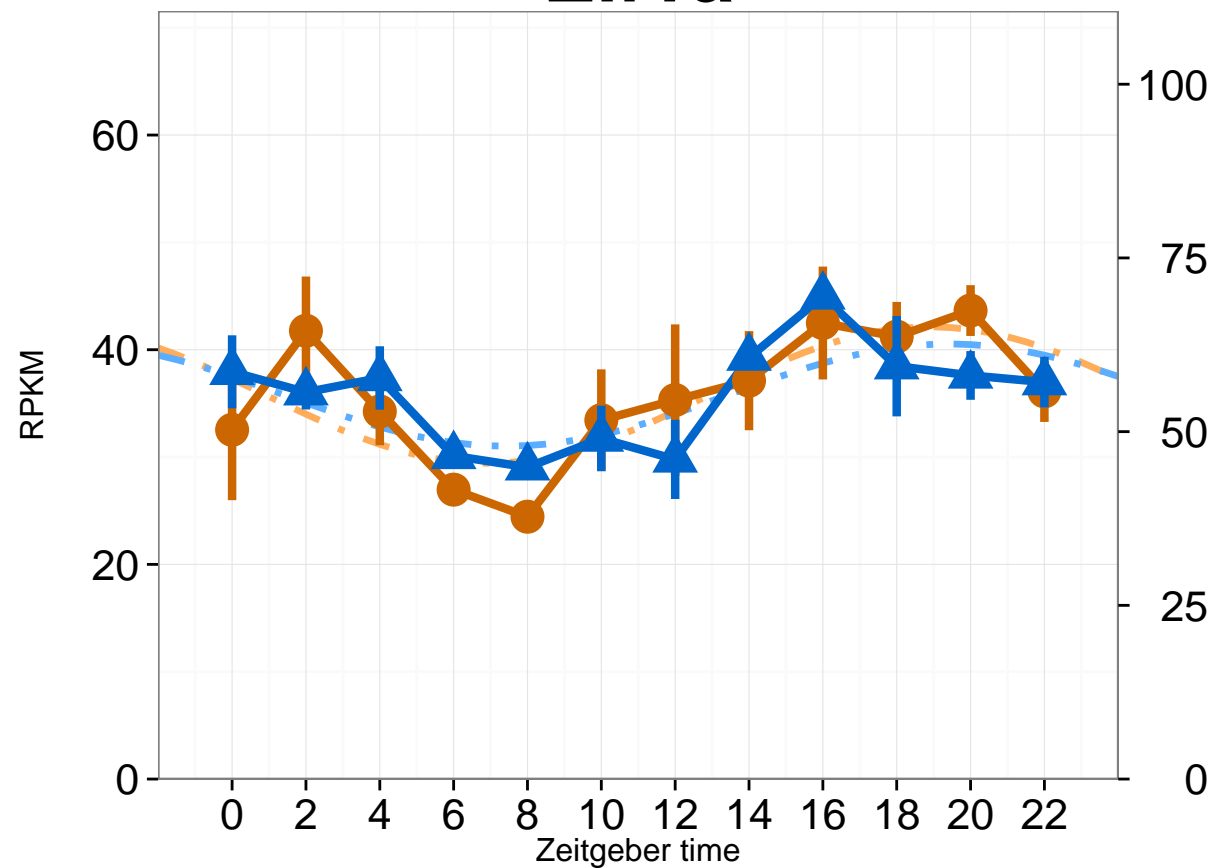

# Eif1a

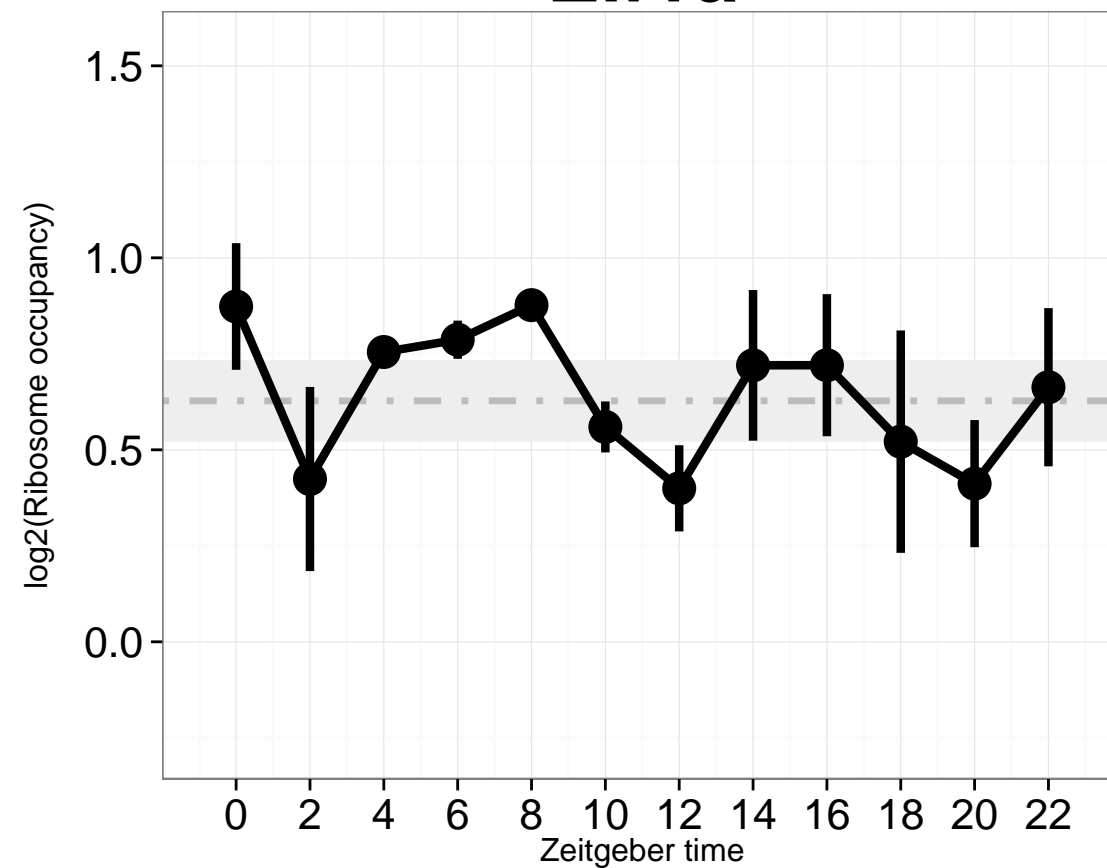

Supplement: Supplementary file 4810 [file 1]

## Pdxk

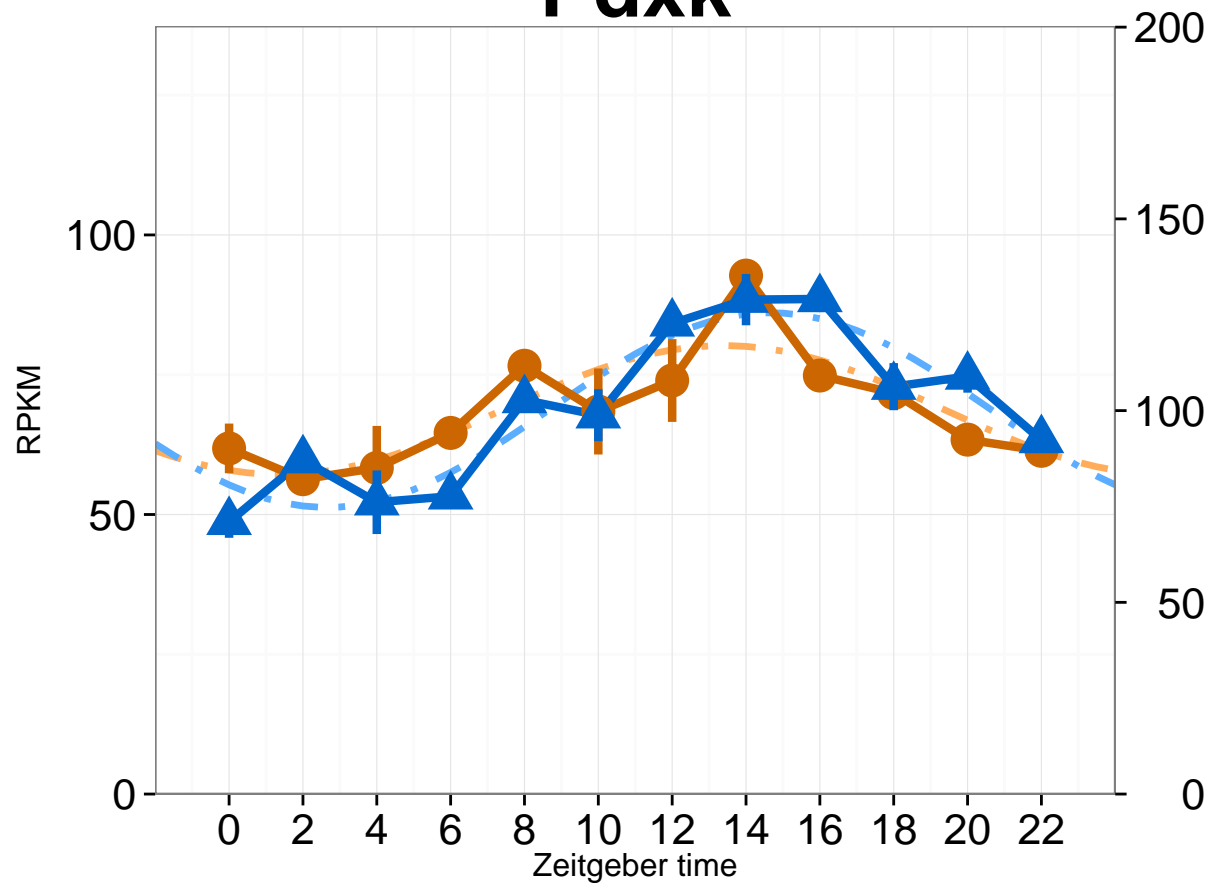

## Pdxk

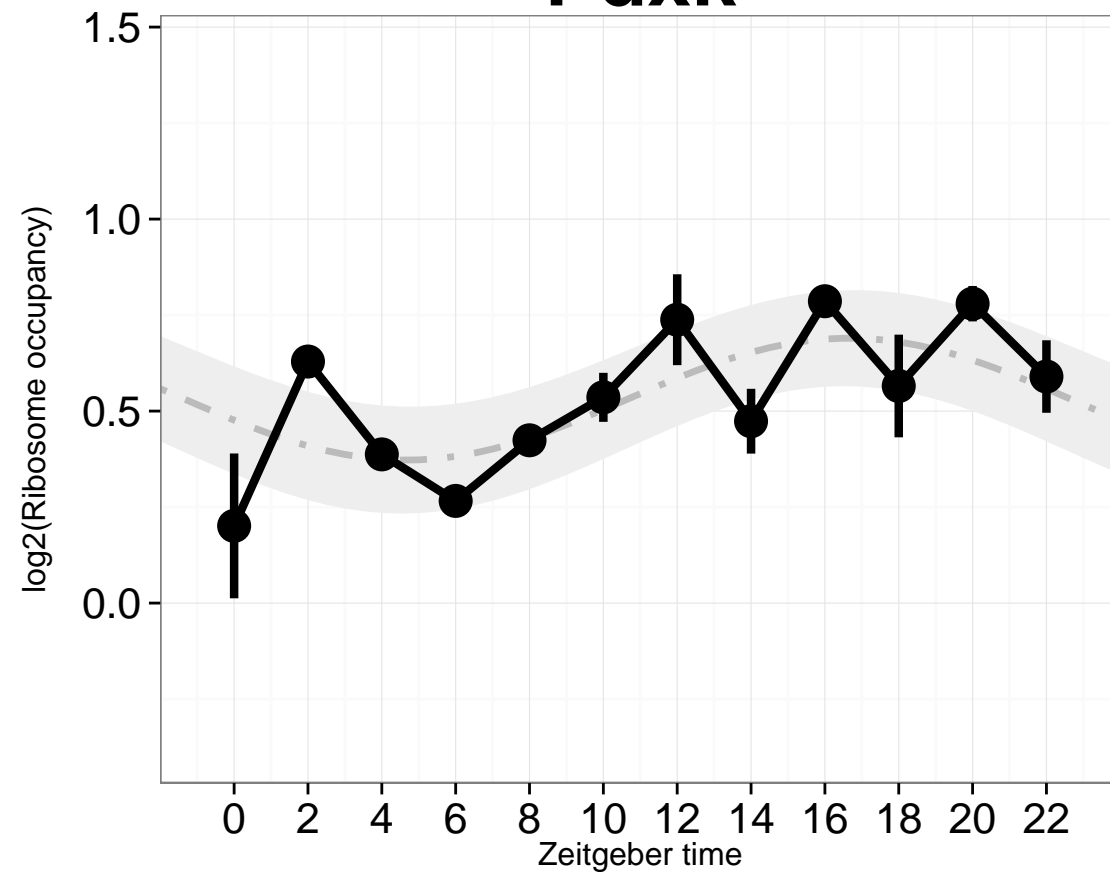

Supplement: Supplementary file 4811 [file 1]

## Tmem30b

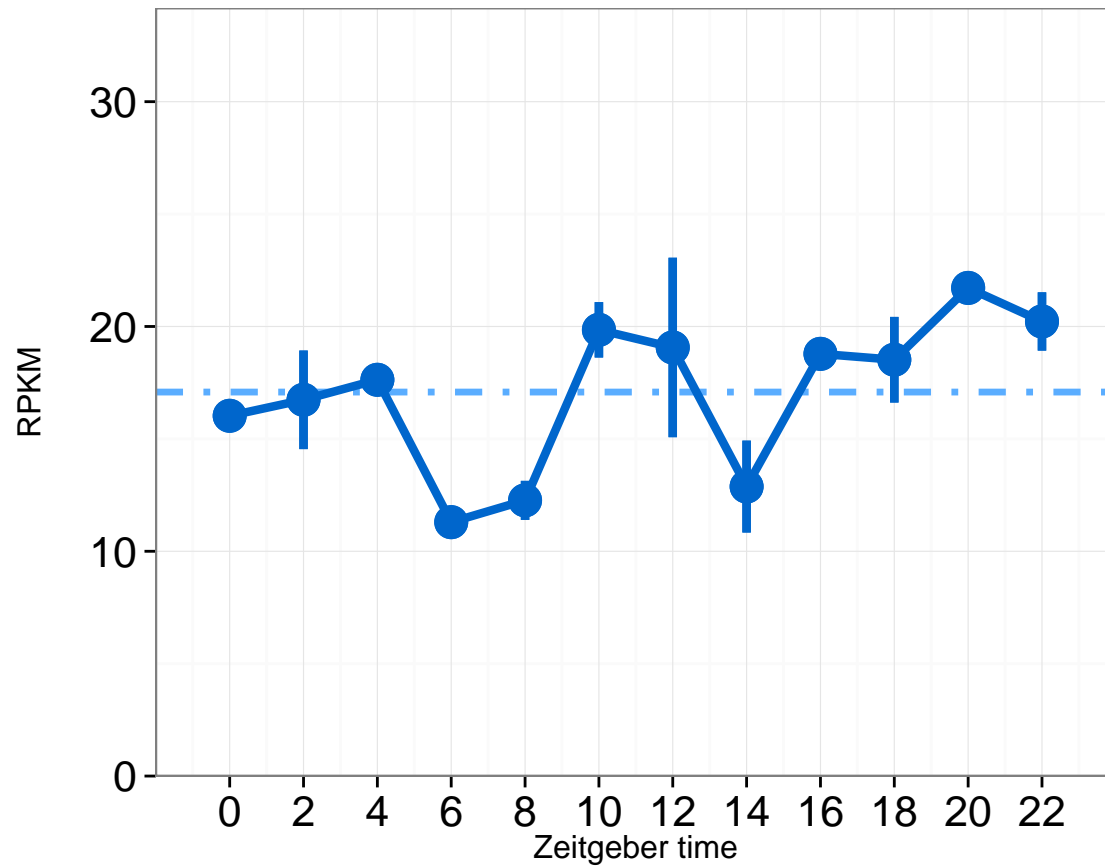

## Tmem30b log2(Ribosome occupancy)

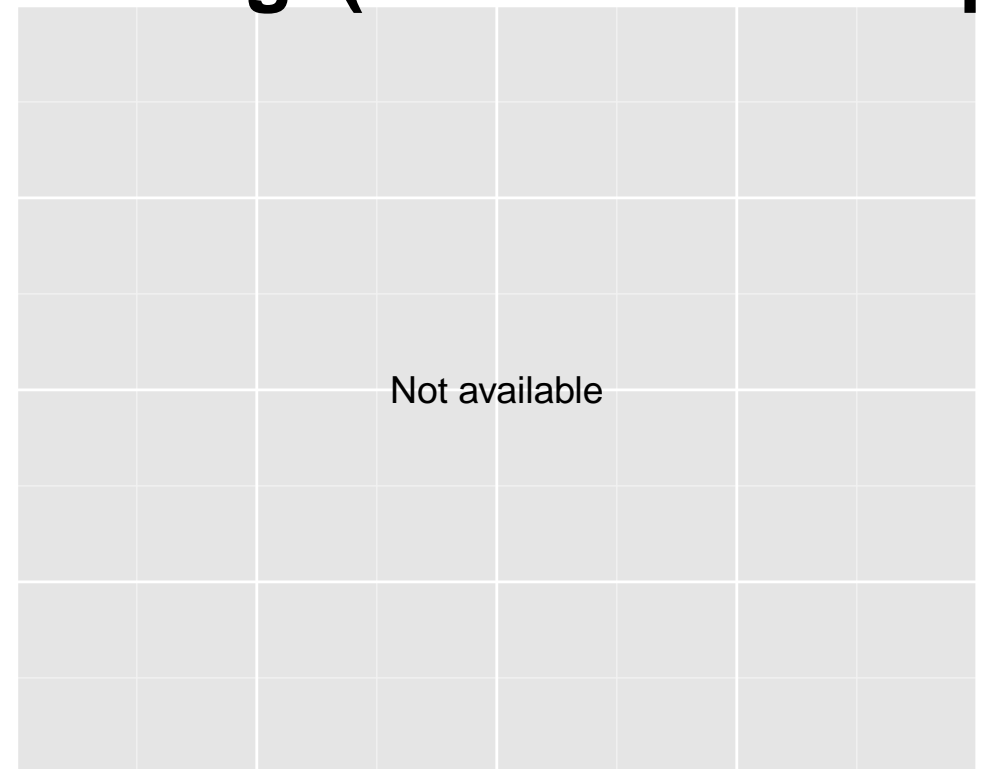

Supplement: Supplementary file 4812 [file 1]

## Piga

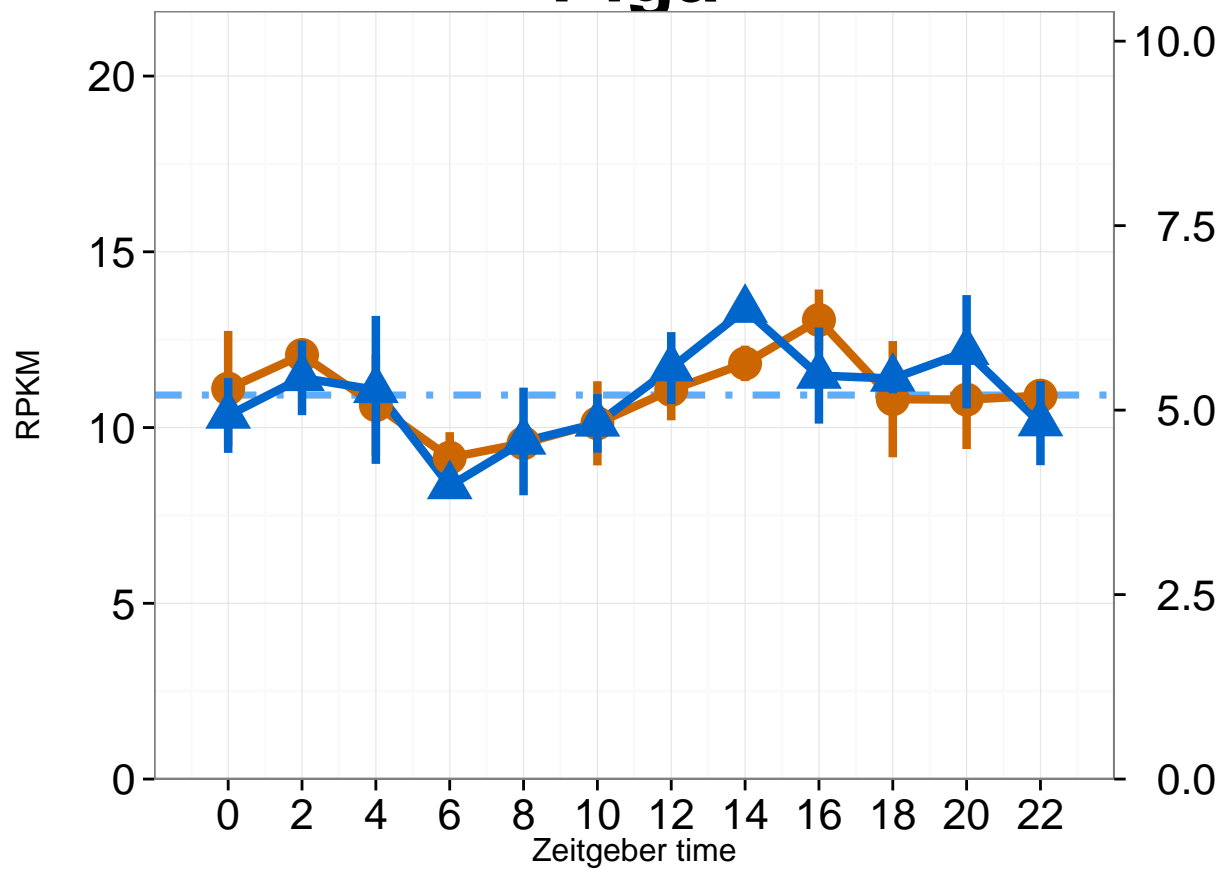

## Piga

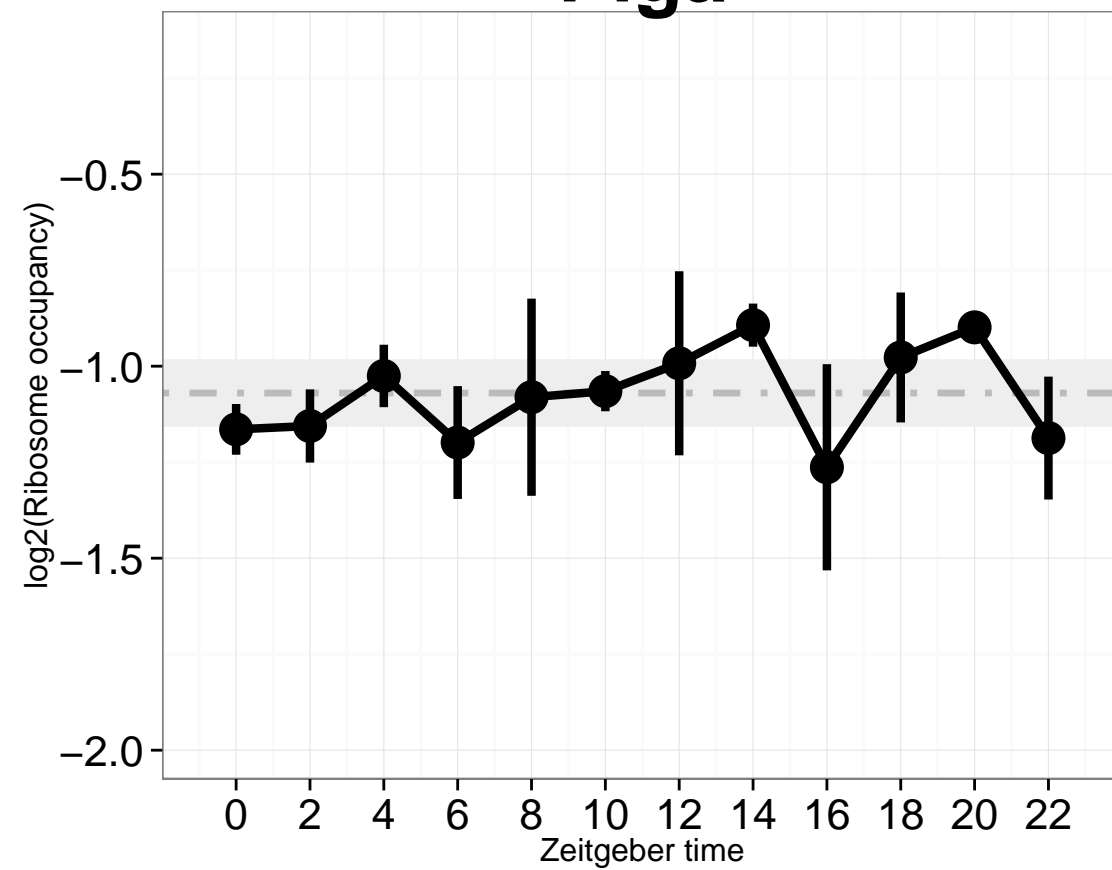

Supplement: Supplementary file 4813 [file 1]

## Irx2

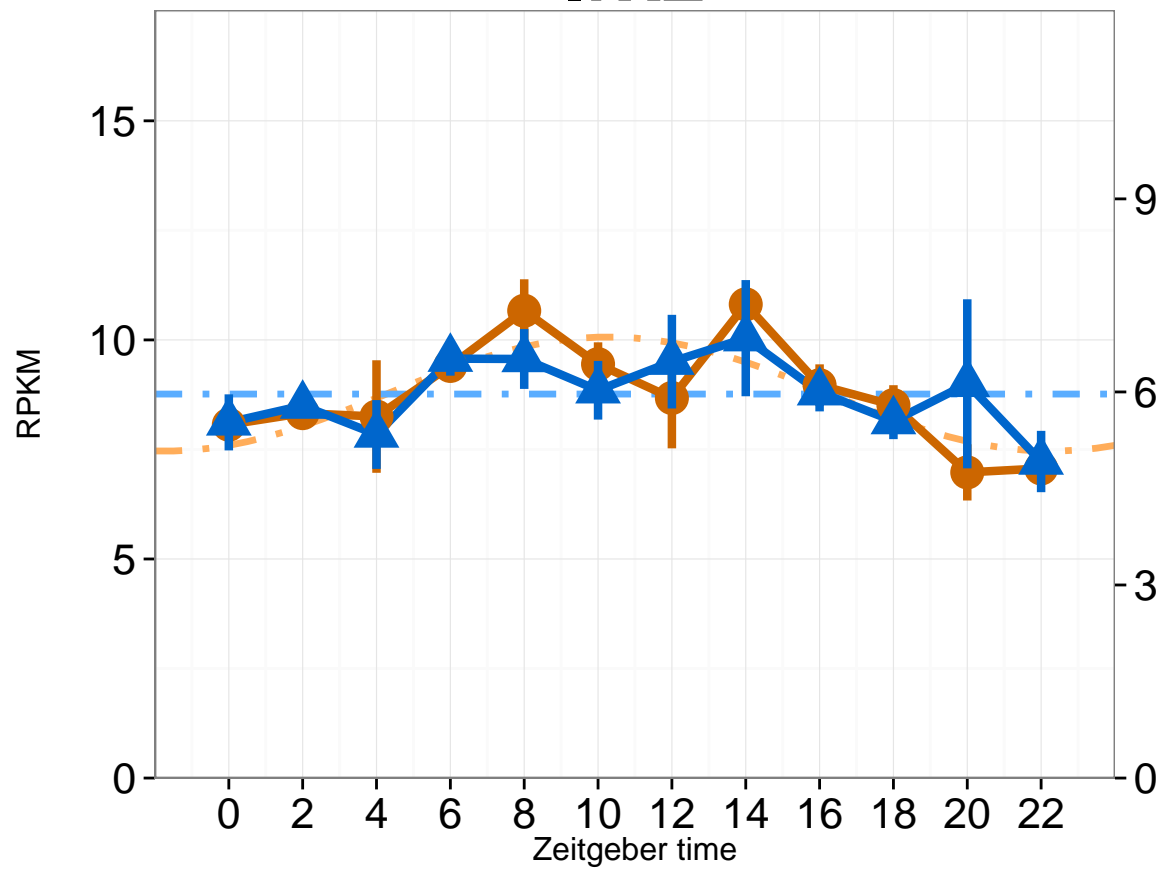

## Irx2

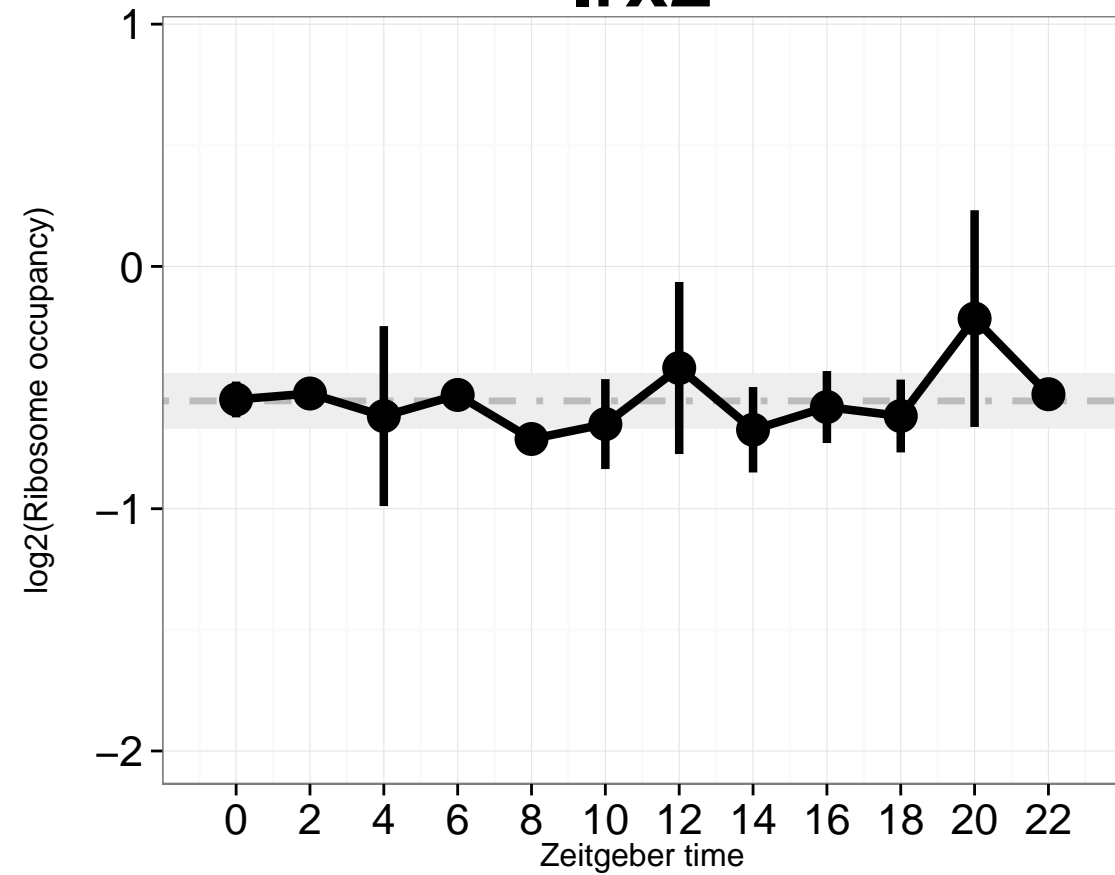

Supplement: Supplementary file 4814 [file 1]

## E2f5

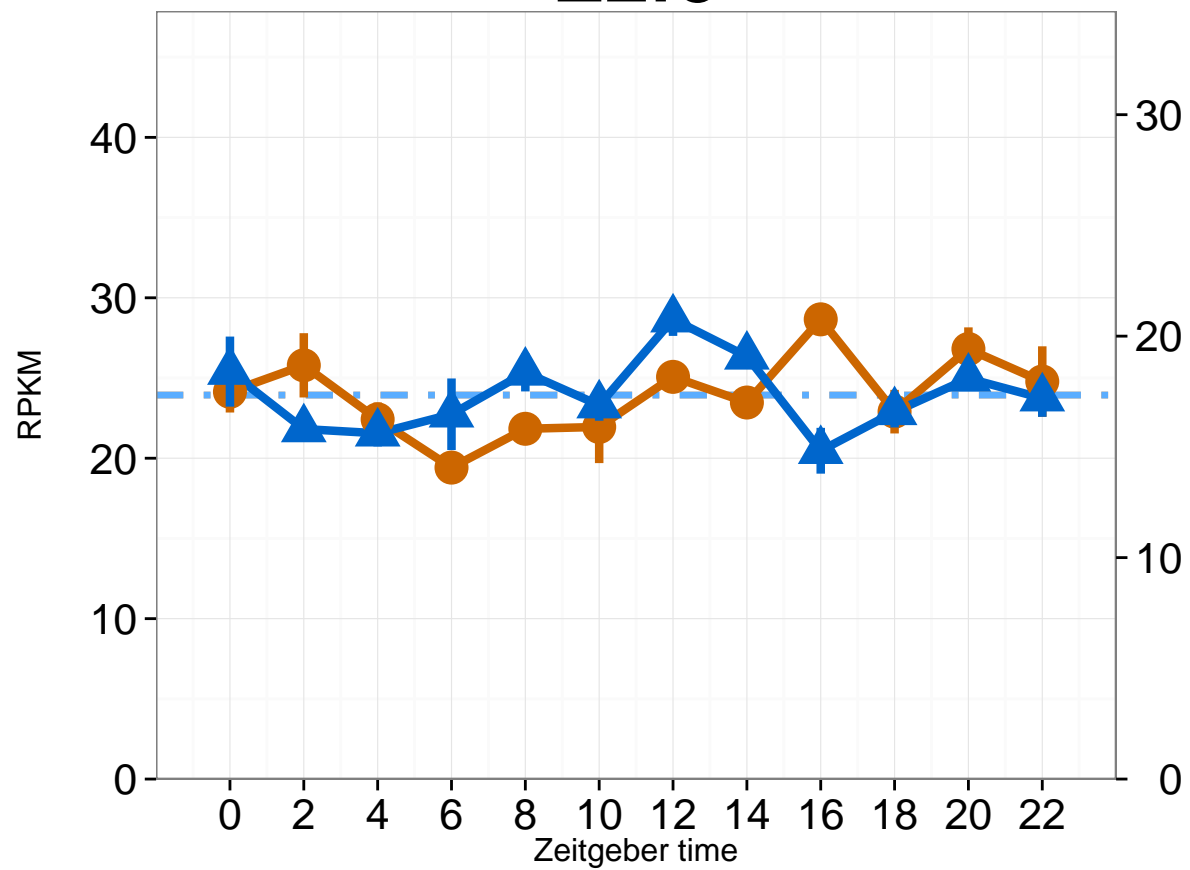

## E2f5

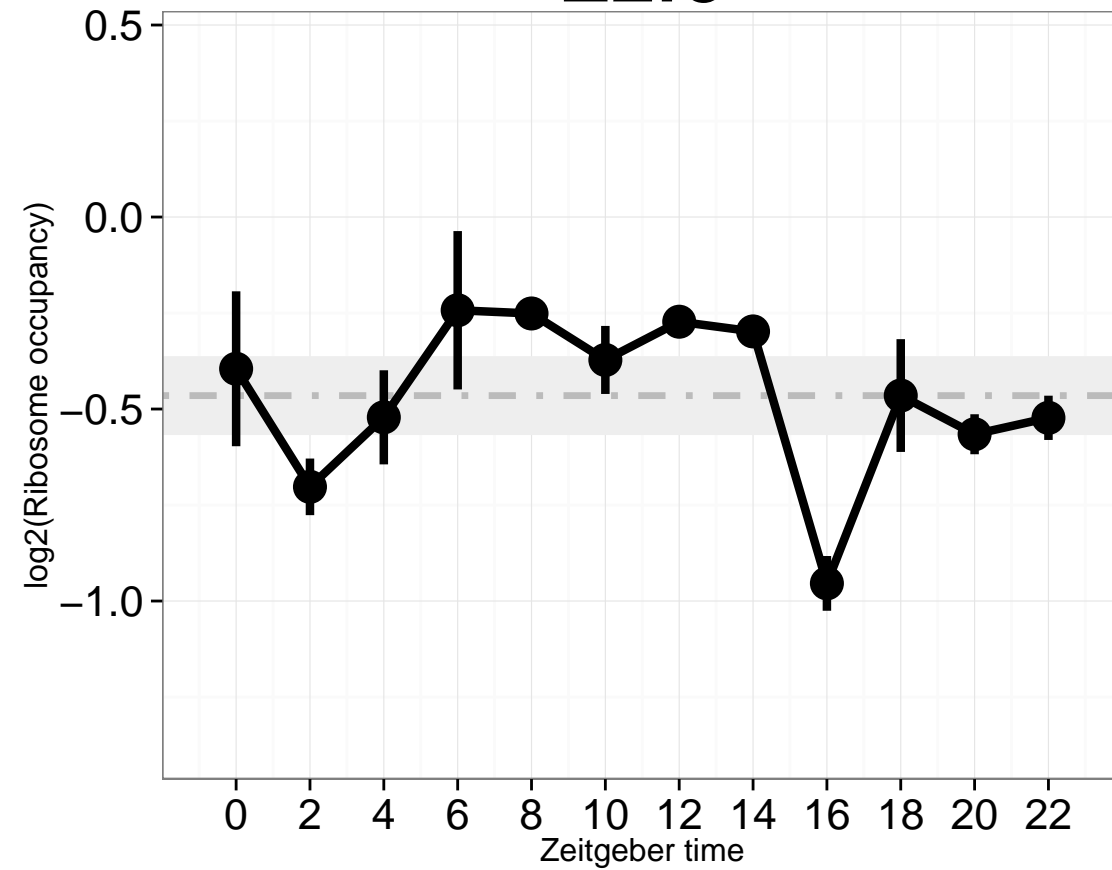

Supplement: Supplementary file 4815 [file 1]

## Shq1

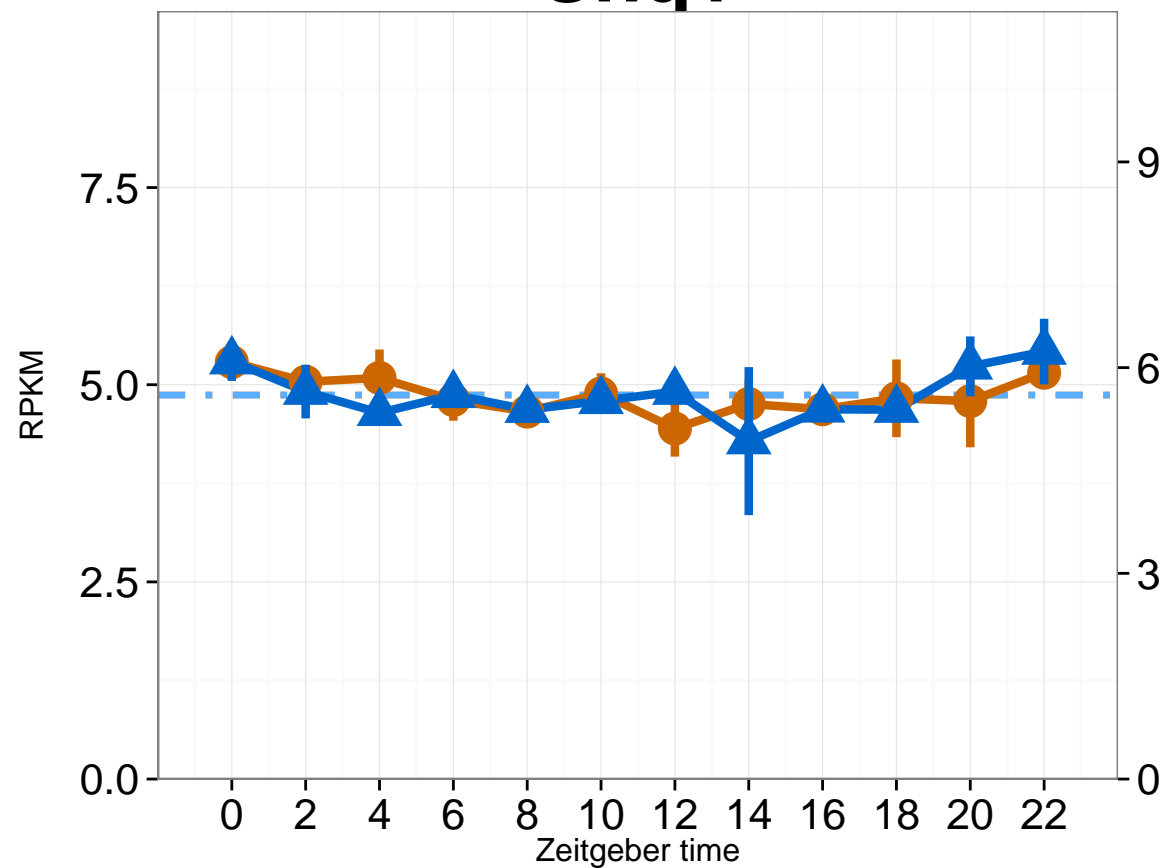

## Shq1

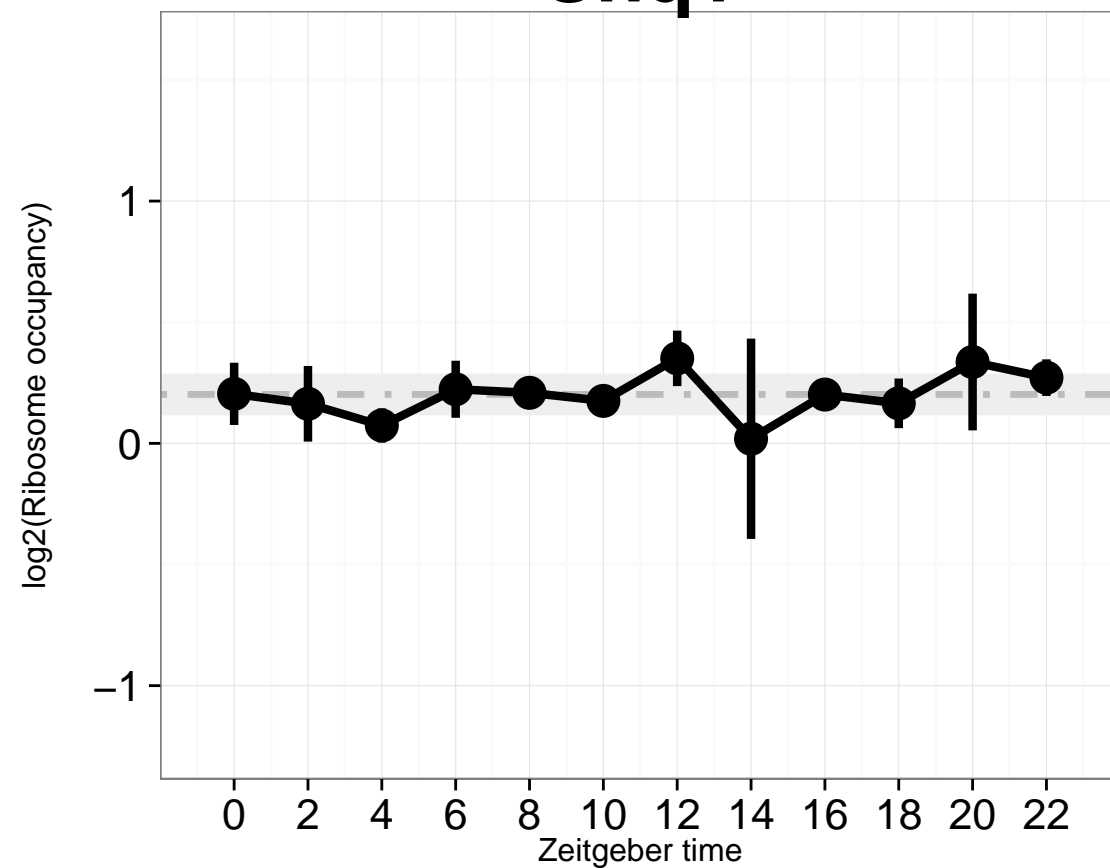

Supplement: Supplementary file 4816 [file 1]

## Sptbn2

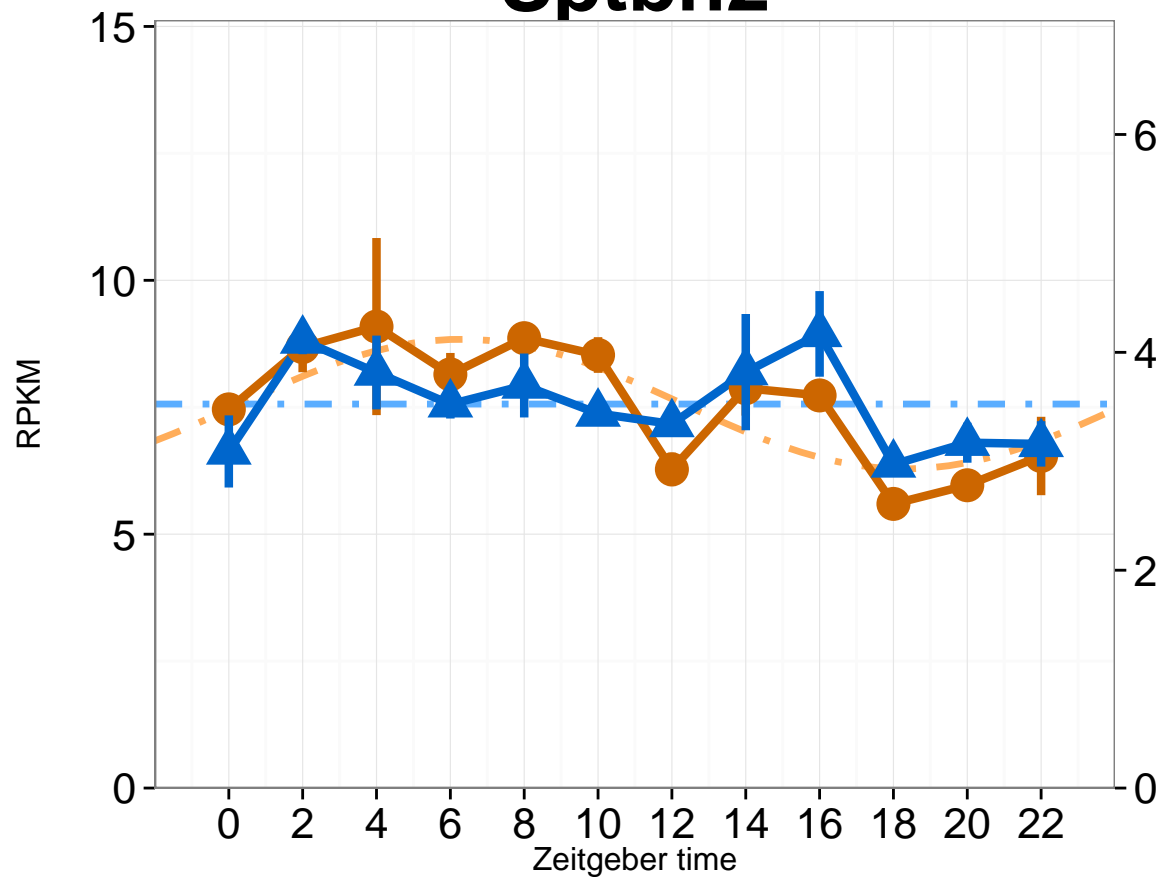

## Sptbn2

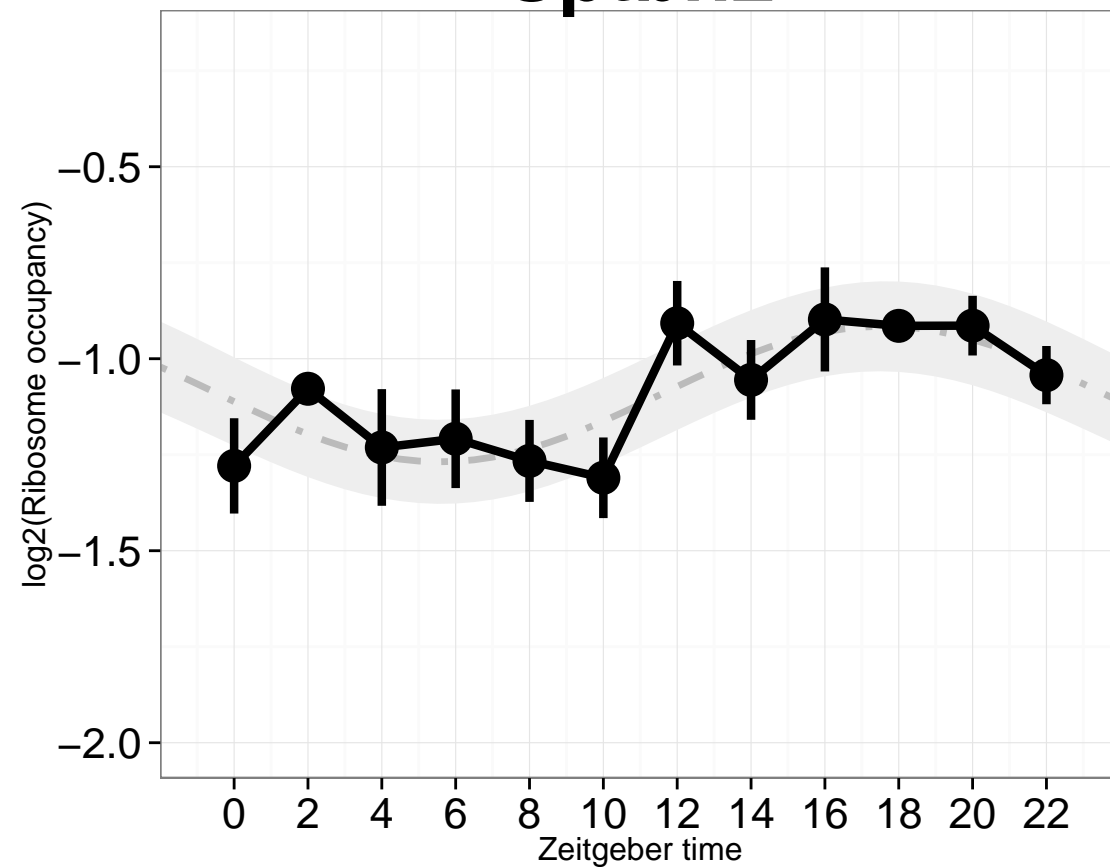

Supplement: Supplementary file 4817 [file 1]

## Gm17615

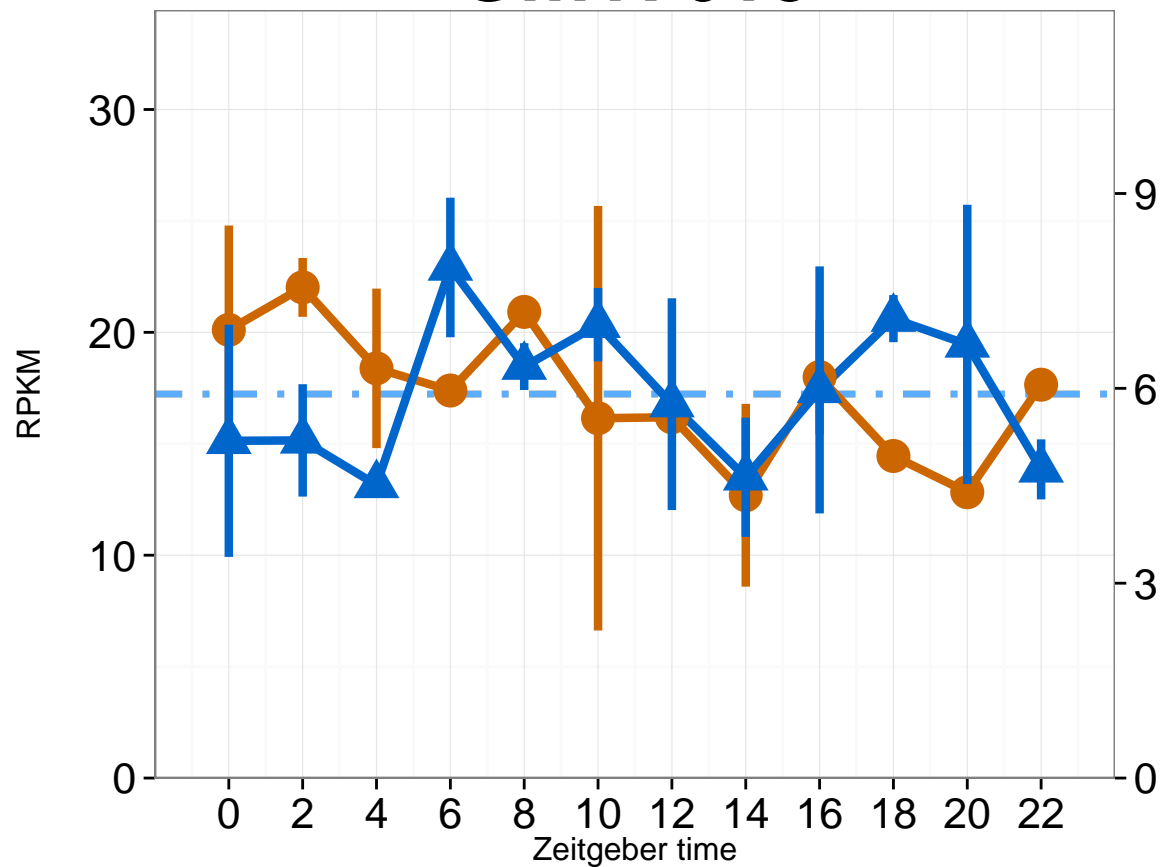

## Gm17615

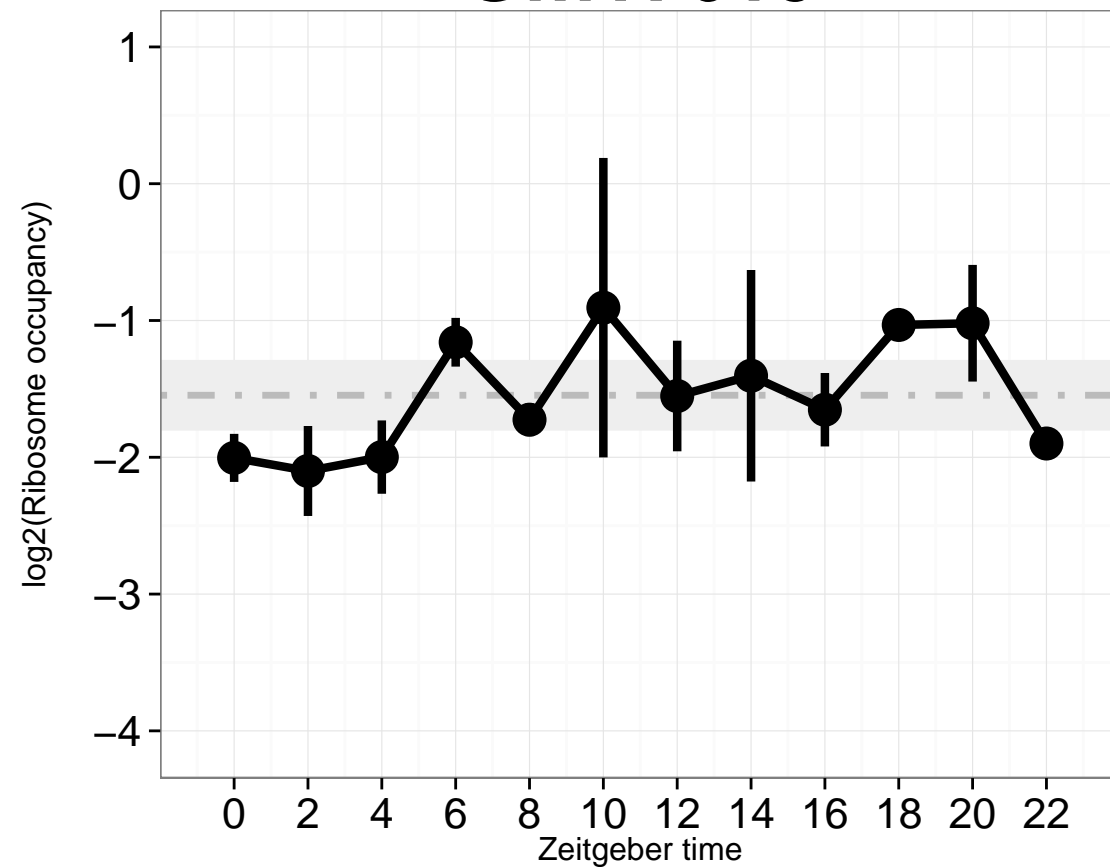

Supplement: Supplementary file 4818 [file 1]

## Dhcr7

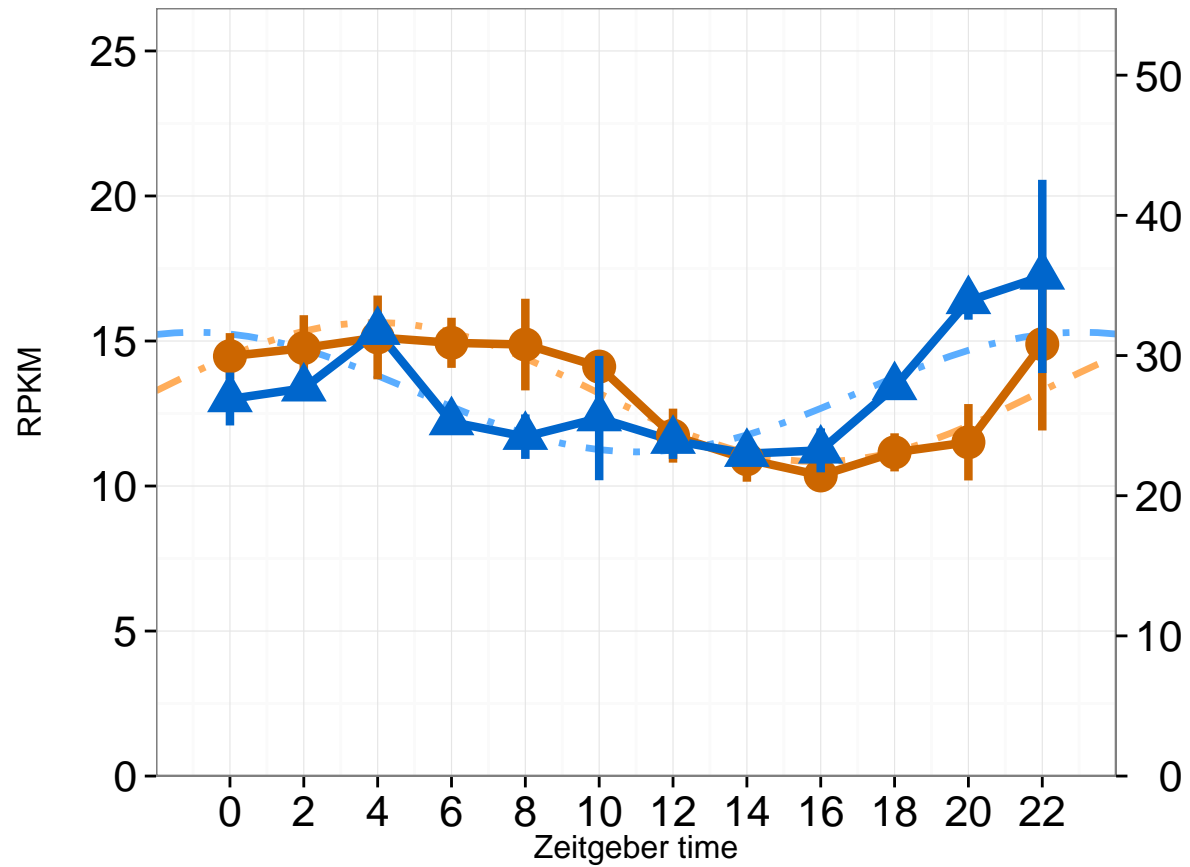

## Dhcr7

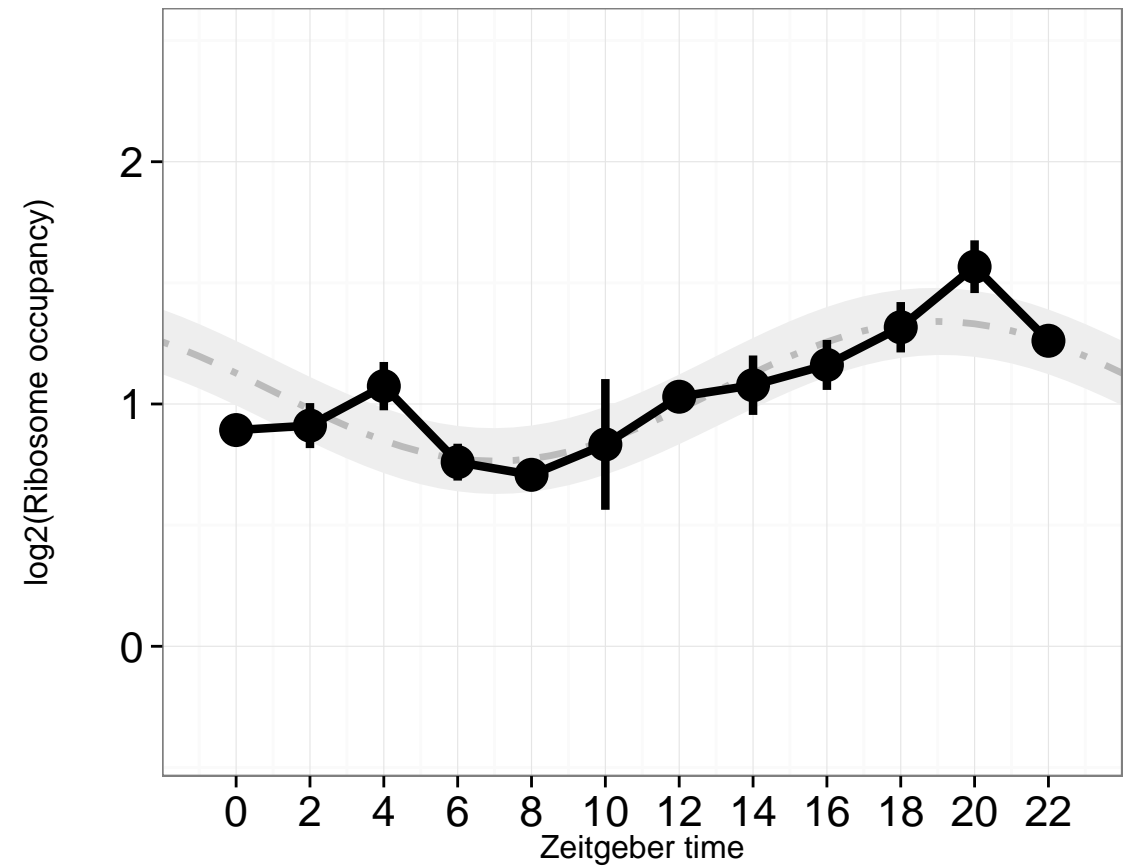

Supplement: Supplementary file 4819 [file 1]

## Emilin1

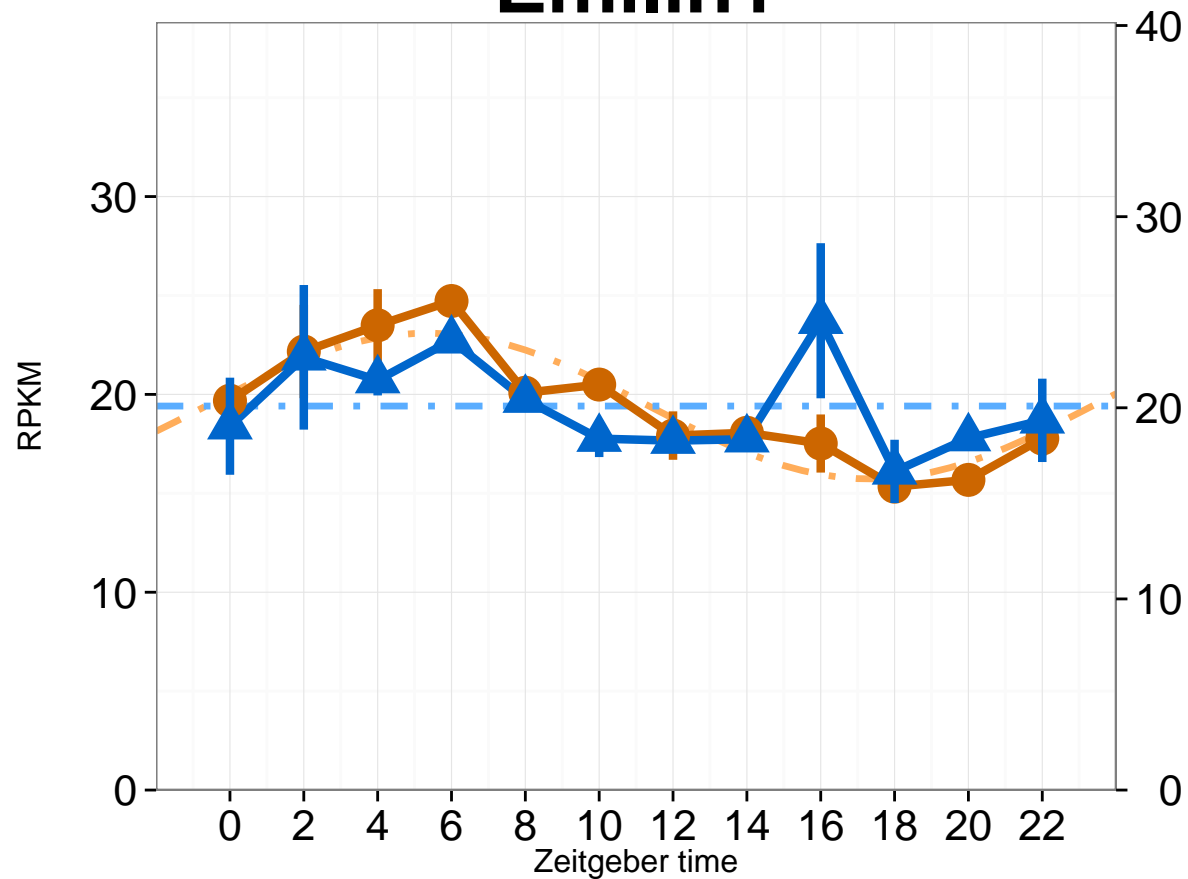

## Emilin1

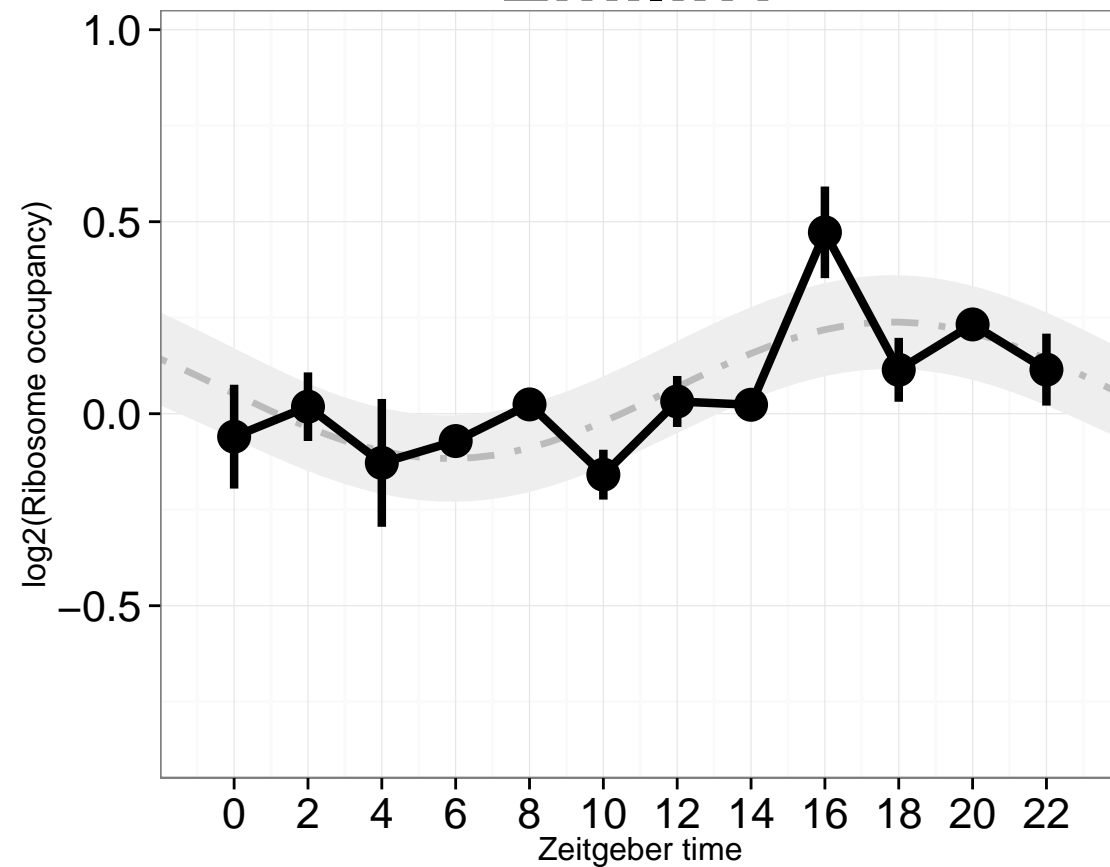

Supplement: Supplementary file 4820 [file 1]
