# Supplementary material (part 49 of 133)
Source: publisher figshare collection journal article supplement (https://springernature.figshare.com/articles/dataset/_/4903193)

## Wdr55

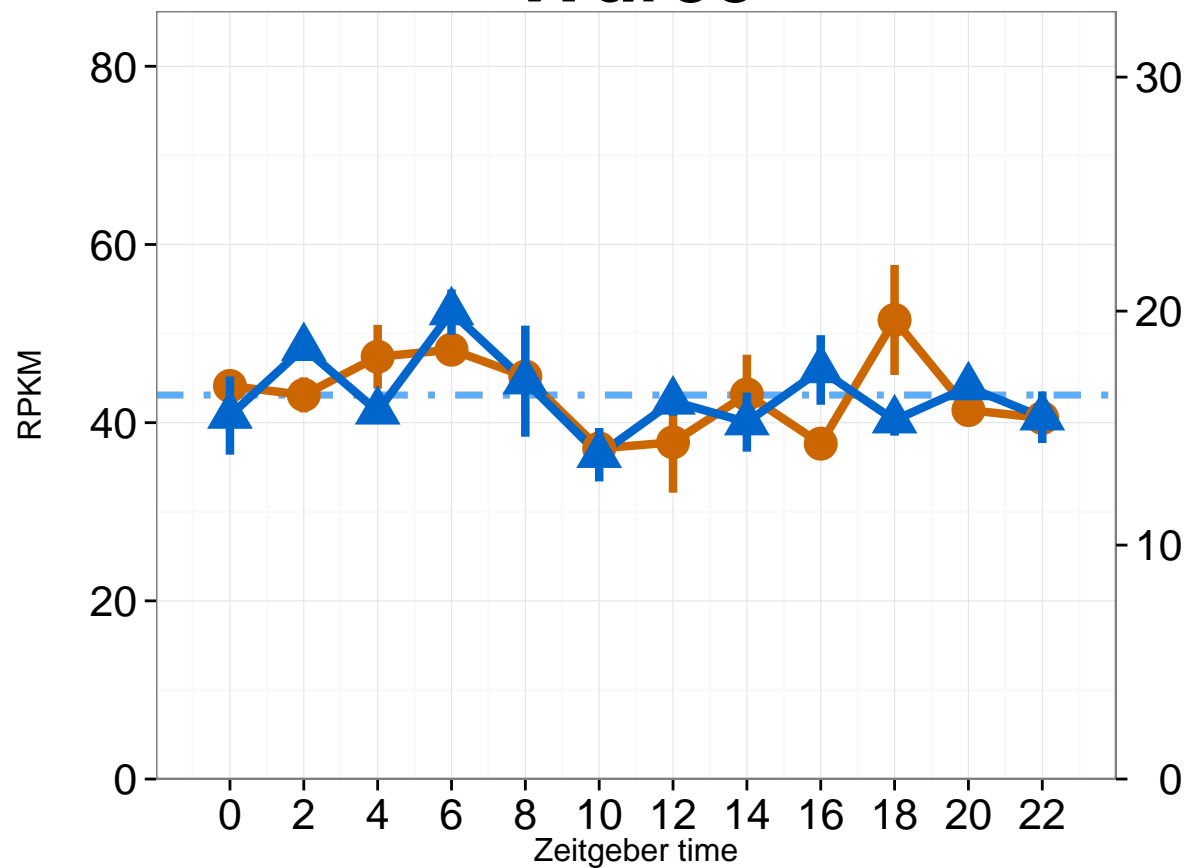

## Wdr55

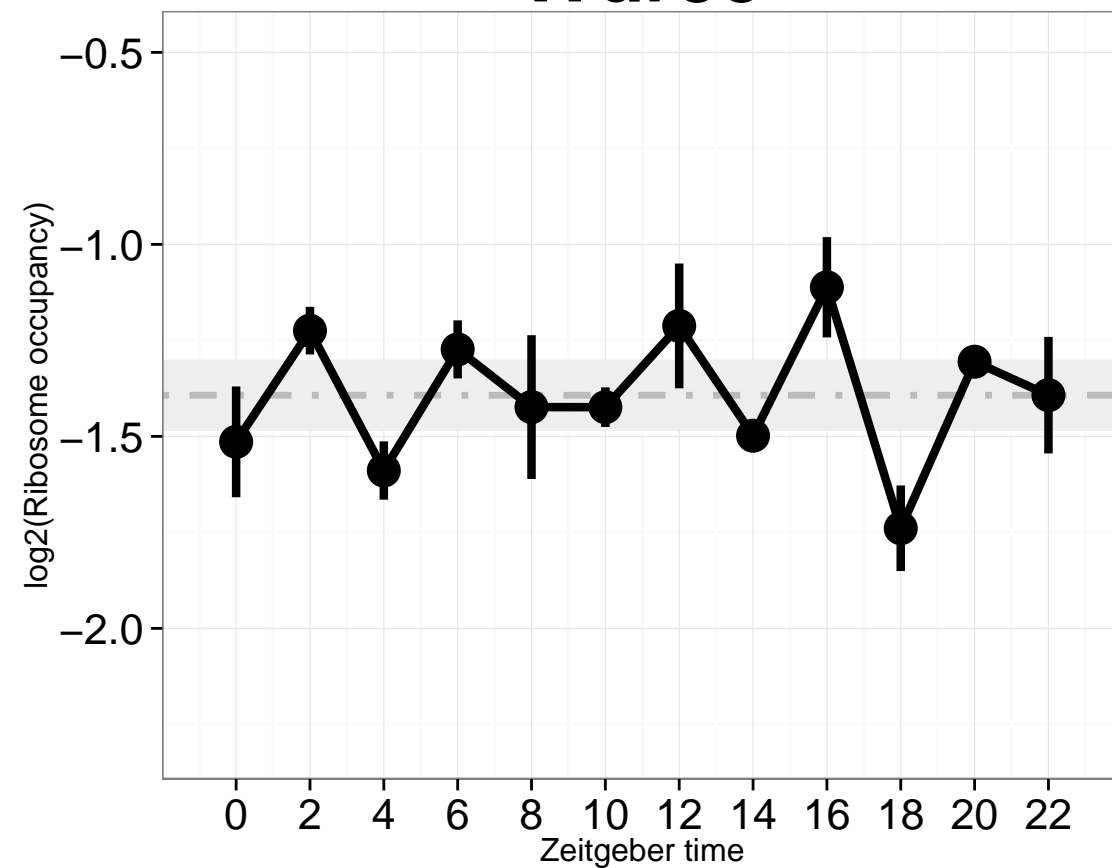

Supplement: Supplementary file 4821 [file 1]

## Snx24

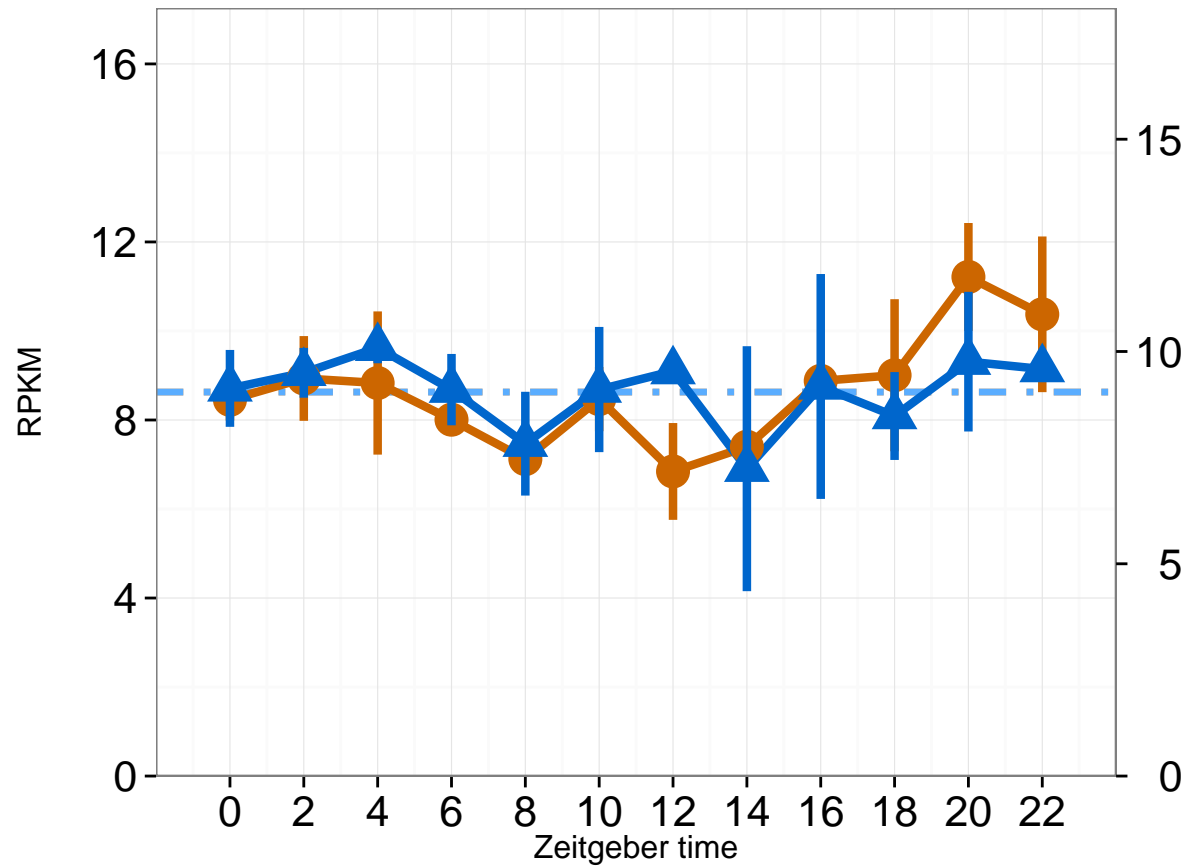

## Snx24

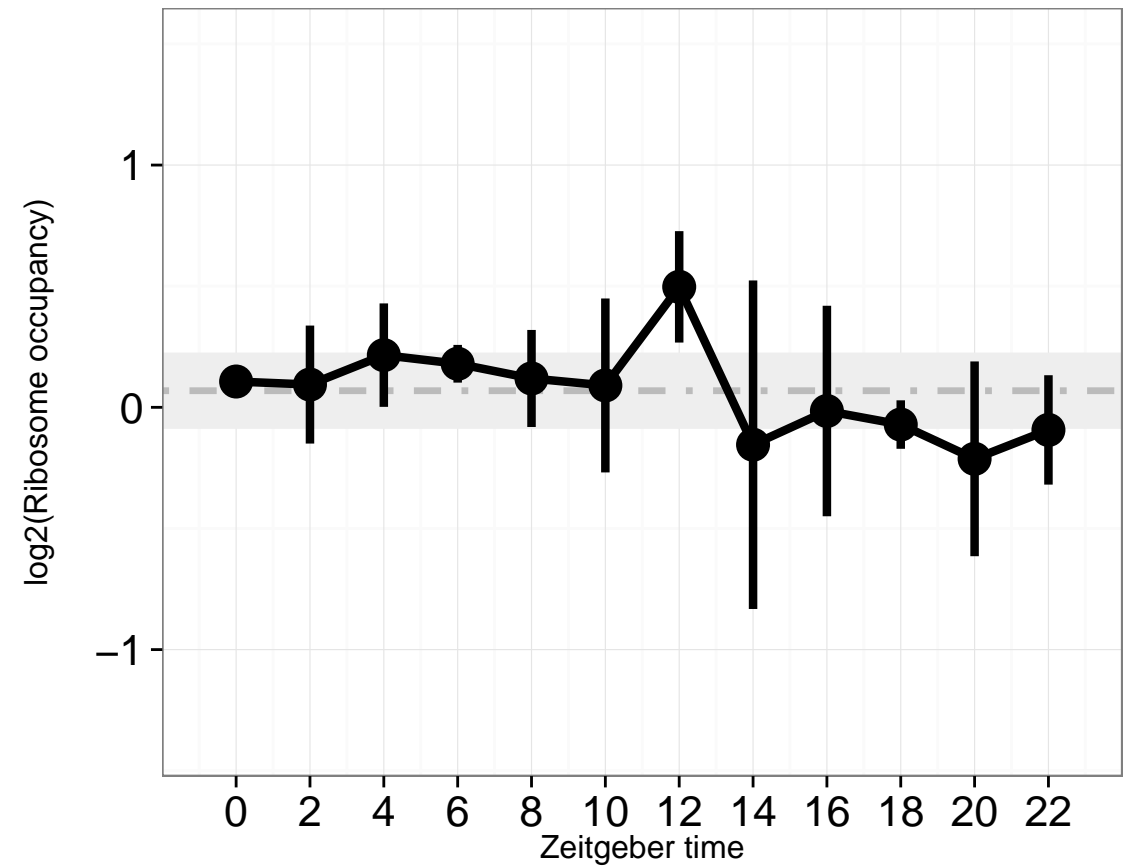

Supplement: Supplementary file 4822 [file 1]

# Gjb1

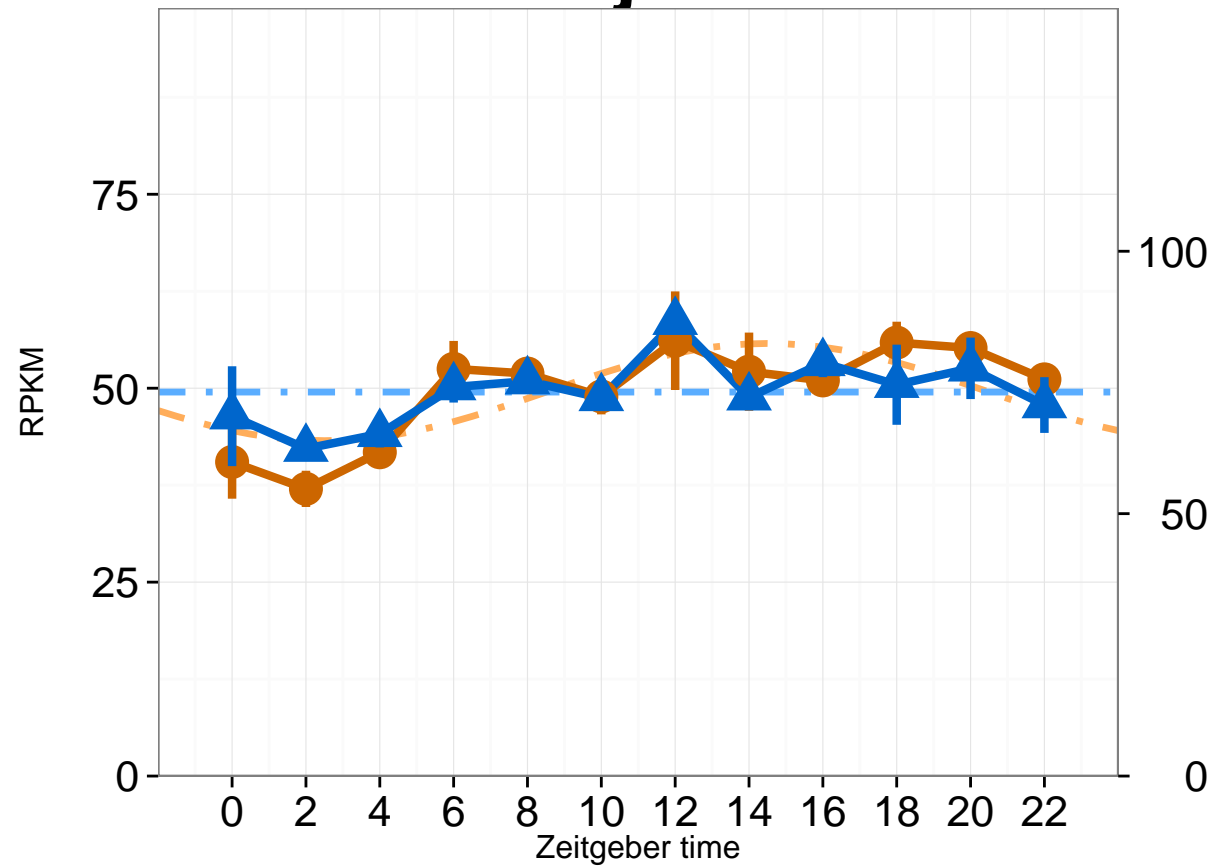

# Gjb1

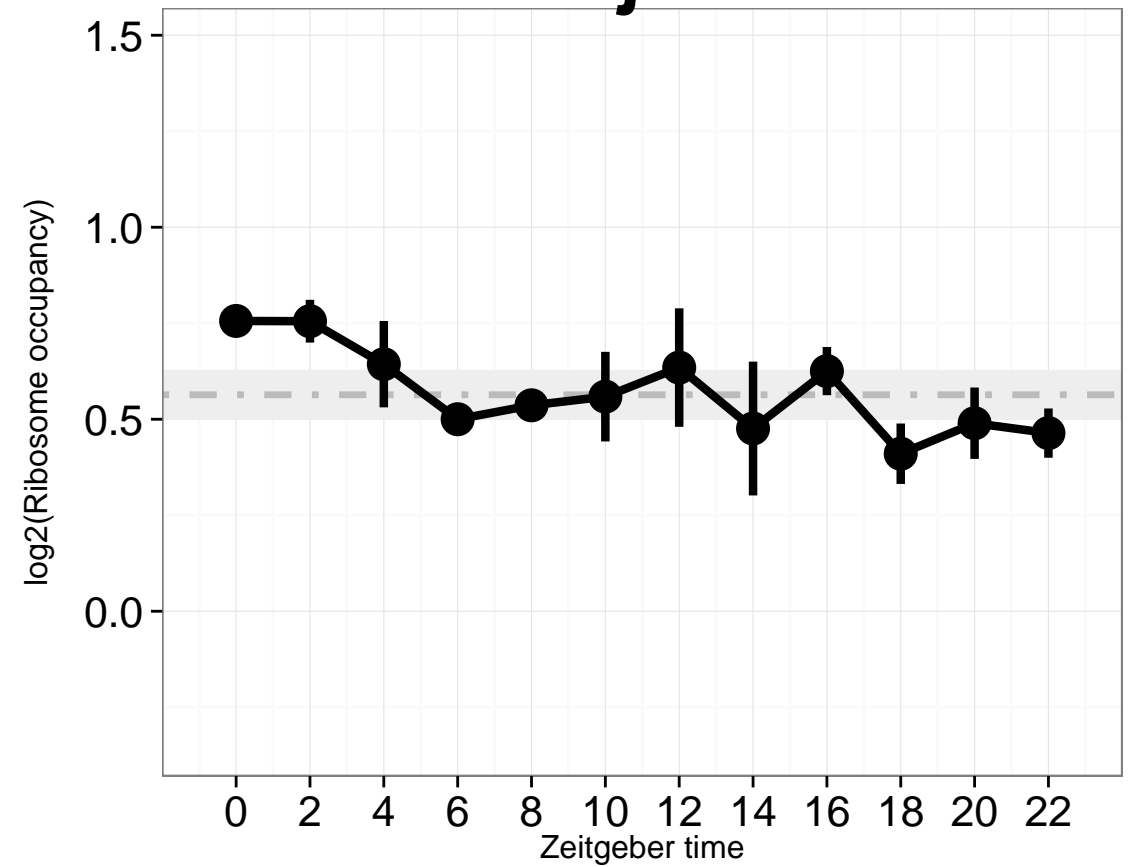

Supplement: Supplementary file 4823 [file 1]

# Cplx2

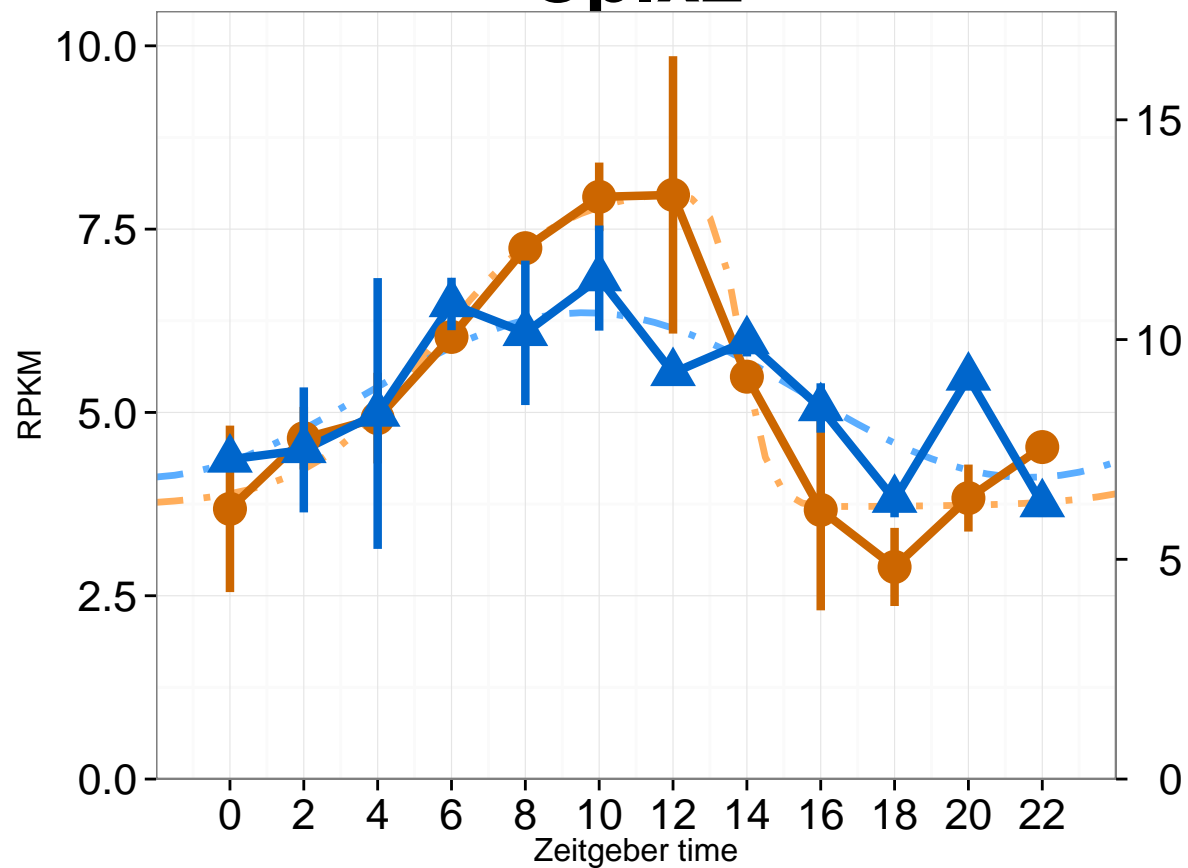

# Cplx2

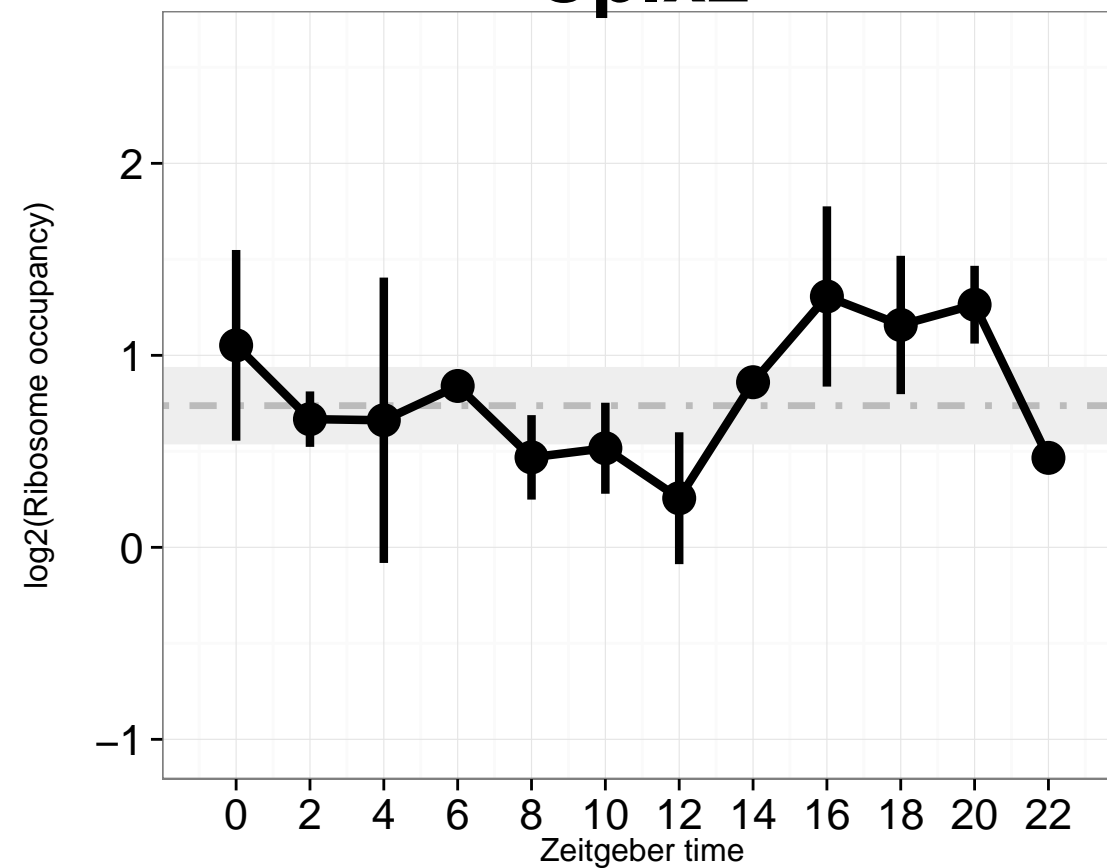

Supplement: Supplementary file 4824 [file 1]

# Ranbp2

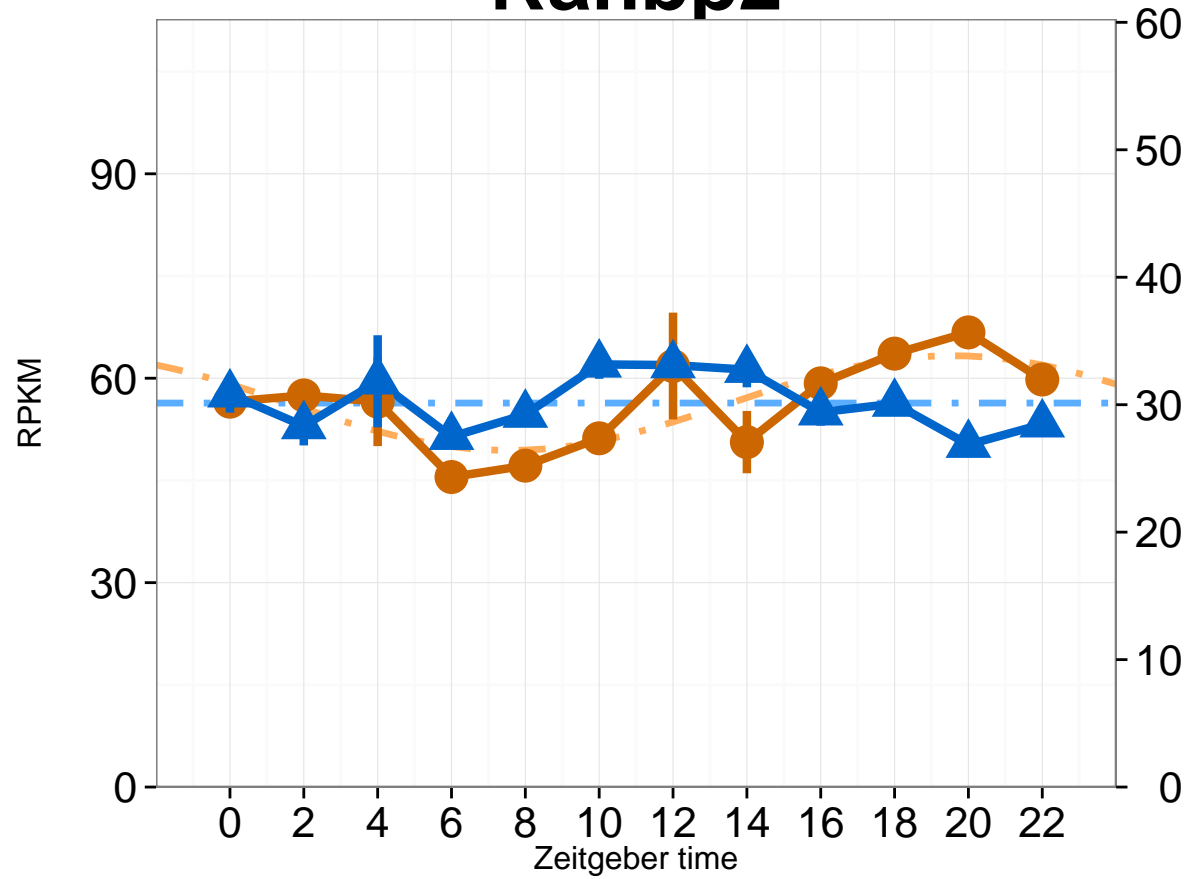

# Ranbp2

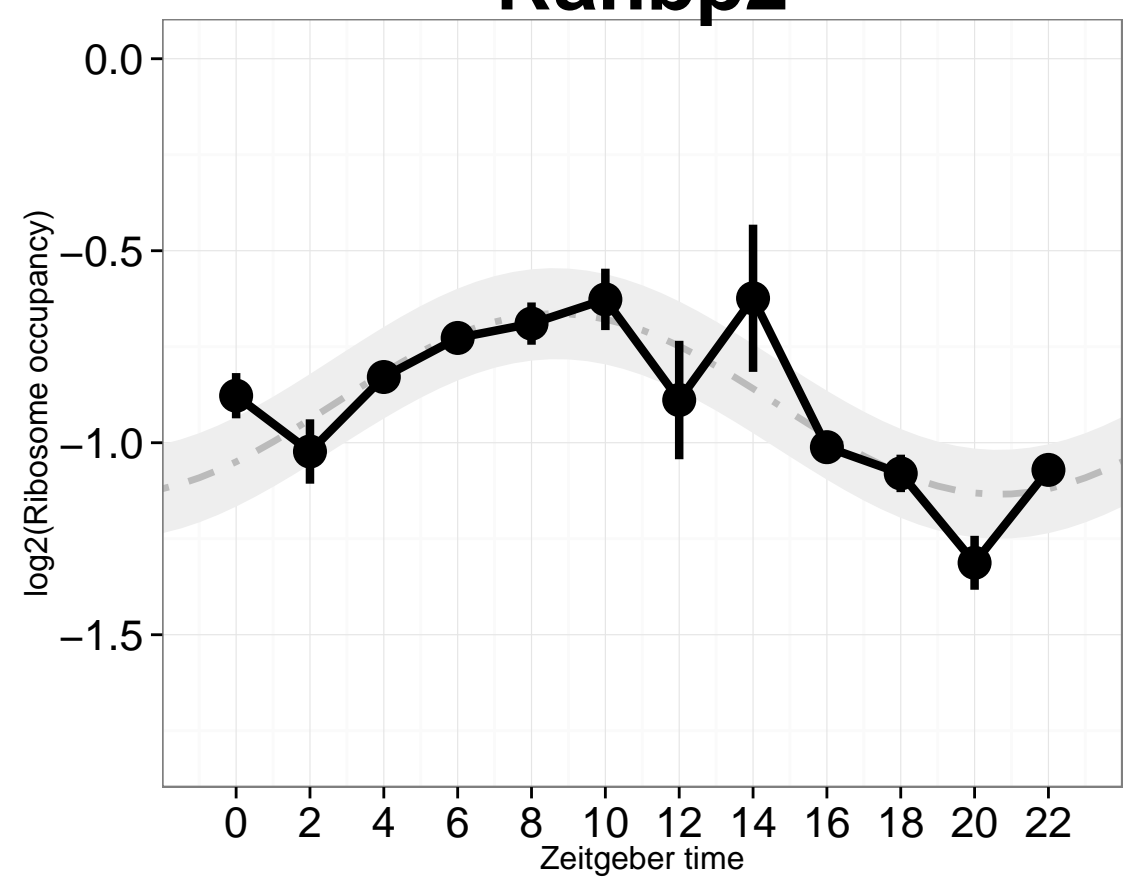

Supplement: Supplementary file 4825 [file 1]

## EtI4

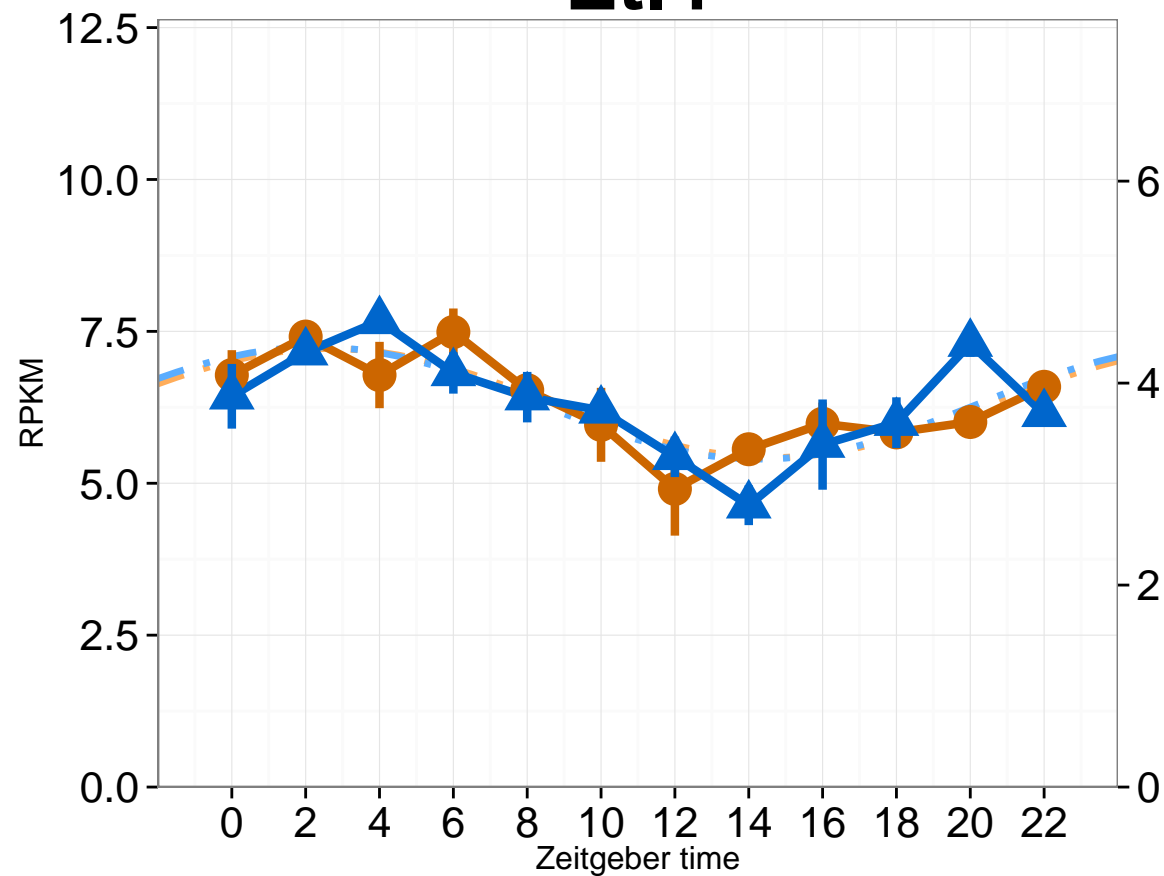

## EtI4

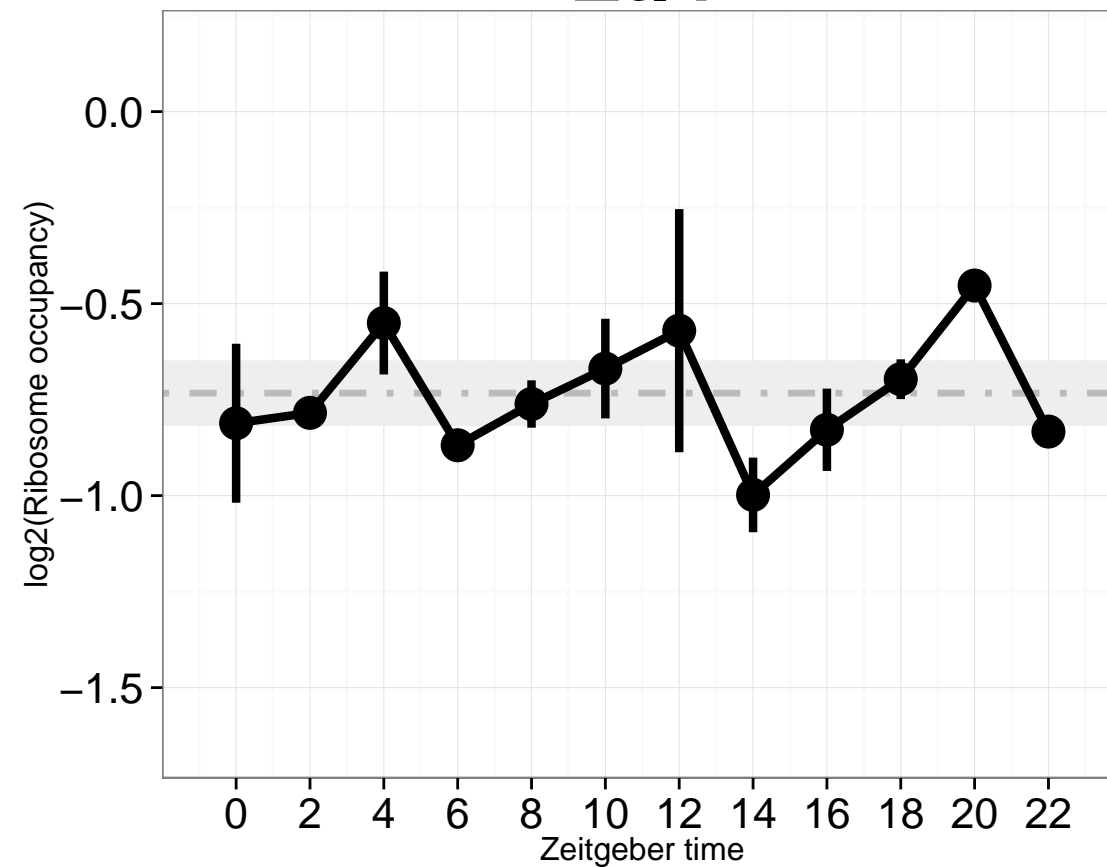

Supplement: Supplementary file 4826 [file 1]

# Slc51b

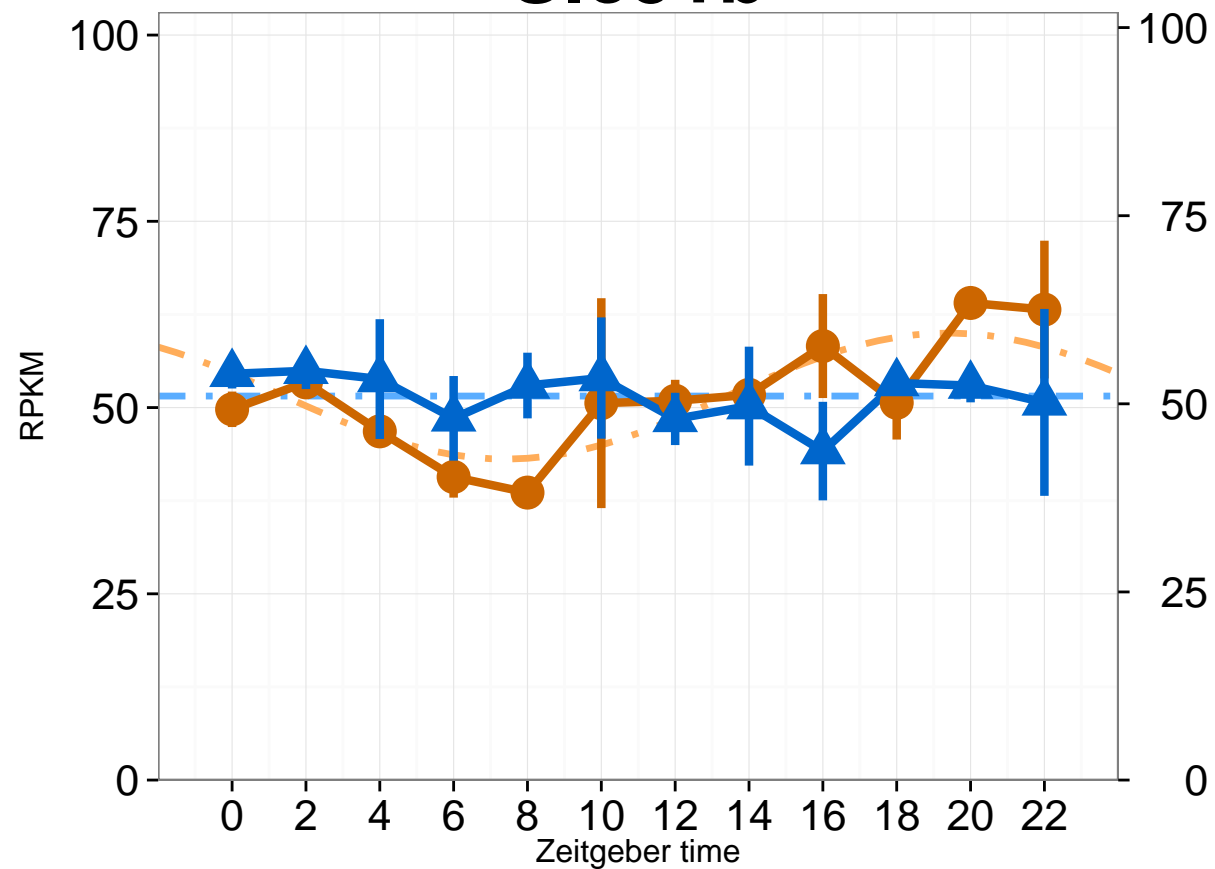

# Slc51b

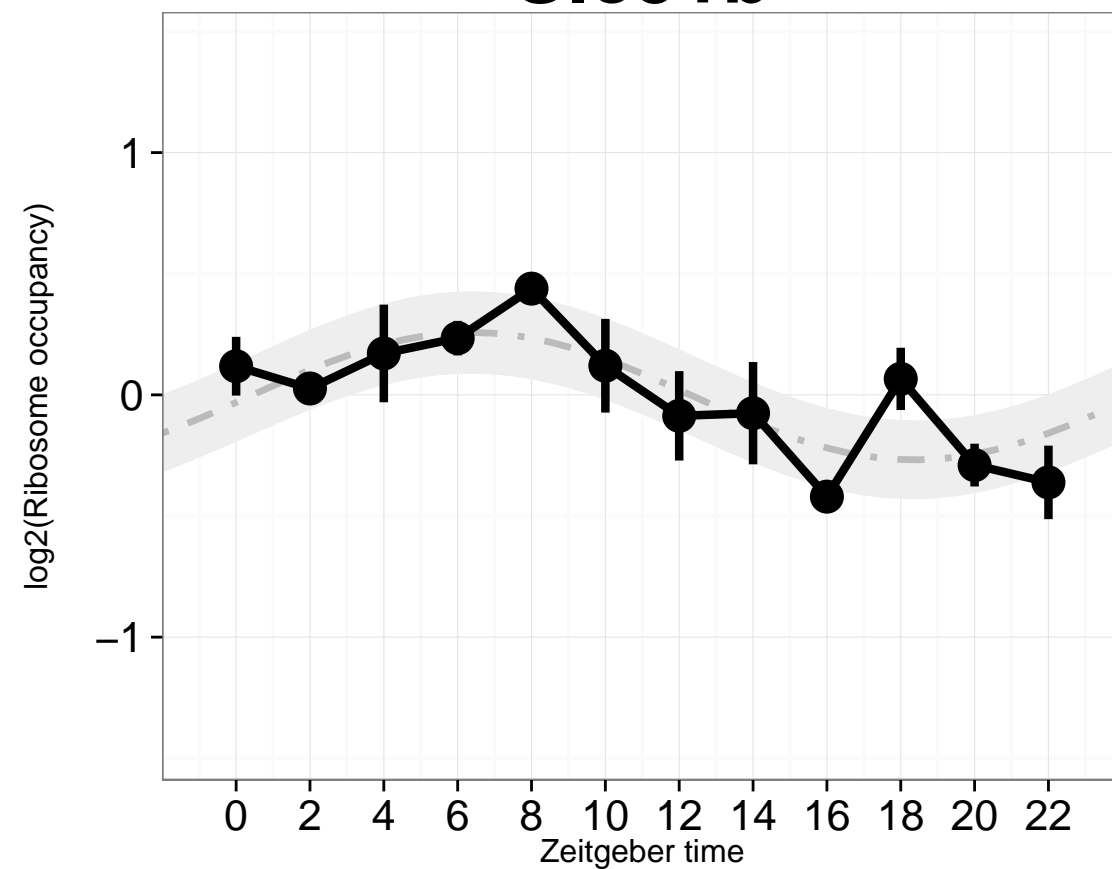

Supplement: Supplementary file 4827 [file 1]

# Clip2

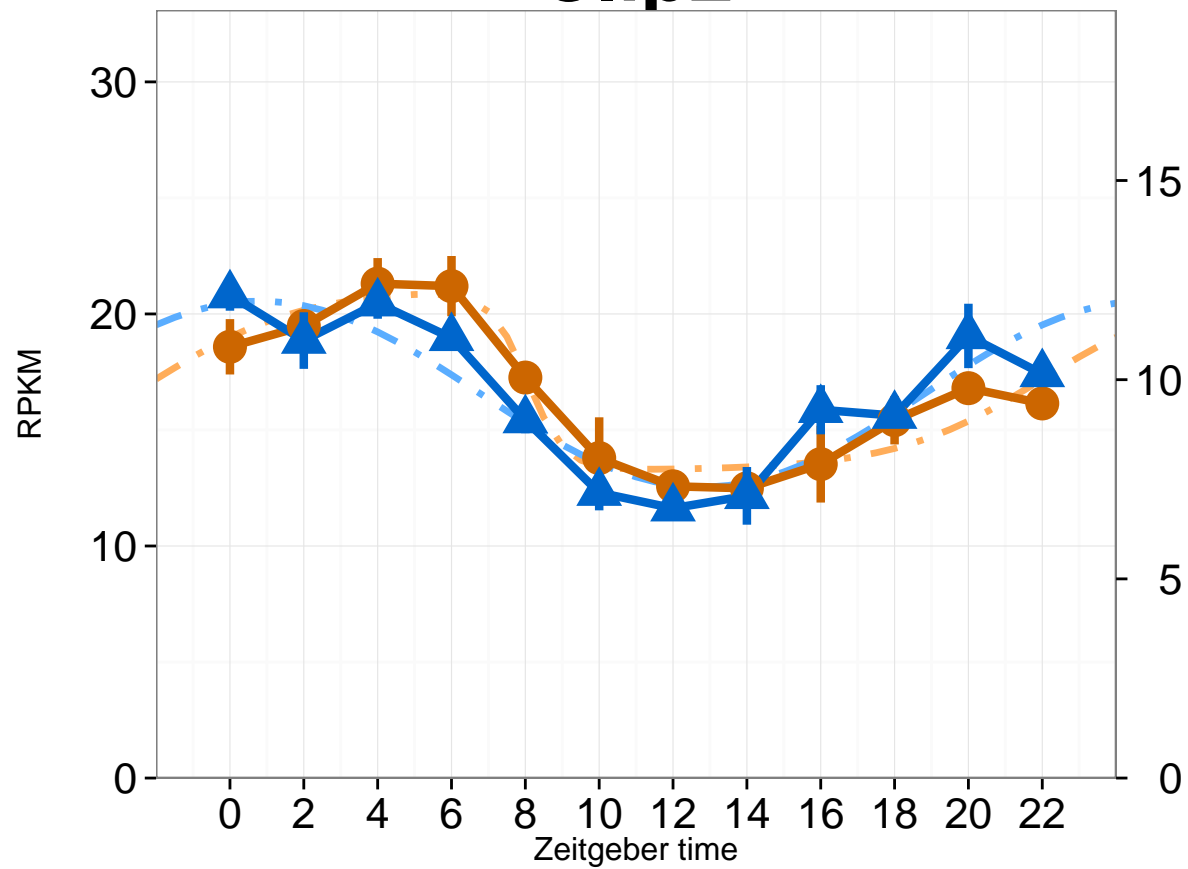

# Clip2

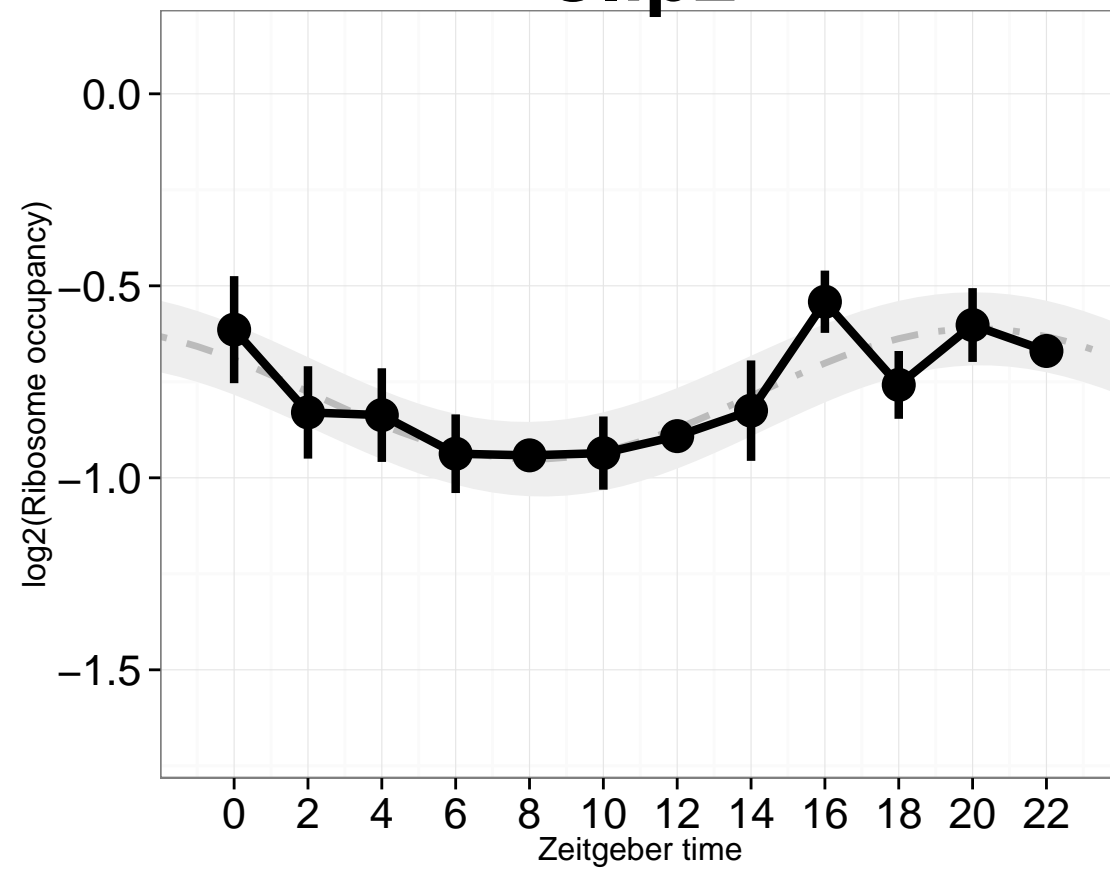

Supplement: Supplementary file 4828 [file 1]

## Tbck

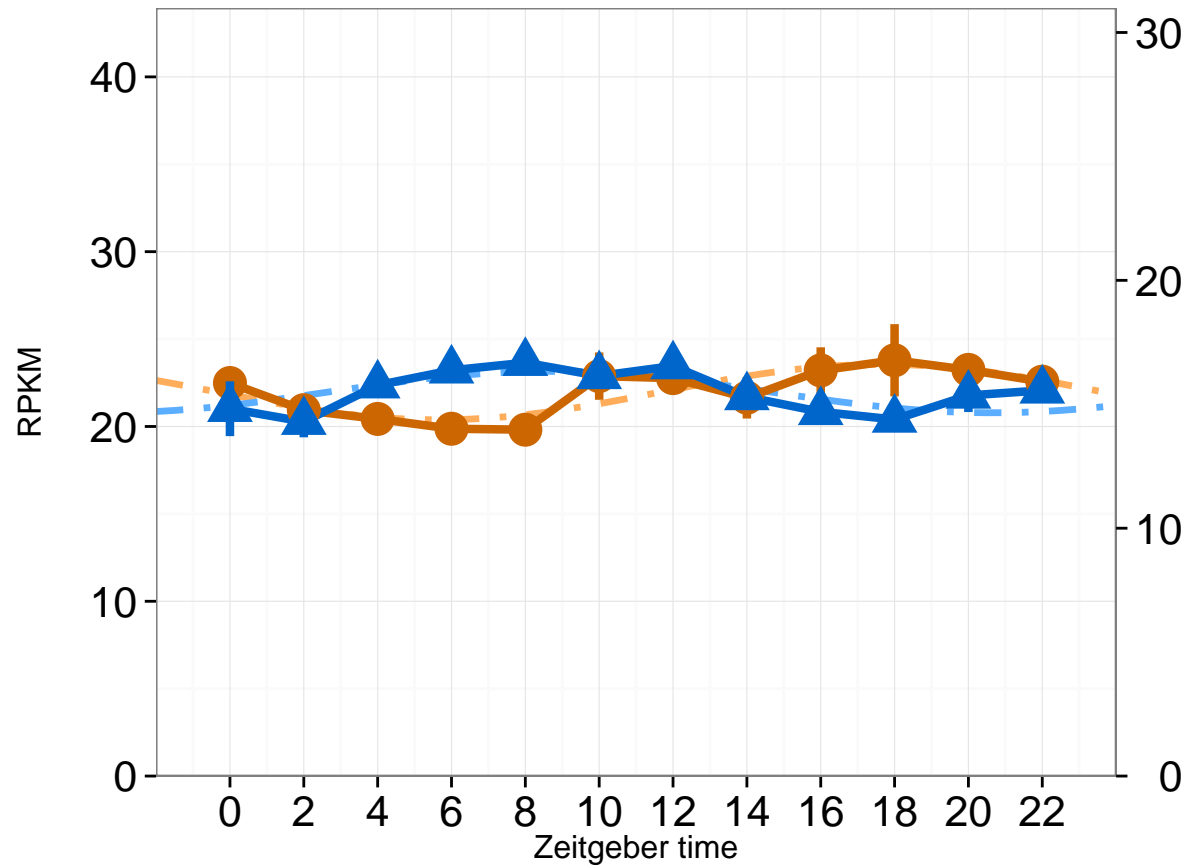

## Tbck

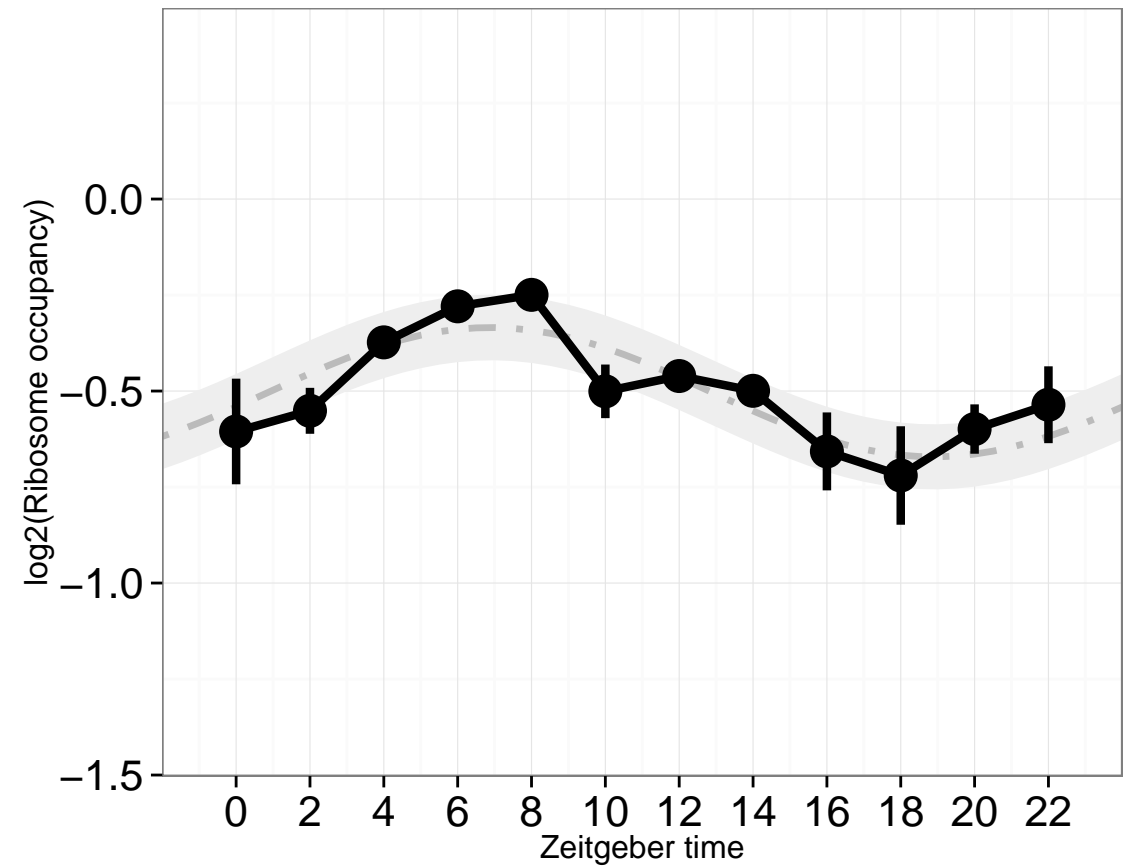

Supplement: Supplementary file 4829 [file 1]

## Bcl11b

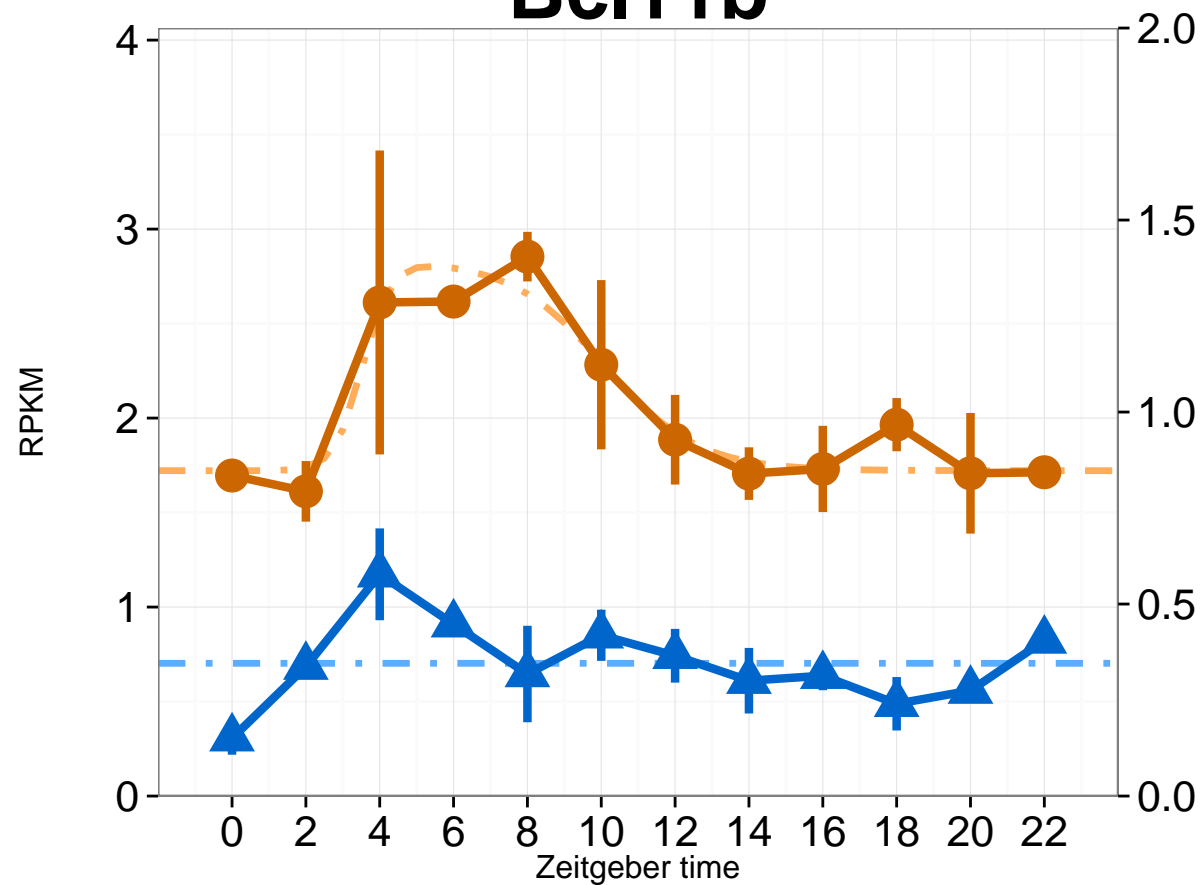

## Bcl11b

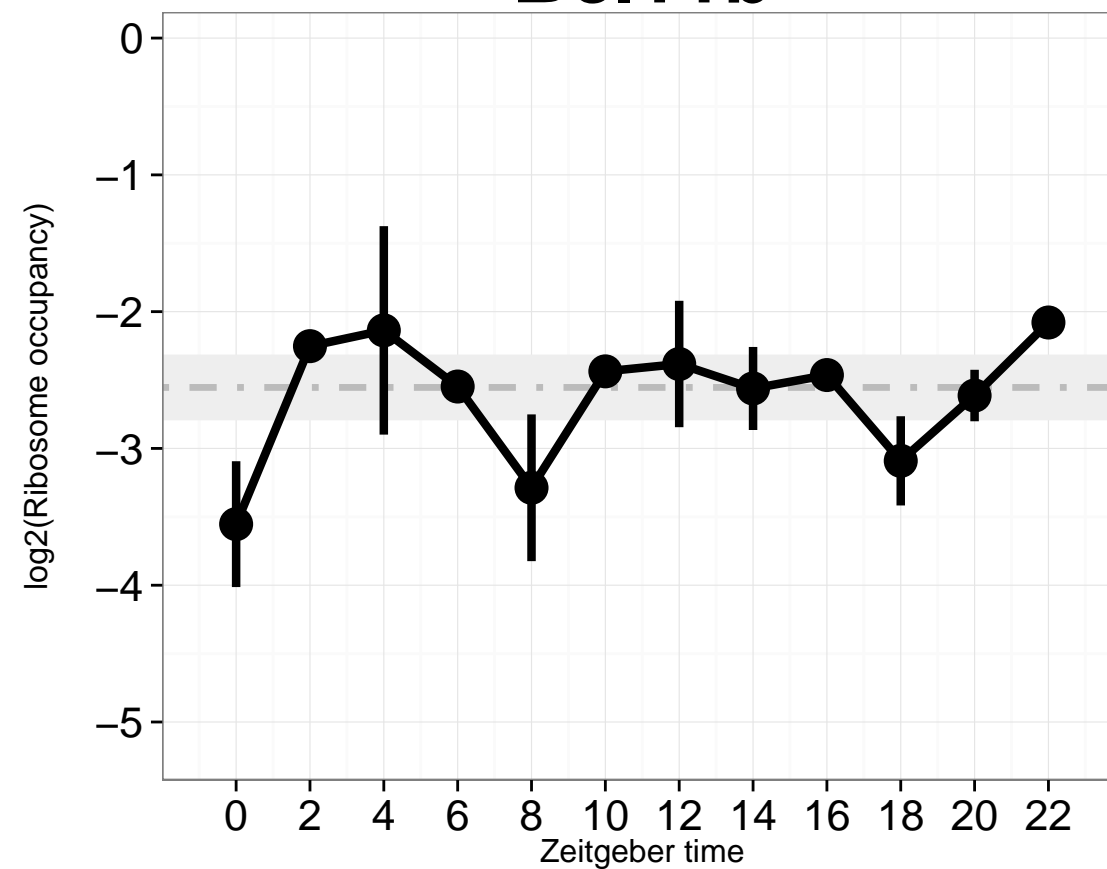

Supplement: Supplementary file 4830 [file 1]

# Zfp697

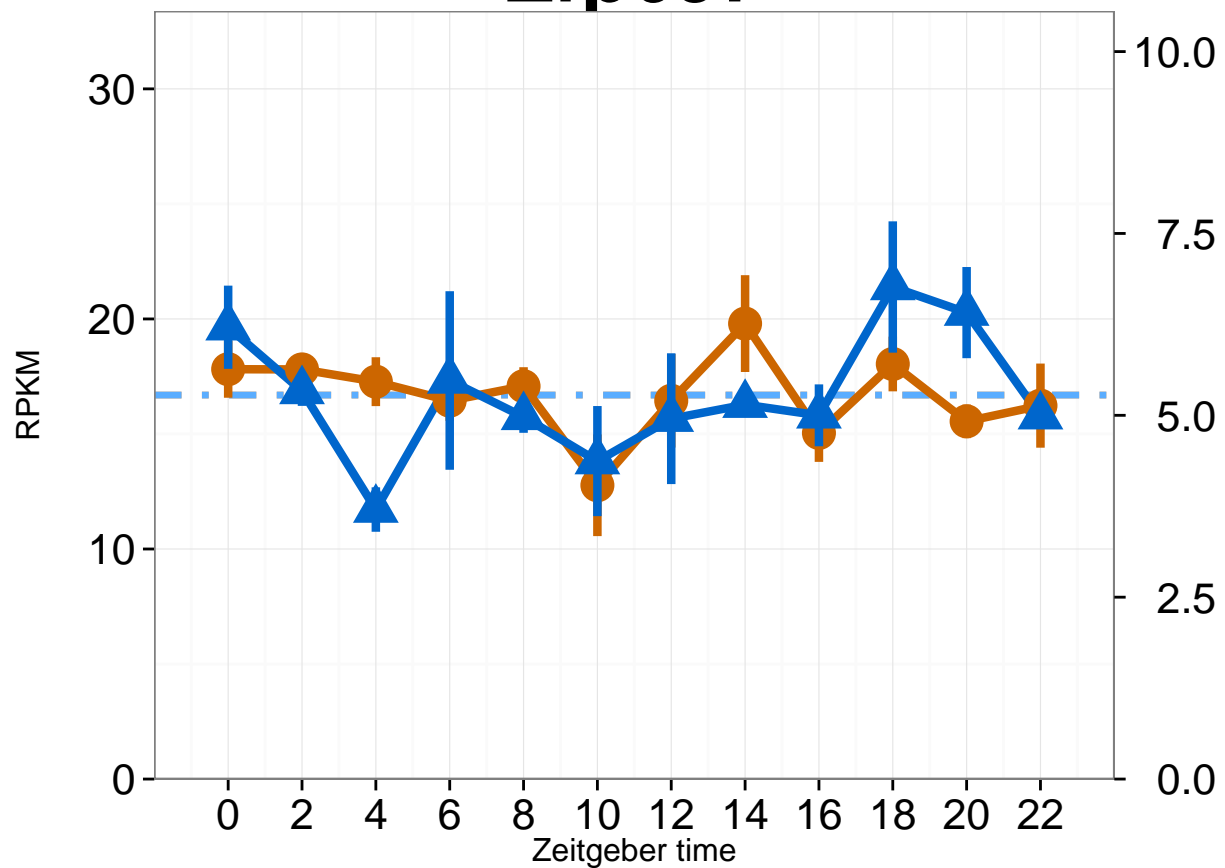

# Zfp697

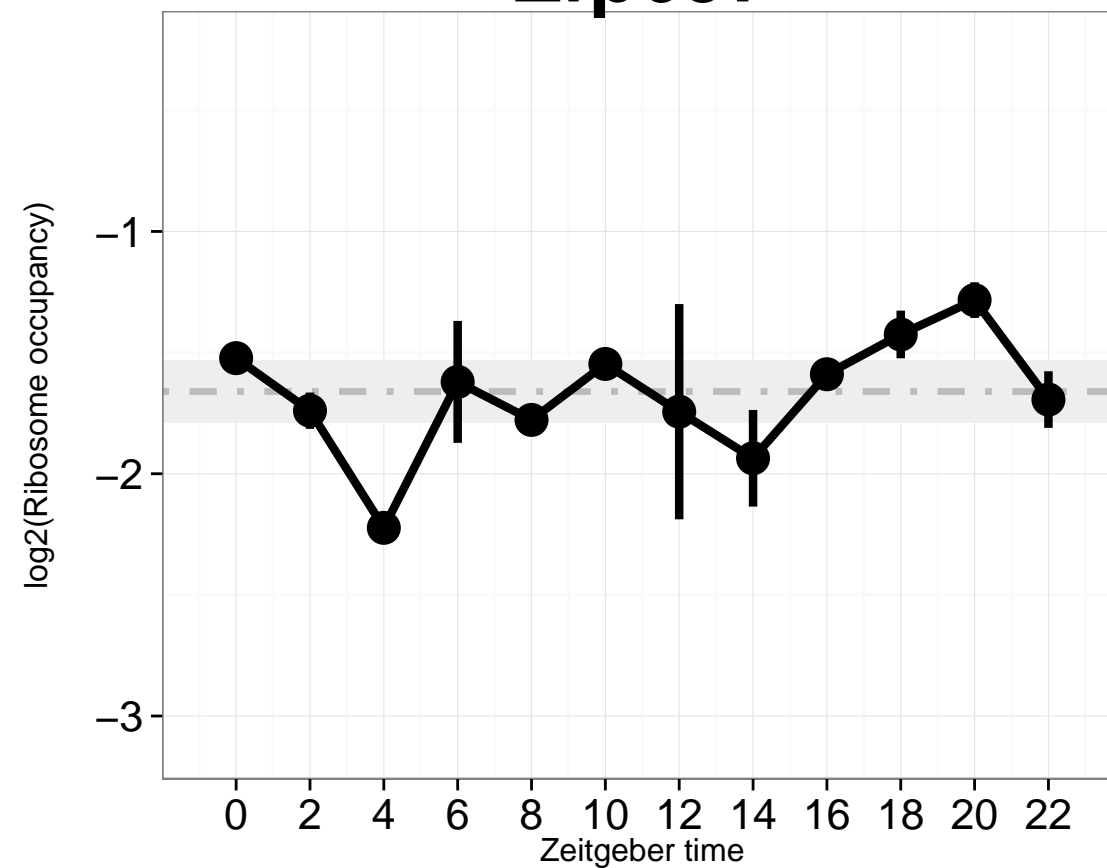

Supplement: Supplementary file 4831 [file 1]

## Nudt3

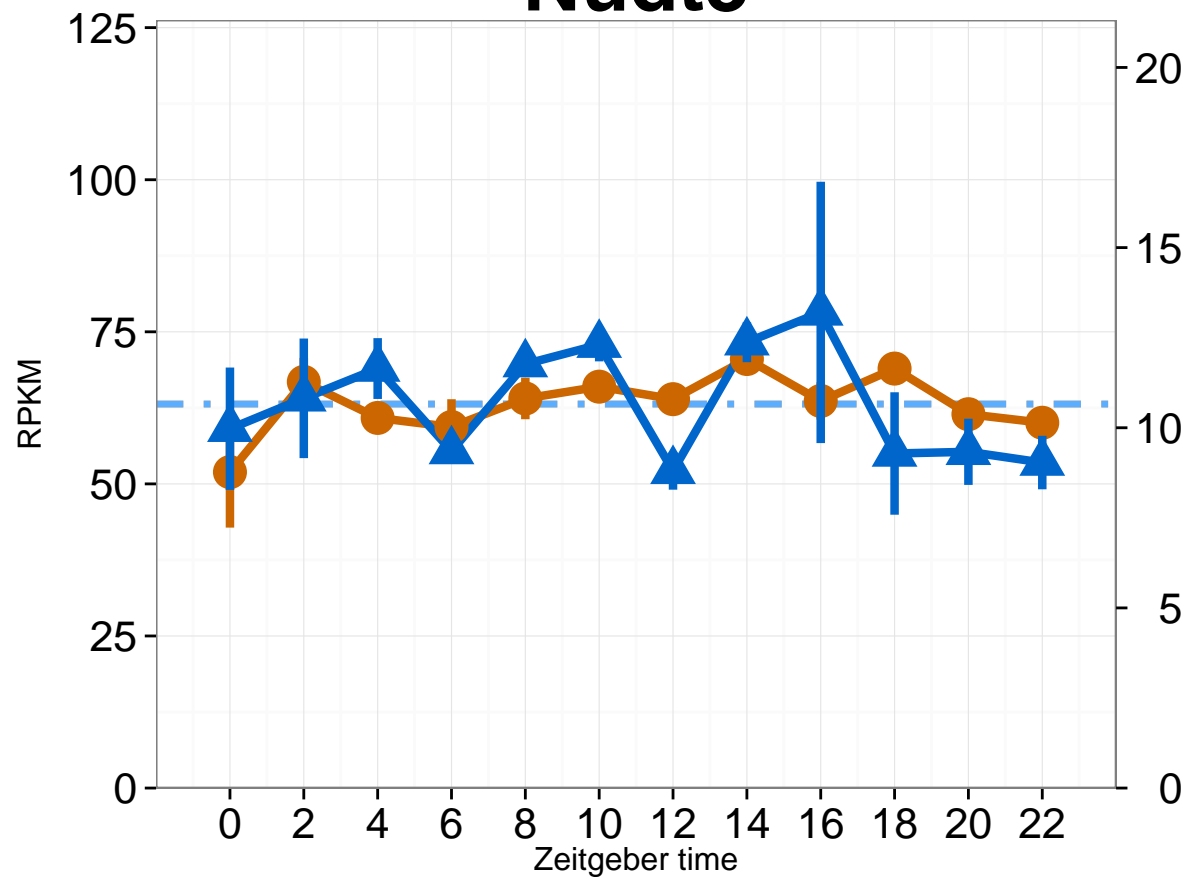

## Nudt3

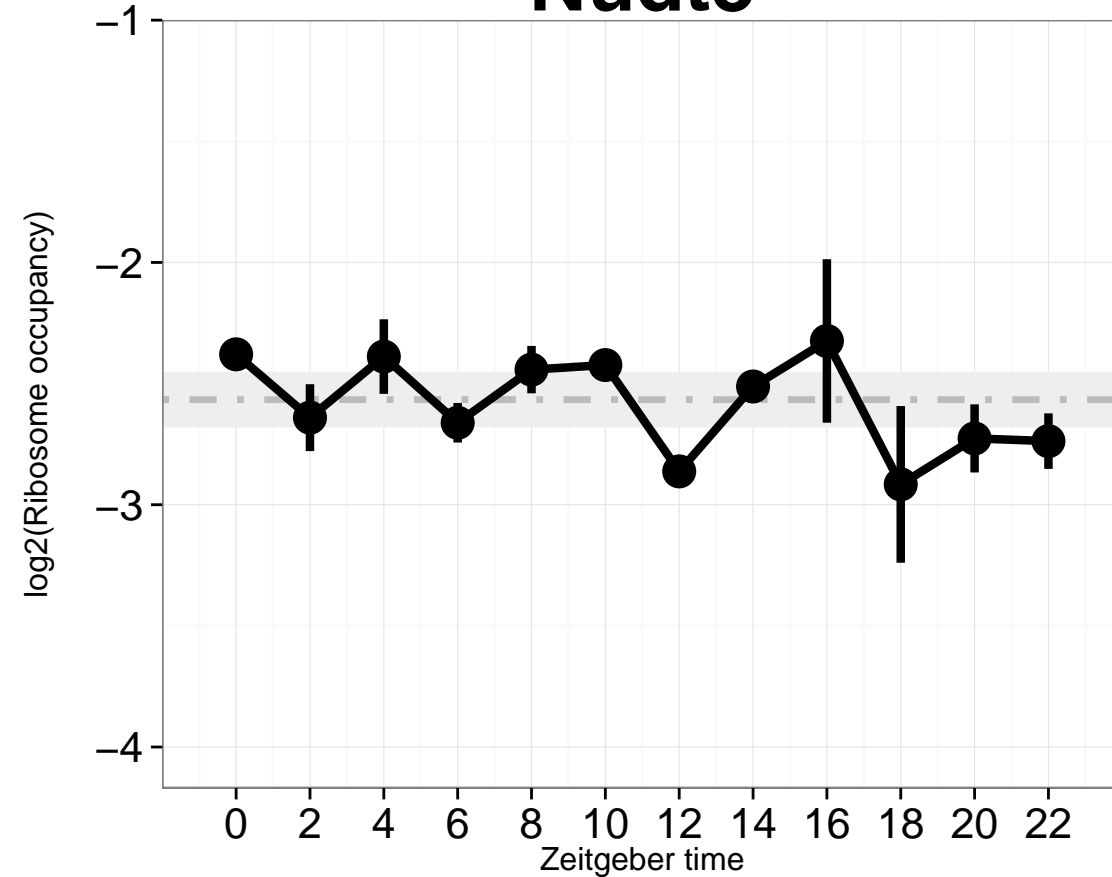

Supplement: Supplementary file 4832 [file 1]

# Zfp648

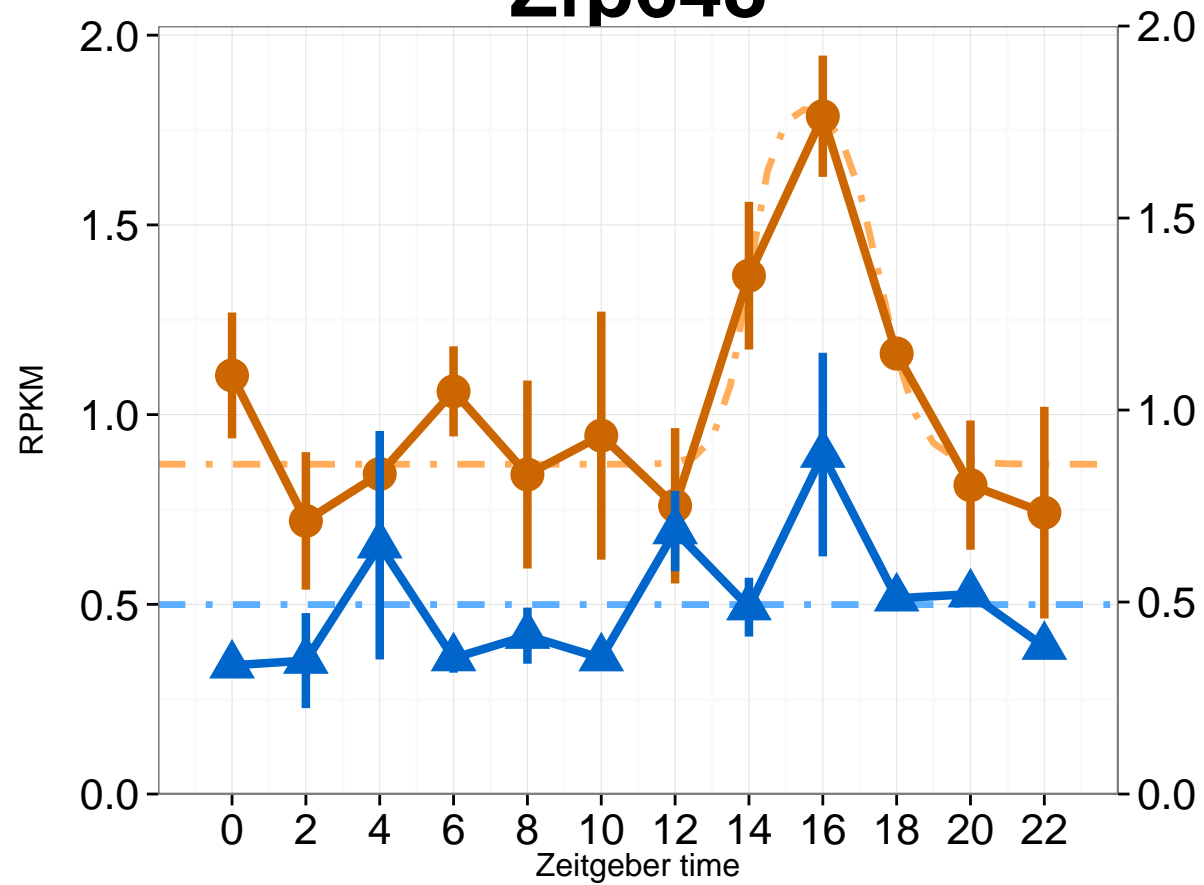

# Zfp648

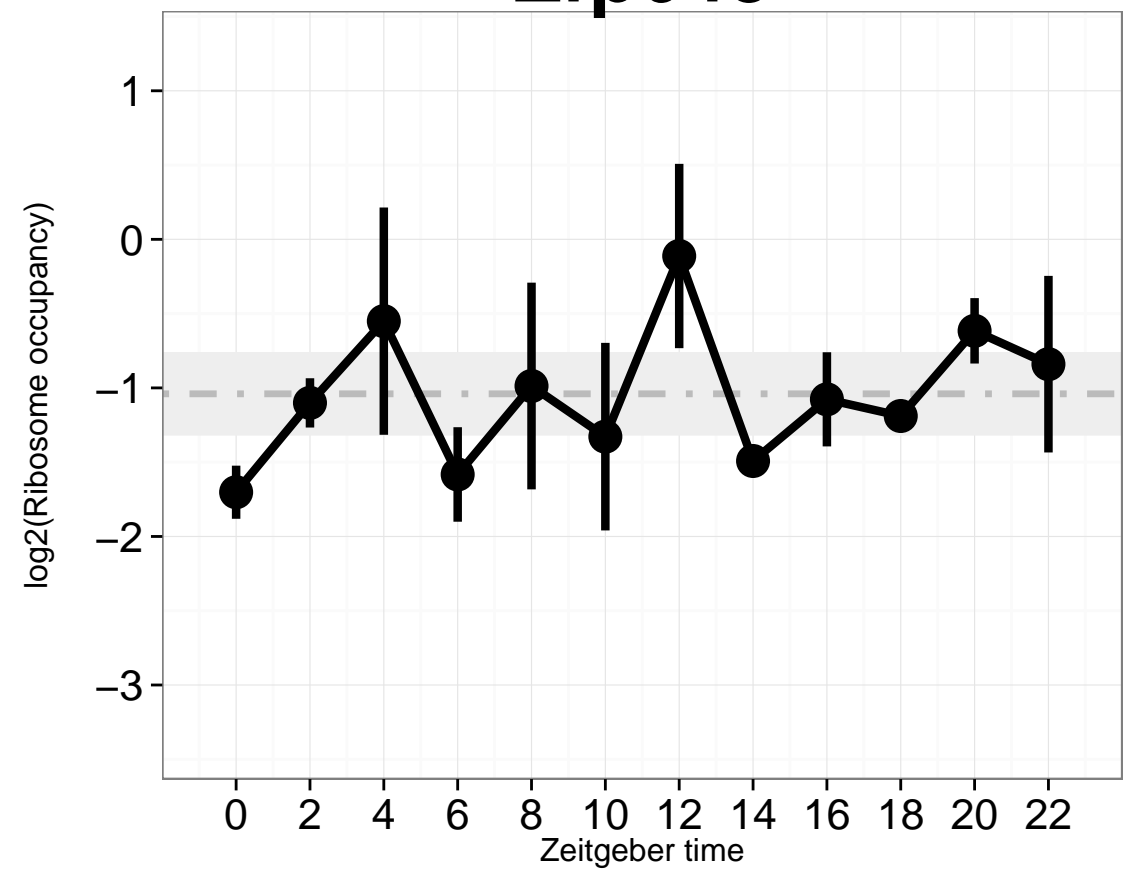

Supplement: Supplementary file 4833 [file 1]

## Rbm3

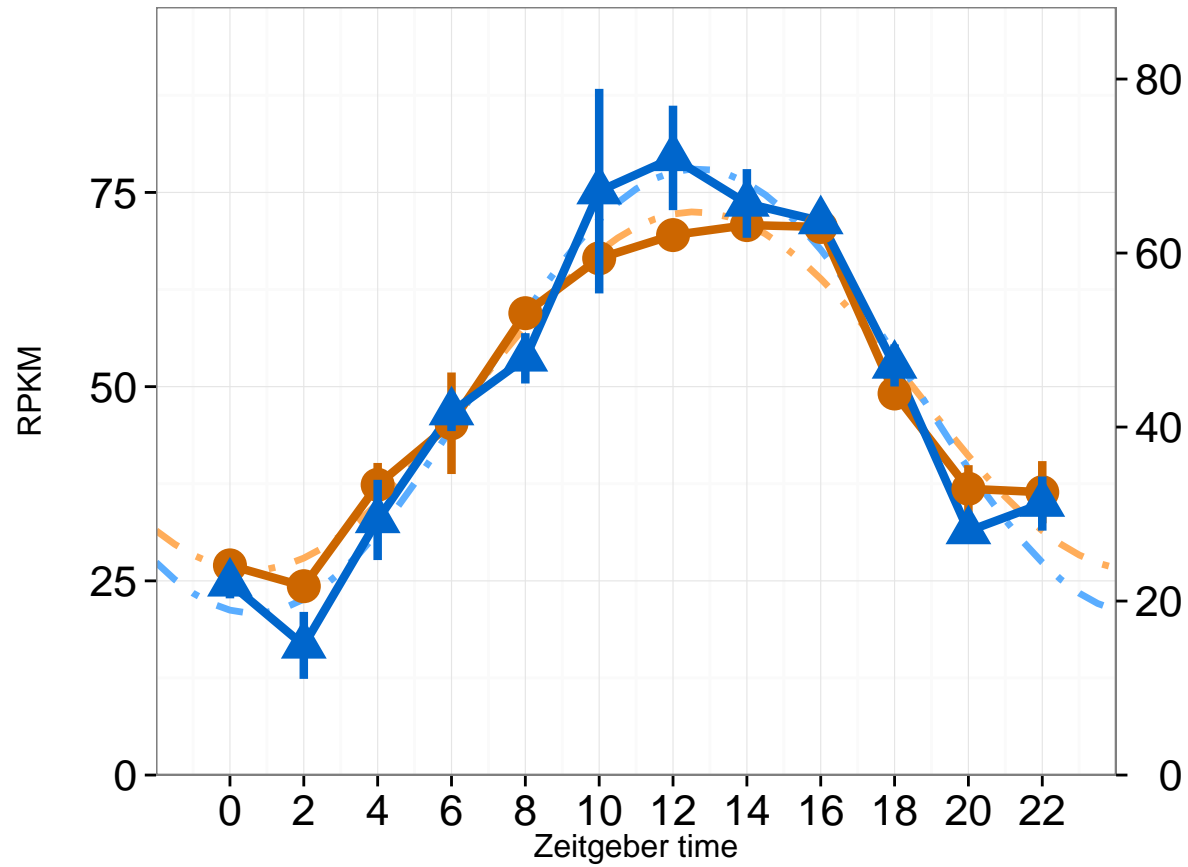

## Rbm3

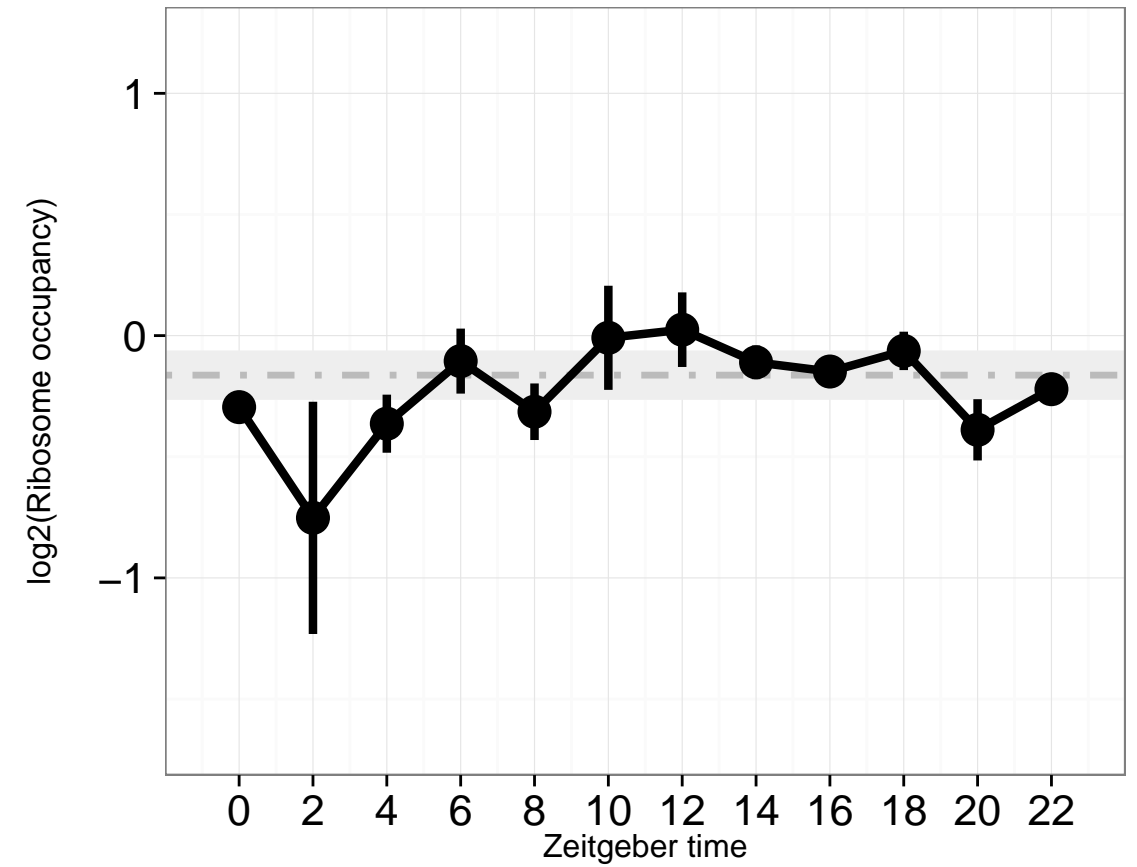

Supplement: Supplementary file 4834 [file 1]

## Slc16a1

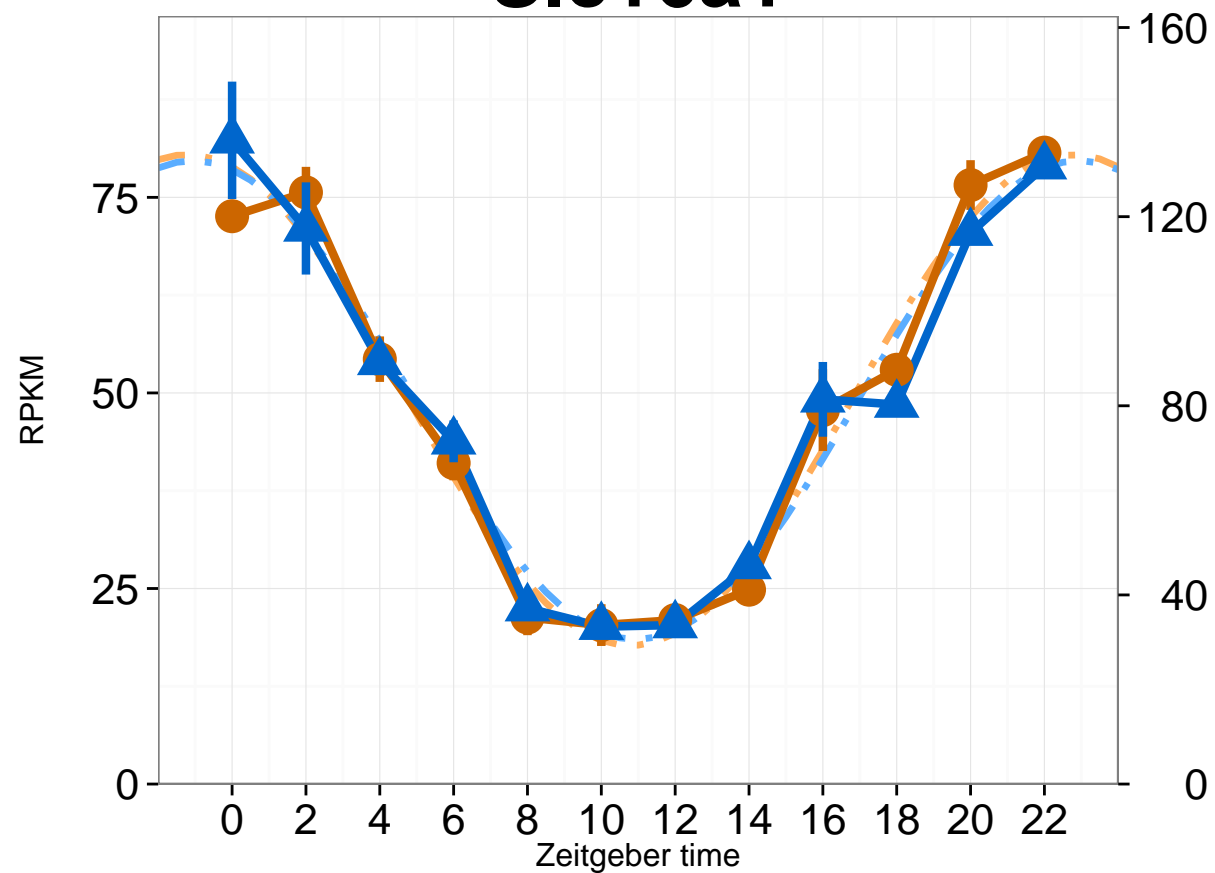

## Slc16a1

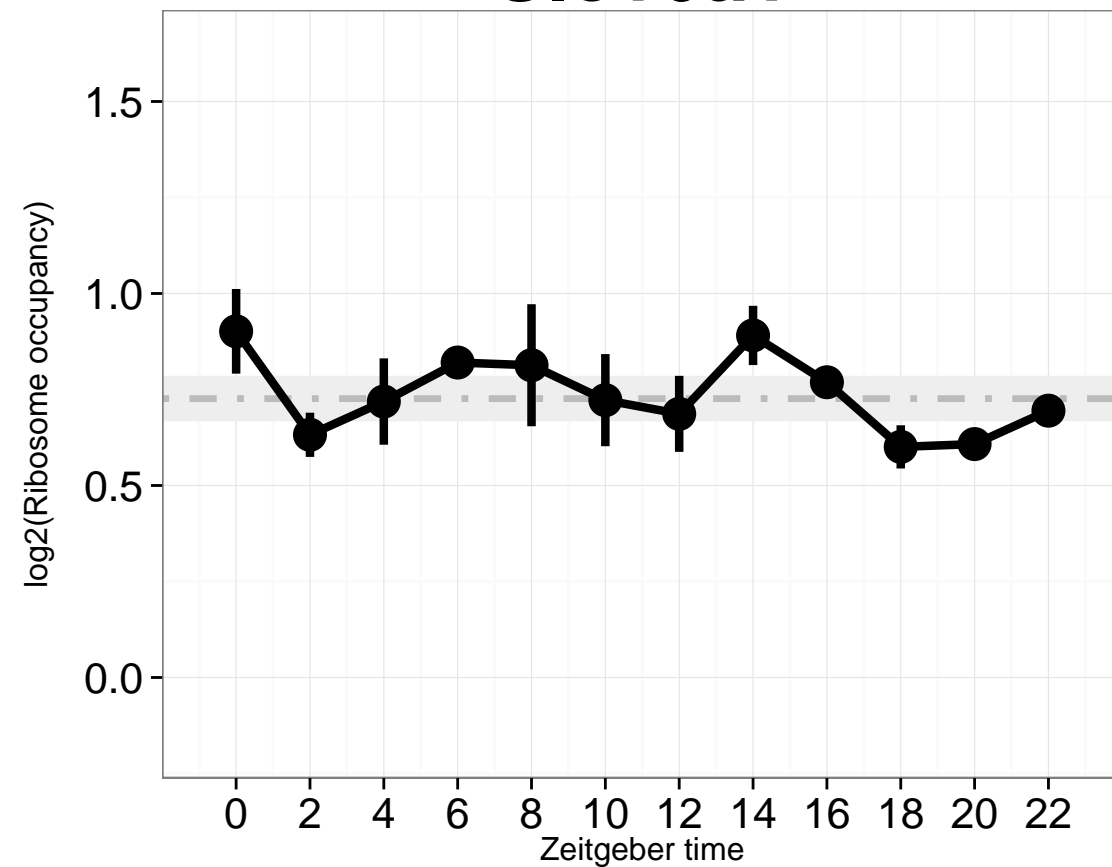

Supplement: Supplementary file 4835 [file 1]

## PIk4

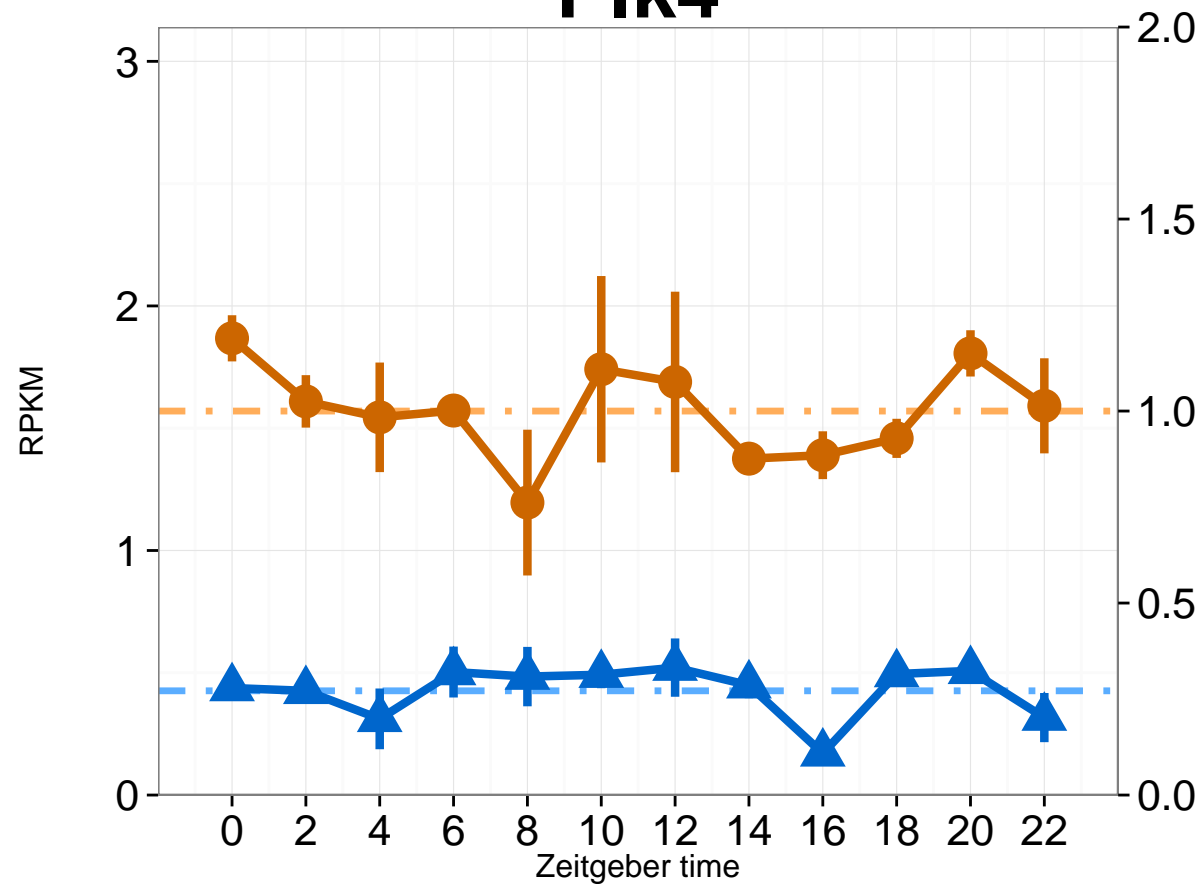

## PIk4

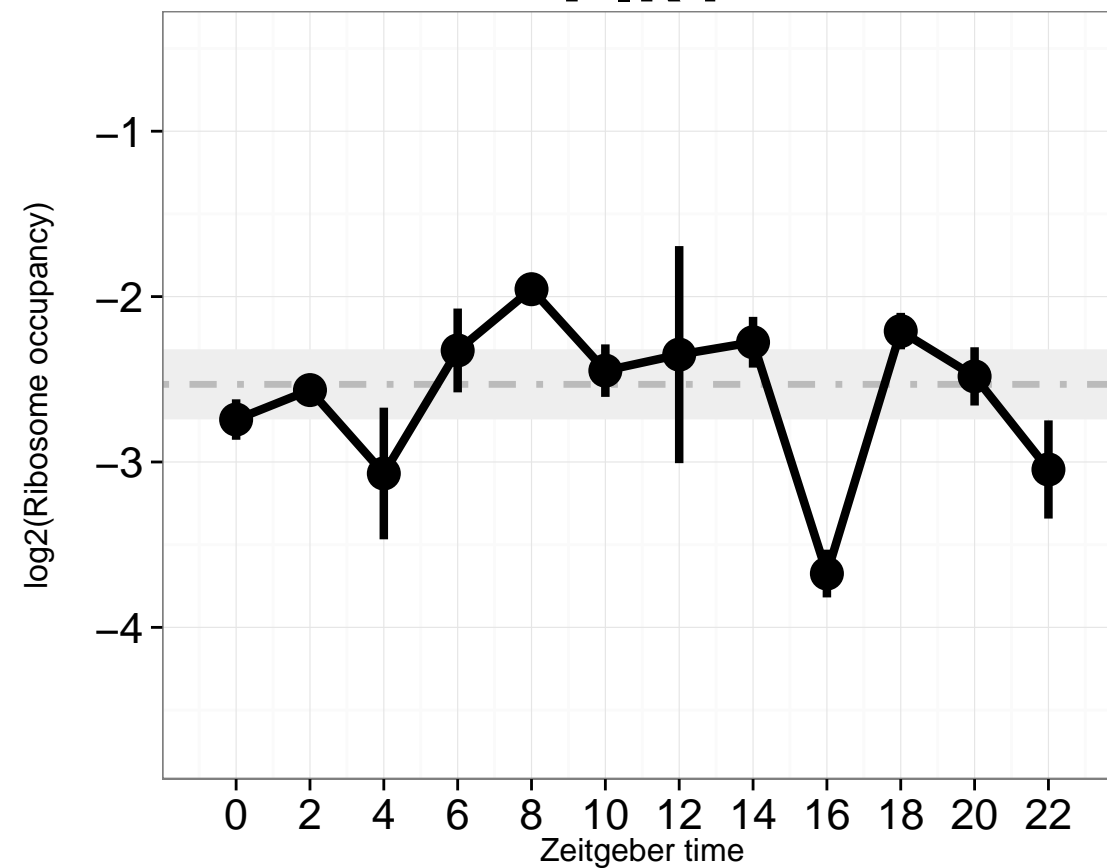

Supplement: Supplementary file 4836 [file 1]

## Prrx1

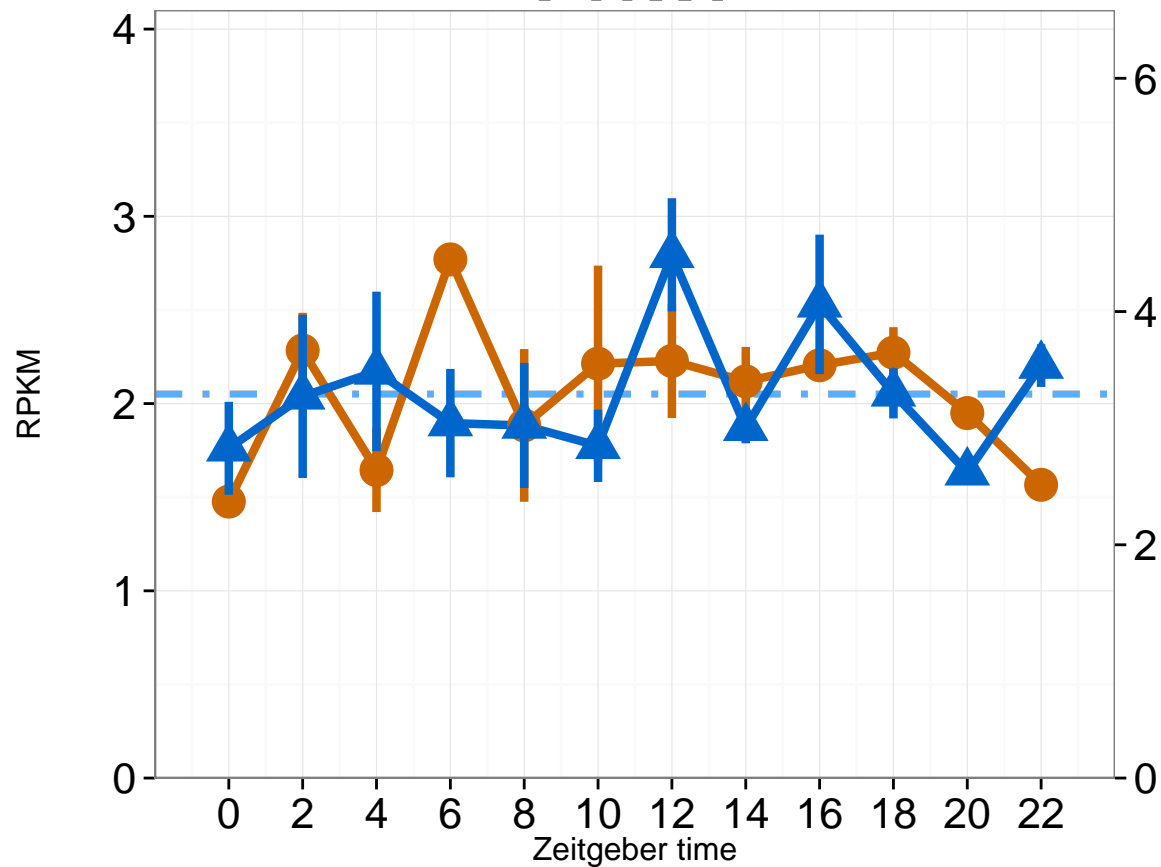

## Prrx1

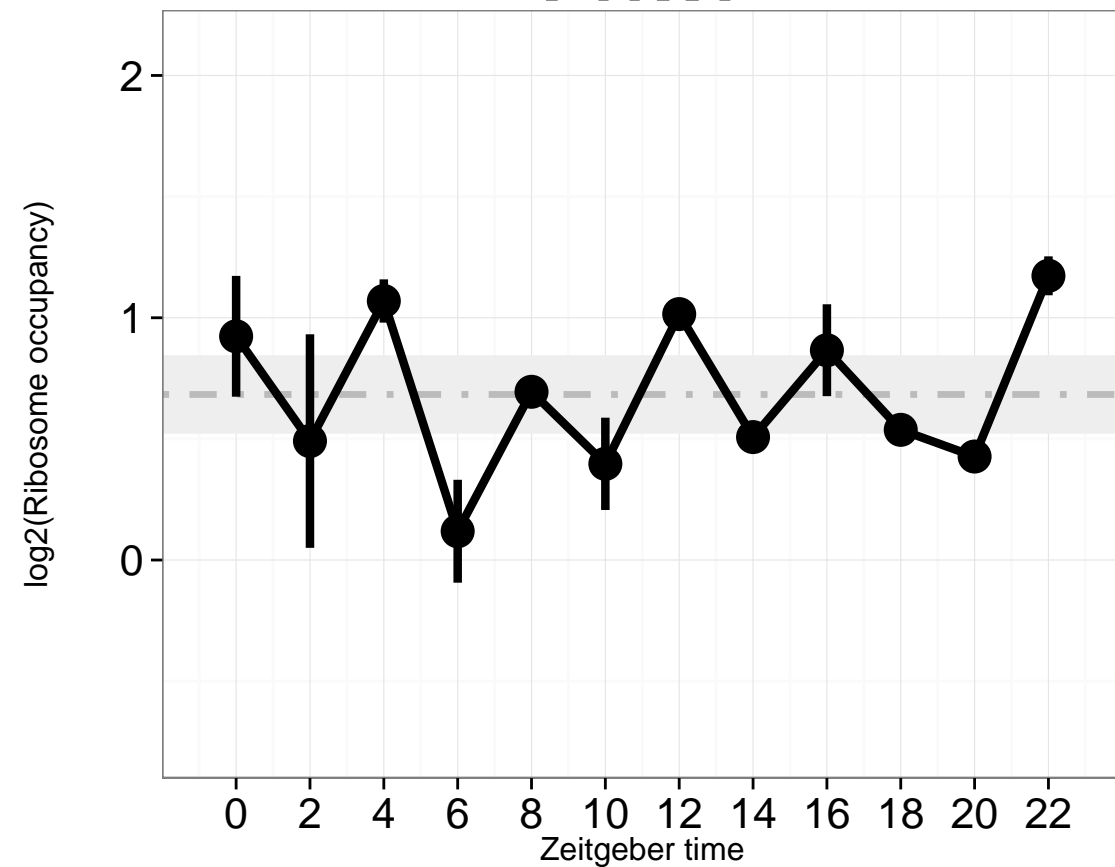

Supplement: Supplementary file 4837 [file 1]

## Zdhhc13

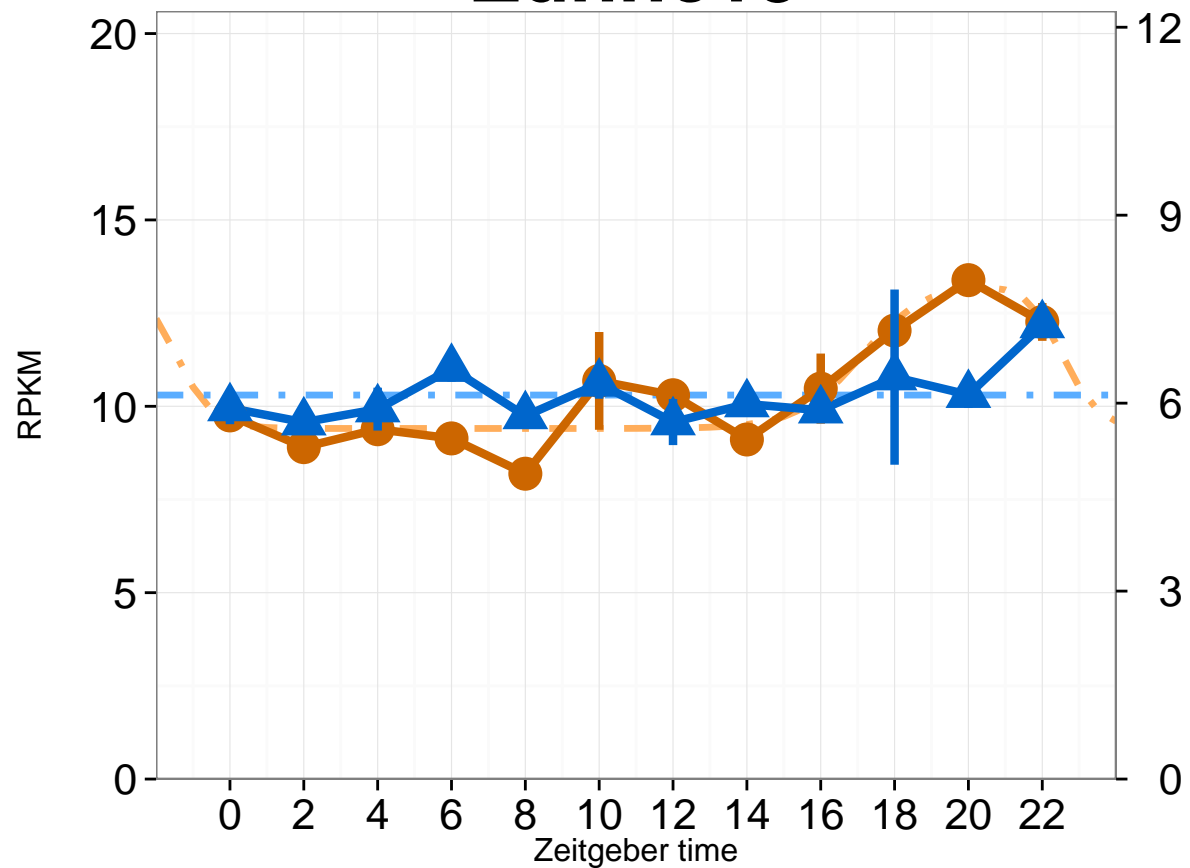

## Zdhhc13

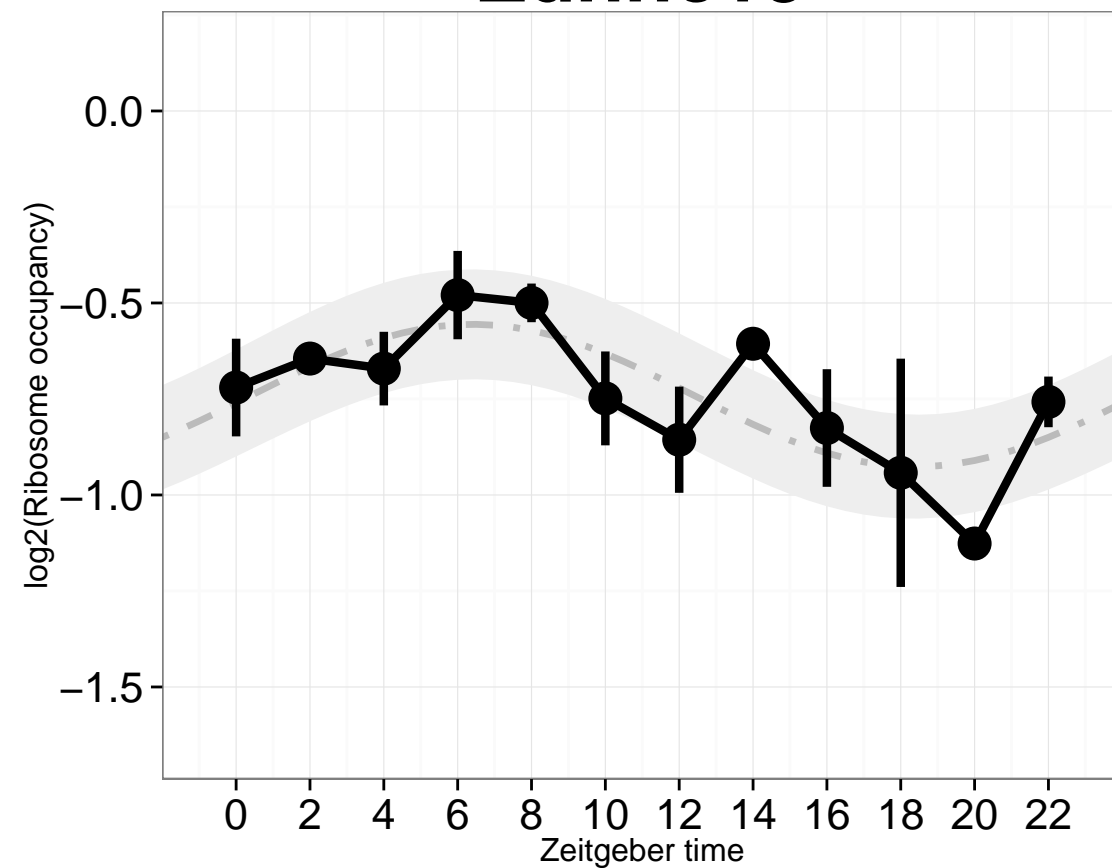

Supplement: Supplementary file 4838 [file 1]

# Gm13157

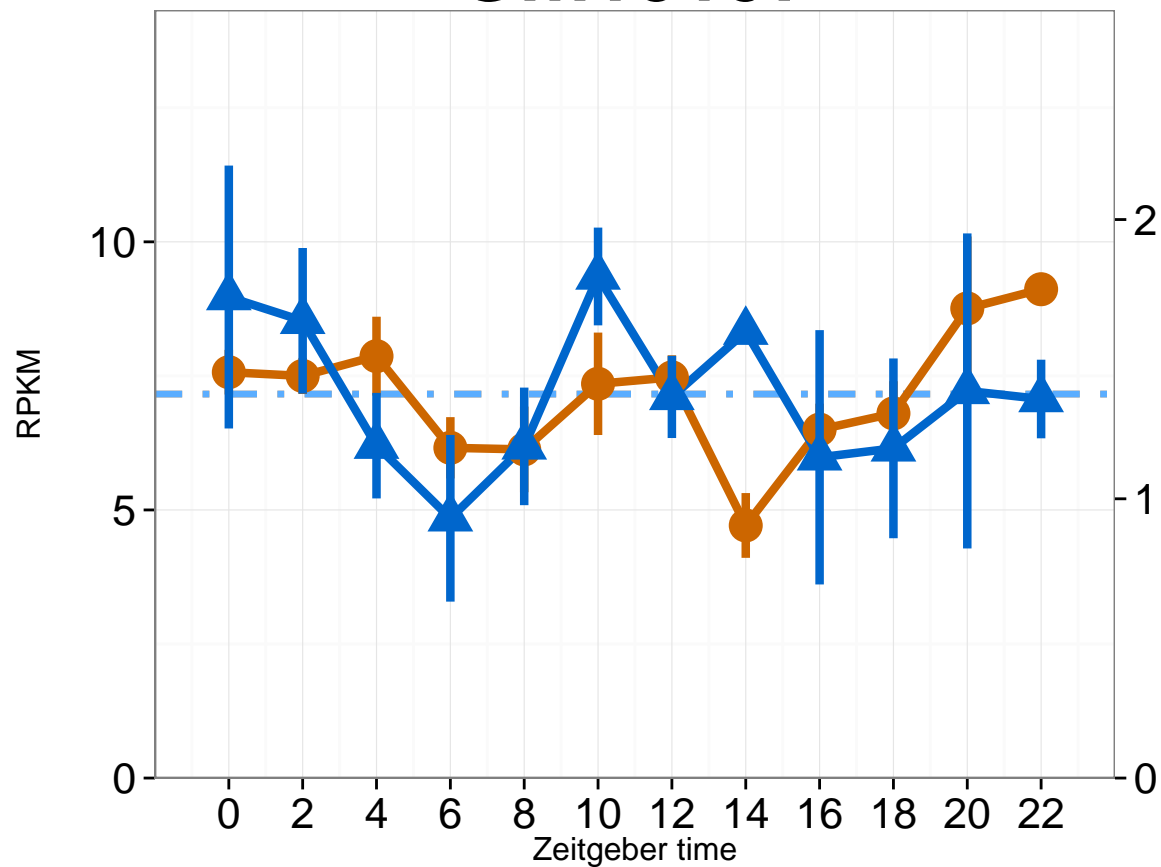

# Gm13157

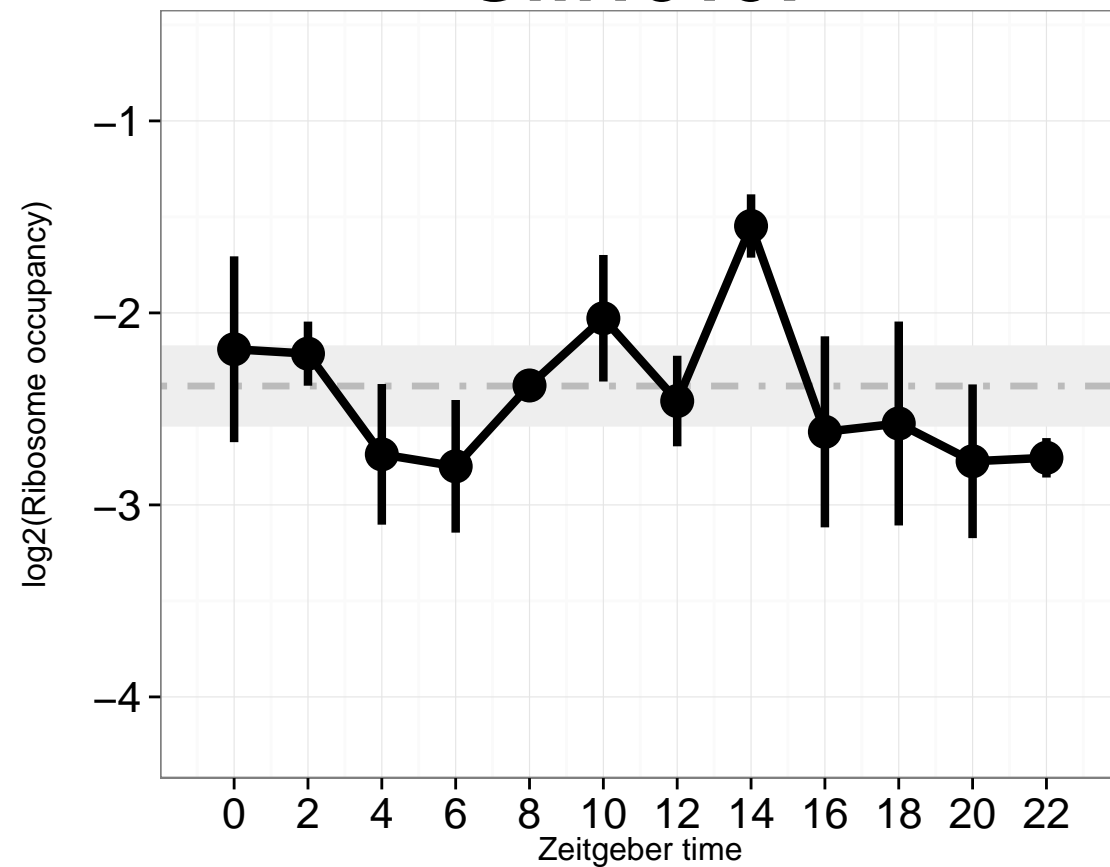

Supplement: Supplementary file 4839 [file 1]

# Cep290

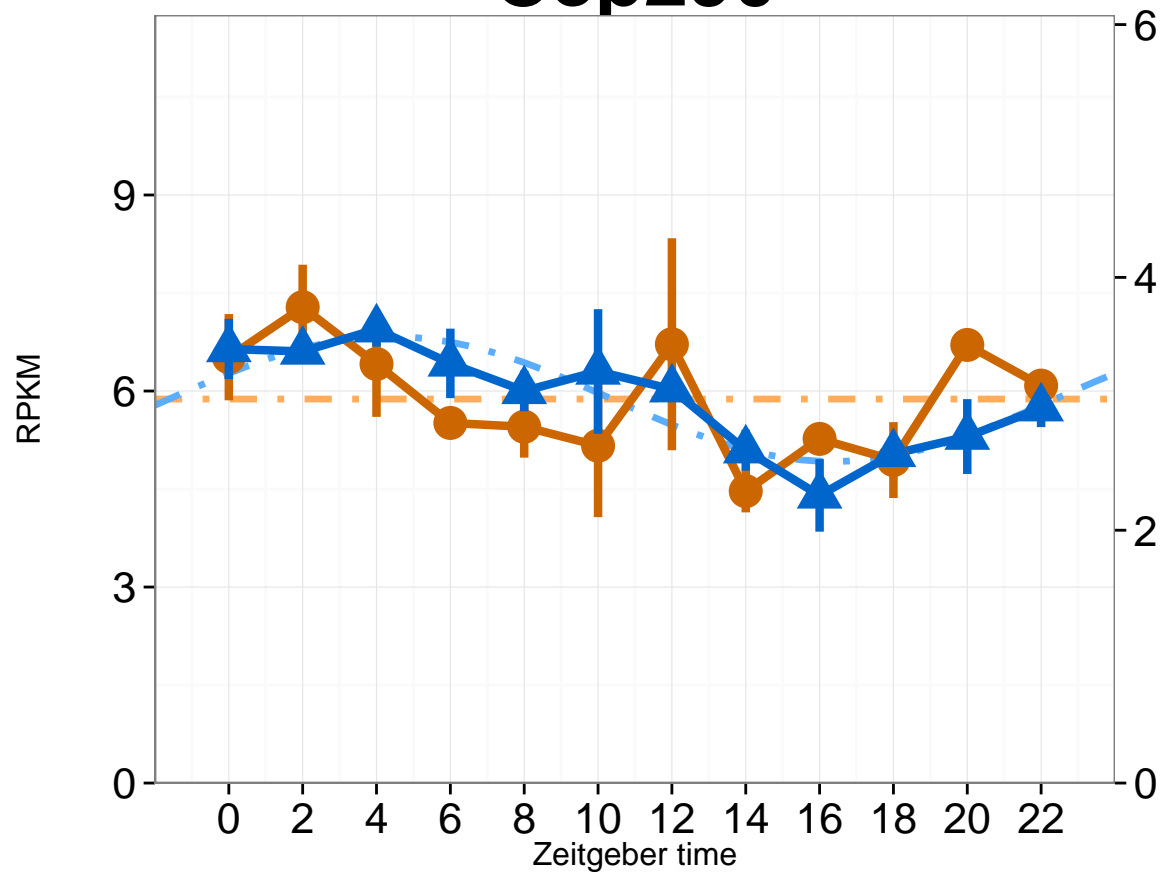

# Cep290

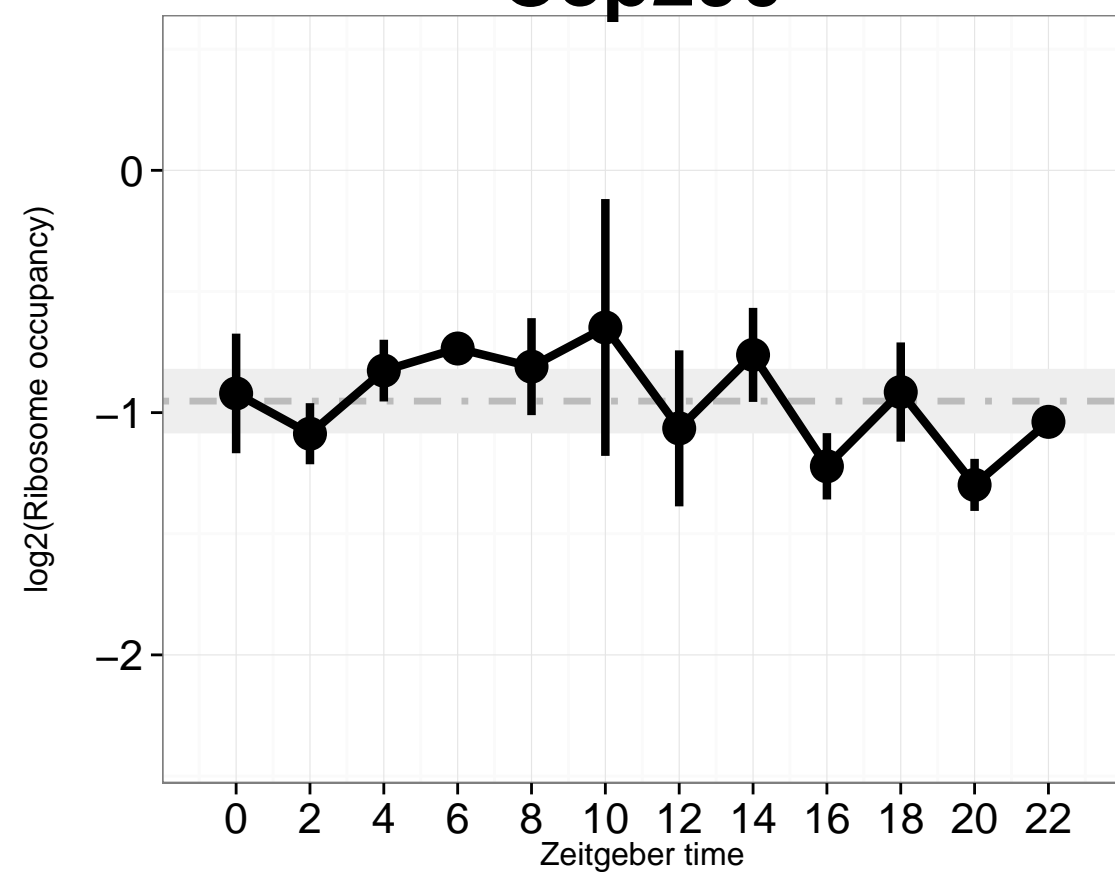

Supplement: Supplementary file 4840 [file 1]

## Kcnk5

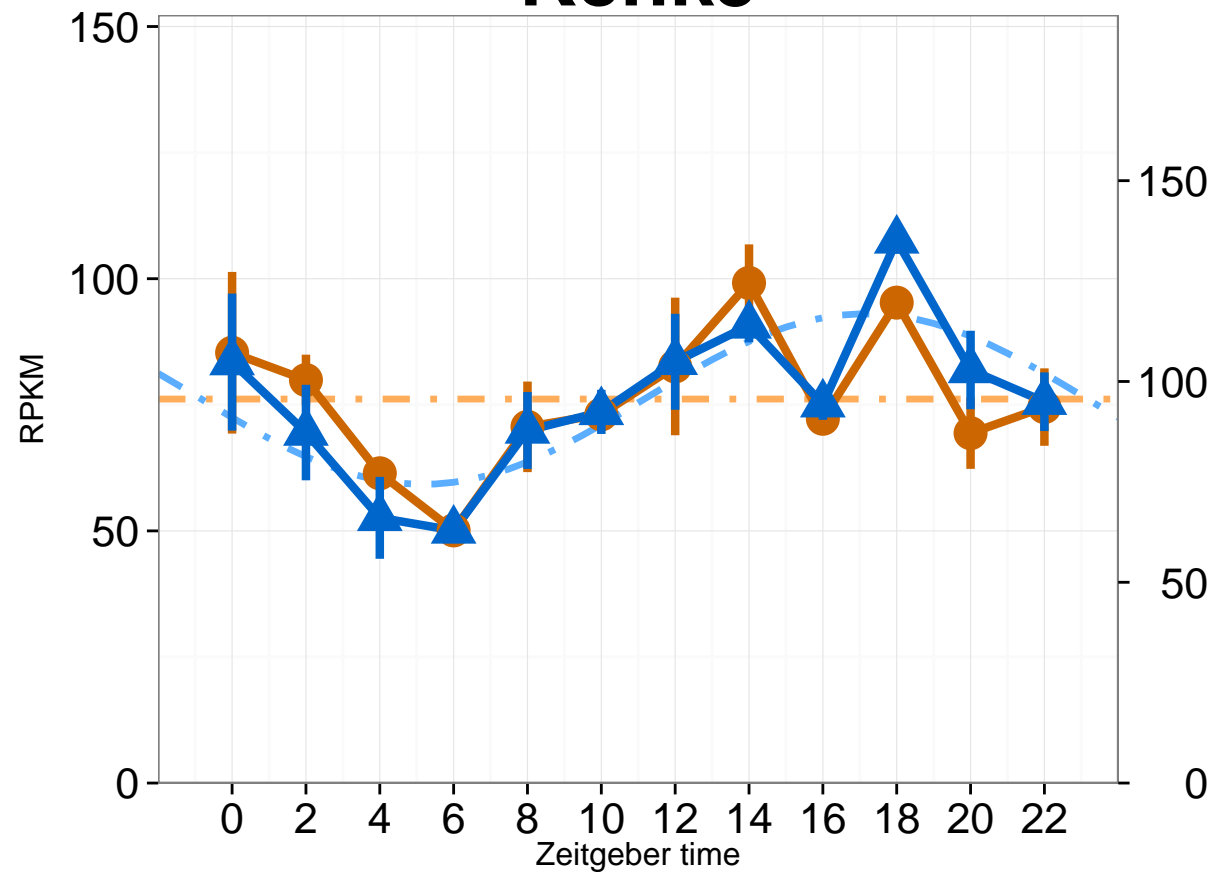

## Kcnk5

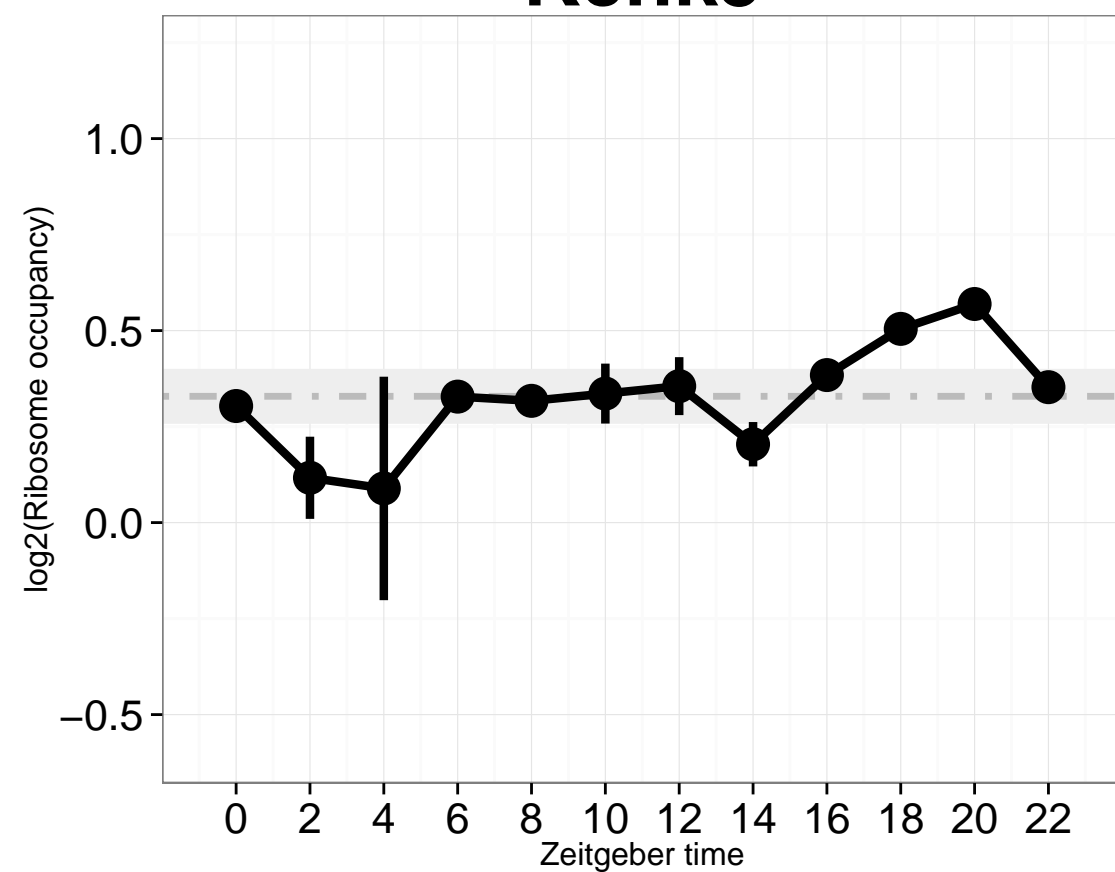

Supplement: Supplementary file 4841 [file 1]

## Raly

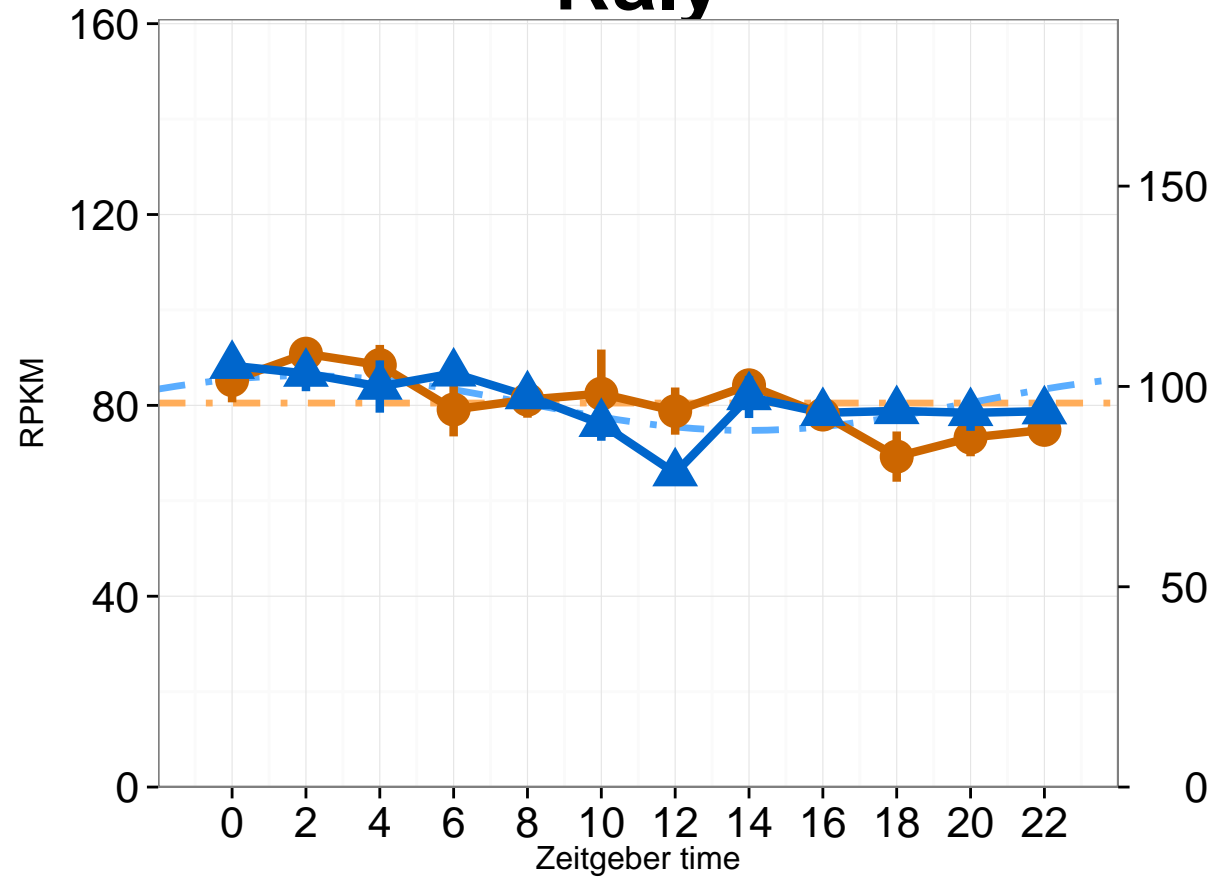

## Raly

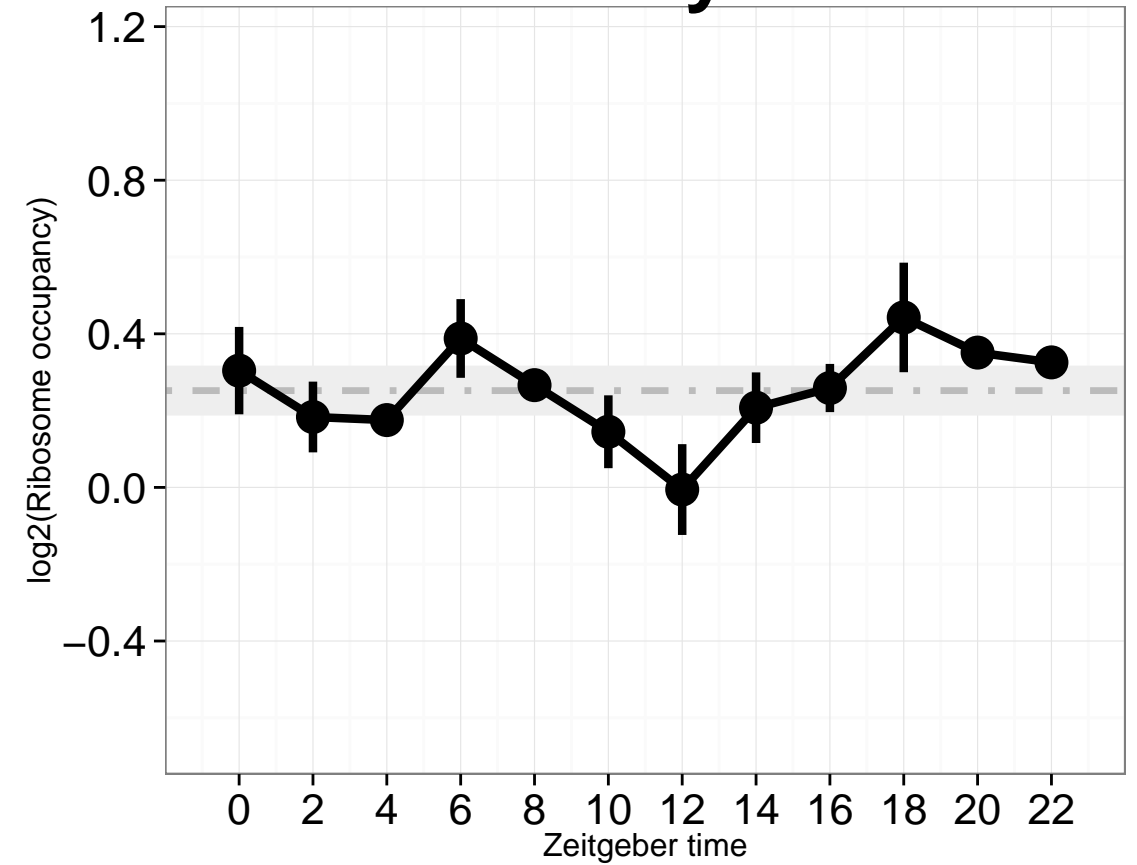

Supplement: Supplementary file 4842 [file 1]

# Fam161b

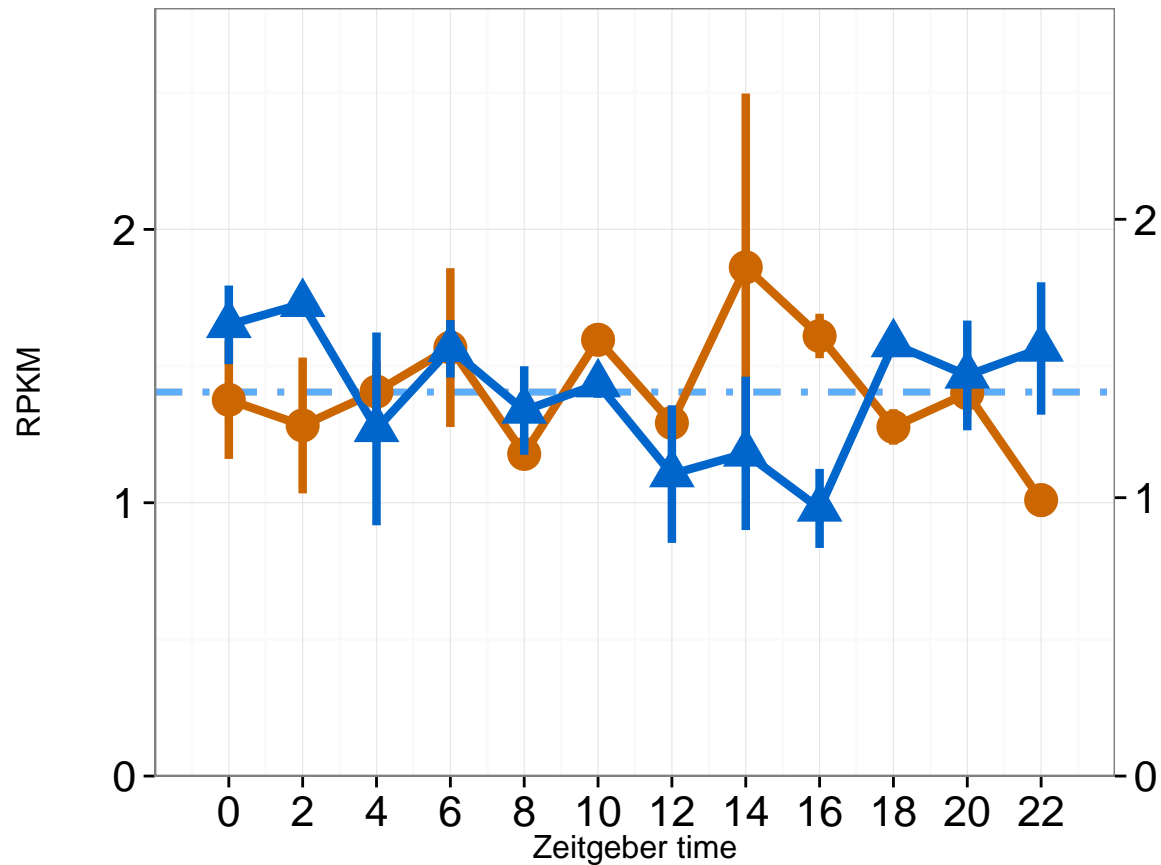

# Fam161b

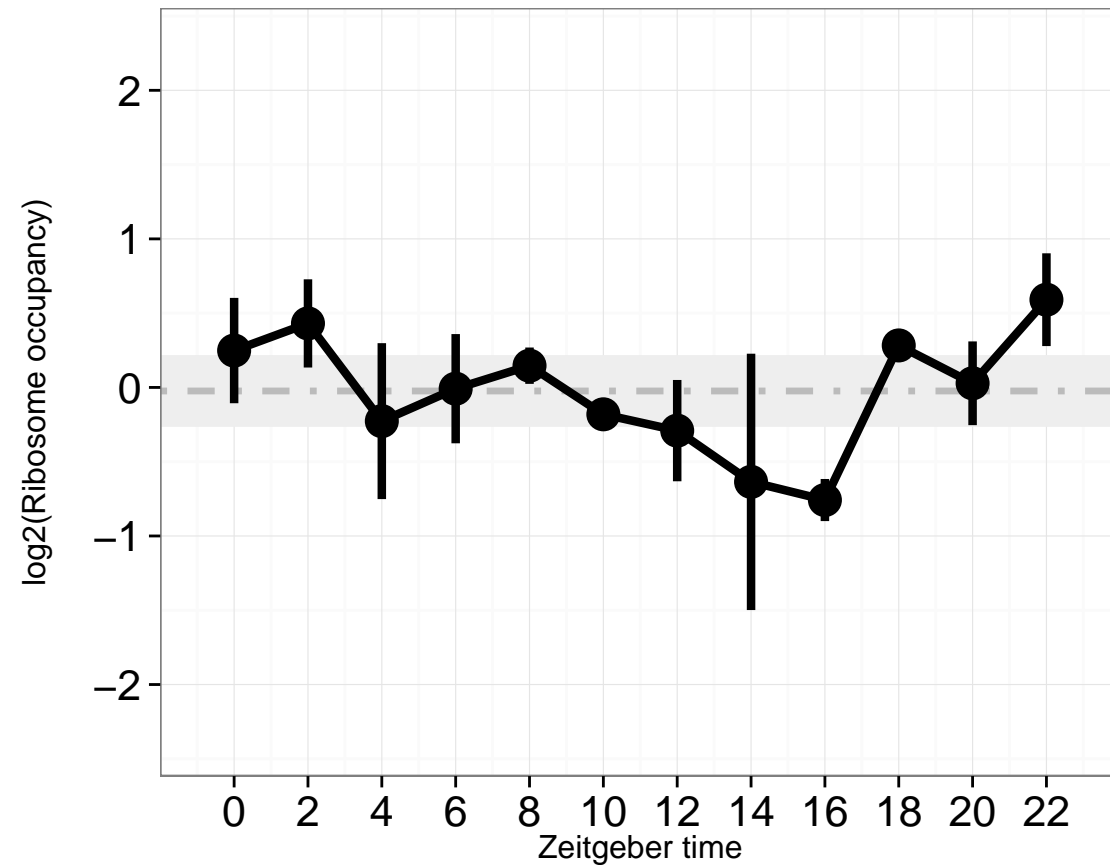

Supplement: Supplementary file 4843 [file 1]

## Synpo

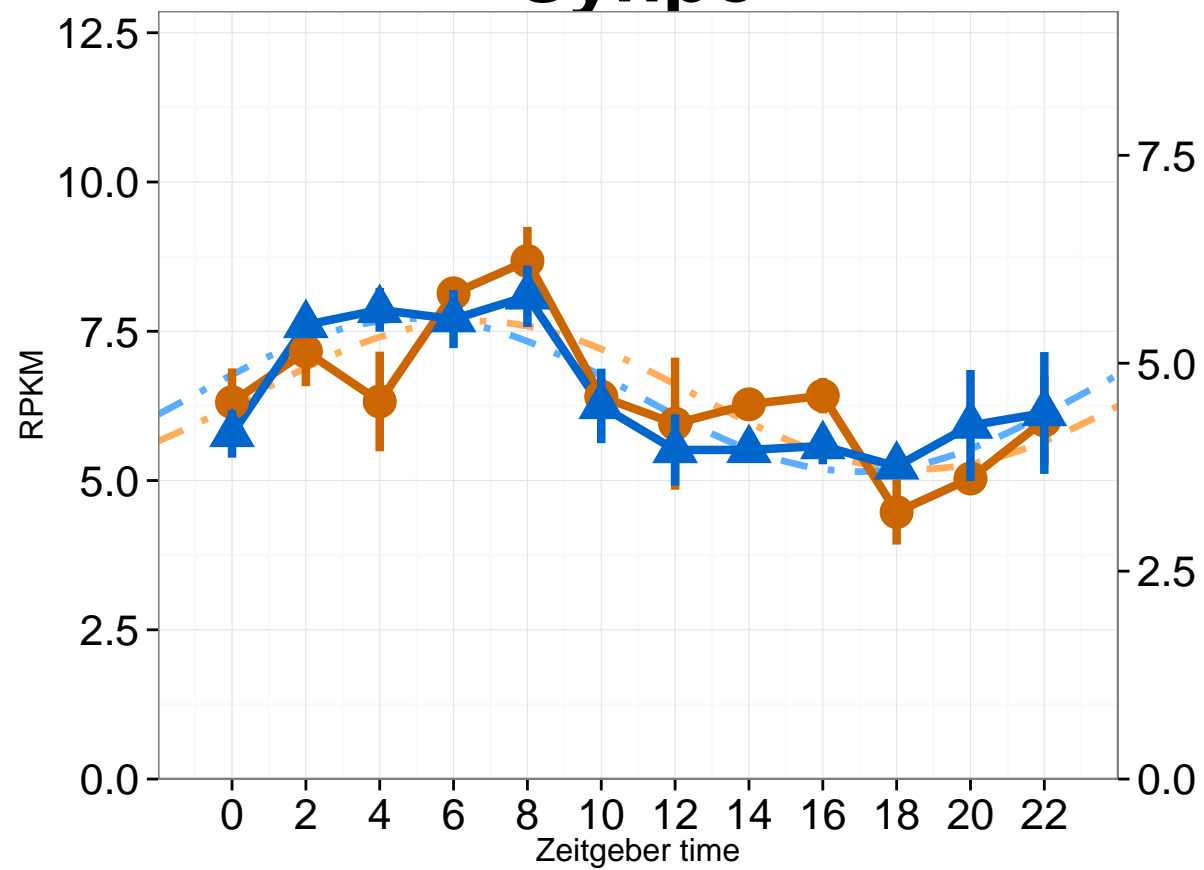

## Synpo

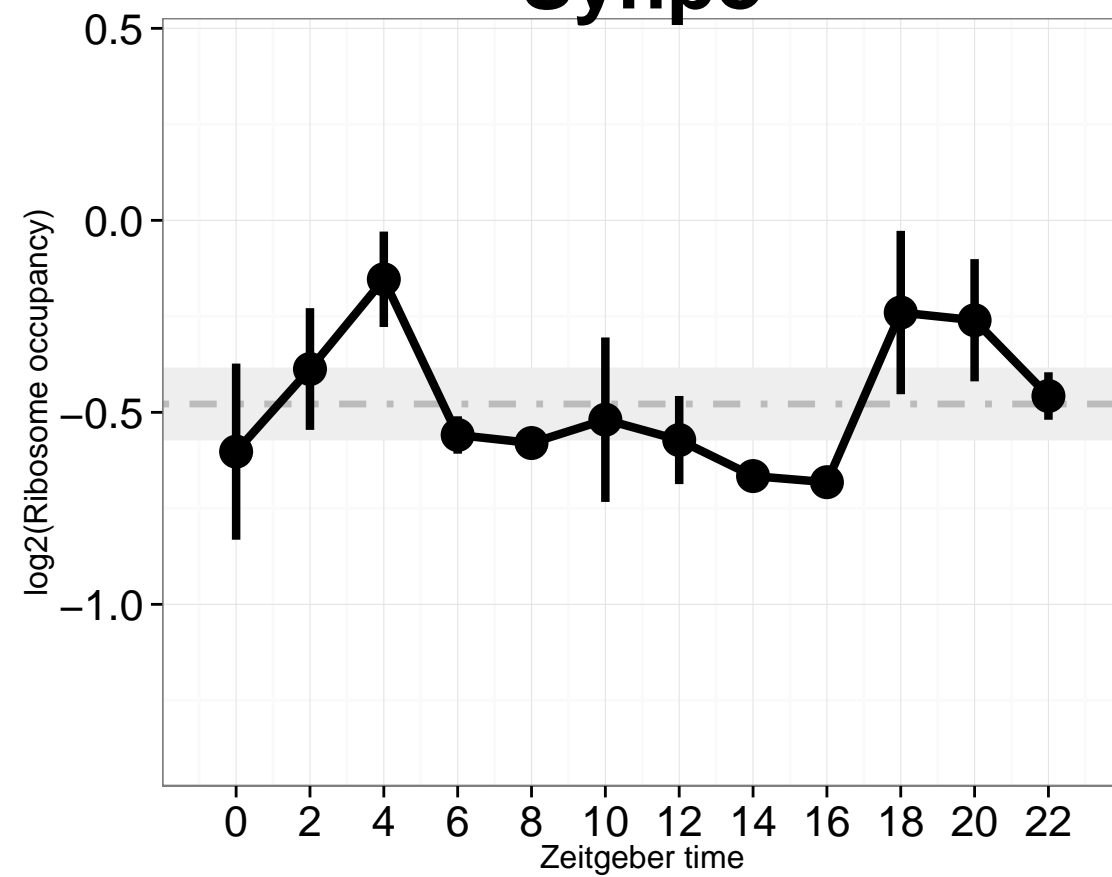

Supplement: Supplementary file 4844 [file 1]

## Coil

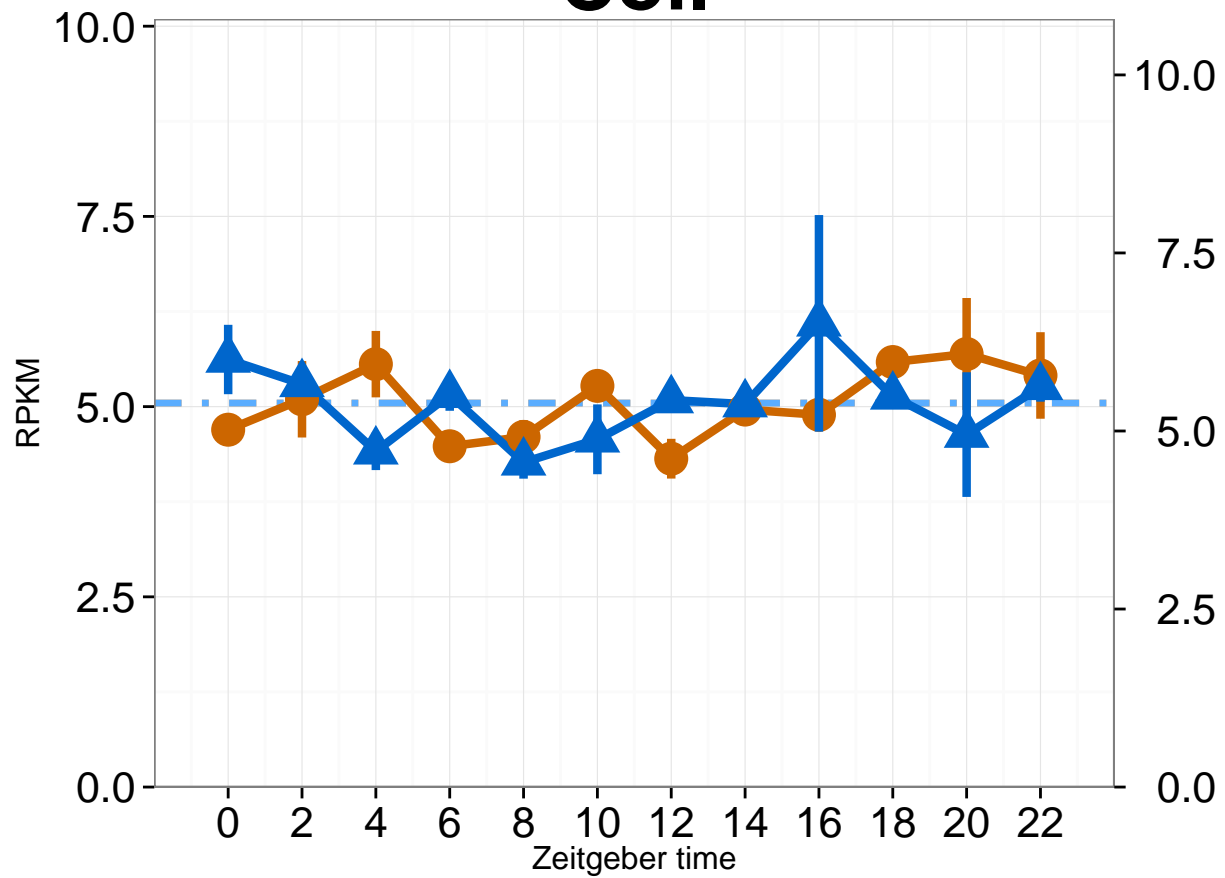

## Coil

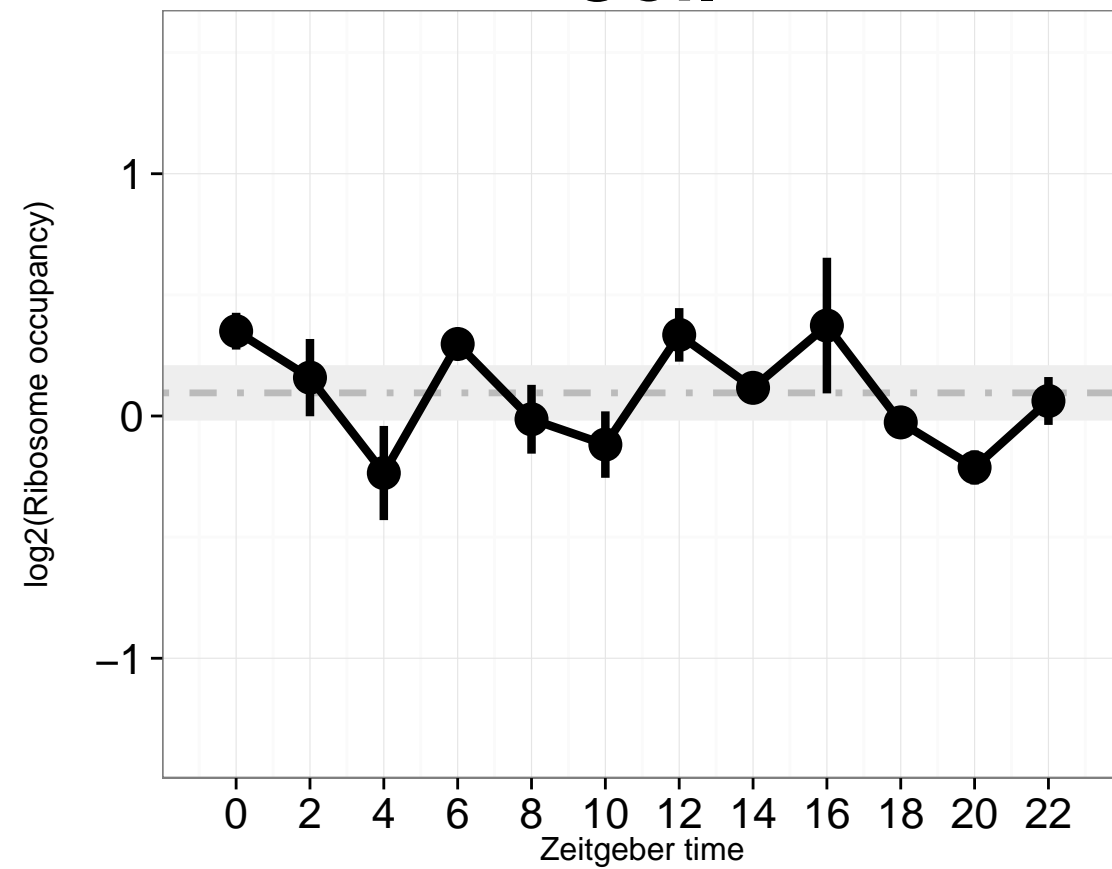

Supplement: Supplementary file 4845 [file 1]

## Fbxo45

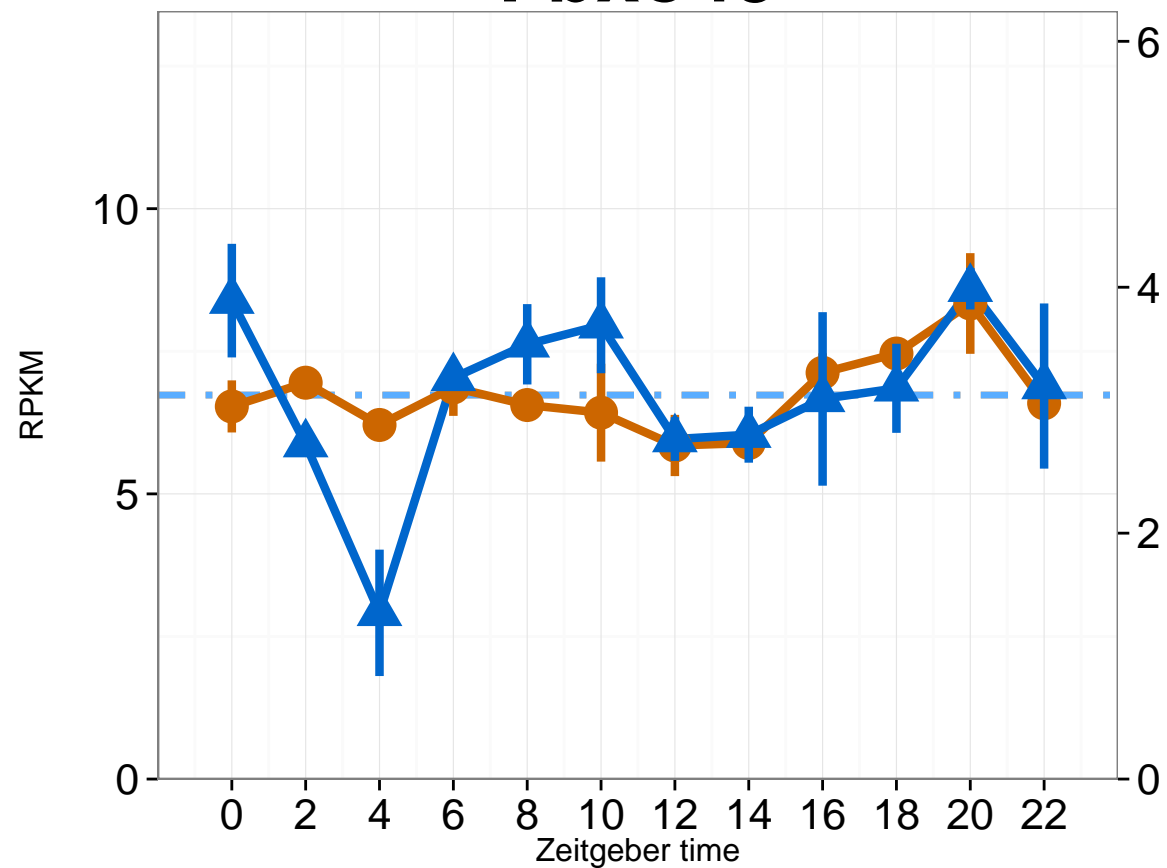

## Fbxo45

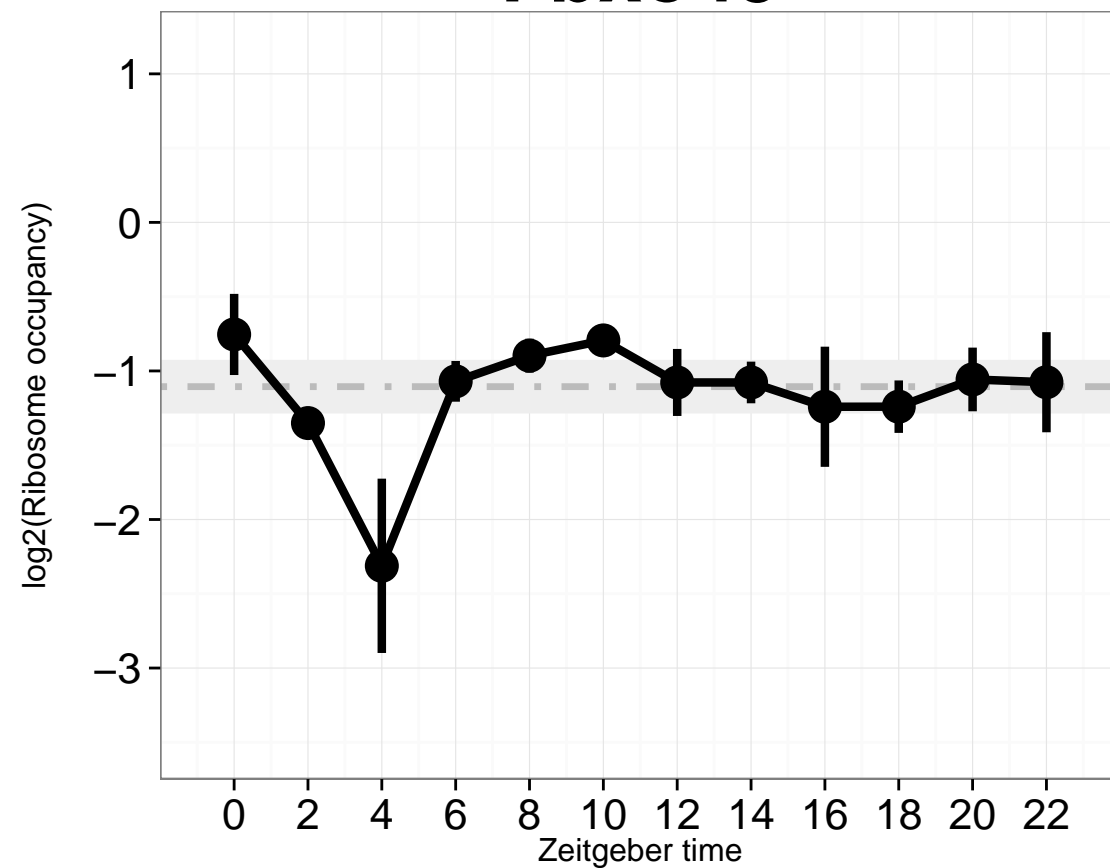

Supplement: Supplementary file 4846 [file 1]

## Unc5c

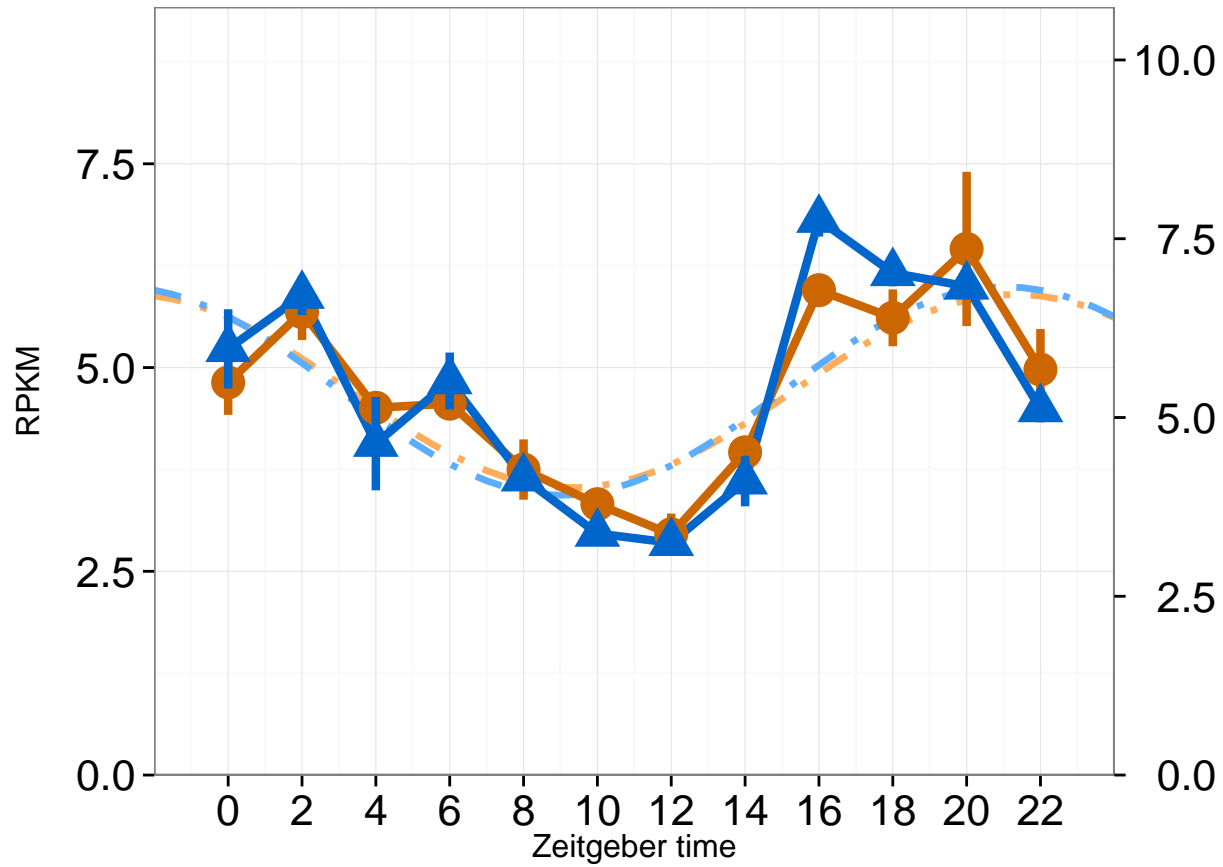

## Unc5c

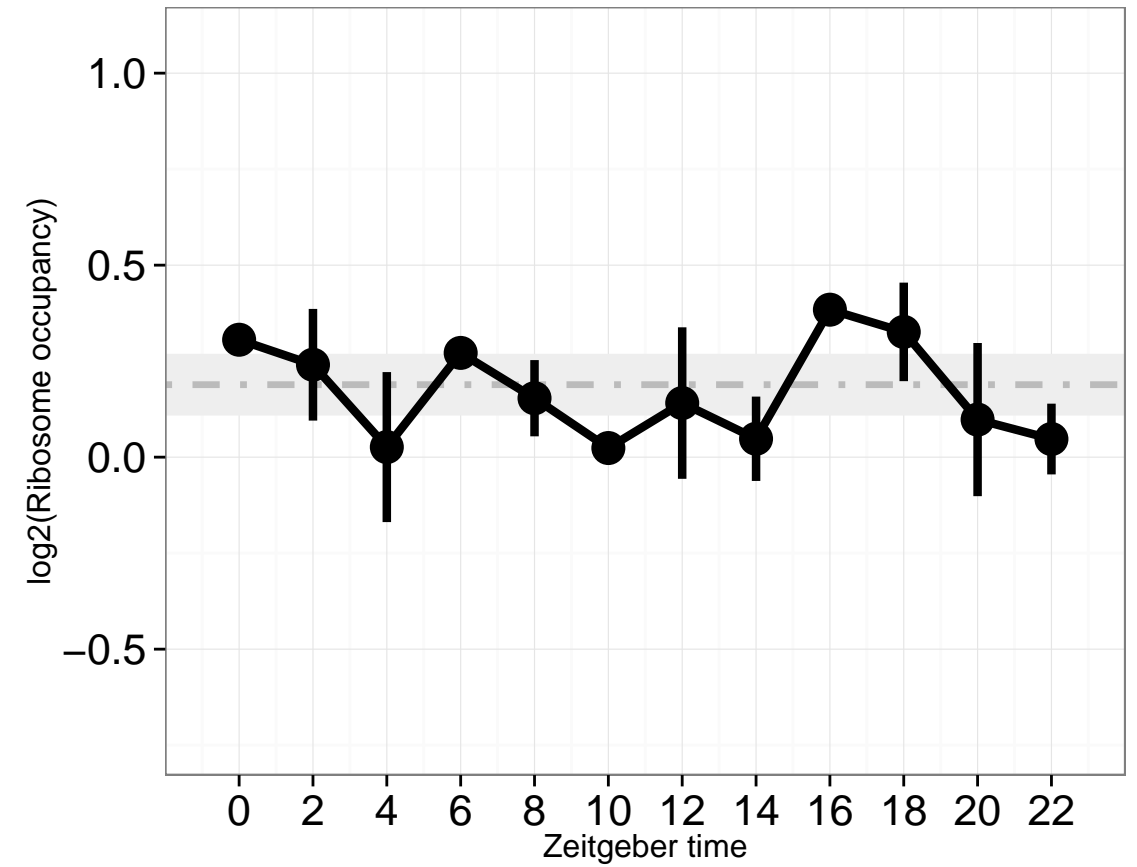

Supplement: Supplementary file 4847 [file 1]

# Rbm26

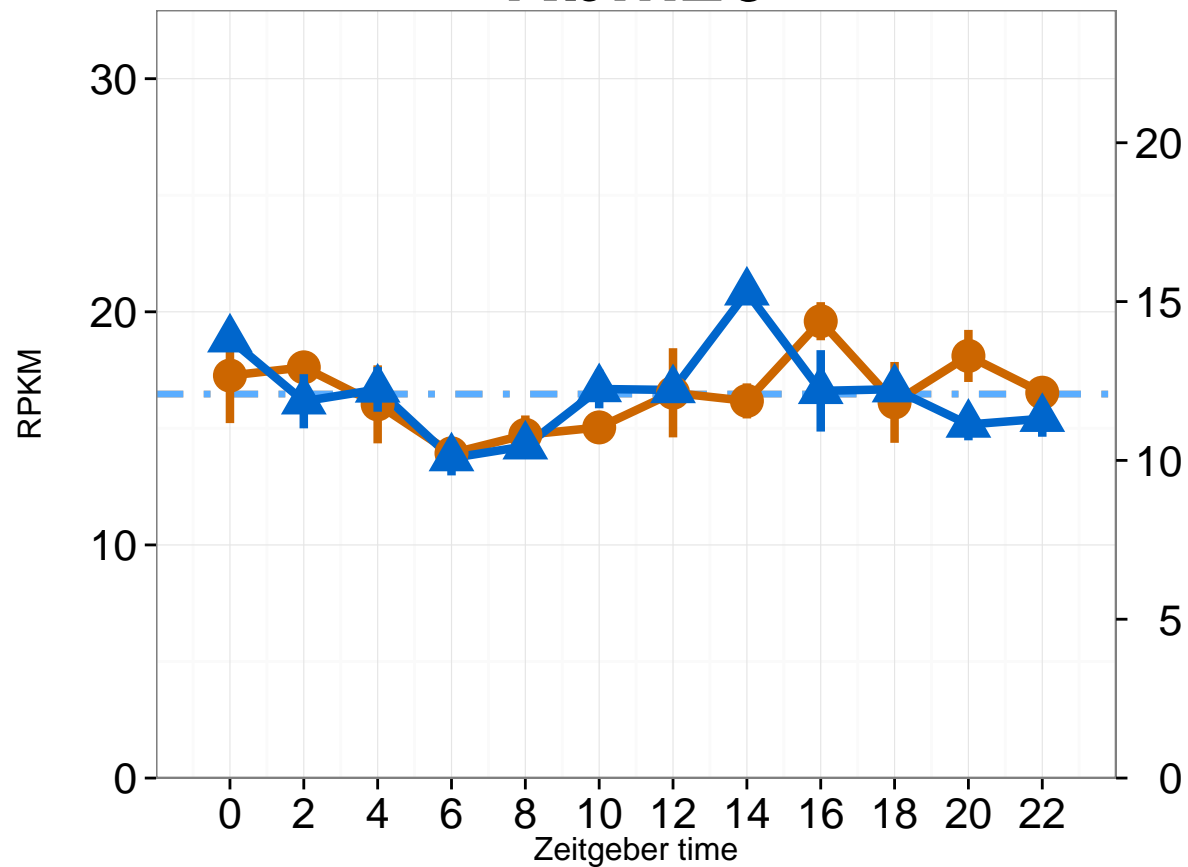

# Rbm26

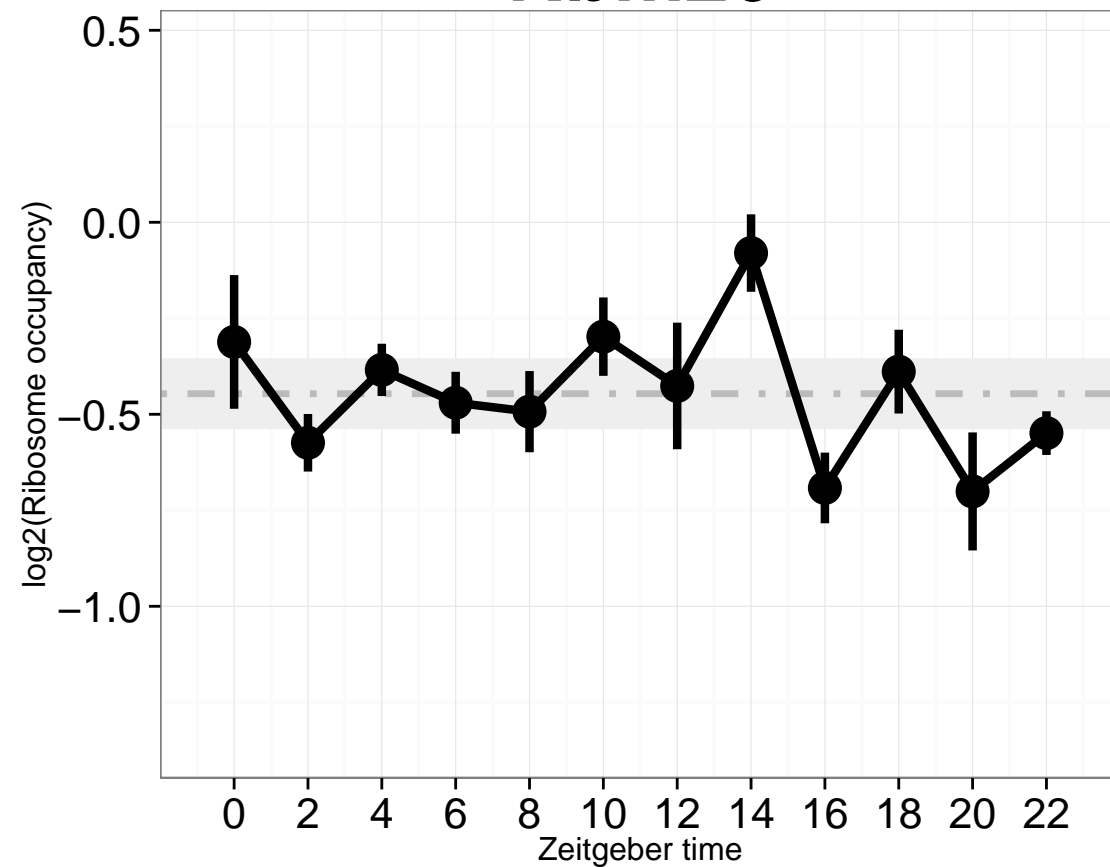

Supplement: Supplementary file 4848 [file 1]

## Fsd1l

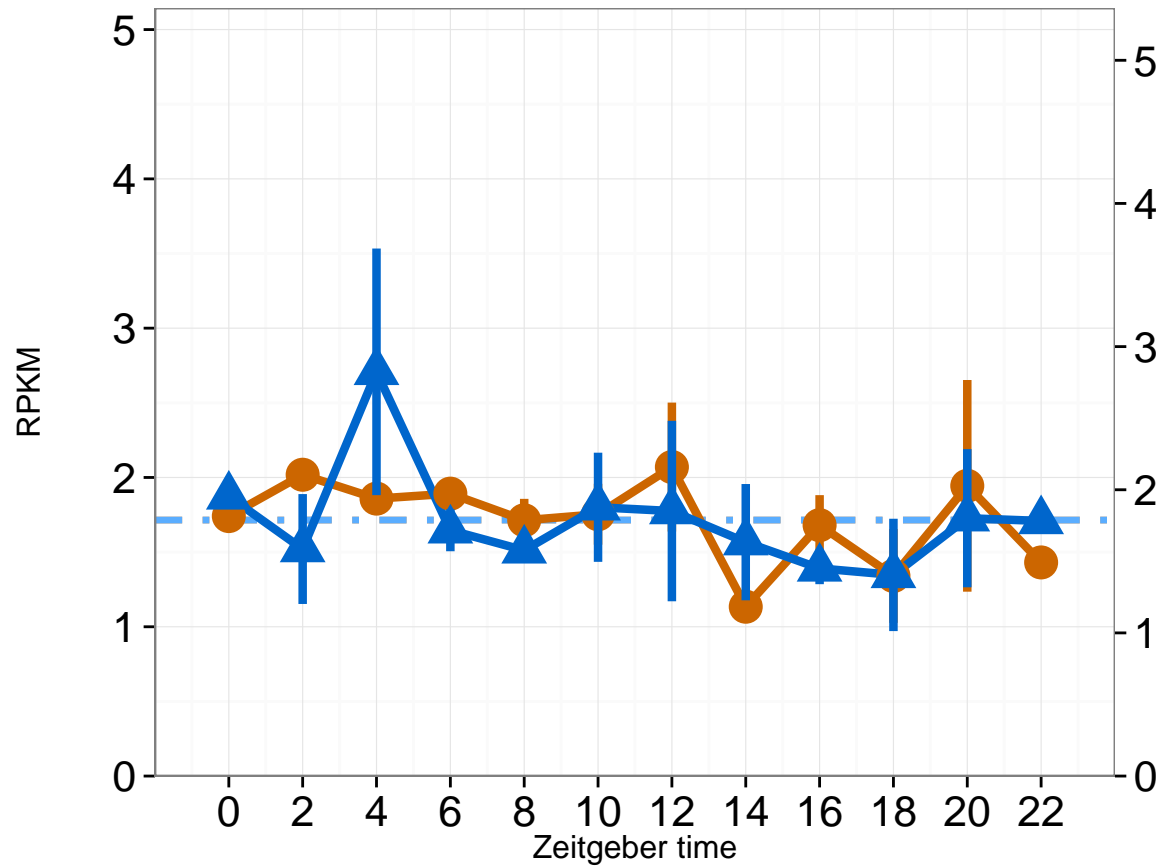

## Fsd1l

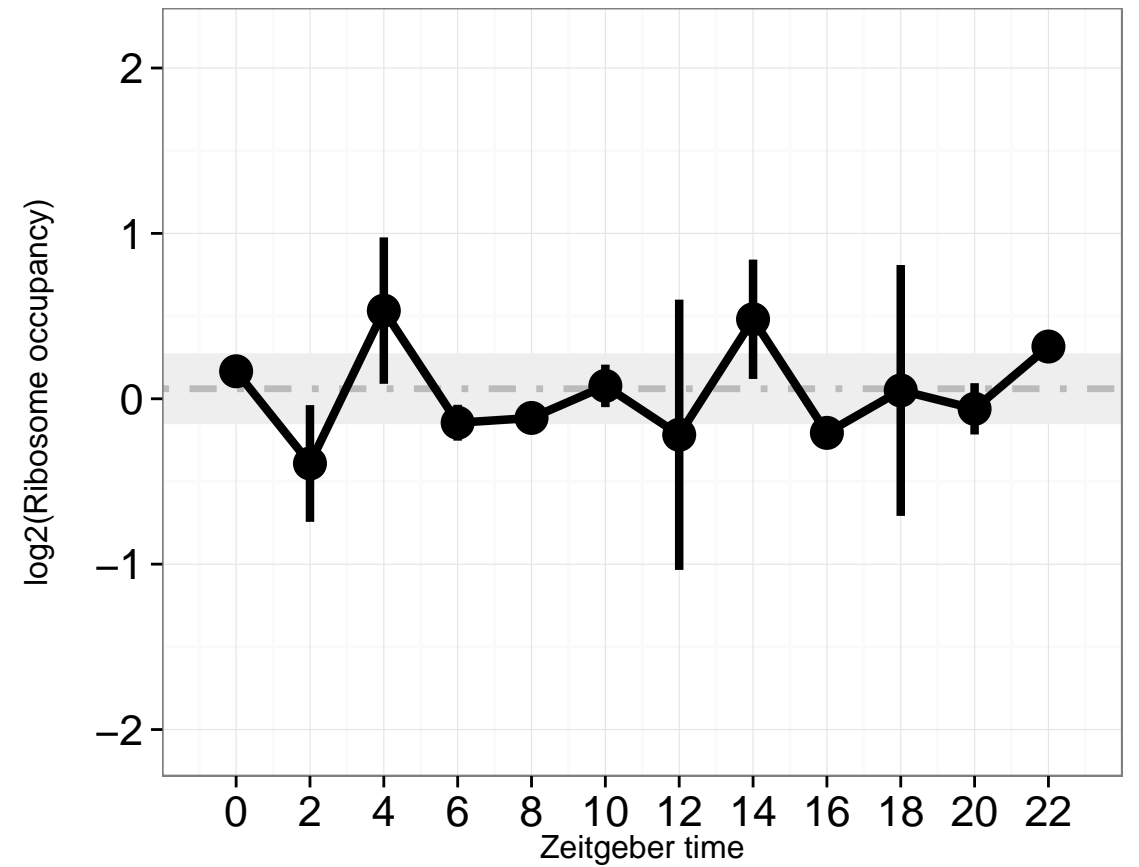

Supplement: Supplementary file 4849 [file 1]

## Dolk

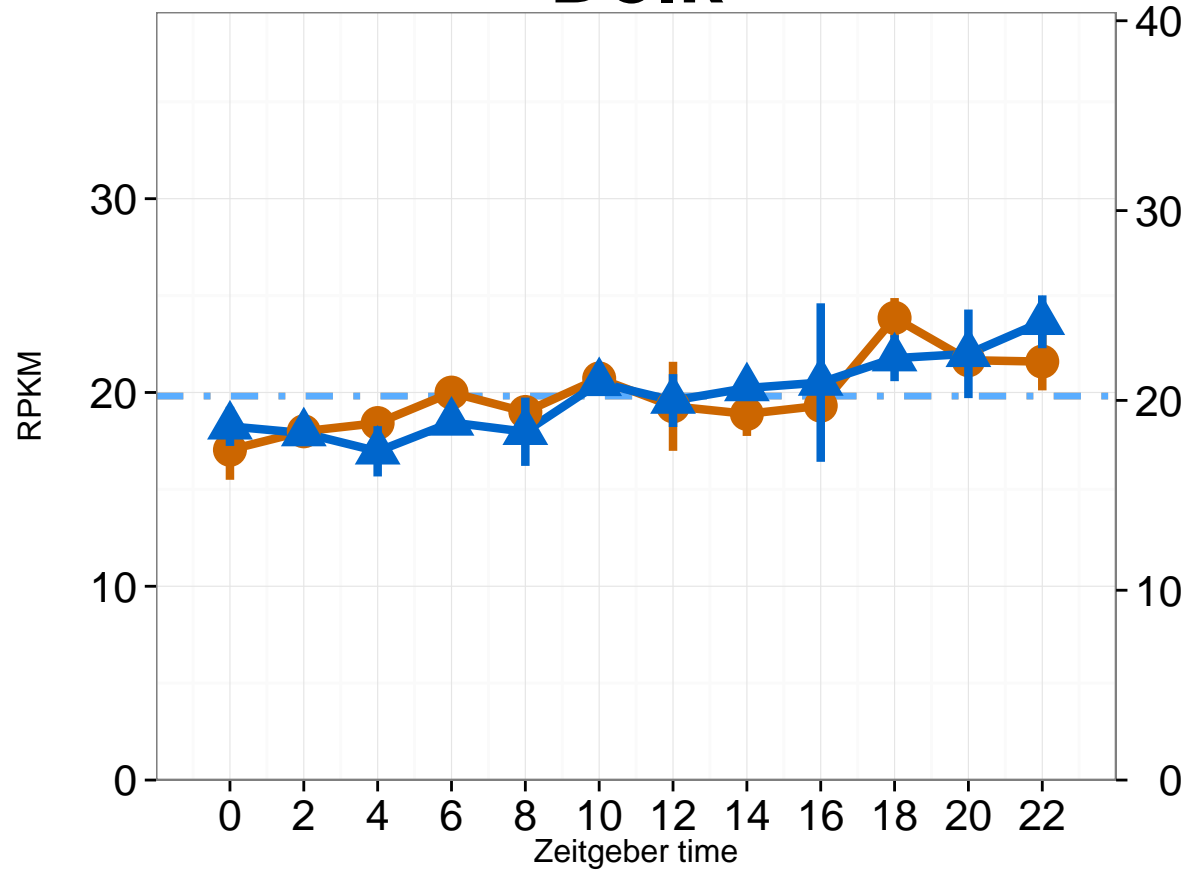

## Dolk

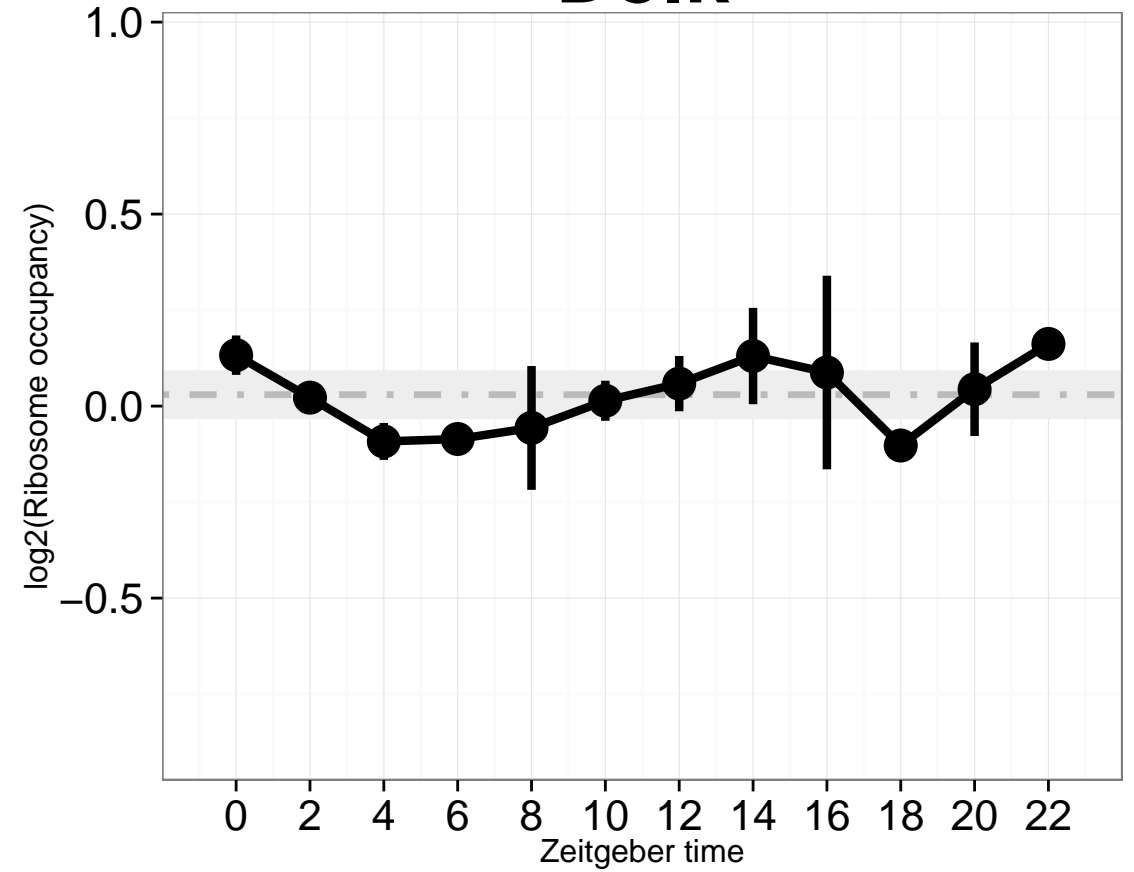

Supplement: Supplementary file 4850 [file 1]

## Eya3

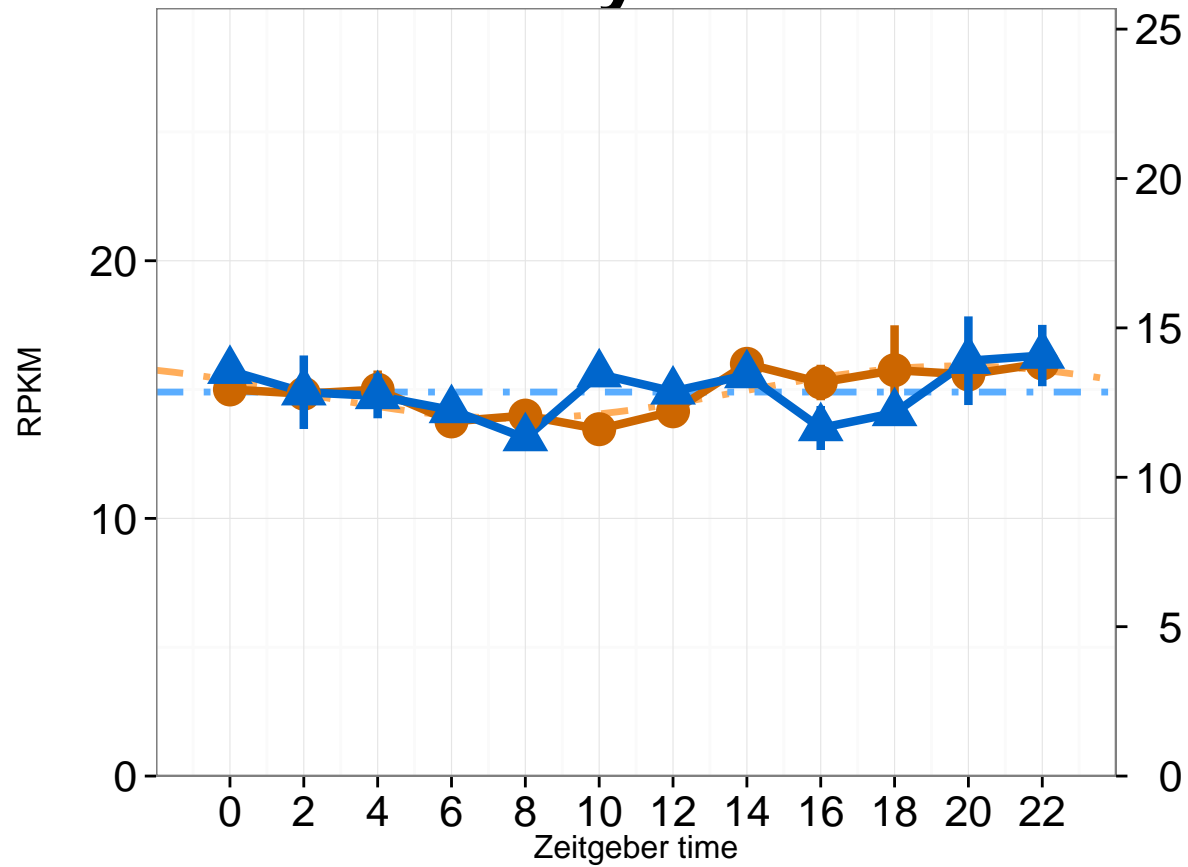

## Eya3

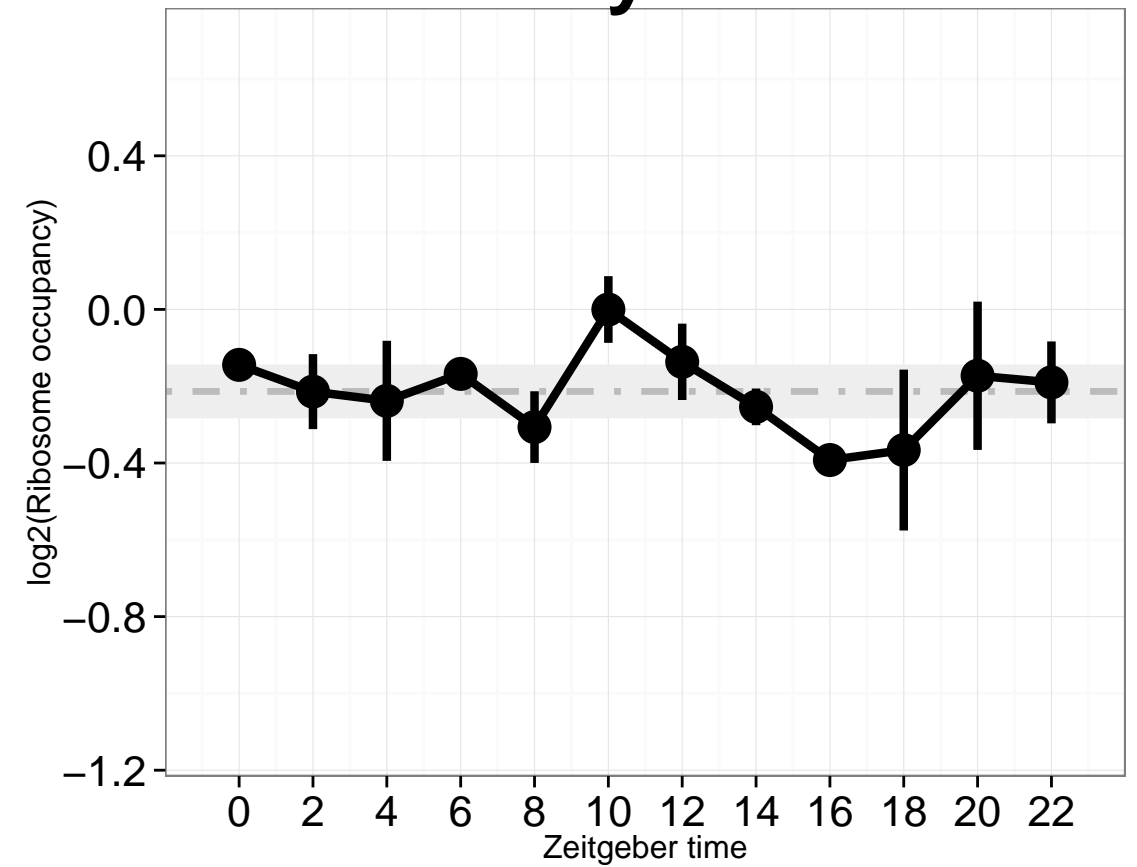

Supplement: Supplementary file 4851 [file 1]

**Twist1 TR**

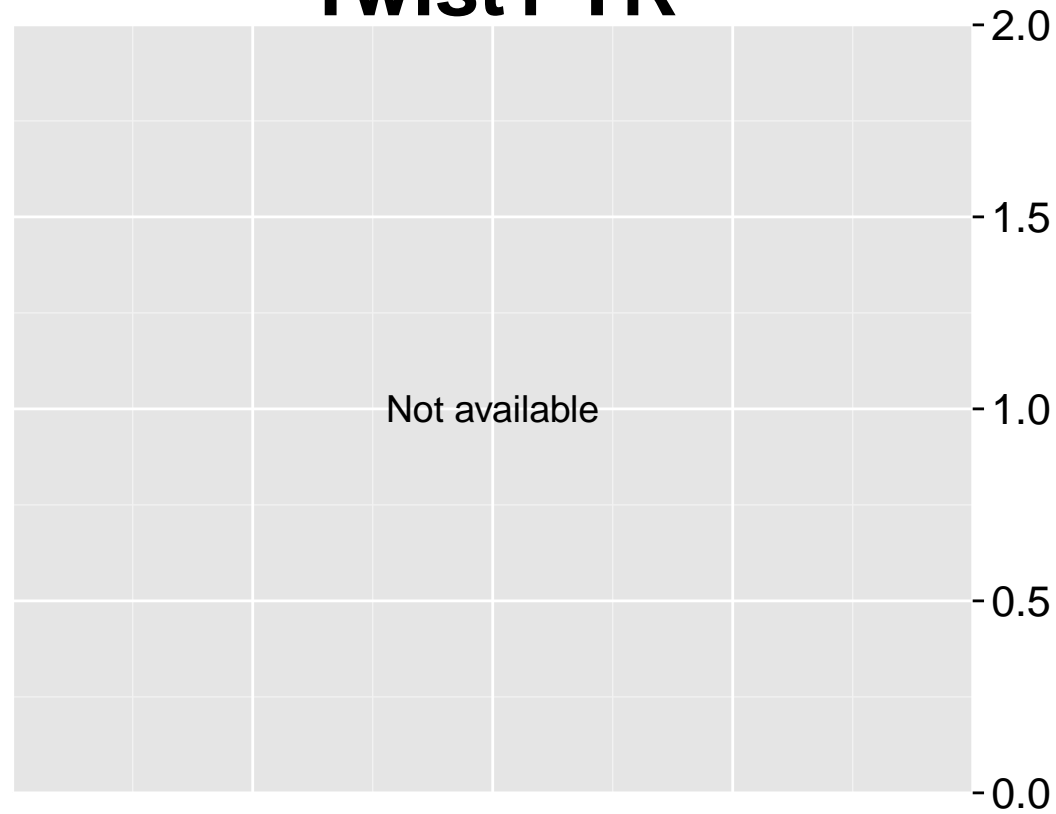

**Twist1 log2(Ribosome occupancy**

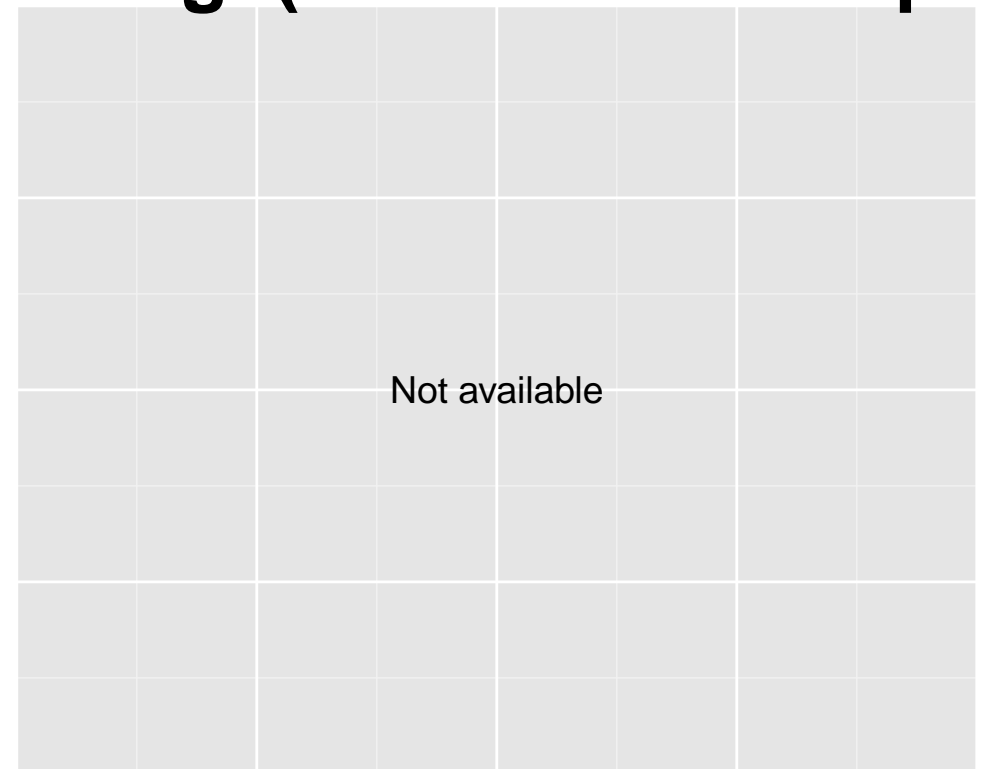

Supplement: Supplementary file 4852 [file 1]

# Runx1t1

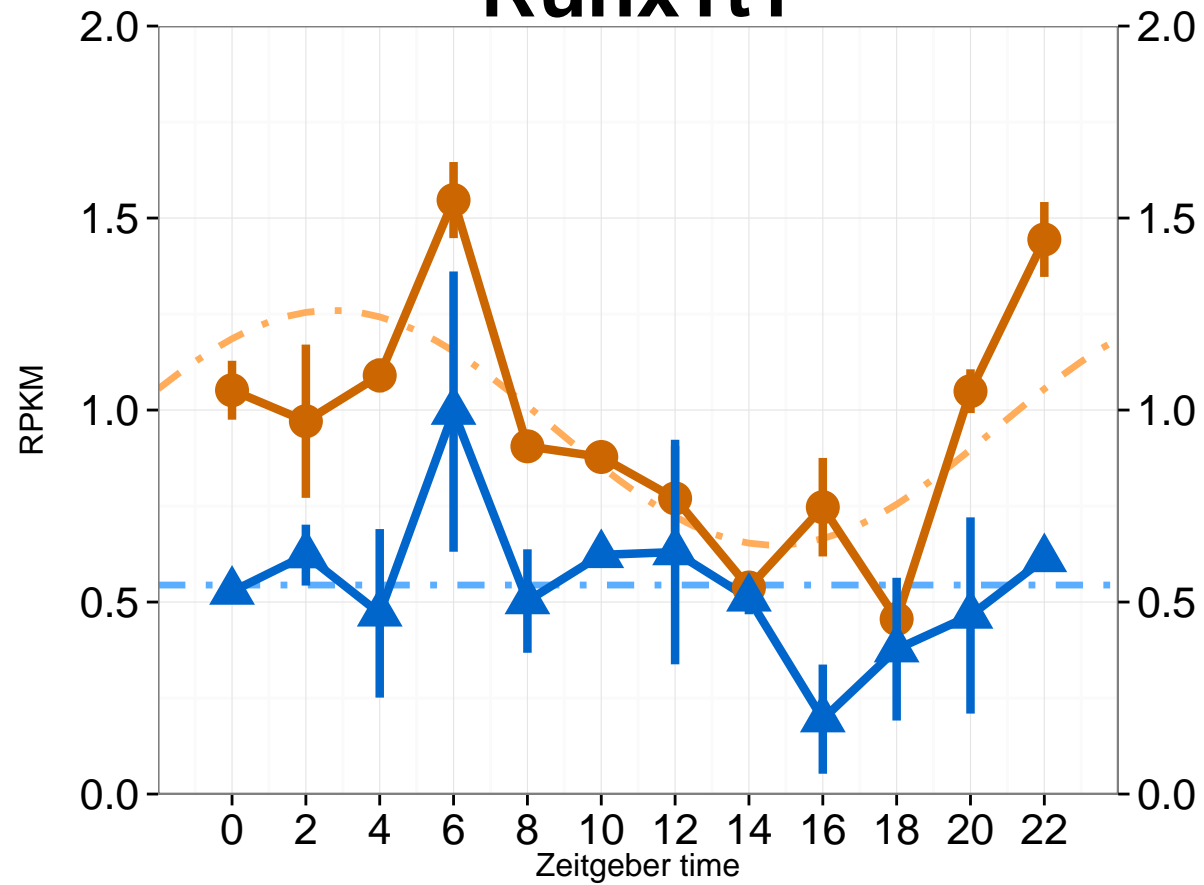

# Runx1t1

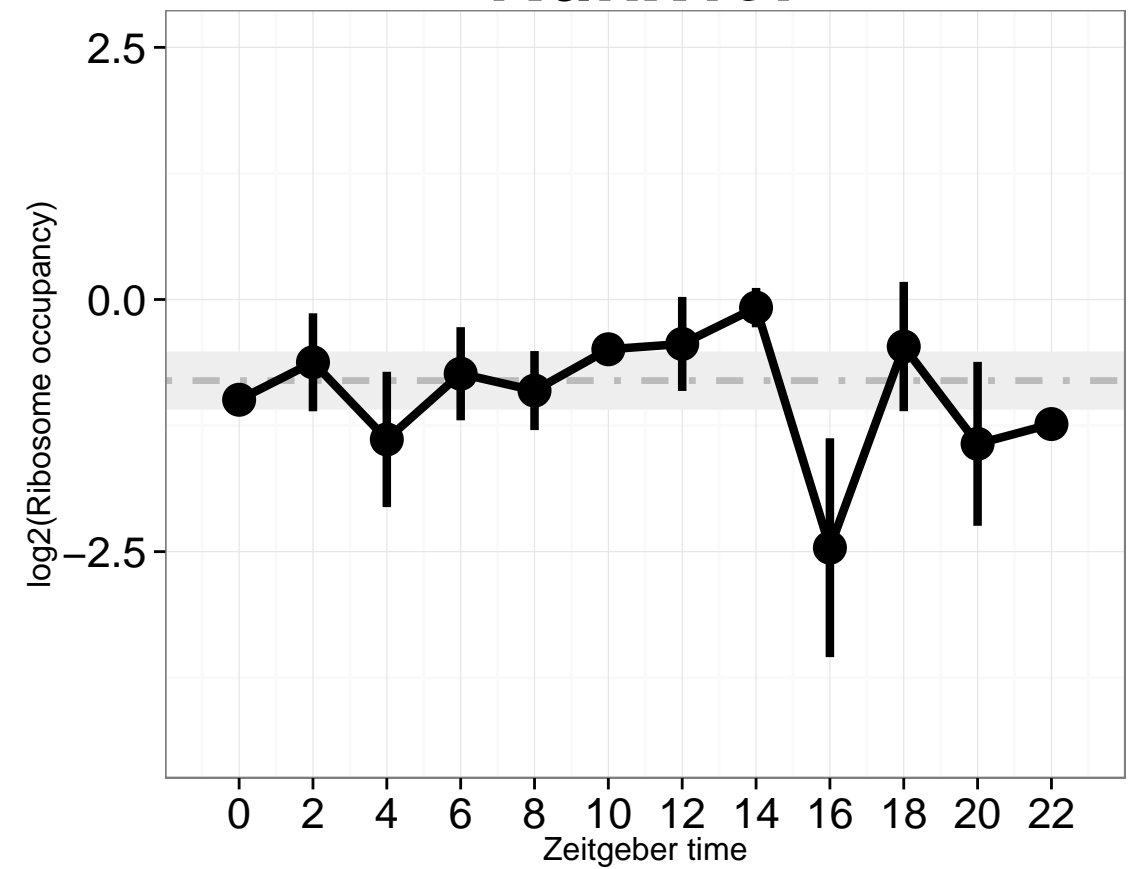

Supplement: Supplementary file 4853 [file 1]

# Ccdc3

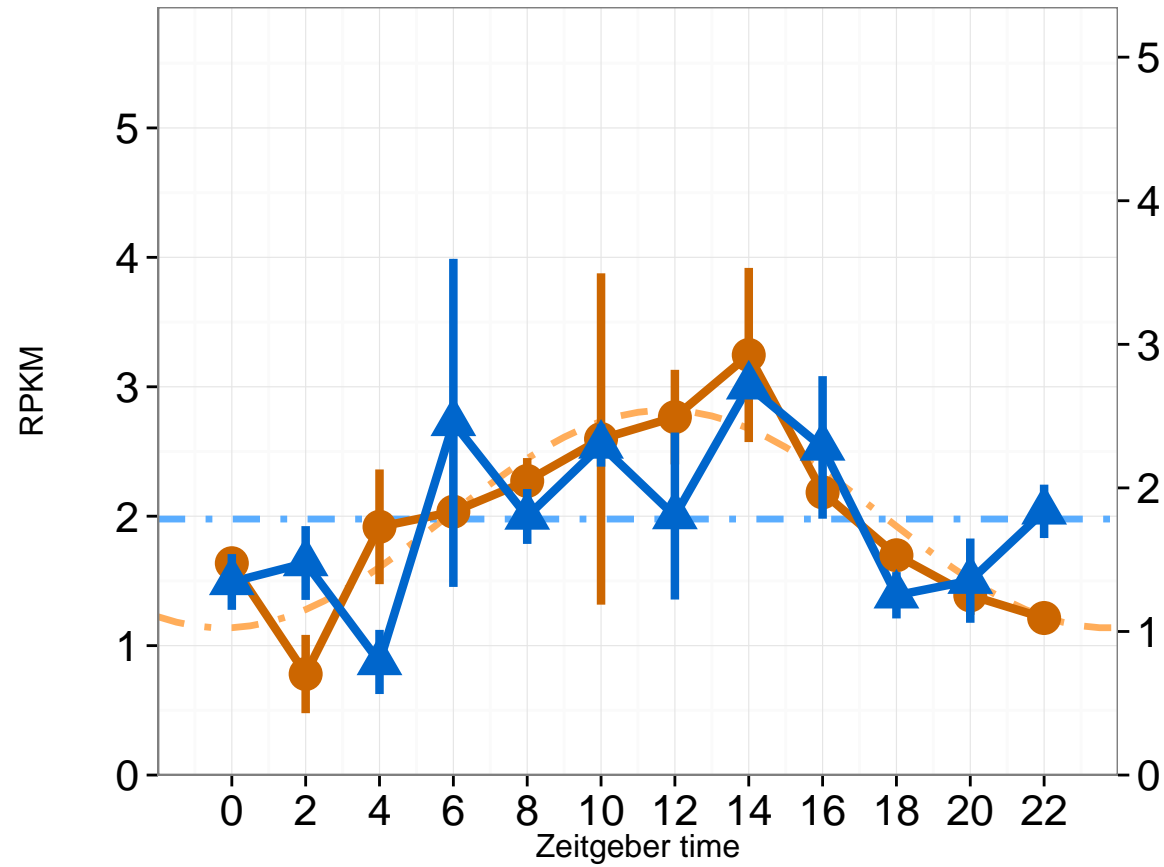

# Ccdc3

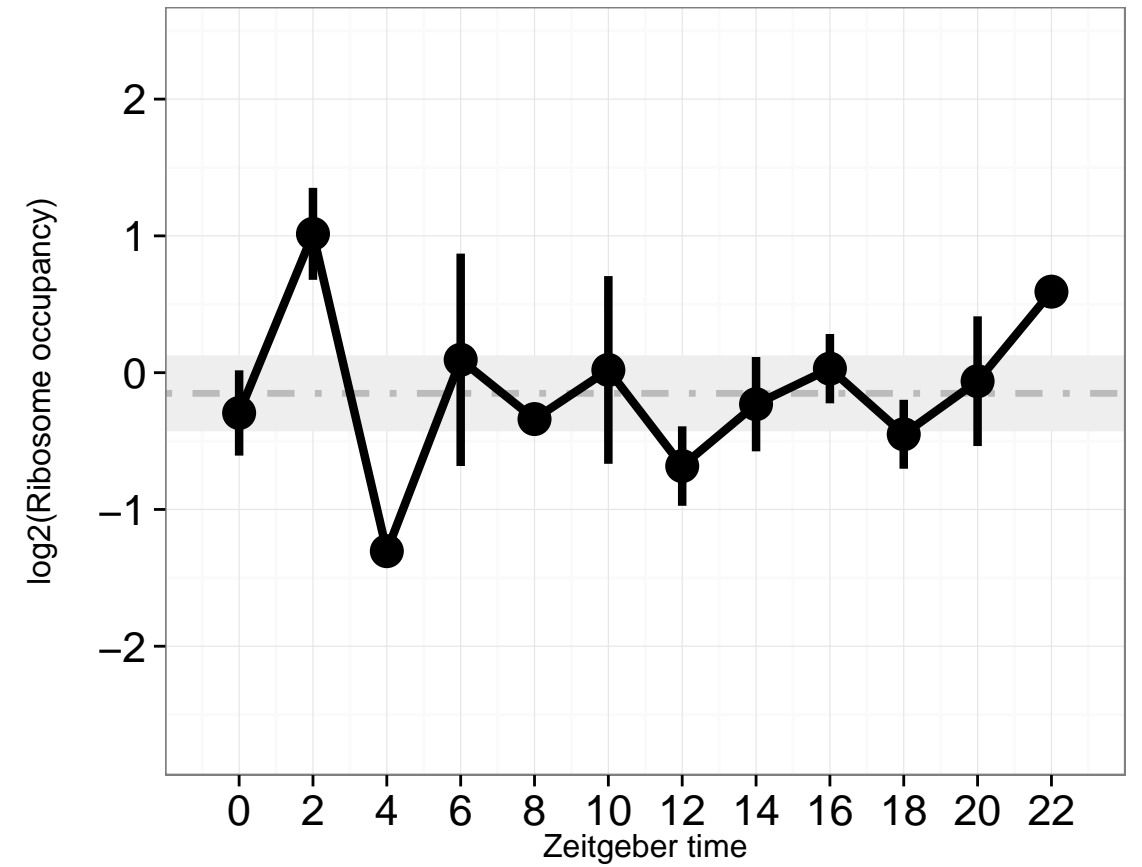

Supplement: Supplementary file 4854 [file 1]

# Tmem167

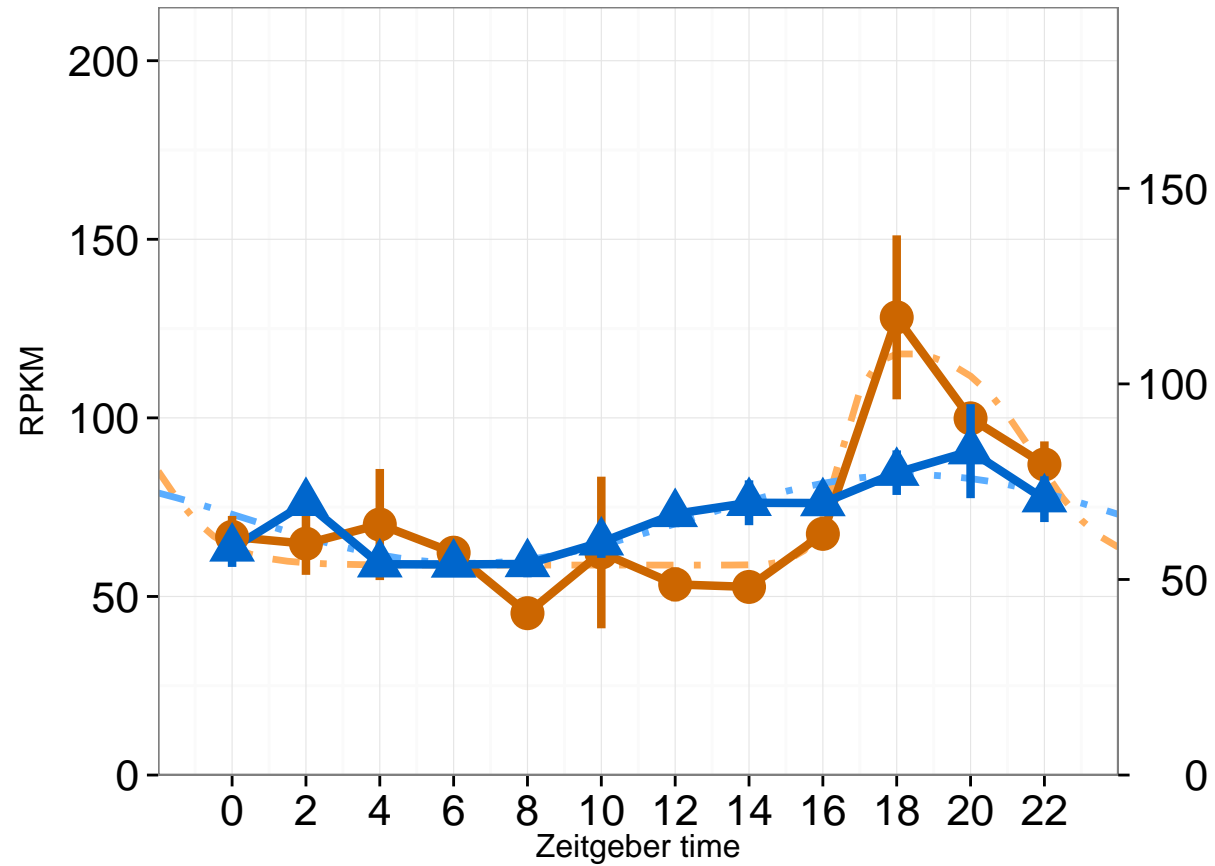

# Tmem167

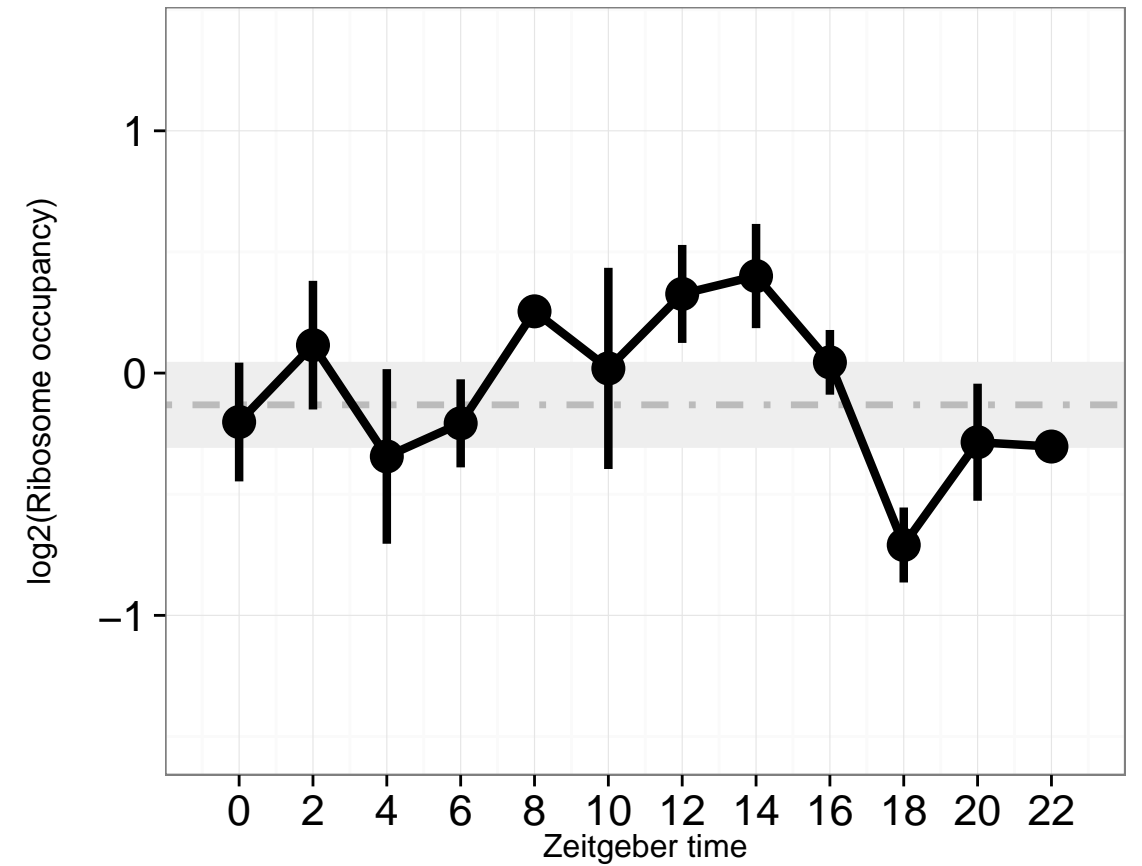

Supplement: Supplementary file 4855 [file 1]

## Vamp8

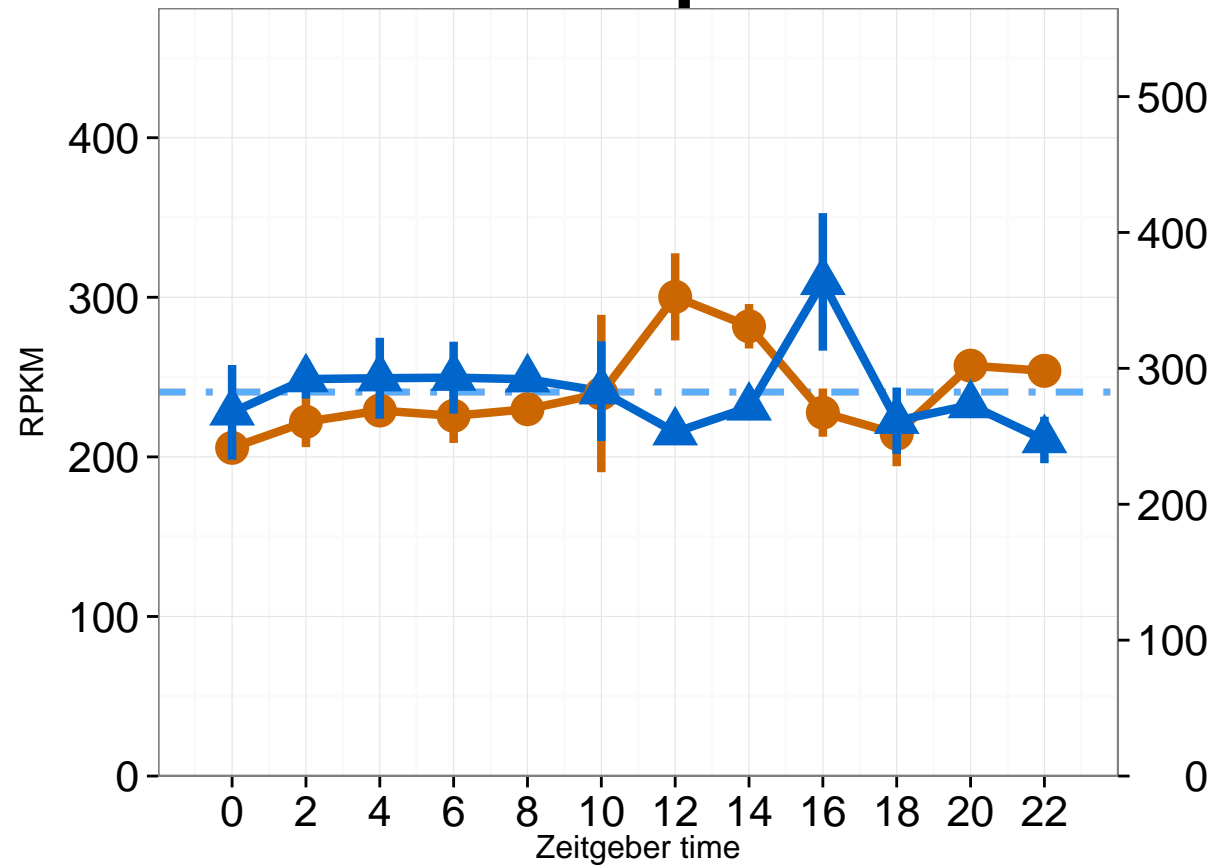

## Vamp8

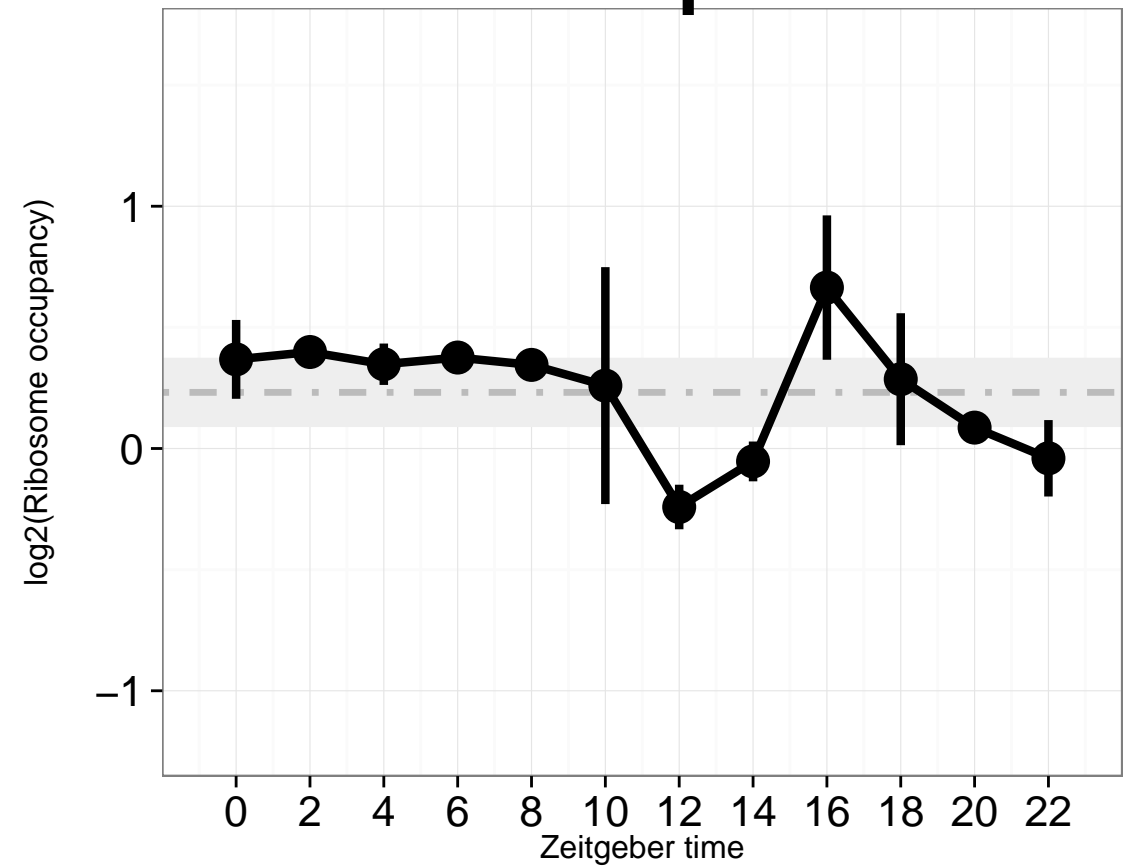

Supplement: Supplementary file 4856 [file 1]

## Rexo4

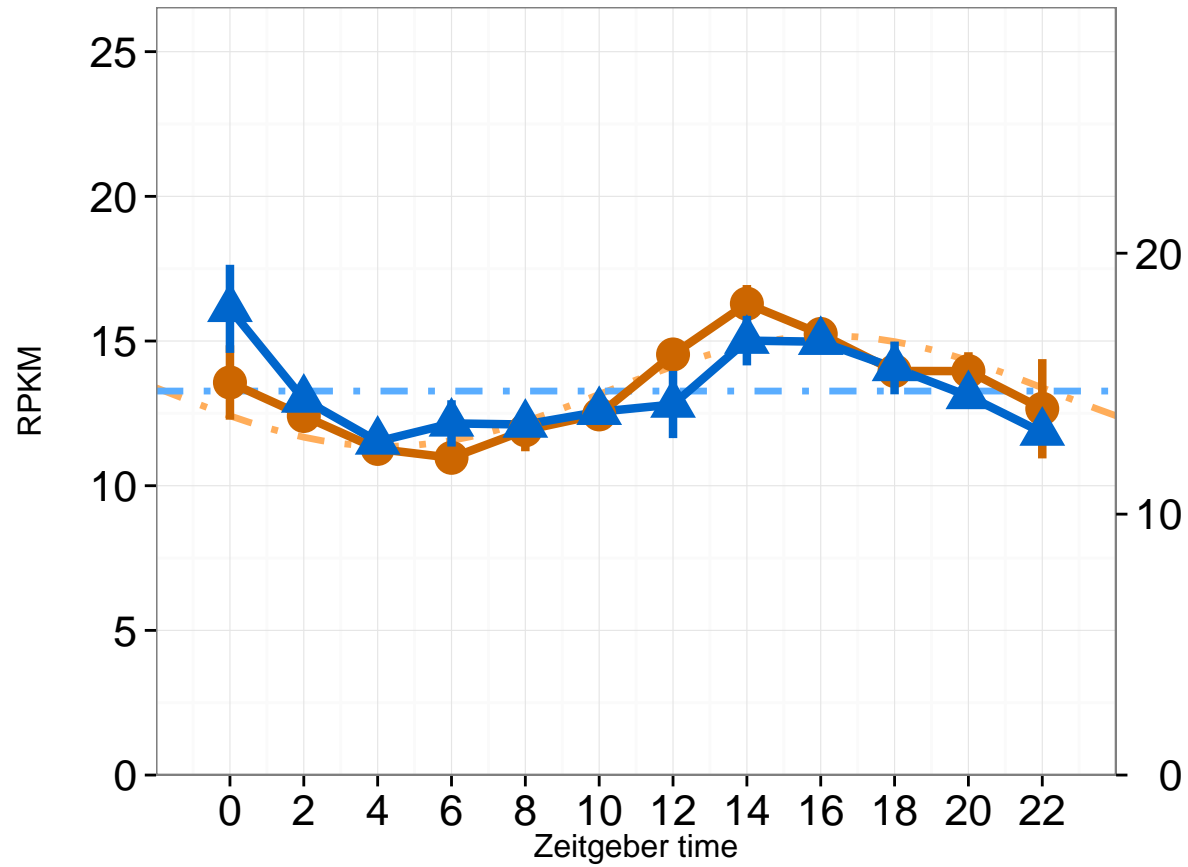

## Rexo4

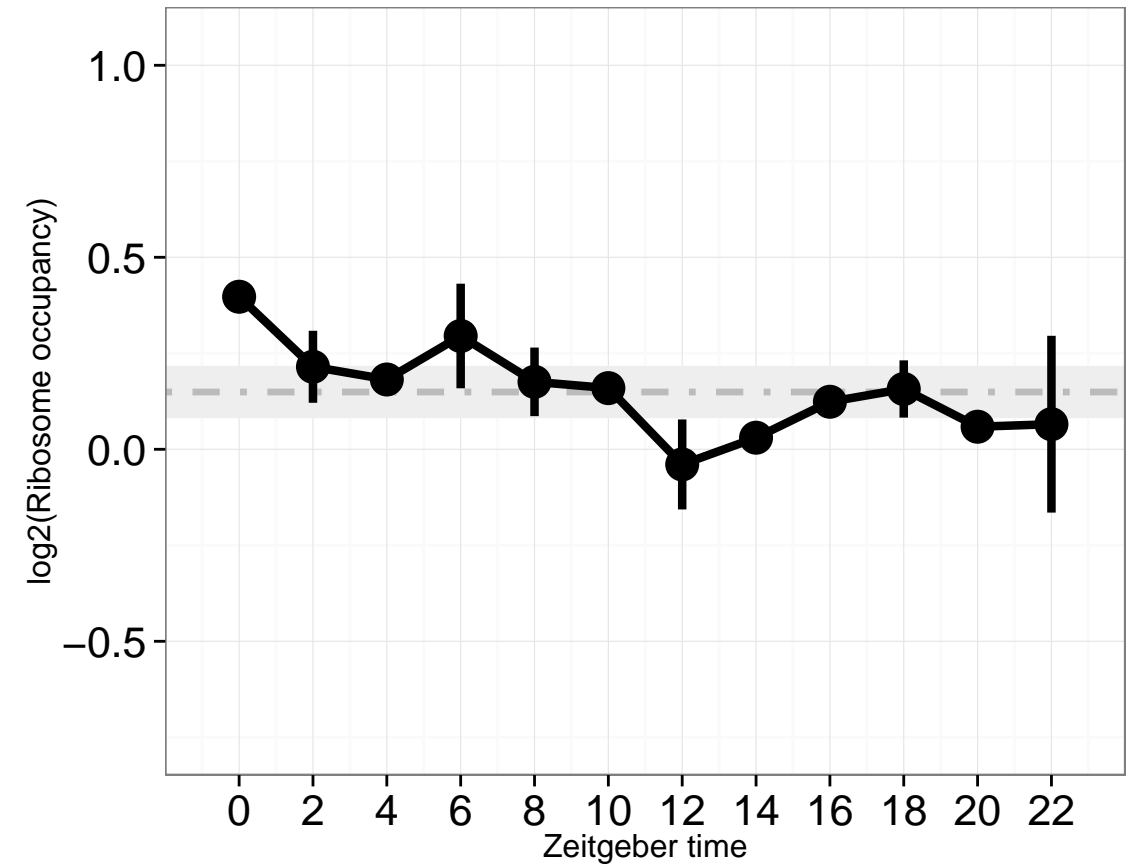

Supplement: Supplementary file 4857 [file 1]

## Htra1

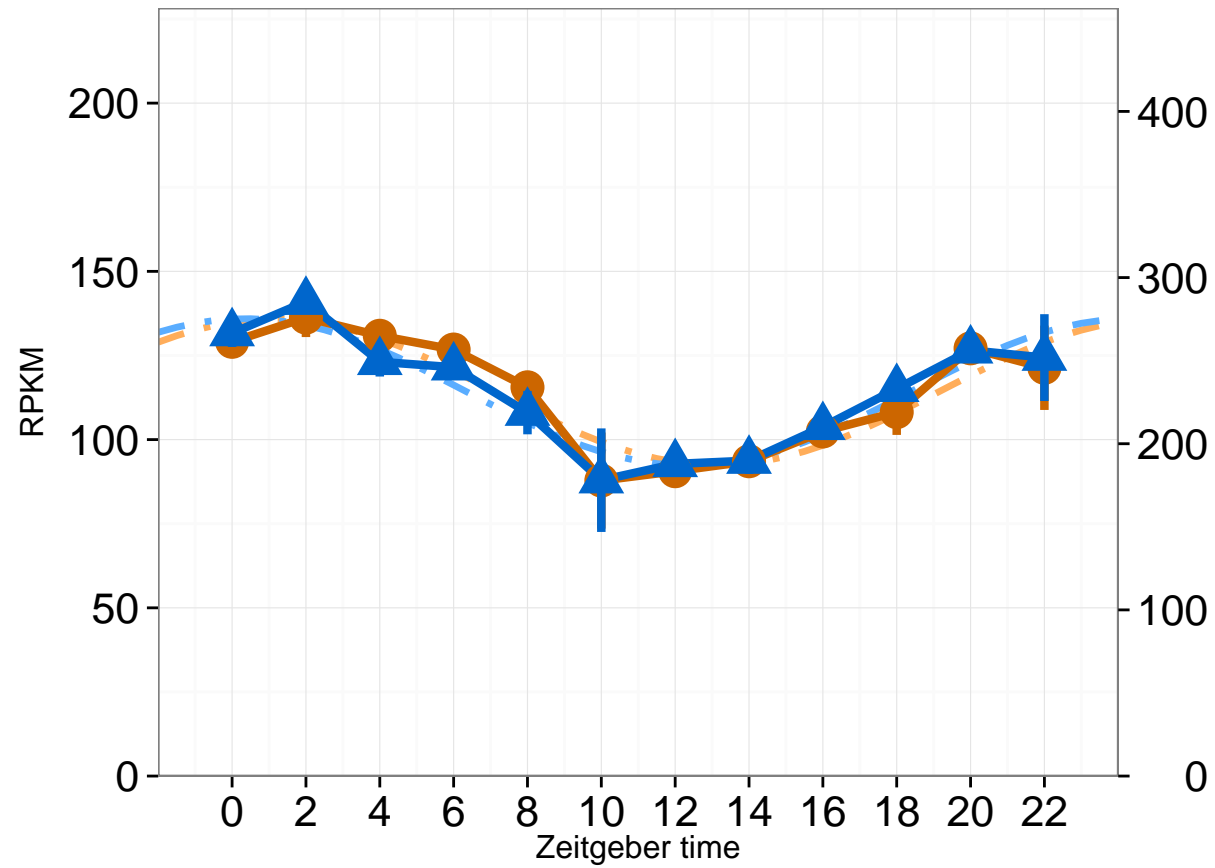

## Htra1

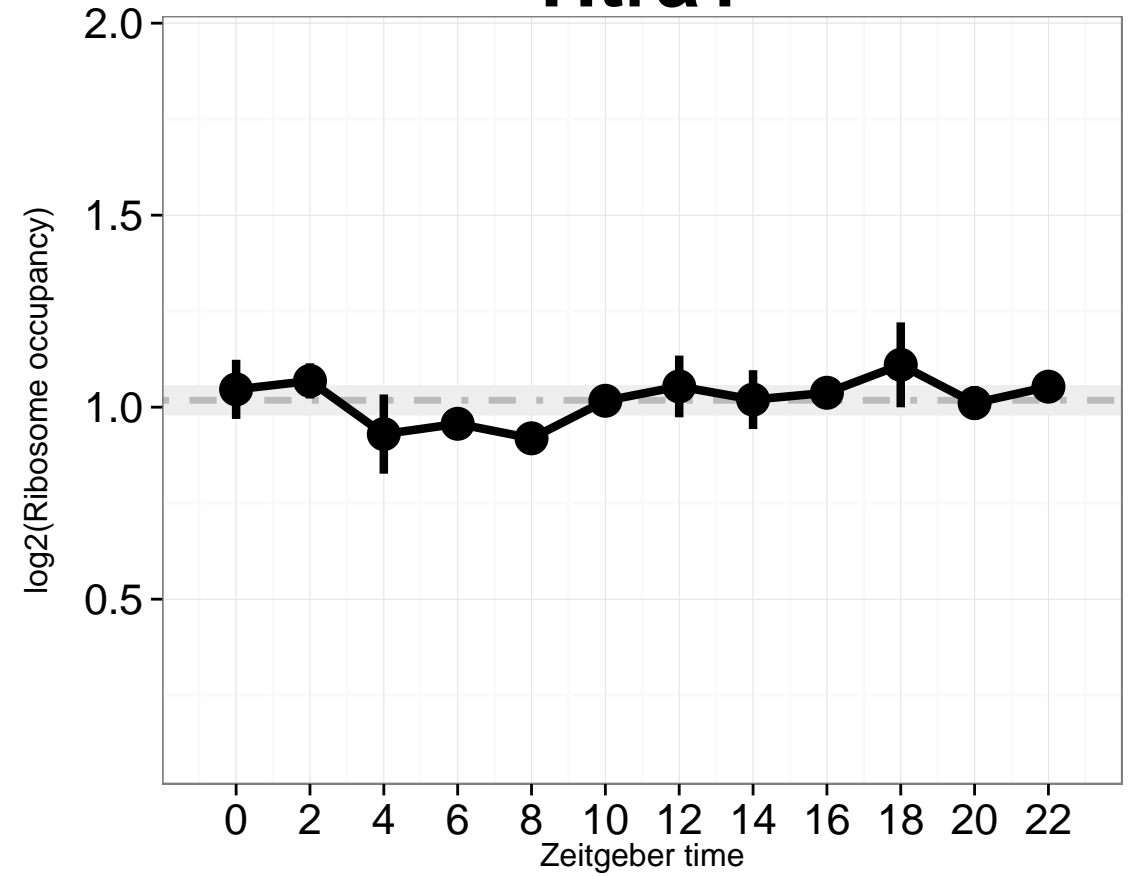

Supplement: Supplementary file 4858 [file 1]

# Arhgap30

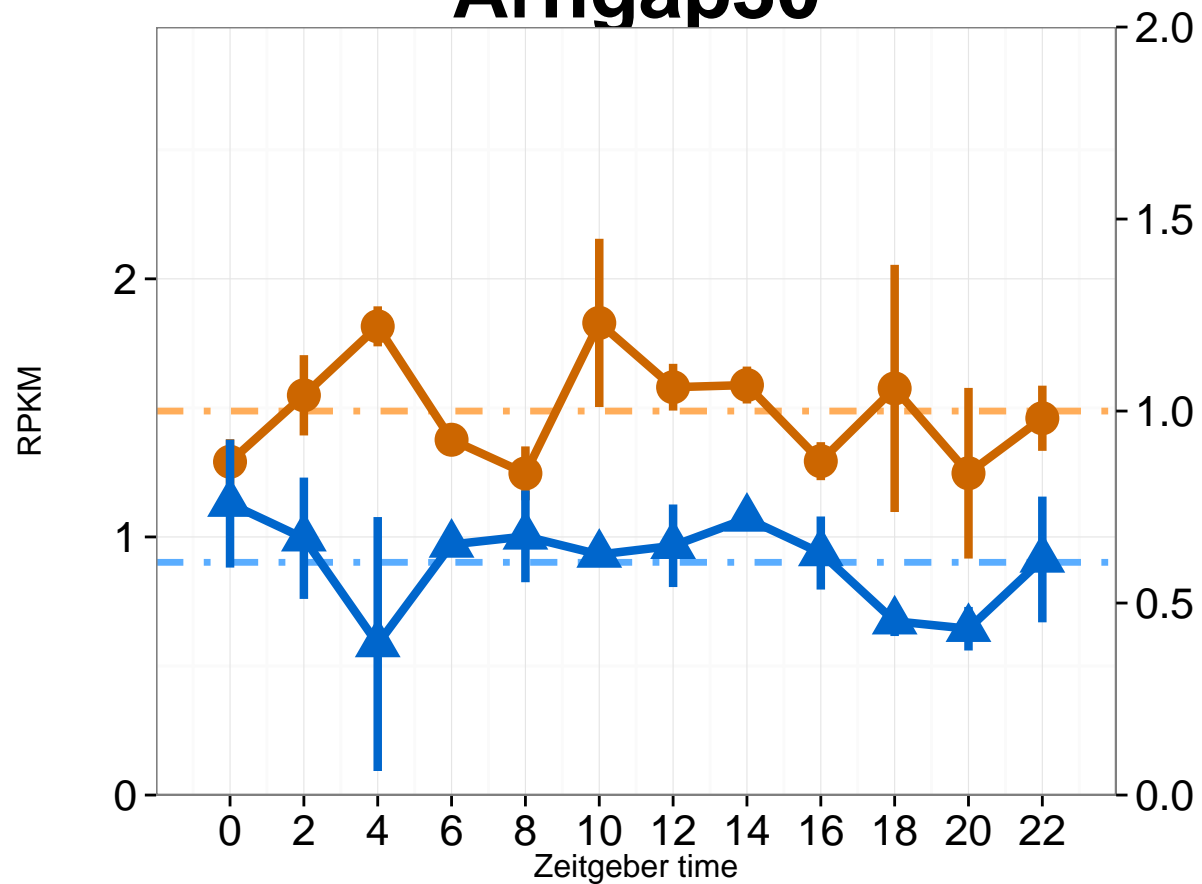

# Arhgap30

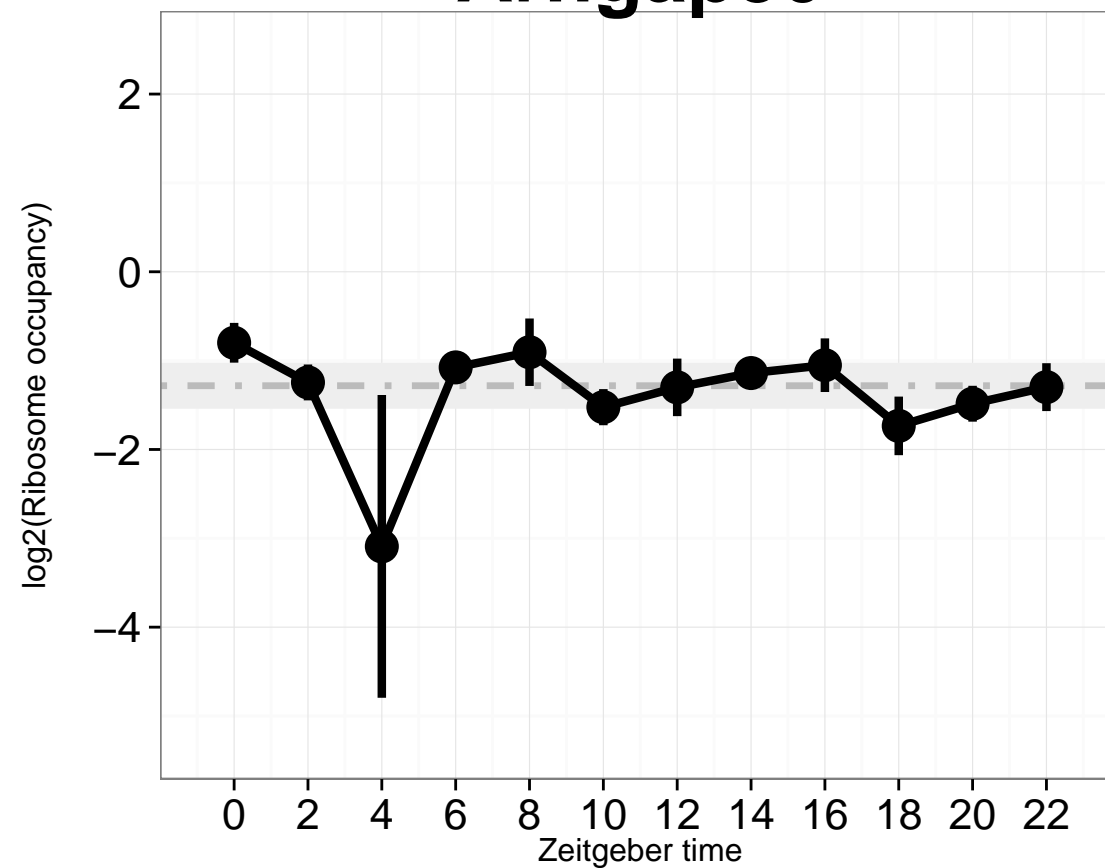

Supplement: Supplementary file 4859 [file 1]

# Rbm12b2

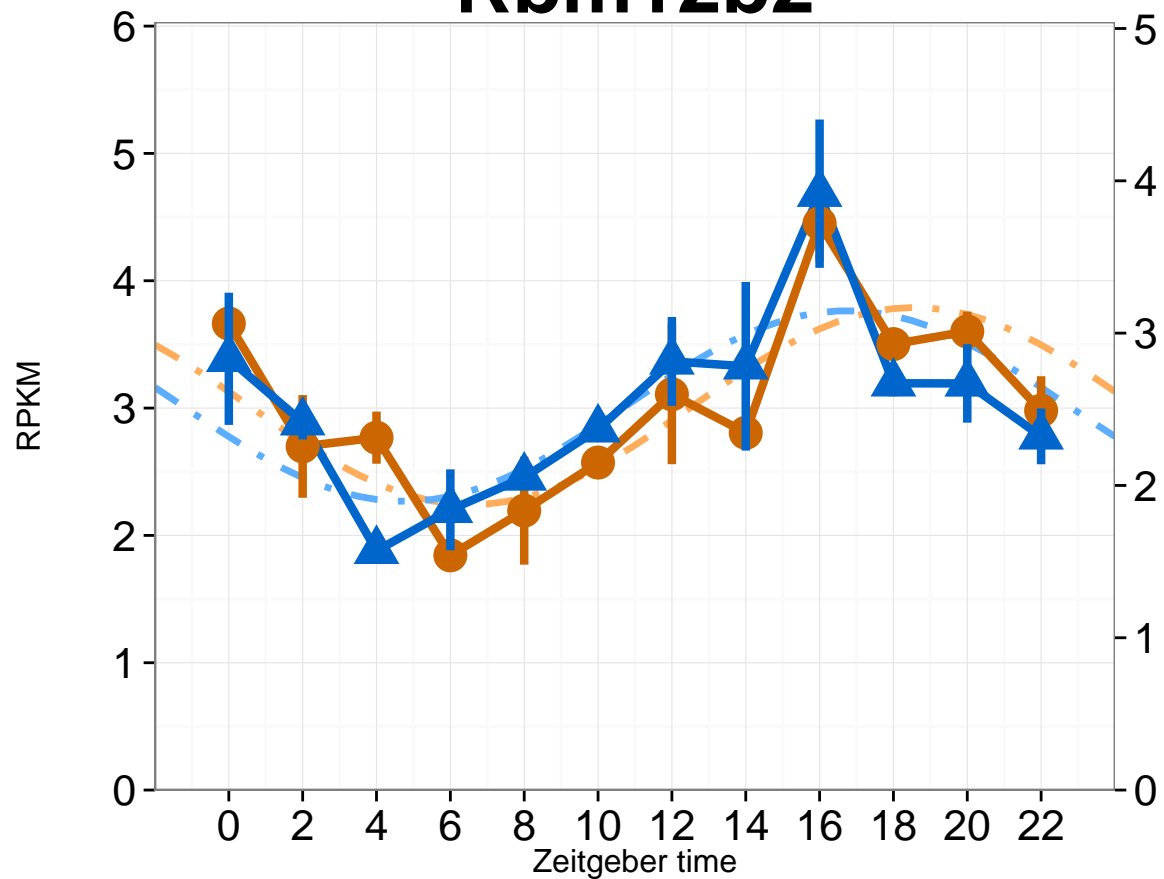

# Rbm12b2

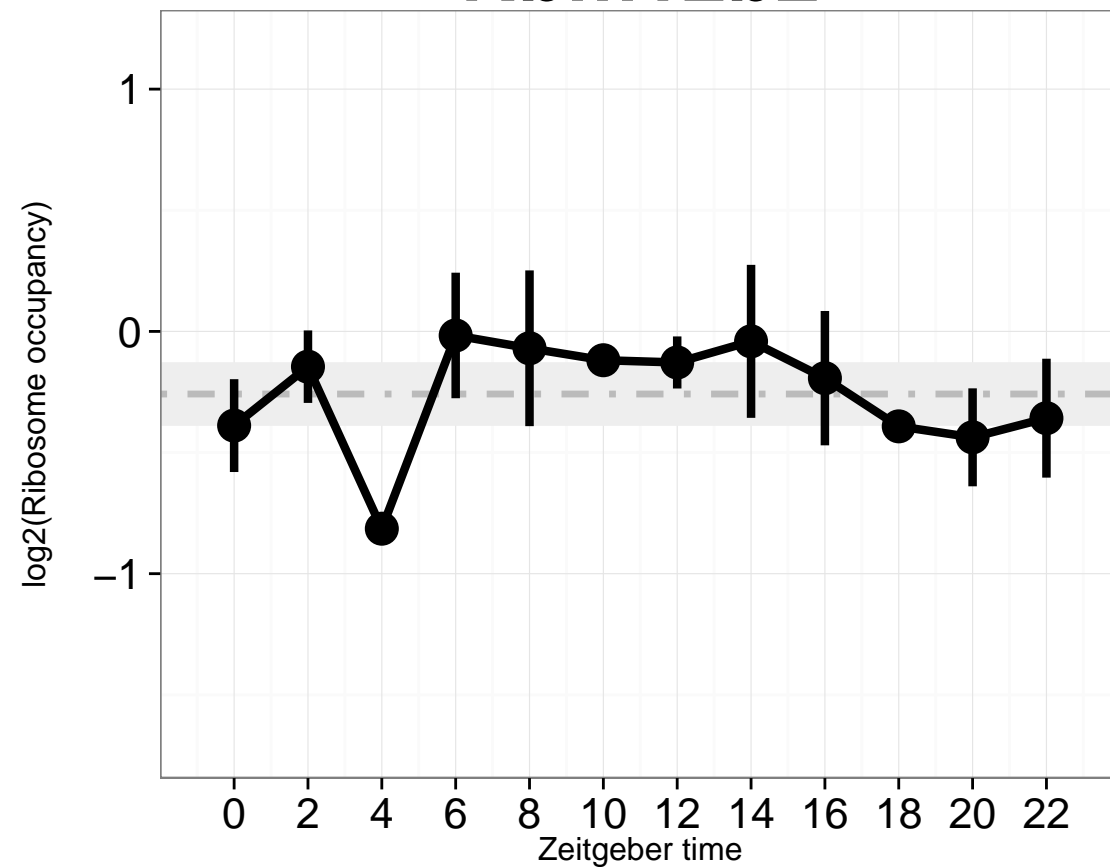

Supplement: Supplementary file 4860 [file 1]

## Acads

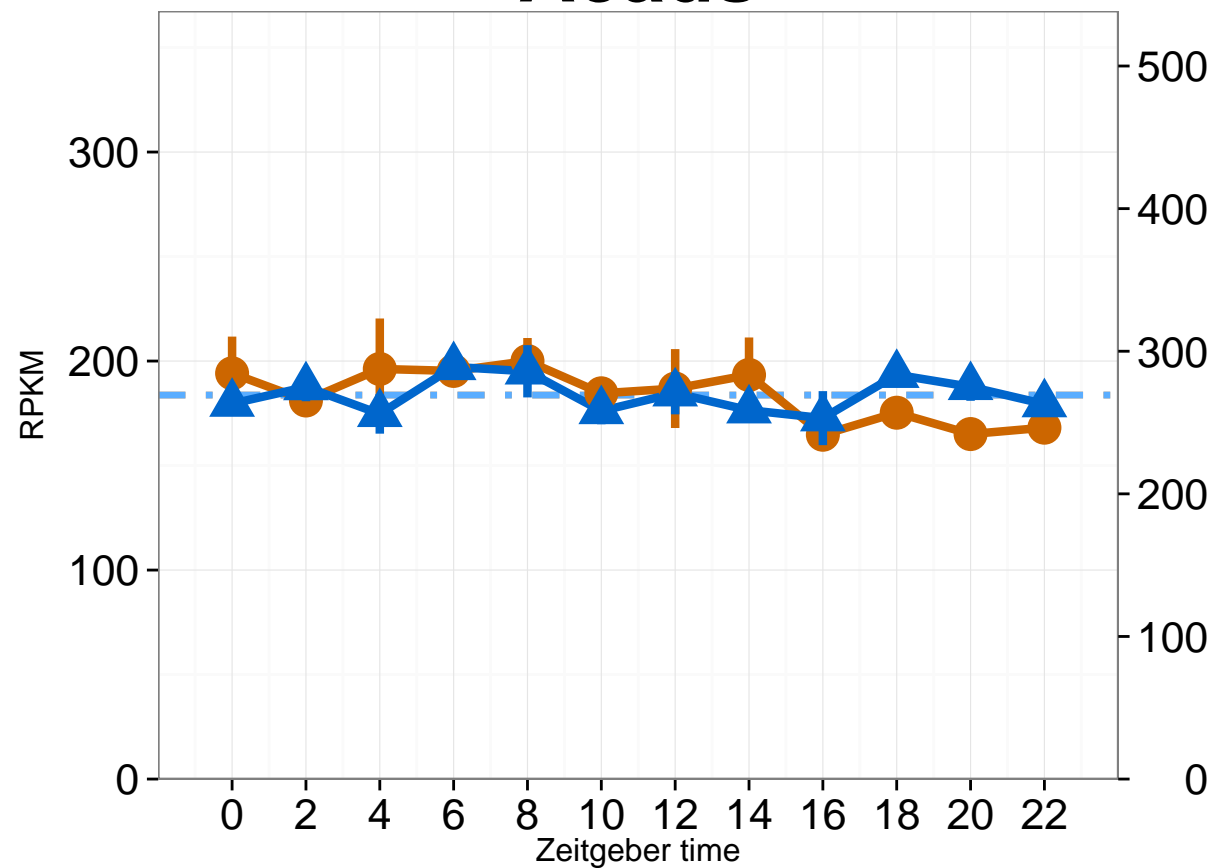

## Acads

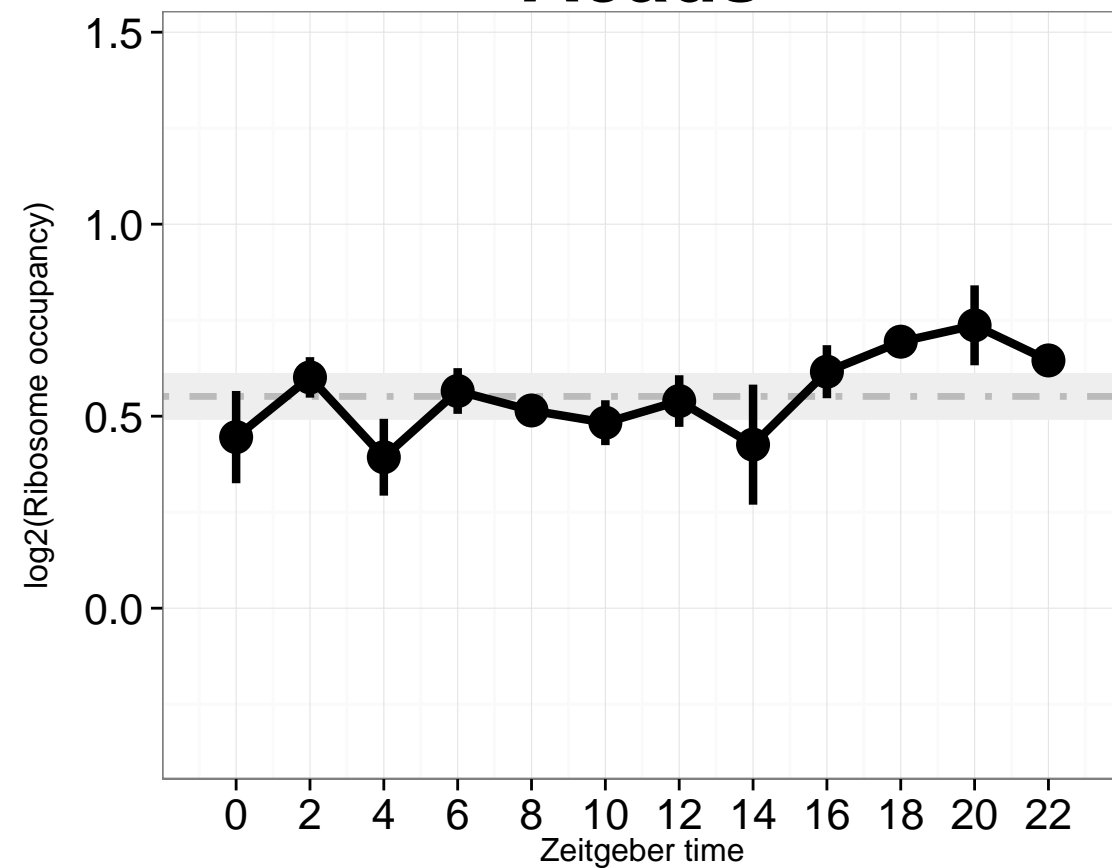

Supplement: Supplementary file 4861 [file 1]

## Lsm2

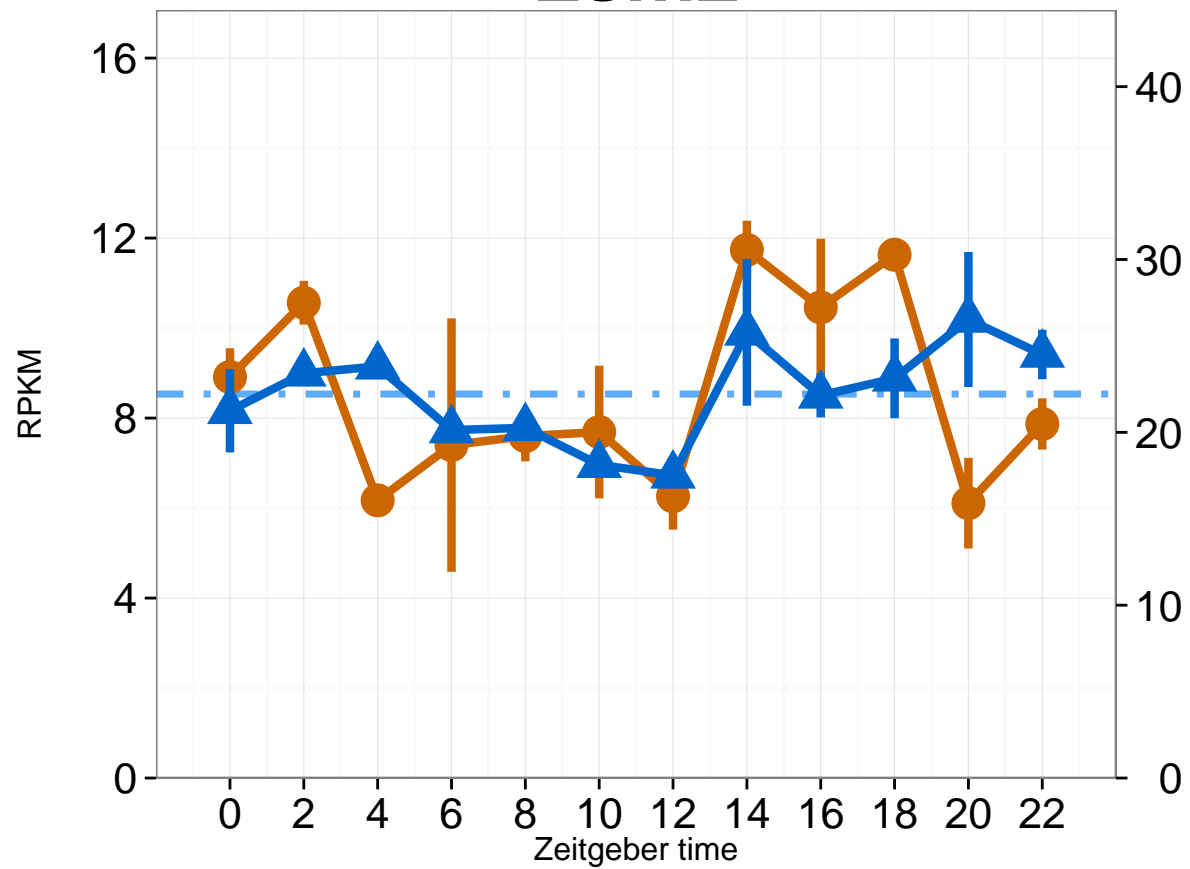

## Lsm2

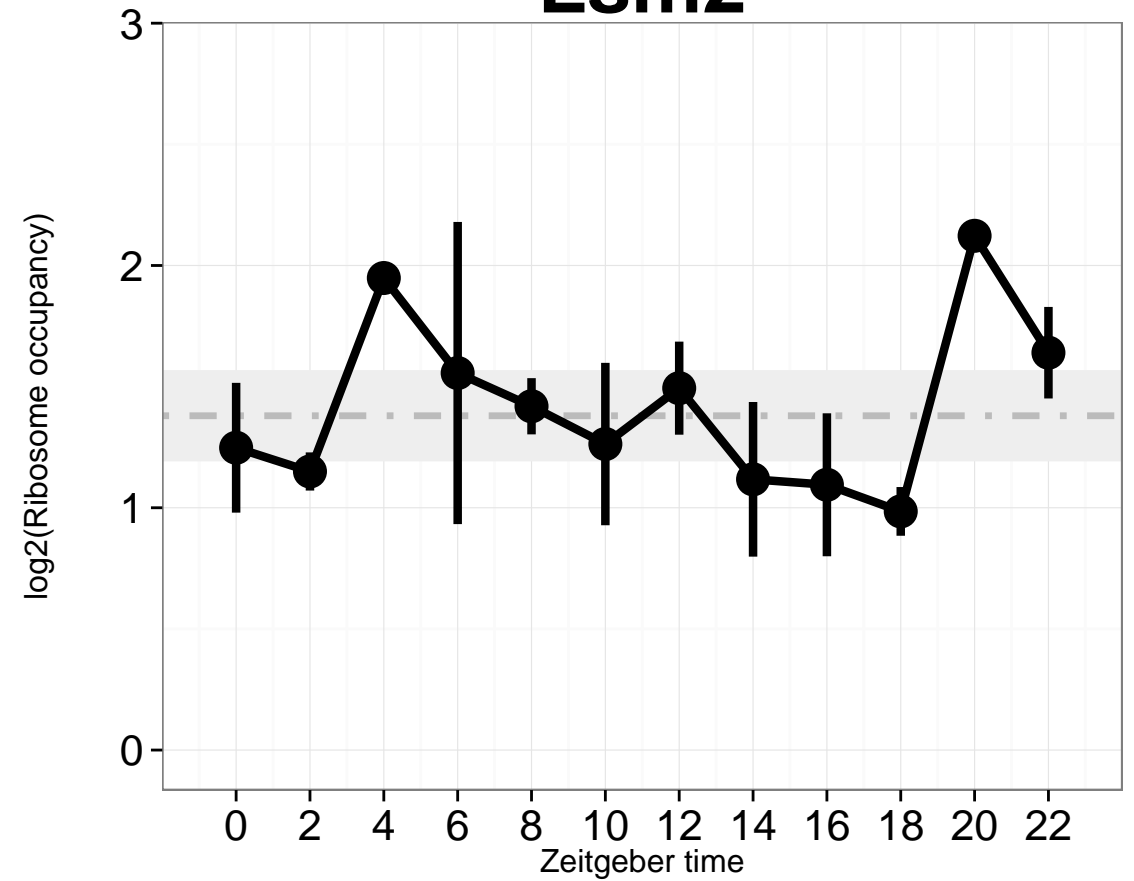

Supplement: Supplementary file 4862 [file 1]

# Acvr2a

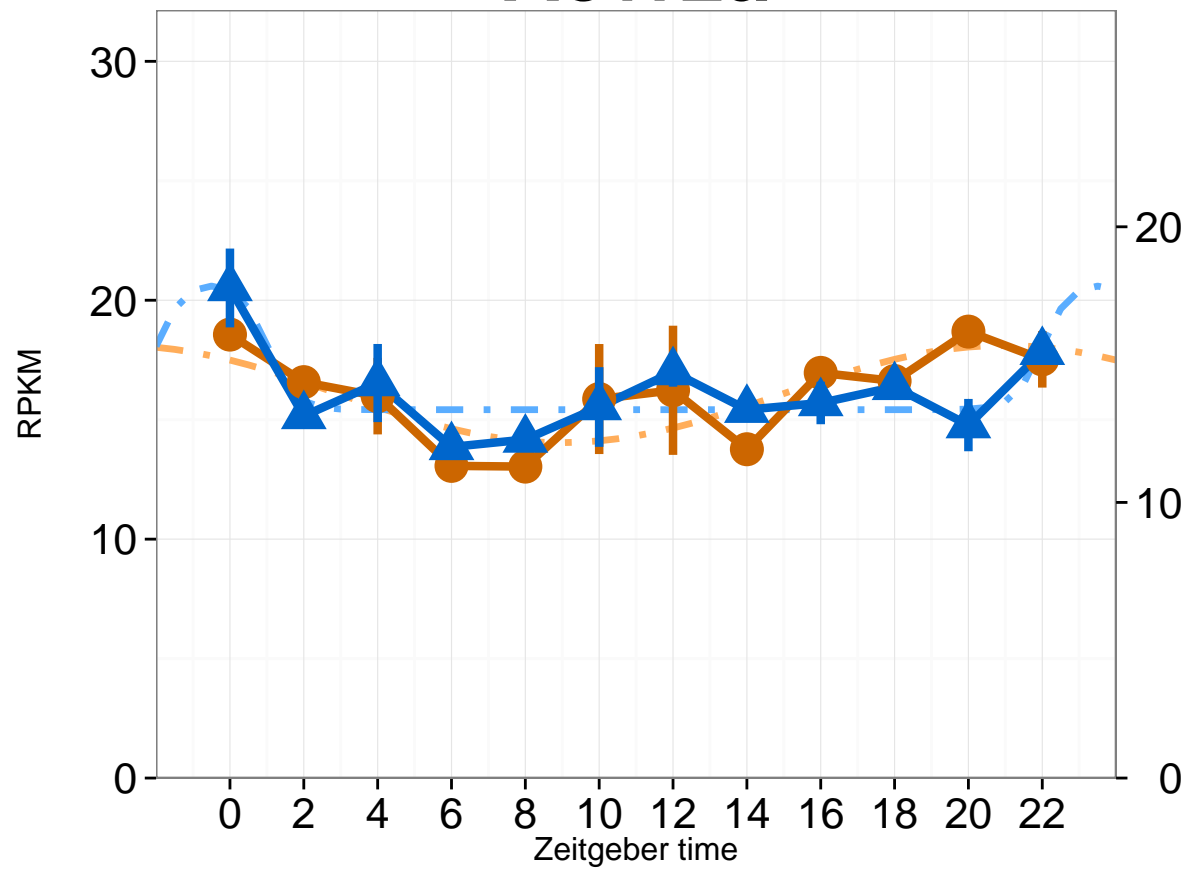

# Acvr2a

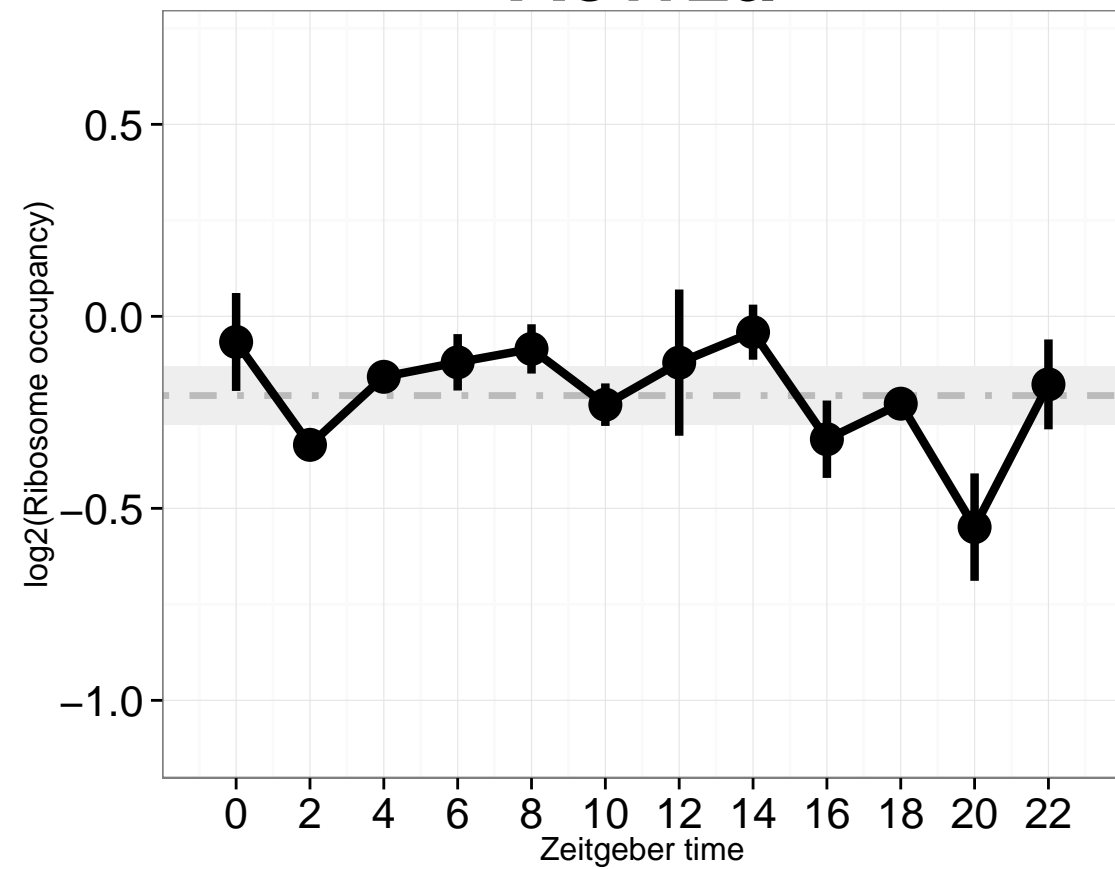

Supplement: Supplementary file 4863 [file 1]

# Ddx11

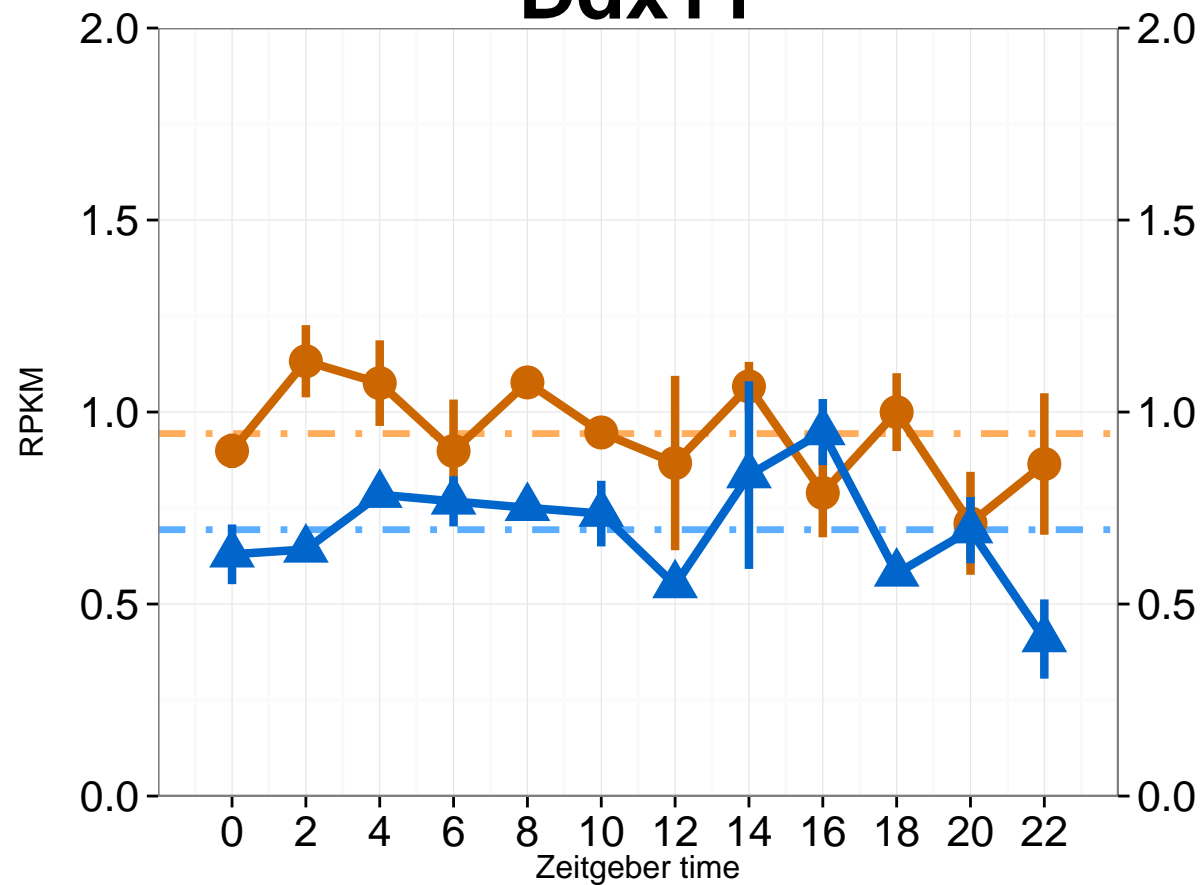

# Ddx11

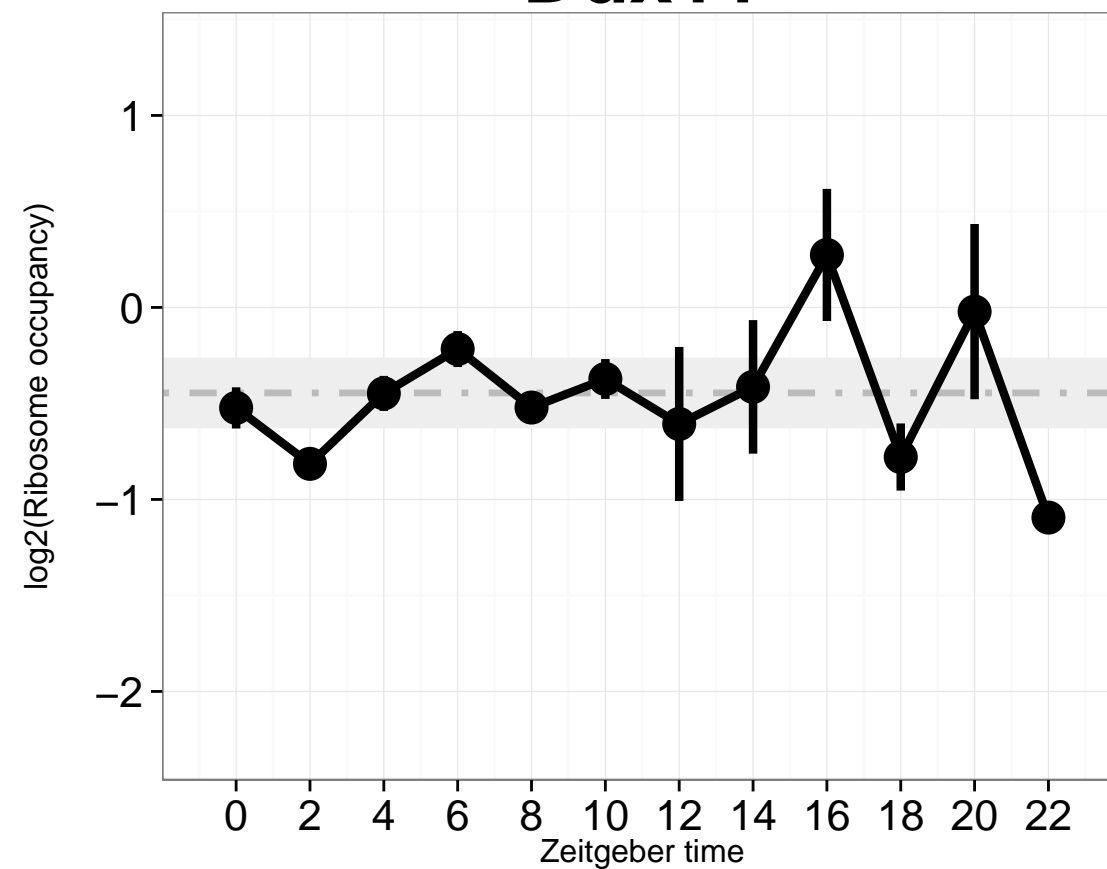

Supplement: Supplementary file 4864 [file 1]

# Inpp5f

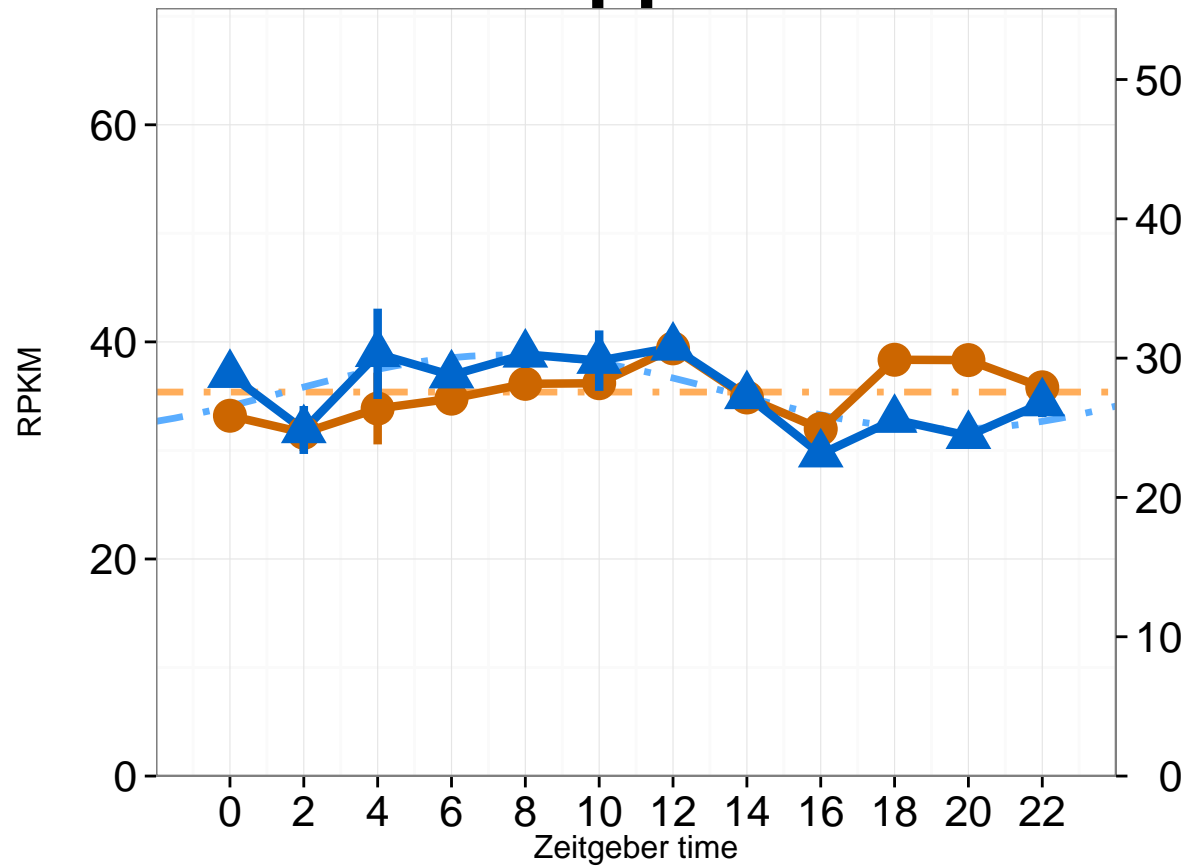

# Inpp5f

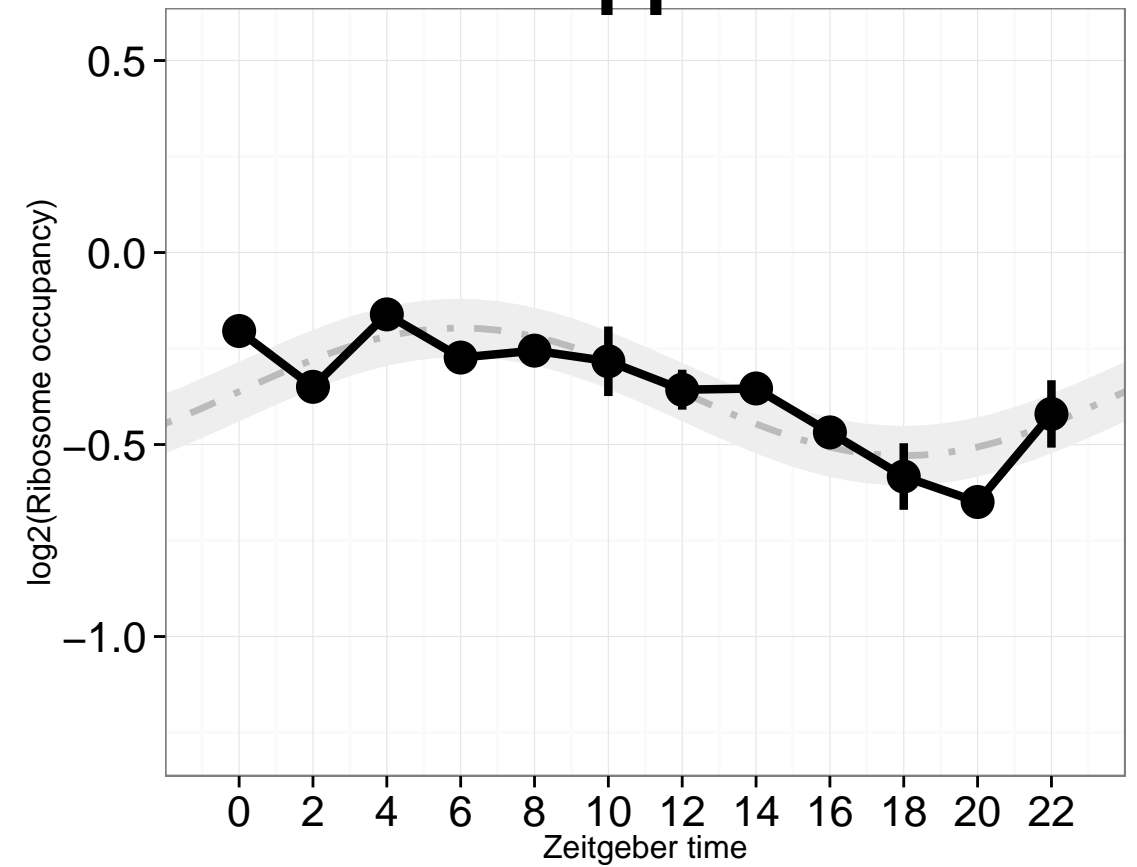

Supplement: Supplementary file 4865 [file 1]

mt-Nd1

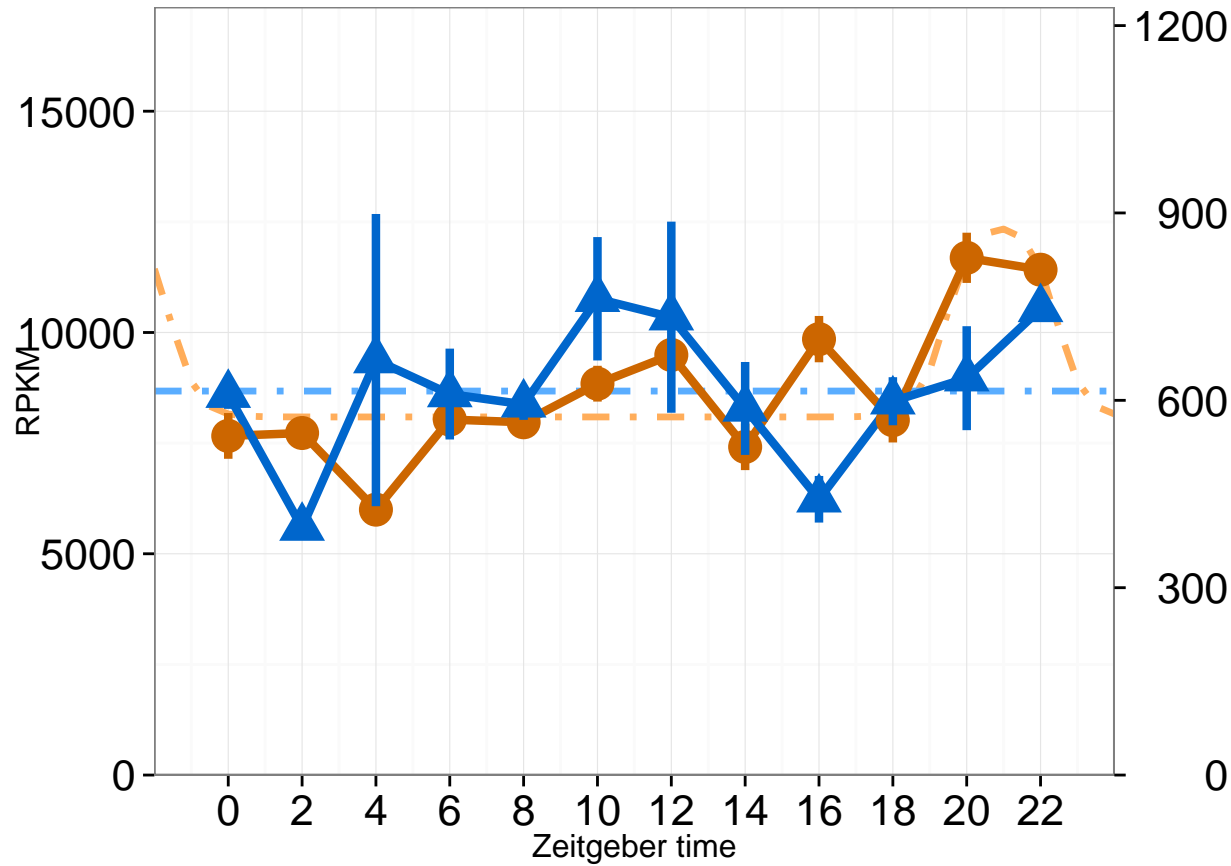

mt-Nd1

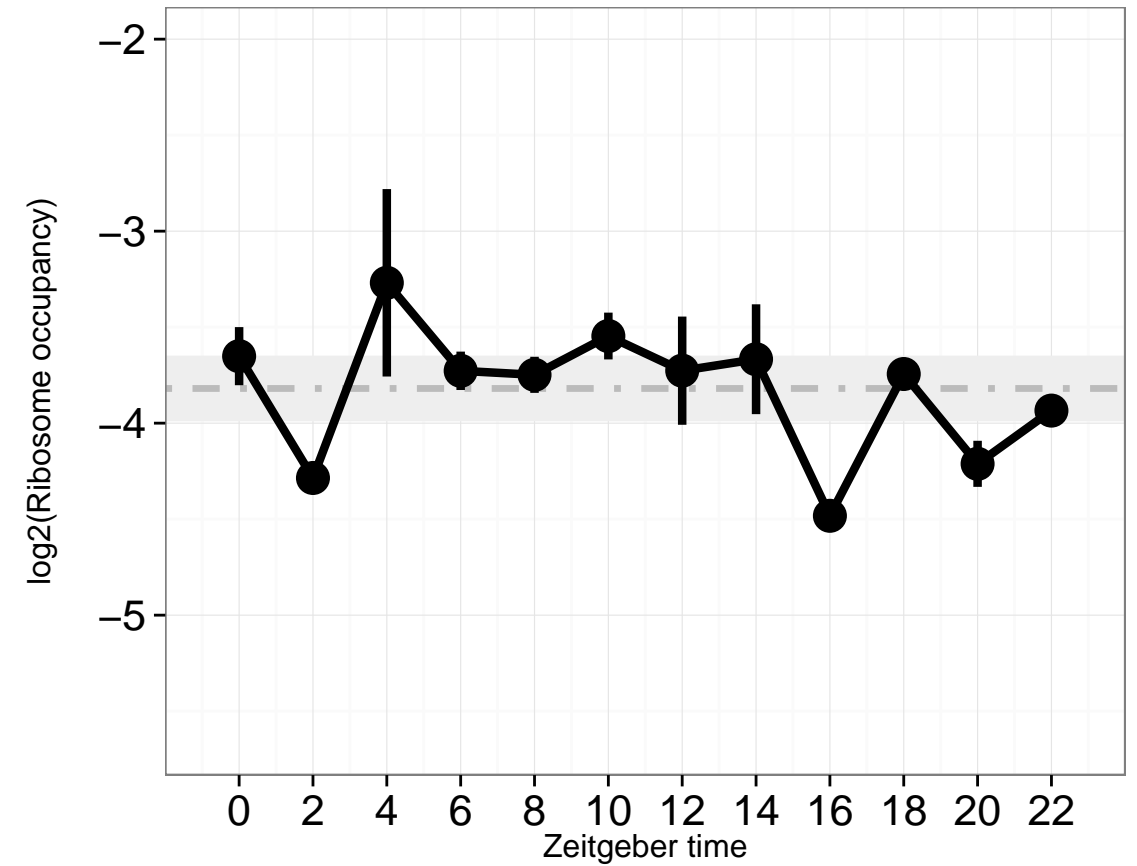

Supplement: Supplementary file 4866 [file 1]

**E130012A19Rik**

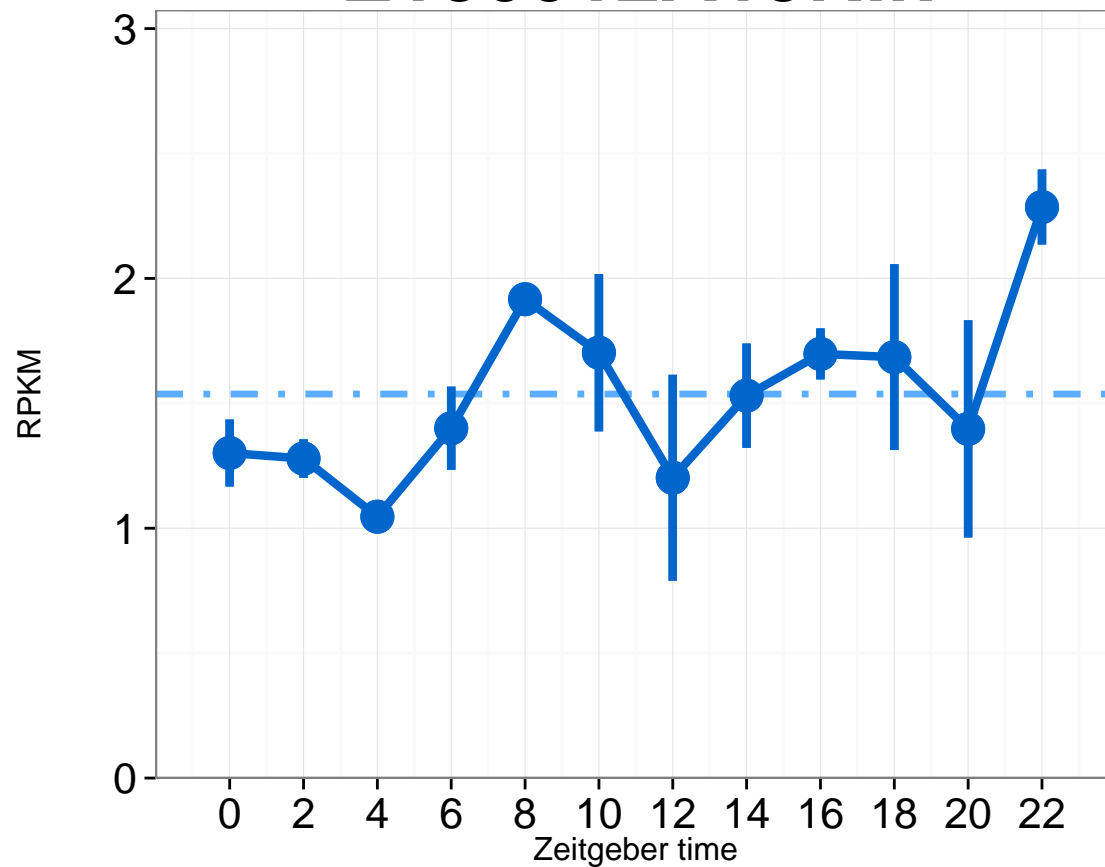

**E130012A19Rik log2(Ribosome occup**

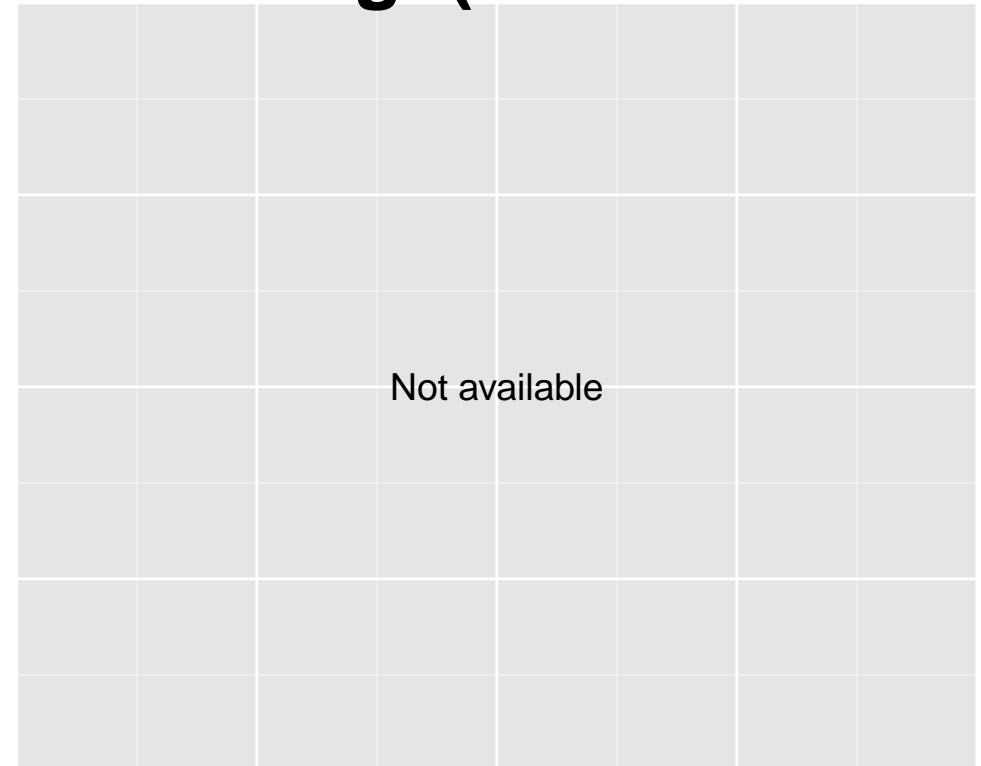

Supplement: Supplementary file 4867 [file 1]

# Stat2

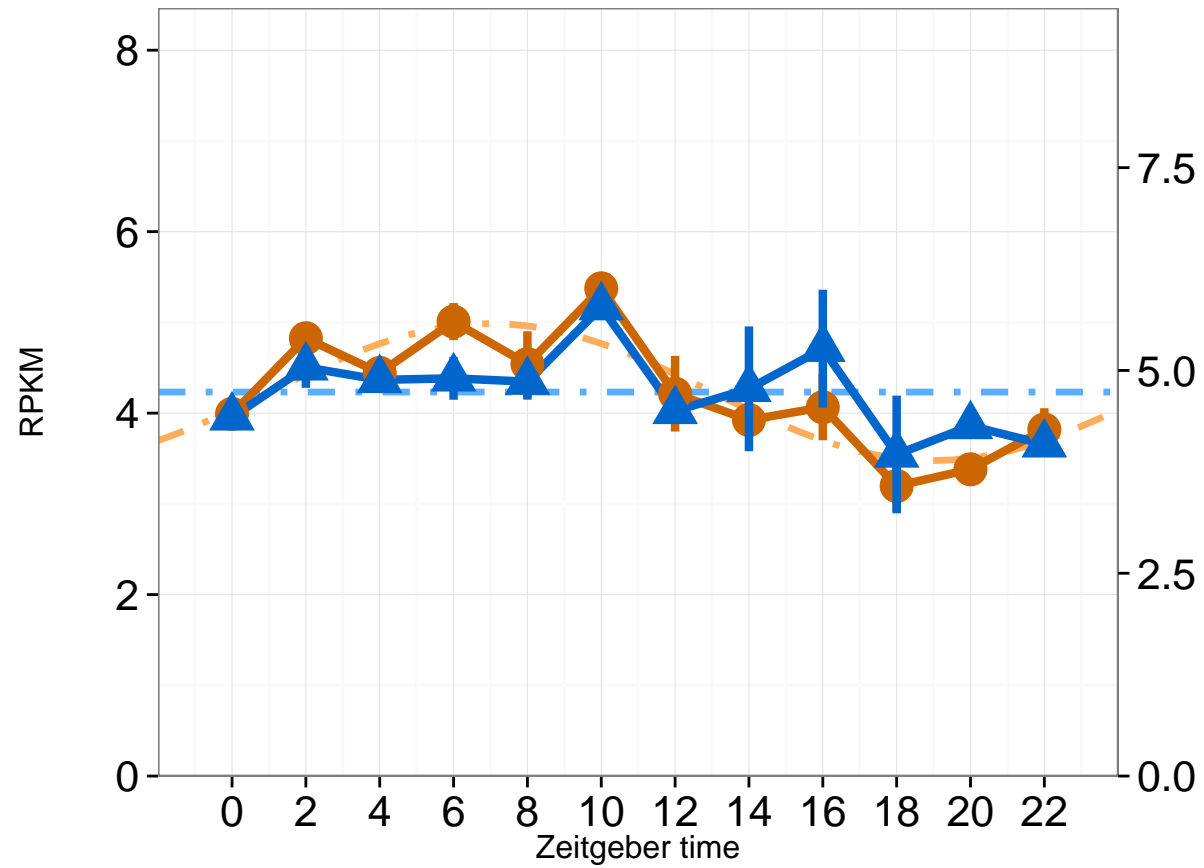

# Stat2

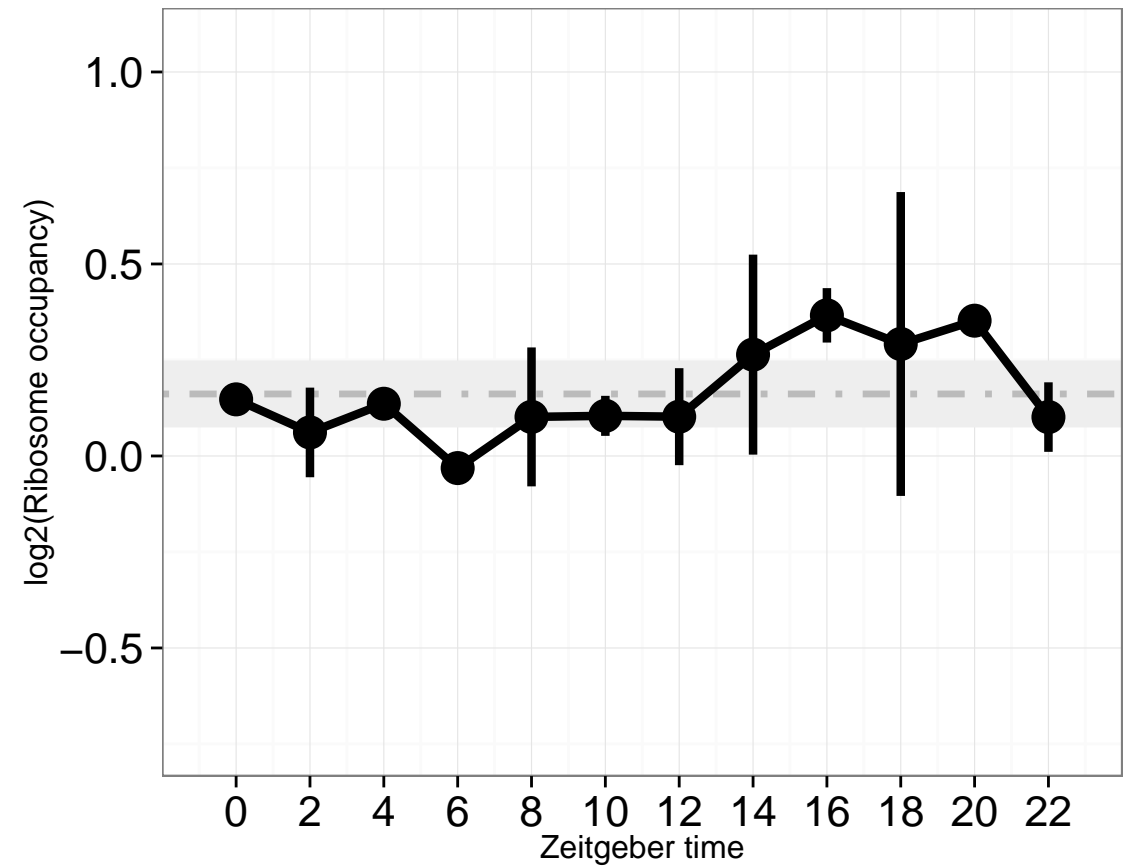

Supplement: Supplementary file 4868 [file 1]

# Trappc9

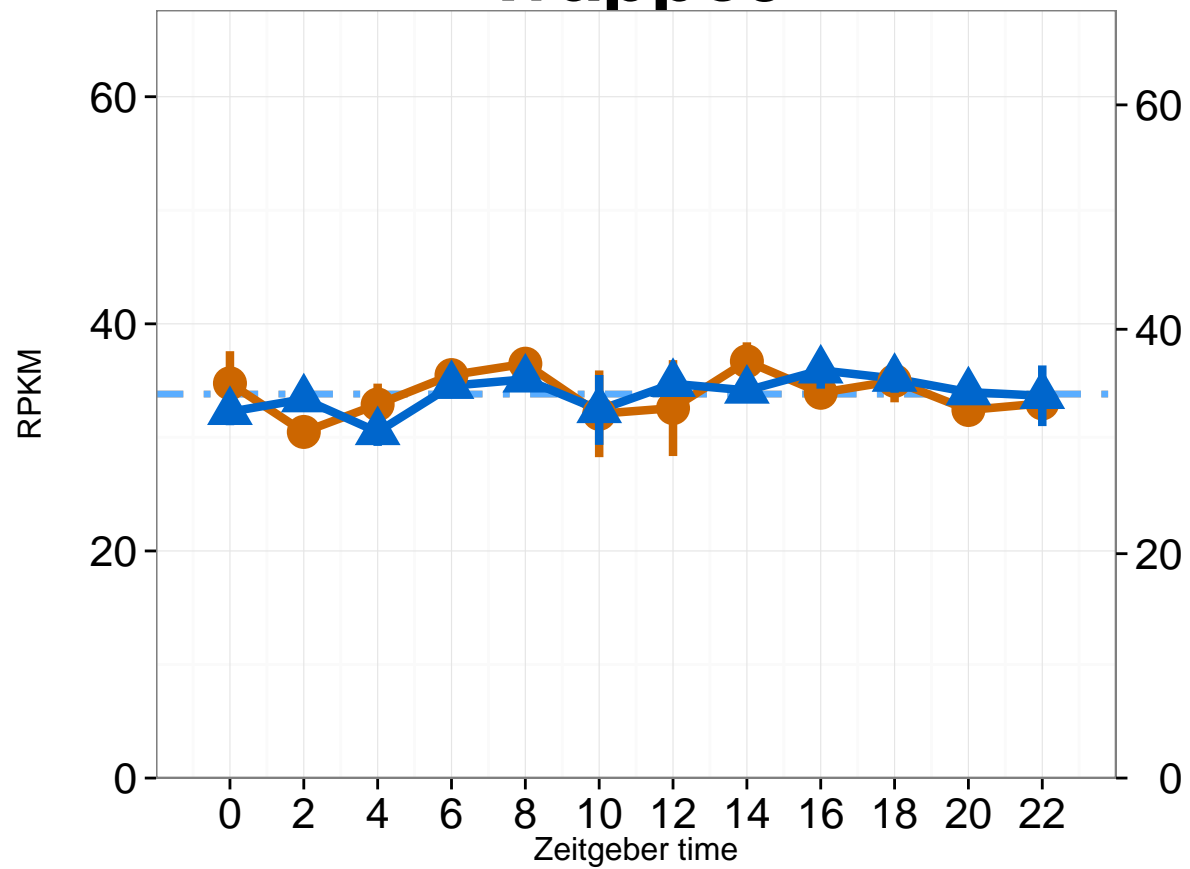

# Trappc9

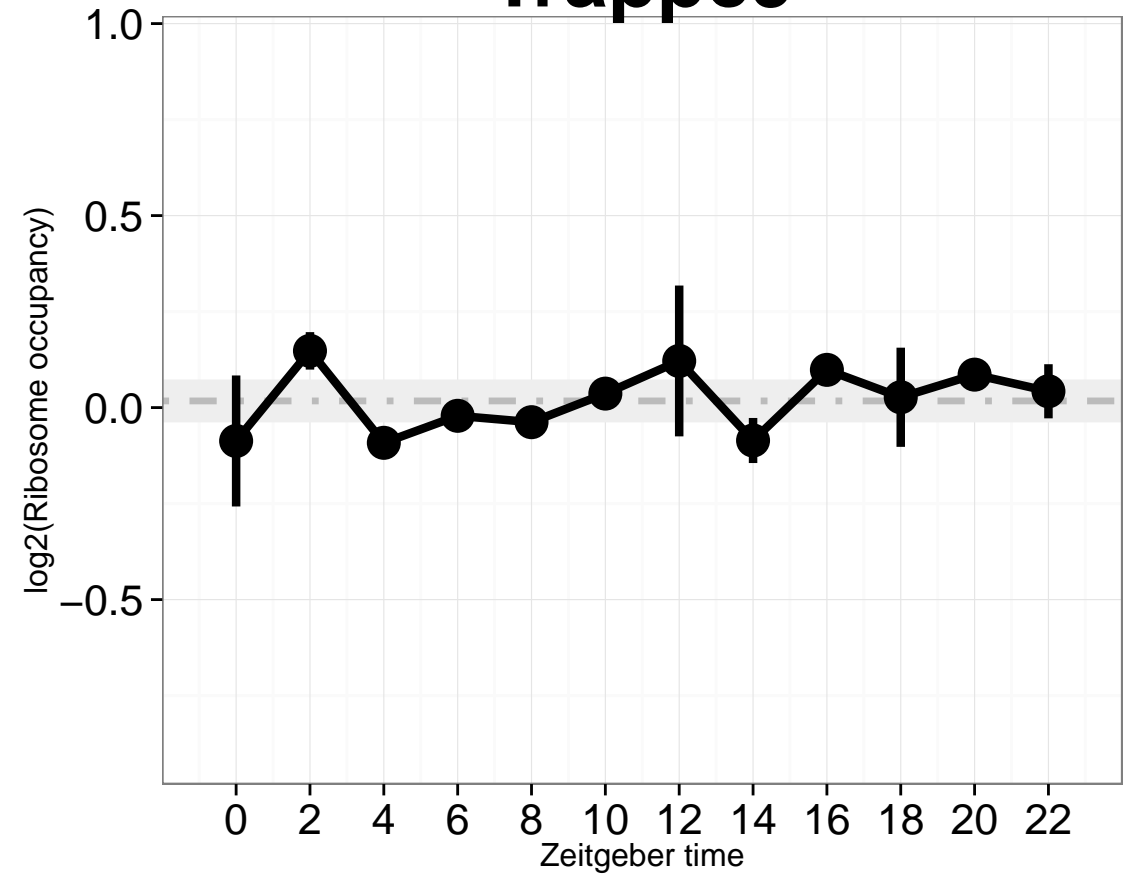

Supplement: Supplementary file 4869 [file 1]

# Map2k6

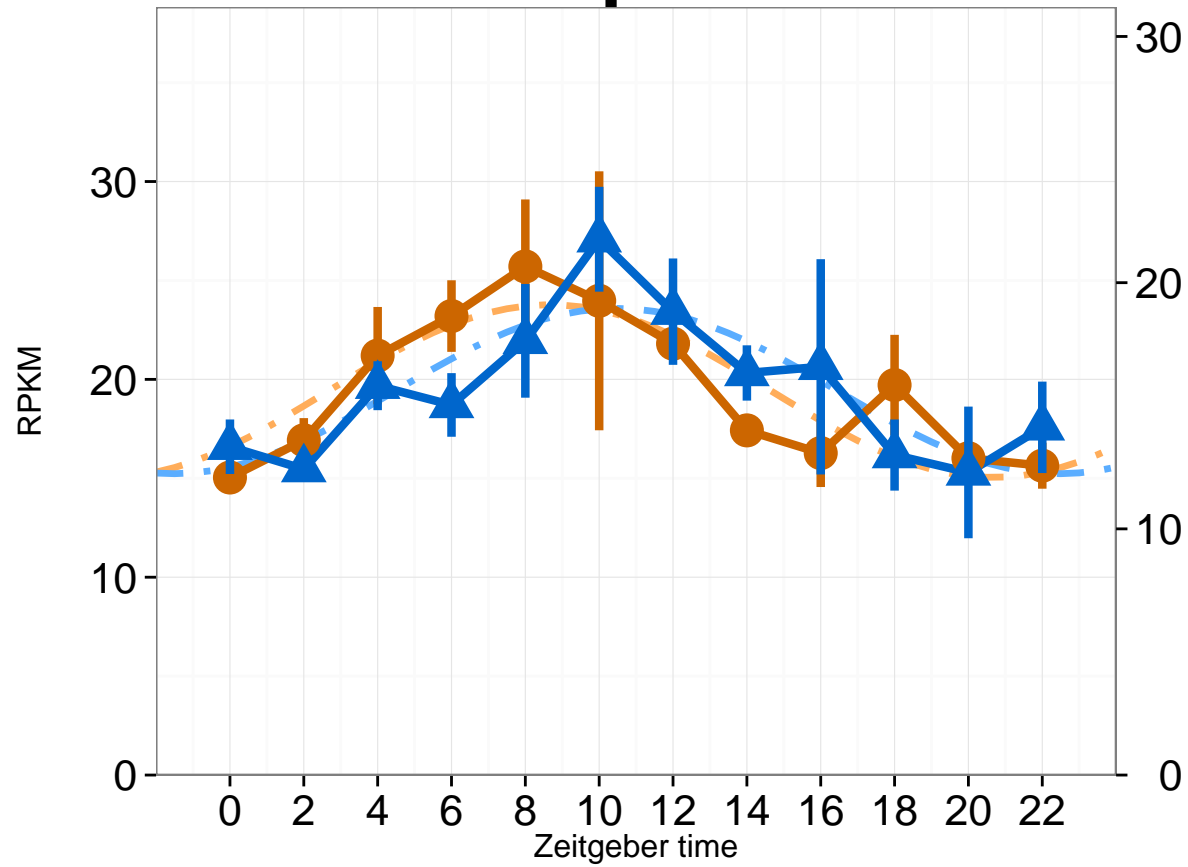

# Map2k6

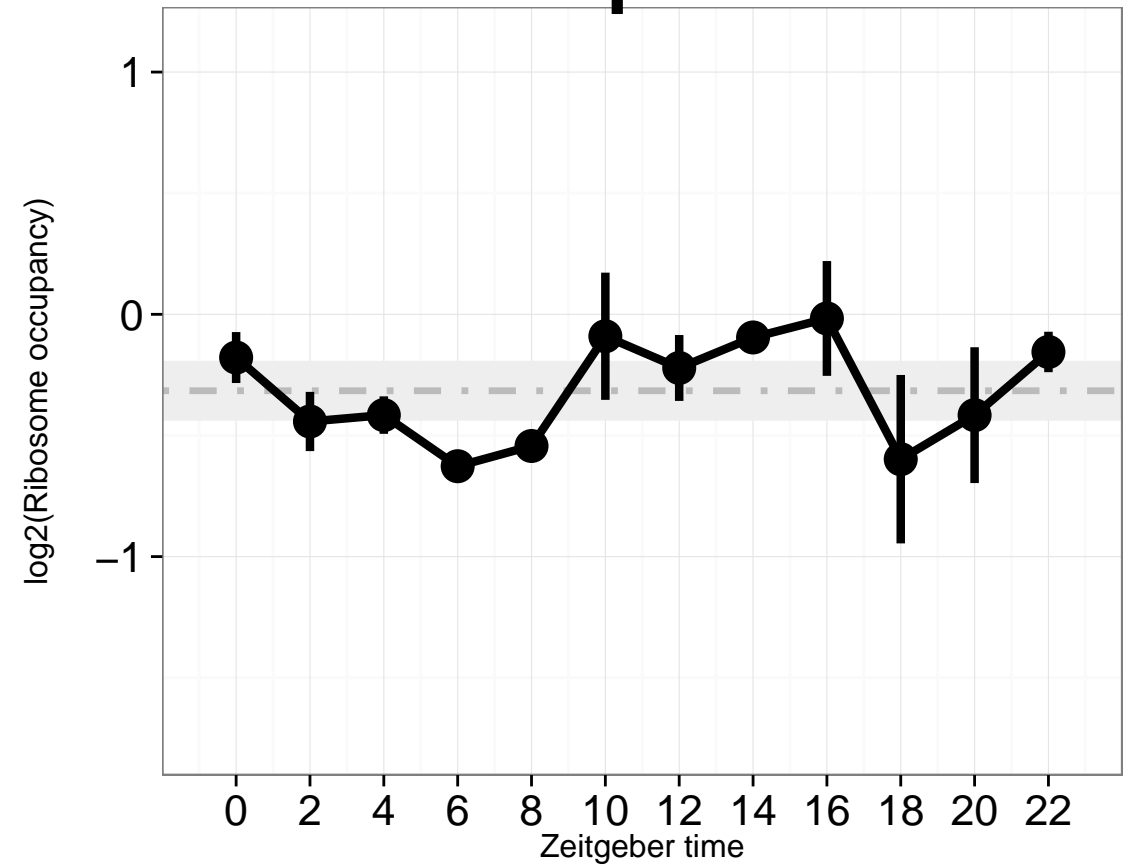

Supplement: Supplementary file 4870 [file 1]

## Slc25a20

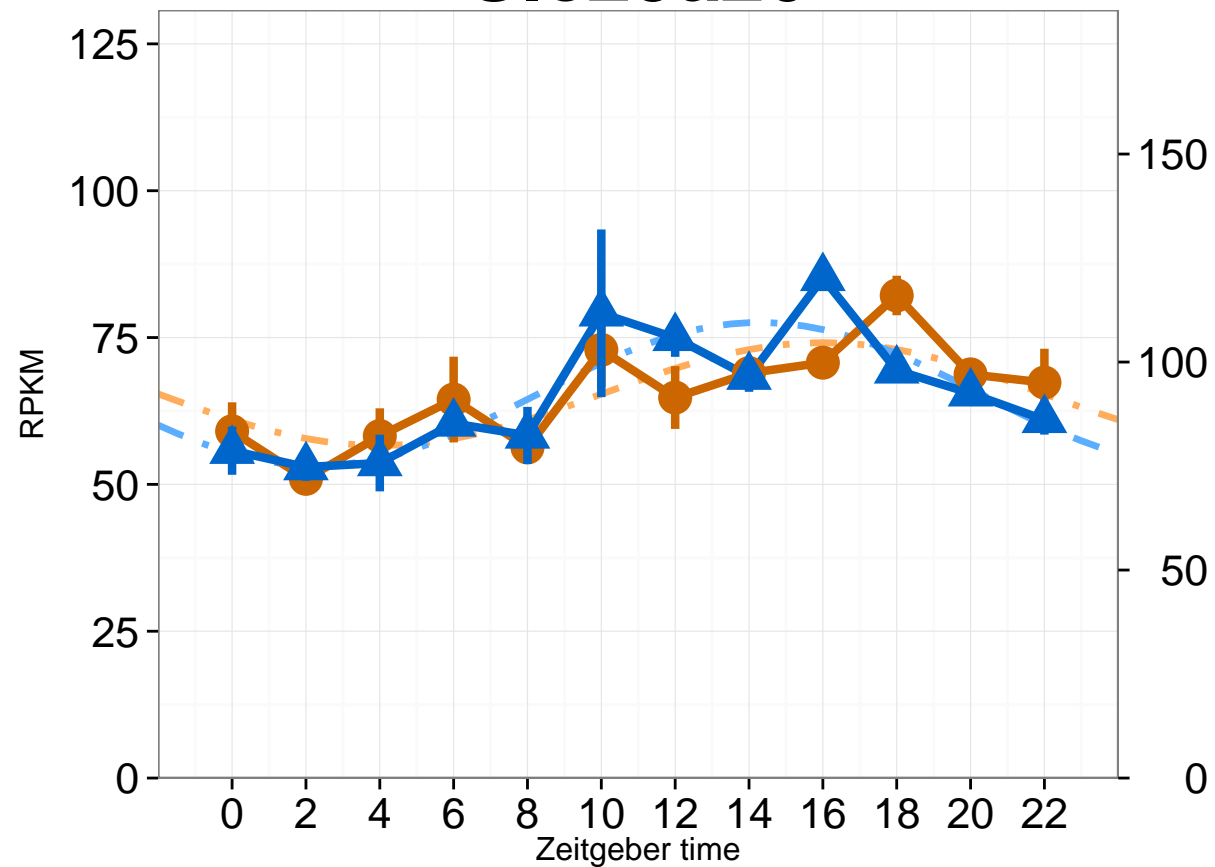

## Slc25a20

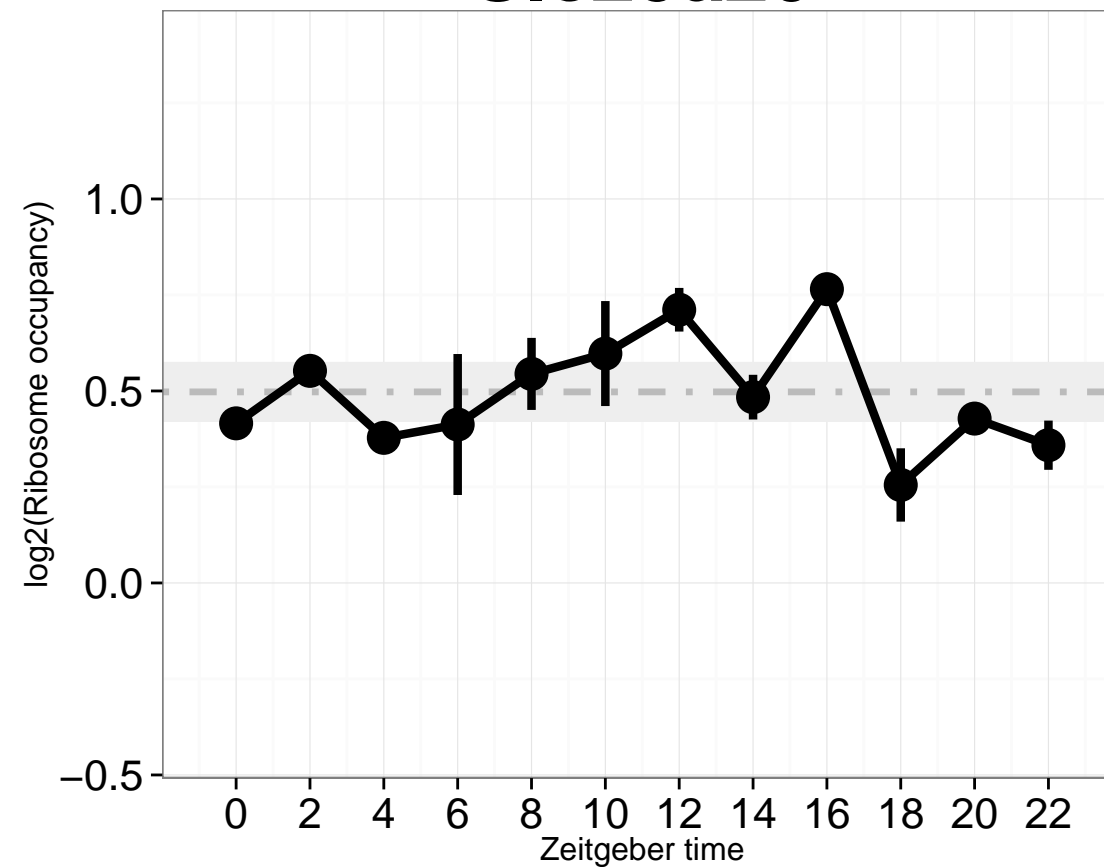

Supplement: Supplementary file 4871 [file 1]

# Clec16a

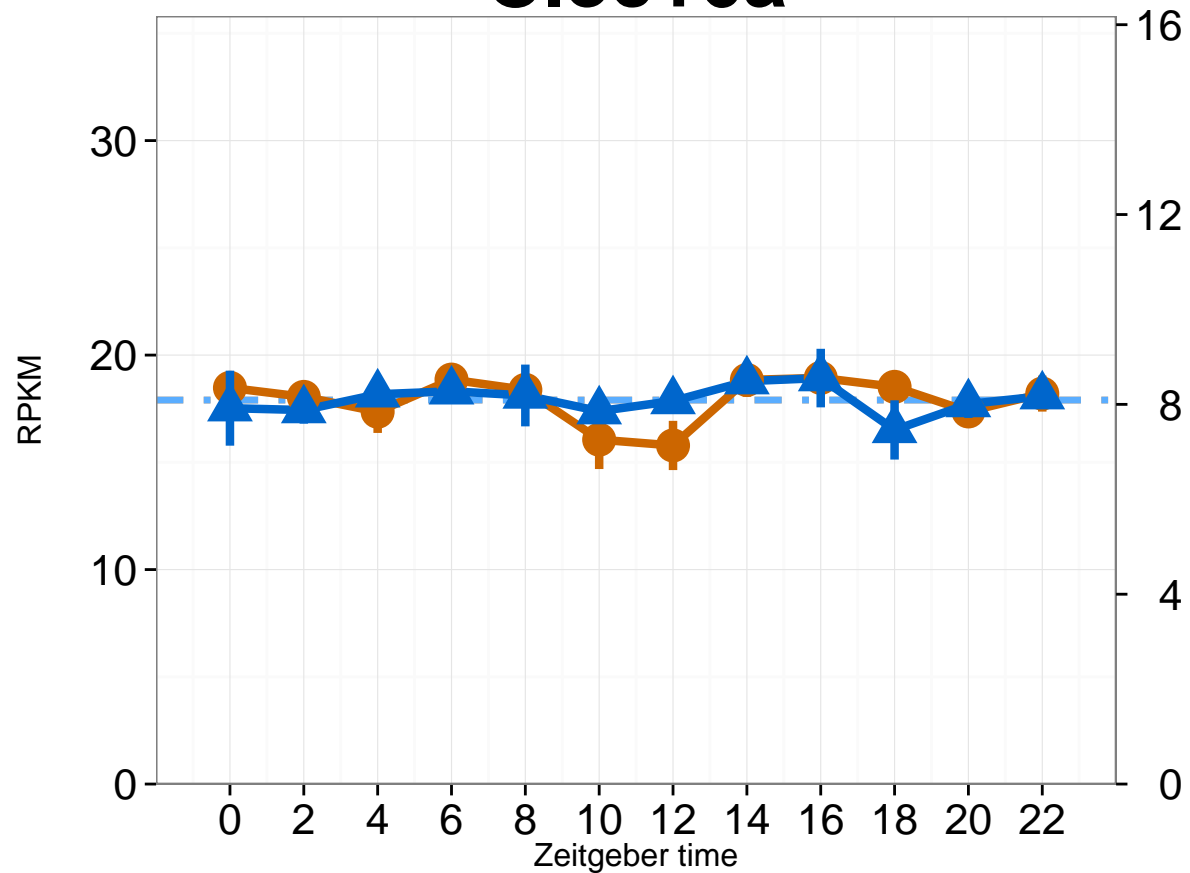

# Clec16a

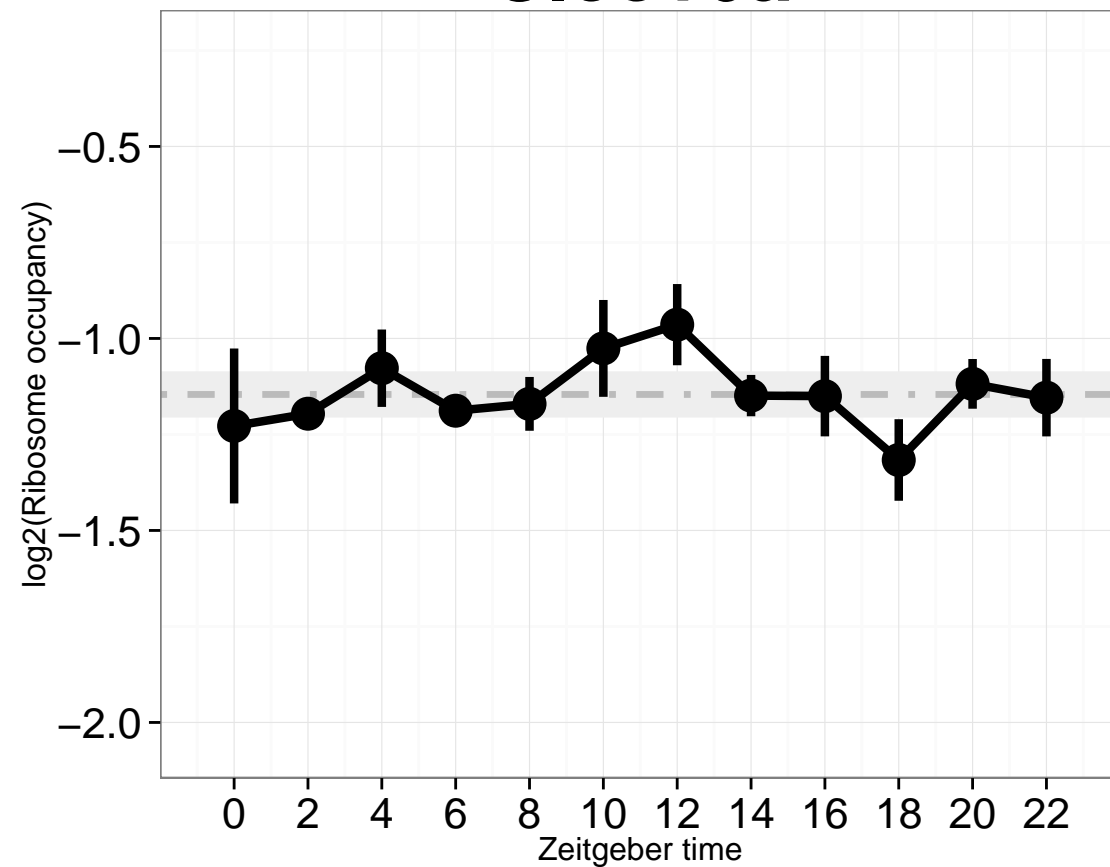

Supplement: Supplementary file 4872 [file 1]

# Mrpl47

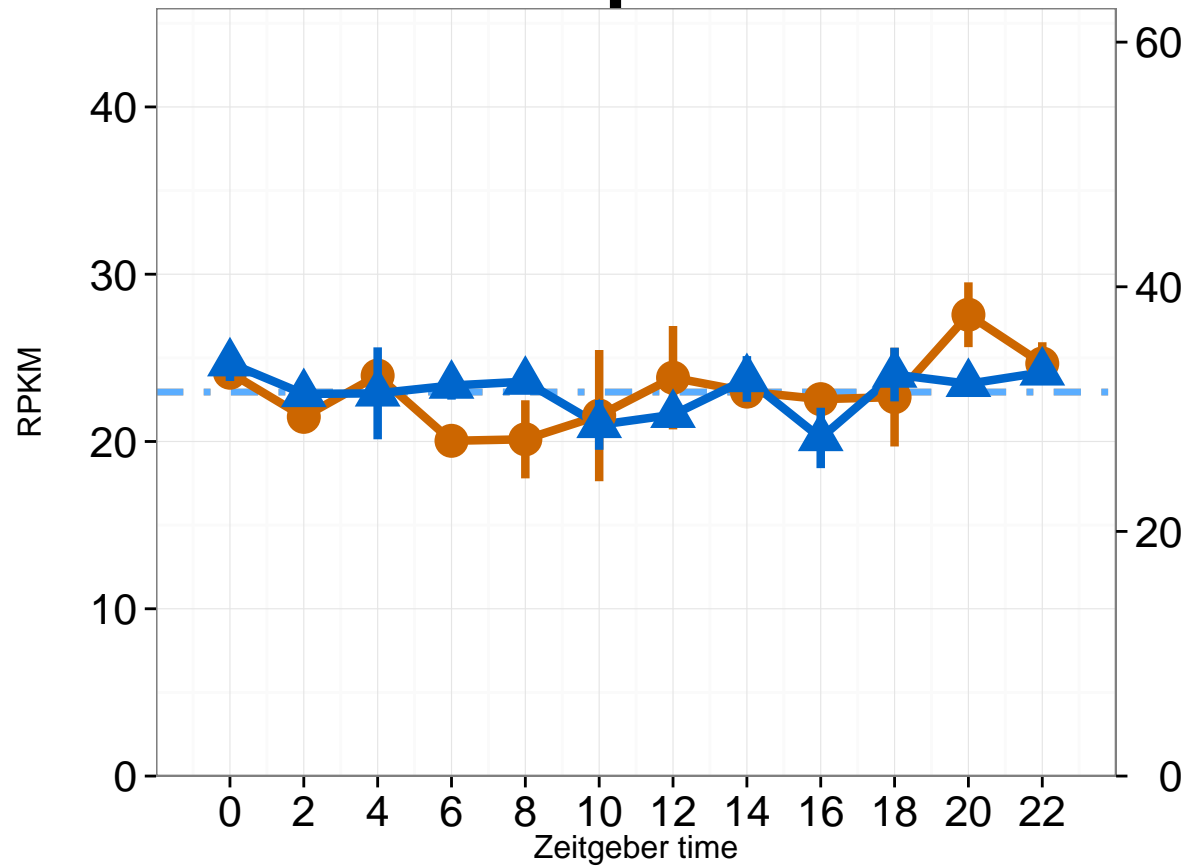

# Mrpl47

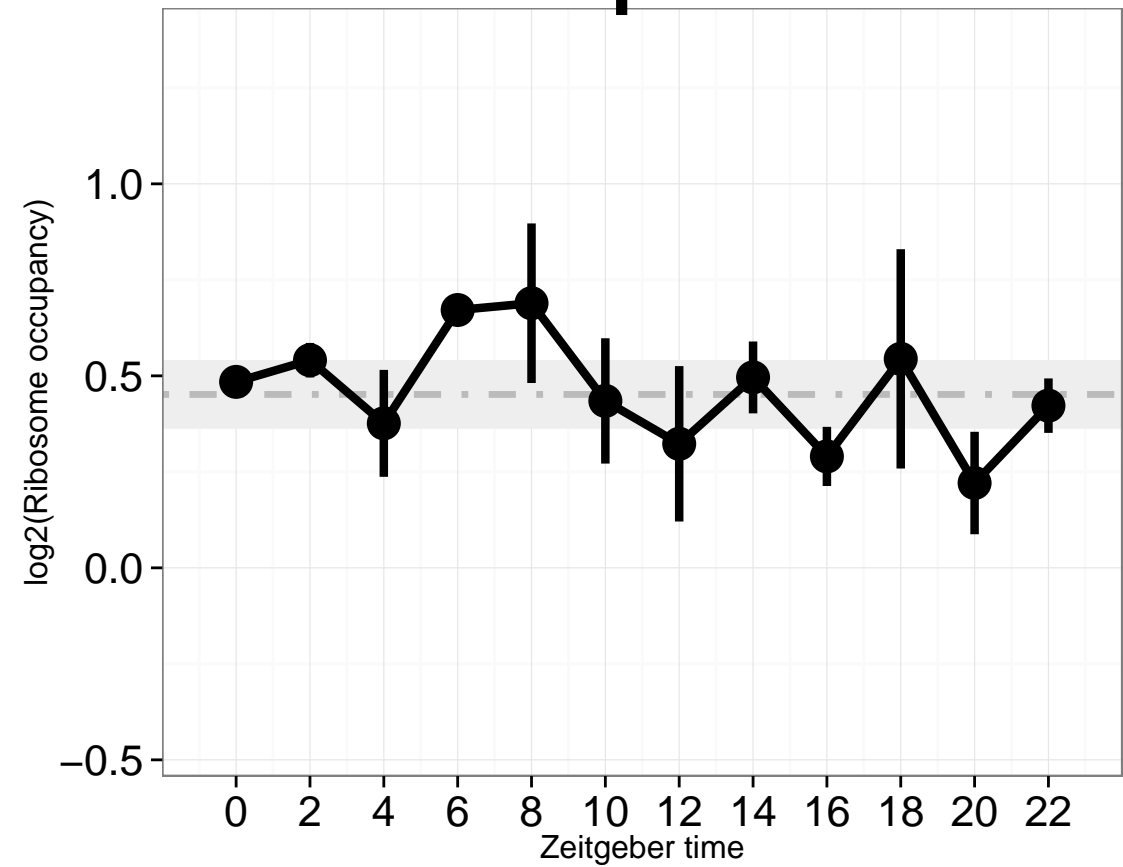

Supplement: Supplementary file 4873 [file 1]

## Meox1

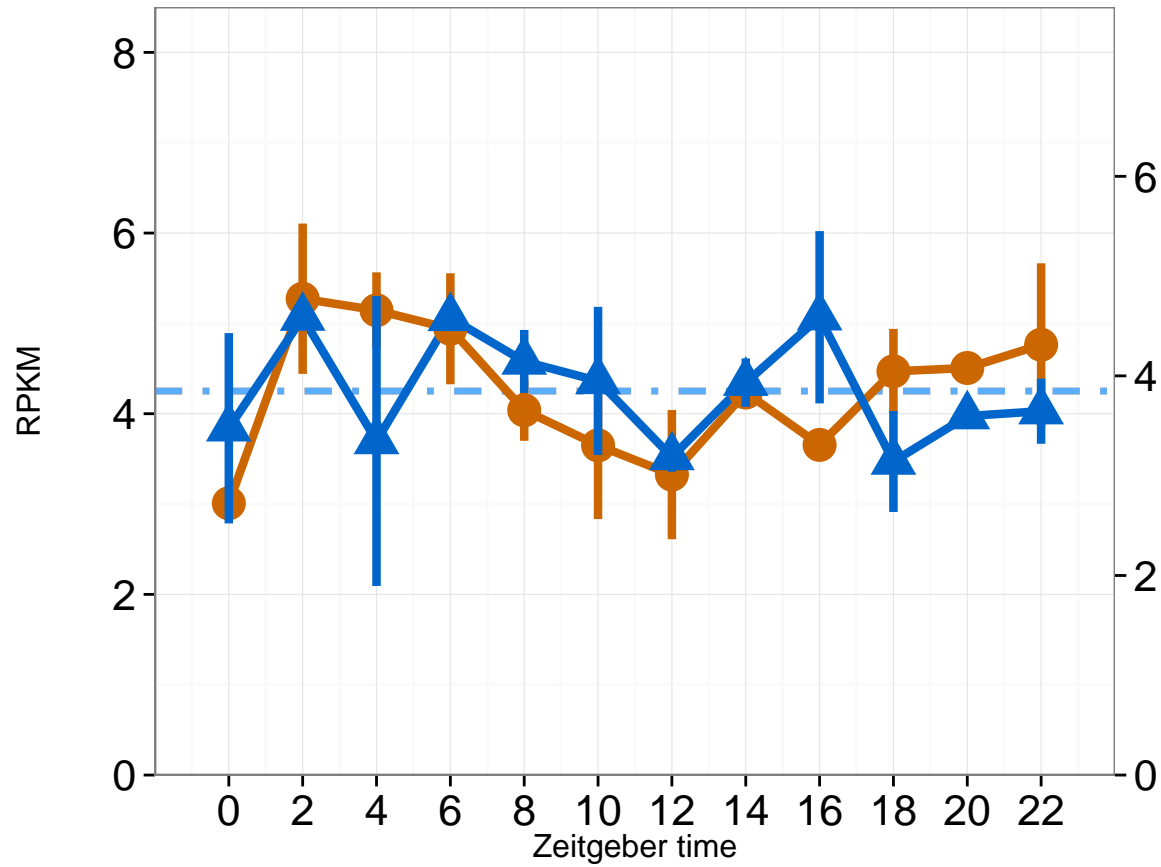

## Meox1

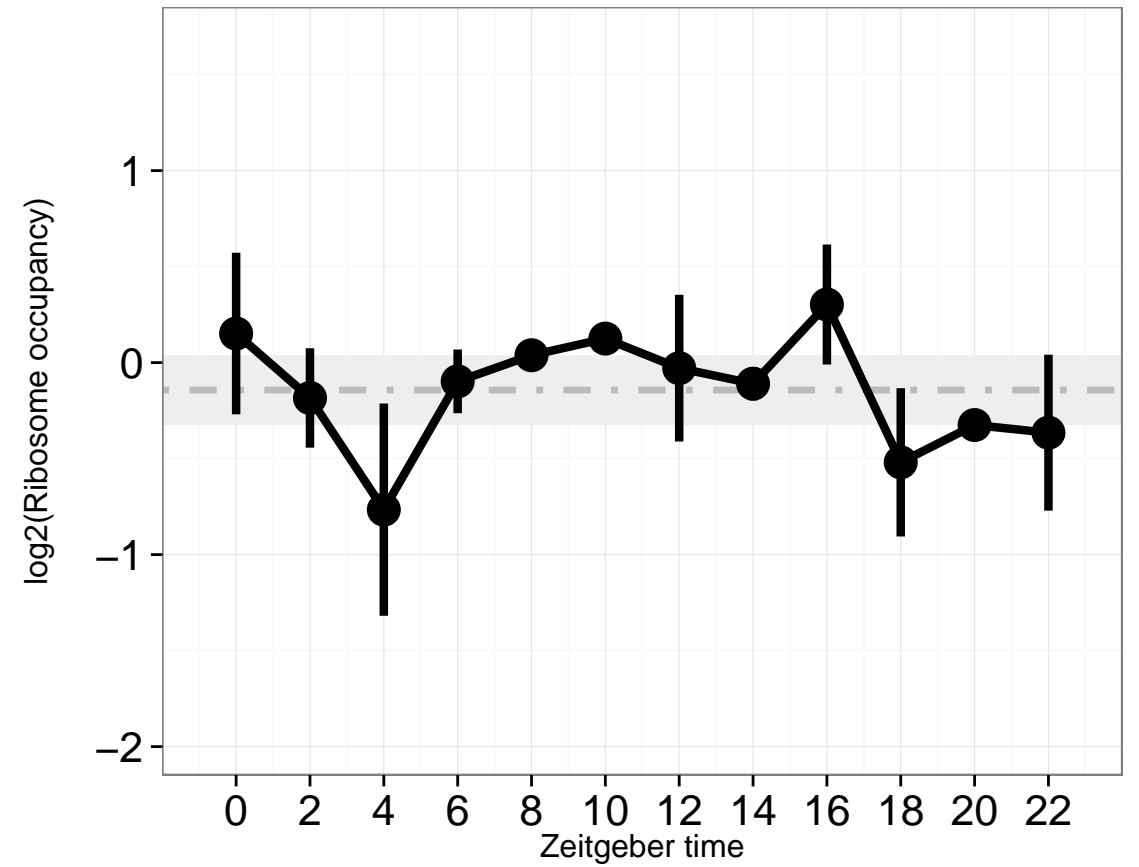

Supplement: Supplementary file 4874 [file 1]

## Mlxip

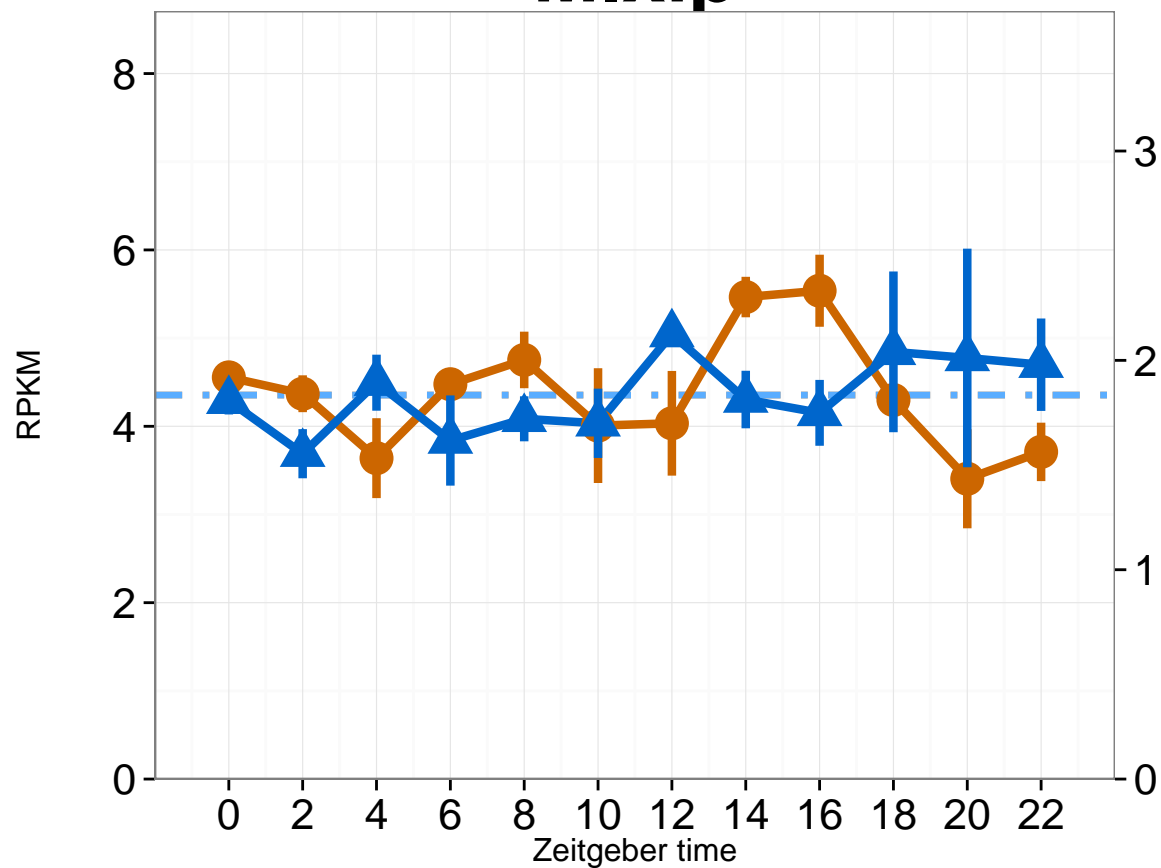

## Mlxip

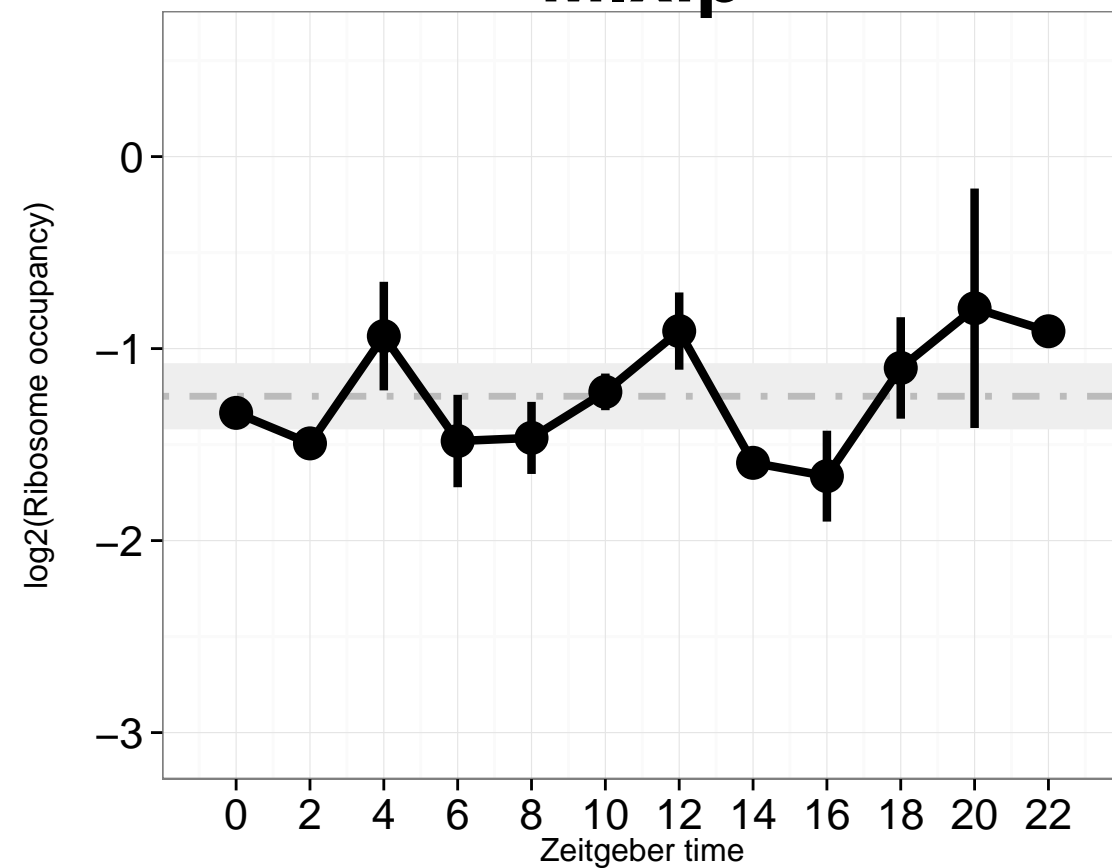

Supplement: Supplementary file 4875 [file 1]

## Orc6

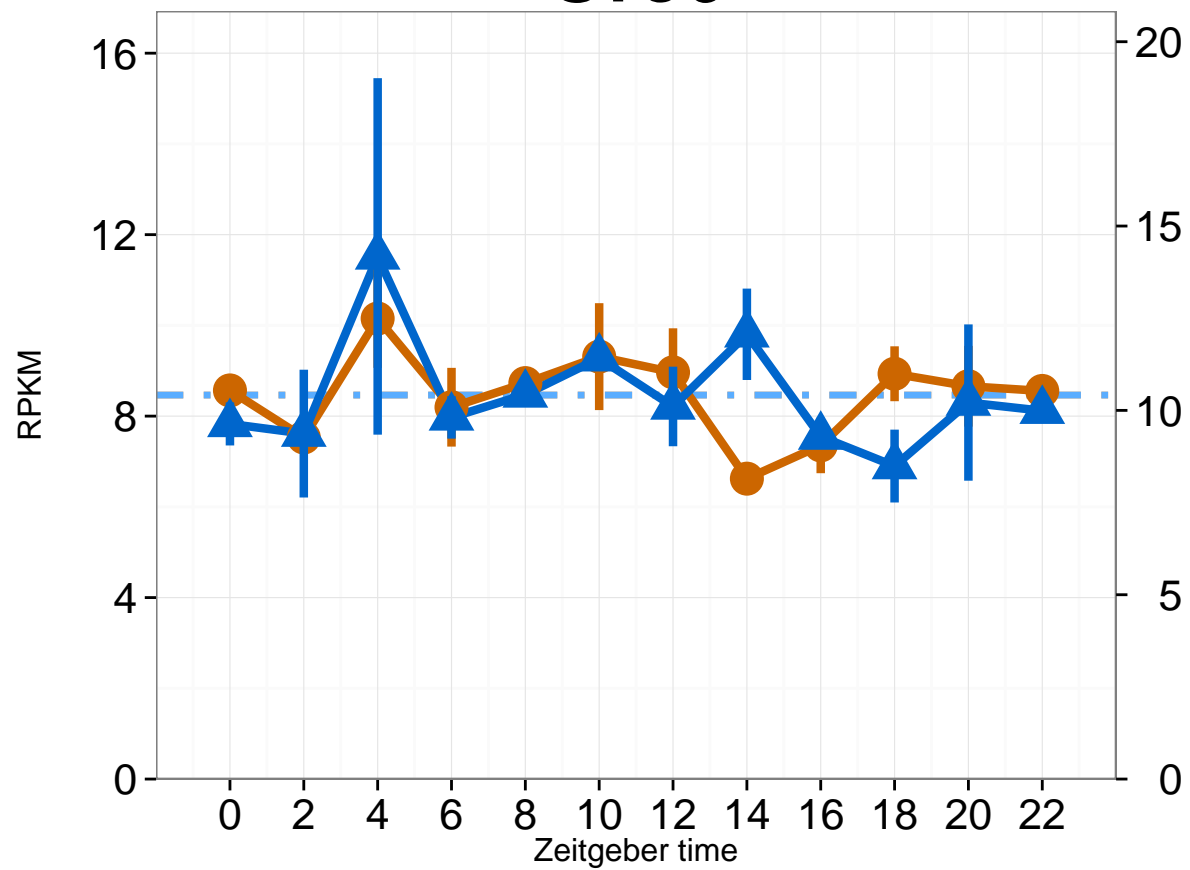

## Orc6

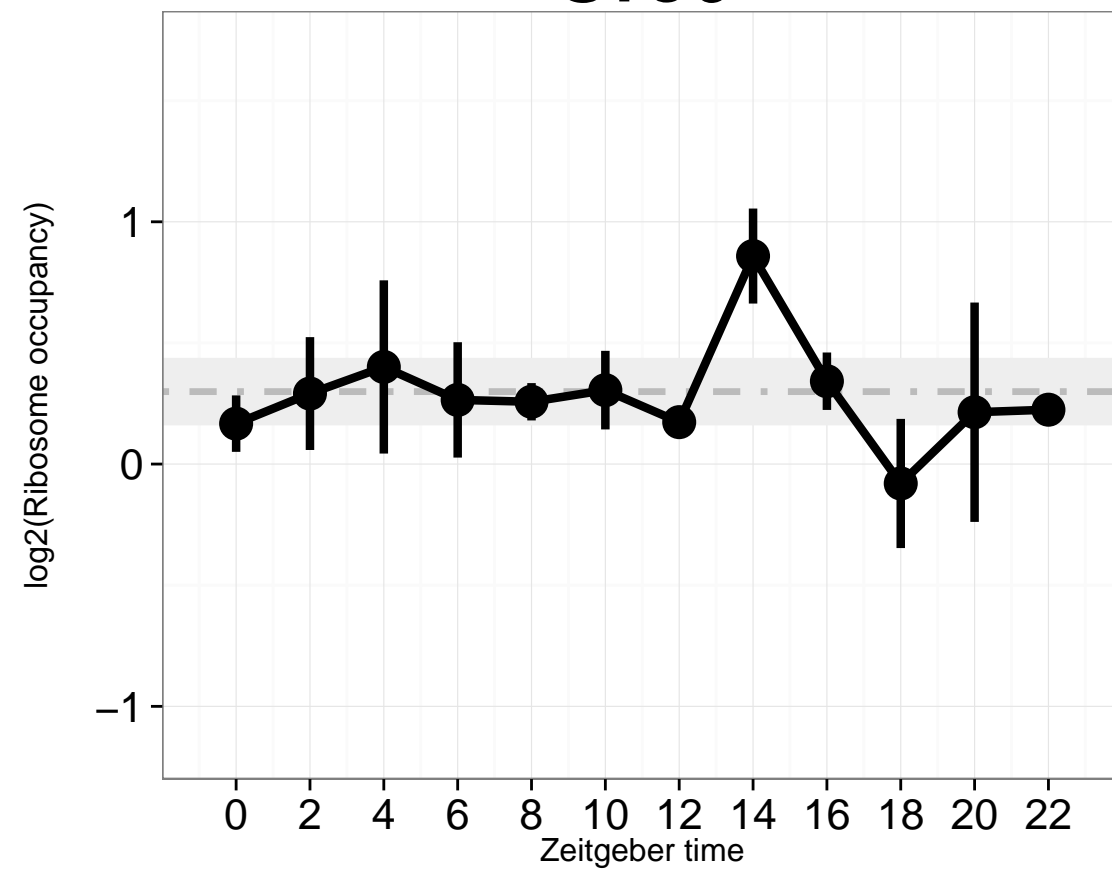

Supplement: Supplementary file 4876 [file 1]

## Bcl9l

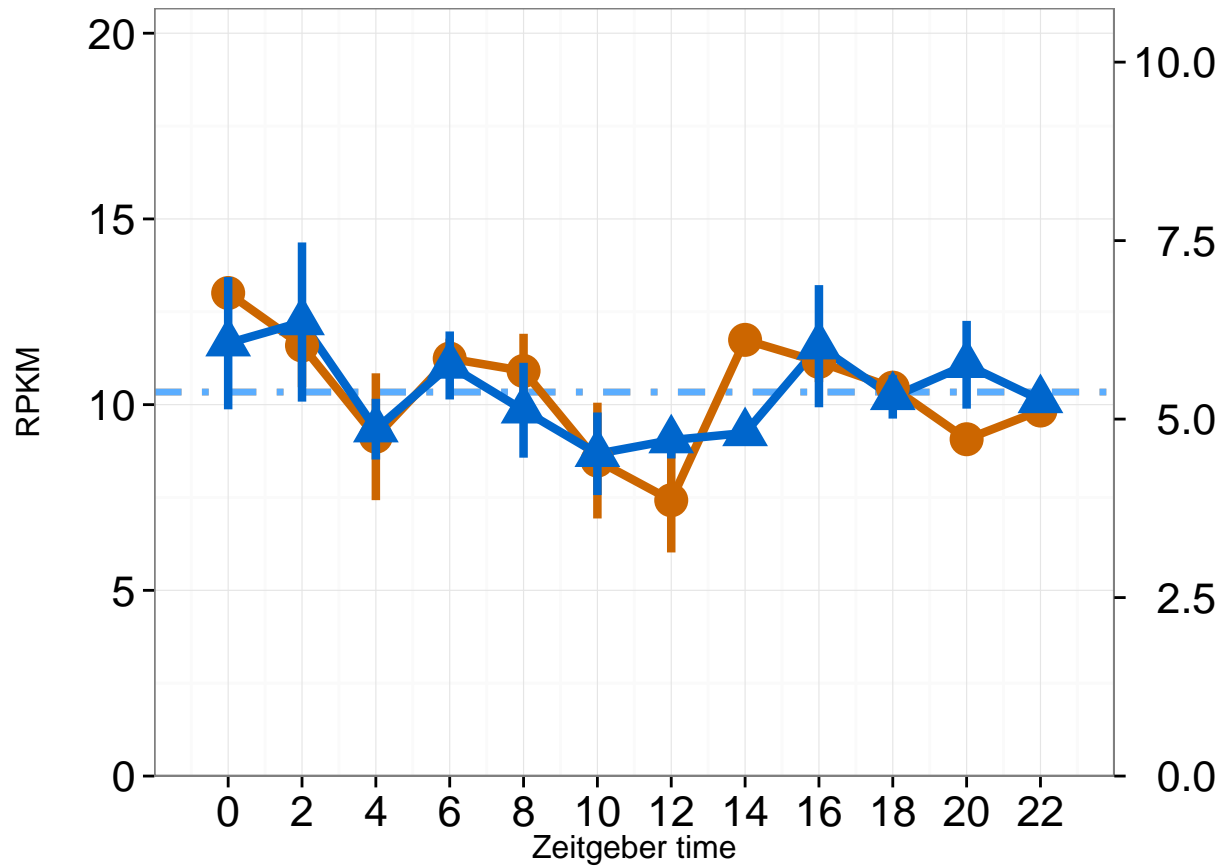

## Bcl9l

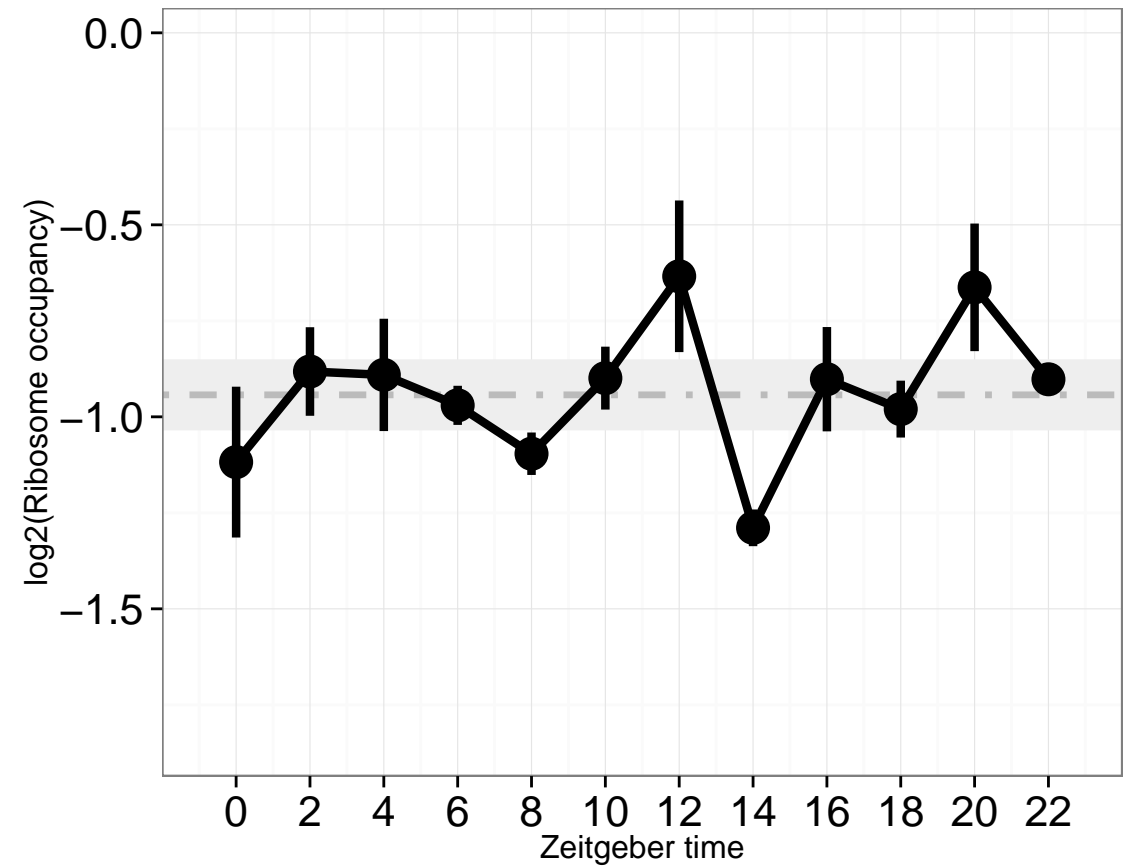

Supplement: Supplementary file 4877 [file 1]

# Nudt6

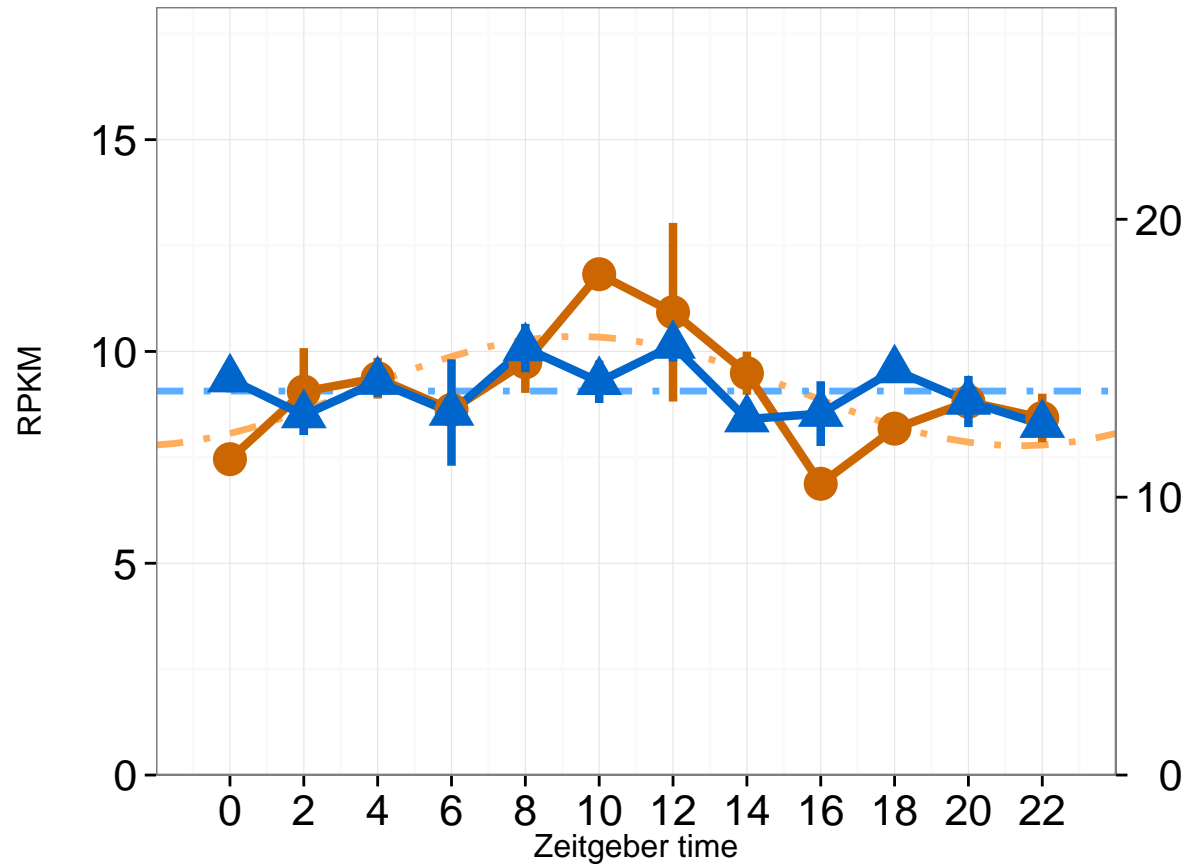

# Nudt6

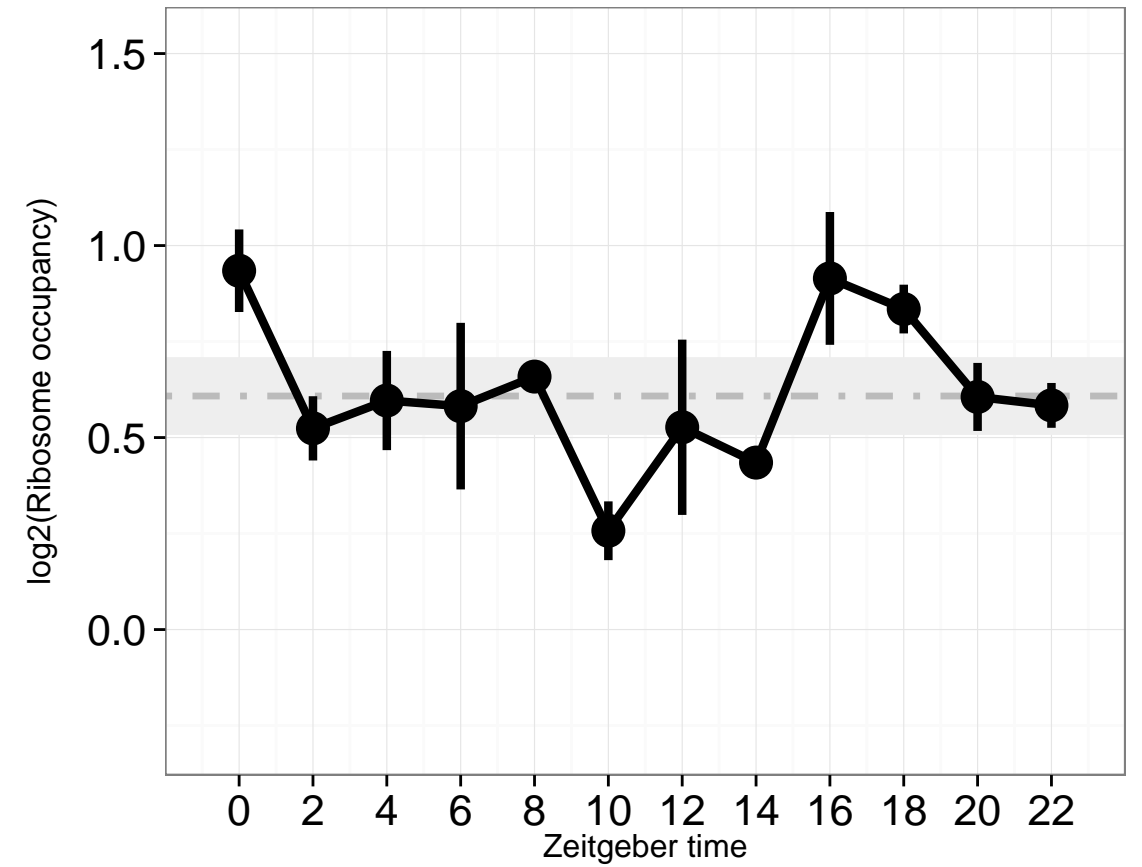

Supplement: Supplementary file 4878 [file 1]

# Whrn

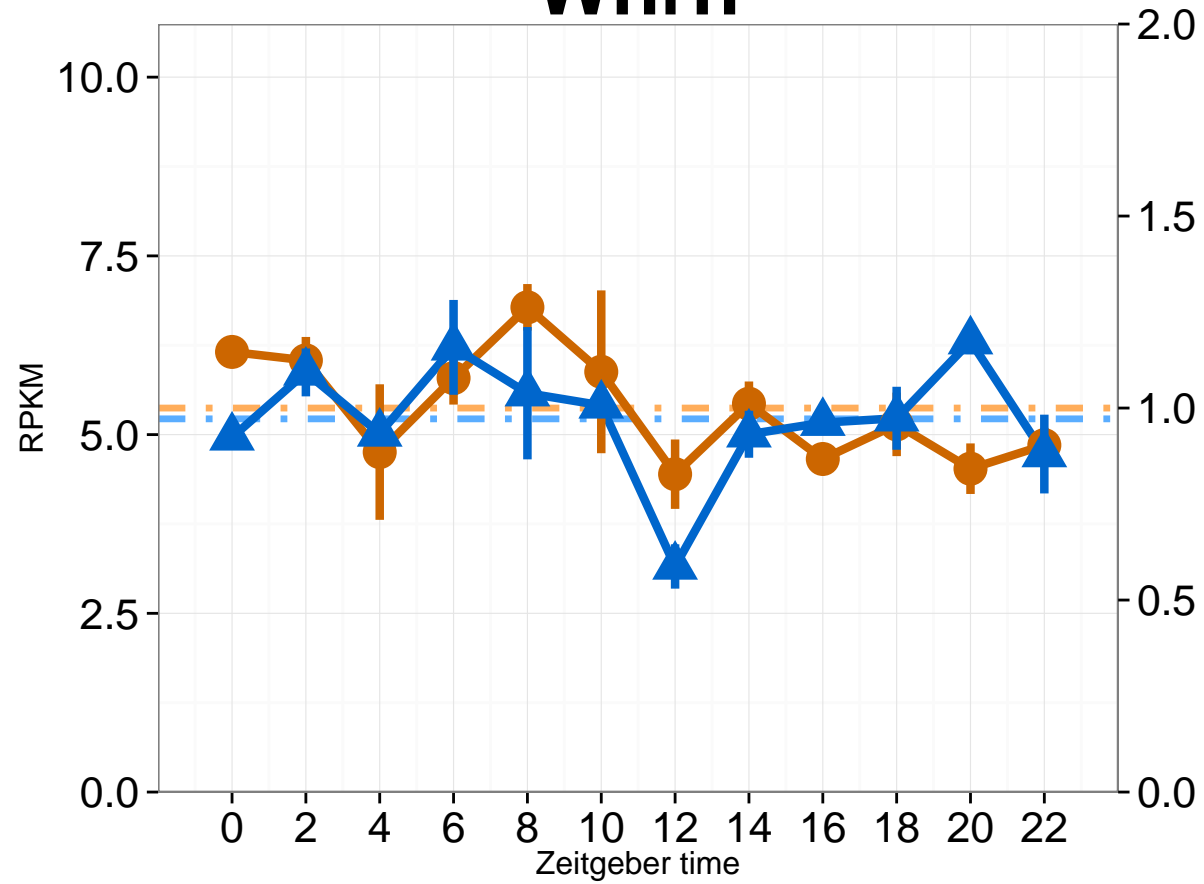

# Whrn

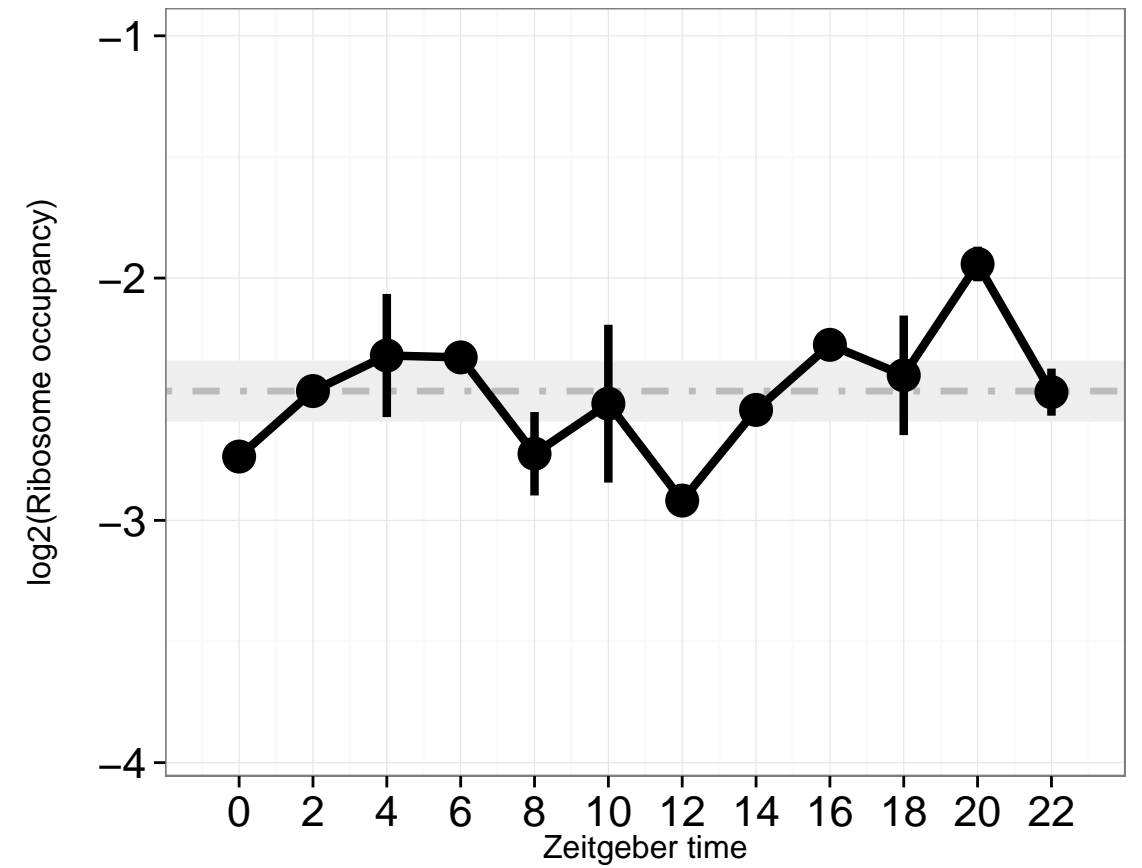

Supplement: Supplementary file 4879 [file 1]

## Coch

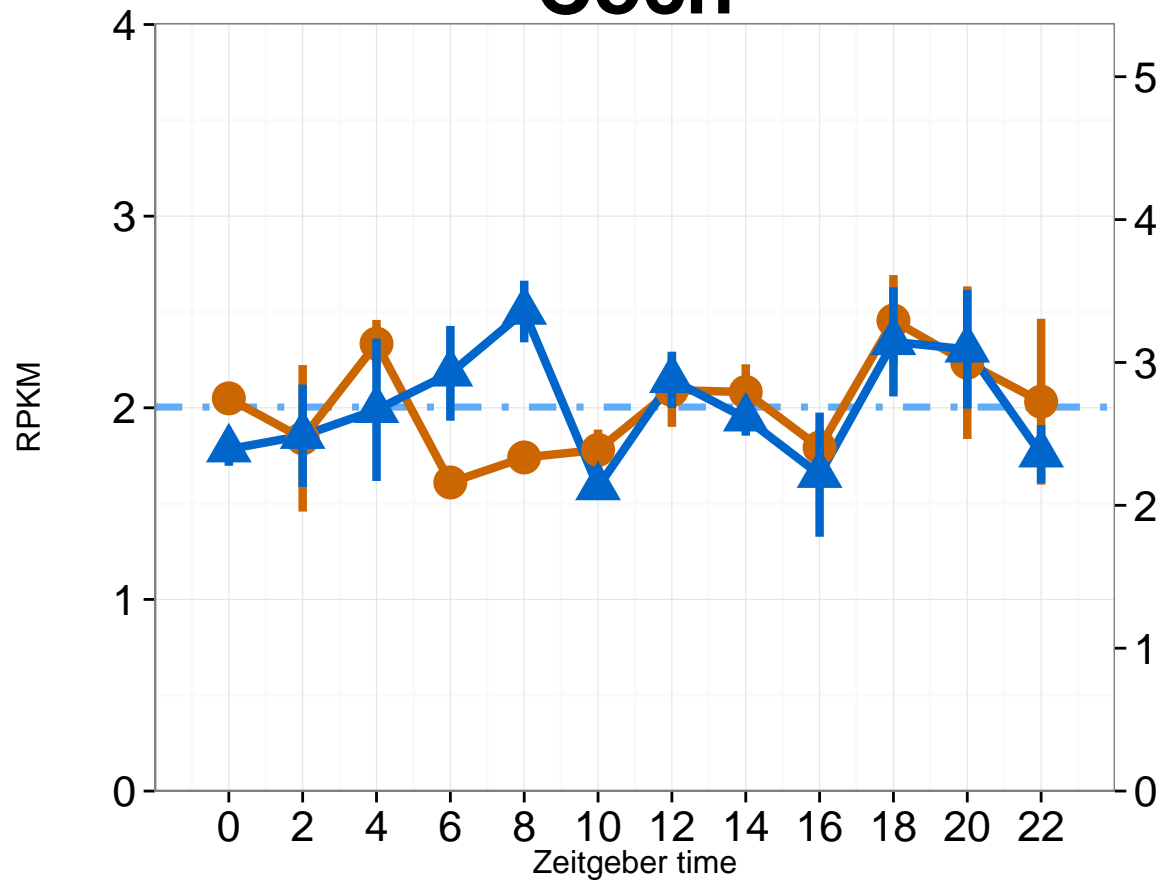

## Coch

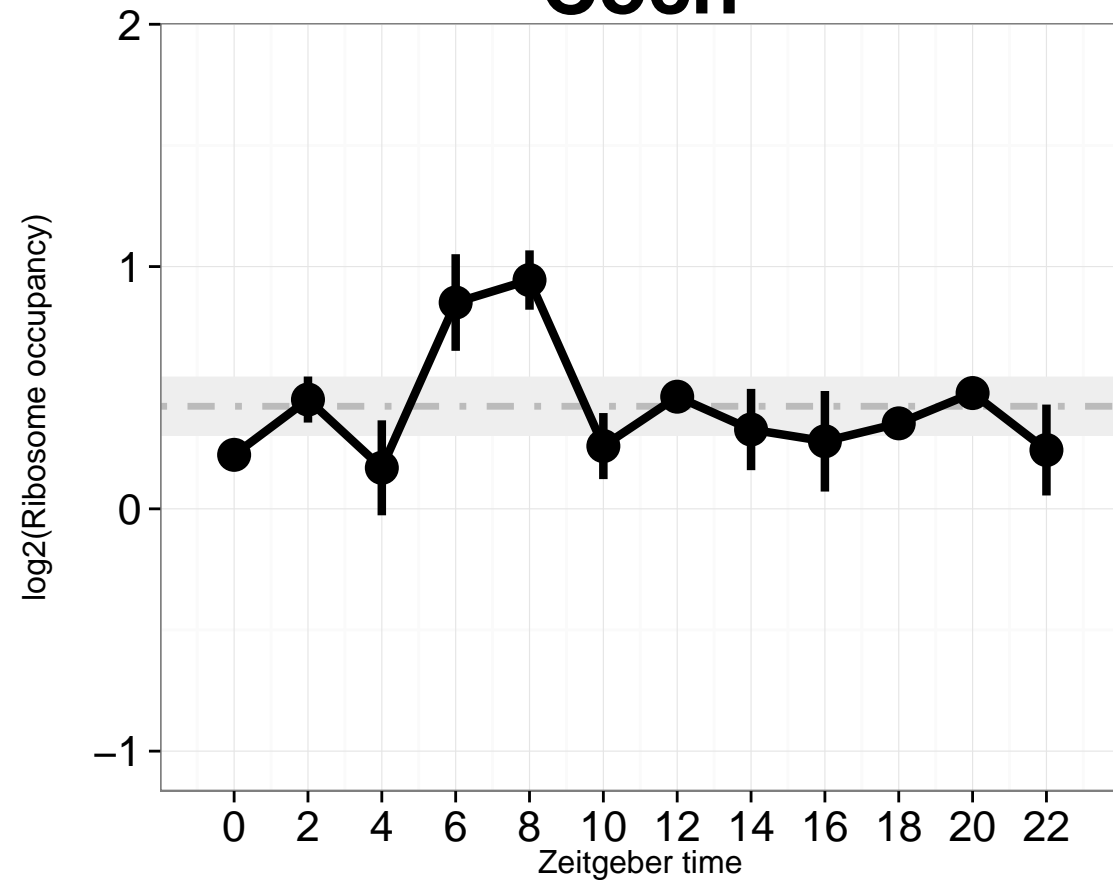

Supplement: Supplementary file 4880 [file 1]

# Tor4a

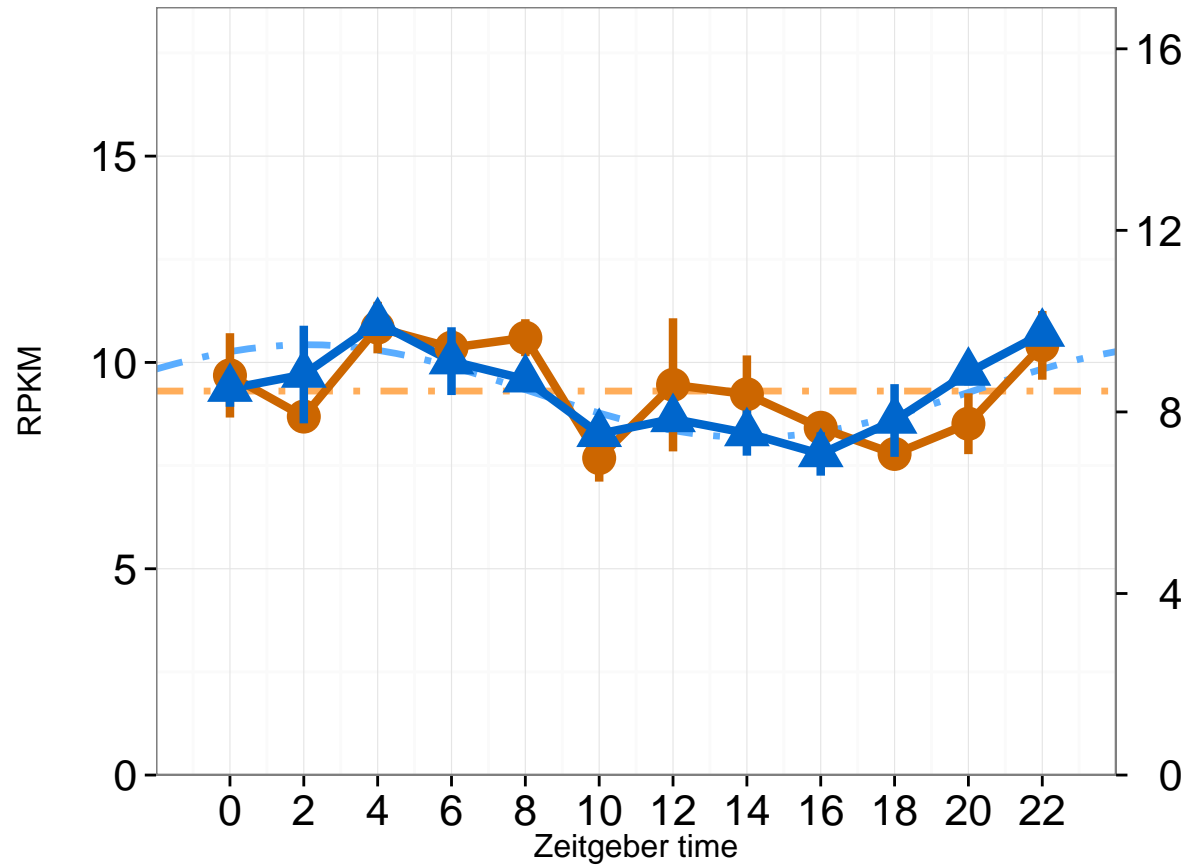

# Tor4a

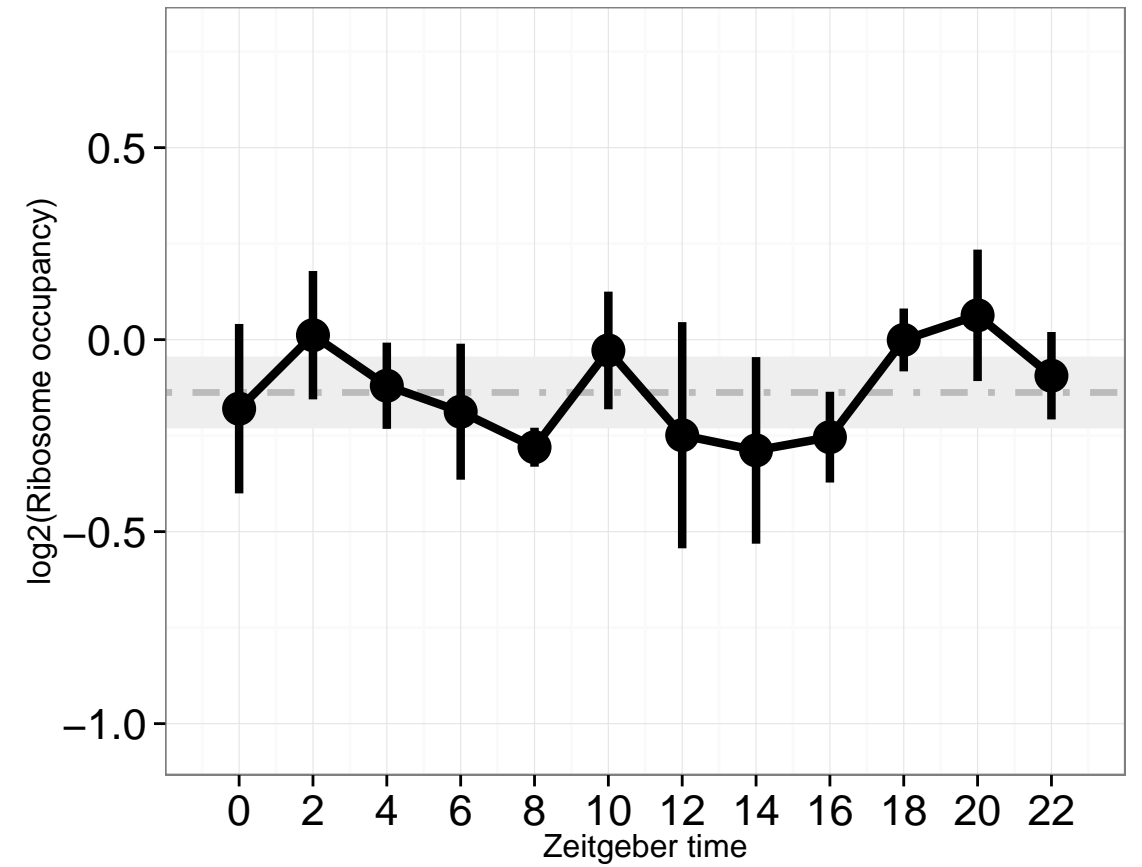

Supplement: Supplementary file 4881 [file 1]

# Fbxl21

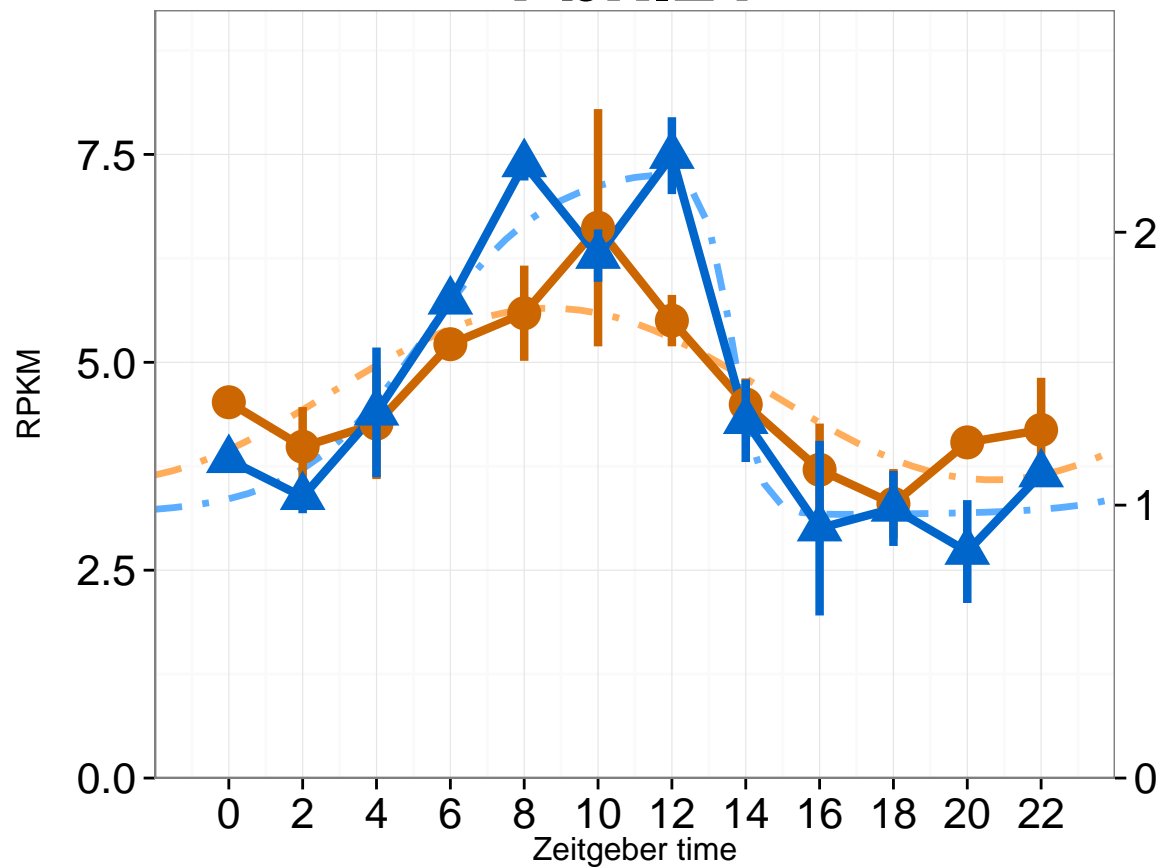

# Fbxl21

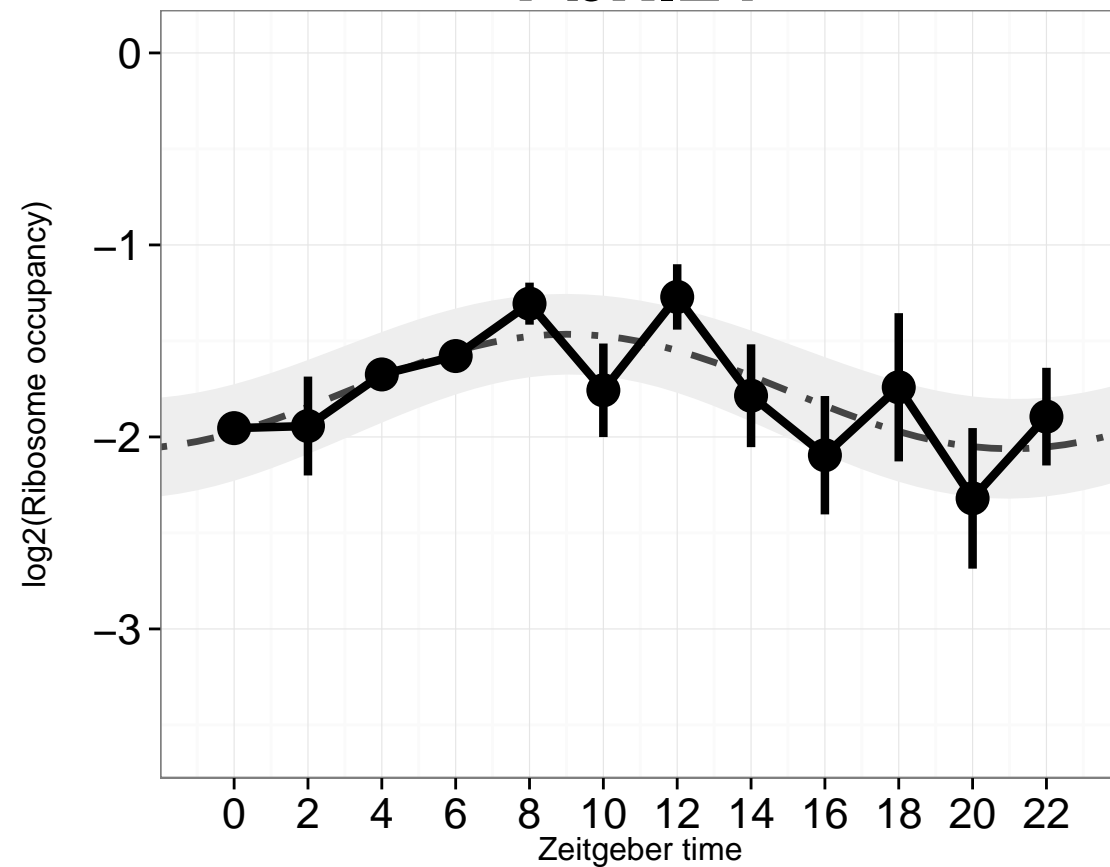

Supplement: Supplementary file 4882 [file 1]

## Sqrdl

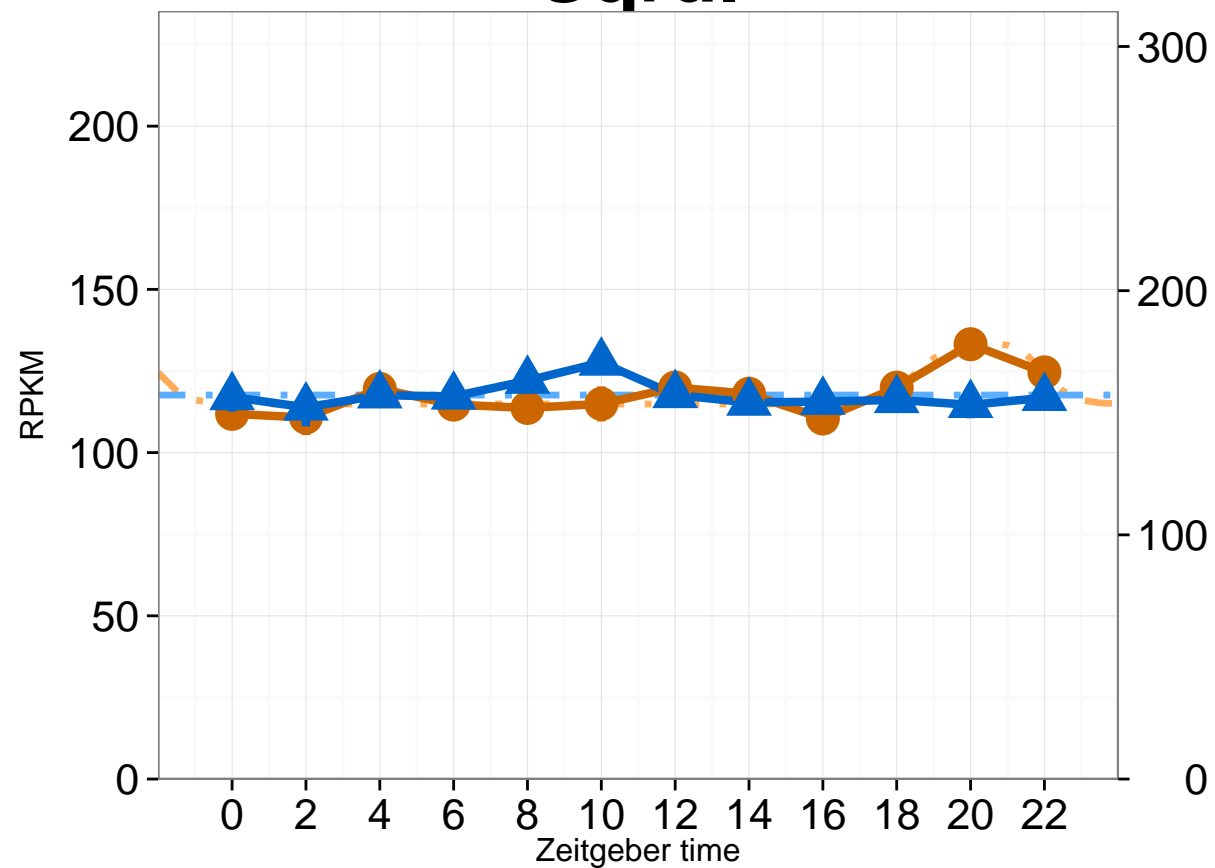

## Sqrdl

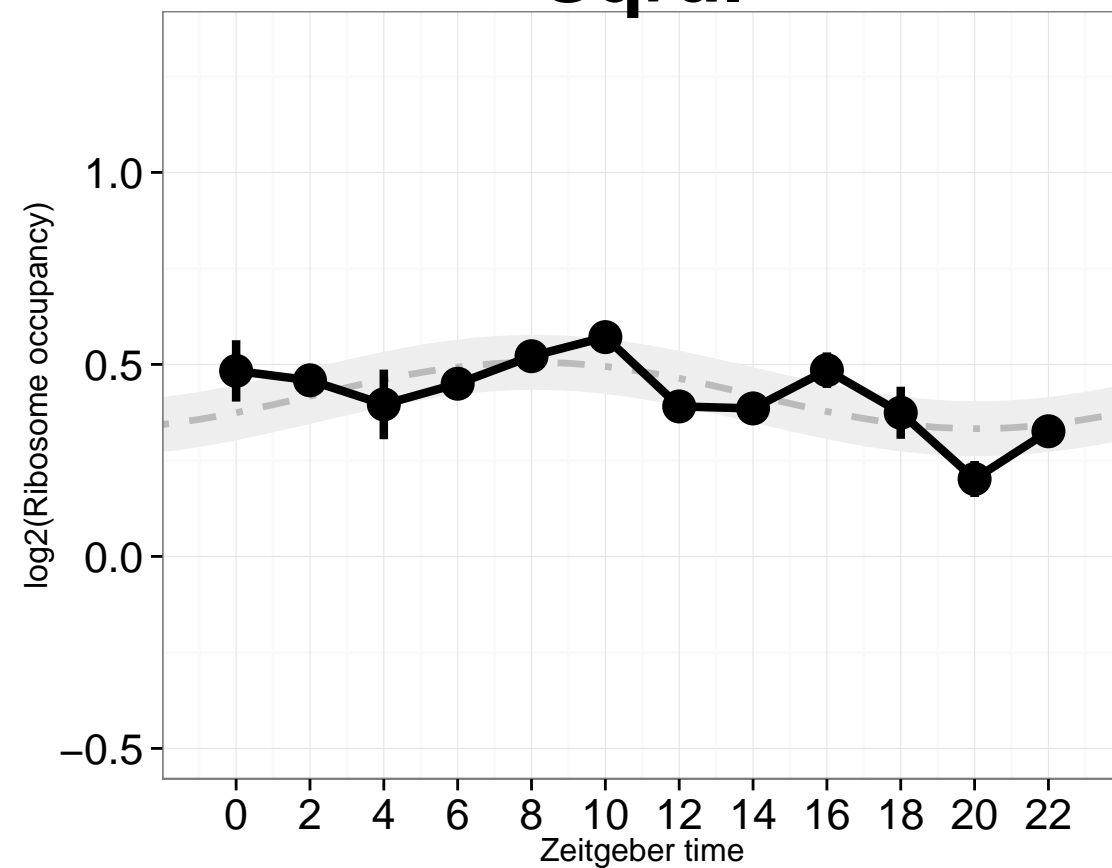

Supplement: Supplementary file 4883 [file 1]

## Zdhhc5

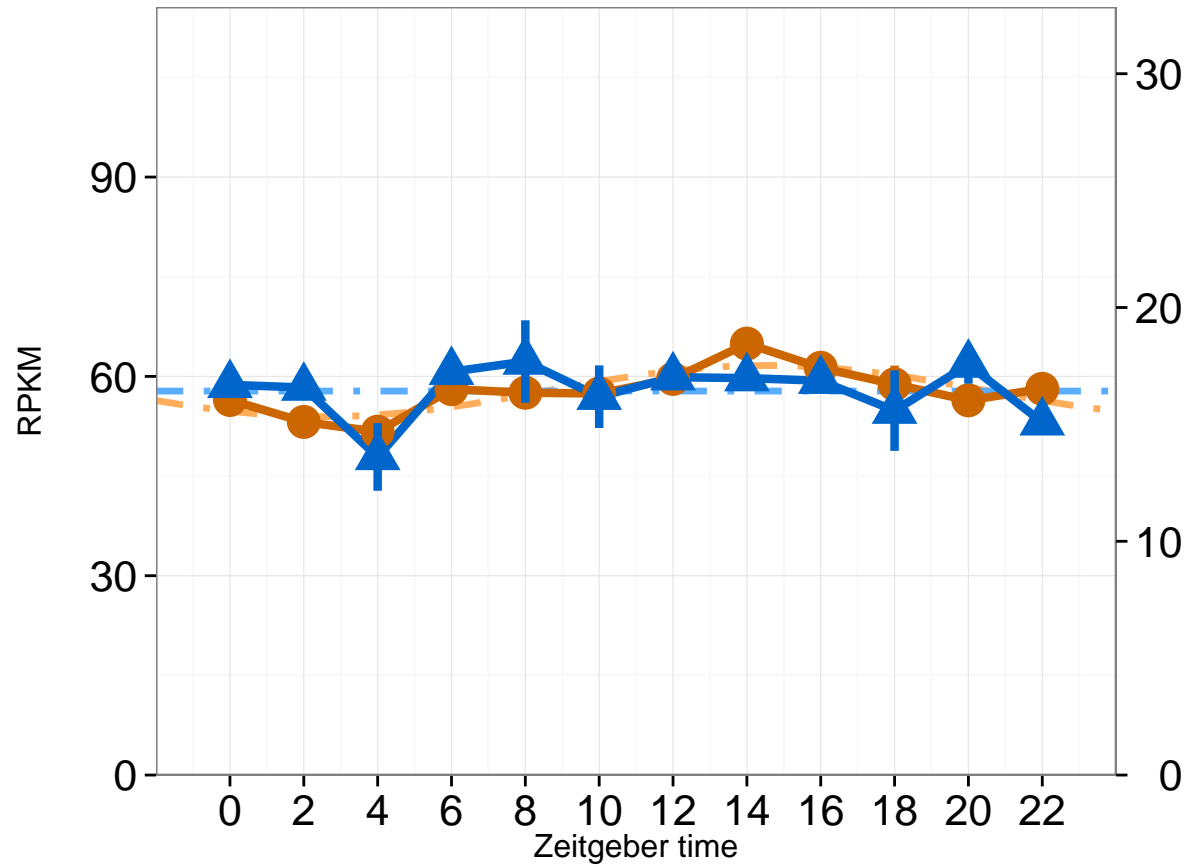

## Zdhhc5

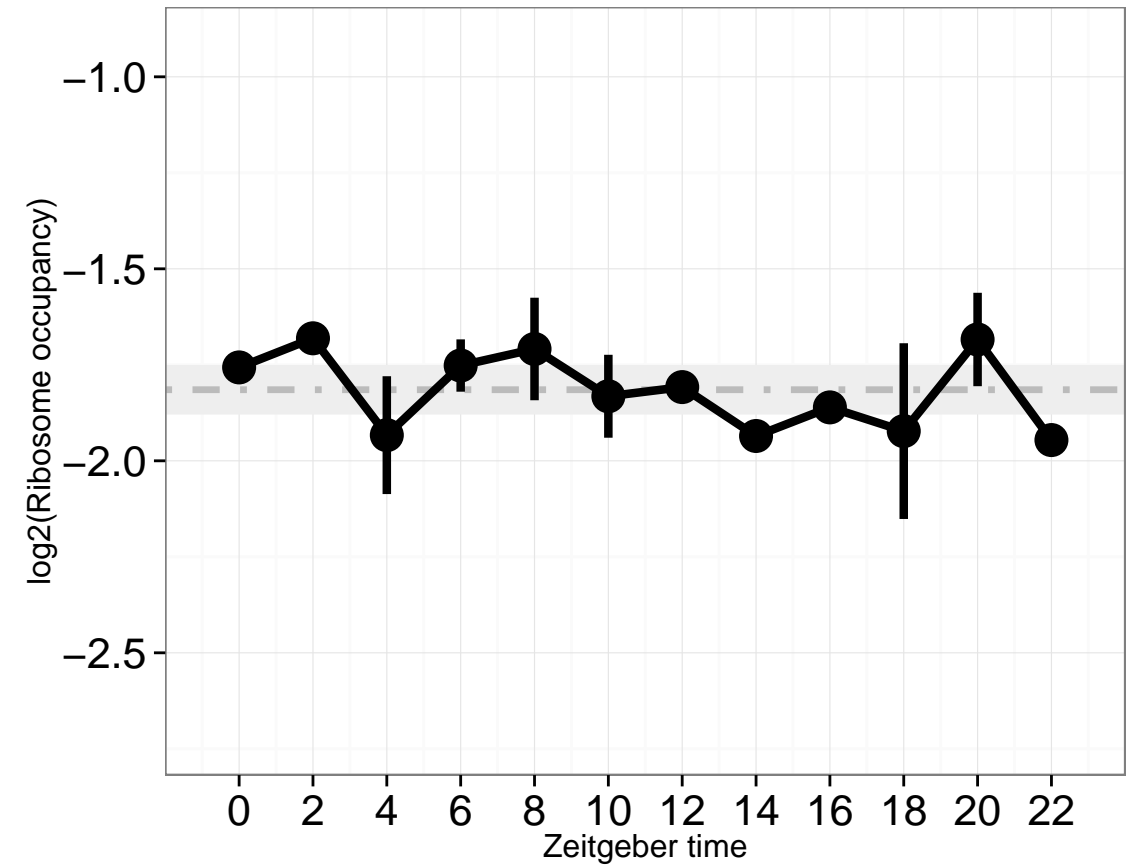

Supplement: Supplementary file 4884 [file 1]

# Cdadc1

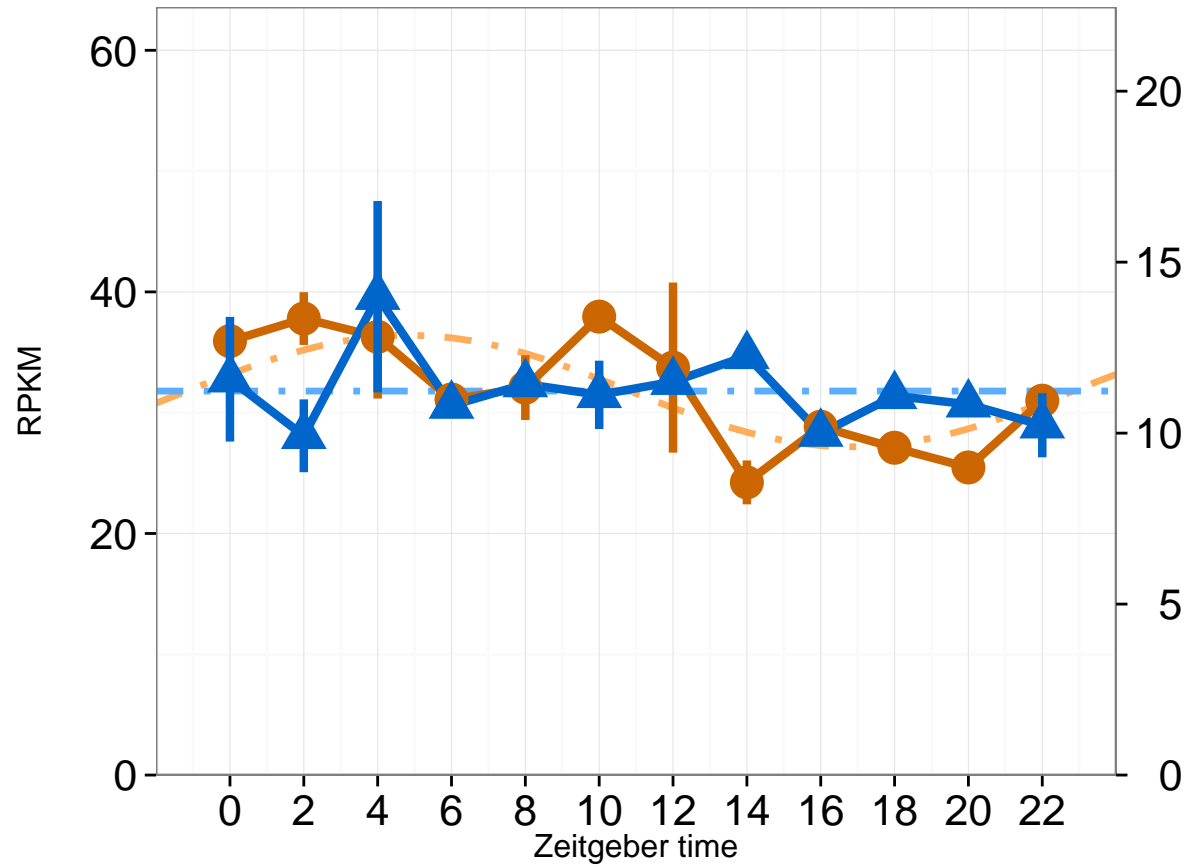

# Cdadc1

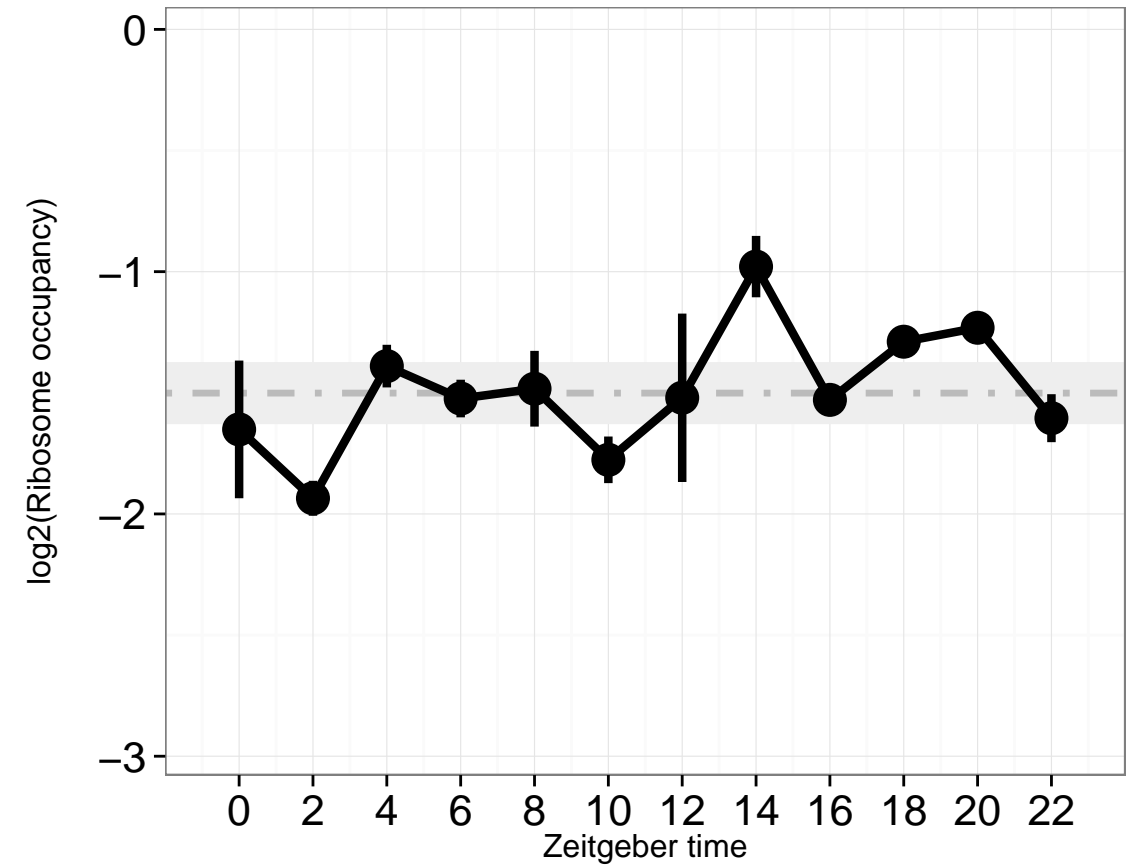

Supplement: Supplementary file 4885 [file 1]

## Kcnip3

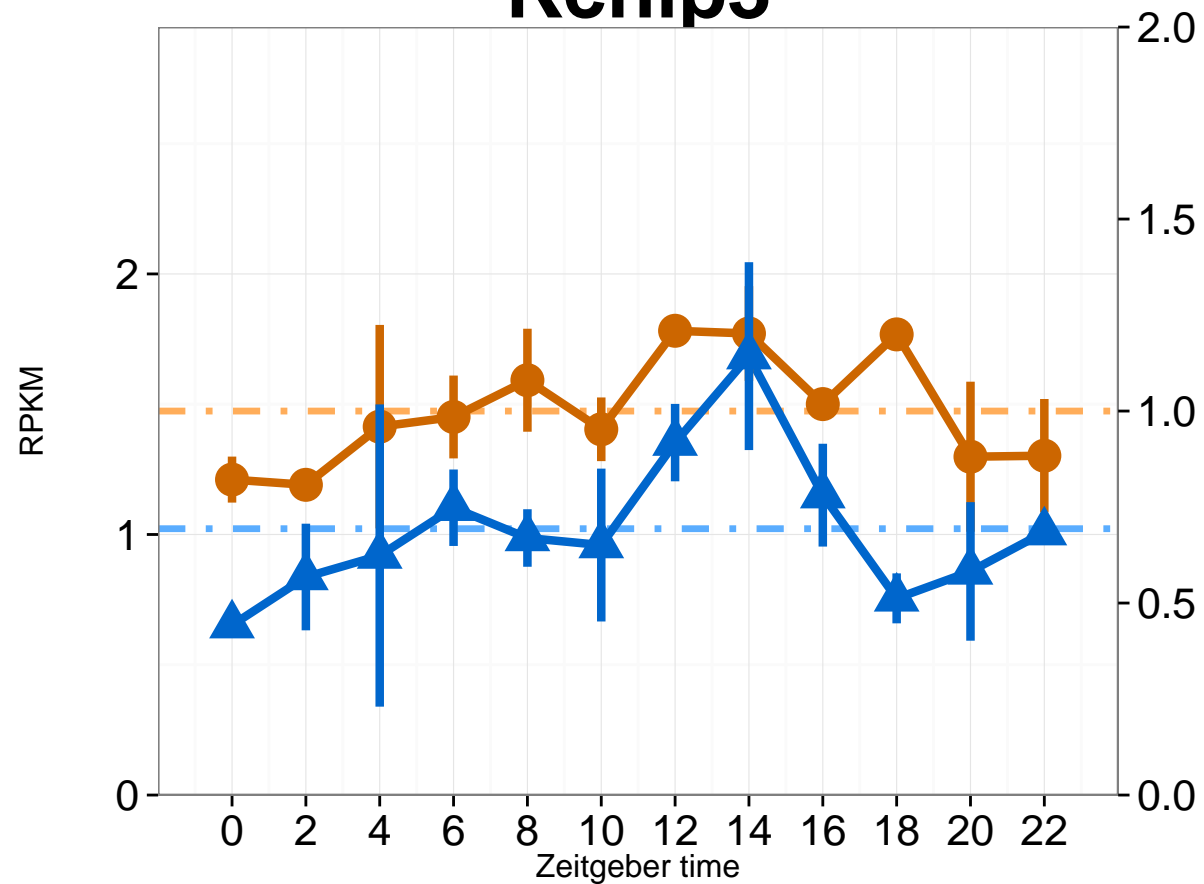

## Kcnip3

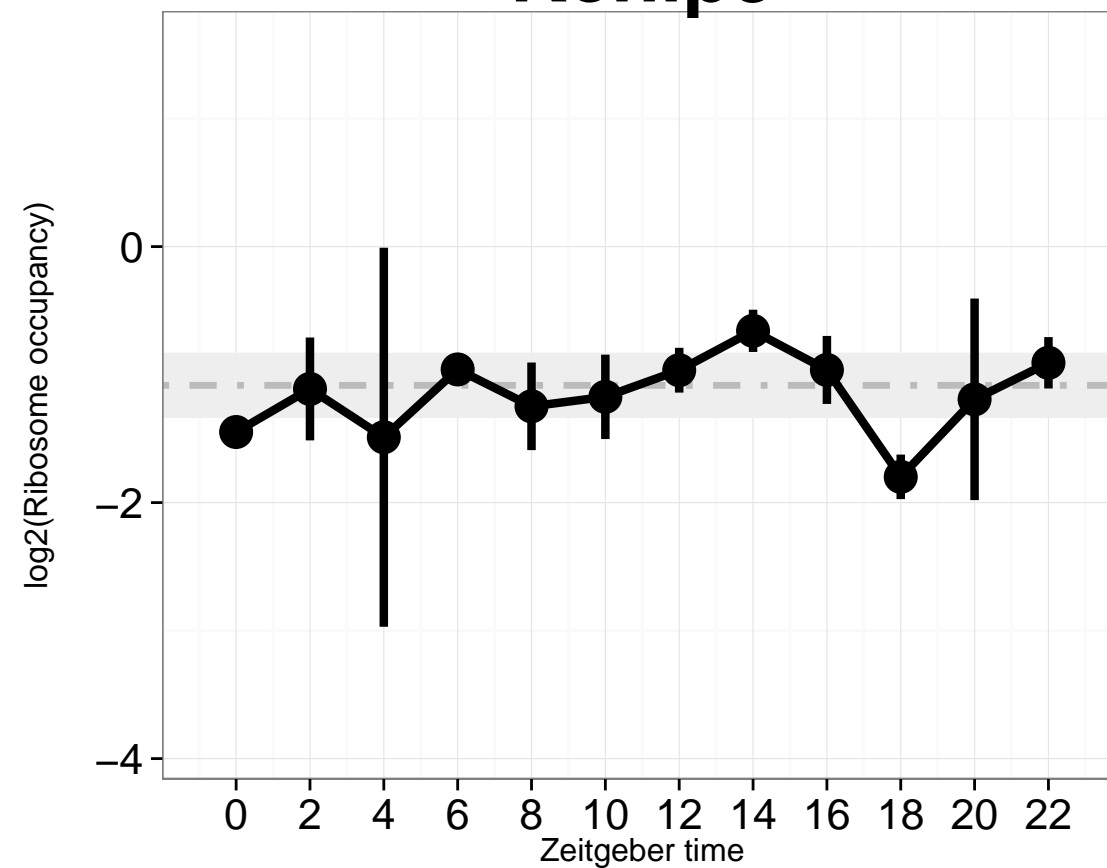

Supplement: Supplementary file 4886 [file 1]

# Tpt1

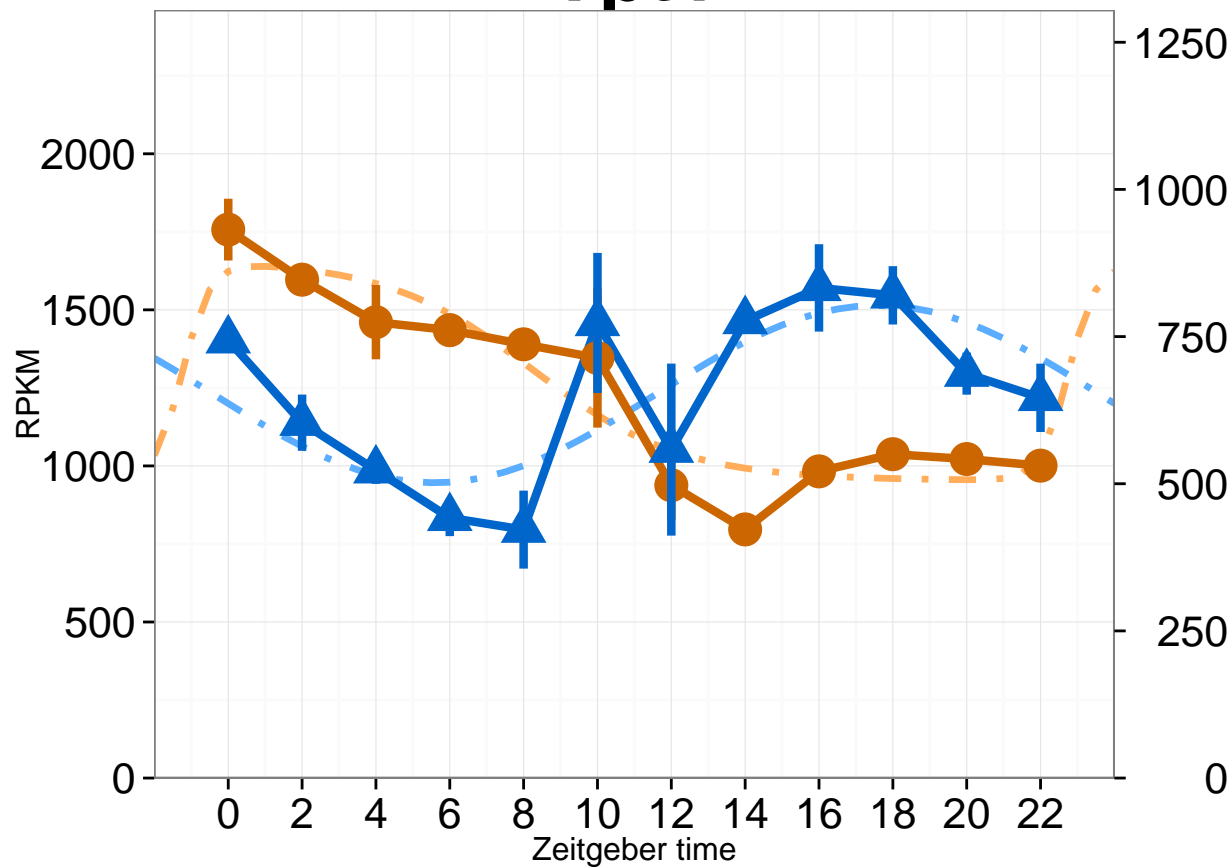

# Tpt1

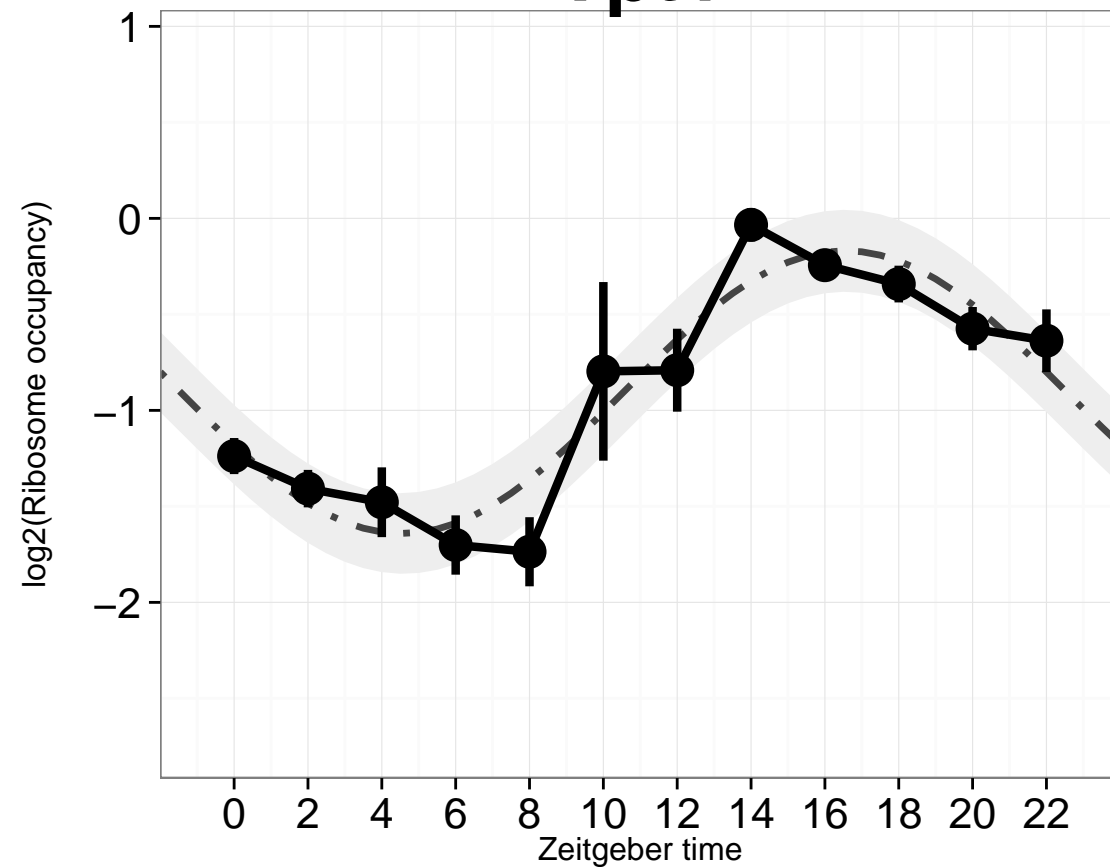

Supplement: Supplementary file 4887 [file 1]

## Dcaf7

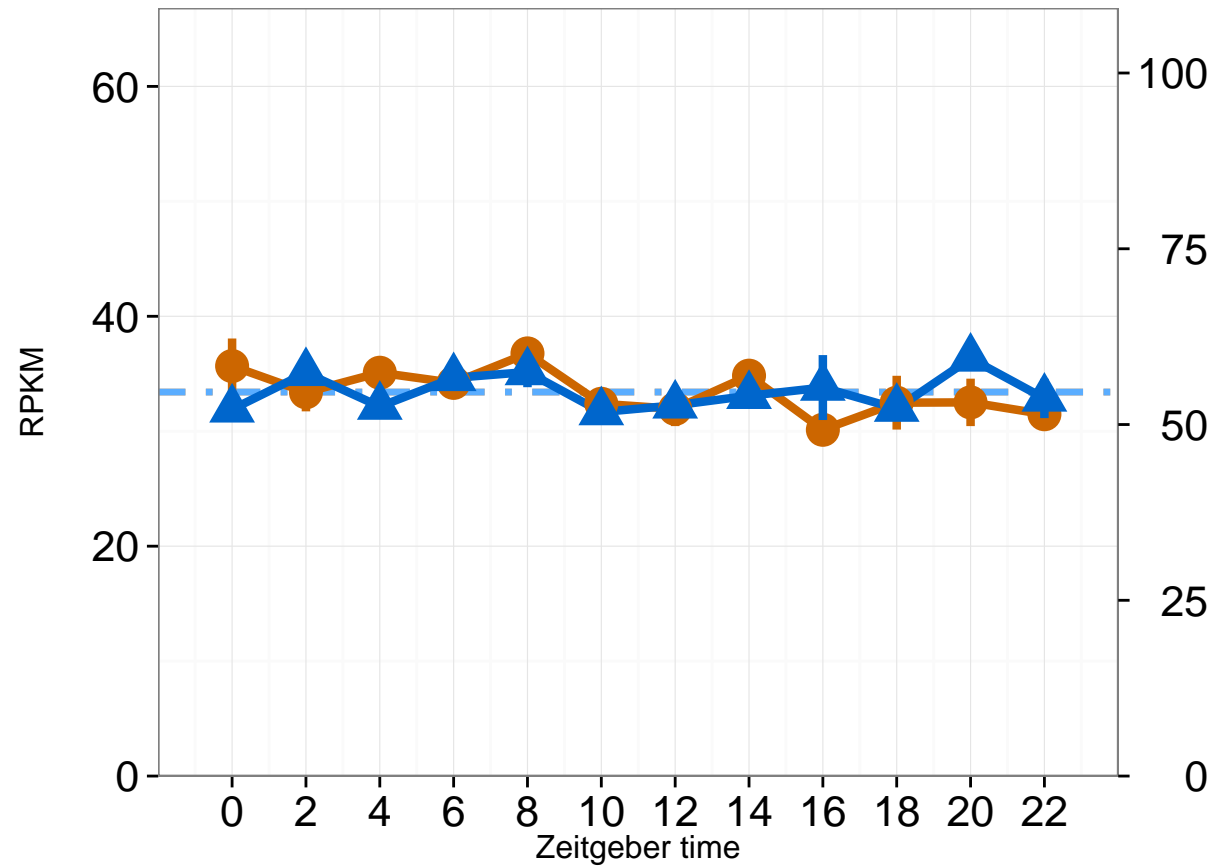

## Dcaf7

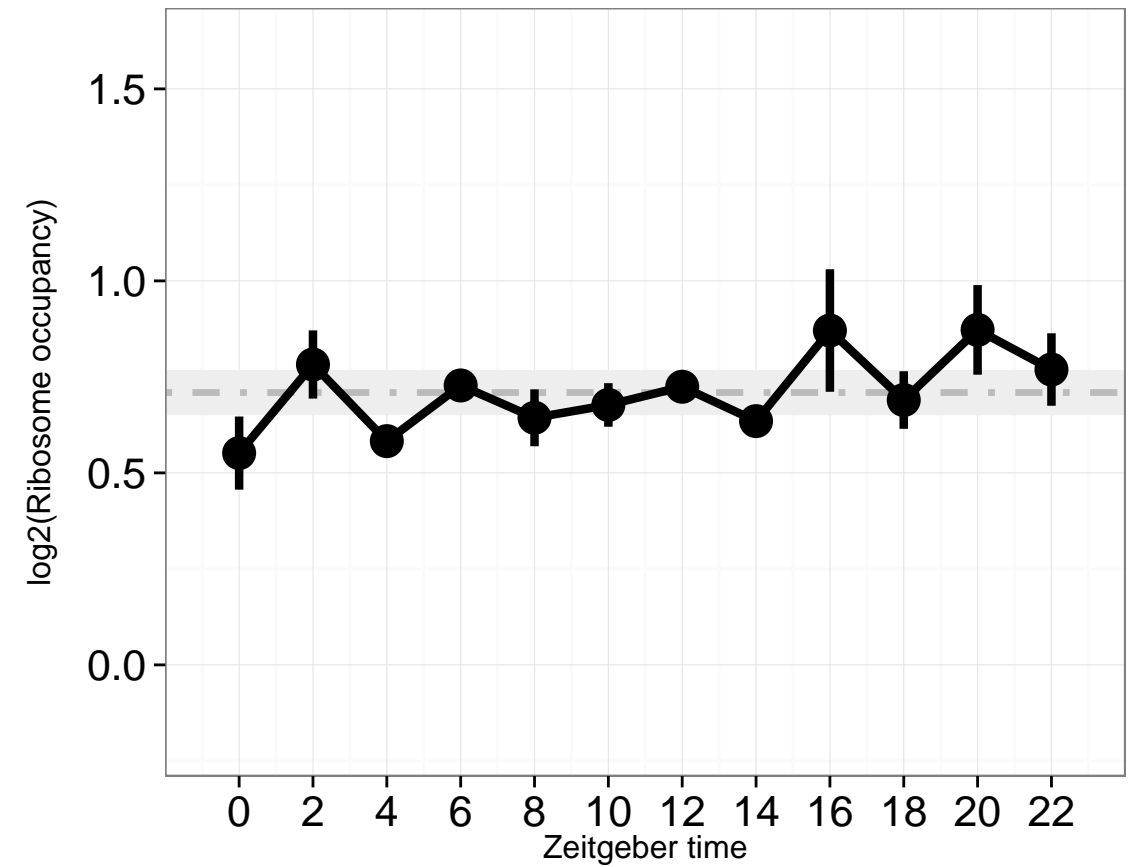

Supplement: Supplementary file 4888 [file 1]

## Sdc1

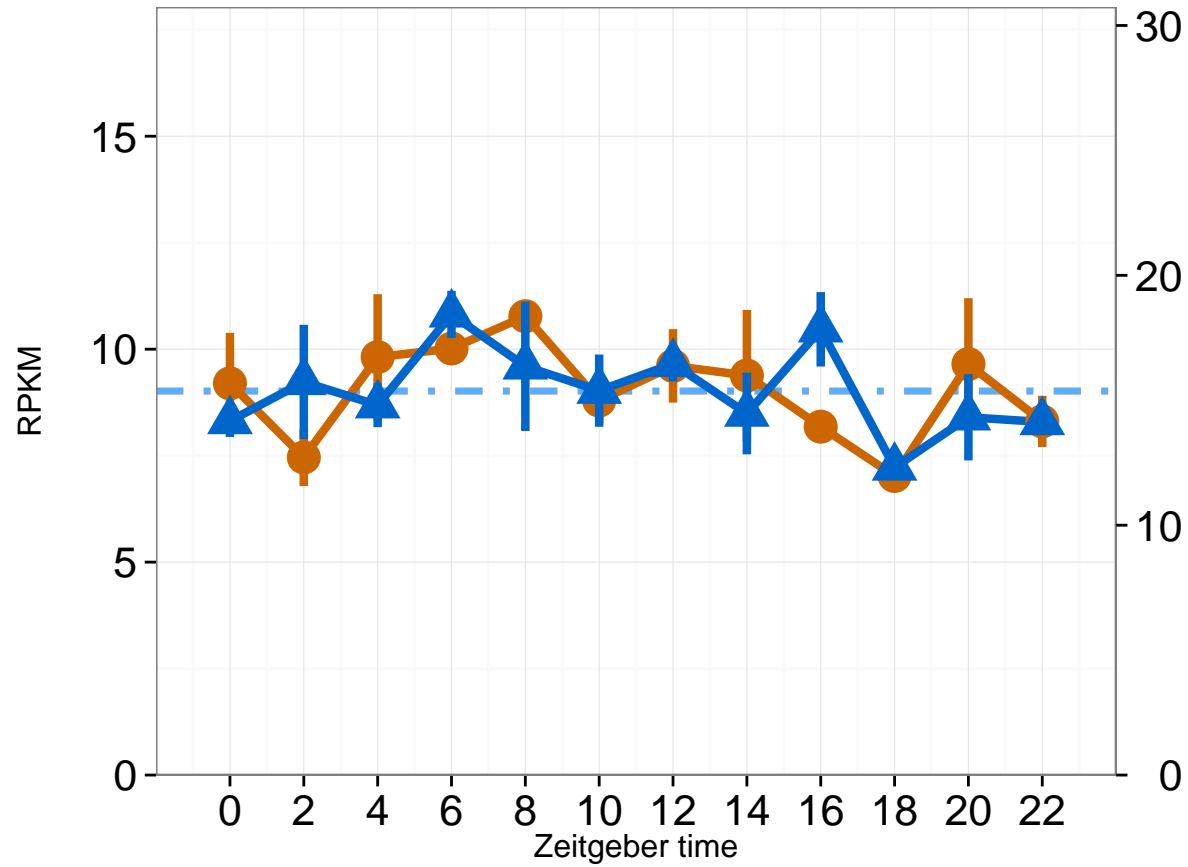

## Sdc1

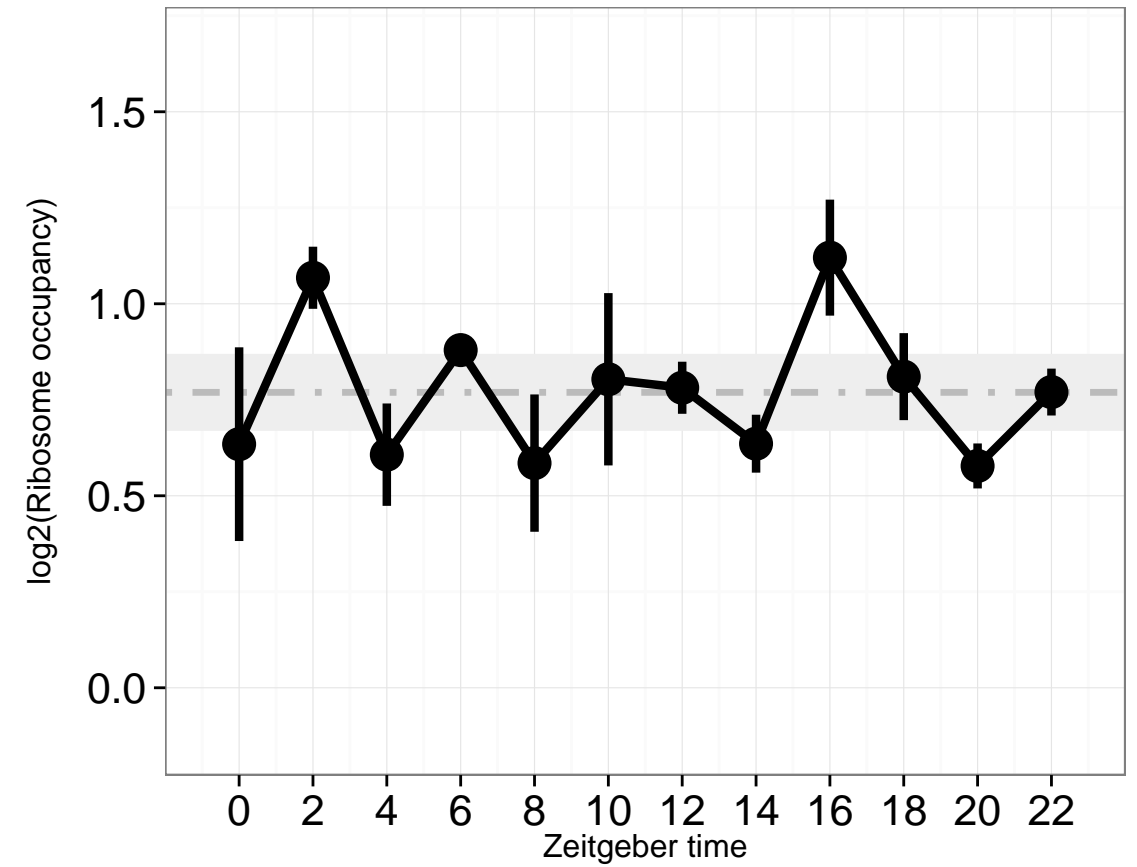

Supplement: Supplementary file 4889 [file 1]

# Slamf9

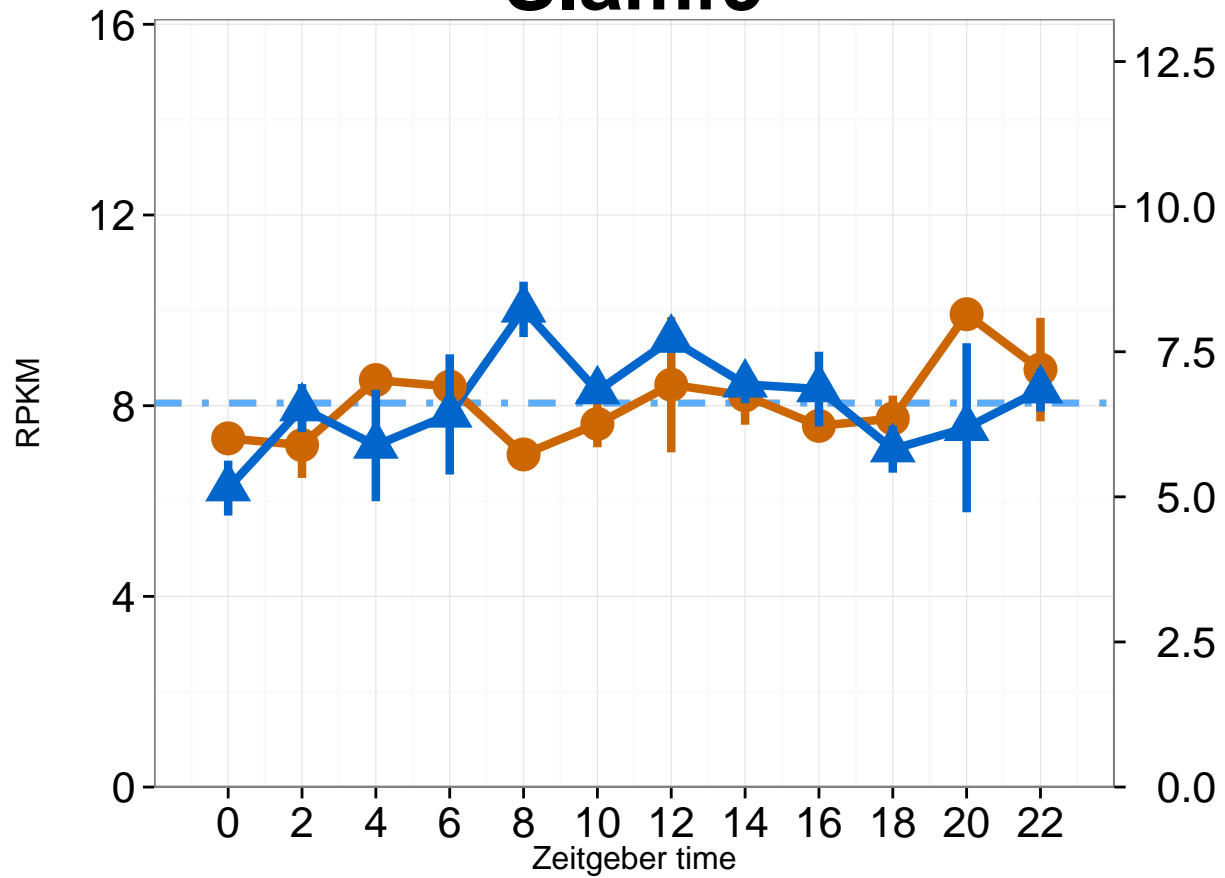

# Slamf9

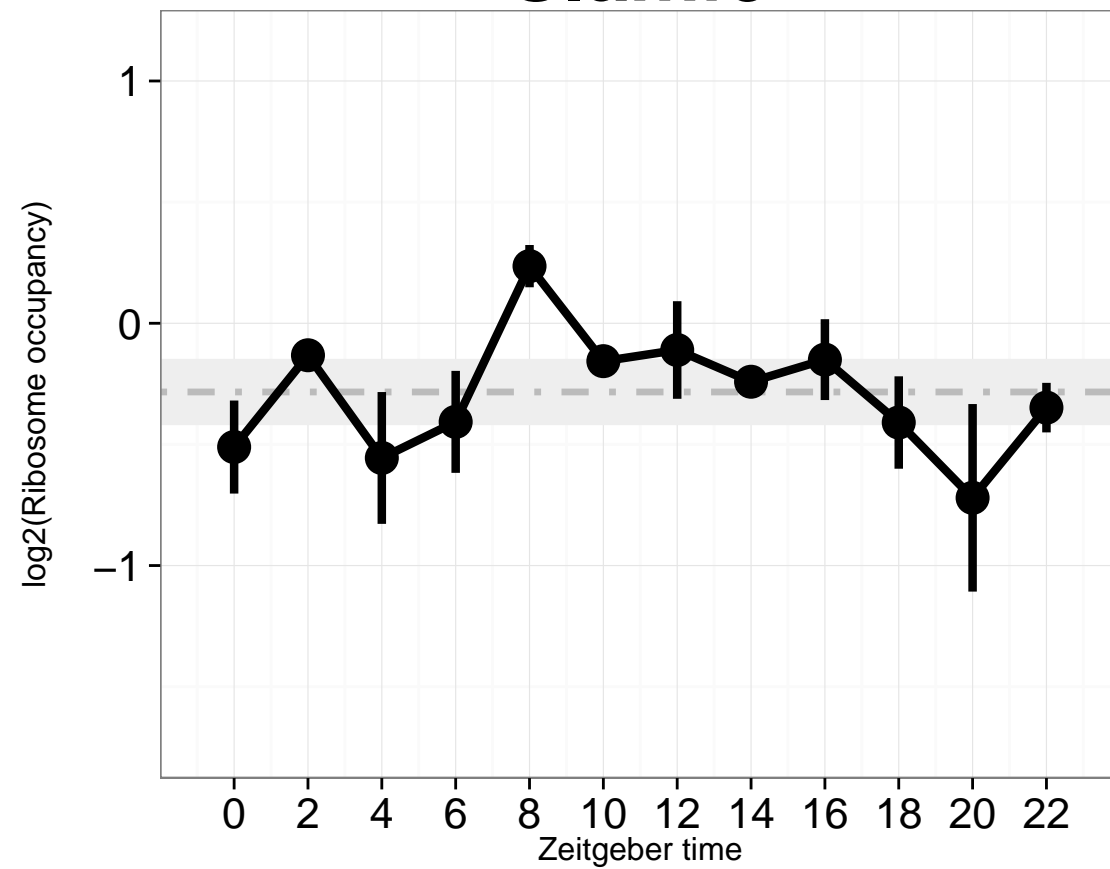

Supplement: Supplementary file 4890 [file 1]

## Fbxo8

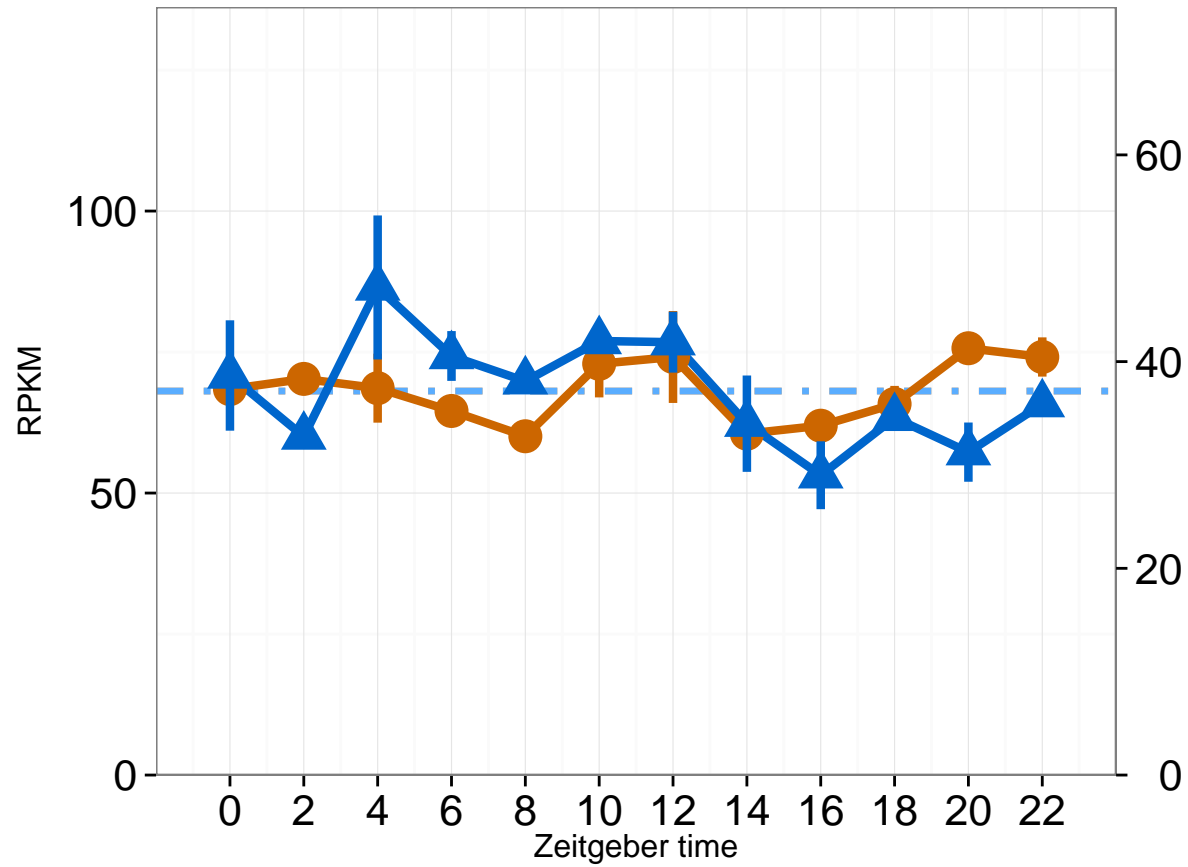

## Fbxo8

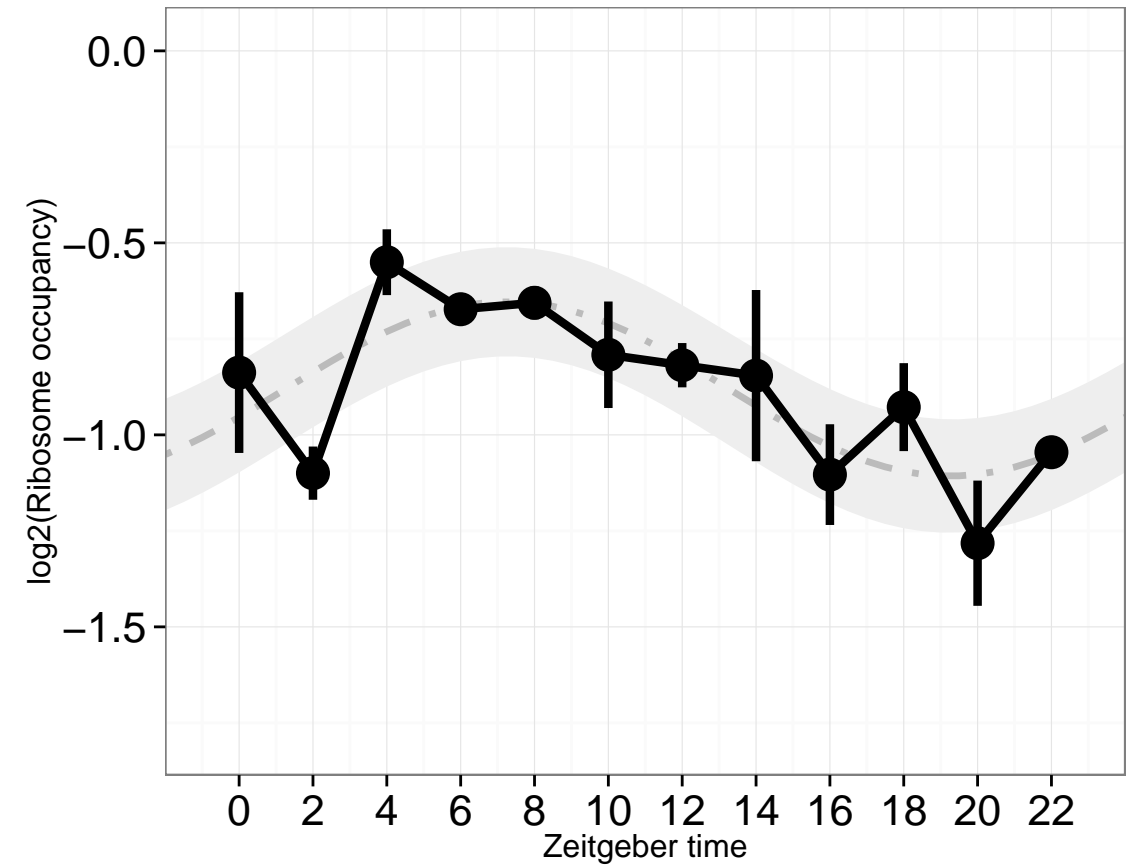

Supplement: Supplementary file 4891 [file 1]

## Yipf3

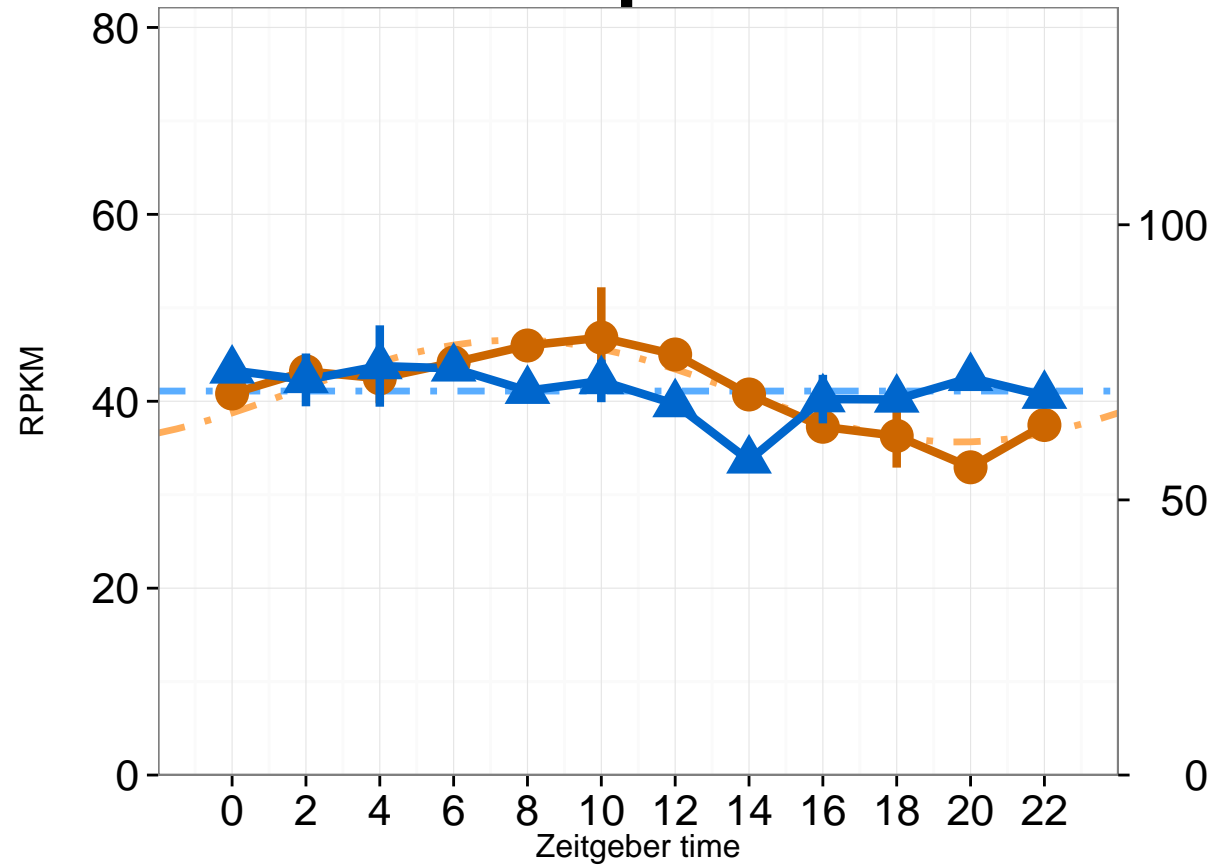

## Yipf3

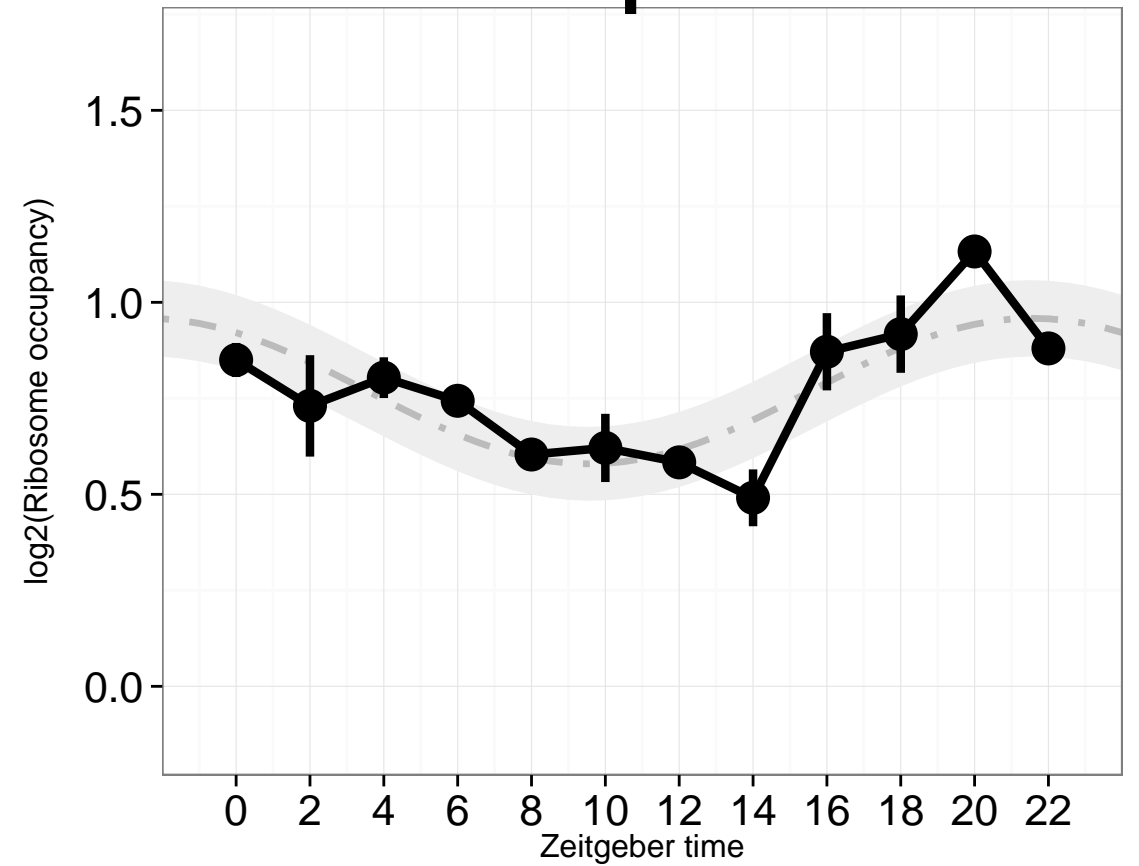

Supplement: Supplementary file 4892 [file 1]

## Cmah

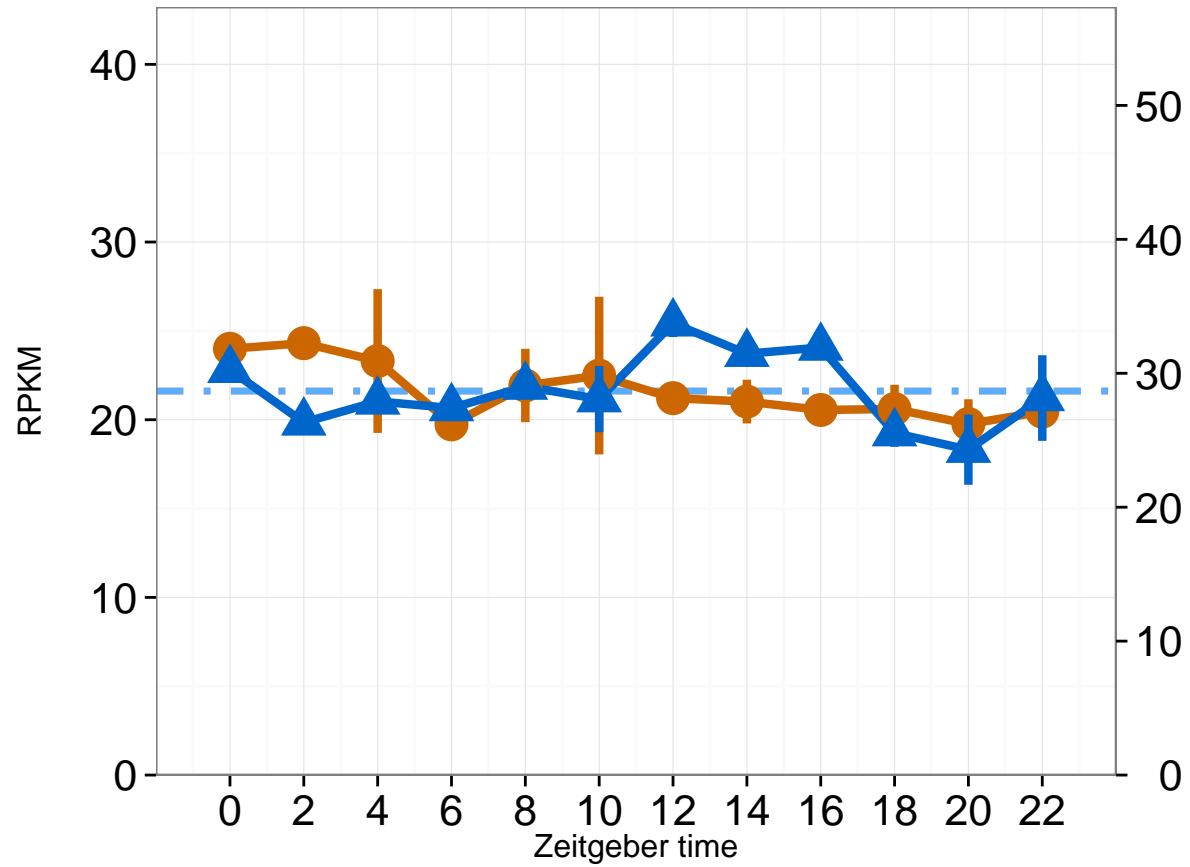

## Cmah

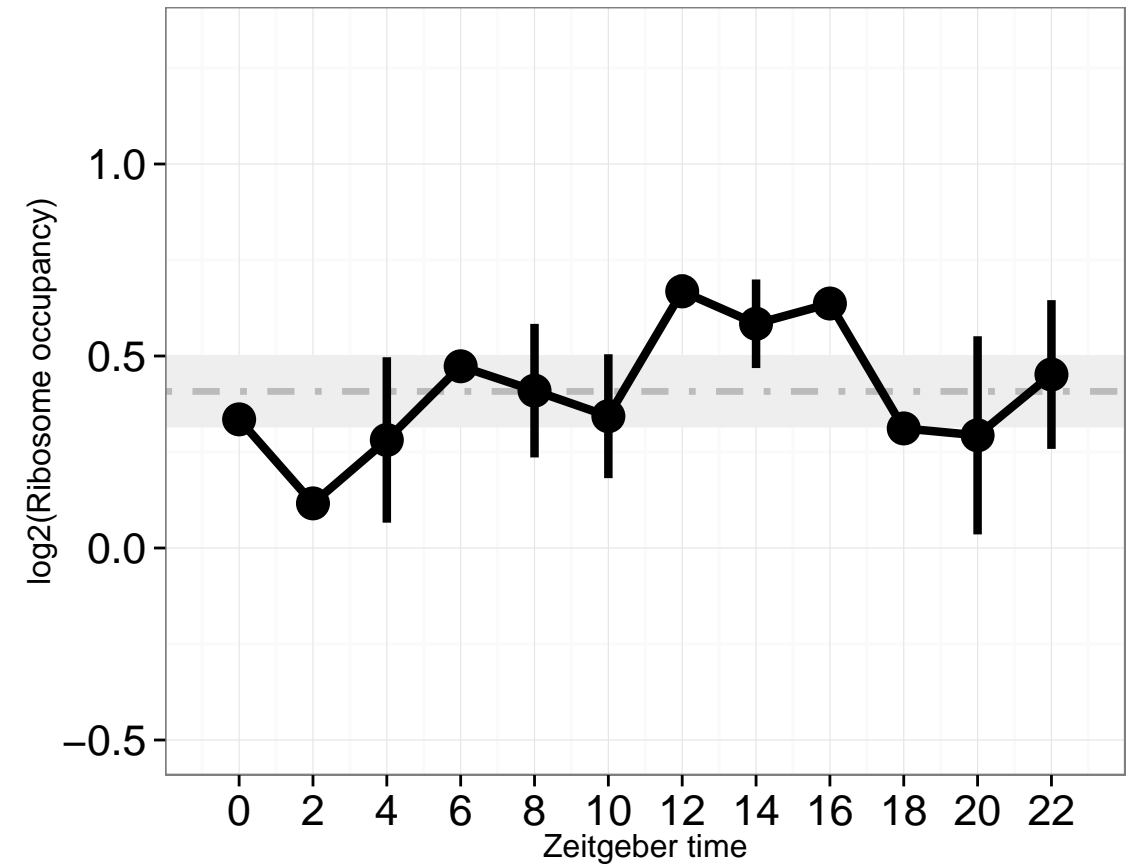

Supplement: Supplementary file 4893 [file 1]

# Tubg1

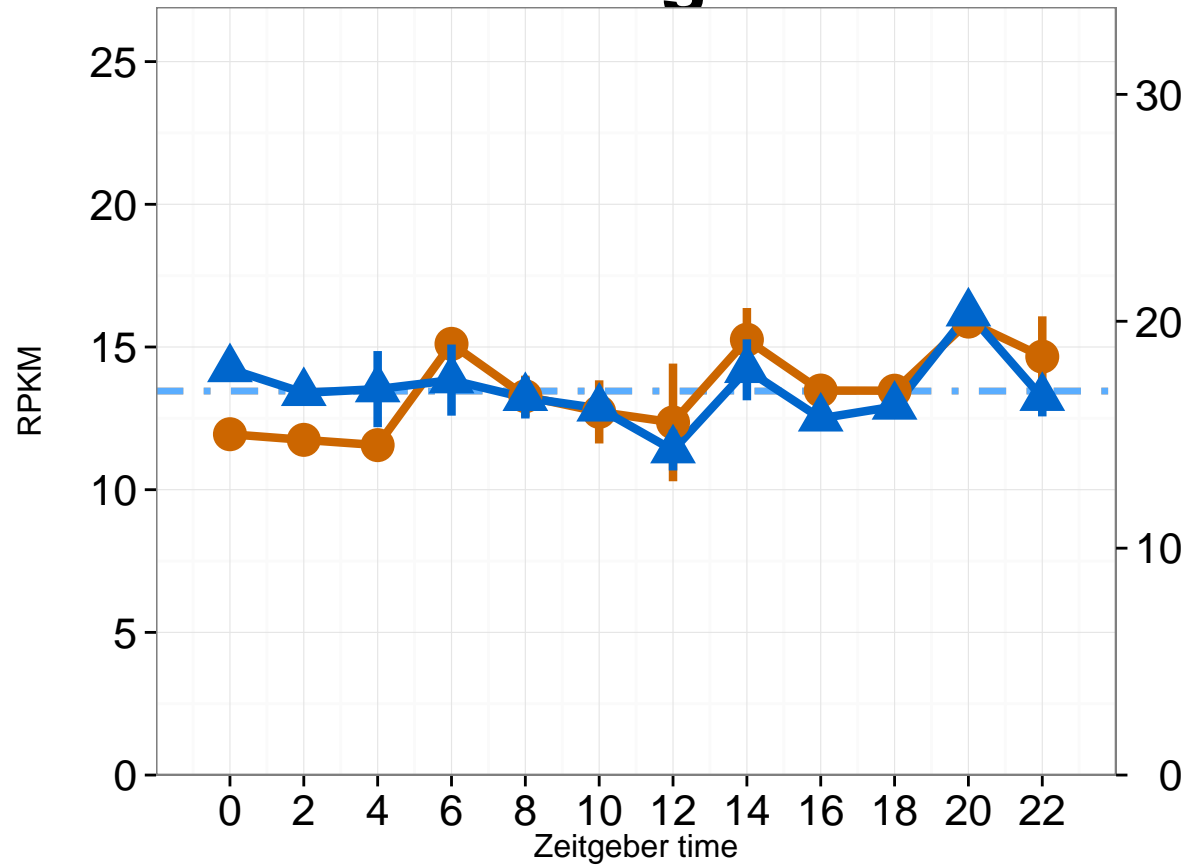

# Tubg1

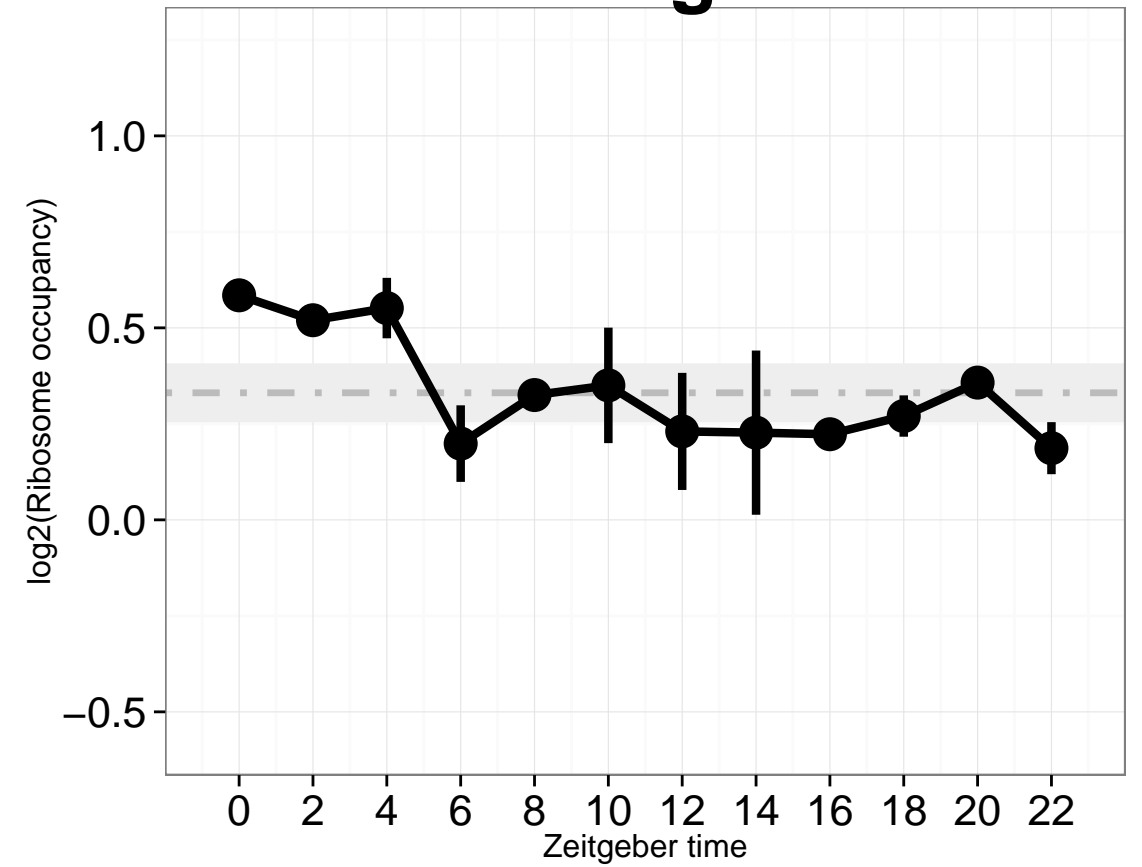

Supplement: Supplementary file 4894 [file 1]

# Cml1

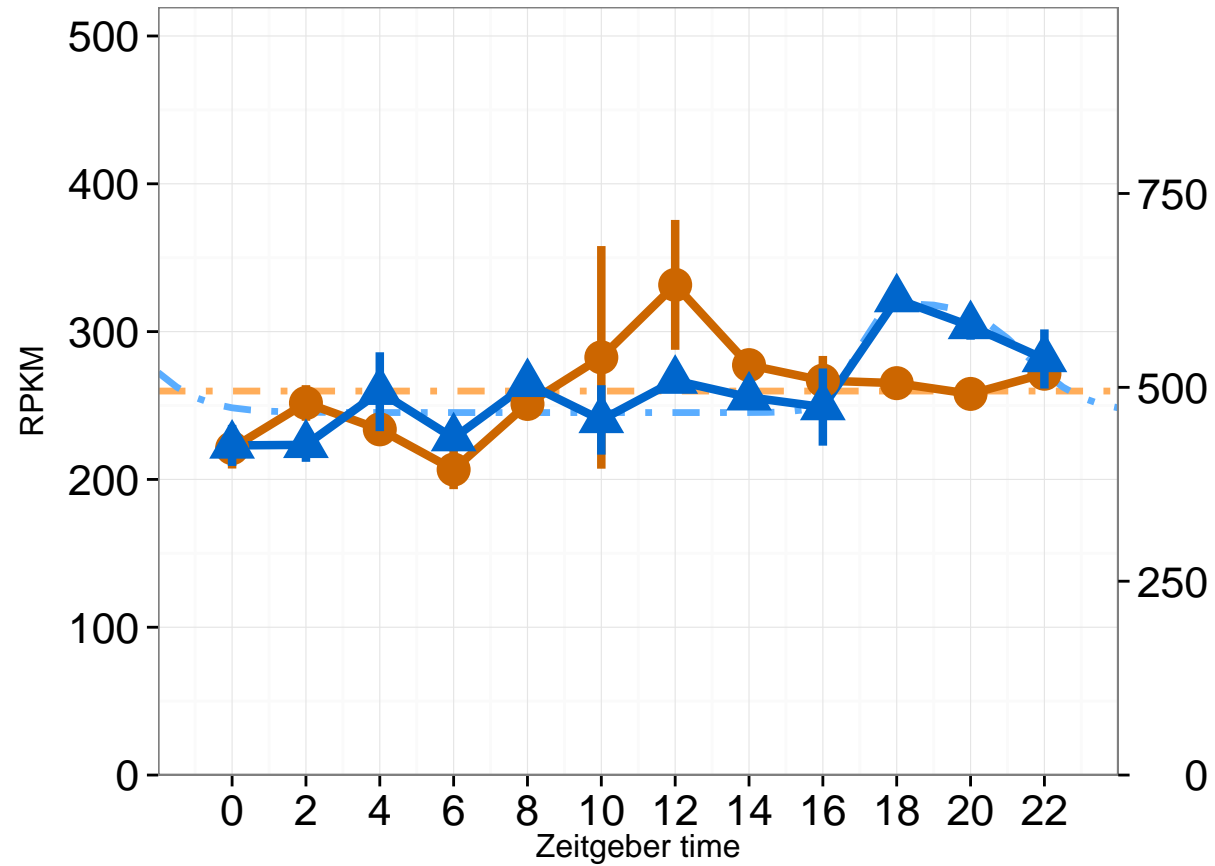

# Cml1

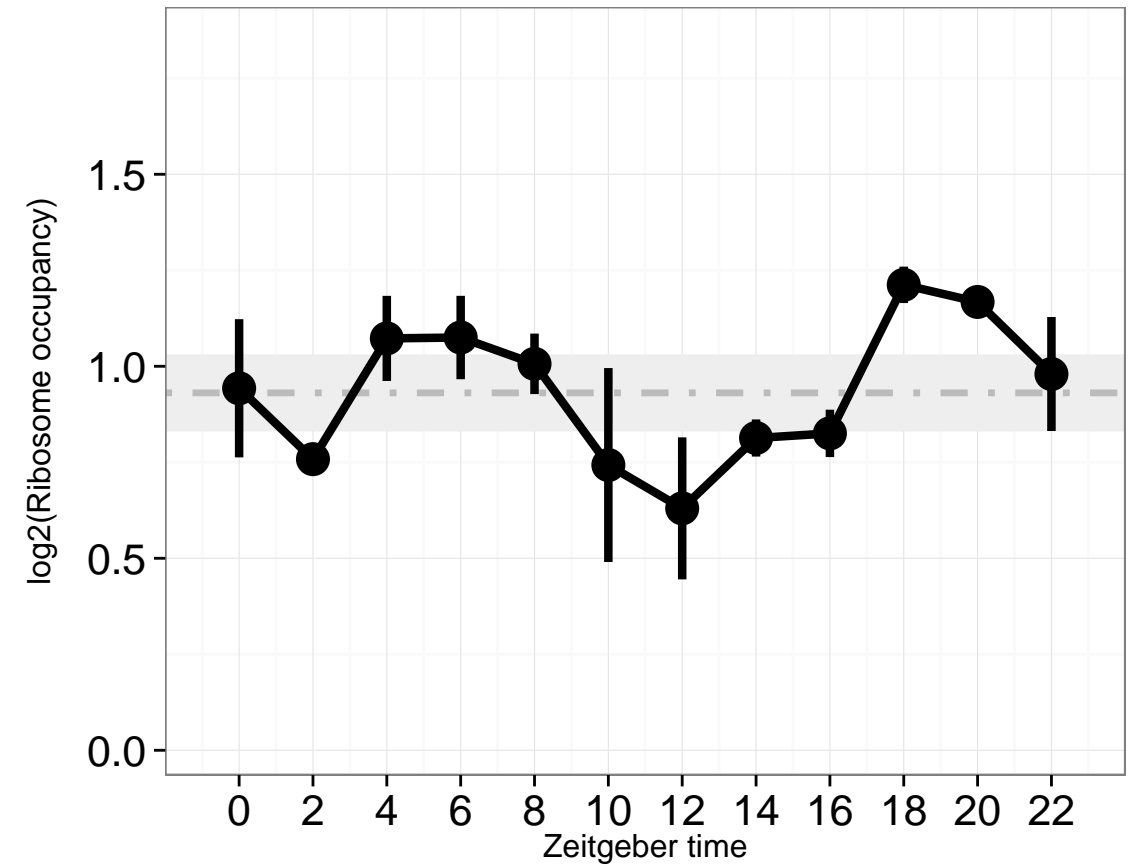

Supplement: Supplementary file 4895 [file 1]

## Zfp319

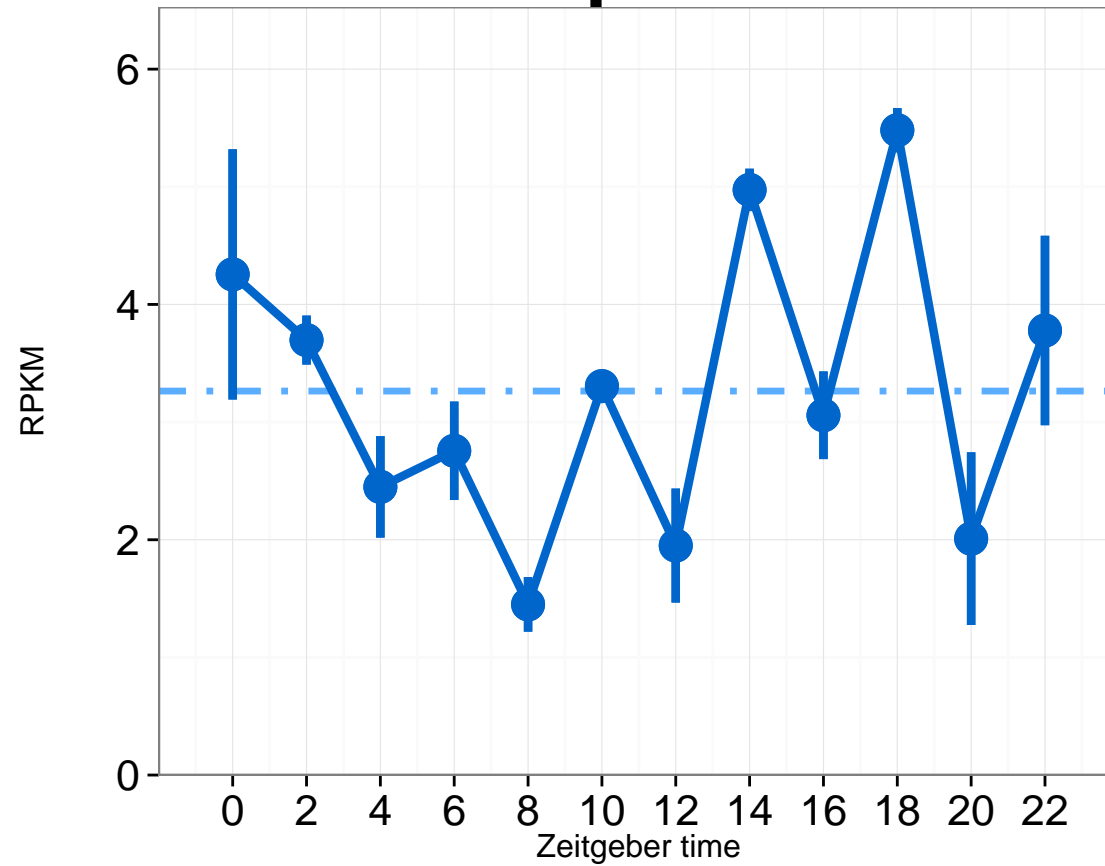

## Zfp319 log2(Ribosome occupancy

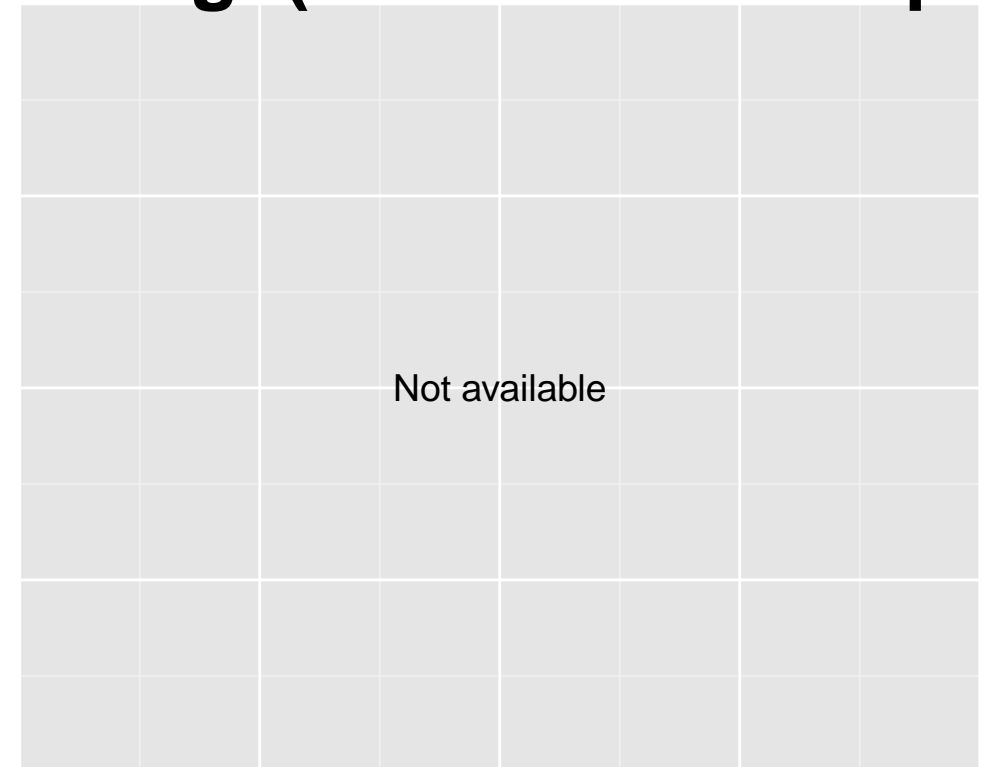

Supplement: Supplementary file 4896 [file 1]

## Sass6

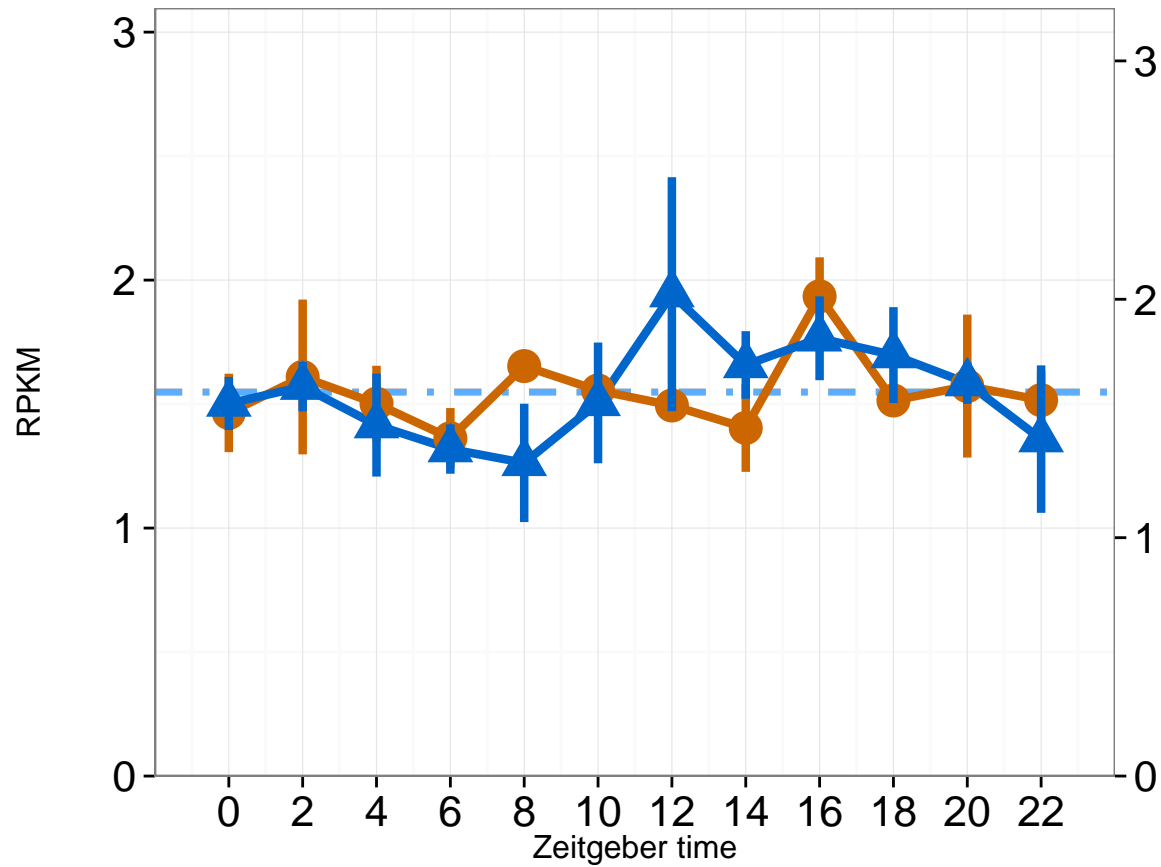

## Sass6

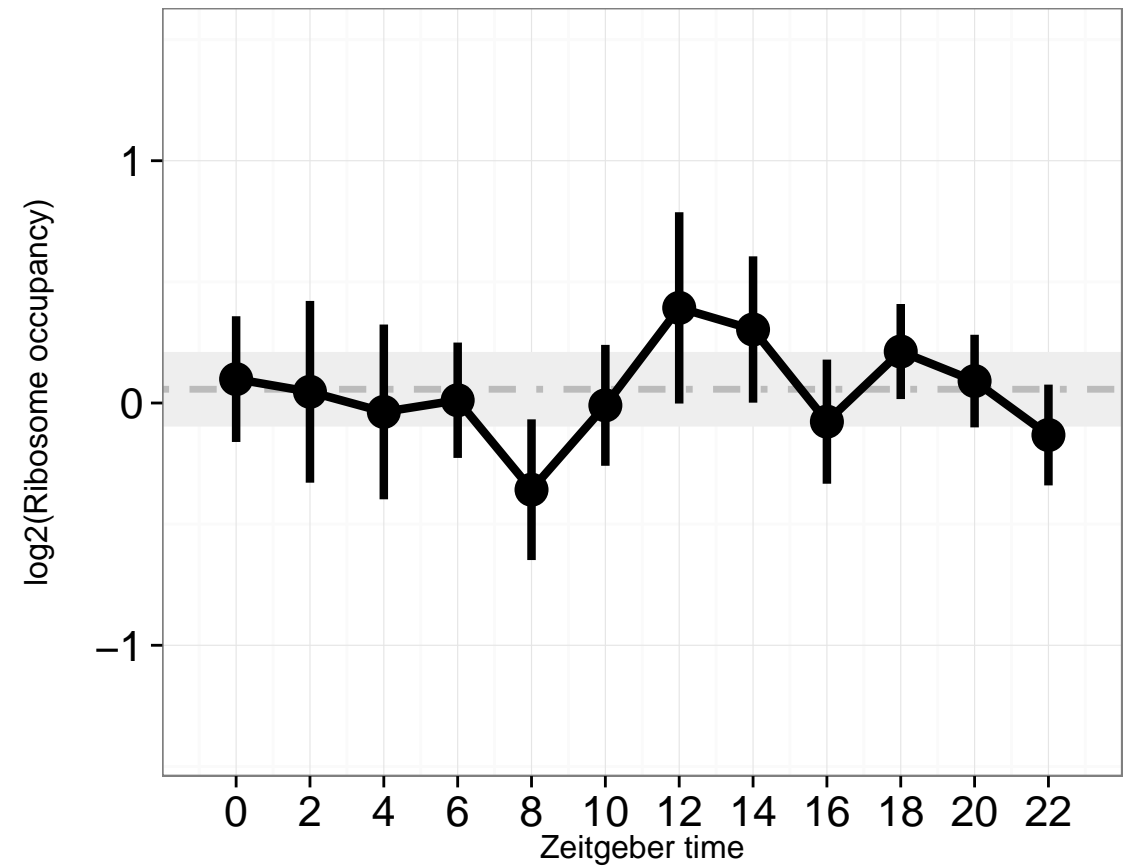

Supplement: Supplementary file 4897 [file 1]

## Csad

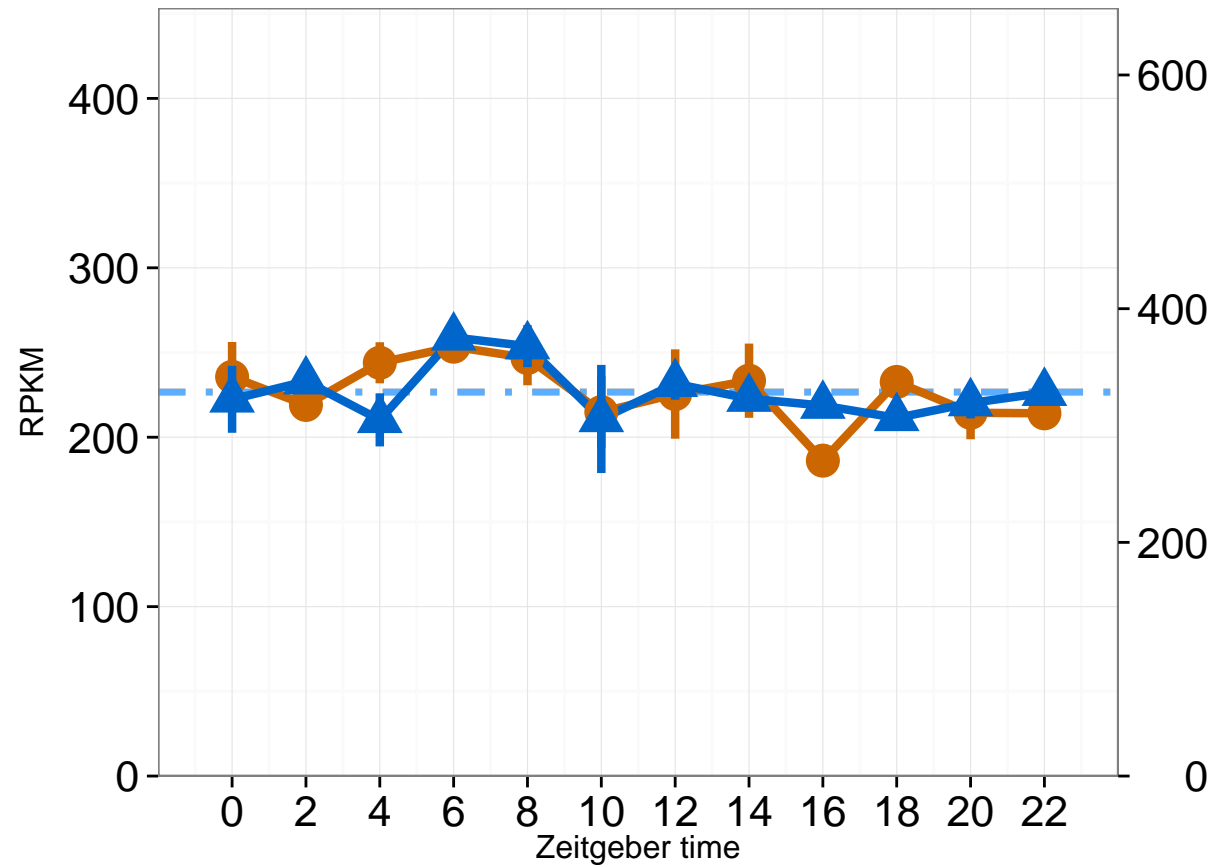

## Csad

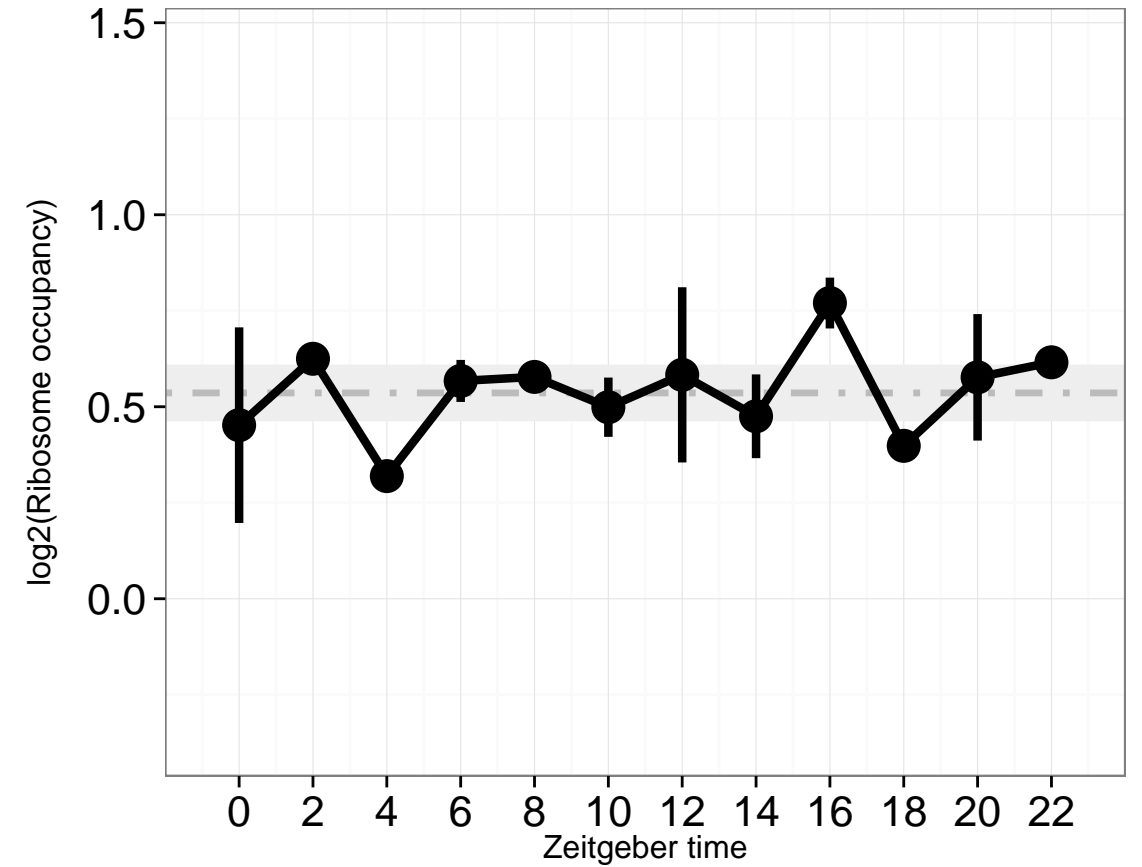

Supplement: Supplementary file 4898 [file 1]

## Mthfd1l

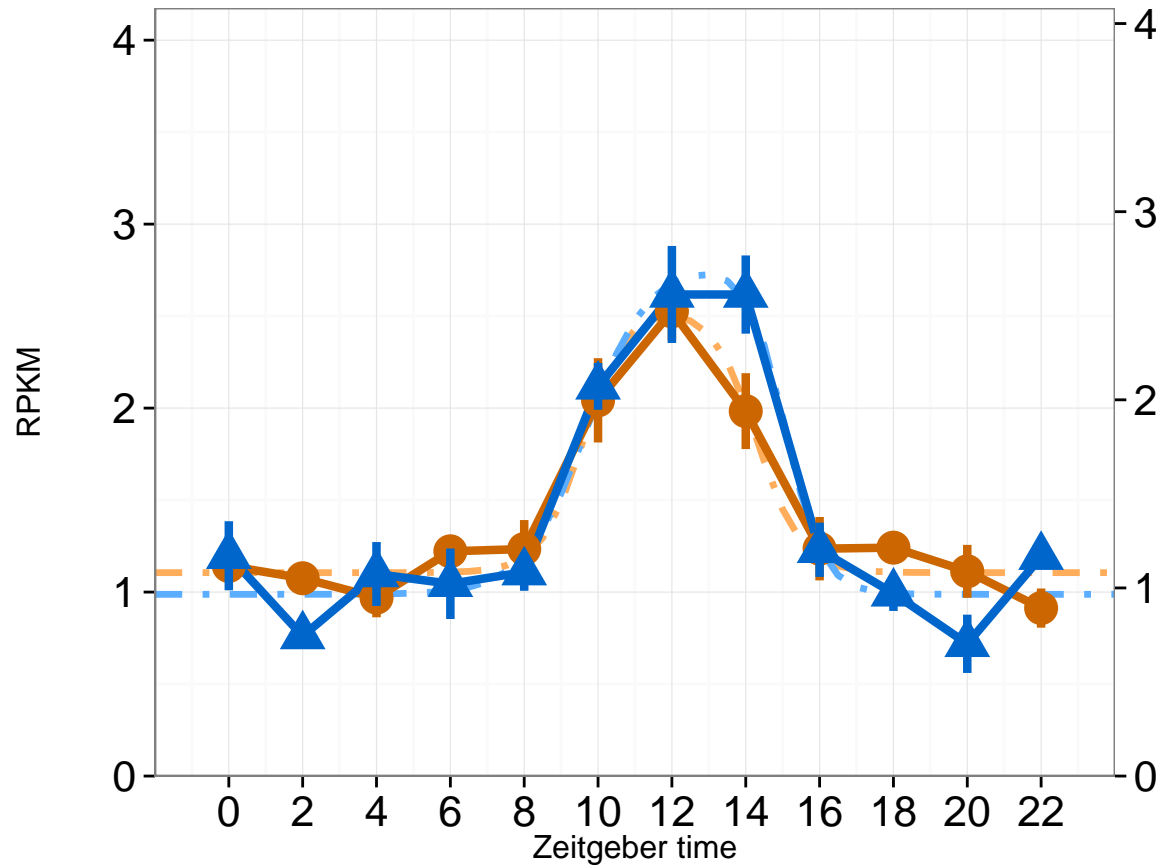

## Mthfd1l

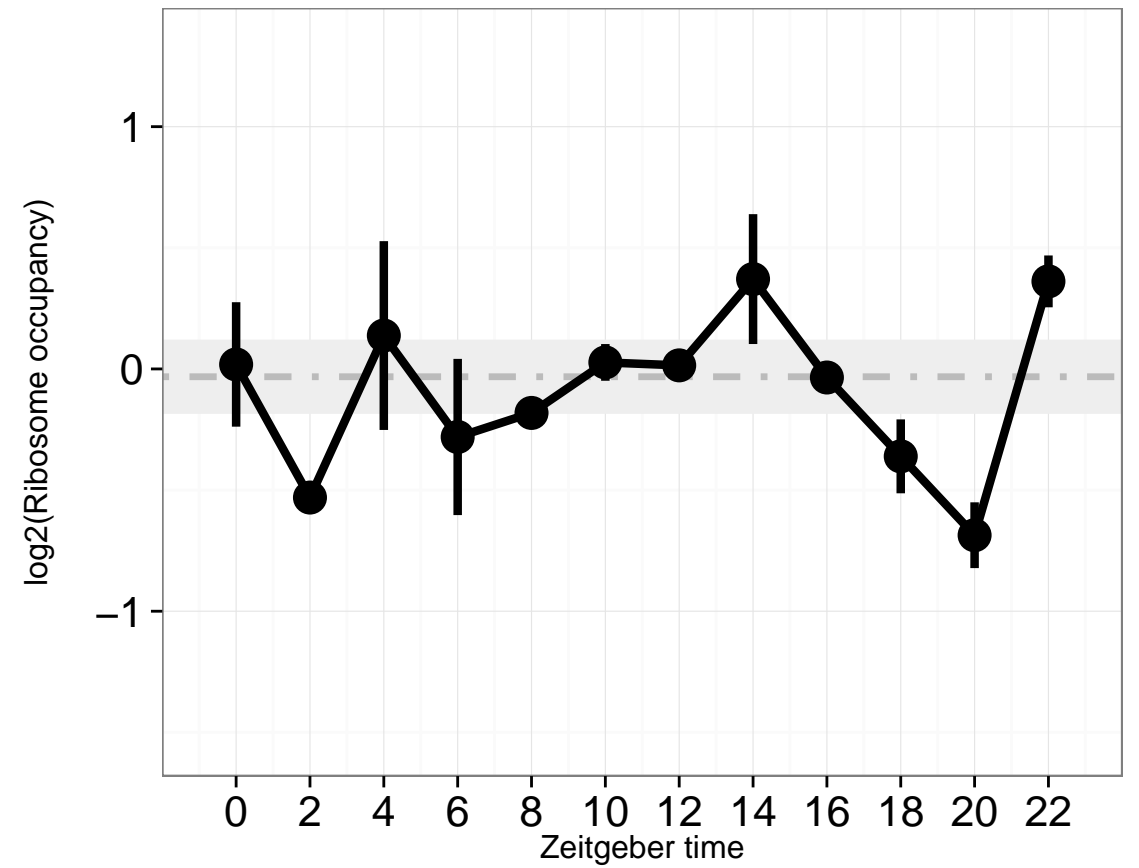

Supplement: Supplementary file 4899 [file 1]

# Cdca7l

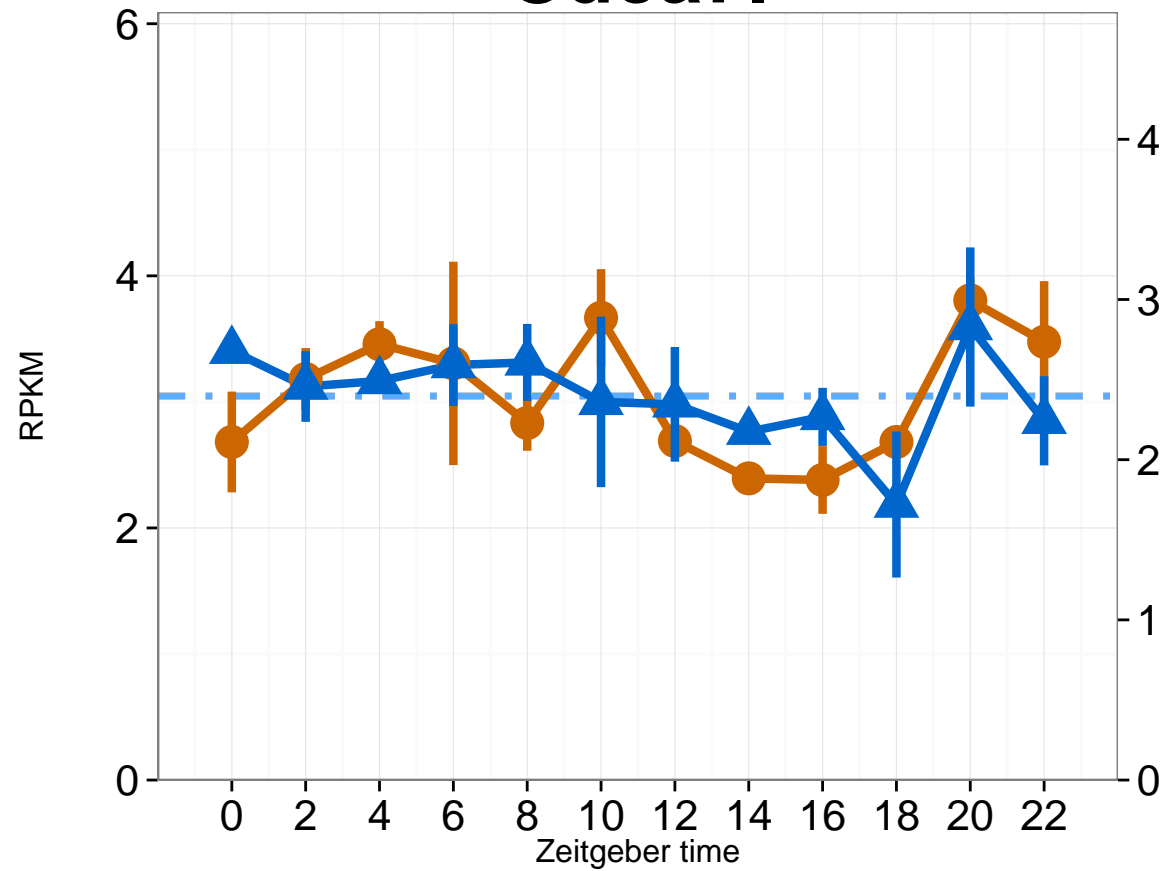

# Cdca7l

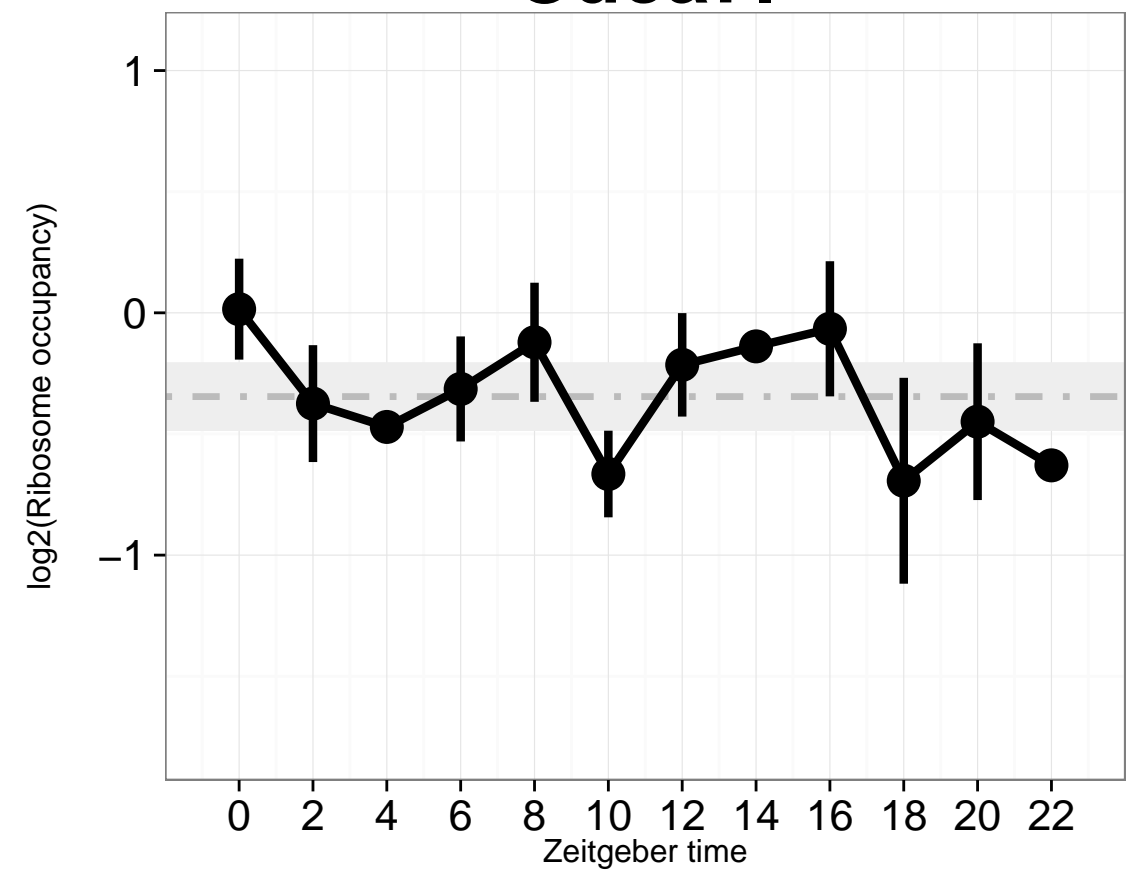

Supplement: Supplementary file 4900 [file 1]

# Trmt2b

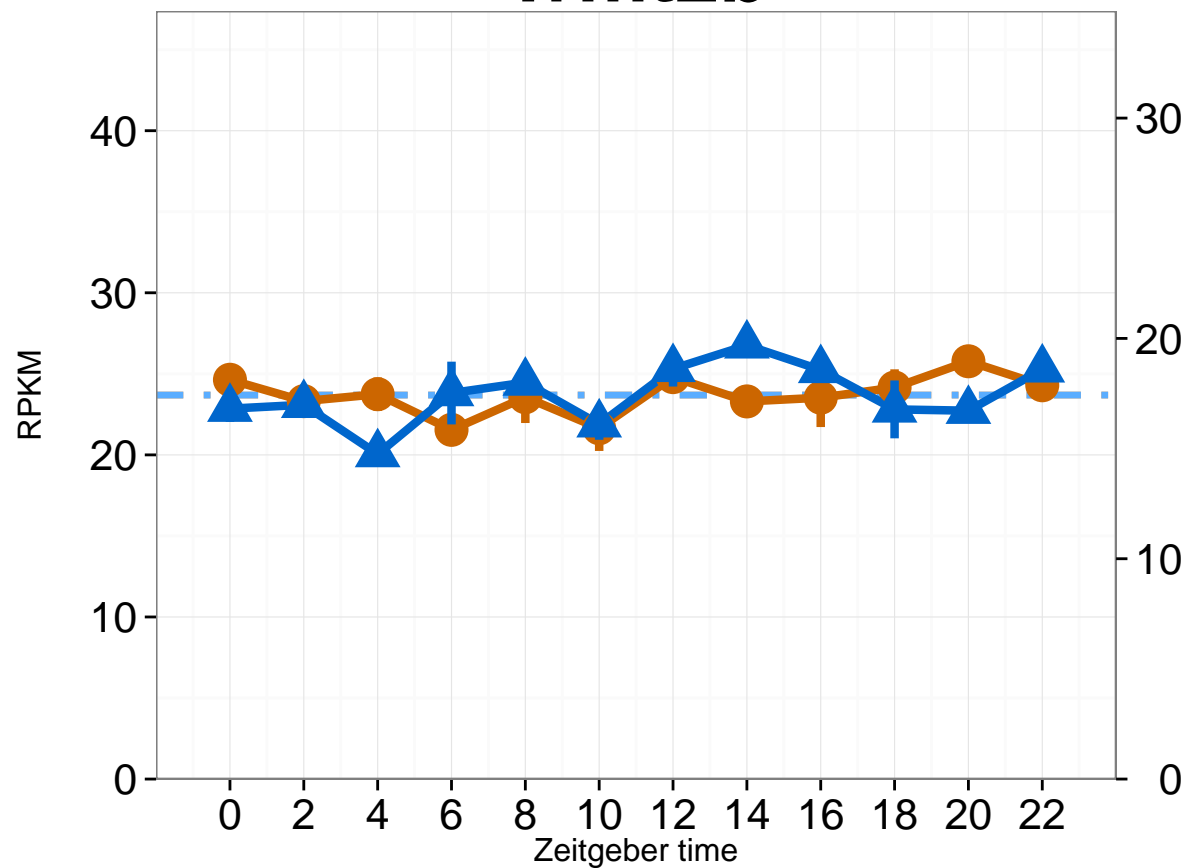

# Trmt2b

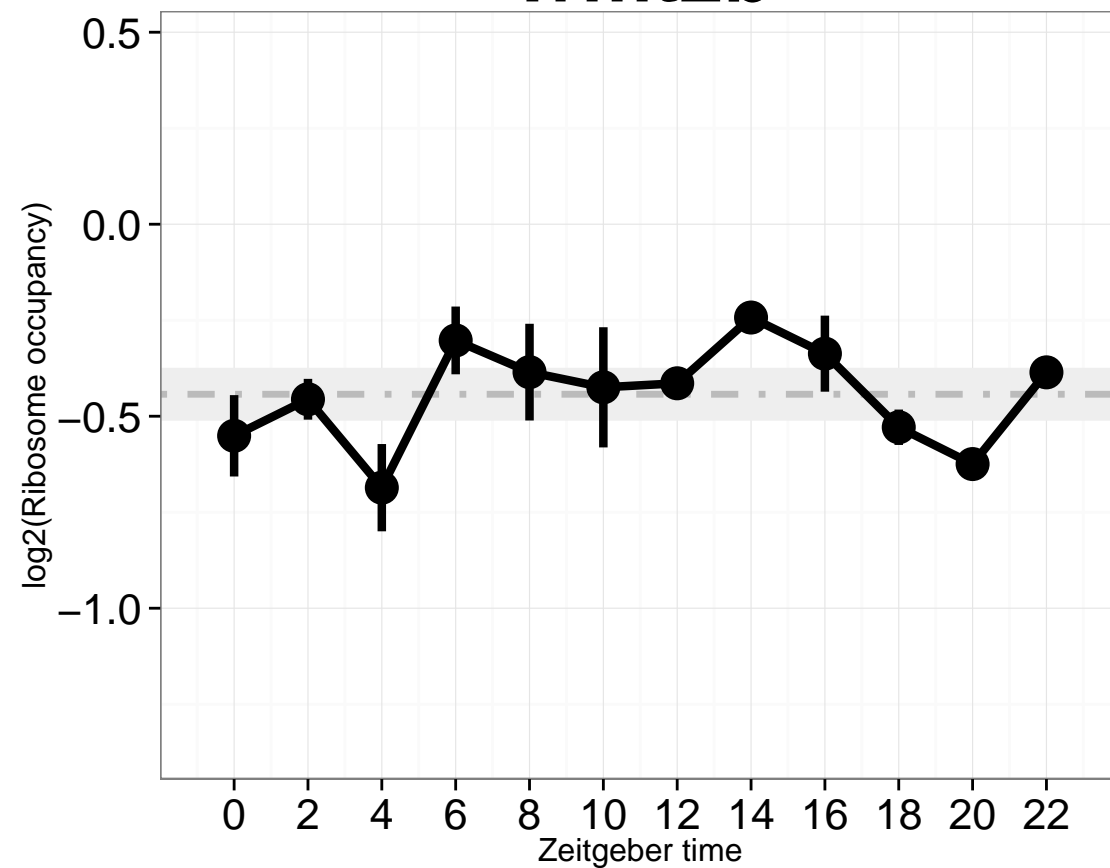

Supplement: Supplementary file 4901 [file 1]

## Syf2

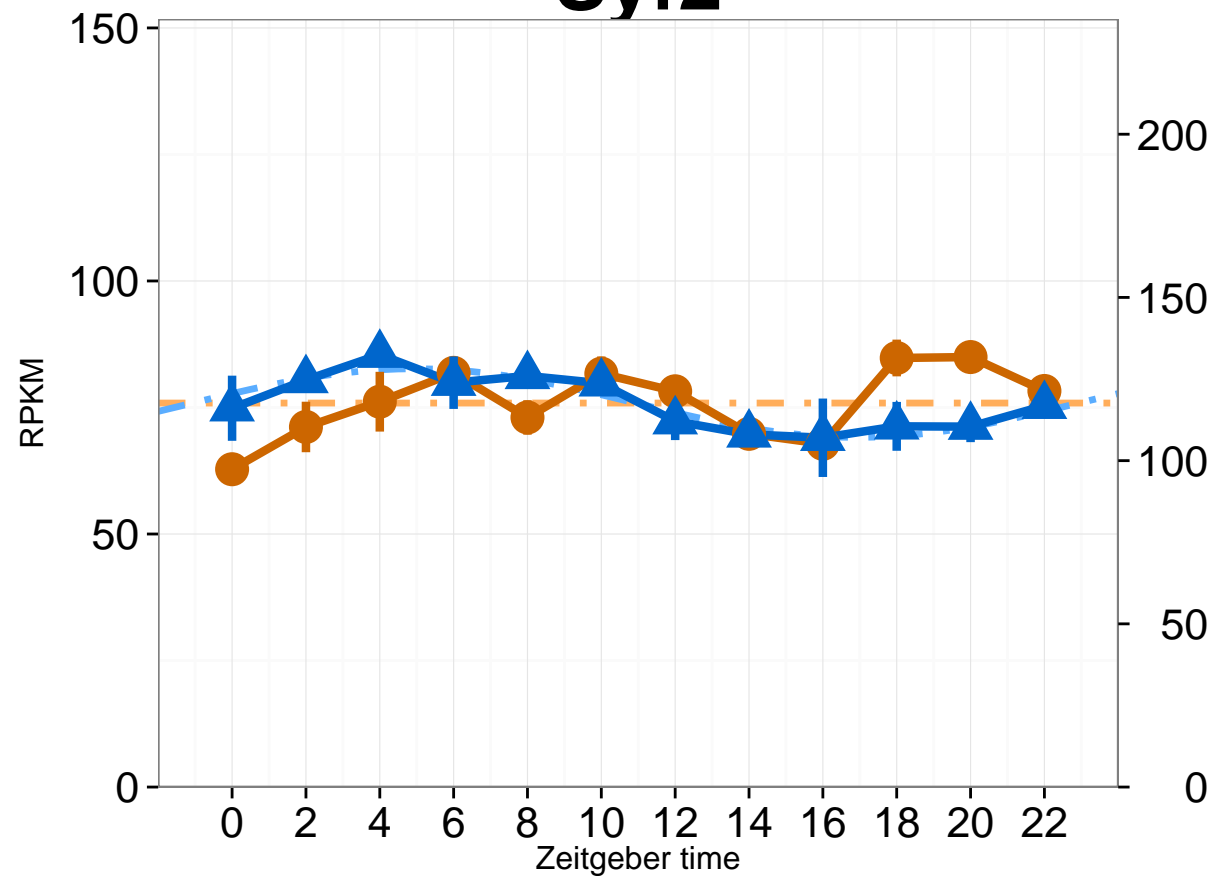

## Syf2

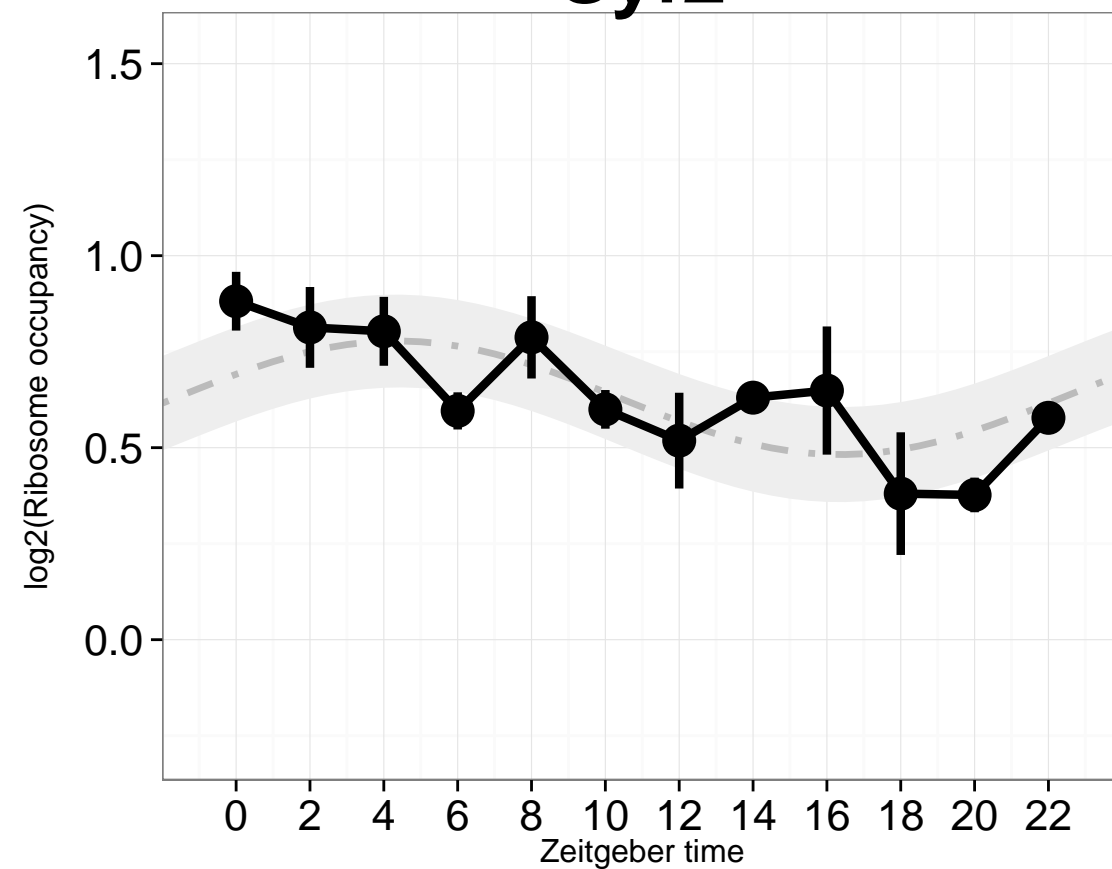

Supplement: Supplementary file 4902 [file 1]

# R3hdm2

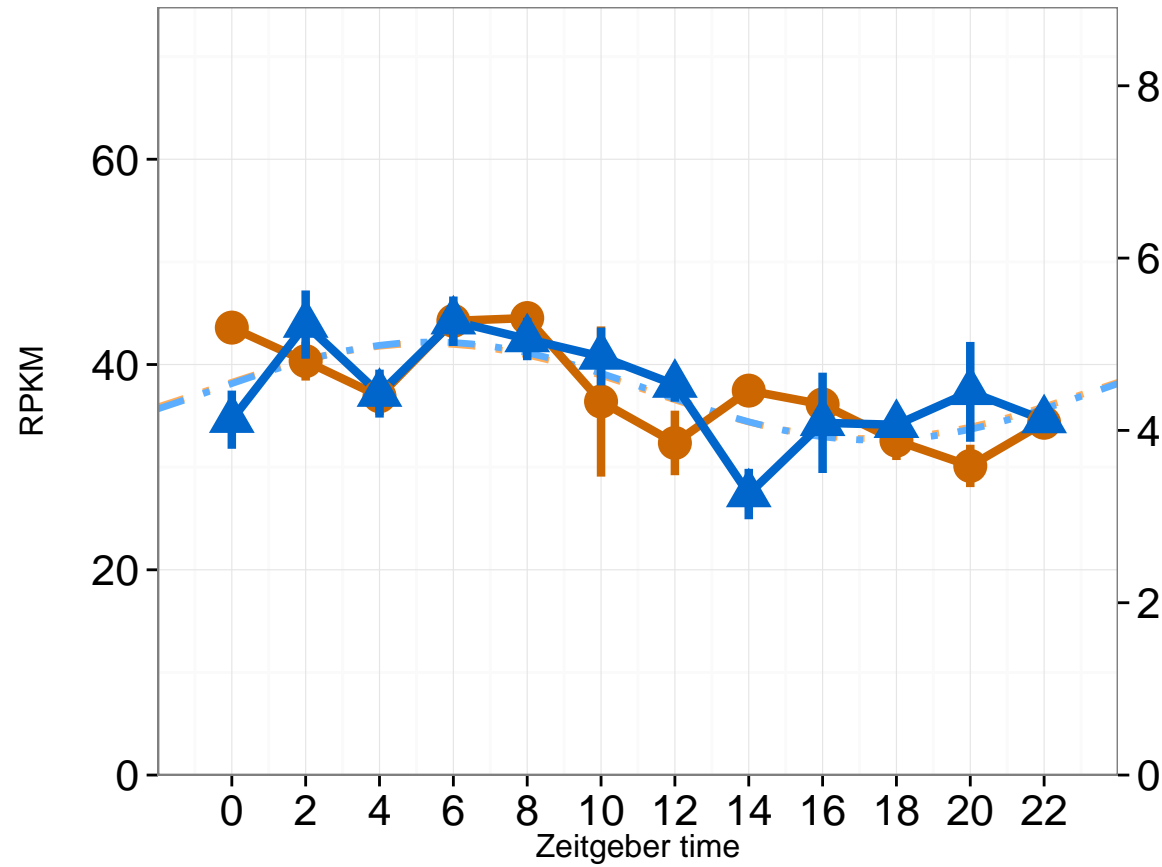

# R3hdm2

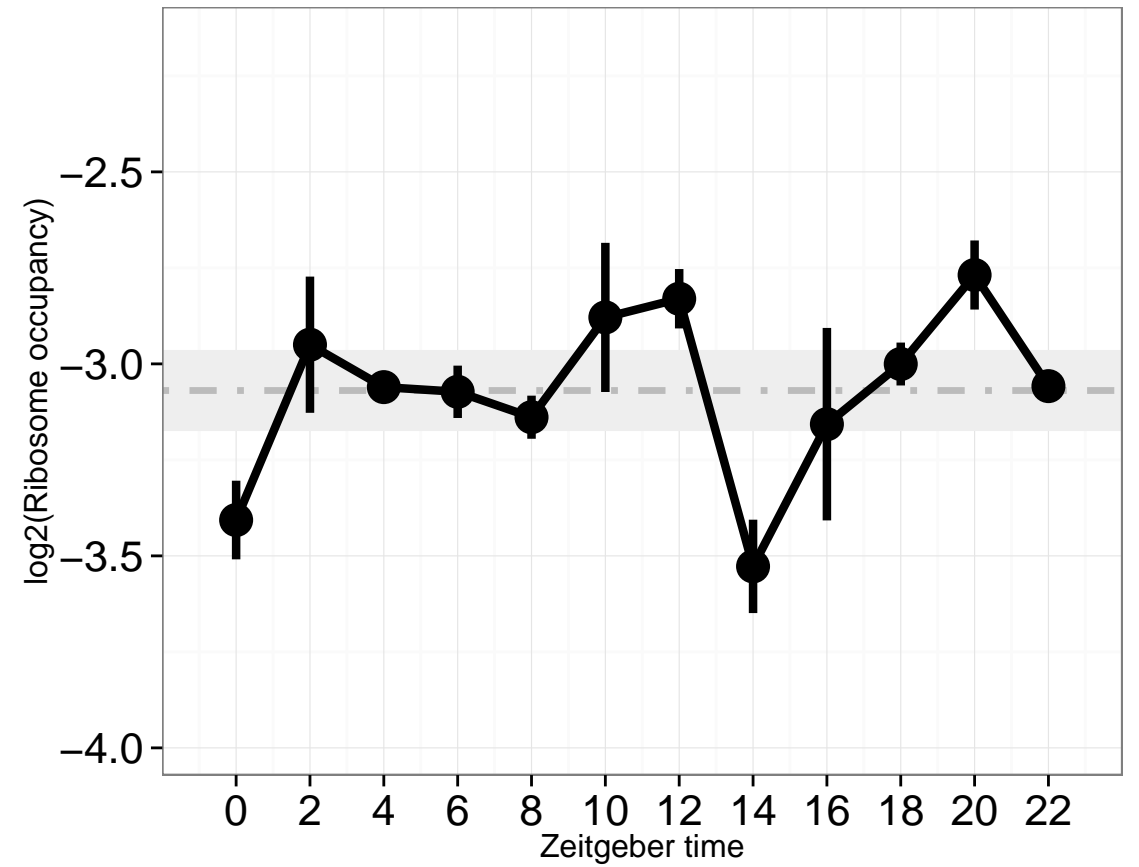

Supplement: Supplementary file 4903 [file 1]

# Ch25h

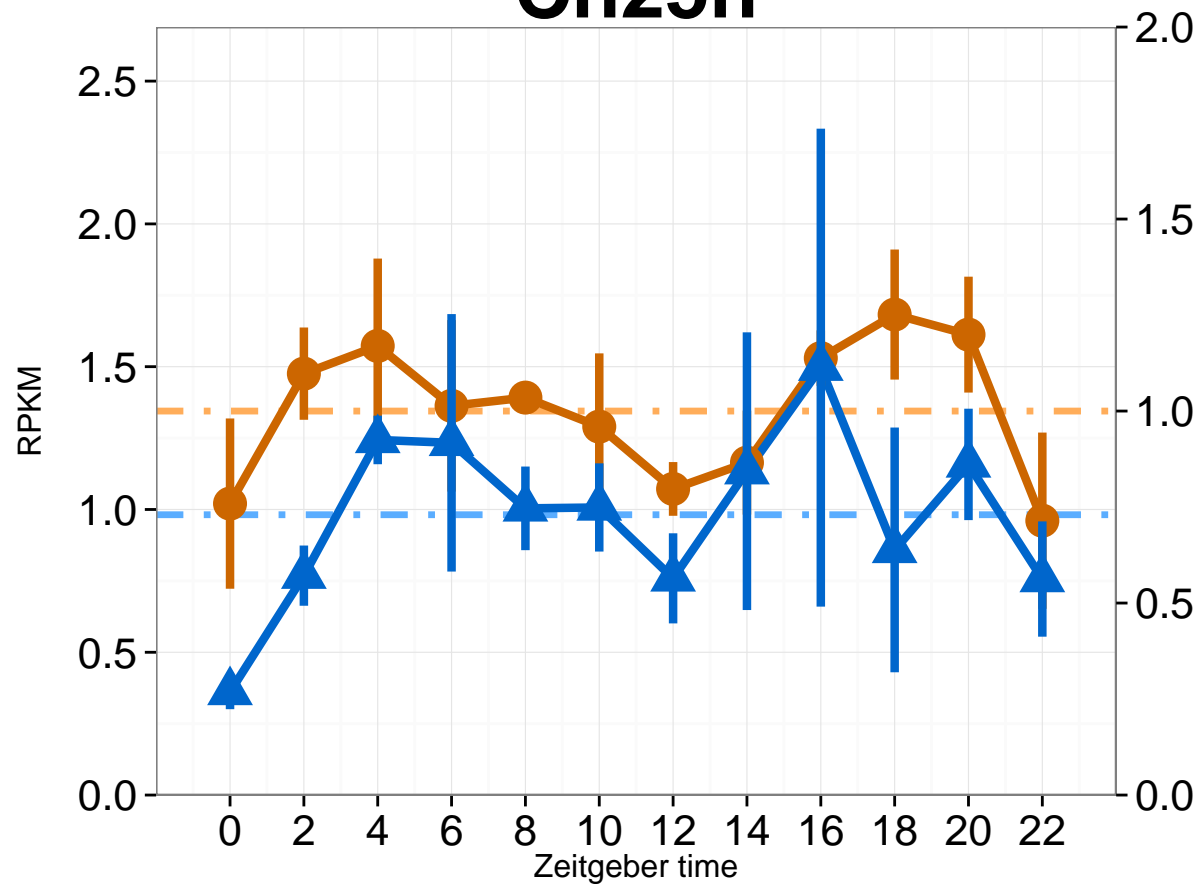

# Ch25h

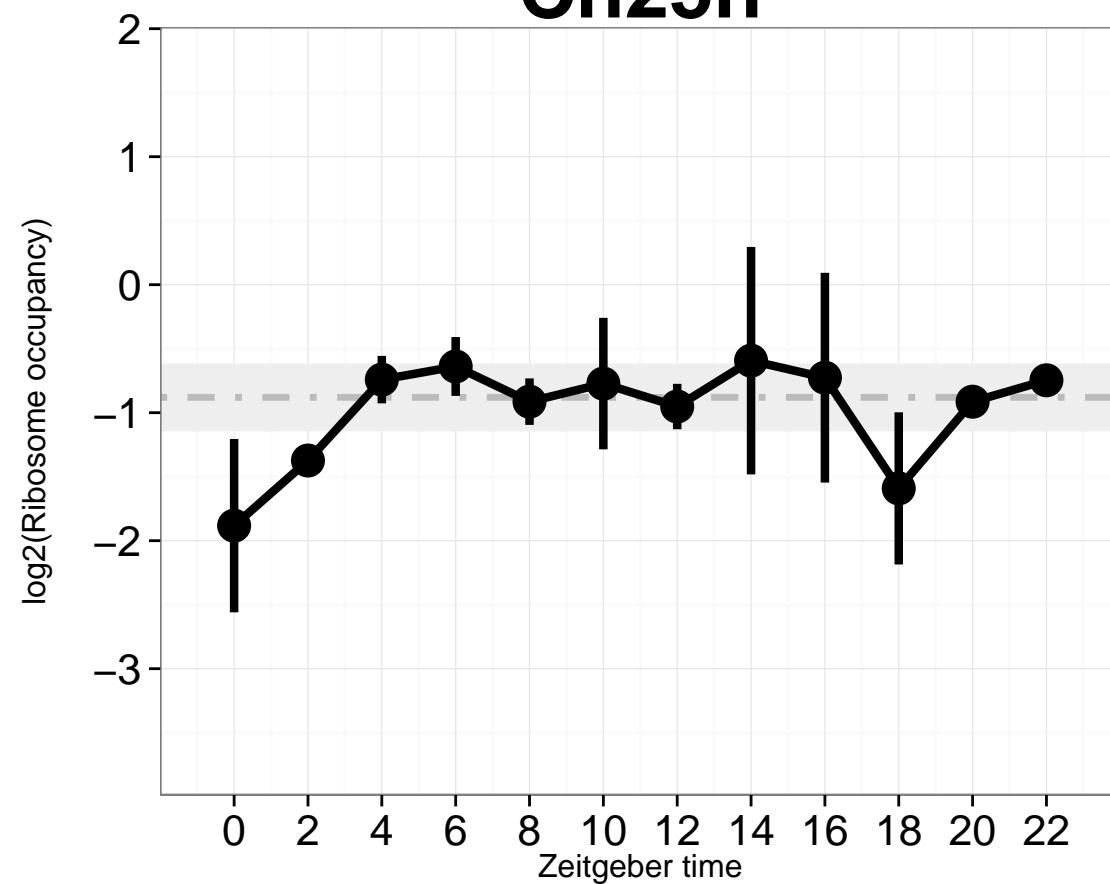

Supplement: Supplementary file 4904 [file 1]

## Strap

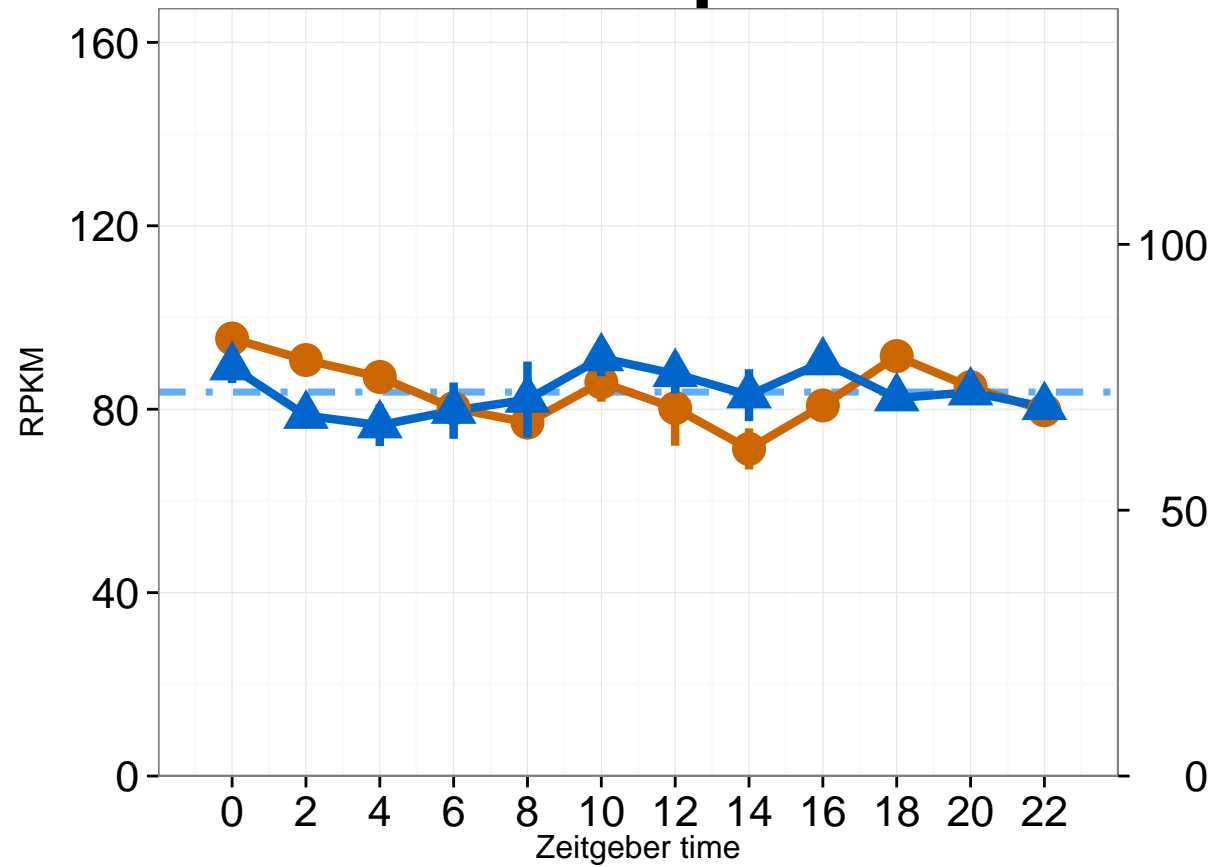

## Strap

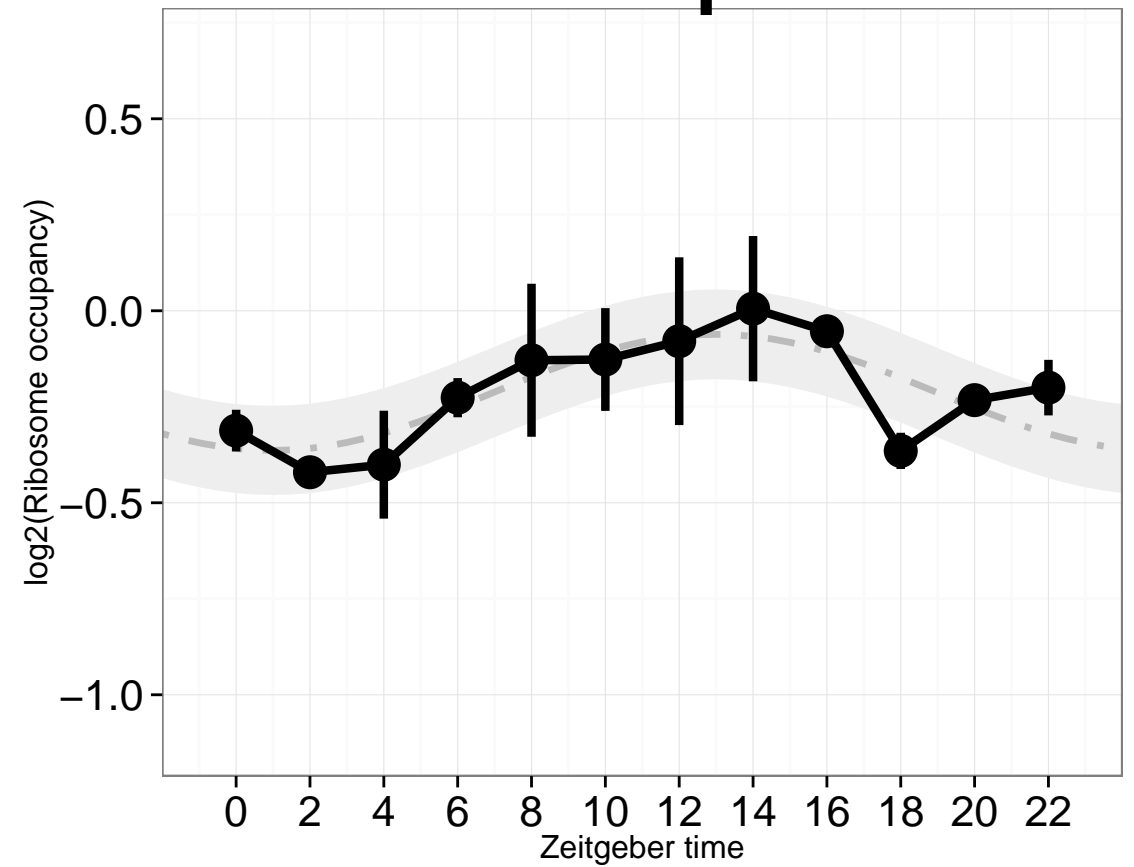

Supplement: Supplementary file 4905 [file 1]

## Bcat2

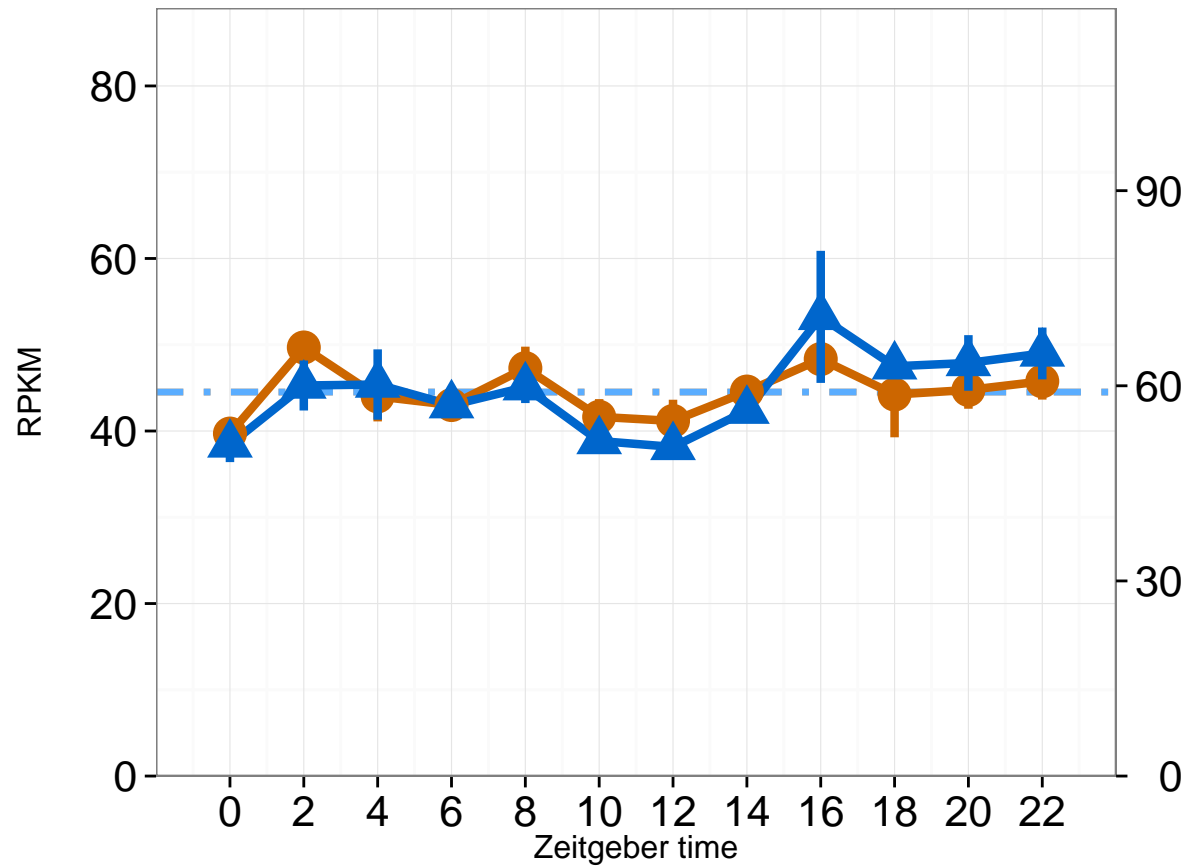

## Bcat2

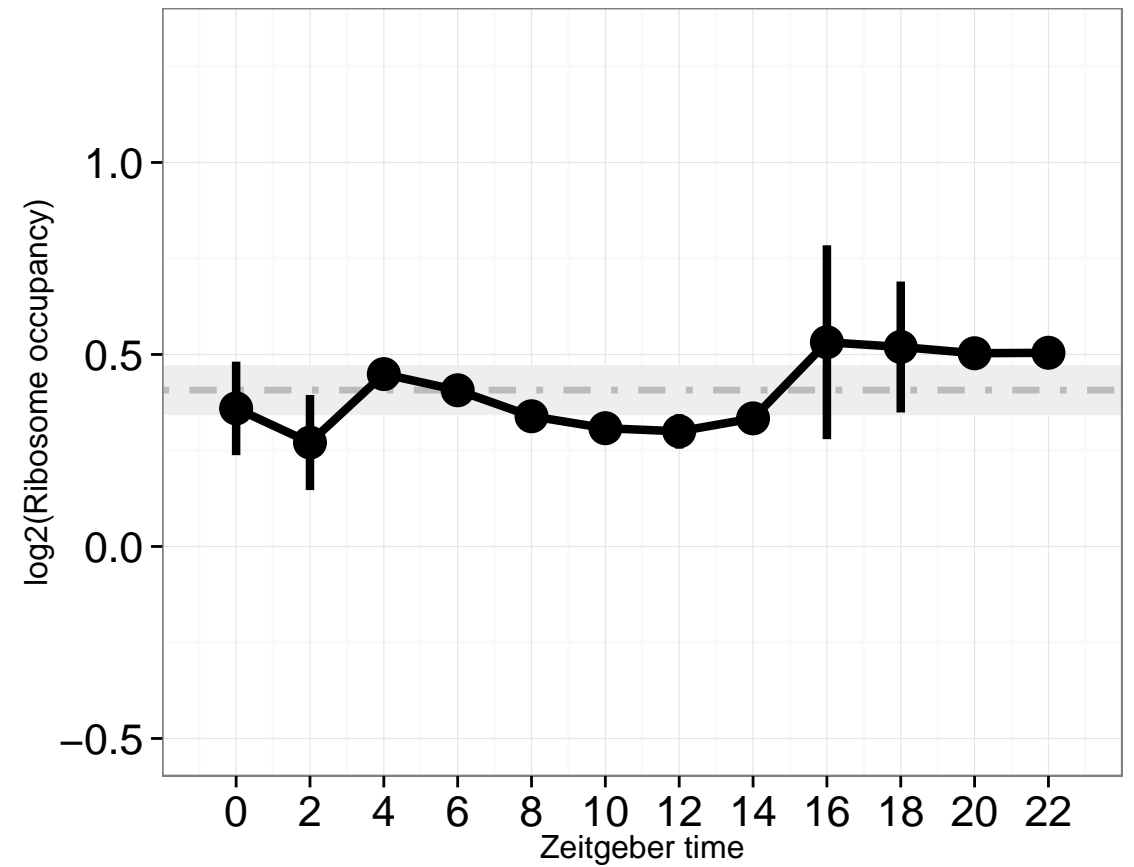

Supplement: Supplementary file 4906 [file 1]

# Arl13b

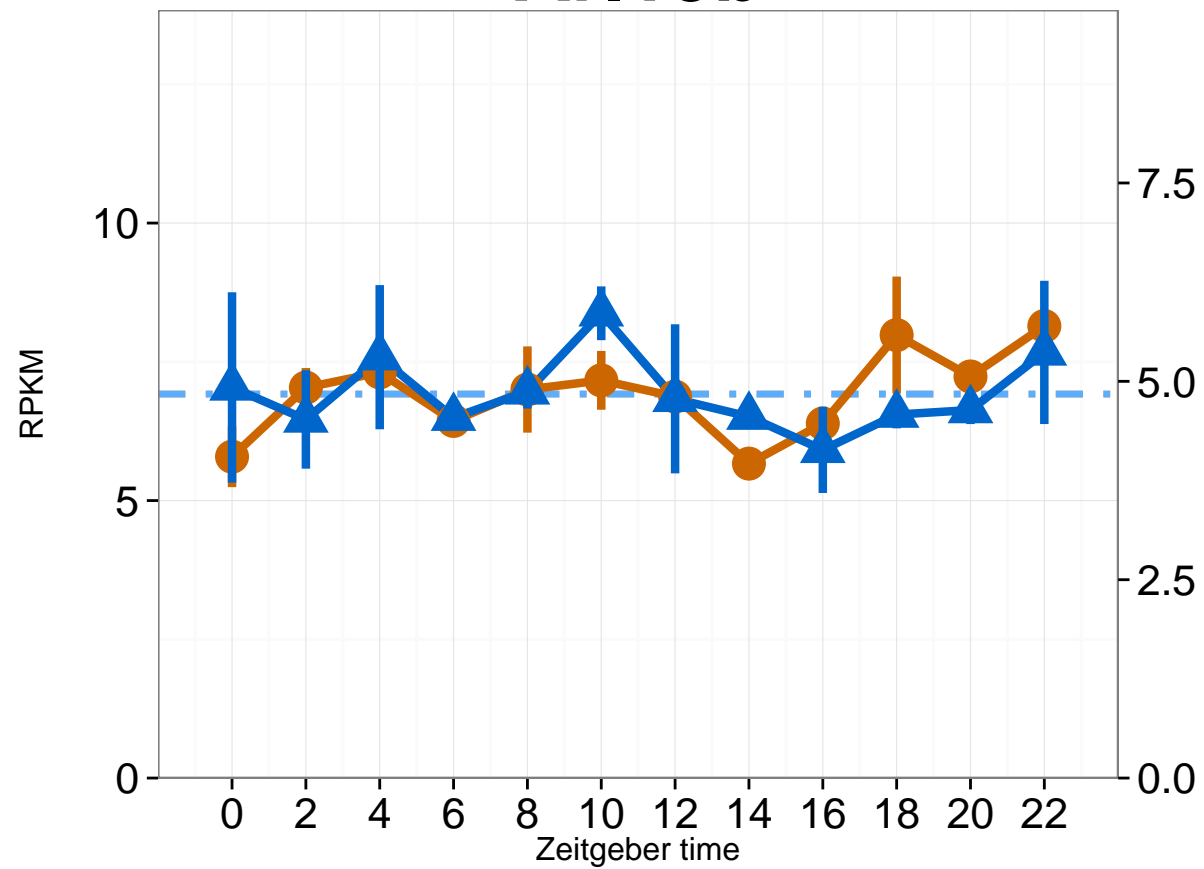

# Arl13b

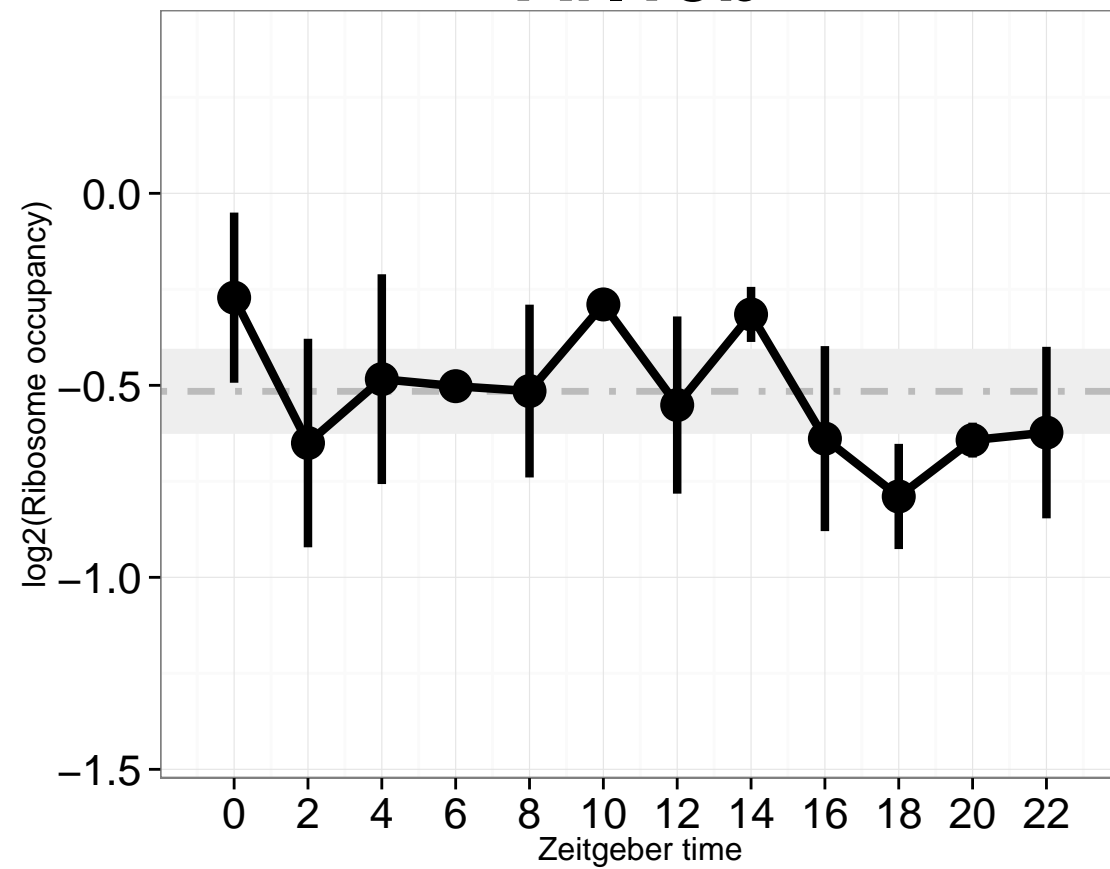

Supplement: Supplementary file 4907 [file 1]

# Cyp4f14

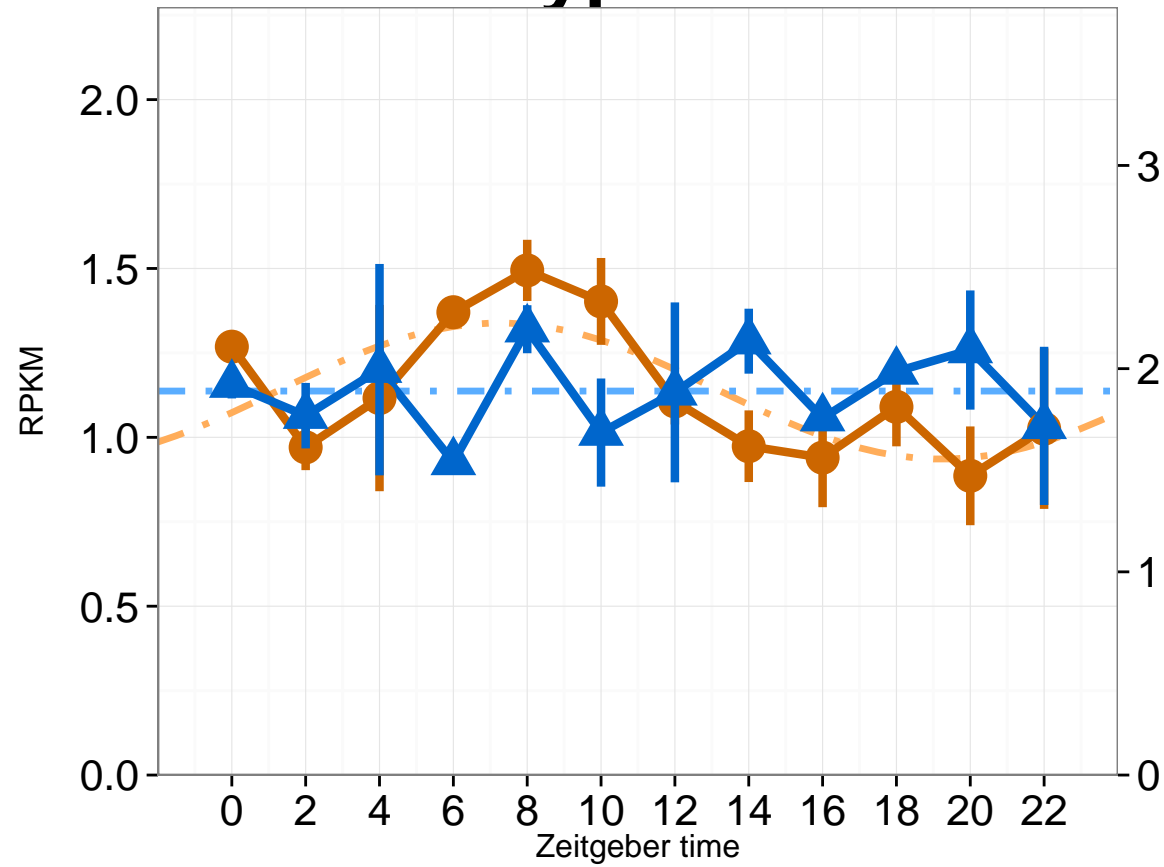

# Cyp4f14

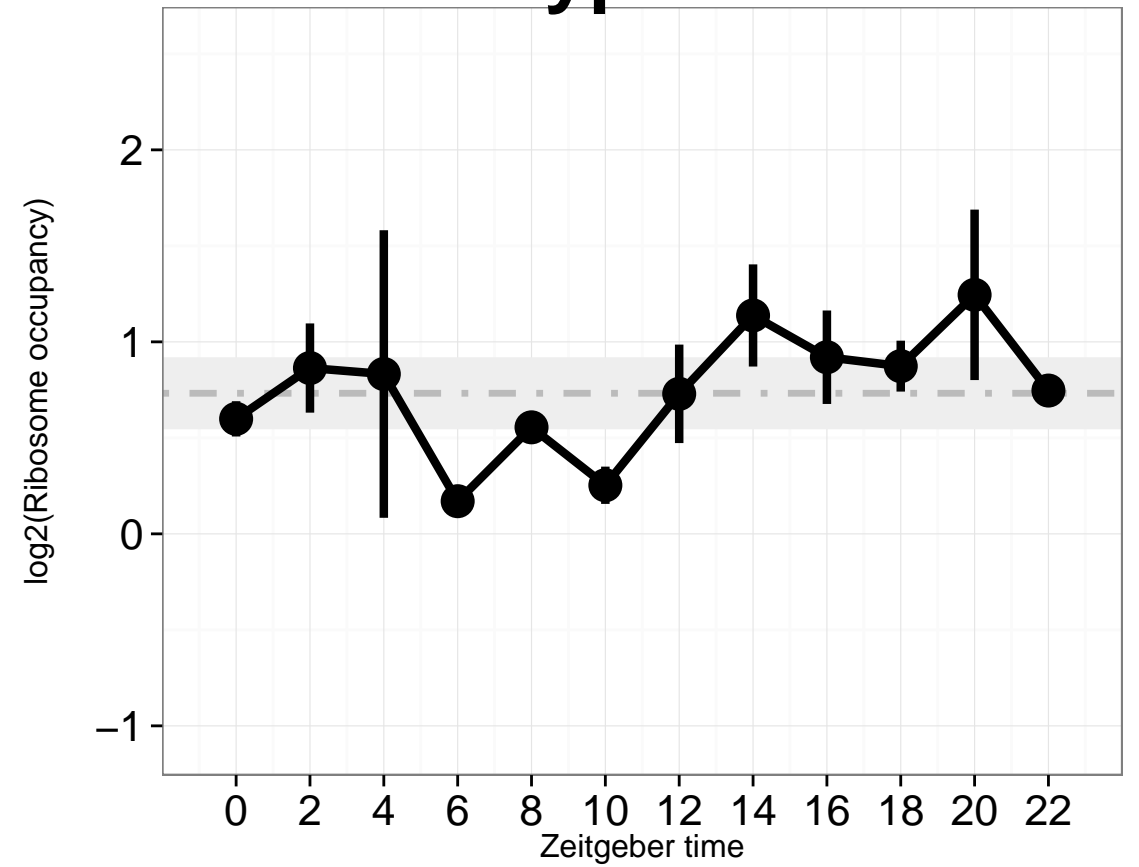

Supplement: Supplementary file 4908 [file 1]

# Rcan1

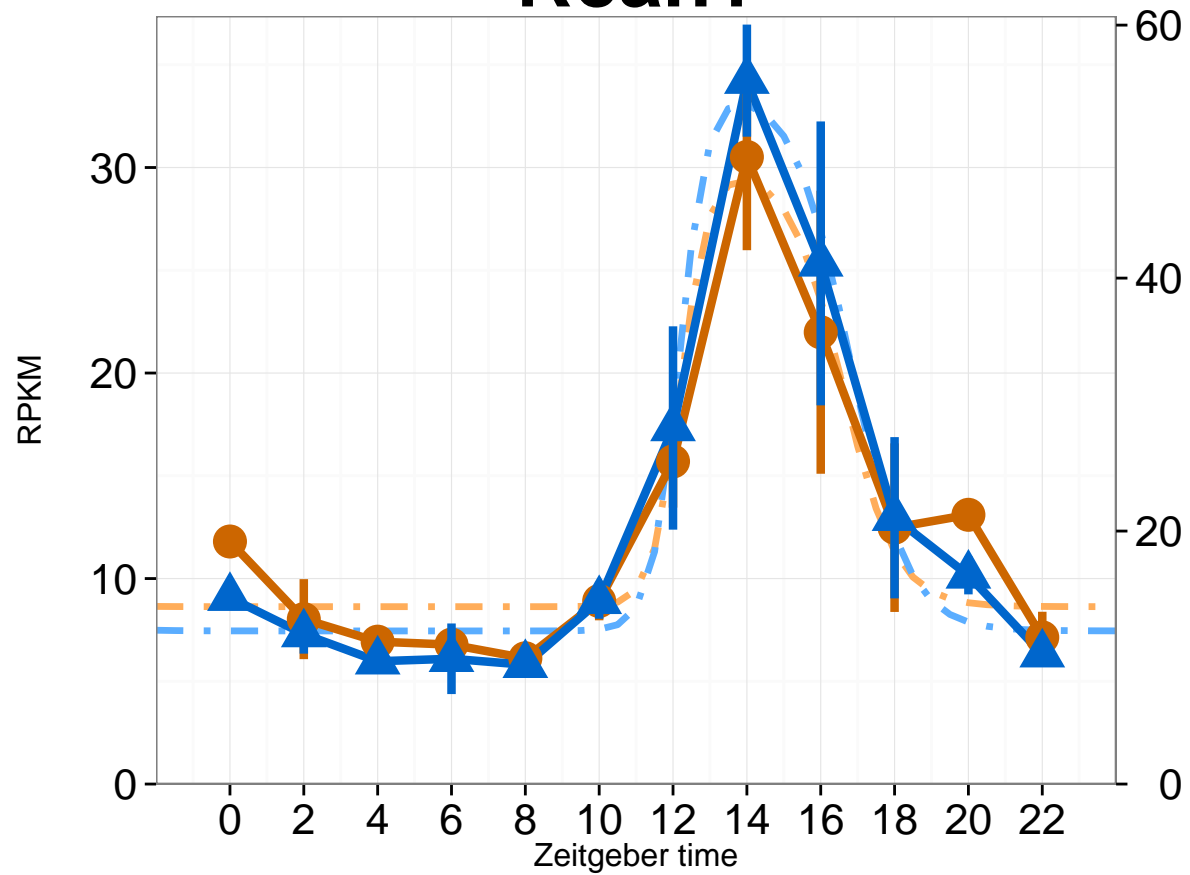

# Rcan1

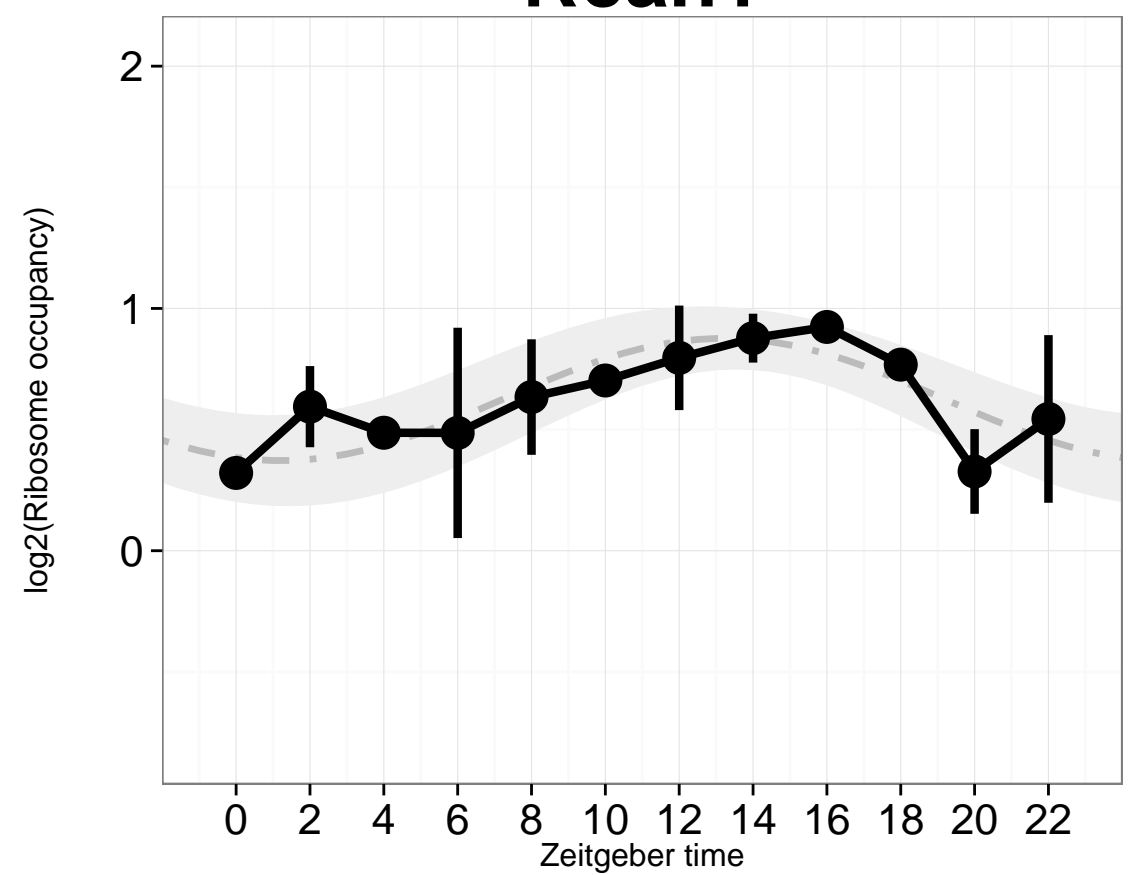

Supplement: Supplementary file 4909 [file 1]

## Btbd2

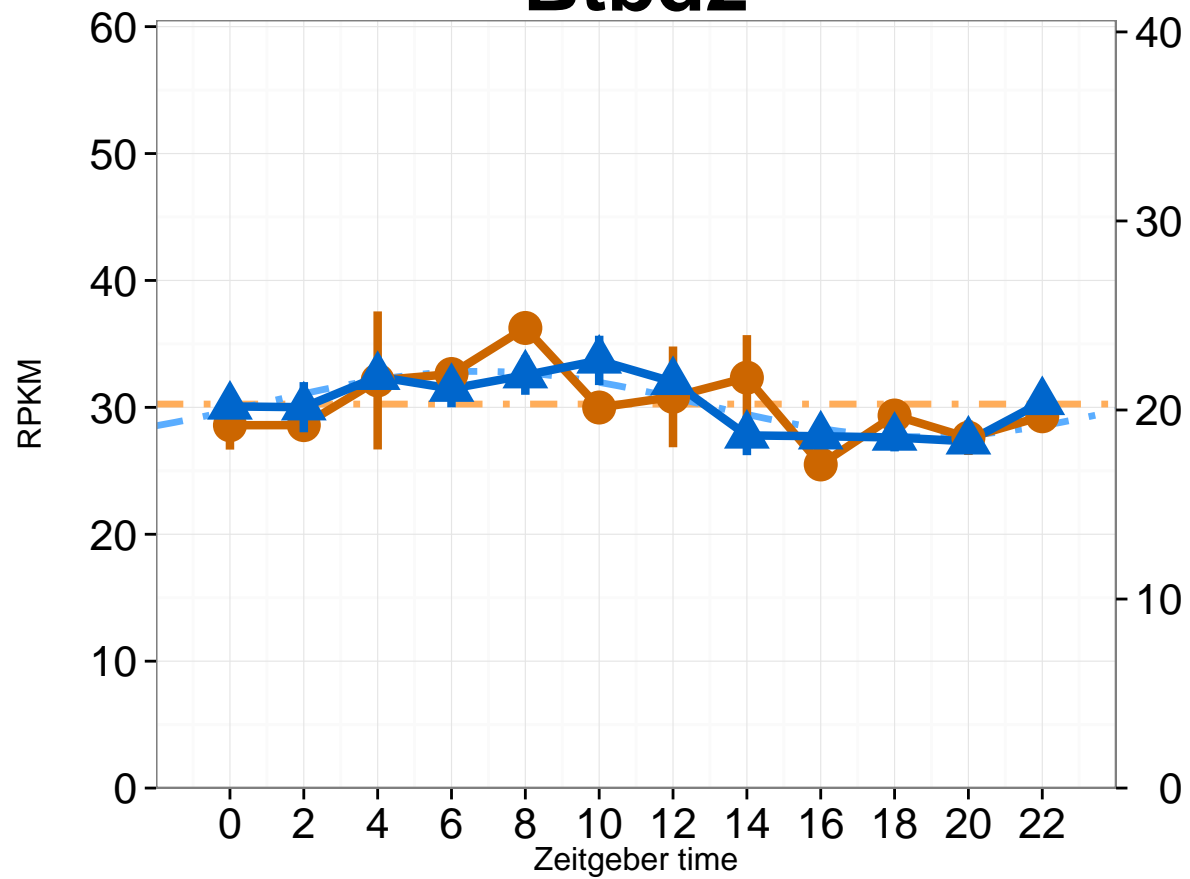

## Btbd2

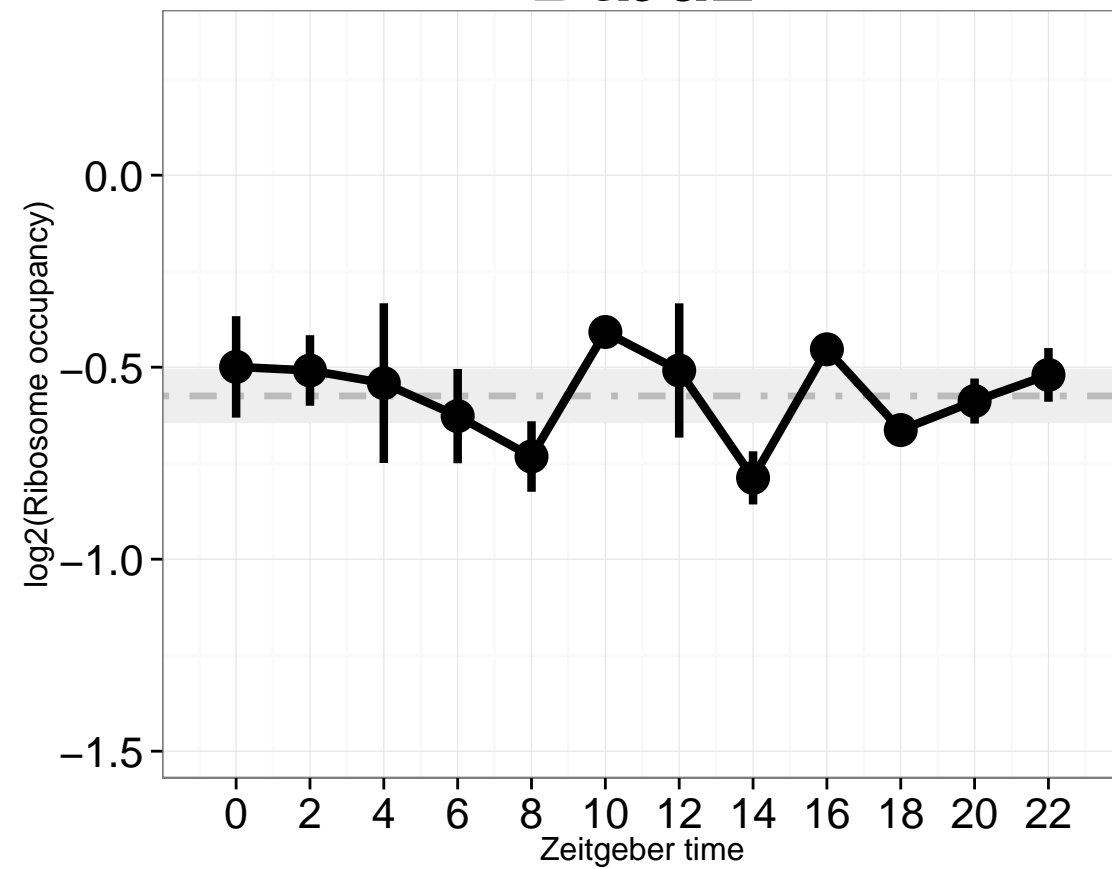

Supplement: Supplementary file 4910 [file 1]

# Smim3

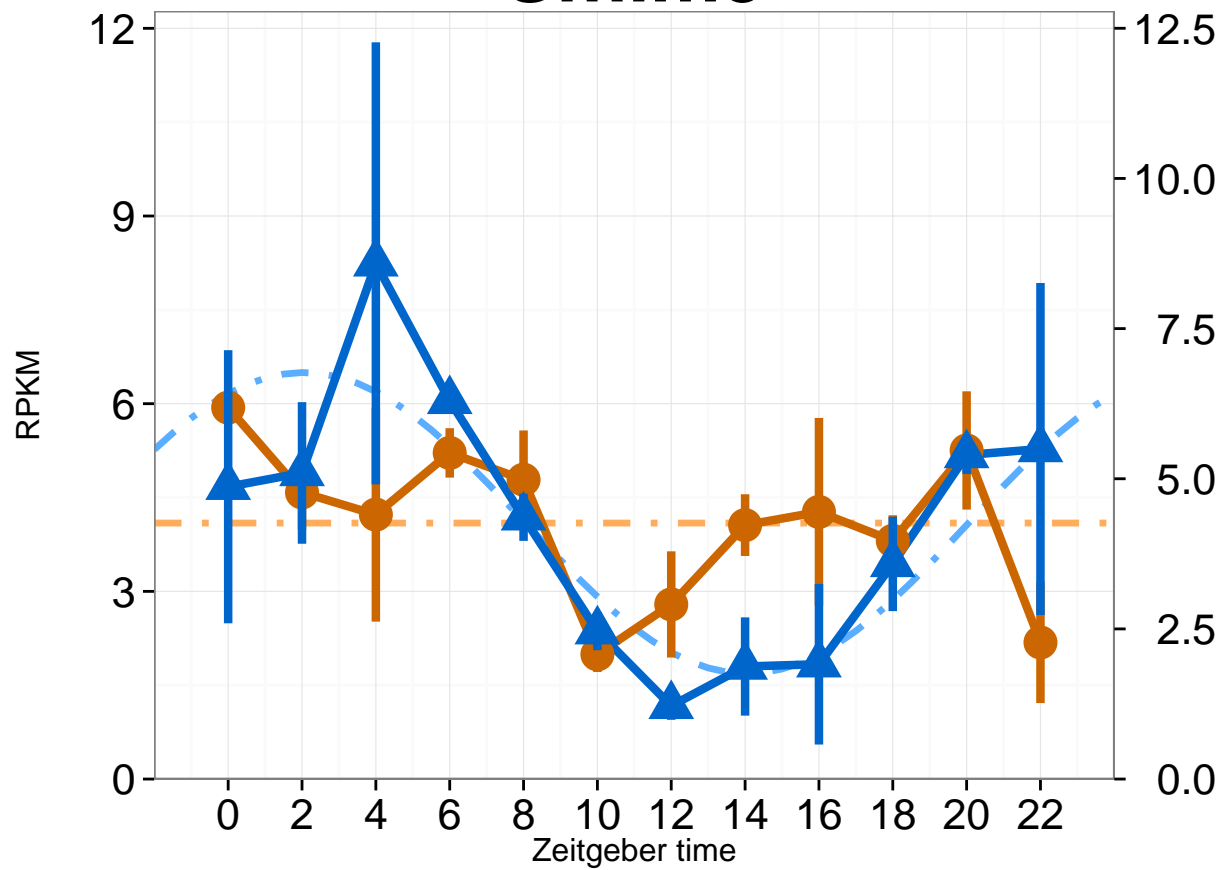

# Smim3

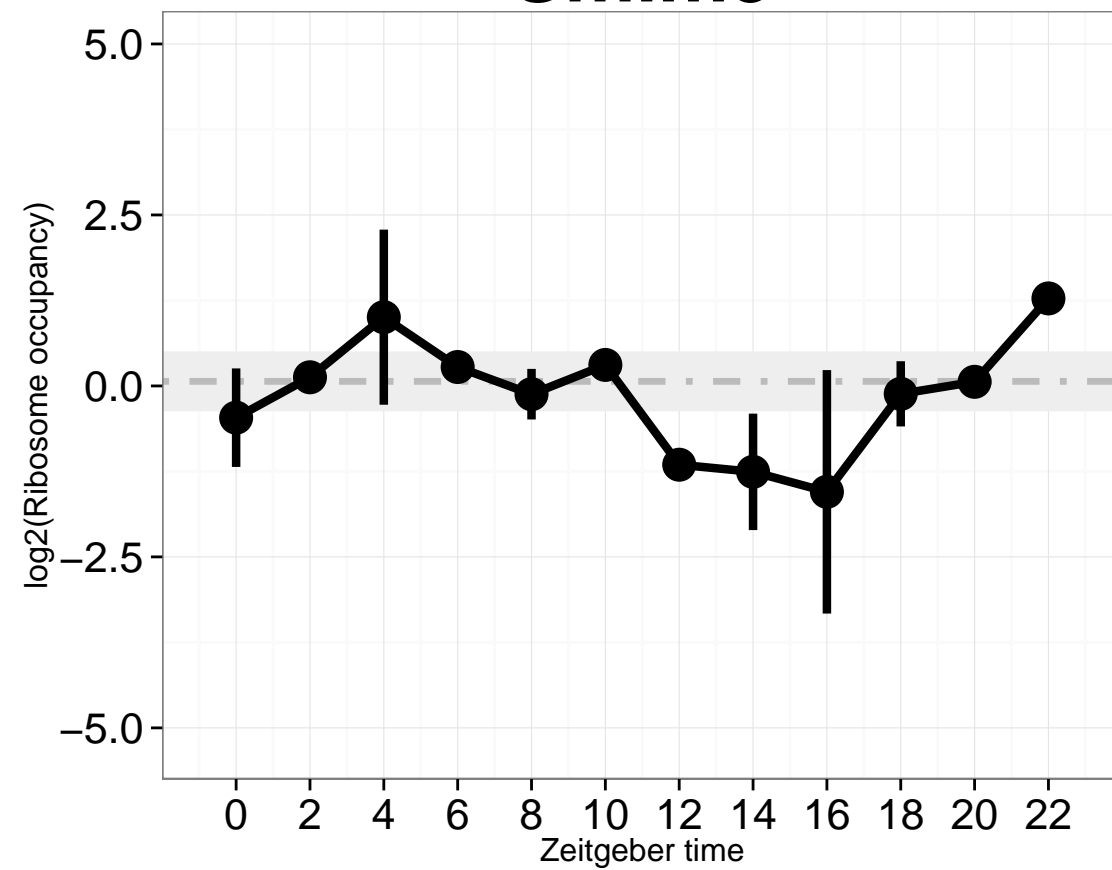

Supplement: Supplementary file 4911 [file 1]

## Snx19

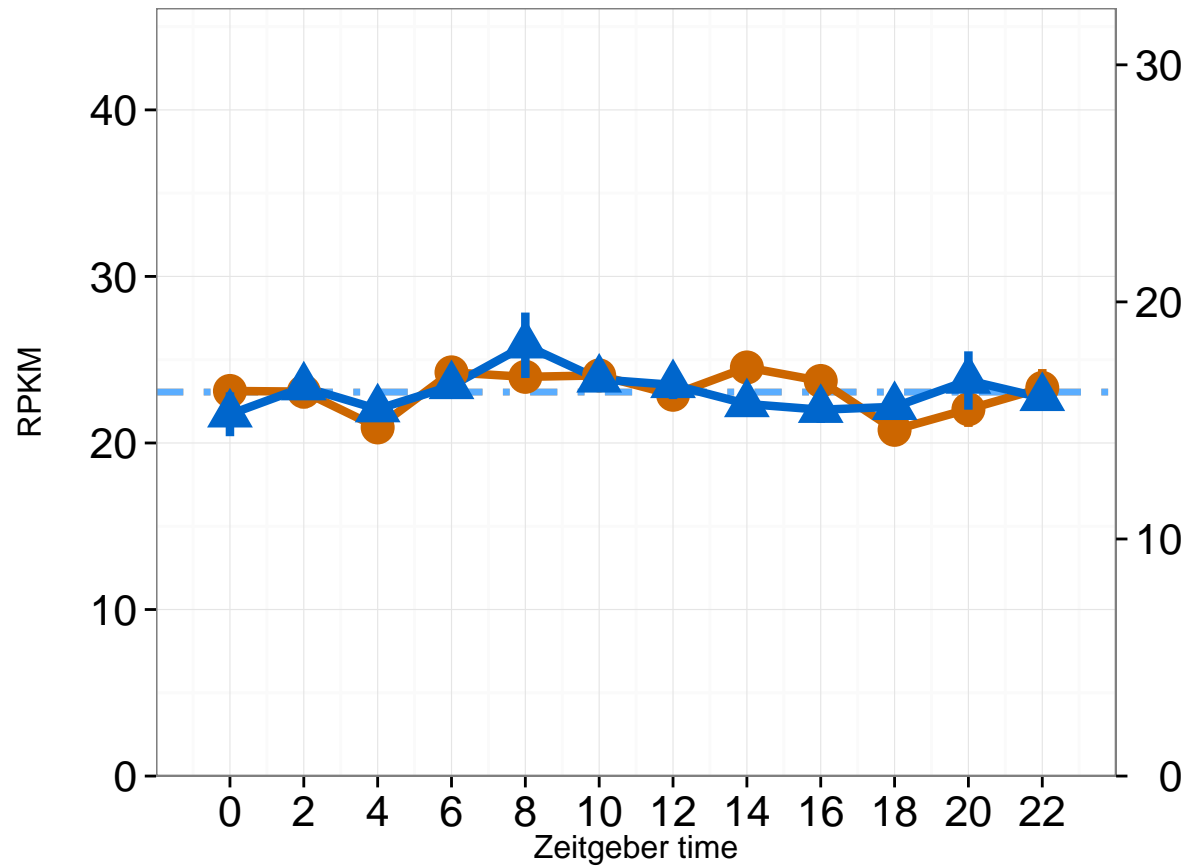

## Snx19

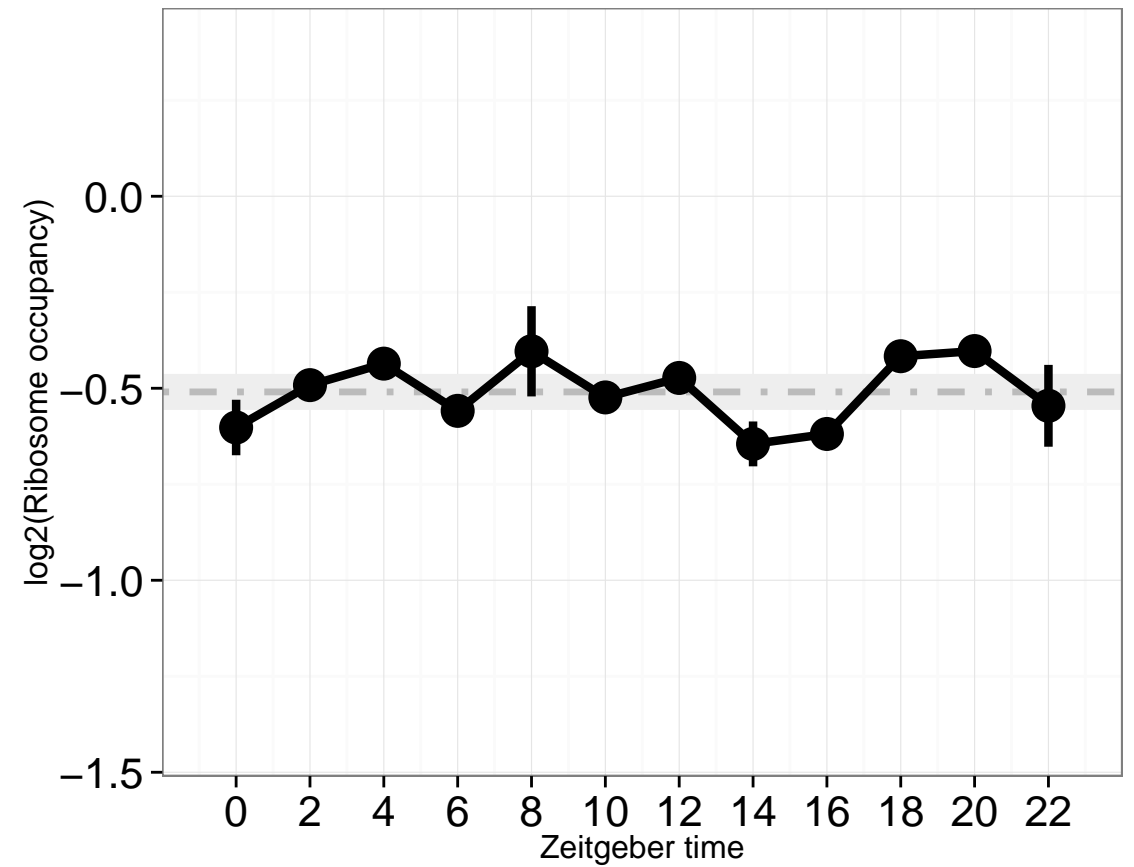

Supplement: Supplementary file 4912 [file 1]

## Dync2li1

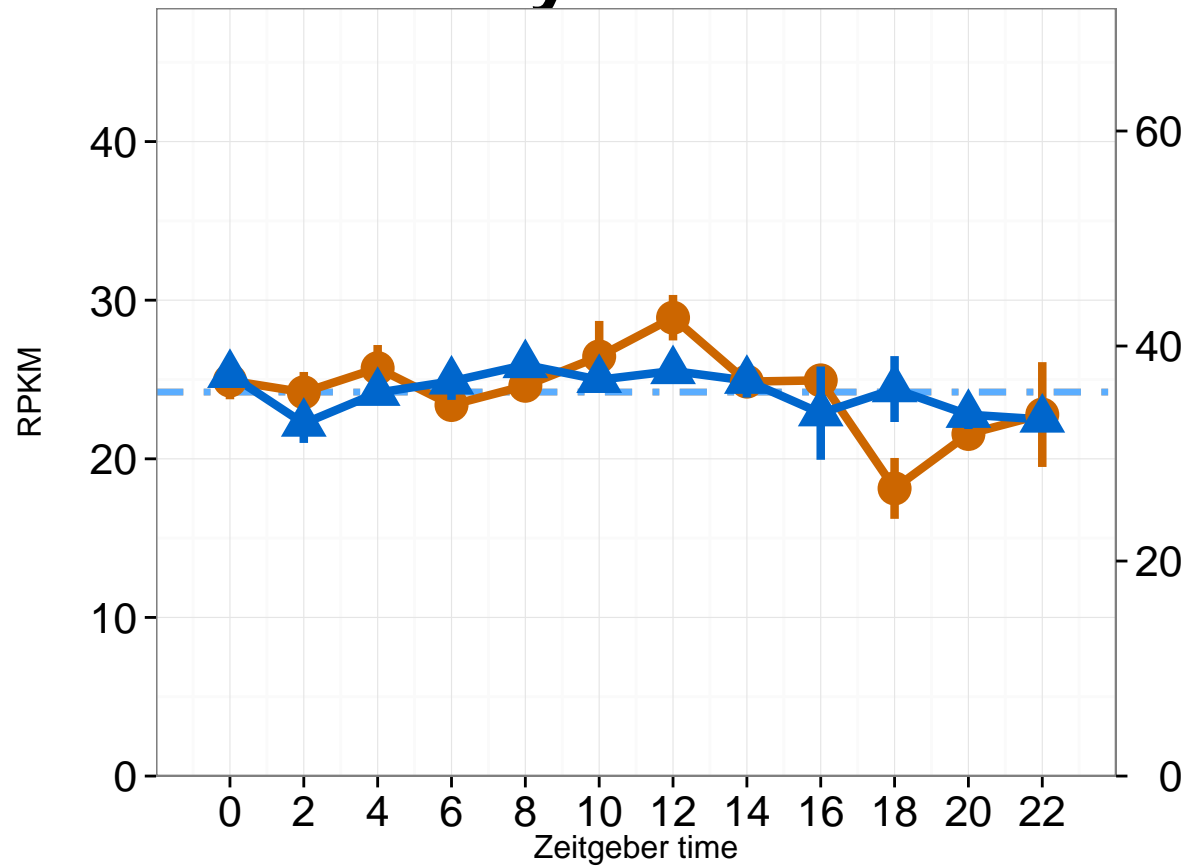

## Dync2li1

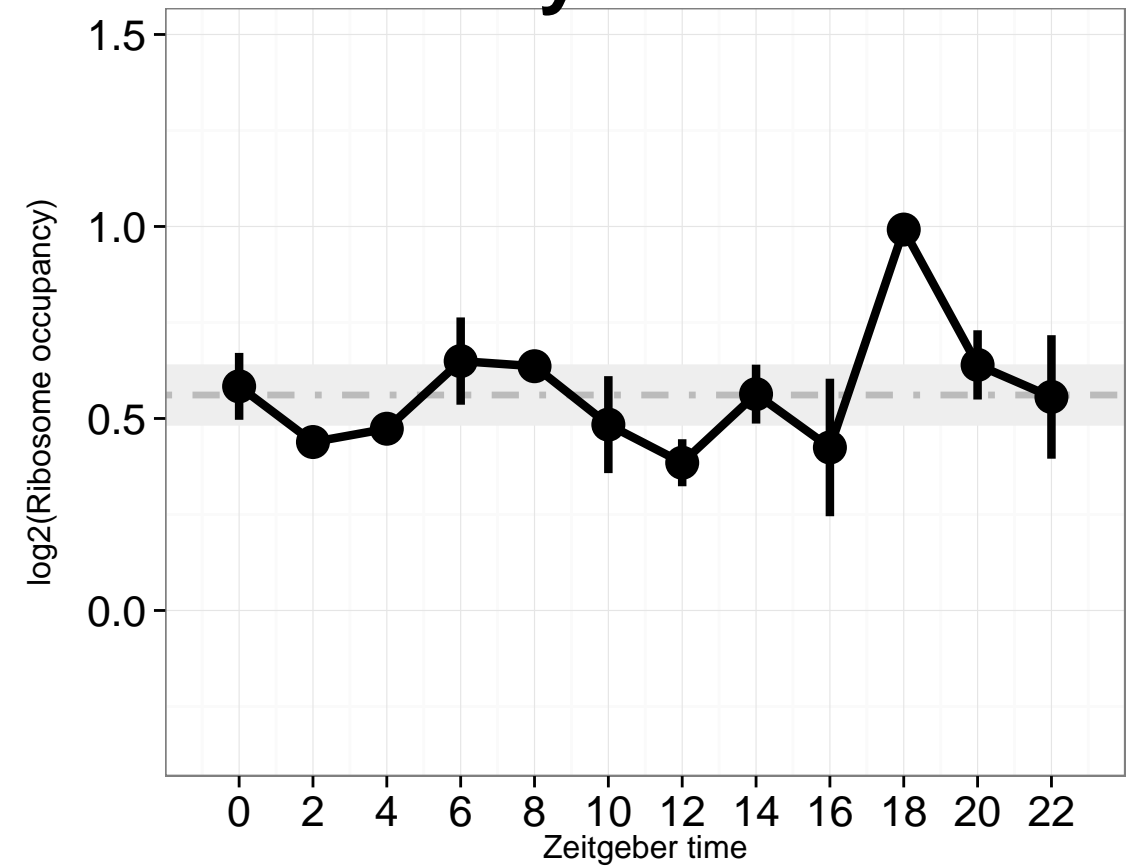

Supplement: Supplementary file 4913 [file 1]

# Mapkap1

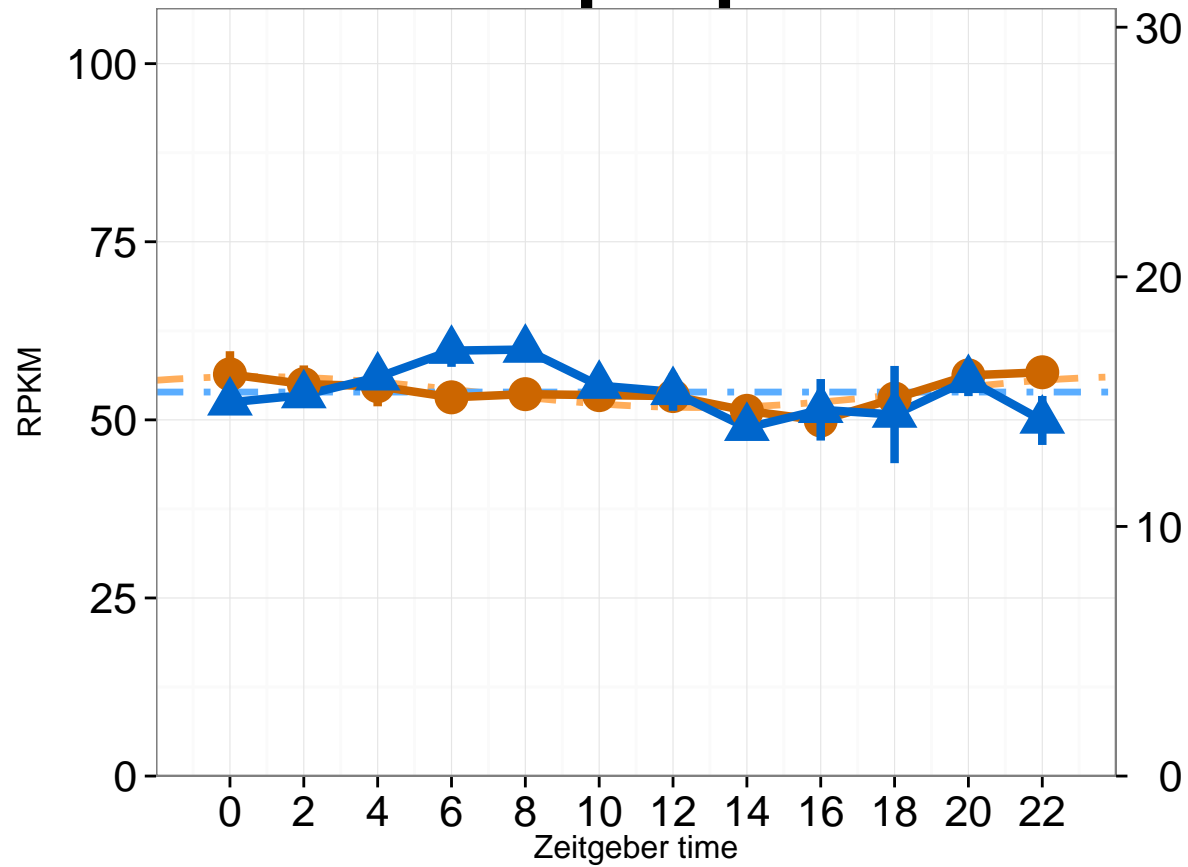

# Mapkap1

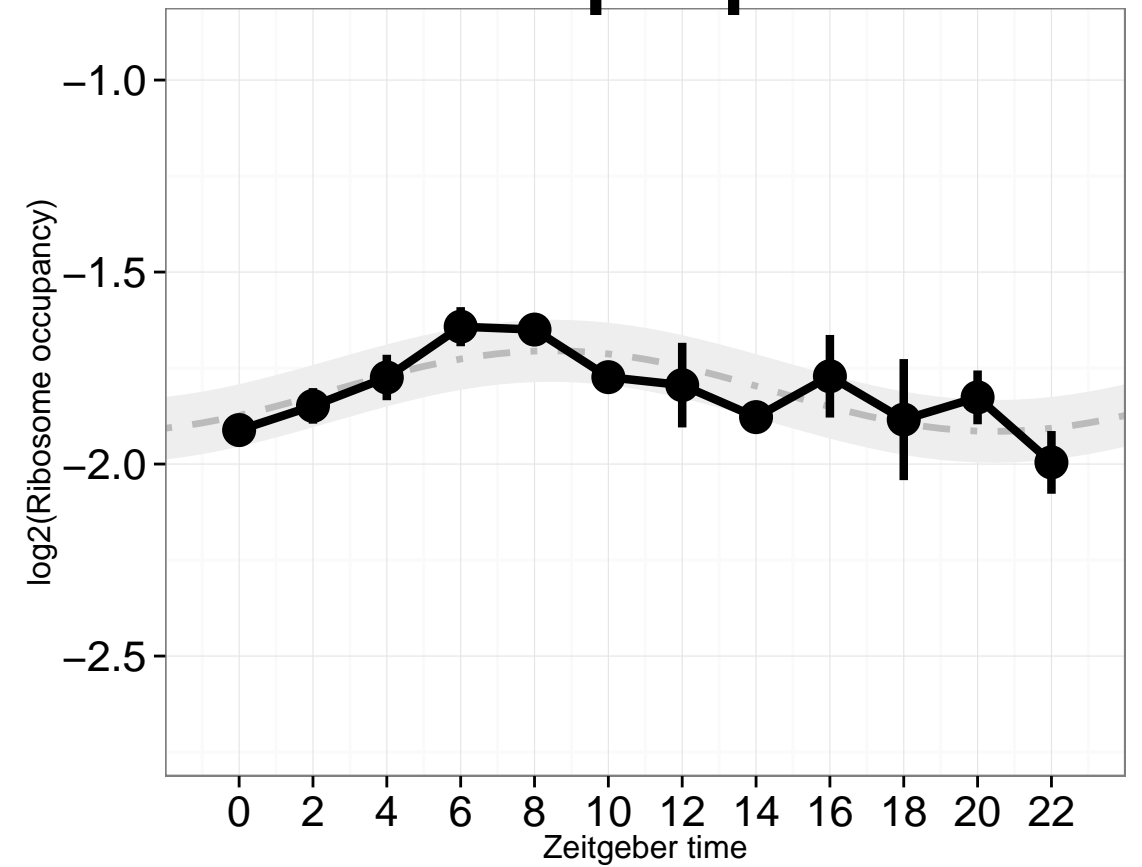

Supplement: Supplementary file 4914 [file 1]

## Tex2

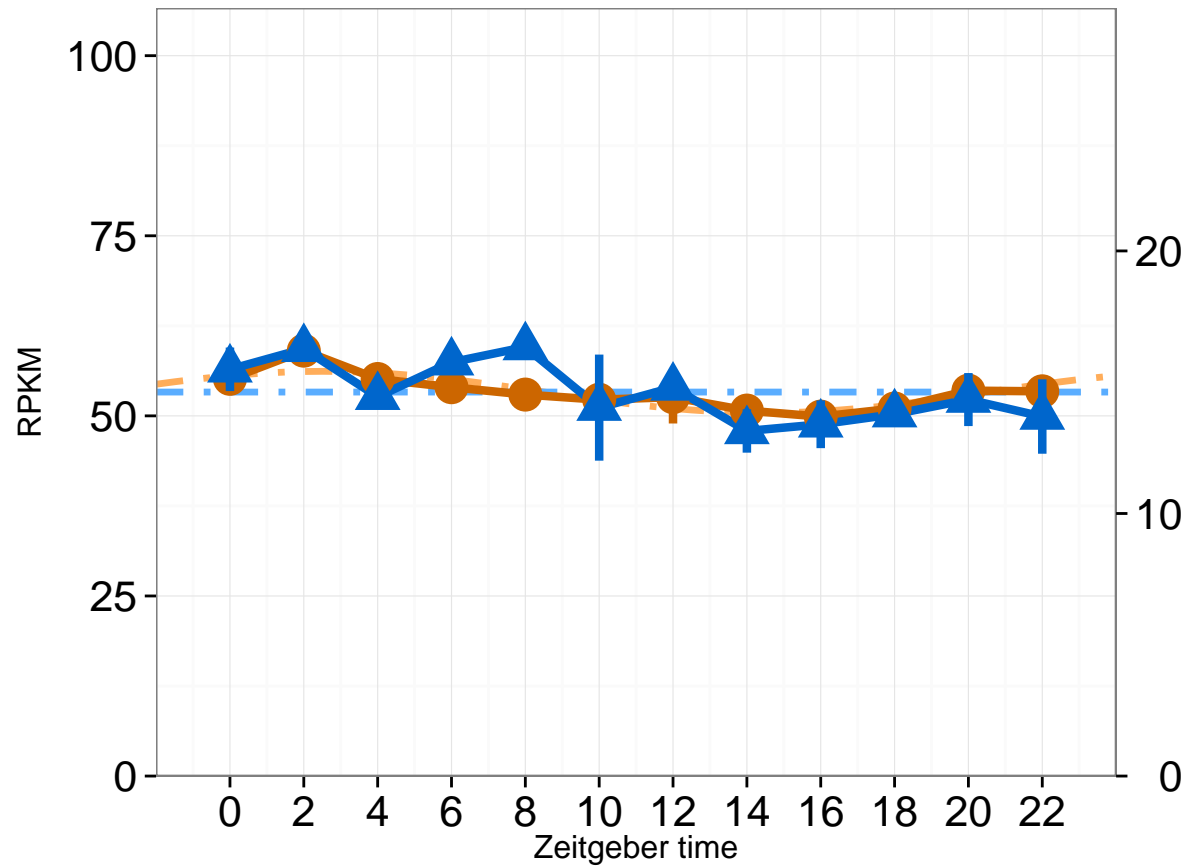

## Tex2

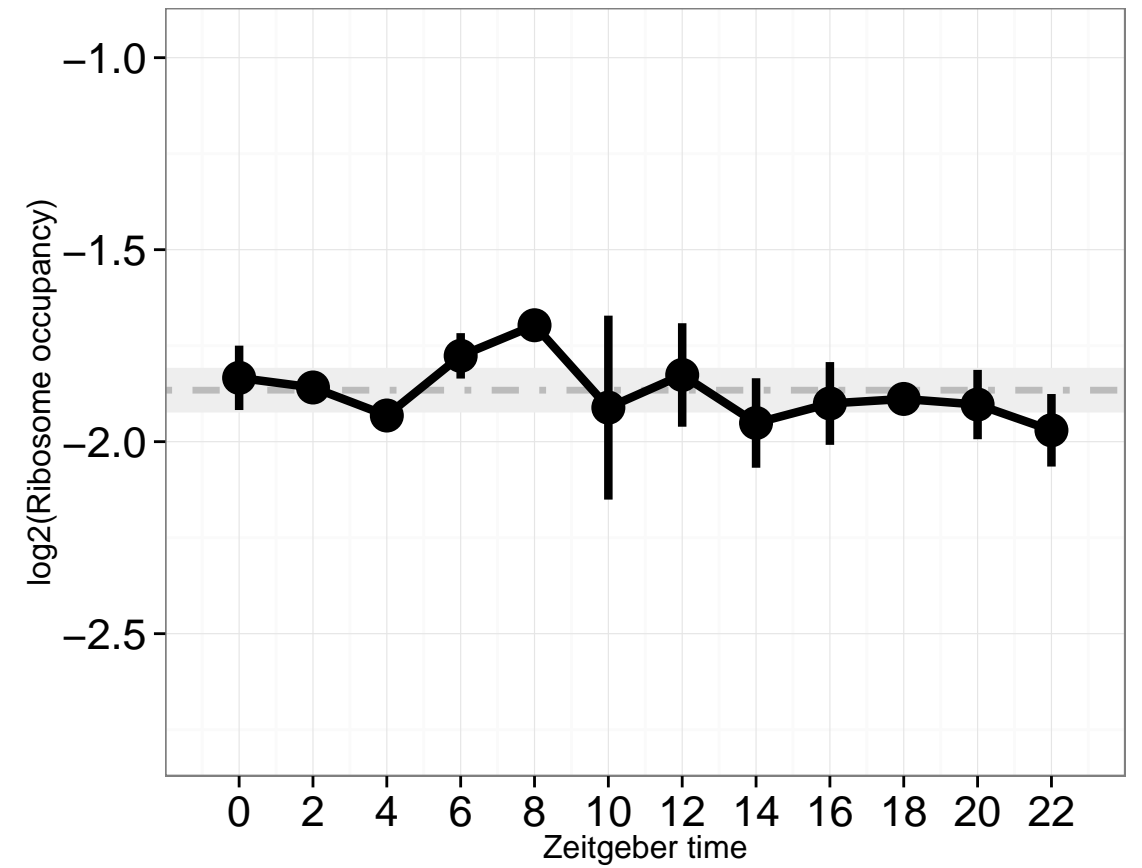

Supplement: Supplementary file 4915 [file 1]

## Shkbp1

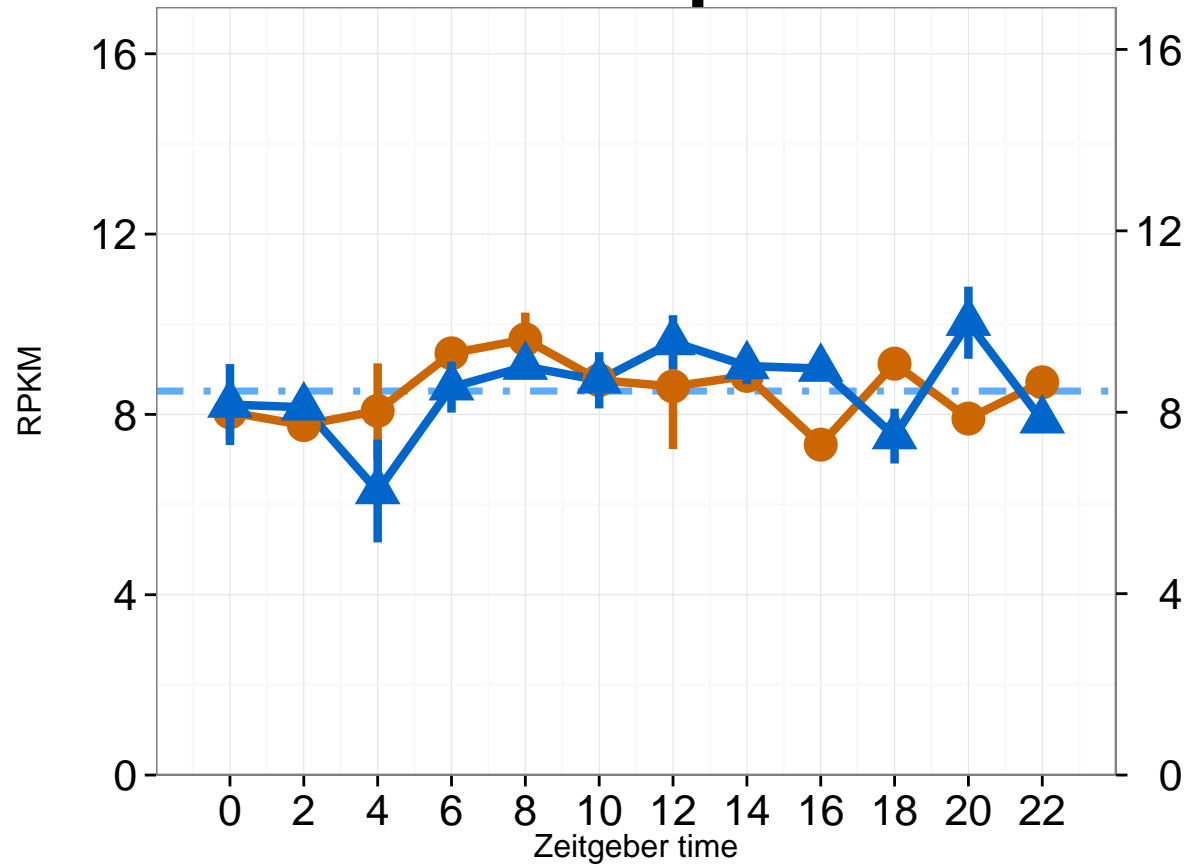

## Shkbp1

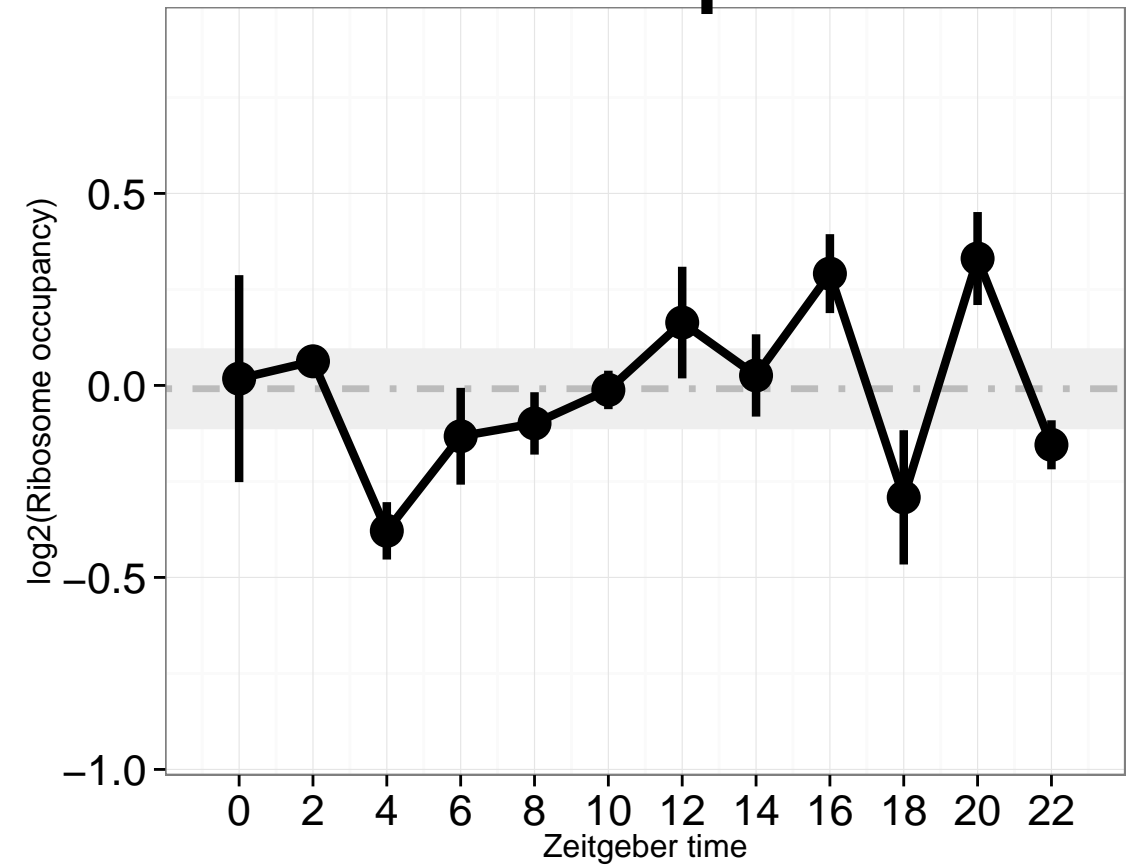

Supplement: Supplementary file 4916 [file 1]

# Nr1h2

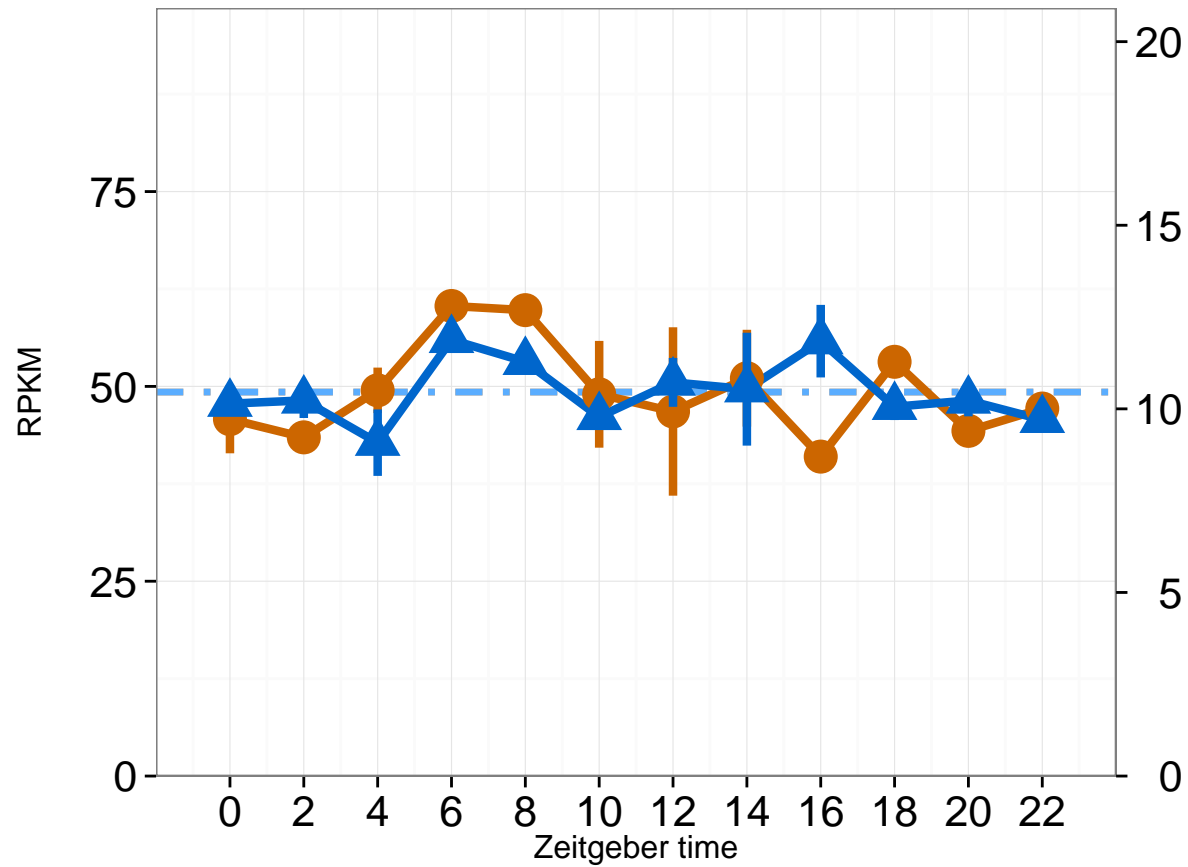

# Nr1h2

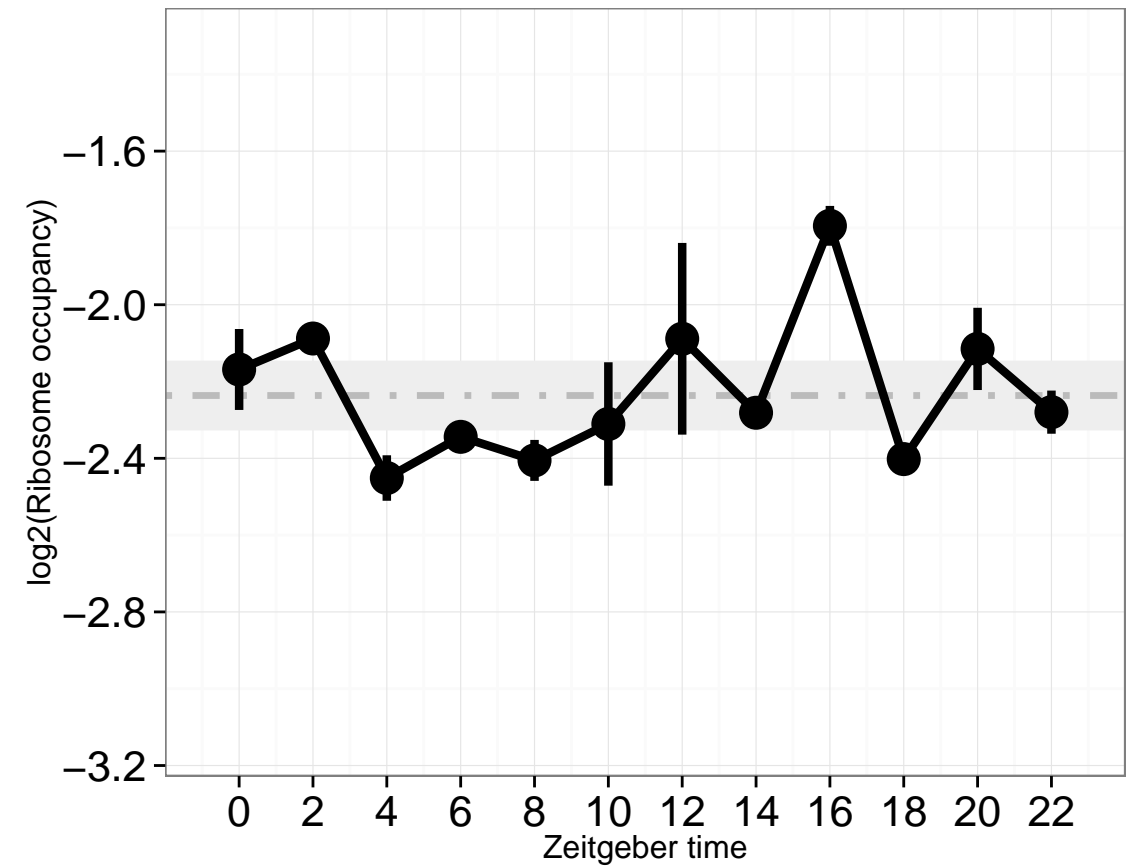

Supplement: Supplementary file 4917 [file 1]

## Vps53

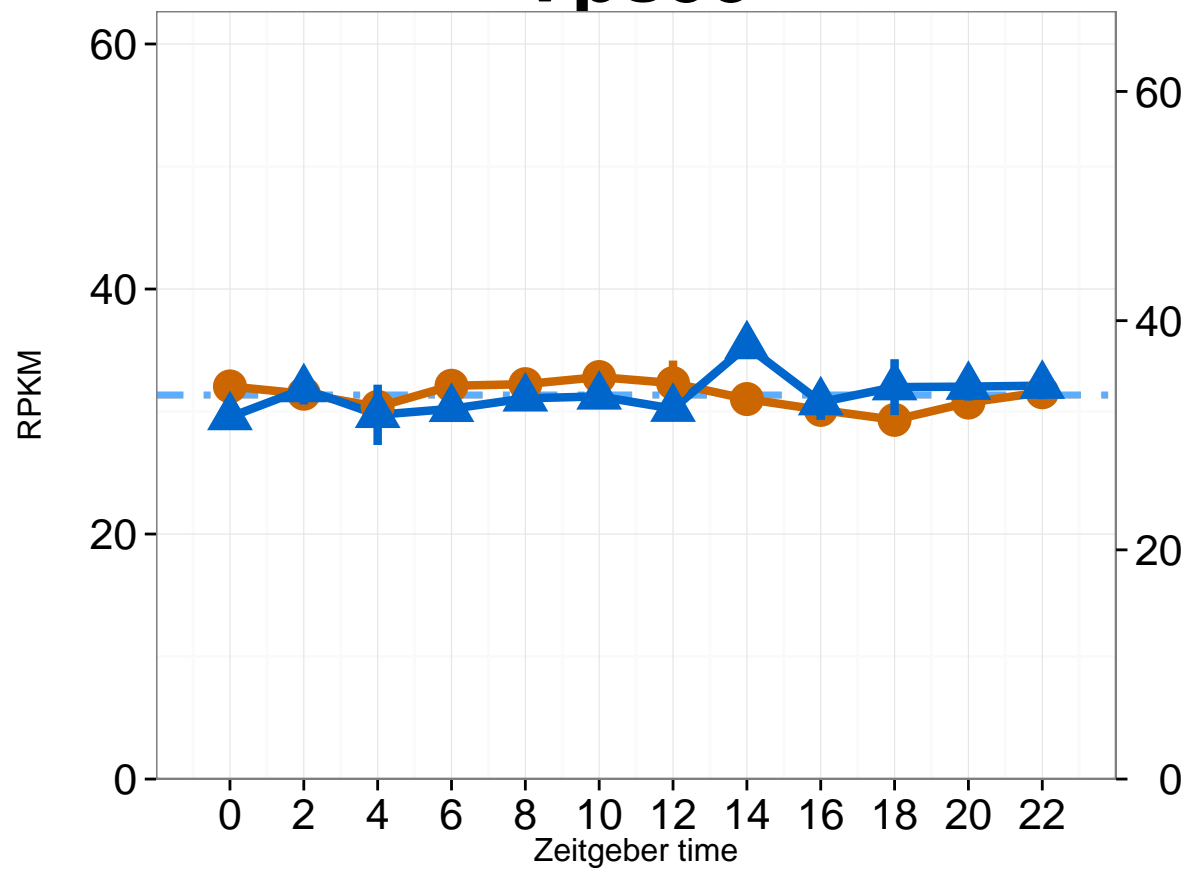

## Vps53

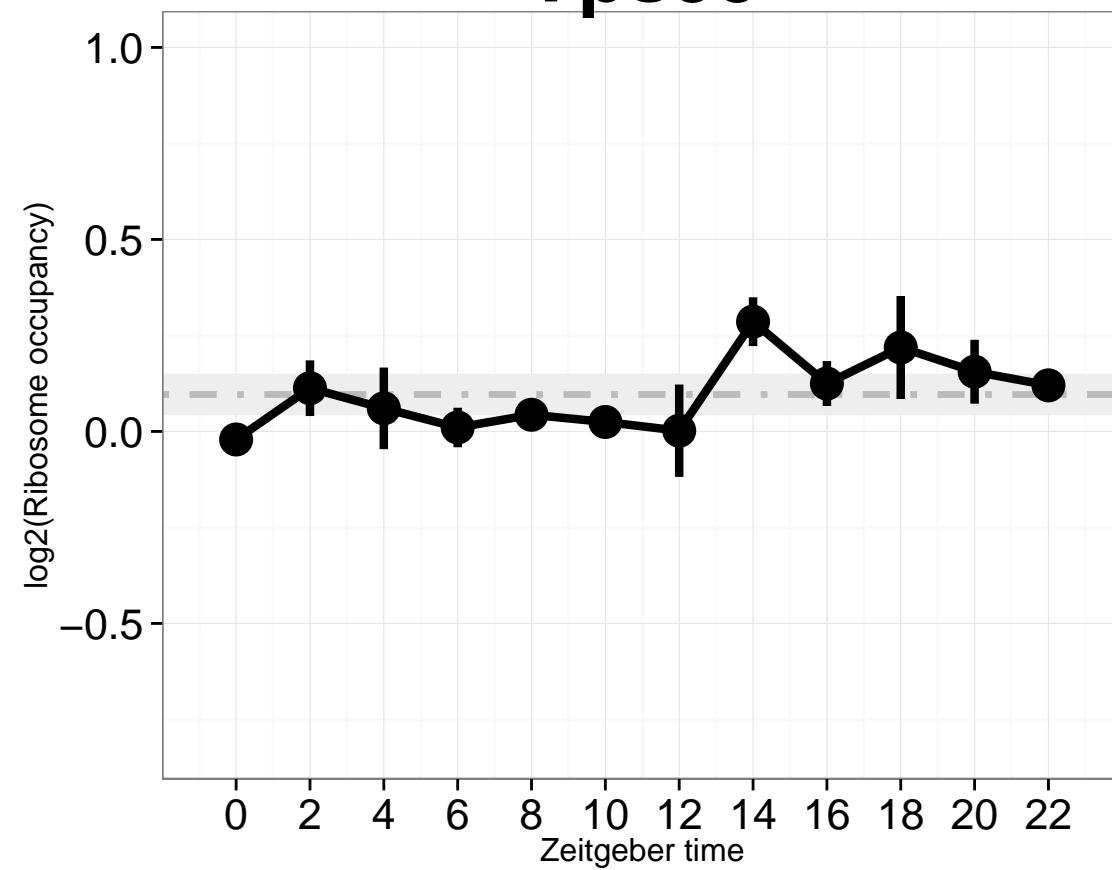

Supplement: Supplementary file 4918 [file 1]

## Terf1

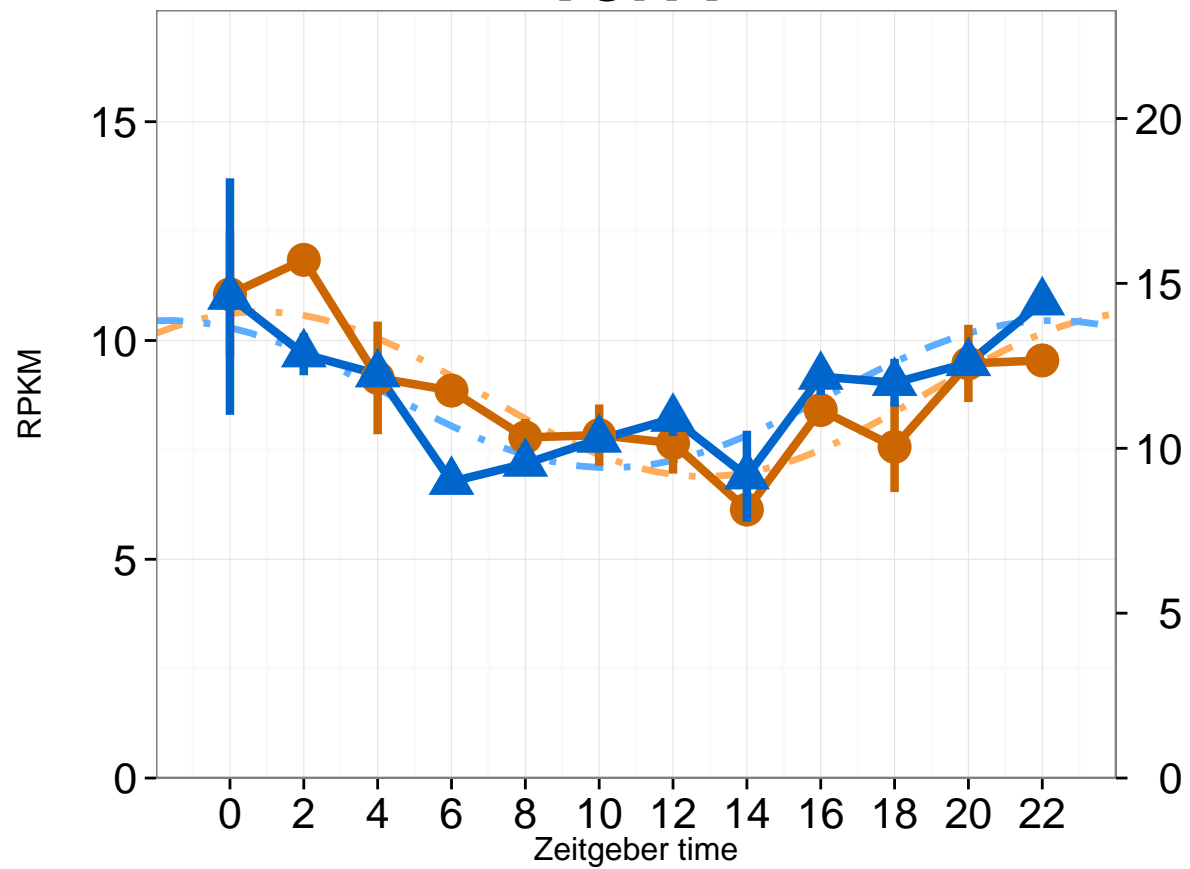

## Terf1

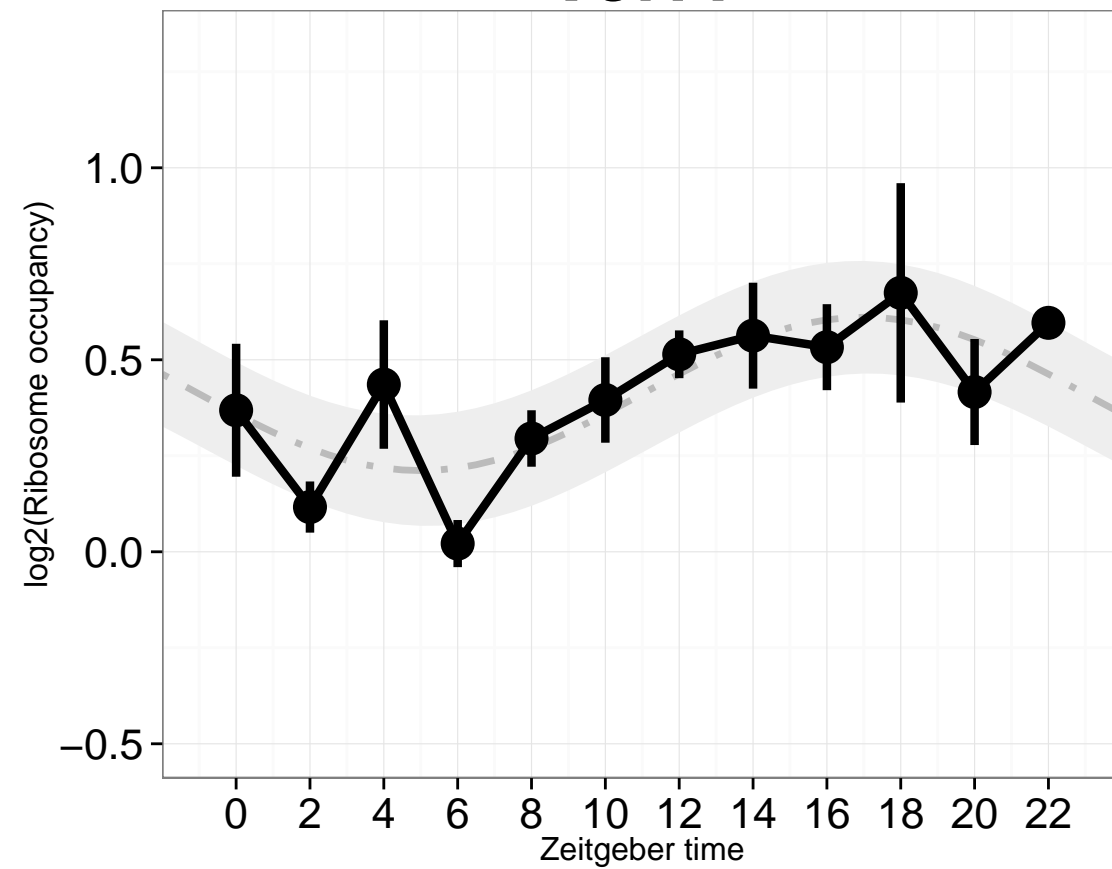

Supplement: Supplementary file 4919 [file 1]

# Cnot7

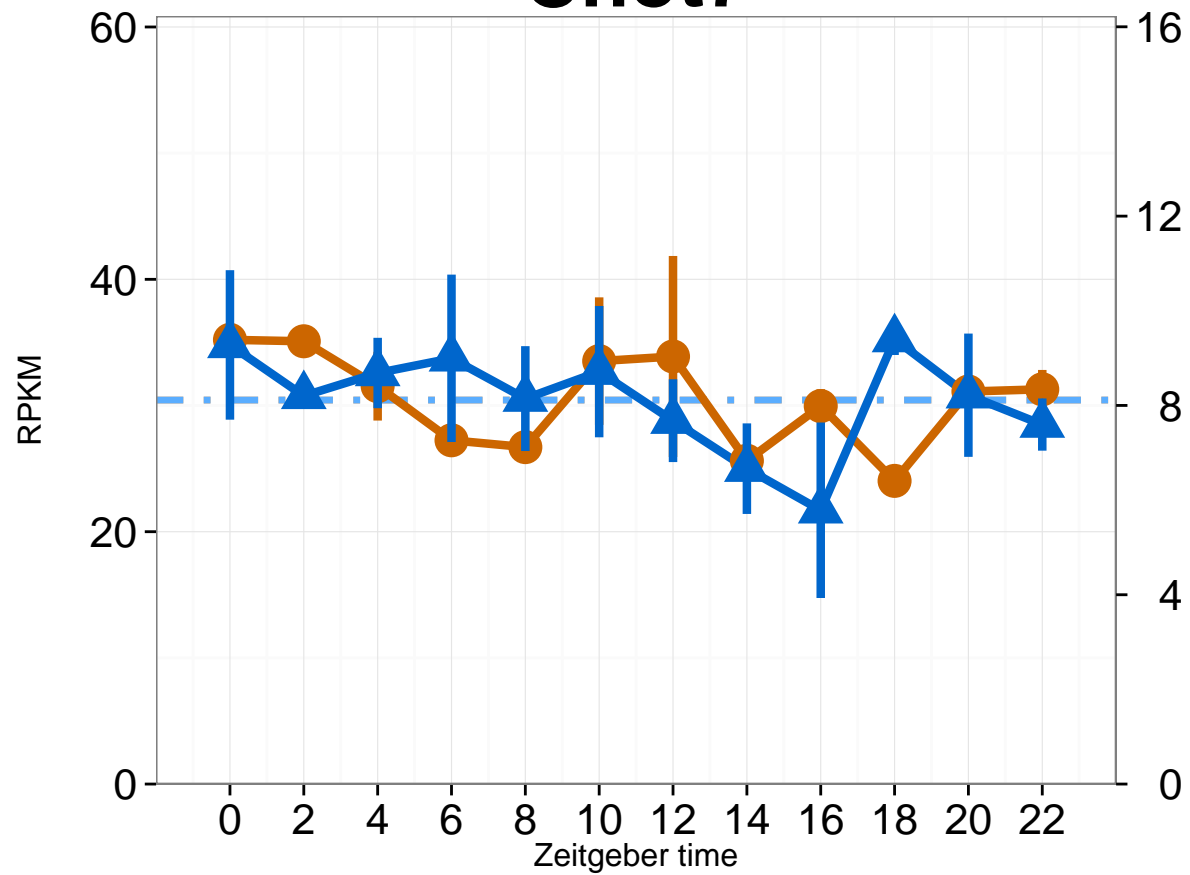

# Cnot7

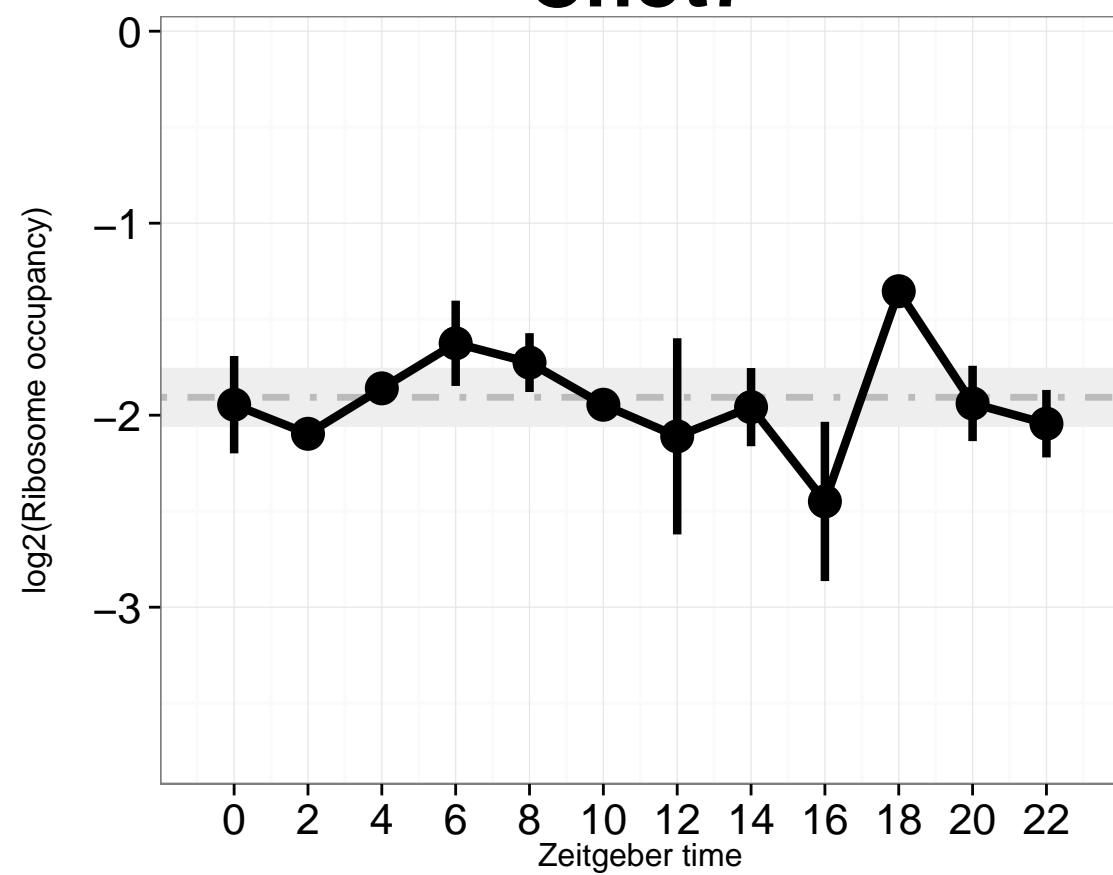

Supplement: Supplementary file 4920 [file 1]
