# Supplementary material (part 50 of 133)
Source: publisher figshare collection journal article supplement (https://springernature.figshare.com/articles/dataset/_/4903193)

## Tamm41

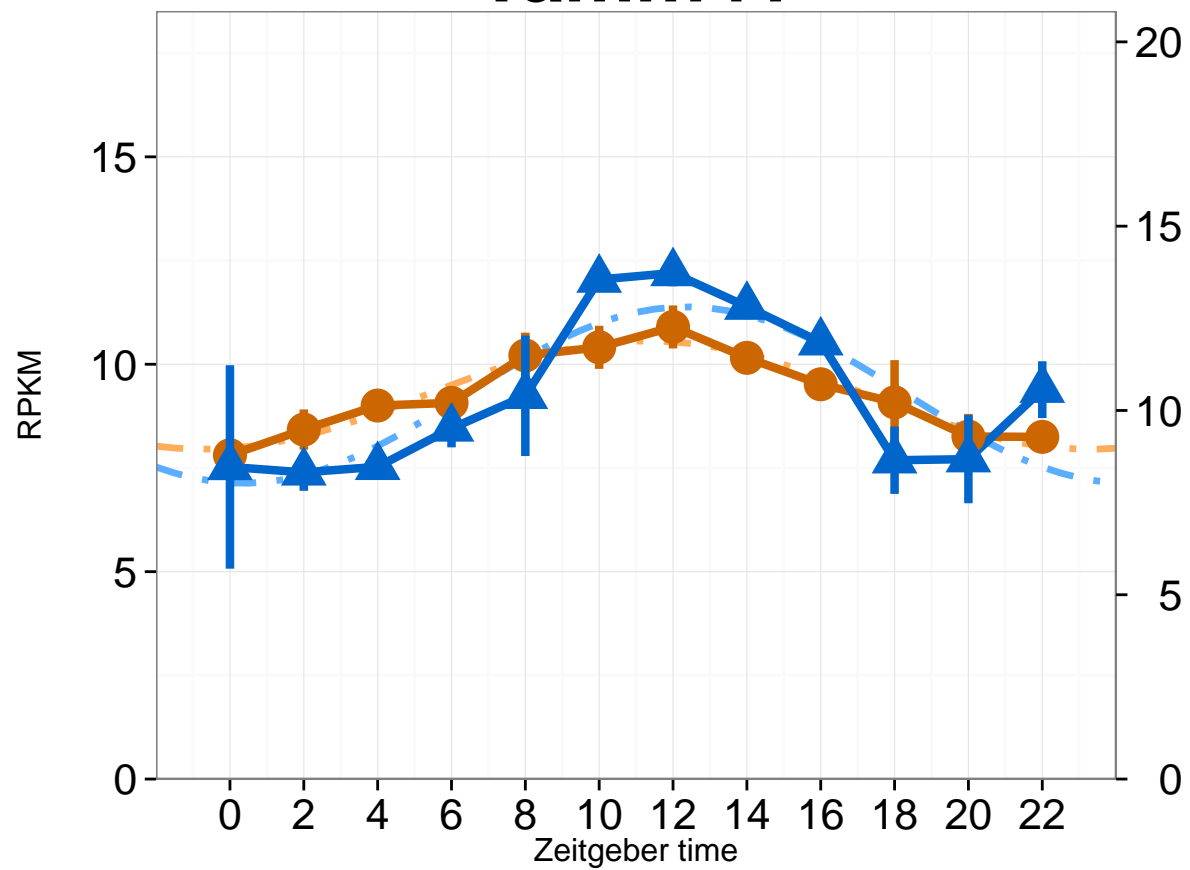

## Tamm41

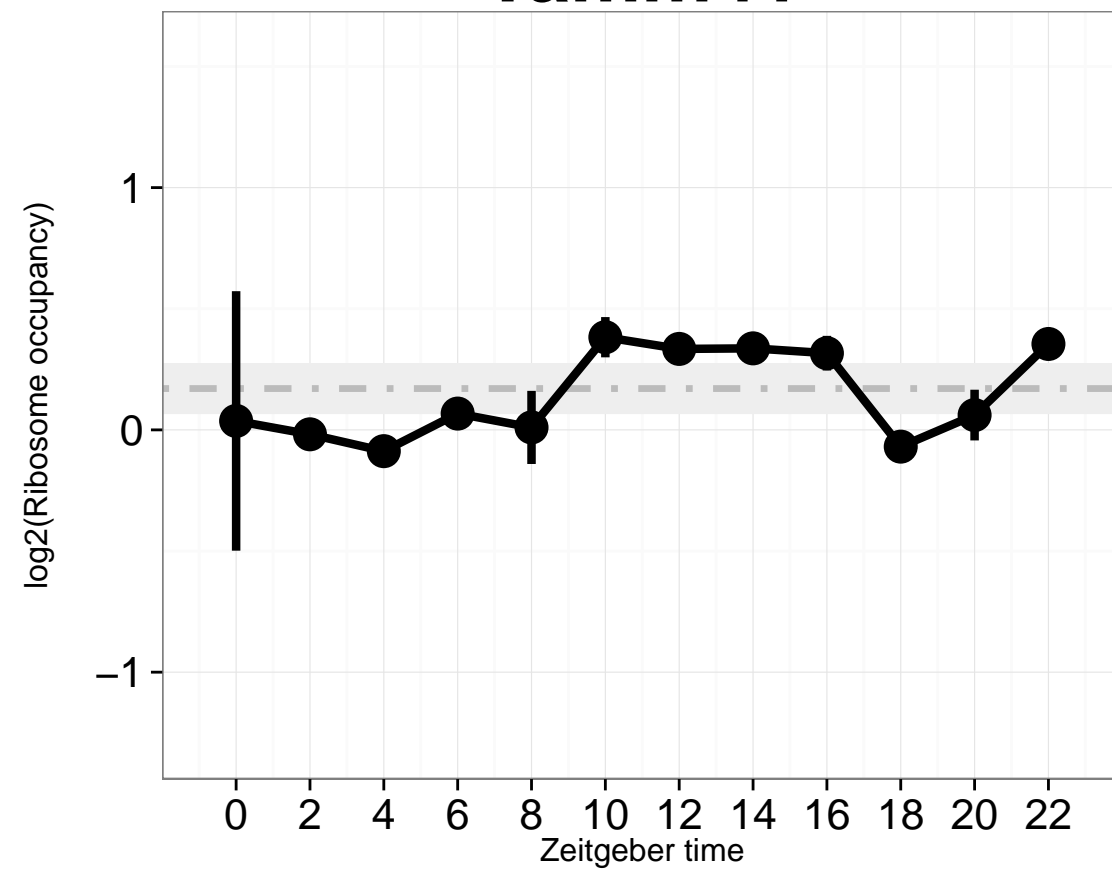

Supplement: Supplementary file 4921 [file 1]

## Apoe

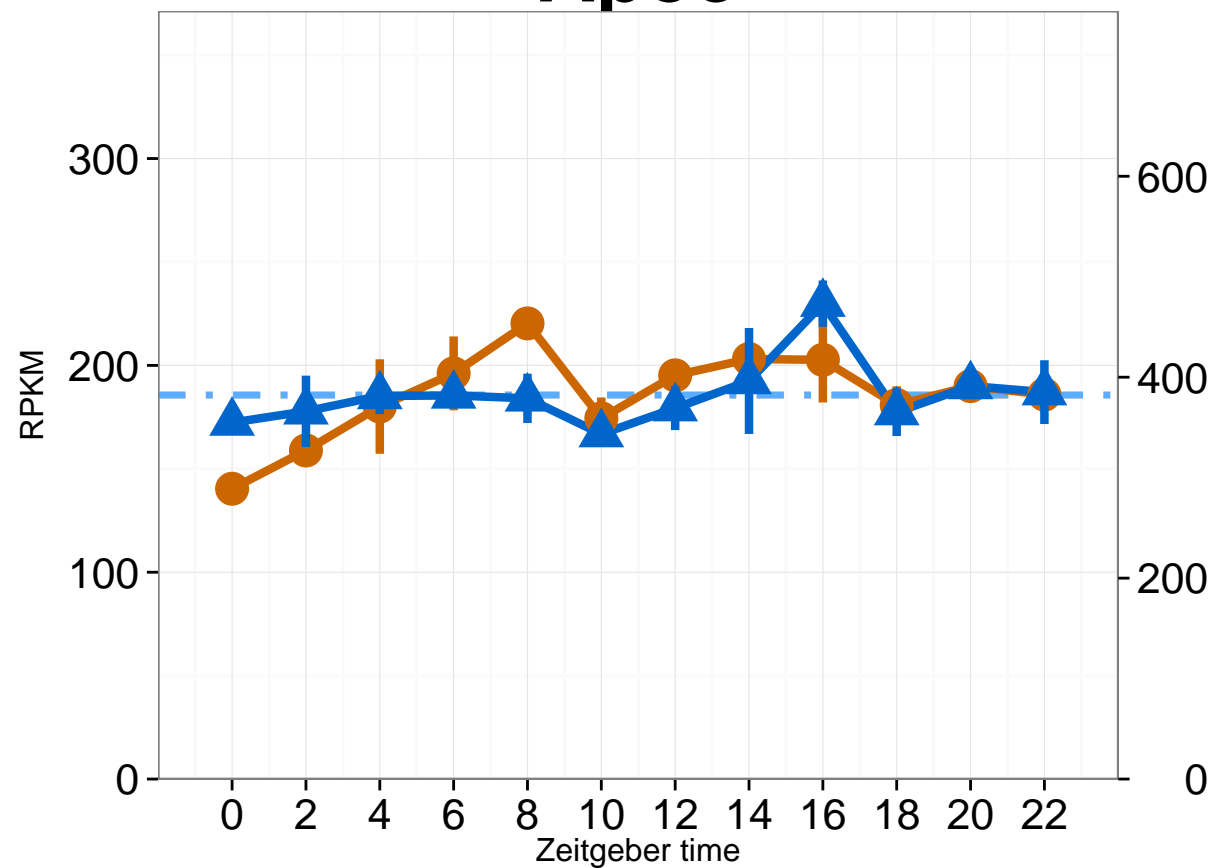

## Apoe

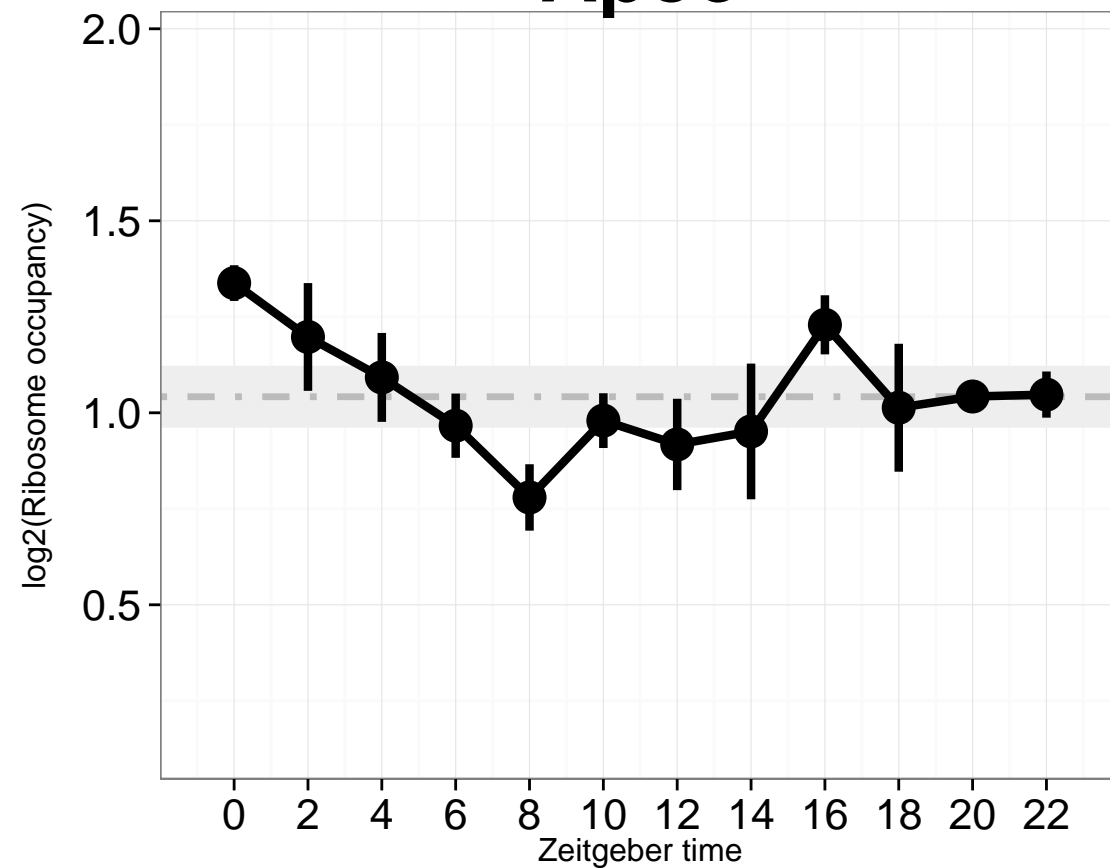

Supplement: Supplementary file 4922 [file 1]

# Lrrc16b

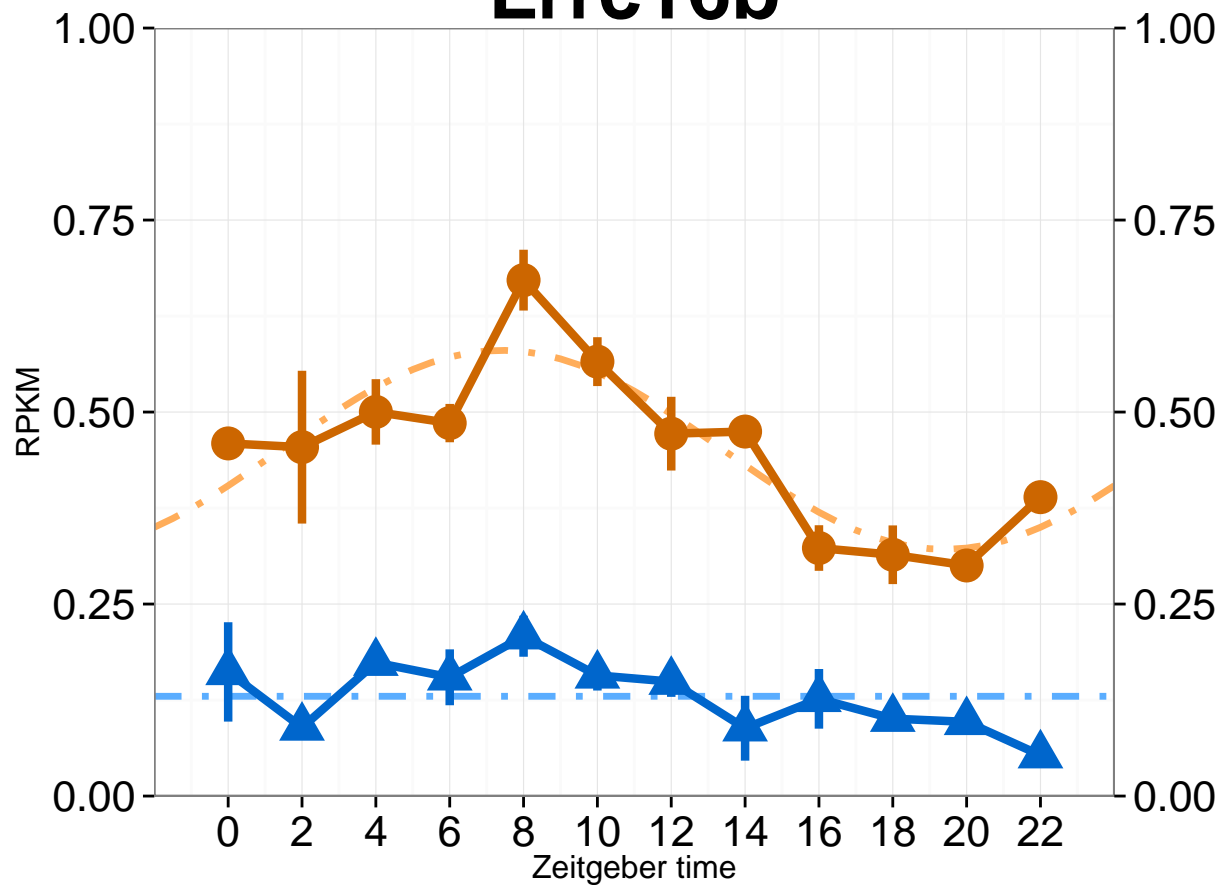

# Lrrc16b

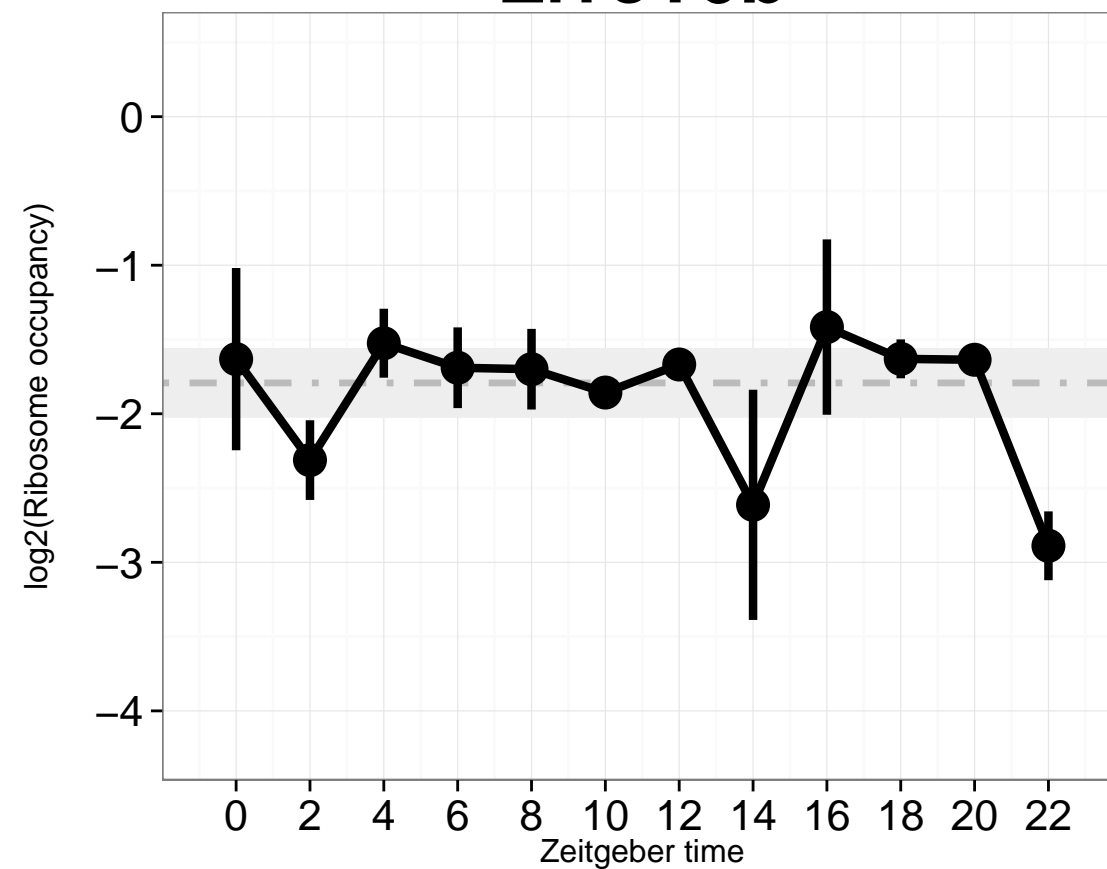

Supplement: Supplementary file 4923 [file 1]

## Rock2

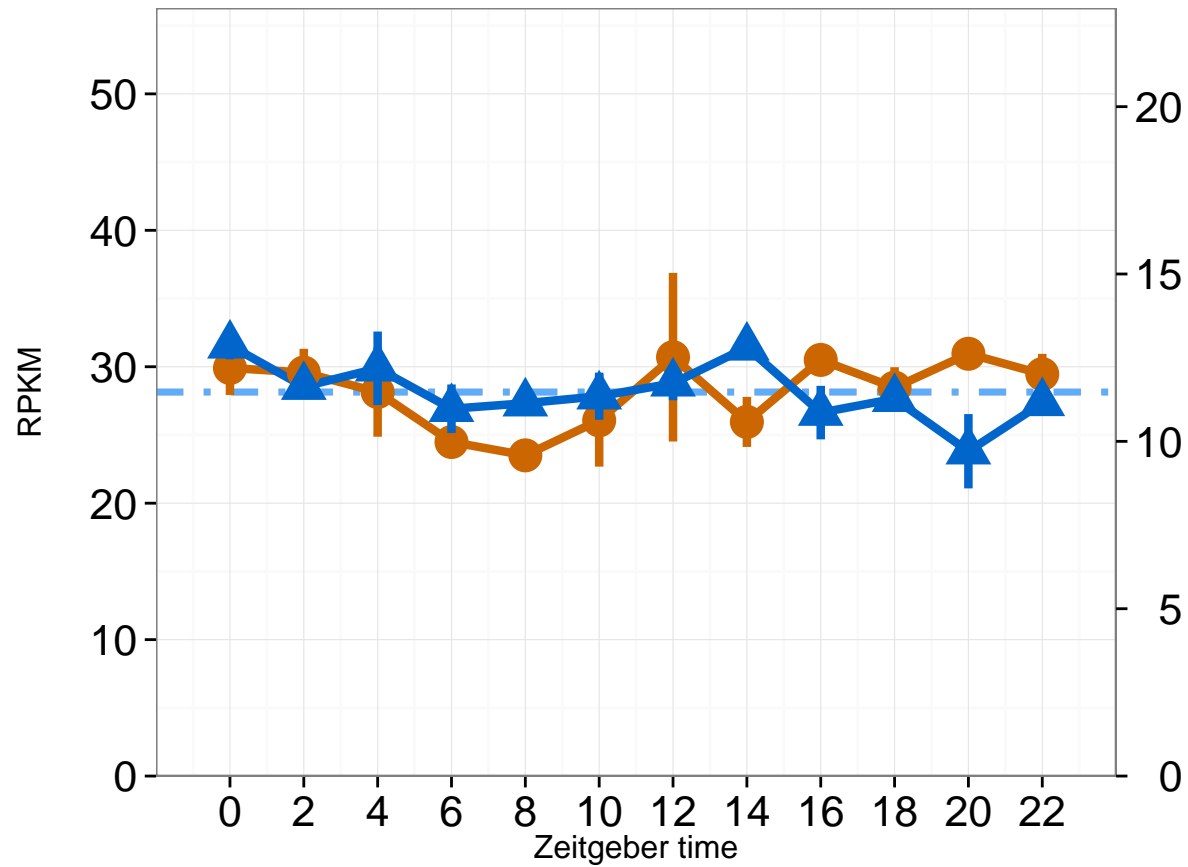

## Rock2

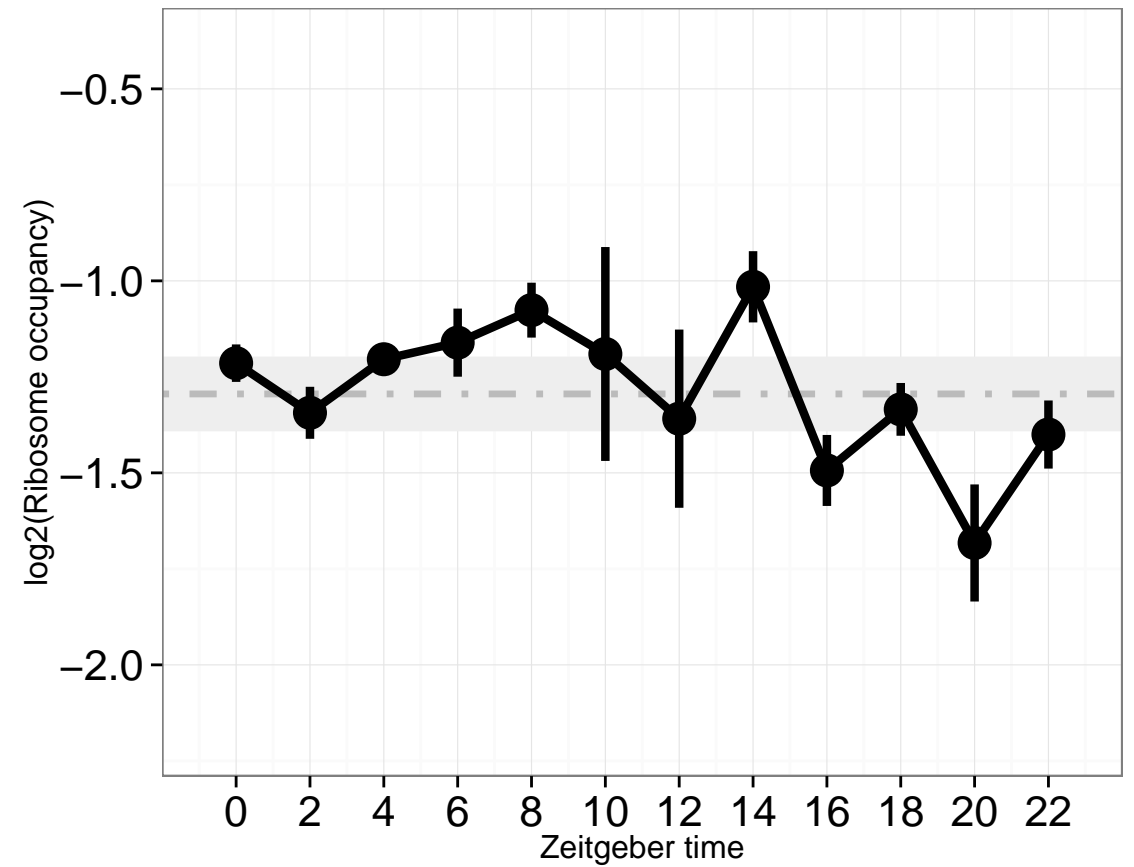

Supplement: Supplementary file 4924 [file 1]

## Hck

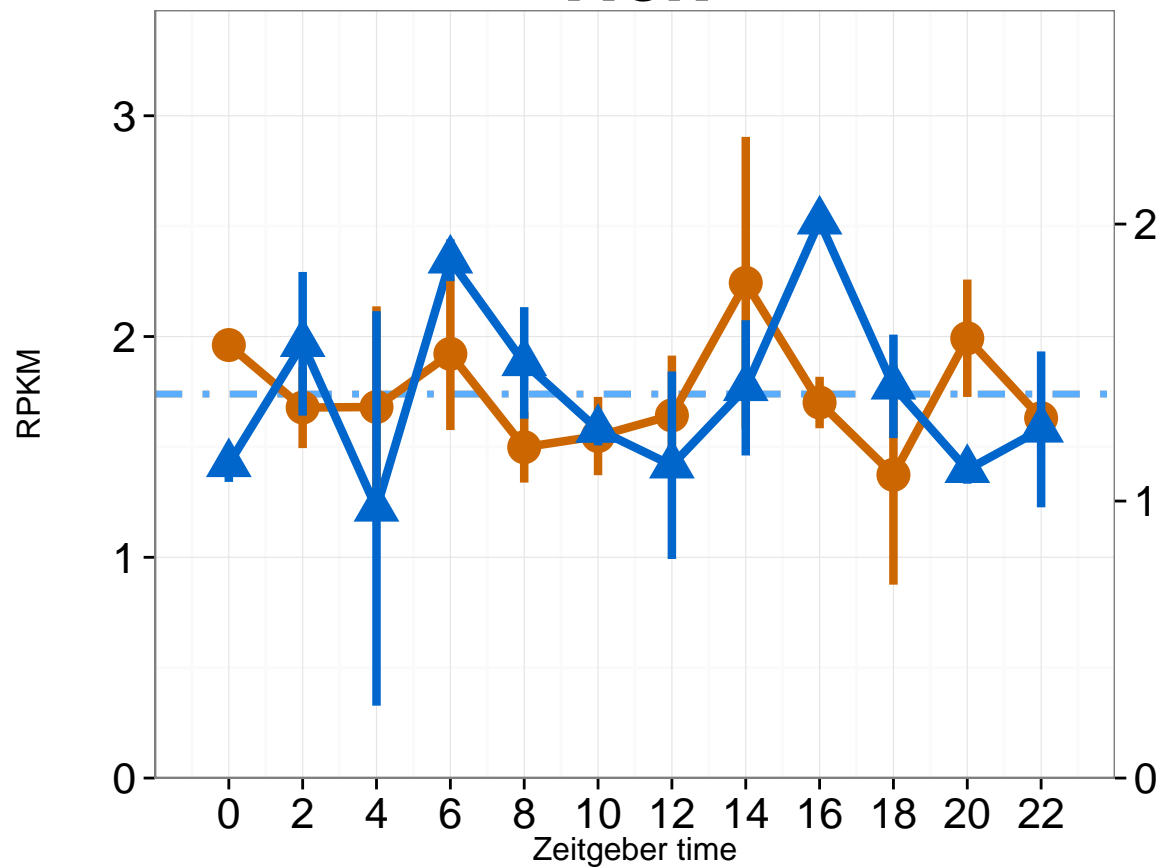

## Hck

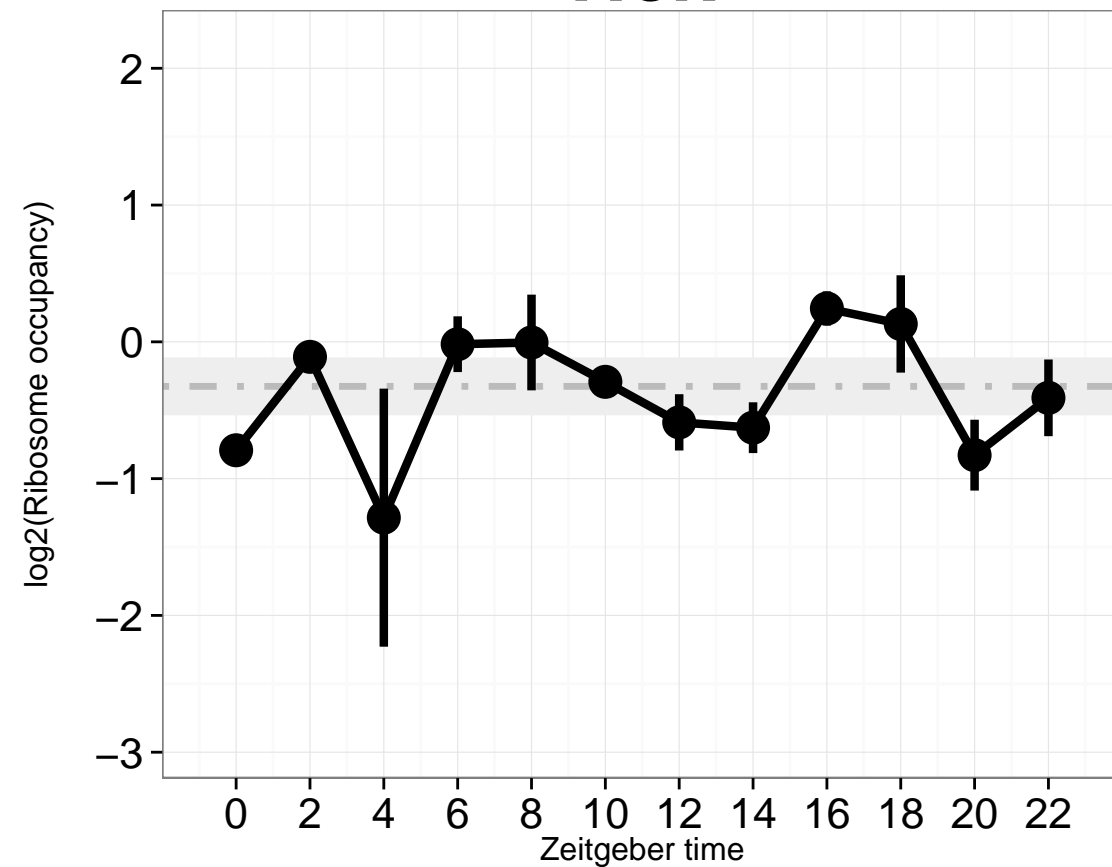

Supplement: Supplementary file 4925 [file 1]

## Cnih1

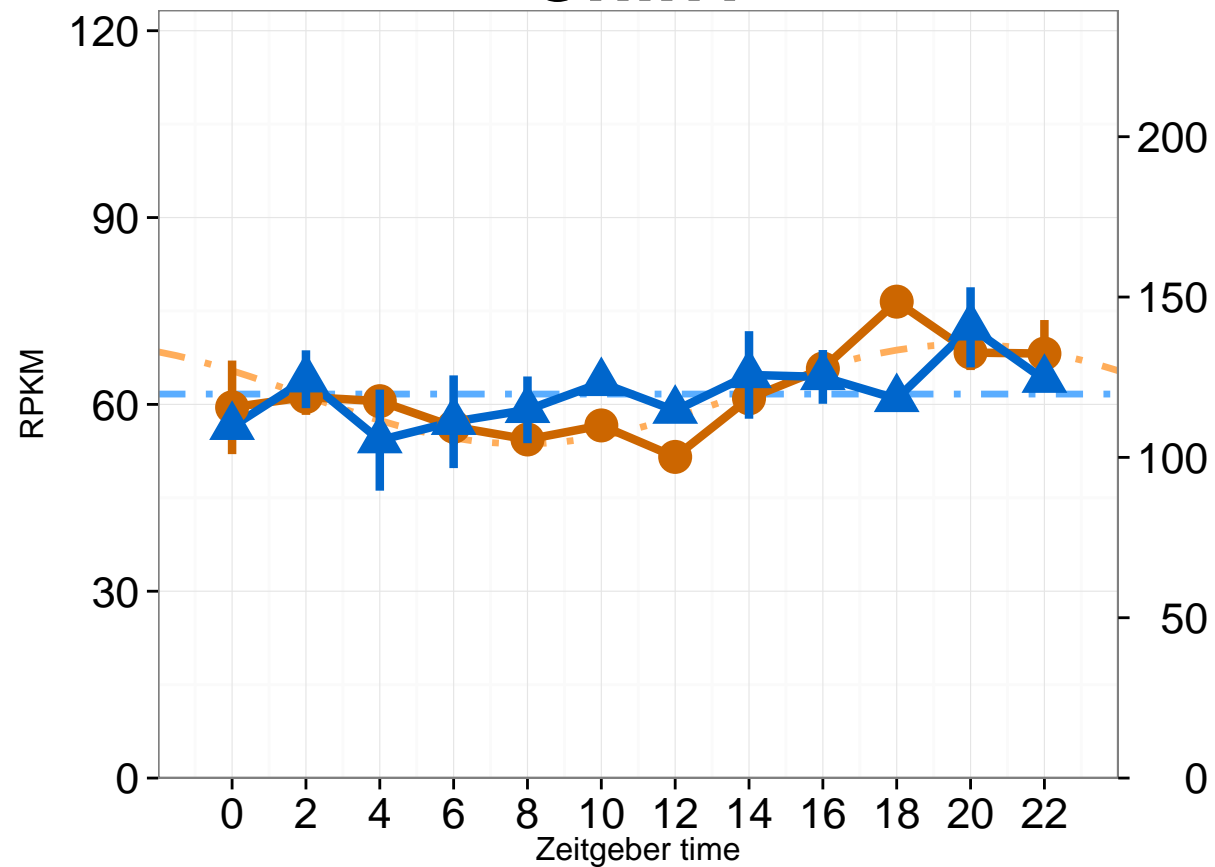

## Cnih1

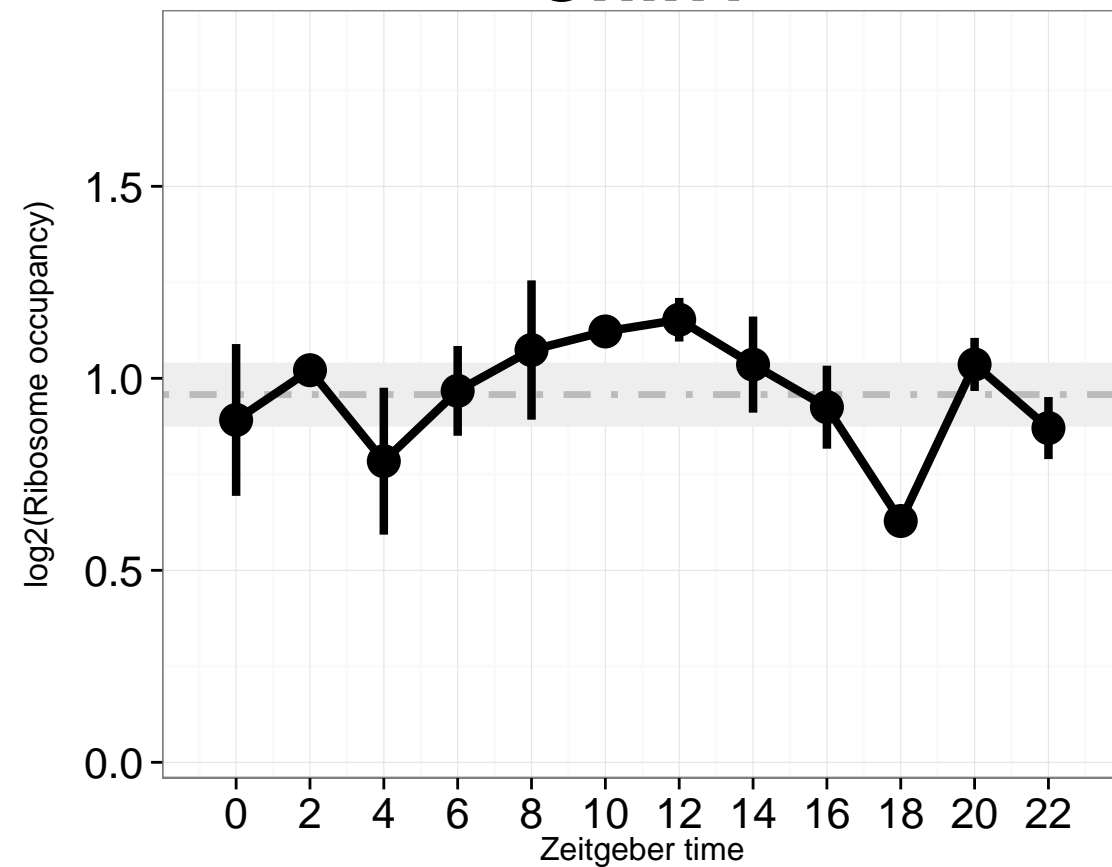

Supplement: Supplementary file 4926 [file 1]

## Sorbs1

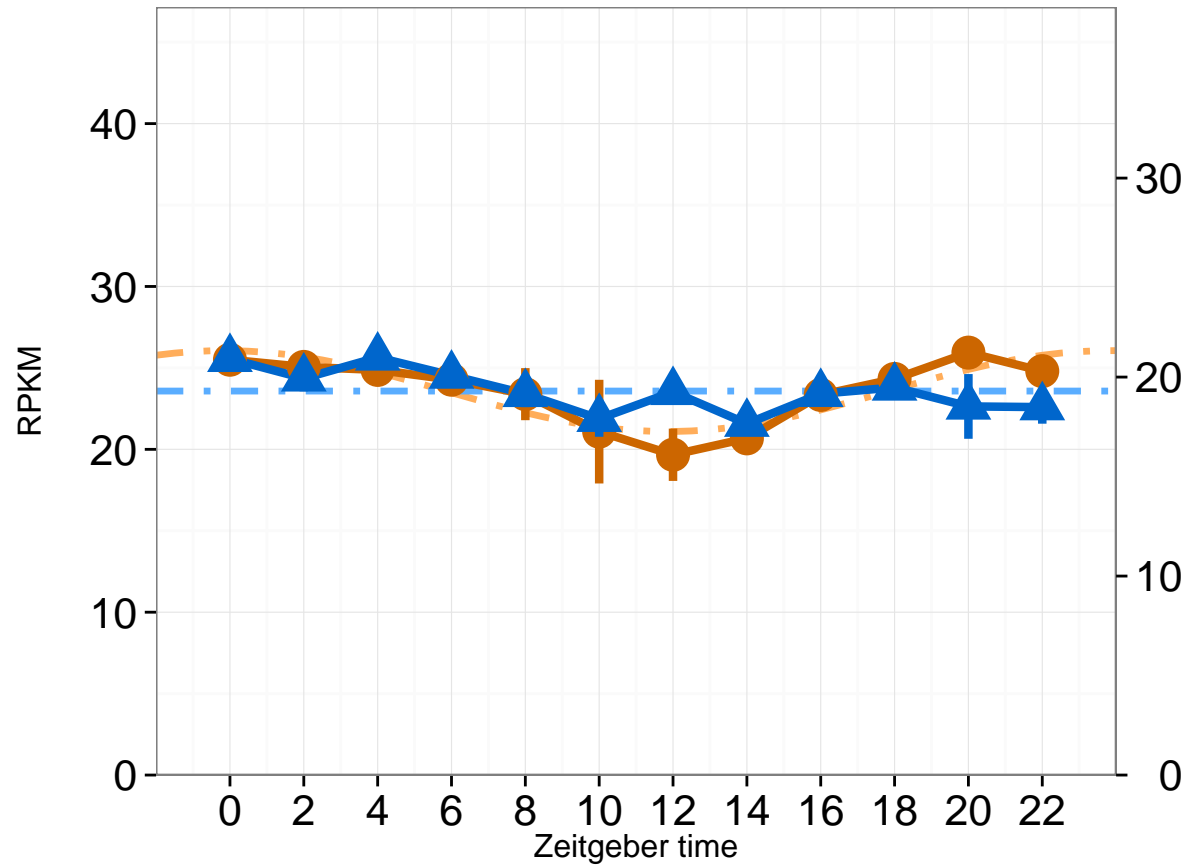

## Sorbs1

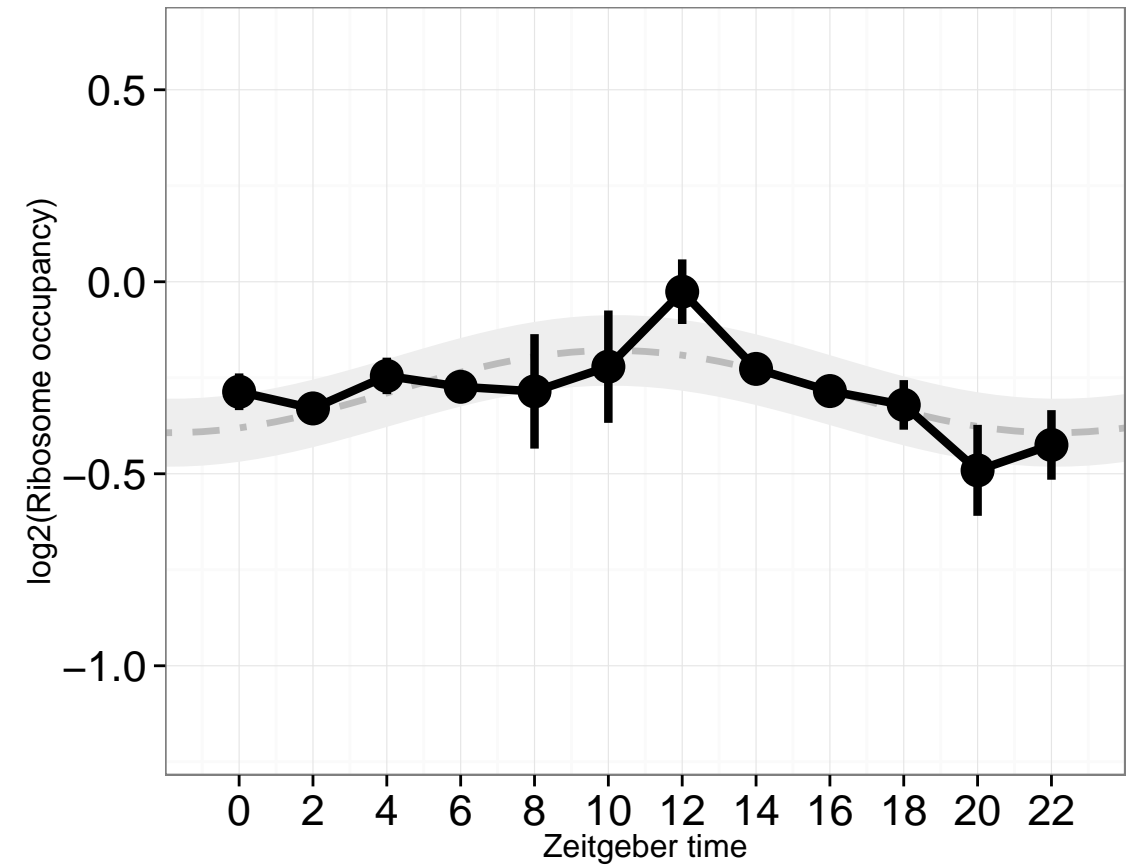

Supplement: Supplementary file 4927 [file 1]

# Dusp28

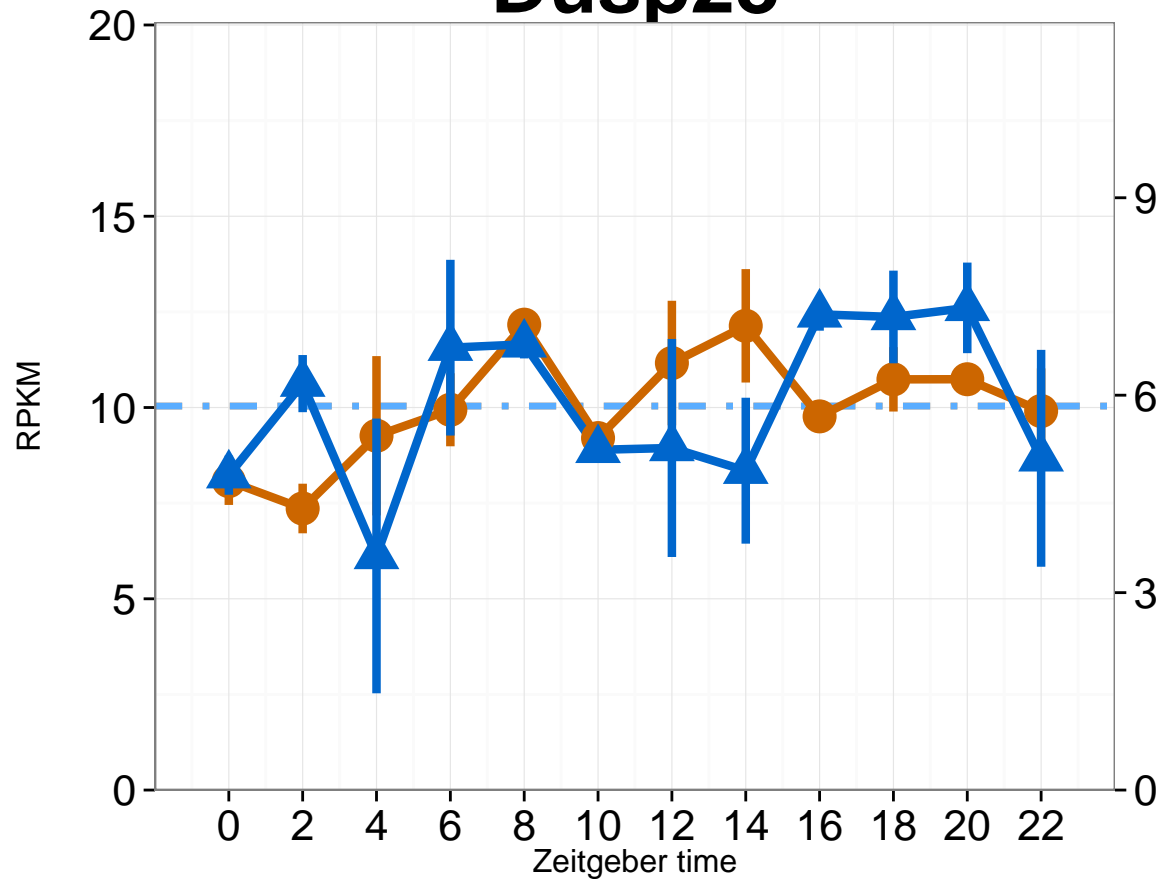

# Dusp28

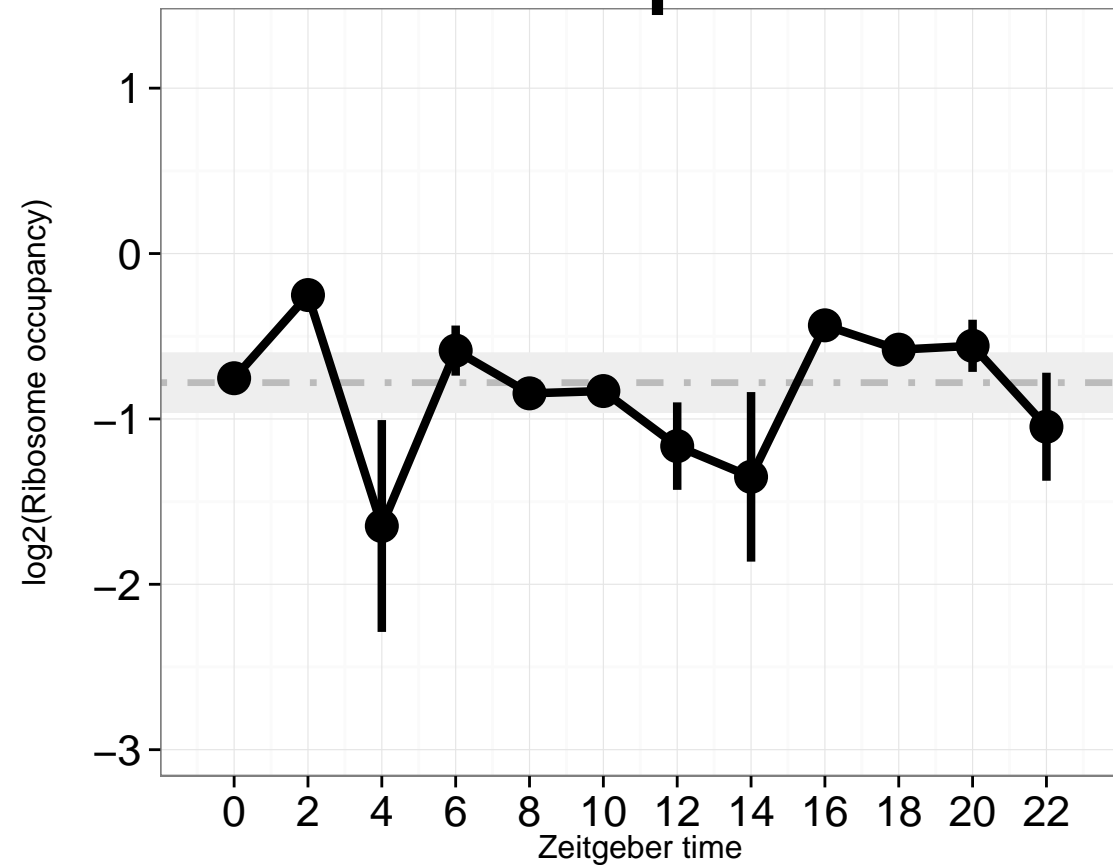

Supplement: Supplementary file 4928 [file 1]

# Mrps26

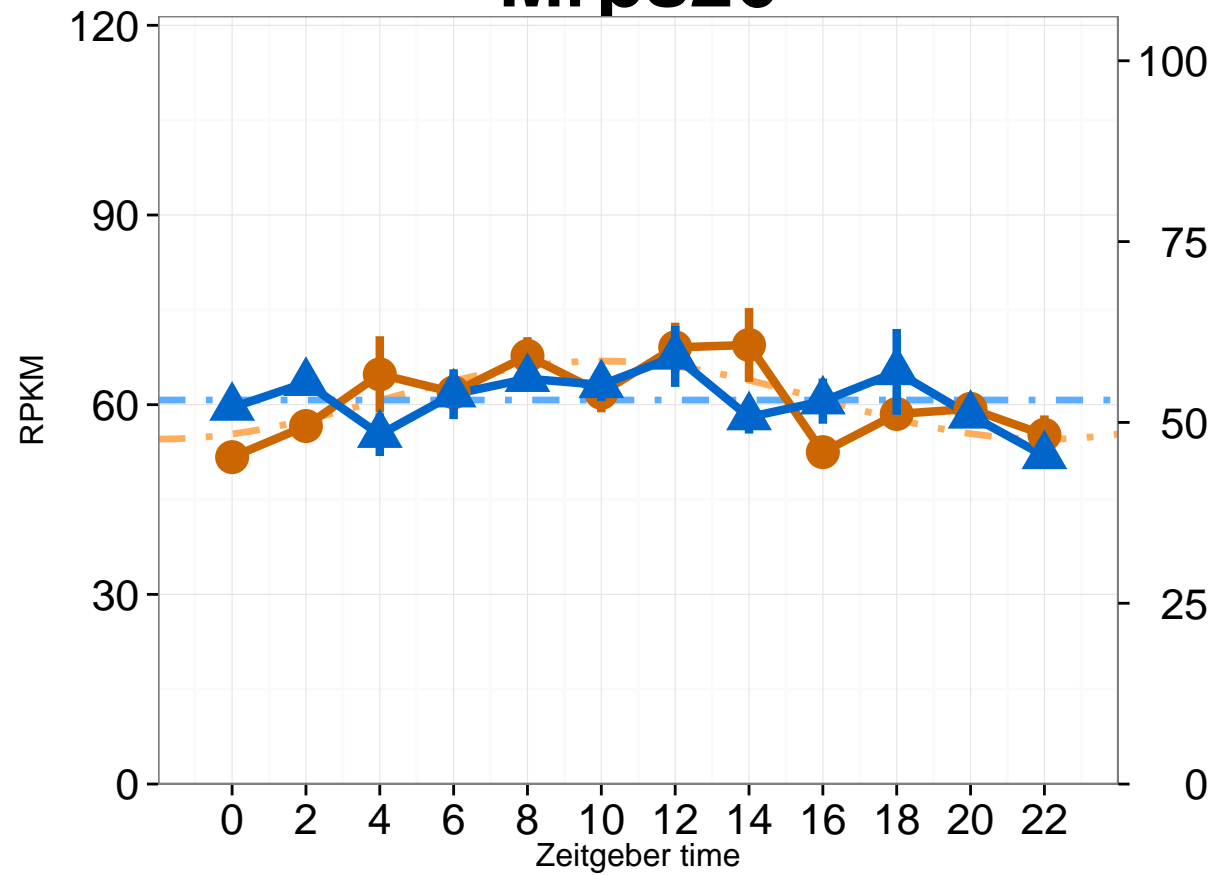

# Mrps26

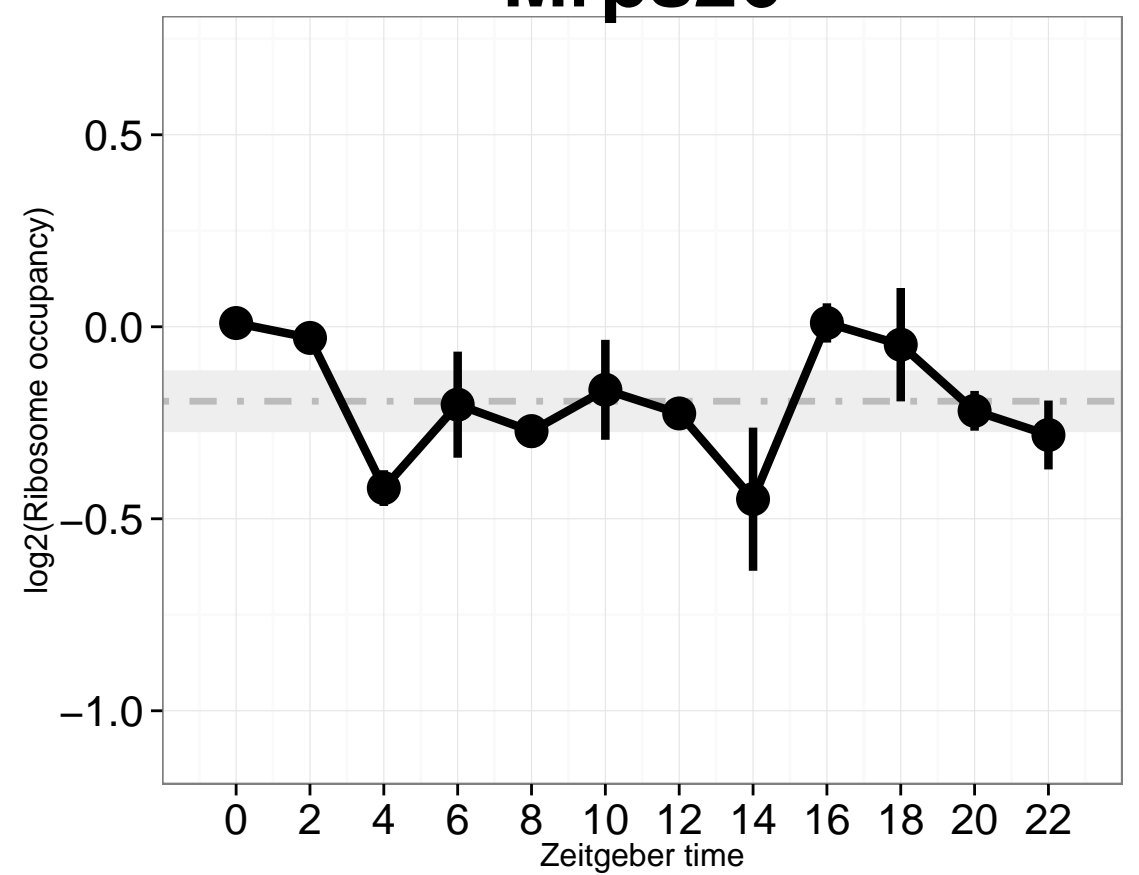

Supplement: Supplementary file 4929 [file 1]

# Tpst2

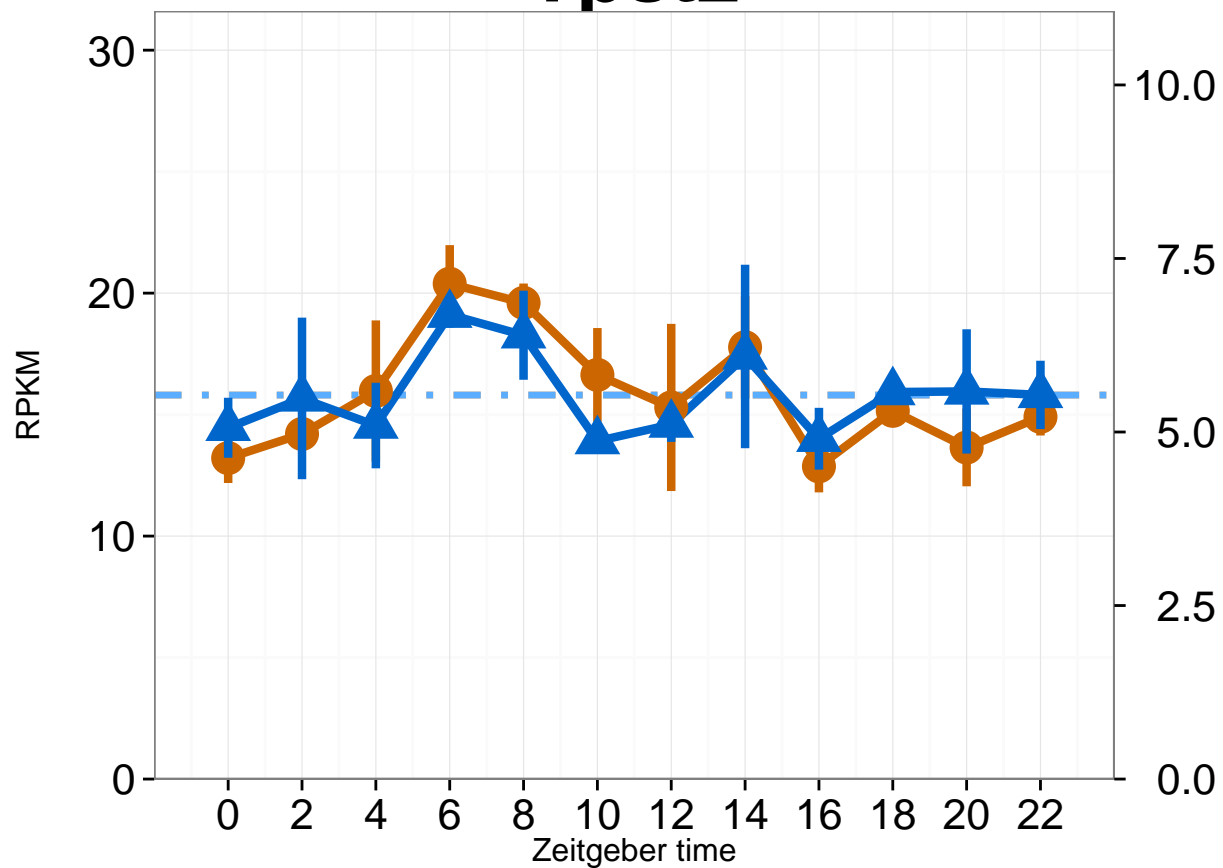

# Tpst2

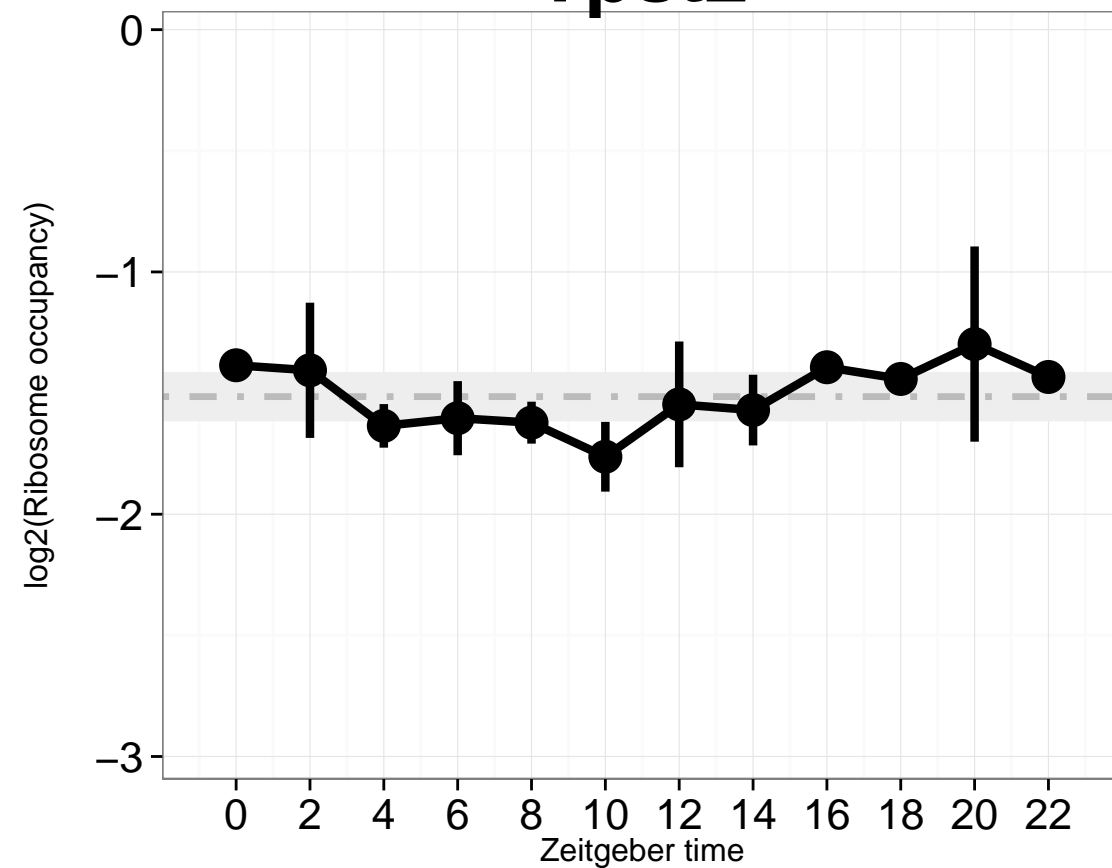

Supplement: Supplementary file 4930 [file 1]

# Tra2a

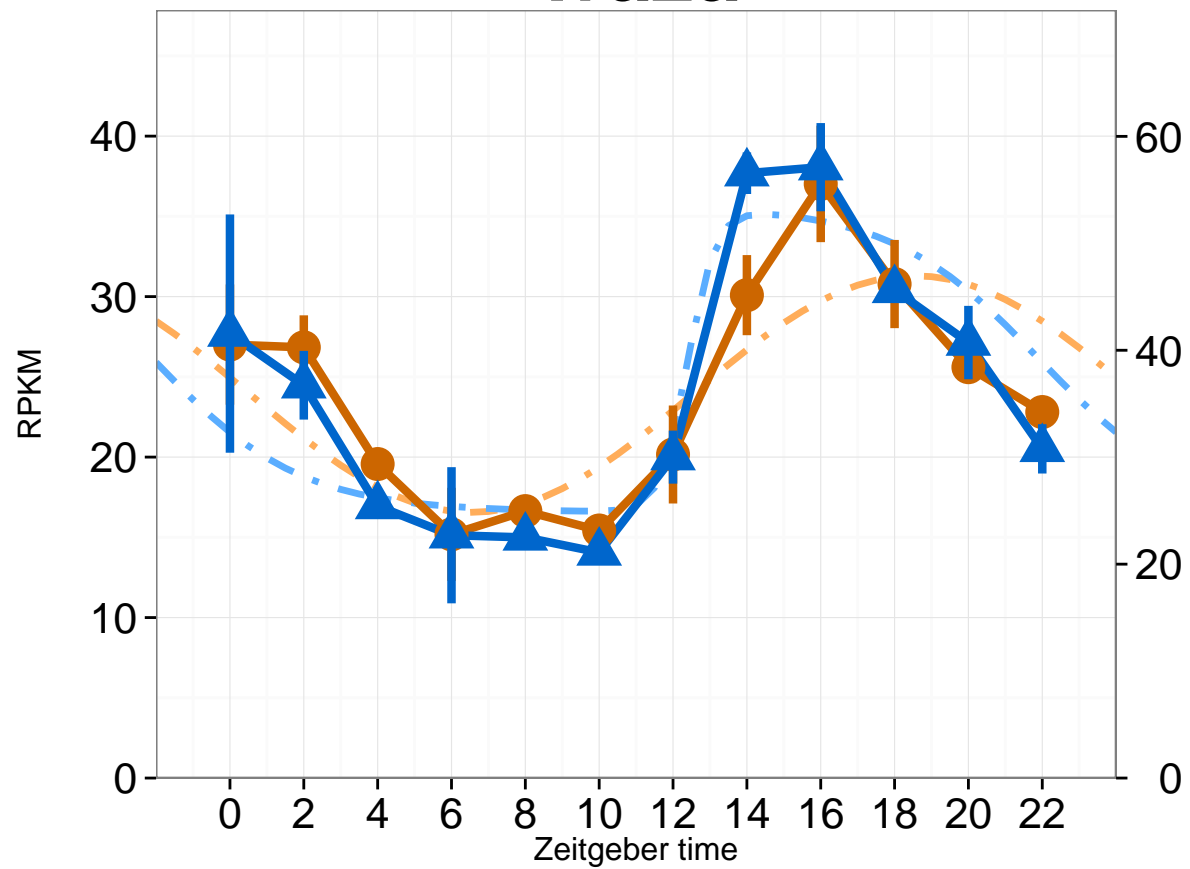

# Tra2a

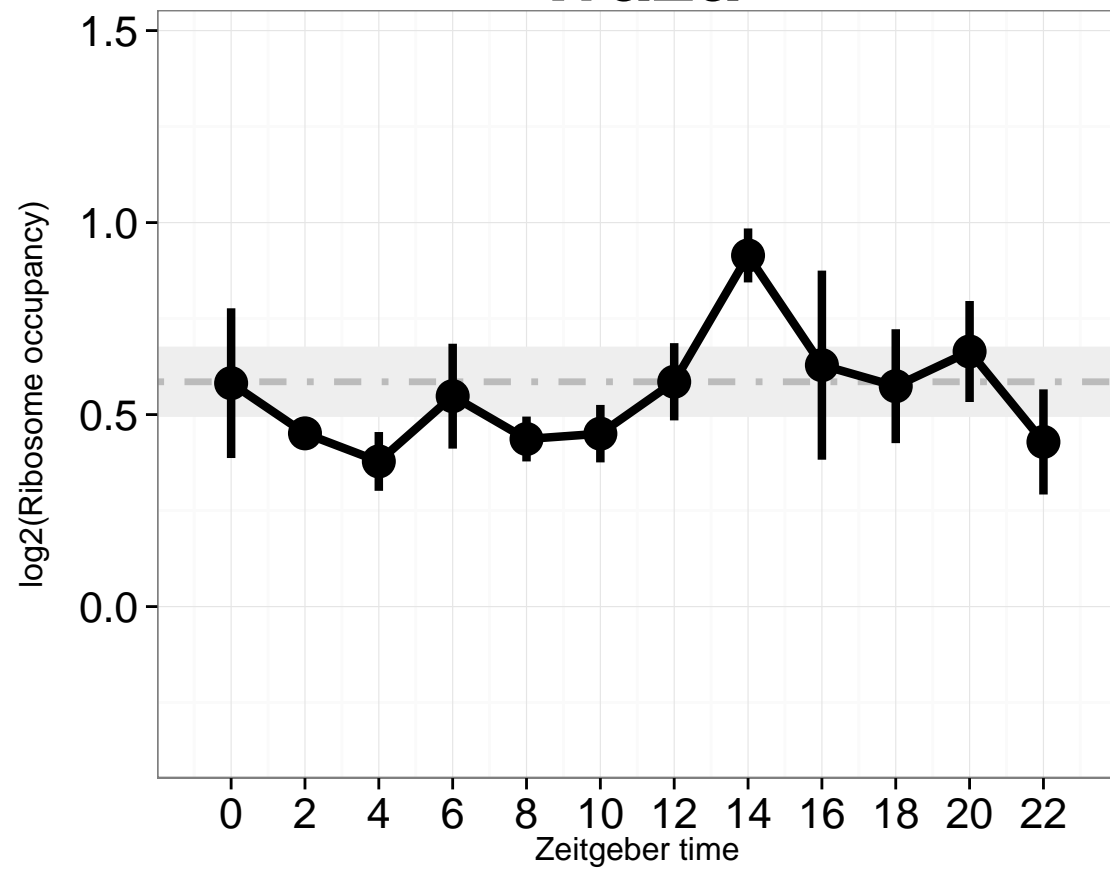

Supplement: Supplementary file 4931 [file 1]

## Polr2d

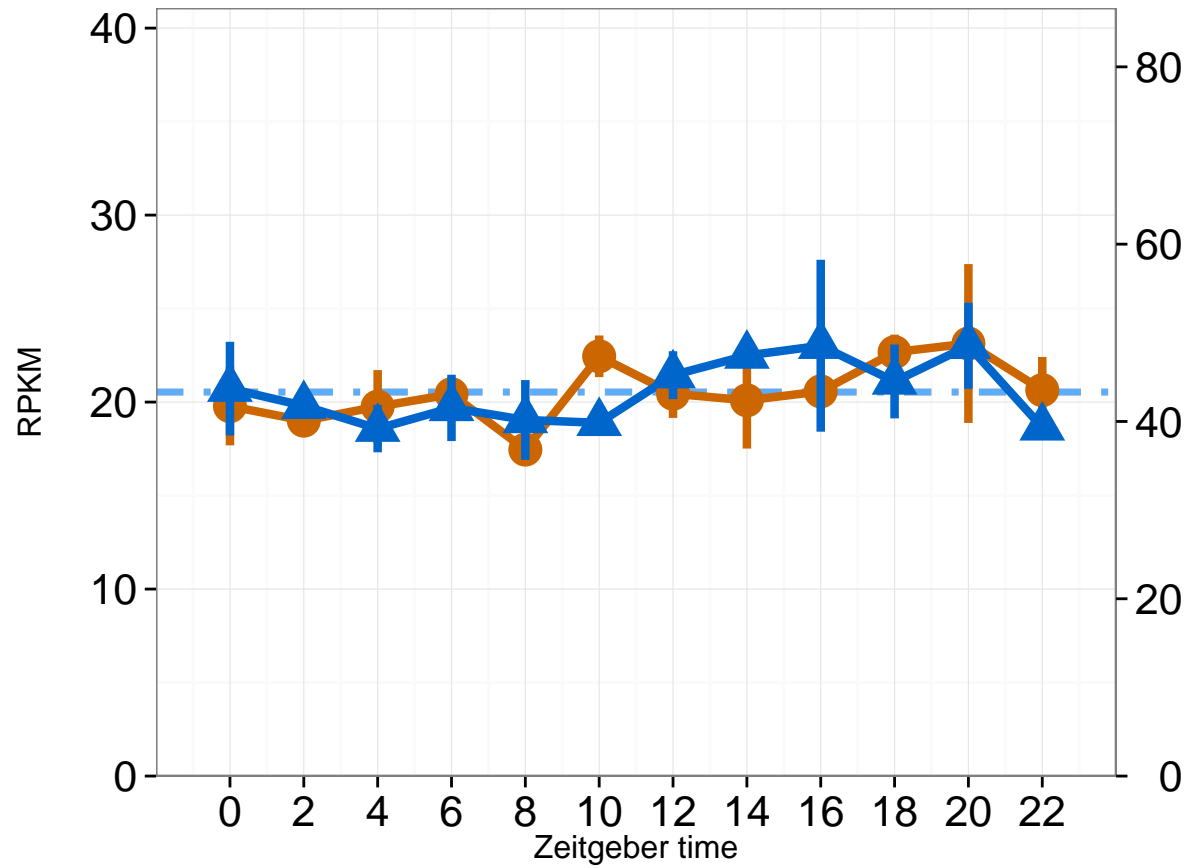

## Polr2d

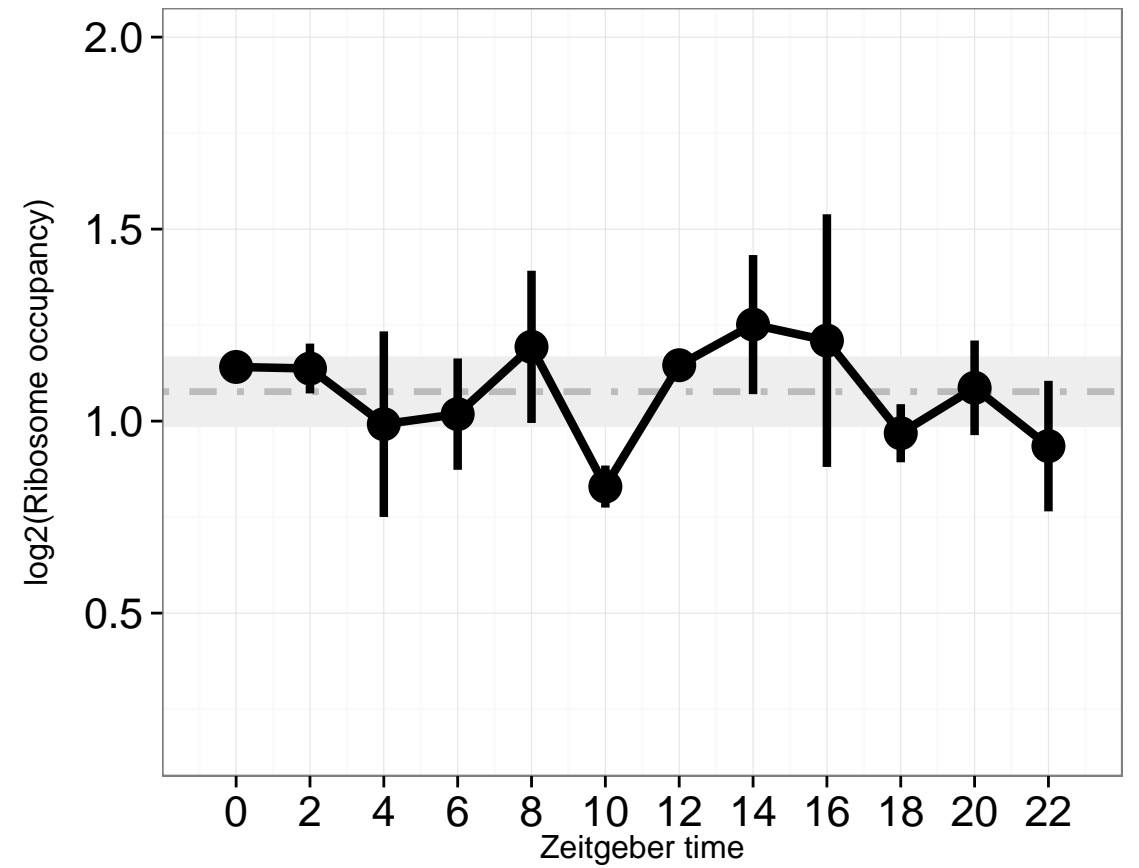

Supplement: Supplementary file 4932 [file 1]

# Zfyve20

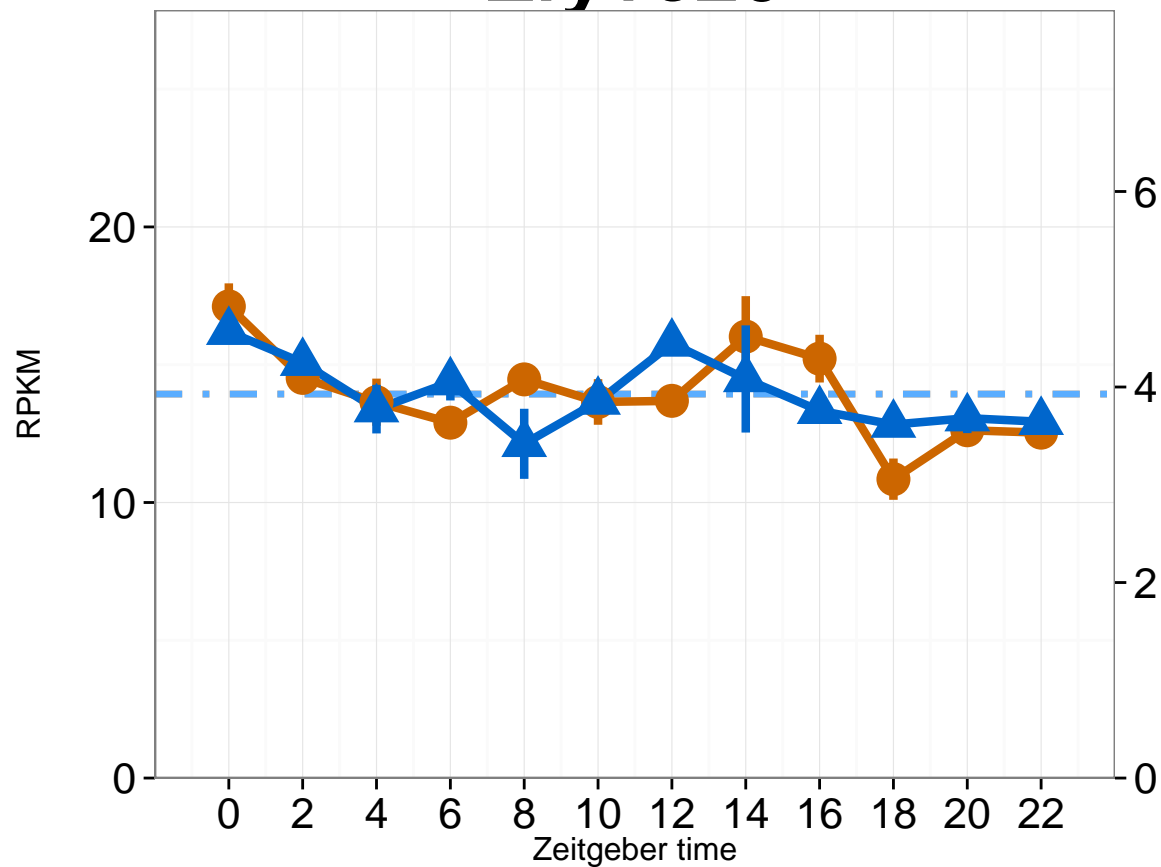

# Zfyve20

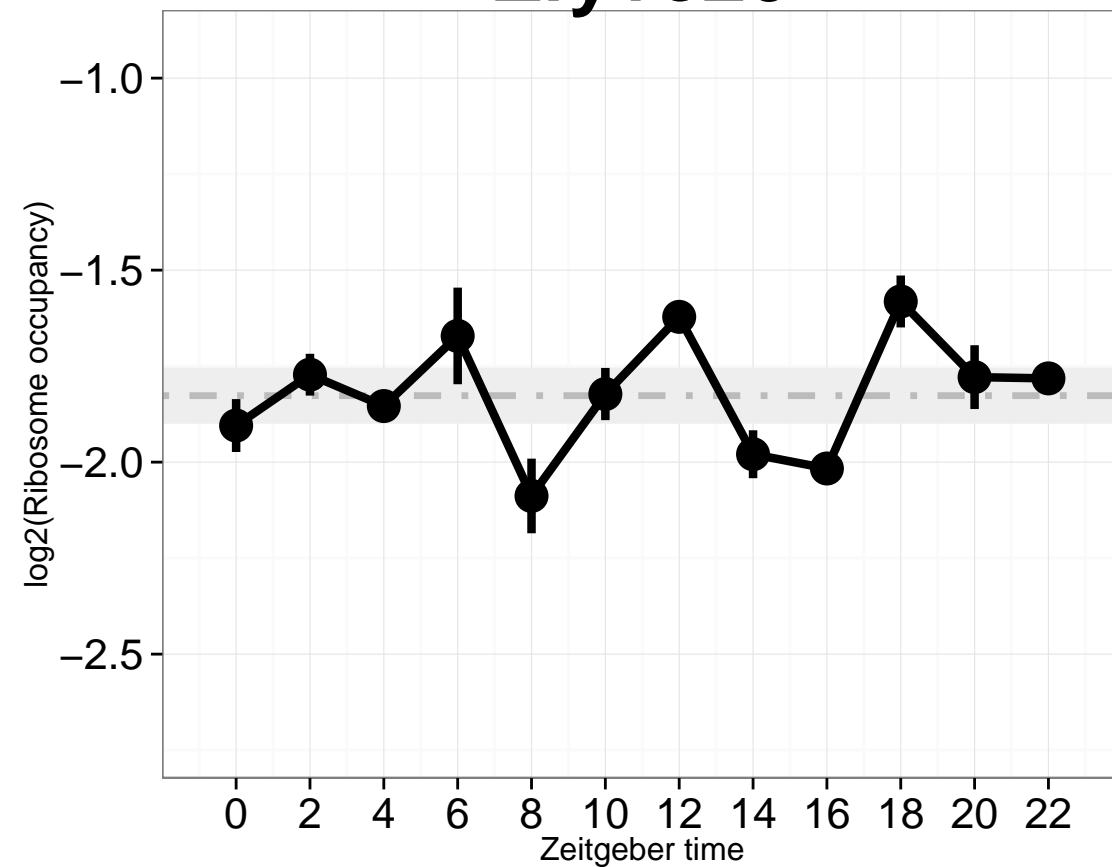

Supplement: Supplementary file 4933 [file 1]

## 9430015G10Rik

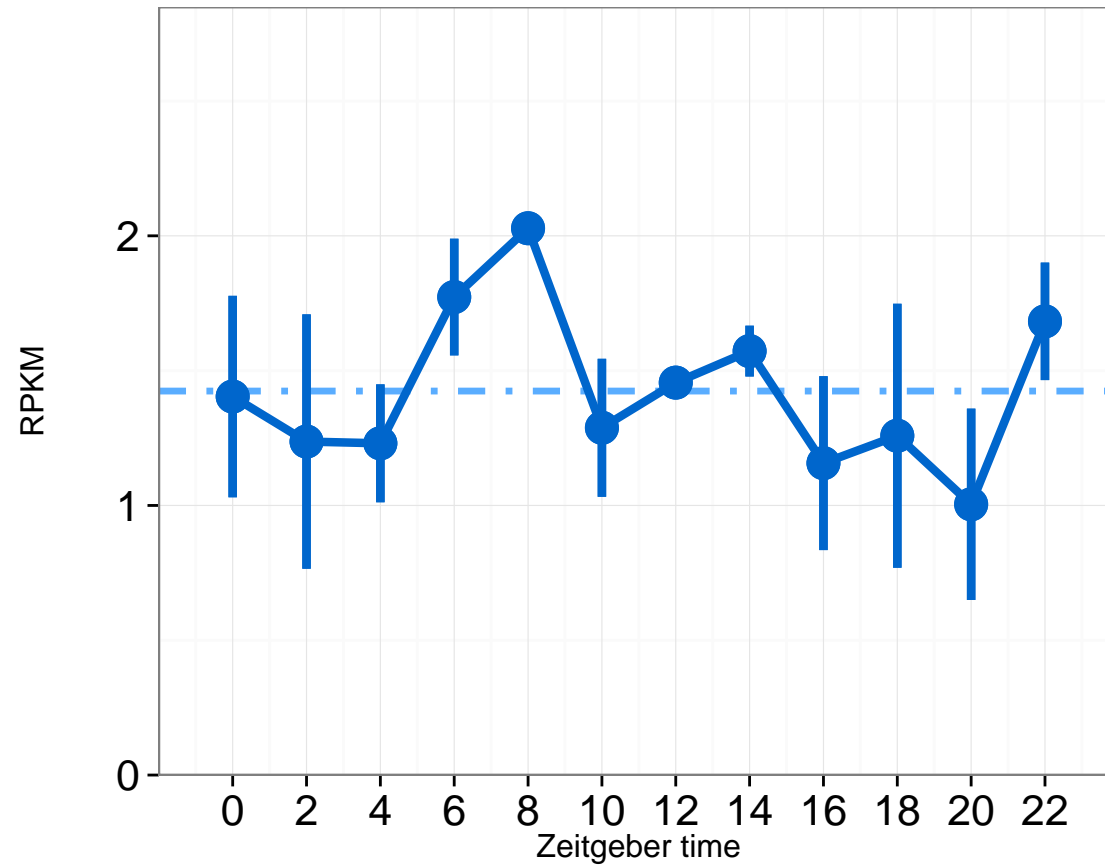

## 9430015G10Rik log2(Ribosome occup

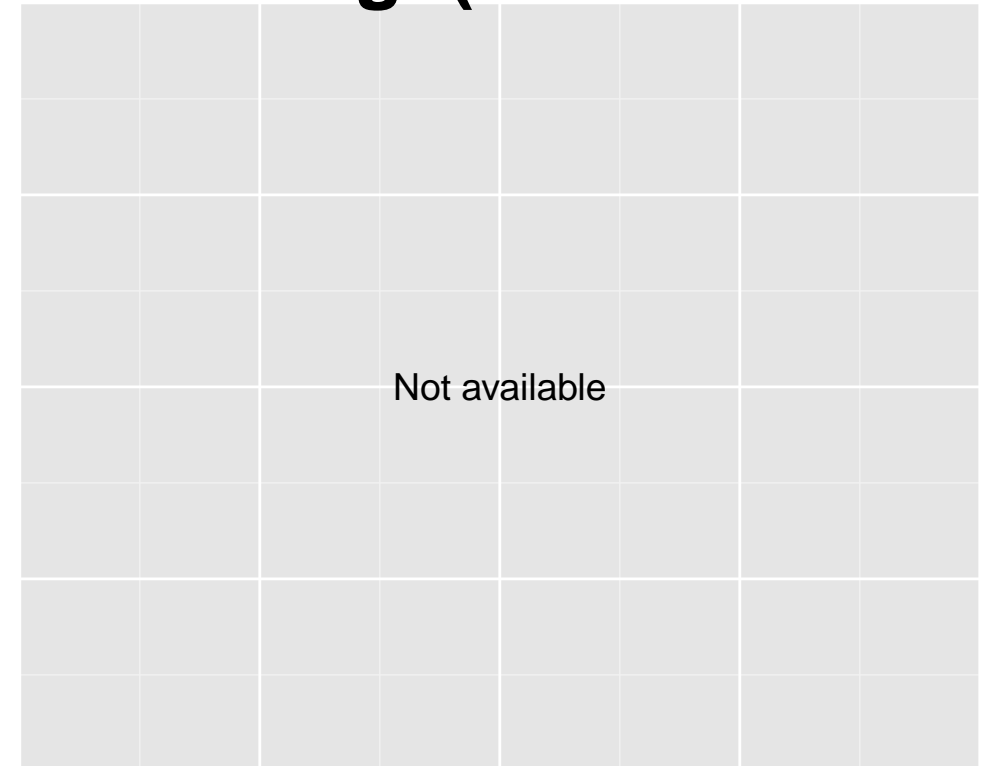

Supplement: Supplementary file 4934 [file 1]

## Maged2

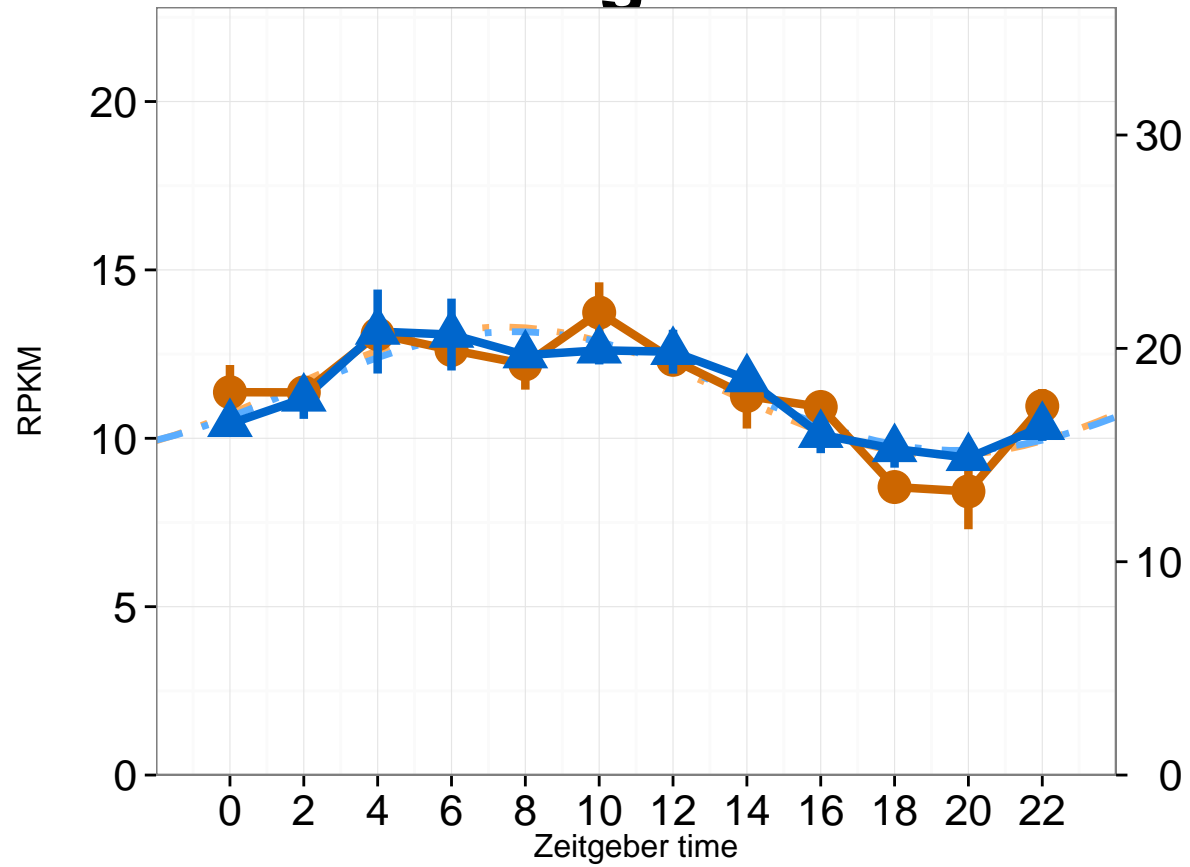

## Maged2

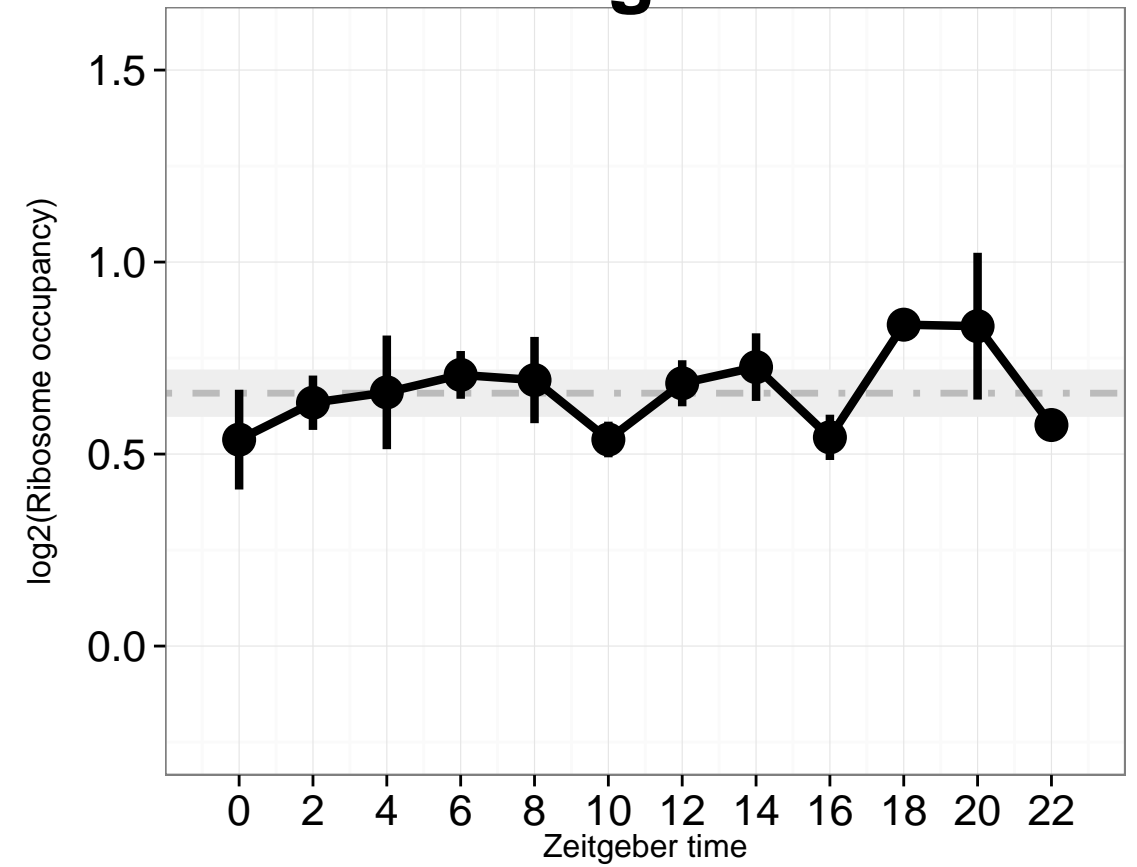

Supplement: Supplementary file 4935 [file 1]

## Aifm1

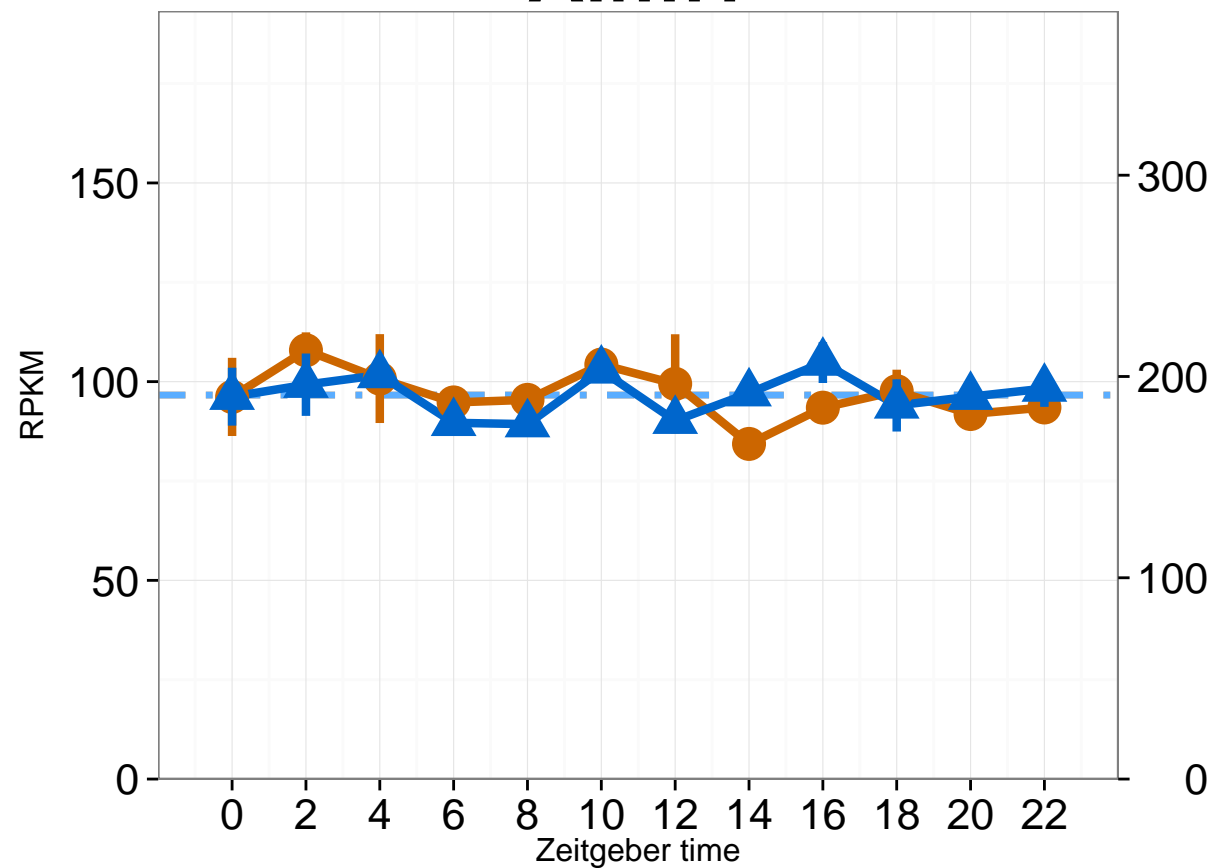

## Aifm1

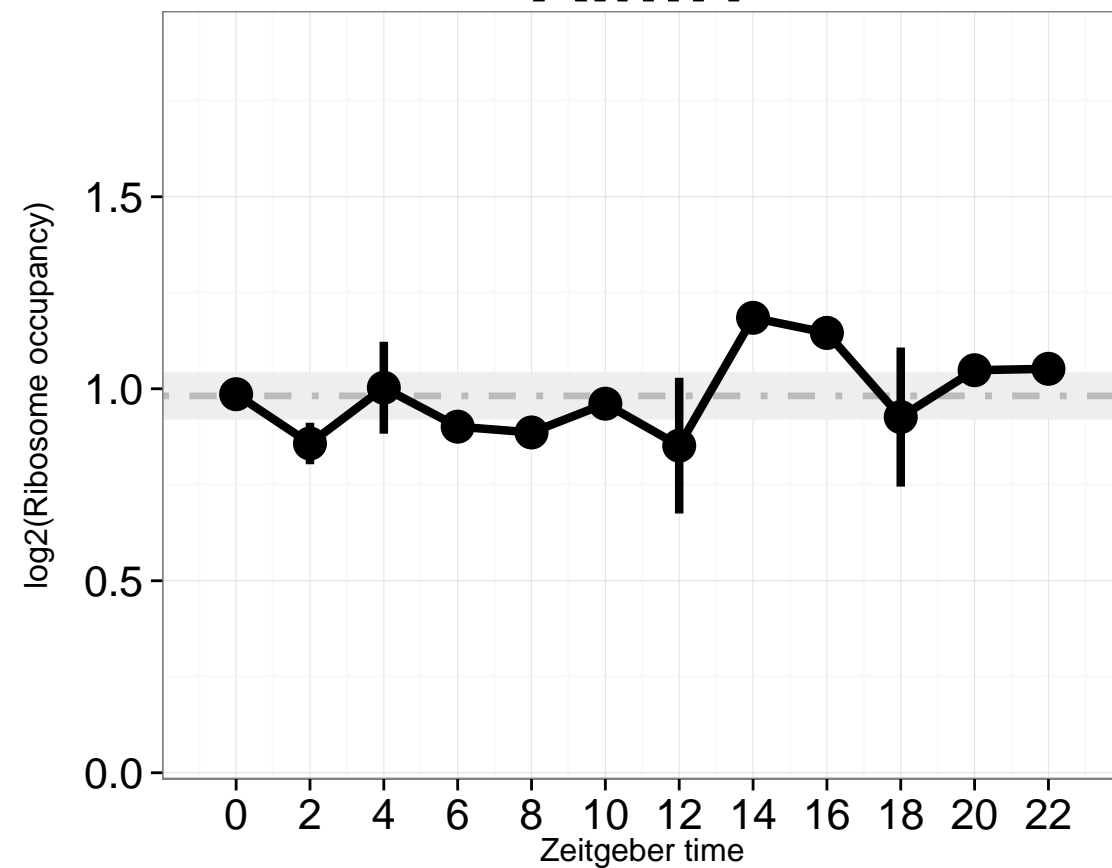

Supplement: Supplementary file 4936 [file 1]

## Mlst8

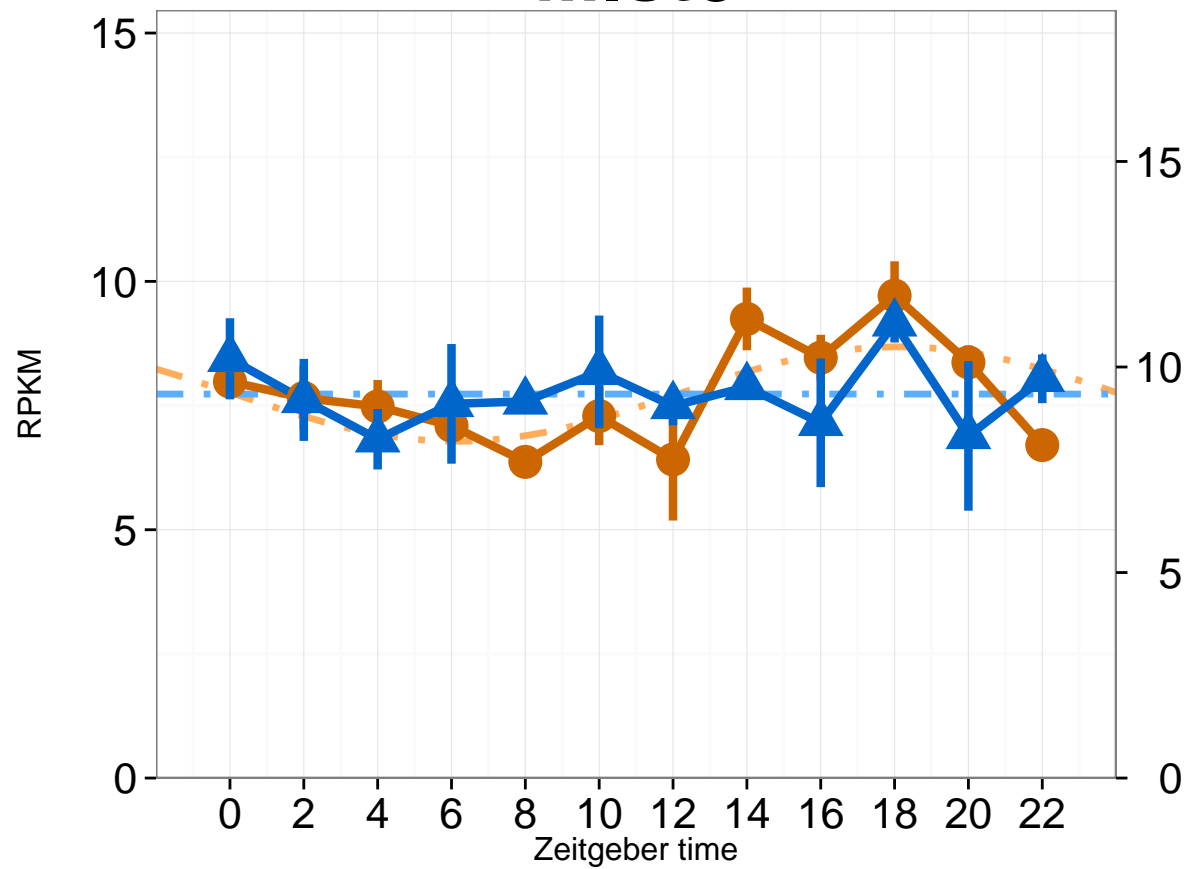

## Mlst8

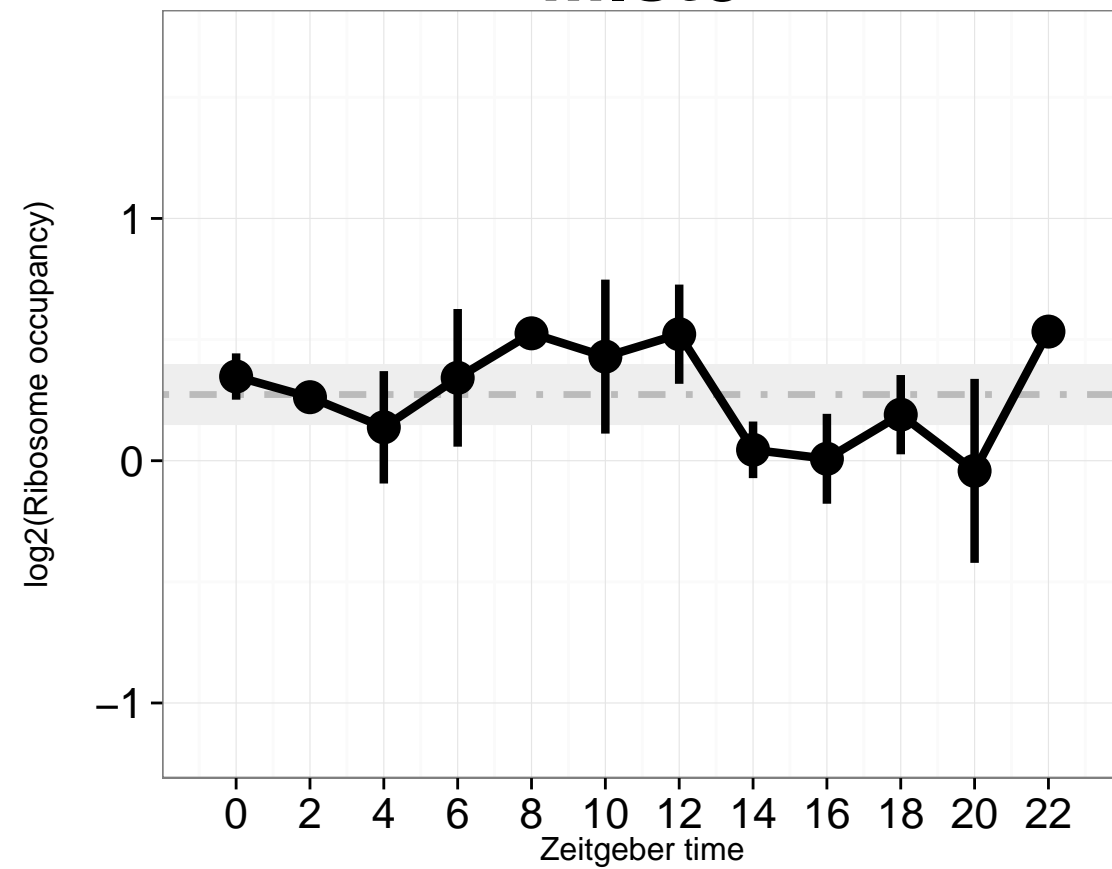

Supplement: Supplementary file 4937 [file 1]

# Slc9a2

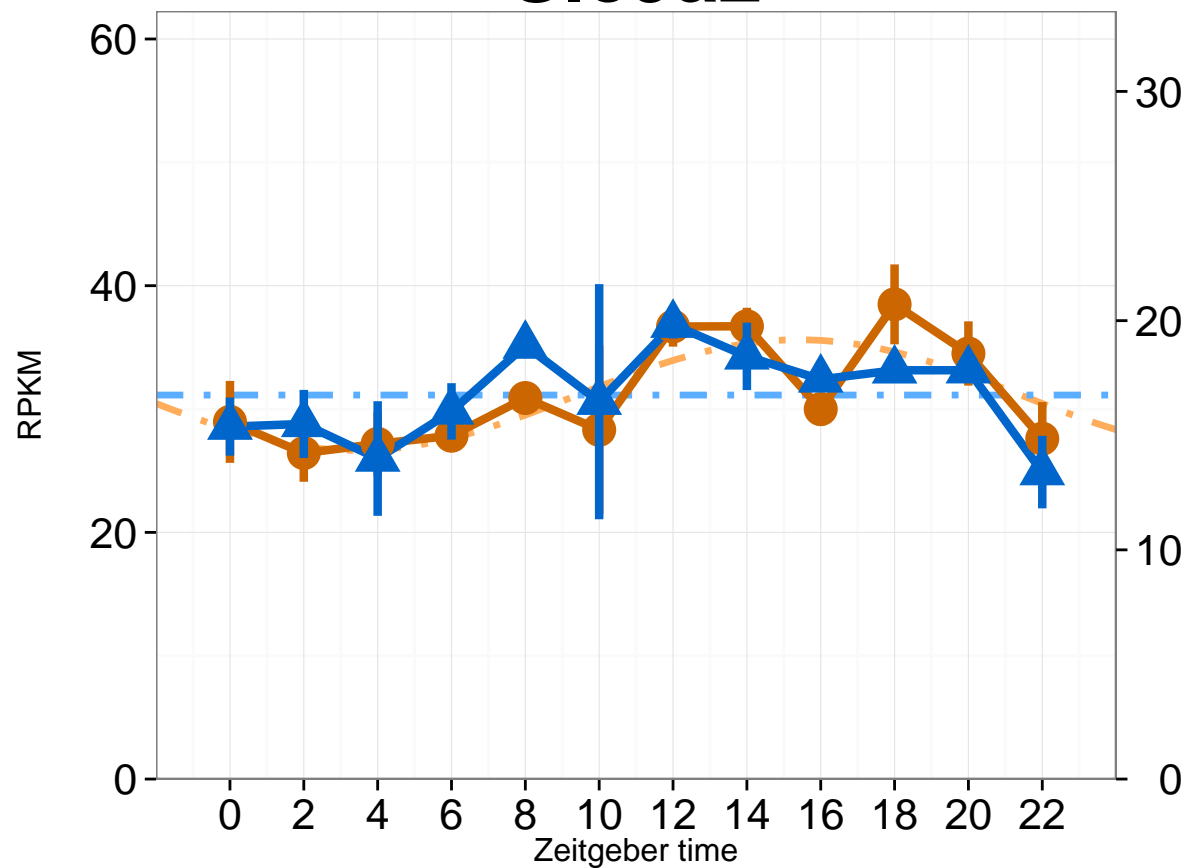

# Slc9a2

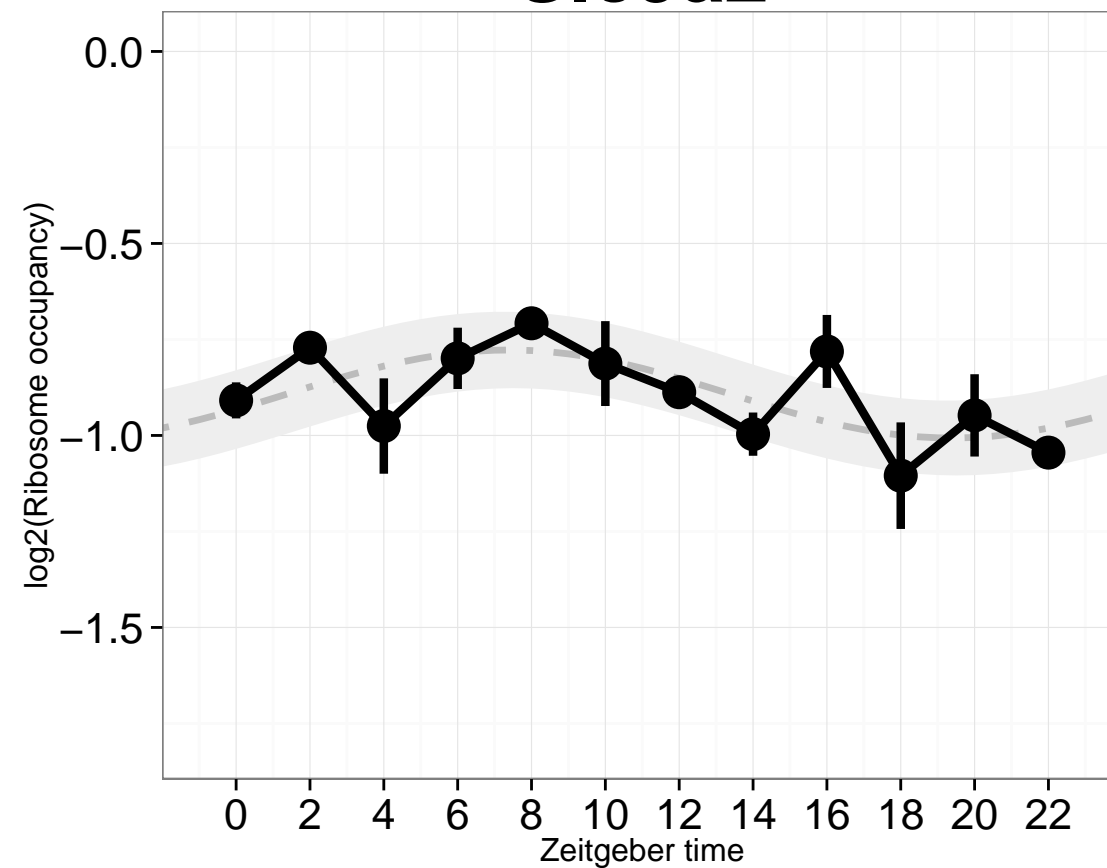

Supplement: Supplementary file 4938 [file 1]

# Hmg20a

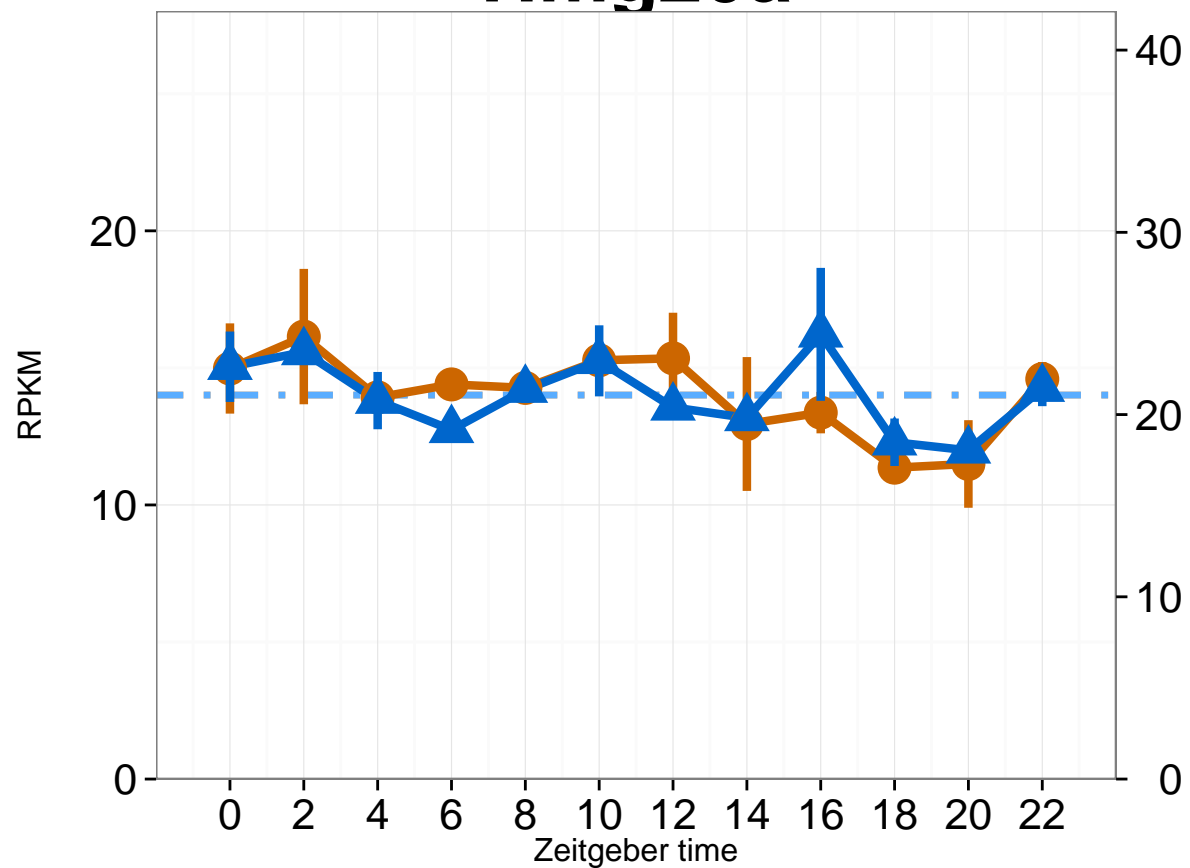

# Hmg20a

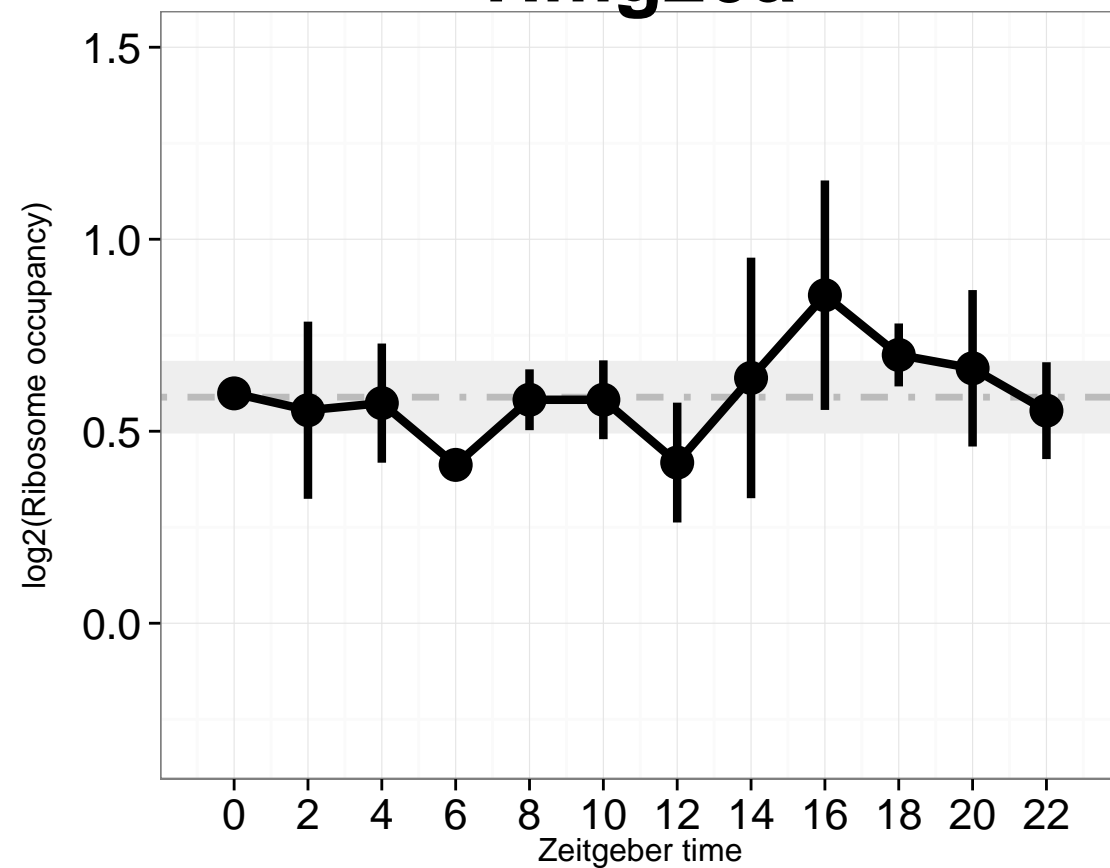

Supplement: Supplementary file 4939 [file 1]

# Rab11fip1

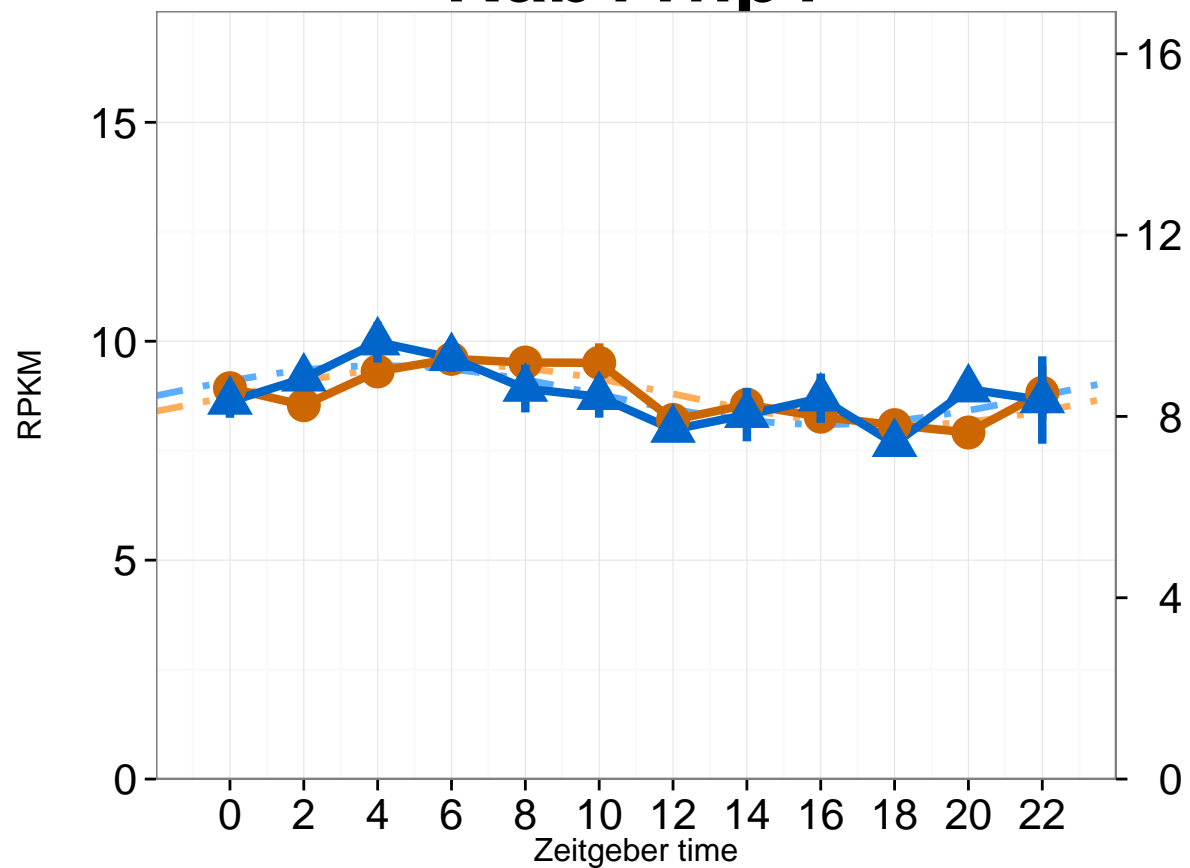

# Rab11fip1

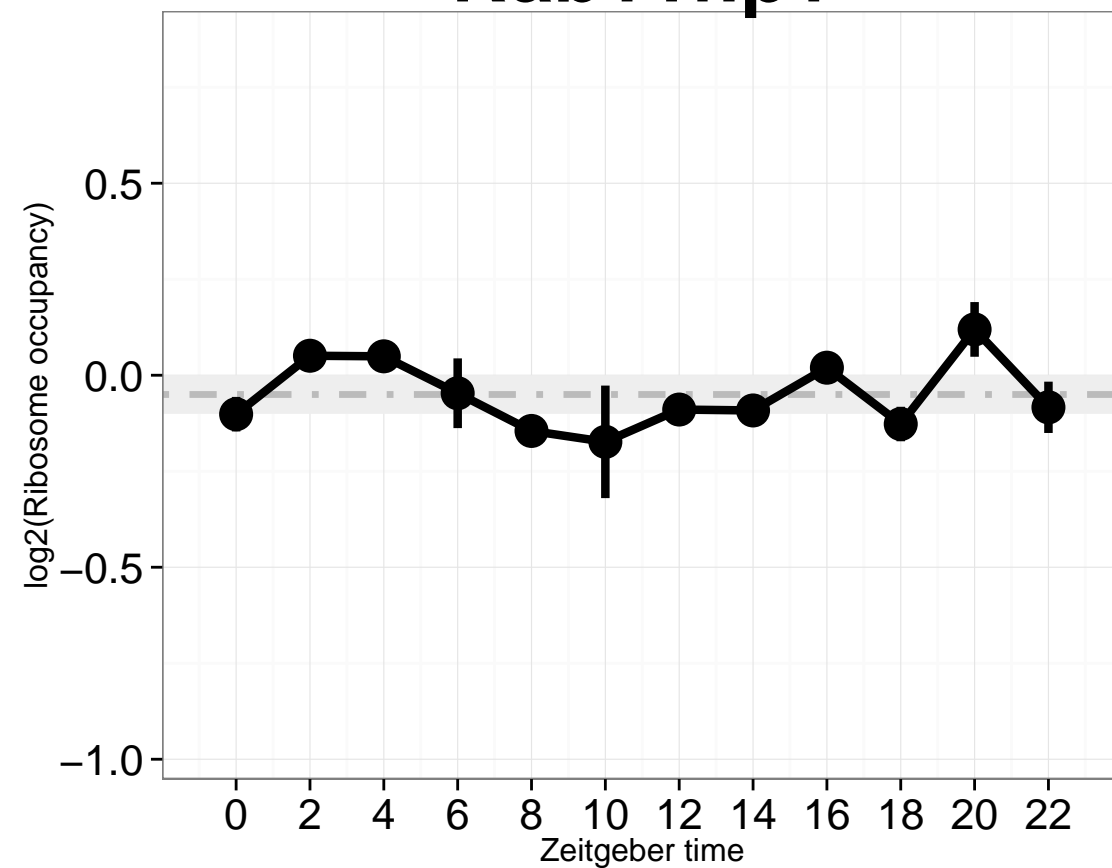

Supplement: Supplementary file 4940 [file 1]

## Ndufb6

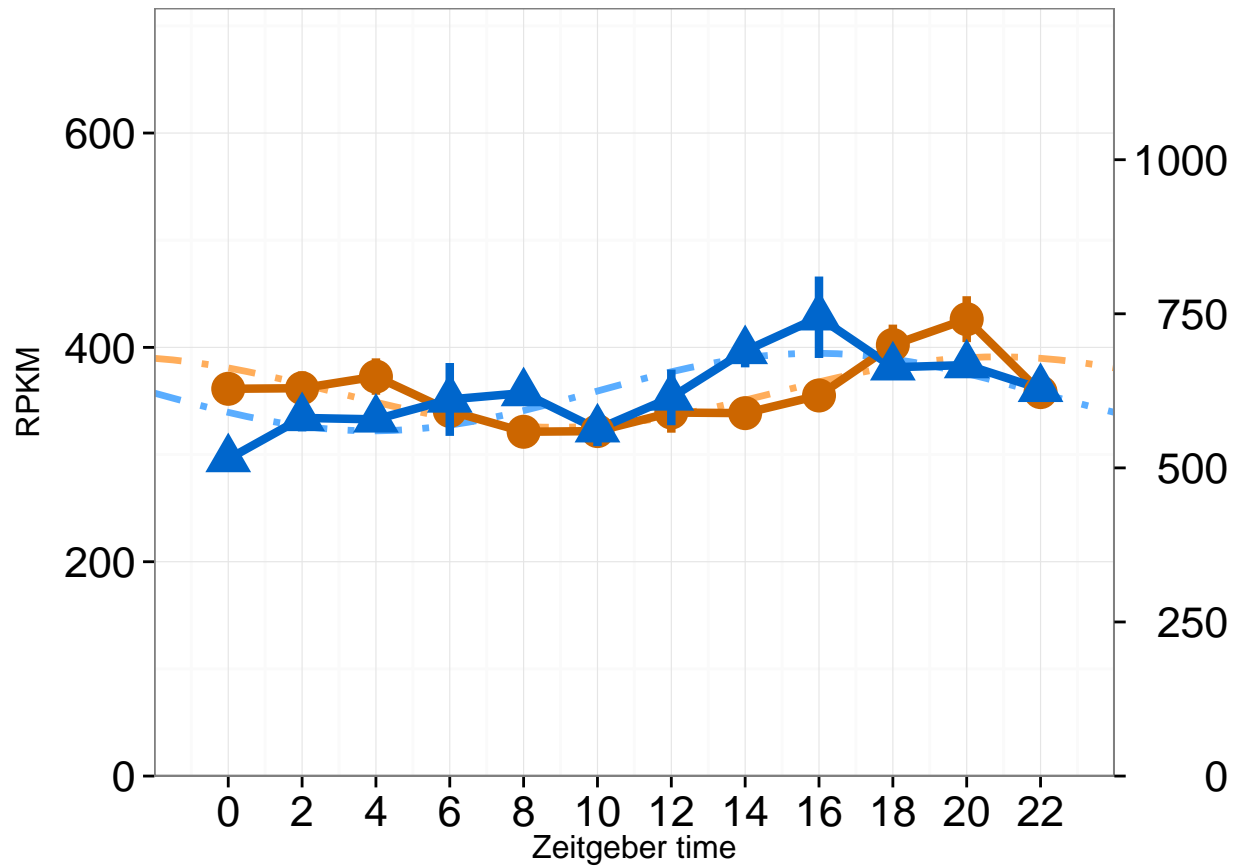

## Ndufb6

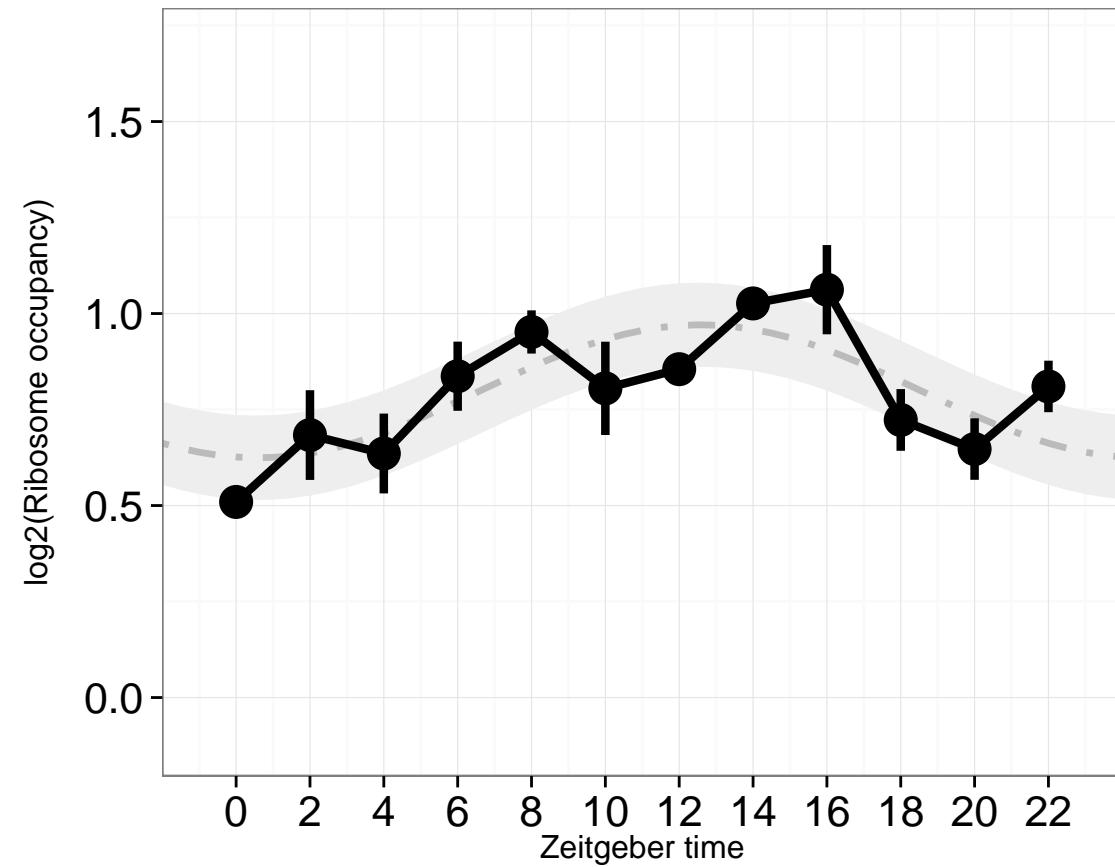

Supplement: Supplementary file 4941 [file 1]

## Dhx15

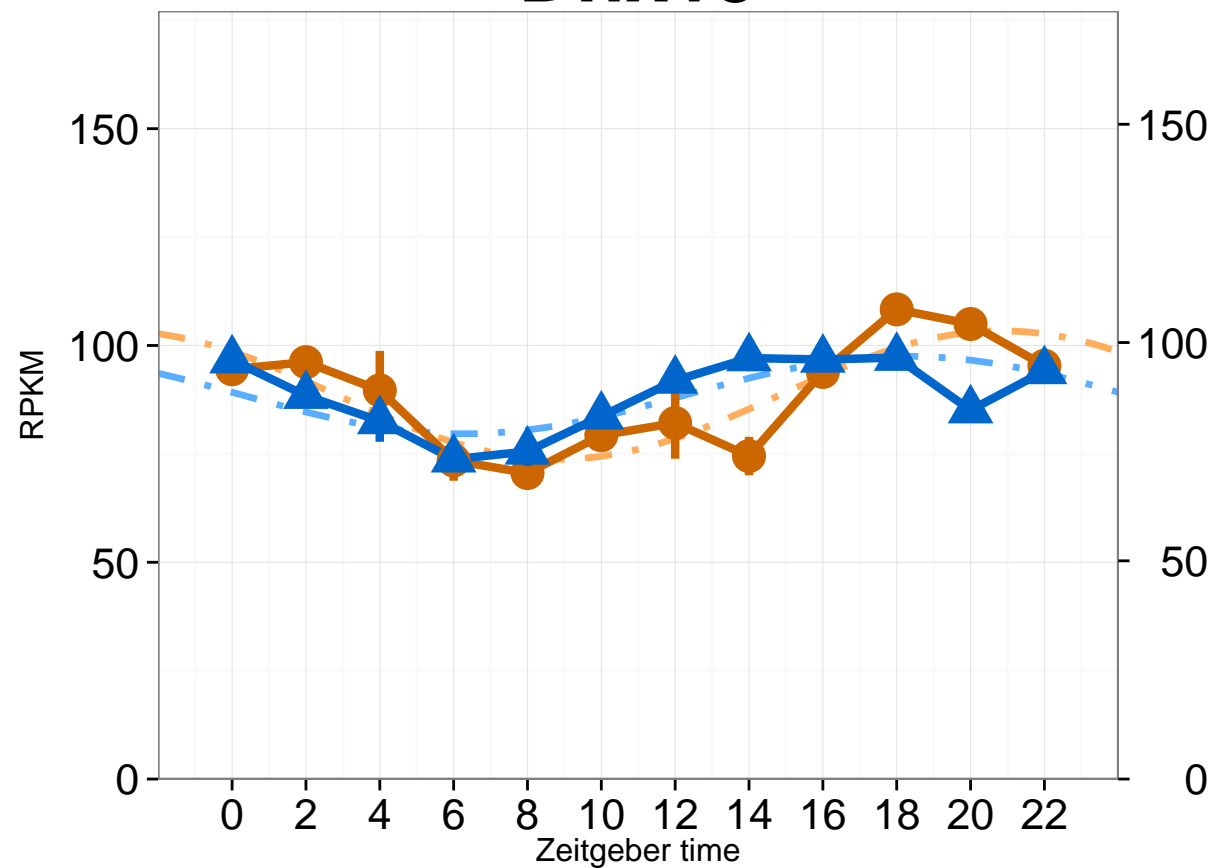

## Dhx15

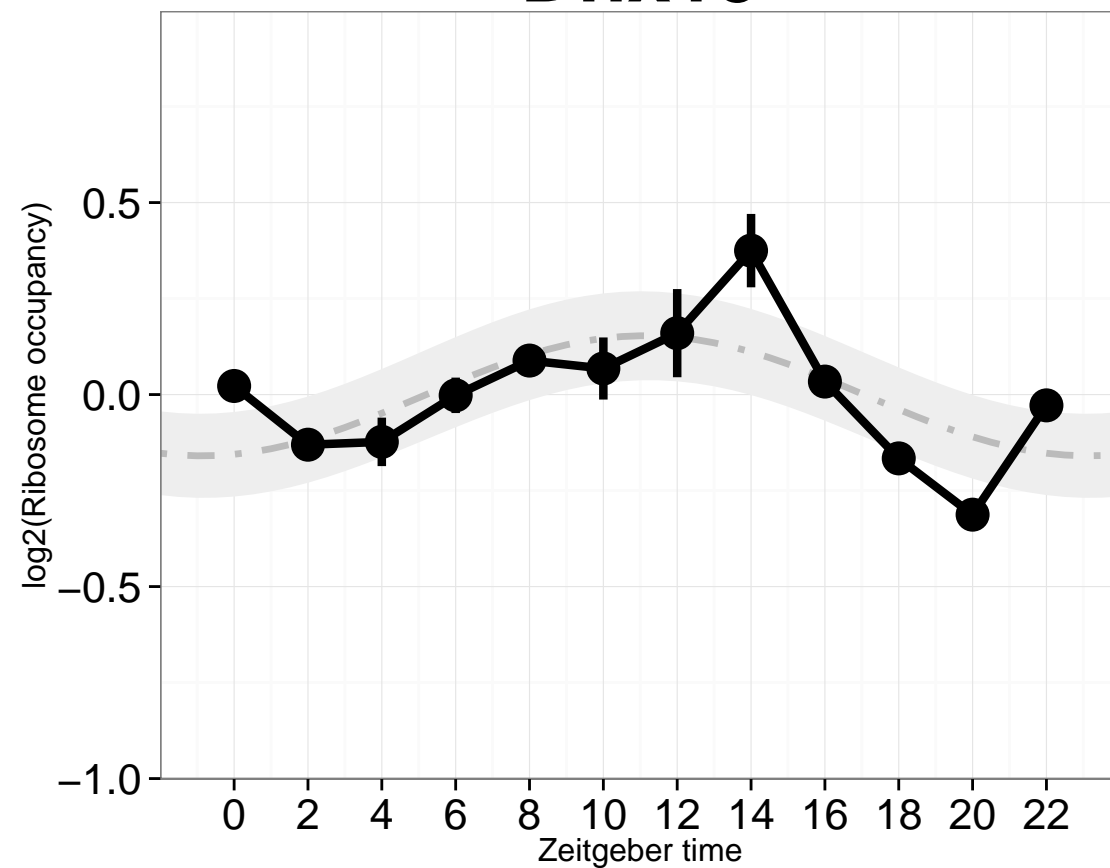

Supplement: Supplementary file 4942 [file 1]

# Helq

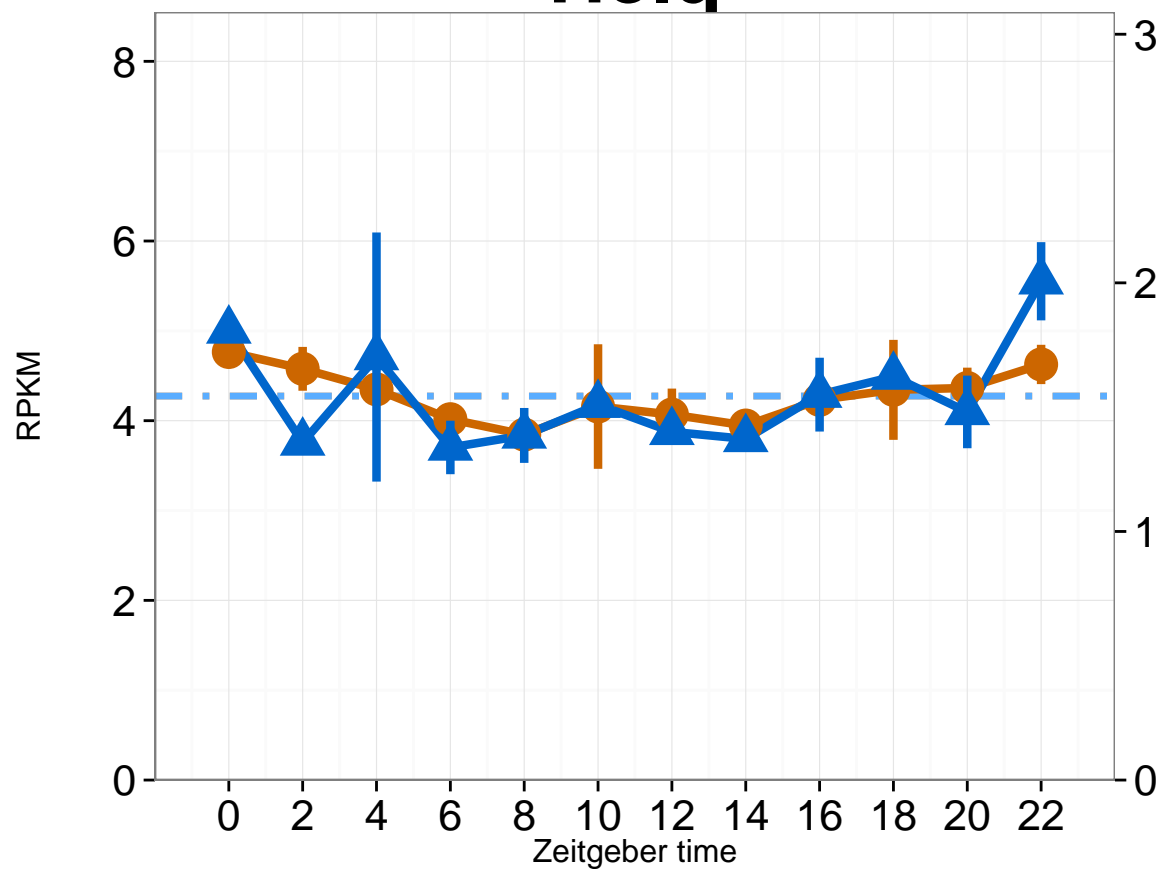

# Helq

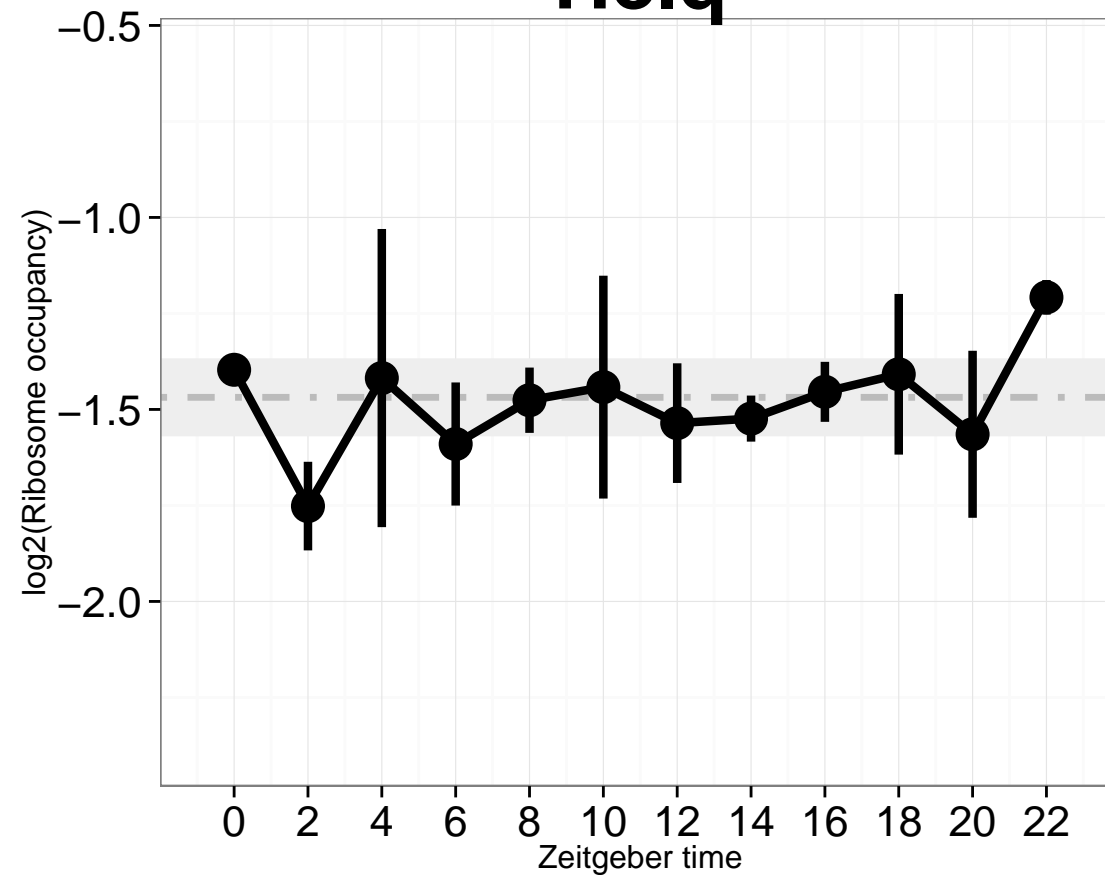

Supplement: Supplementary file 4943 [file 1]

# Kcnj15

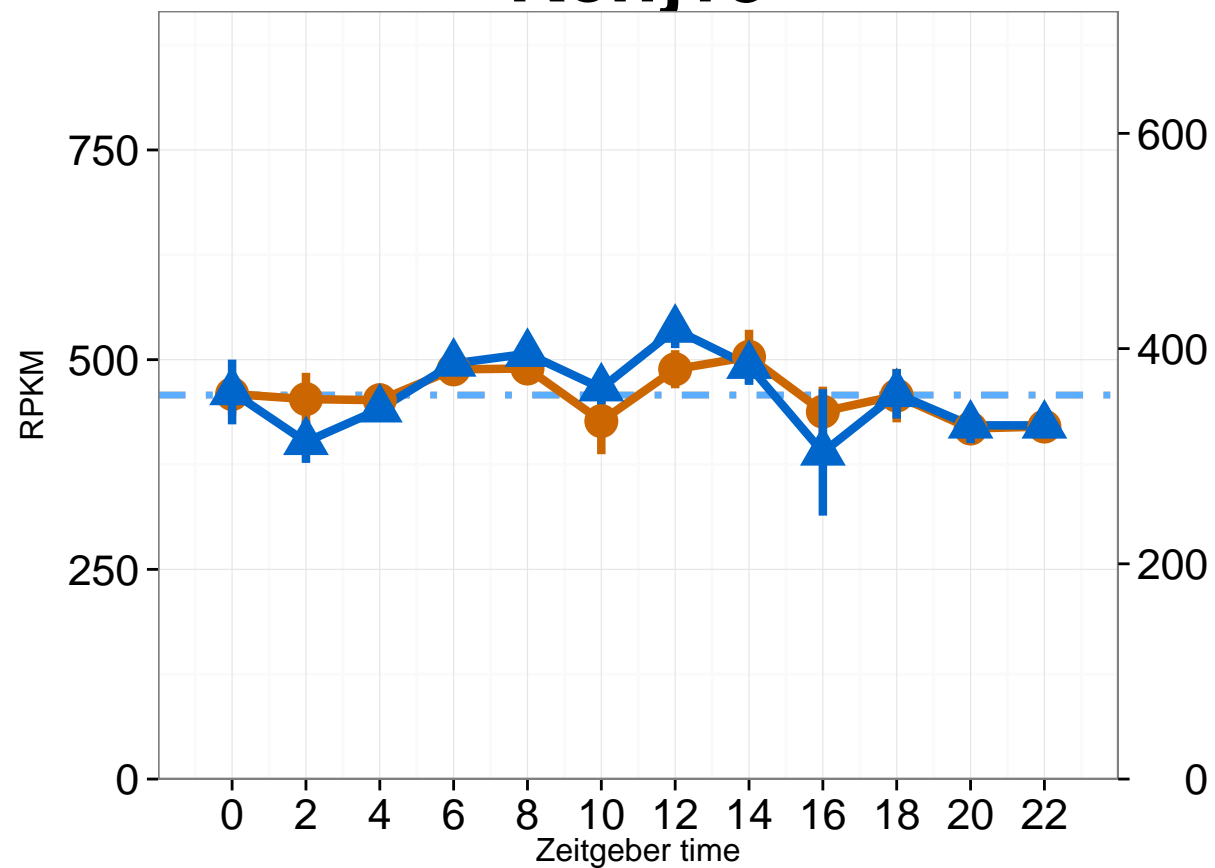

# Kcnj15

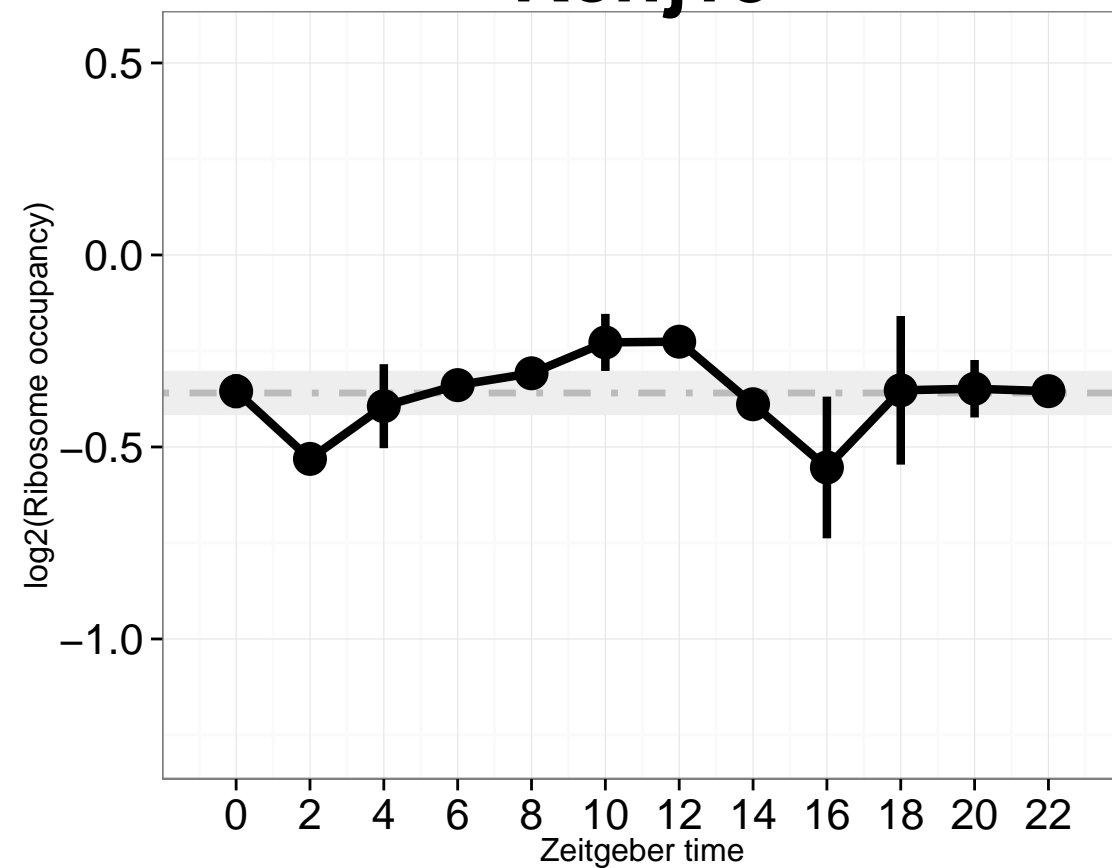

Supplement: Supplementary file 4944 [file 1]

## Rorc

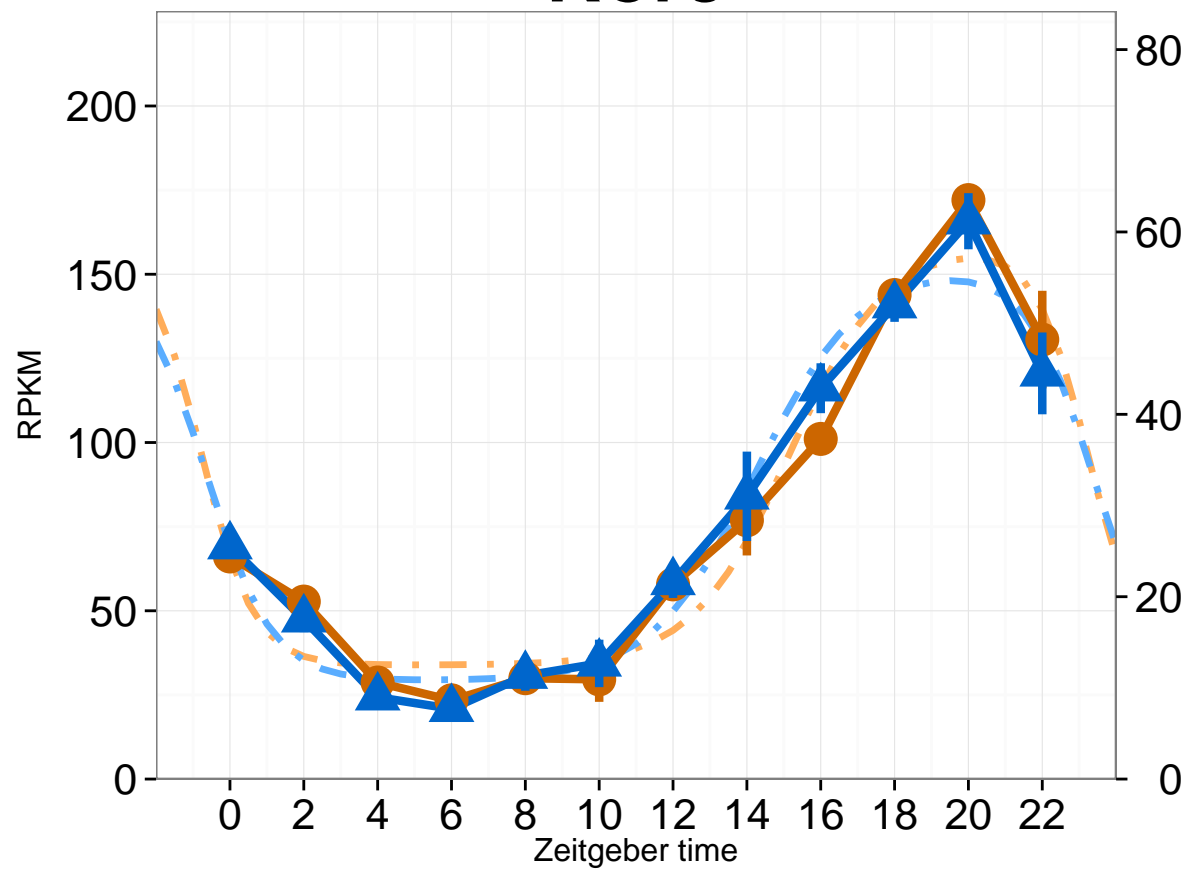

## Rorc

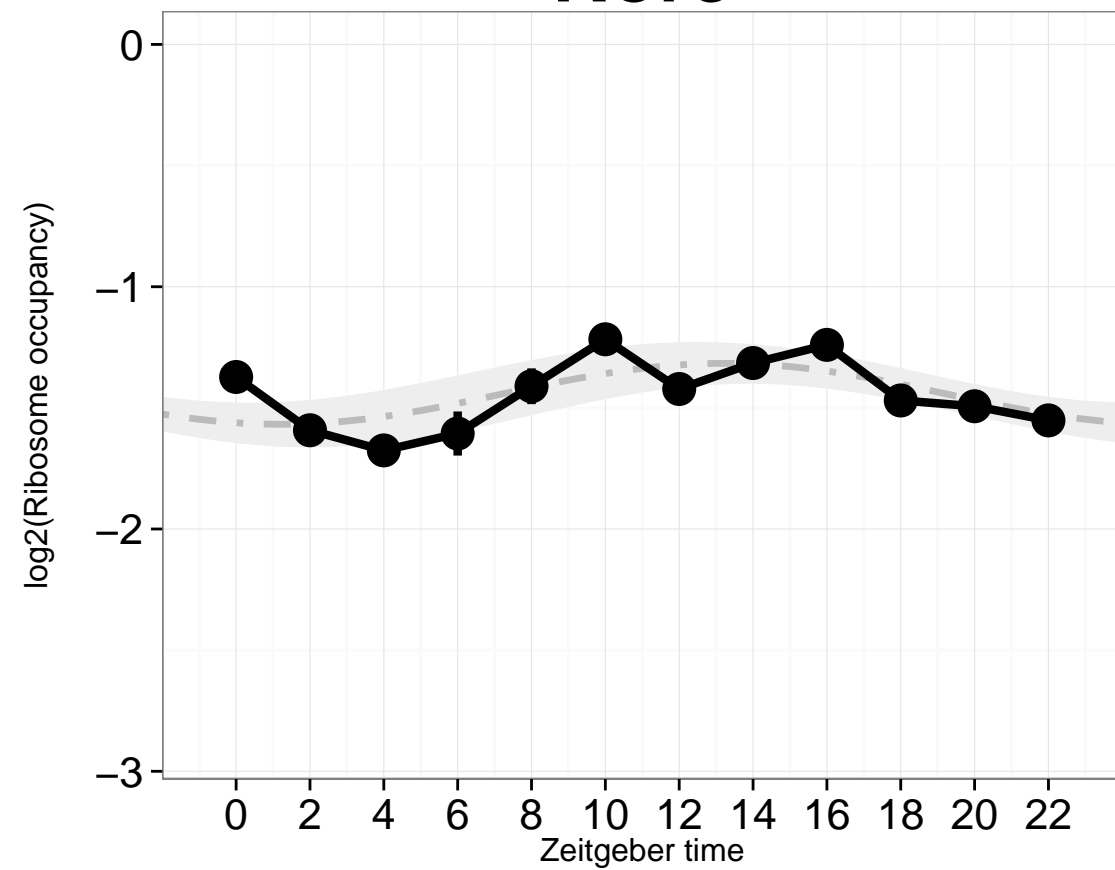

Supplement: Supplementary file 4945 [file 1]

## Slamf8

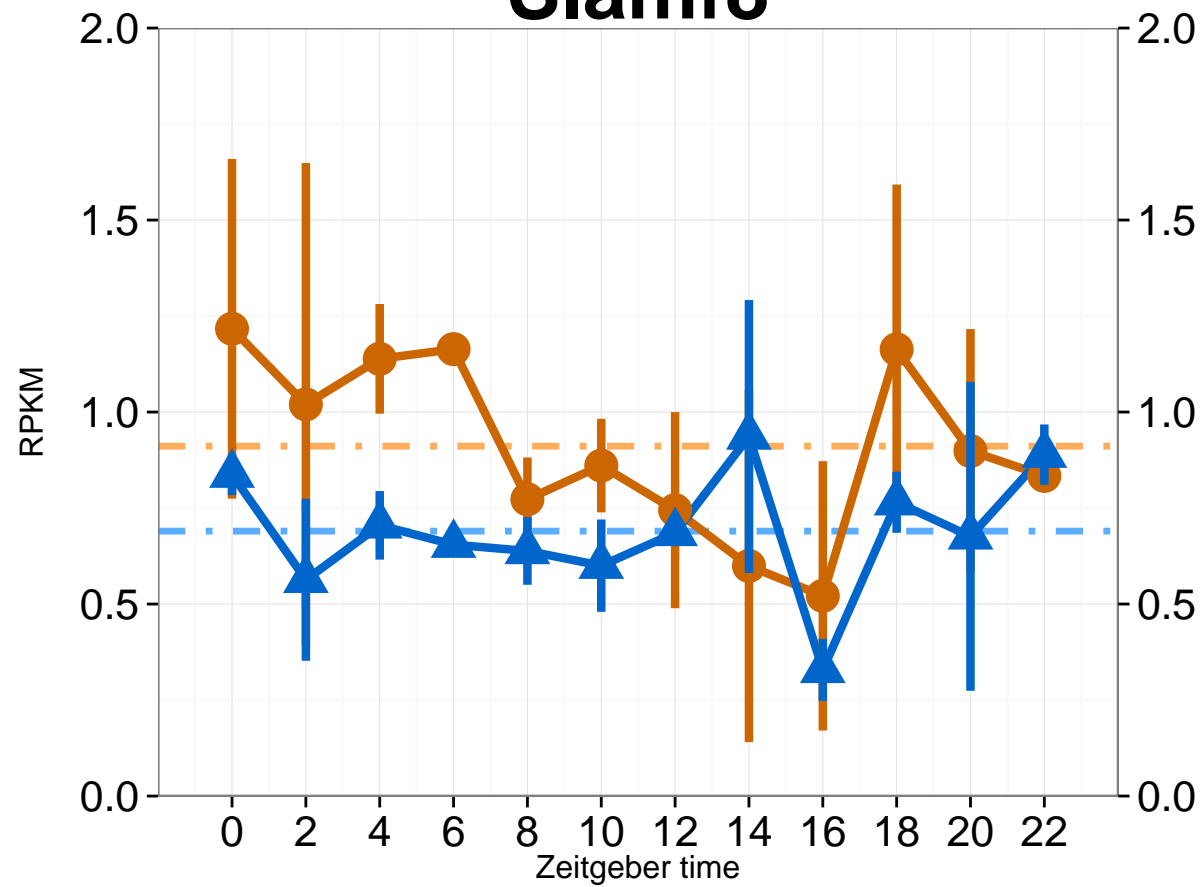

## Slamf8

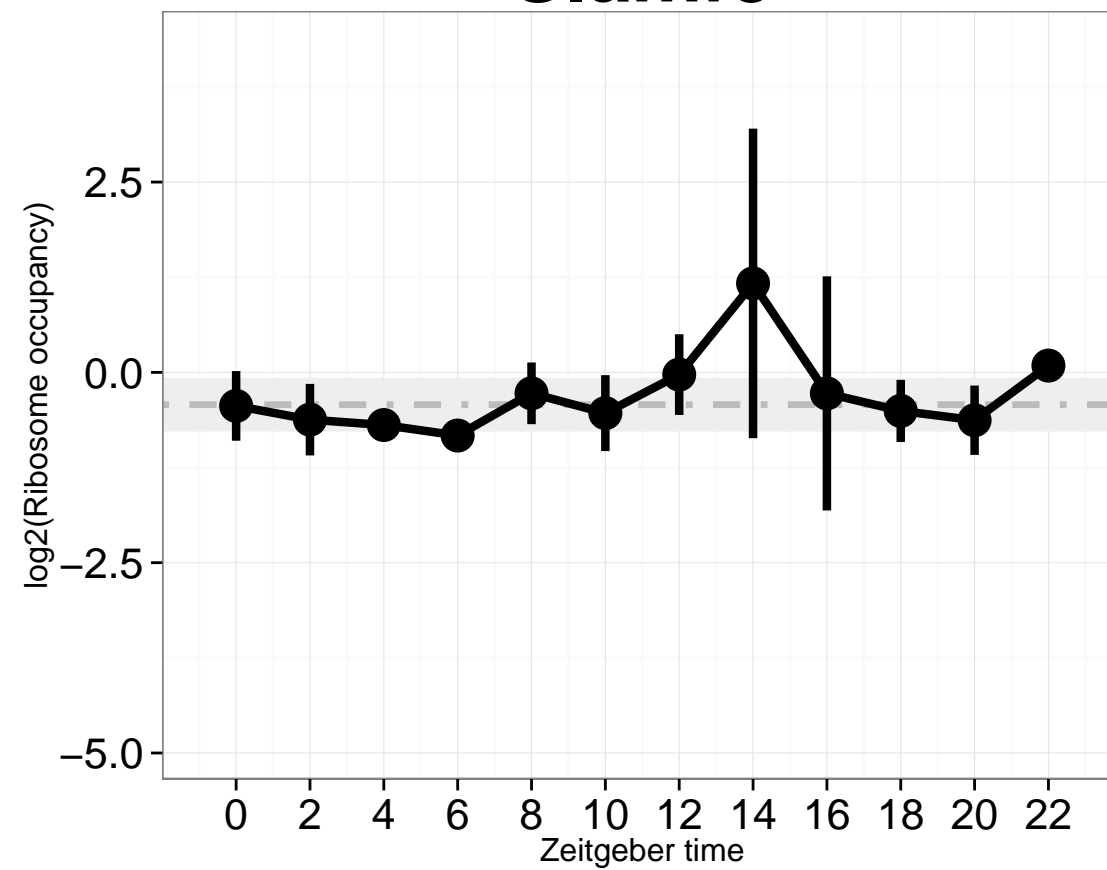

Supplement: Supplementary file 4946 [file 1]

# Otud3

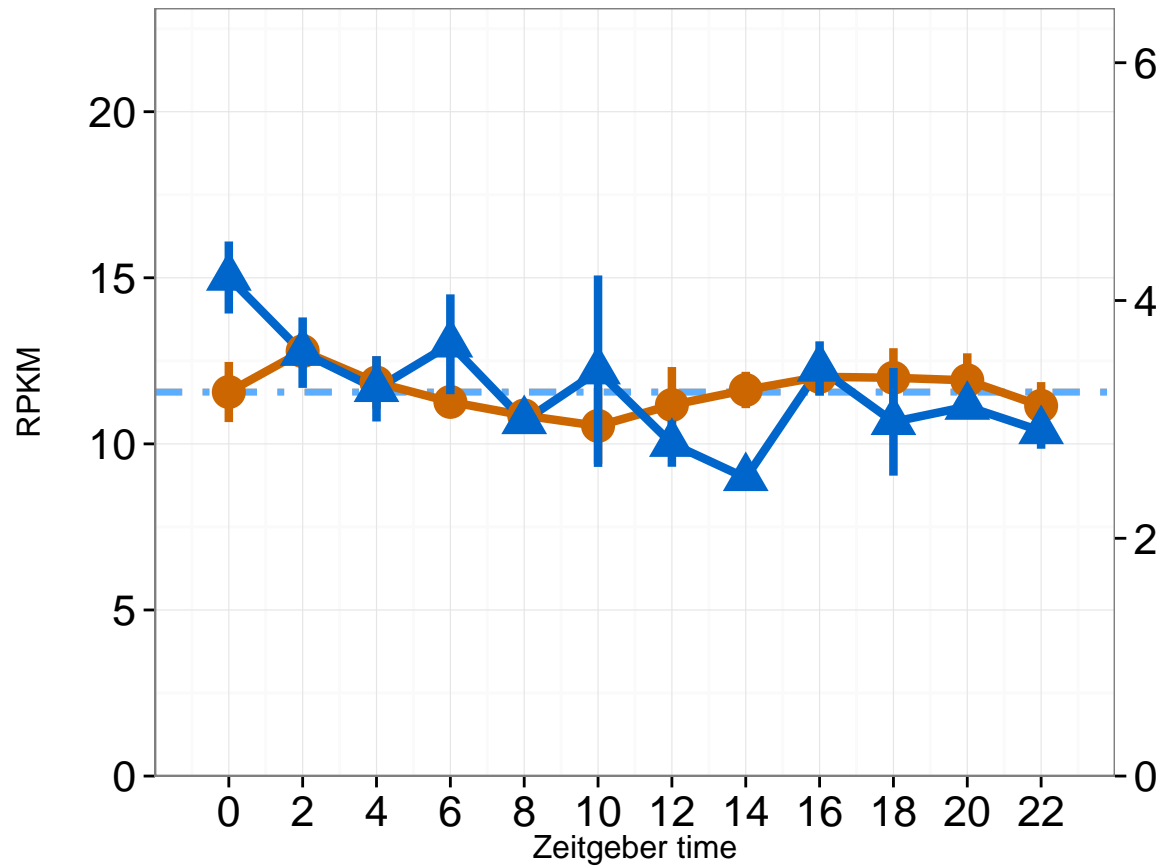

# Otud3

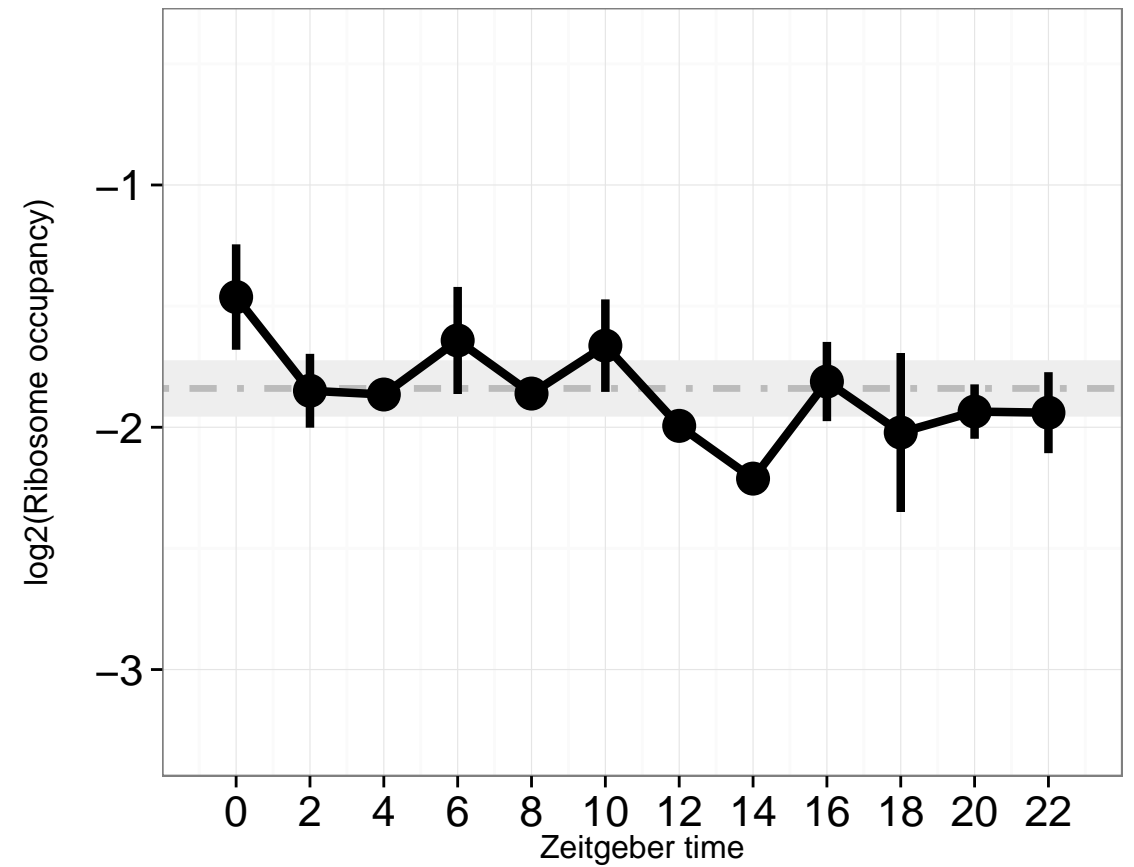

Supplement: Supplementary file 4947 [file 1]

# B4galt7

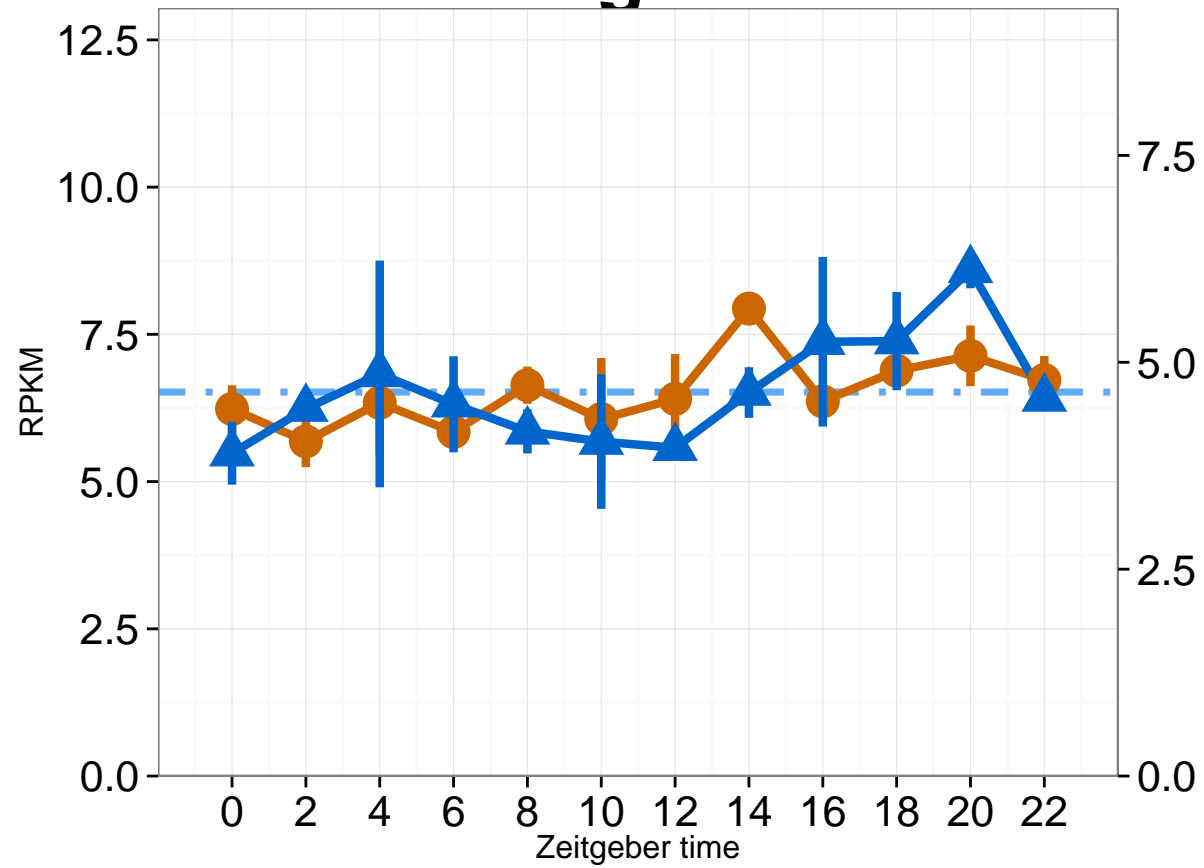

# B4galt7

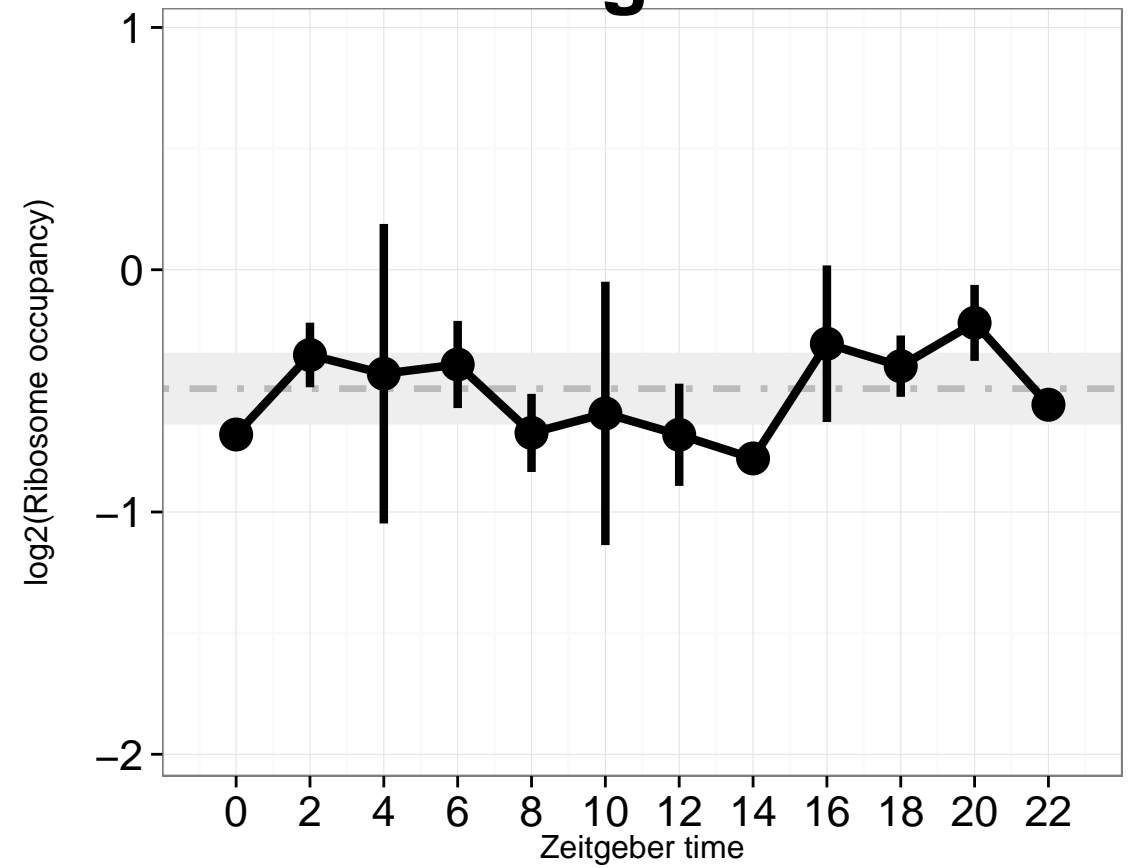

Supplement: Supplementary file 4948 [file 1]

**Dnajb3 TR**

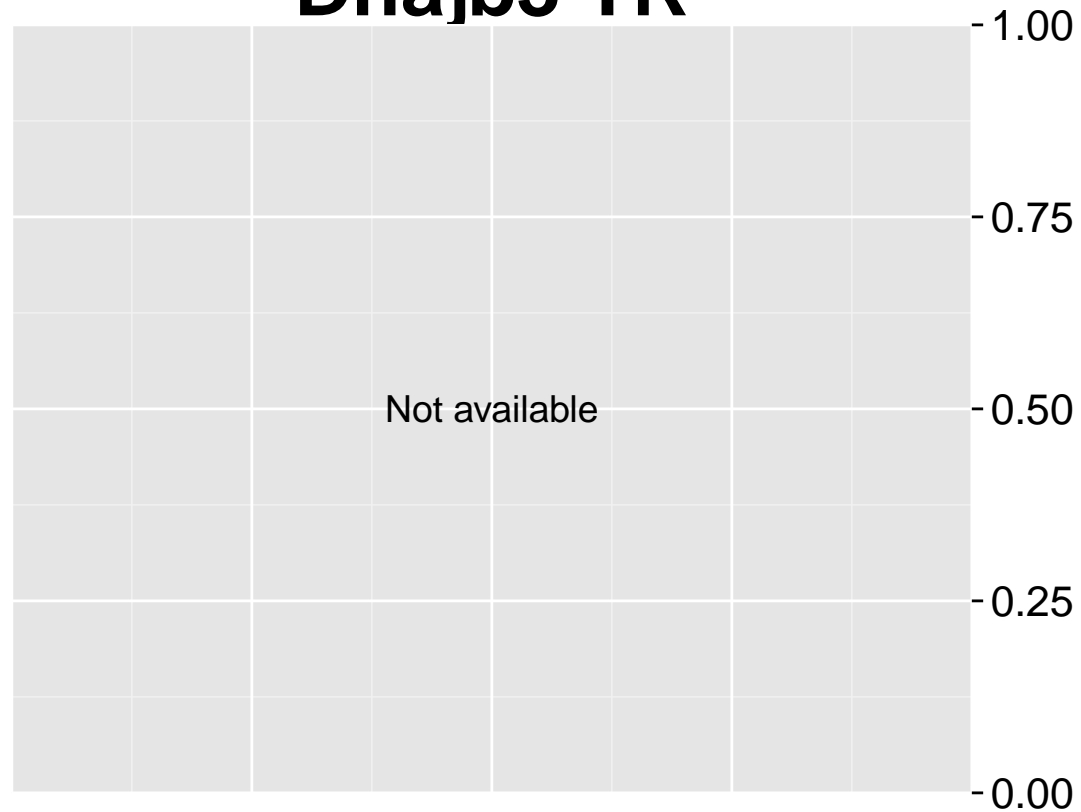

**Dnajb3 log2(Ribosome occupancy**

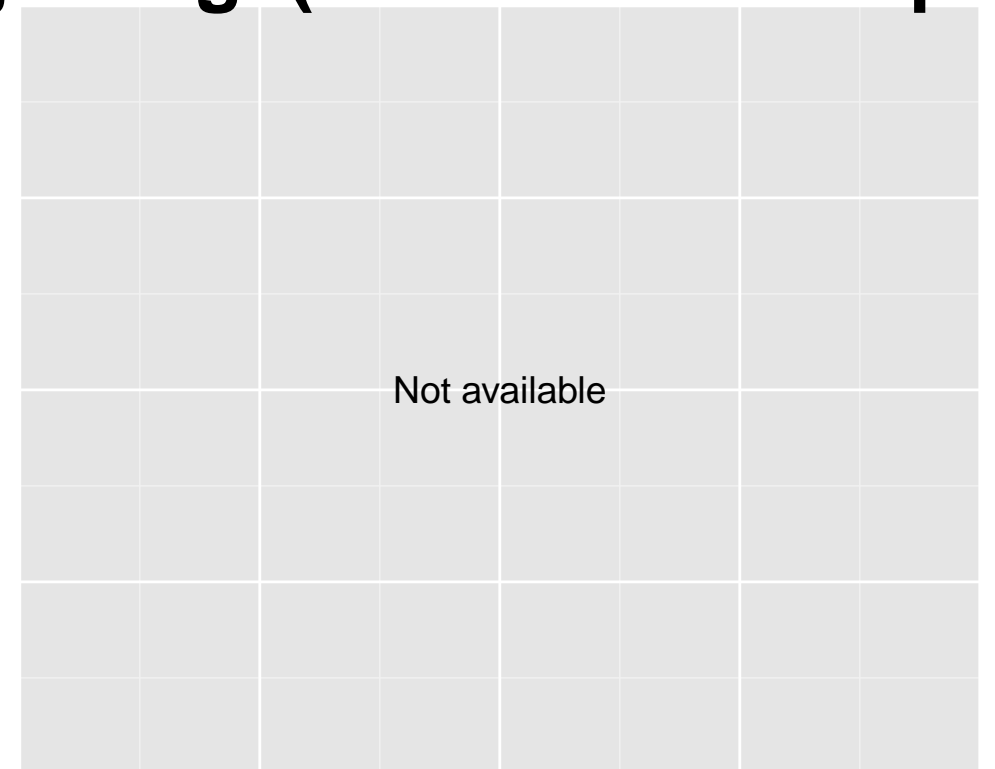

Supplement: Supplementary file 4949 [file 1]

## Tbx2

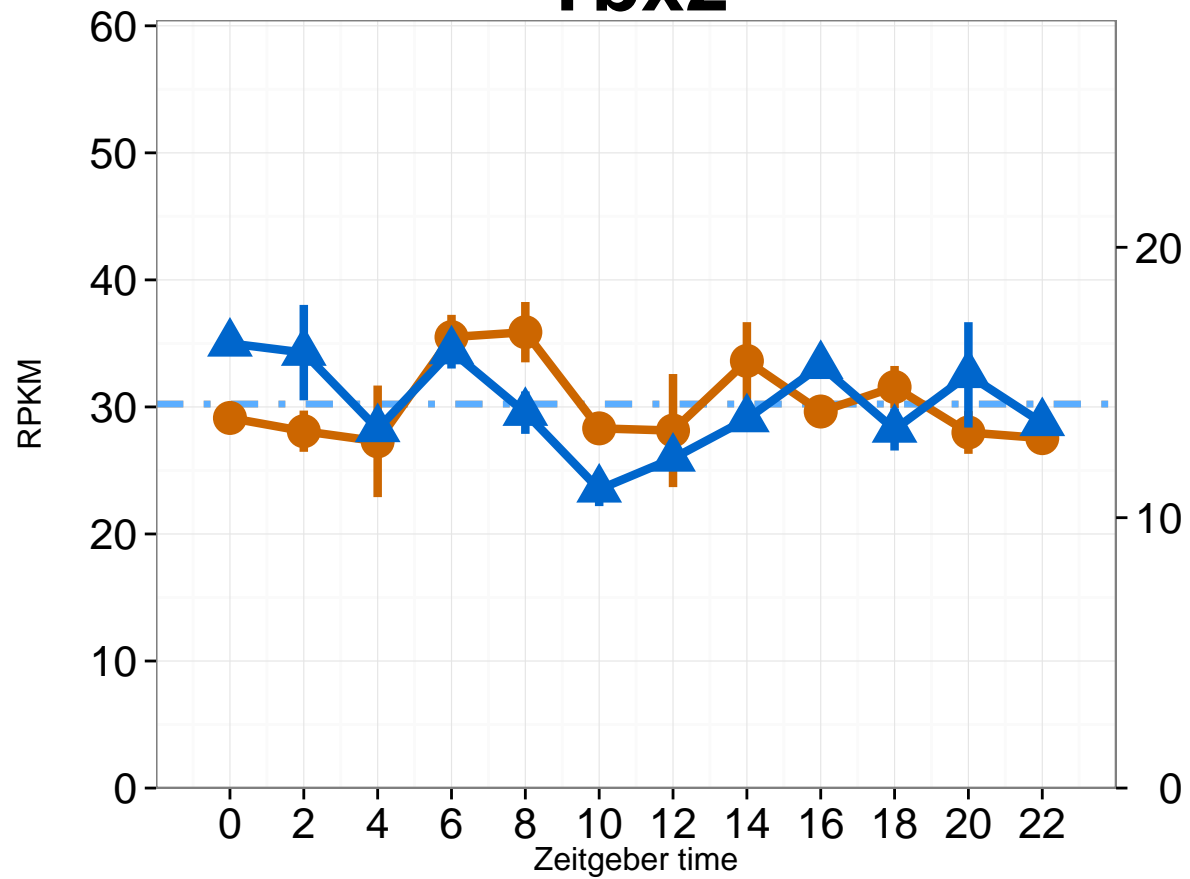

## Tbx2

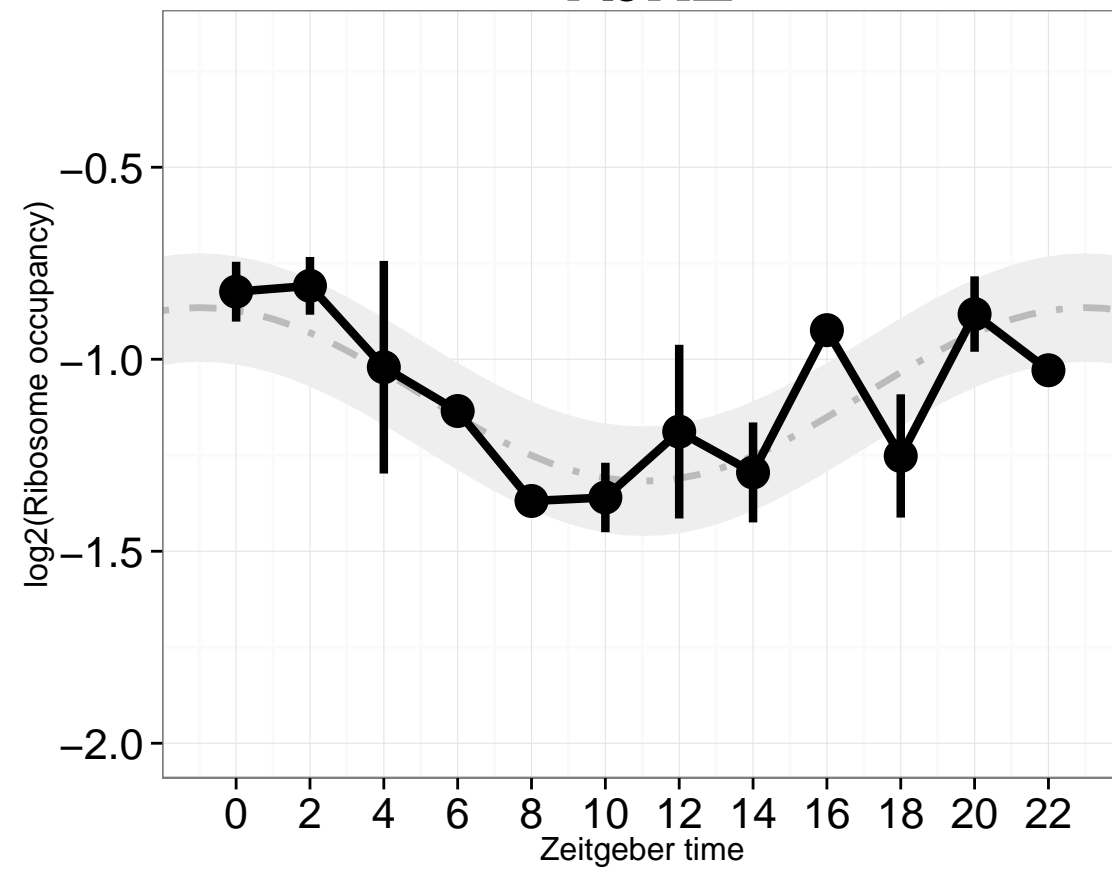

Supplement: Supplementary file 4950 [file 1]

## Gabarapl2

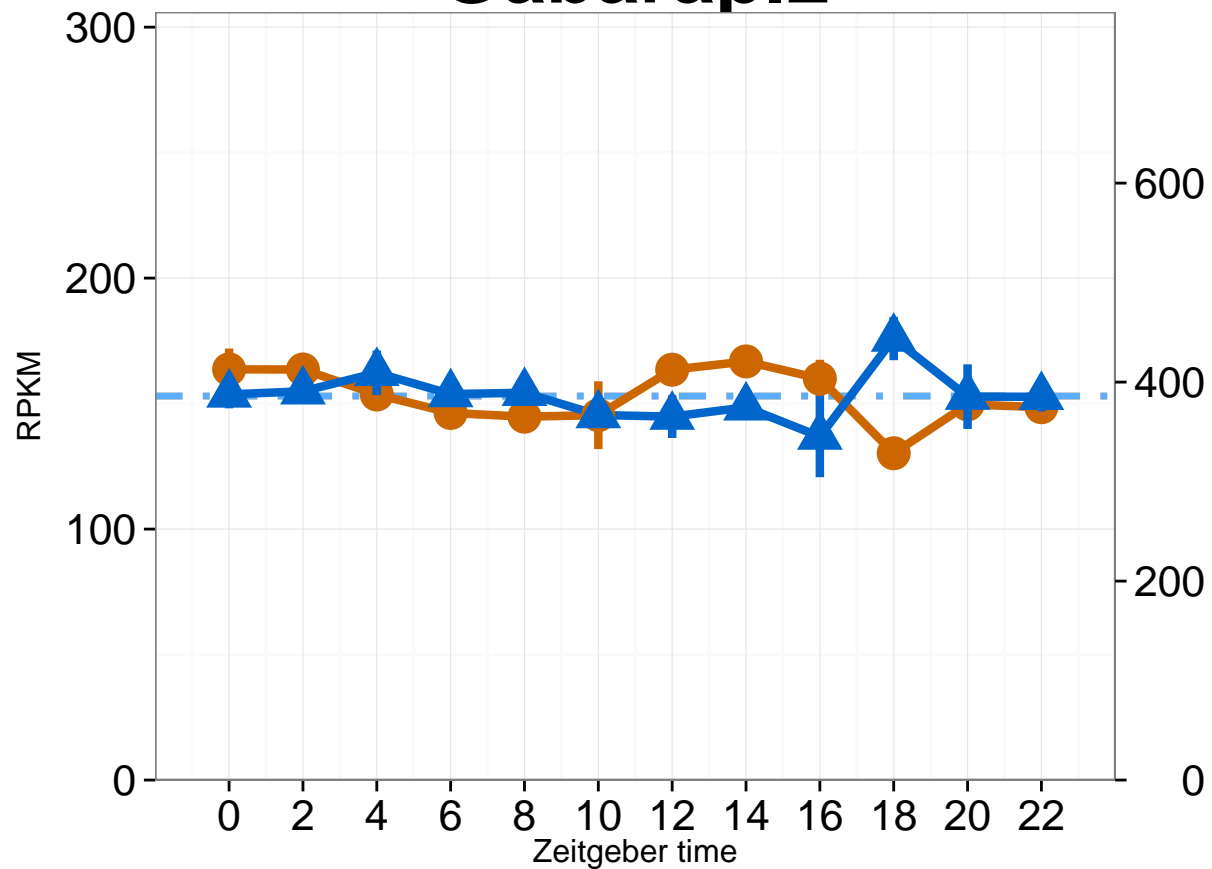

## Gabarapl2

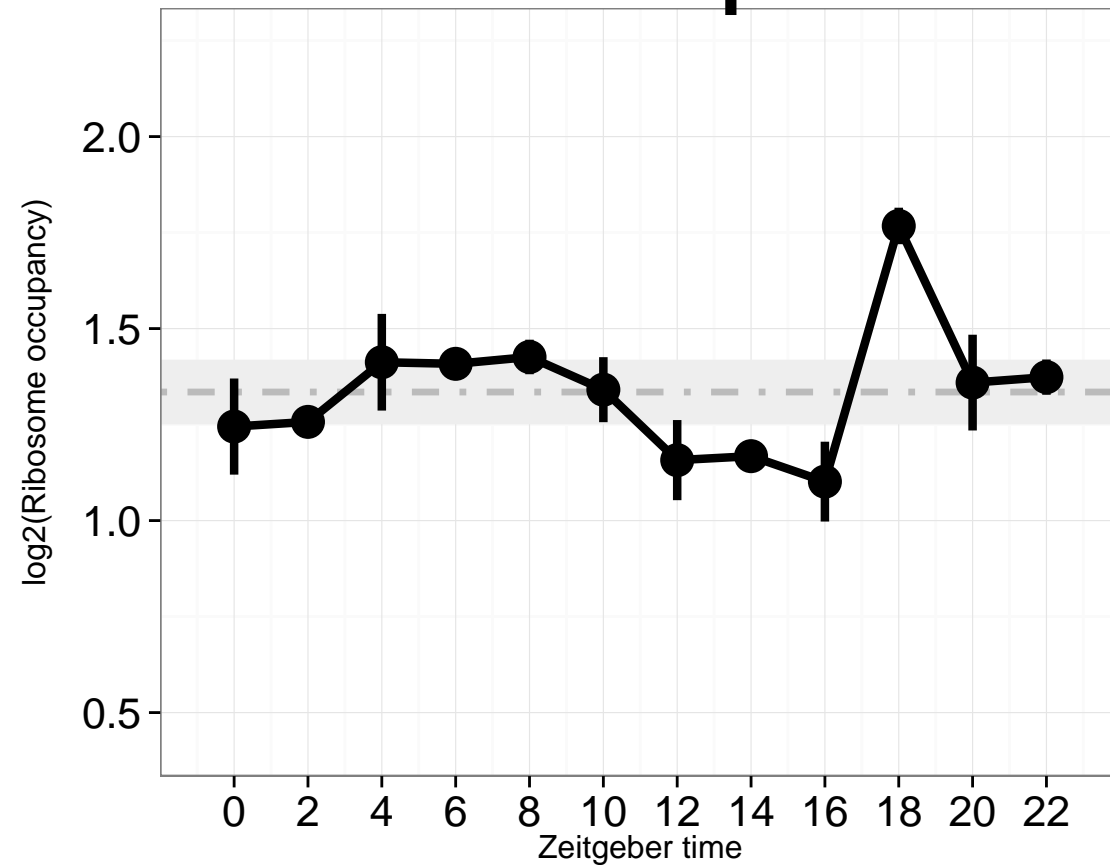

Supplement: Supplementary file 4951 [file 1]

# C1galt1c1

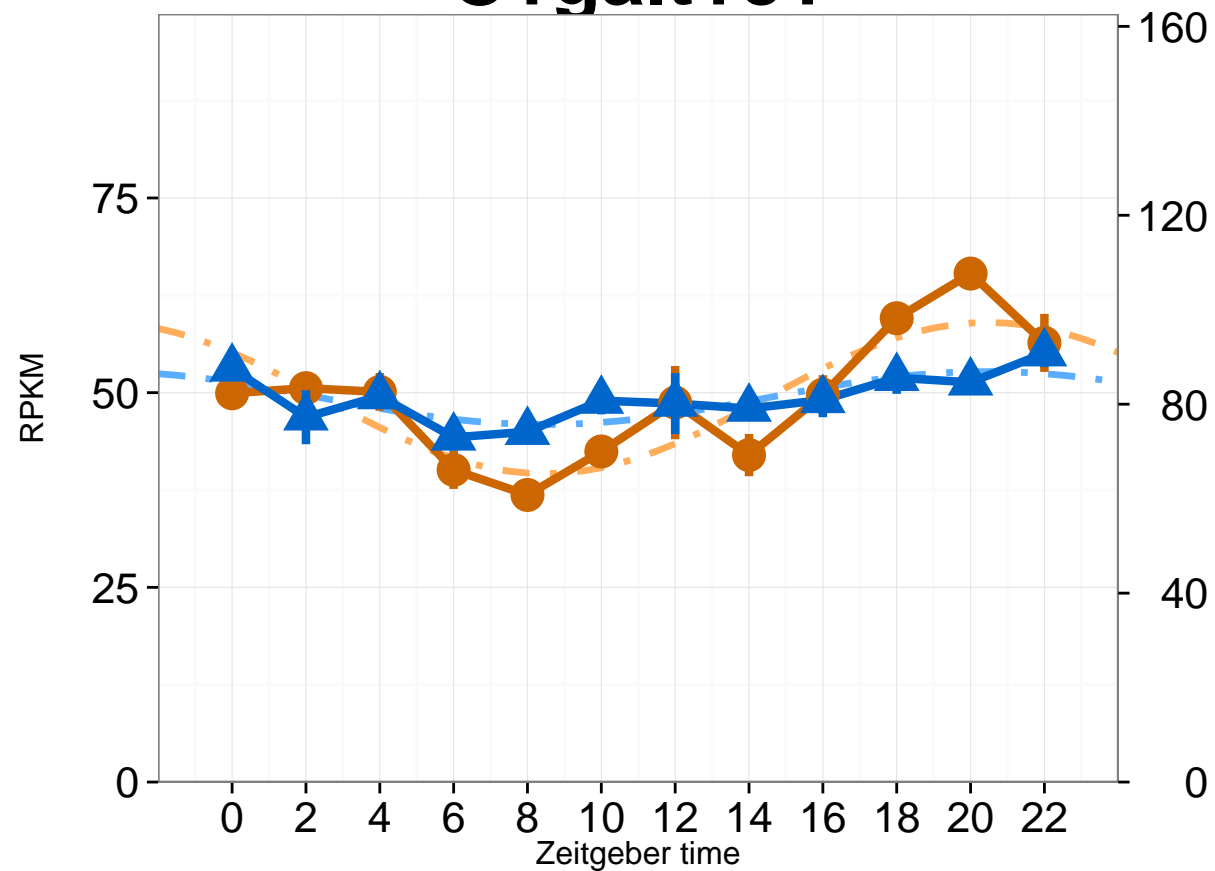

# C1galt1c1

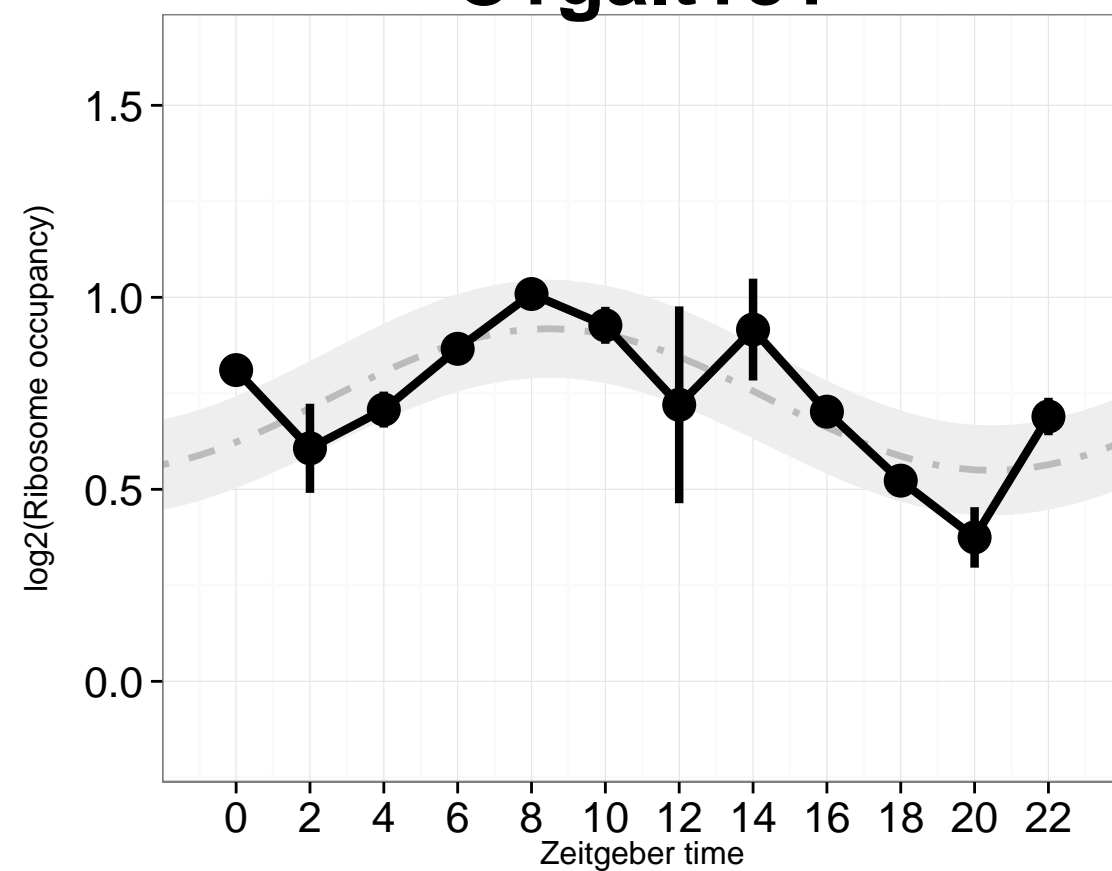

Supplement: Supplementary file 4952 [file 1]

# Ift140

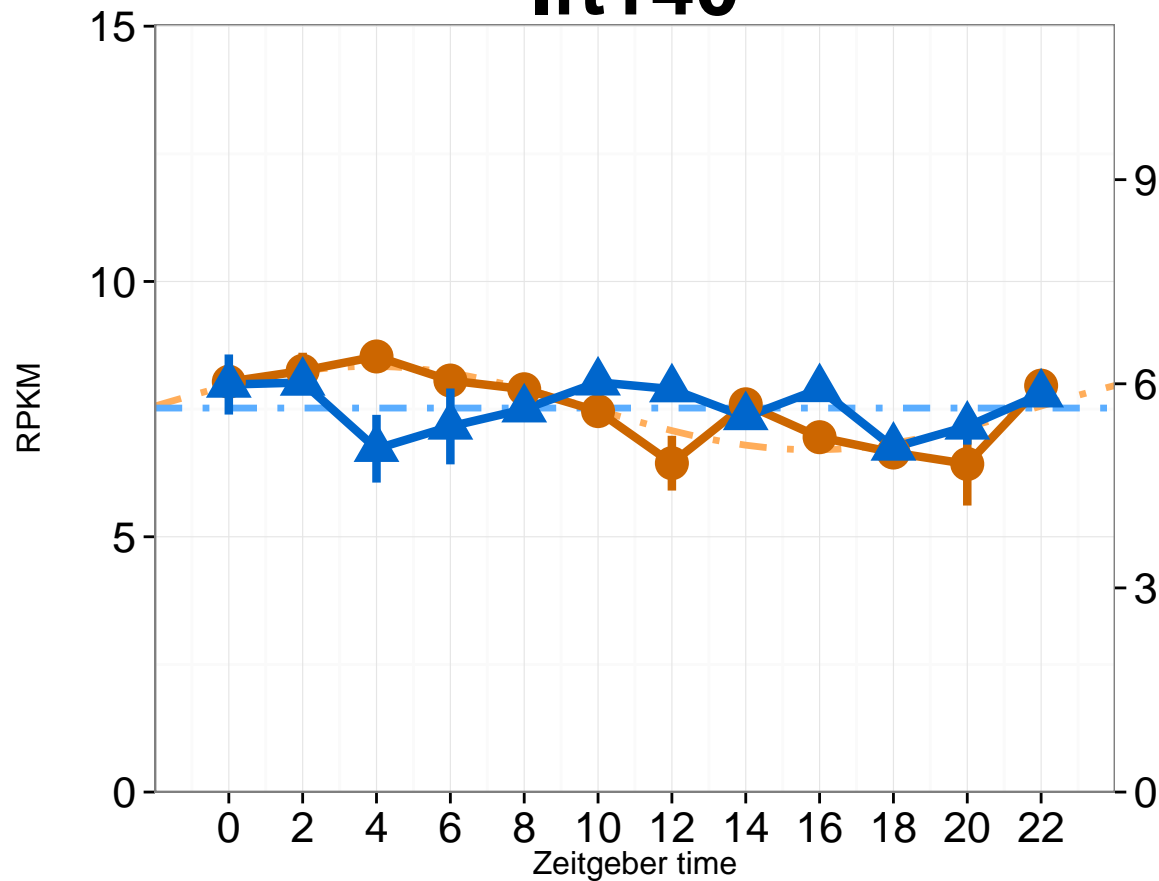

# Ift140

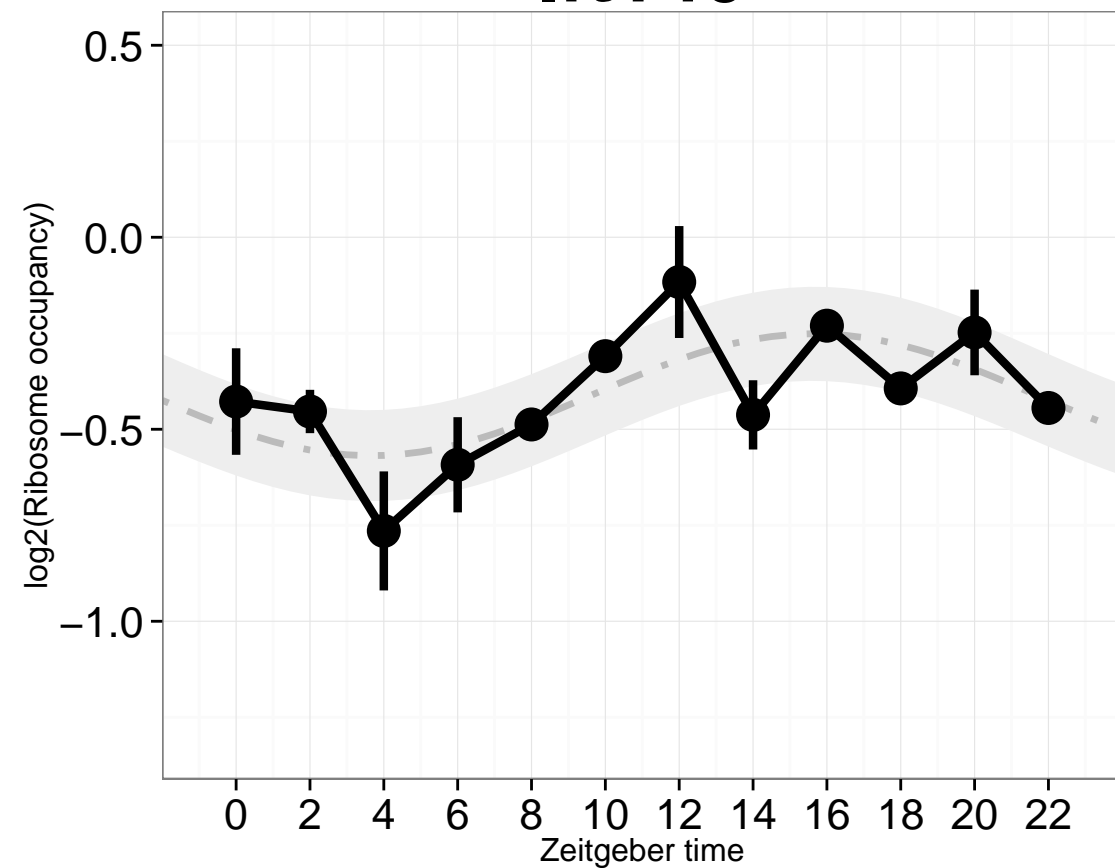

Supplement: Supplementary file 4953 [file 1]

## G0s2

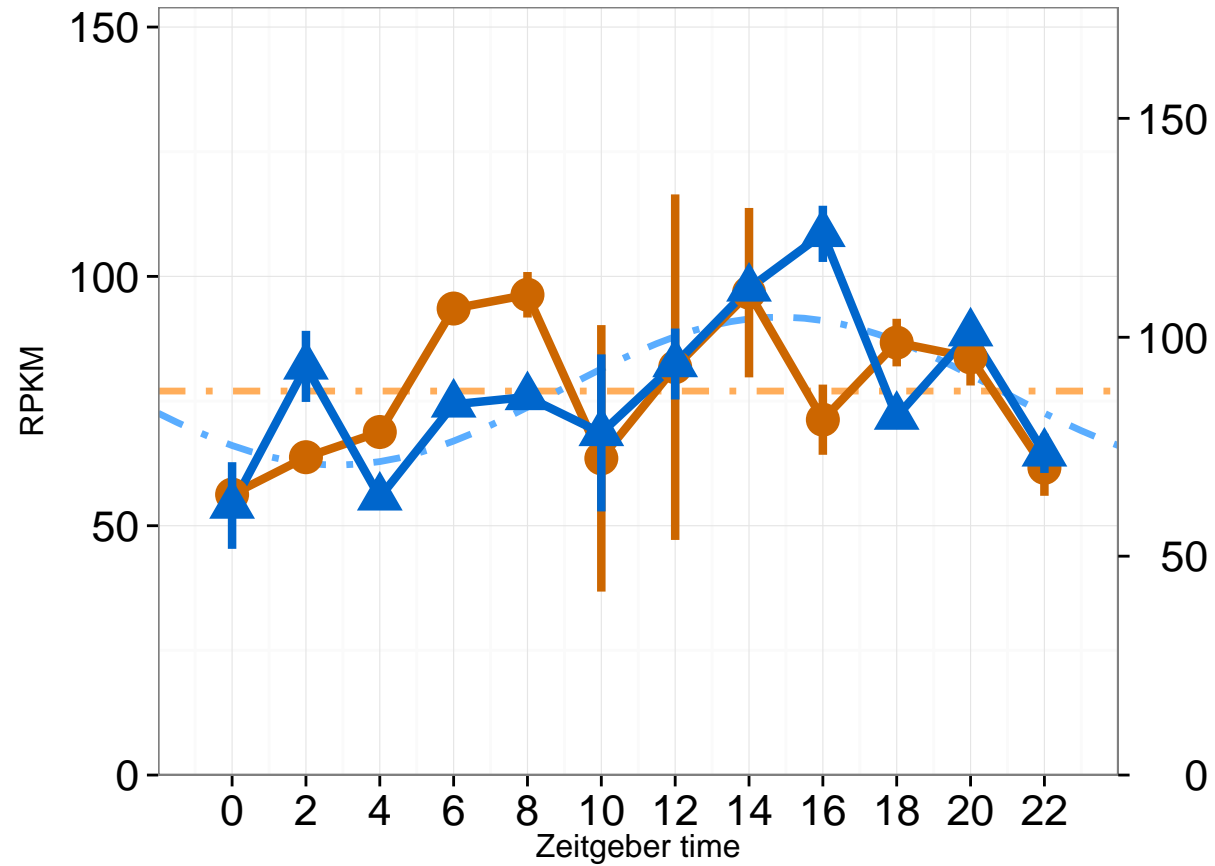

## G0s2

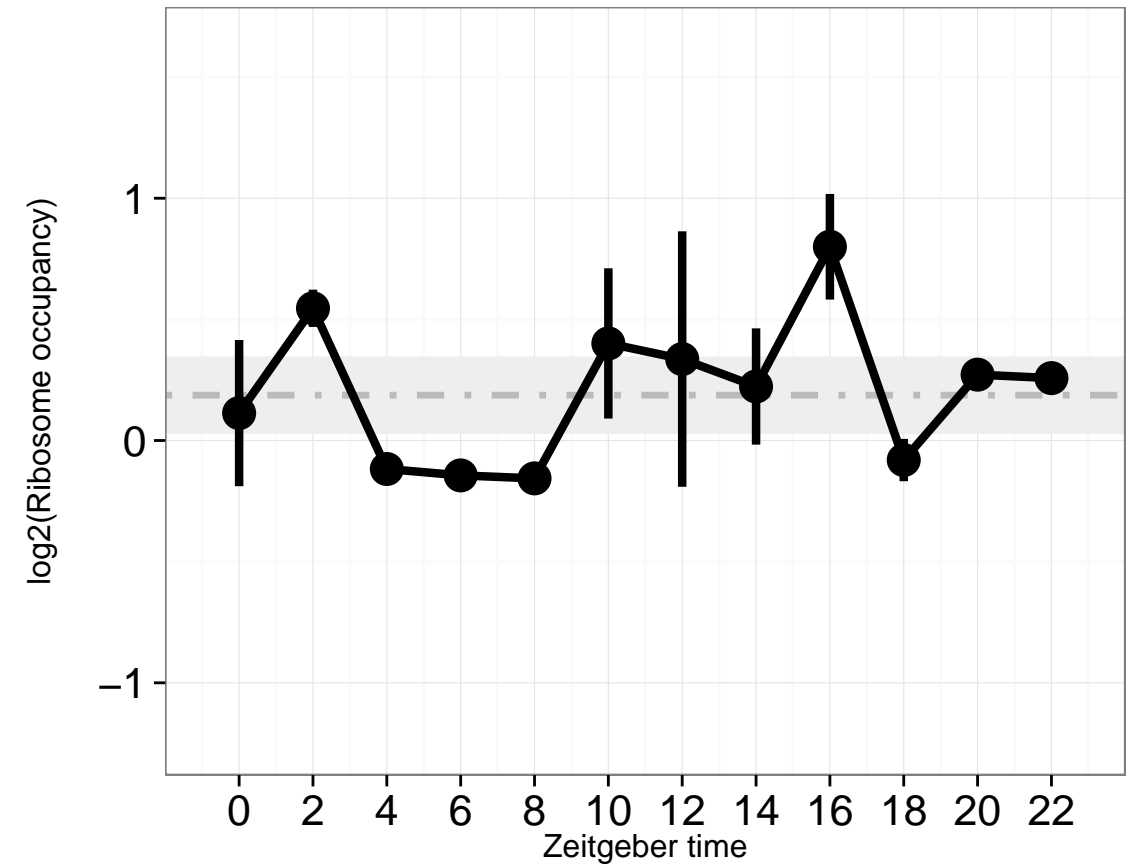

Supplement: Supplementary file 4954 [file 1]

## Hoxb4

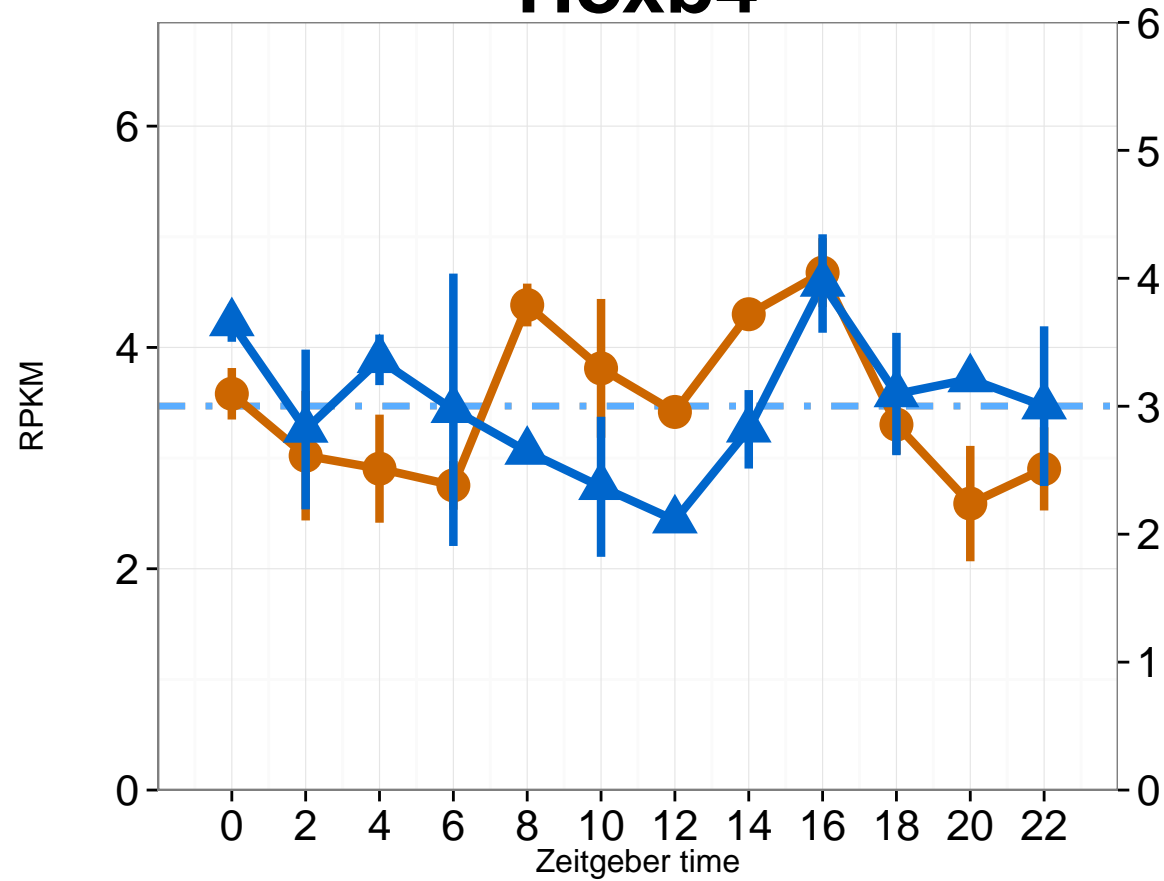

## Hoxb4

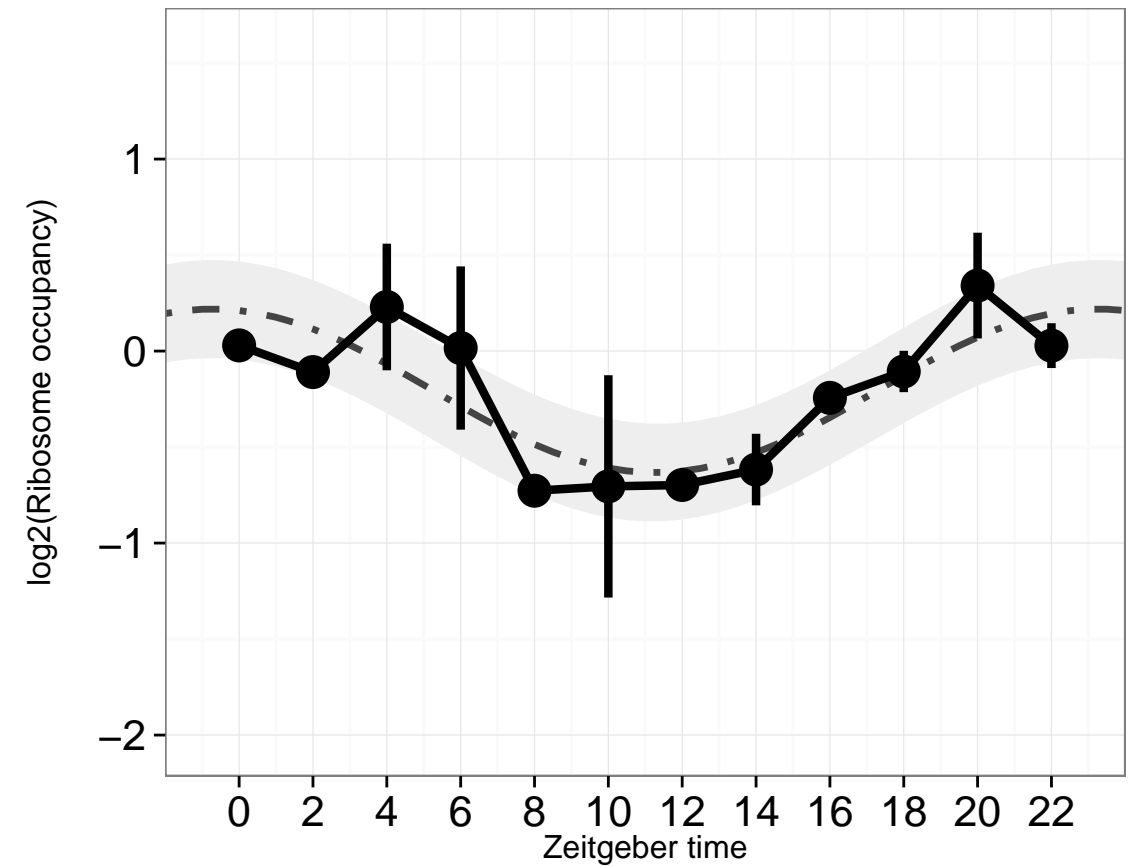

Supplement: Supplementary file 4955 [file 1]

# Akr1c13

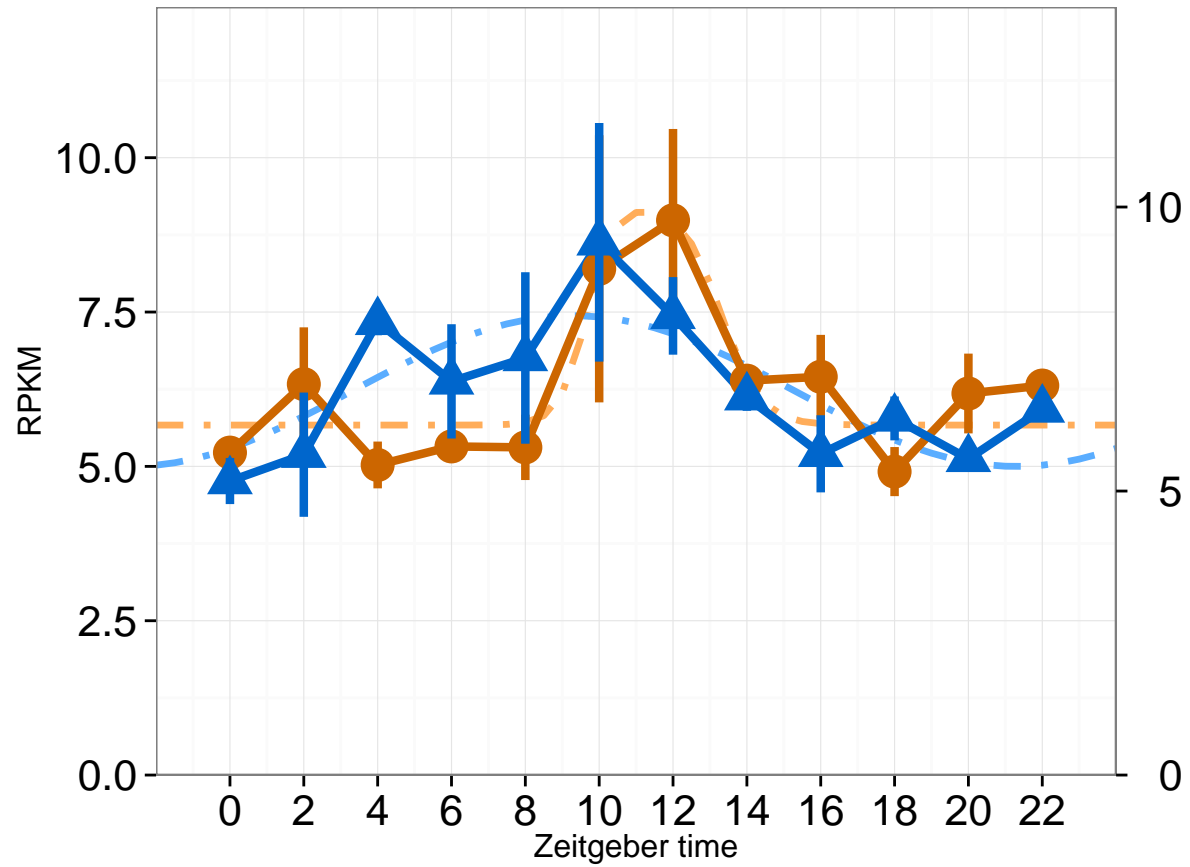

# Akr1c13

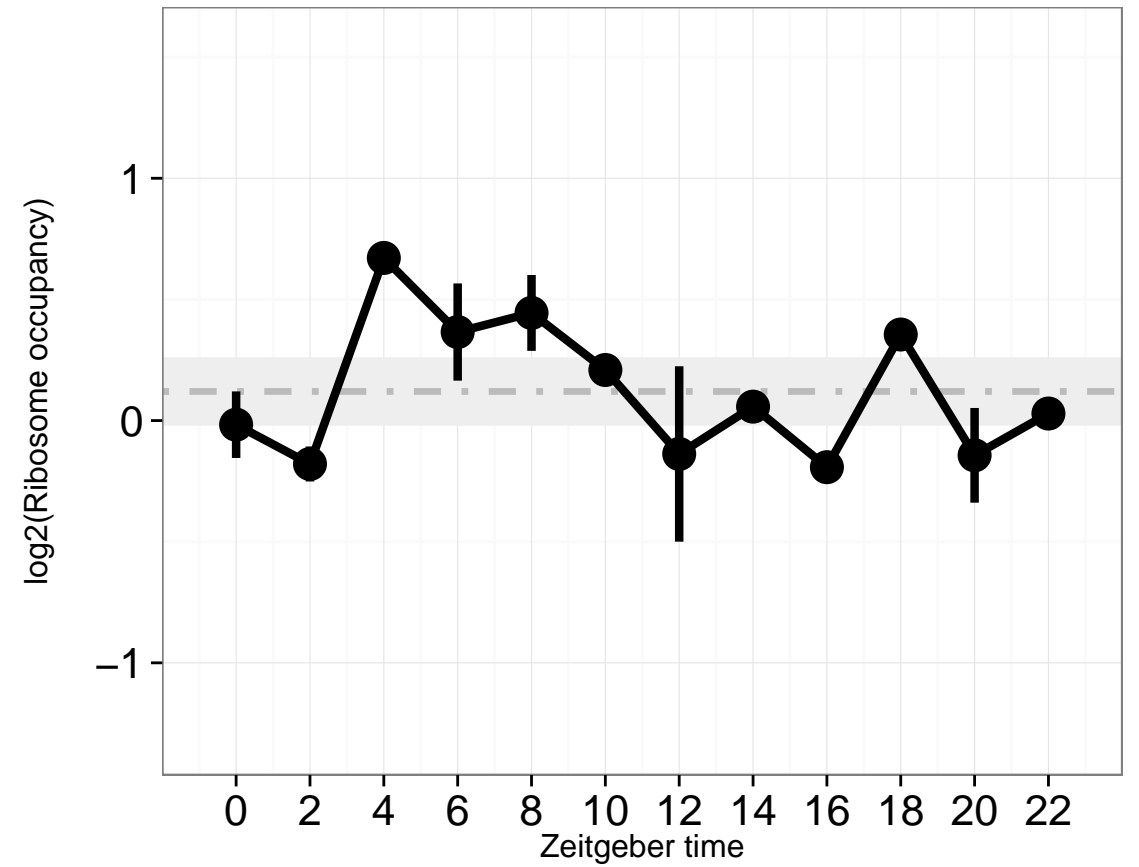

Supplement: Supplementary file 4956 [file 1]

## Orc5

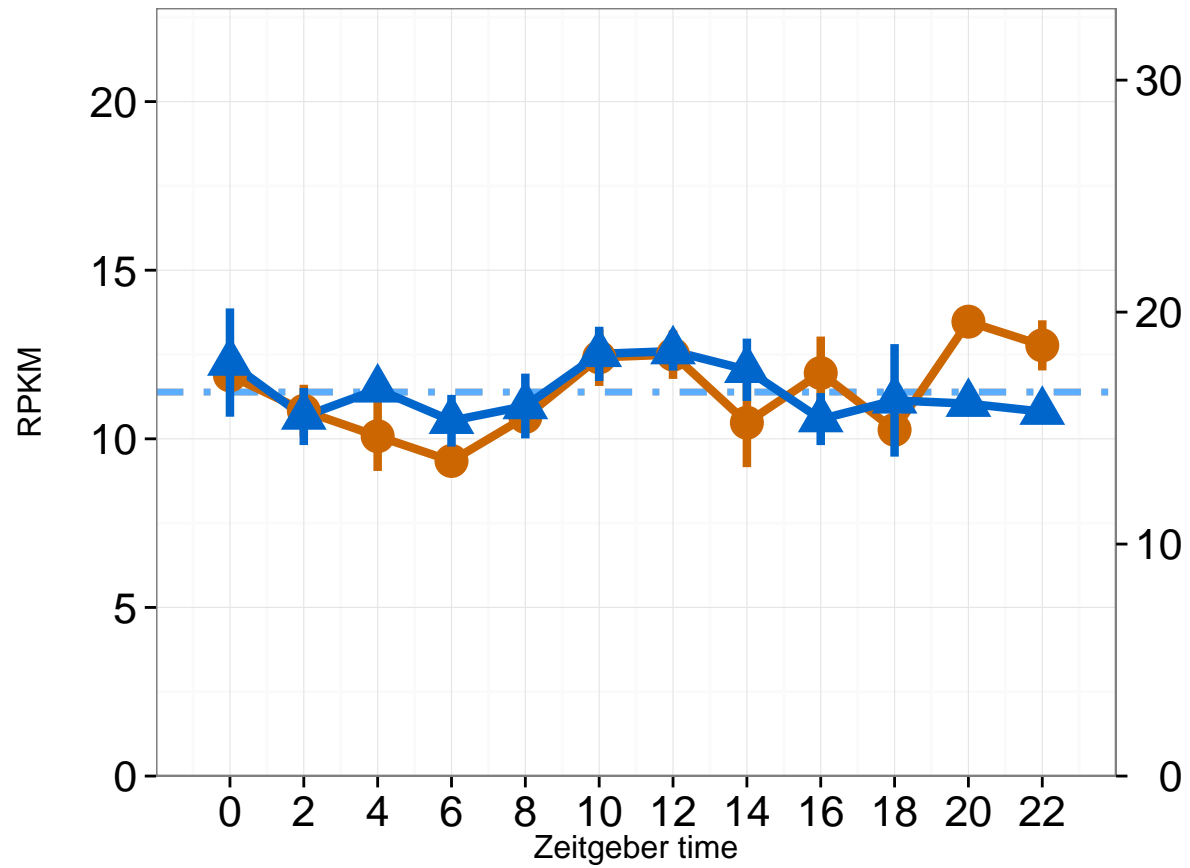

## Orc5

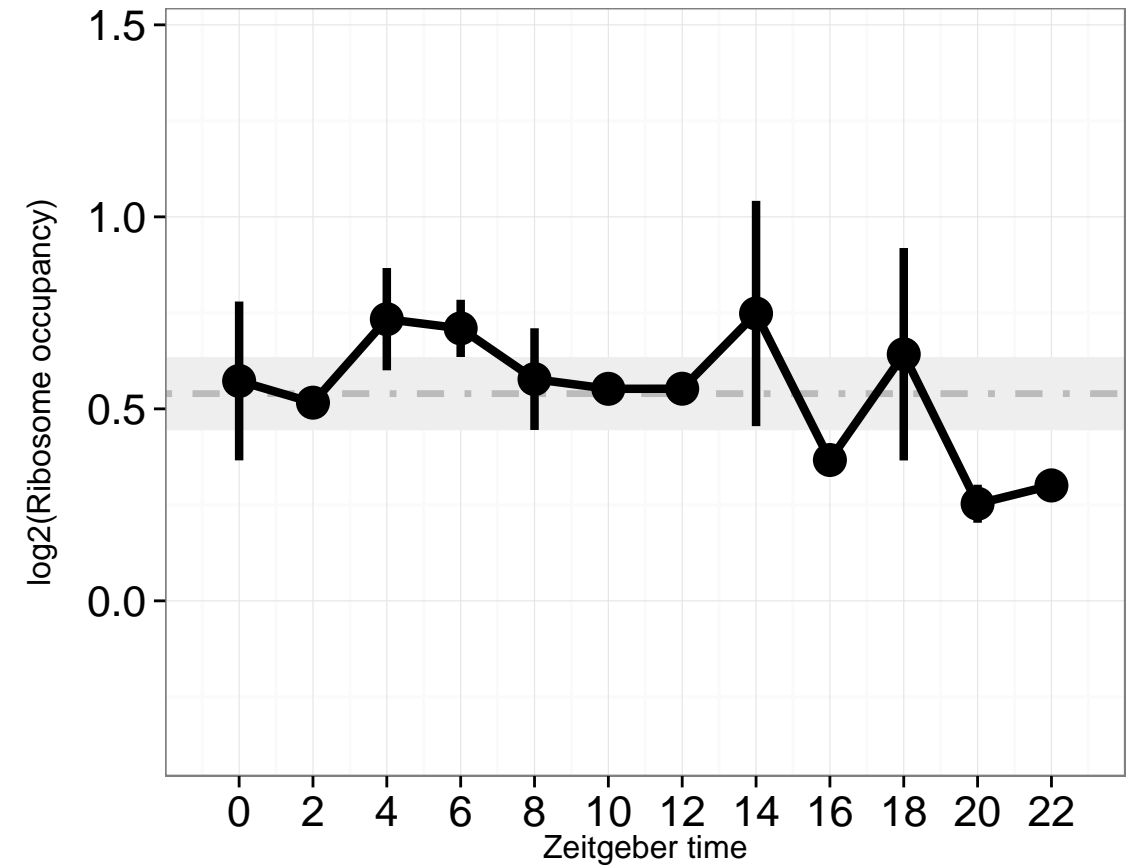

Supplement: Supplementary file 4957 [file 1]

# Mfrp

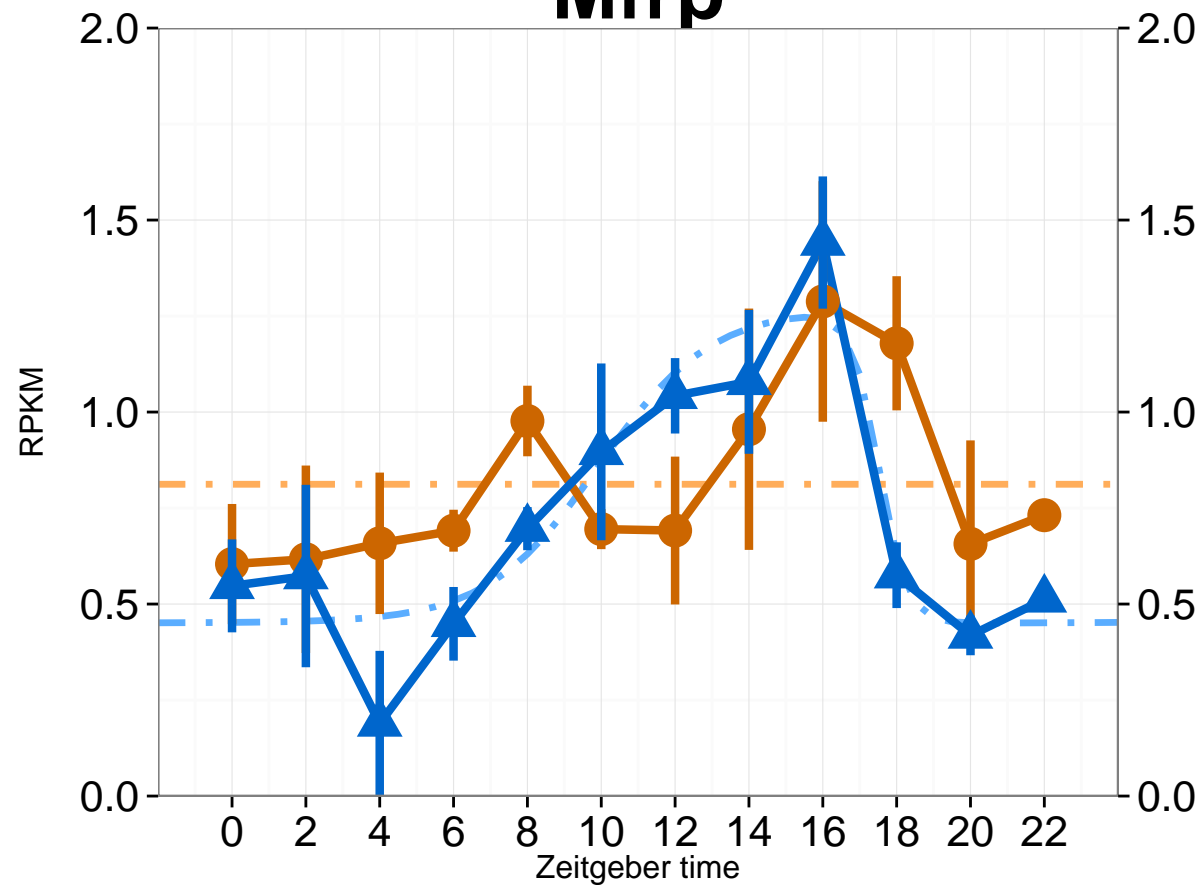

# Mfrp

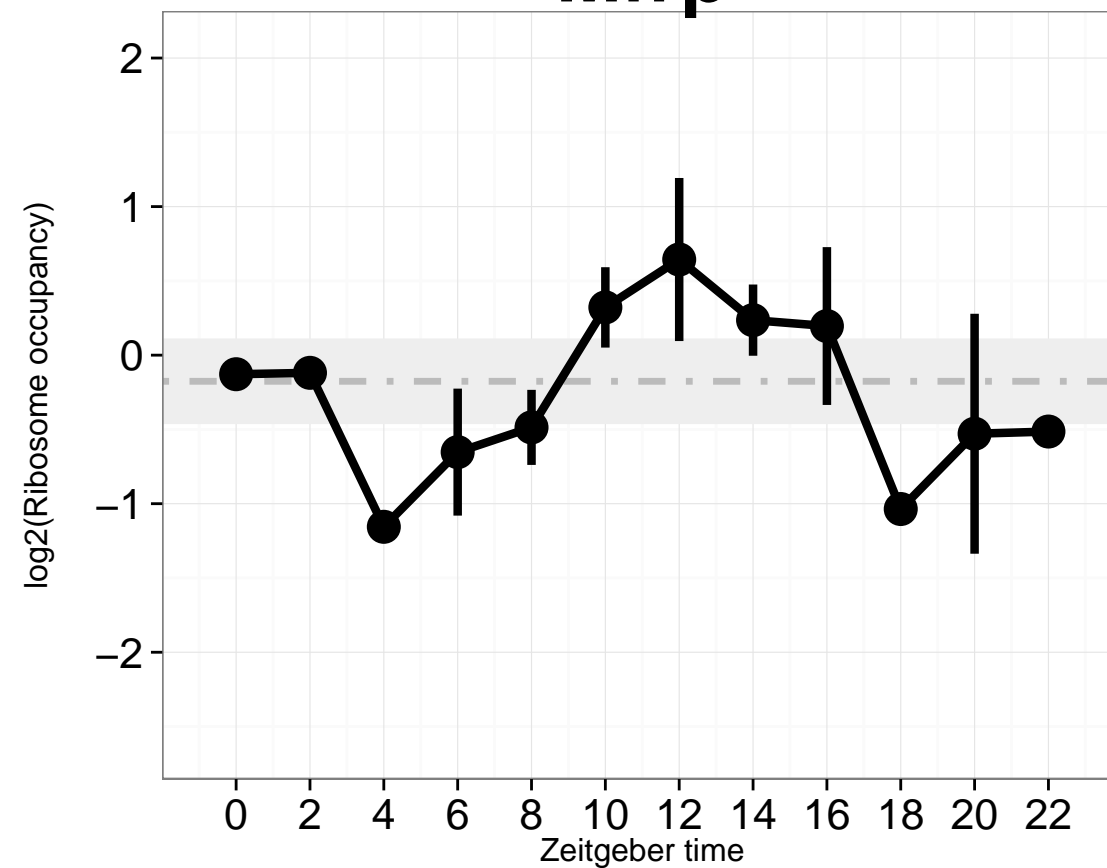

Supplement: Supplementary file 4958 [file 1]

## Cit

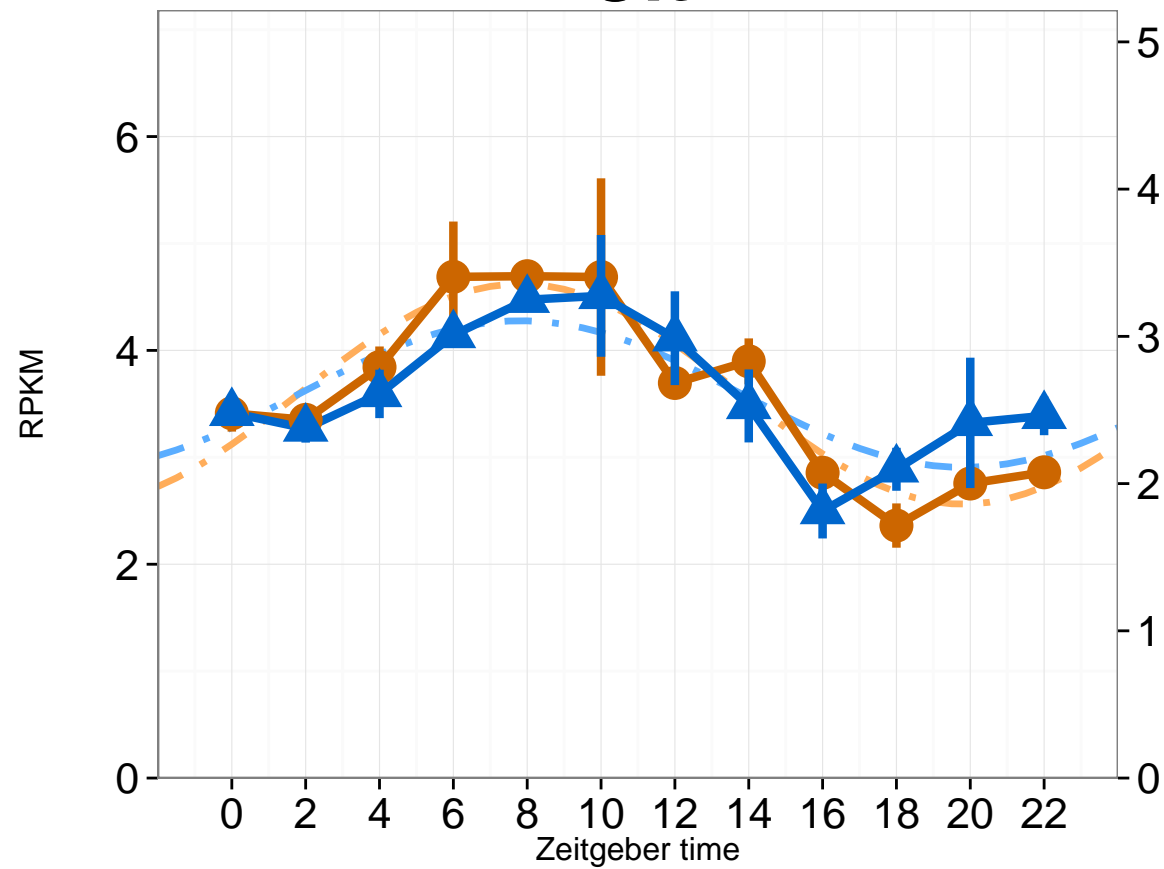

## Cit

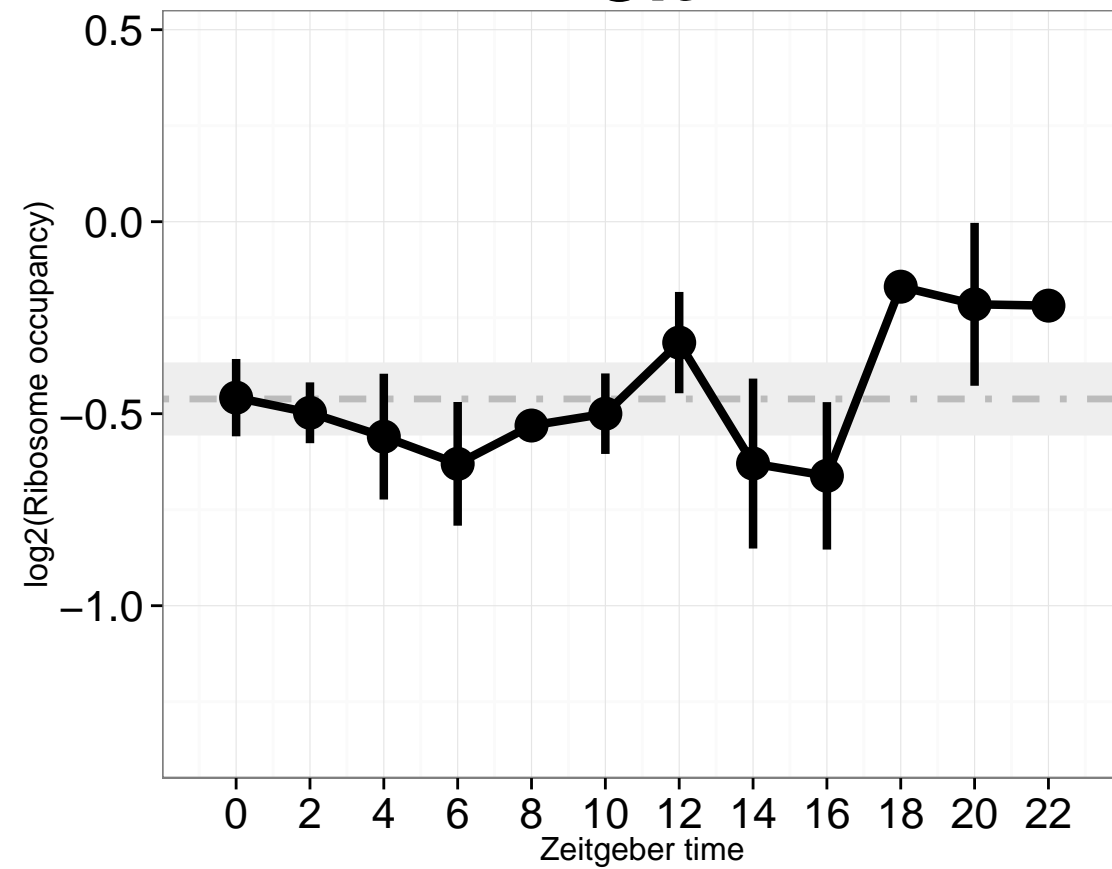

Supplement: Supplementary file 4959 [file 1]

## Hells

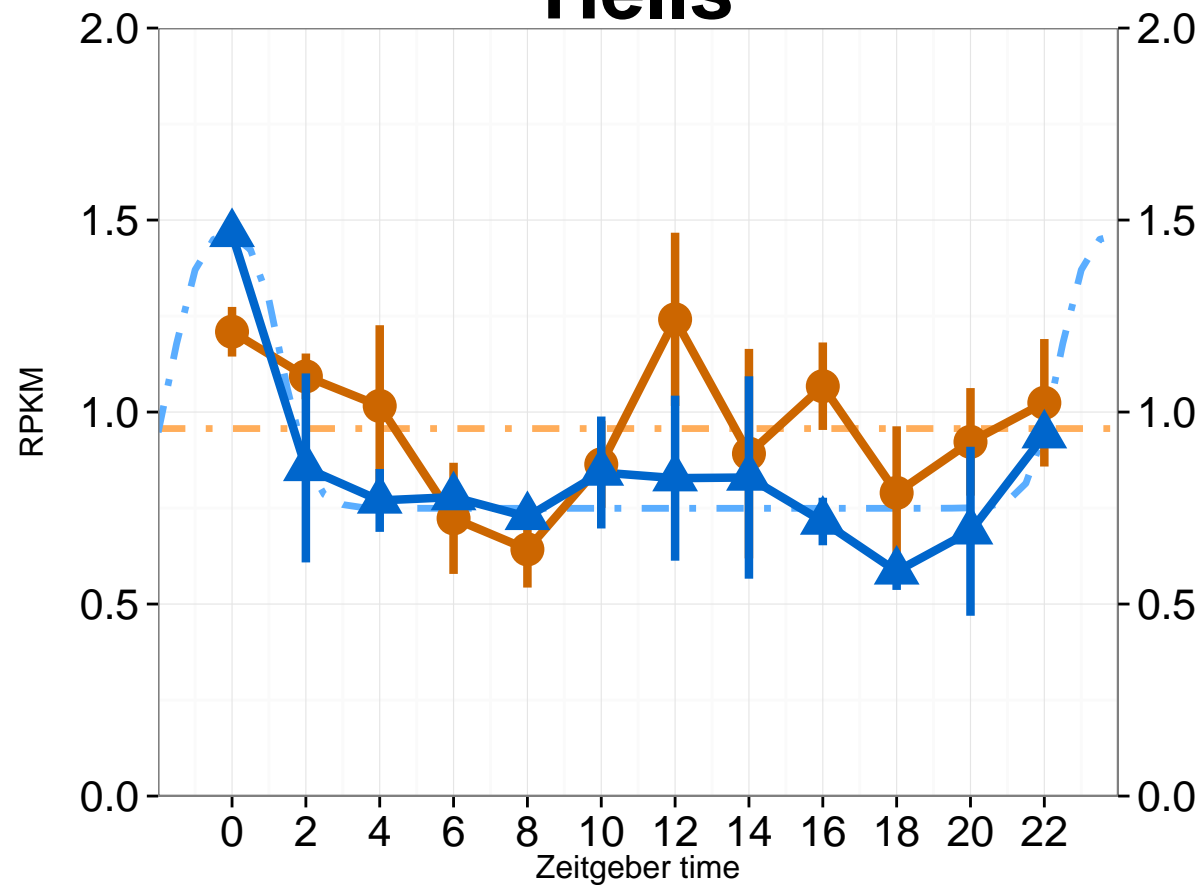

## Hells

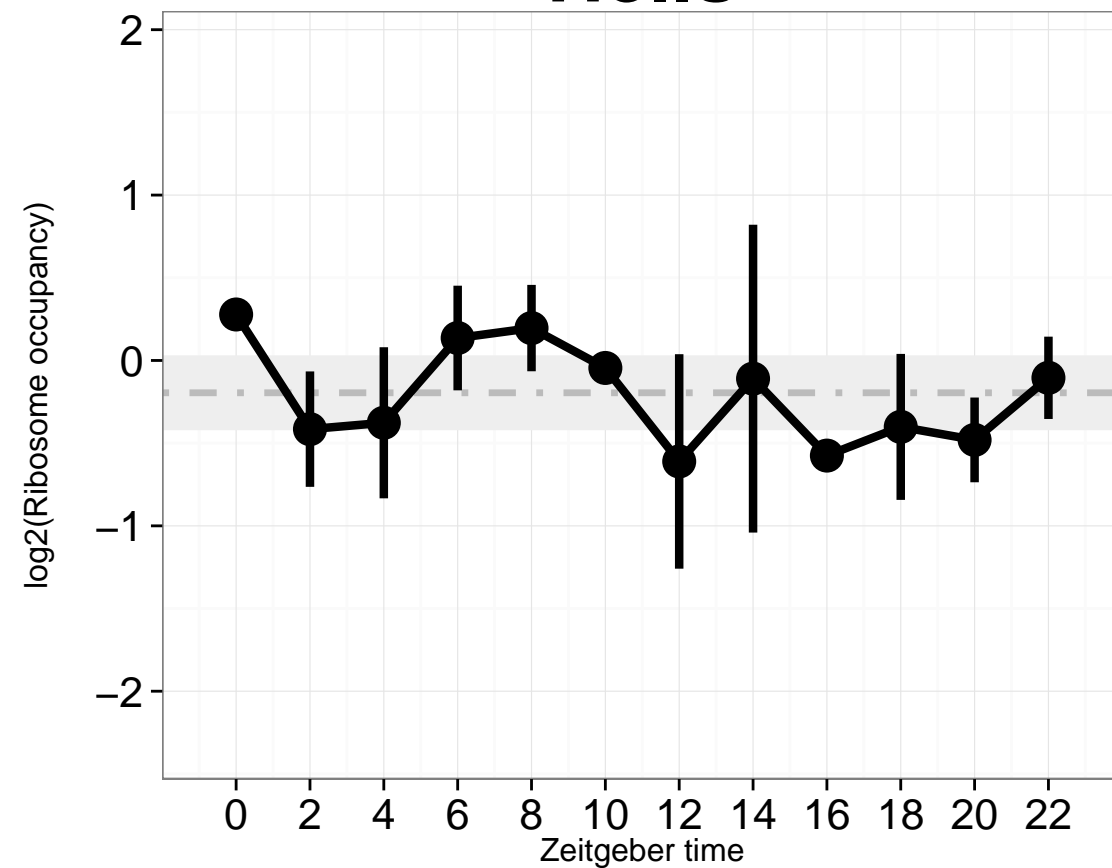

Supplement: Supplementary file 4960 [file 1]

# Fam168a

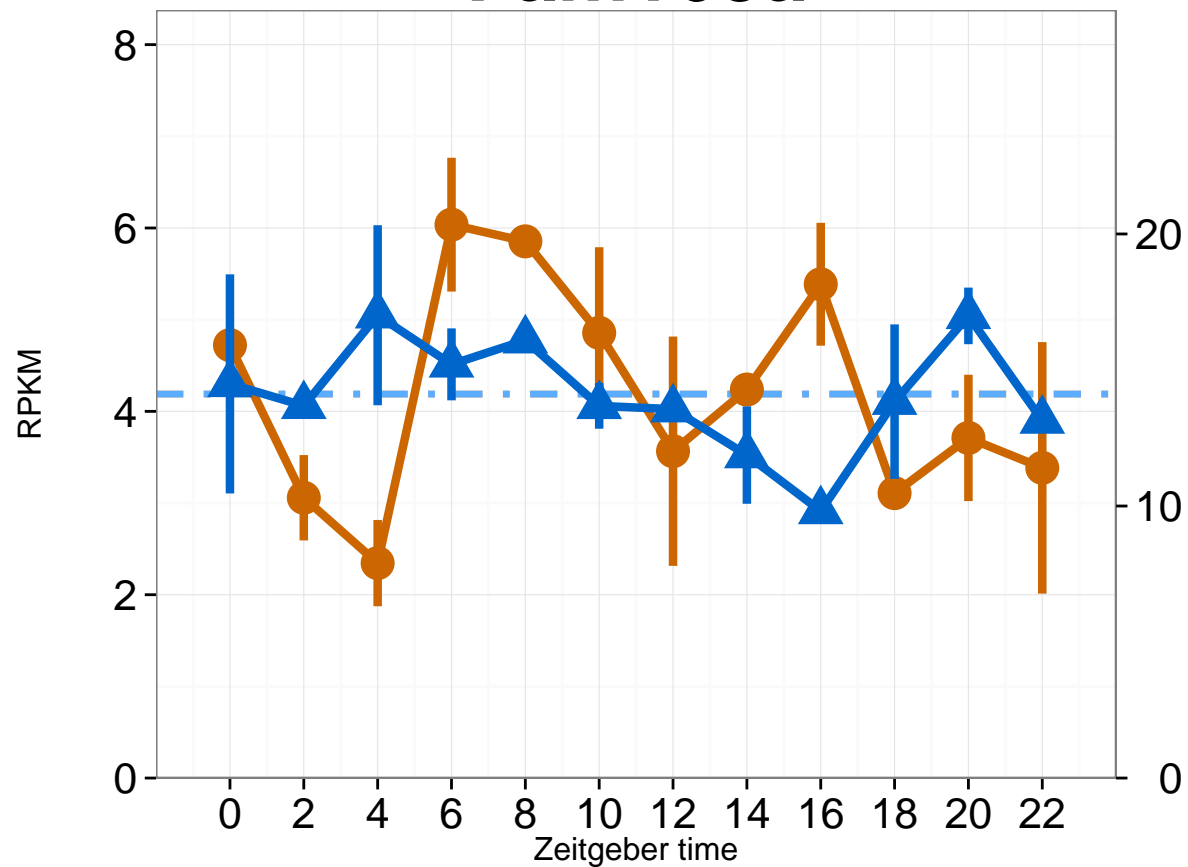

# Fam168a

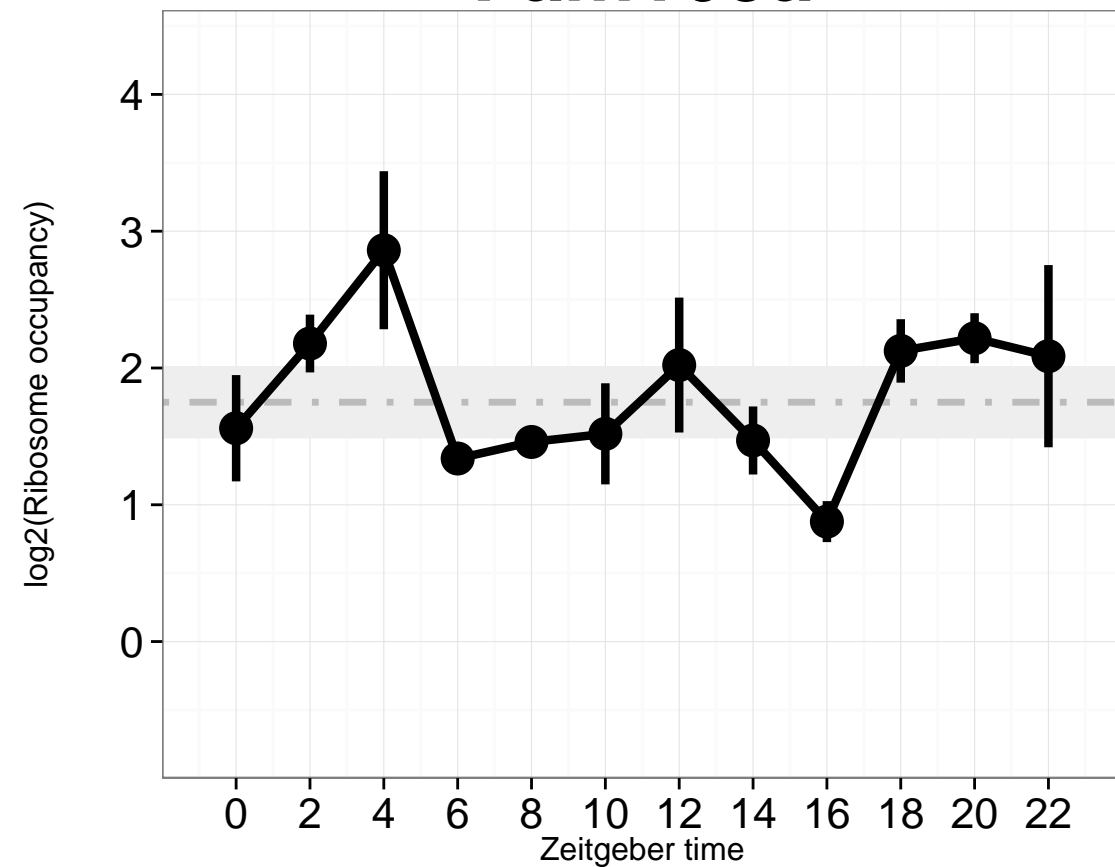

Supplement: Supplementary file 4961 [file 1]

**Nat1 TR**

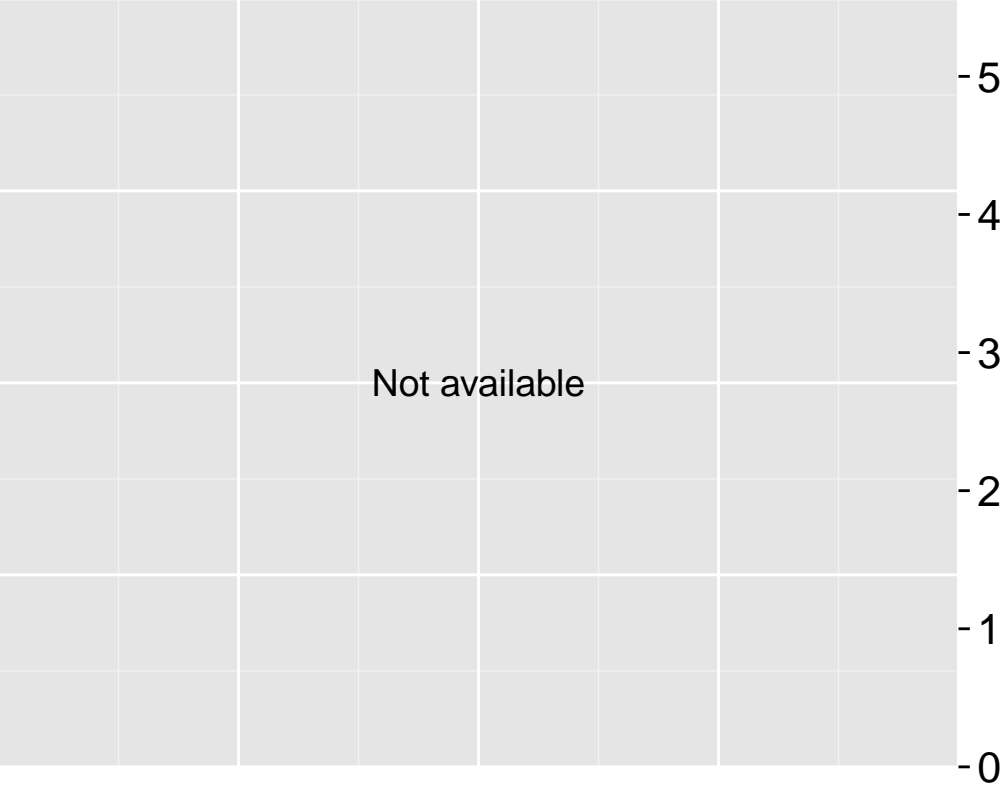

**Nat1 log2(Ribosome occupancy)**

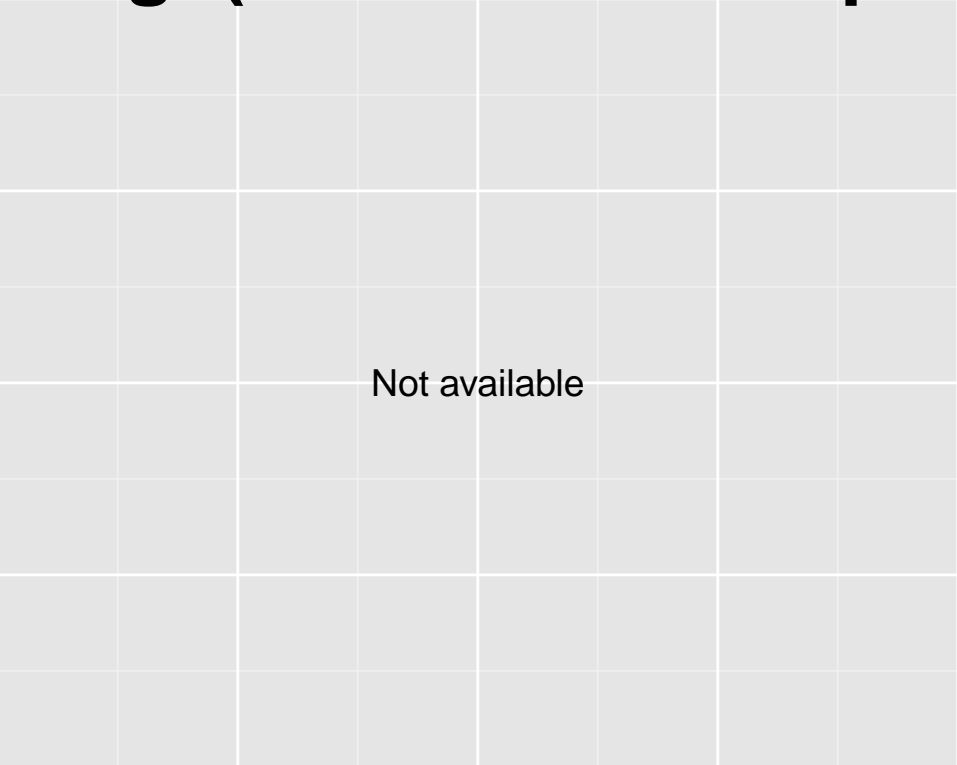

Supplement: Supplementary file 4962 [file 1]

## Zscan25

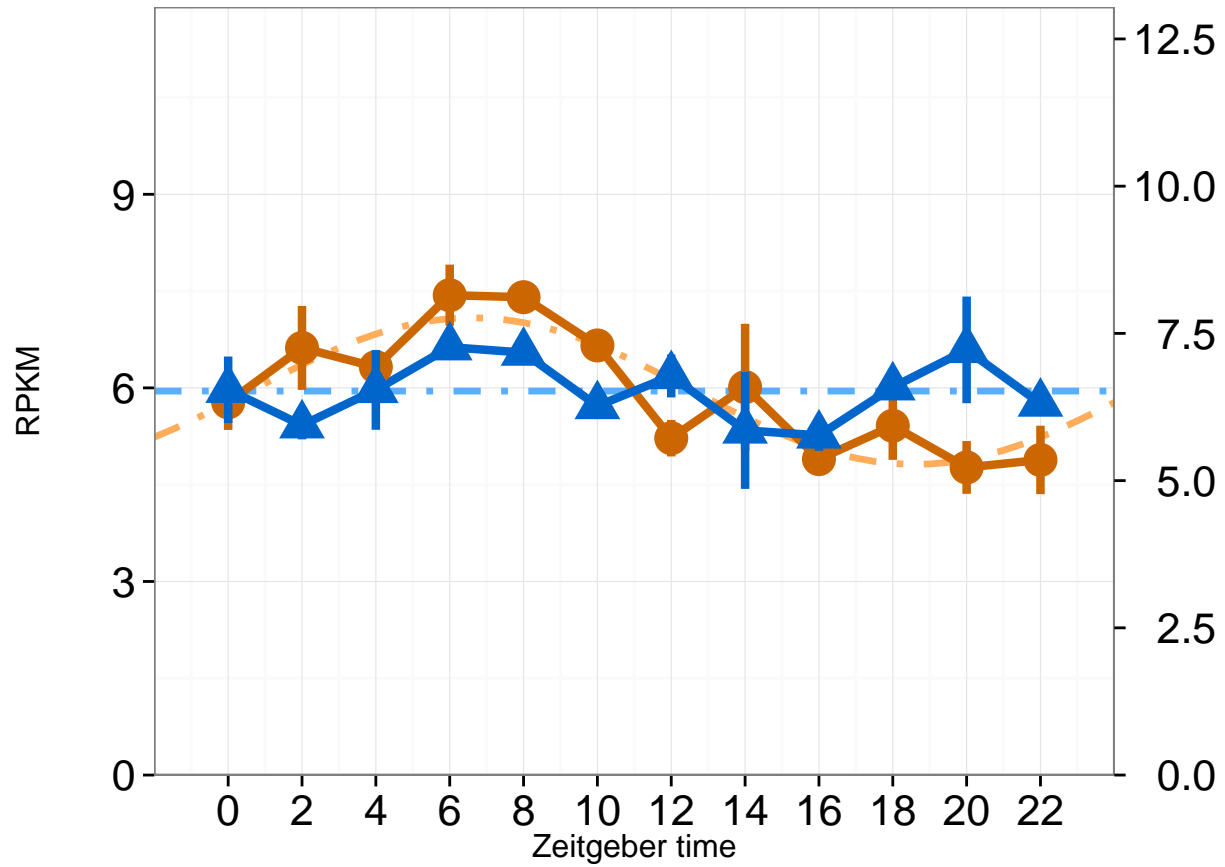

## Zscan25

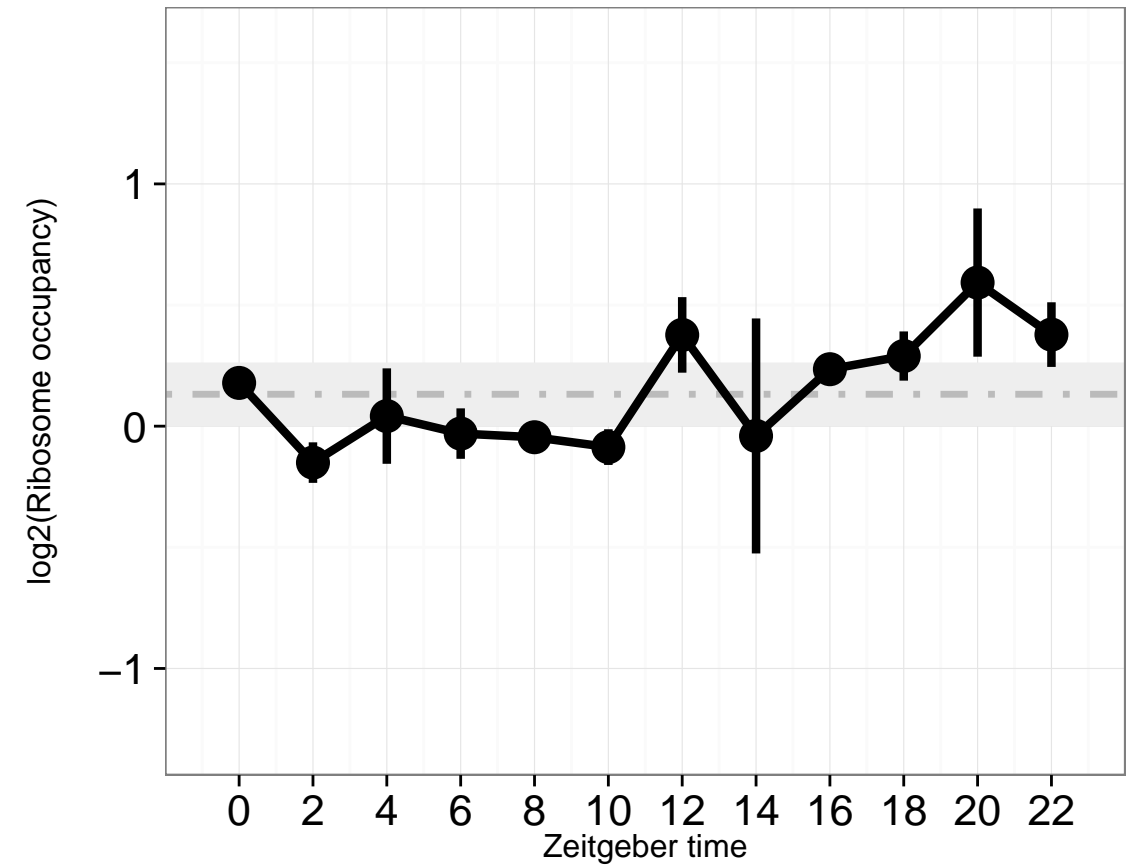

Supplement: Supplementary file 4963 [file 1]

# Ankrd33b

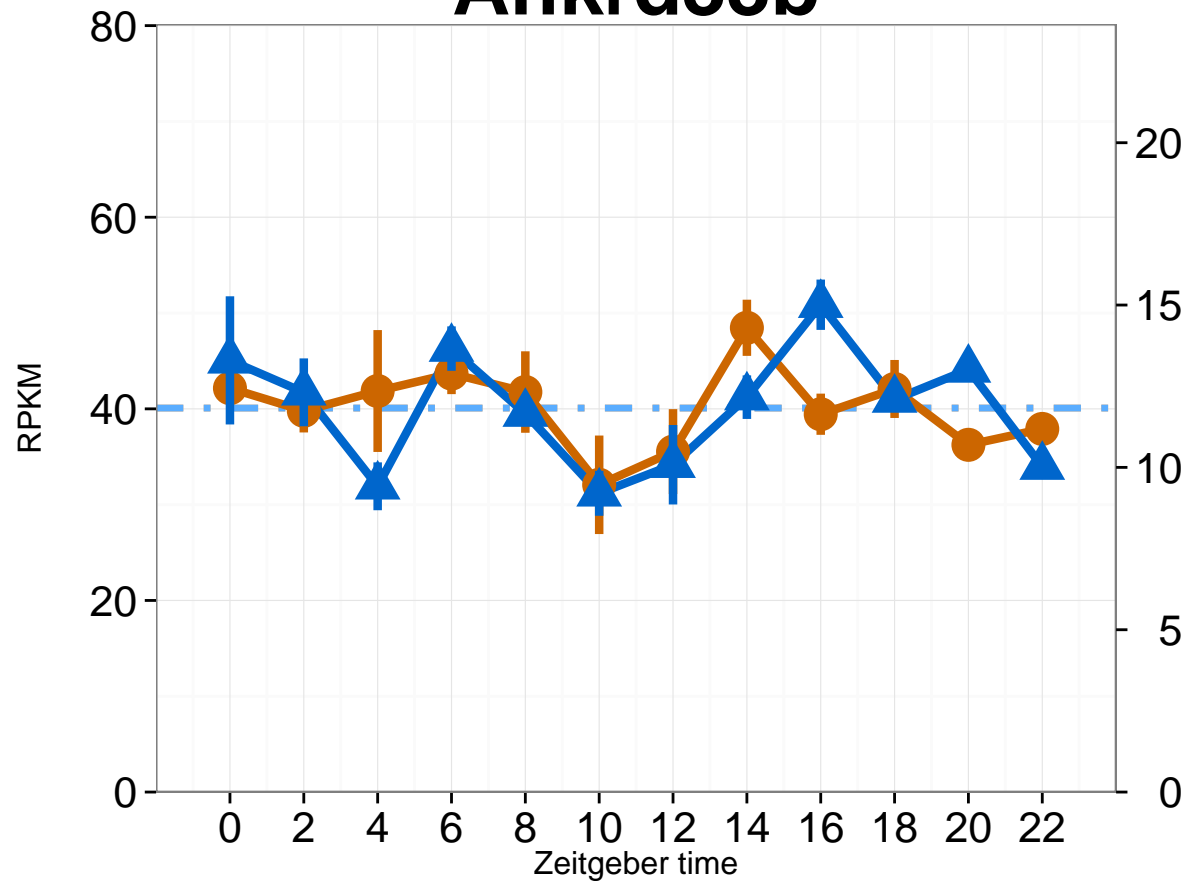

# Ankrd33b

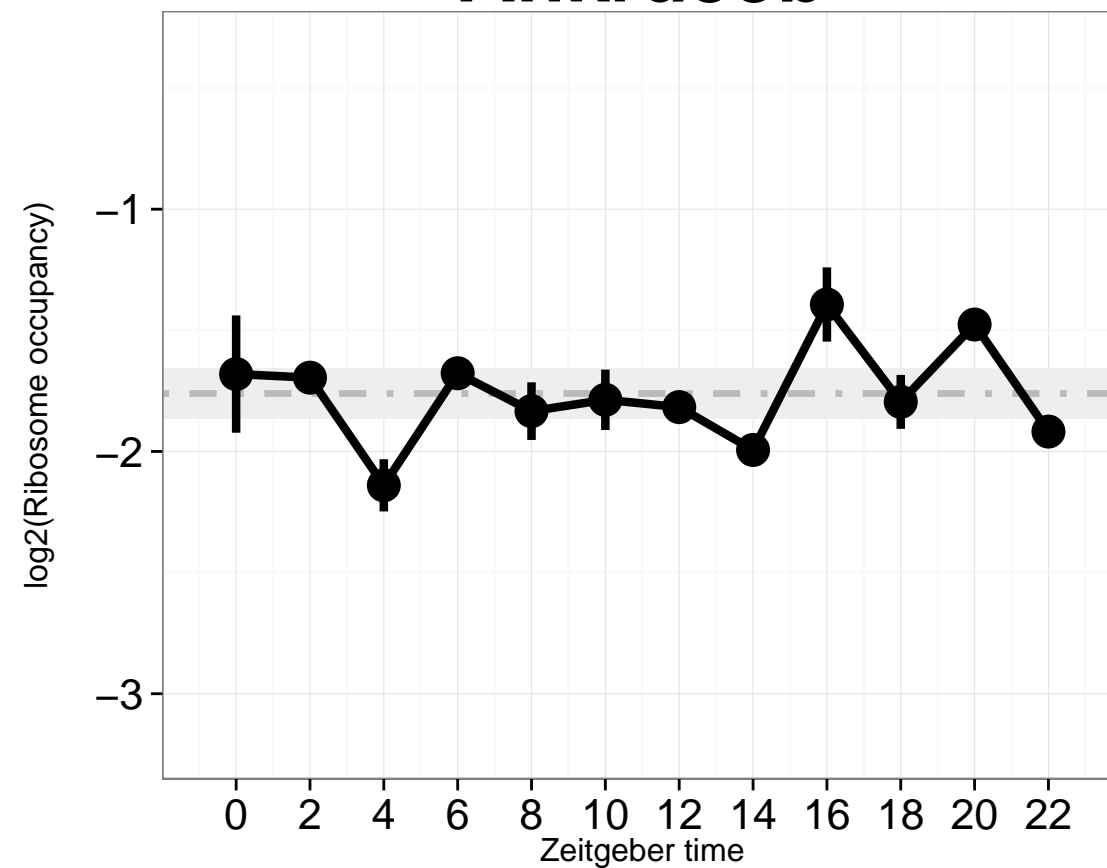

Supplement: Supplementary file 4964 [file 1]

## Btk

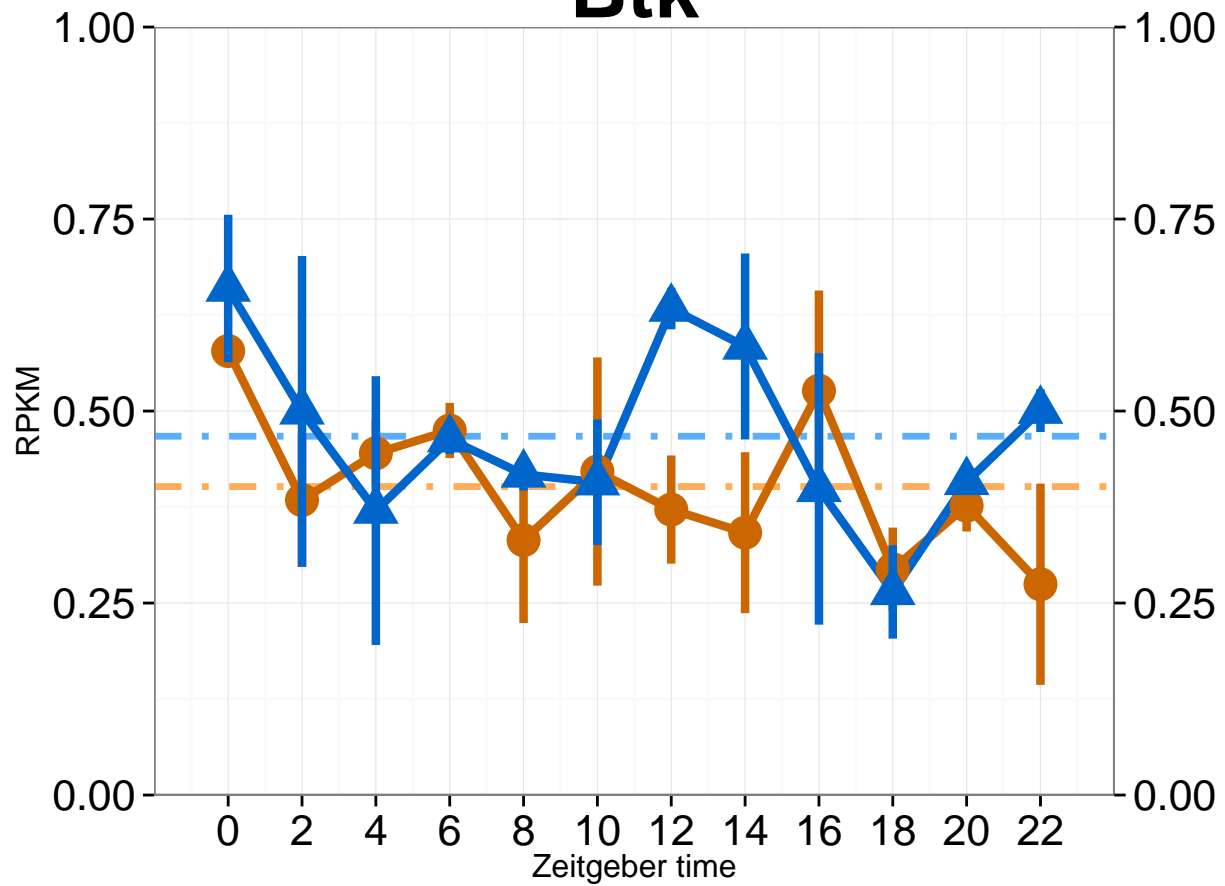

## Btk

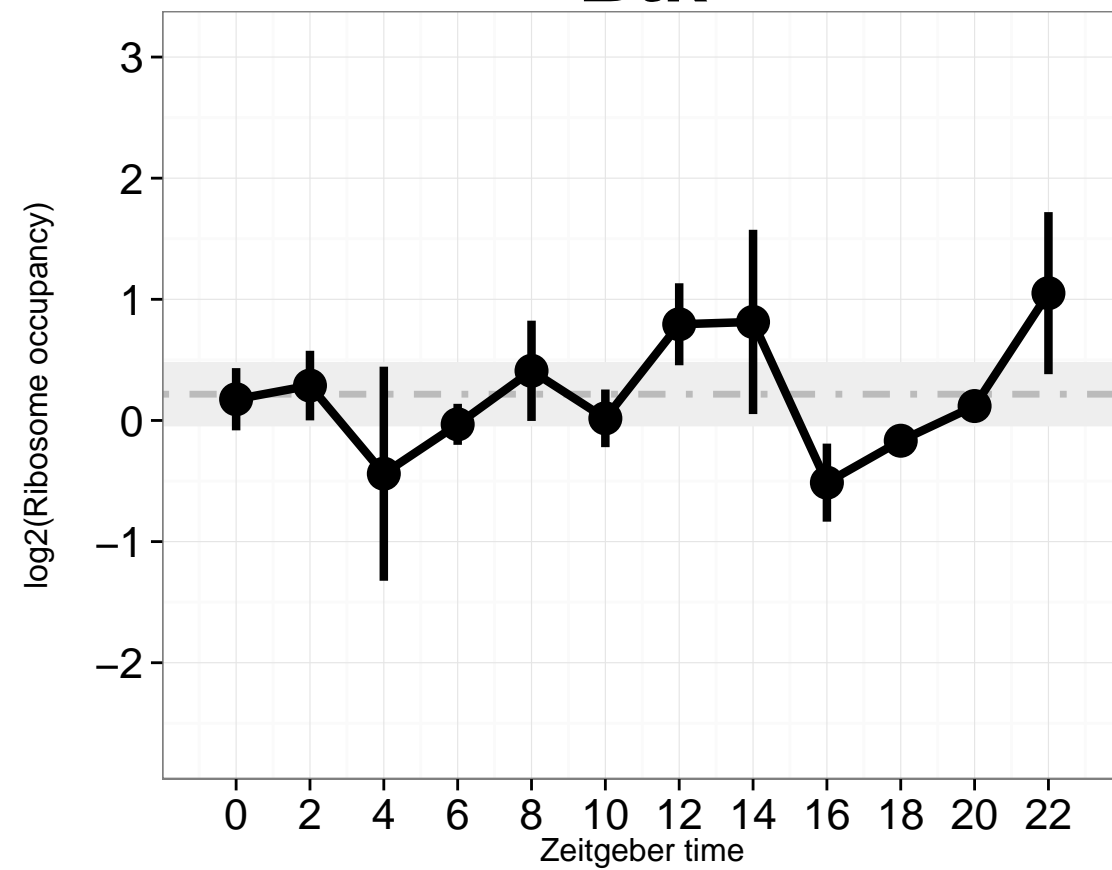

Supplement: Supplementary file 4965 [file 1]

# Rnf138

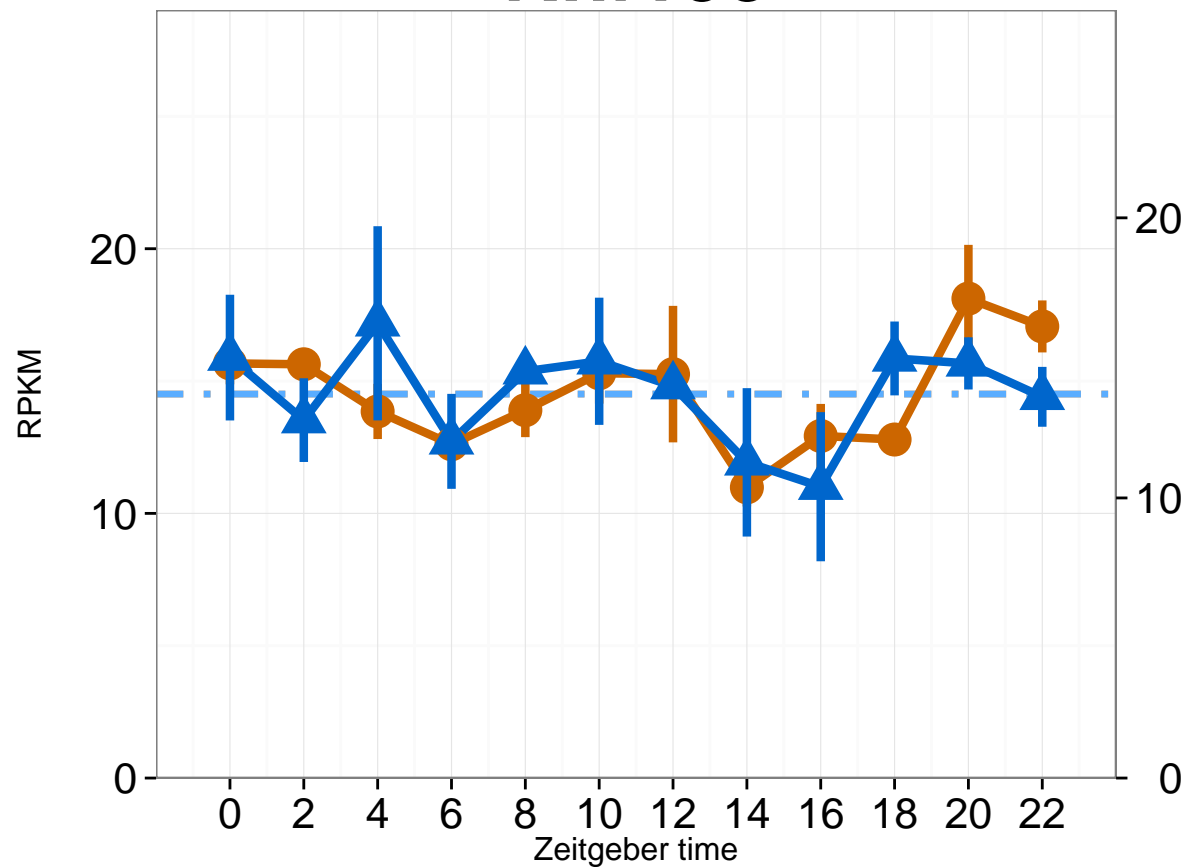

# Rnf138

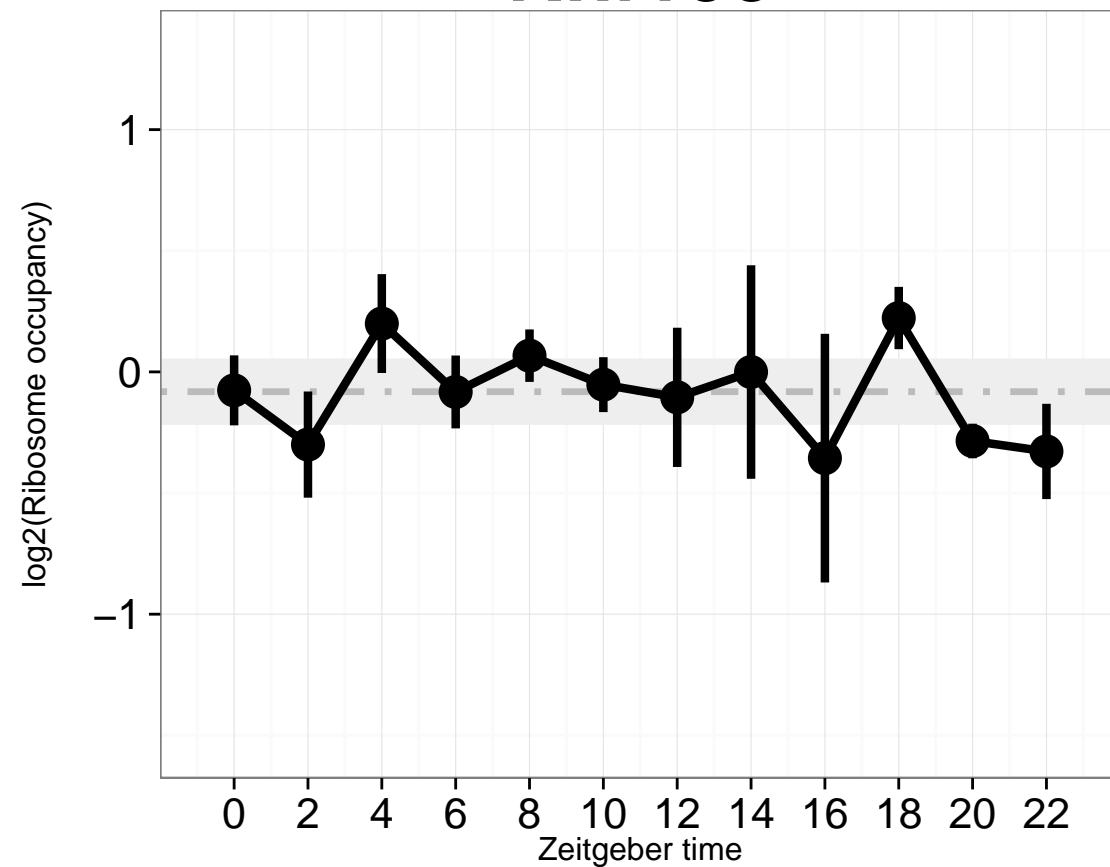

Supplement: Supplementary file 4966 [file 1]

# Dock7

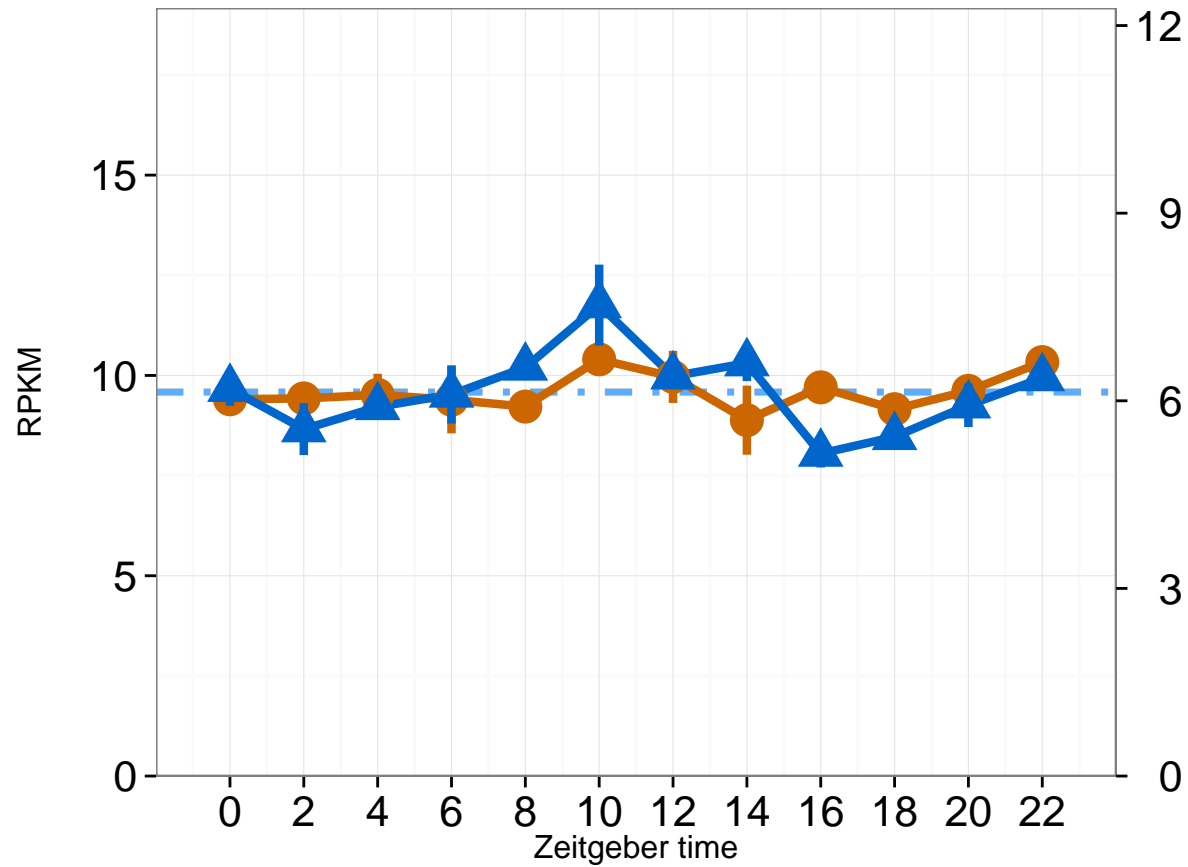

# Dock7

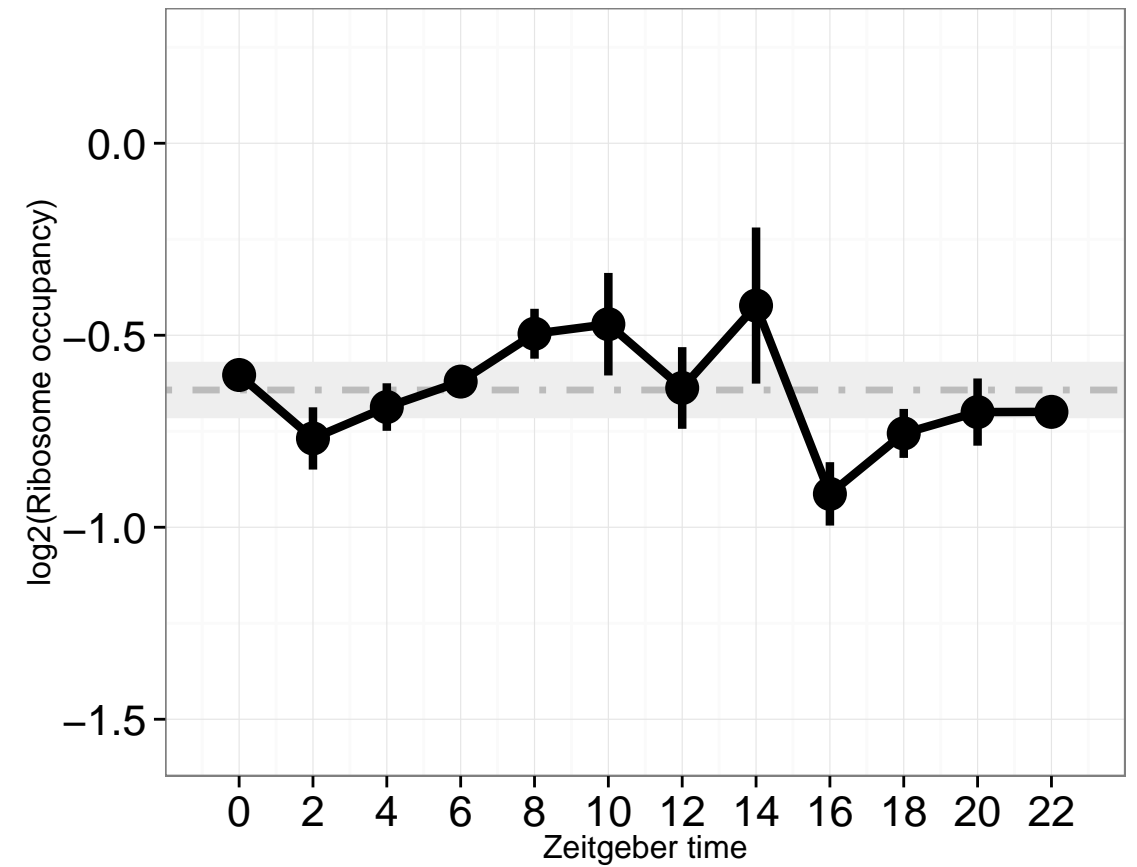

Supplement: Supplementary file 4967 [file 1]

# Prss12

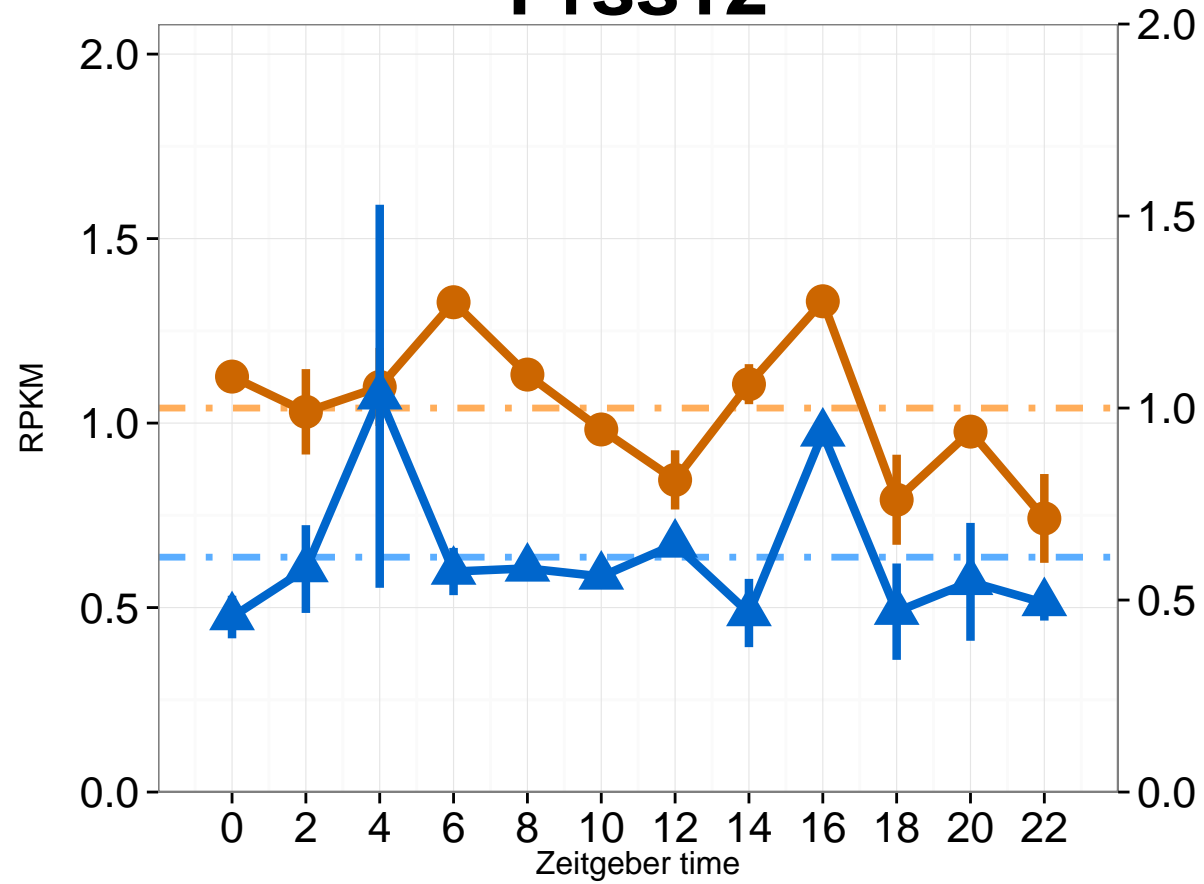

# Prss12

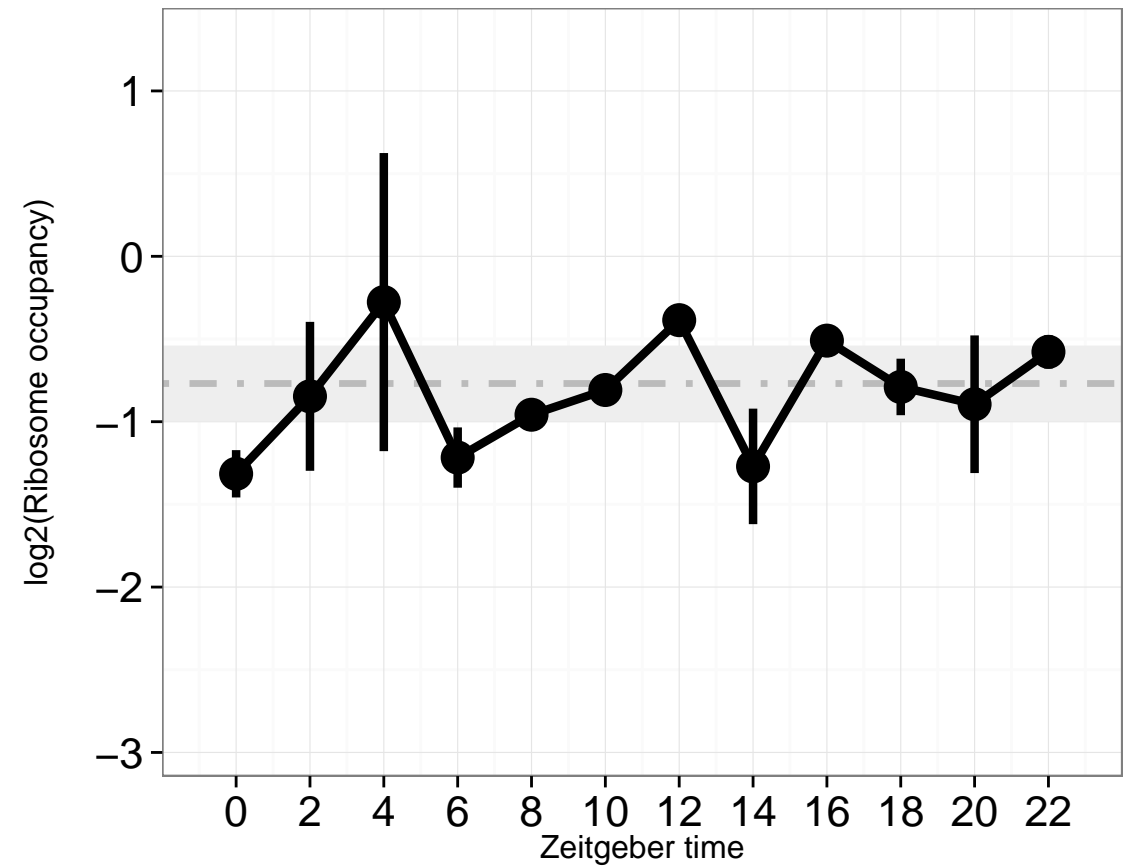

Supplement: Supplementary file 4968 [file 1]

## Ripk3

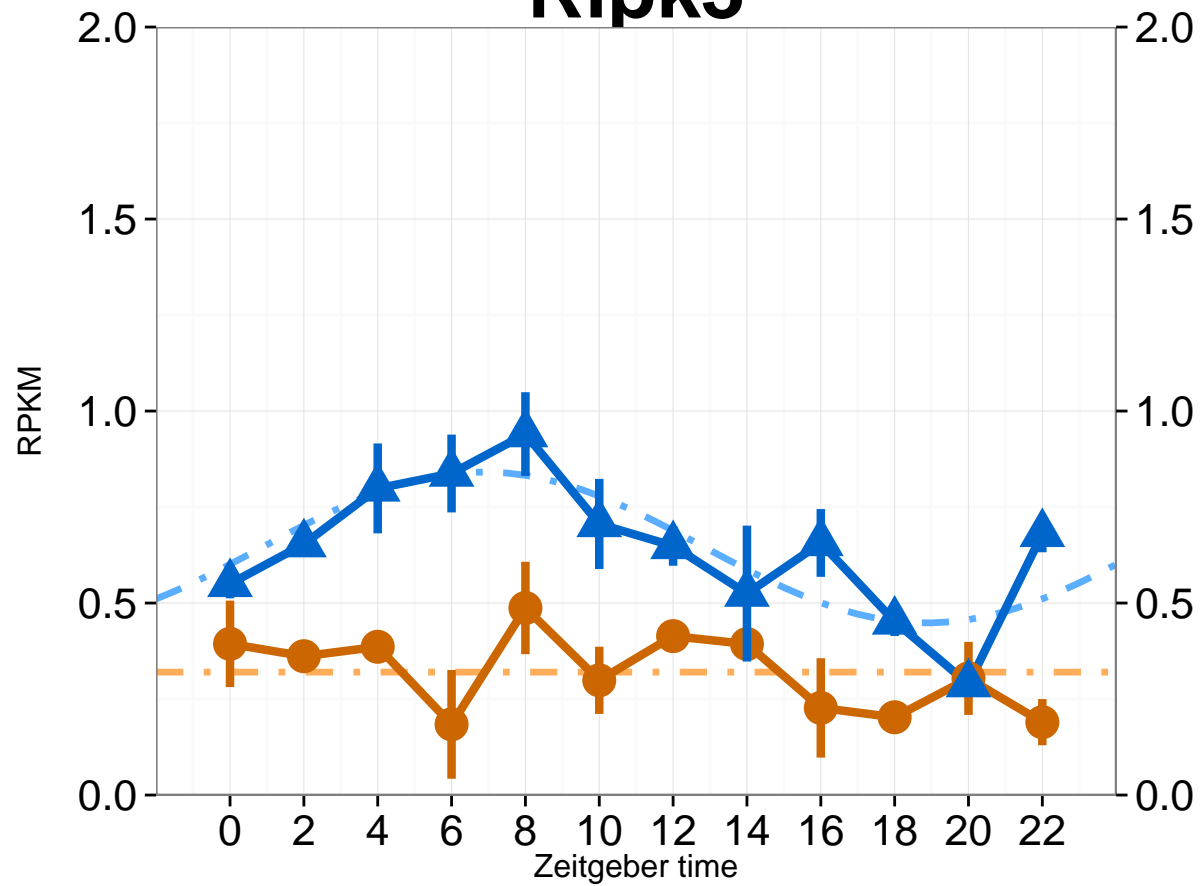

## Ripk3

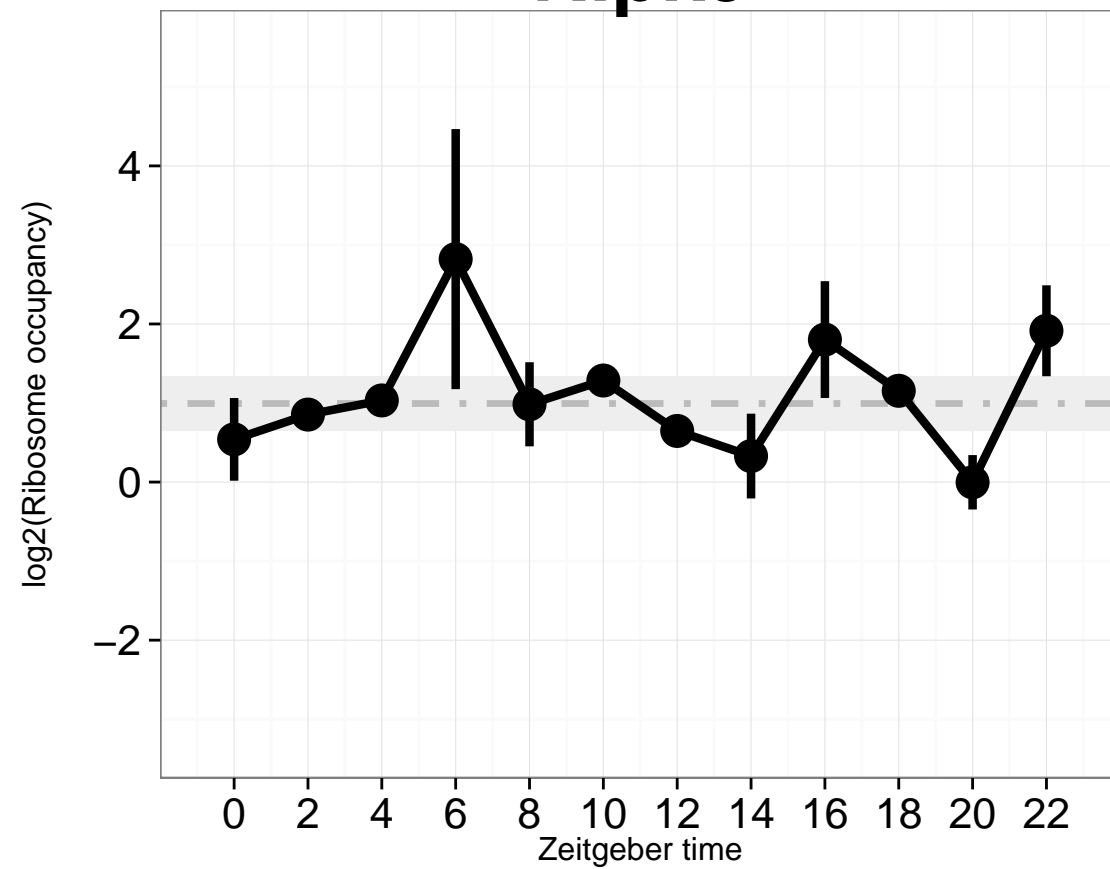

Supplement: Supplementary file 4969 [file 1]

# Sdr39u1

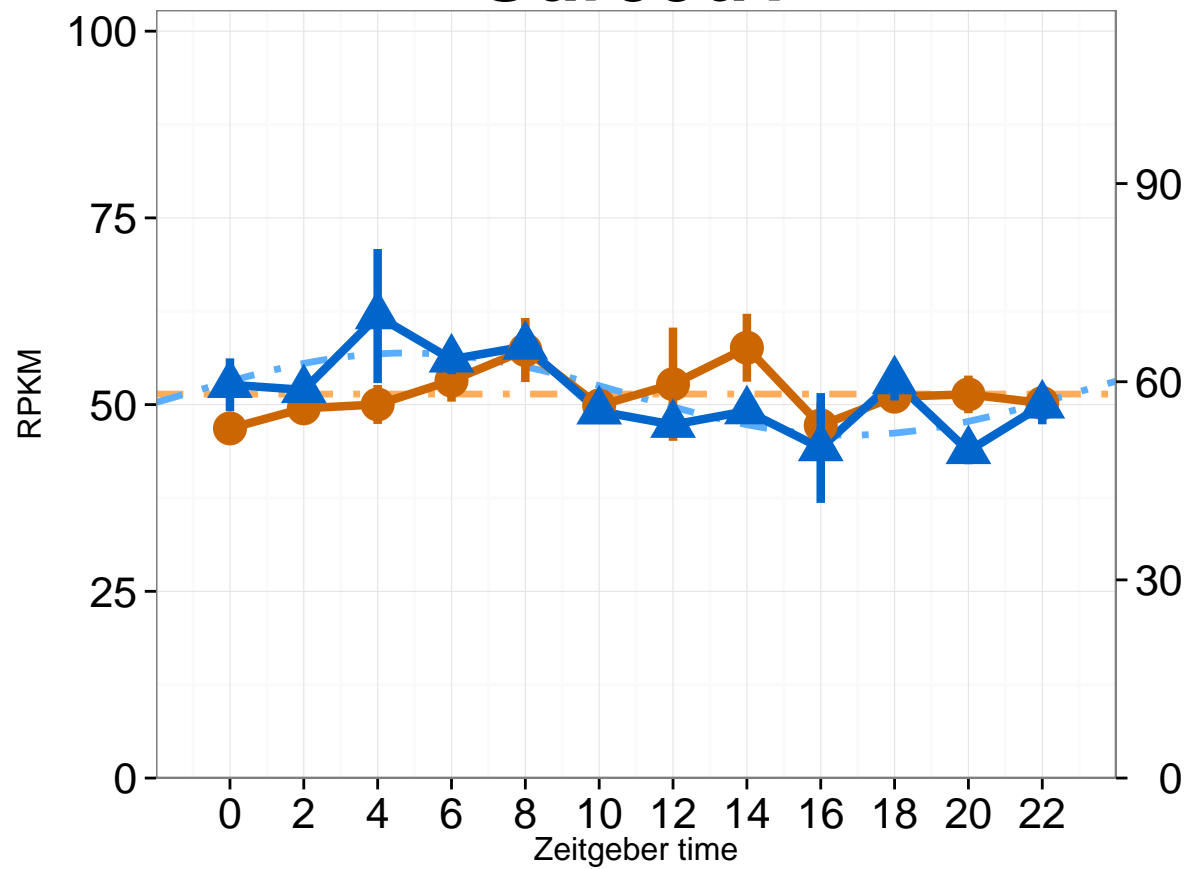

# Sdr39u1

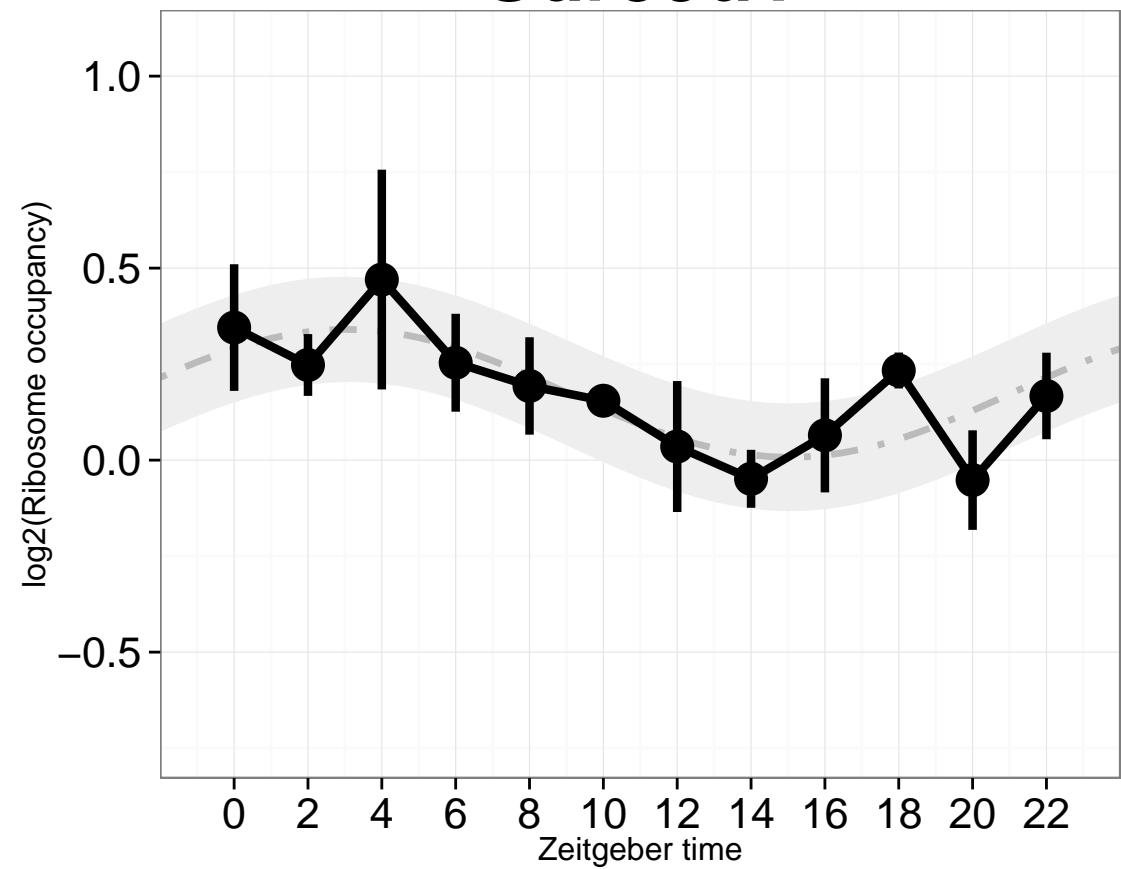

Supplement: Supplementary file 4970 [file 1]

# Agpat3

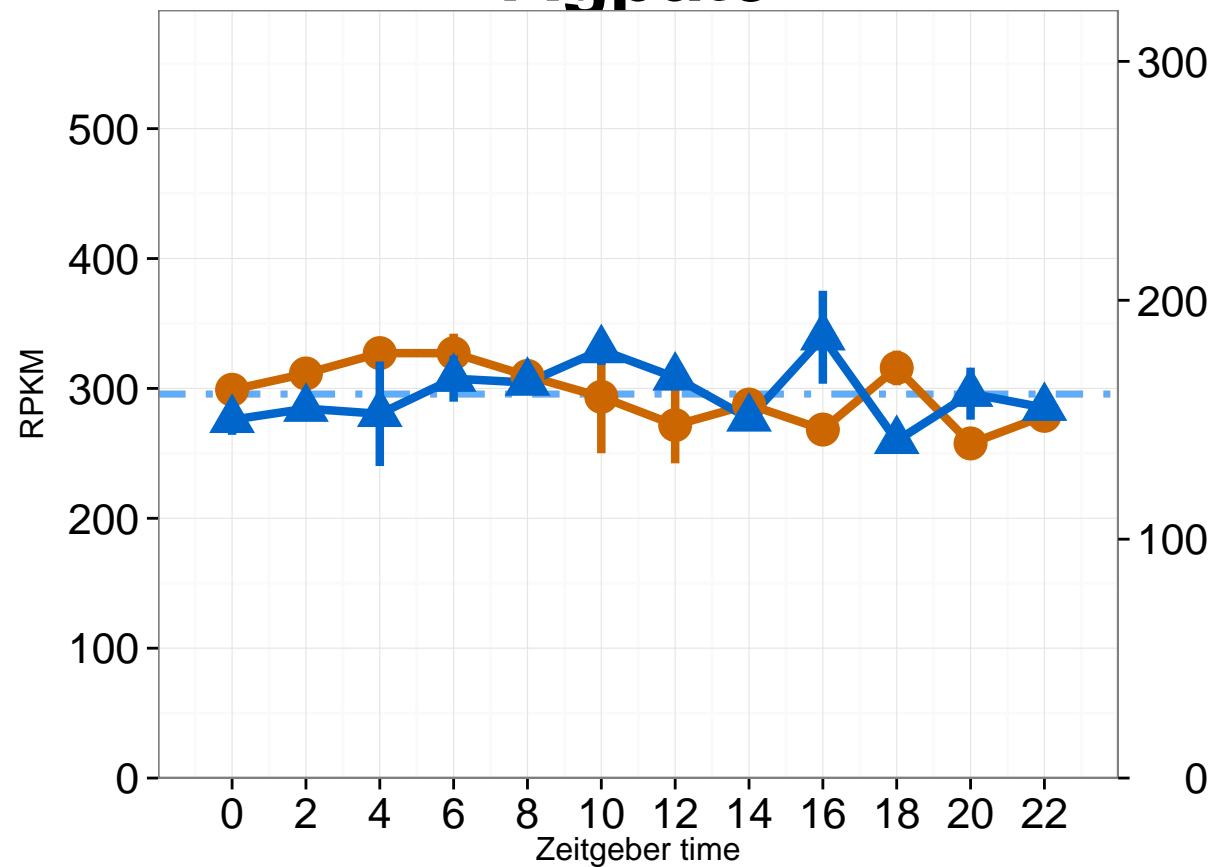

# Agpat3

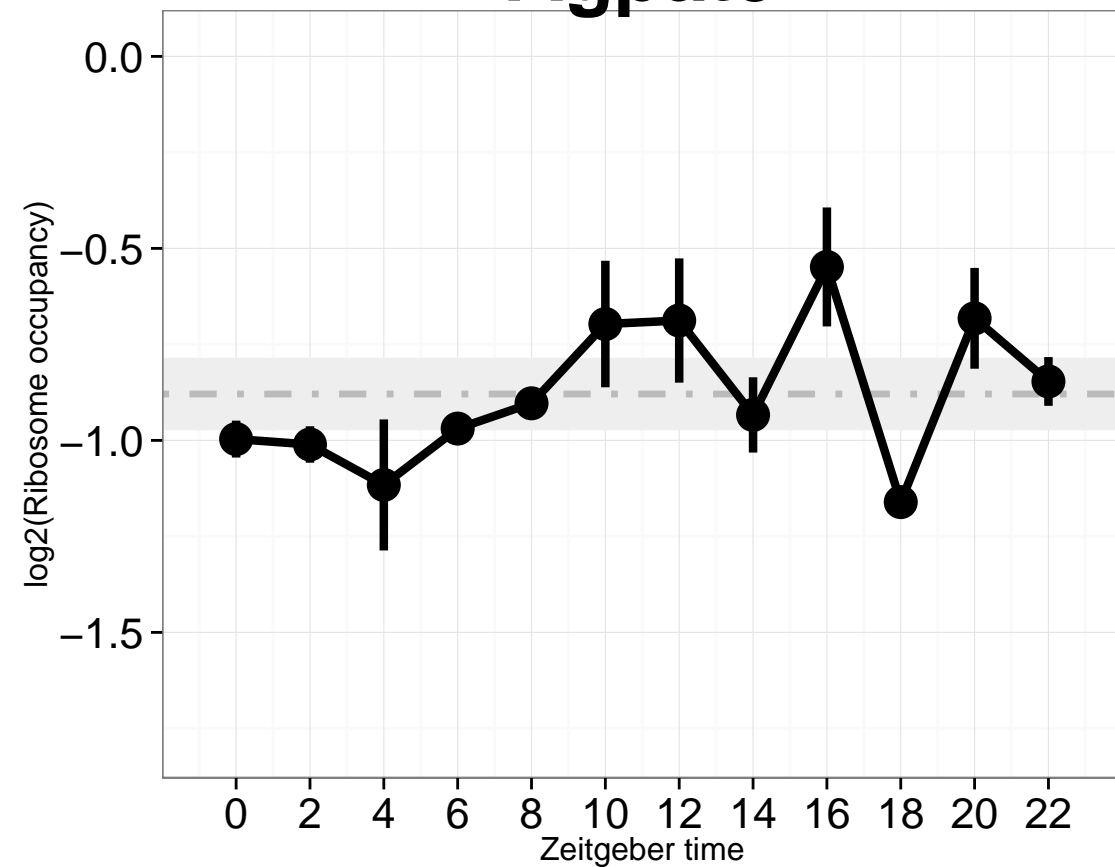

Supplement: Supplementary file 4971 [file 1]

## Car4

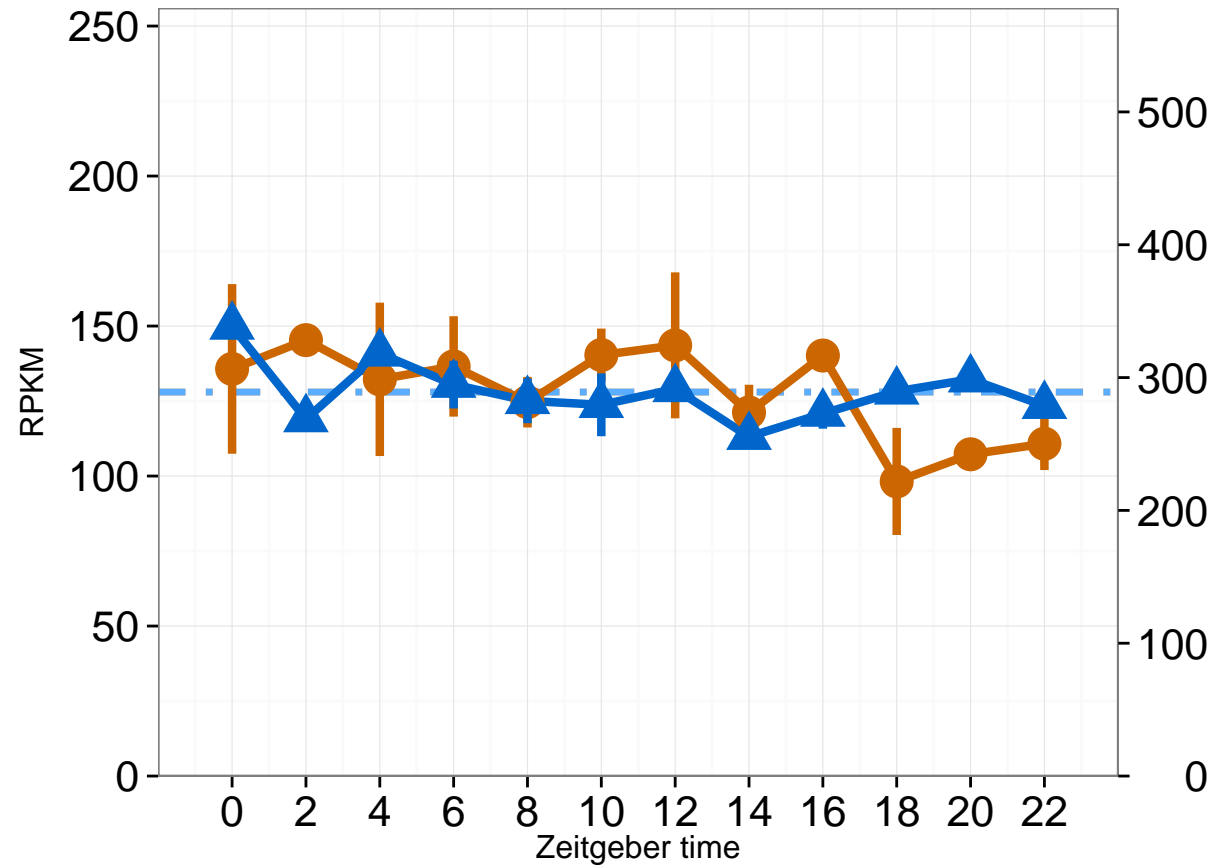

## Car4

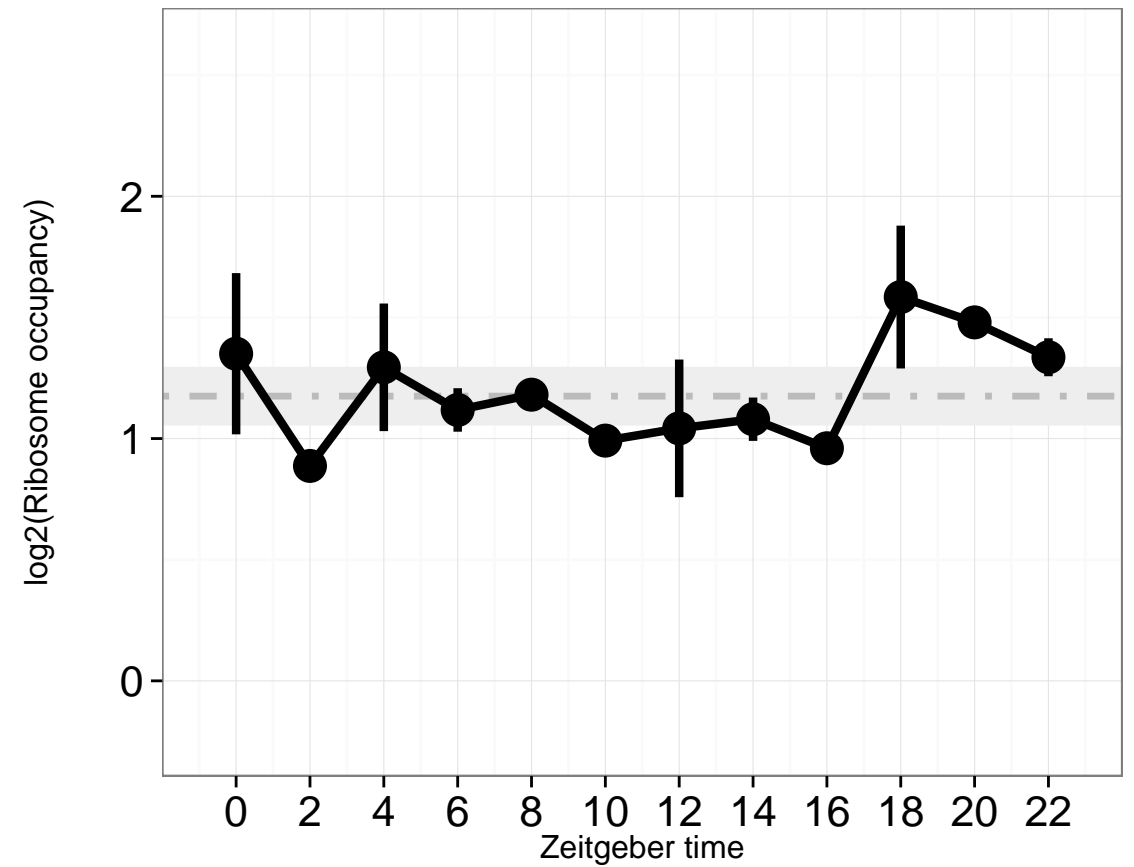

Supplement: Supplementary file 4972 [file 1]

# Map2k7

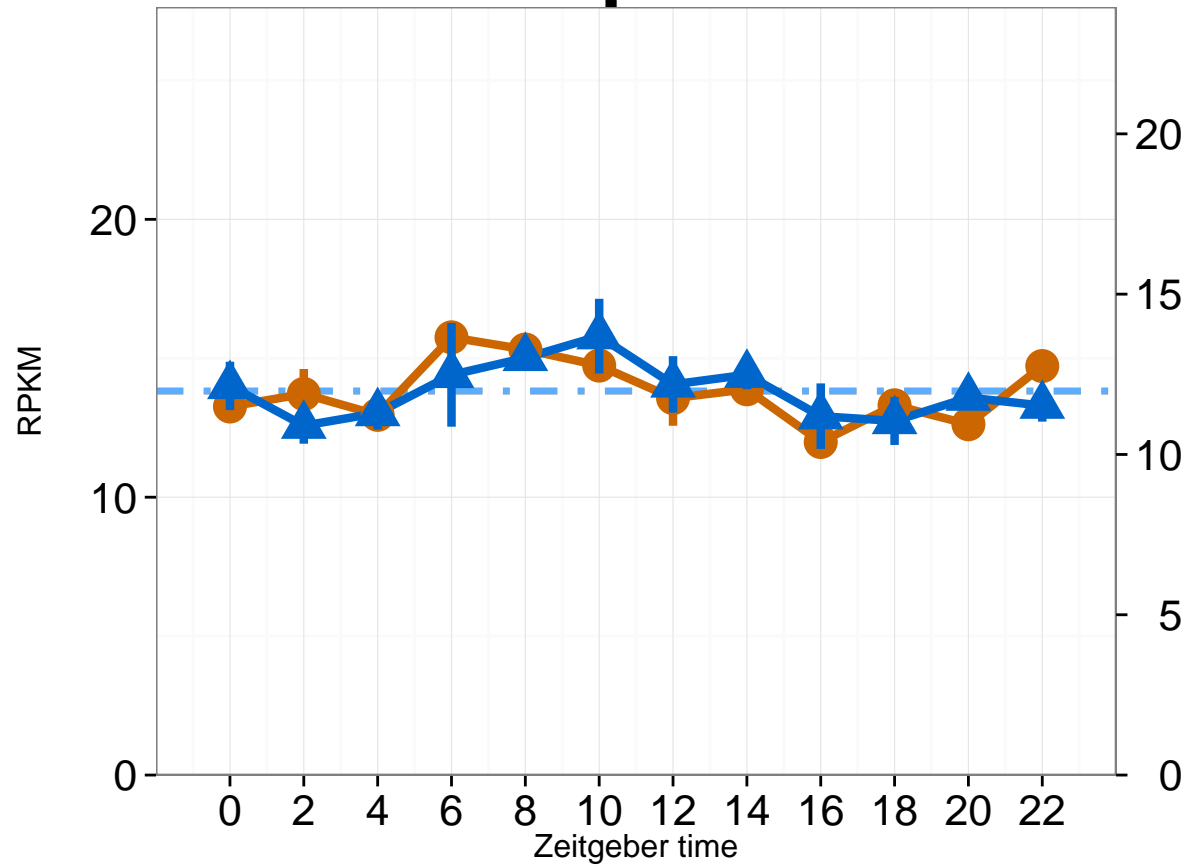

# Map2k7

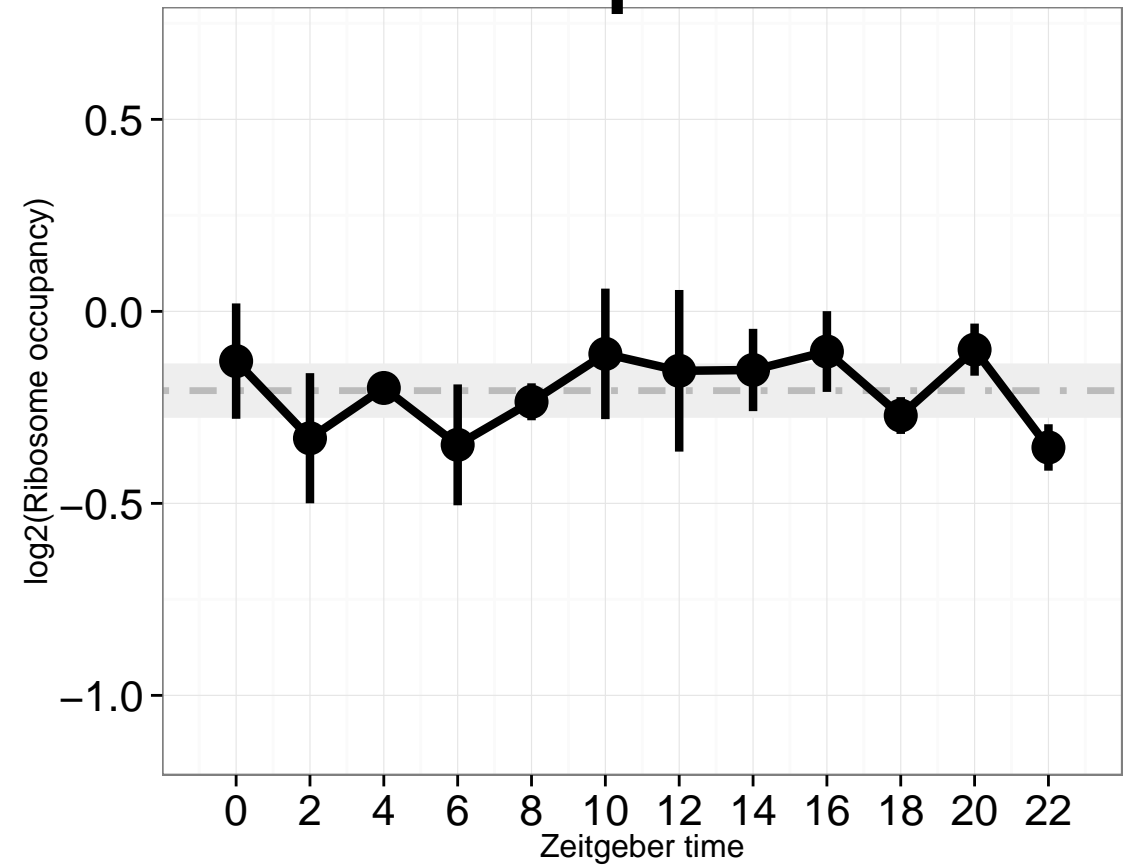

Supplement: Supplementary file 4973 [file 1]

# Cyp4a12a

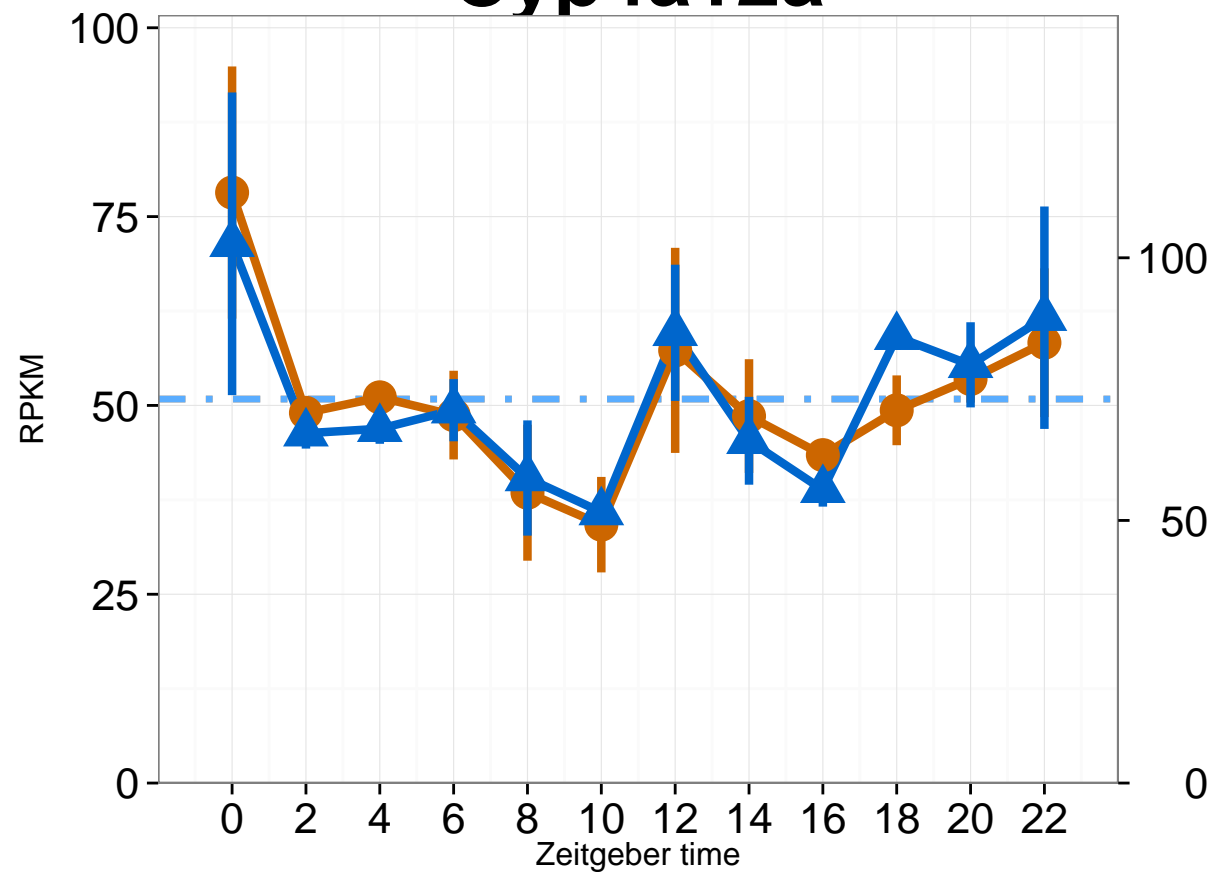

# Cyp4a12a

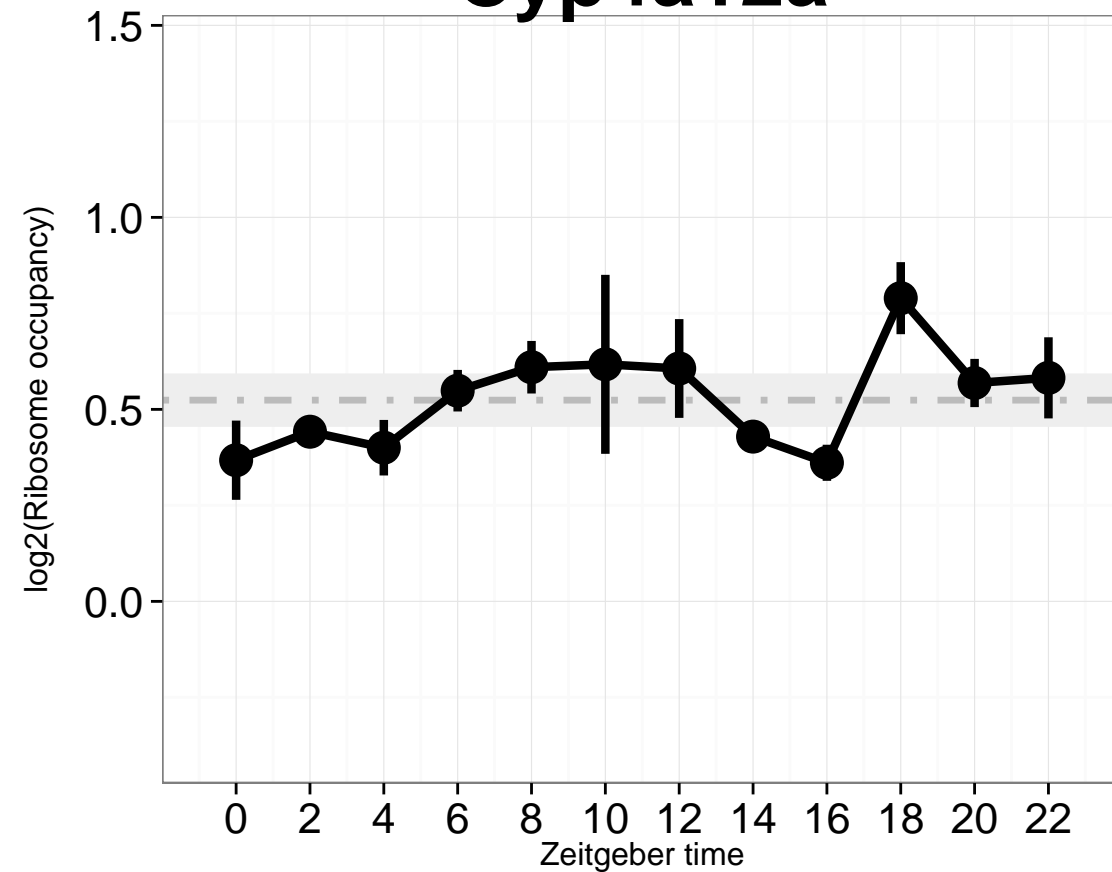

Supplement: Supplementary file 4974 [file 1]

## Anapc10

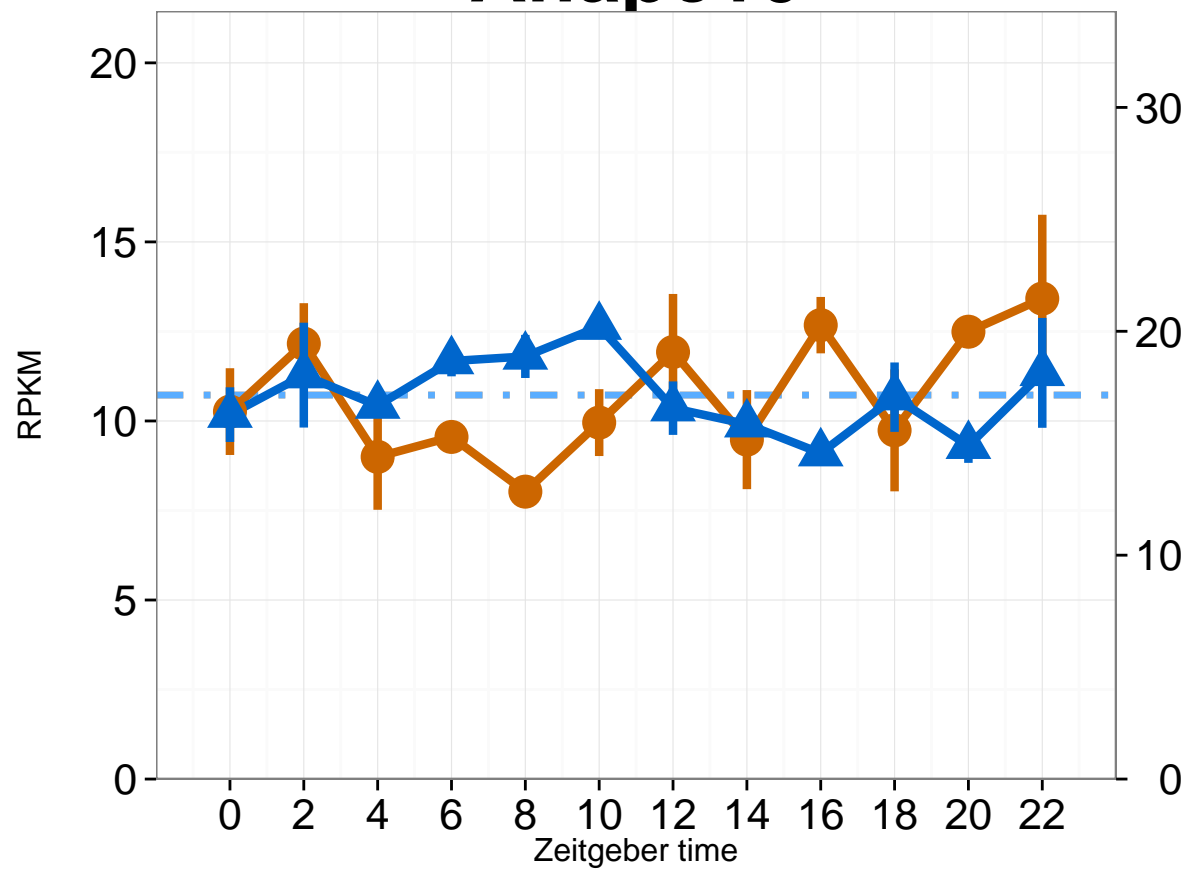

## Anapc10

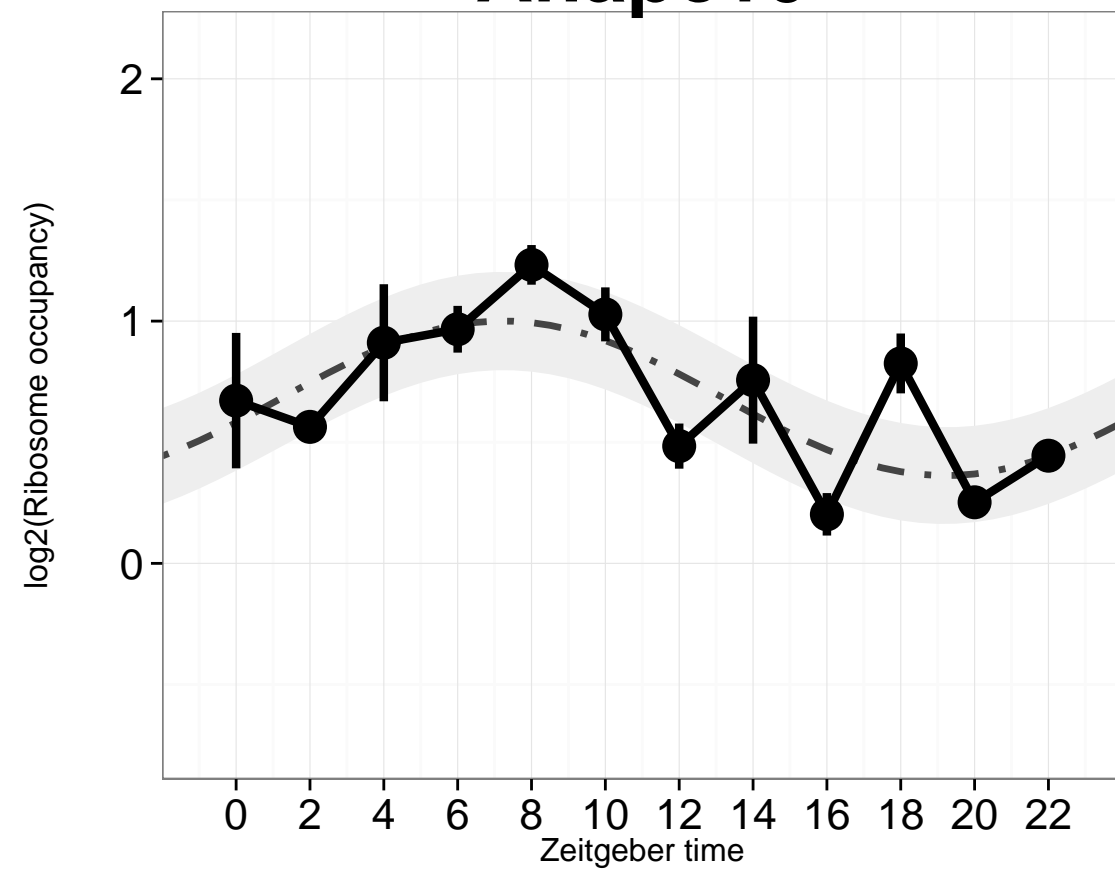

Supplement: Supplementary file 4975 [file 1]

# Psat1

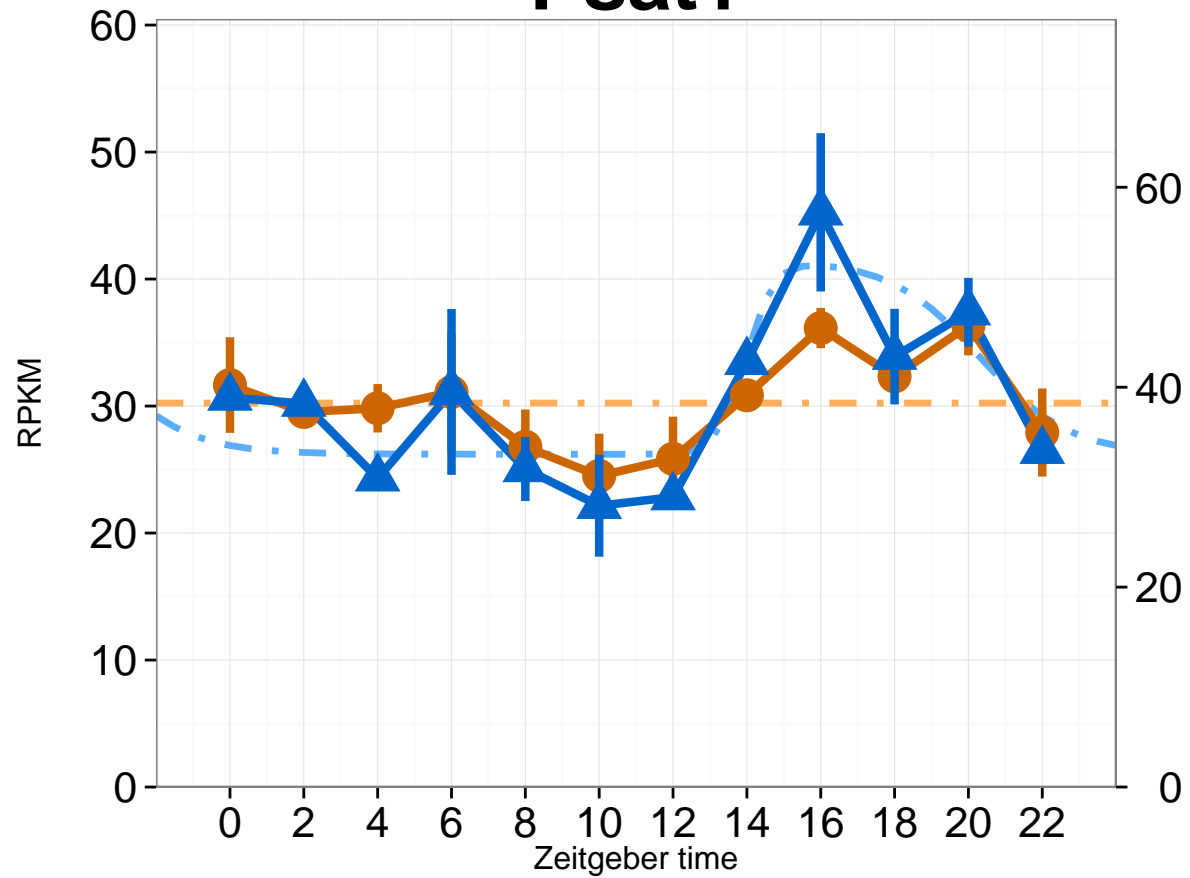

# Pstat1

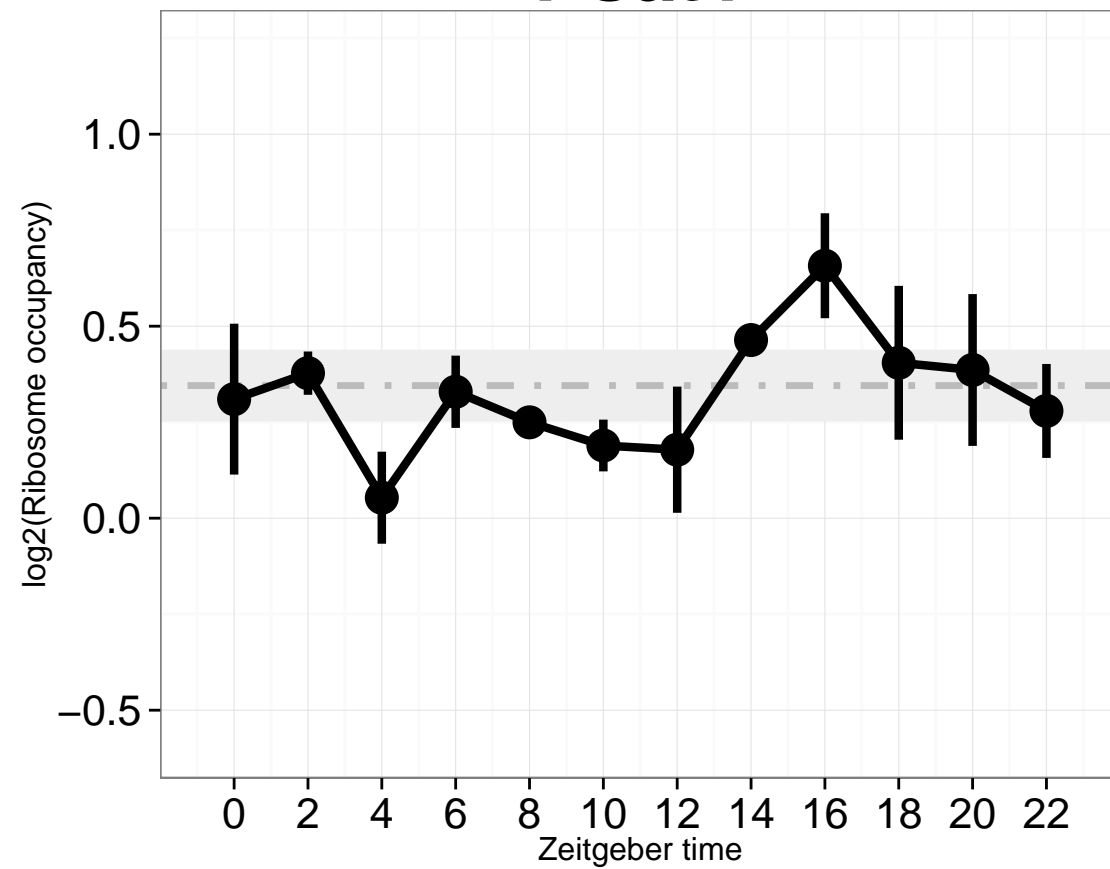

Supplement: Supplementary file 4976 [file 1]

## Sf3b2

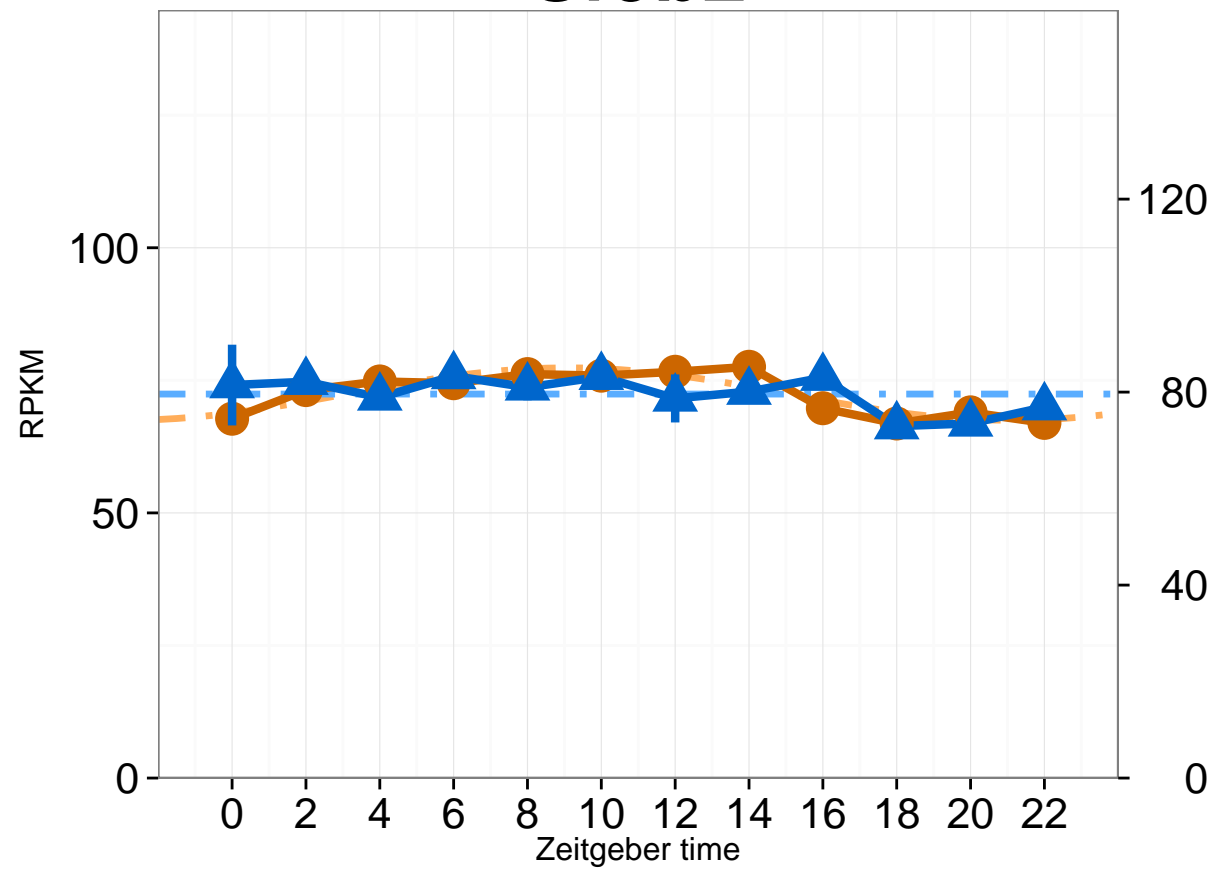

## Sf3b2

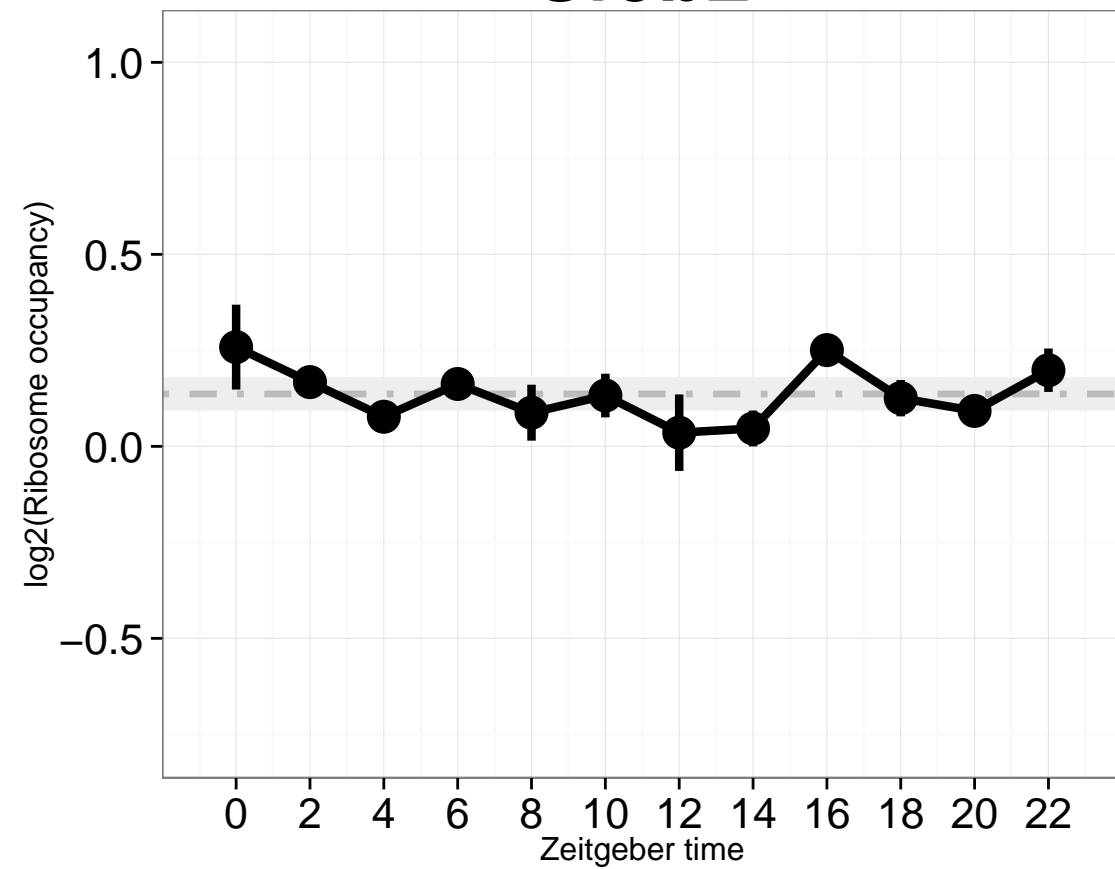

Supplement: Supplementary file 4977 [file 1]

# Tprn

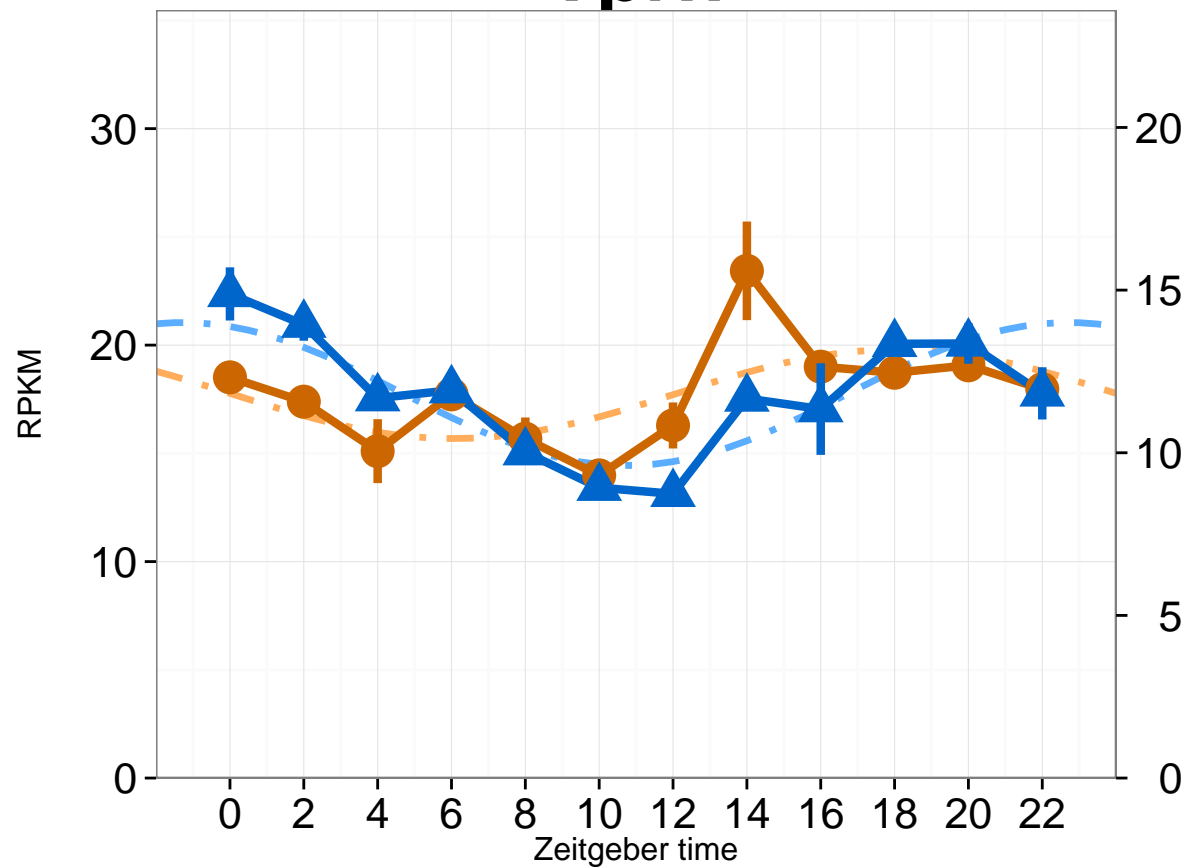

# Tprn

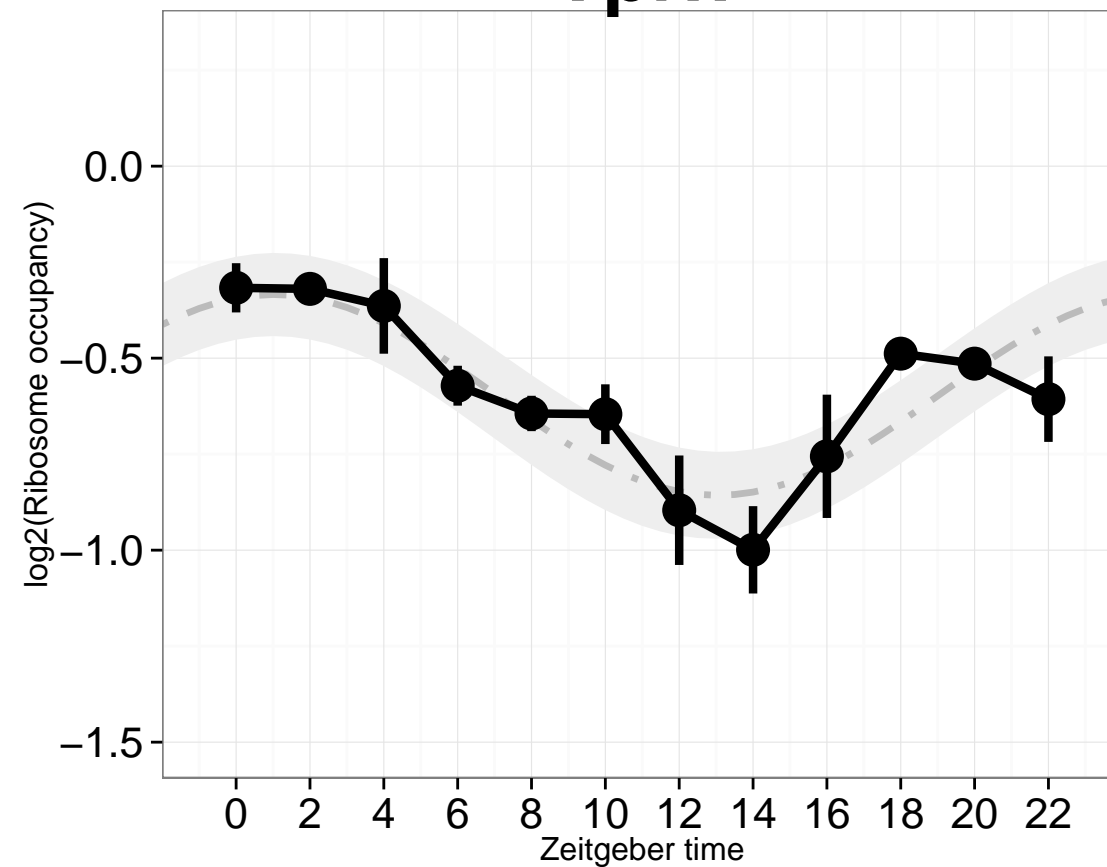

Supplement: Supplementary file 4978 [file 1]

## Ubox5

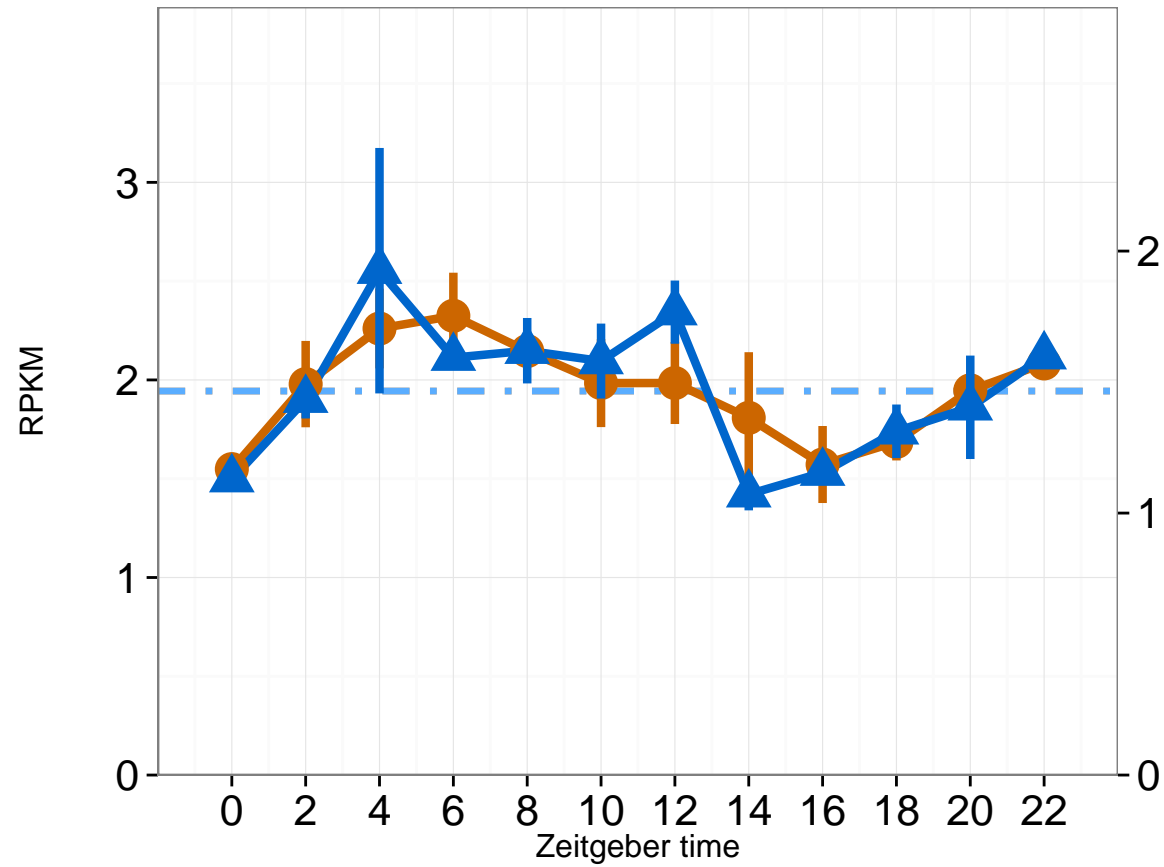

## Ubox5

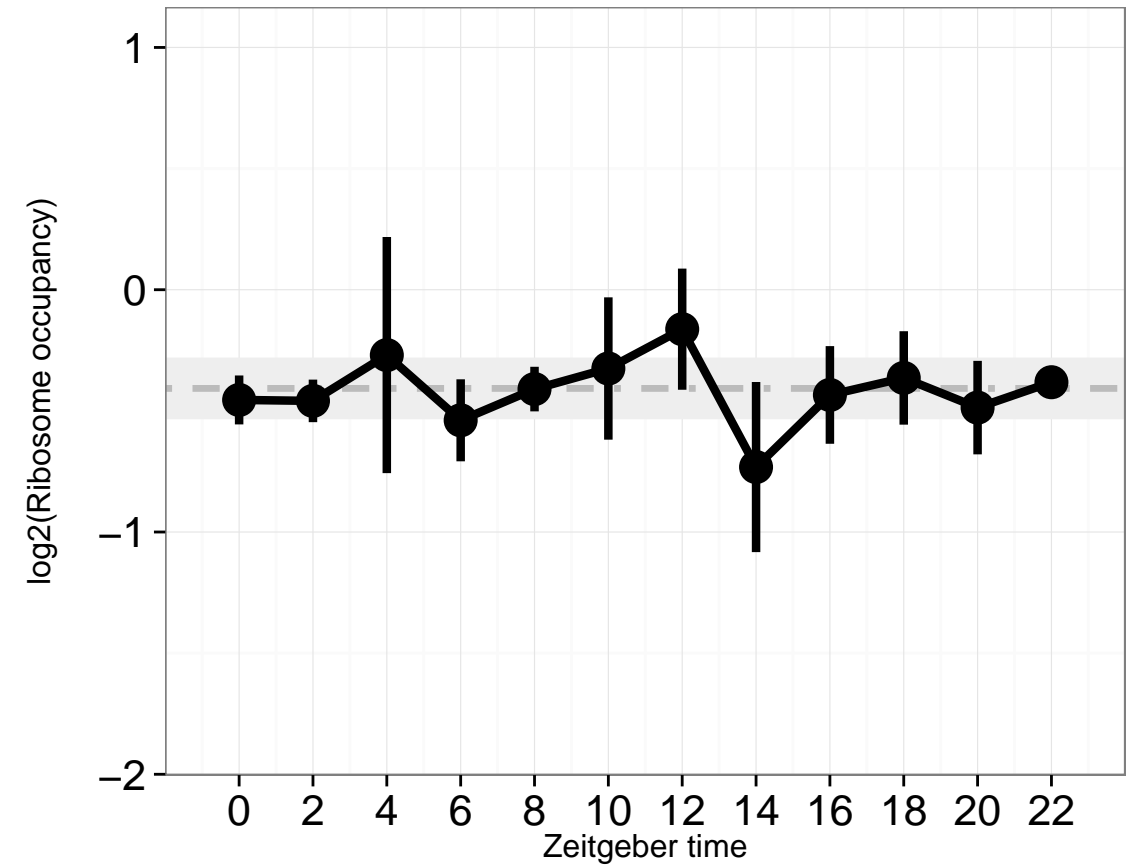

Supplement: Supplementary file 4979 [file 1]

# Golt1b

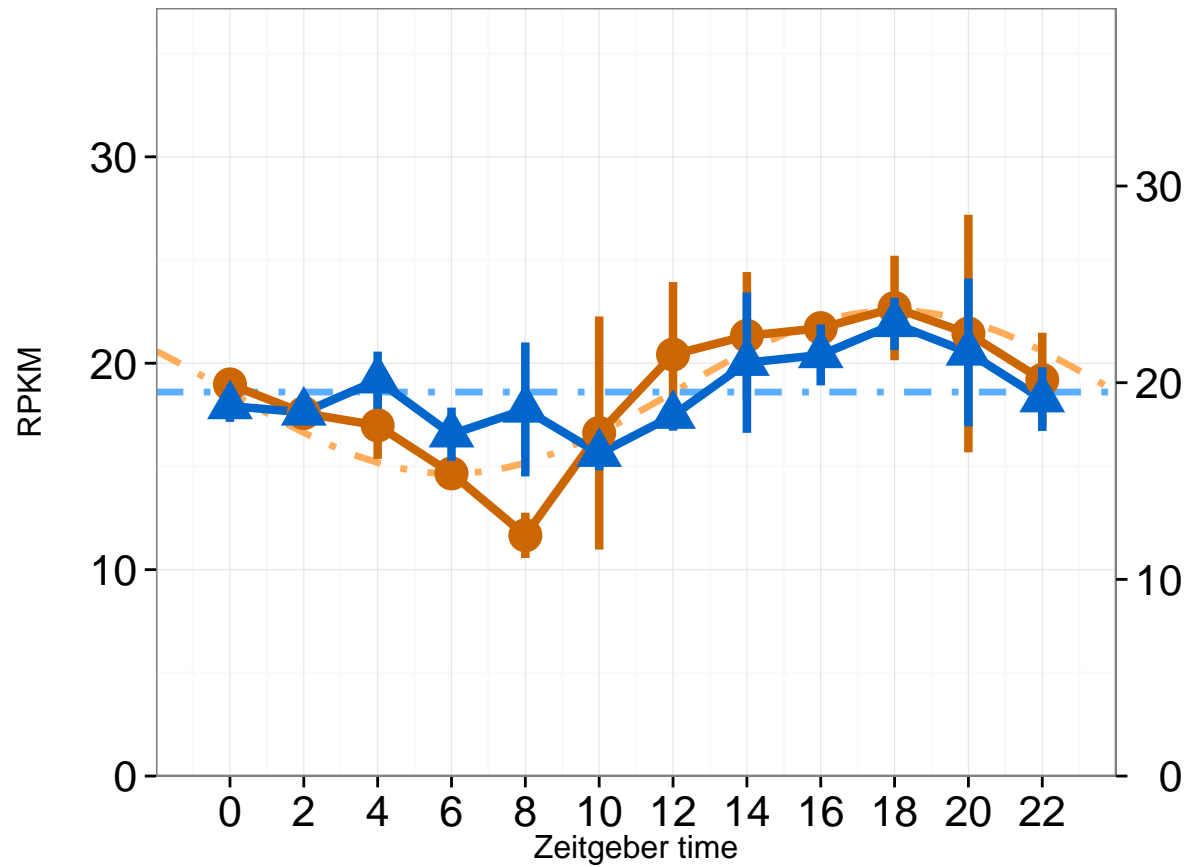

# Golt1b

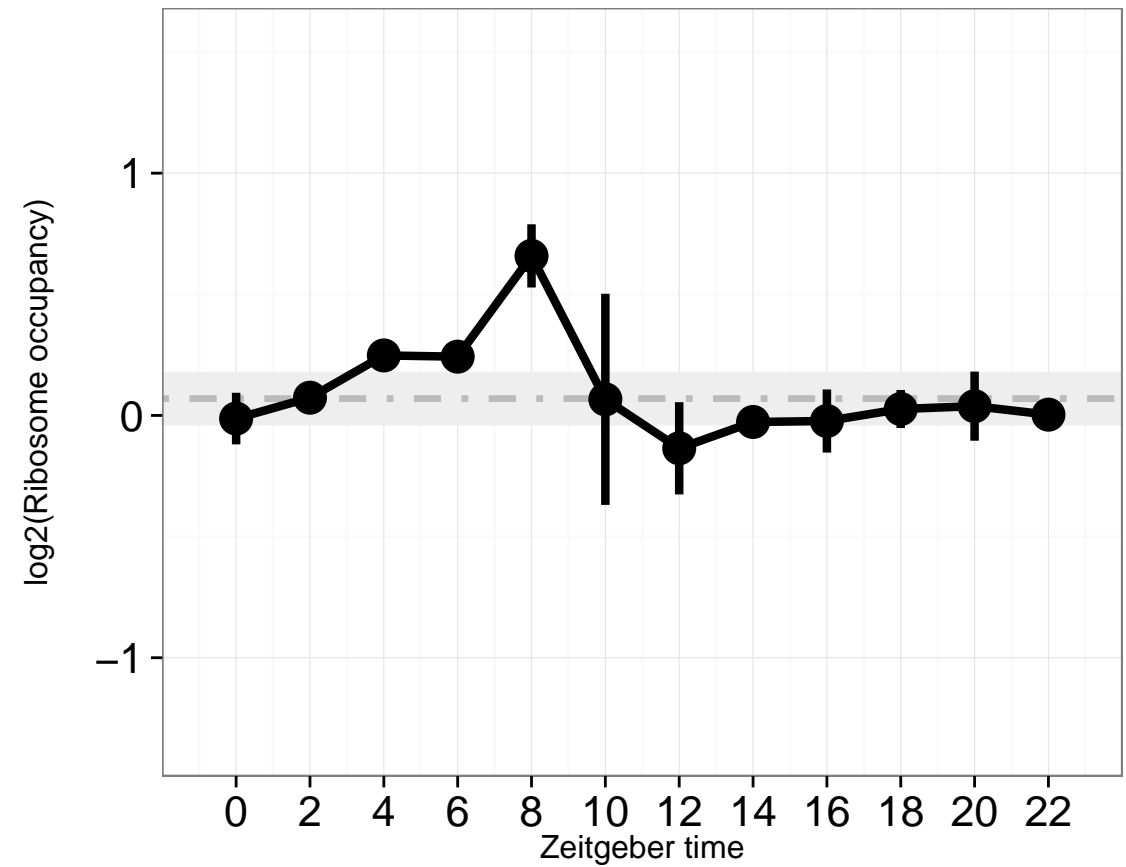

Supplement: Supplementary file 4980 [file 1]

# 5031414D18Rik

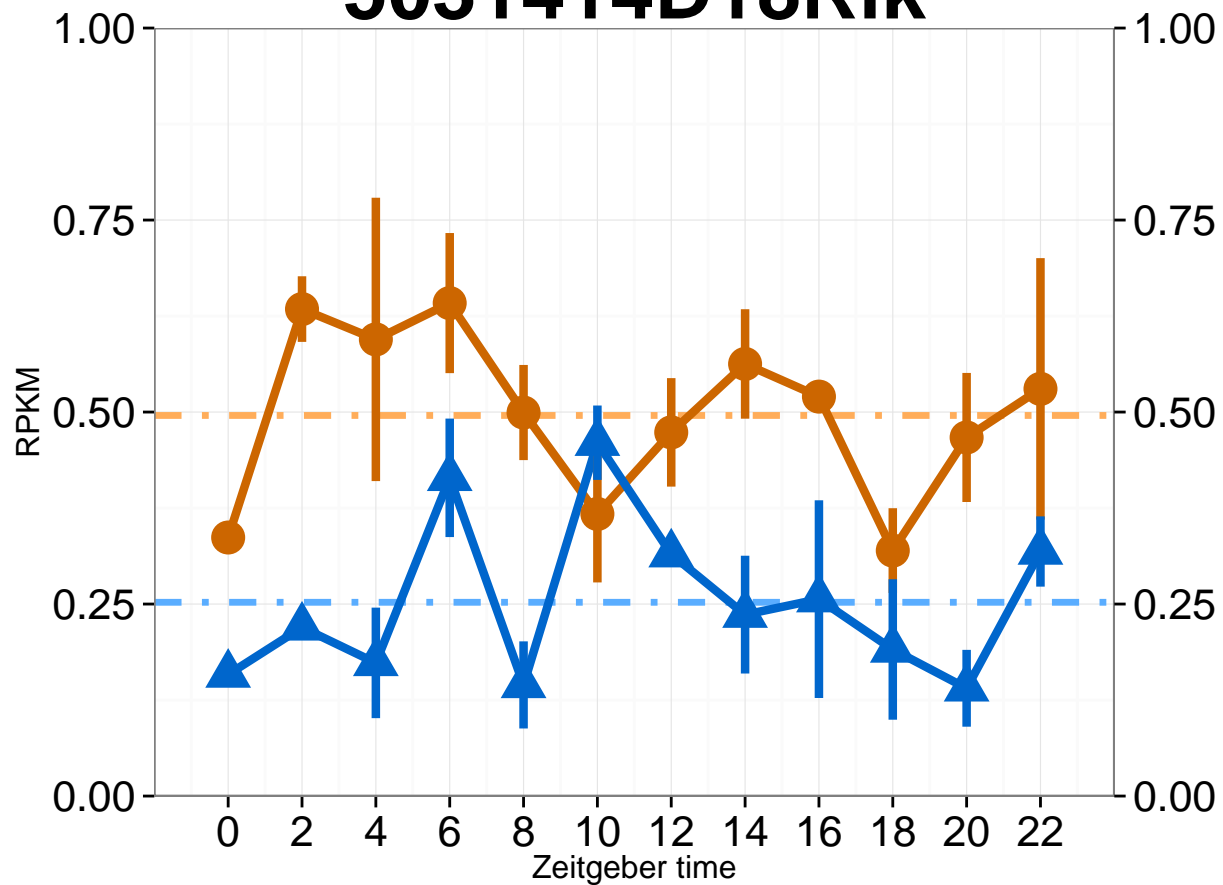

# 5031414D18Rik

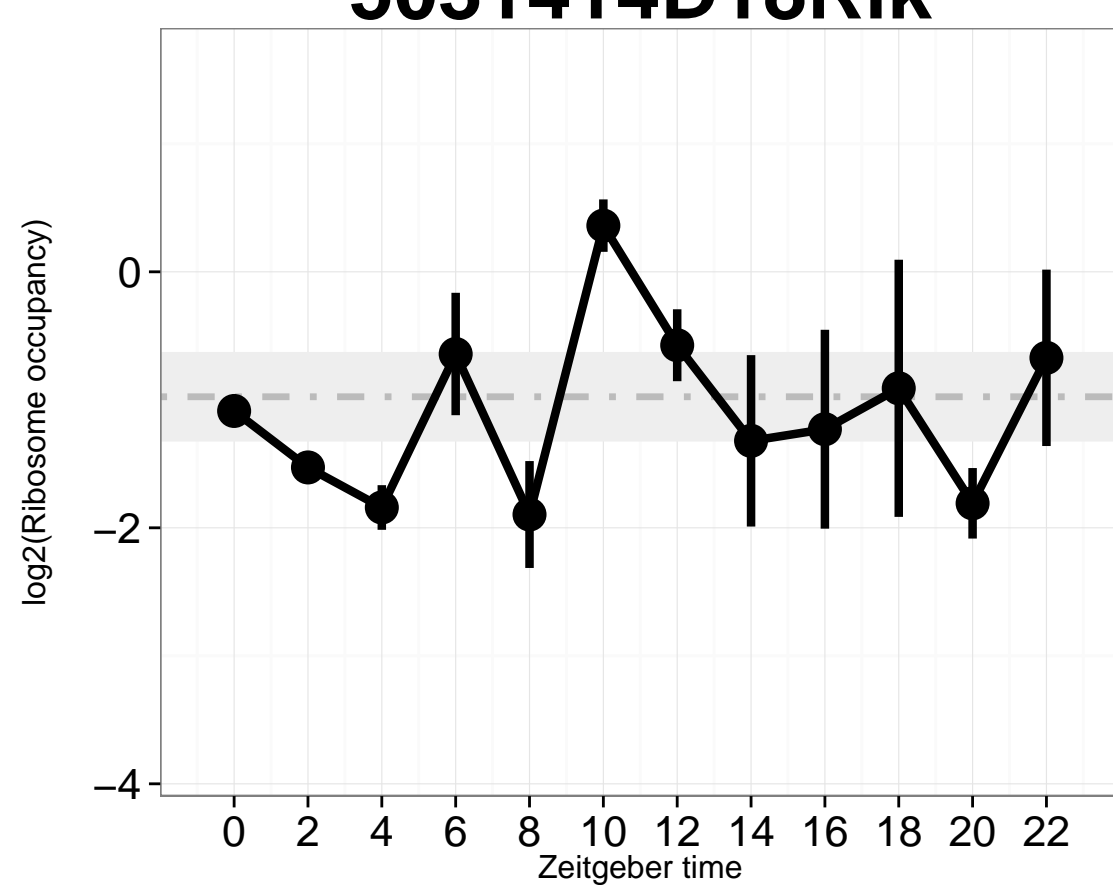

Supplement: Supplementary file 4981 [file 1]

# Zdhhc16

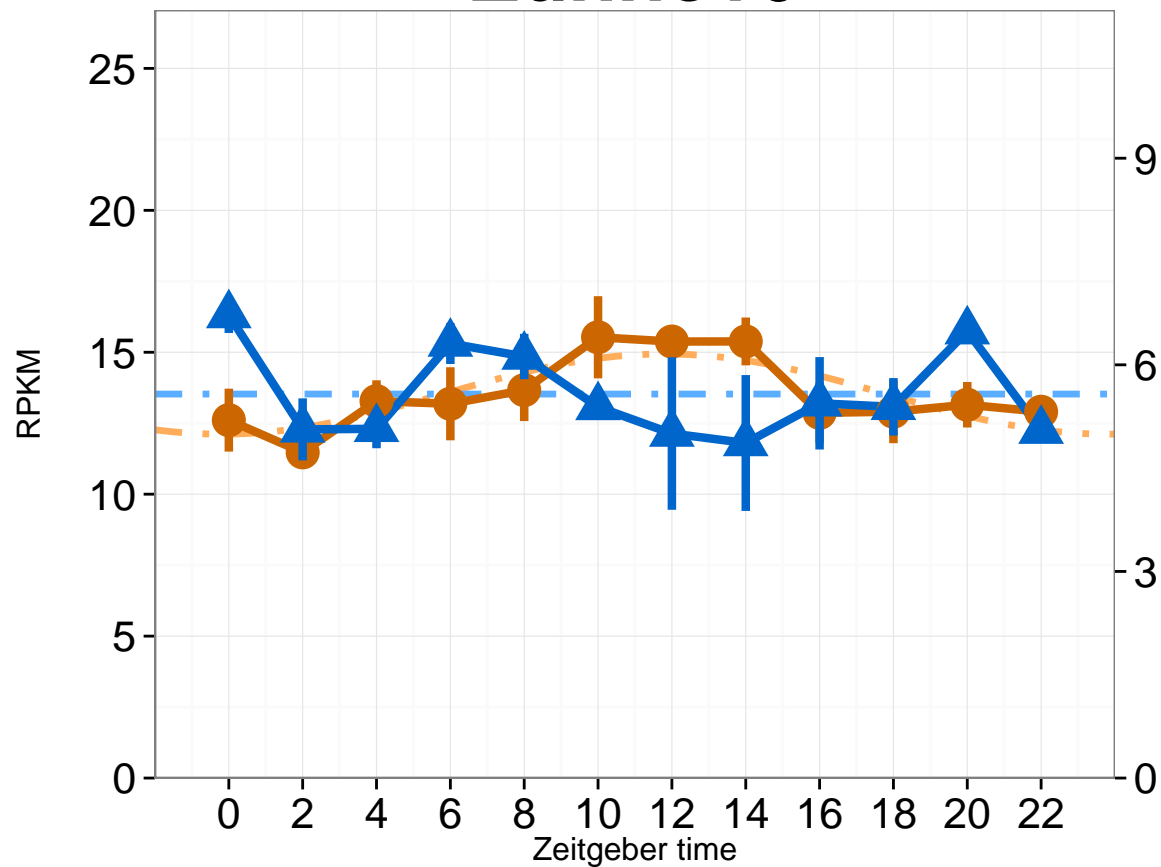

# Zdhhc16

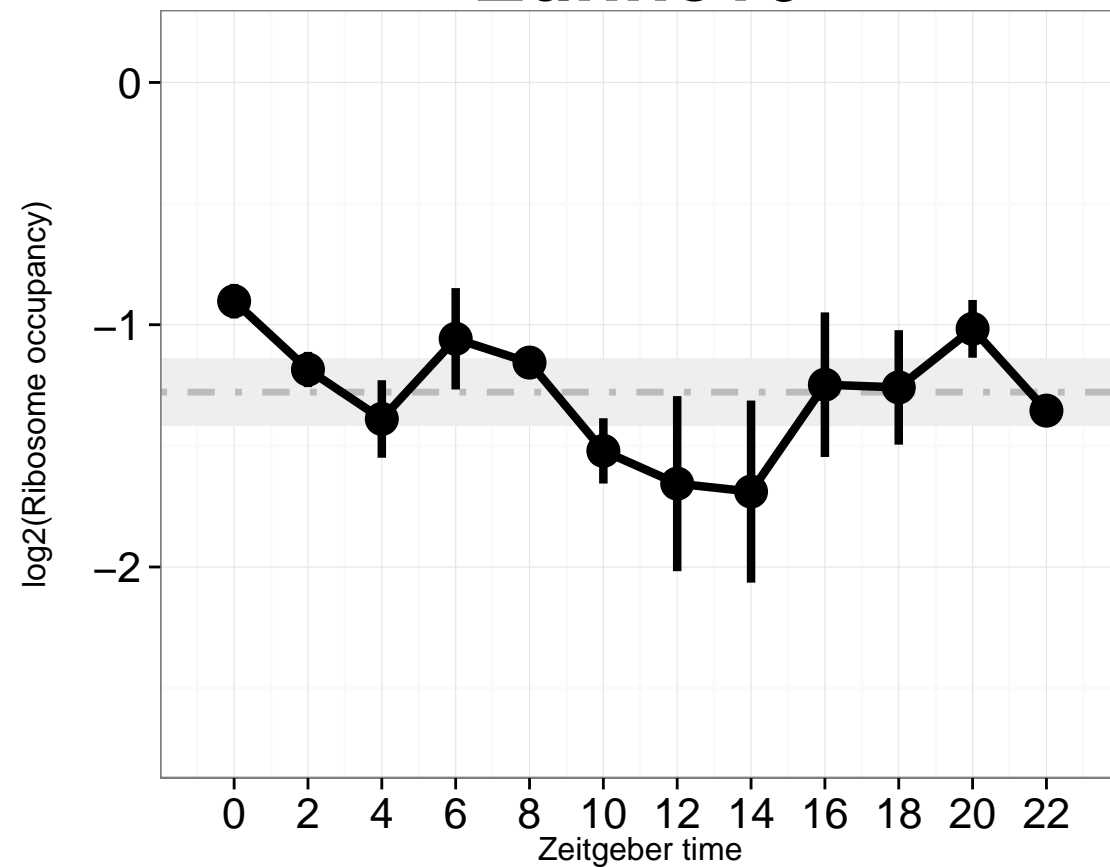

Supplement: Supplementary file 4982 [file 1]

## Pld1

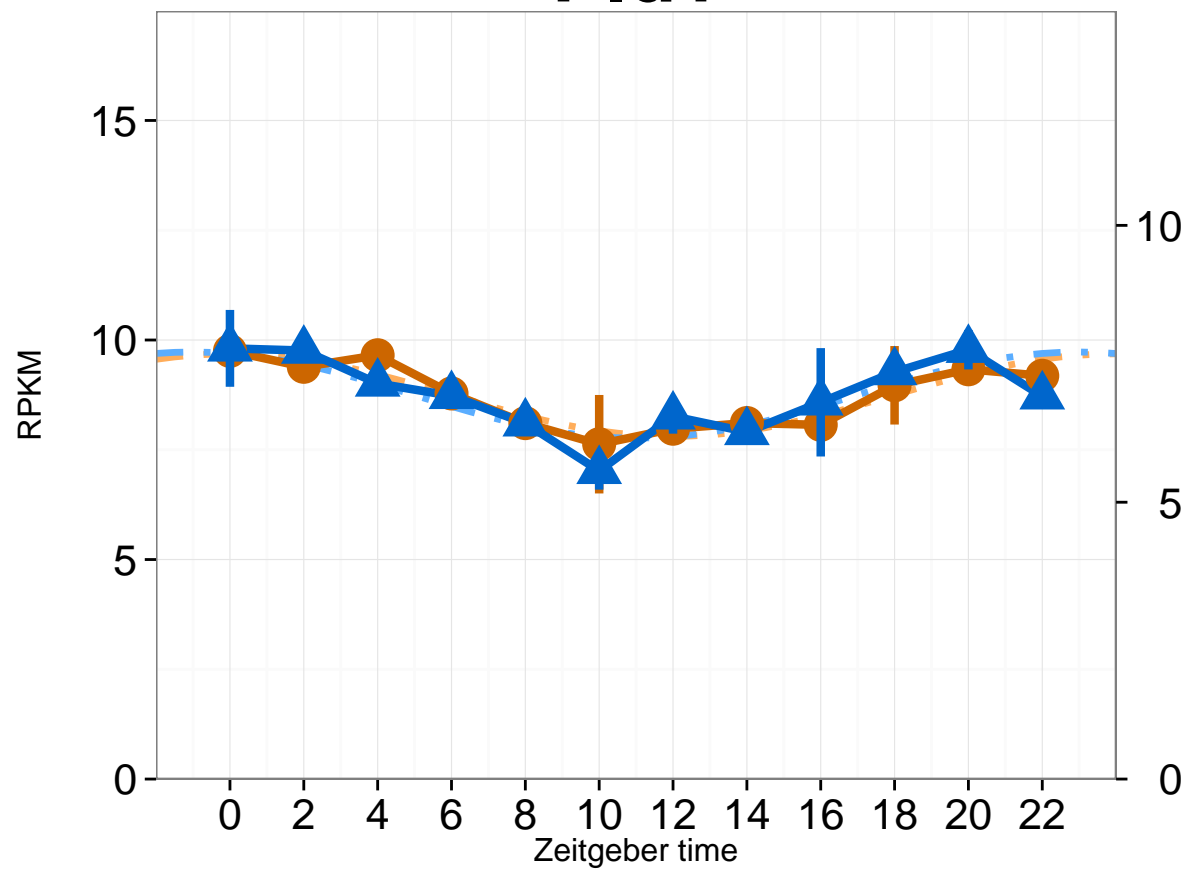

## Pld1

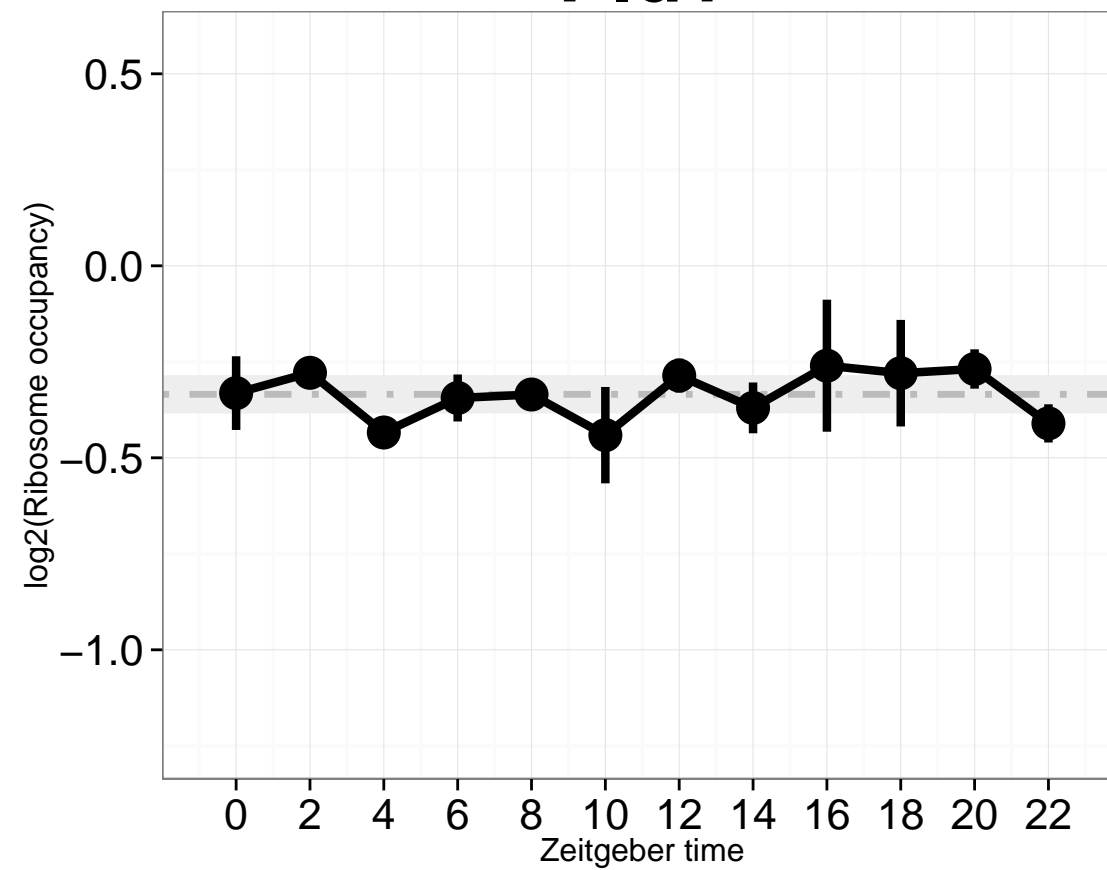

Supplement: Supplementary file 4983 [file 1]

# Ap2a2

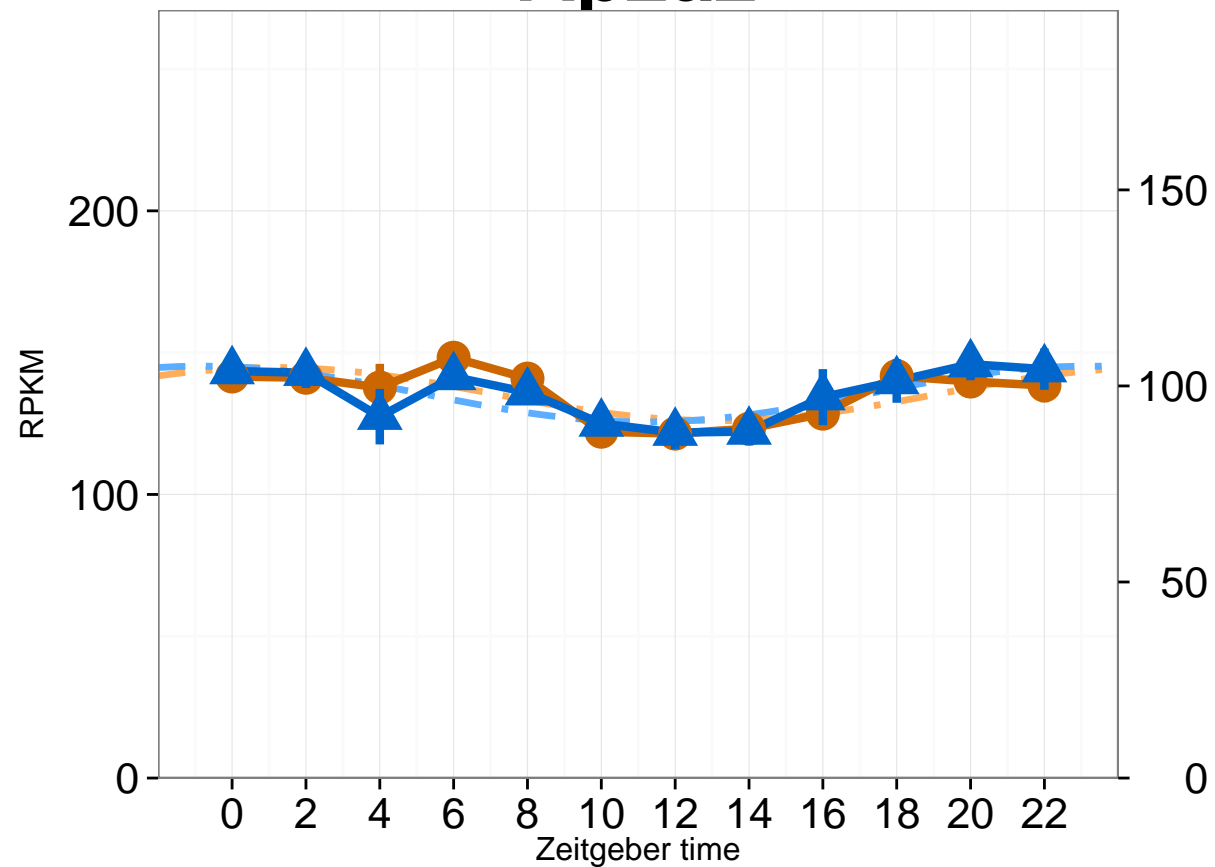

# Ap2a2

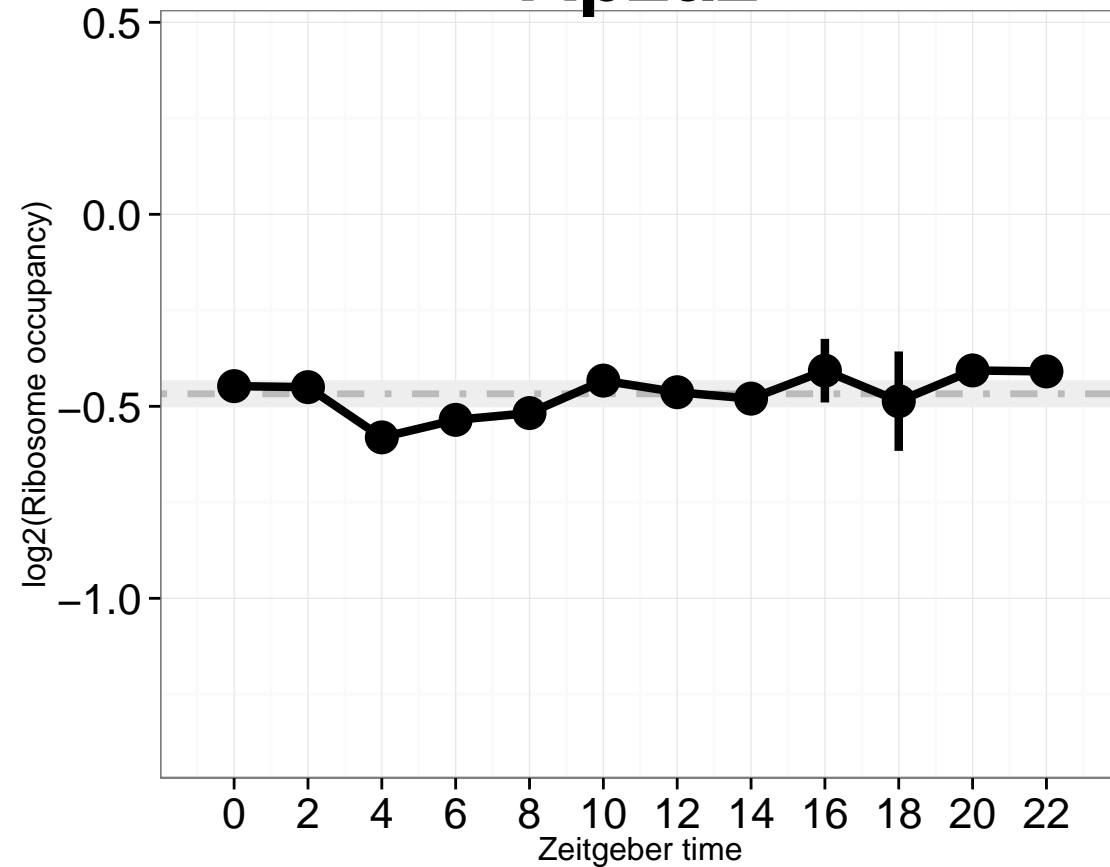

Supplement: Supplementary file 4984 [file 1]

**Smim12**

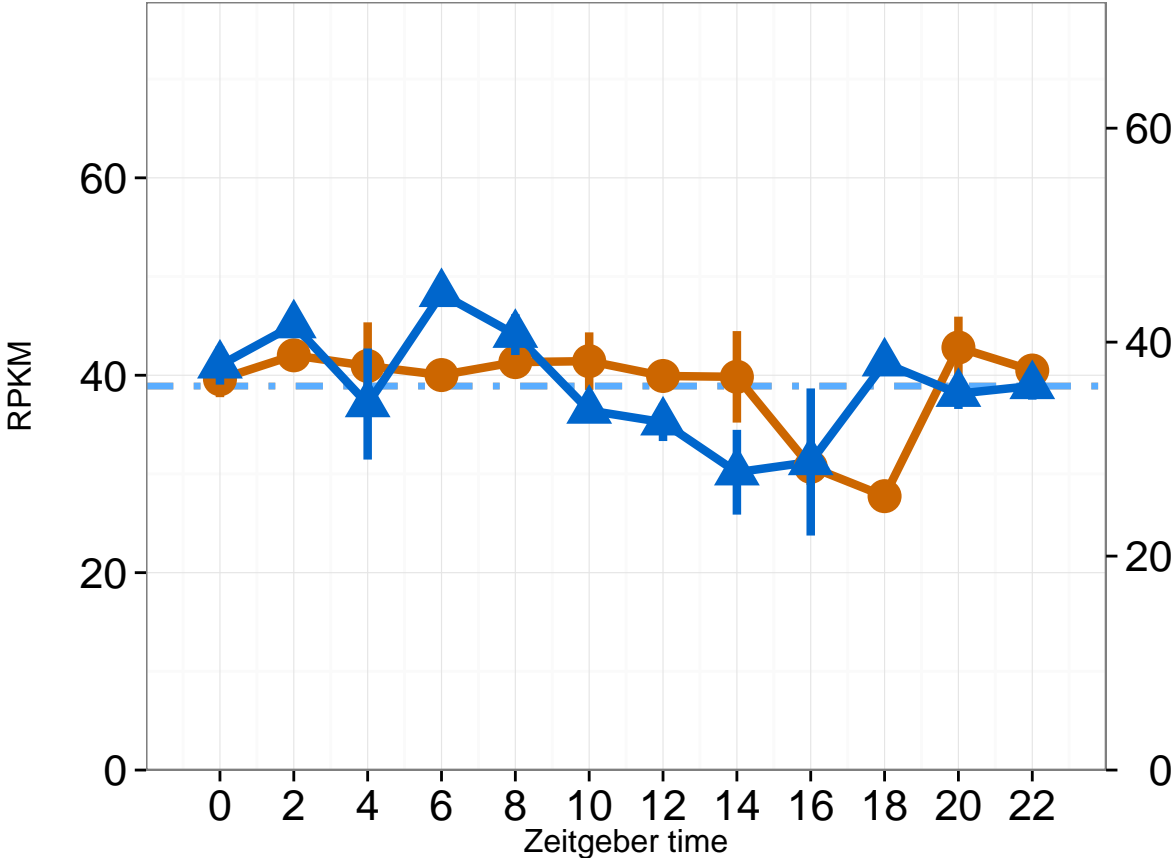

**Smim12**

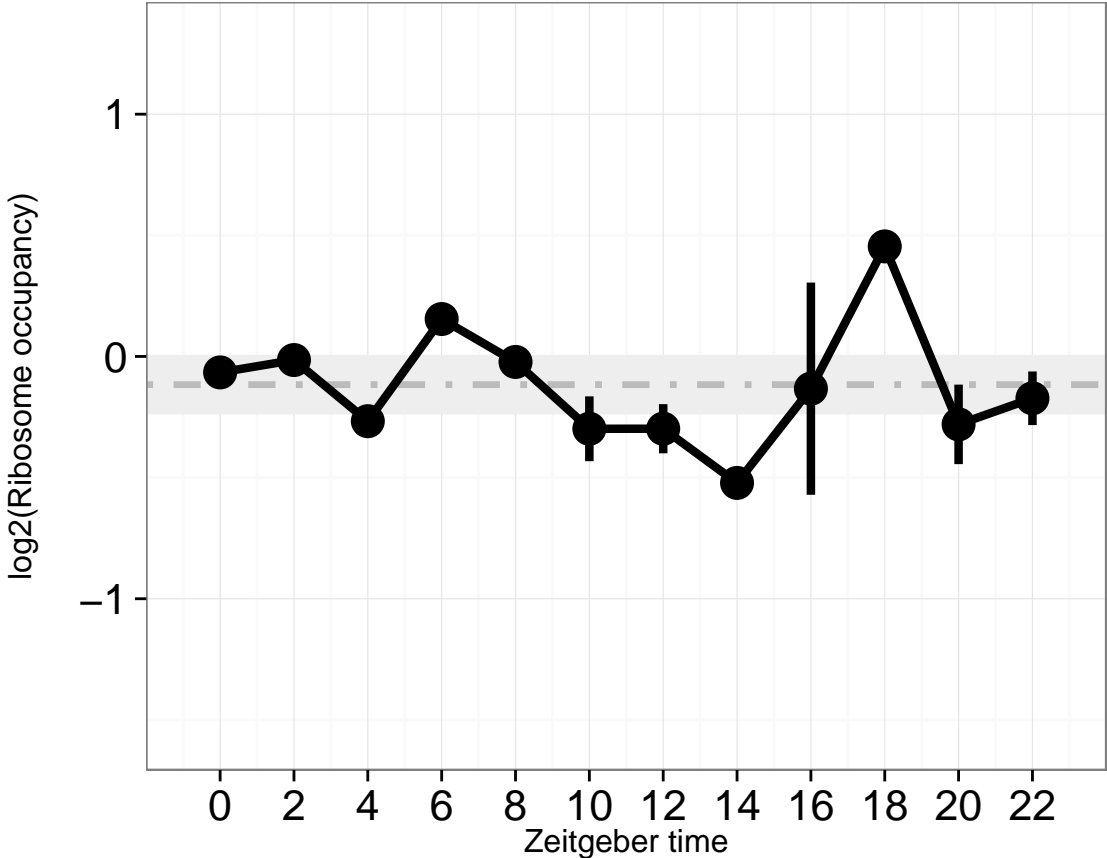

Supplement: Supplementary file 4985 [file 1]

## Eif3d

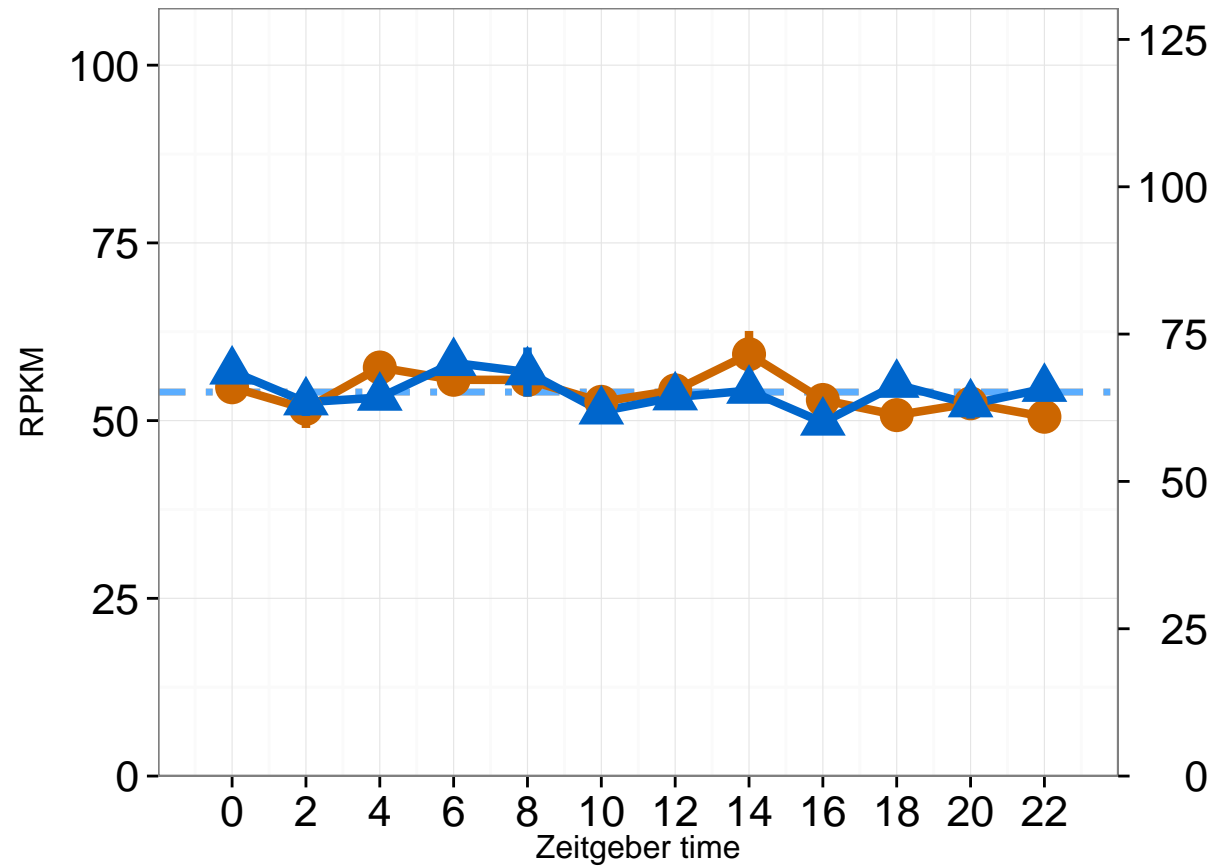

## Eif3d

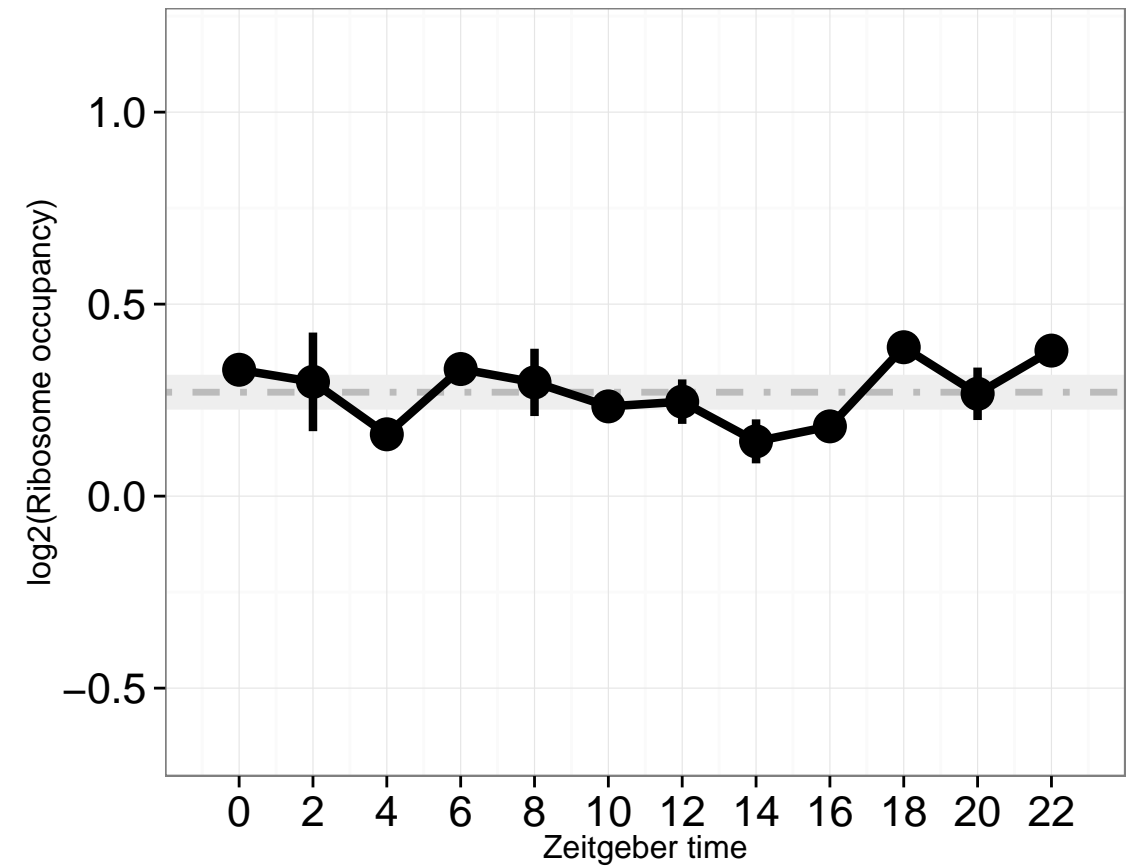

Supplement: Supplementary file 4986 [file 1]

# Hist1h4d

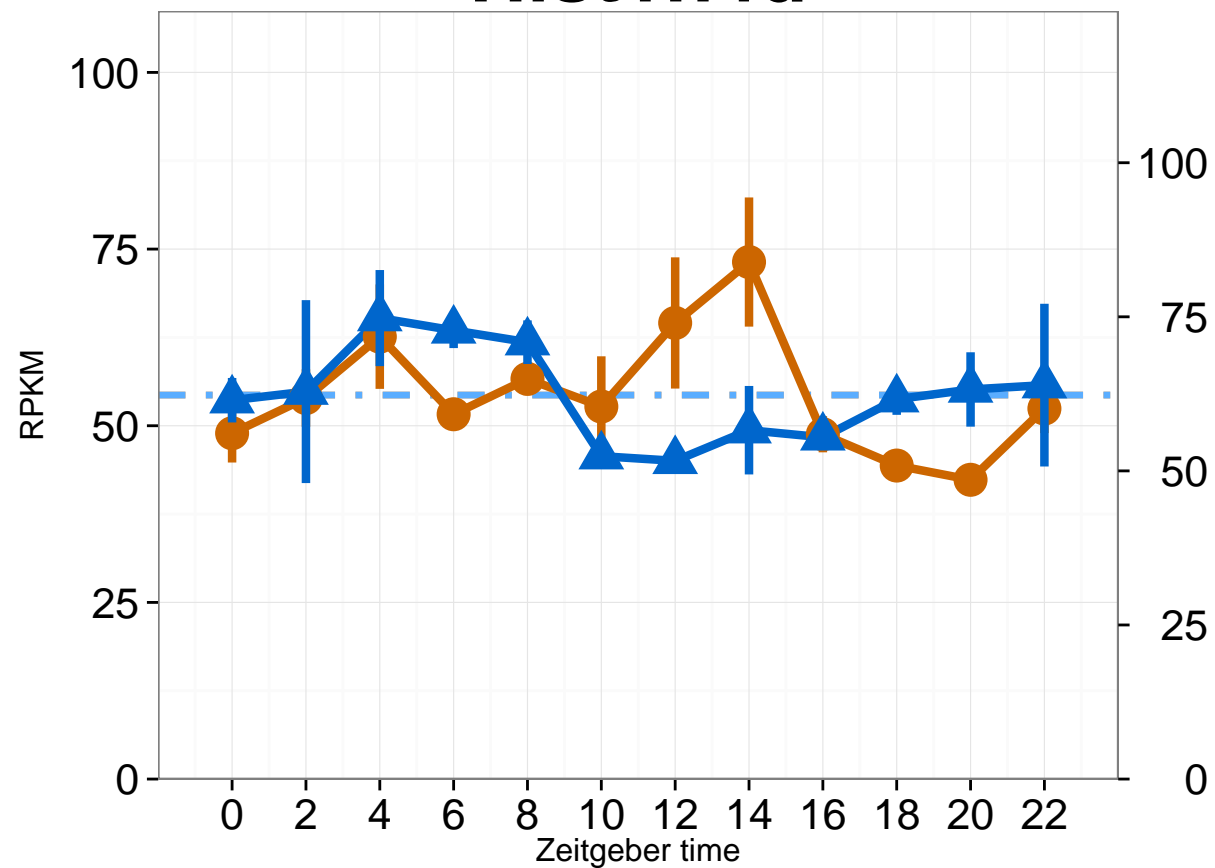

# Hist1h4d

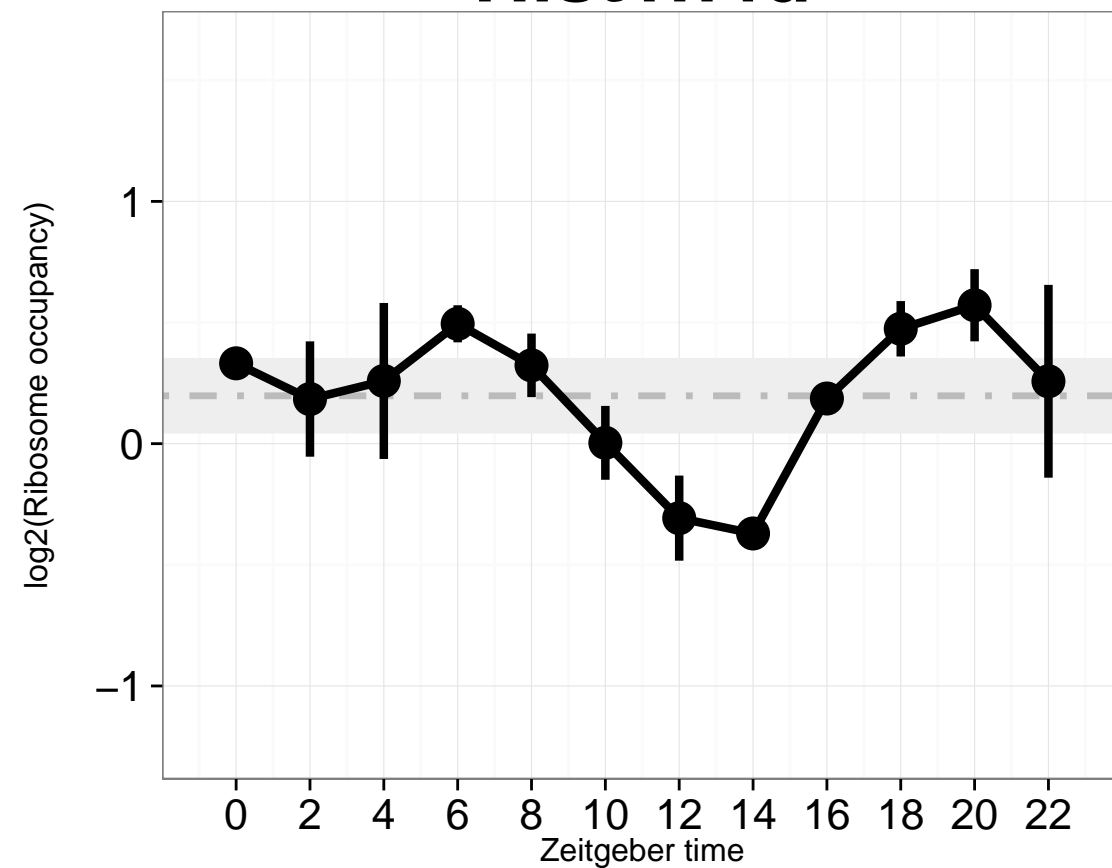

Supplement: Supplementary file 4987 [file 1]

# Metrn

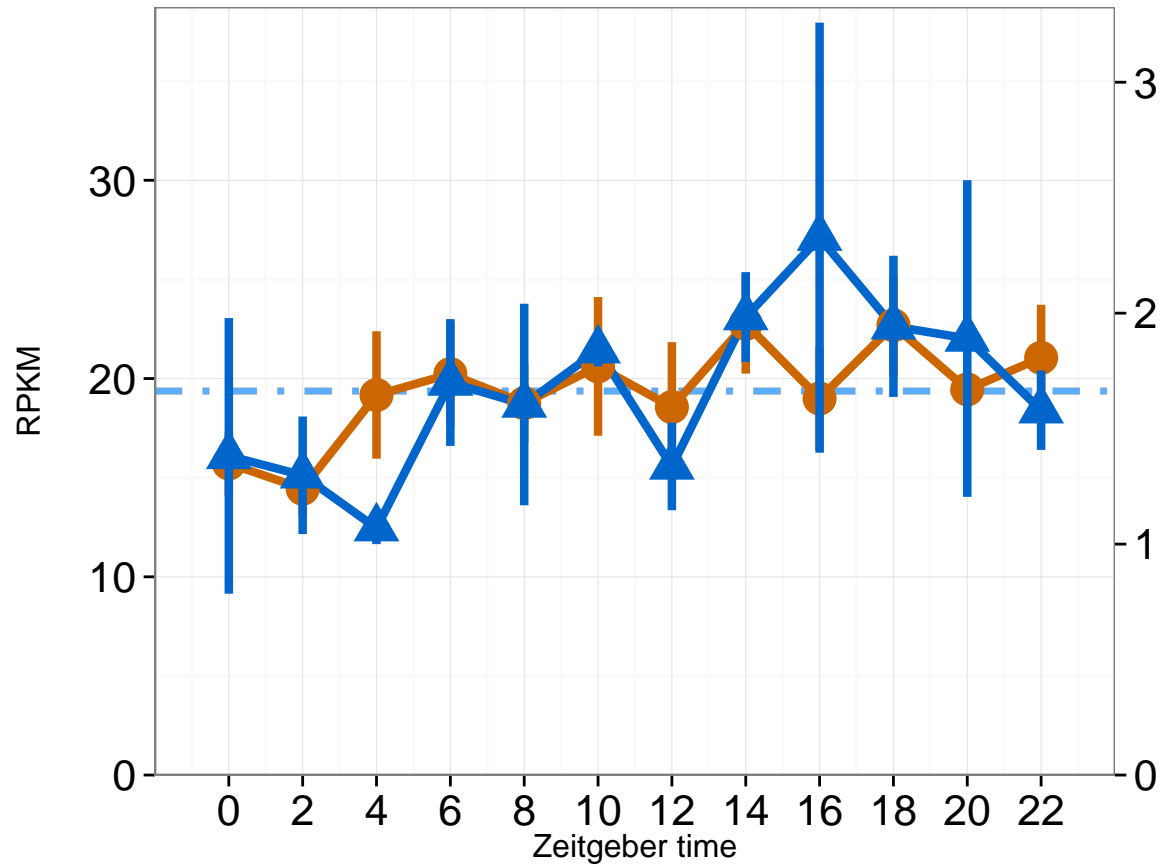

# Metrn

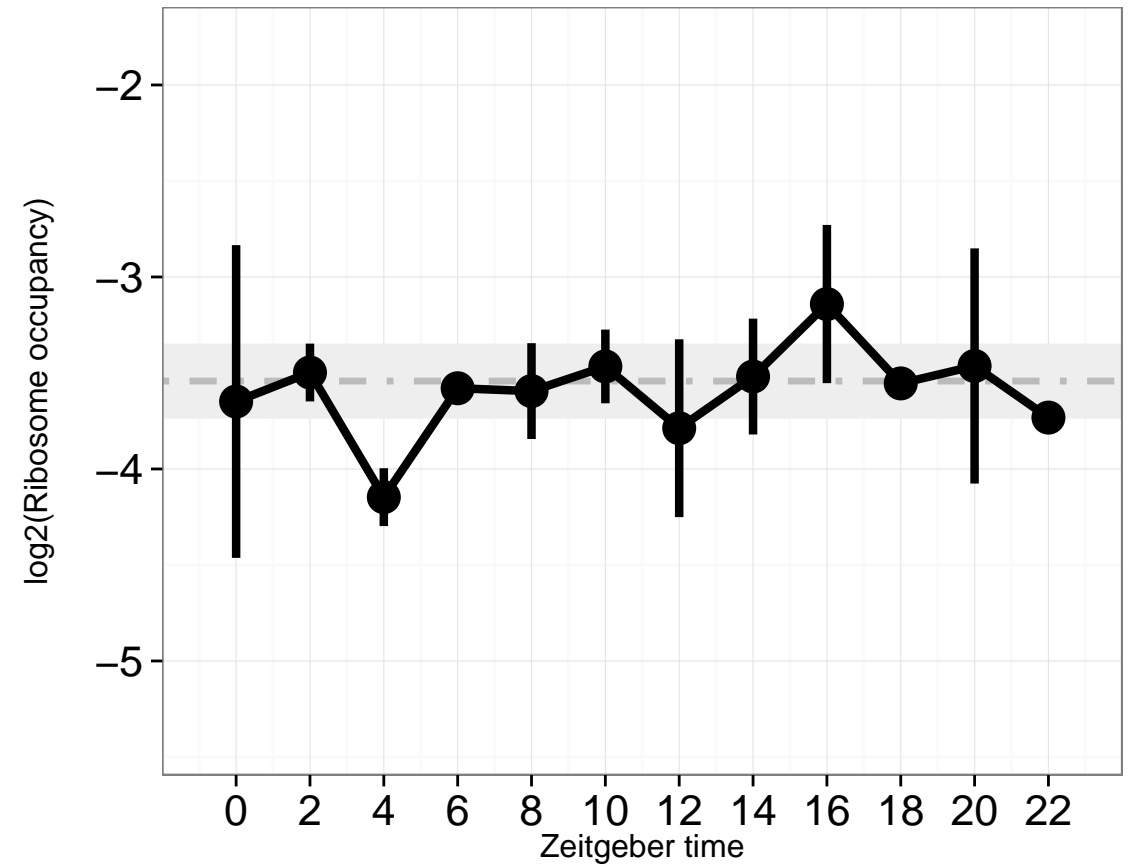

Supplement: Supplementary file 4988 [file 1]

## Ufsp2

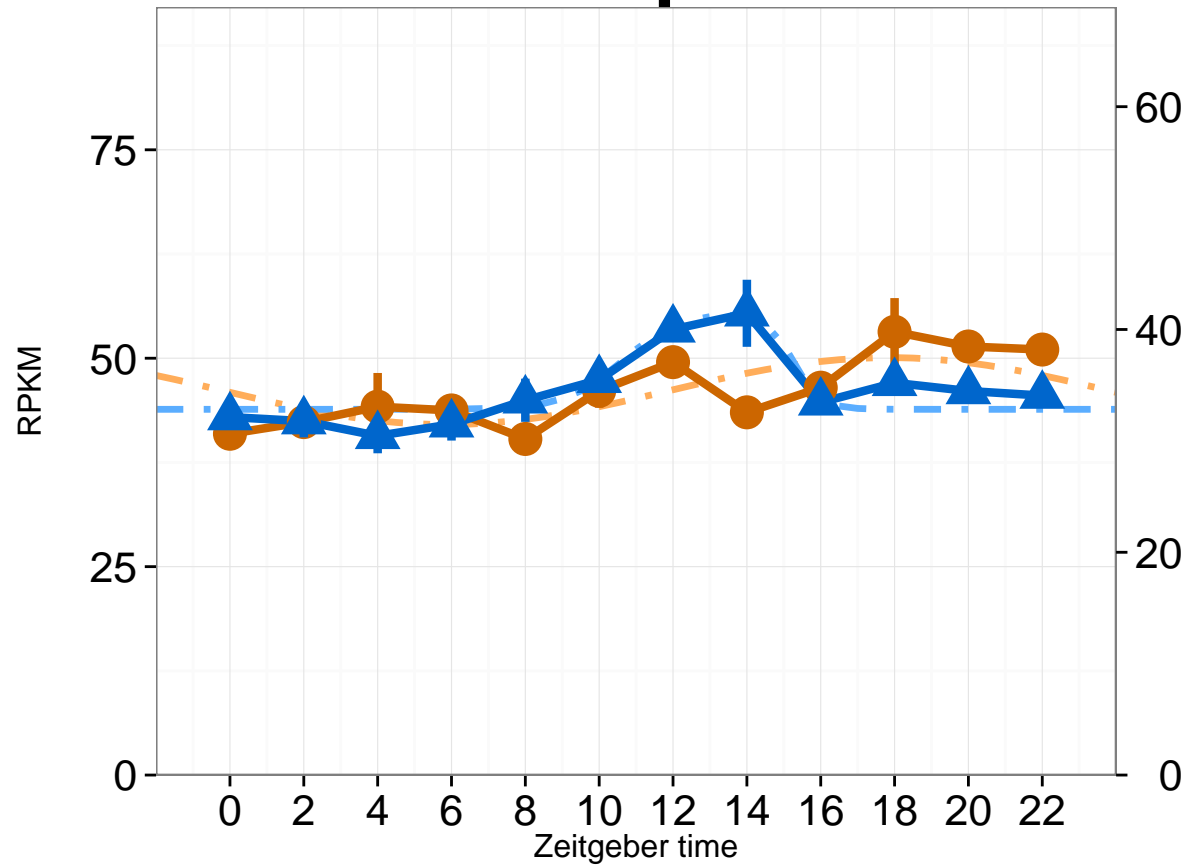

## Ufsp2

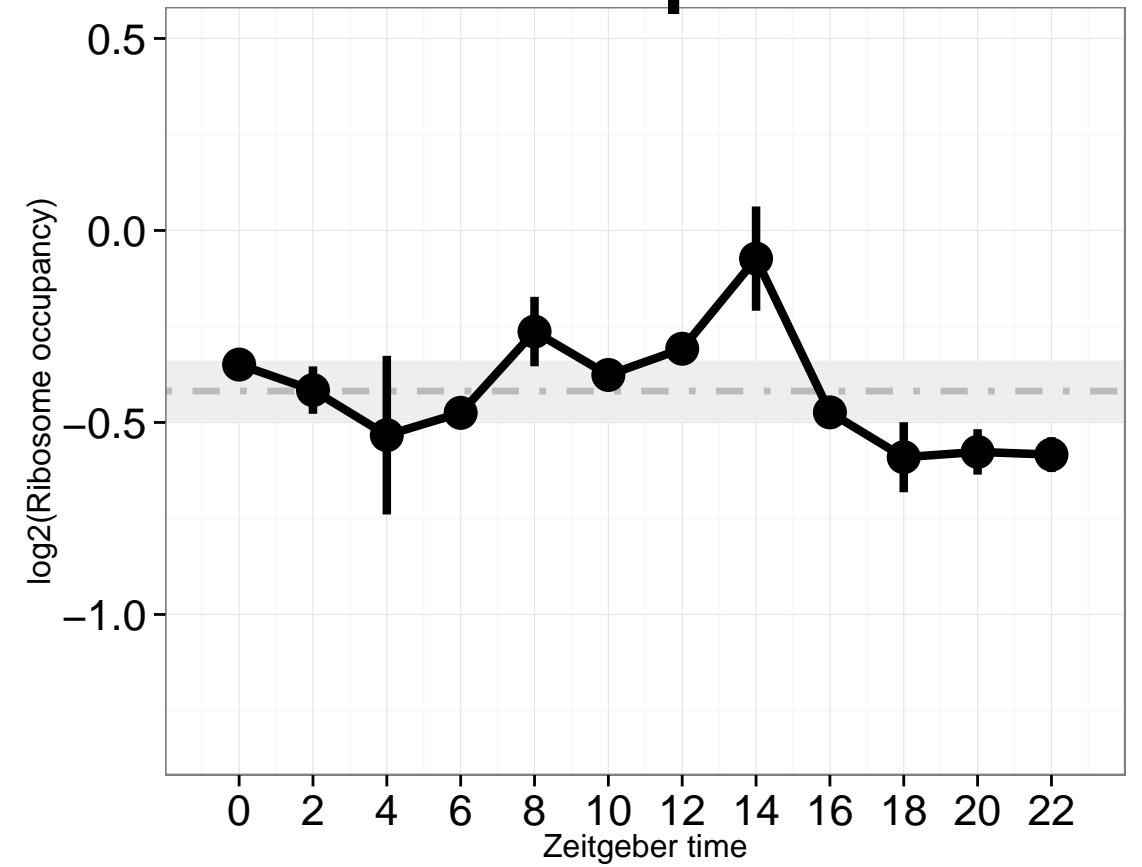

Supplement: Supplementary file 4989 [file 1]

## Gnaq

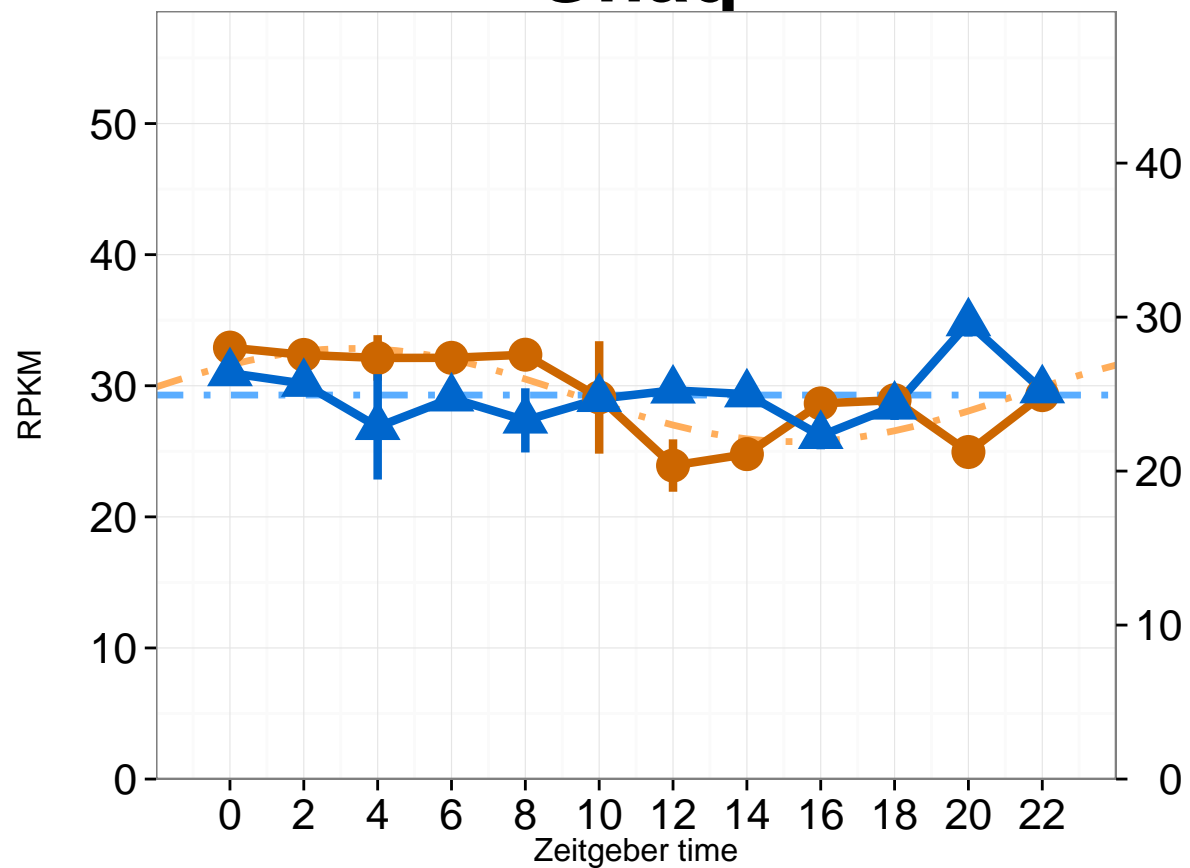

## Gnaq

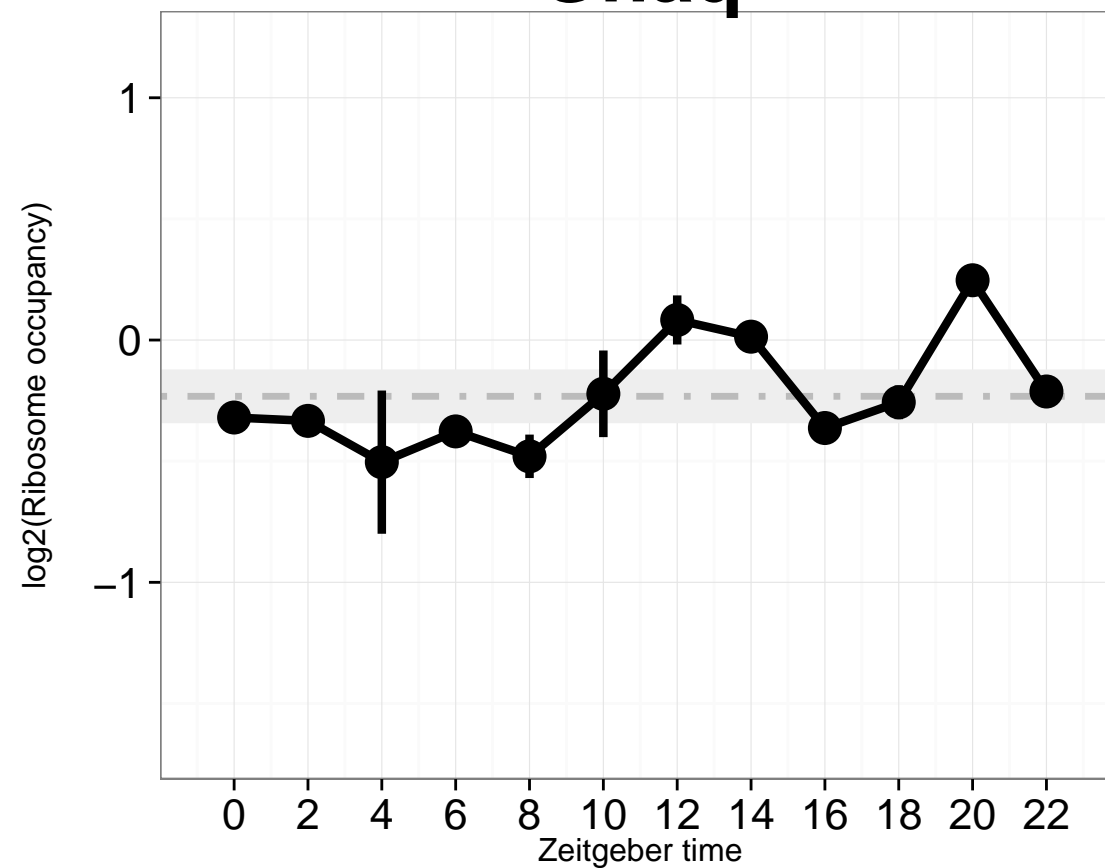

Supplement: Supplementary file 4990 [file 1]

# C130074G19Rik

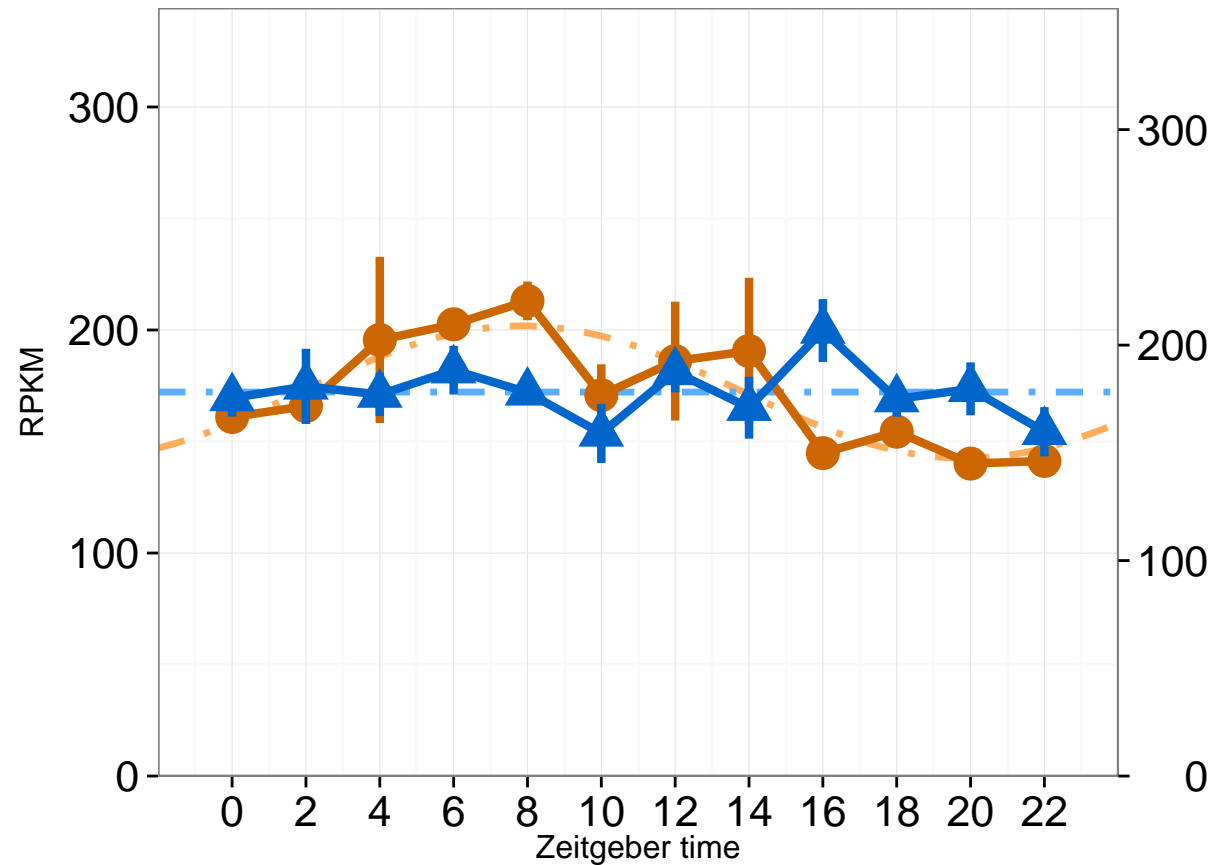

# C130074G19Rik

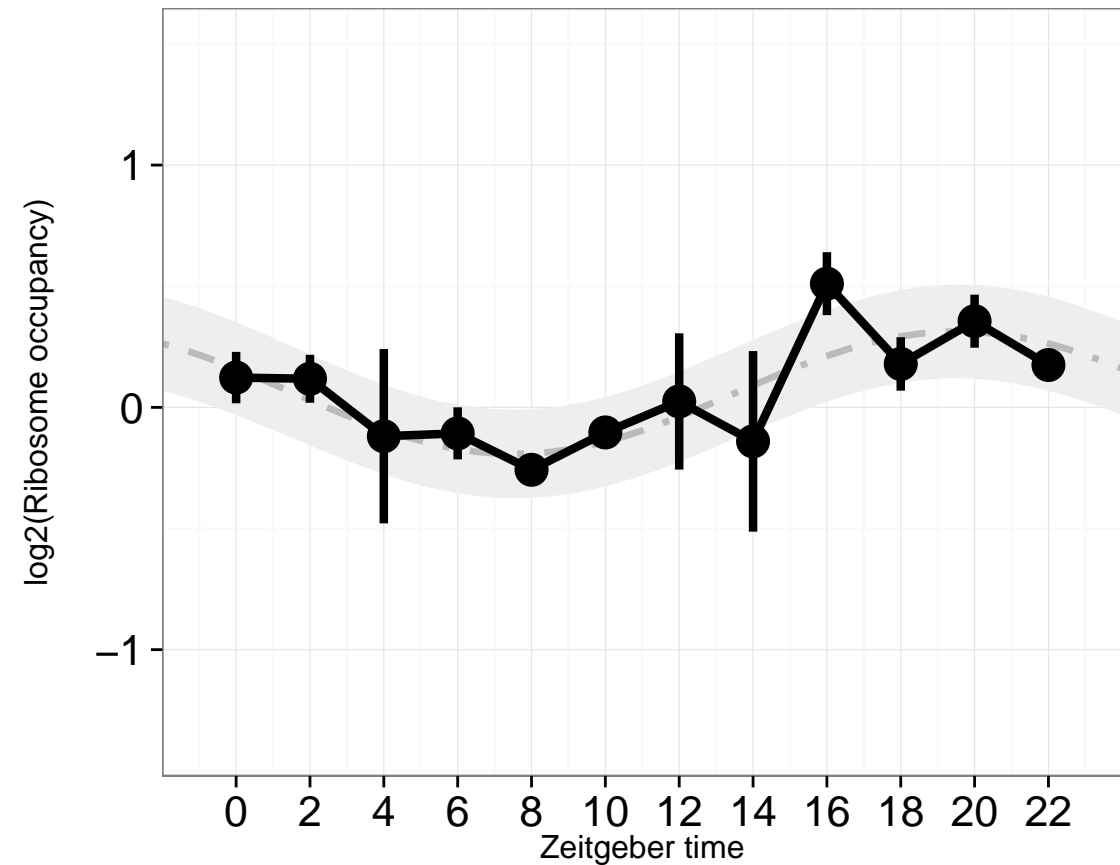

Supplement: Supplementary file 4991 [file 1]

# B630005N14Rik

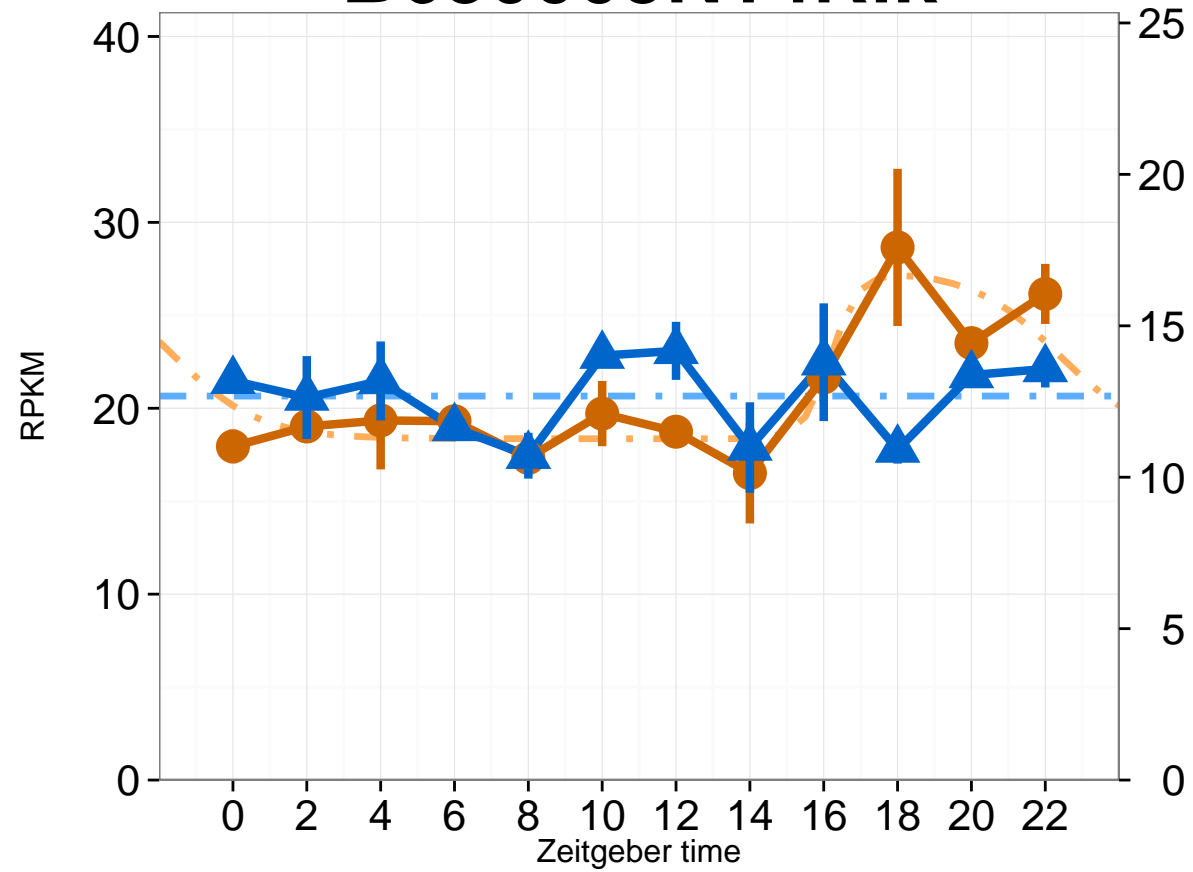

# B630005N14Rik

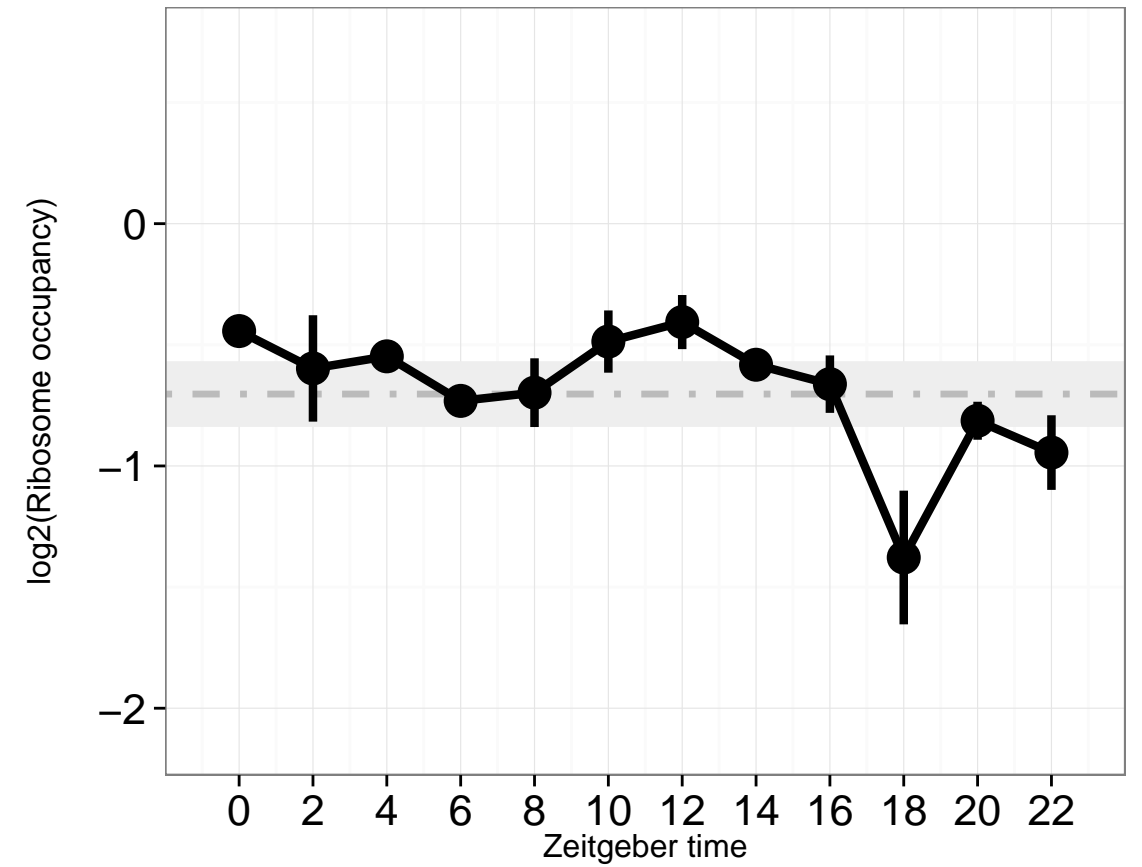

Supplement: Supplementary file 4992 [file 1]

# Lsmd1

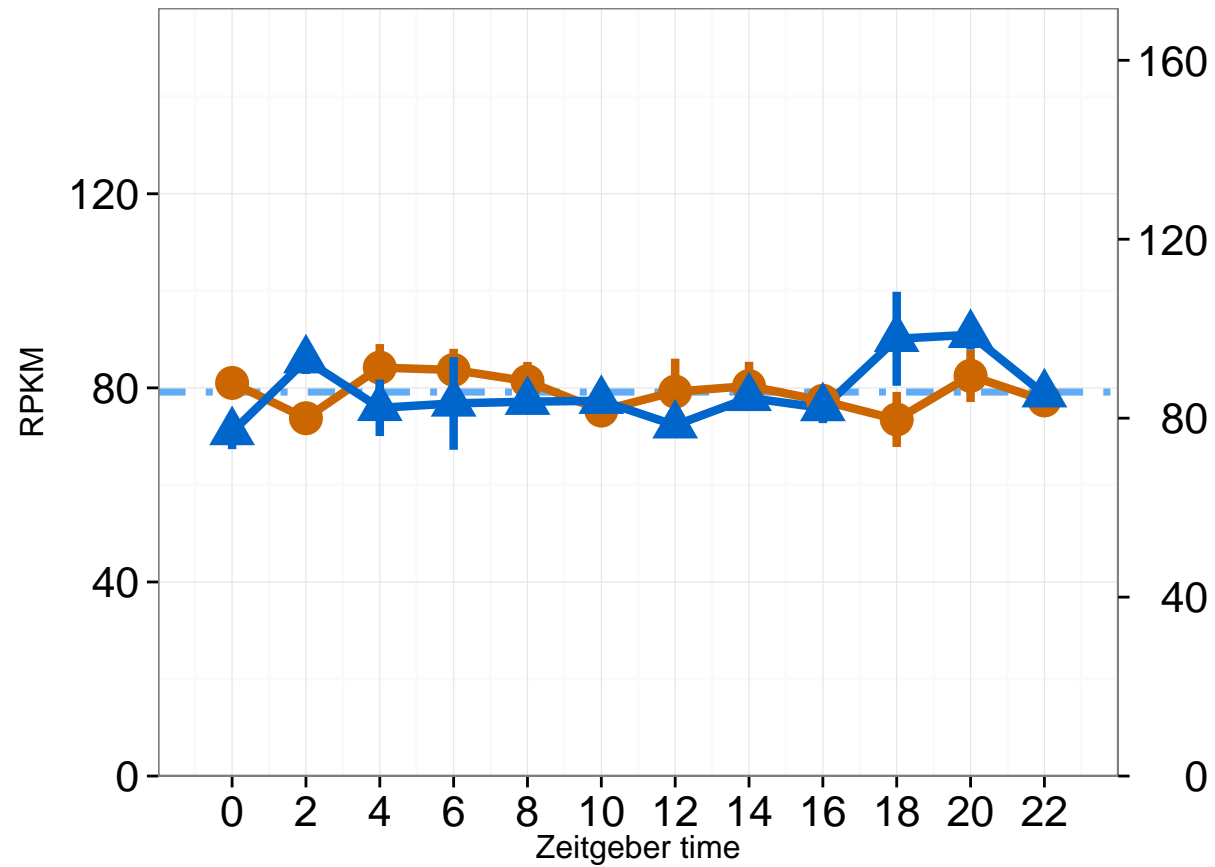

# Lsmd1

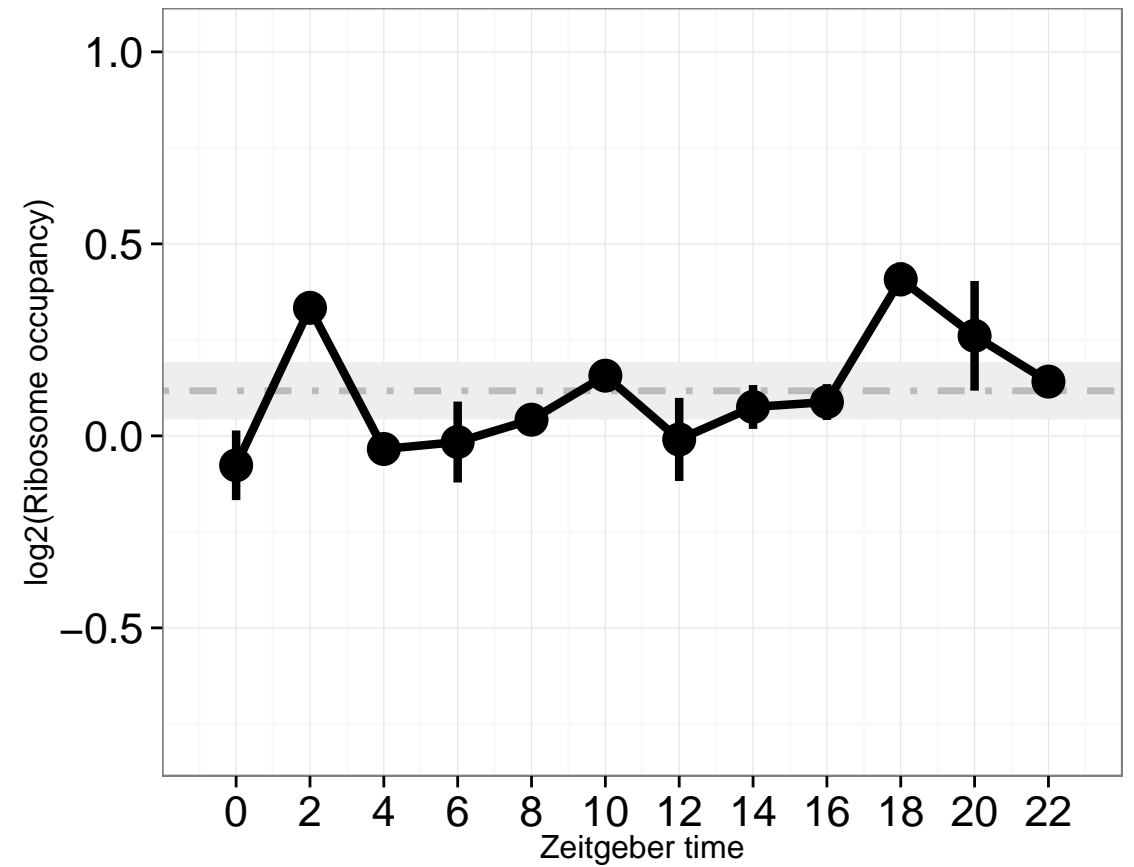

Supplement: Supplementary file 4993 [file 1]

**Sept9**

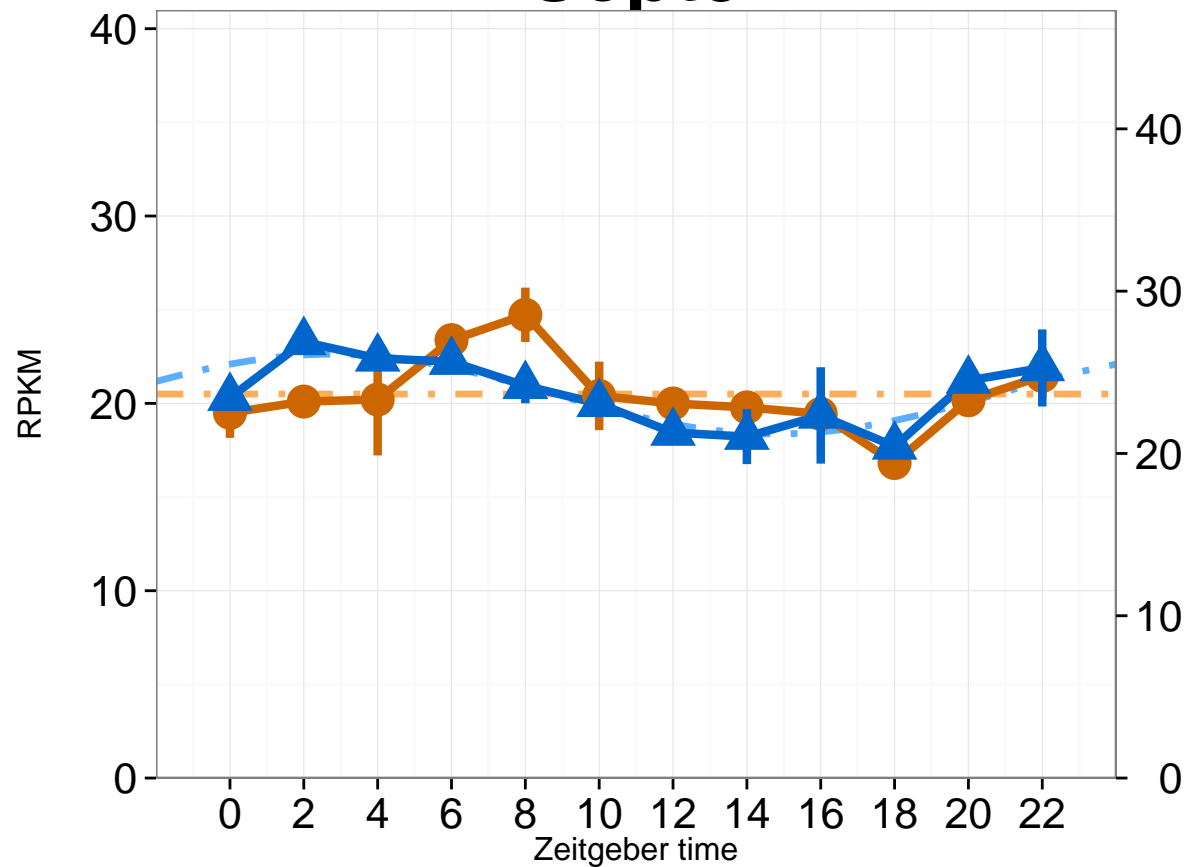

**Sept9**

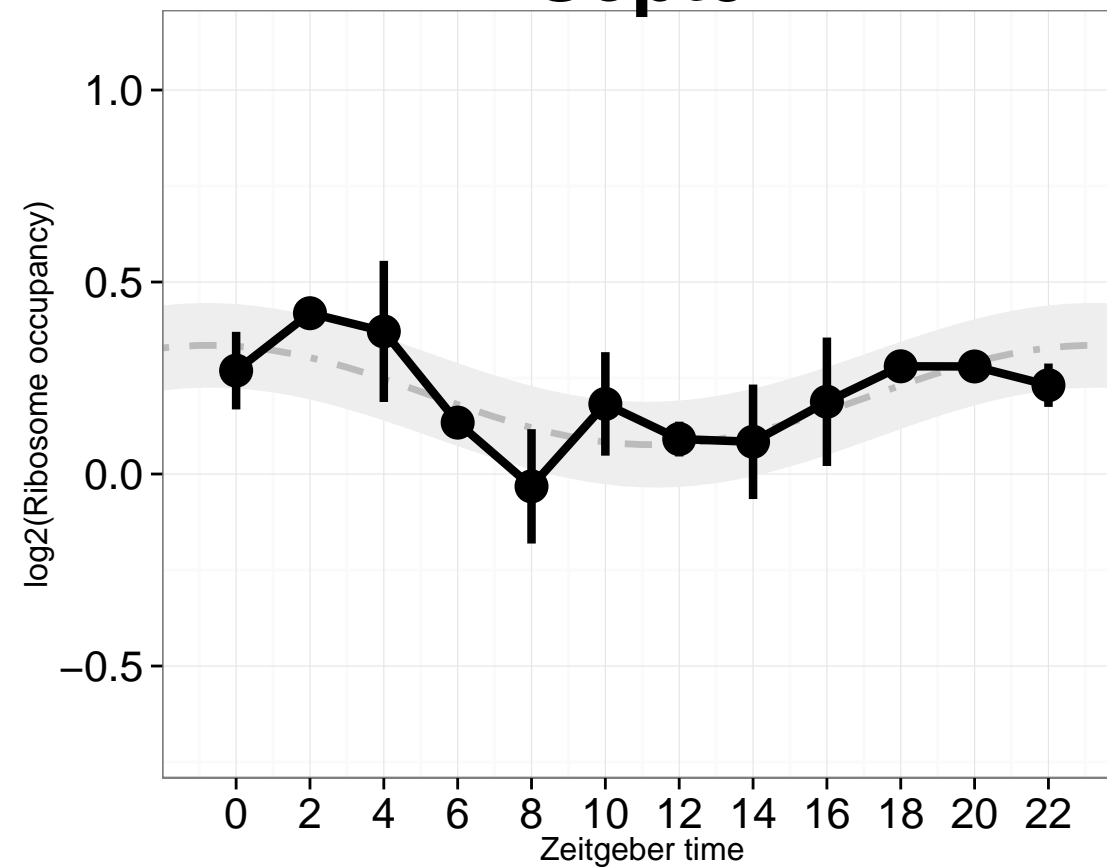

Supplement: Supplementary file 4994 [file 1]

# Capza1

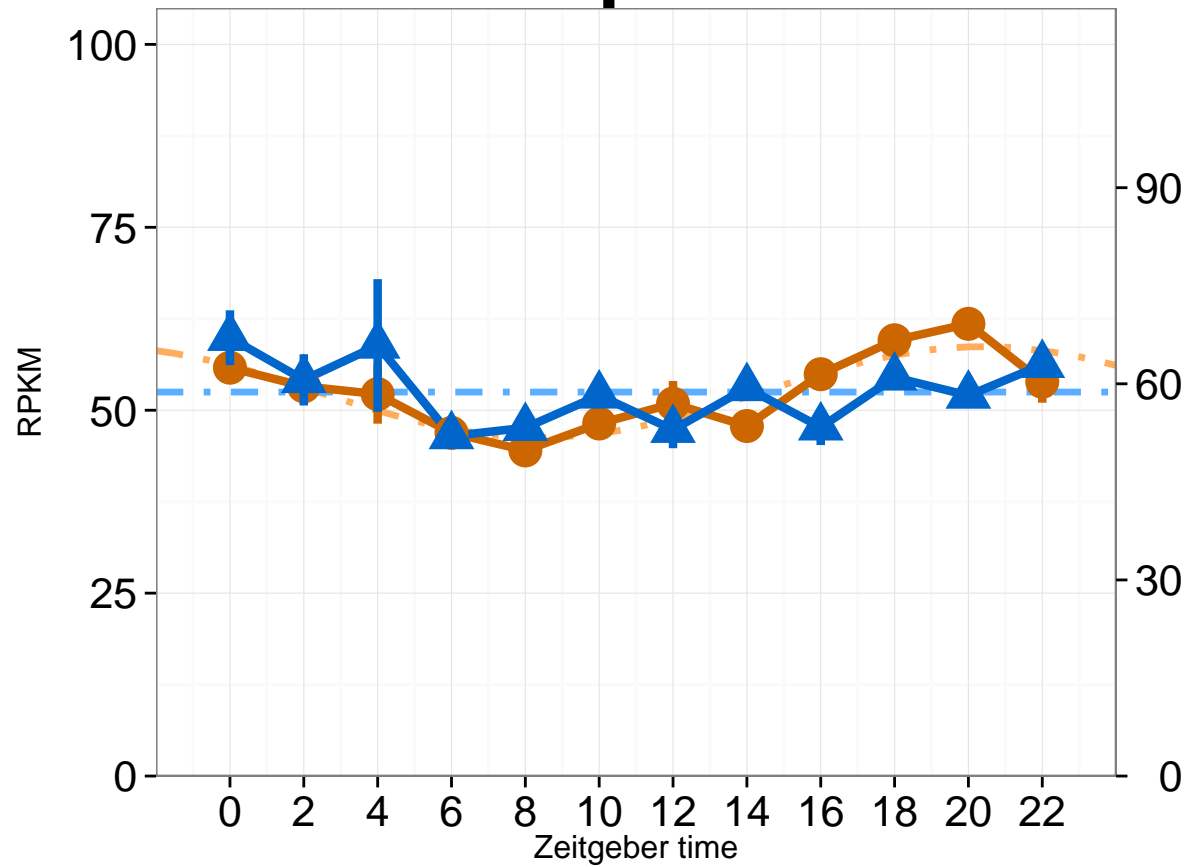

# Capza1

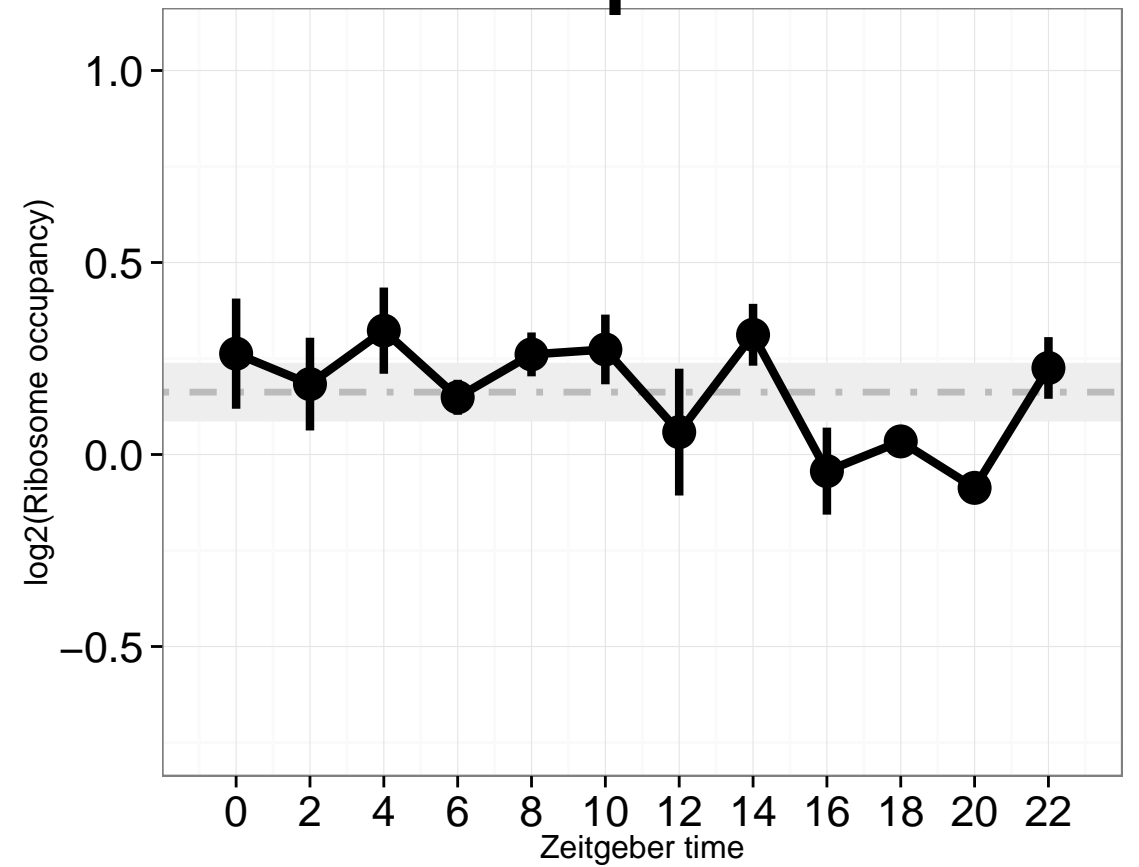

Supplement: Supplementary file 4995 [file 1]

# Fam120a

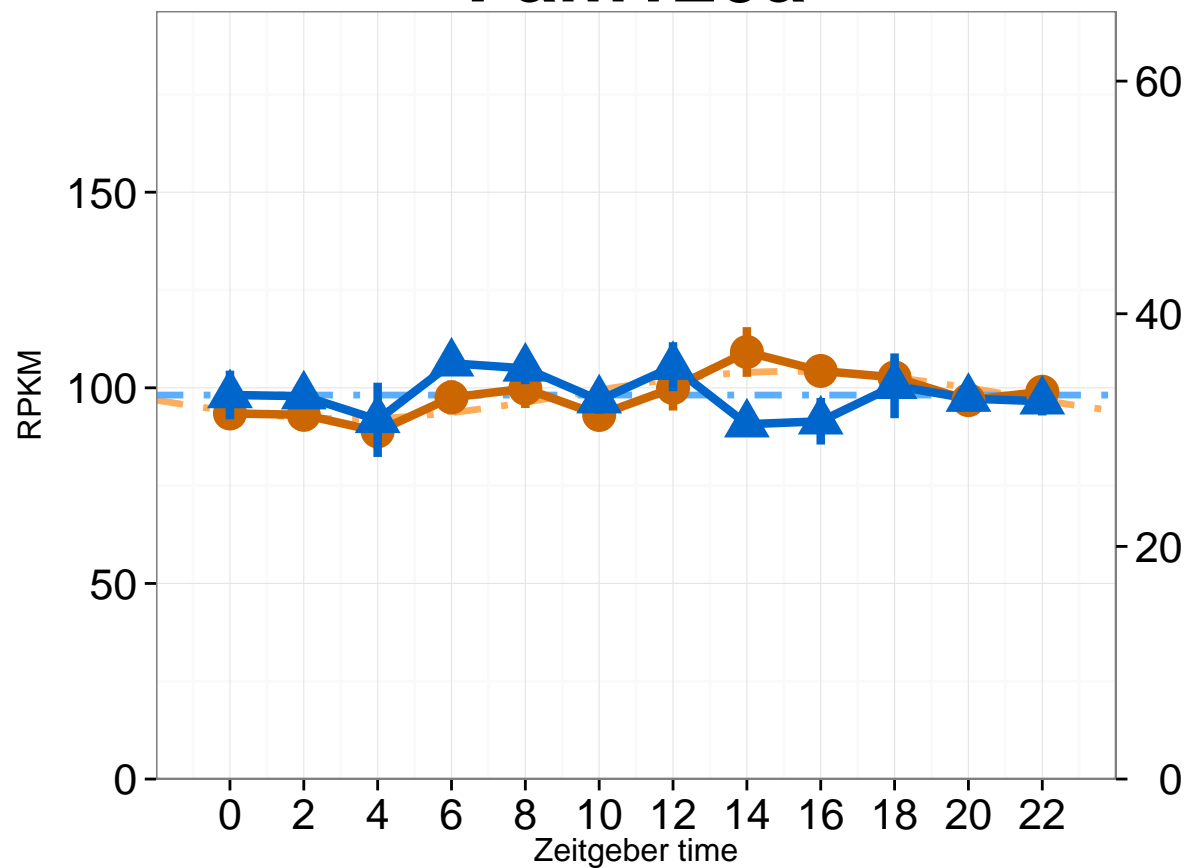

# Fam120a

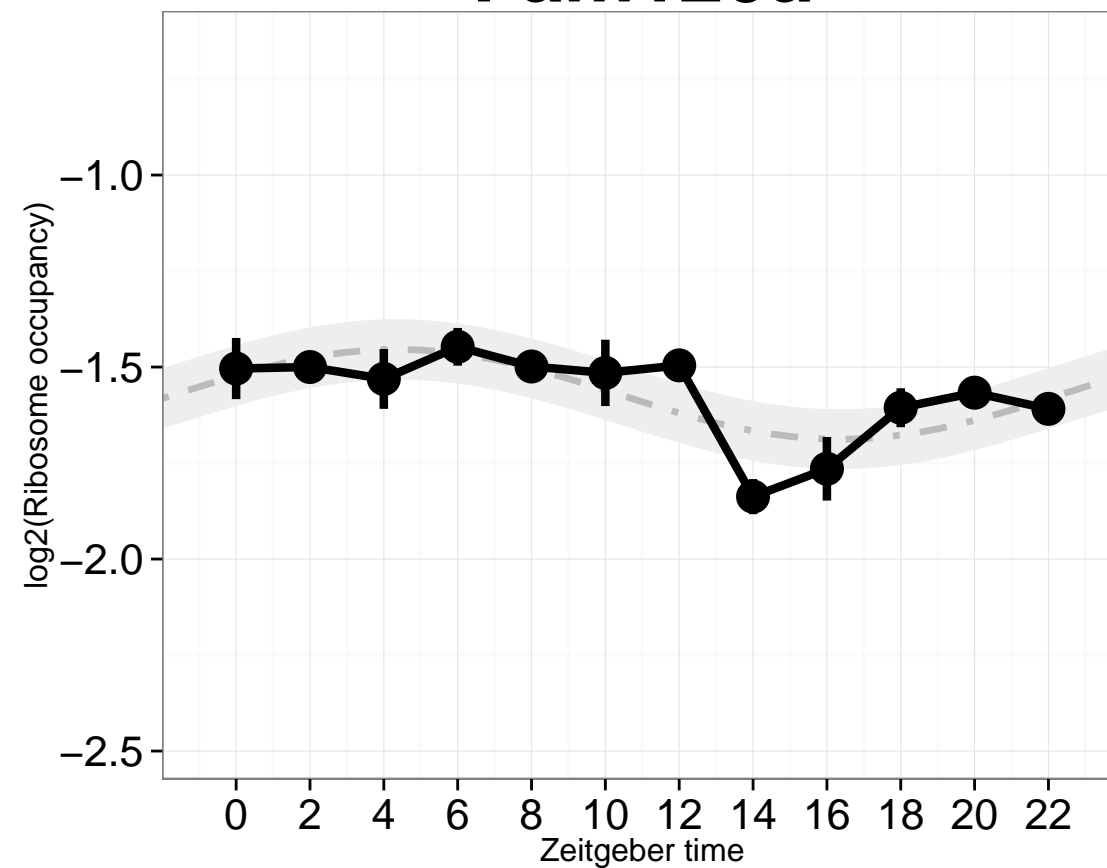

Supplement: Supplementary file 4996 [file 1]

# Ryk

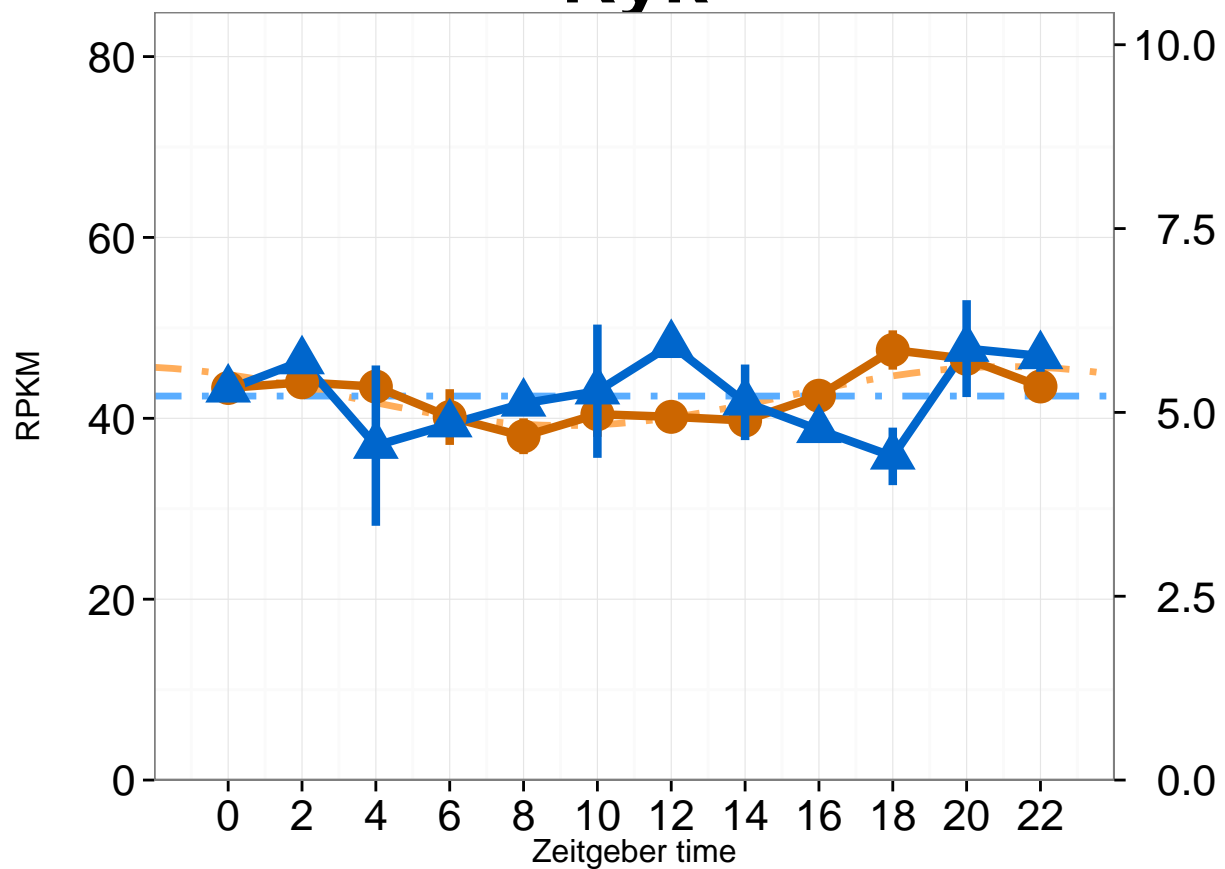

# Ryk

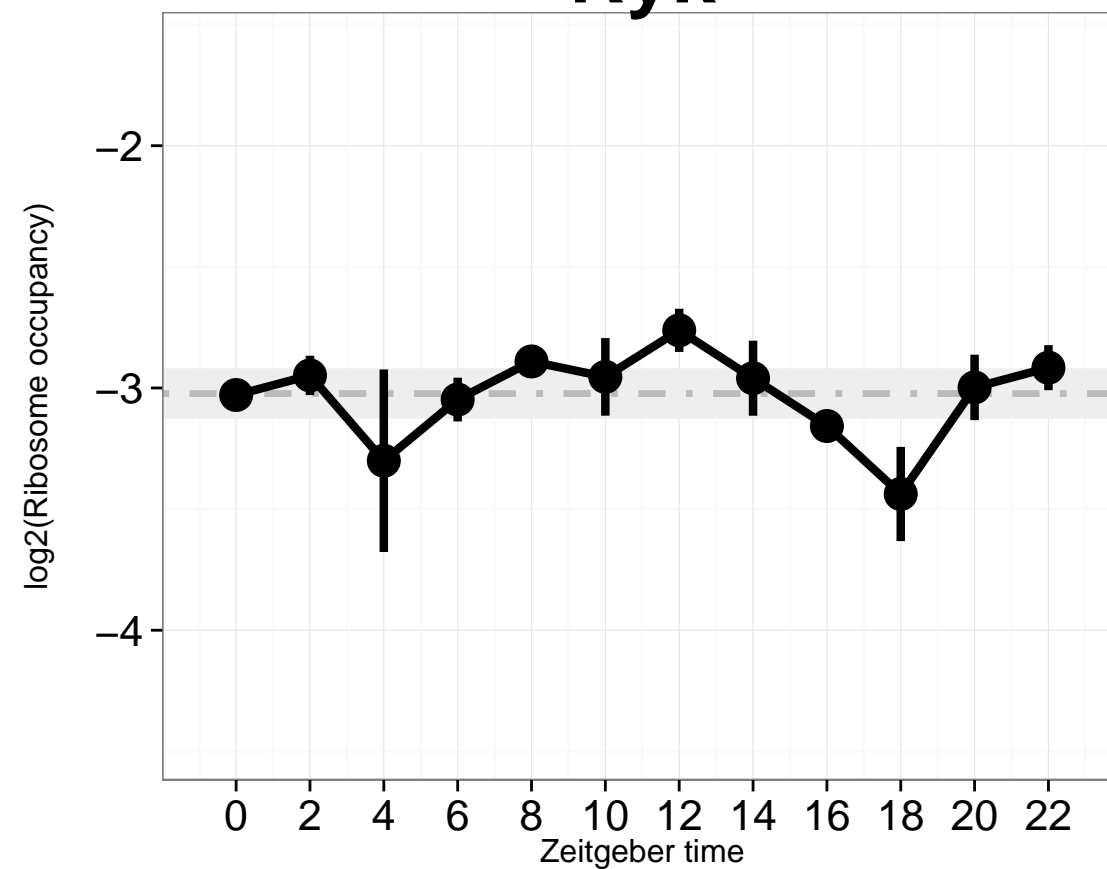

Supplement: Supplementary file 4997 [file 1]

# P2ry2

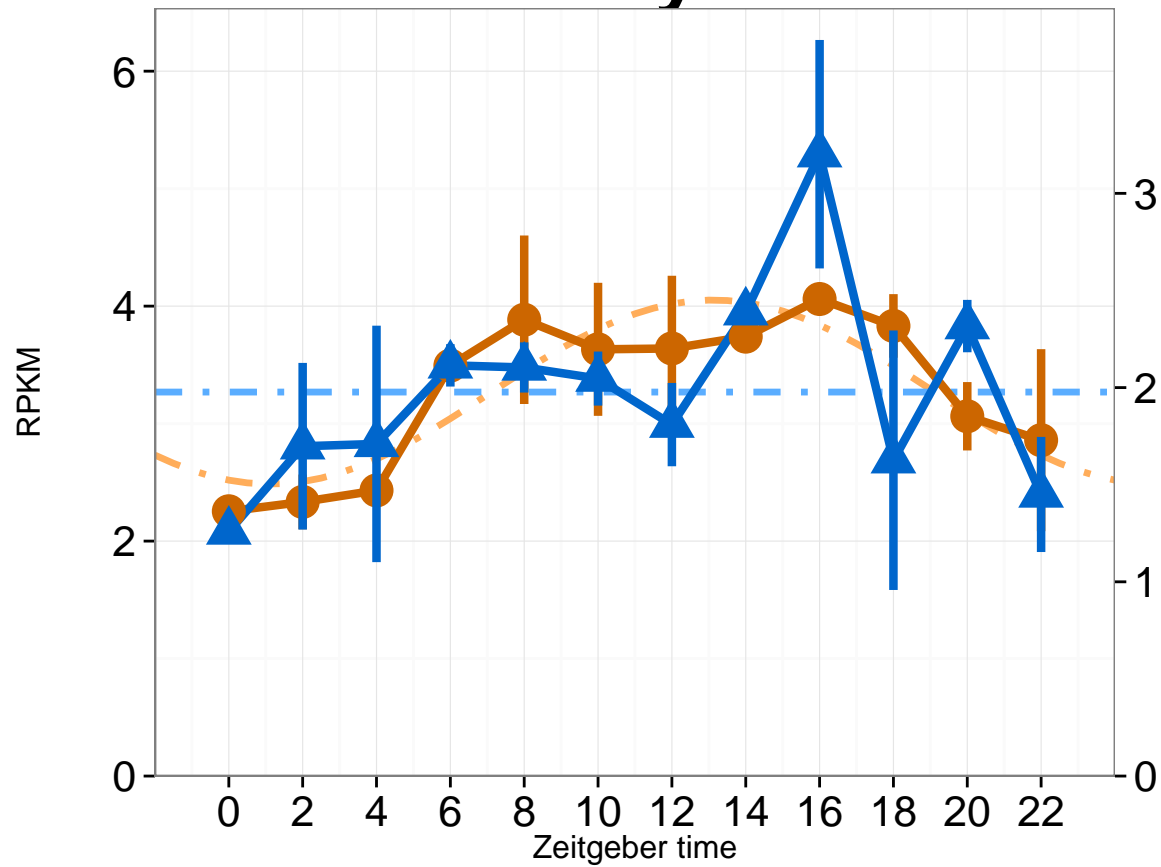

# P2ry2

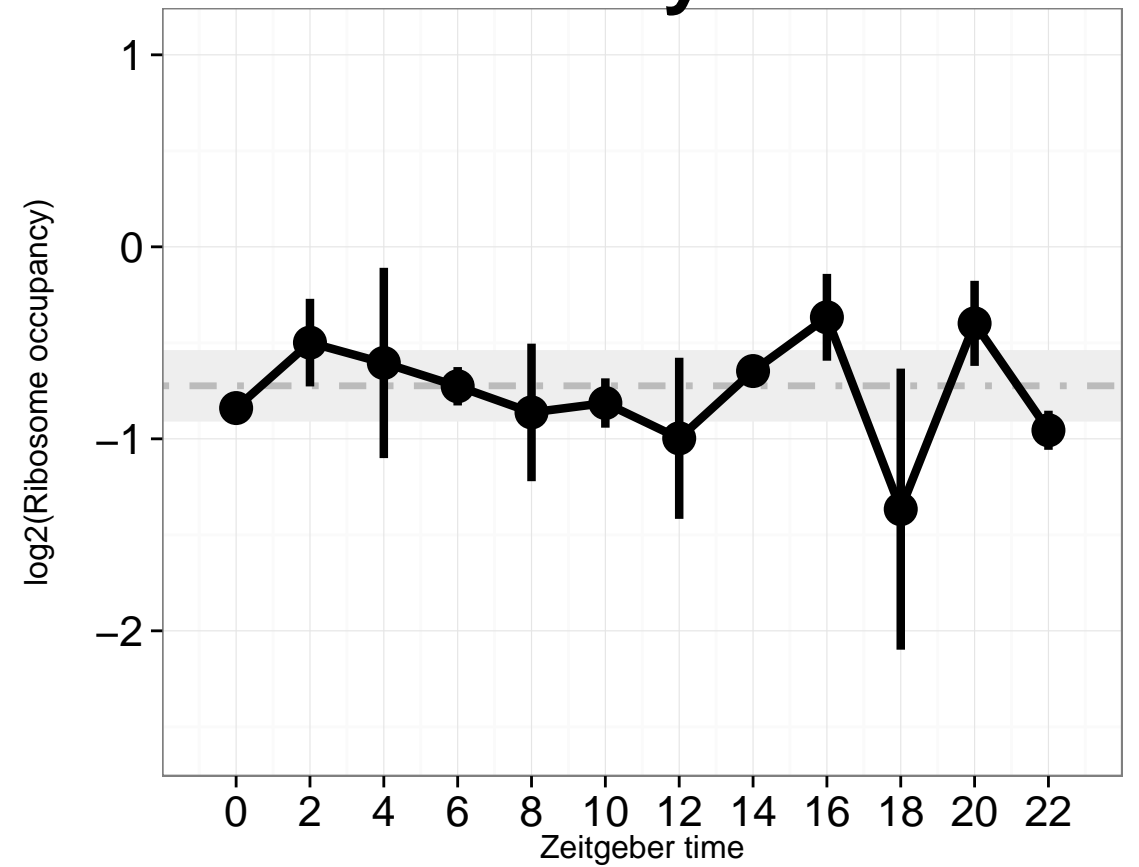

Supplement: Supplementary file 4998 [file 1]

# Cecr5

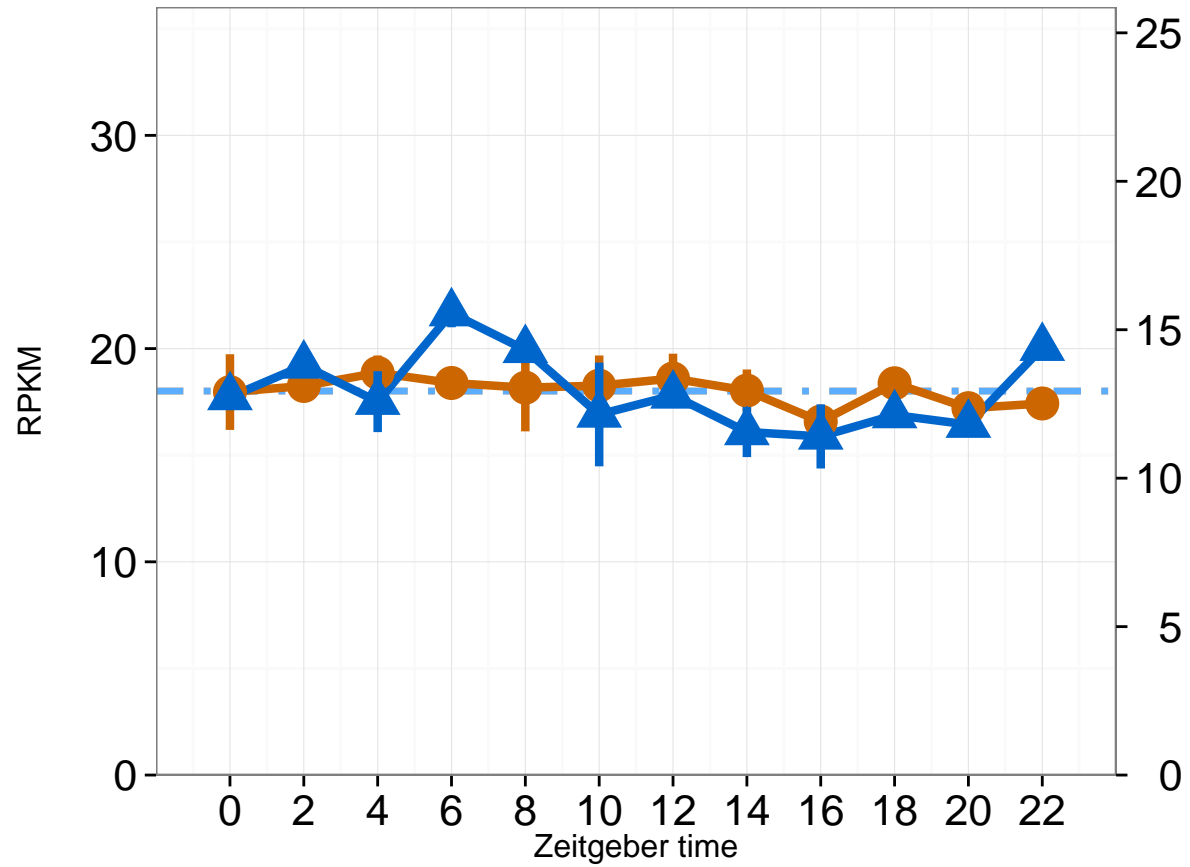

# Cecr5

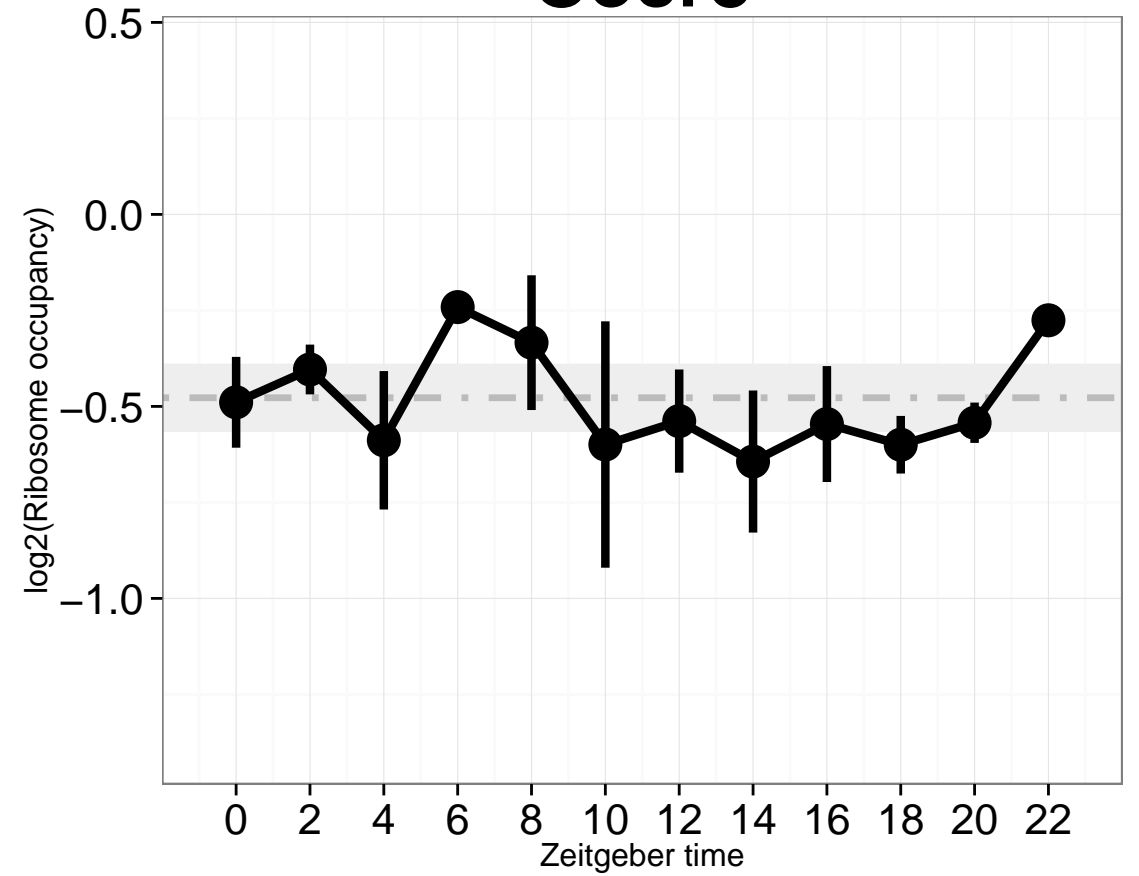

Supplement: Supplementary file 4999 [file 1]

## Podxl

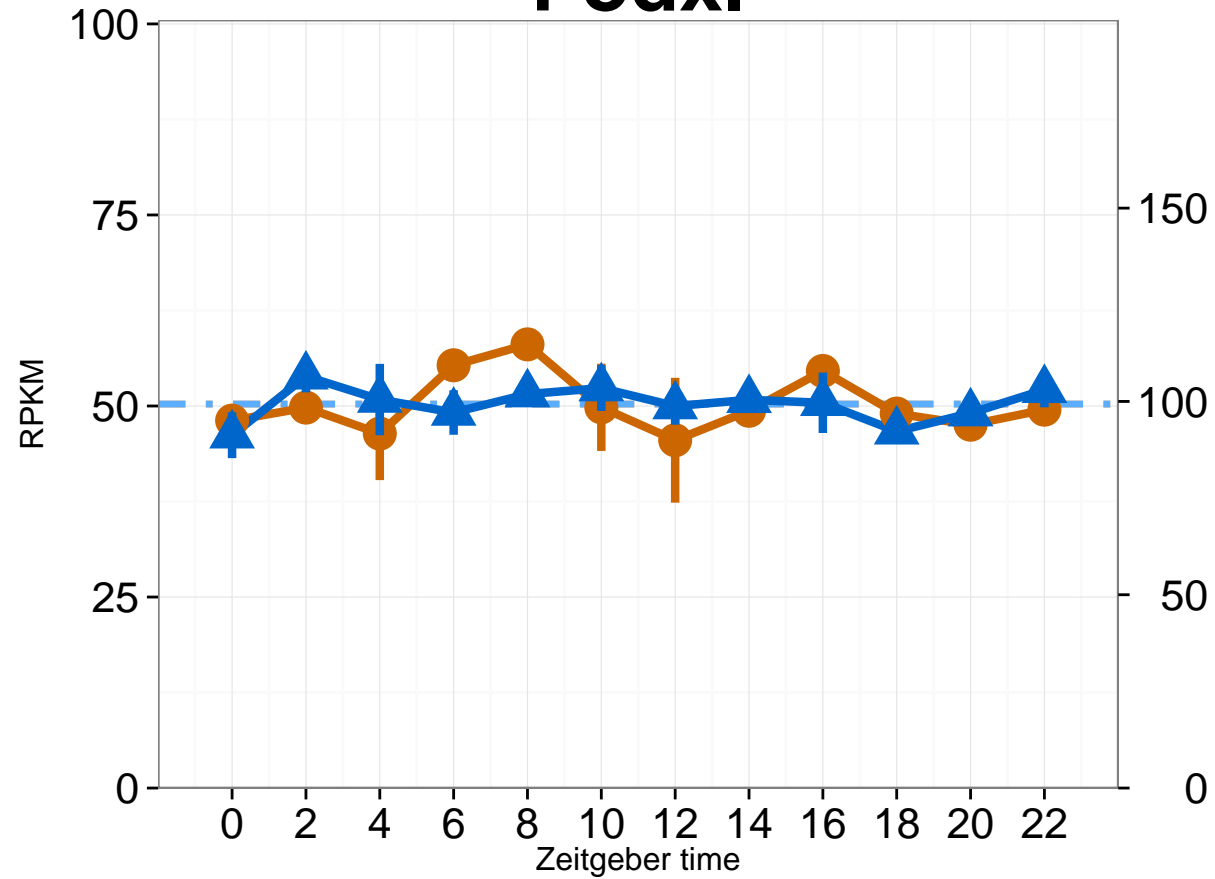

## Podxl

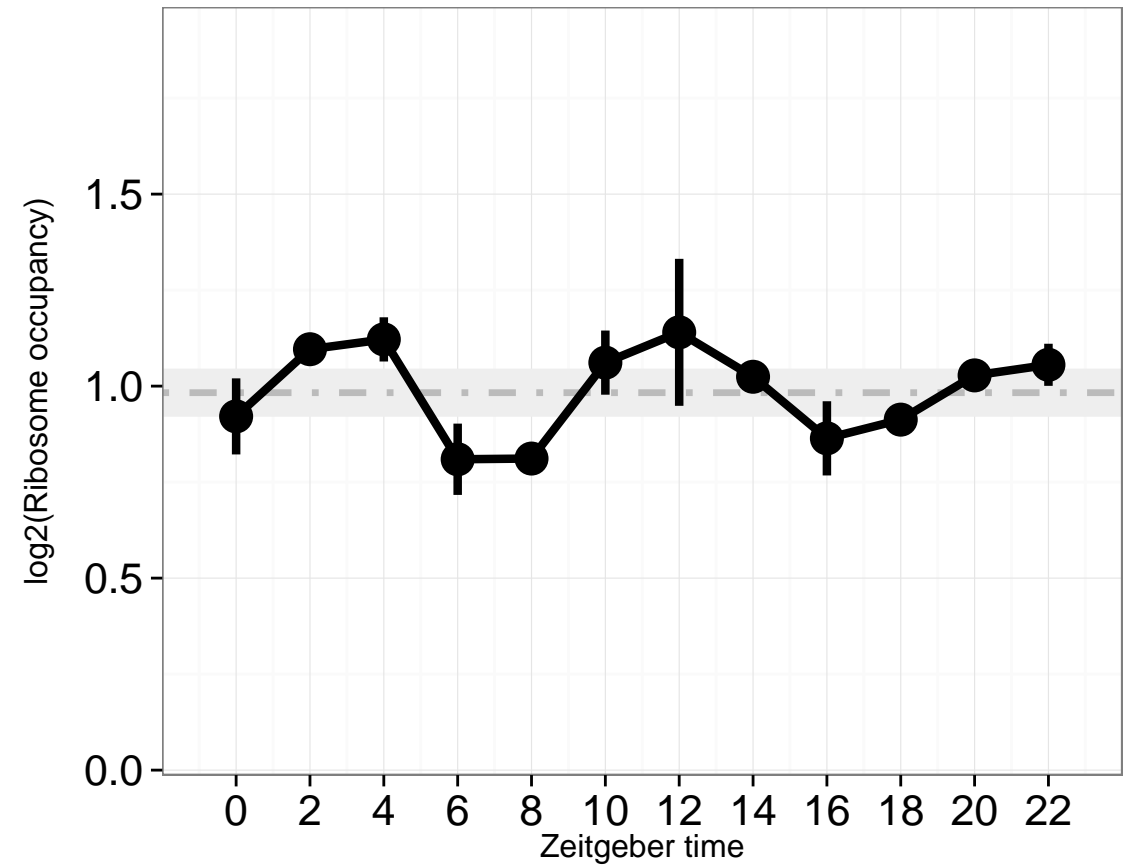

Supplement: Supplementary file 5000 [file 1]

## Snx16

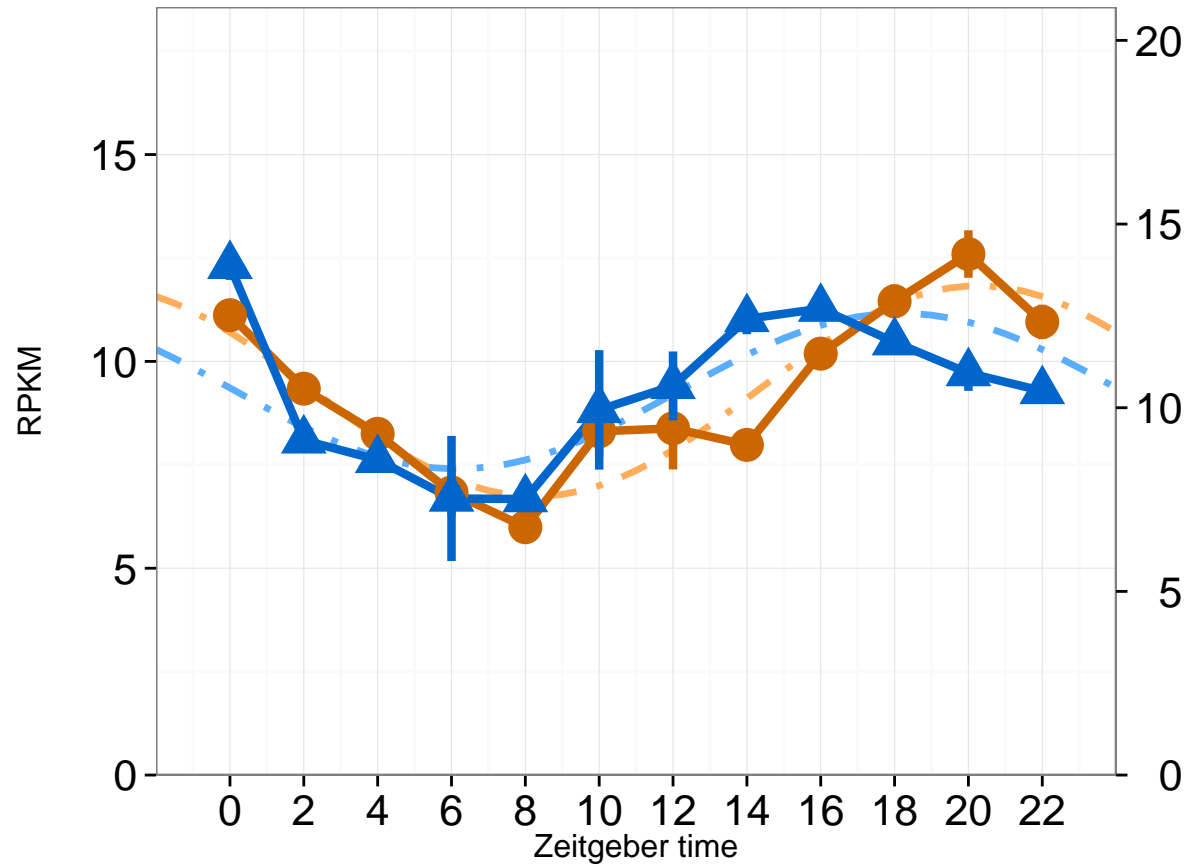

## Snx16

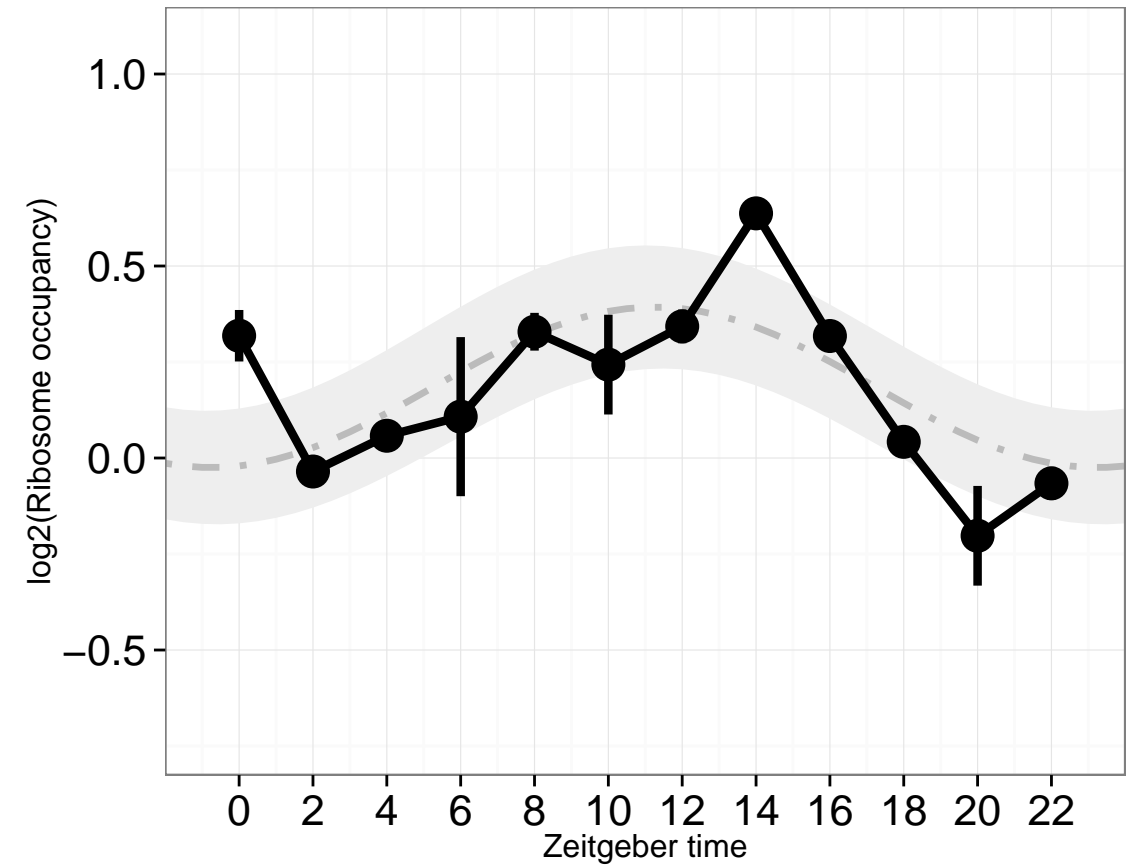

Supplement: Supplementary file 5001 [file 1]

## Rdh5

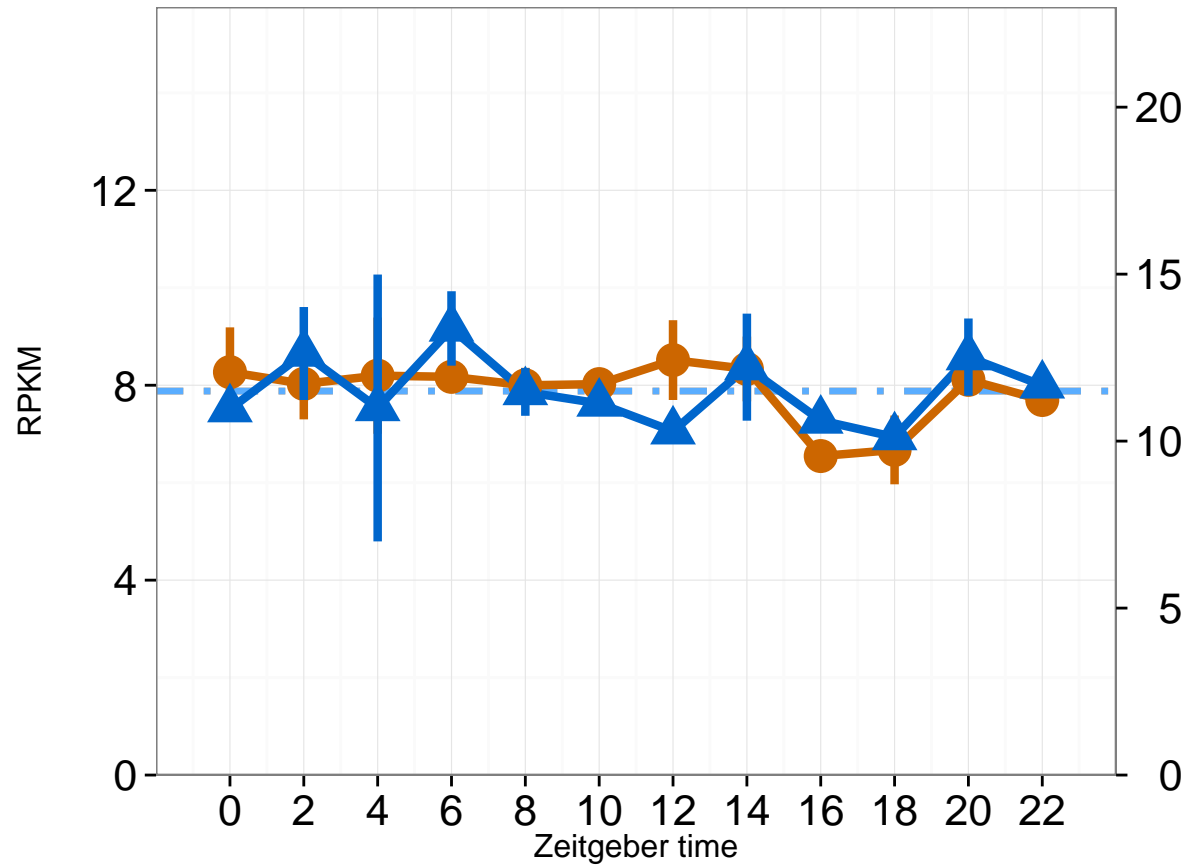

## Rdh5

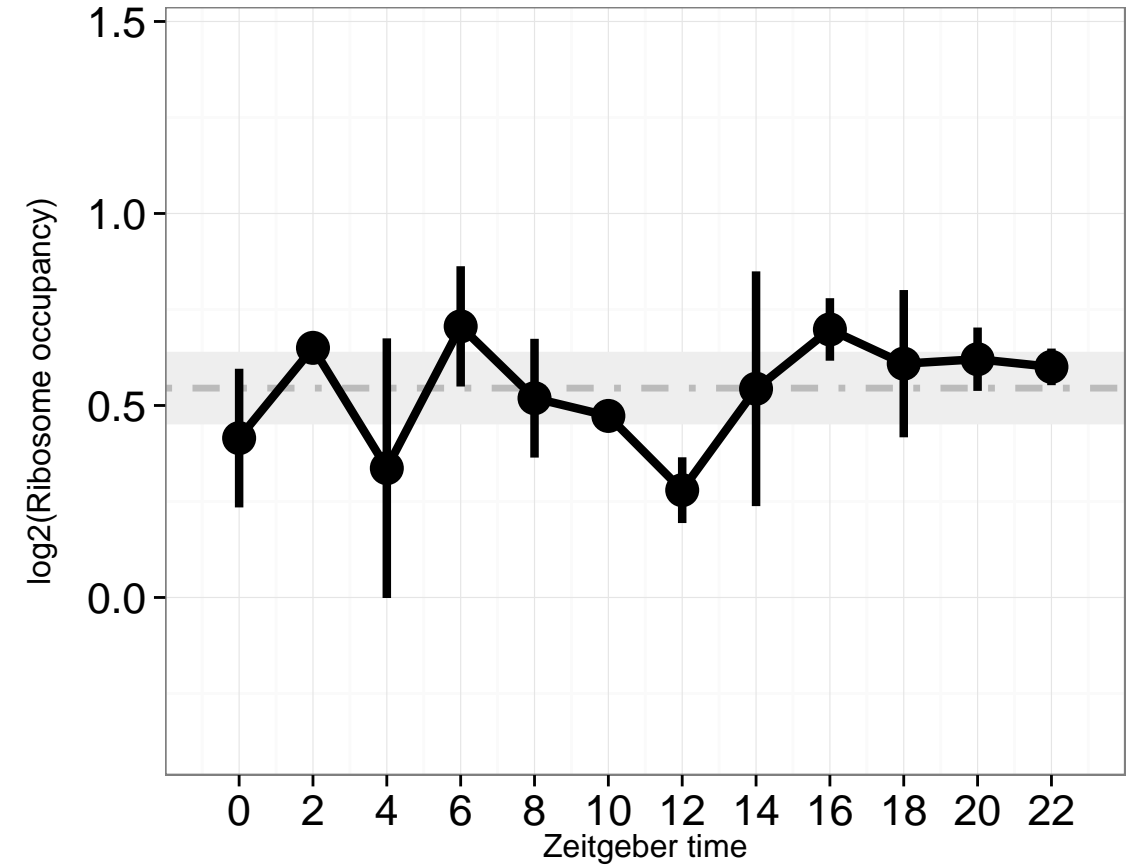

Supplement: Supplementary file 5002 [file 1]

## Spryd7

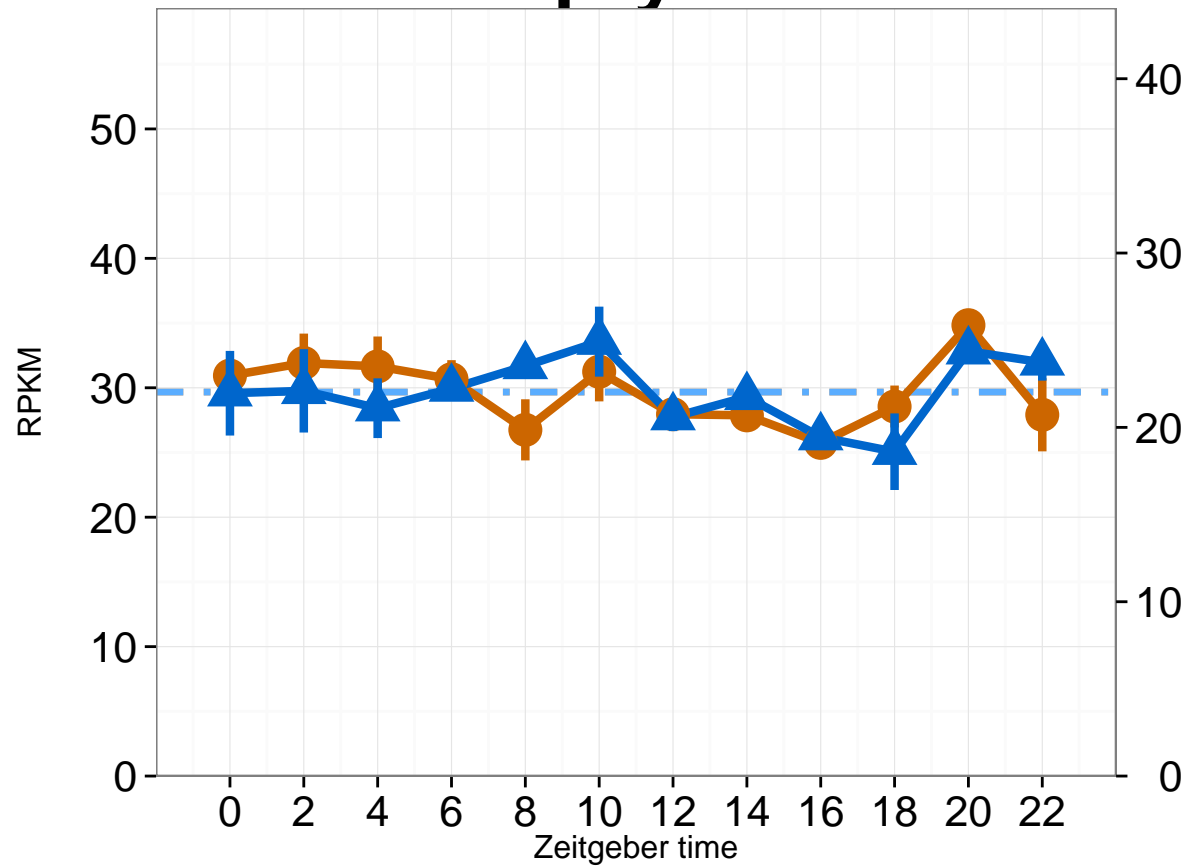

## Spryd7

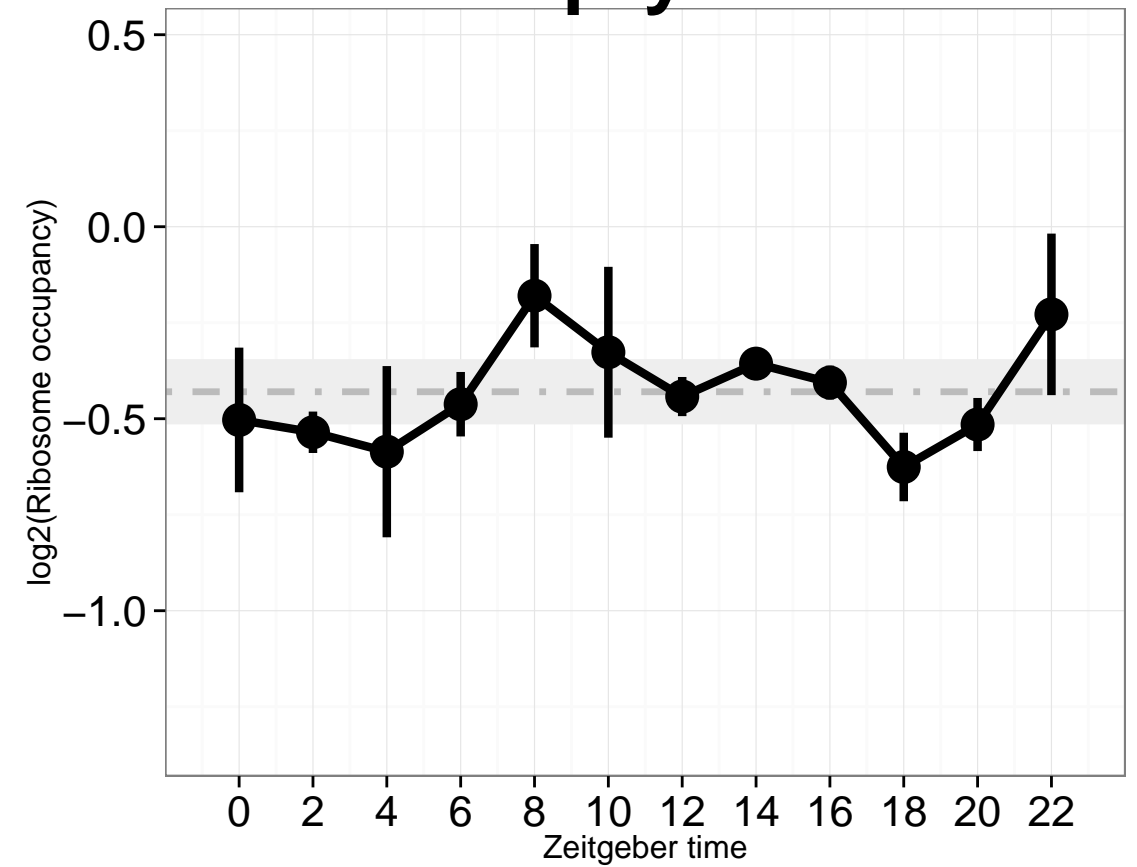

Supplement: Supplementary file 5003 [file 1]

**Slc15a1**

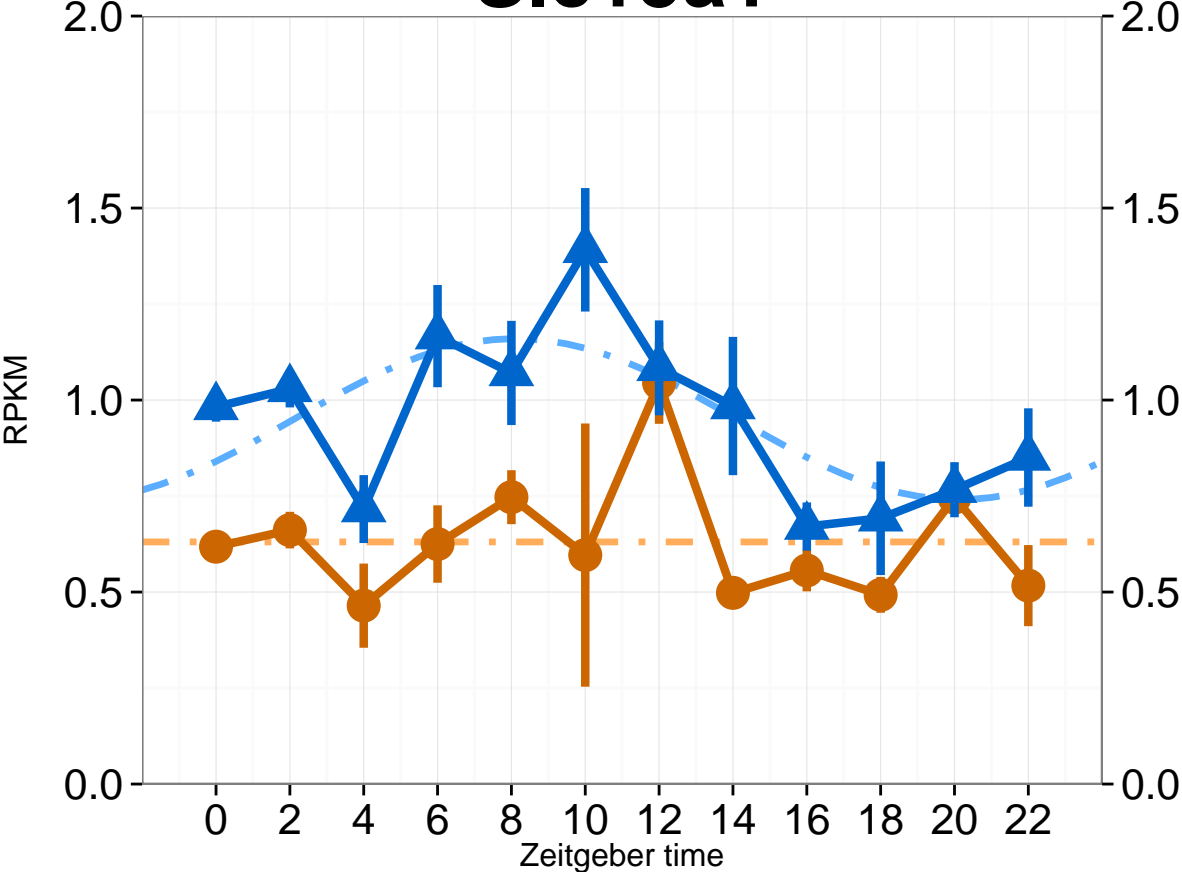

**Slc15a1**

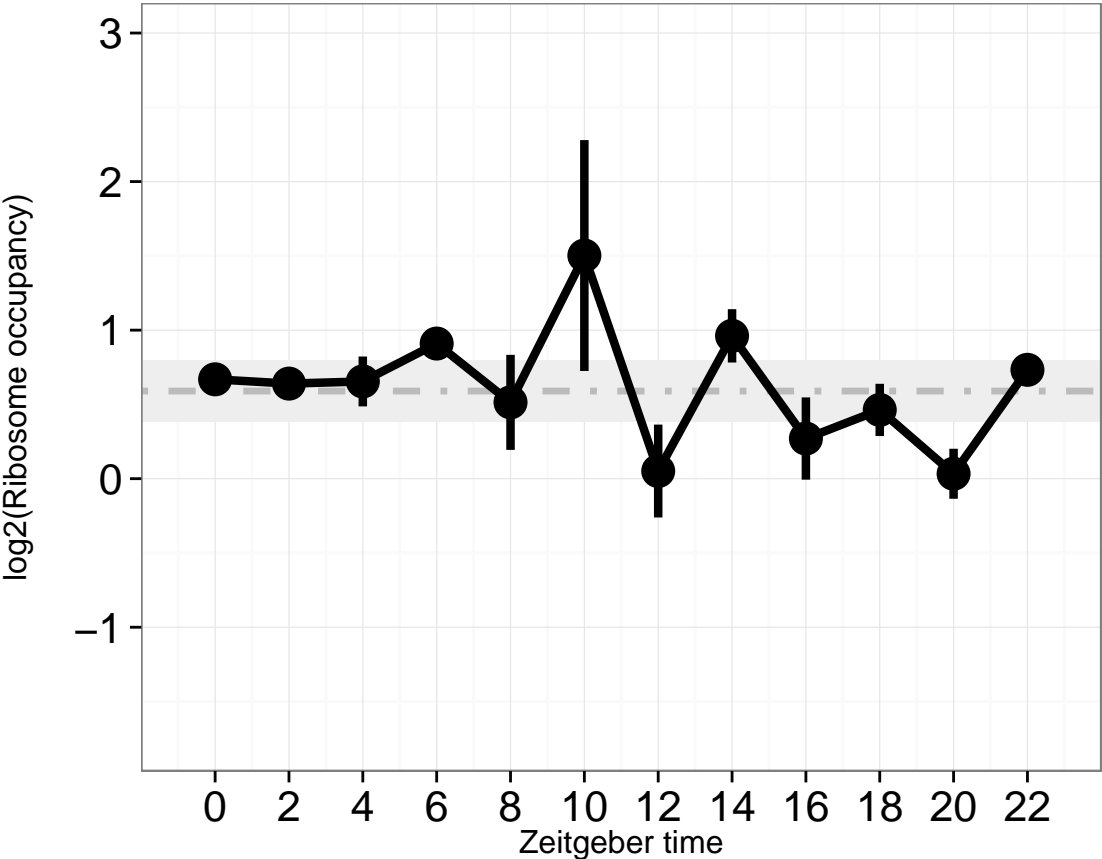

Supplement: Supplementary file 5004 [file 1]

**Mt3 TR**

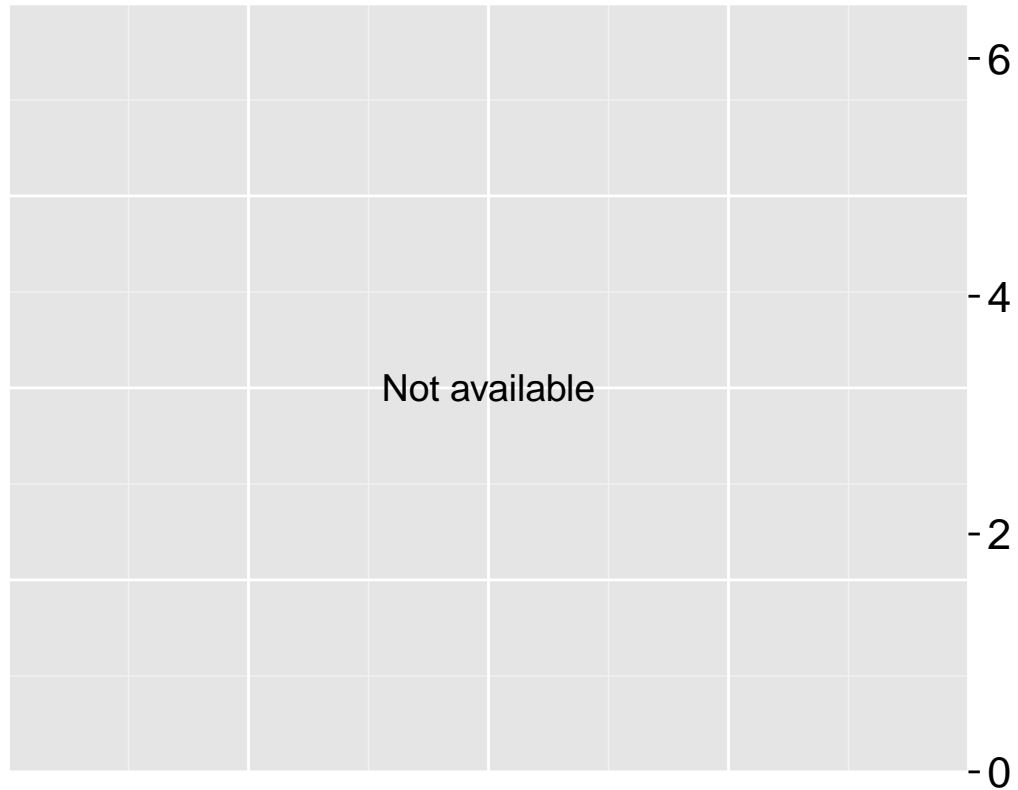

**Mt3 log<sub>2</sub>(Ribosome occupancy)**

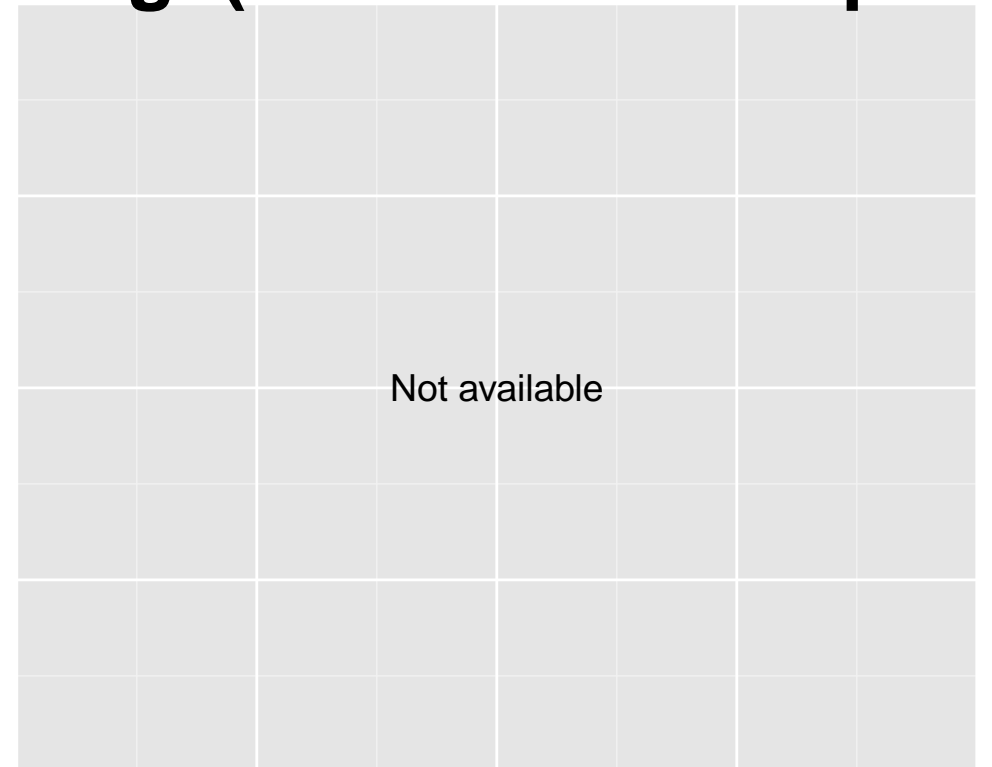

Supplement: Supplementary file 5005 [file 1]

## Xrcc4

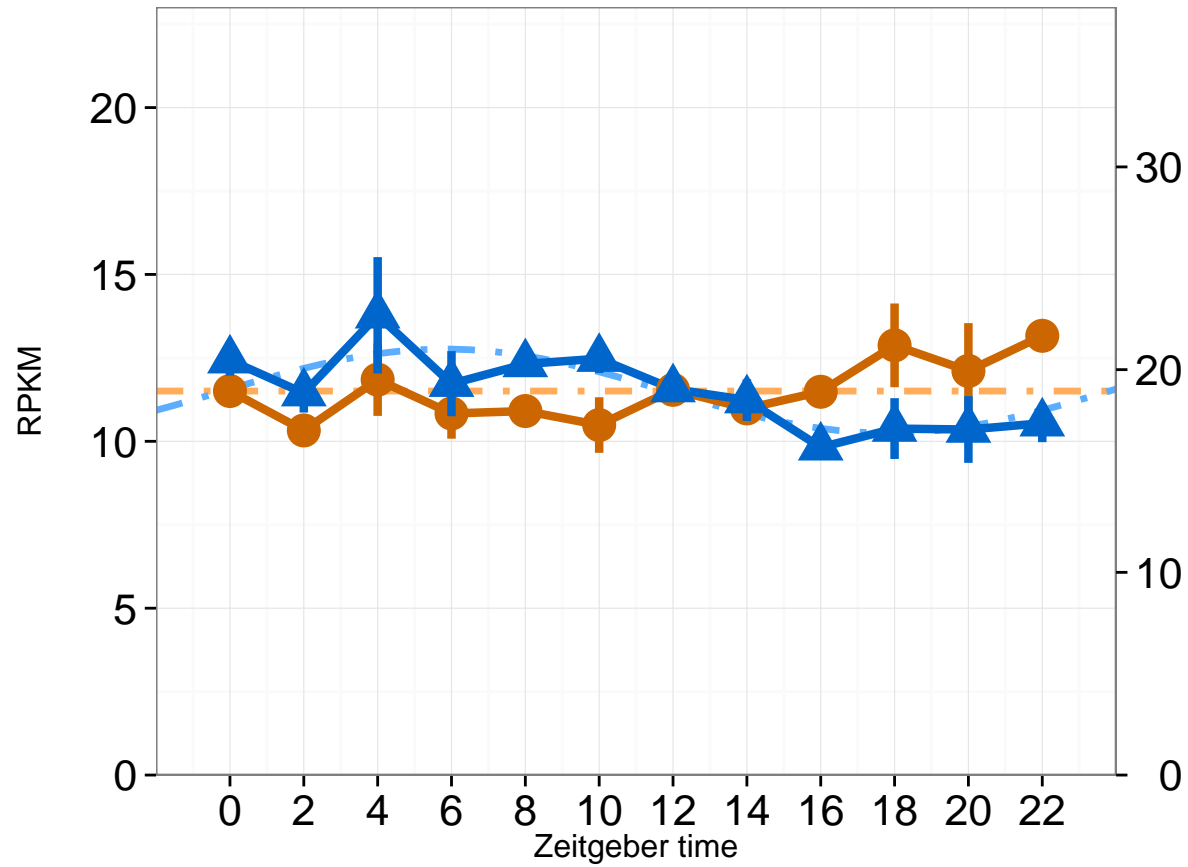

## Xrcc4

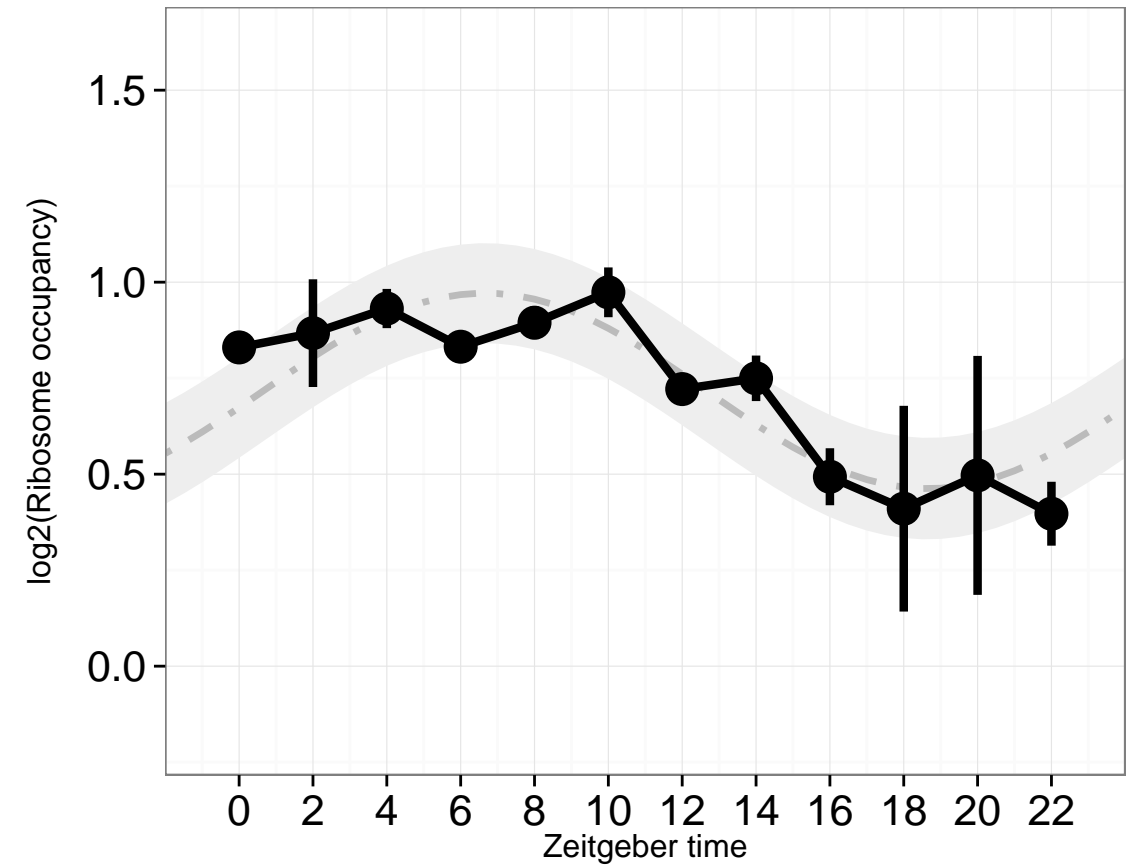

Supplement: Supplementary file 5006 [file 1]

# 1110002L01Rik

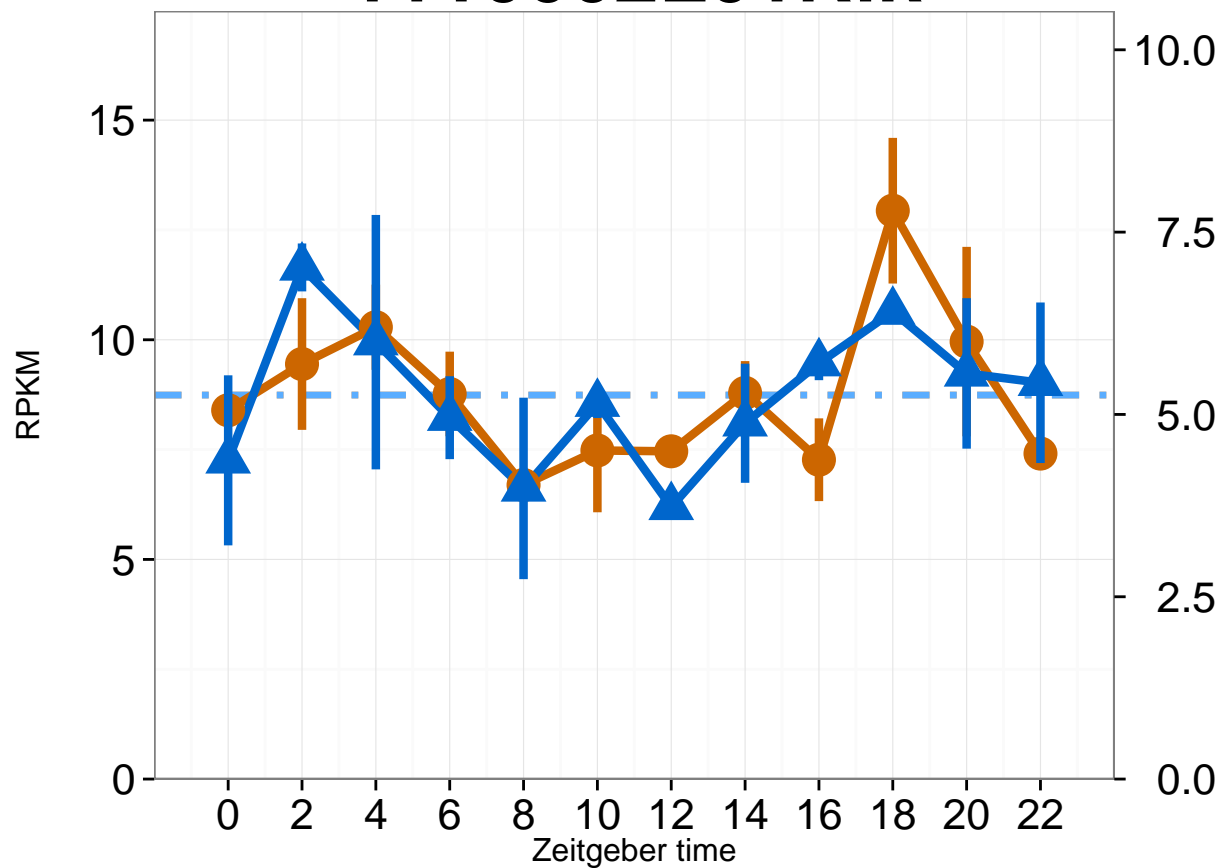

# 1110002L01Rik

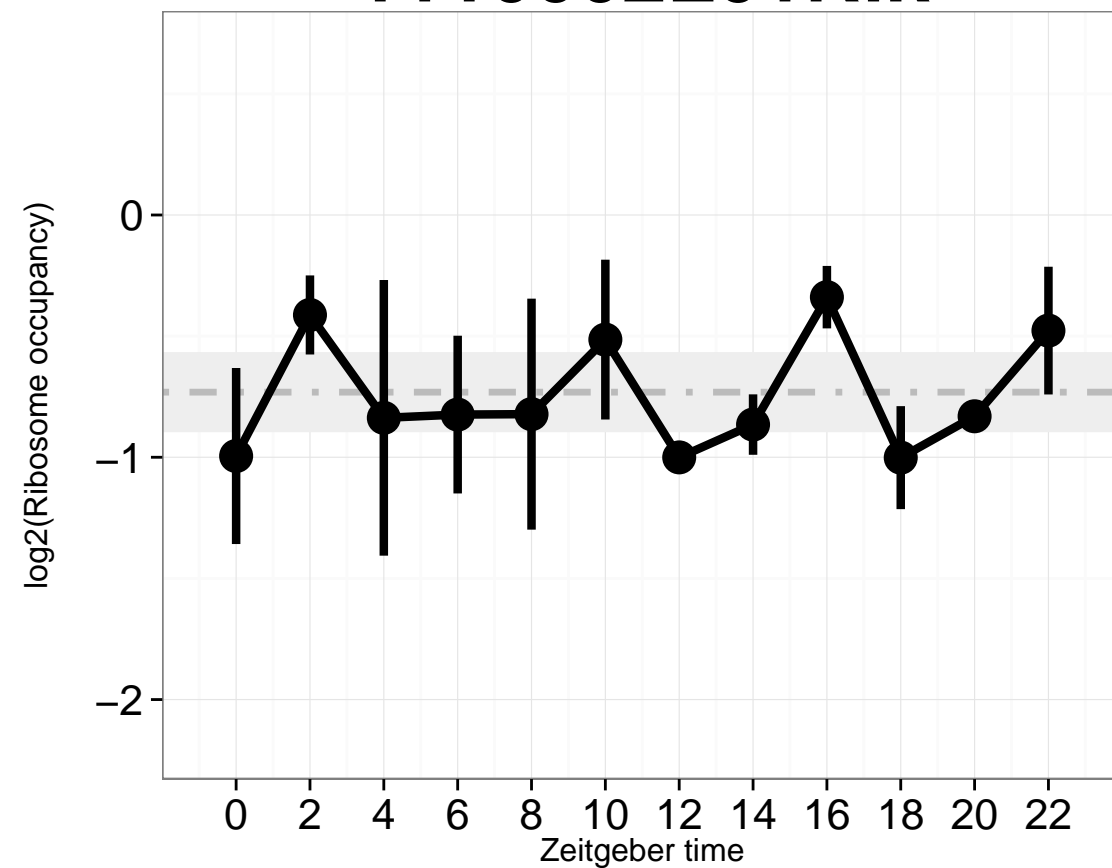

Supplement: Supplementary file 5007 [file 1]

# Gm9938

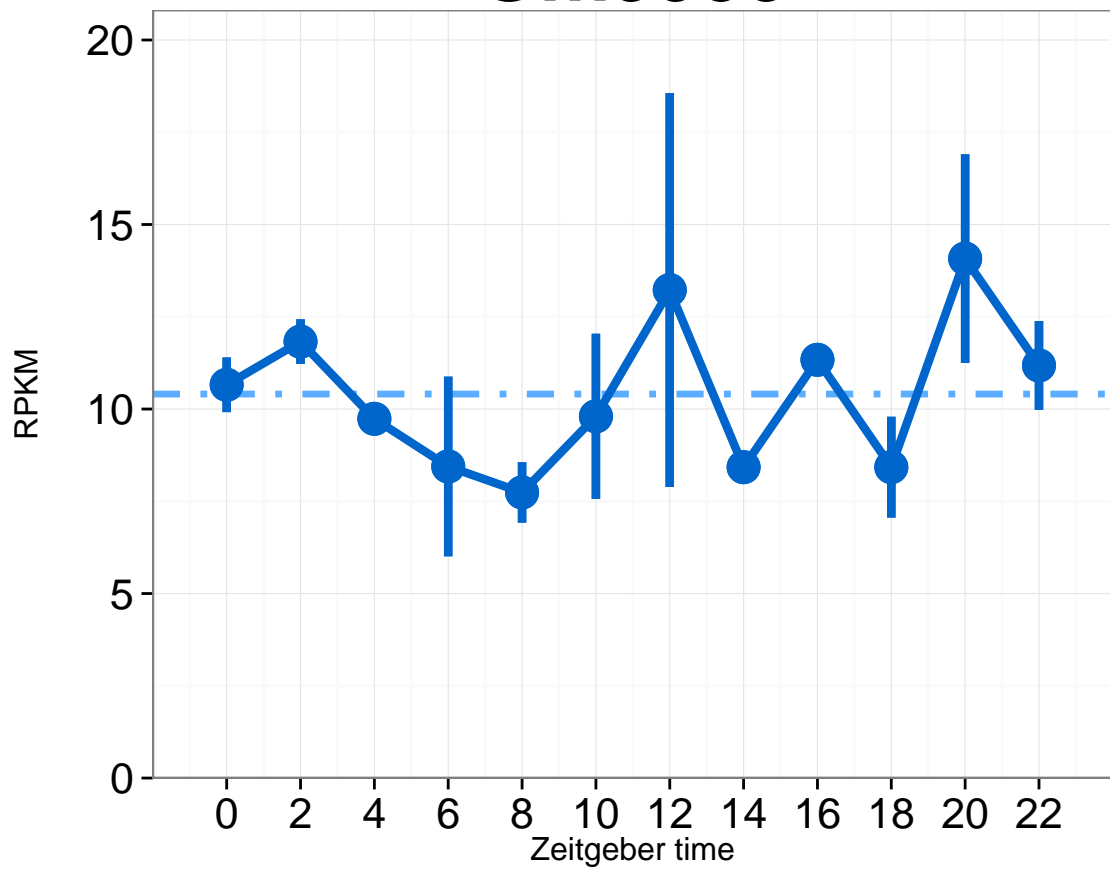

# Gm9938 log2(Ribosome occupanc

Supplement: Supplementary file 5008 [file 1]

# Map3k4

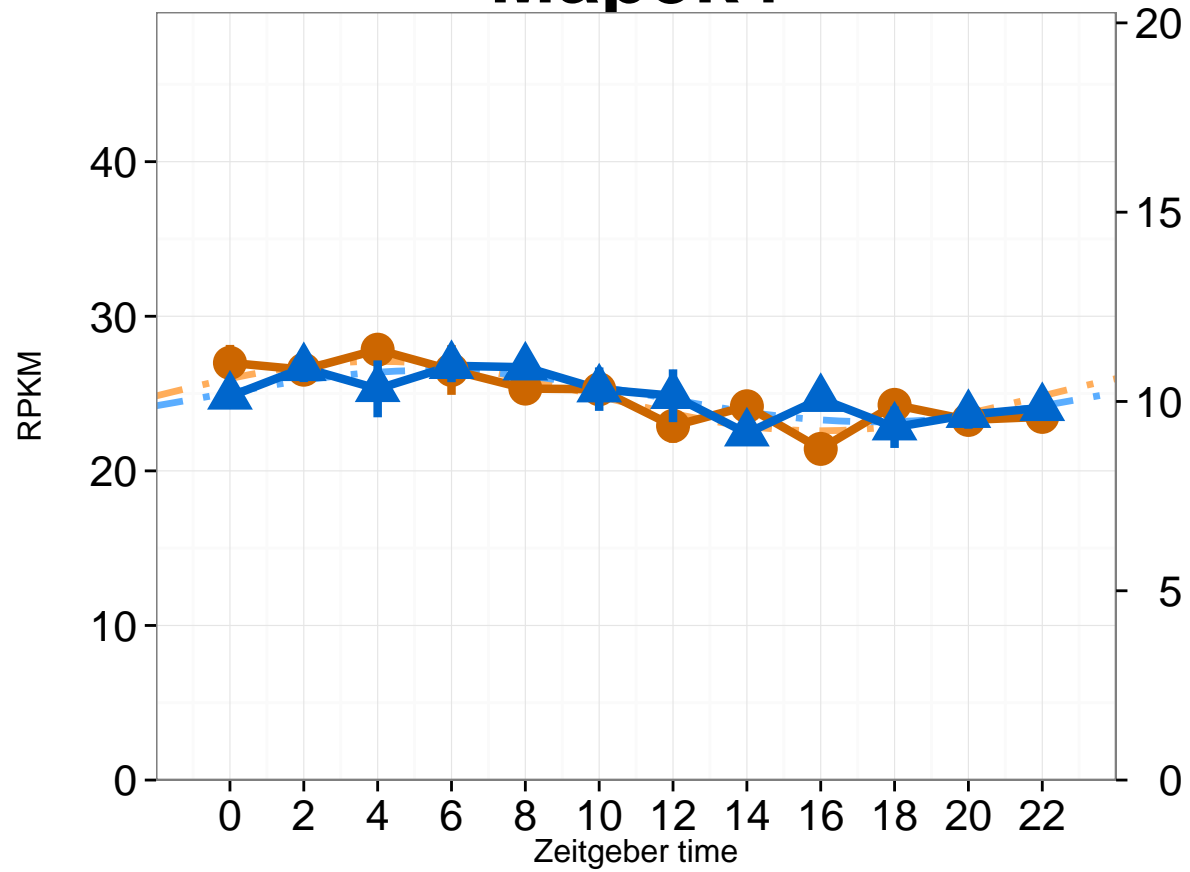

# Map3k4

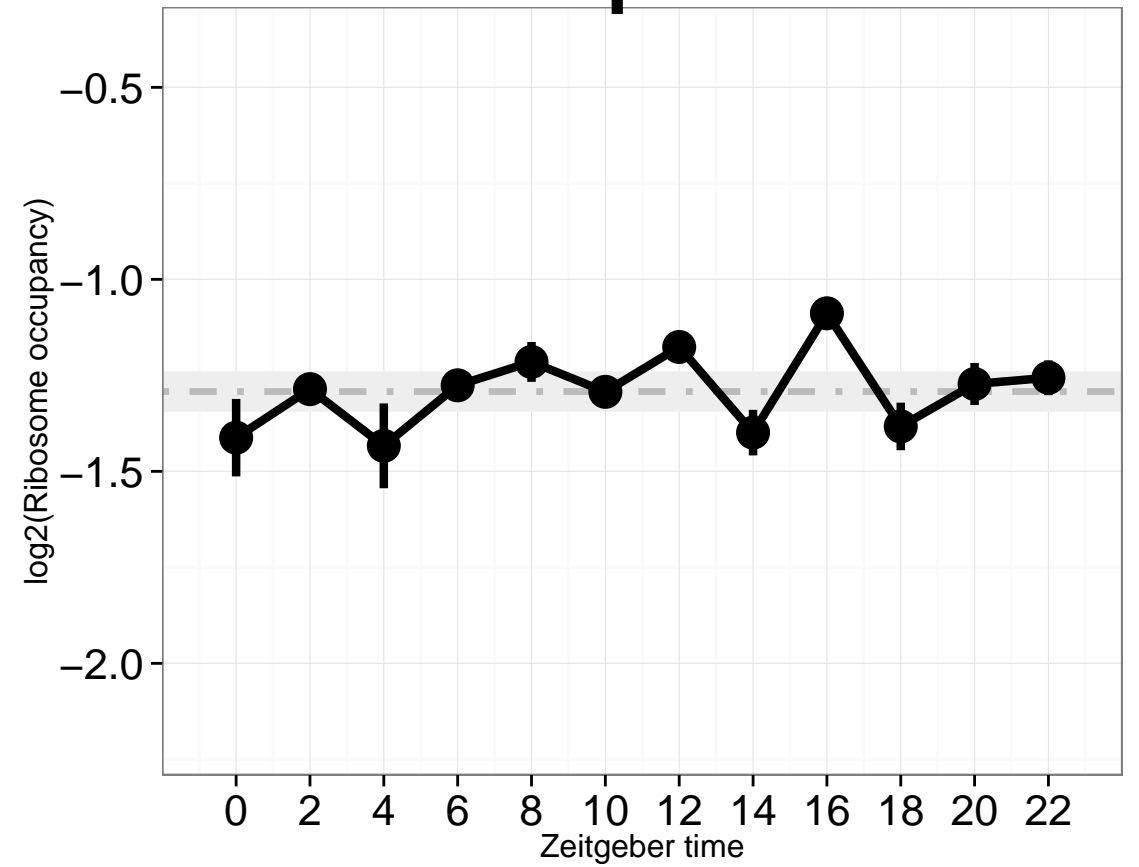

Supplement: Supplementary file 5009 [file 1]

# Fig1l2

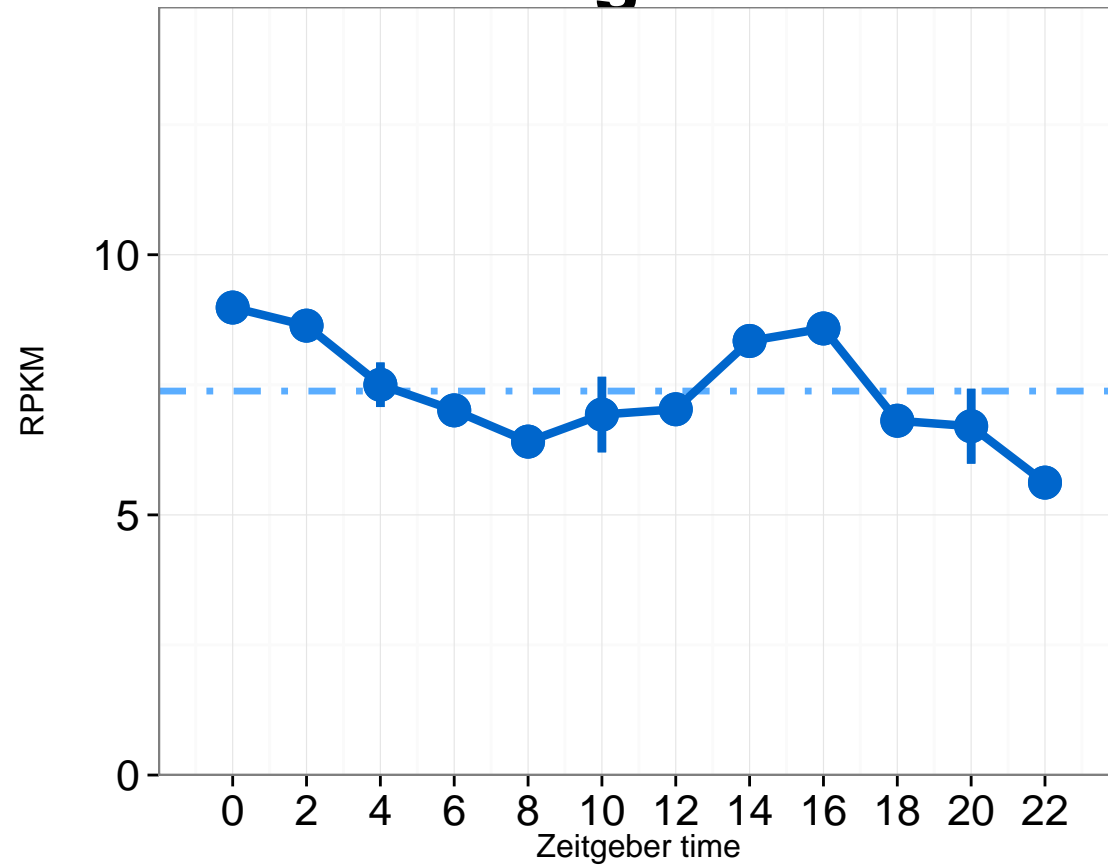

# Fig1l2 log2(Ribosome occupancy

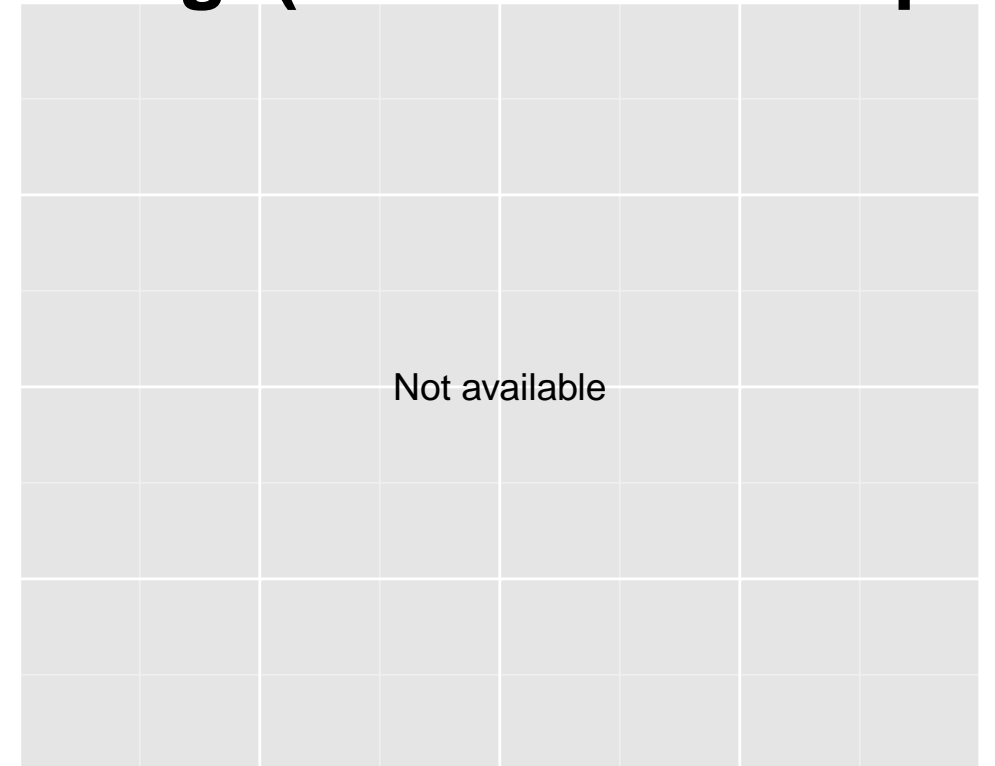

Supplement: Supplementary file 5010 [file 1]

## Aamp

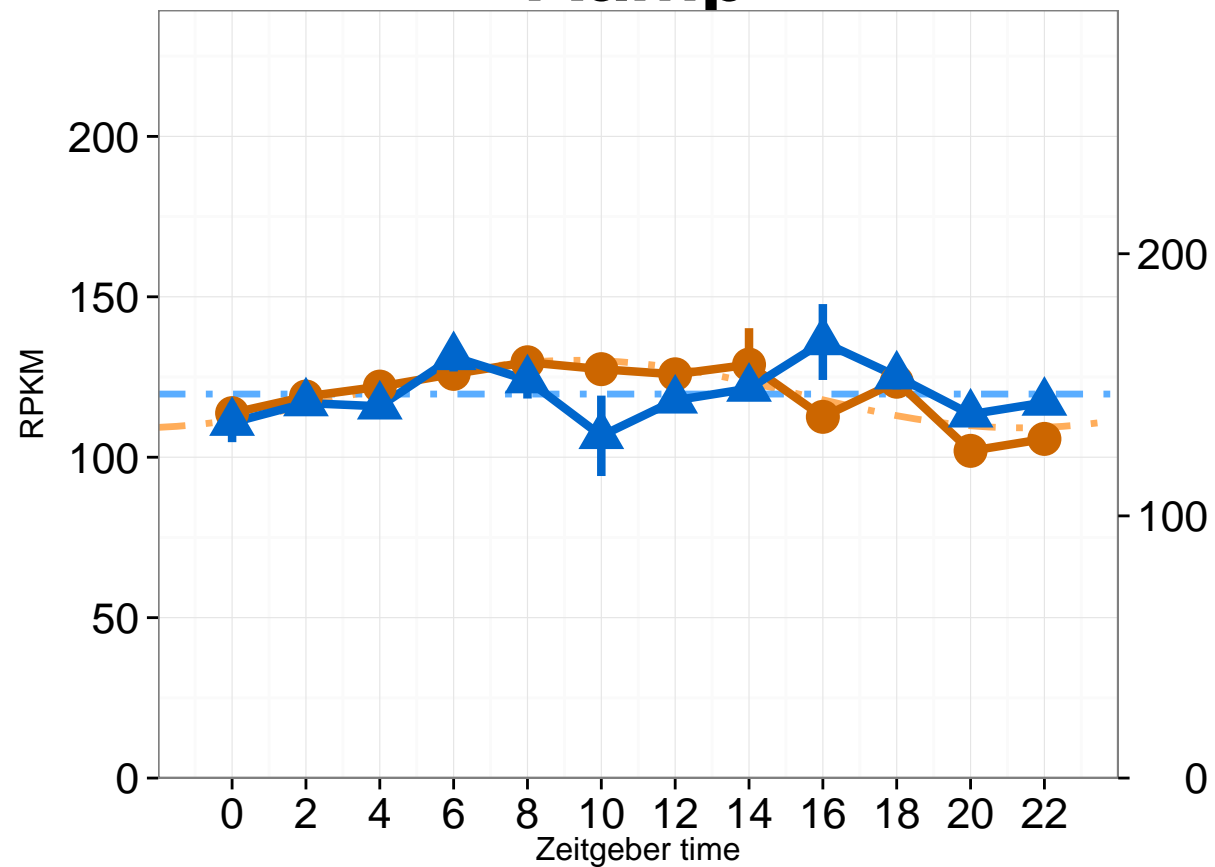

## Aamp

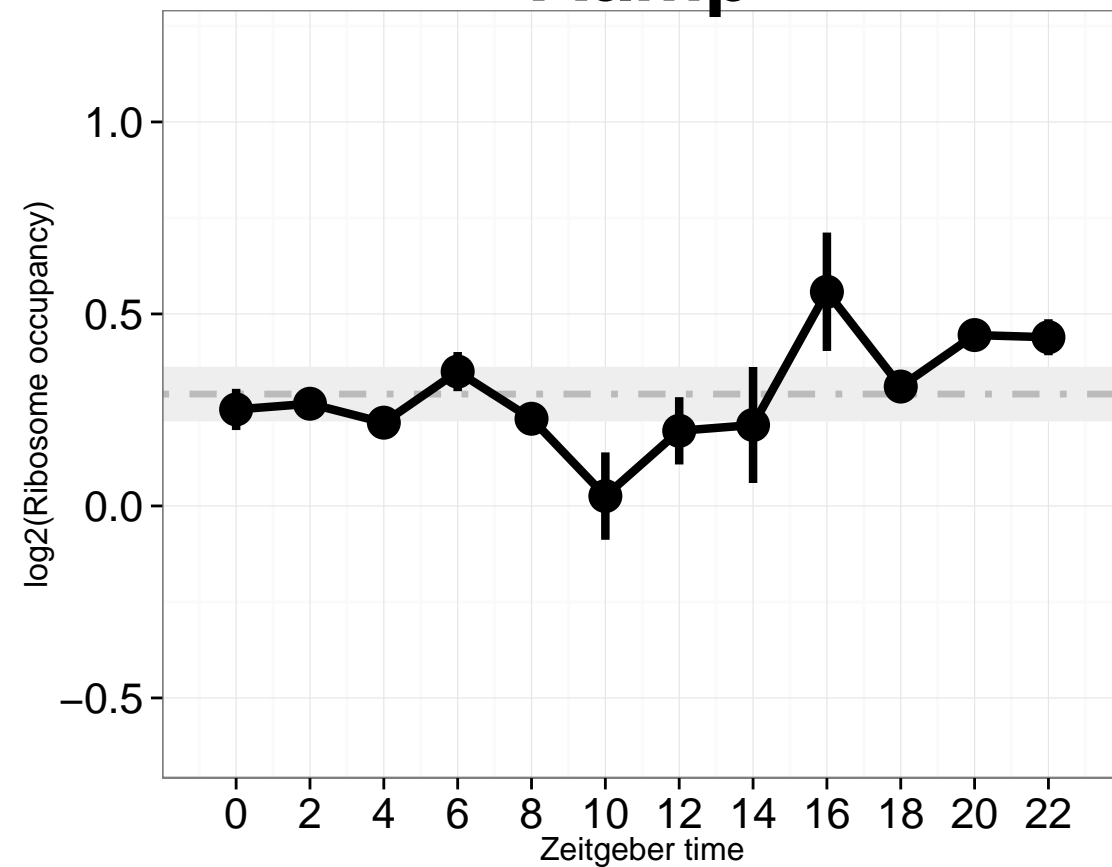

Supplement: Supplementary file 5011 [file 1]

# Hmgcl

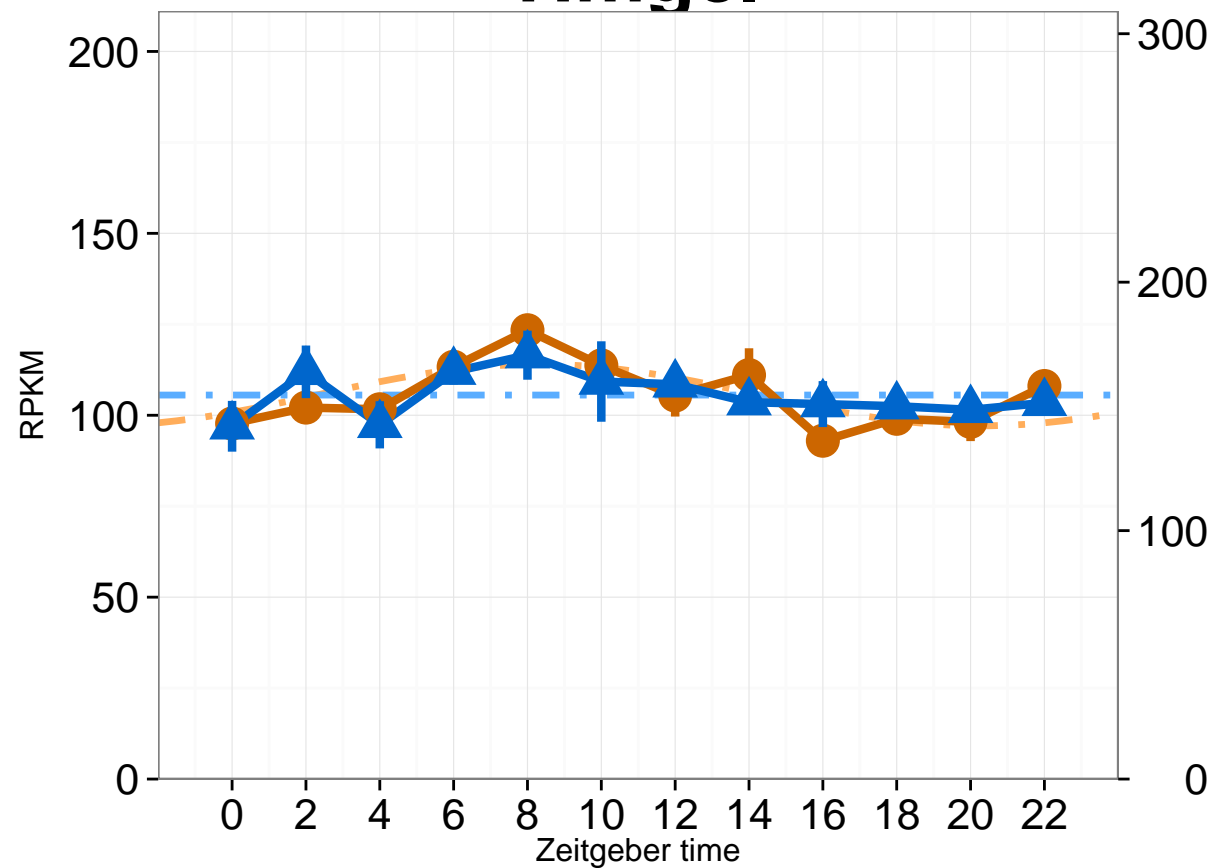

# Hmgcl

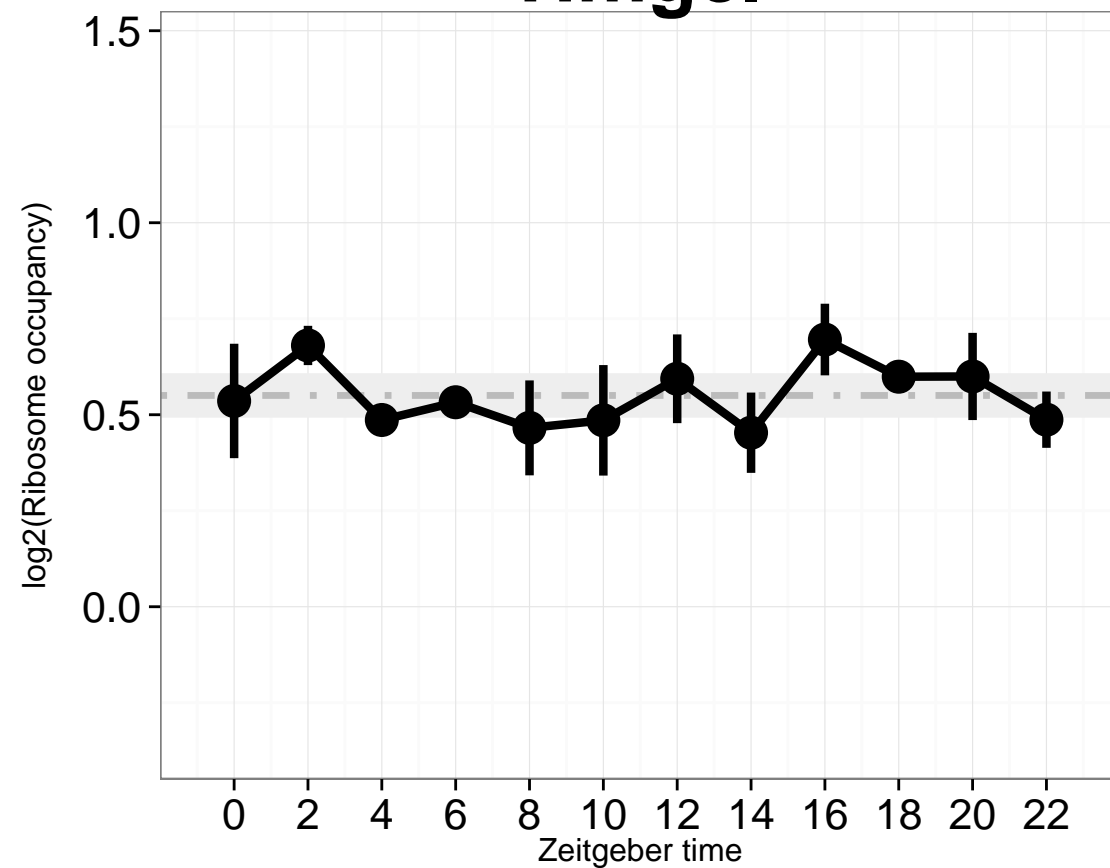

Supplement: Supplementary file 5012 [file 1]

## Nmnat3

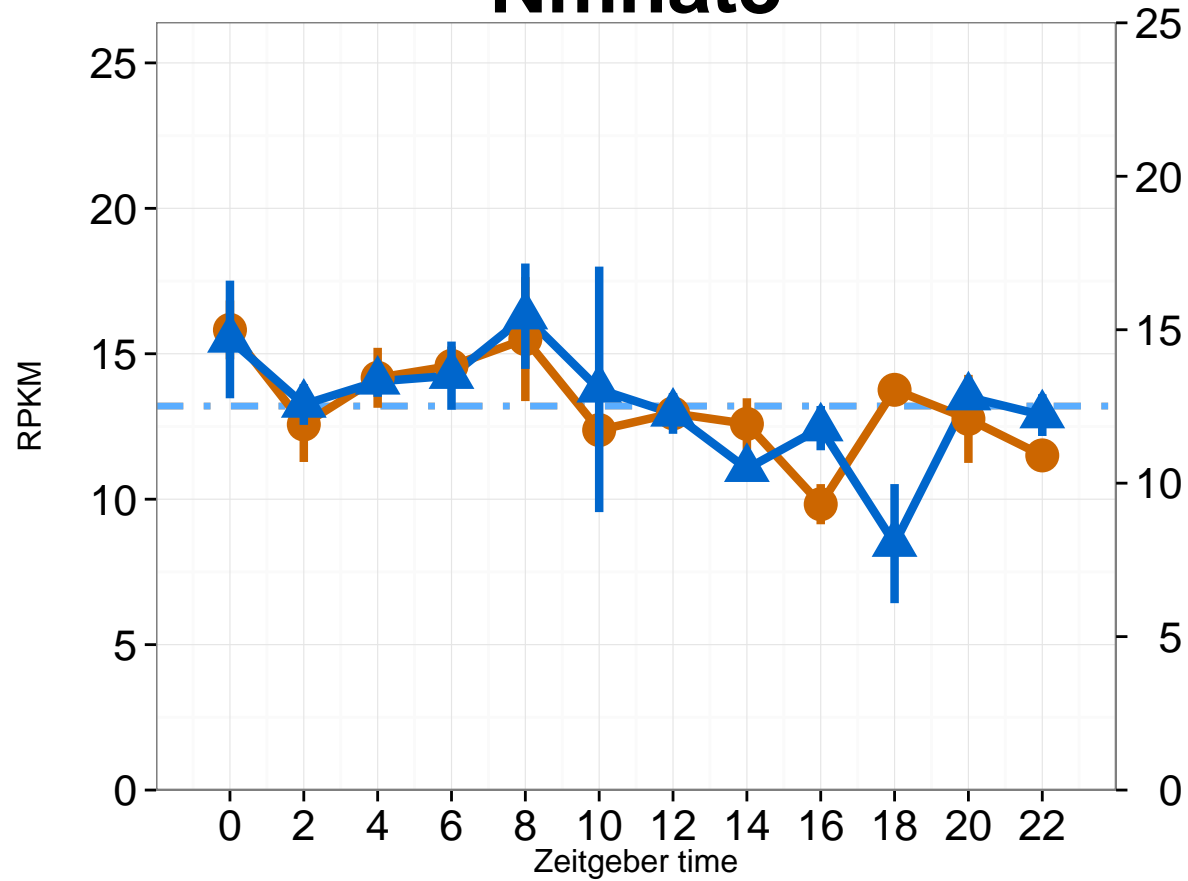

## Nmnat3

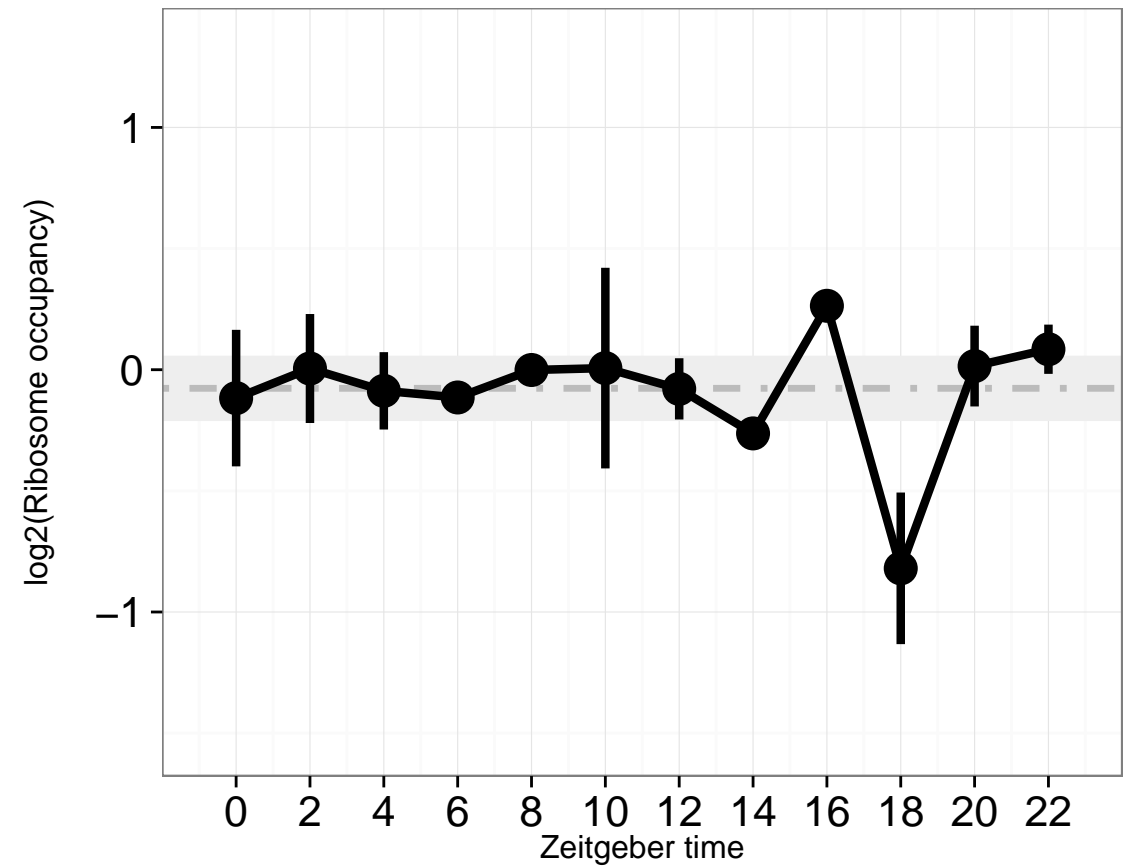

Supplement: Supplementary file 5013 [file 1]

# Fam35a

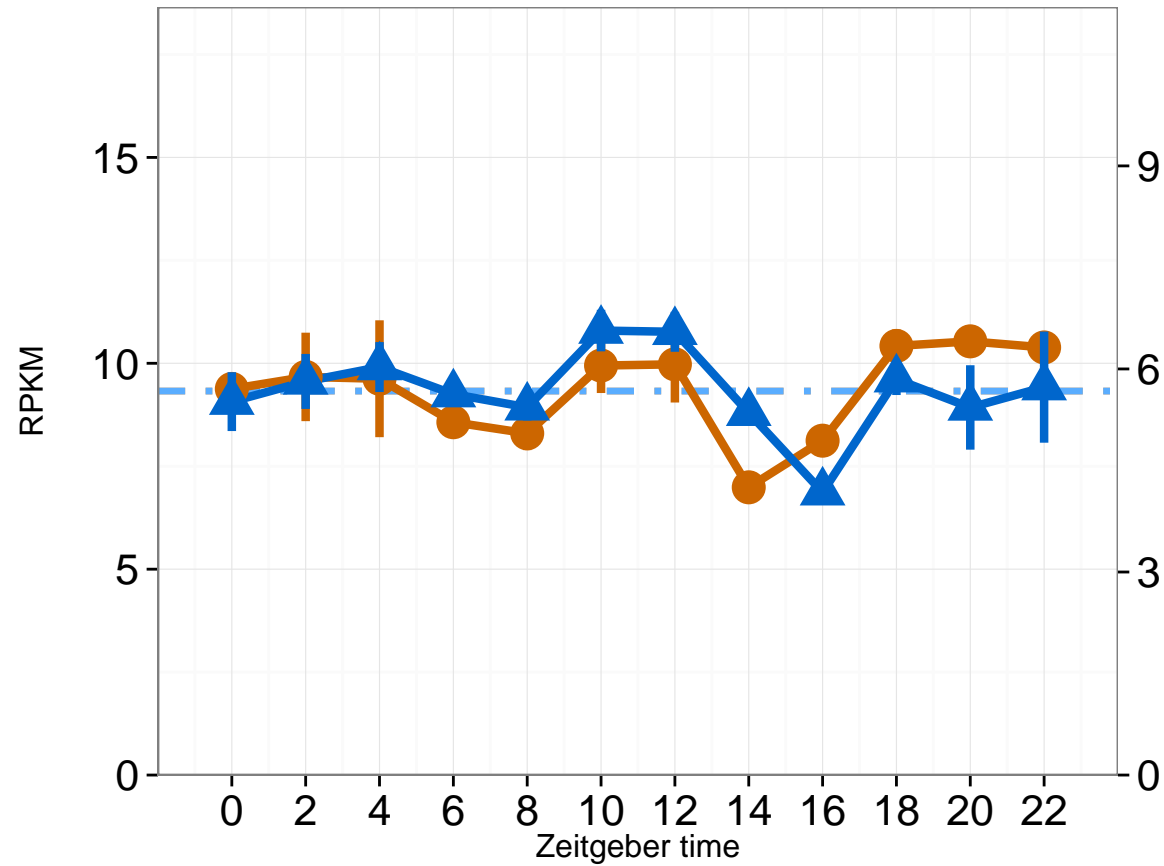

# Fam35a

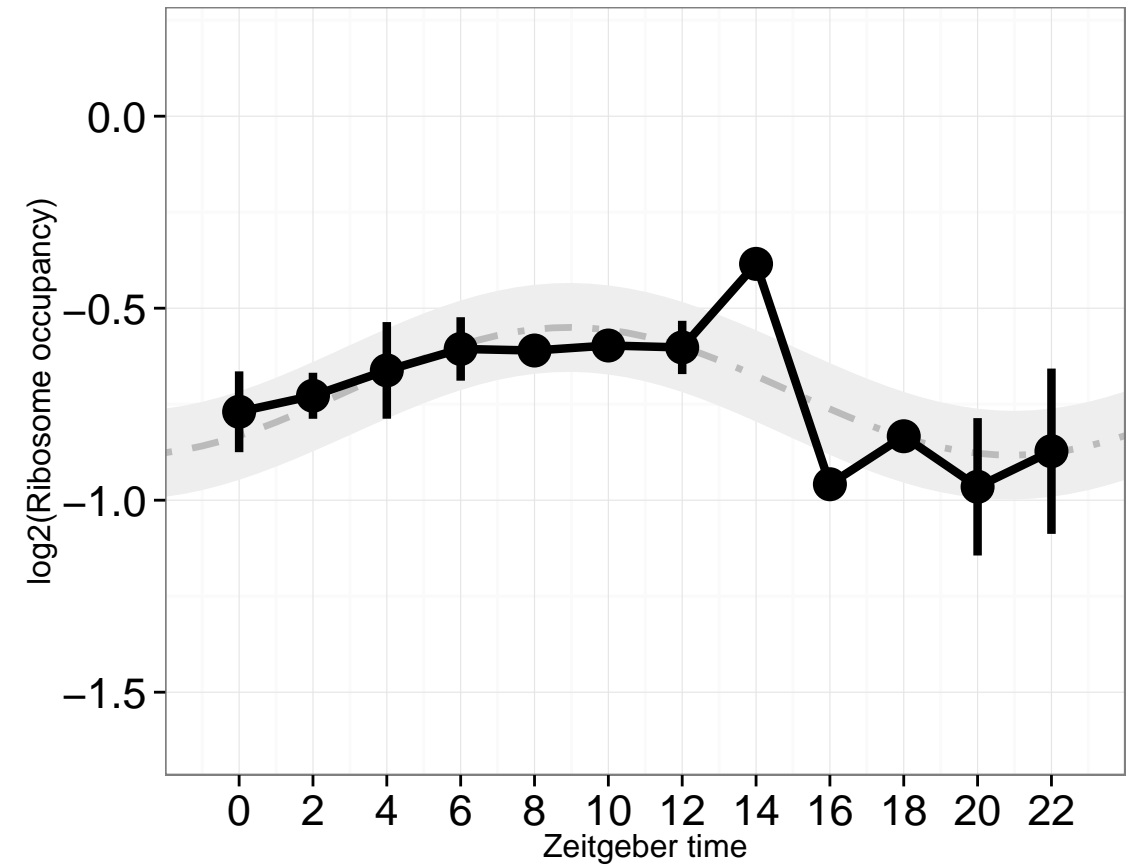

Supplement: Supplementary file 5014 [file 1]

# Heatr5b

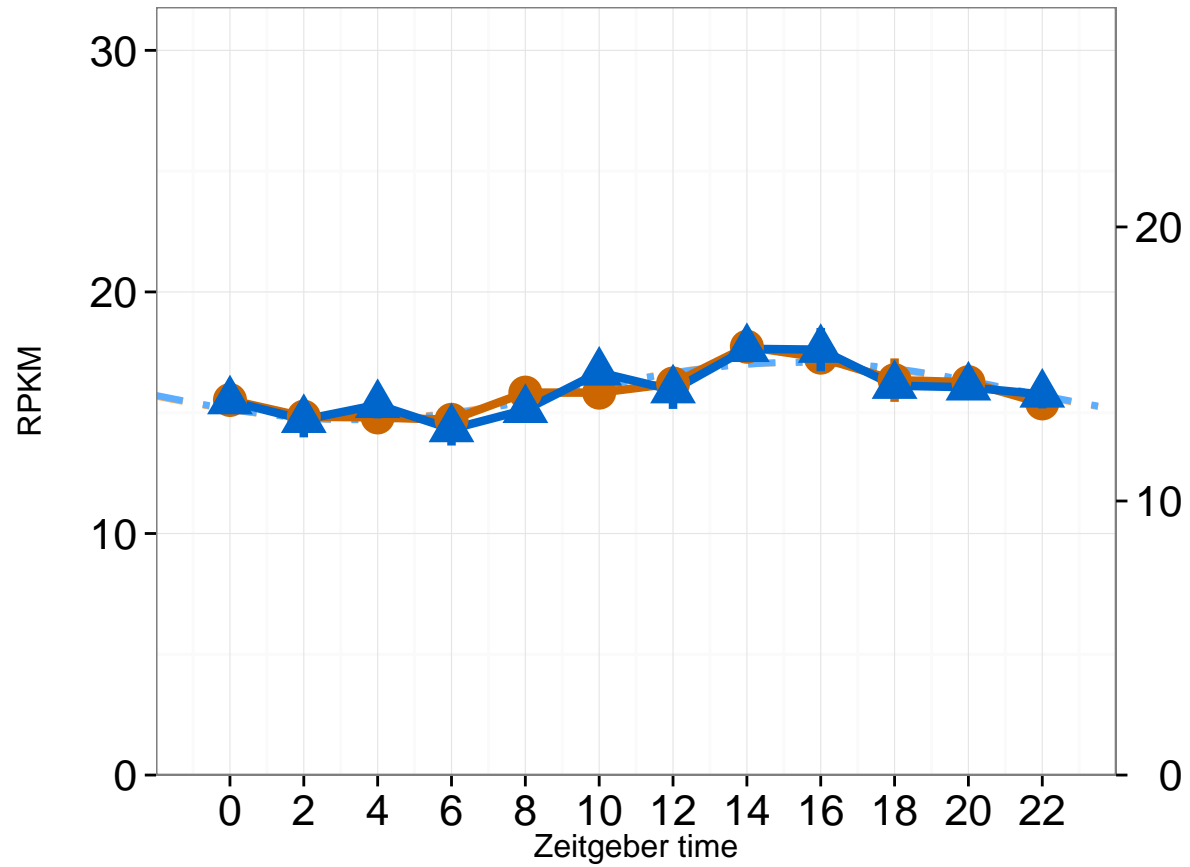

# Heatr5b

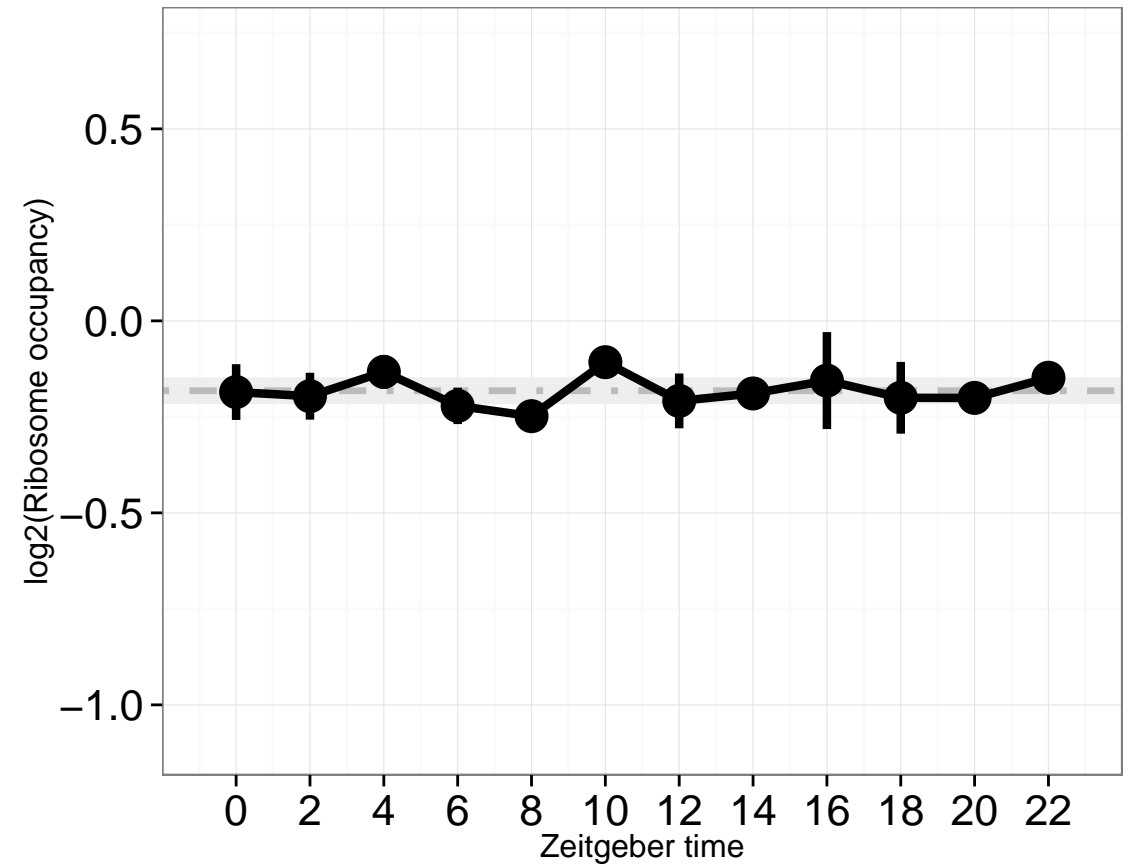

Supplement: Supplementary file 5015 [file 1]

# Pms1

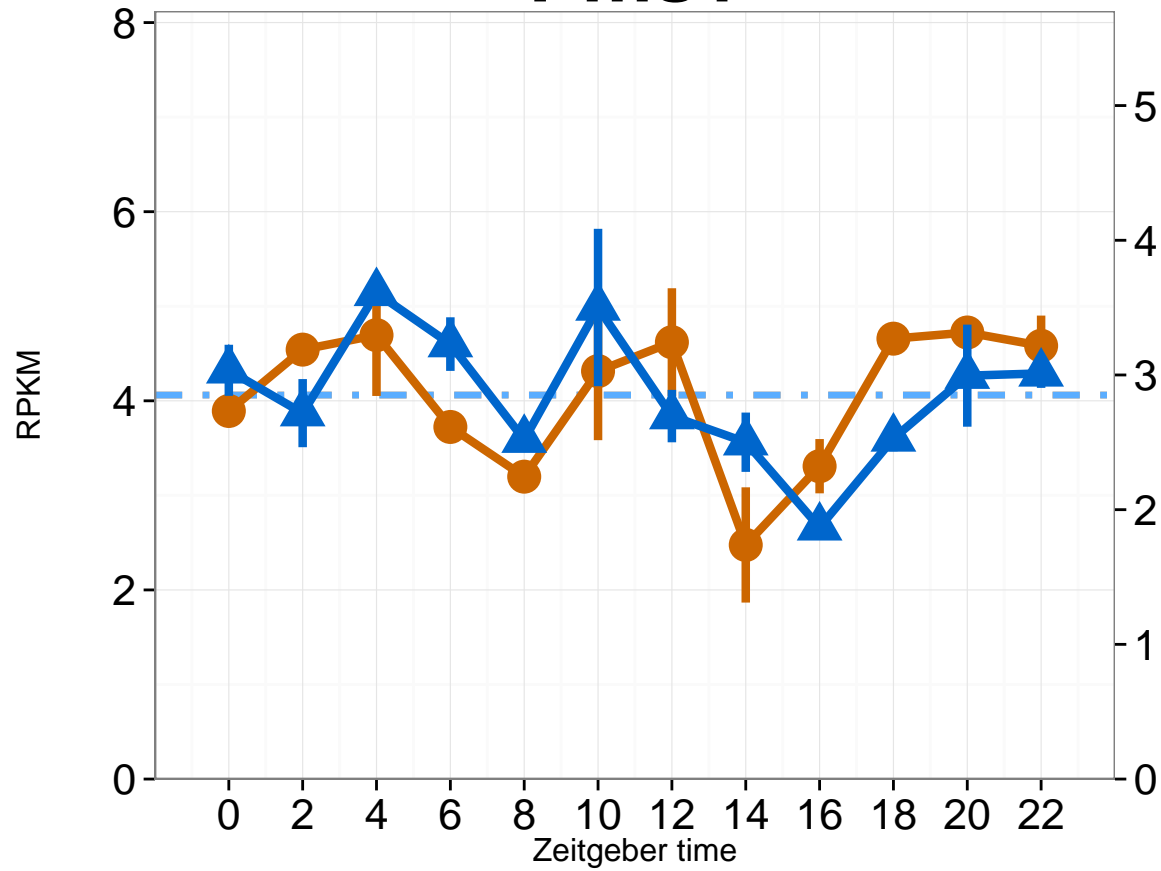

# Pms1

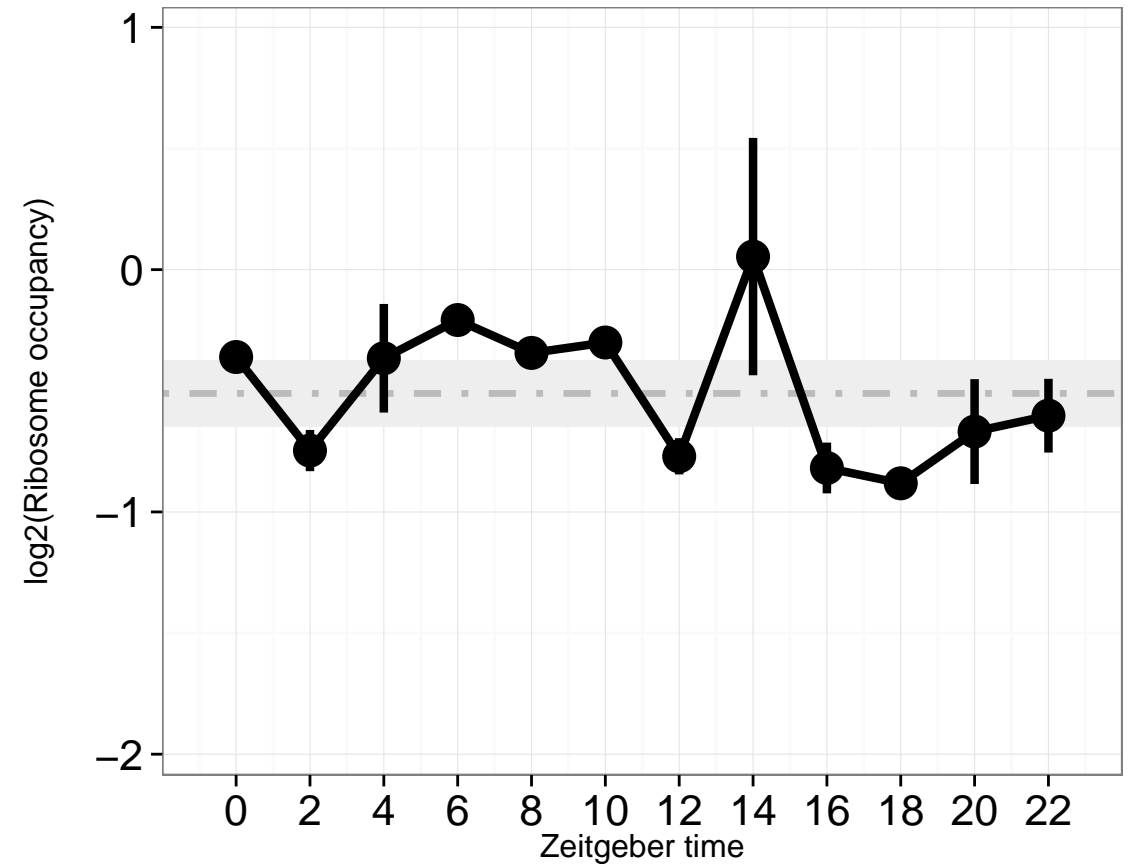

Supplement: Supplementary file 5016 [file 1]

## Cdk2

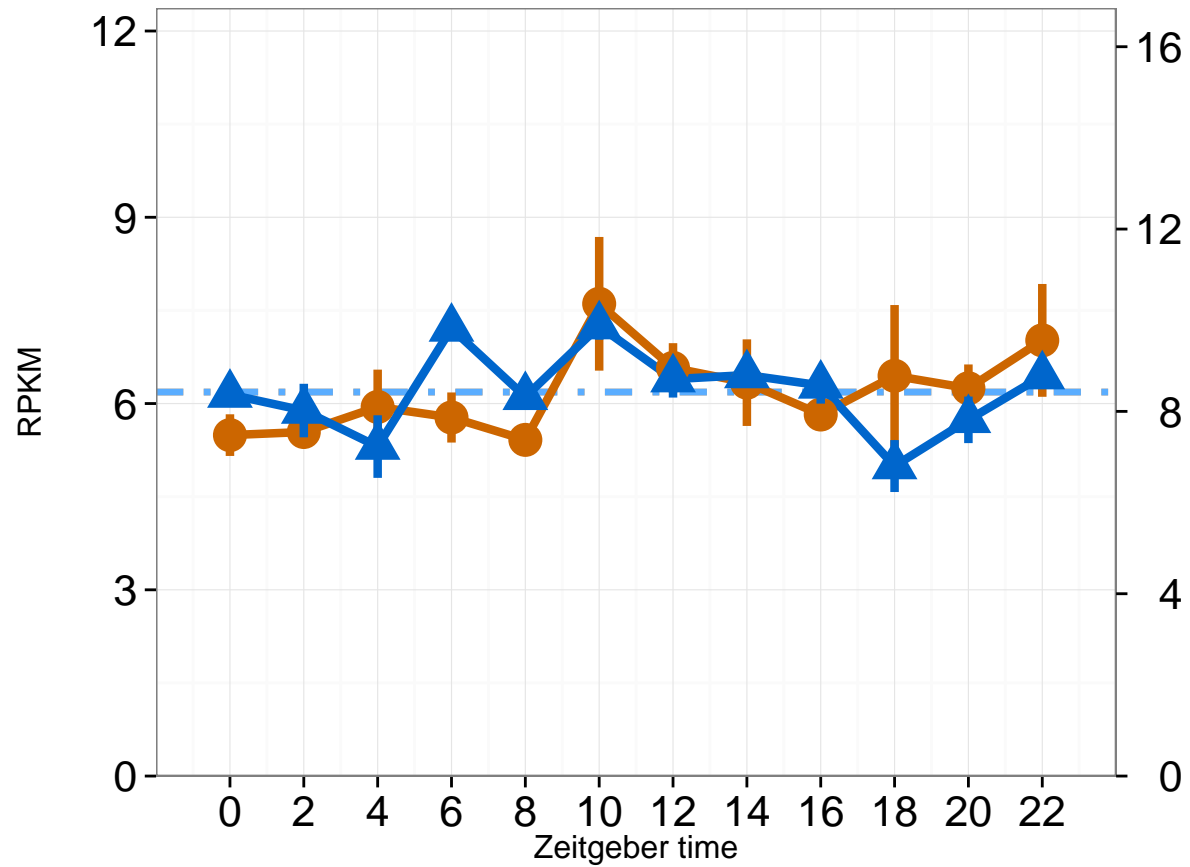

## Cdk2

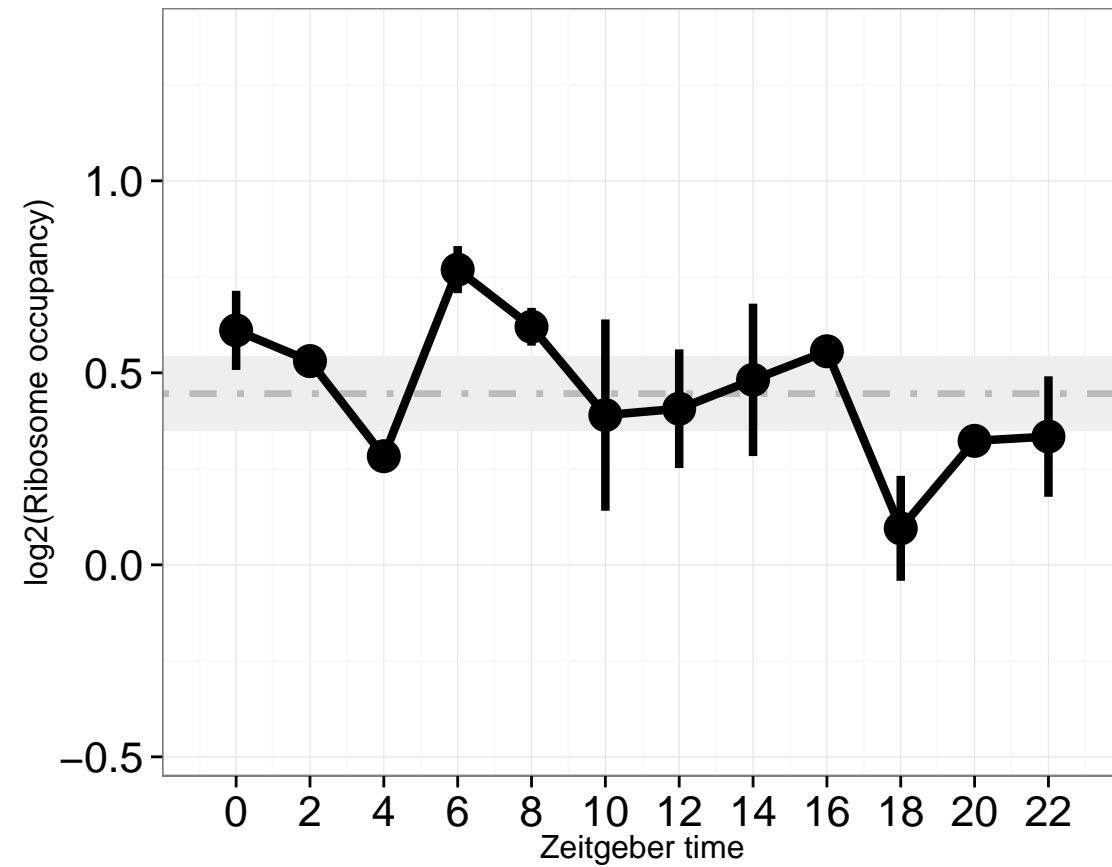

Supplement: Supplementary file 5017 [file 1]

# Dusp1

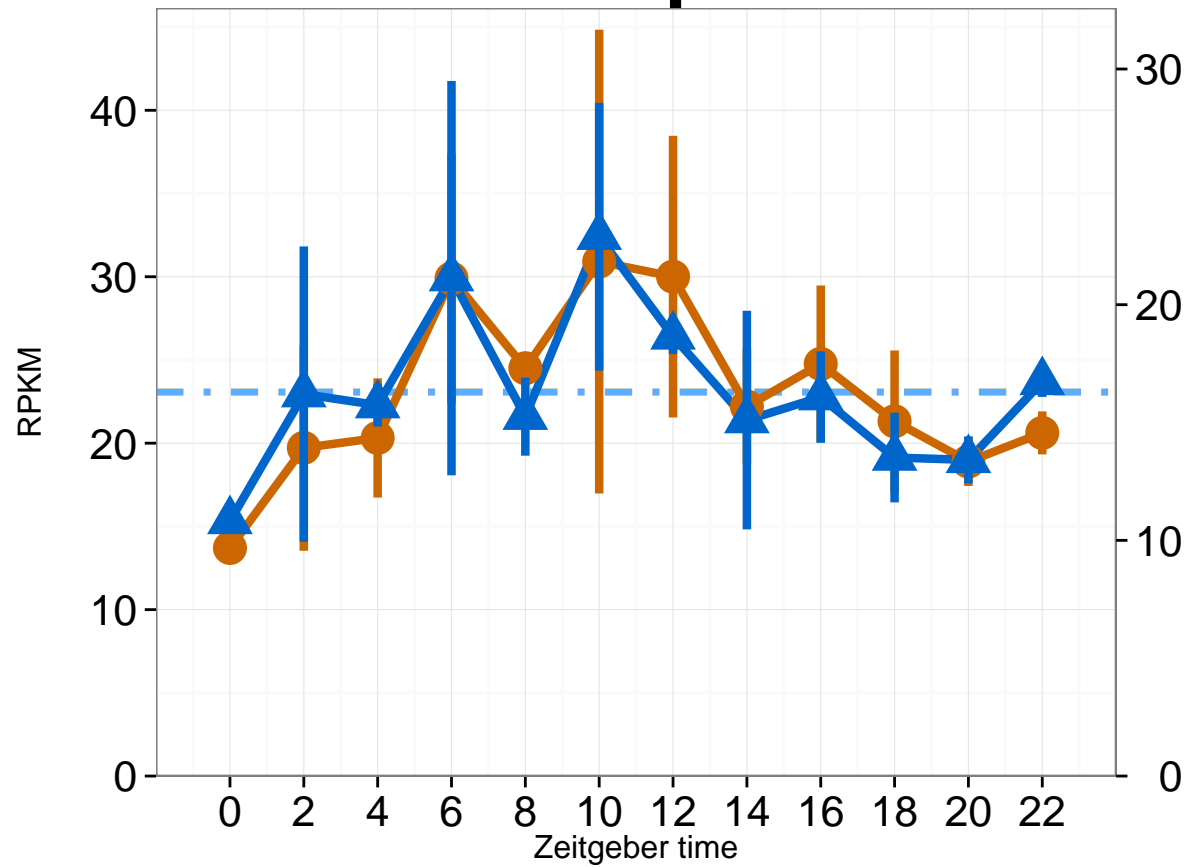

# Dusp1

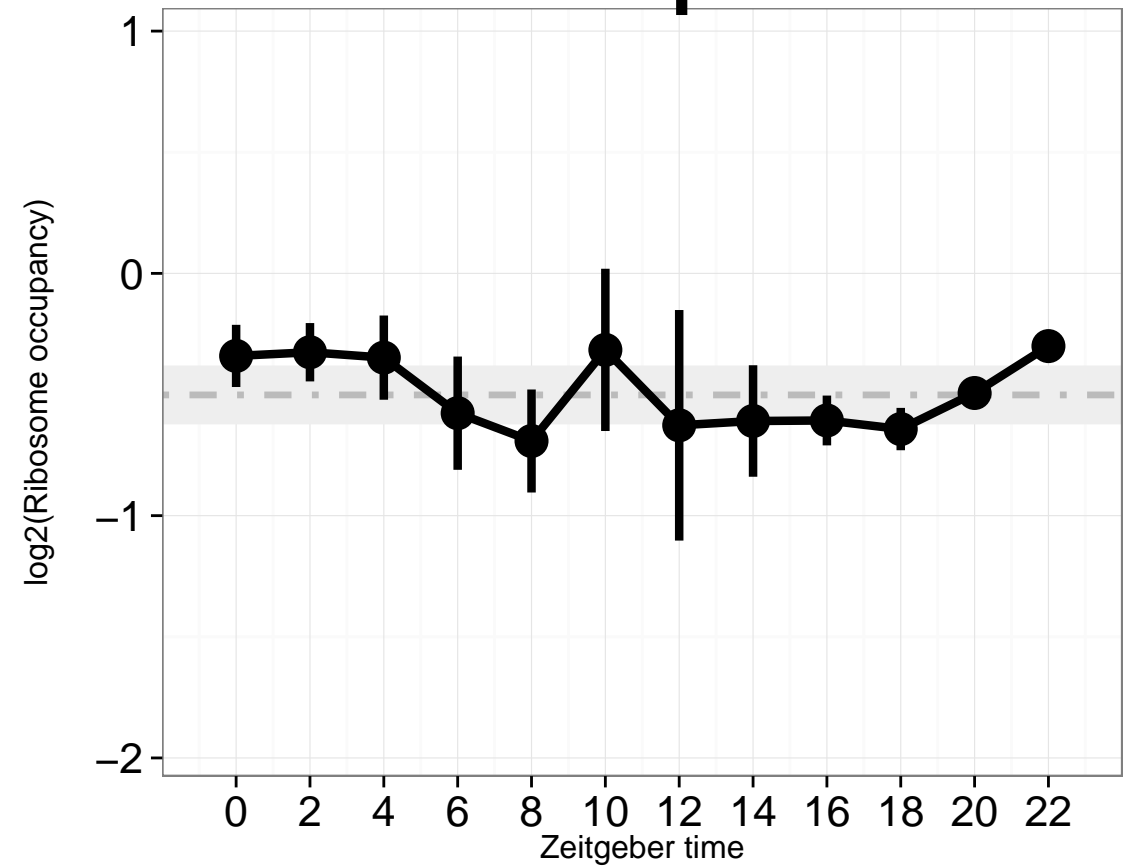

Supplement: Supplementary file 5018 [file 1]

## Mrto4

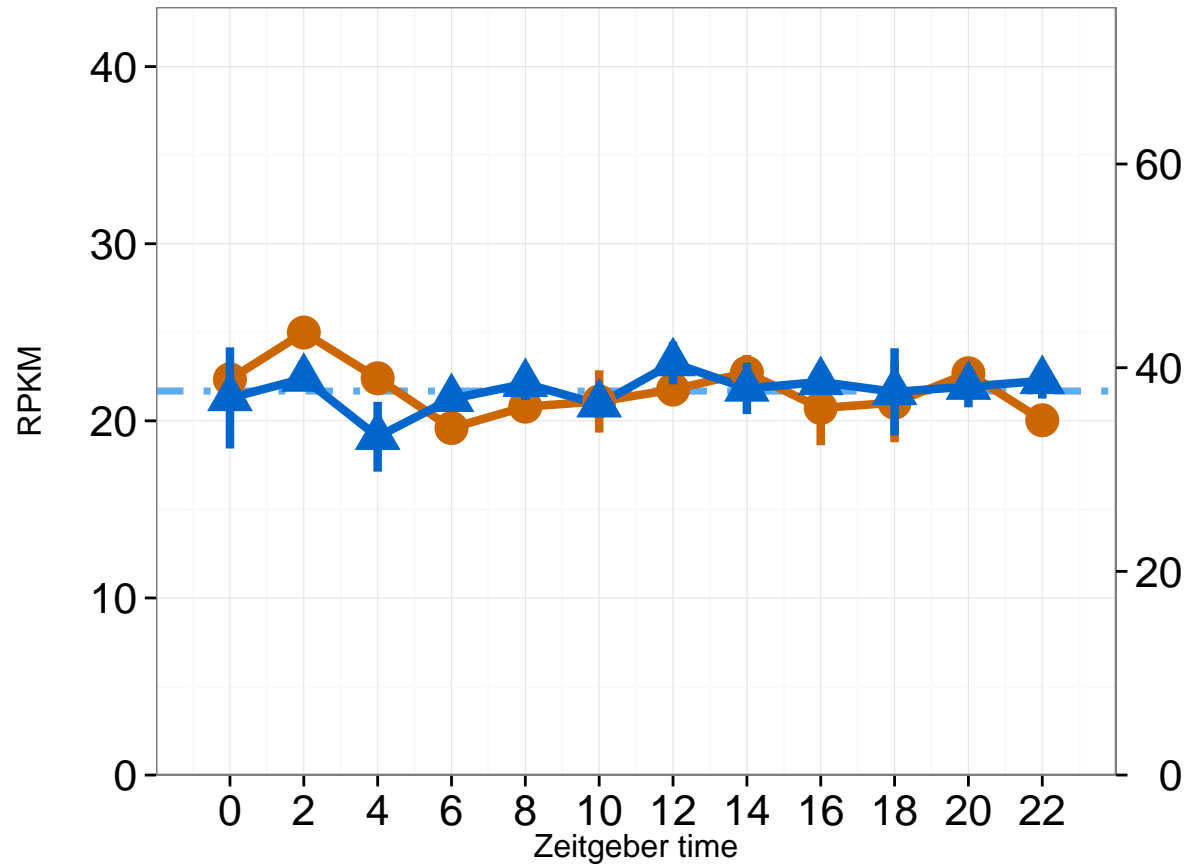

## Mrto4

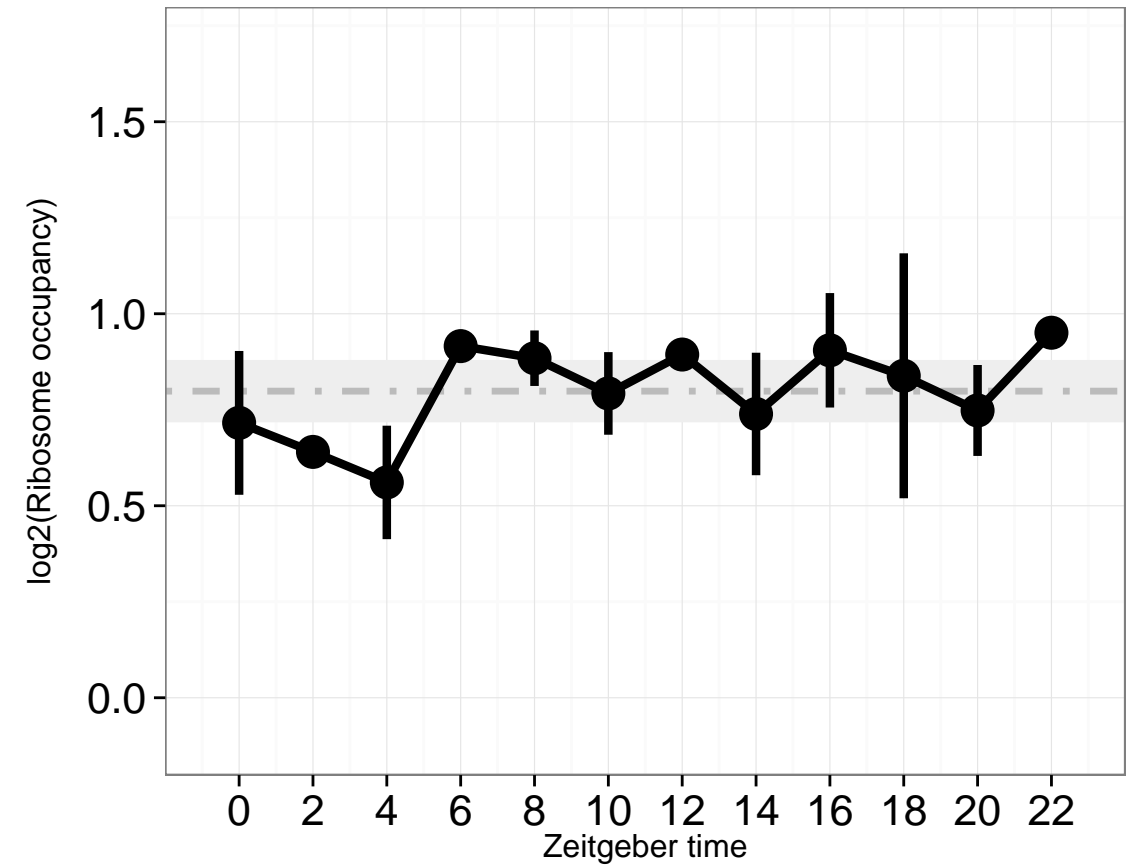

Supplement: Supplementary file 5019 [file 1]

## Birc3

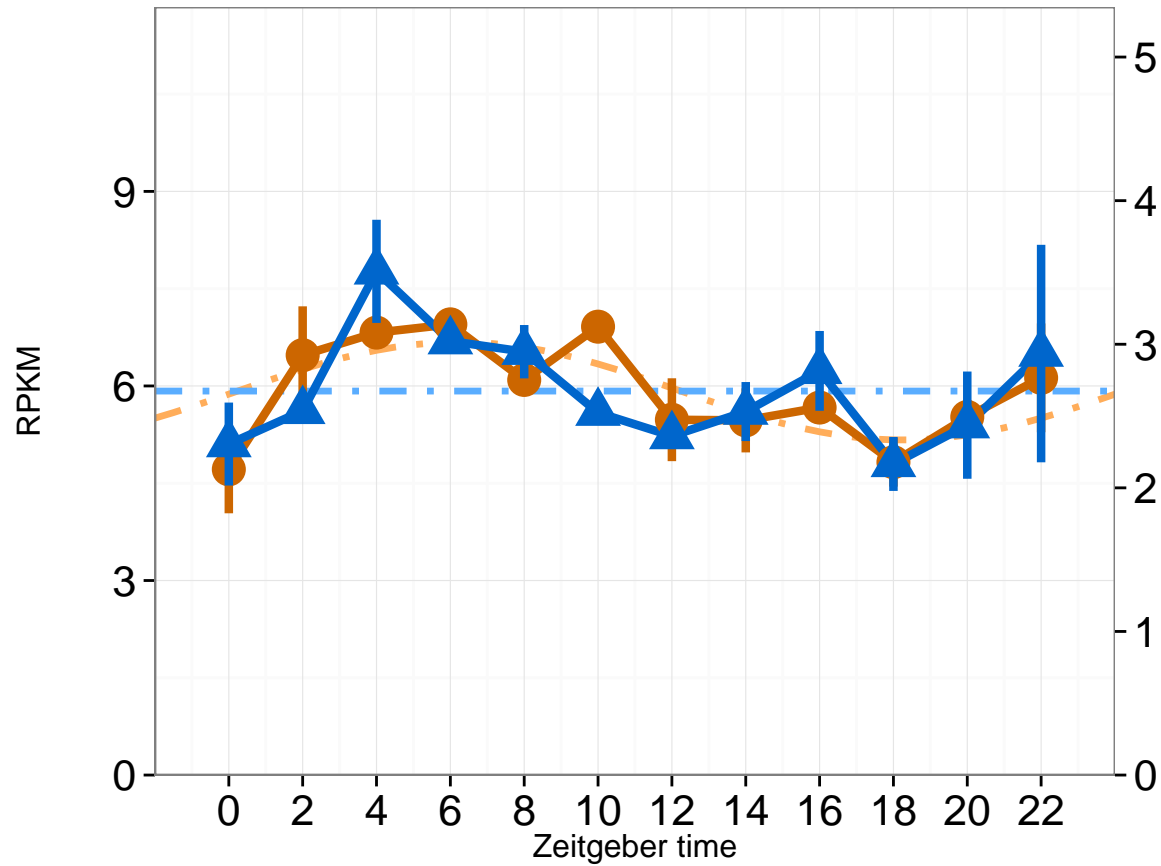

## Birc3

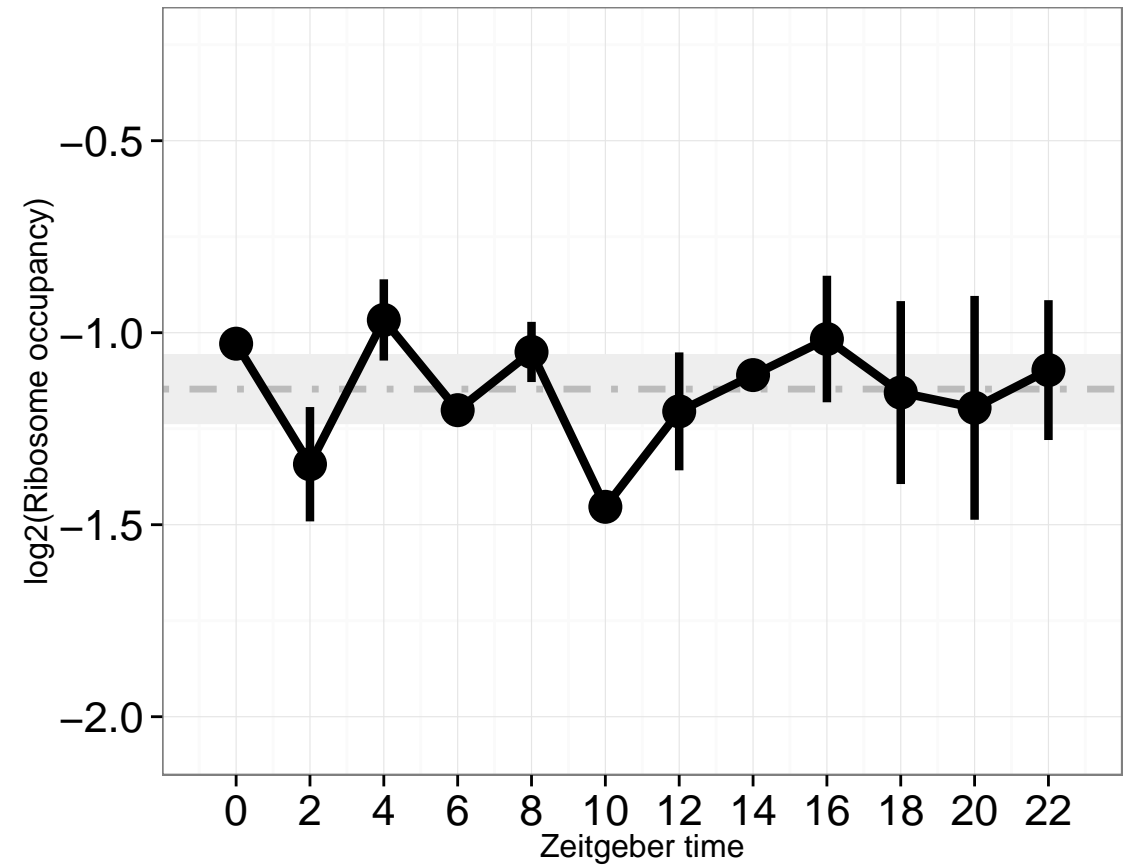

Supplement: Supplementary file 5020 [file 1]
