# Supplementary material (part 51 of 133)
Source: publisher figshare collection journal article supplement (https://springernature.figshare.com/articles/dataset/_/4903193)

# Lamc2

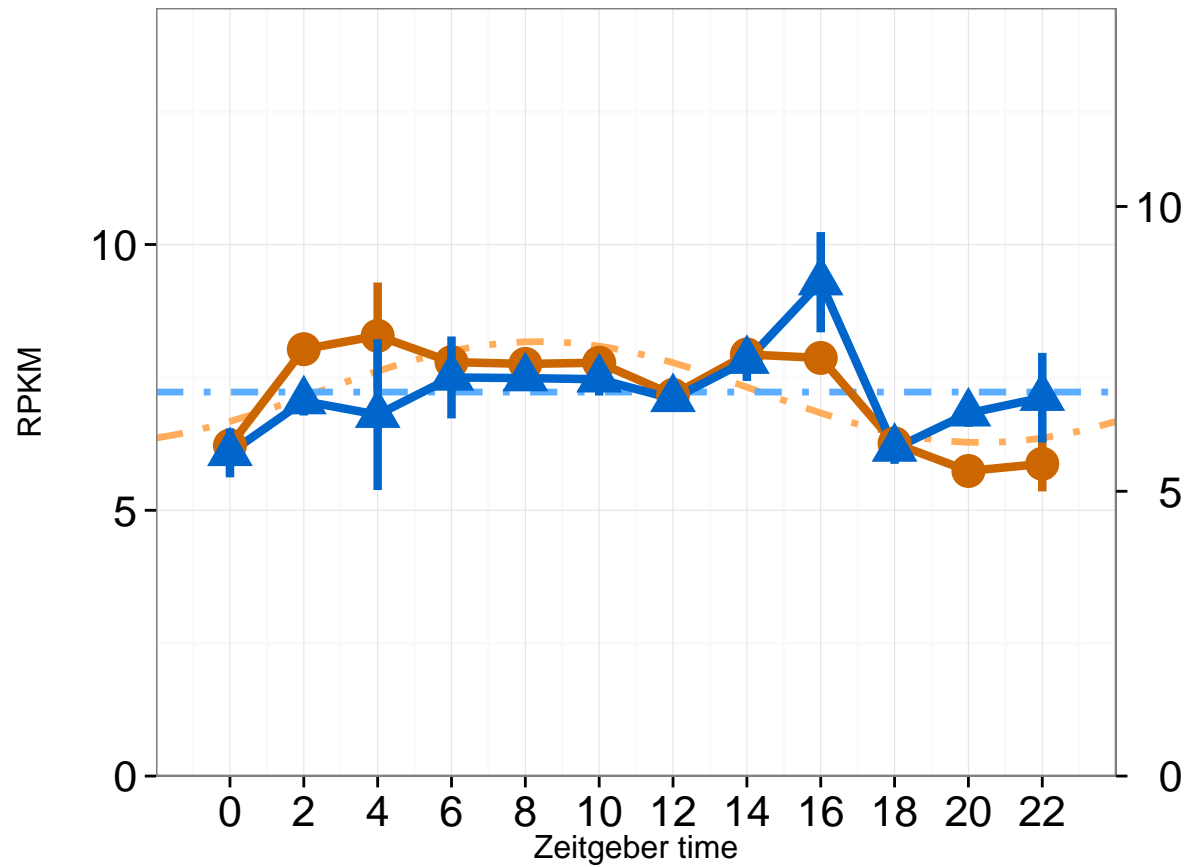

# Lamc2

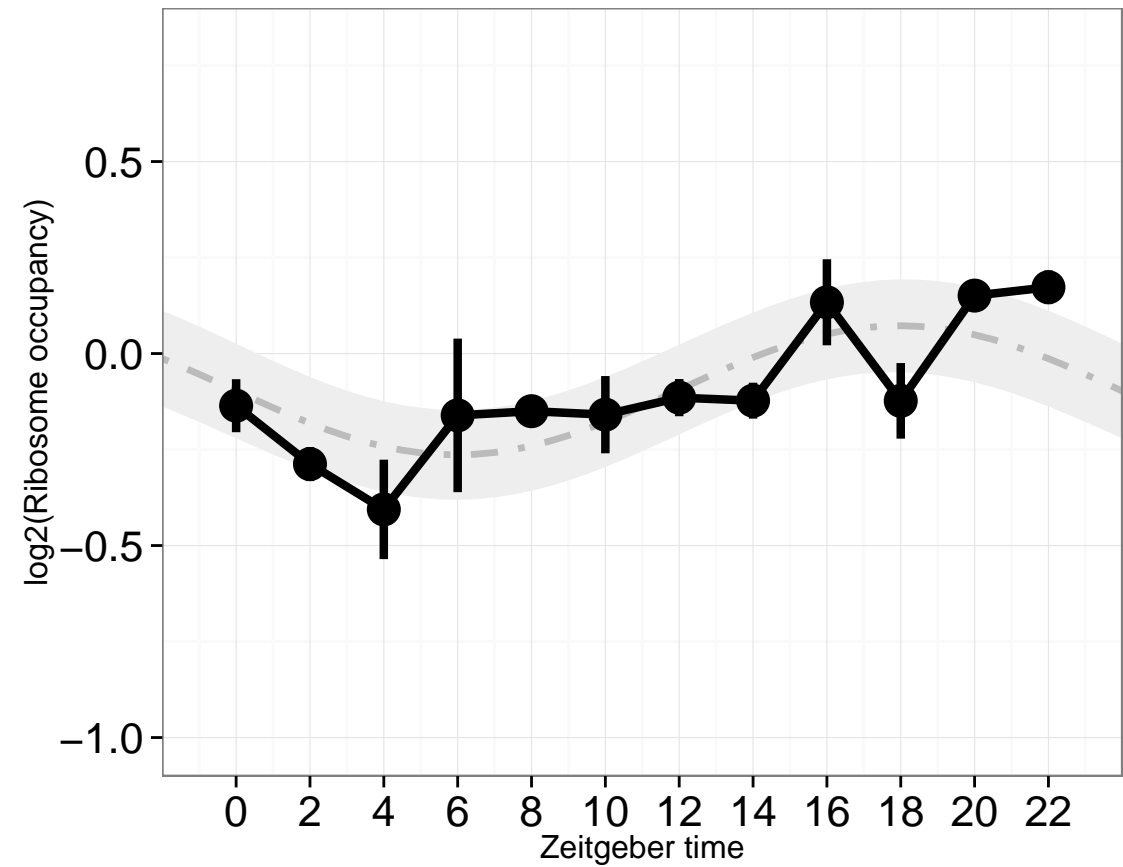

Supplement: Supplementary file 5021 [file 1]

# Map3k11

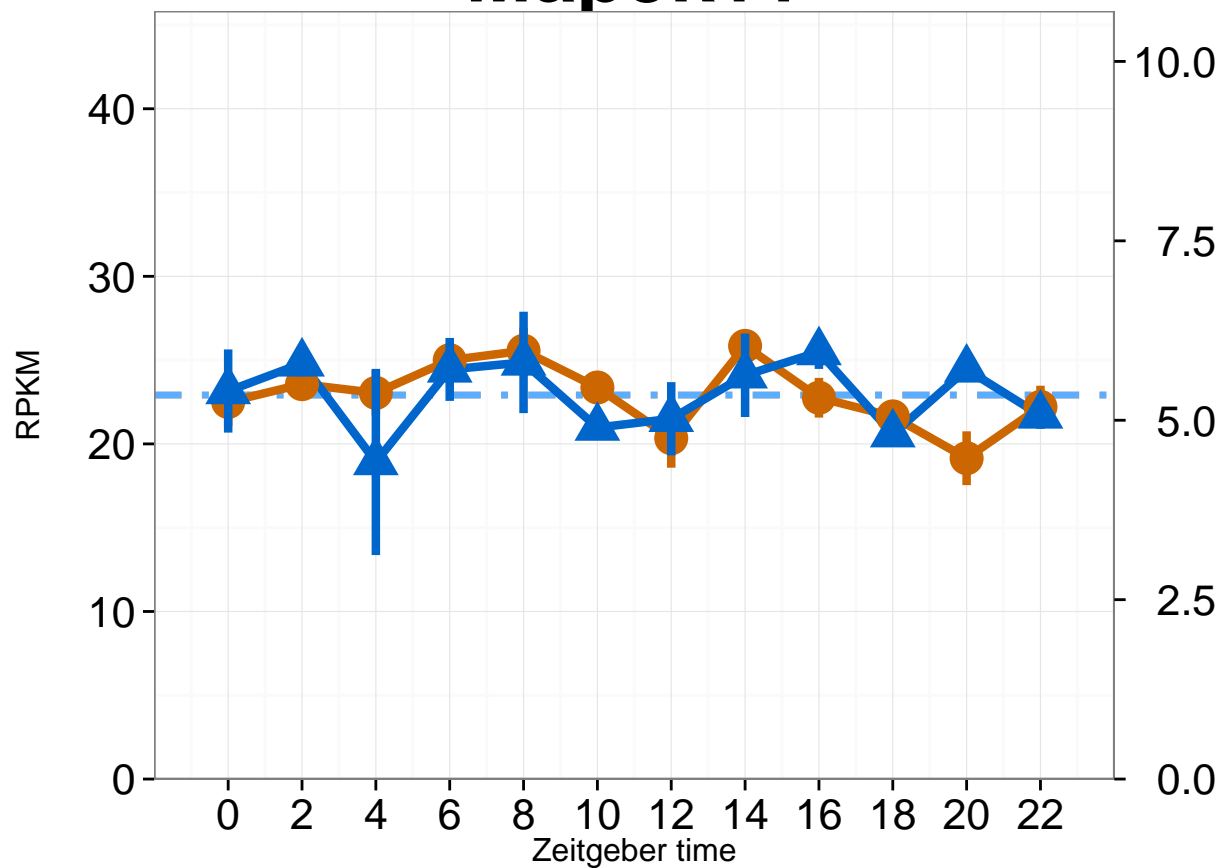

# Map3k11

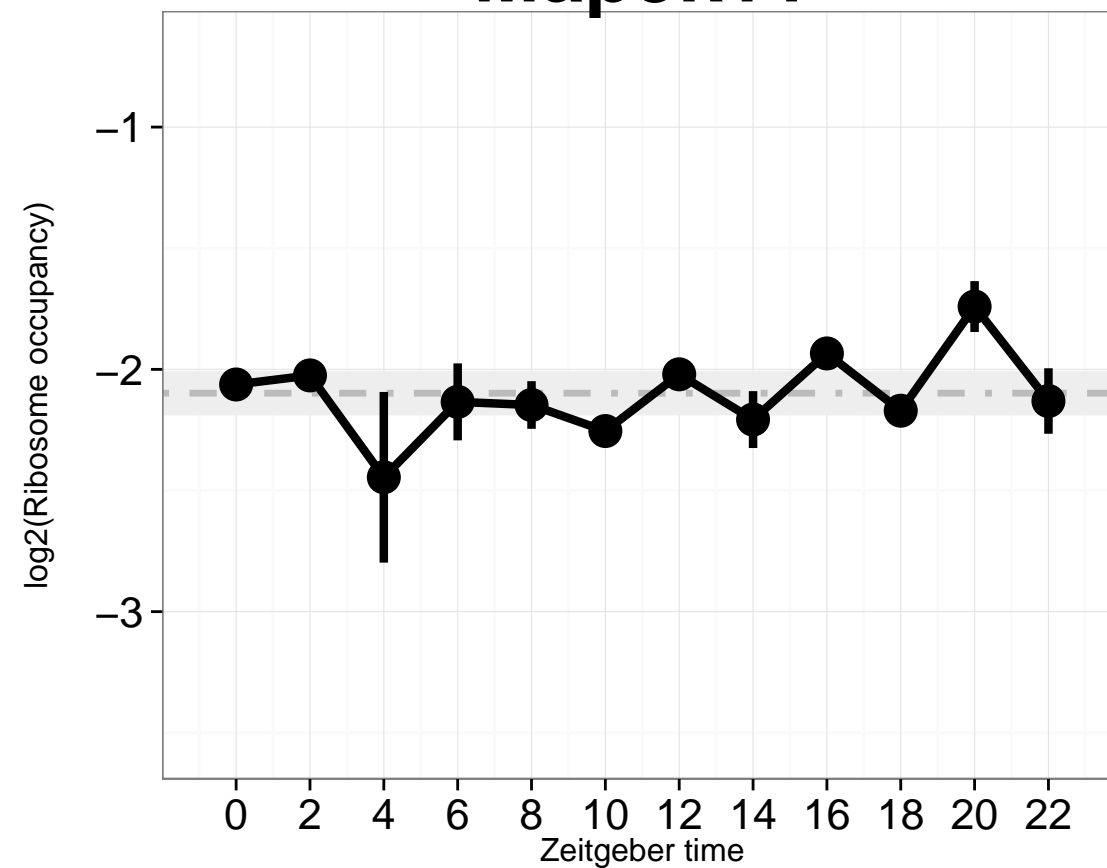

Supplement: Supplementary file 5022 [file 1]

## Ankrd32

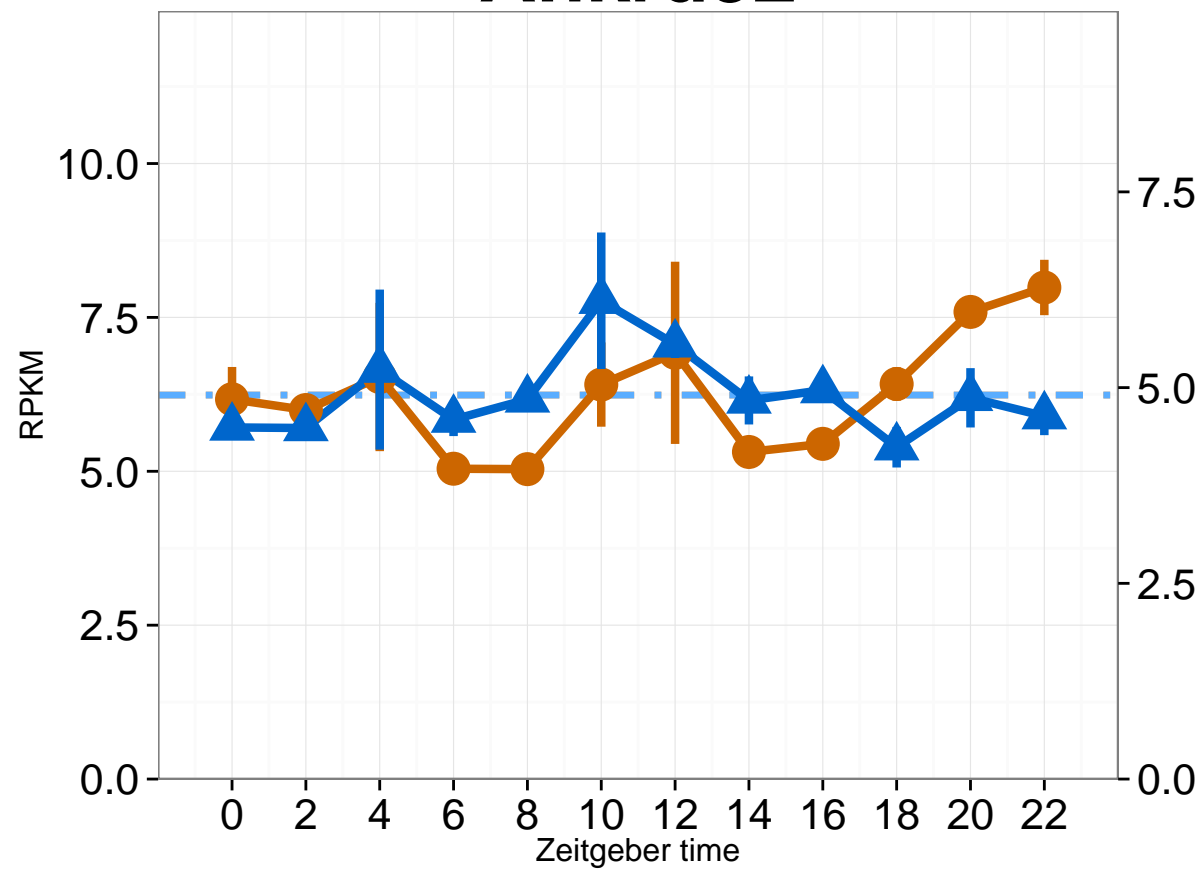

## Ankrd32

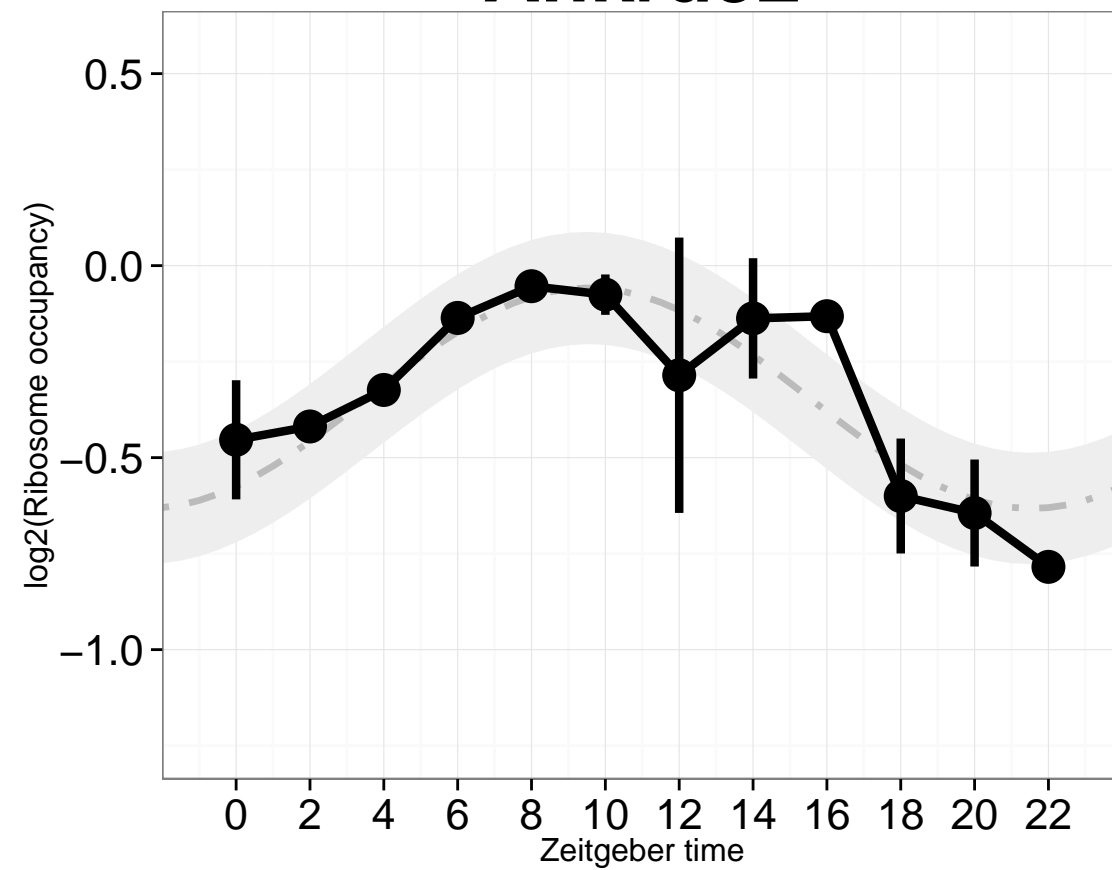

Supplement: Supplementary file 5023 [file 1]

# Zfp119a

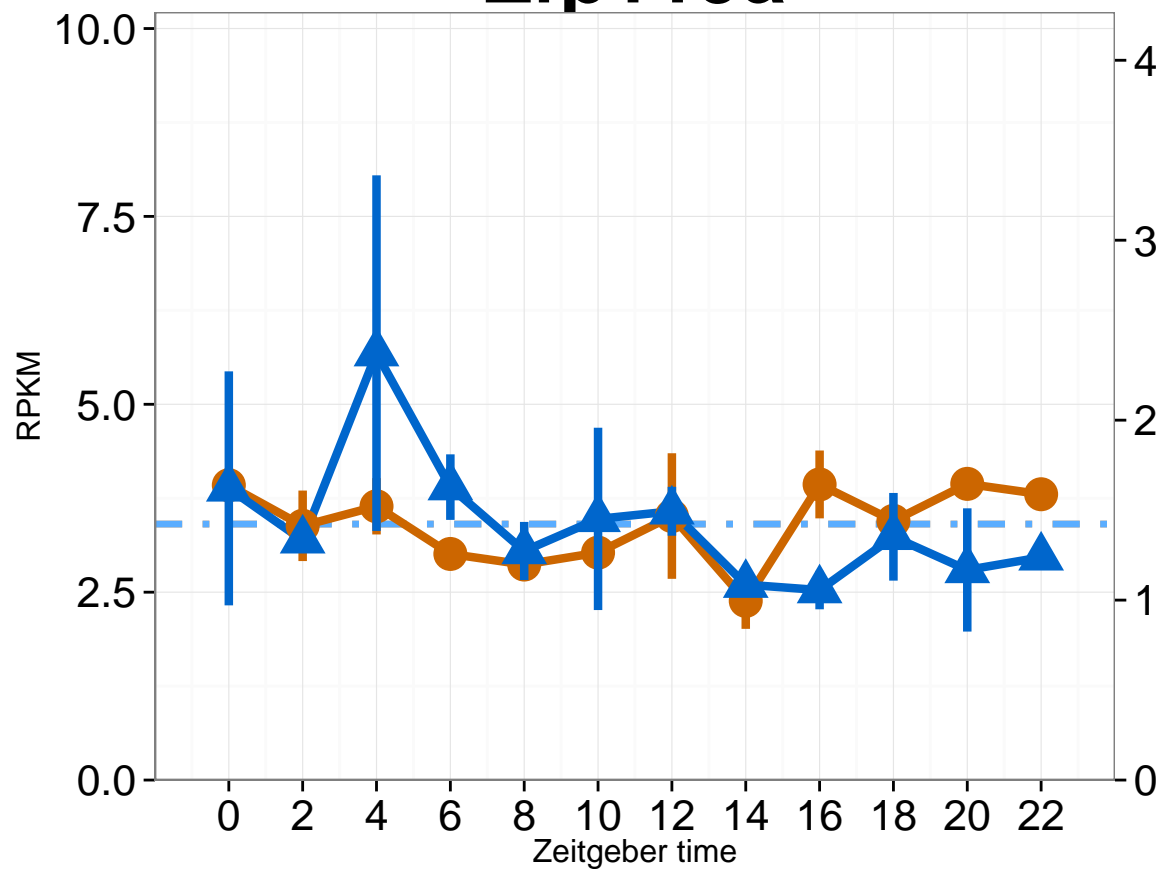

# Zfp119a

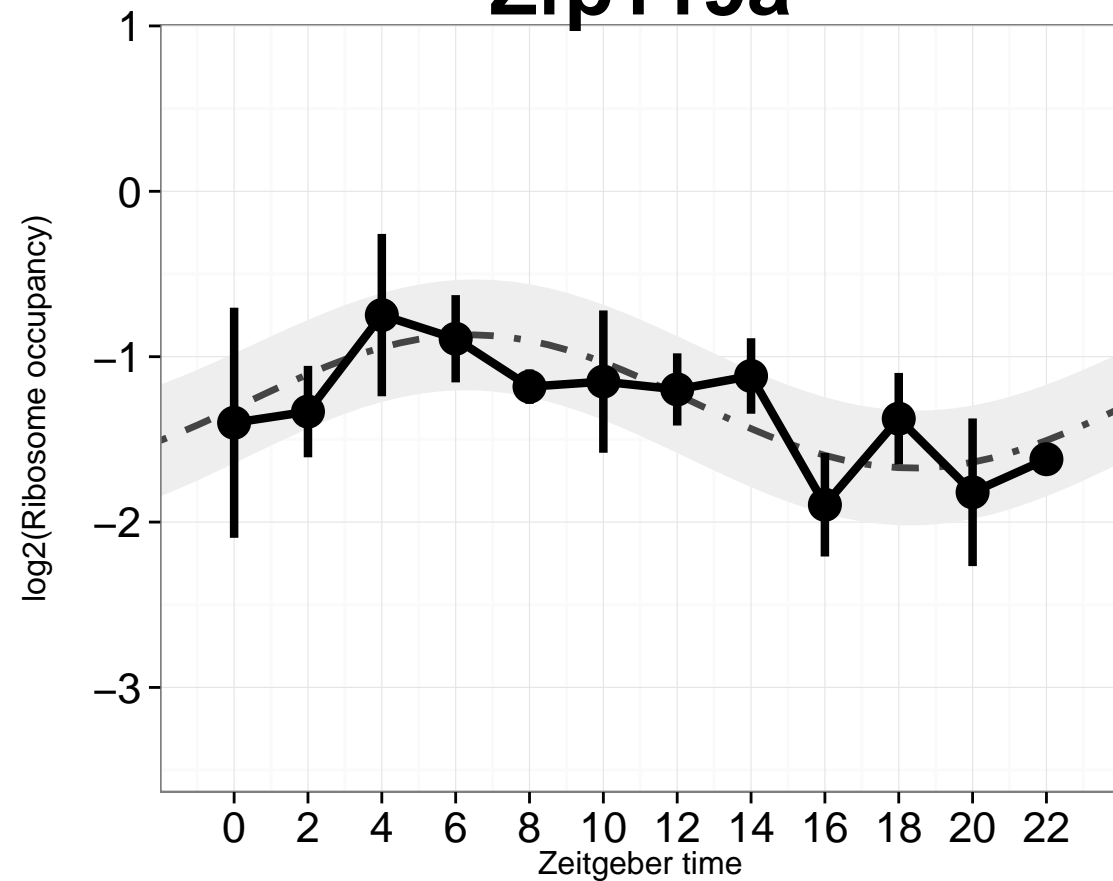

Supplement: Supplementary file 5024 [file 1]

# Avpr1a

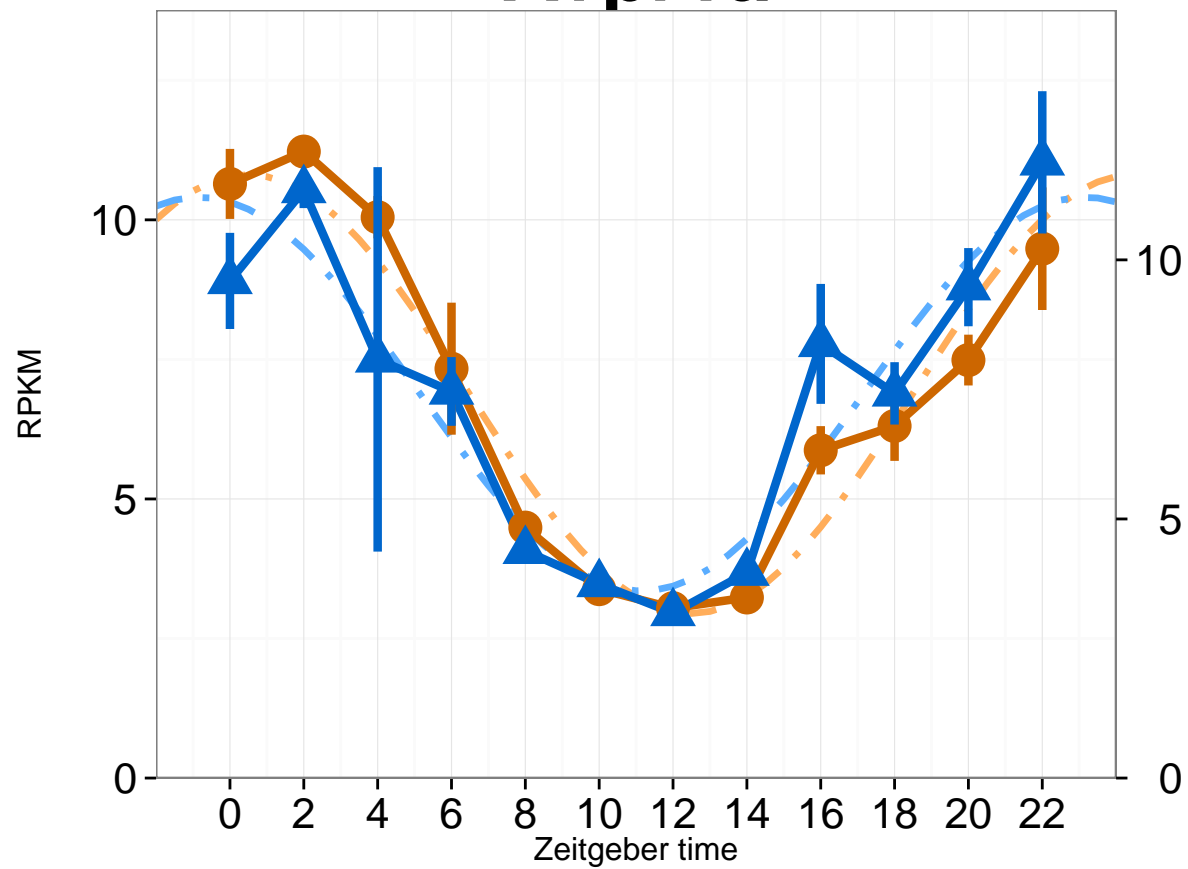

# Avpr1a

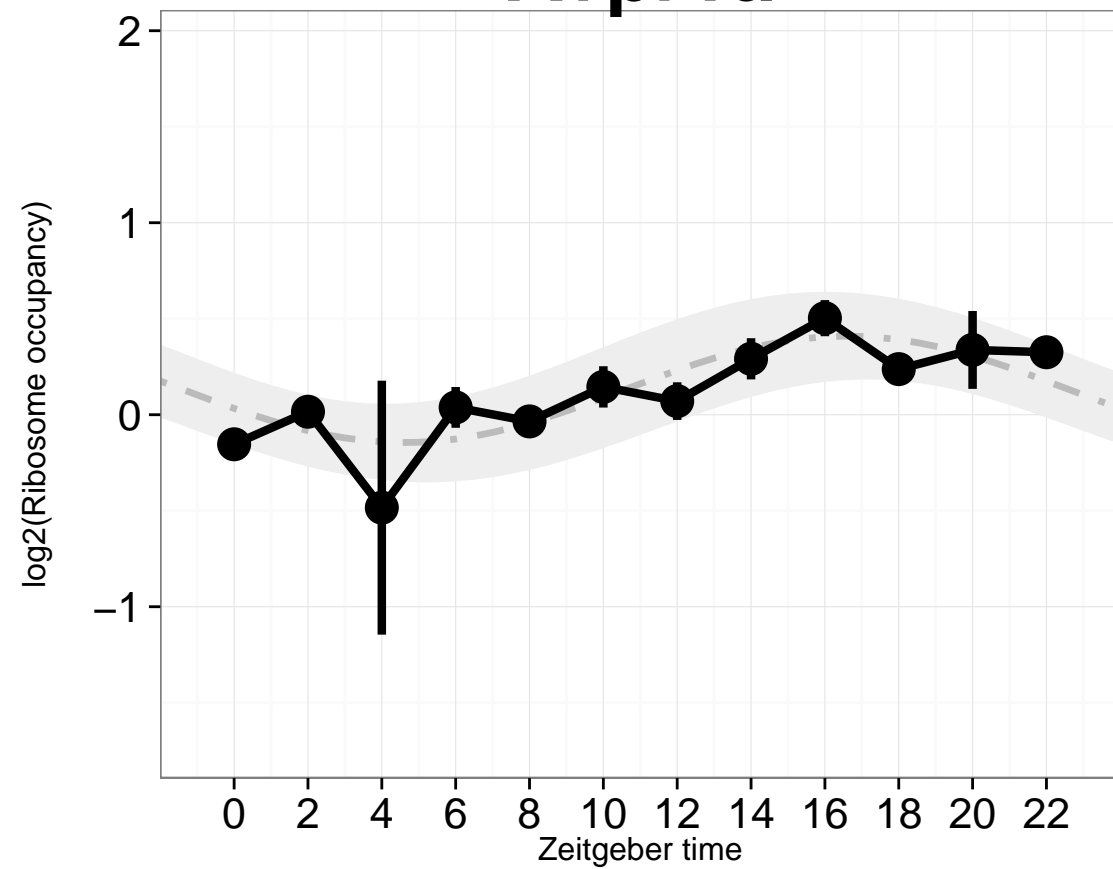

Supplement: Supplementary file 5025 [file 1]

# Prpf19

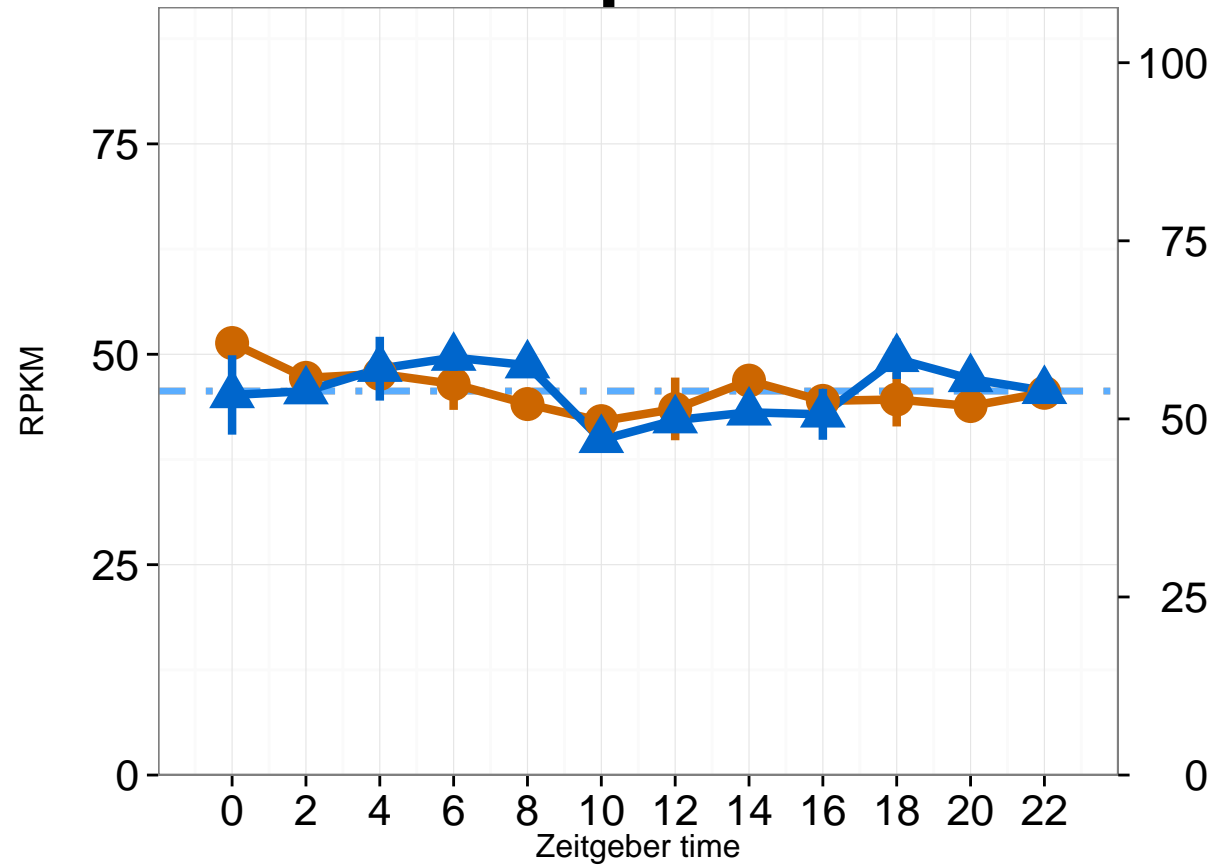

# Prpf19

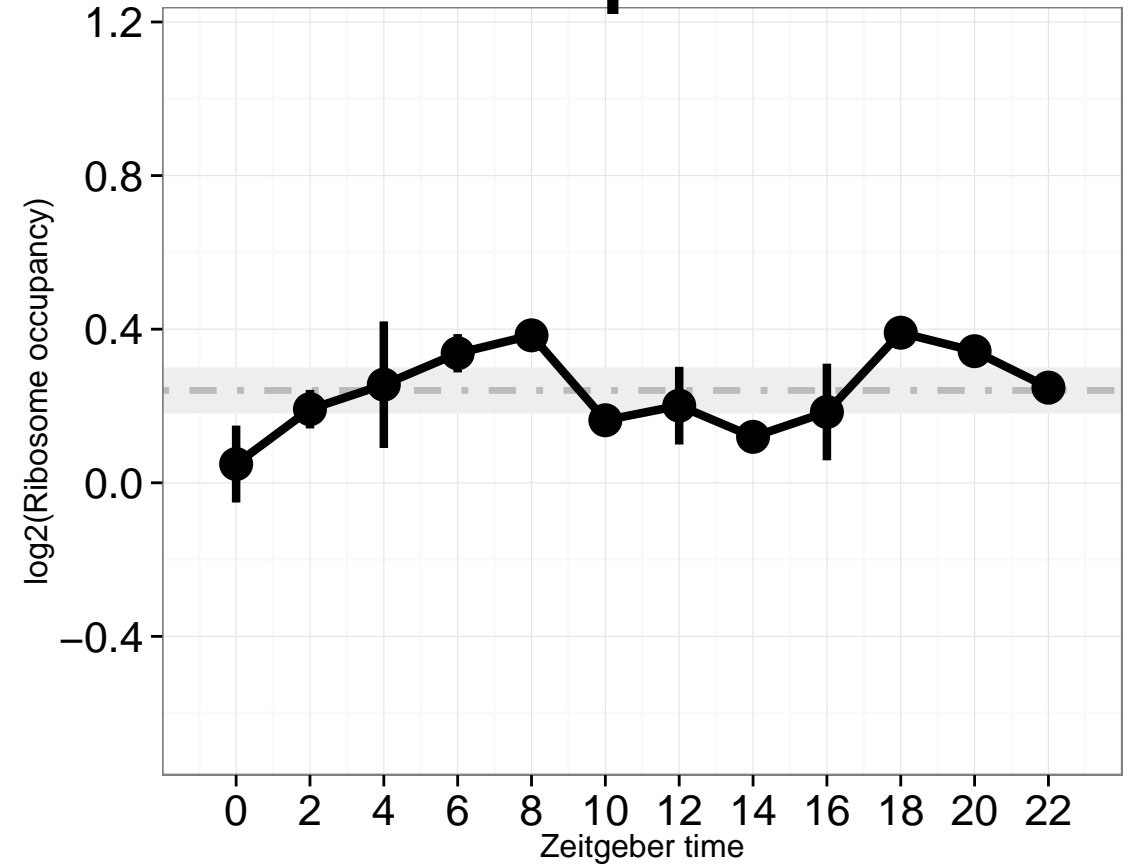

Supplement: Supplementary file 5026 [file 1]

# Nr2c2ap

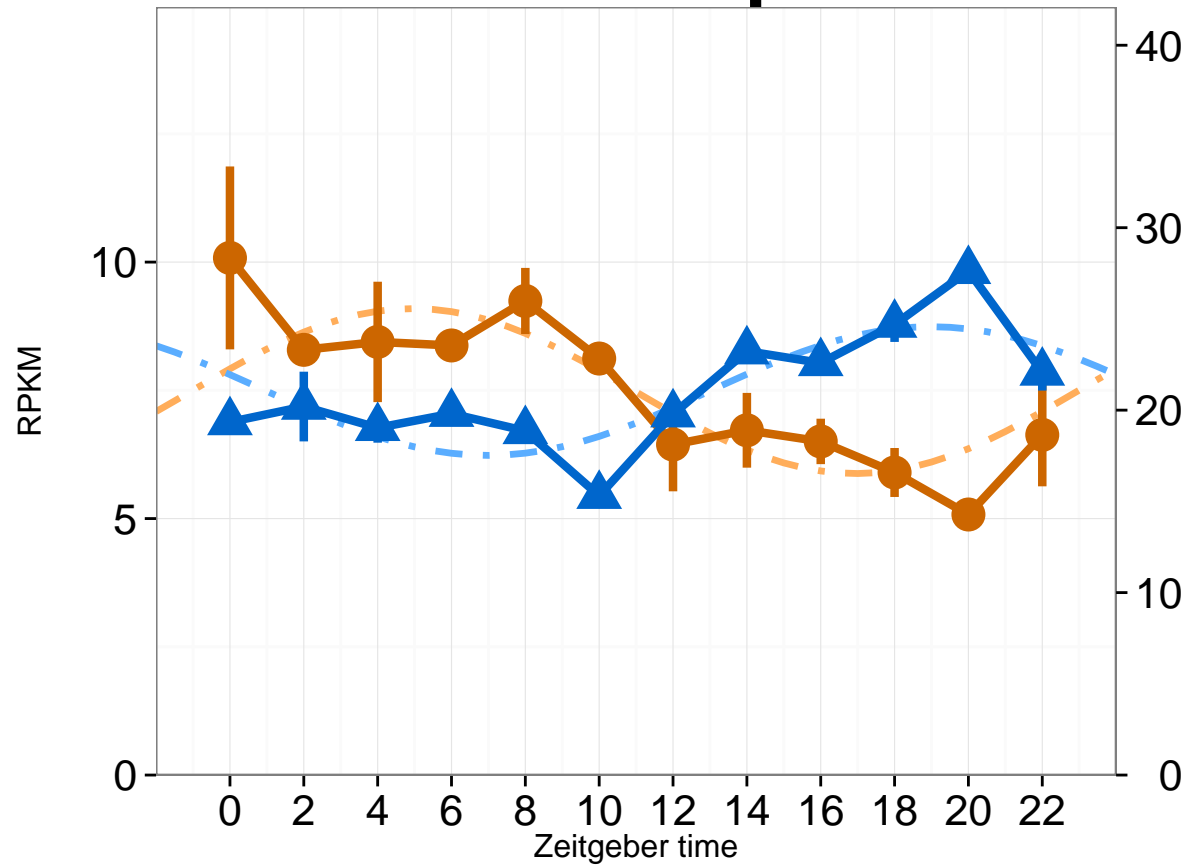

# Nr2c2ap

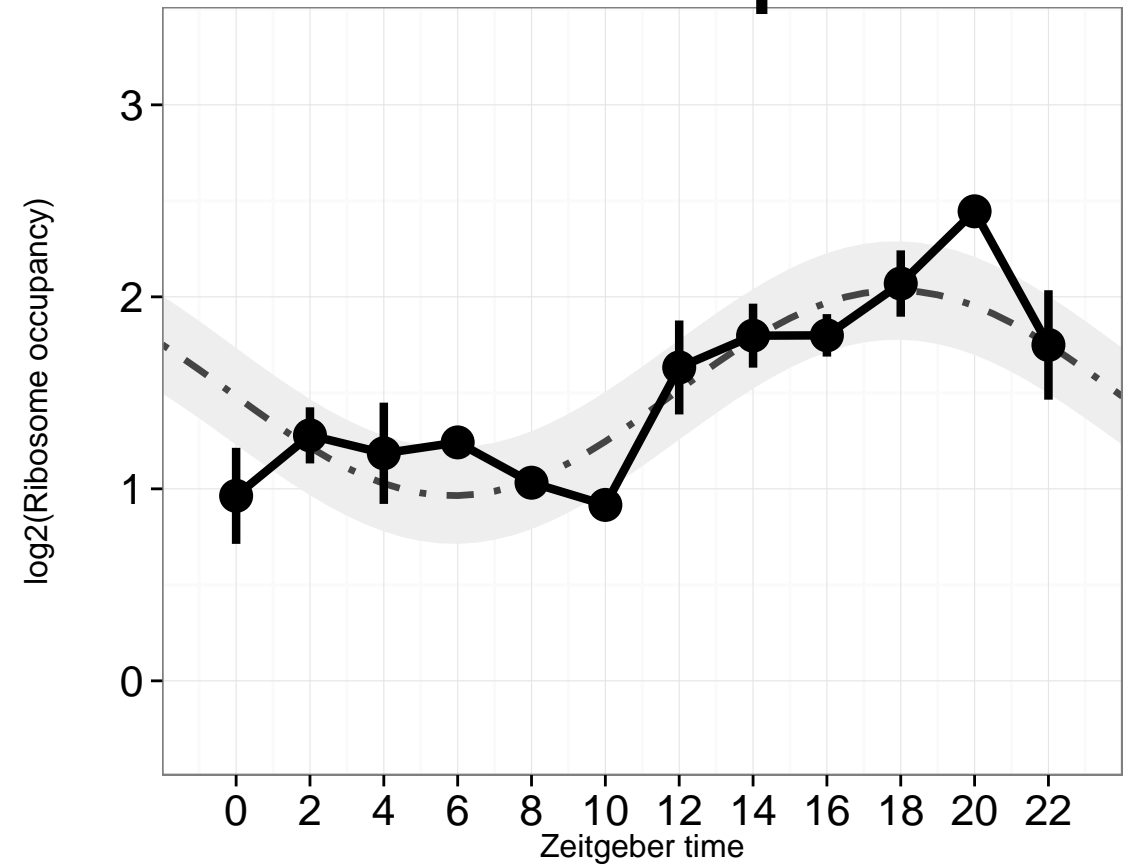

Supplement: Supplementary file 5027 [file 1]

# Zfp692

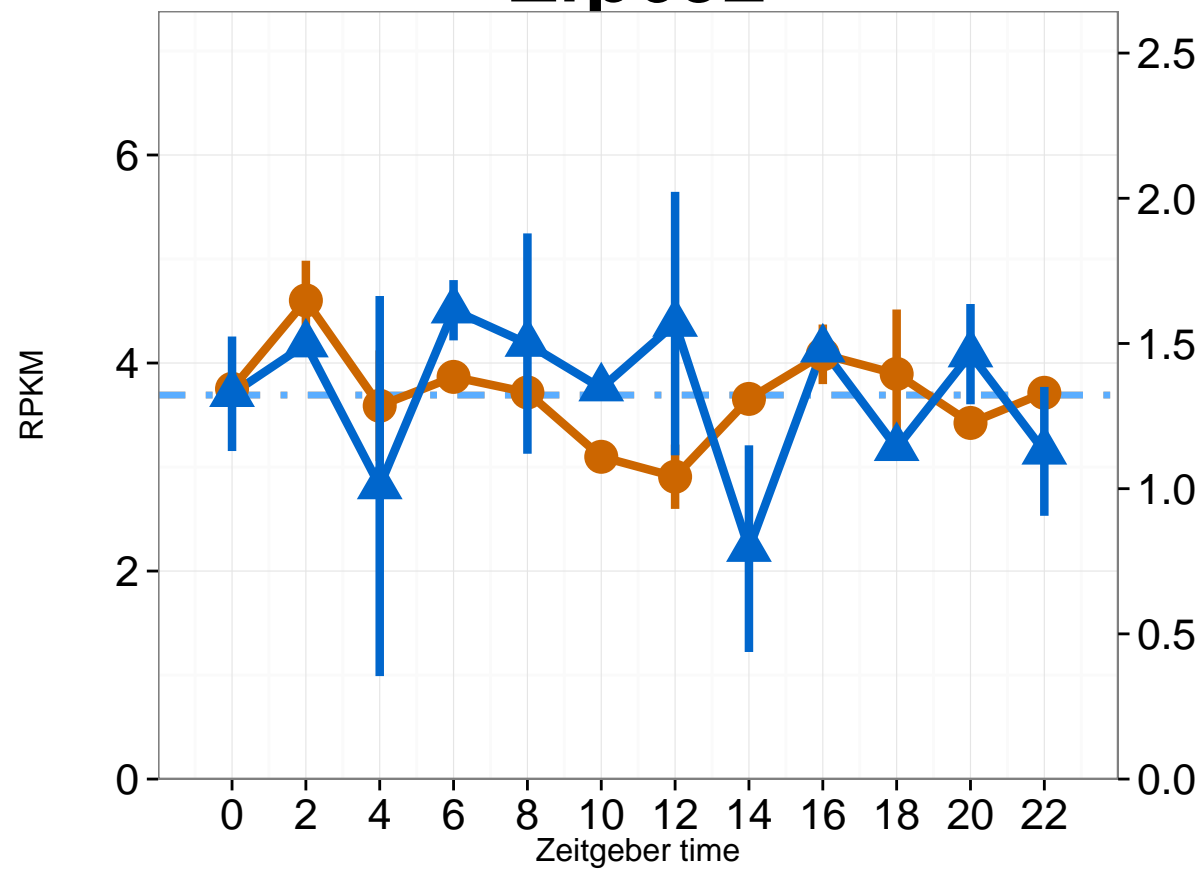

# Zfp692

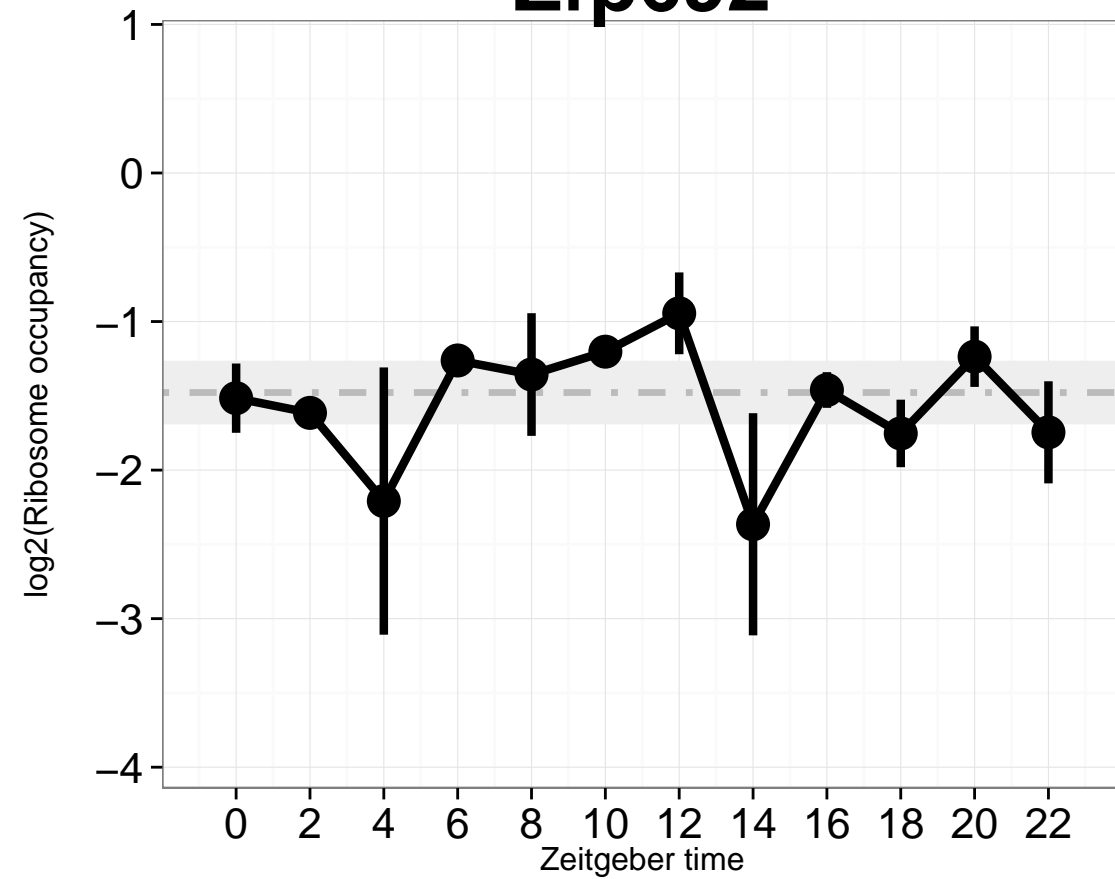

Supplement: Supplementary file 5028 [file 1]

# Prpsap2

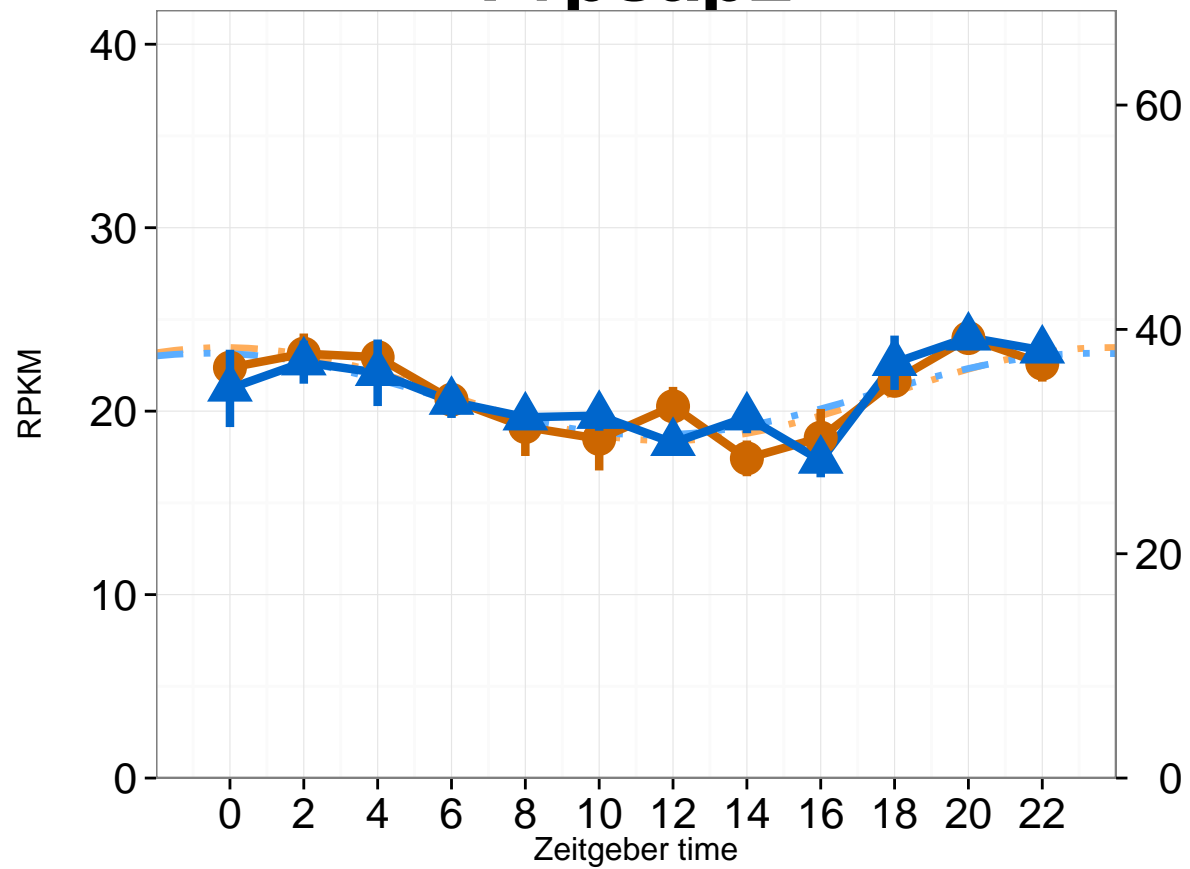

# Prpsap2

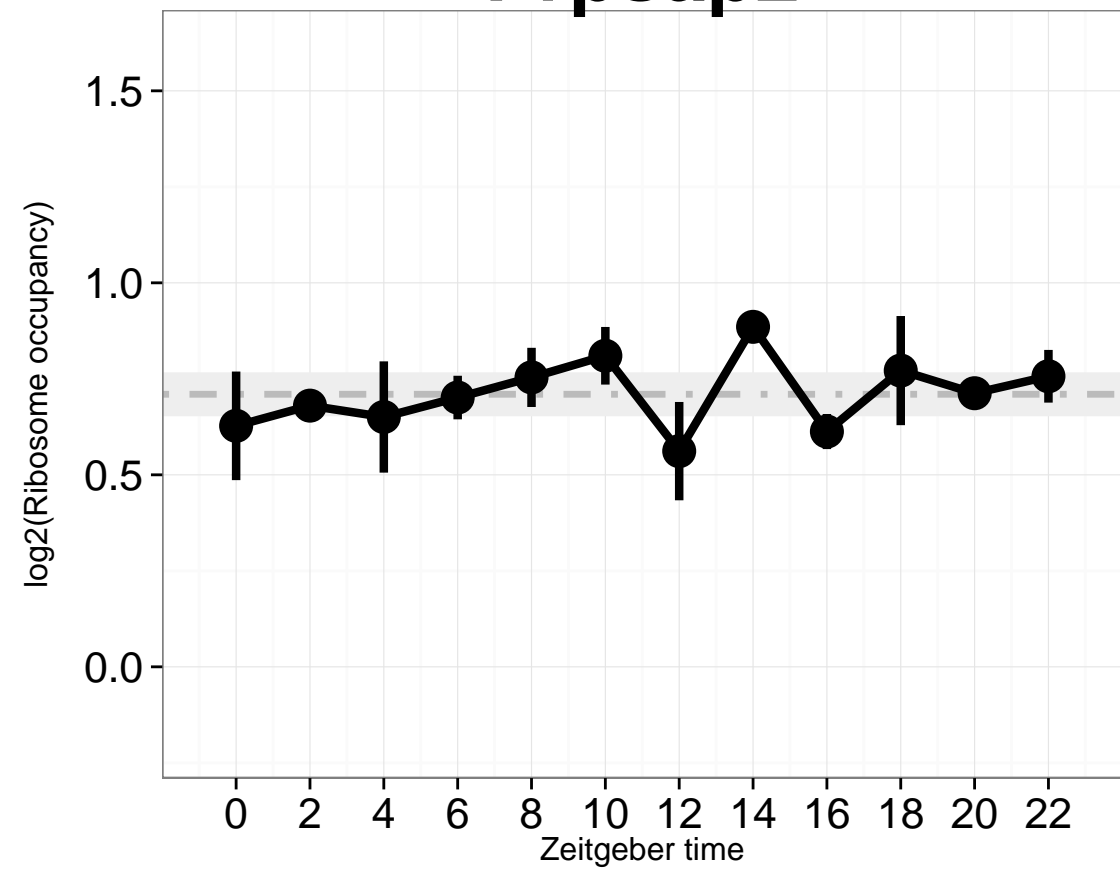

Supplement: Supplementary file 5029 [file 1]

## Cml5

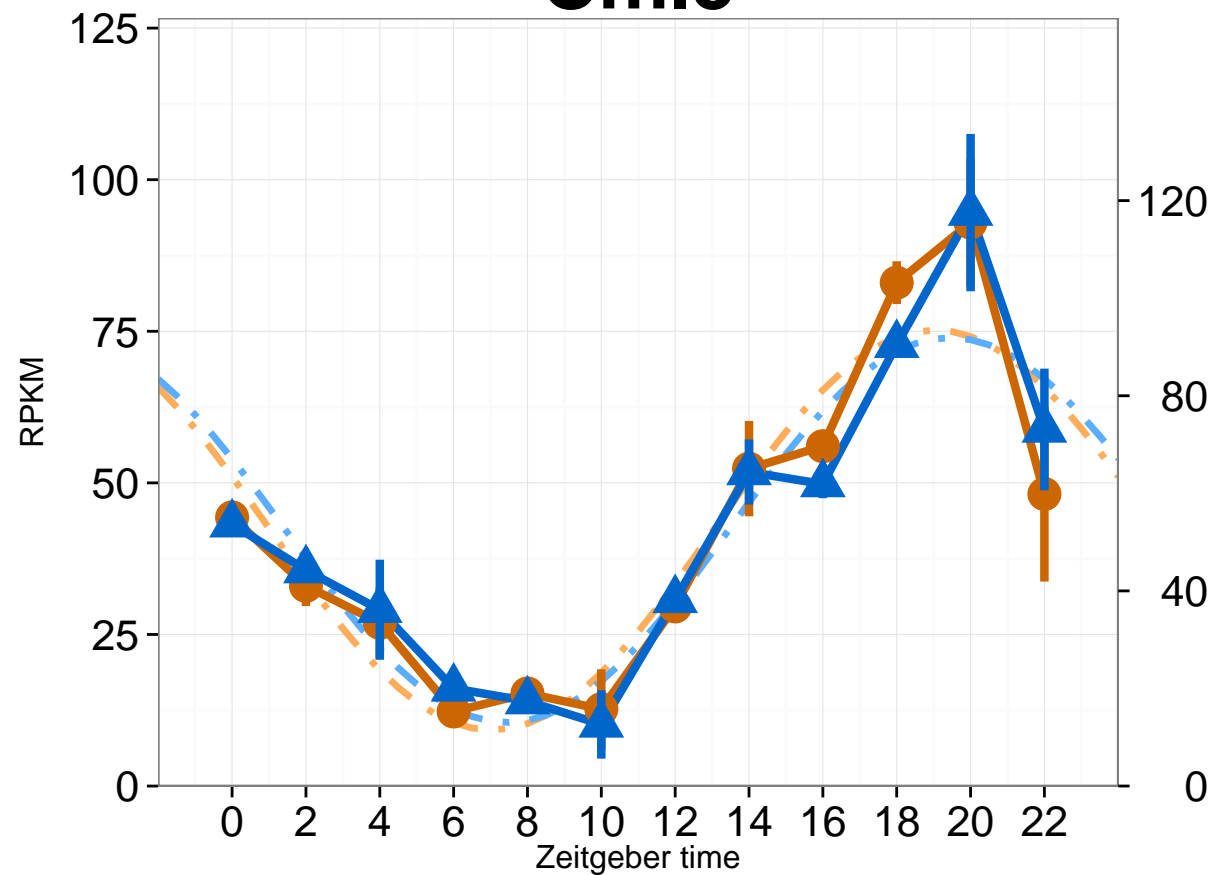

## Cml5

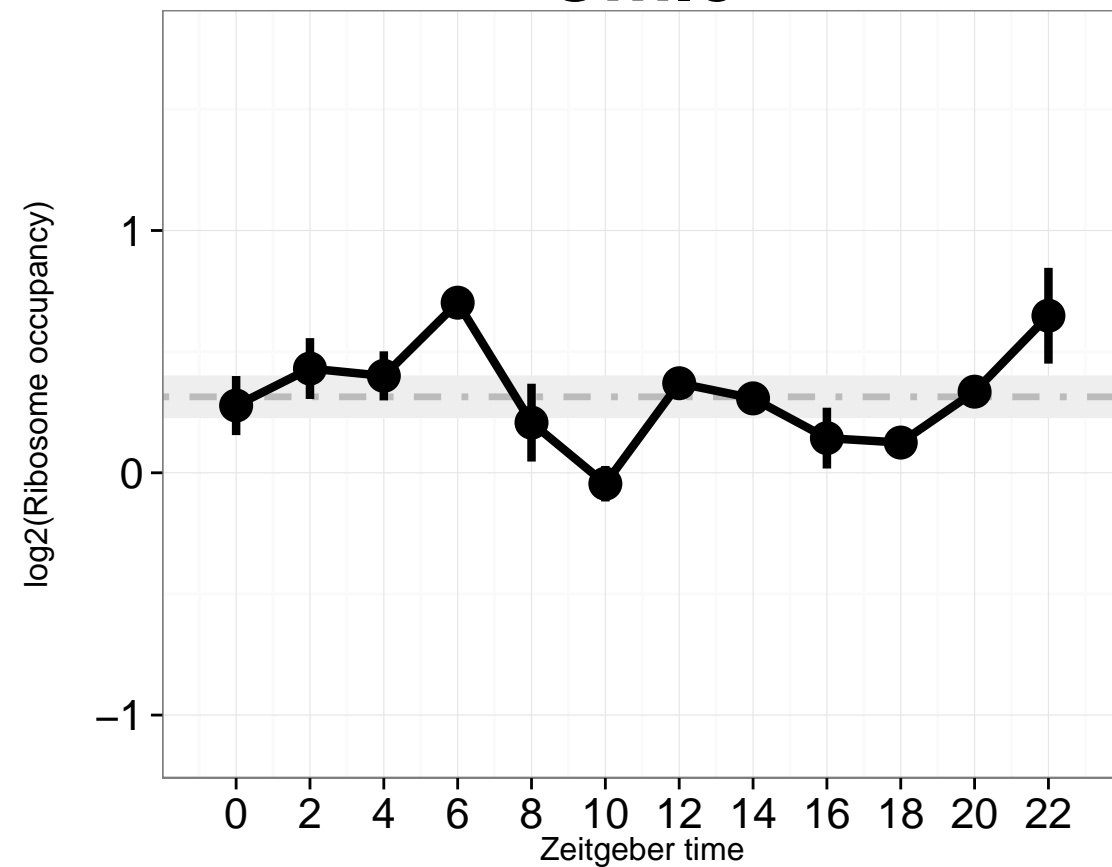

Supplement: Supplementary file 5030 [file 1]

## Nop14

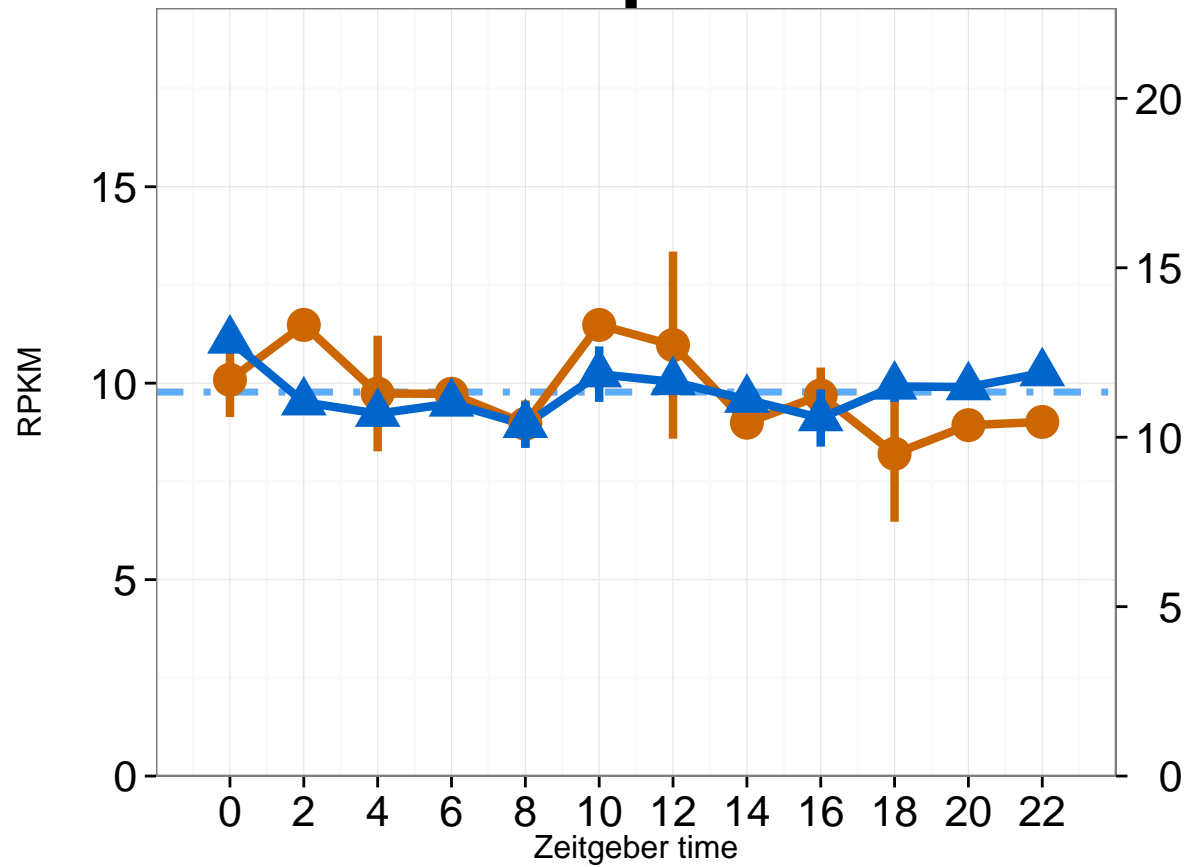

## Nop14

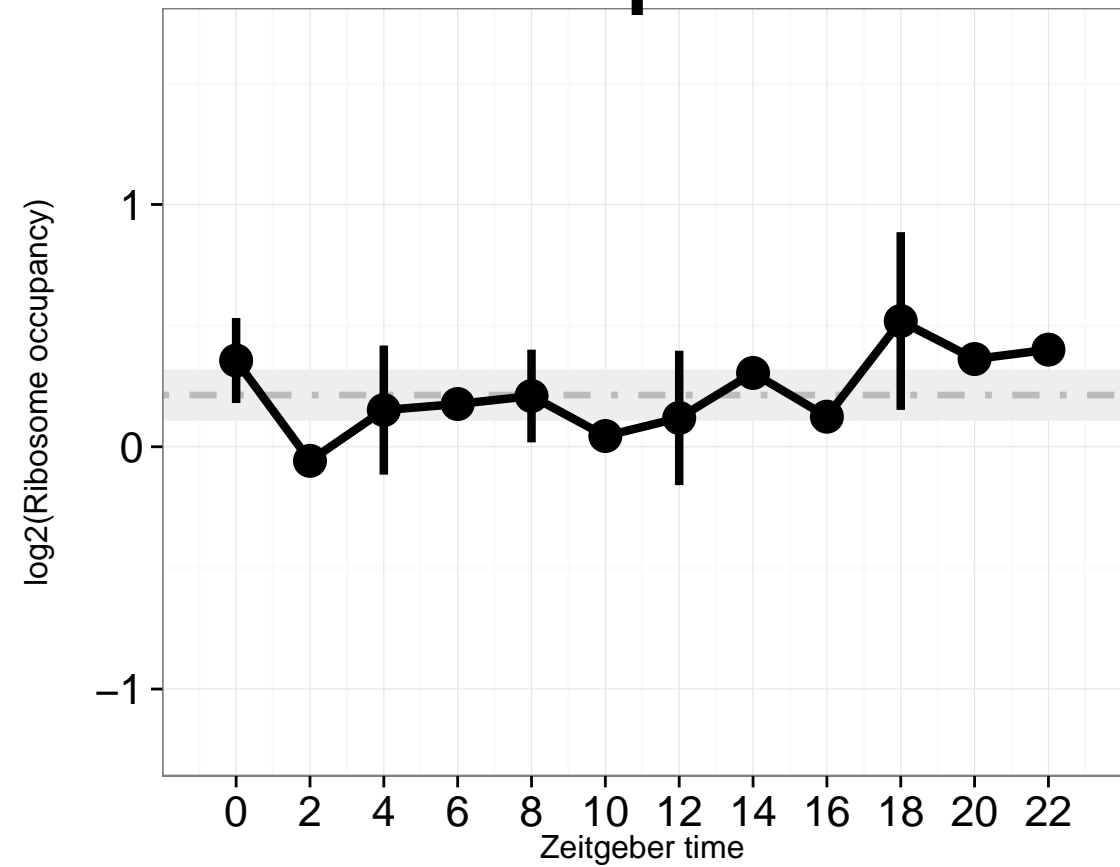

Supplement: Supplementary file 5031 [file 1]

## Cdk16

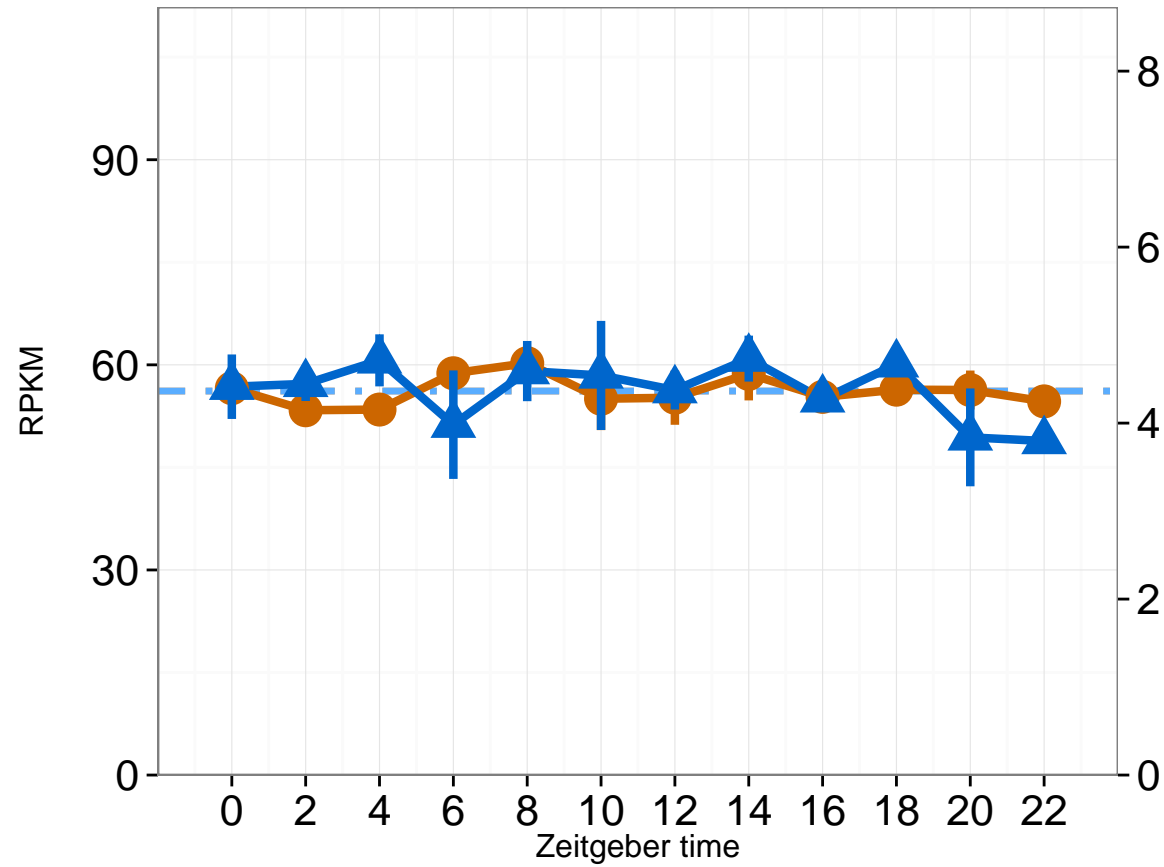

## Cdk16

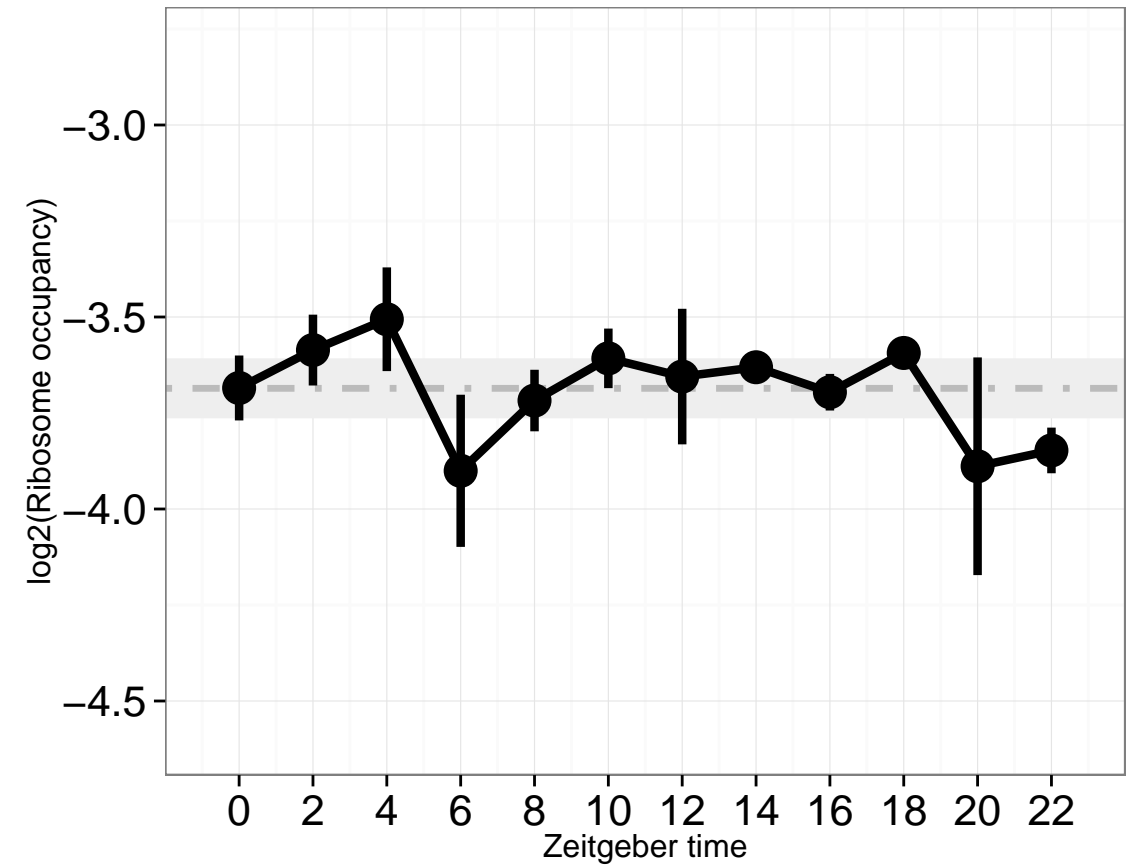

Supplement: Supplementary file 5032 [file 1]

# Mtus1

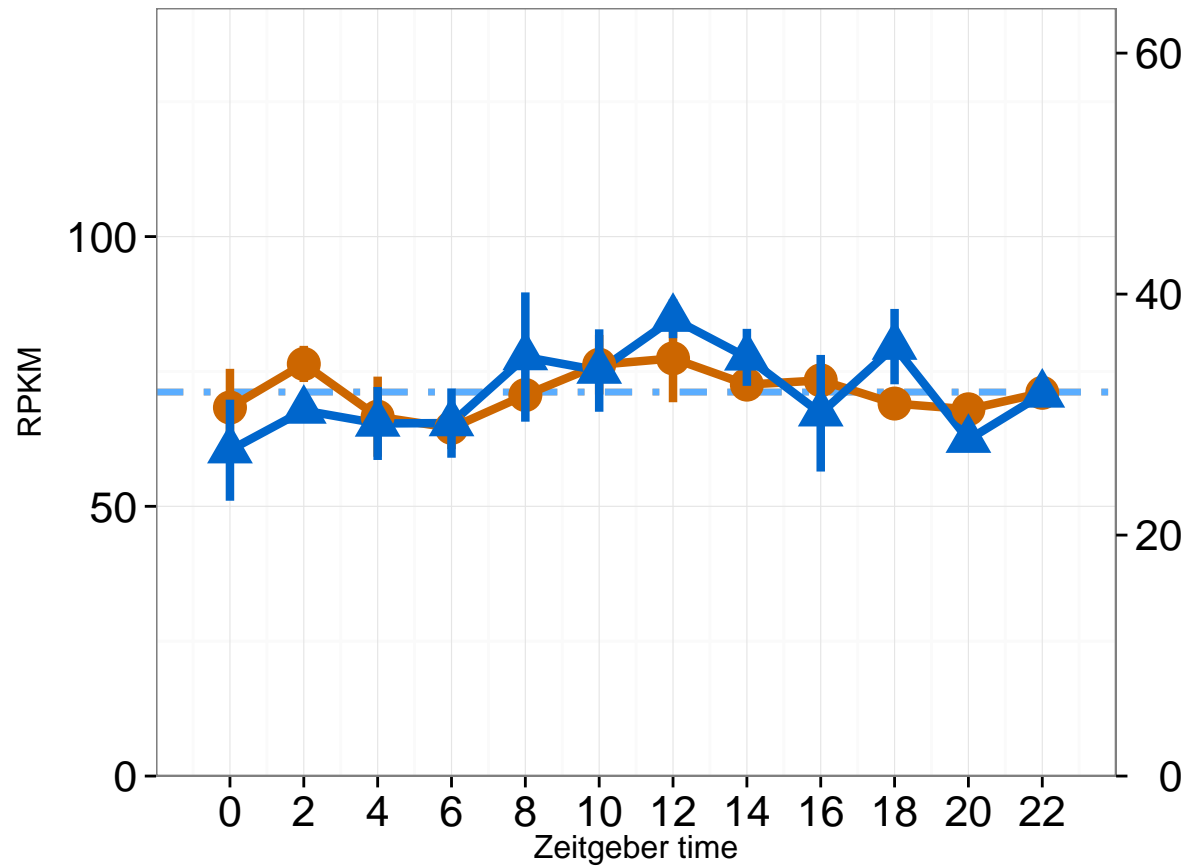

# Mtus1

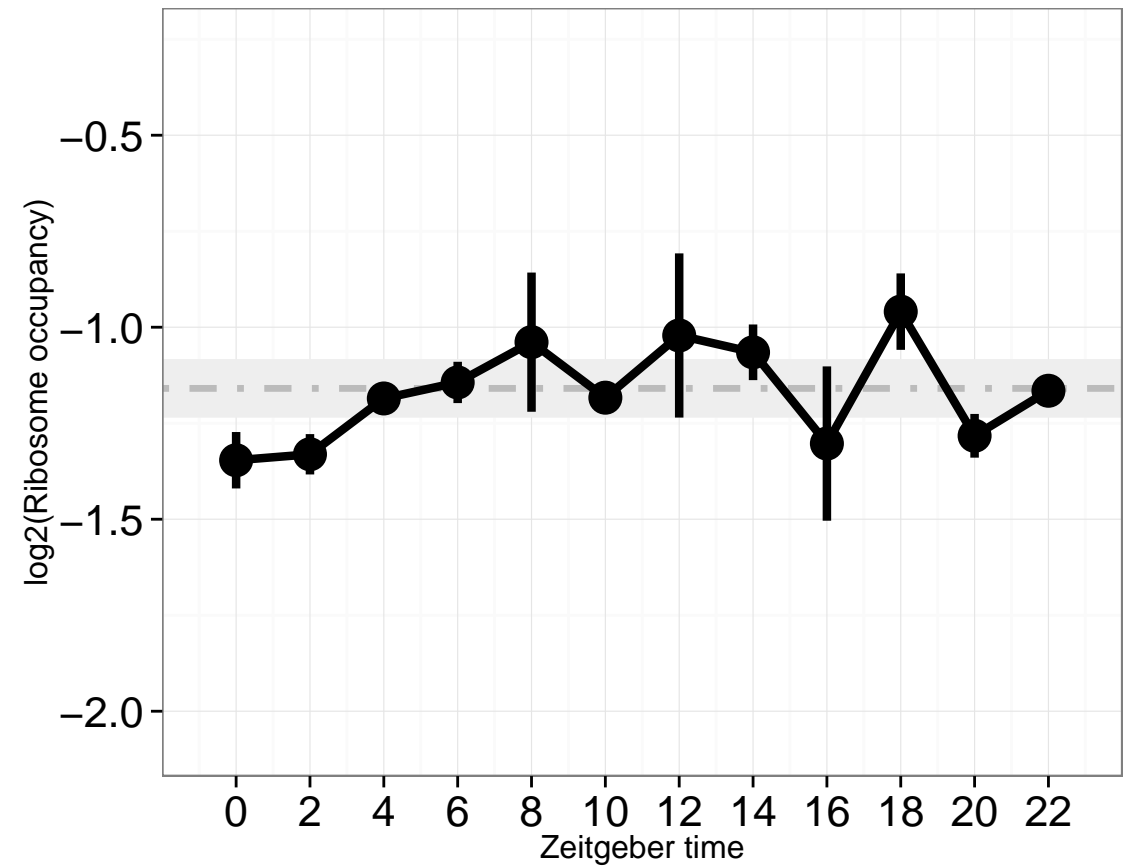

Supplement: Supplementary file 5033 [file 1]

## Unc13c

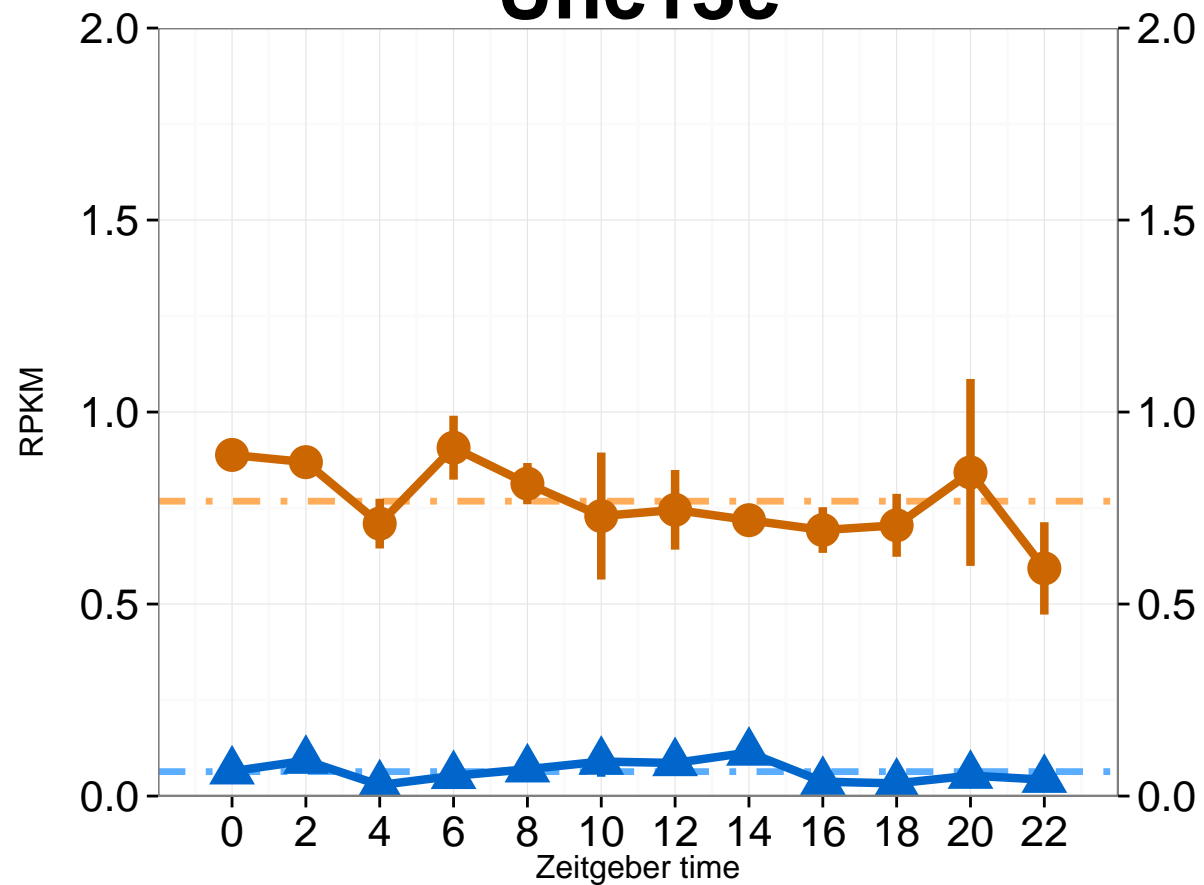

## Unc13c

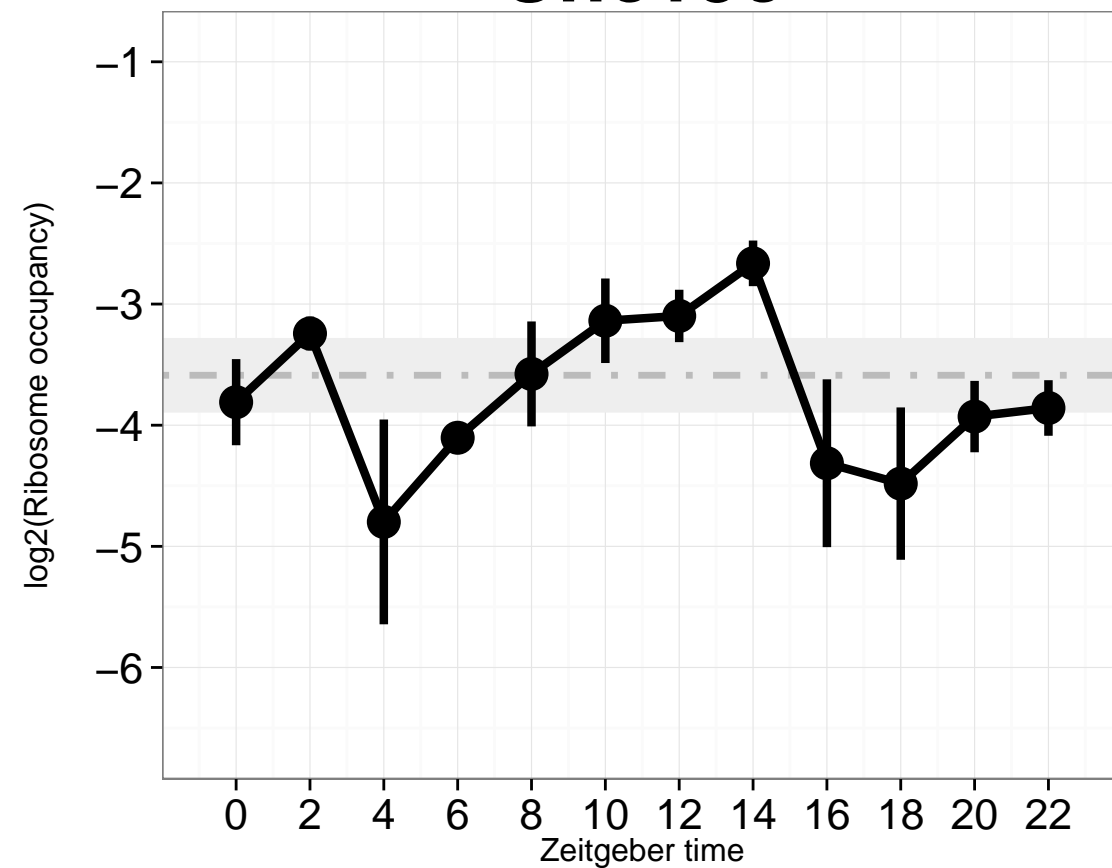

Supplement: Supplementary file 5034 [file 1]

# Tmem44

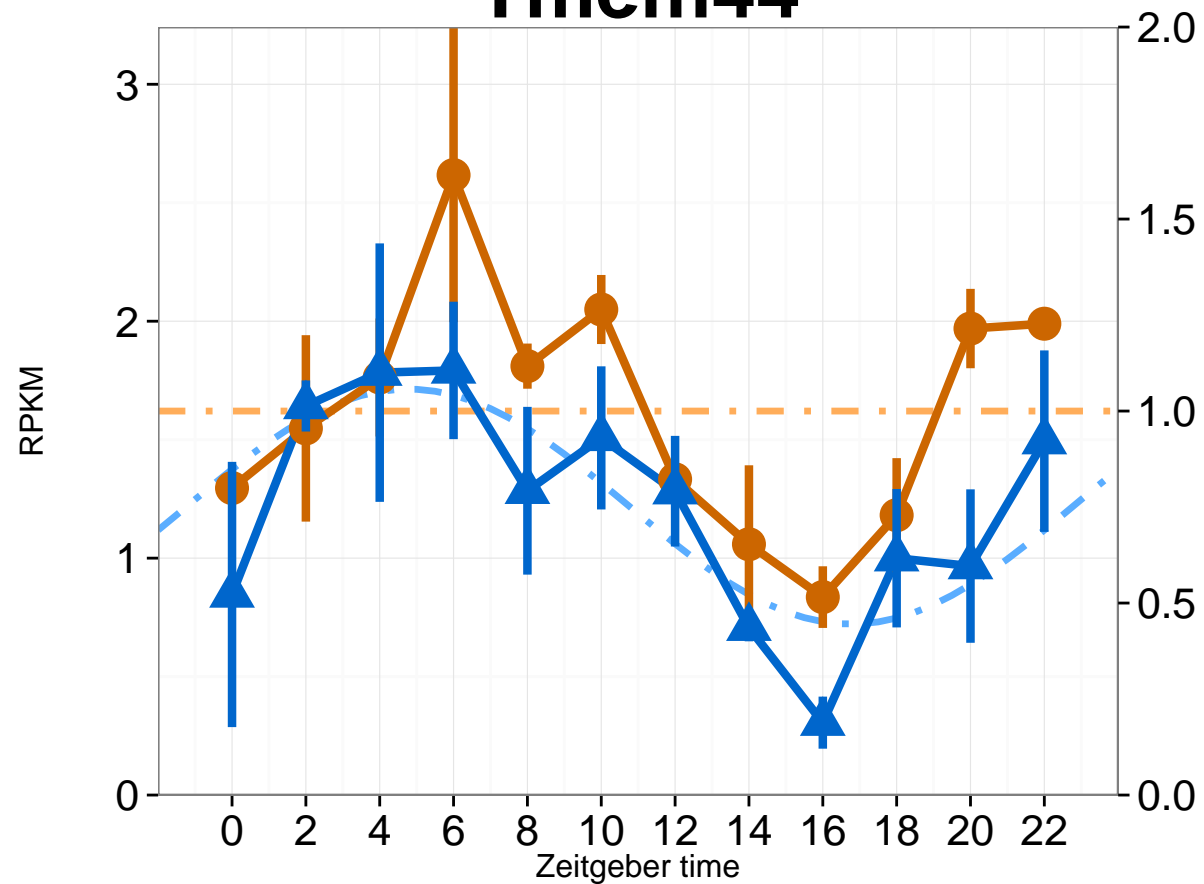

# Tmem44

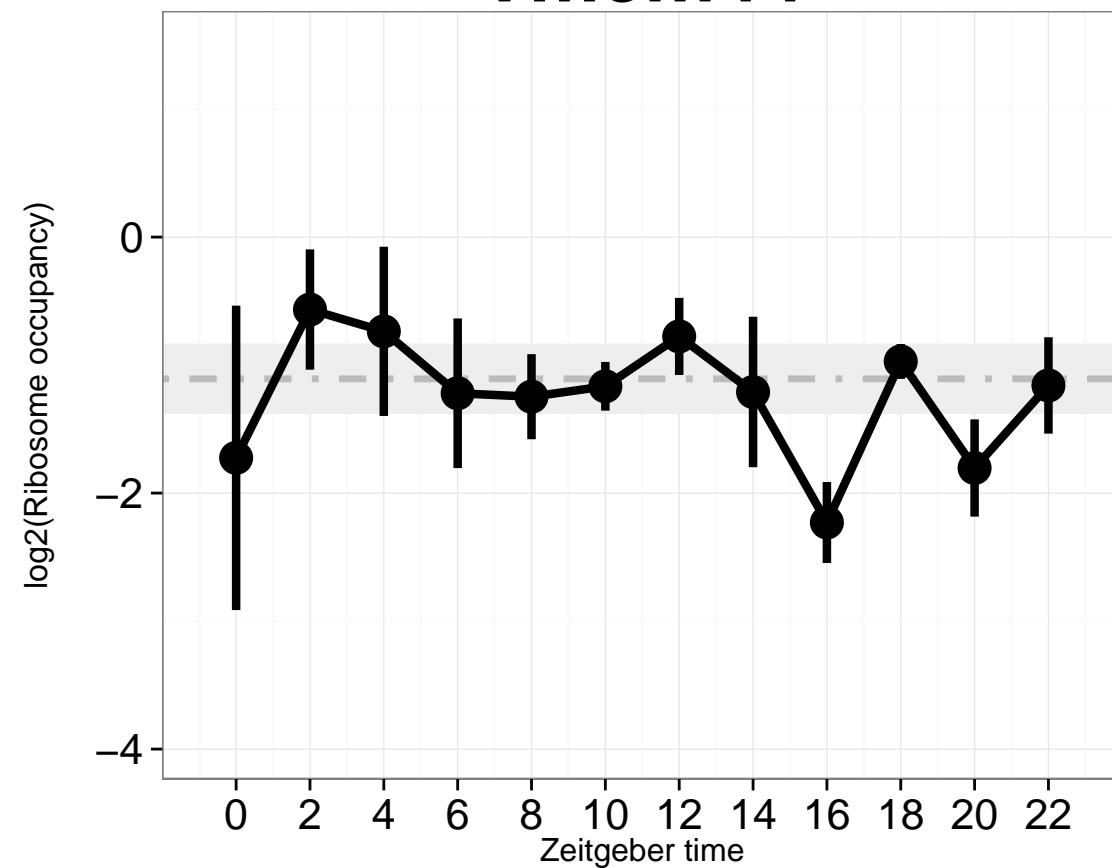

Supplement: Supplementary file 5035 [file 1]

## Dos

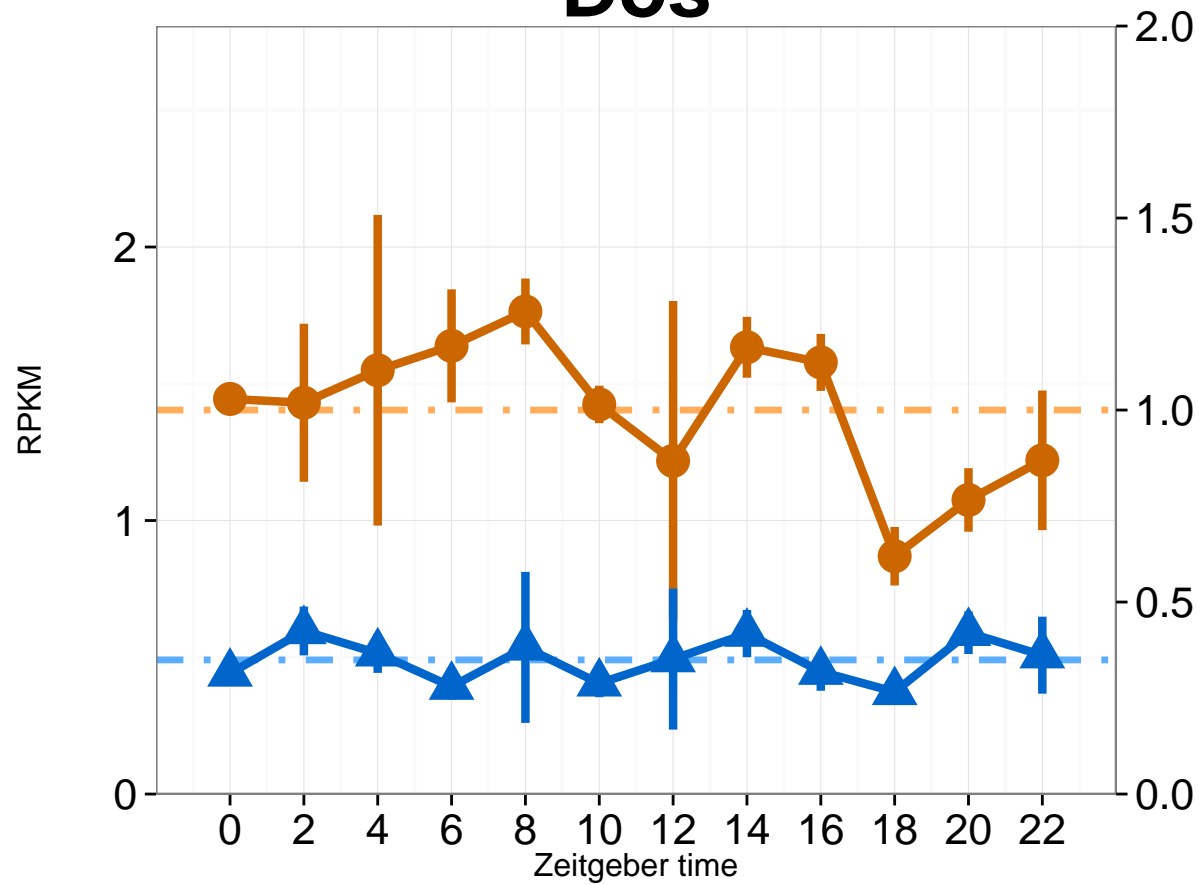

## Dos

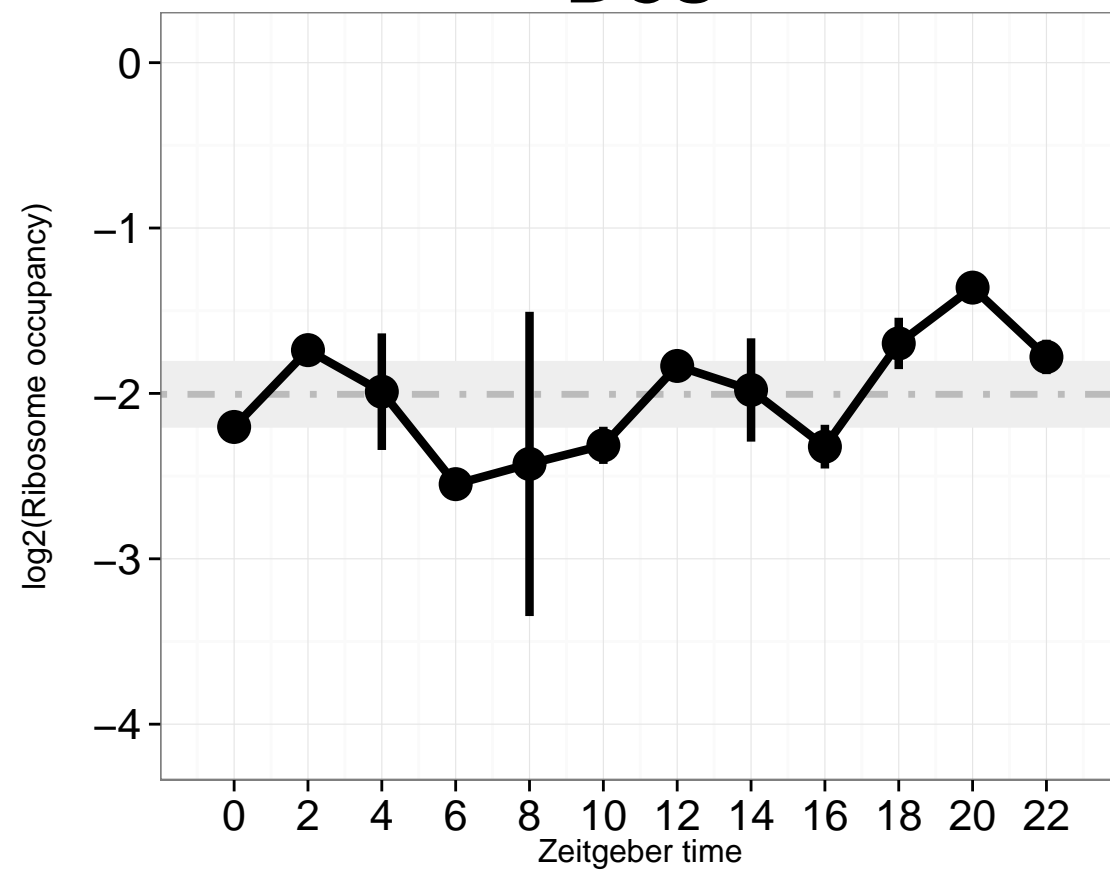

Supplement: Supplementary file 5036 [file 1]

## Dus4l

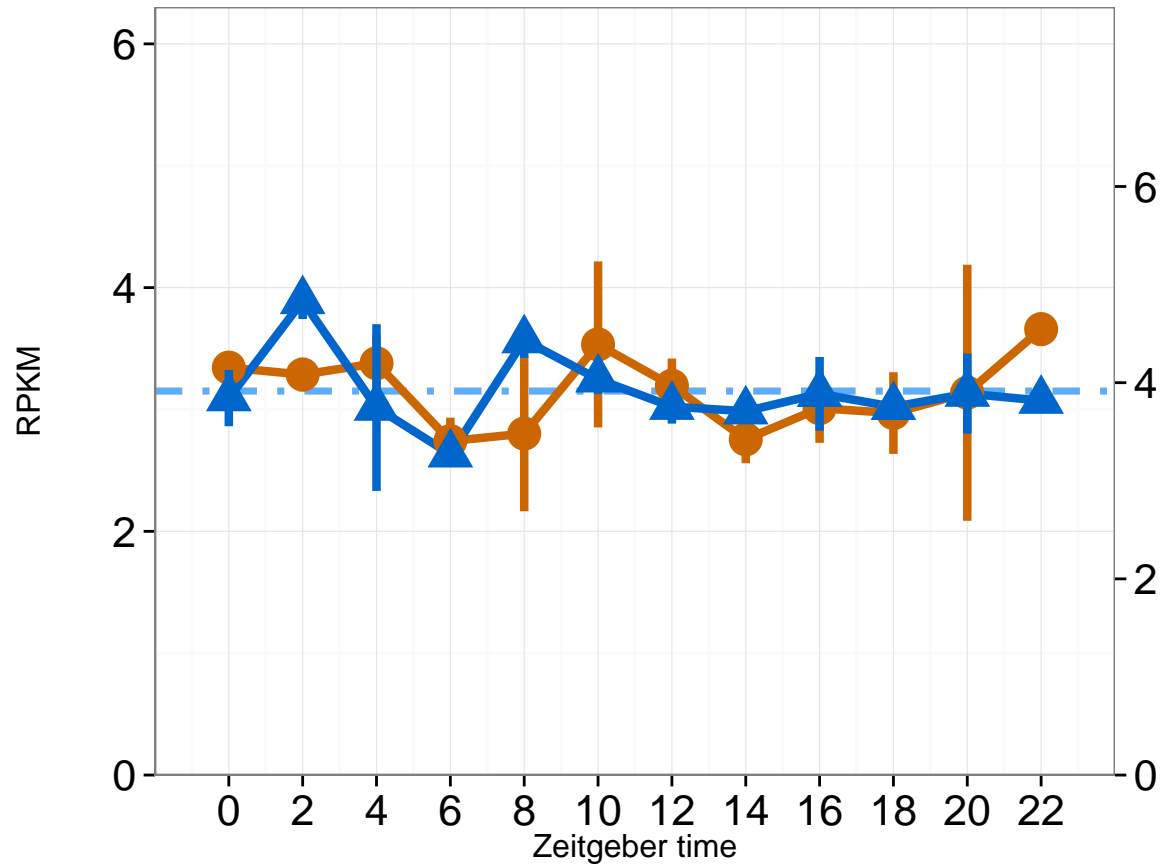

## Dus4l

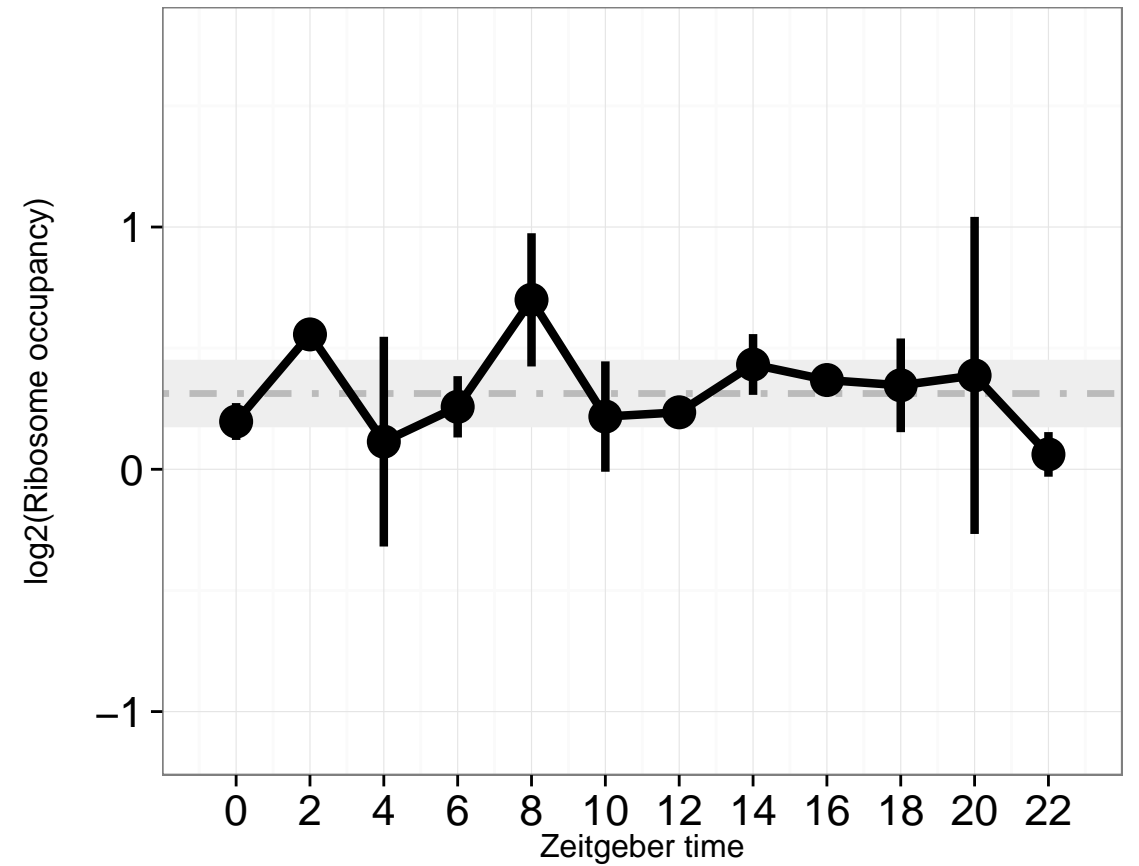

Supplement: Supplementary file 5037 [file 1]

**Creb5 TR**

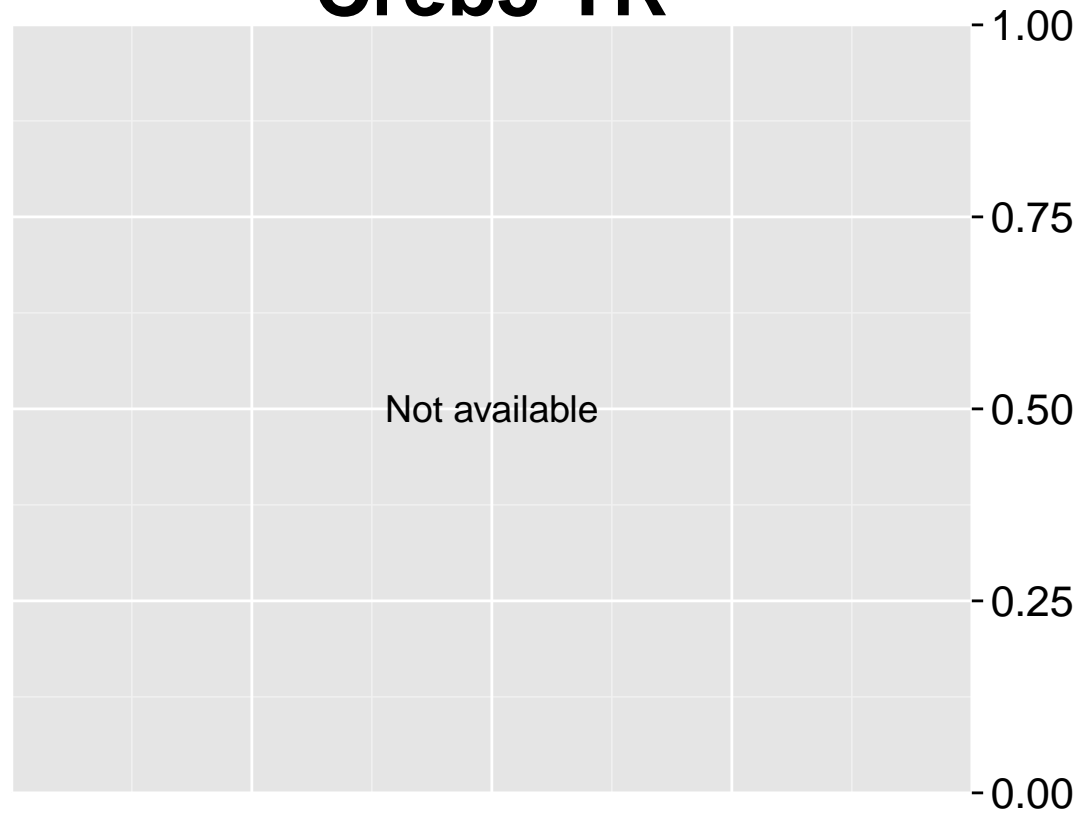

**Creb5 log2(Ribosome occupancy**

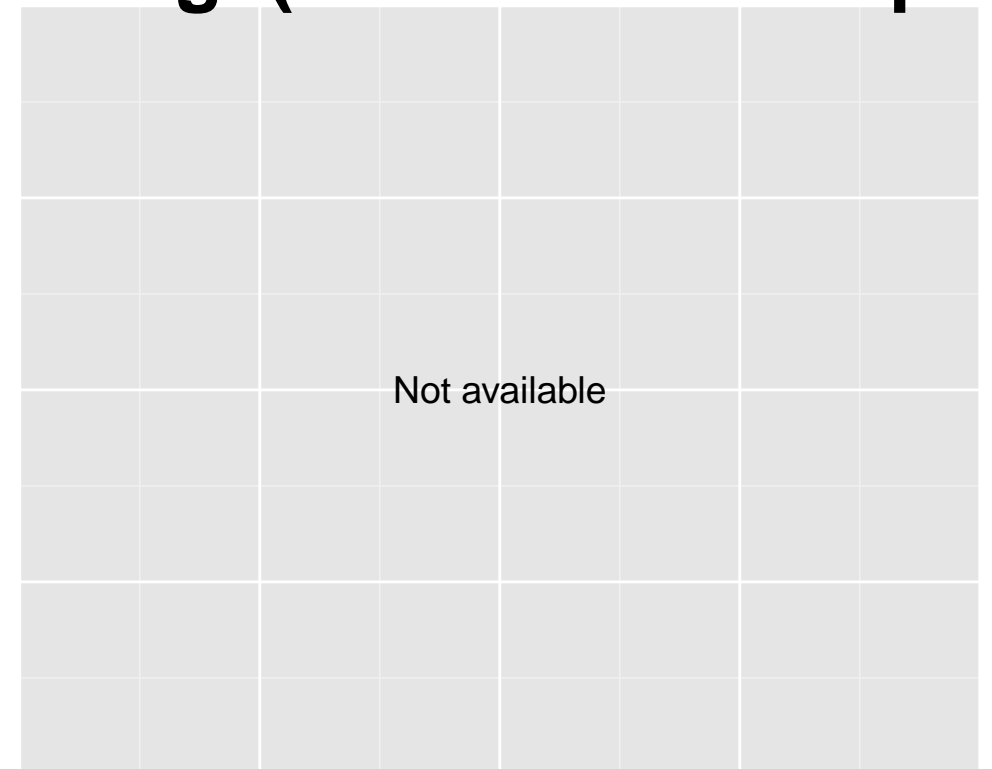

Supplement: Supplementary file 5038 [file 1]

# Tuba4a

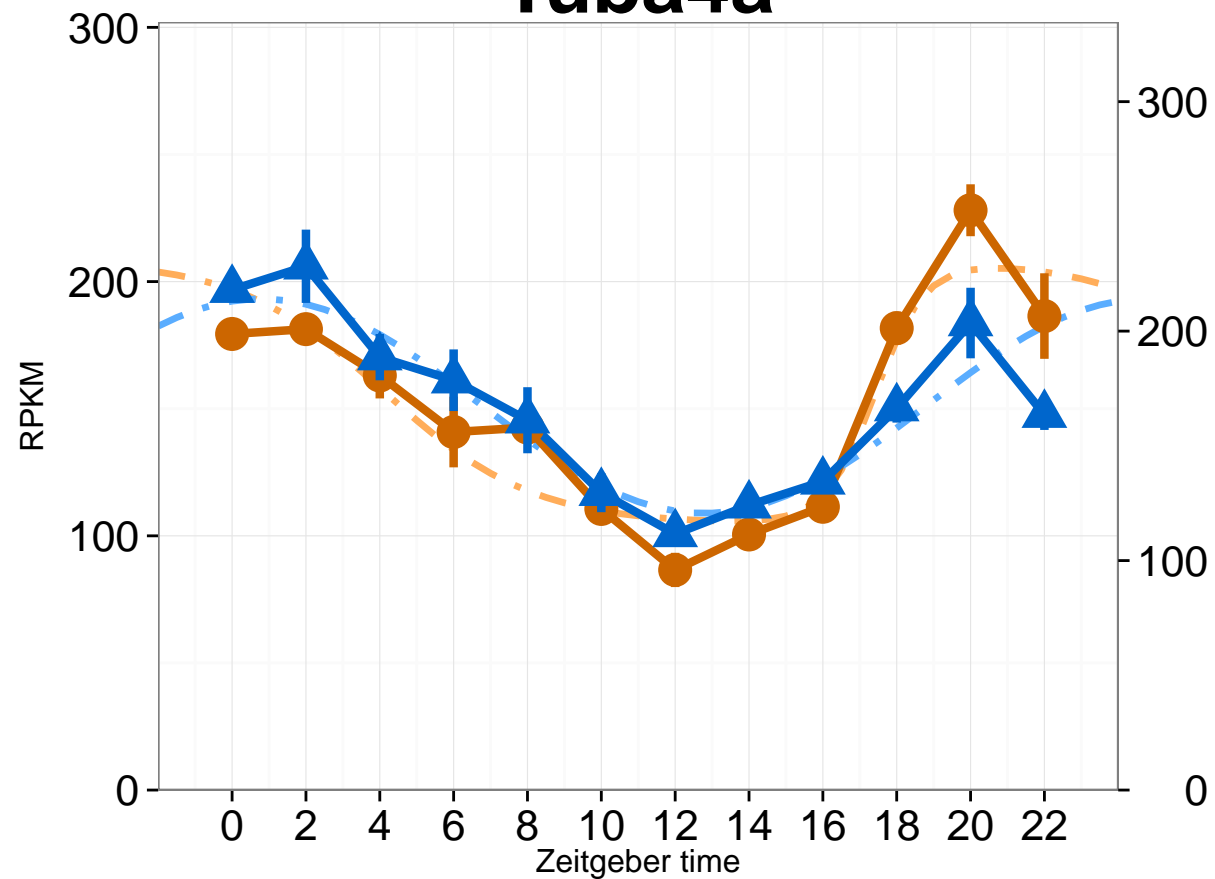

# Tuba4a

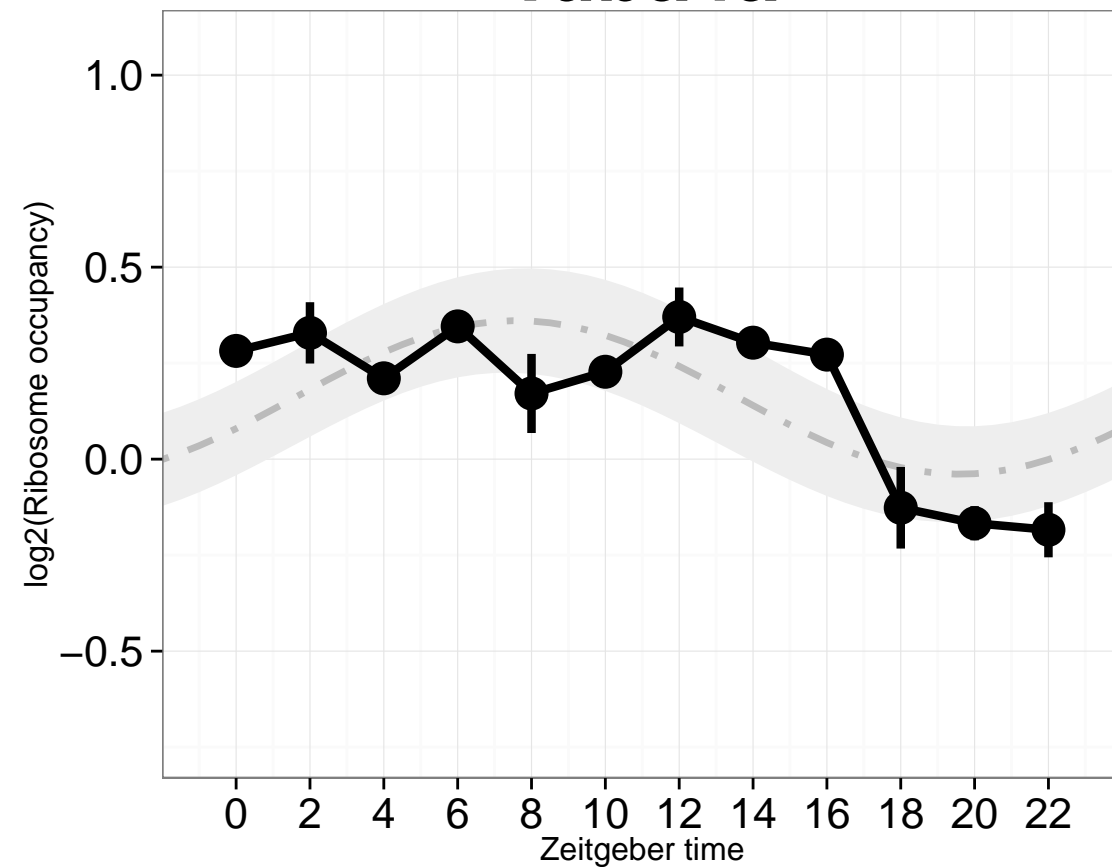

Supplement: Supplementary file 5039 [file 1]

## Cldn1

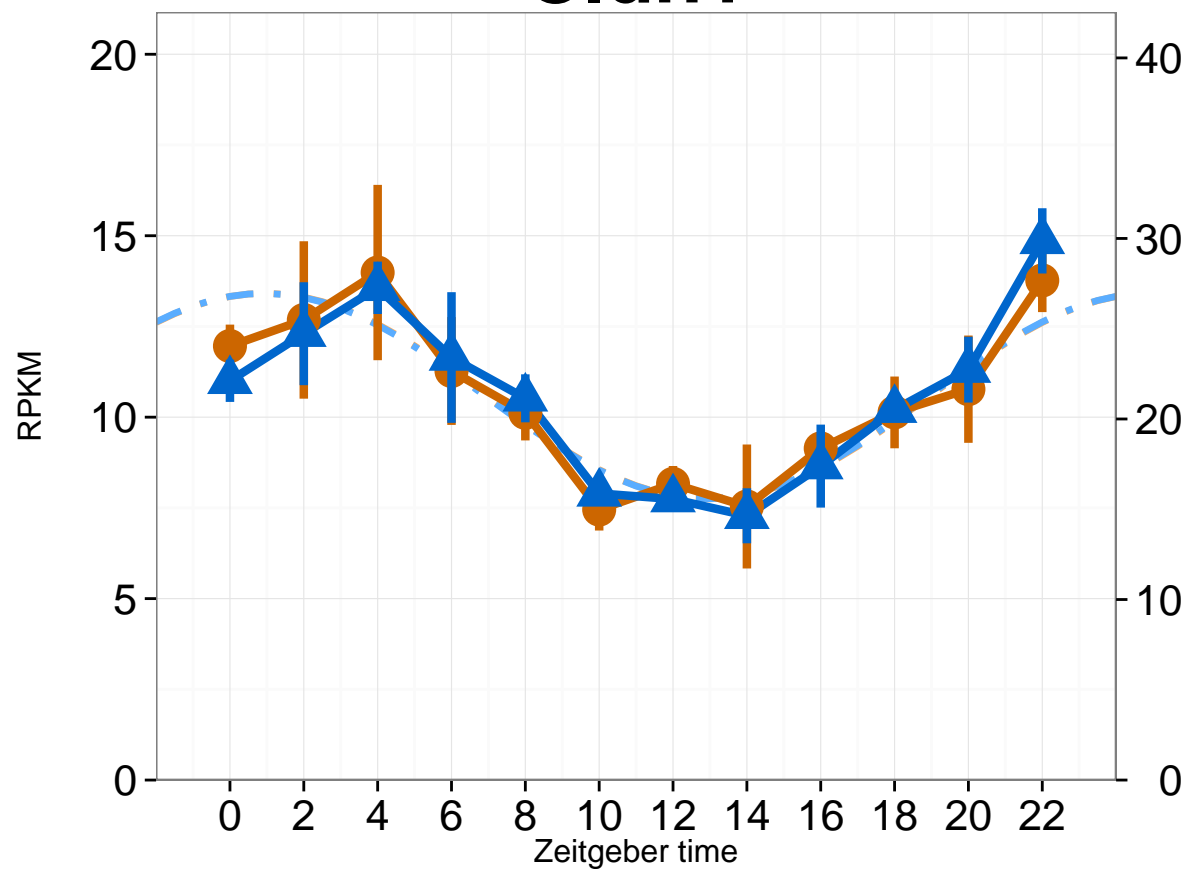

## Cldn1

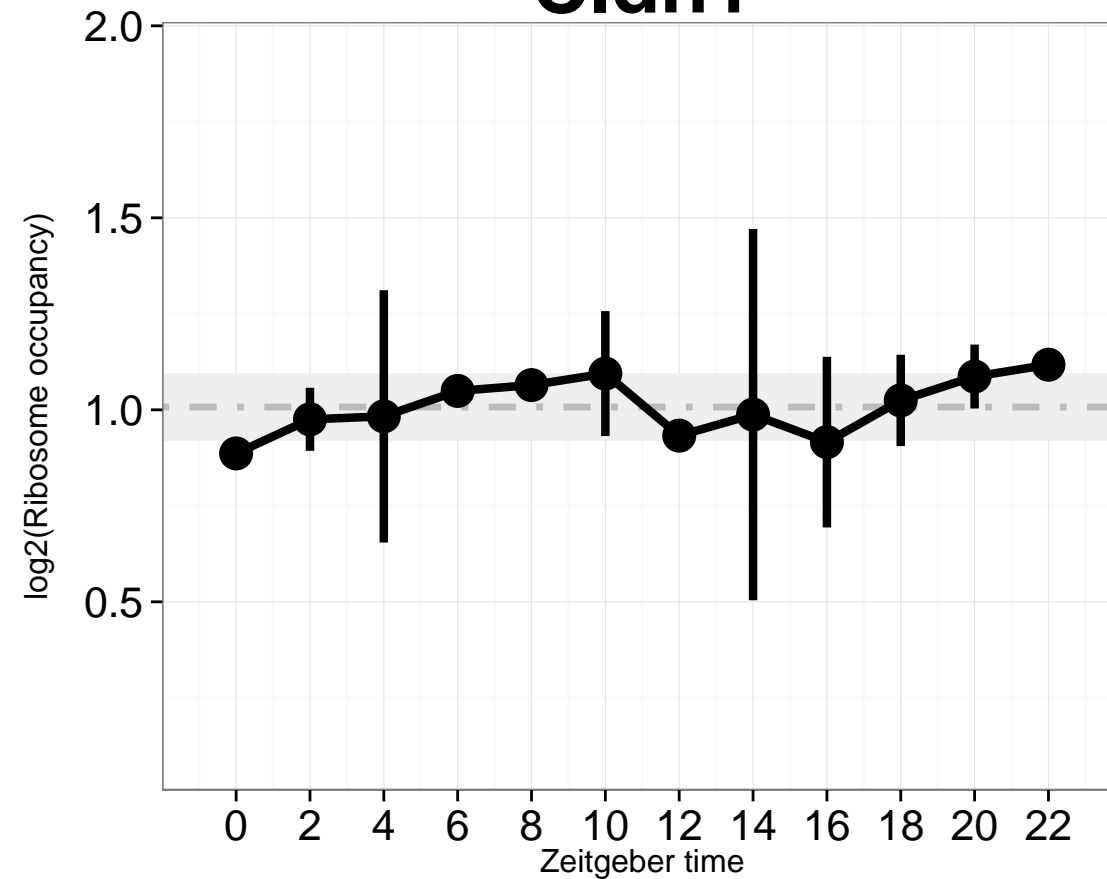

Supplement: Supplementary file 5040 [file 1]

## Pfkl

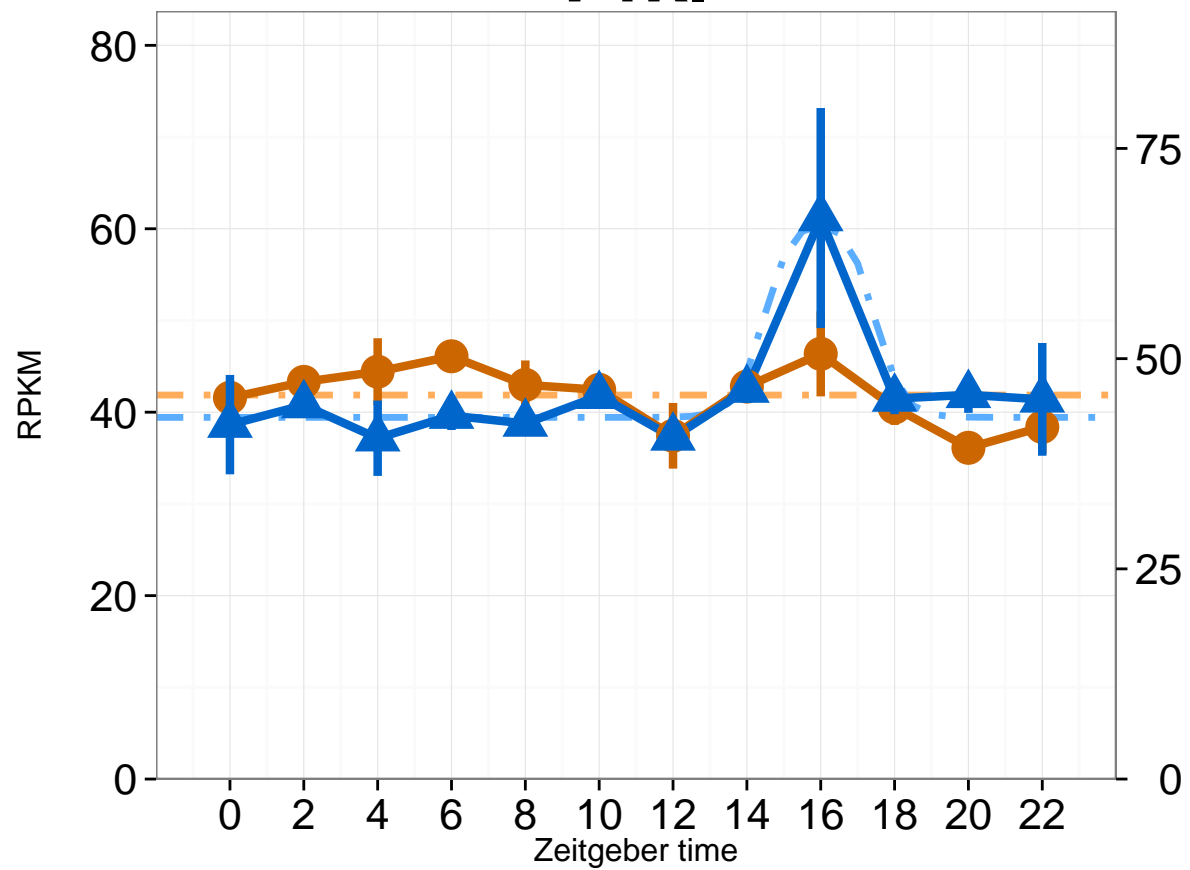

## Pfkl

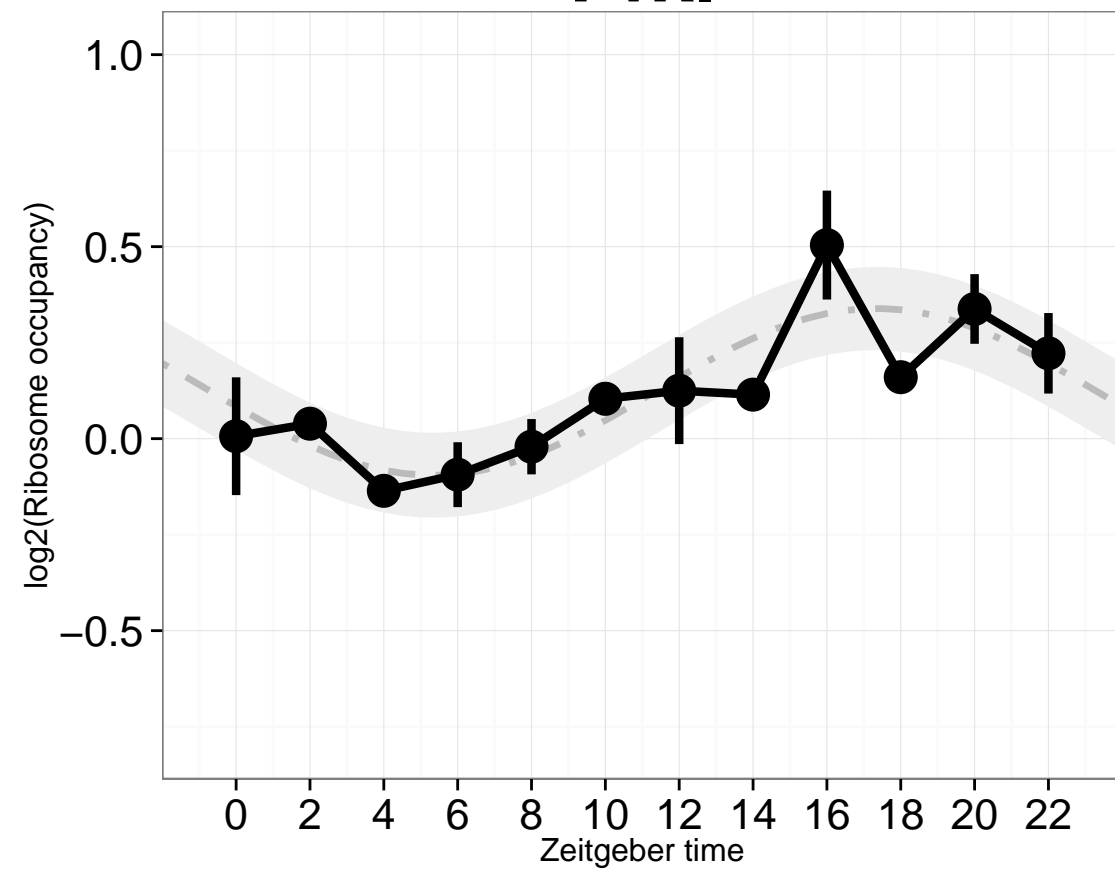

Supplement: Supplementary file 5041 [file 1]

## Svopl

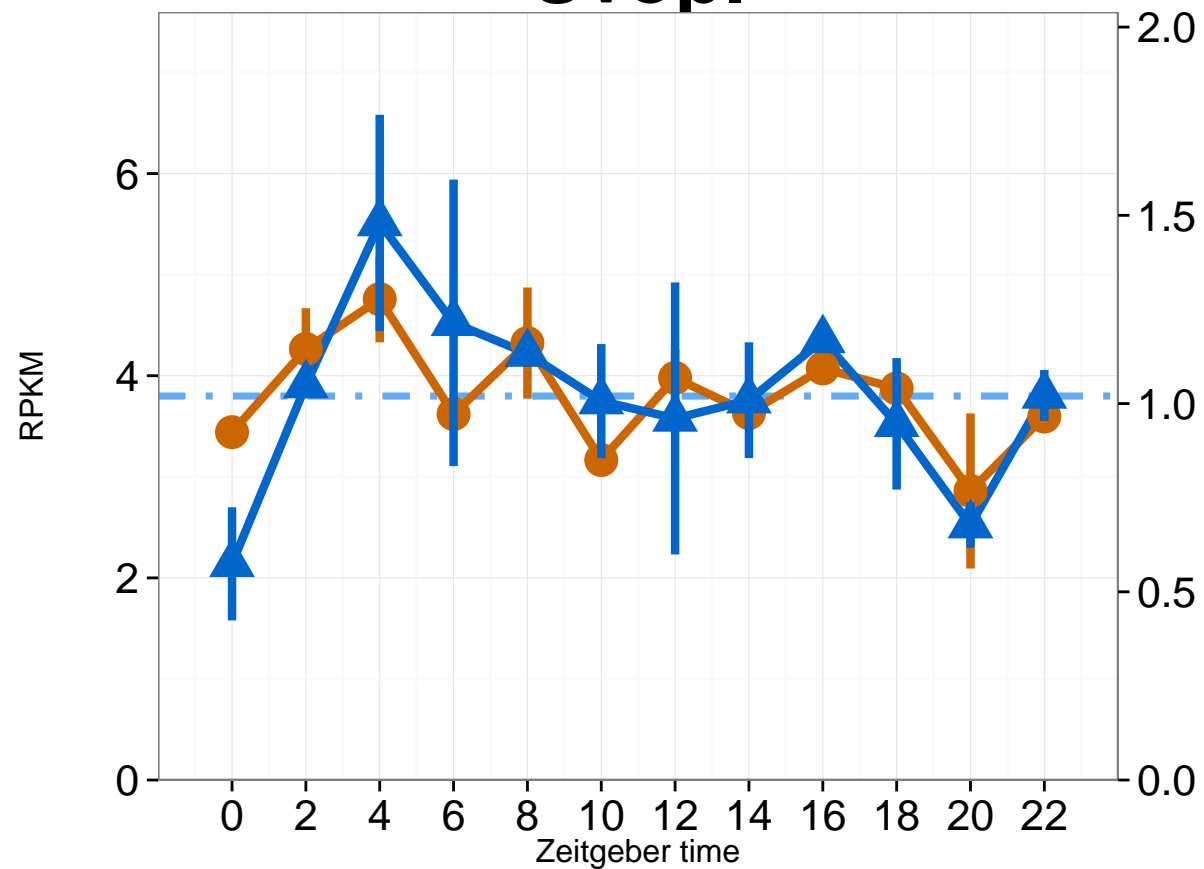

## Svopl

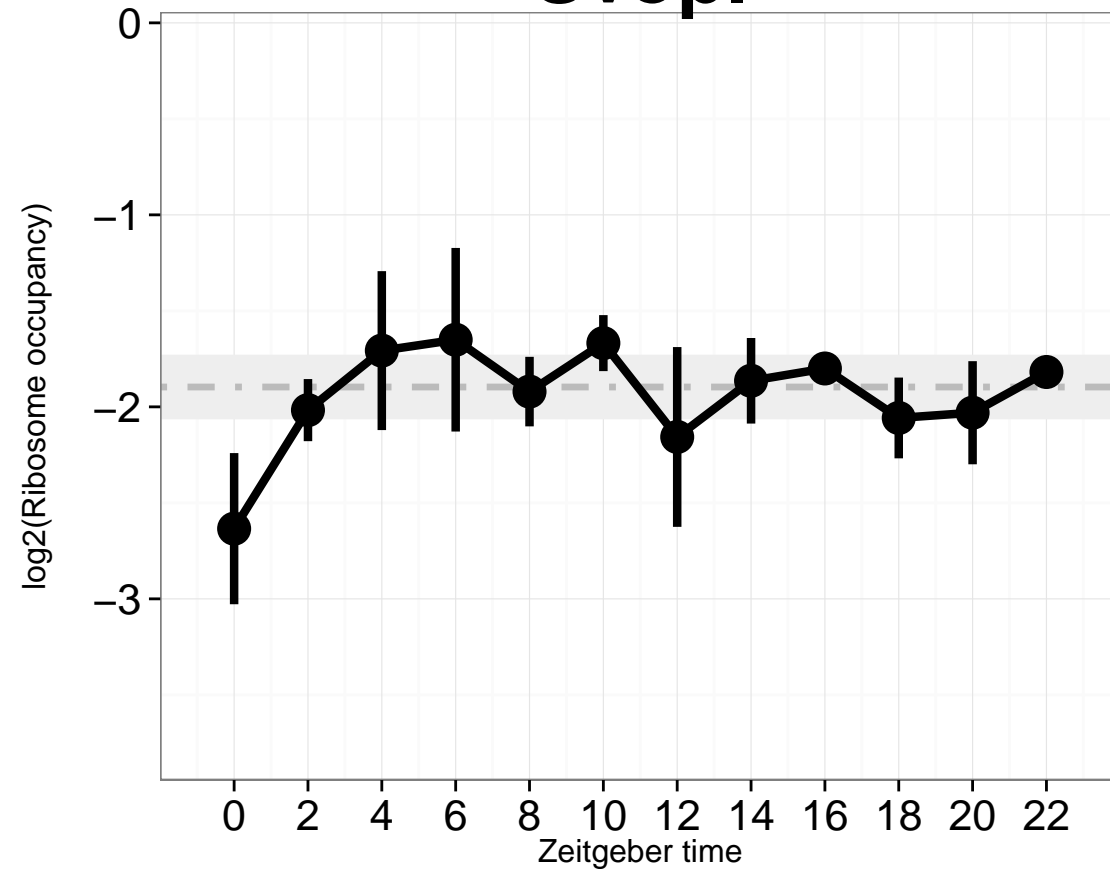

Supplement: Supplementary file 5042 [file 1]

## Cdyl2

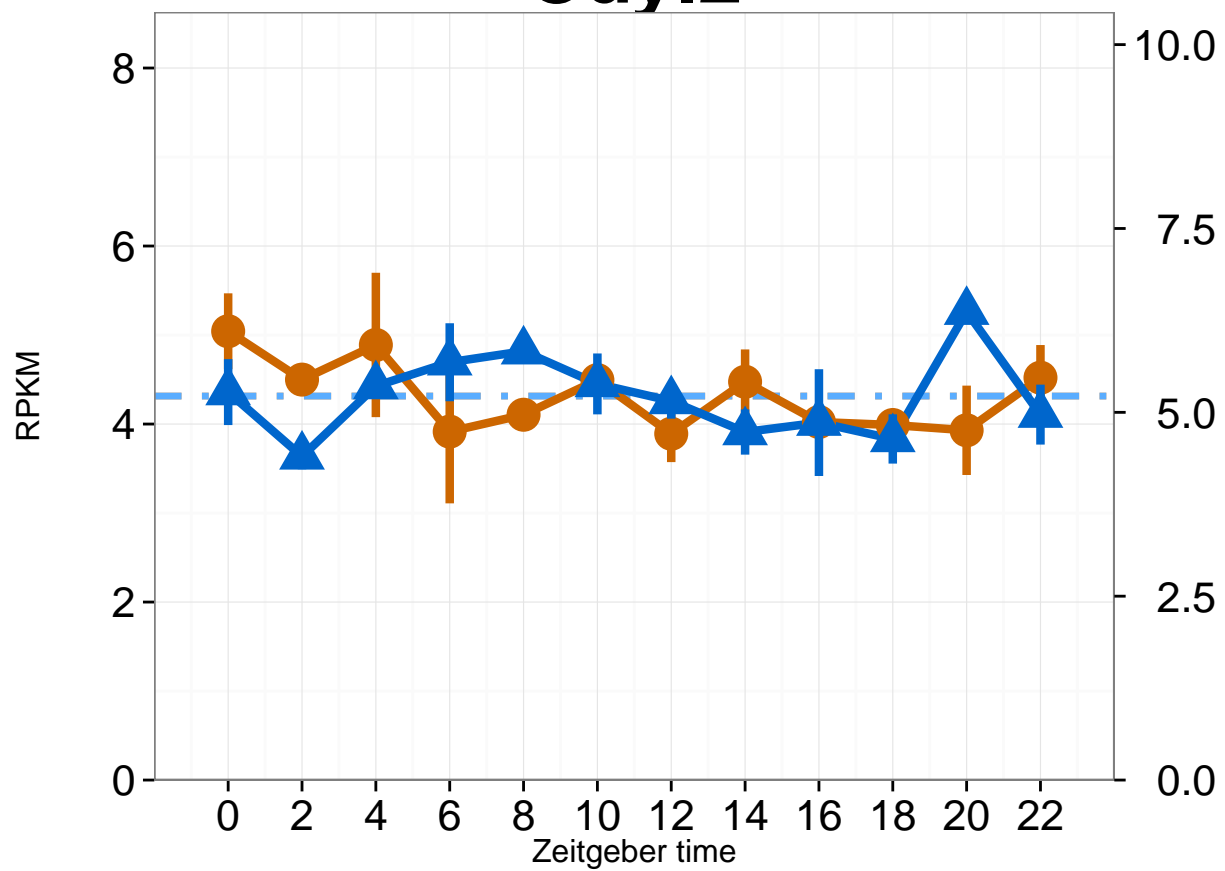

## Cdyl2

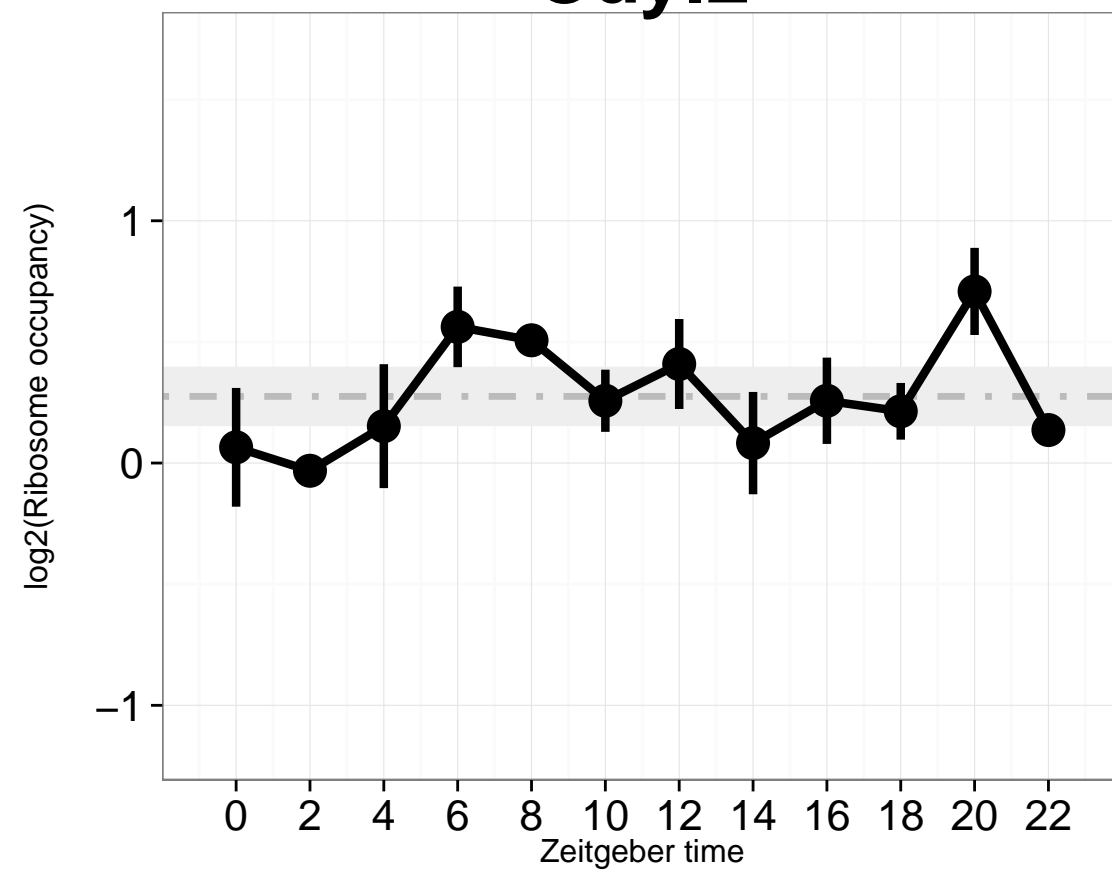

Supplement: Supplementary file 5043 [file 1]

# Slc39a4

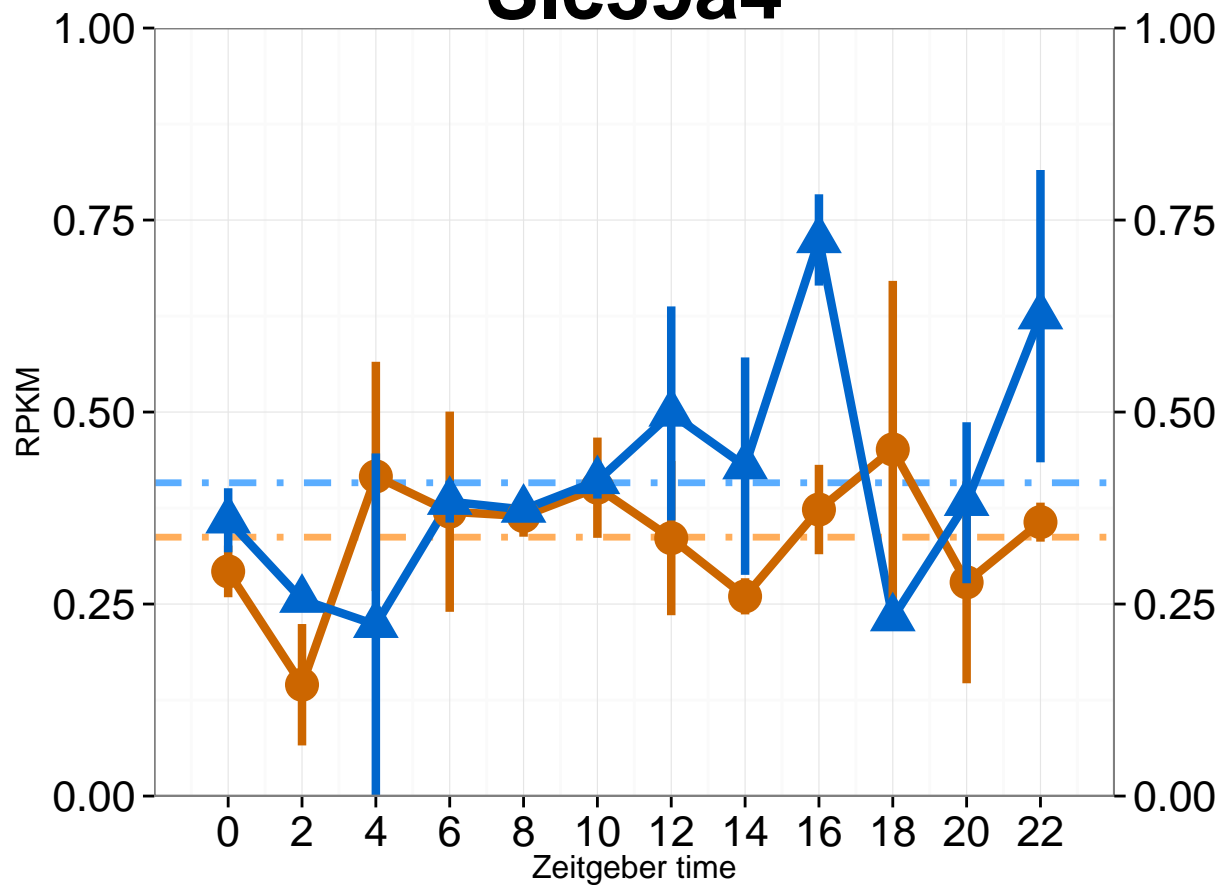

# Slc39a4

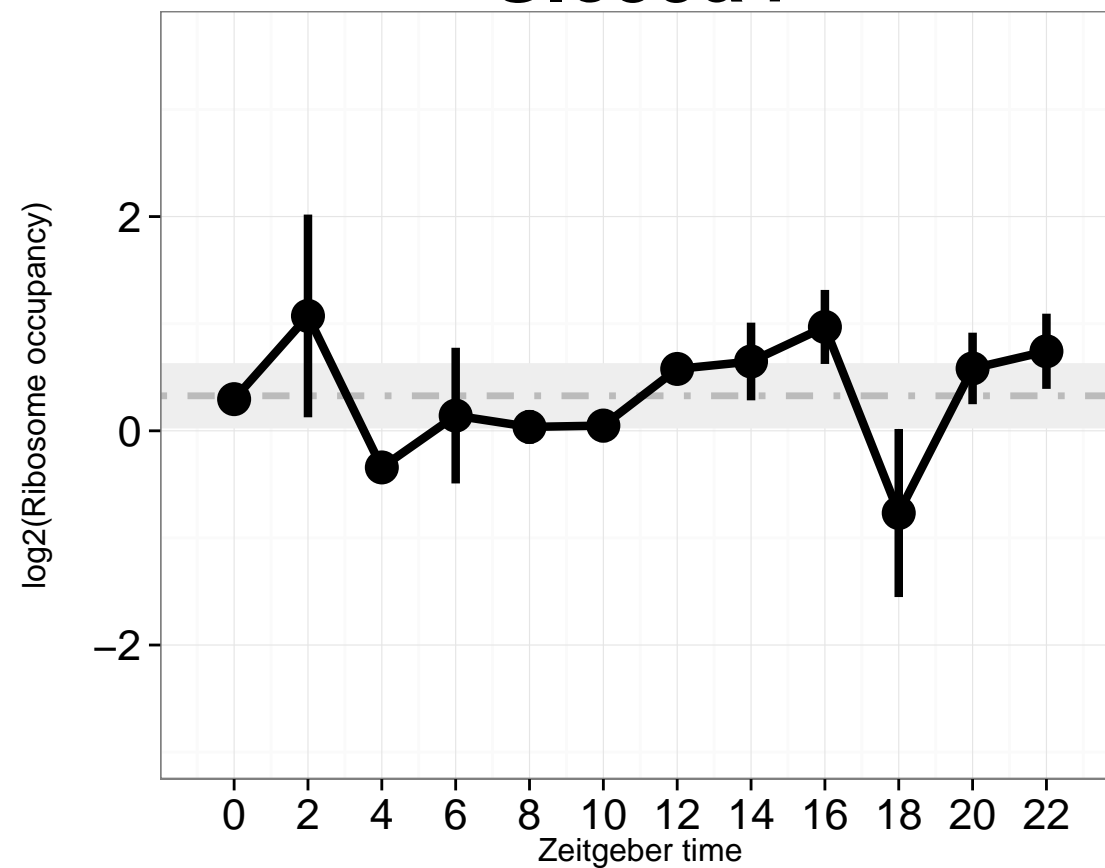

Supplement: Supplementary file 5044 [file 1]

# Gtse1

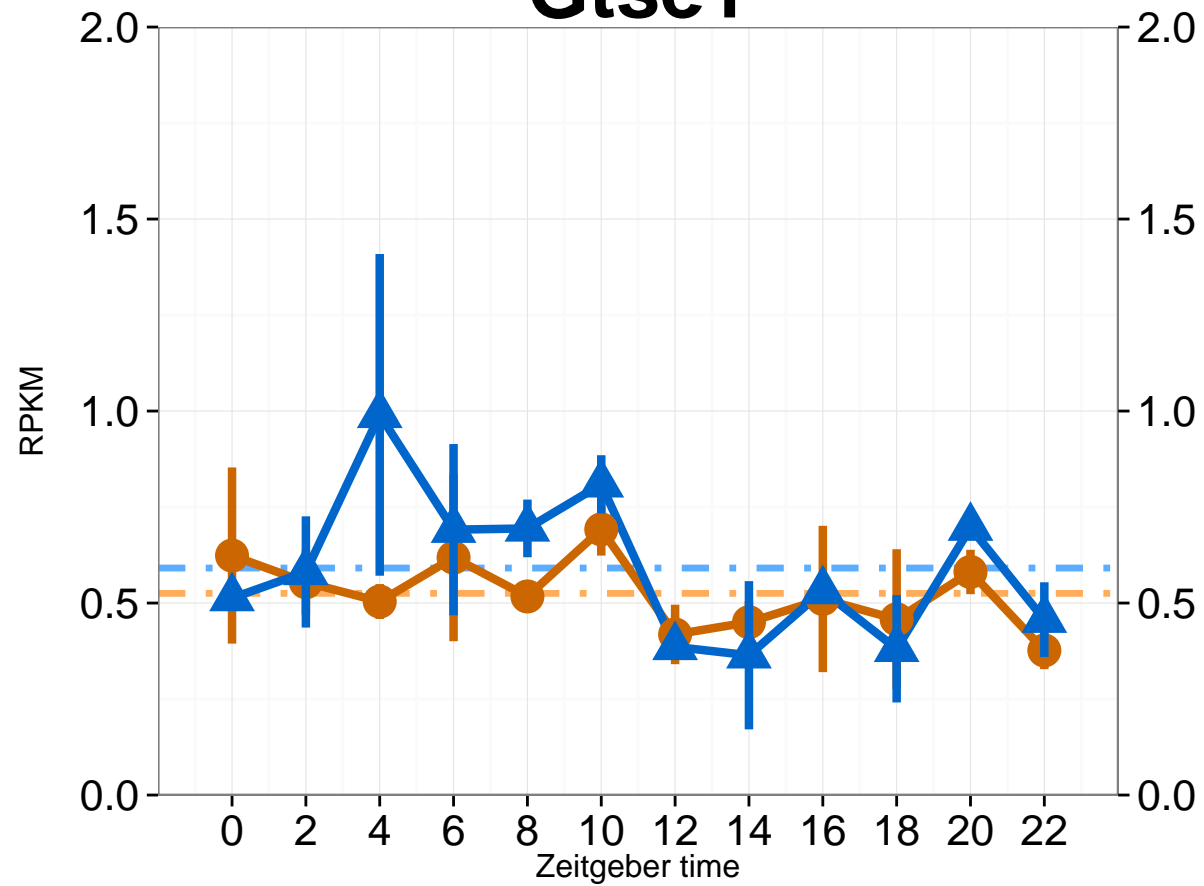

# Gtse1

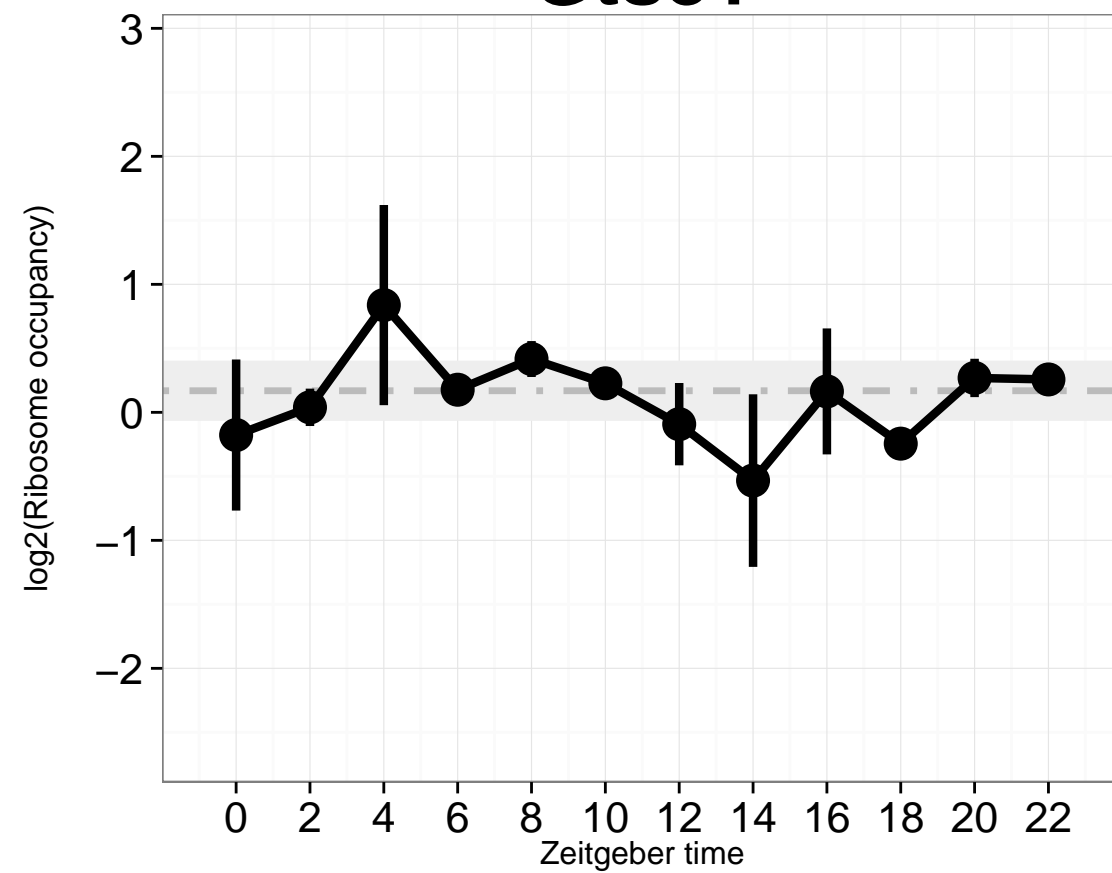

Supplement: Supplementary file 5045 [file 1]

## Pdcd5

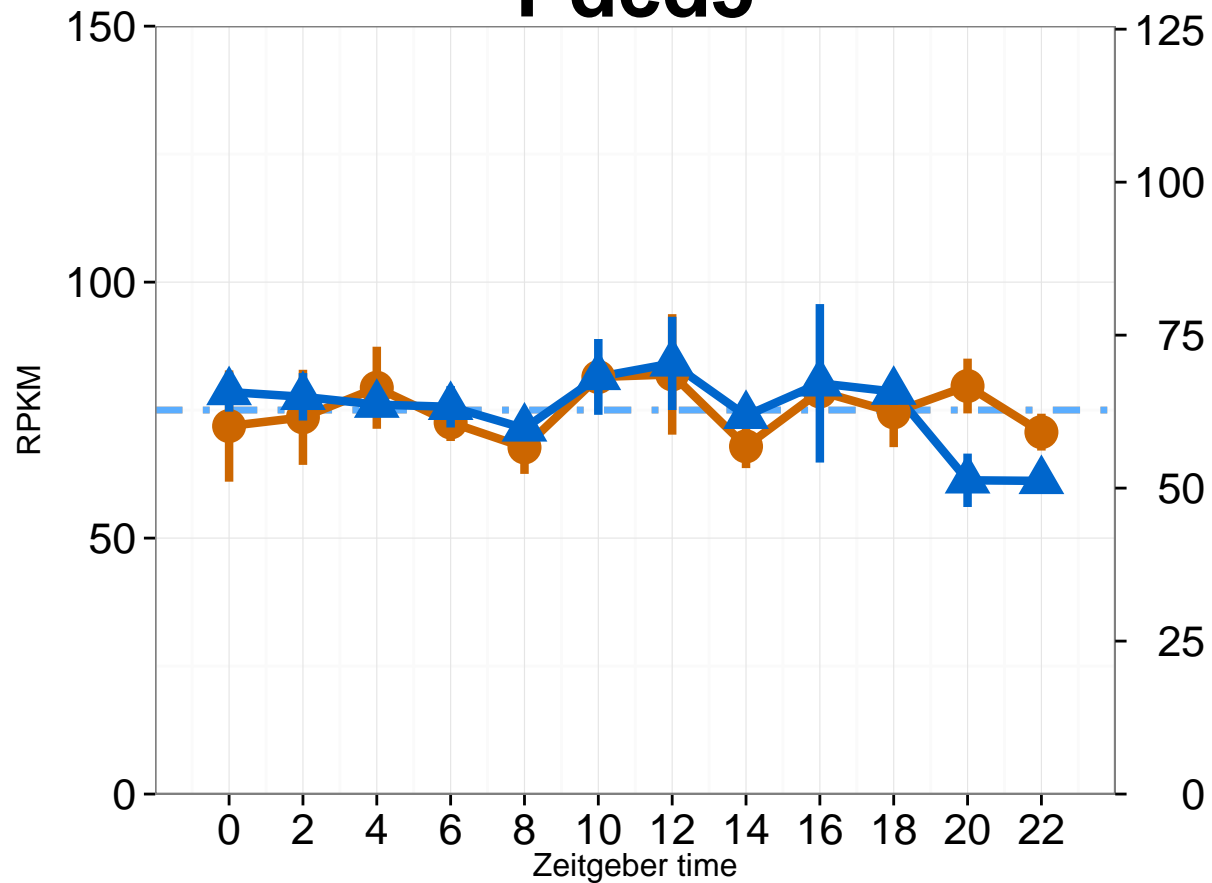

## Pdcd5

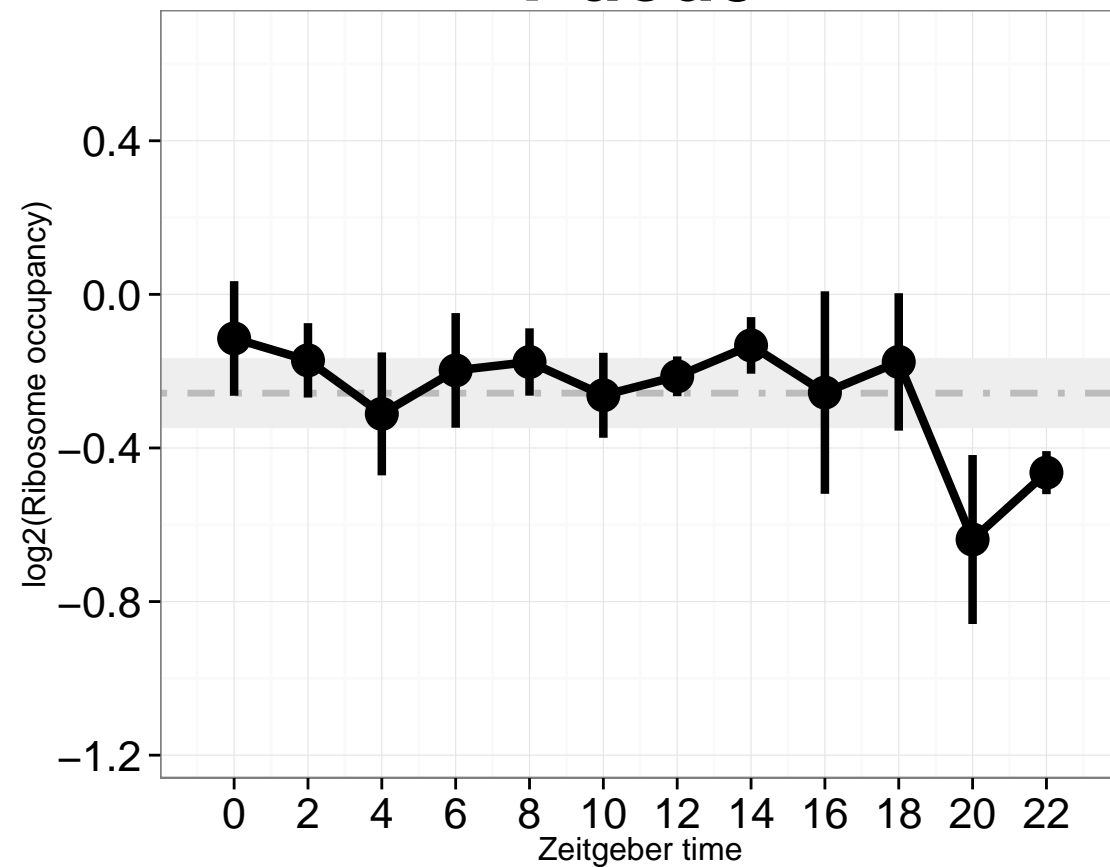

Supplement: Supplementary file 5046 [file 1]

## Plekhhg2

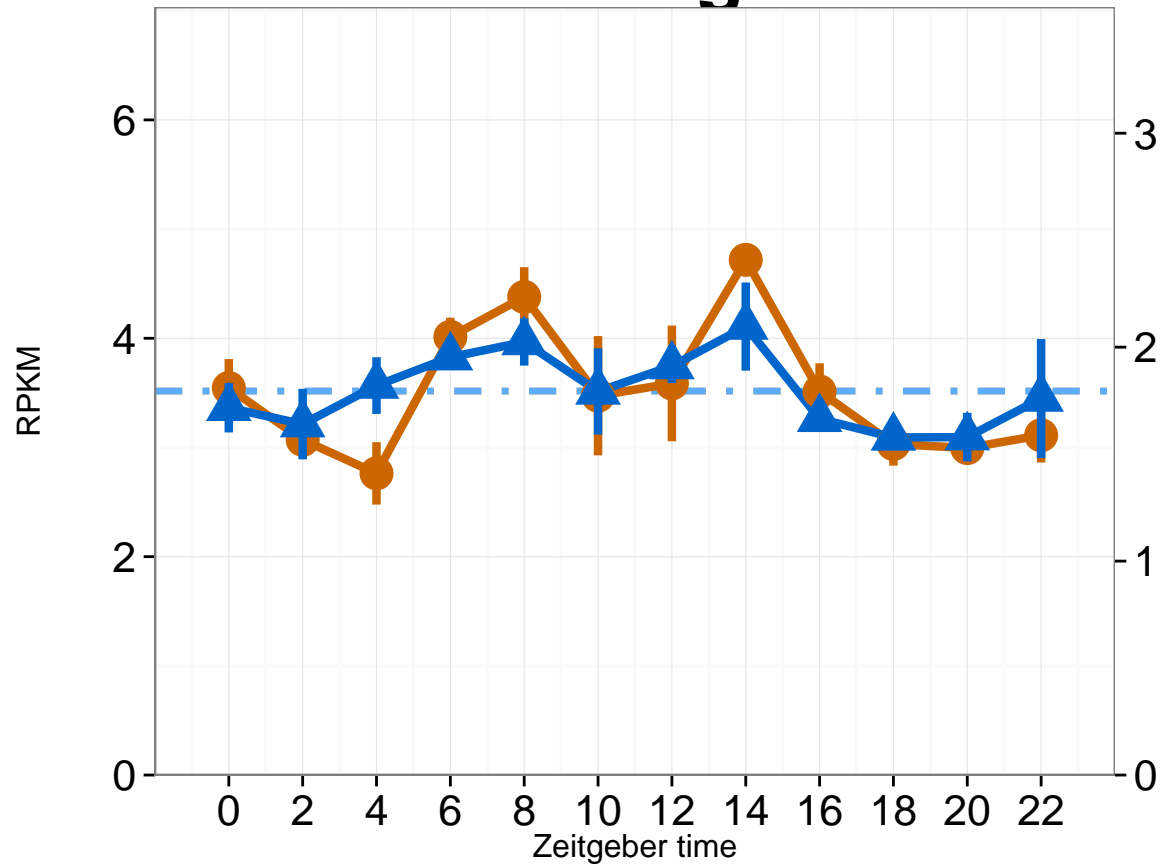

## Plekhhg2

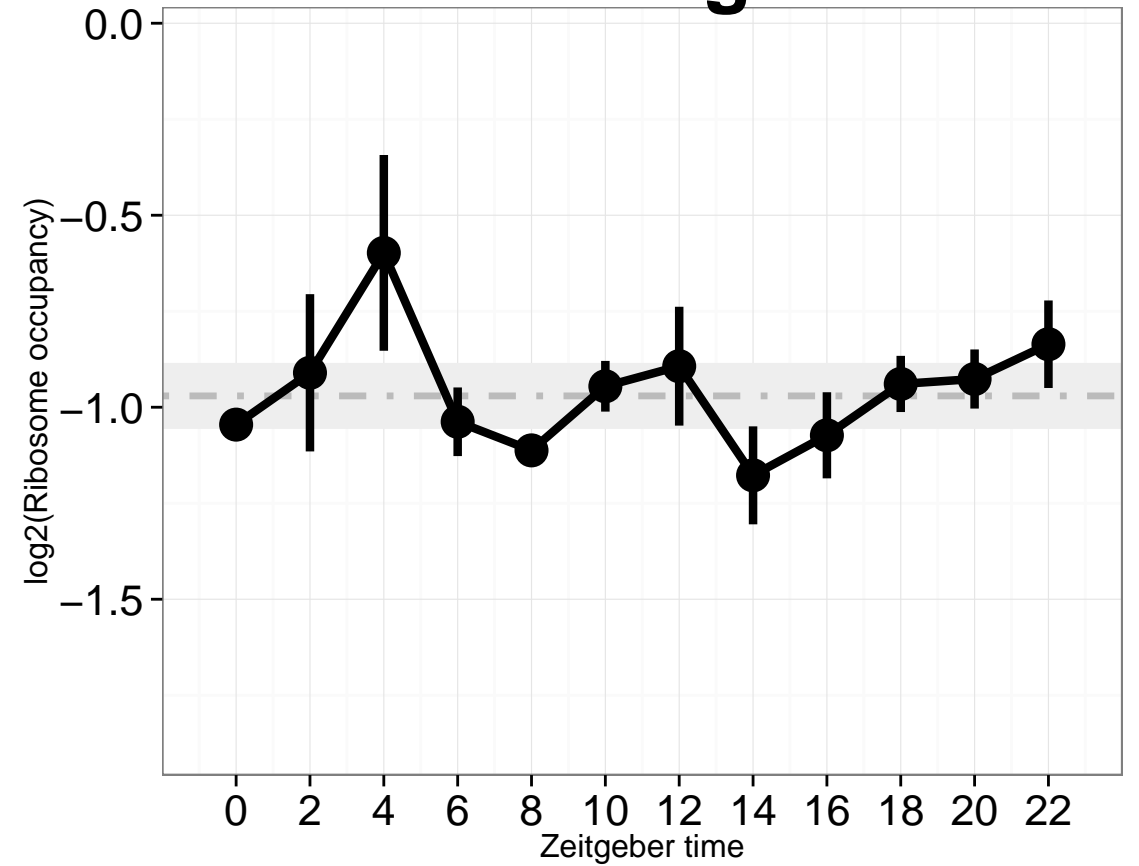

Supplement: Supplementary file 5047 [file 1]

## Smc6

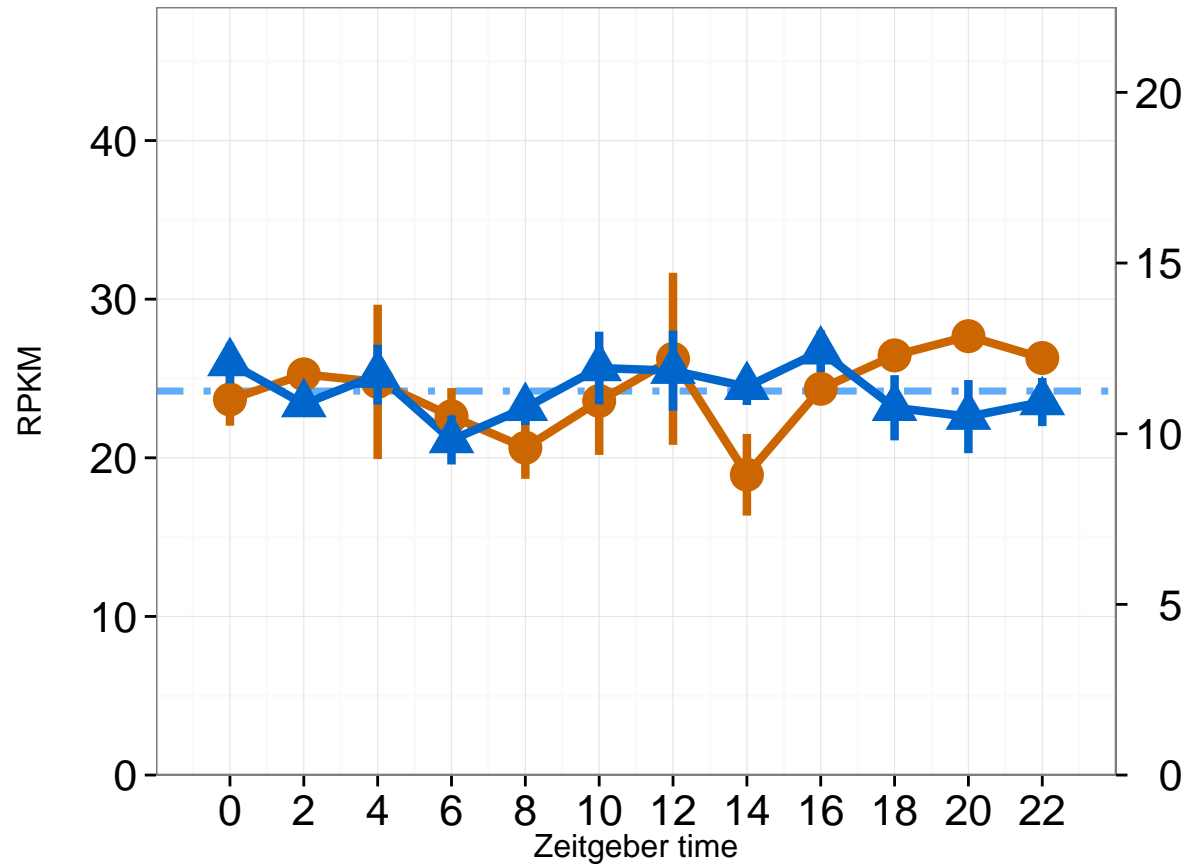

## Smc6

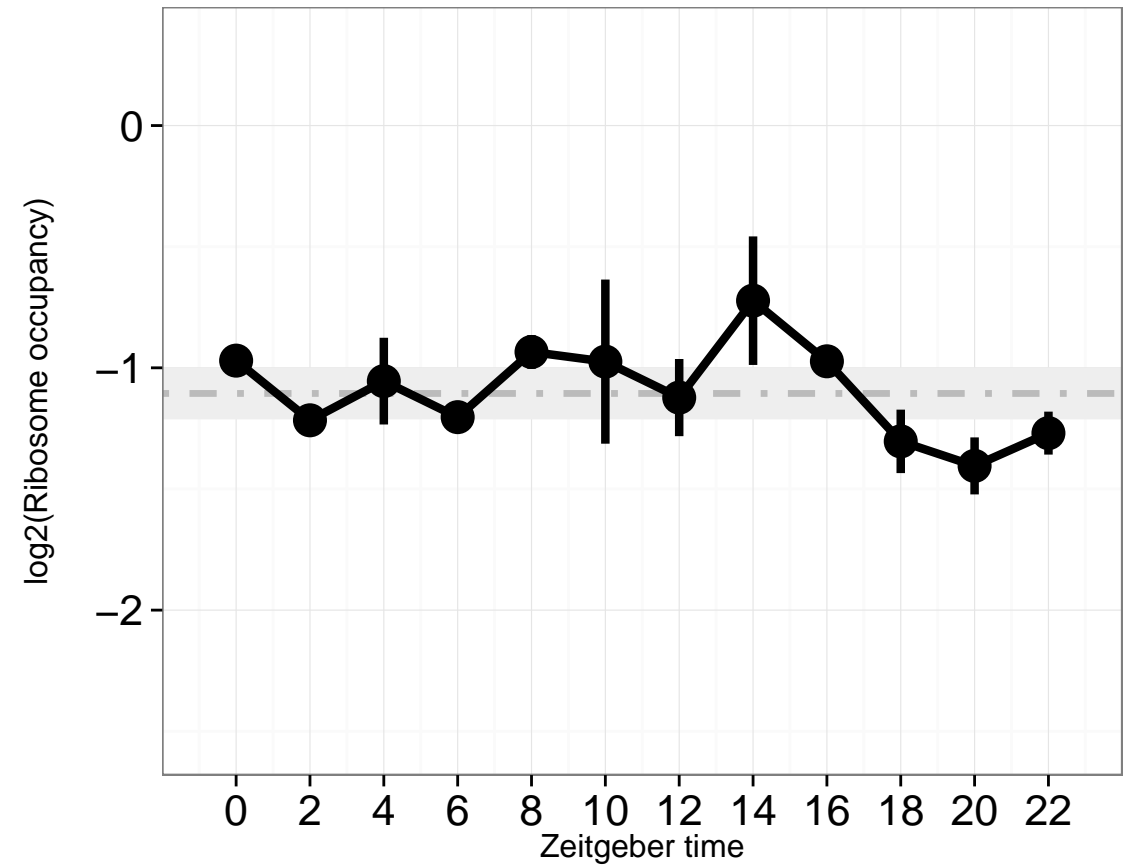

Supplement: Supplementary file 5048 [file 1]

## Gskip

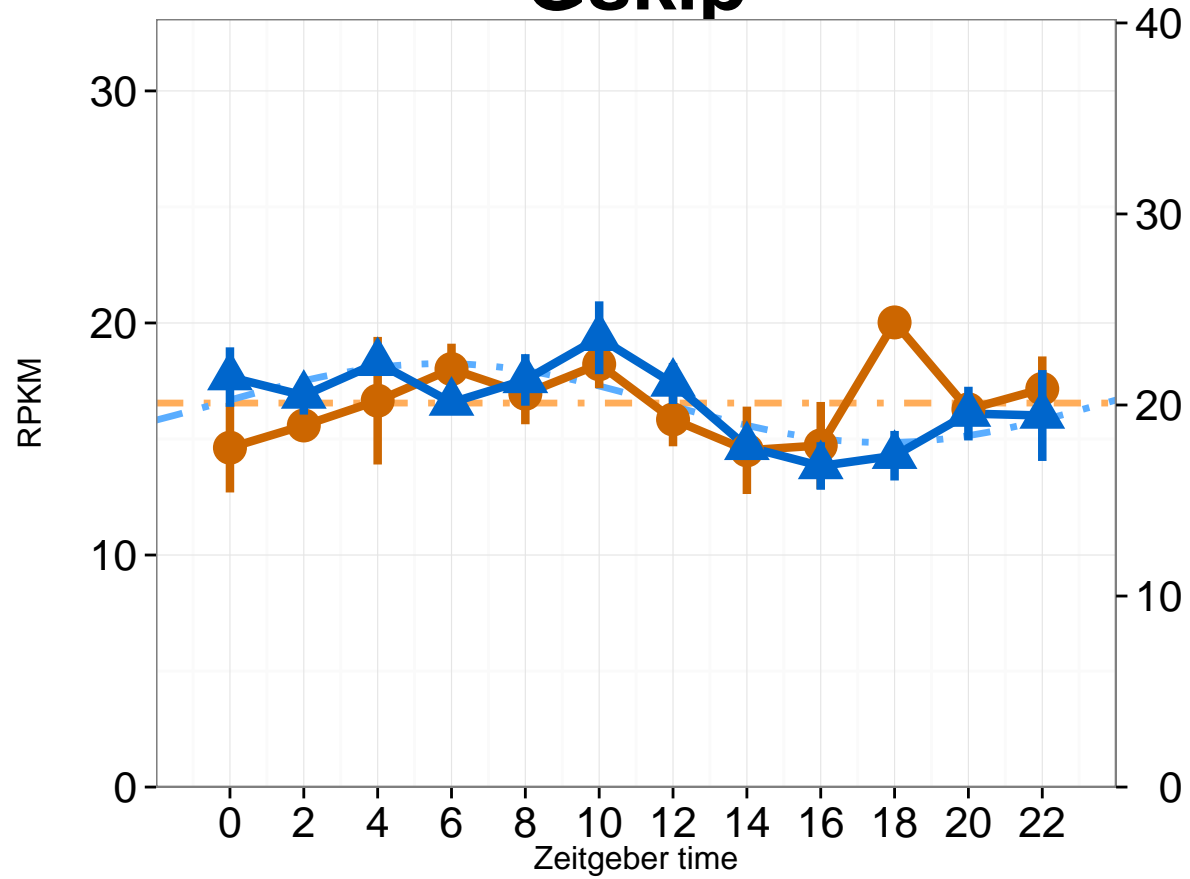

## Gskip

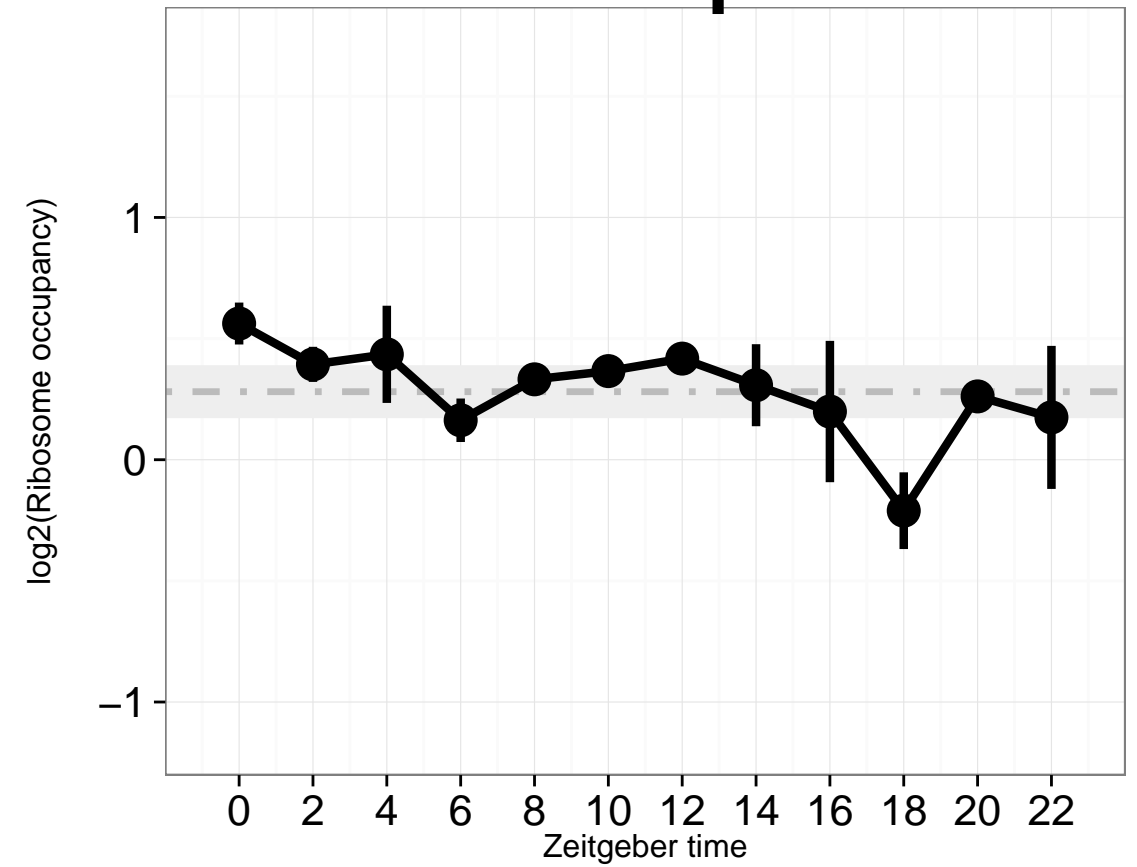

Supplement: Supplementary file 5049 [file 1]

**Tmem52**

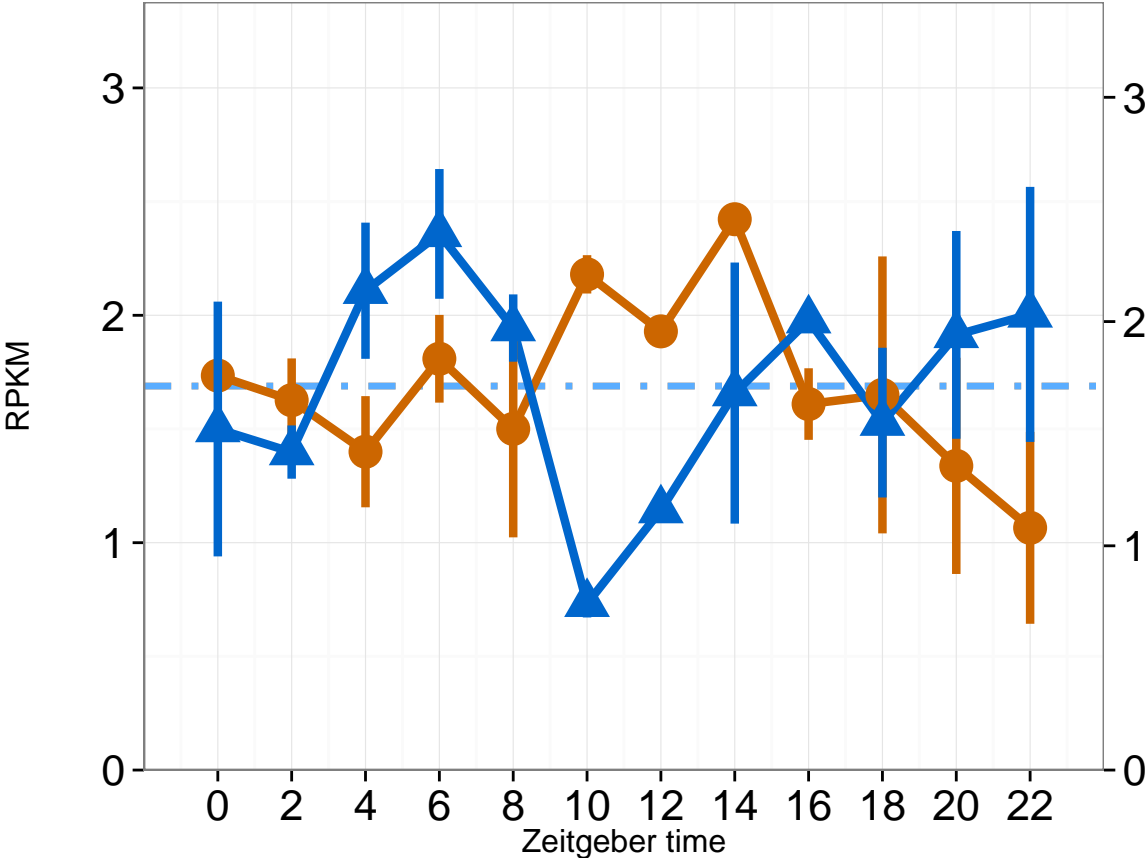

**Tmem52**

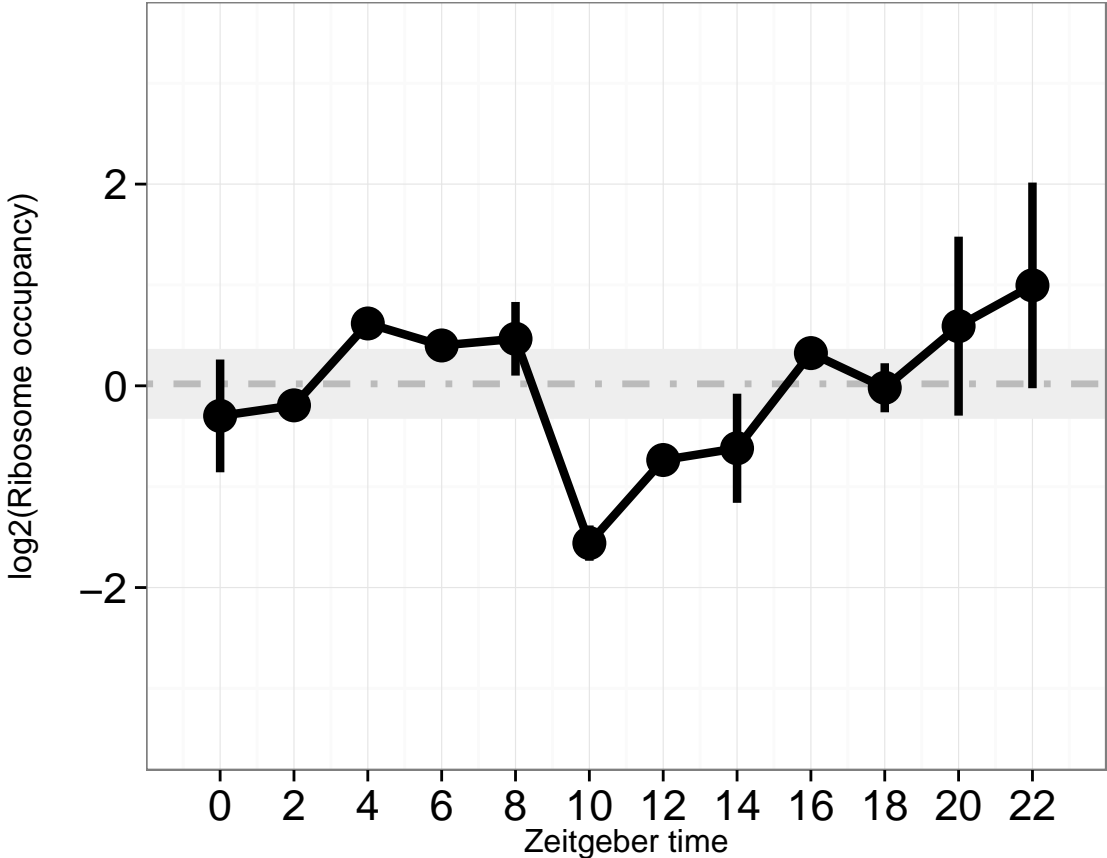

Supplement: Supplementary file 5050 [file 1]

## Dnm2

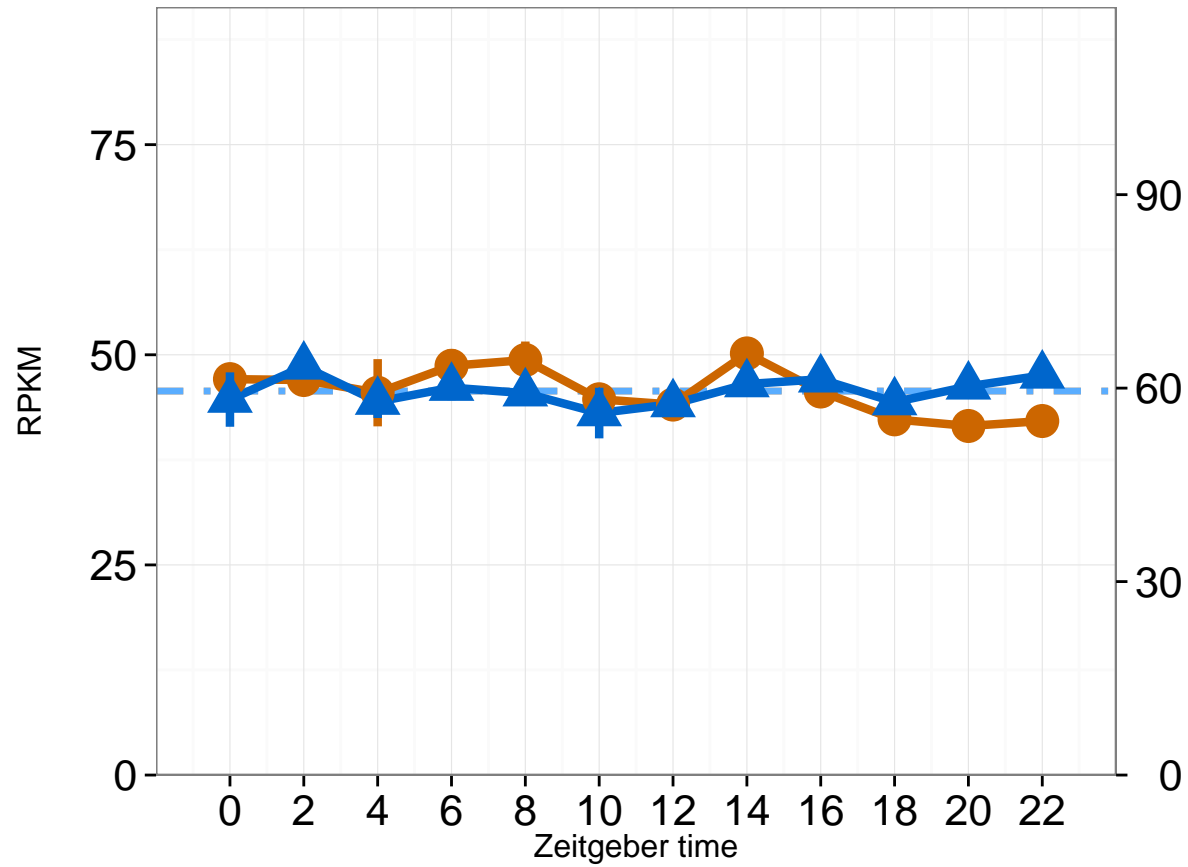

## Dnm2

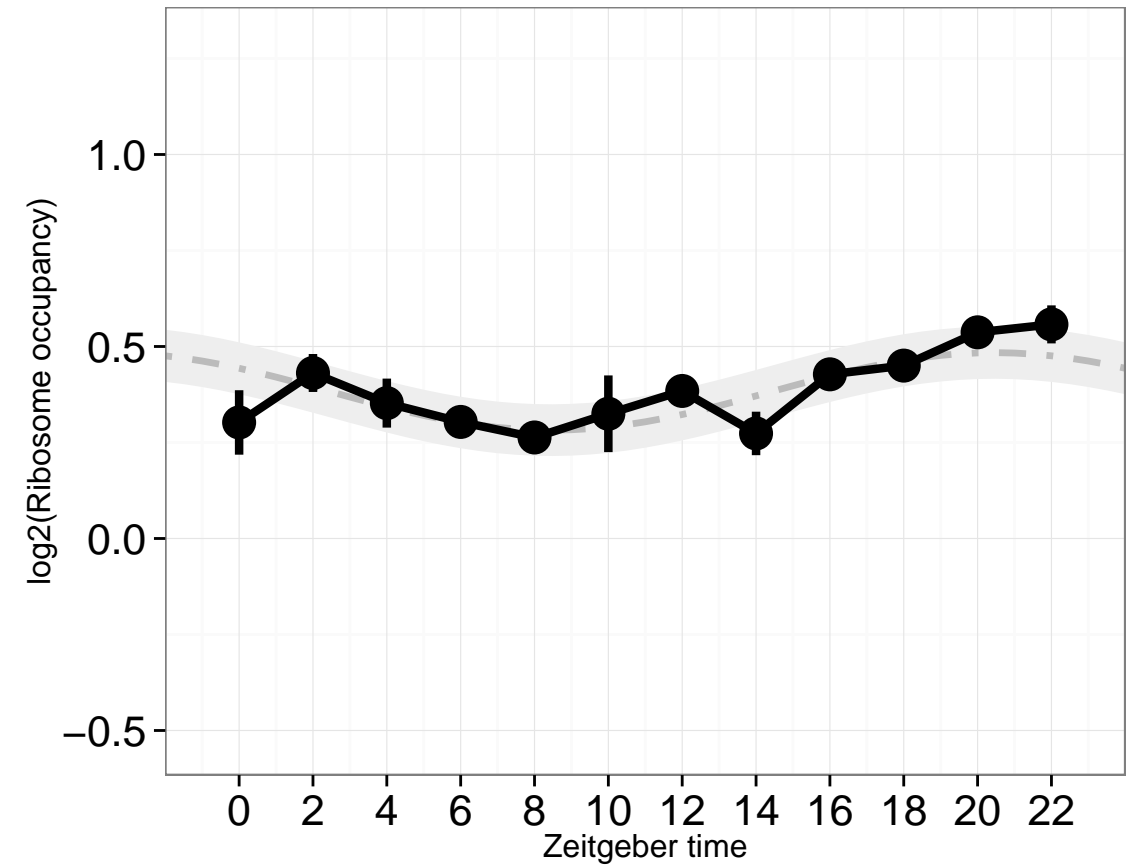

Supplement: Supplementary file 5051 [file 1]

# Hipk3

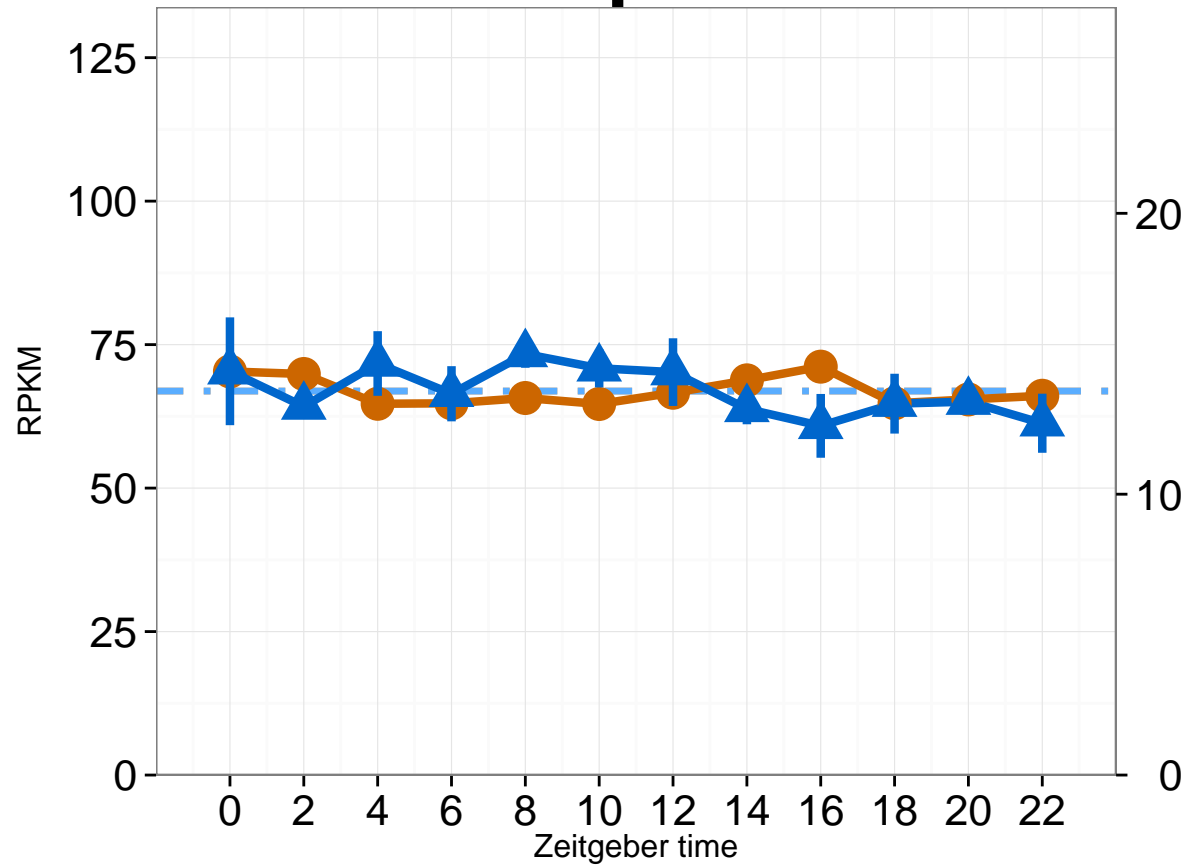

# Hipk3

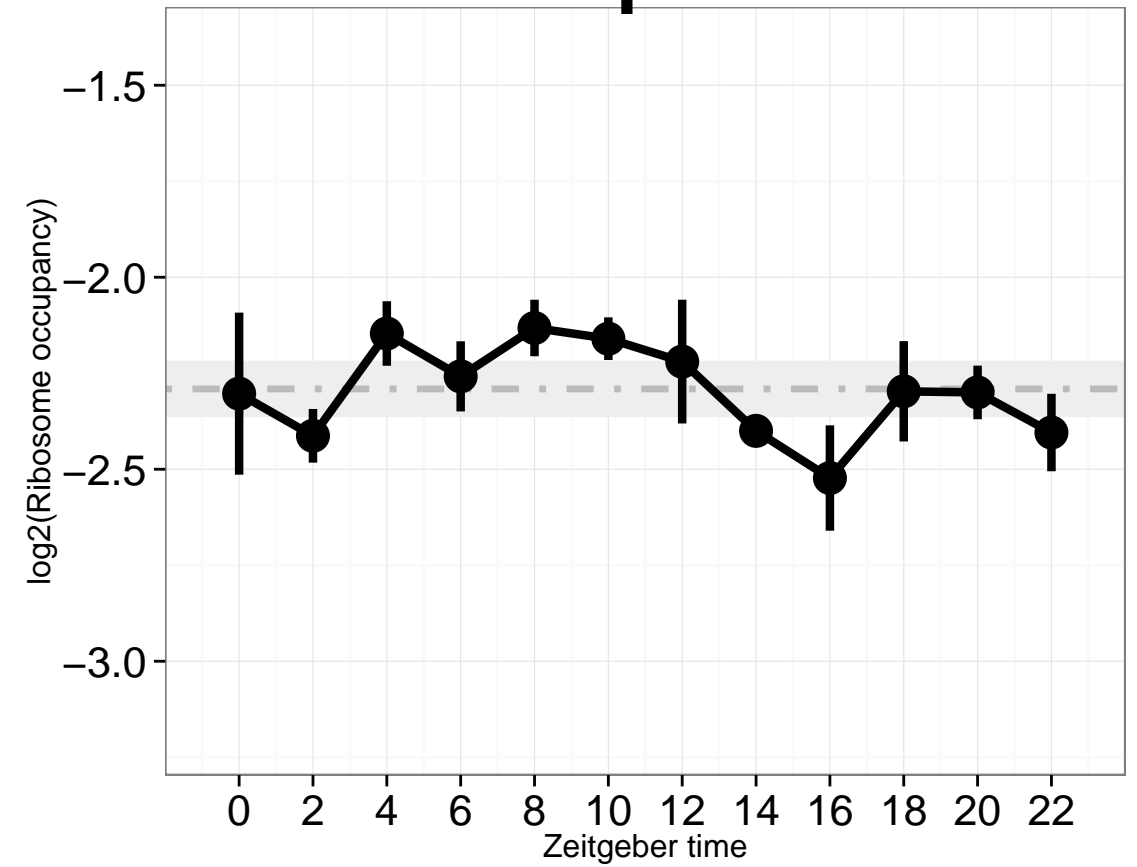

Supplement: Supplementary file 5052 [file 1]

# CrIs1

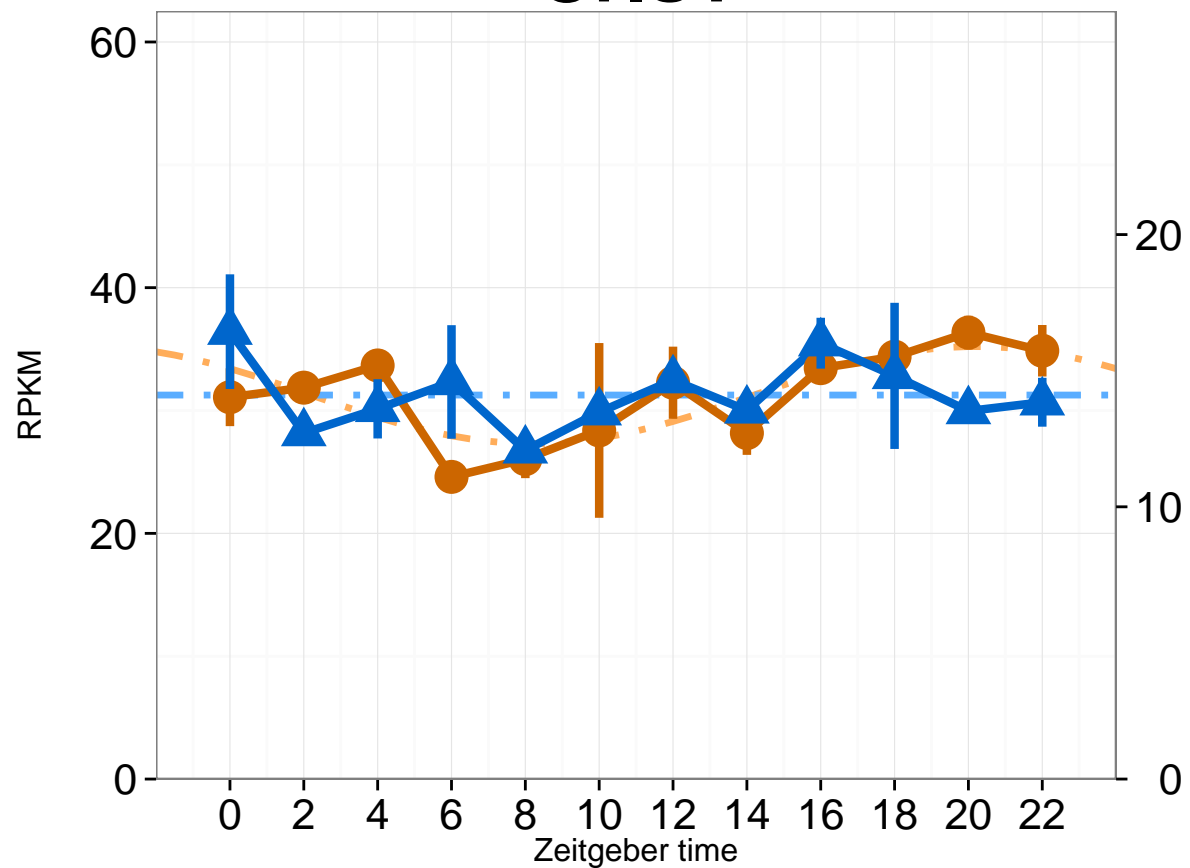

# CrIs1

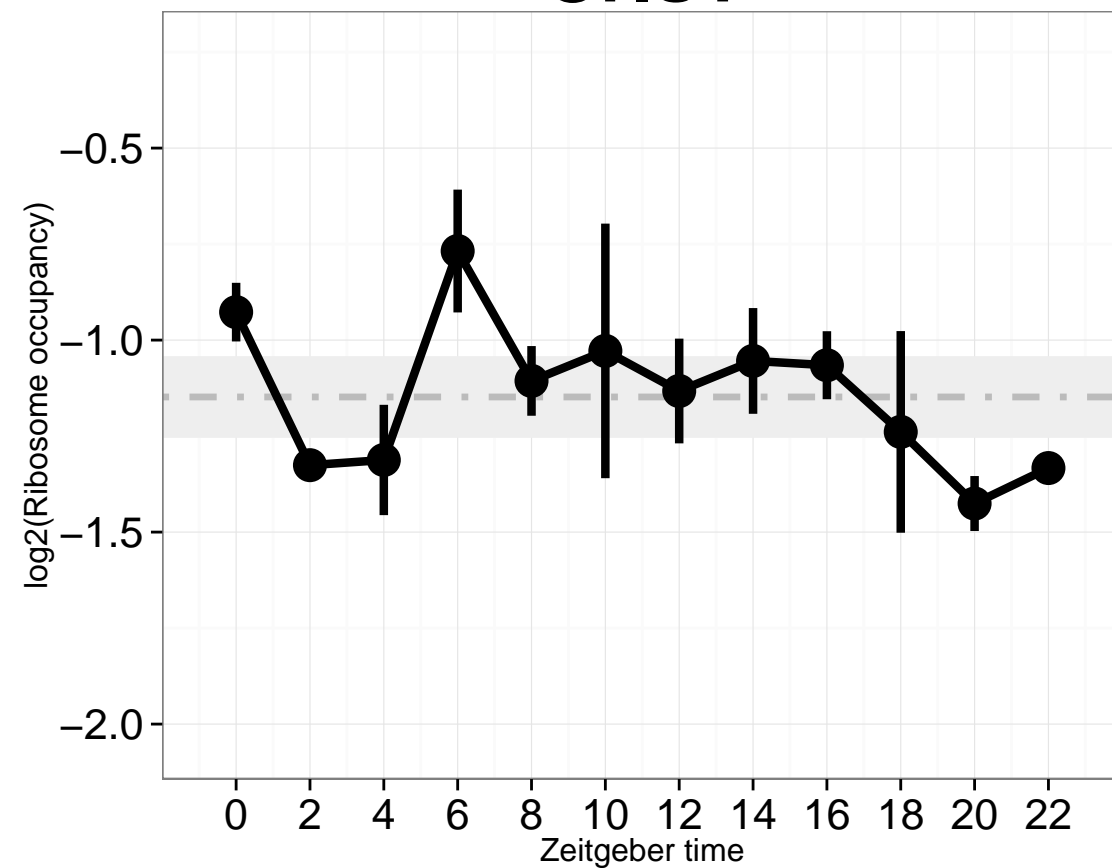

Supplement: Supplementary file 5053 [file 1]

## Leo1

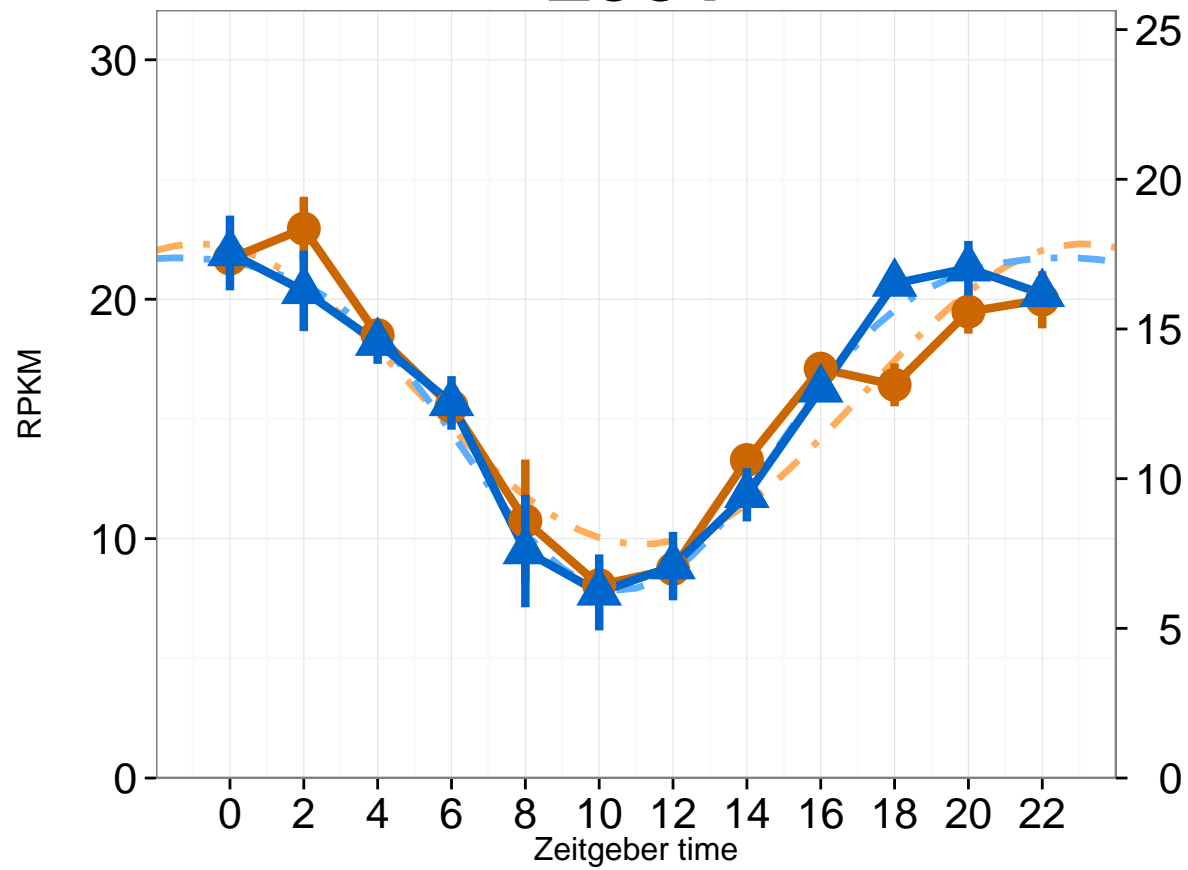

## Leo1

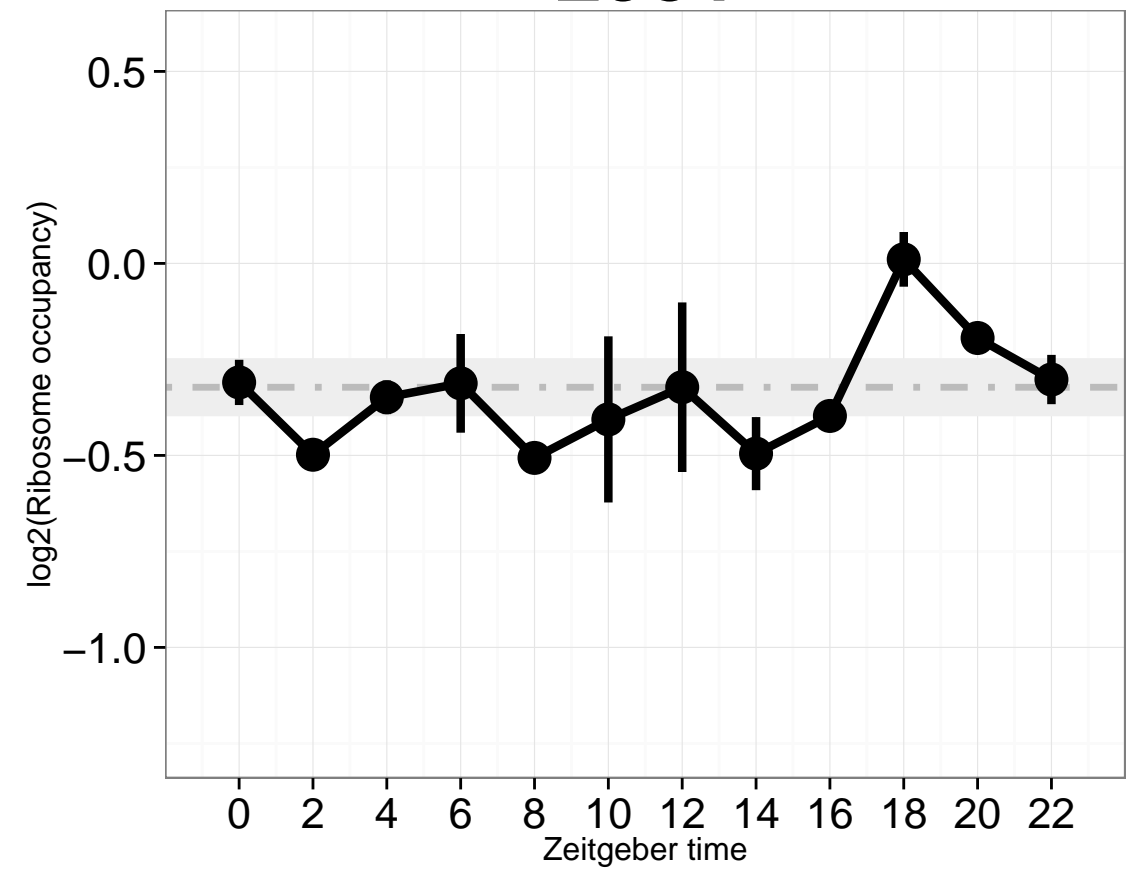

Supplement: Supplementary file 5054 [file 1]

# Brip1

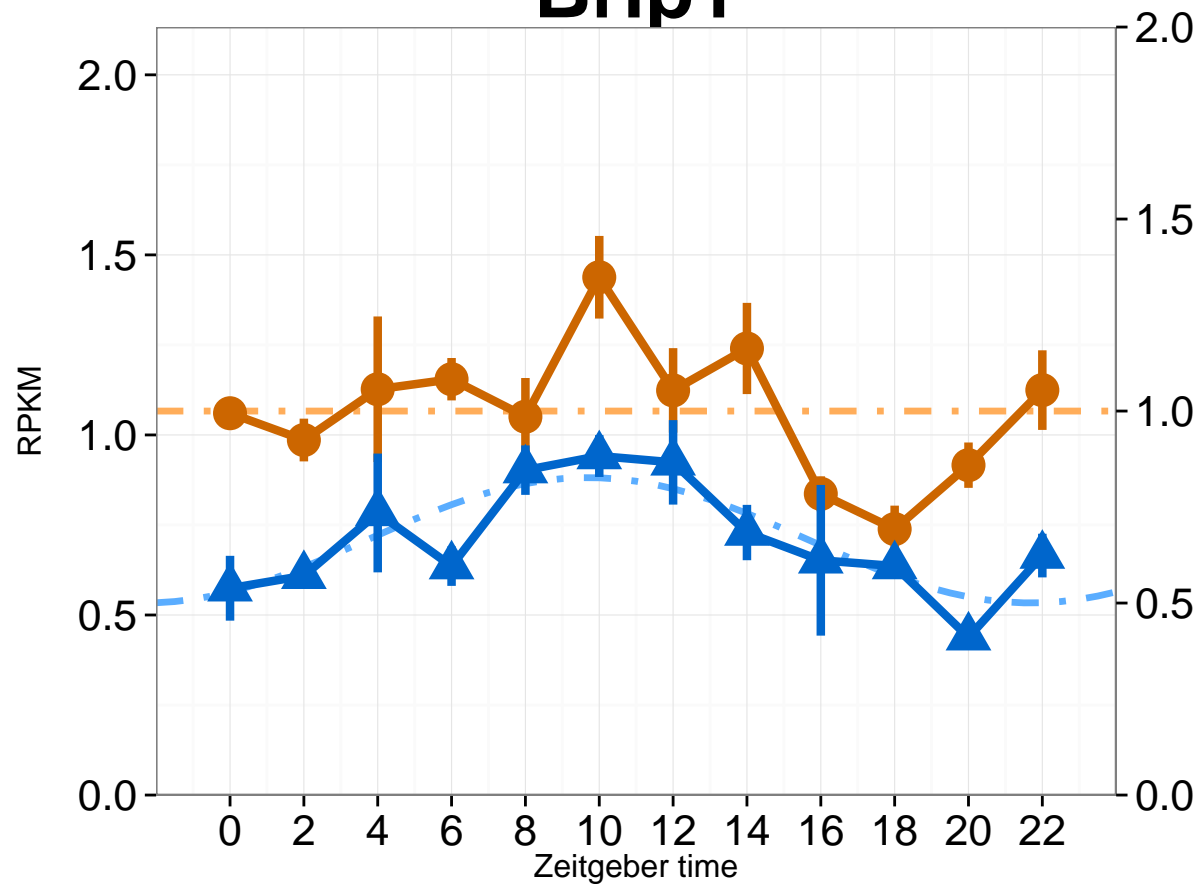

# Brip1

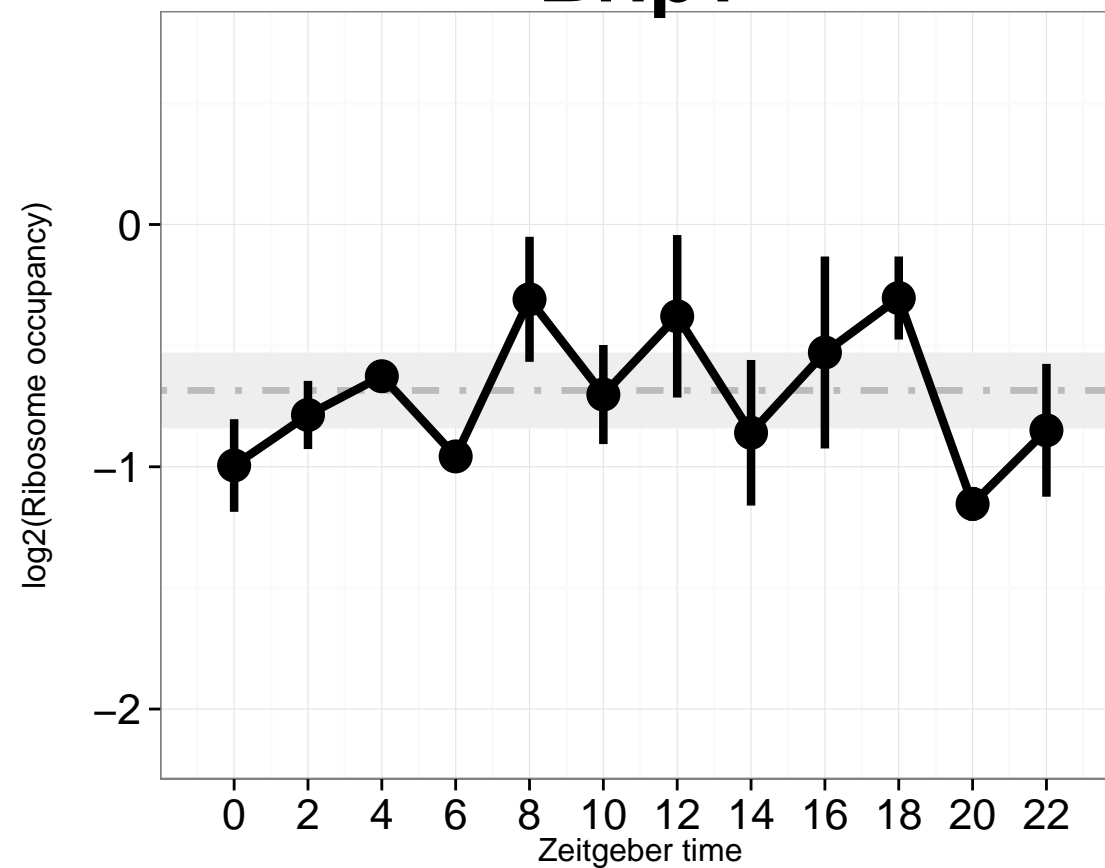

Supplement: Supplementary file 5055 [file 1]

## Clic4

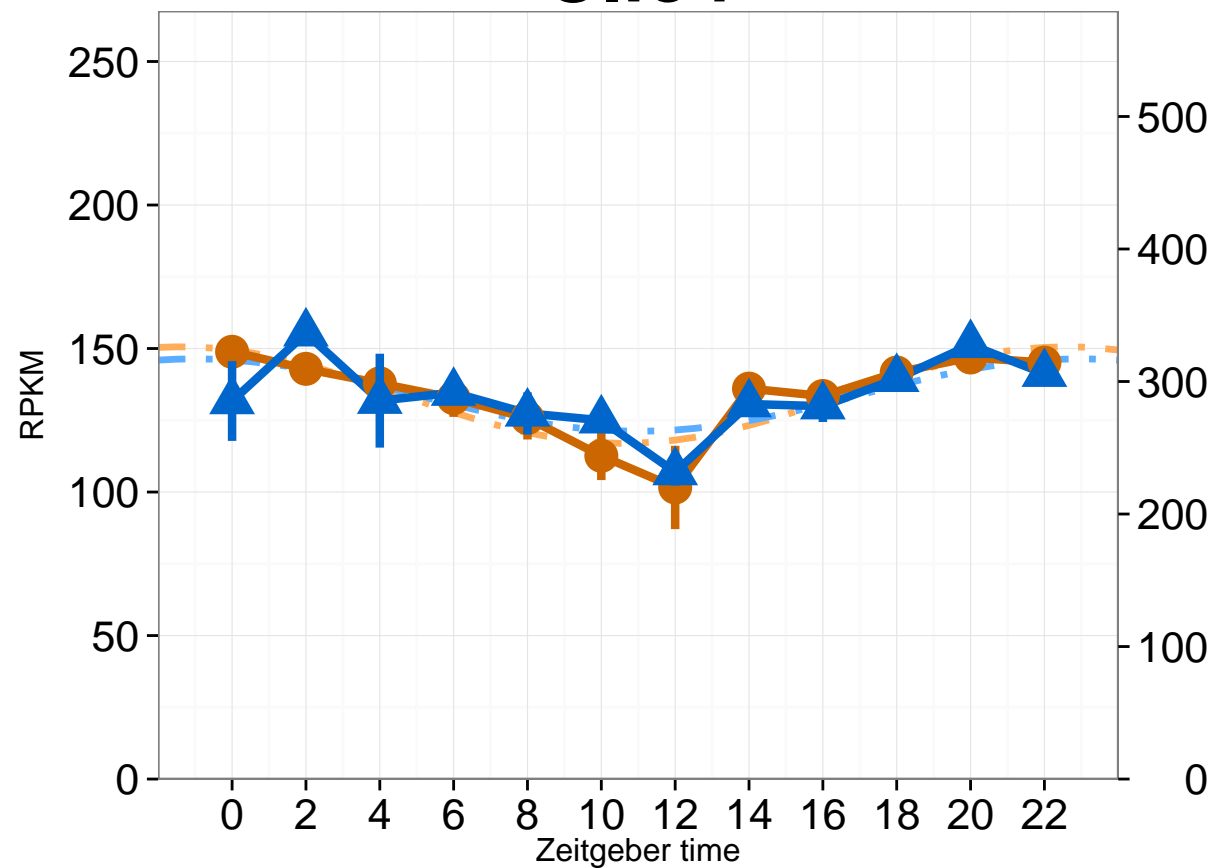

## Clic4

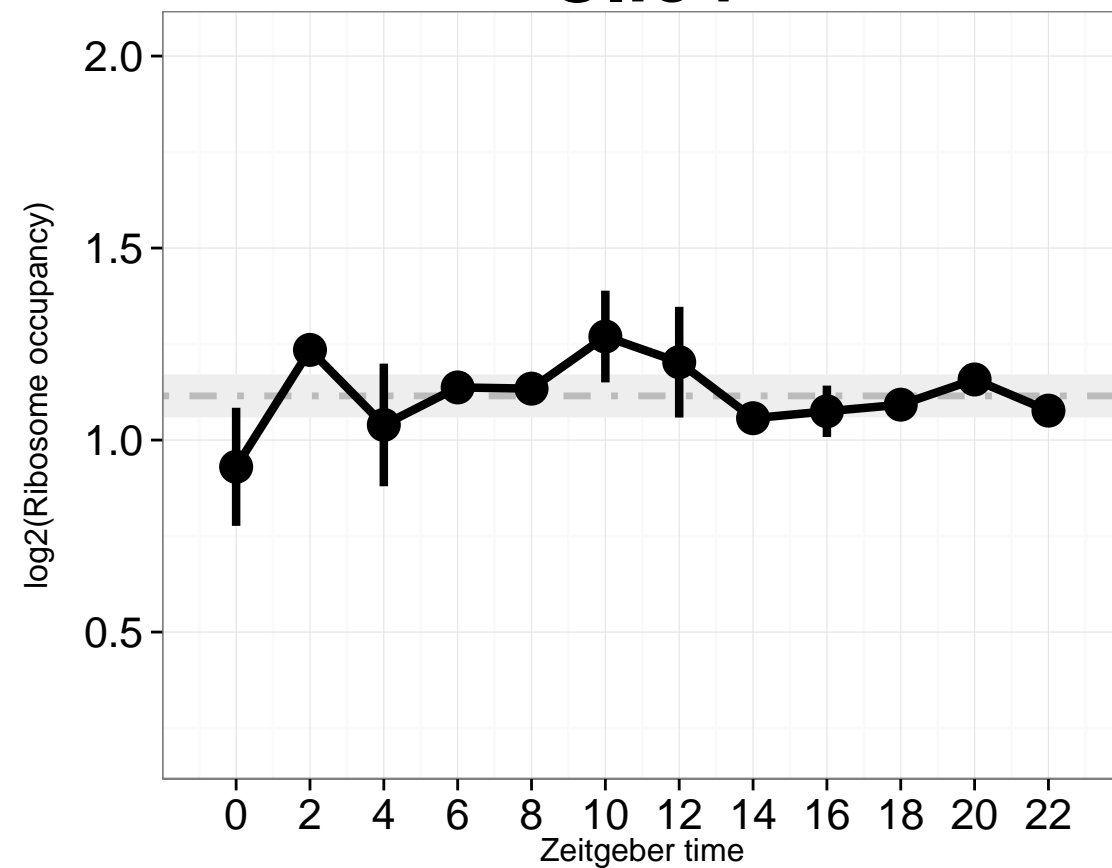

Supplement: Supplementary file 5056 [file 1]

# Phf16

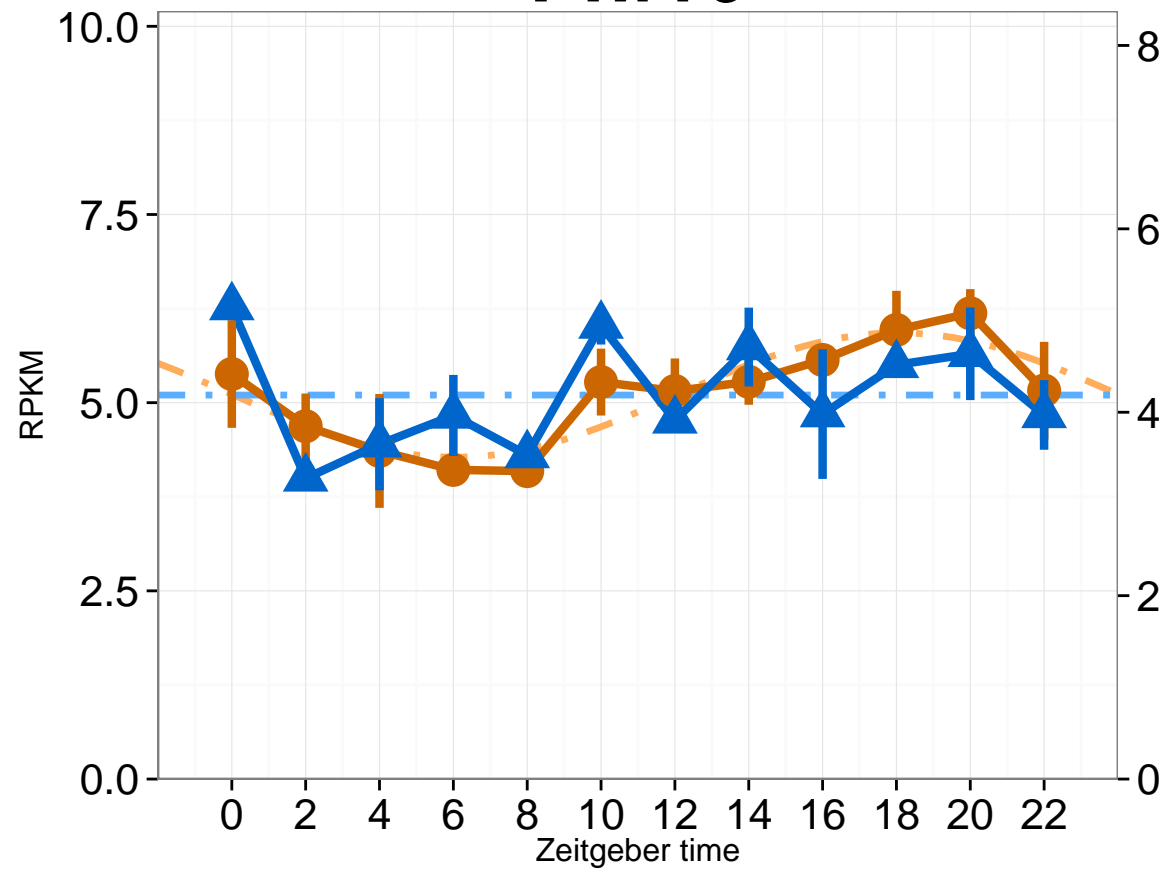

# Phf16

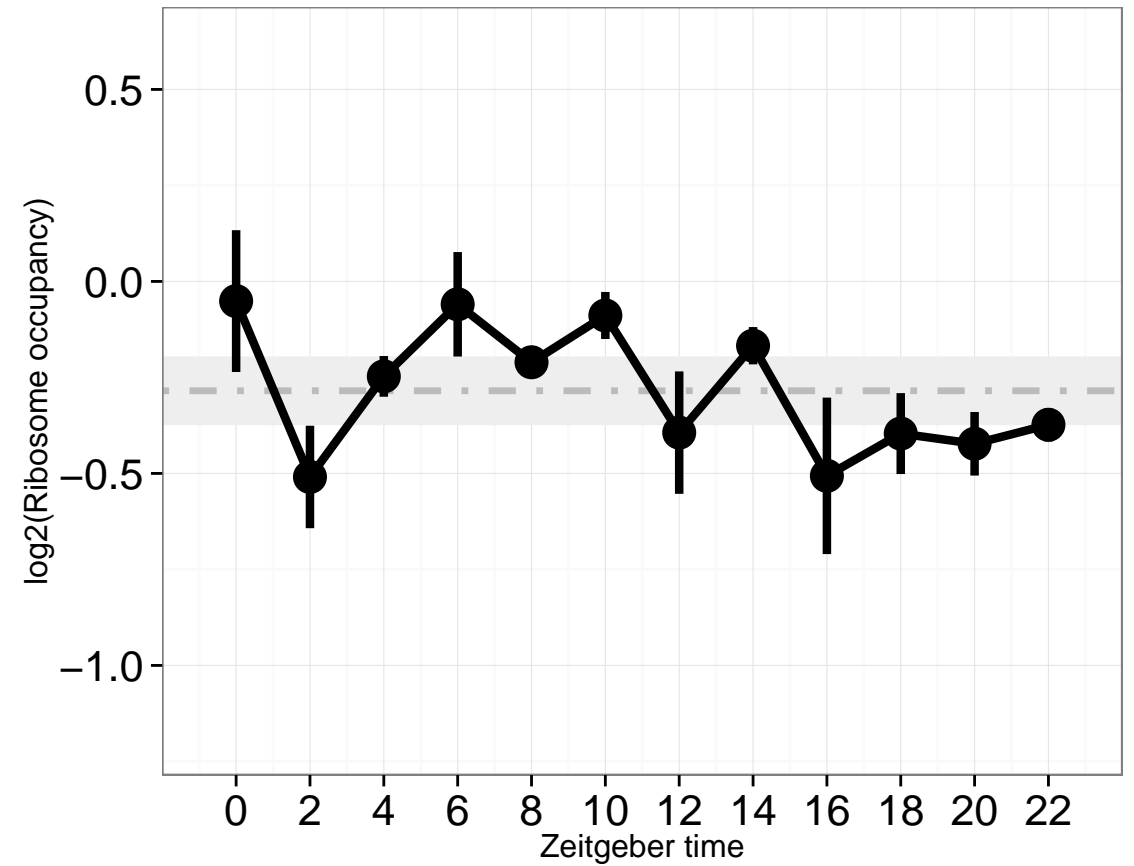

Supplement: Supplementary file 5057 [file 1]

## Arnt

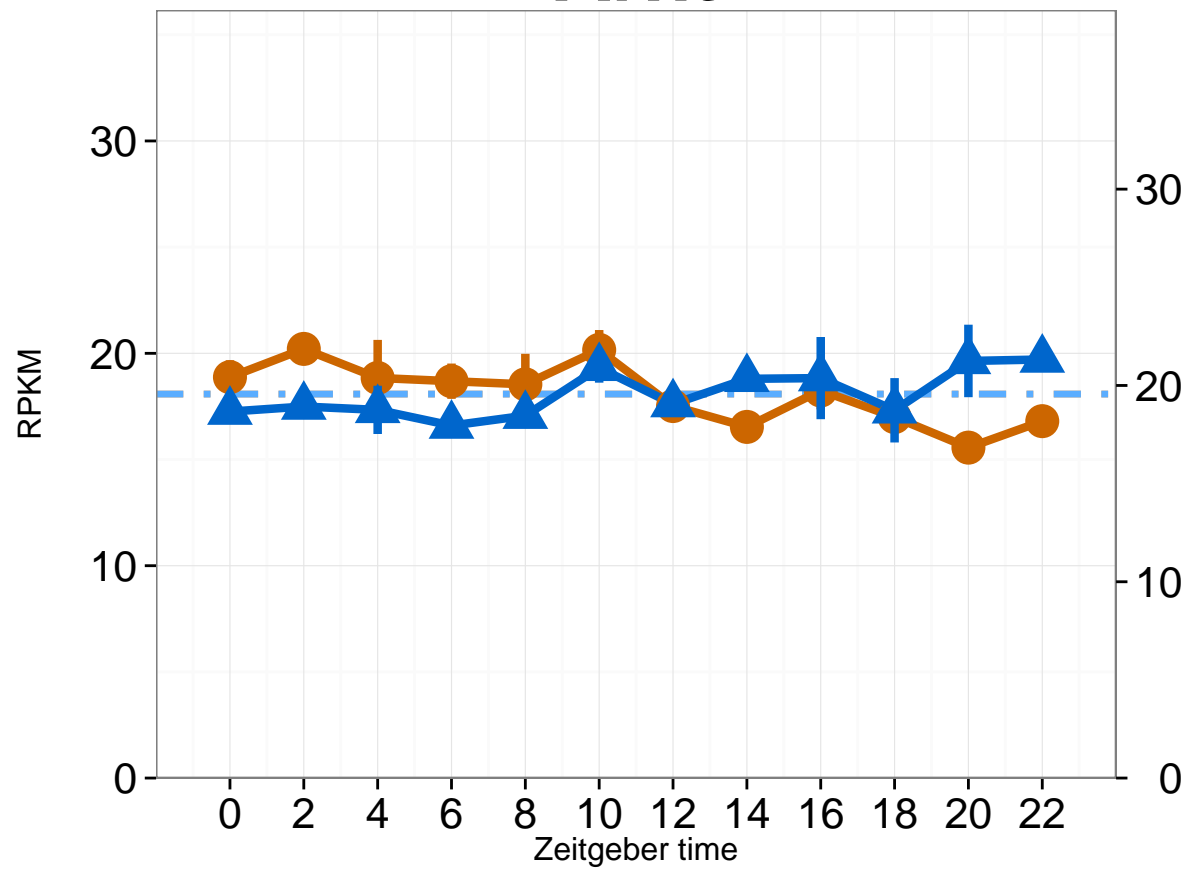

## Arnt

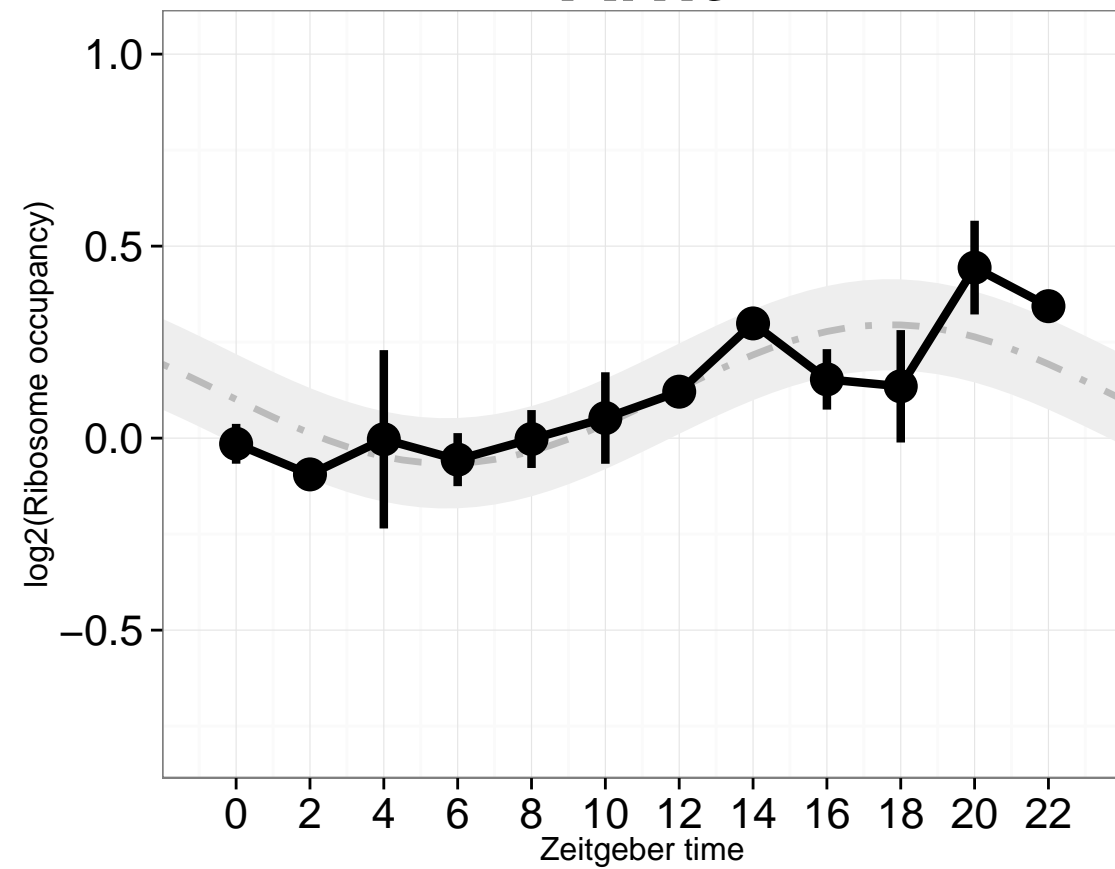

Supplement: Supplementary file 5058 [file 1]

## Dsg2

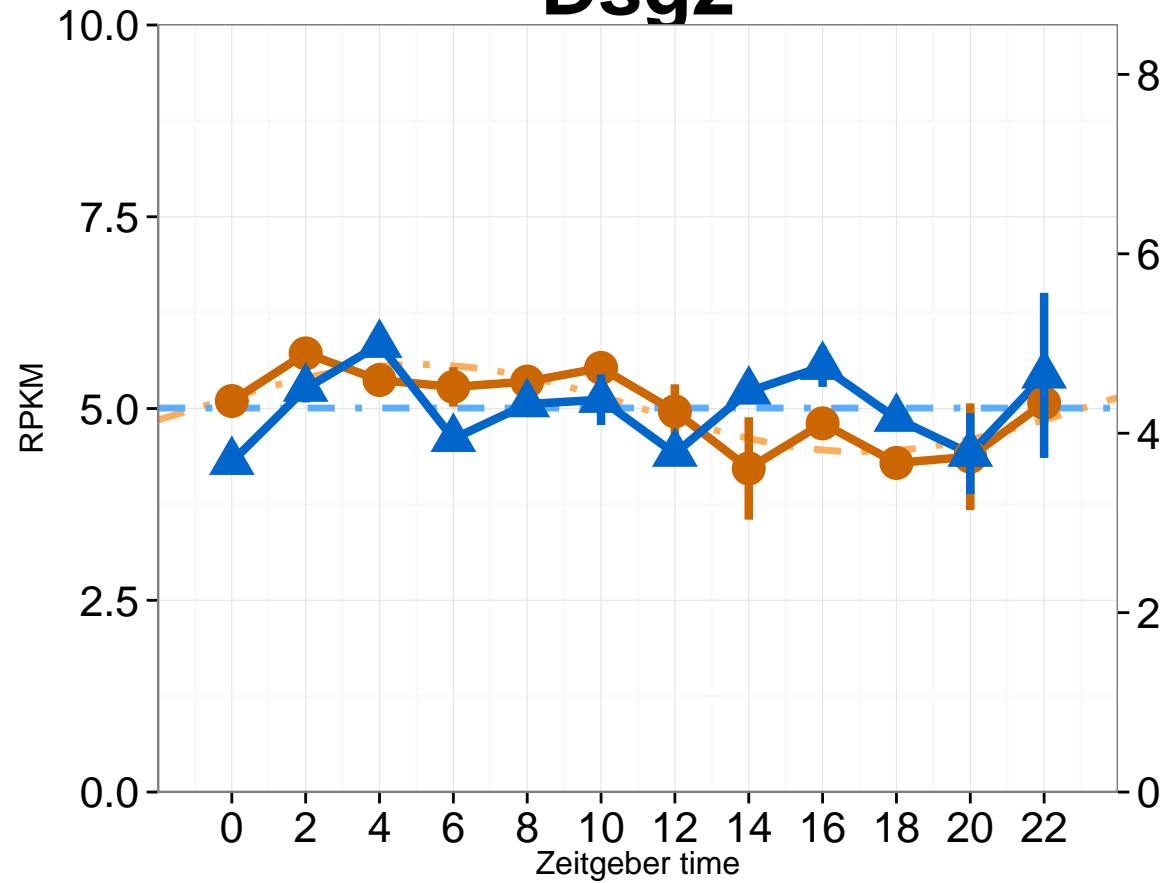

## Dsg2

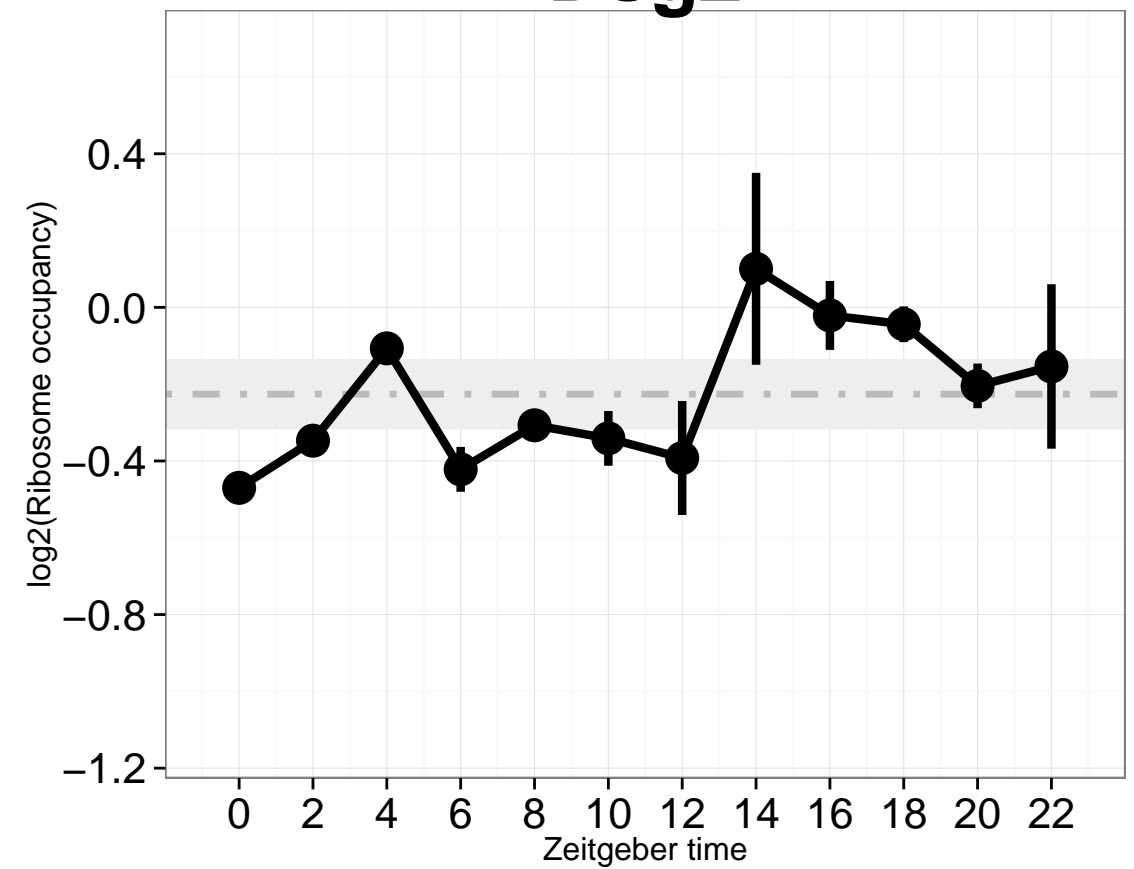

Supplement: Supplementary file 5059 [file 1]

## Sirt7

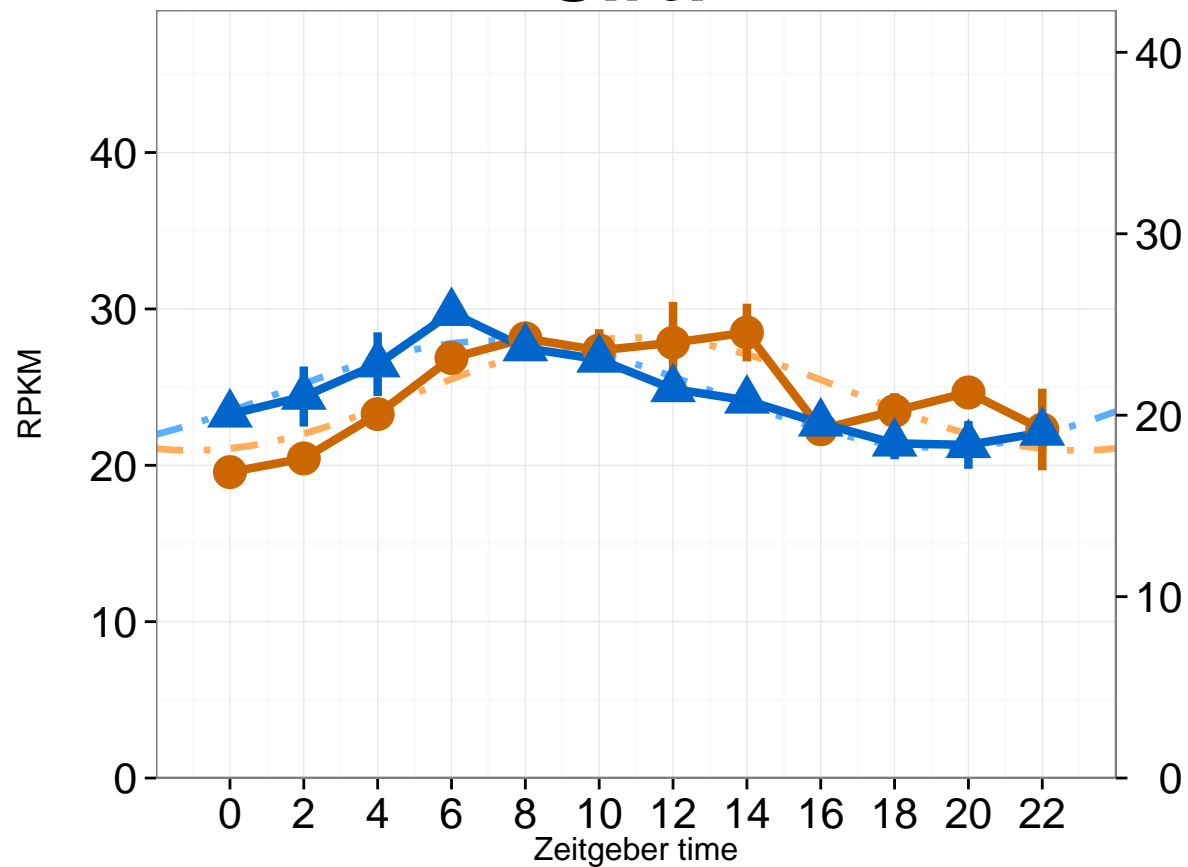

## Sirt7

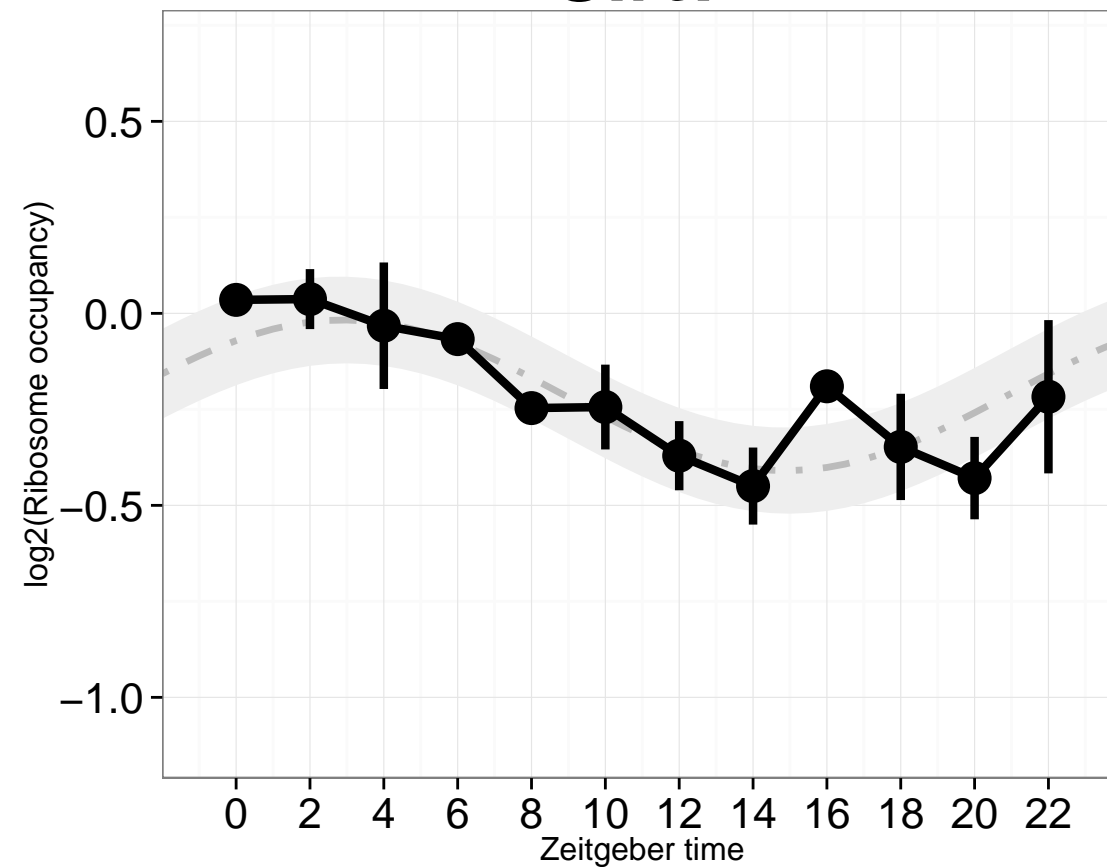

Supplement: Supplementary file 5060 [file 1]

## Srf

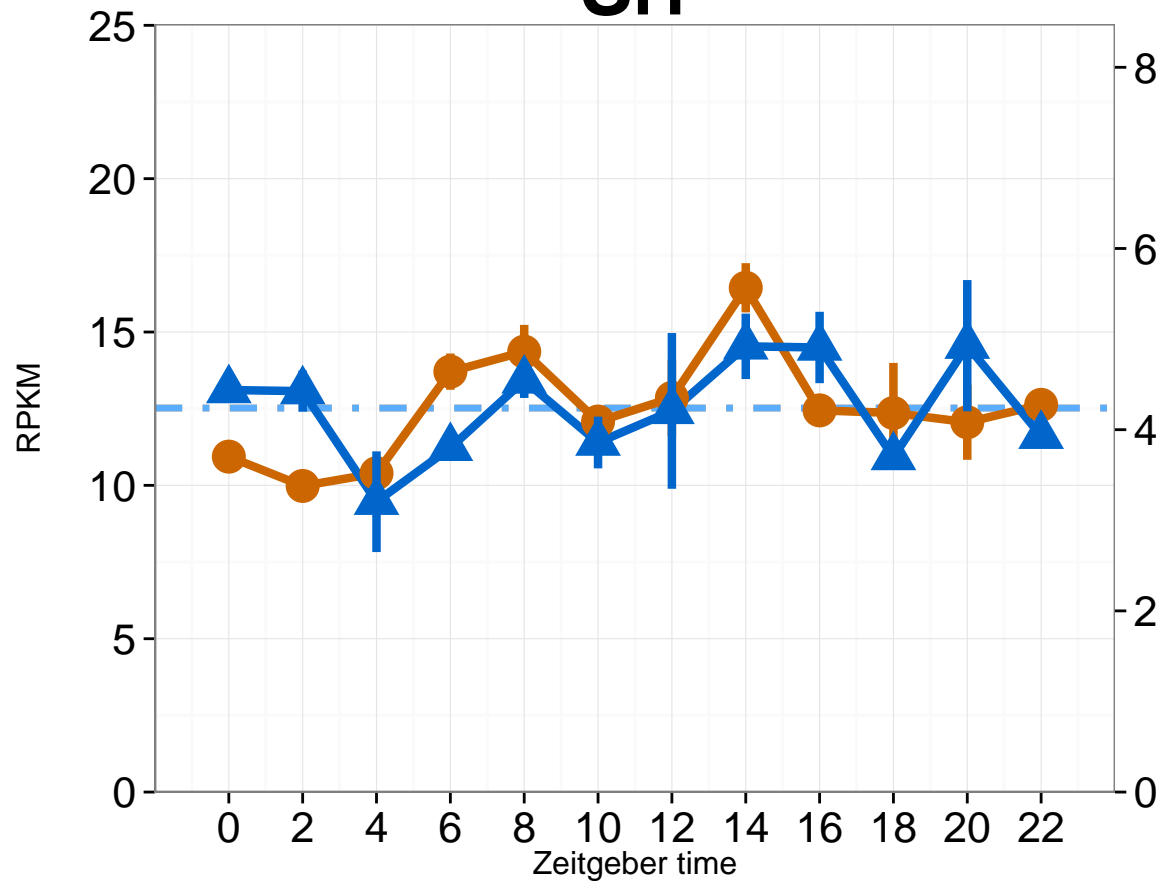

## Srf

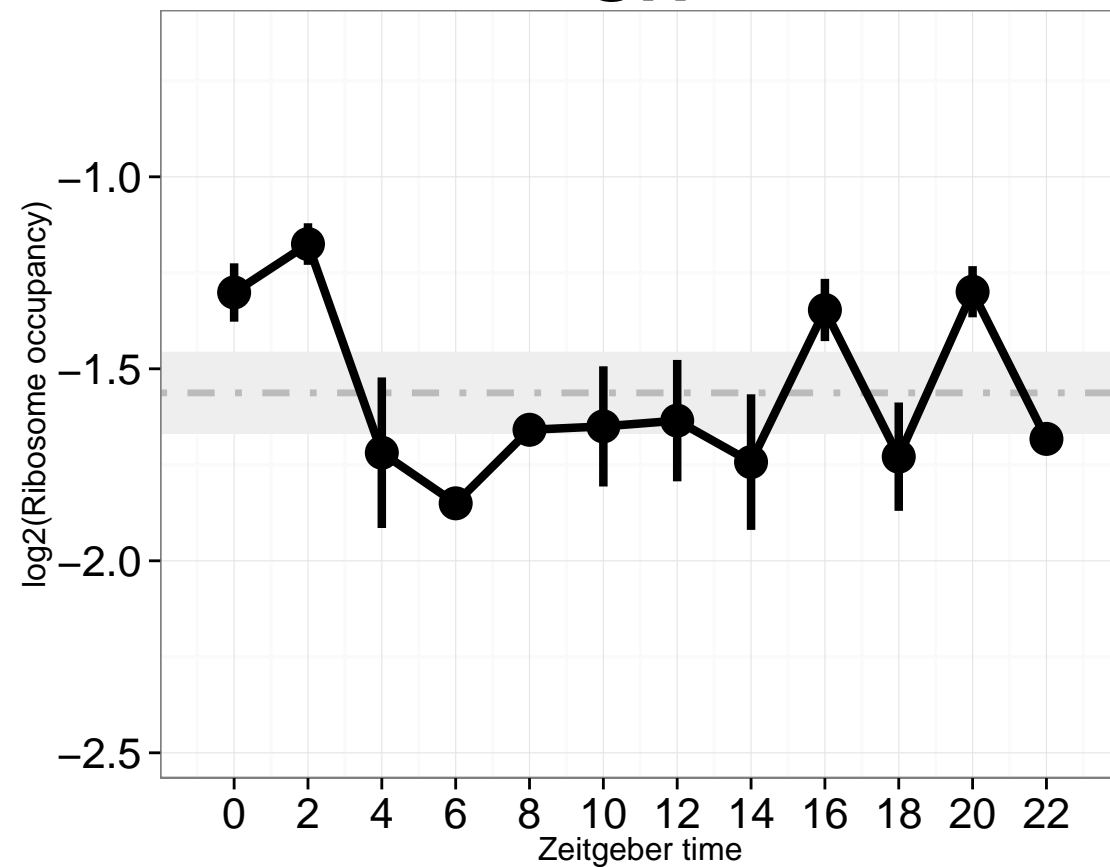

Supplement: Supplementary file 5061 [file 1]

## NoI11

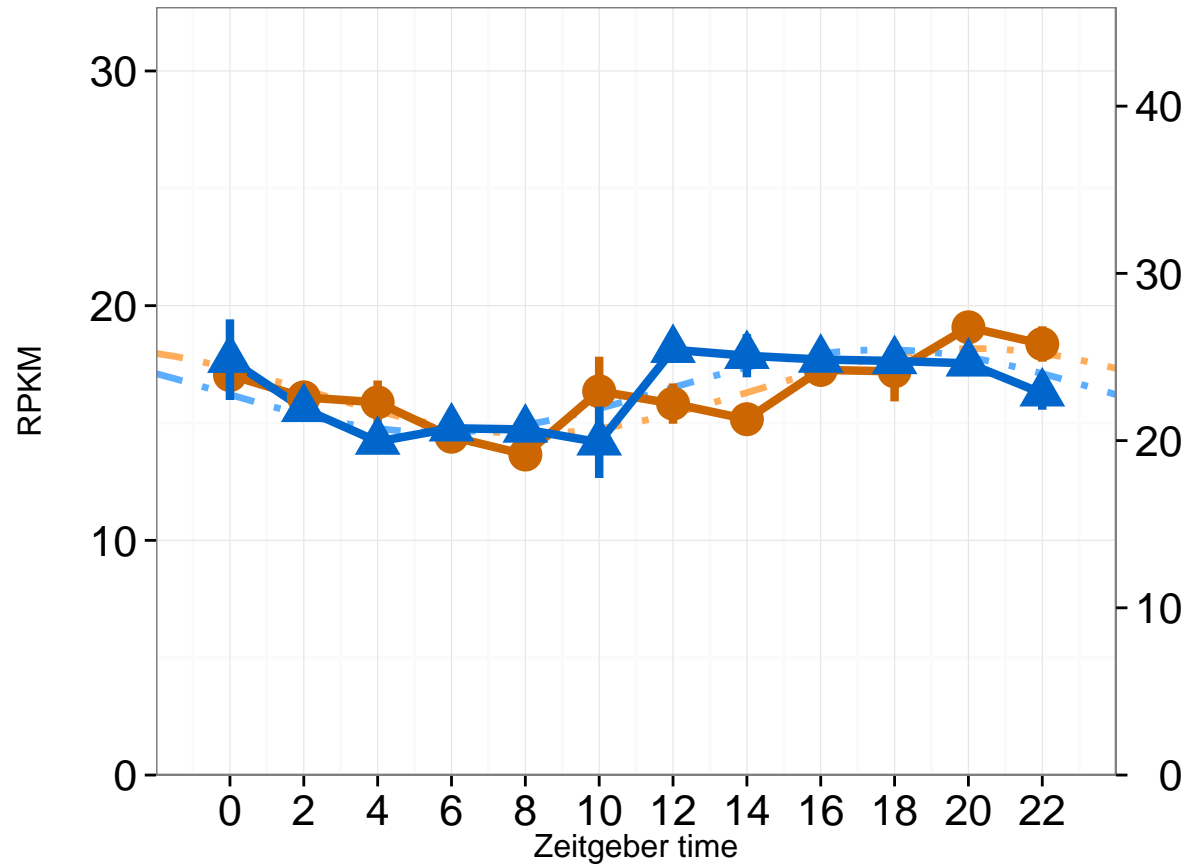

## NoI11

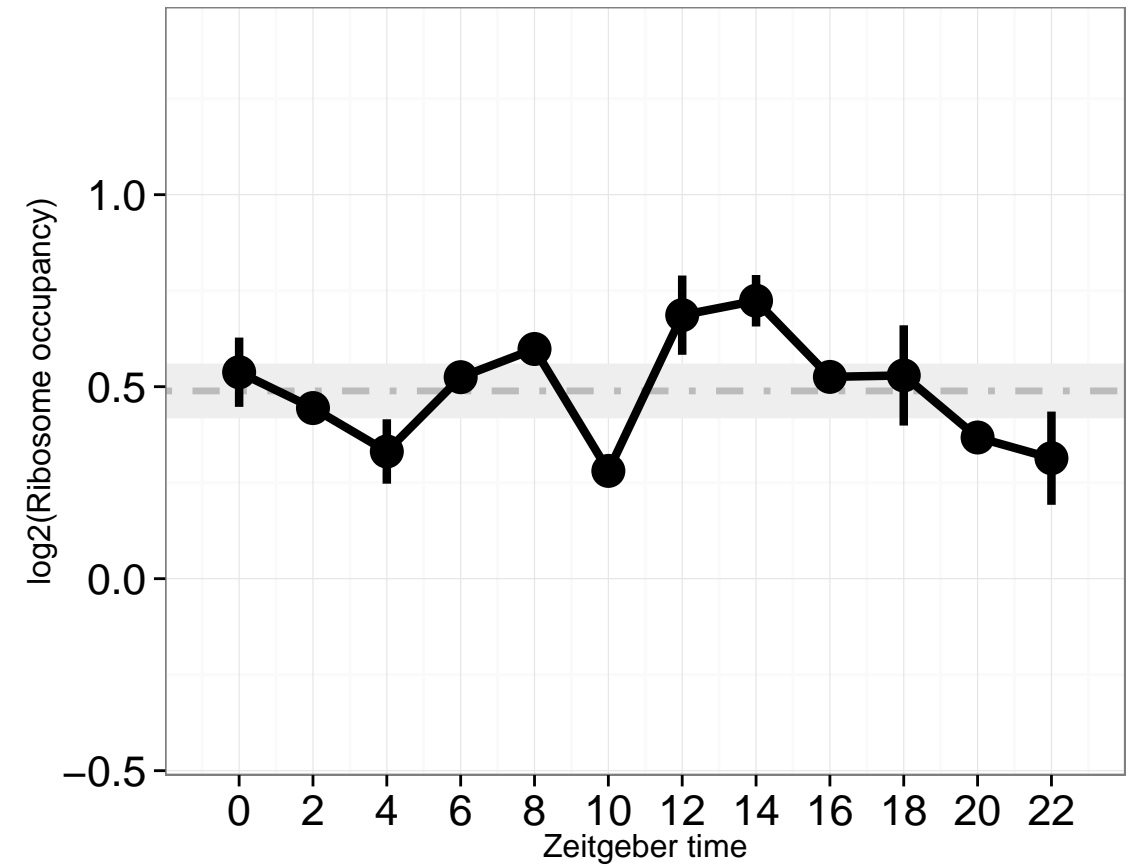

Supplement: Supplementary file 5062 [file 1]

## Abtb2

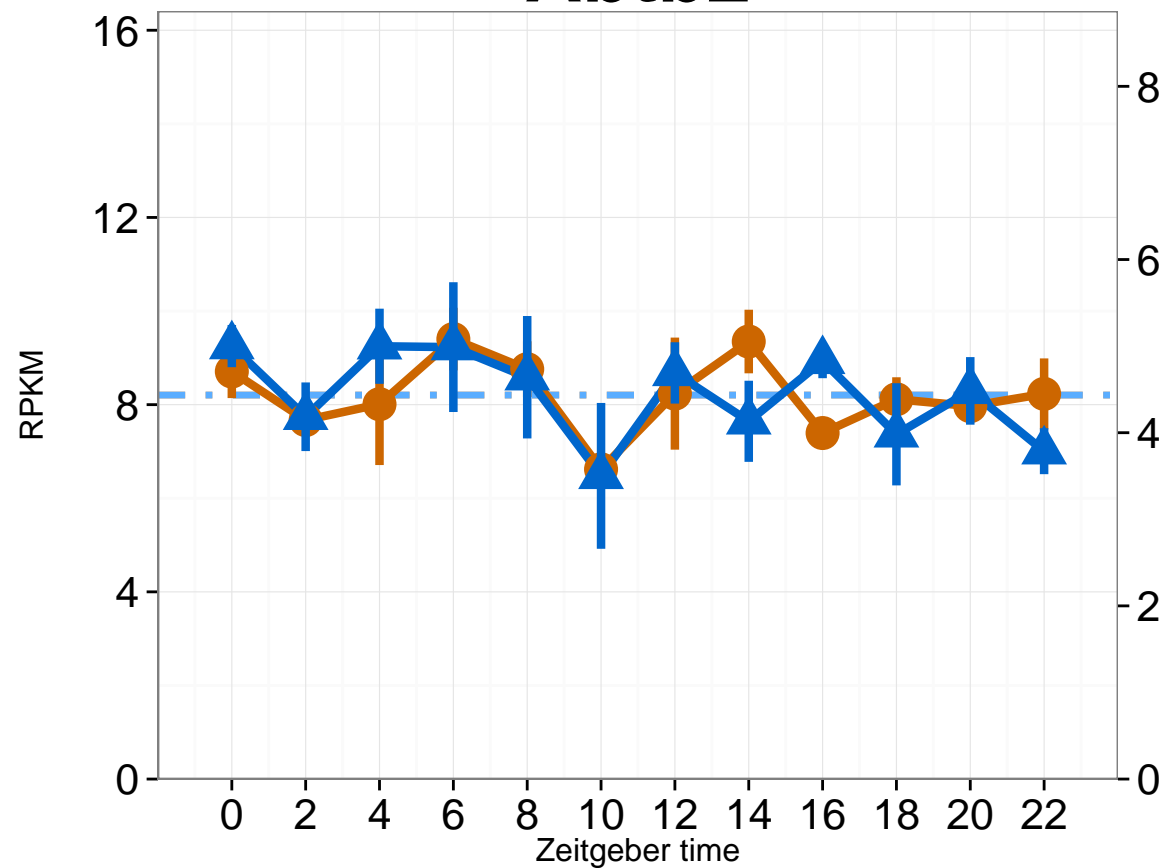

## Abtb2

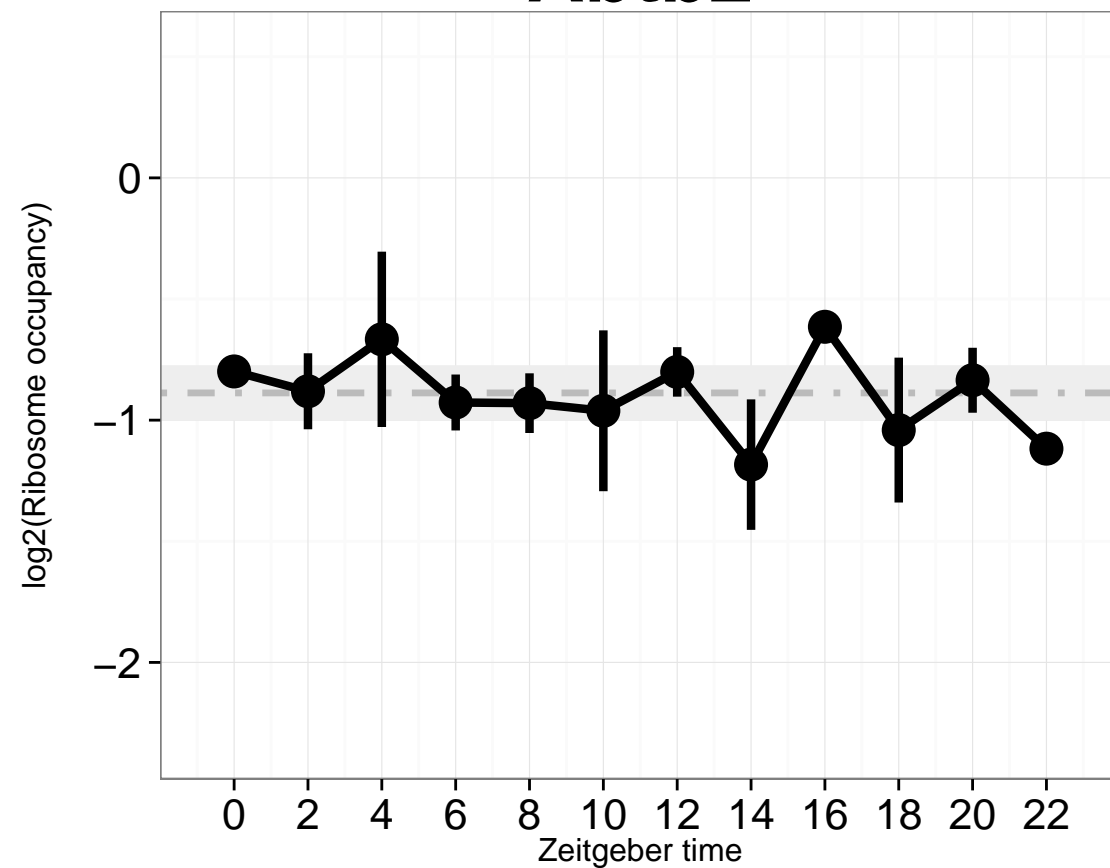

Supplement: Supplementary file 5063 [file 1]

## Slc35a1

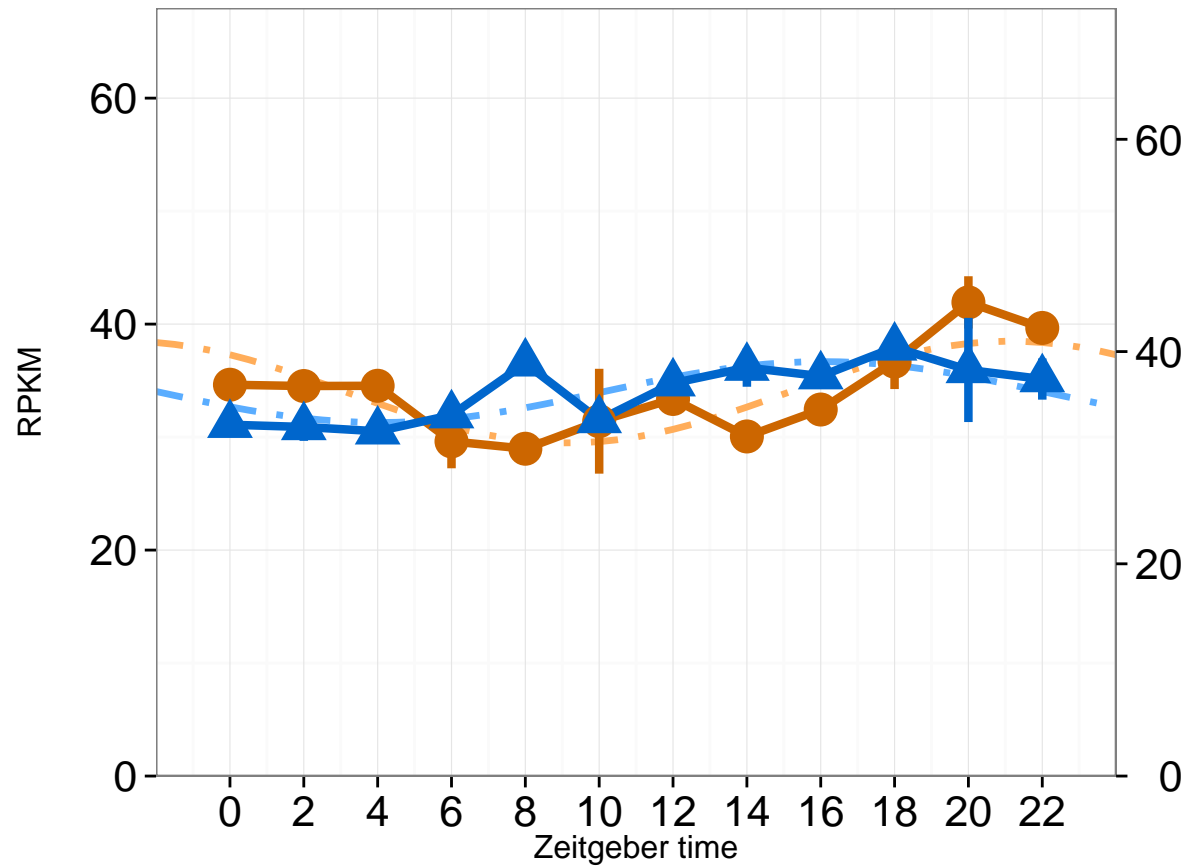

## Slc35a1

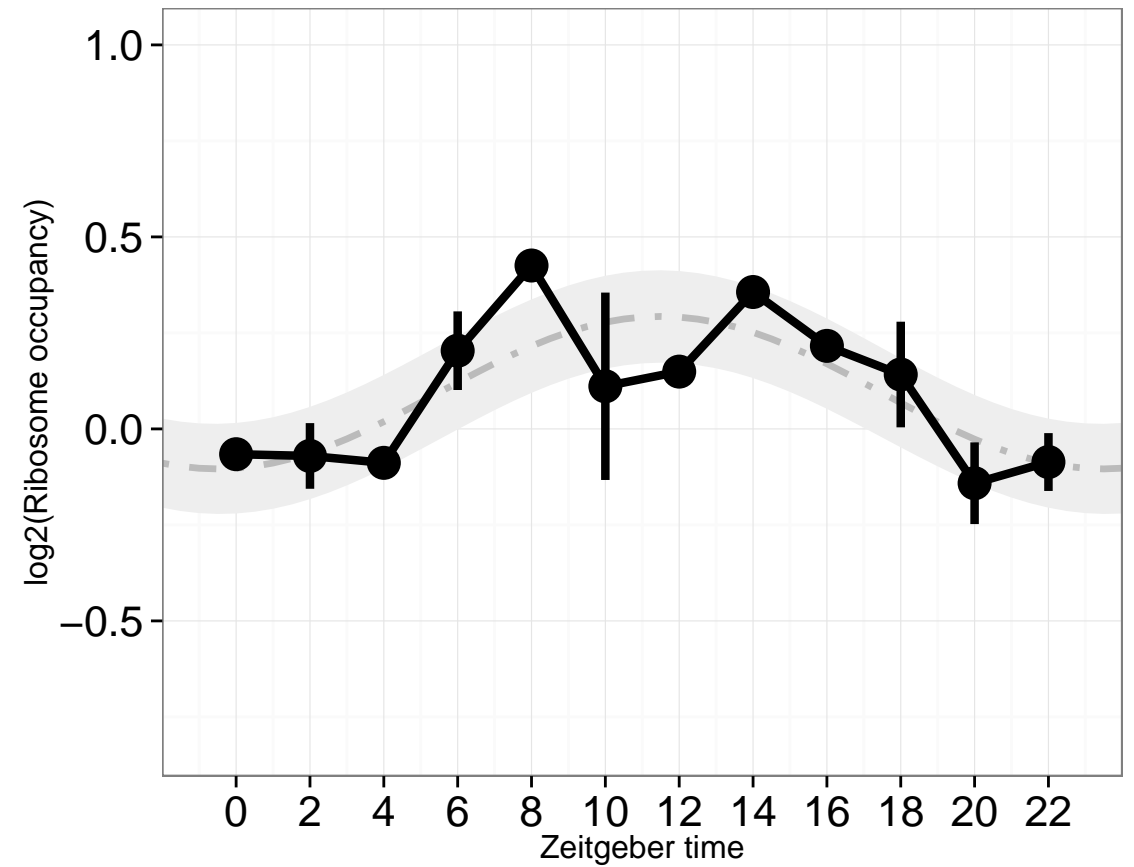

Supplement: Supplementary file 5064 [file 1]

# Tgfb2

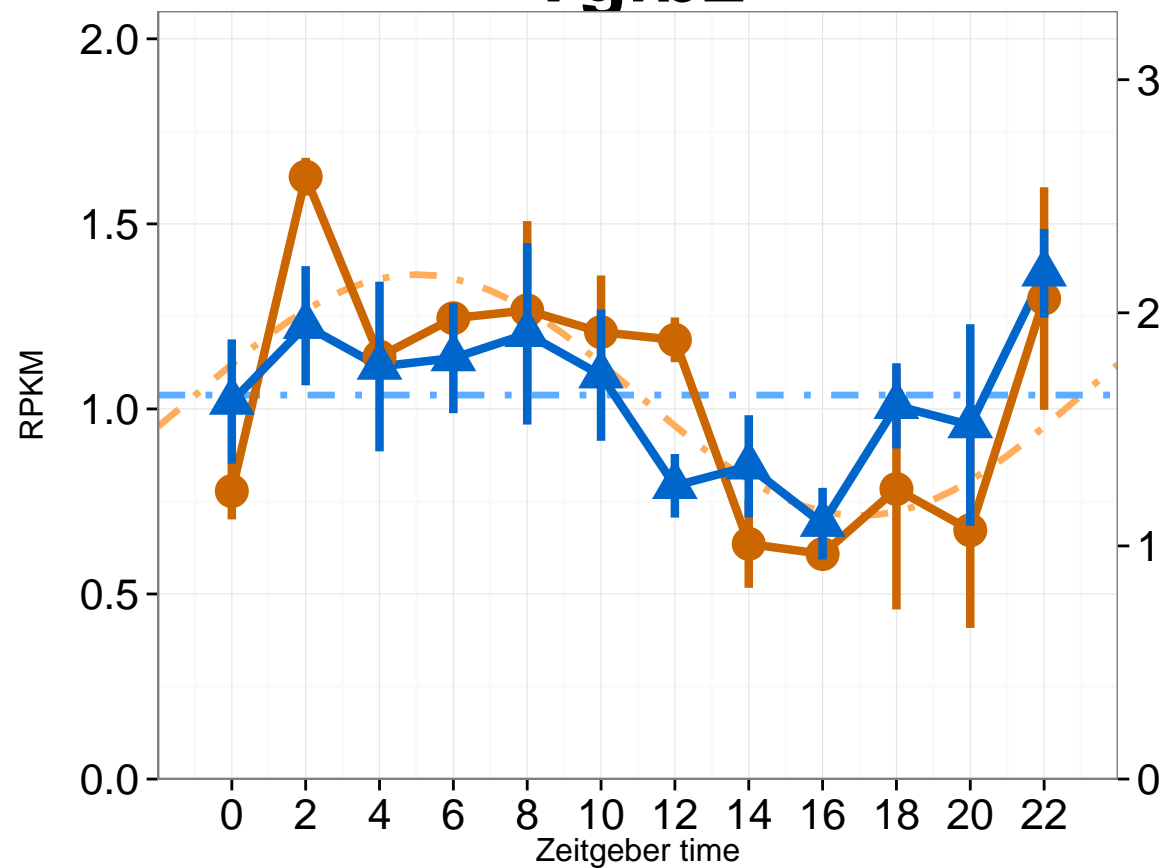

# Tgfb2

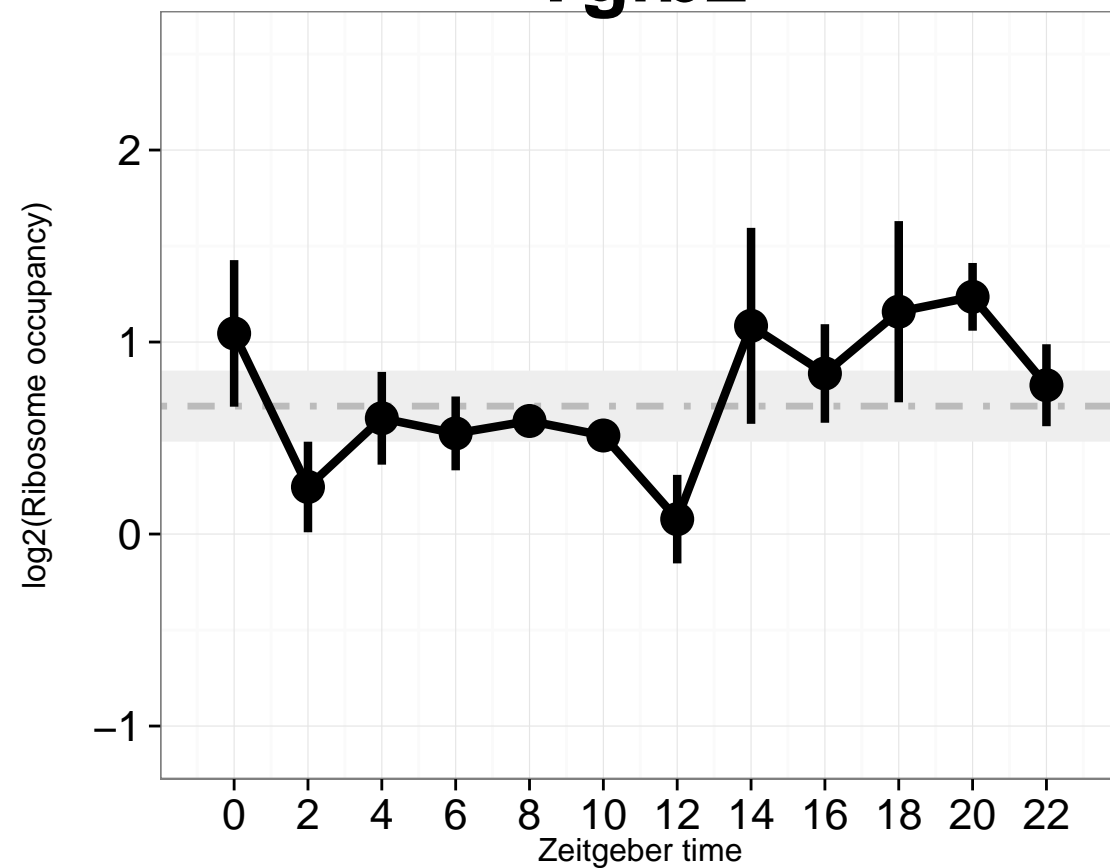

Supplement: Supplementary file 5065 [file 1]

## Lyst

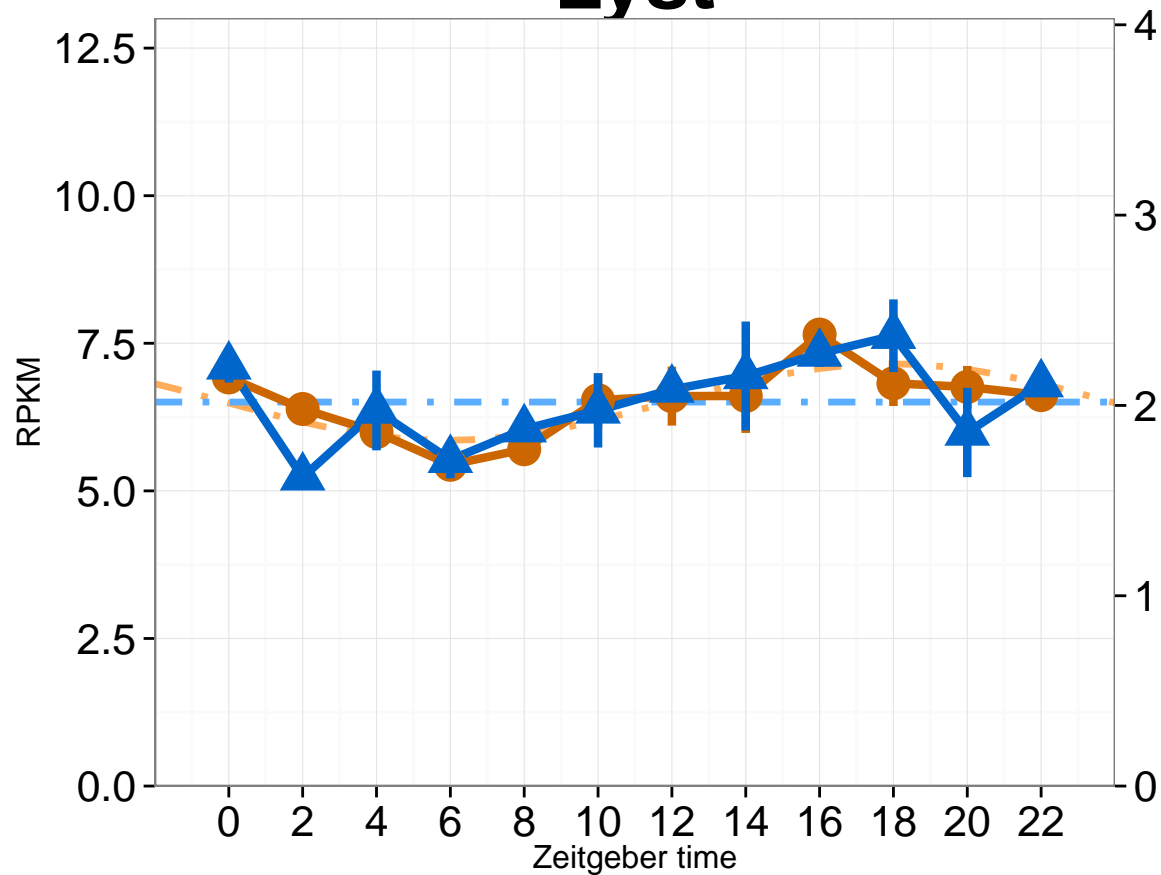

## Lyst

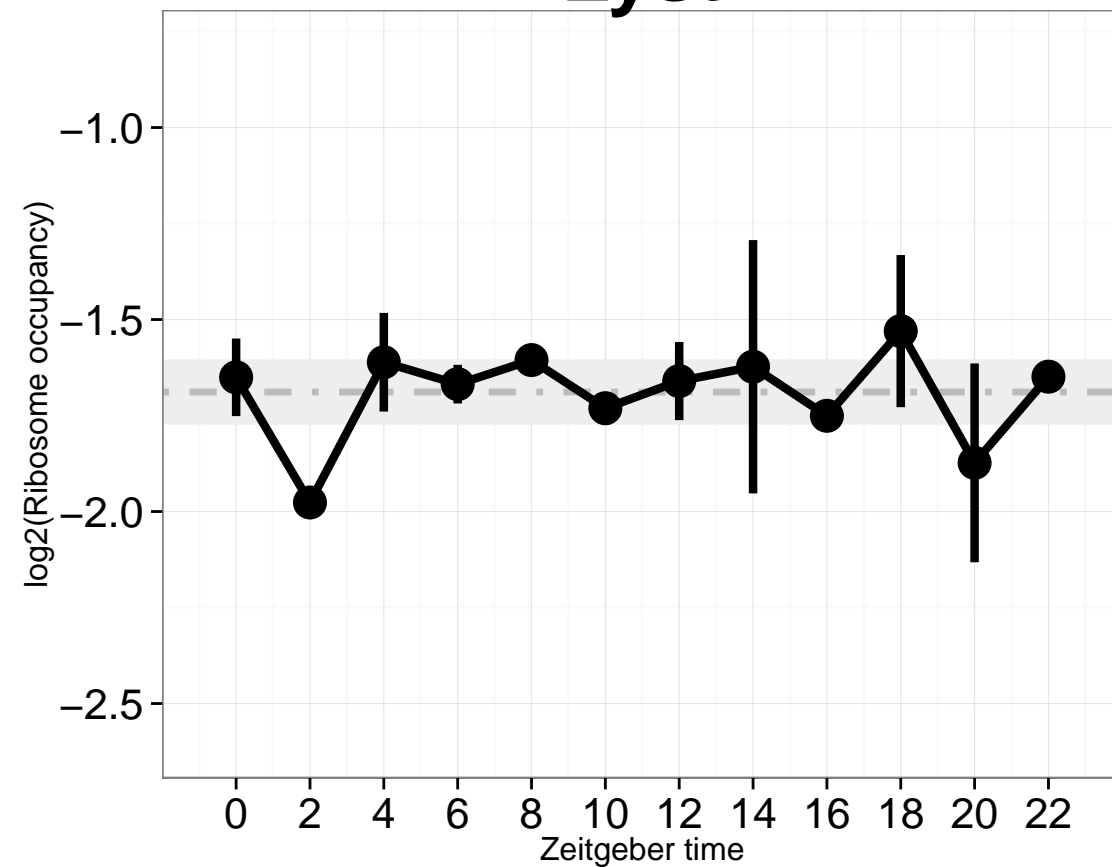

Supplement: Supplementary file 5066 [file 1]

# Smim20

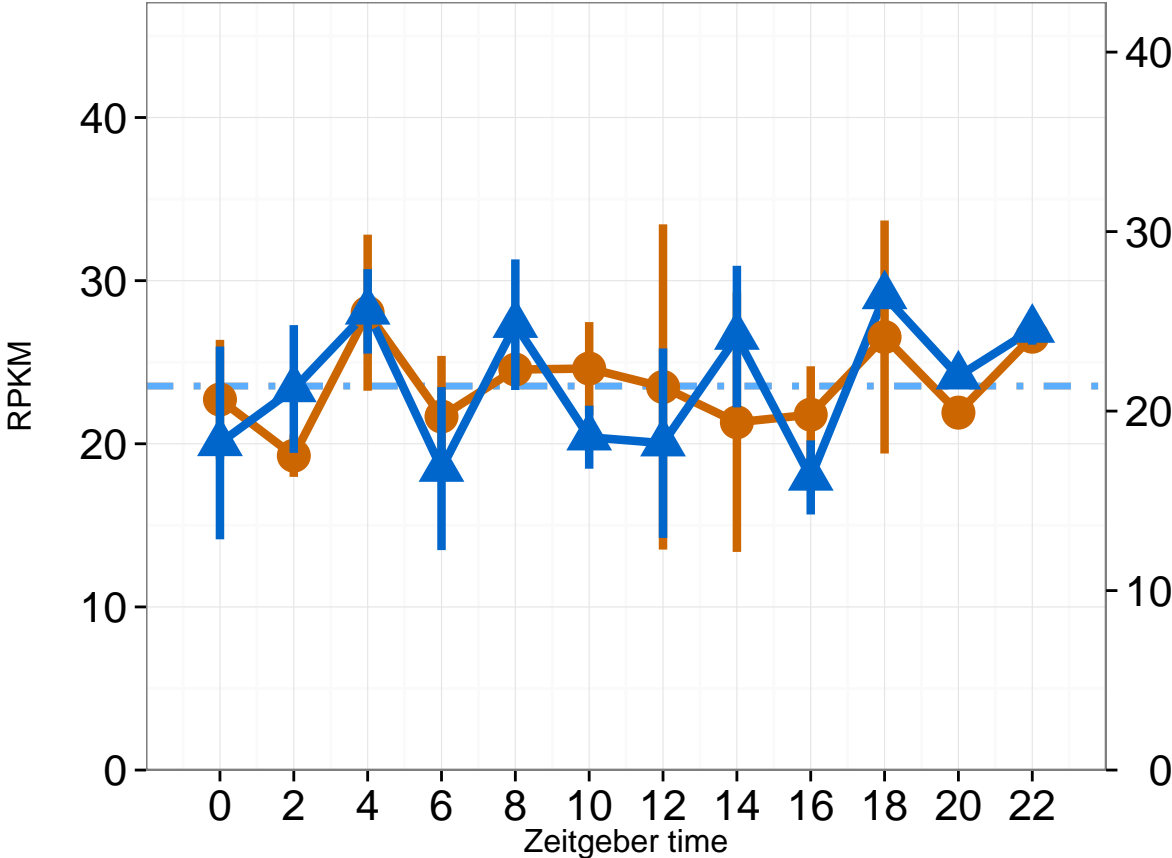

# Smim20

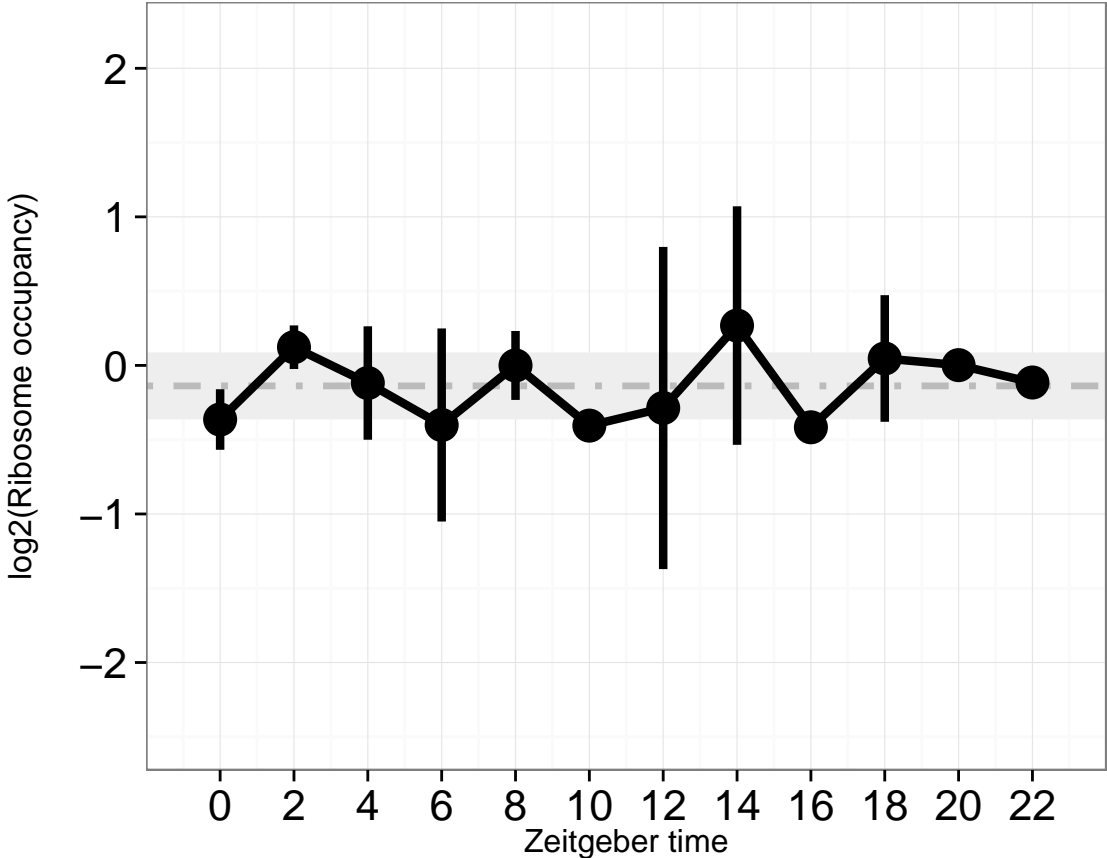

Supplement: Supplementary file 5067 [file 1]

## Klf9

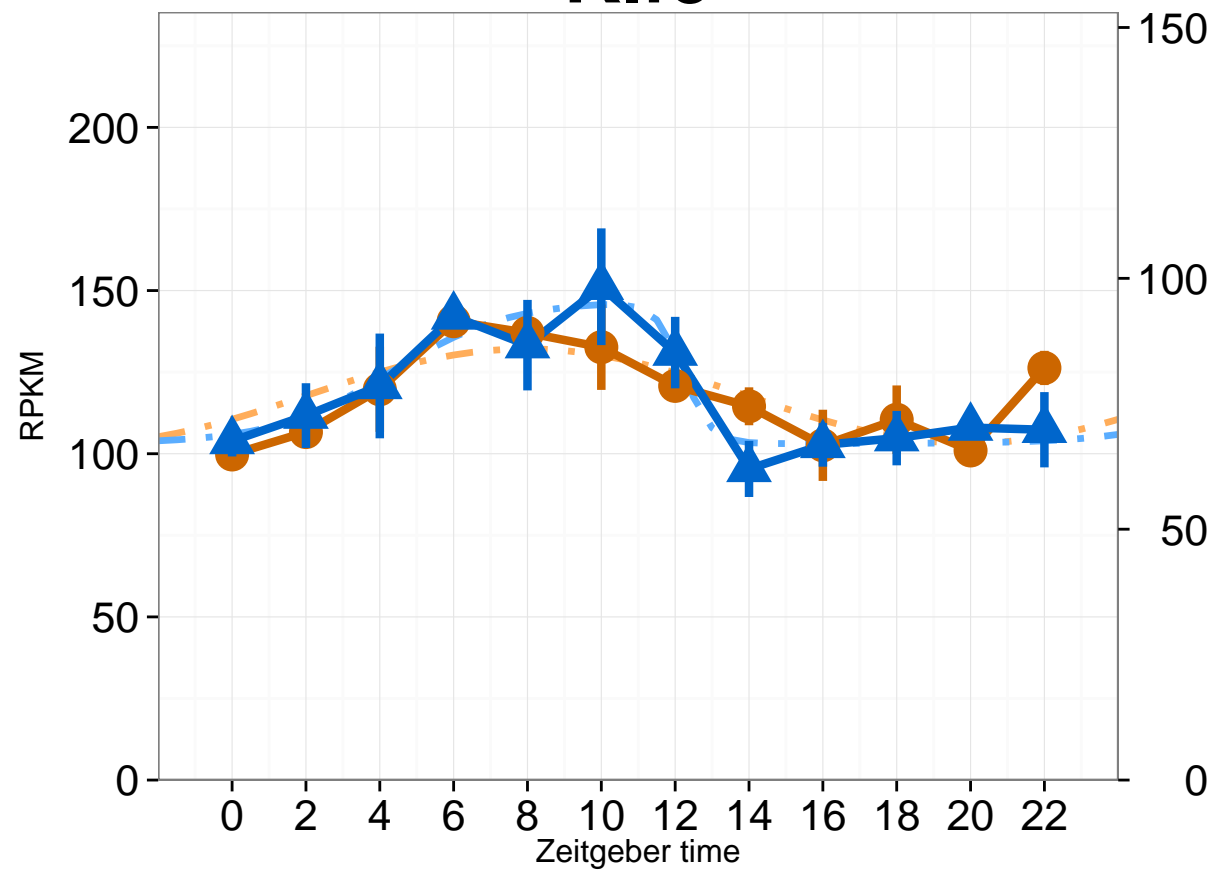

## Klf9

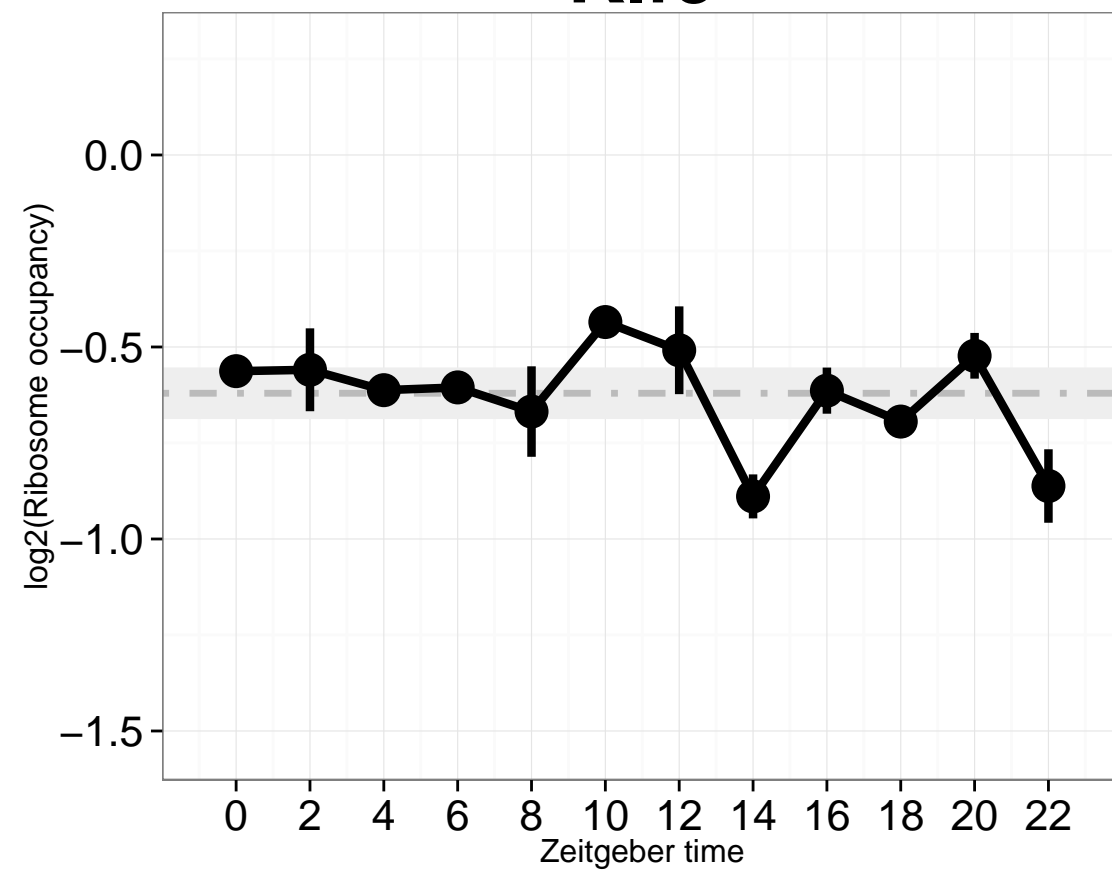

Supplement: Supplementary file 5068 [file 1]

## Ybx3

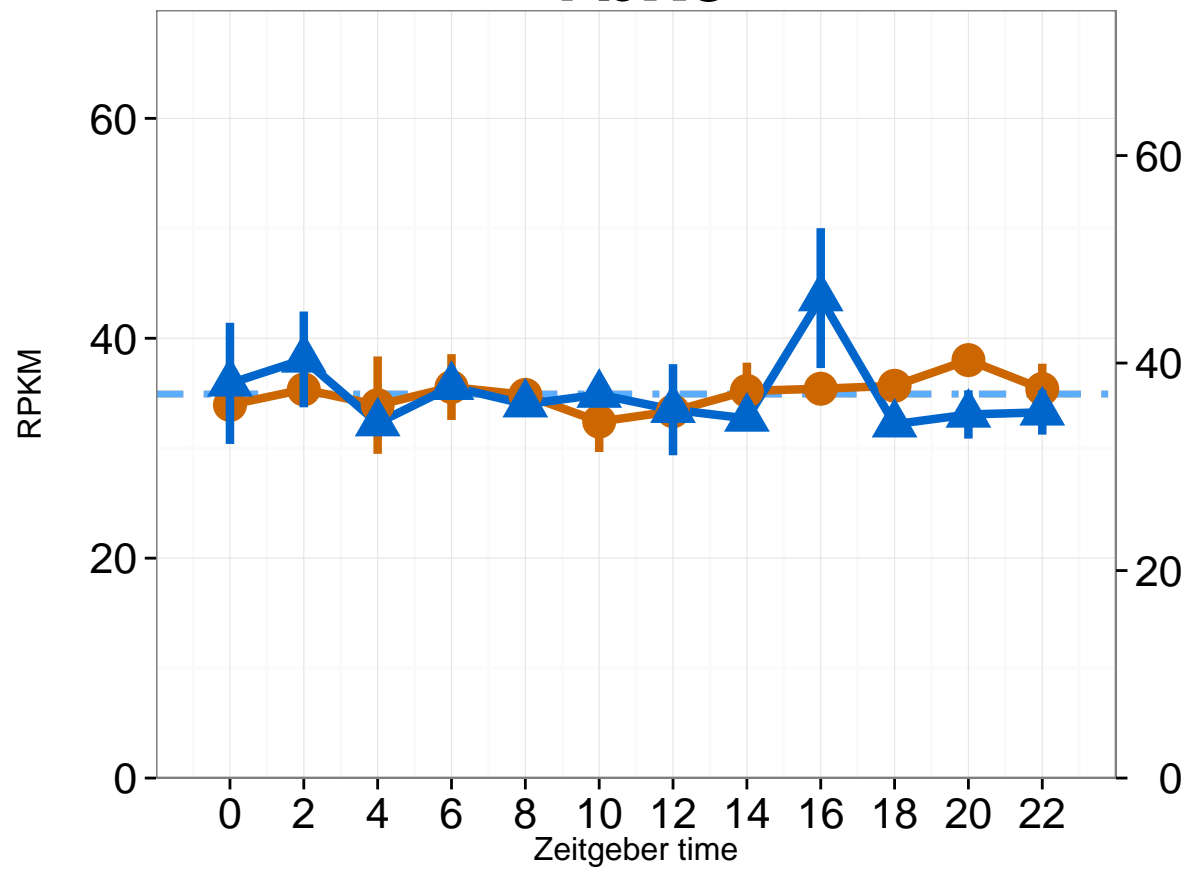

## Ybx3

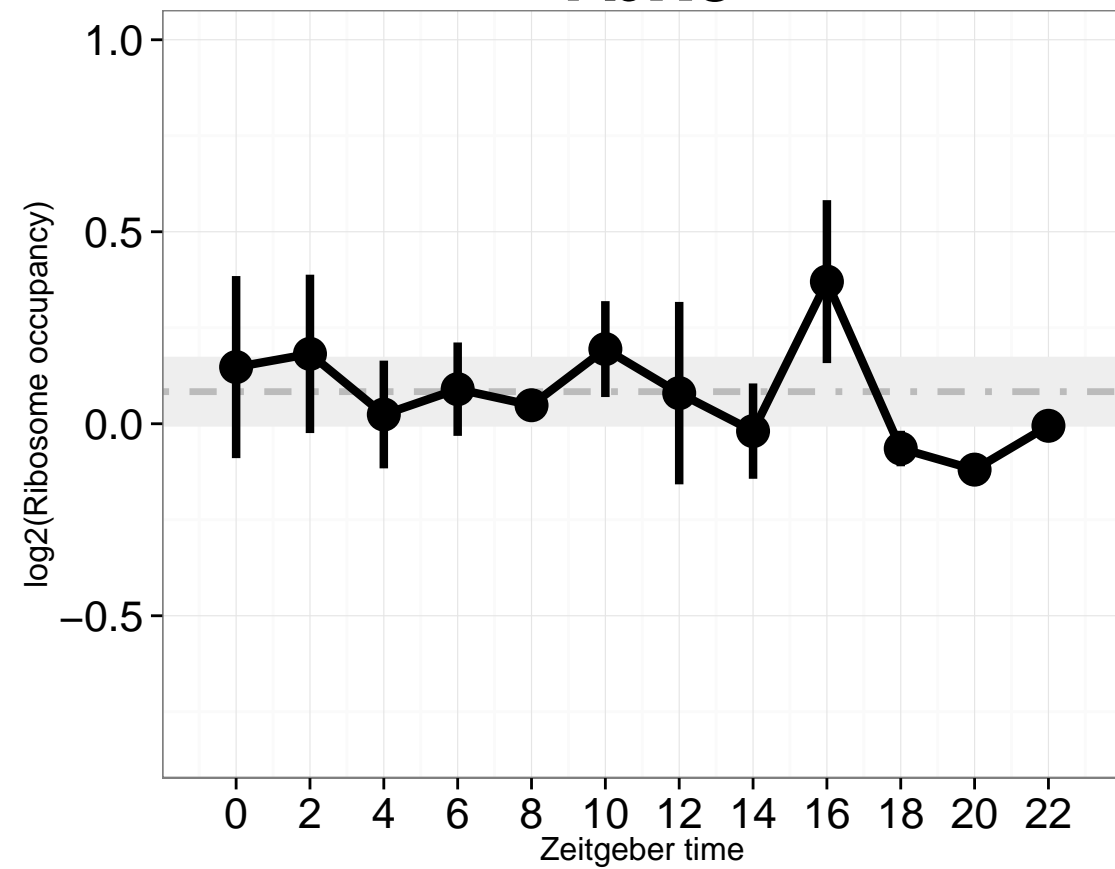

Supplement: Supplementary file 5069 [file 1]

## Nob1

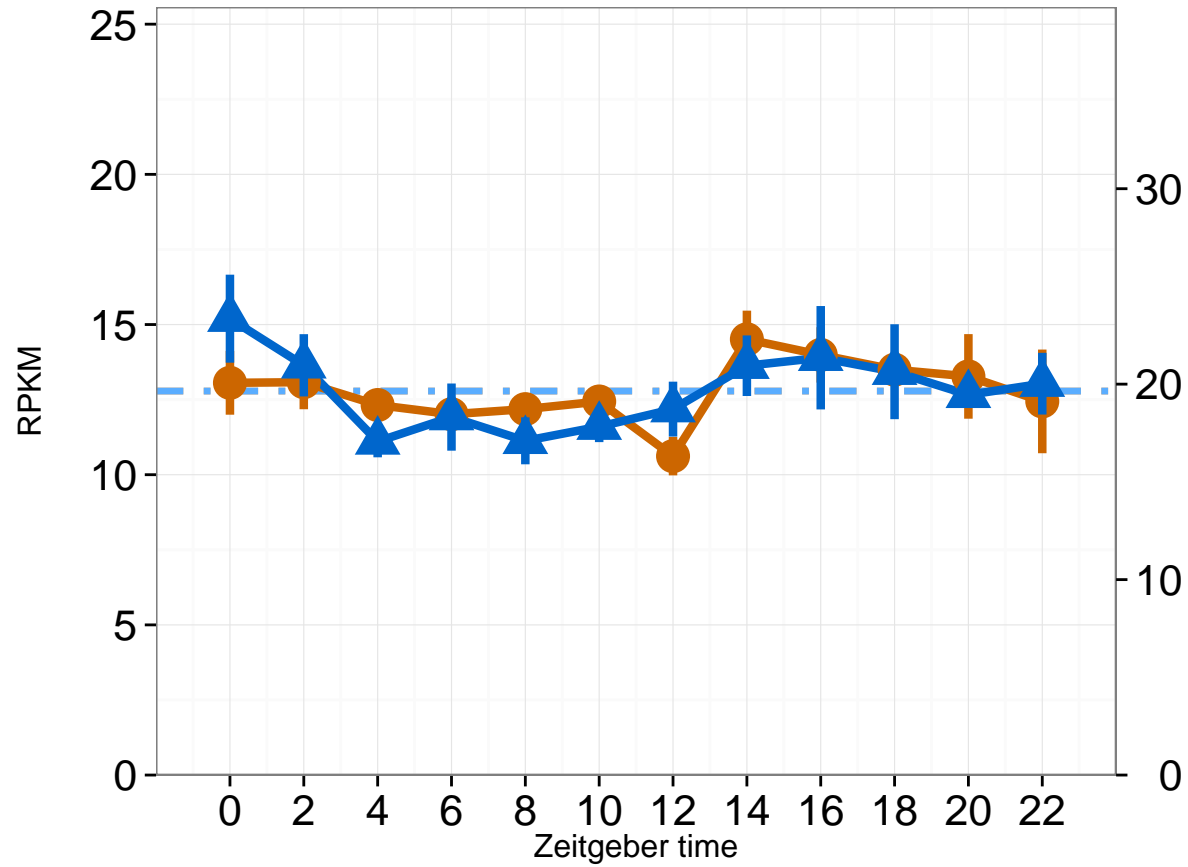

## Nob1

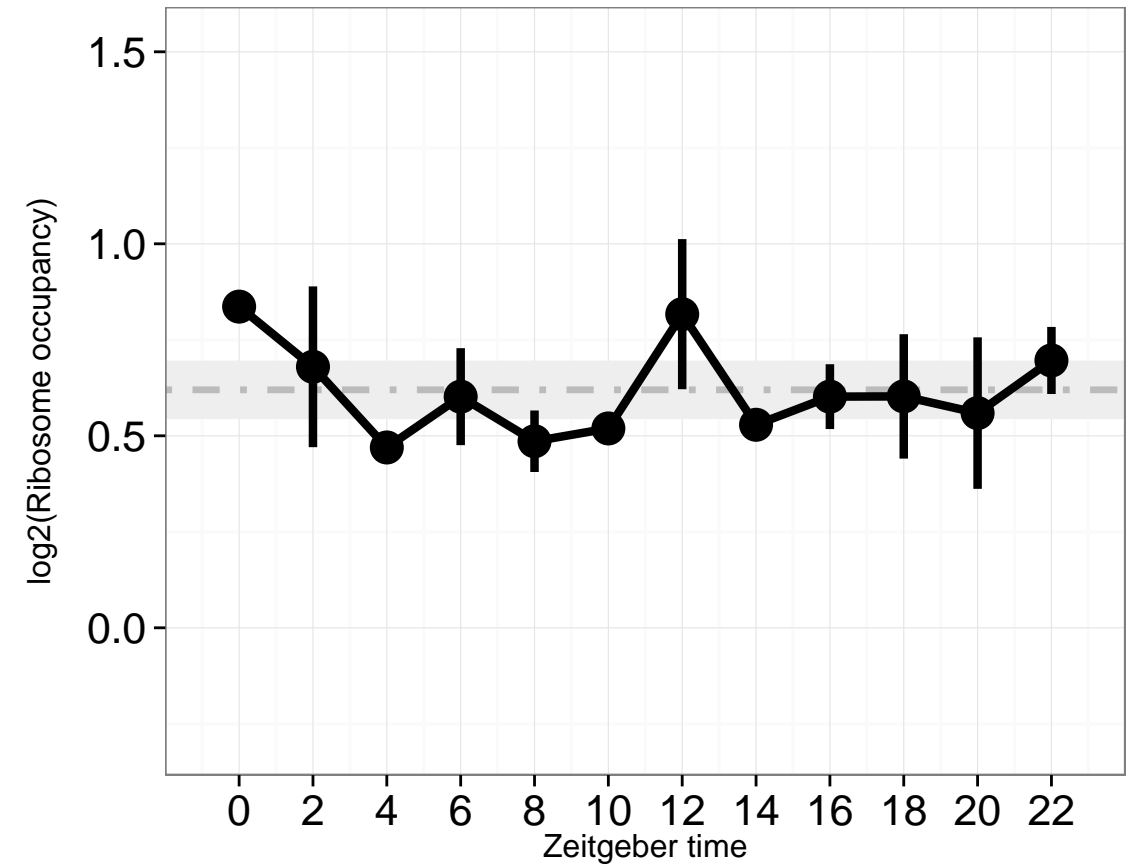

Supplement: Supplementary file 5070 [file 1]

# Scube1

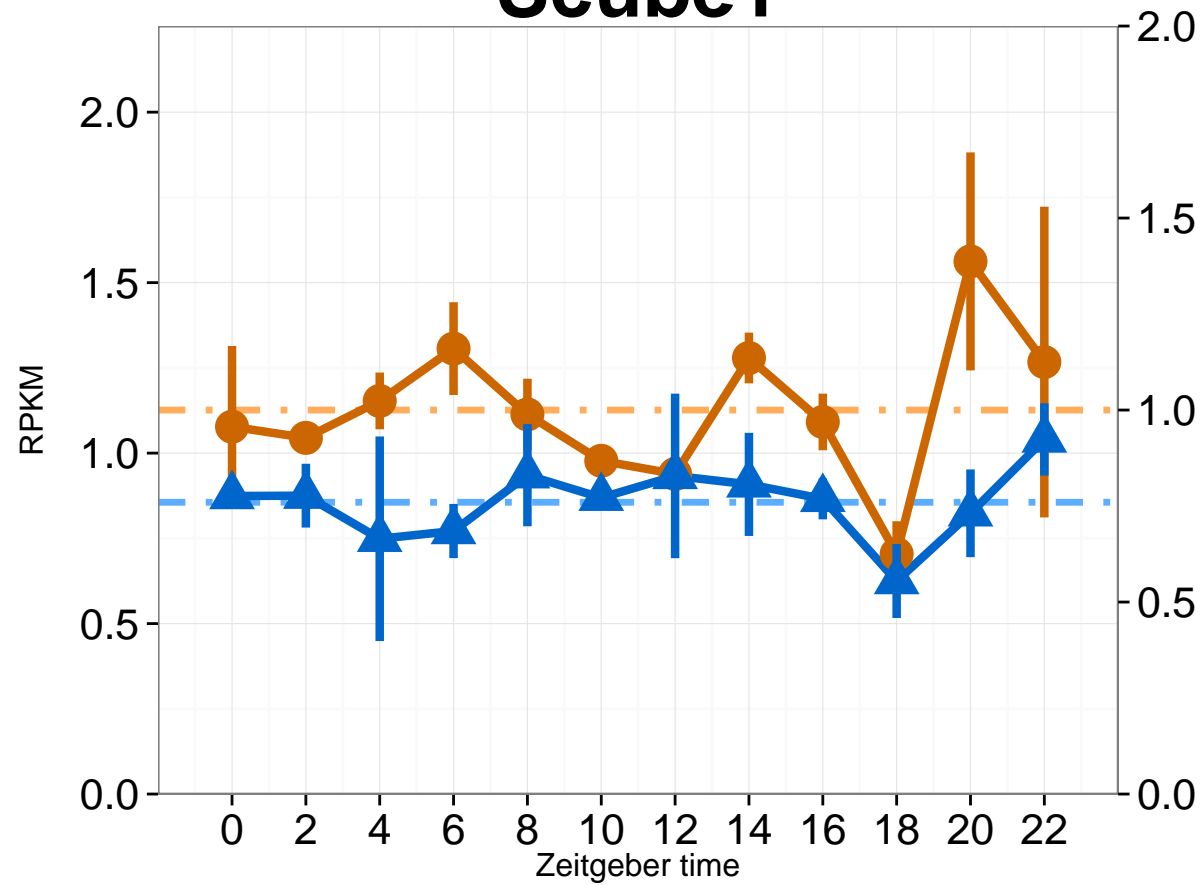

# Scube1

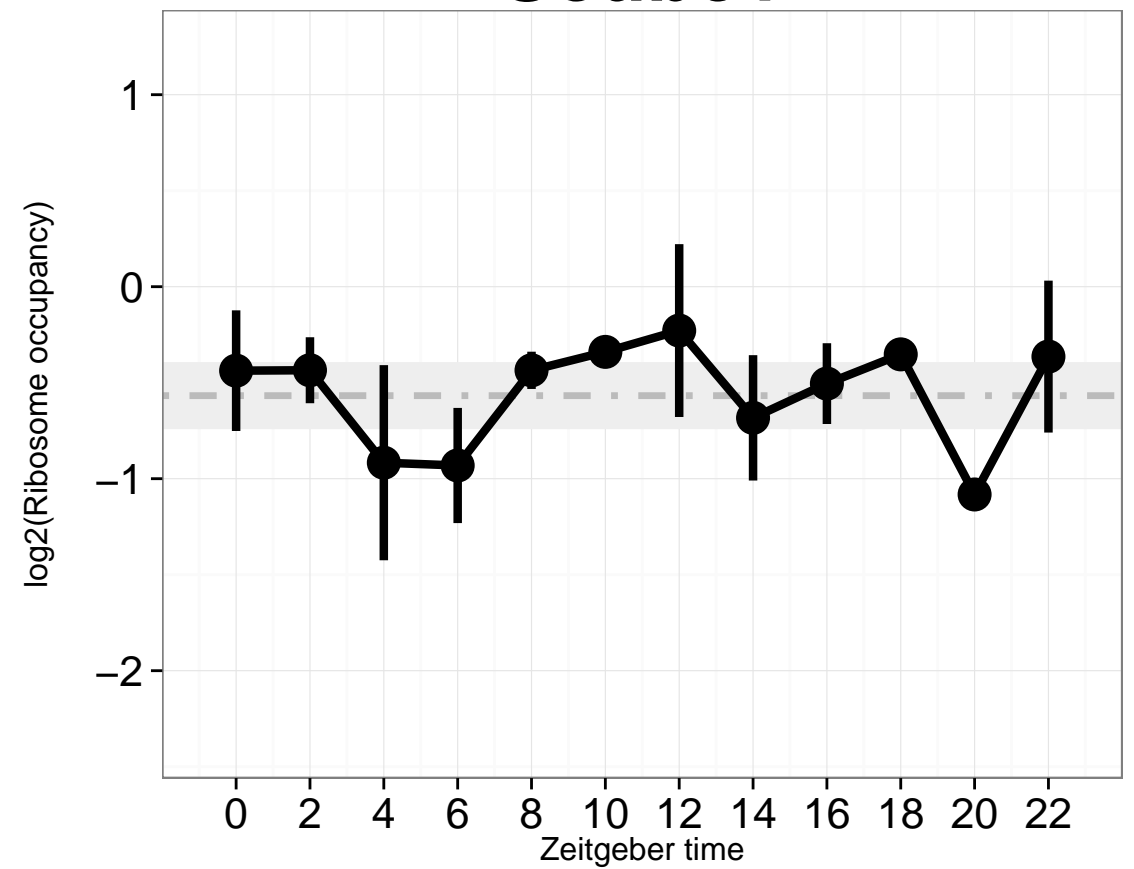

Supplement: Supplementary file 5071 [file 1]

## Ubp2l

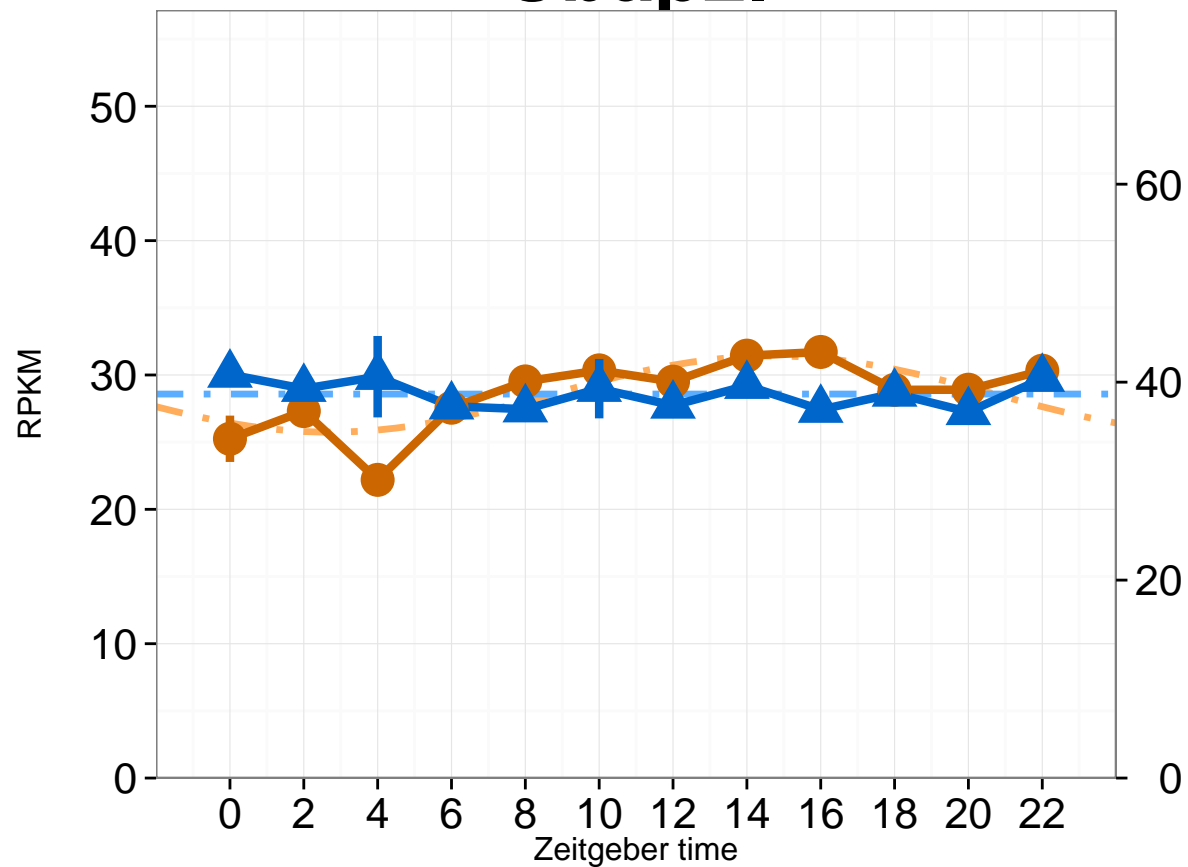

## Ubp2l

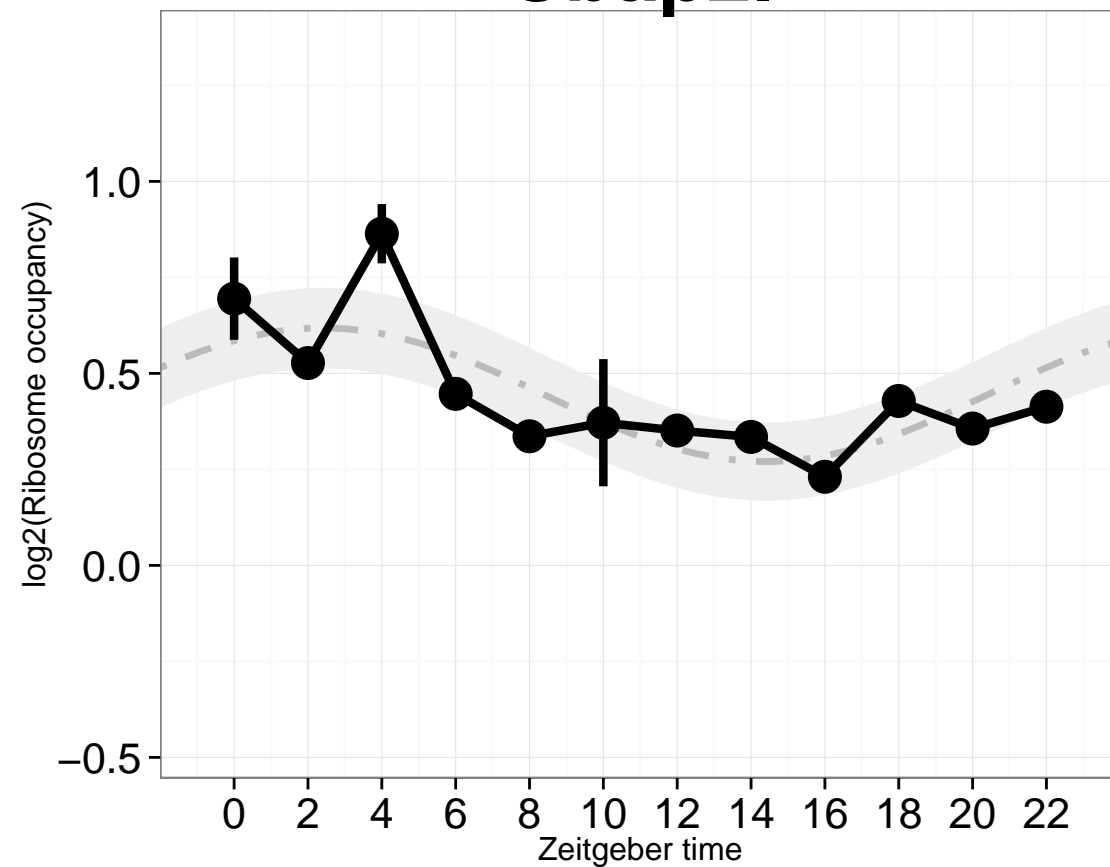

Supplement: Supplementary file 5072 [file 1]

# Nupl1

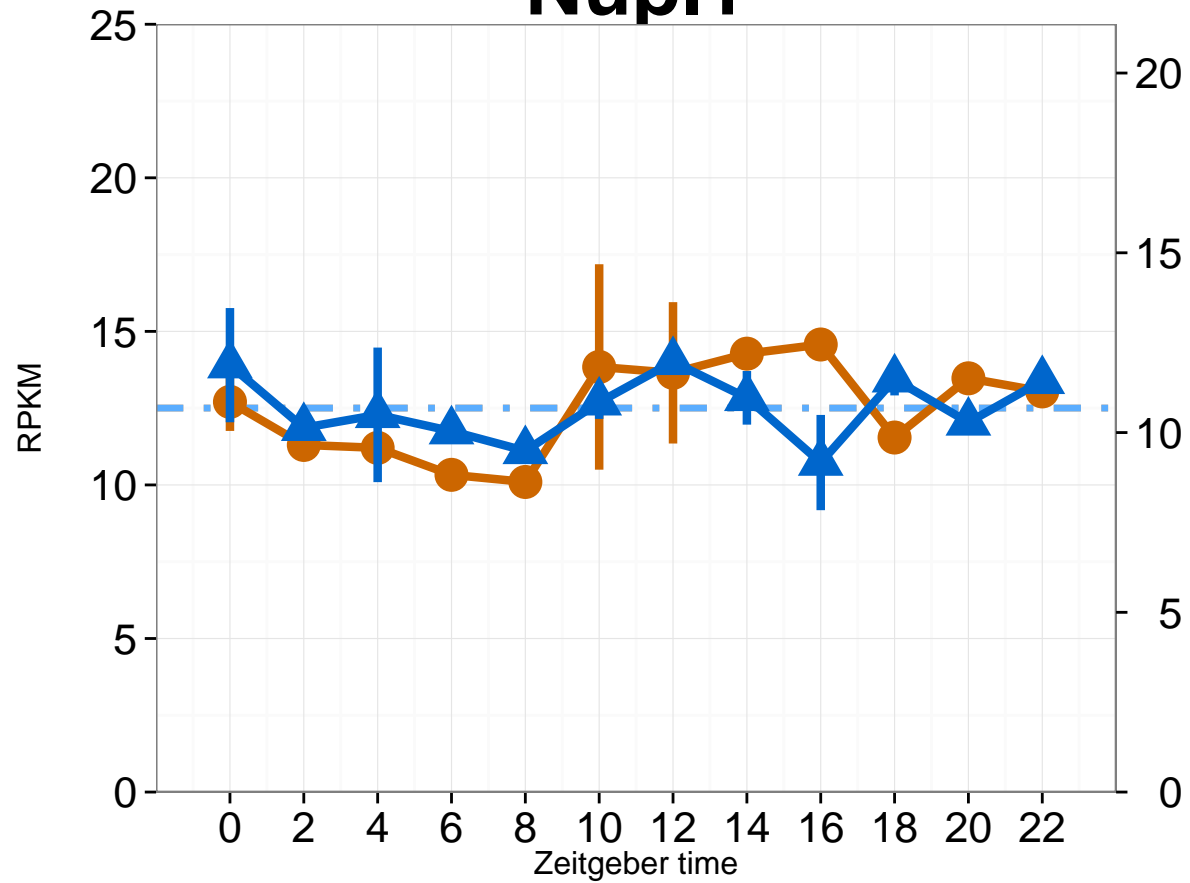

# Nupl1

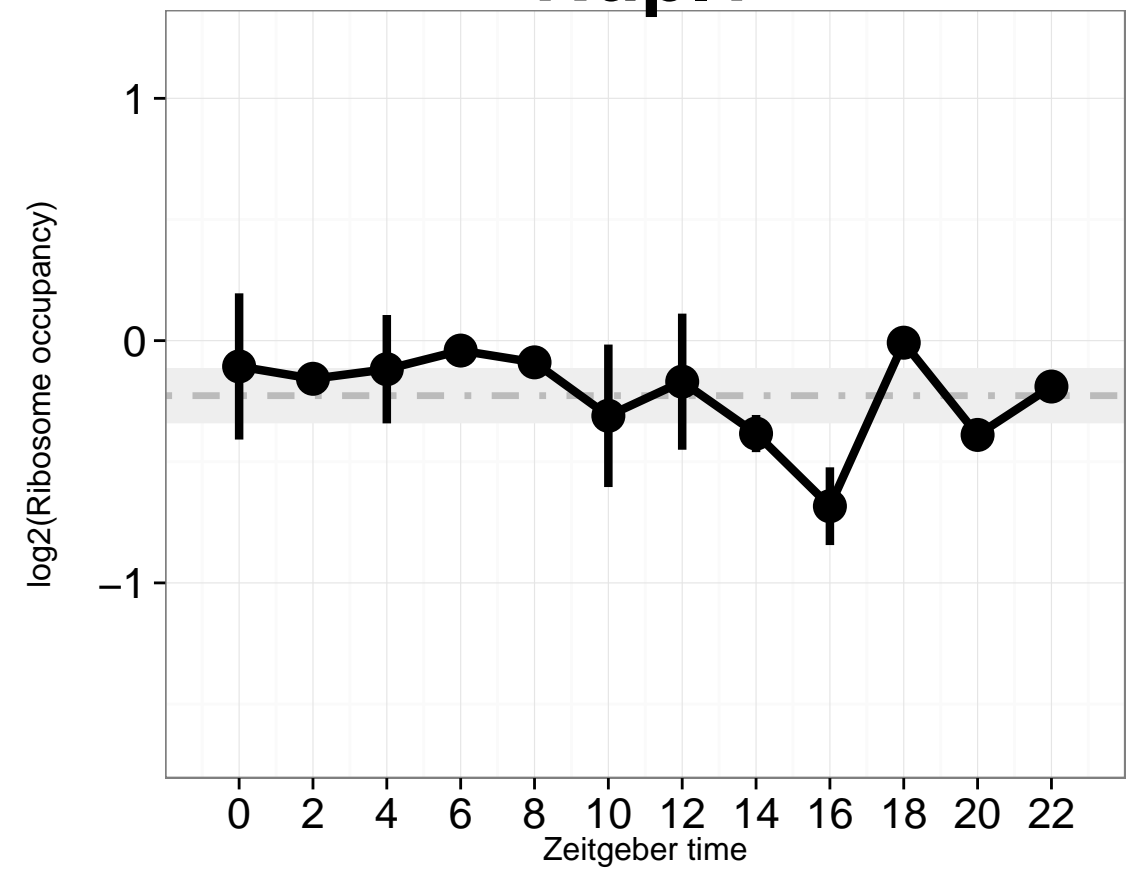

Supplement: Supplementary file 5073 [file 1]

# Chid1

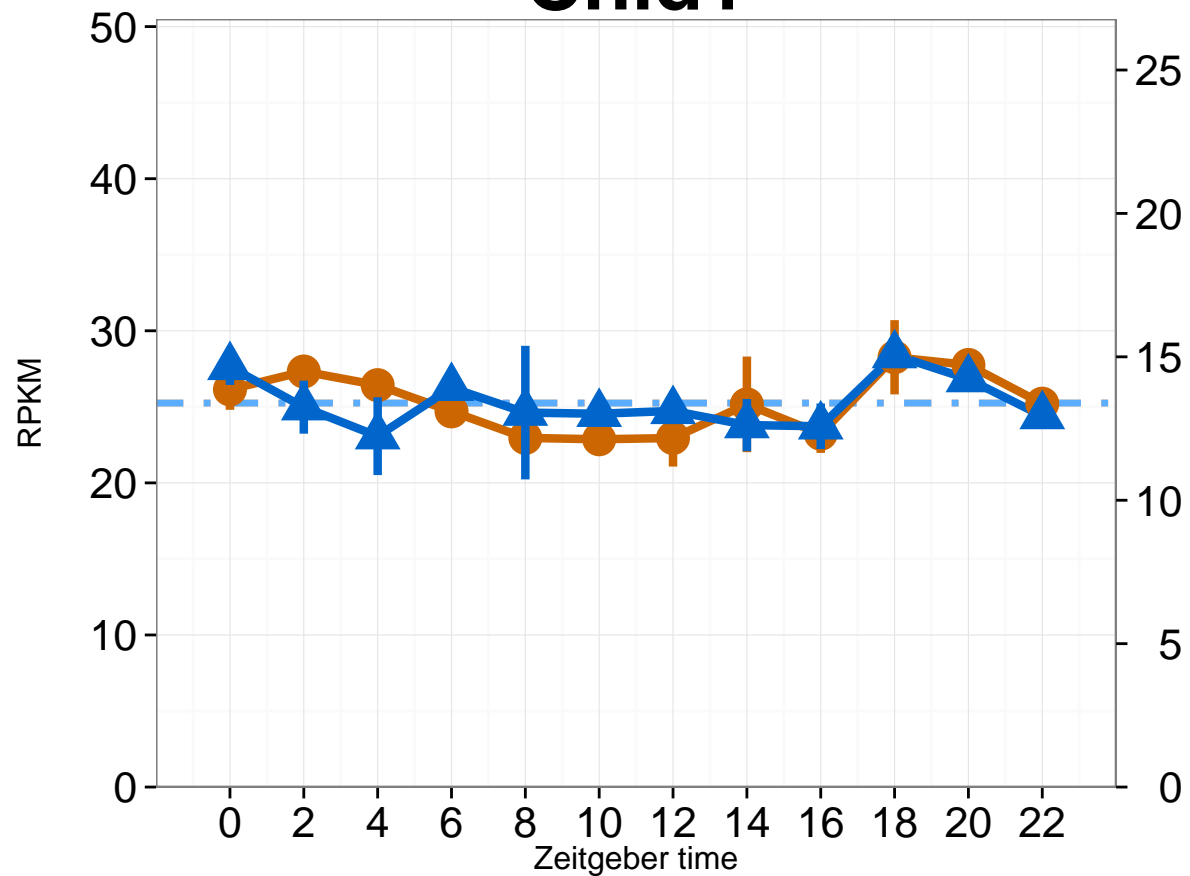

# Chid1

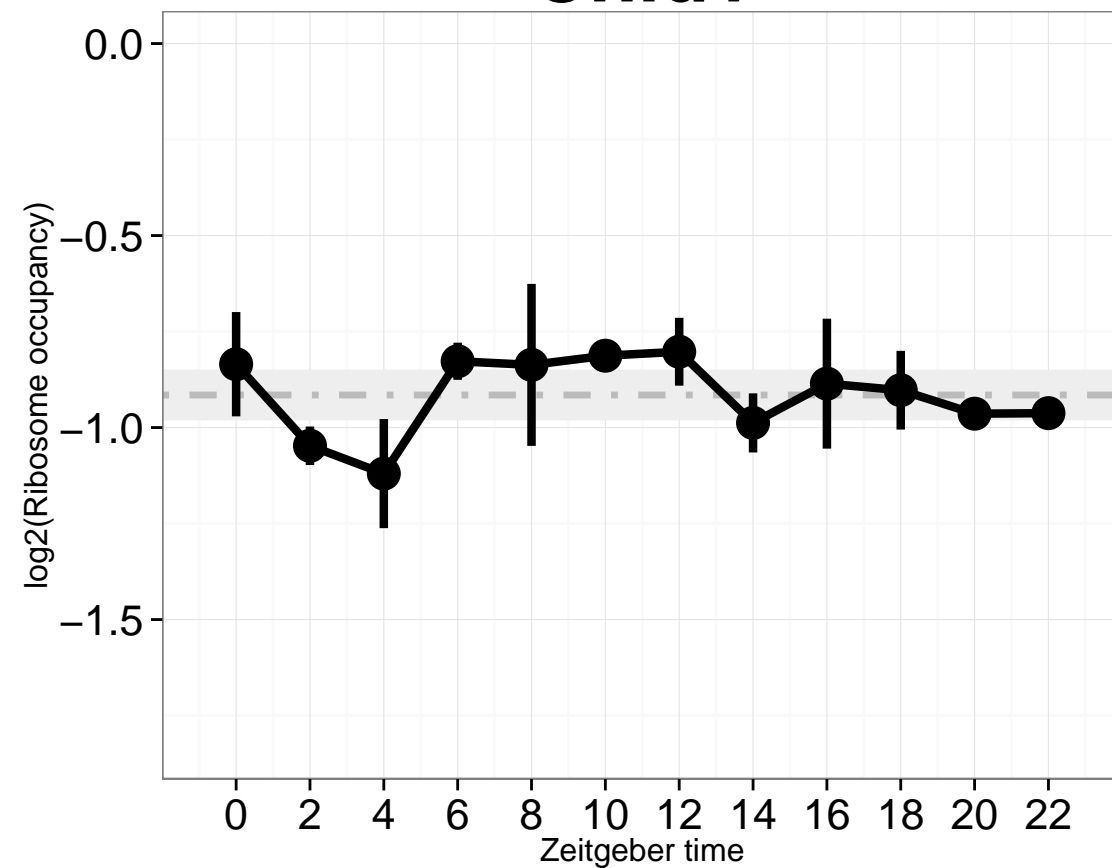

Supplement: Supplementary file 5074 [file 1]

# Arfgap1

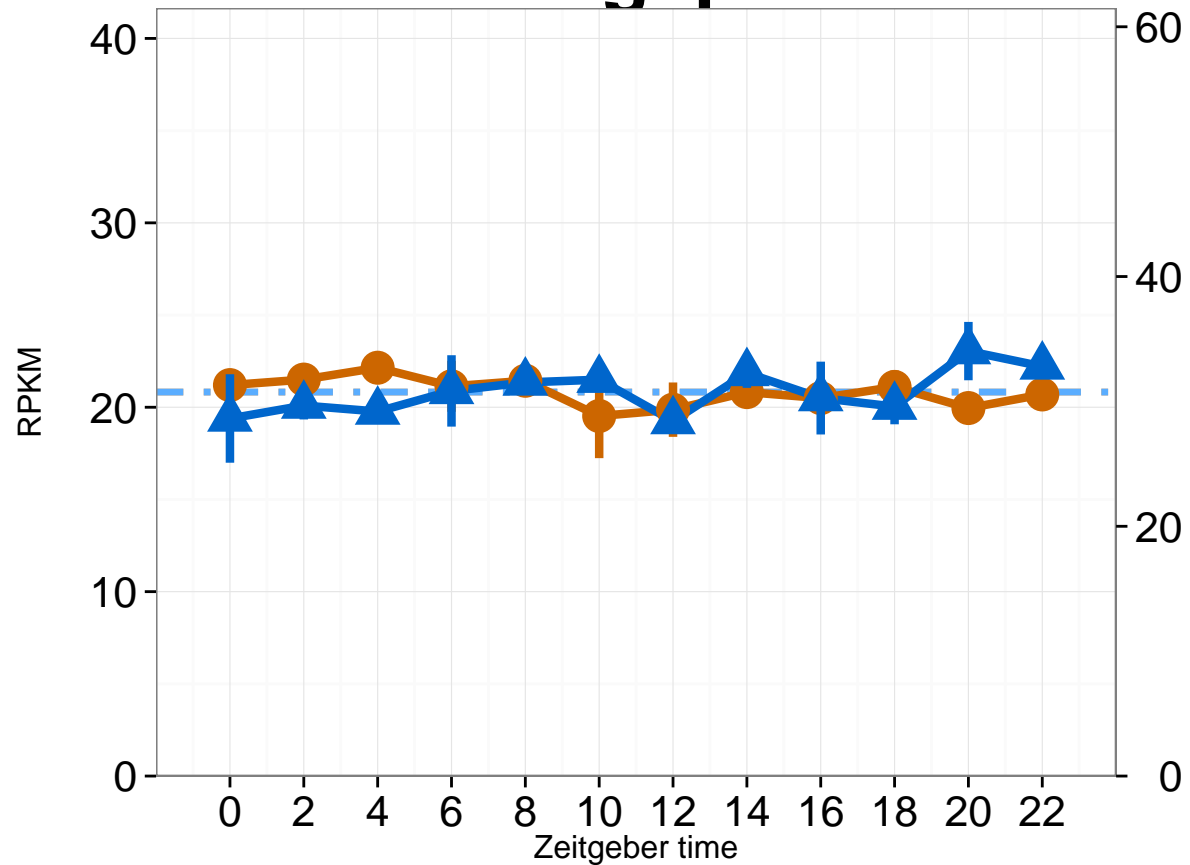

# Arfgap1

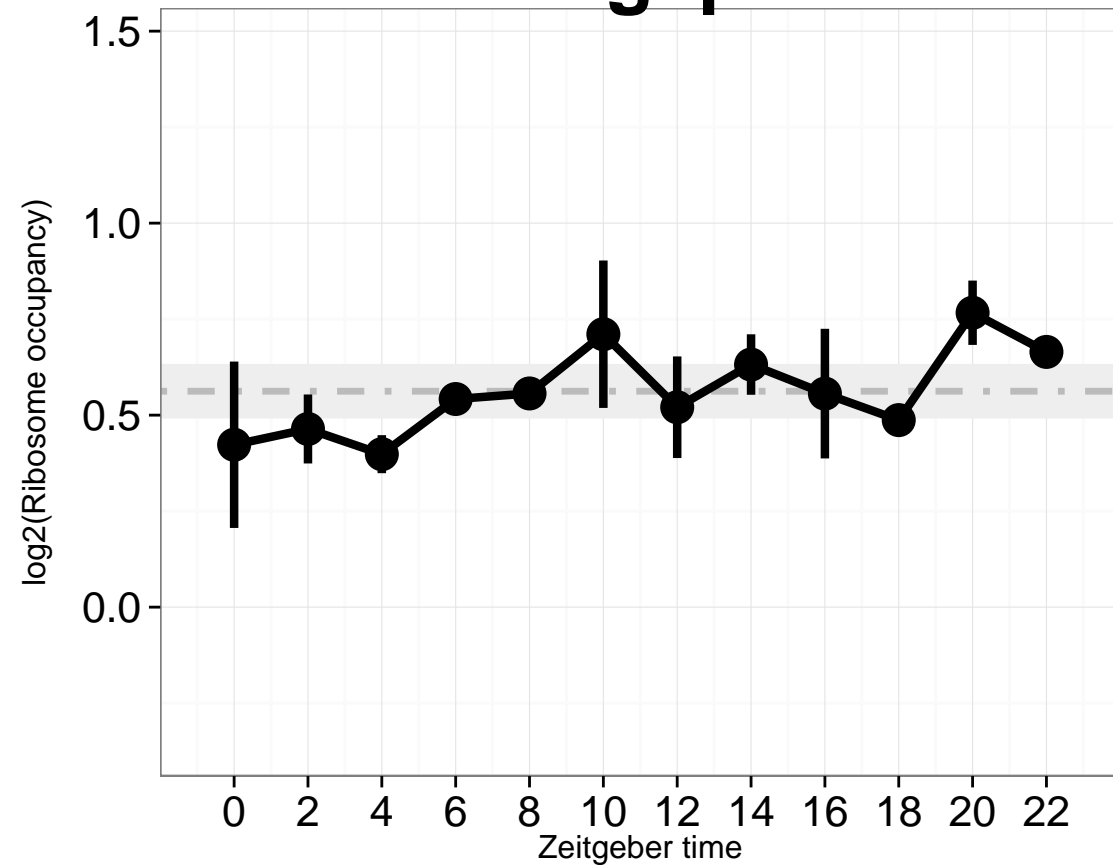

Supplement: Supplementary file 5075 [file 1]

# Ppp1r18

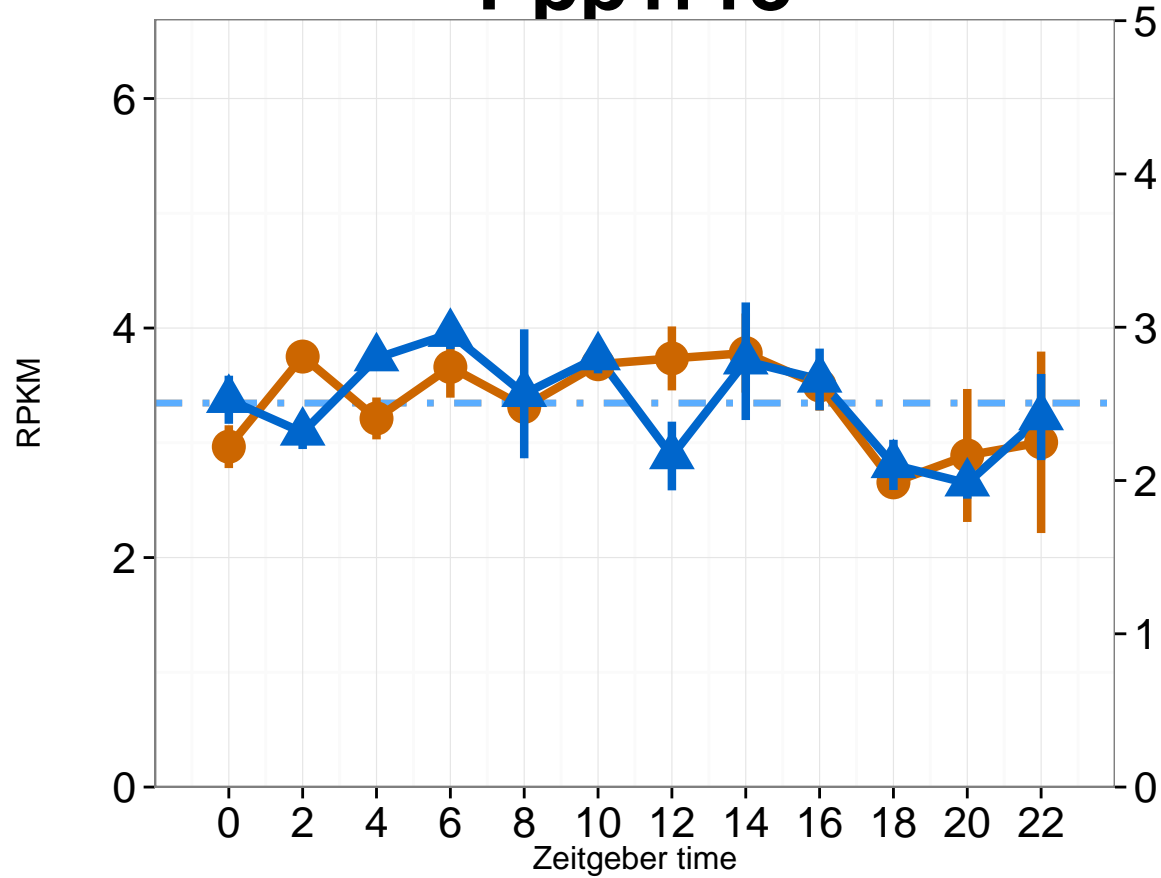

# Ppp1r18

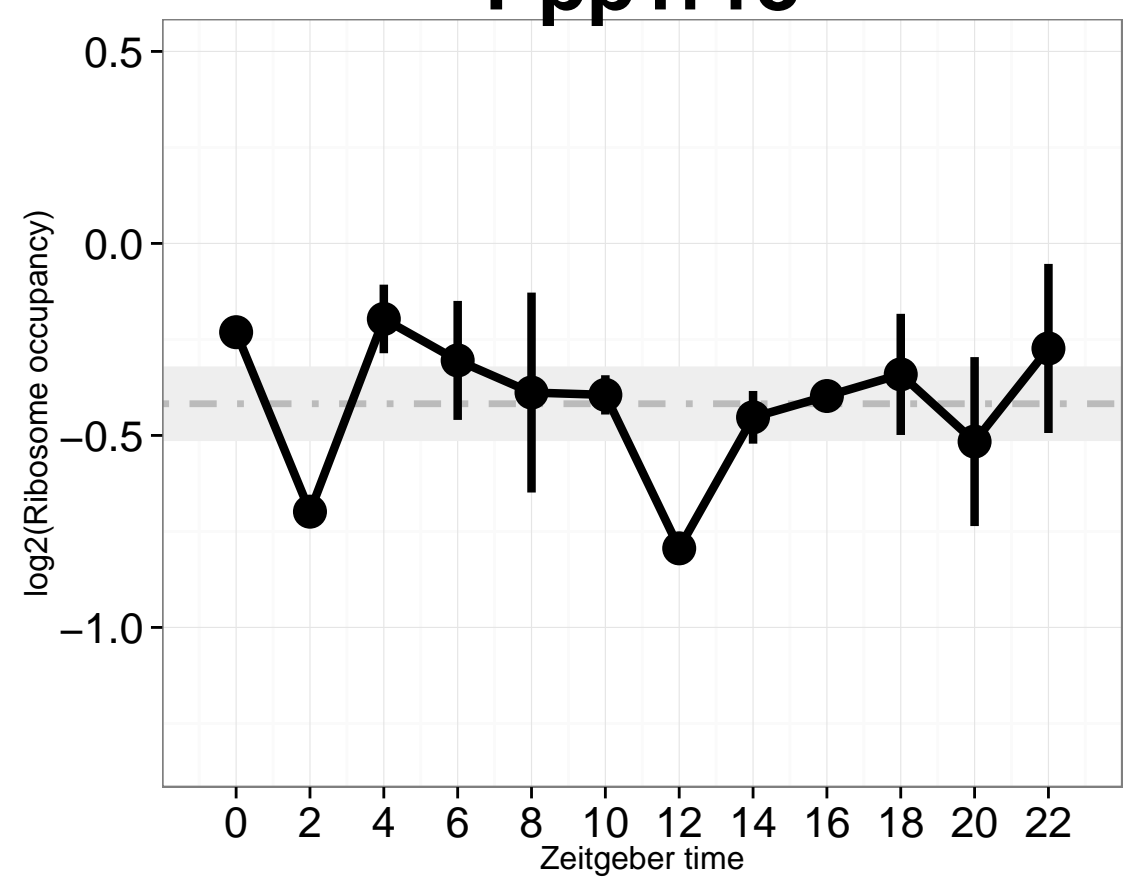

Supplement: Supplementary file 5076 [file 1]

# Prkd1

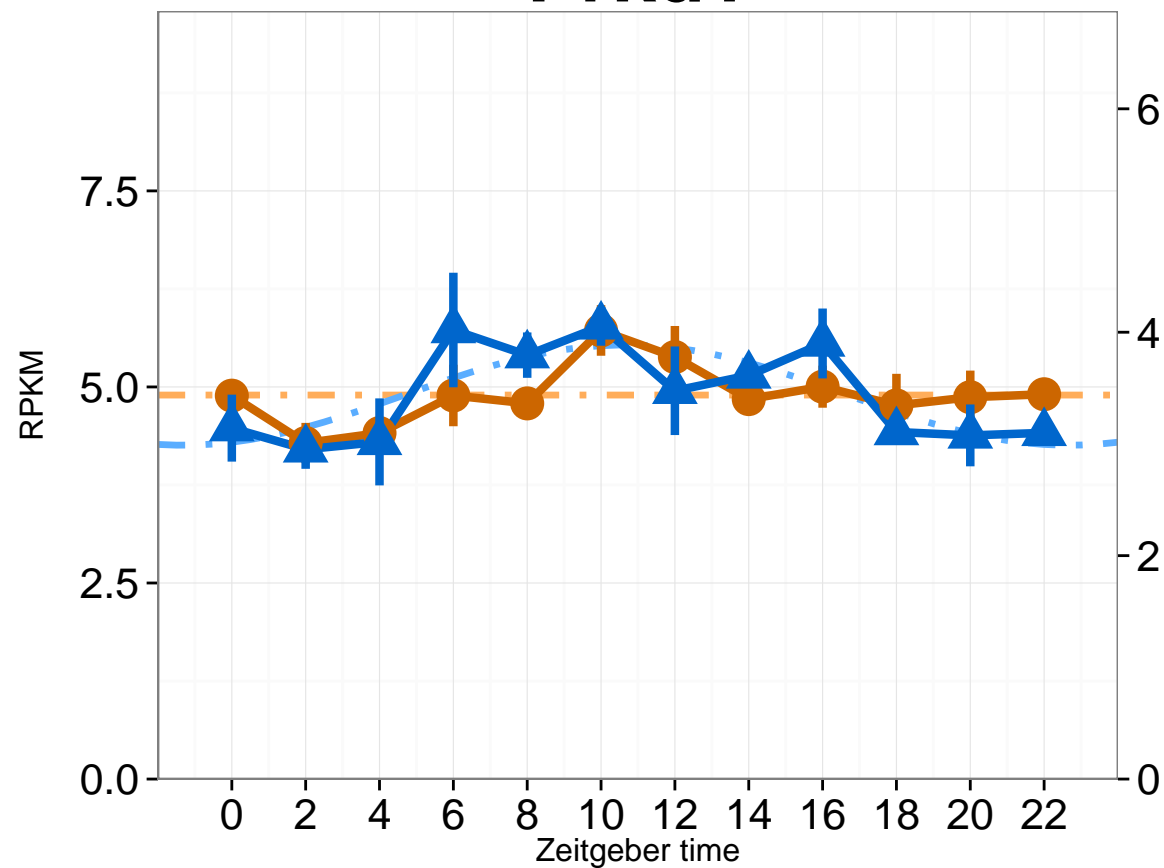

# Prkd1

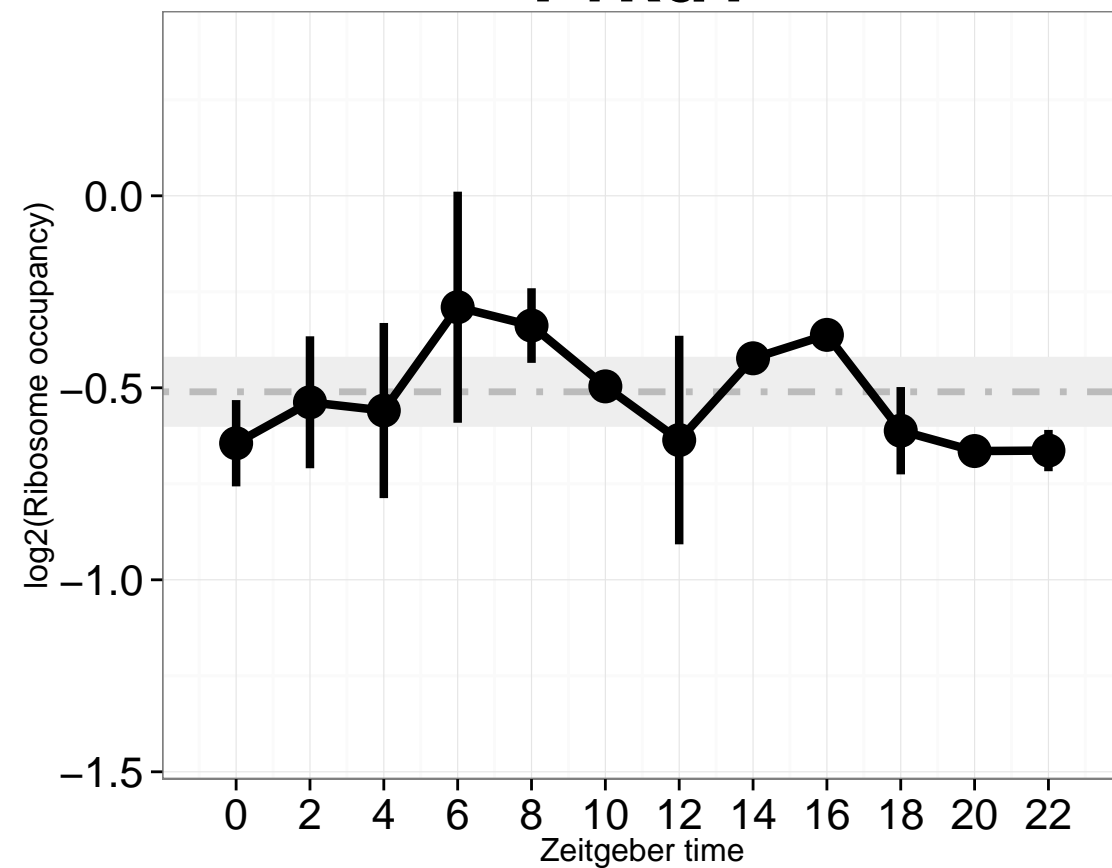

Supplement: Supplementary file 5077 [file 1]

# Tmem150a

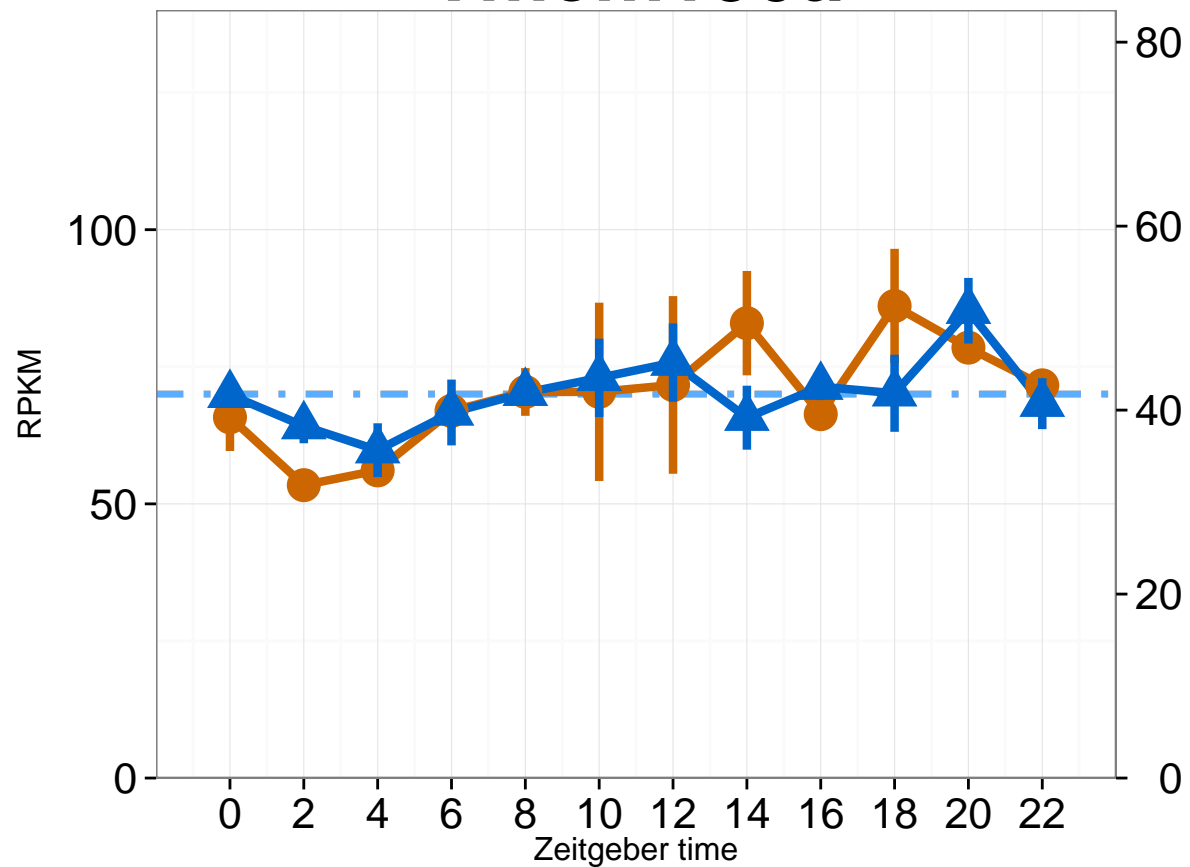

# Tmem150a

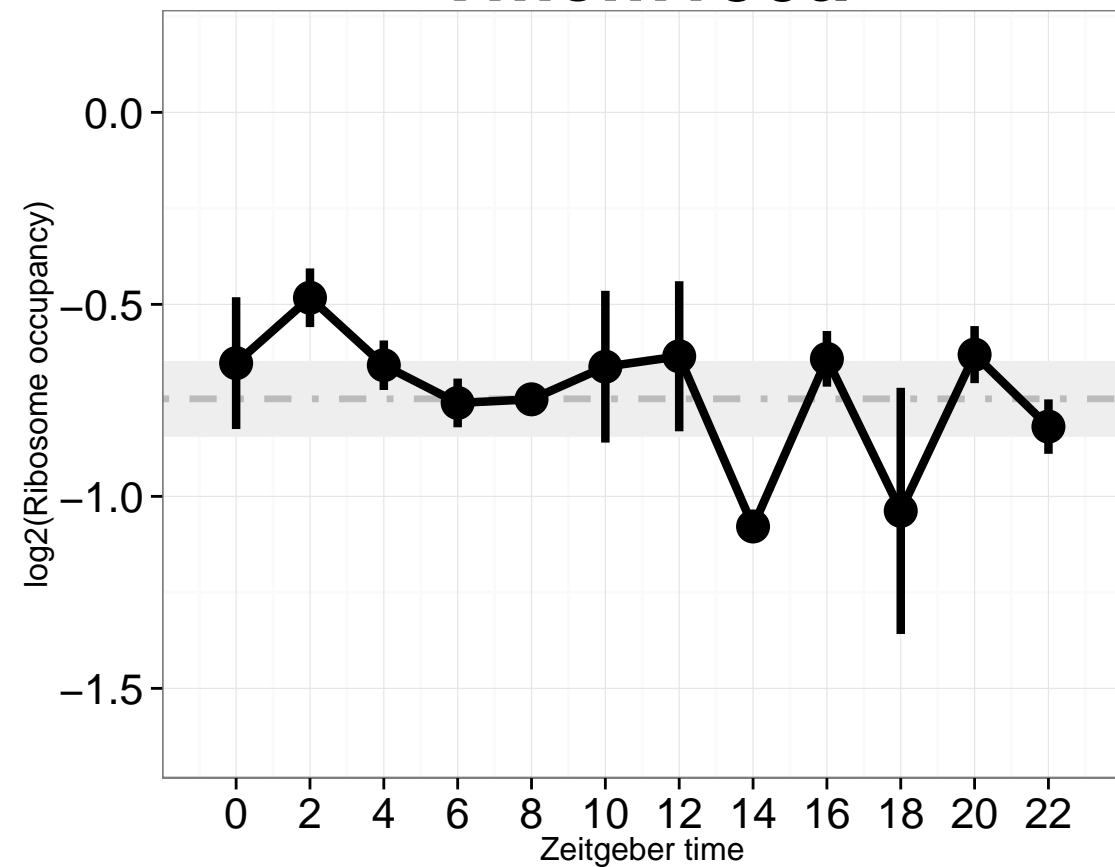

Supplement: Supplementary file 5078 [file 1]

# Chrac1

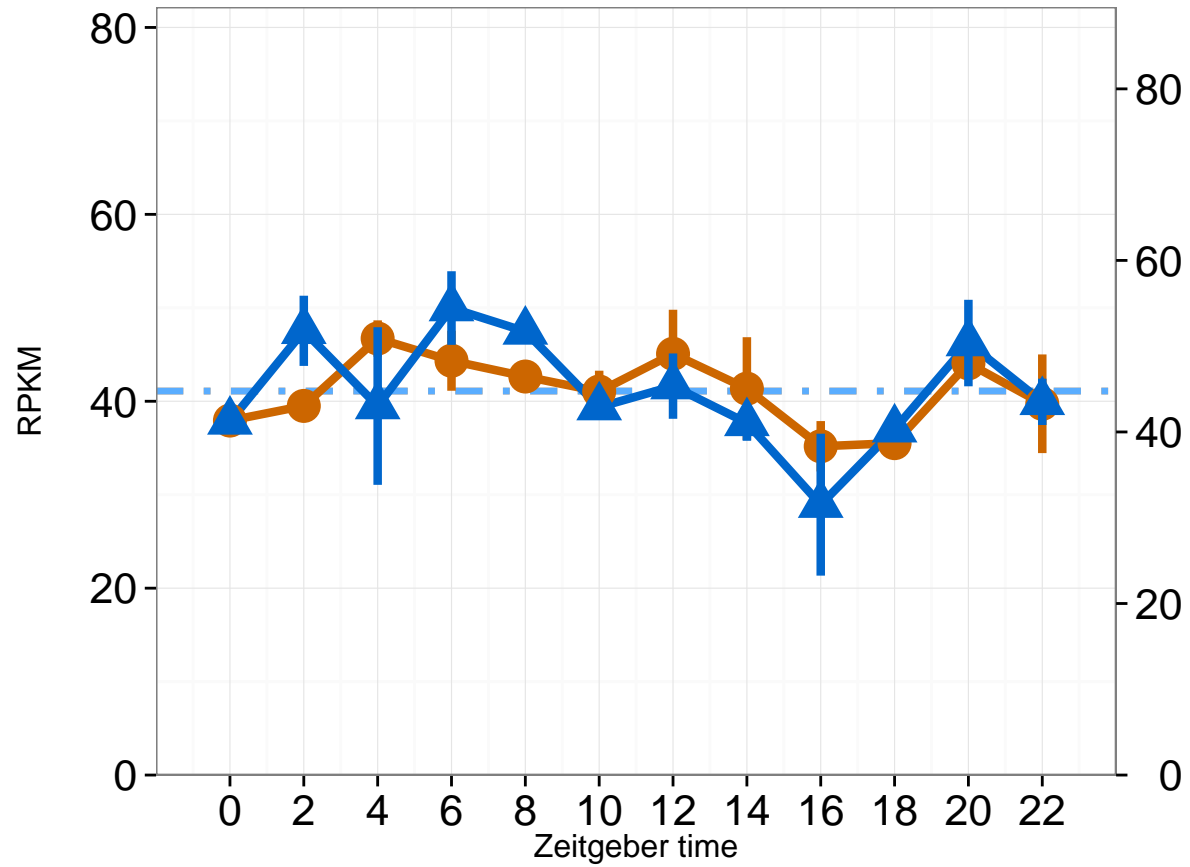

# Chrac1

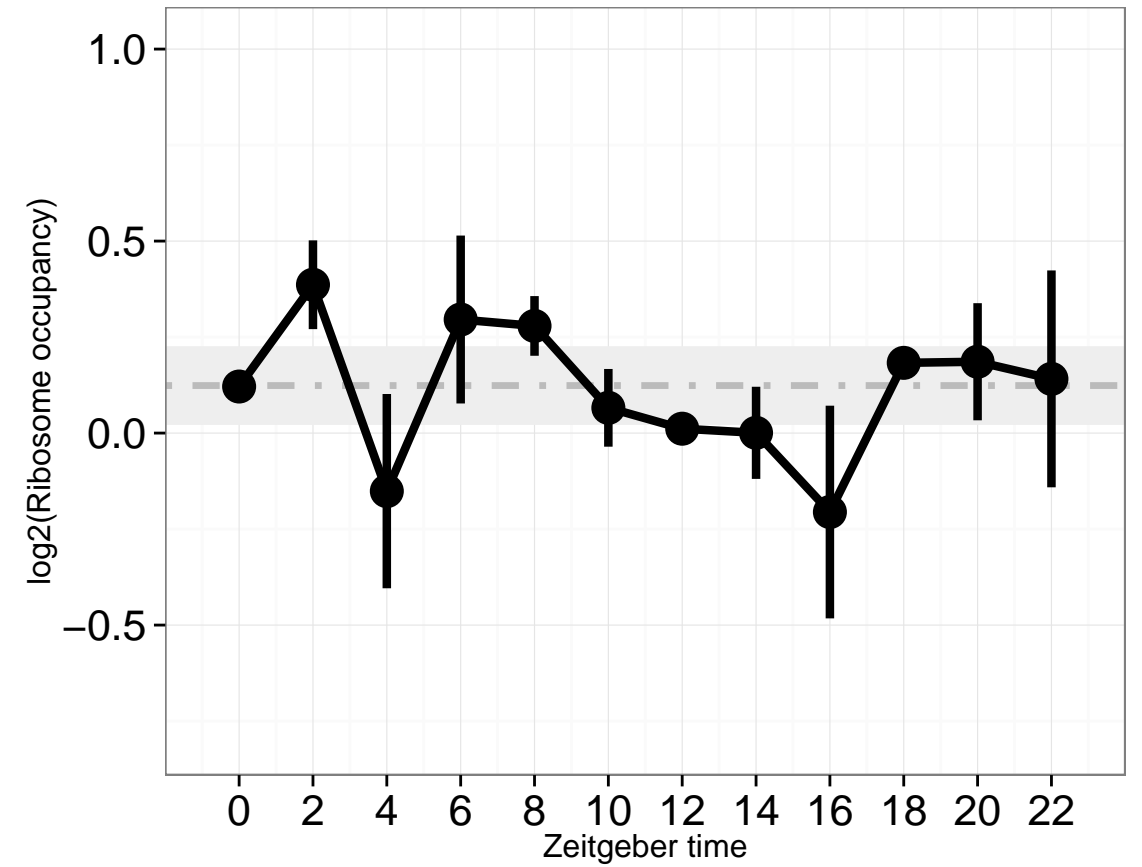

Supplement: Supplementary file 5079 [file 1]

# Mfsd8

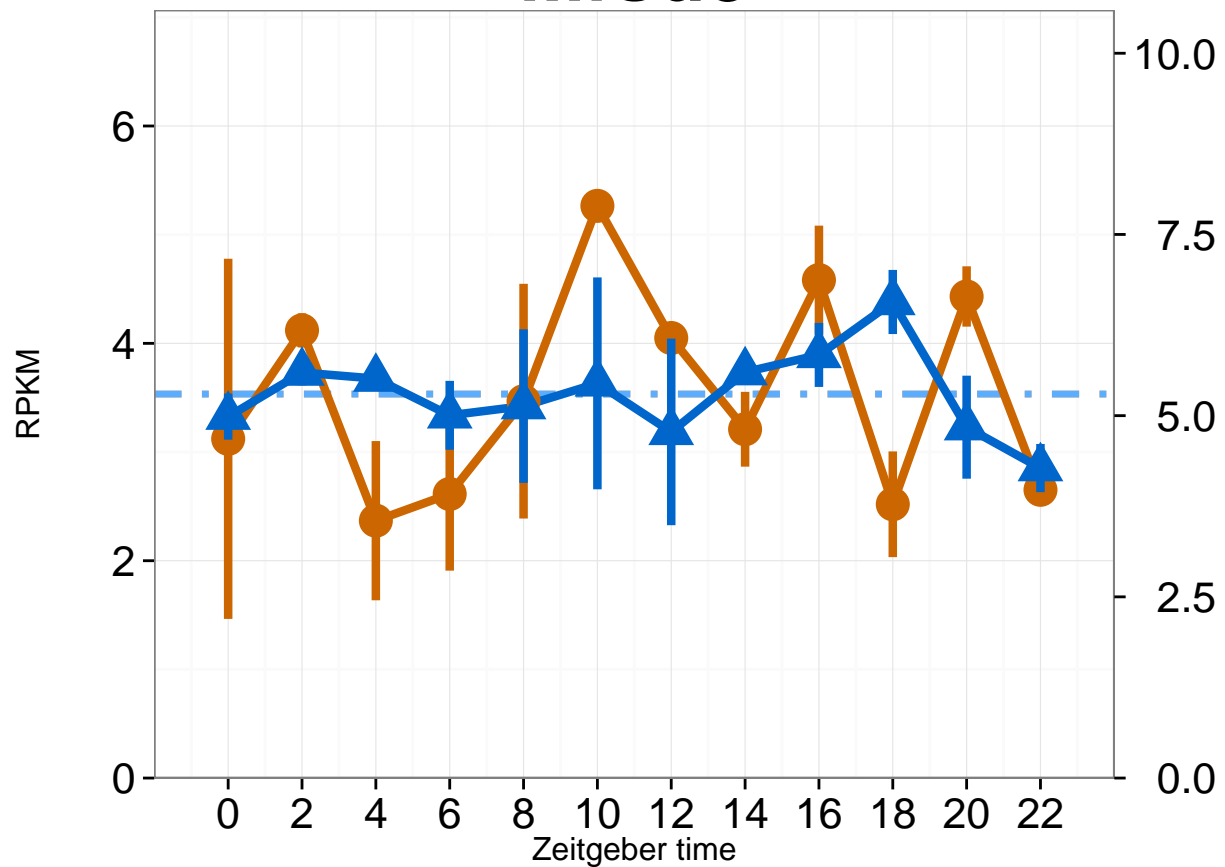

# Mfsd8

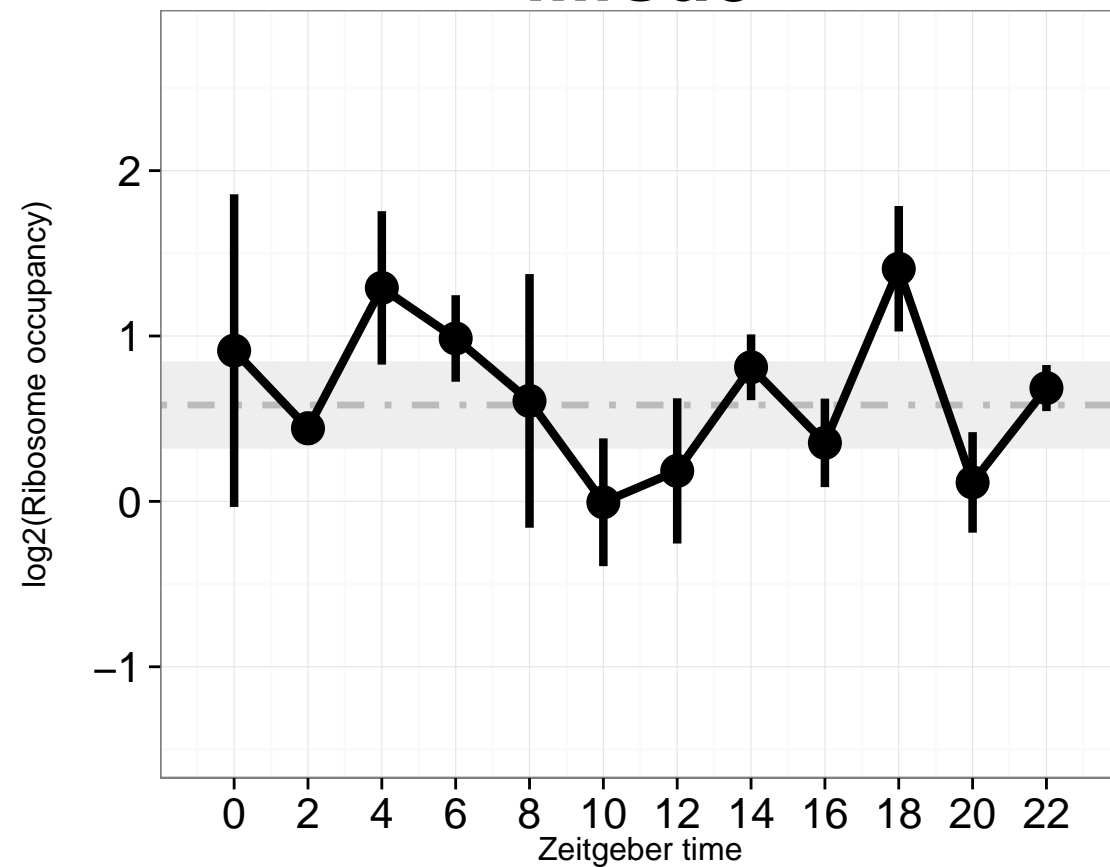

Supplement: Supplementary file 5080 [file 1]

# Pi4k2a

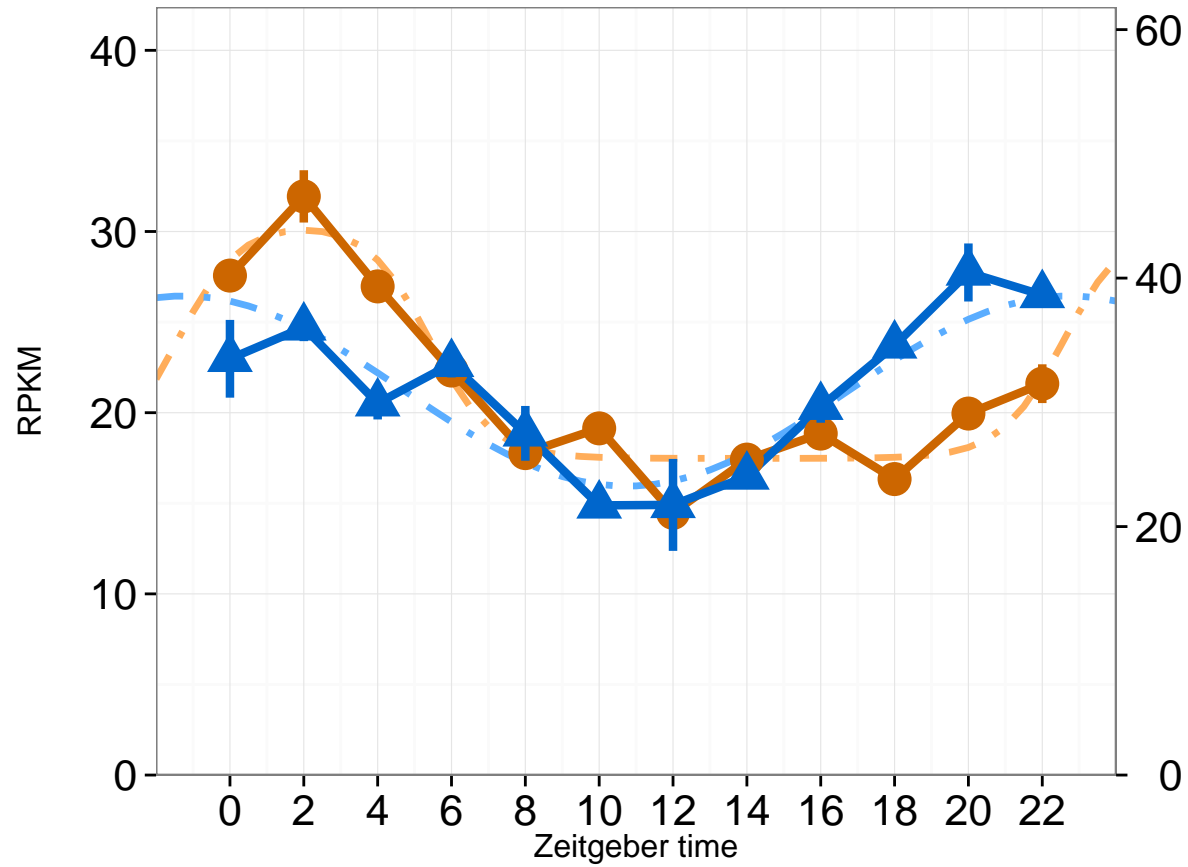

# Pi4k2a

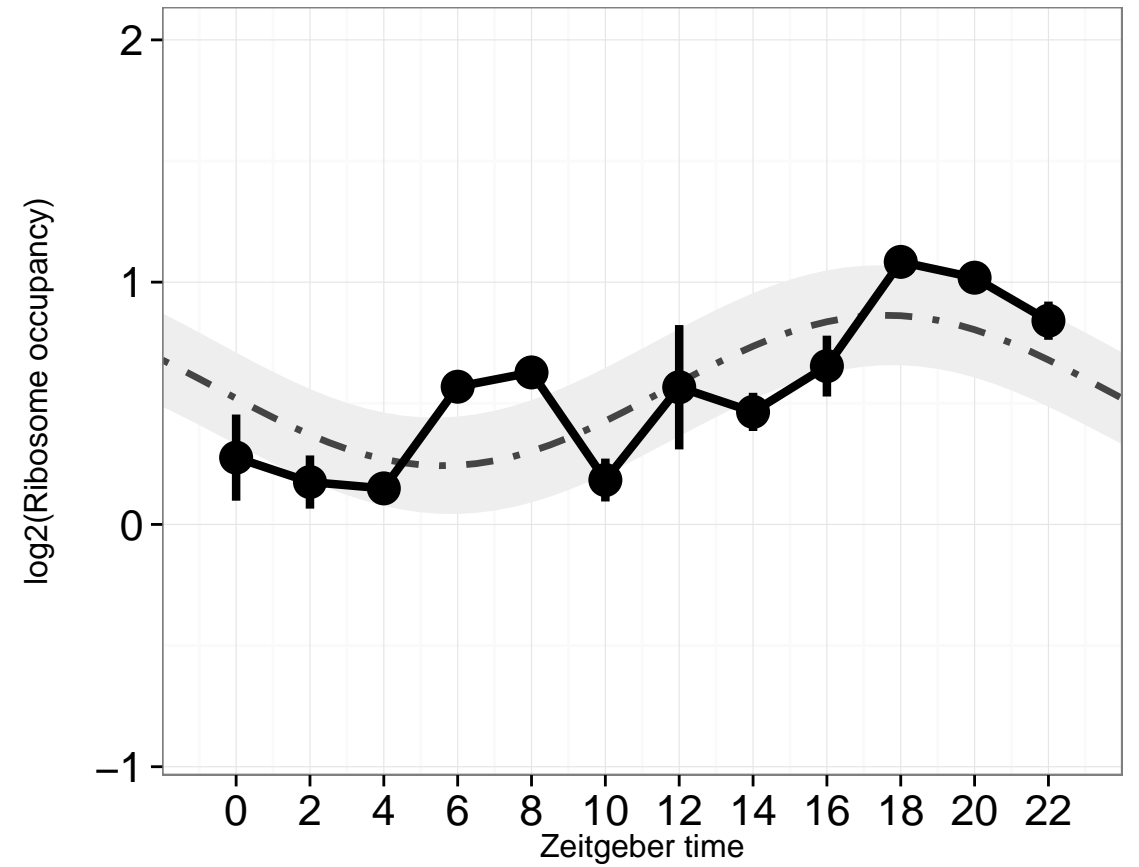

Supplement: Supplementary file 5081 [file 1]

# Zdhhc1

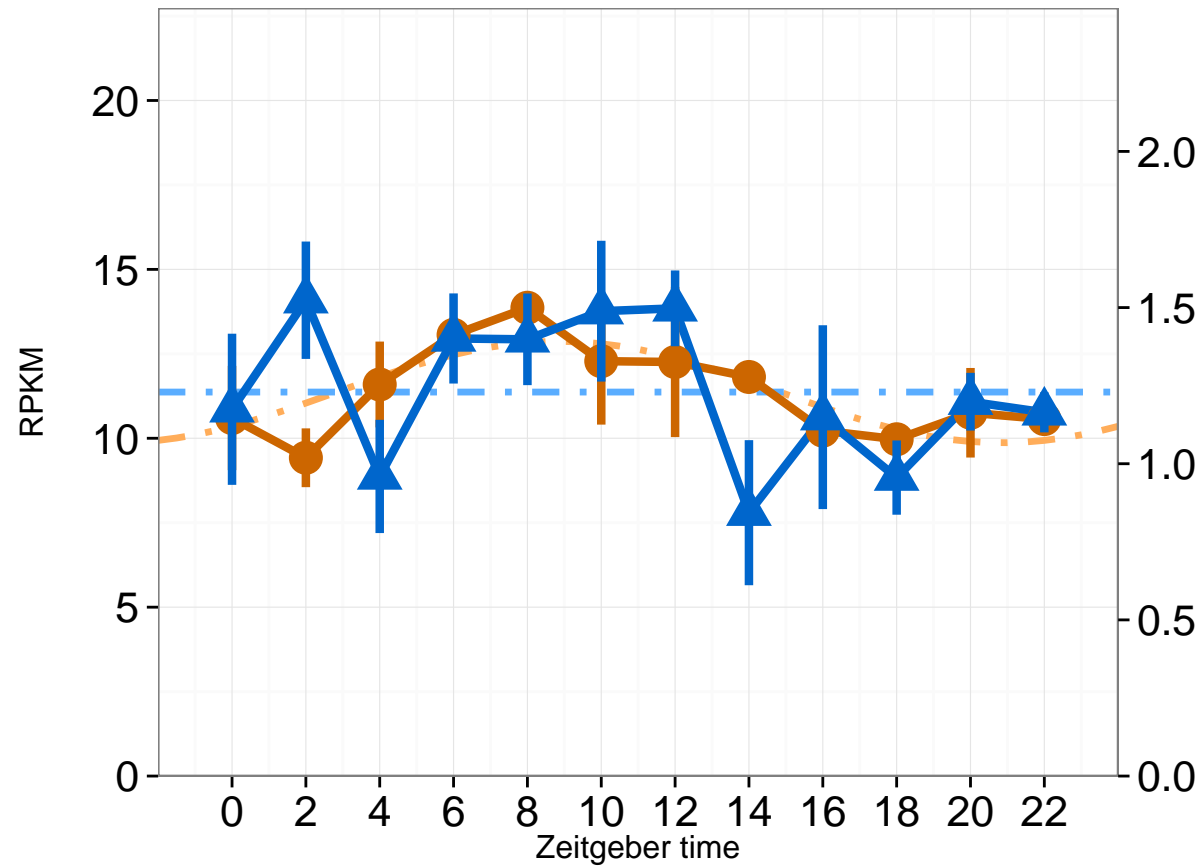

# Zdhhc1

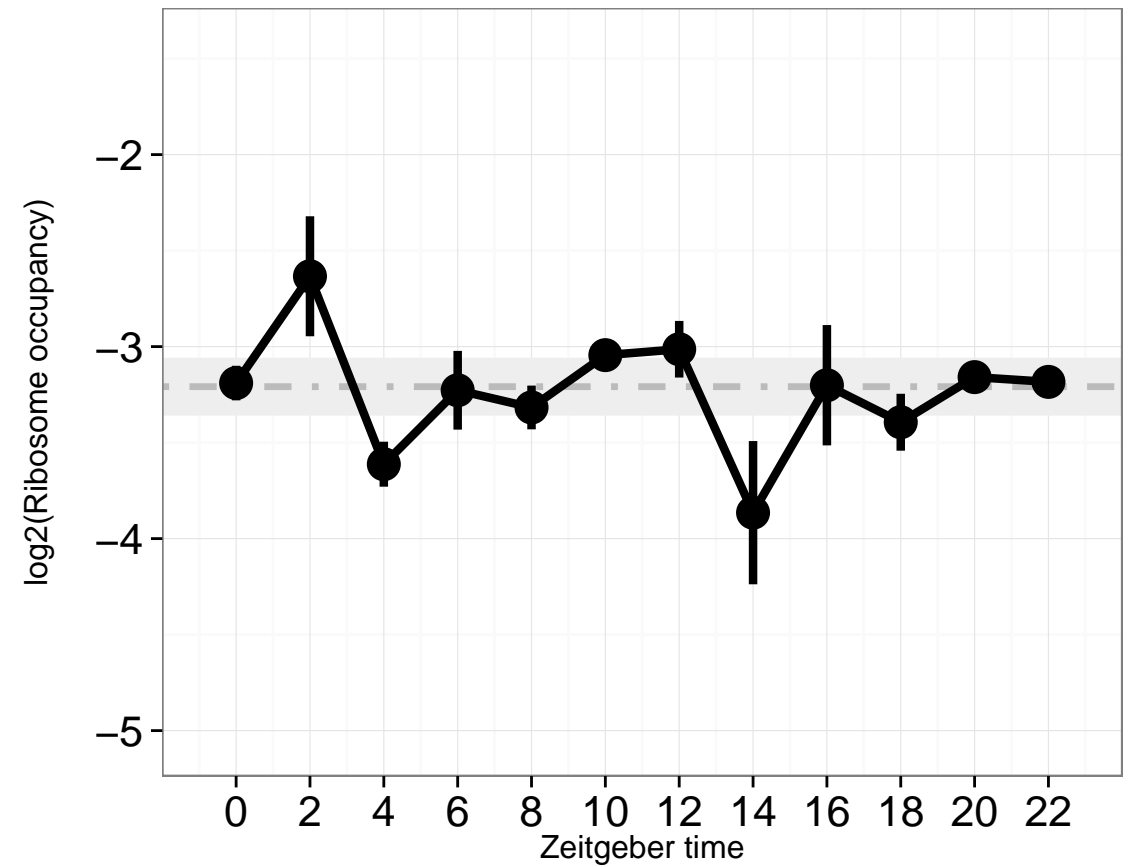

Supplement: Supplementary file 5082 [file 1]

## Uaca

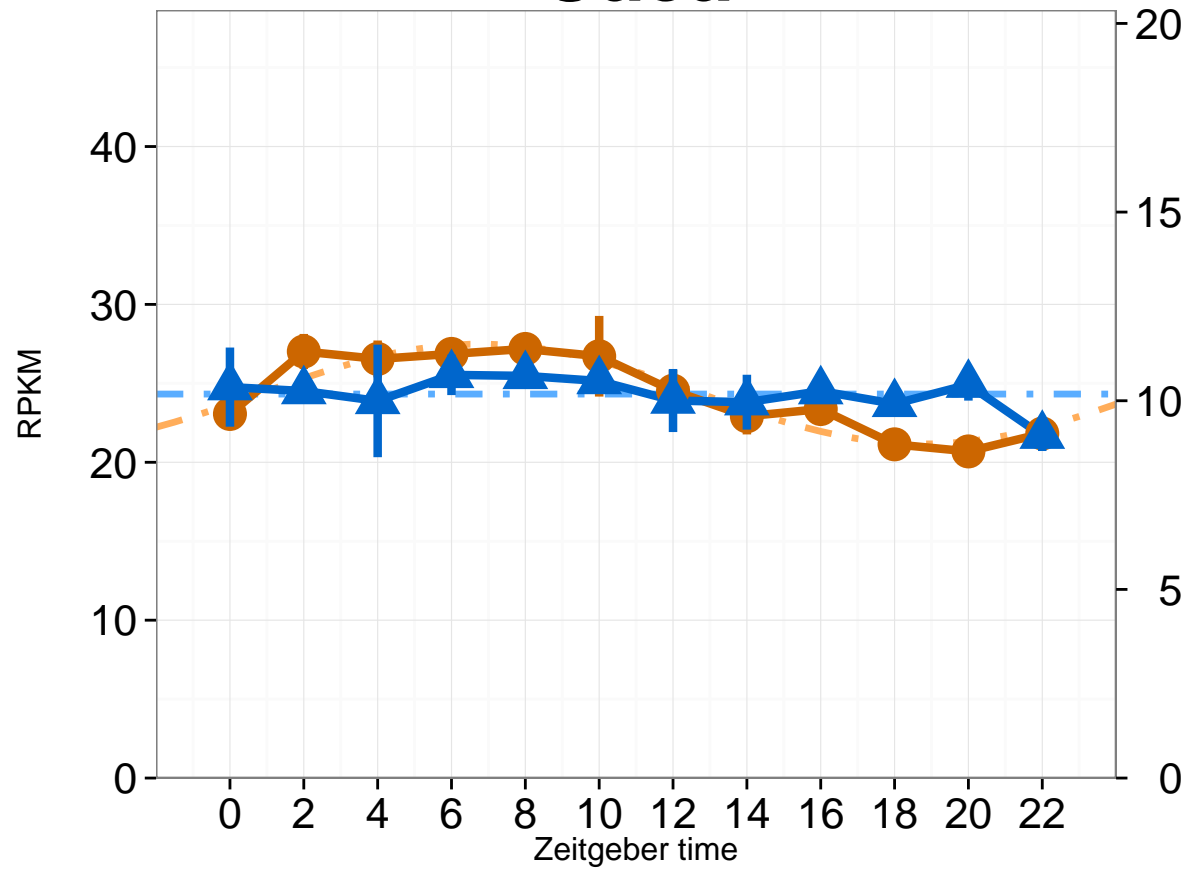

## Uaca

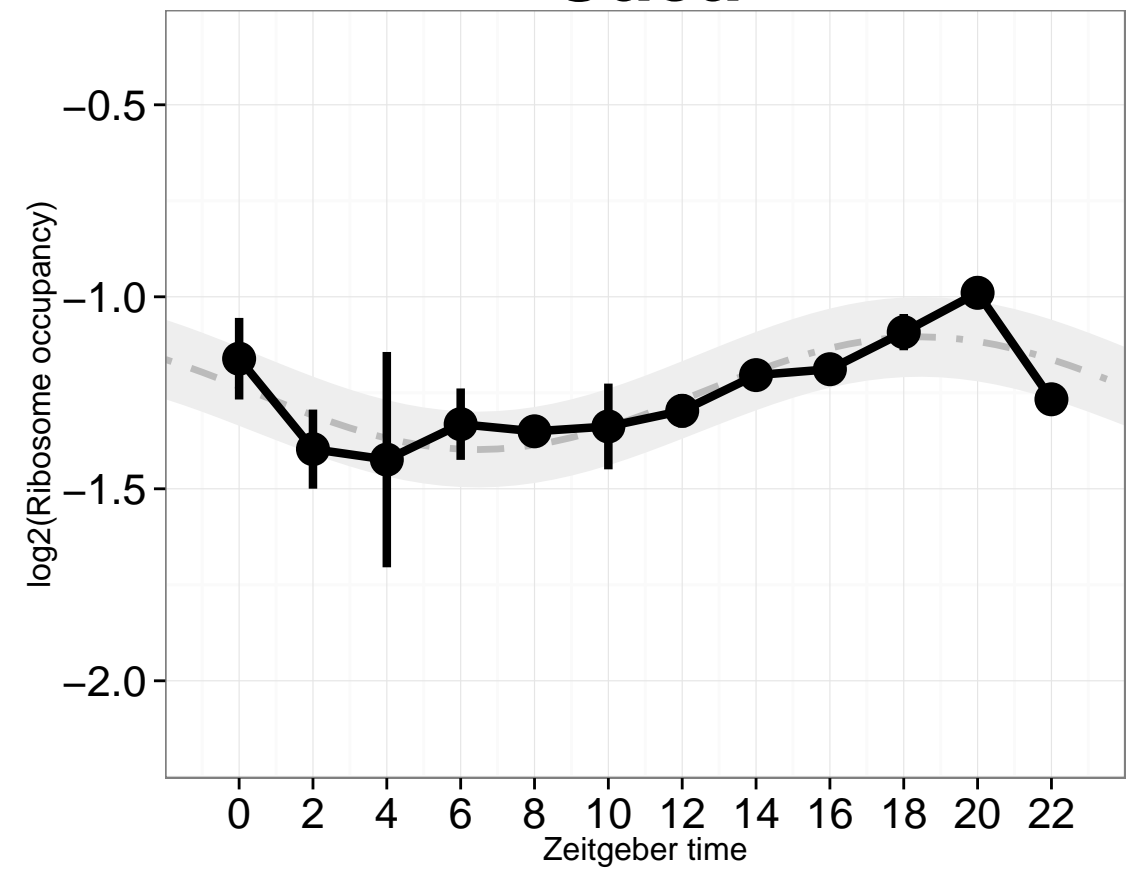

Supplement: Supplementary file 5083 [file 1]

## Lig3

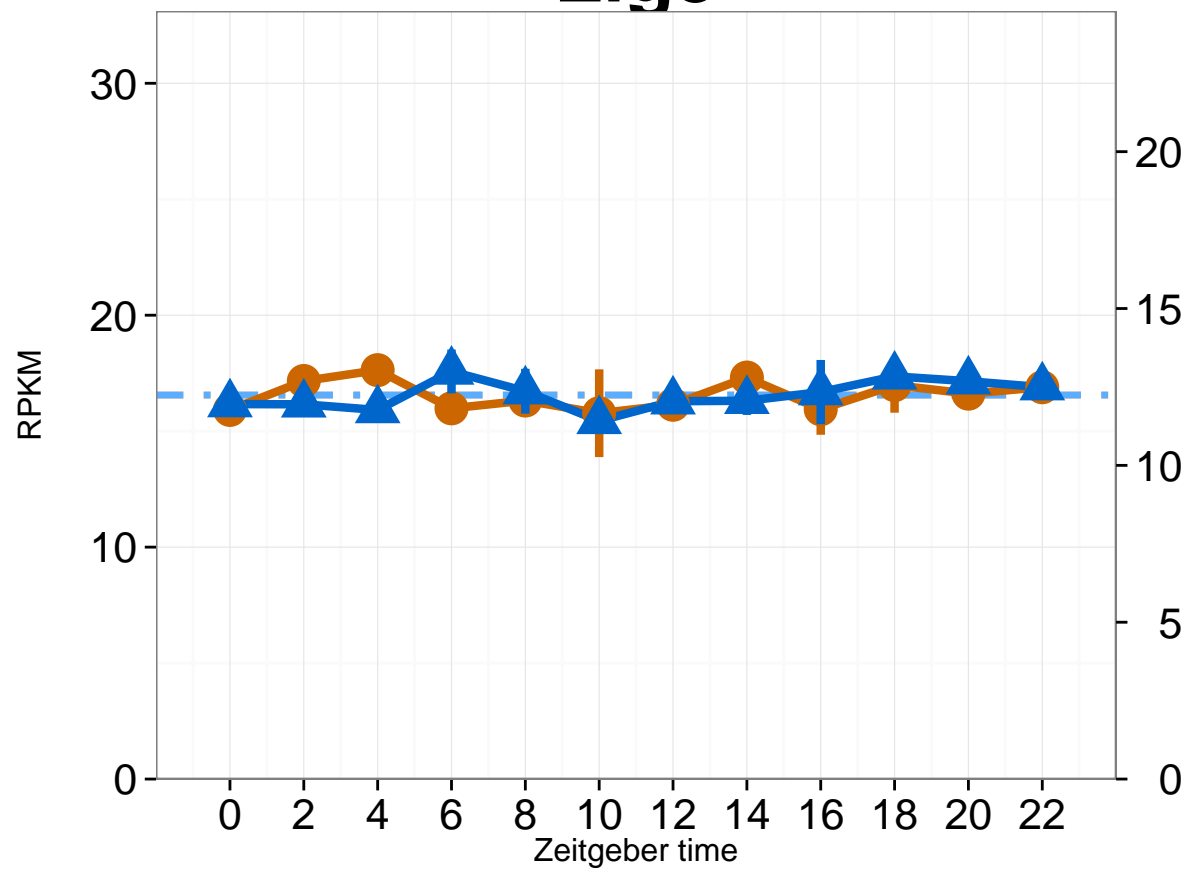

## Lig3

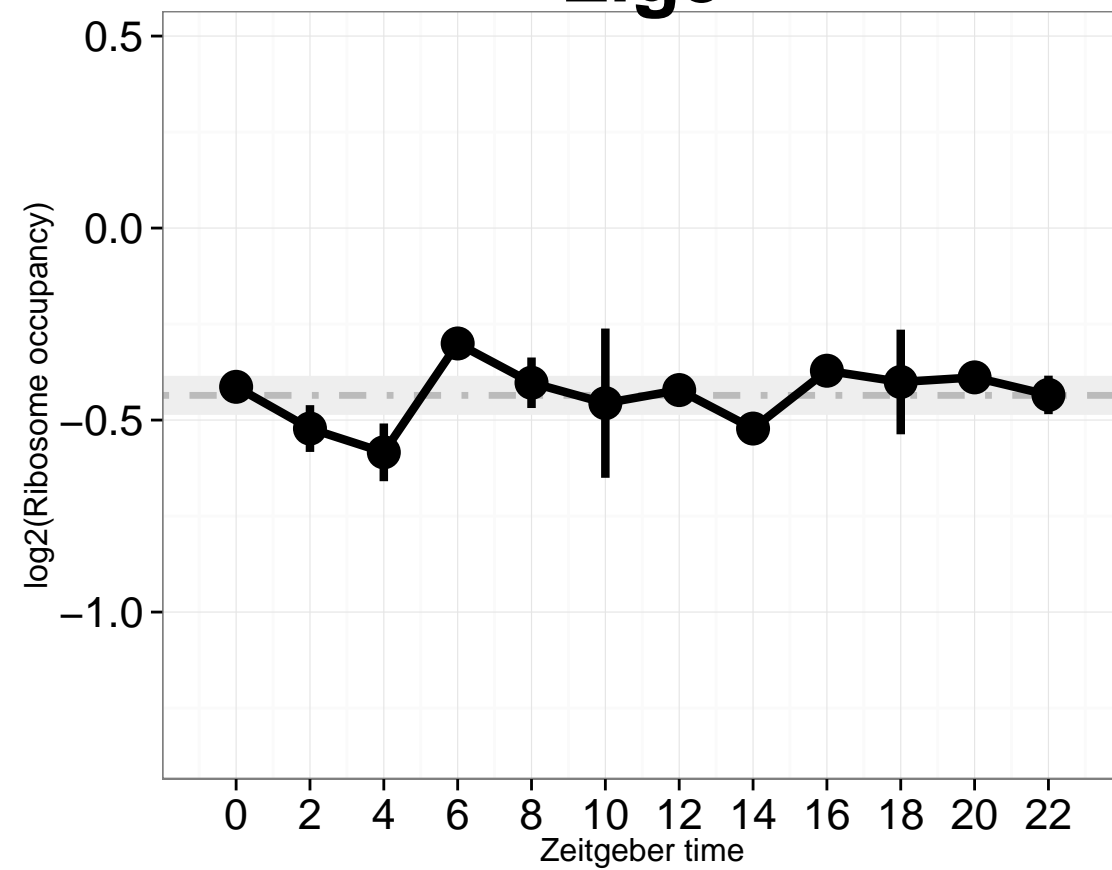

Supplement: Supplementary file 5084 [file 1]

# Mapk8ip1

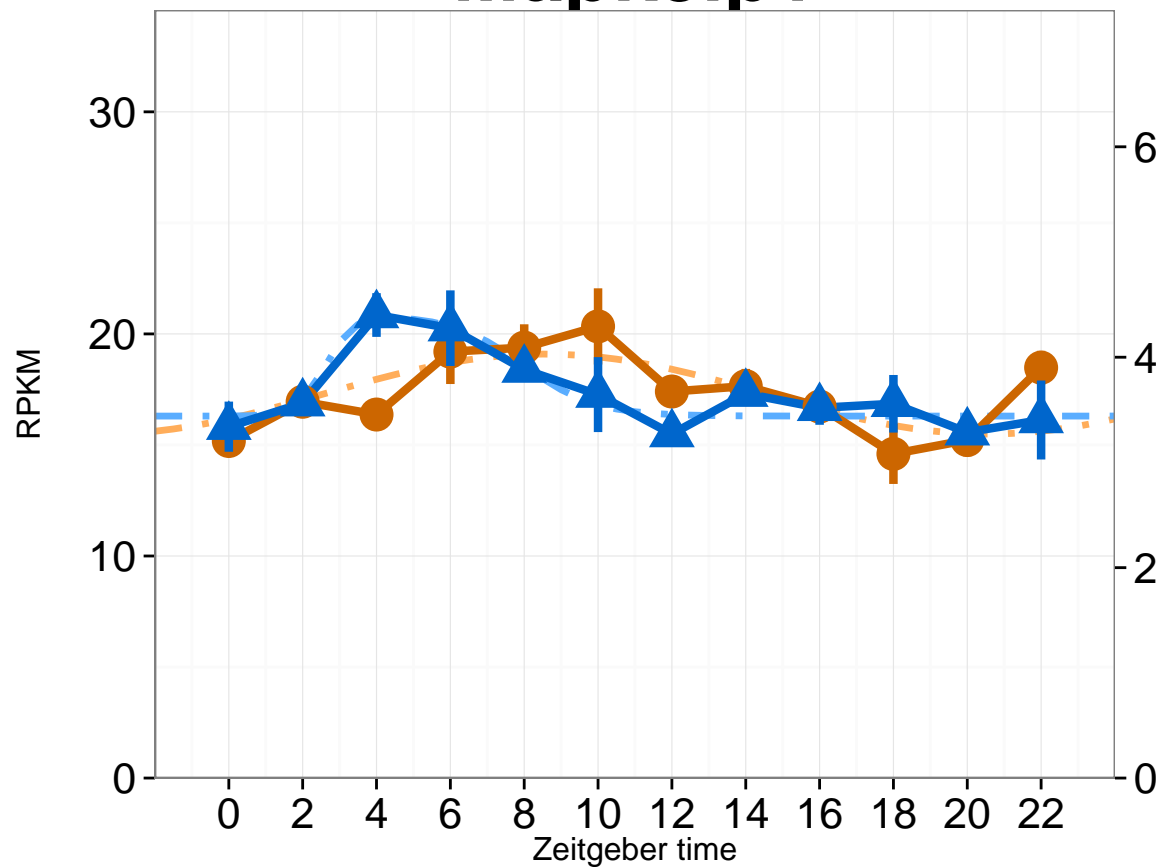

# Mapk8ip1

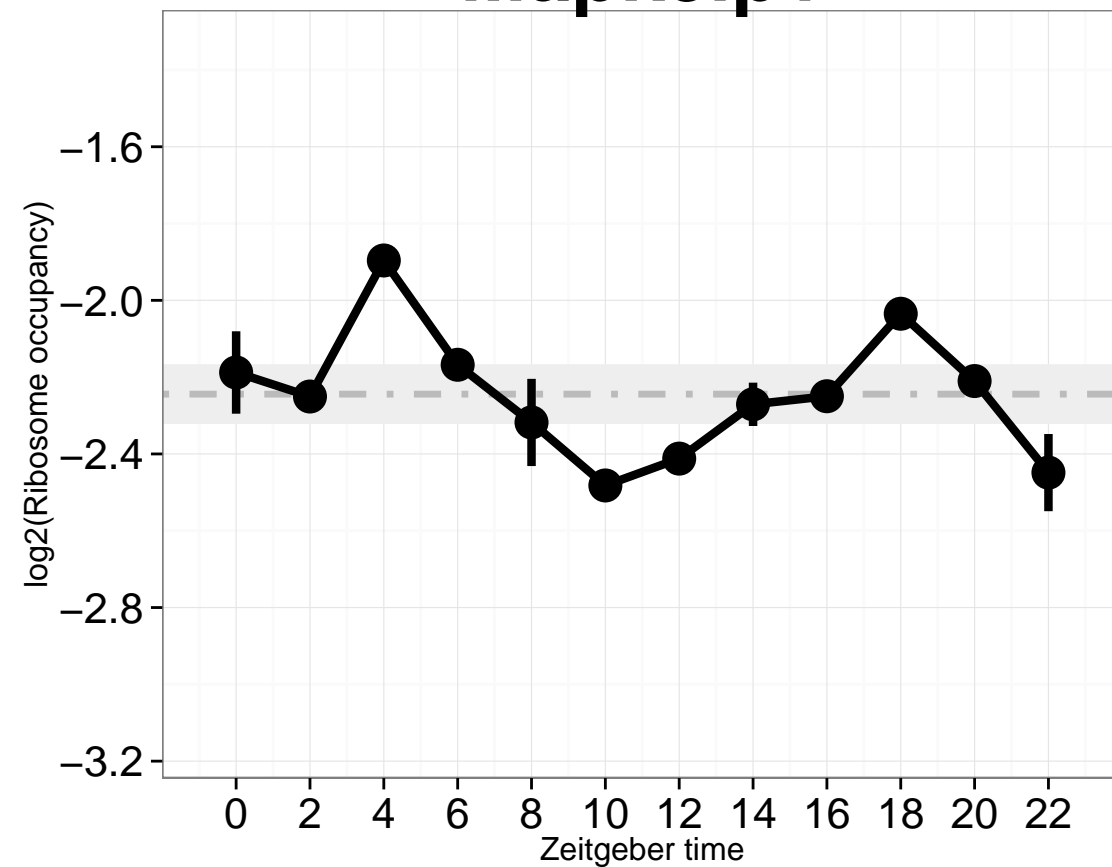

Supplement: Supplementary file 5085 [file 1]

# Nme5

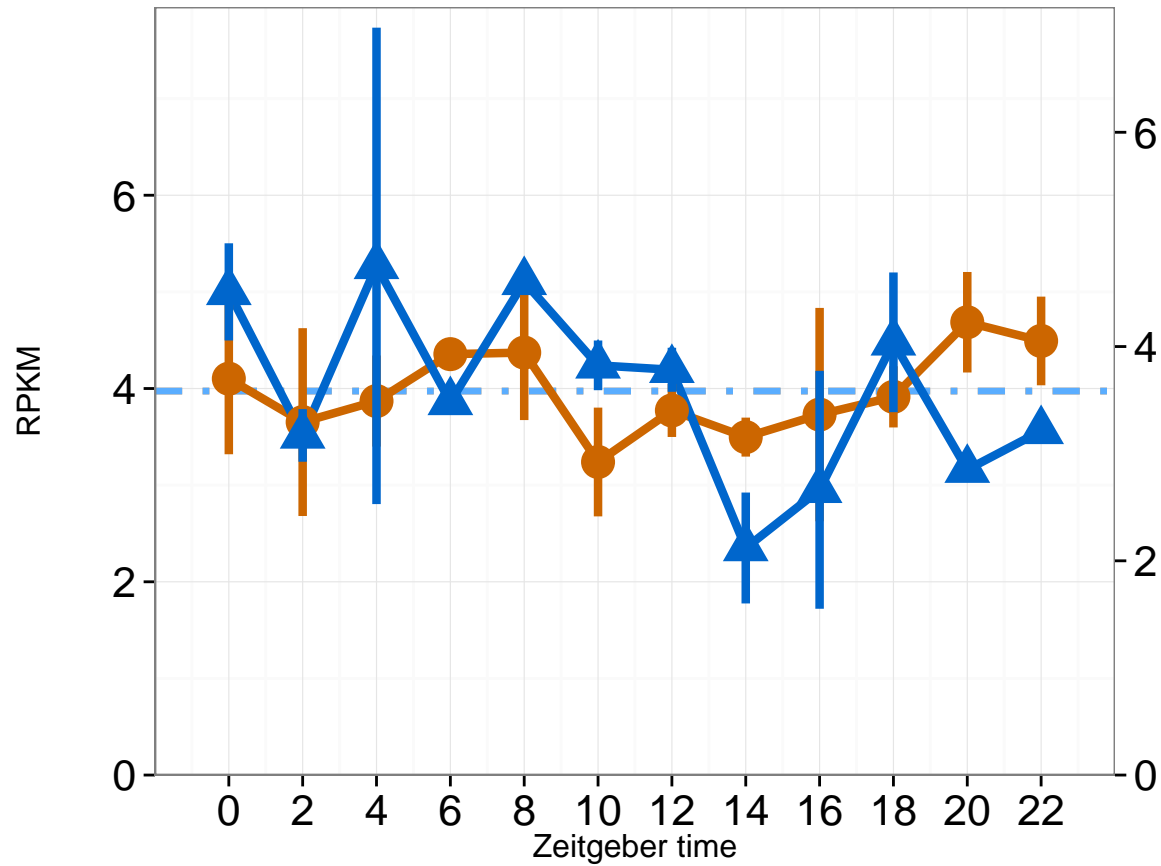

# Nme5

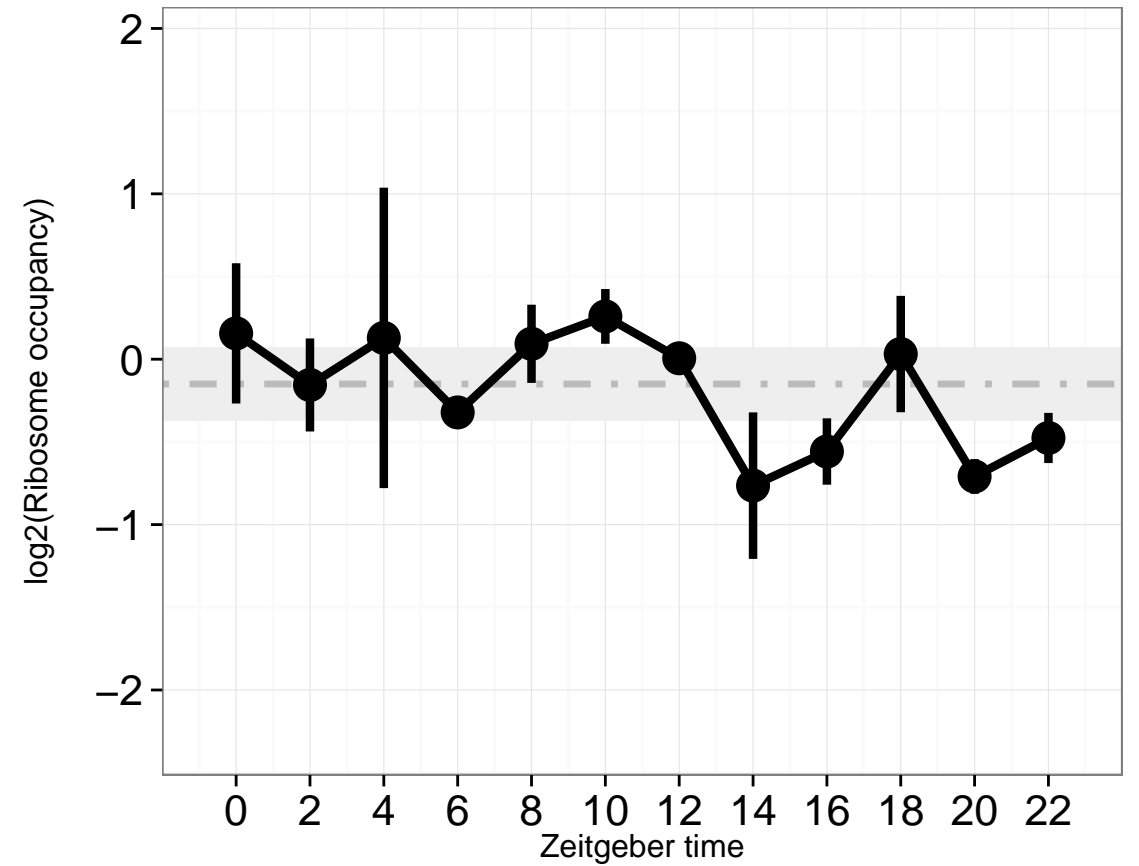

Supplement: Supplementary file 5086 [file 1]

## Eaf1

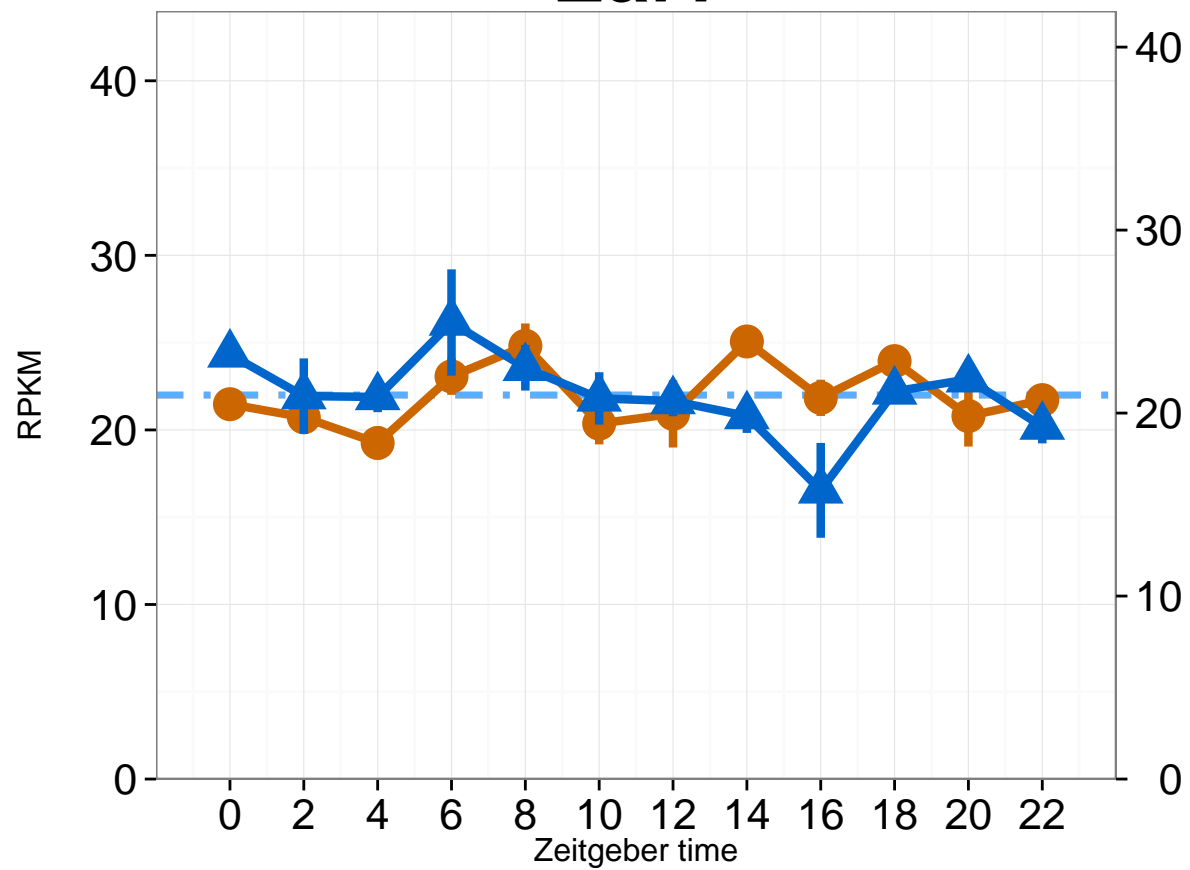

## Eaf1

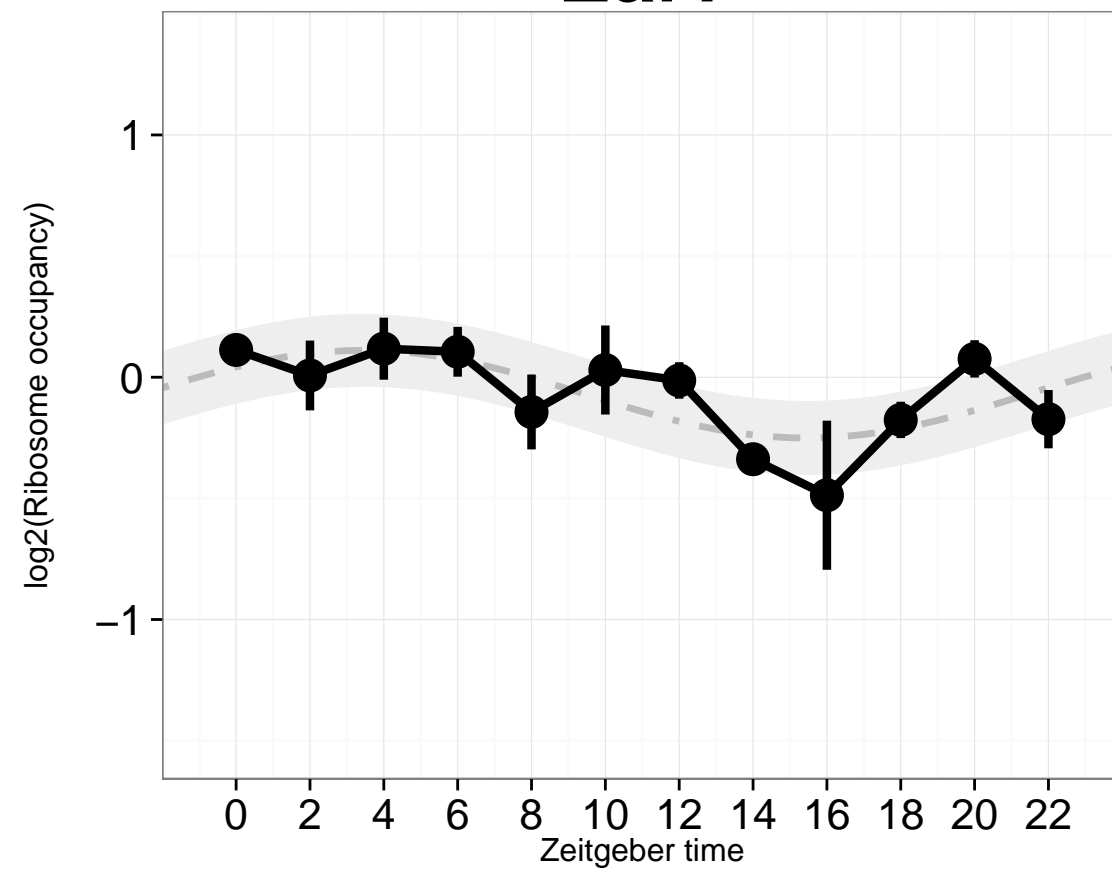

Supplement: Supplementary file 5087 [file 1]

## HpdI

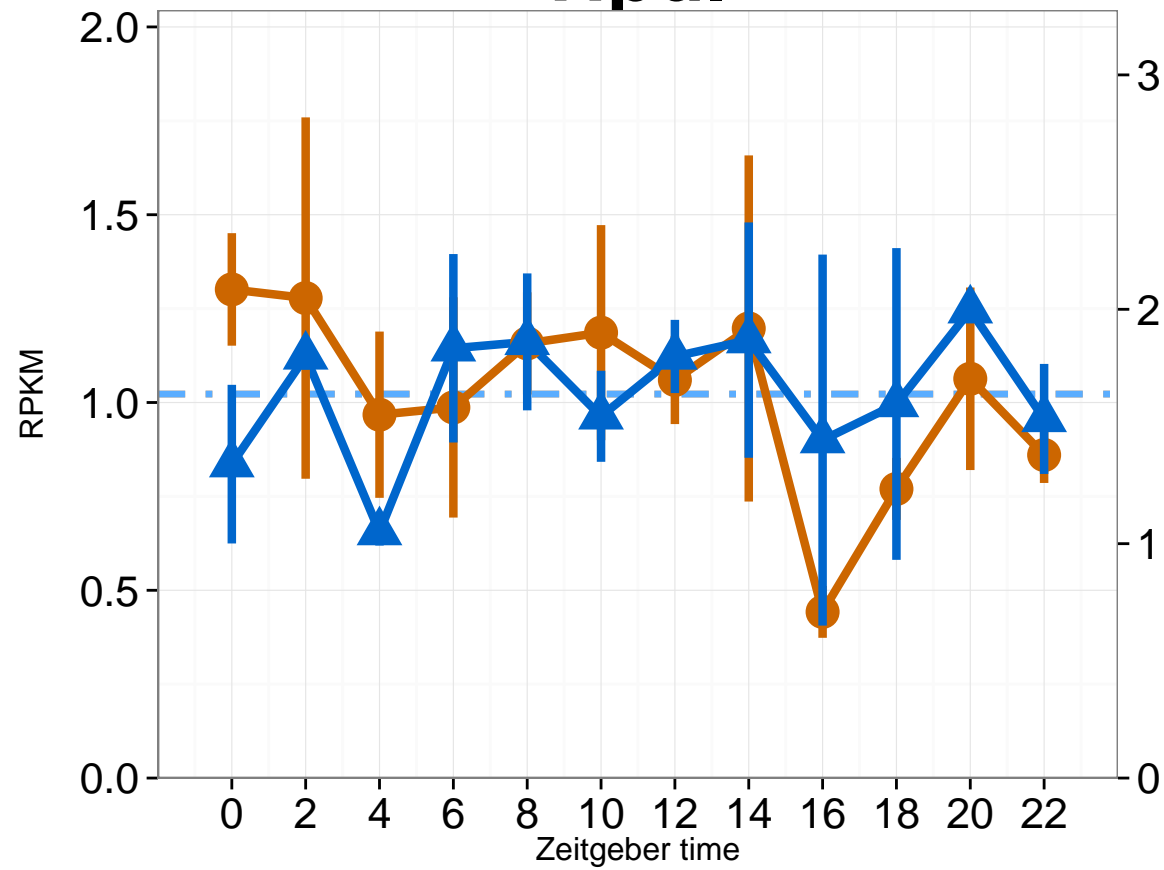

## HpdI

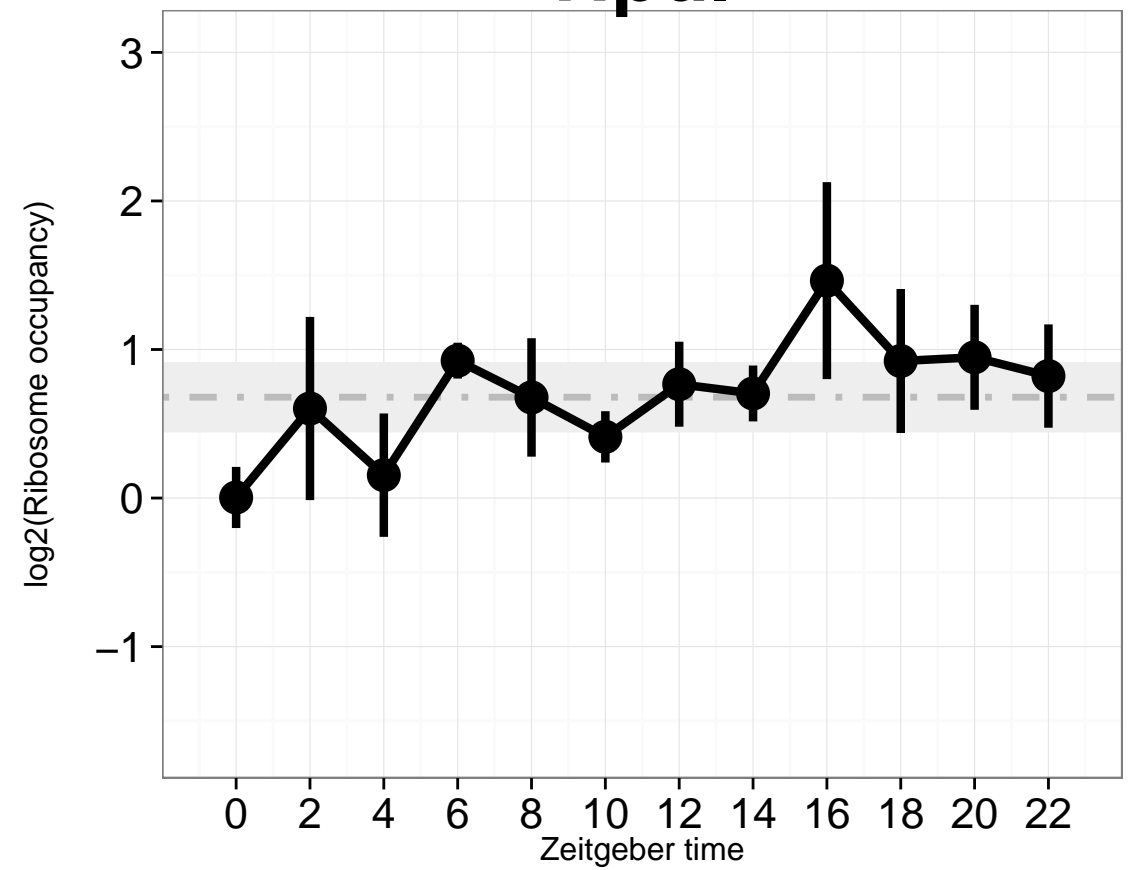

Supplement: Supplementary file 5088 [file 1]

## Scimp

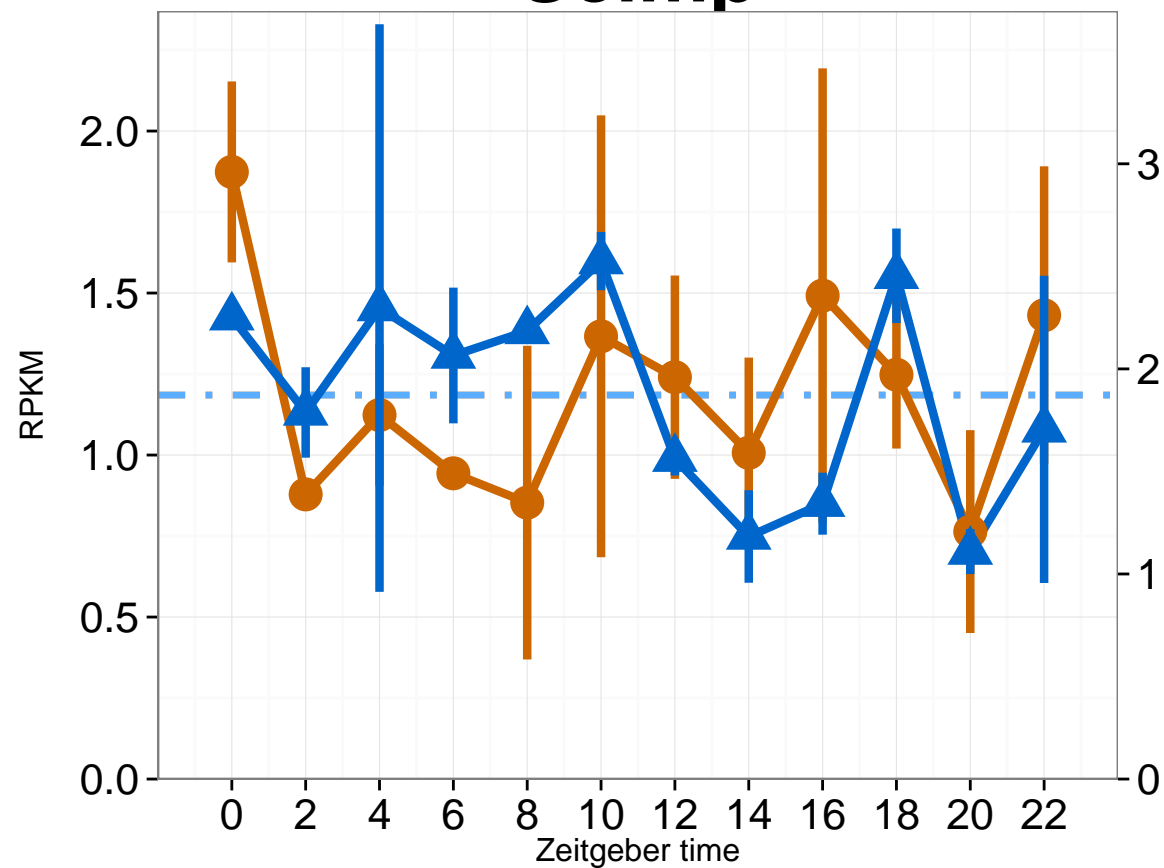

## Scimp

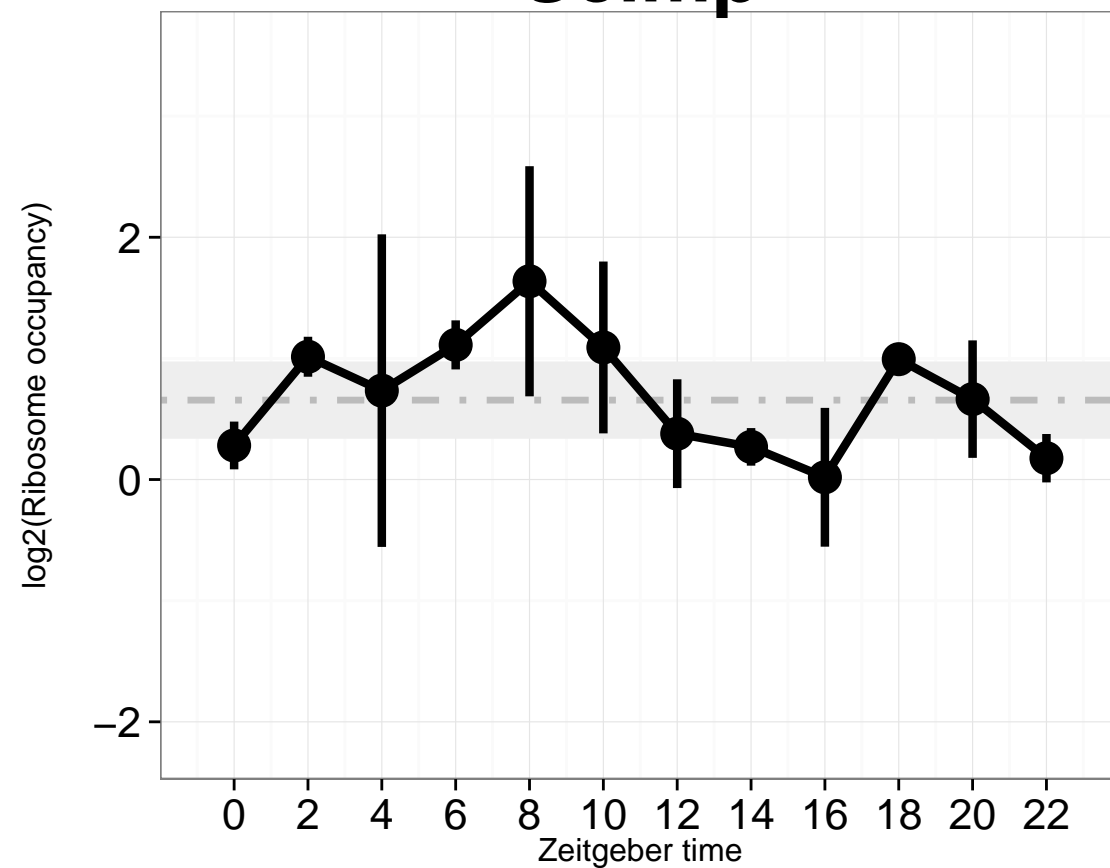

Supplement: Supplementary file 5089 [file 1]

## Rgs14

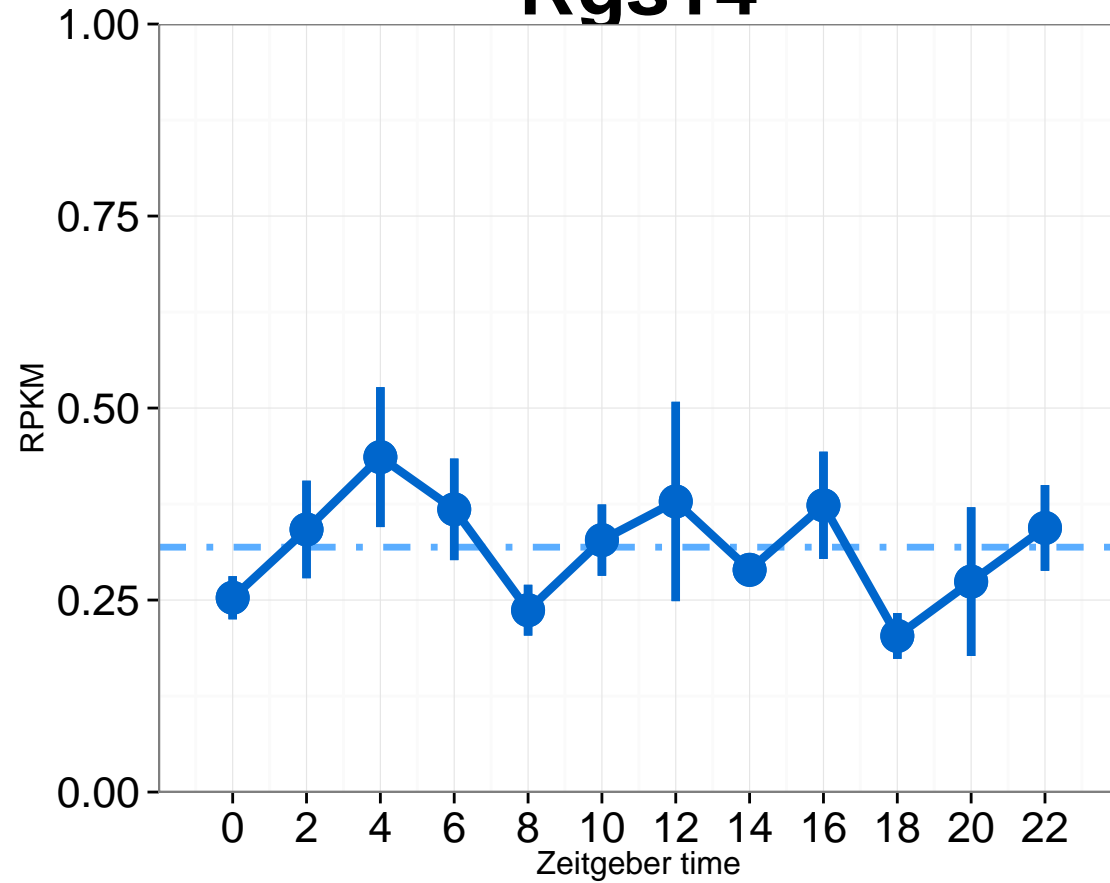

## Rgs14 log2(Ribosome occupancy

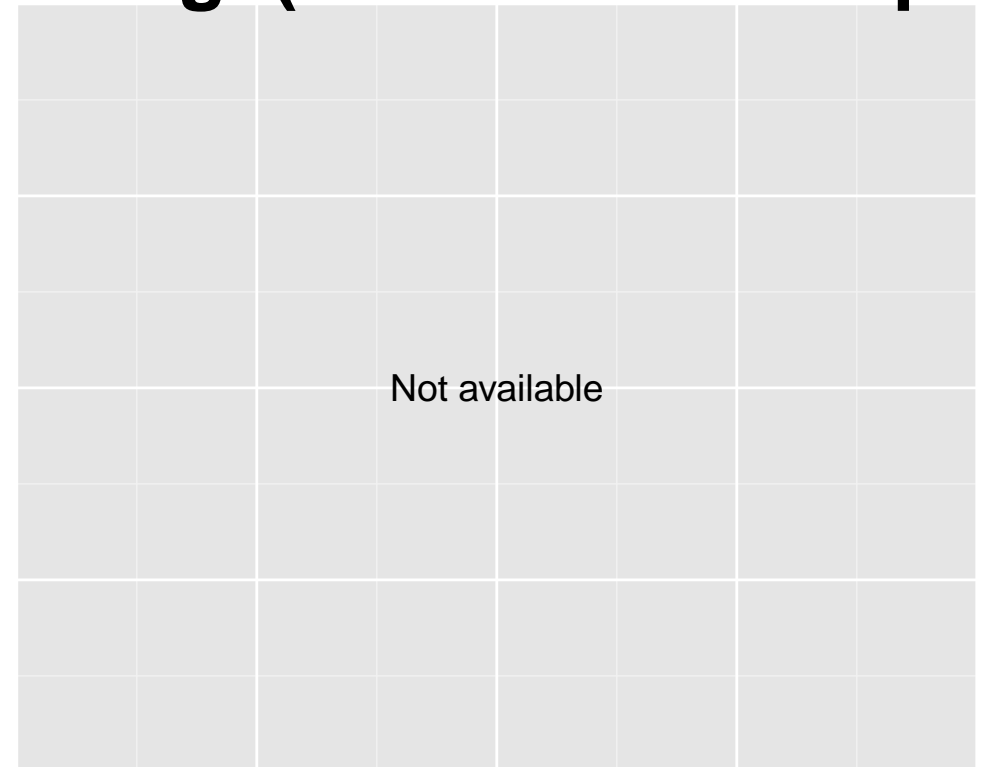

Supplement: Supplementary file 5090 [file 1]

## Hpn

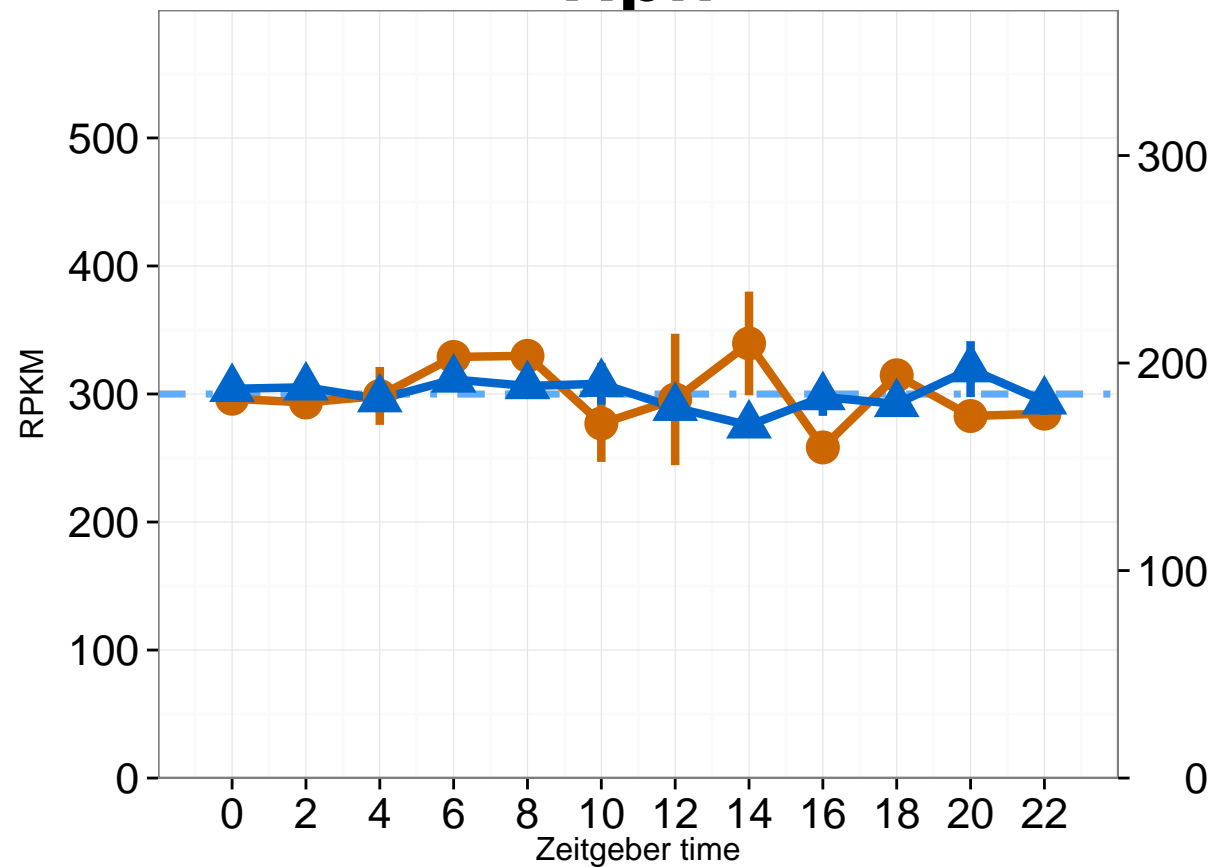

## Hpn

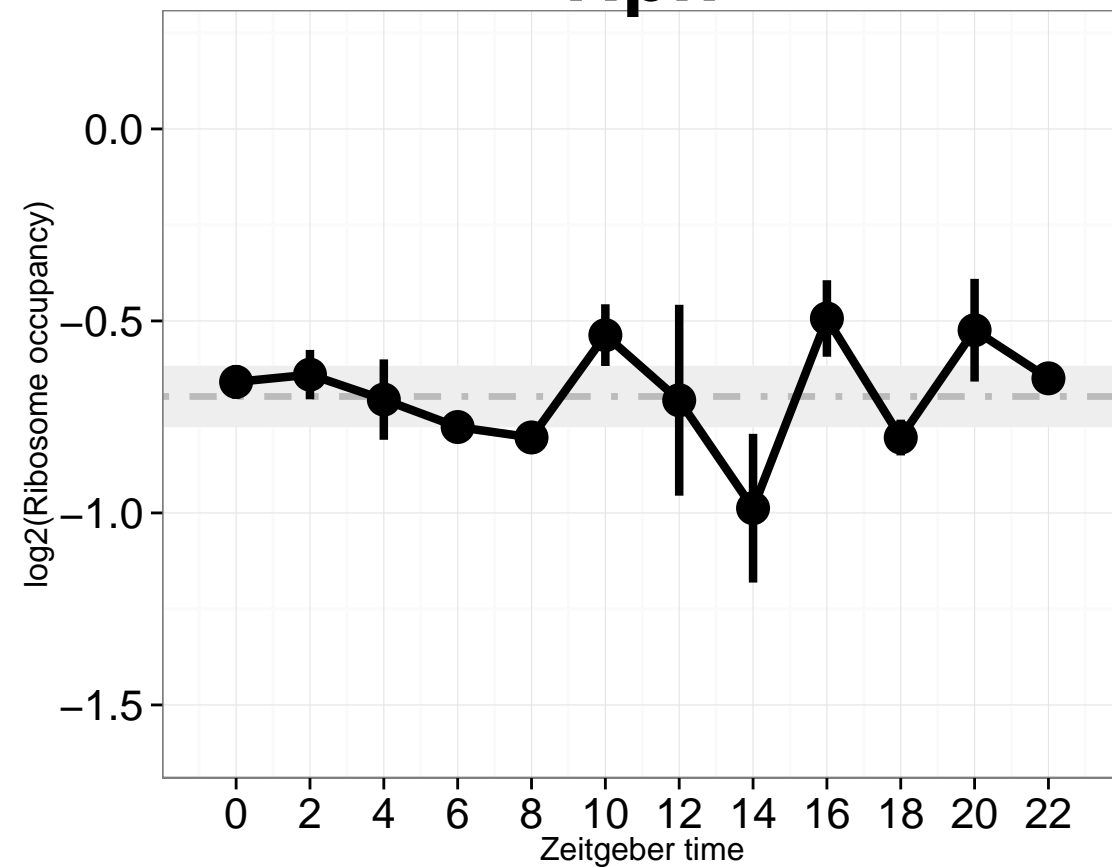

Supplement: Supplementary file 5091 [file 1]

# Vps13d

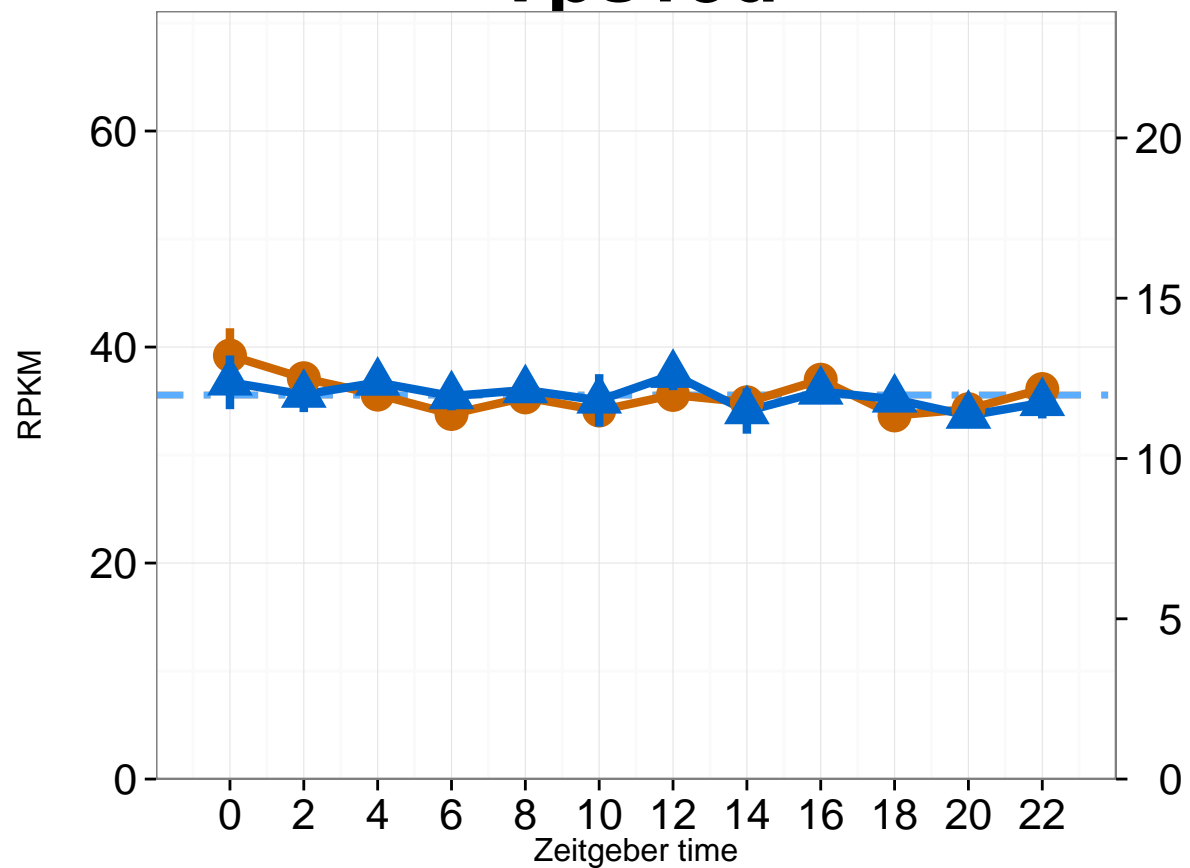

# Vps13d

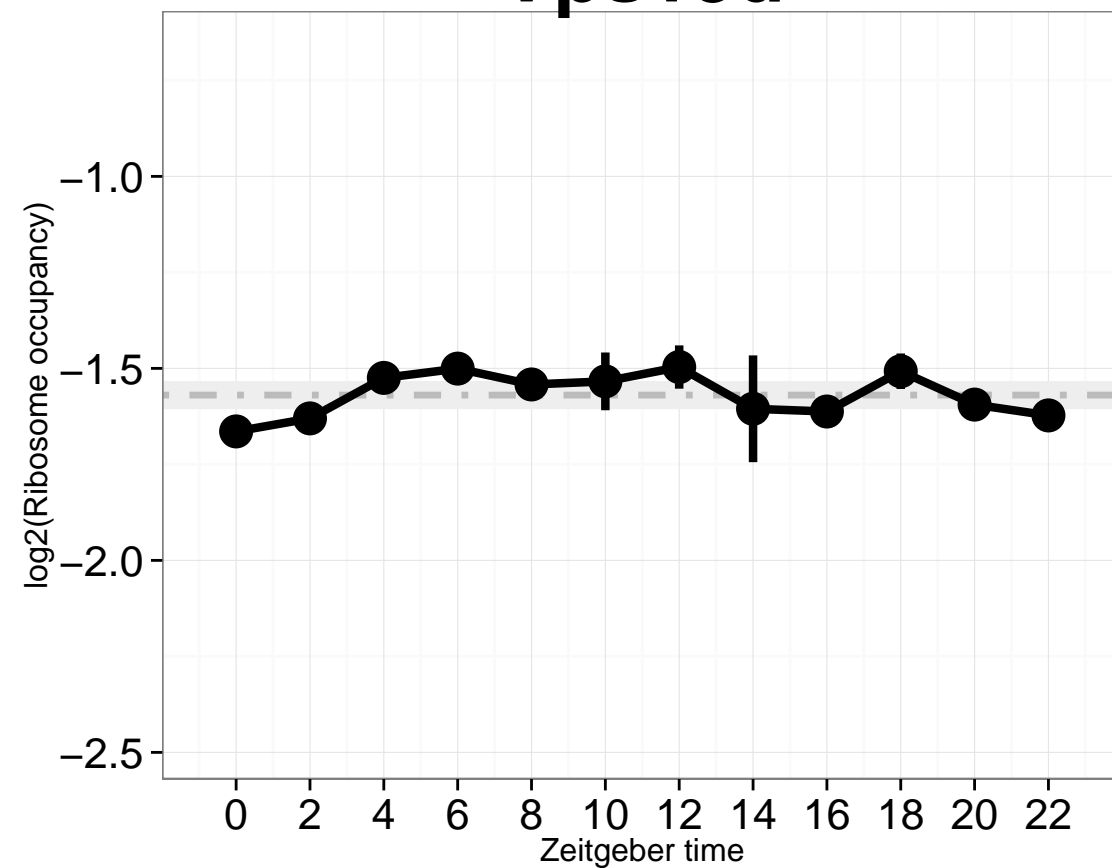

Supplement: Supplementary file 5092 [file 1]

# Fjx1

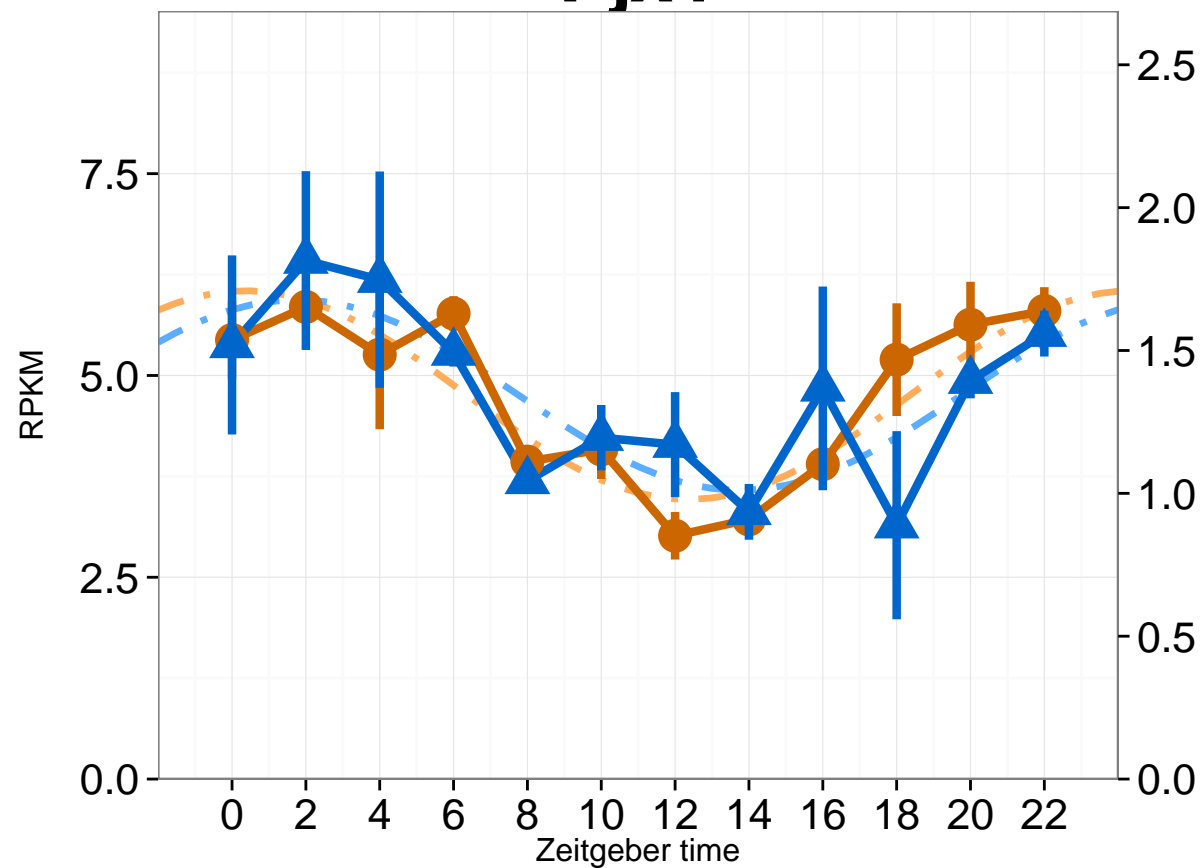

# Fjx1

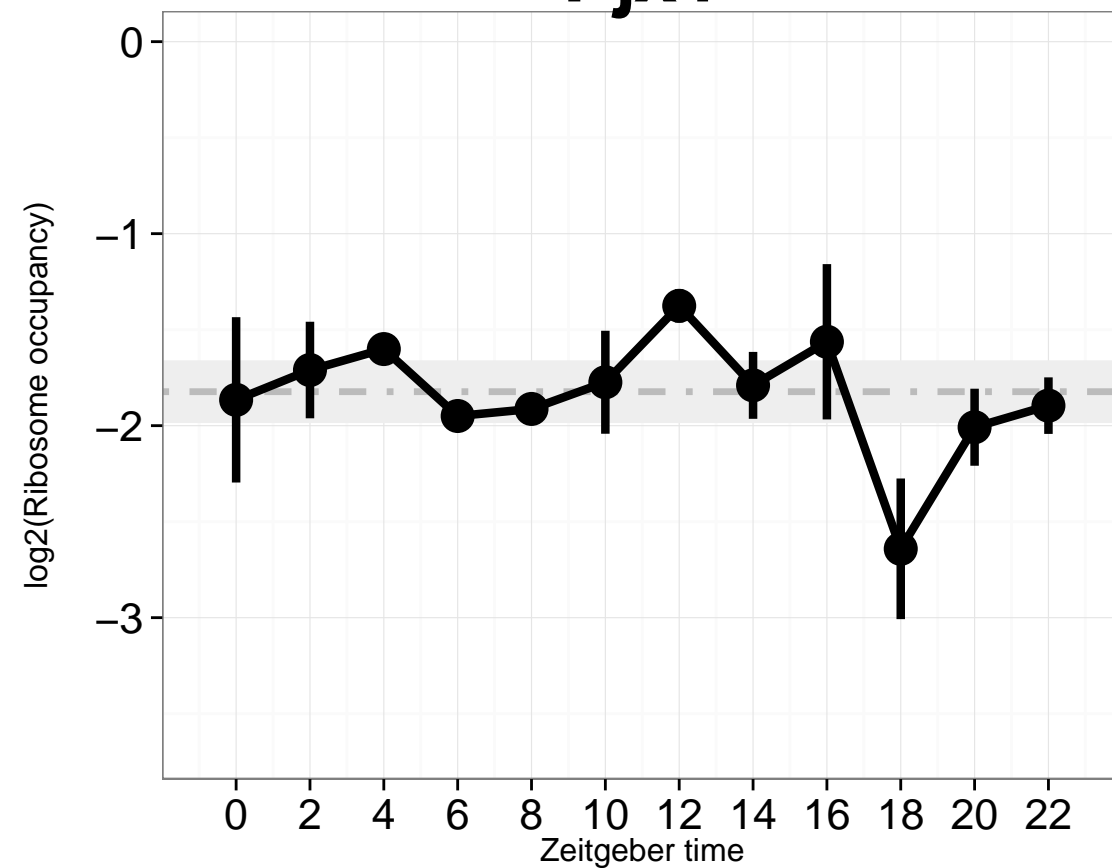

Supplement: Supplementary file 5093 [file 1]

## Cpsf3l

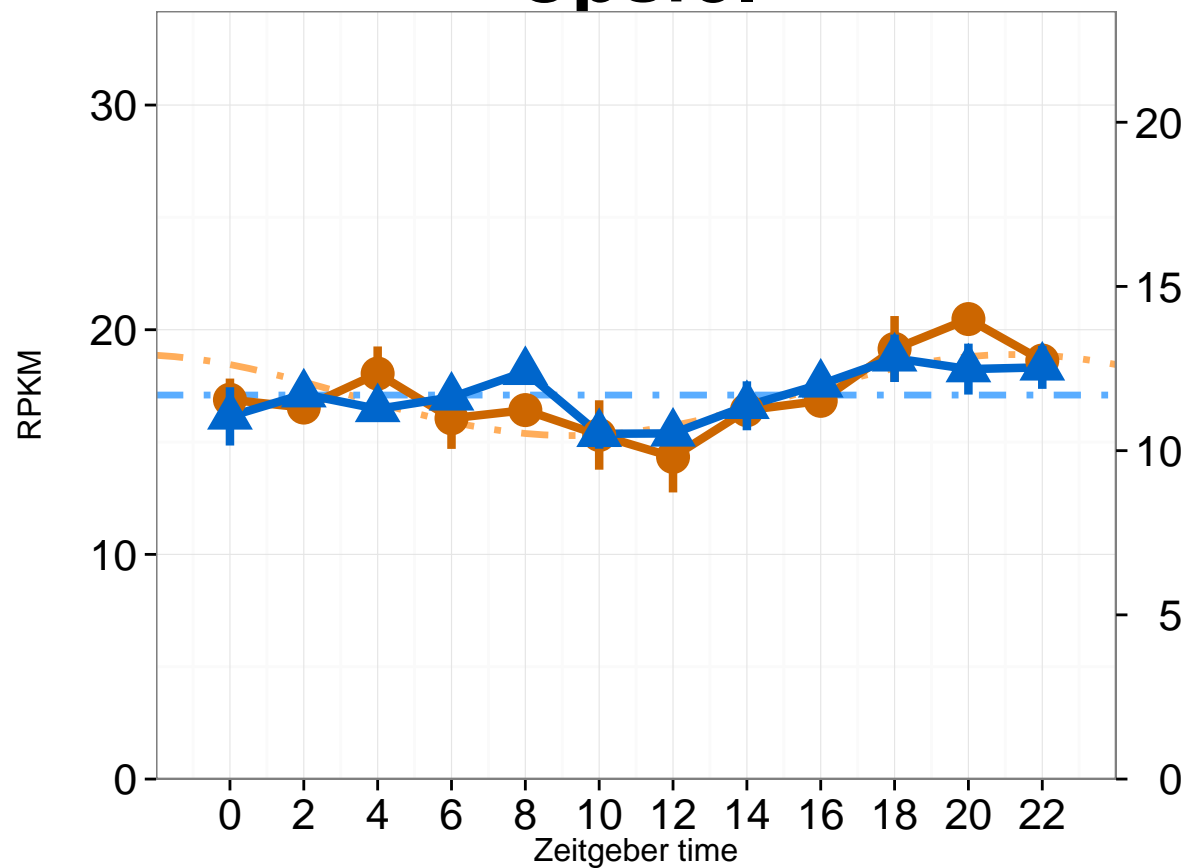

## Cpsf3l

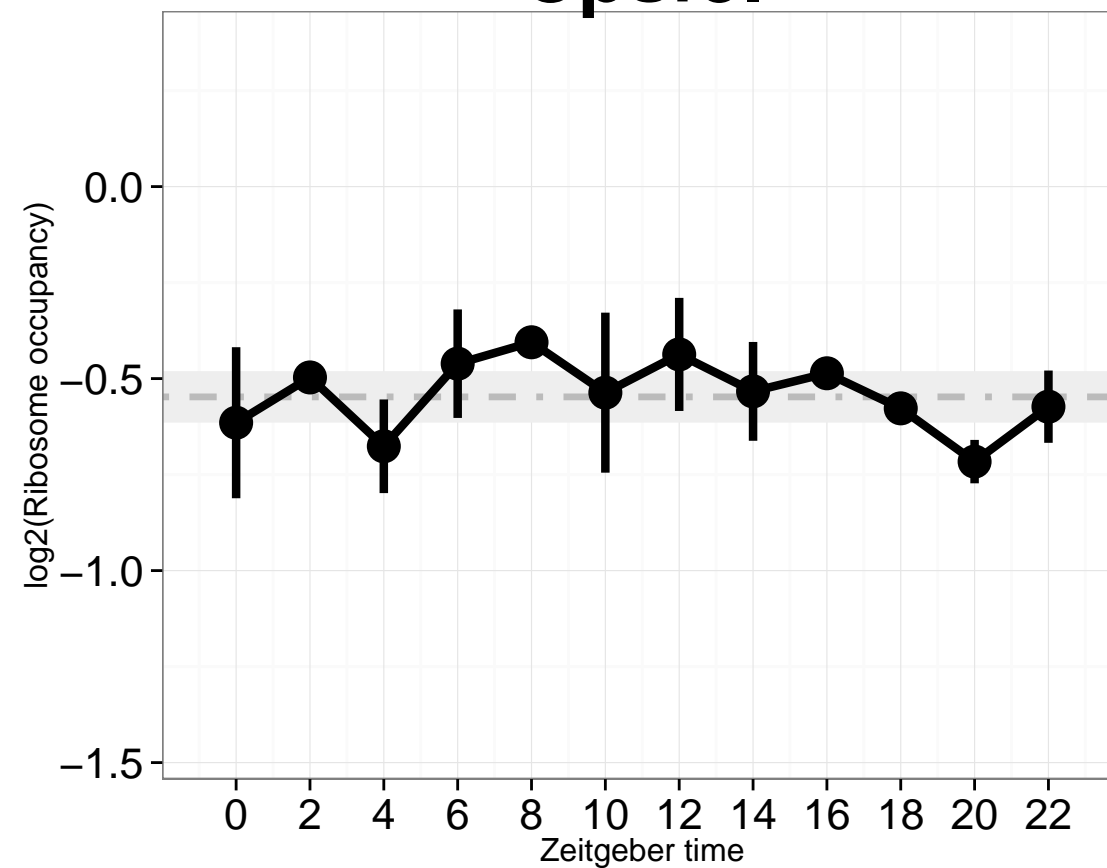

Supplement: Supplementary file 5094 [file 1]

# Ugcg

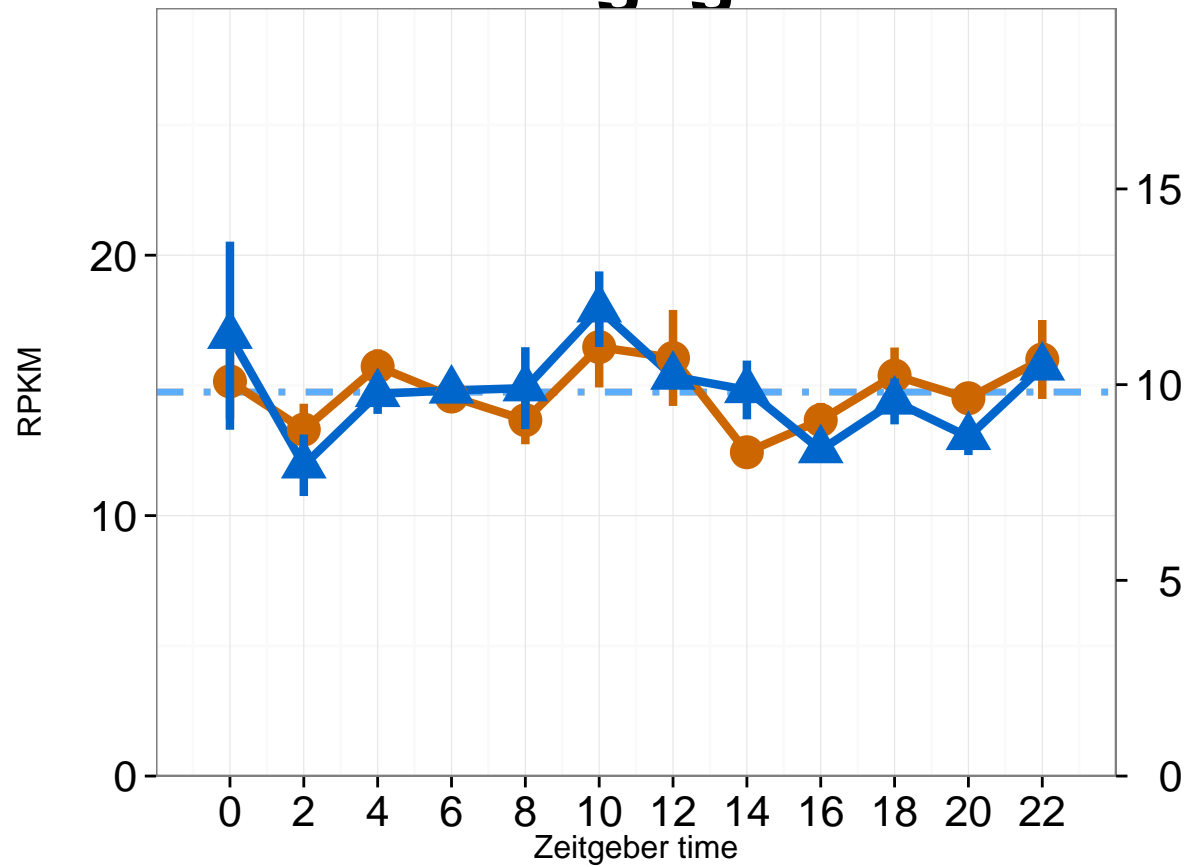

# Ugcg

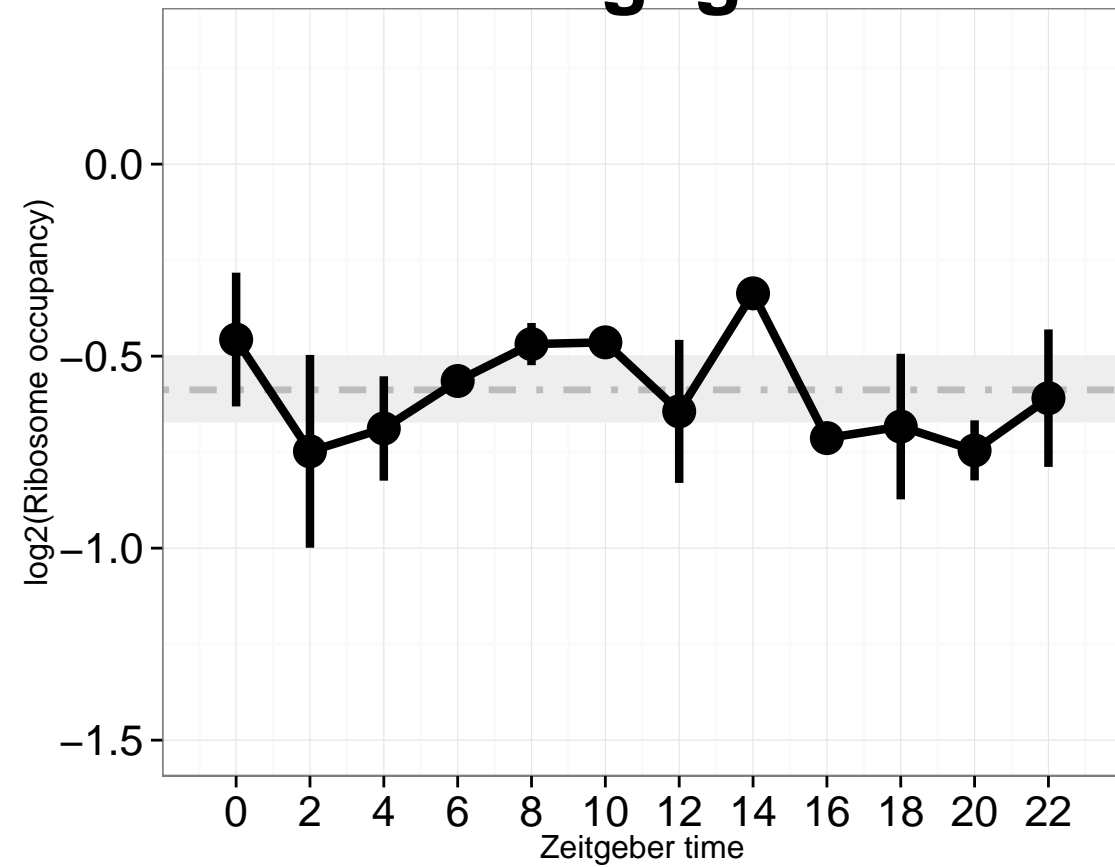

Supplement: Supplementary file 5095 [file 1]

## Bak1

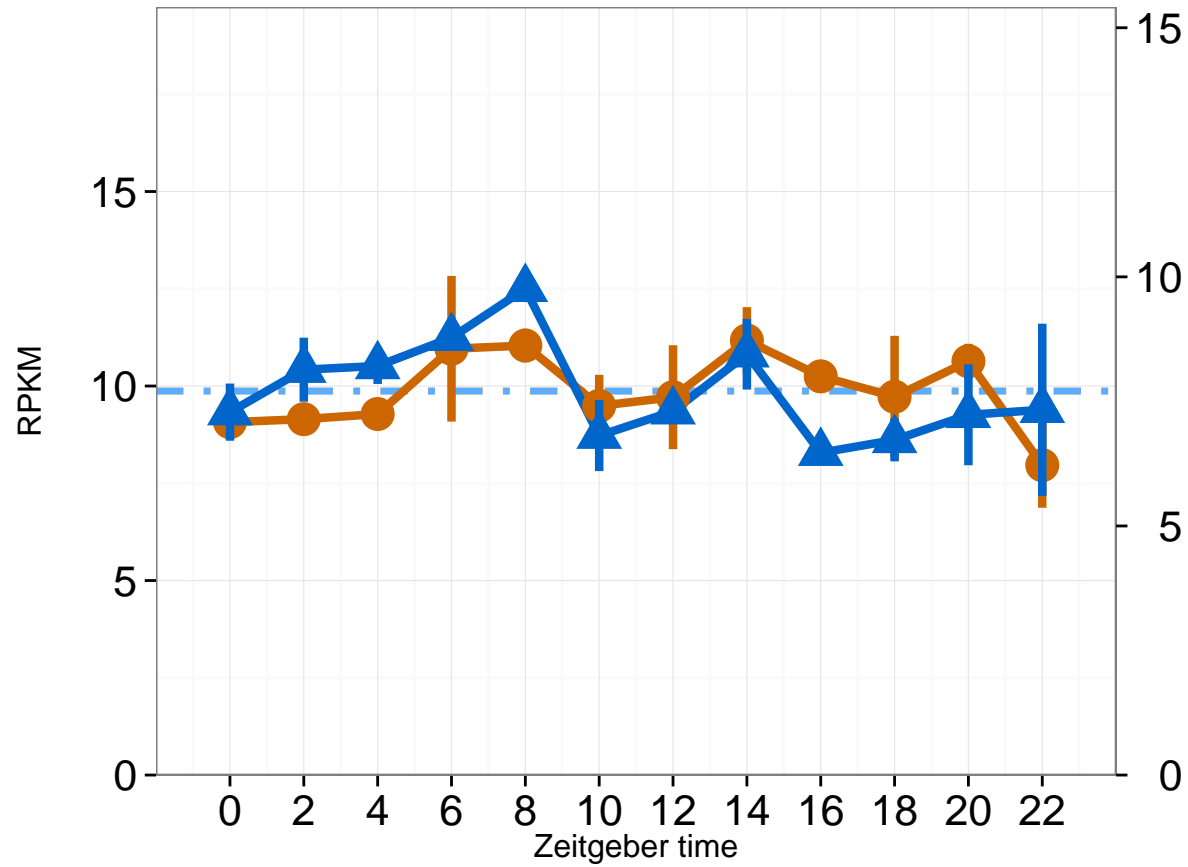

## Bak1

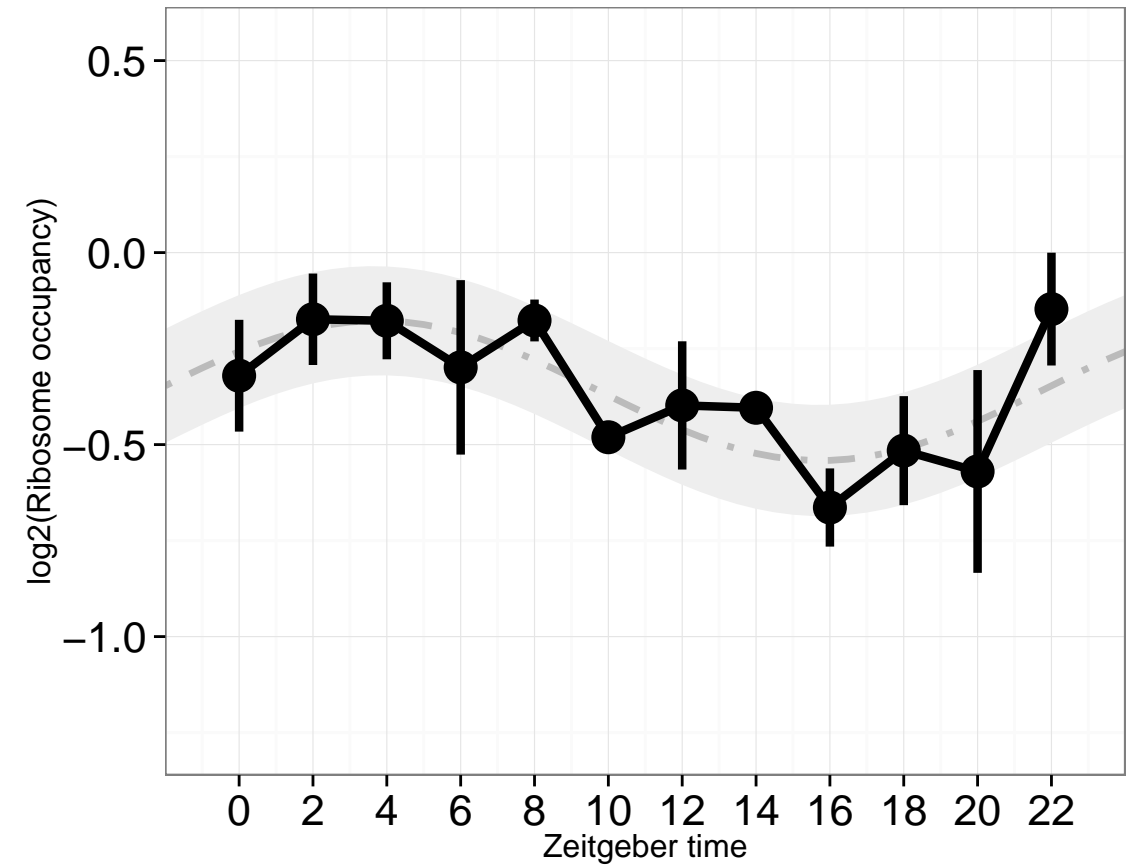

Supplement: Supplementary file 5096 [file 1]

## Thap4

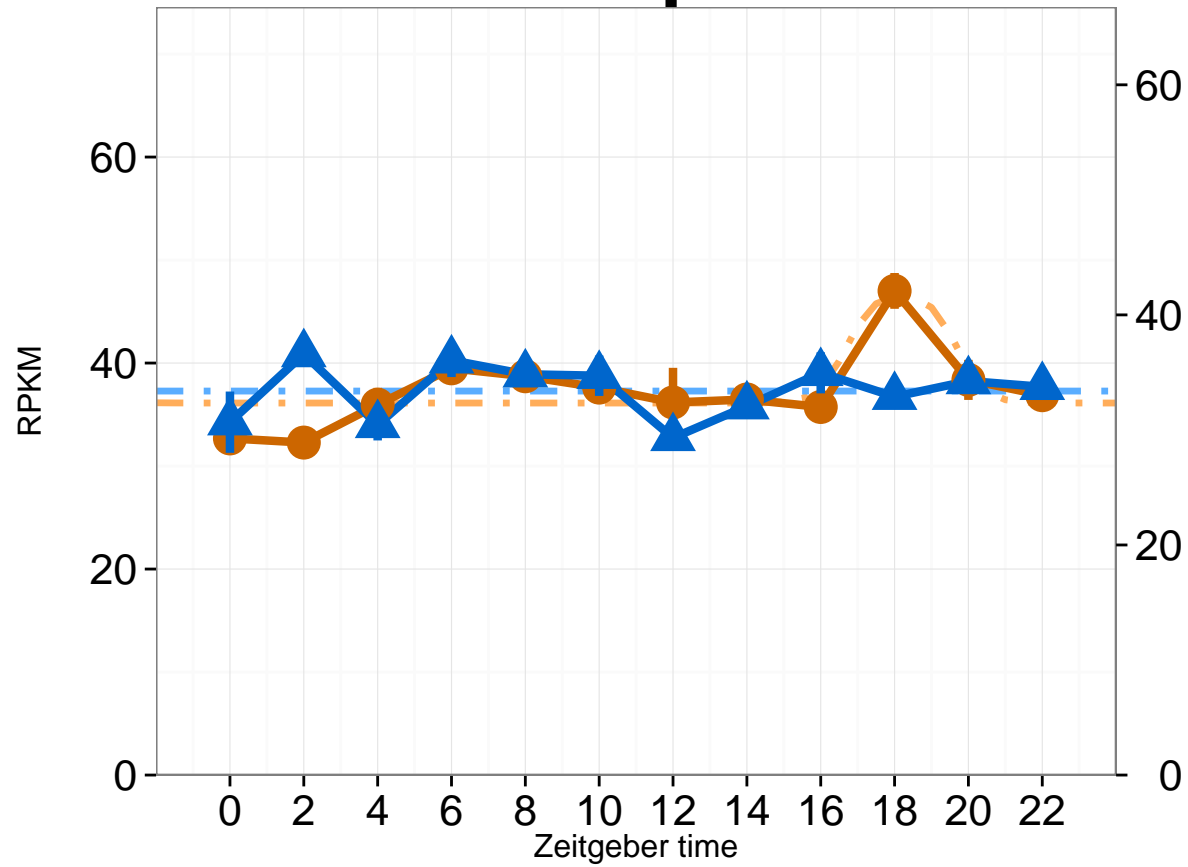

## Thap4

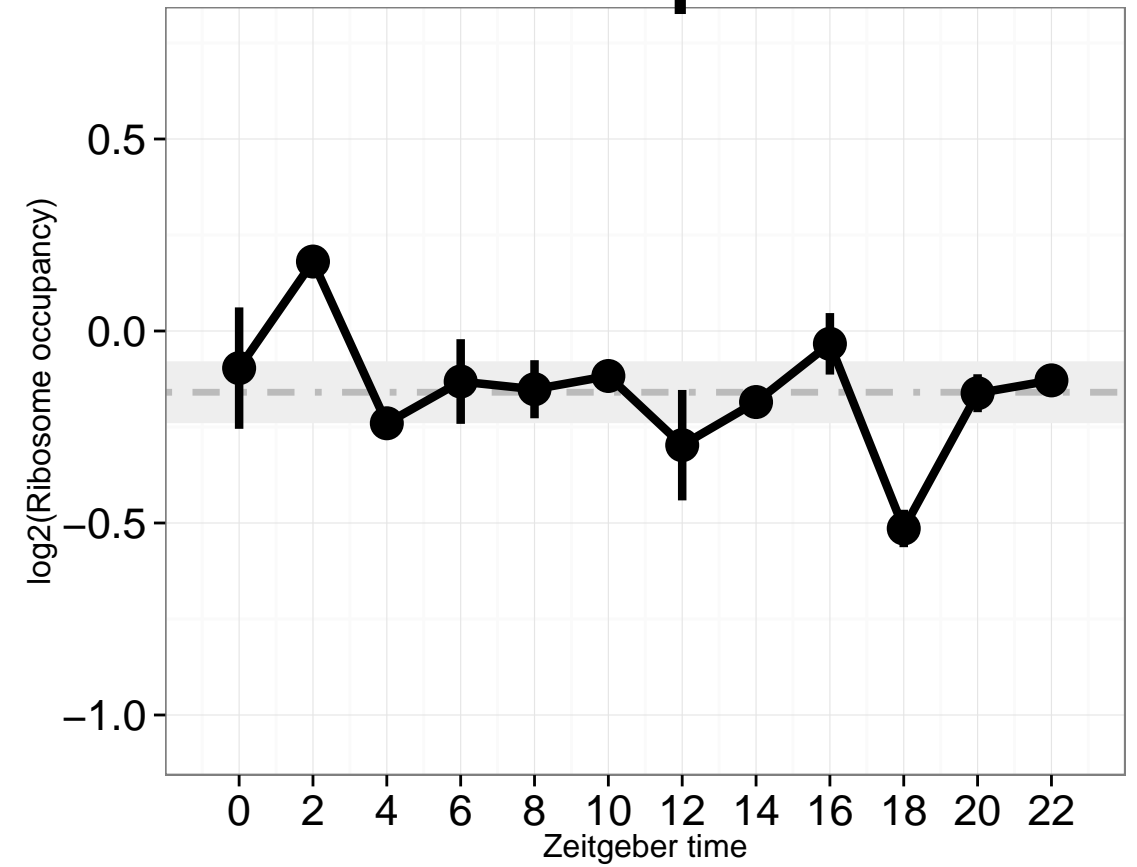

Supplement: Supplementary file 5097 [file 1]

## Kdm5d

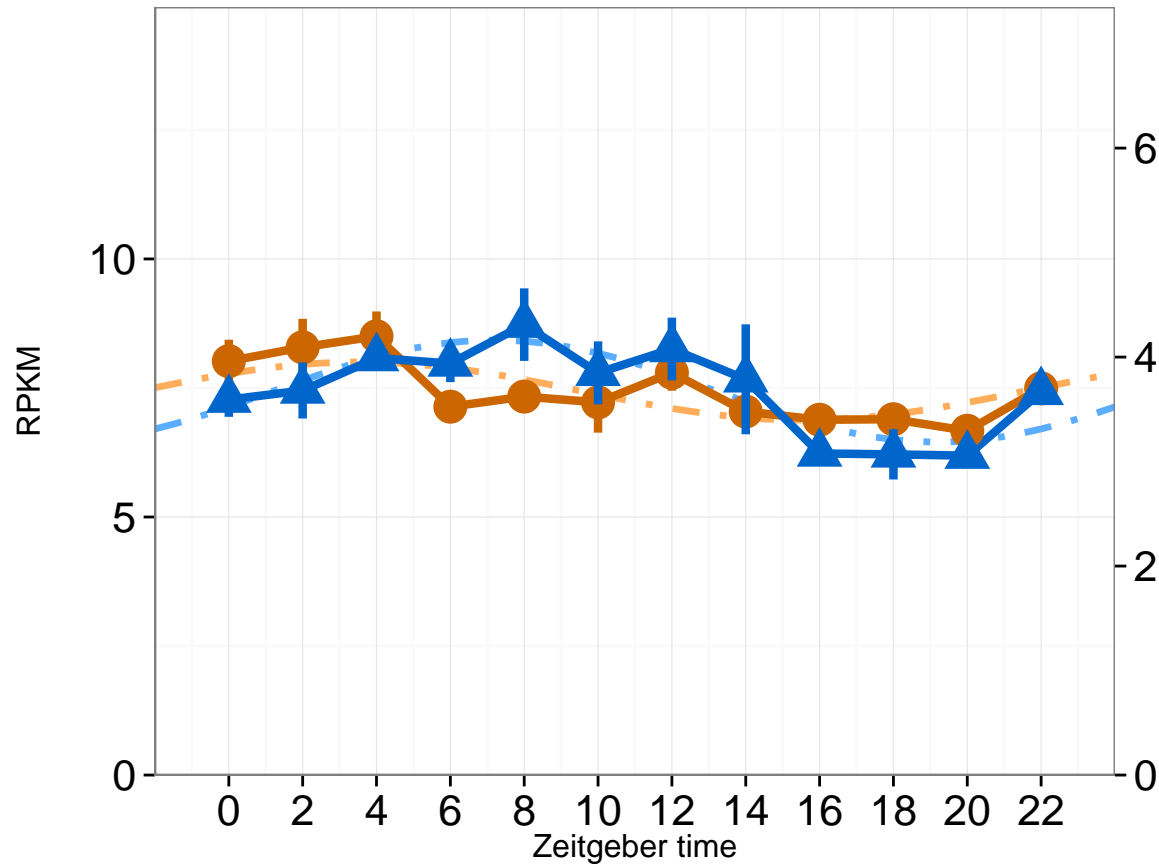

## Kdm5d

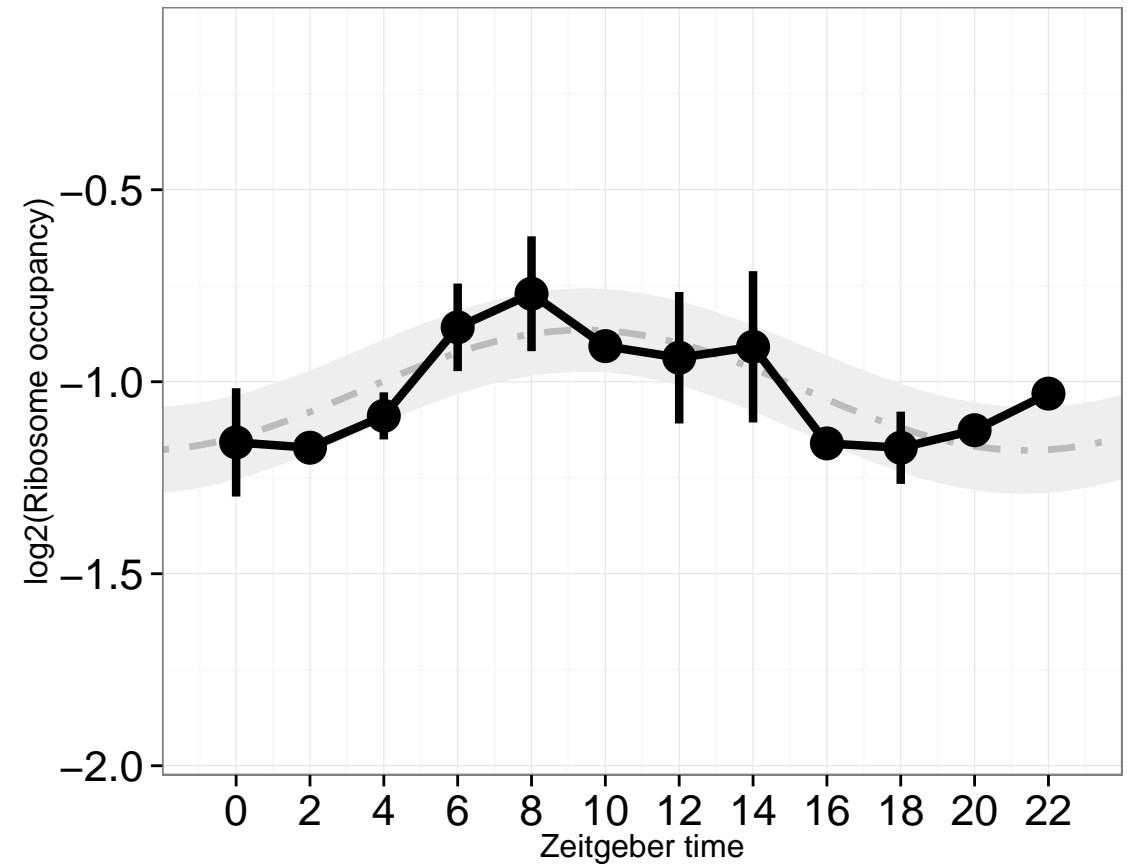

Supplement: Supplementary file 5098 [file 1]

# Taok3

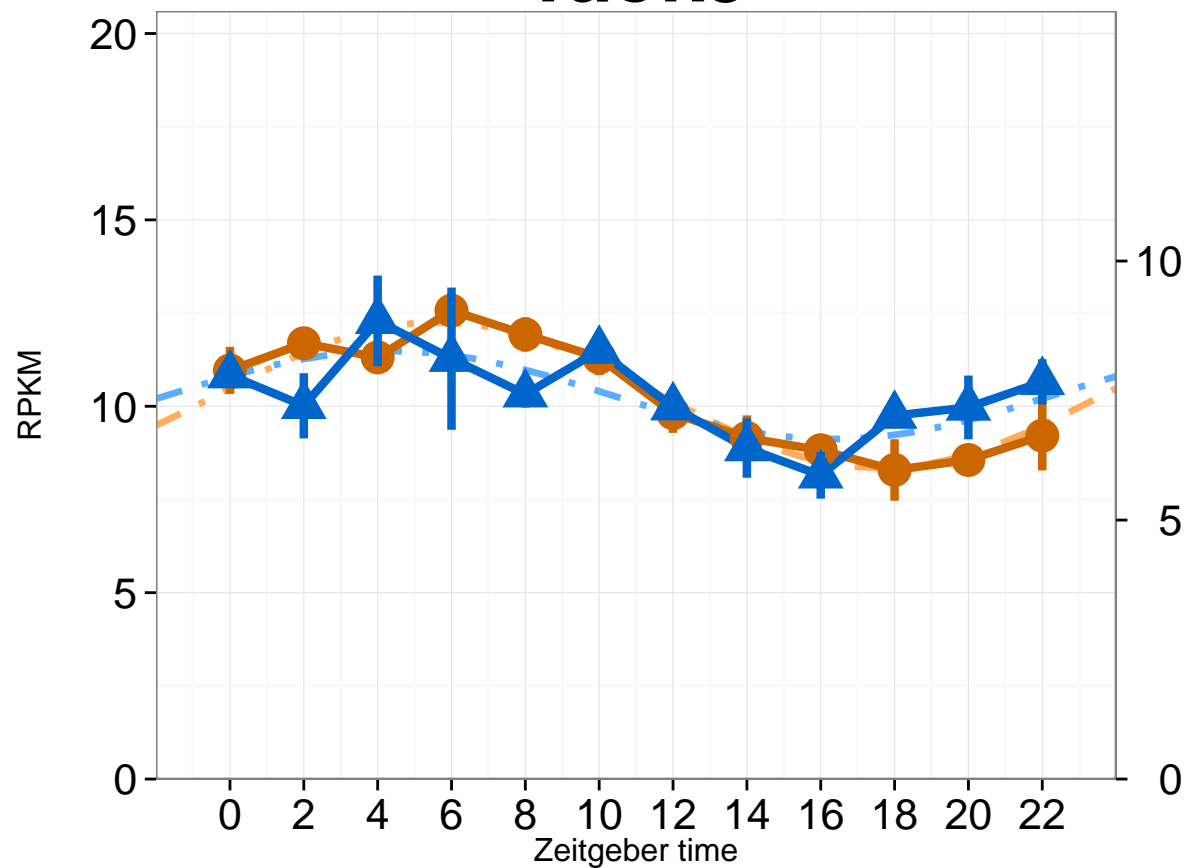

# Taok3

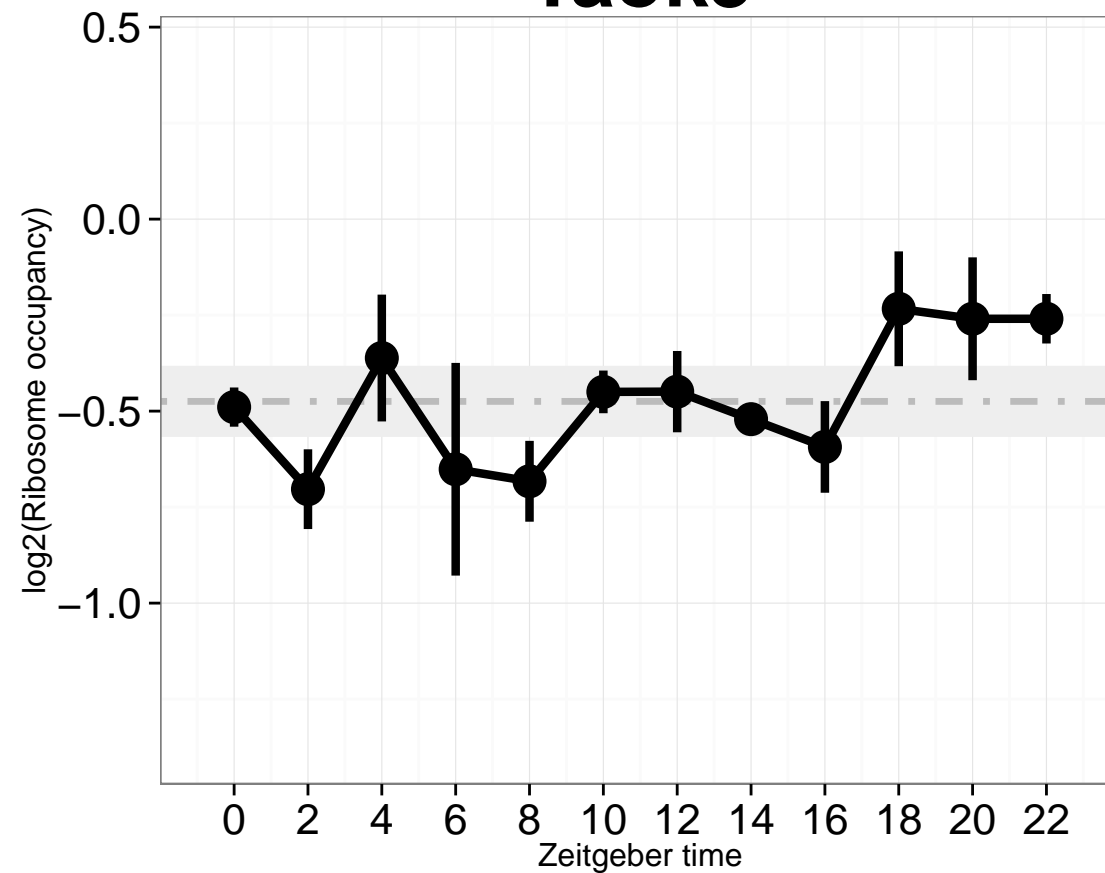

Supplement: Supplementary file 5099 [file 1]

## Gan

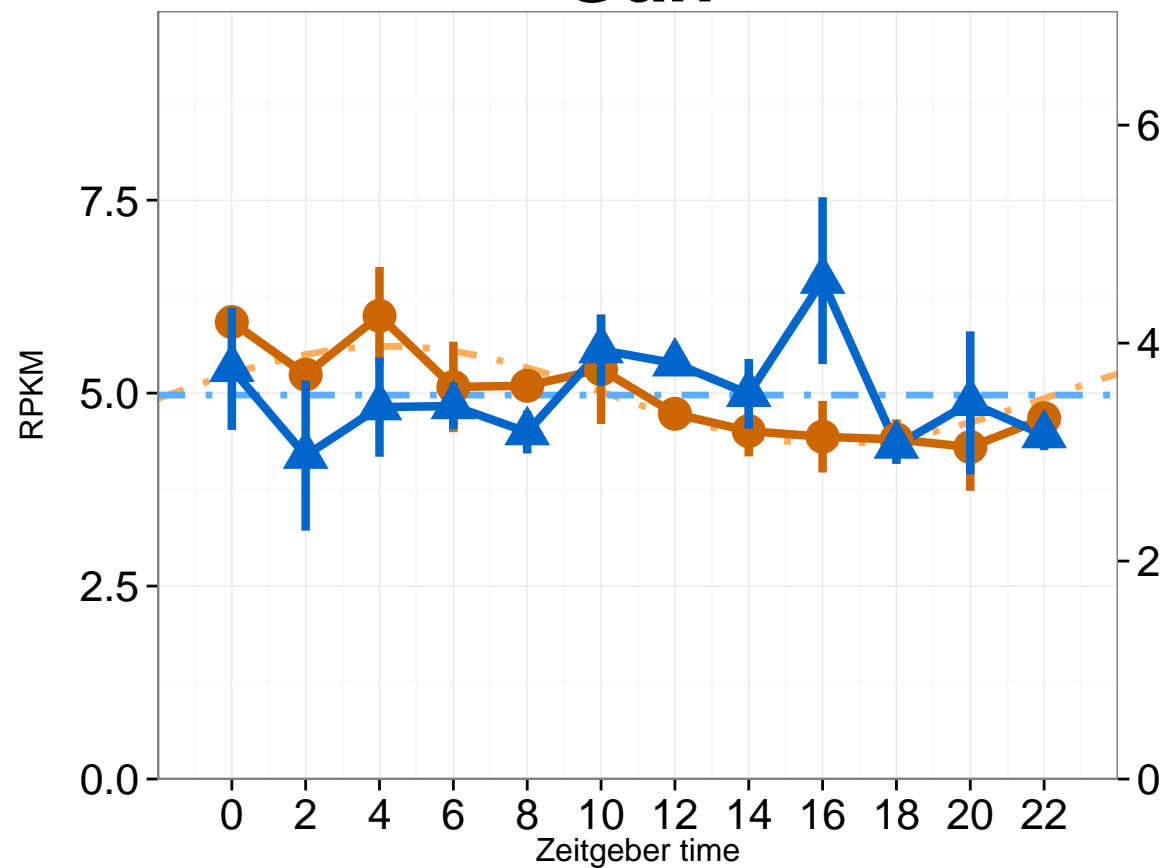

## Gan

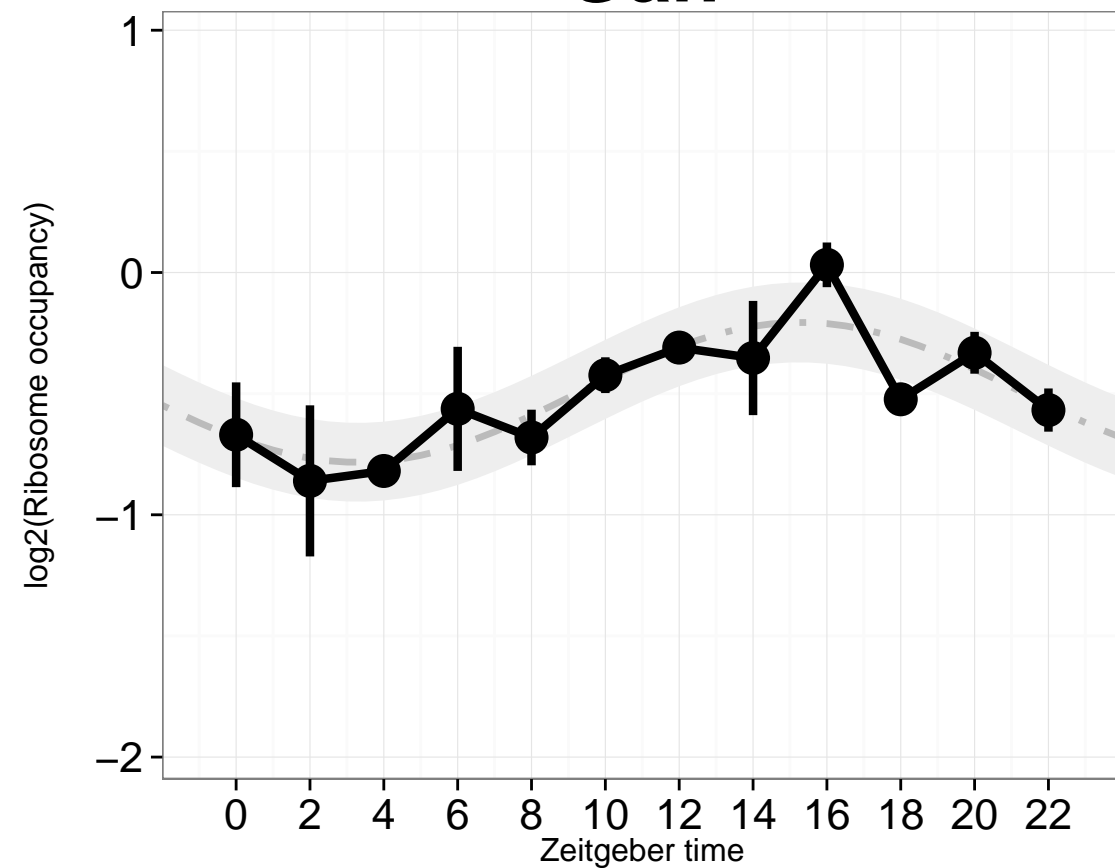

Supplement: Supplementary file 5100 [file 1]

# Gtf2e2

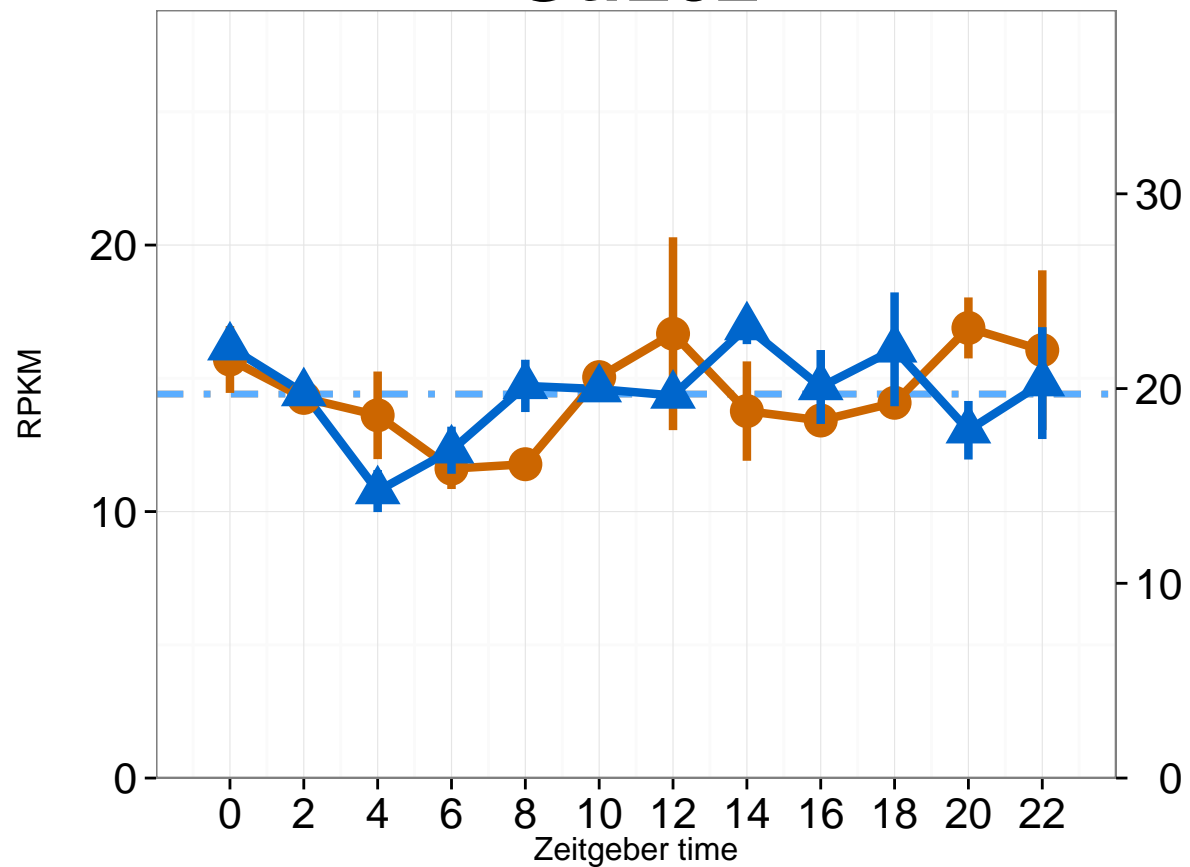

# Gtf2e2

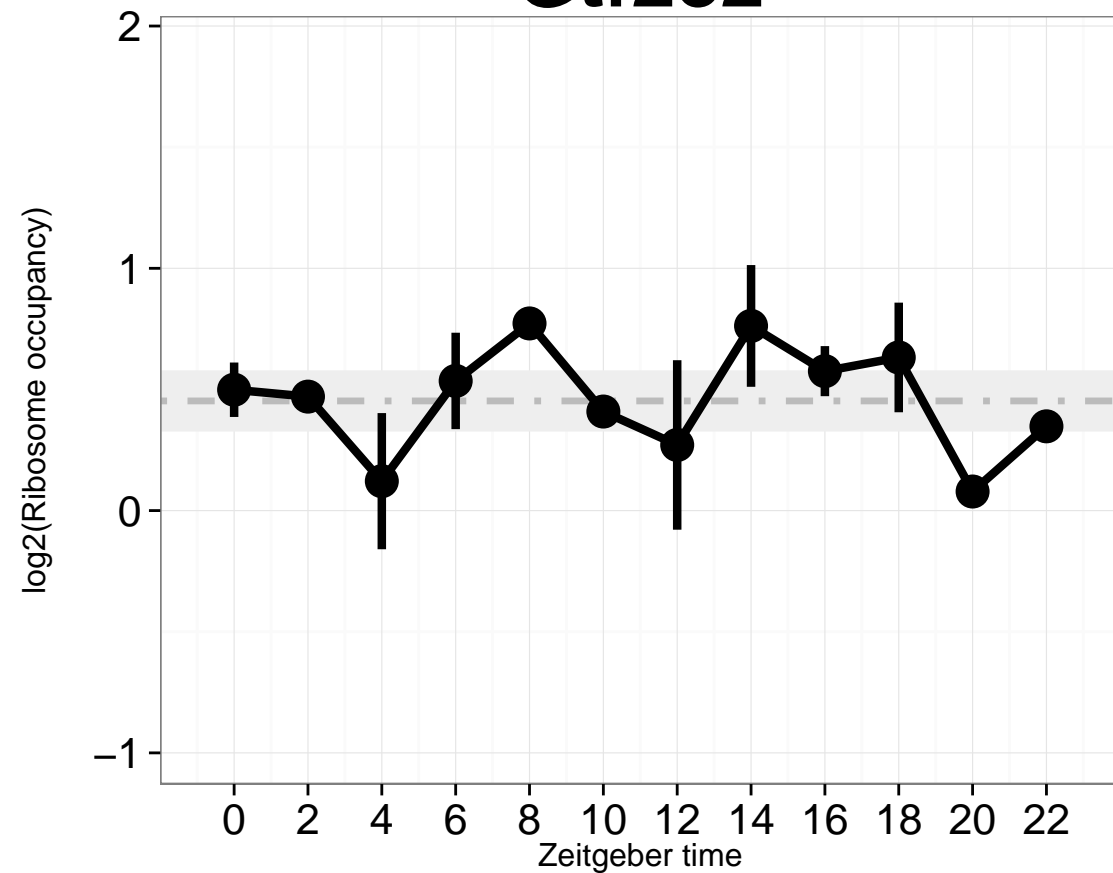

Supplement: Supplementary file 5101 [file 1]

## Tnfrsf1b

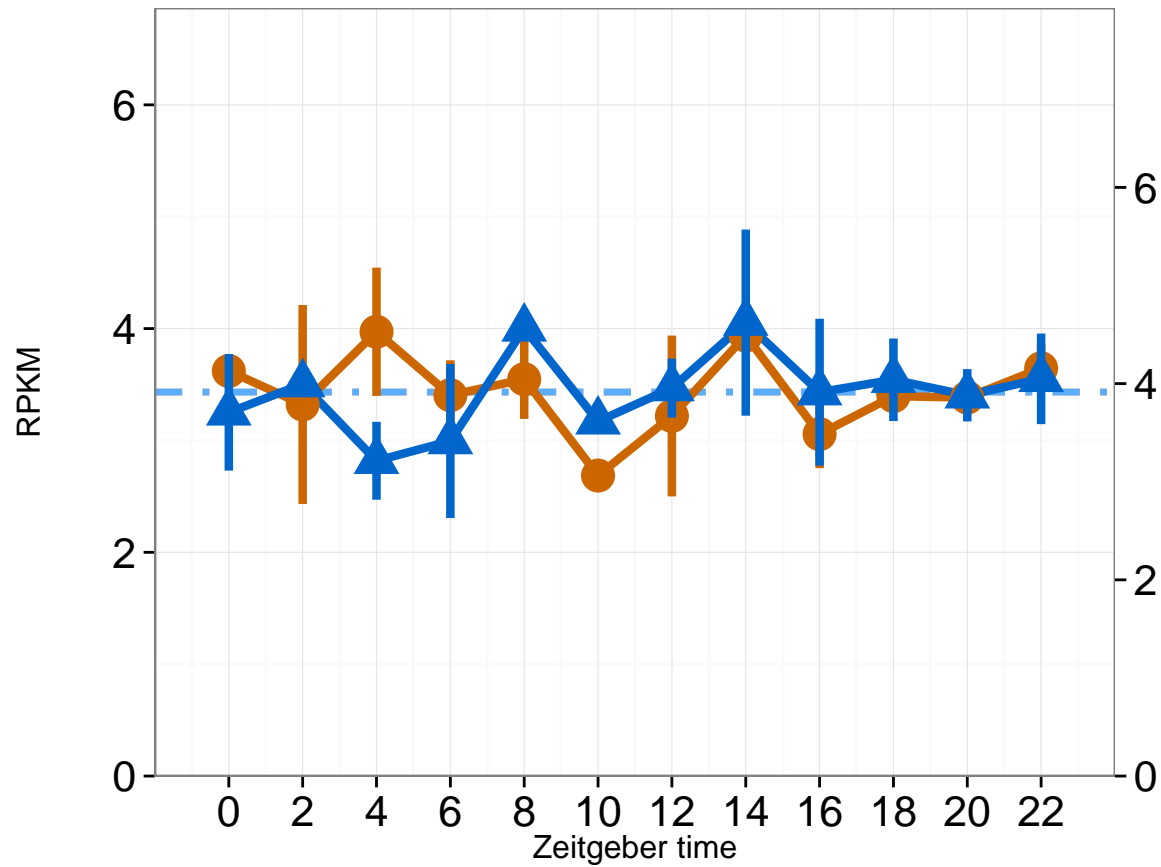

## Tnfrsf1b

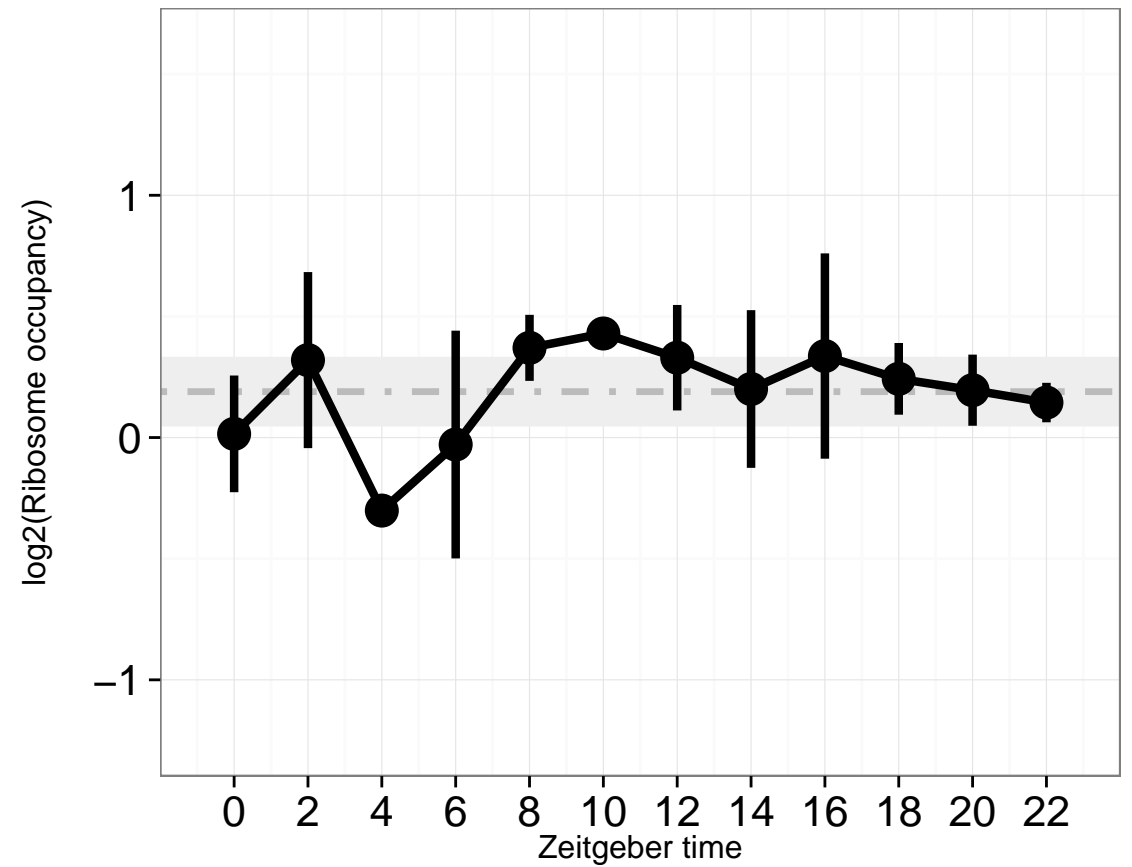

Supplement: Supplementary file 5102 [file 1]

## Ngef

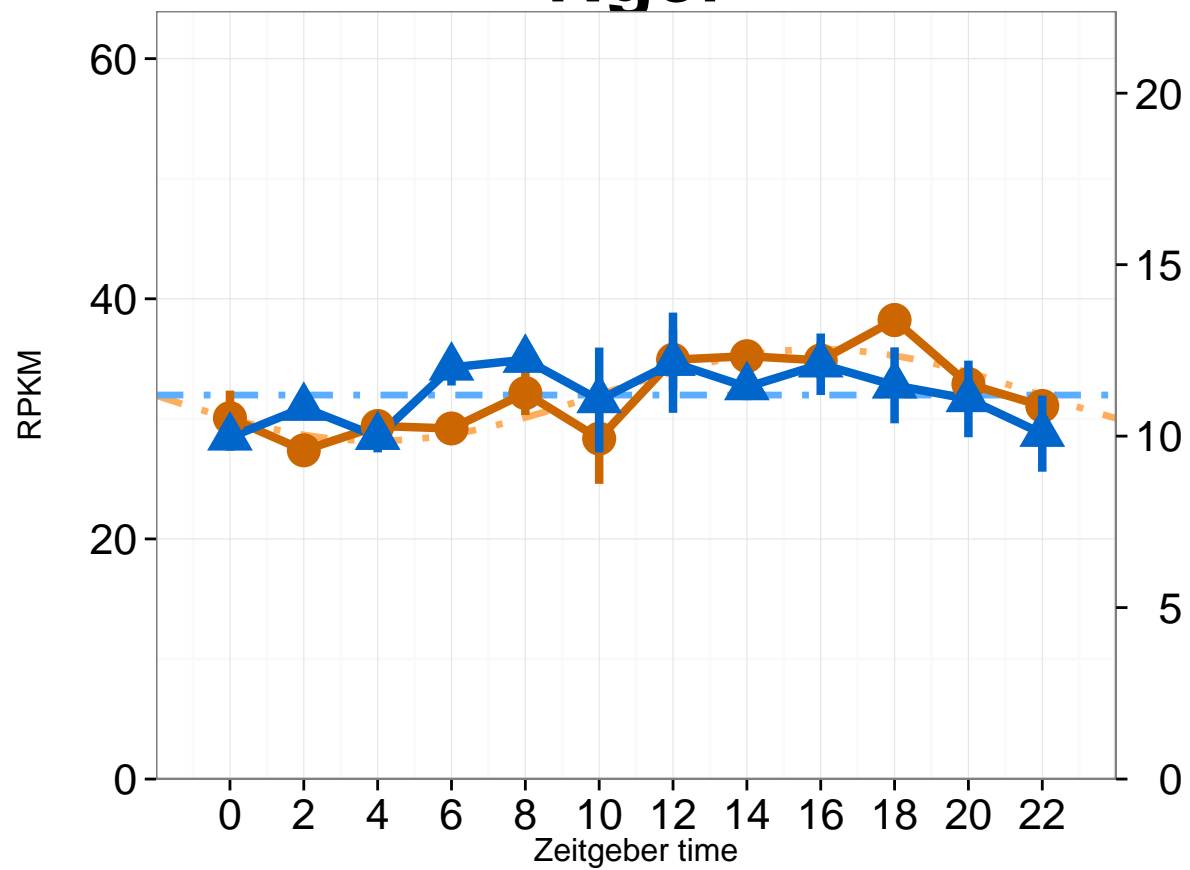

## Ngef

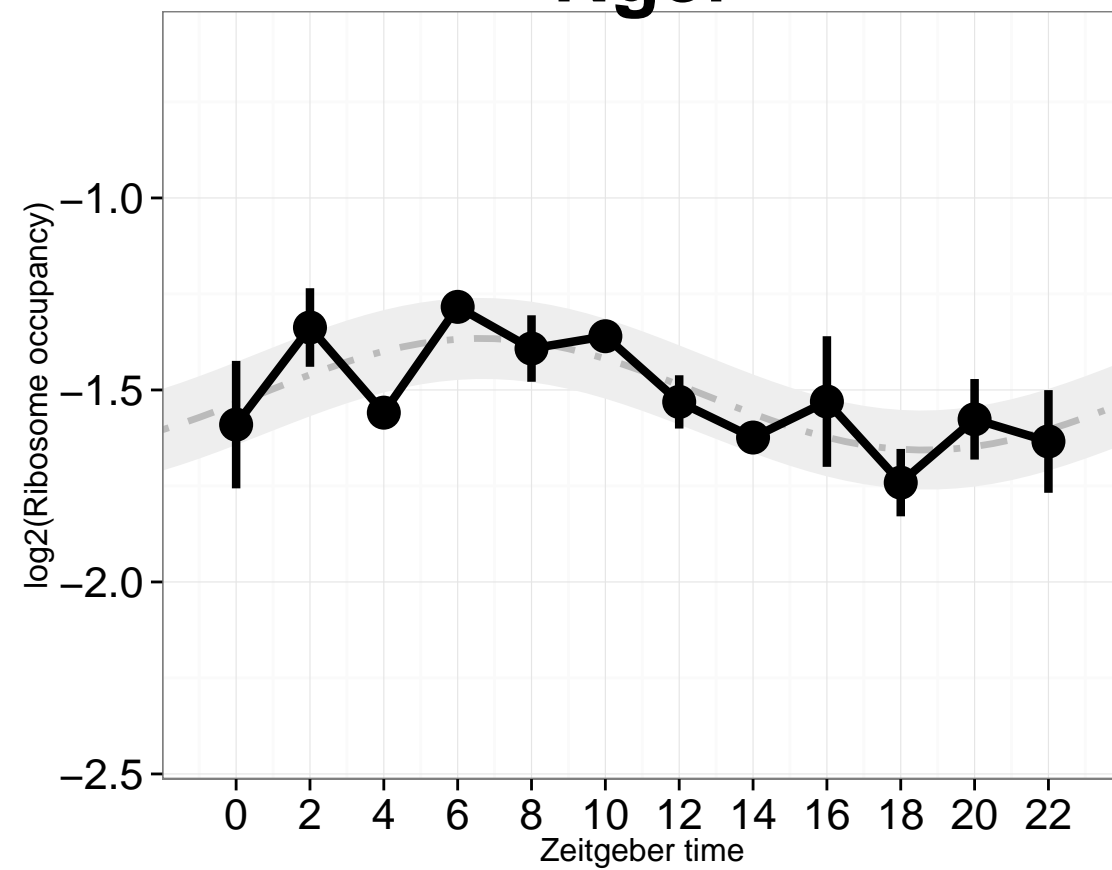

Supplement: Supplementary file 5103 [file 1]

## Slc25a34

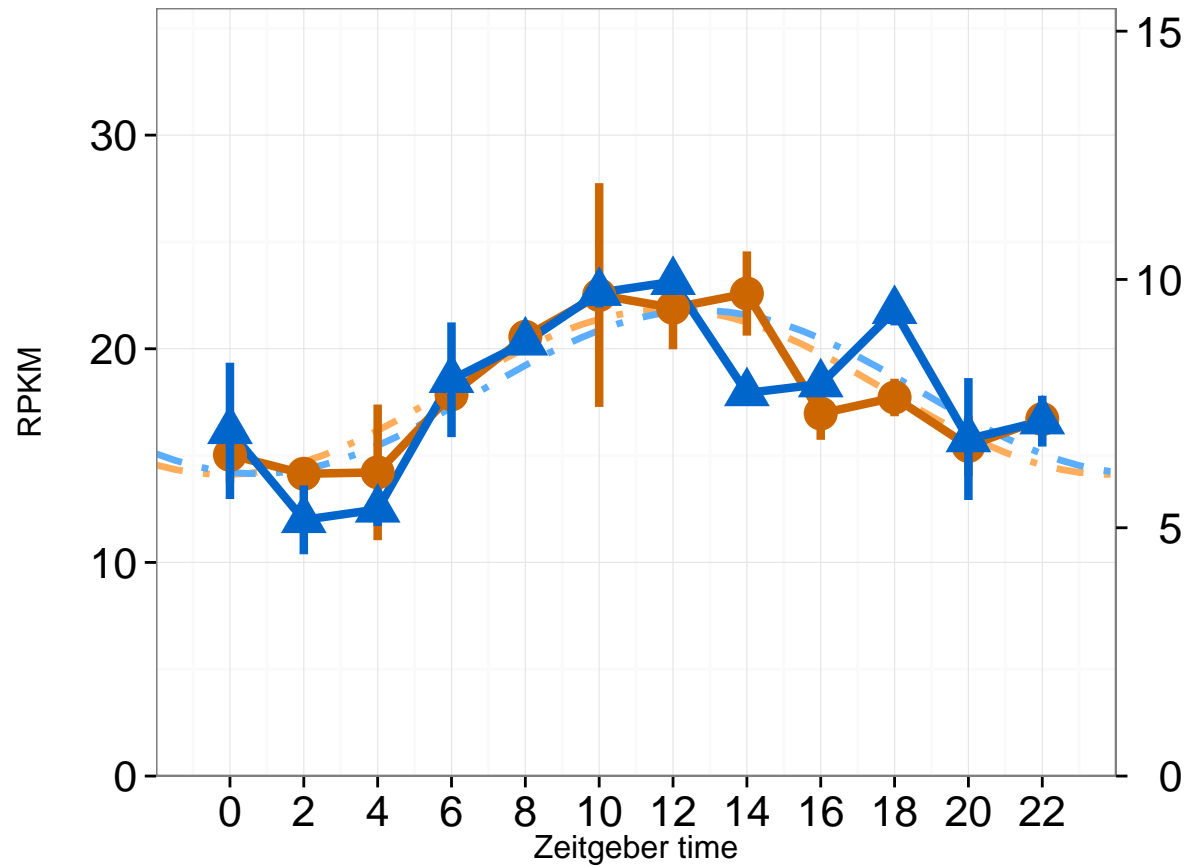

## Slc25a34

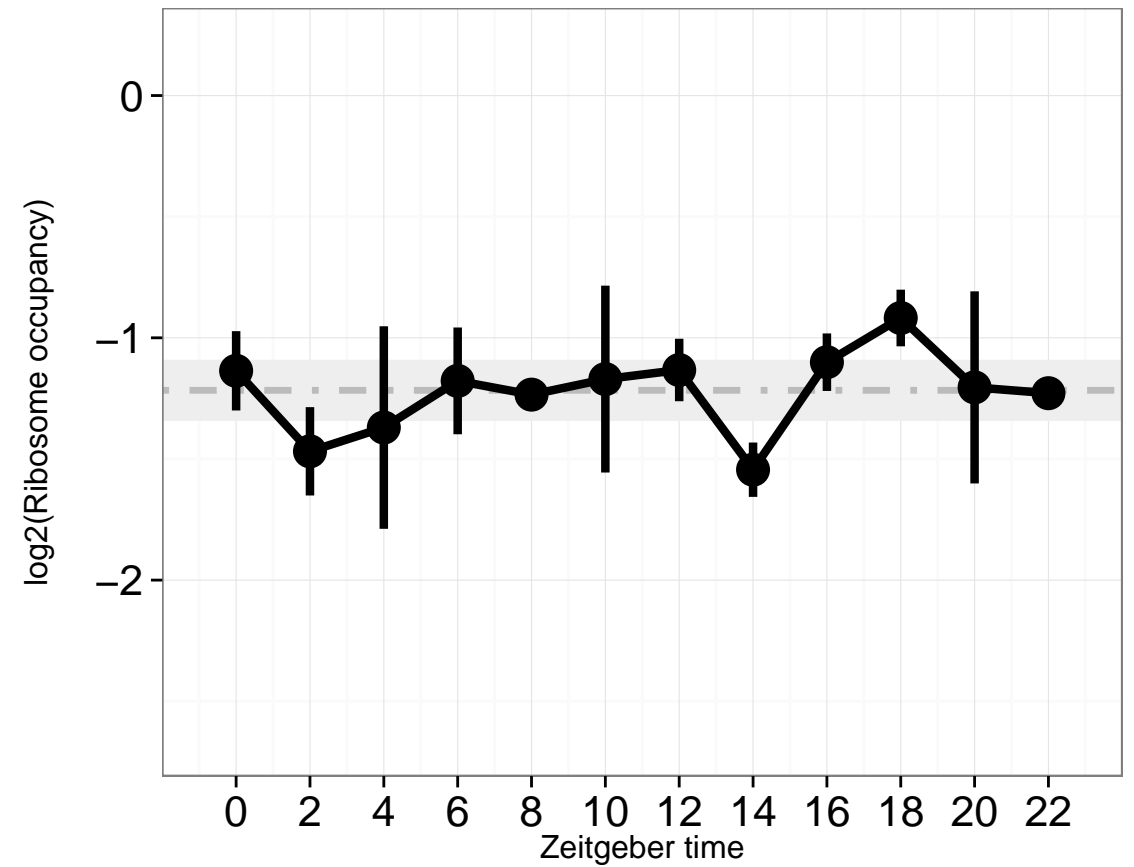

Supplement: Supplementary file 5104 [file 1]

## Zfand6

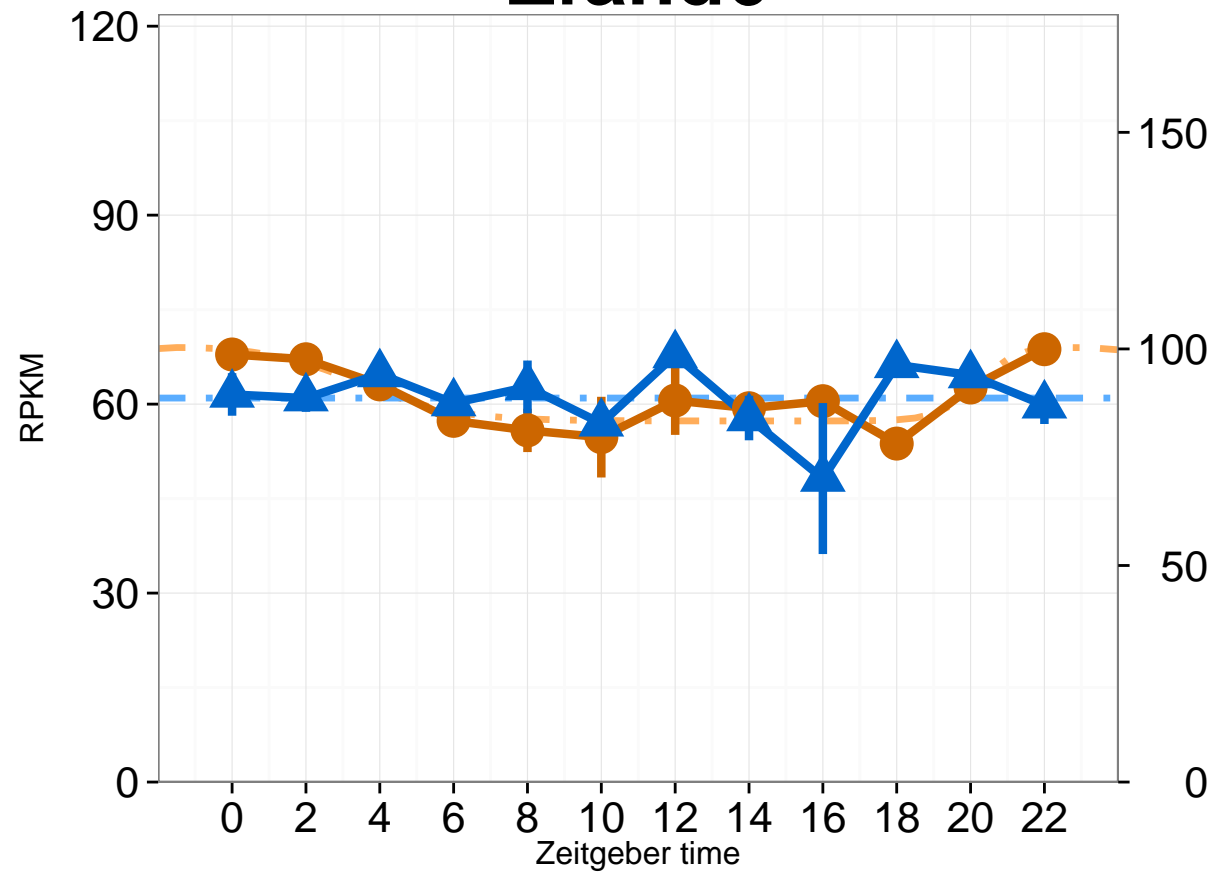

## Zfand6

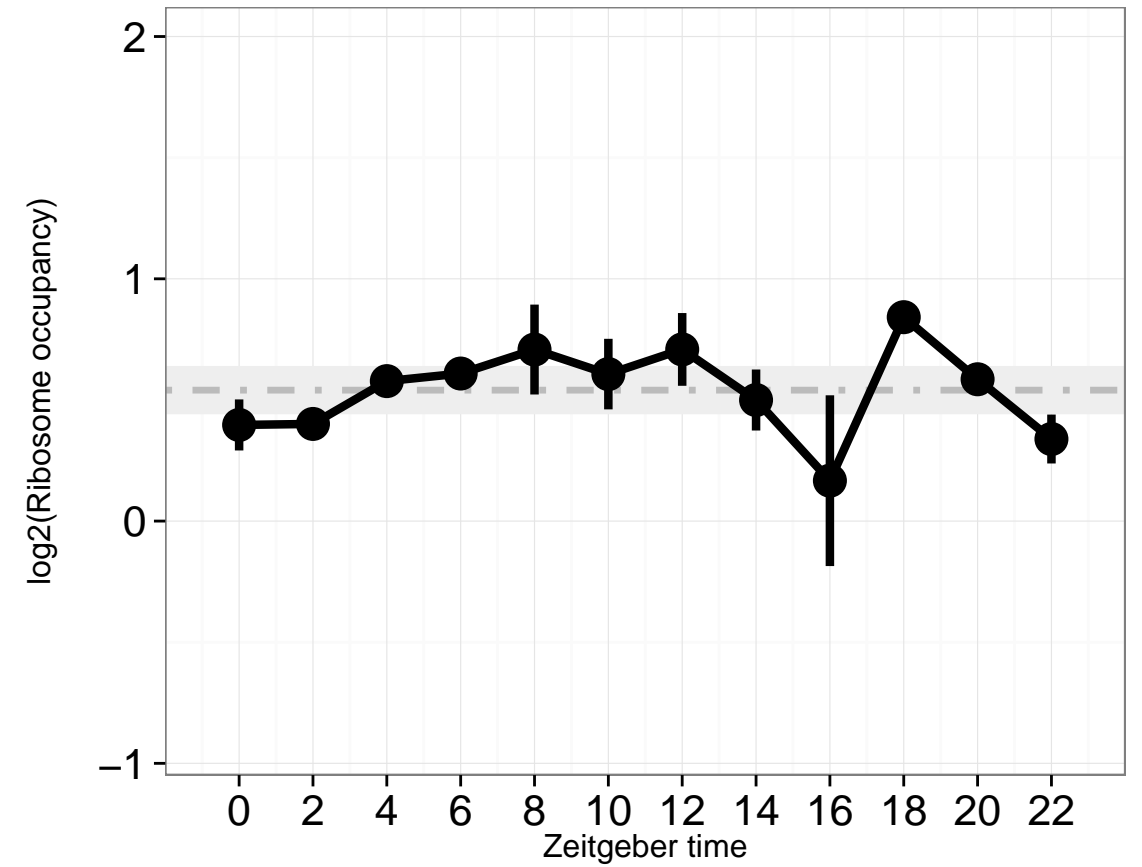

Supplement: Supplementary file 5105 [file 1]

## Hif1a

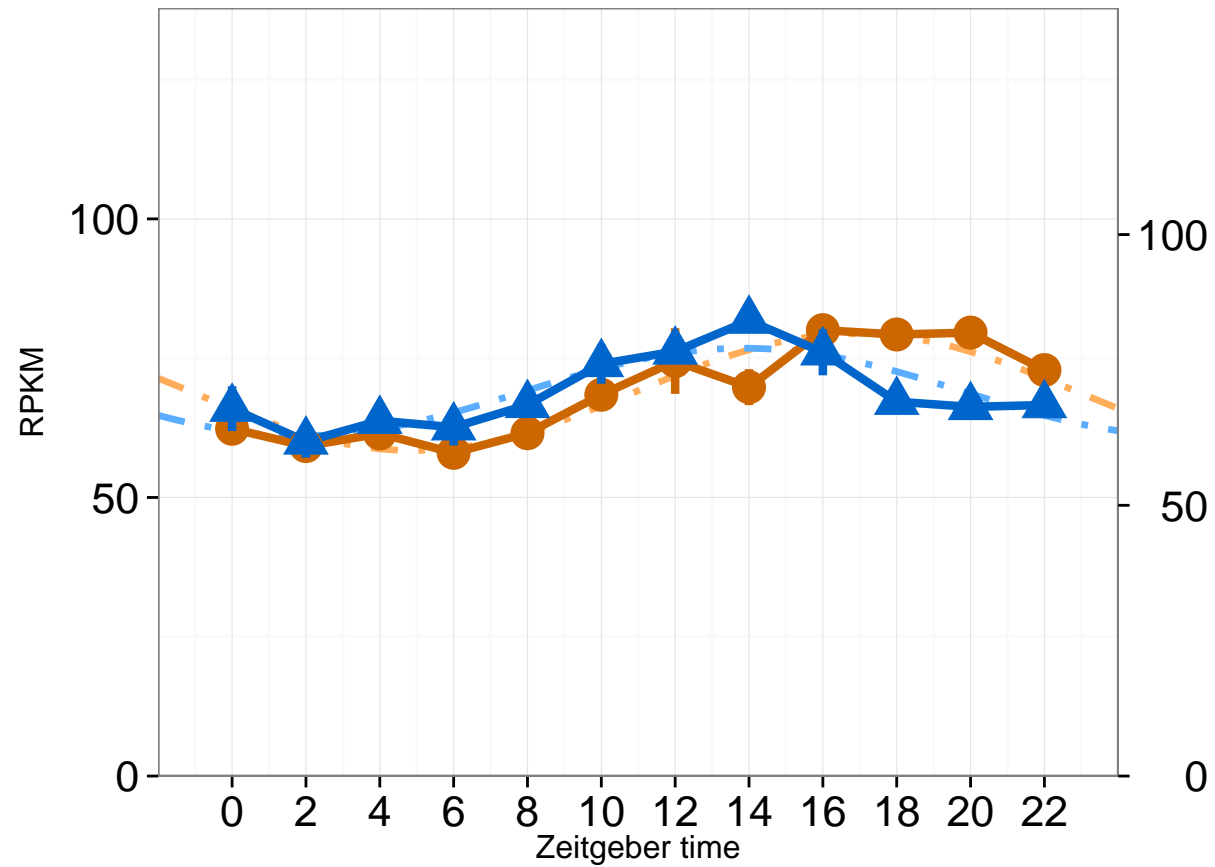

## Hif1a

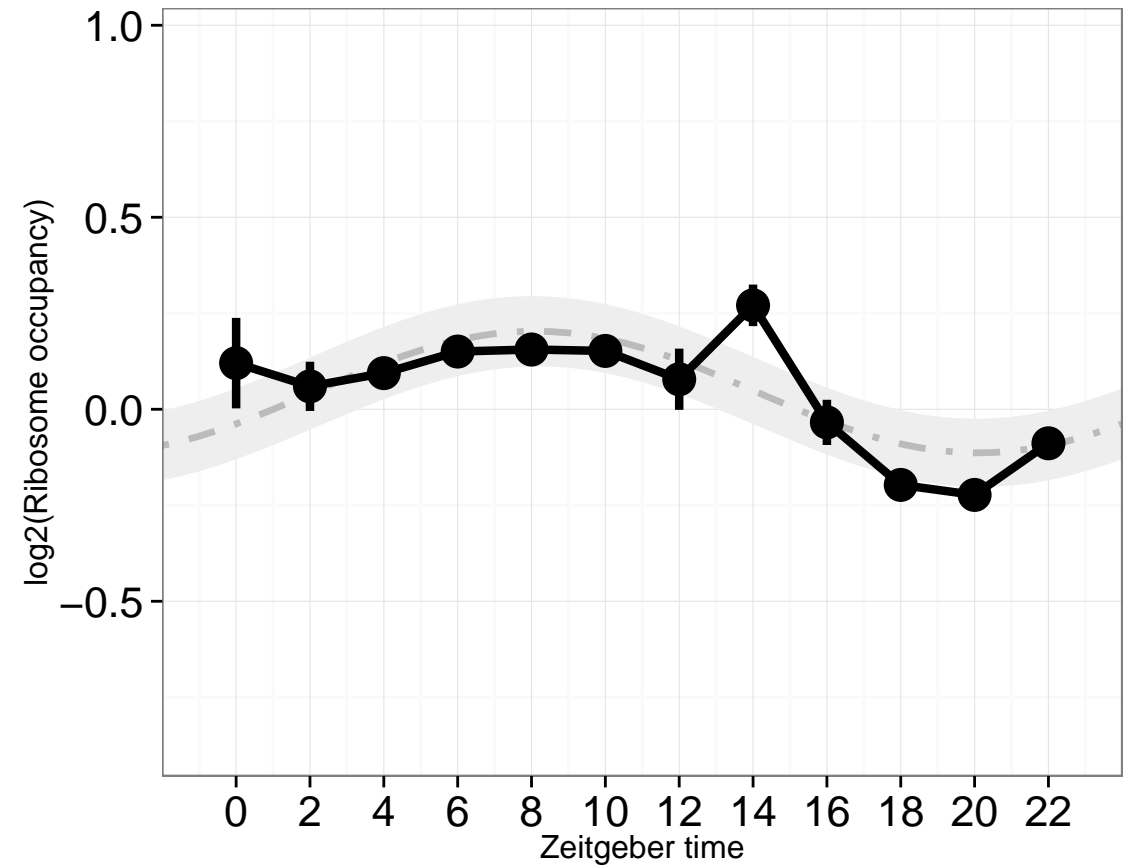

Supplement: Supplementary file 5106 [file 1]

## Urod

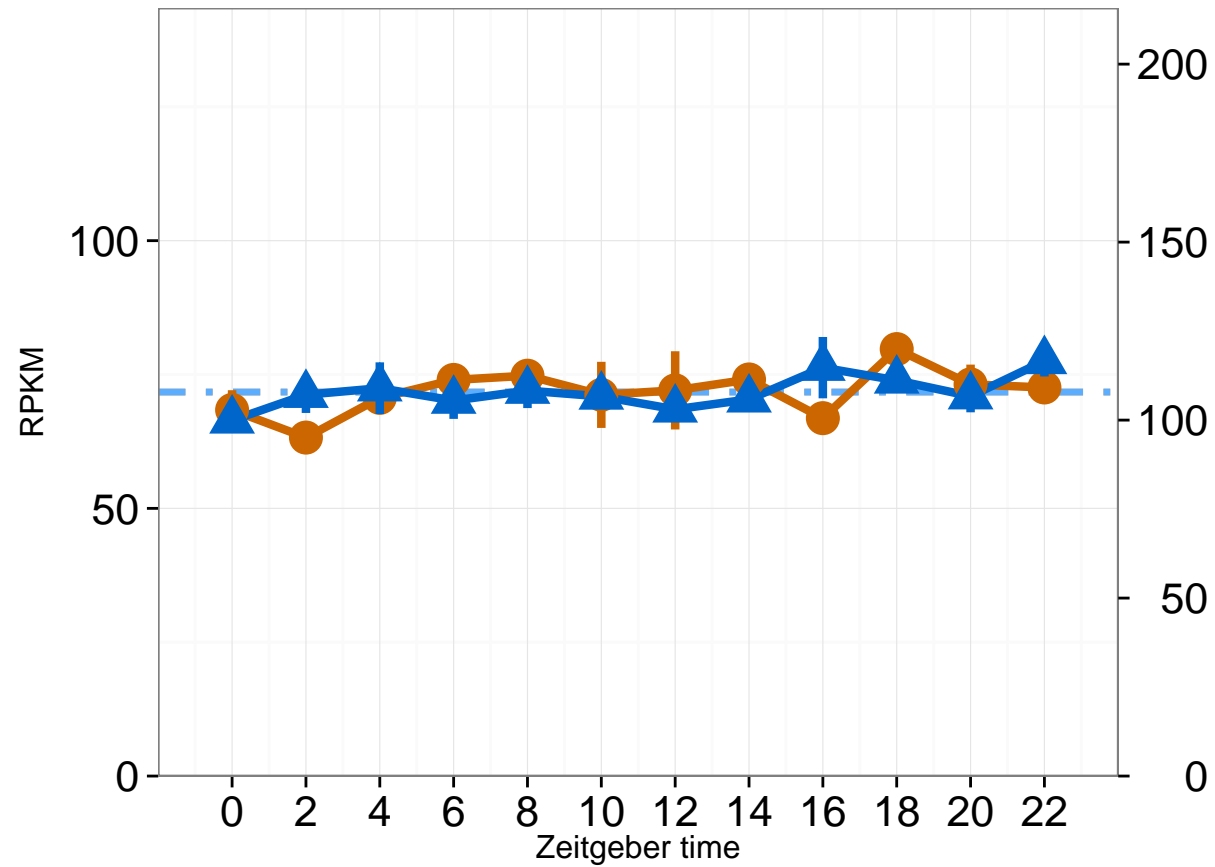

## Urod

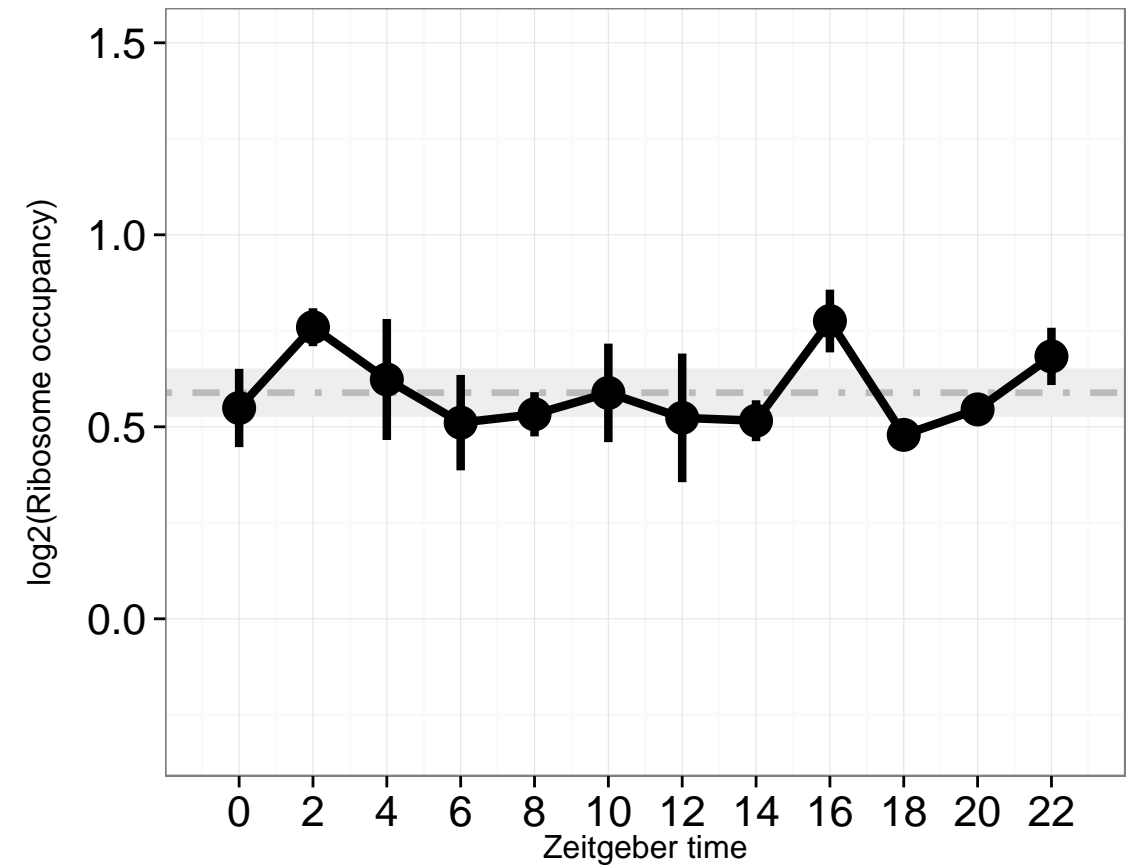

Supplement: Supplementary file 5107 [file 1]

## Wdr75

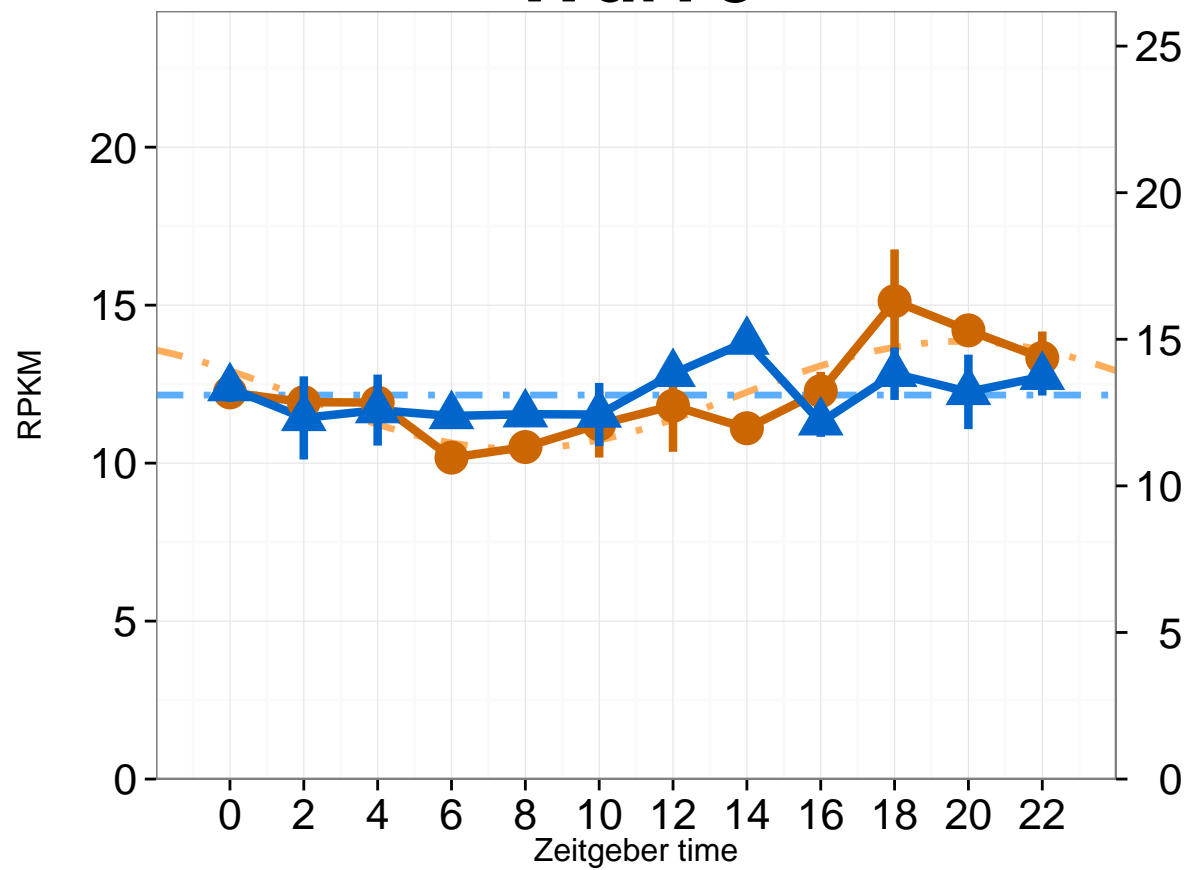

## Wdr75

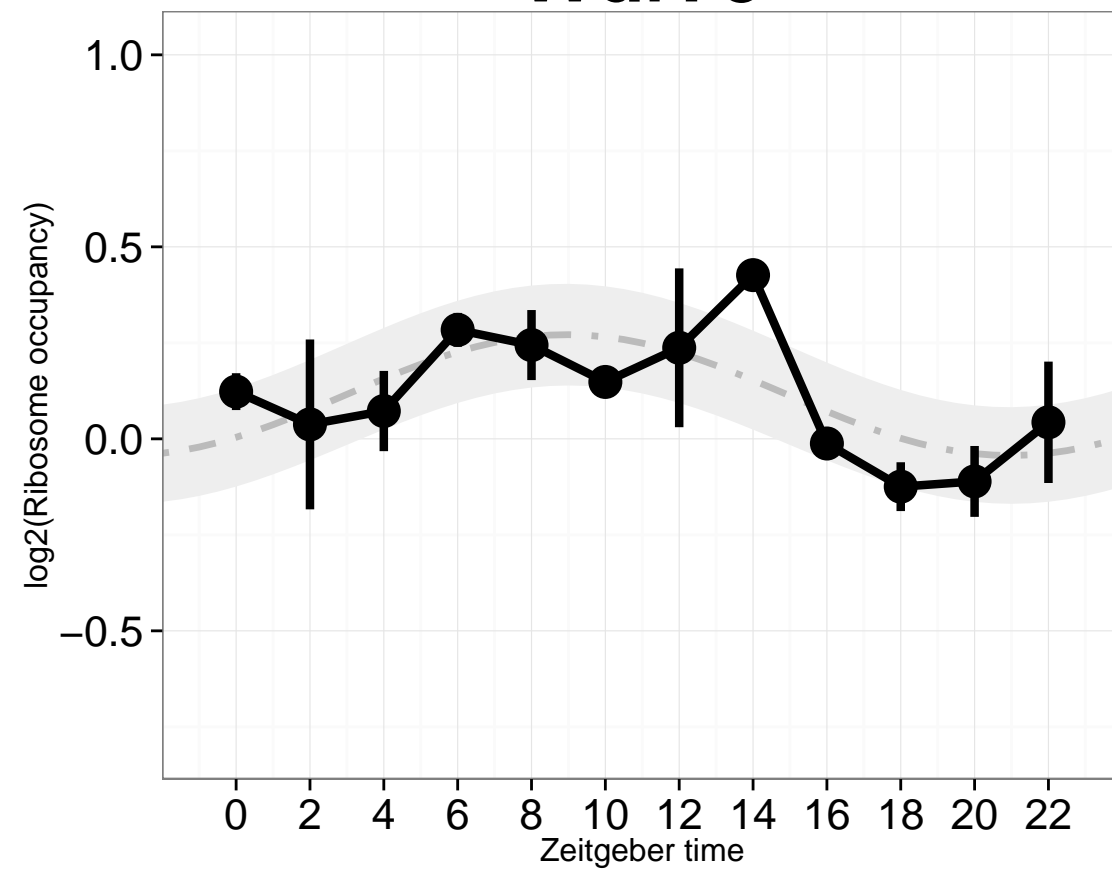

Supplement: Supplementary file 5108 [file 1]

## MacroD2

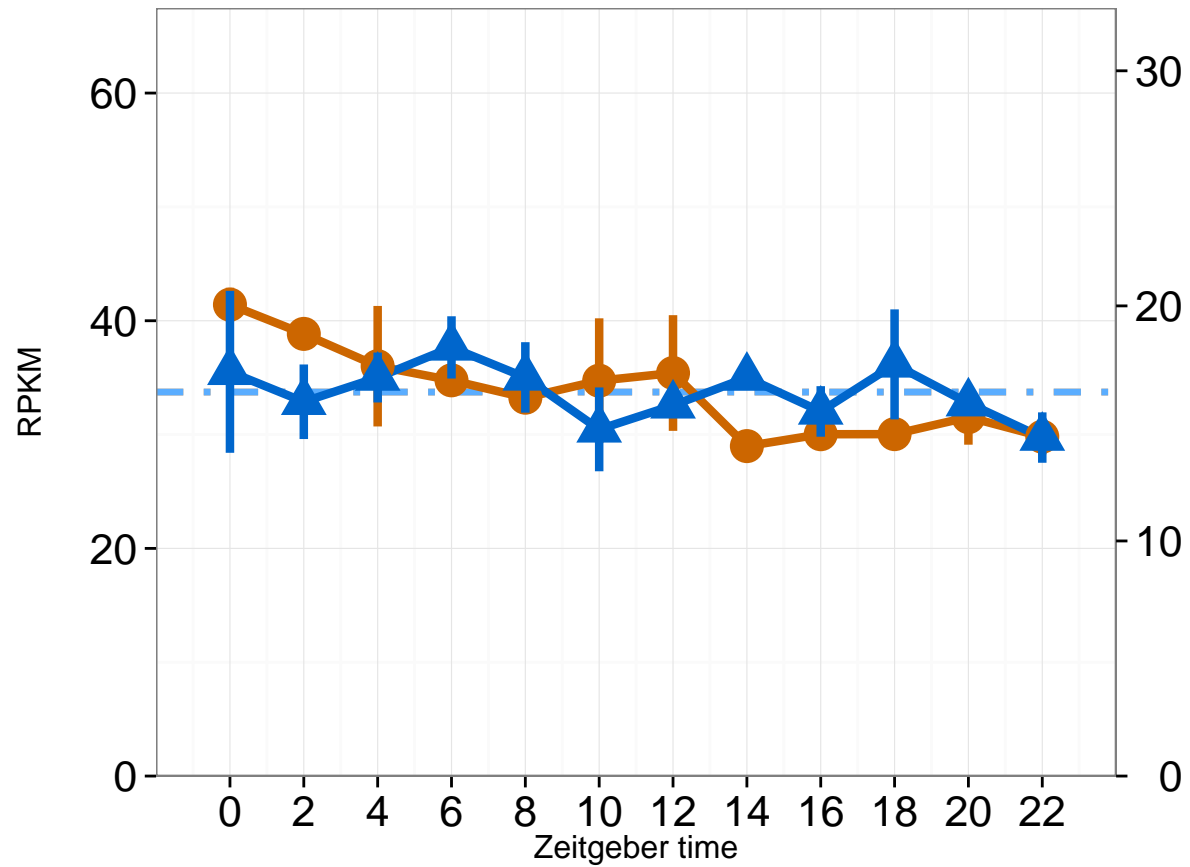

## MacroD2

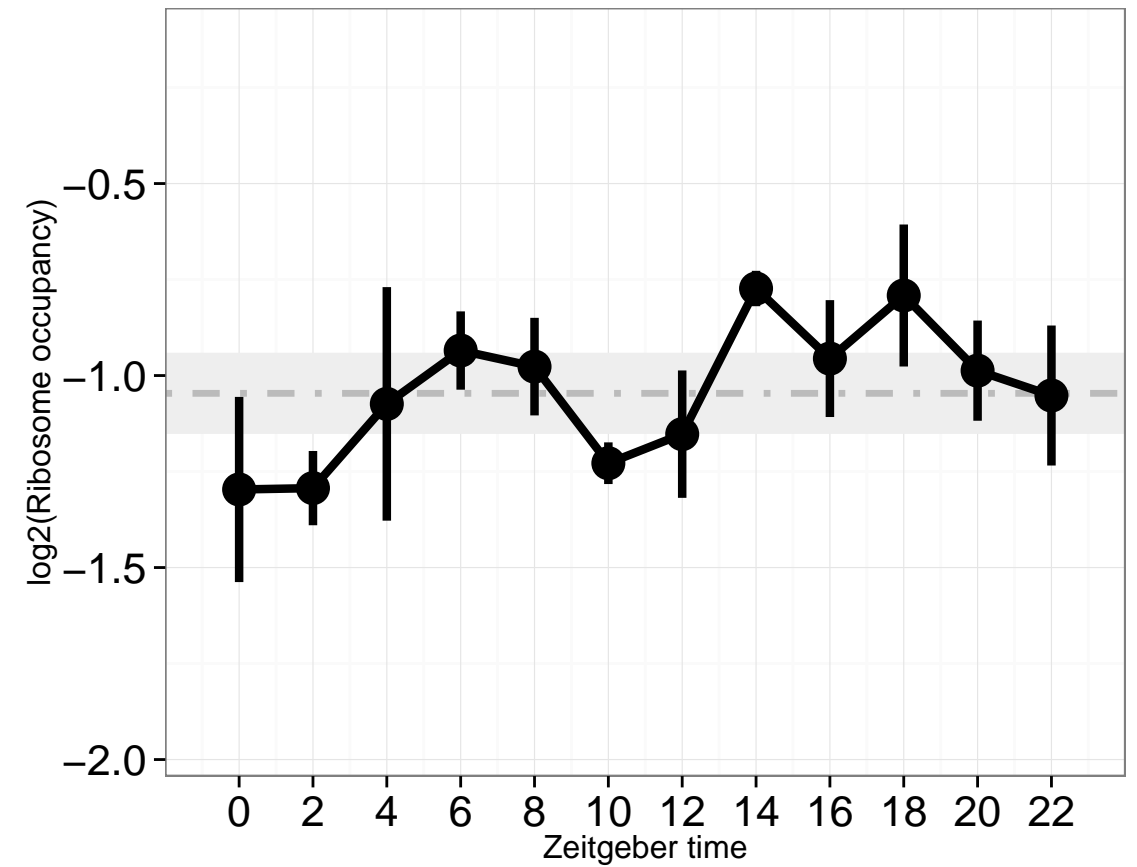

Supplement: Supplementary file 5109 [file 1]

## Tsnax

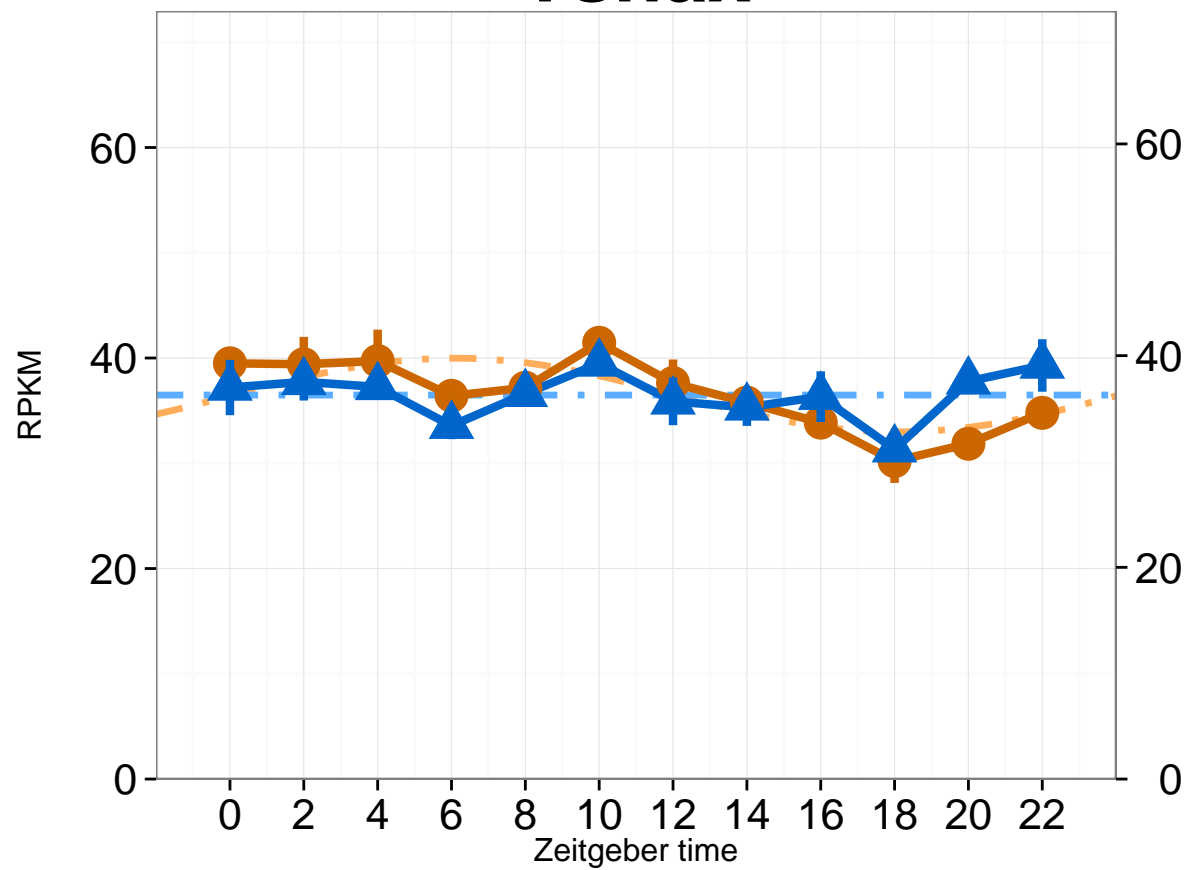

## Tsnax

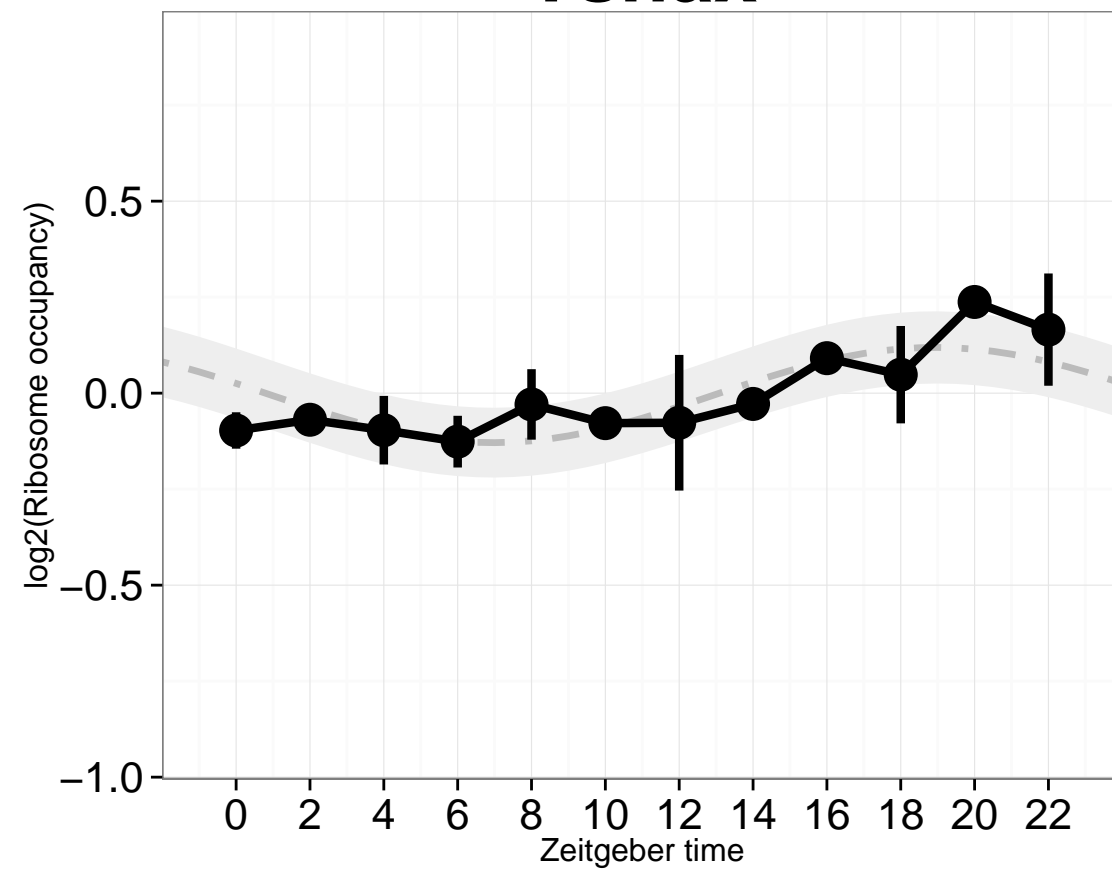

Supplement: Supplementary file 5110 [file 1]

# Prok1

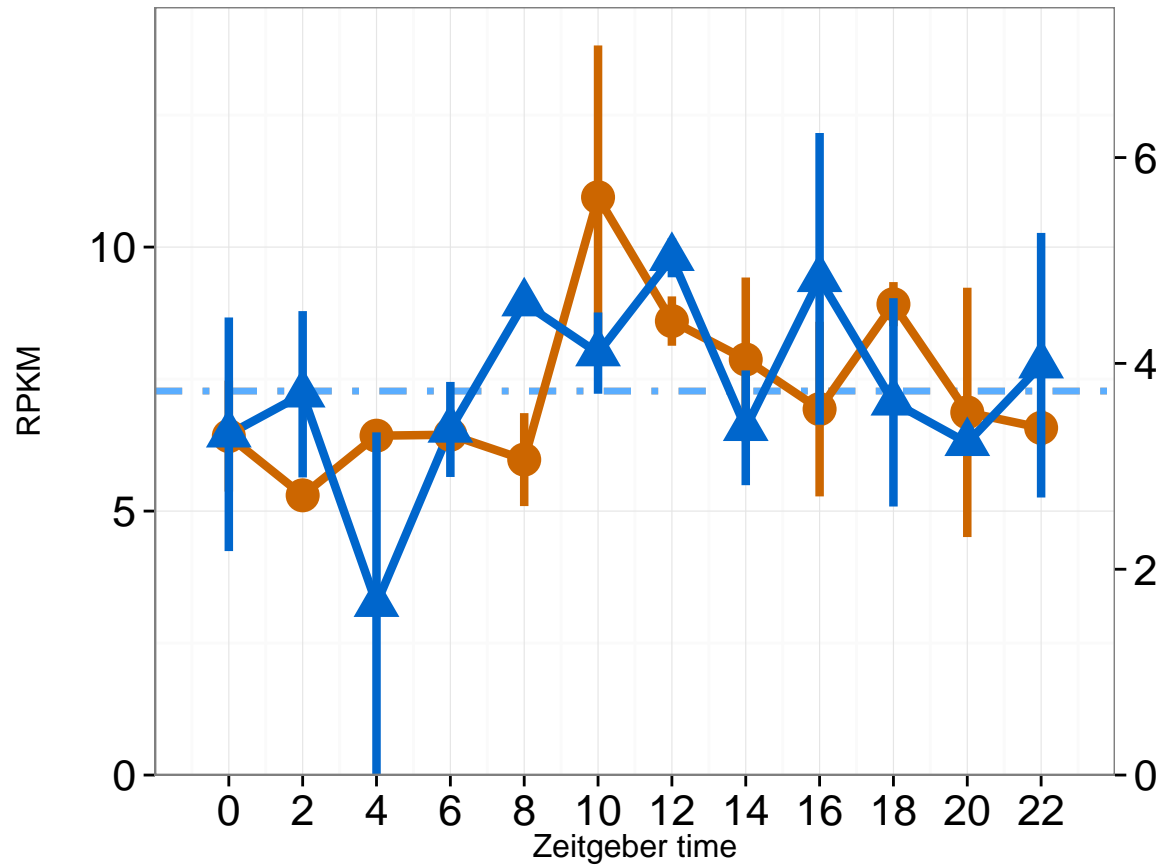

# Prok1

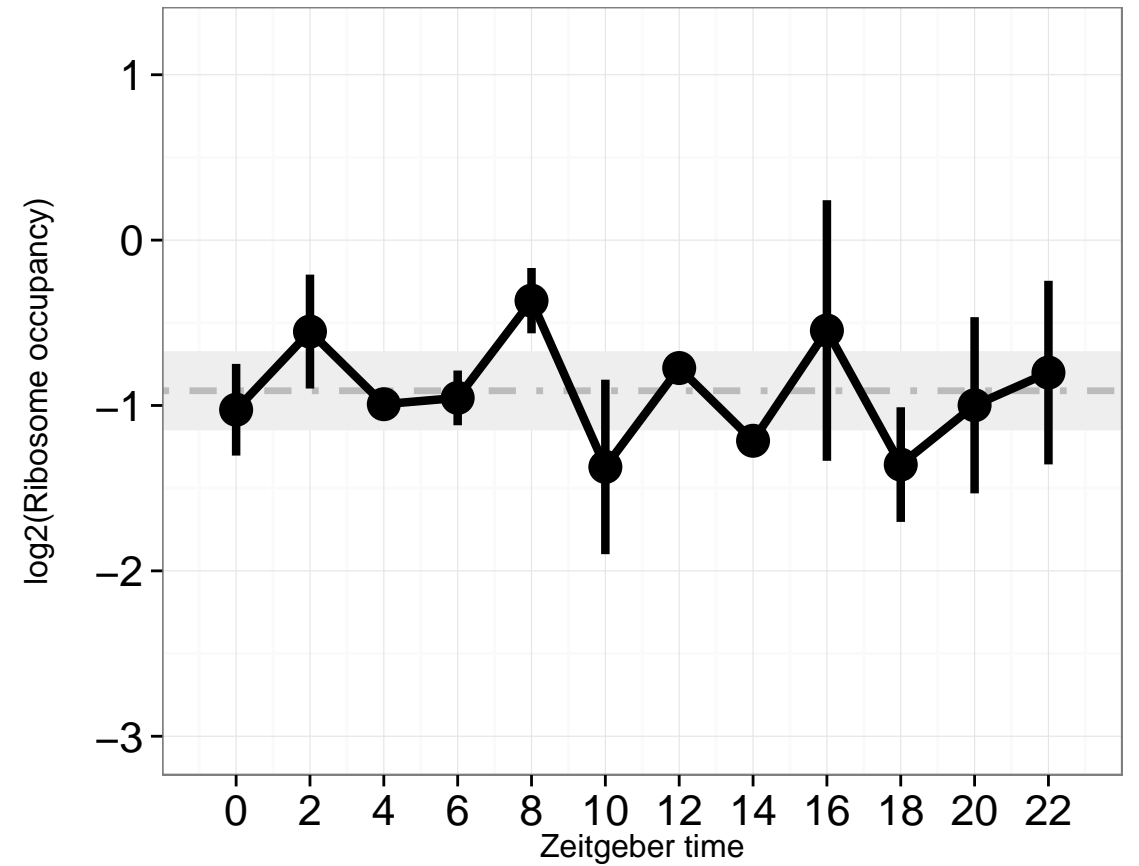

Supplement: Supplementary file 5111 [file 1]

# Hist1h1c

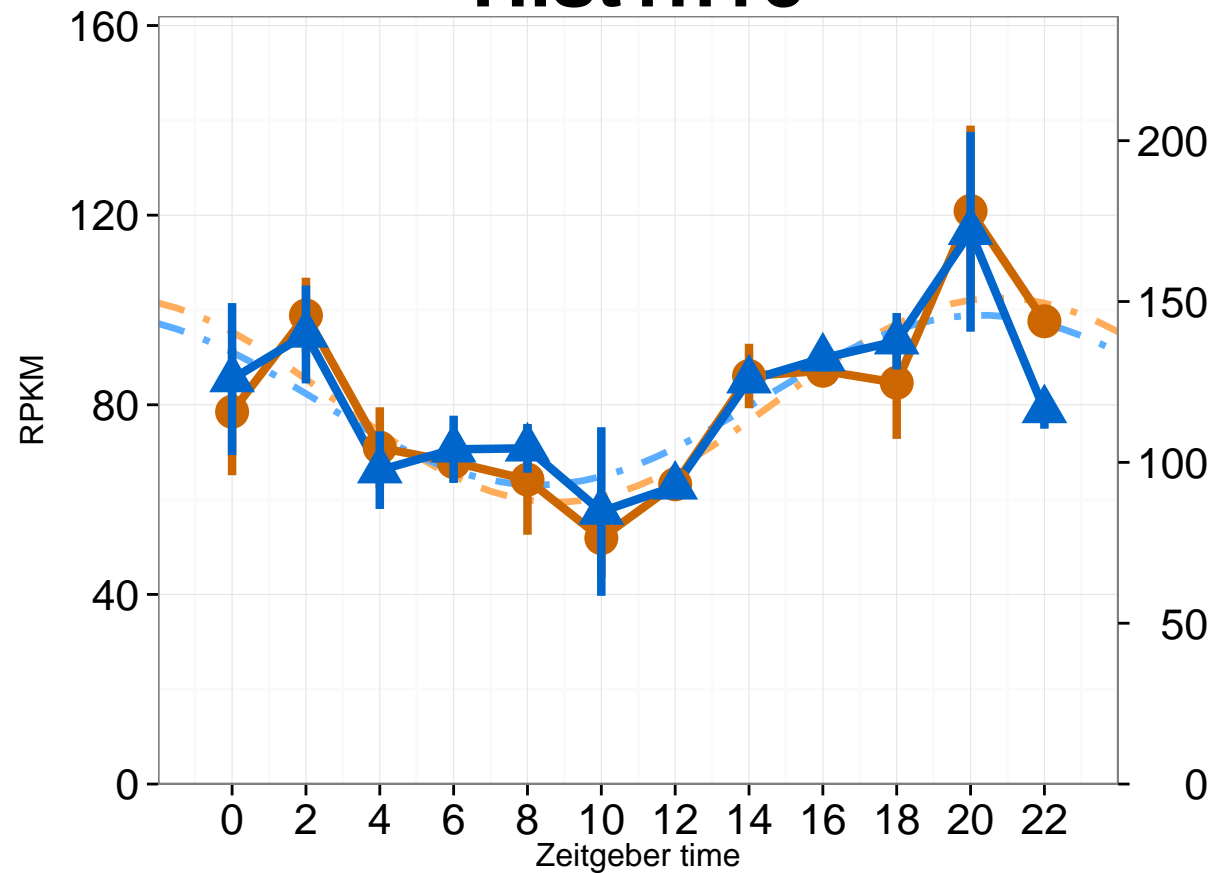

# Hist1h1c

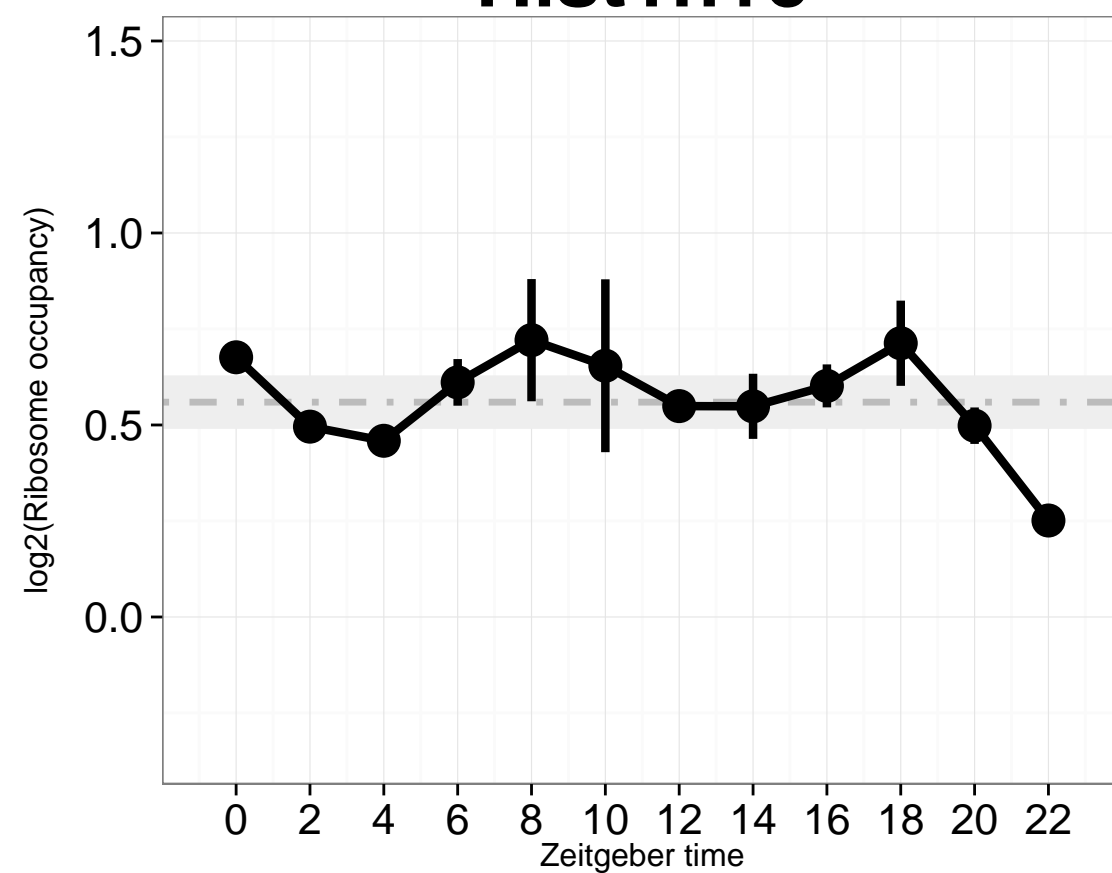

Supplement: Supplementary file 5112 [file 1]

## Ankrd24

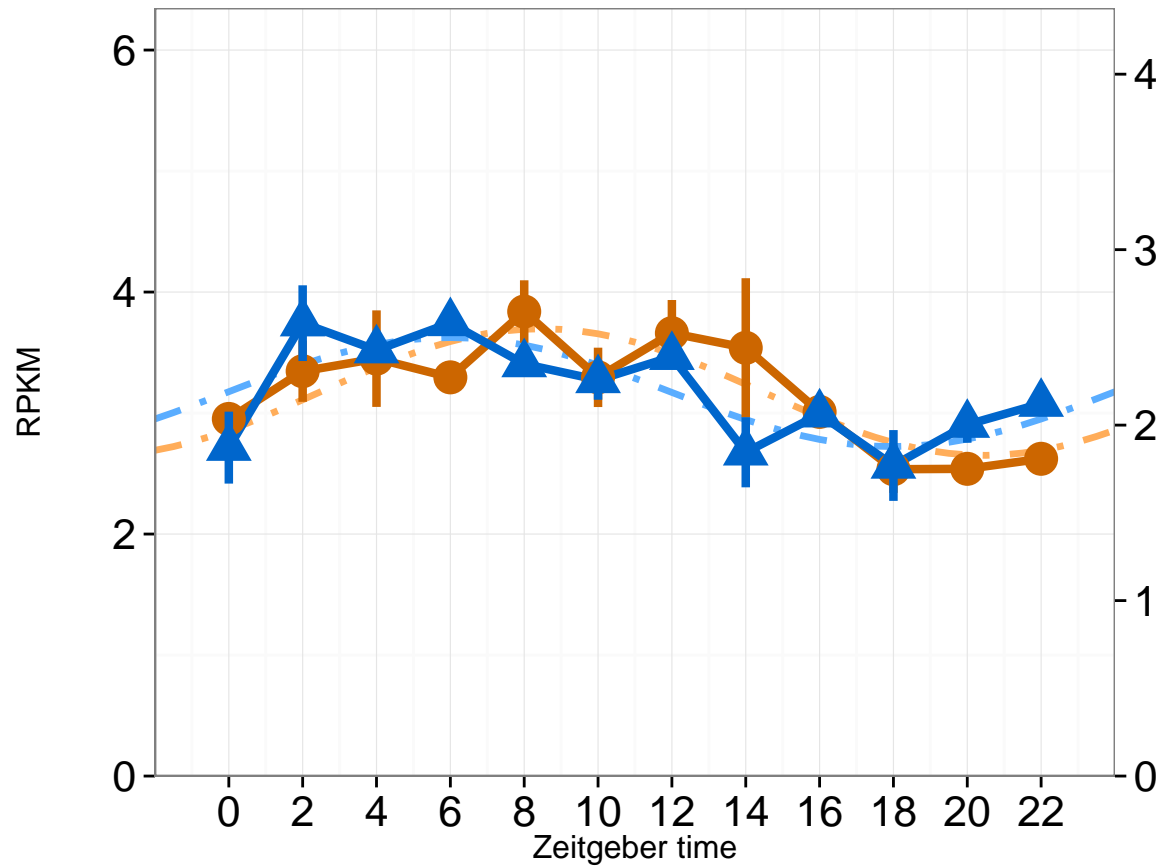

## Ankrd24

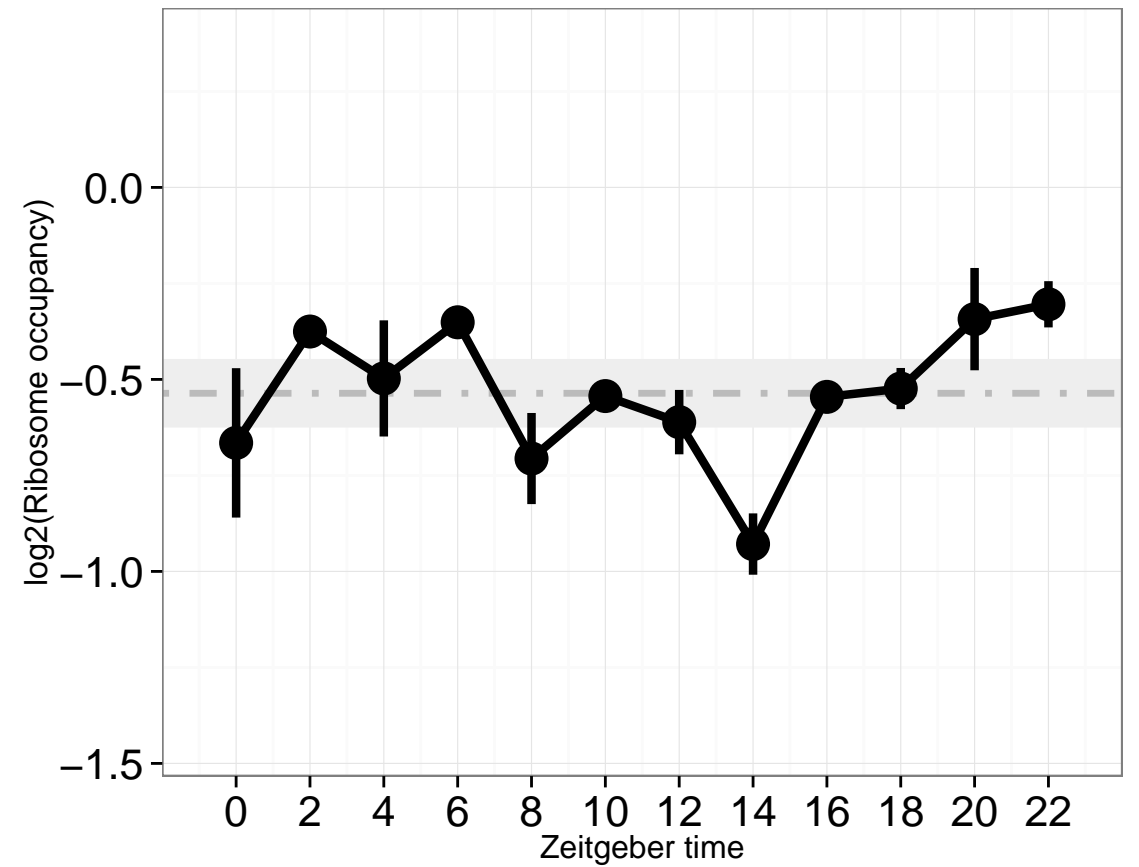

Supplement: Supplementary file 5113 [file 1]

## Zcchc9

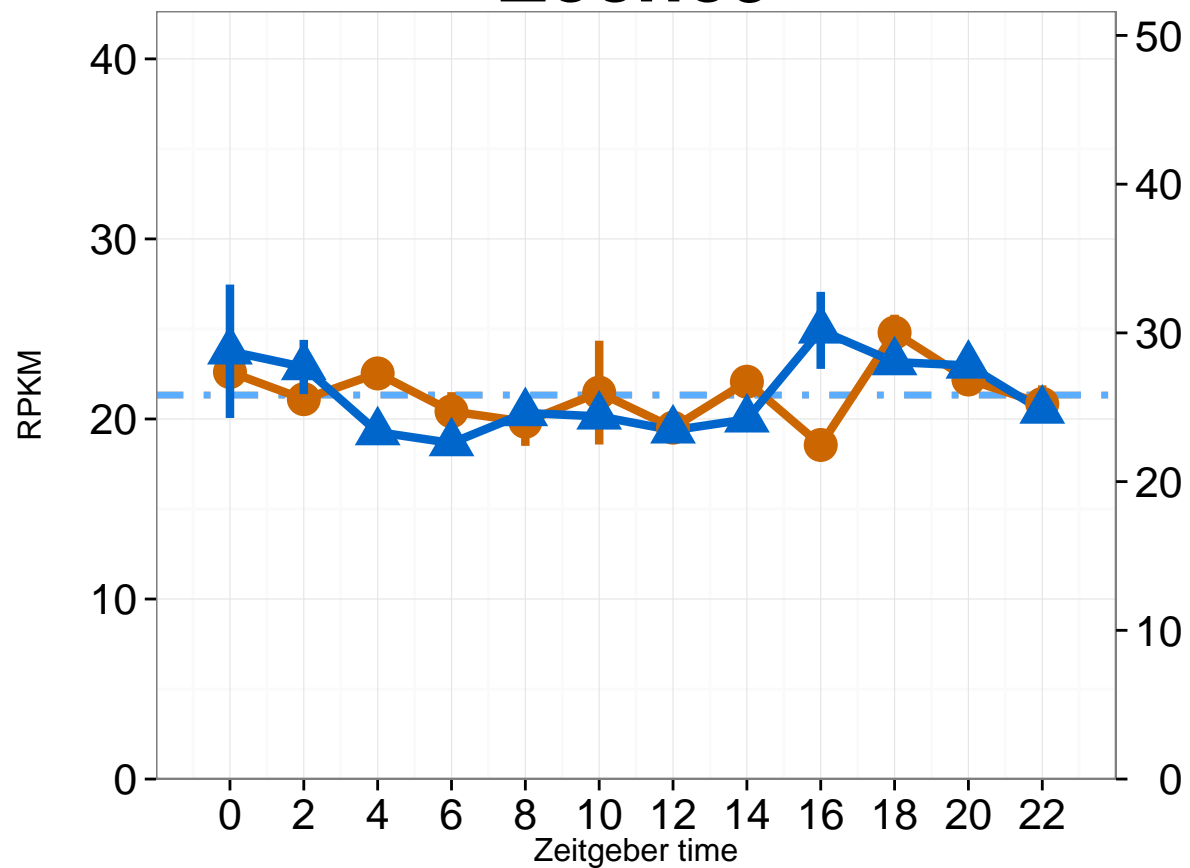

## Zcchc9

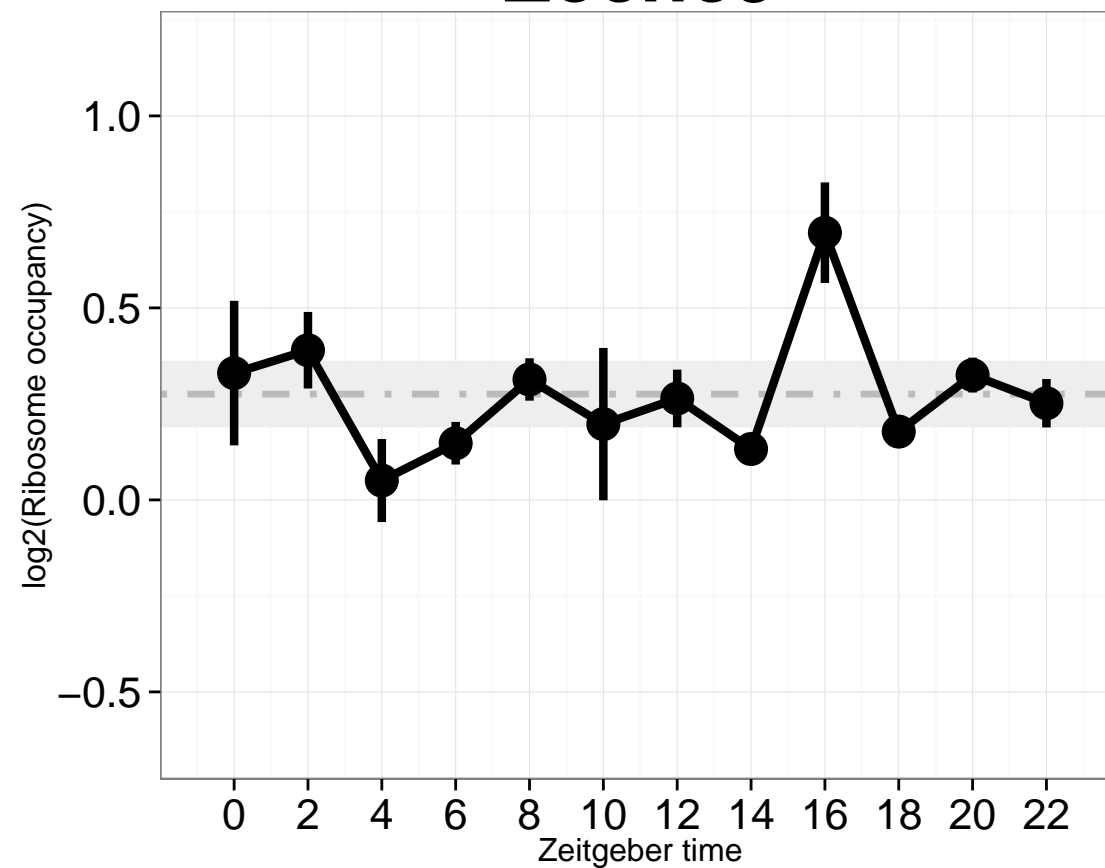

Supplement: Supplementary file 5114 [file 1]

# Hivep1

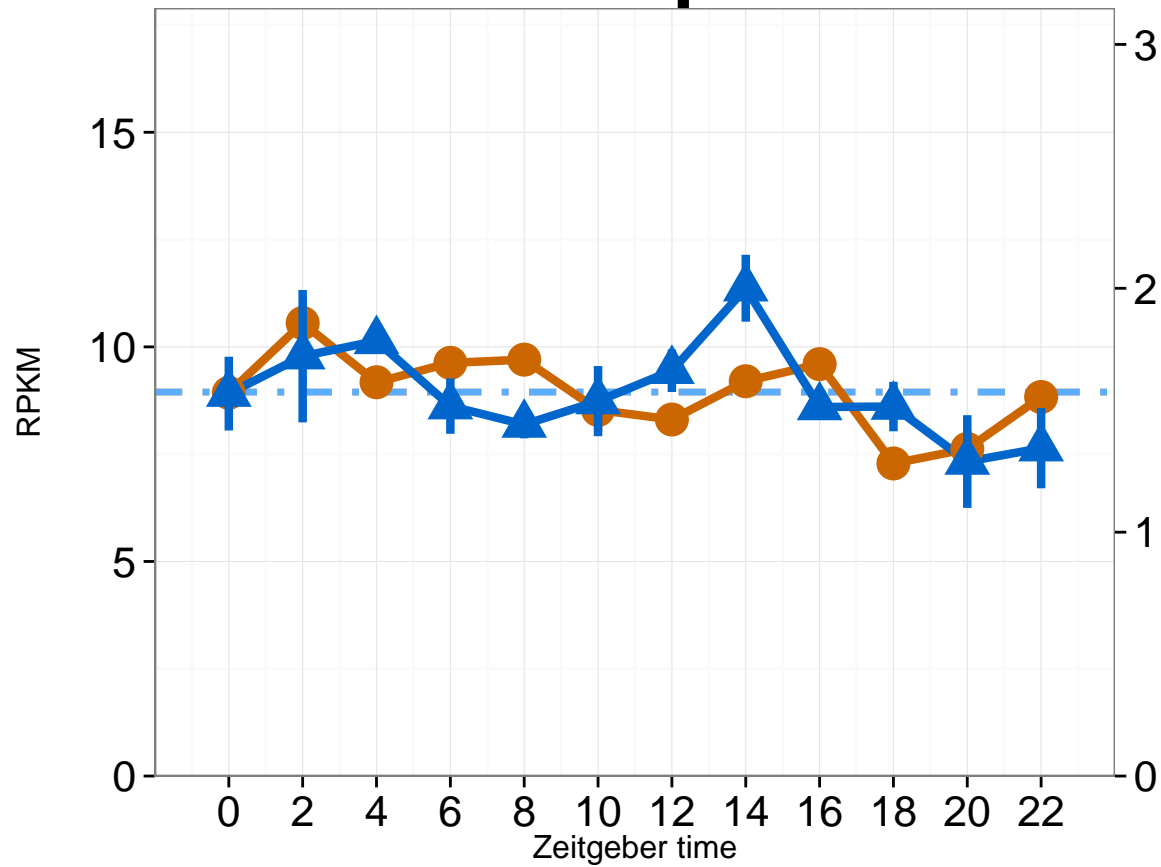

# Hivep1

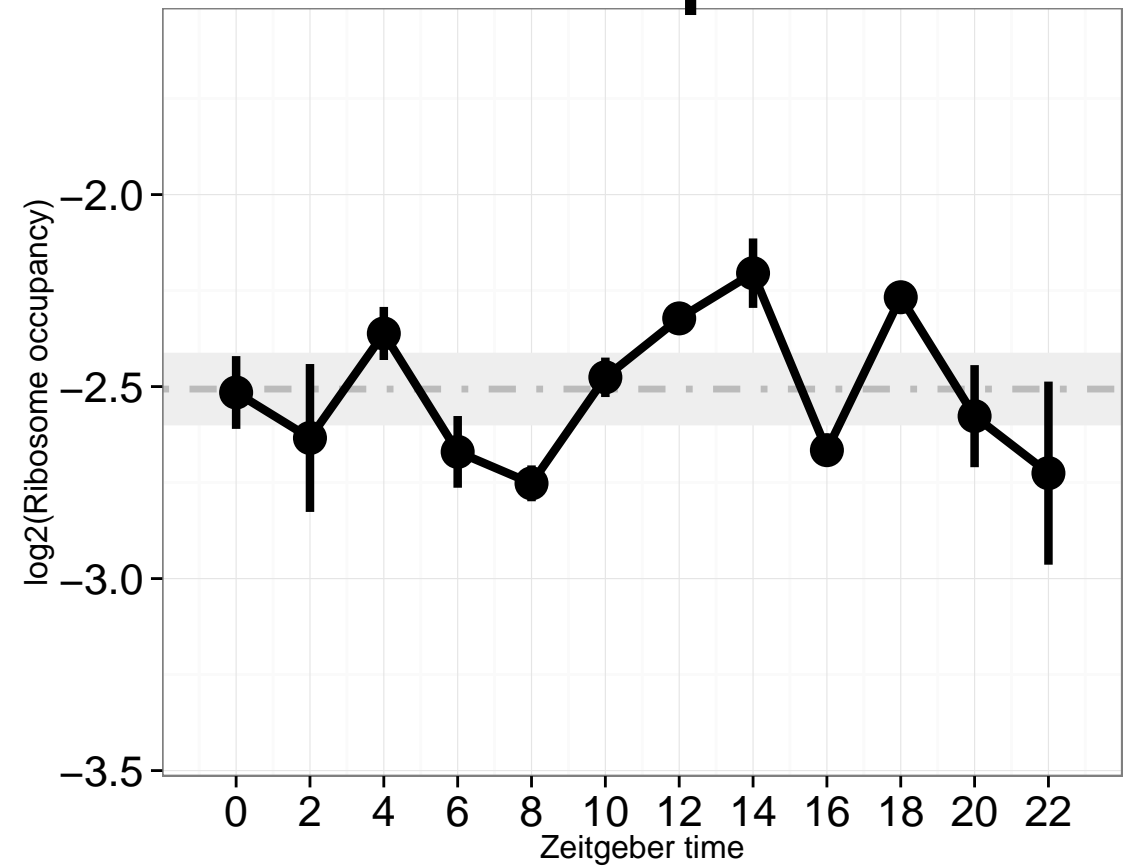

Supplement: Supplementary file 5115 [file 1]

# Tmem38a

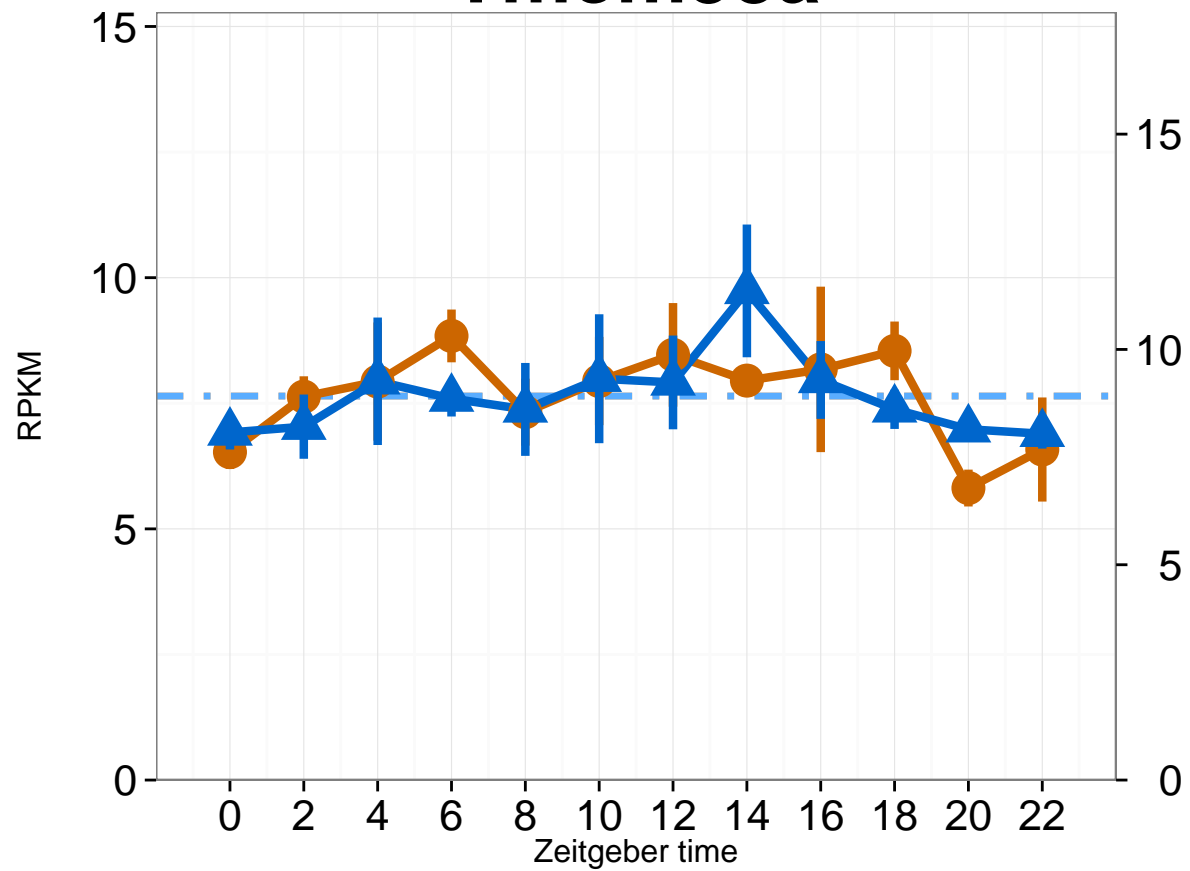

# Tmem38a

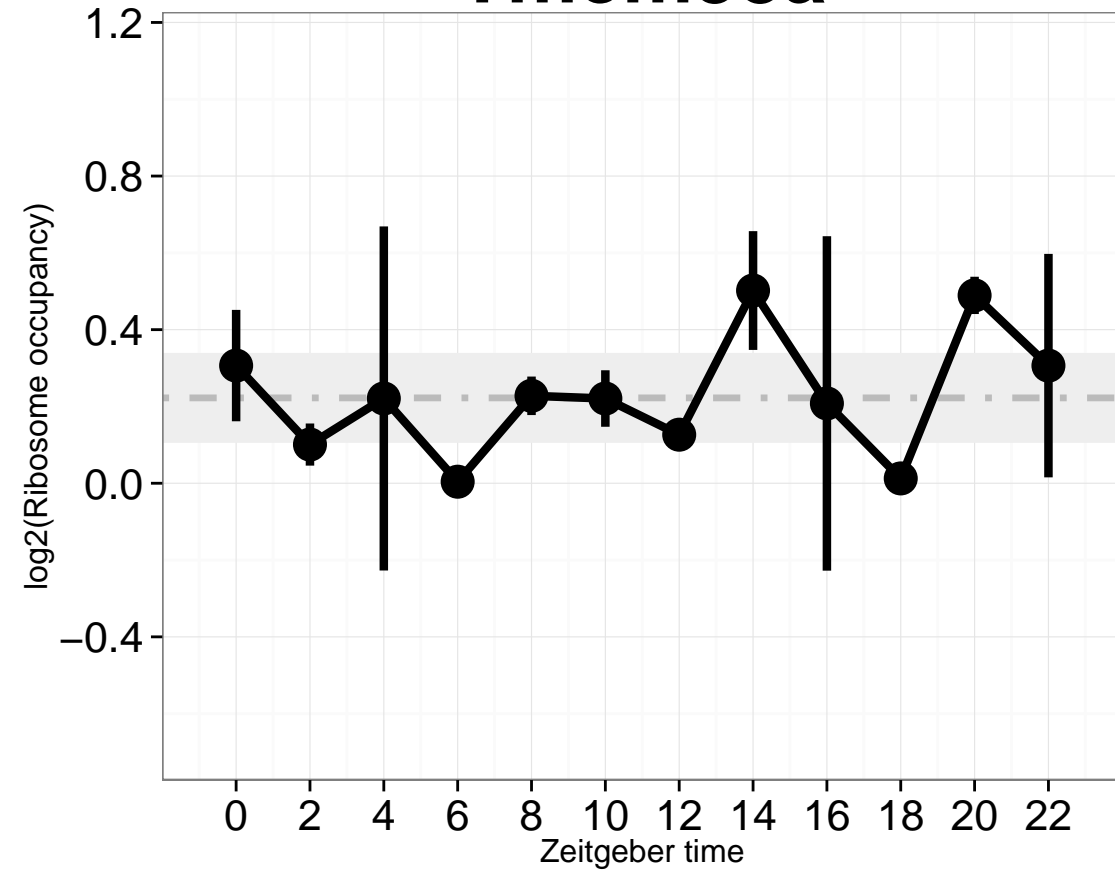

Supplement: Supplementary file 5116 [file 1]

## Rbms2

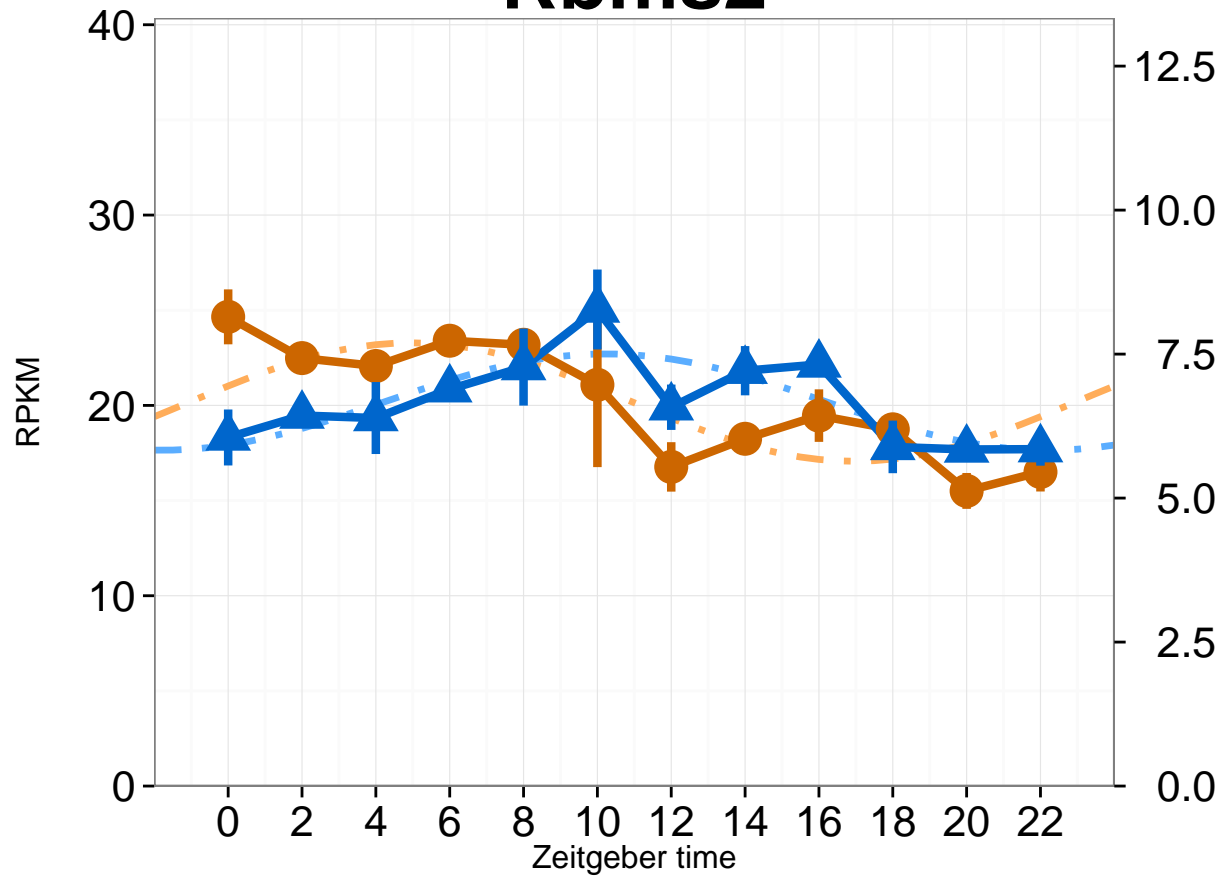

## Rbms2

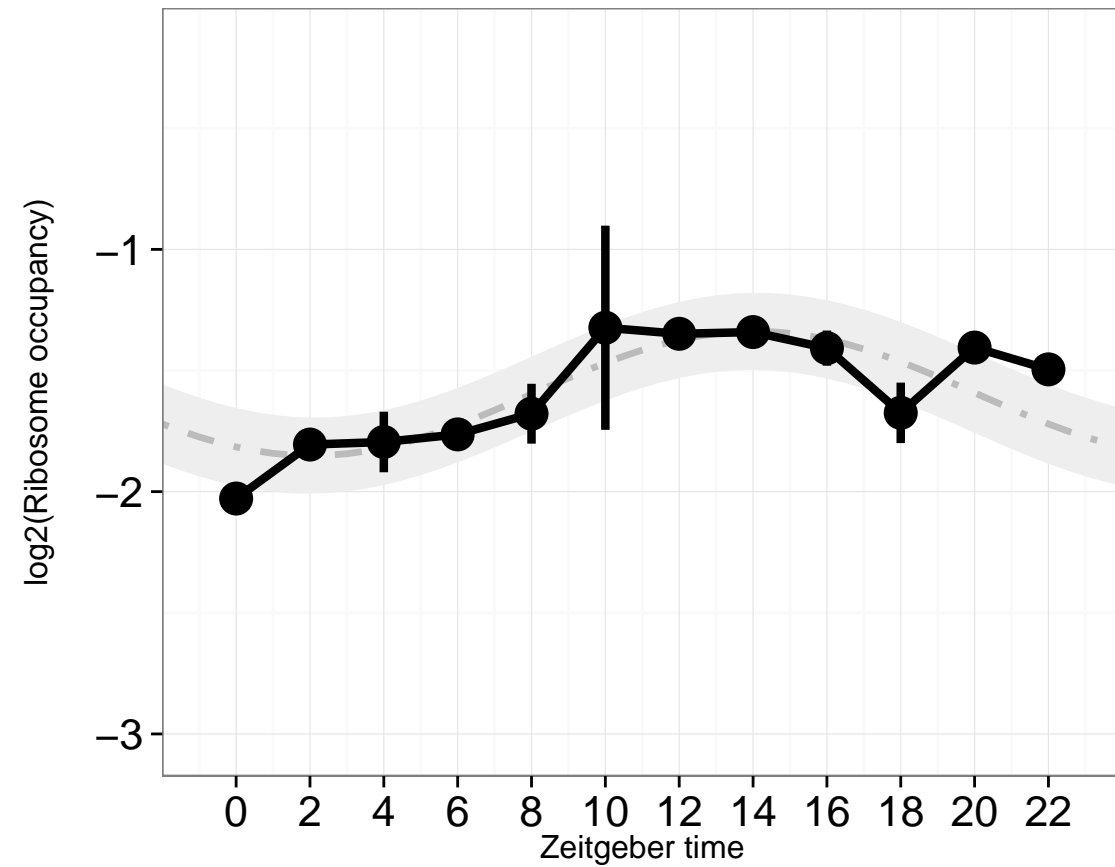

Supplement: Supplementary file 5117 [file 1]

# Tal1

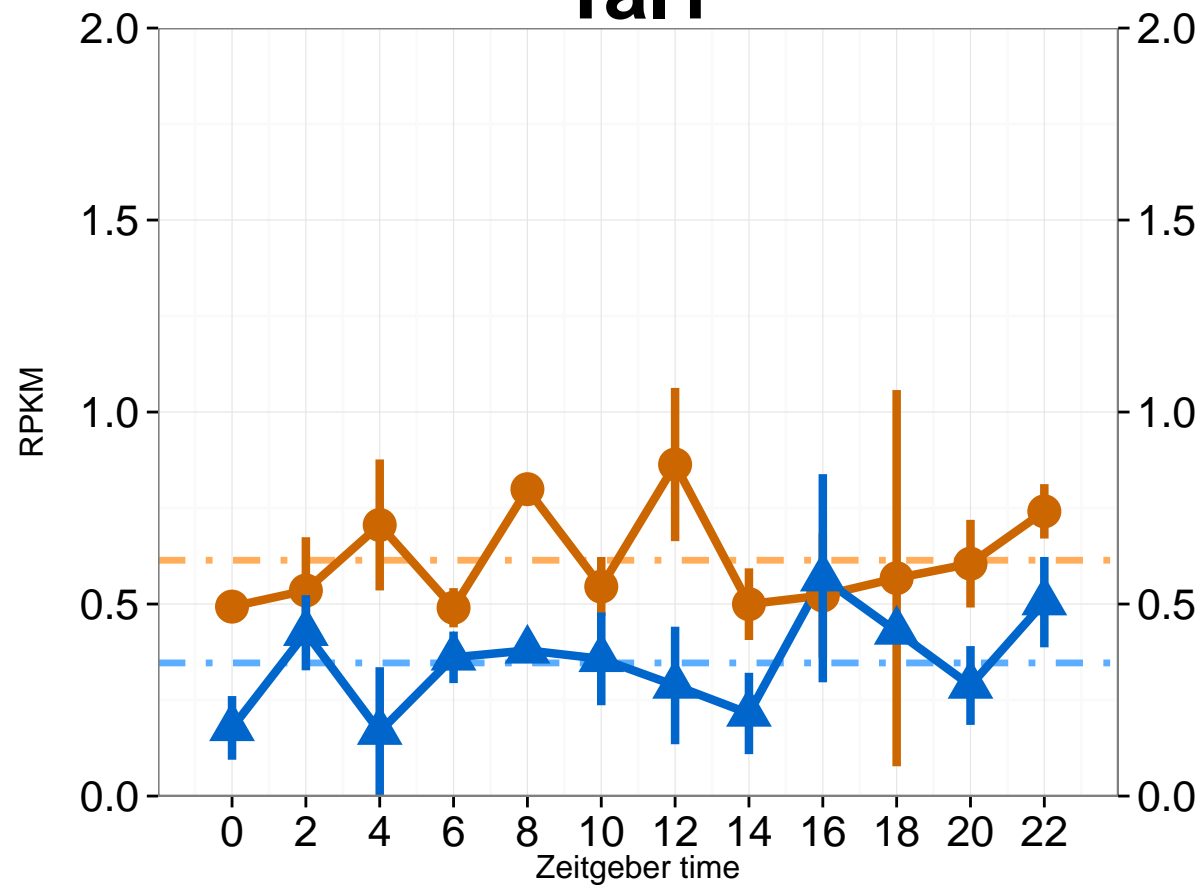

# Tal1

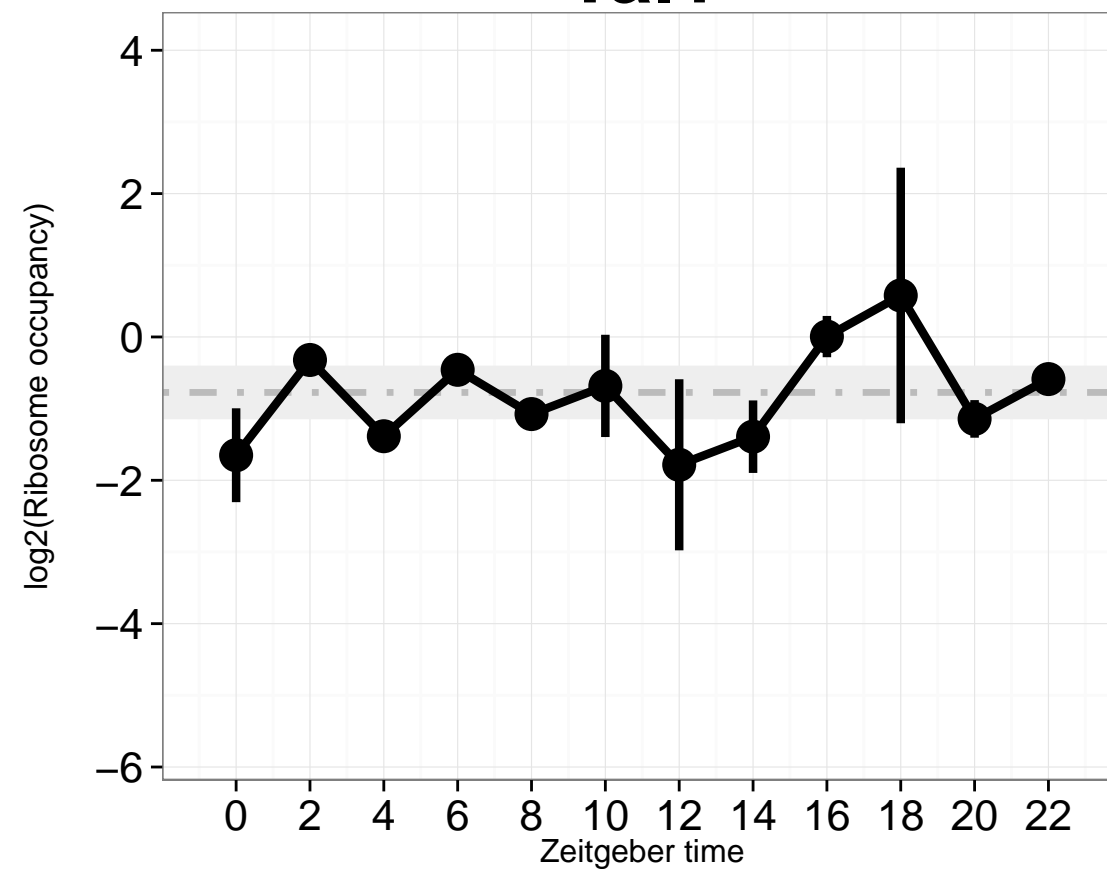

Supplement: Supplementary file 5118 [file 1]

## Smim7

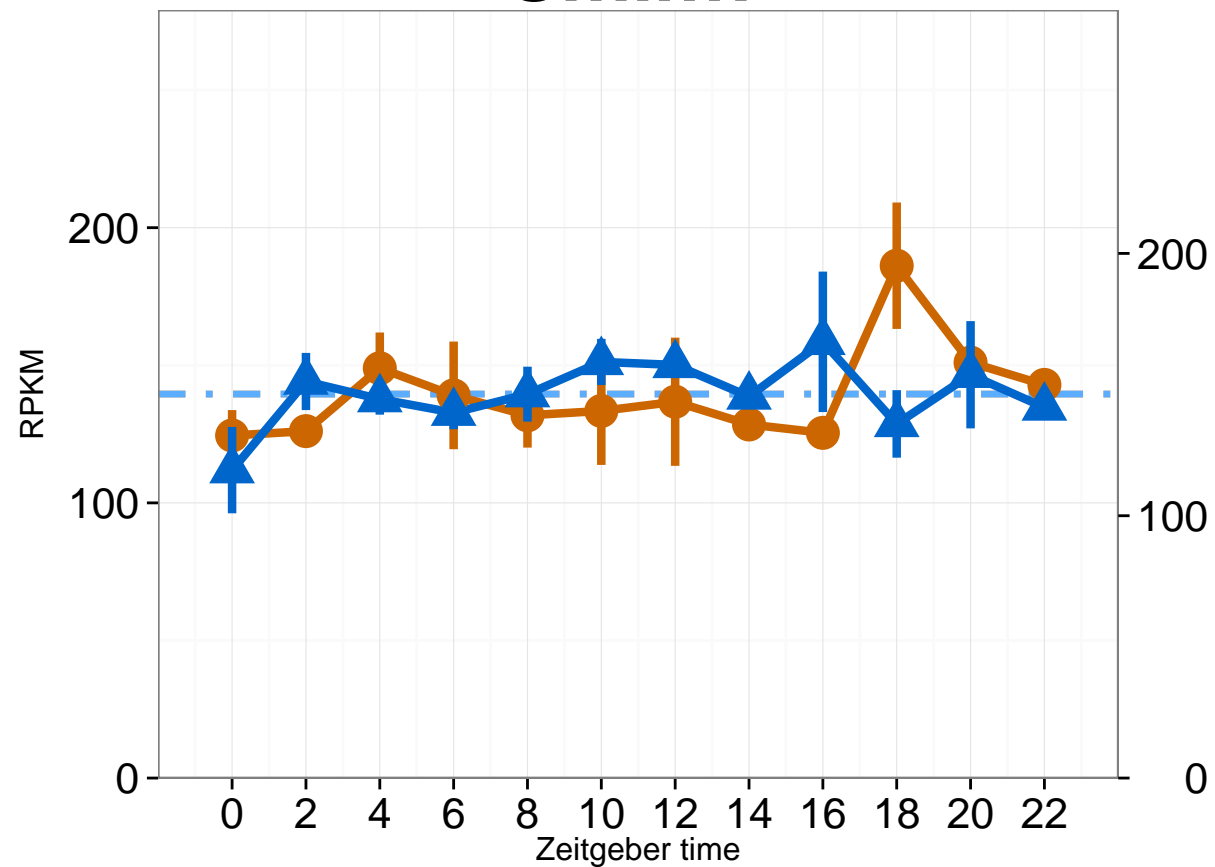

## Smim7

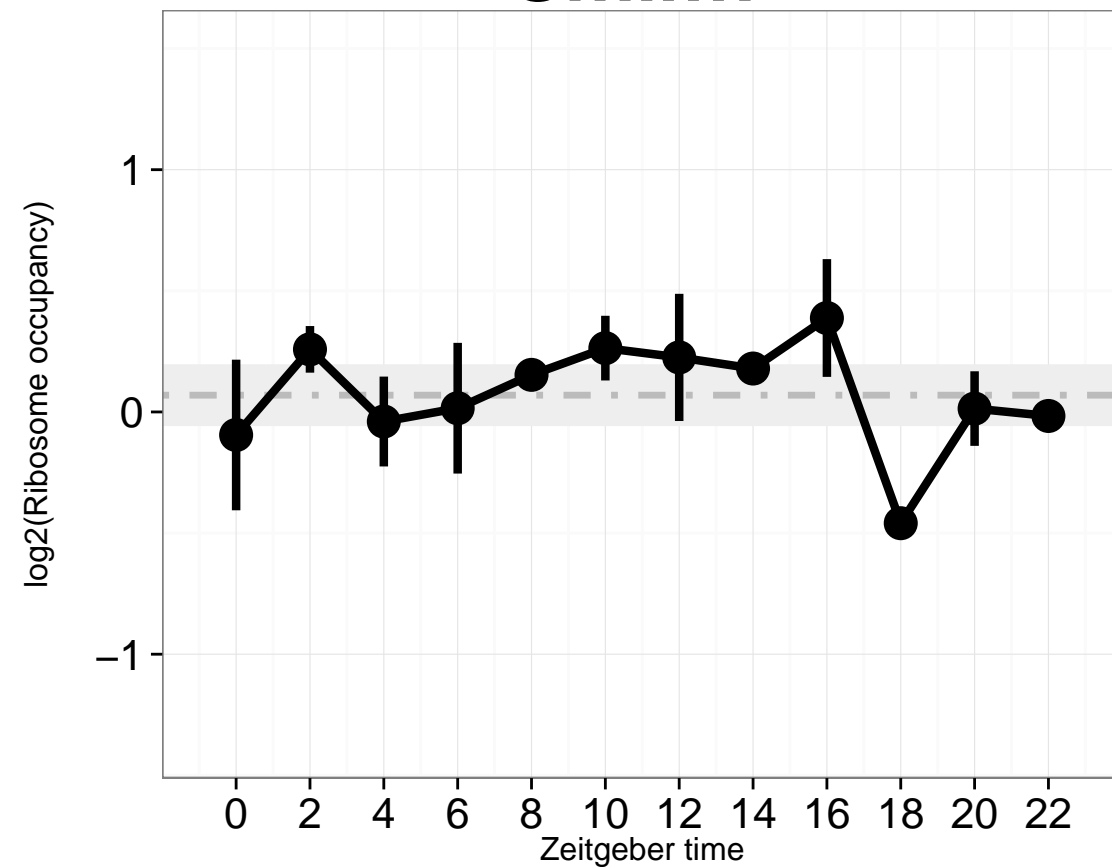

Supplement: Supplementary file 5119 [file 1]

## Epcam

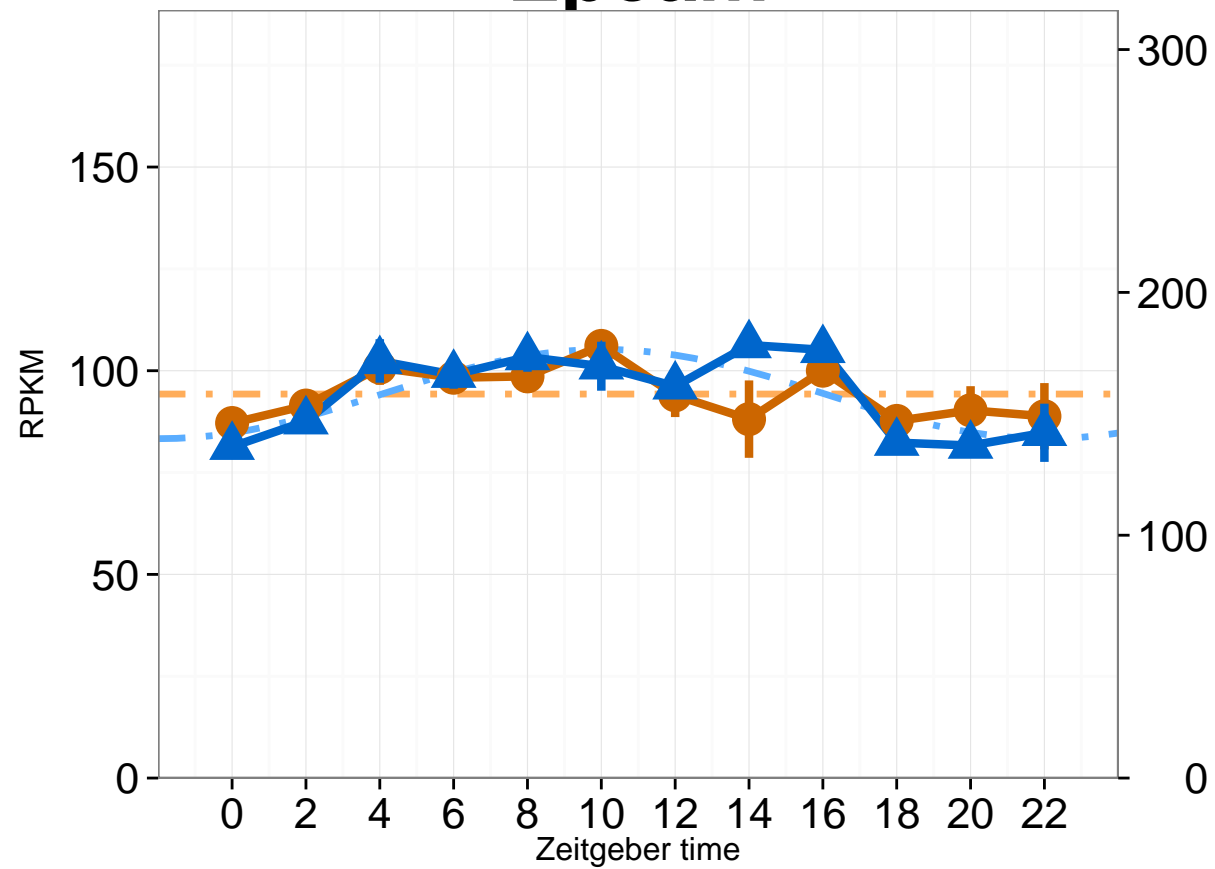

## Epcam

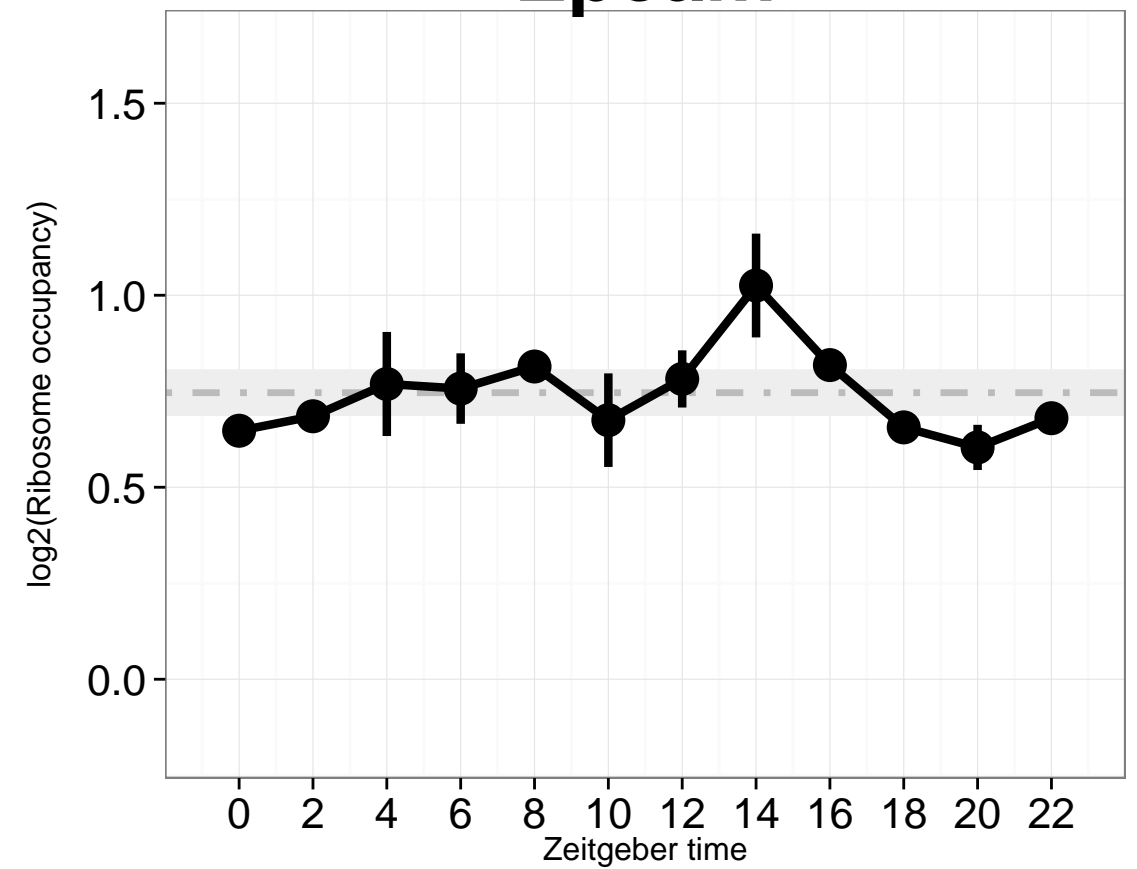

Supplement: Supplementary file 5120 [file 1]
