# Supplementary material (part 52 of 133)
Source: publisher figshare collection journal article supplement (https://springernature.figshare.com/articles/dataset/_/4903193)

## Esf1

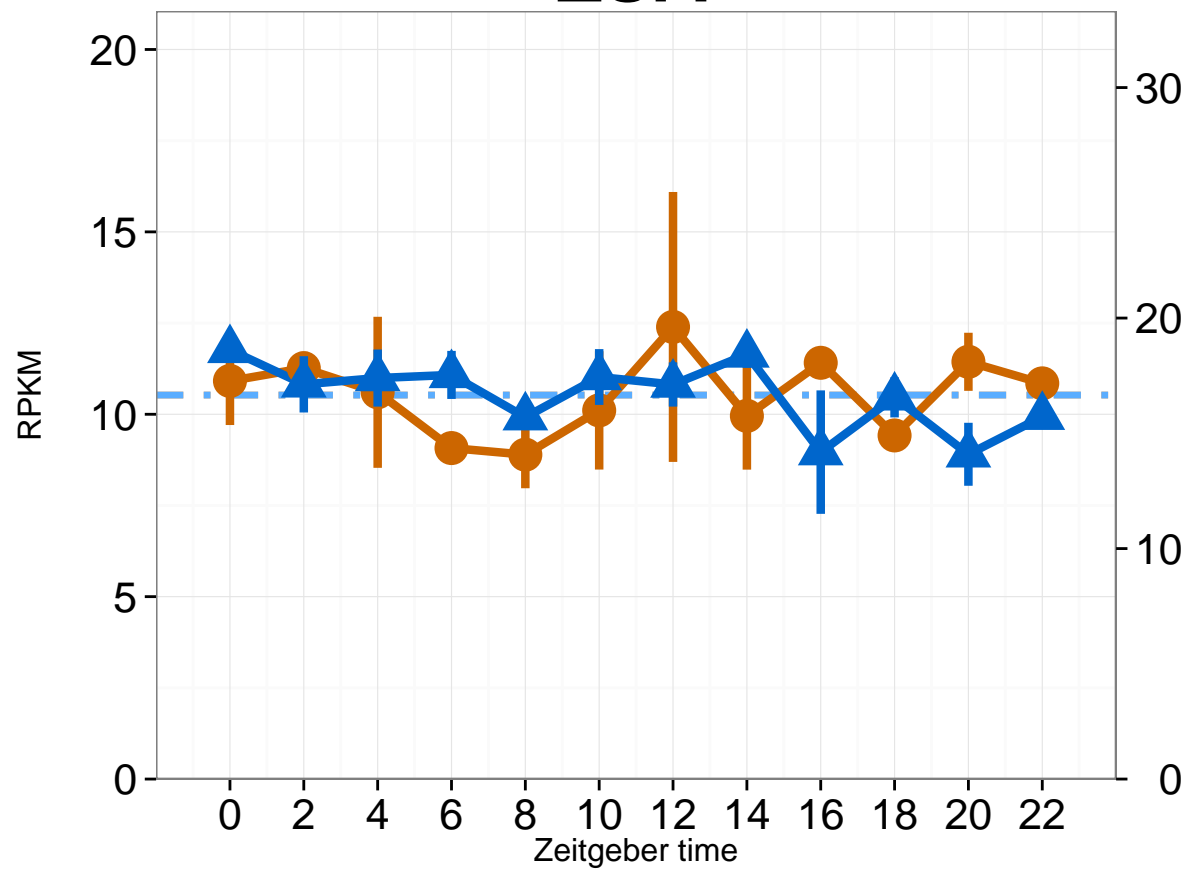

## Esf1

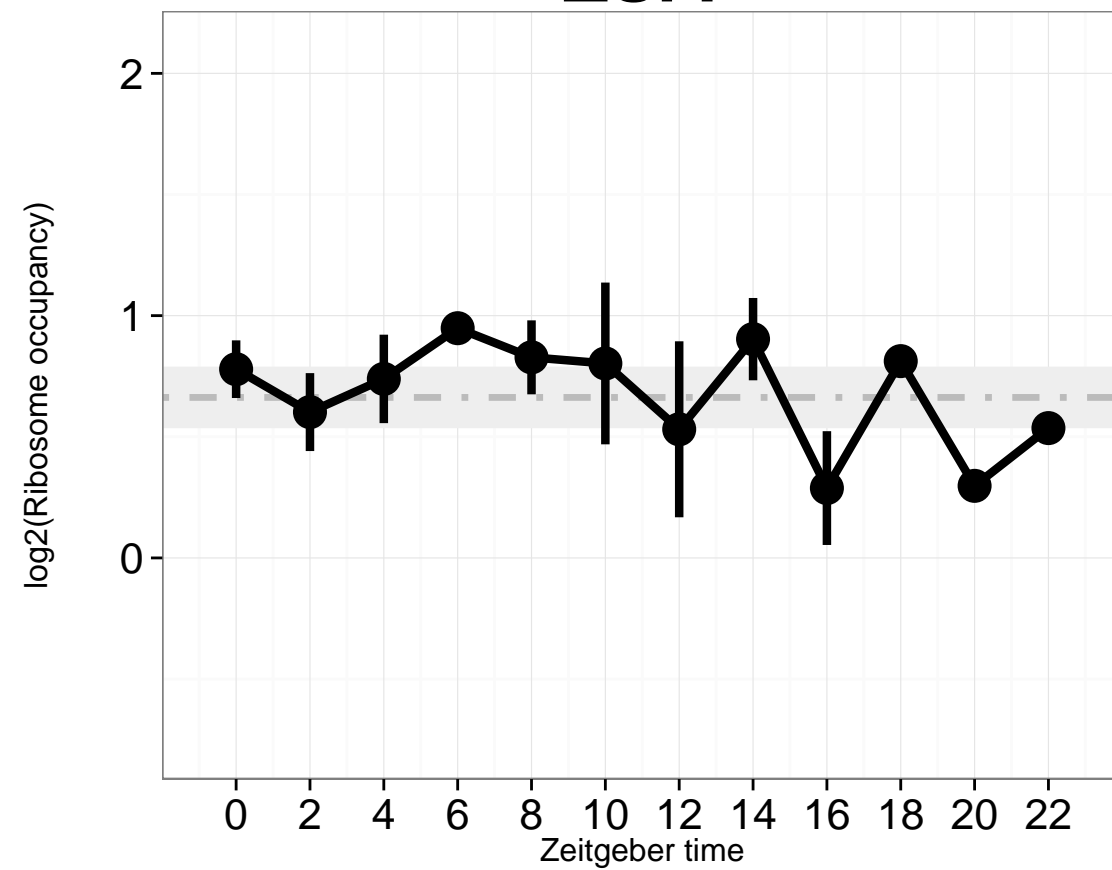

Supplement: Supplementary file 5121 [file 1]

## Svip

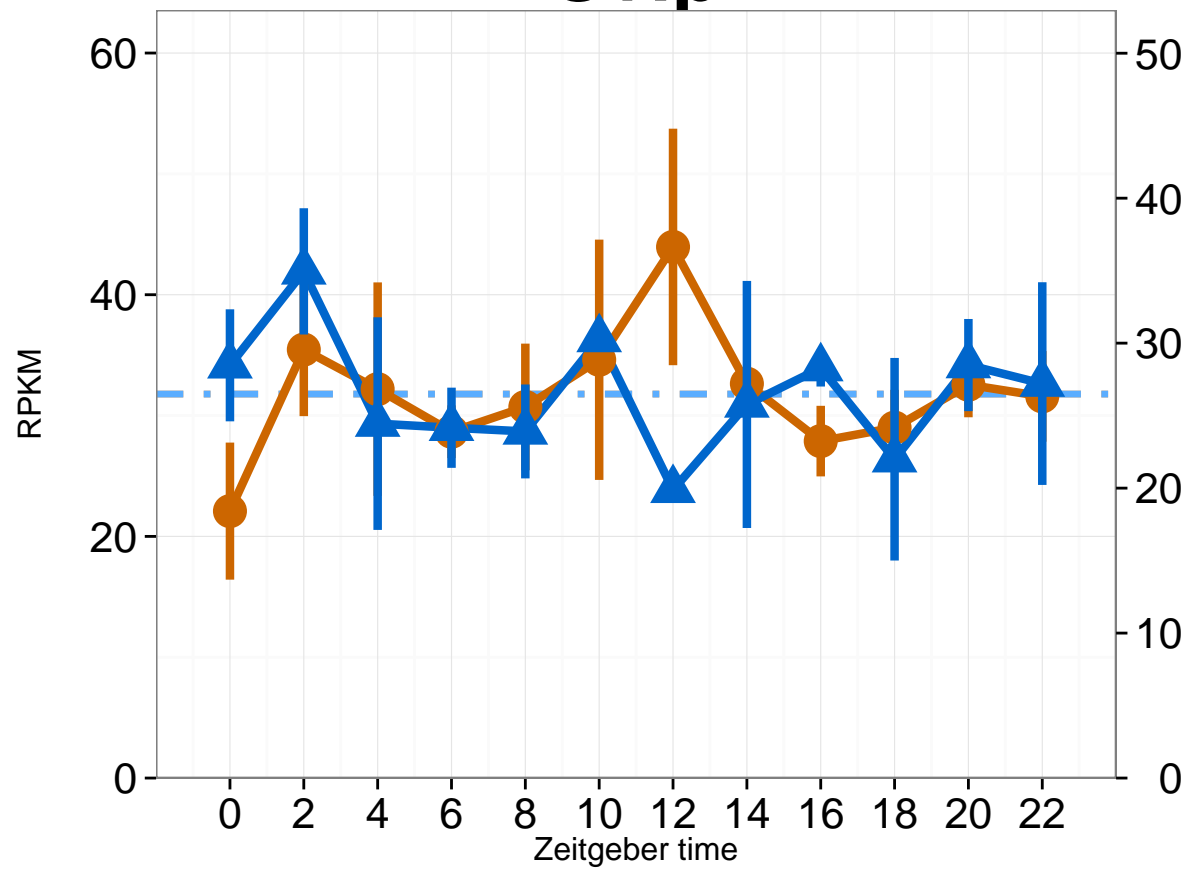

## Svip

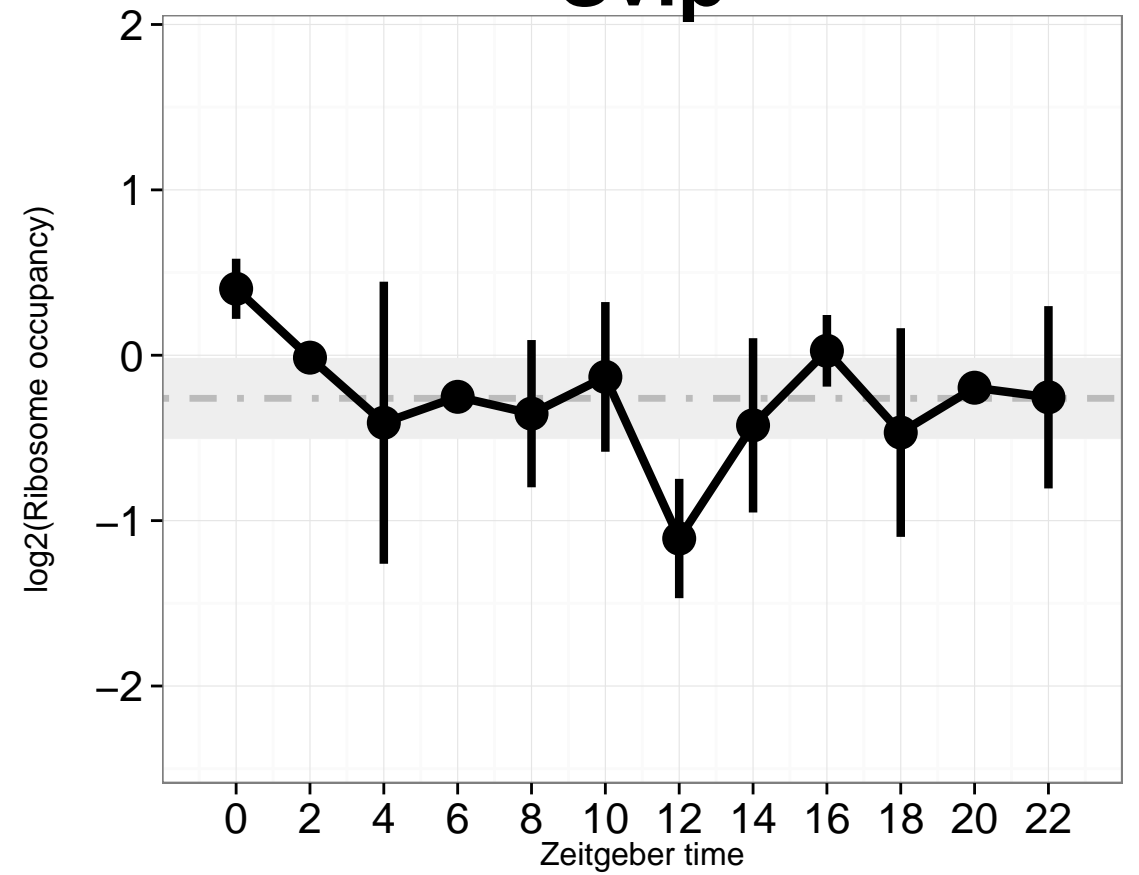

Supplement: Supplementary file 5122 [file 1]

# Rpap1

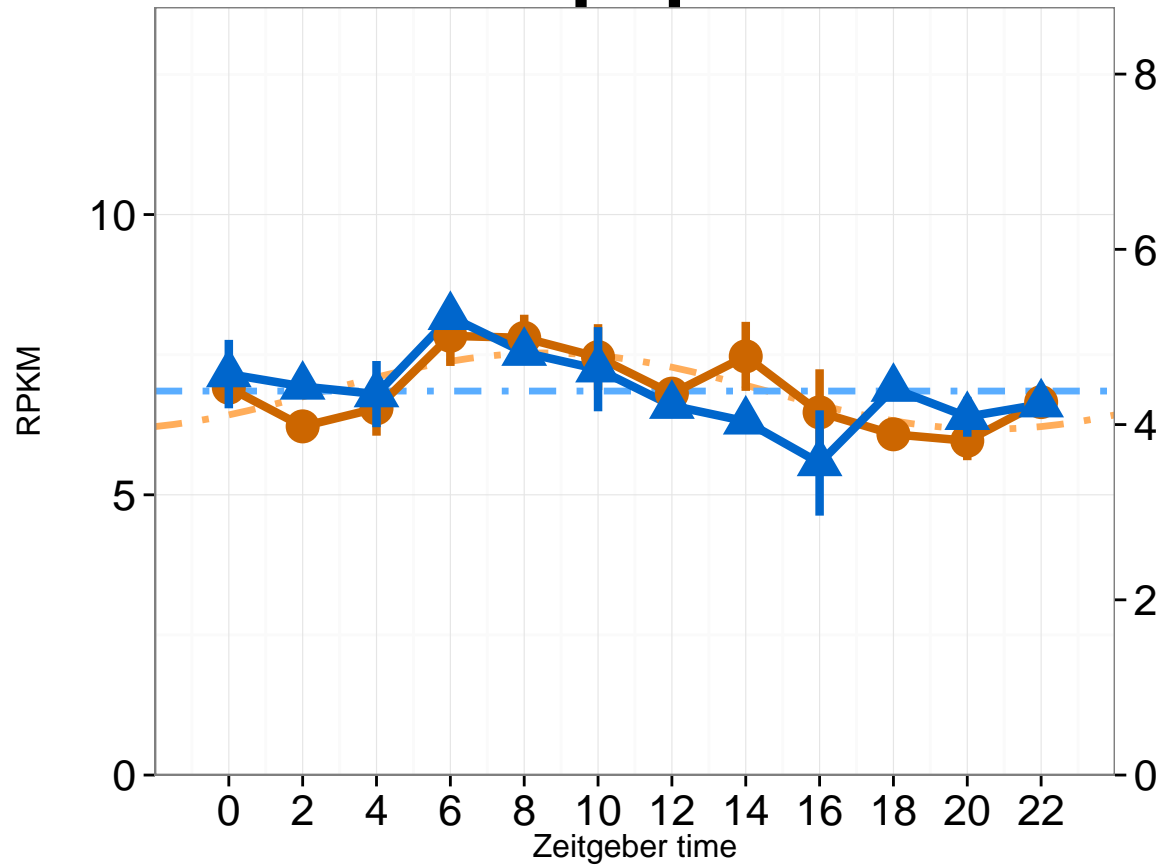

# Rpap1

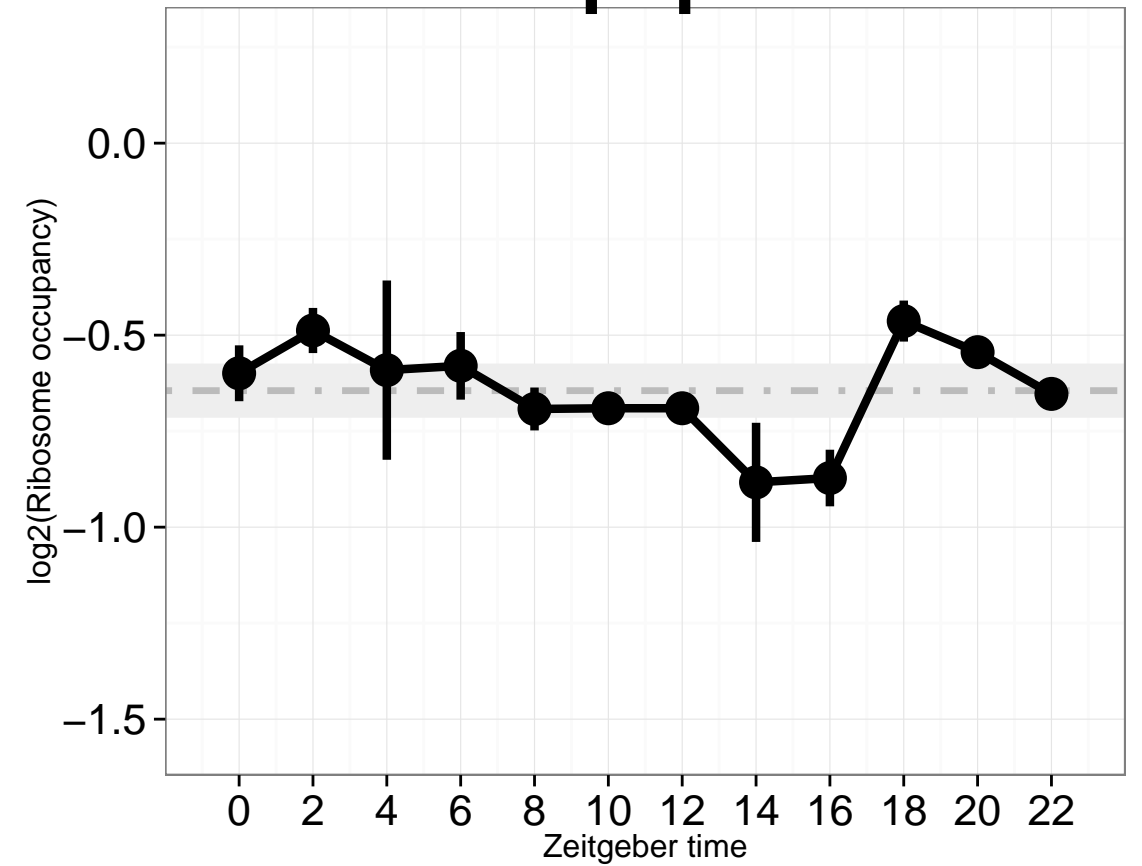

Supplement: Supplementary file 5123 [file 1]

## Ofd1

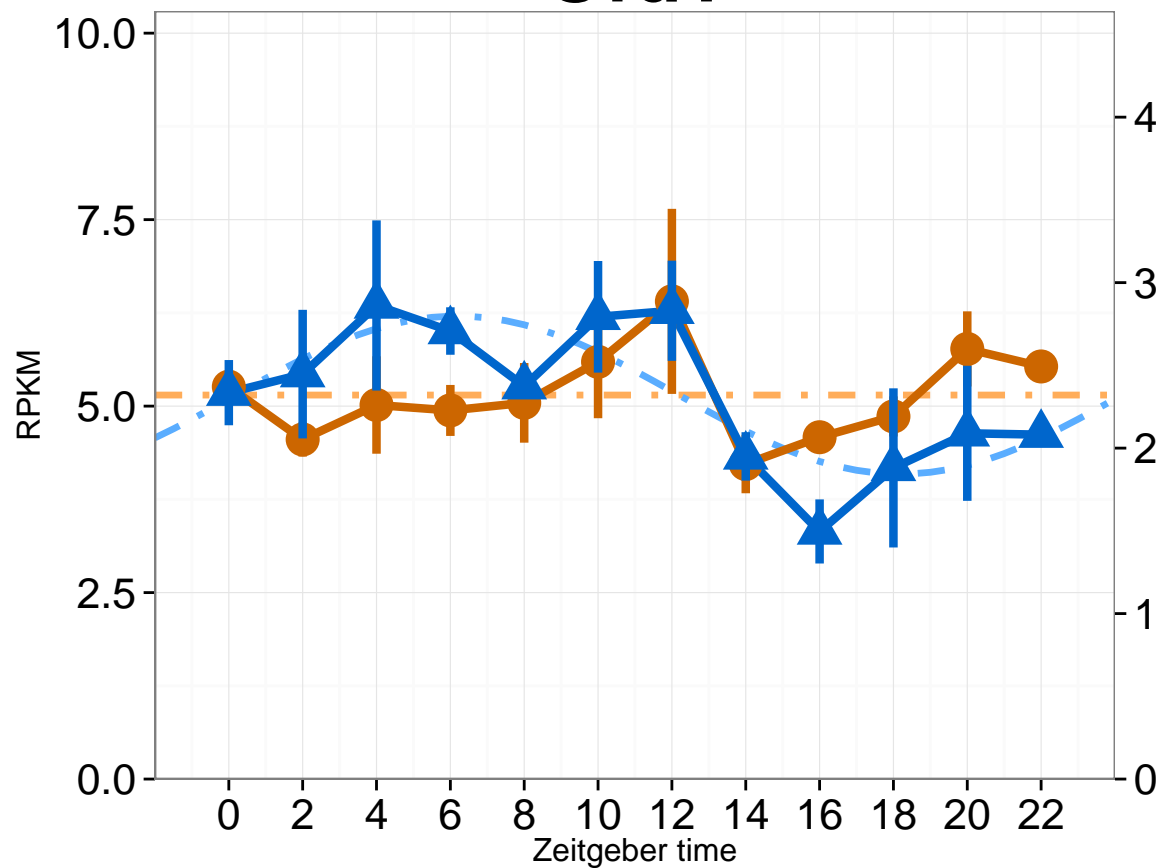

## Ofd1

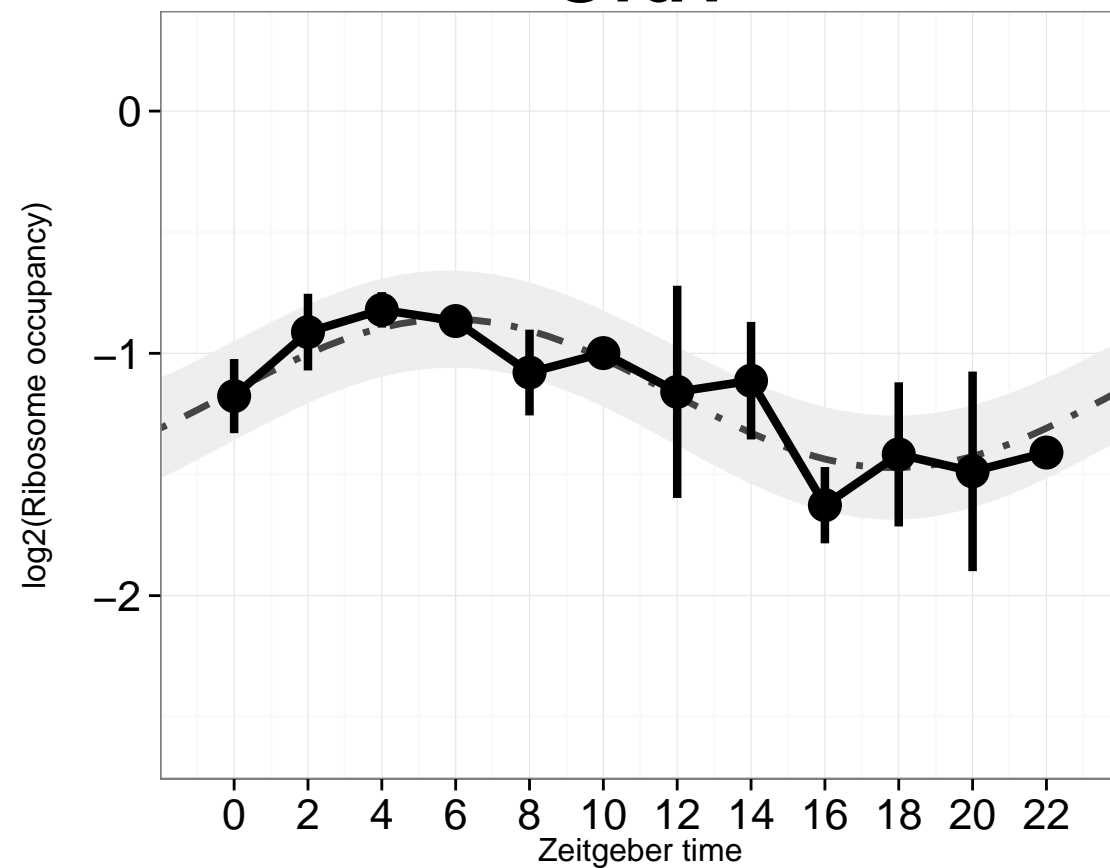

Supplement: Supplementary file 5124 [file 1]

## Spp1

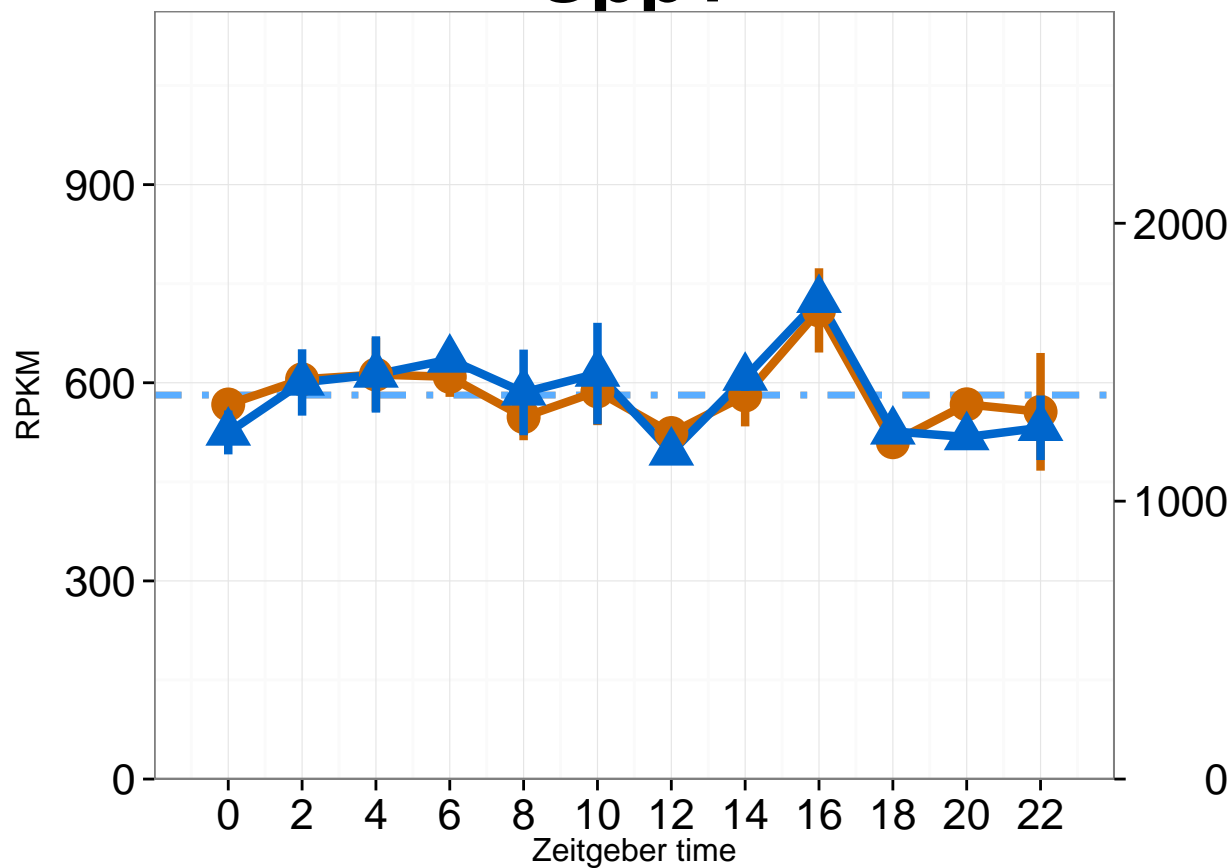

## Spp1

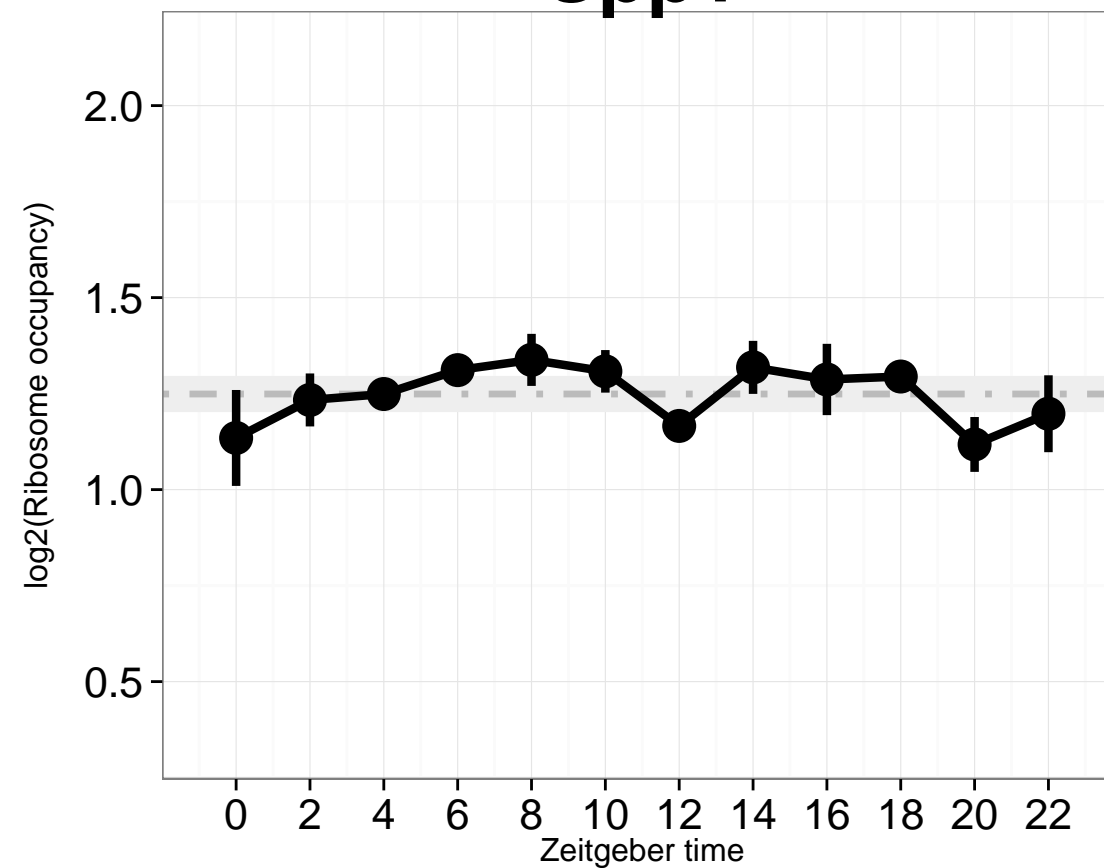

Supplement: Supplementary file 5125 [file 1]

## Gm2564

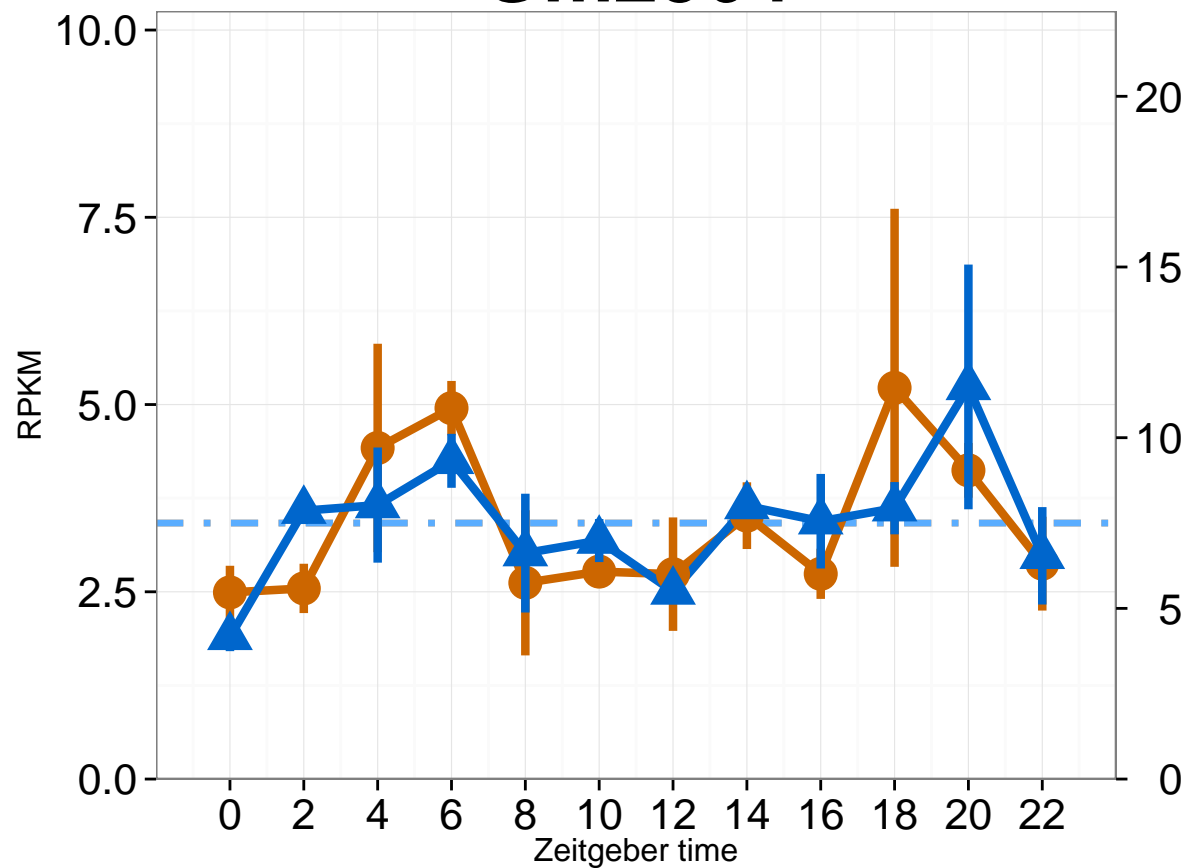

## Gm2564

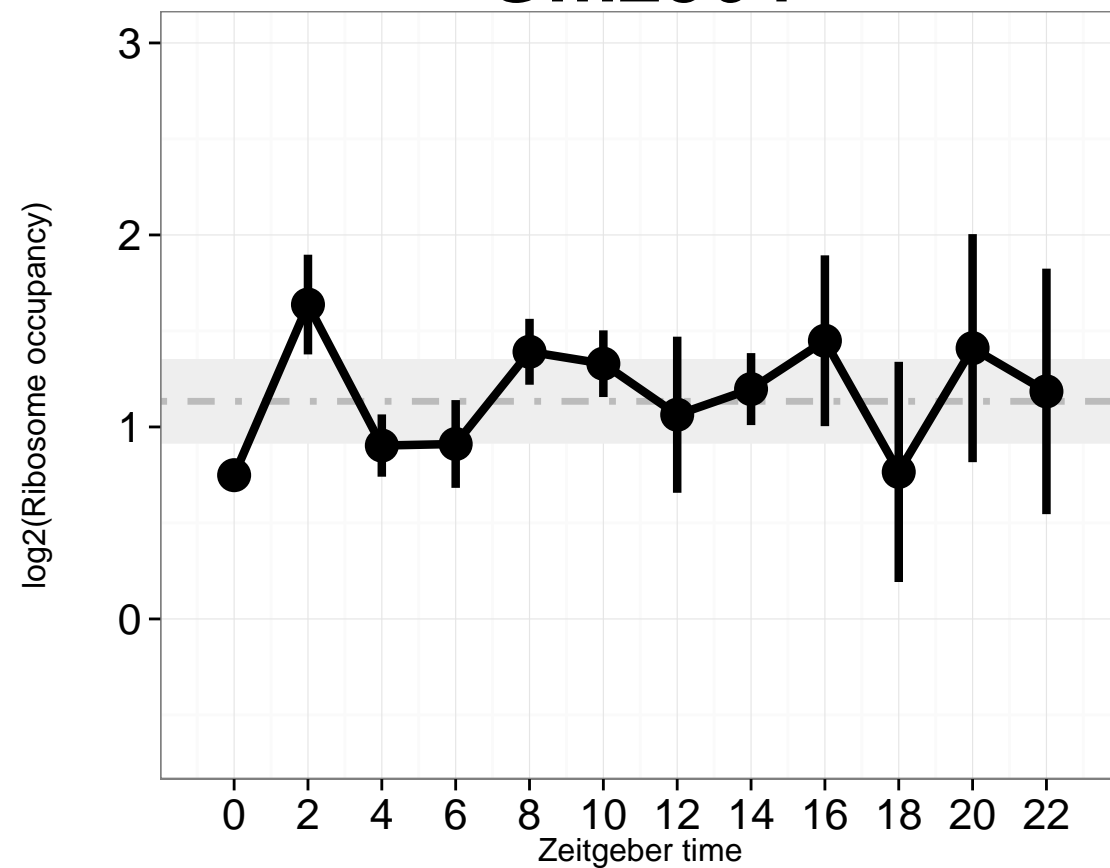

Supplement: Supplementary file 5126 [file 1]

## Arrdc1

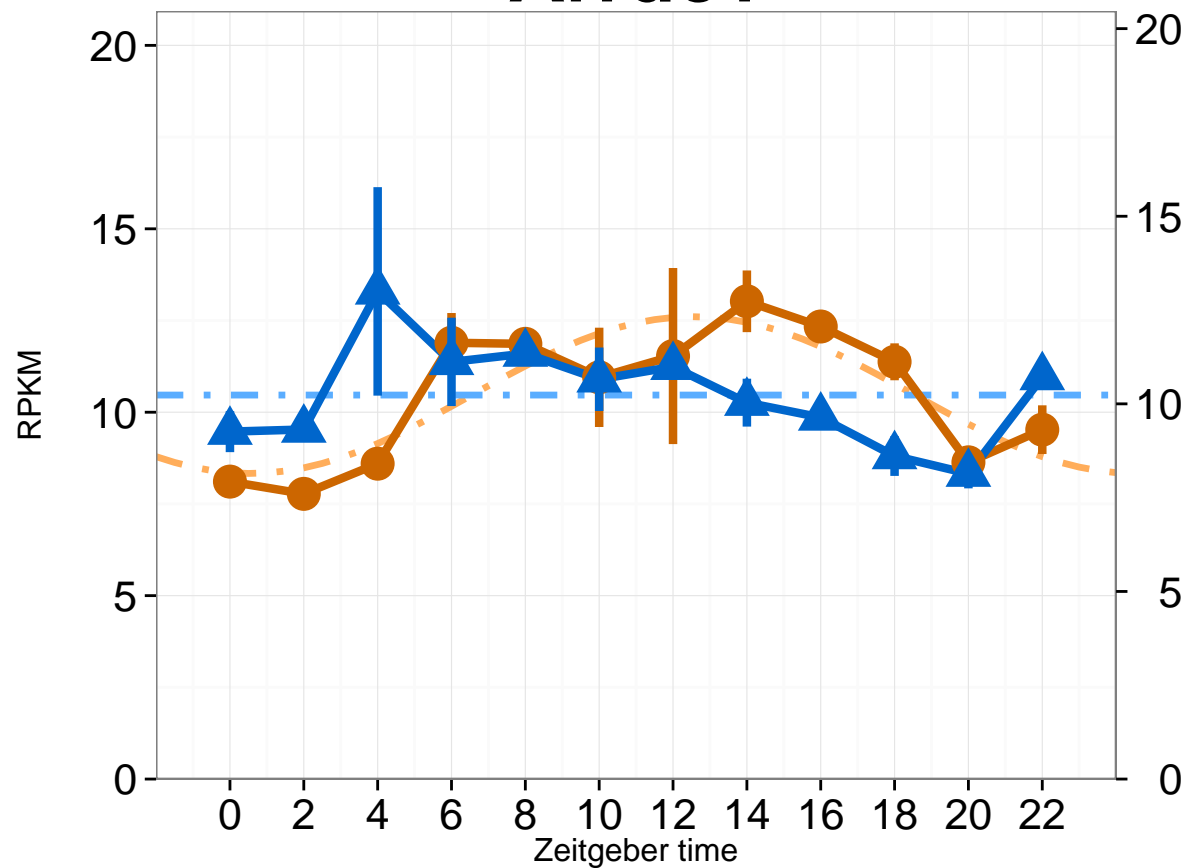

## Arrdc1

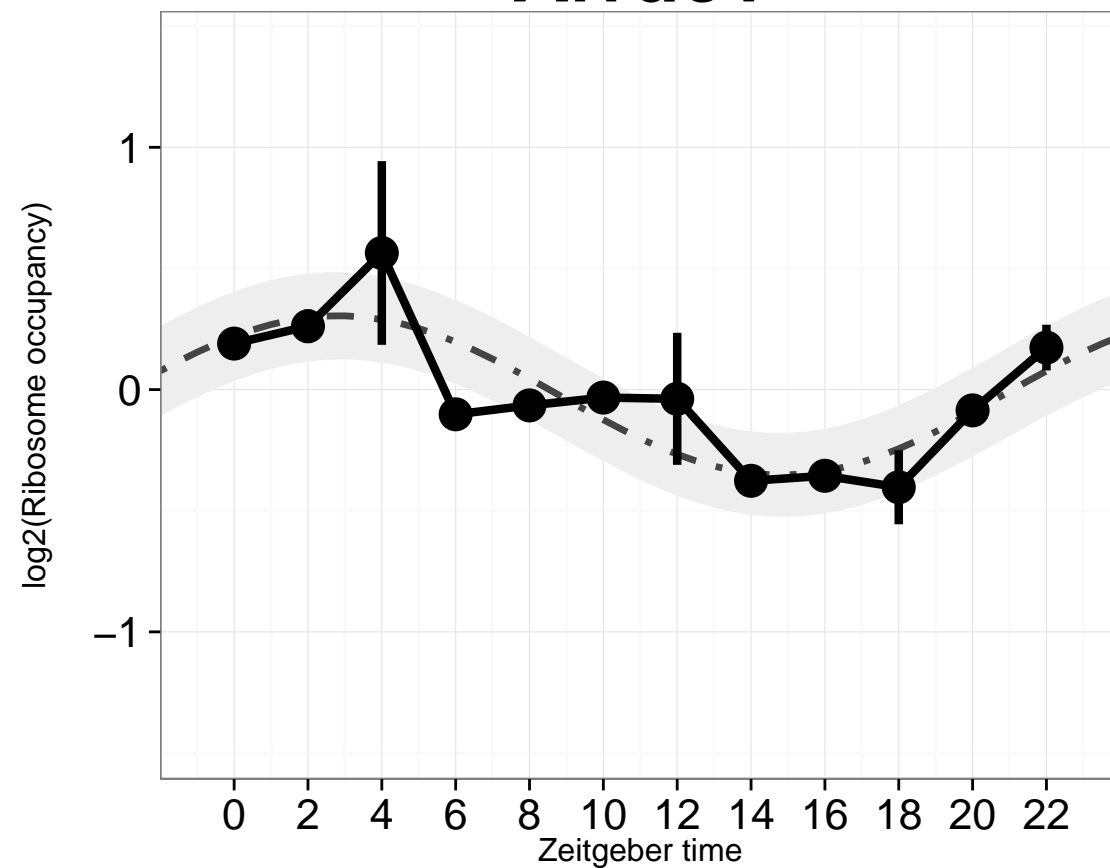

Supplement: Supplementary file 5127 [file 1]

## Sel1l

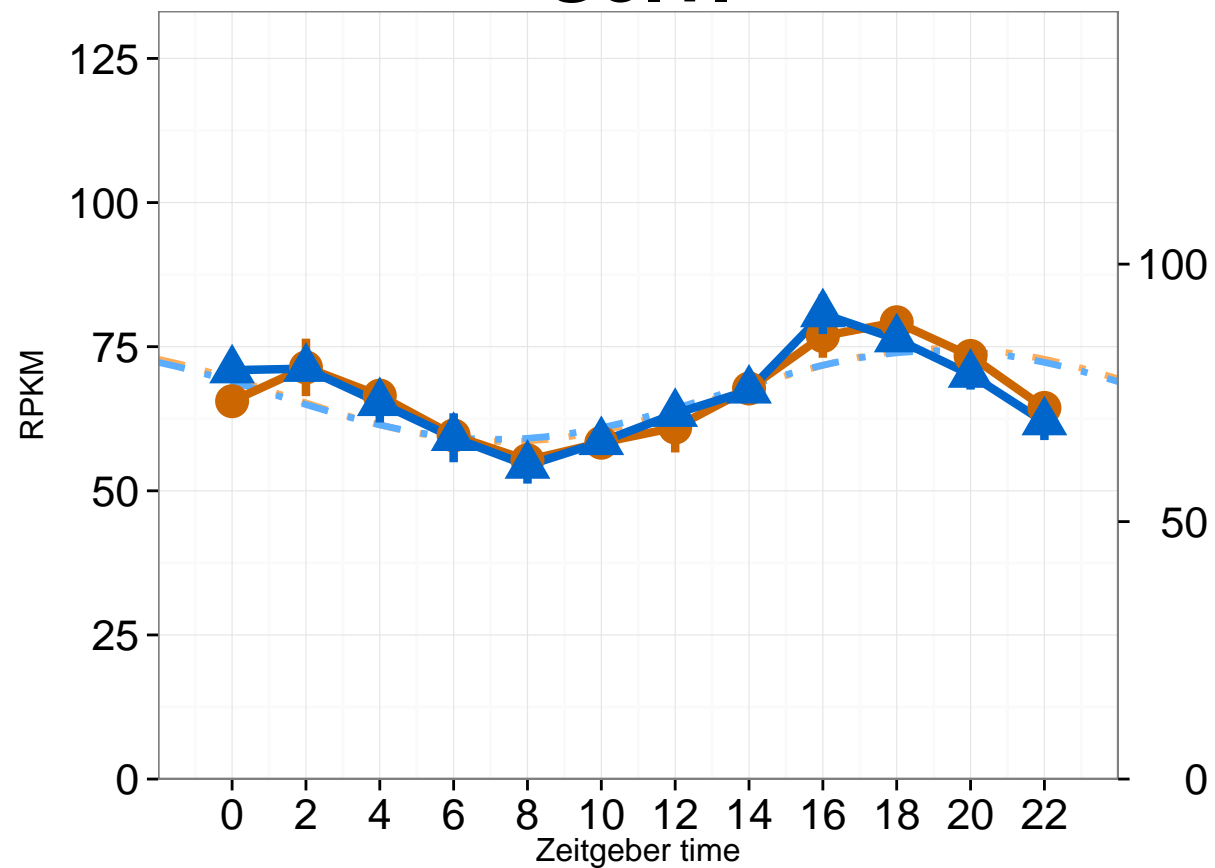

## Sel1l

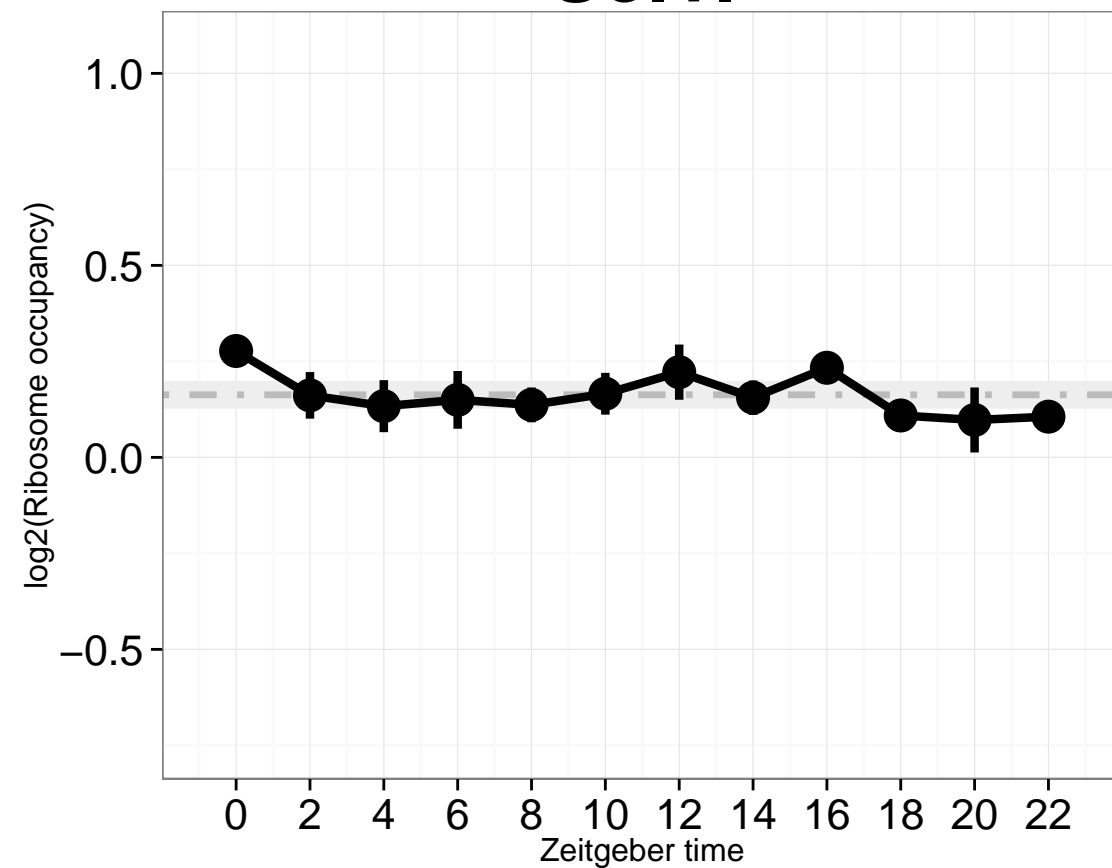

Supplement: Supplementary file 5128 [file 1]

## Gcnt2

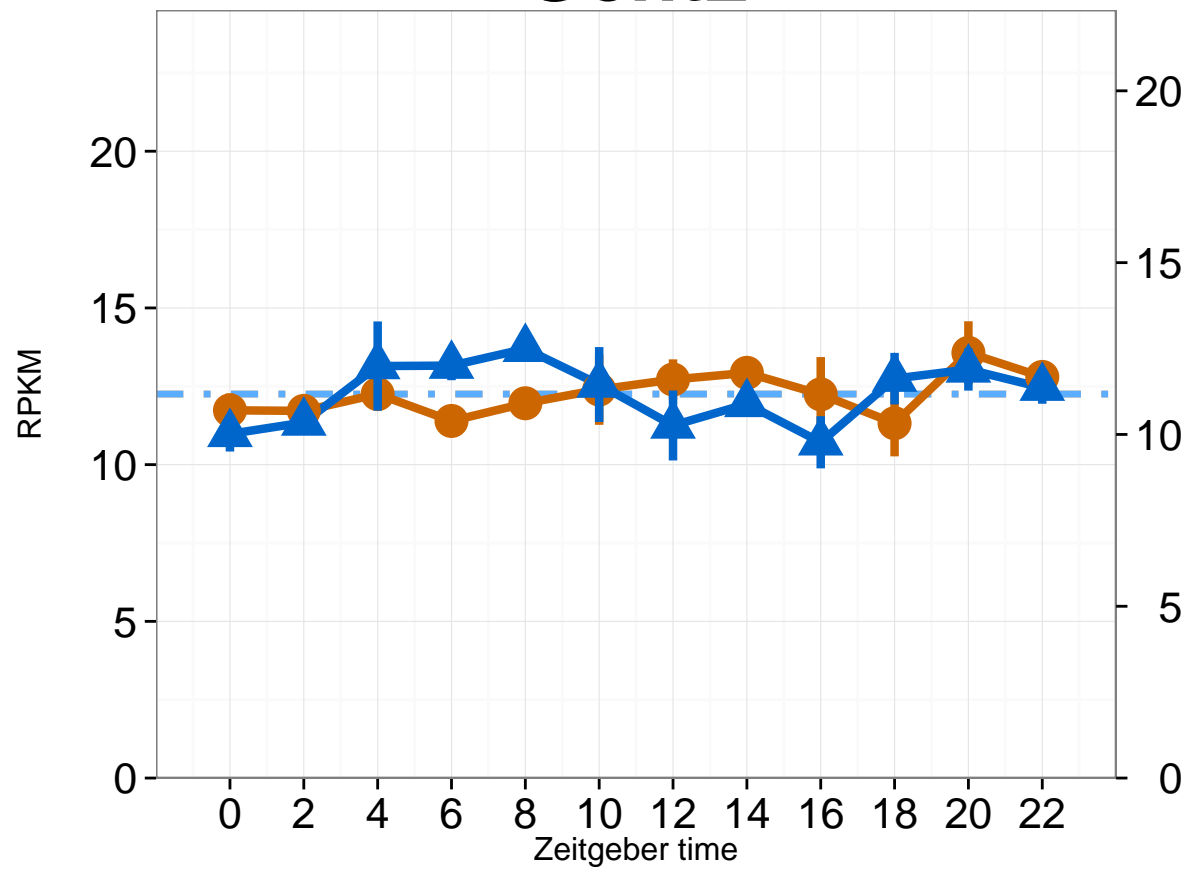

## Gcnt2

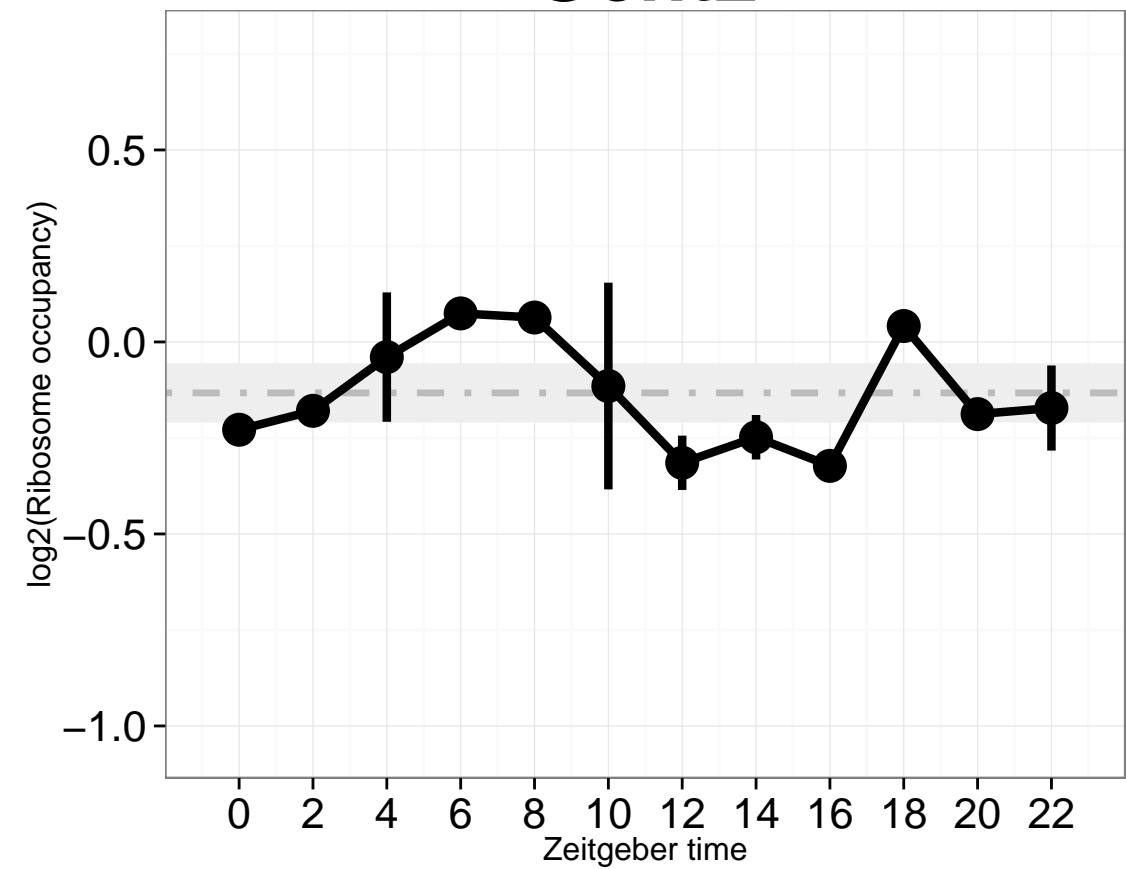

Supplement: Supplementary file 5129 [file 1]

## Zdhhc9

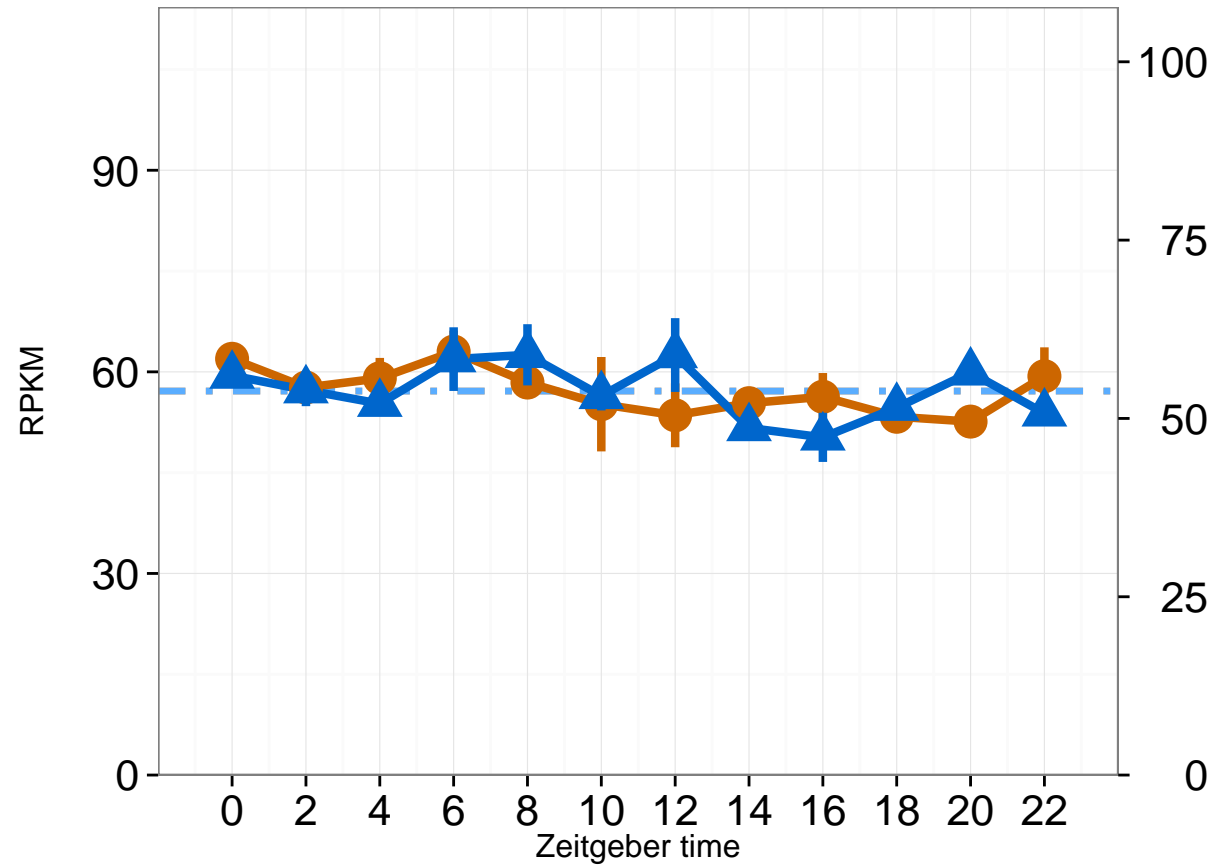

## Zdhhc9

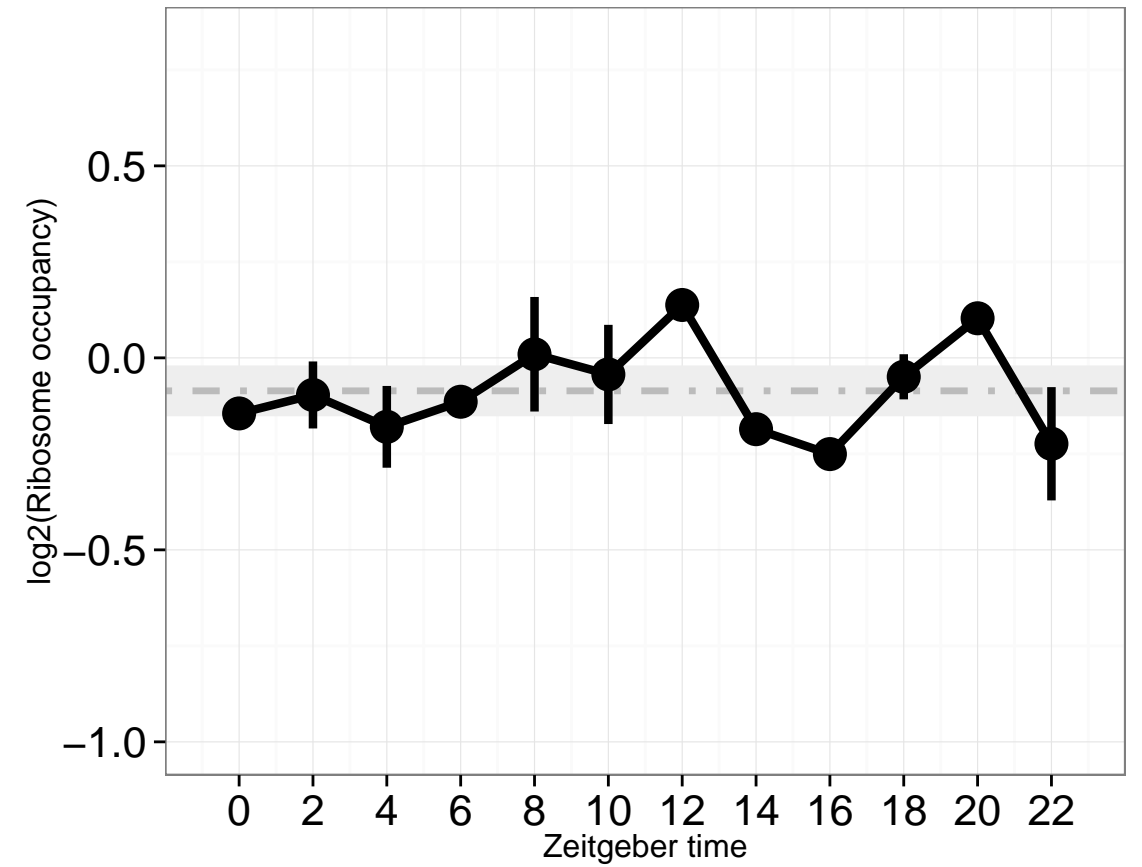

Supplement: Supplementary file 5130 [file 1]

## Cbx7

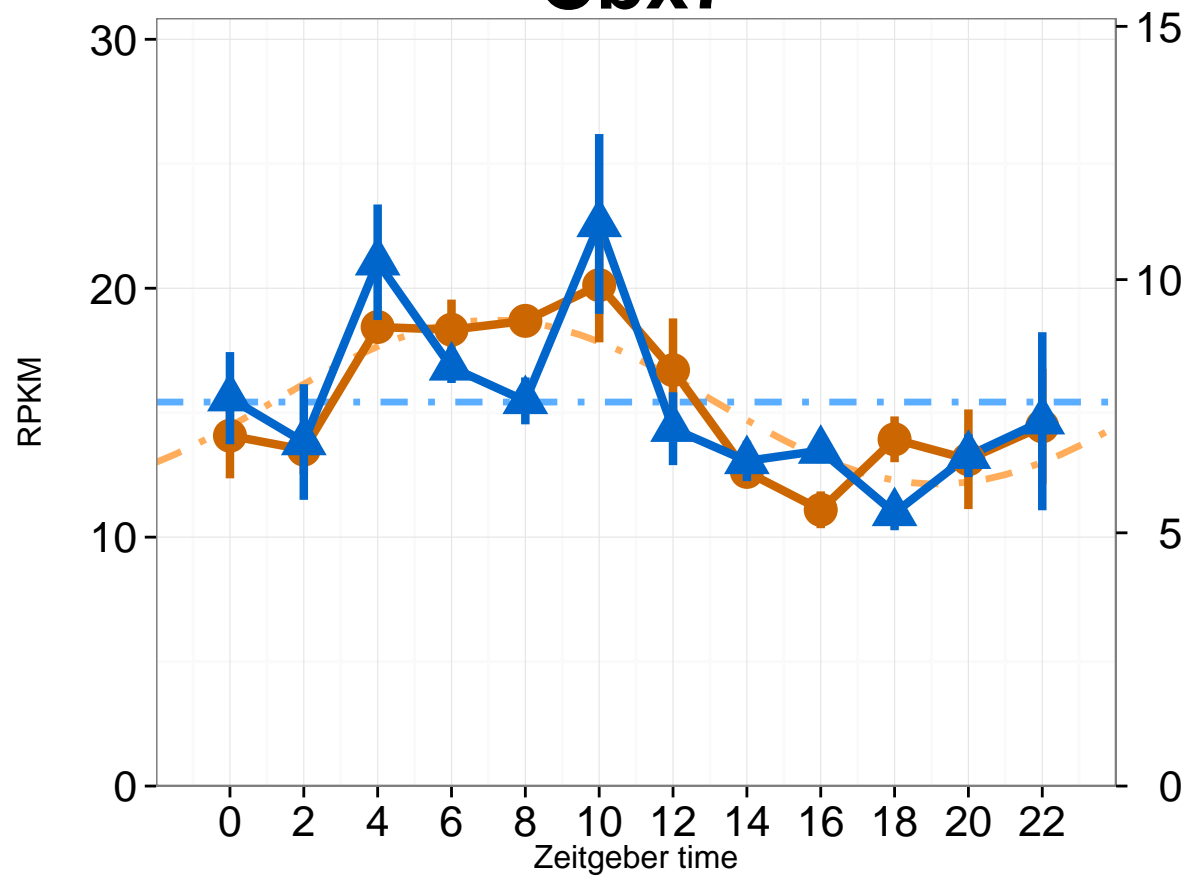

## Cbx7

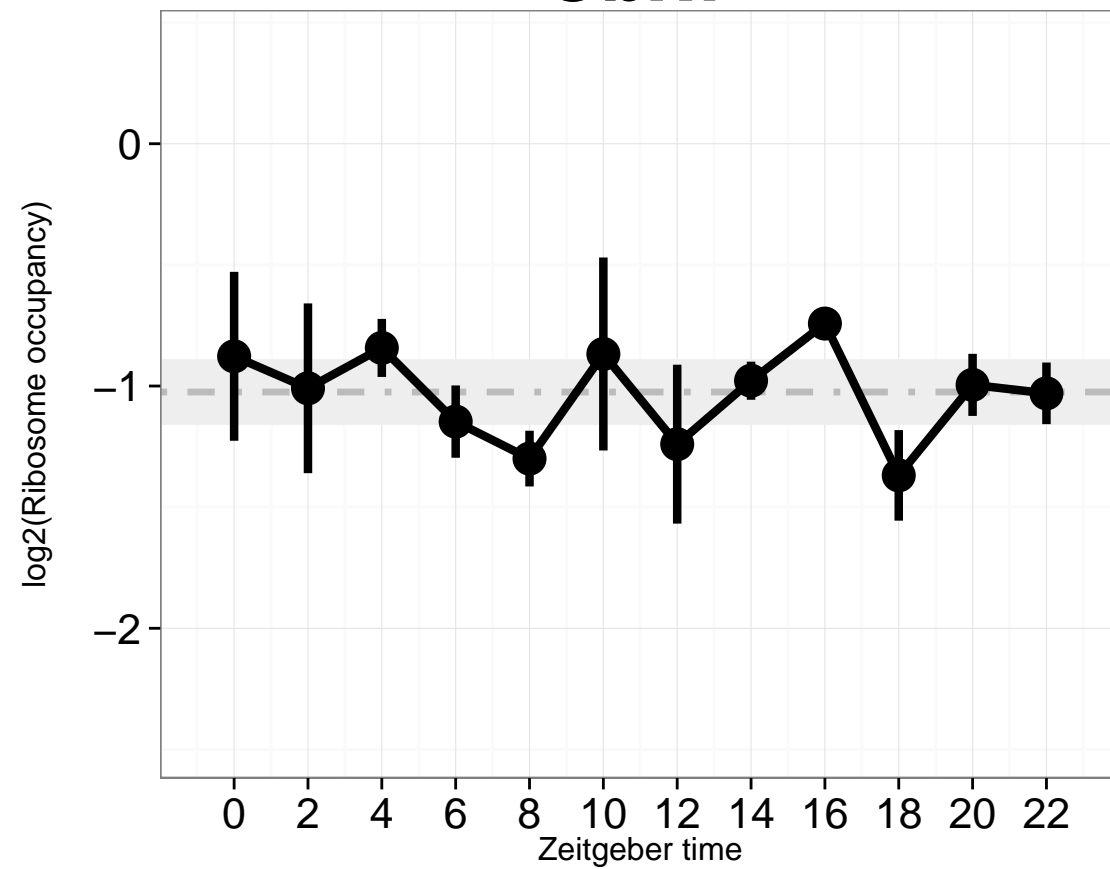

Supplement: Supplementary file 5131 [file 1]

## Pitx2

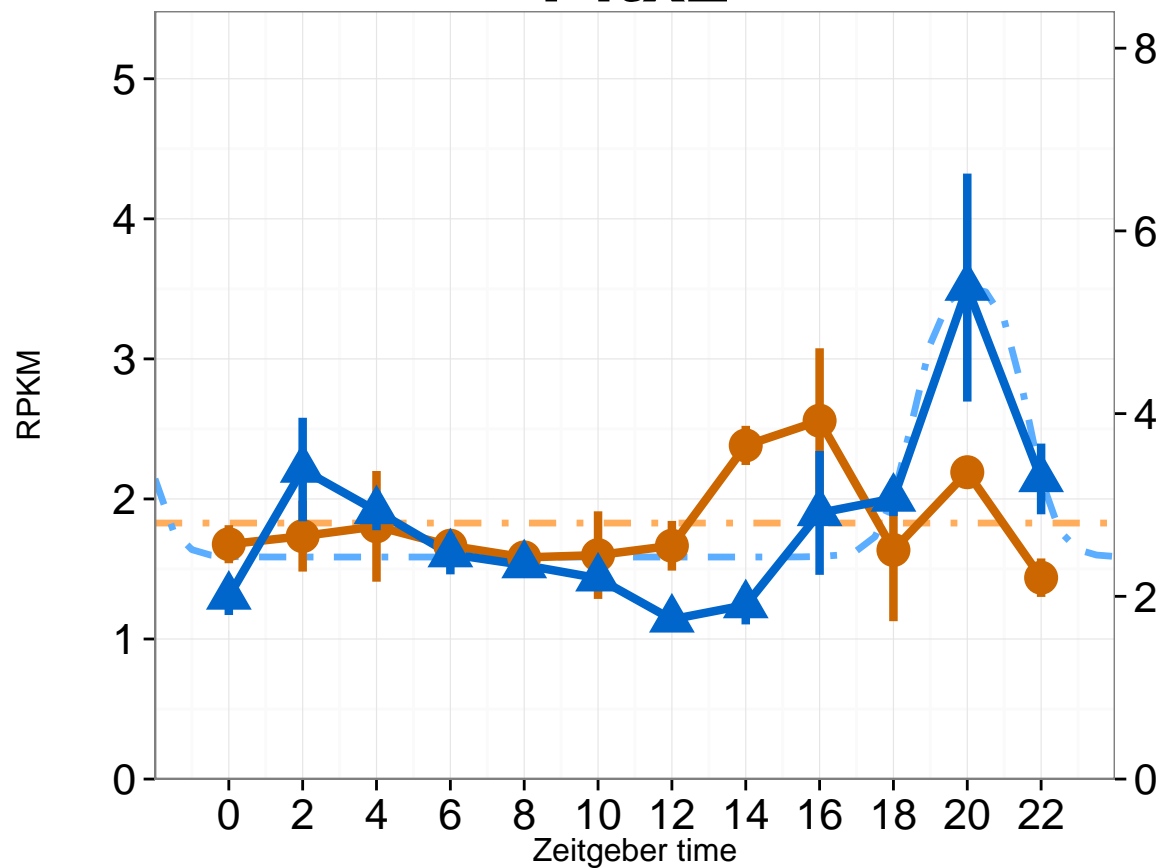

## Pitx2

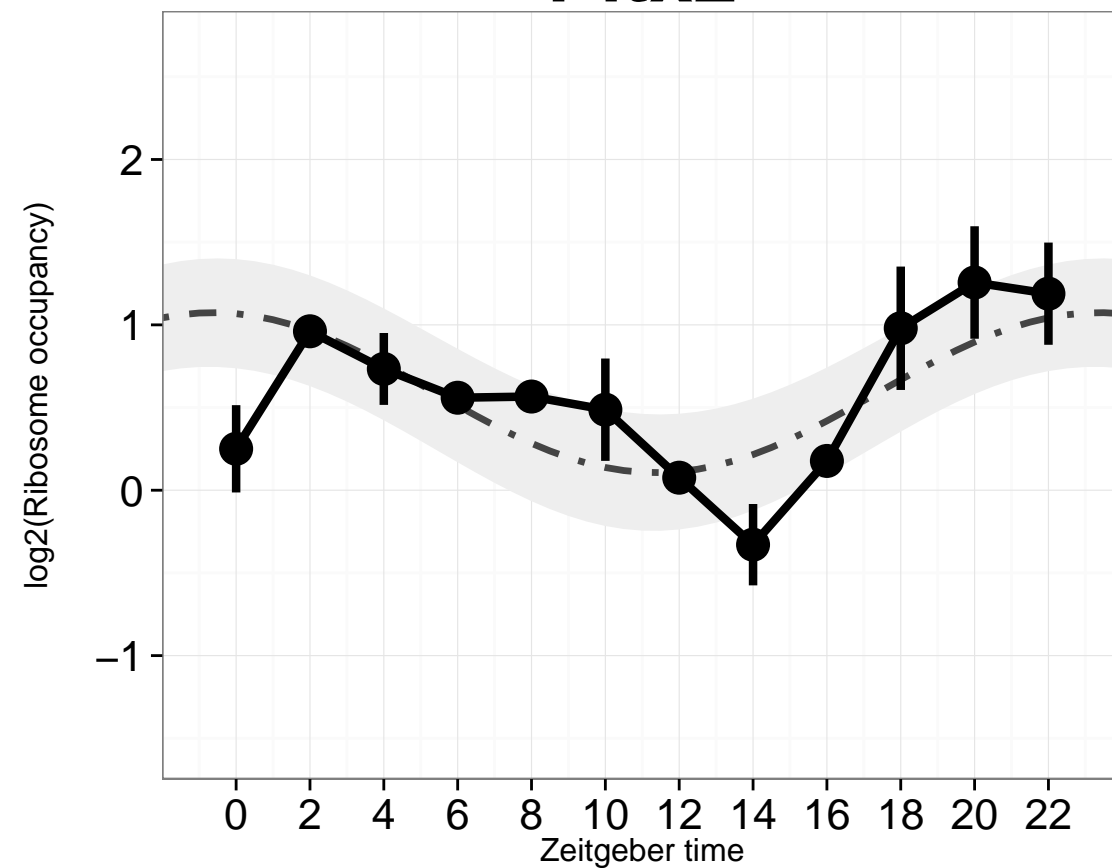

Supplement: Supplementary file 5132 [file 1]

## Itpa

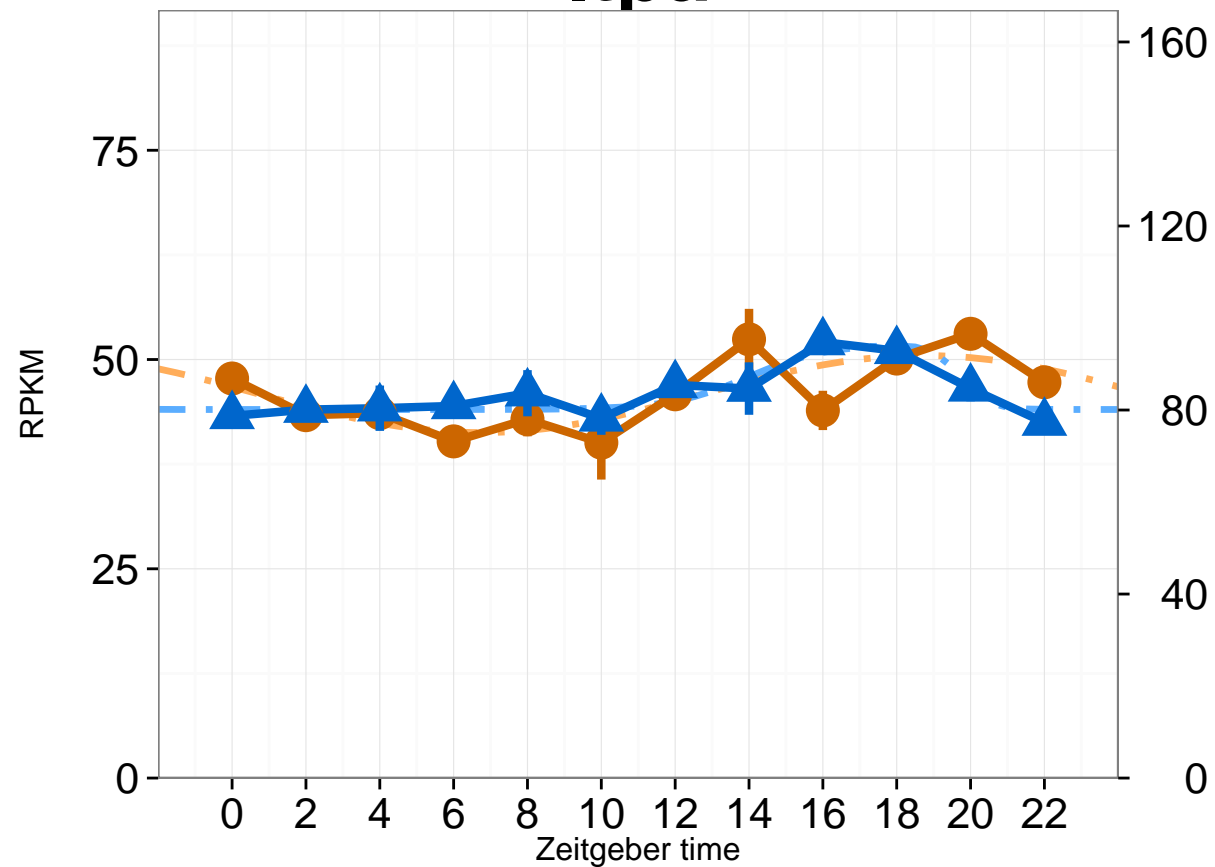

## Itpa

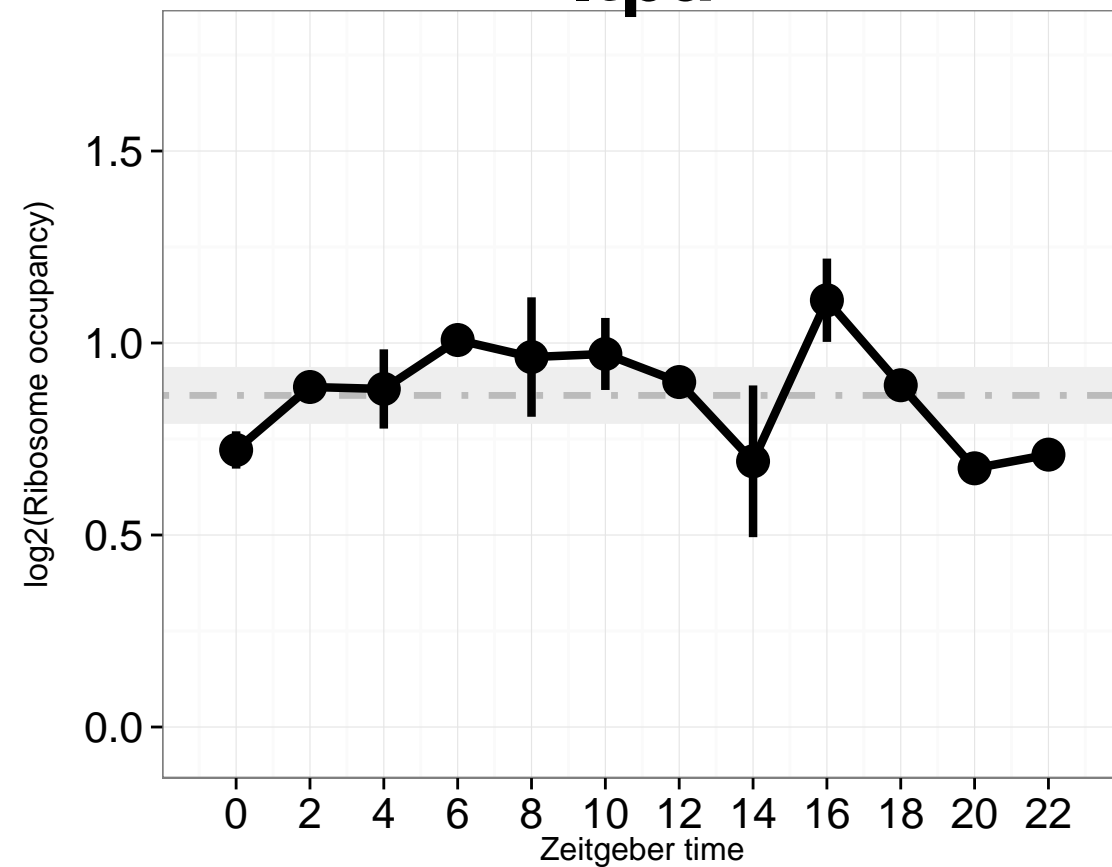

Supplement: Supplementary file 5133 [file 1]

# Chic1

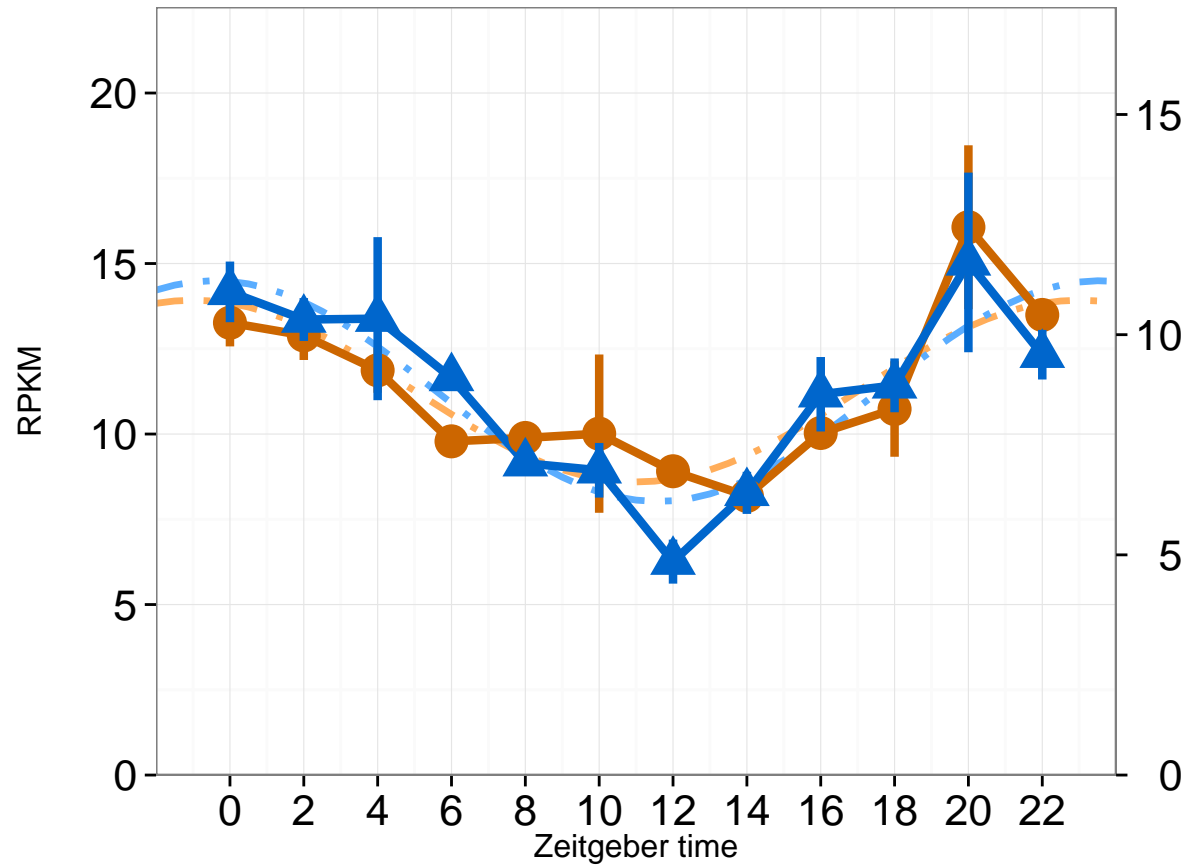

# Chic1

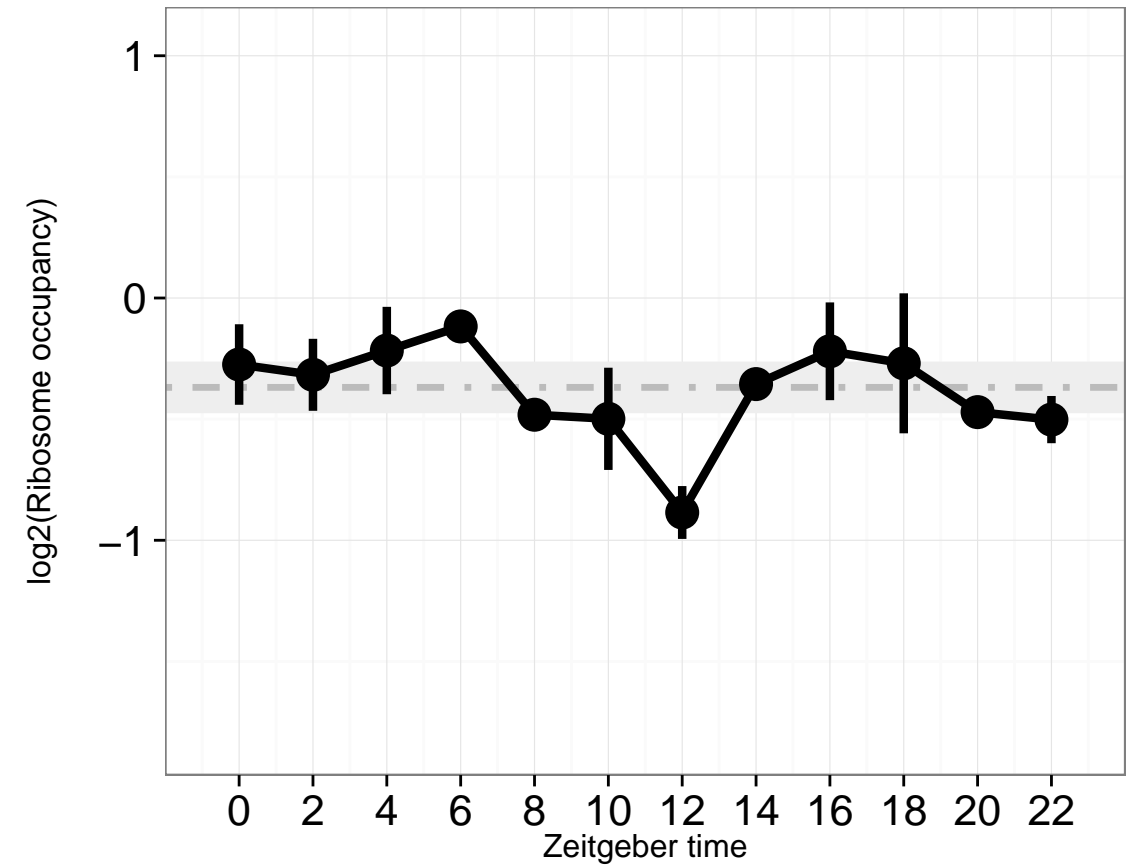

Supplement: Supplementary file 5134 [file 1]

## Thpo

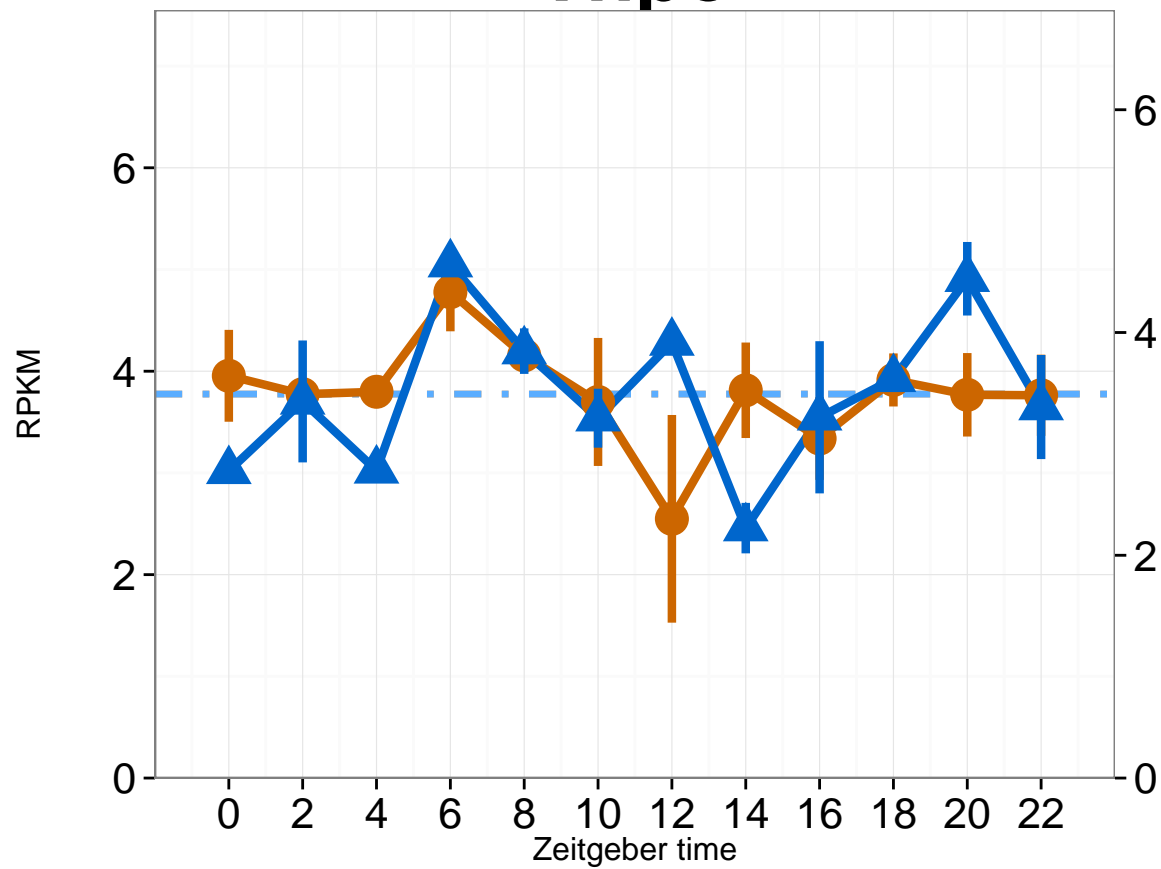

## Thpo

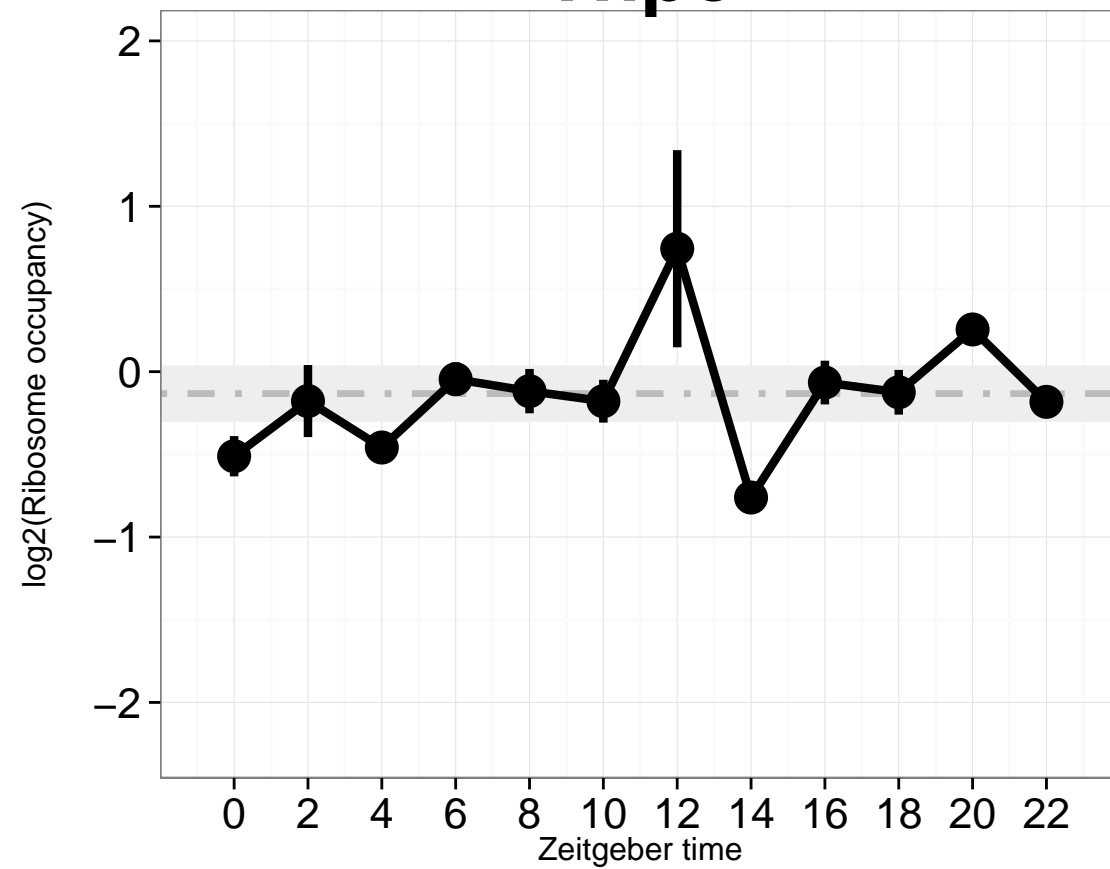

Supplement: Supplementary file 5135 [file 1]

## Ndutfaf2

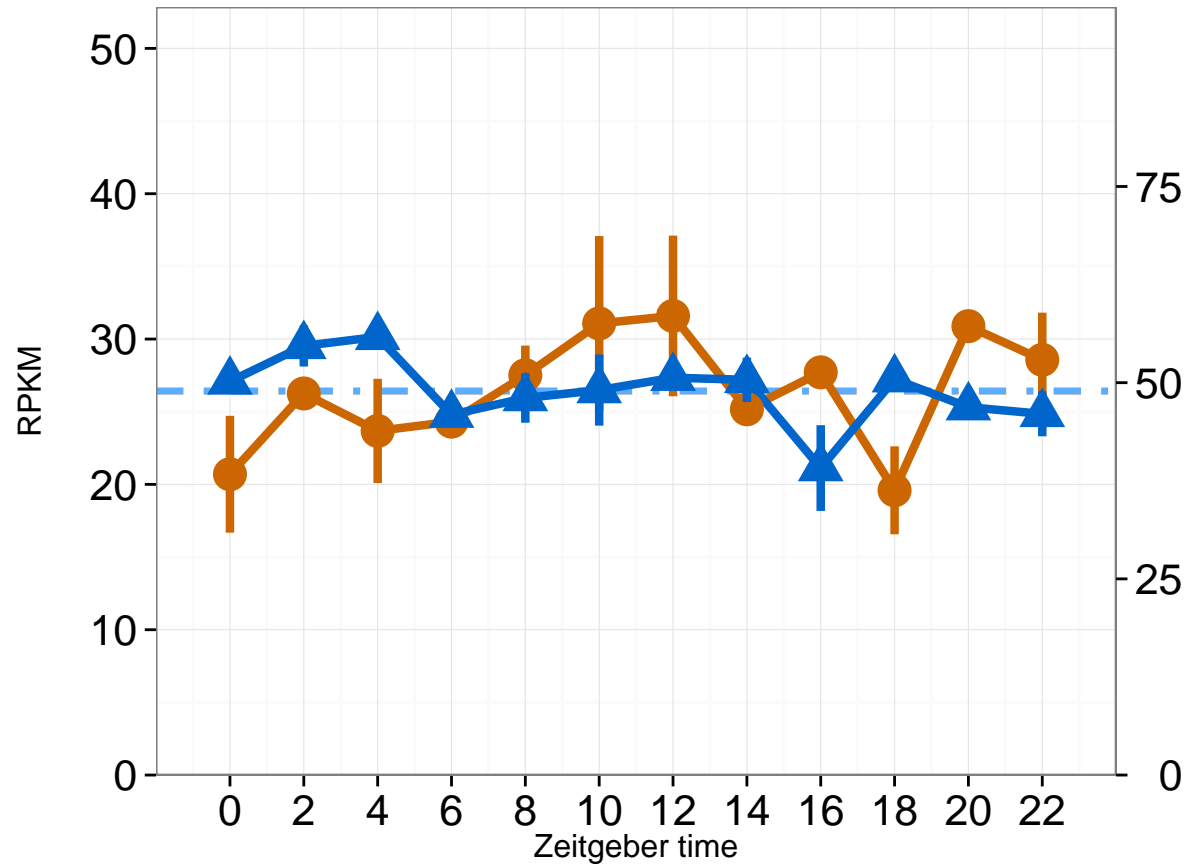

## Ndutfaf2

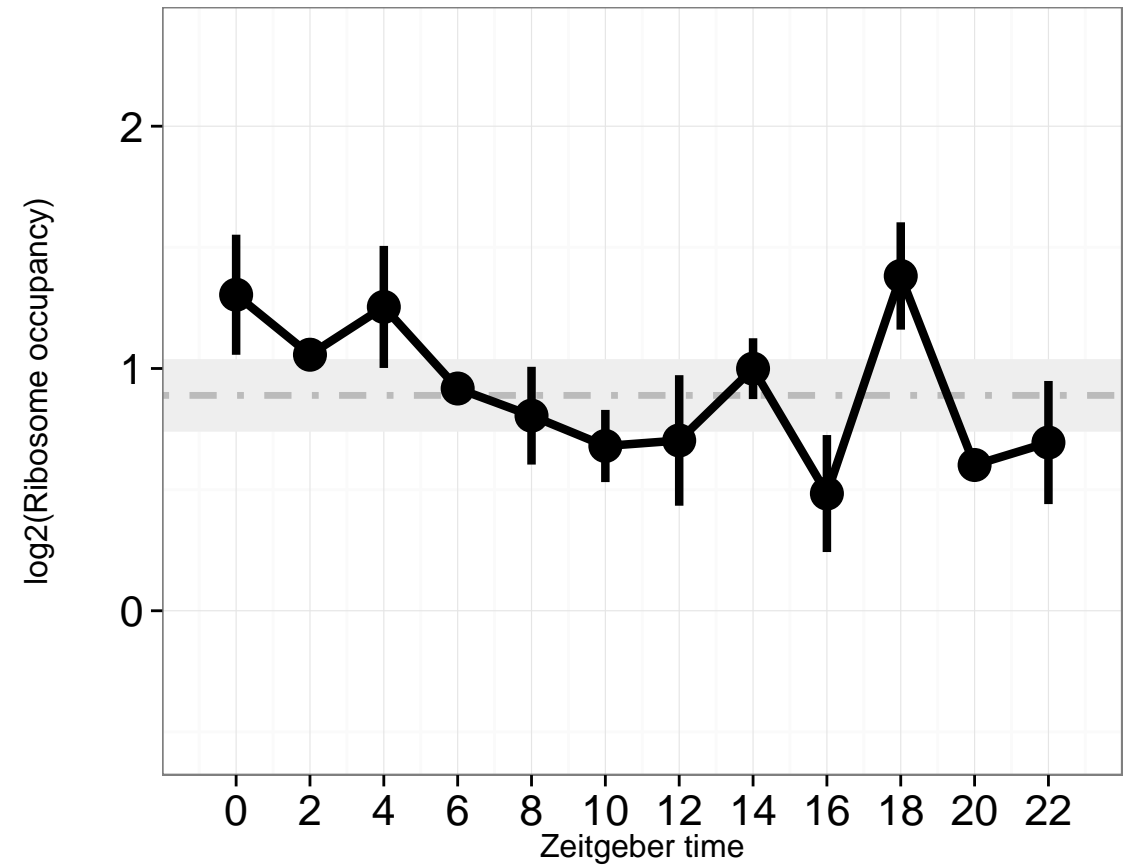

Supplement: Supplementary file 5136 [file 1]

## Snx21

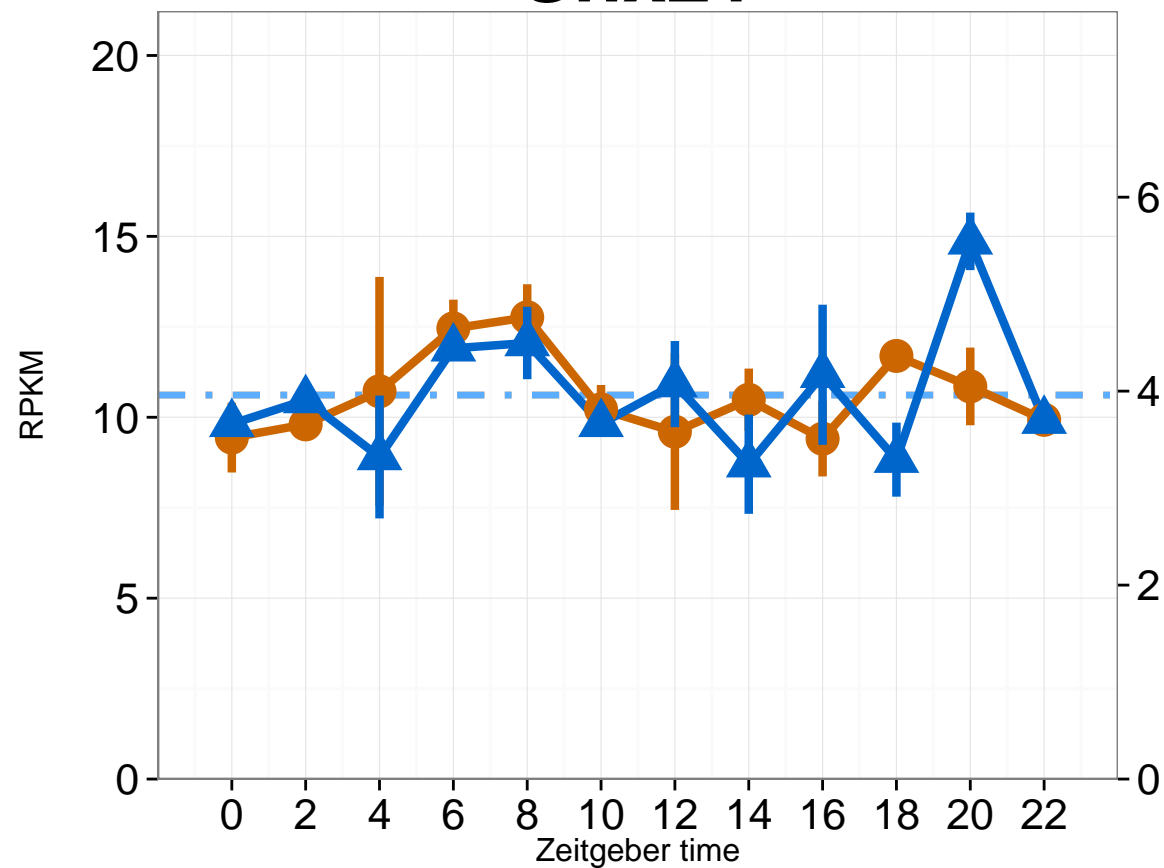

## Snx21

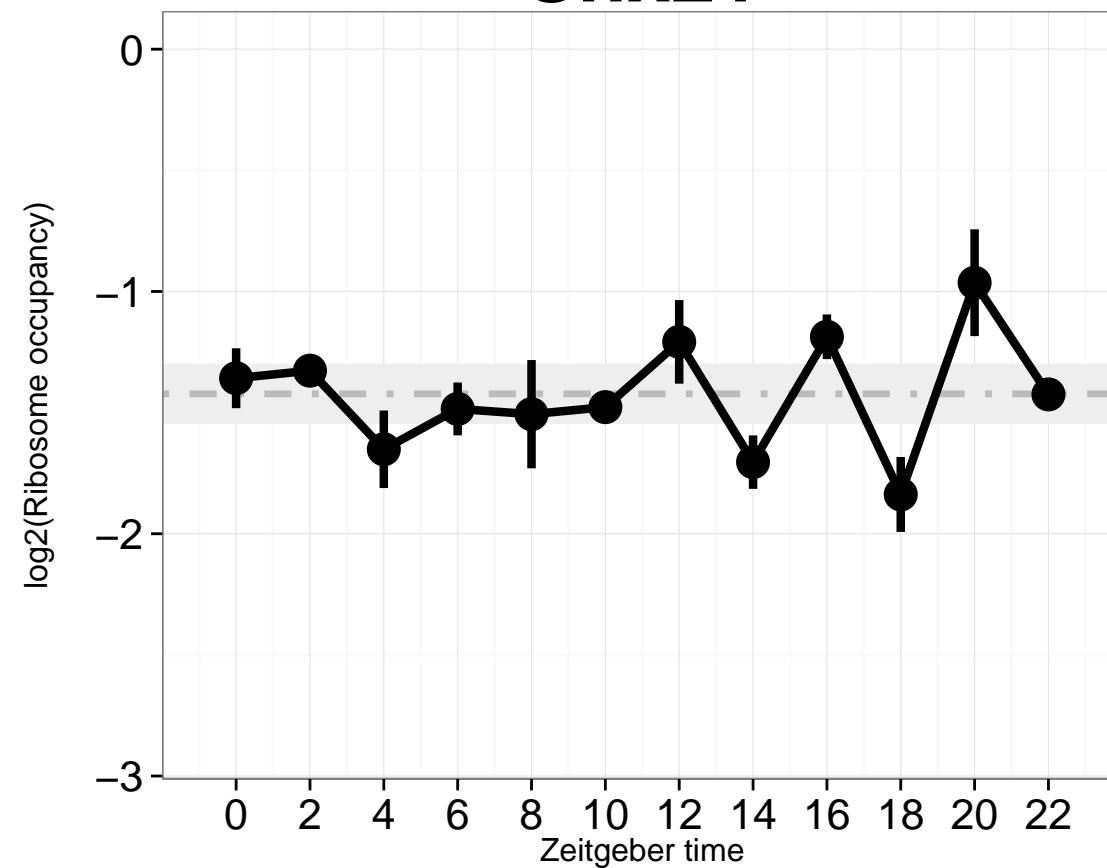

Supplement: Supplementary file 5137 [file 1]

# Ptpra

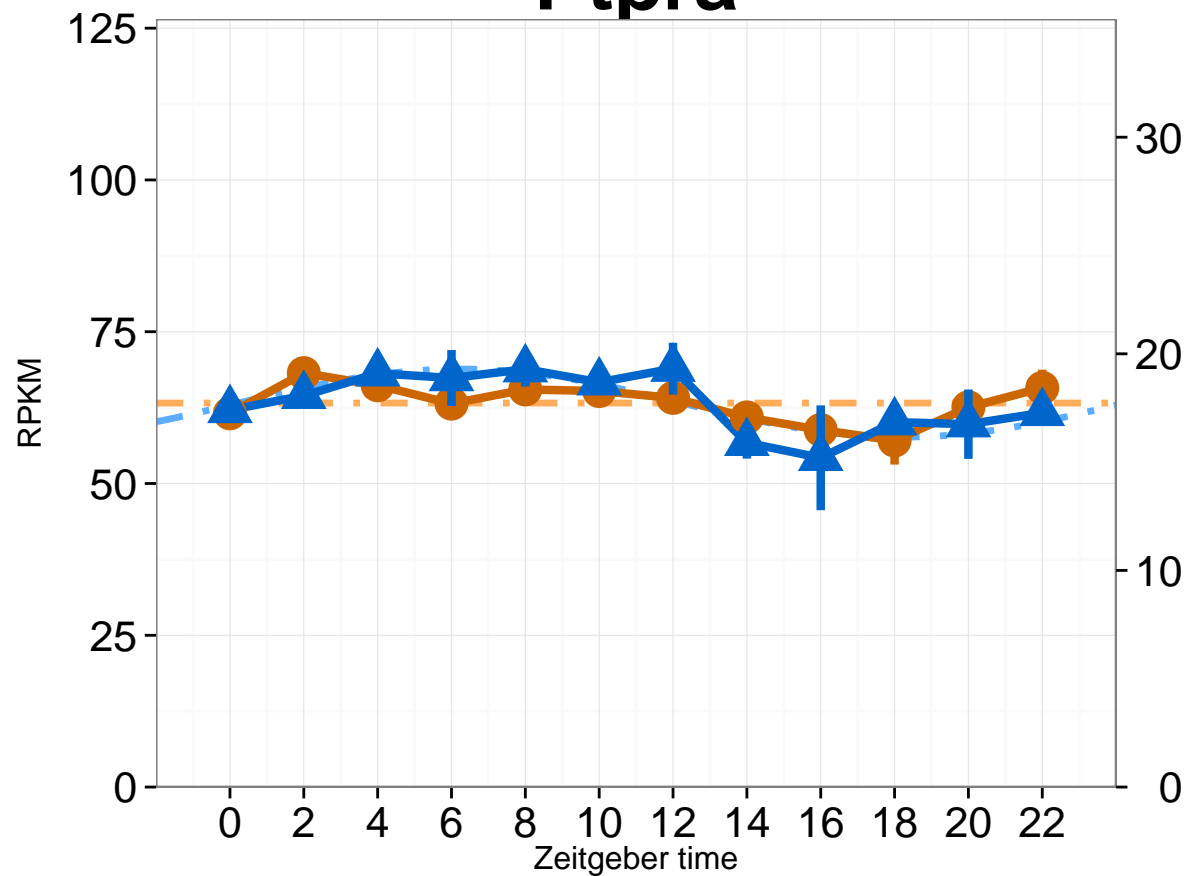

# Ptpra

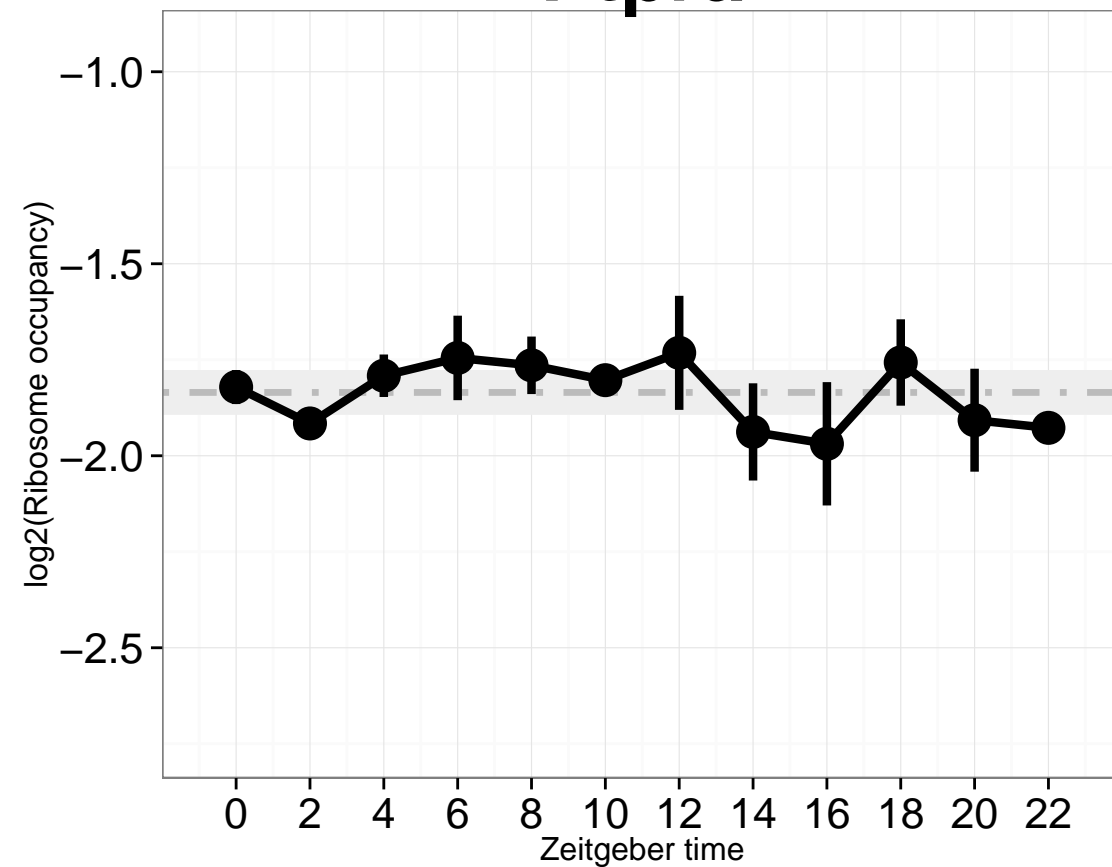

Supplement: Supplementary file 5138 [file 1]

# Crim1

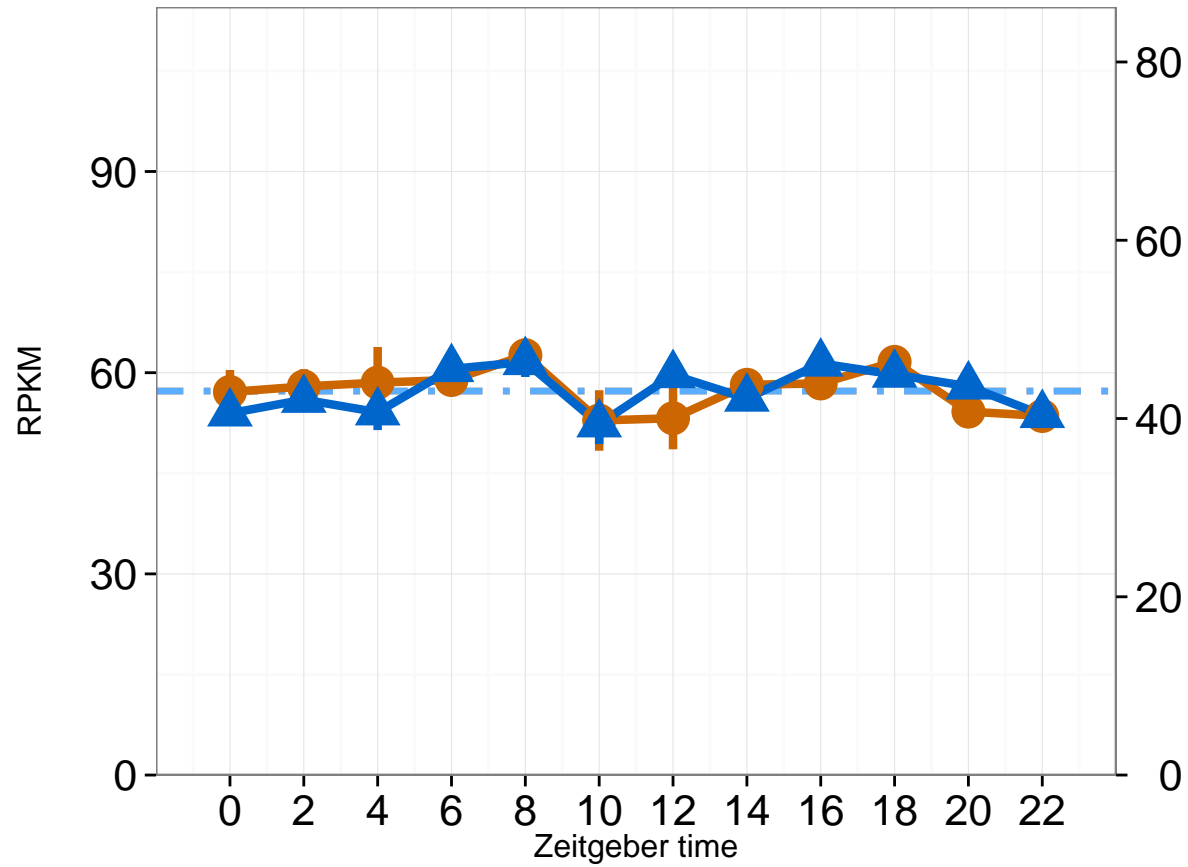

# Crim1

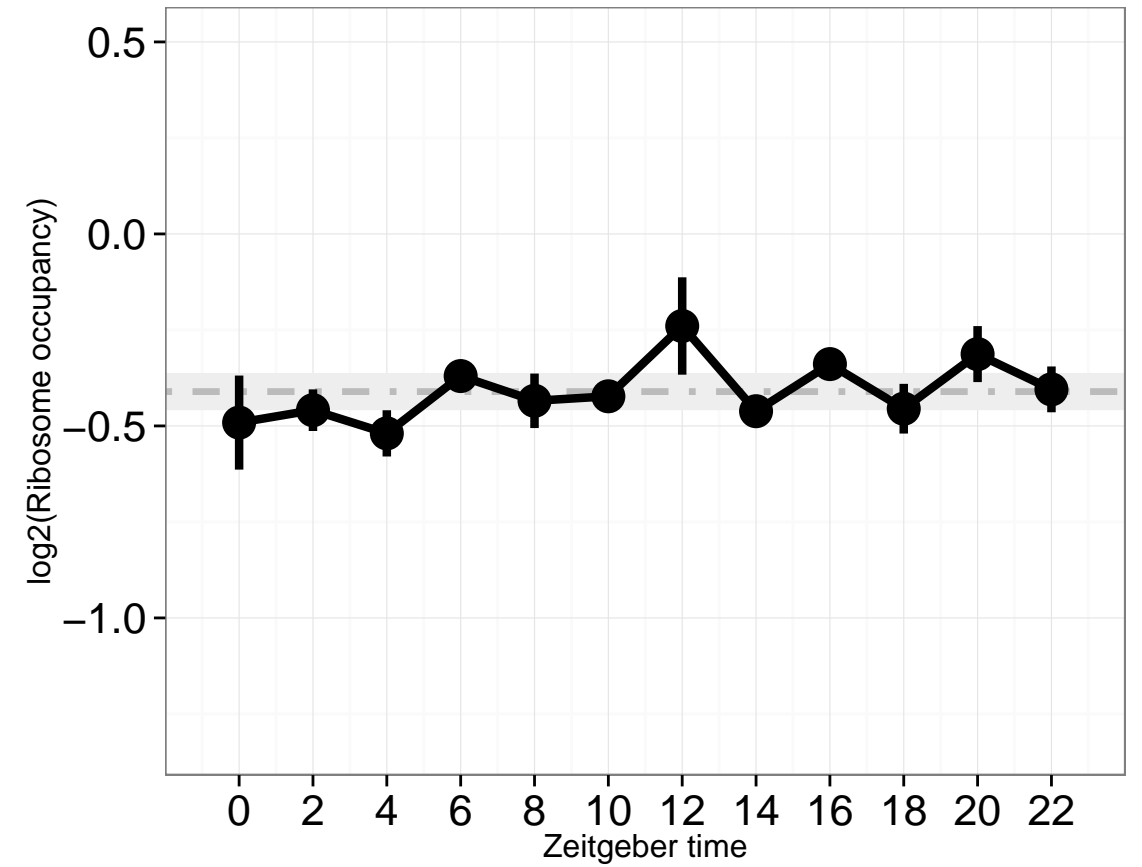

Supplement: Supplementary file 5139 [file 1]

# Mospd1

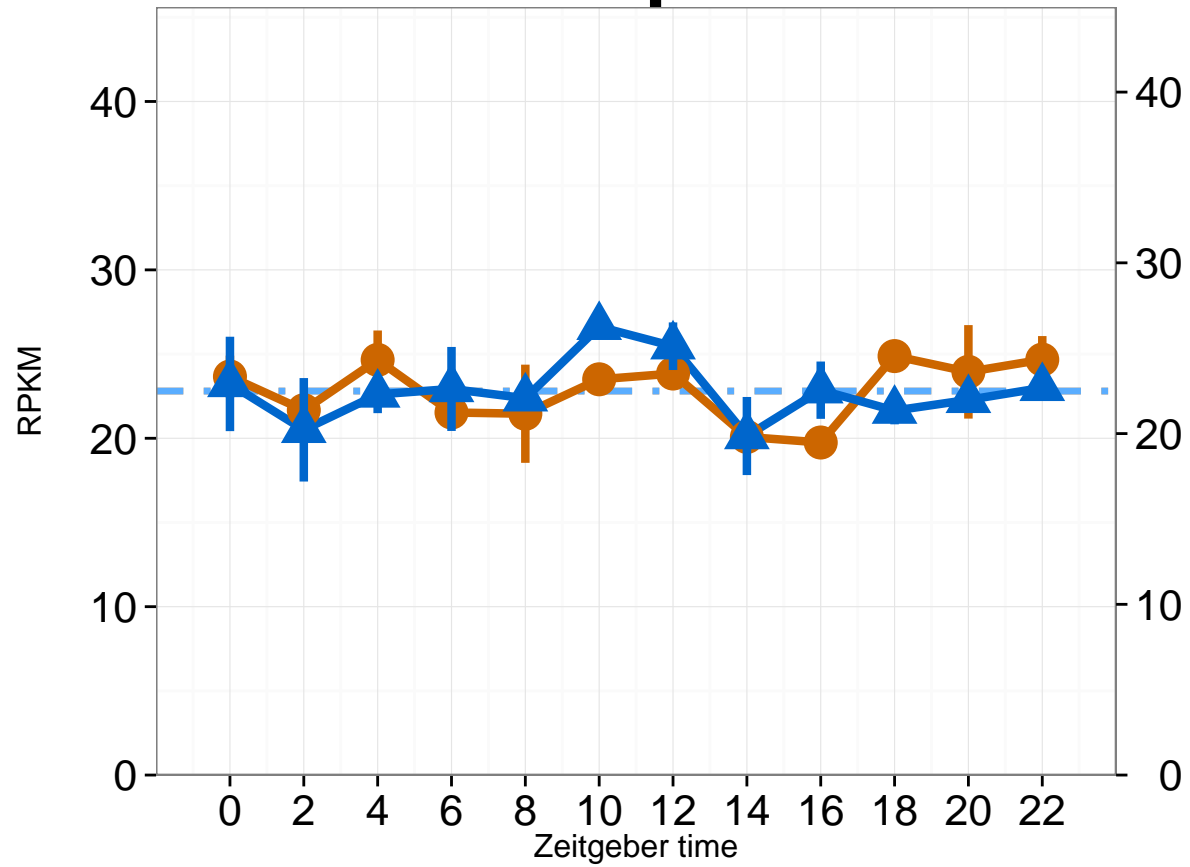

# Mospd1

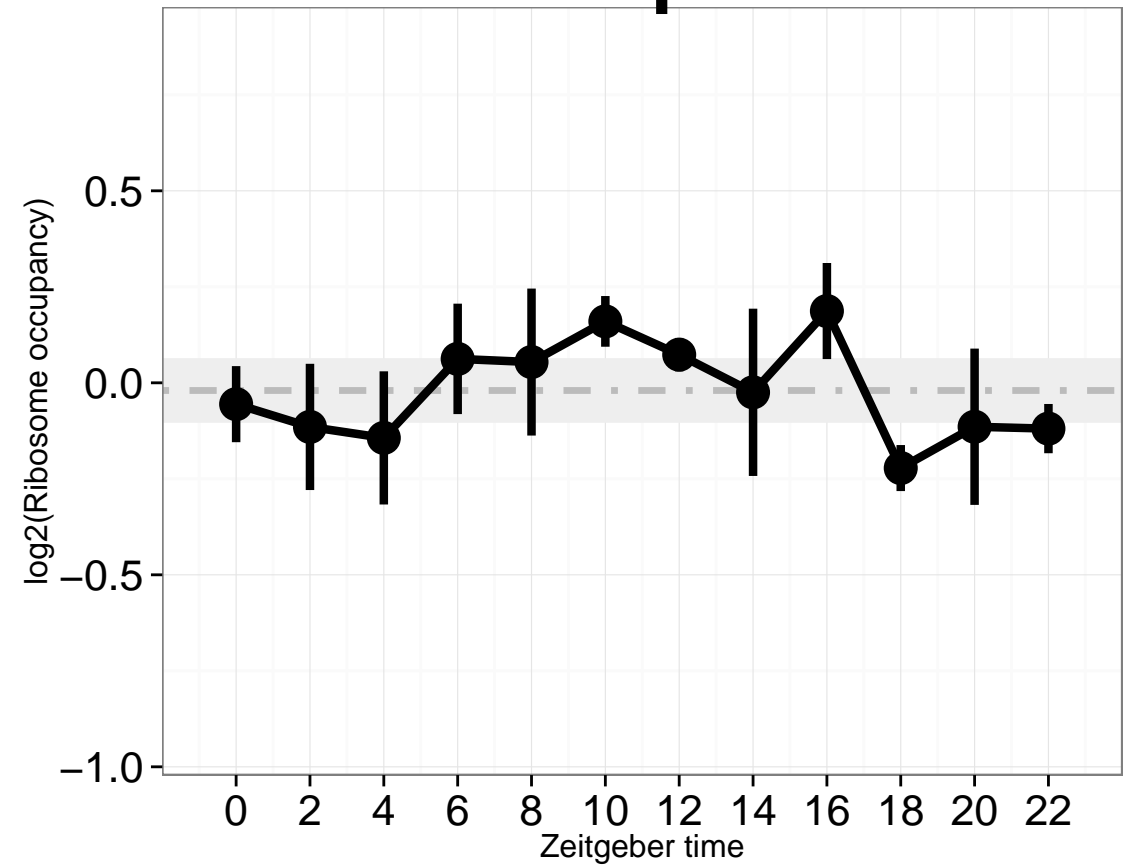

Supplement: Supplementary file 5140 [file 1]

## Shisa3

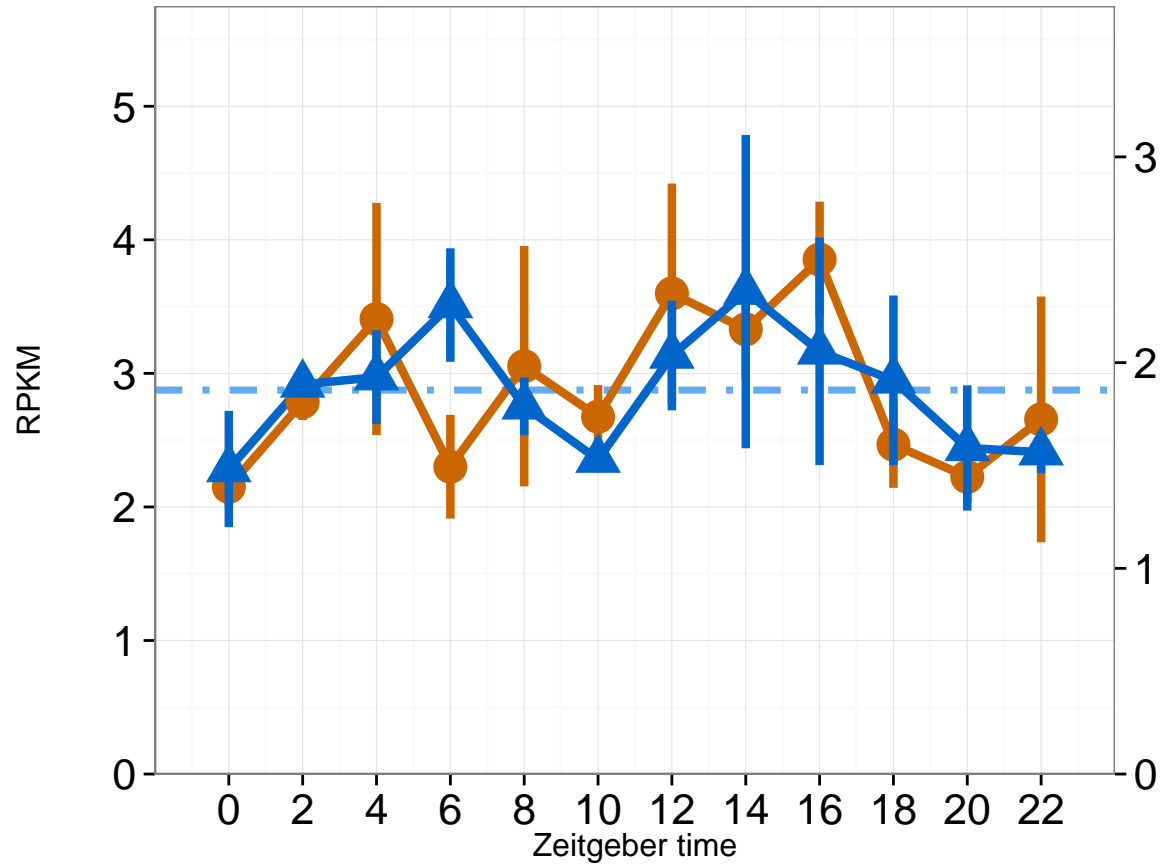

## Shisa3

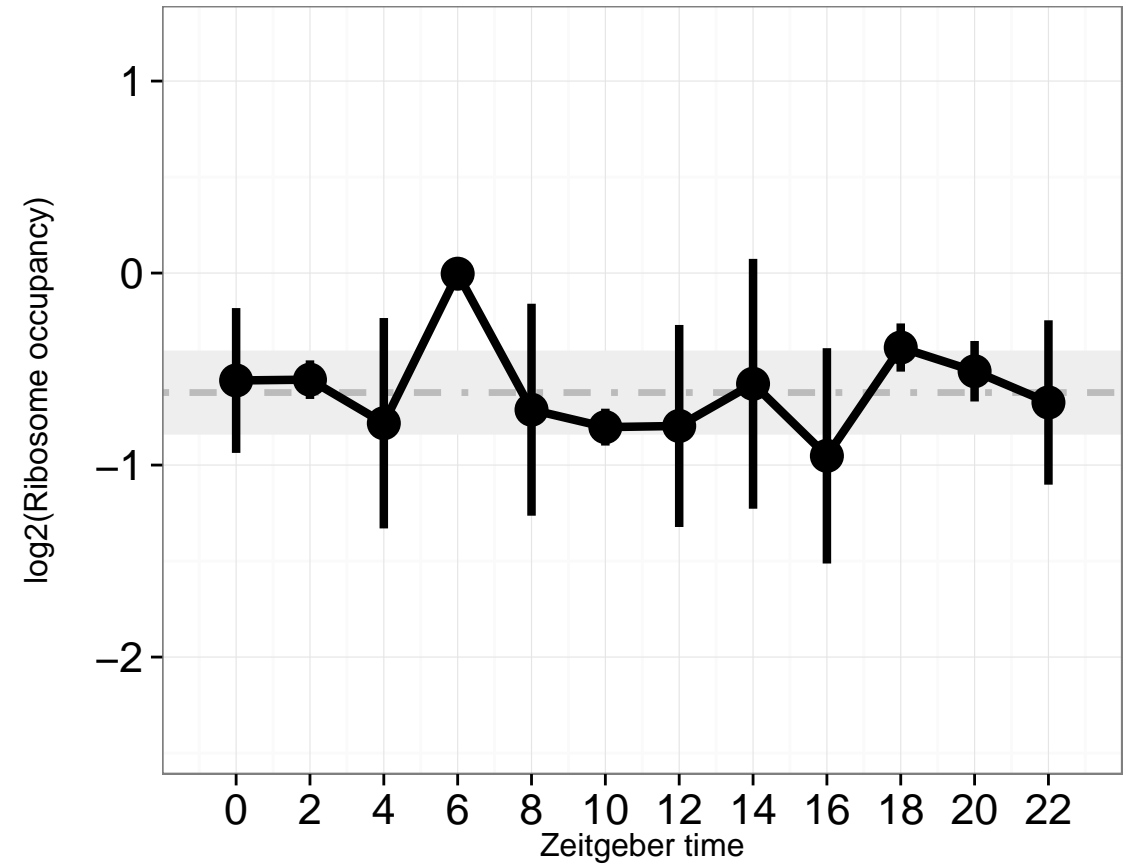

Supplement: Supplementary file 5141 [file 1]

## Sdcbp

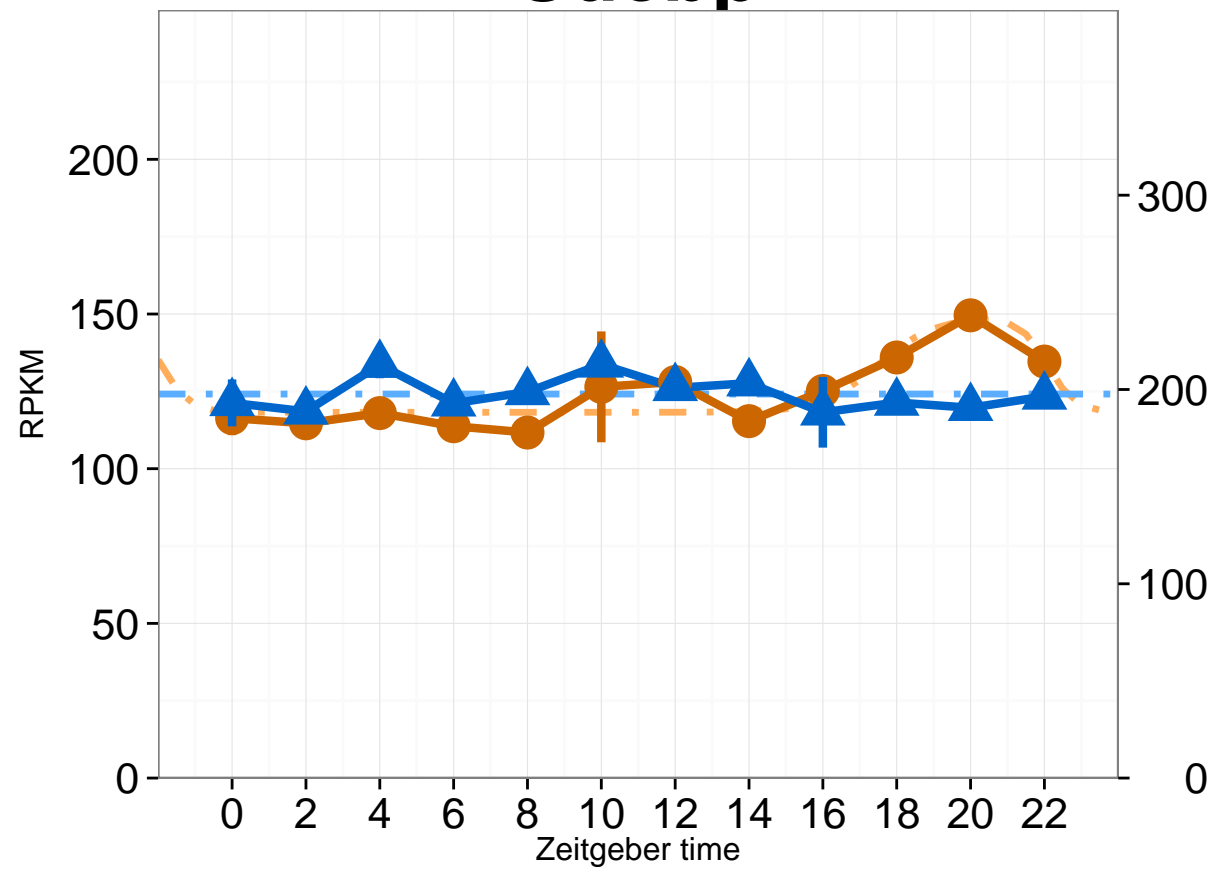

## Sdcbp

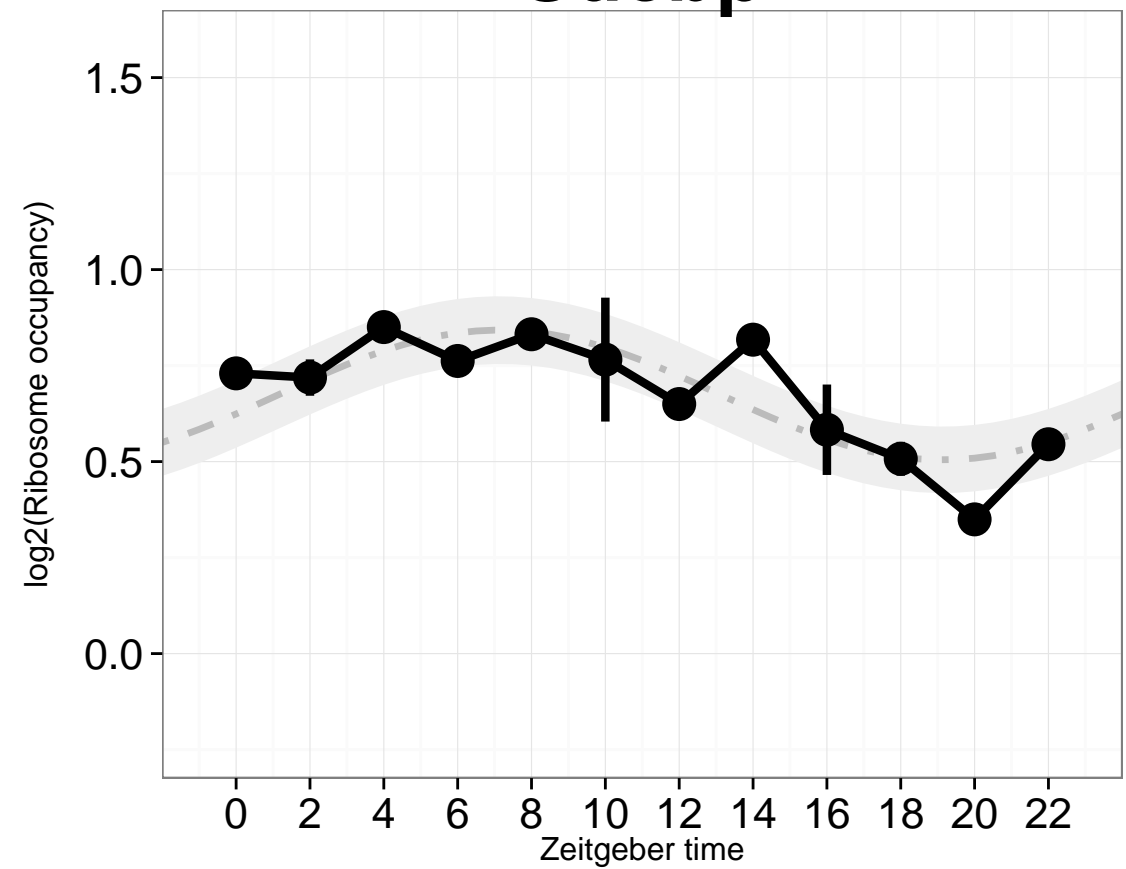

Supplement: Supplementary file 5142 [file 1]

## Heg1

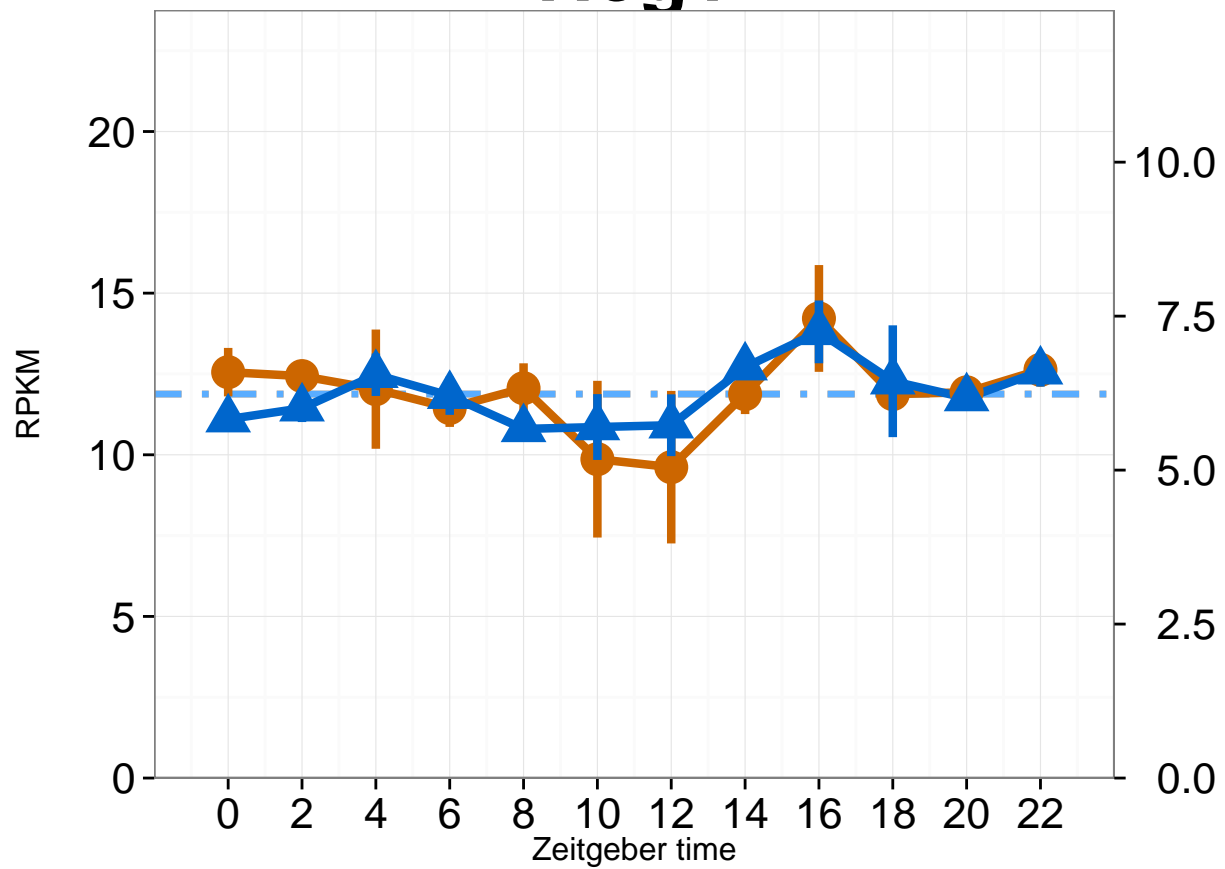

## Heg1

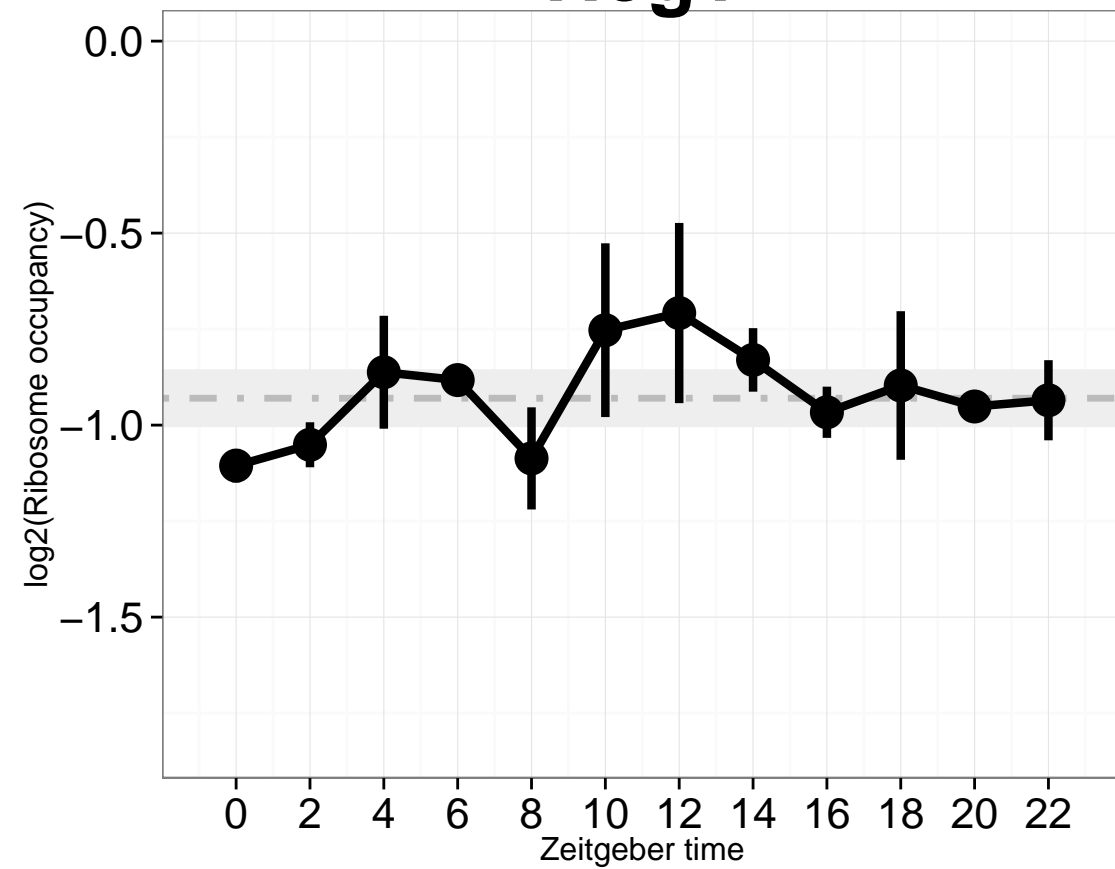

Supplement: Supplementary file 5143 [file 1]

## Zfyve1

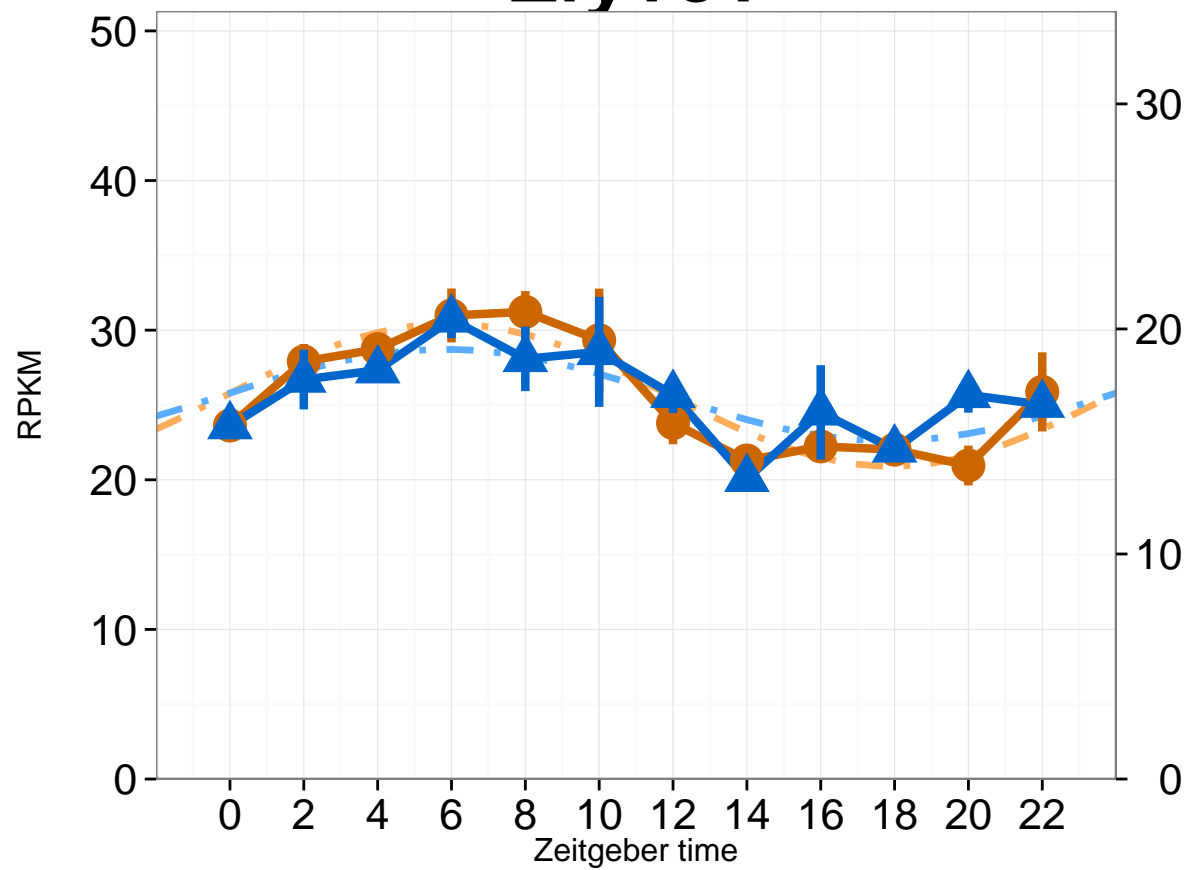

## Zfyve1

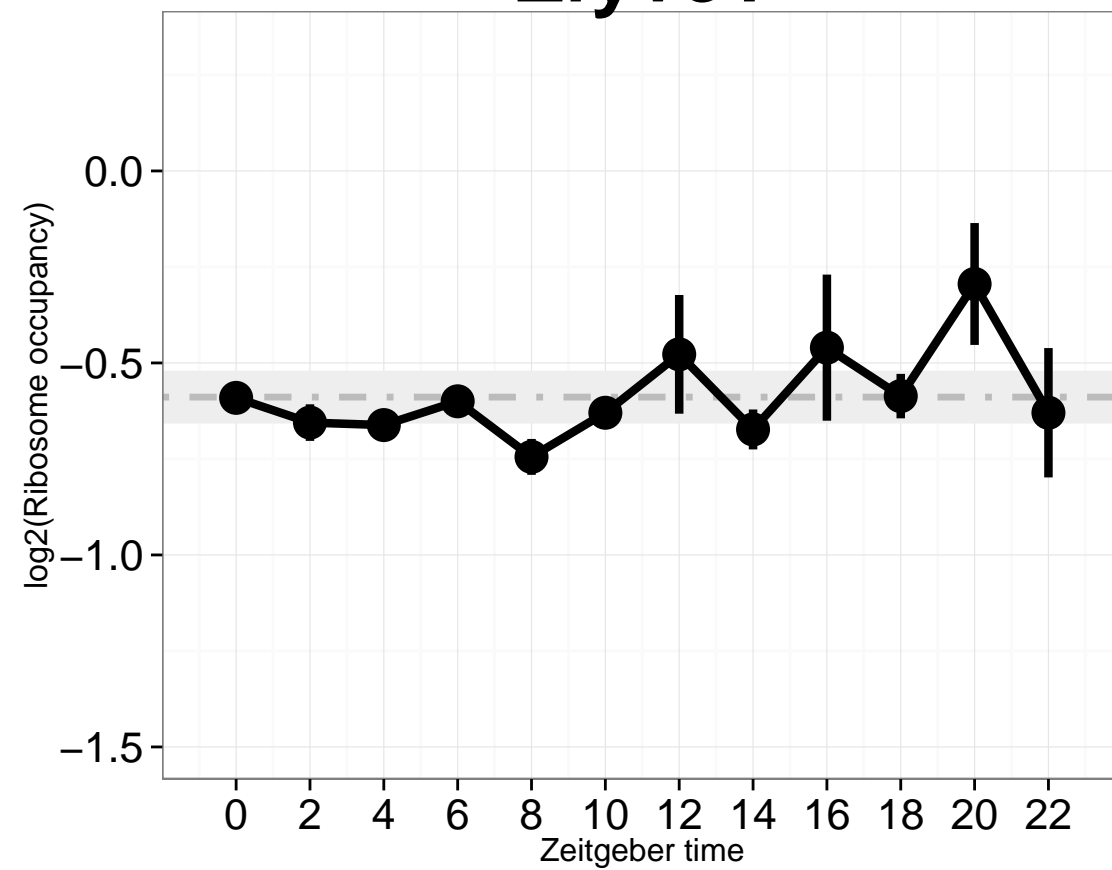

Supplement: Supplementary file 5144 [file 1]

## Slc13a2

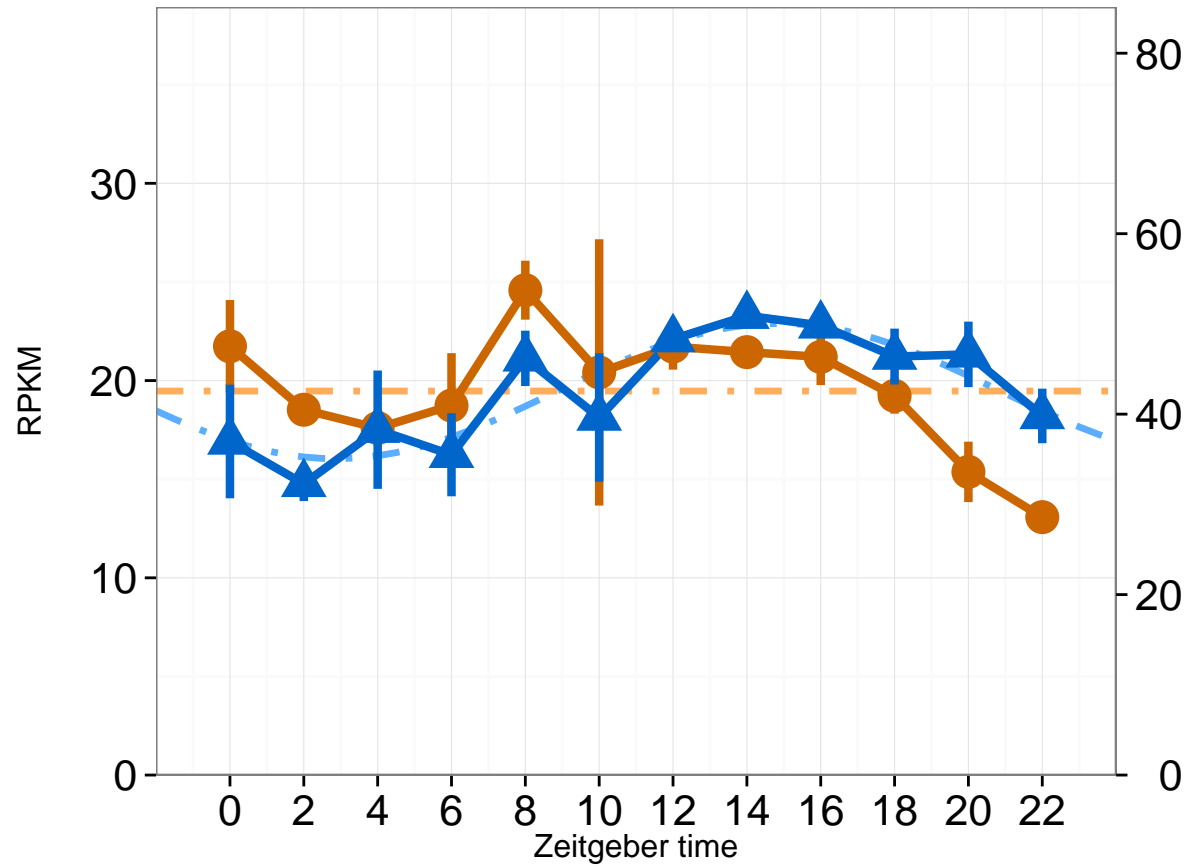

## Slc13a2

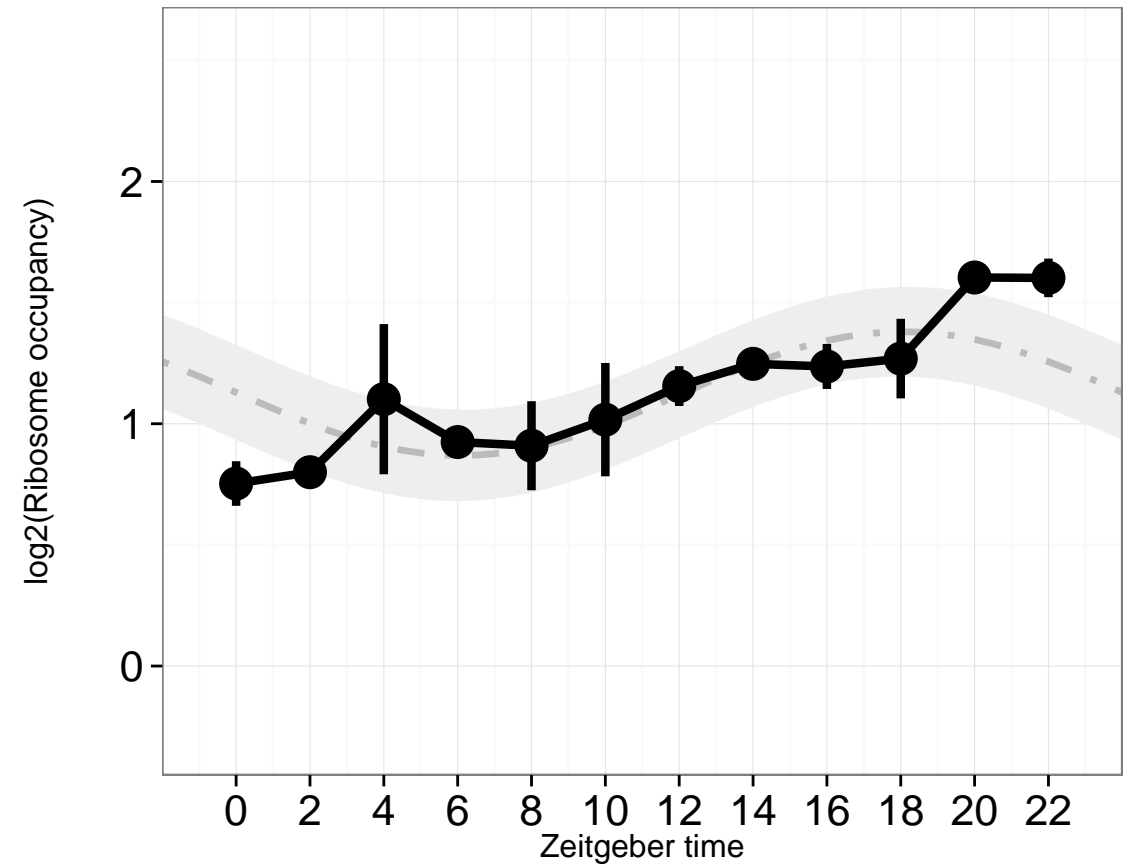

Supplement: Supplementary file 5145 [file 1]

# Trp53

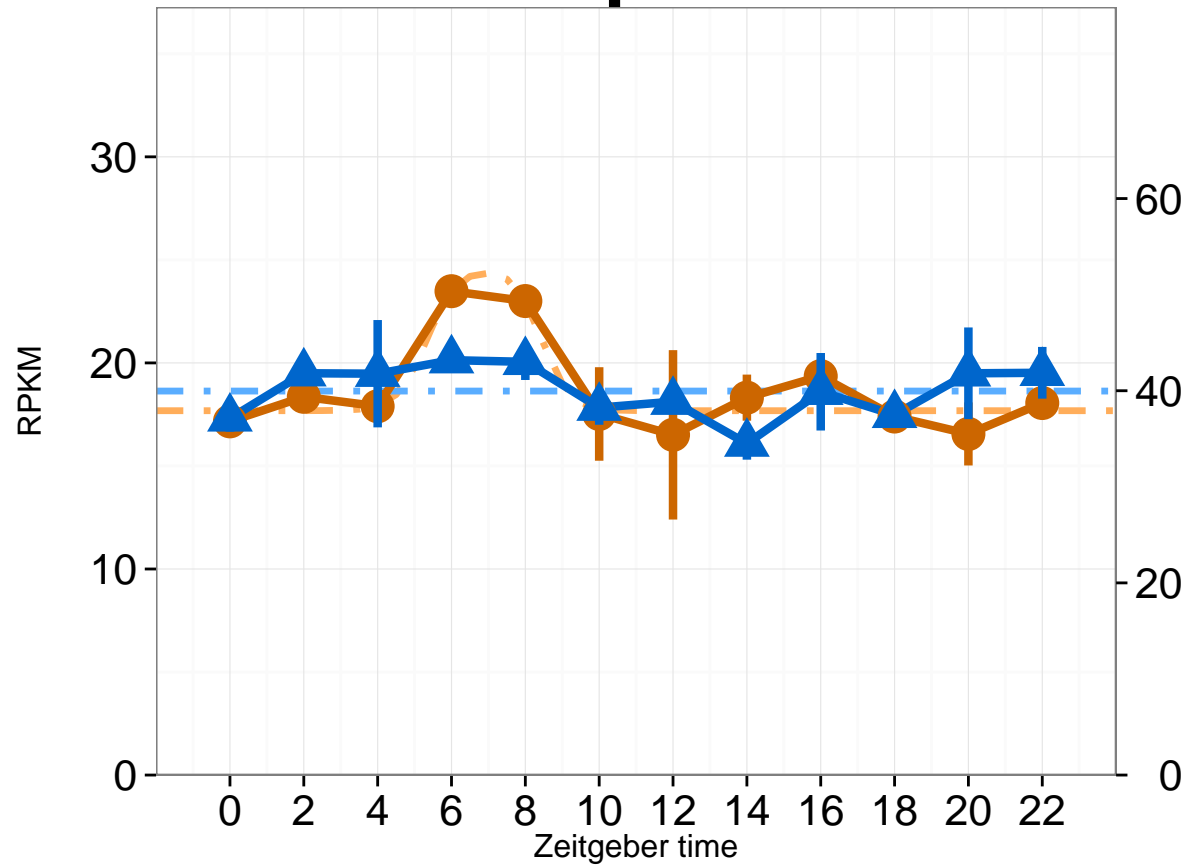

# Trp53

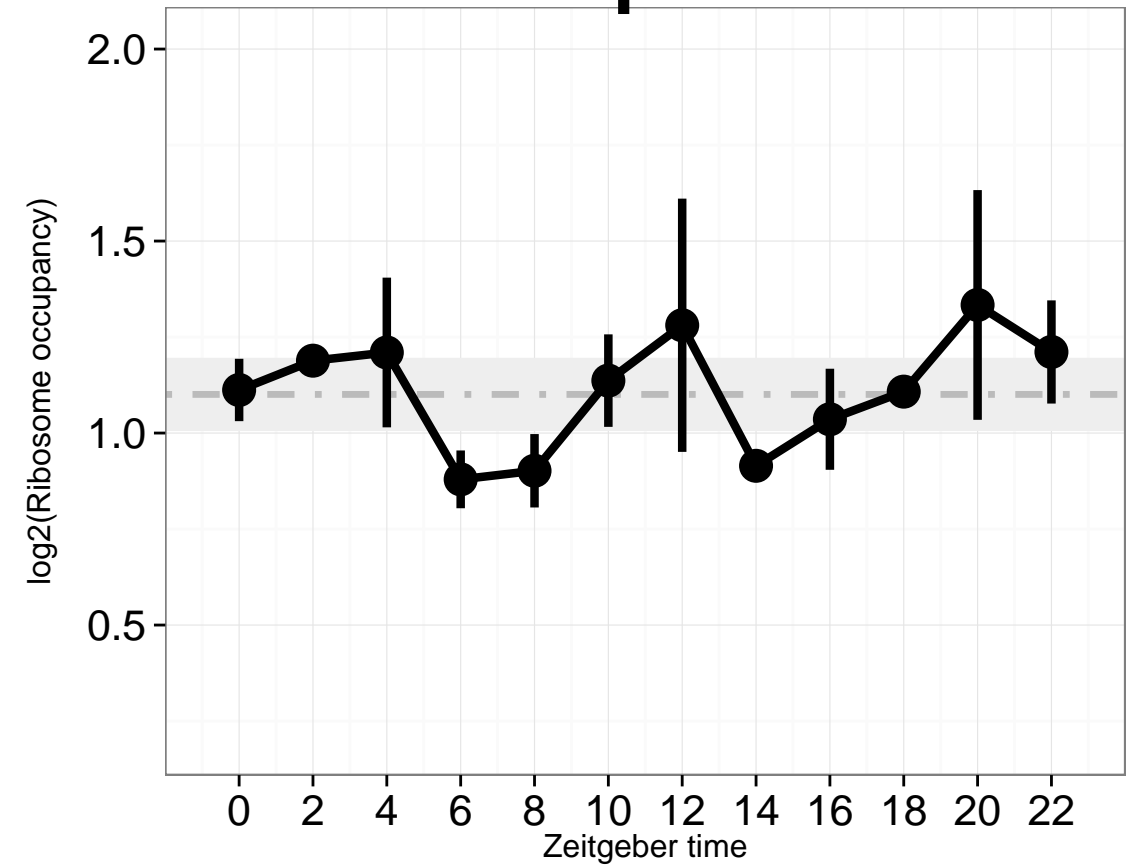

Supplement: Supplementary file 5146 [file 1]

**Nsmce1**

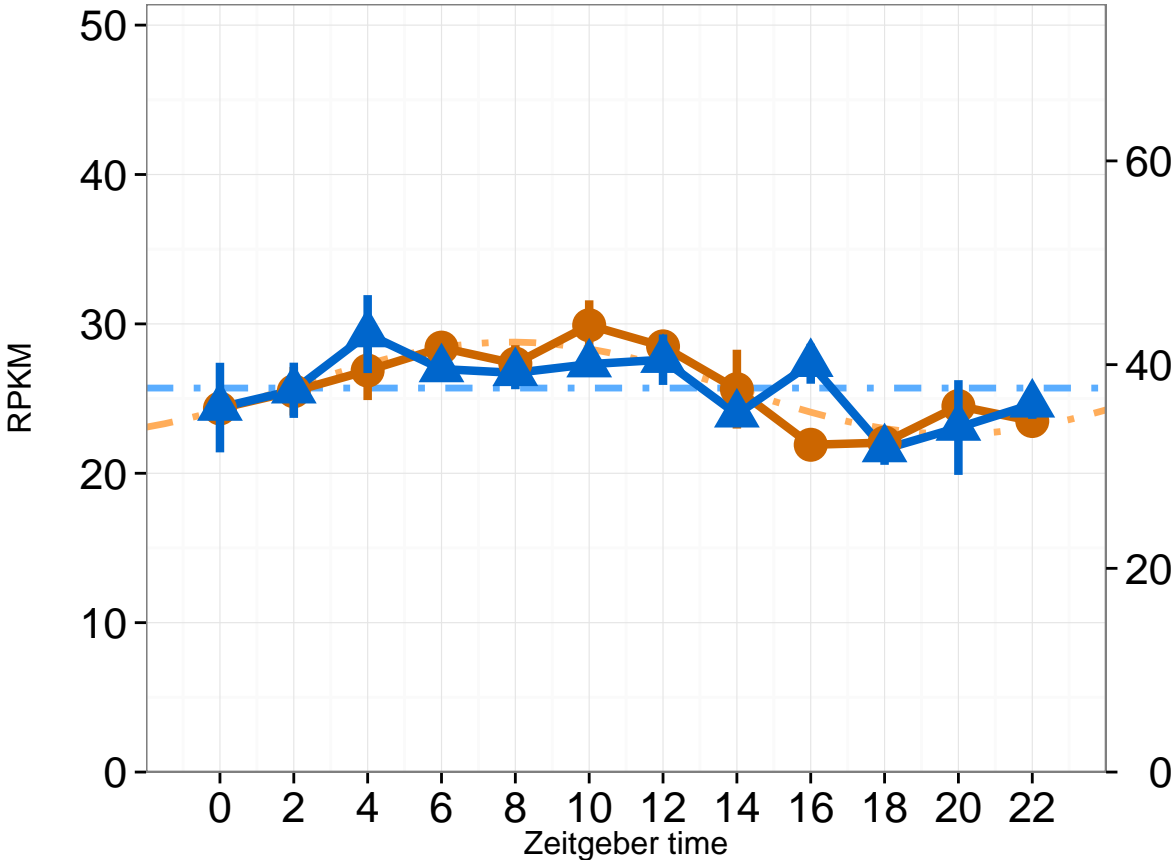

**Nsmce1**

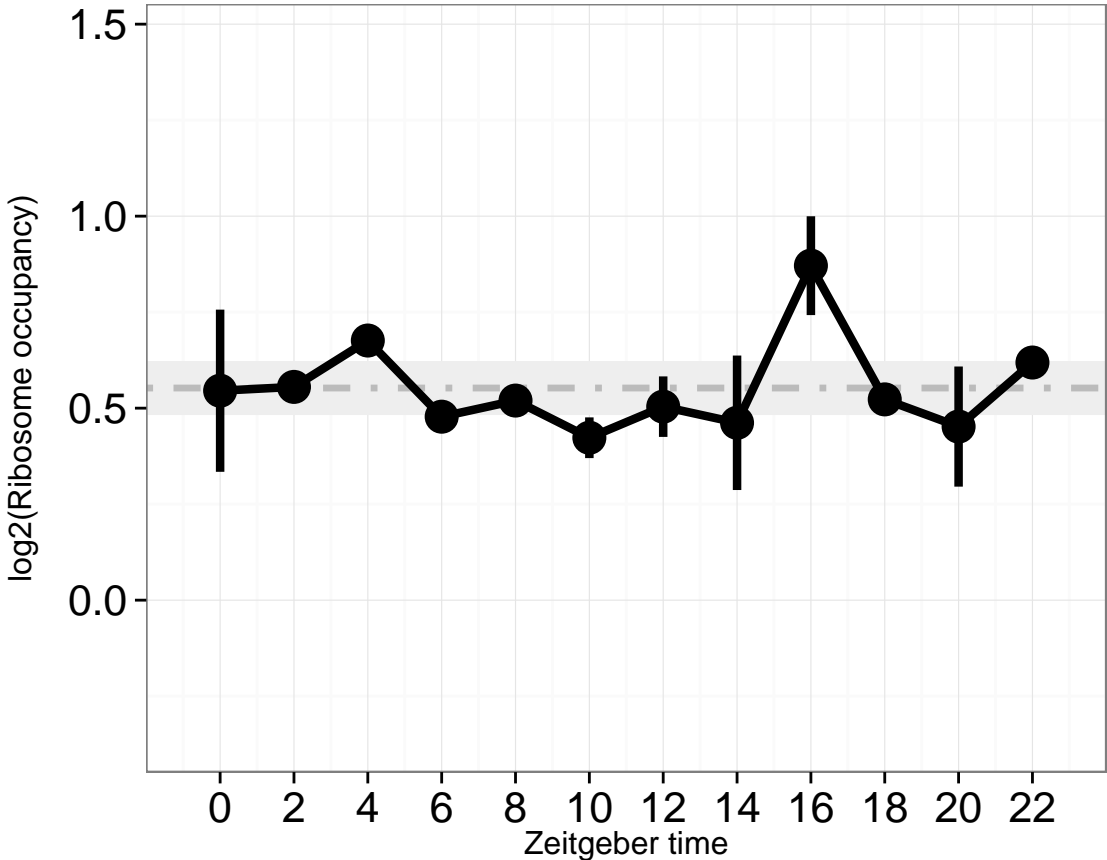

Supplement: Supplementary file 5147 [file 1]

# Dclre1c

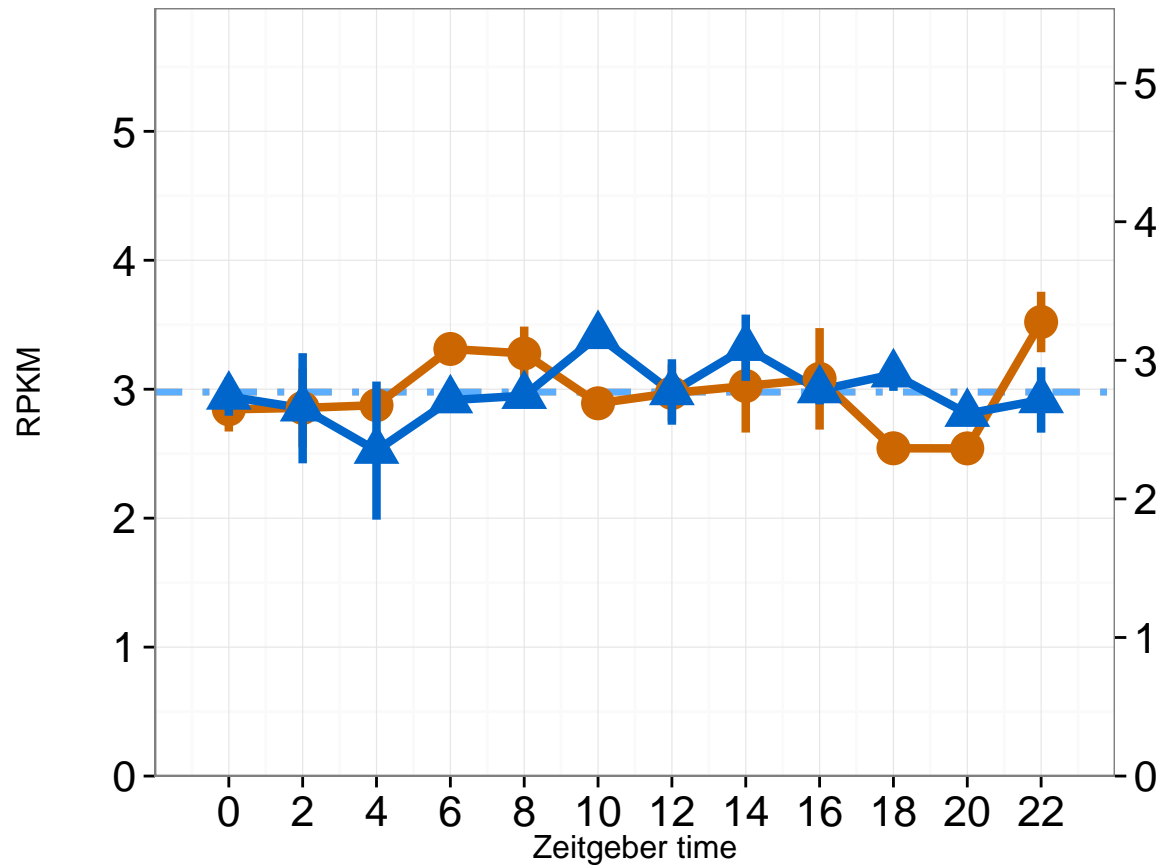

# Dclre1c

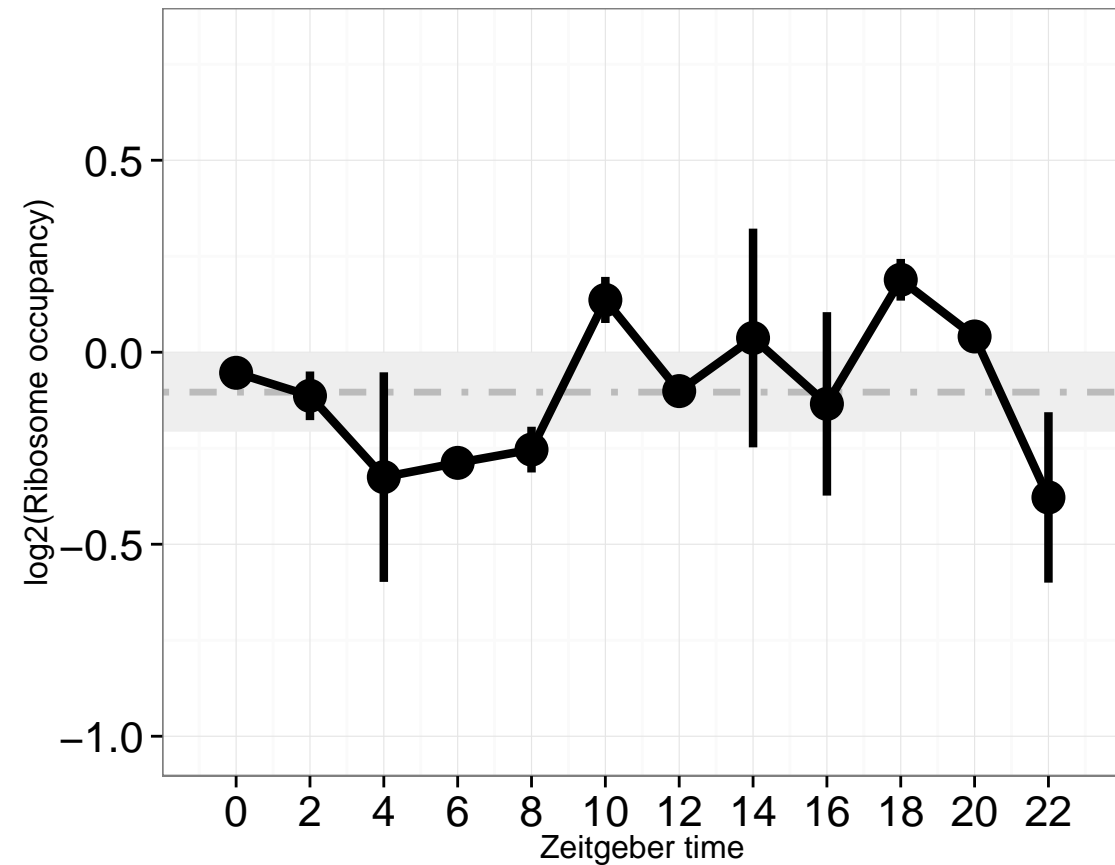

Supplement: Supplementary file 5148 [file 1]

## Strip2

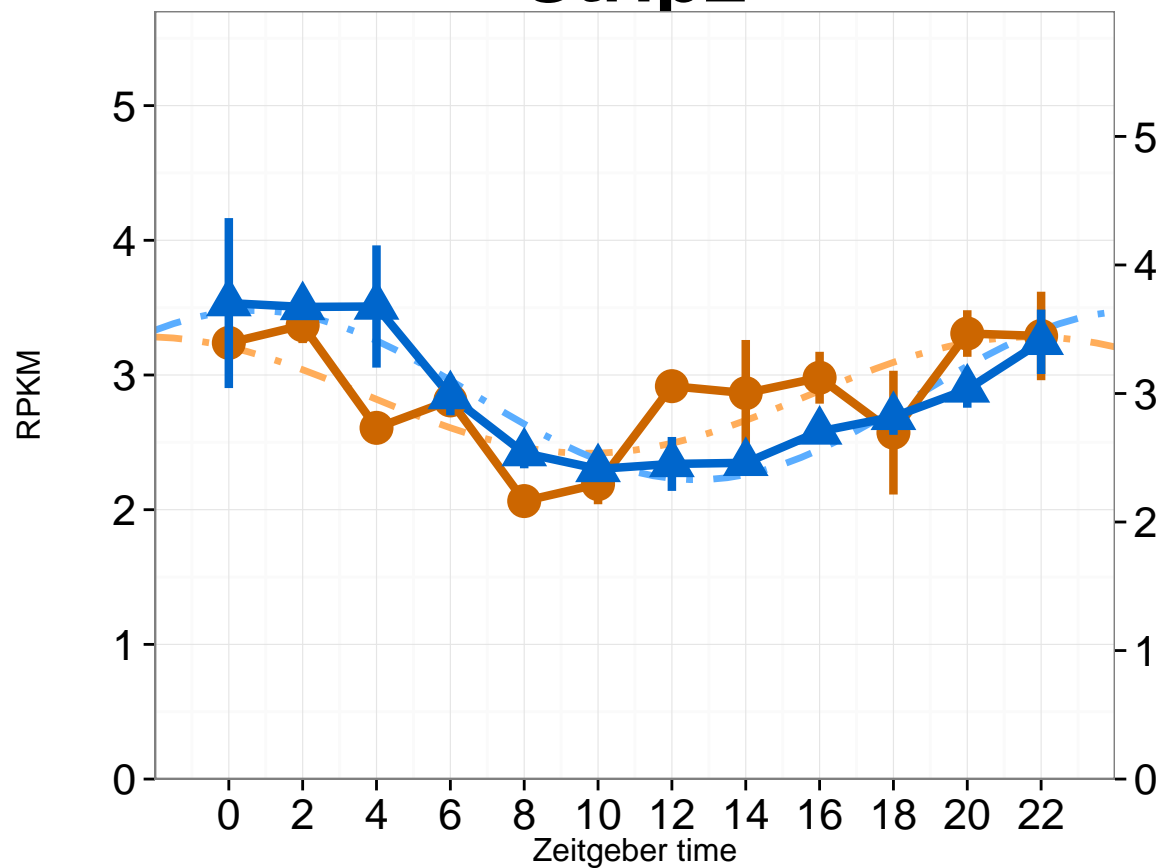

## Strip2

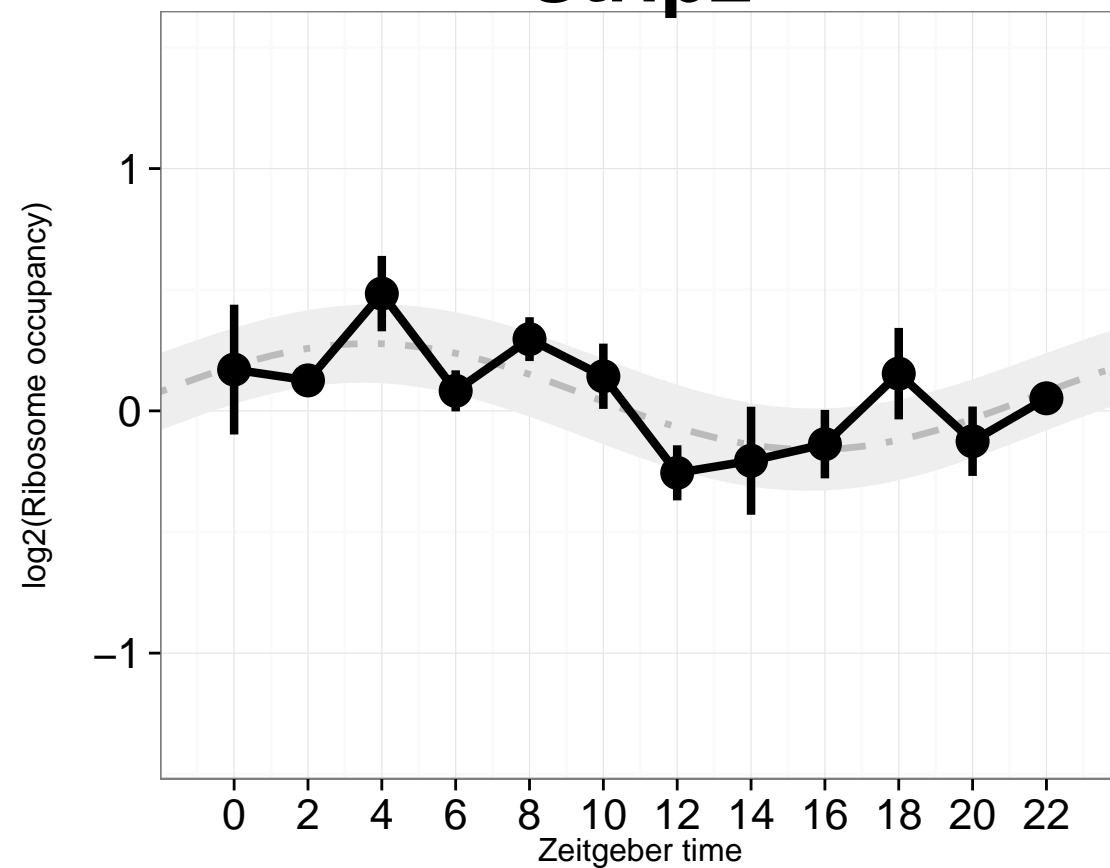

Supplement: Supplementary file 5149 [file 1]

## Apoc3

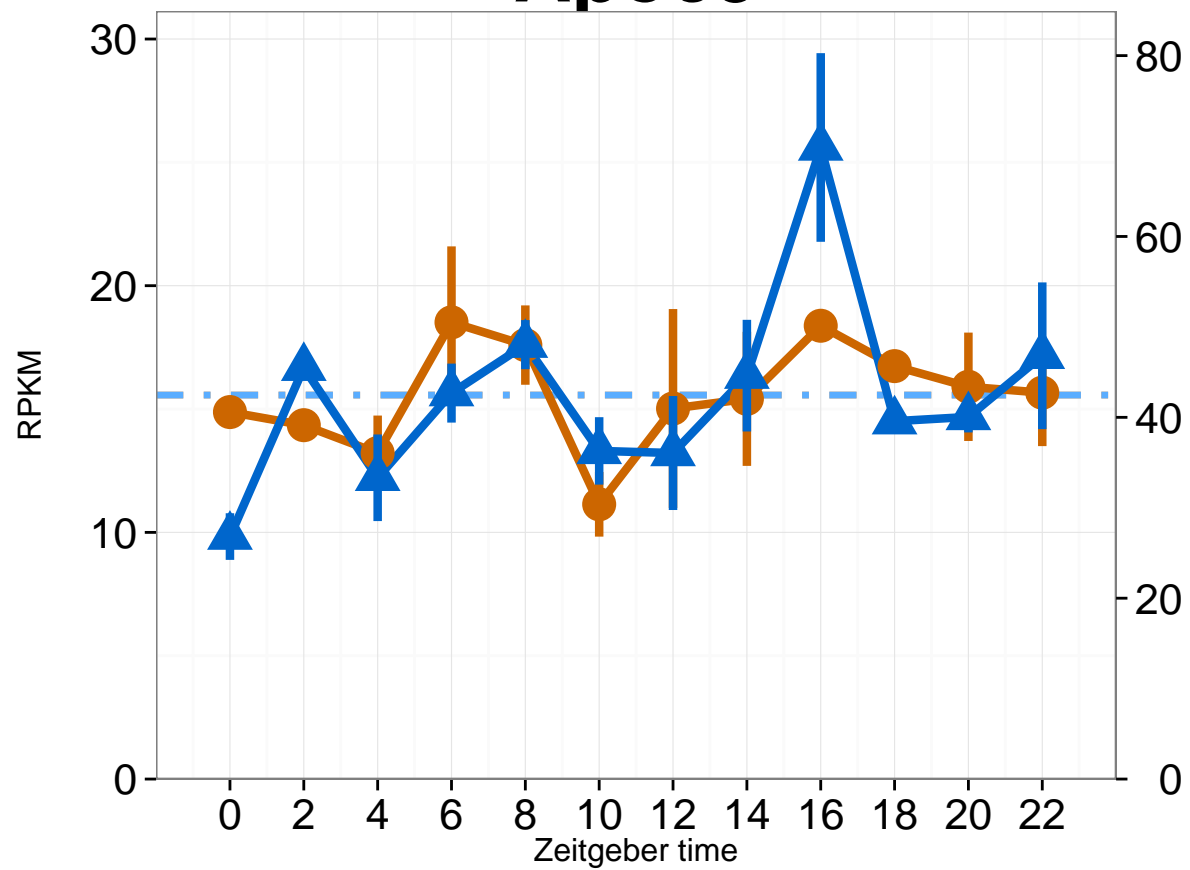

## Apoc3

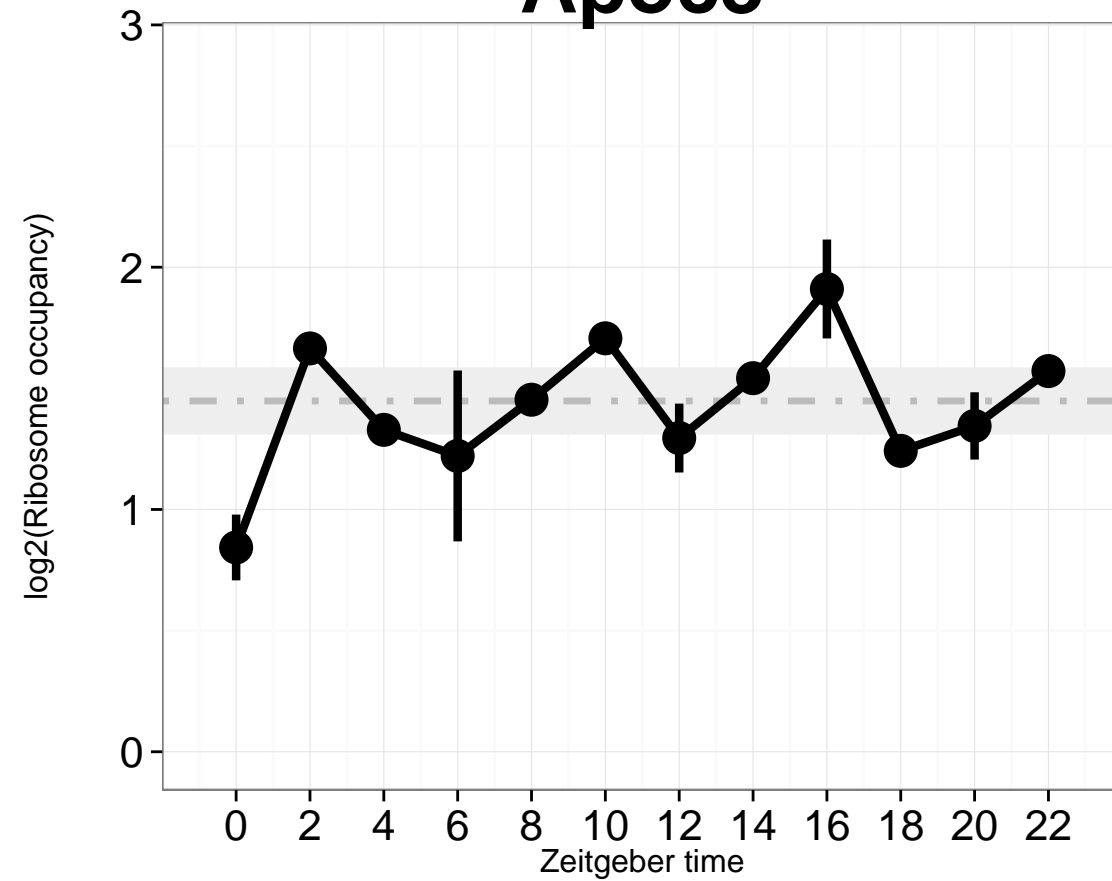

Supplement: Supplementary file 5150 [file 1]

## Cutc

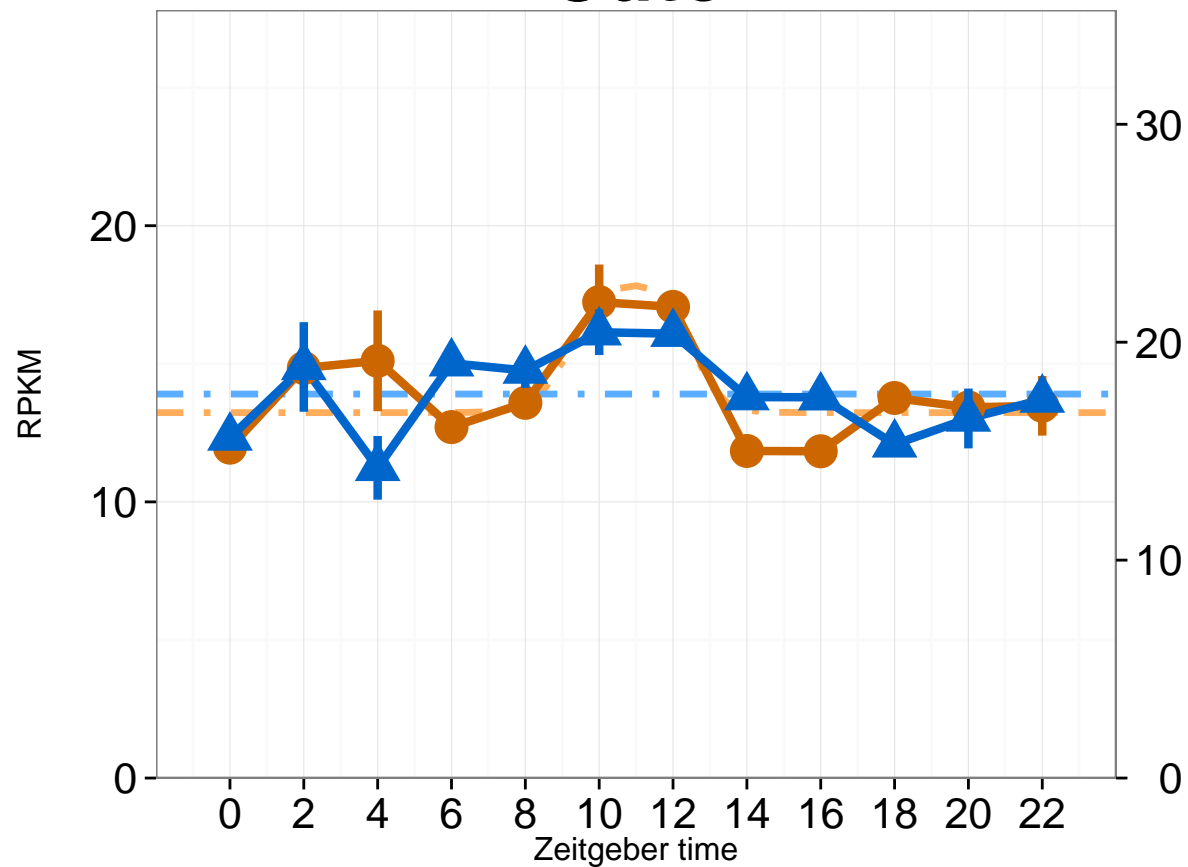

## Cutc

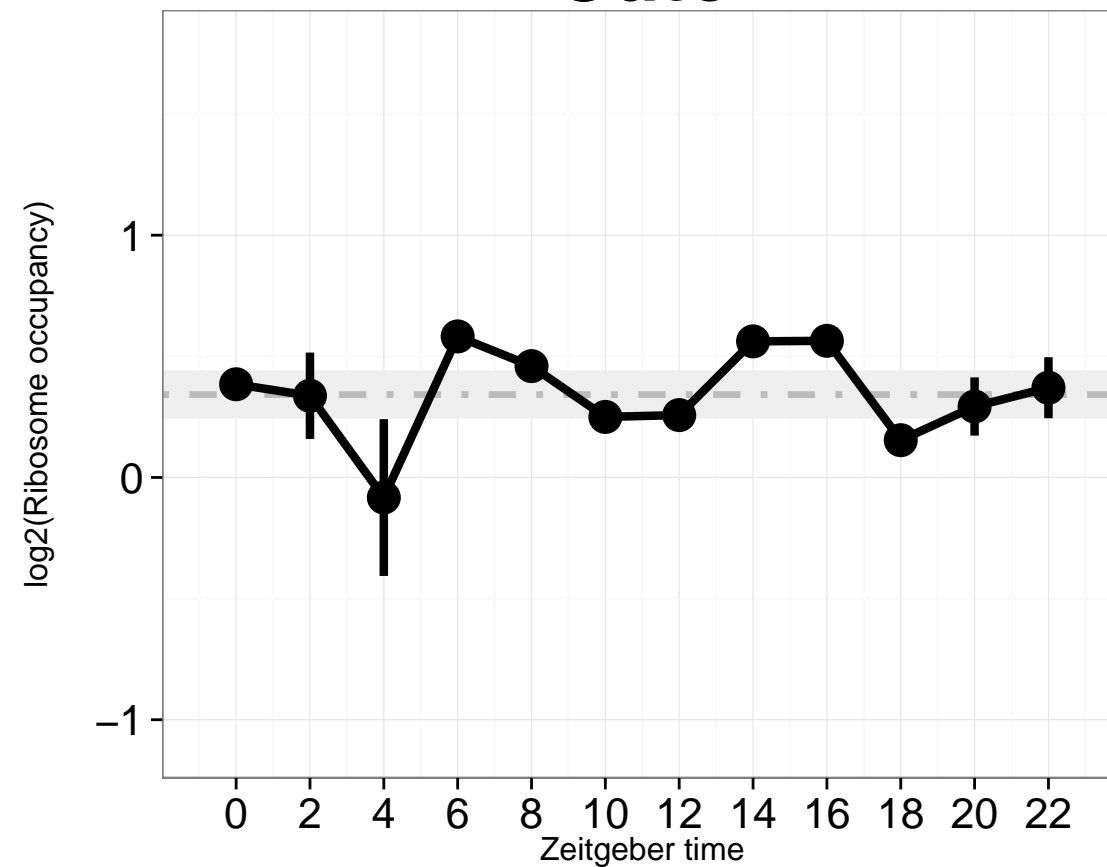

Supplement: Supplementary file 5151 [file 1]

## Haus5

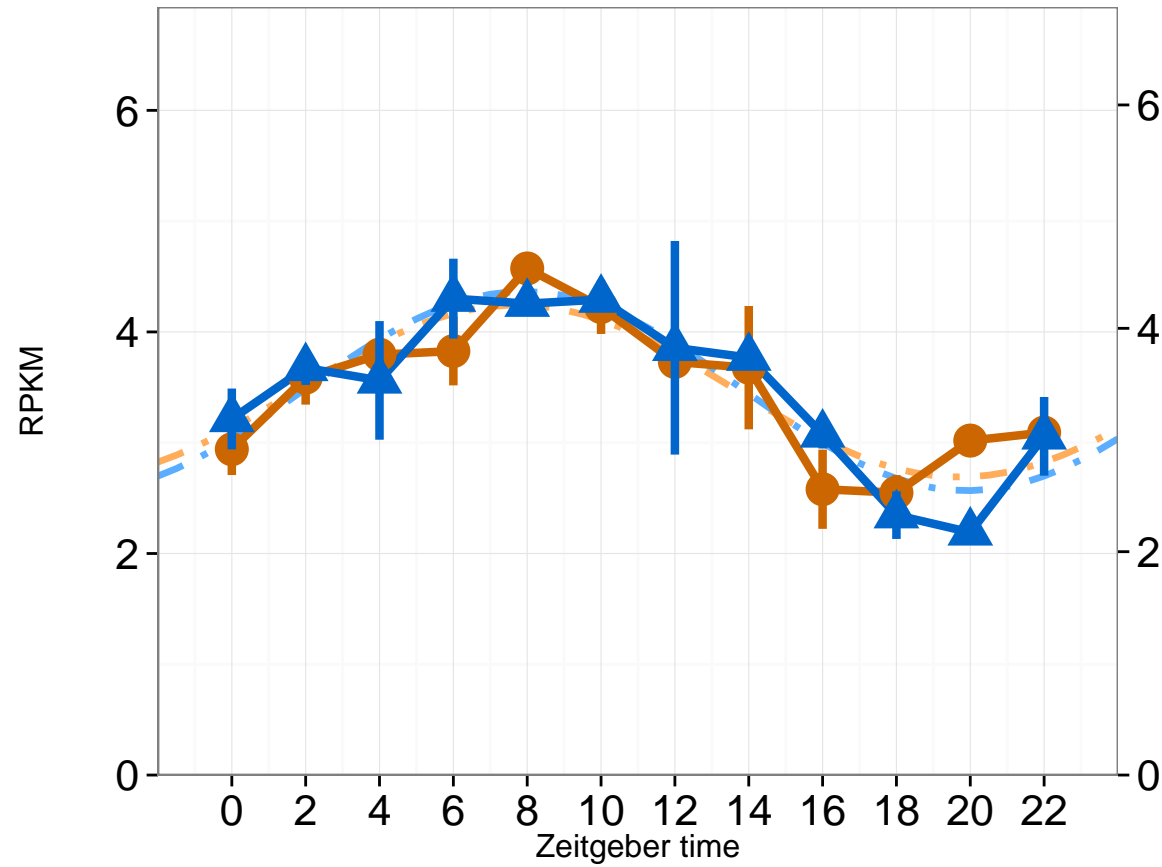

## Haus5

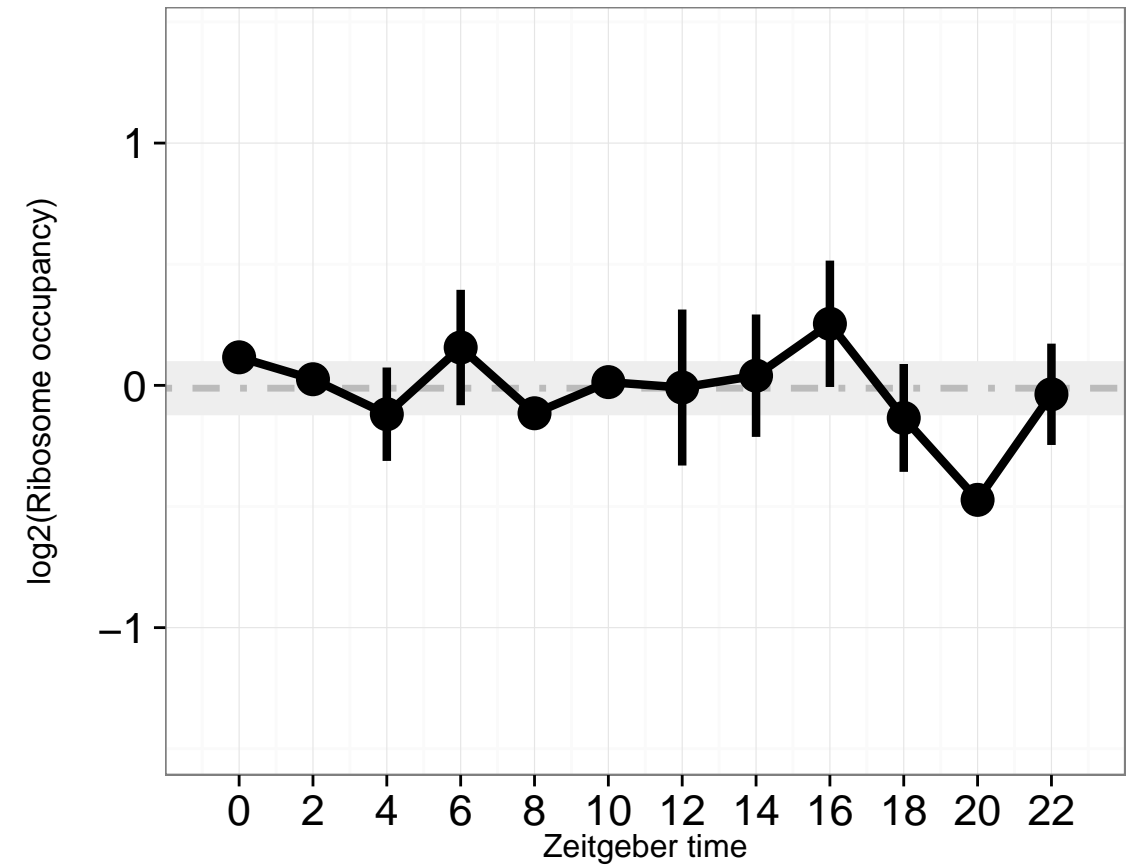

Supplement: Supplementary file 5152 [file 1]

## Mospd2

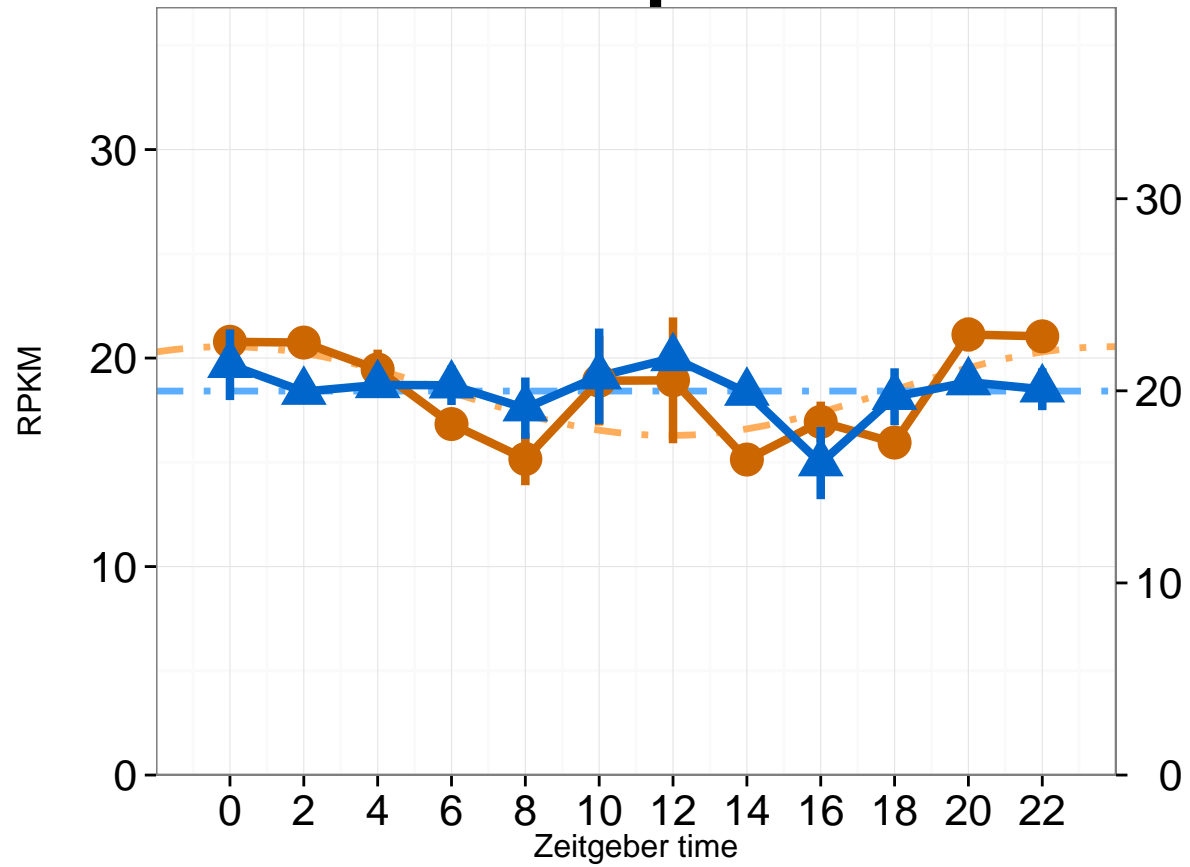

## Mospd2

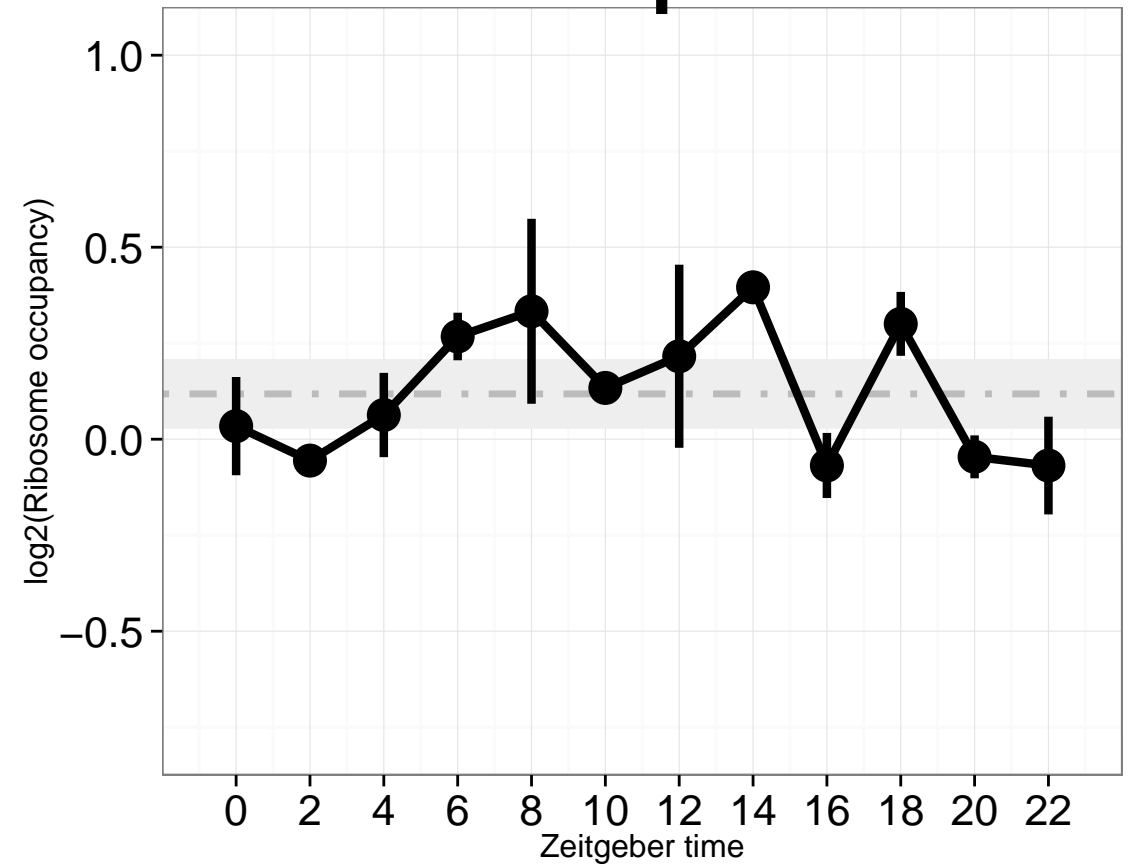

Supplement: Supplementary file 5153 [file 1]

# Ube2j2

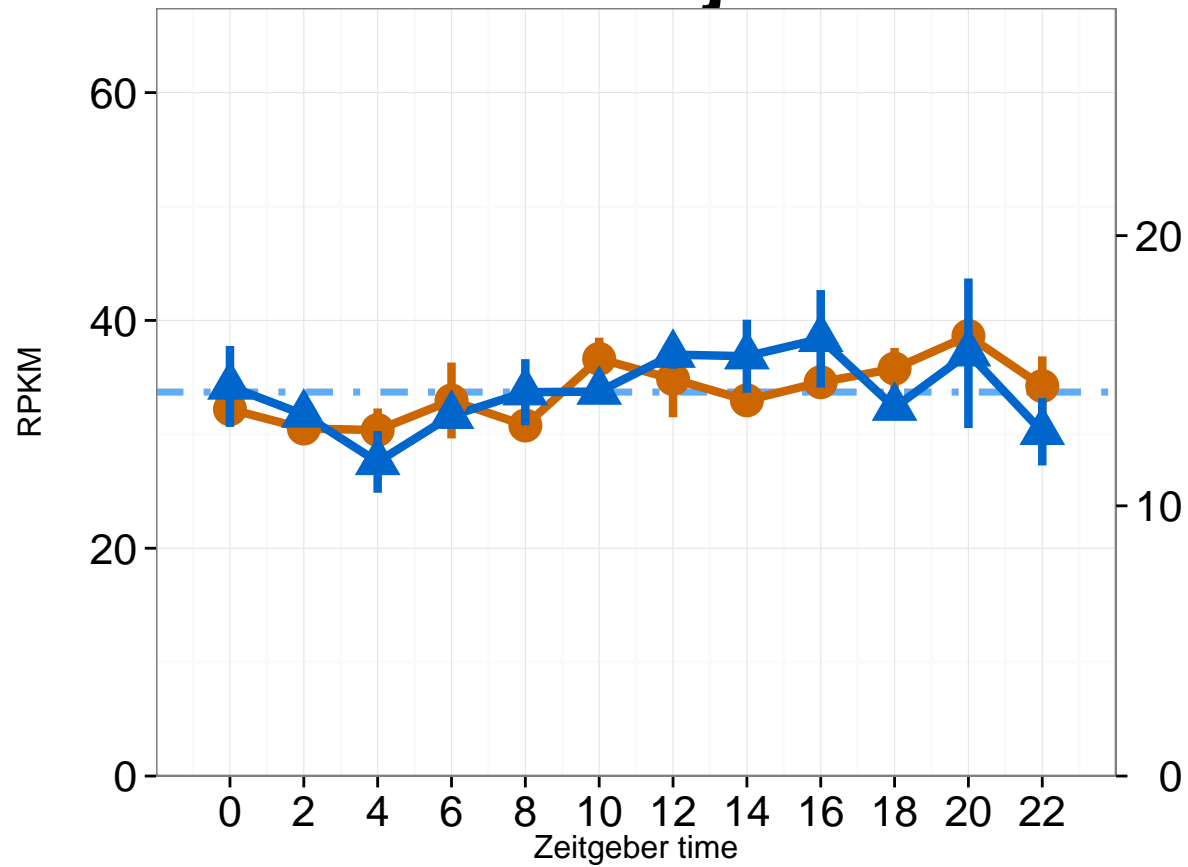

# Ube2j2

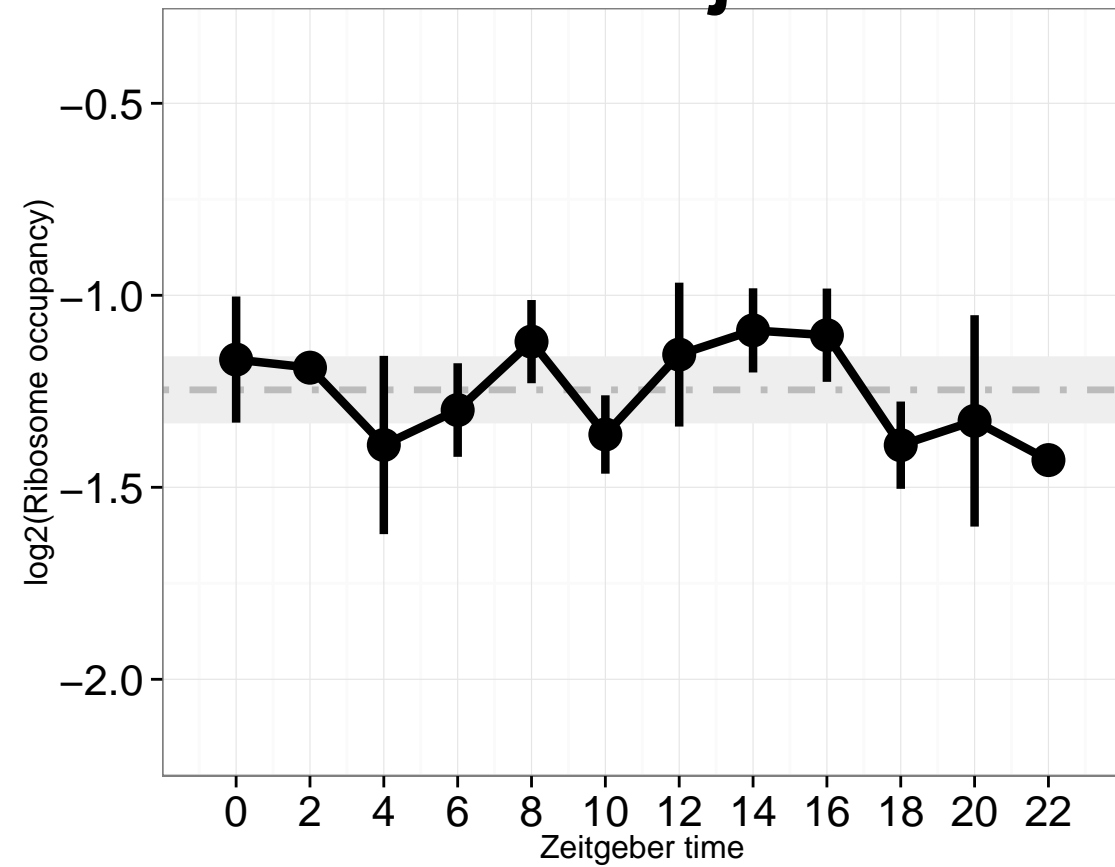

Supplement: Supplementary file 5154 [file 1]

## Olfm1

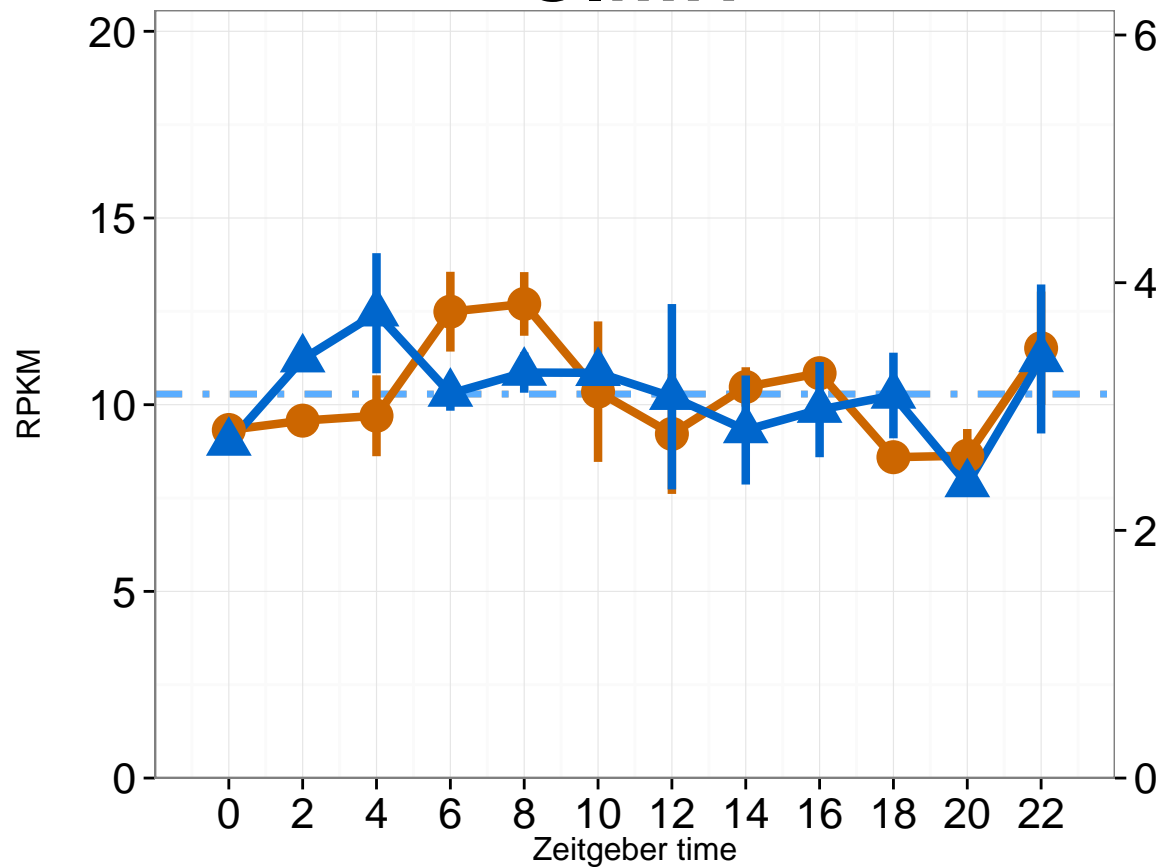

## Olfm1

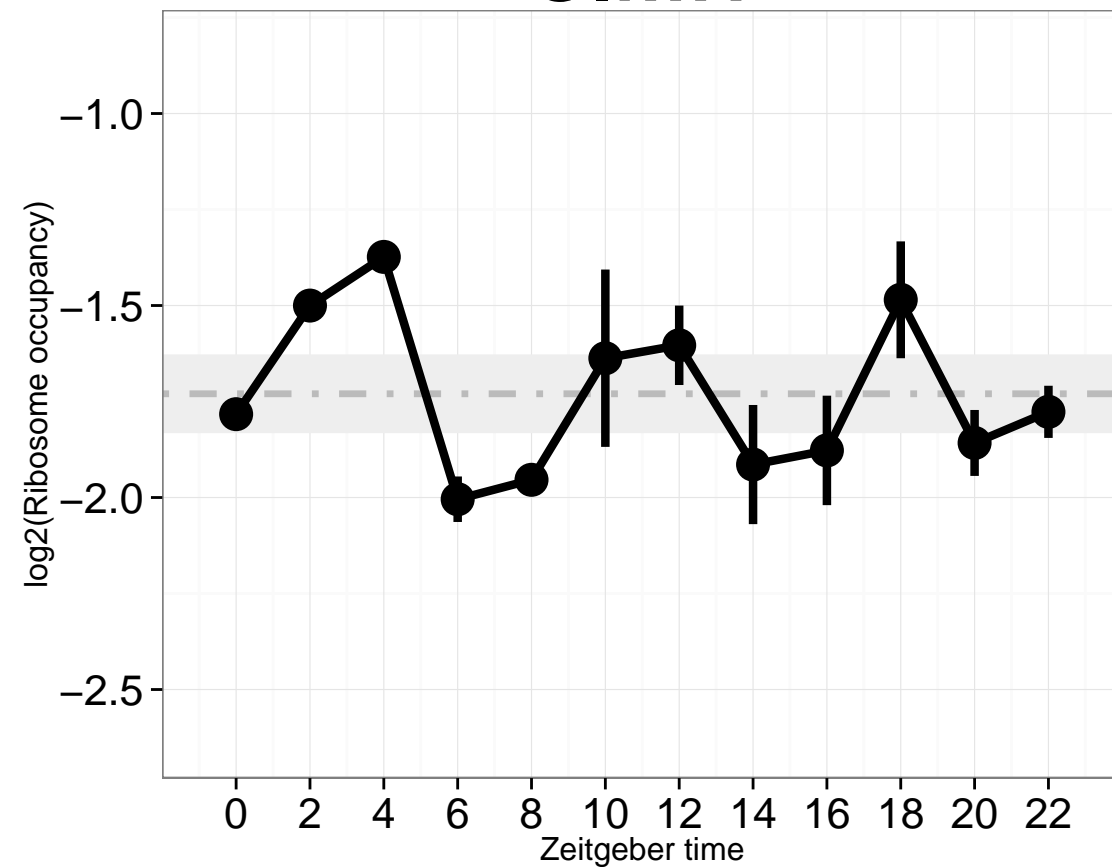

Supplement: Supplementary file 5155 [file 1]

## Thns12

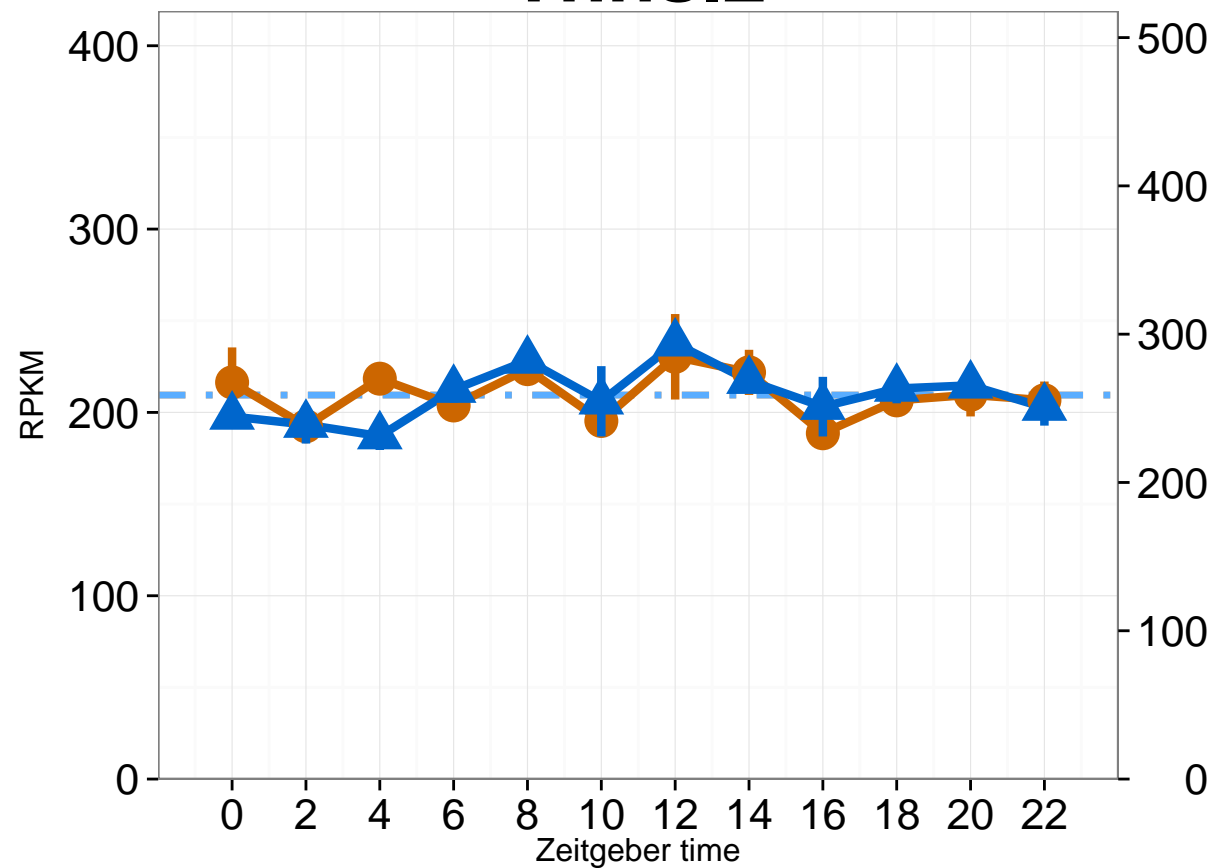

## Thns12

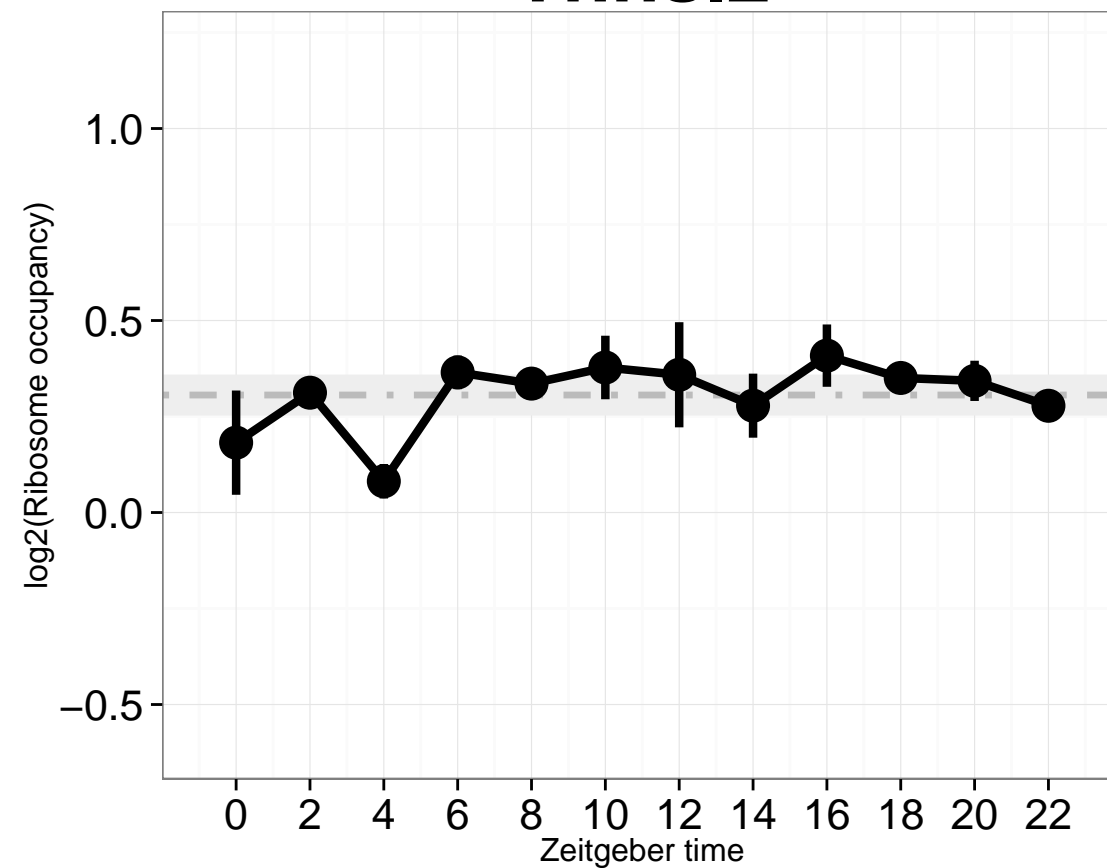

Supplement: Supplementary file 5156 [file 1]

# Ap1b1

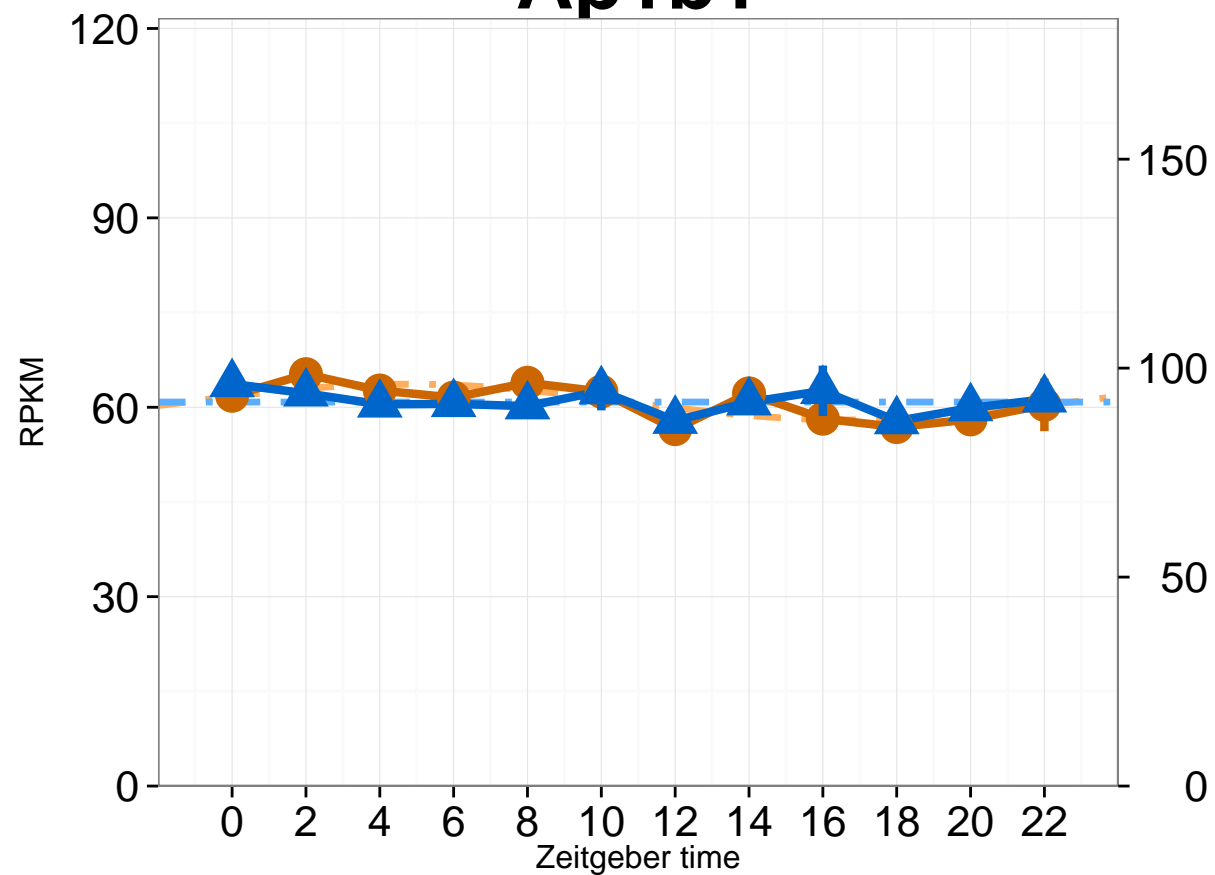

# Ap1b1

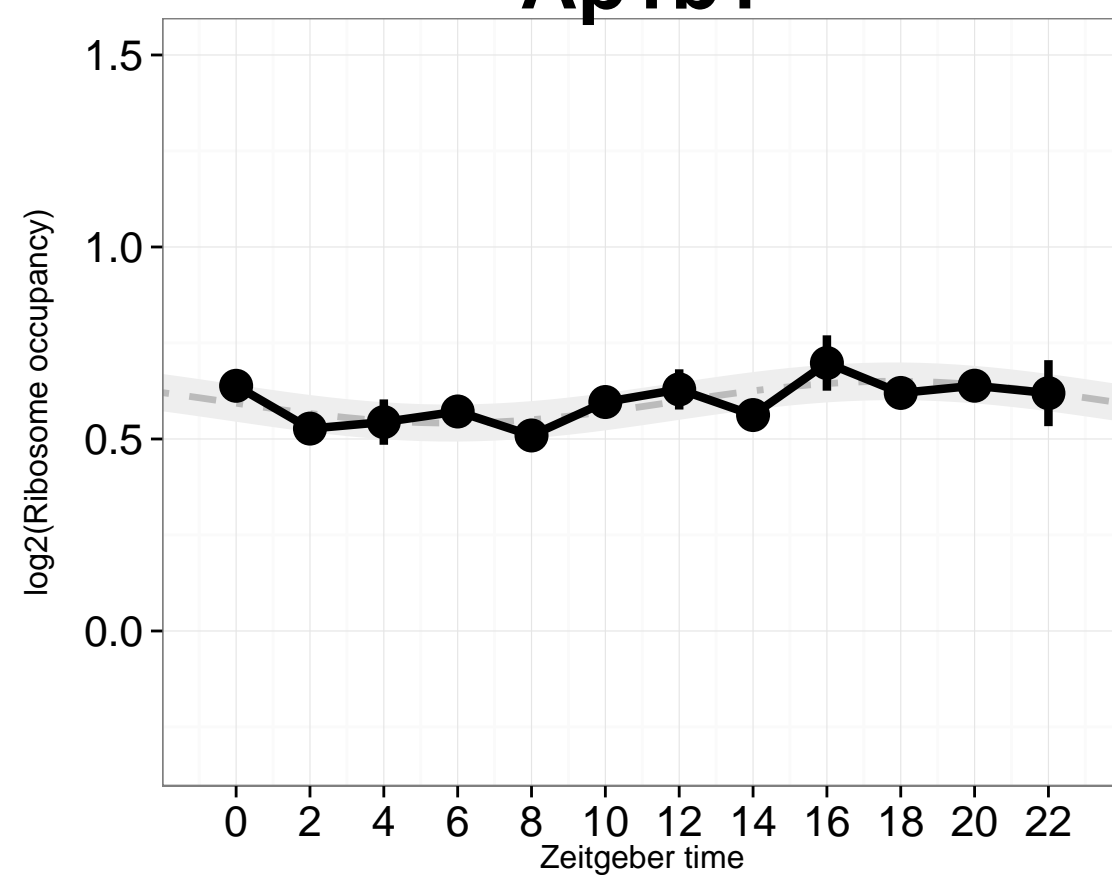

Supplement: Supplementary file 5157 [file 1]

## Cxcr3

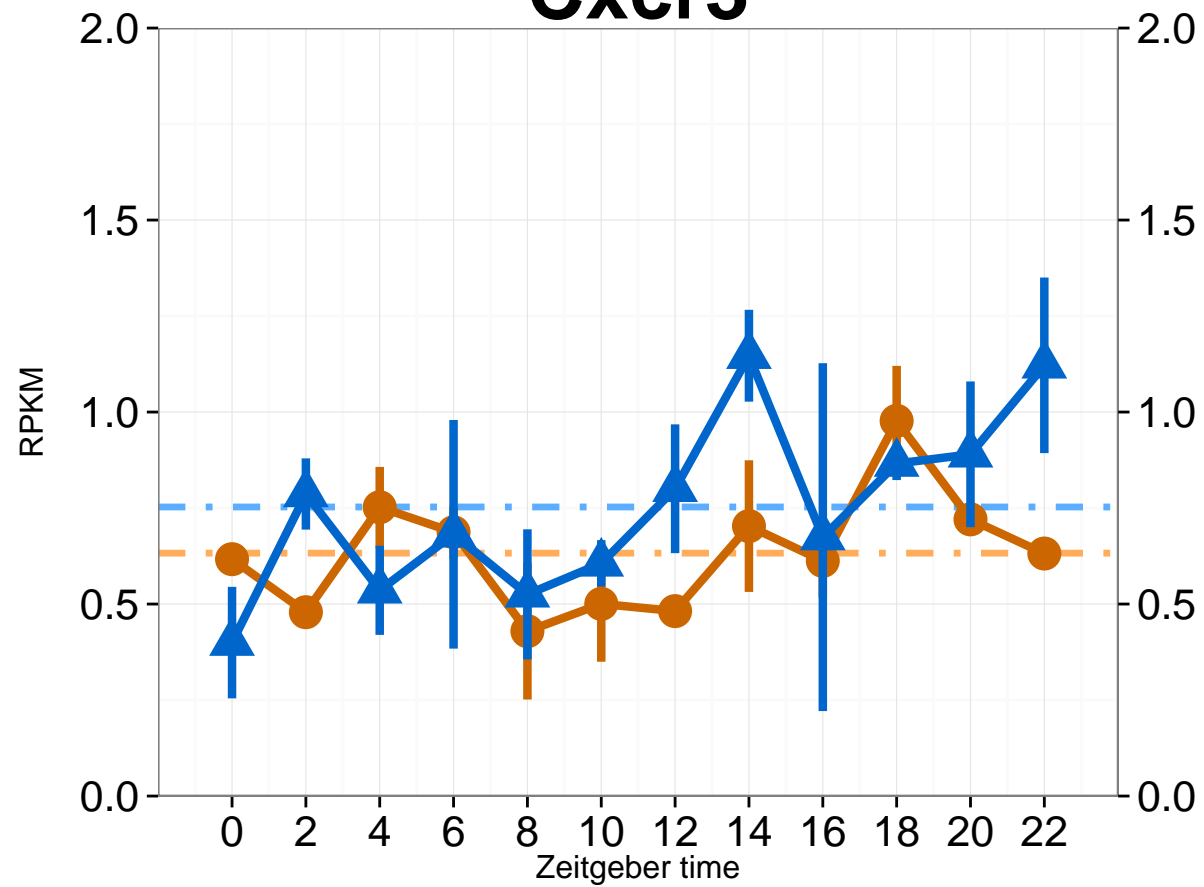

## Cxcr3

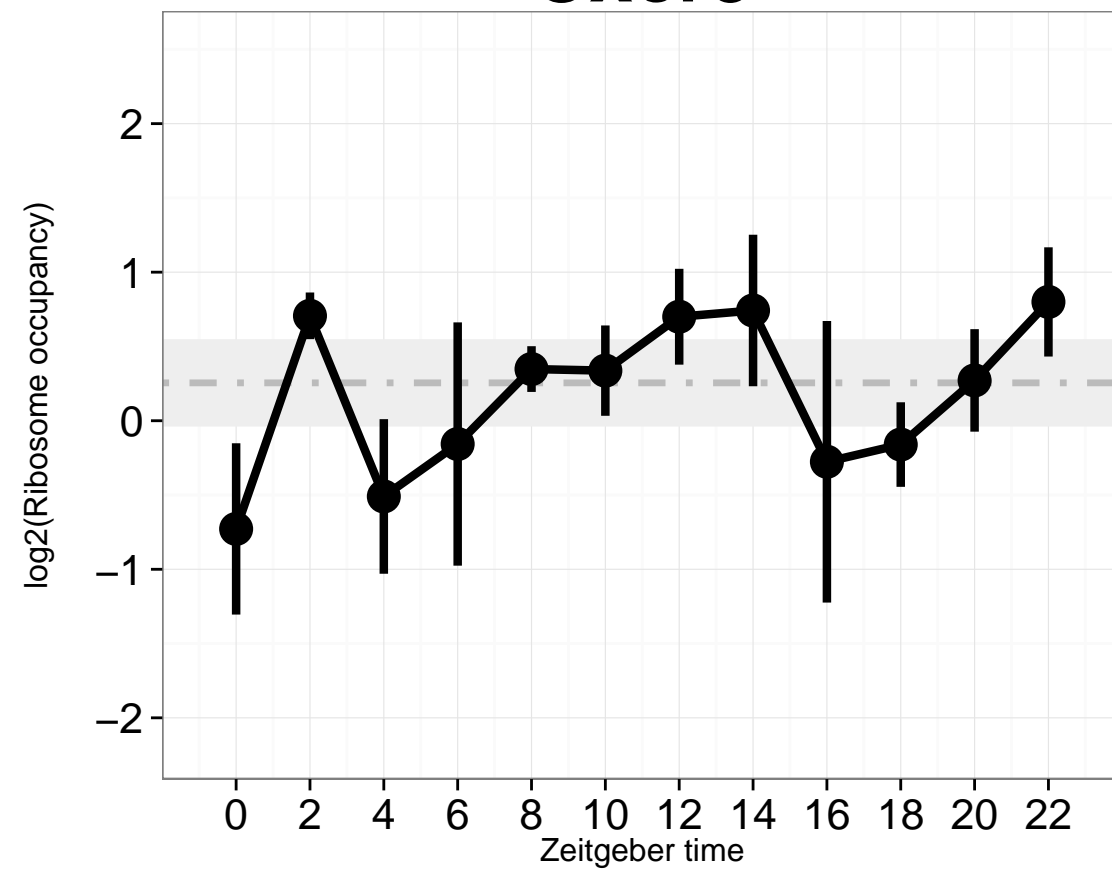

Supplement: Supplementary file 5158 [file 1]

# Kcna5

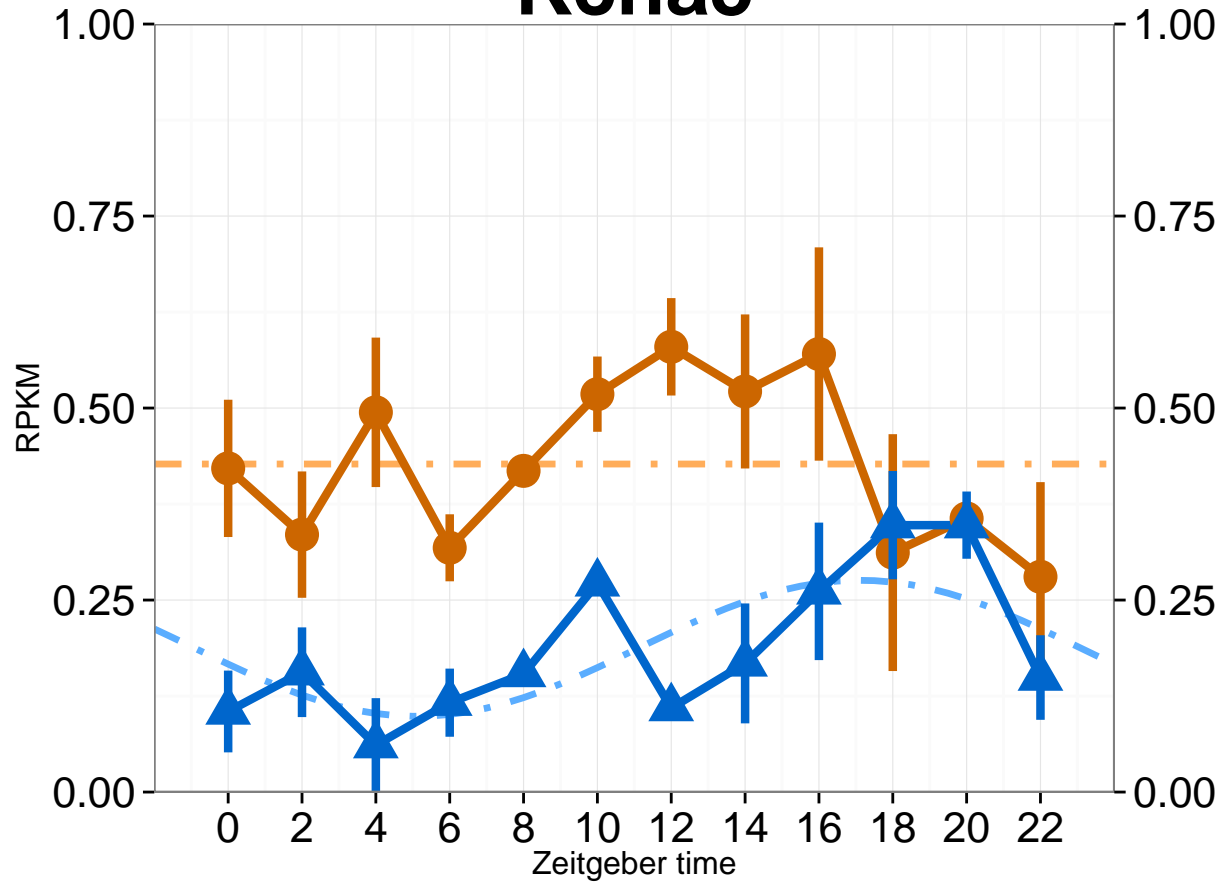

# Kcna5

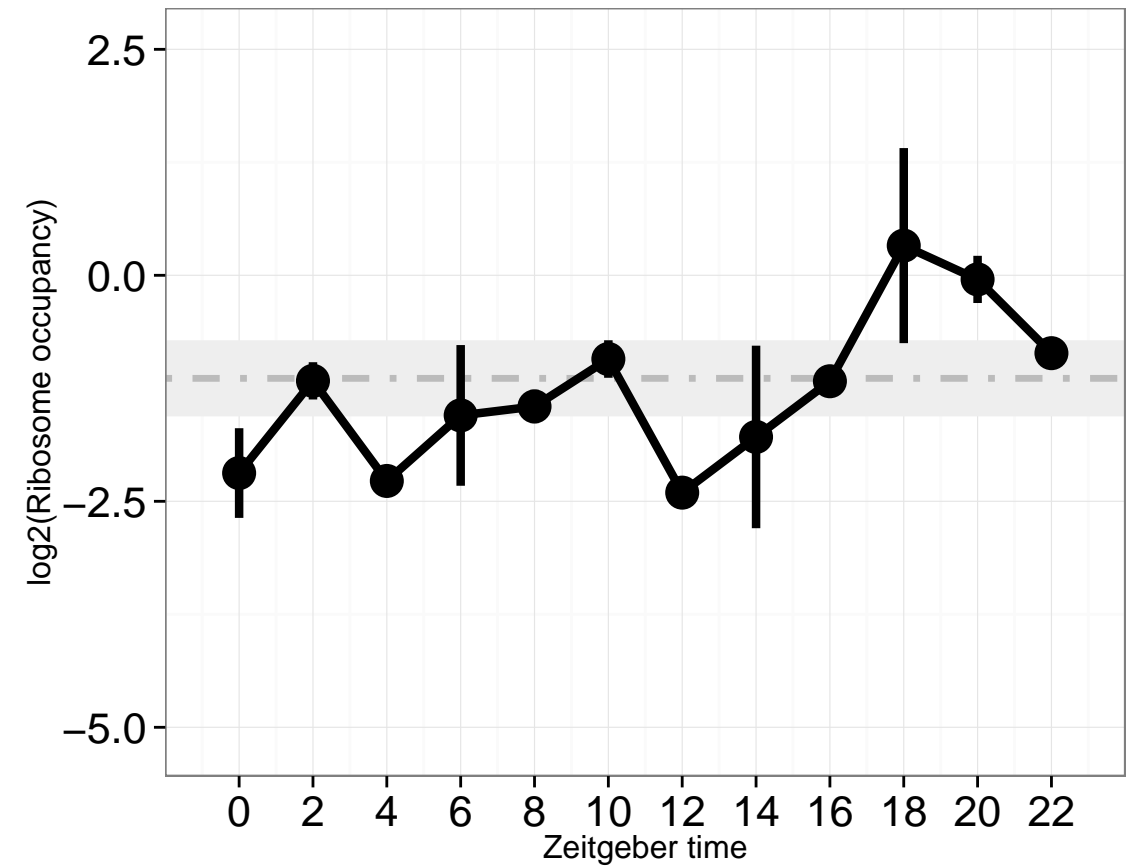

Supplement: Supplementary file 5159 [file 1]

## Sh3rf1

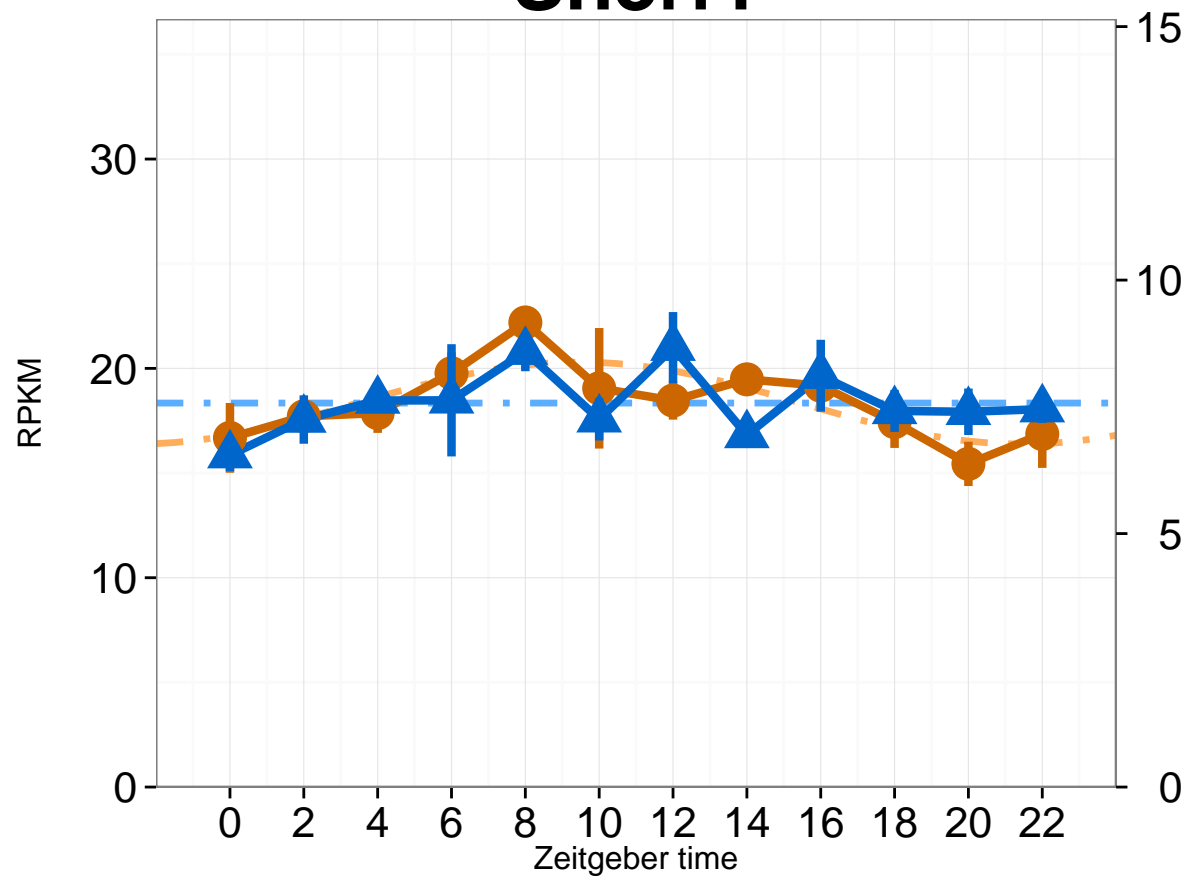

## Sh3rf1

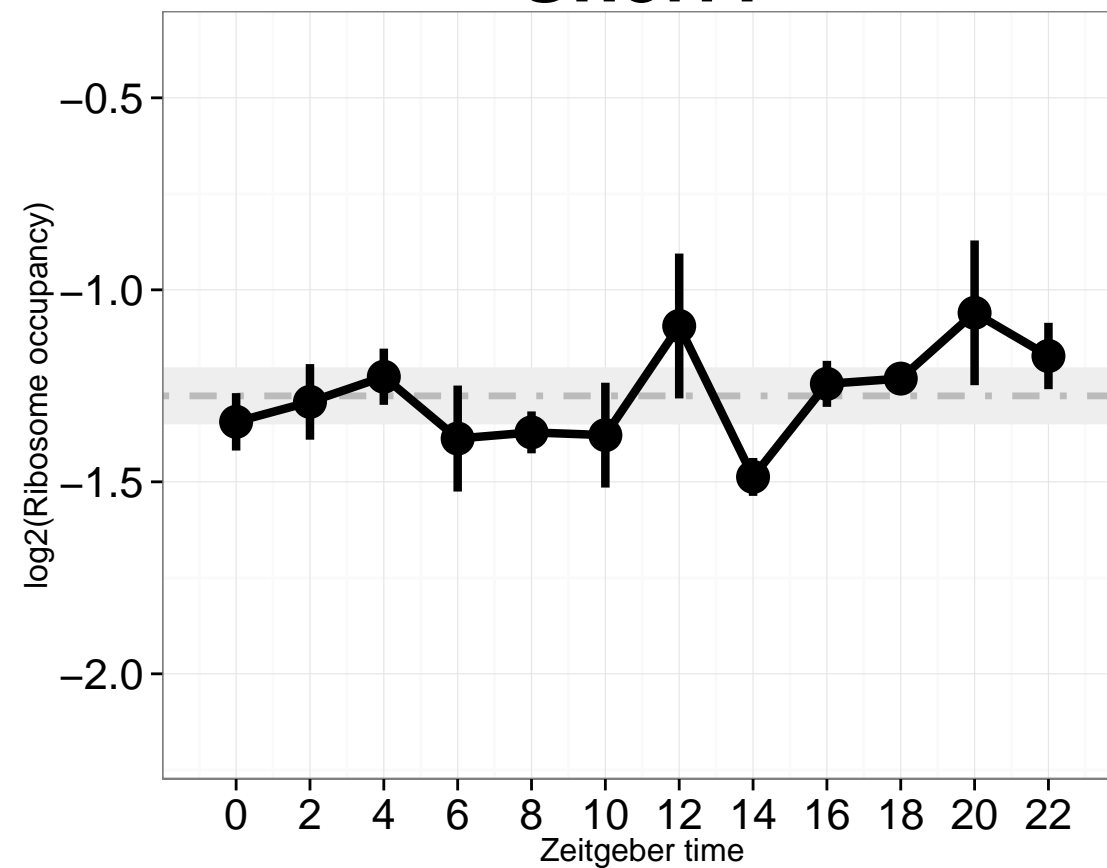

Supplement: Supplementary file 5160 [file 1]

## Rnf32

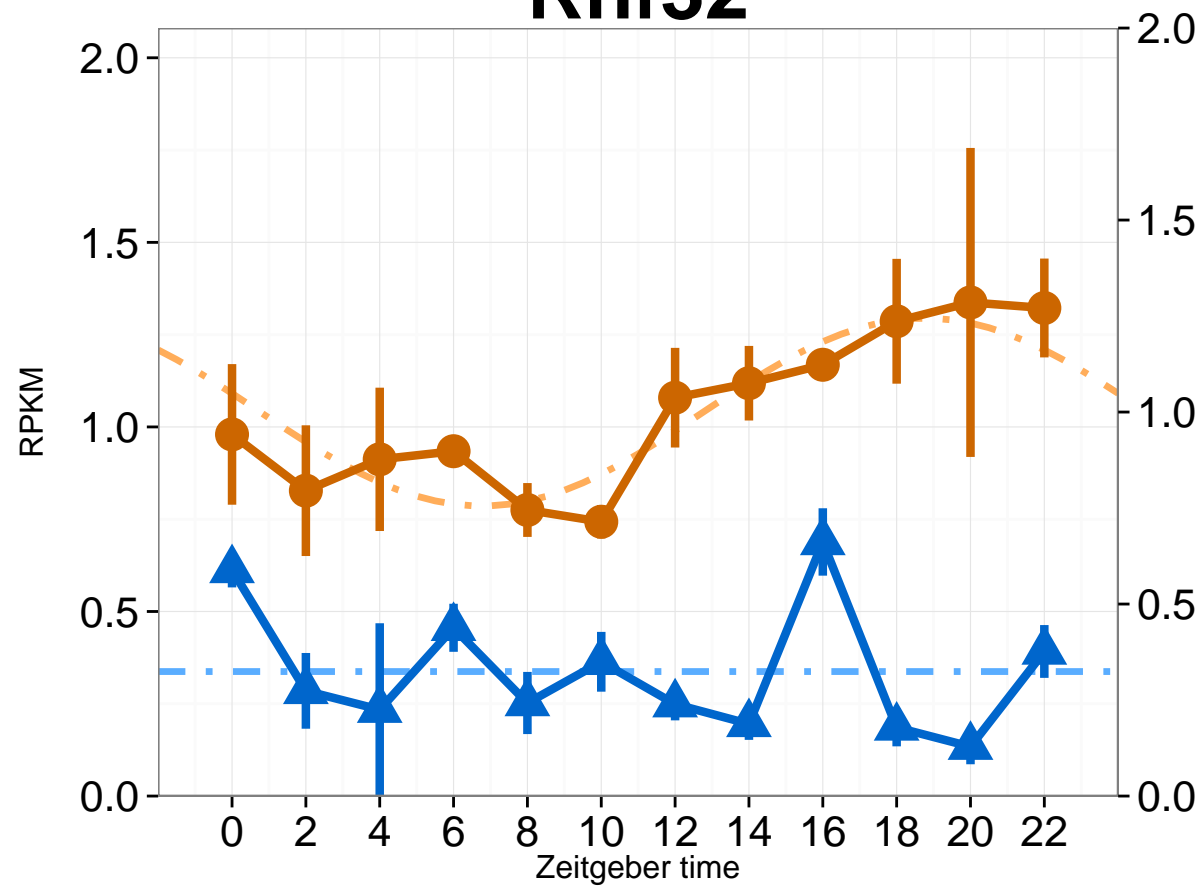

## Rnf32

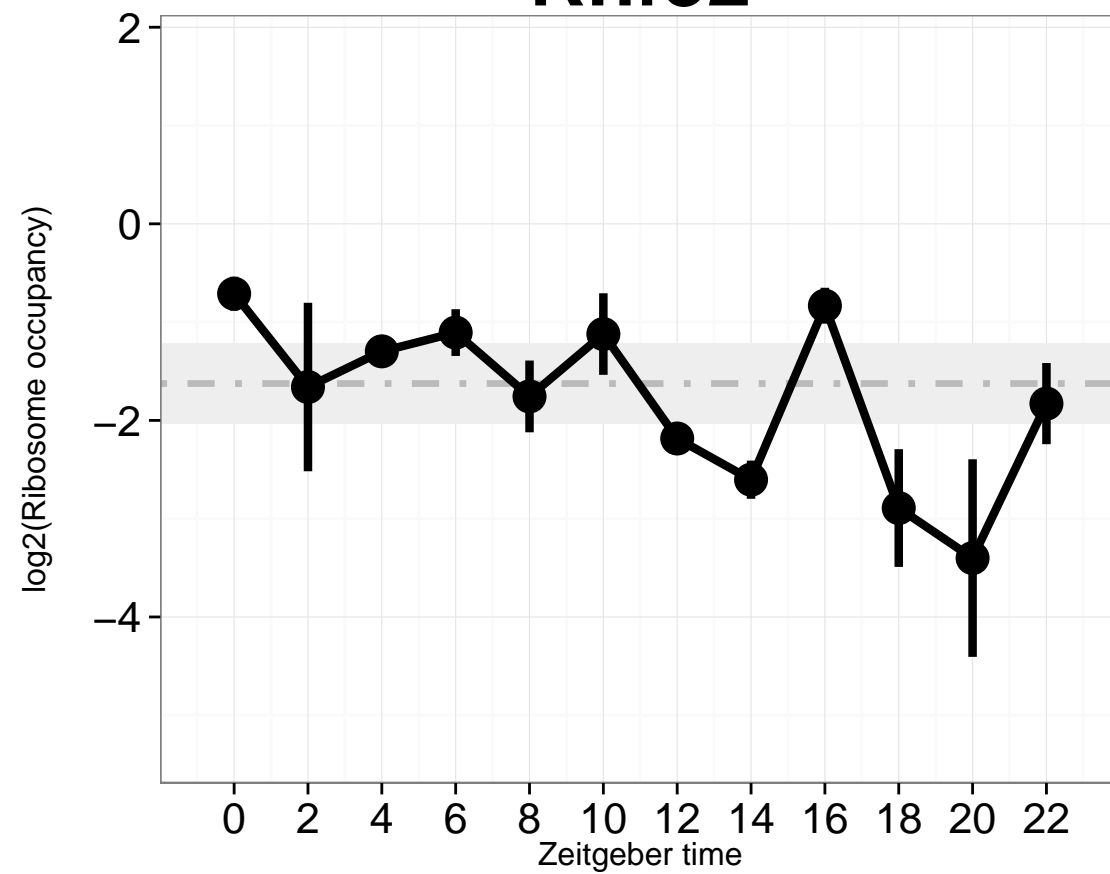

Supplement: Supplementary file 5161 [file 1]

## Cnbp

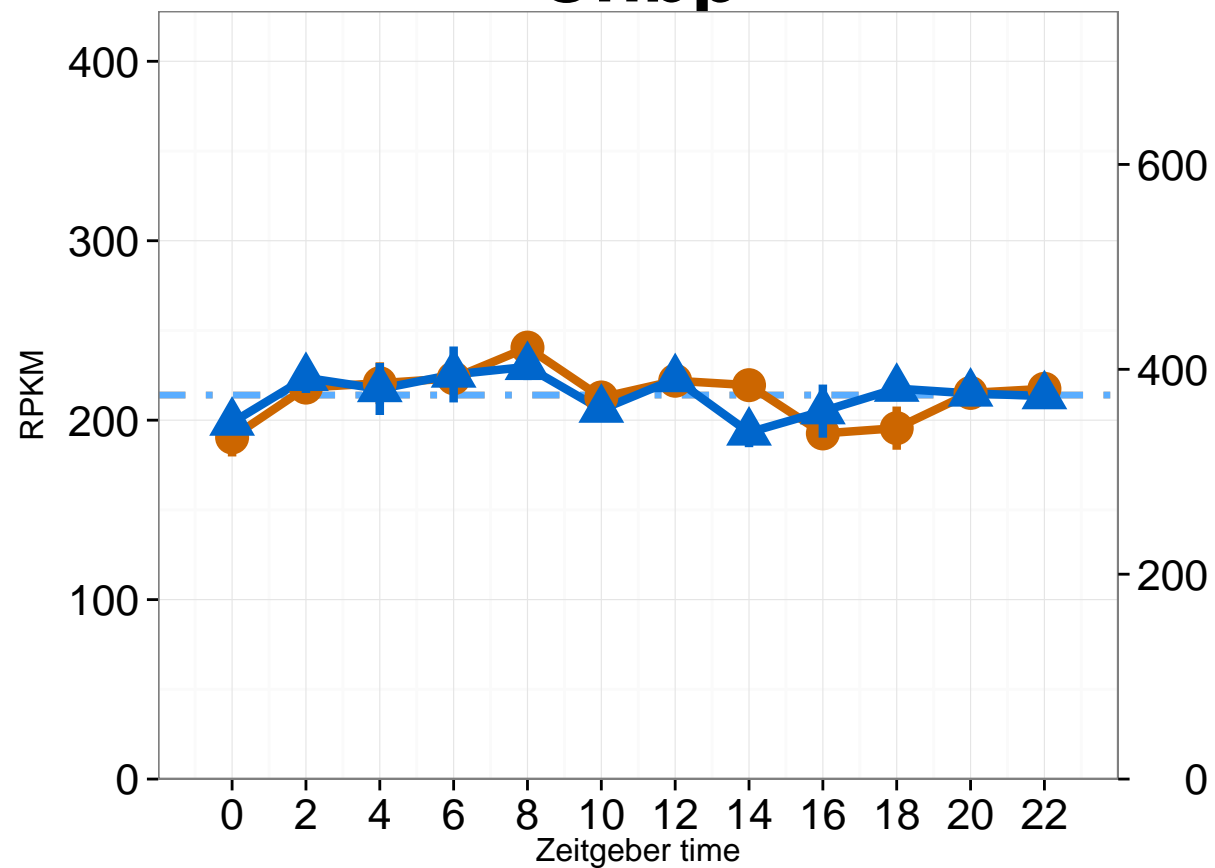

## Cnbp

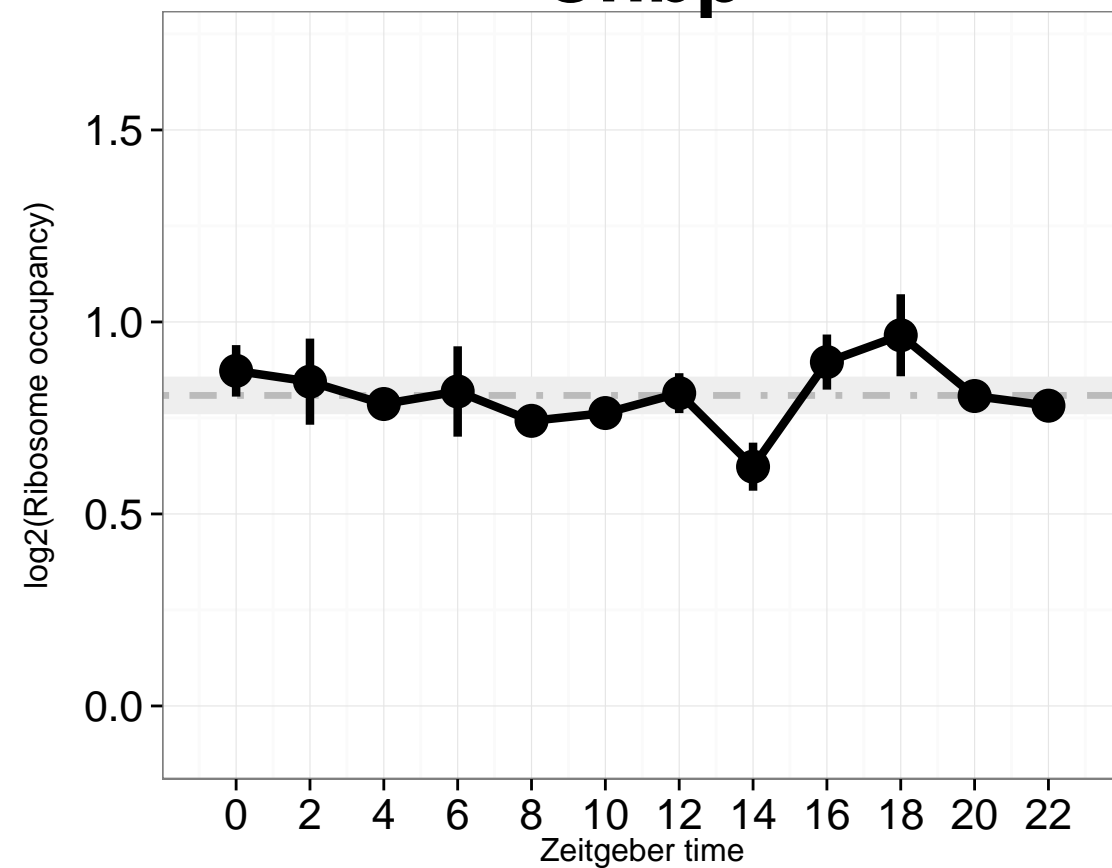

Supplement: Supplementary file 5162 [file 1]

## Leo1

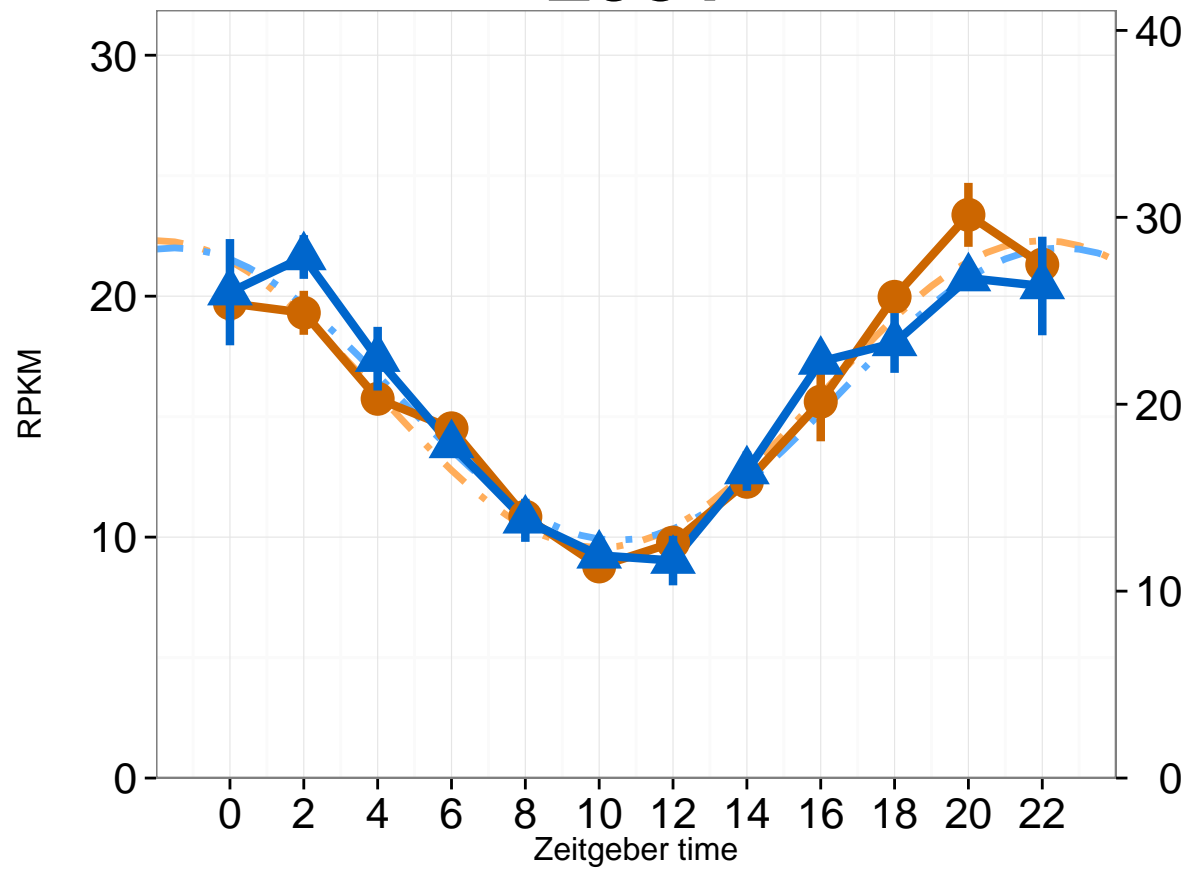

## Leo1

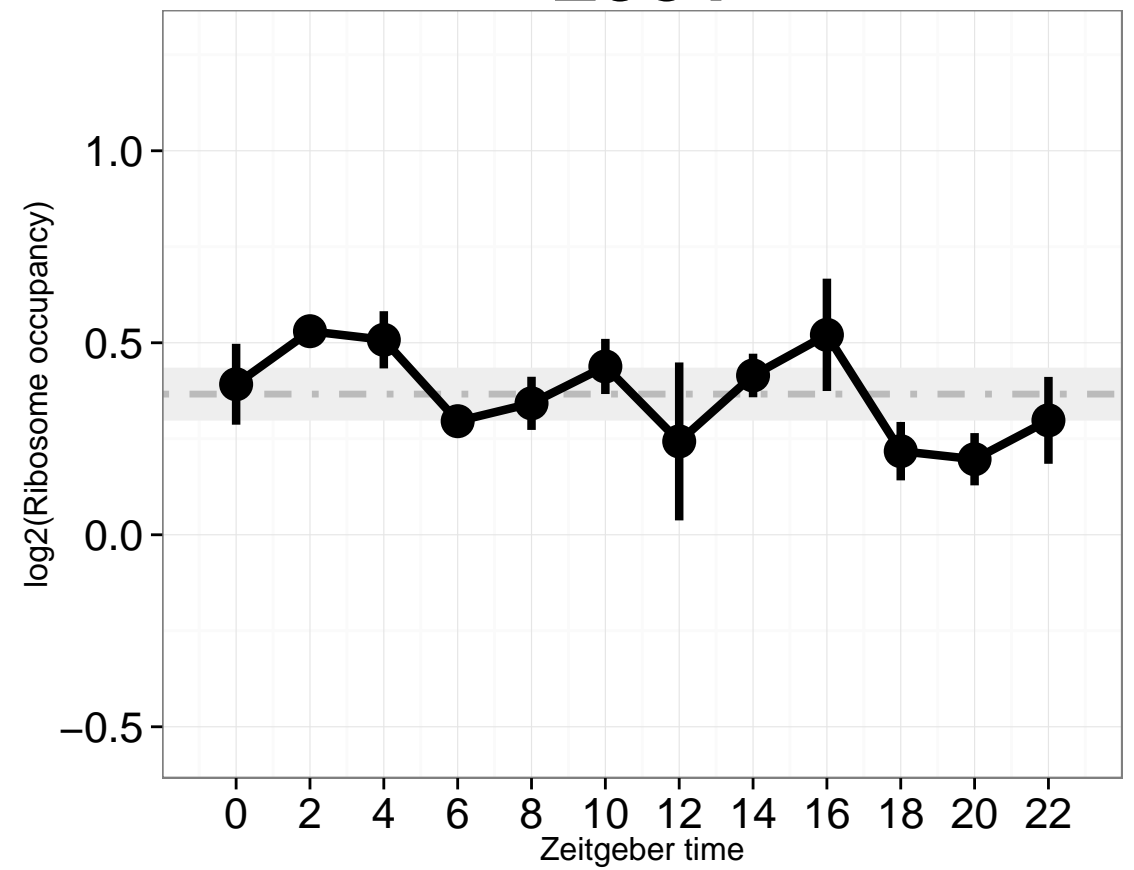

Supplement: Supplementary file 5163 [file 1]

## Slc25a15

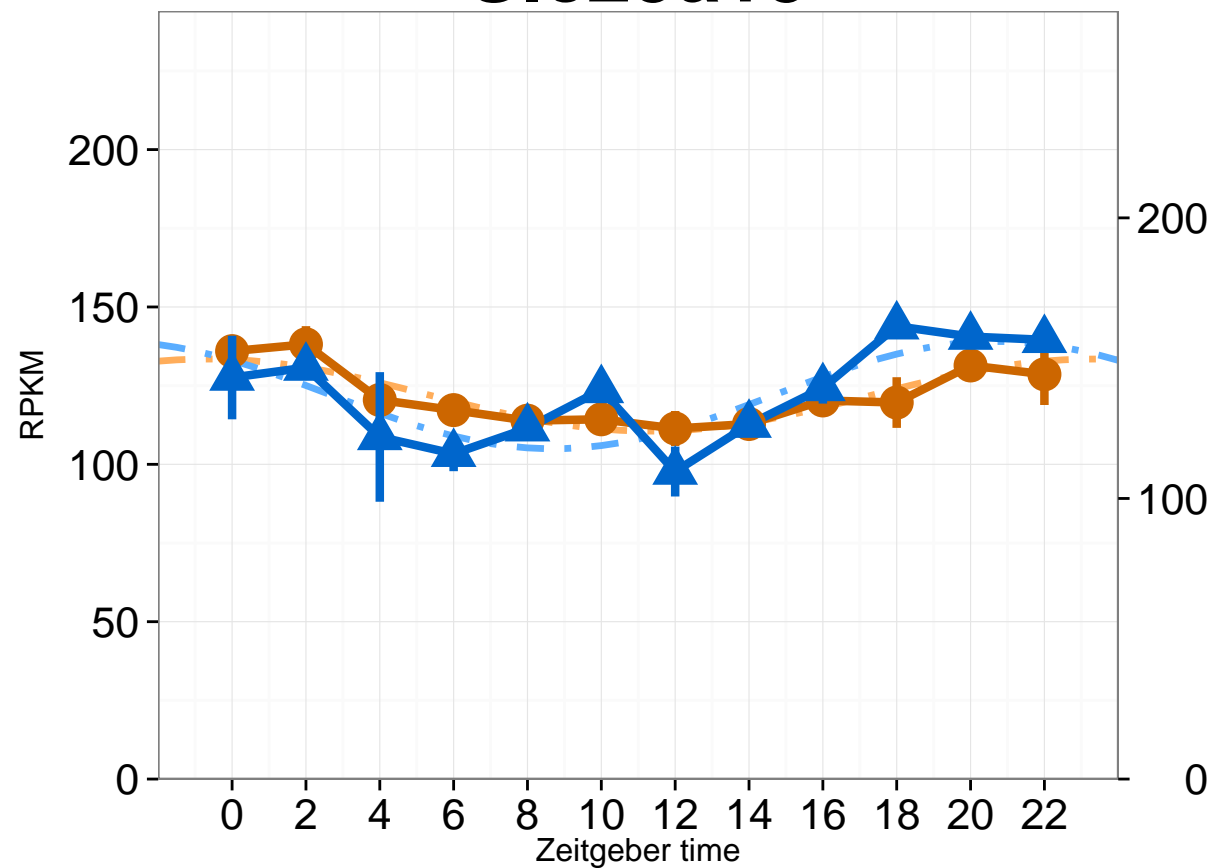

## Slc25a15

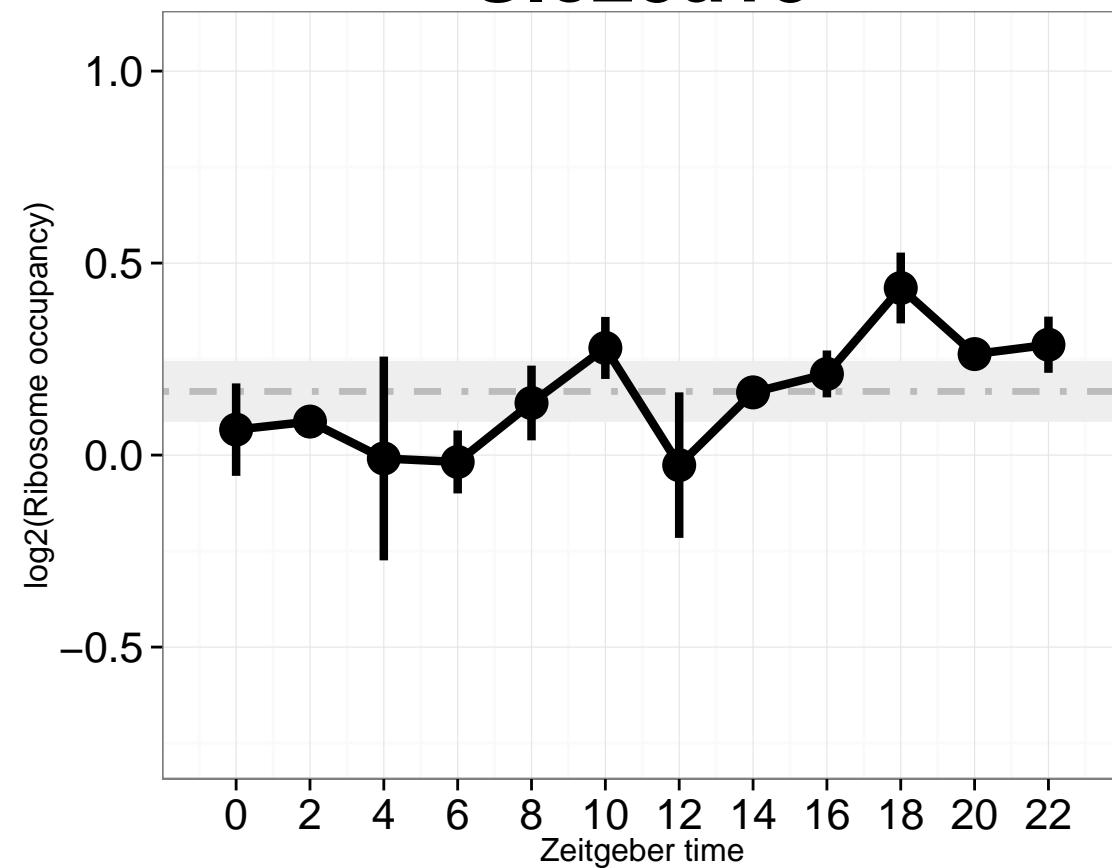

Supplement: Supplementary file 5164 [file 1]

# Zfp772

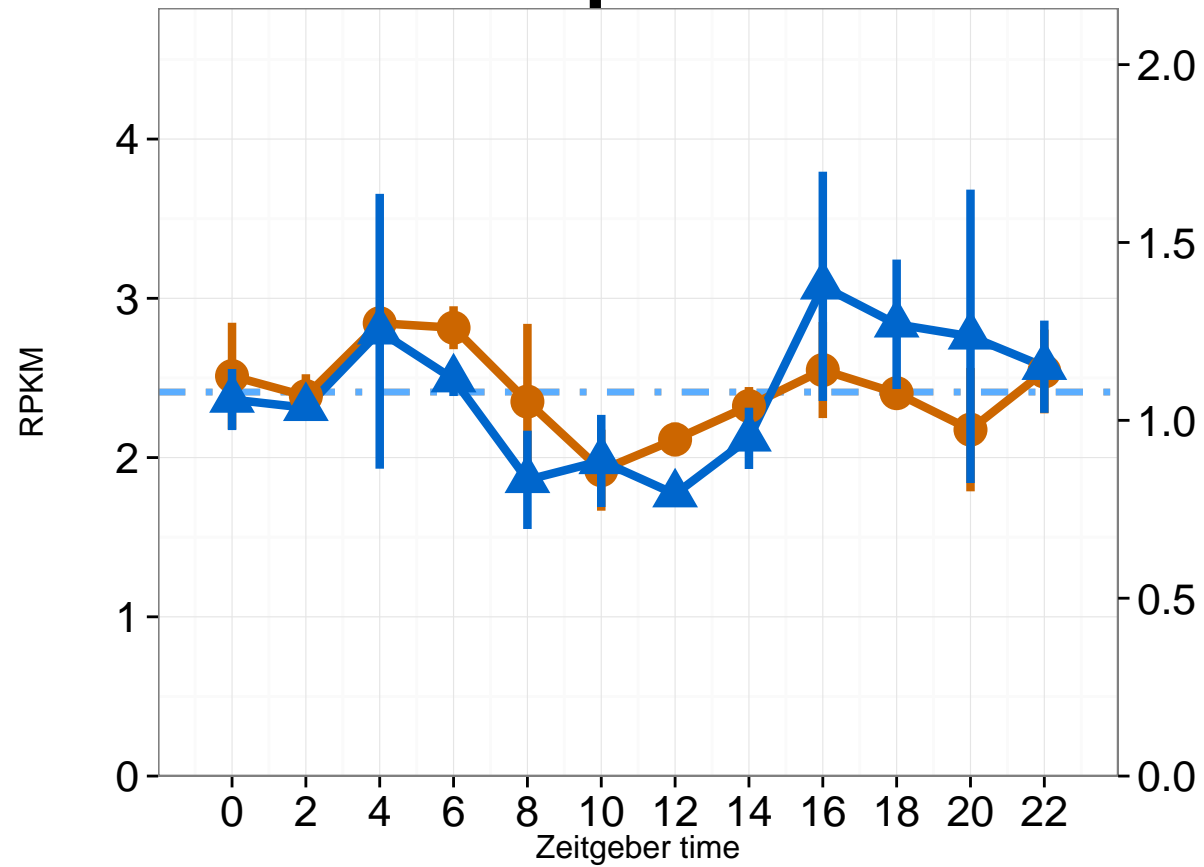

# Zfp772

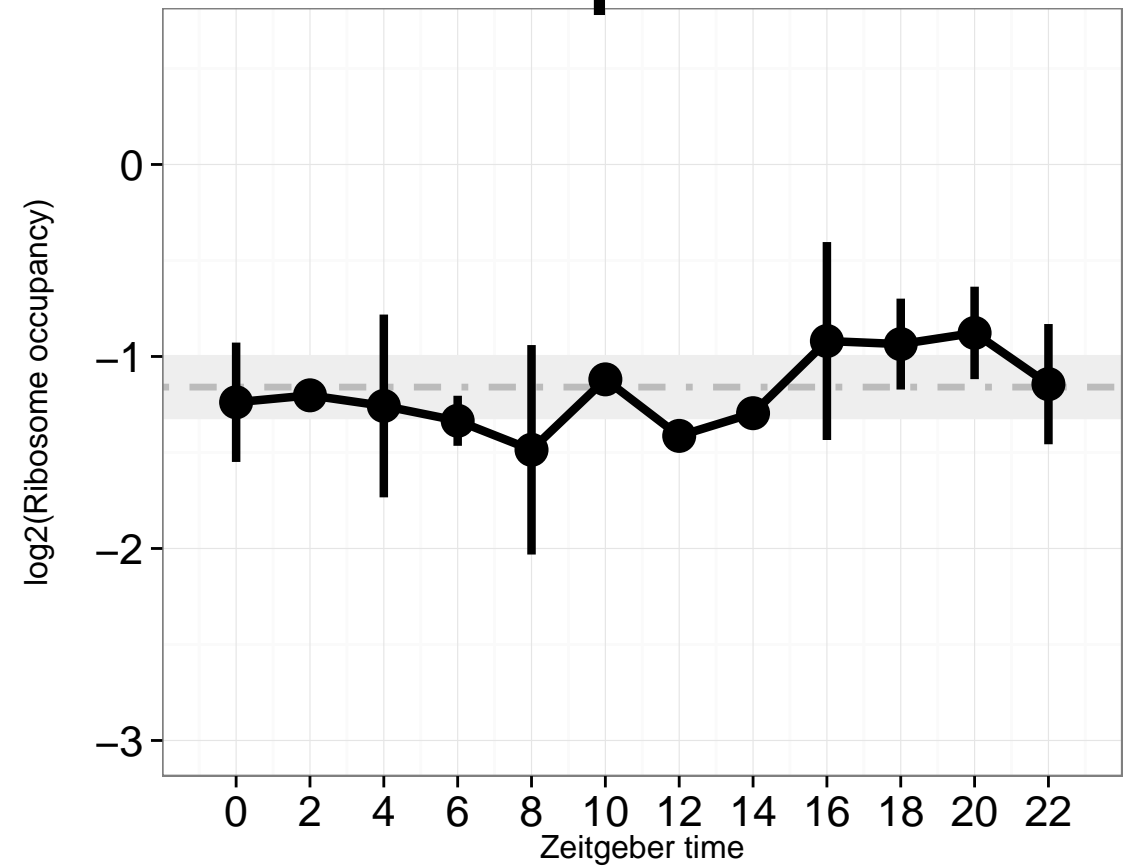

Supplement: Supplementary file 5165 [file 1]

## Cdc42

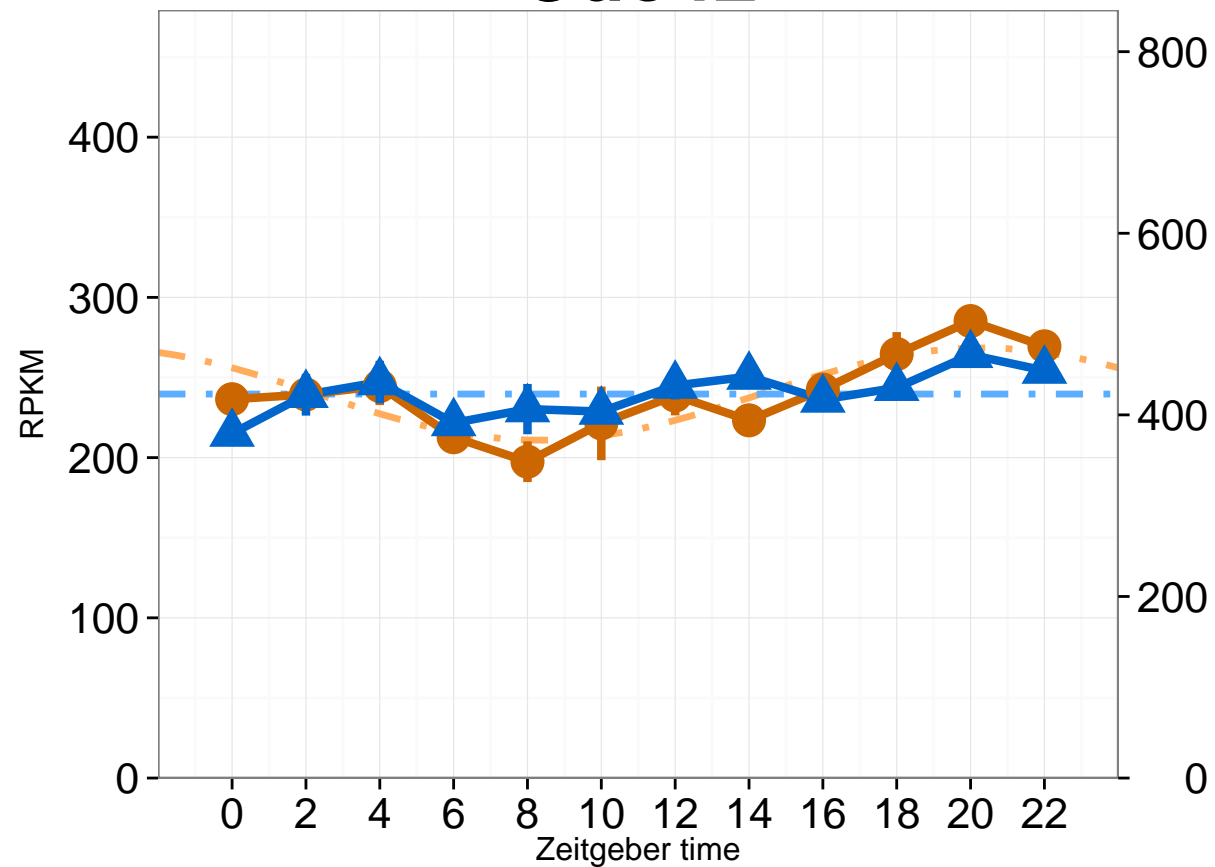

## Cdc42

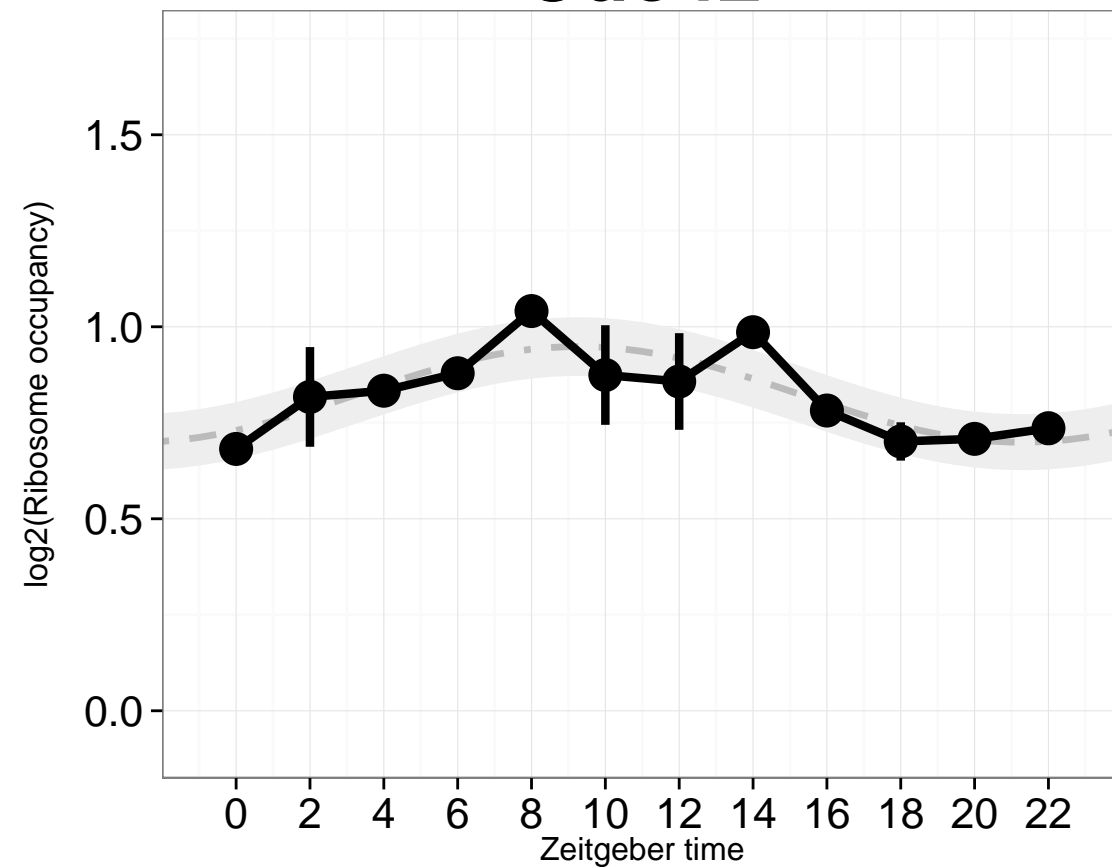

Supplement: Supplementary file 5166 [file 1]

## Utp11I

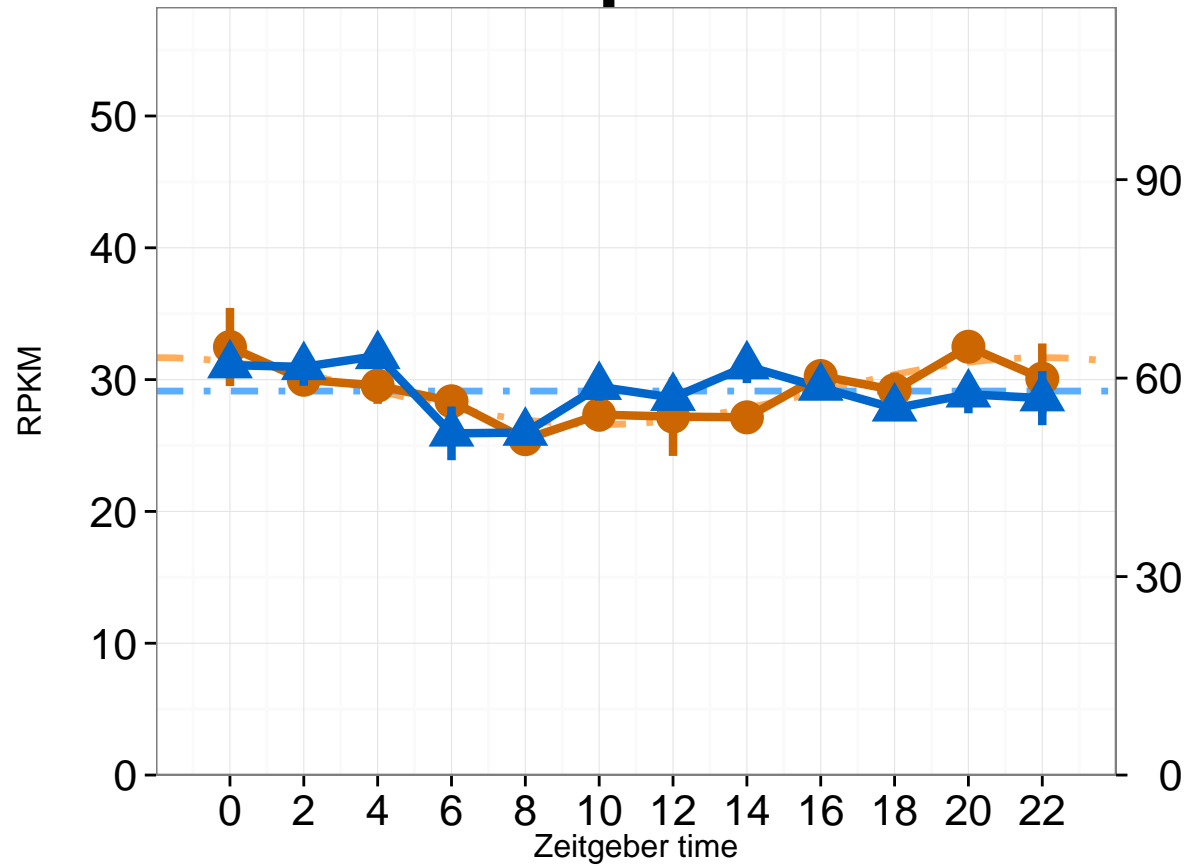

## Utp11I

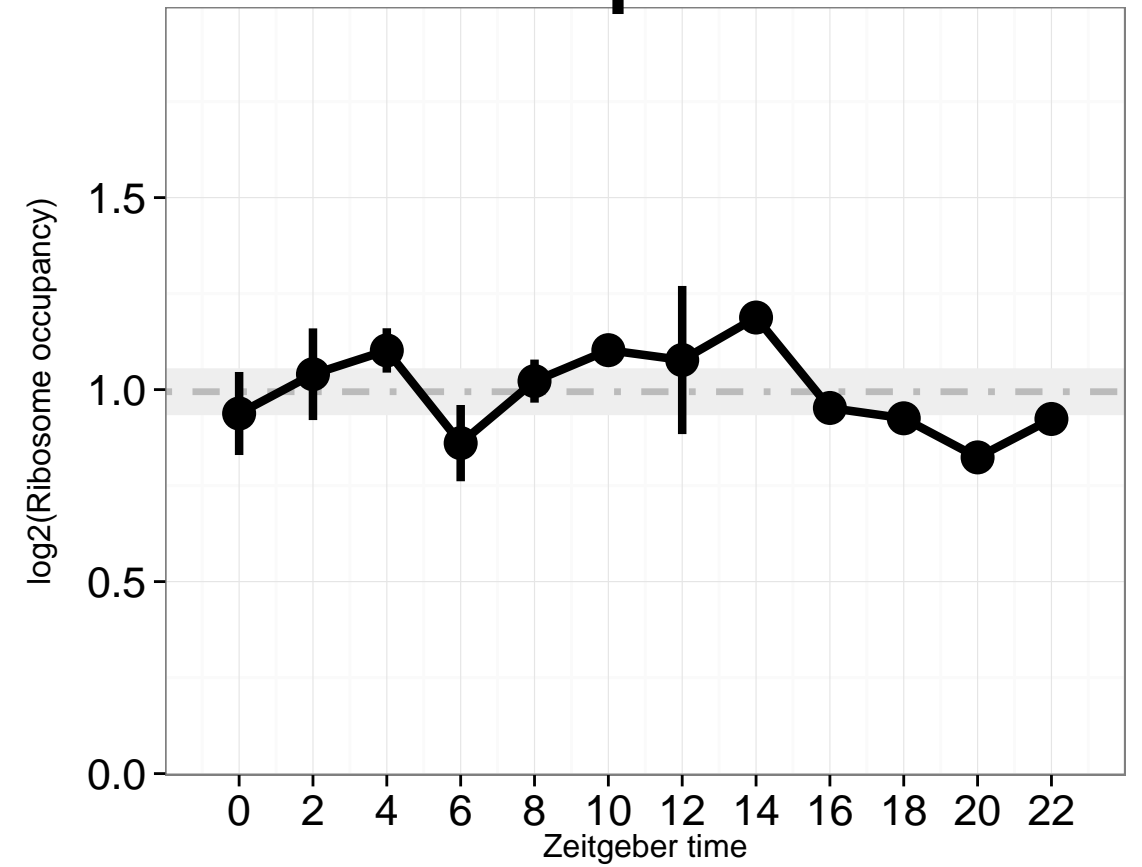

Supplement: Supplementary file 5167 [file 1]

## Nptn

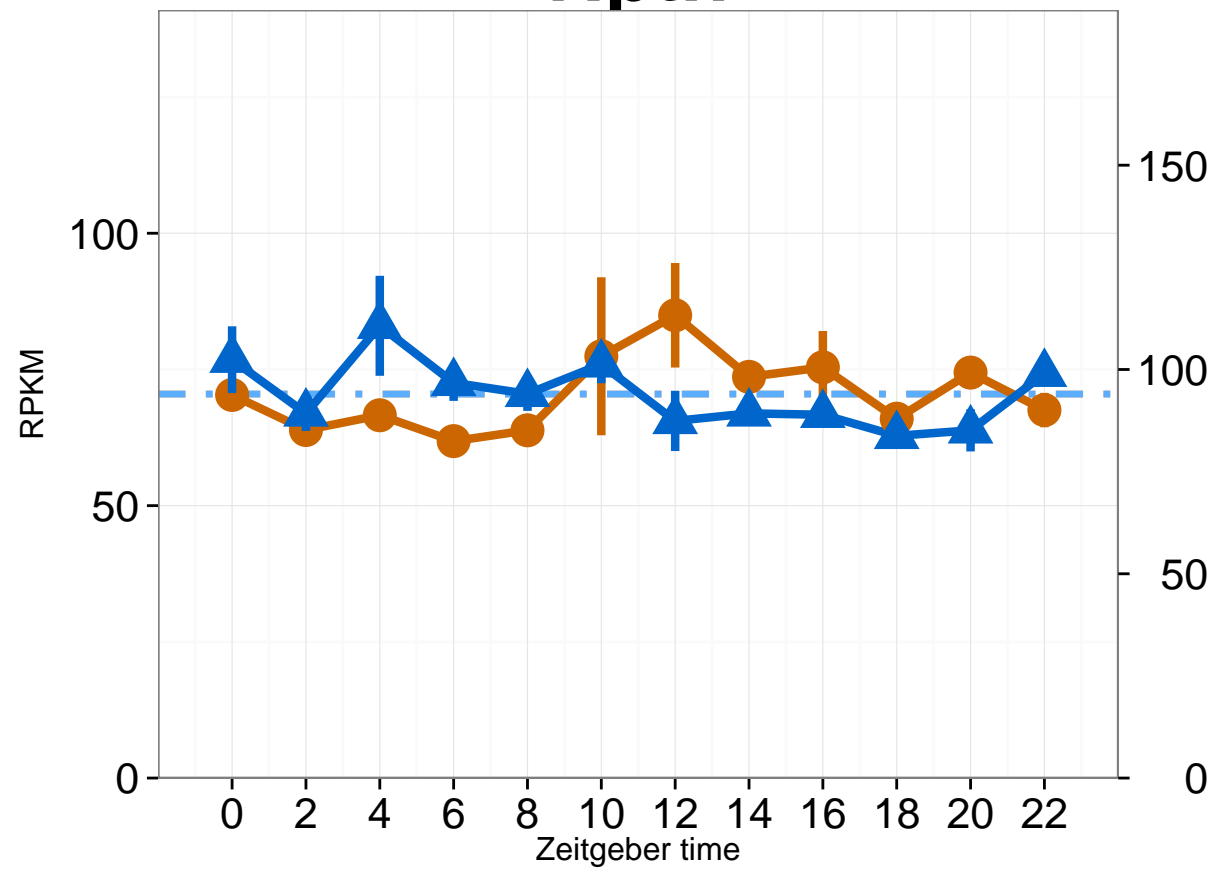

## Nptn

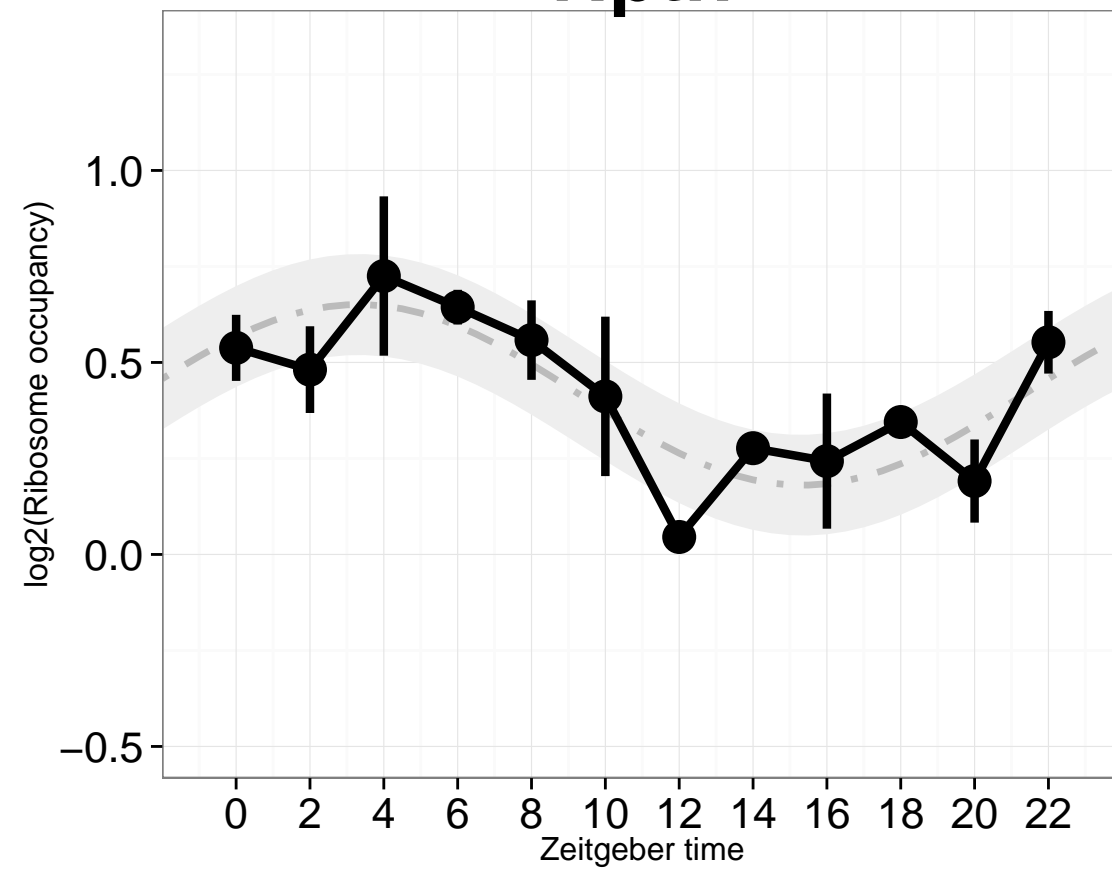

Supplement: Supplementary file 5168 [file 1]

## Ezh2

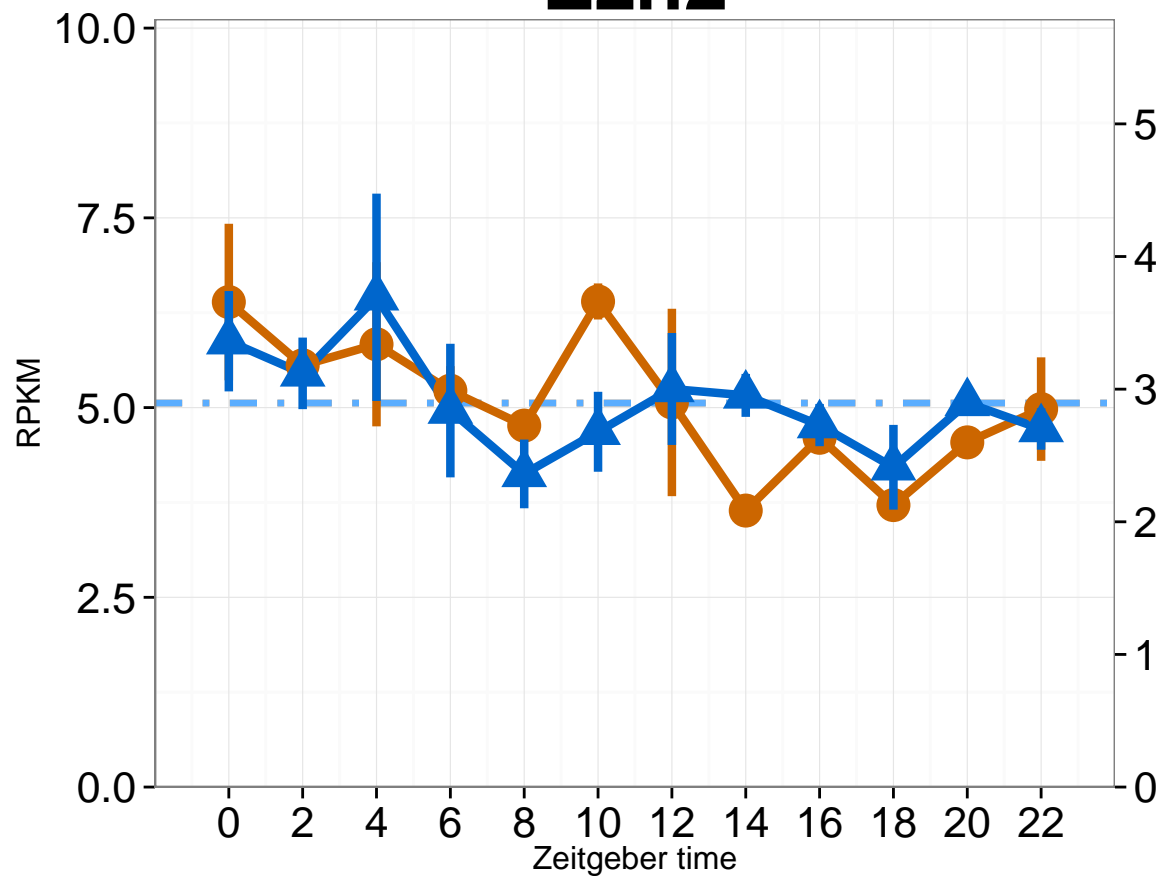

## Ezh2

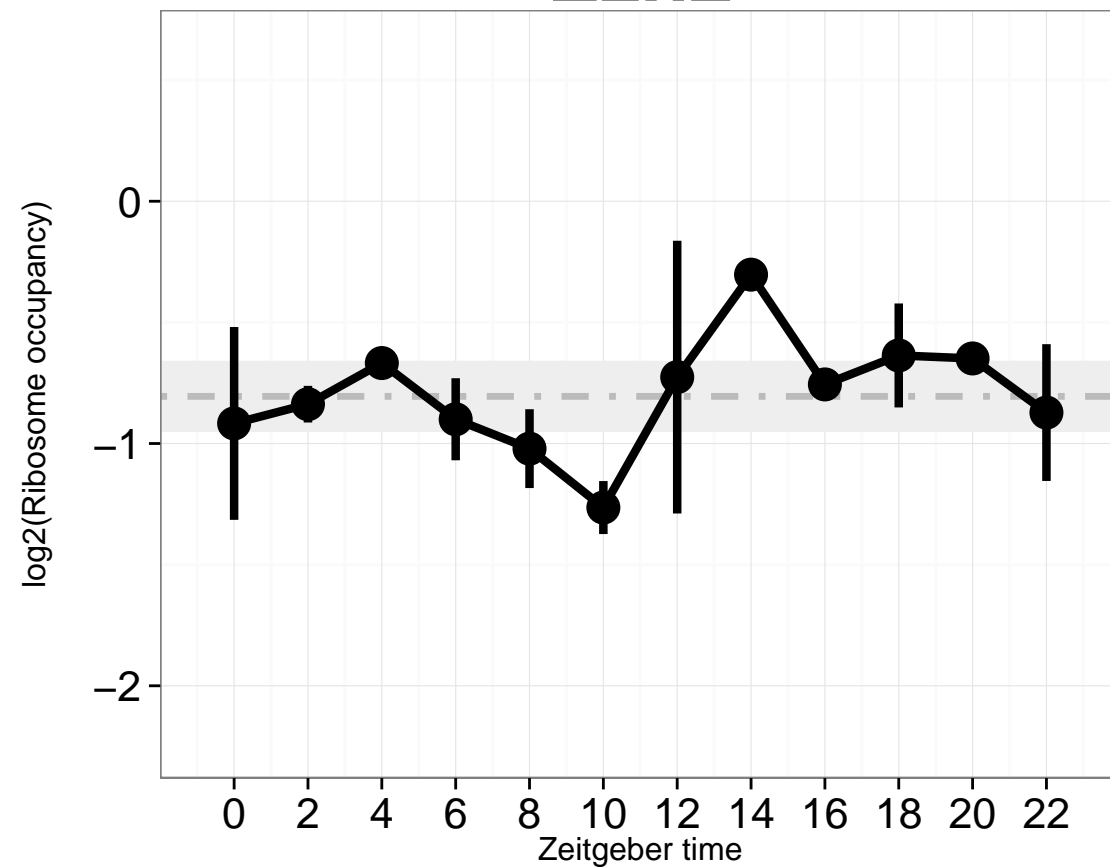

Supplement: Supplementary file 5169 [file 1]

## Fbf1

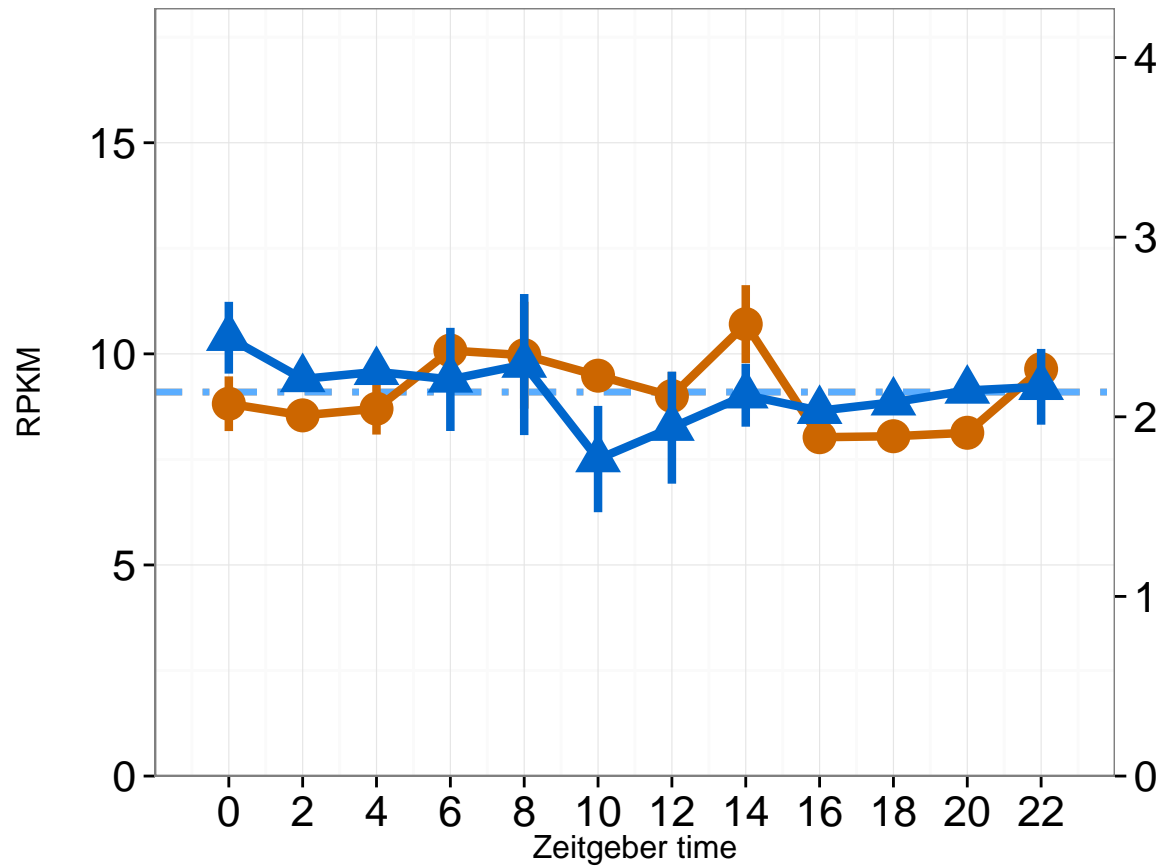

## Fbf1

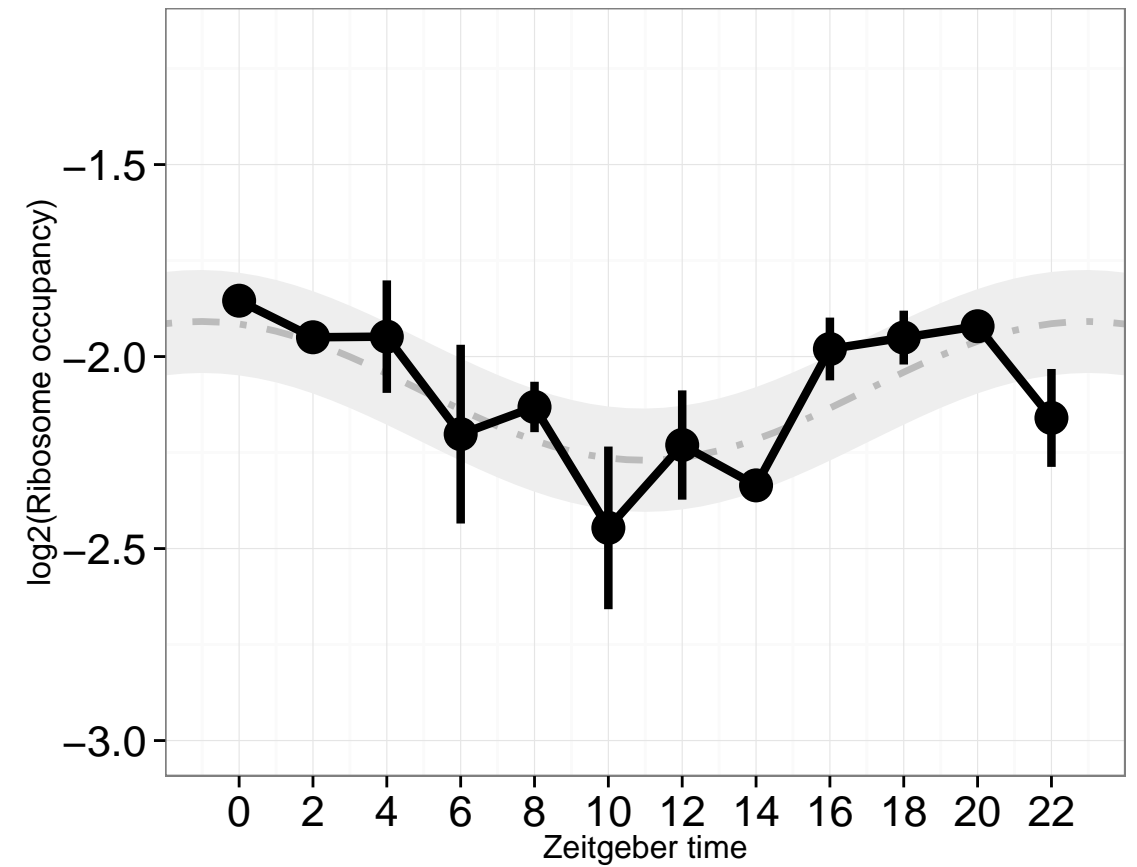

Supplement: Supplementary file 5170 [file 1]

## Stx6

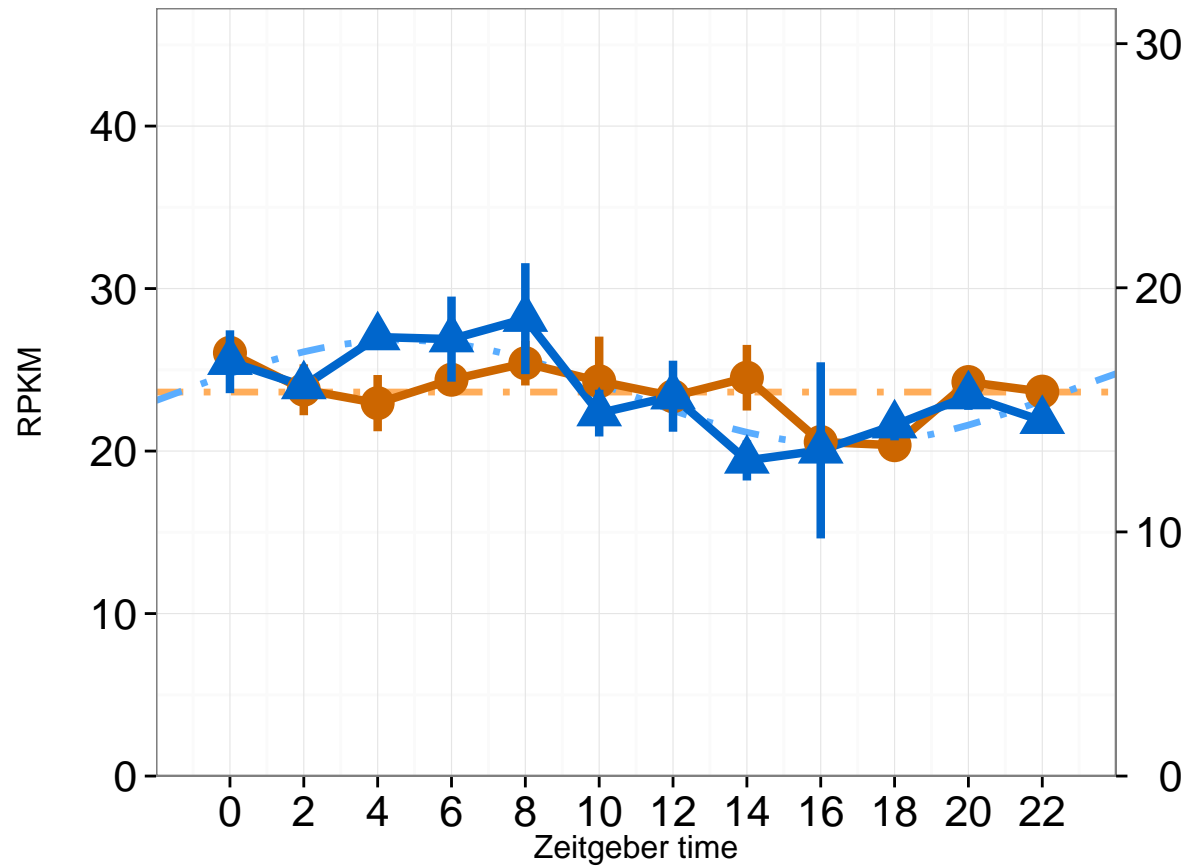

## Stx6

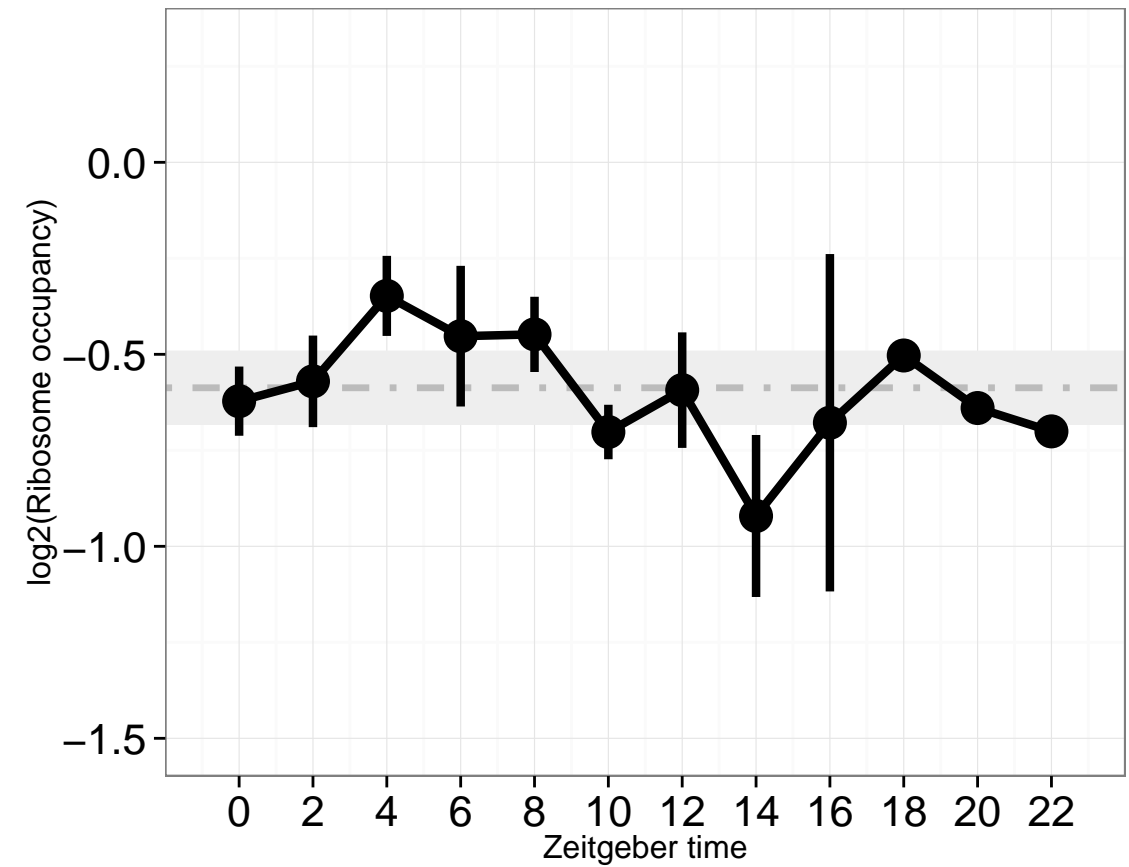

Supplement: Supplementary file 5171 [file 1]

## 0610012H03Rik

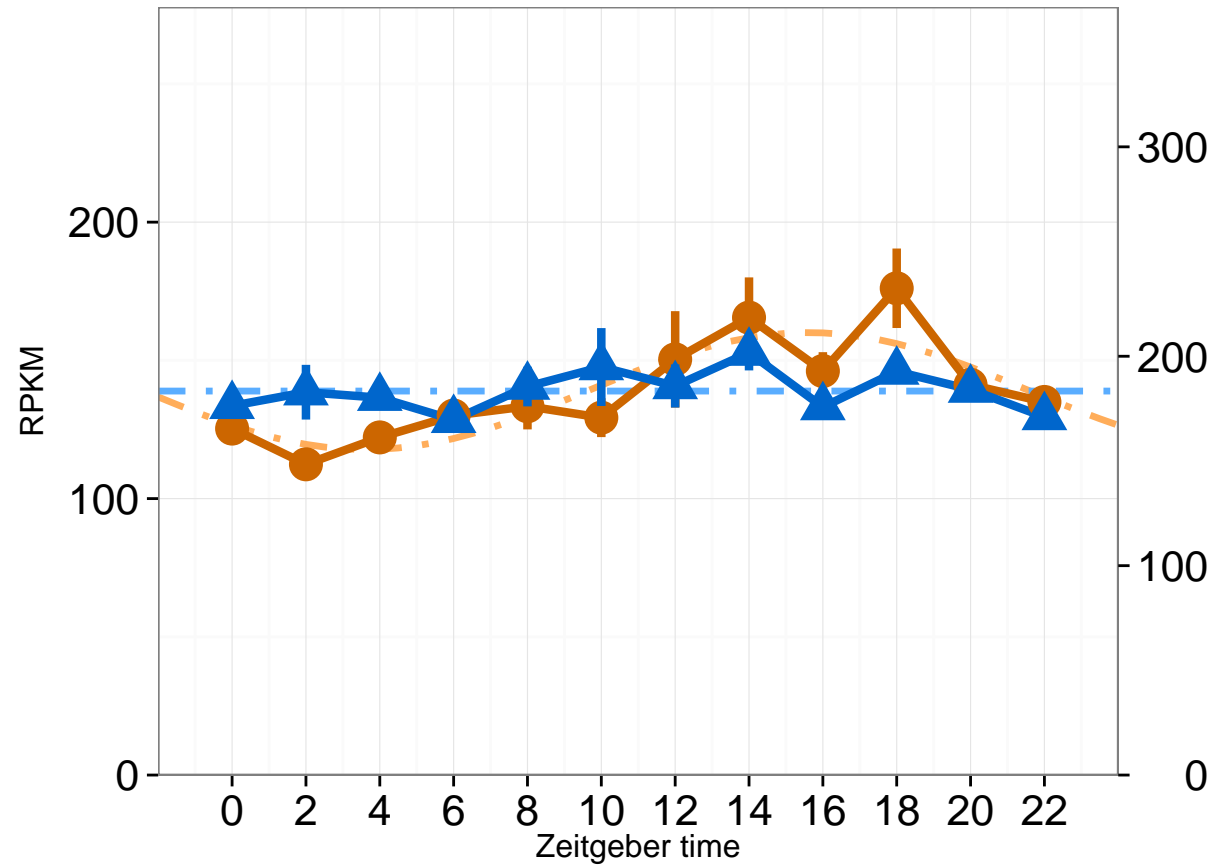

## 0610012H03Rik

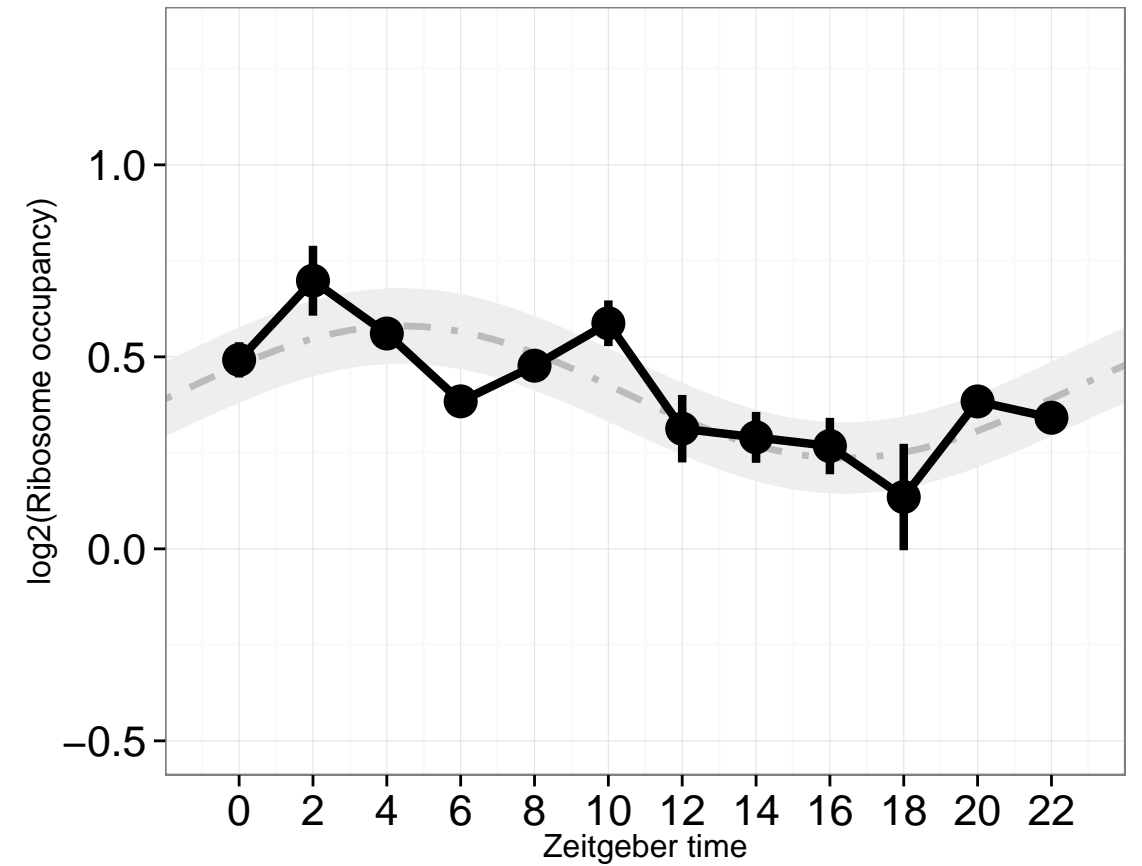

Supplement: Supplementary file 5172 [file 1]

## Kdelr2

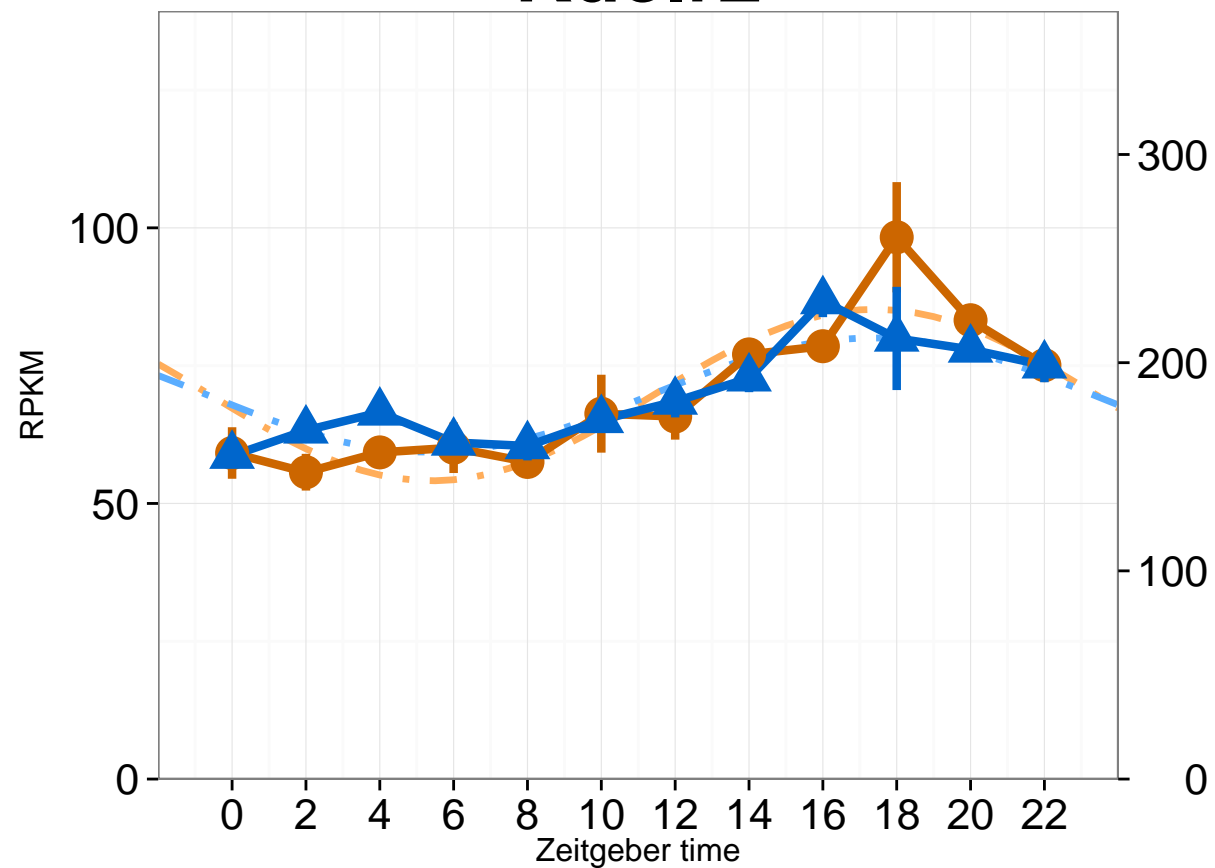

## Kdelr2

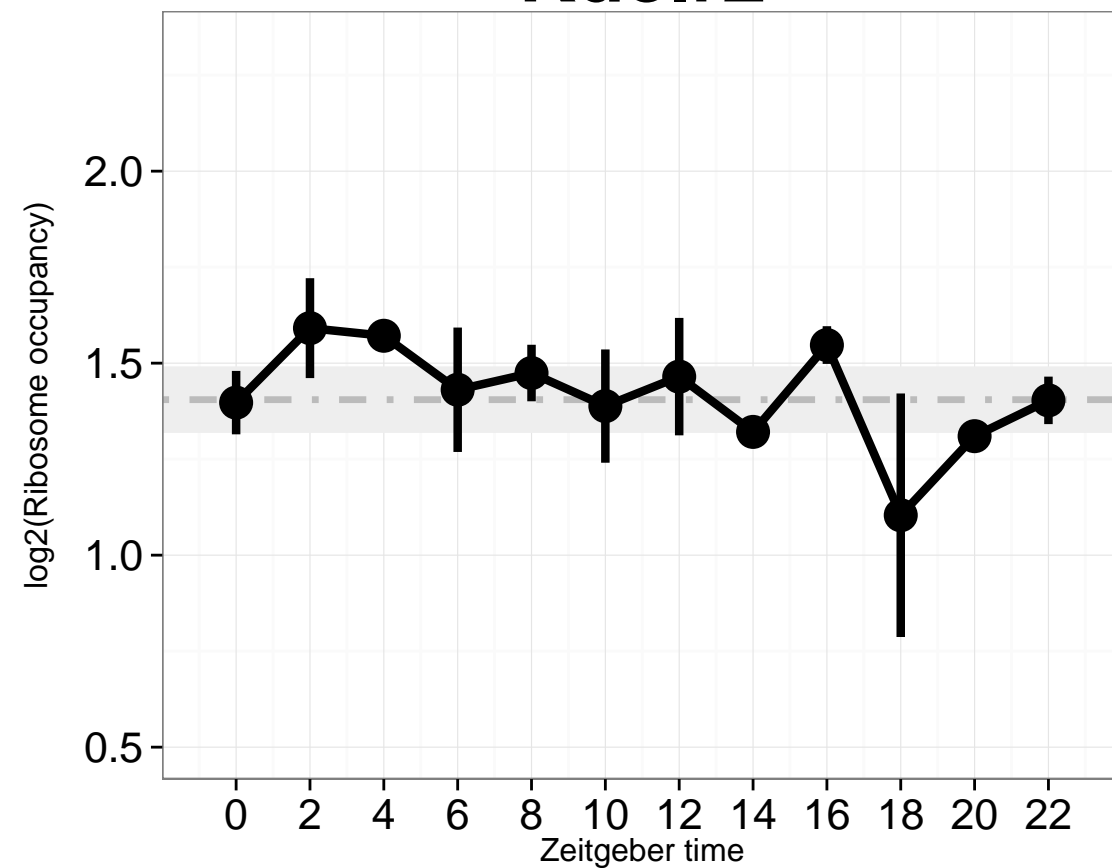

Supplement: Supplementary file 5173 [file 1]

## Abt1

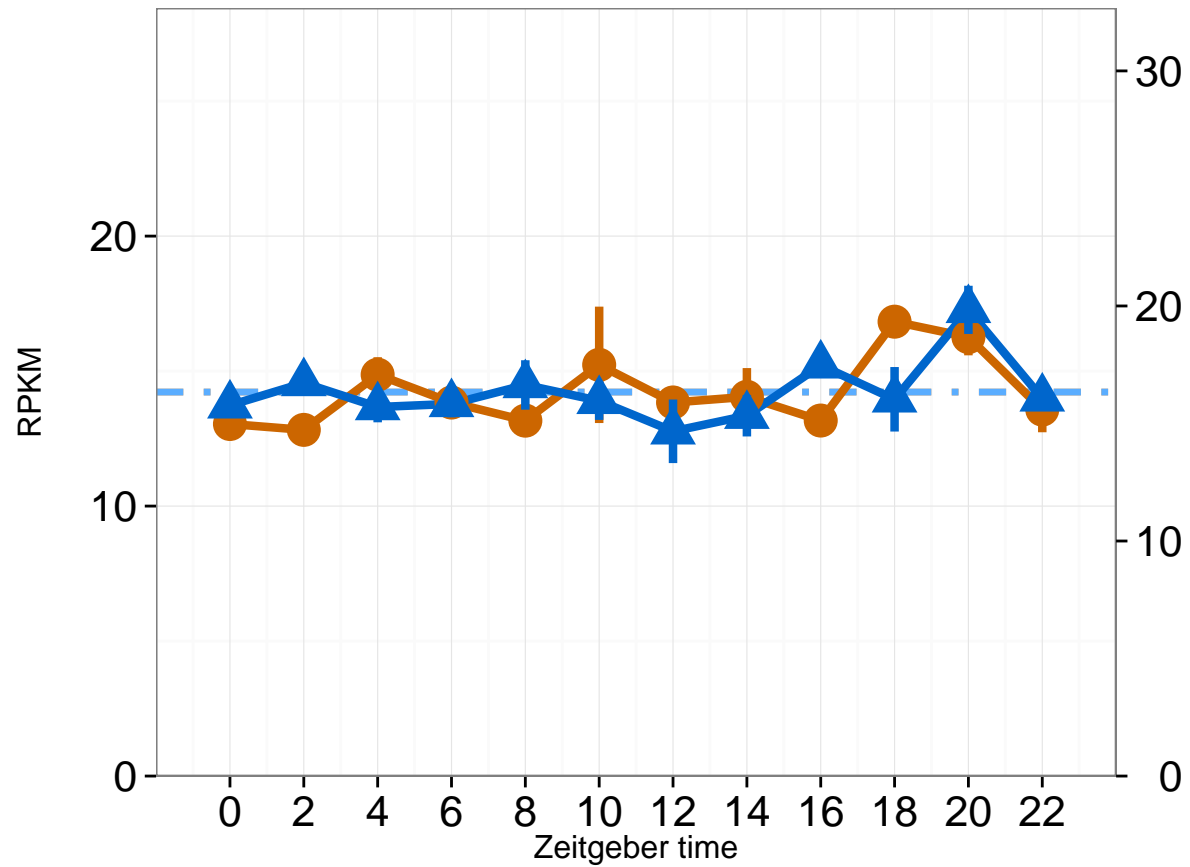

## Abt1

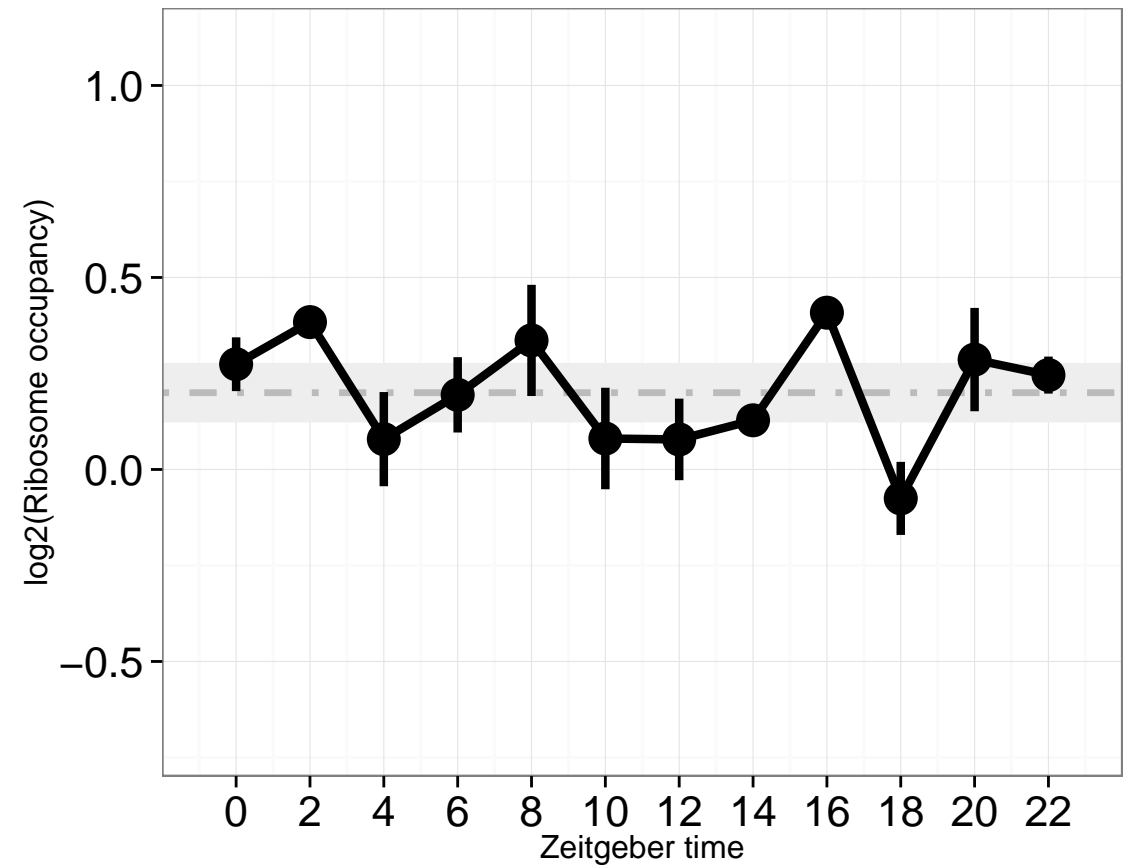

Supplement: Supplementary file 5174 [file 1]

## Wnt5b

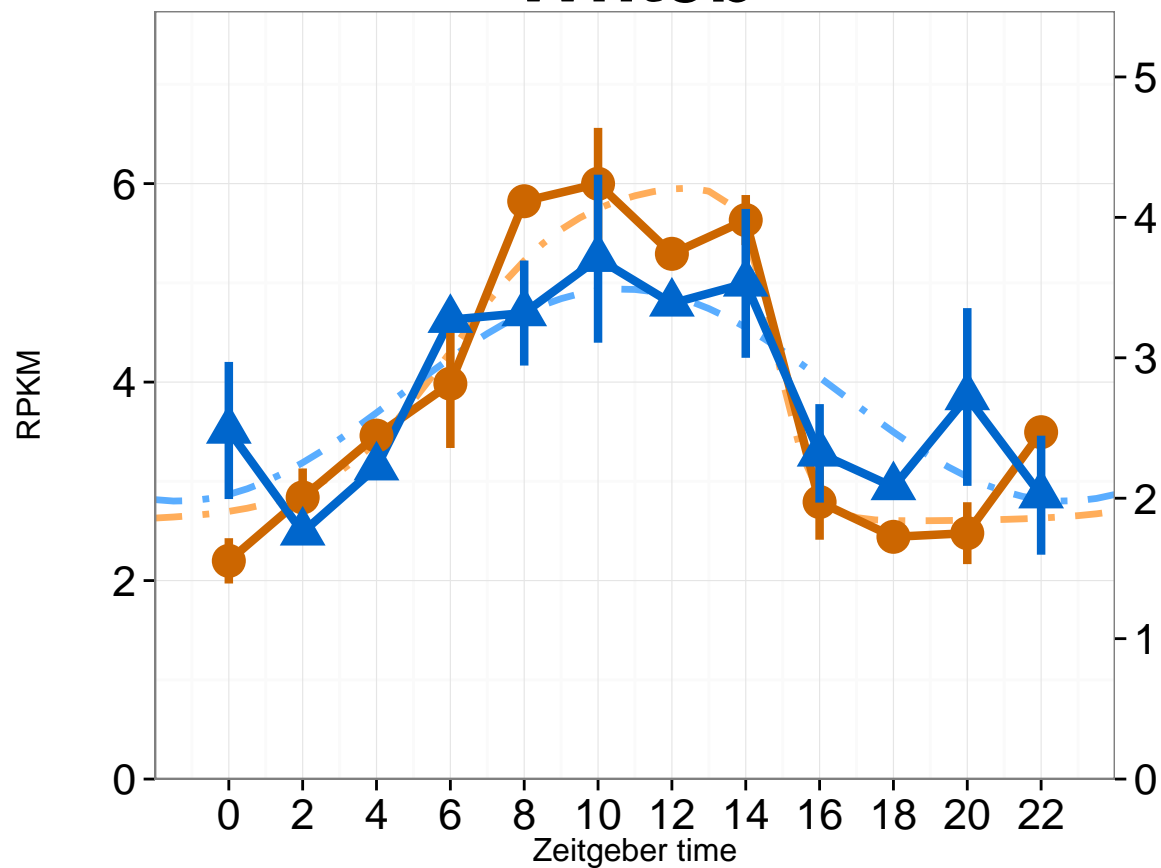

## Wnt5b

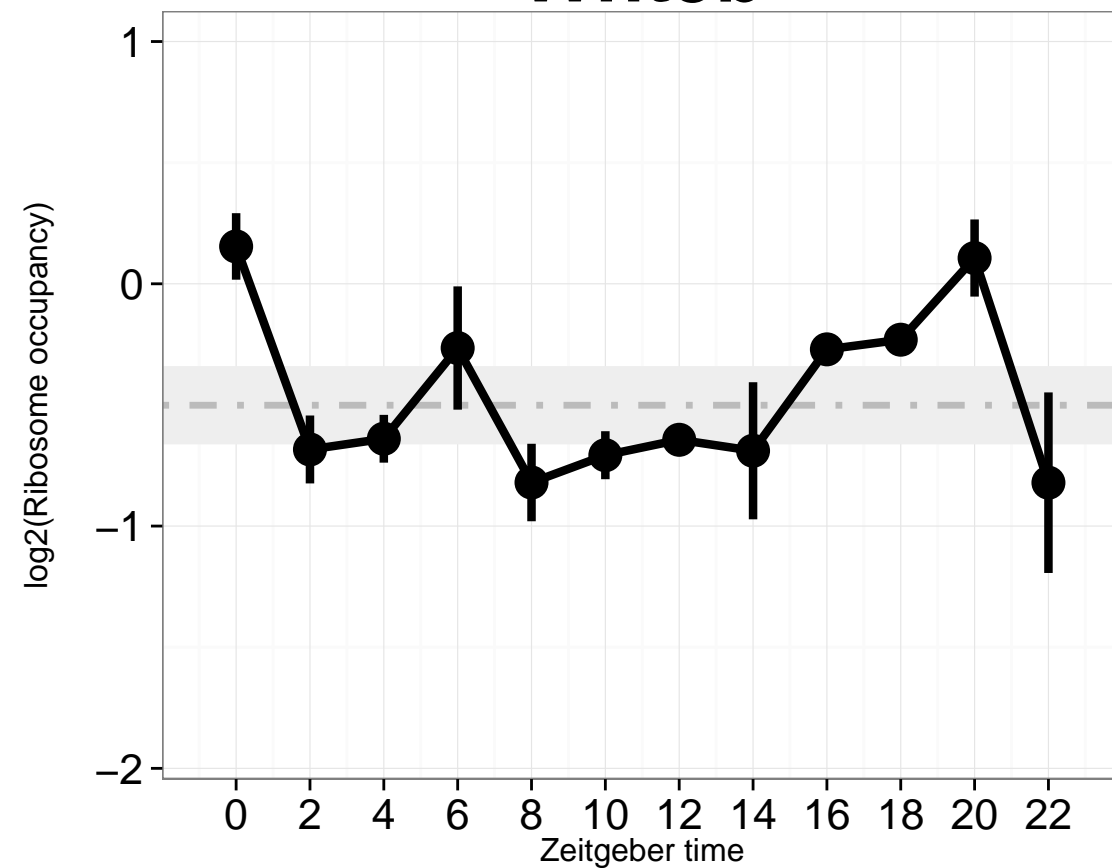

Supplement: Supplementary file 5175 [file 1]

# Gm166

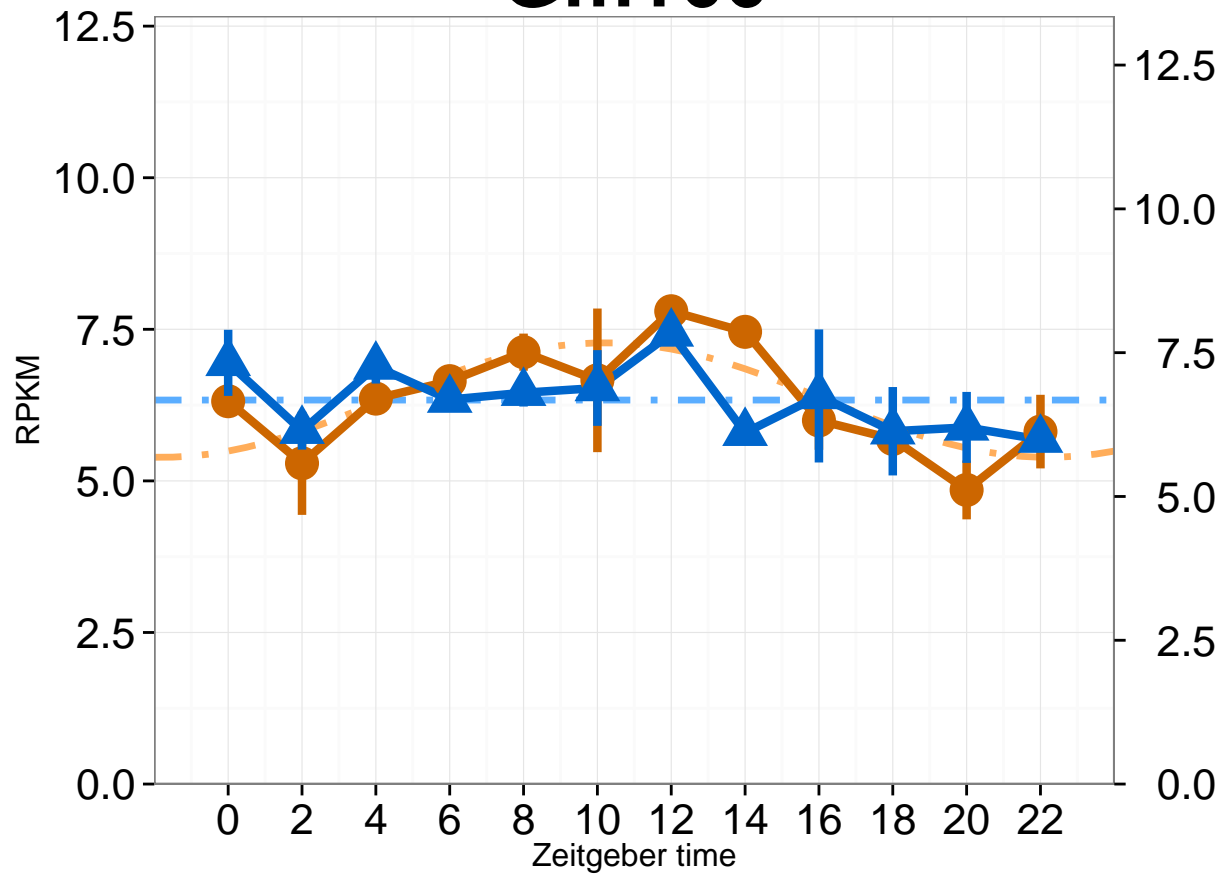

# Gm166

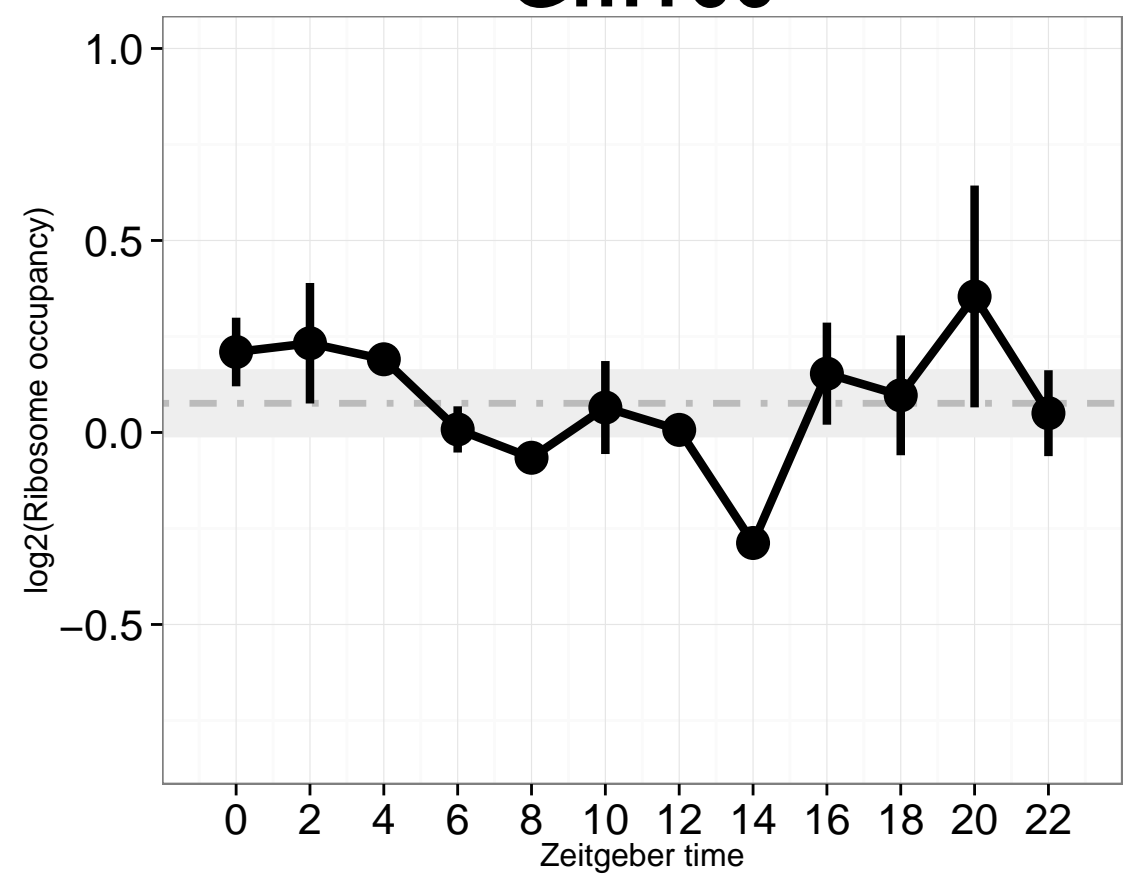

Supplement: Supplementary file 5176 [file 1]

# Tmem221

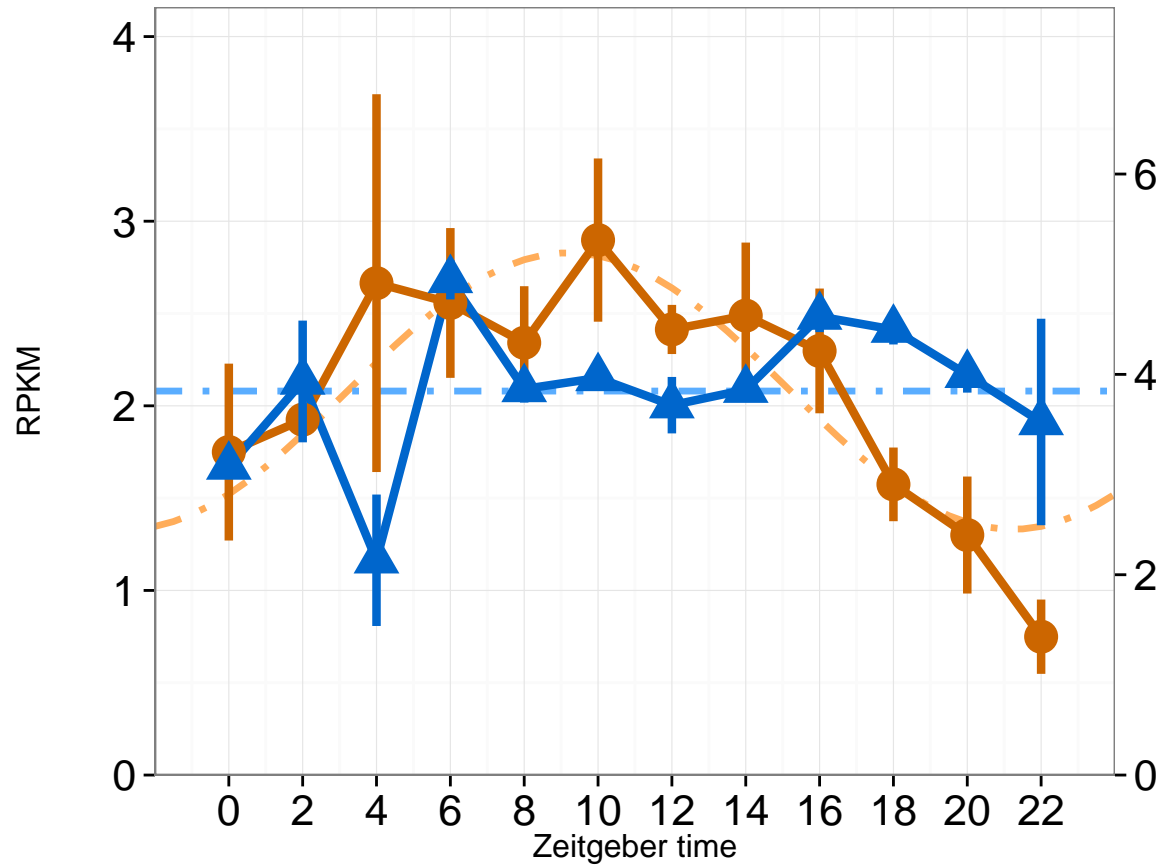

# Tmem221

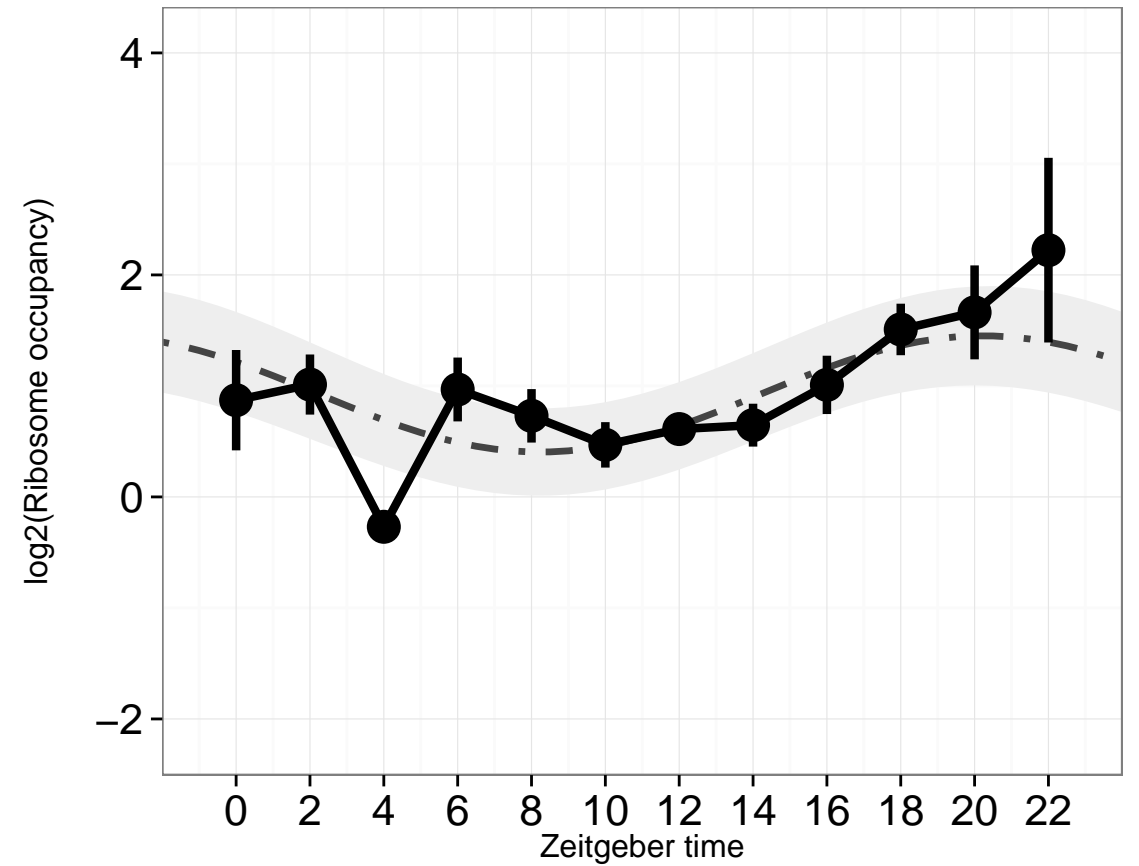

Supplement: Supplementary file 5177 [file 1]

## Hfe

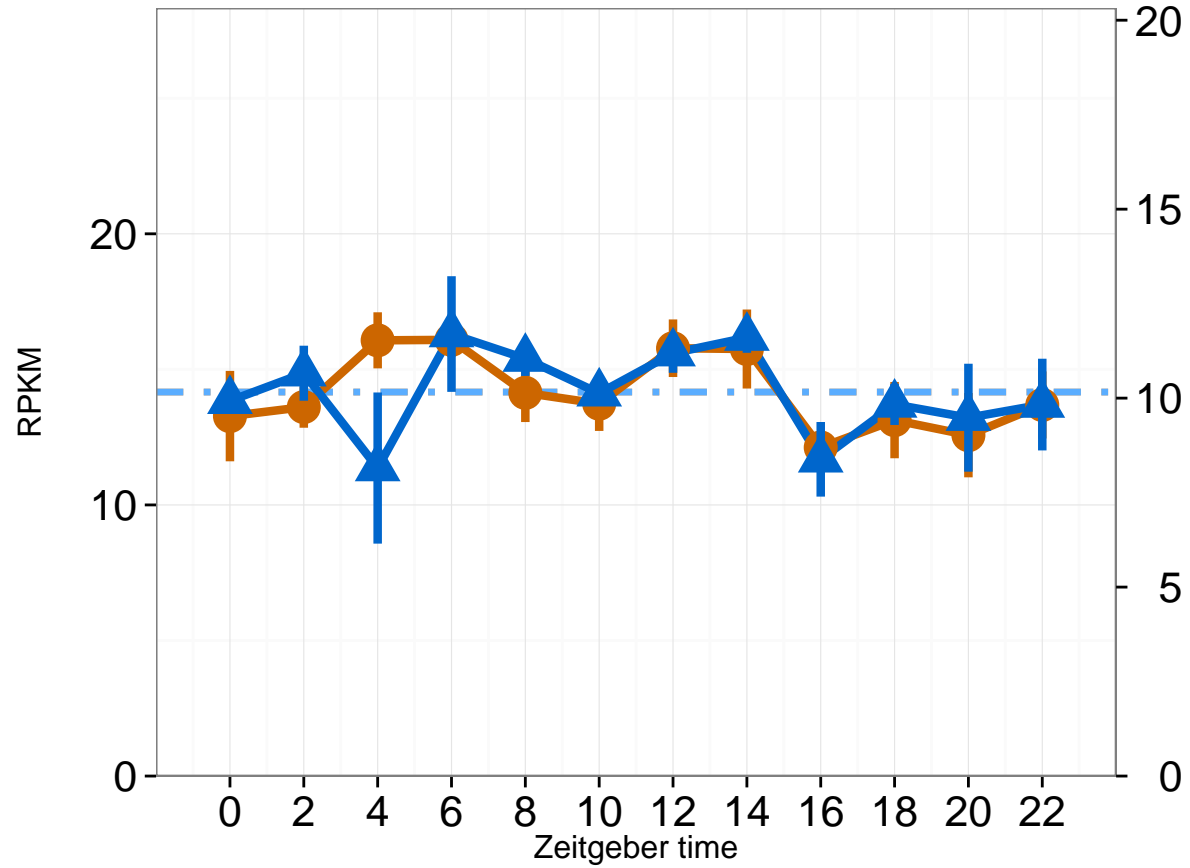

## Hfe

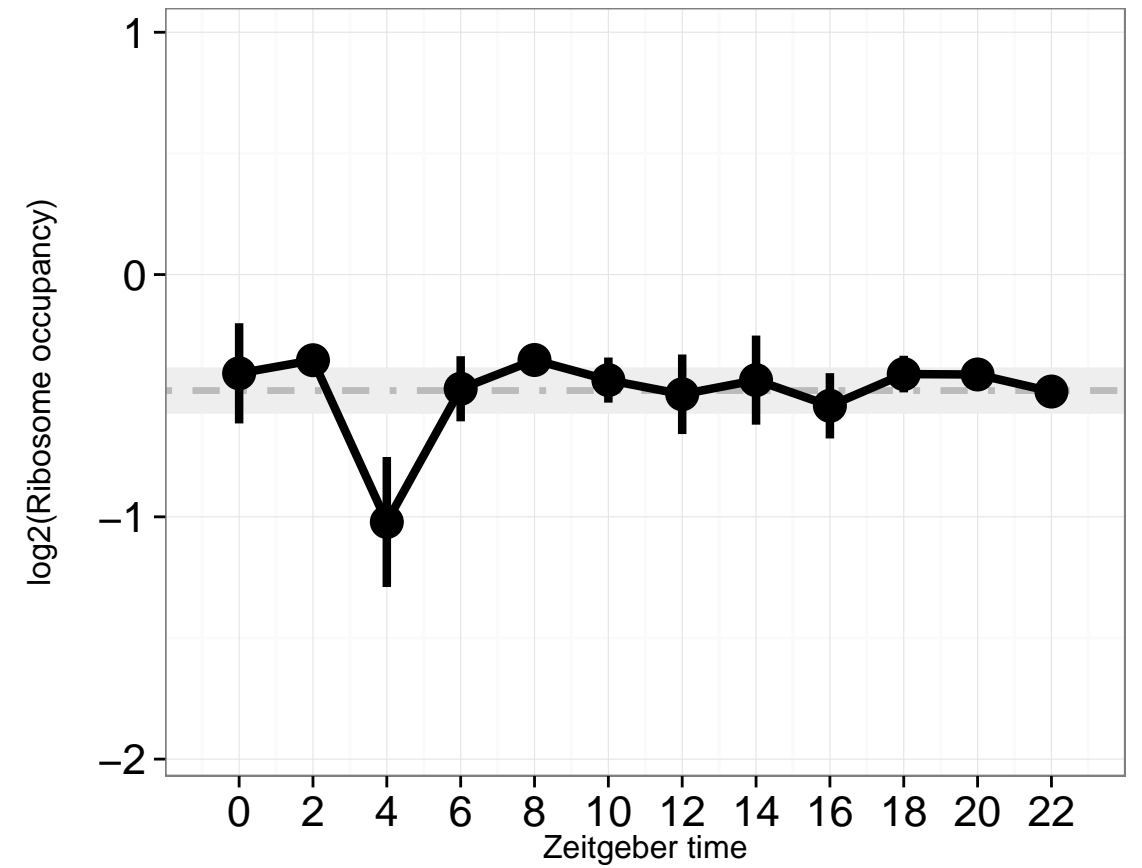

Supplement: Supplementary file 5178 [file 1]

## Sfrp5 TR

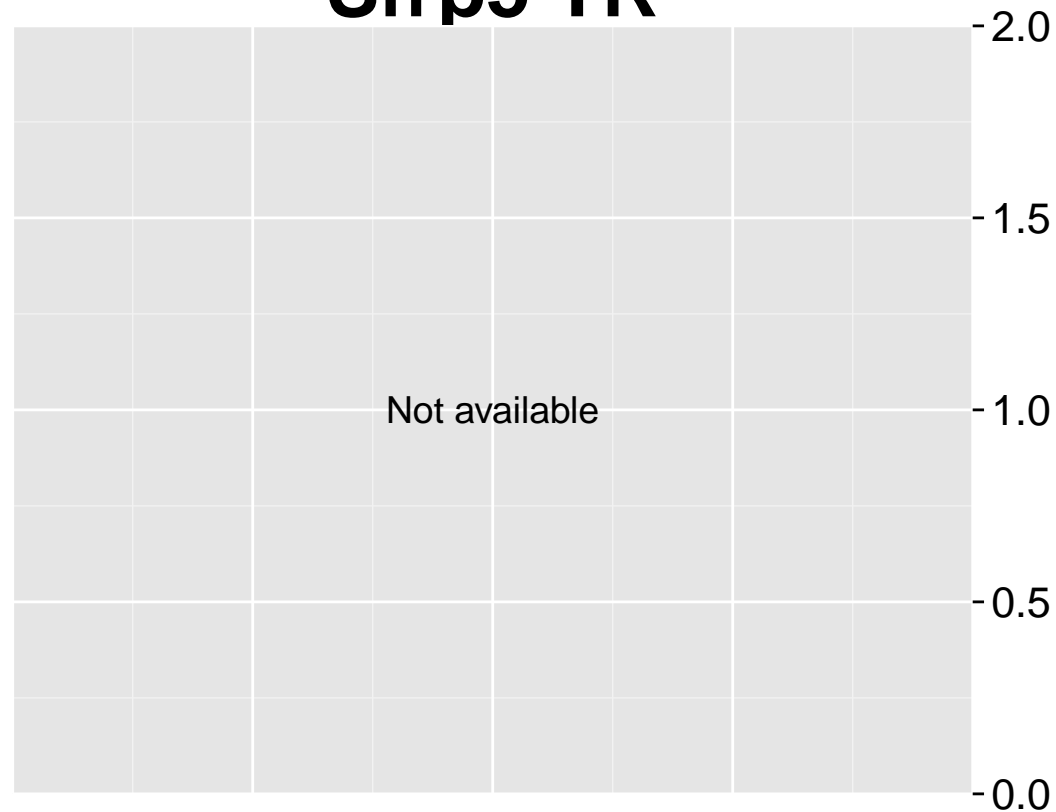

## Sfrp5 log2(Ribosome occupancy)

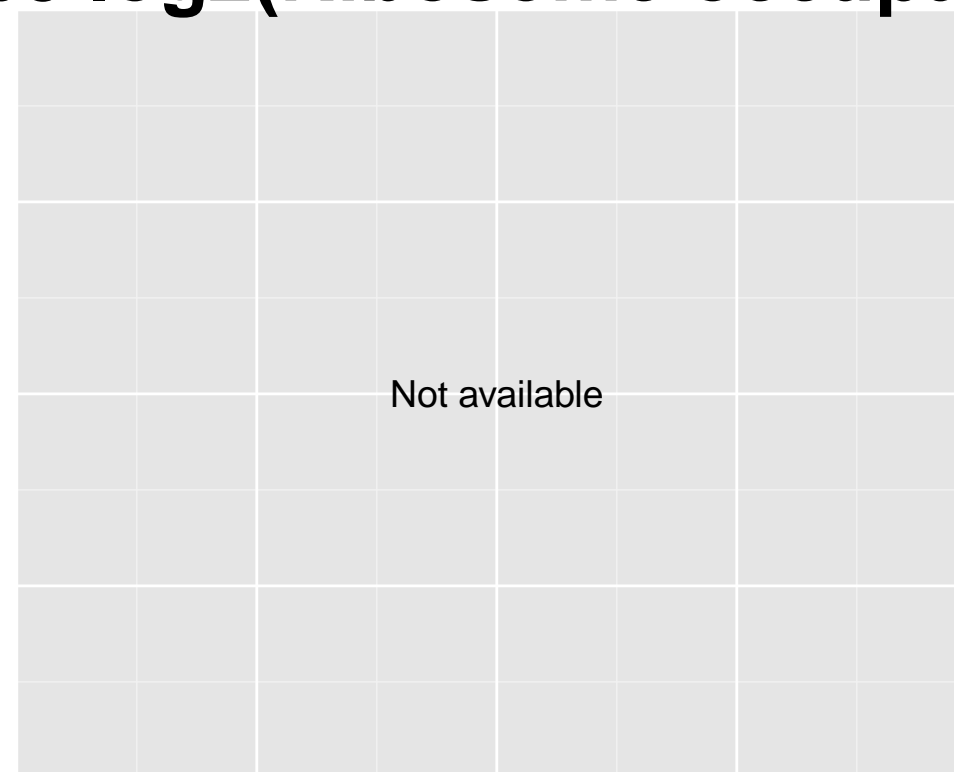

Supplement: Supplementary file 5179 [file 1]

## Tfpi2

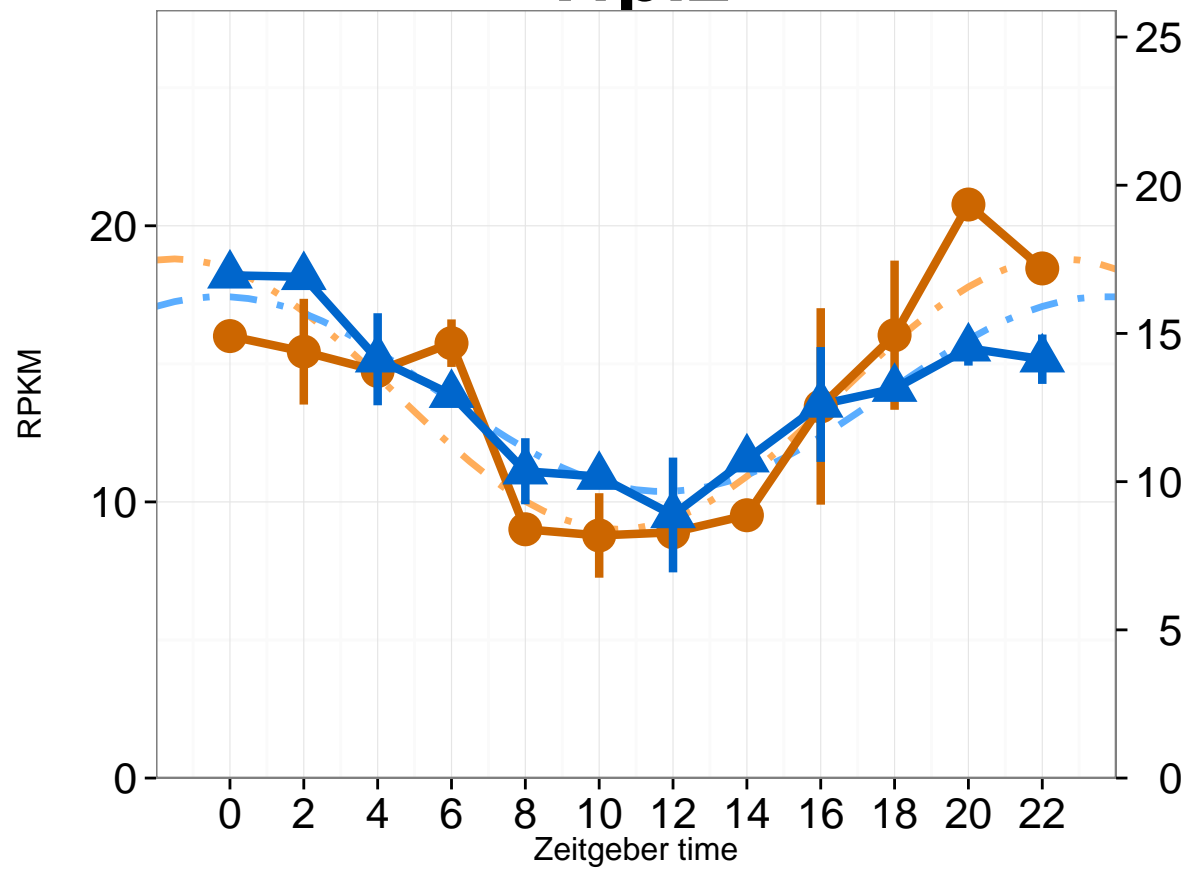

## Tfpi2

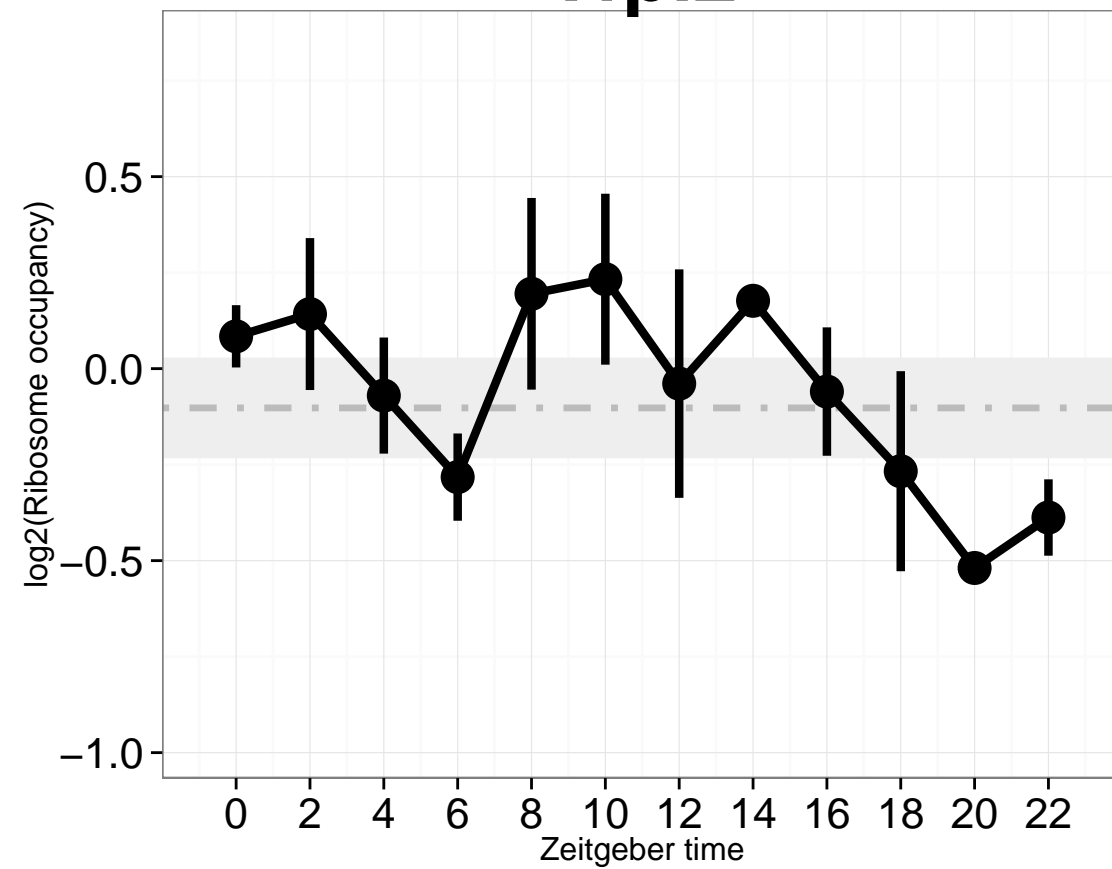

Supplement: Supplementary file 5180 [file 1]

## Dpp4

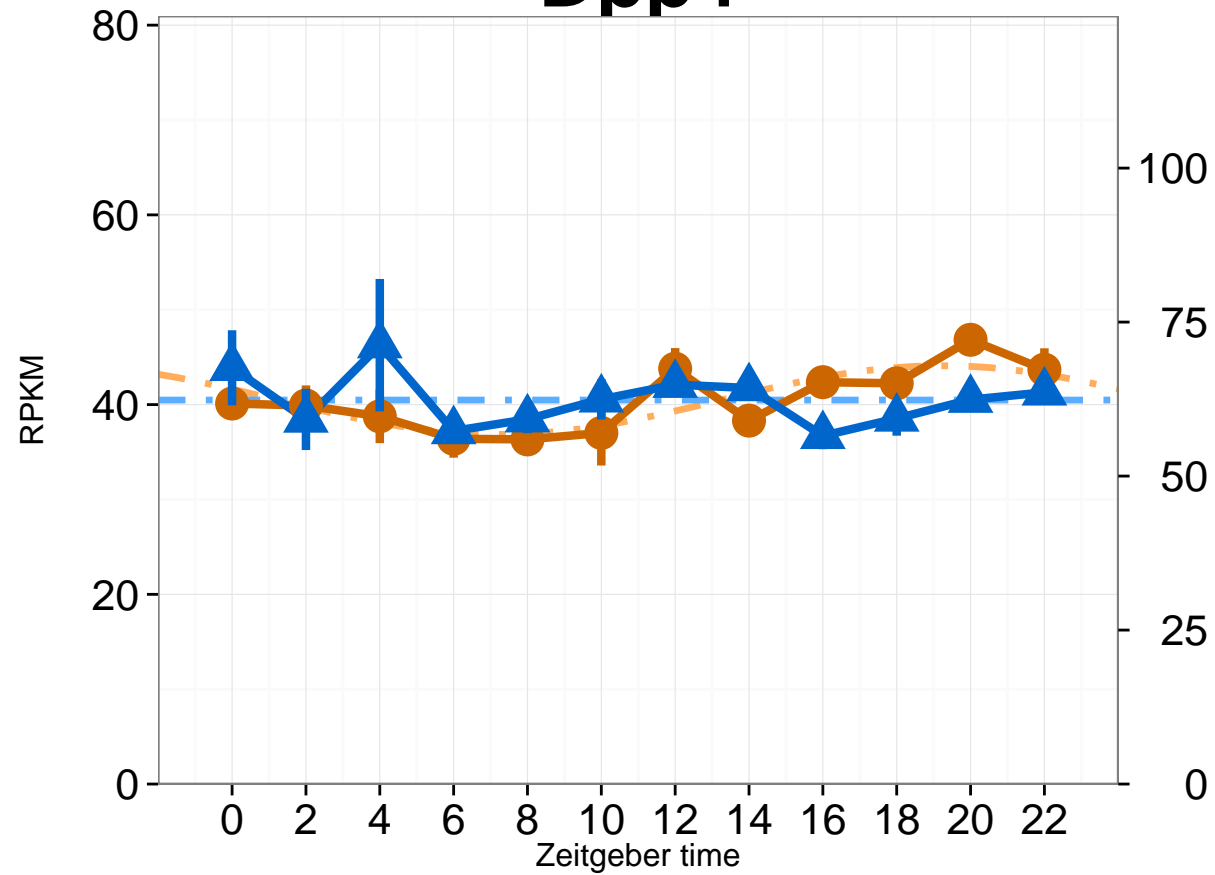

## Dpp4

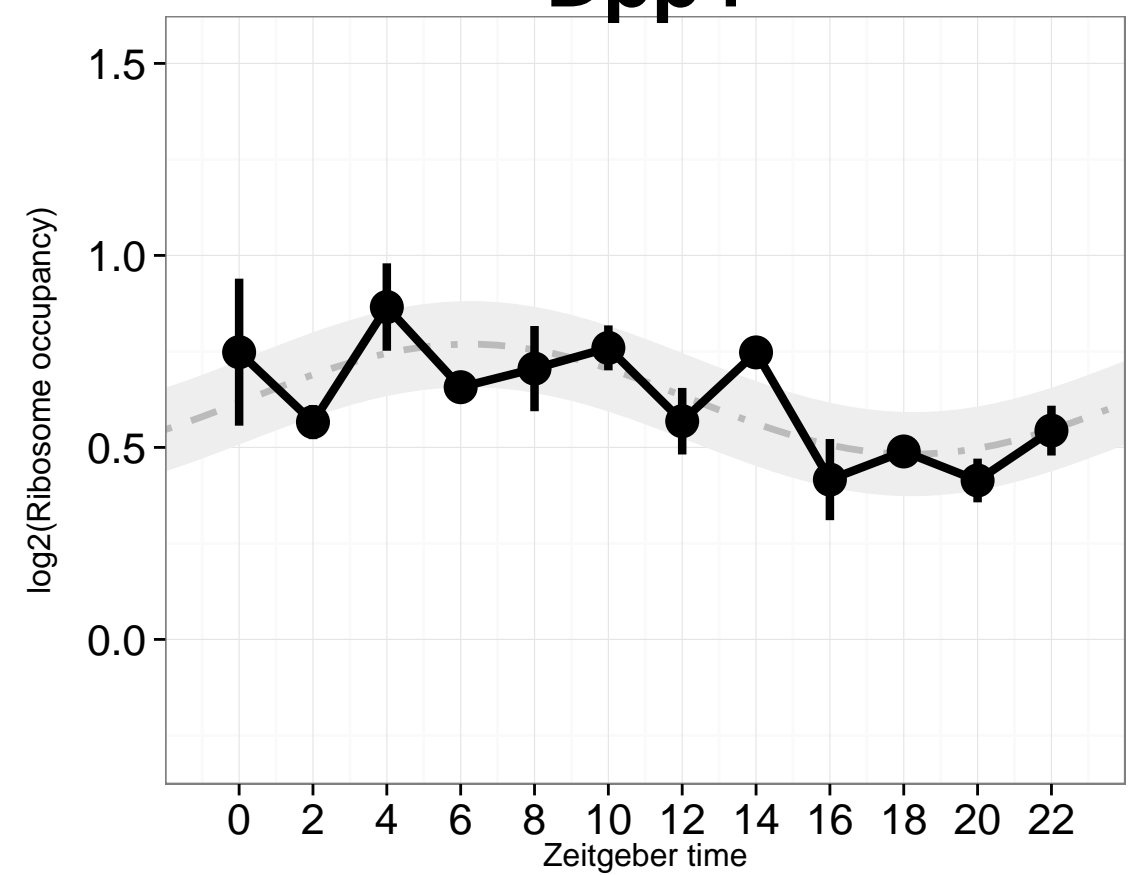

Supplement: Supplementary file 5181 [file 1]

## Fas

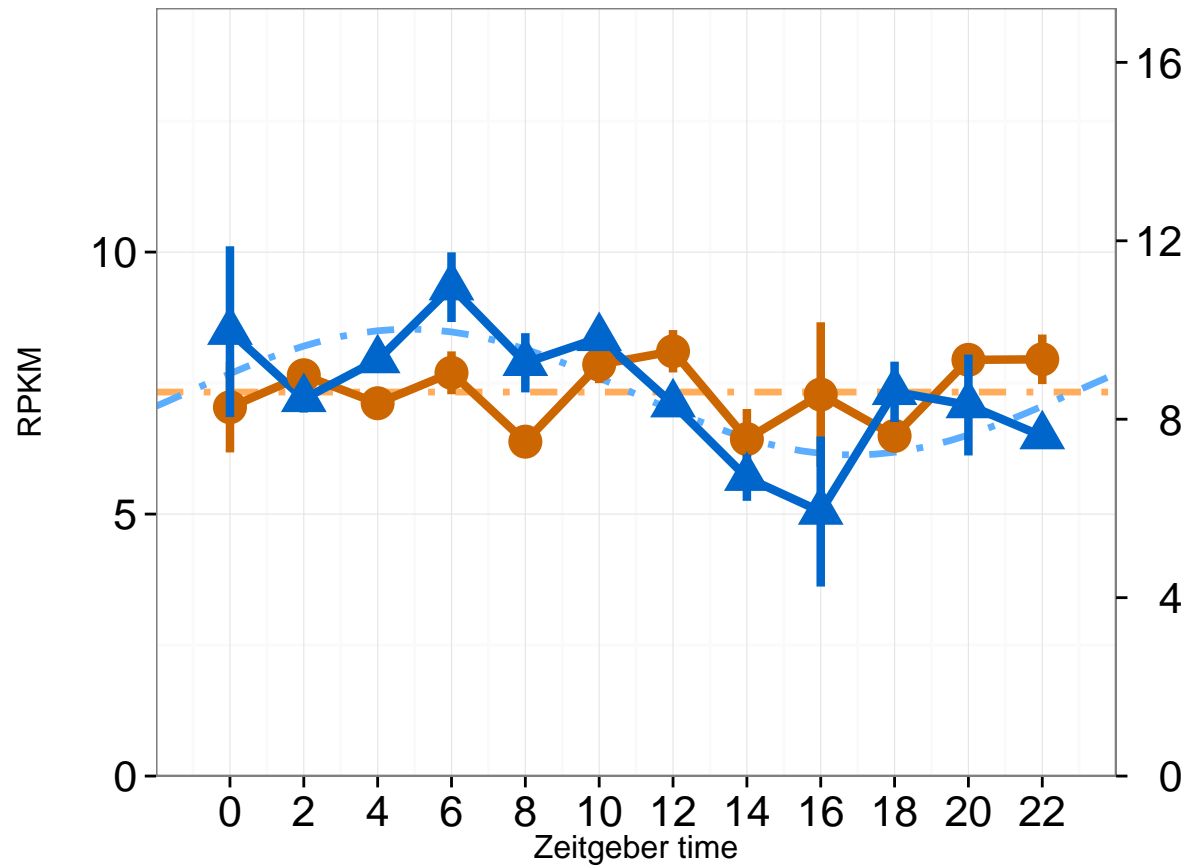

## Fas

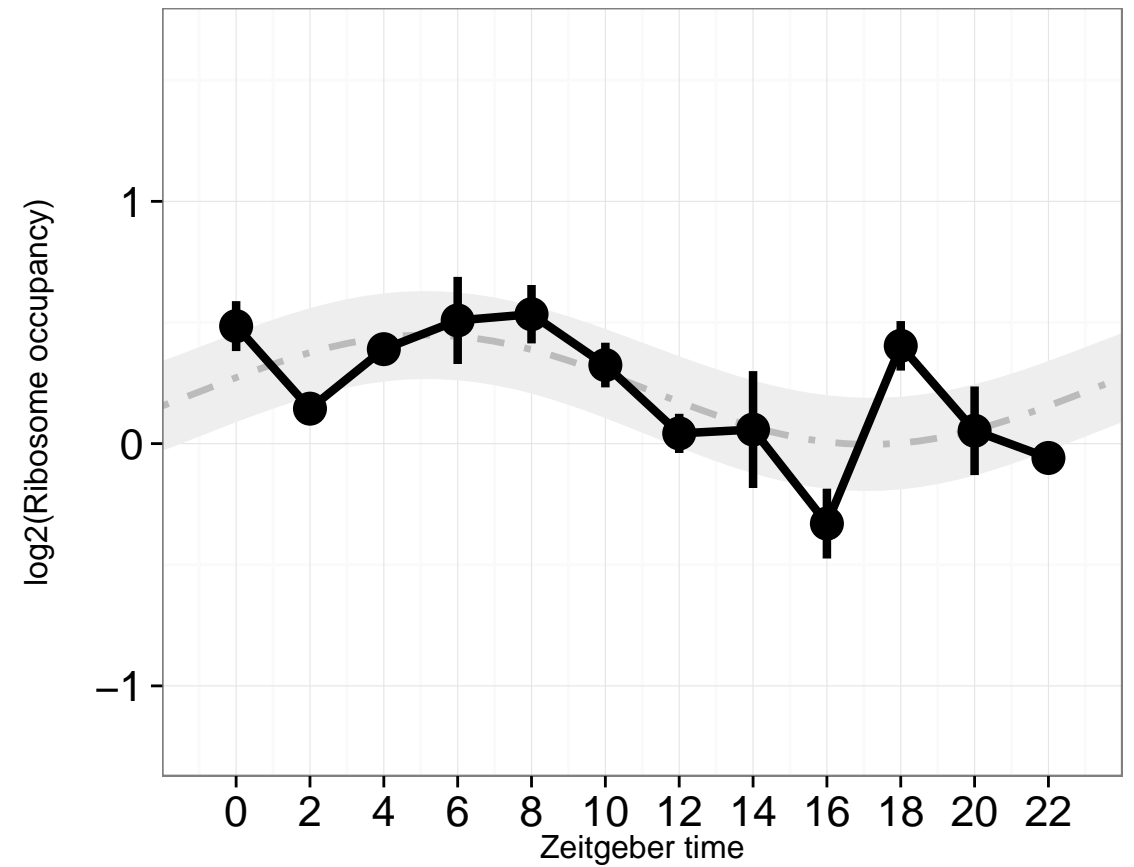

Supplement: Supplementary file 5182 [file 1]

## Syngap1

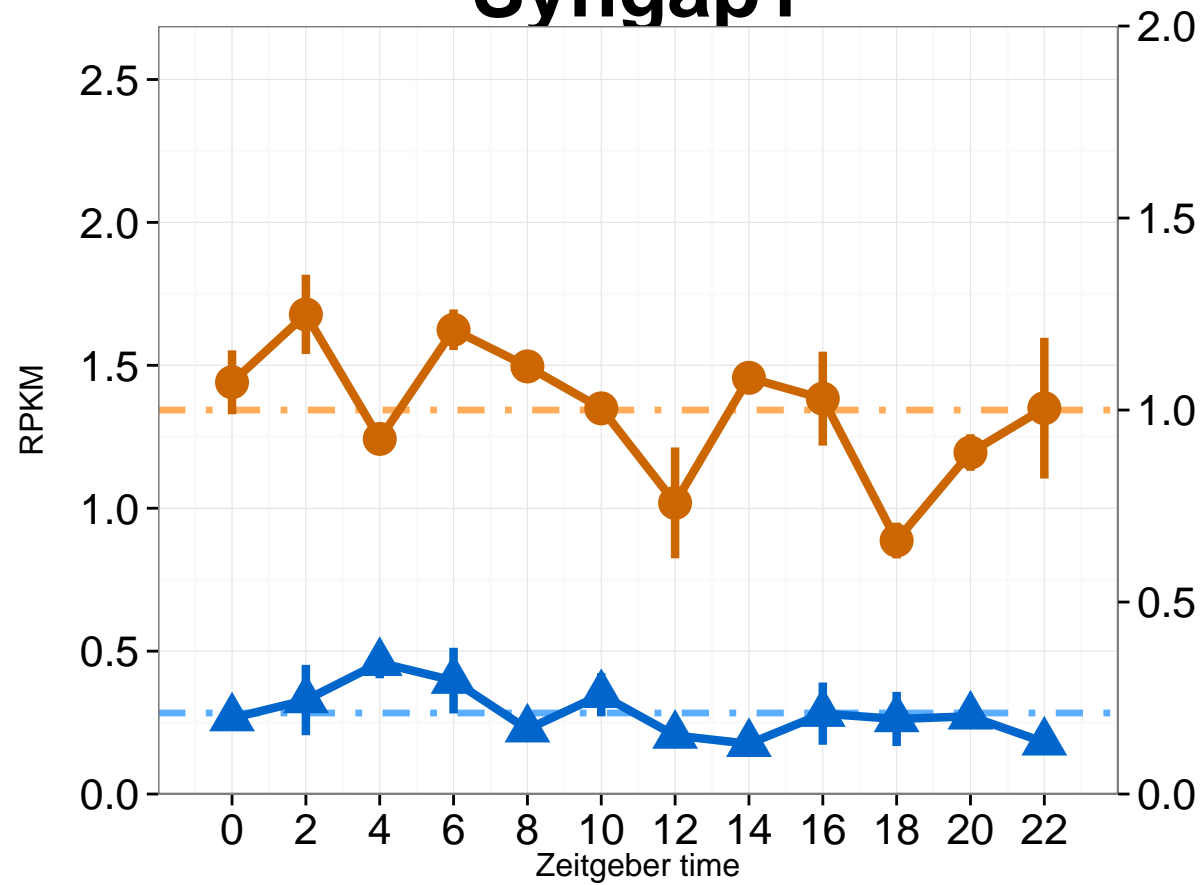

## Syngap1

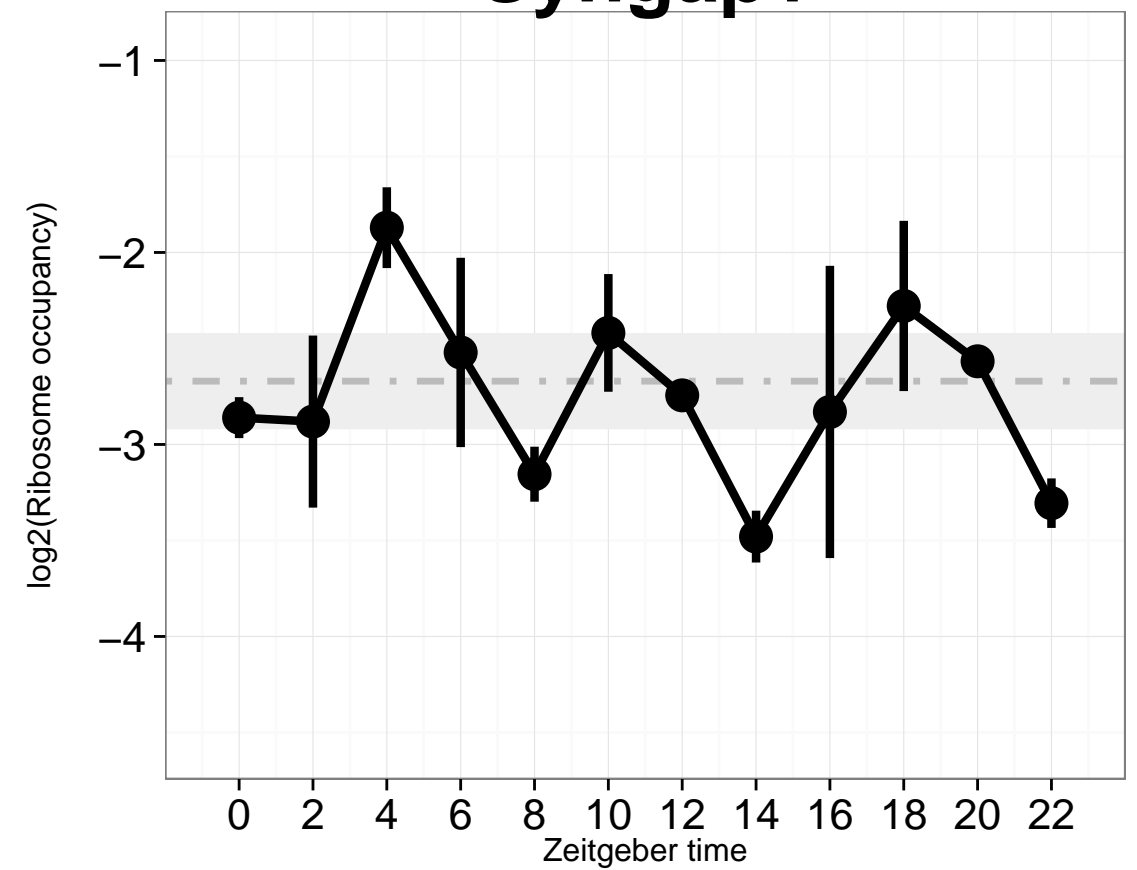

Supplement: Supplementary file 5183 [file 1]

## Tmem252

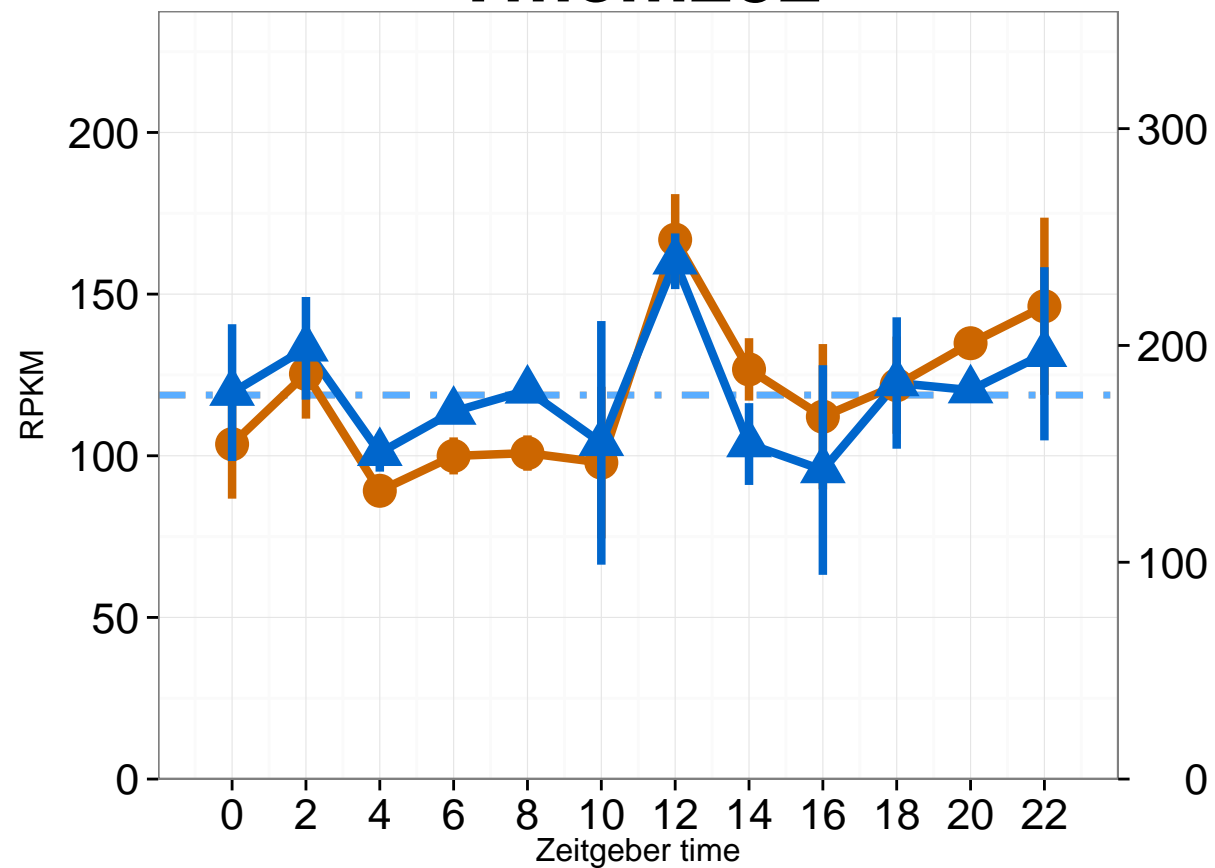

## Tmem252

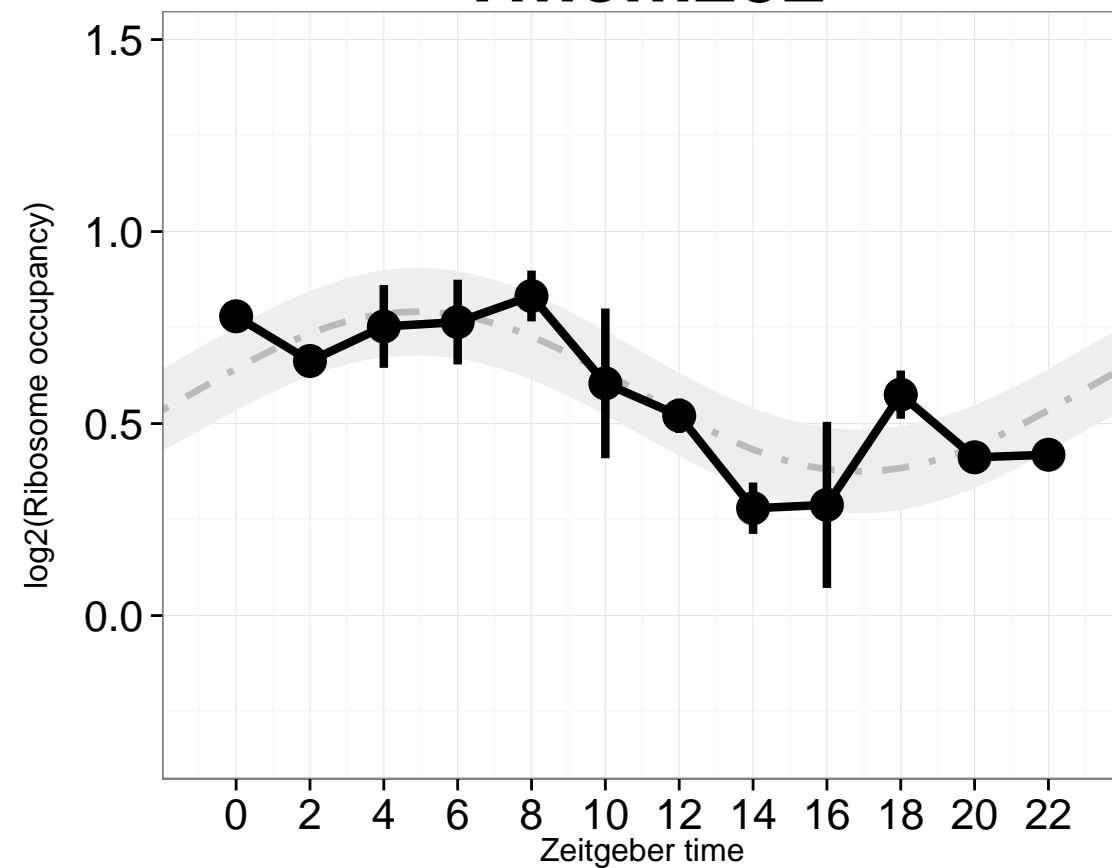

Supplement: Supplementary file 5184 [file 1]

## Mink1

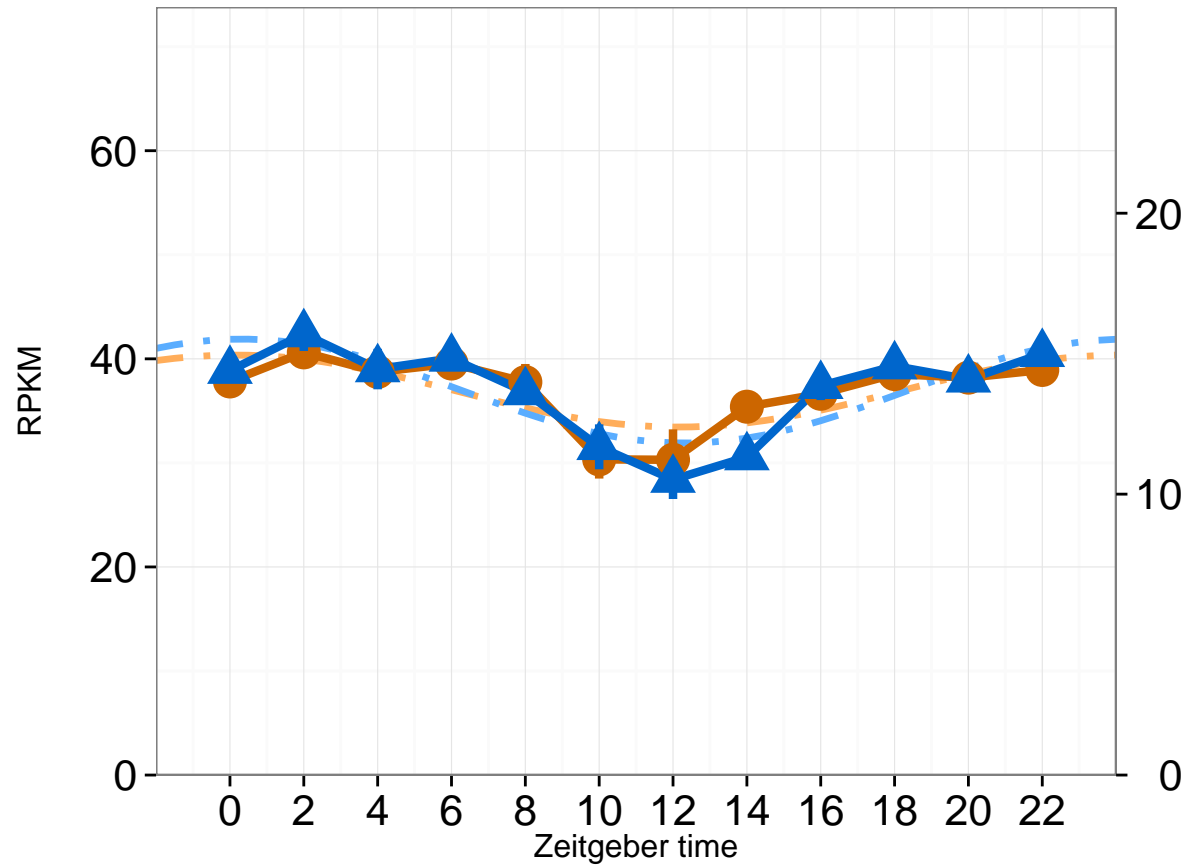

## Mink1

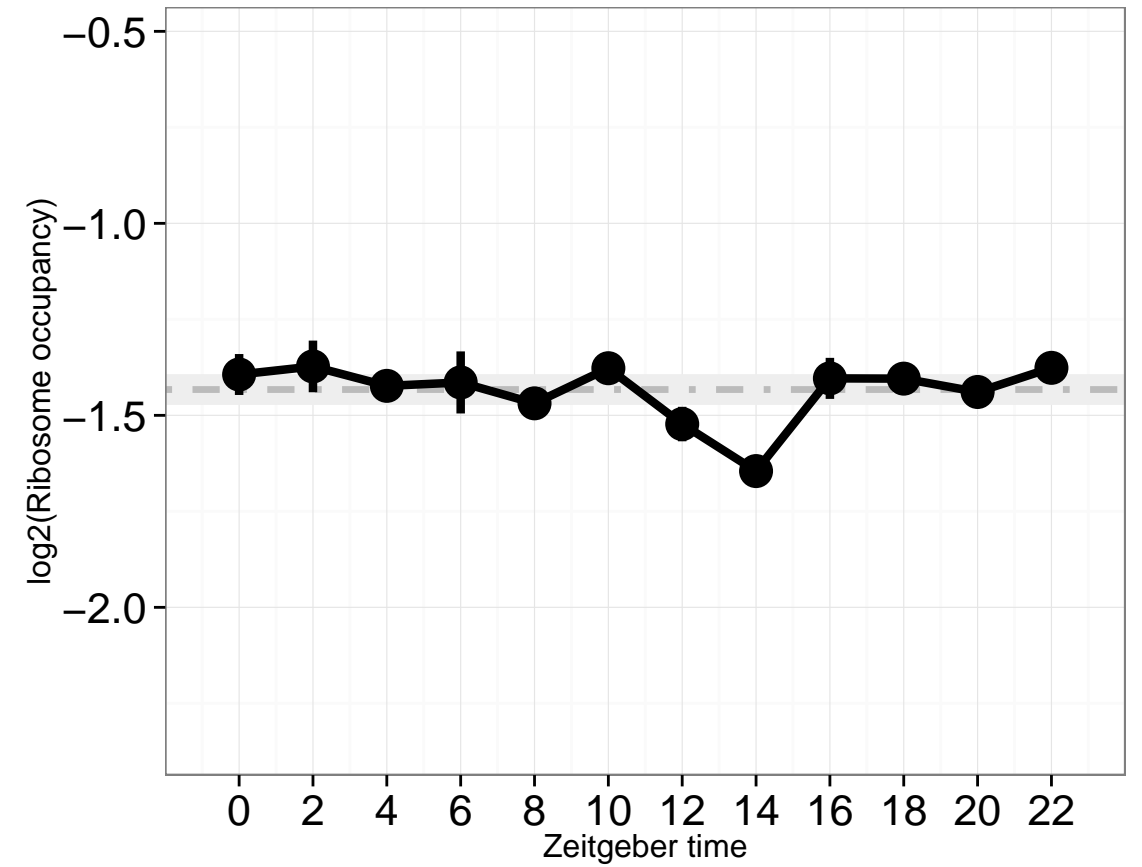

Supplement: Supplementary file 5185 [file 1]

## Rarres2

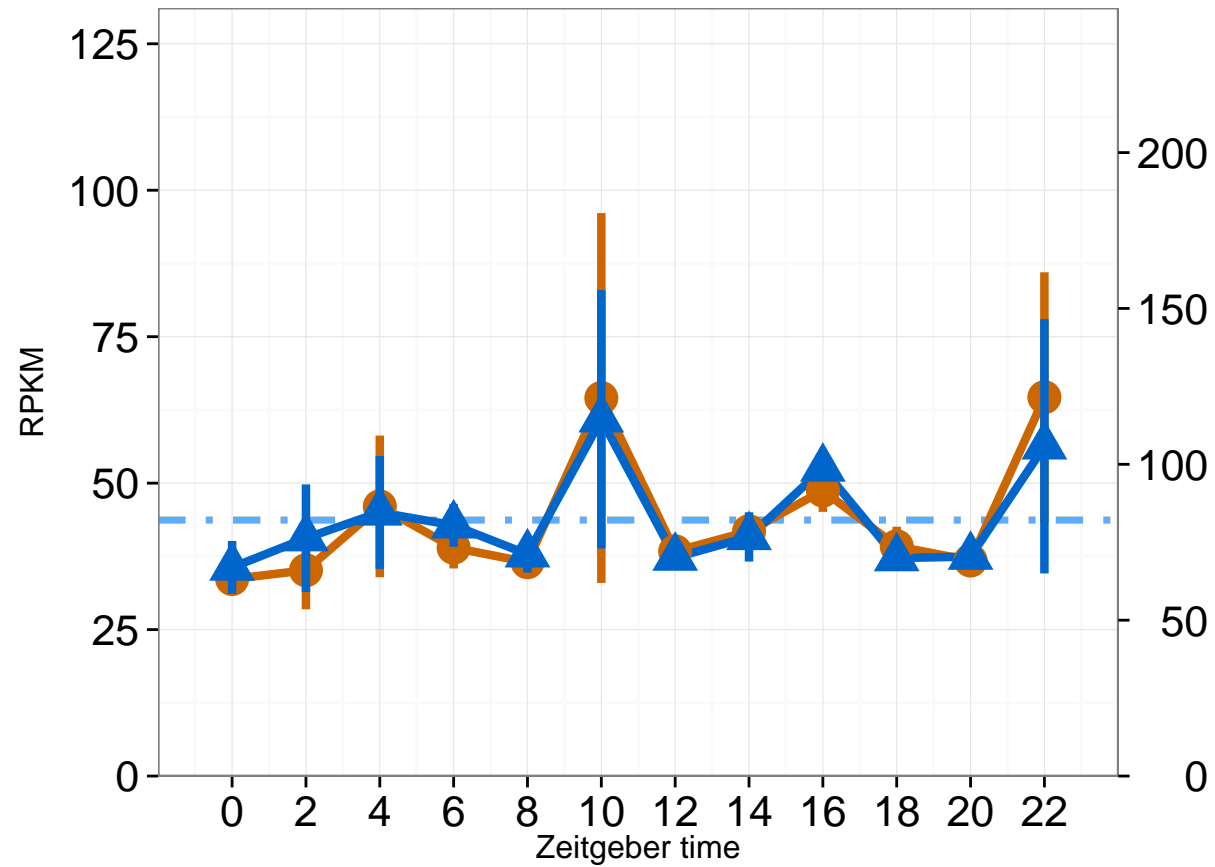

## Rarres2

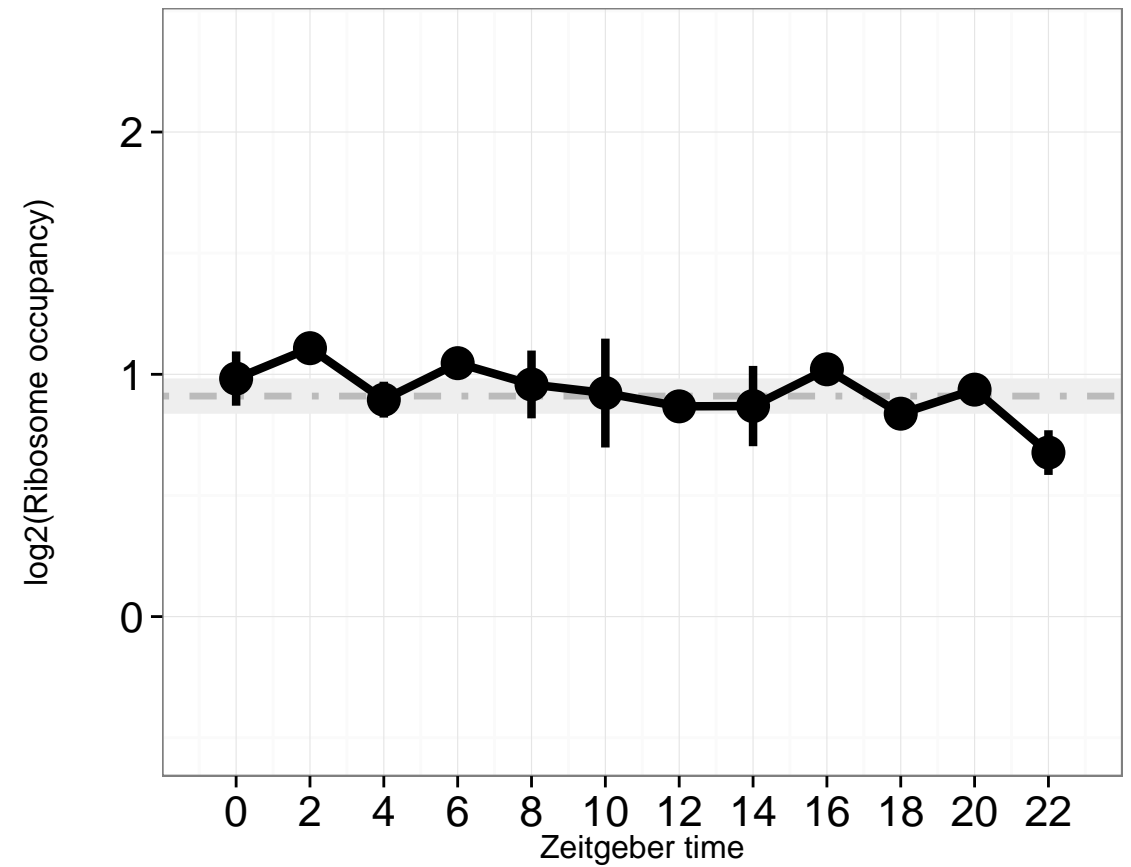

Supplement: Supplementary file 5186 [file 1]

## Nde1

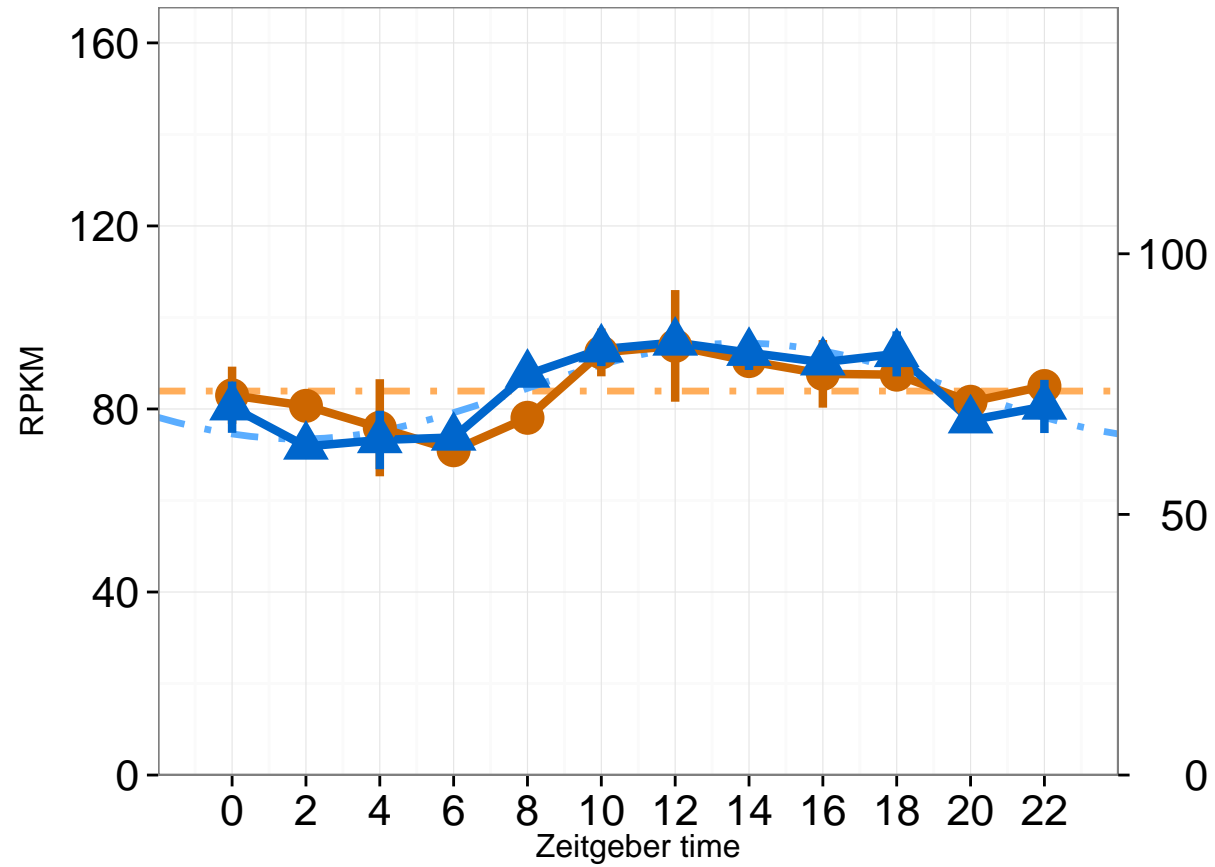

## Nde1

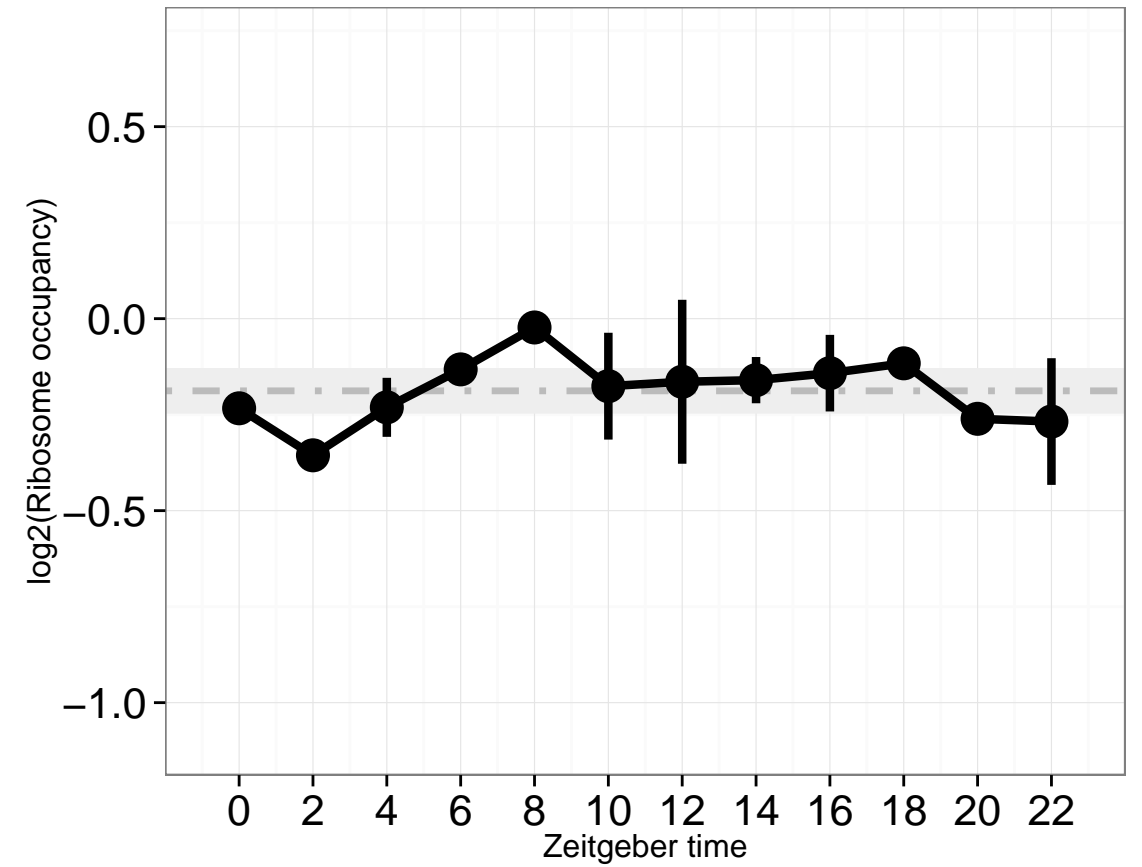

Supplement: Supplementary file 5187 [file 1]

## Sugp1

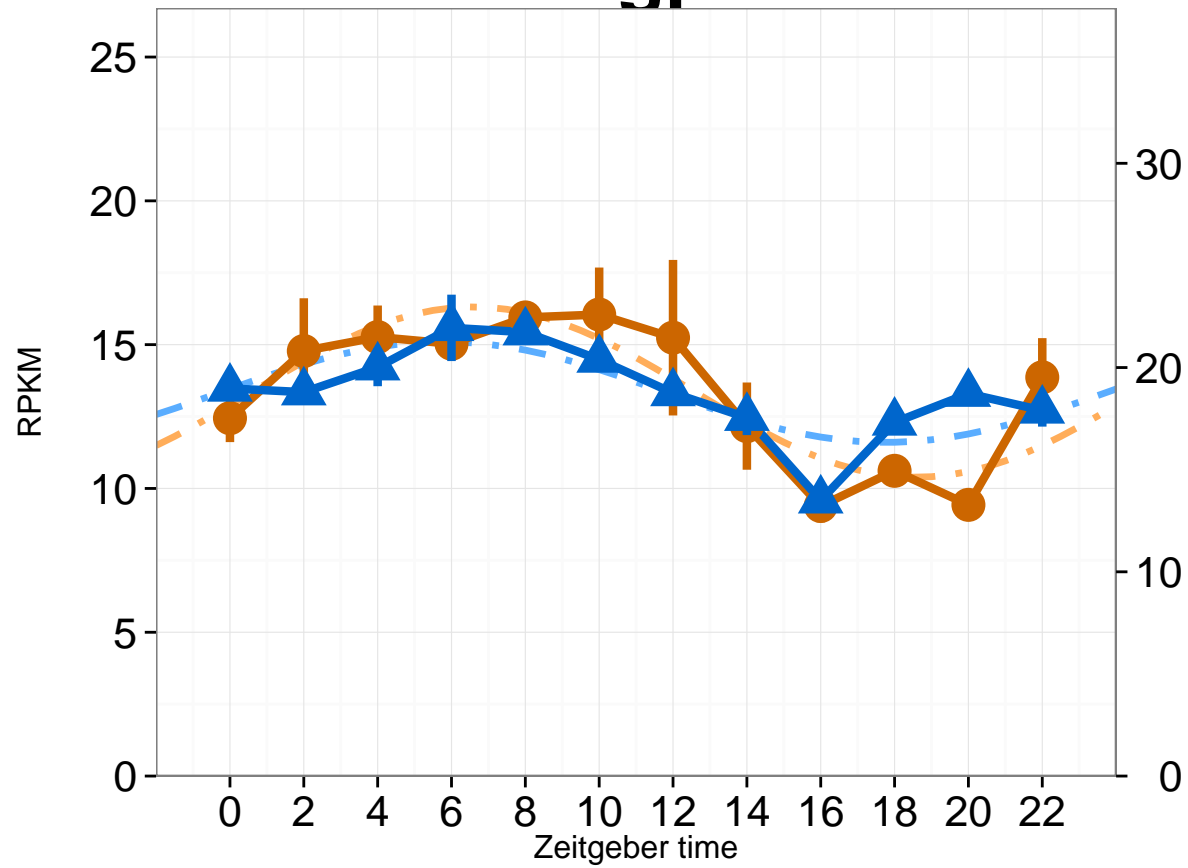

## Sugp1

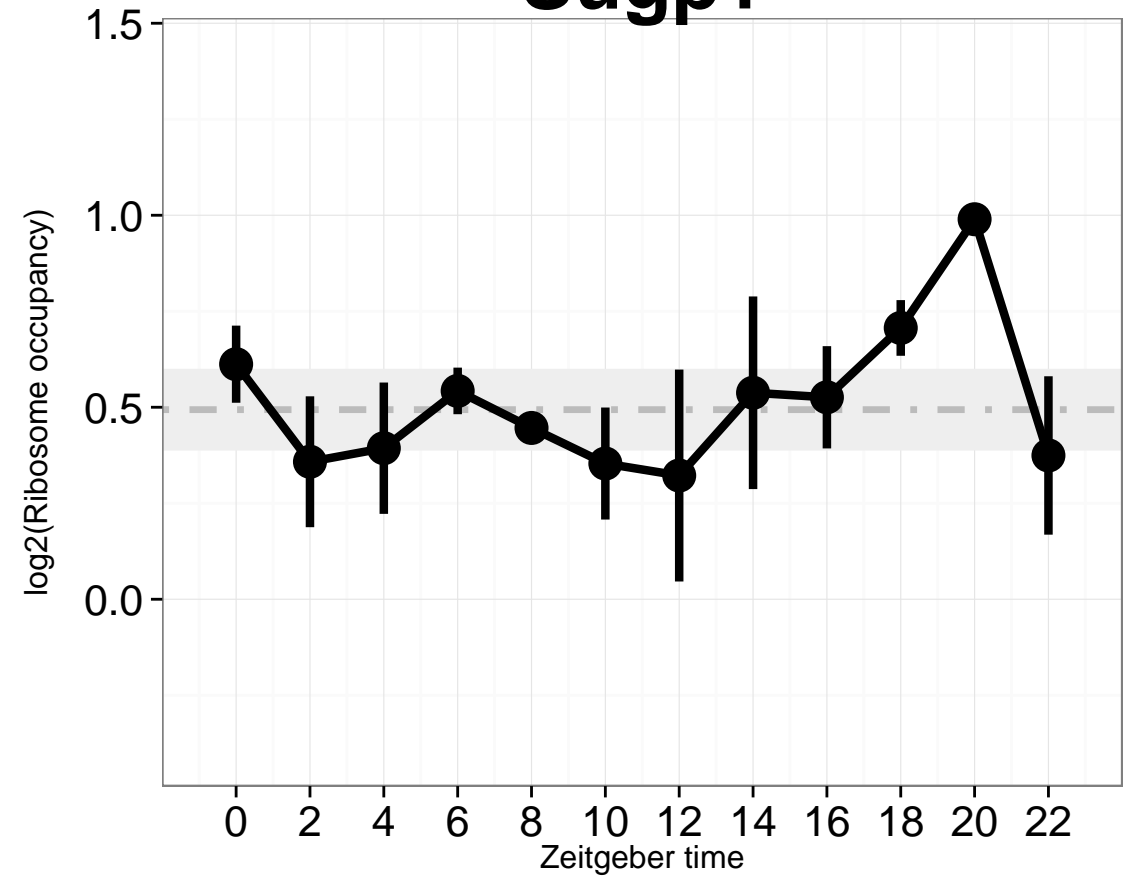

Supplement: Supplementary file 5188 [file 1]

# Arhgap27

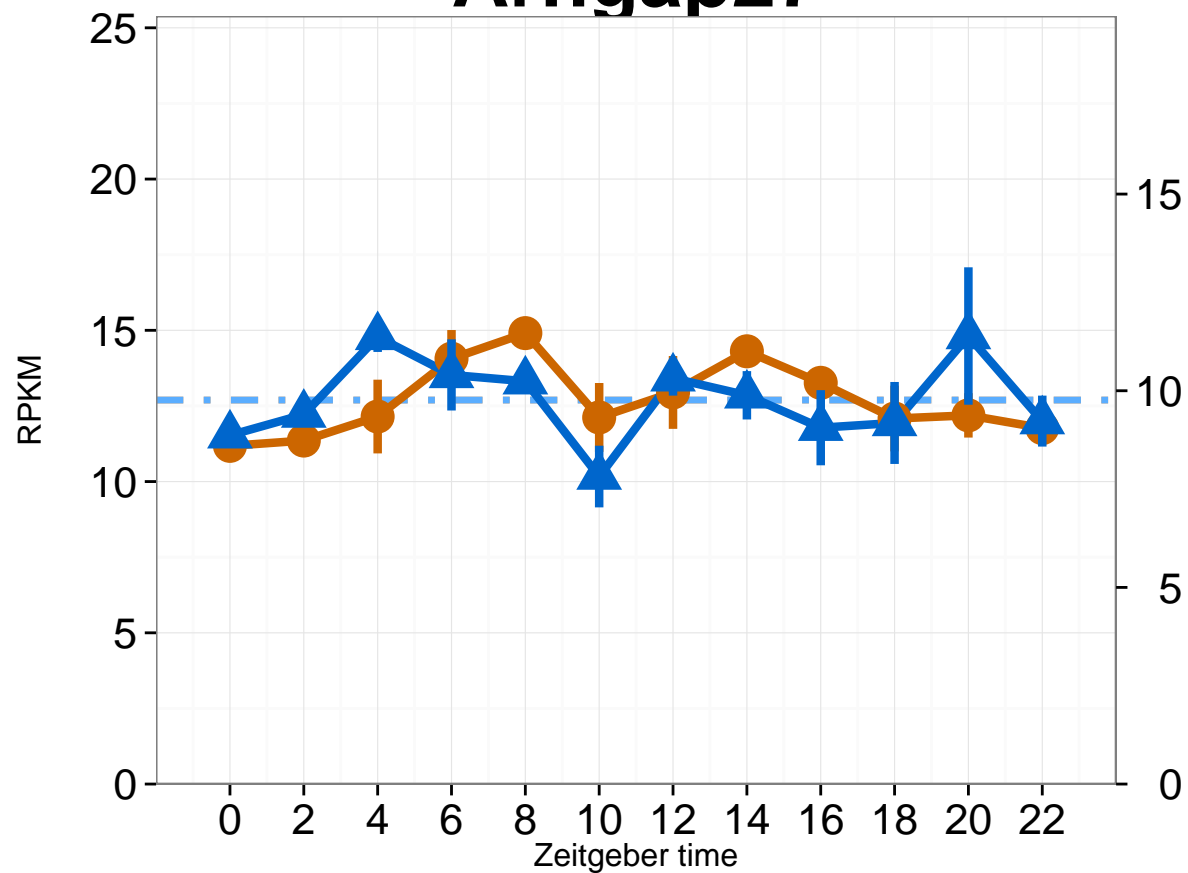

# Arhgap27

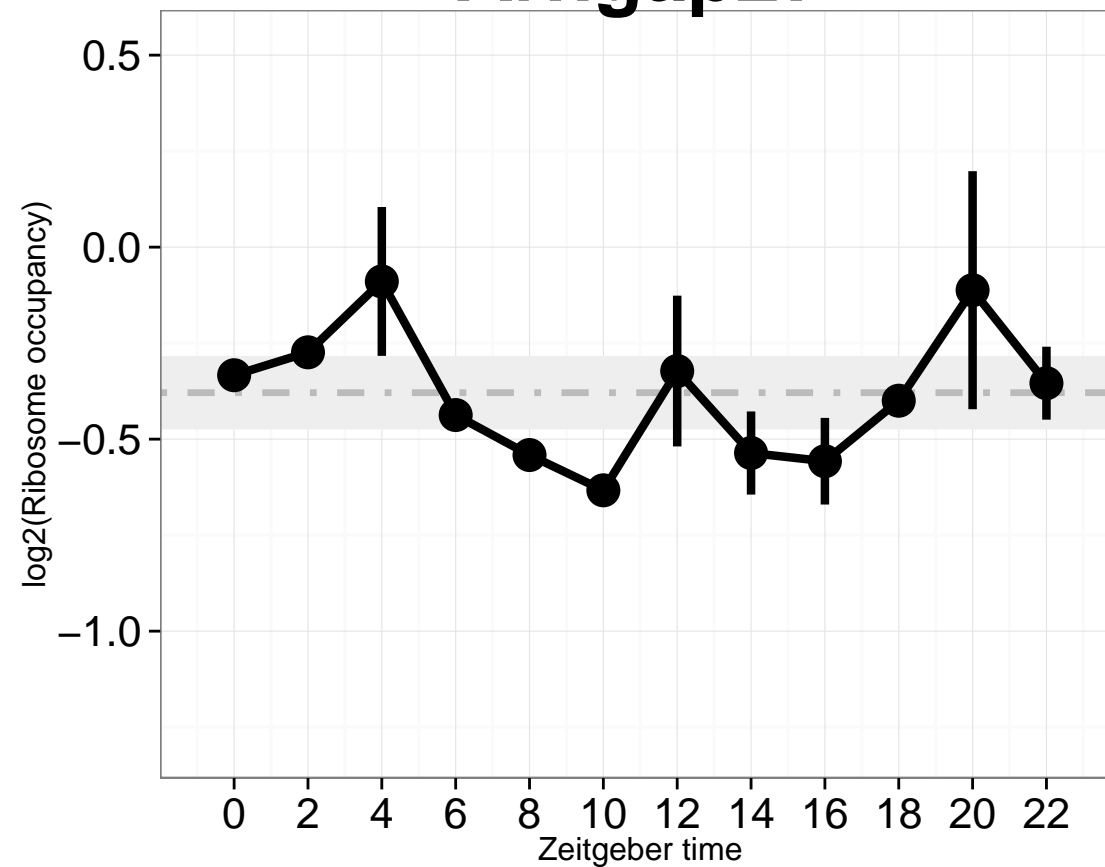

Supplement: Supplementary file 5189 [file 1]

## Mcfd2

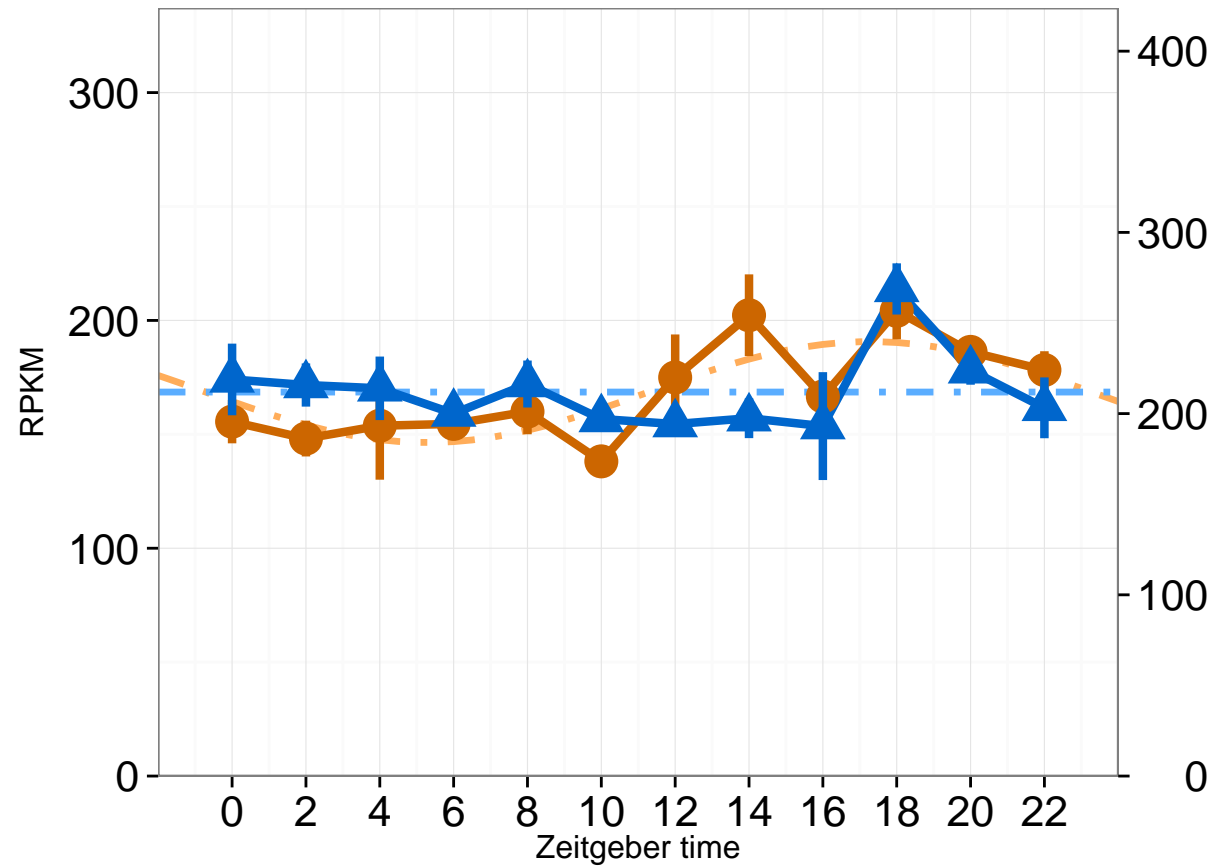

## Mcfd2

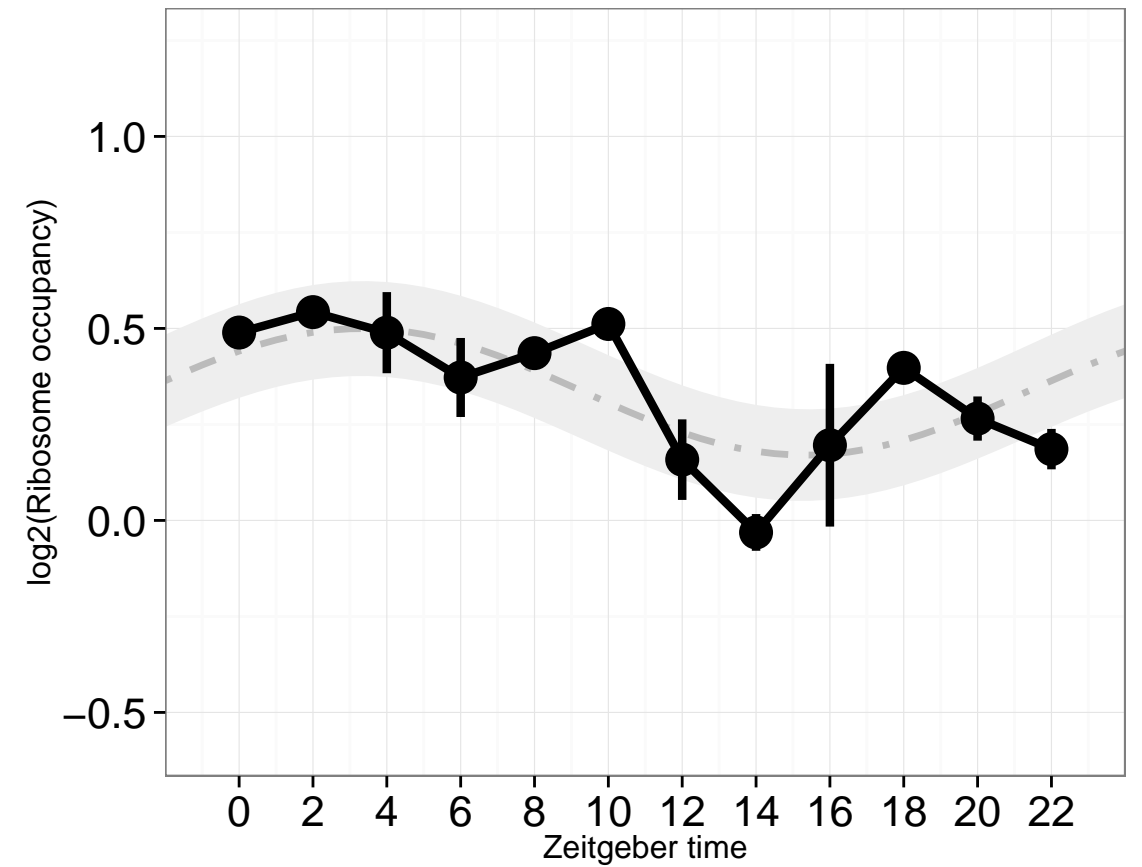

Supplement: Supplementary file 5190 [file 1]

## 2210016L21Rik

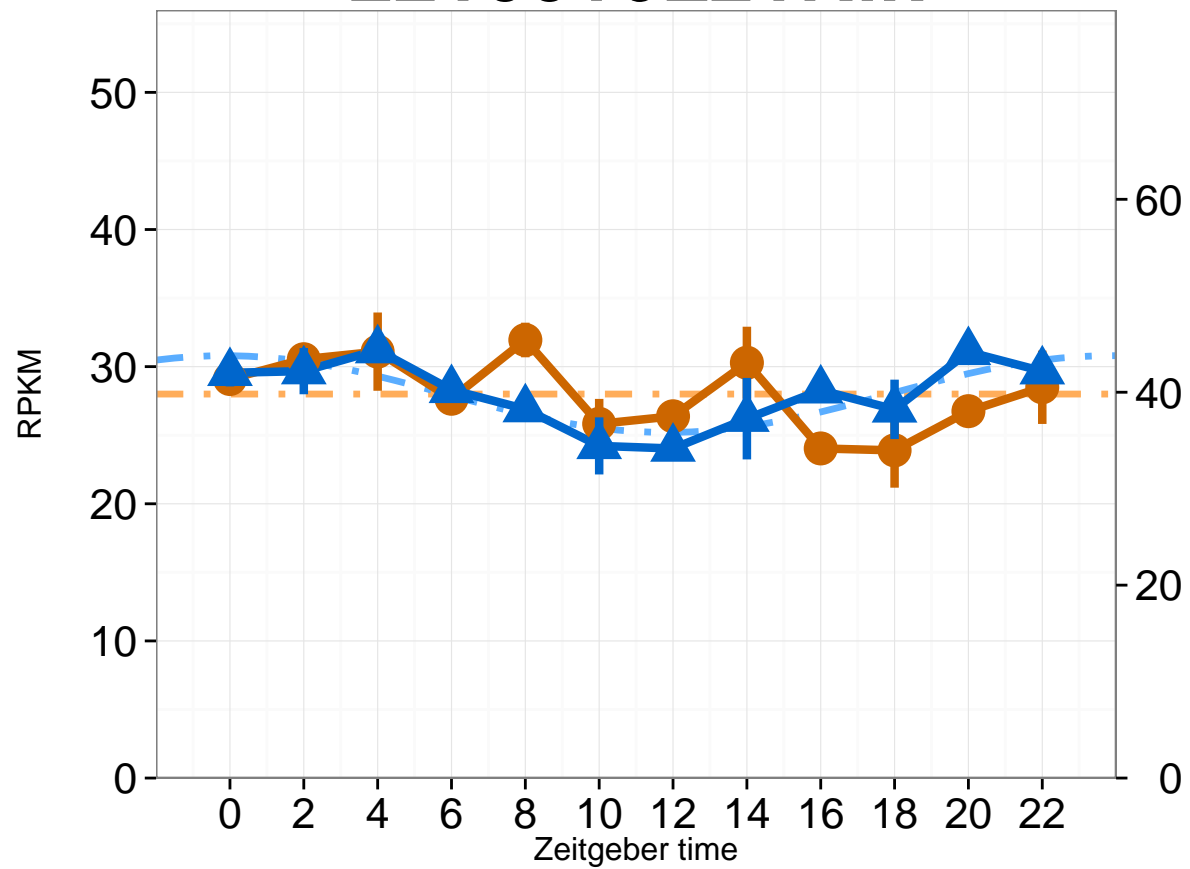

## 2210016L21Rik

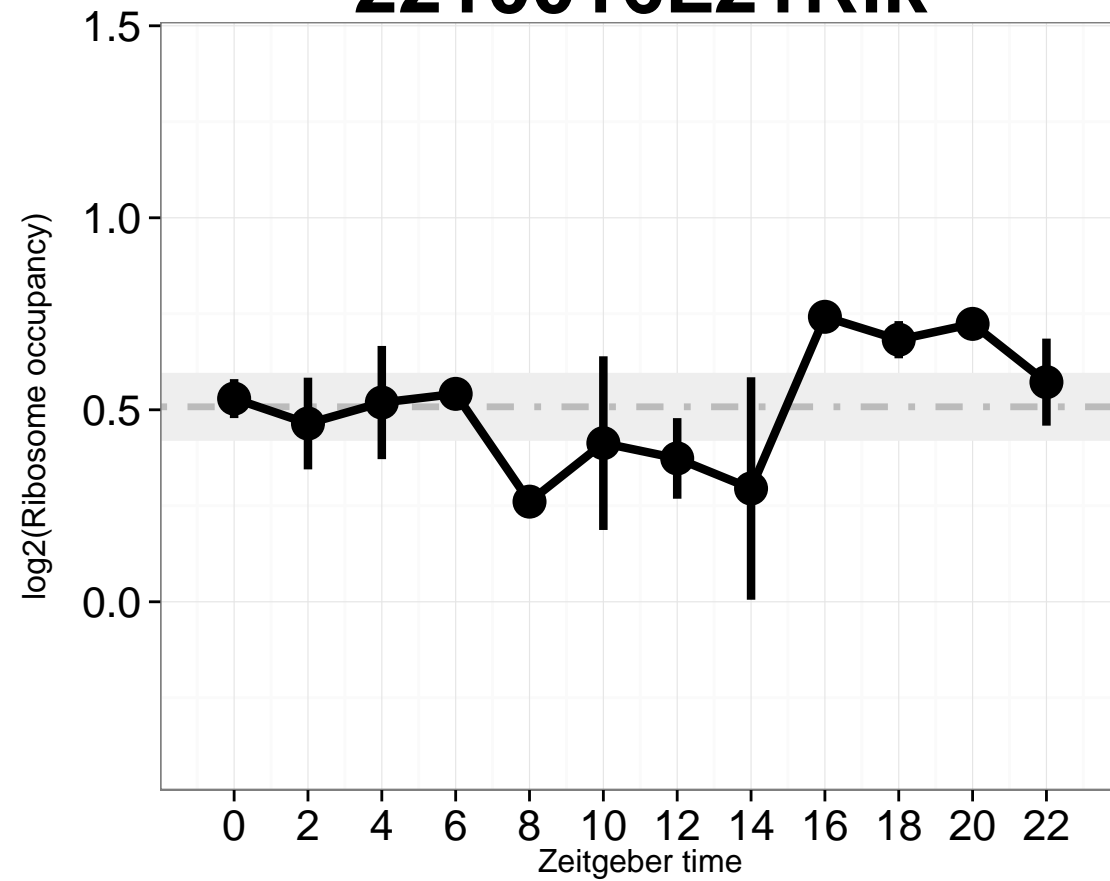

Supplement: Supplementary file 5191 [file 1]

# Hsd3b3

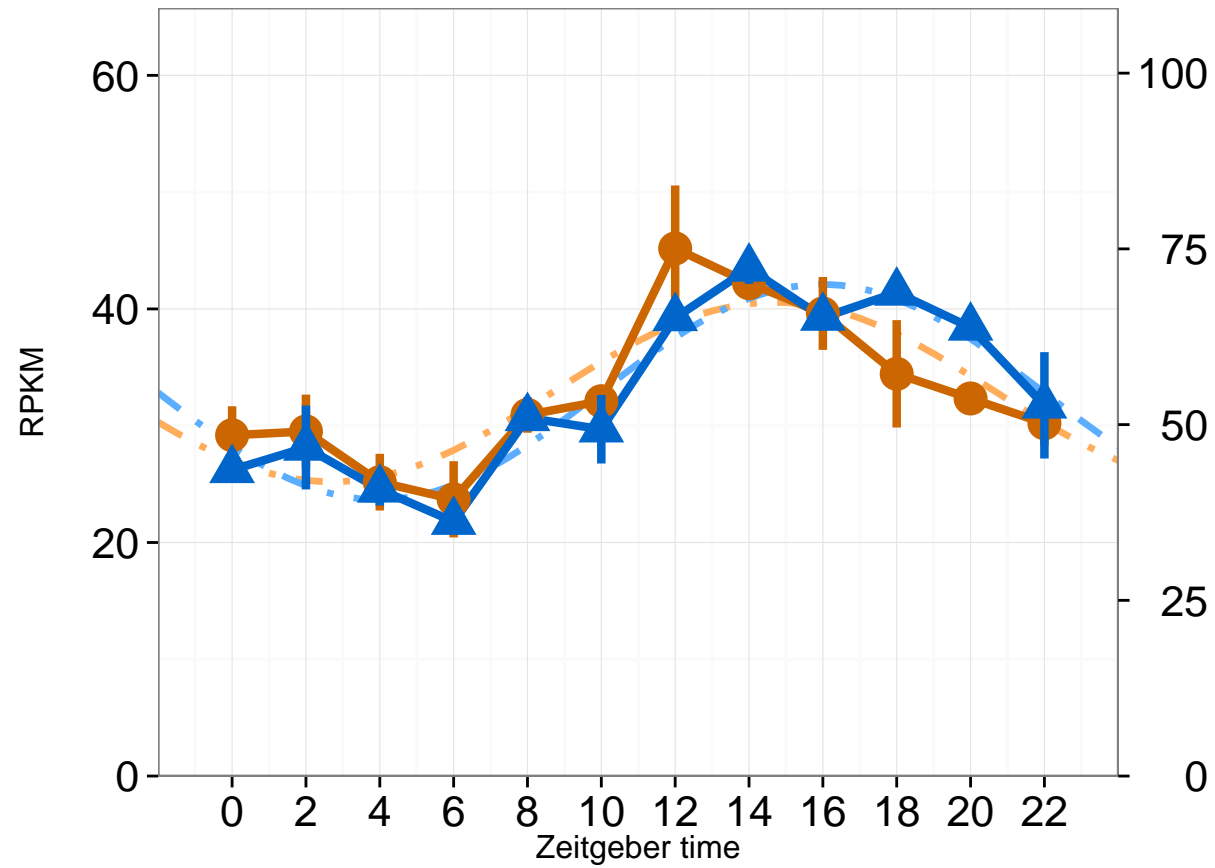

# Hsd3b3

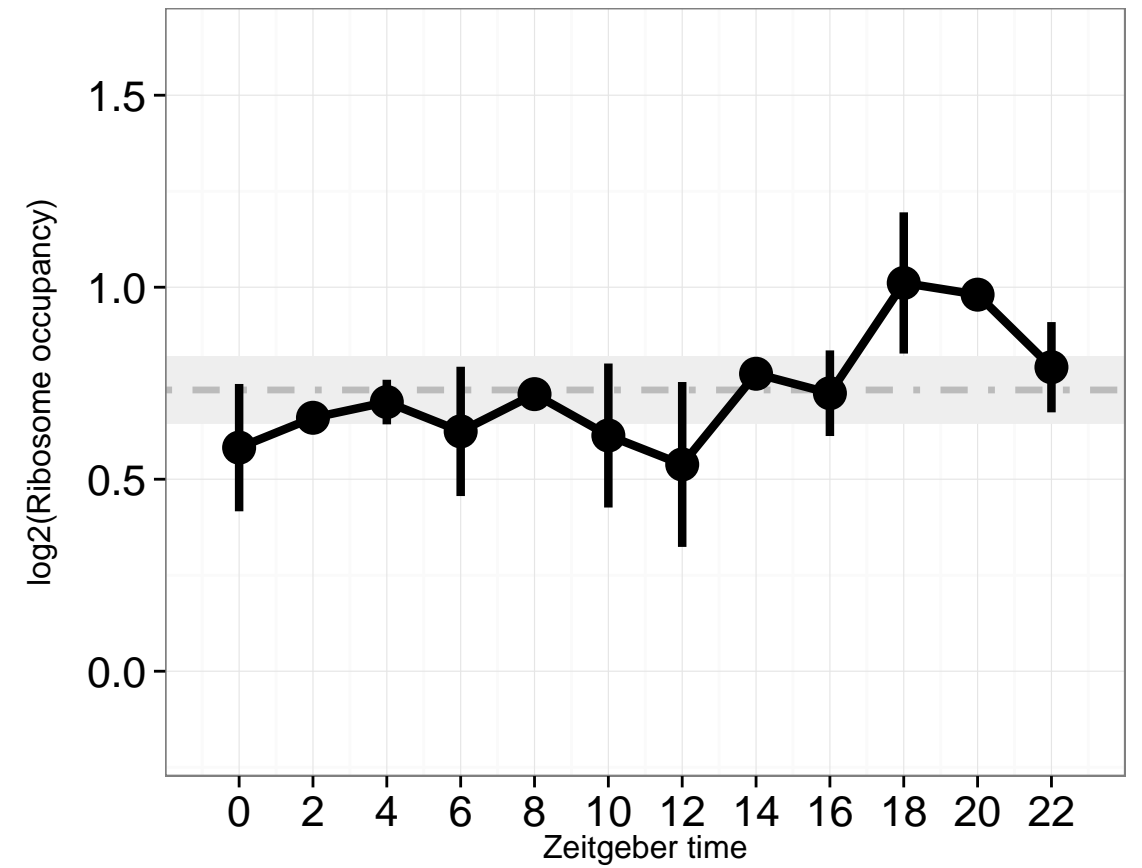

Supplement: Supplementary file 5192 [file 1]

## Peli1

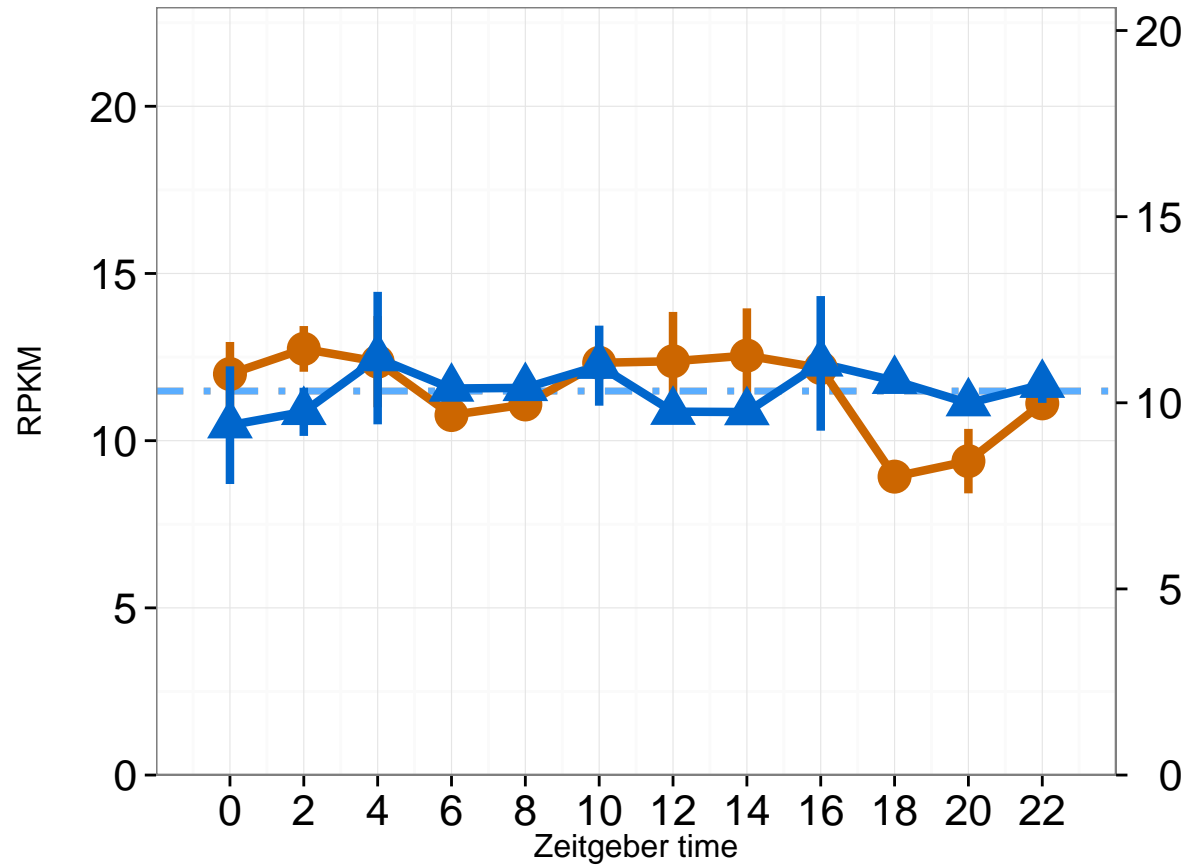

## Peli1

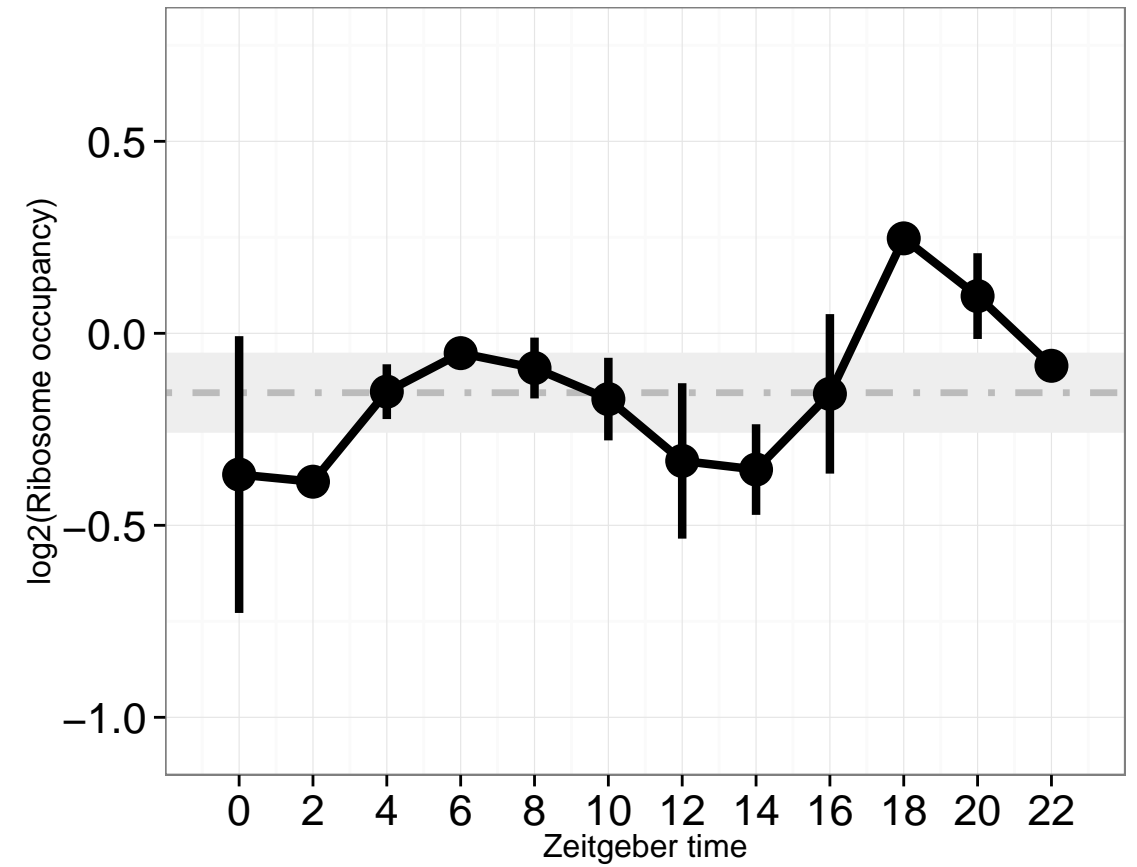

Supplement: Supplementary file 5193 [file 1]

# Amd1

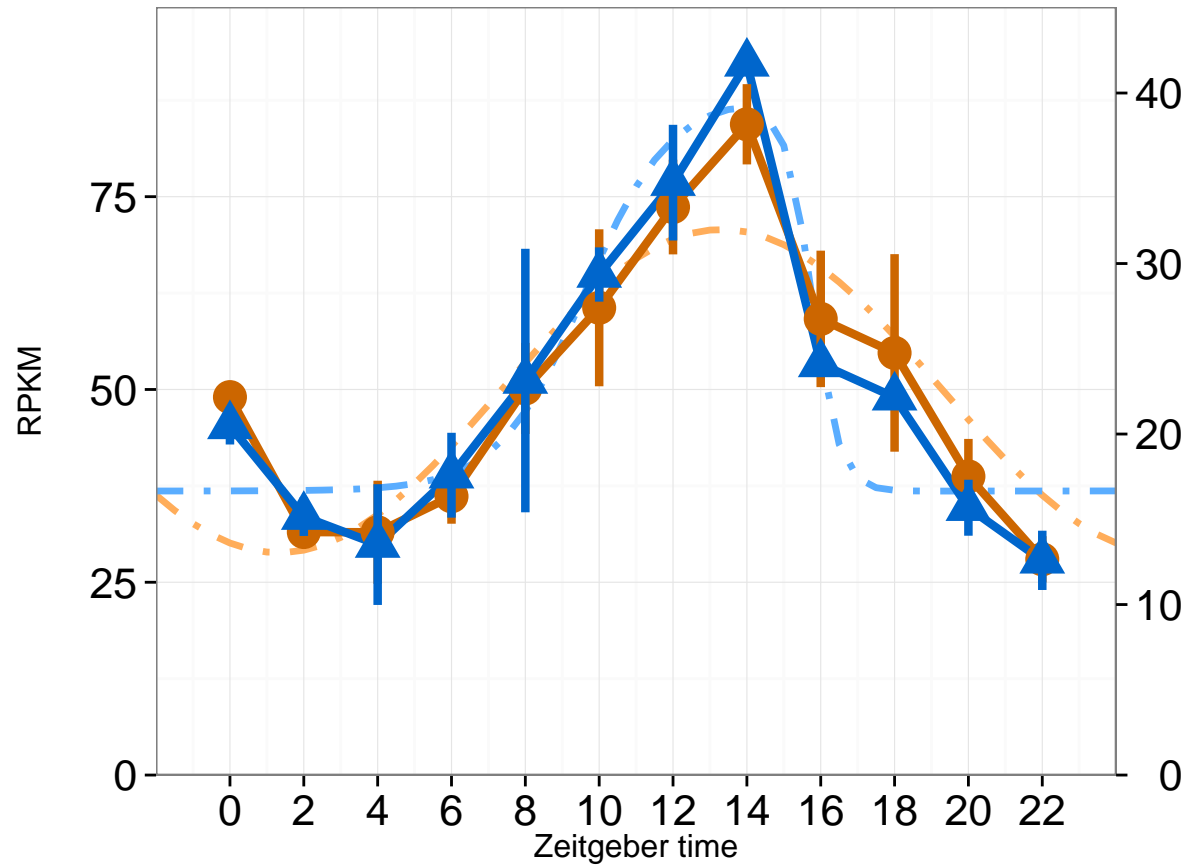

# Amd1

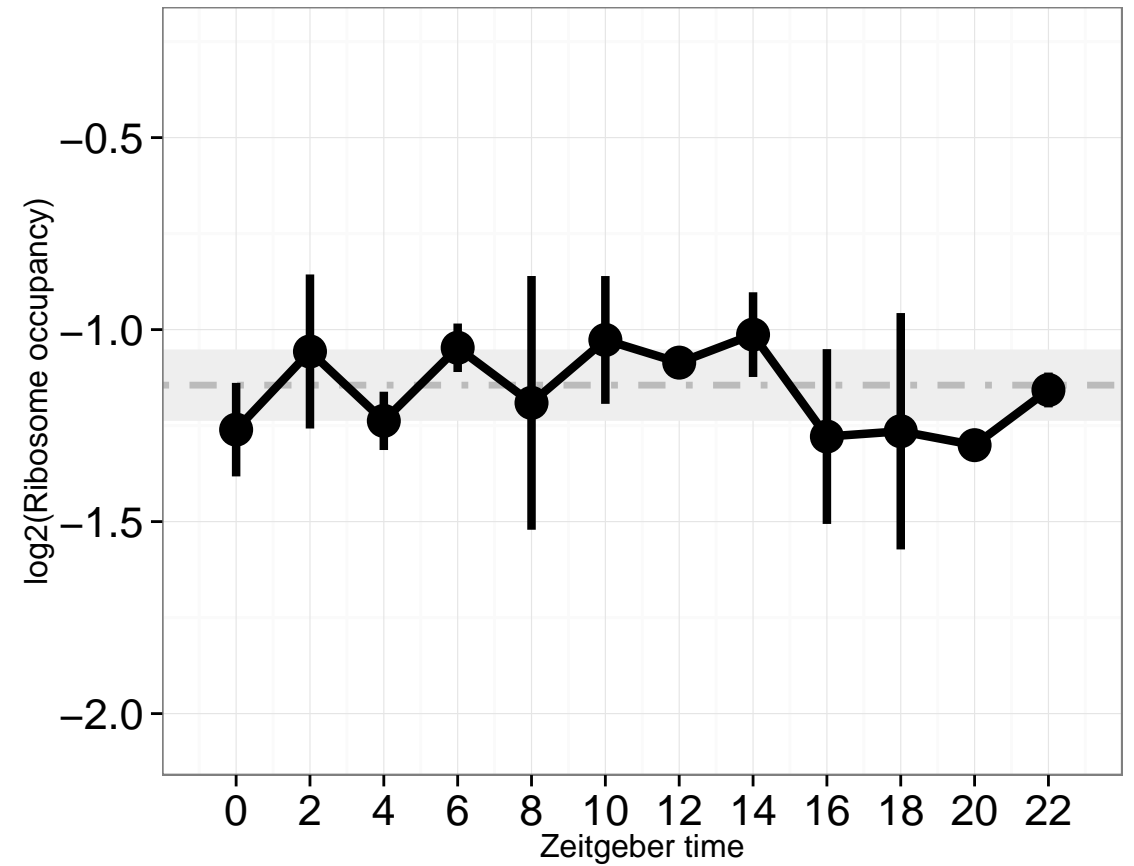

Supplement: Supplementary file 5194 [file 1]

# Ltbp2

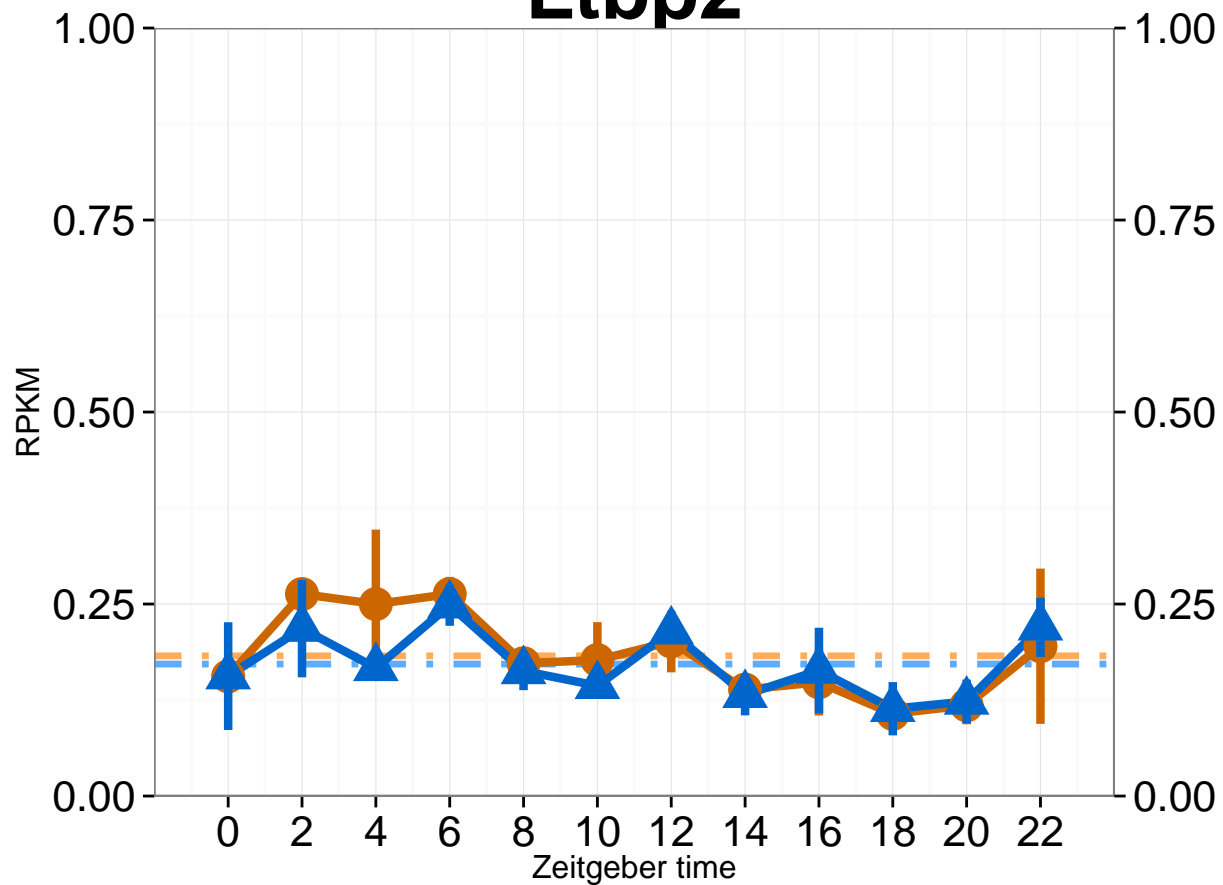

# Ltbp2

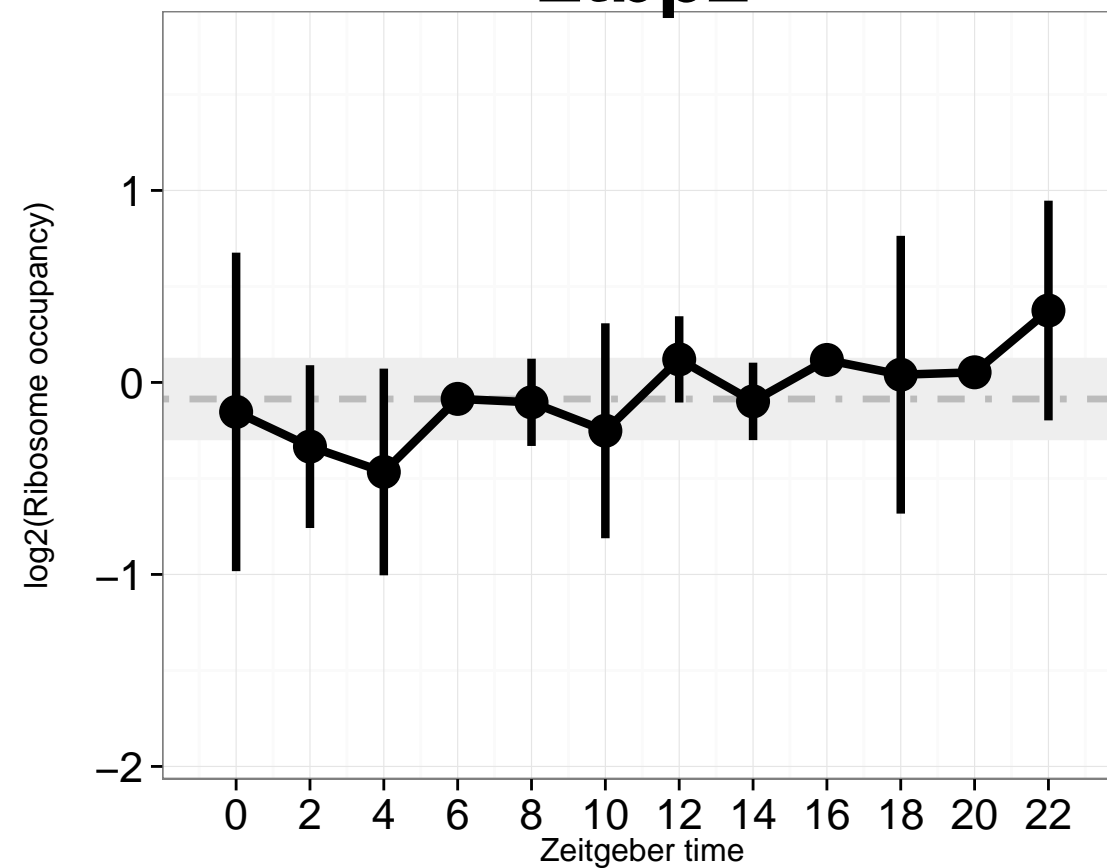

Supplement: Supplementary file 5195 [file 1]

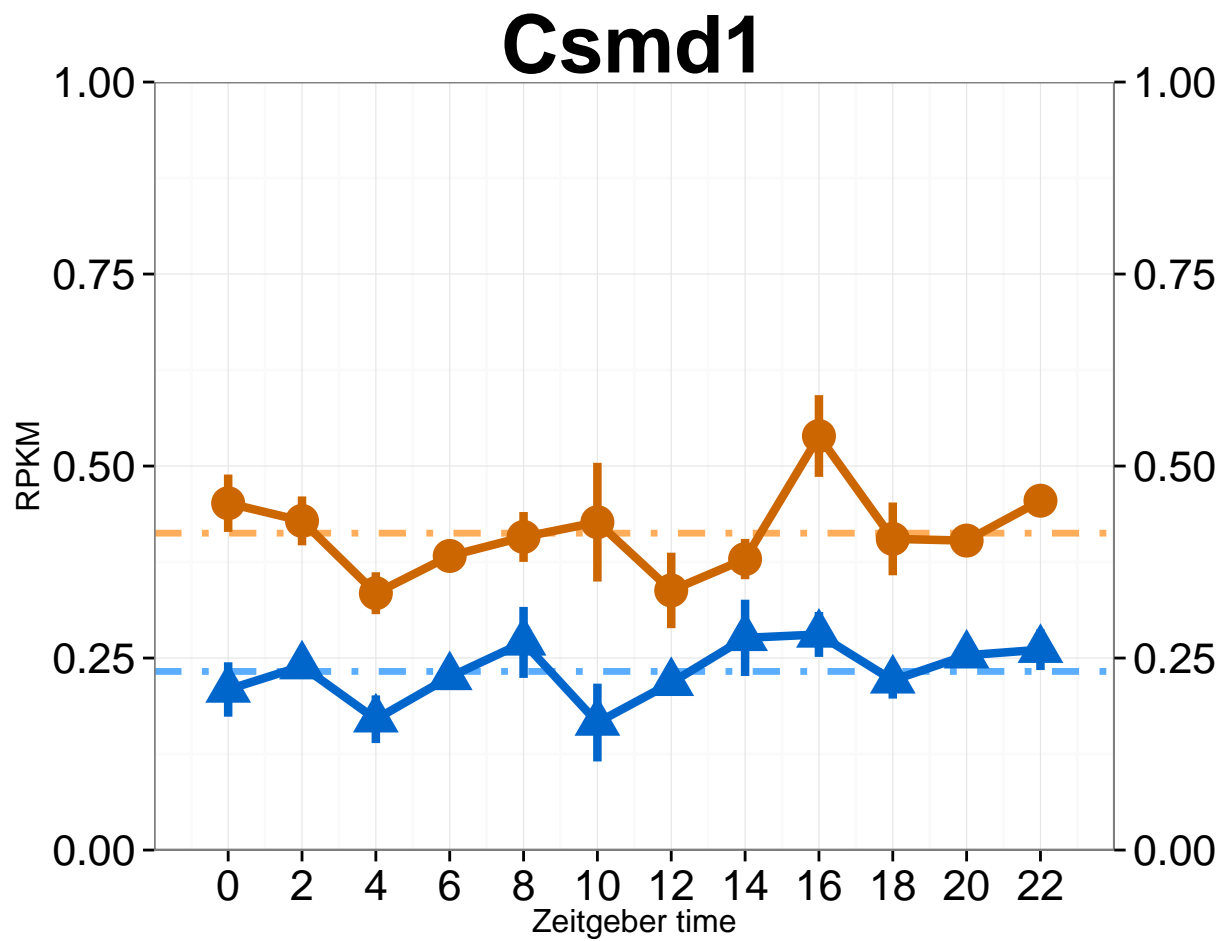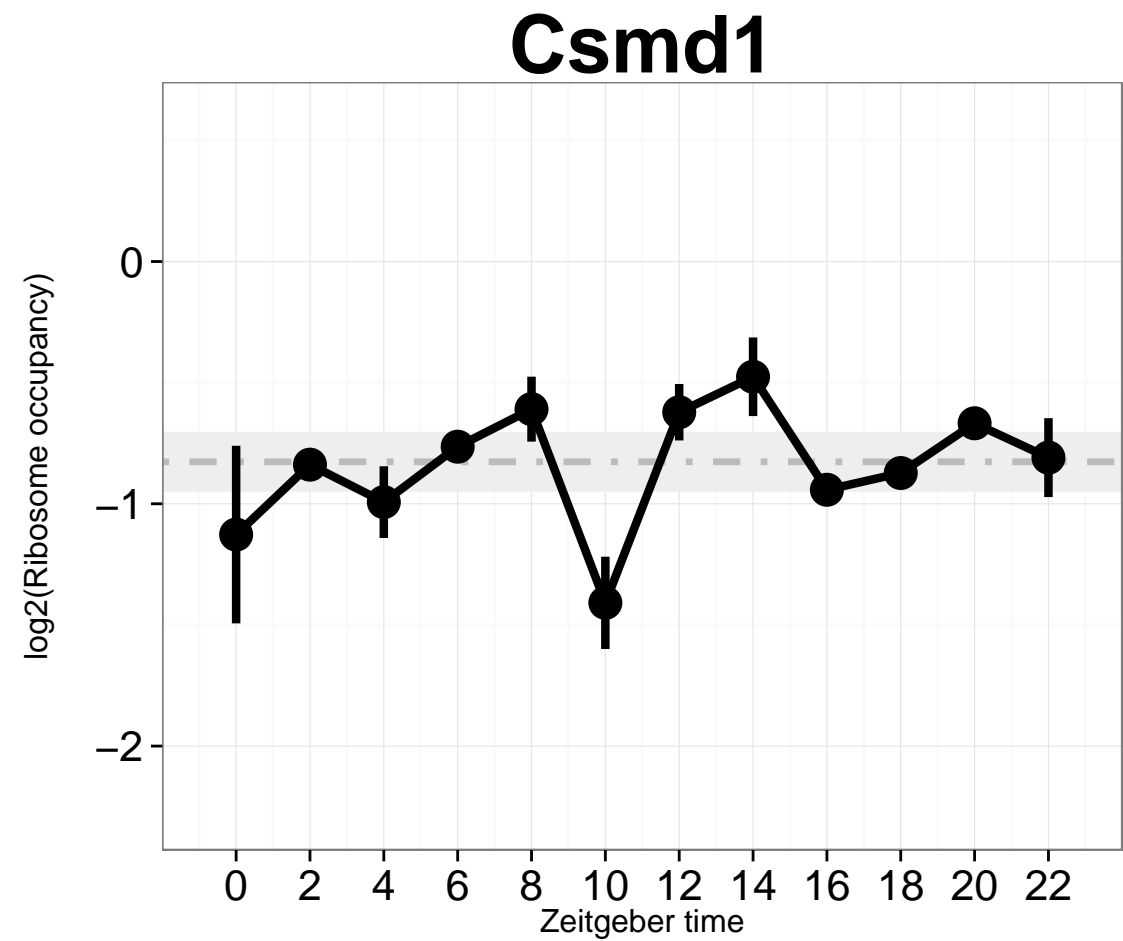

Supplement: Supplementary file 5196 [file 1]

## Adprhl2

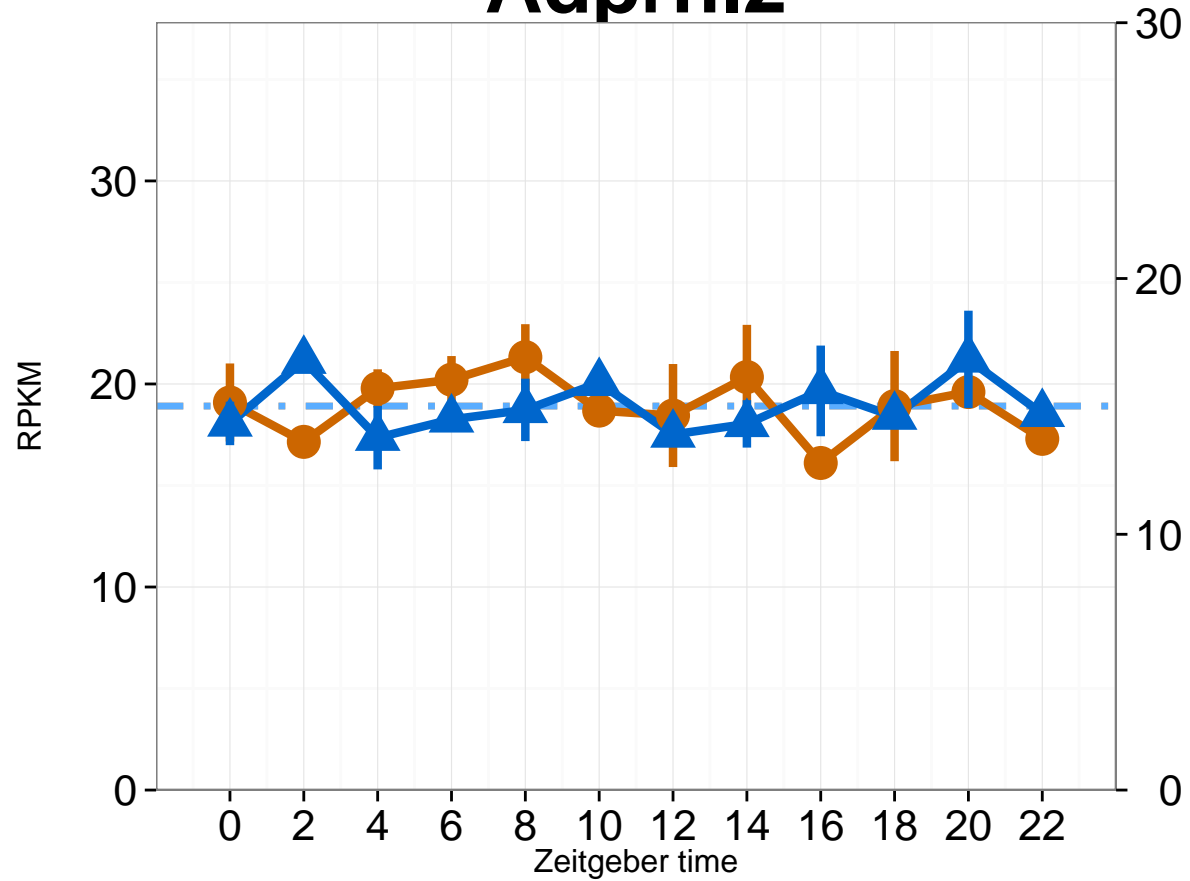

## Adprhl2

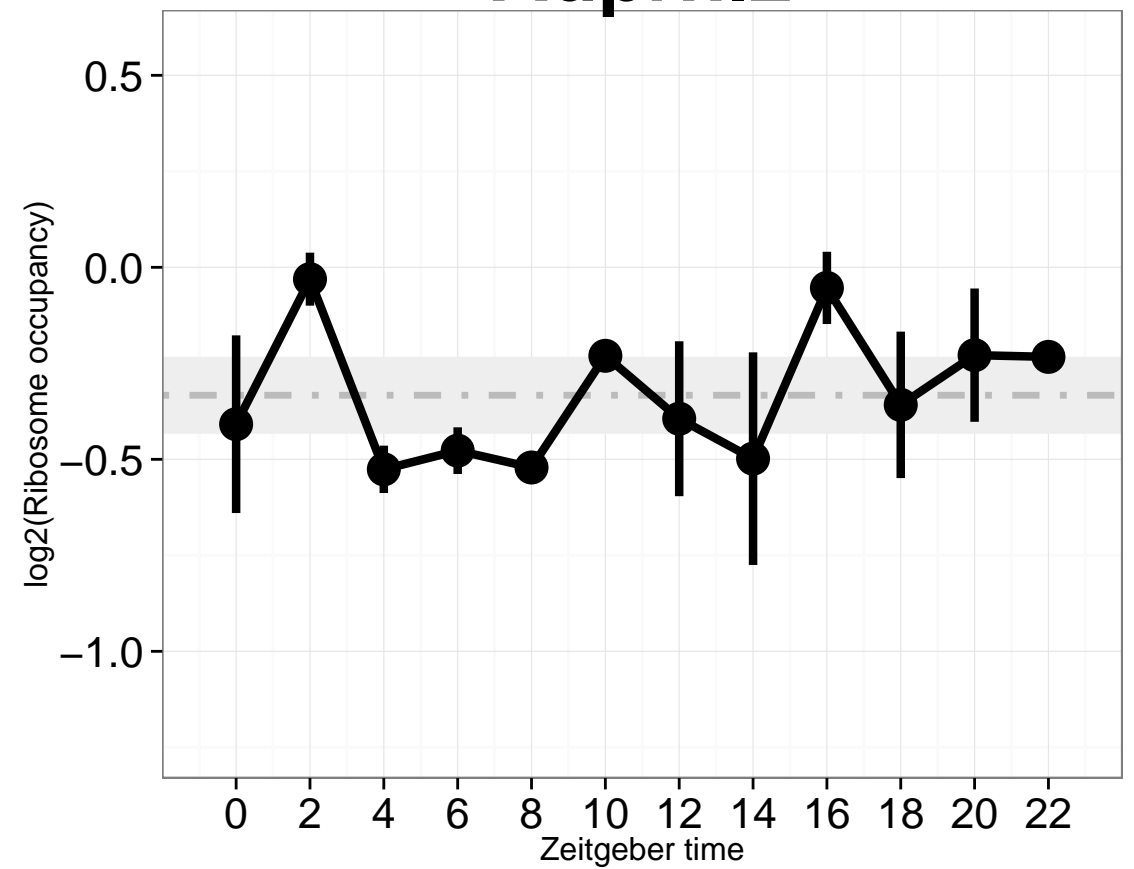

Supplement: Supplementary file 5197 [file 1]

## Vgll3

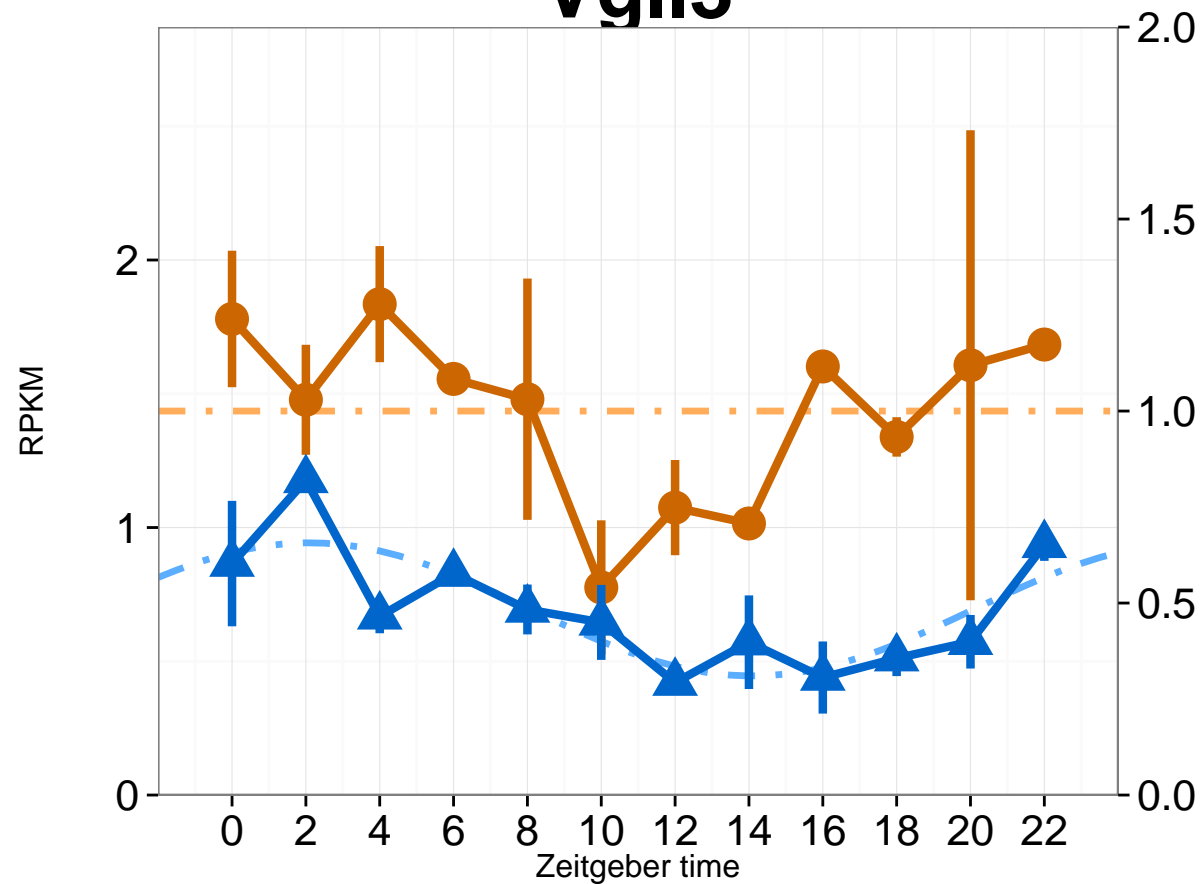

## Vgll3

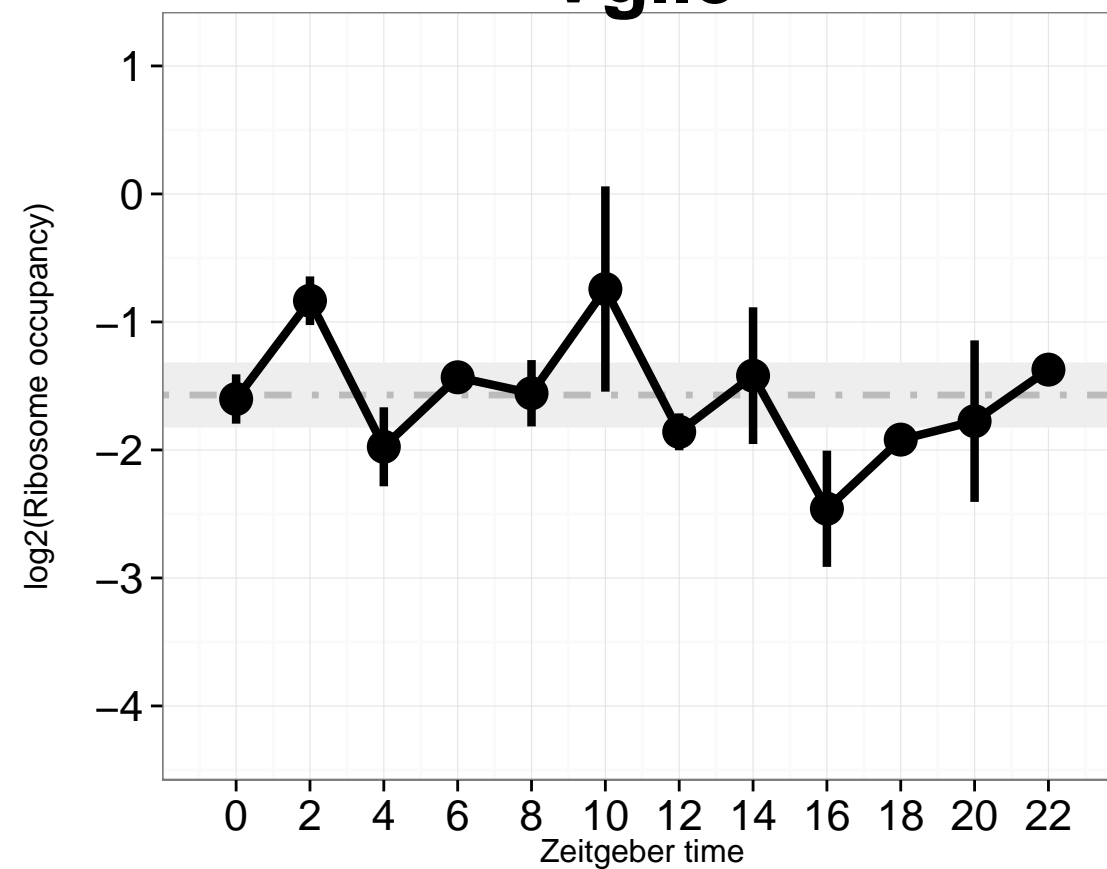

Supplement: Supplementary file 5198 [file 1]

# Bmp8a

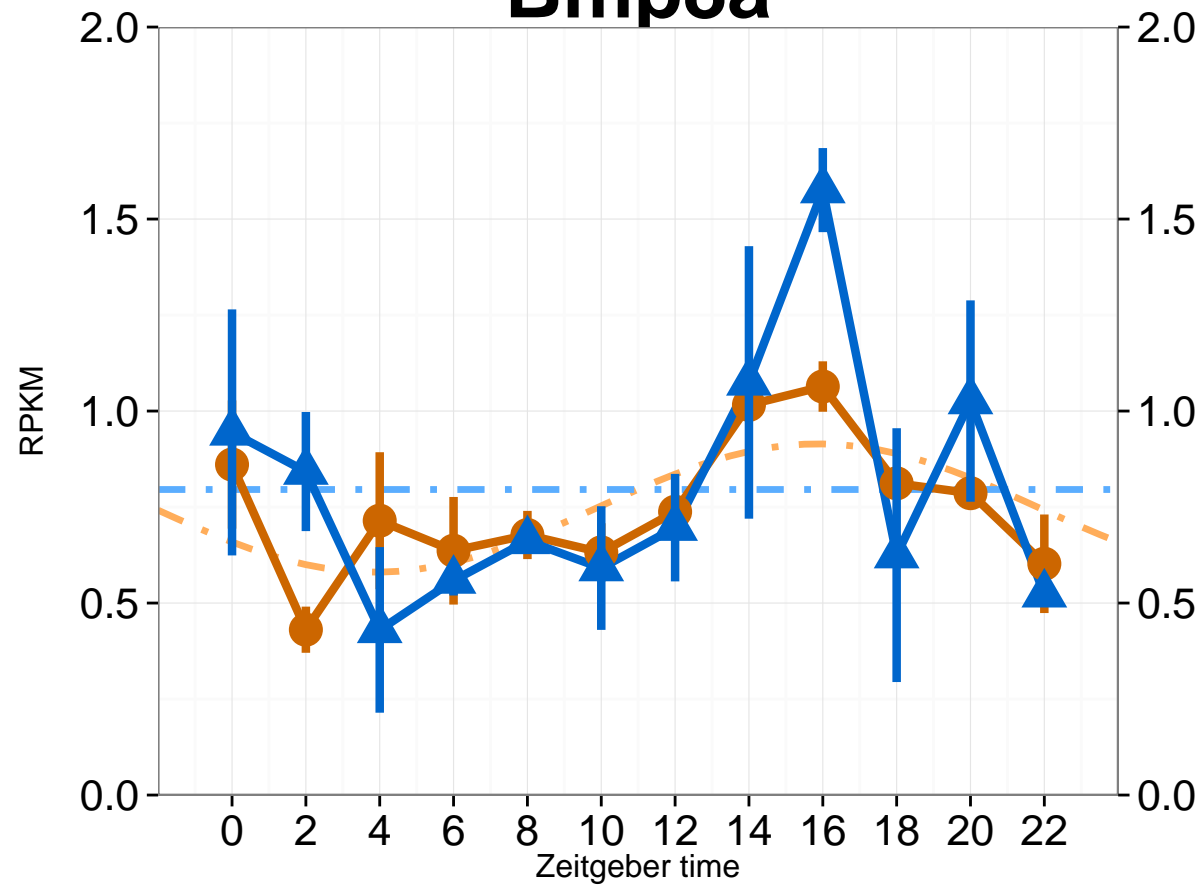

# Bmp8a

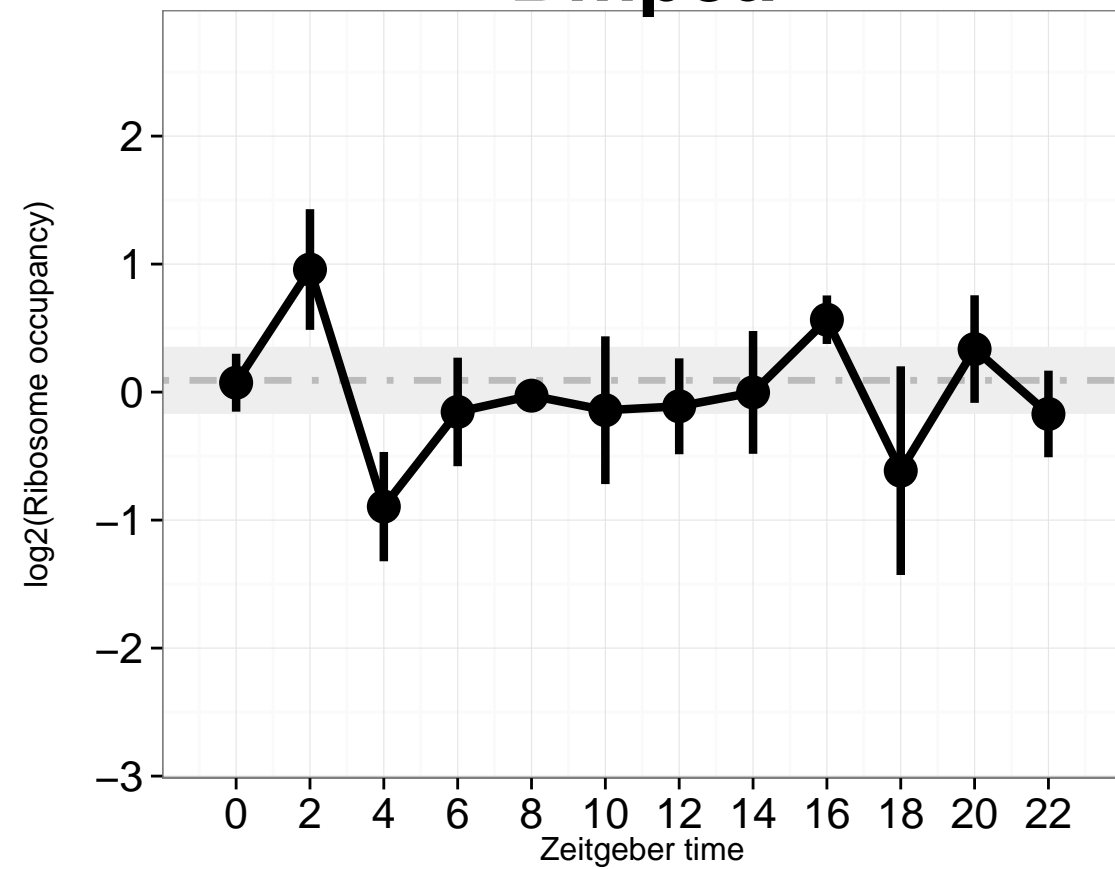

Supplement: Supplementary file 5199 [file 1]

# Rrp36

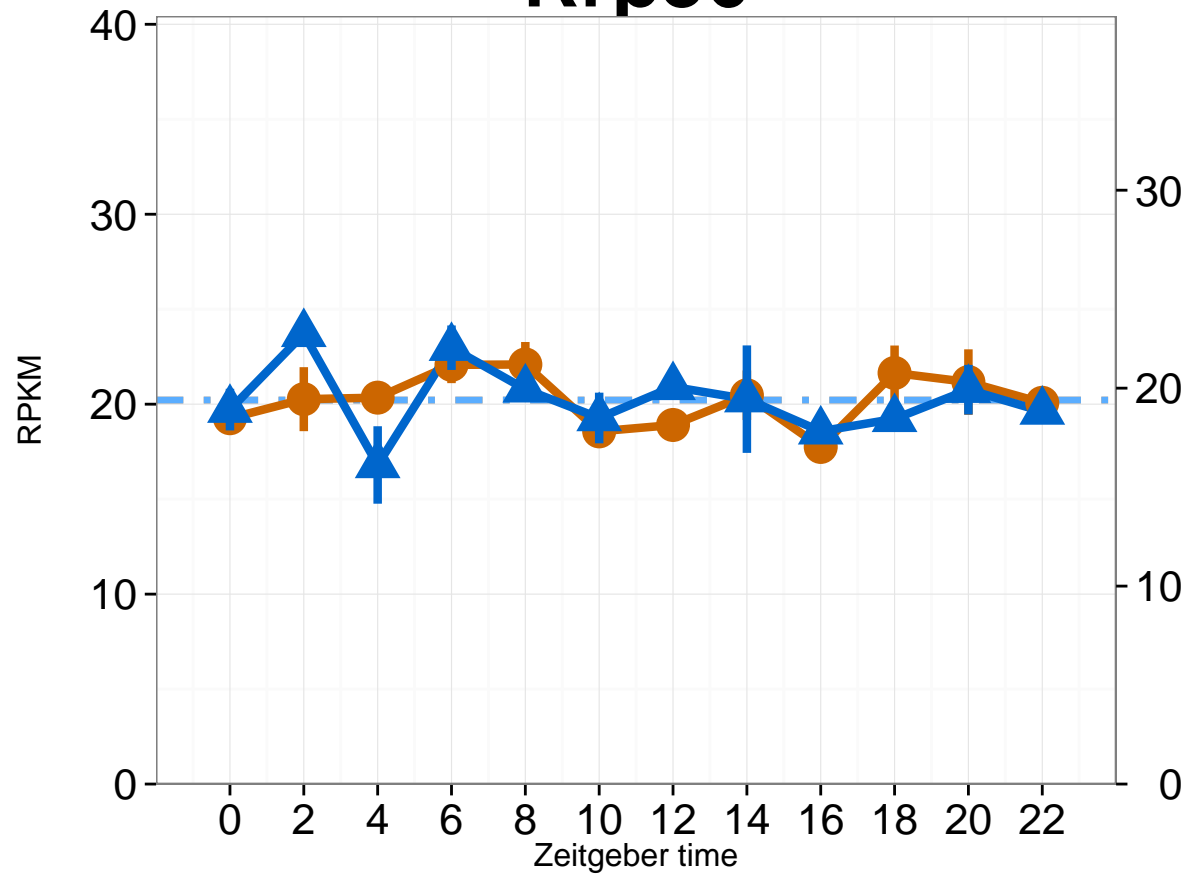

# Rrp36

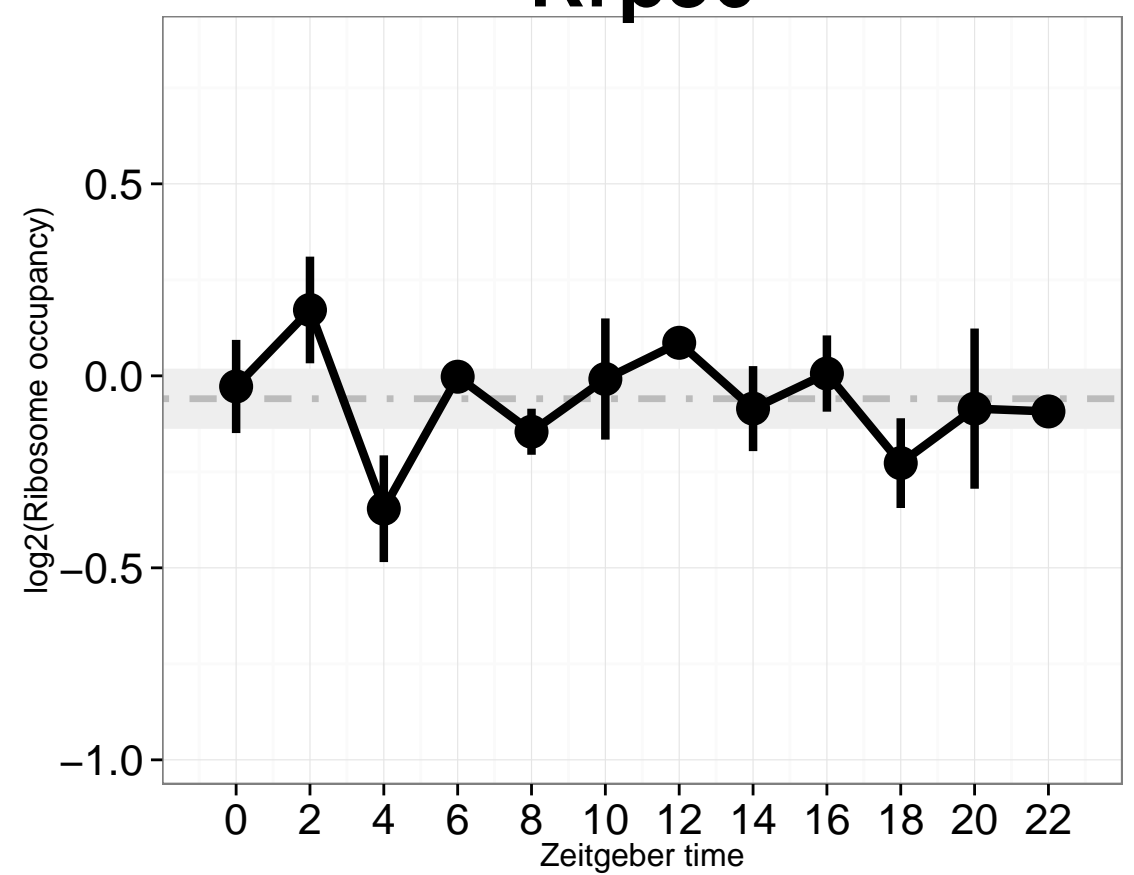

Supplement: Supplementary file 5200 [file 1]

## Agtrap

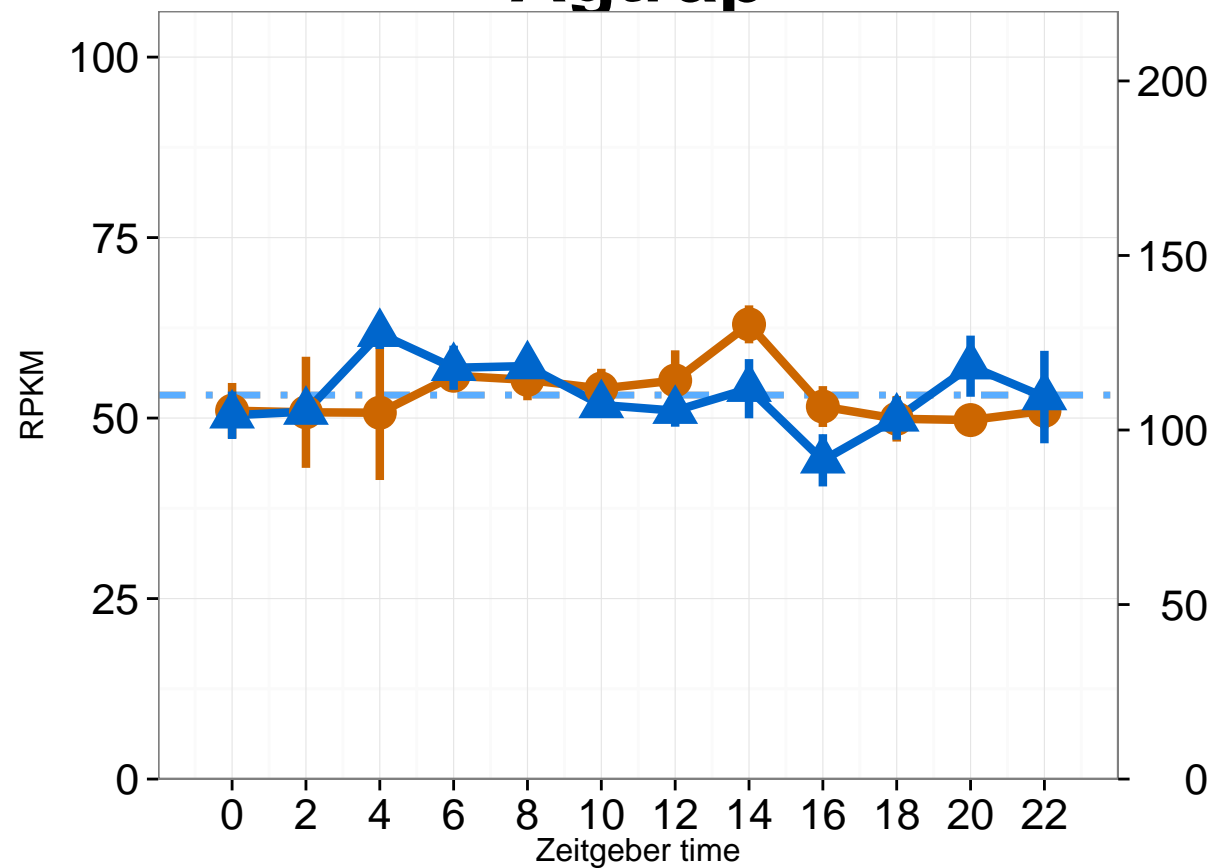

## Agtrap

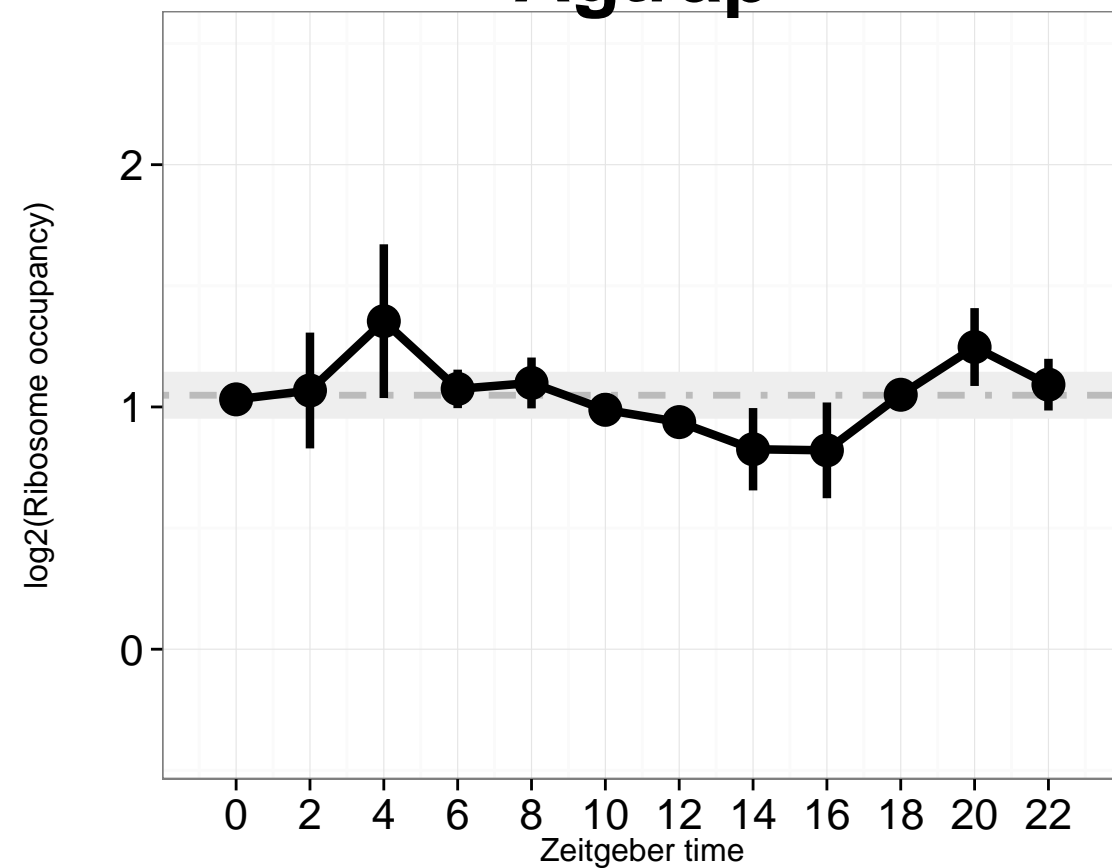

Supplement: Supplementary file 5201 [file 1]

## Mia2

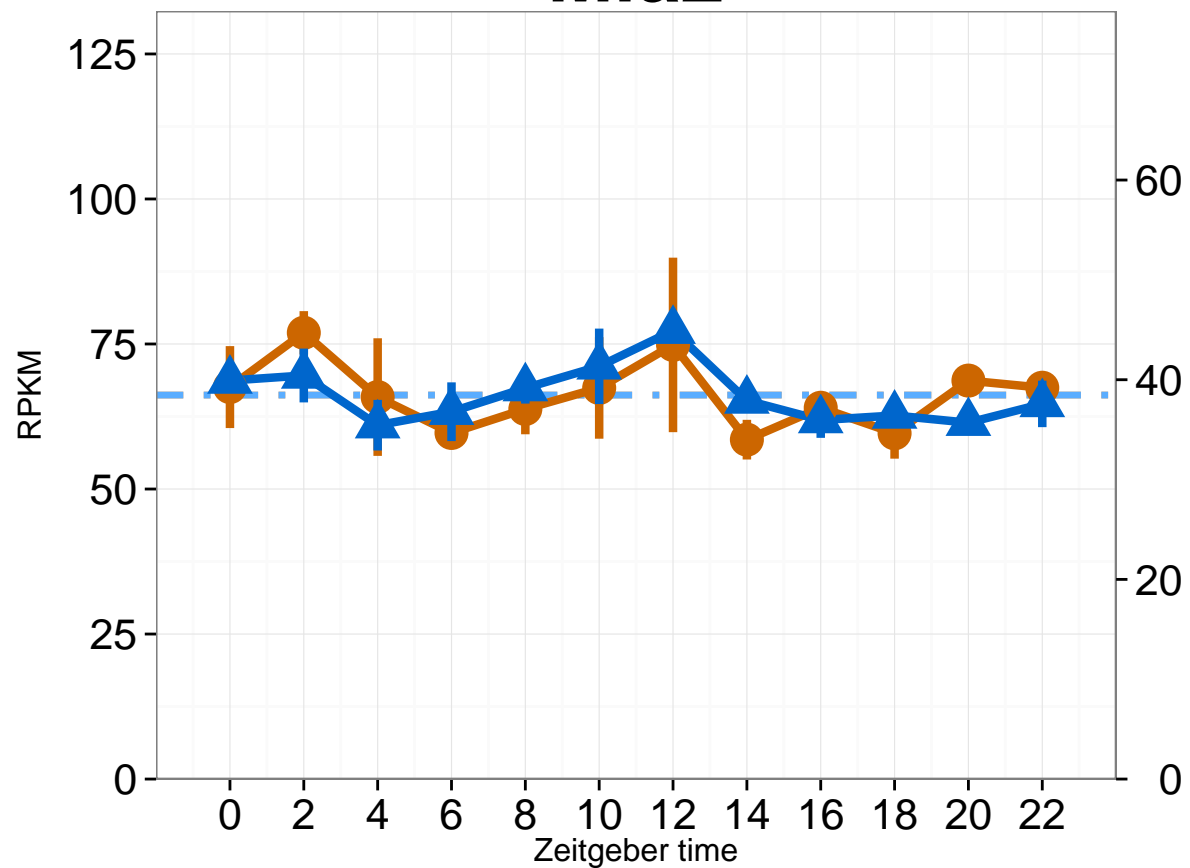

## Mia2

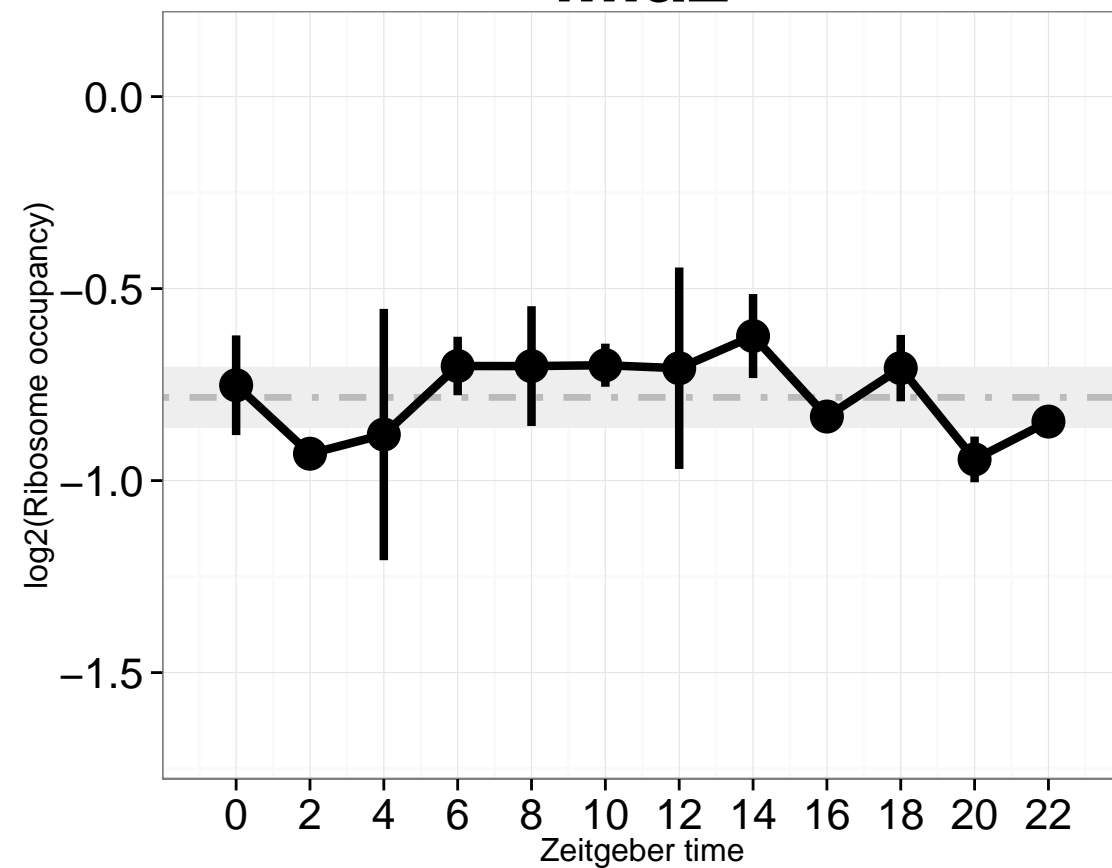

Supplement: Supplementary file 5202 [file 1]

## Hmgcr

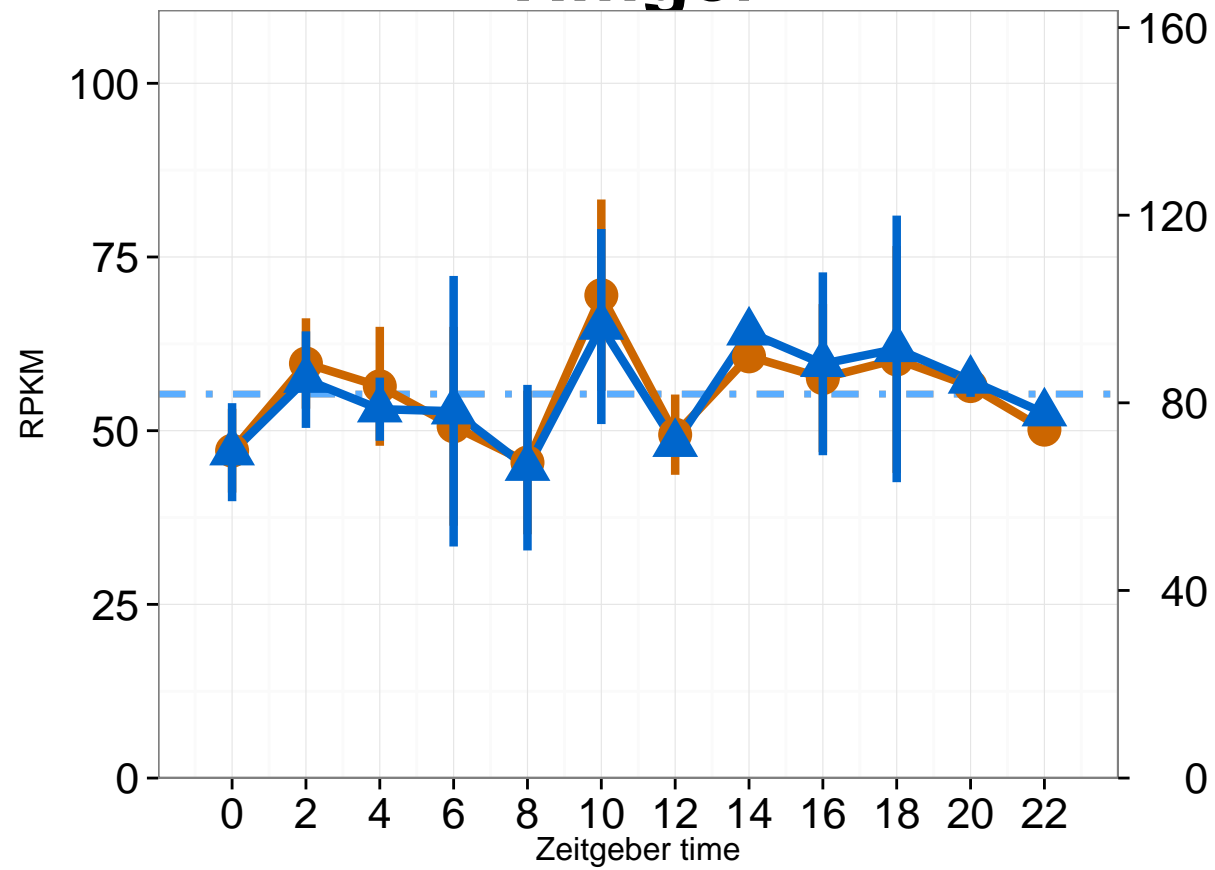

## Hmgcr

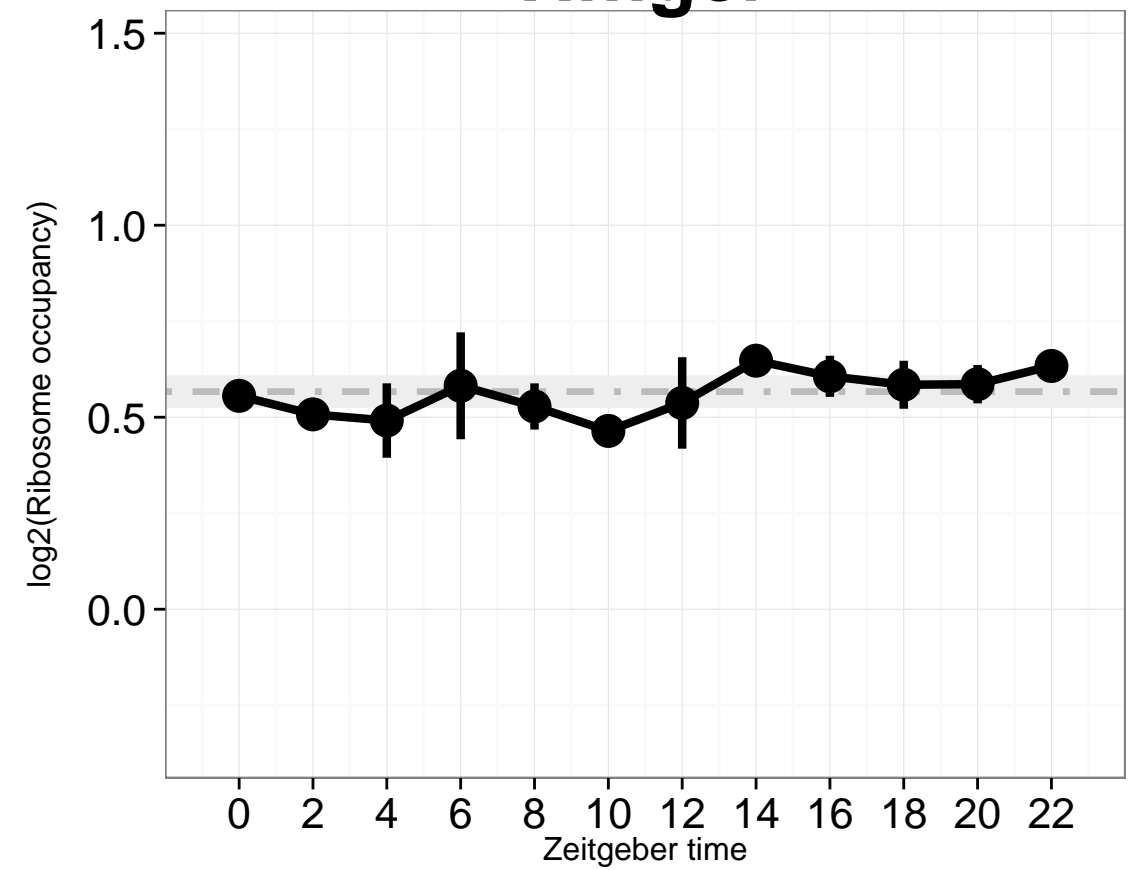

Supplement: Supplementary file 5203 [file 1]

# Ndutfaf3

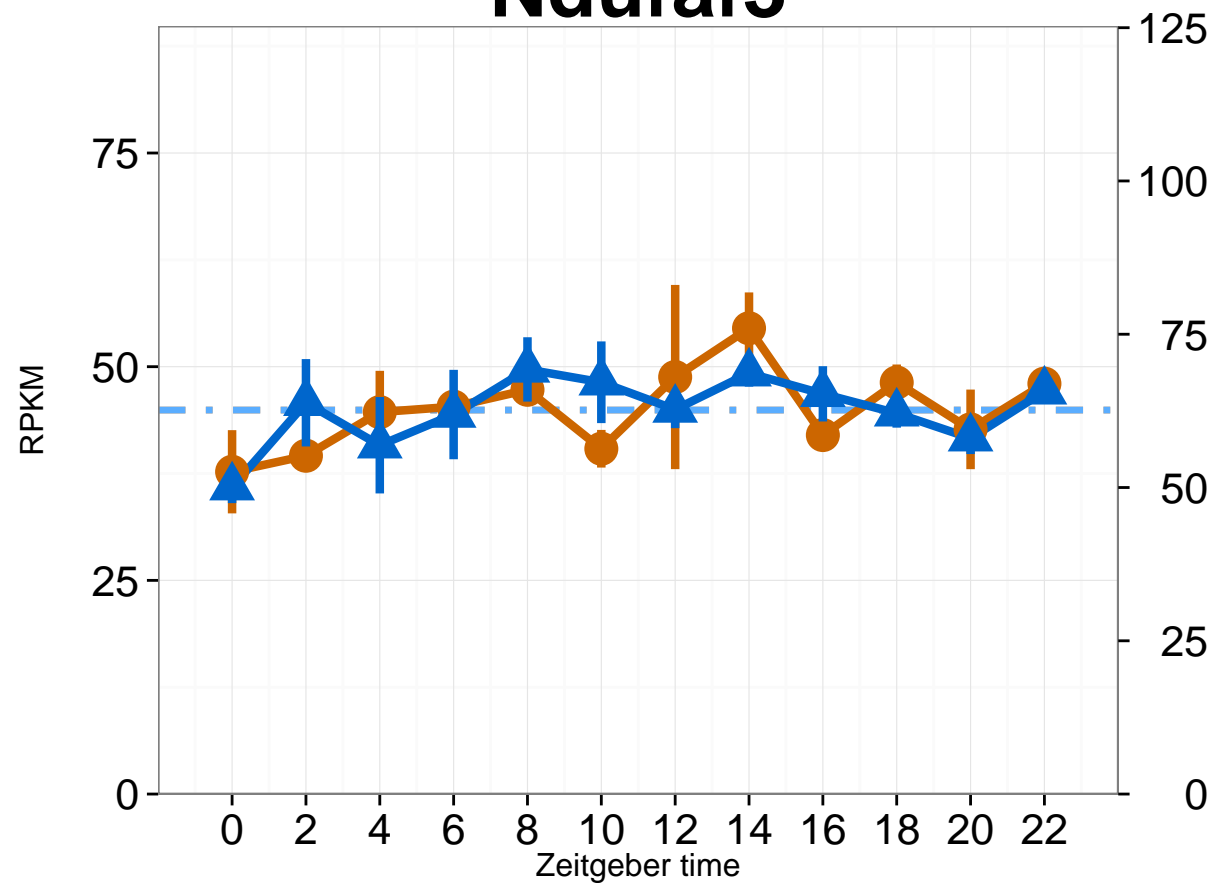

# Ndutfaf3

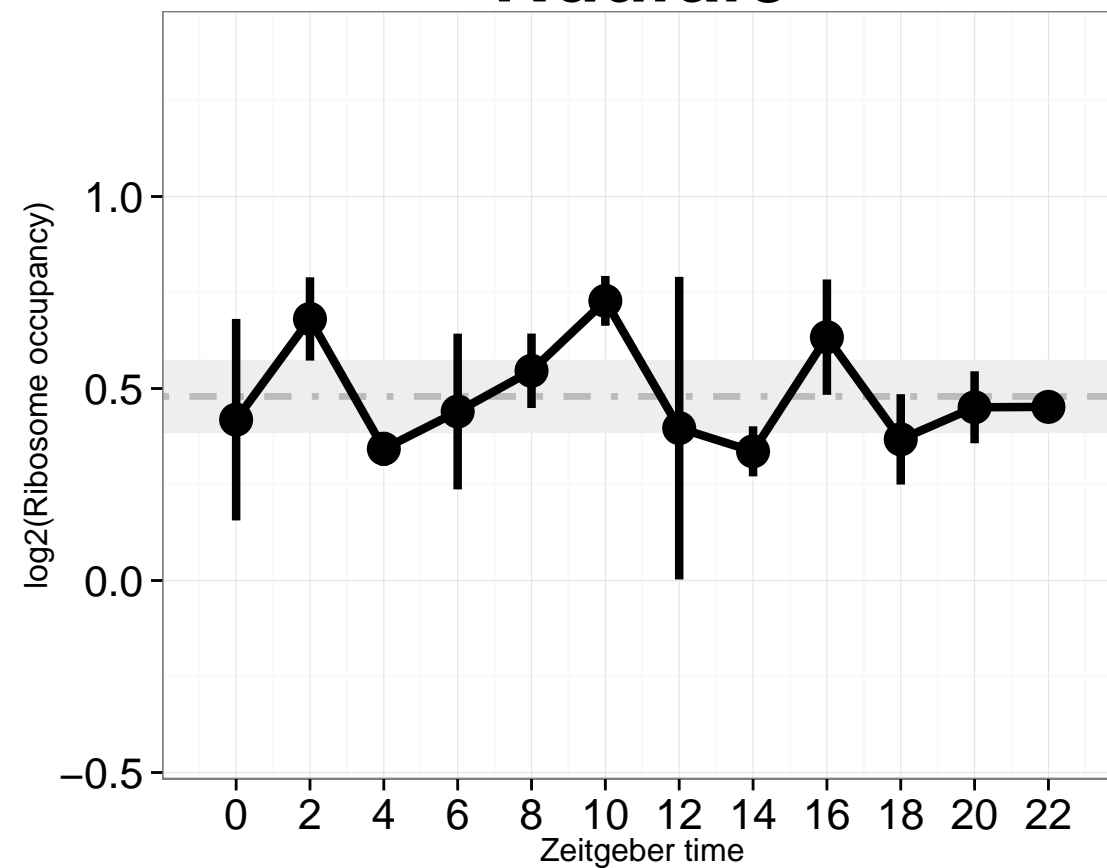

Supplement: Supplementary file 5204 [file 1]

## Kctd6

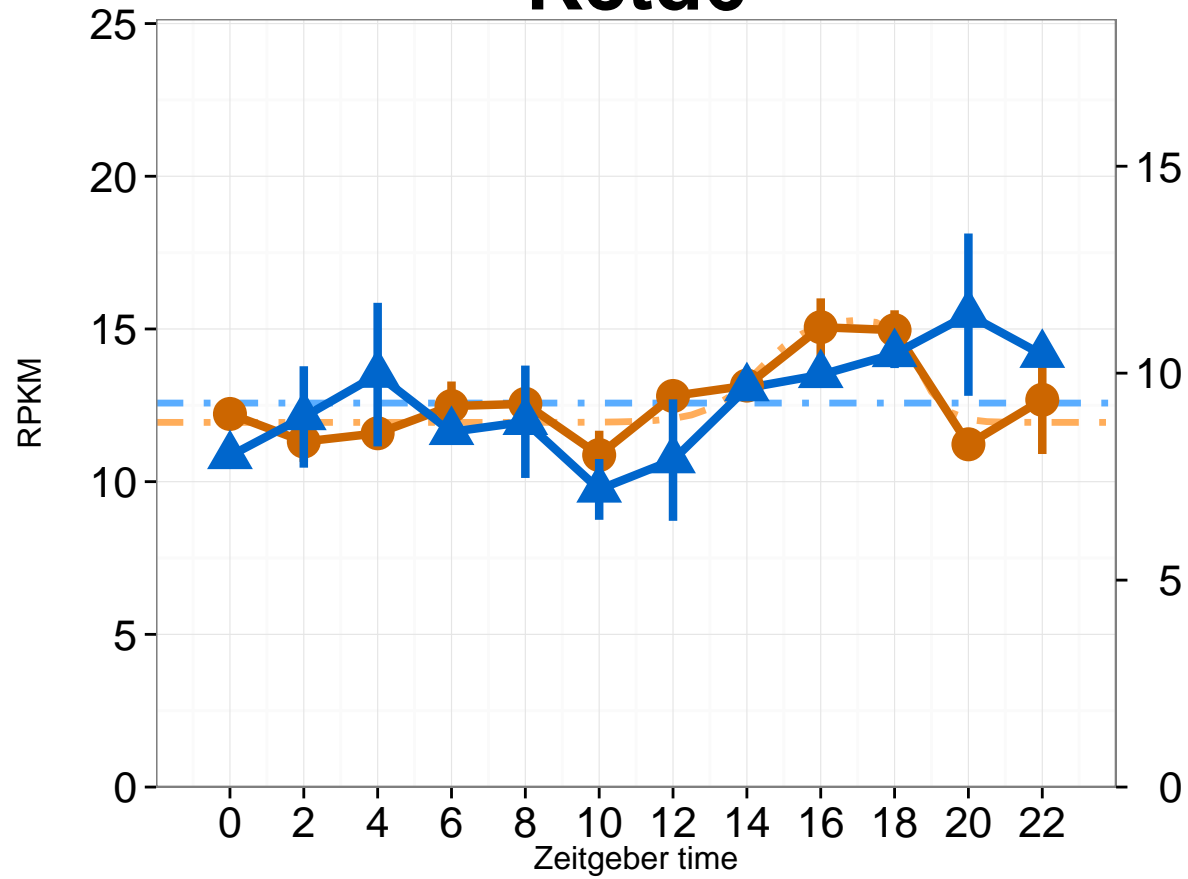

## Kctd6

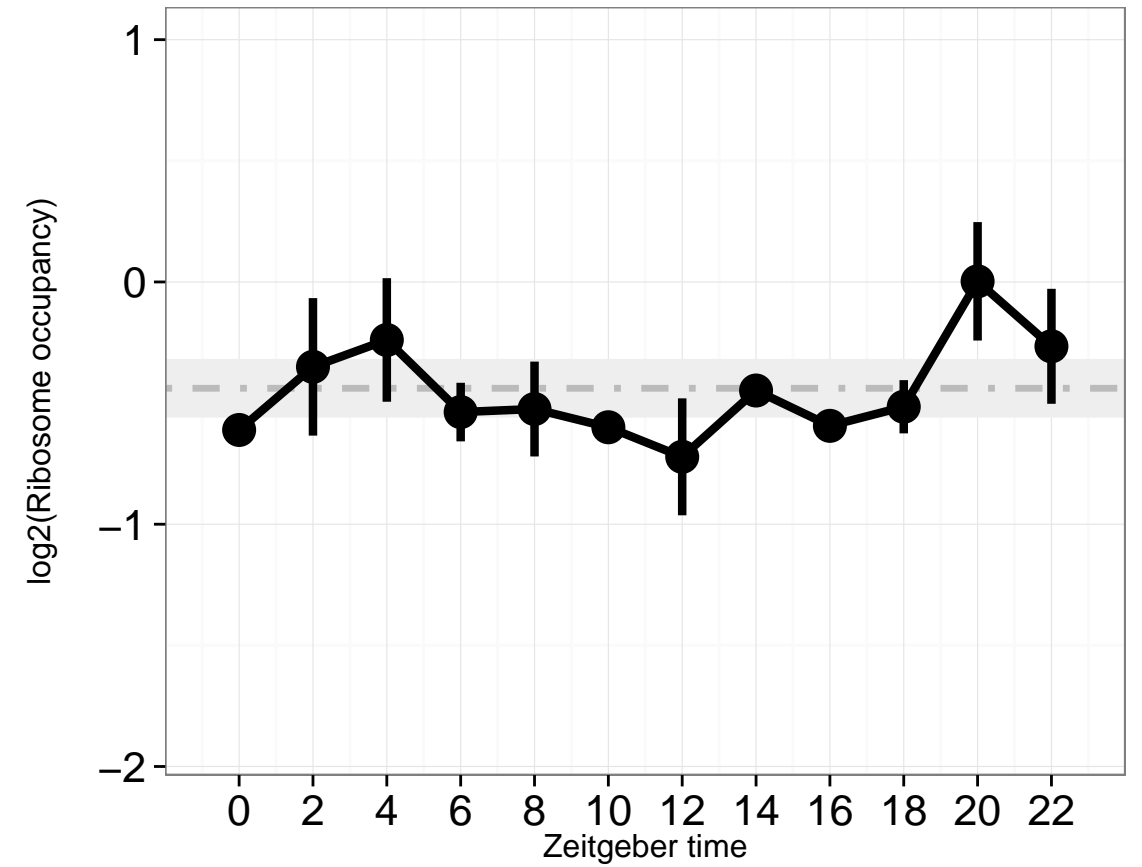

Supplement: Supplementary file 5205 [file 1]

## Pggt1b

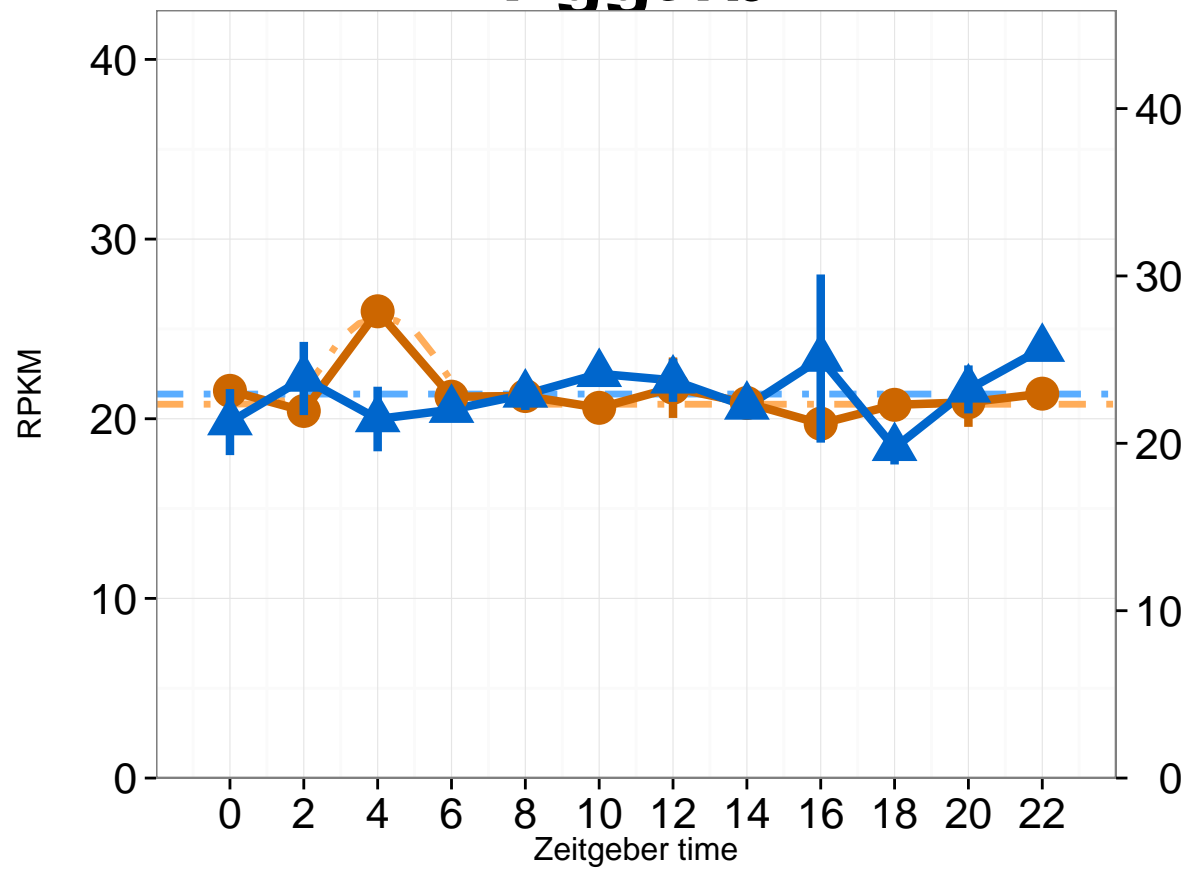

## Pggt1b

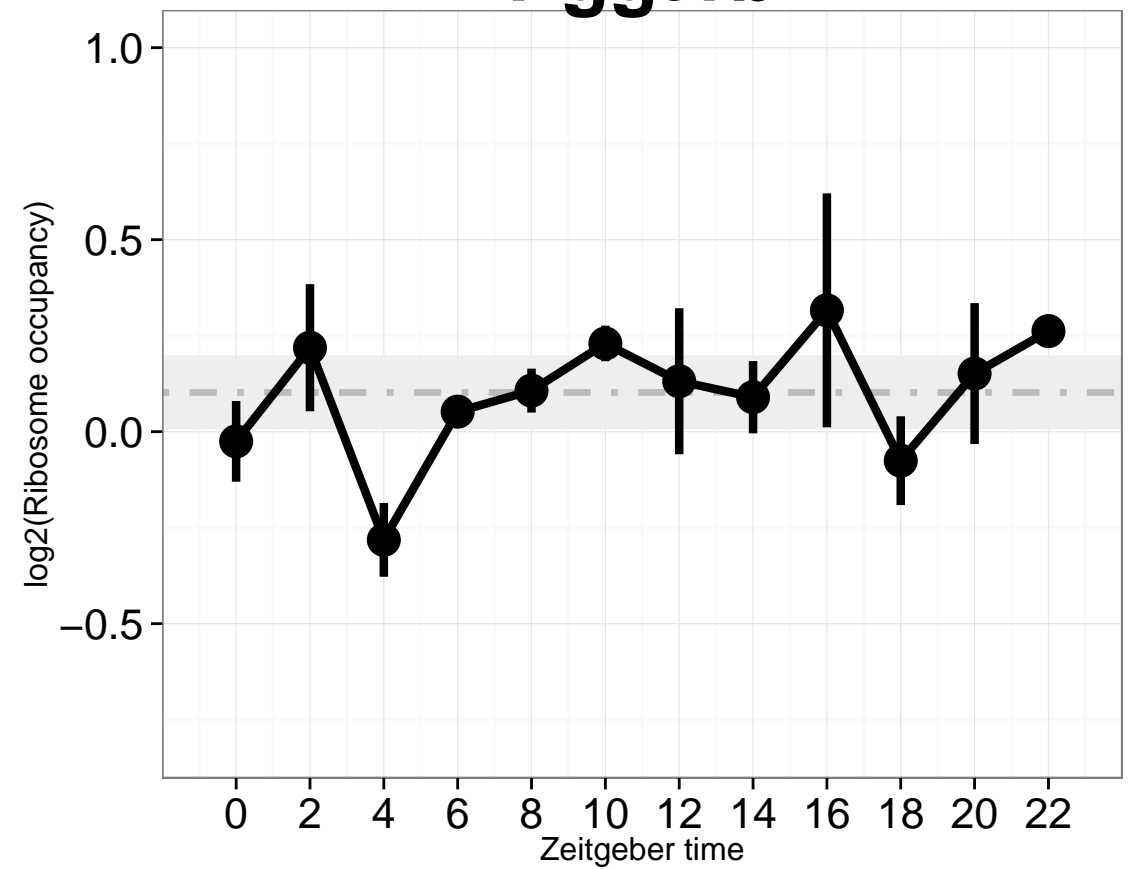

Supplement: Supplementary file 5206 [file 1]

# Fbxo5

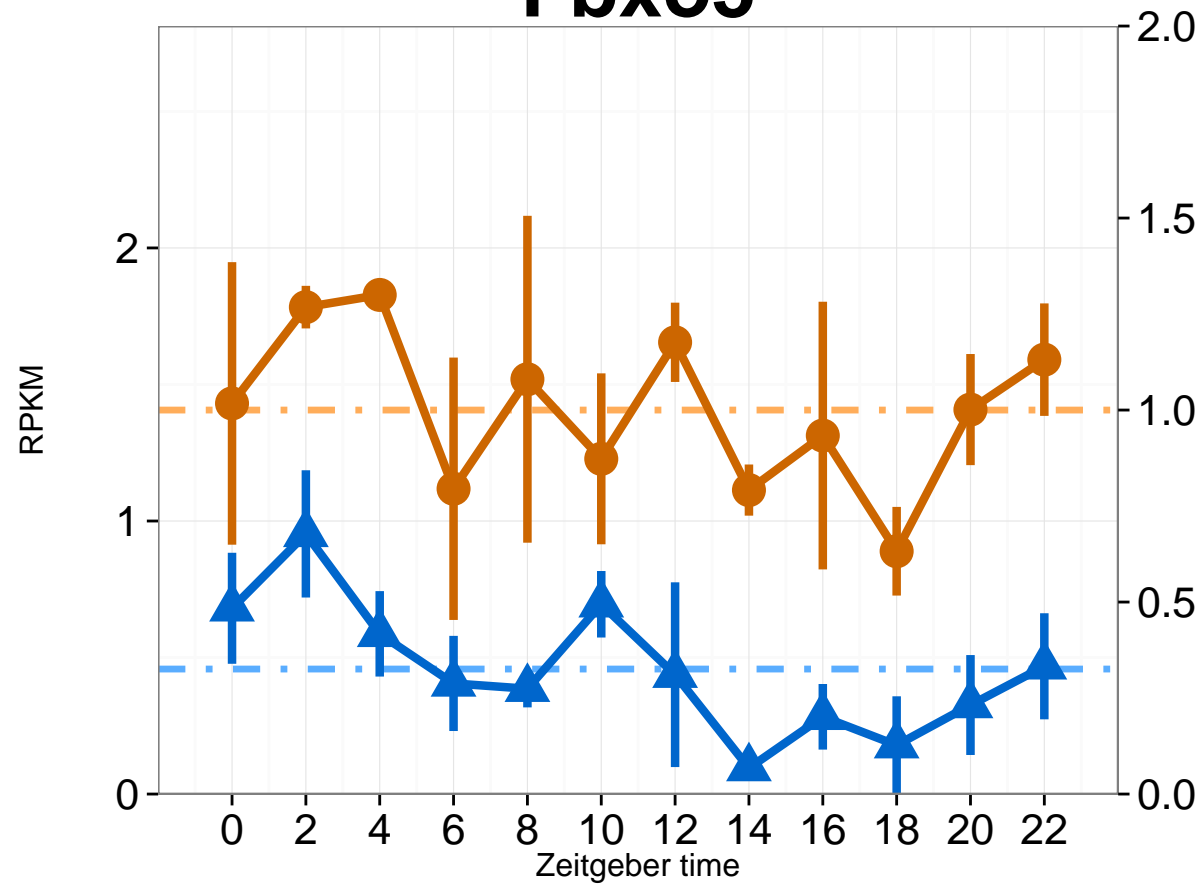

# Fbxo5

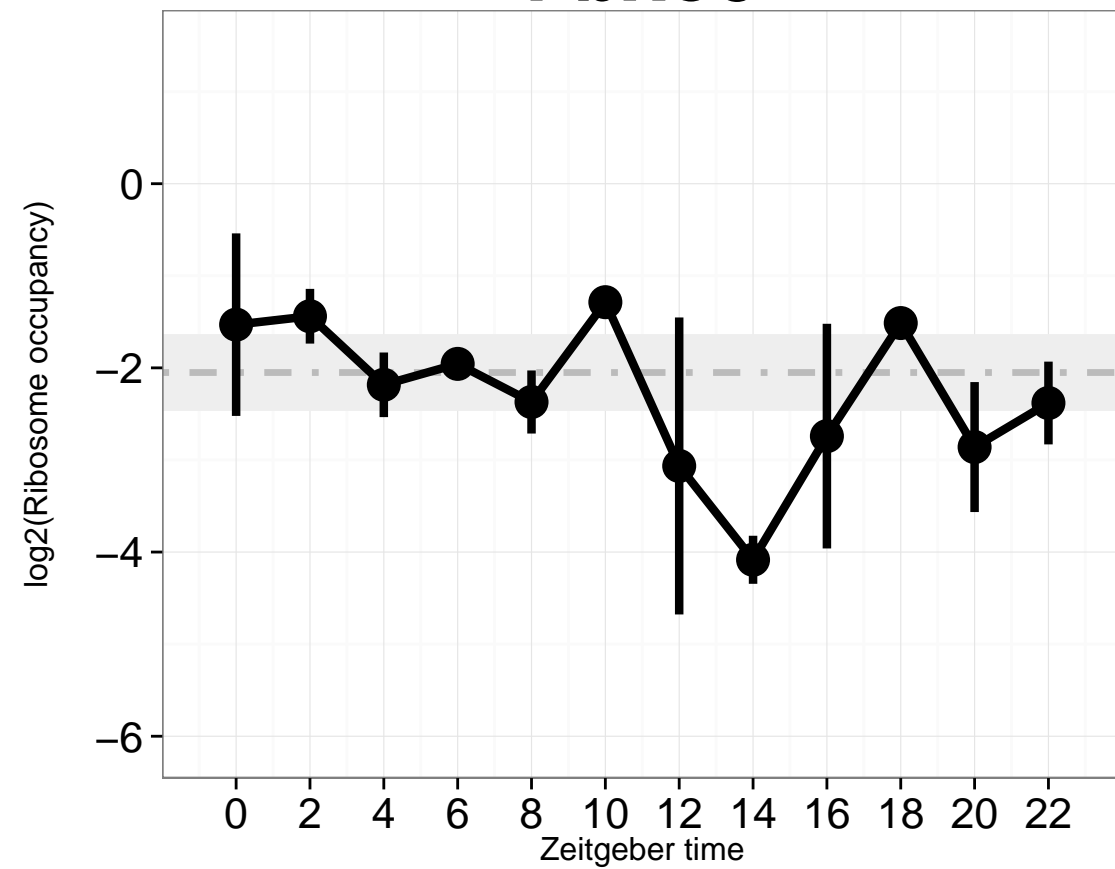

Supplement: Supplementary file 5207 [file 1]

## Plekha7

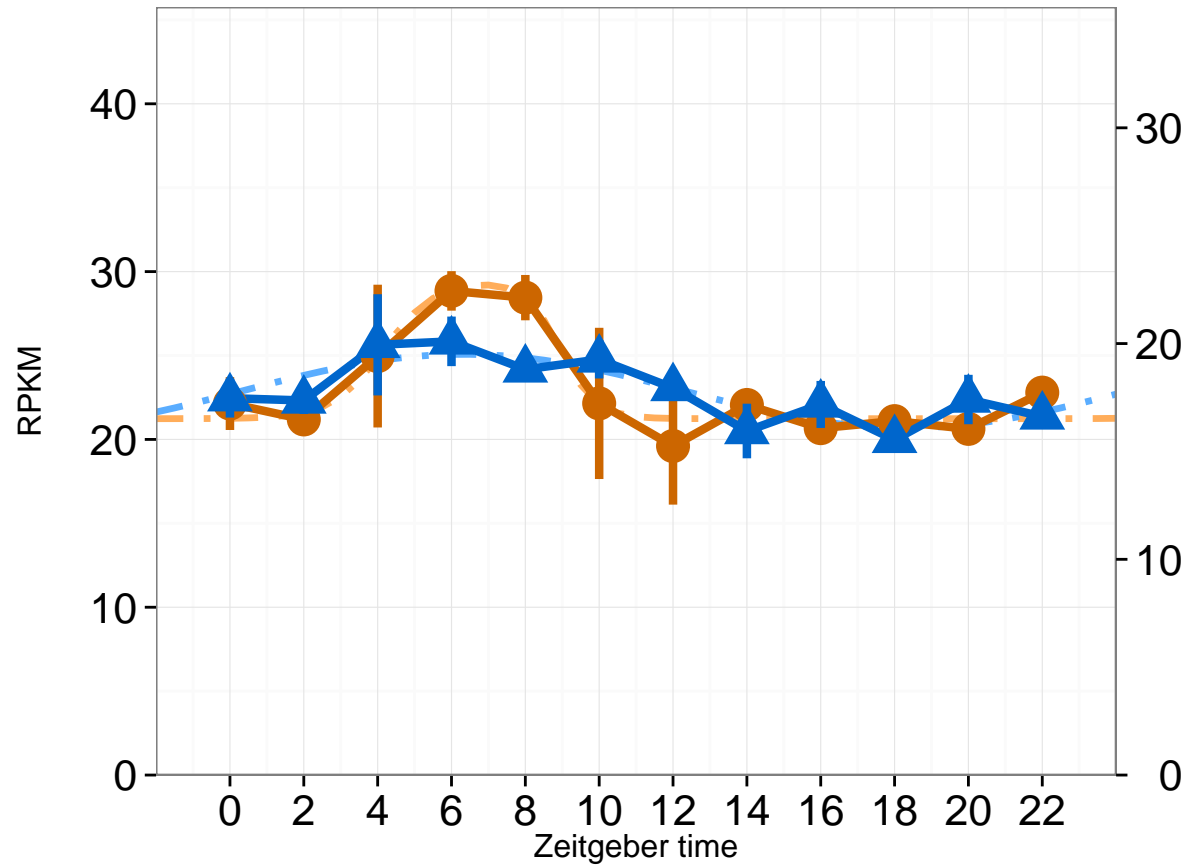

## Plekha7

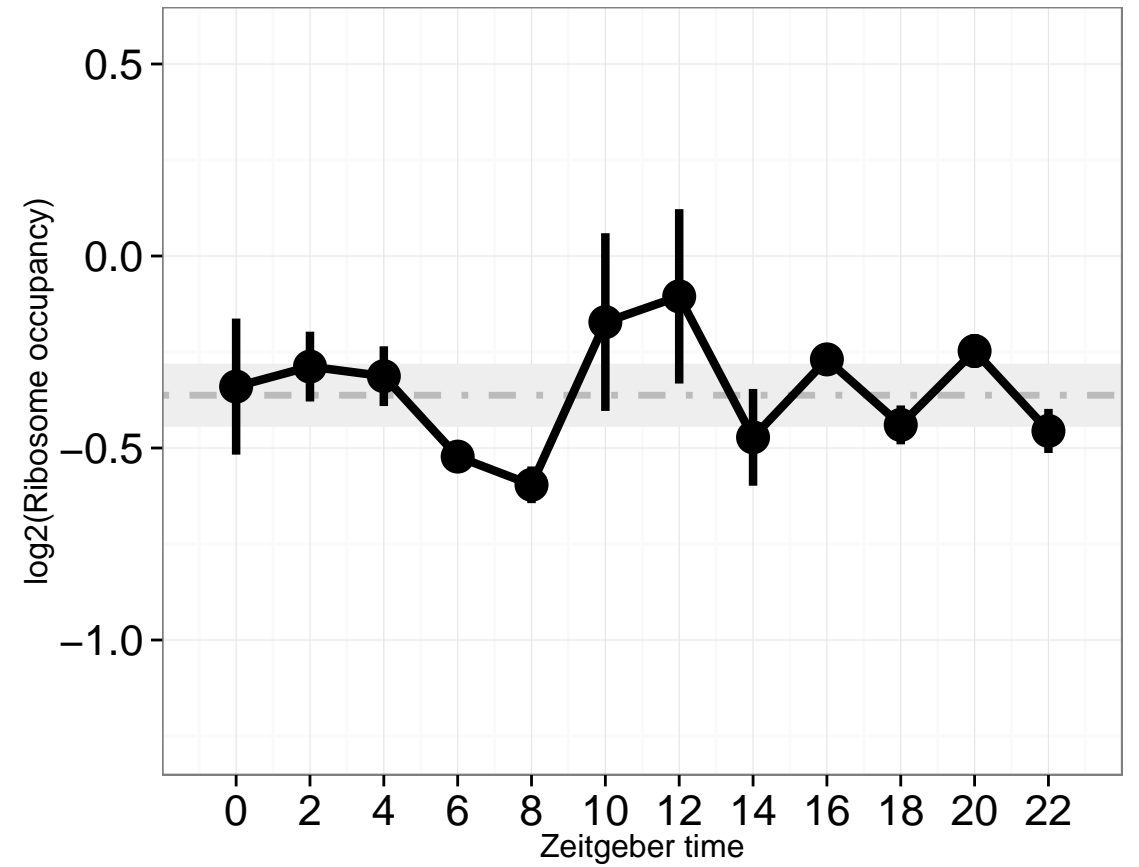

Supplement: Supplementary file 5208 [file 1]

## Cbl

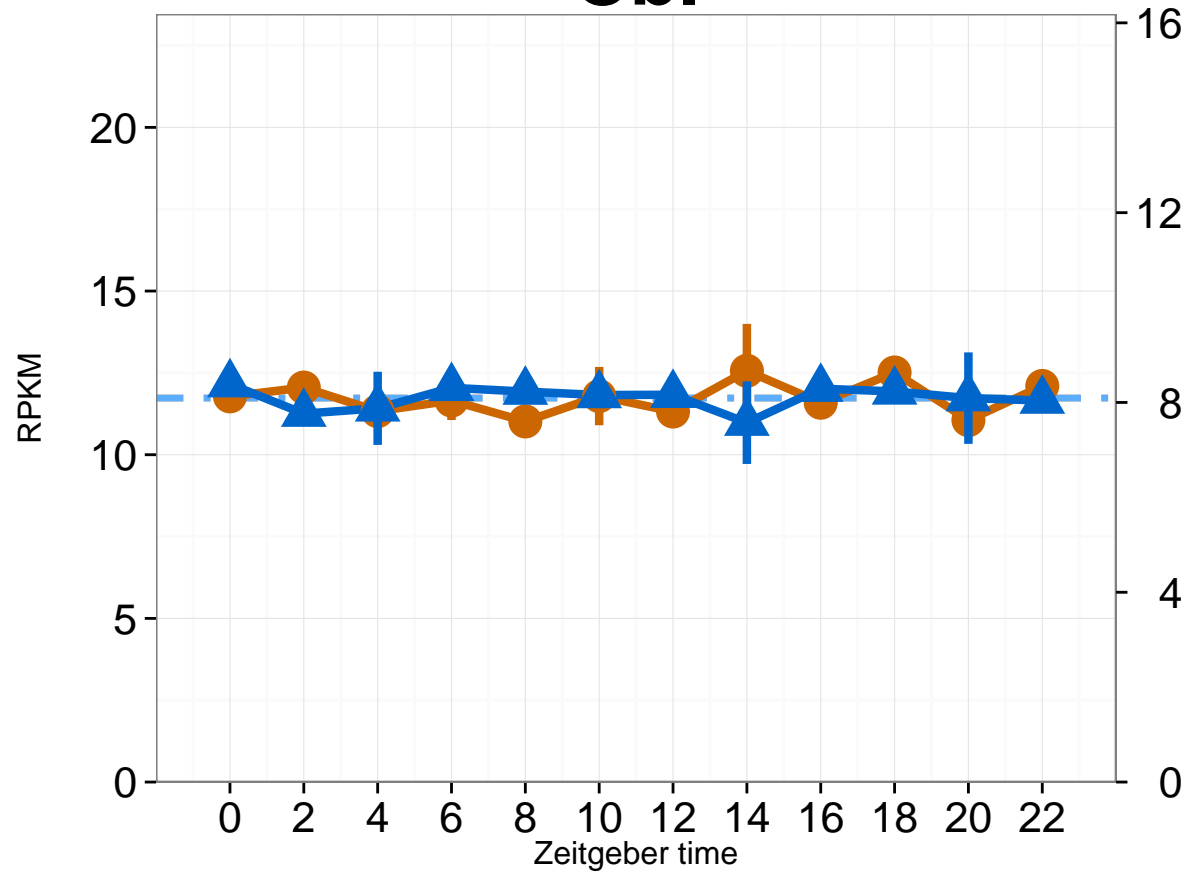

## Cbl

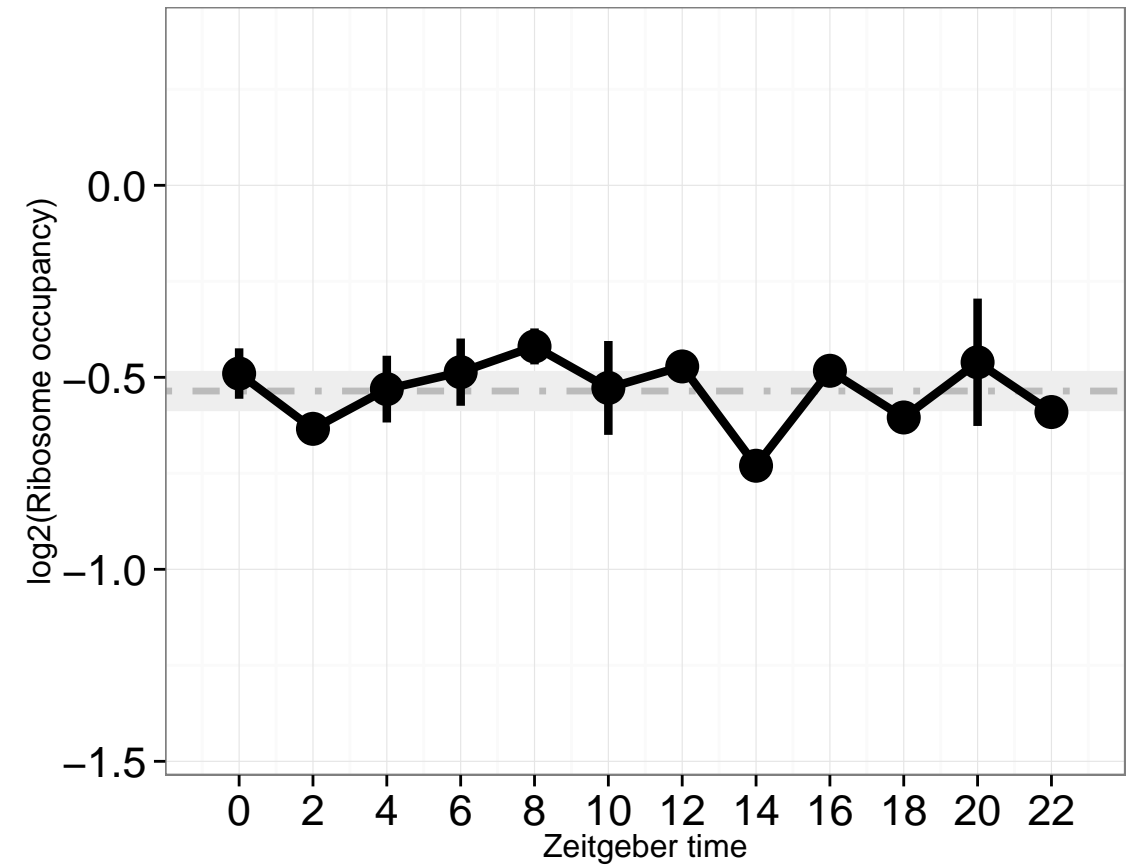

Supplement: Supplementary file 5209 [file 1]

## Ttc23

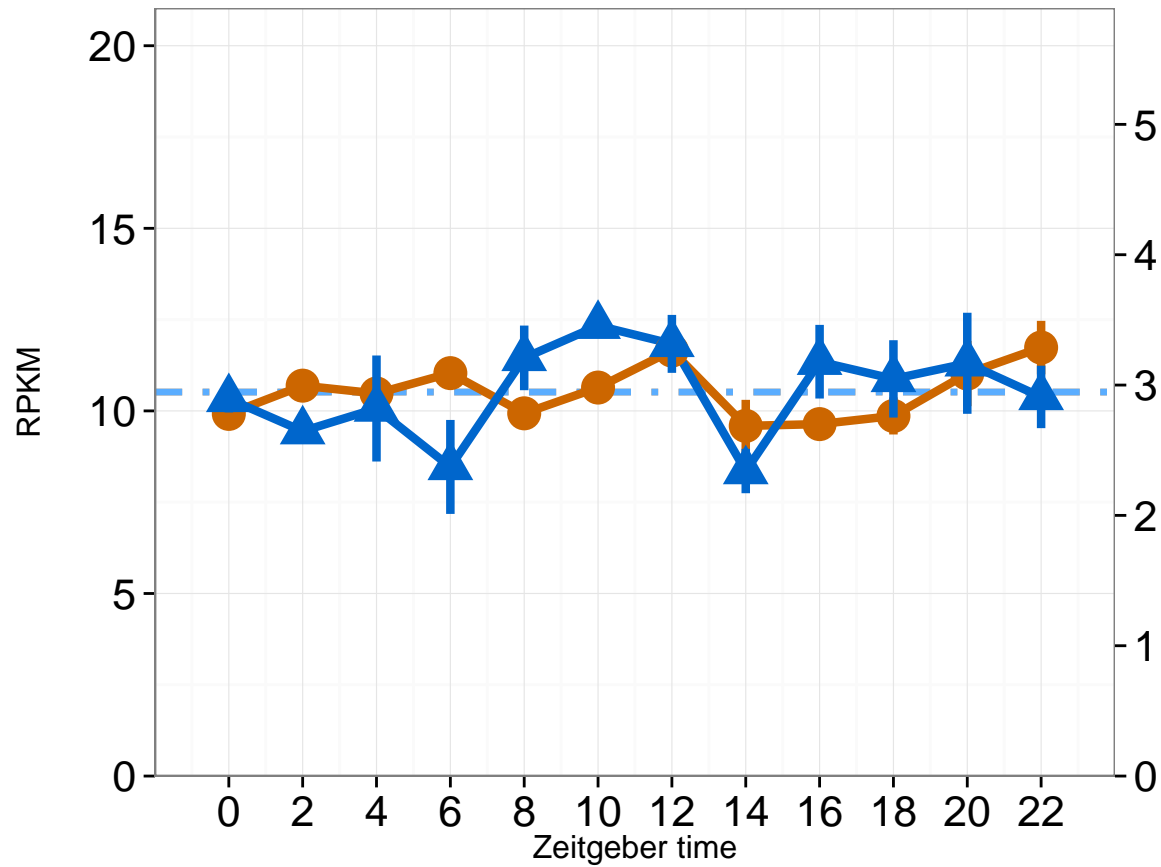

## Ttc23

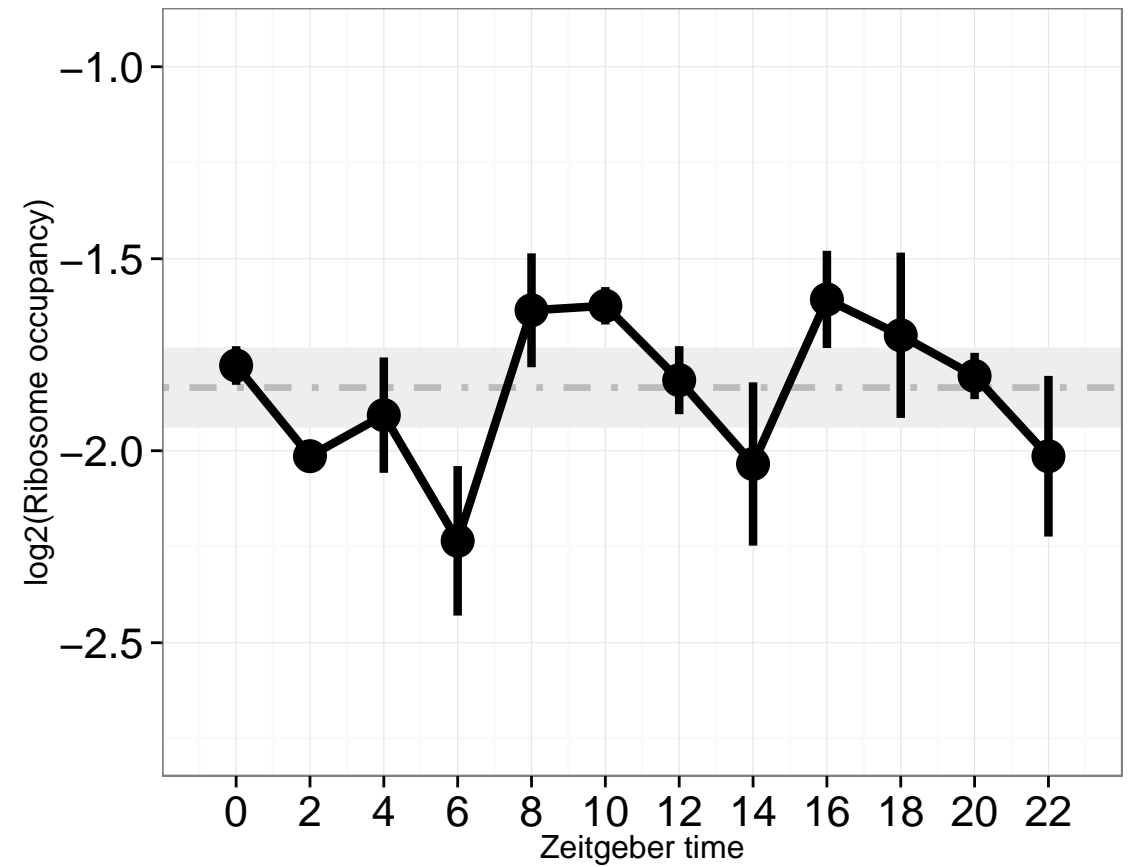

Supplement: Supplementary file 5210 [file 1]

## Nub1

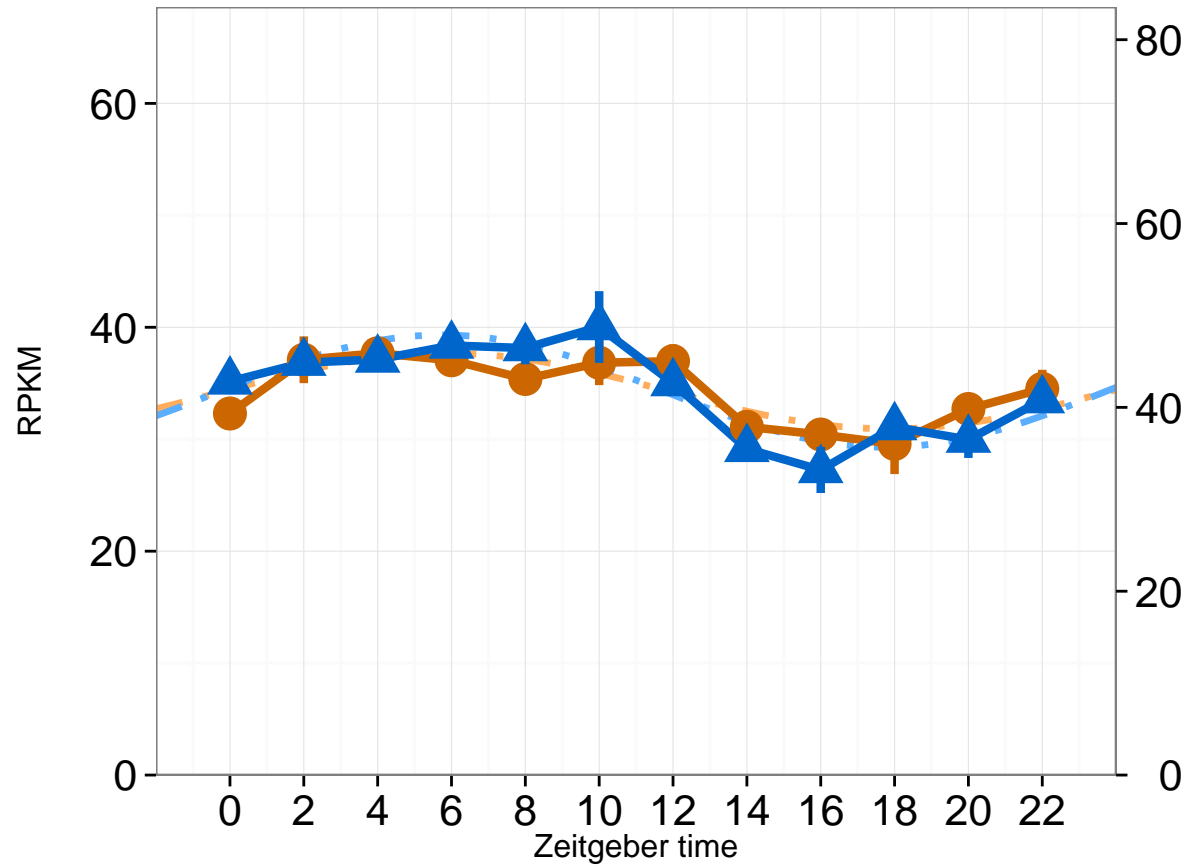

## Nub1

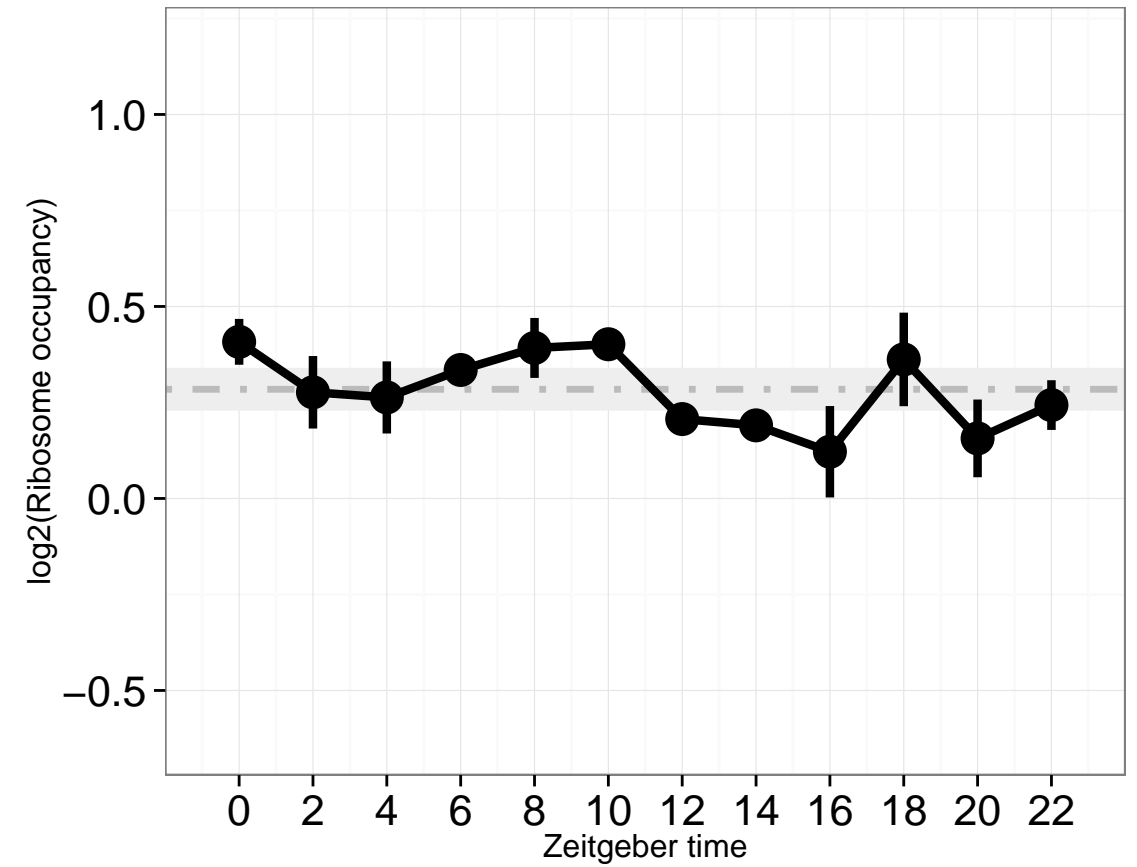

Supplement: Supplementary file 5211 [file 1]

## Clcn2

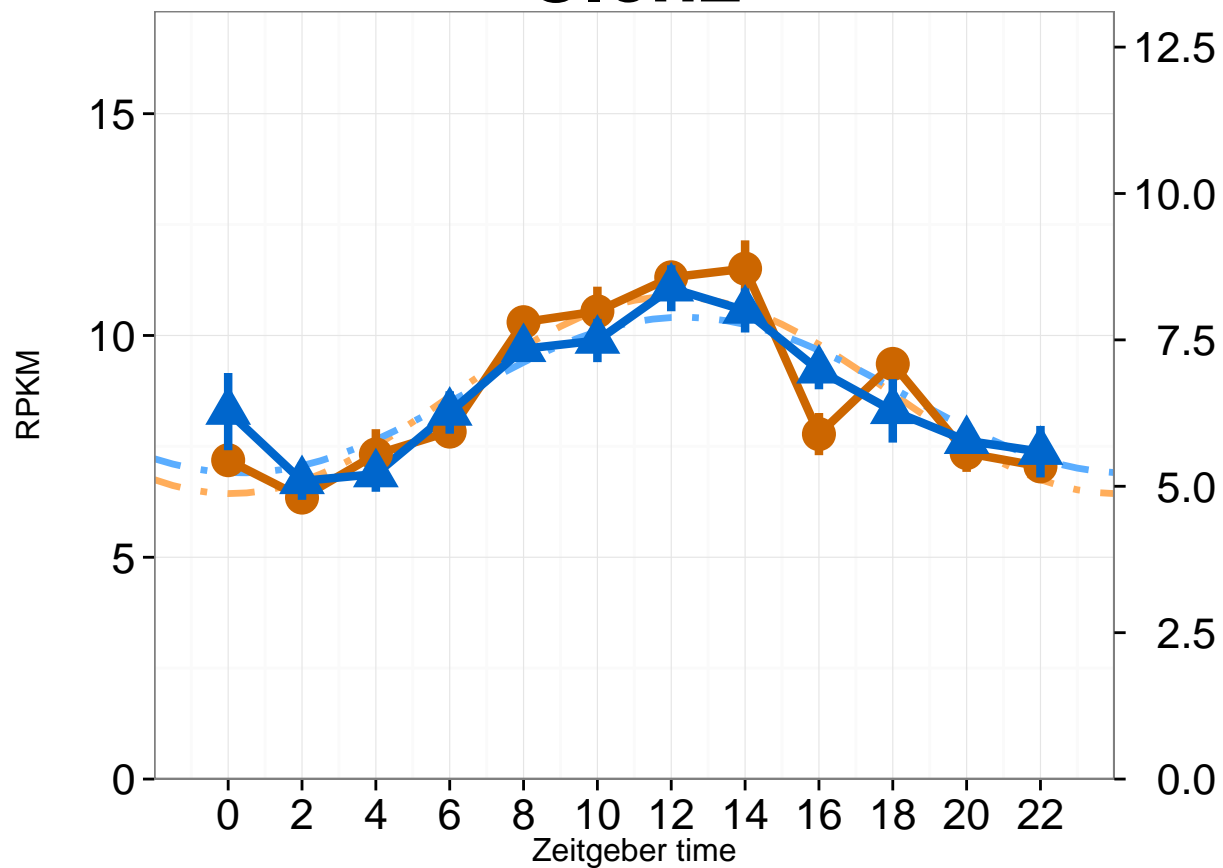

## Clcn2

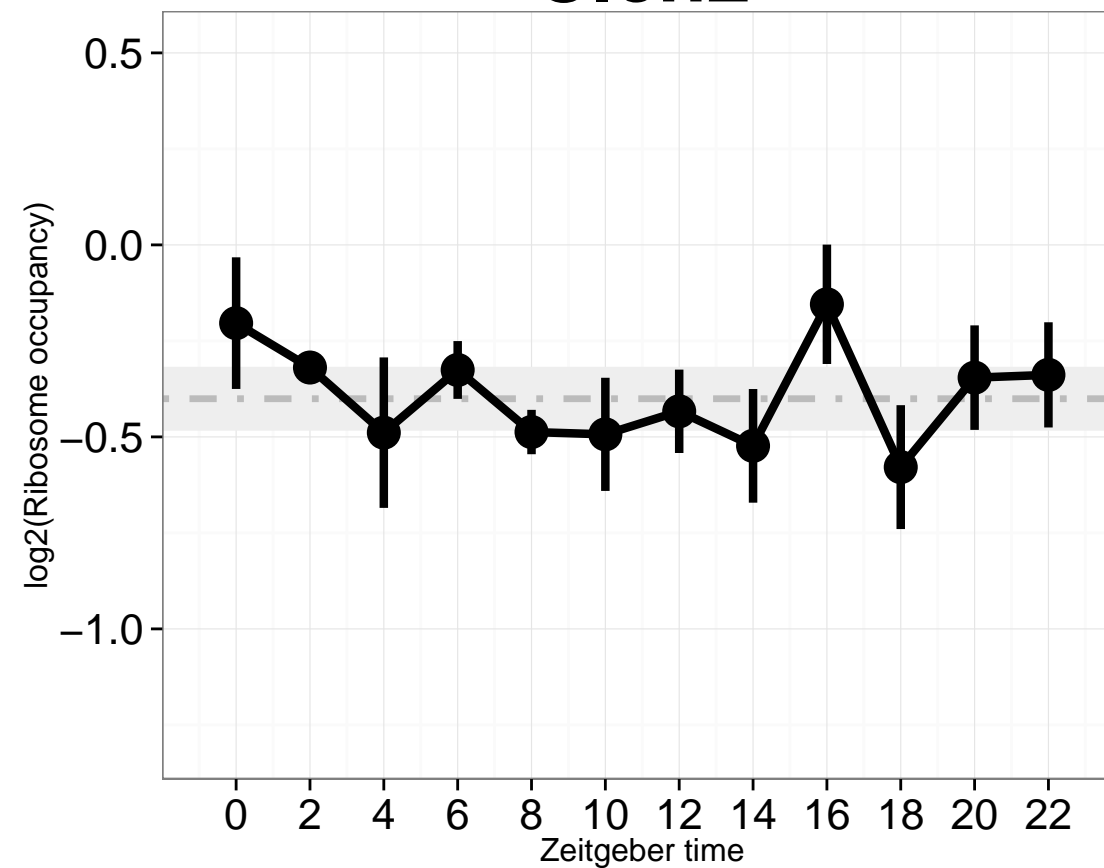

Supplement: Supplementary file 5212 [file 1]

## Herpud2

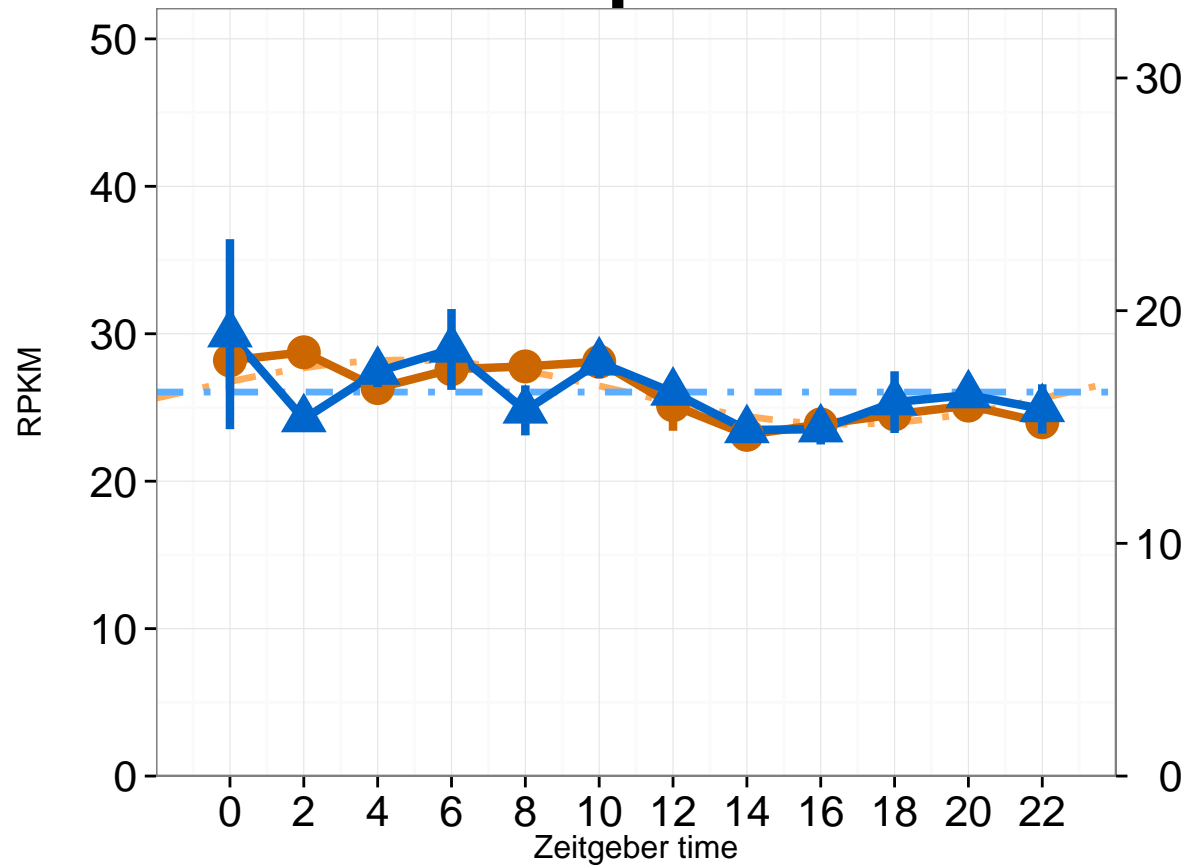

## Herpud2

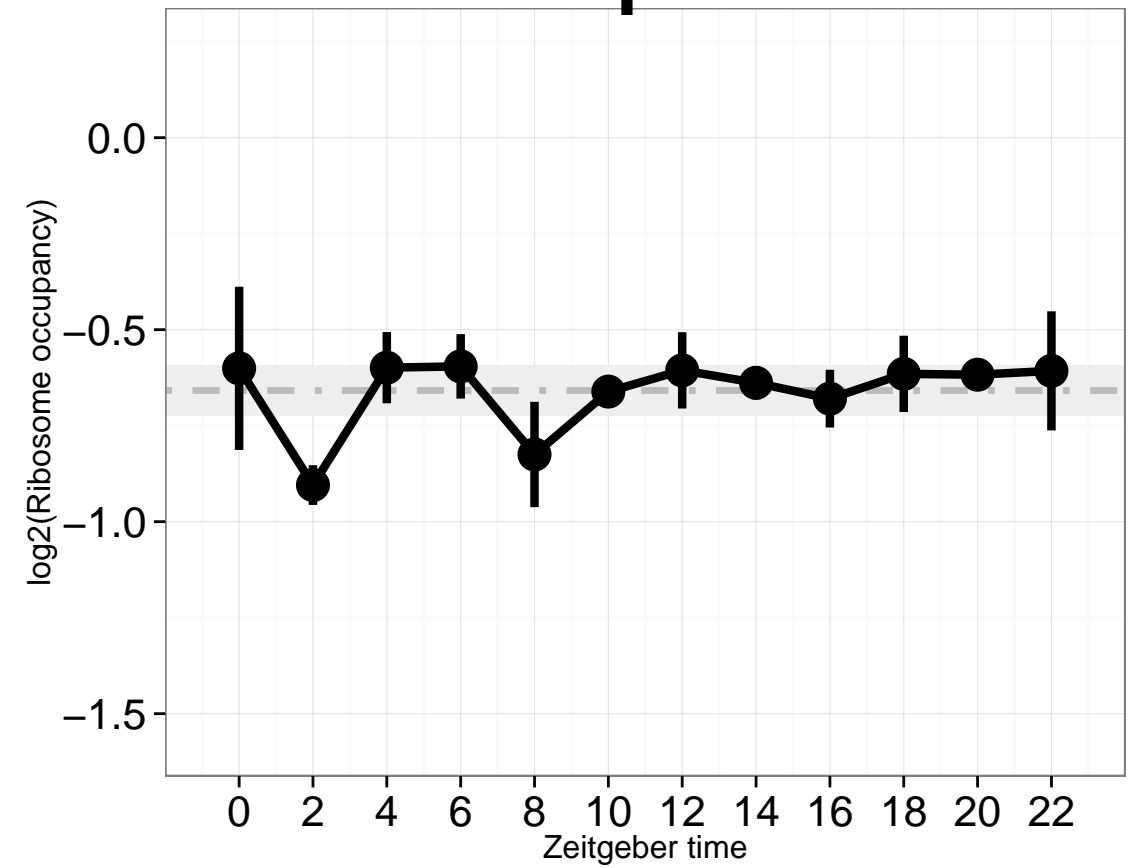

Supplement: Supplementary file 5213 [file 1]

# Slc25a44

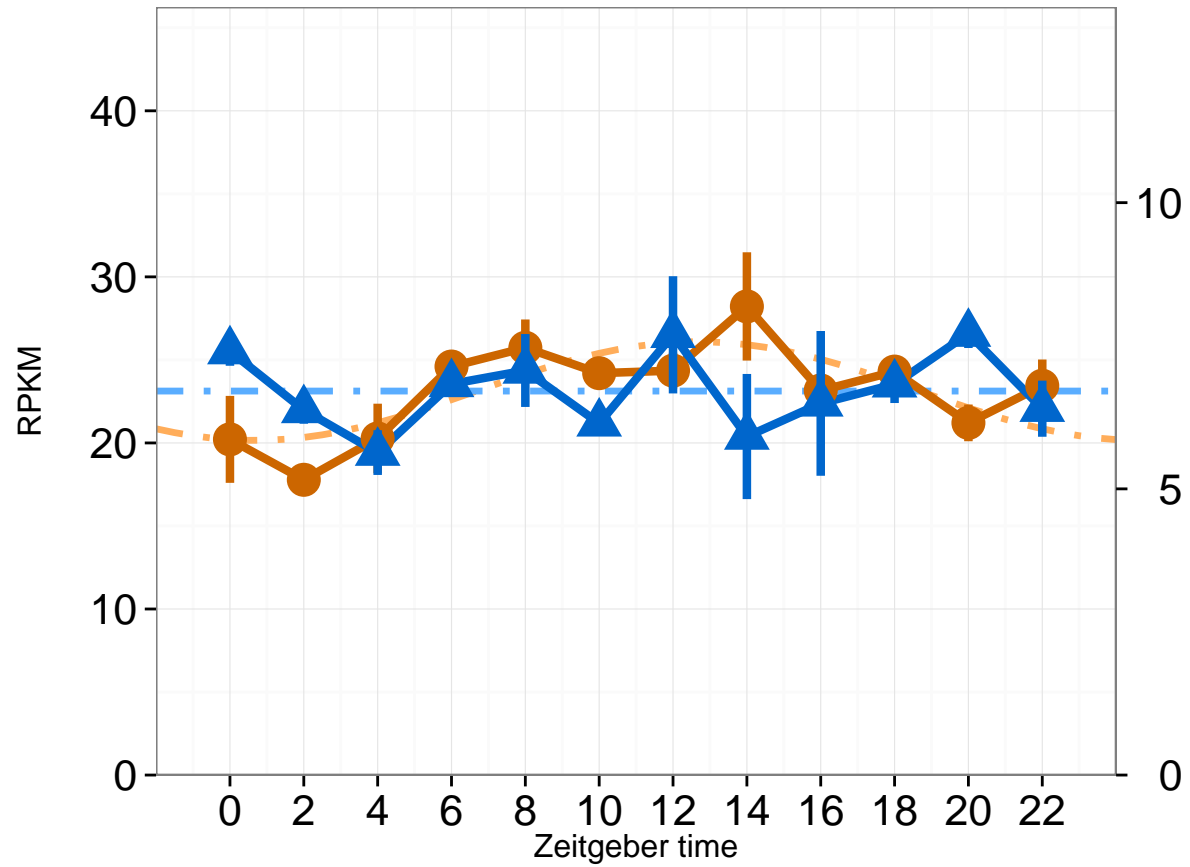

# Slc25a44

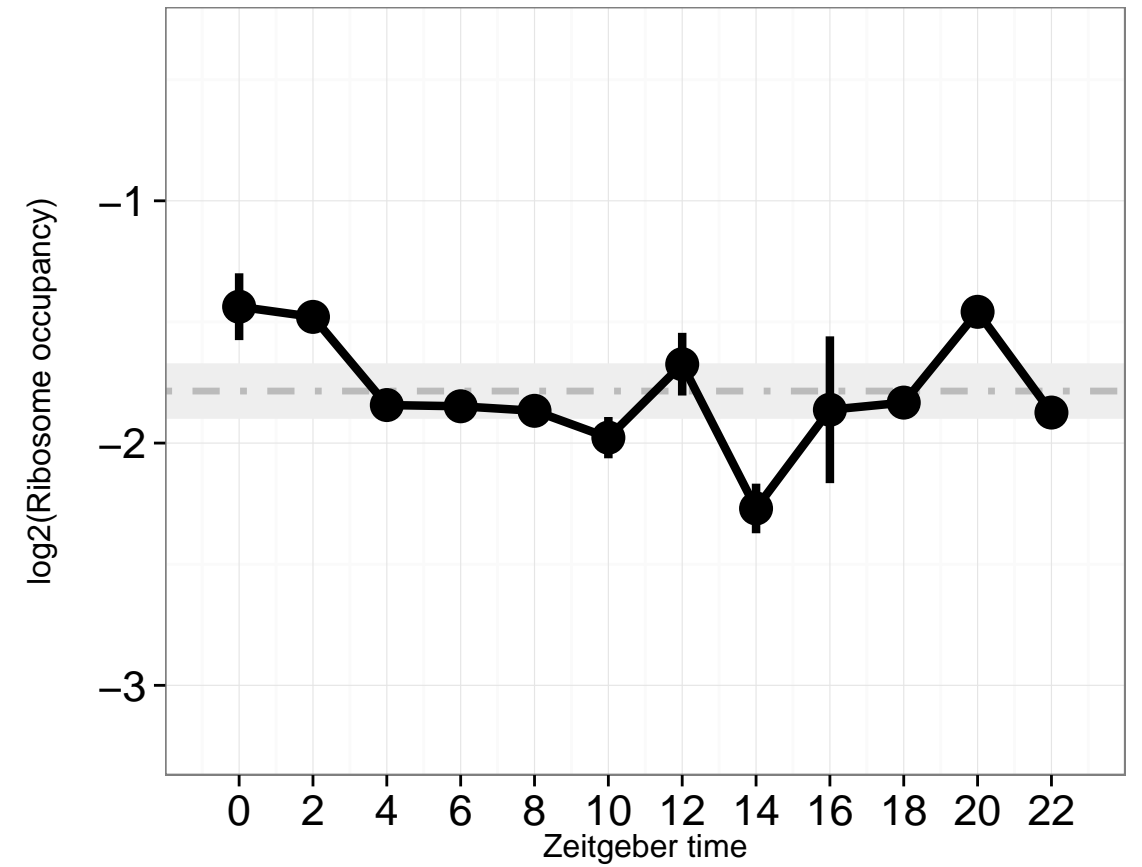

Supplement: Supplementary file 5214 [file 1]

# Cep44

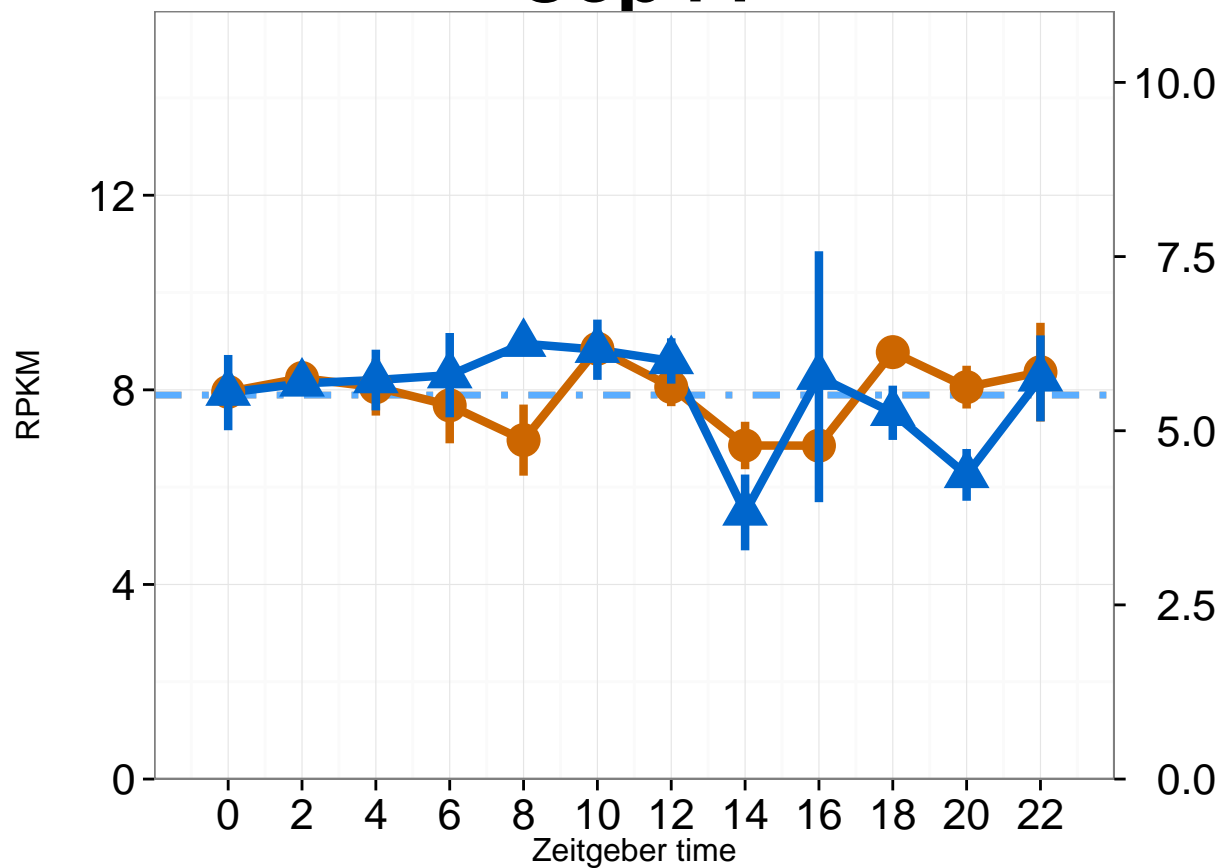

# Cep44

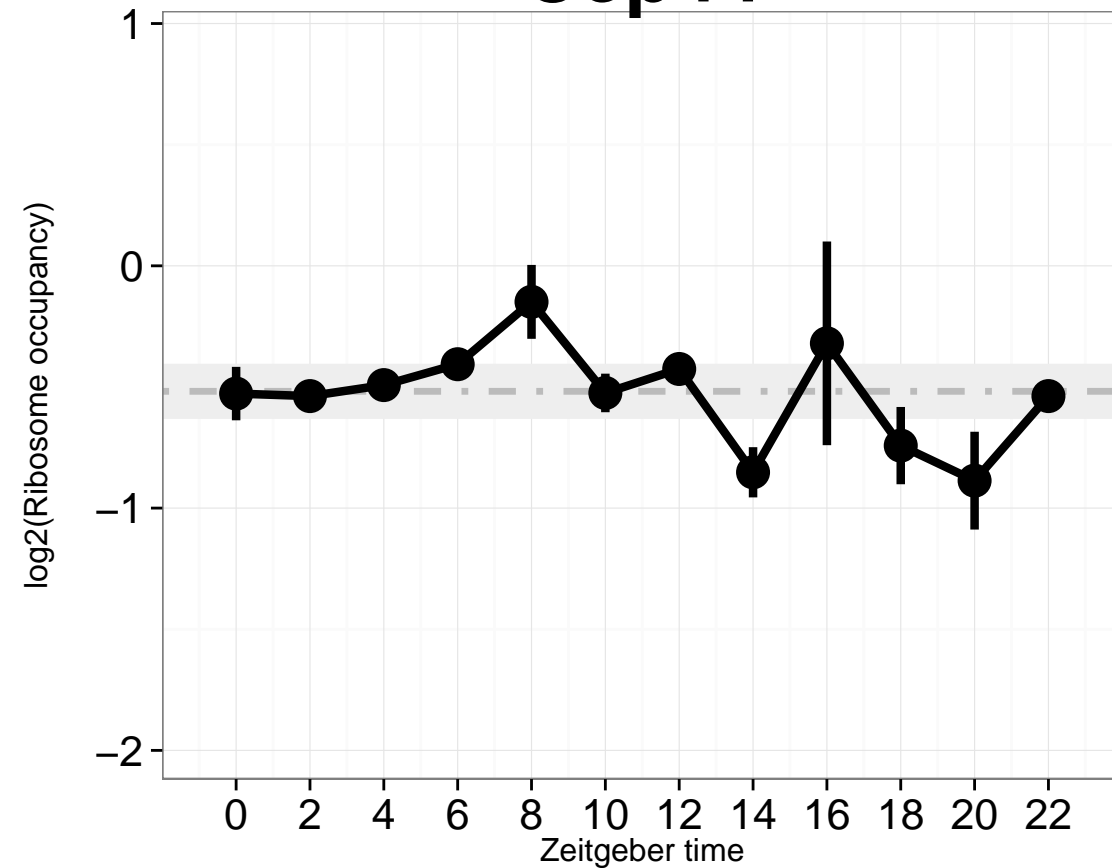

Supplement: Supplementary file 5215 [file 1]

# B4galnt1

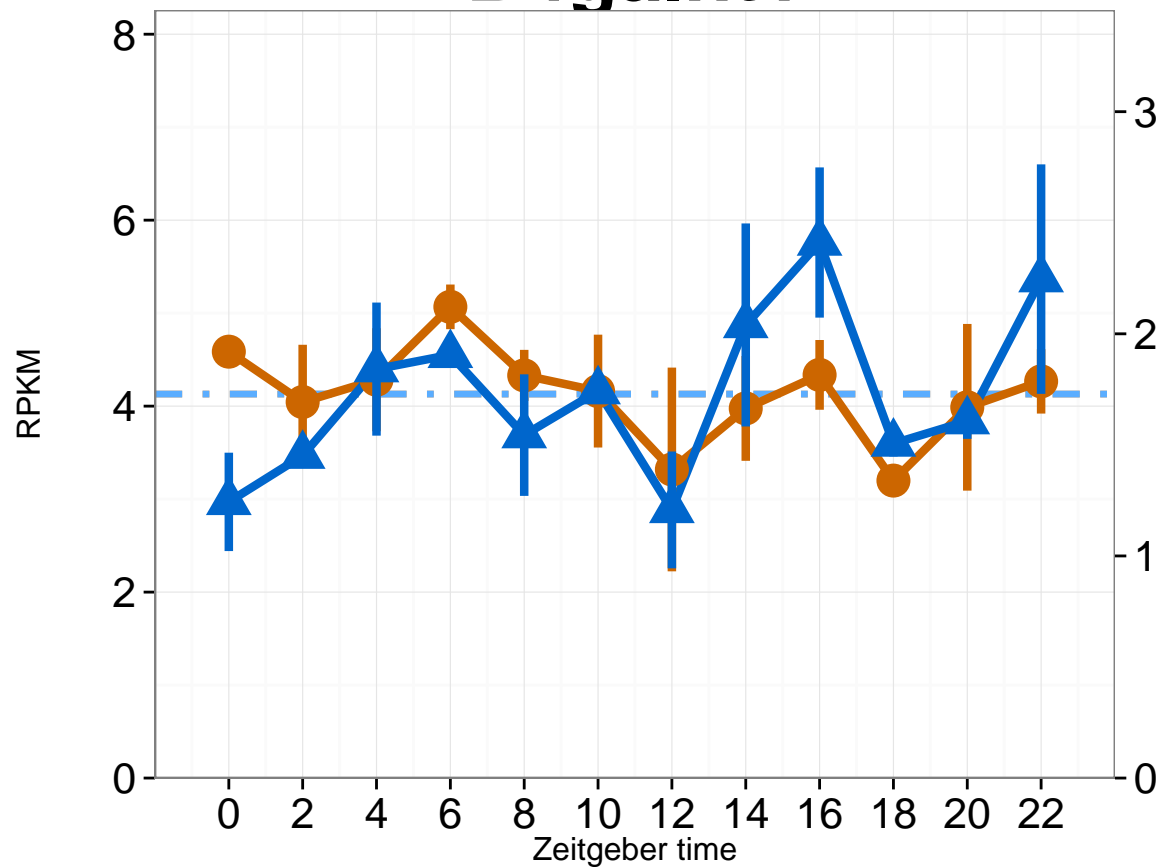

# B4galnt1

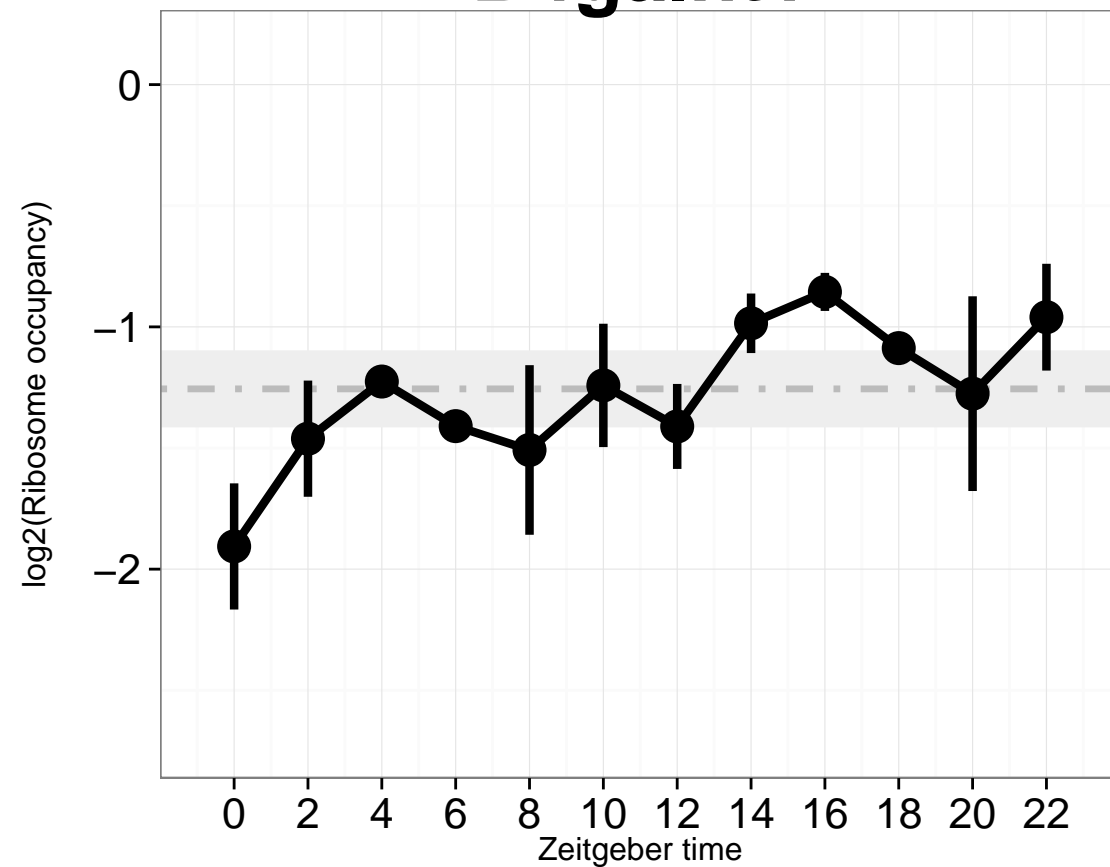

Supplement: Supplementary file 5216 [file 1]

# Scaf11

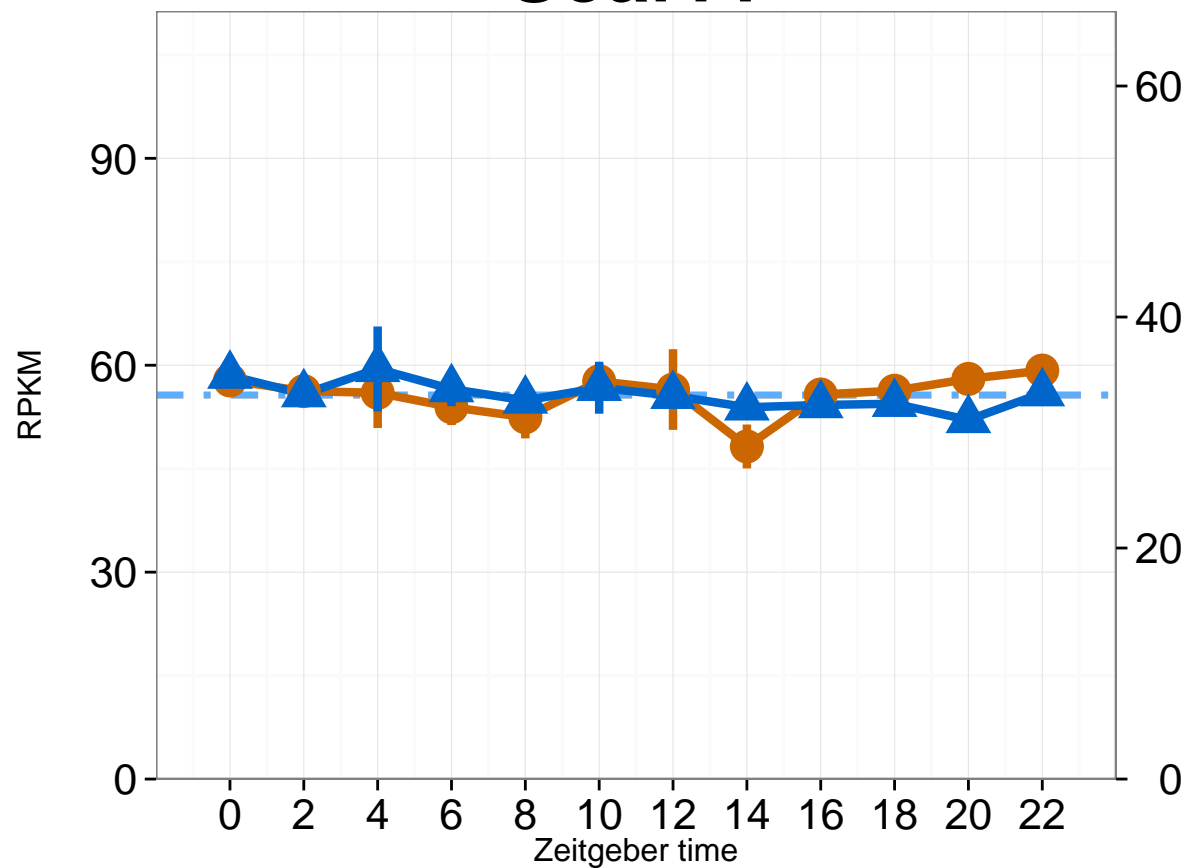

# Scaf11

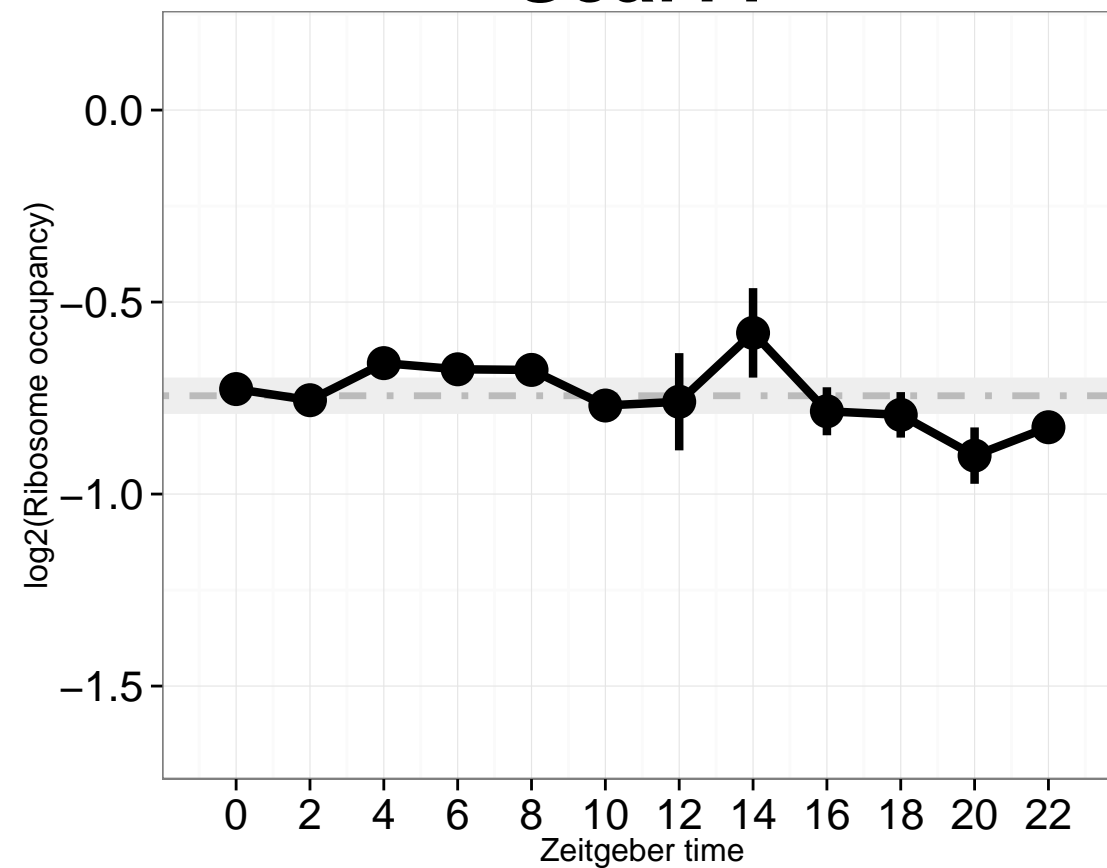

Supplement: Supplementary file 5217 [file 1]

# Ttpal

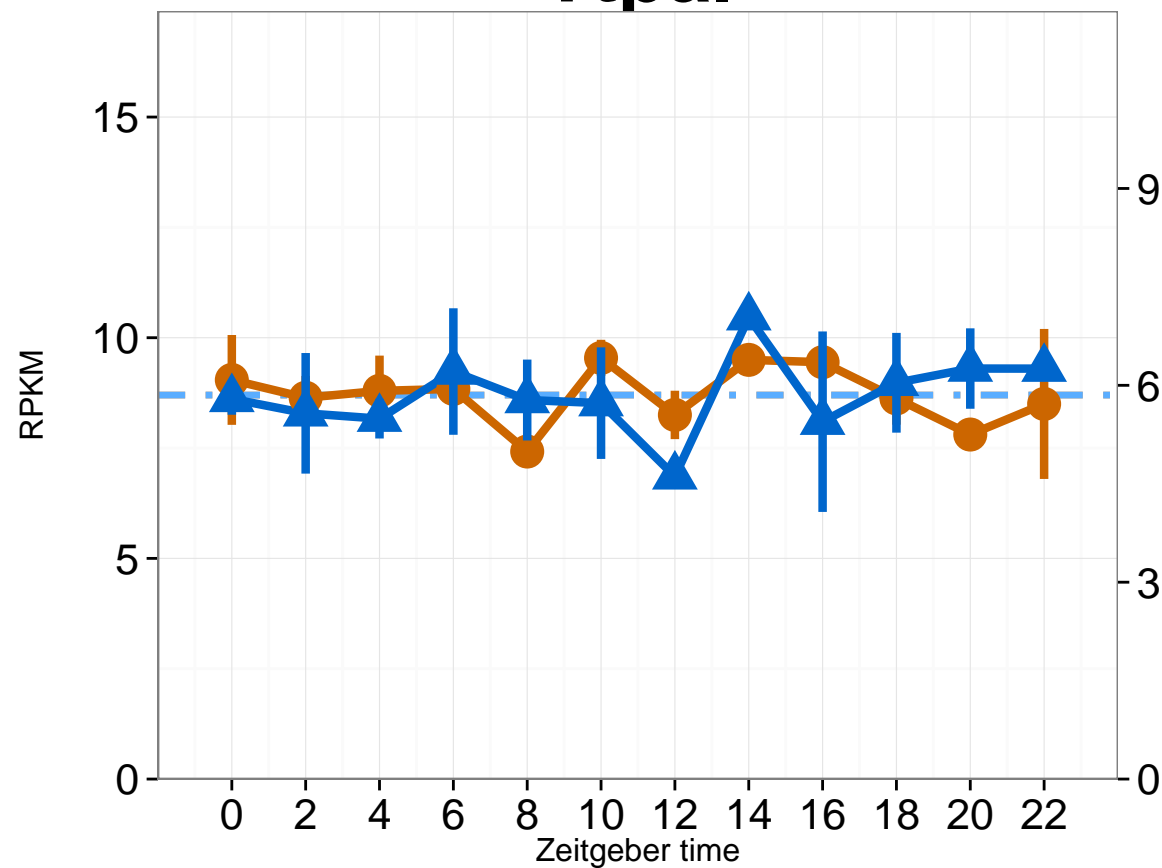

# Ttpal

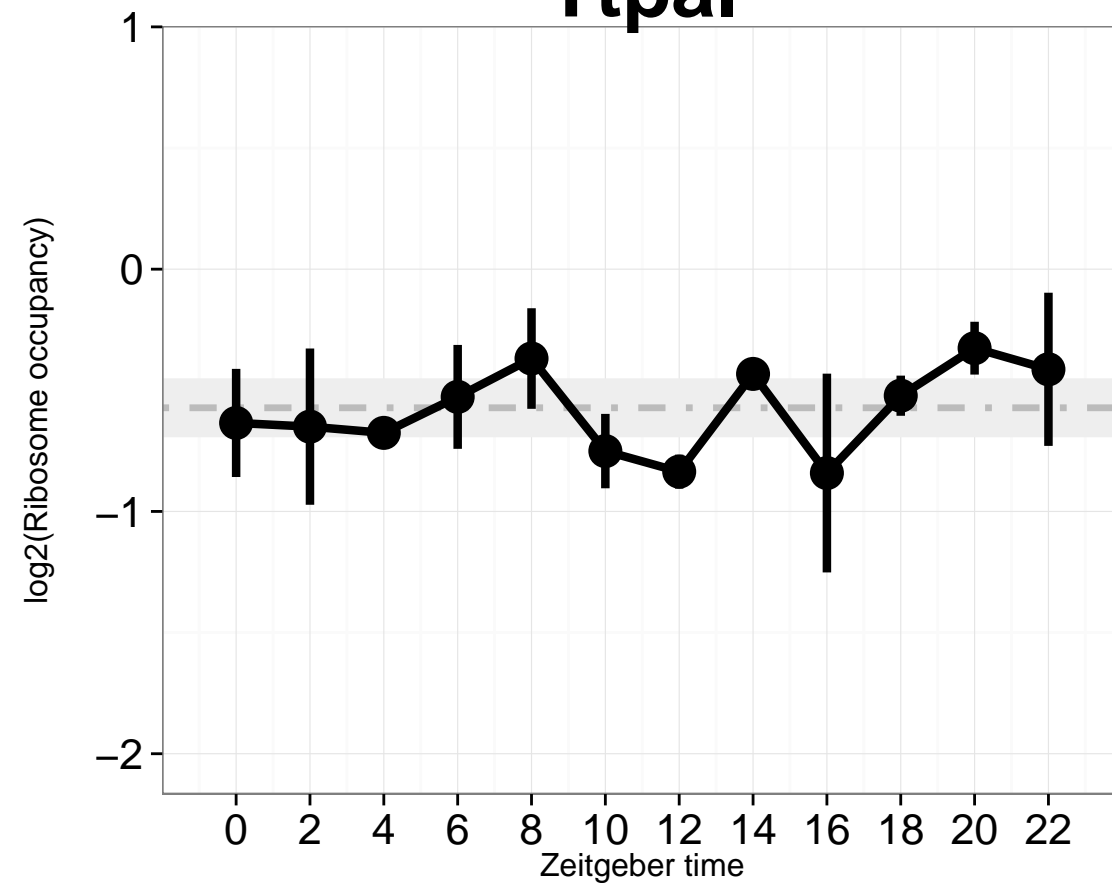

Supplement: Supplementary file 5218 [file 1]

## Aar2

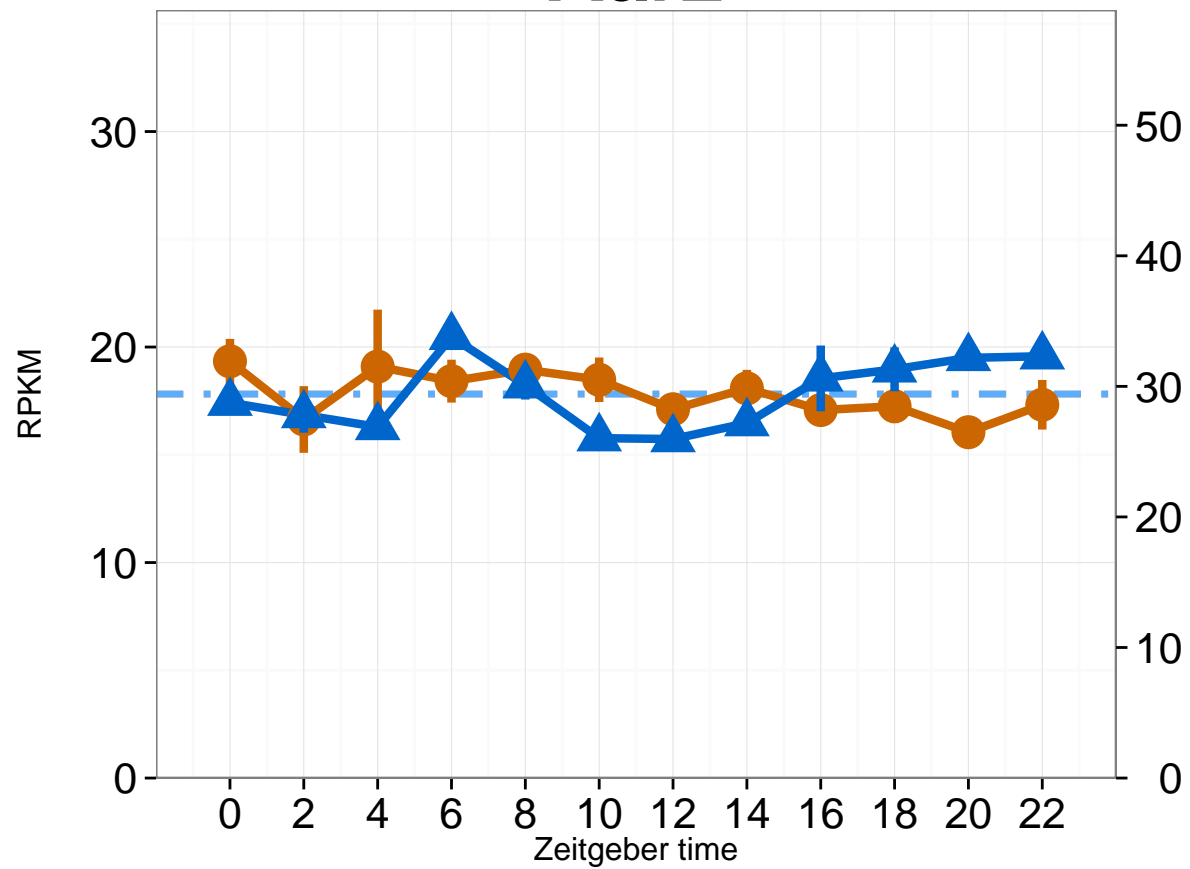

## Aar2

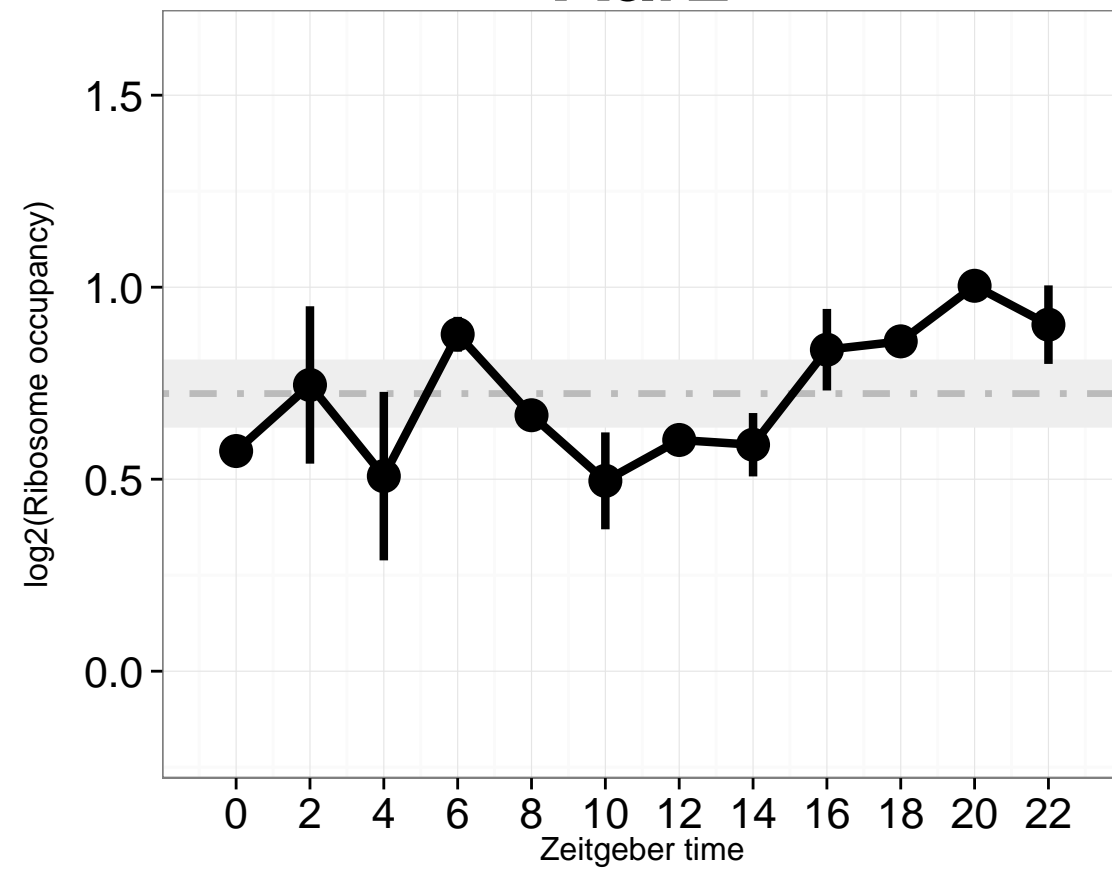

Supplement: Supplementary file 5219 [file 1]

## Gpx8

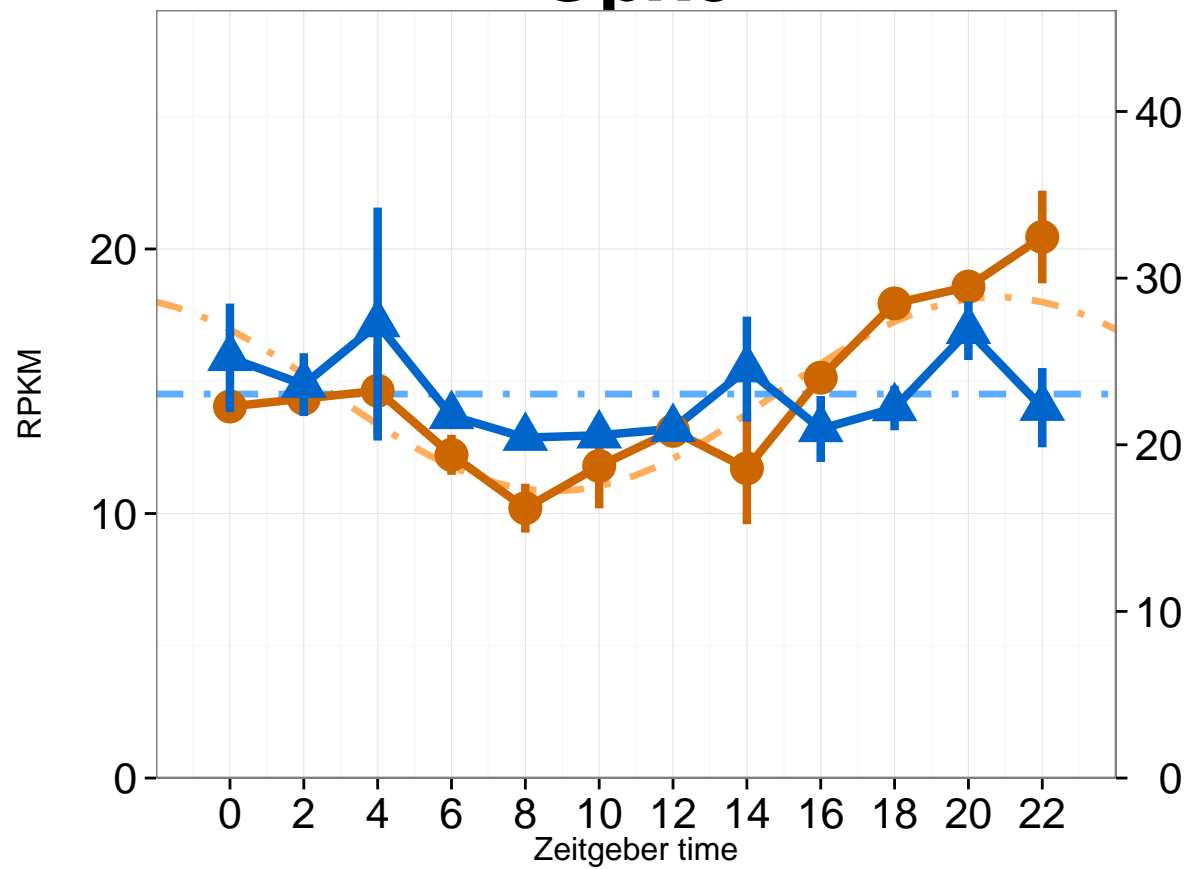

## Gpx8

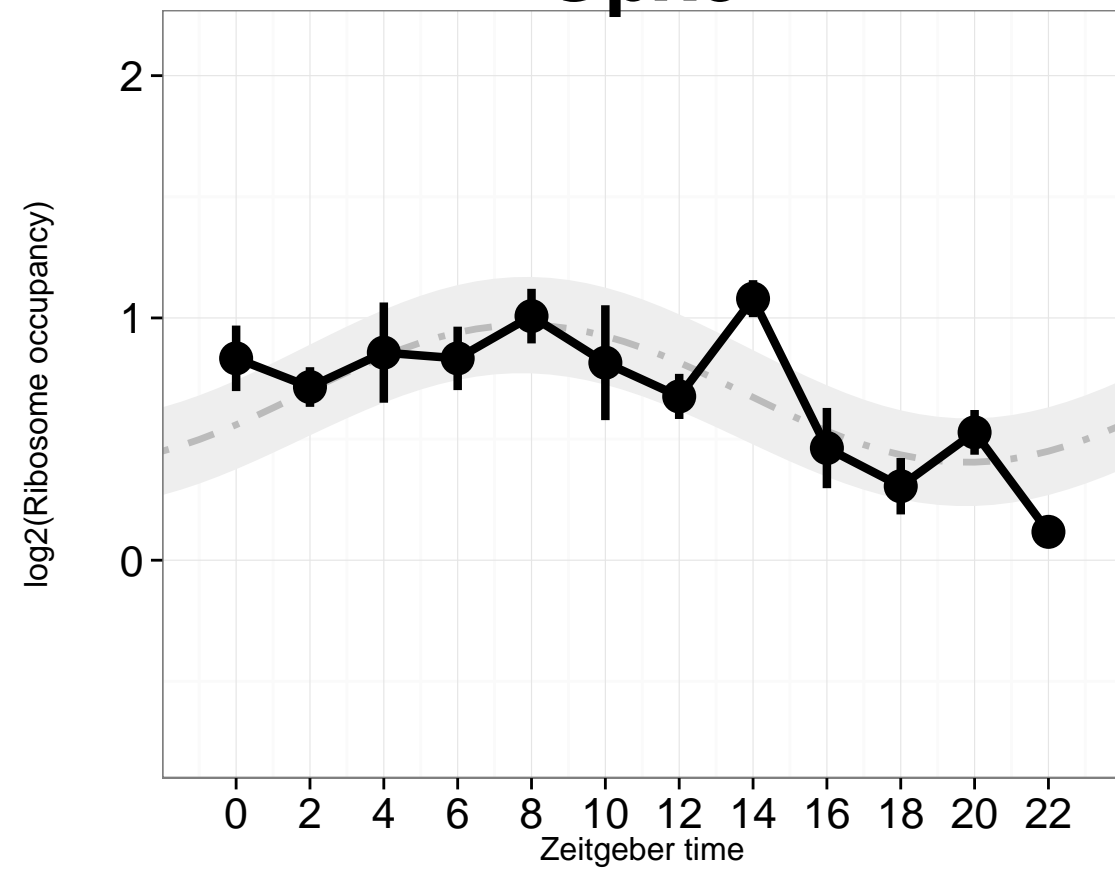

Supplement: Supplementary file 5220 [file 1]
