# Supplementary material (part 53 of 133)
Source: publisher figshare collection journal article supplement (https://springernature.figshare.com/articles/dataset/_/4903193)

# Utp15

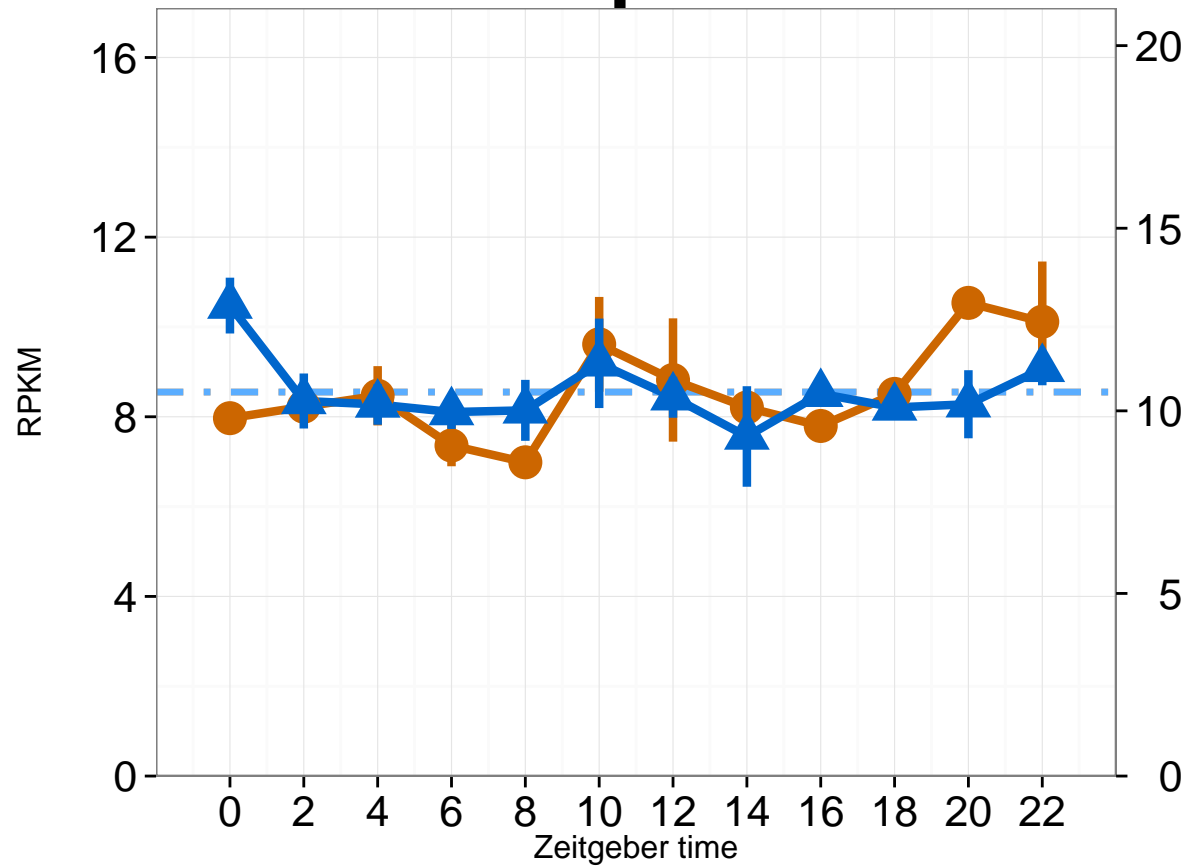

# Utp15

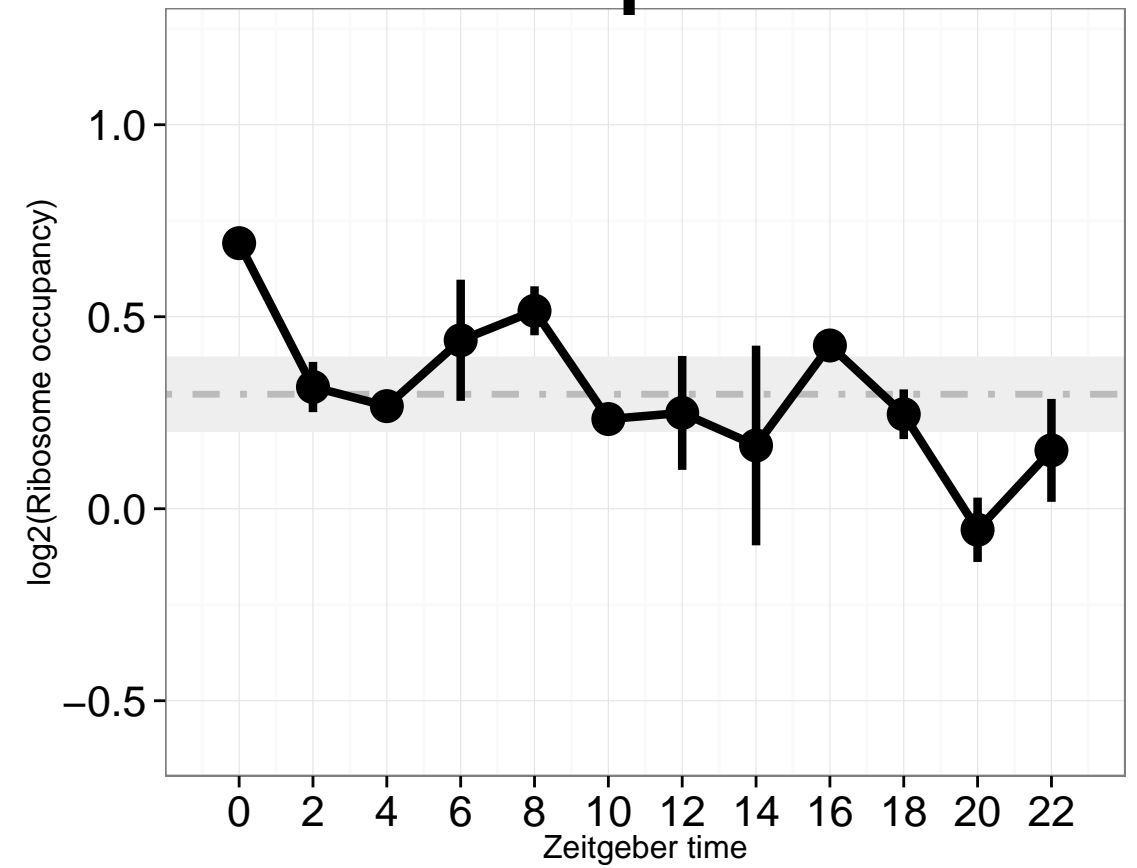

Supplement: Supplementary file 5221 [file 1]

## Mcm4

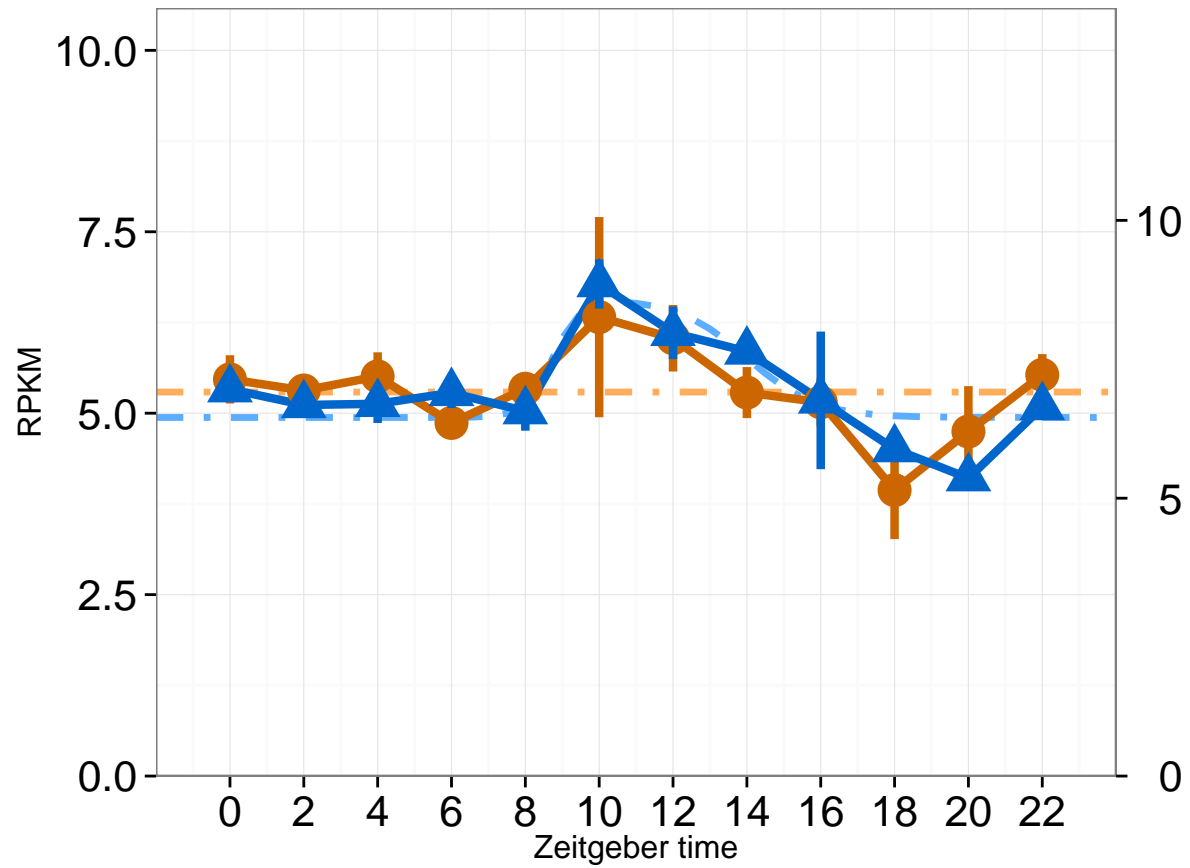

## Mcm4

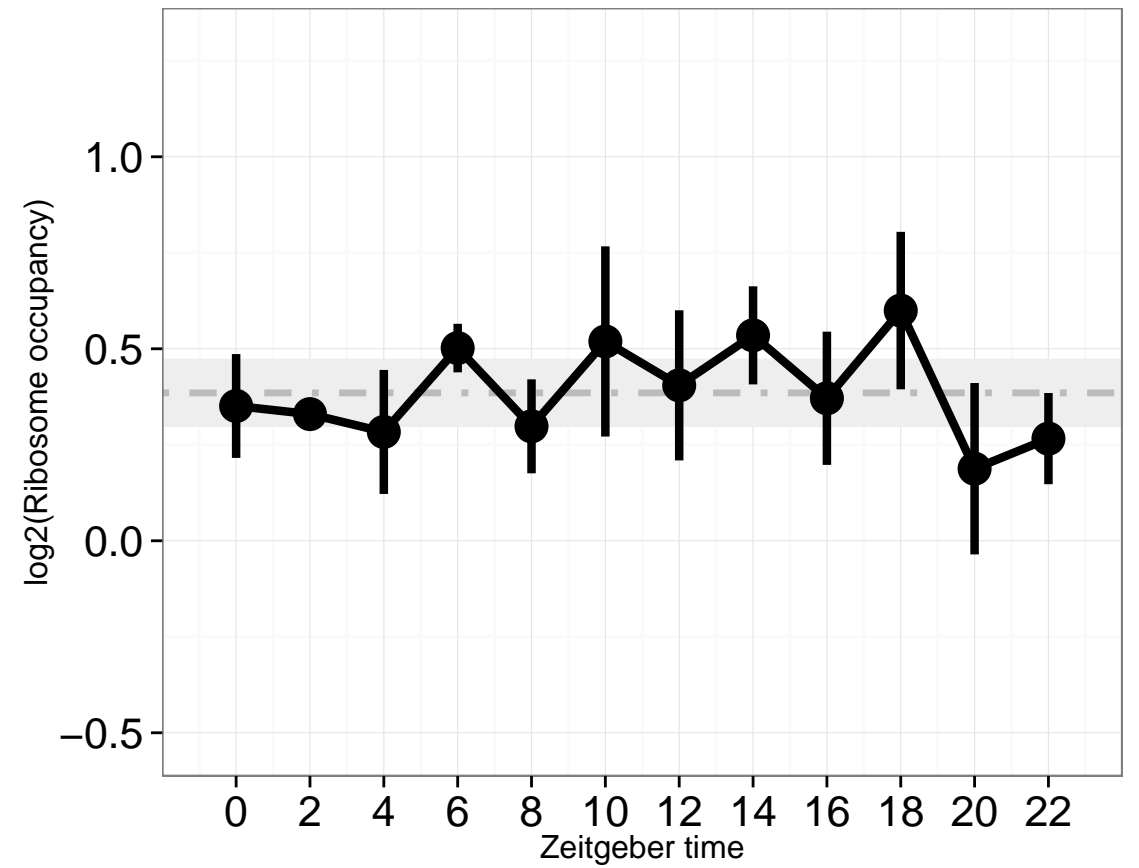

Supplement: Supplementary file 5222 [file 1]

# Mterfd1

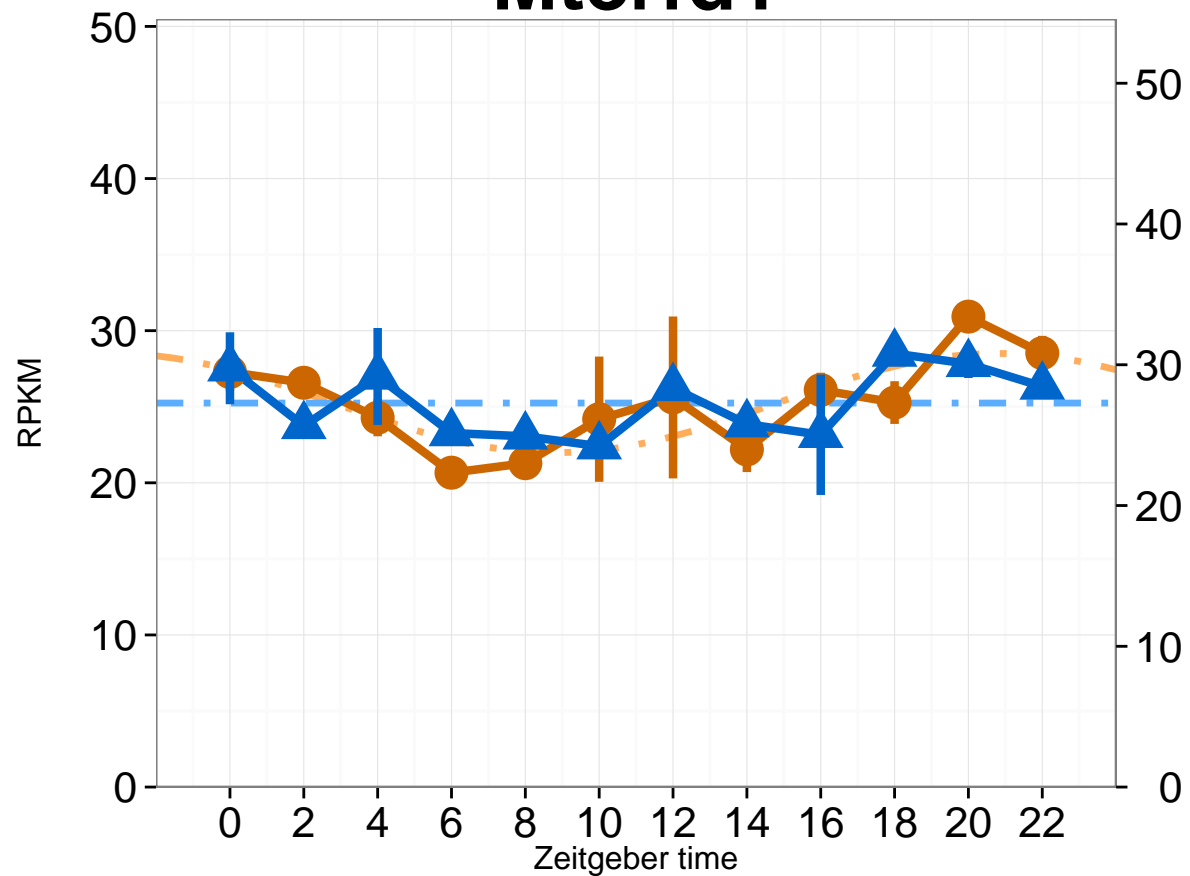

# Mterfd1

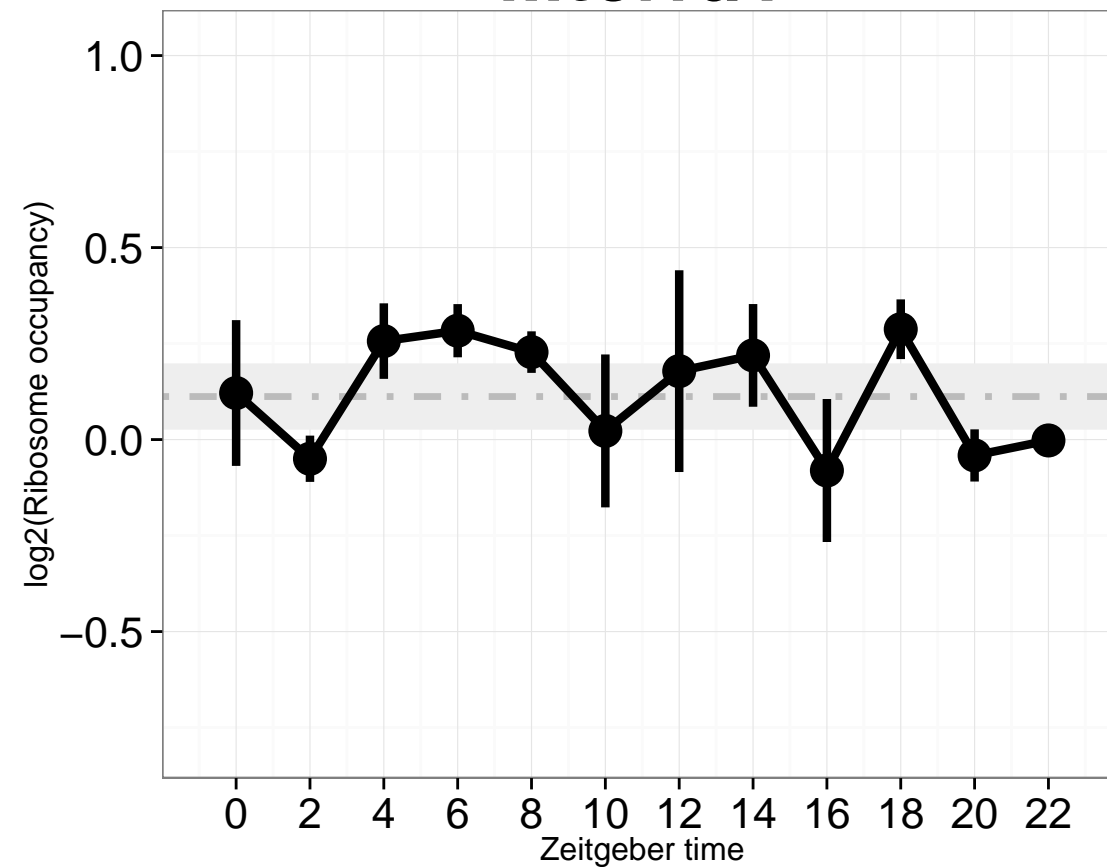

Supplement: Supplementary file 5223 [file 1]

# Kcmf1

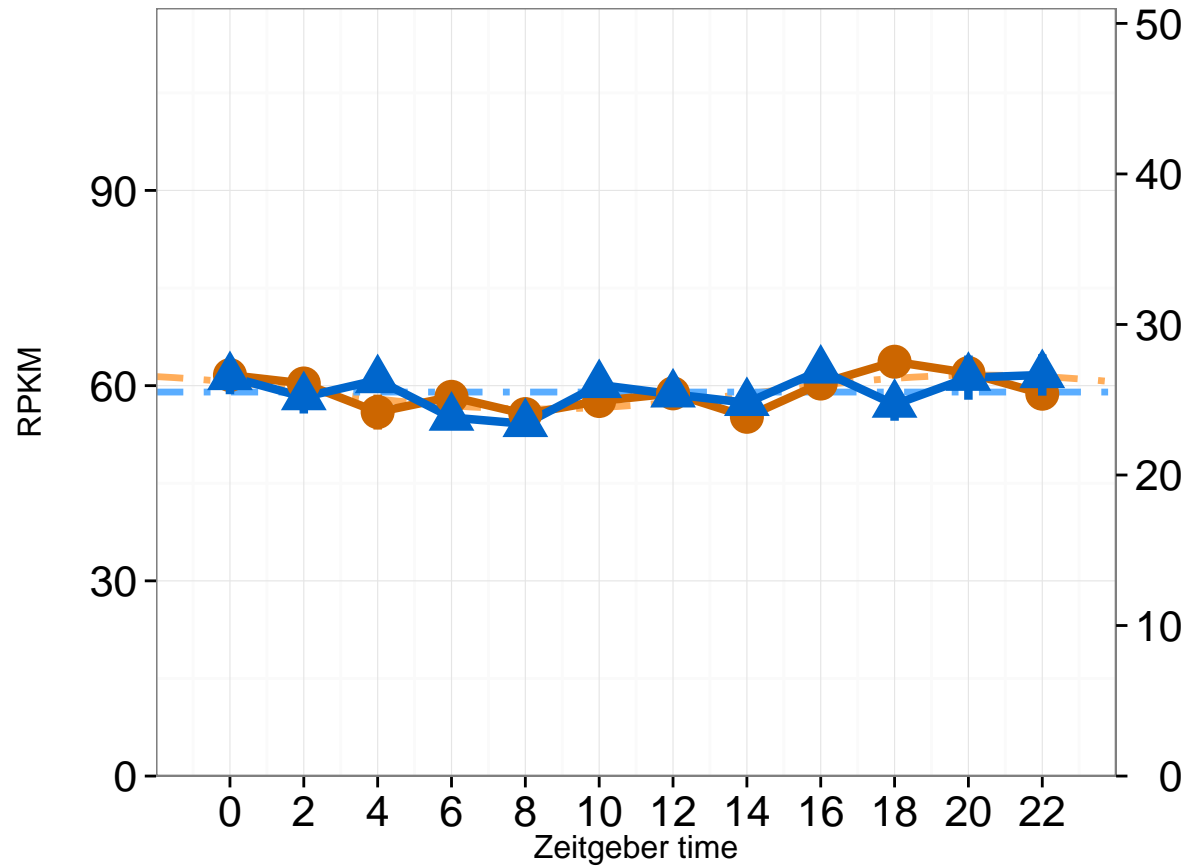

# Kcmf1

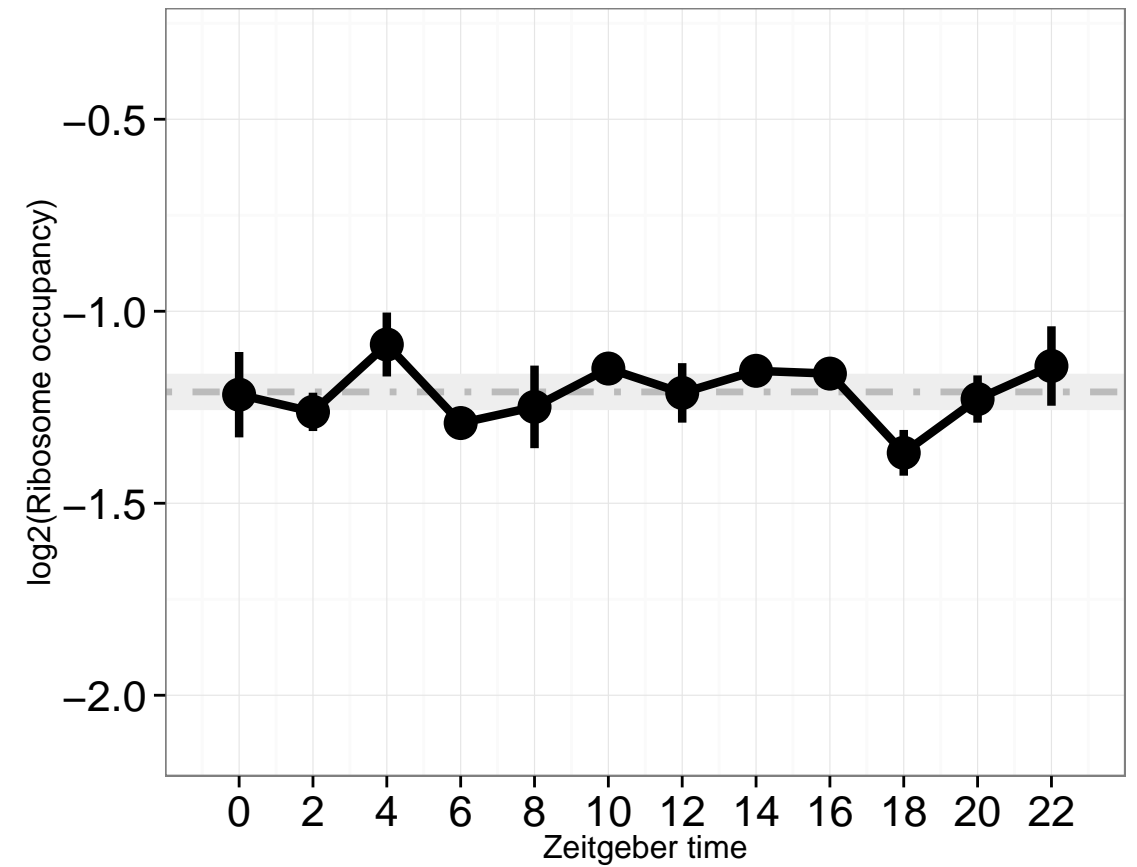

Supplement: Supplementary file 5224 [file 1]

## Uqcrc1

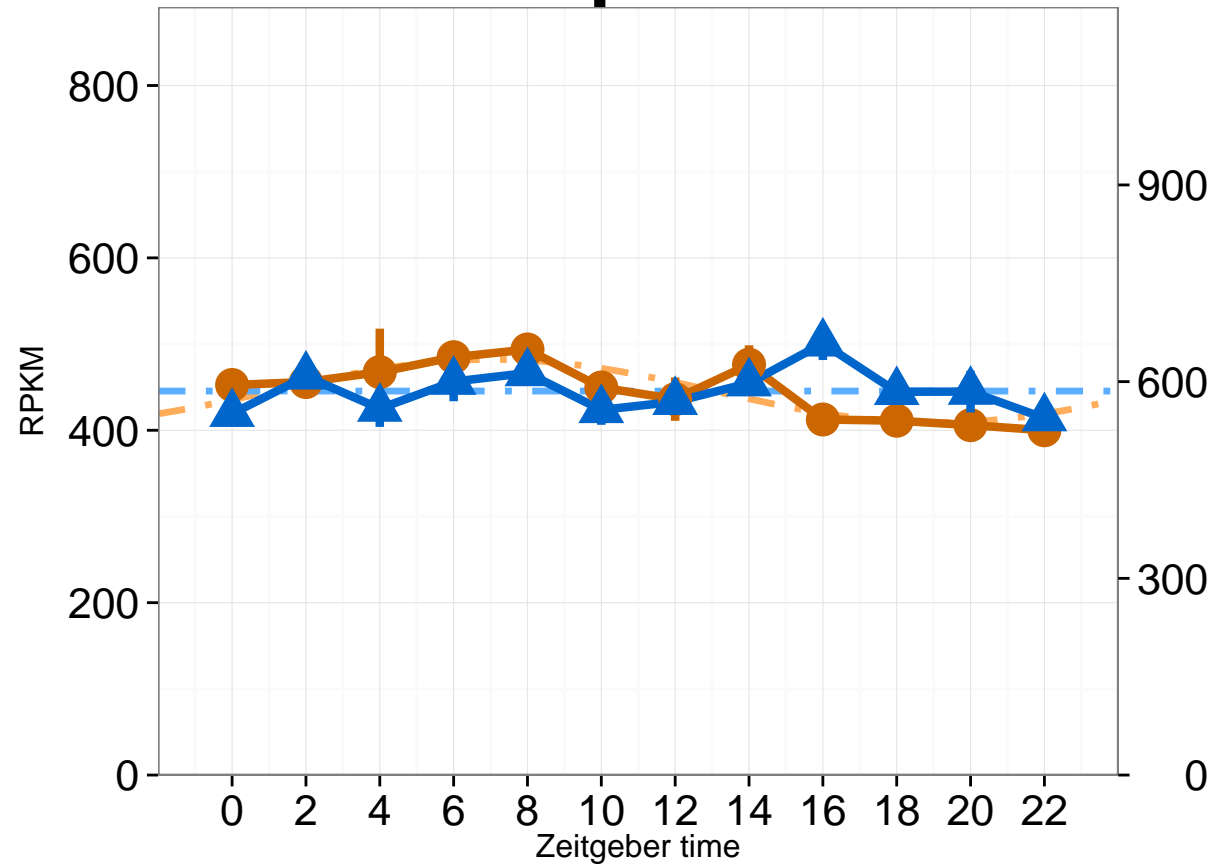

## Uqcrc1

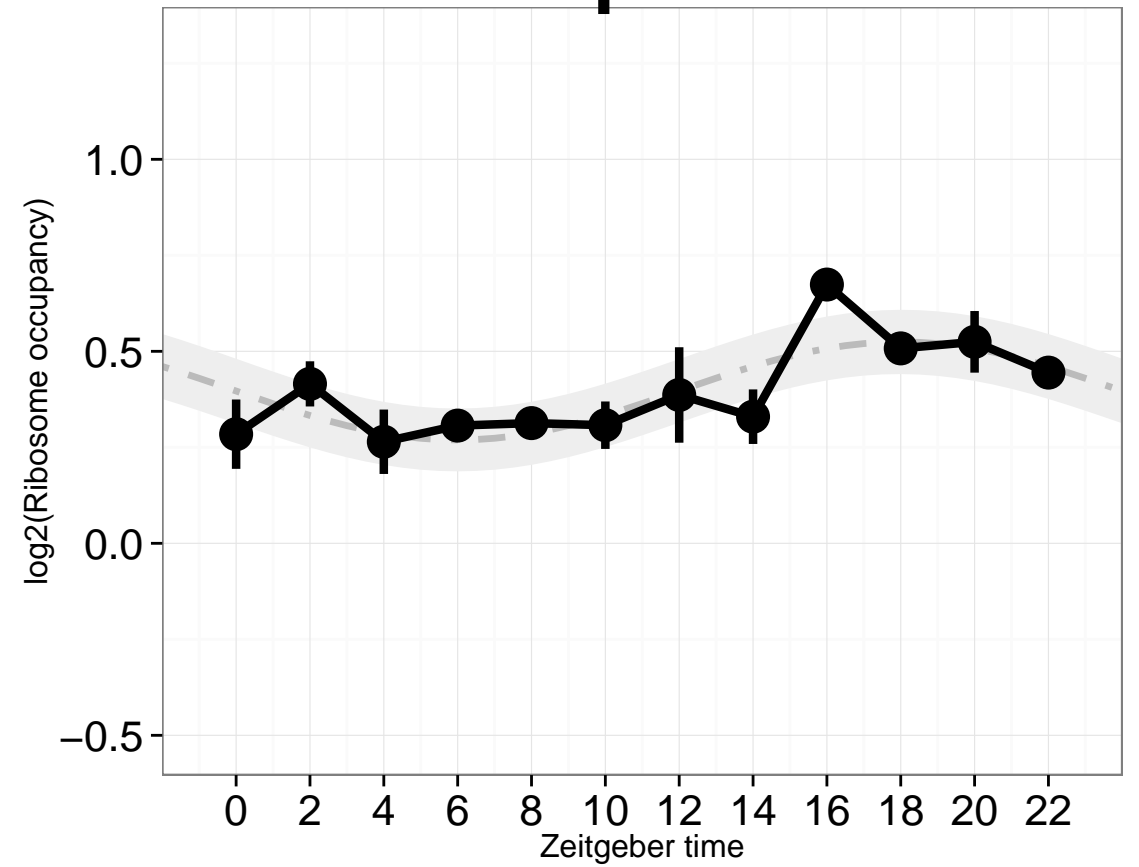

Supplement: Supplementary file 5225 [file 1]

# Slc15a3

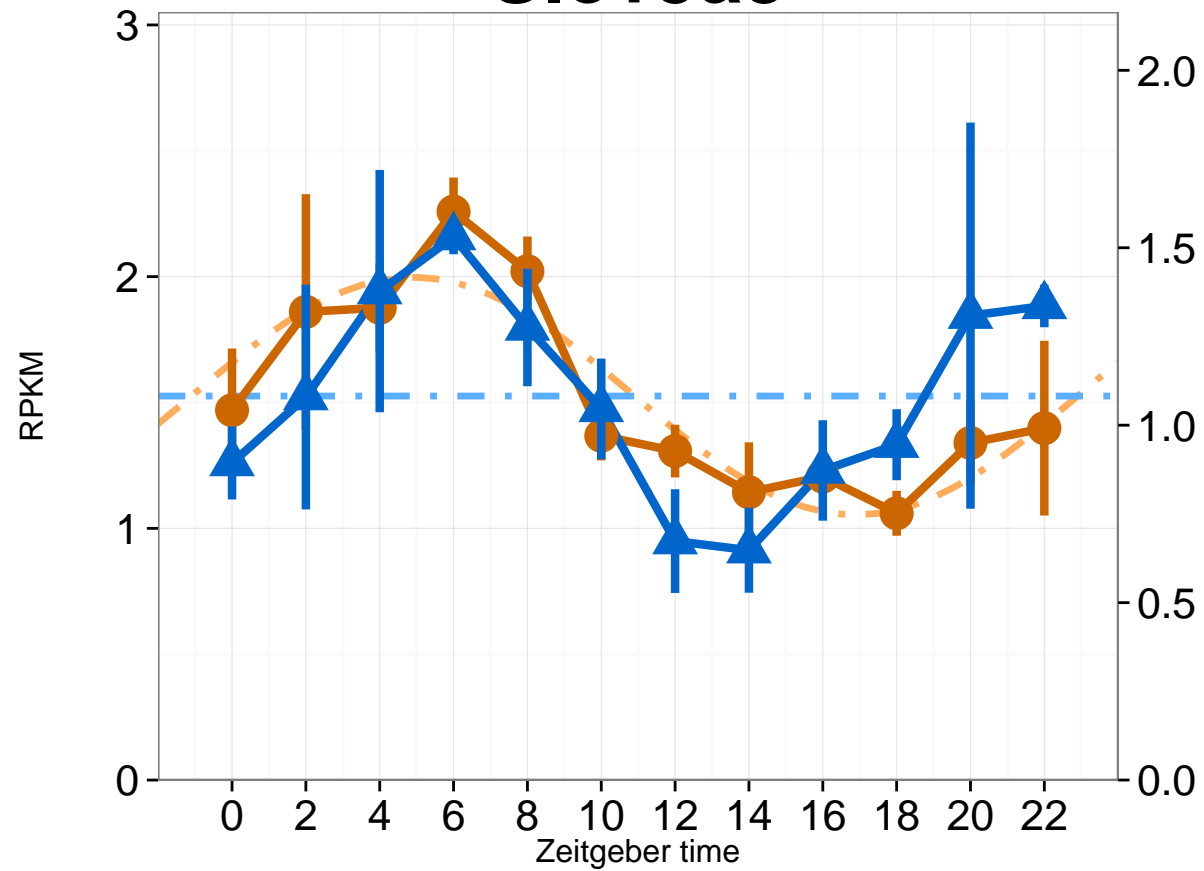

# Slc15a3

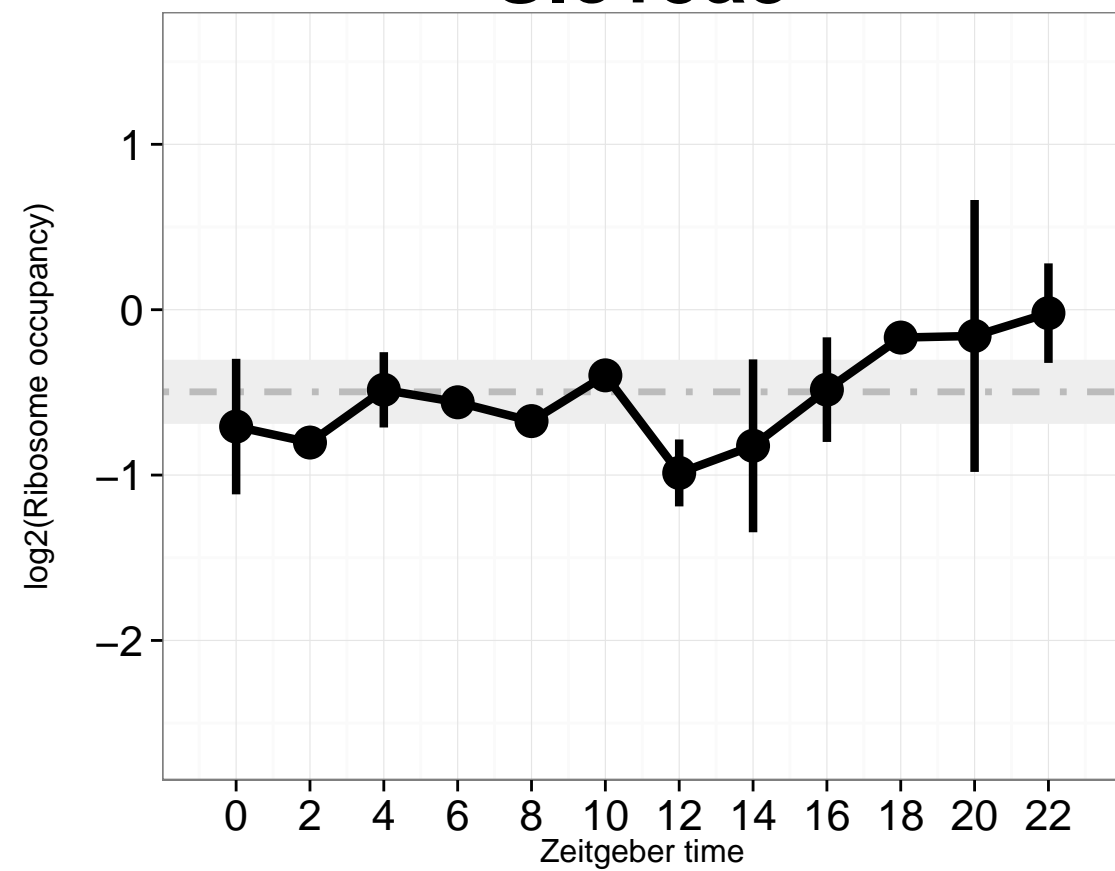

Supplement: Supplementary file 5226 [file 1]

## Nfe2l2

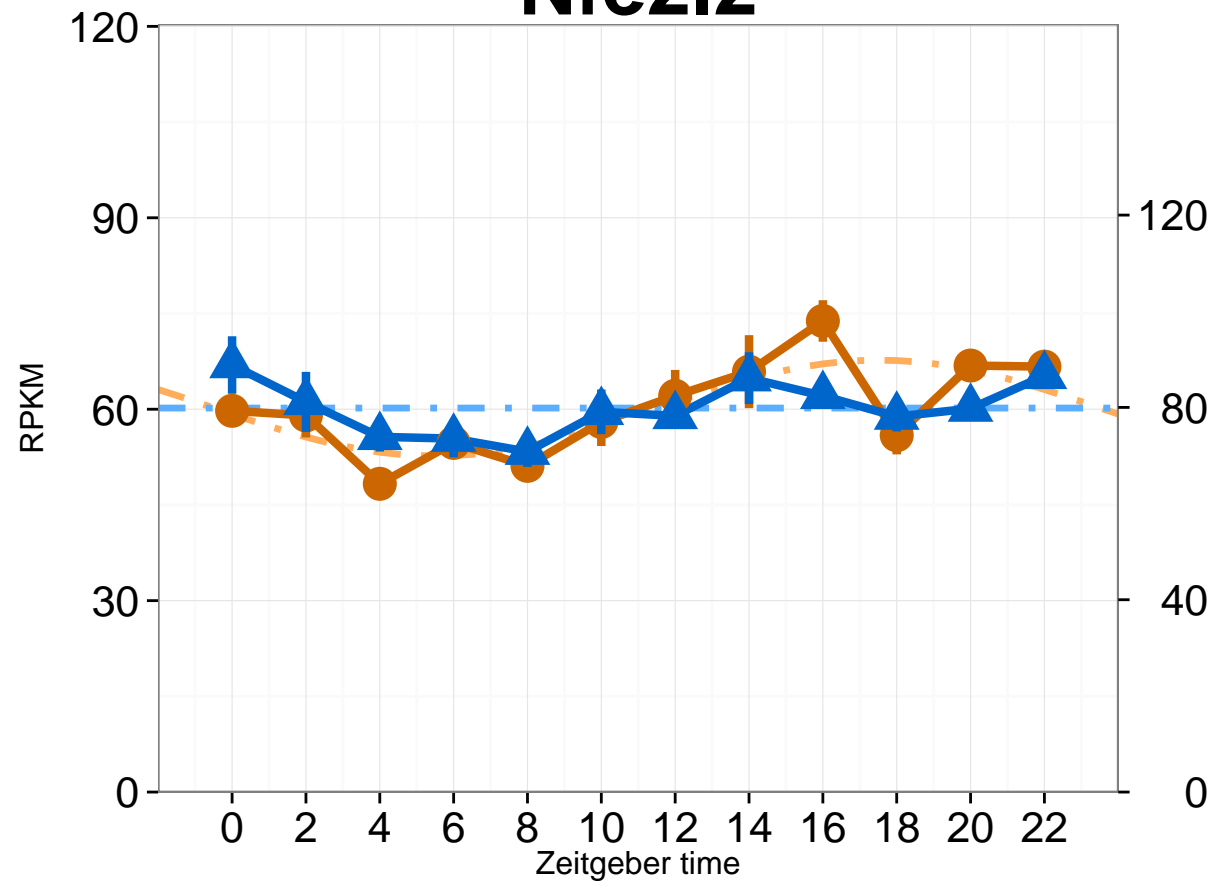

## Nfe2l2

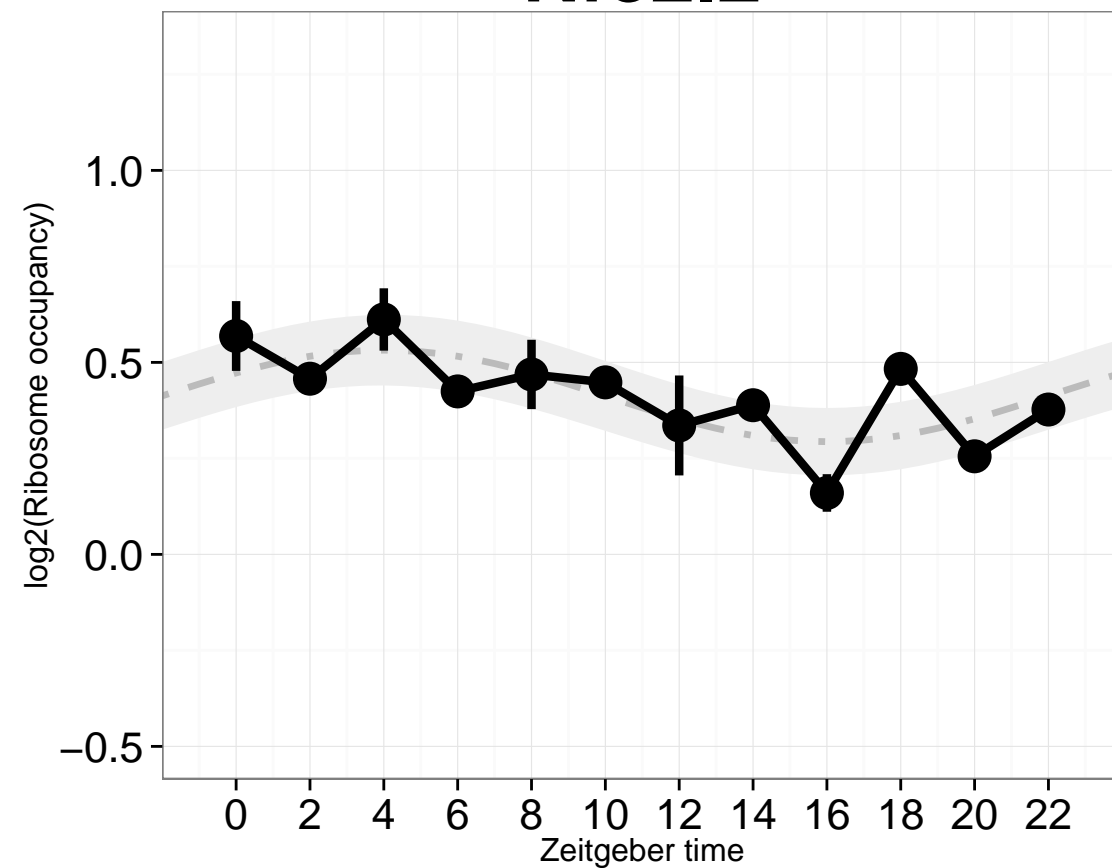

Supplement: Supplementary file 5227 [file 1]

## Cyth3

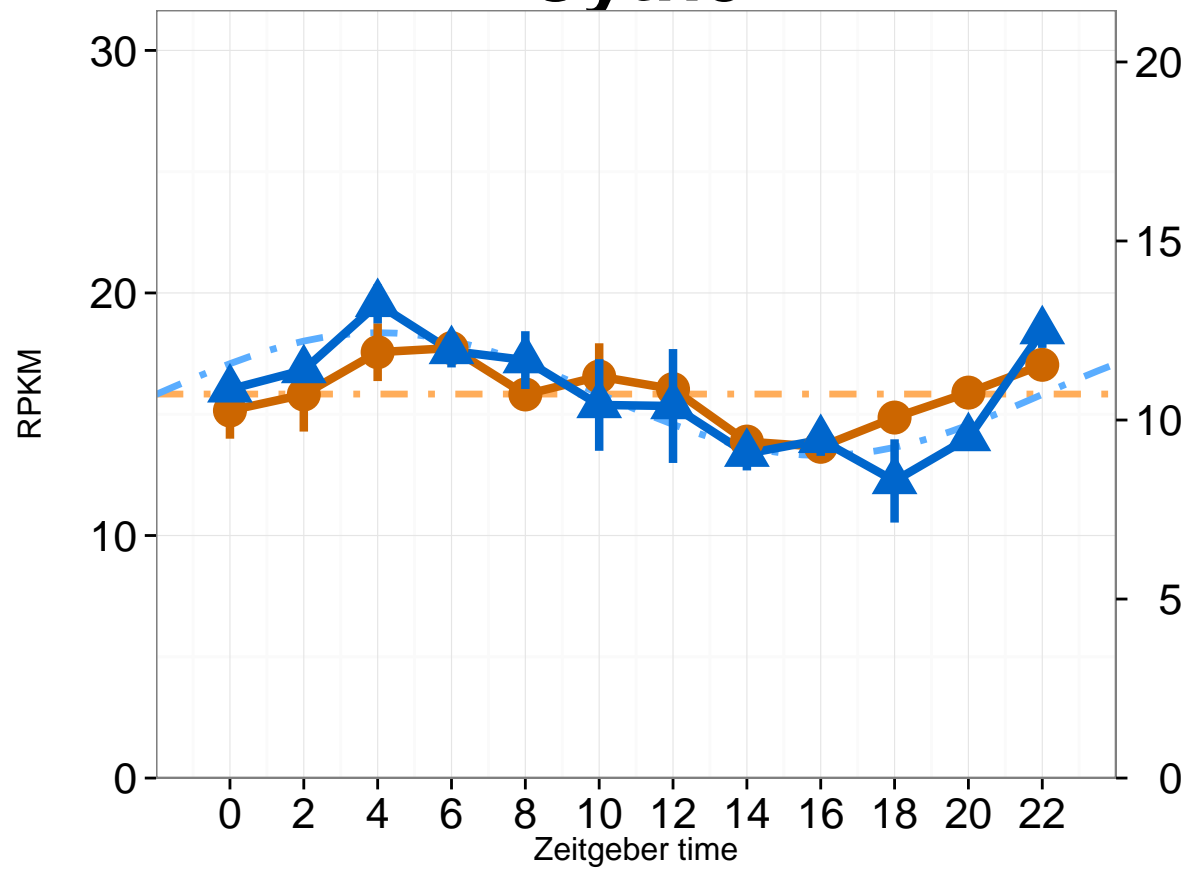

## Cyth3

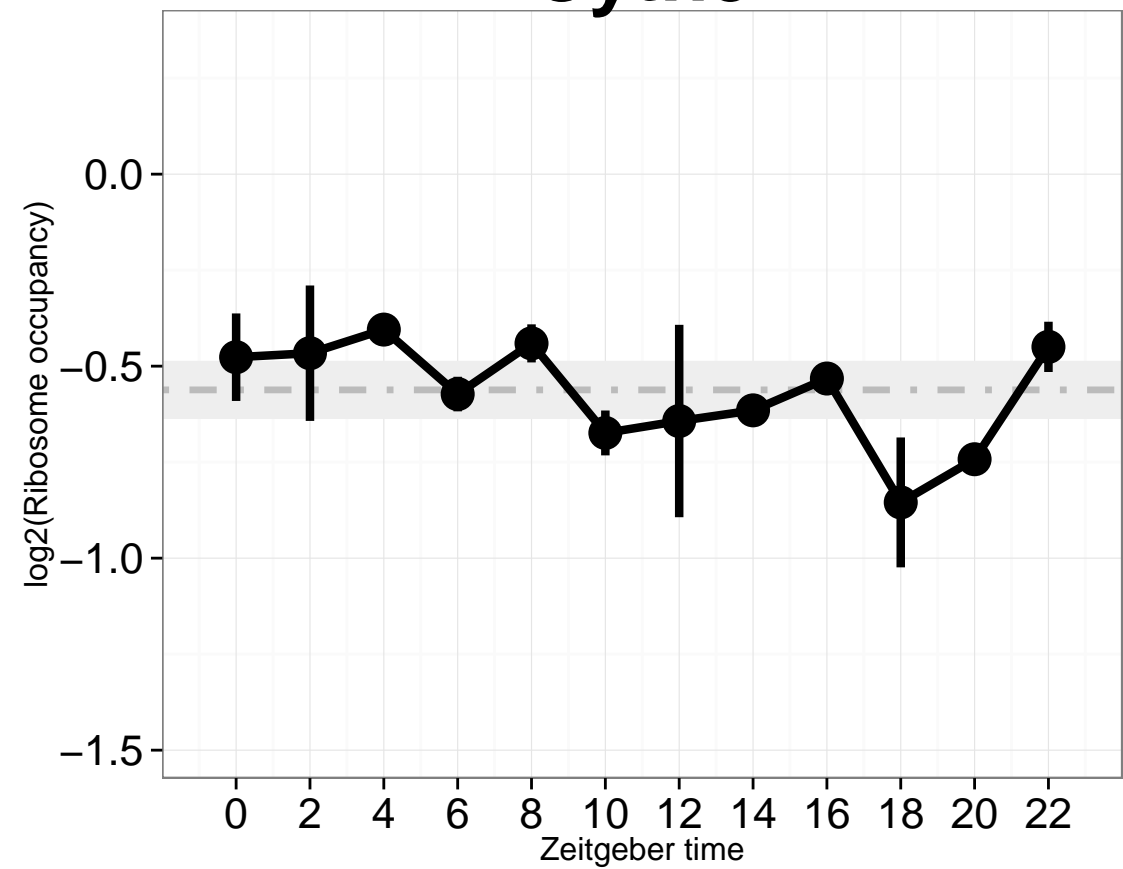

Supplement: Supplementary file 5228 [file 1]

# Gm21750

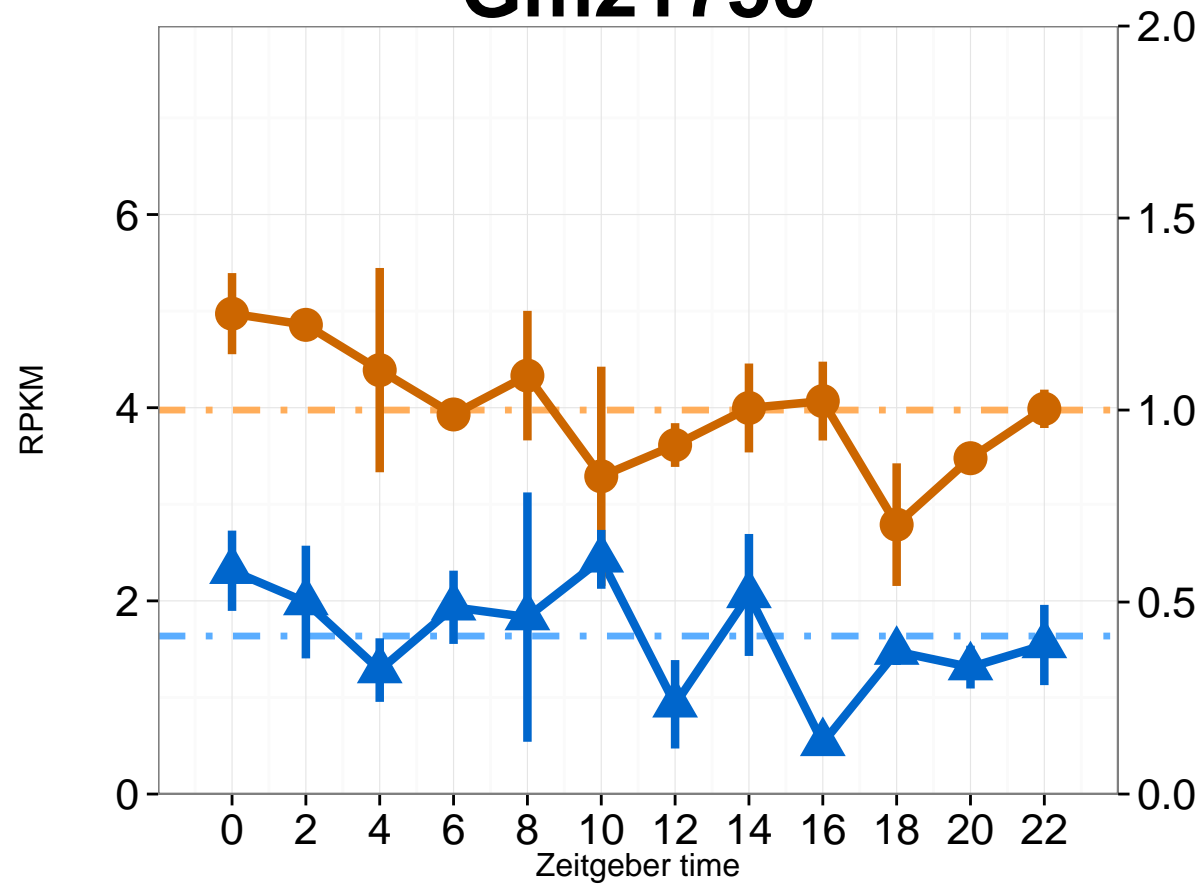

# Gm21750

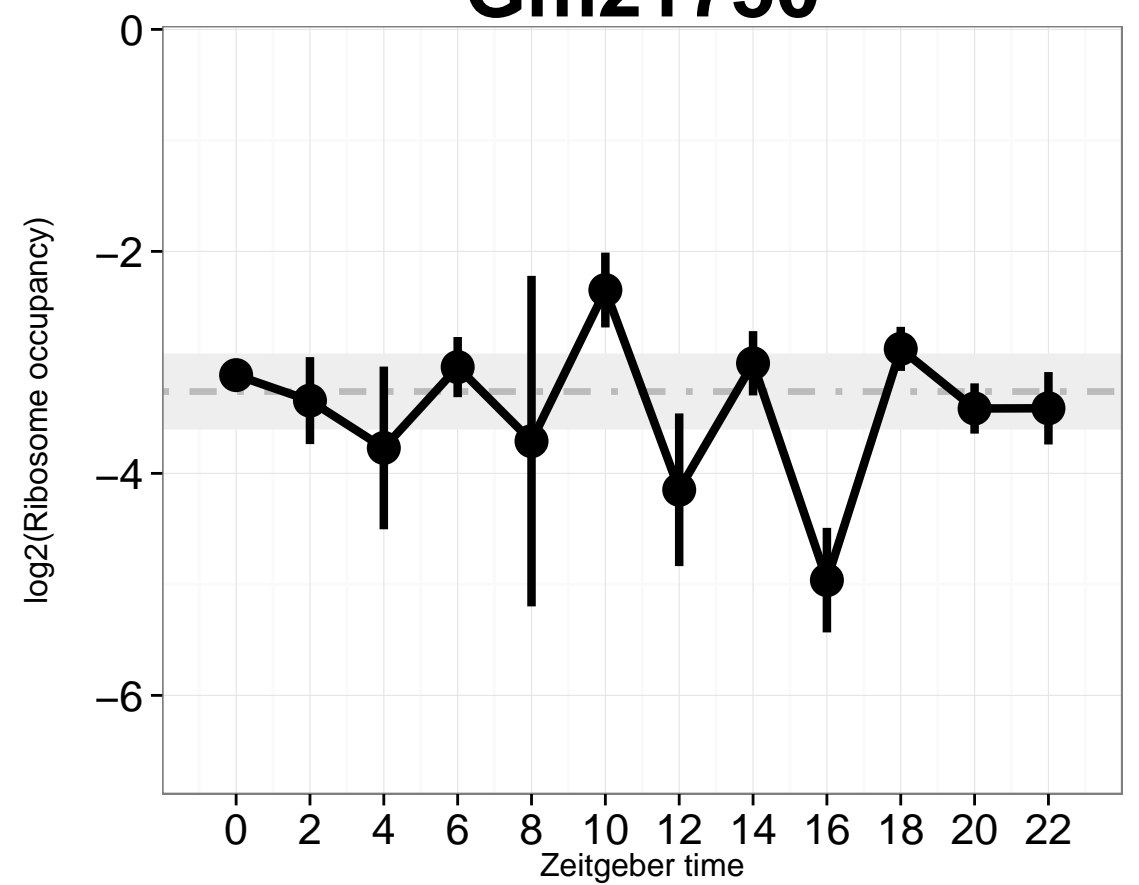

Supplement: Supplementary file 5229 [file 1]

## Zbtb24

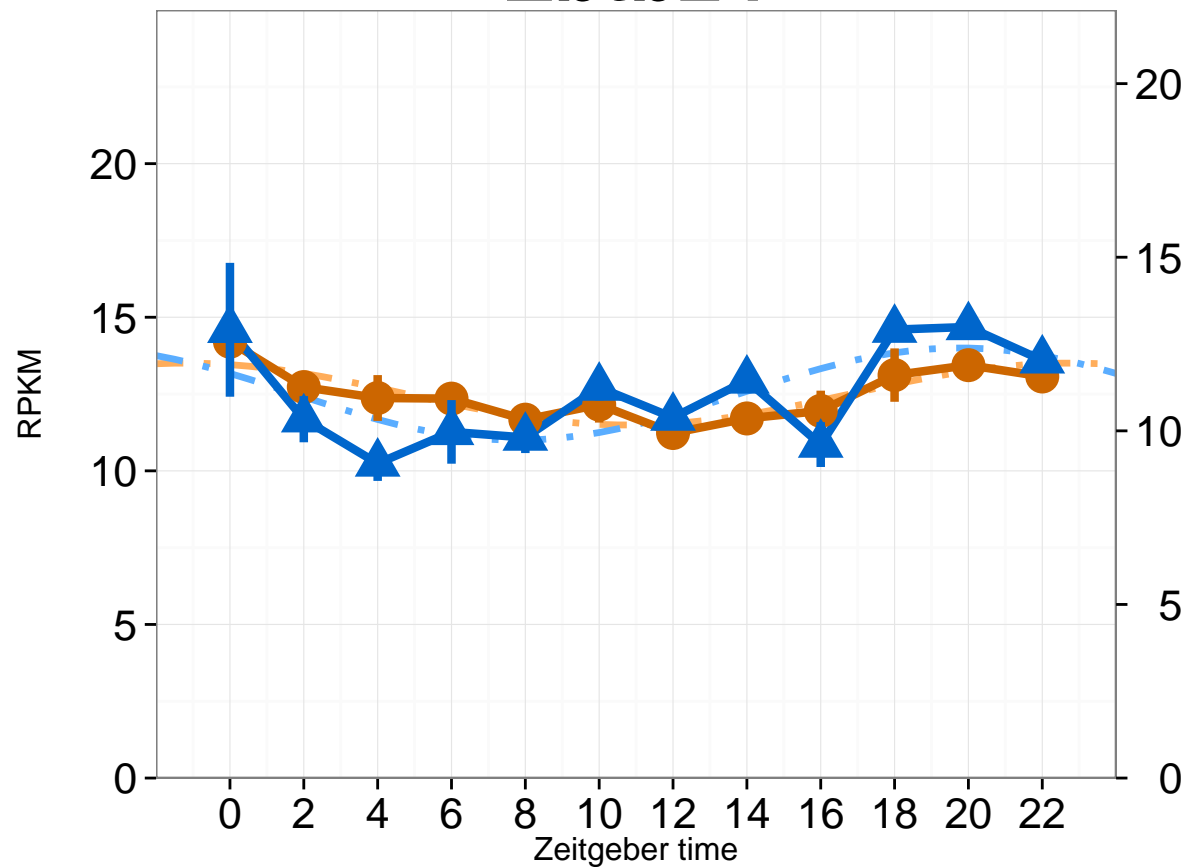

## Zbtb24

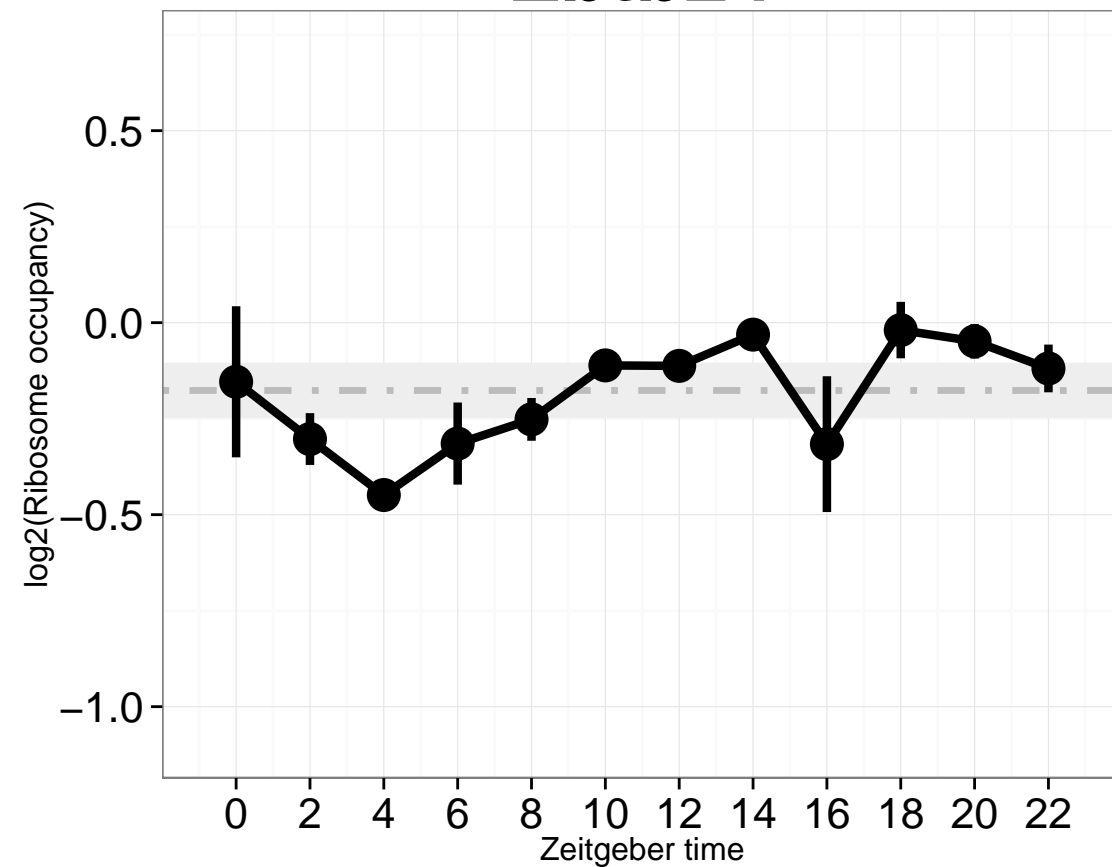

Supplement: Supplementary file 5230 [file 1]

# Lamb2

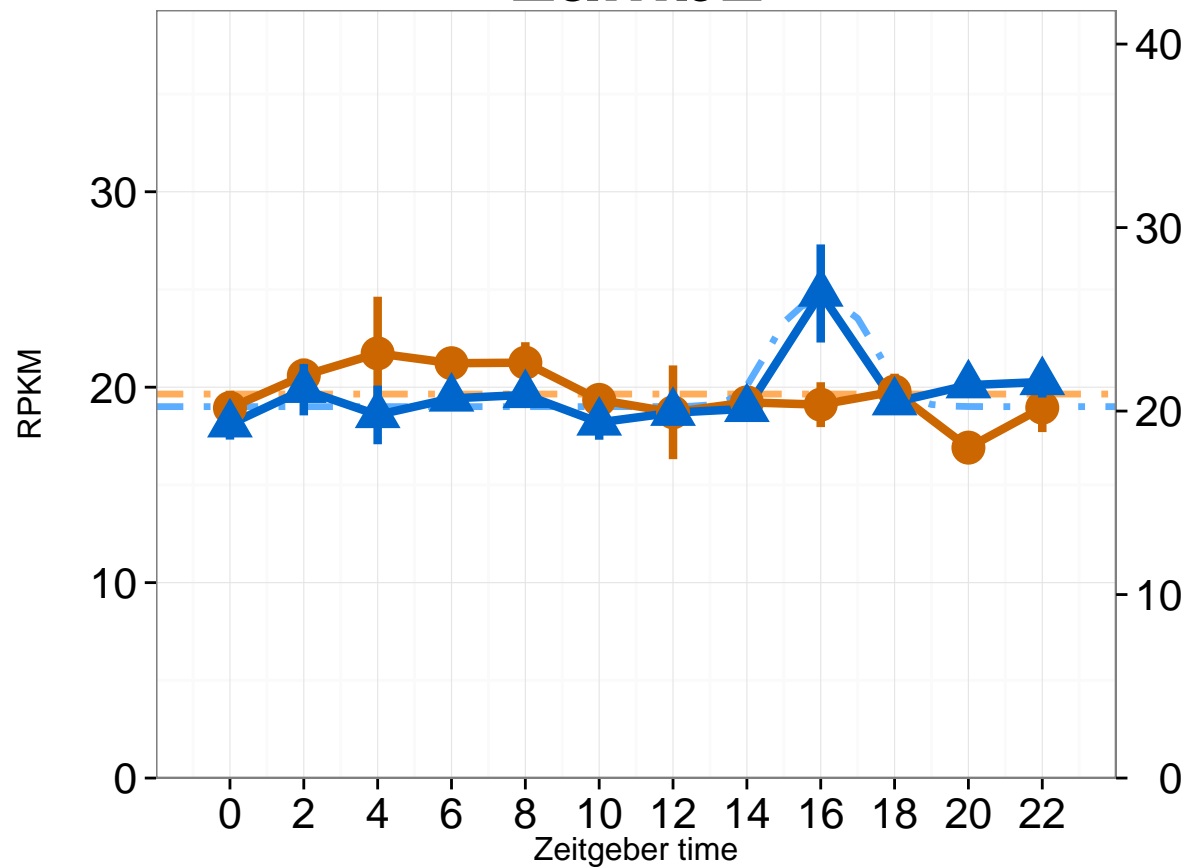

# Lamb2

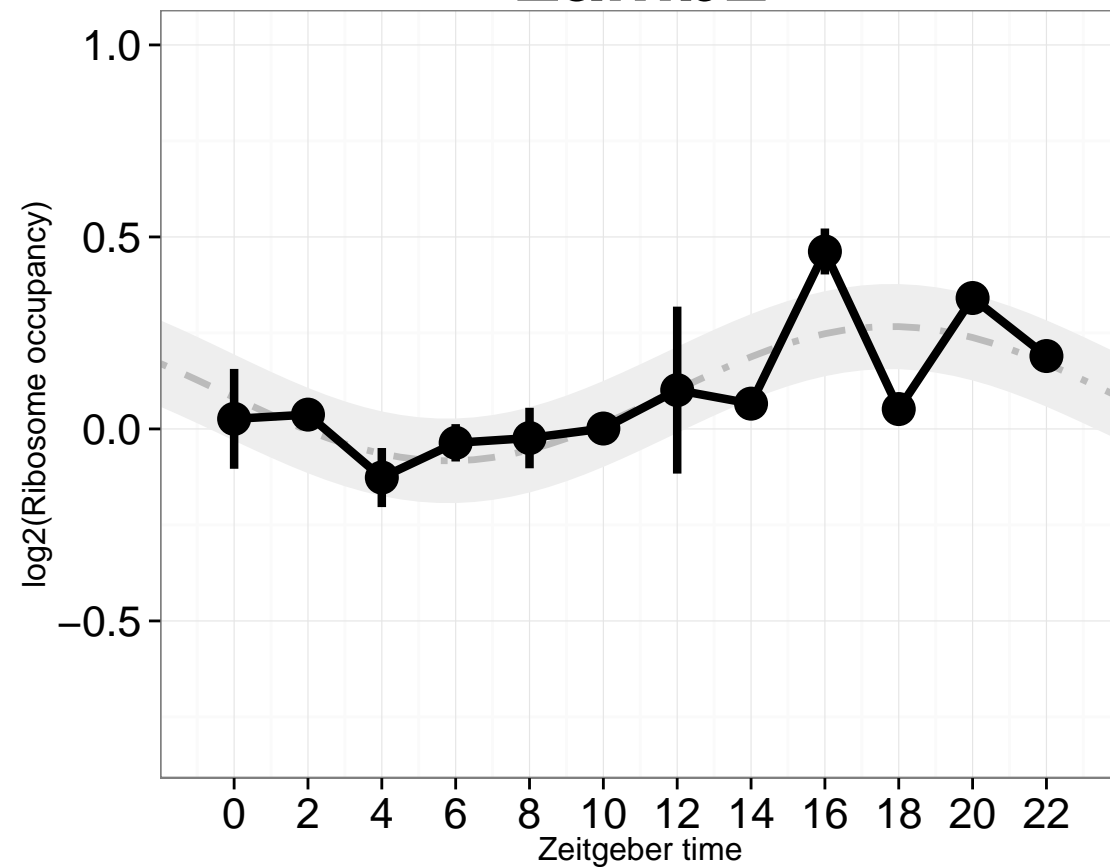

Supplement: Supplementary file 5231 [file 1]

# Ldb1

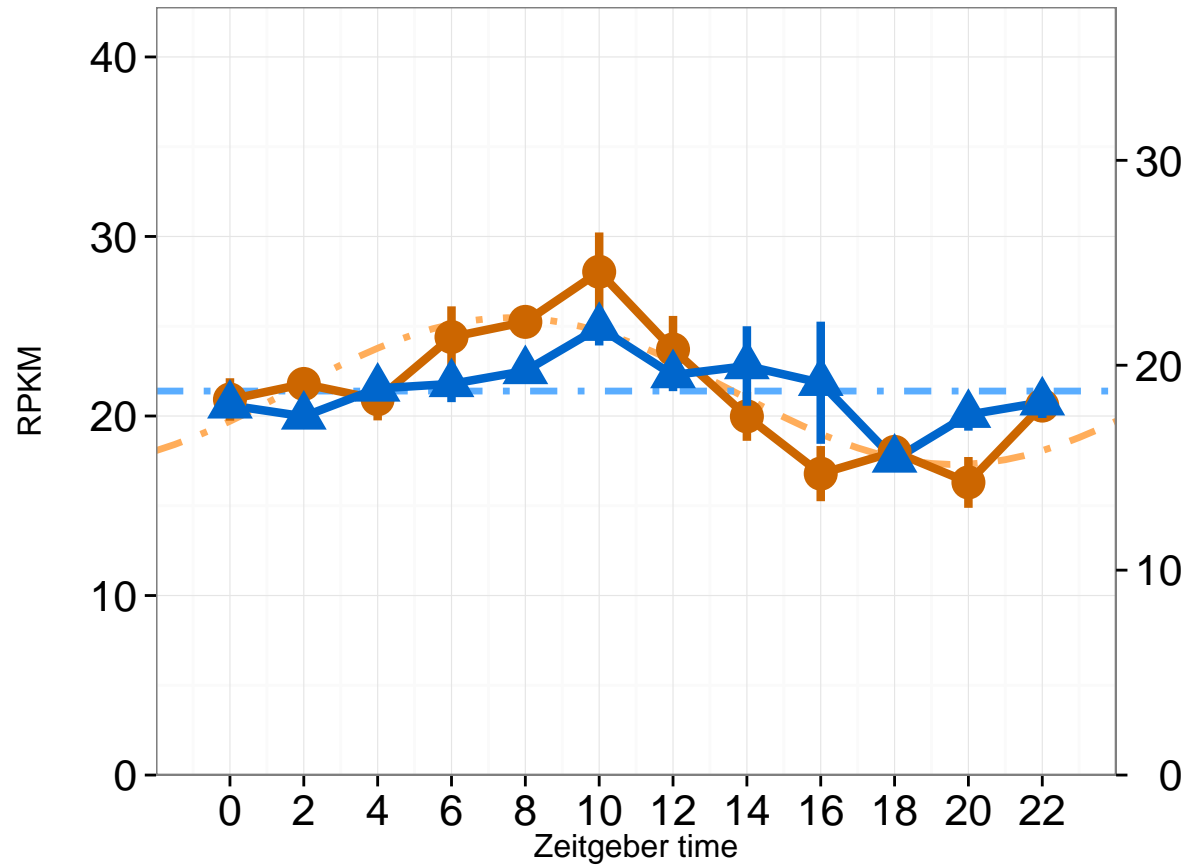

# Ldb1

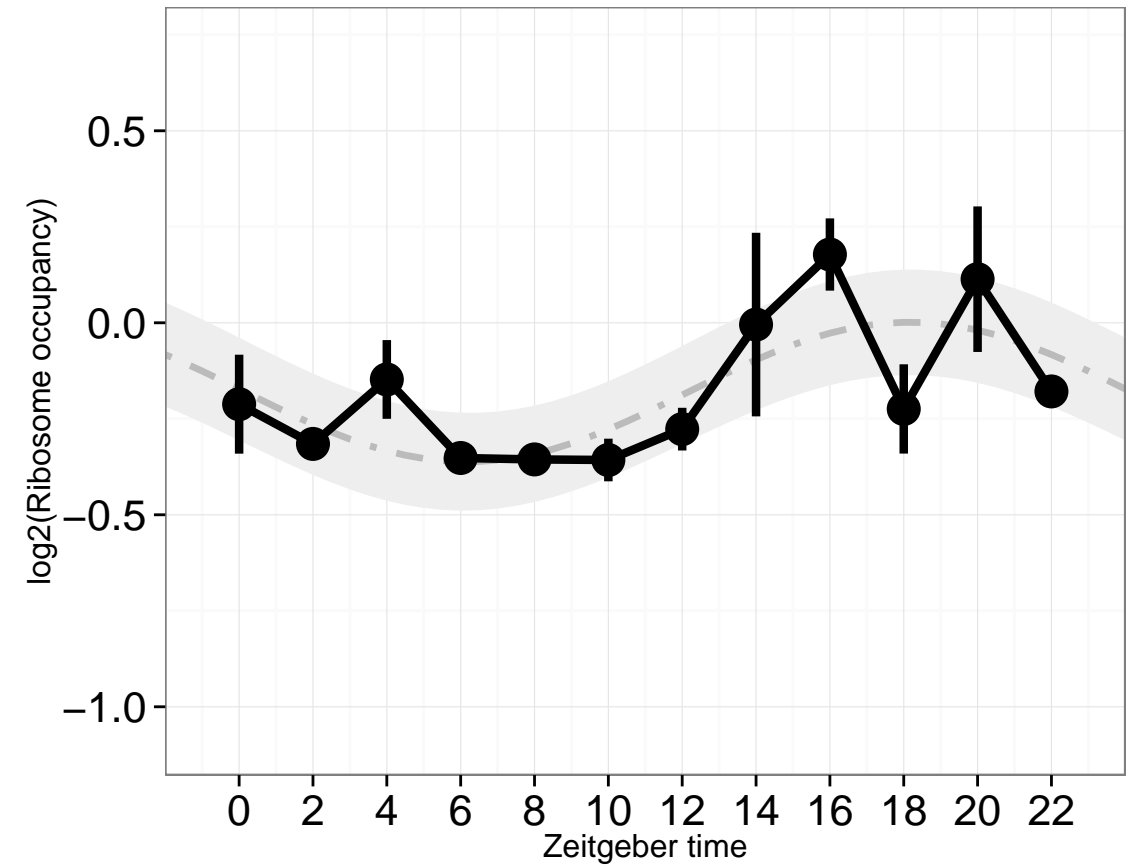

Supplement: Supplementary file 5232 [file 1]

## Dhx38

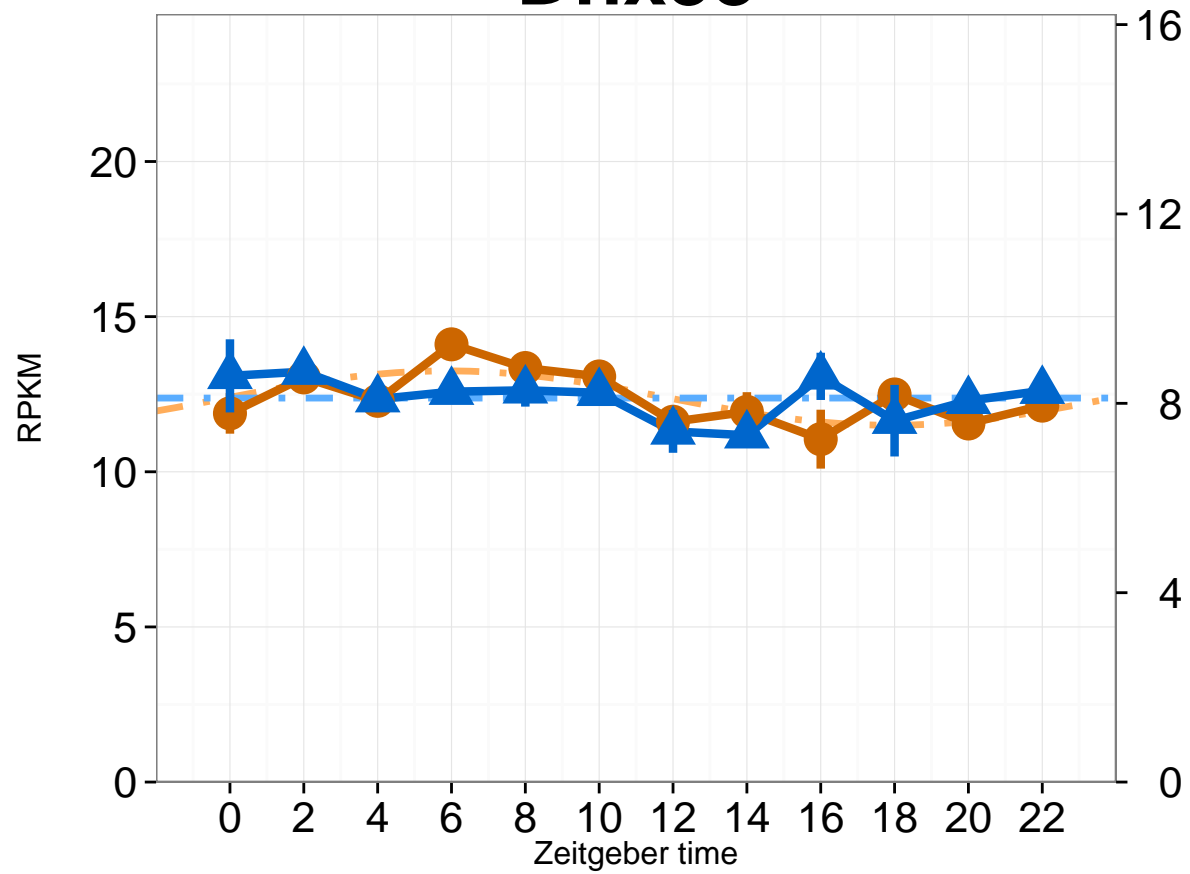

## Dhx38

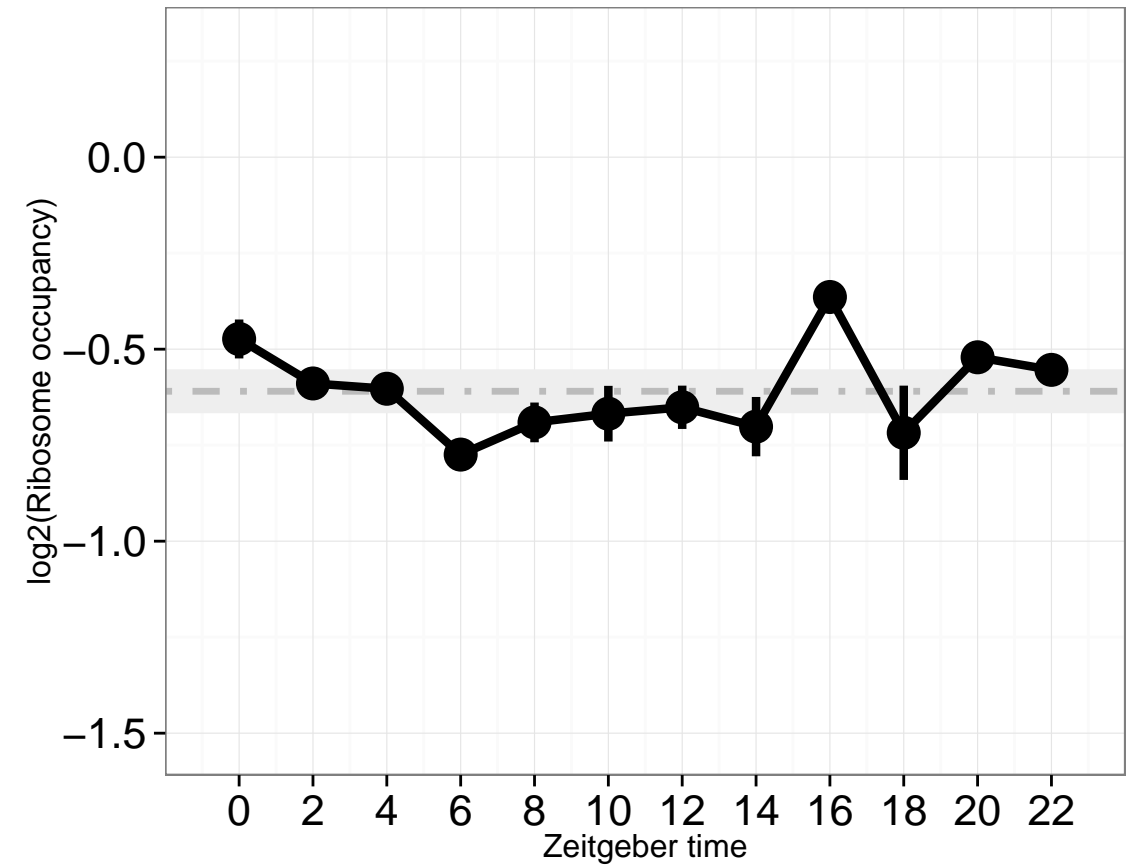

Supplement: Supplementary file 5233 [file 1]

## 5033411D12Rik

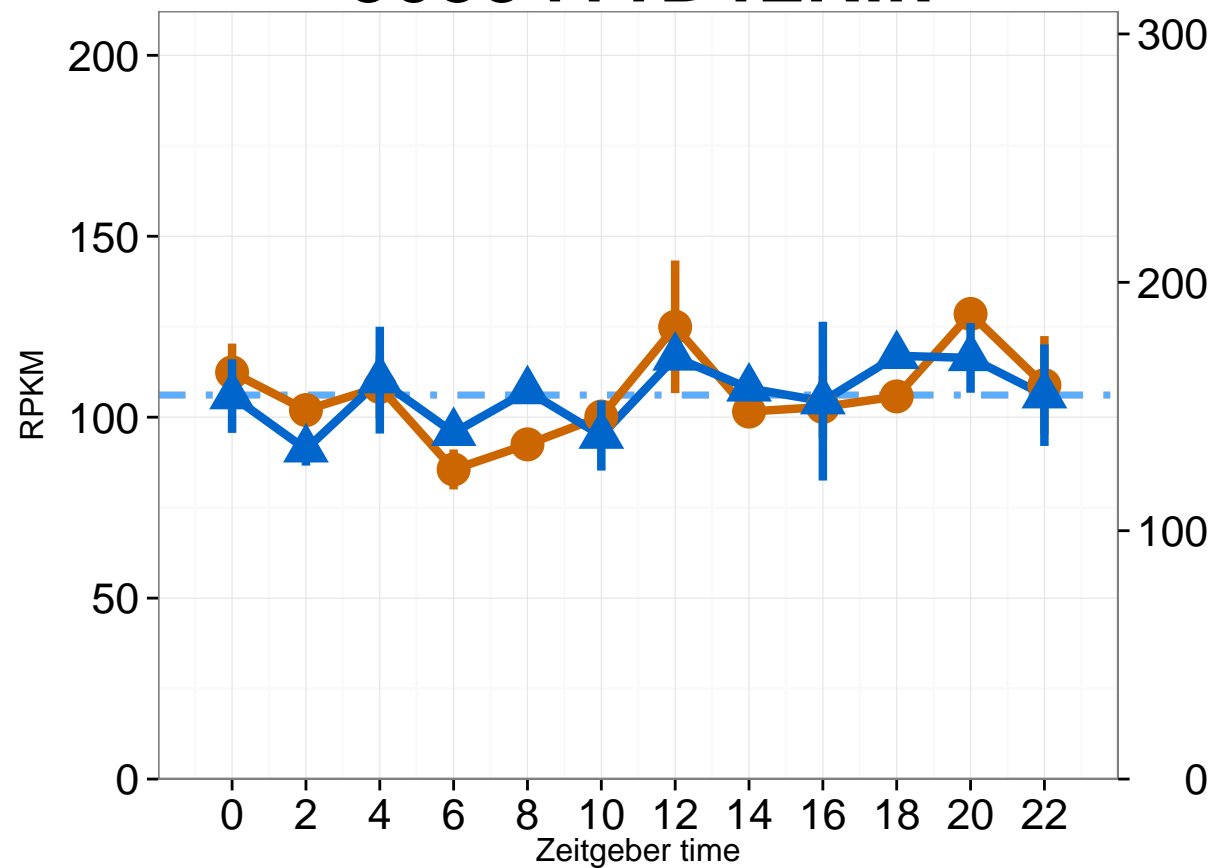

## 5033411D12Rik

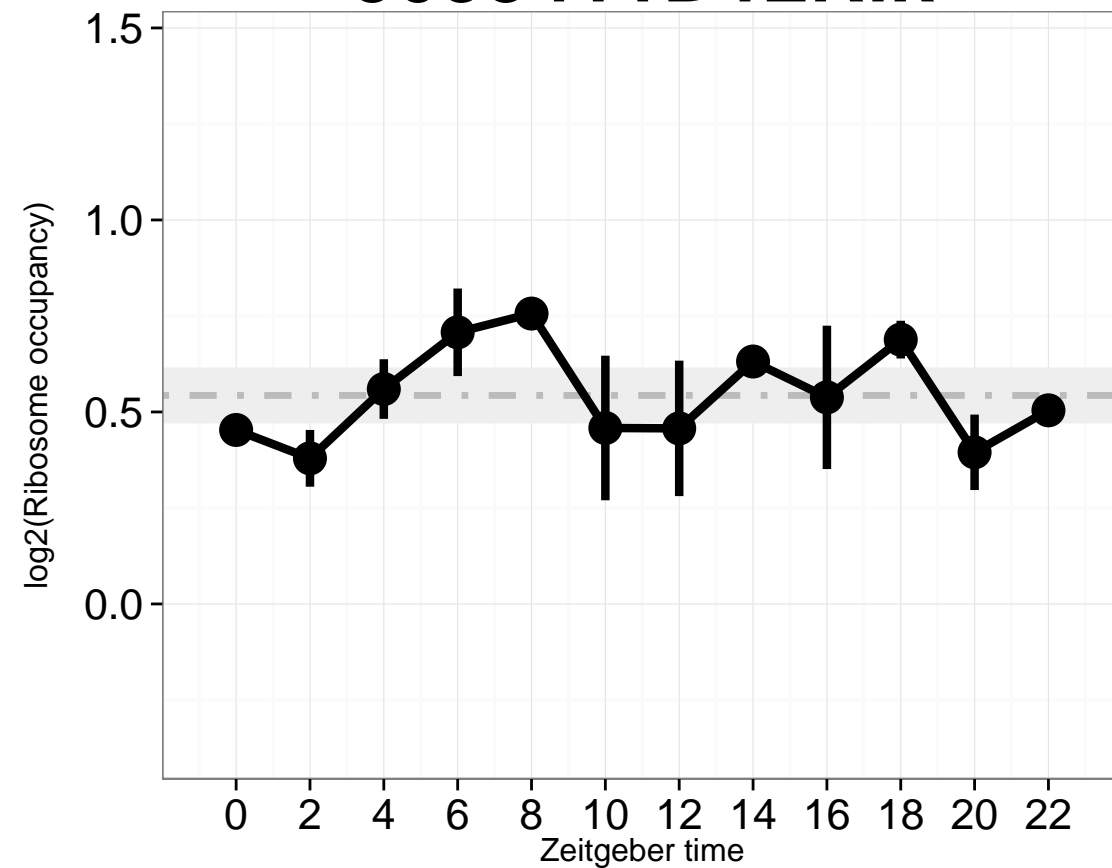

Supplement: Supplementary file 5234 [file 1]

## Pltp

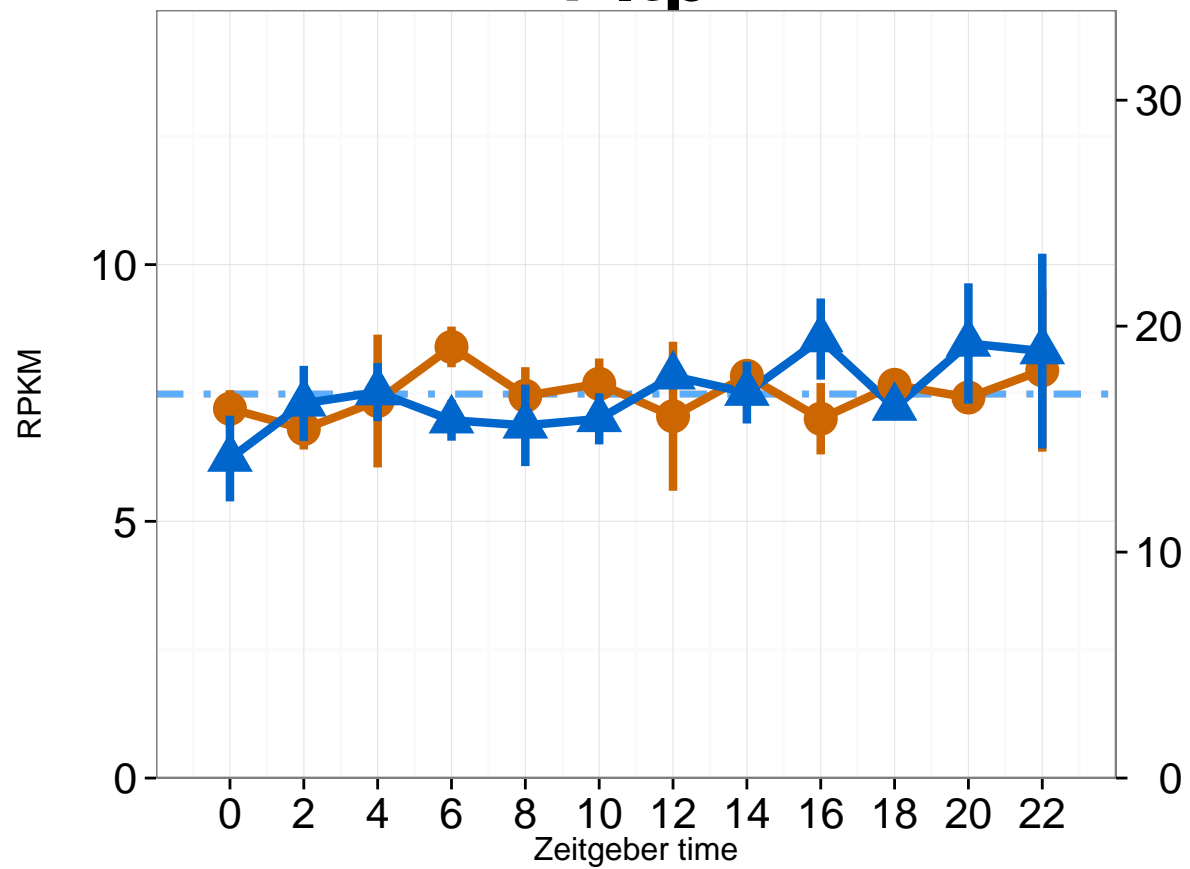

## Pltp

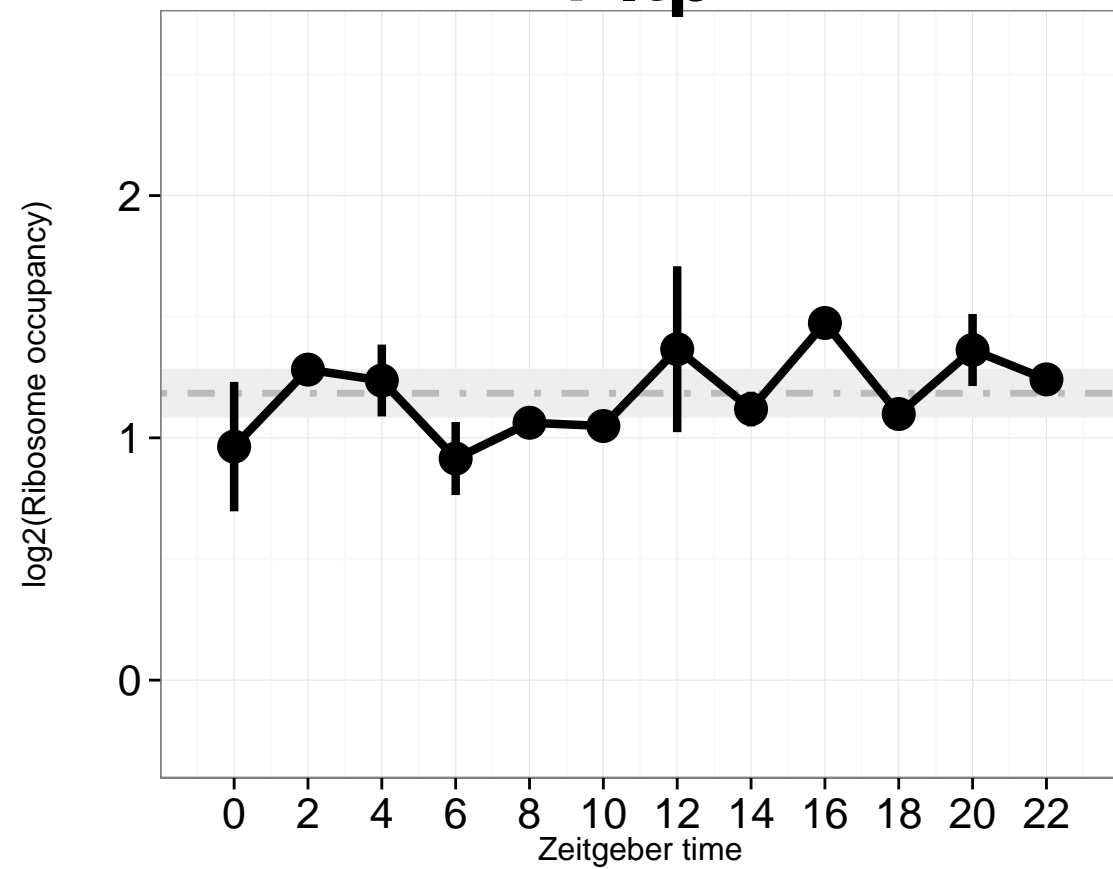

Supplement: Supplementary file 5235 [file 1]

## Shc1

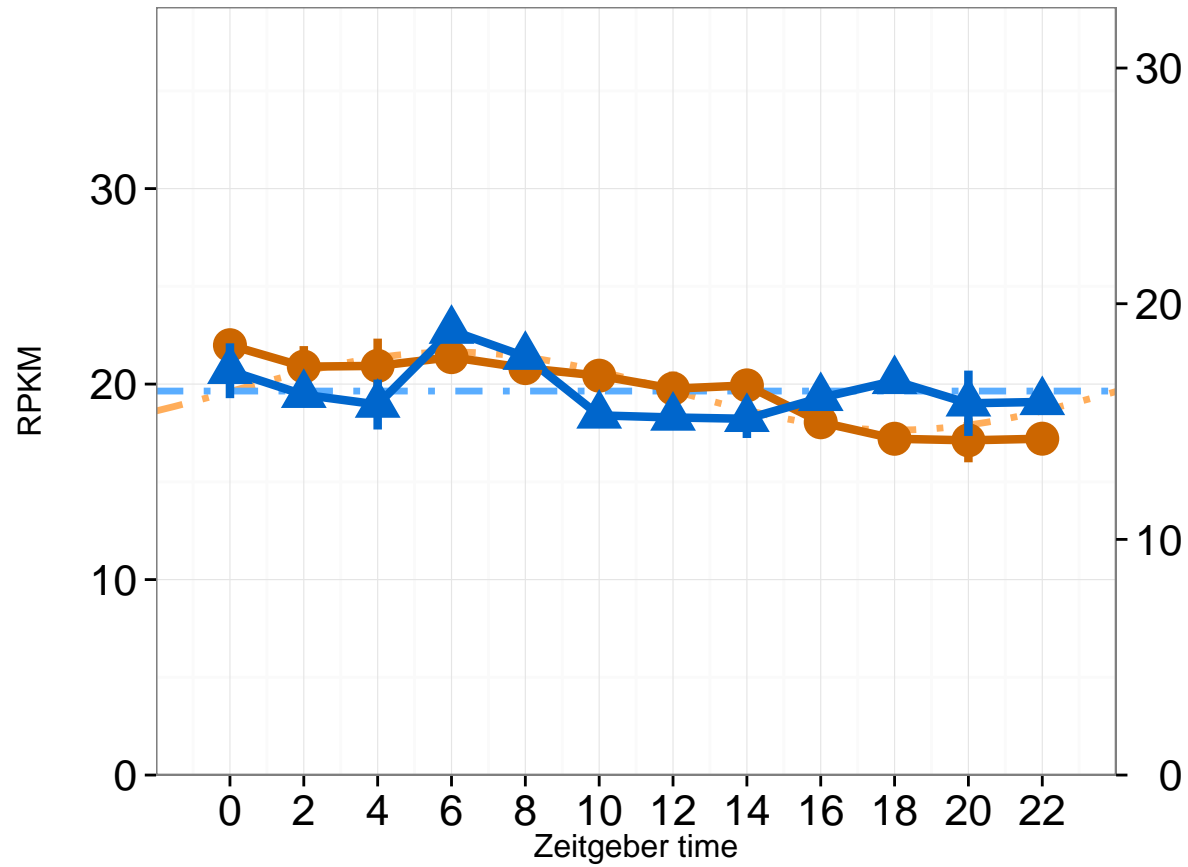

## Shc1

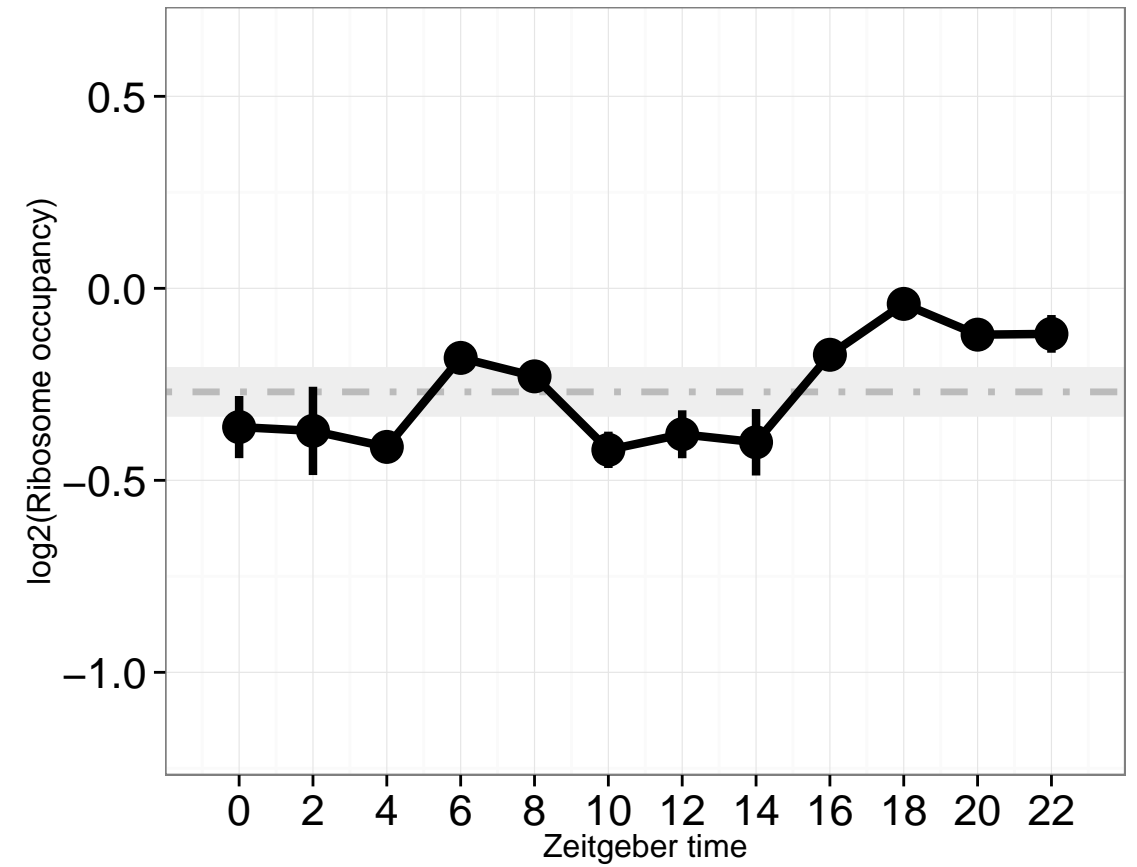

Supplement: Supplementary file 5236 [file 1]

# Csnk1g2

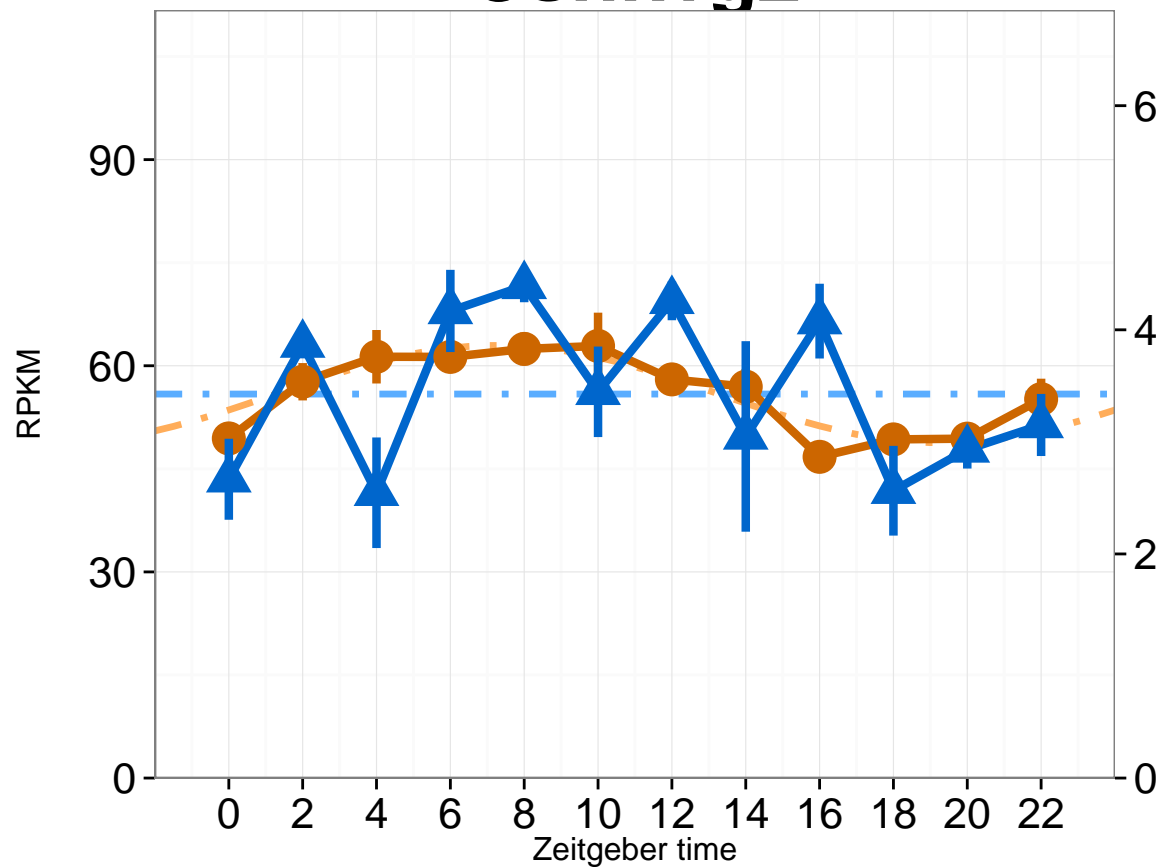

# Csnk1g2

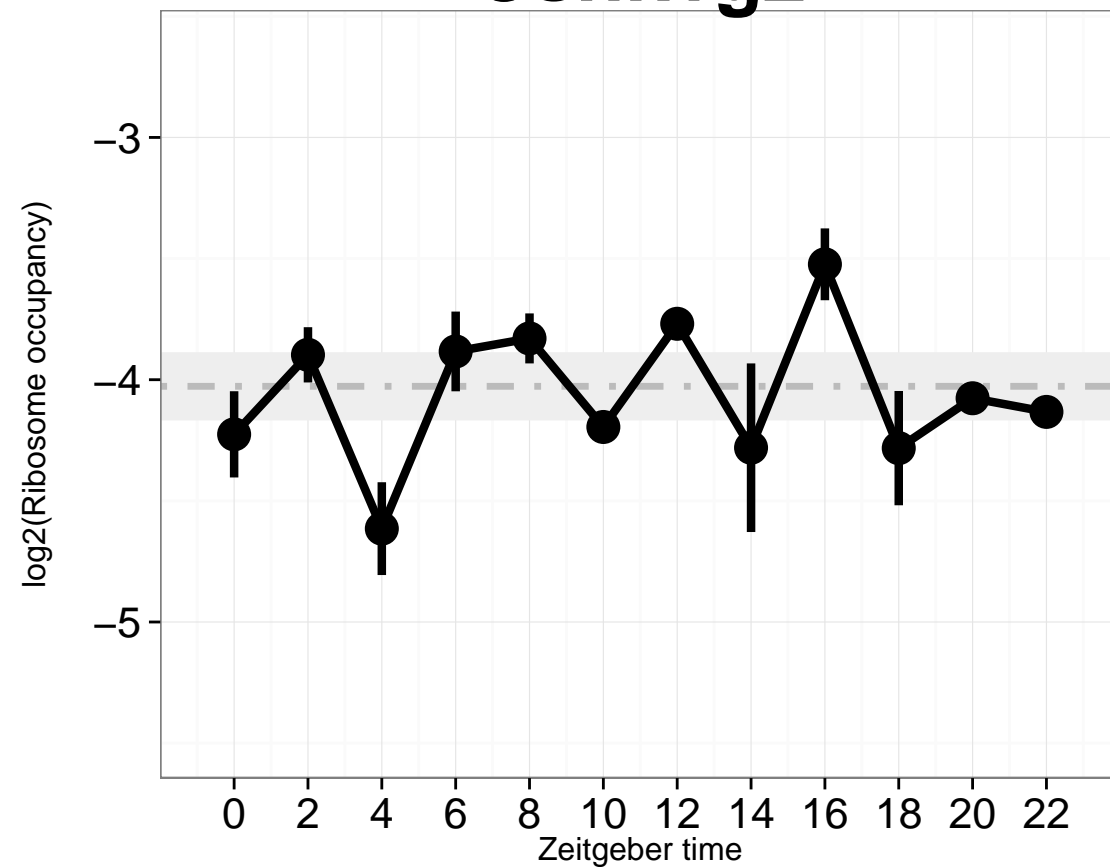

Supplement: Supplementary file 5237 [file 1]

## 8430408G22Rik

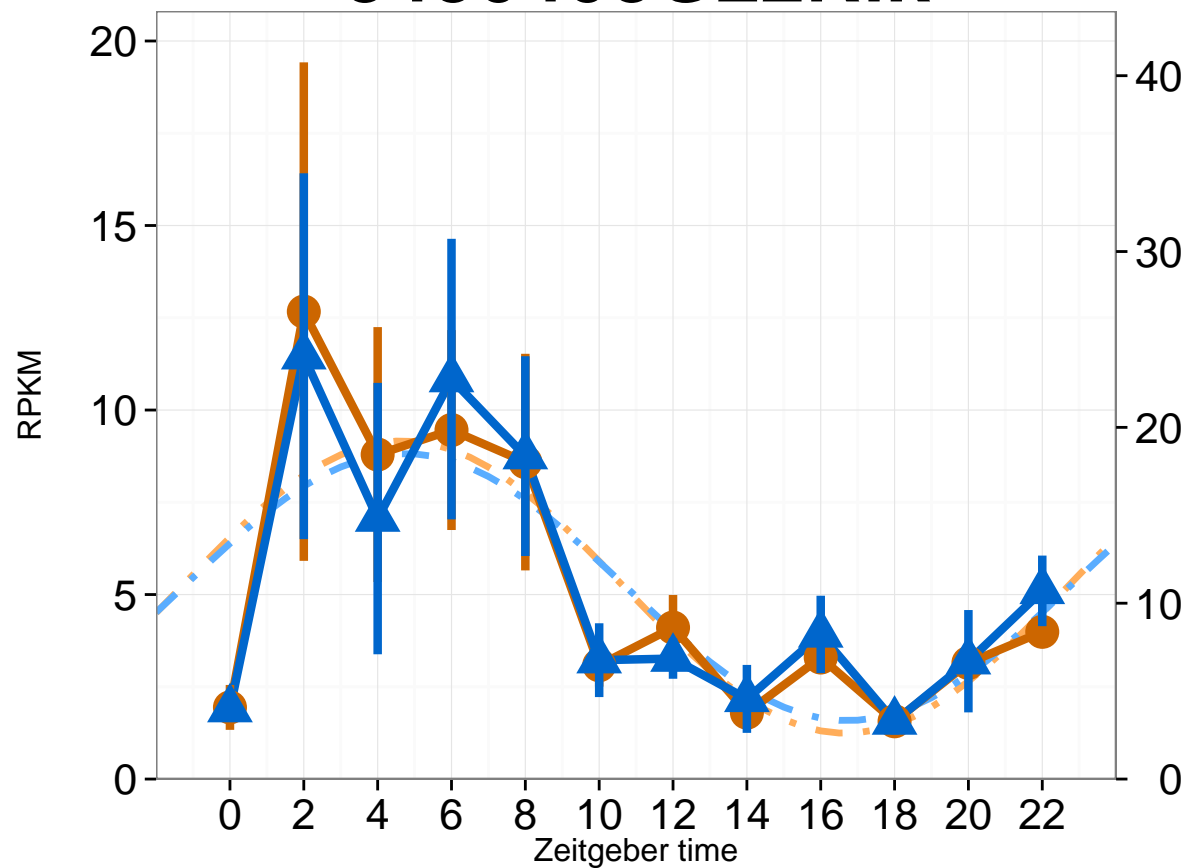

## 8430408G22Rik

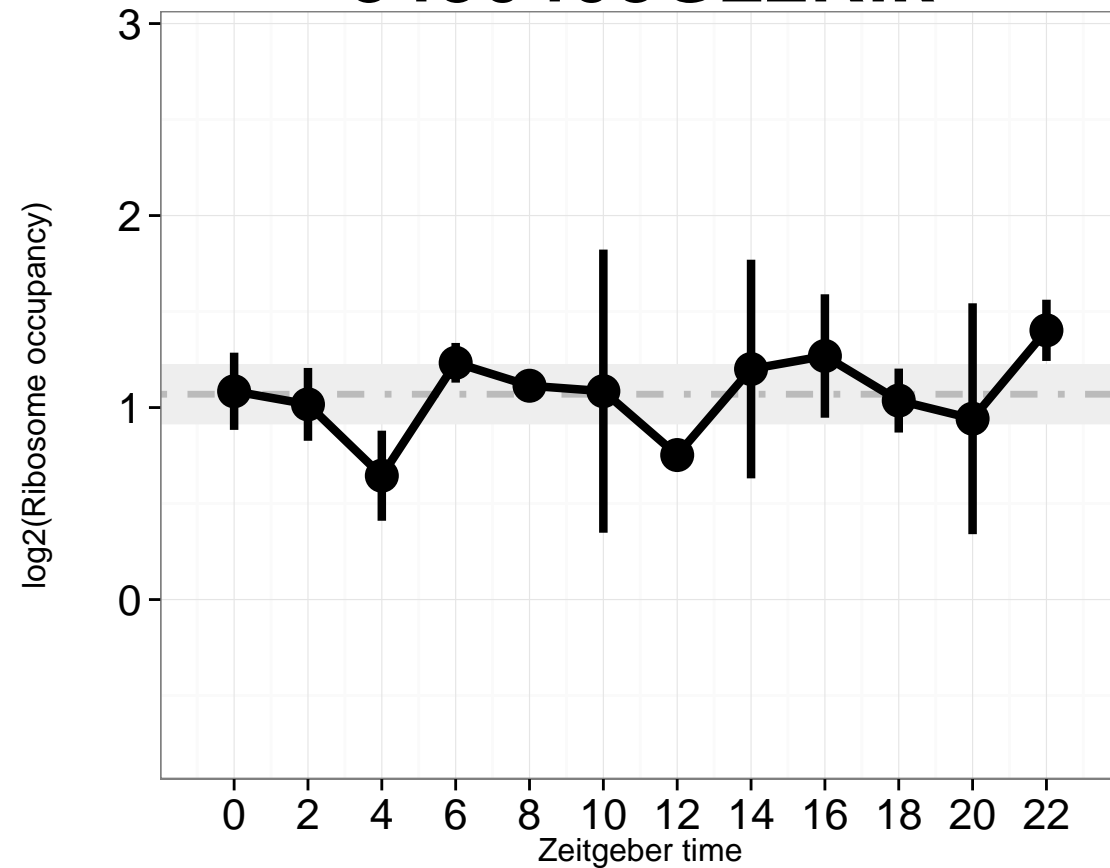

Supplement: Supplementary file 5238 [file 1]

# Snap23

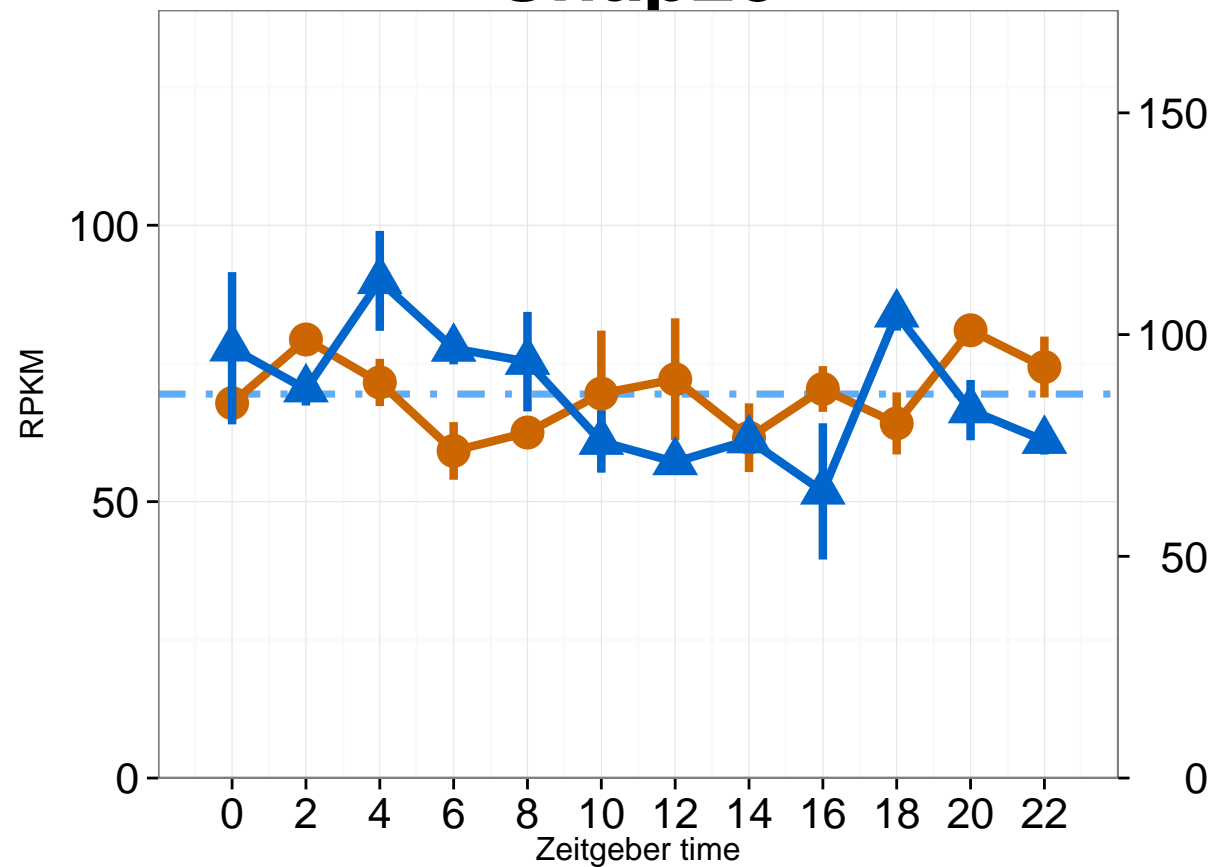

# Snap23

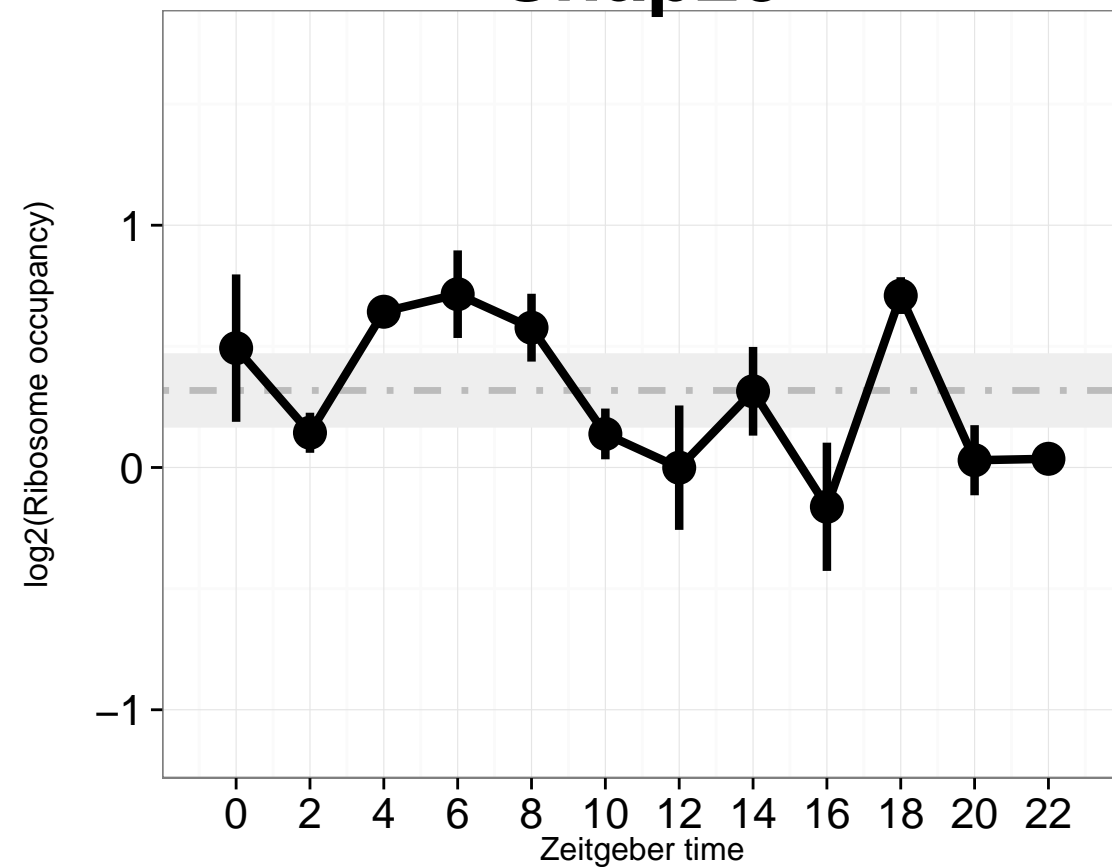

Supplement: Supplementary file 5239 [file 1]

# Hrct1

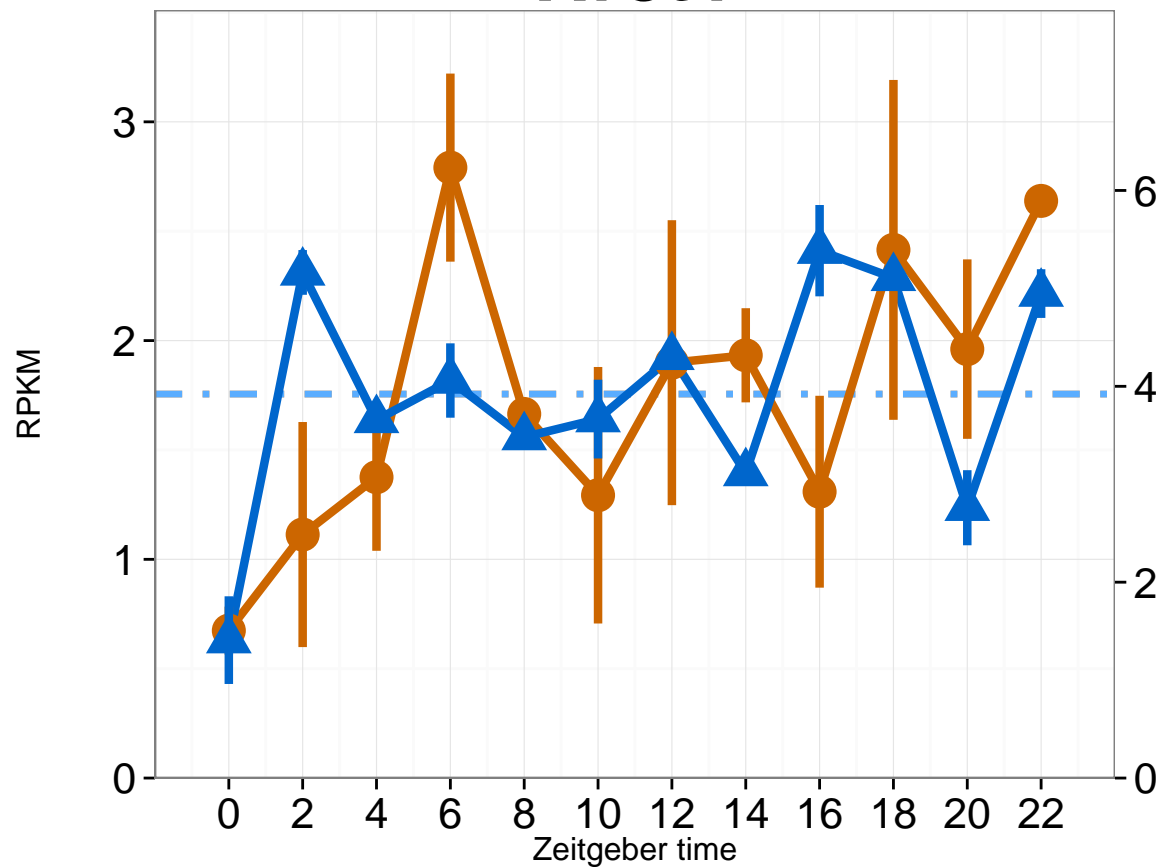

# Hrct1

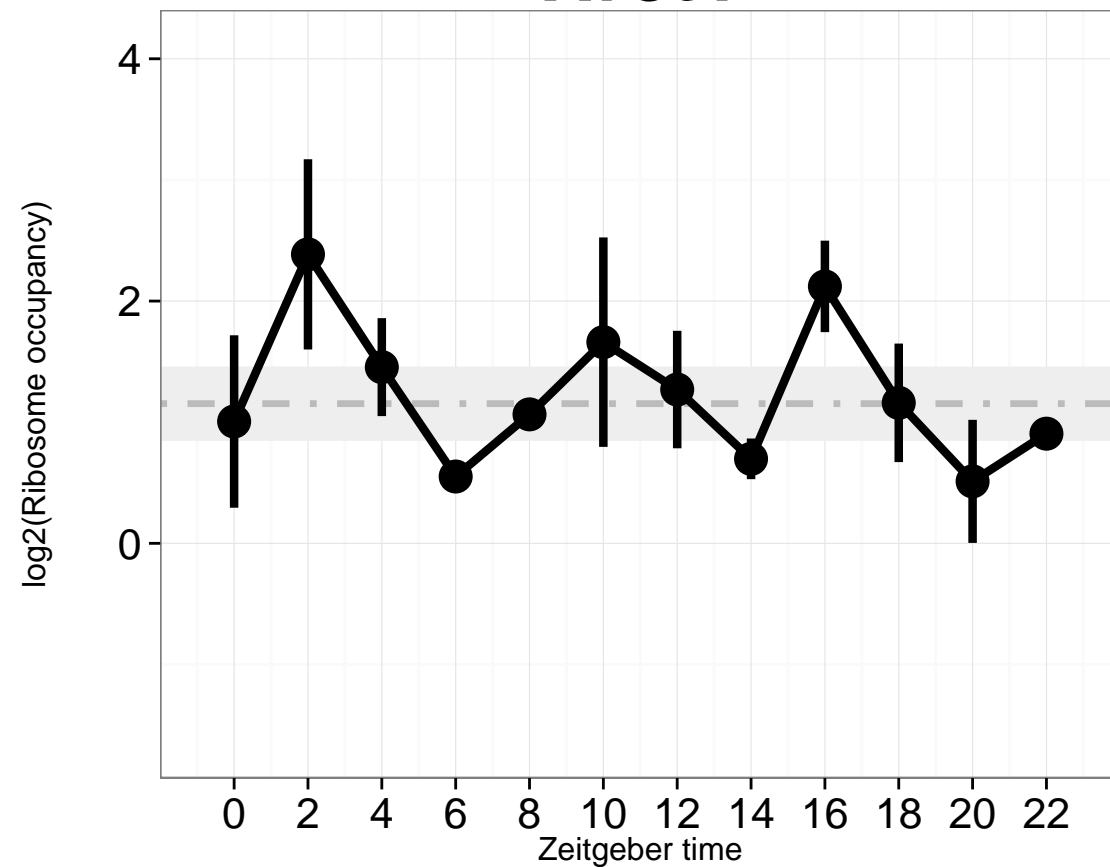

Supplement: Supplementary file 5240 [file 1]

## Ube2u

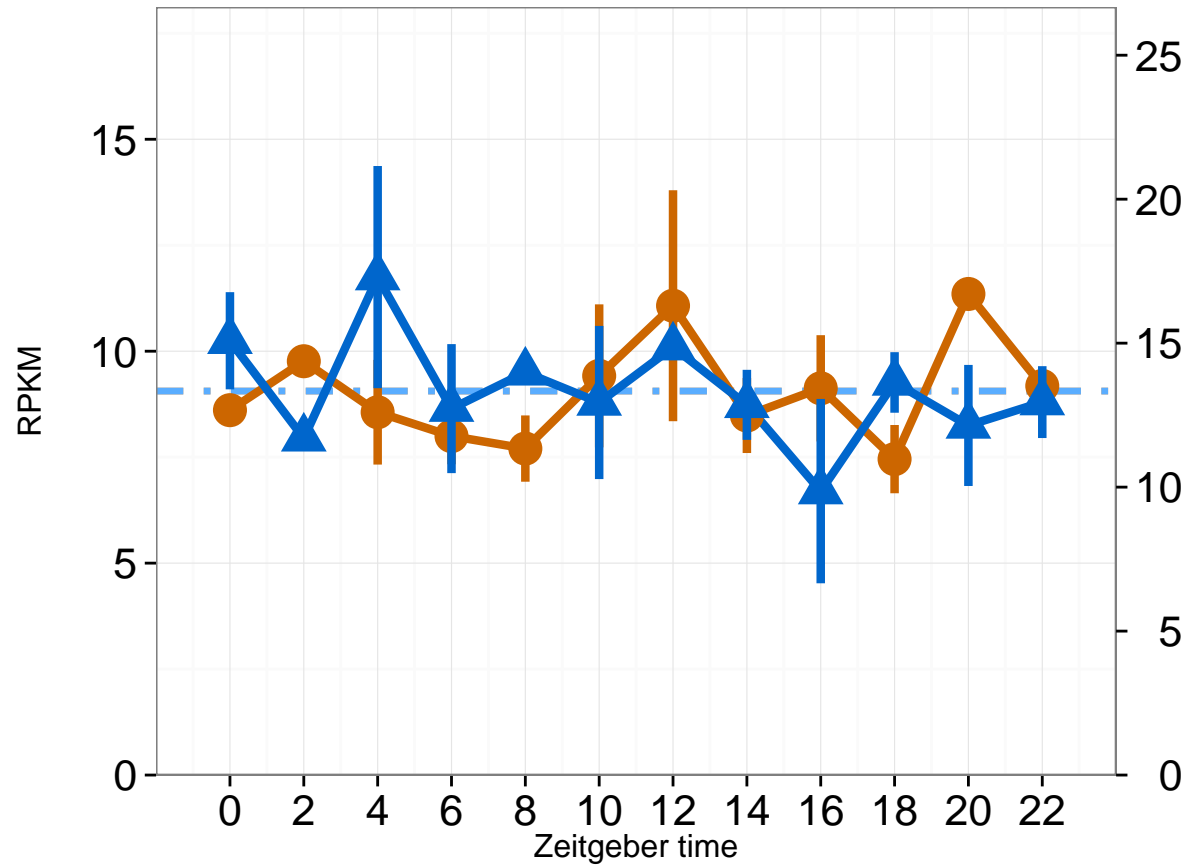

## Ube2u

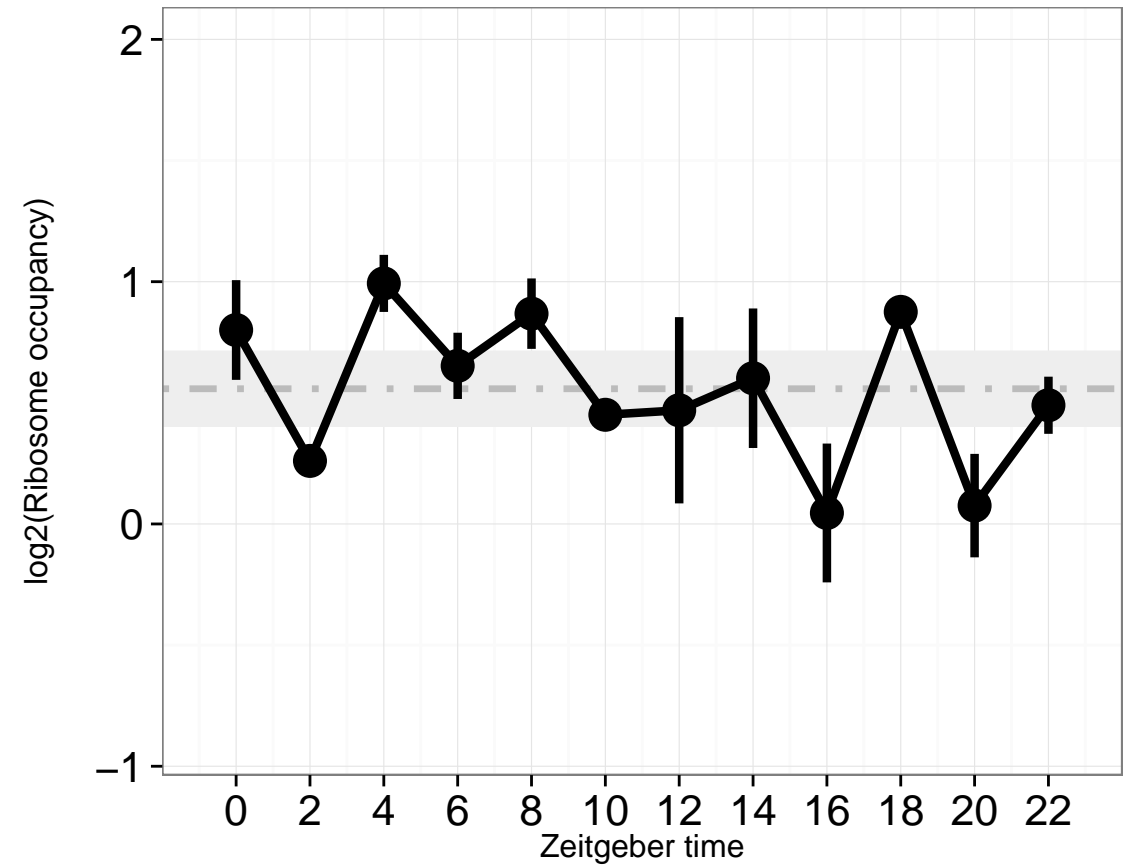

Supplement: Supplementary file 5241 [file 1]

# F10

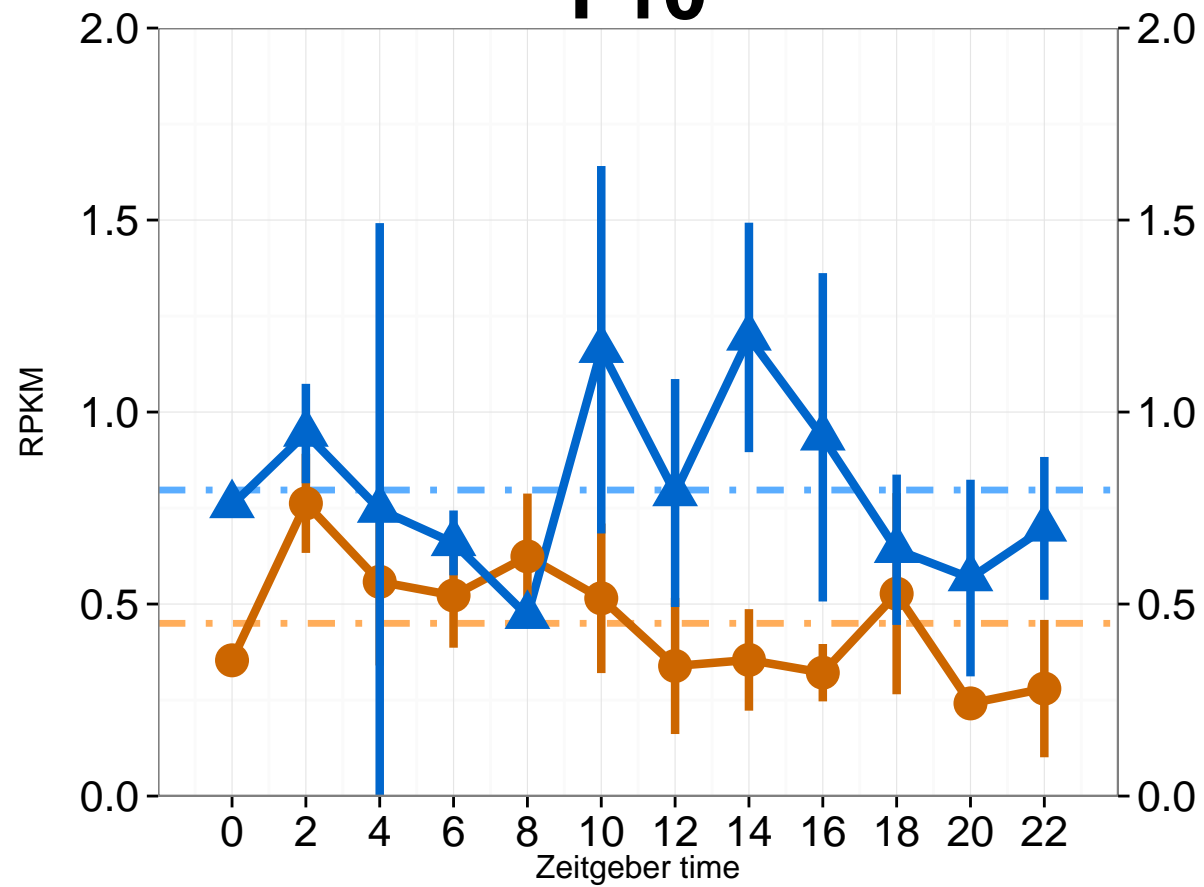

# F10

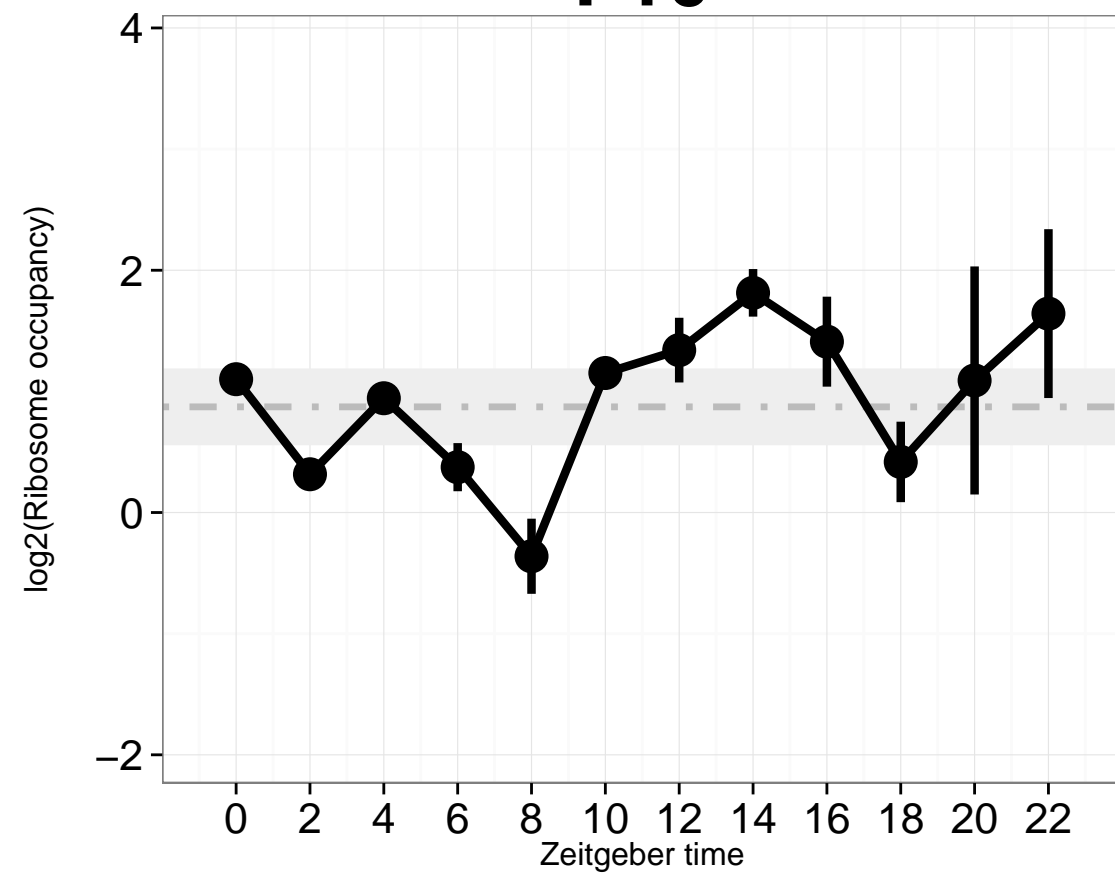

Supplement: Supplementary file 5242 [file 1]

## Ankrd44

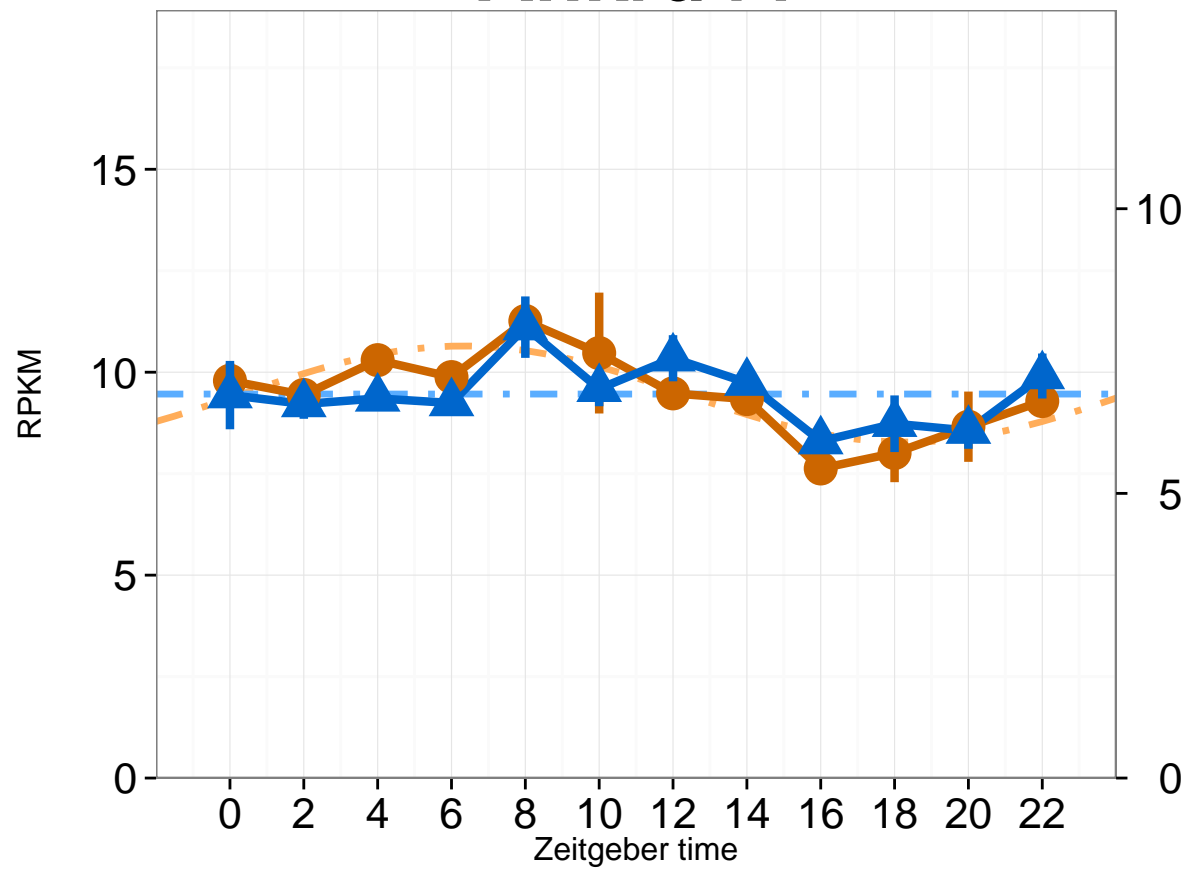

## Ankrd44

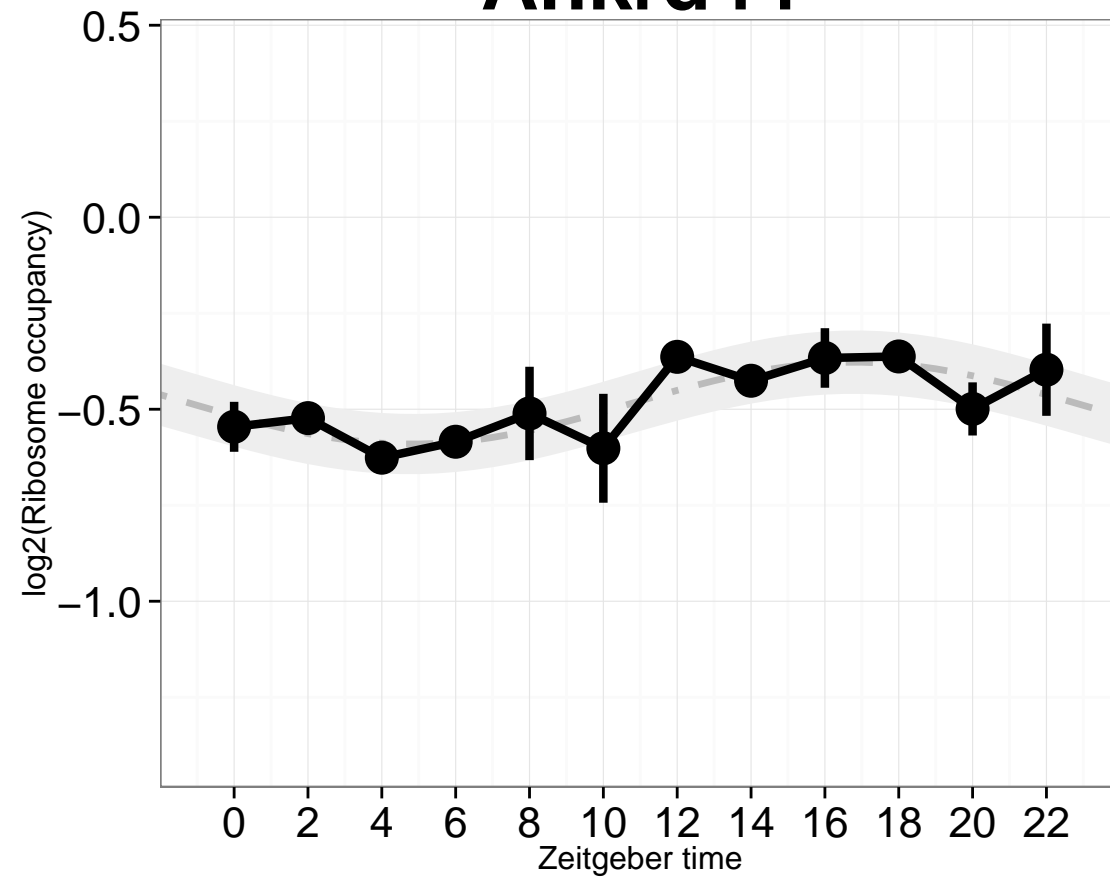

Supplement: Supplementary file 5243 [file 1]

## Smoc1

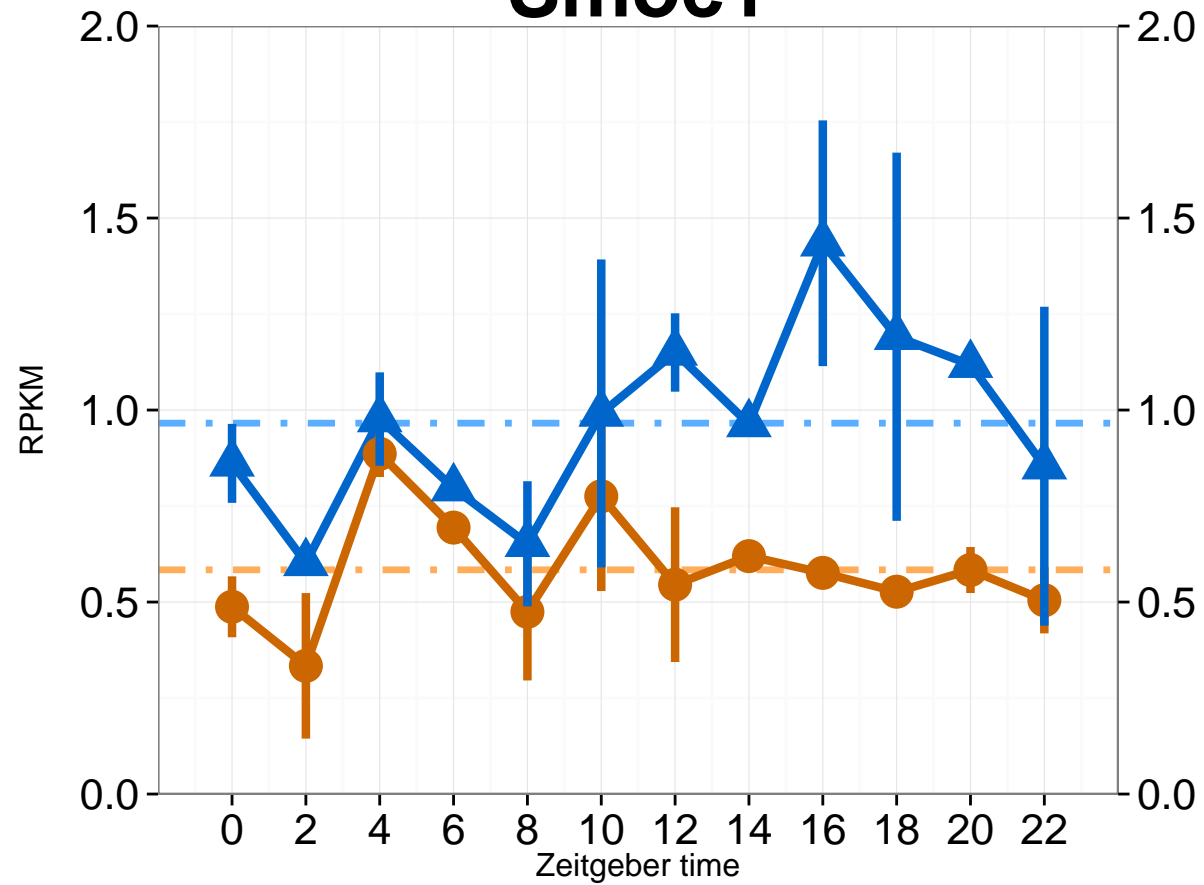

## Smoc1

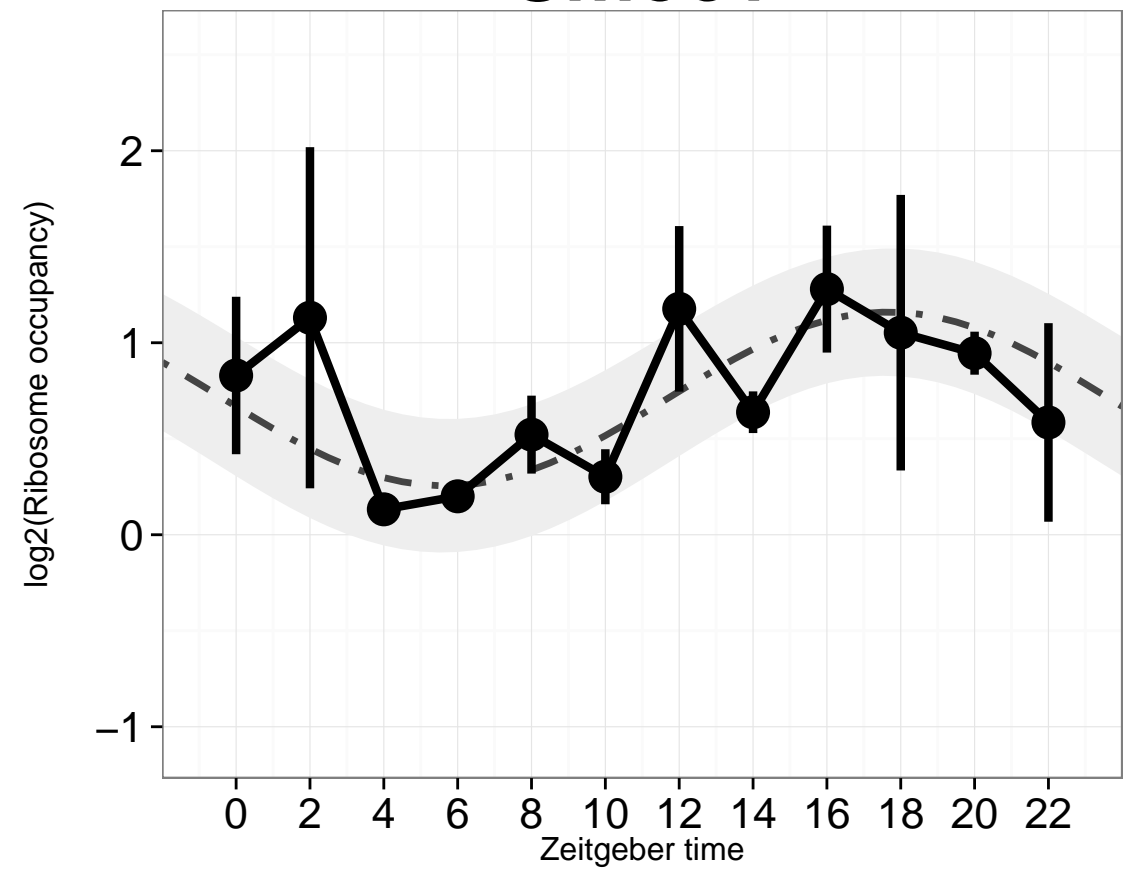

Supplement: Supplementary file 5244 [file 1]

## Mical2

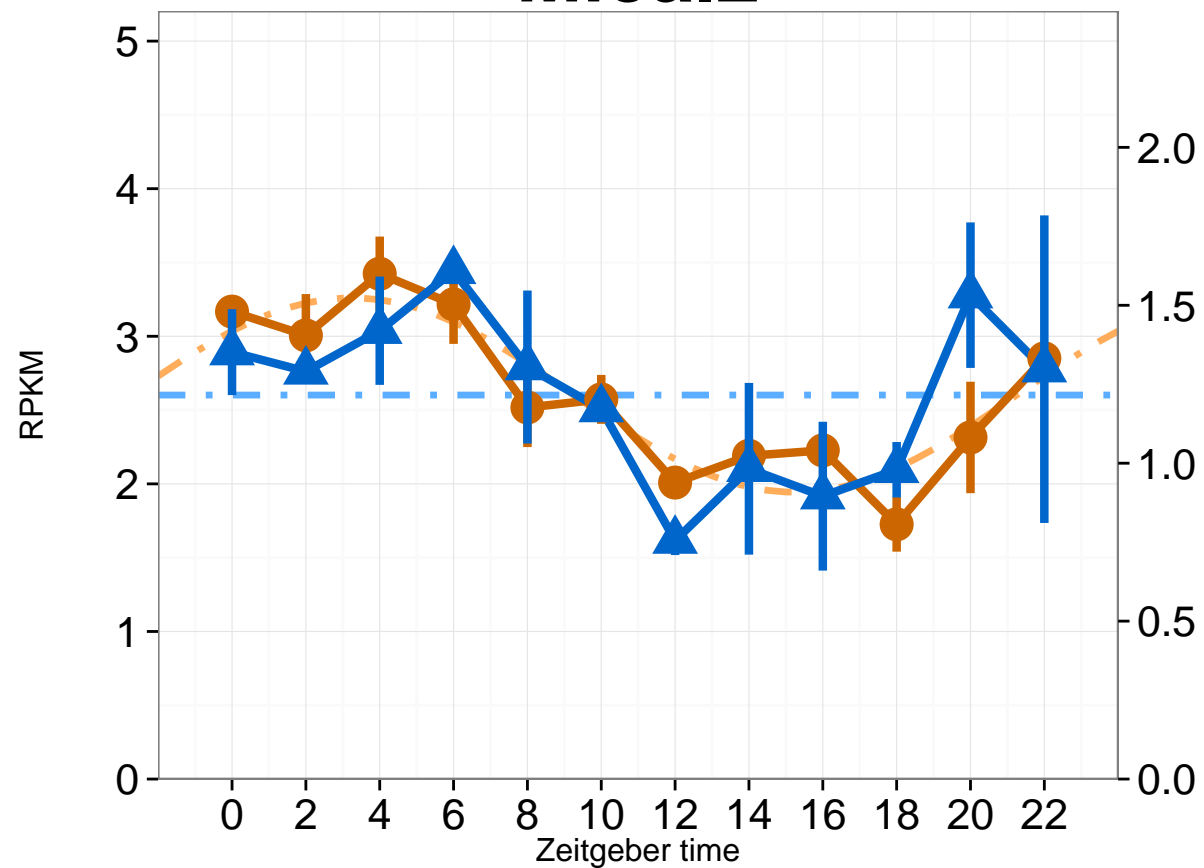

## Mical2

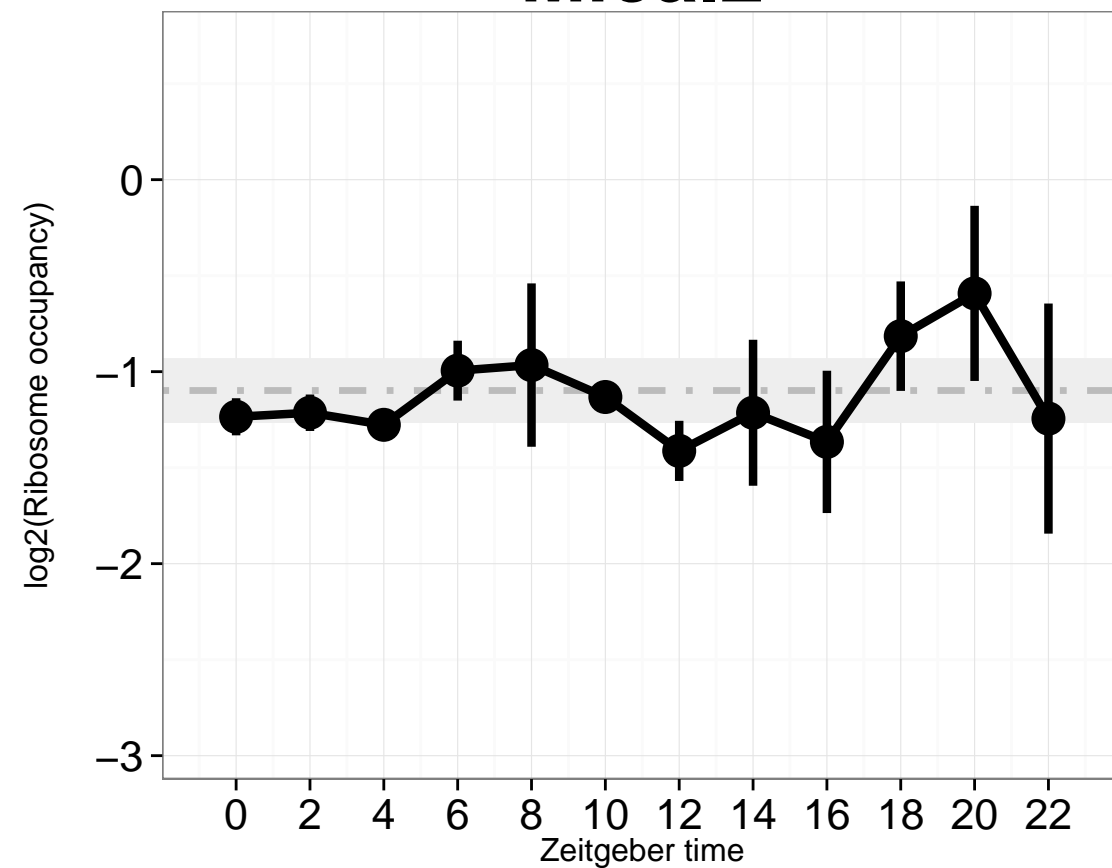

Supplement: Supplementary file 5245 [file 1]

# Zfp799

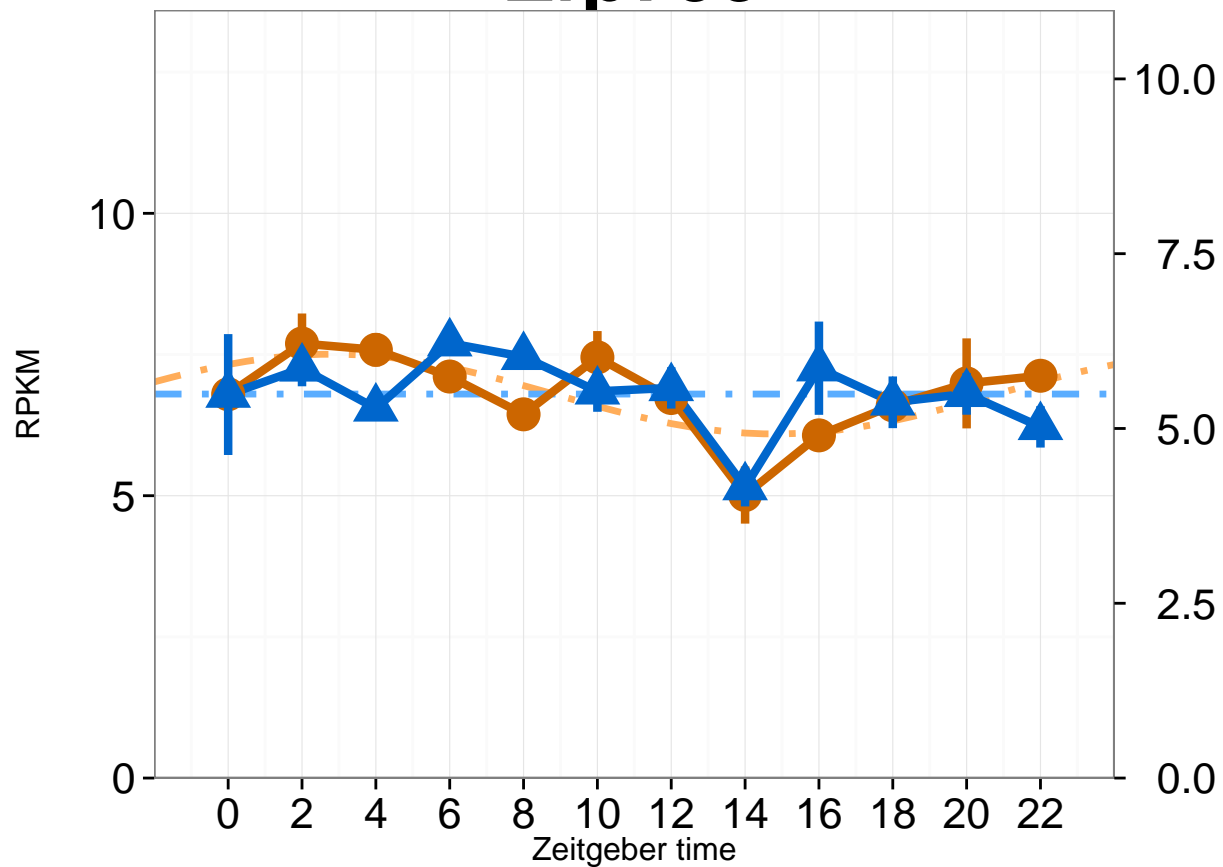

# Zfp799

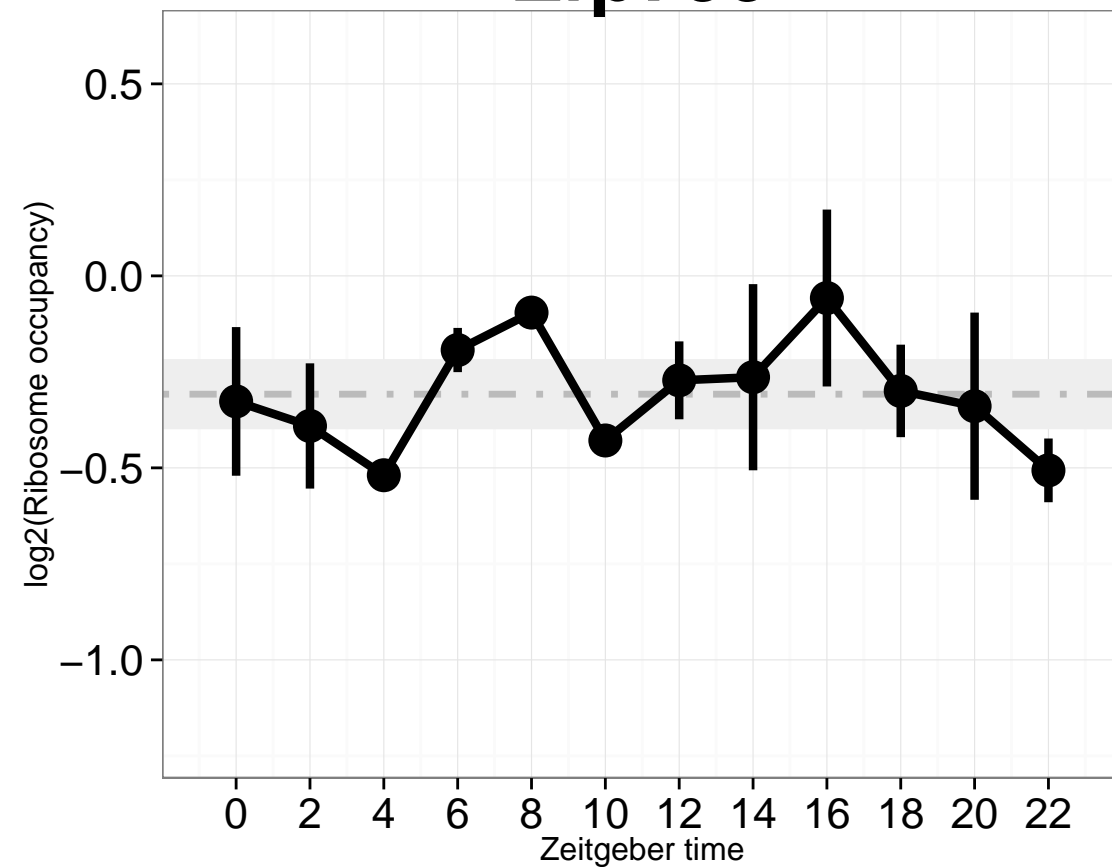

Supplement: Supplementary file 5246 [file 1]

## Rarb

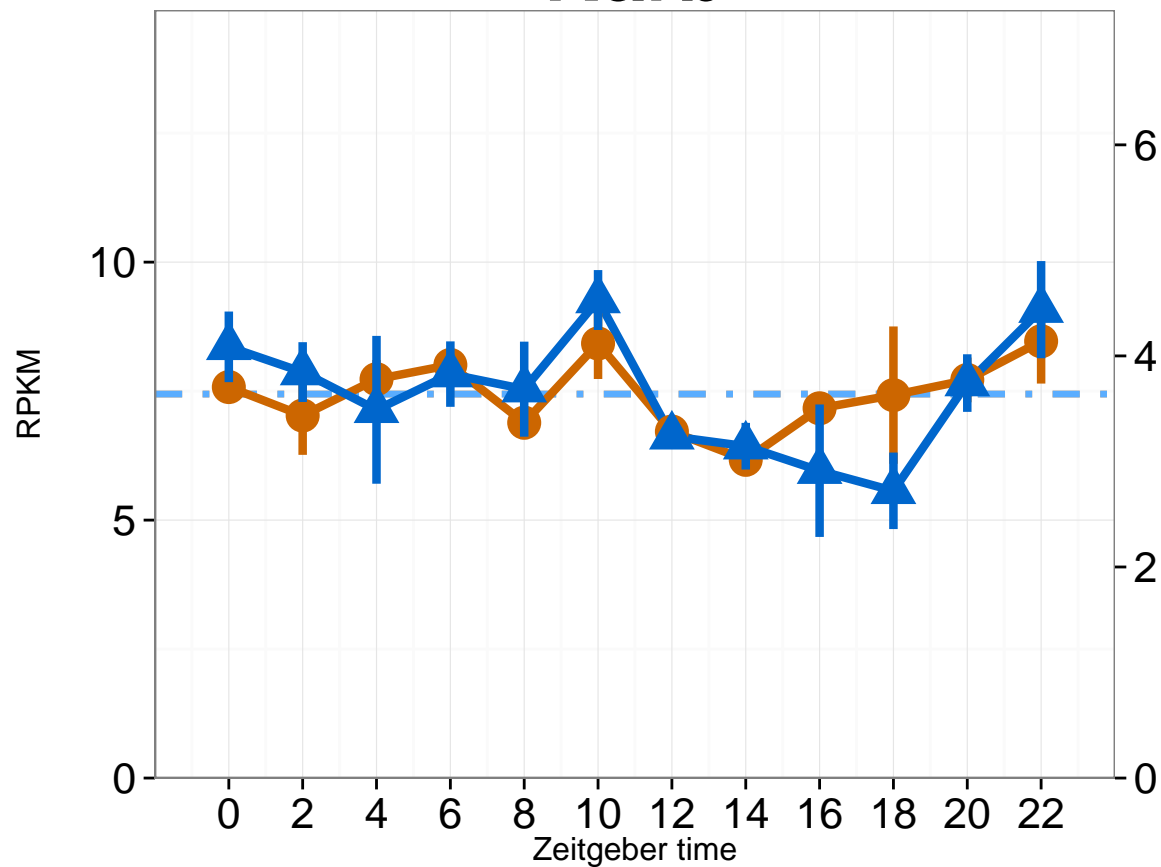

## Rarb

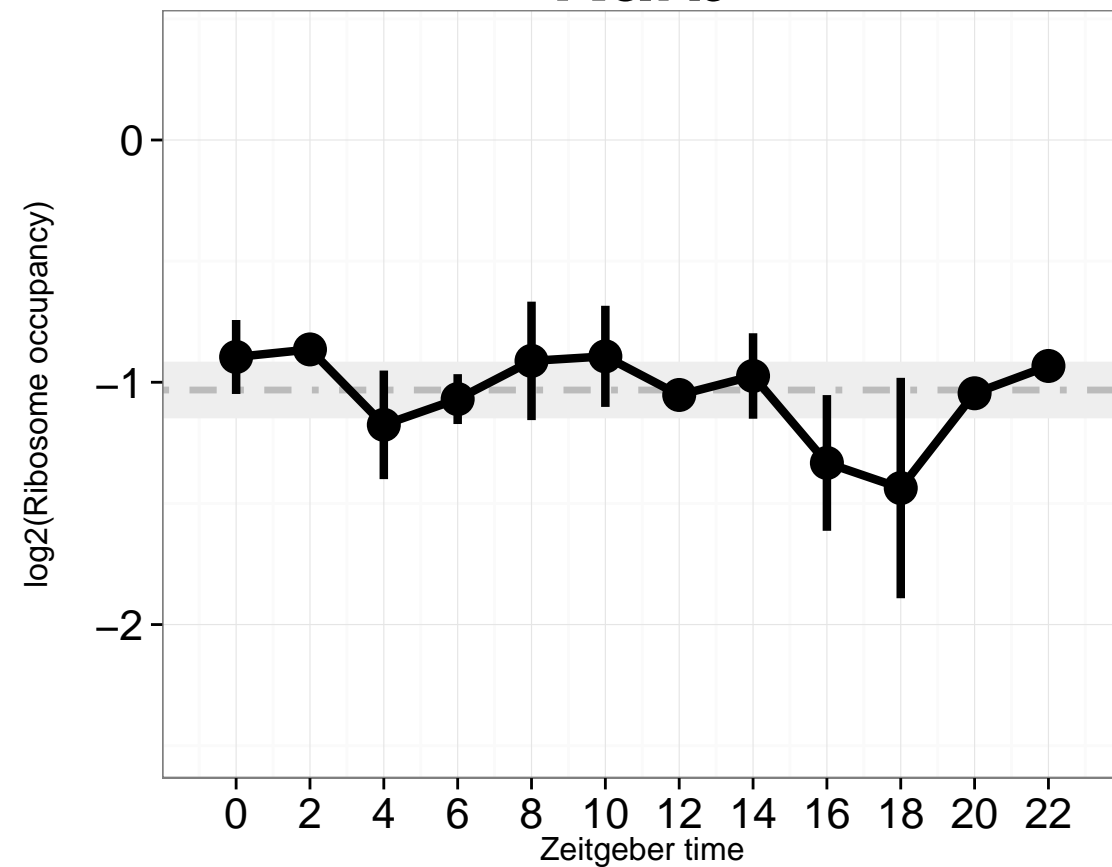

Supplement: Supplementary file 5247 [file 1]

# F3

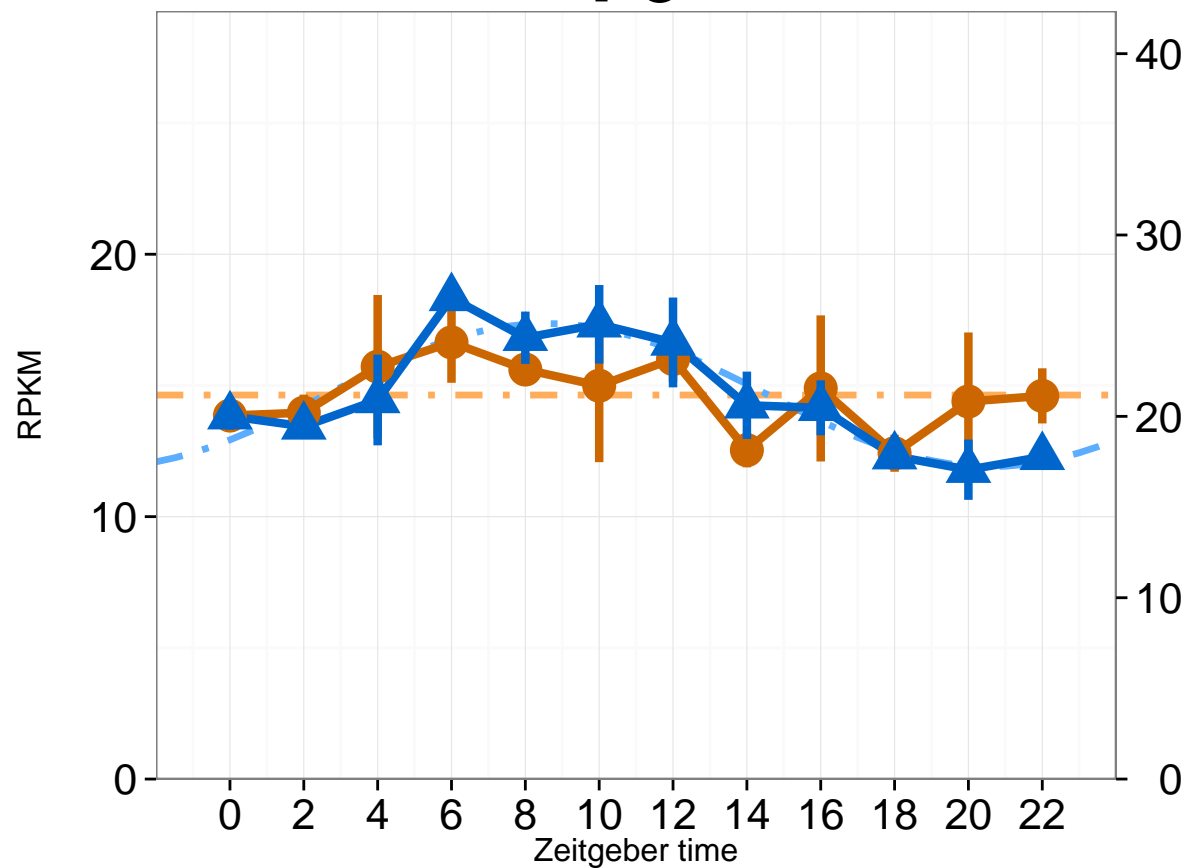

# F3

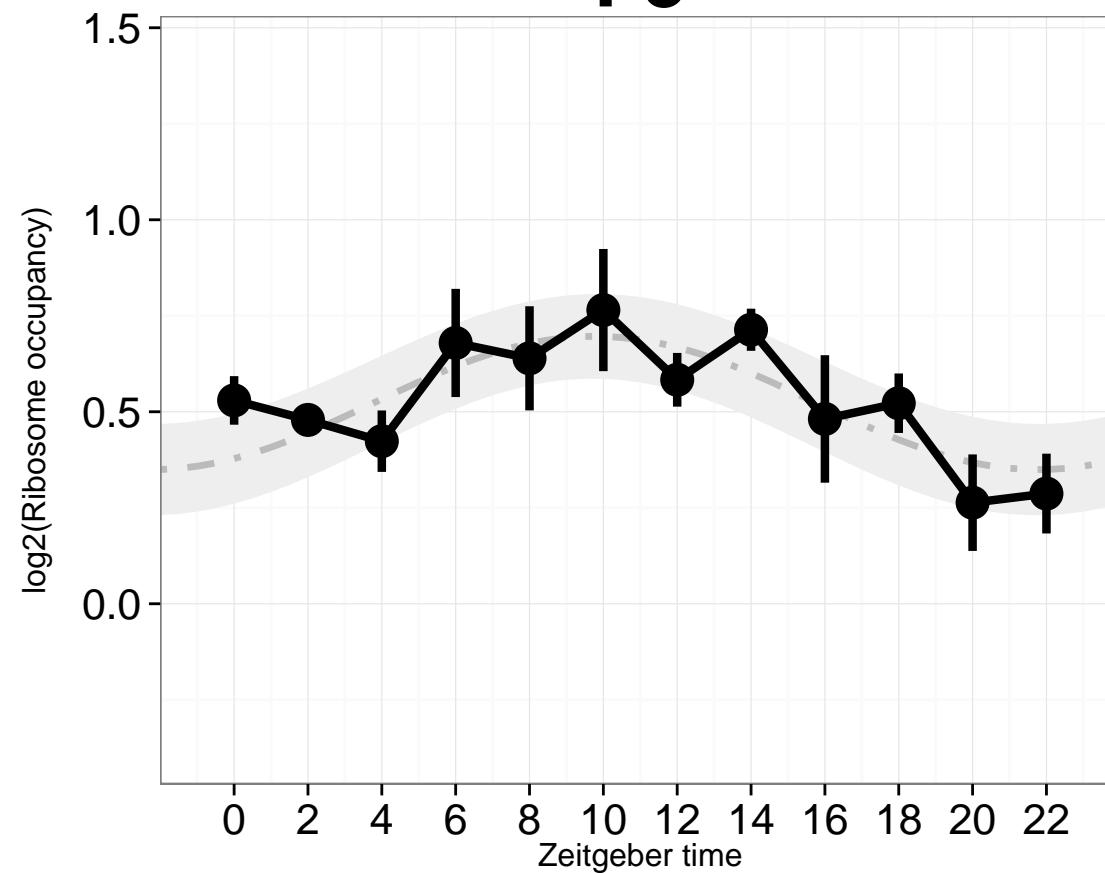

Supplement: Supplementary file 5248 [file 1]

# Rps21

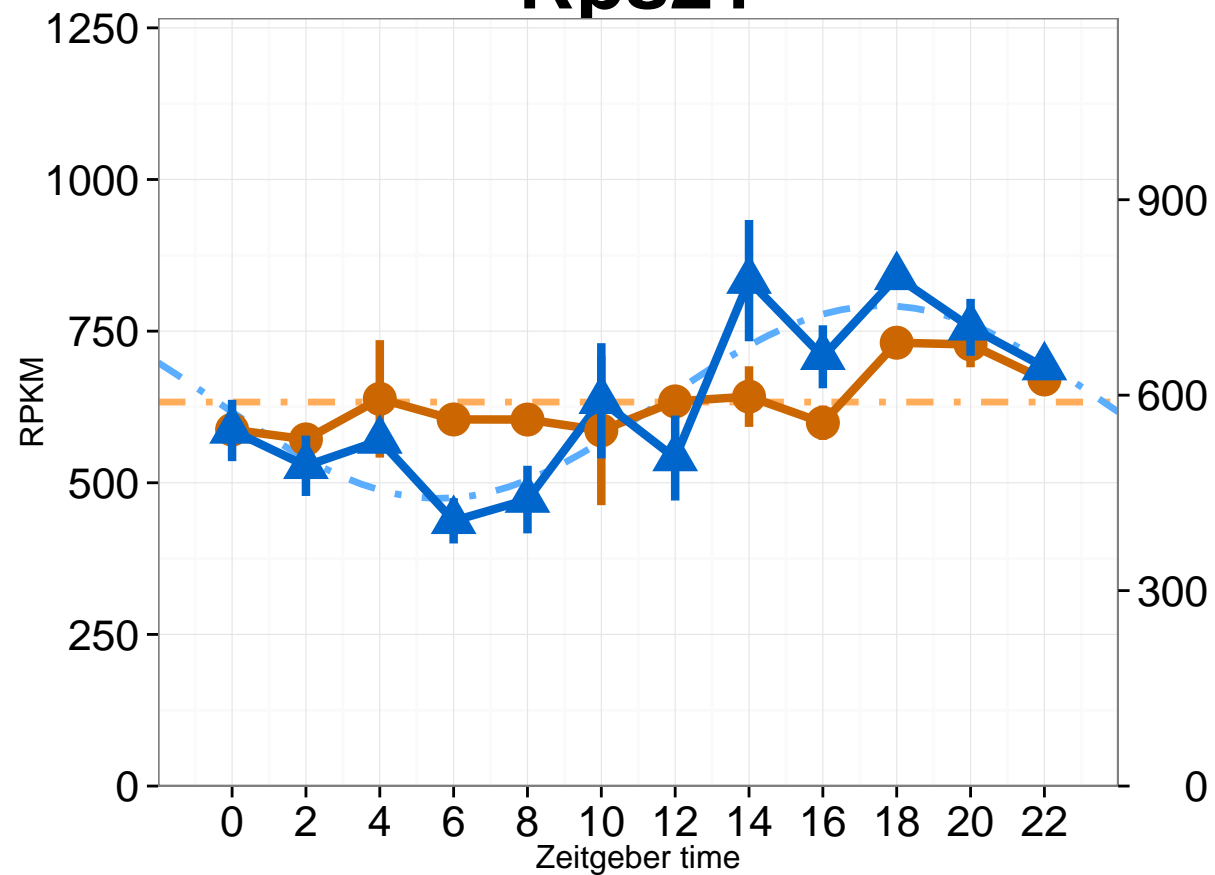

# Rps21

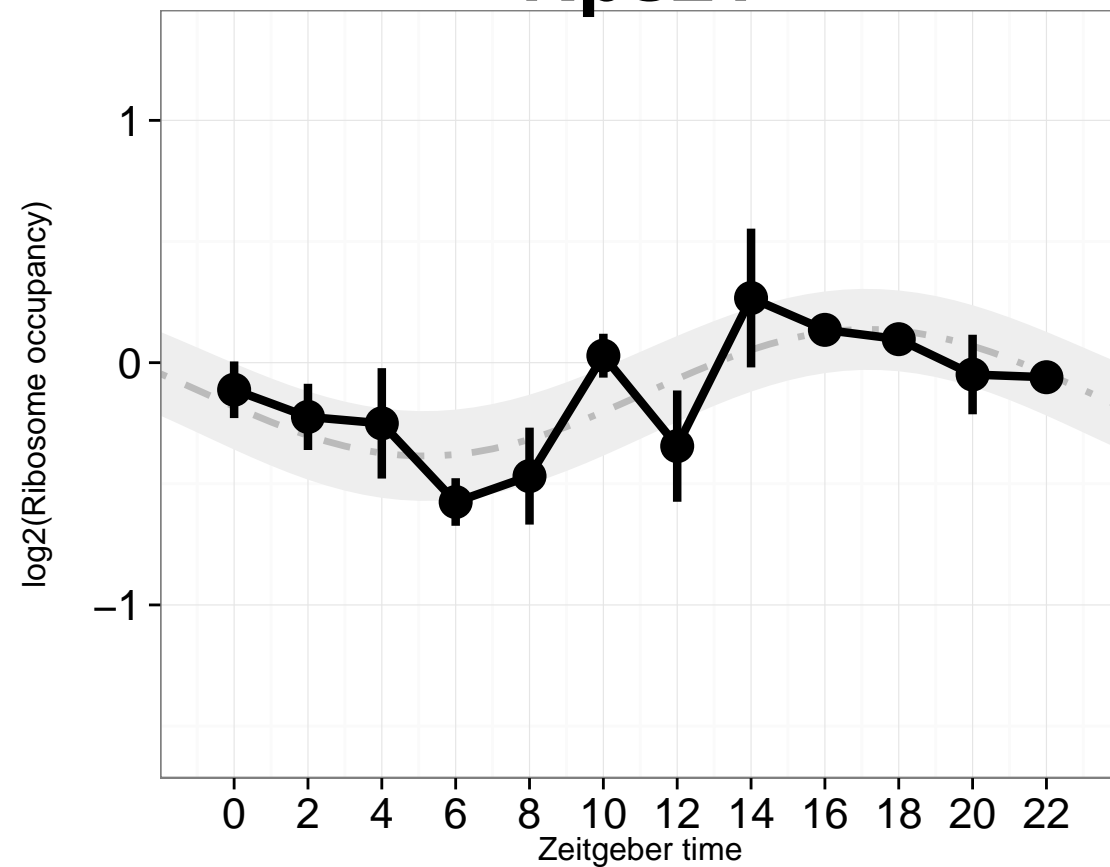

Supplement: Supplementary file 5249 [file 1]

## Ldlrad3

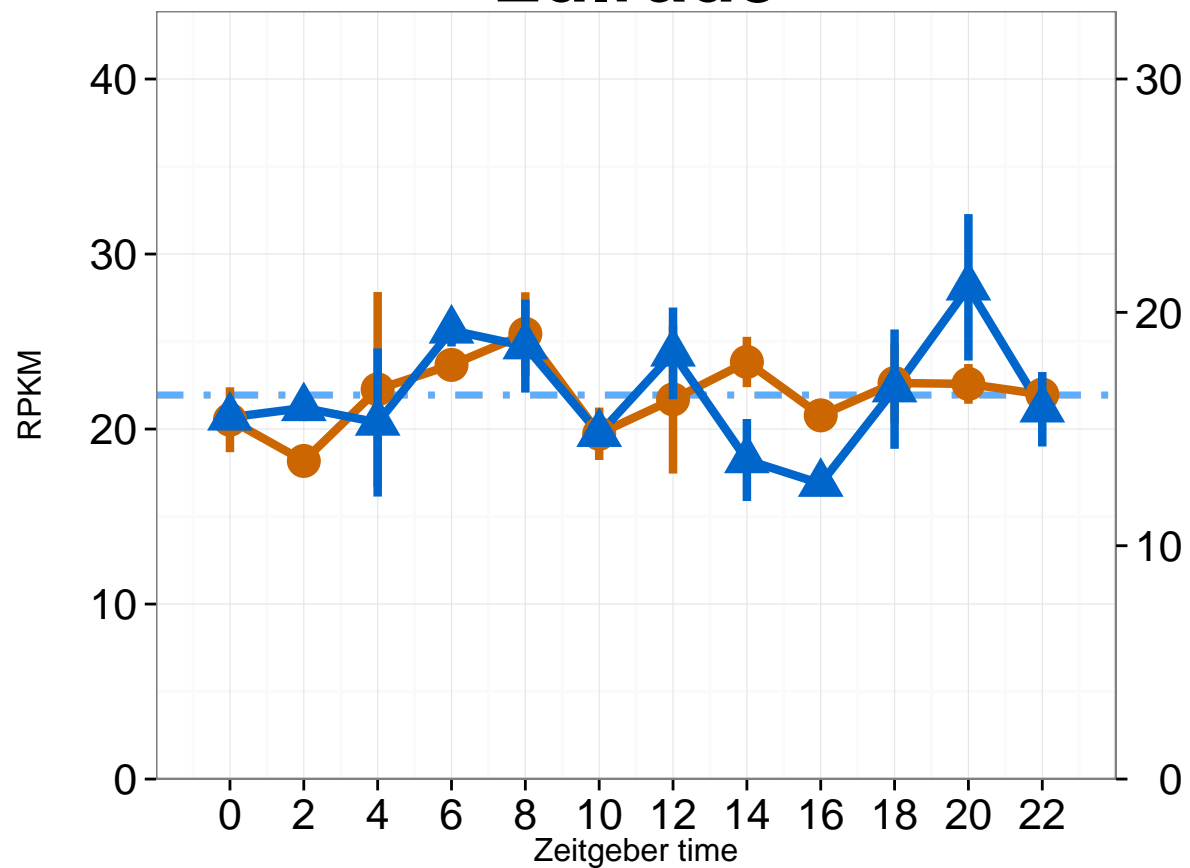

## Ldlrad3

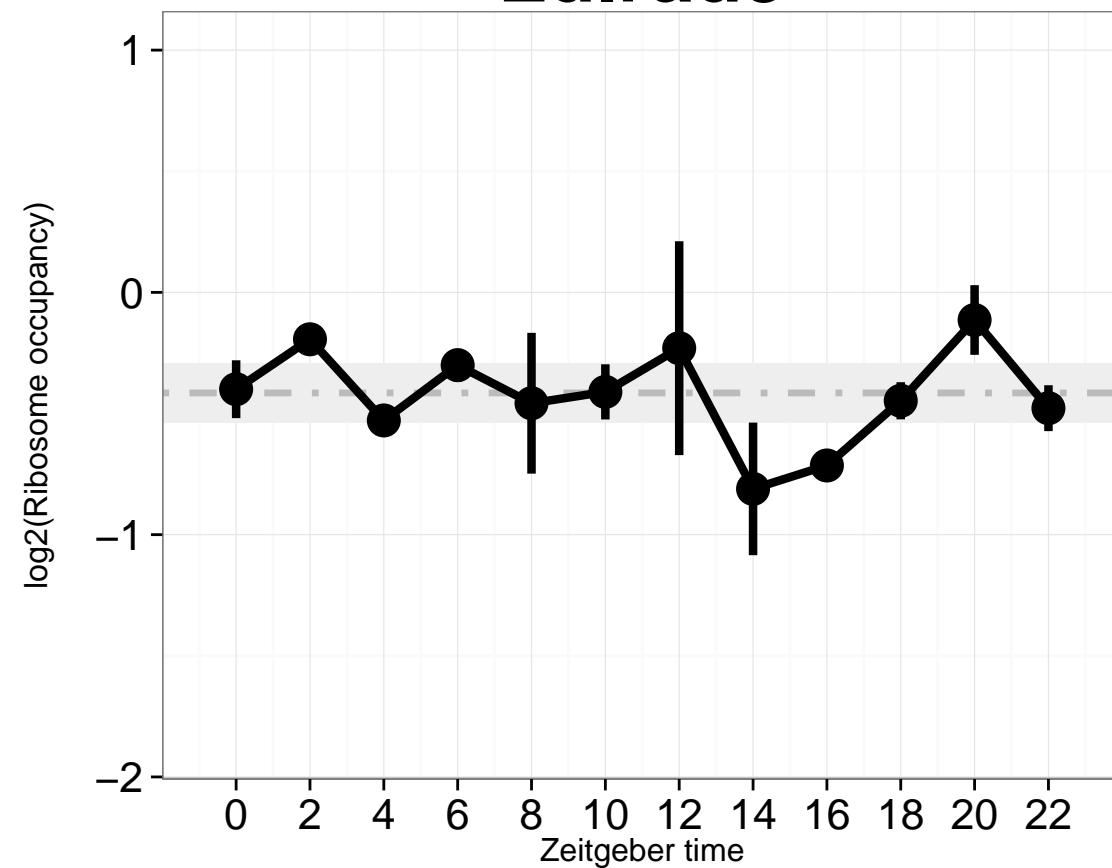

Supplement: Supplementary file 5250 [file 1]

## Dtx3l

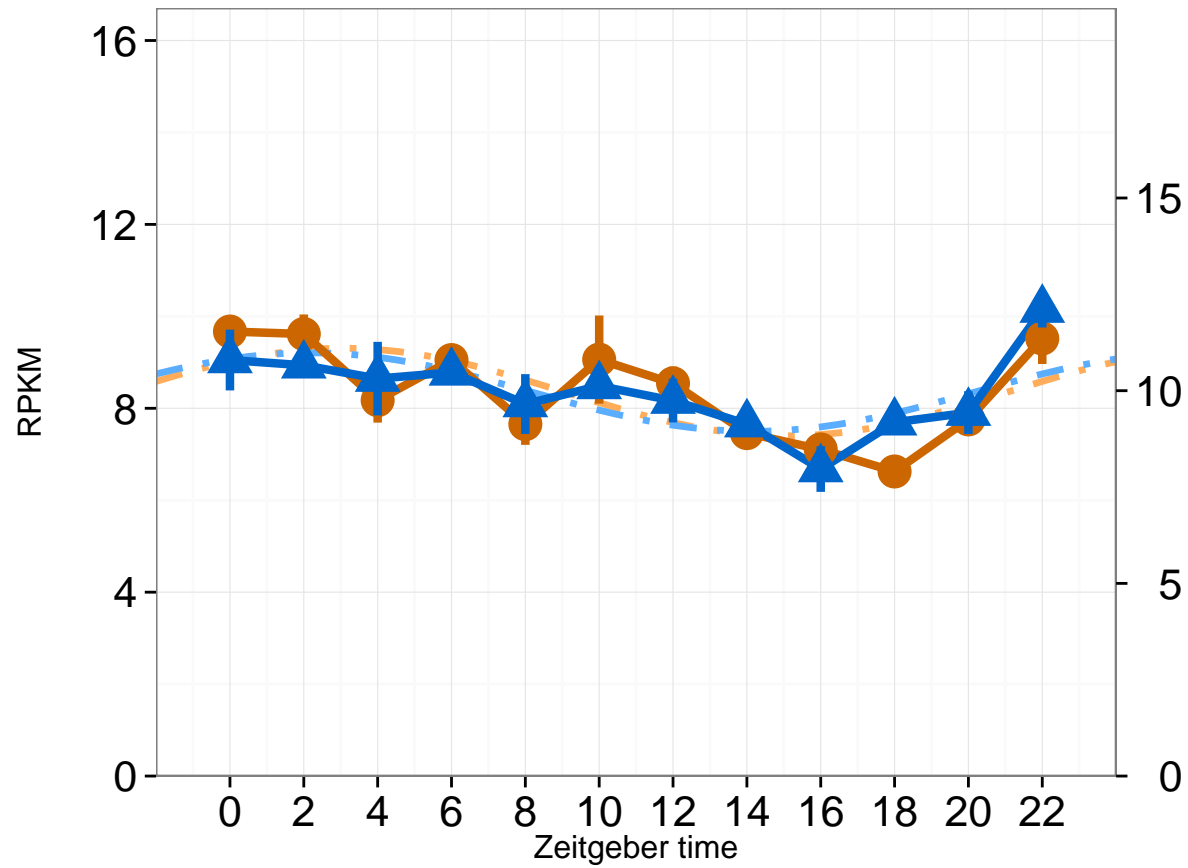

## Dtx3l

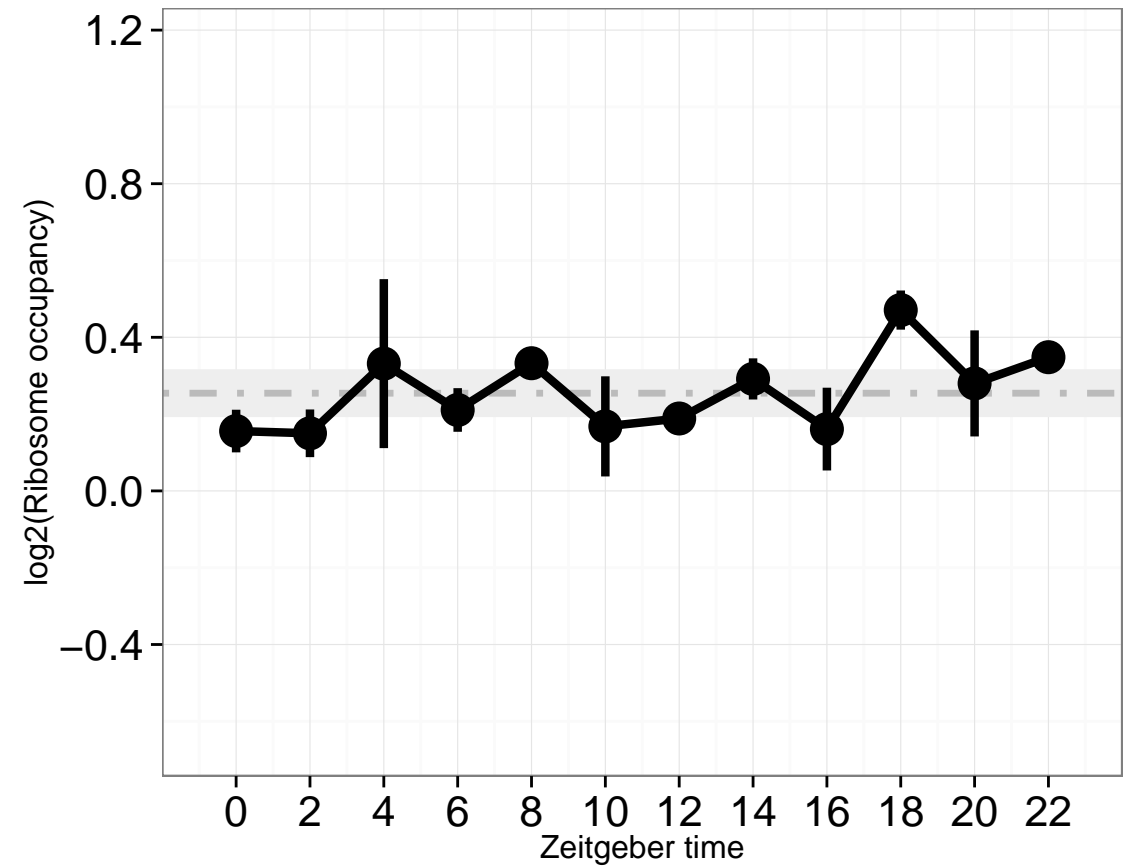

Supplement: Supplementary file 5251 [file 1]

## Pdlim1

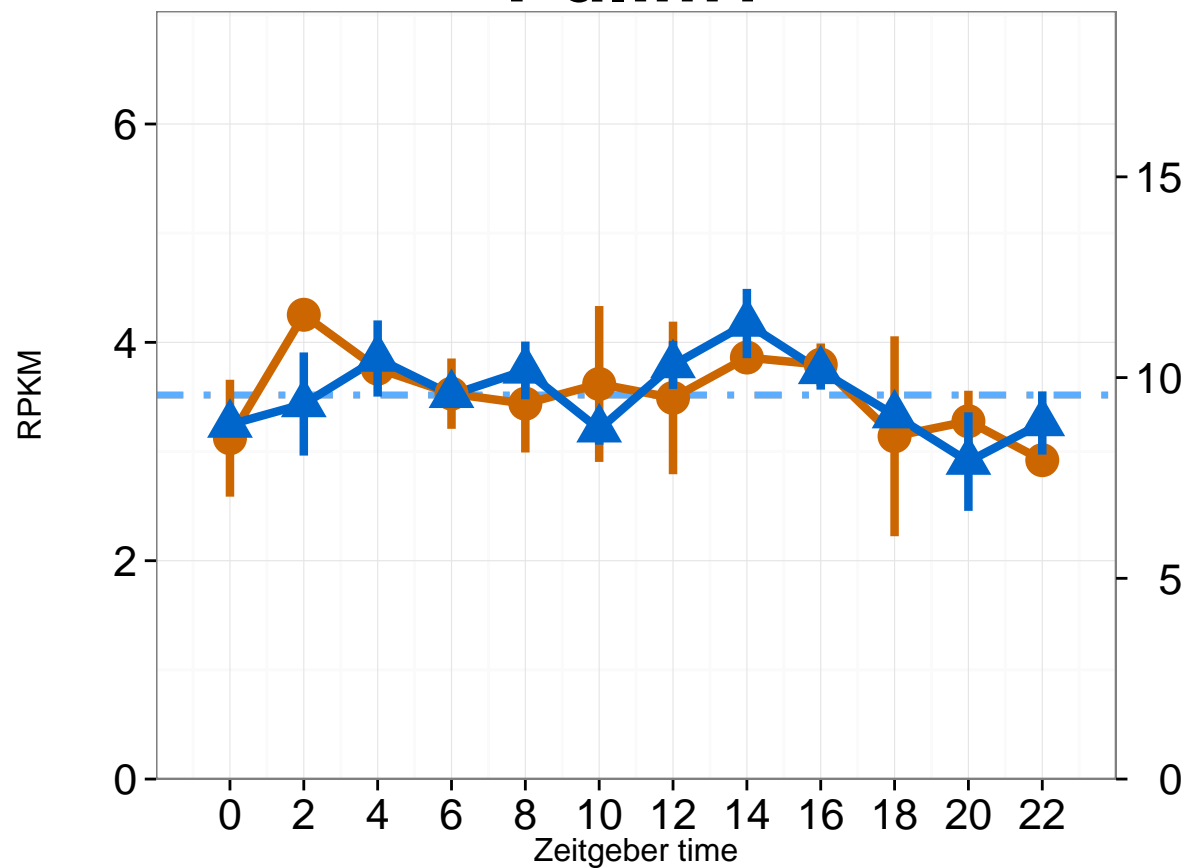

## Pdlim1

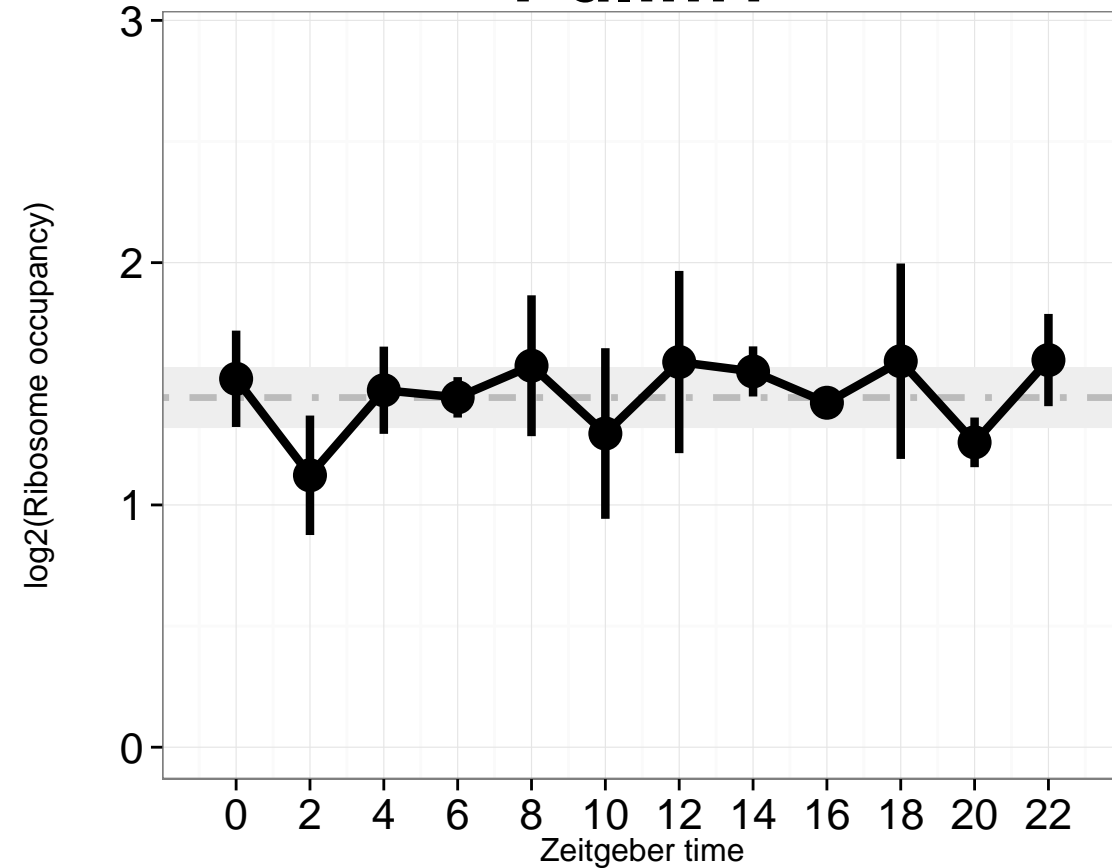

Supplement: Supplementary file 5252 [file 1]

## Zdhhc12

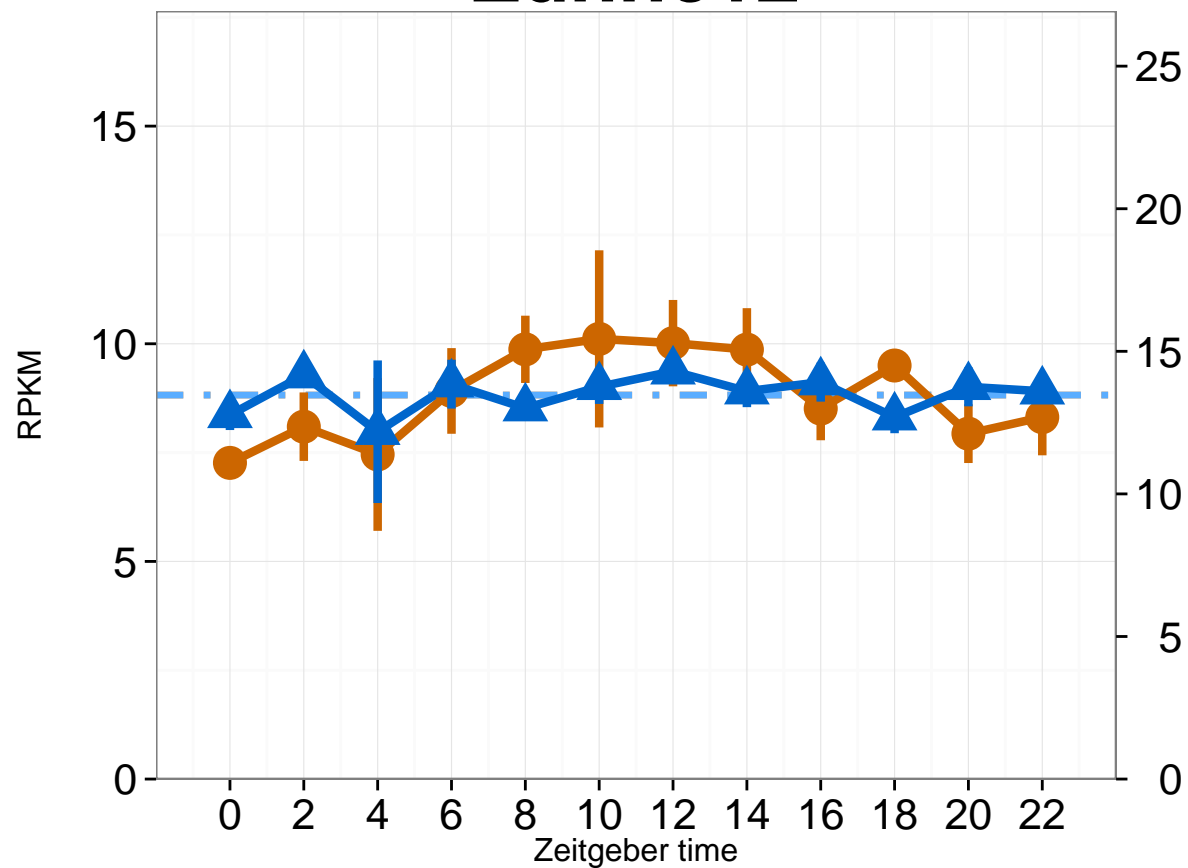

## Zdhhc12

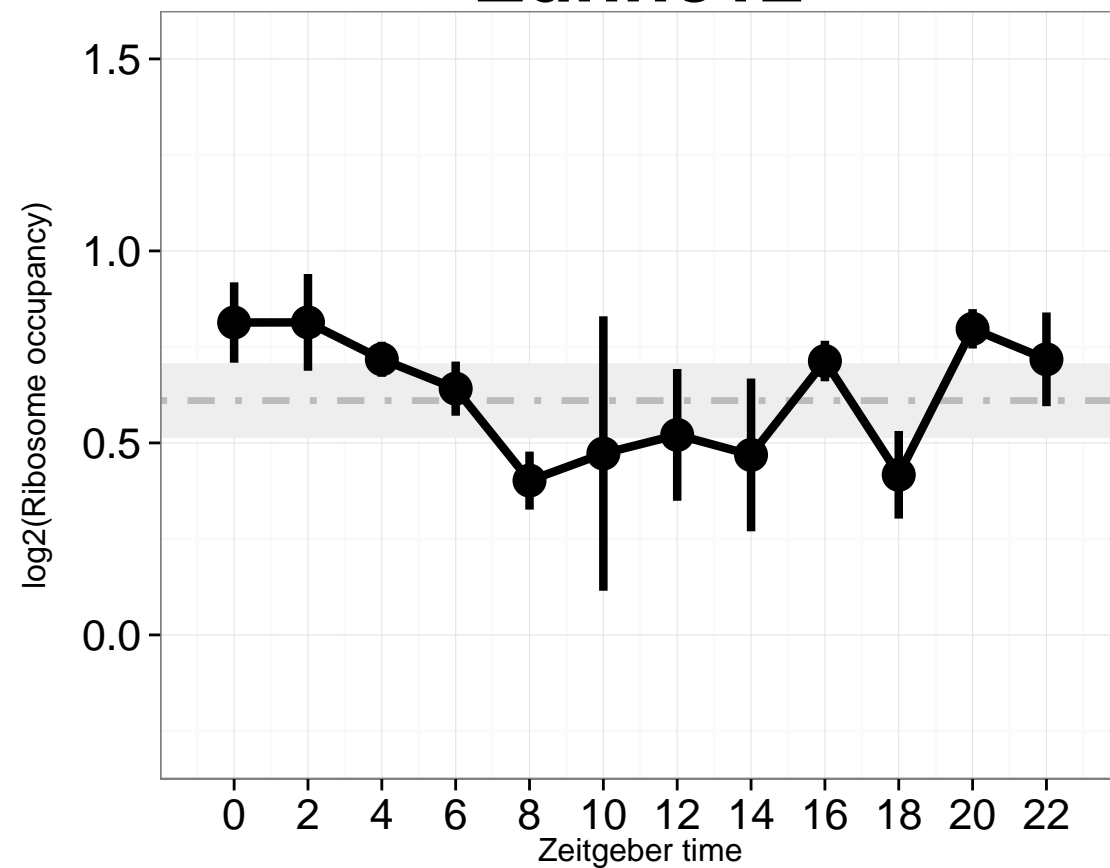

Supplement: Supplementary file 5253 [file 1]

# 4930453N24Rik

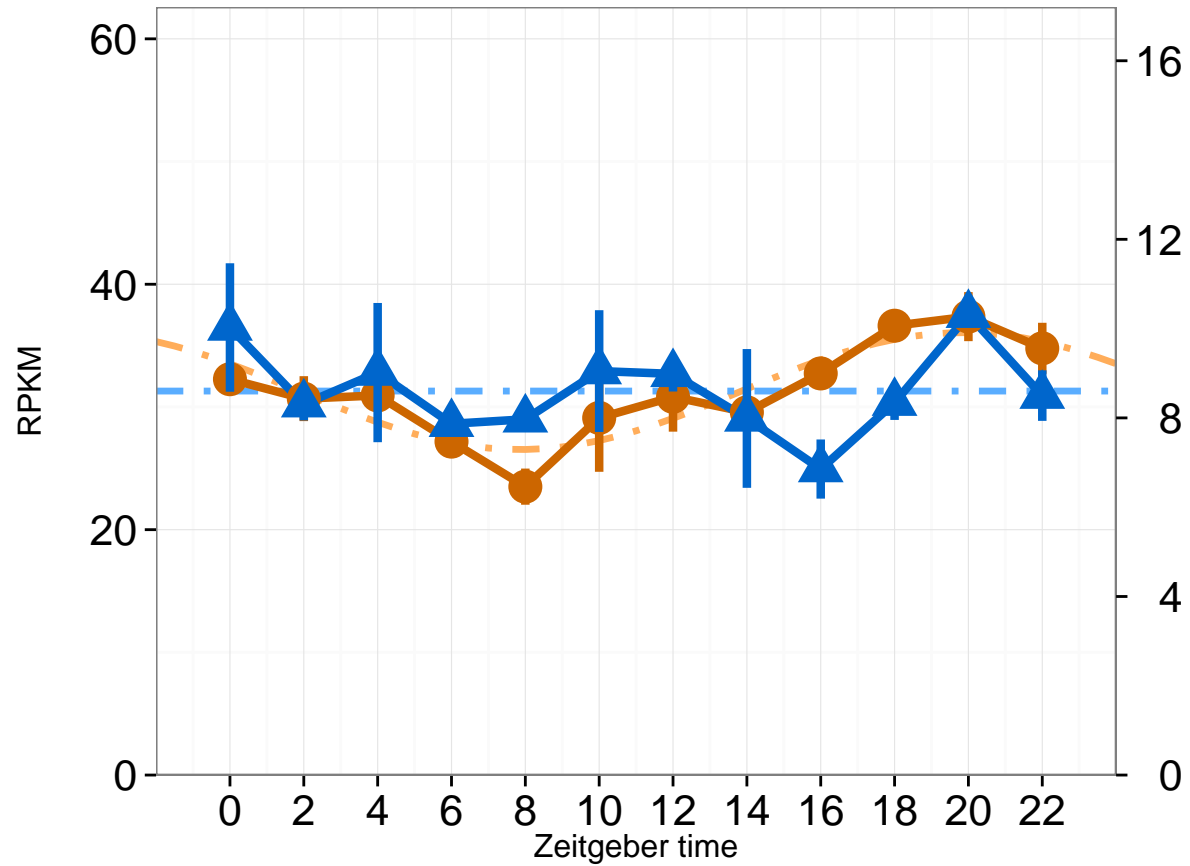

# 4930453N24Rik

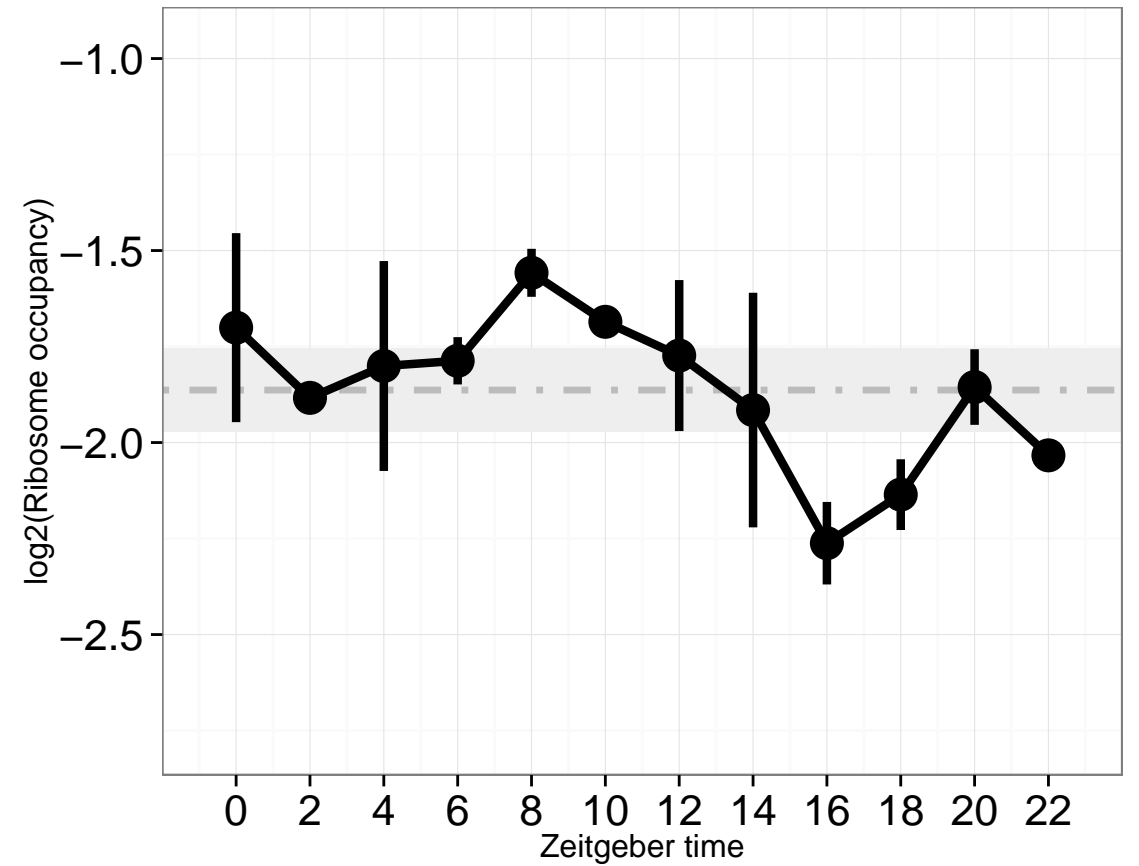

Supplement: Supplementary file 5254 [file 1]

# Rnd1

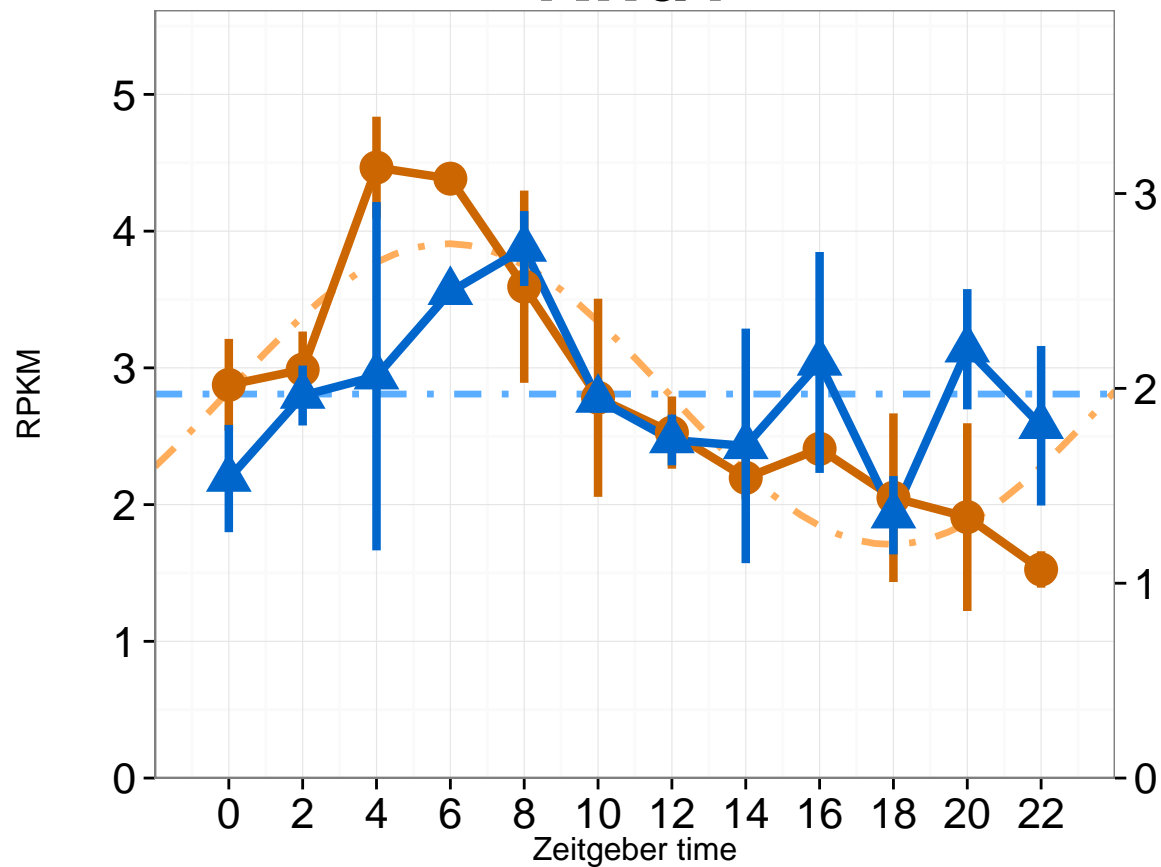

# Rnd1

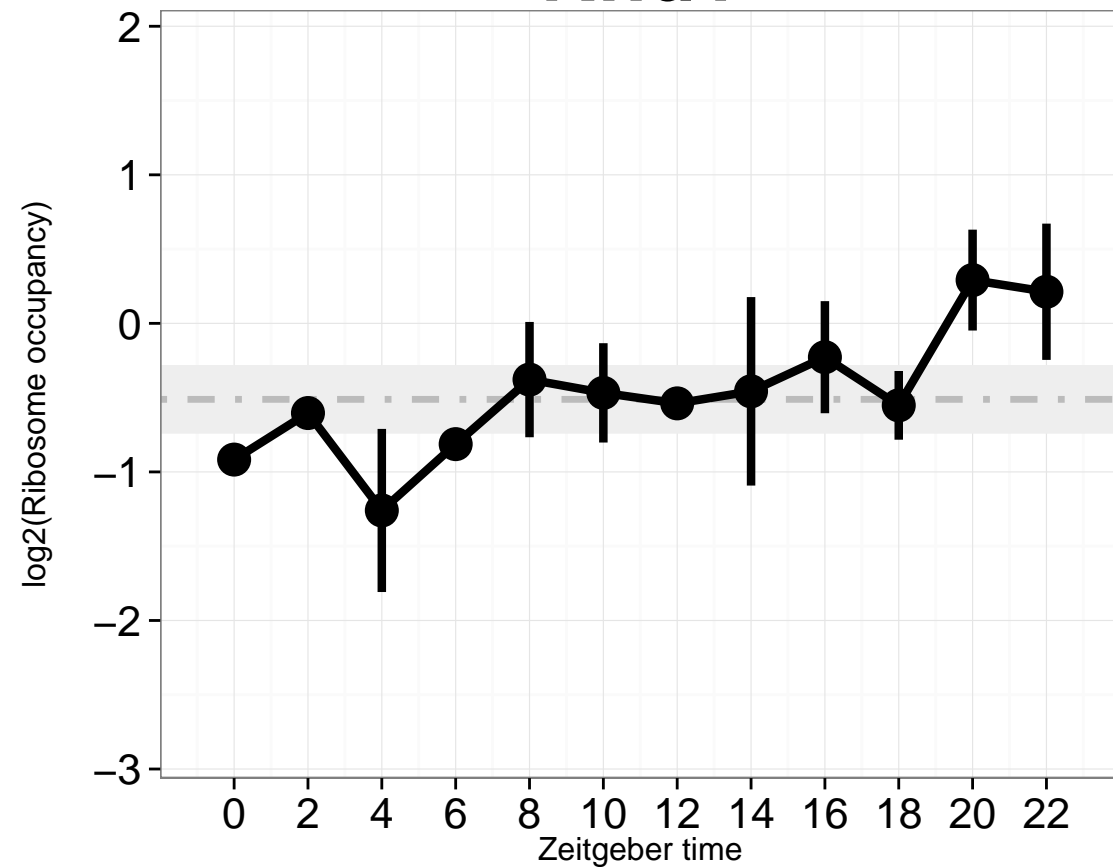

Supplement: Supplementary file 5255 [file 1]

## Gart

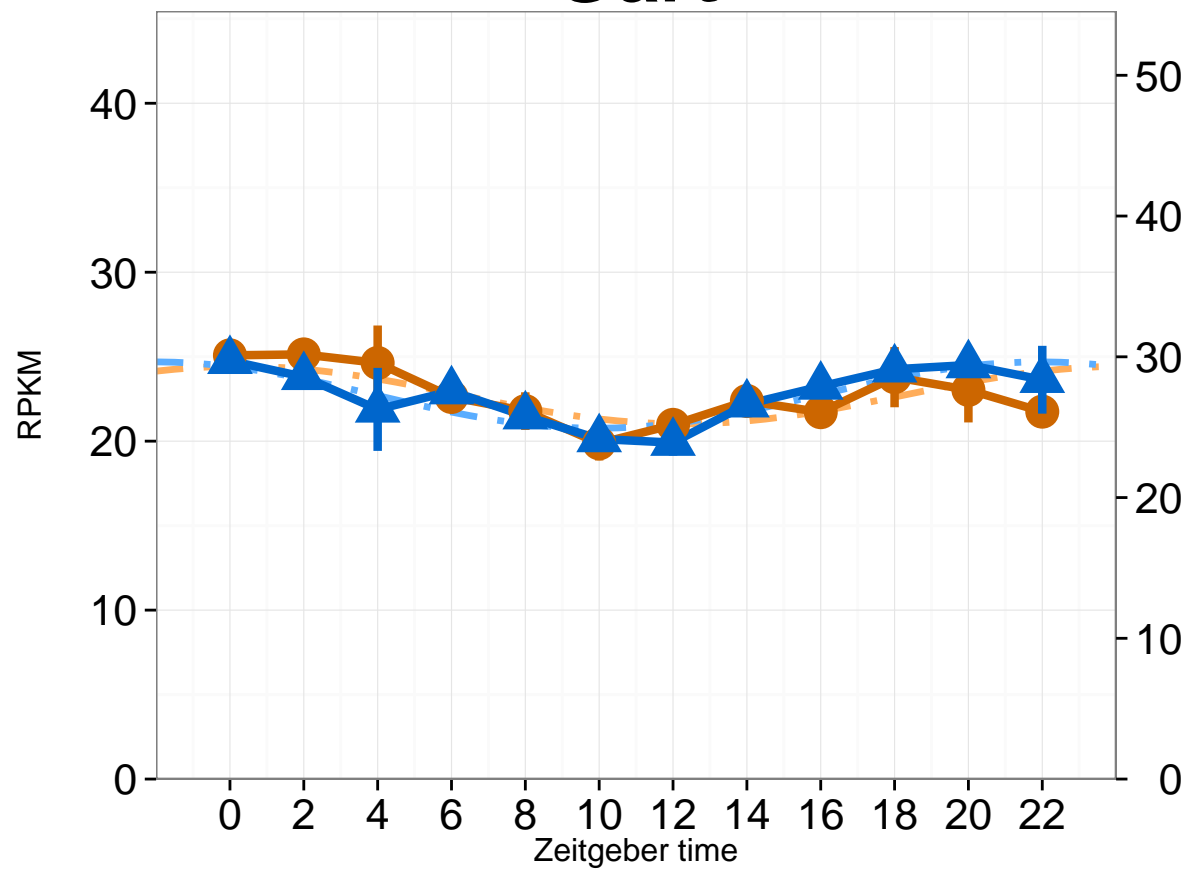

## Gart

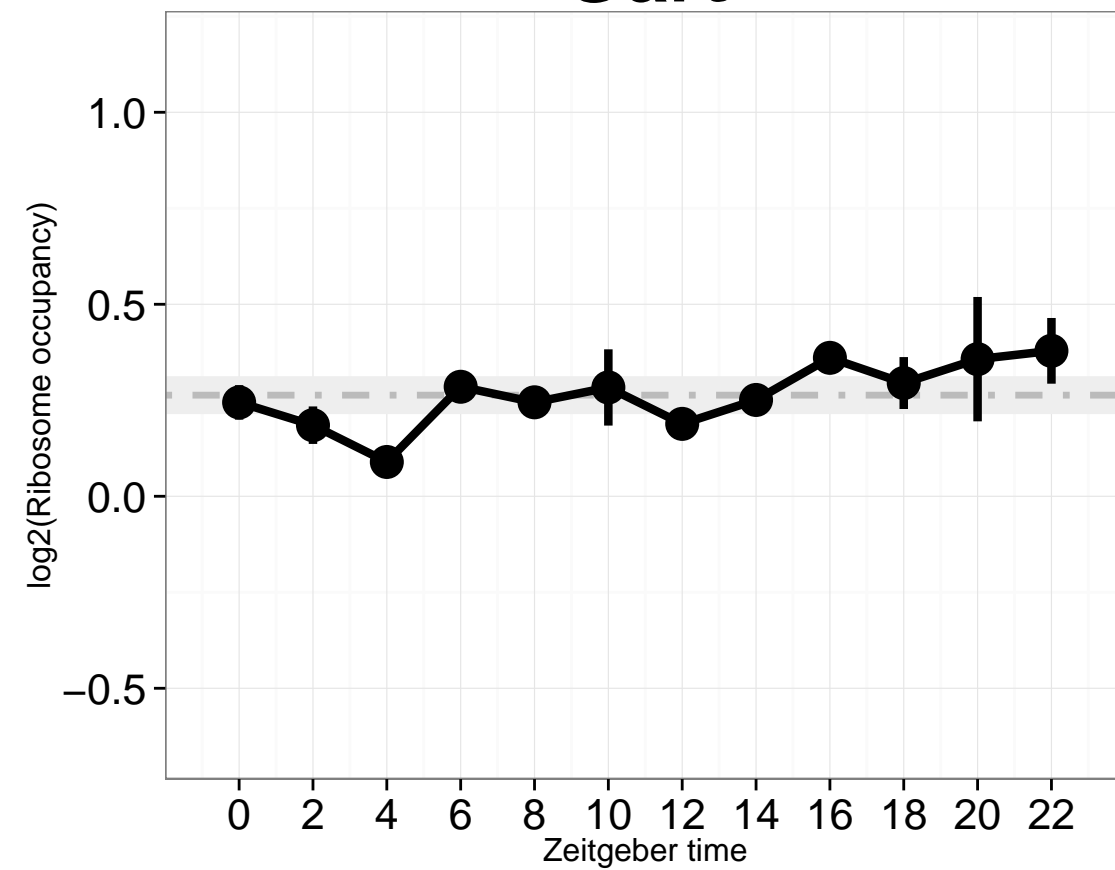

Supplement: Supplementary file 5256 [file 1]

## Usp1

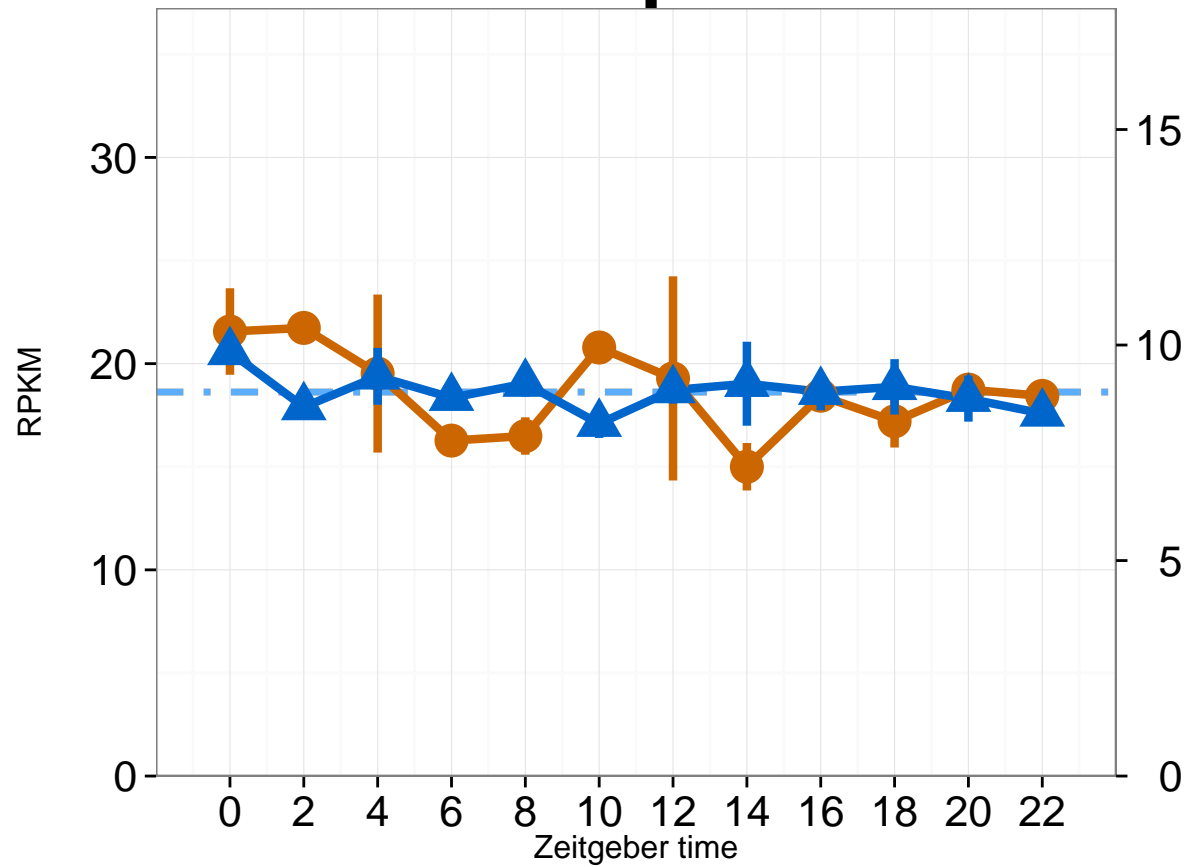

## Usp1

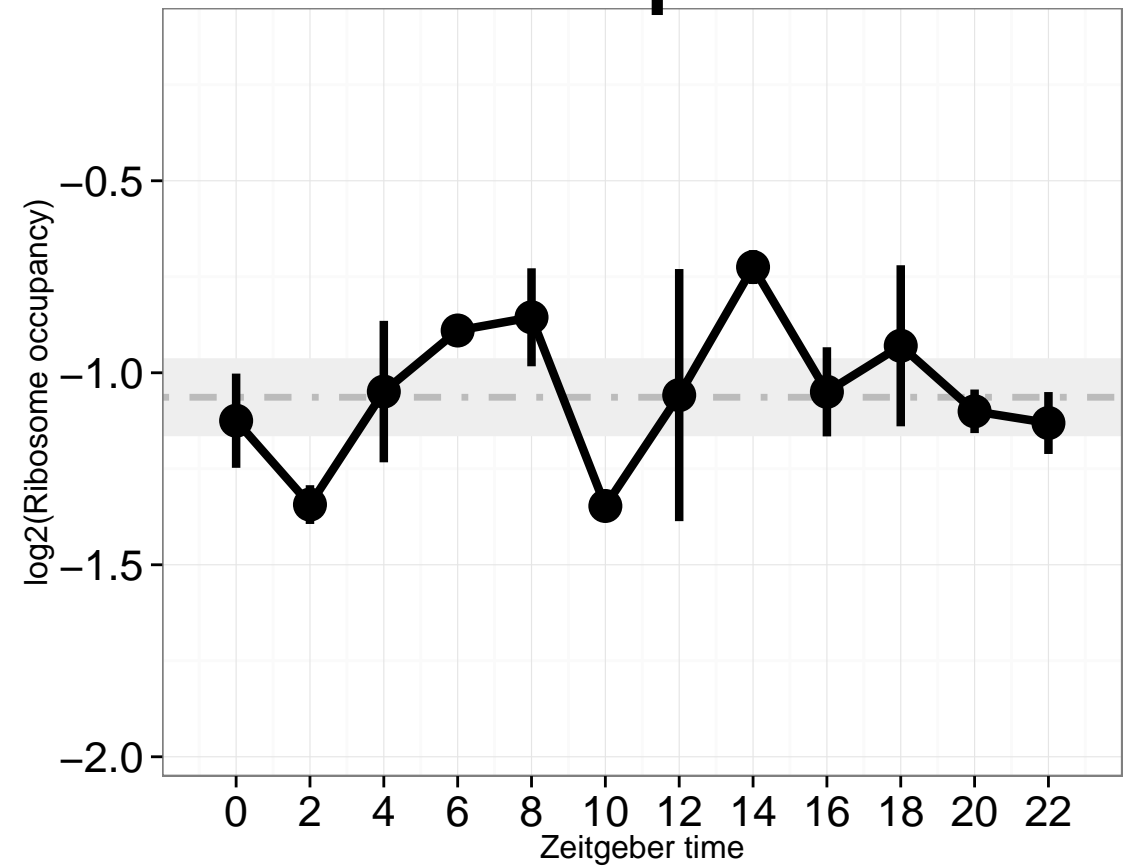

Supplement: Supplementary file 5257 [file 1]

## Kcp

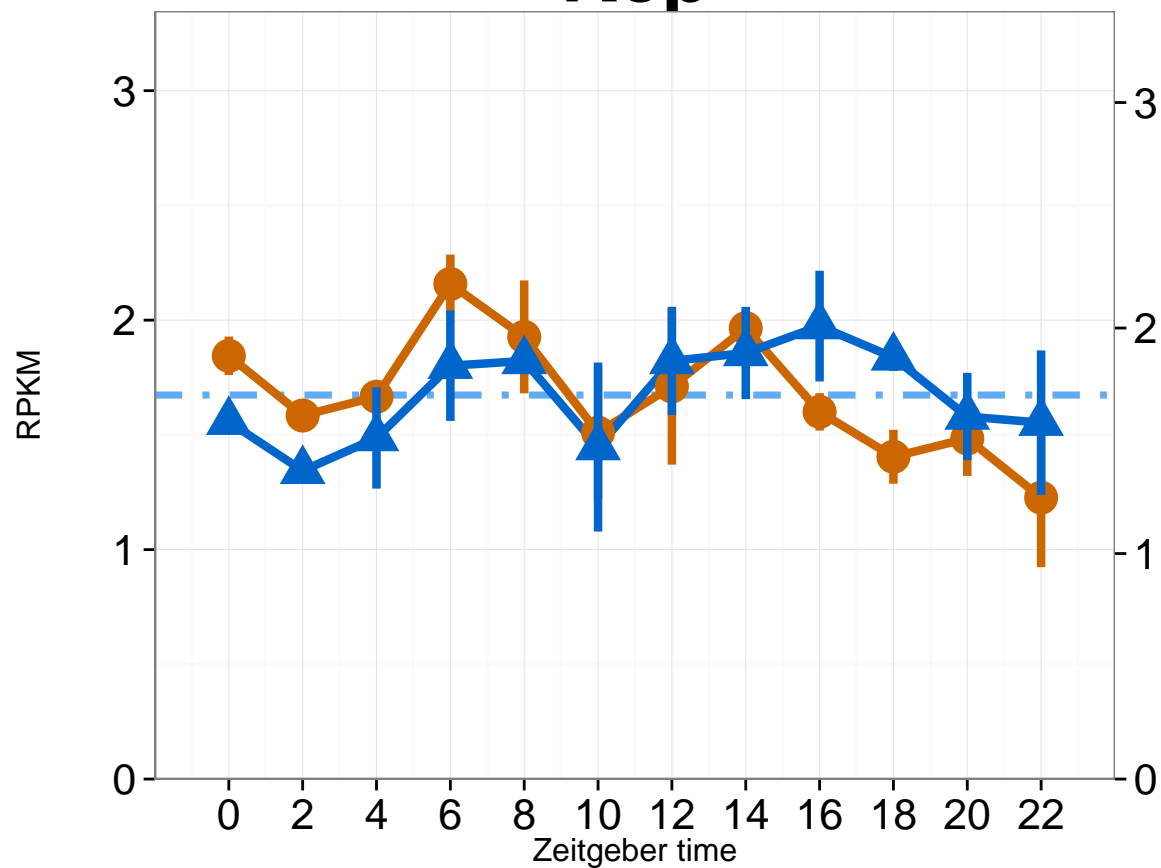

## Kcp

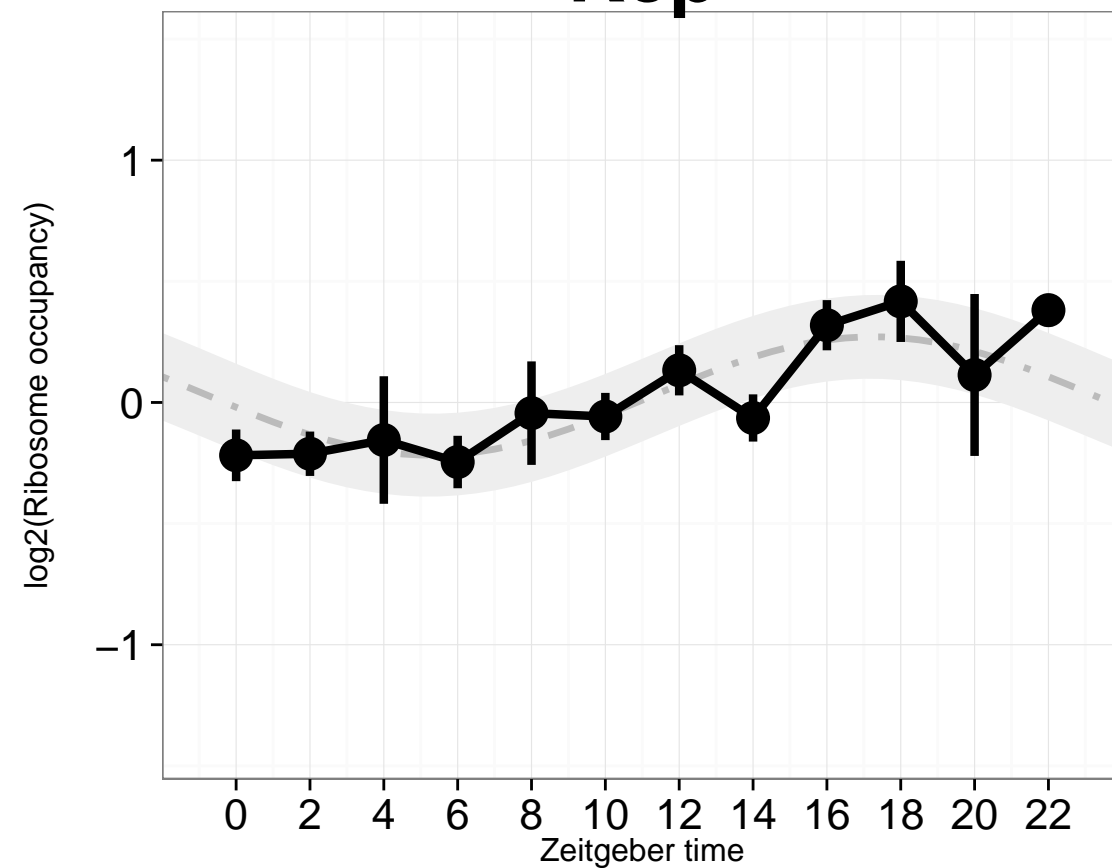

Supplement: Supplementary file 5258 [file 1]

## Gba2

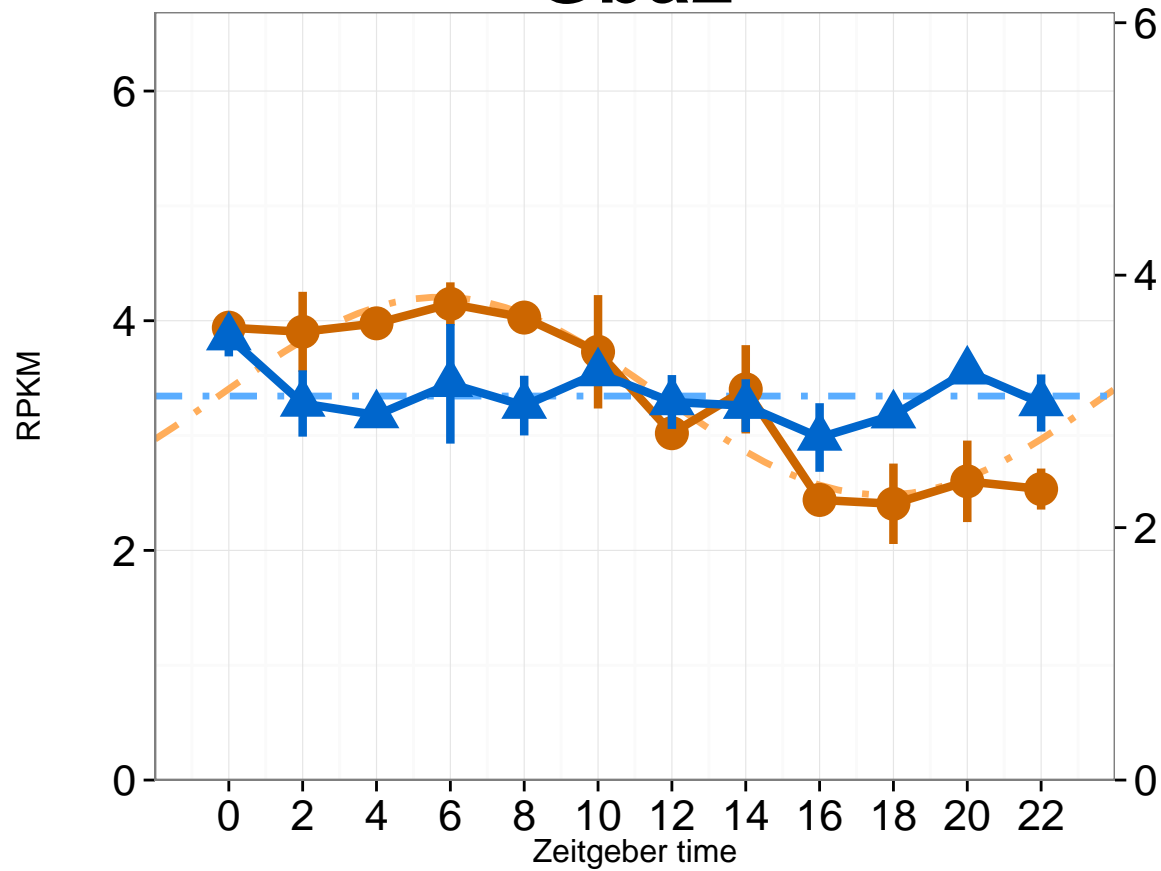

## Gba2

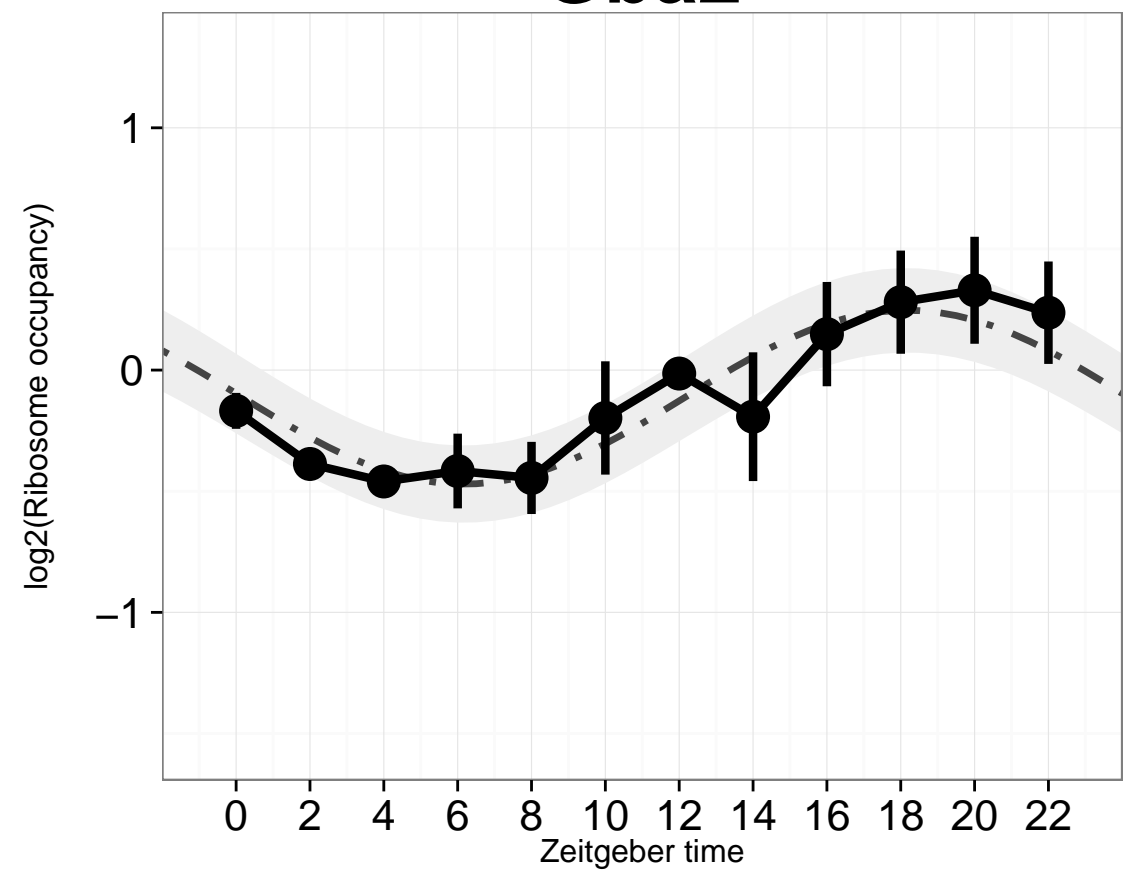

Supplement: Supplementary file 5259 [file 1]

## Zswim3

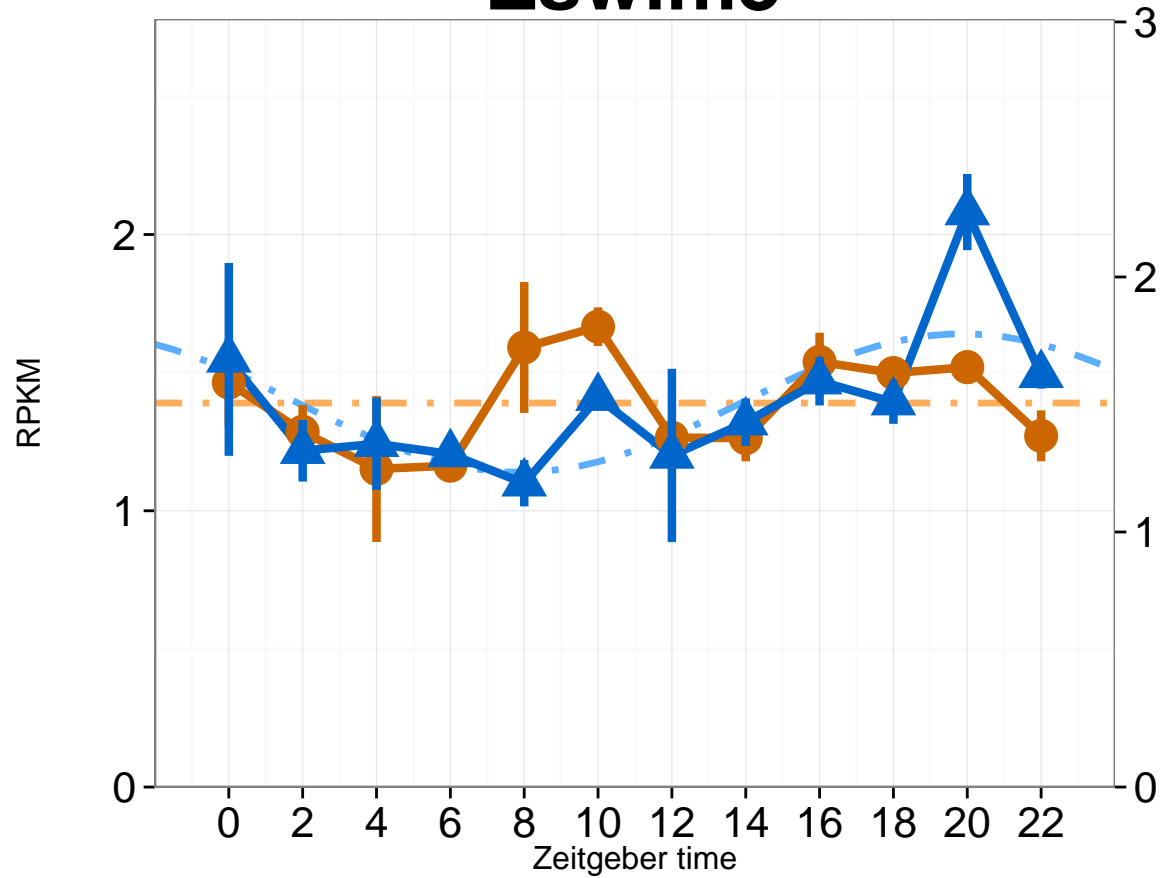

## Zswim3

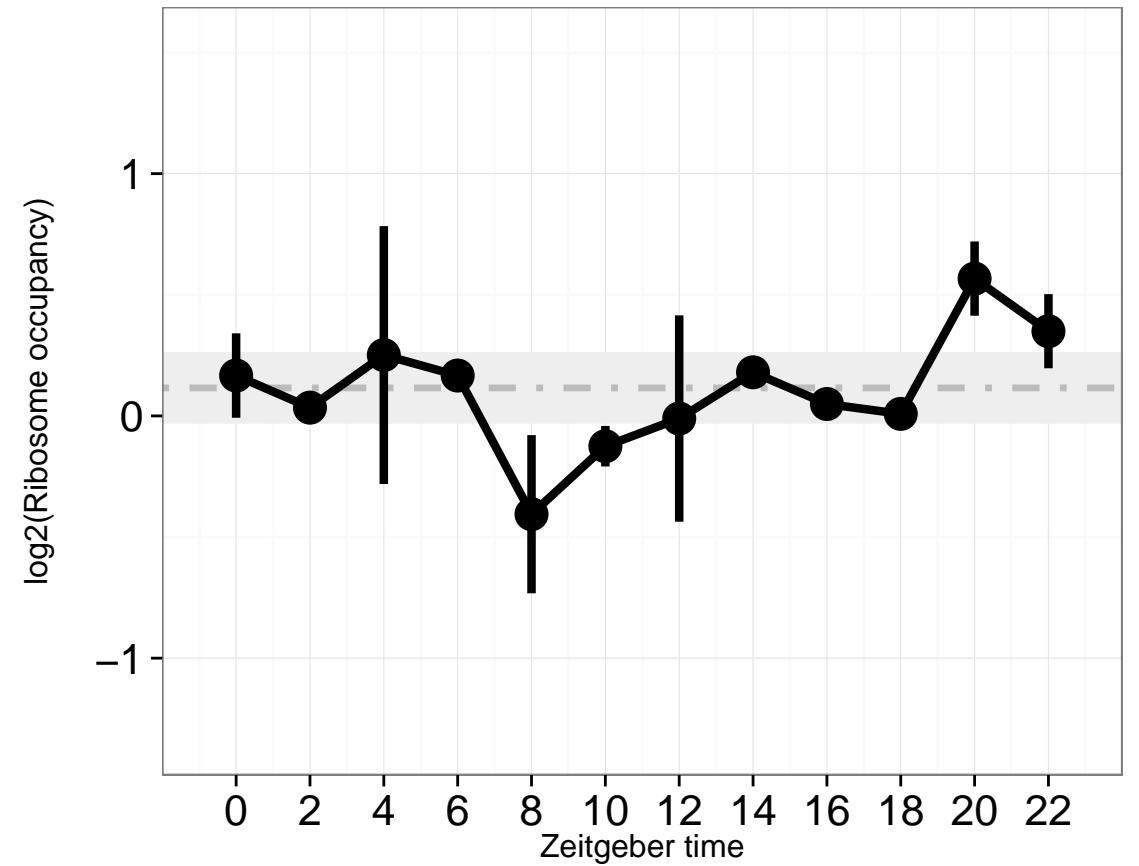

Supplement: Supplementary file 5260 [file 1]

# Haus1

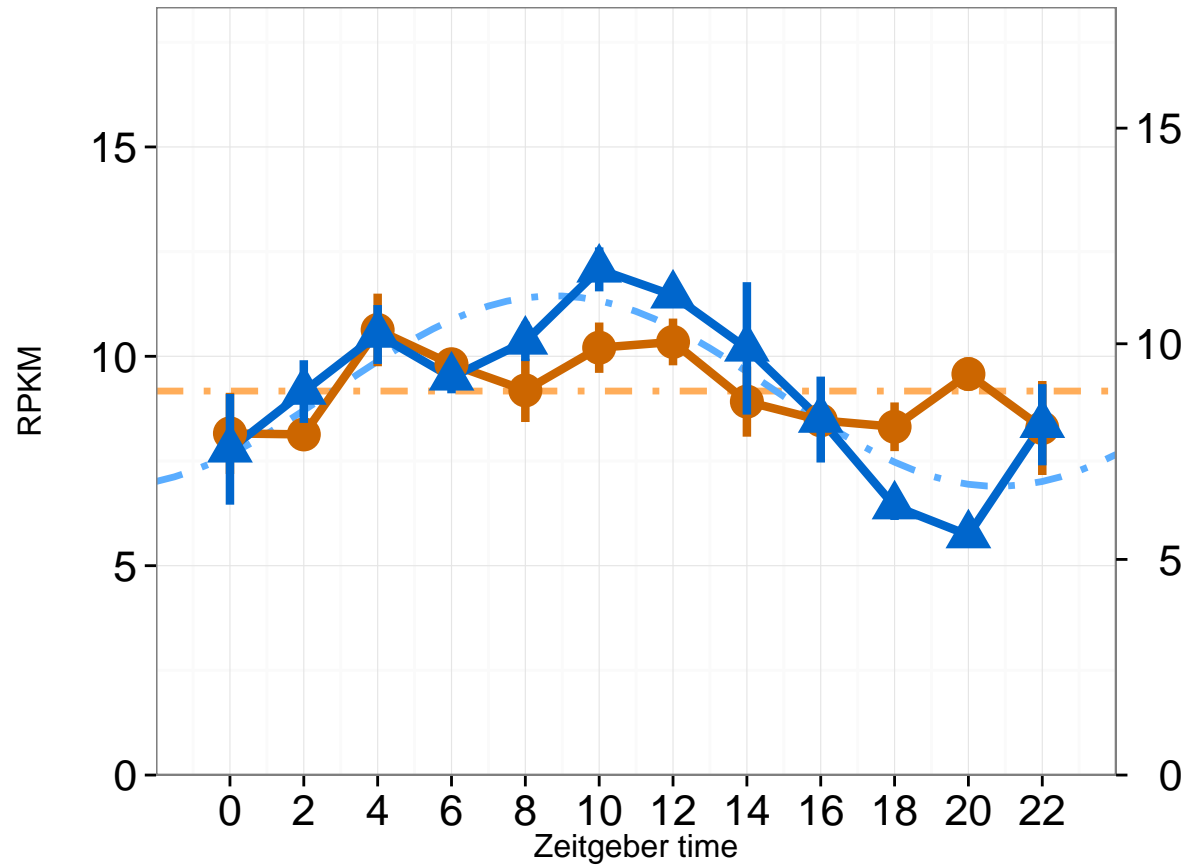

# Haus1

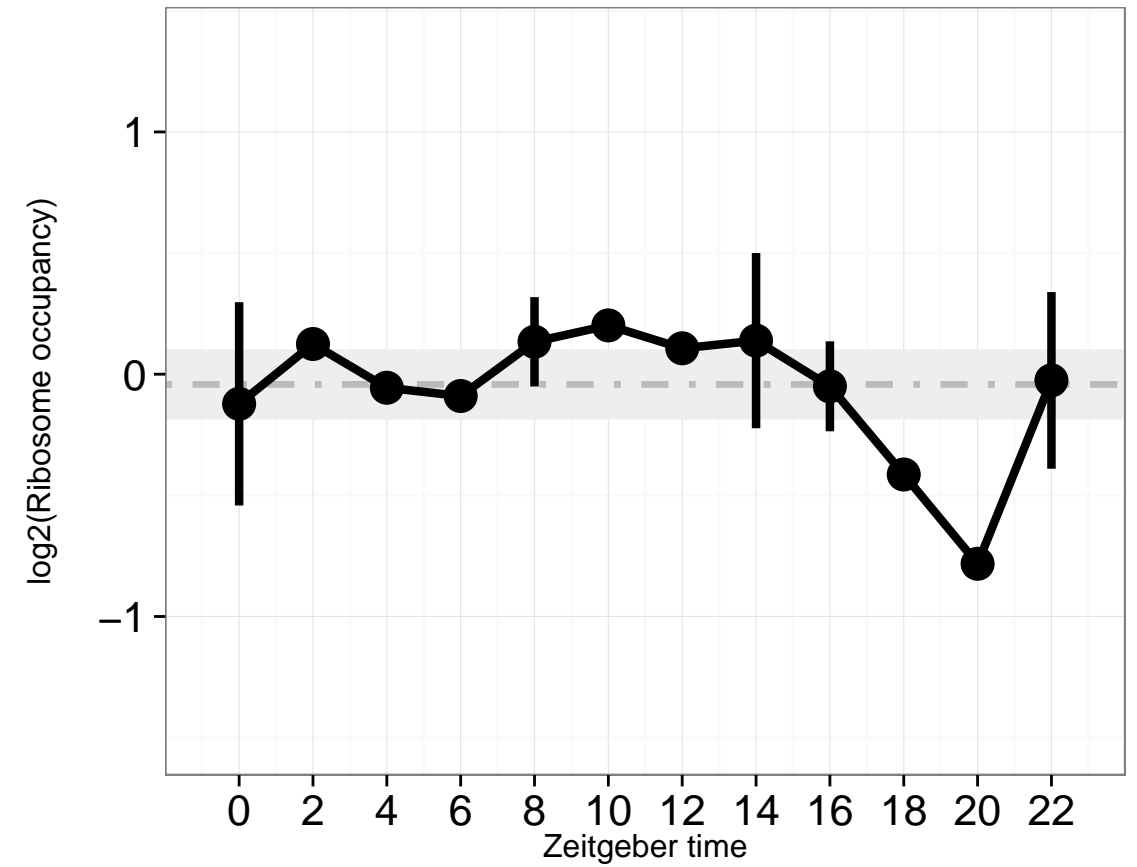

Supplement: Supplementary file 5261 [file 1]

## Slc16a12

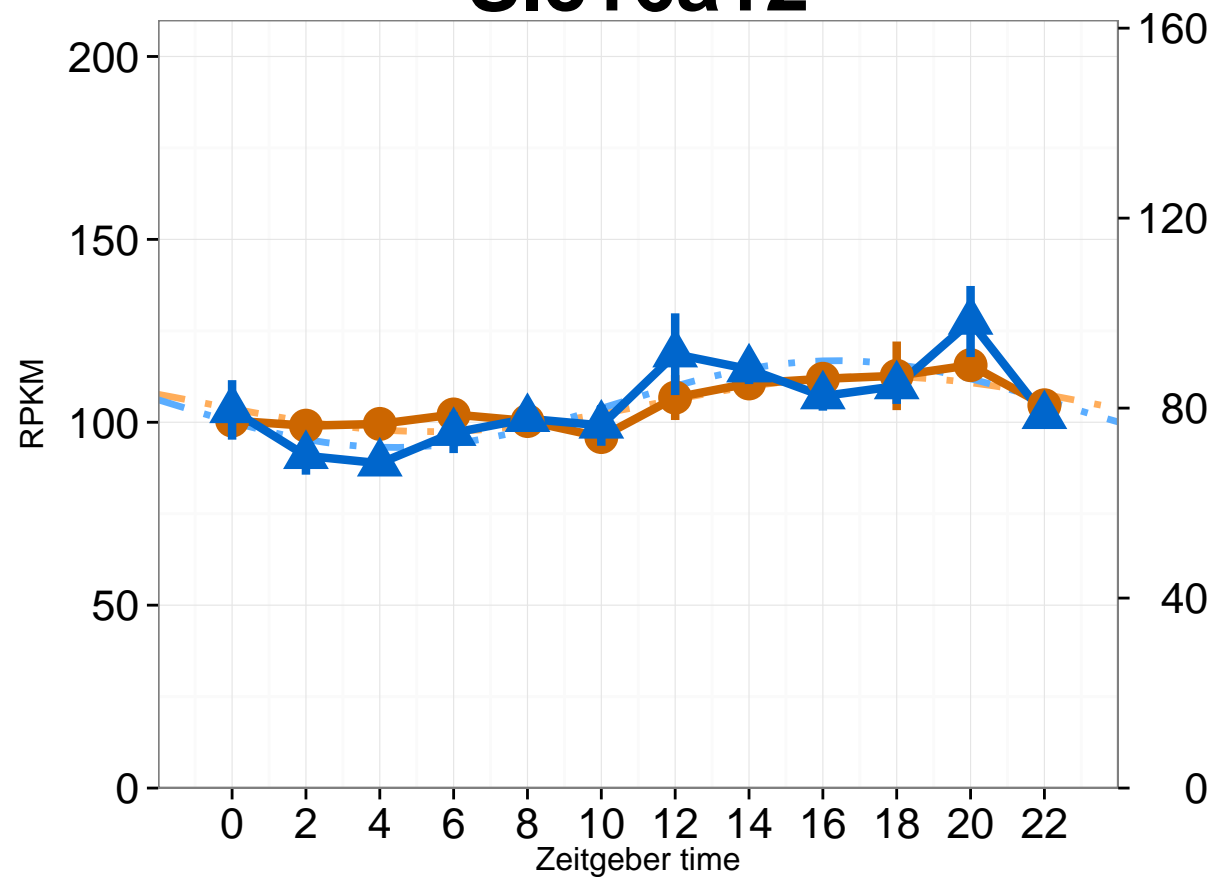

## Slc16a12

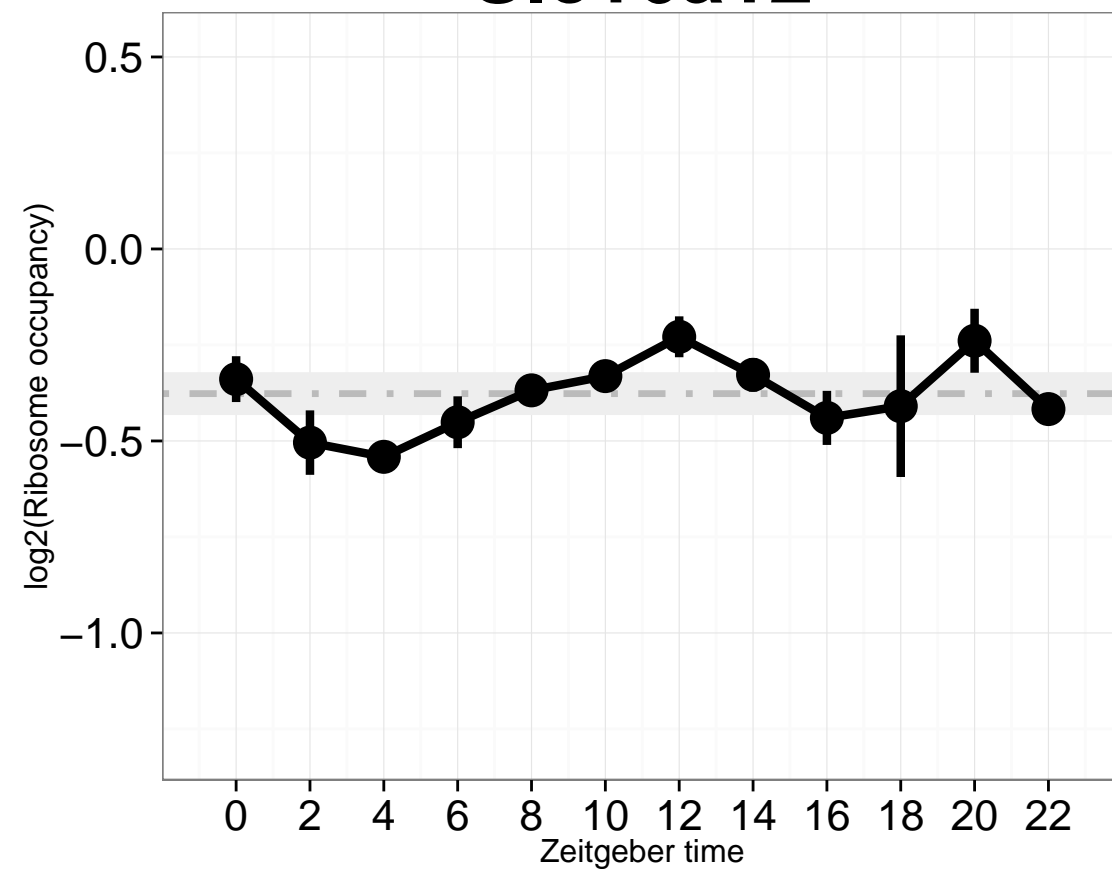

Supplement: Supplementary file 5262 [file 1]

**Tsn**

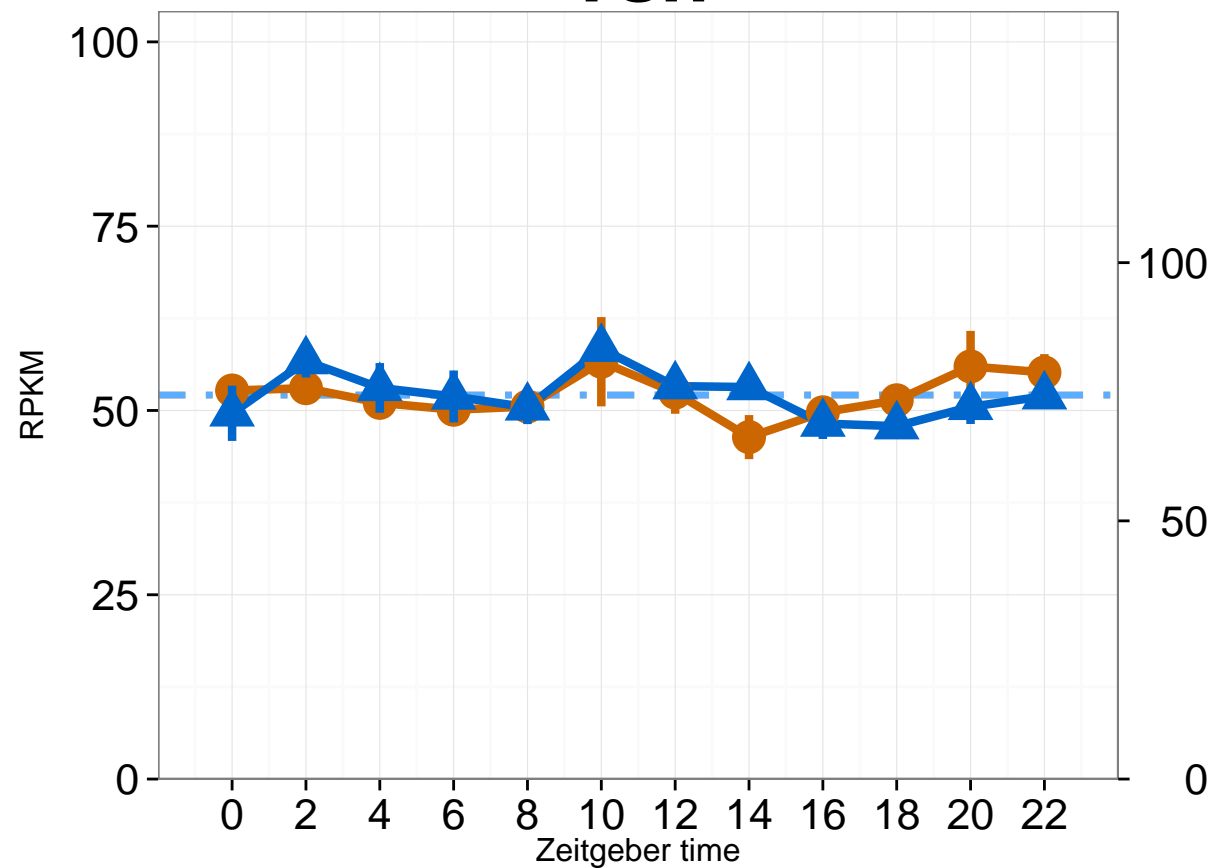

**Tsn**

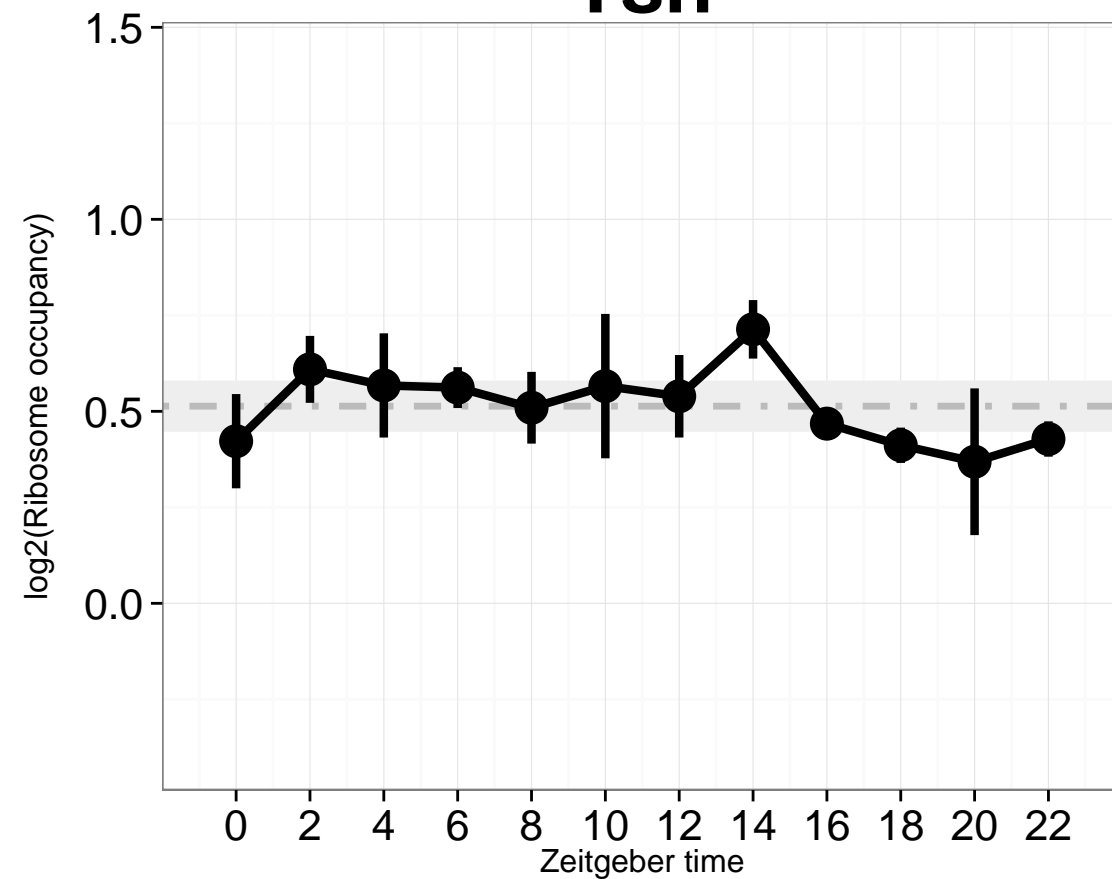

Supplement: Supplementary file 5263 [file 1]

# Rps15a

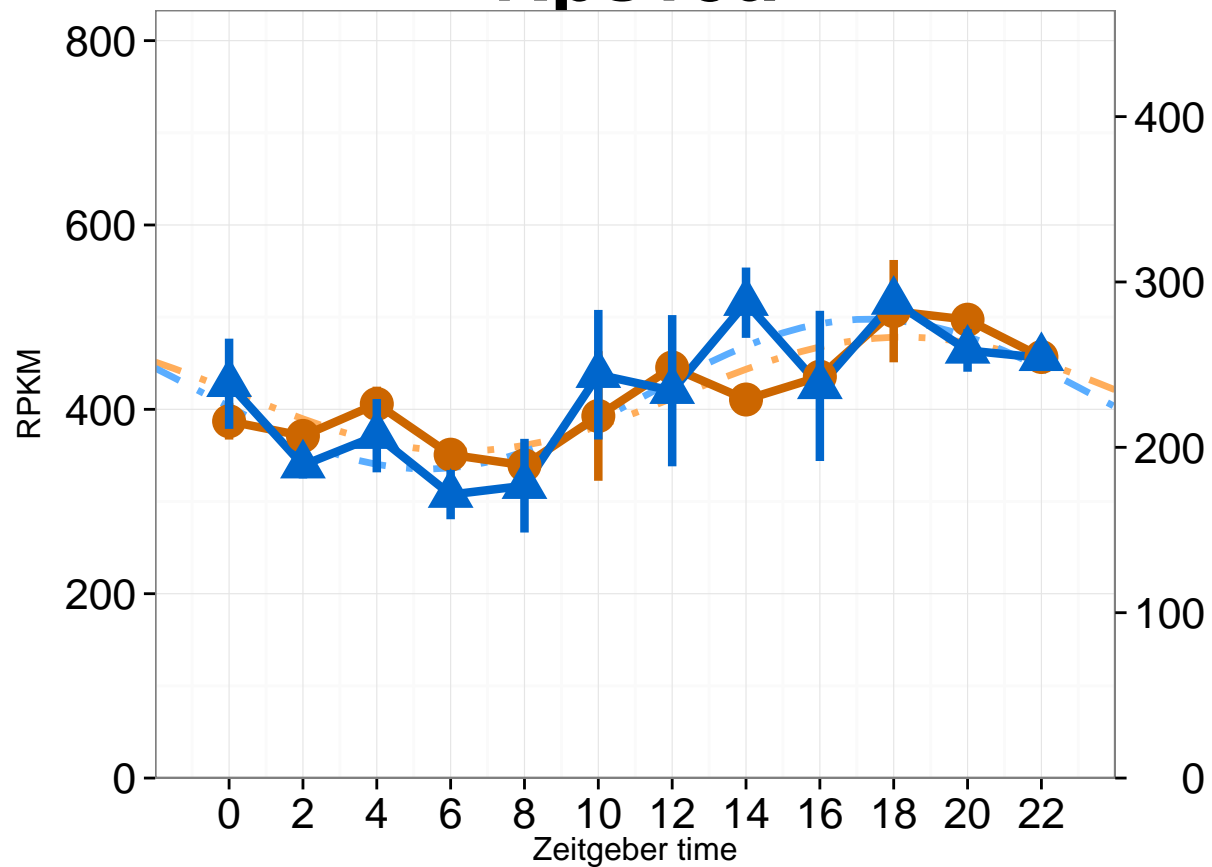

# Rps15a

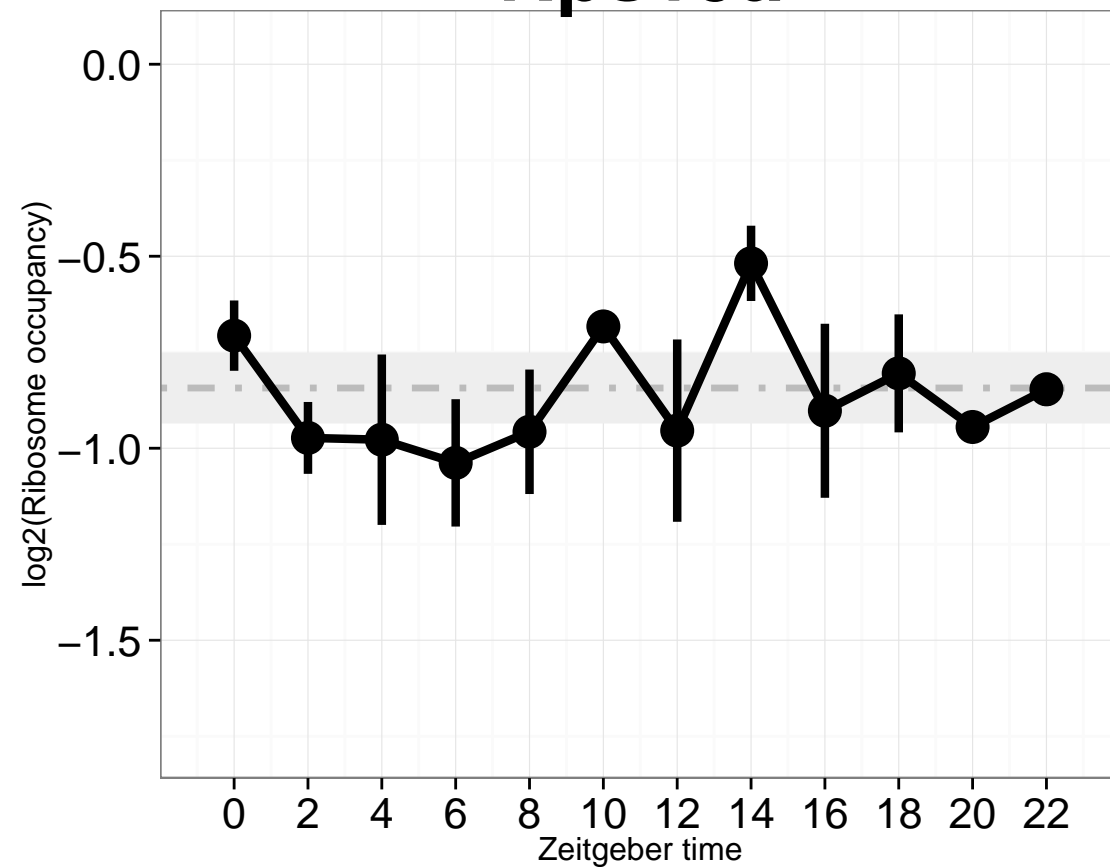

Supplement: Supplementary file 5264 [file 1]

## Uap1l1

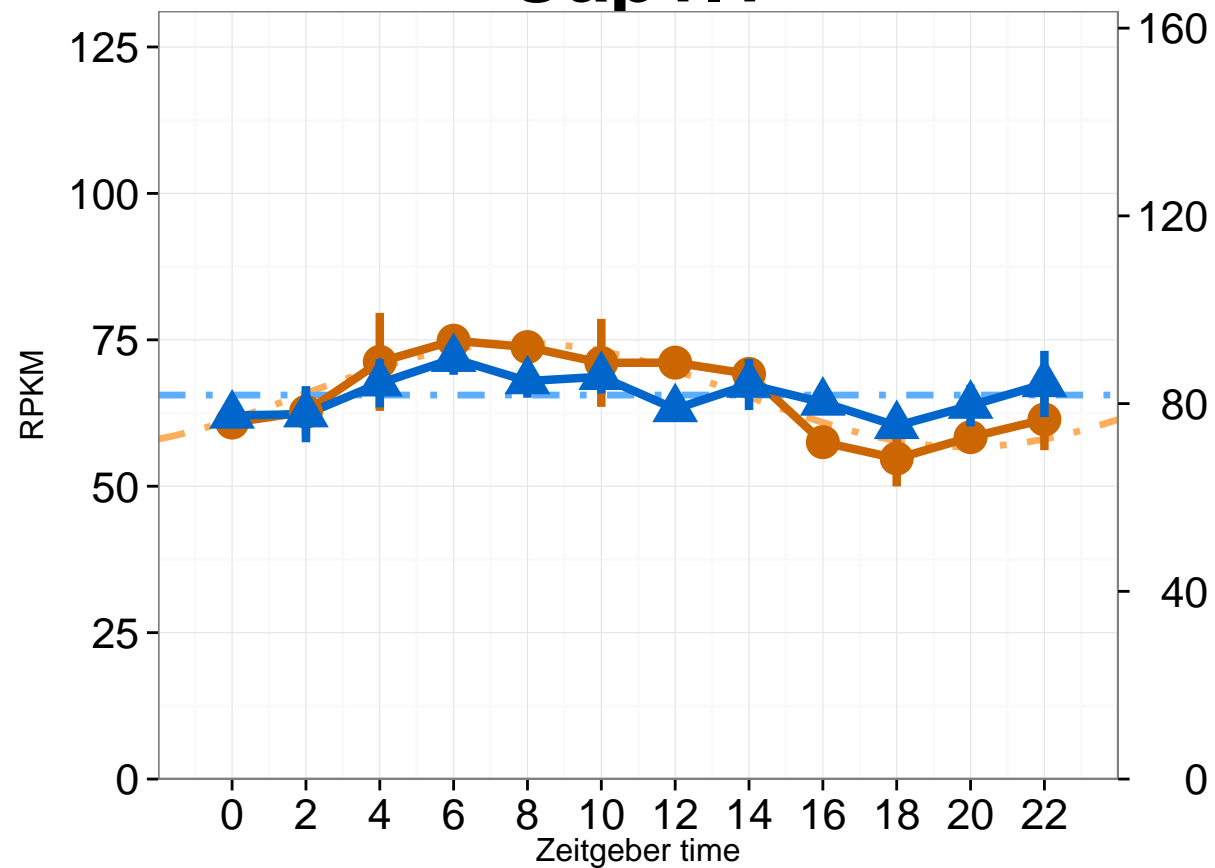

## Uap1l1

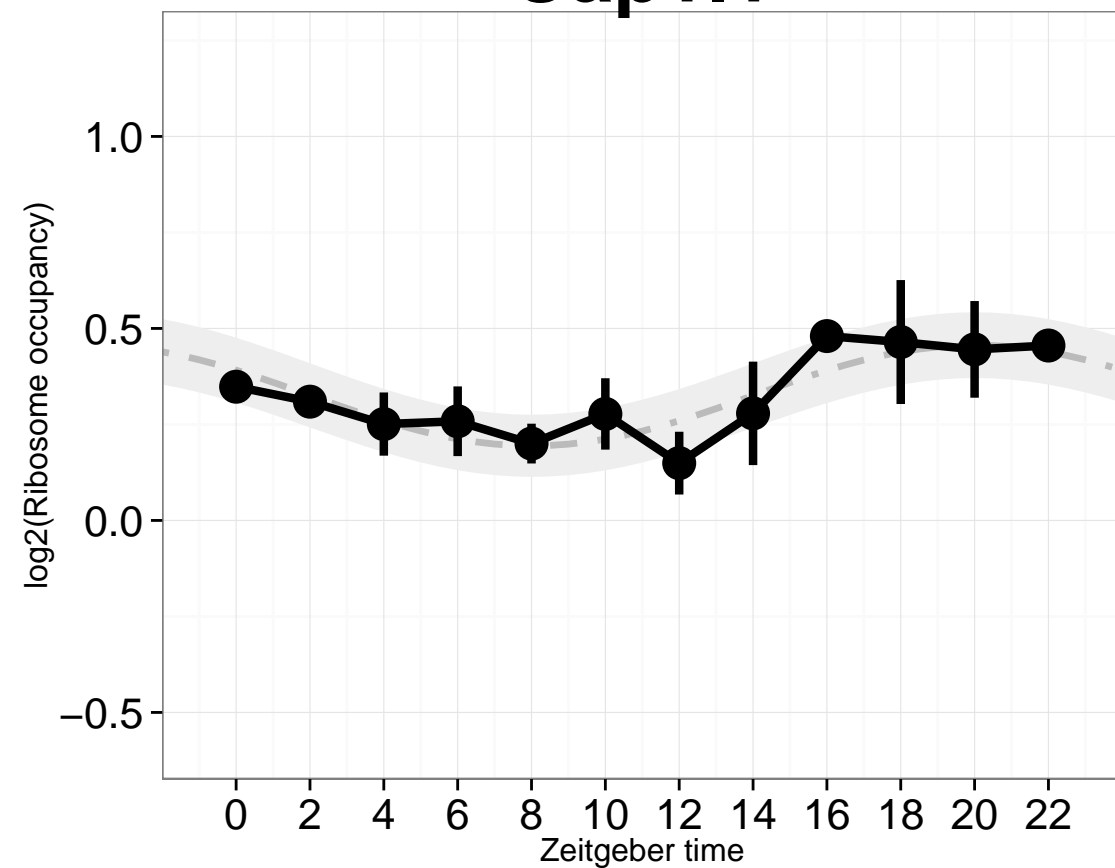

Supplement: Supplementary file 5265 [file 1]

# Osbpl11

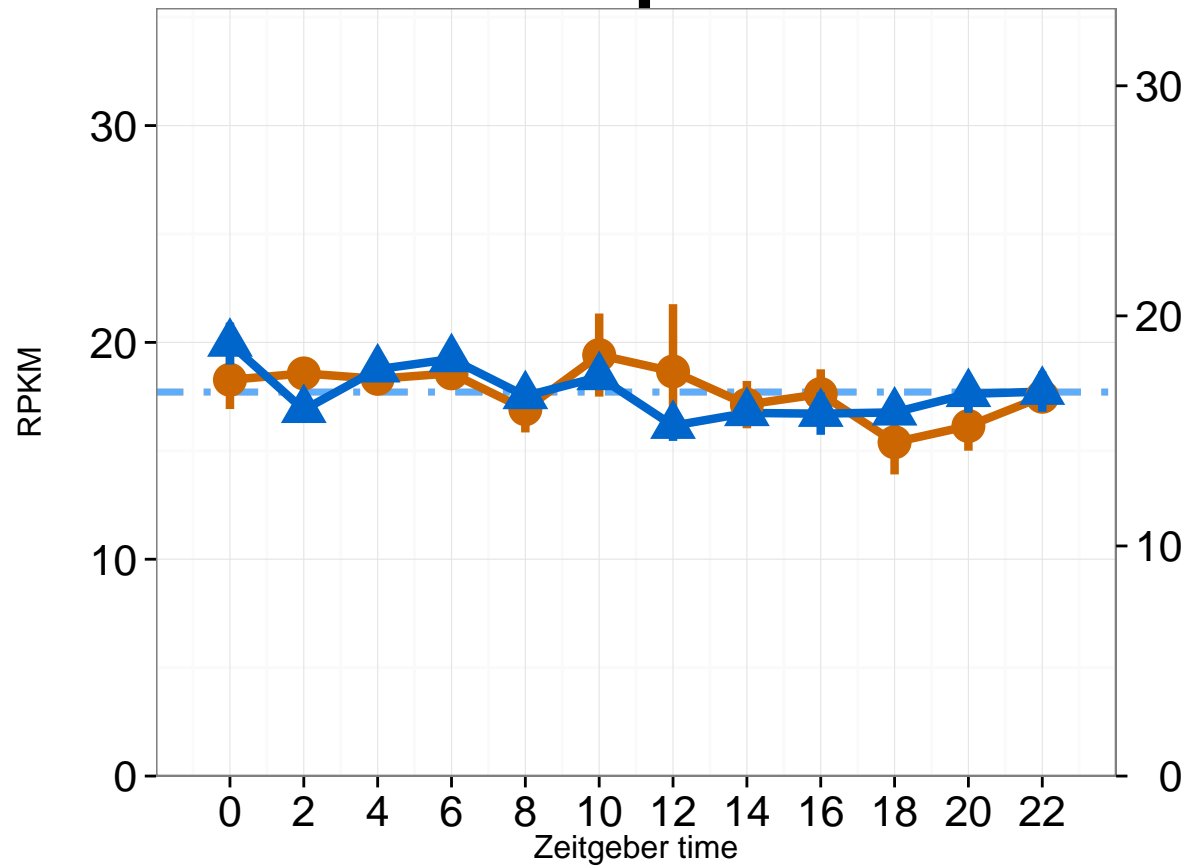

# Osbpl11

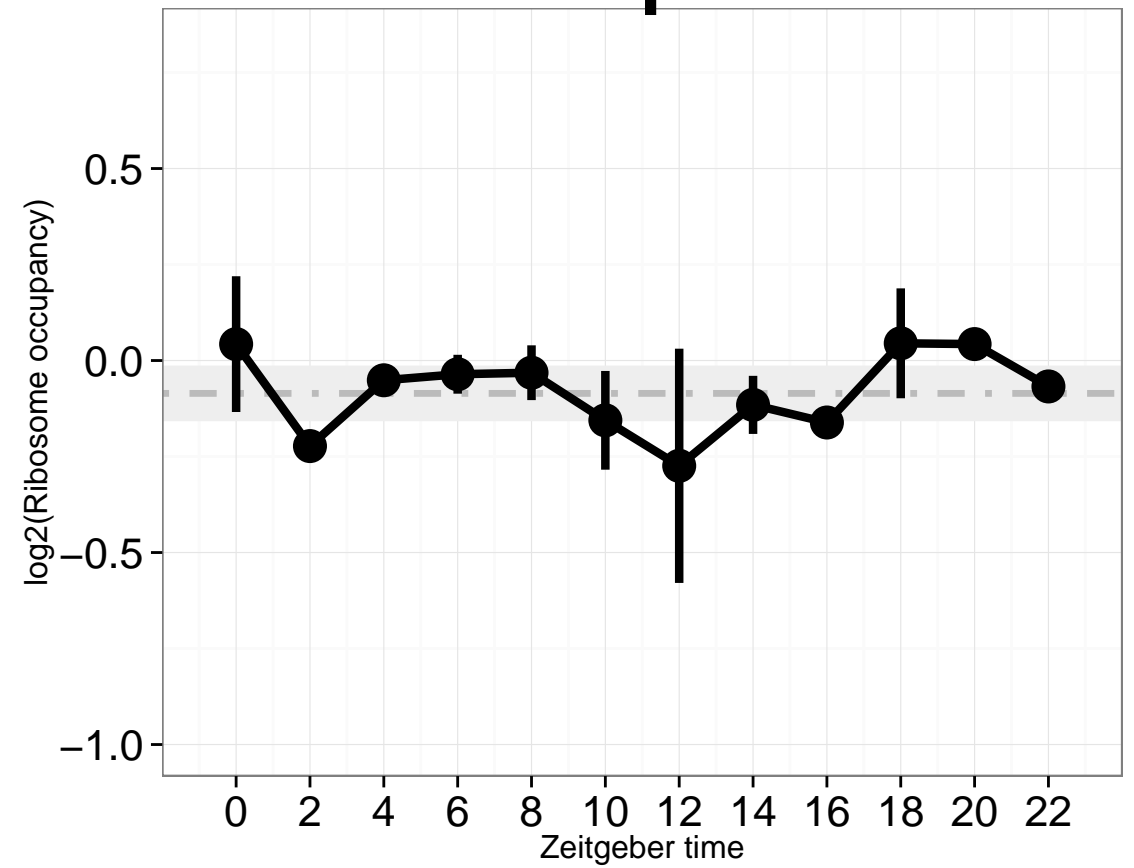

Supplement: Supplementary file 5266 [file 1]

## Tmem237

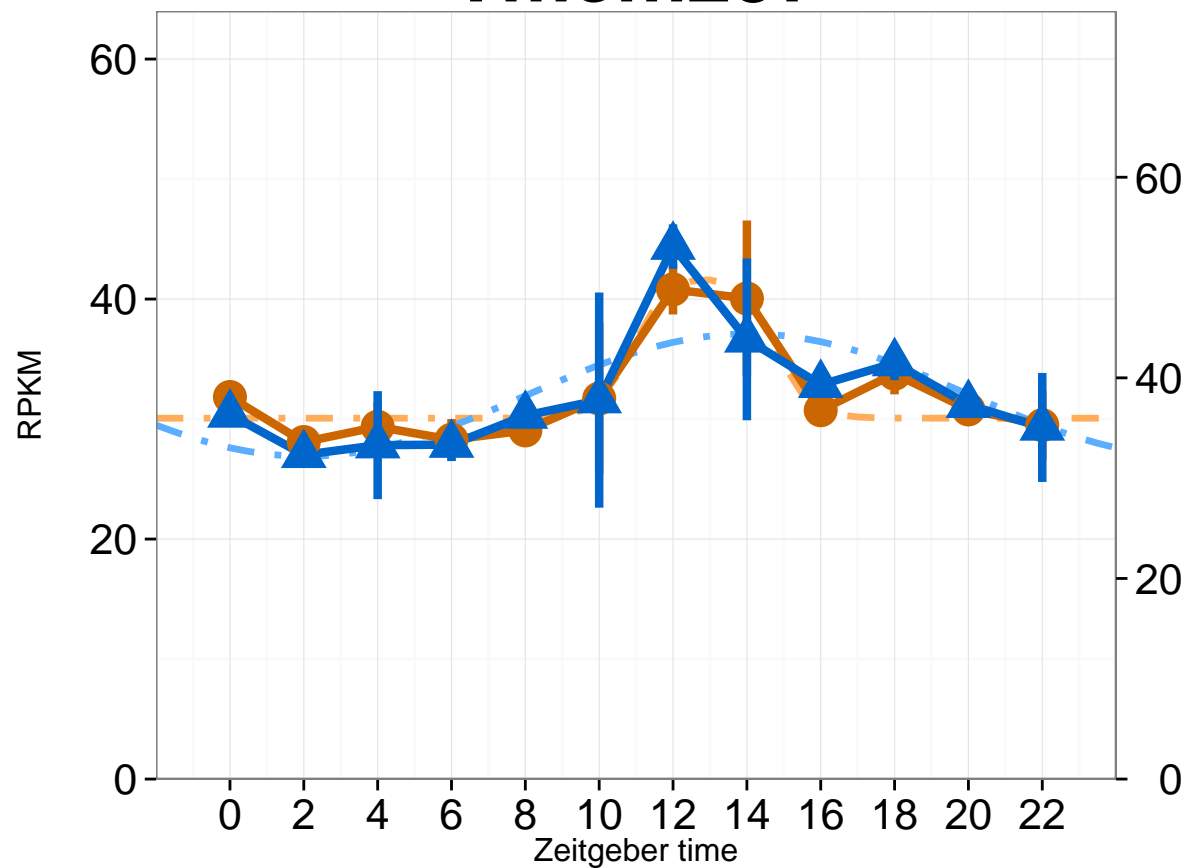

## Tmem237

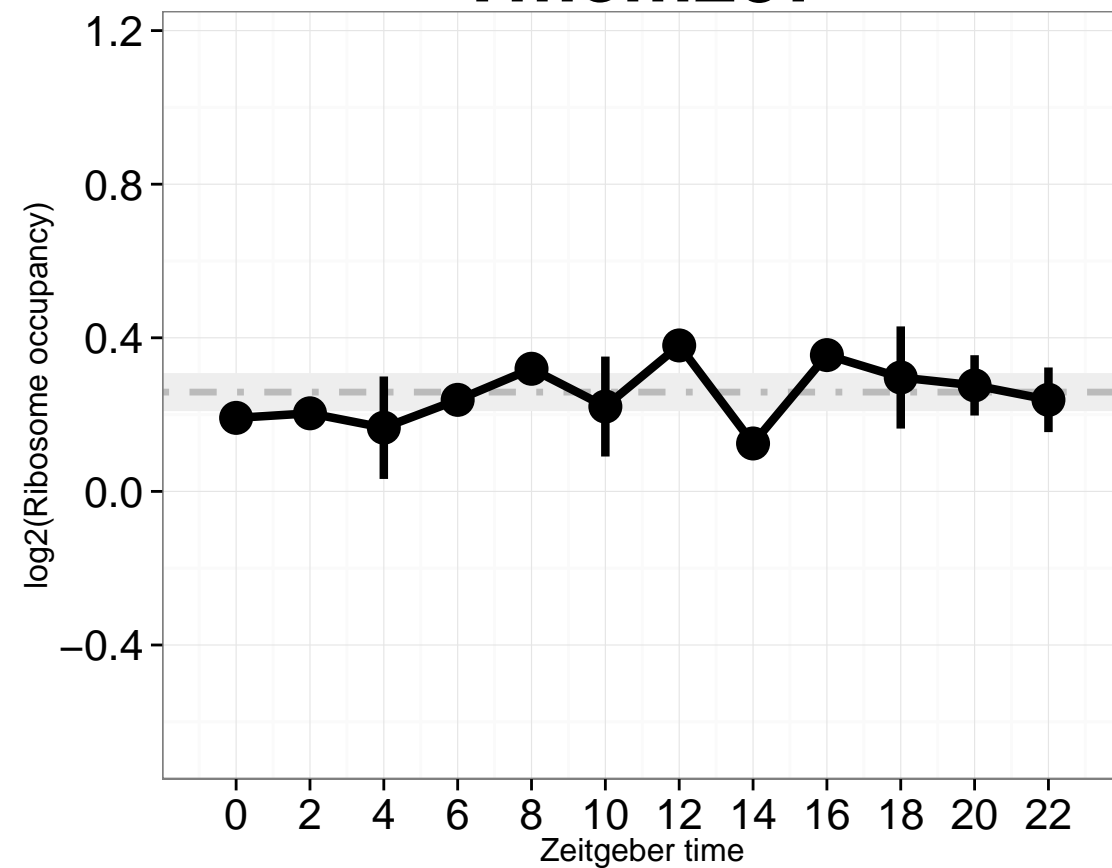

Supplement: Supplementary file 5267 [file 1]

## Kif5b

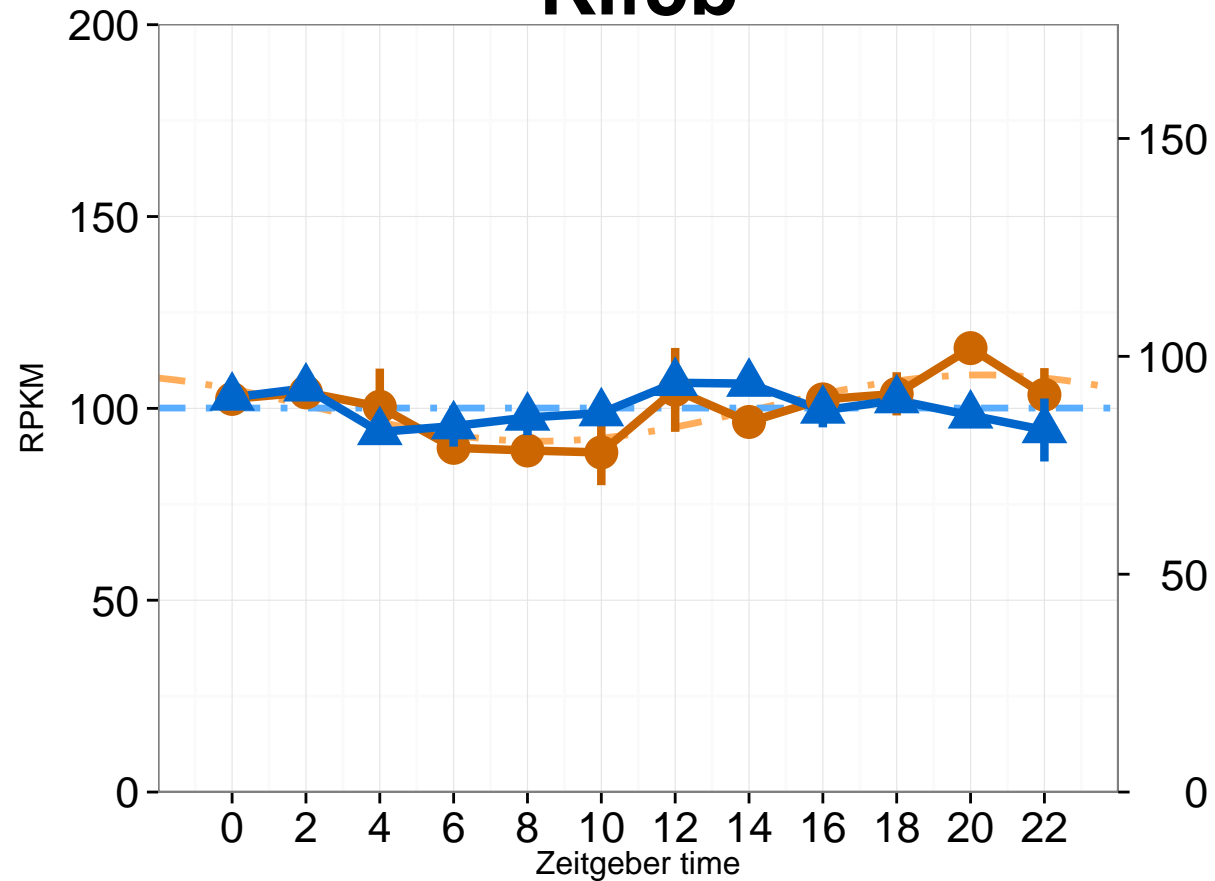

## Kif5b

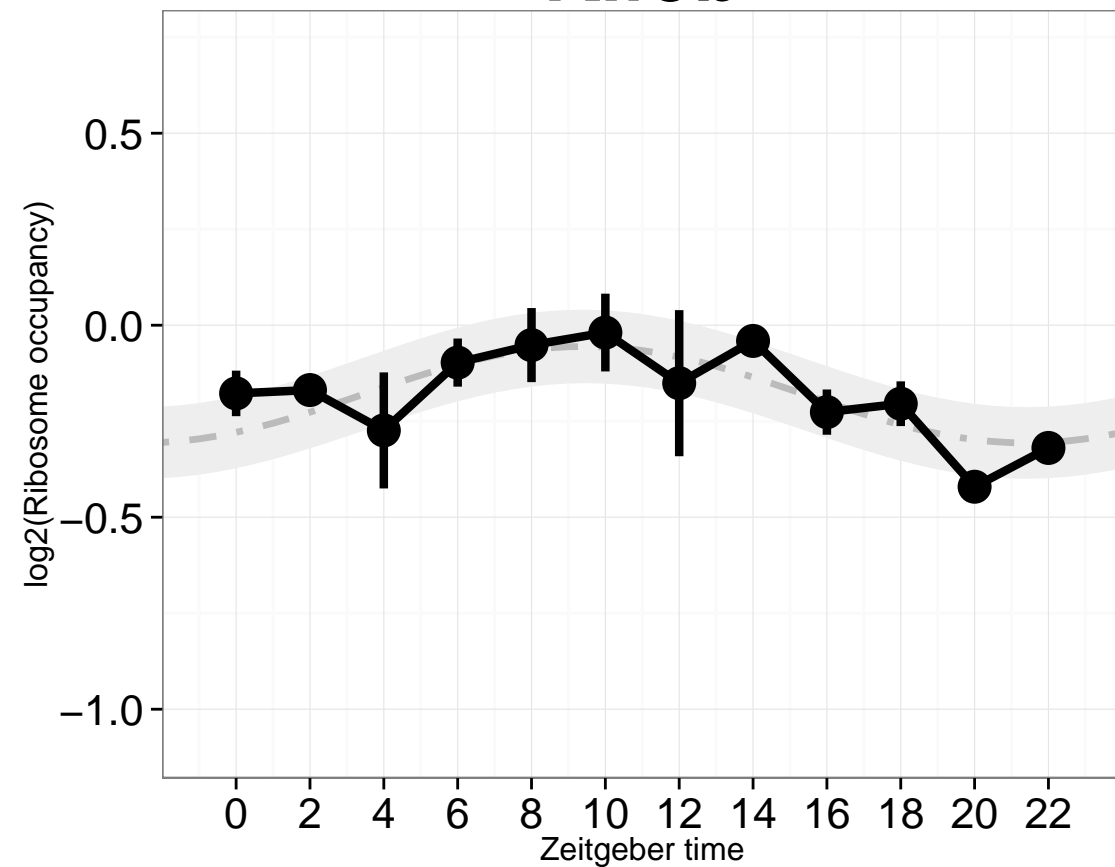

Supplement: Supplementary file 5268 [file 1]

## Tusc2

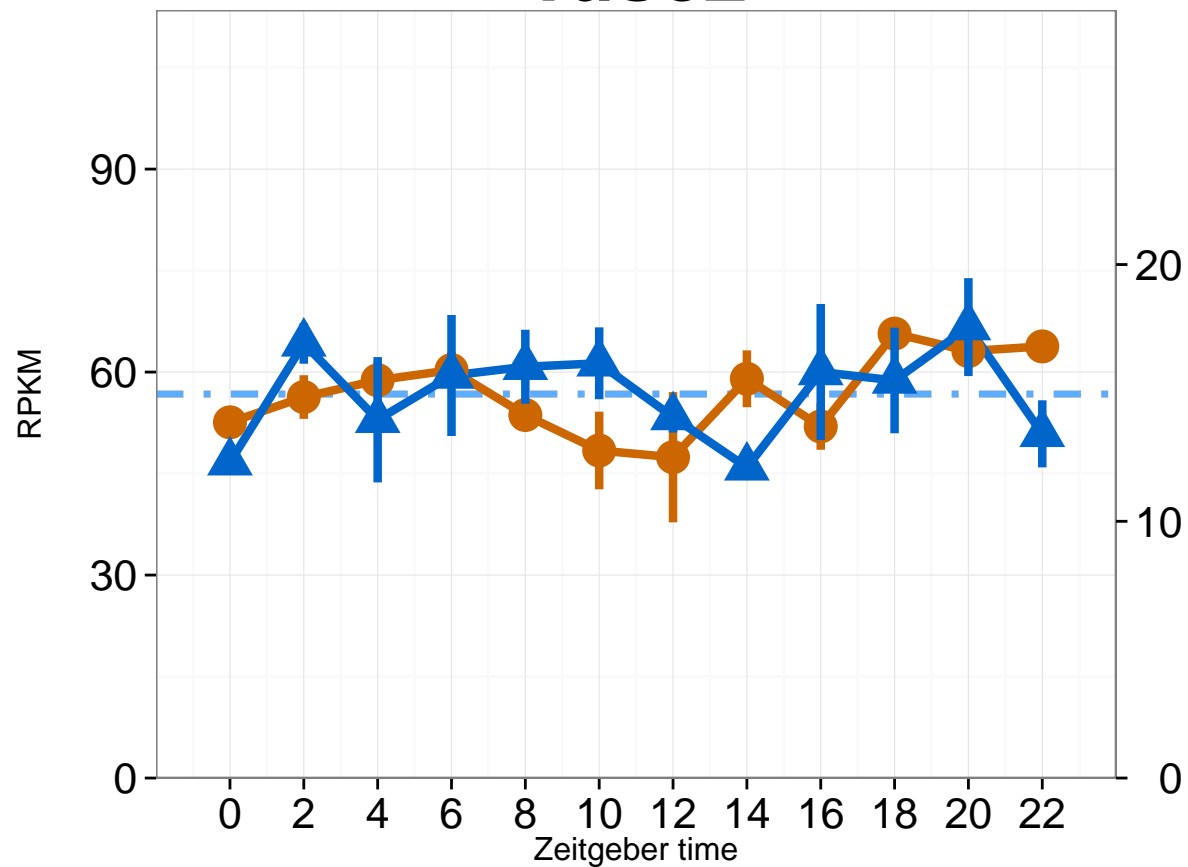

## Tusc2

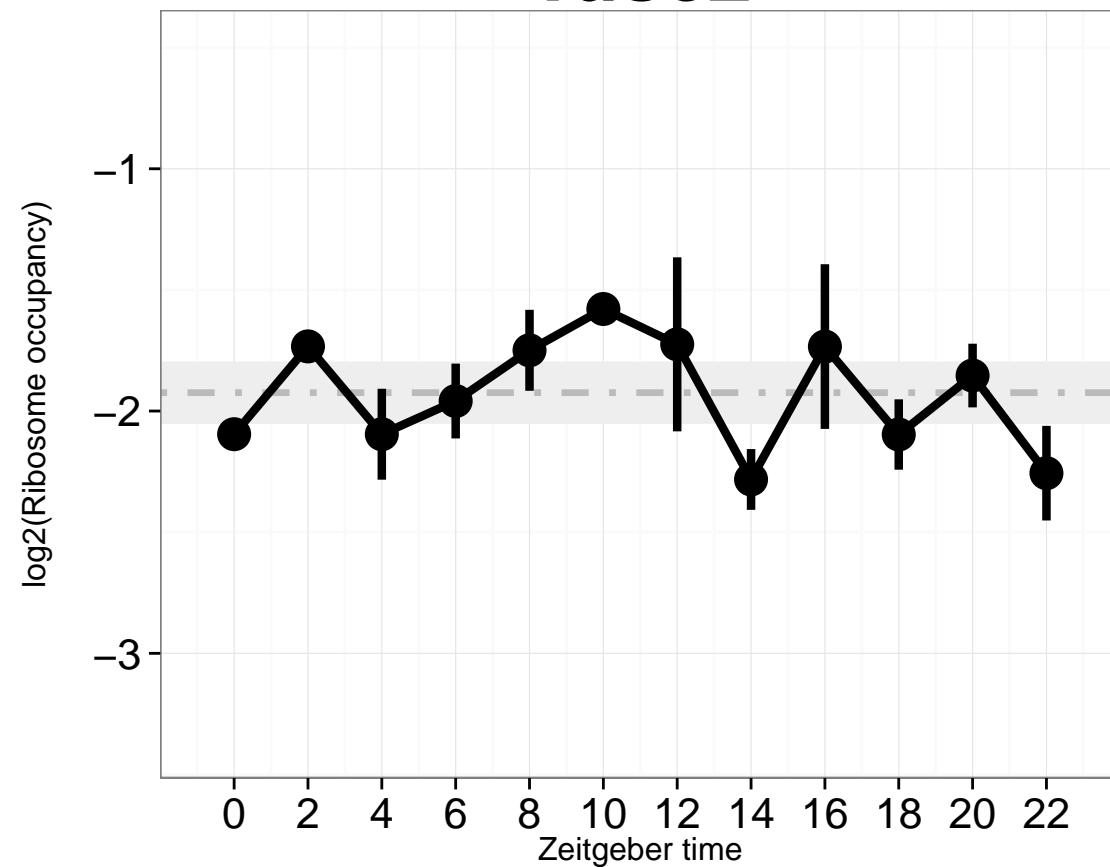

Supplement: Supplementary file 5269 [file 1]

## Pnkd

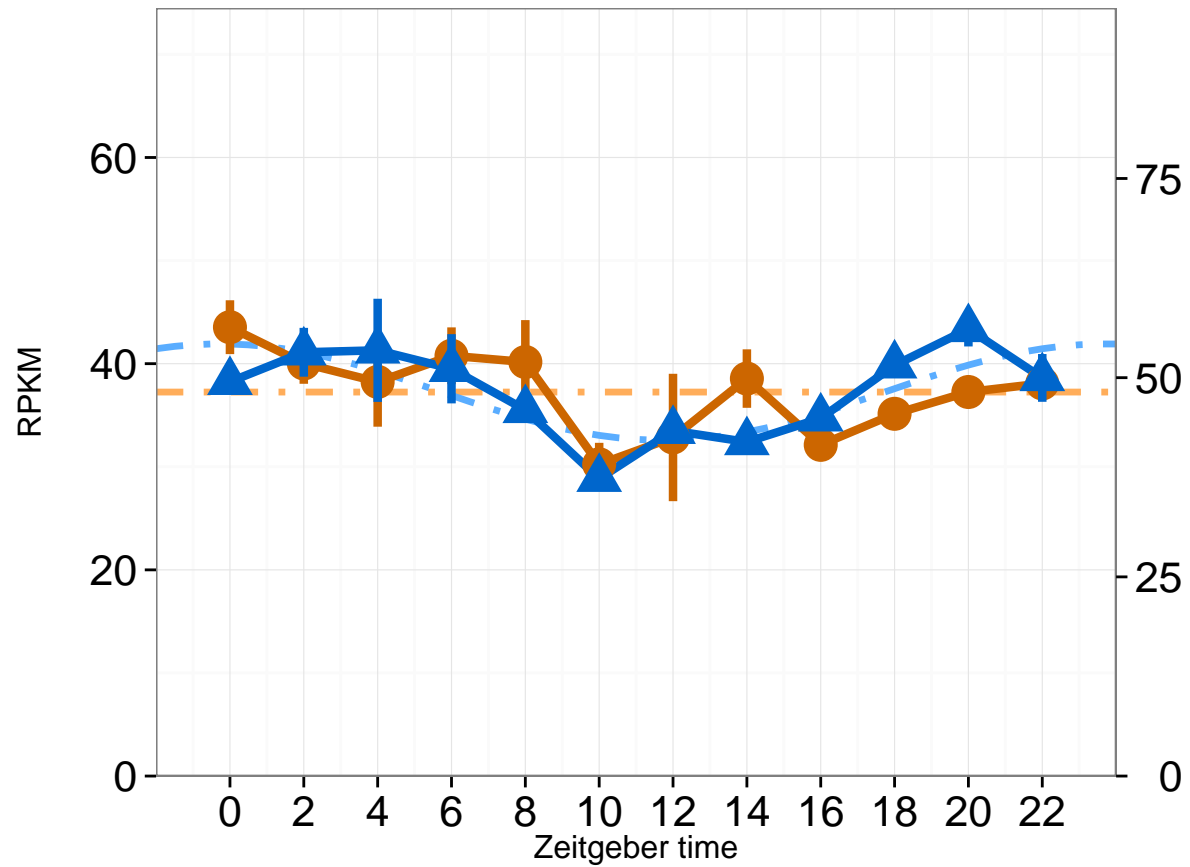

## Pnkd

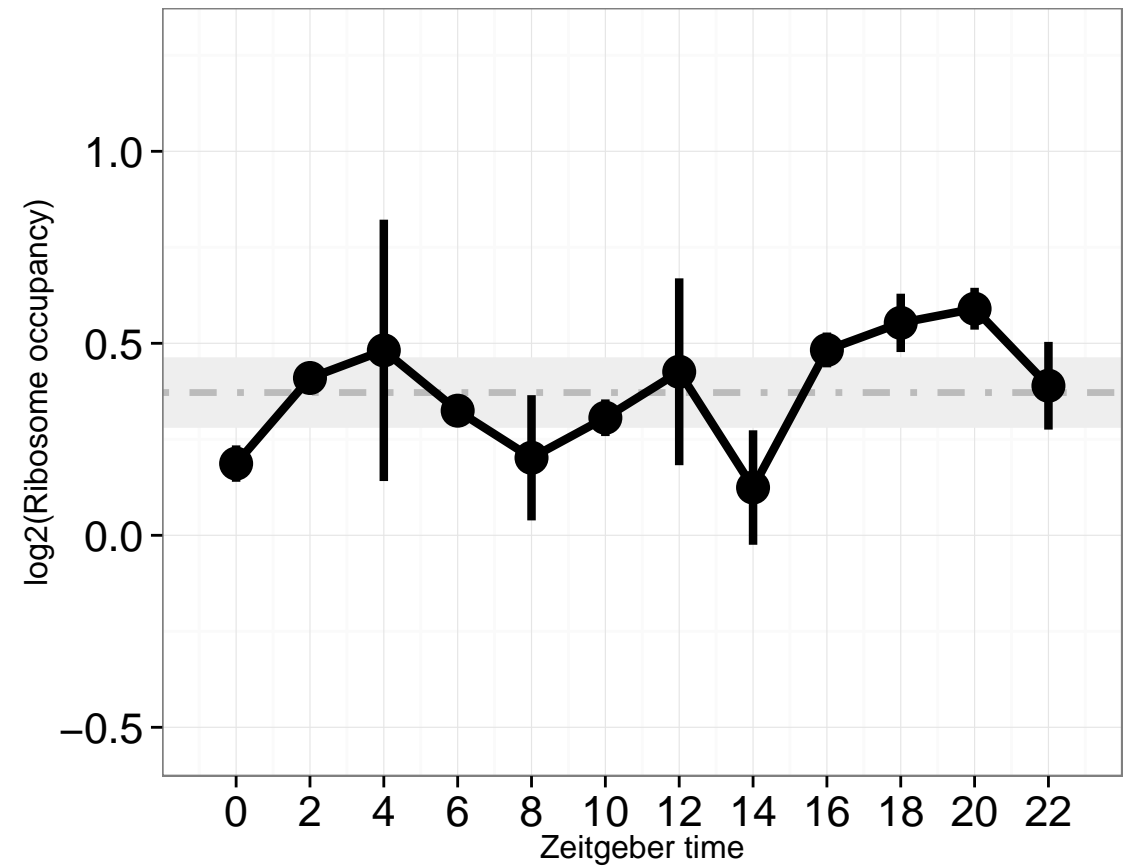

Supplement: Supplementary file 5270 [file 1]

# Ptplad1

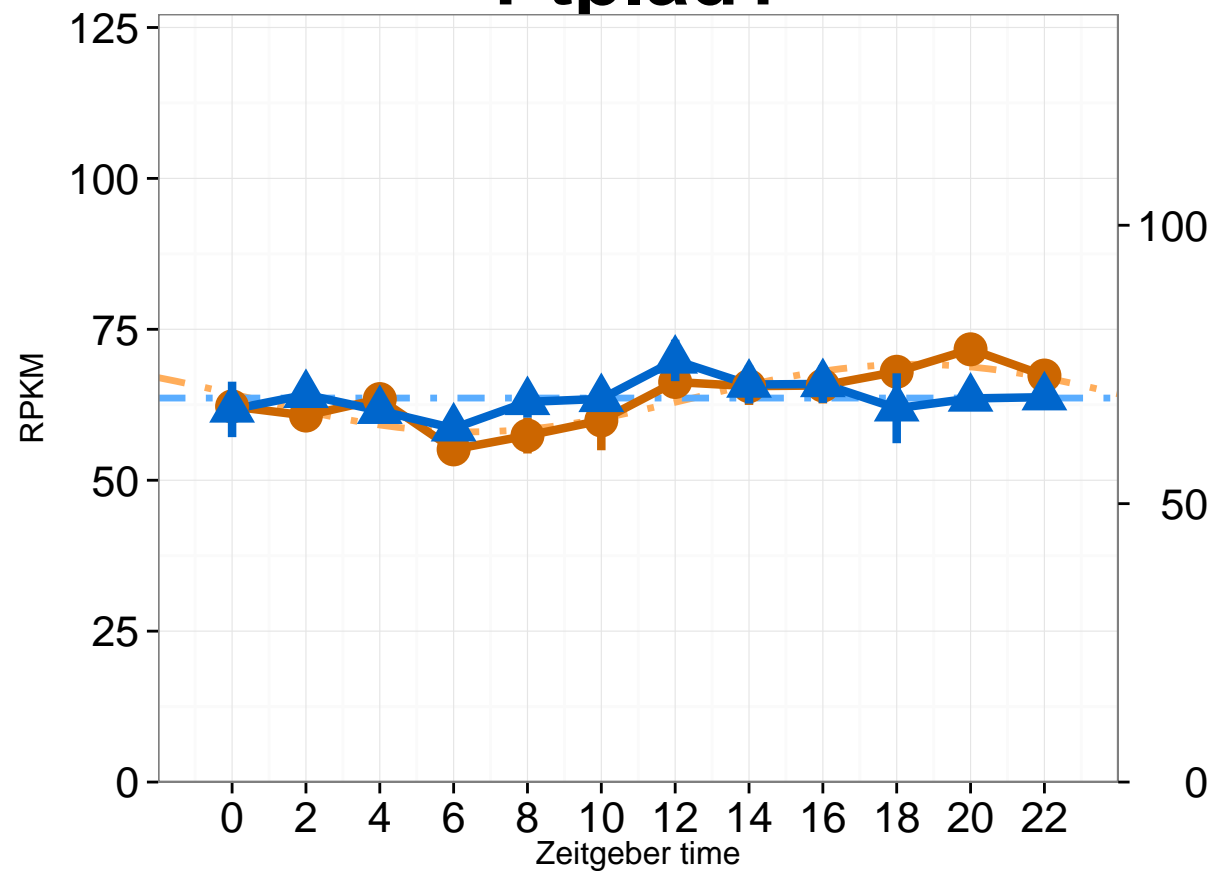

# Ptplad1

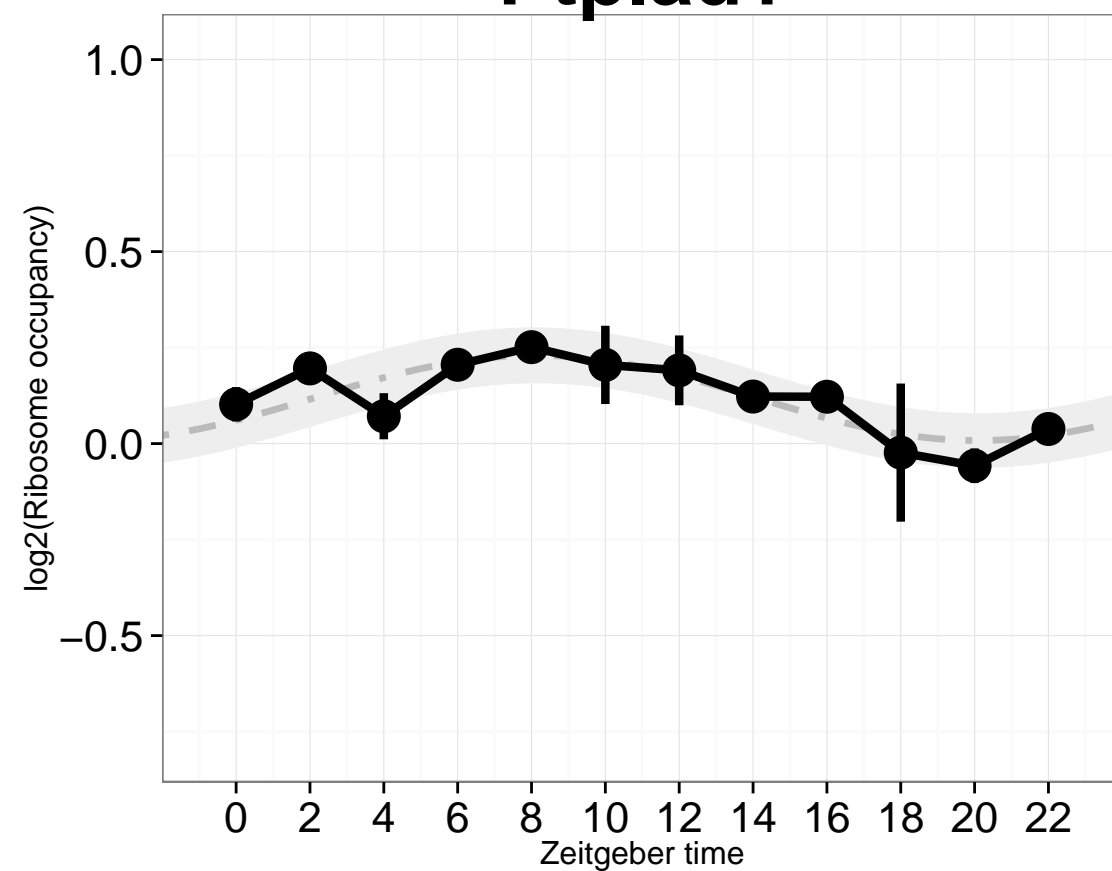

Supplement: Supplementary file 5271 [file 1]

## Cdon

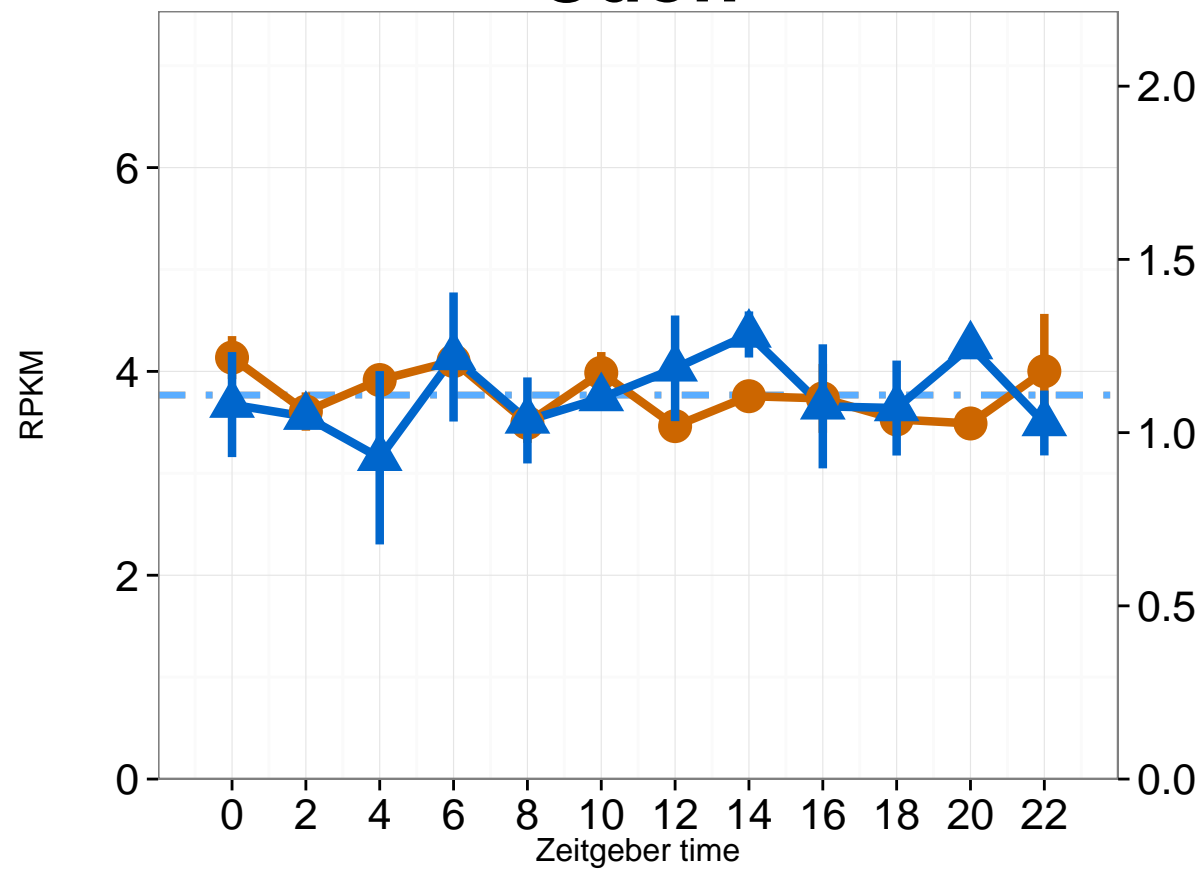

## Cdon

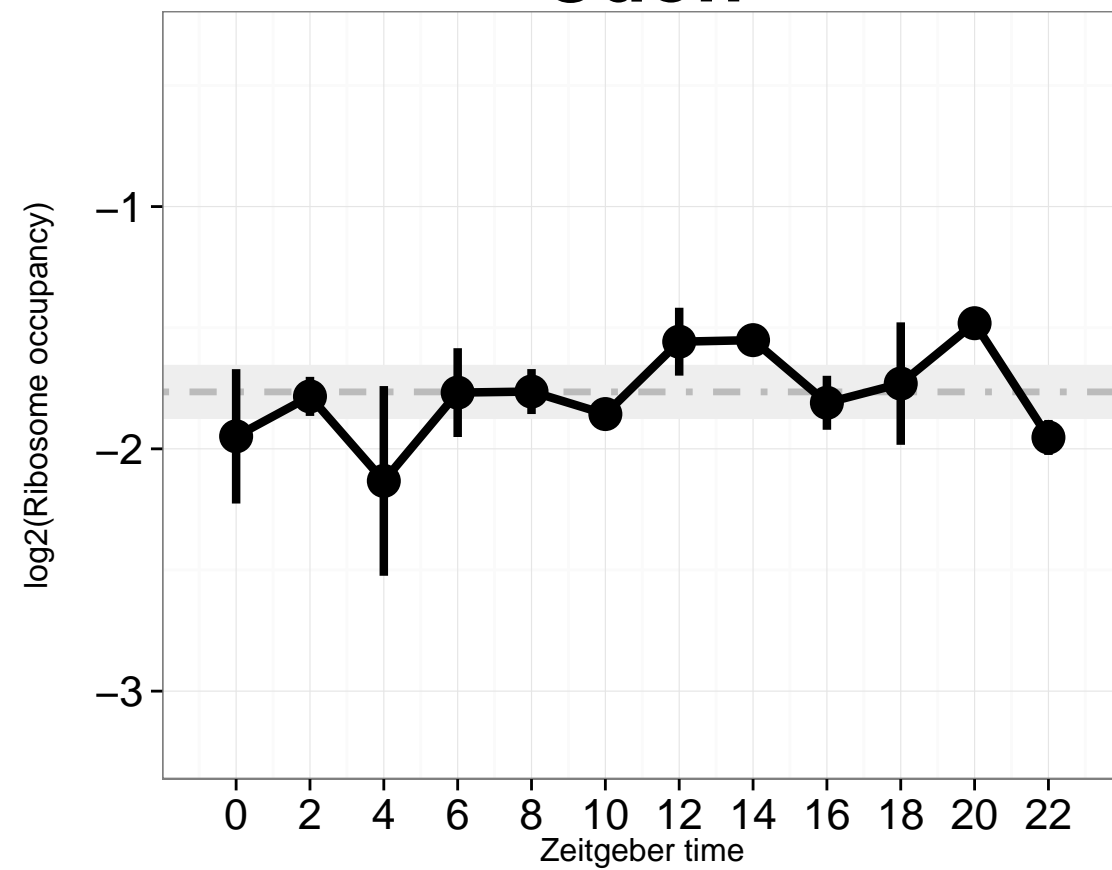

Supplement: Supplementary file 5272 [file 1]

## Slc12a4

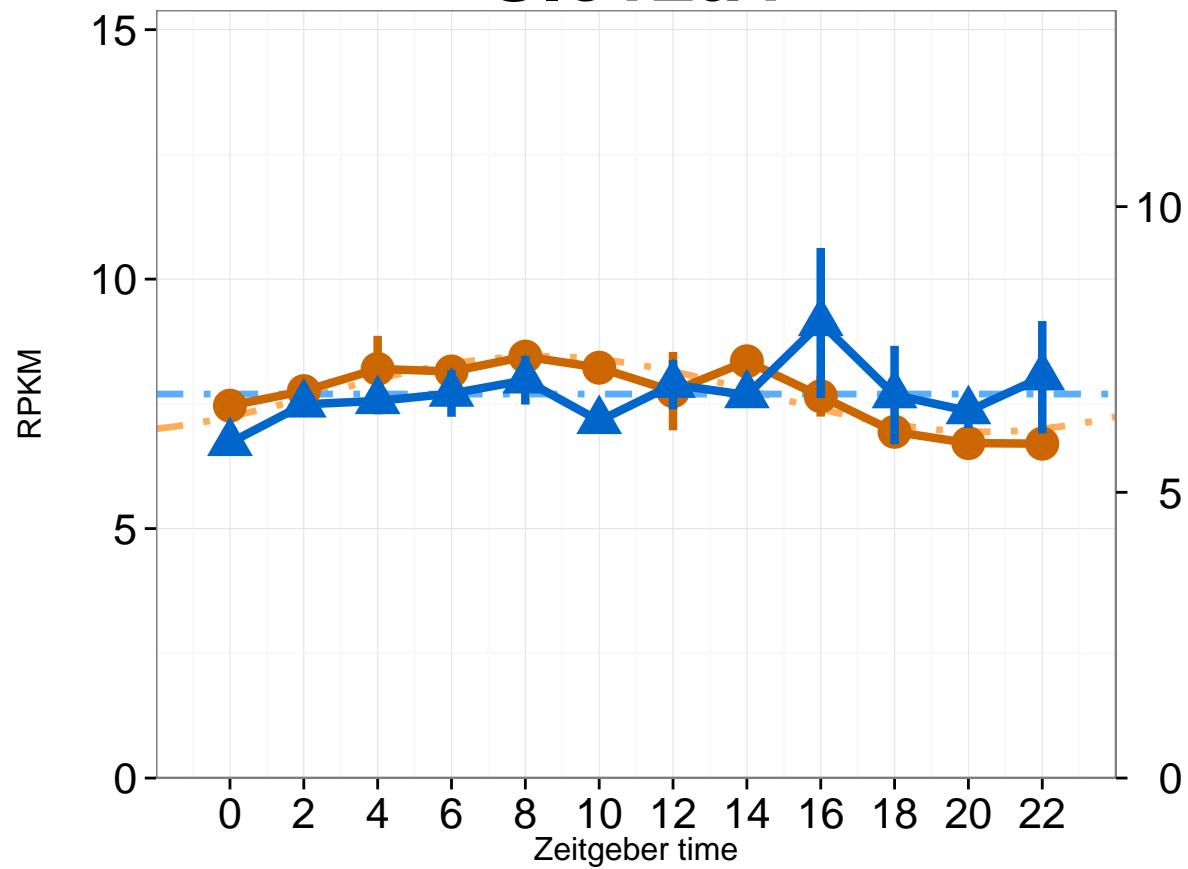

## Slc12a4

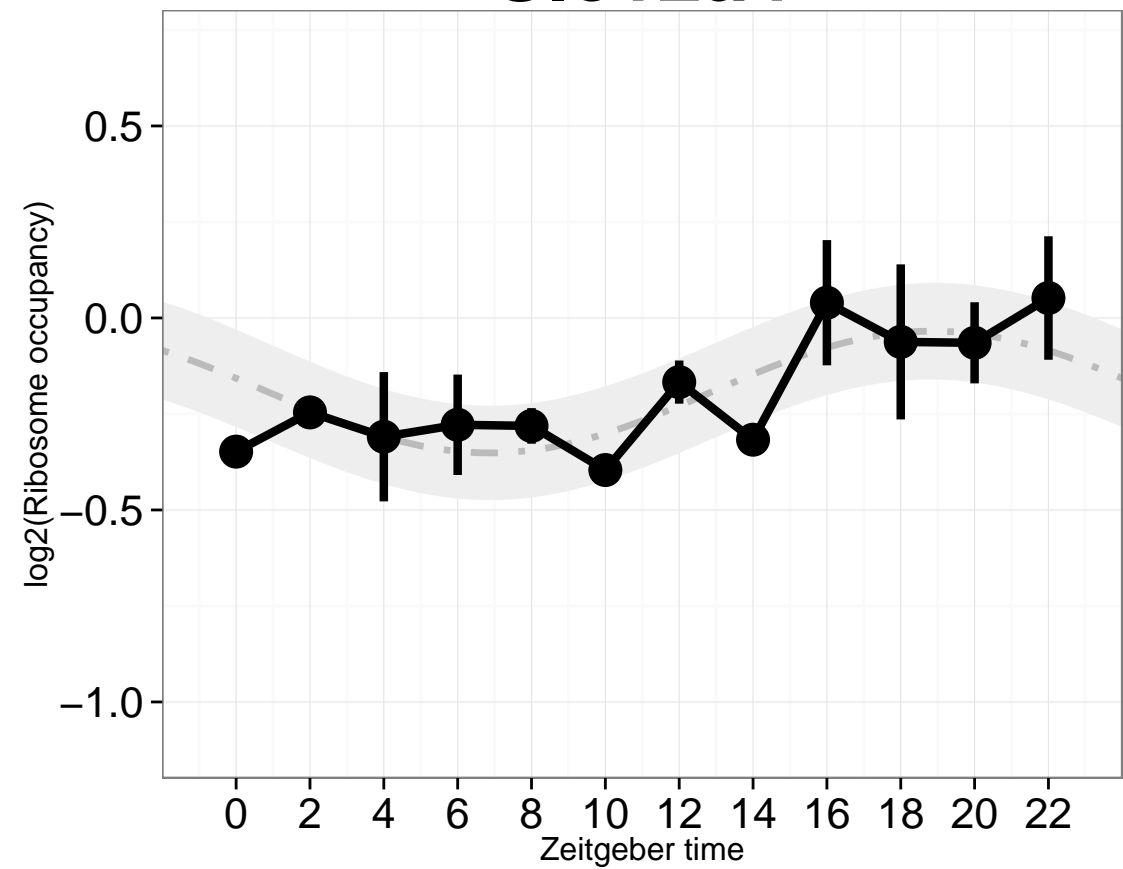

Supplement: Supplementary file 5273 [file 1]

## Foxj3

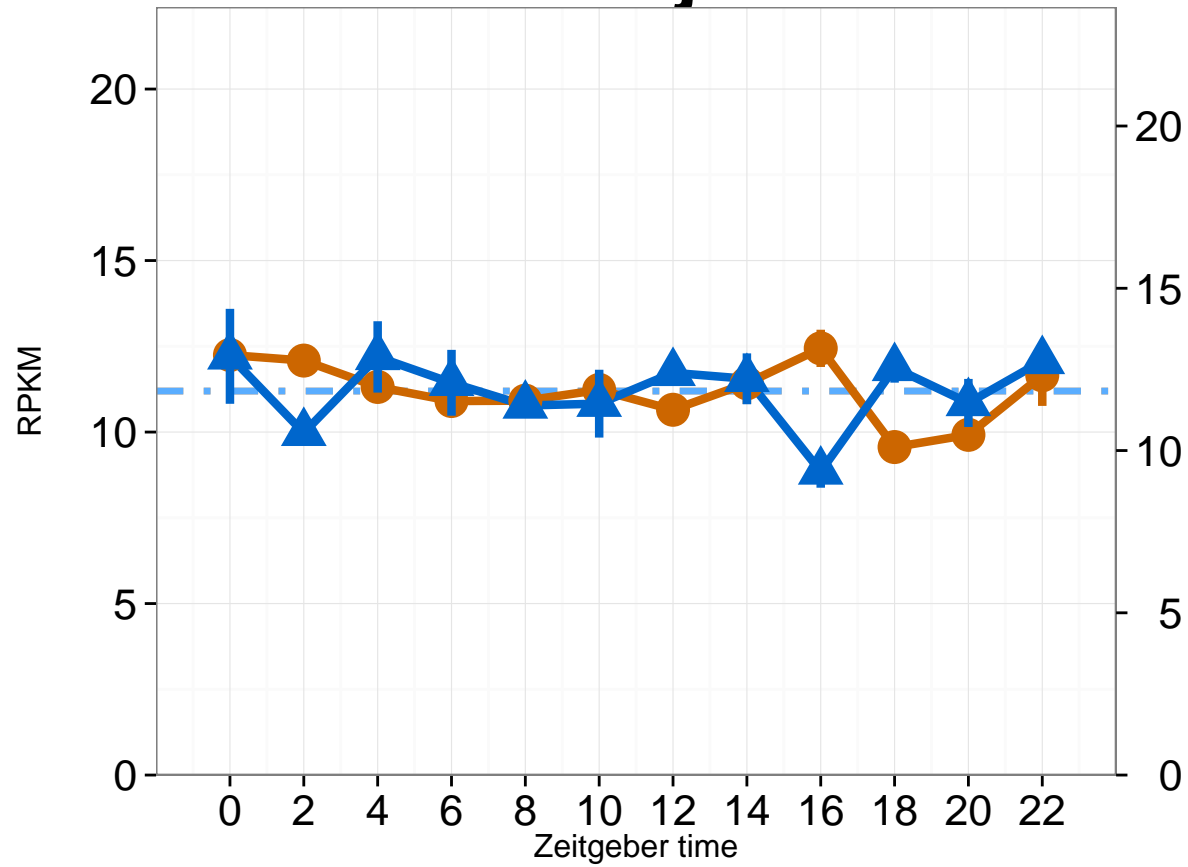

## Foxj3

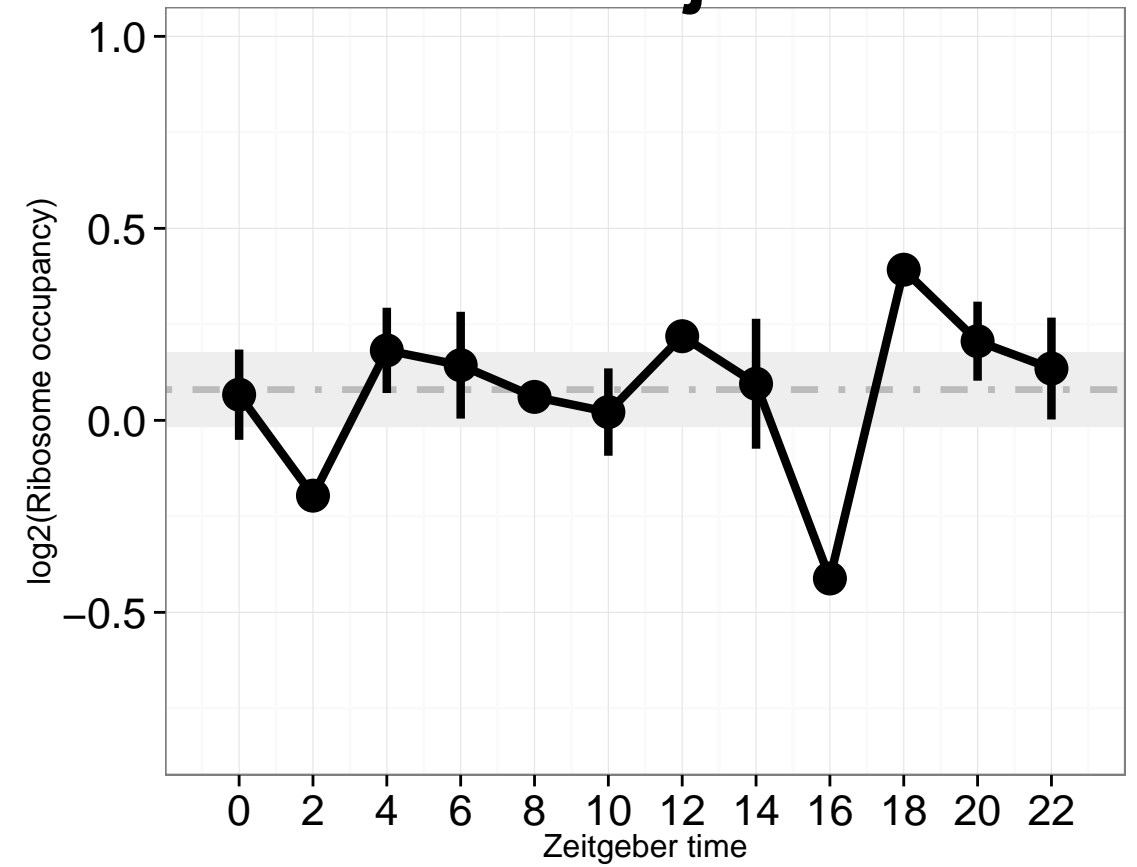

Supplement: Supplementary file 5274 [file 1]

## Asx12

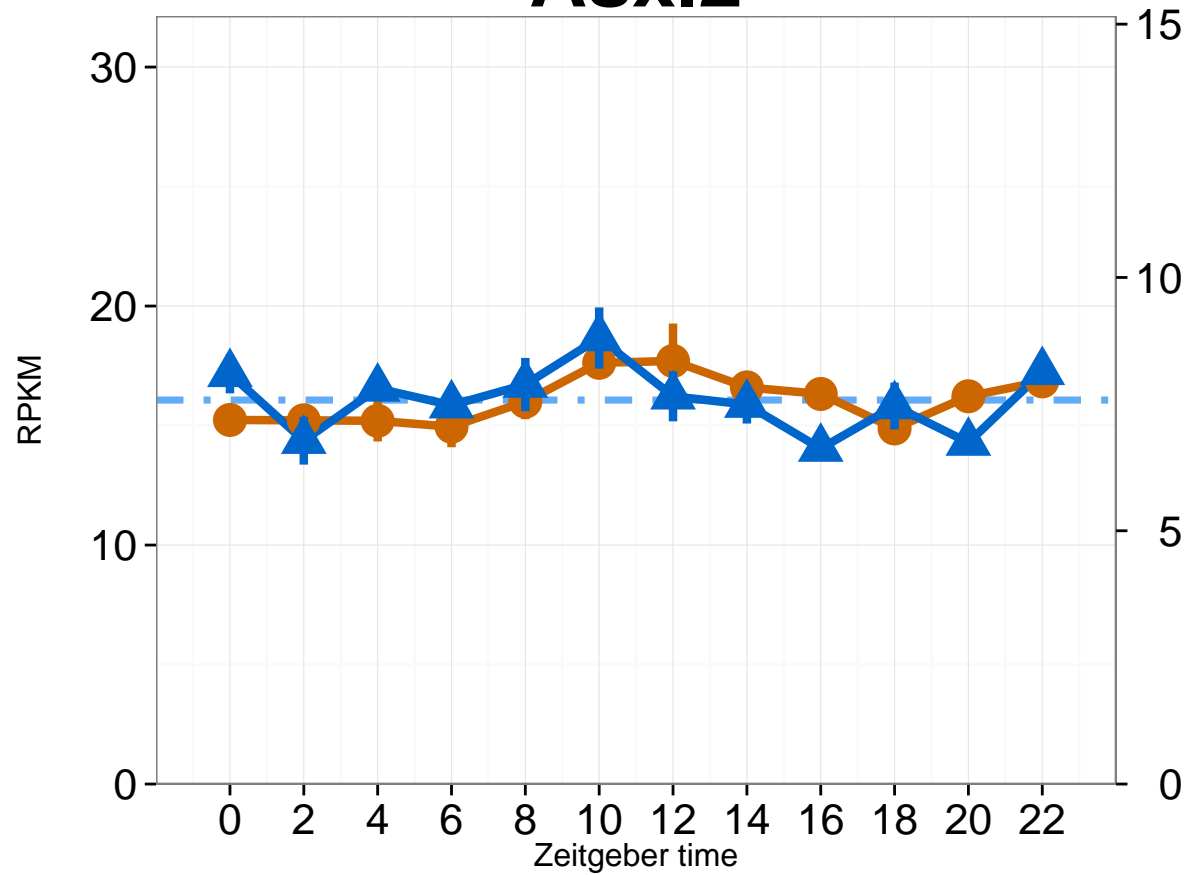

## Asx12

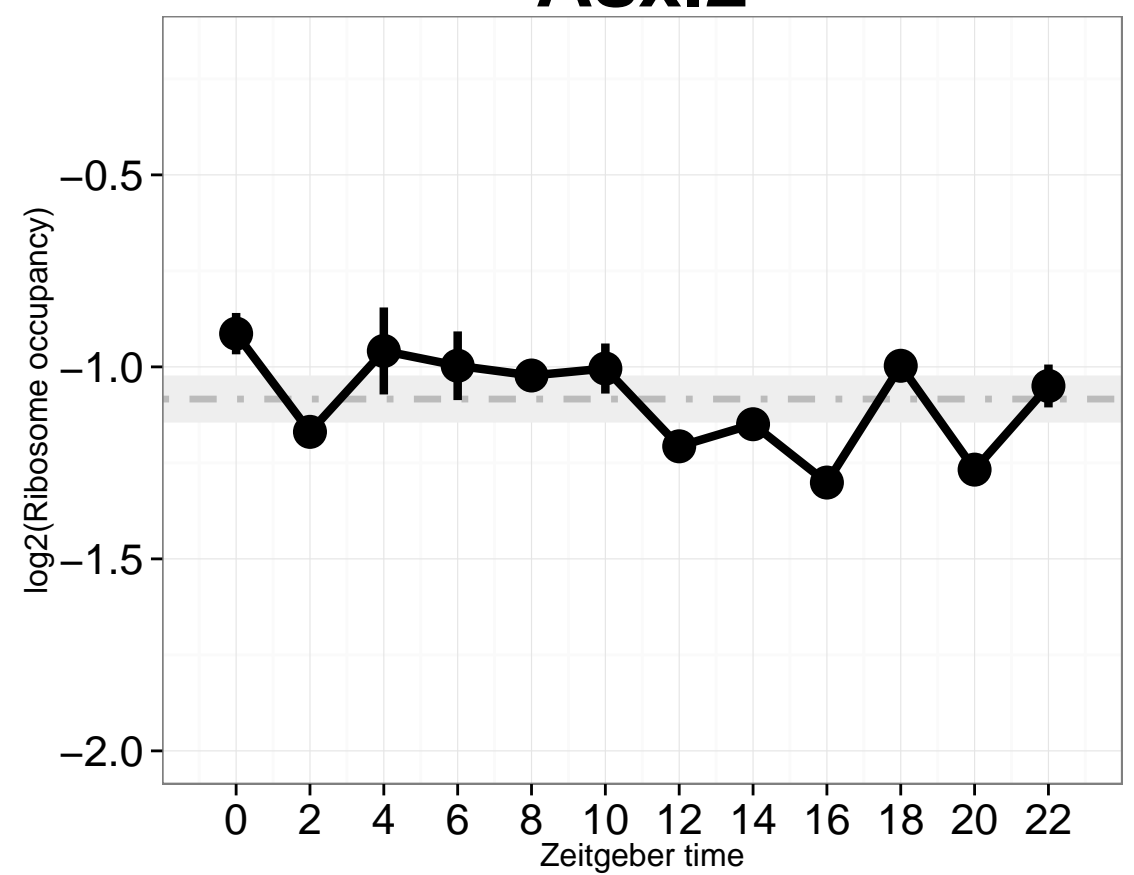

Supplement: Supplementary file 5275 [file 1]

**Sept8**

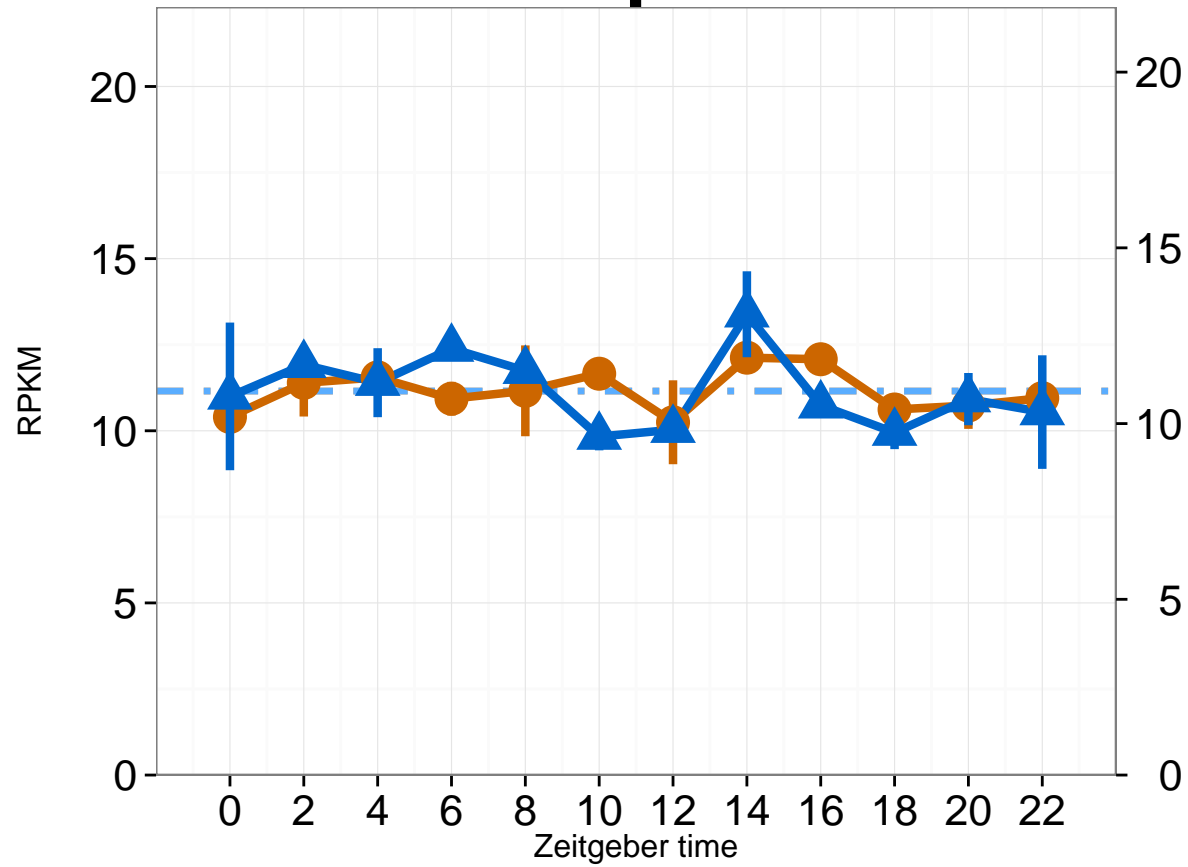

**Sept8**

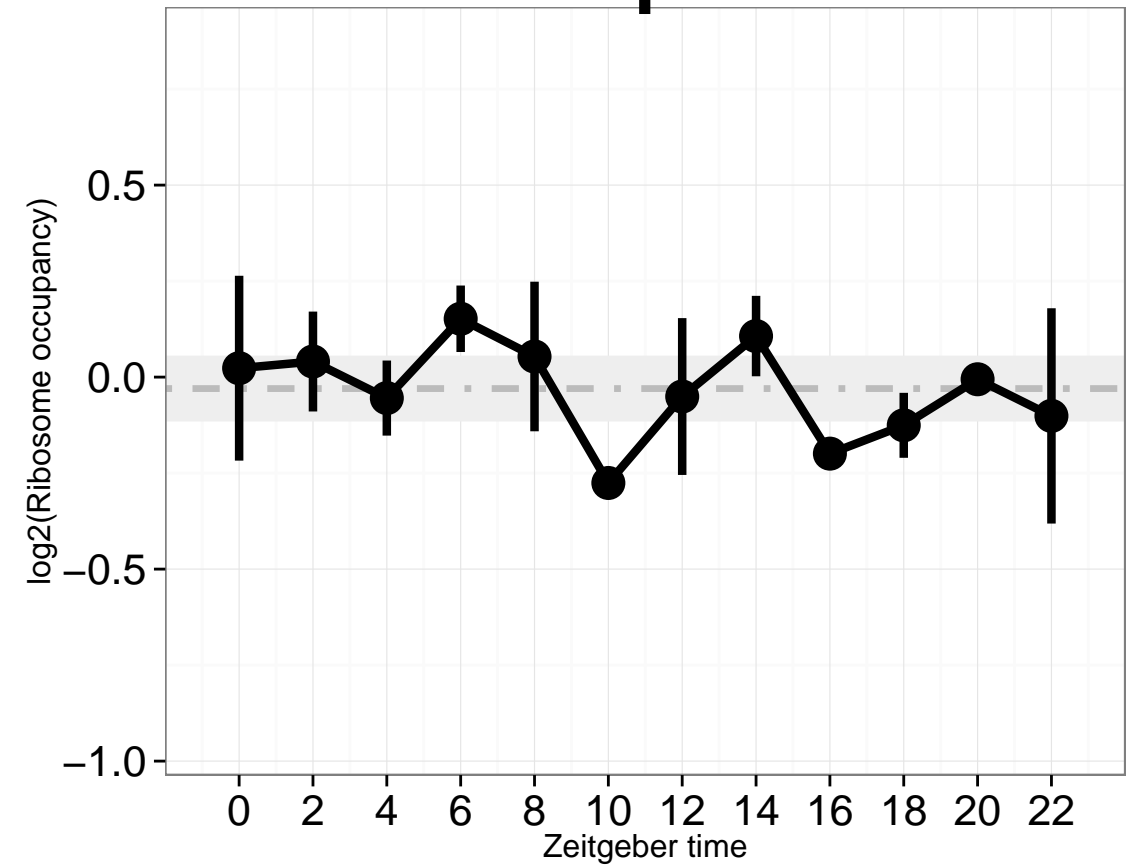

Supplement: Supplementary file 5276 [file 1]

## Ctso

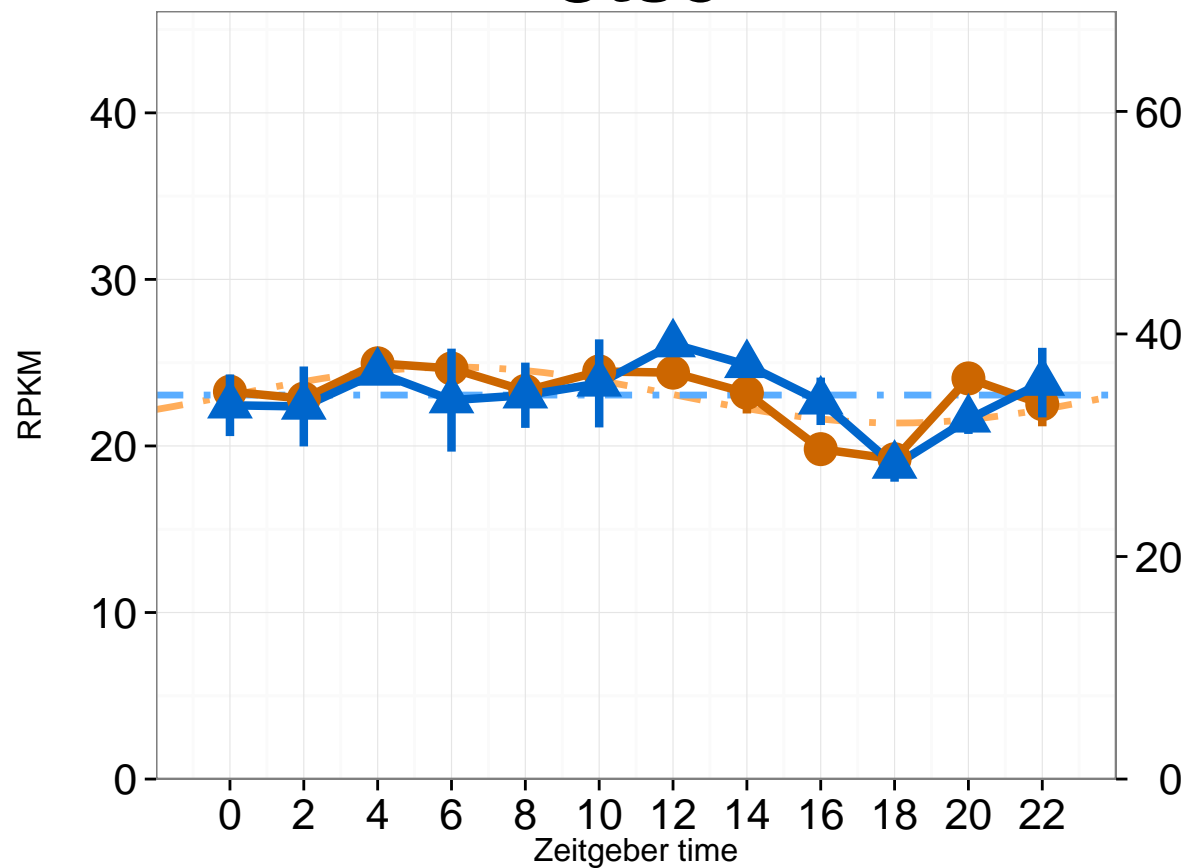

## Ctso

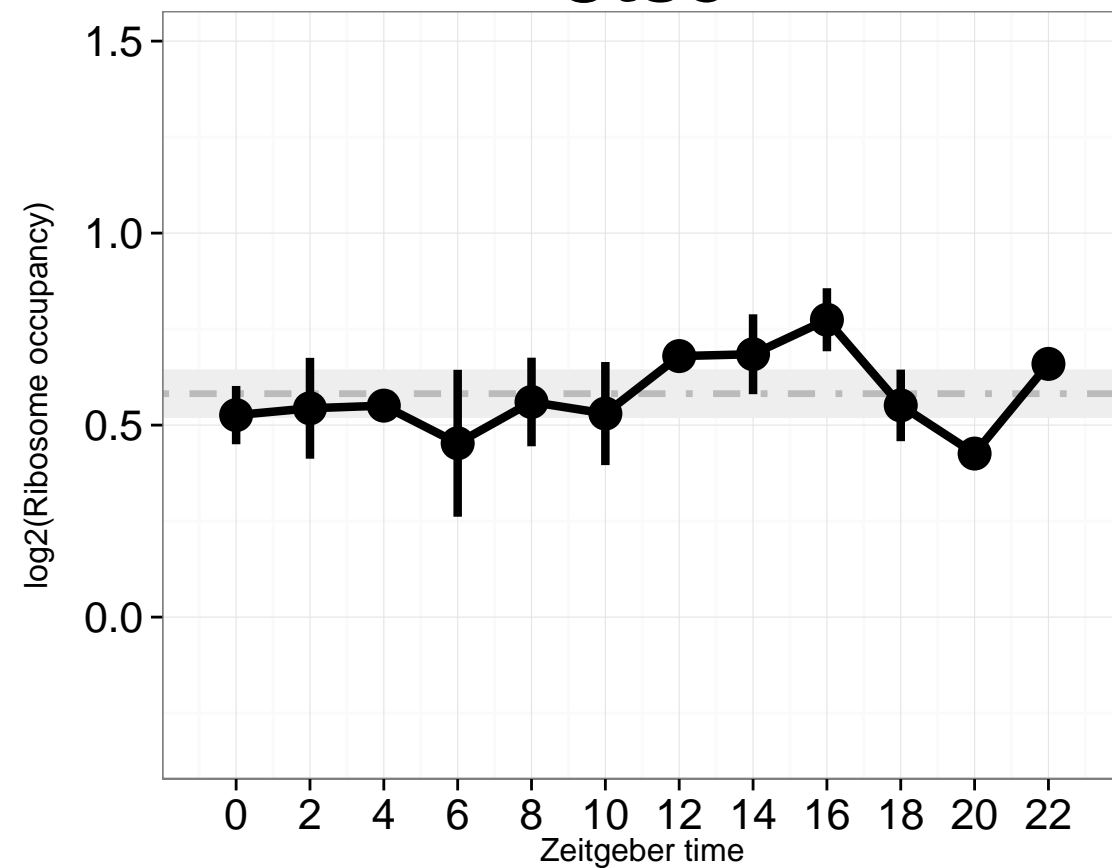

Supplement: Supplementary file 5277 [file 1]

# lfi27l2a

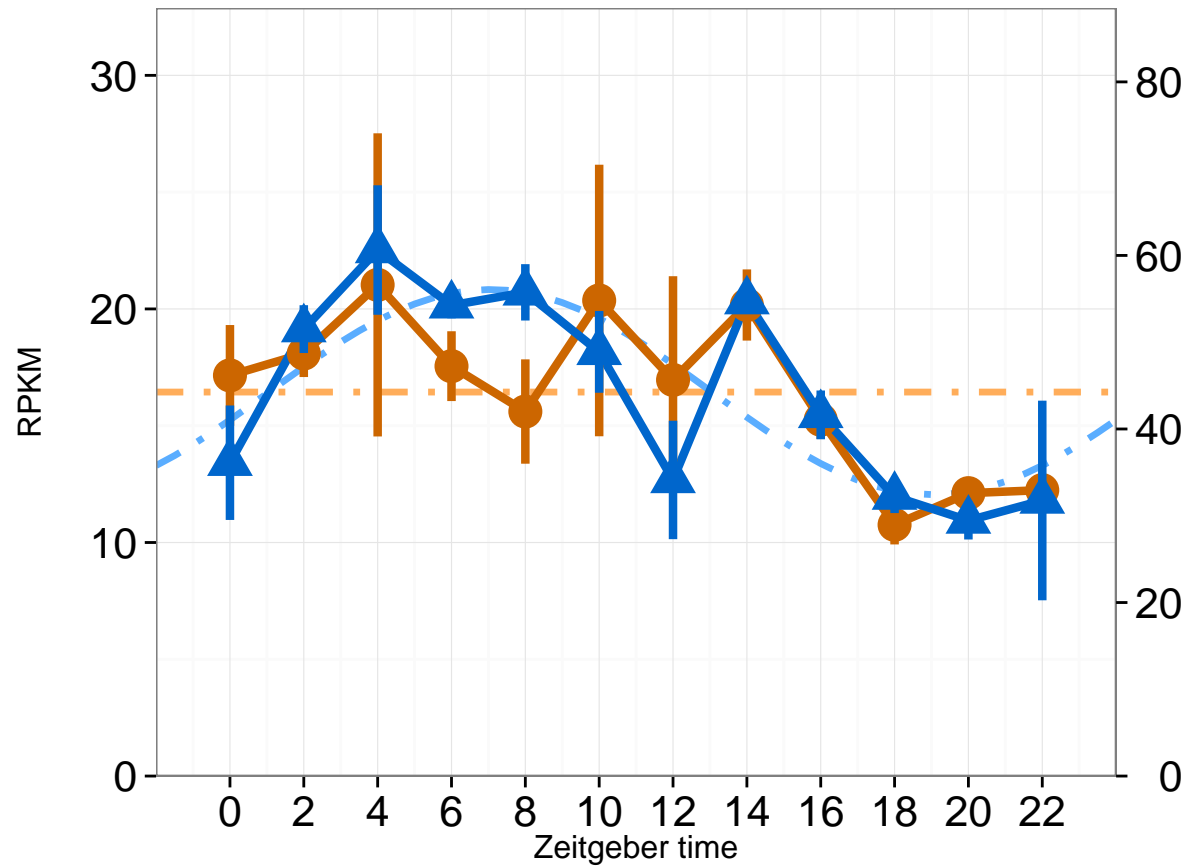

# lfi27l2a

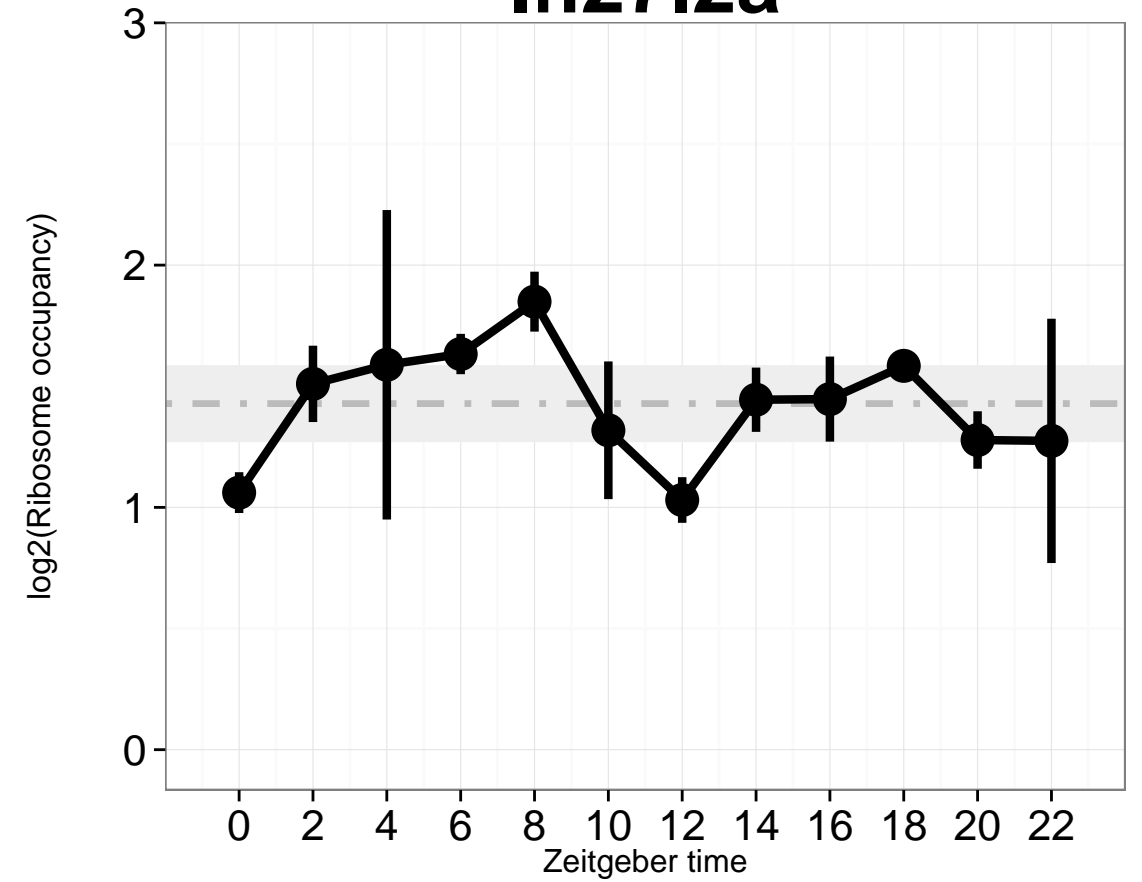

Supplement: Supplementary file 5278 [file 1]

## Rfxank

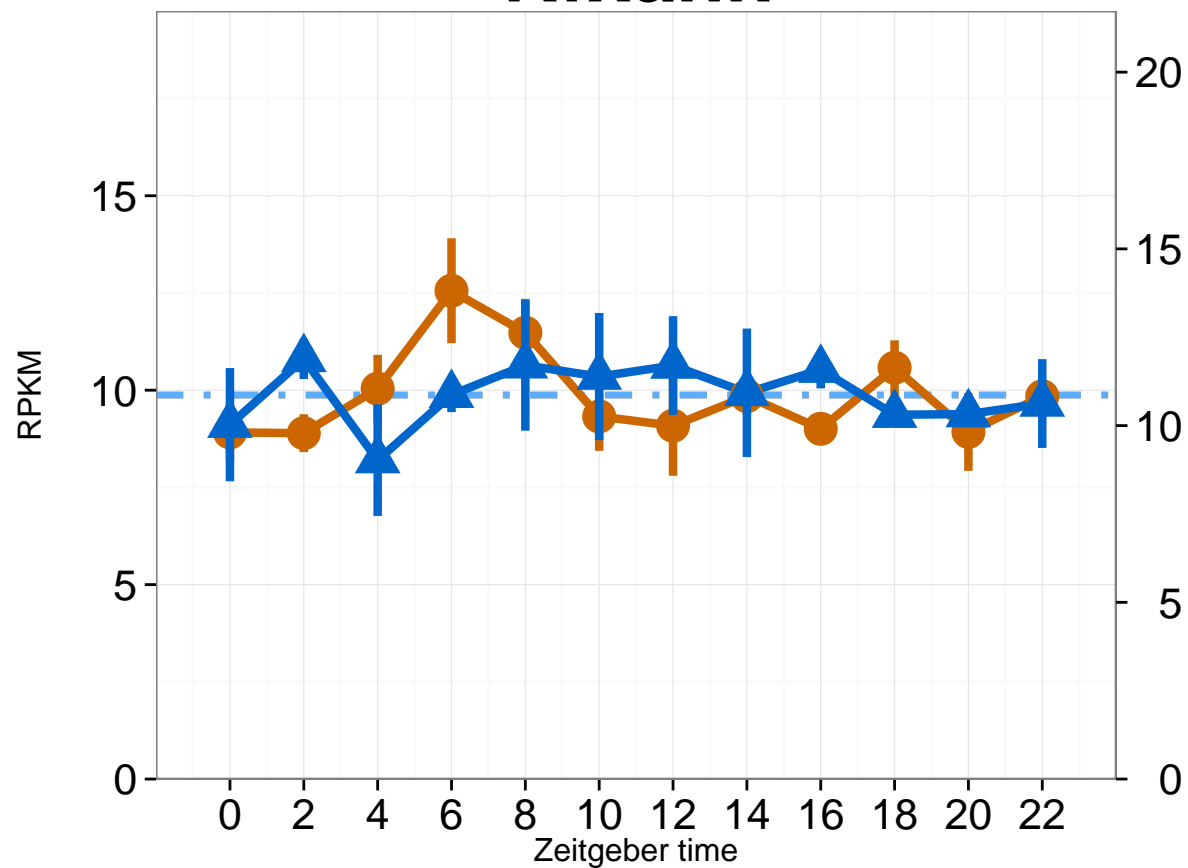

## Rfxank

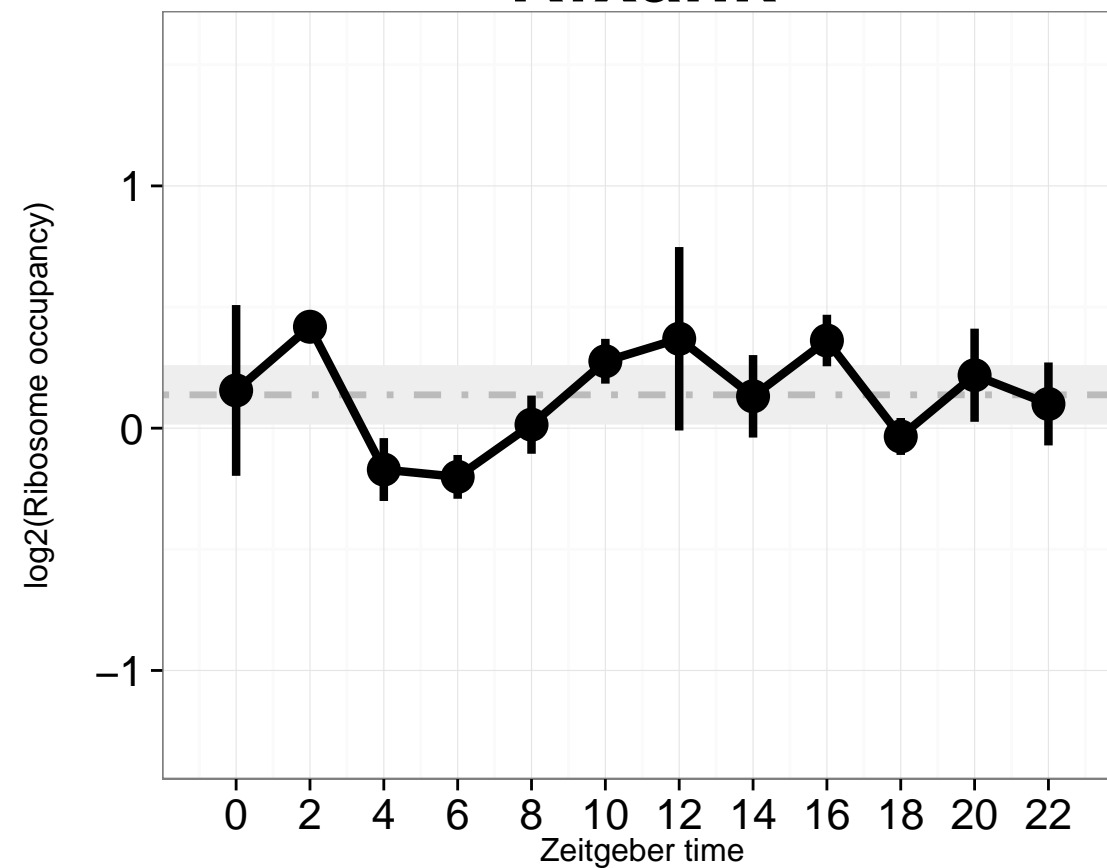

Supplement: Supplementary file 5279 [file 1]

# Ssx2ip

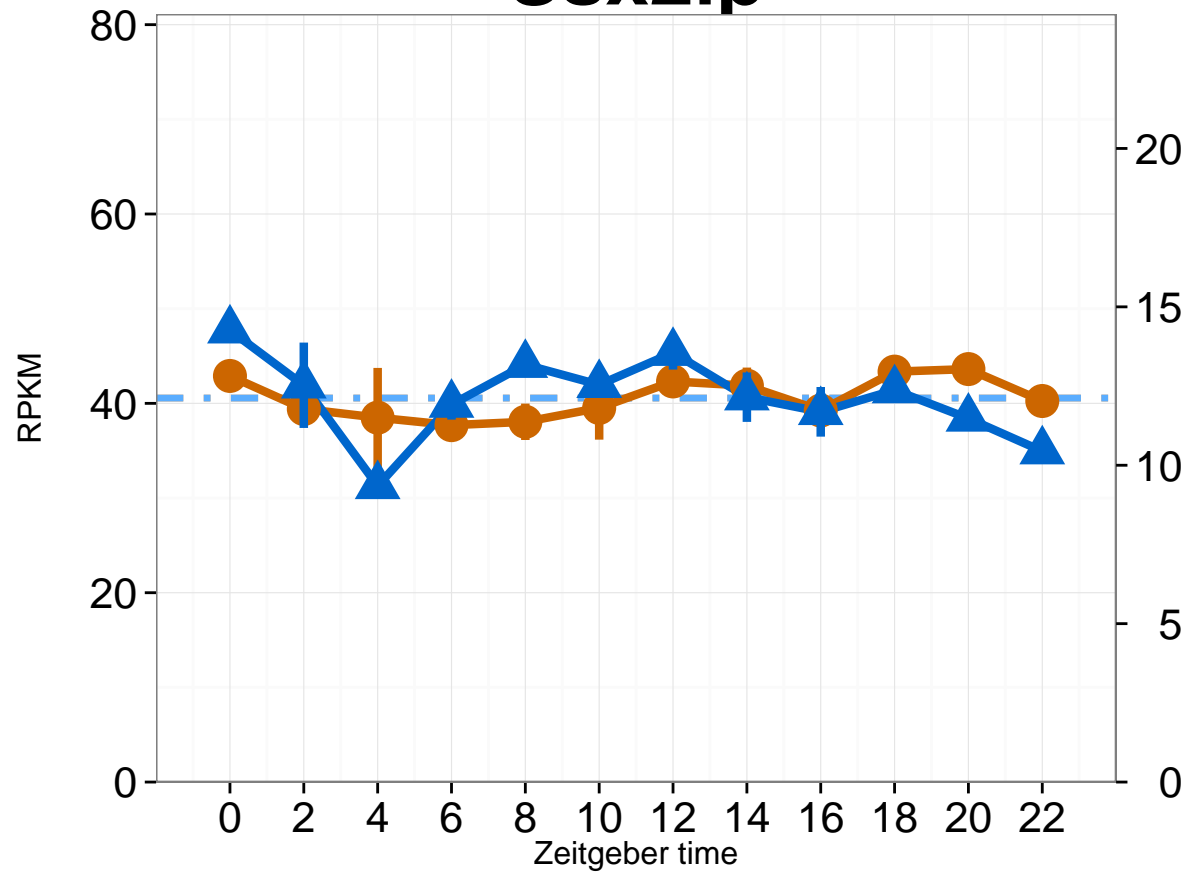

# Ssx2ip

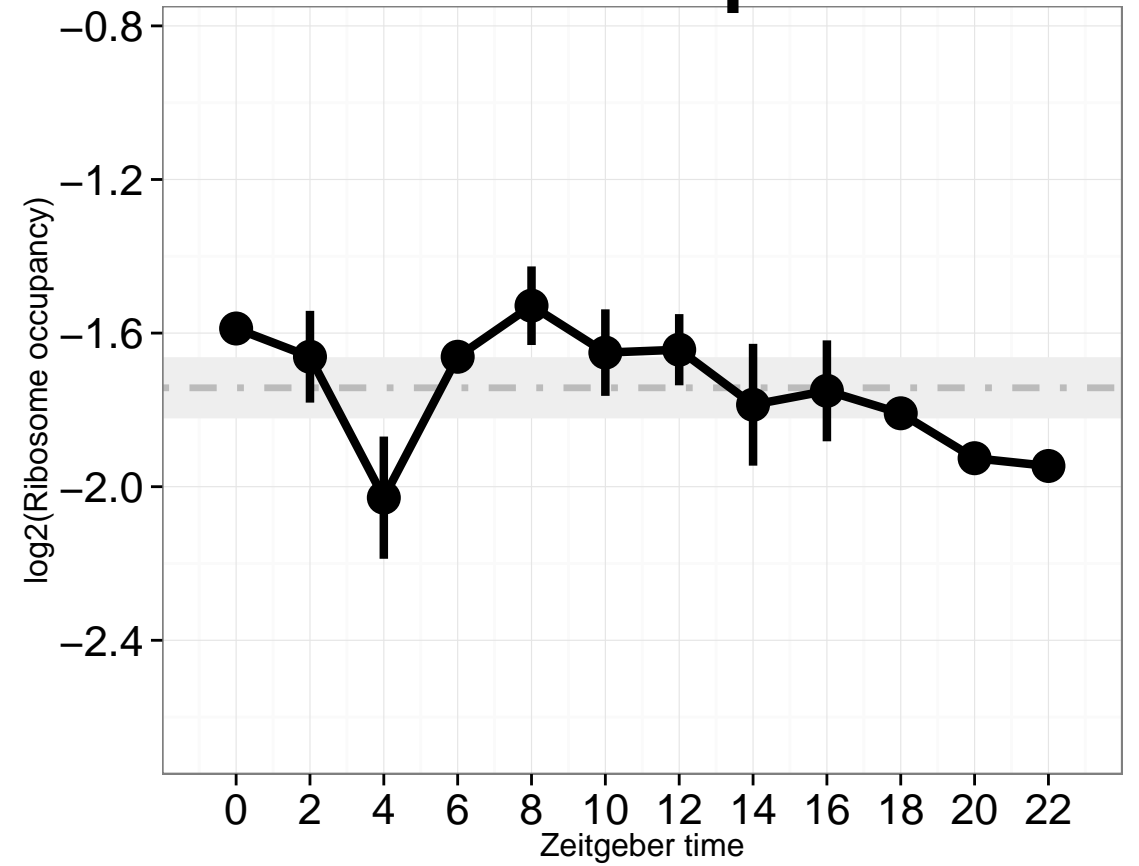

Supplement: Supplementary file 5280 [file 1]

## Slc16a4

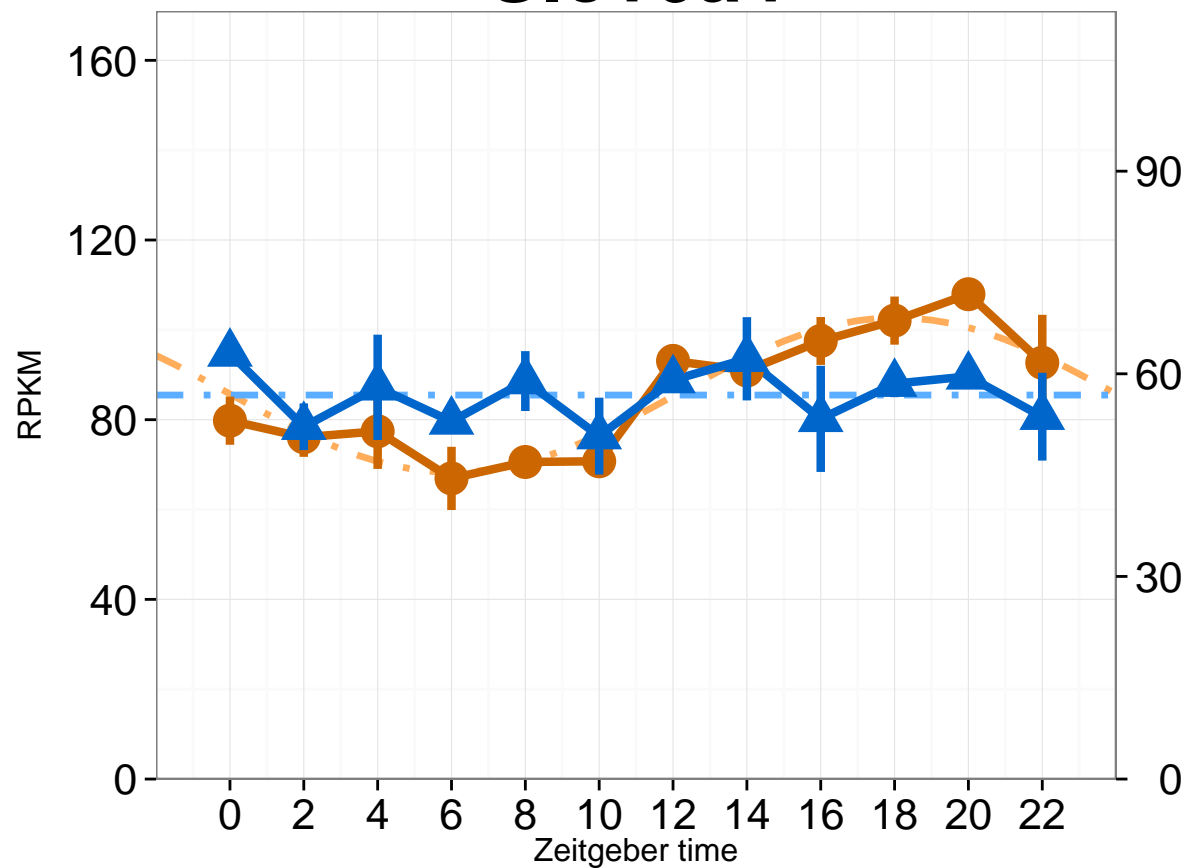

## Slc16a4

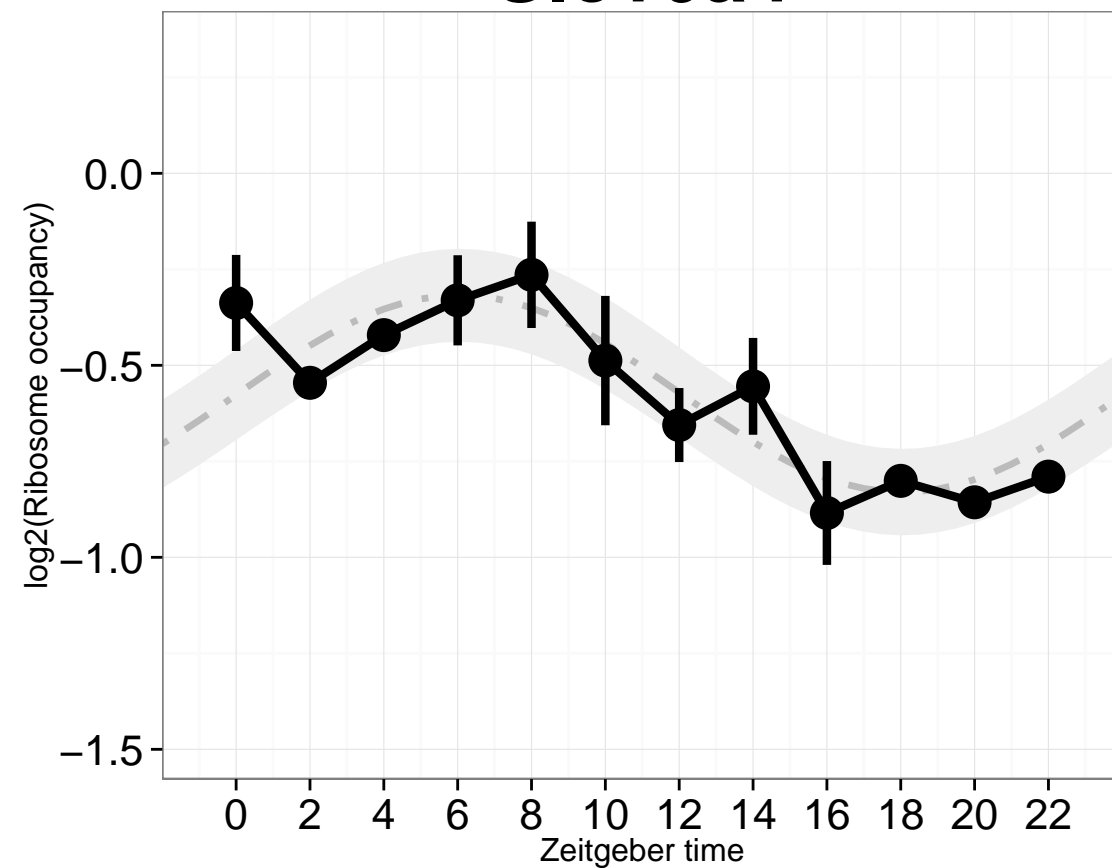

Supplement: Supplementary file 5281 [file 1]

# Arhgap26

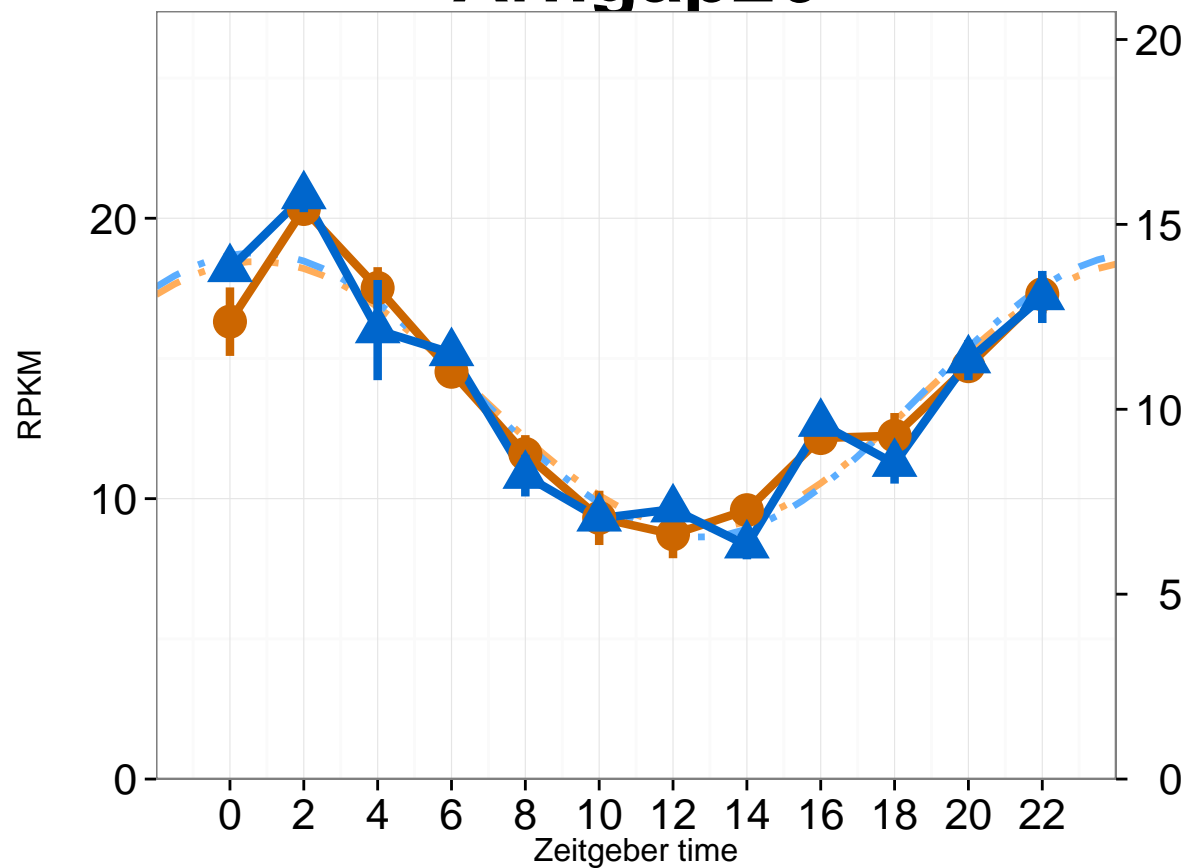

# Arhgap26

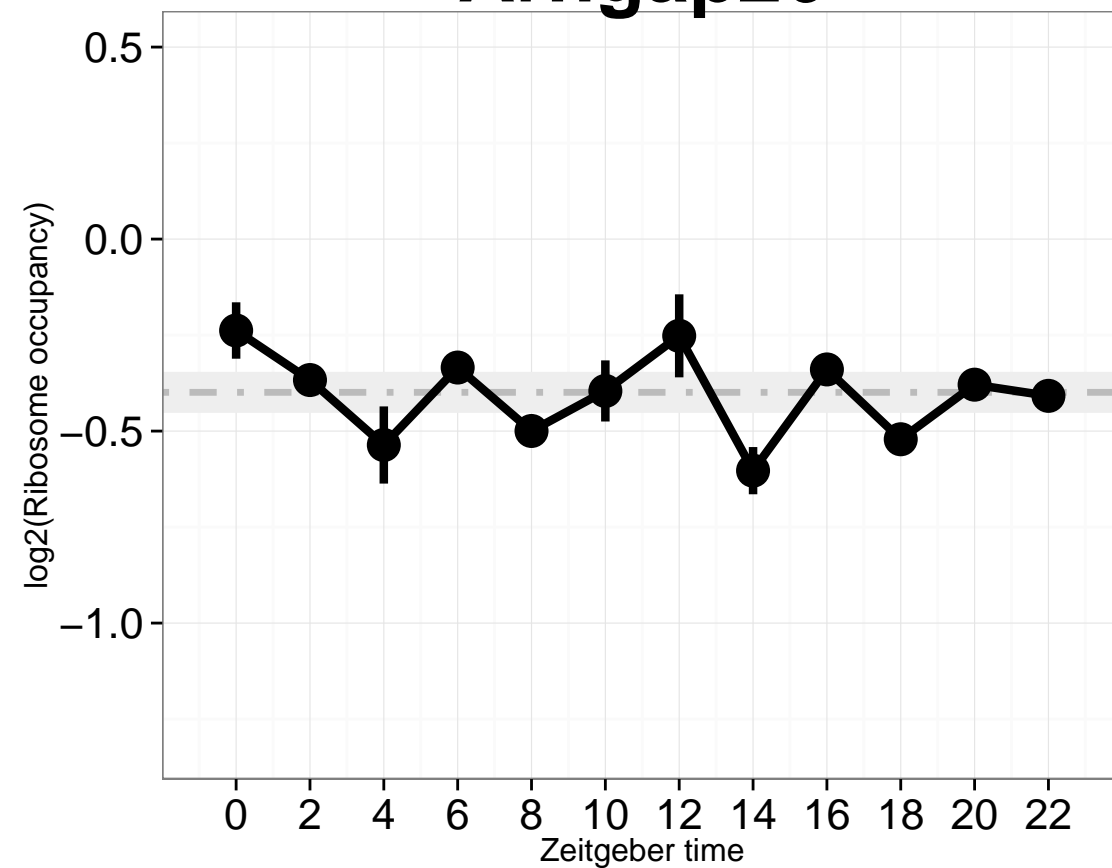

Supplement: Supplementary file 5282 [file 1]

## KlhI4

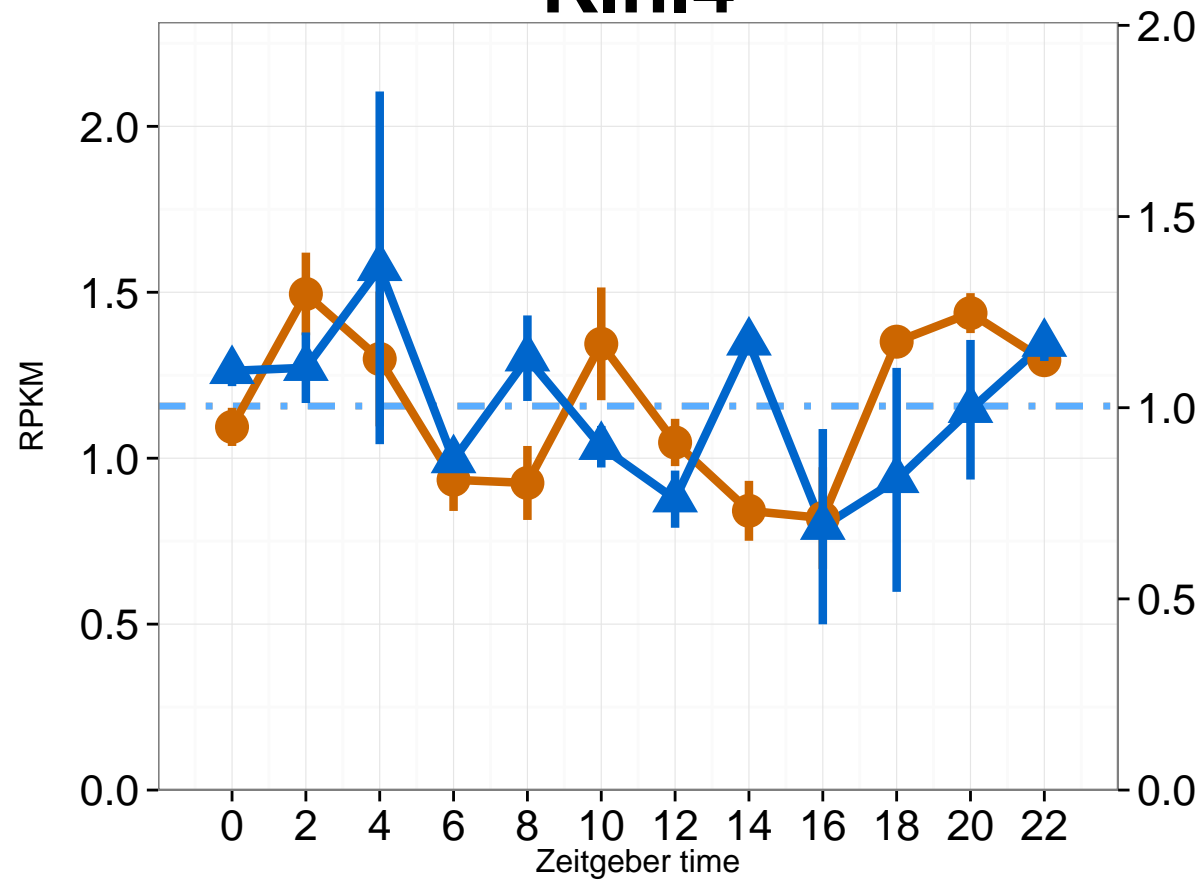

## KlhI4

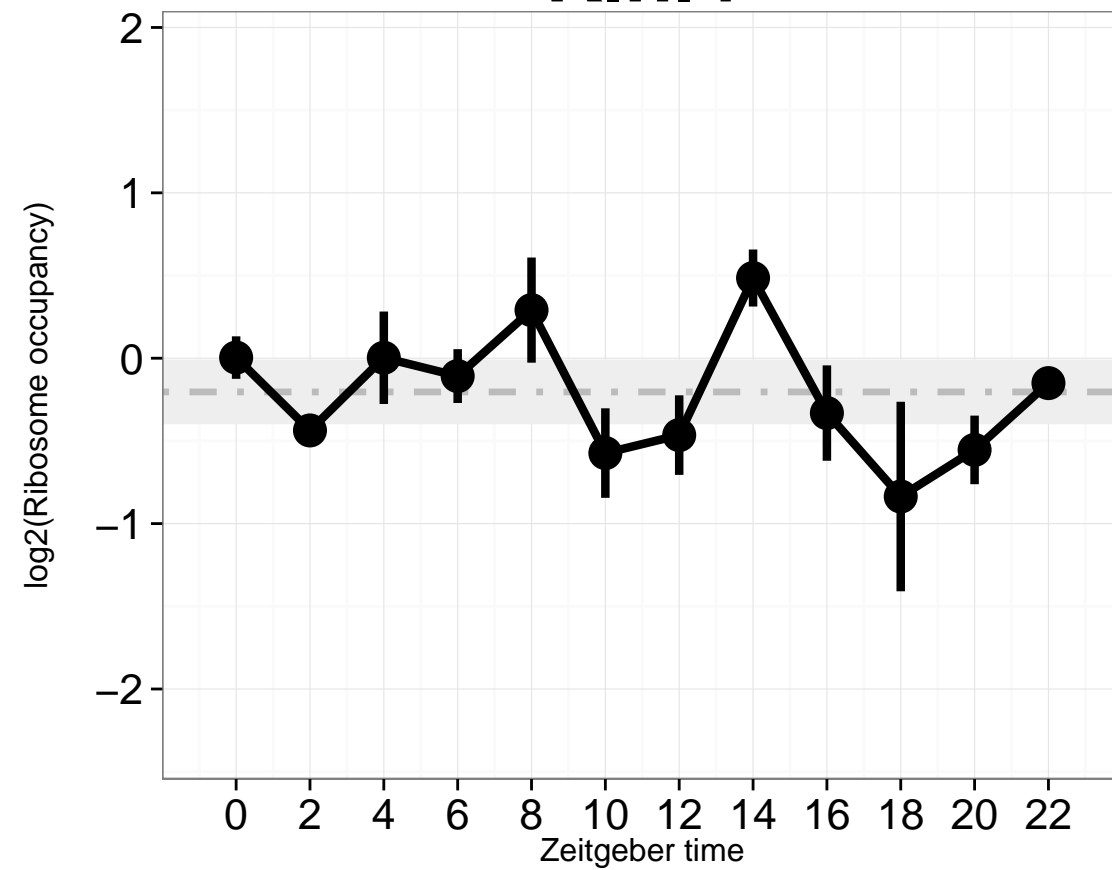

Supplement: Supplementary file 5283 [file 1]

# Supt4a

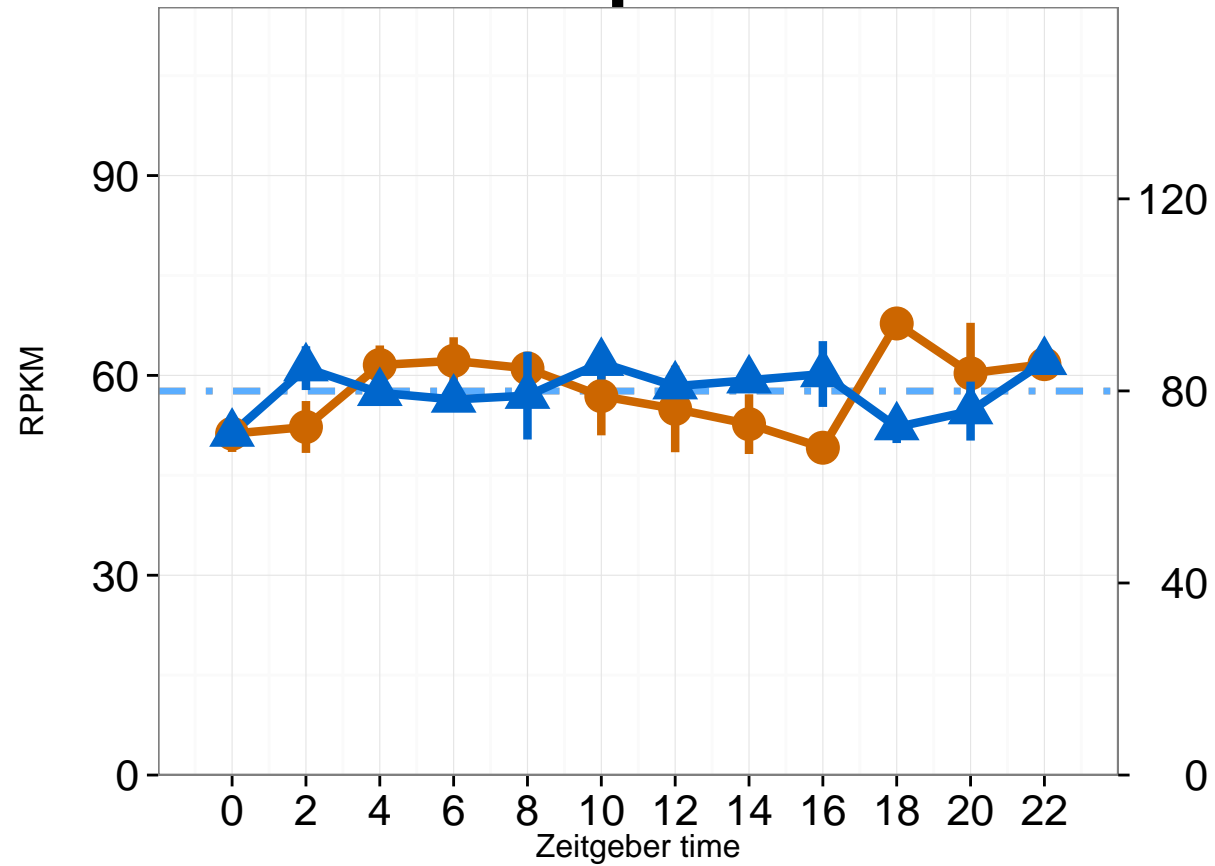

# Supt4a

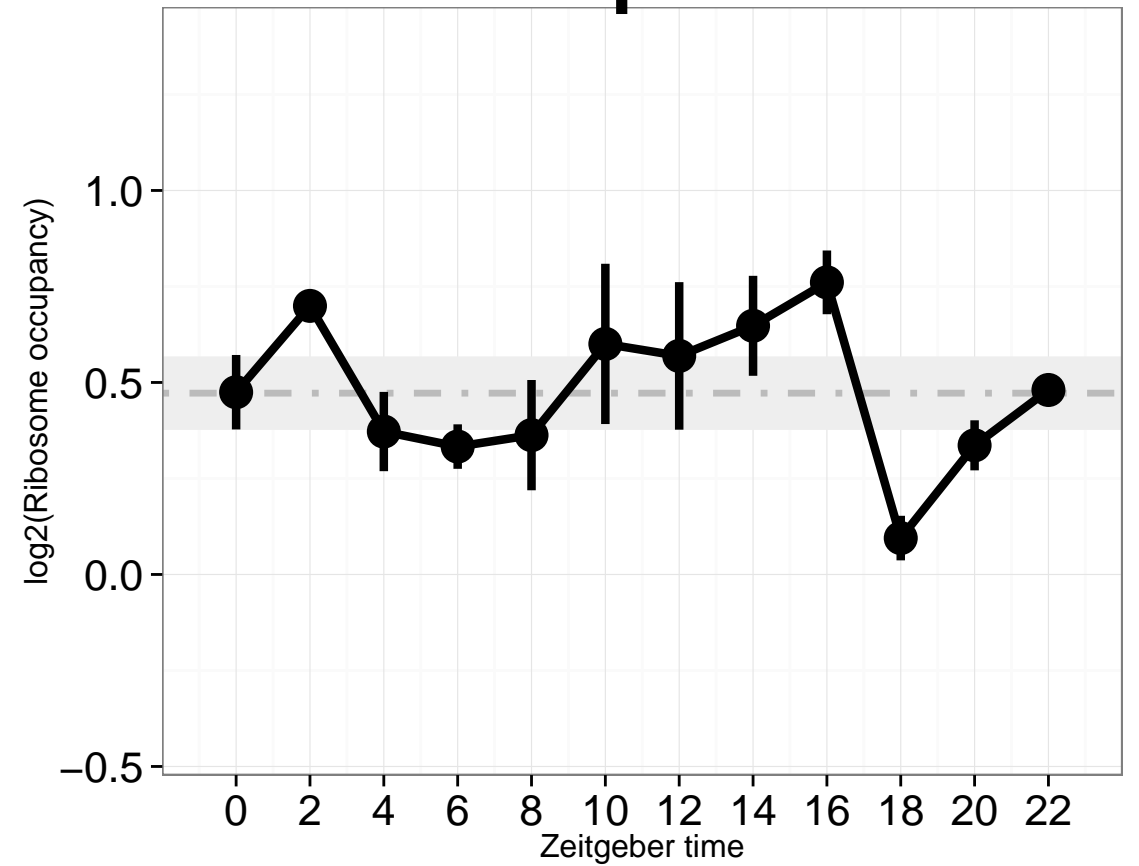

Supplement: Supplementary file 5284 [file 1]

# BC005537

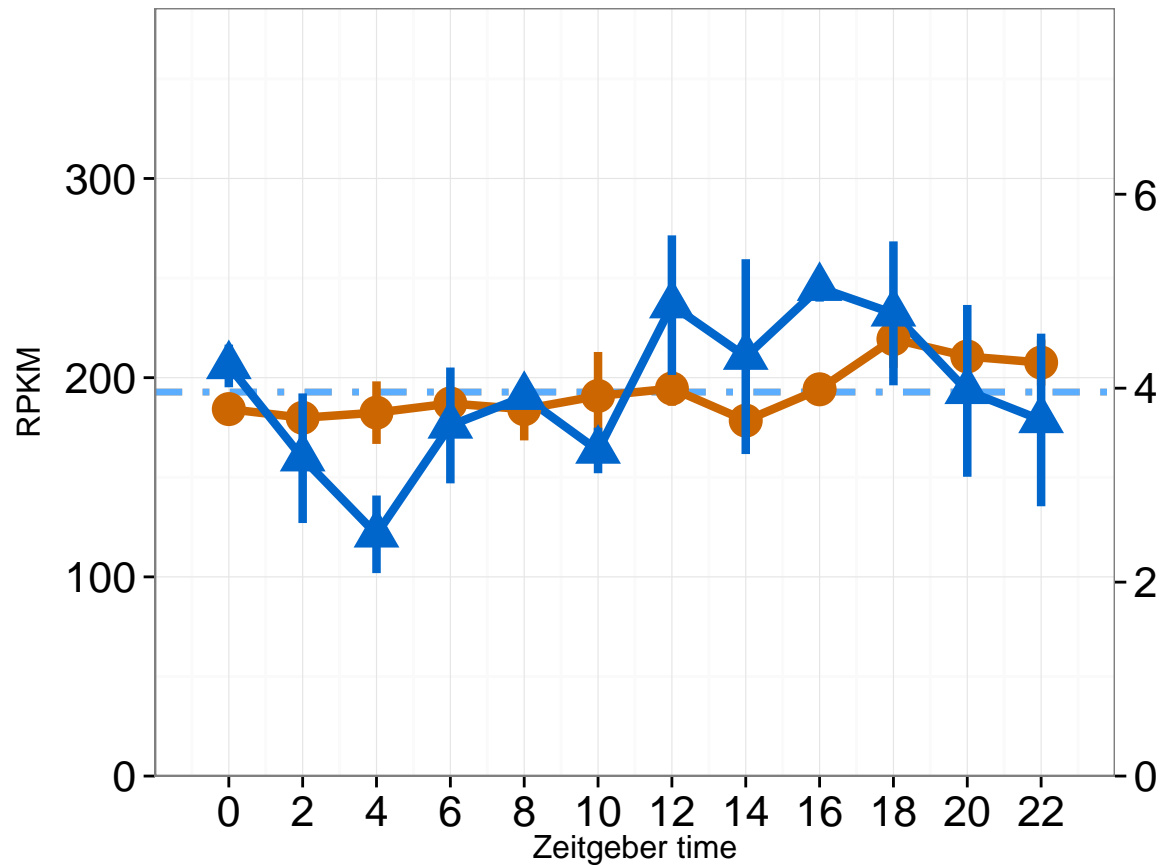

# BC005537

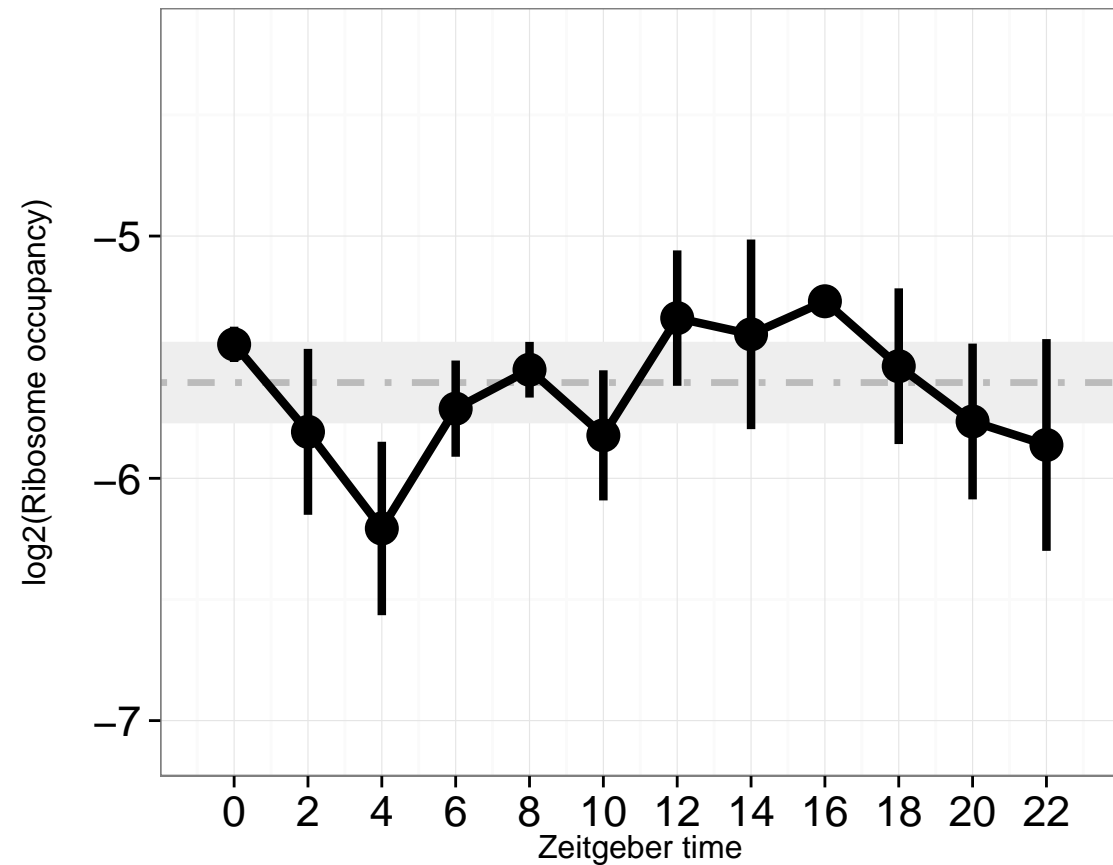

Supplement: Supplementary file 5285 [file 1]

## Milr1

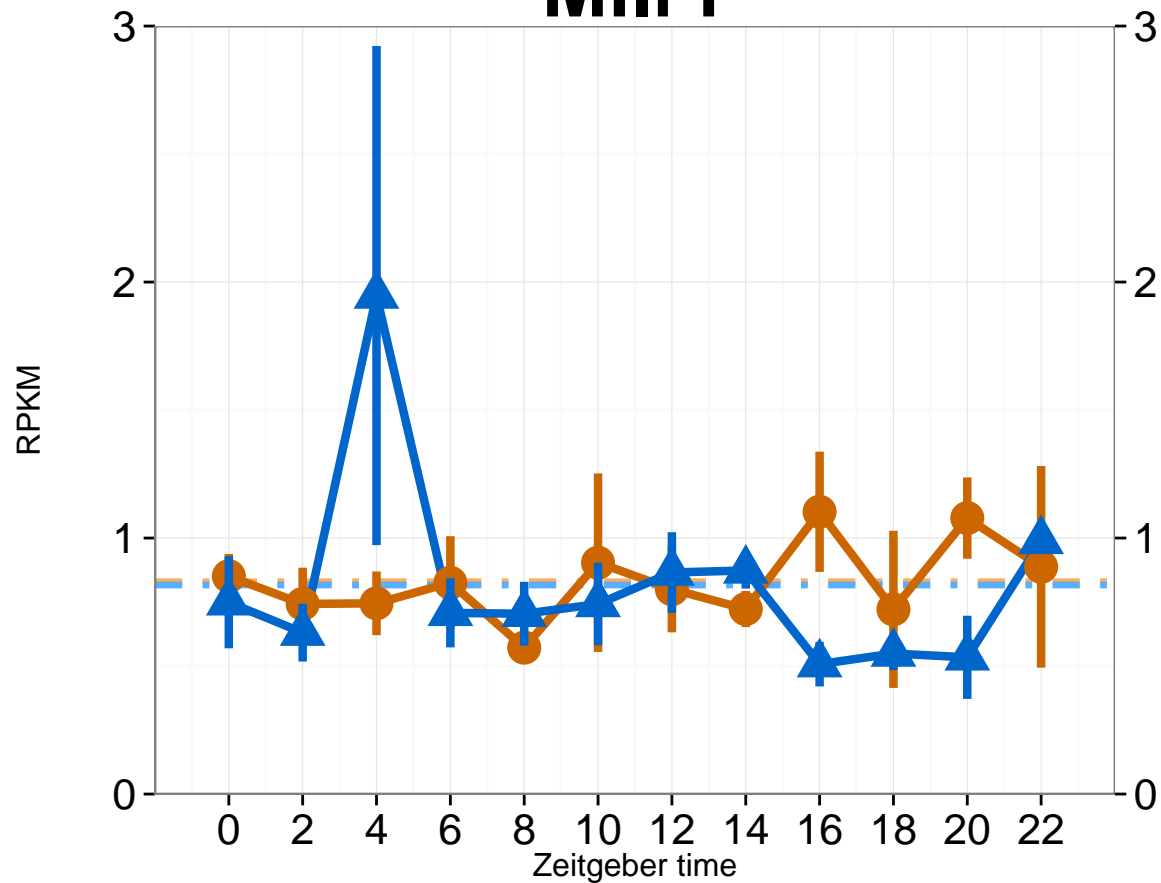

## Milr1

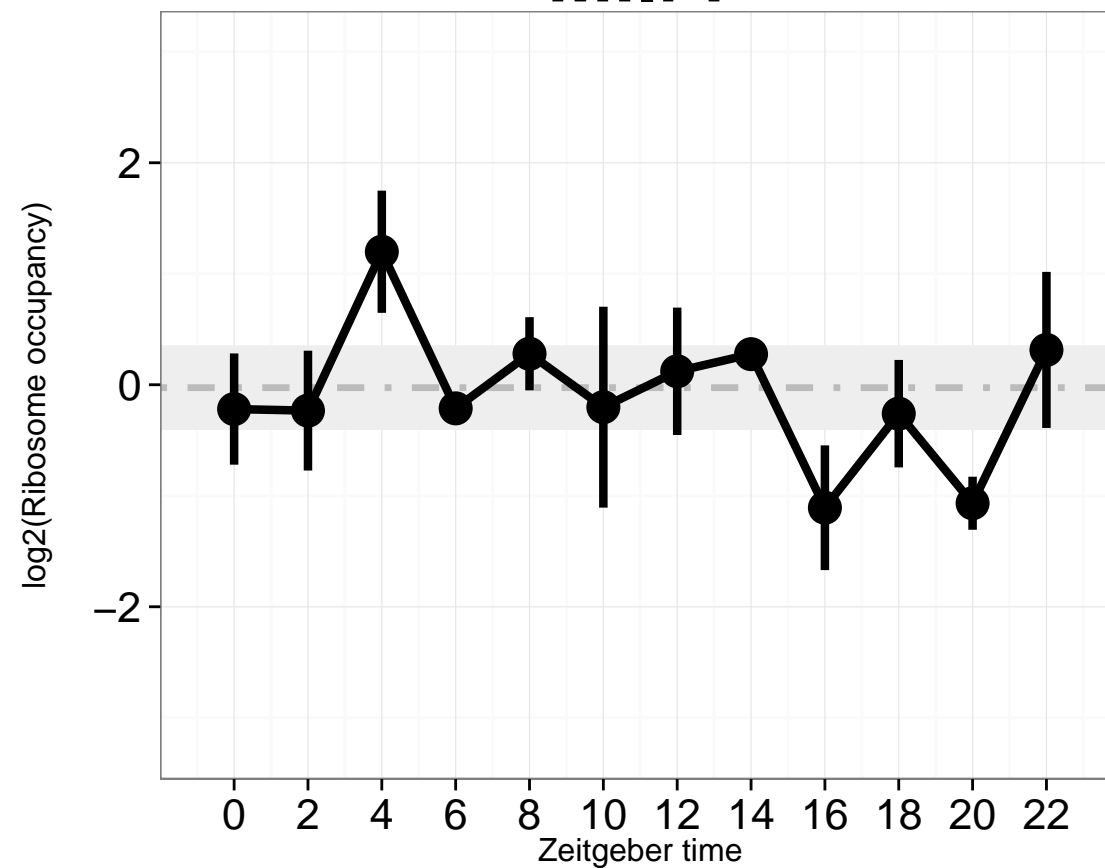

Supplement: Supplementary file 5286 [file 1]

# Zfp939

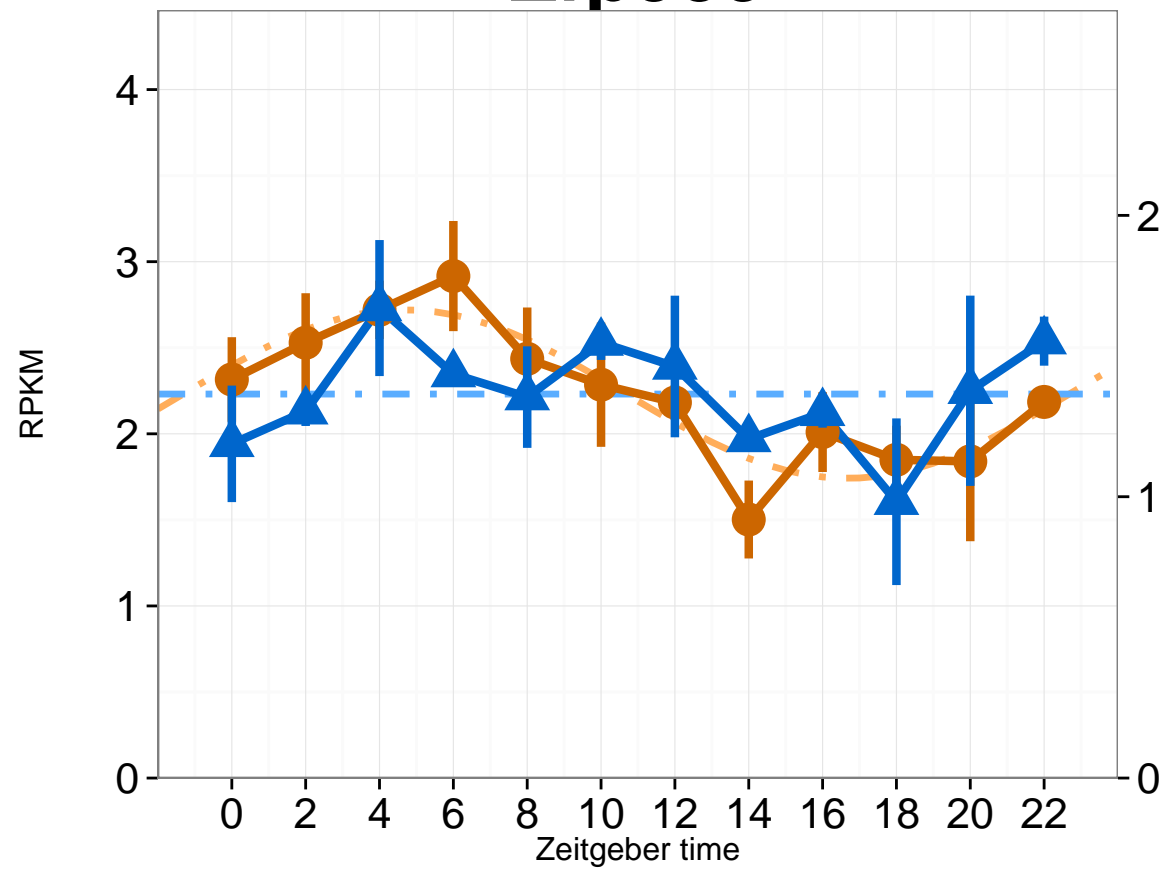

# Zfp939

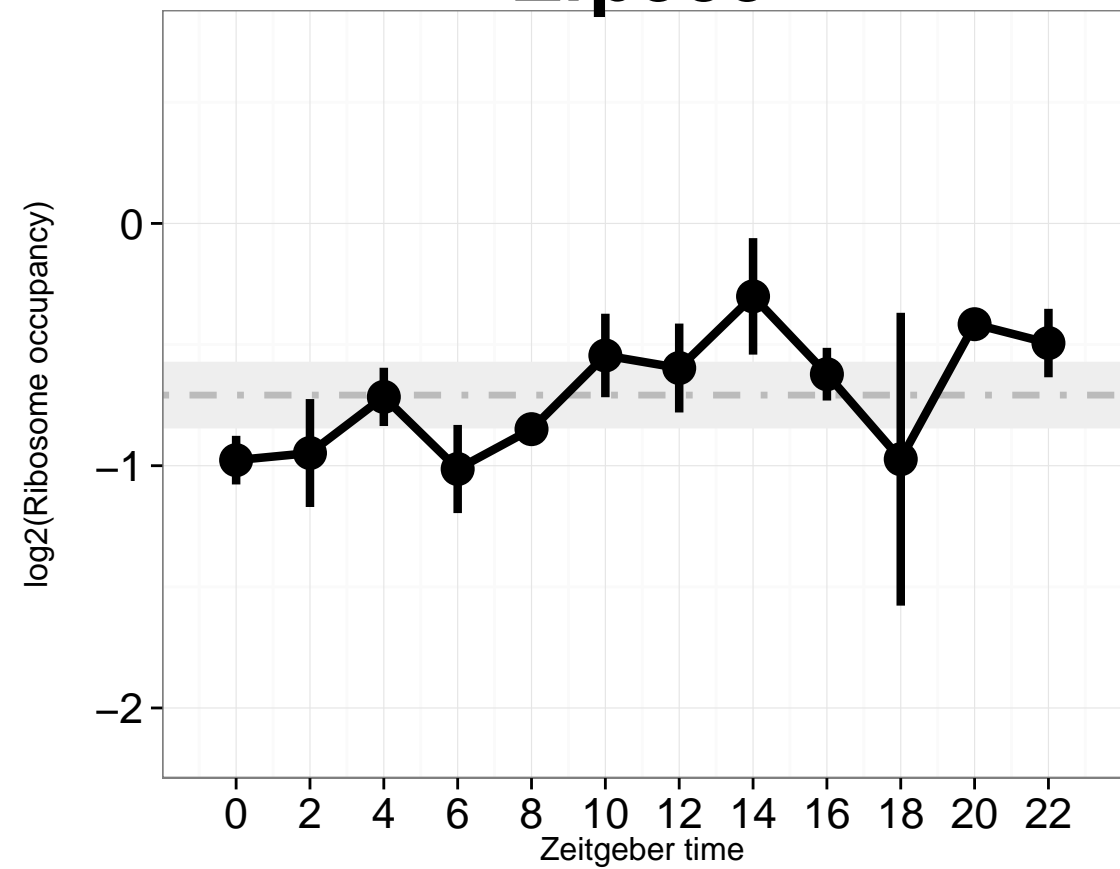

Supplement: Supplementary file 5287 [file 1]

# 1300002K09Rik

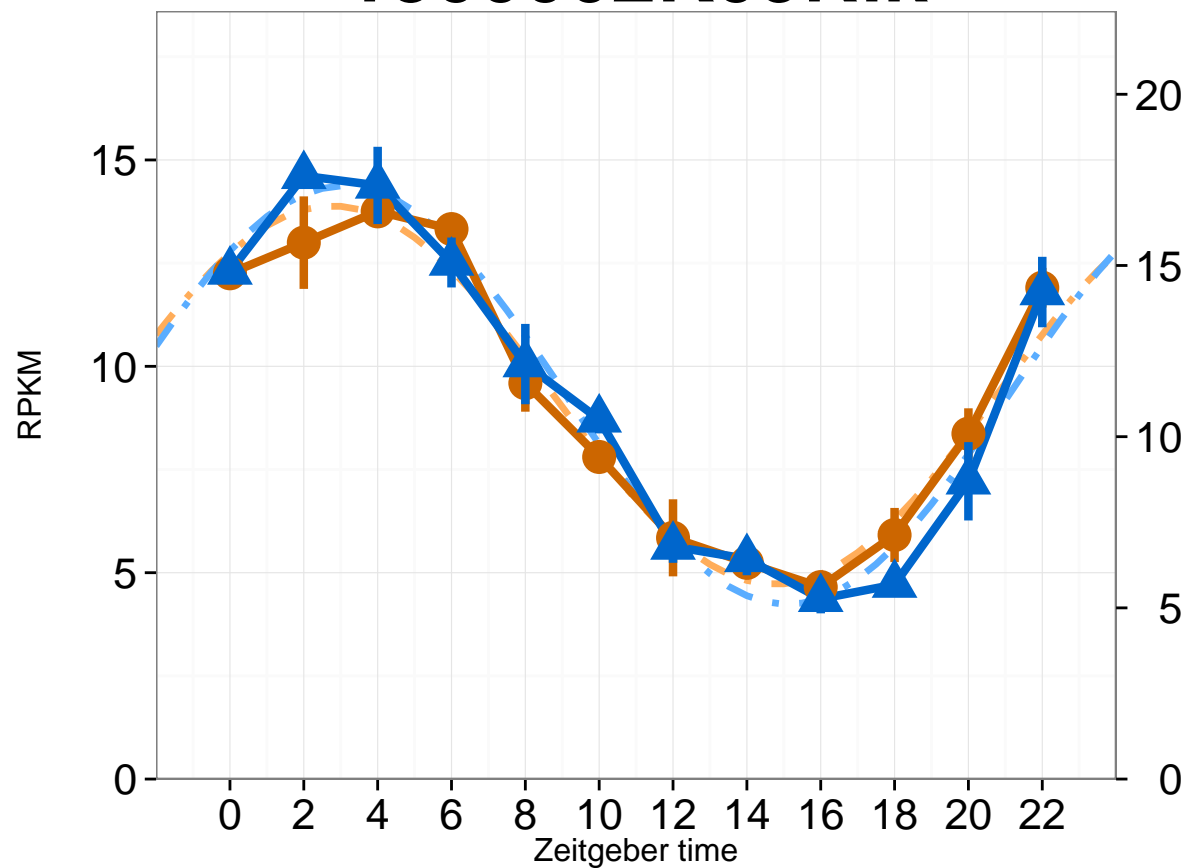

# 1300002K09Rik

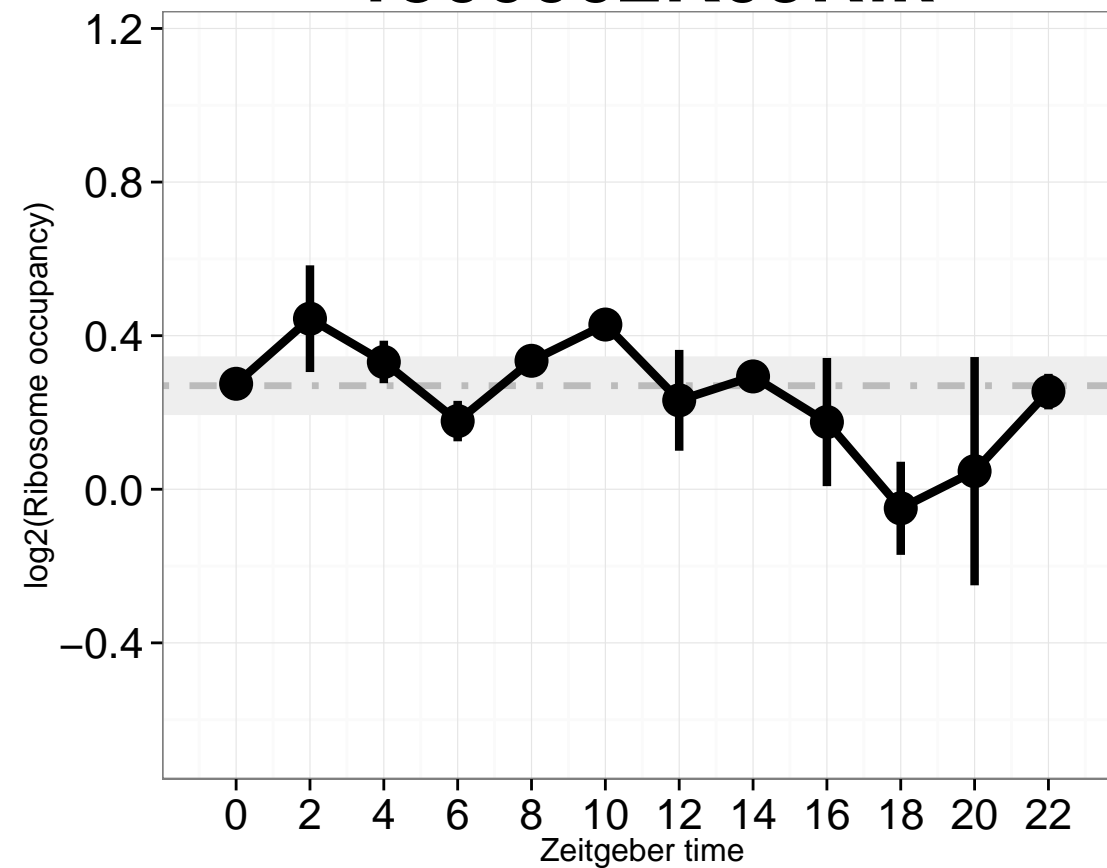

Supplement: Supplementary file 5288 [file 1]

# Hist1h4f

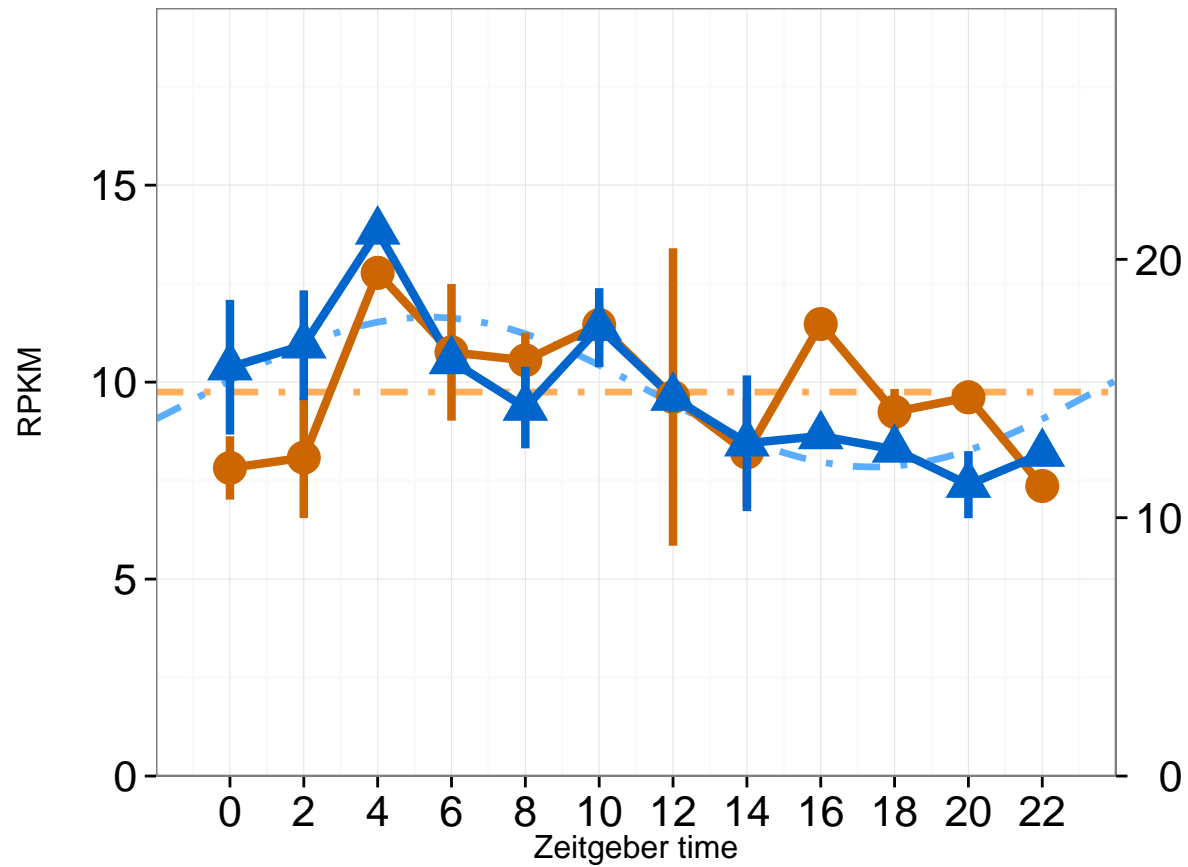

# Hist1h4f

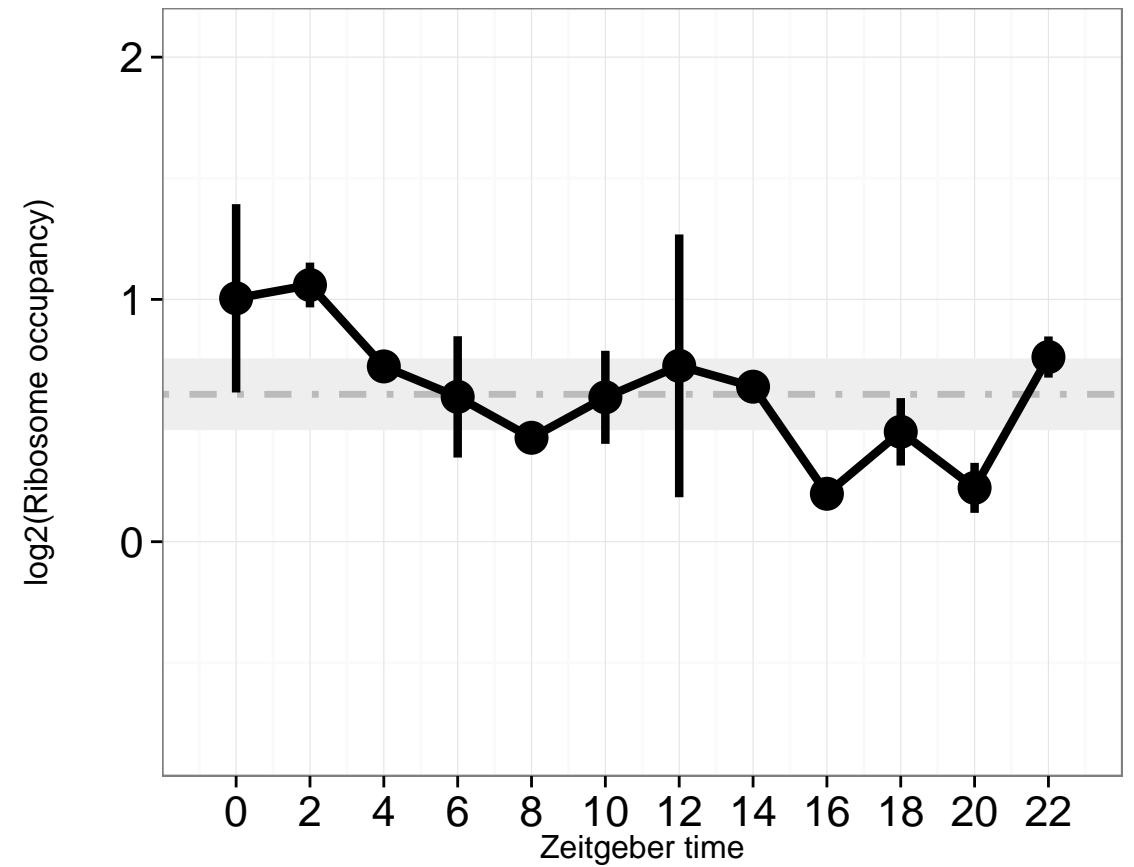

Supplement: Supplementary file 5289 [file 1]

## 4932438A13Rik

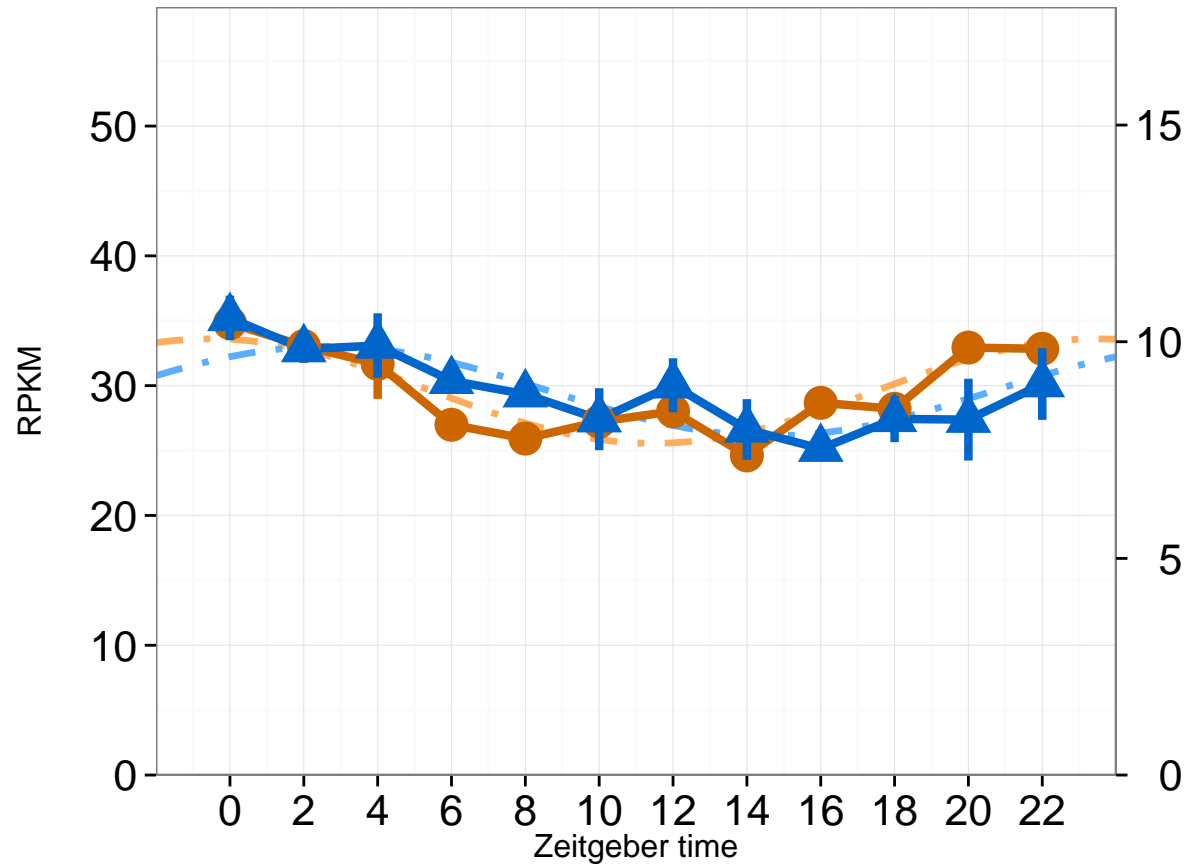

## 4932438A13Rik

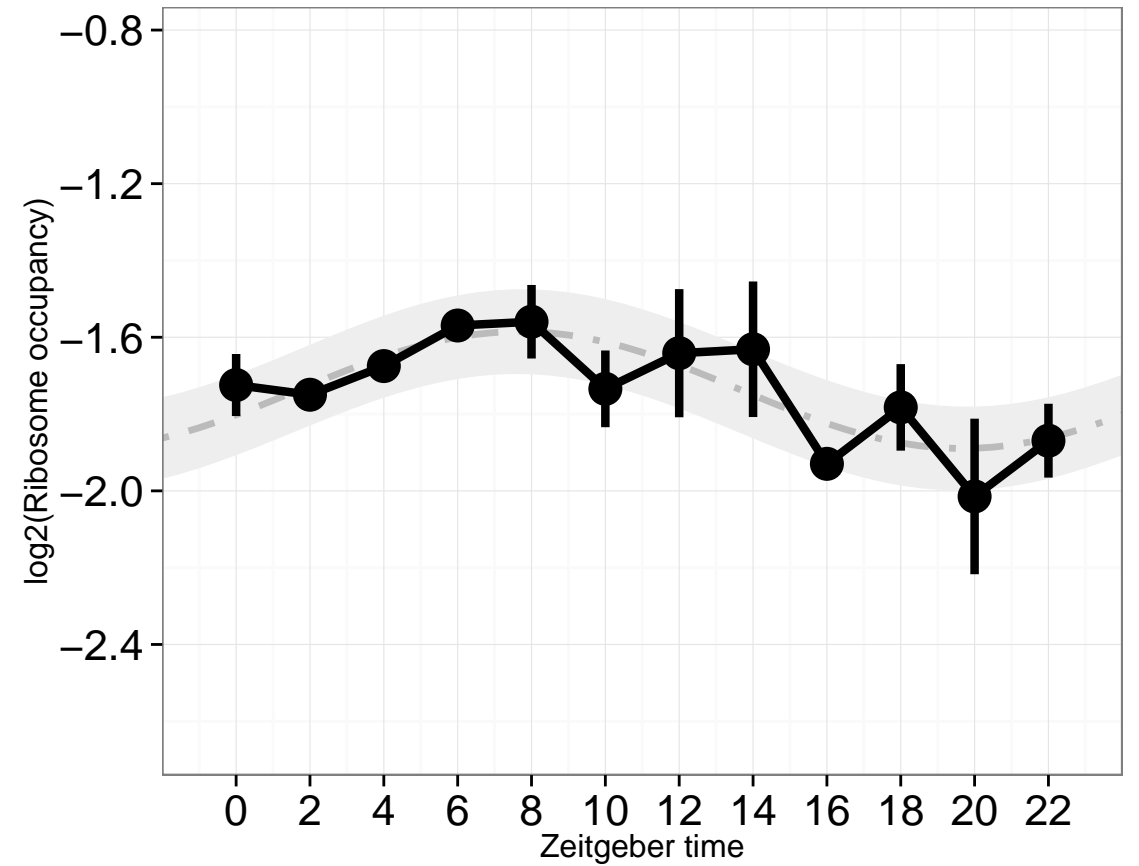

Supplement: Supplementary file 5290 [file 1]

# Wdr19

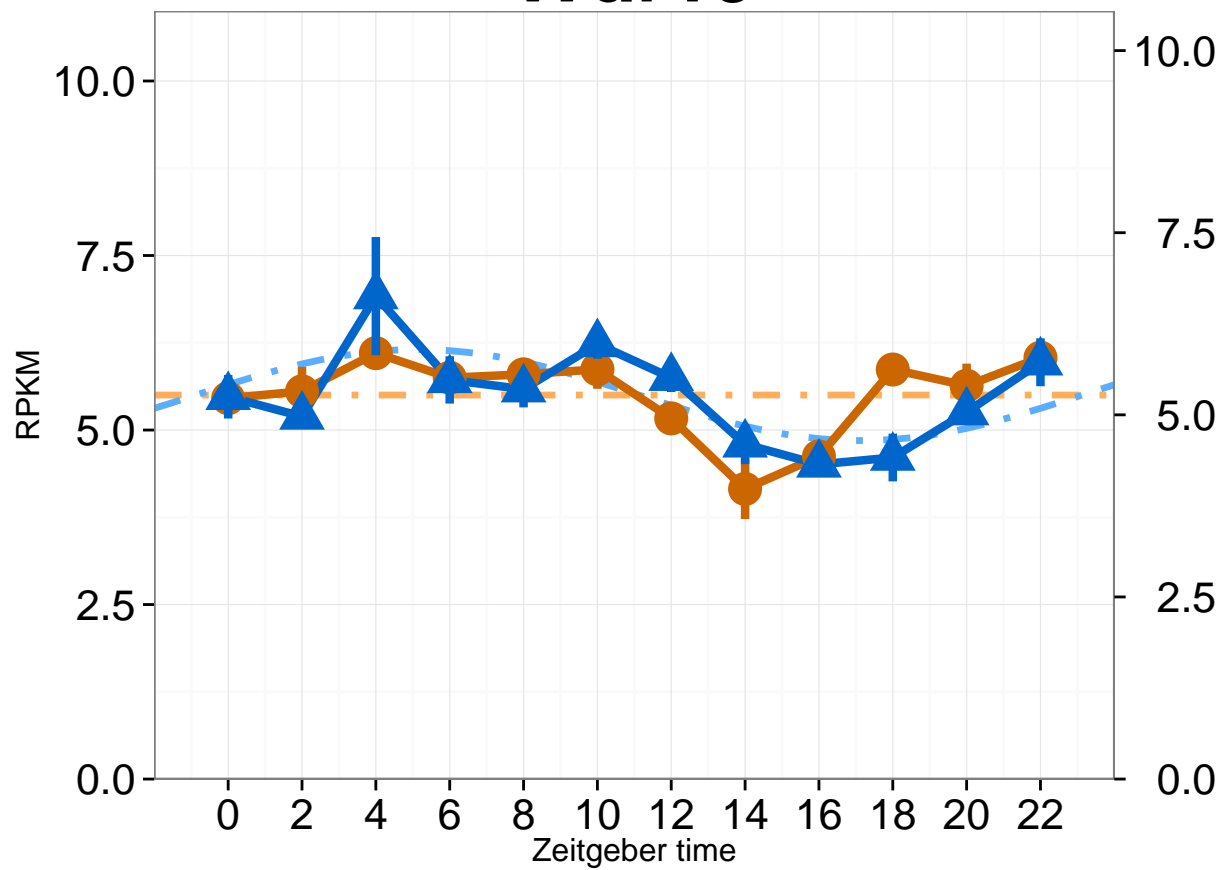

# Wdr19

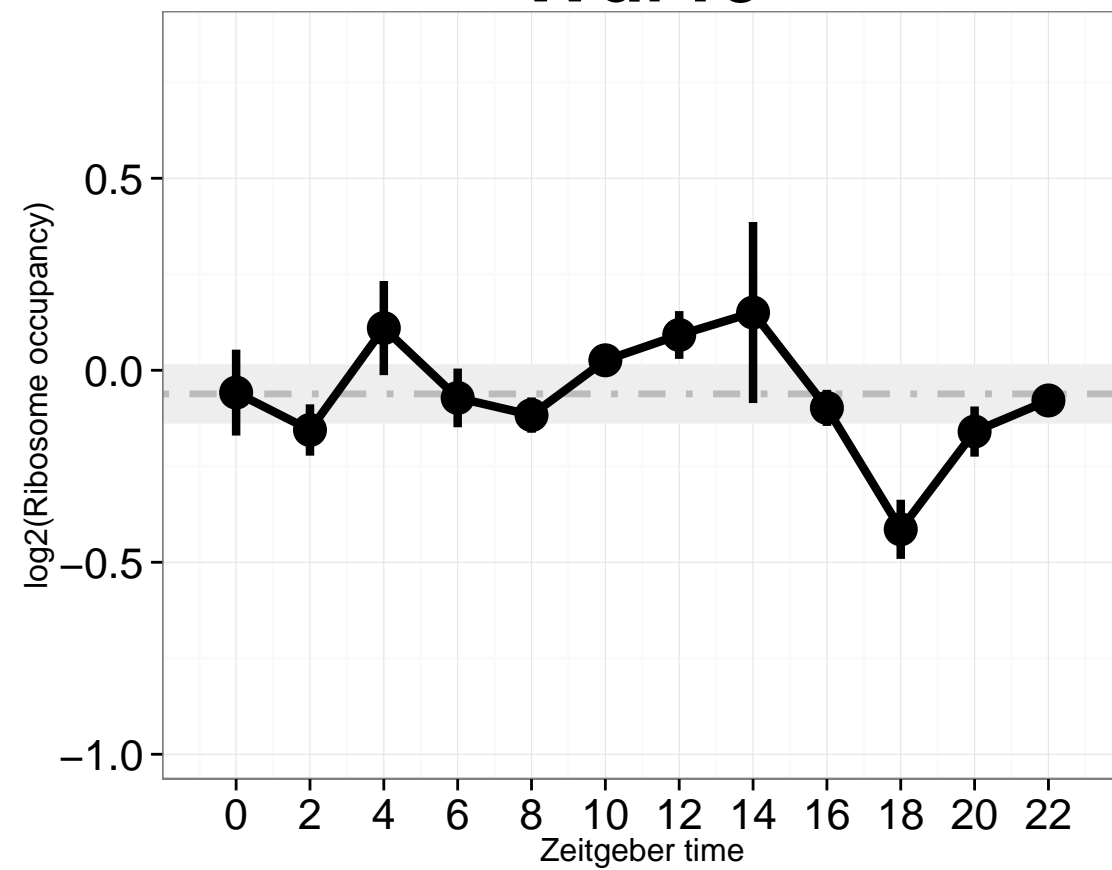

Supplement: Supplementary file 5291 [file 1]

# Alg13

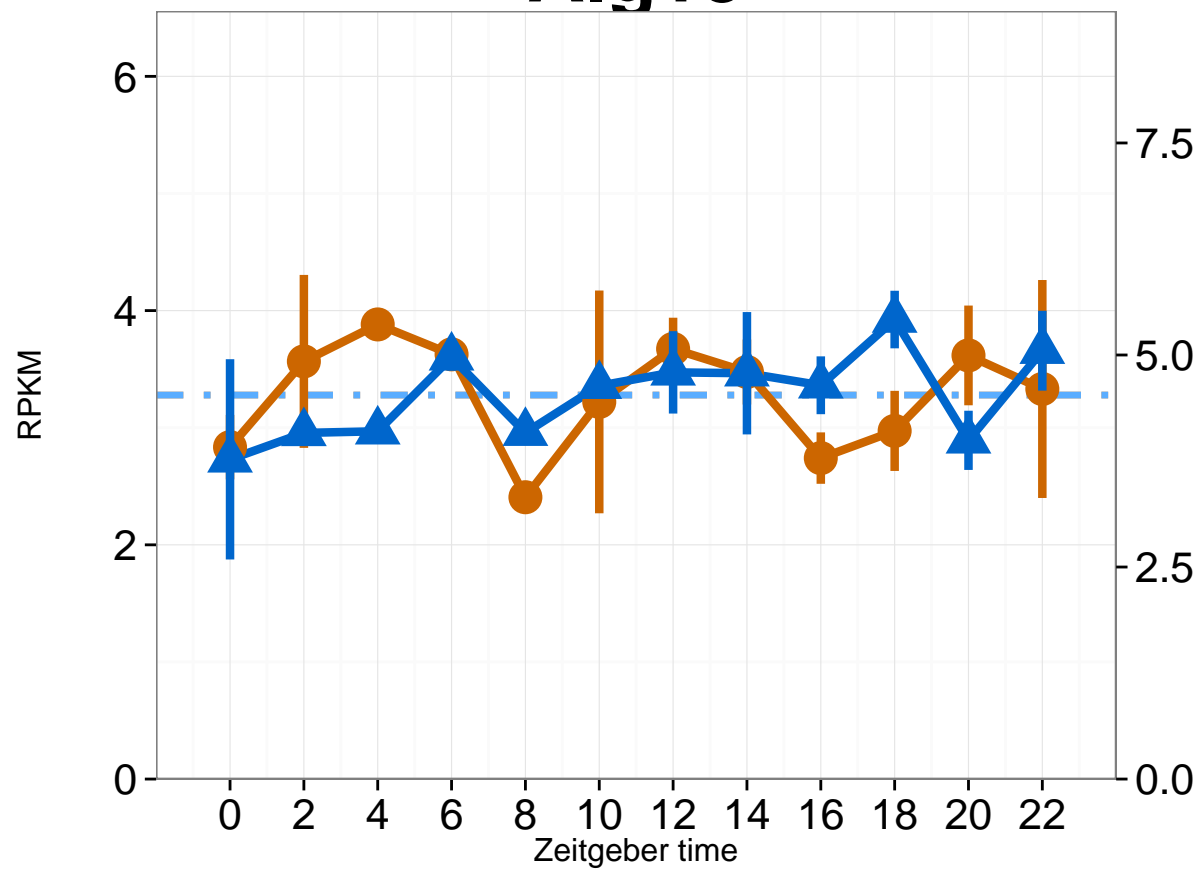

# Alg13

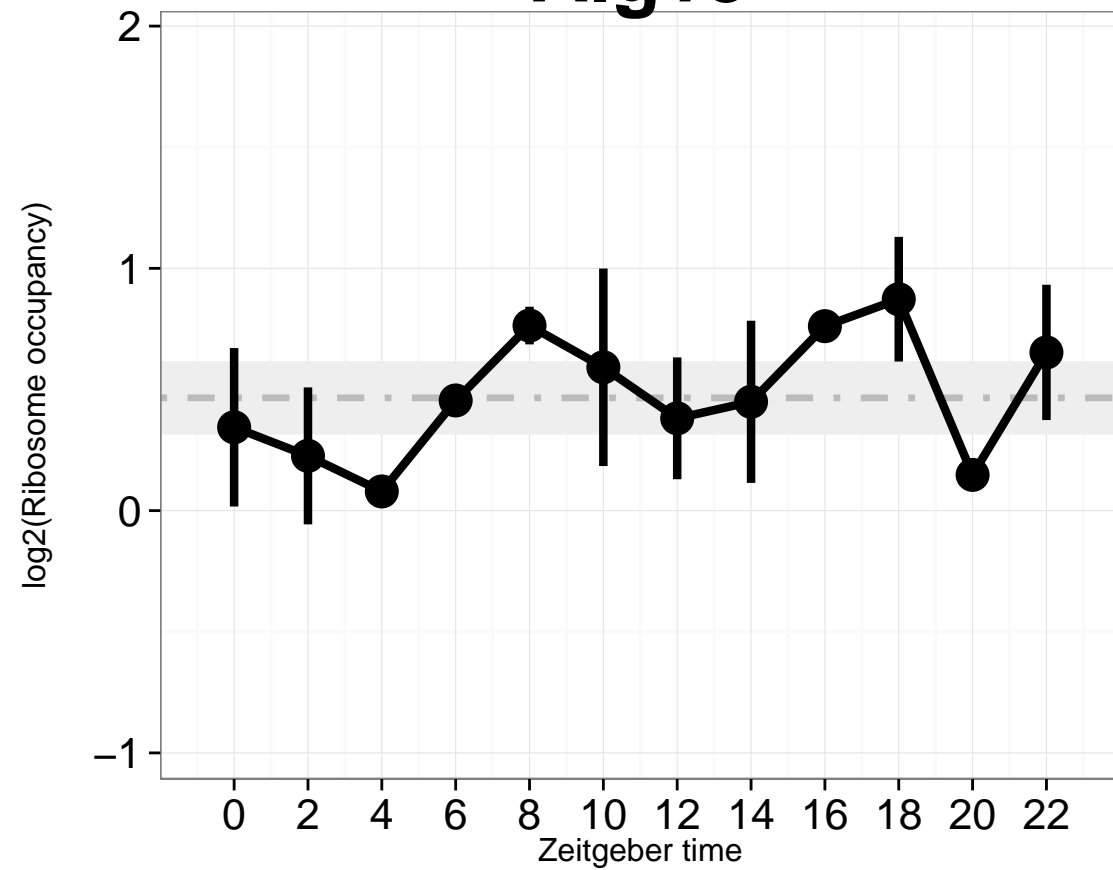

Supplement: Supplementary file 5292 [file 1]

# Dzank1

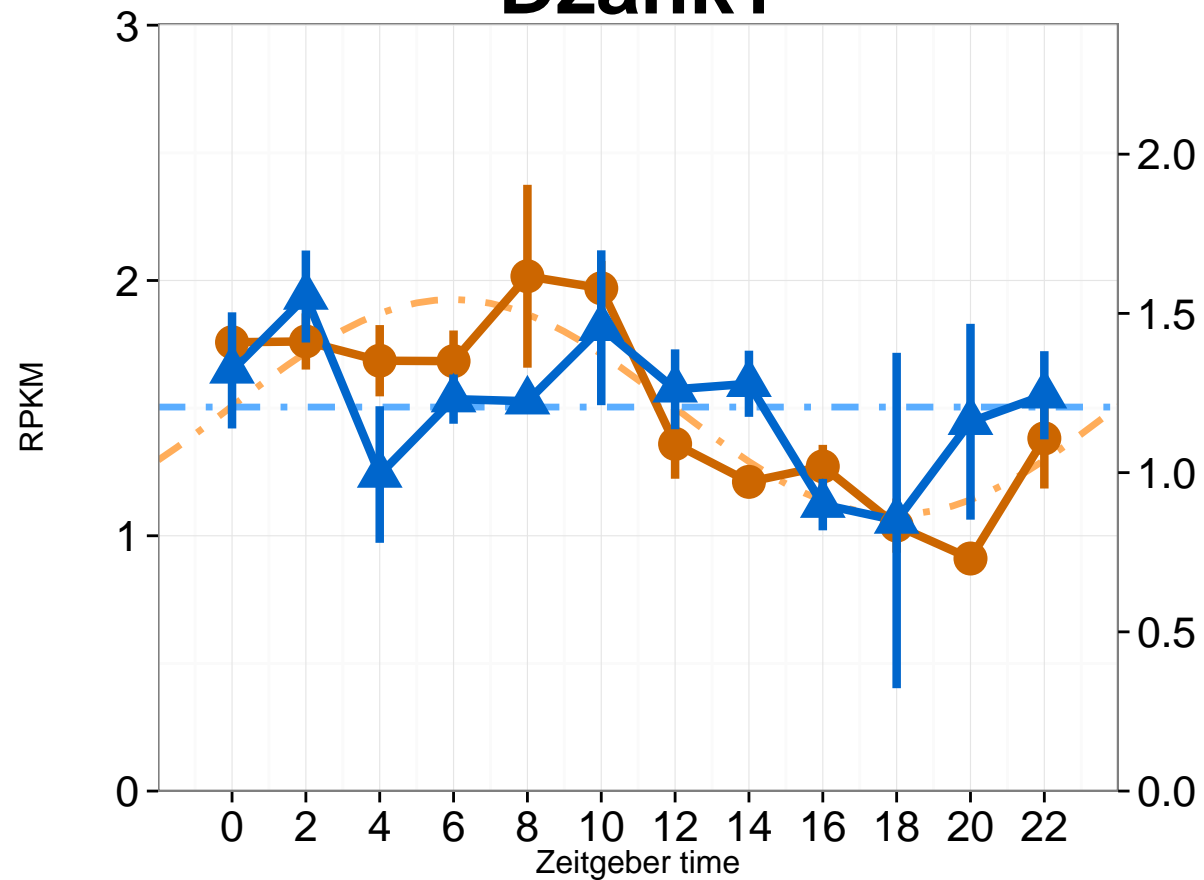

# Dzank1

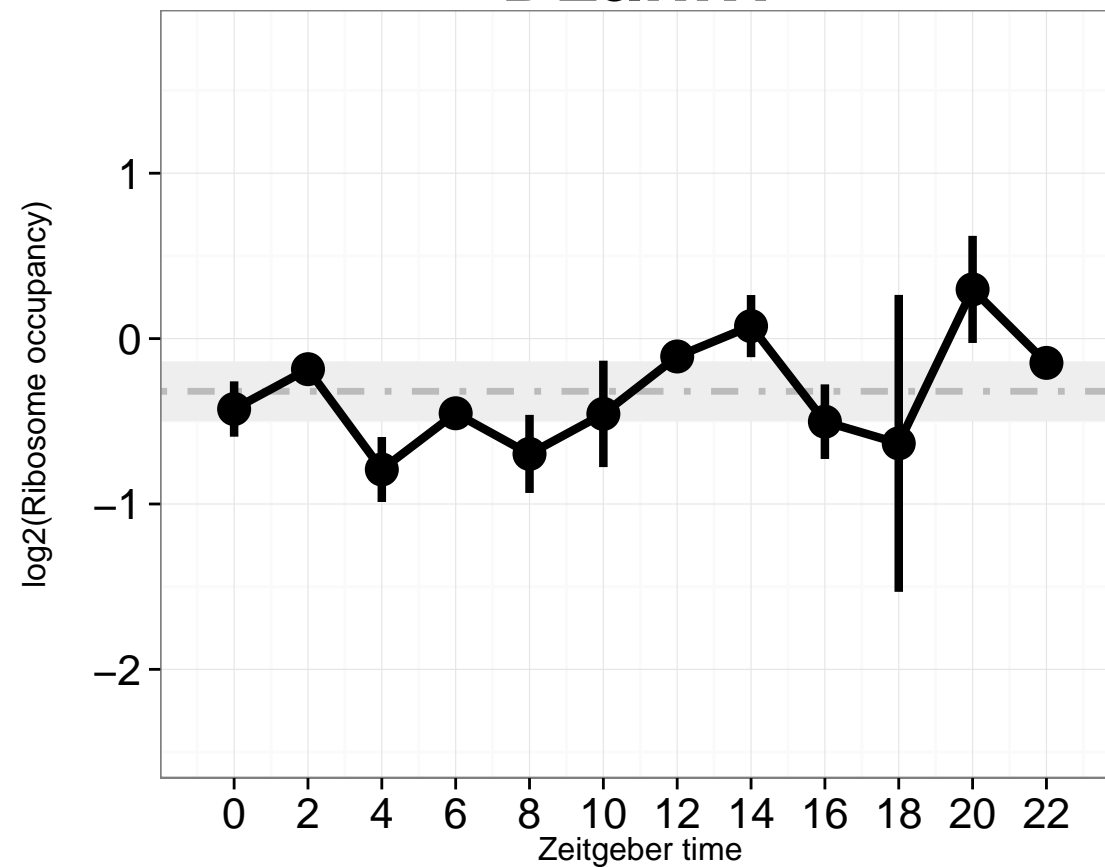

Supplement: Supplementary file 5293 [file 1]

## Rnf14

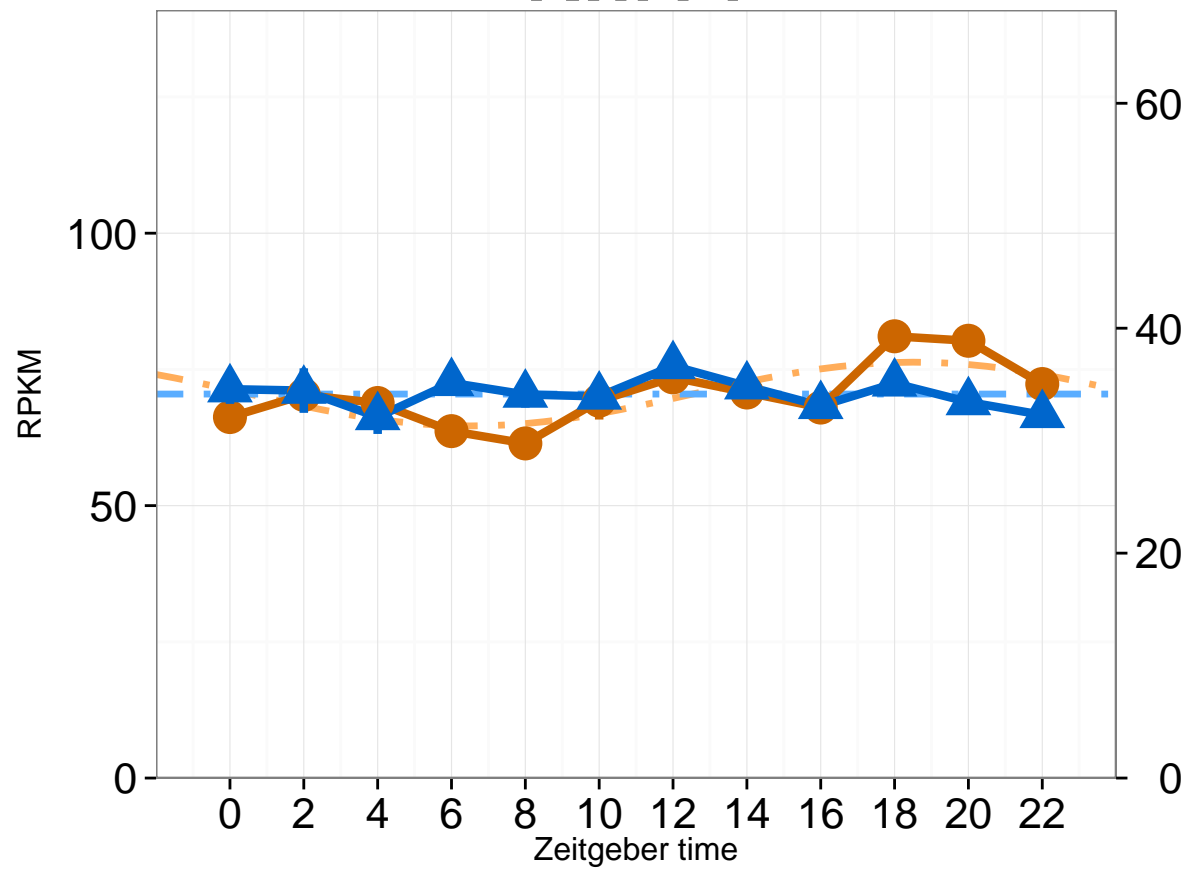

## Rnf14

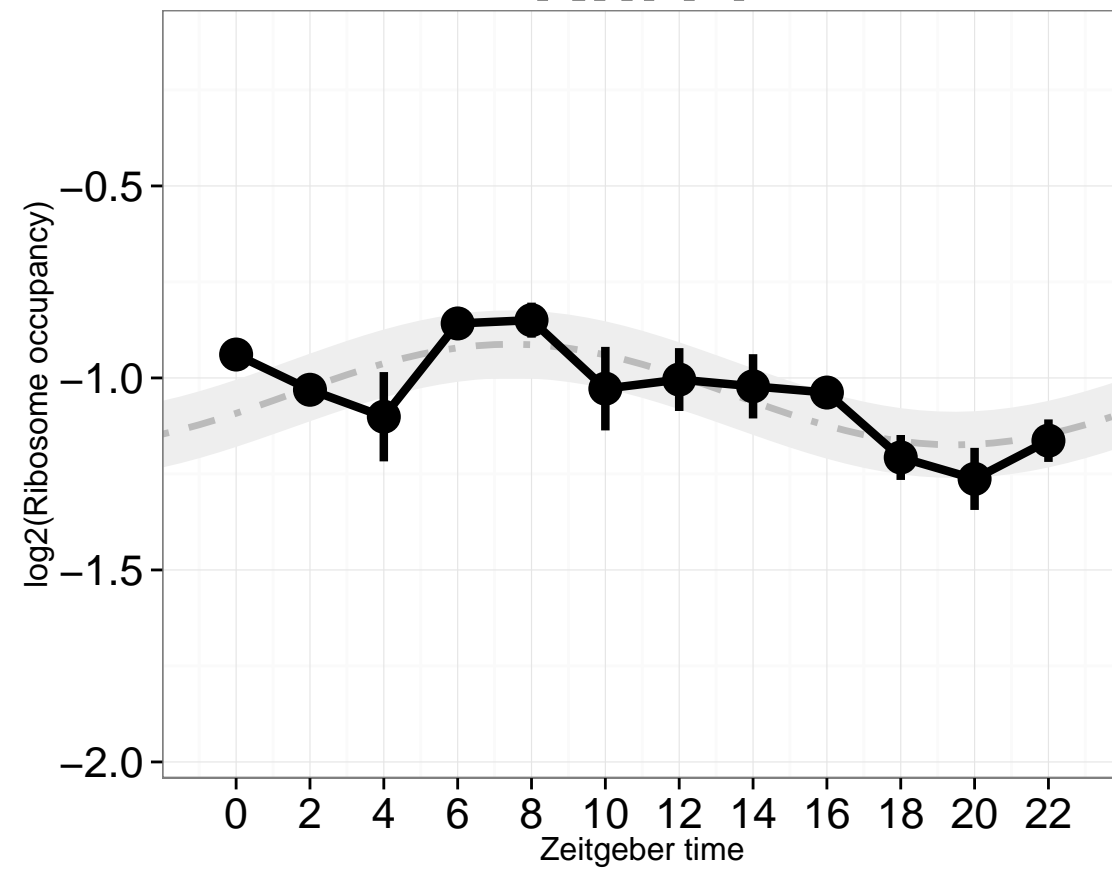

Supplement: Supplementary file 5294 [file 1]

# Fam210b

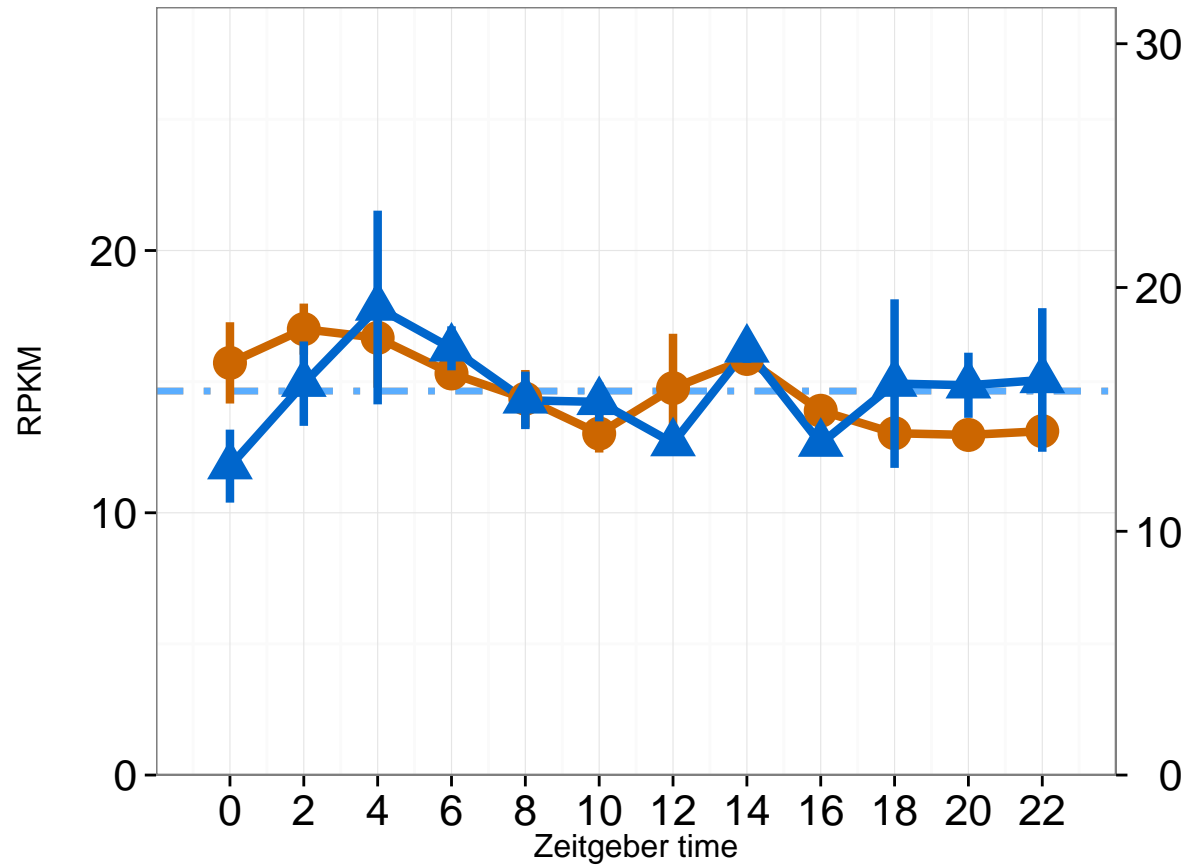

# Fam210b

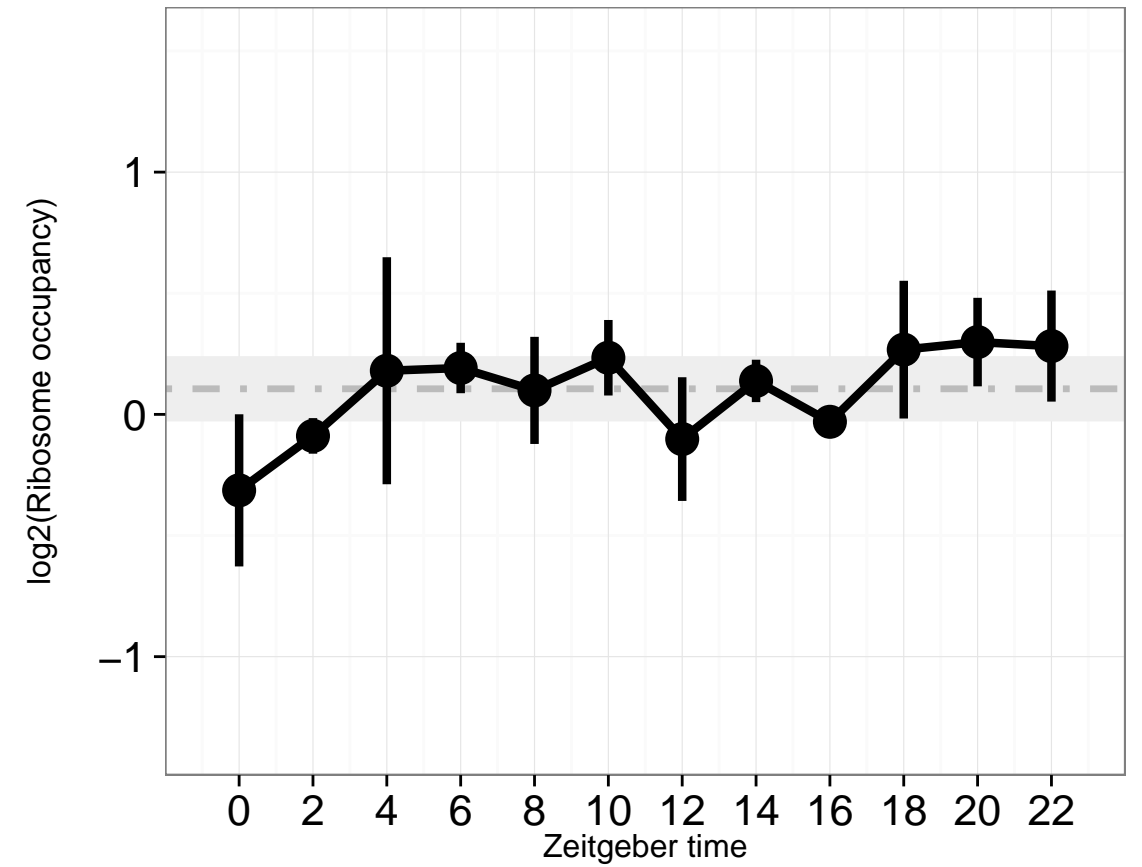

Supplement: Supplementary file 5295 [file 1]

# Hspb1

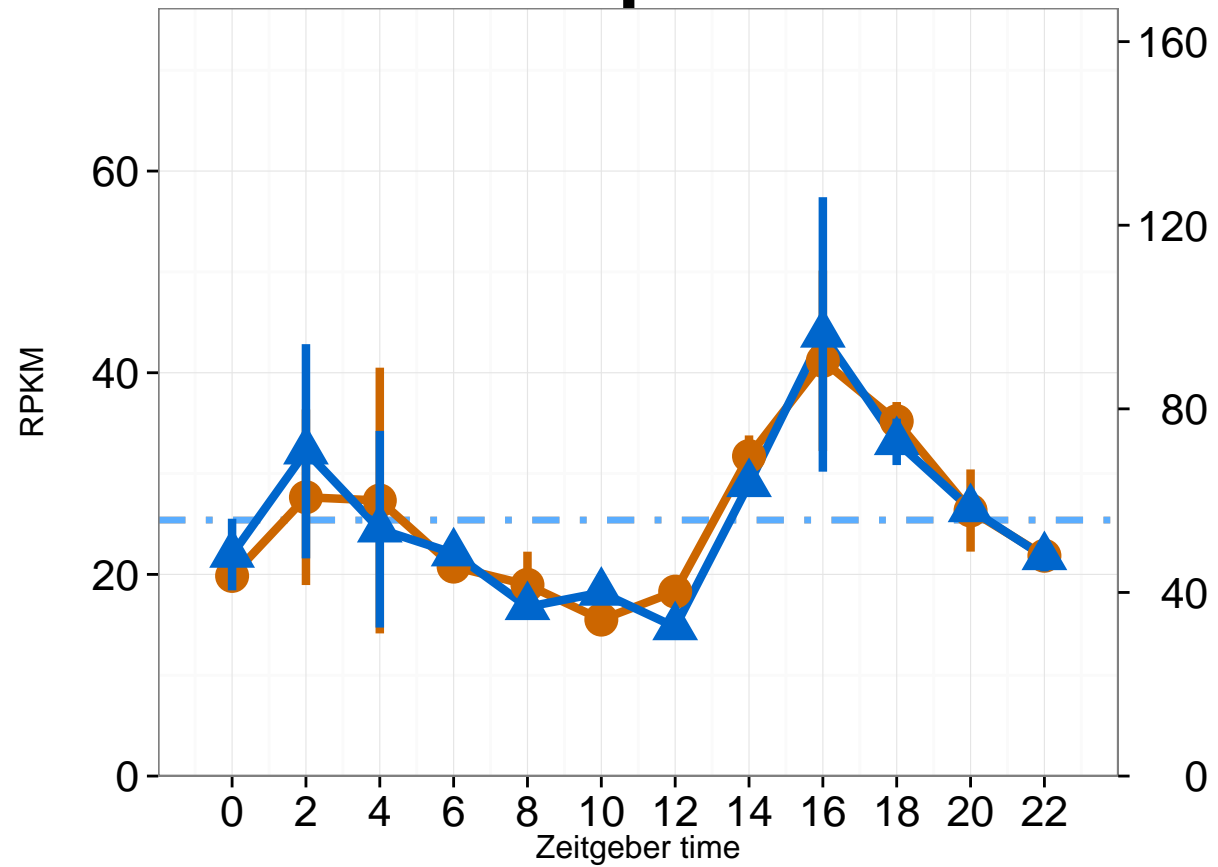

# Hspb1

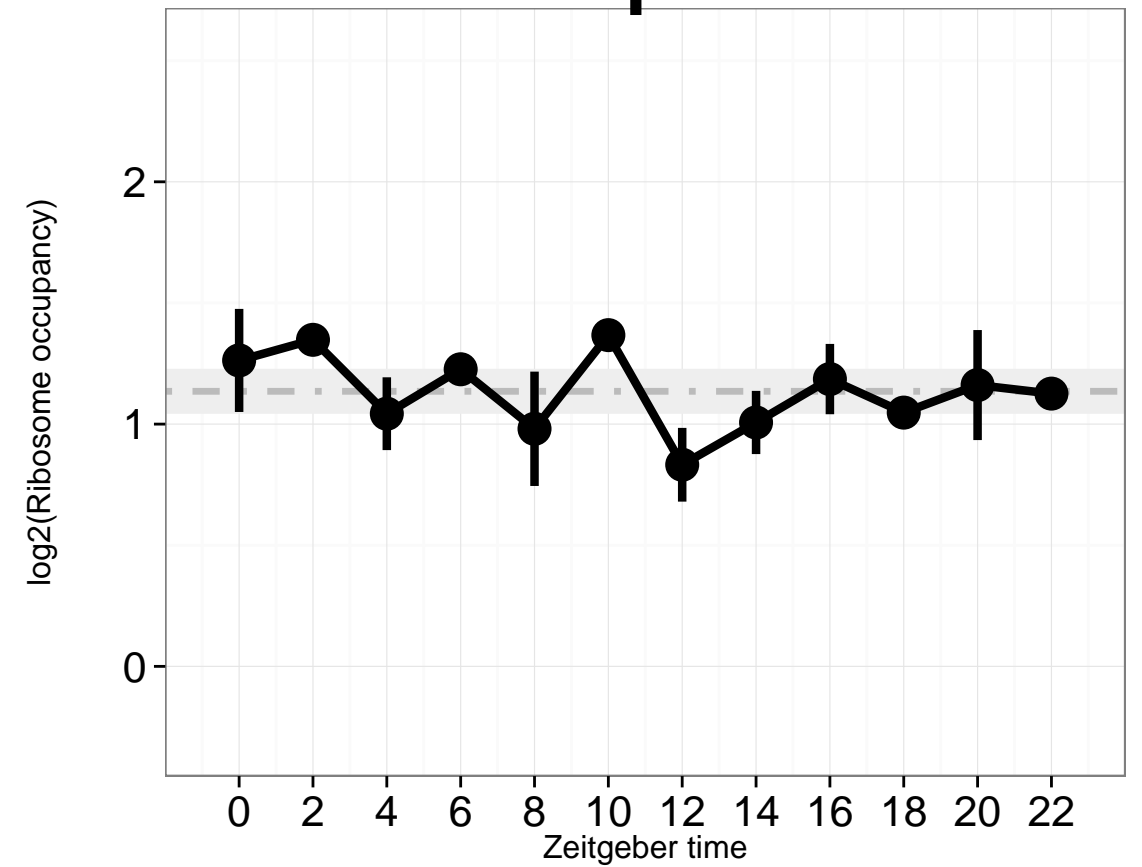

Supplement: Supplementary file 5296 [file 1]

## Ldha

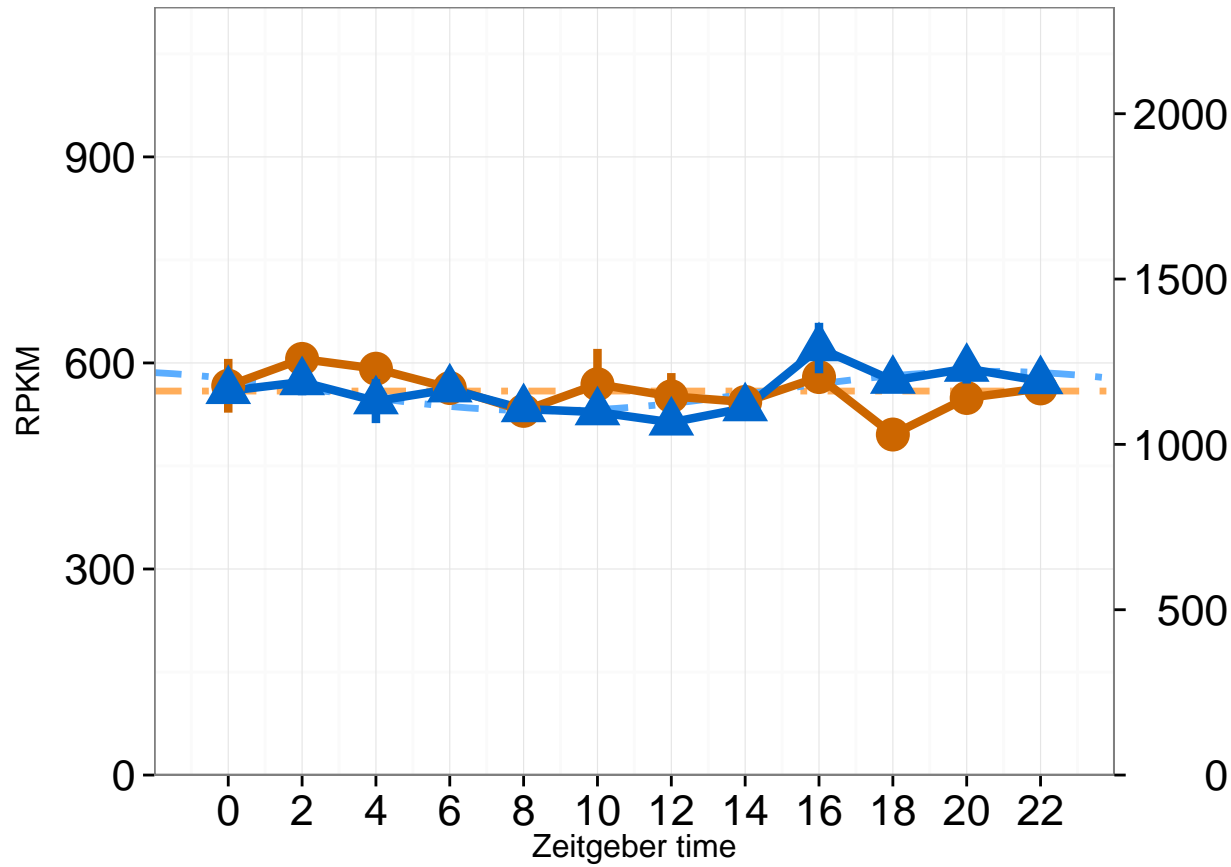

## Ldha

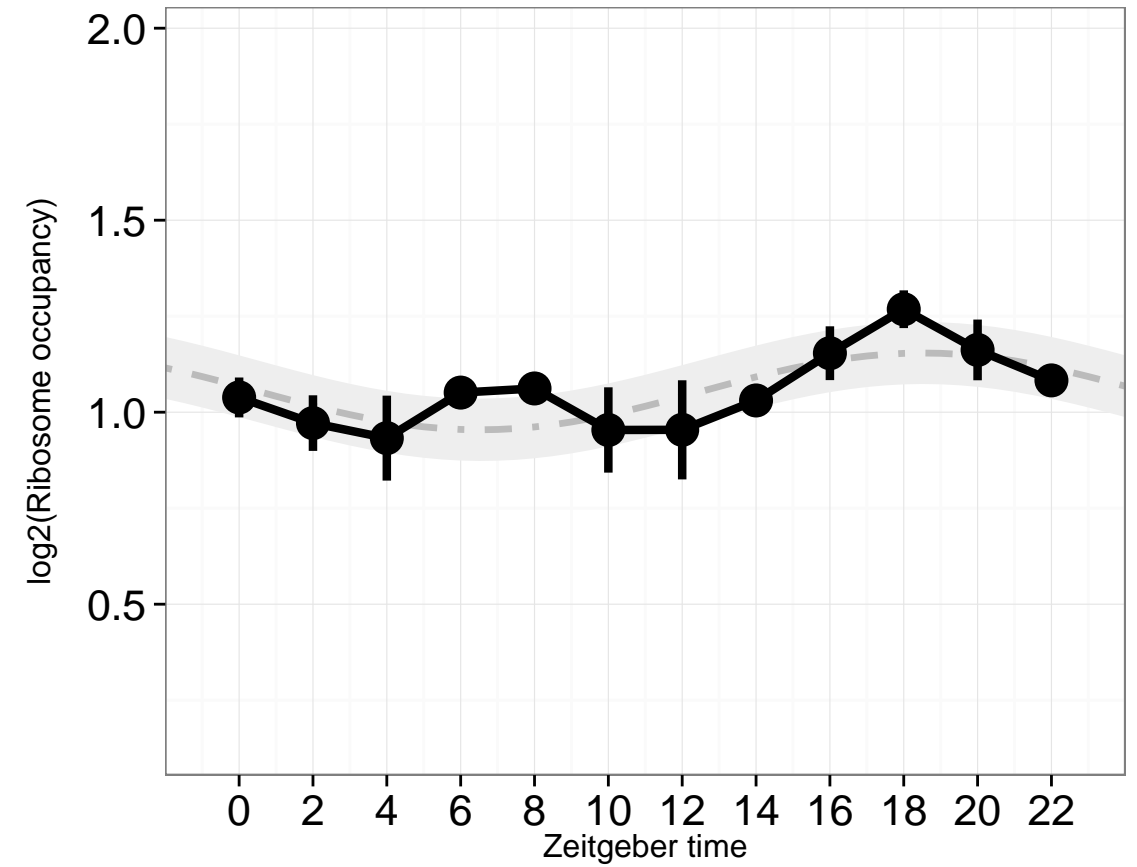

Supplement: Supplementary file 5297 [file 1]

# St6galnac6

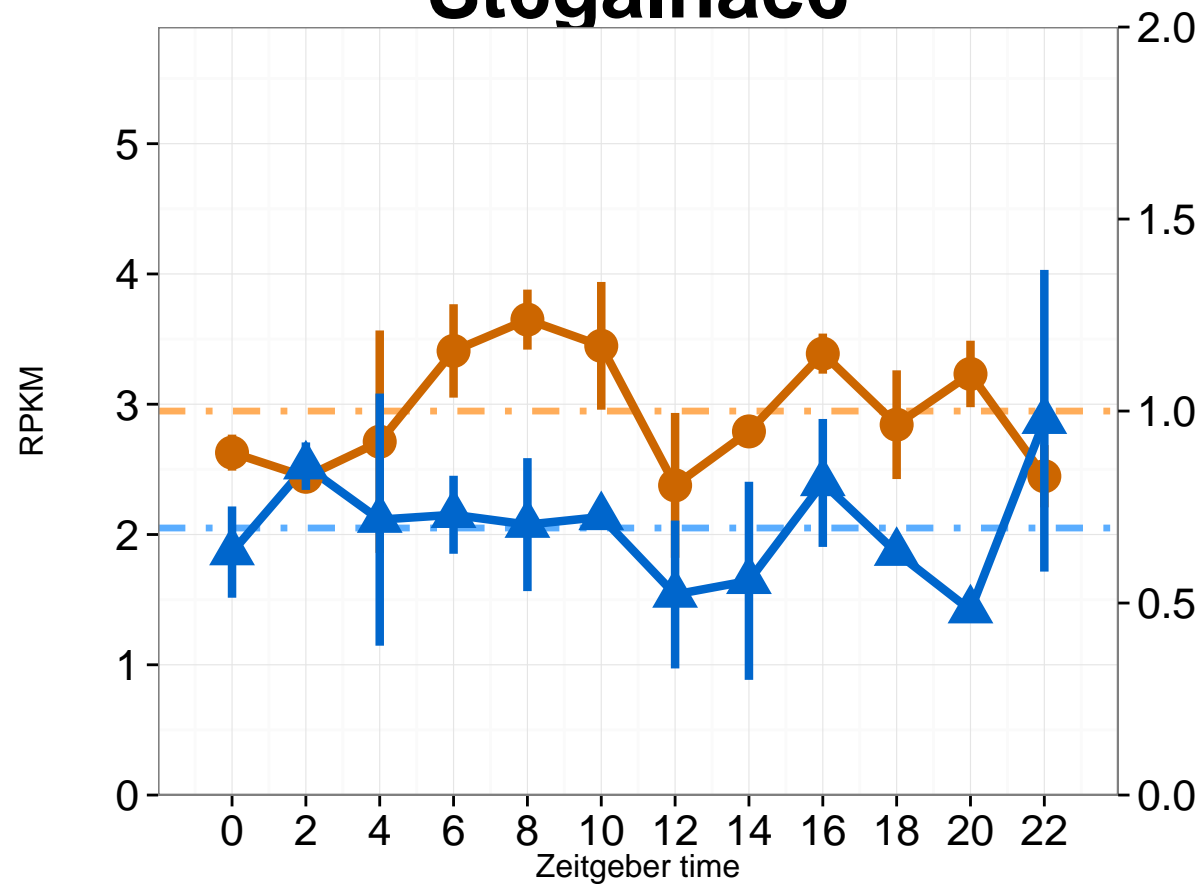

# St6galnac6

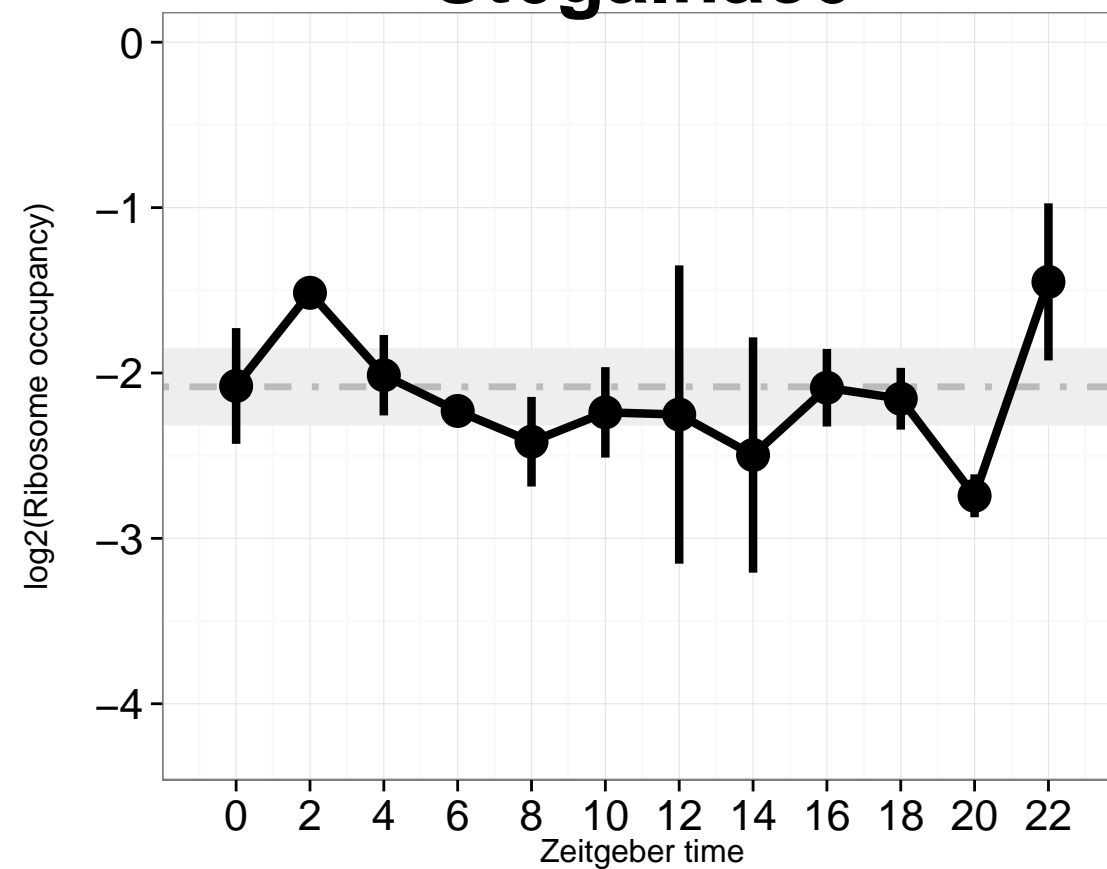

Supplement: Supplementary file 5298 [file 1]

# Slc5a1

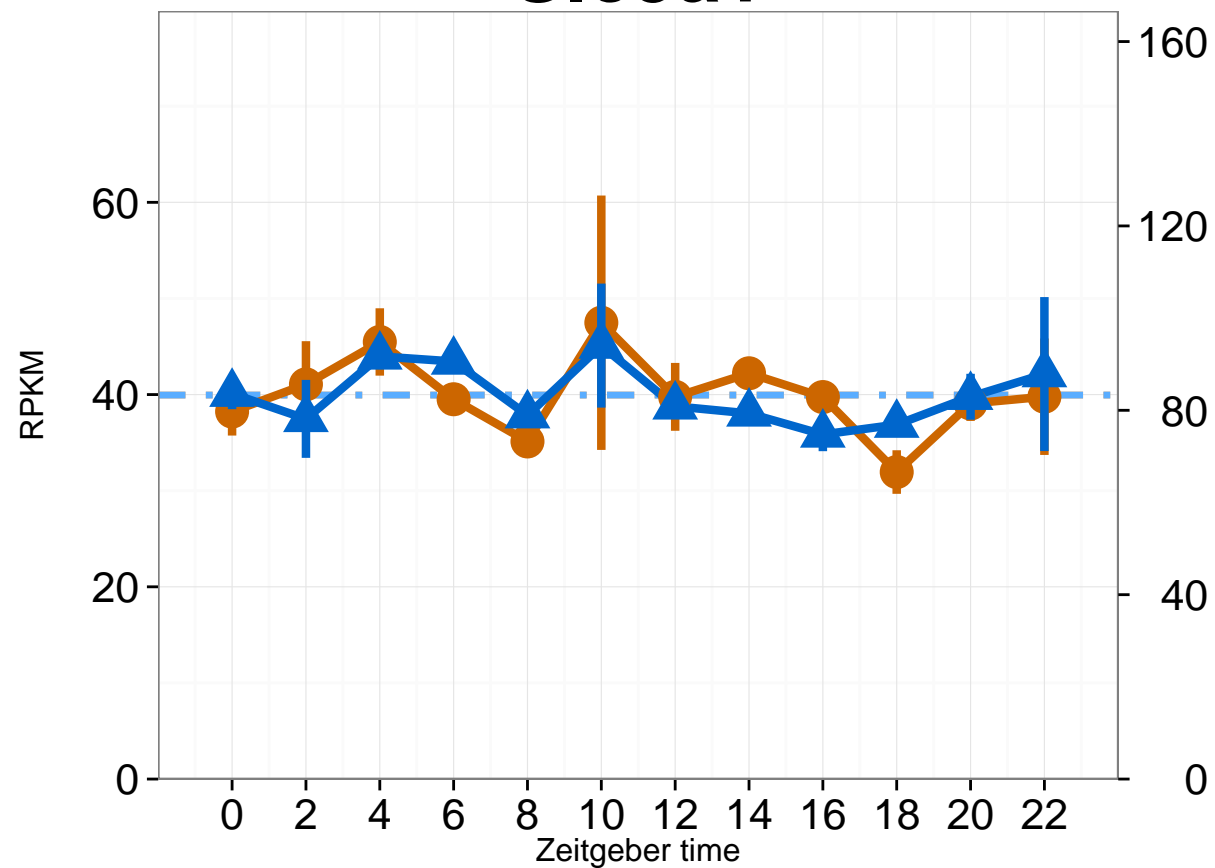

# Slc5a1

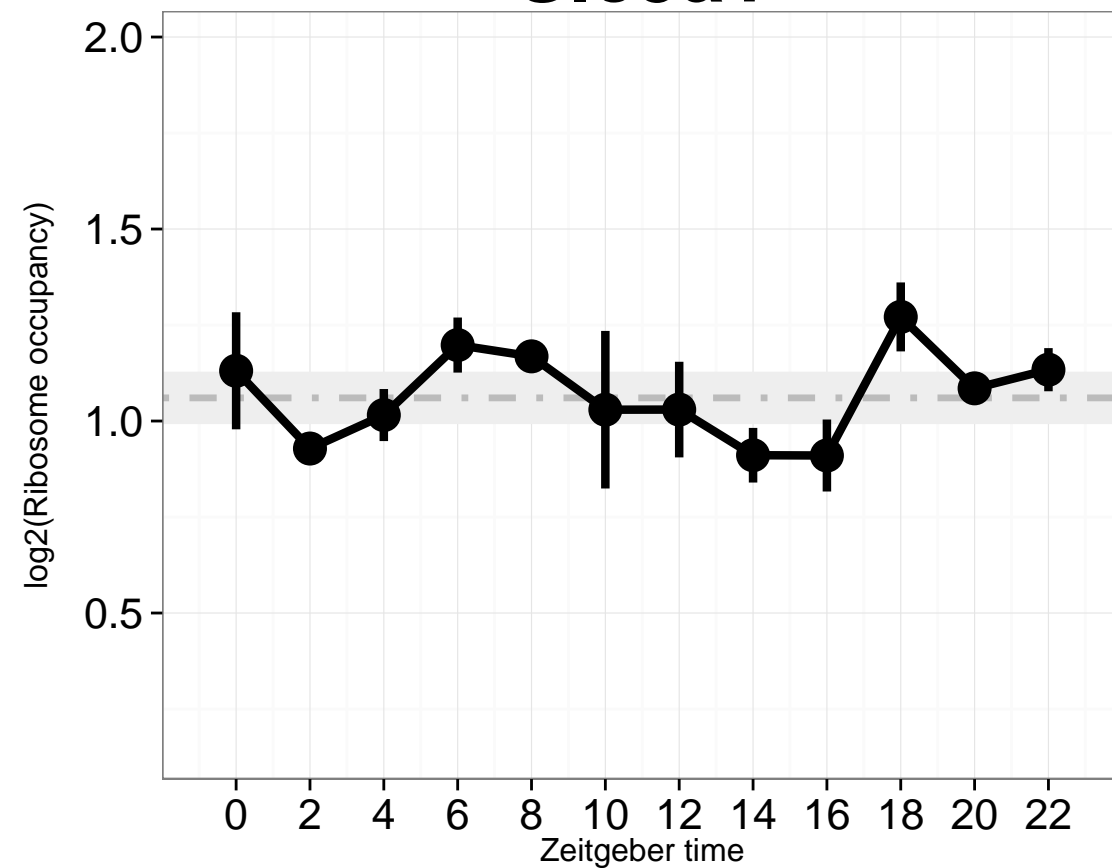

Supplement: Supplementary file 5299 [file 1]

**BC005764 TR**

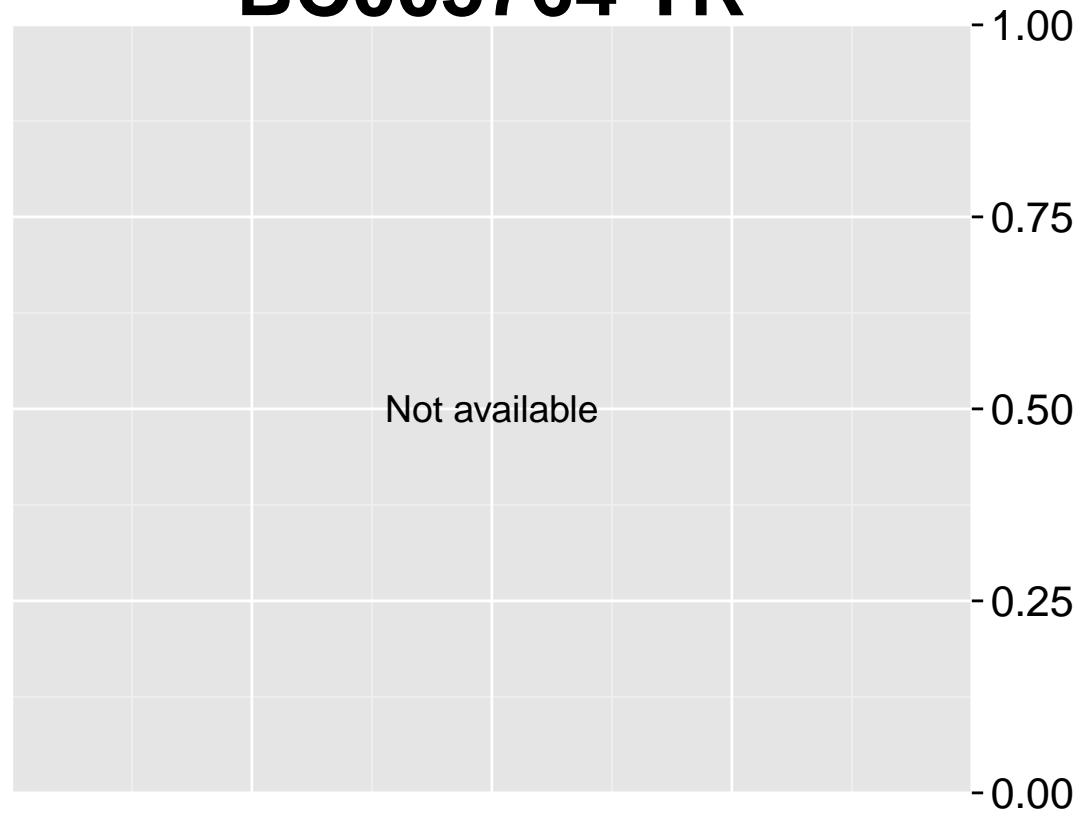

**BC005764 log2(Ribosome occupancy)**

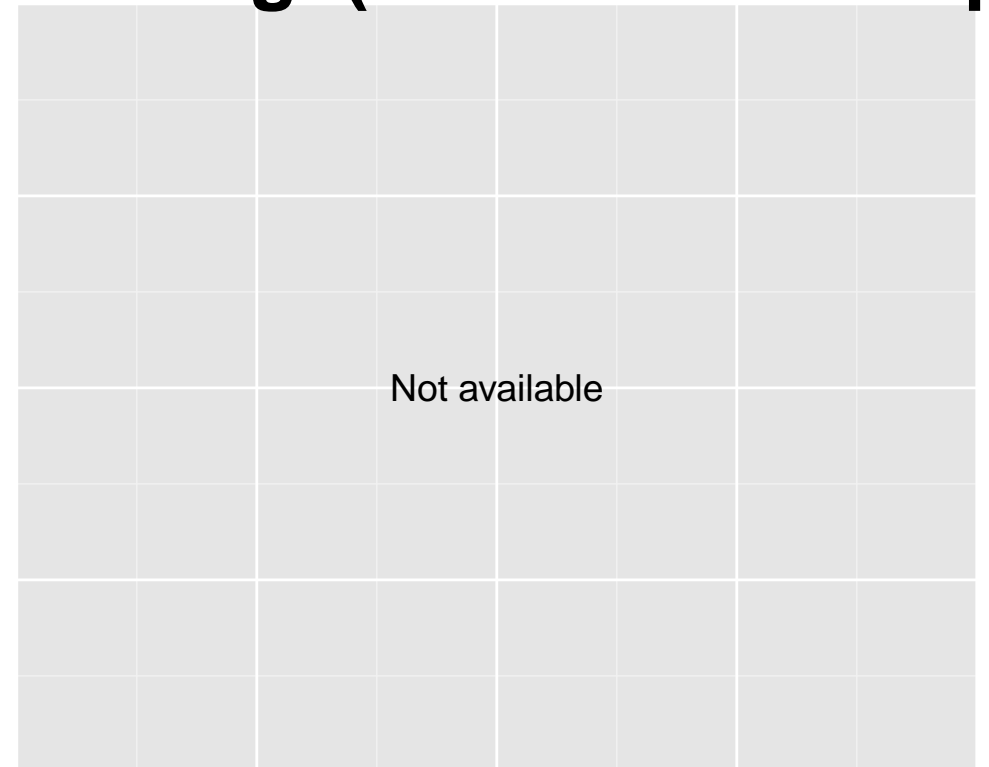

Supplement: Supplementary file 5300 [file 1]

## Nfib

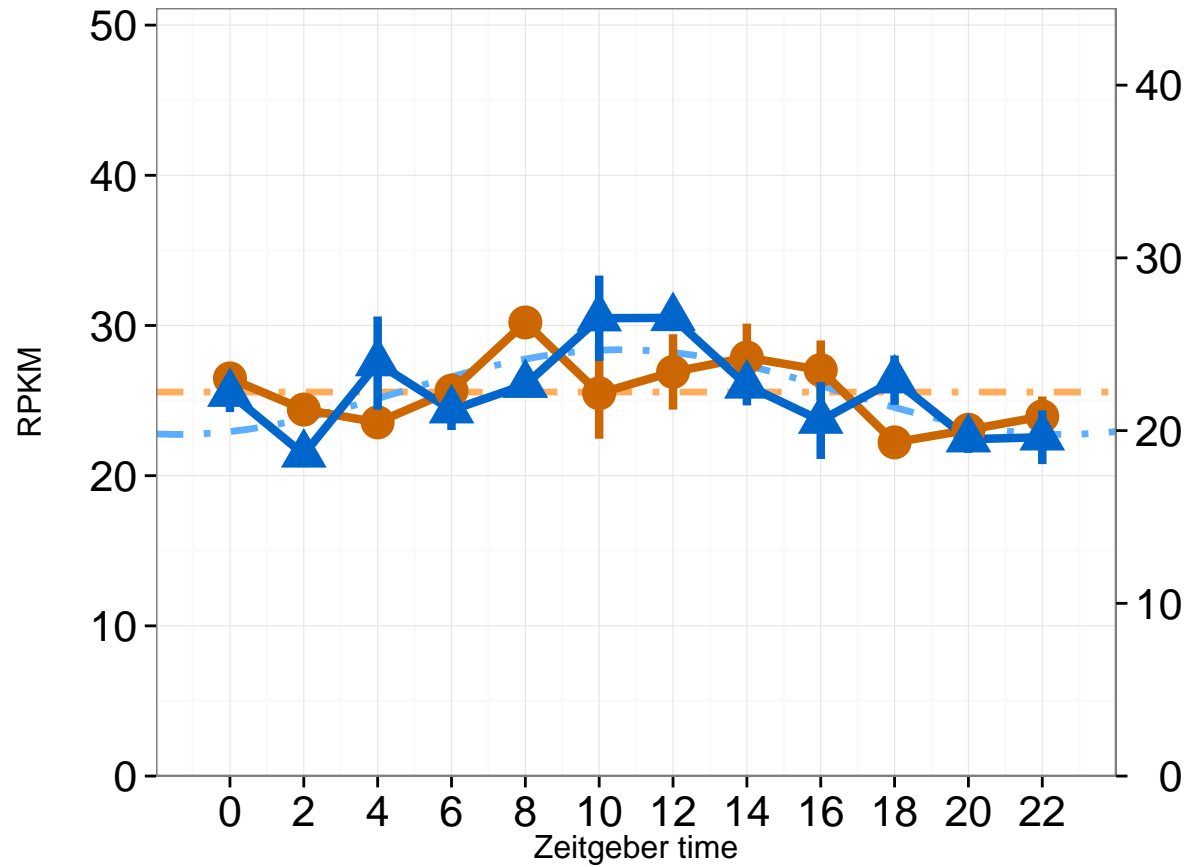

## Nfib

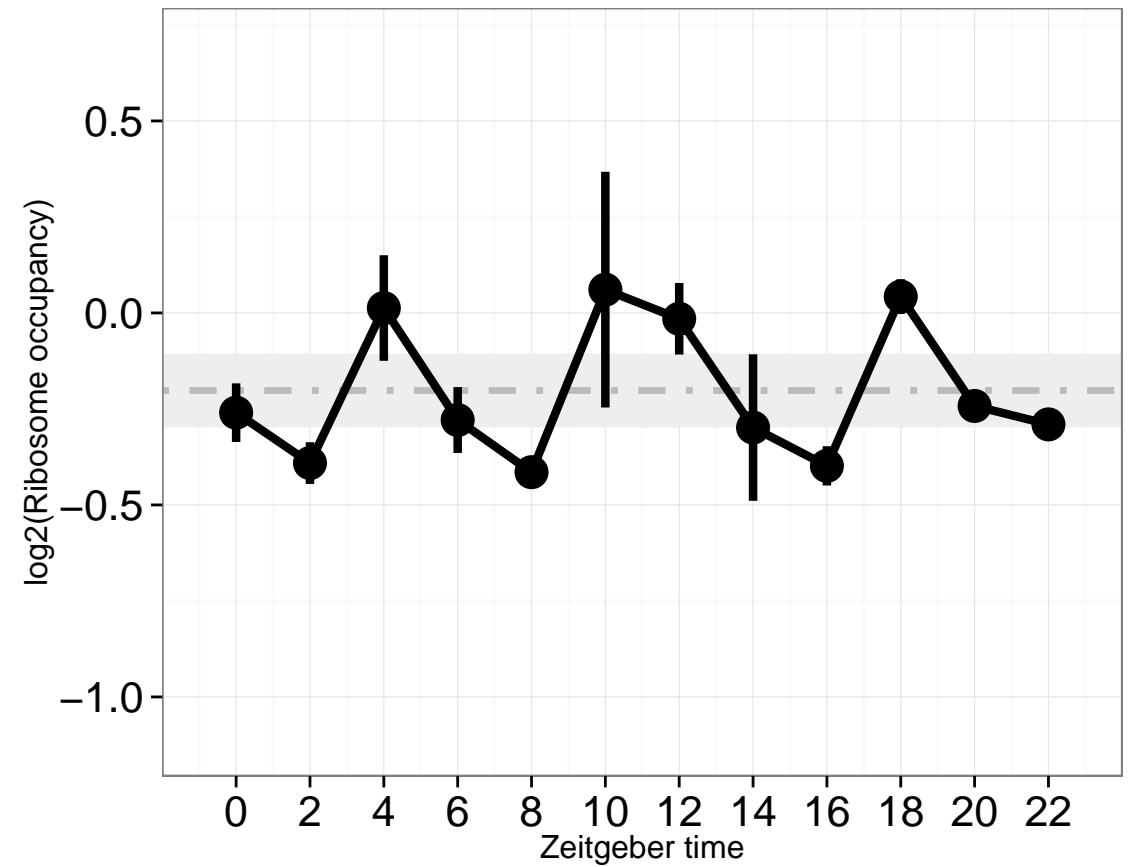

Supplement: Supplementary file 5301 [file 1]

## Wdr92

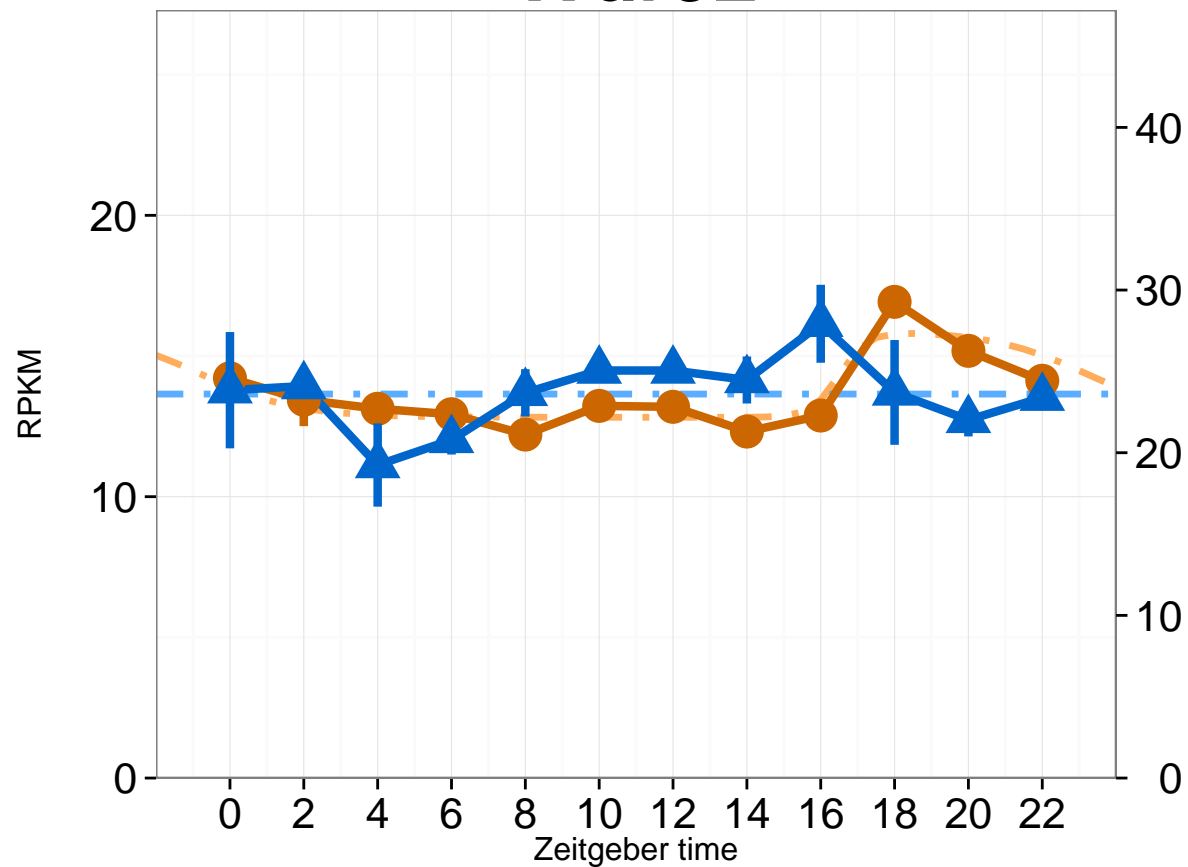

## Wdr92

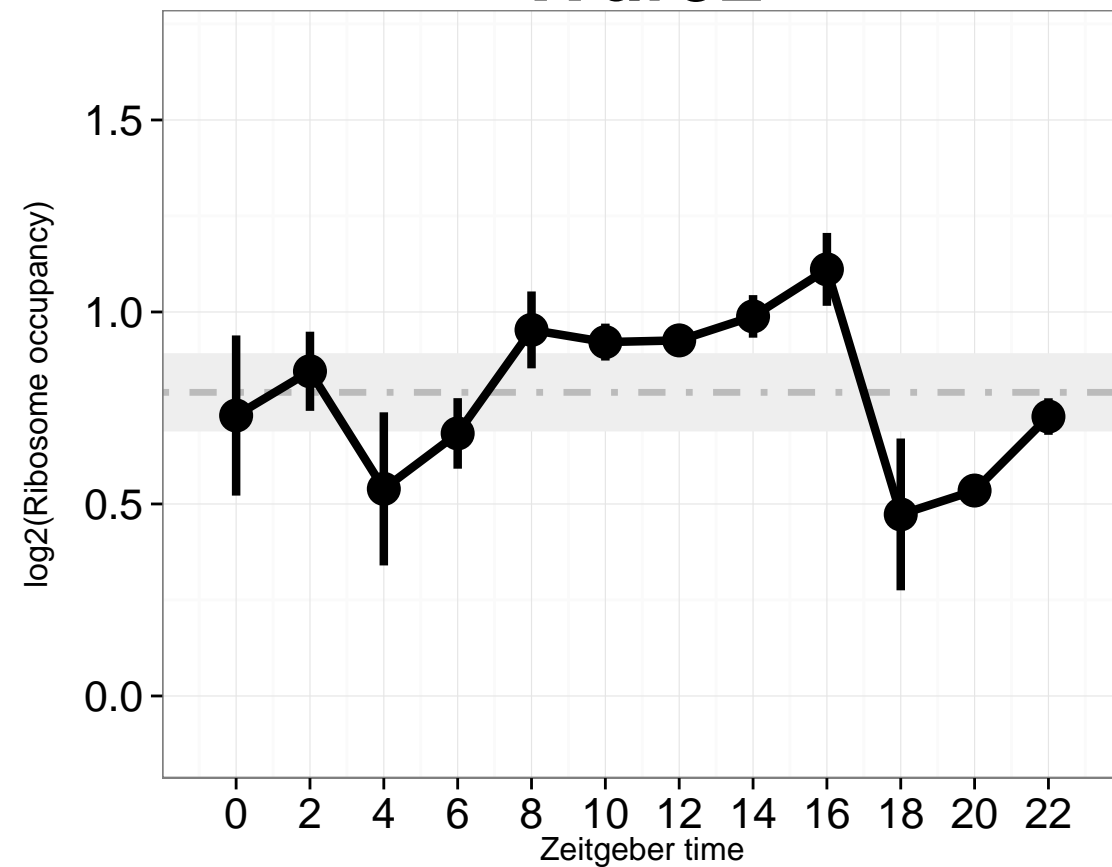

Supplement: Supplementary file 5302 [file 1]

# Zfp809

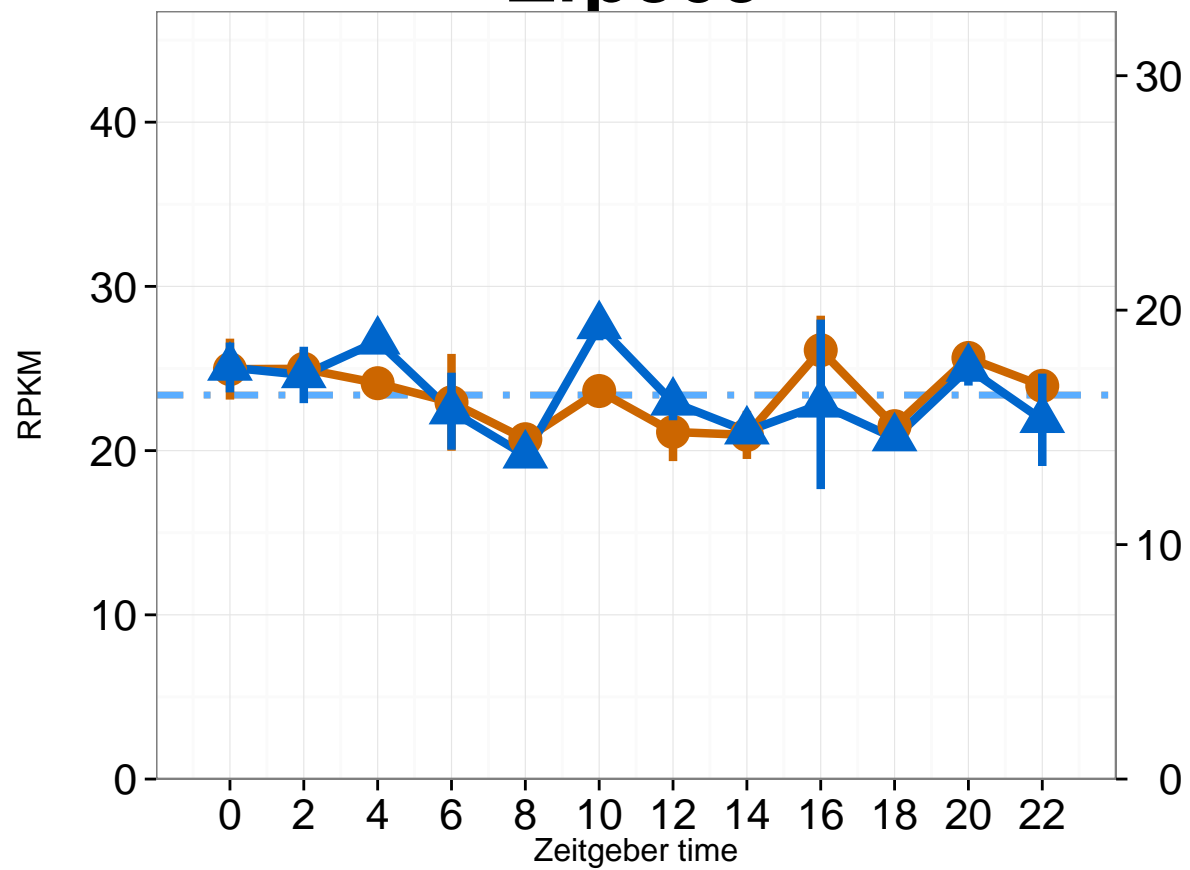

# Zfp809

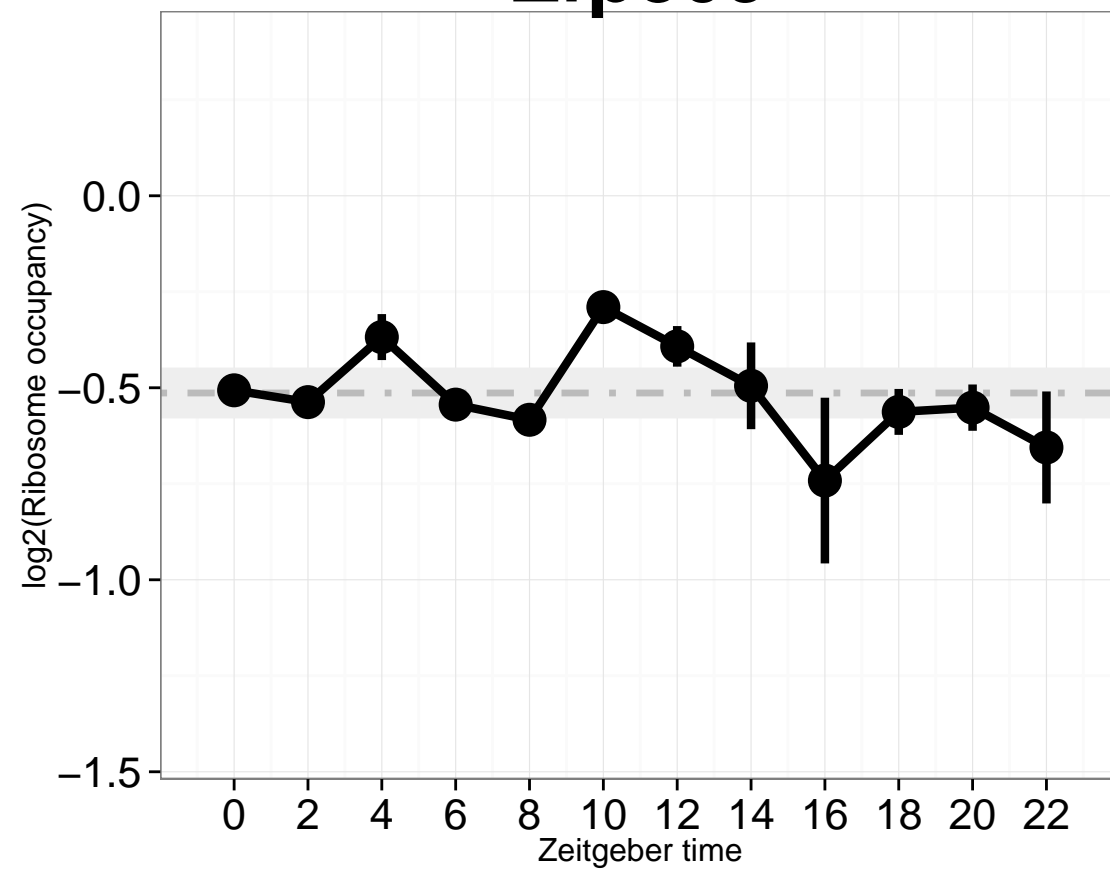

Supplement: Supplementary file 5303 [file 1]

# Ptgr1

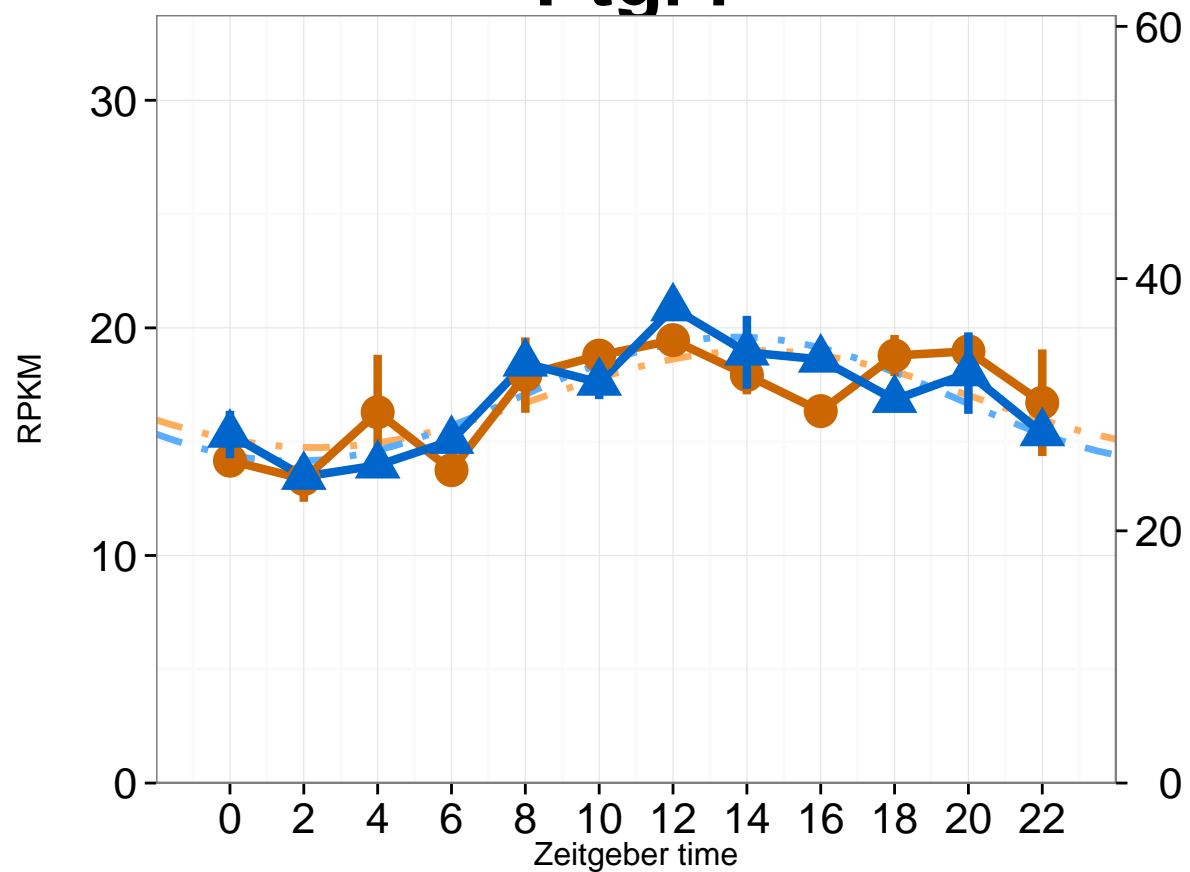

# Ptgr1

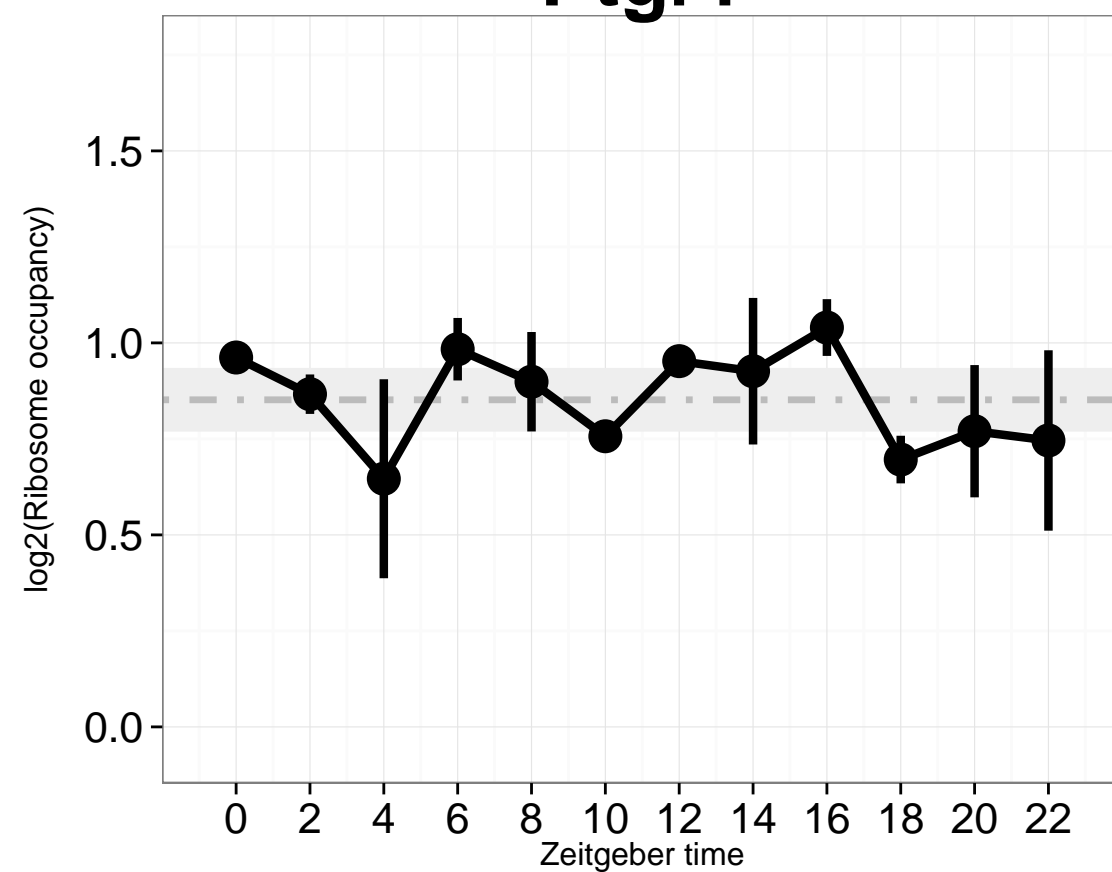

Supplement: Supplementary file 5304 [file 1]

## Fuz

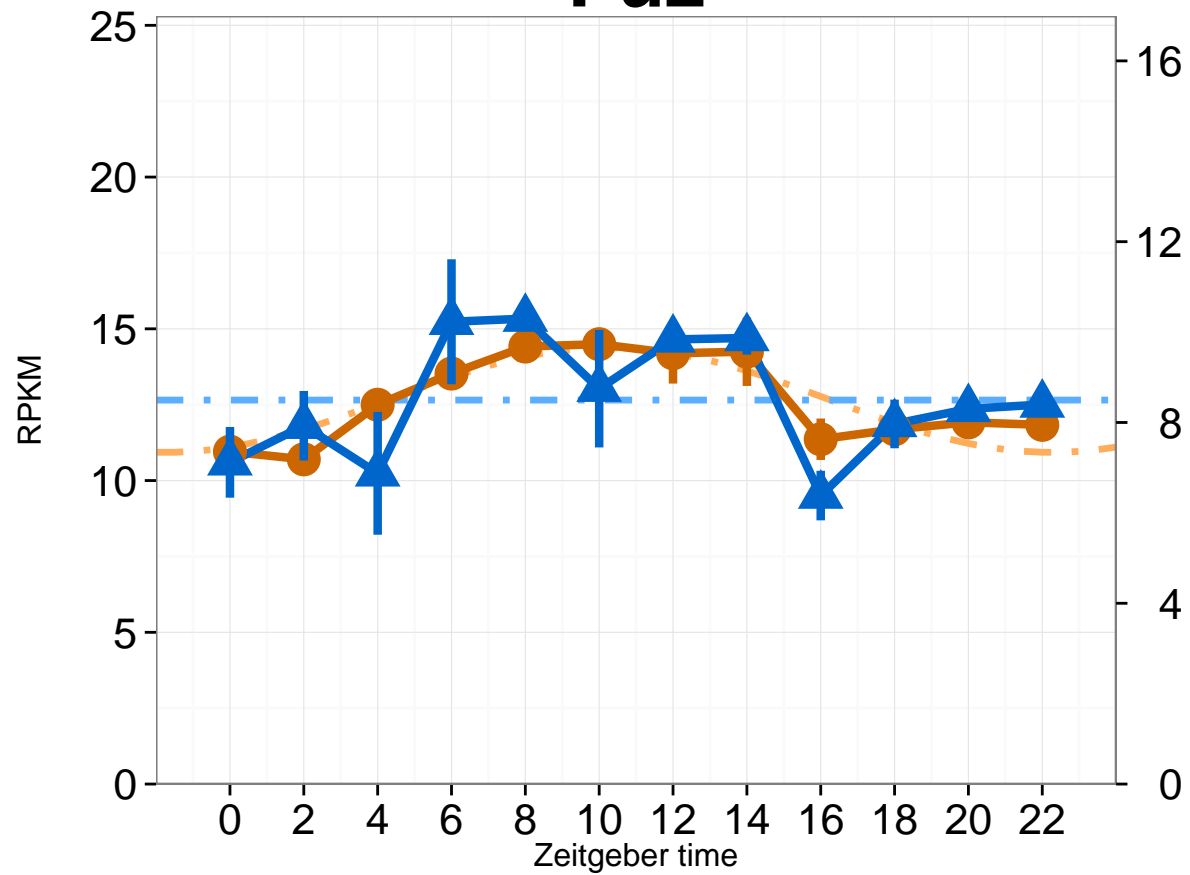

## Fuz

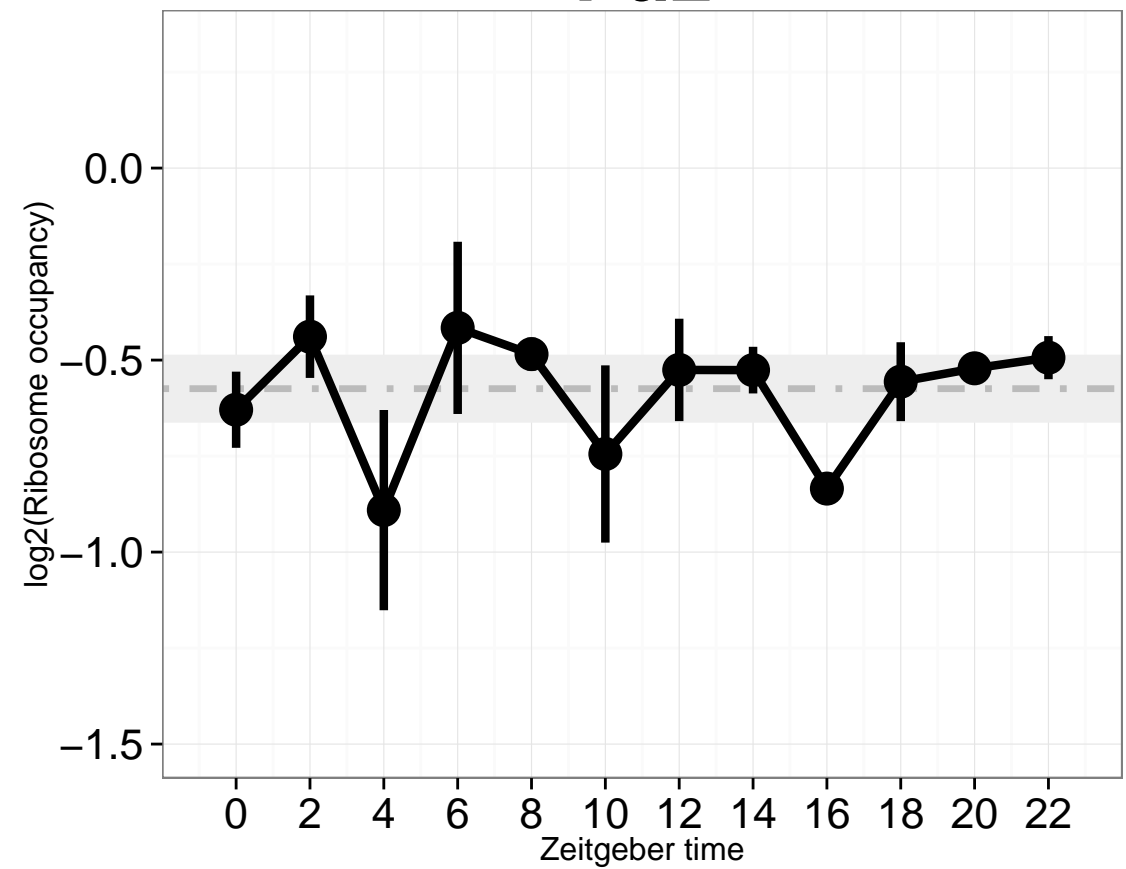

Supplement: Supplementary file 5305 [file 1]

## Mxi1

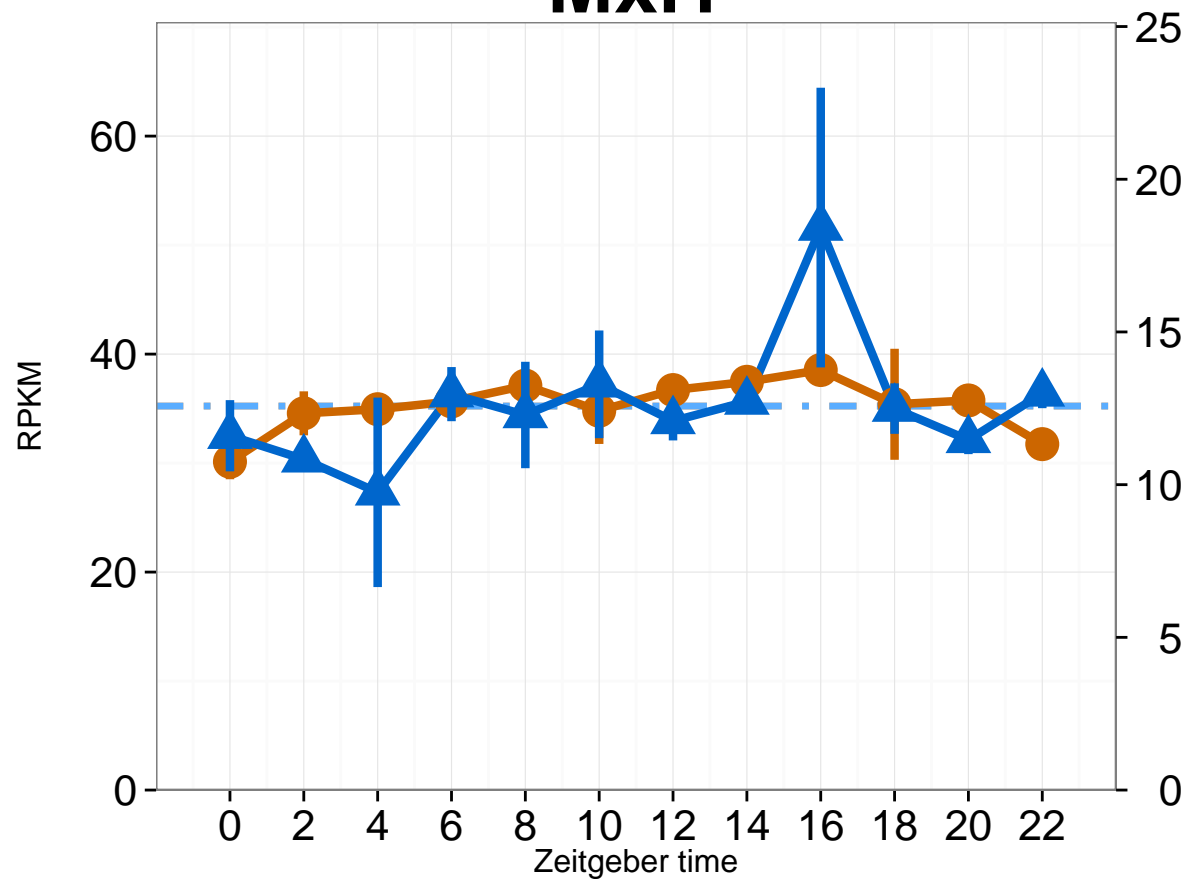

## Mxi1

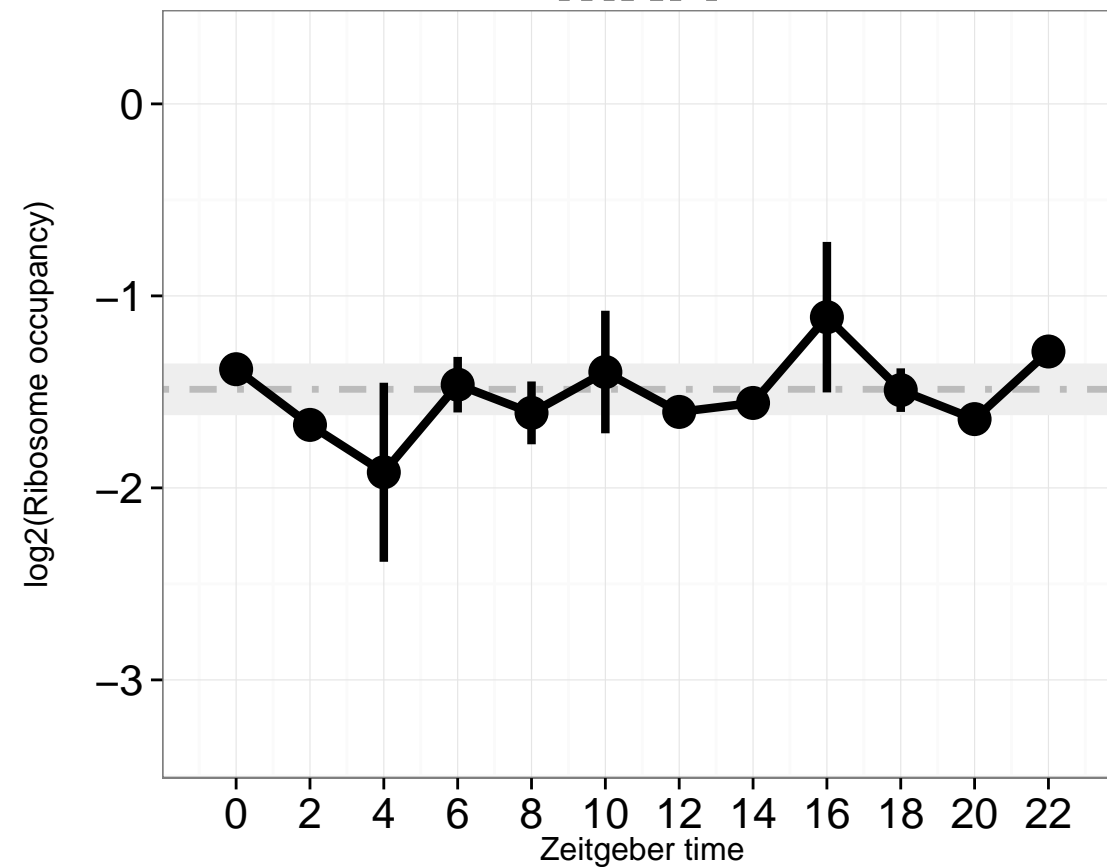

Supplement: Supplementary file 5306 [file 1]

## Gm9900

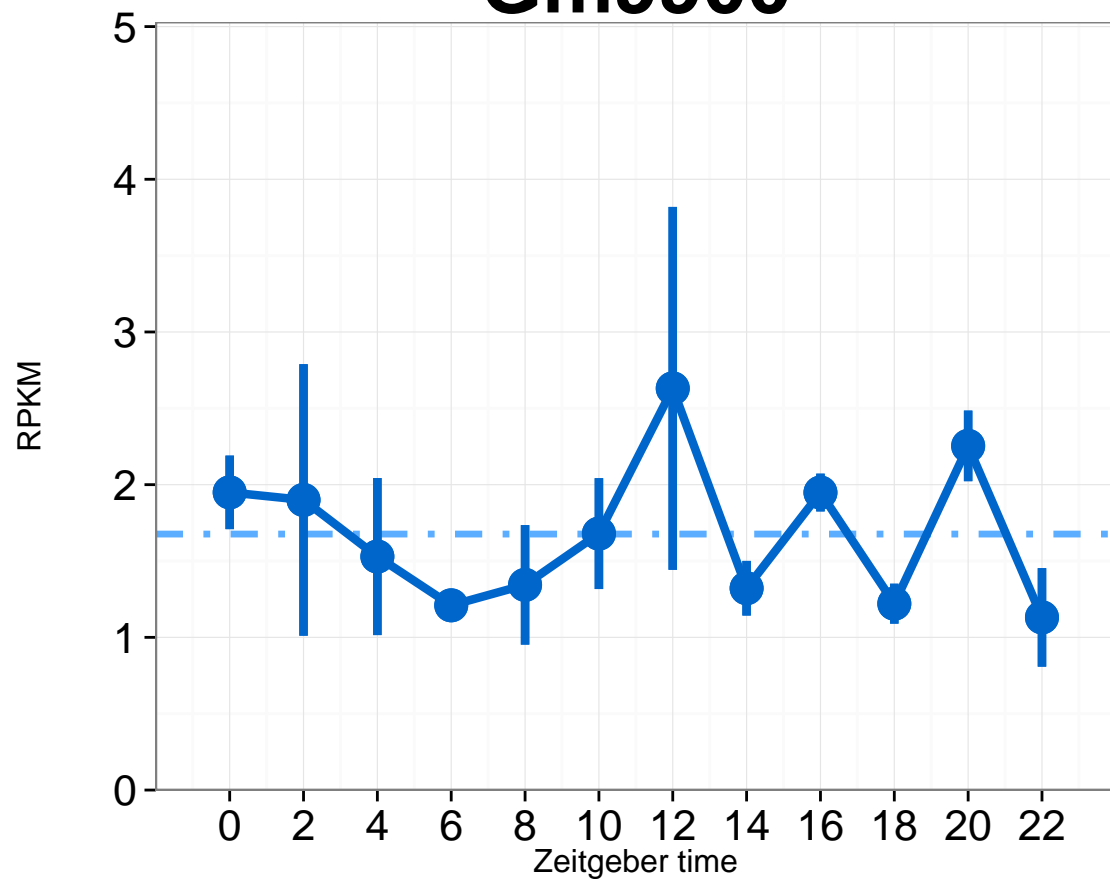

## Gm9900 log2(Ribosome occupanc

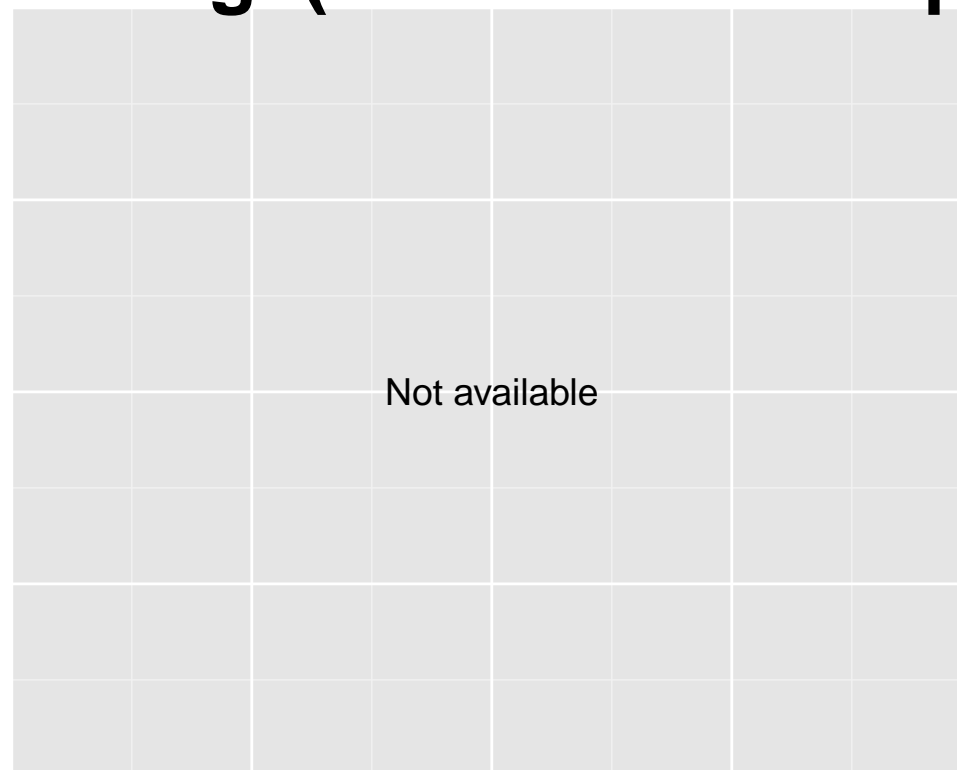

Supplement: Supplementary file 5307 [file 1]

# Fiz1

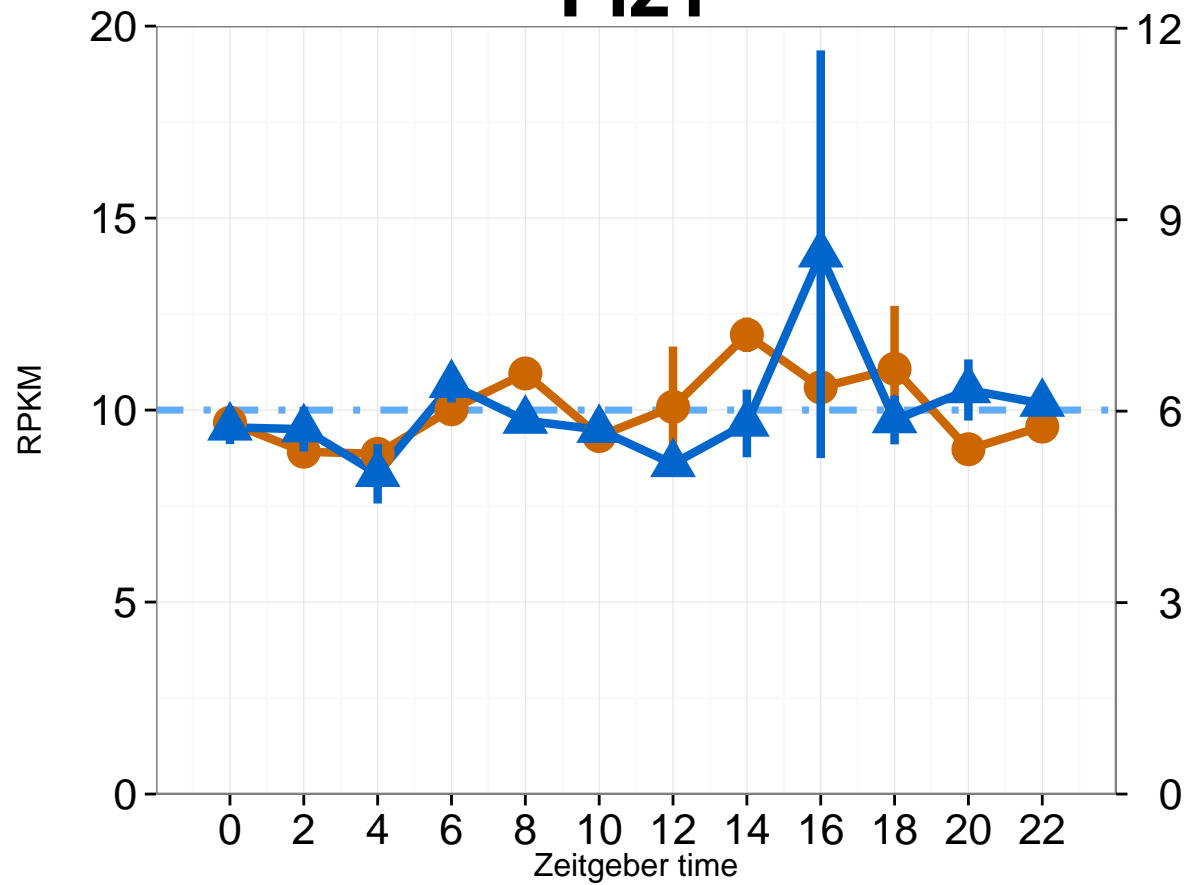

# Fiz1

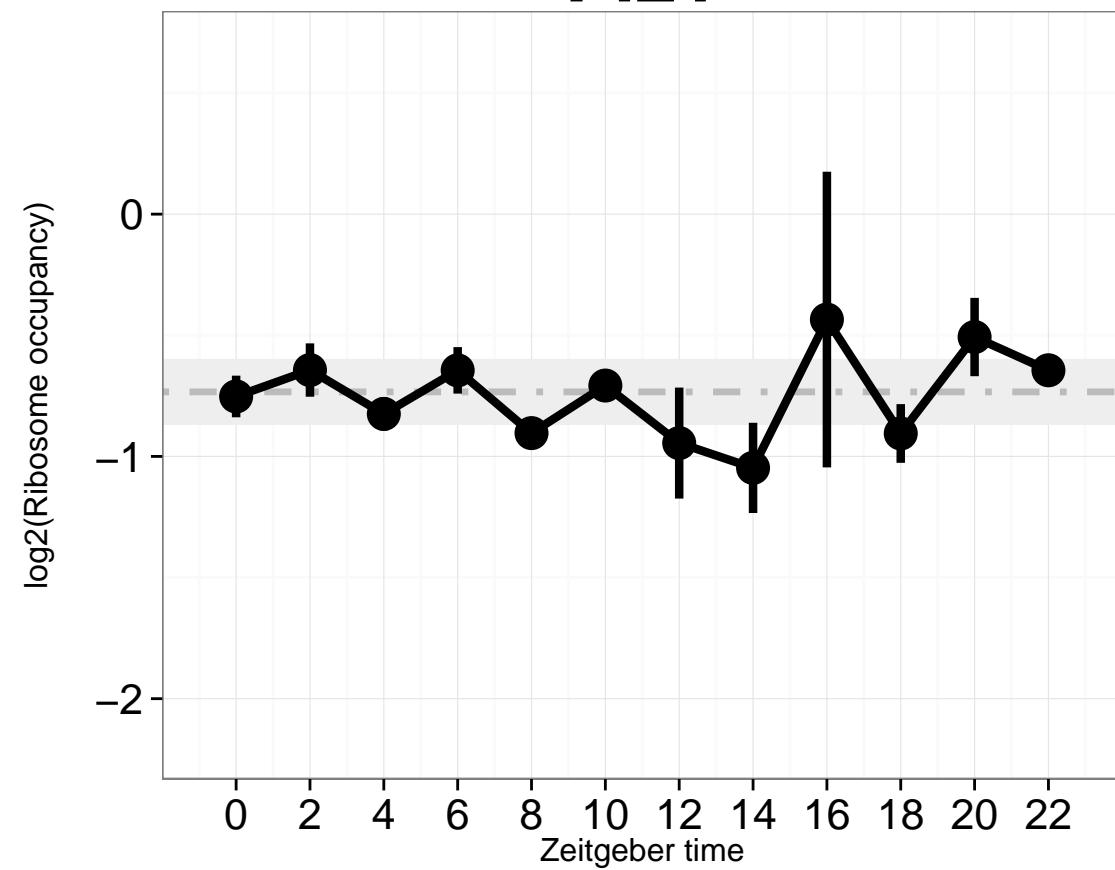

Supplement: Supplementary file 5308 [file 1]

**P2rx6 TR**

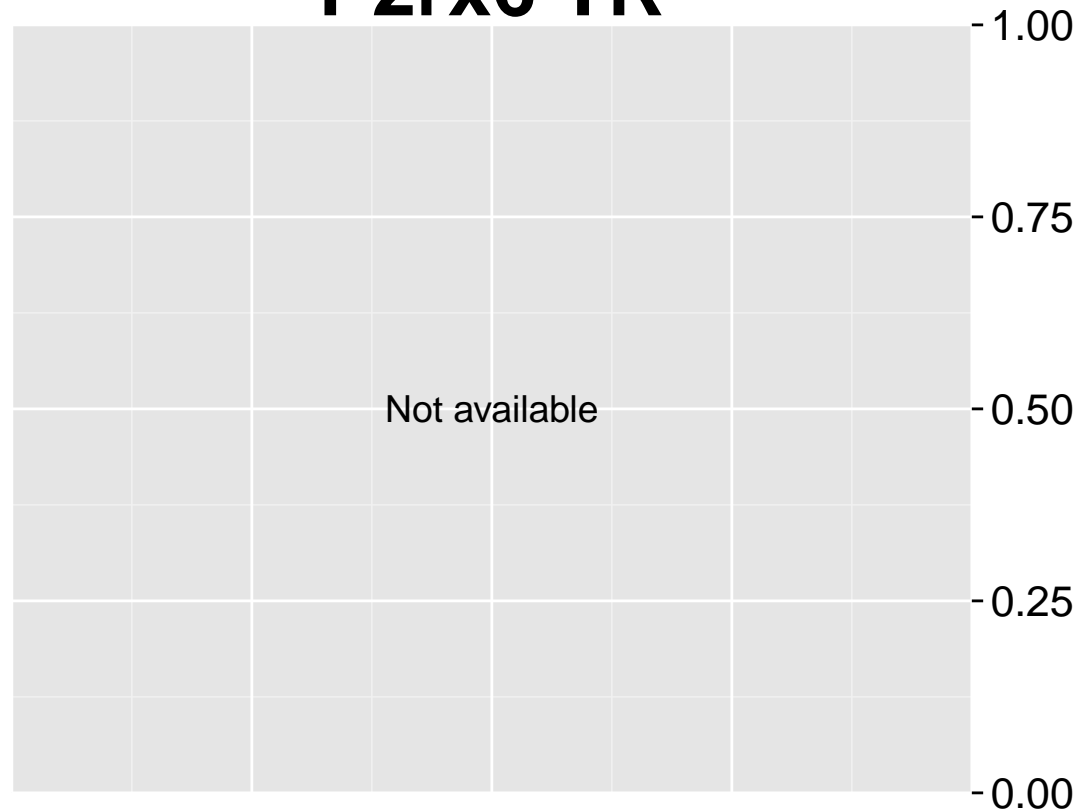

**P2rx6 log2(Ribosome occupancy)**

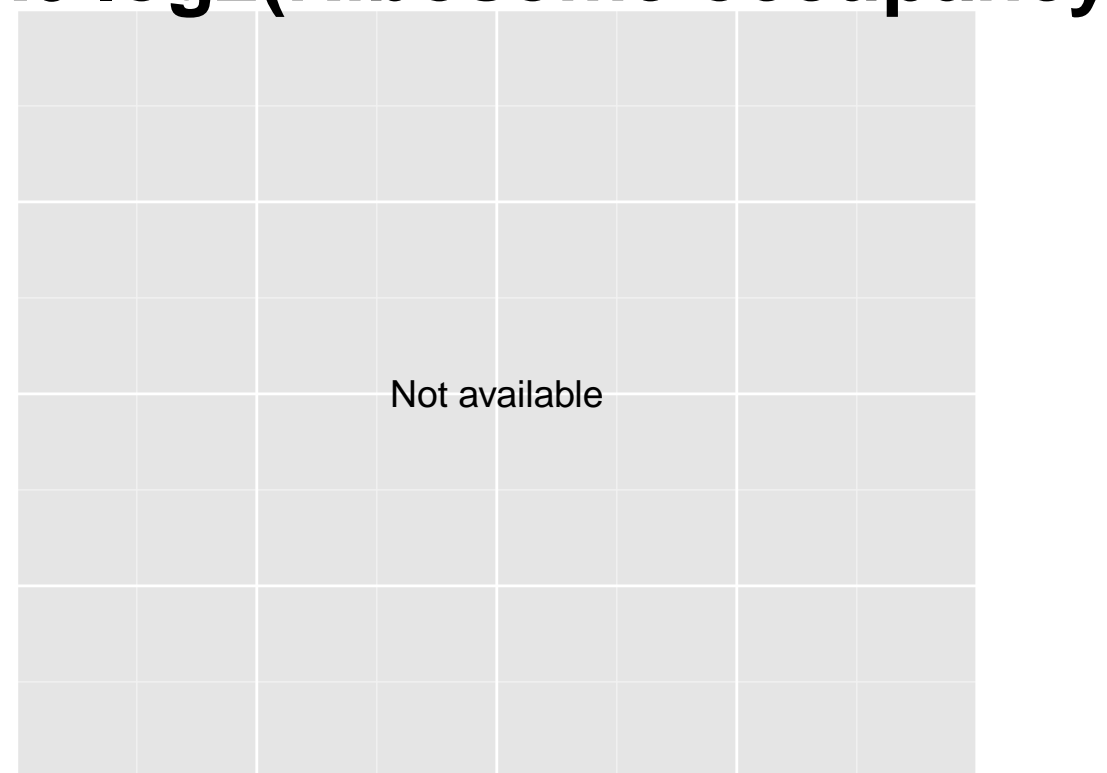

Supplement: Supplementary file 5309 [file 1]

## Pop4

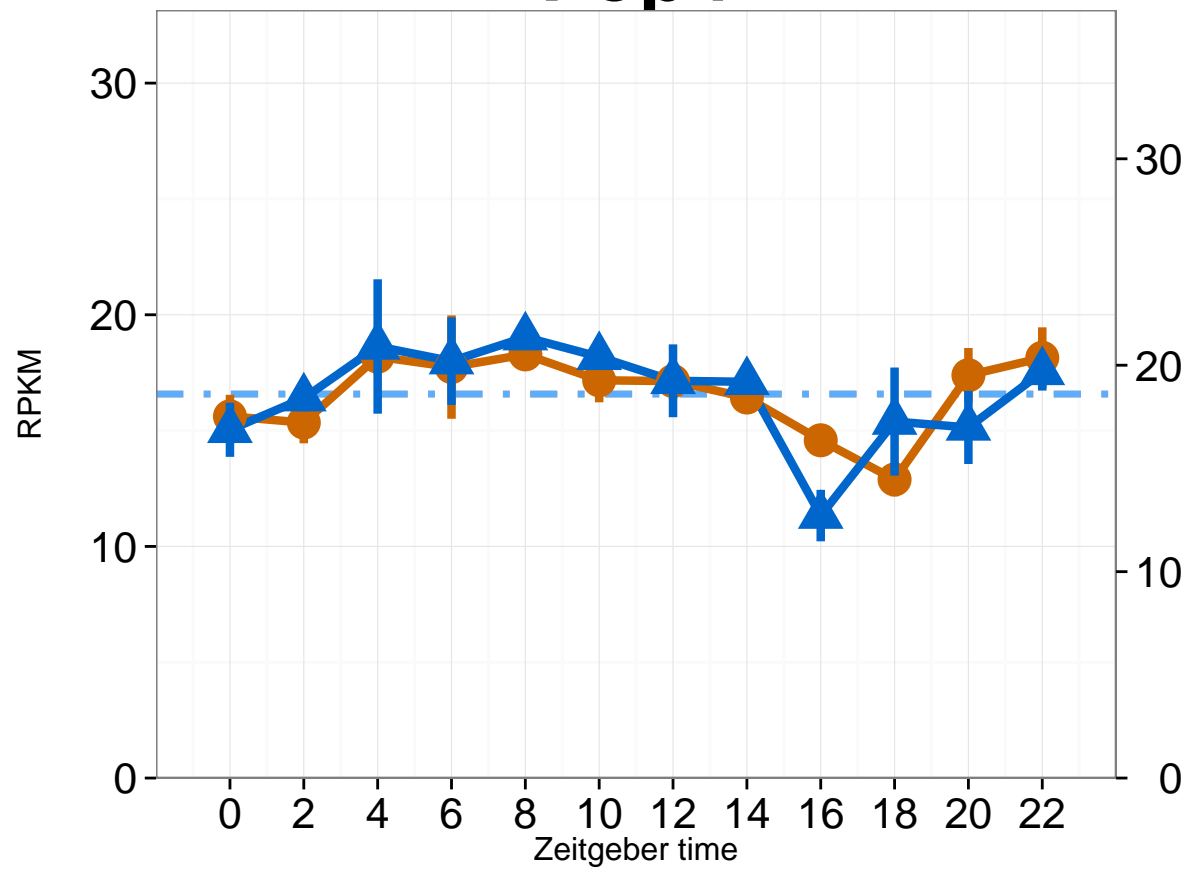

## Pop4

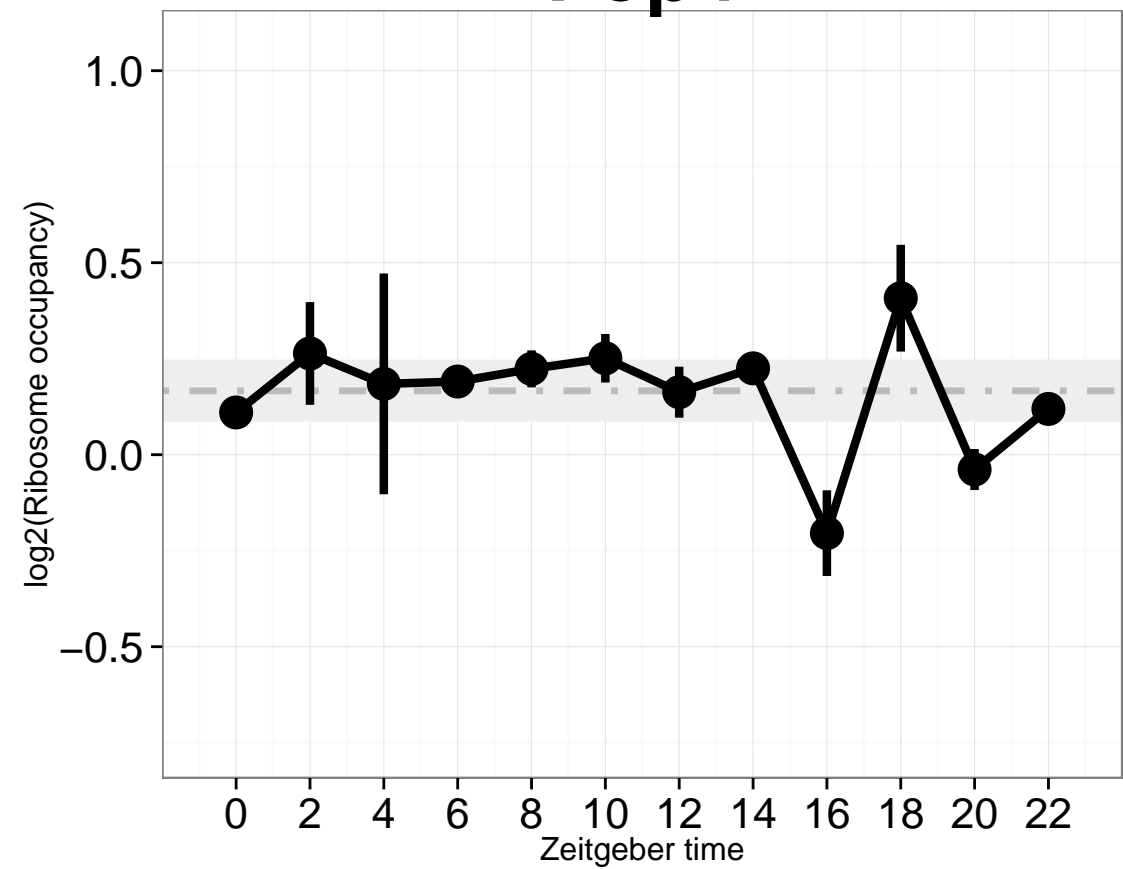

Supplement: Supplementary file 5310 [file 1]

# Rtp3

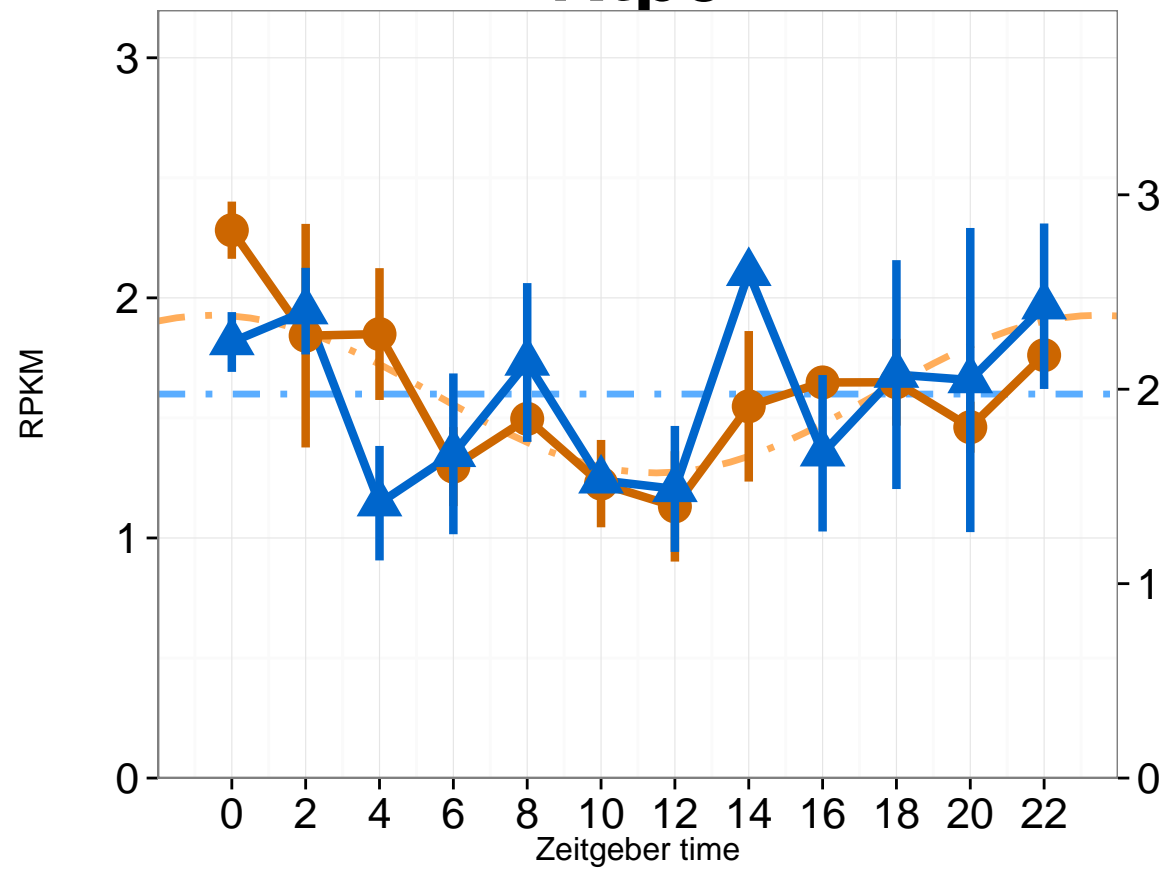

# Rtp3

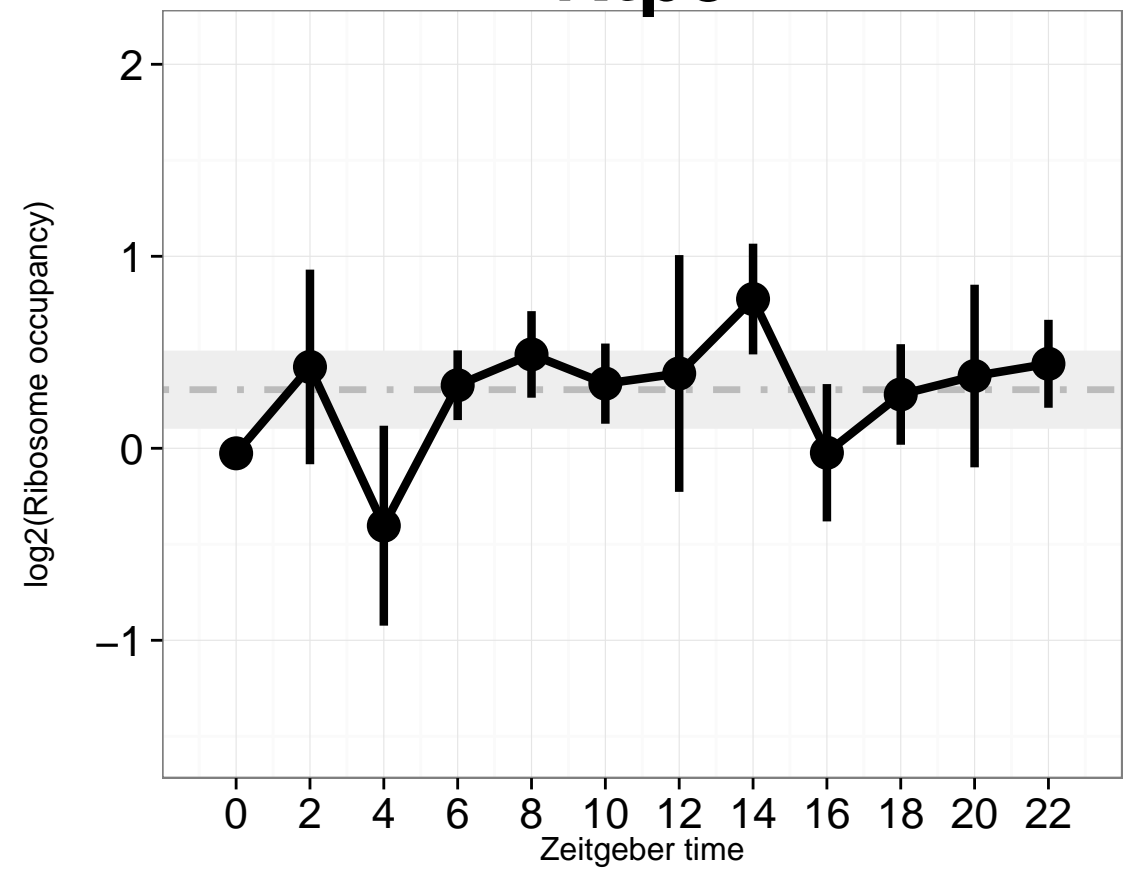

Supplement: Supplementary file 5311 [file 1]

## Cdnf

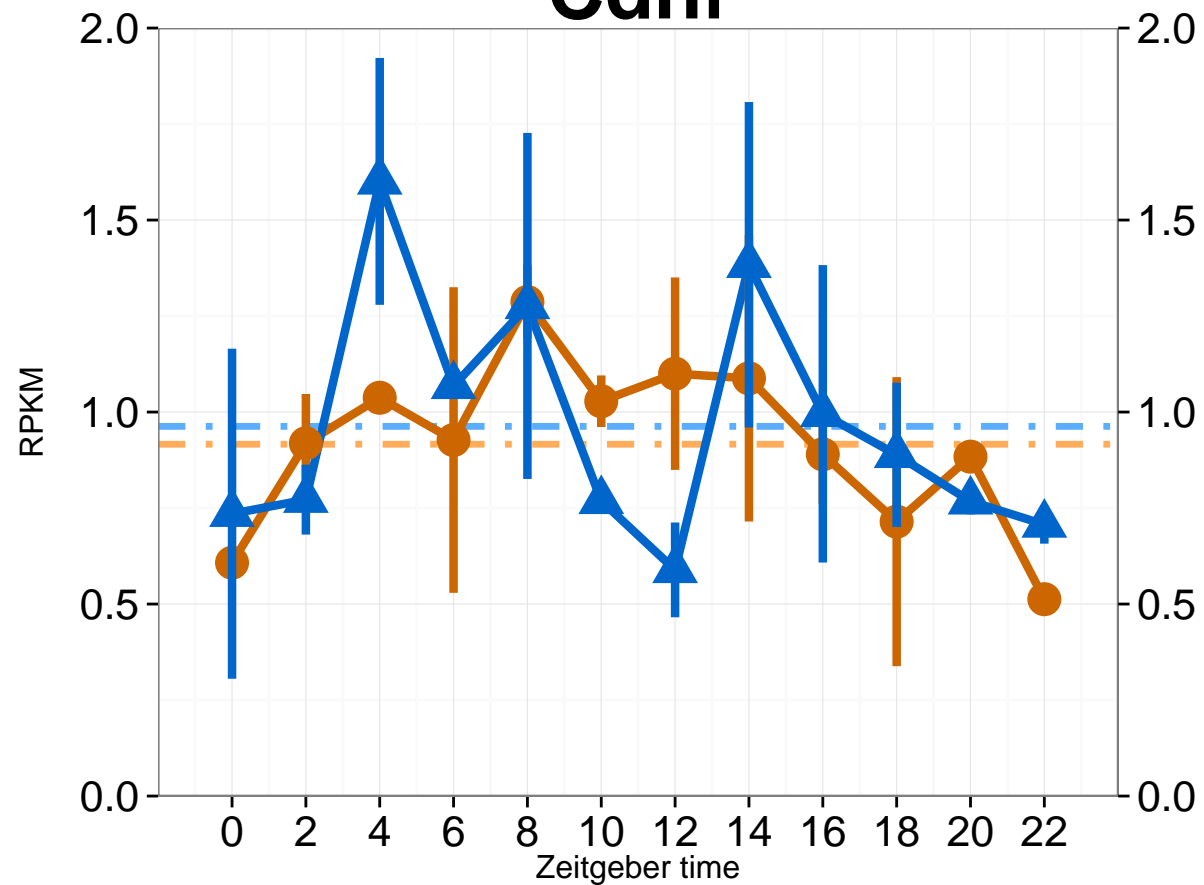

## Cdnf

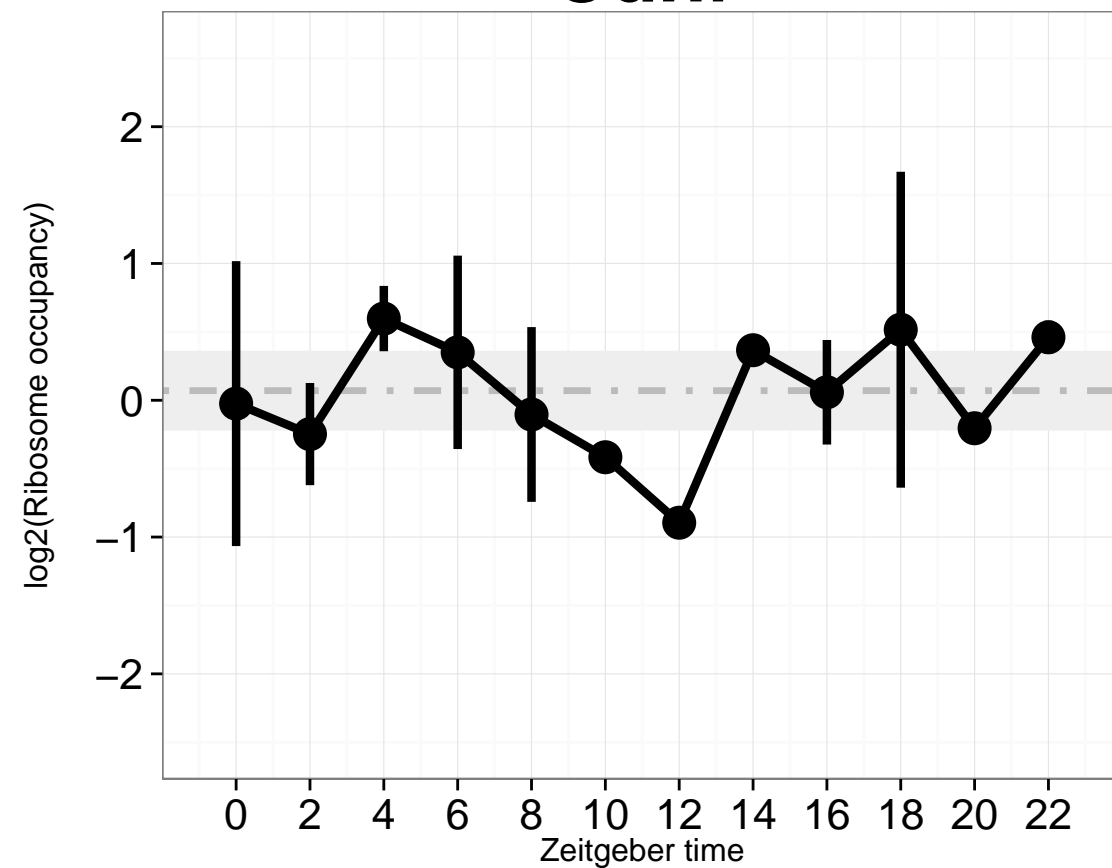

Supplement: Supplementary file 5312 [file 1]

# Med28

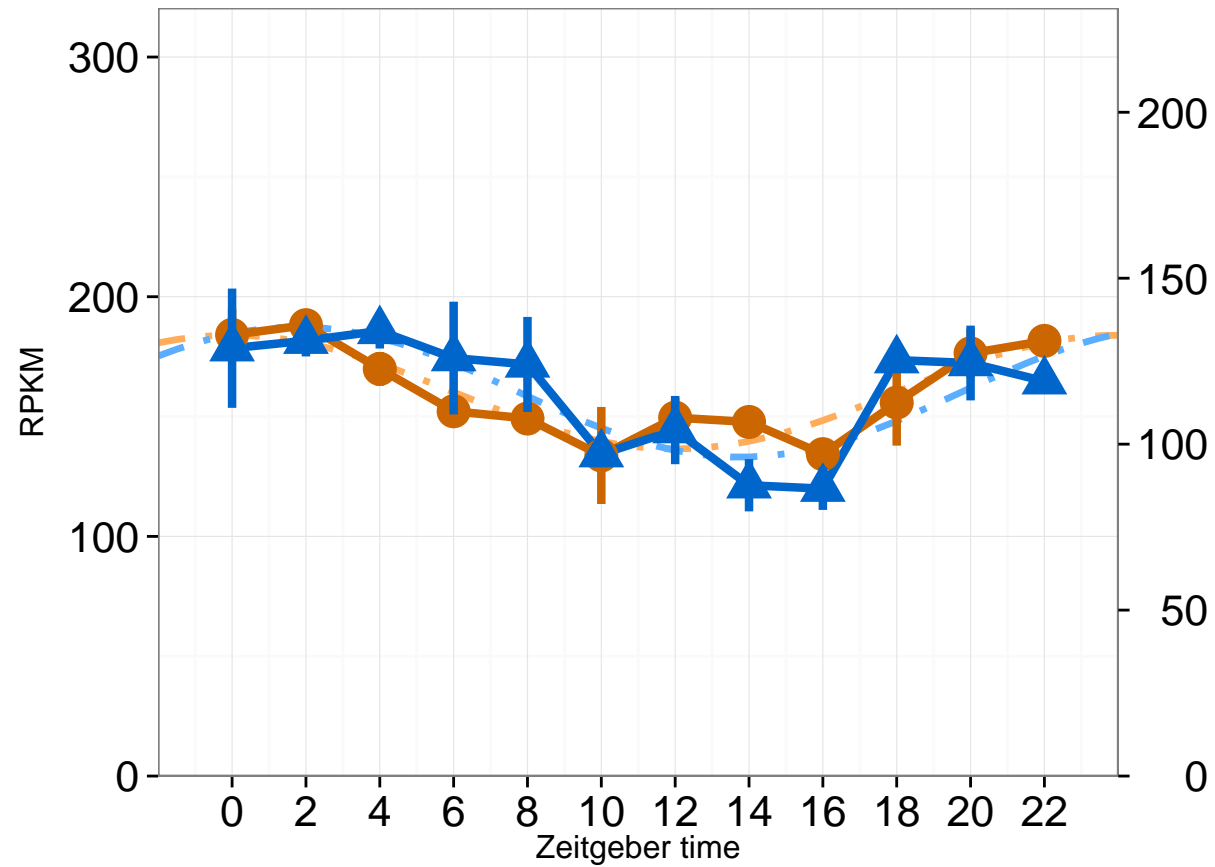

# Med28

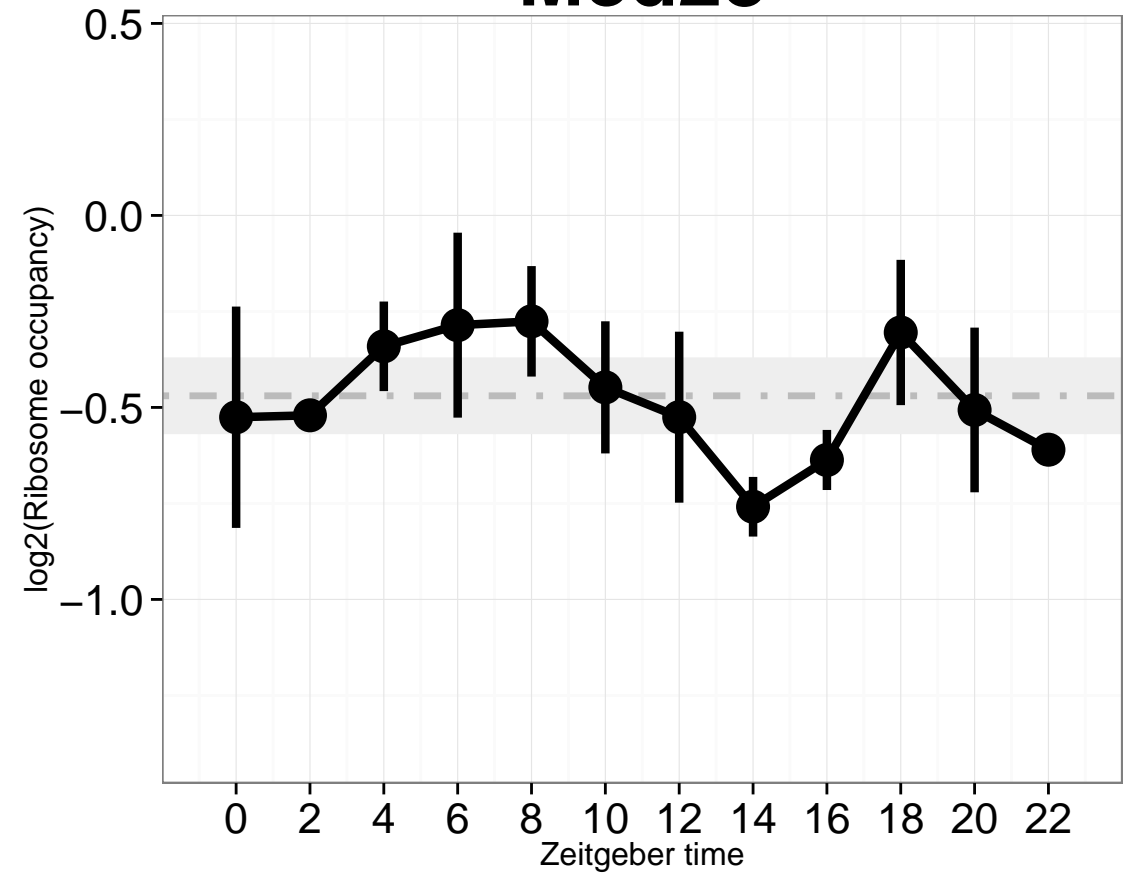

Supplement: Supplementary file 5313 [file 1]

# Tmem161b

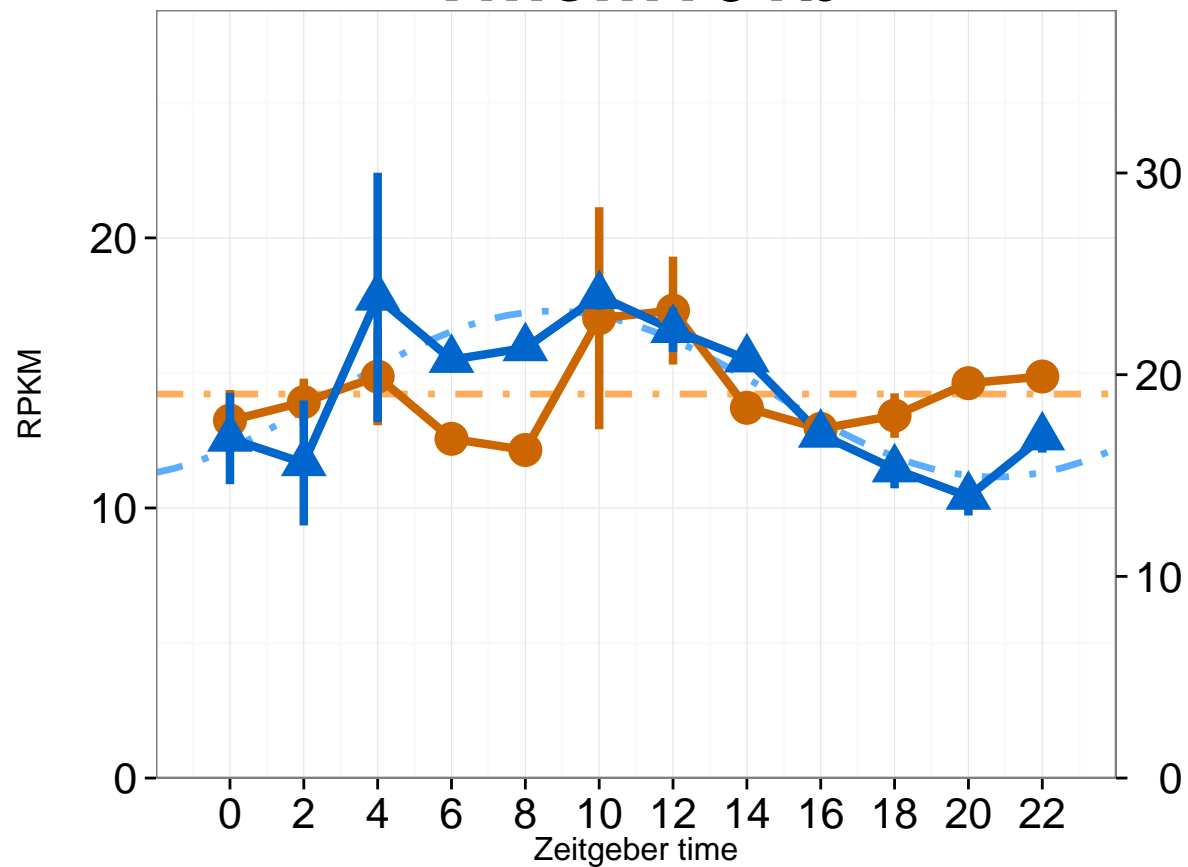

# Tmem161b

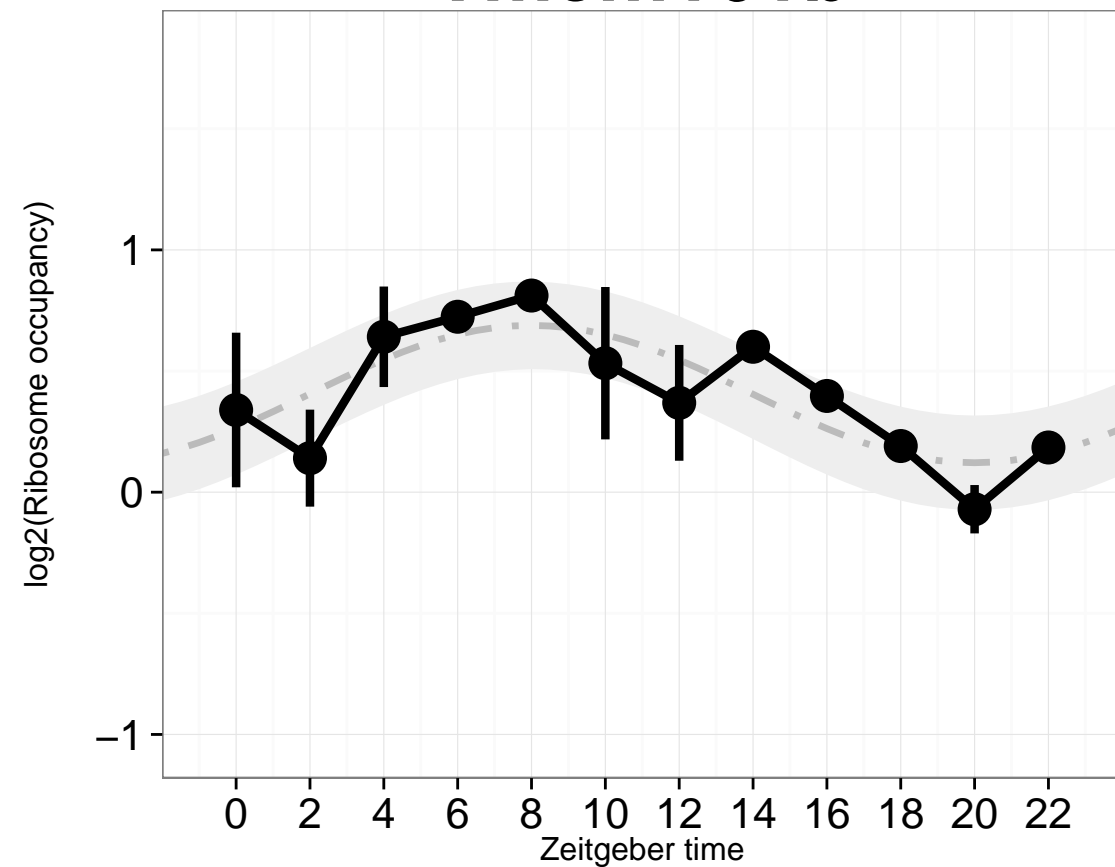

Supplement: Supplementary file 5314 [file 1]

# Ihh

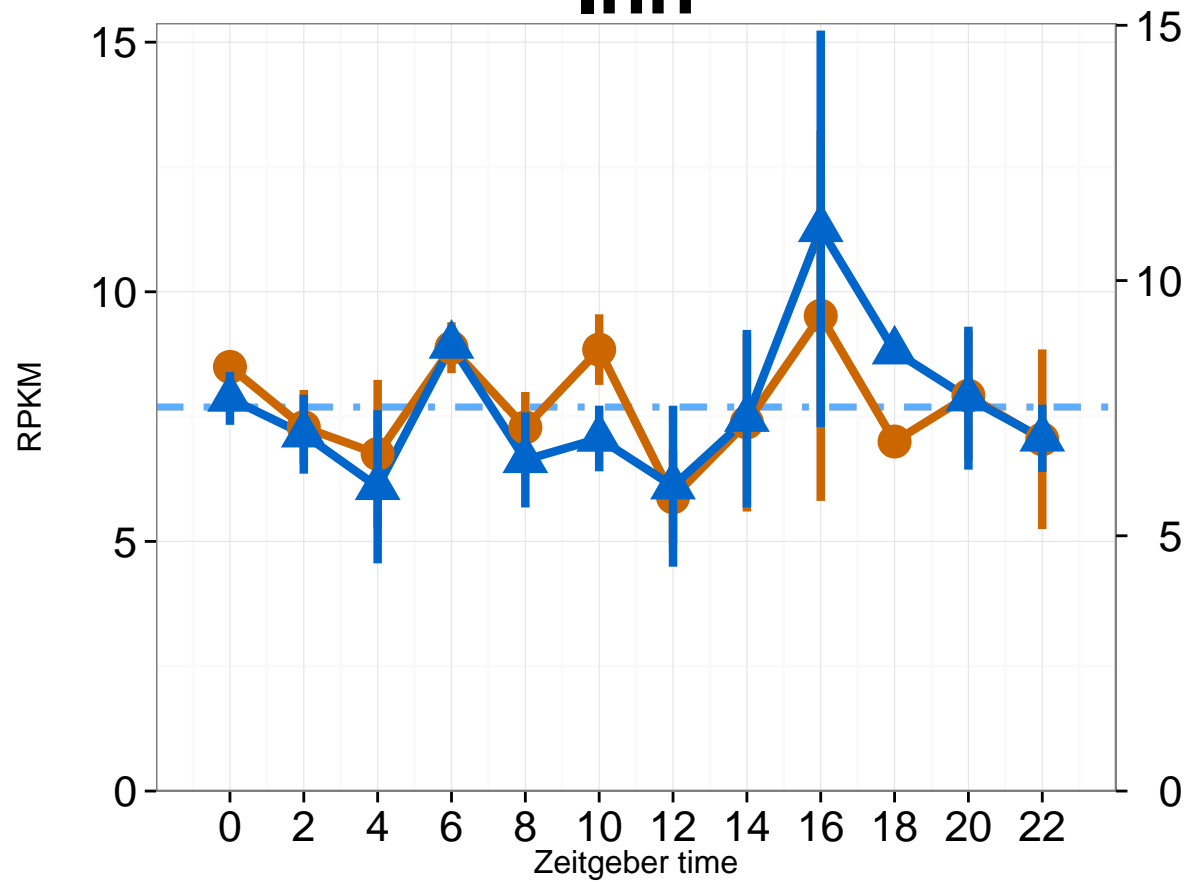

# Ihh

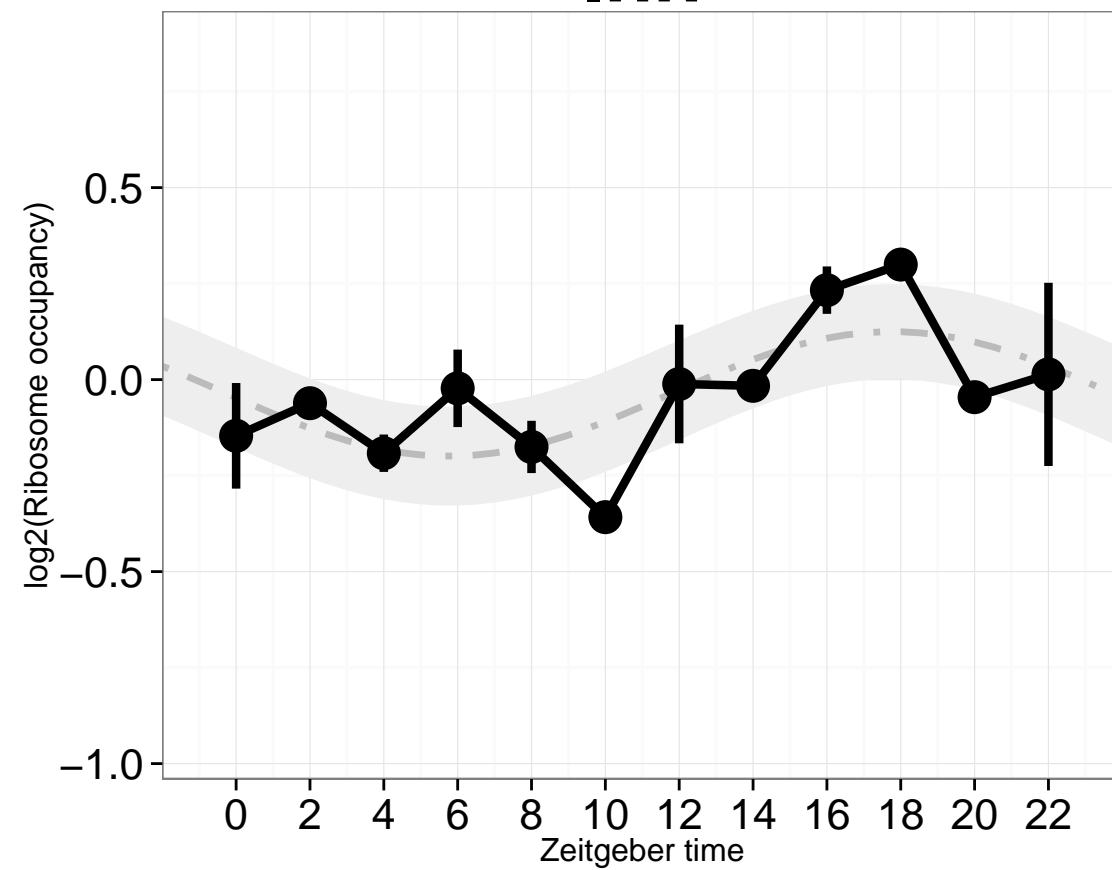

Supplement: Supplementary file 5315 [file 1]

# Pnrc1

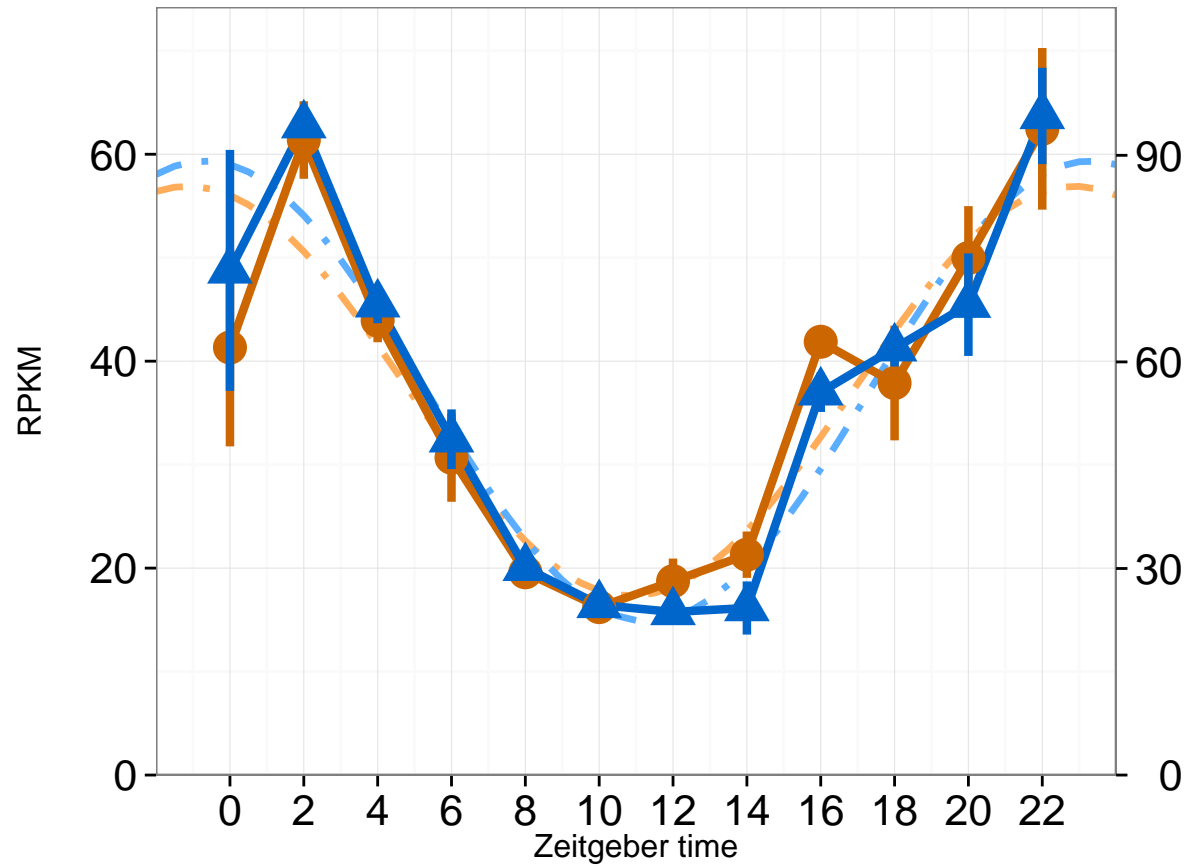

# Pnrc1

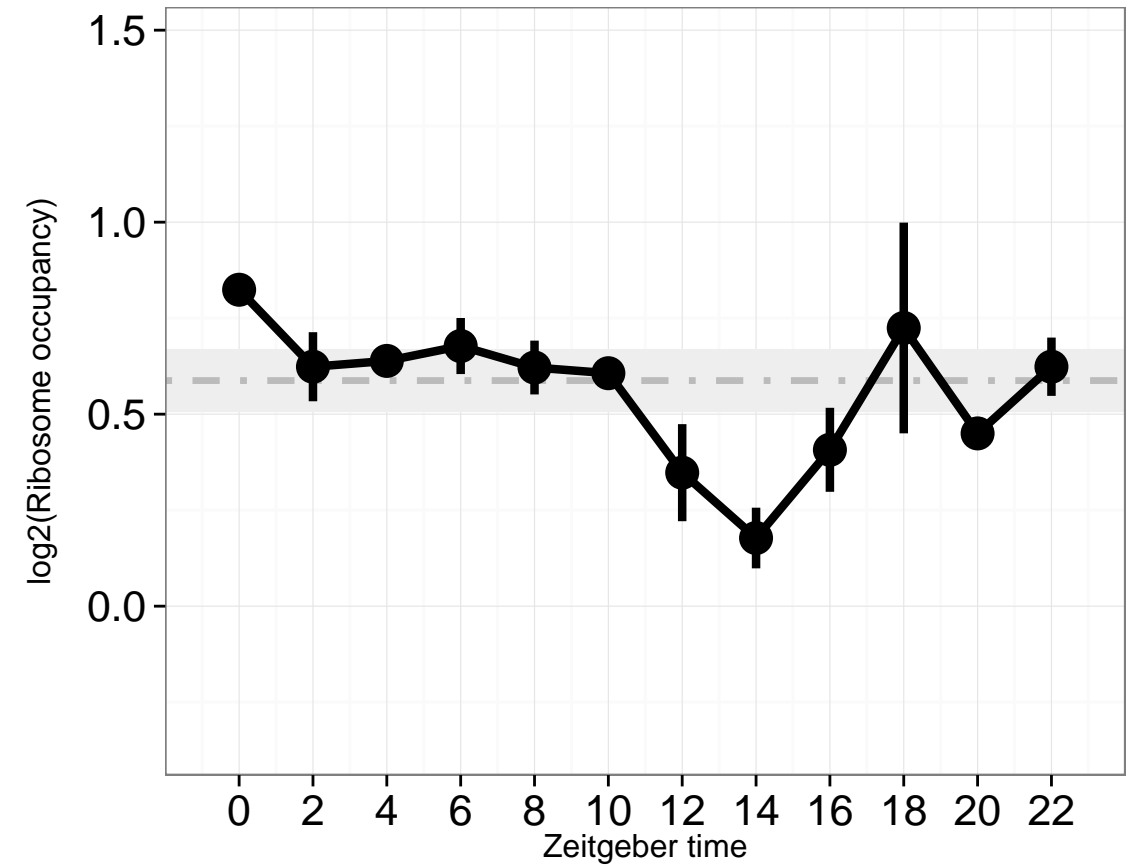

Supplement: Supplementary file 5316 [file 1]

## Brdt

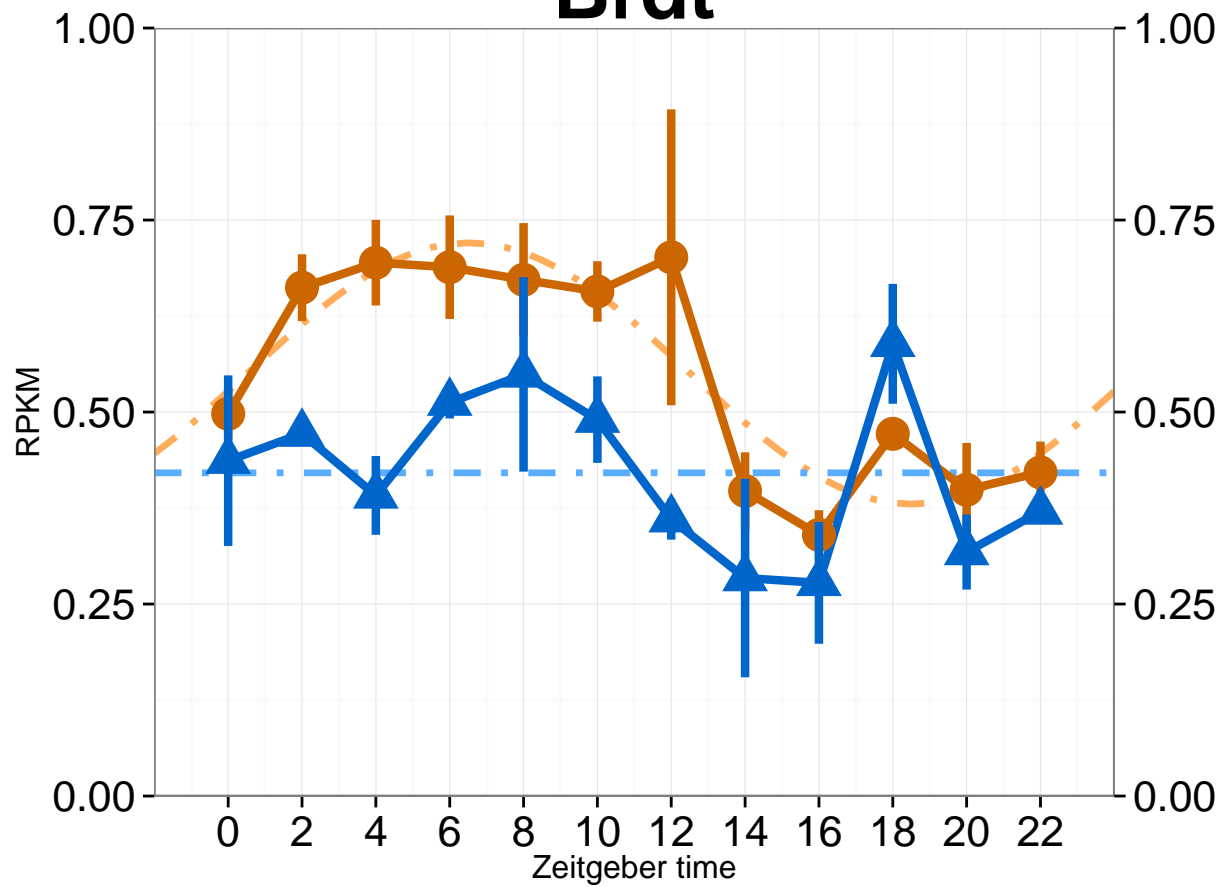

## Brdt

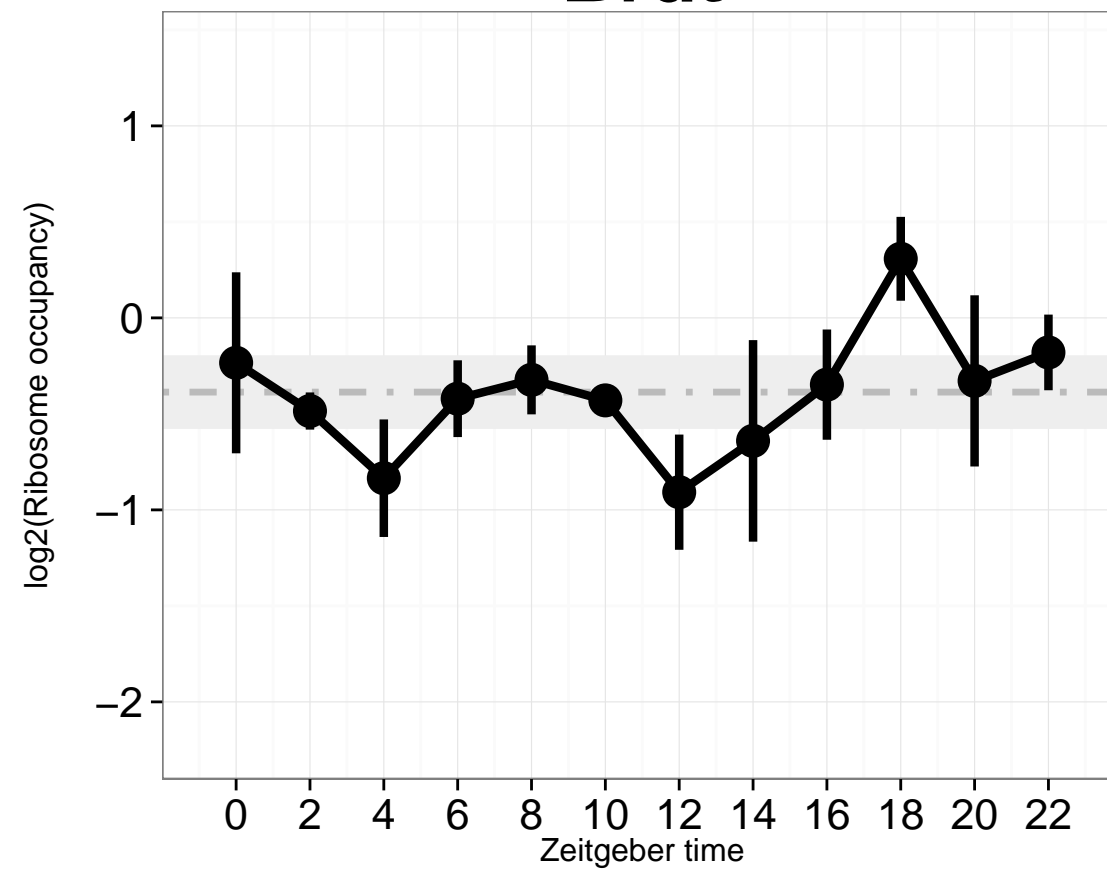

Supplement: Supplementary file 5317 [file 1]

# II34

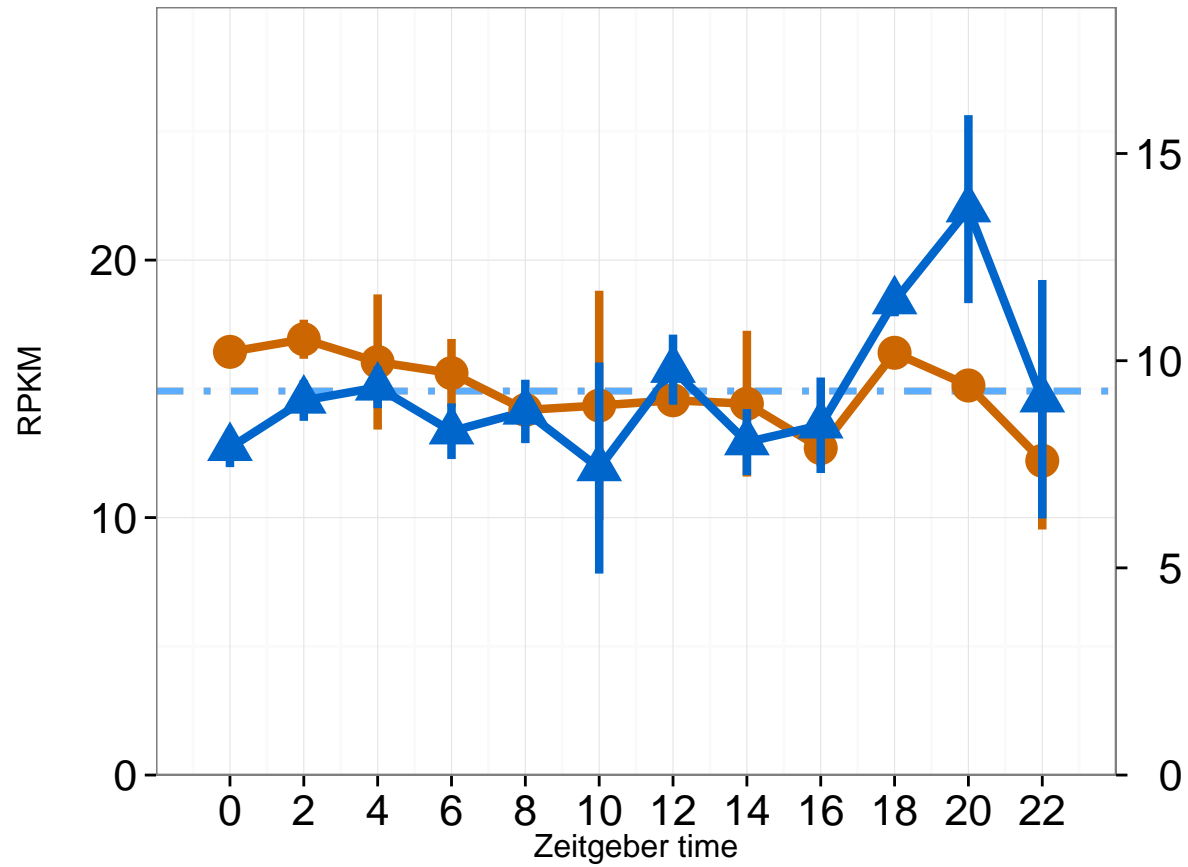

# II34

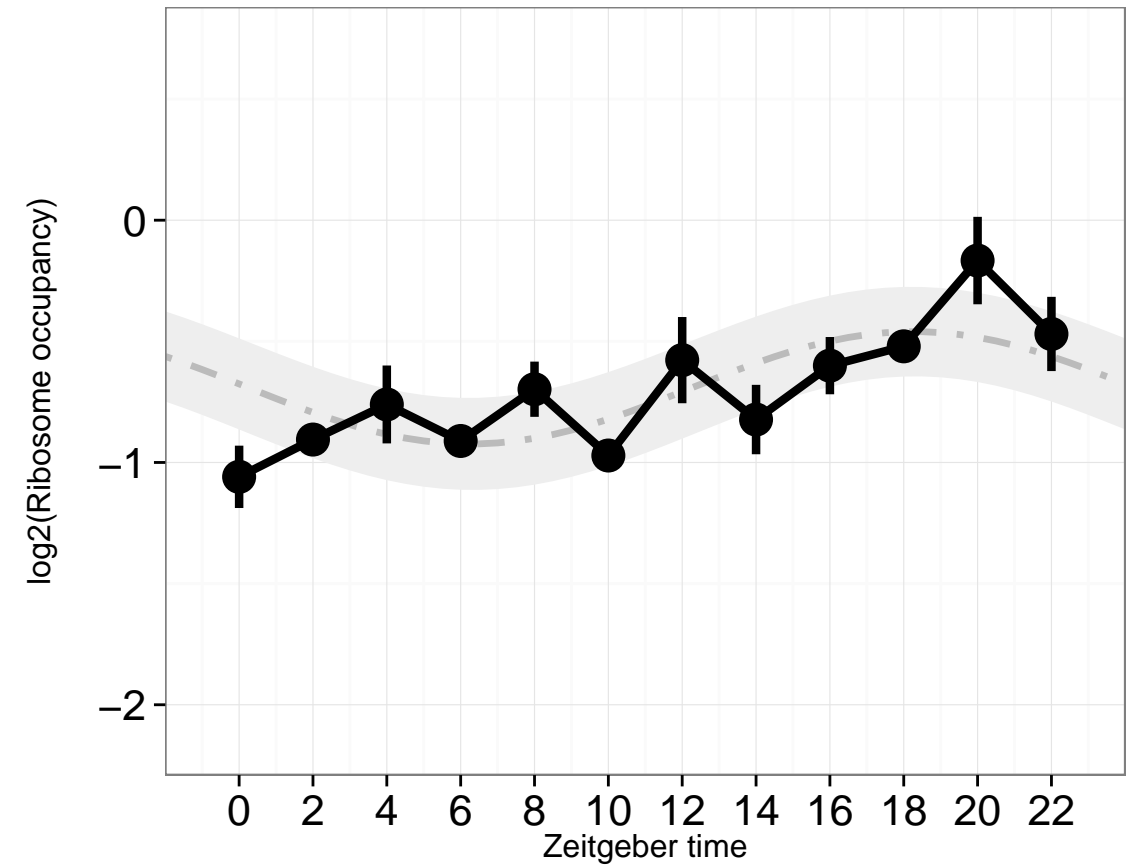

Supplement: Supplementary file 5318 [file 1]

# Macc1

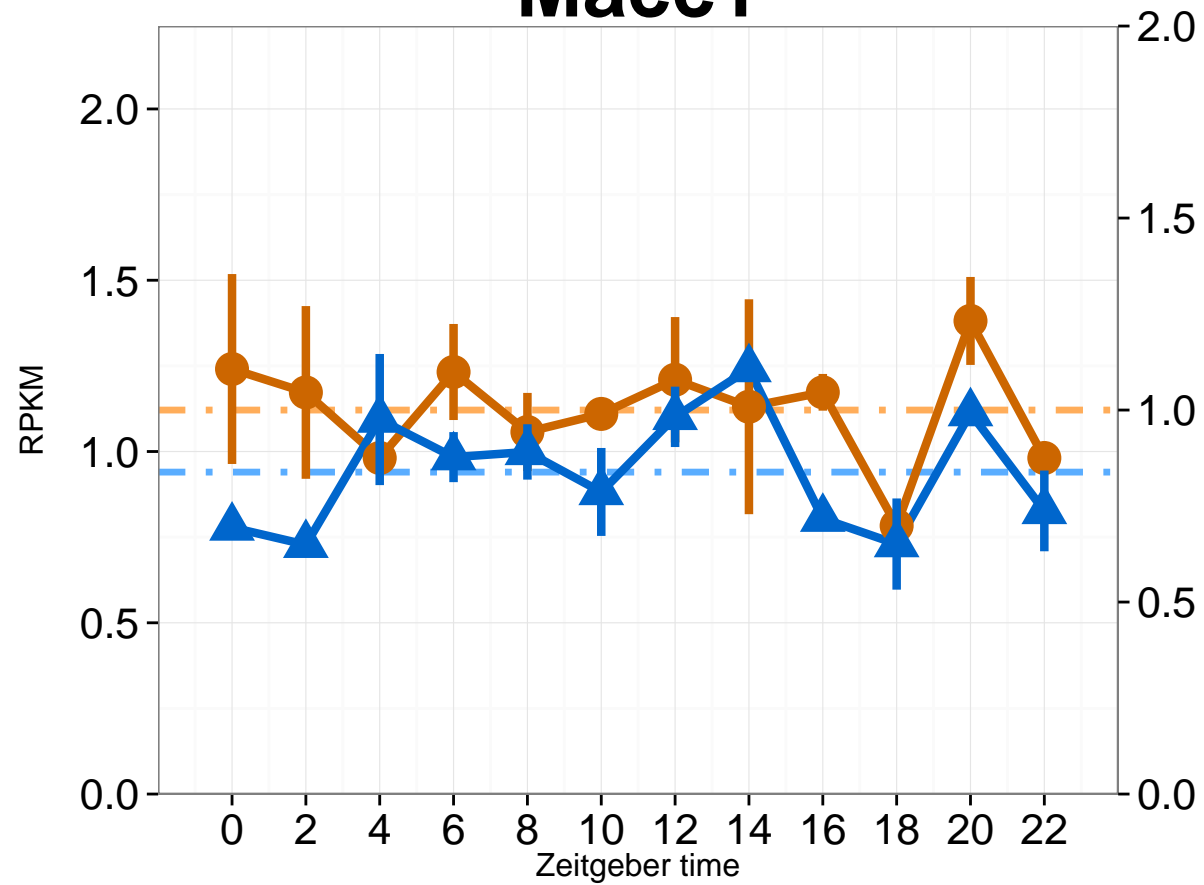

# Macc1

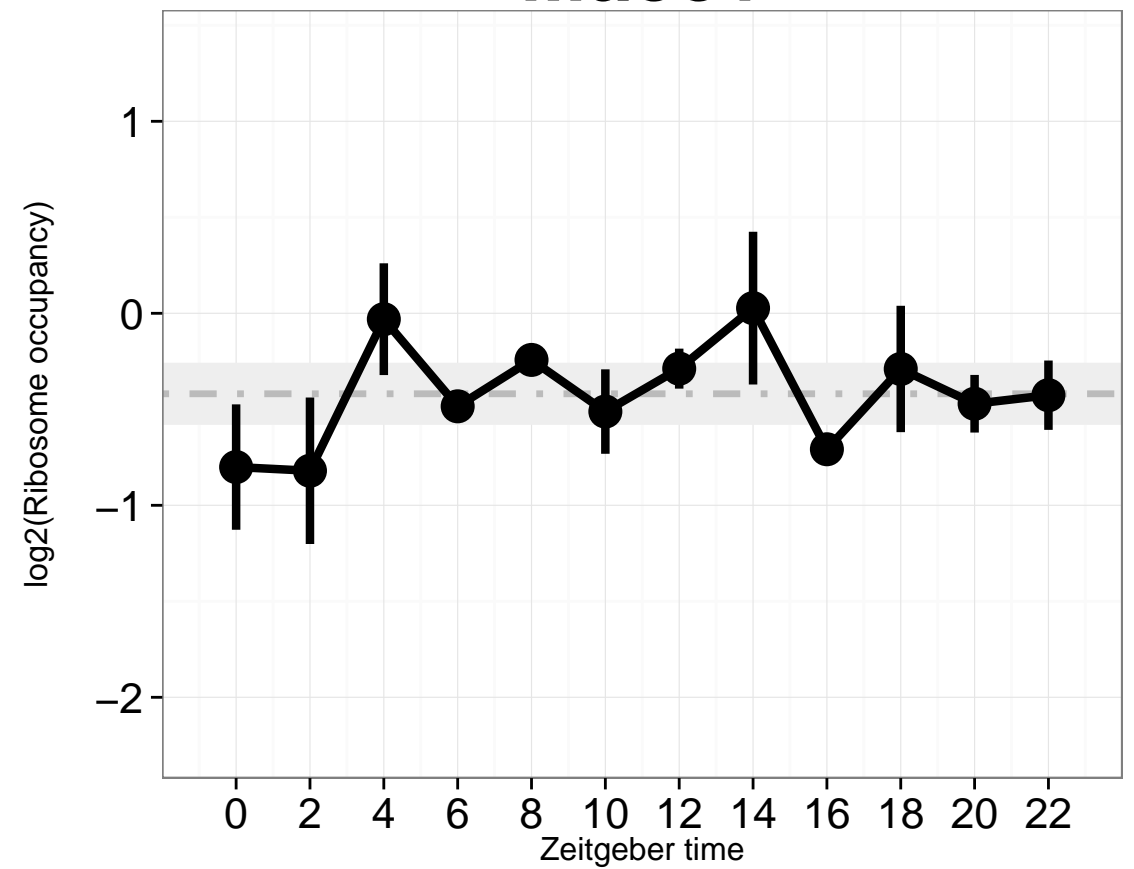

Supplement: Supplementary file 5319 [file 1]

## Car8

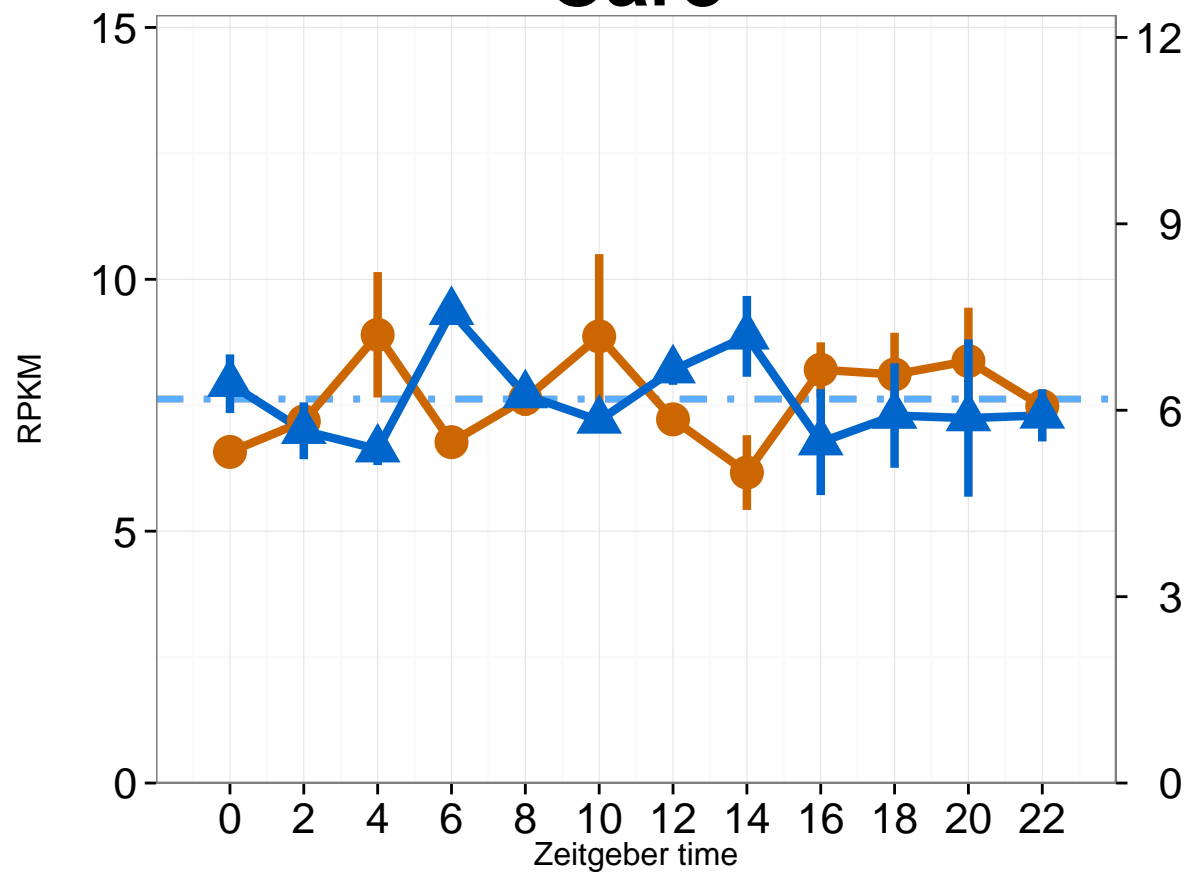

## Car8

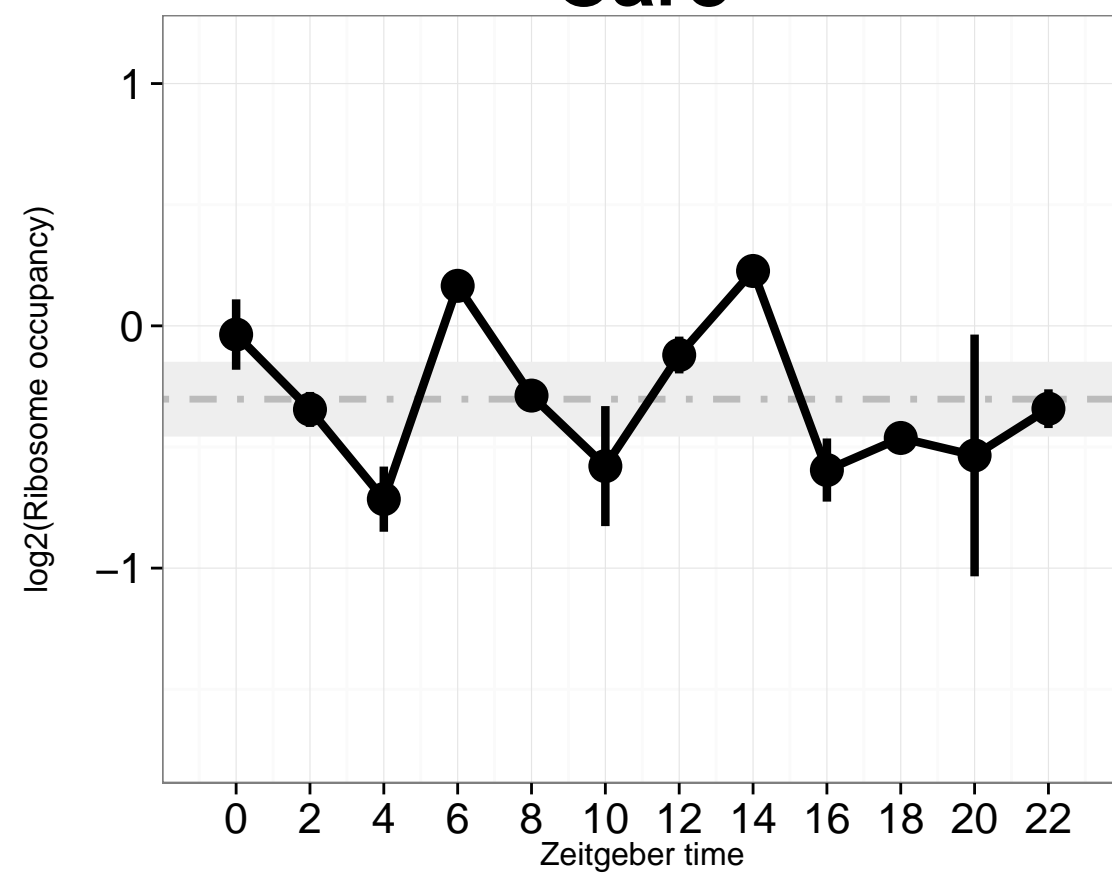

Supplement: Supplementary file 5320 [file 1]
