# Supplementary material (part 54 of 133)
Source: publisher figshare collection journal article supplement (https://springernature.figshare.com/articles/dataset/_/4903193)

## Mcoln2

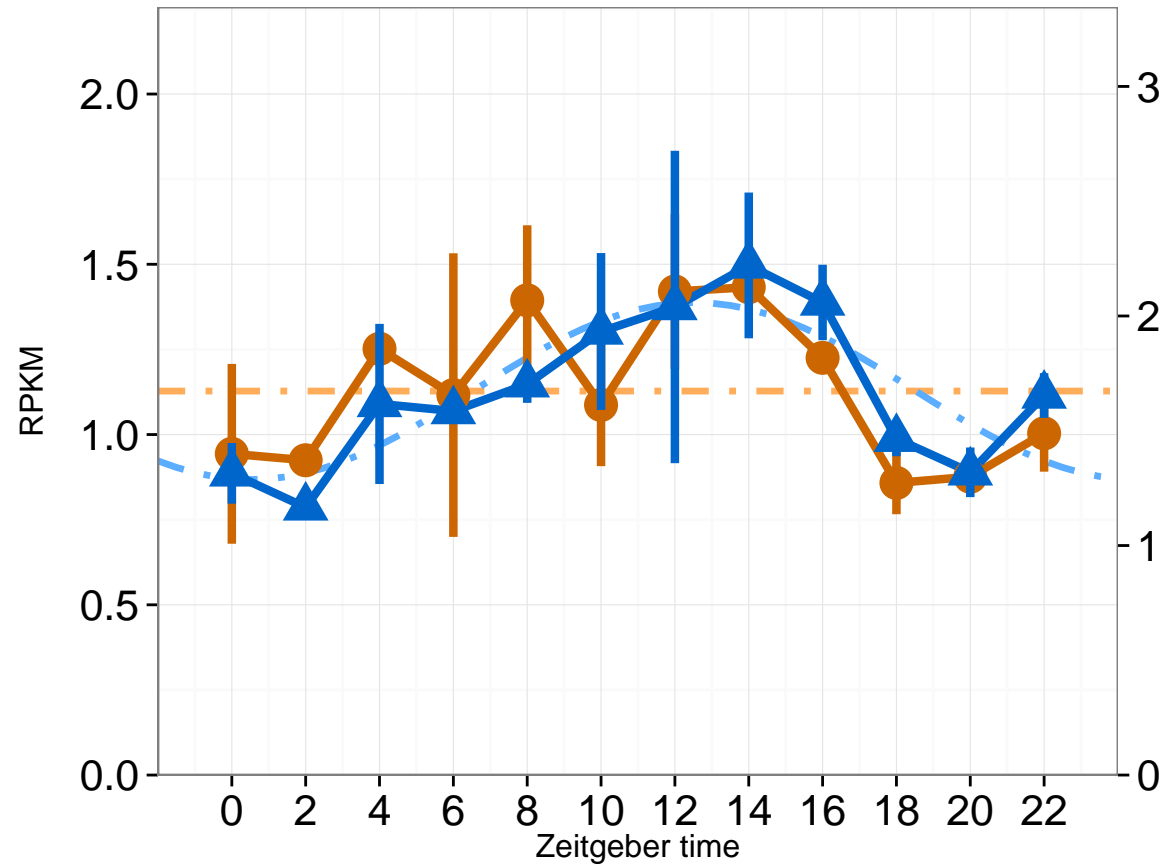

## Mcoln2

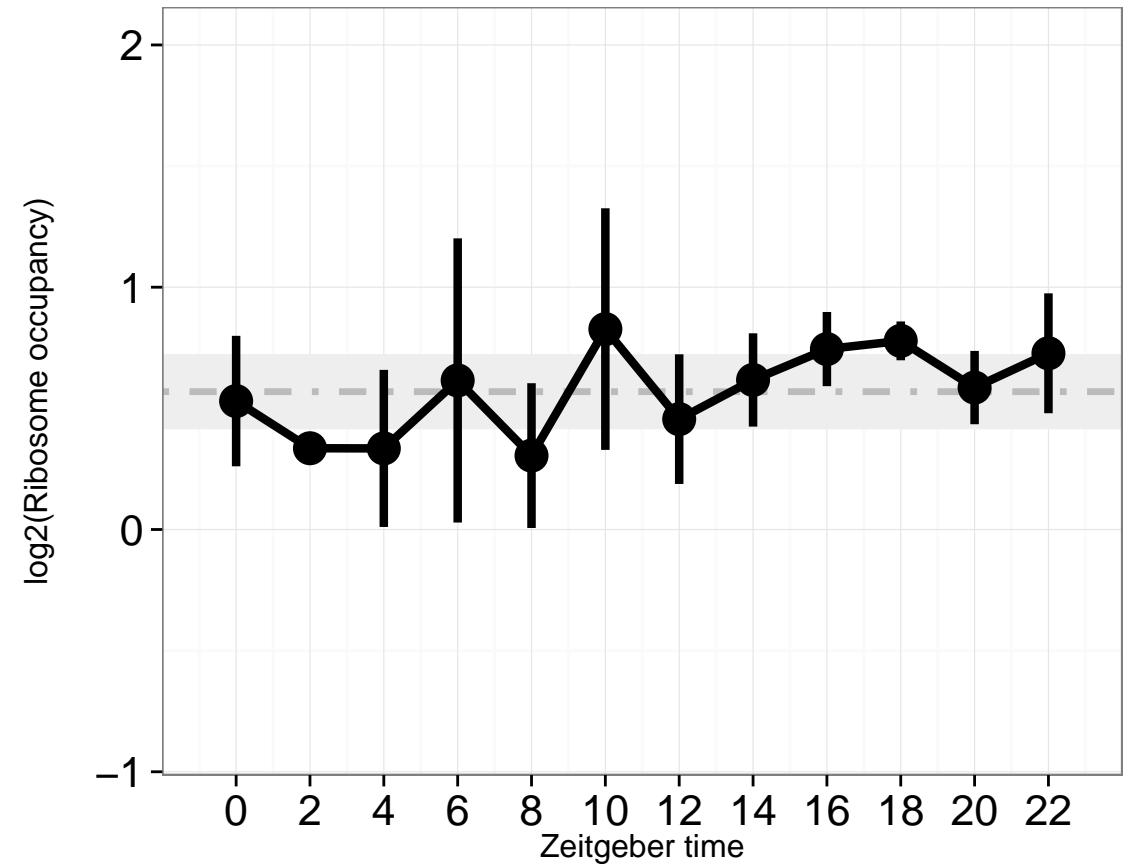

Supplement: Supplementary file 5321 [file 1]

## Vwa9

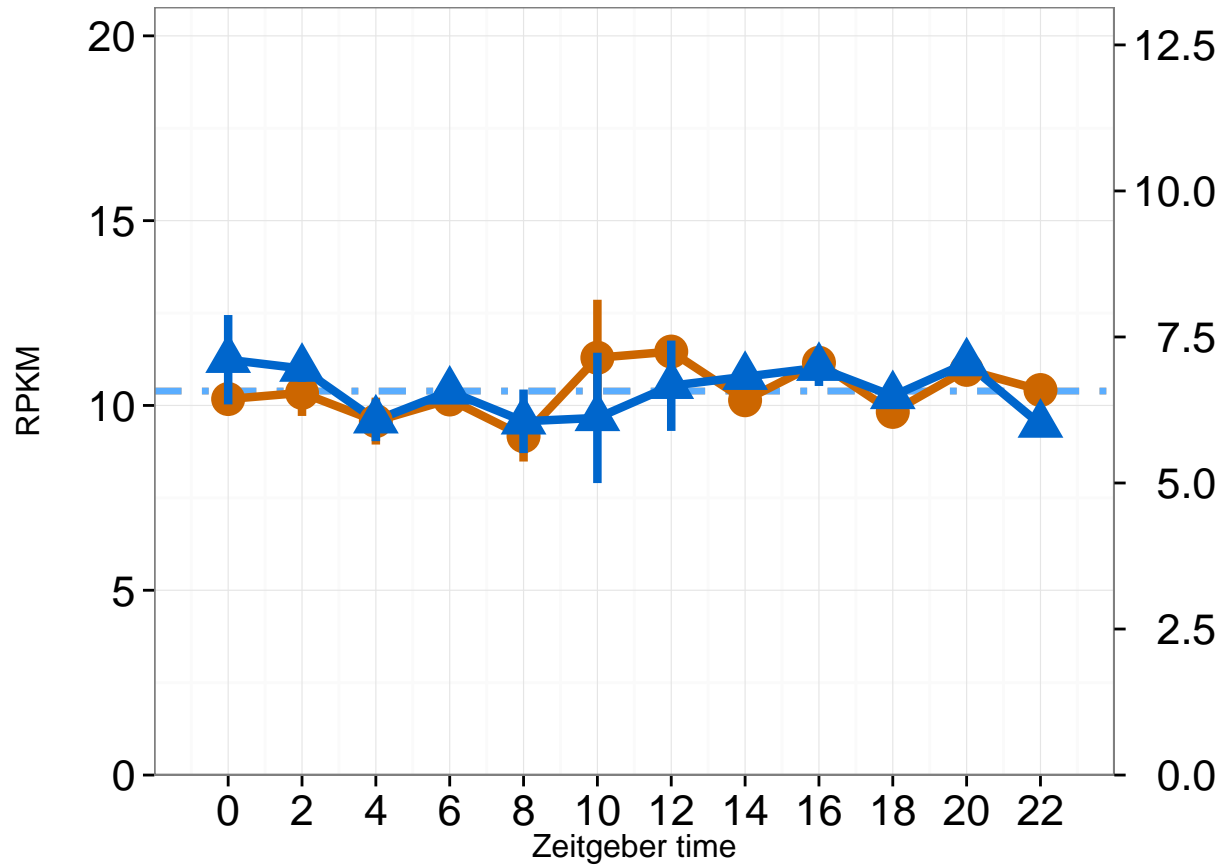

## Vwa9

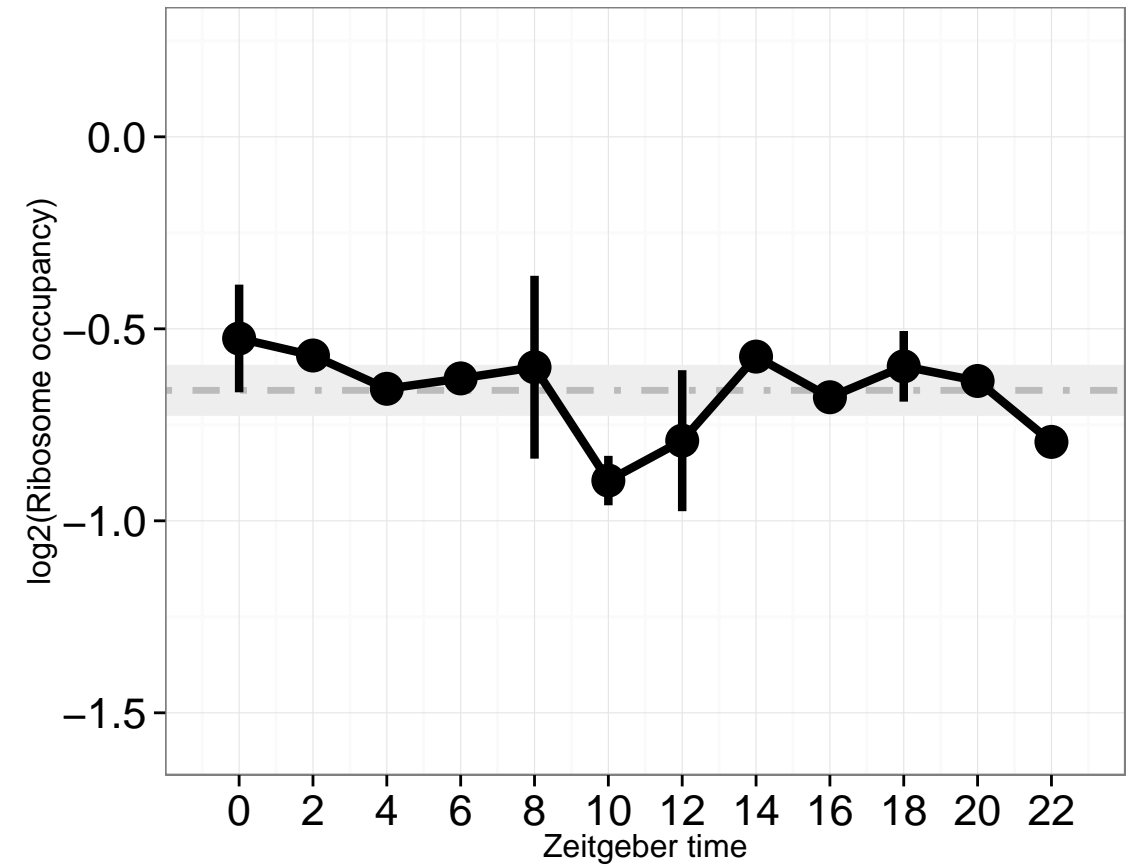

Supplement: Supplementary file 5322 [file 1]

# Dtwd2

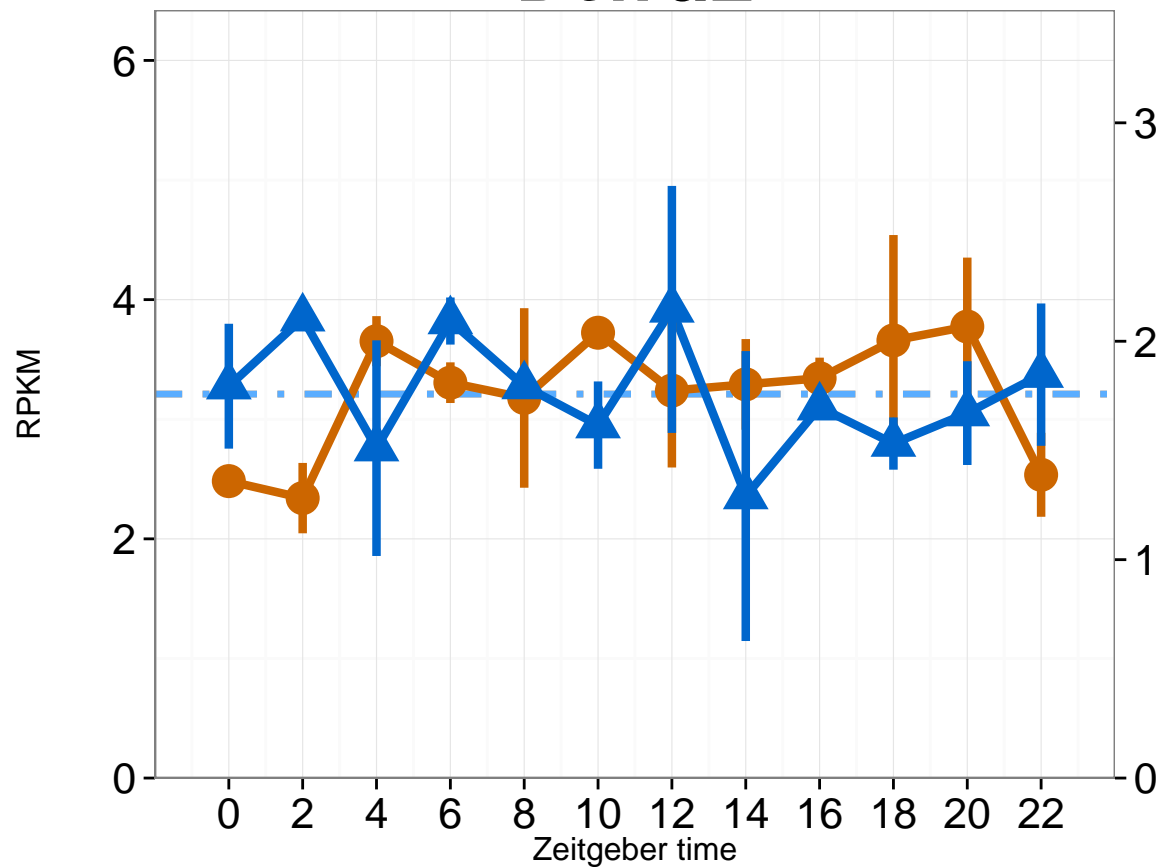

# Dtwd2

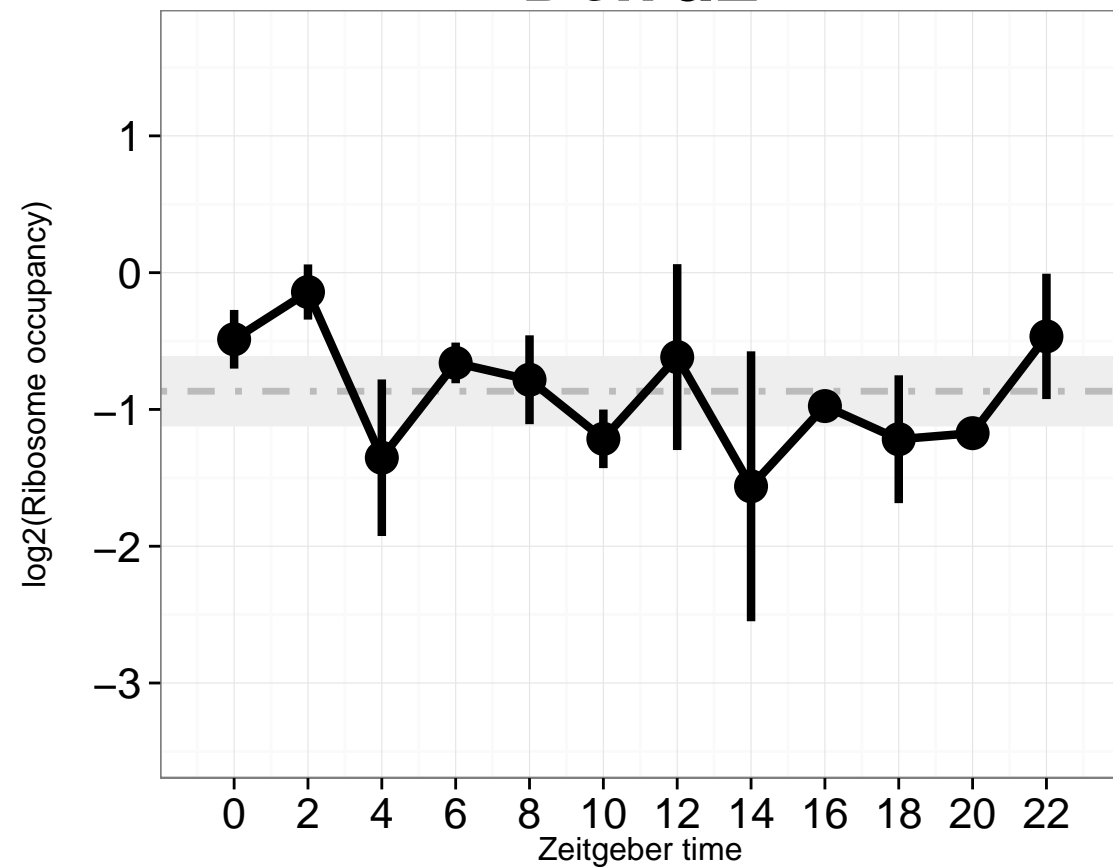

Supplement: Supplementary file 5323 [file 1]

## Sumo2

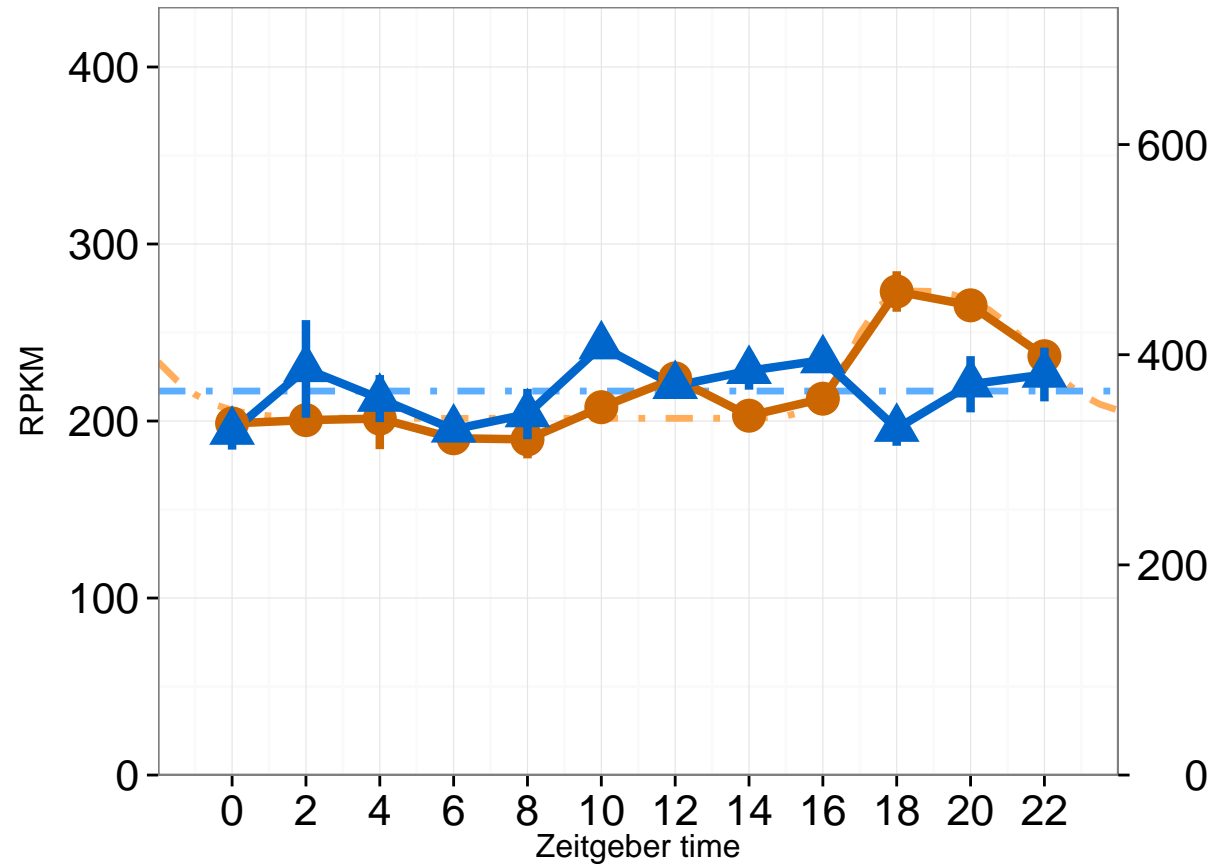

## Sumo2

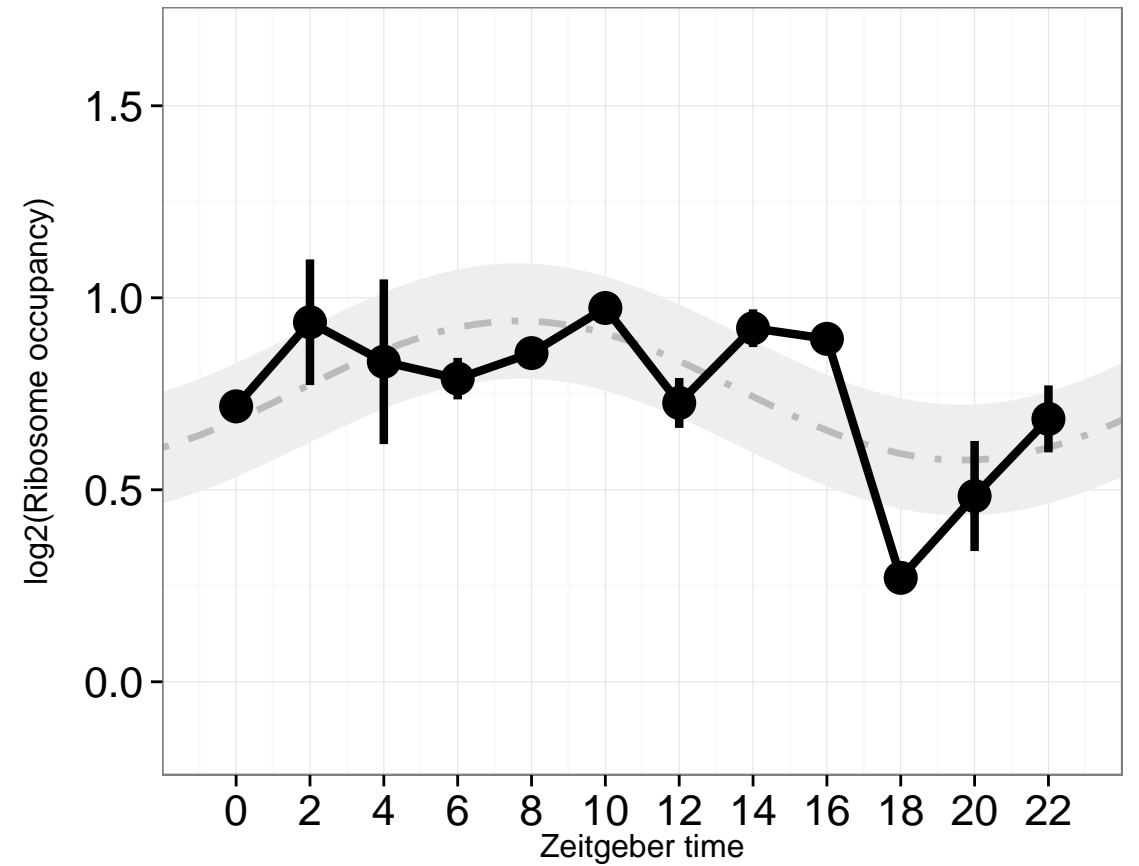

Supplement: Supplementary file 5324 [file 1]

## Rpn1

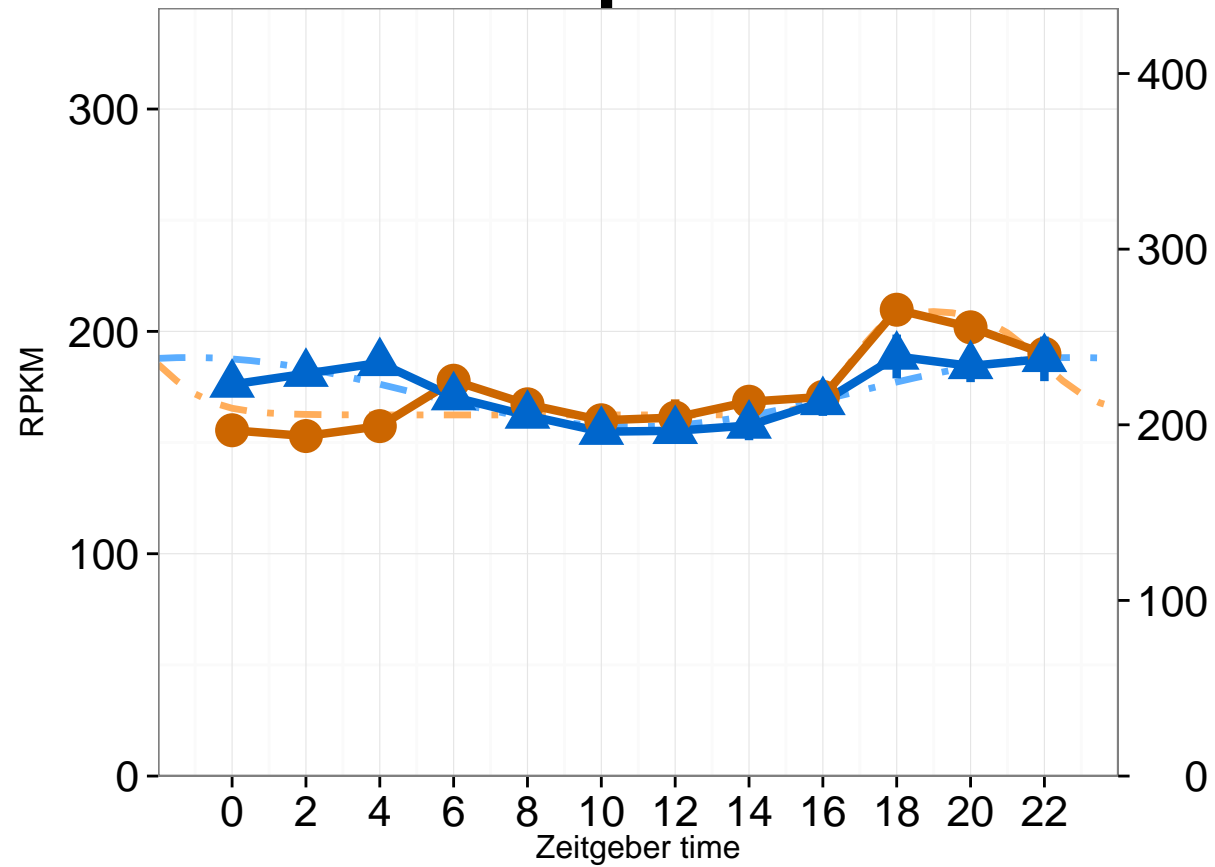

## Rpn1

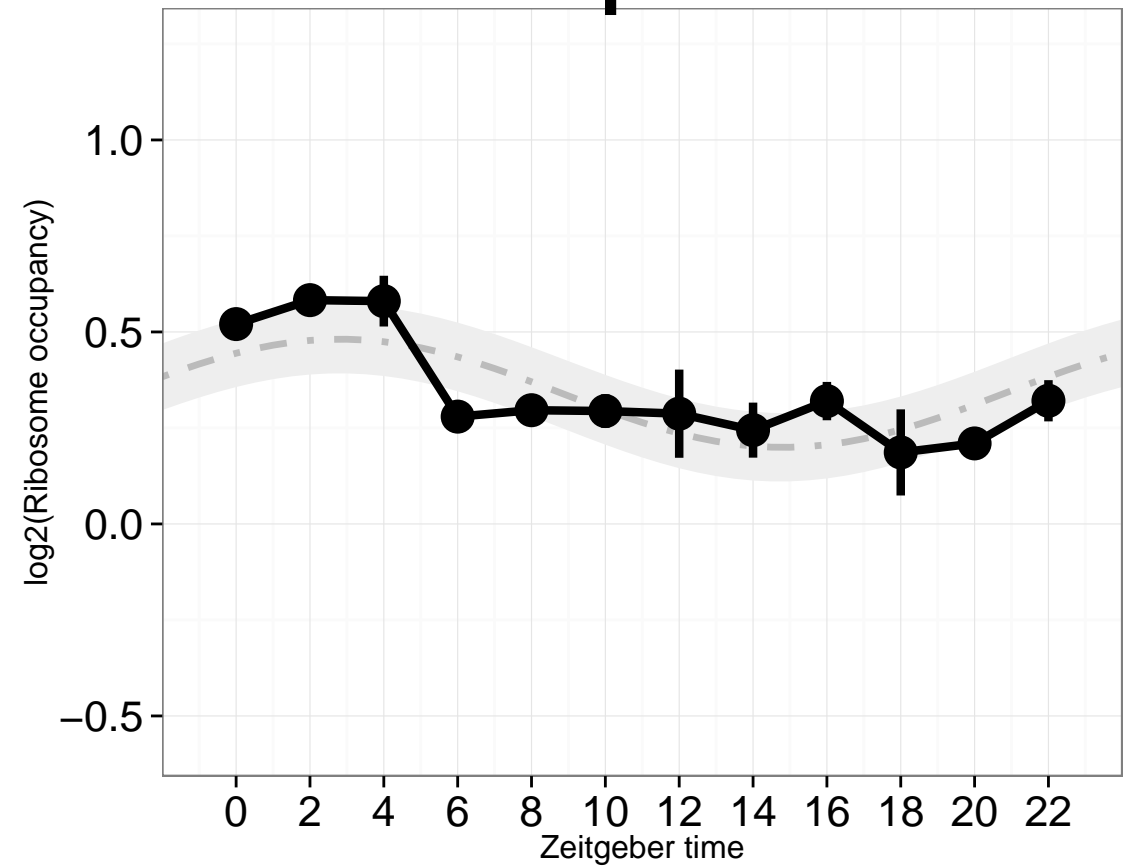

Supplement: Supplementary file 5325 [file 1]

# Cox8a

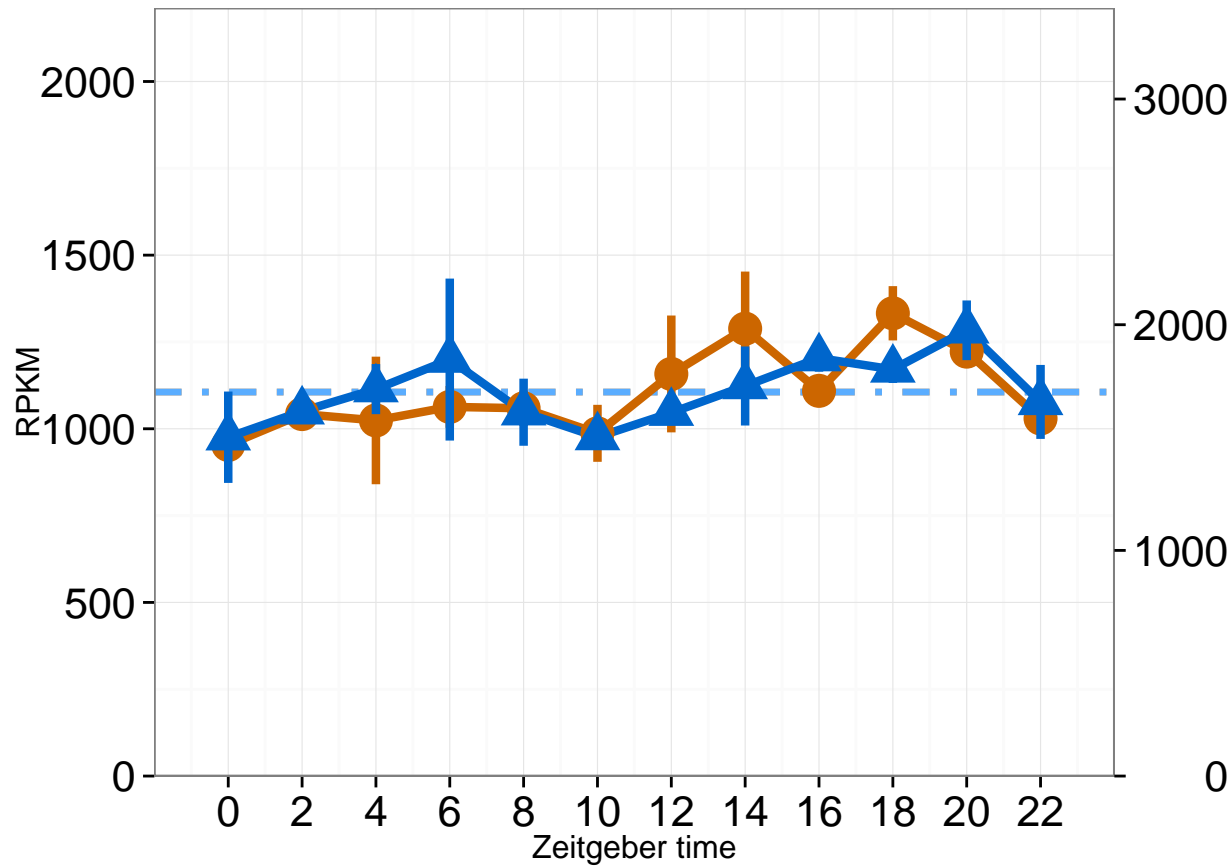

# Cox8a

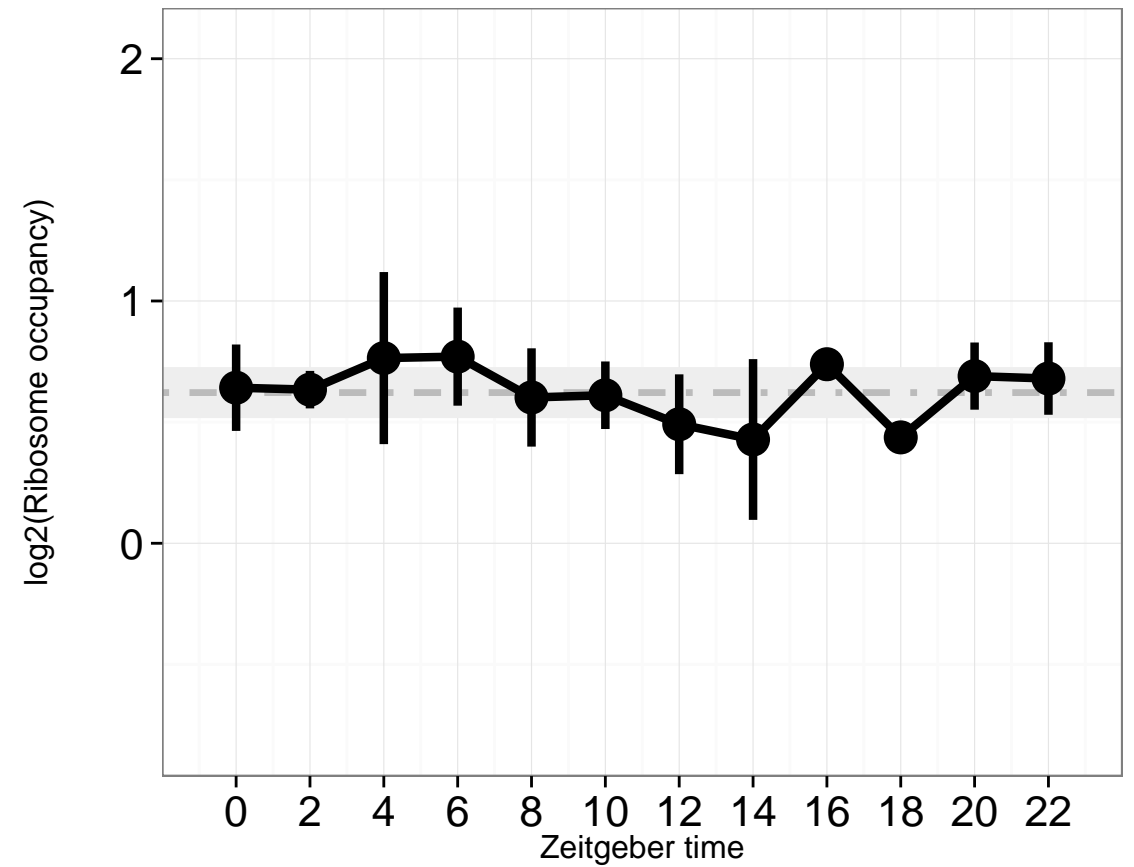

Supplement: Supplementary file 5326 [file 1]

## Ric8

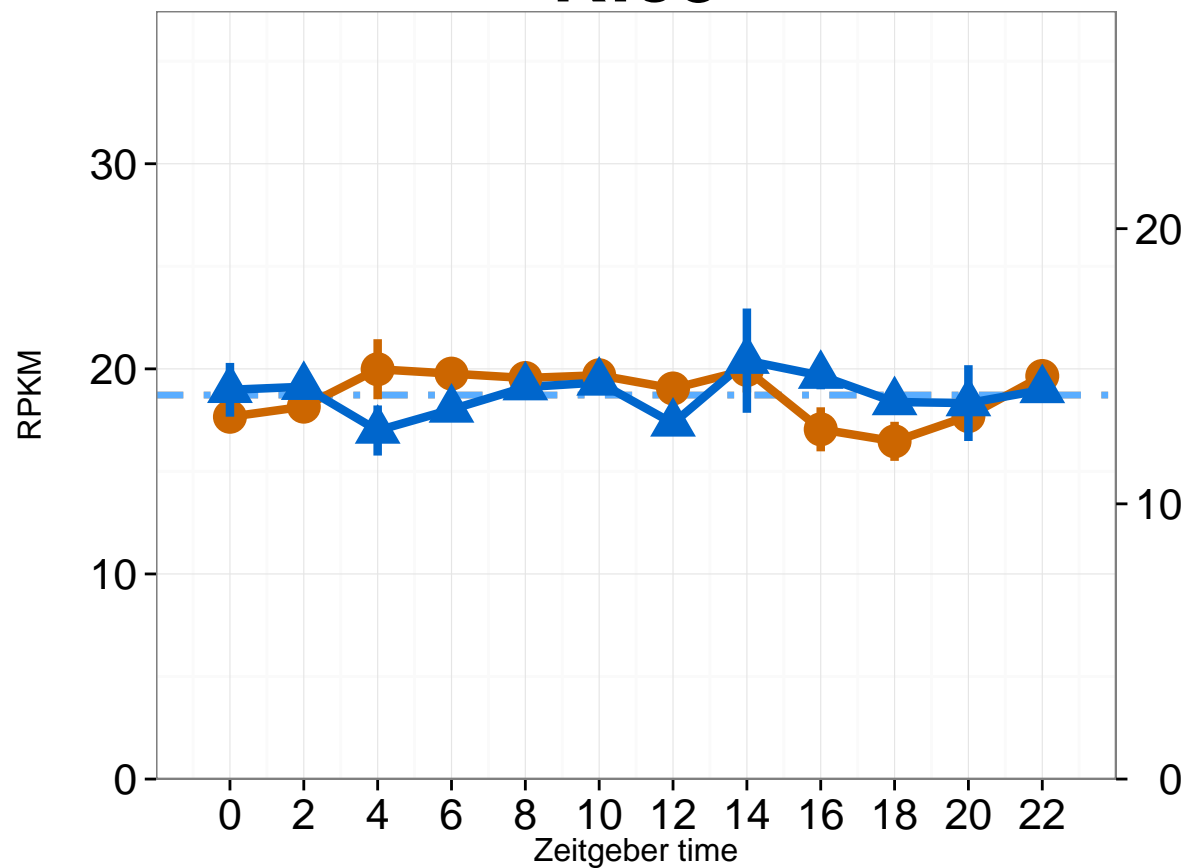

## Ric8

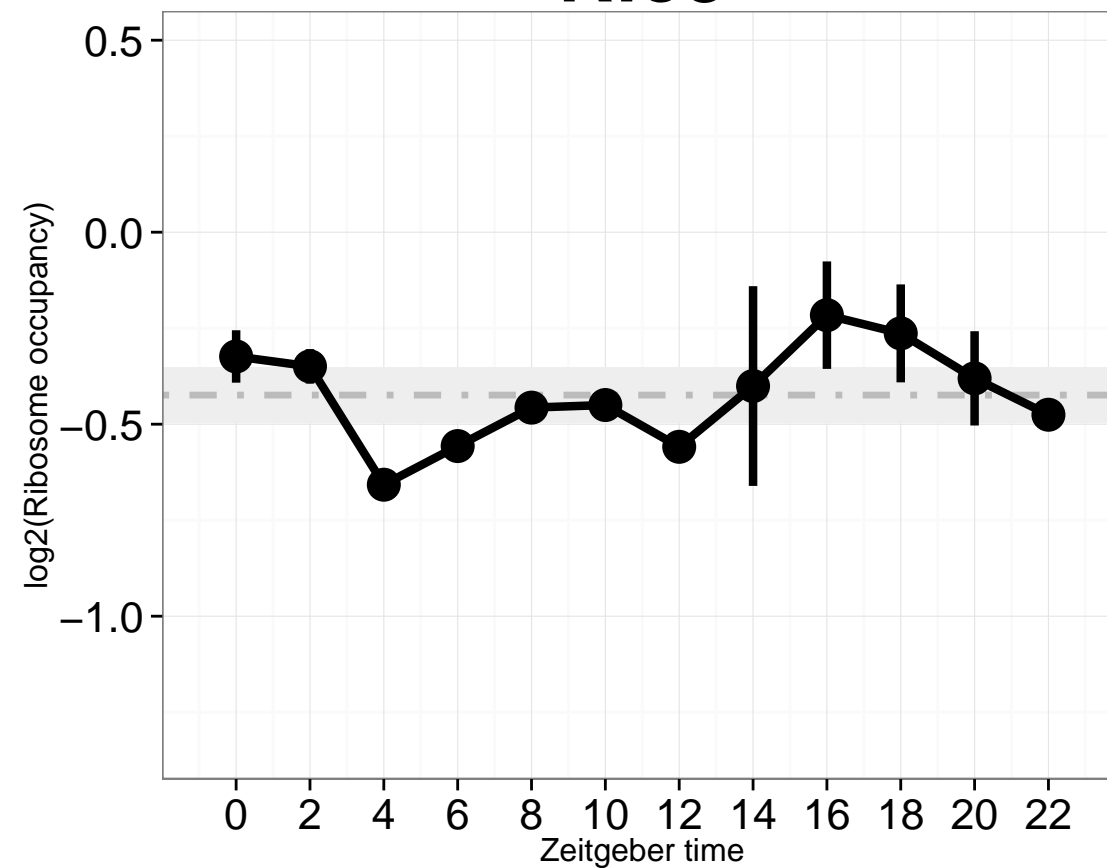

Supplement: Supplementary file 5327 [file 1]

# Ccnt2

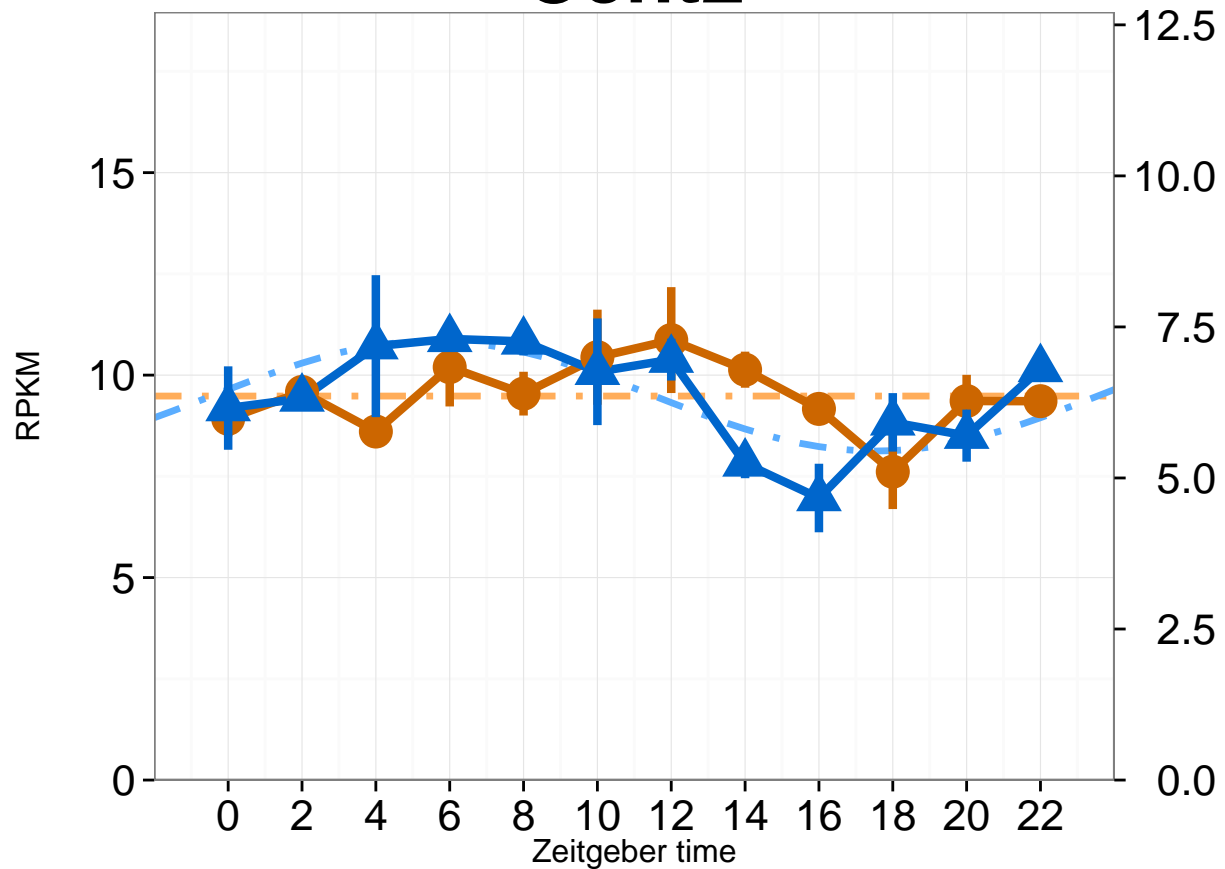

# Ccnt2

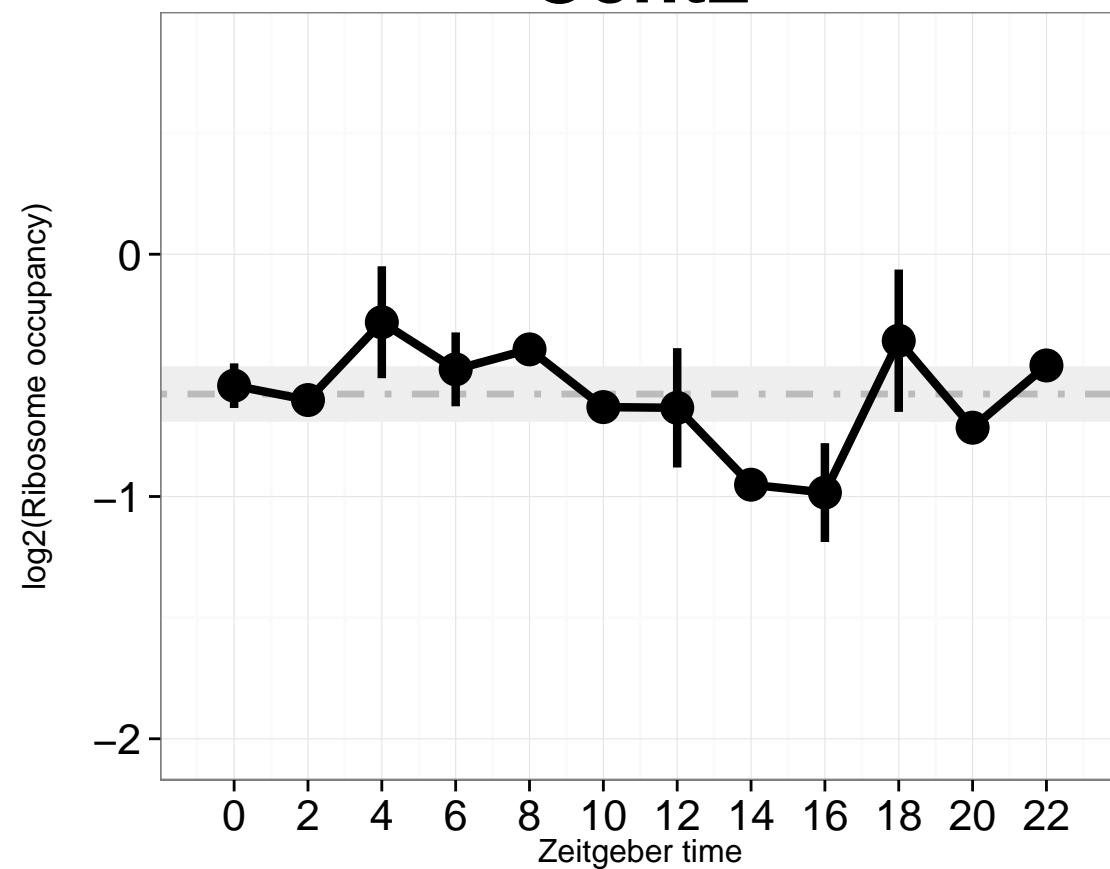

Supplement: Supplementary file 5328 [file 1]

# Snrnp70

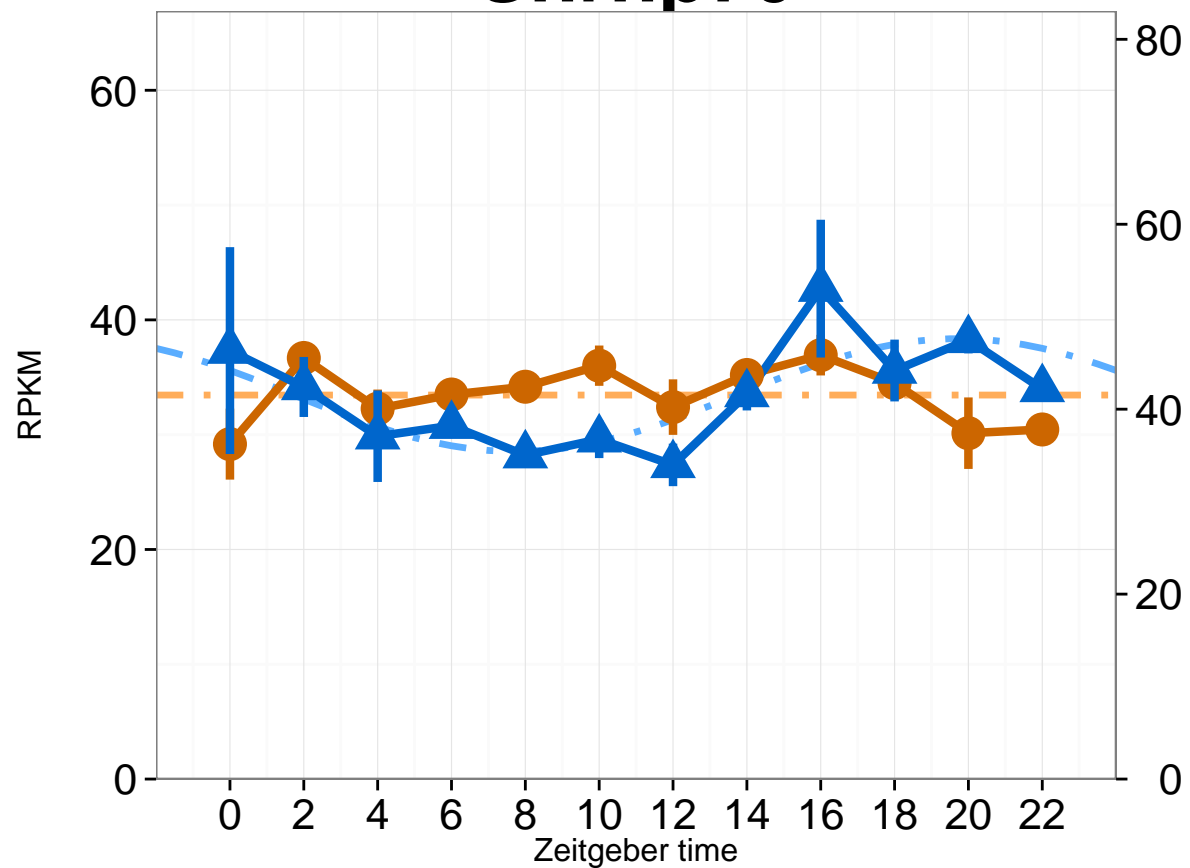

# Snrnp70

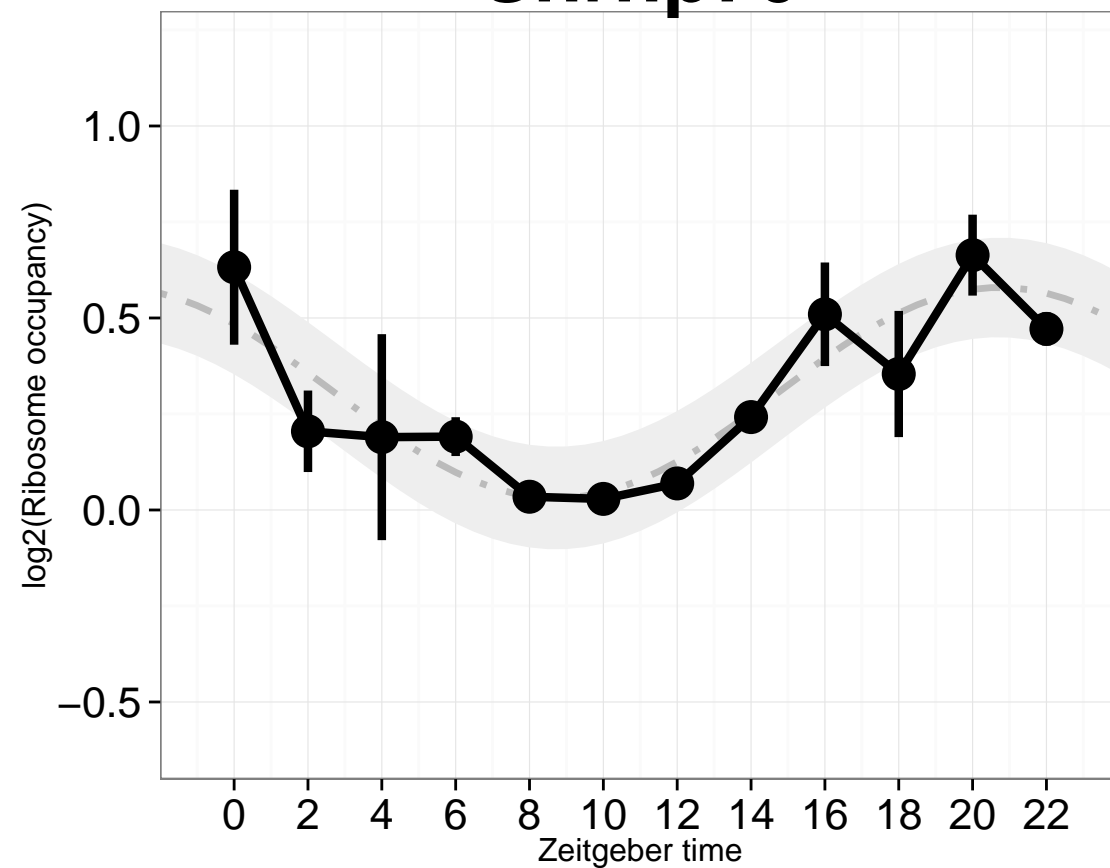

Supplement: Supplementary file 5329 [file 1]

## Dut

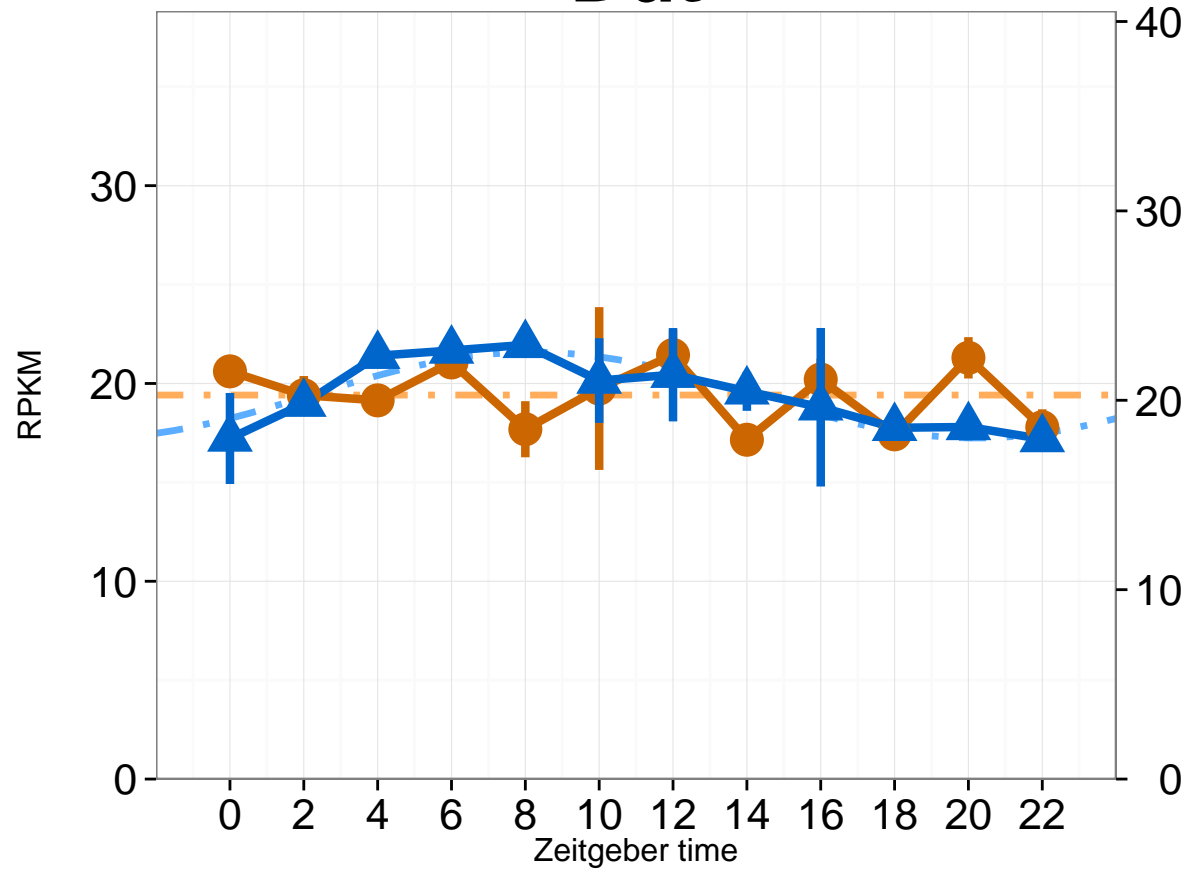

## Dut

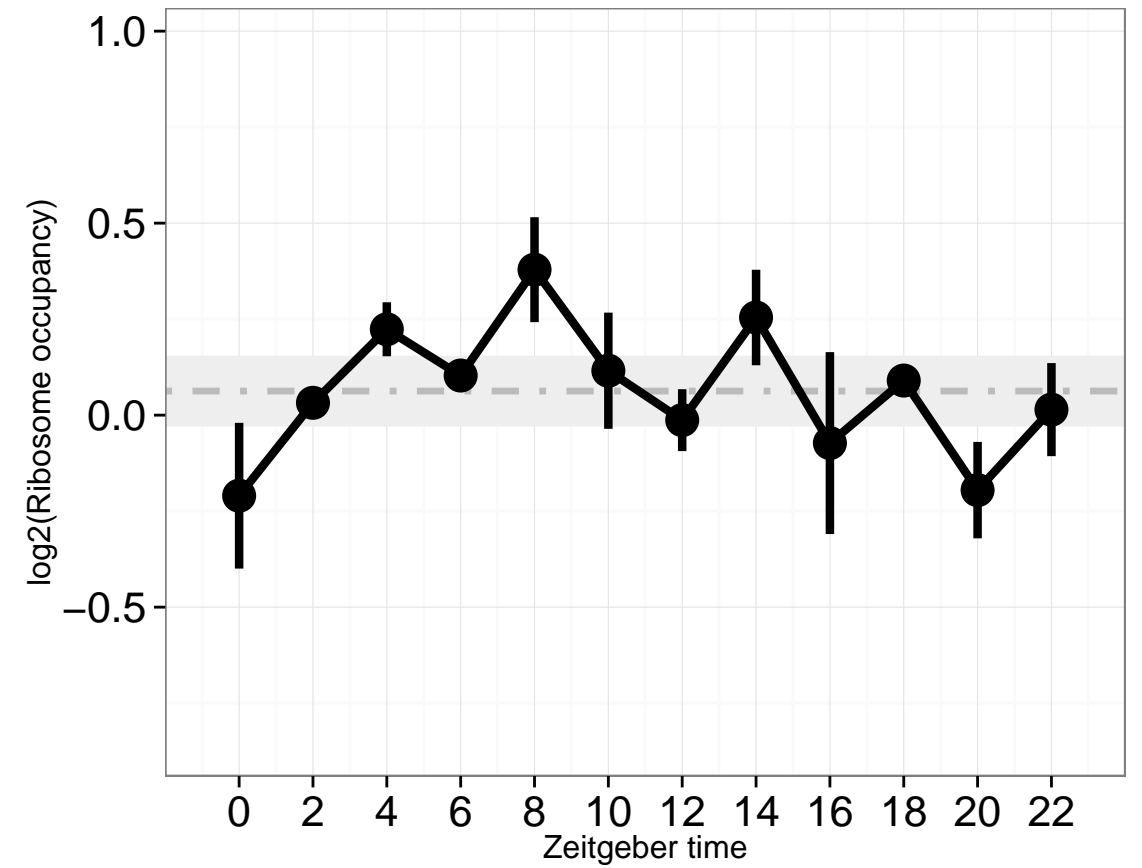

Supplement: Supplementary file 5330 [file 1]

# Pdlim3

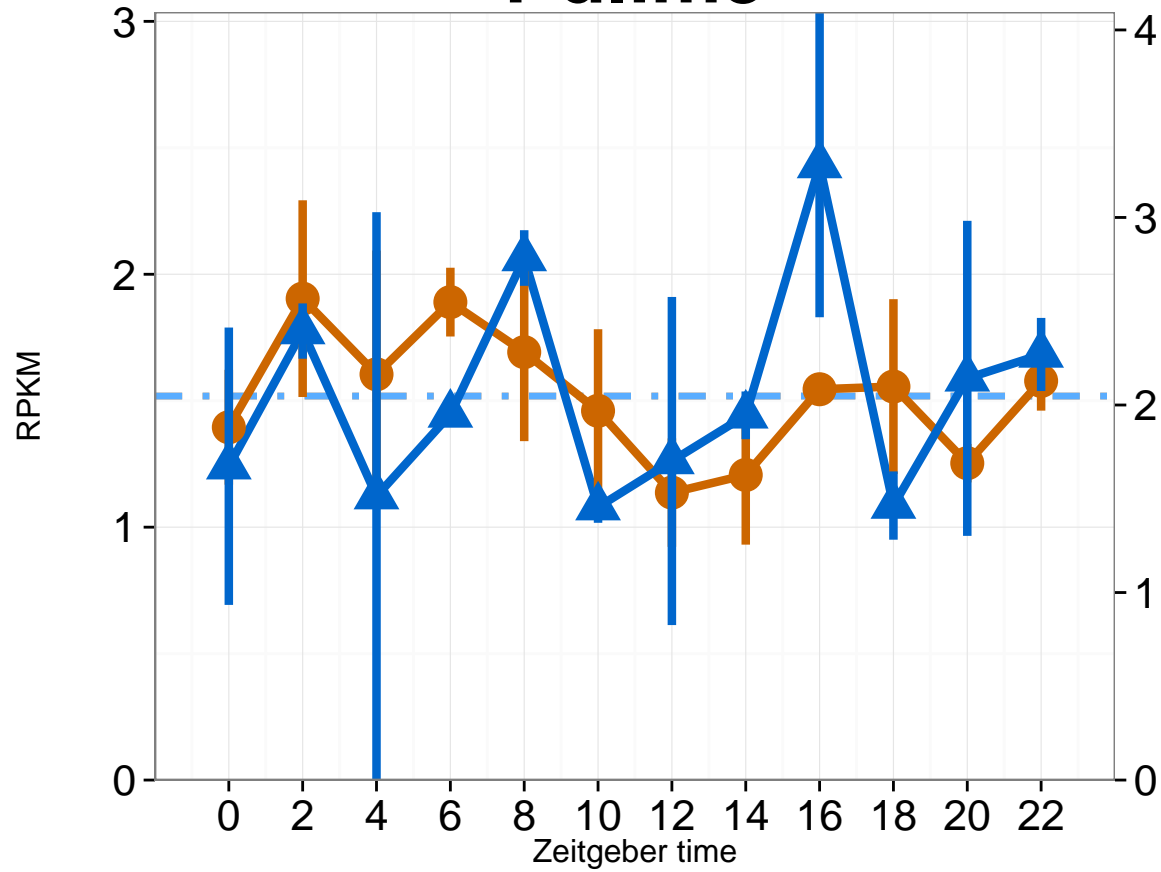

# Pdlim3

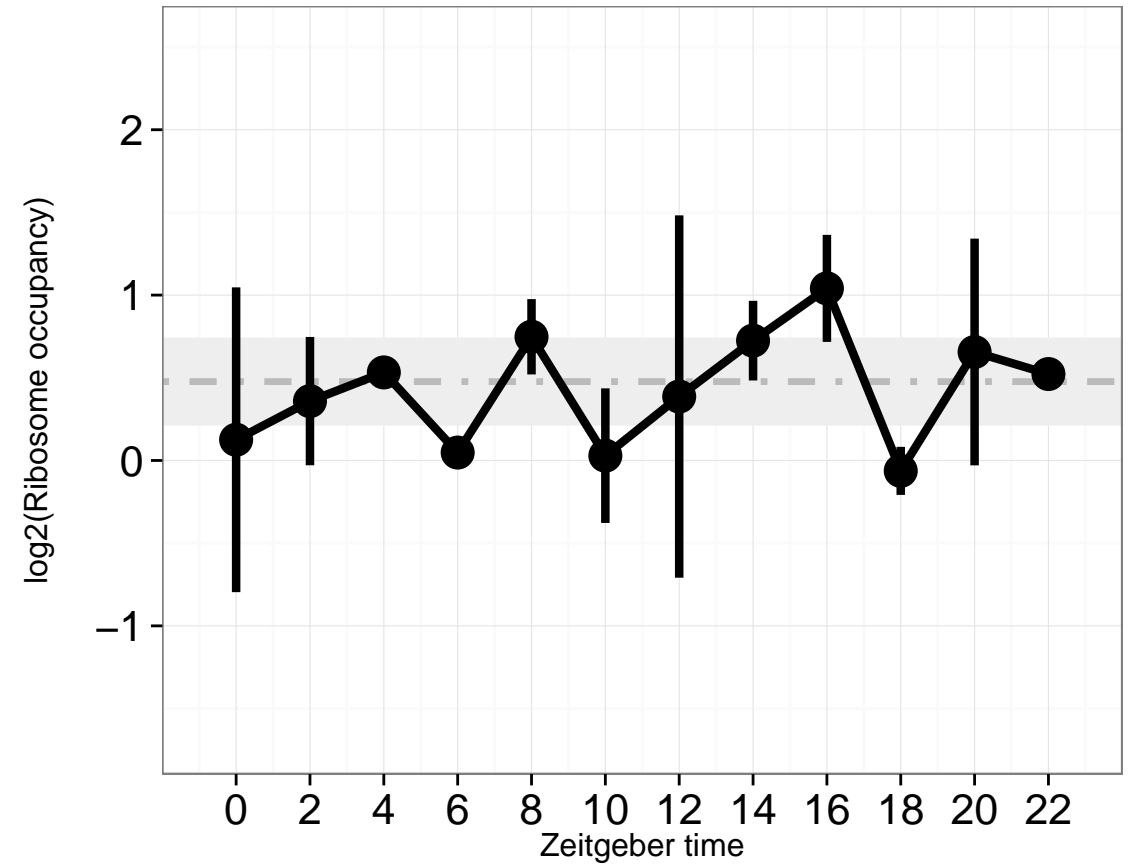

Supplement: Supplementary file 5331 [file 1]

## Pbx1

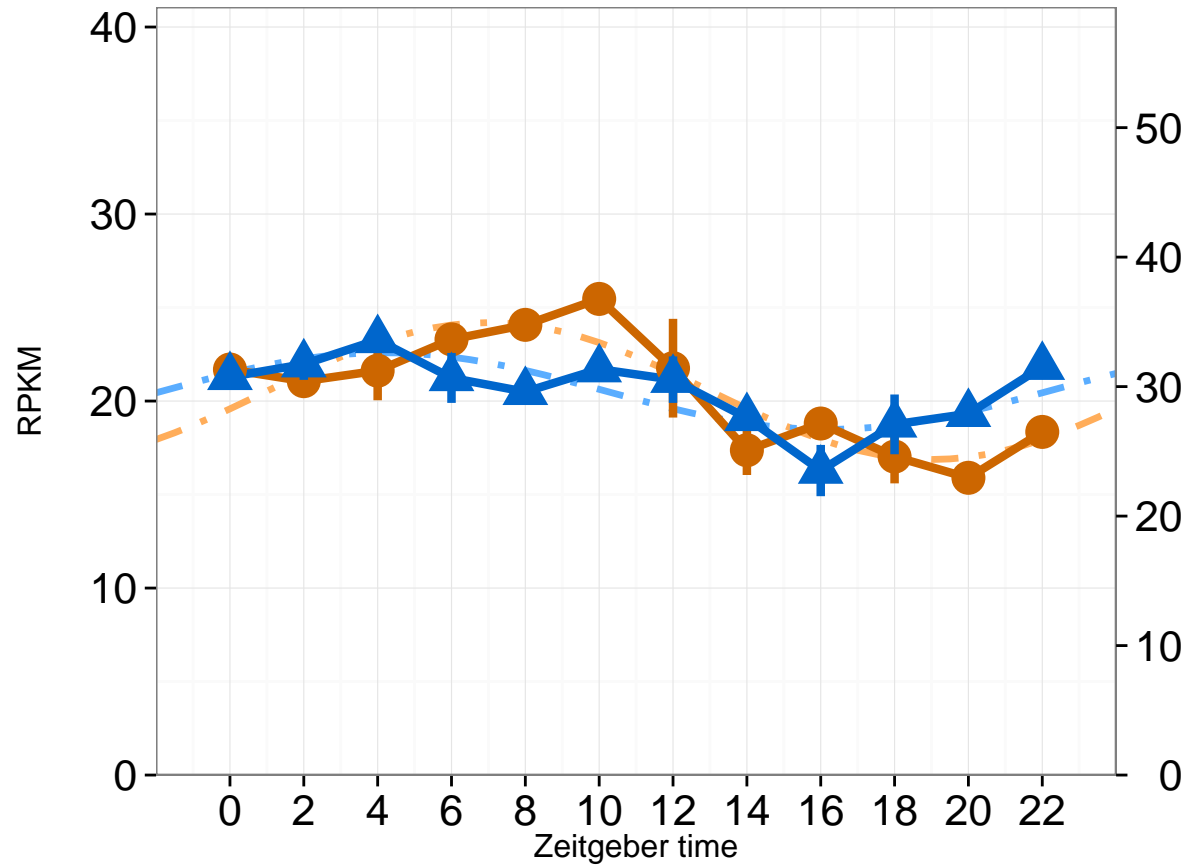

## Pbx1

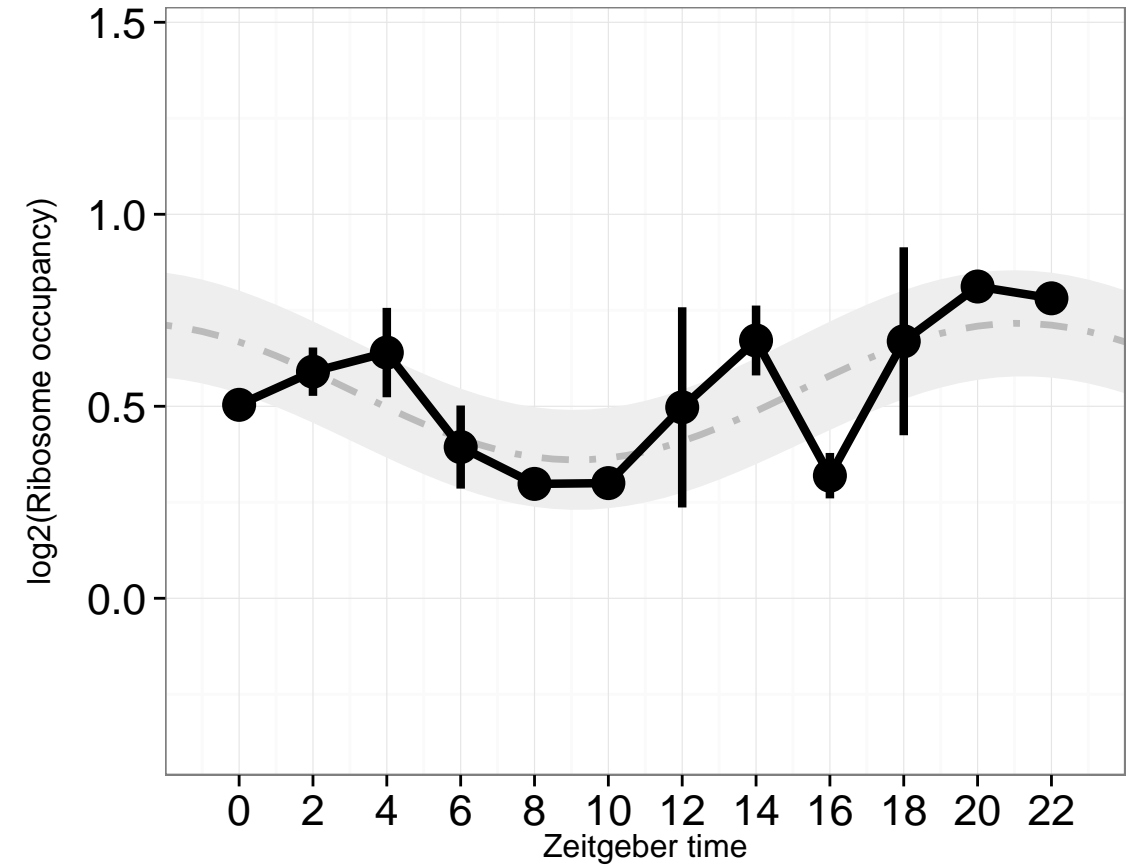

Supplement: Supplementary file 5332 [file 1]

# Zfp874b

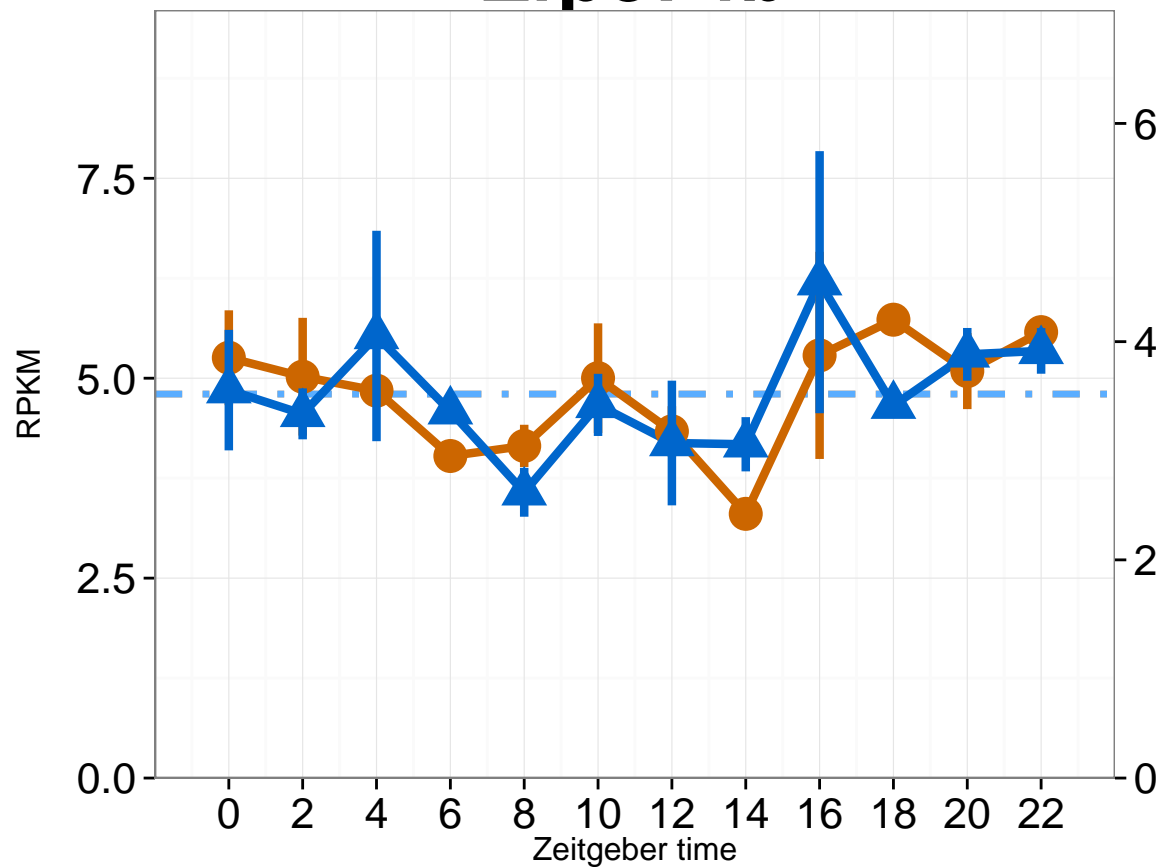

# Zfp874b

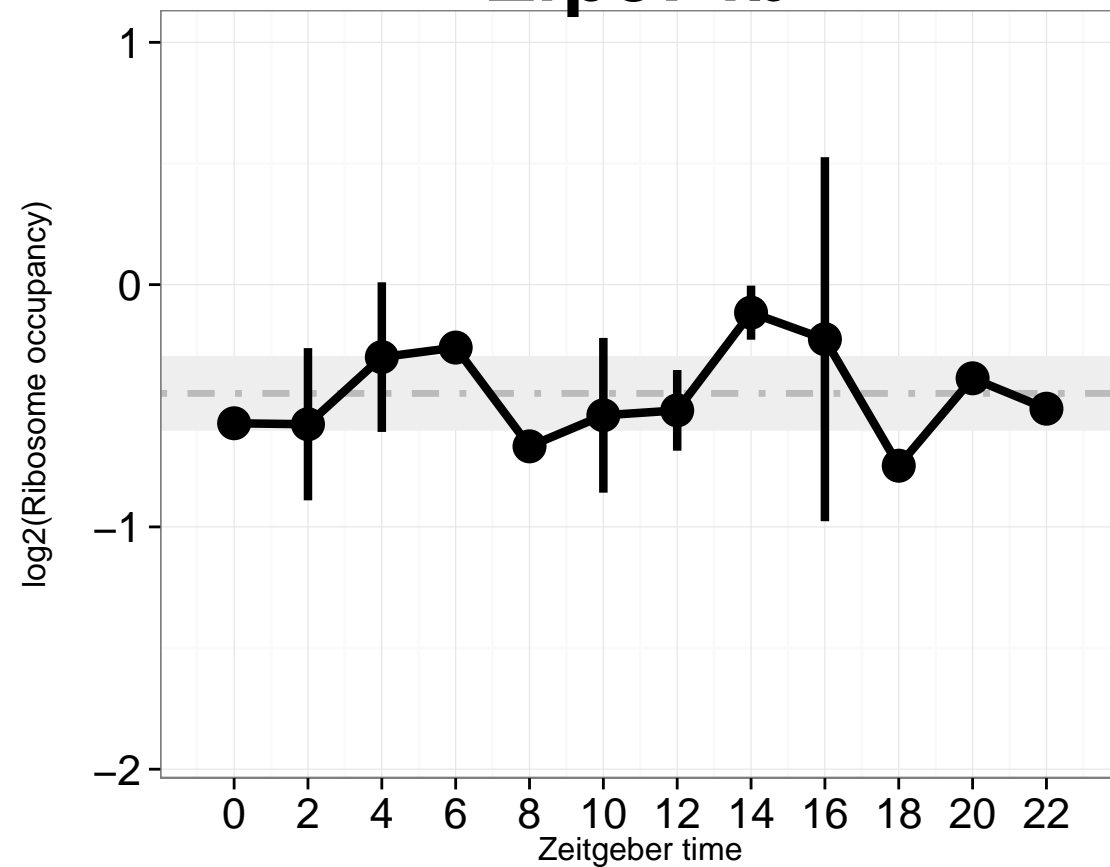

Supplement: Supplementary file 5333 [file 1]

## U2af2

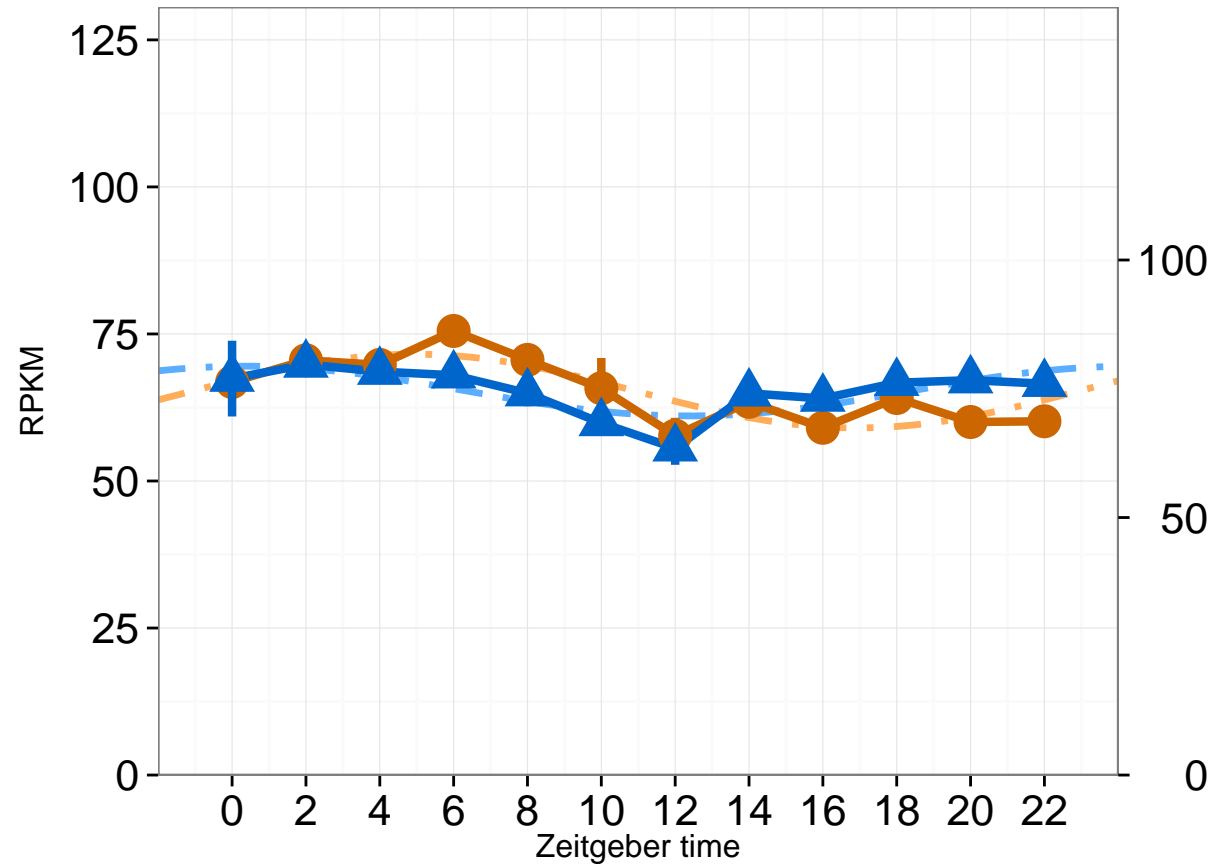

## U2af2

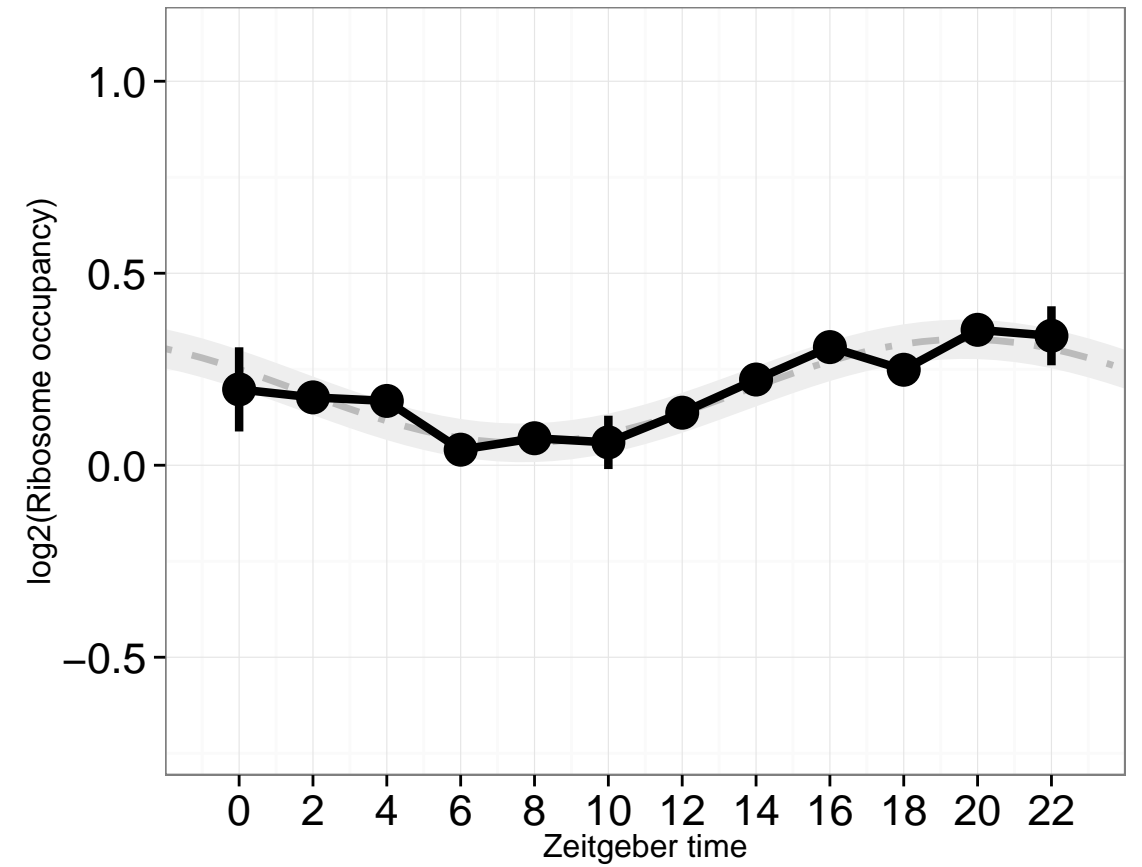

Supplement: Supplementary file 5334 [file 1]

## Pdgfra

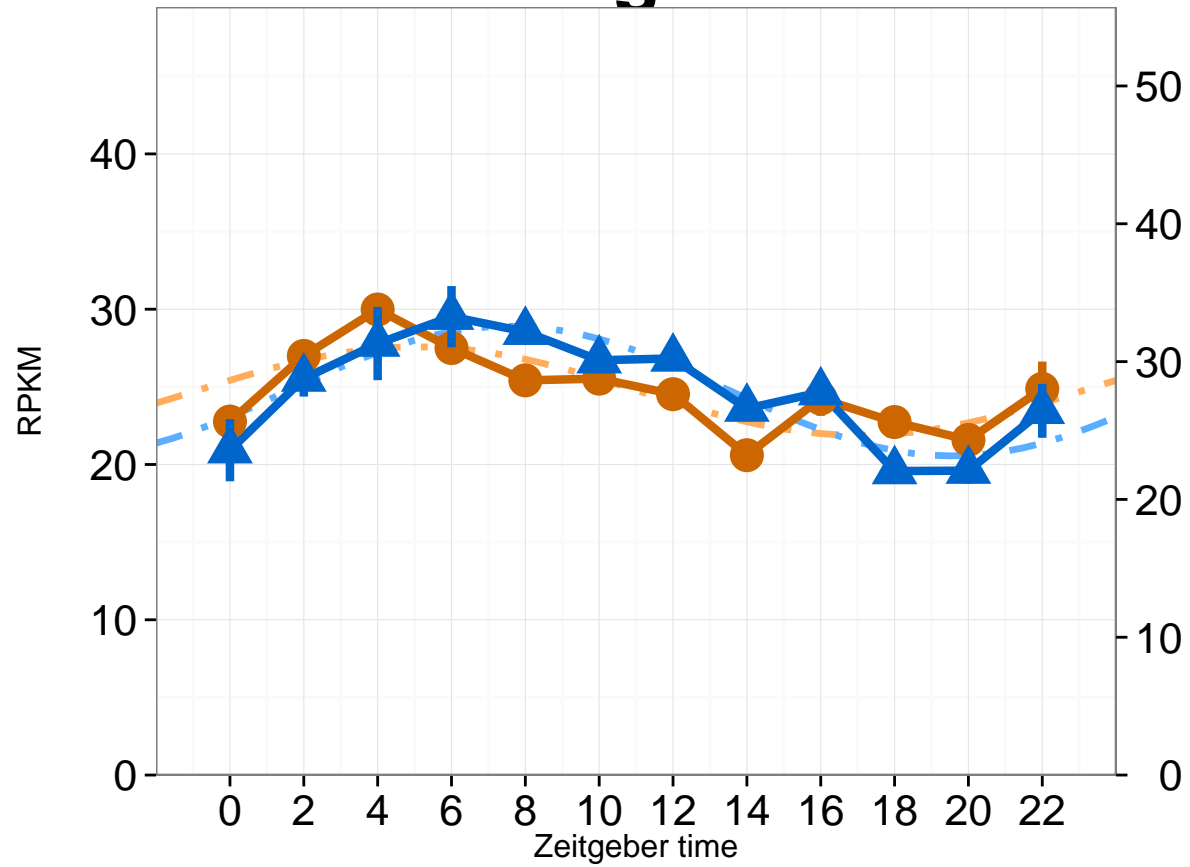

## Pdgfra

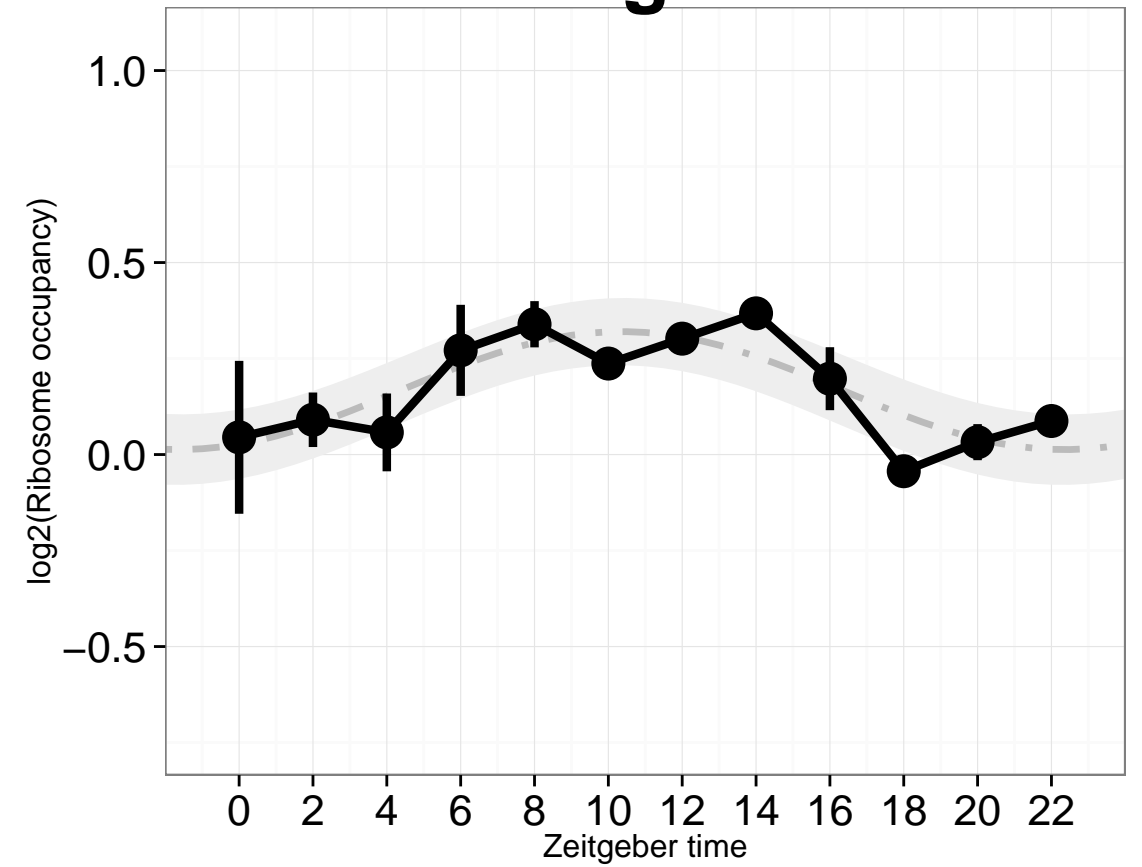

Supplement: Supplementary file 5335 [file 1]

# Psmc1

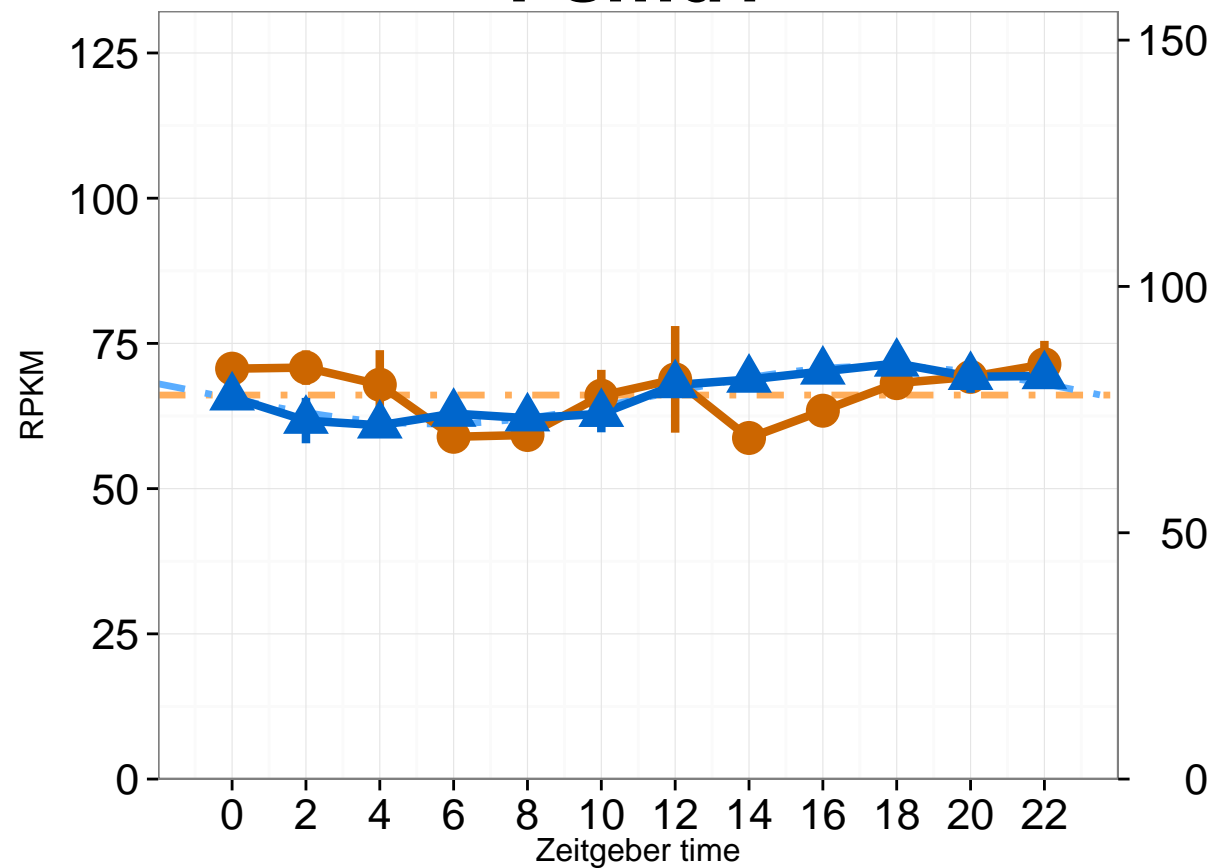

# Psmc1

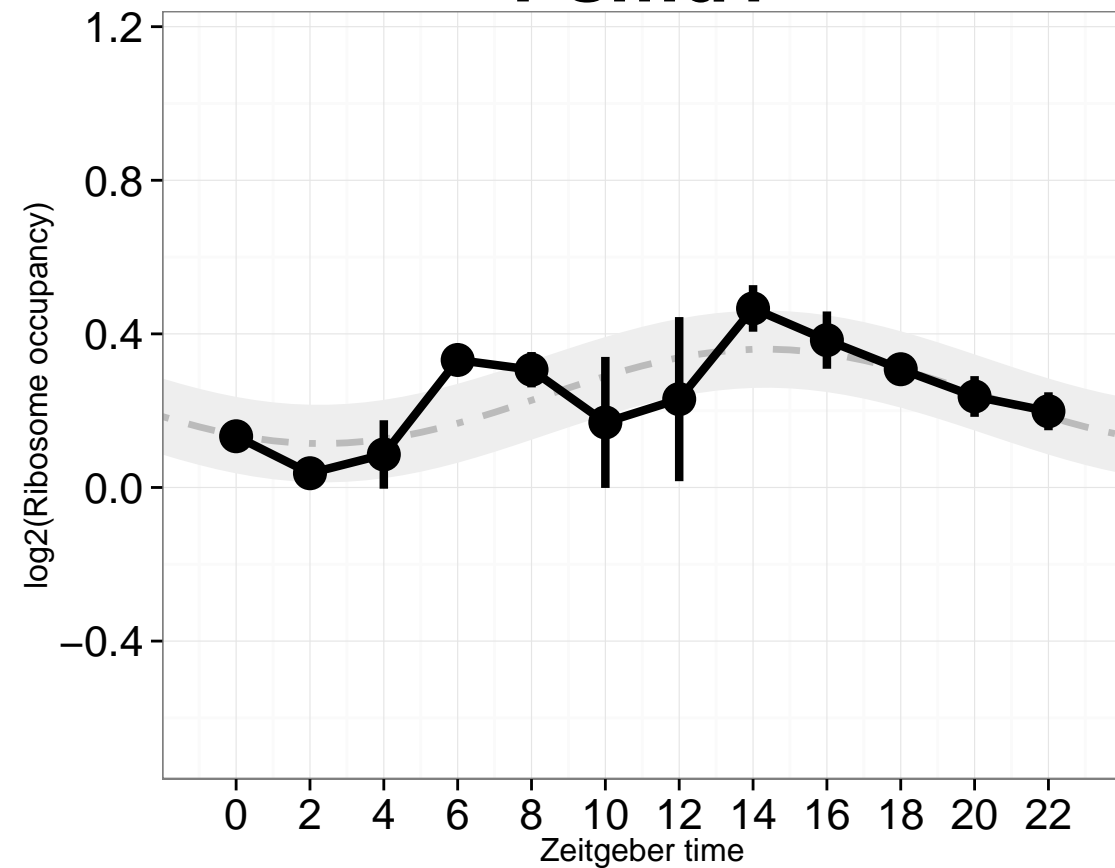

Supplement: Supplementary file 5336 [file 1]

# Hsd3b2

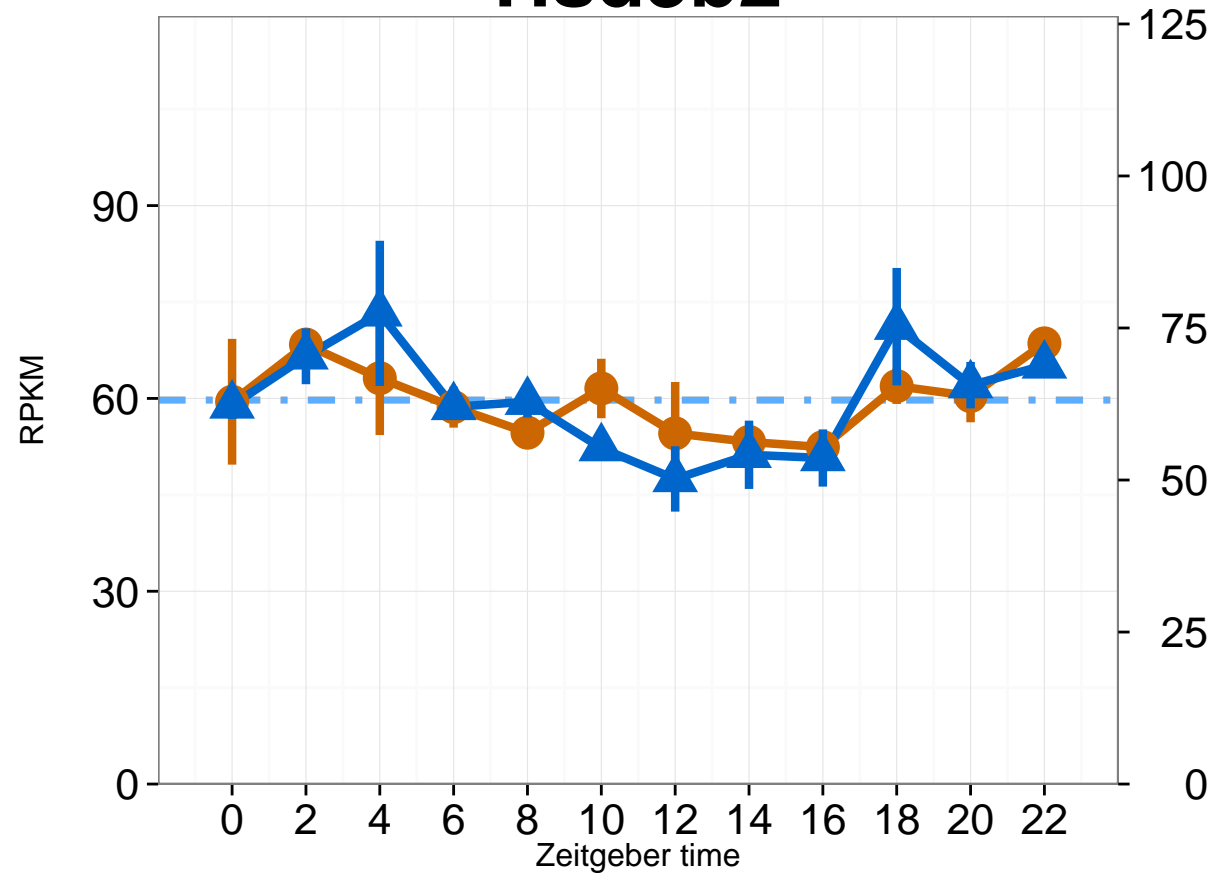

# Hsd3b2

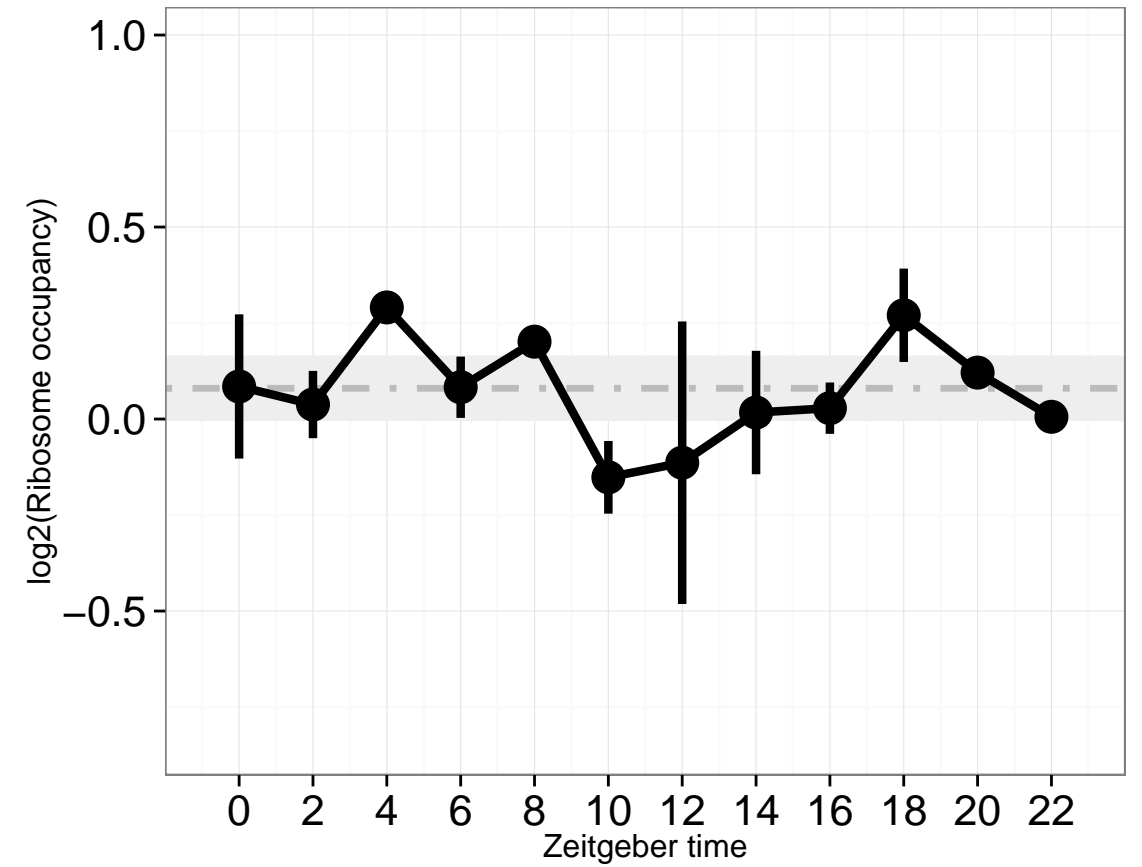

Supplement: Supplementary file 5337 [file 1]

# D14Abb1e

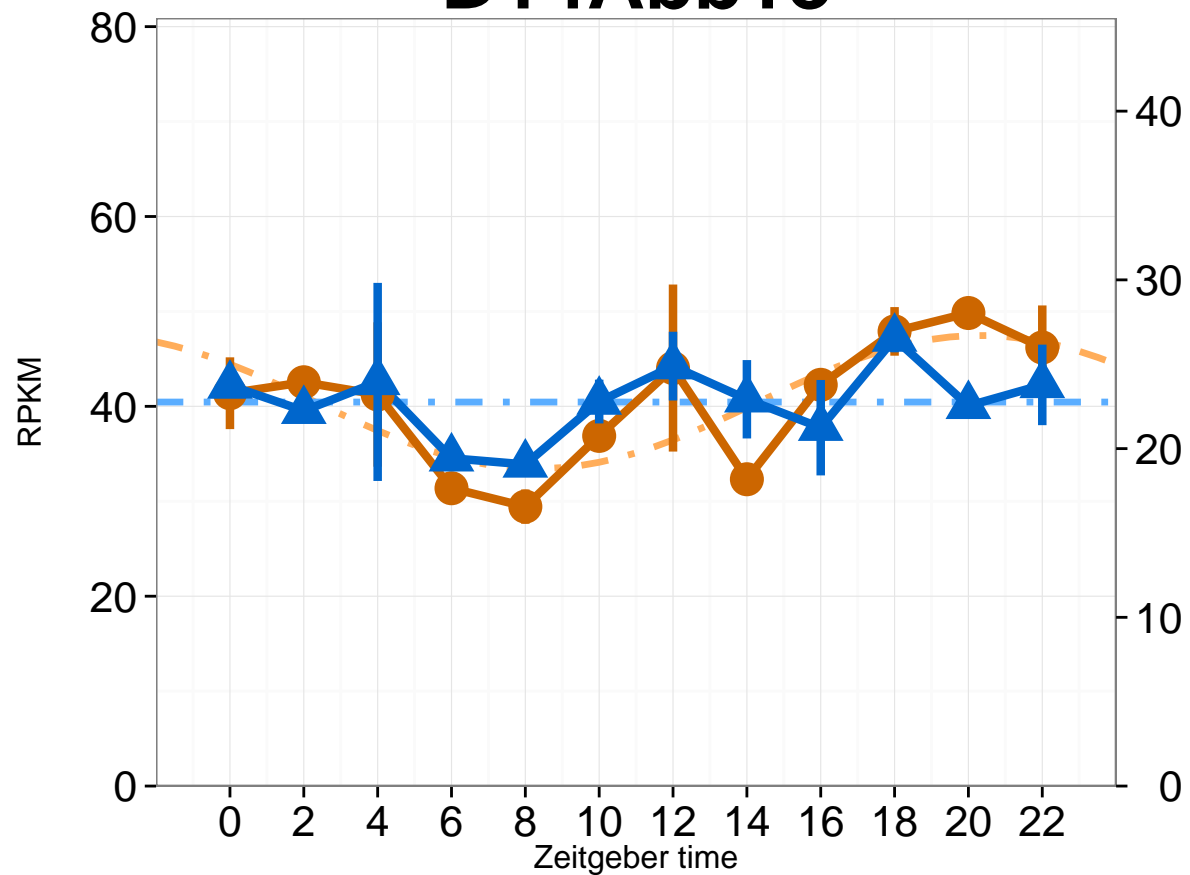

# D14Abb1e

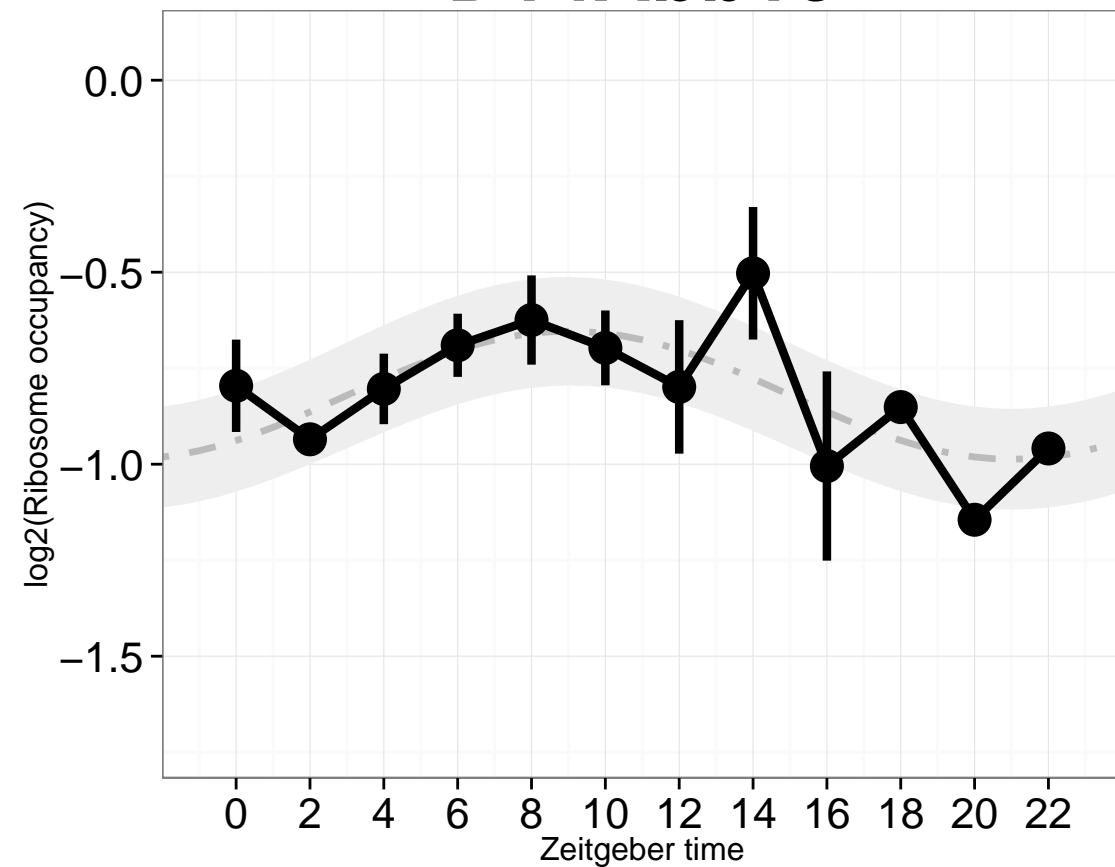

Supplement: Supplementary file 5338 [file 1]

## Lbh

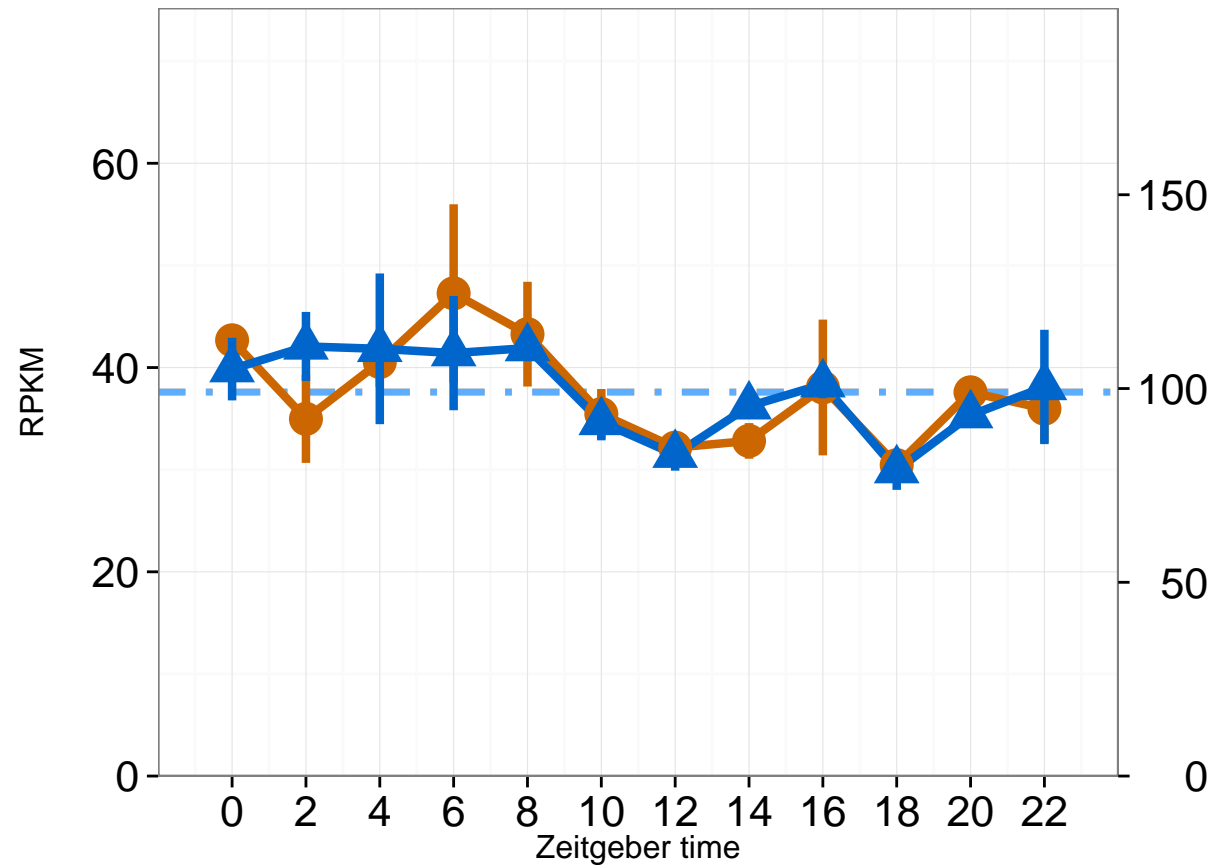

## Lbh

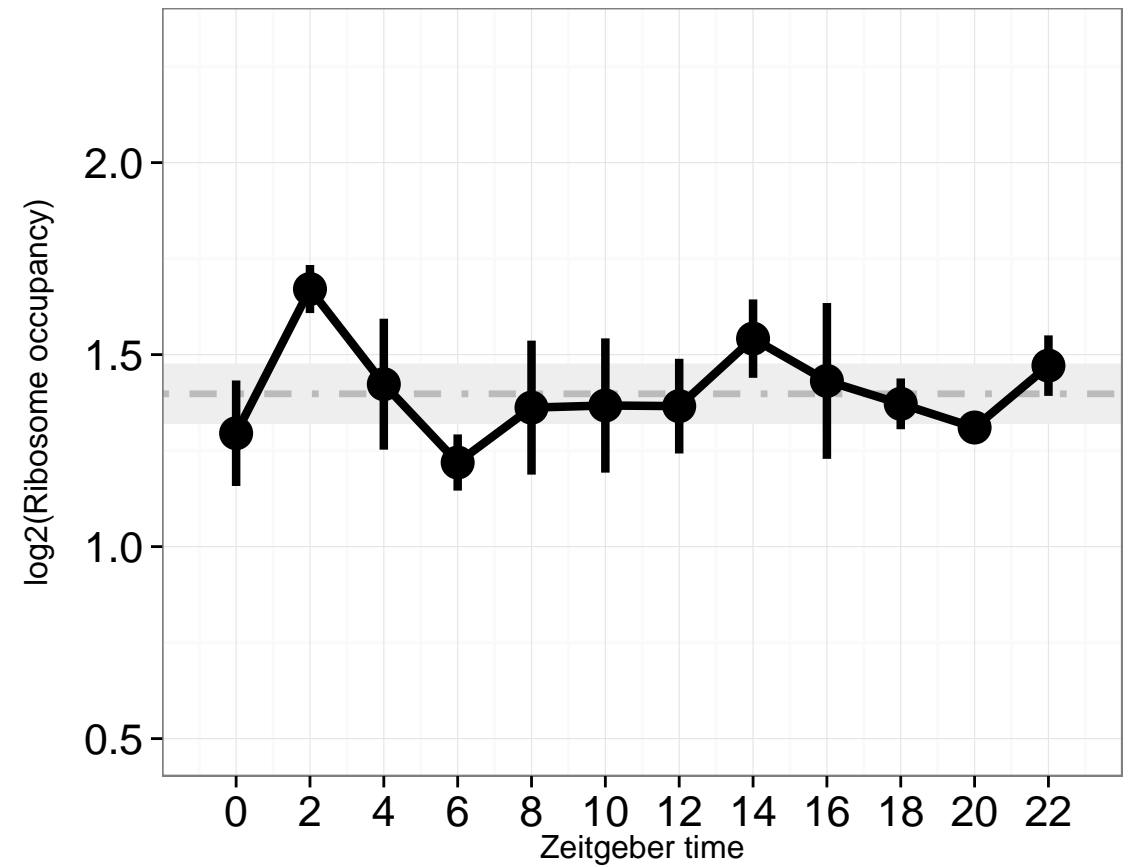

Supplement: Supplementary file 5339 [file 1]

# Armc9

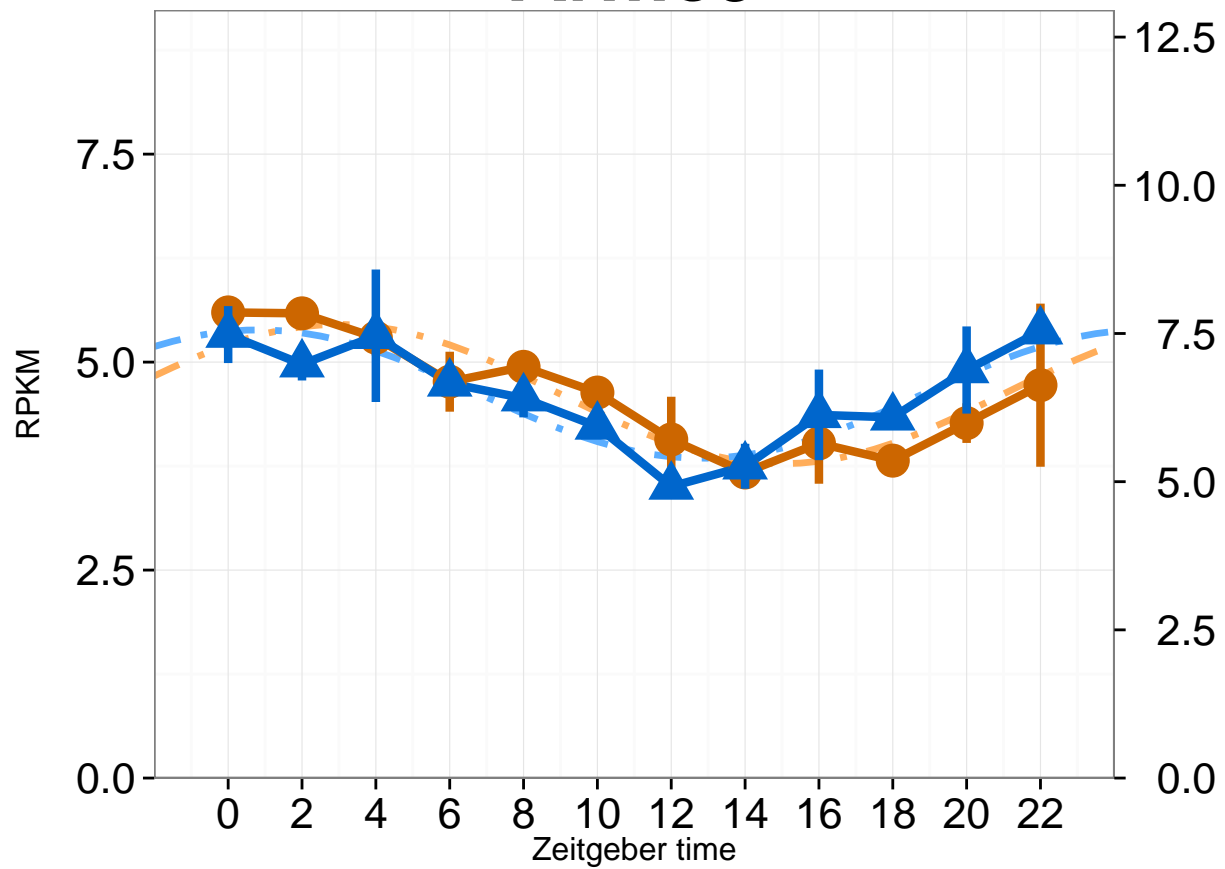

# Armc9

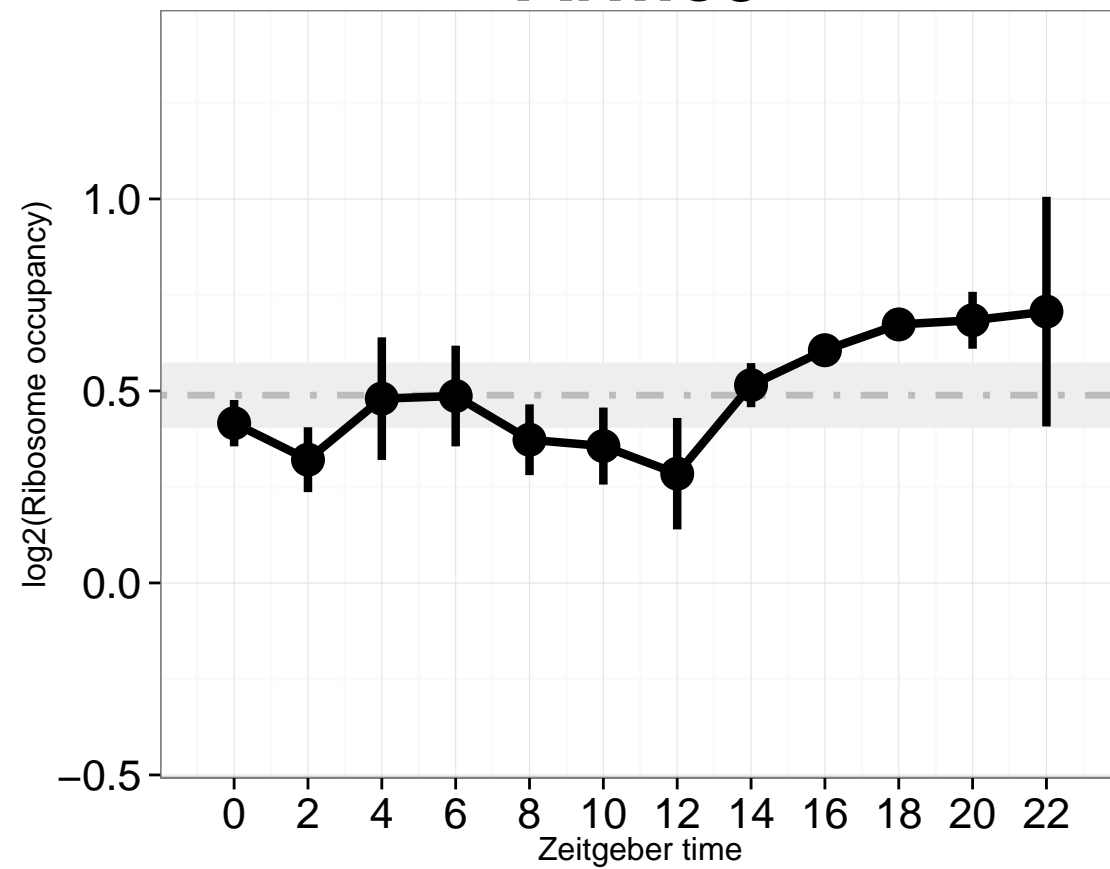

Supplement: Supplementary file 5340 [file 1]

## Il17rd

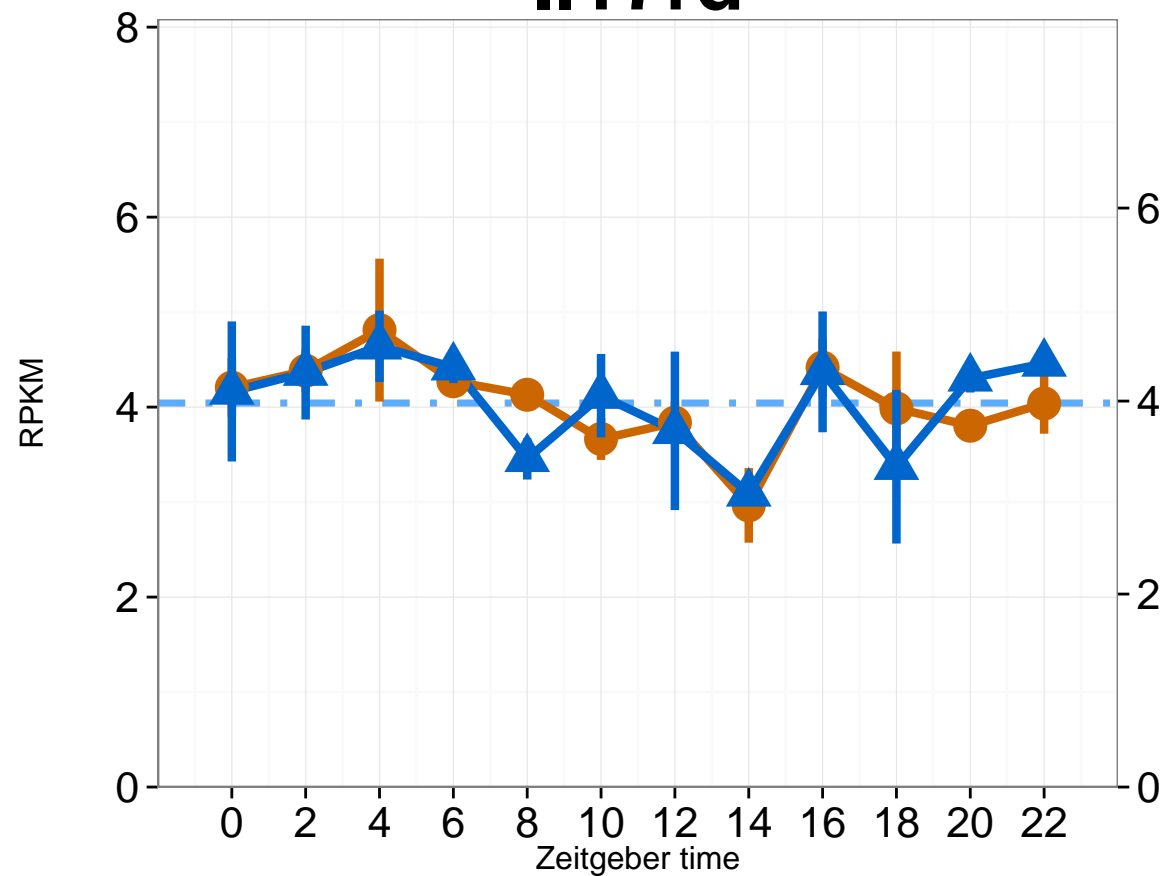

## Il17rd

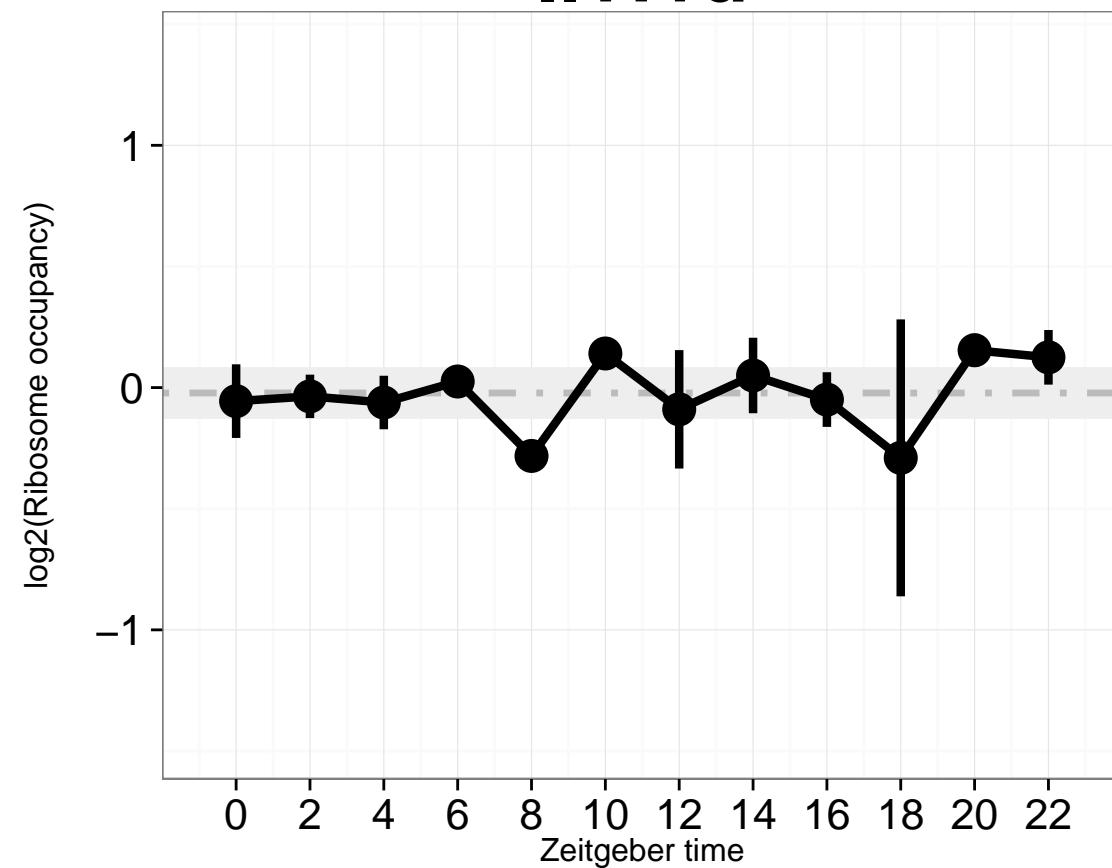

Supplement: Supplementary file 5341 [file 1]

# Pbrm1

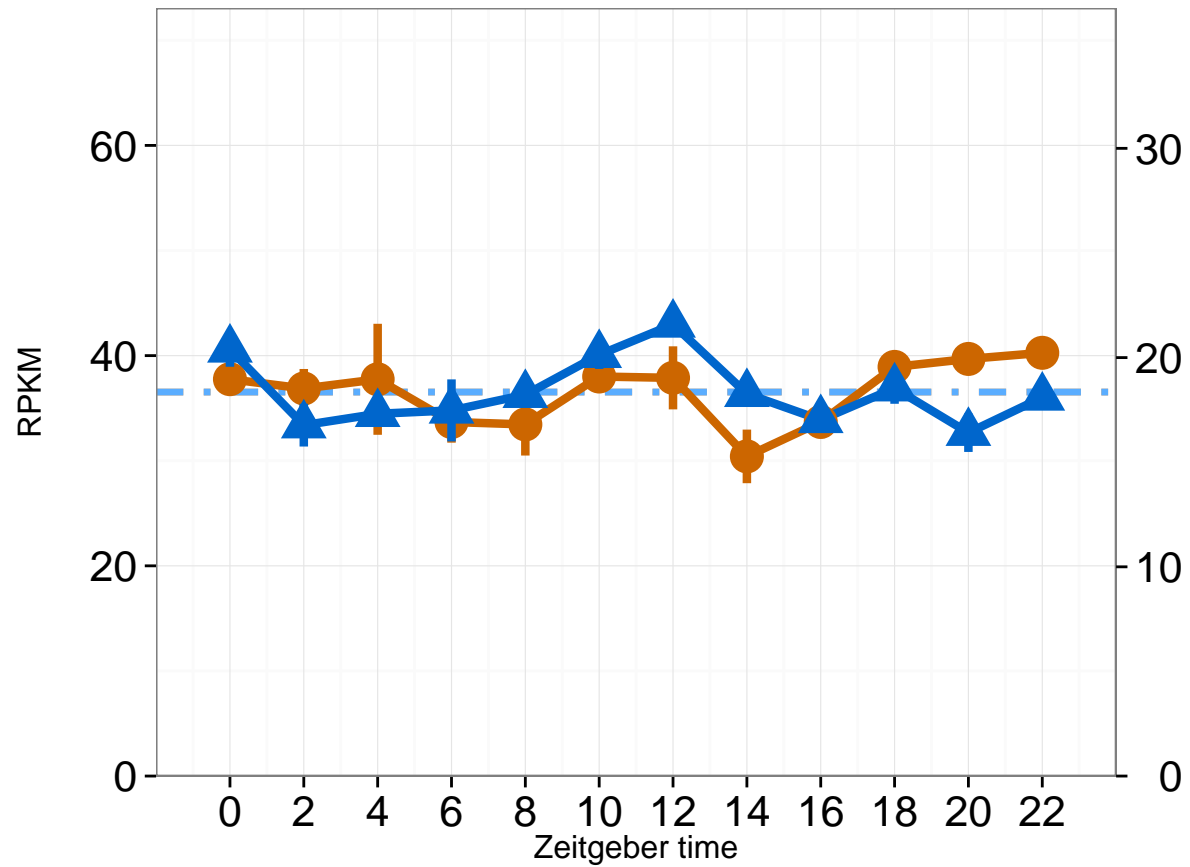

# Pbrm1

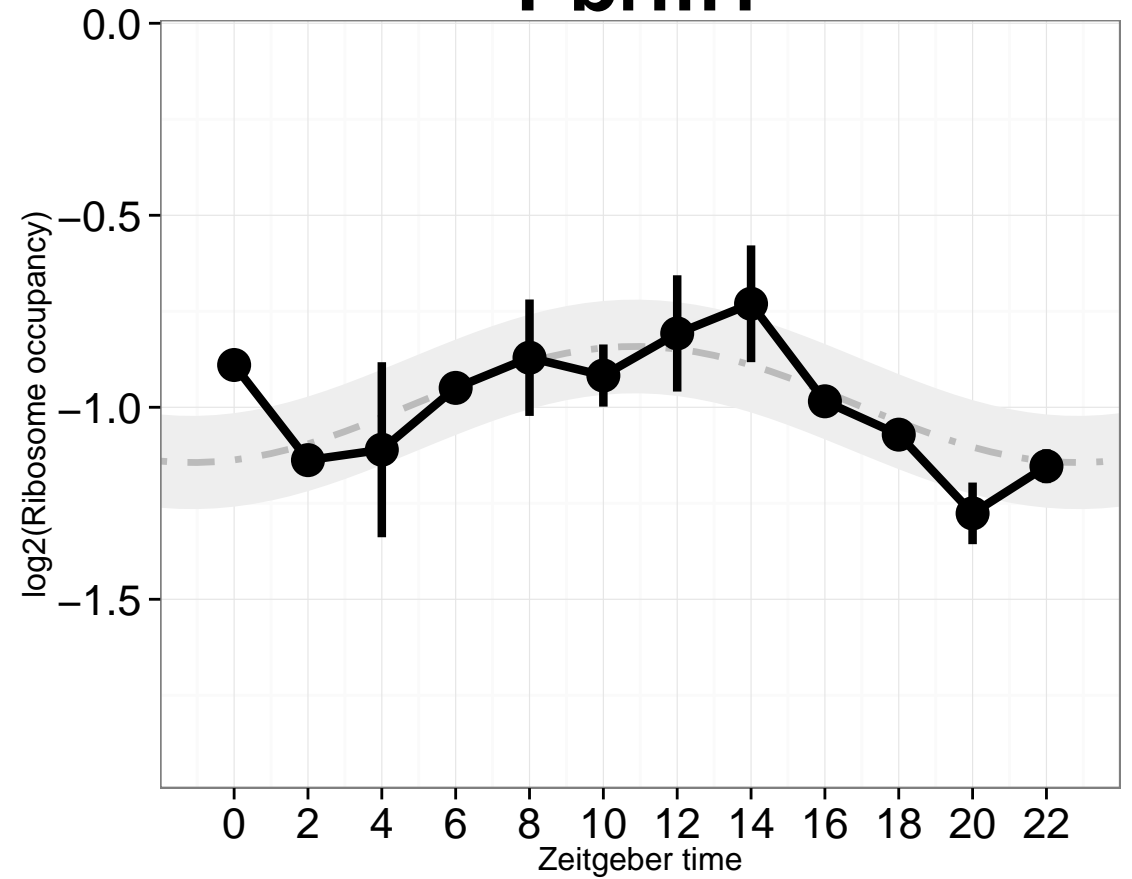

Supplement: Supplementary file 5342 [file 1]

**Tcf15 TR**

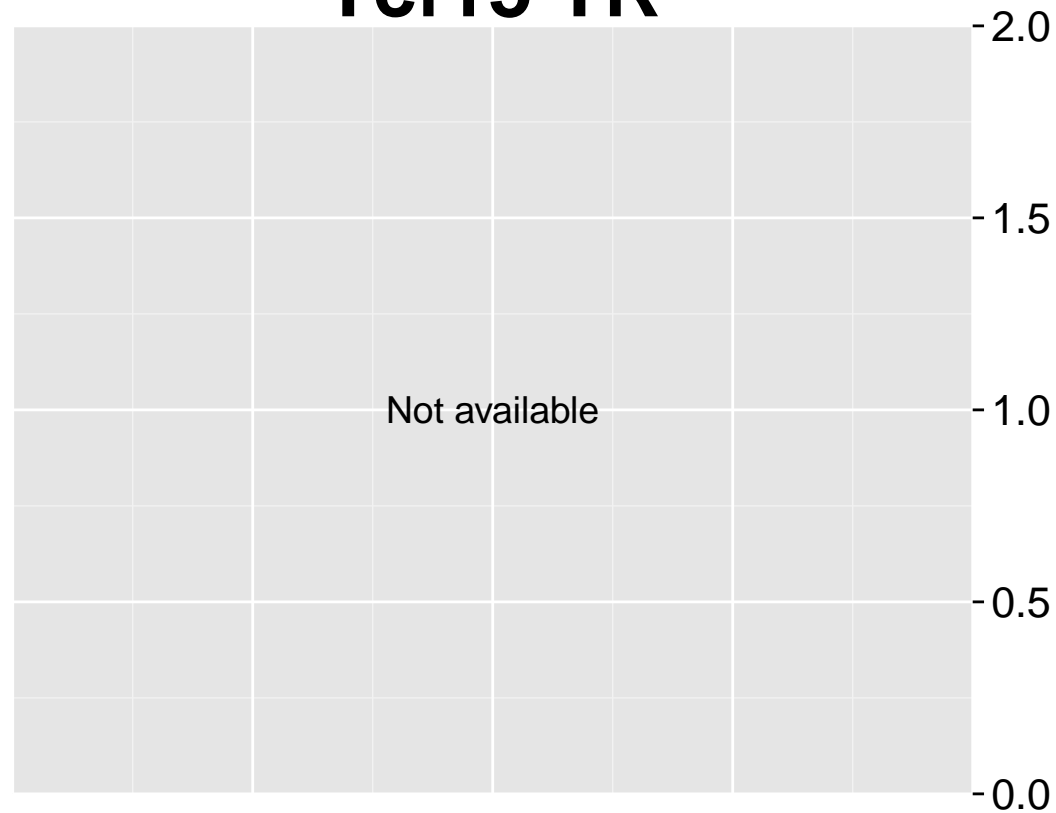

**Tcf15 log2(Ribosome occupancy)**

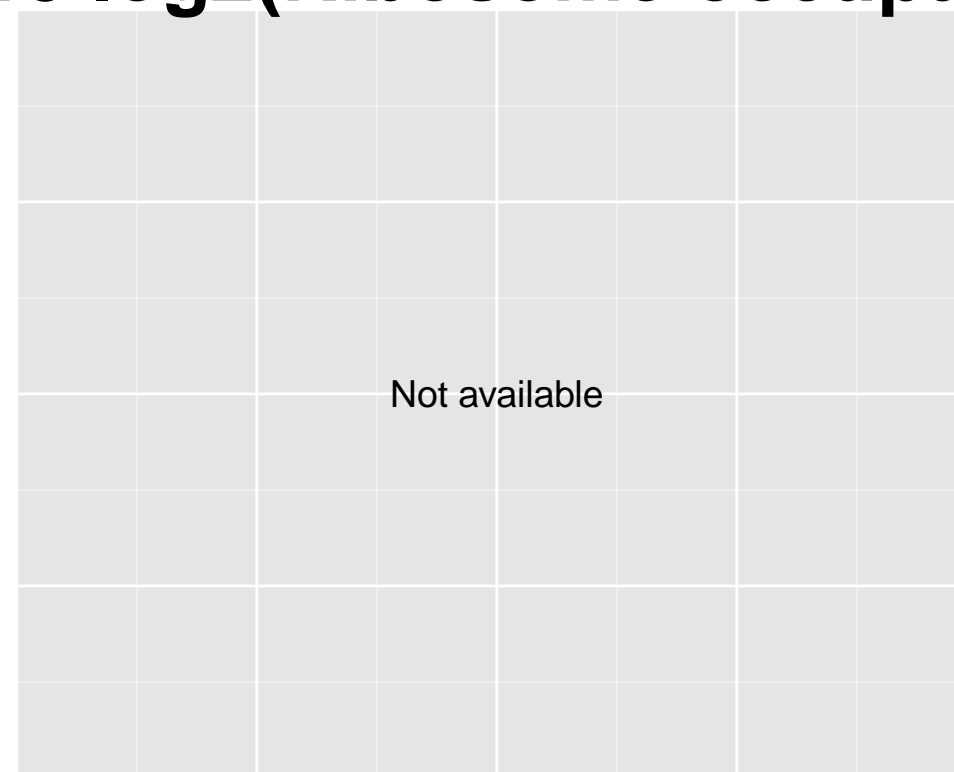

Supplement: Supplementary file 5343 [file 1]

## Smad7

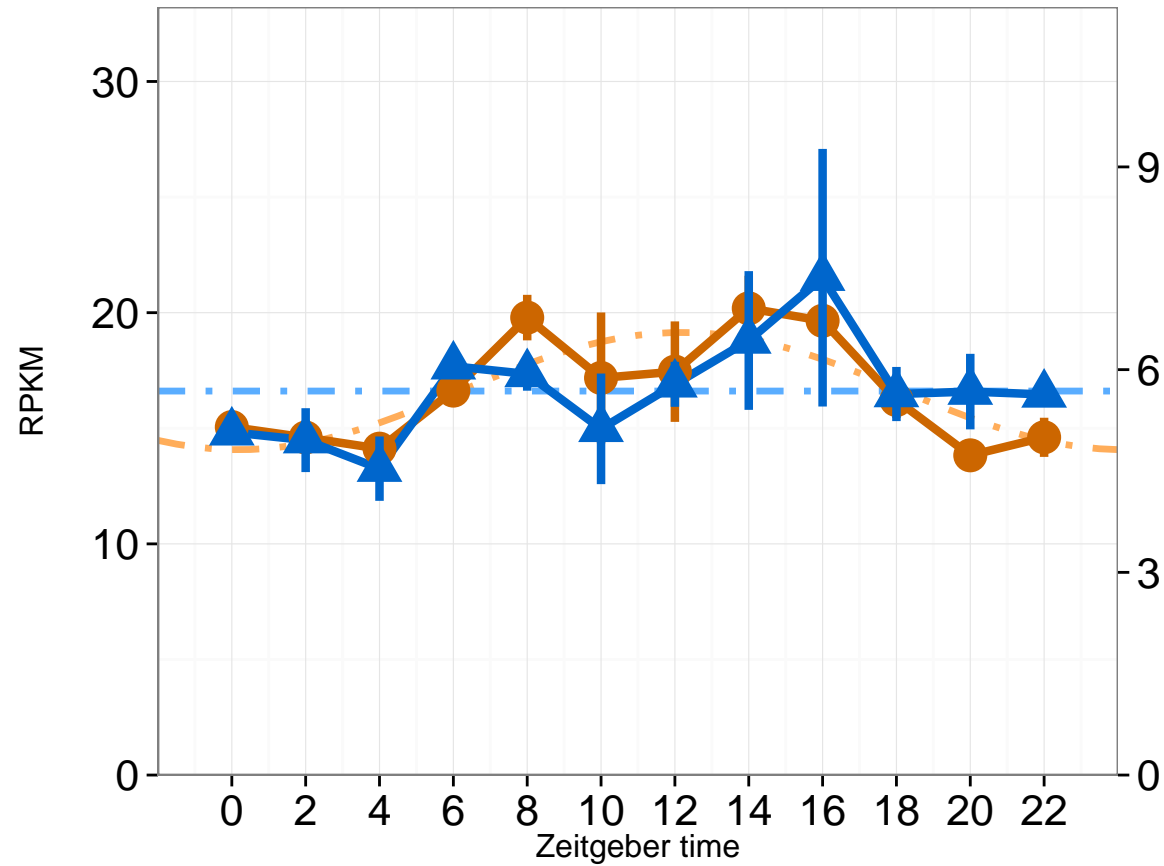

## Smad7

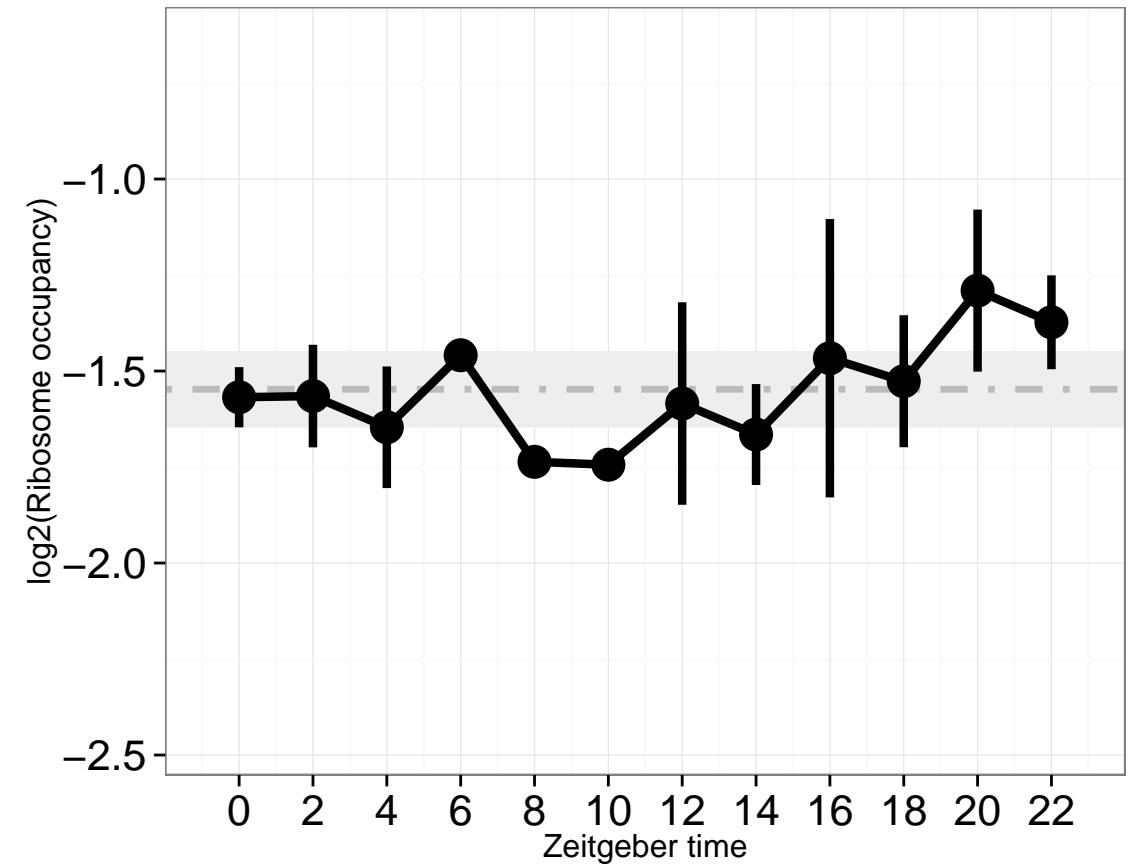

Supplement: Supplementary file 5344 [file 1]

# 1110004E09Rik

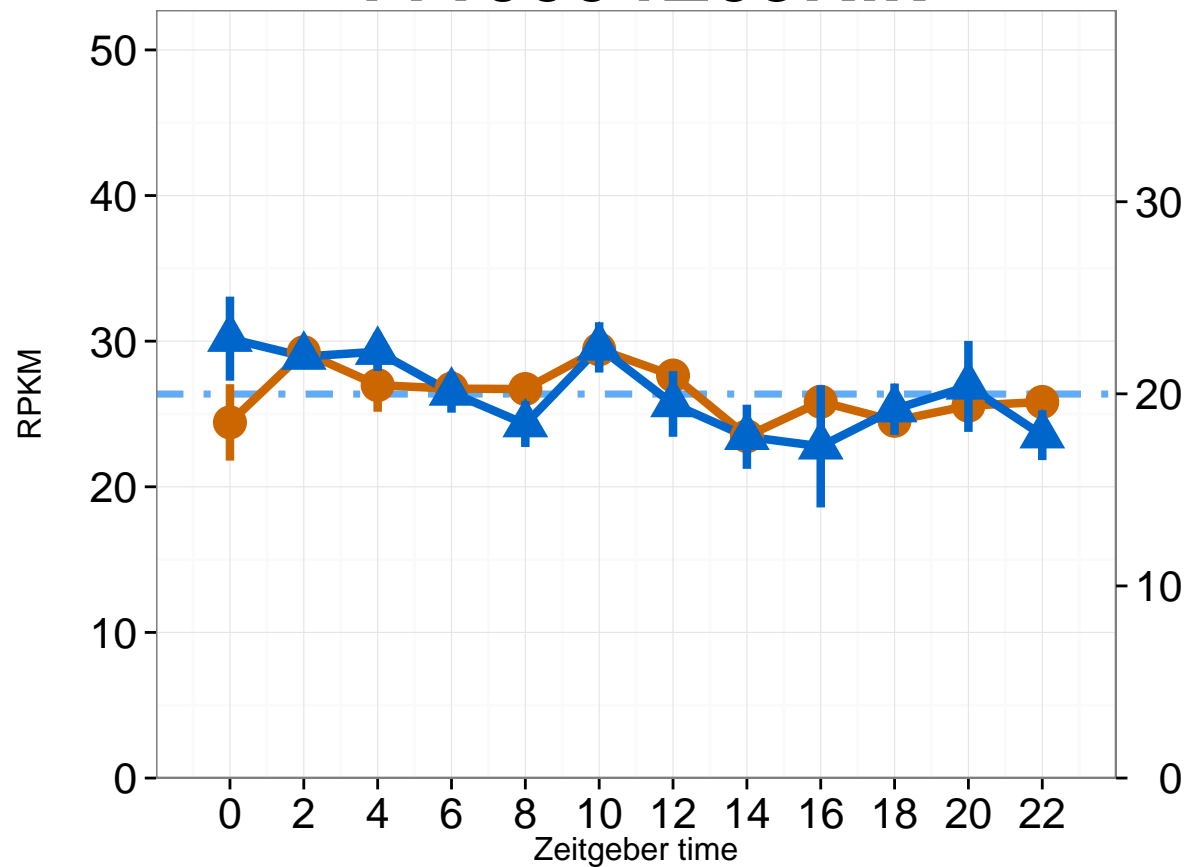

# 1110004E09Rik

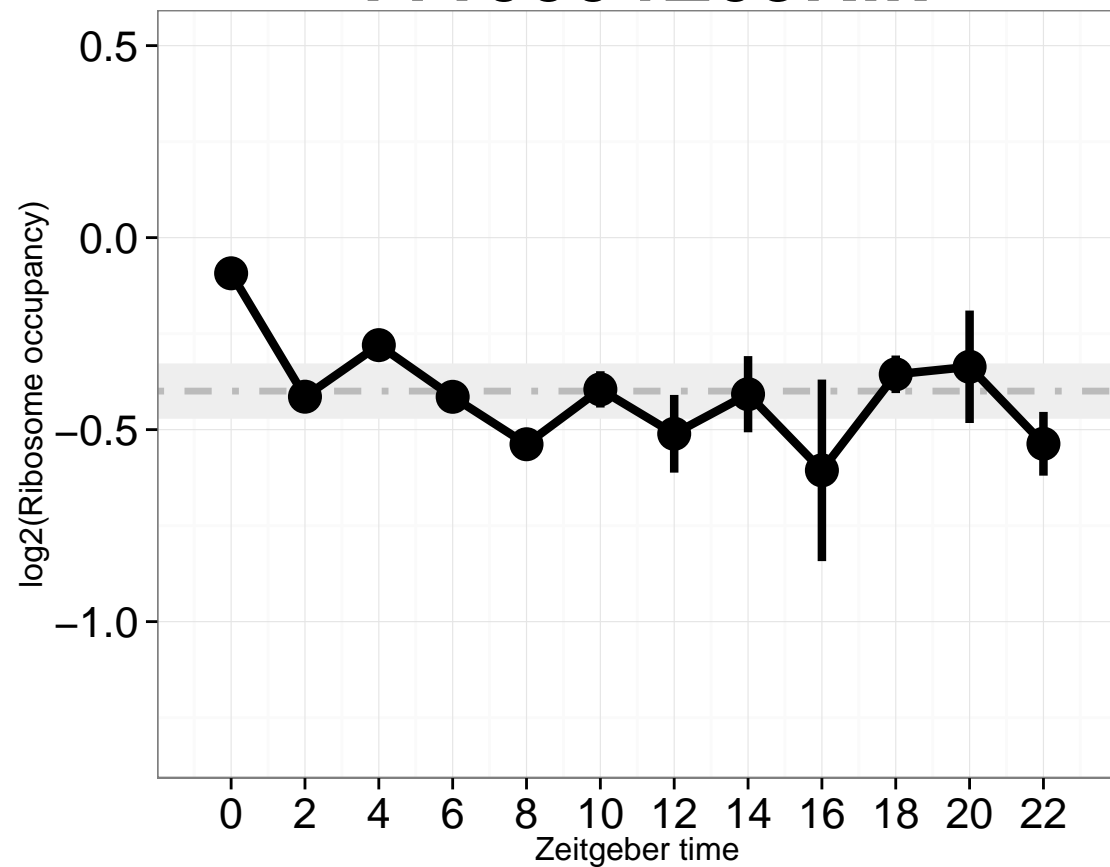

Supplement: Supplementary file 5346 [file 1]

# Suds3

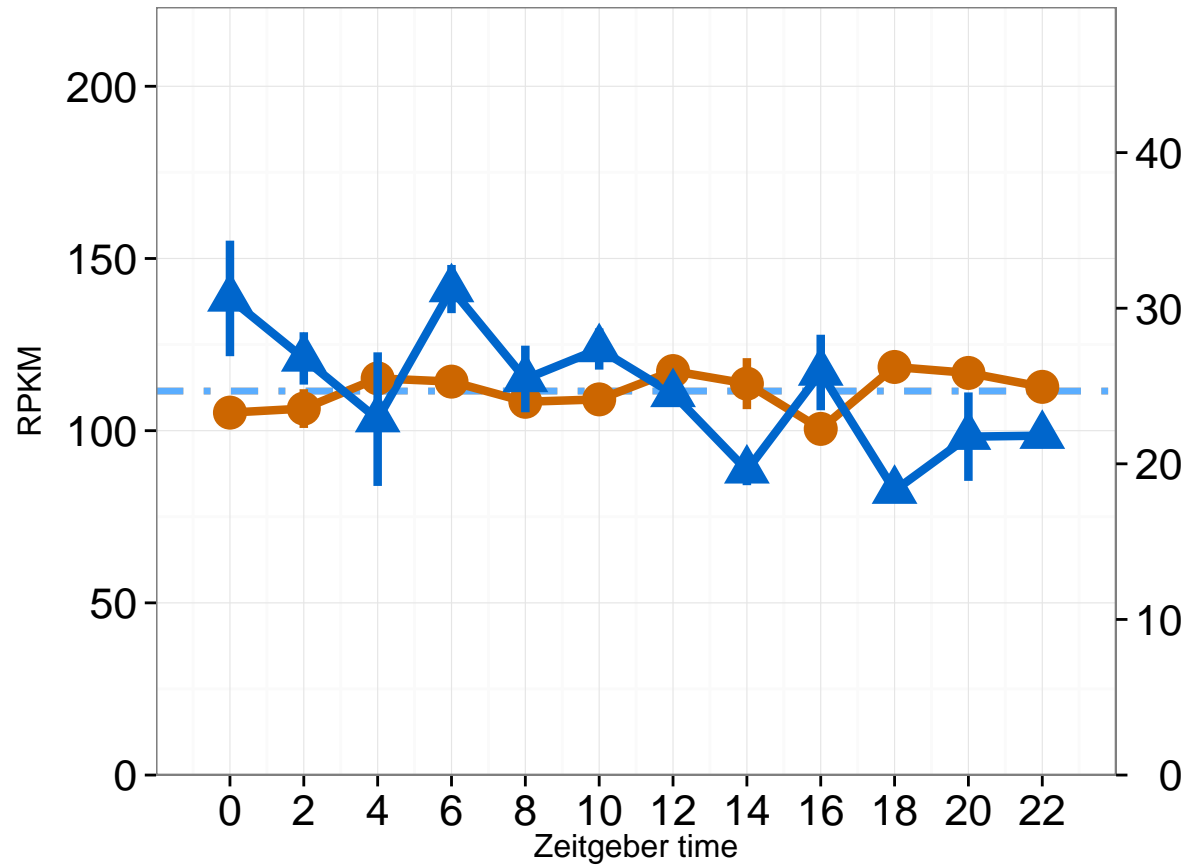

# Suds3

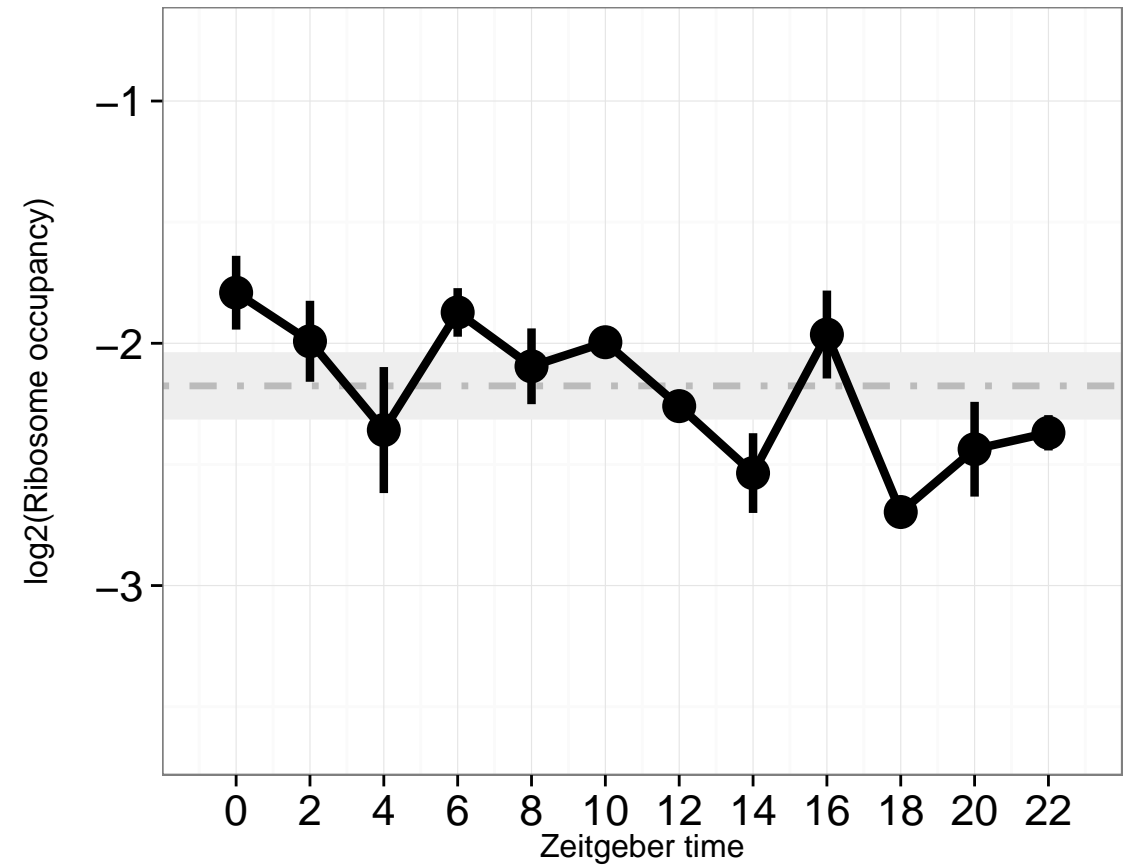

Supplement: Supplementary file 5347 [file 1]

# Hist1h2bj

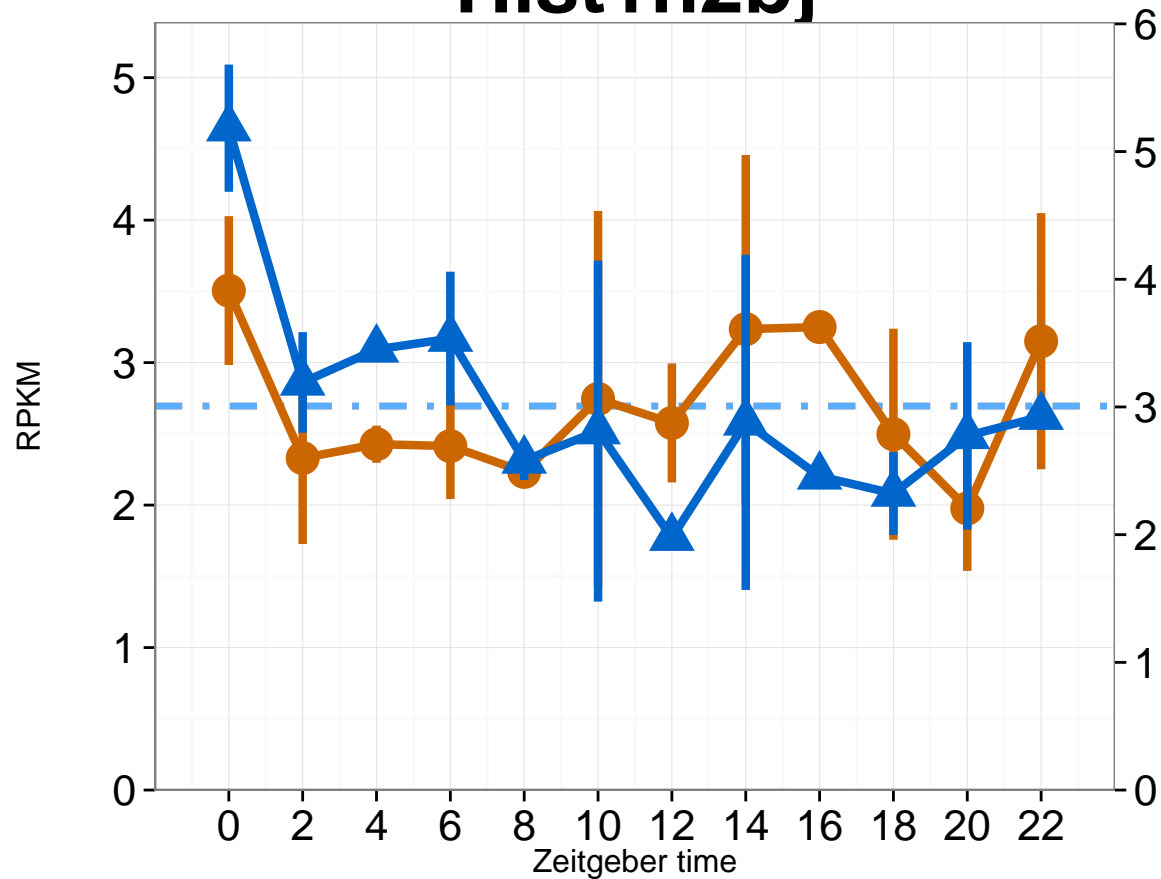

# Hist1h2bj

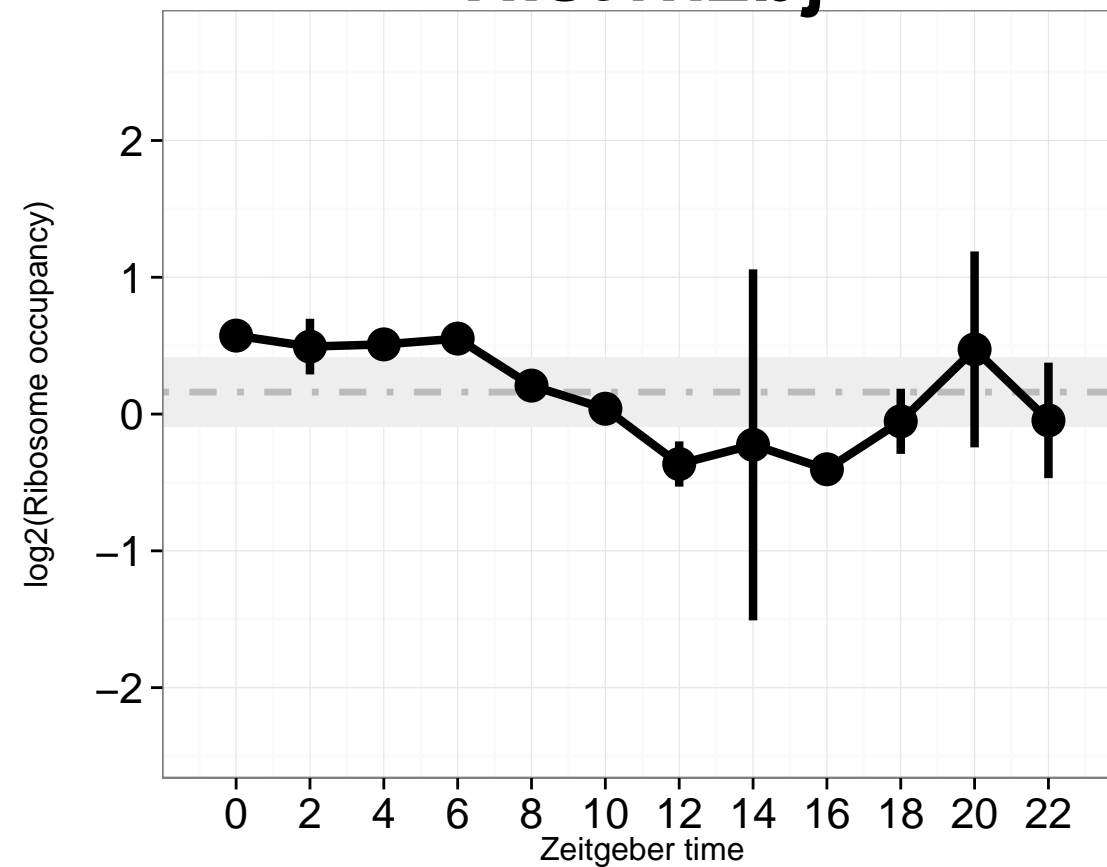

Supplement: Supplementary file 5348 [file 1]

# Ttc39a

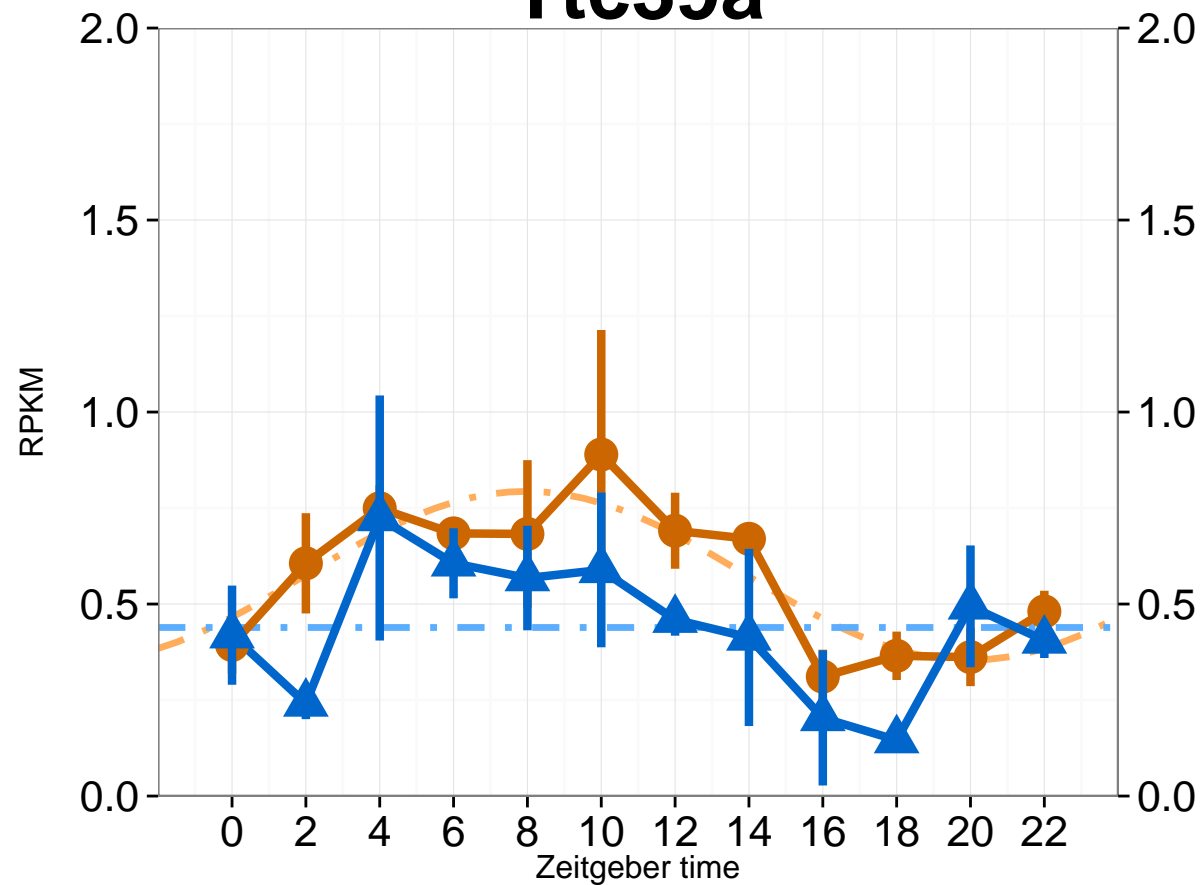

# Ttc39a

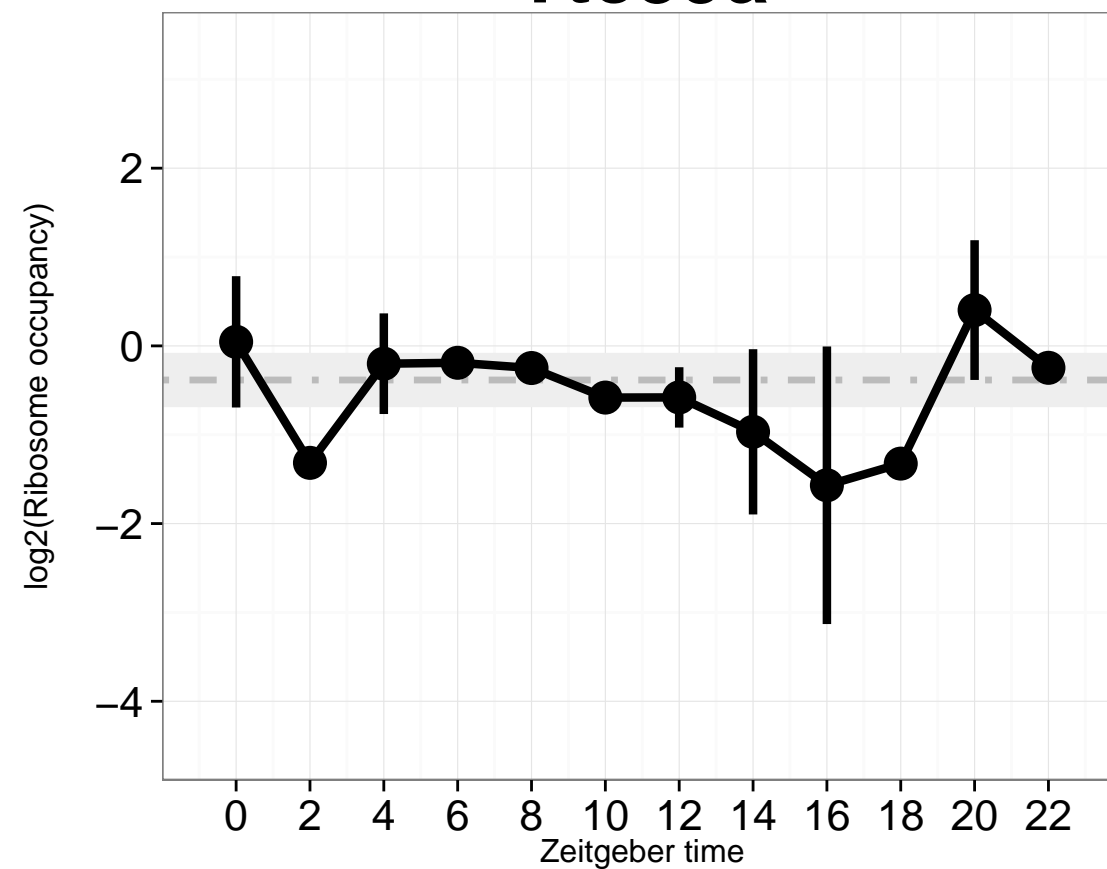

Supplement: Supplementary file 5349 [file 1]

## Cltb

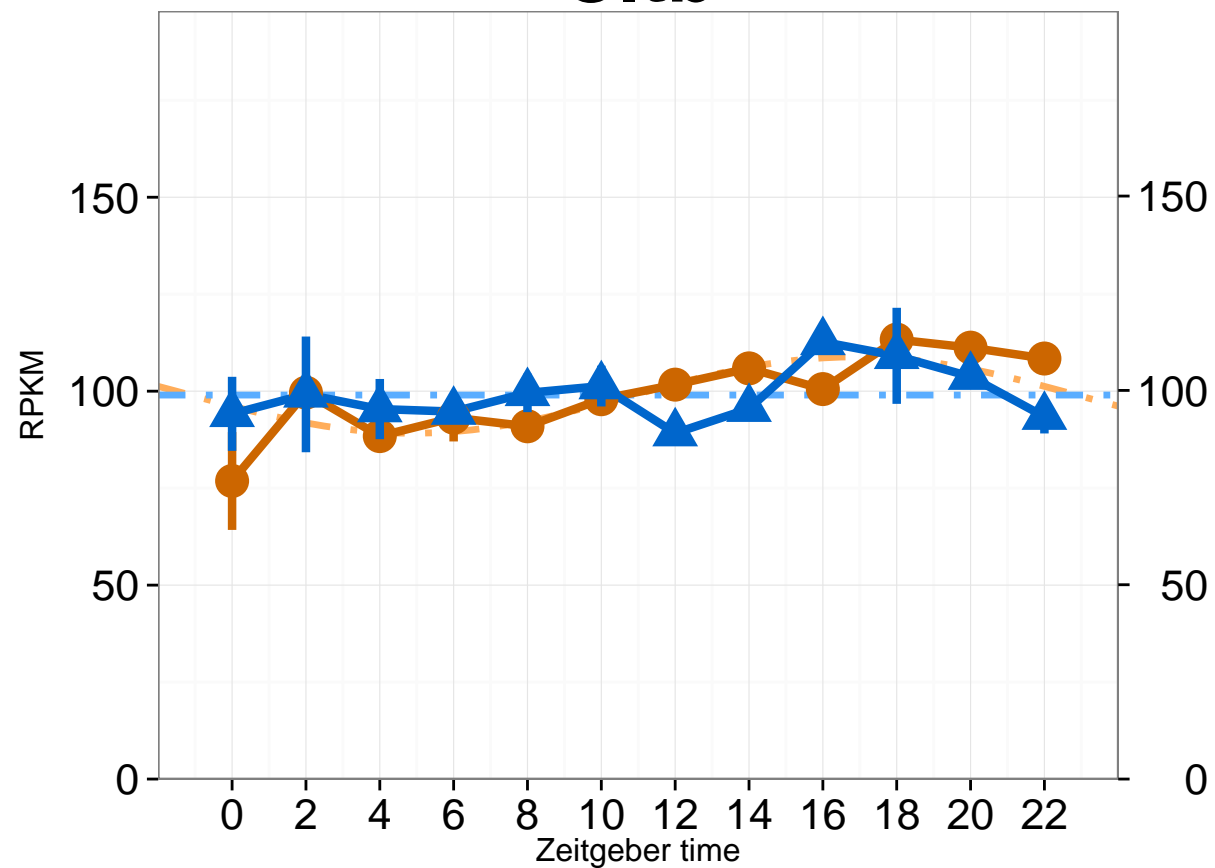

## Cltb

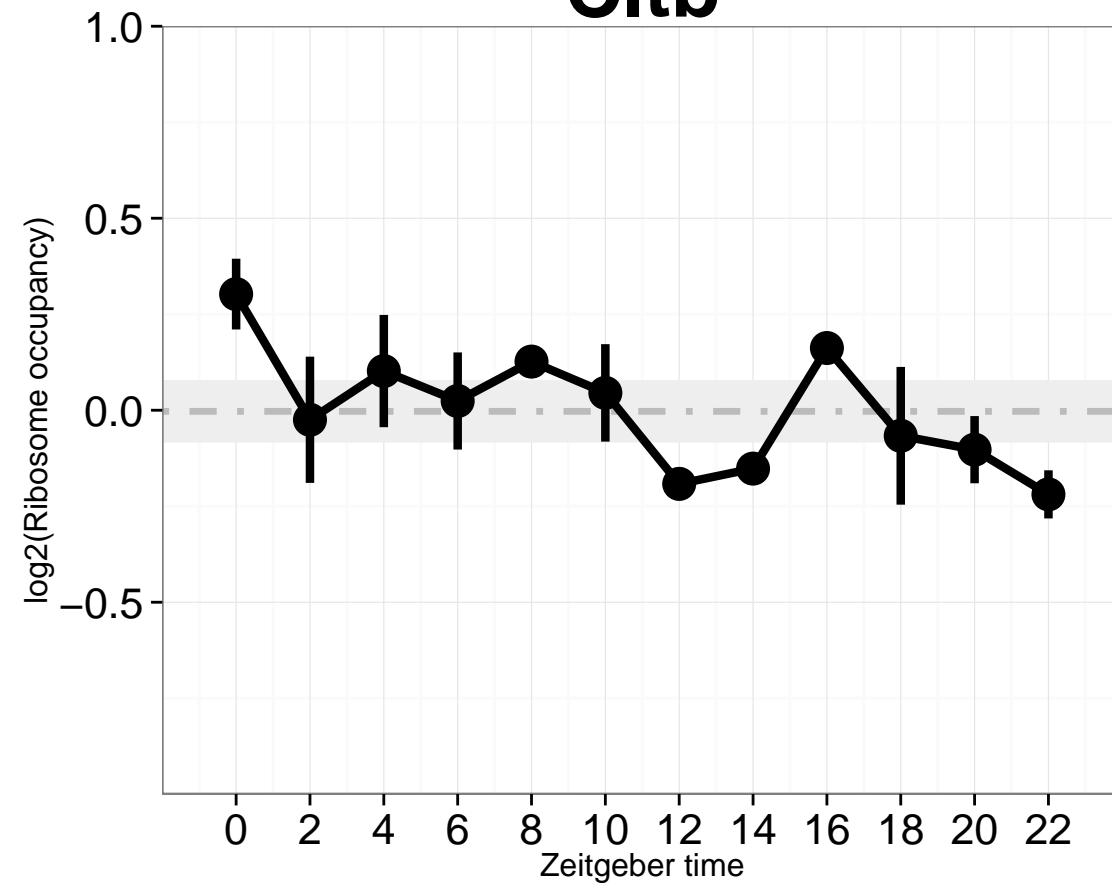

Supplement: Supplementary file 5350 [file 1]

## Dse

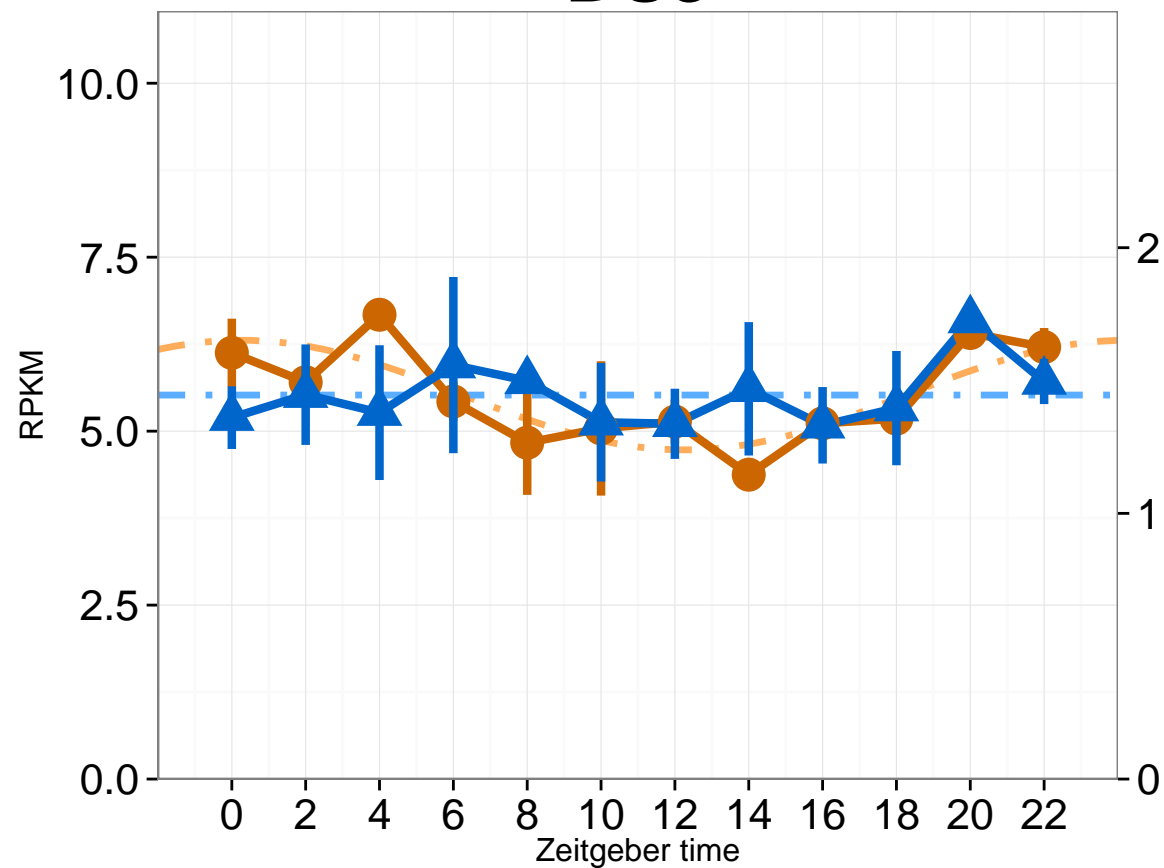

## Dse

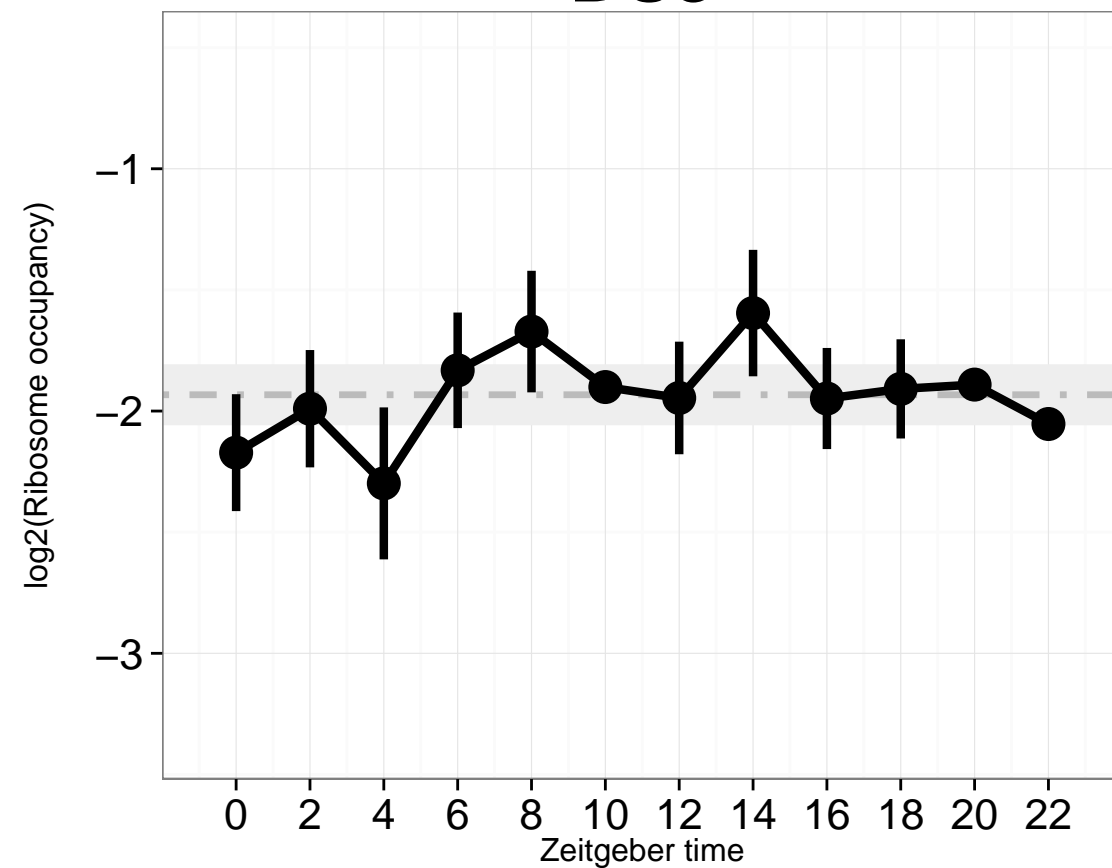

Supplement: Supplementary file 5351 [file 1]

# Higd1b TR

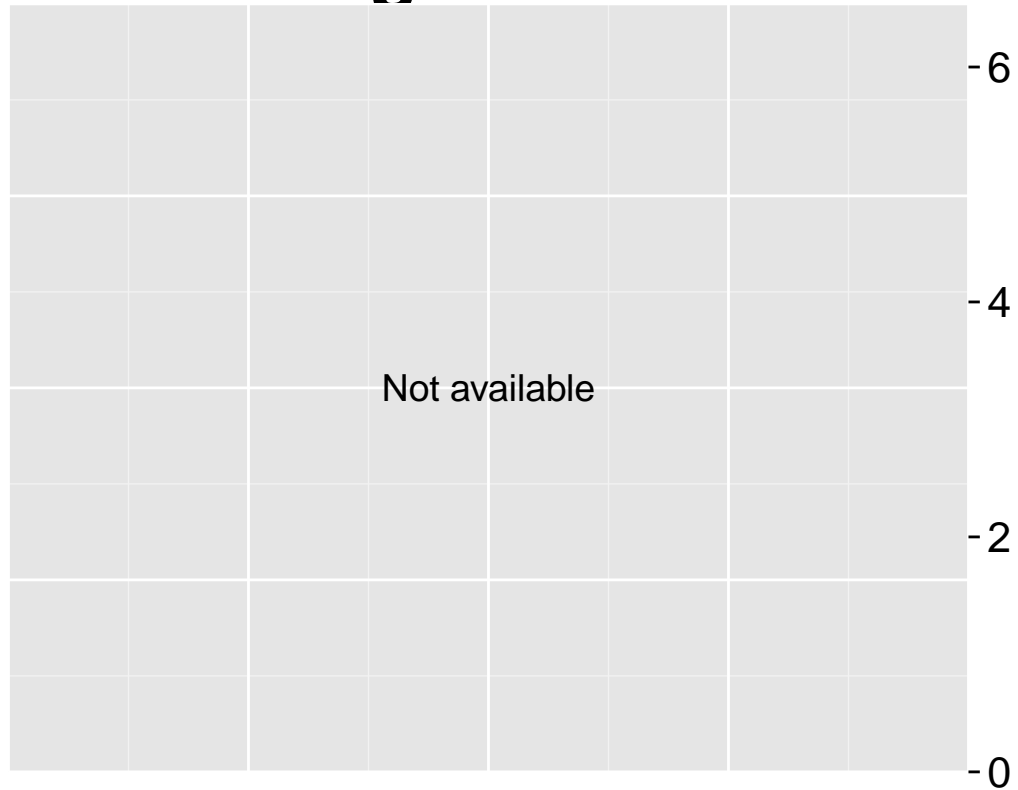

# Higd1b log2(Ribosome occupancy

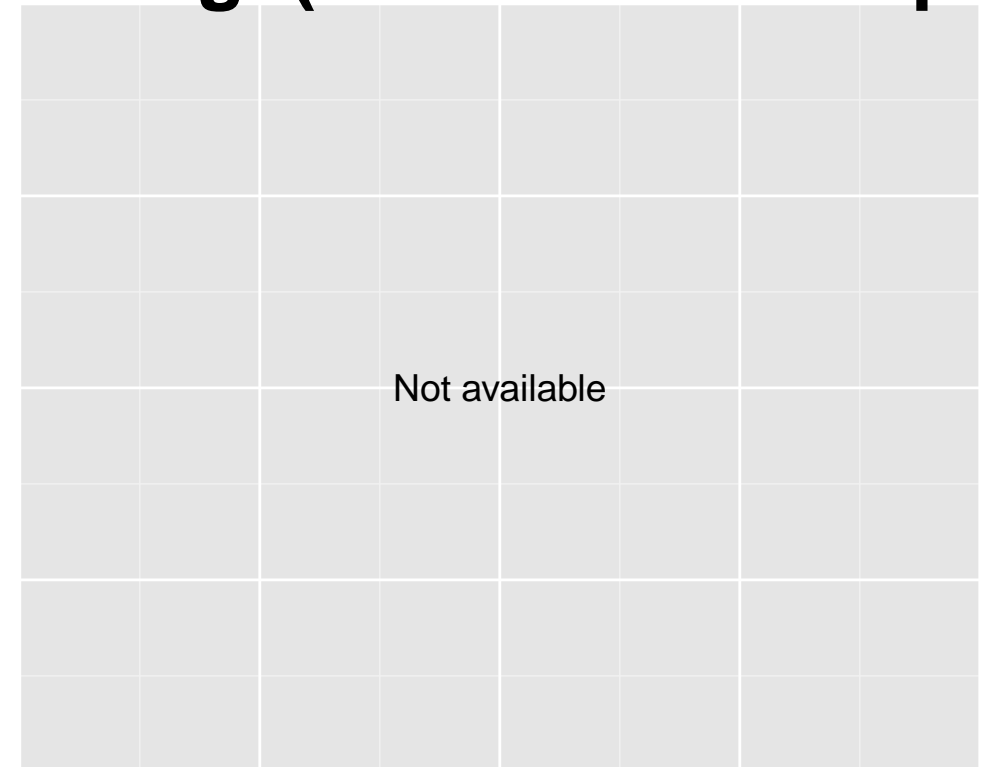

Supplement: Supplementary file 5352 [file 1]

## Scarb2

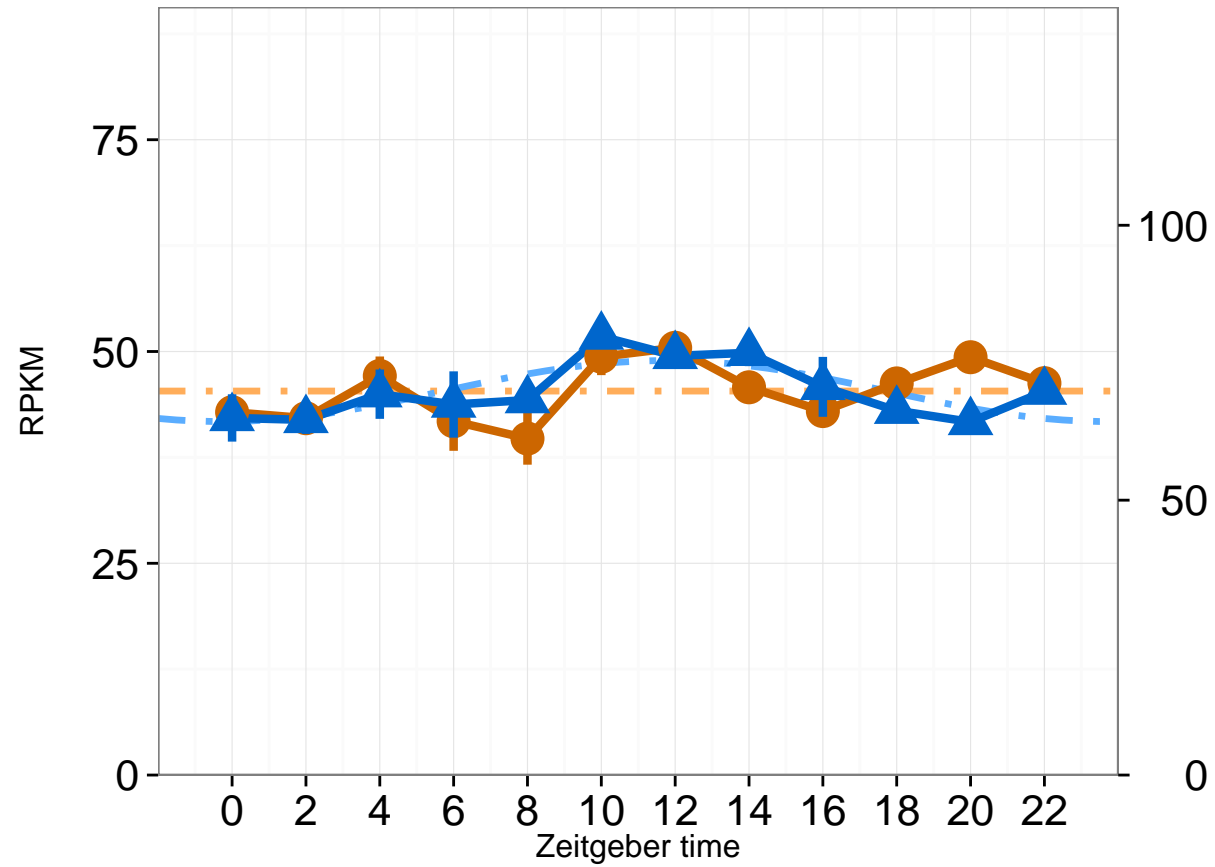

## Scarb2

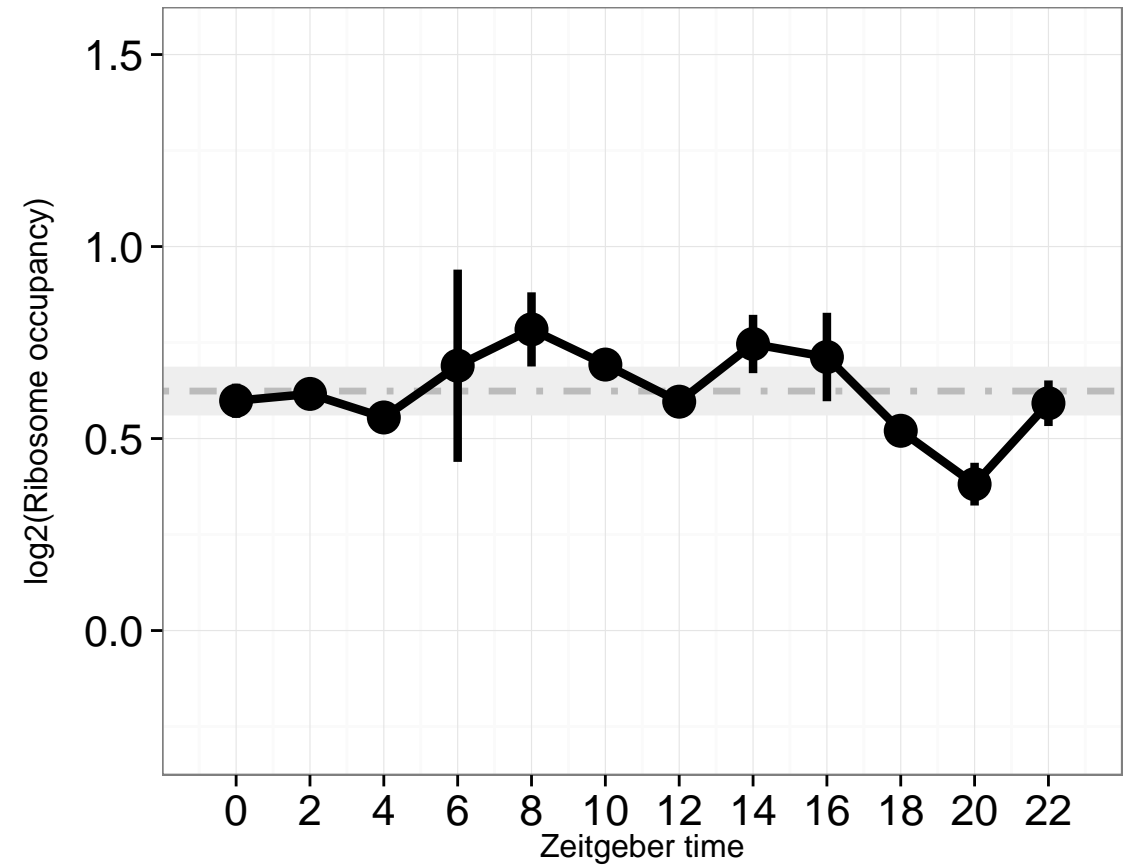

Supplement: Supplementary file 5353 [file 1]

## Elmod2

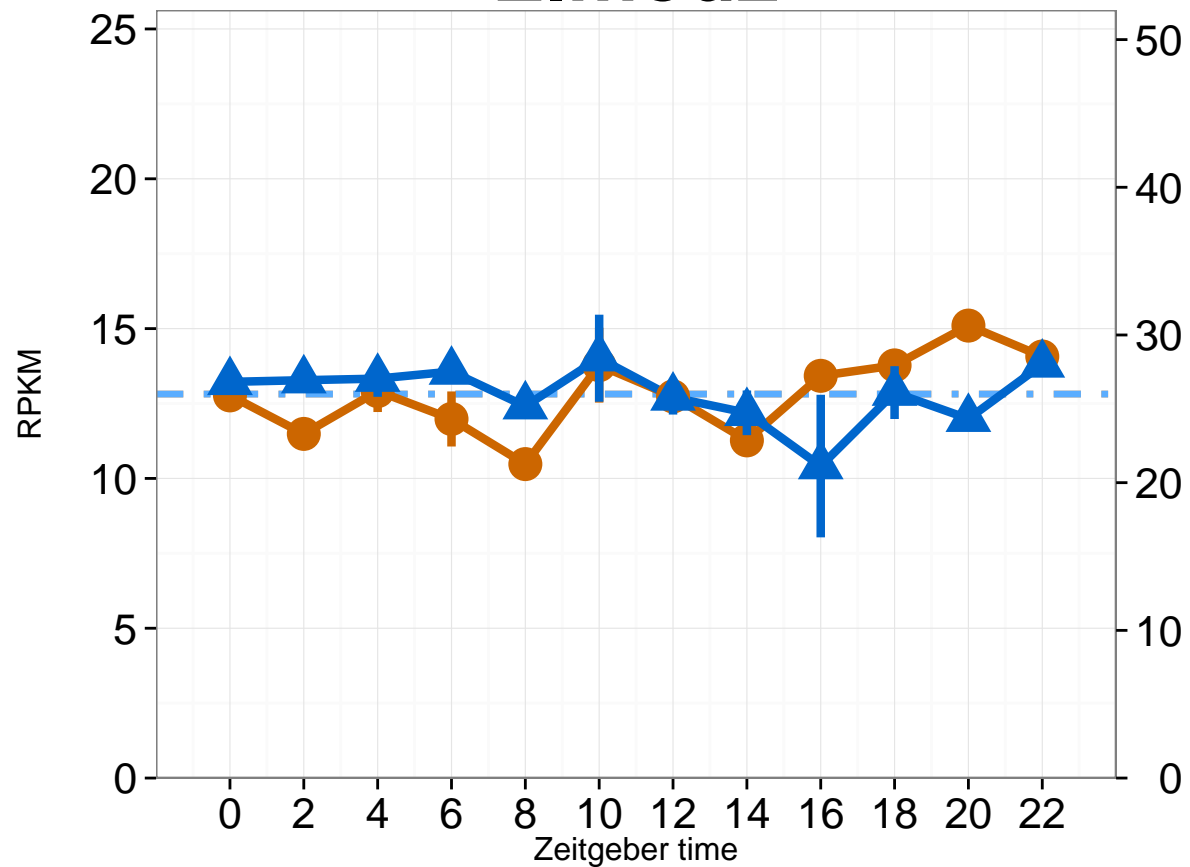

## Elmod2

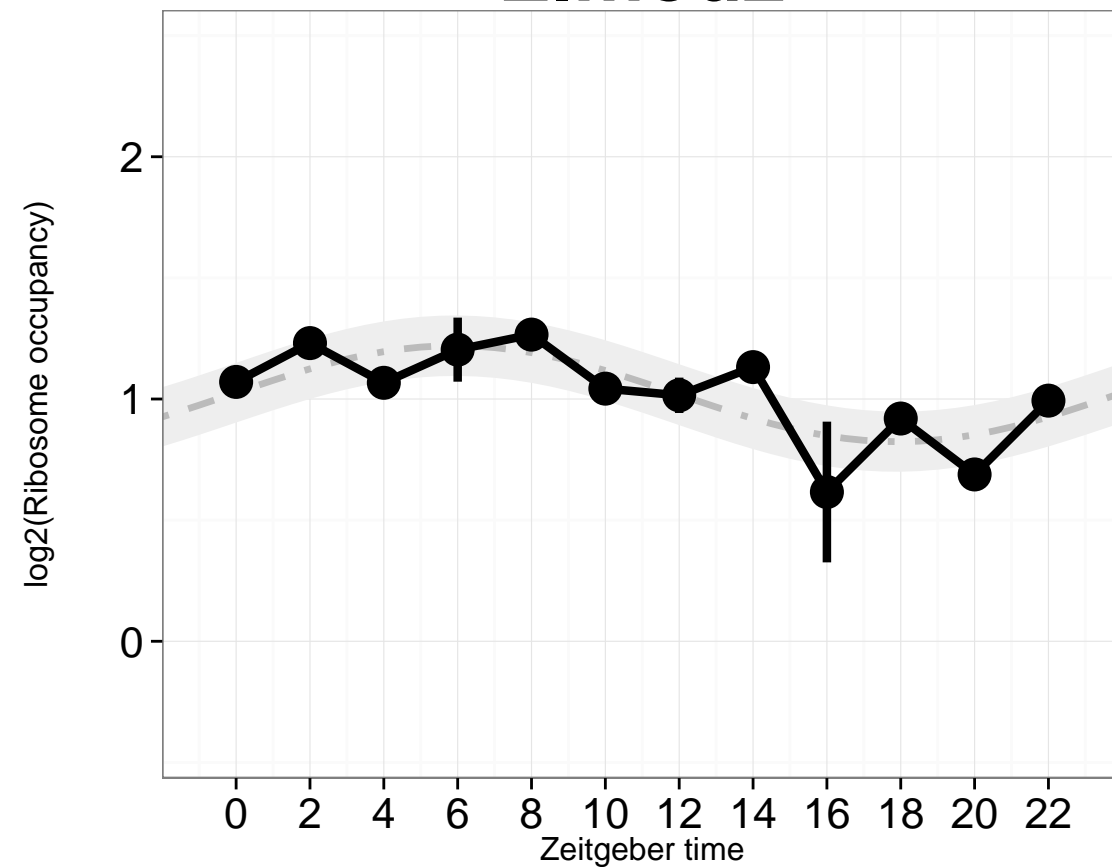

Supplement: Supplementary file 5354 [file 1]

# Atg2b

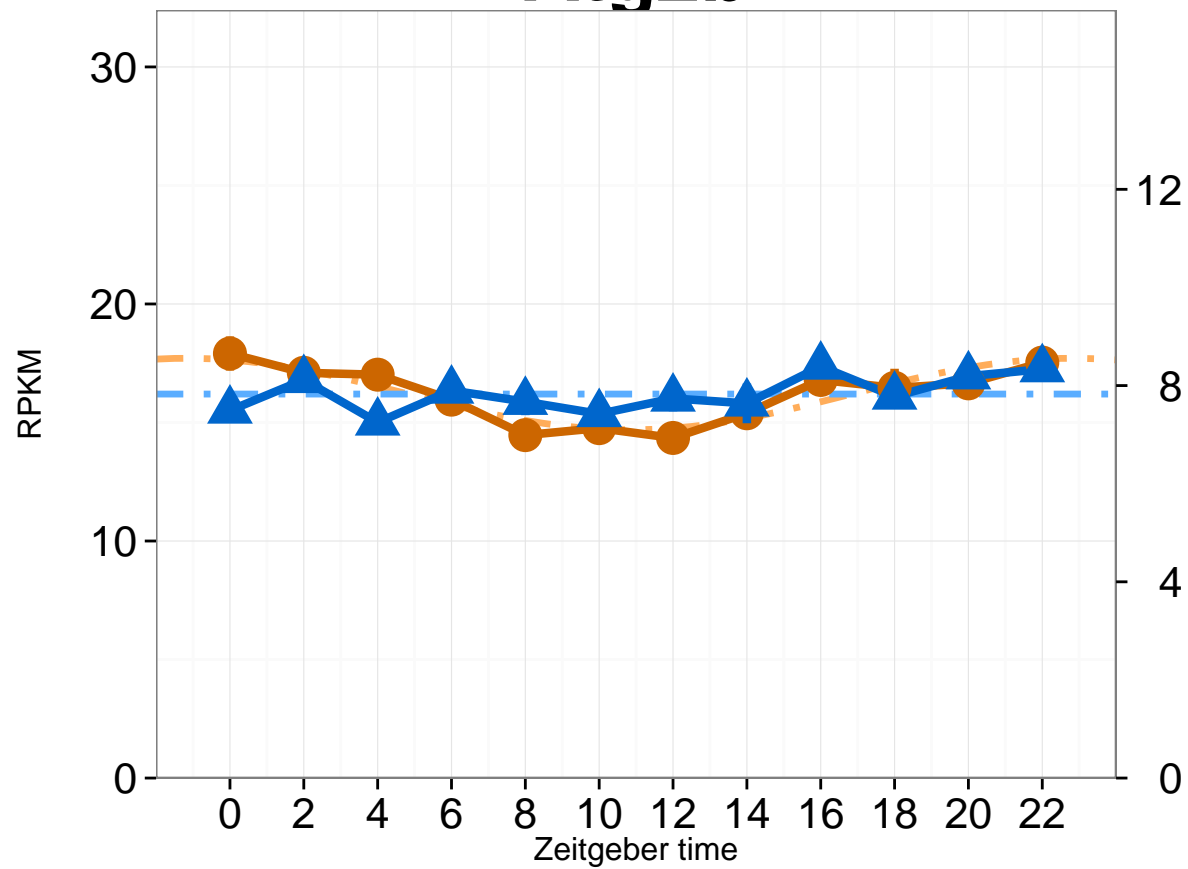

# Atg2b

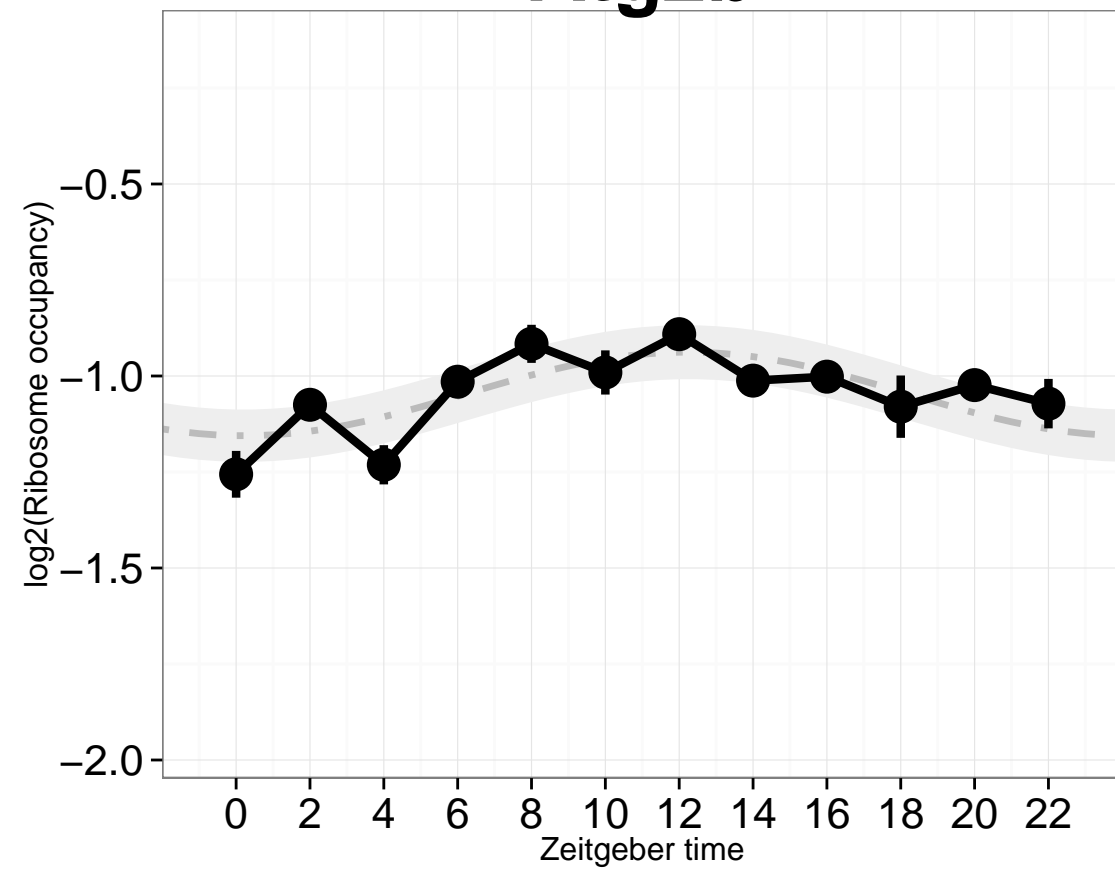

Supplement: Supplementary file 5355 [file 1]

## Map3k2

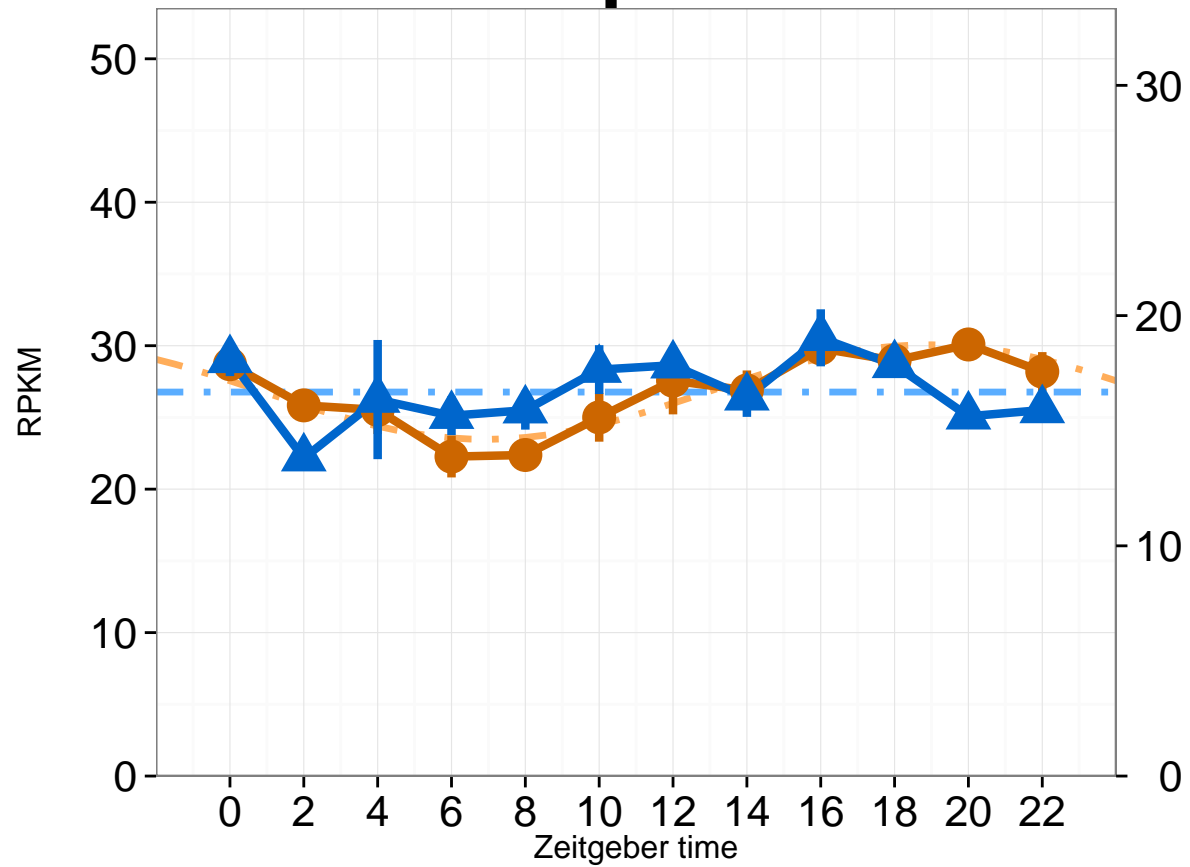

## Map3k2

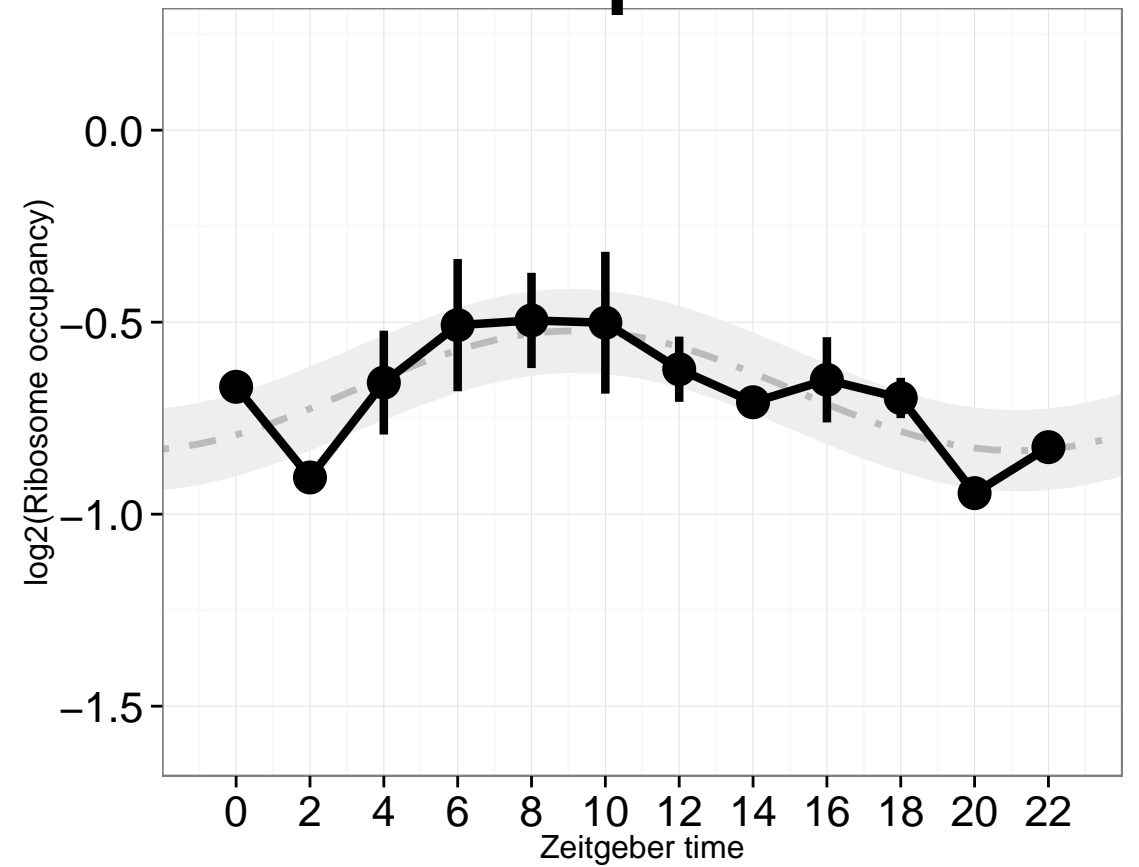

Supplement: Supplementary file 5356 [file 1]

# Pcdhb15

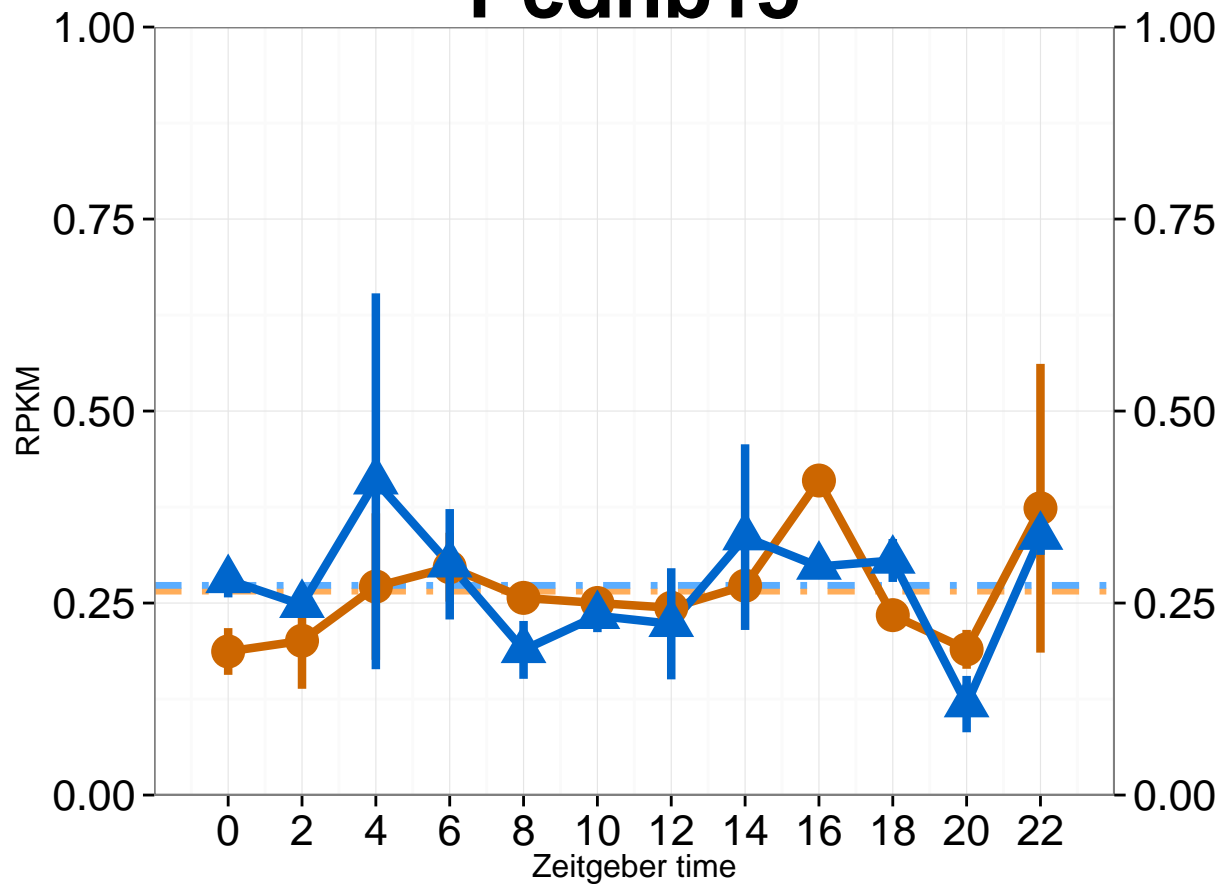

# Pcdhb15

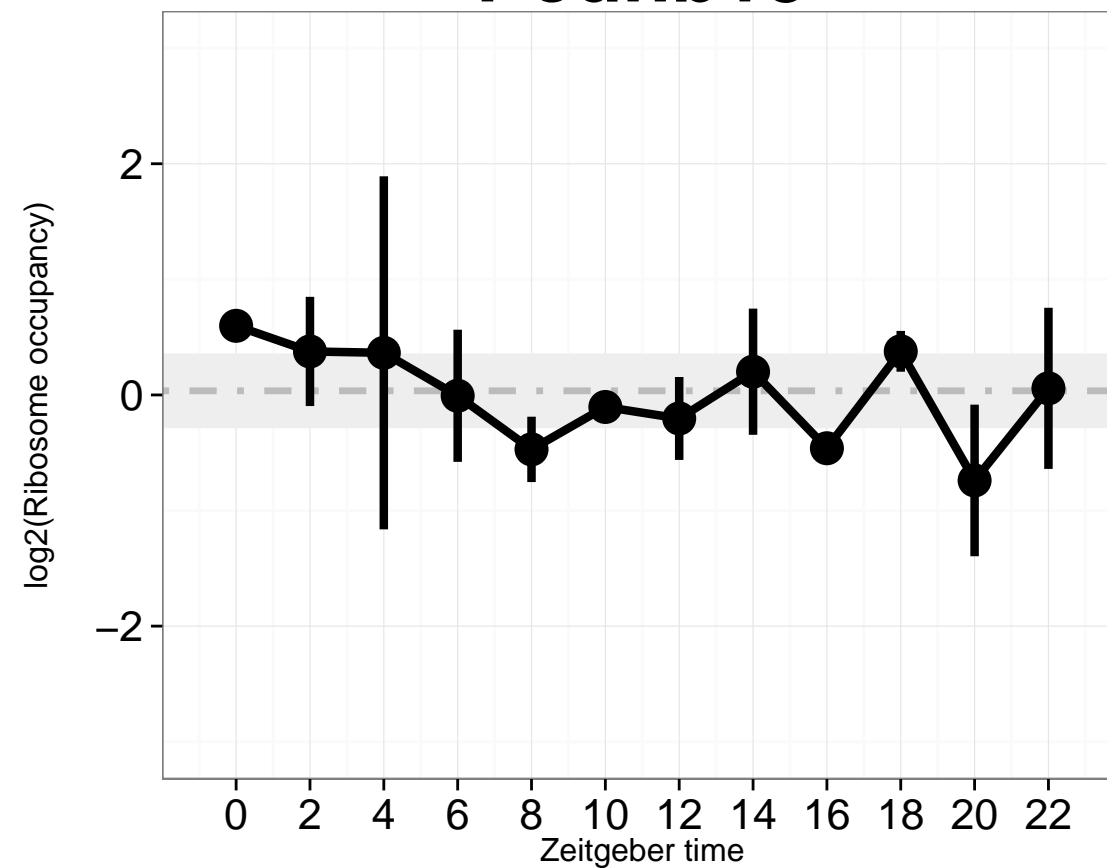

Supplement: Supplementary file 5357 [file 1]

## Ilvbl

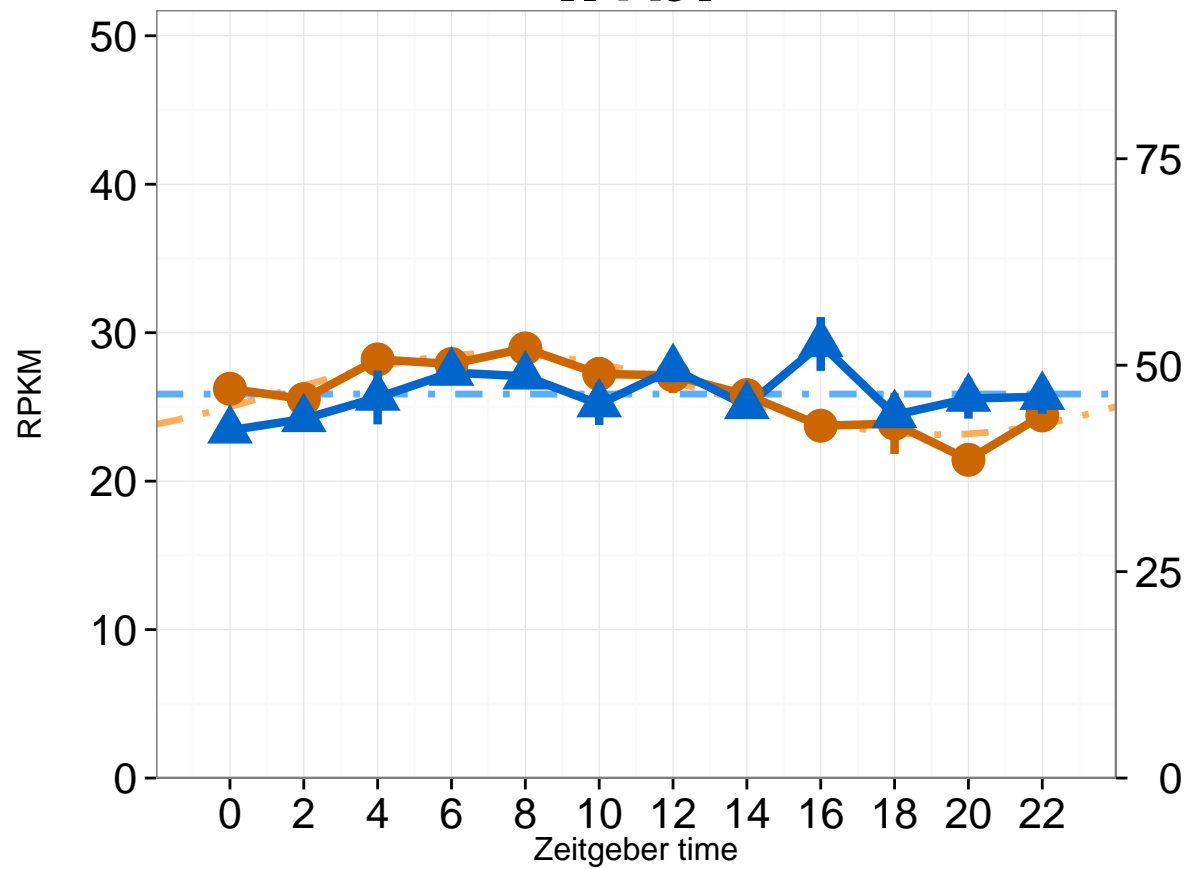

## Ilvbl

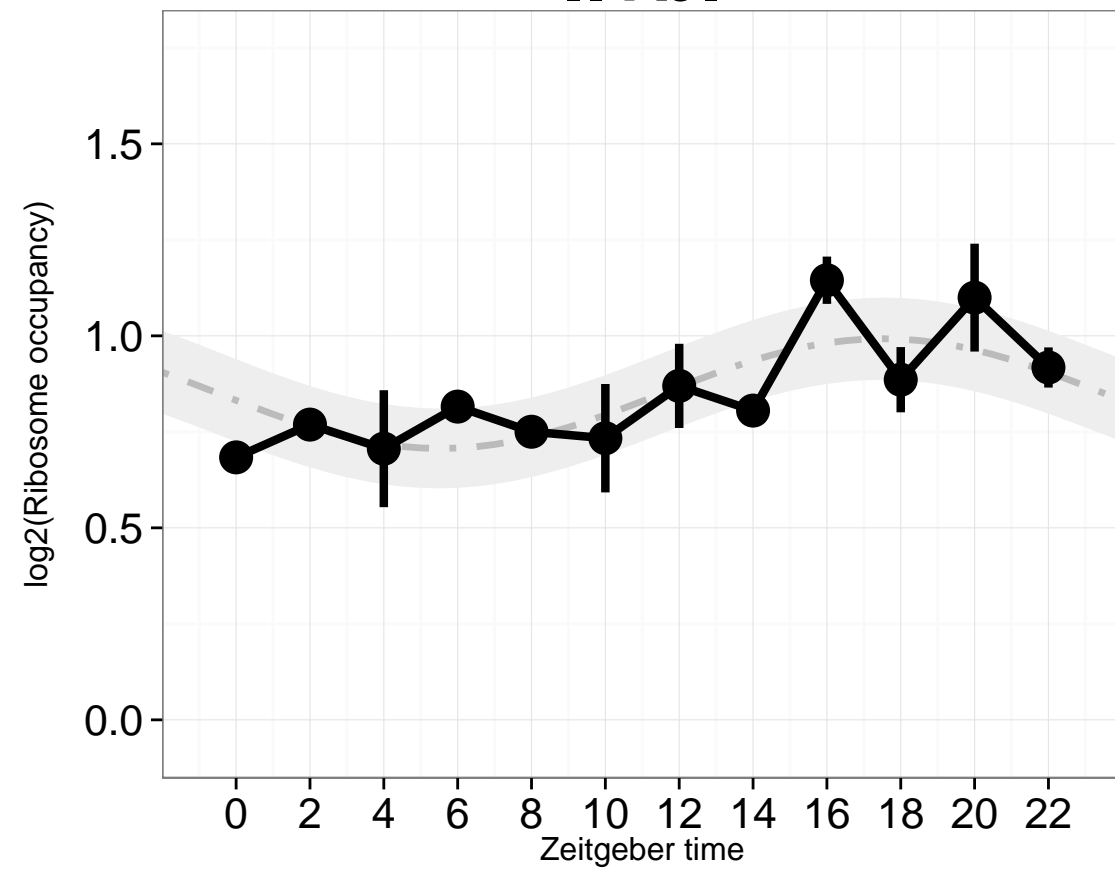

Supplement: Supplementary file 5358 [file 1]

## Polrmt

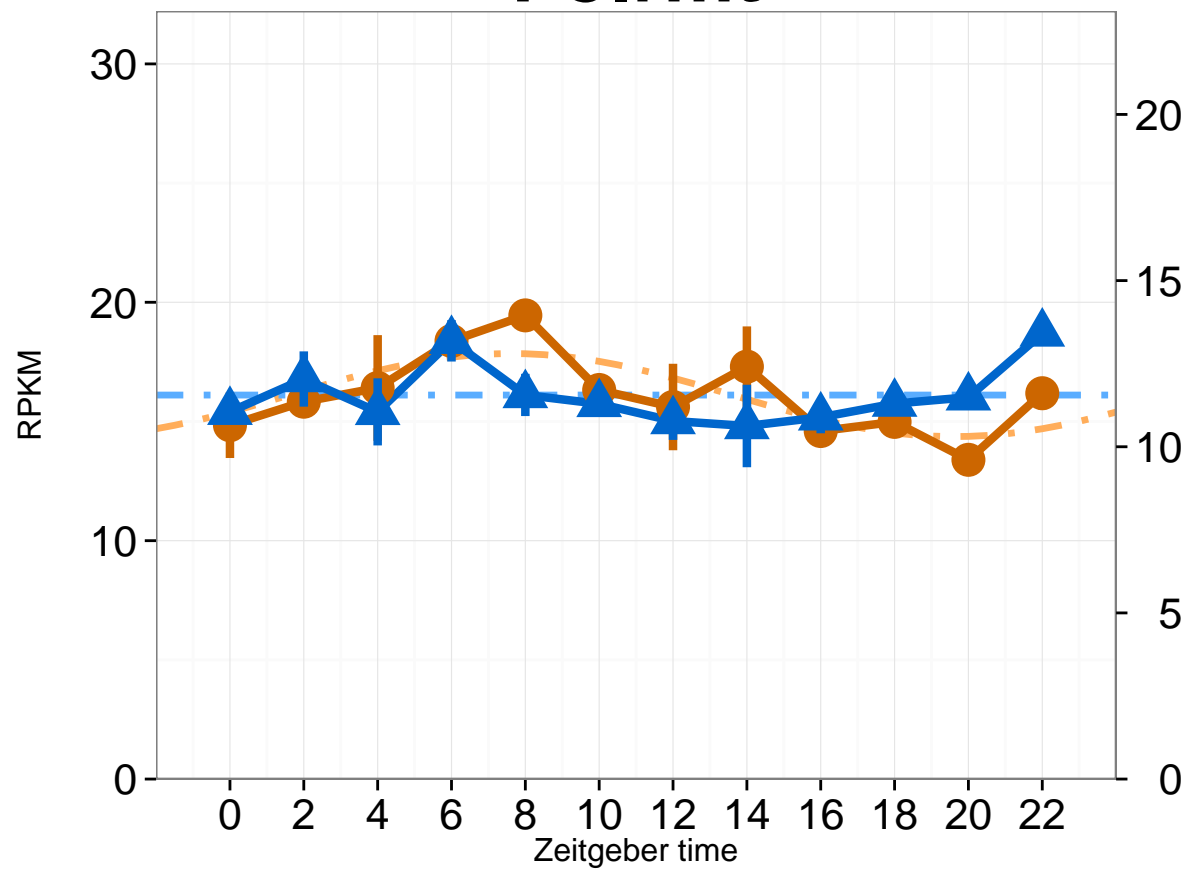

## Polrmt

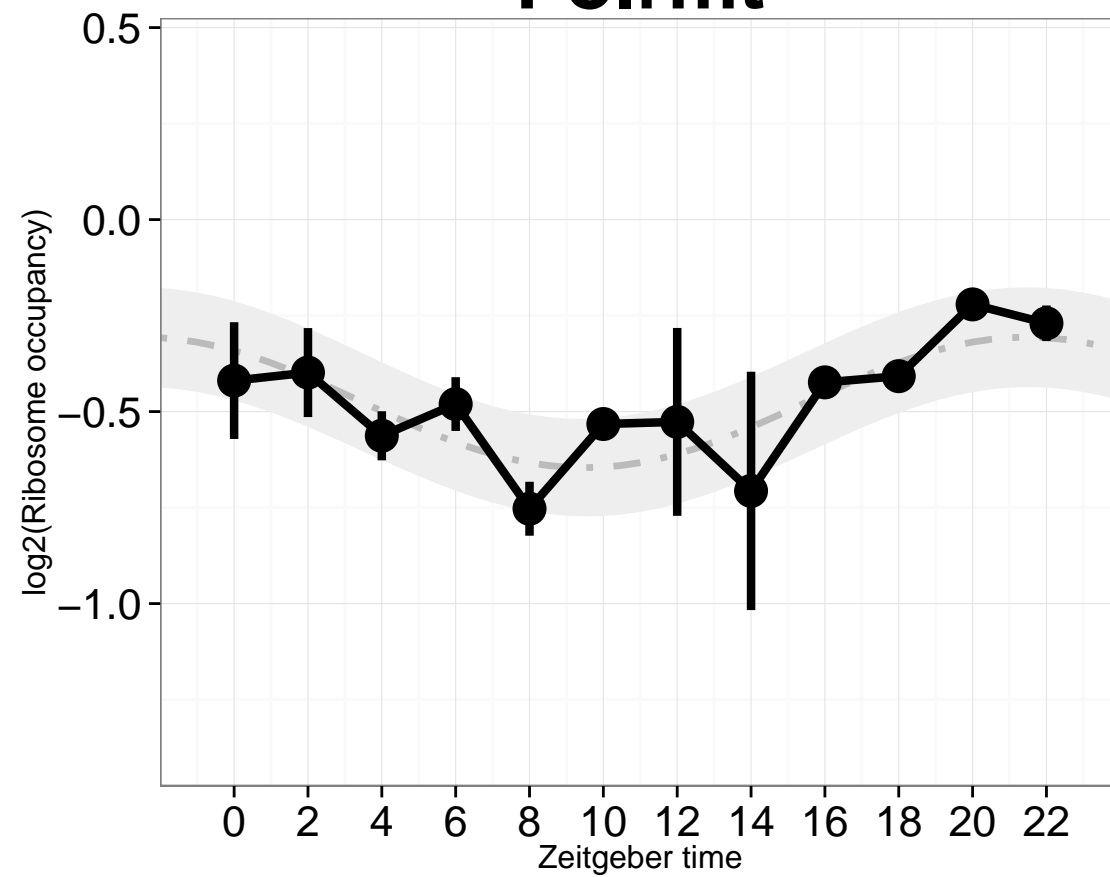

Supplement: Supplementary file 5359 [file 1]

## Suv39h2

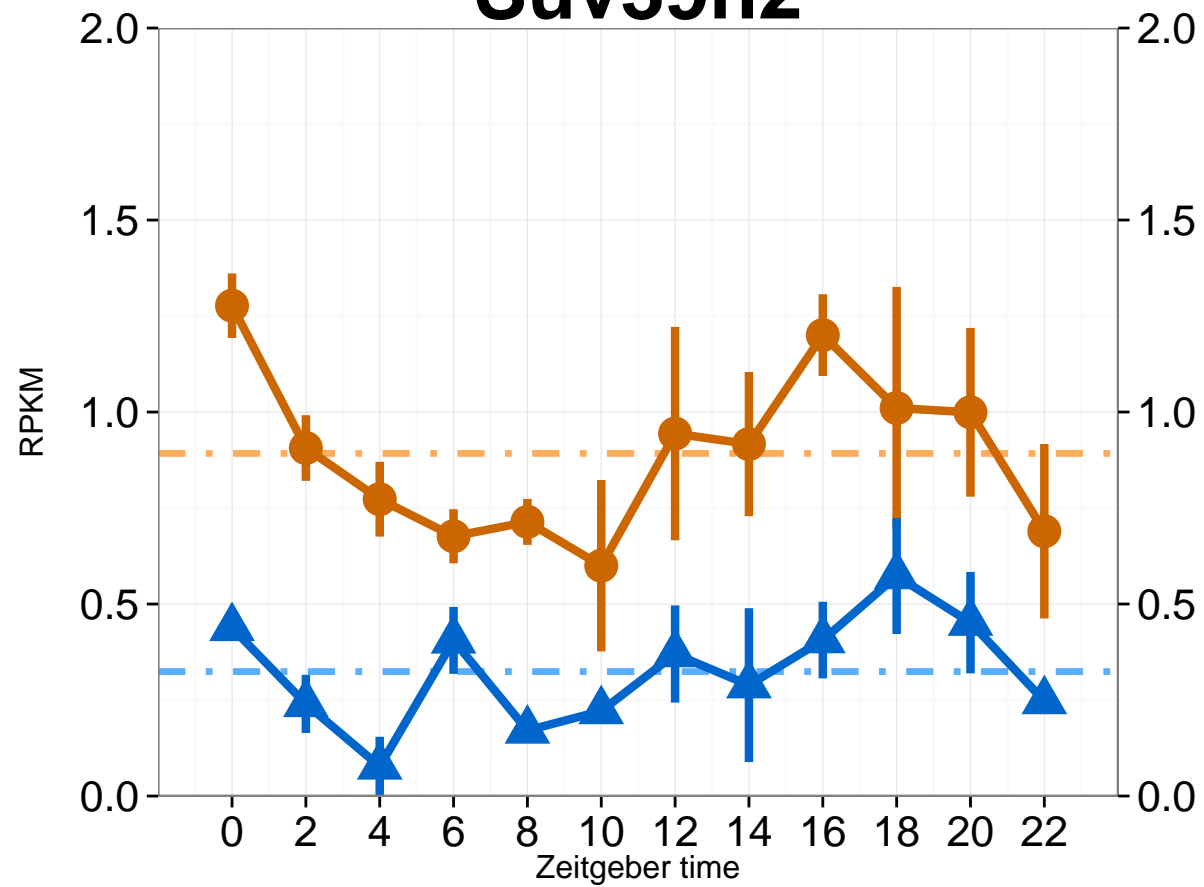

## Suv39h2

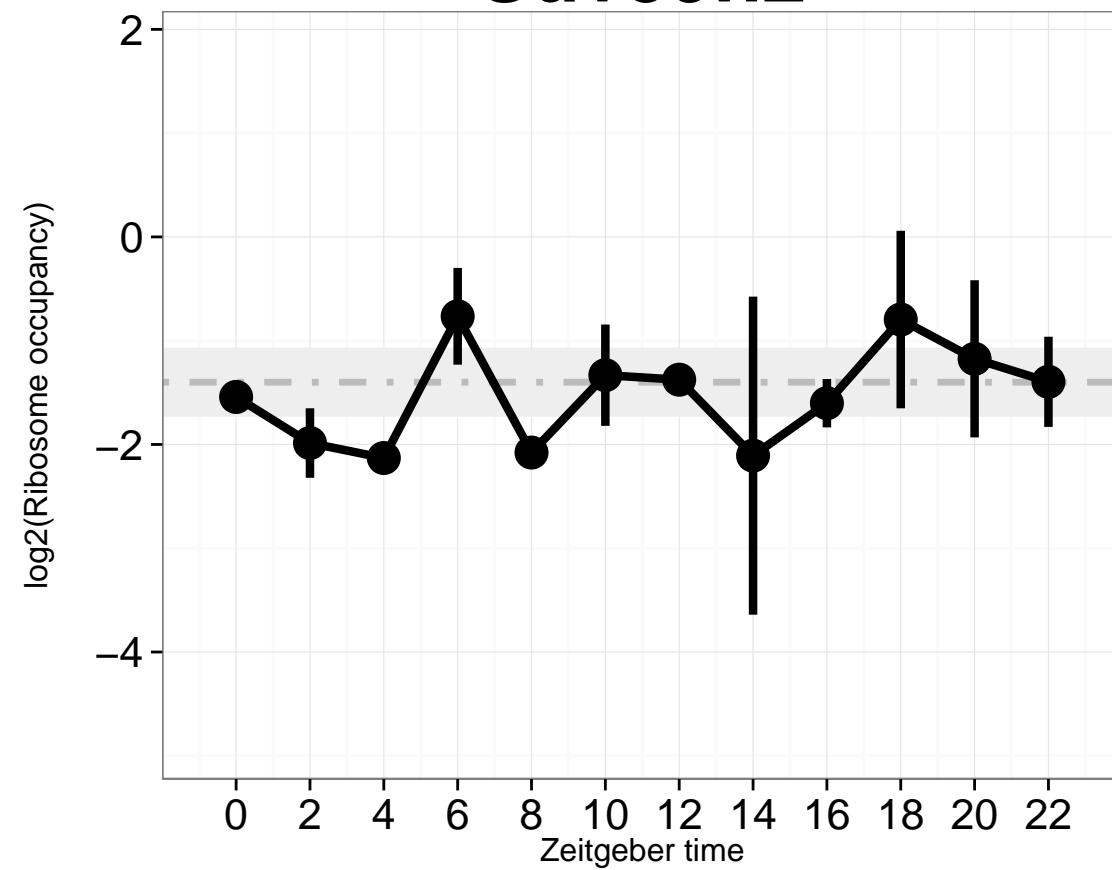

Supplement: Supplementary file 5360 [file 1]

## Kif4

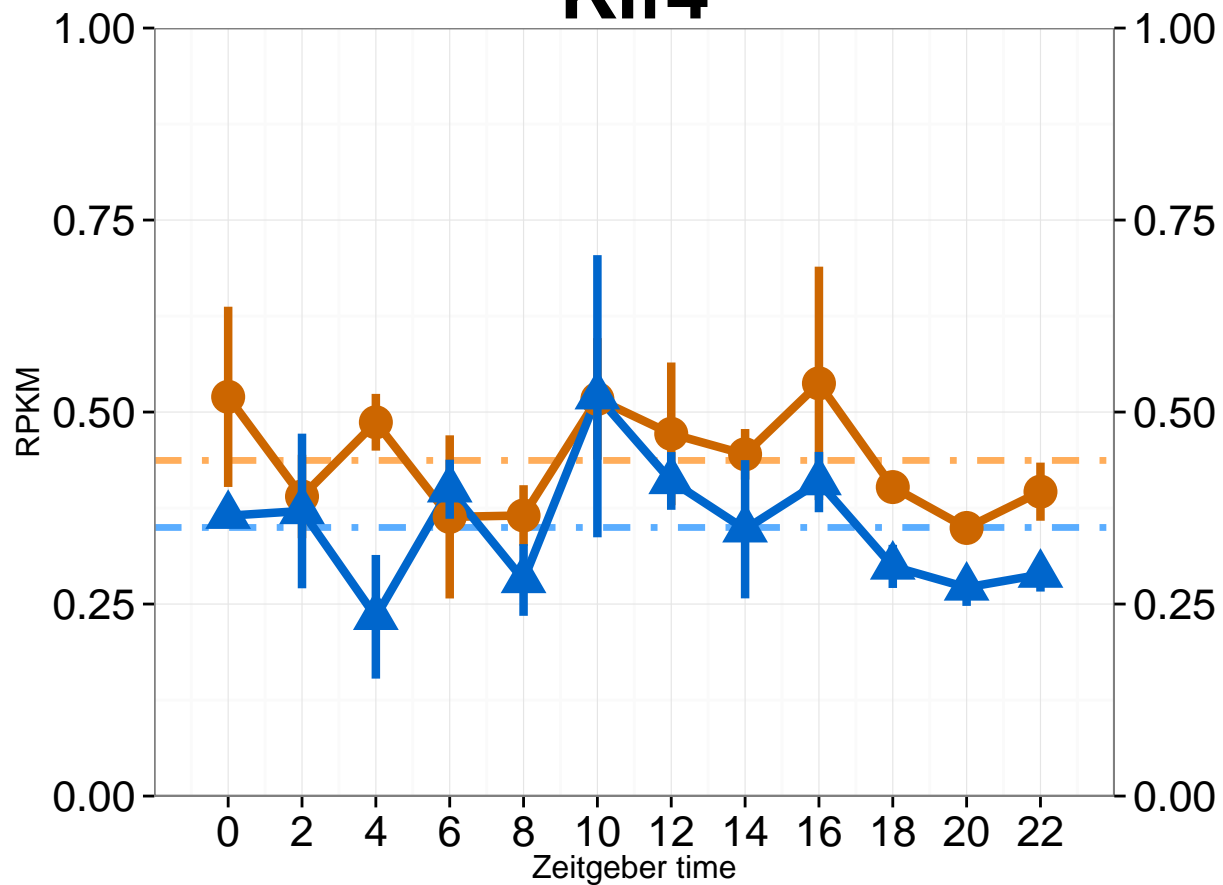

## Kif4

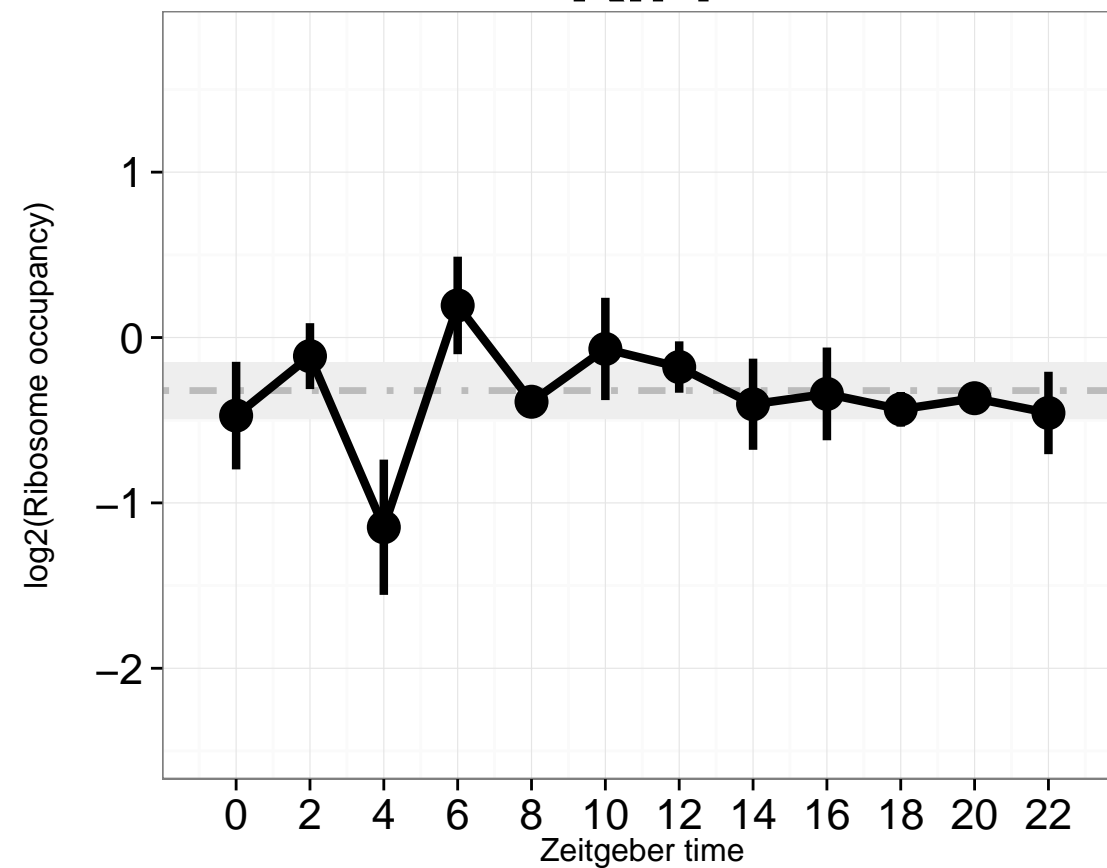

Supplement: Supplementary file 5361 [file 1]

# Atp5g2

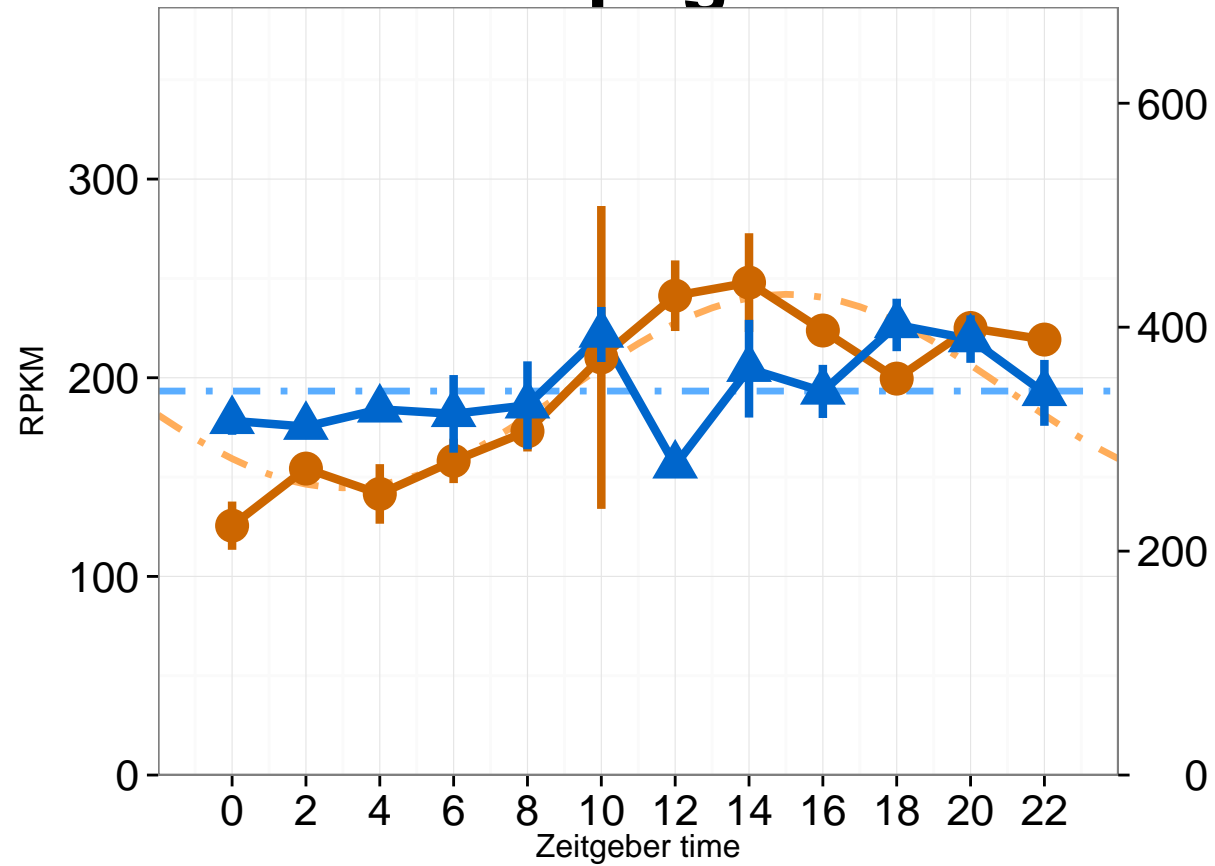

# Atp5g2

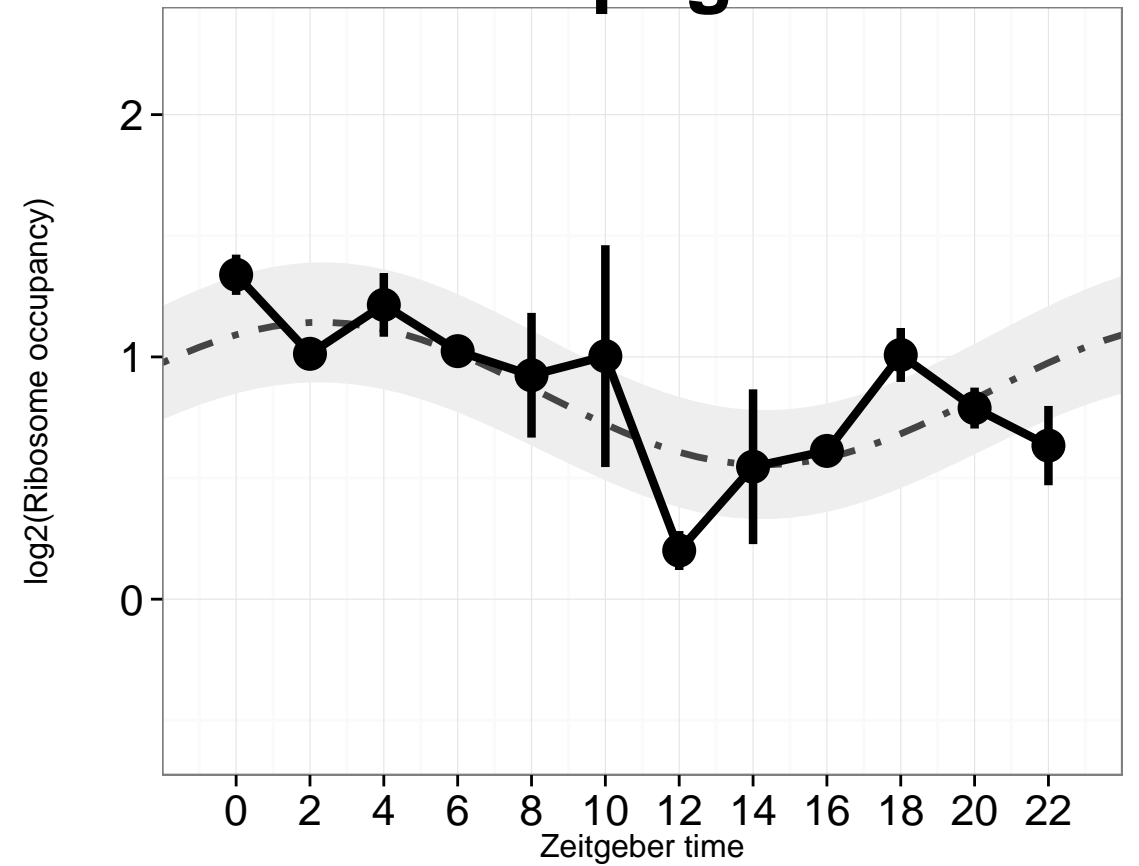

Supplement: Supplementary file 5362 [file 1]

## Ncln

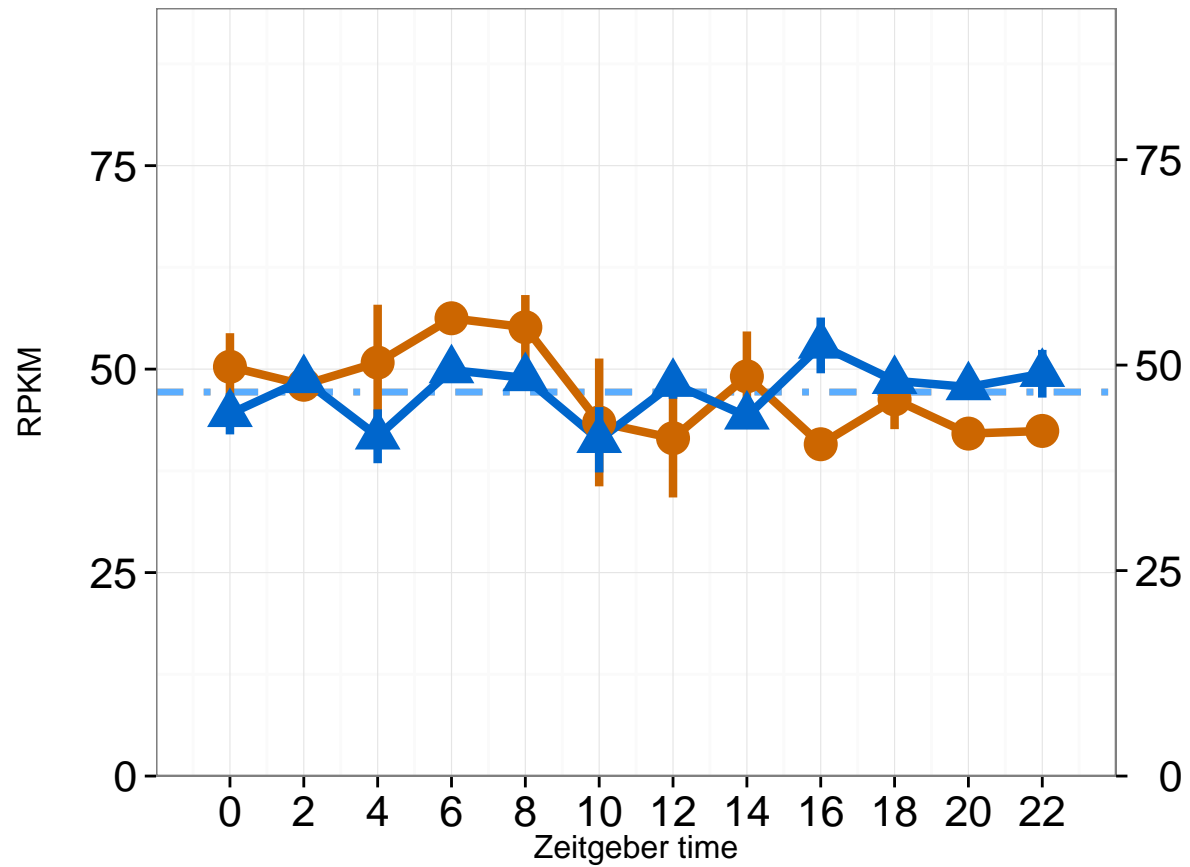

## Ncln

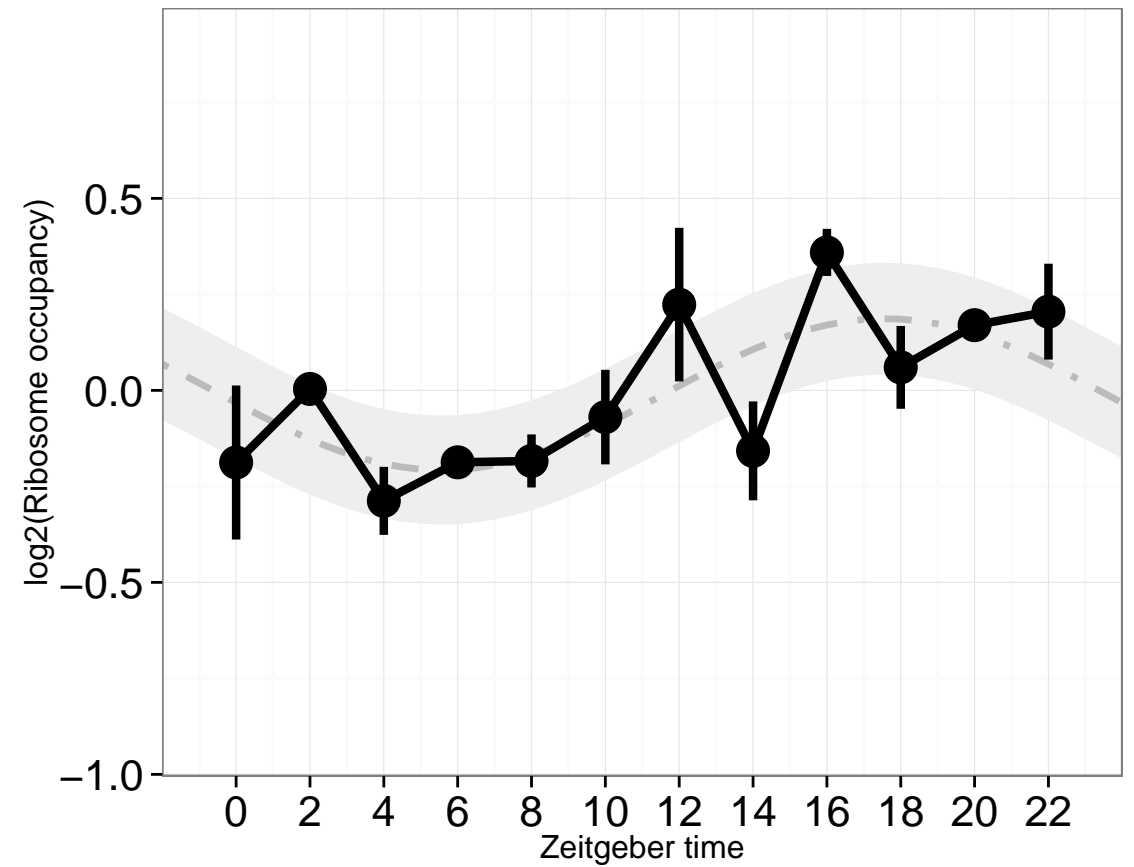

Supplement: Supplementary file 5363 [file 1]

## Tcea3

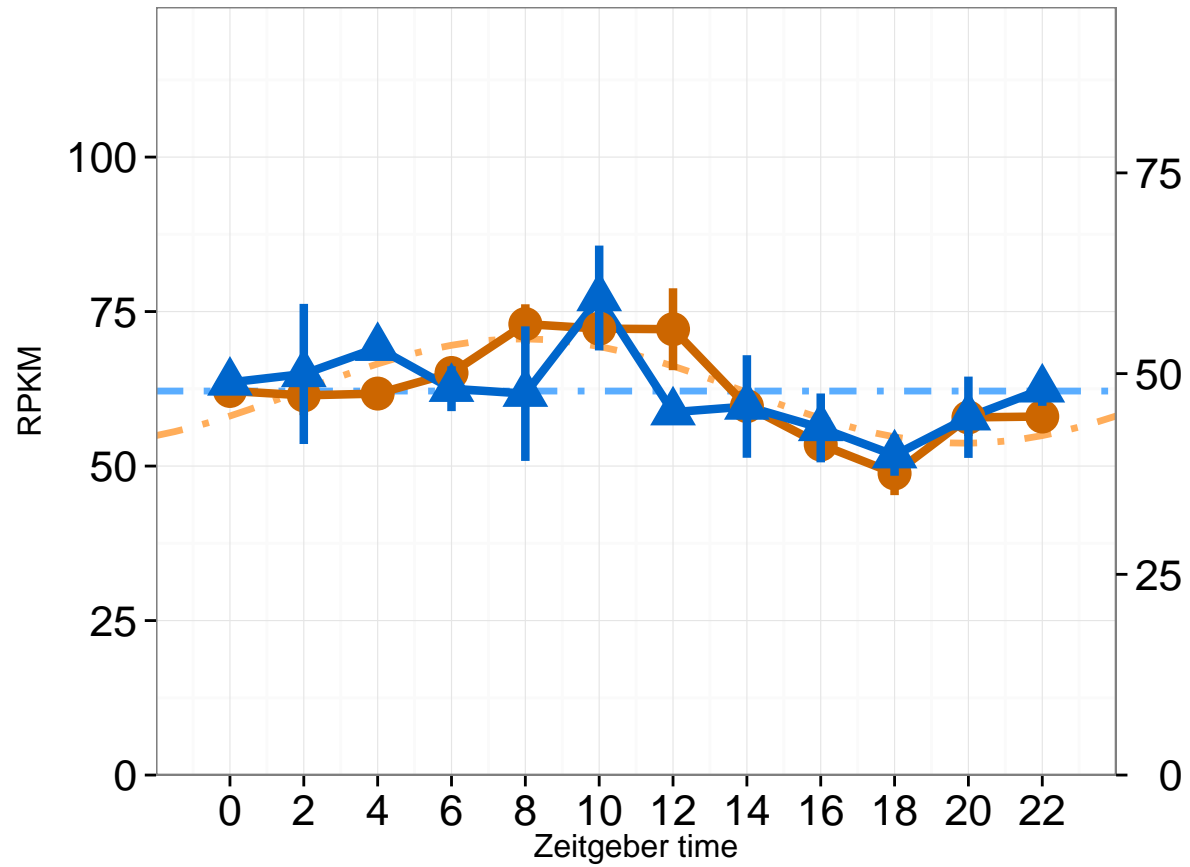

## Tcea3

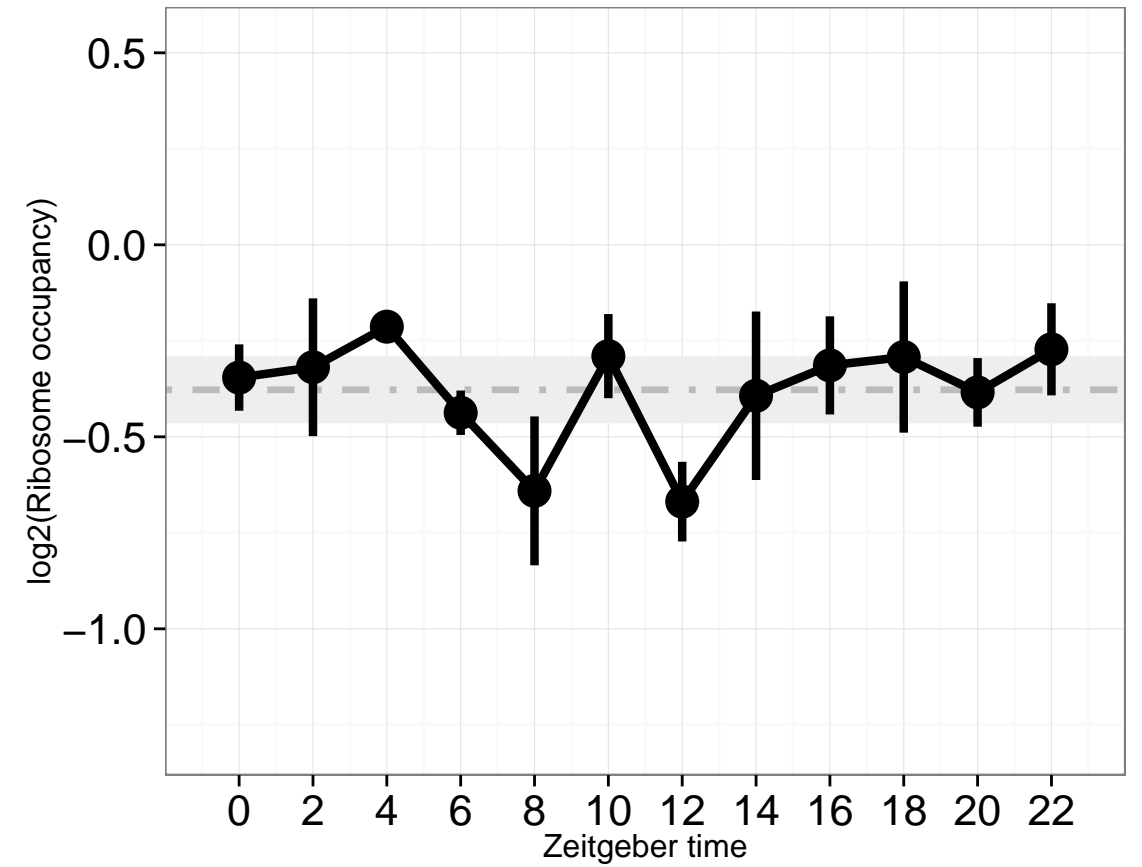

Supplement: Supplementary file 5364 [file 1]

## Anxa13

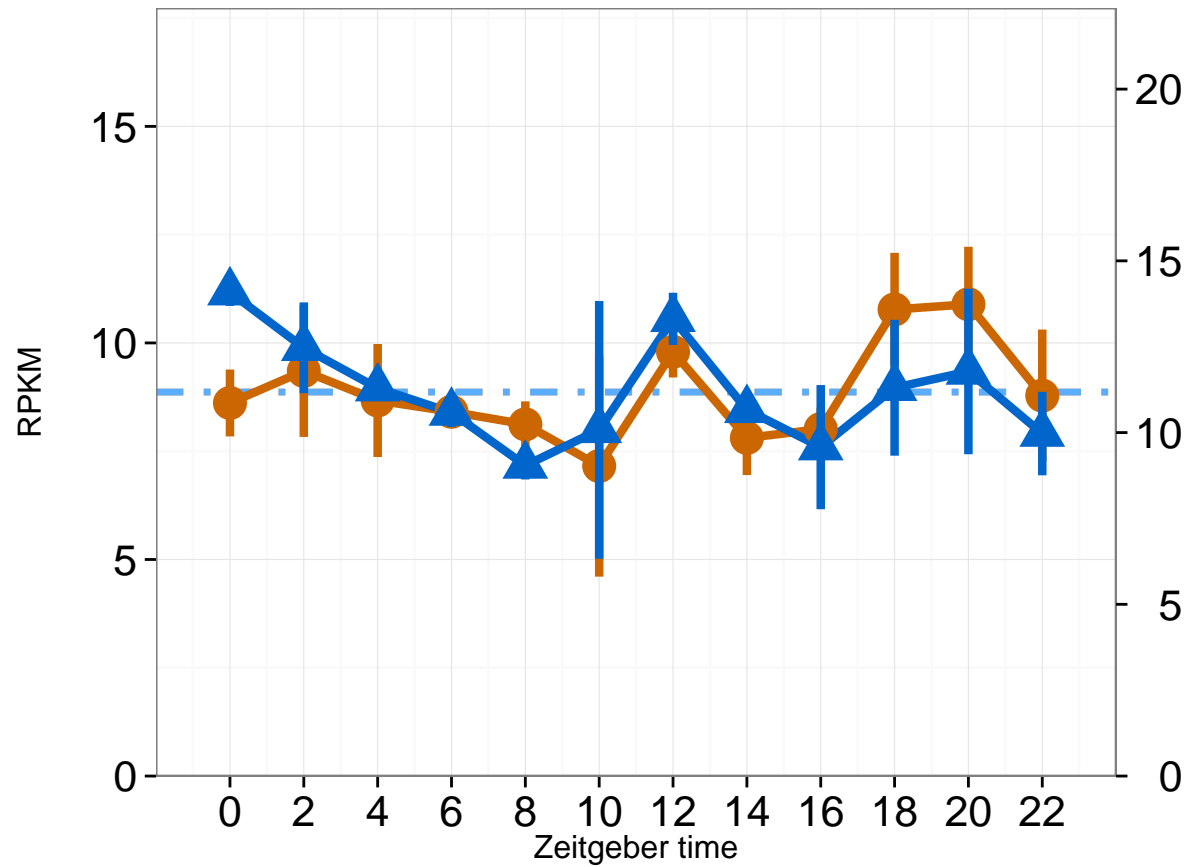

## Anxa13

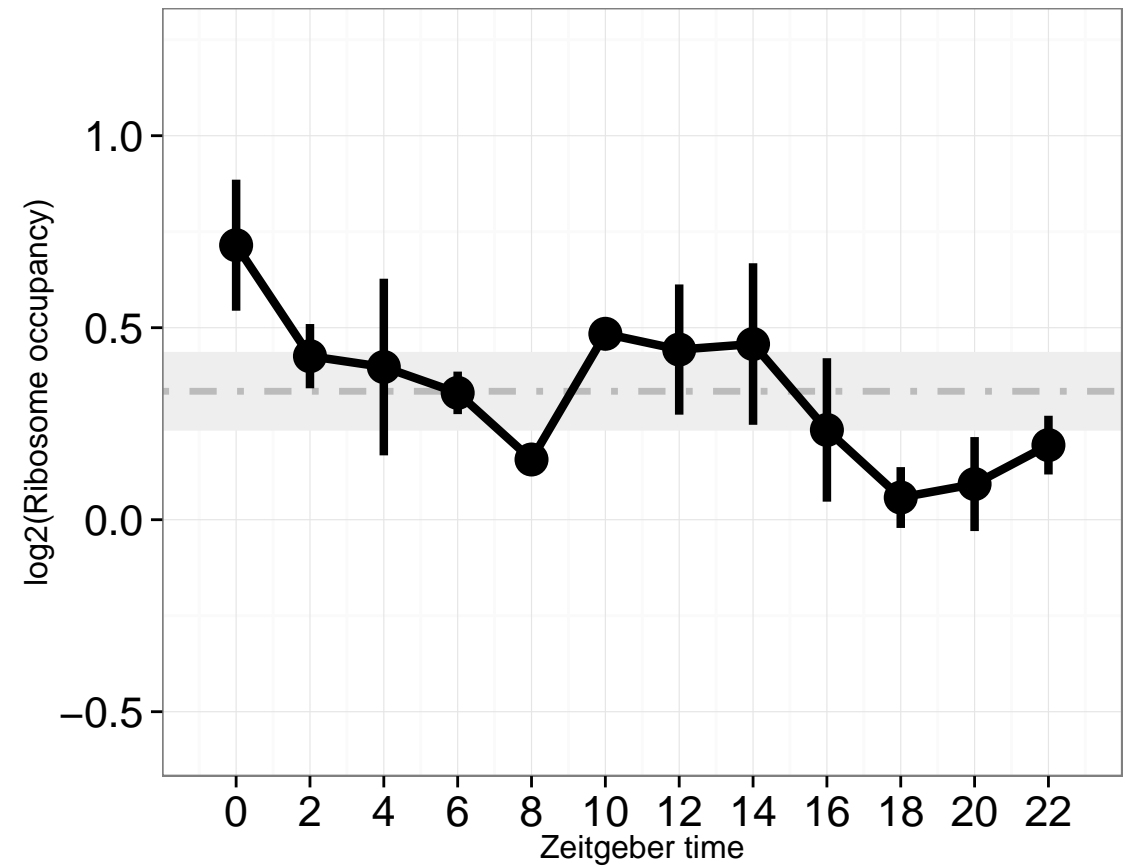

Supplement: Supplementary file 5365 [file 1]

## Enpp3

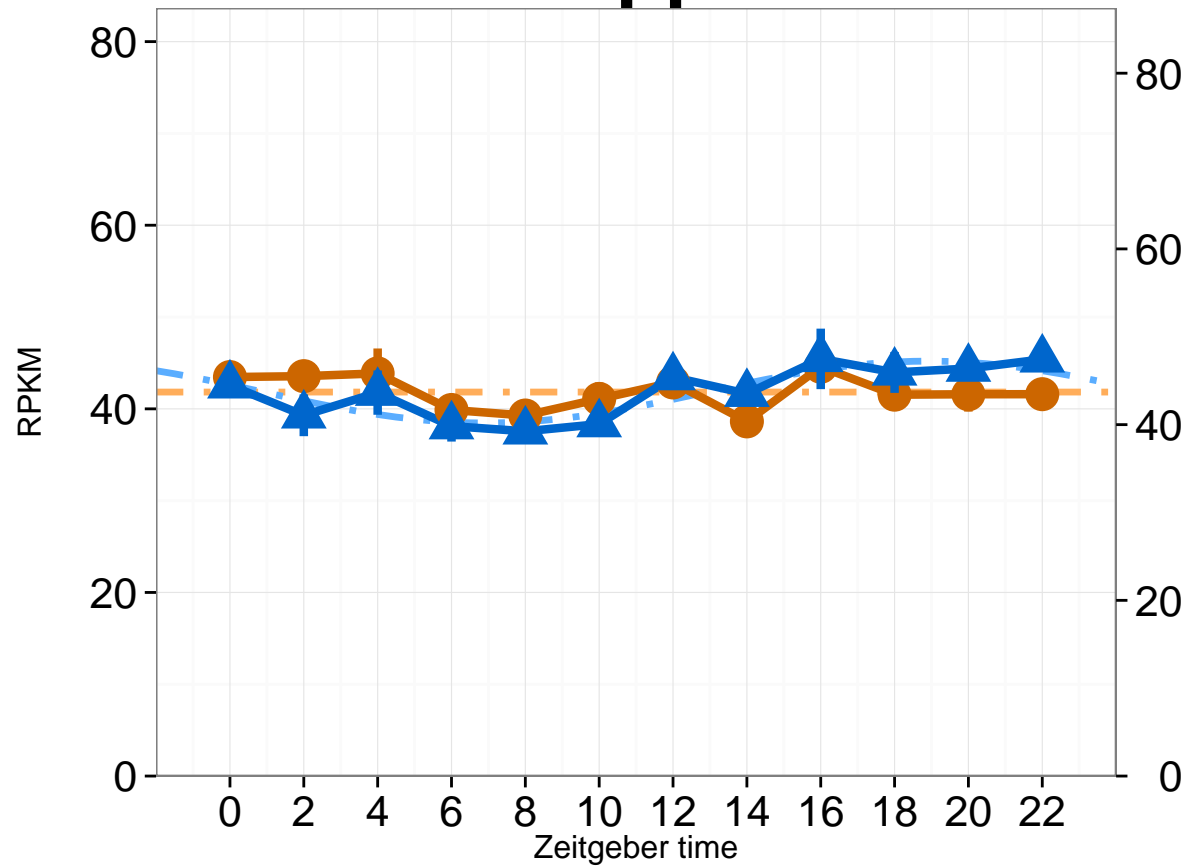

## Enpp3

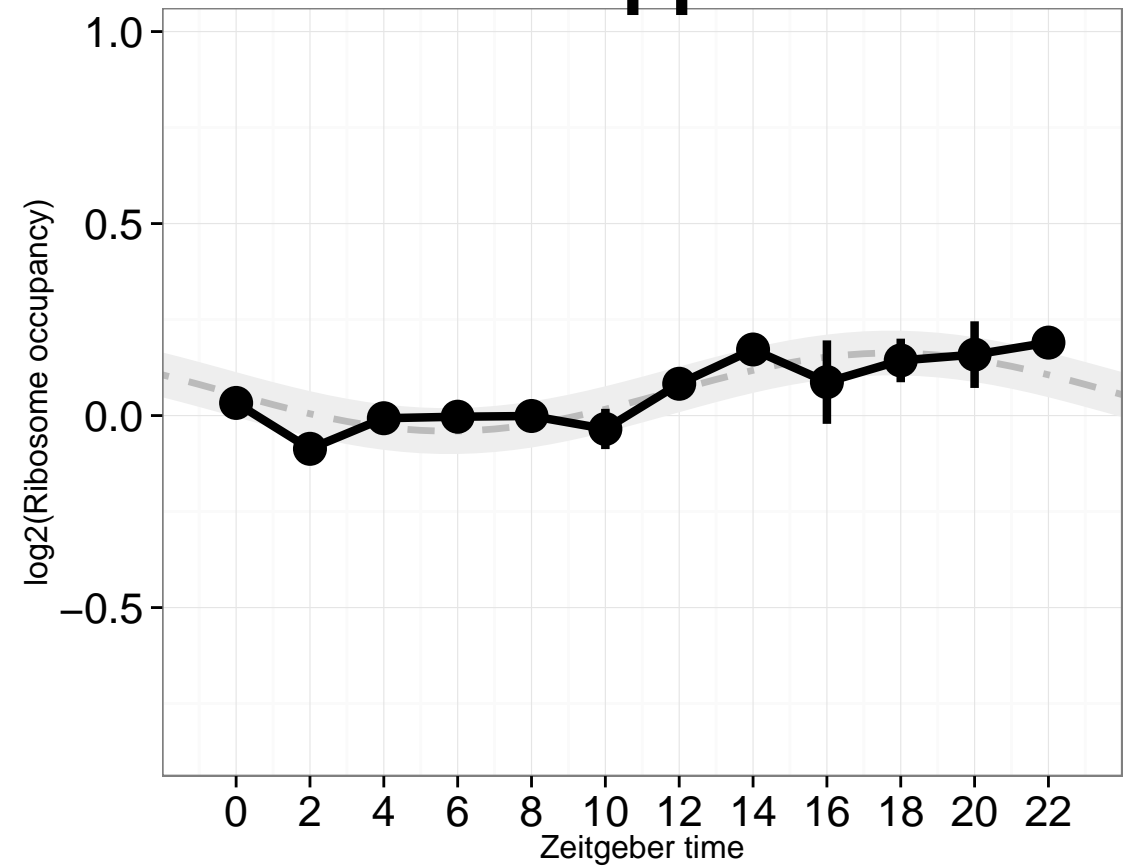

Supplement: Supplementary file 5366 [file 1]

## Bmi1

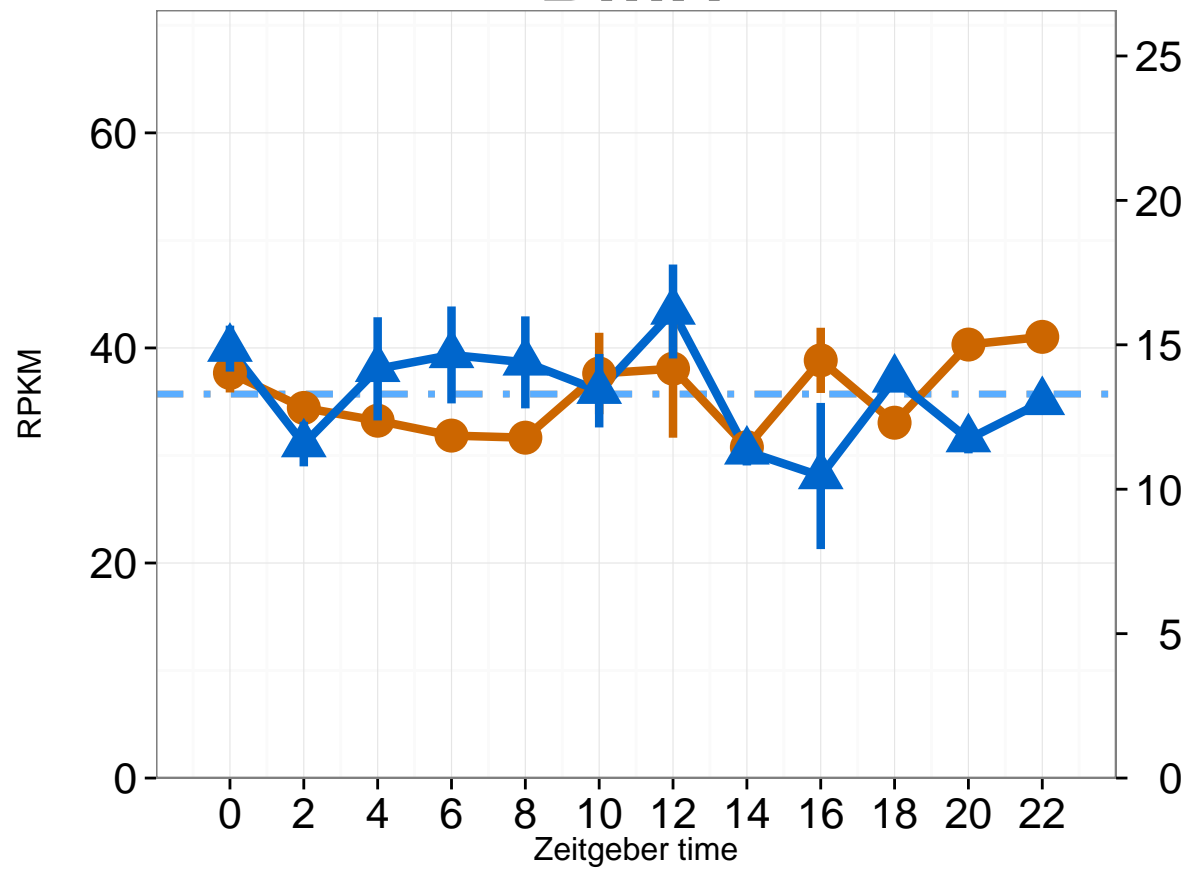

## Bmi1

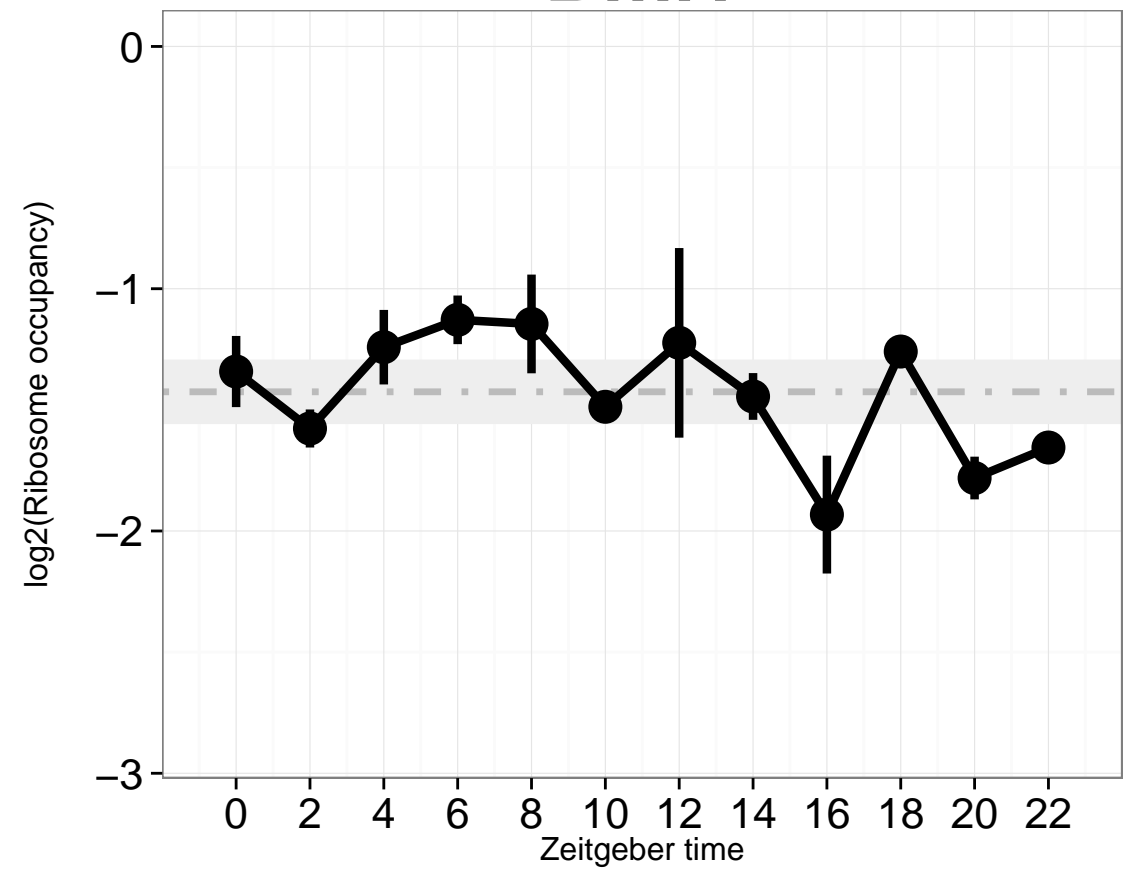

Supplement: Supplementary file 5367 [file 1]

# Lsg1

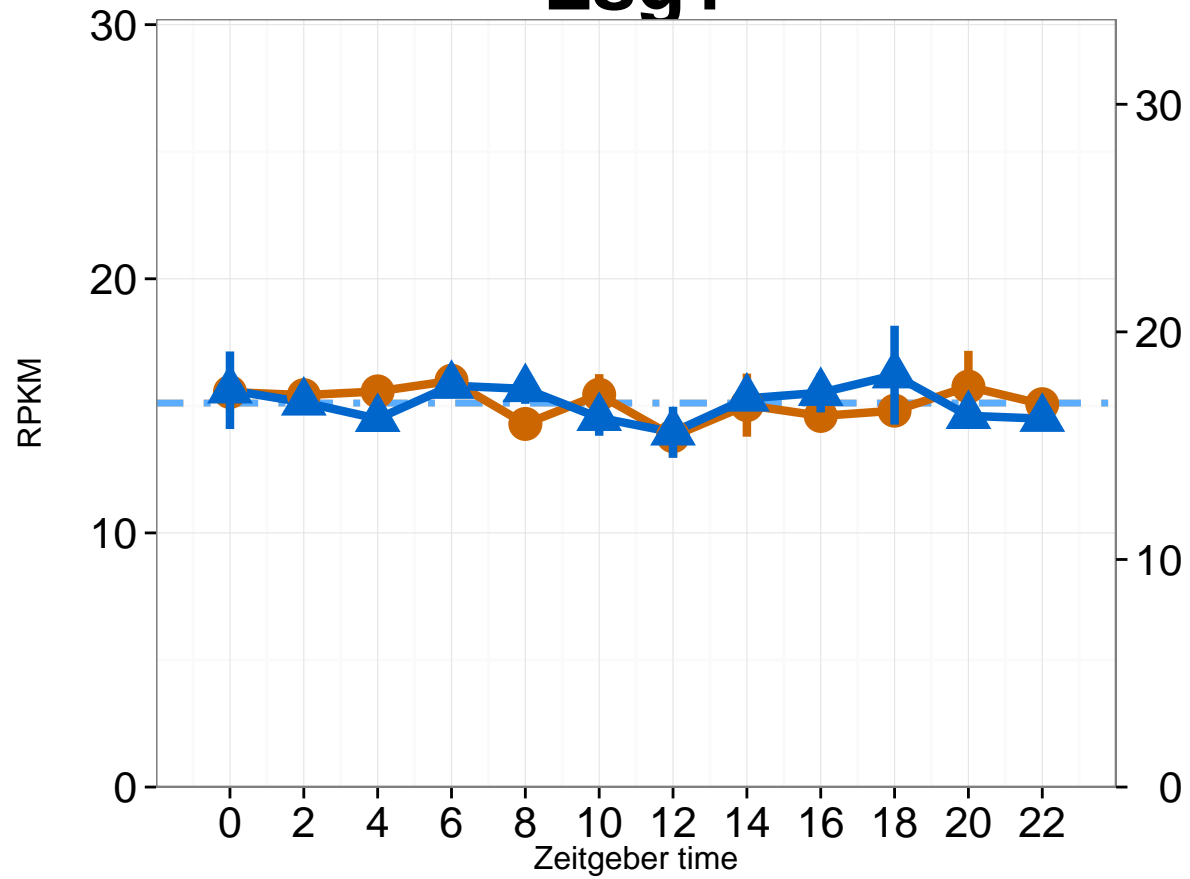

# Lsg1

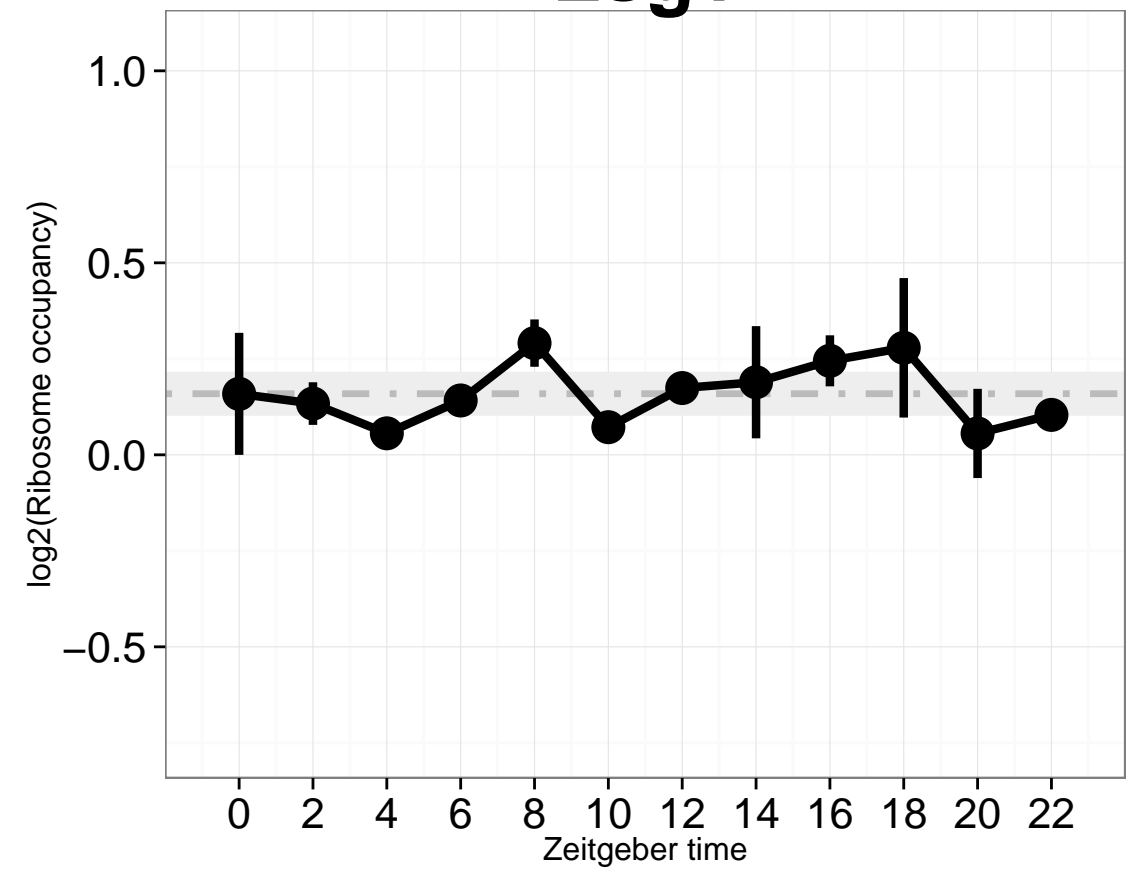

Supplement: Supplementary file 5368 [file 1]

# Zfp708

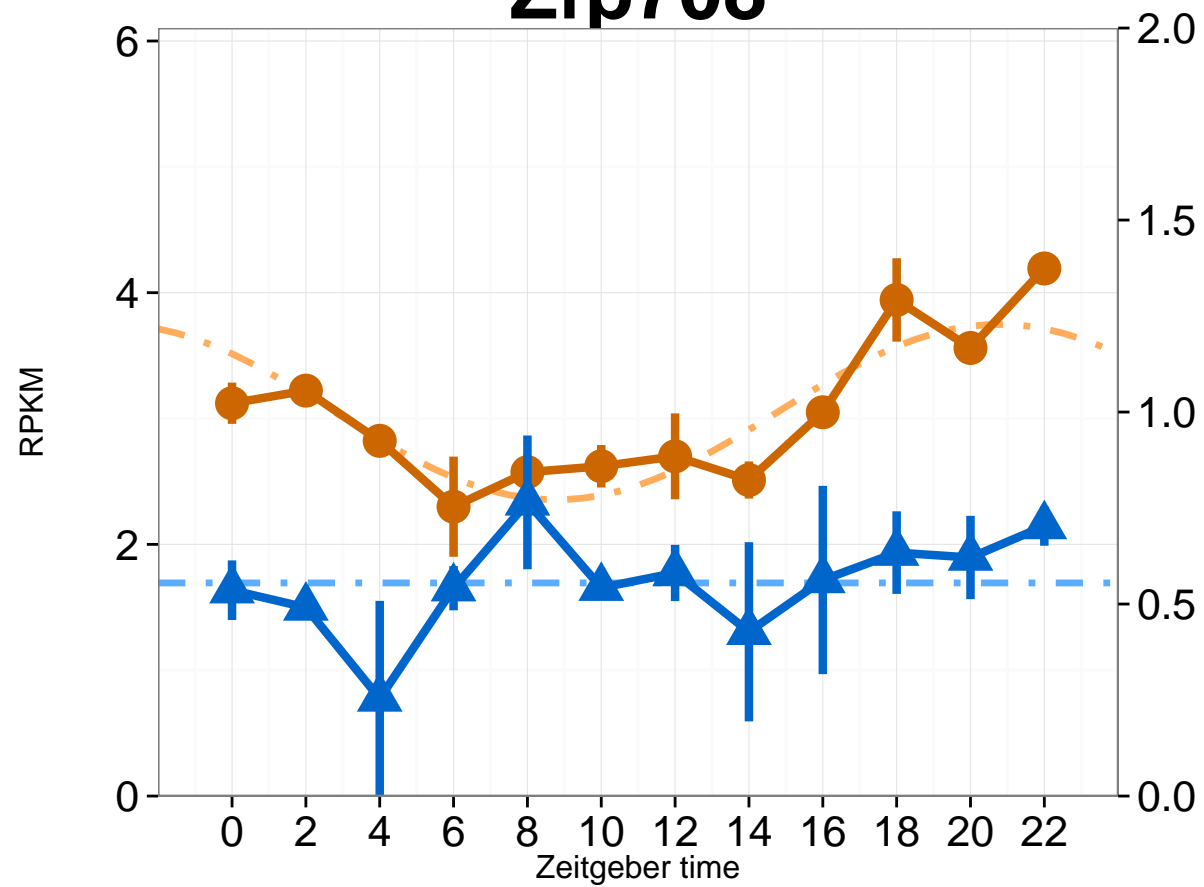

# Zfp708

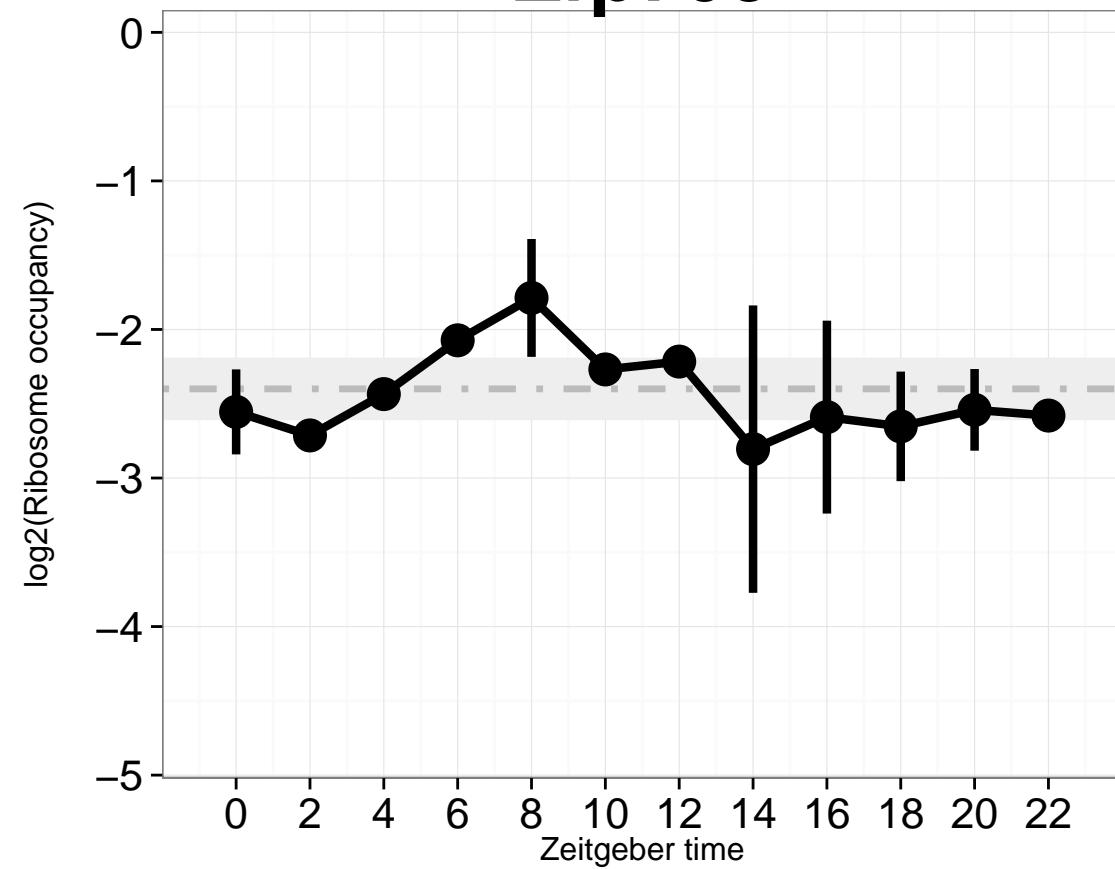

Supplement: Supplementary file 5369 [file 1]

## Haus2

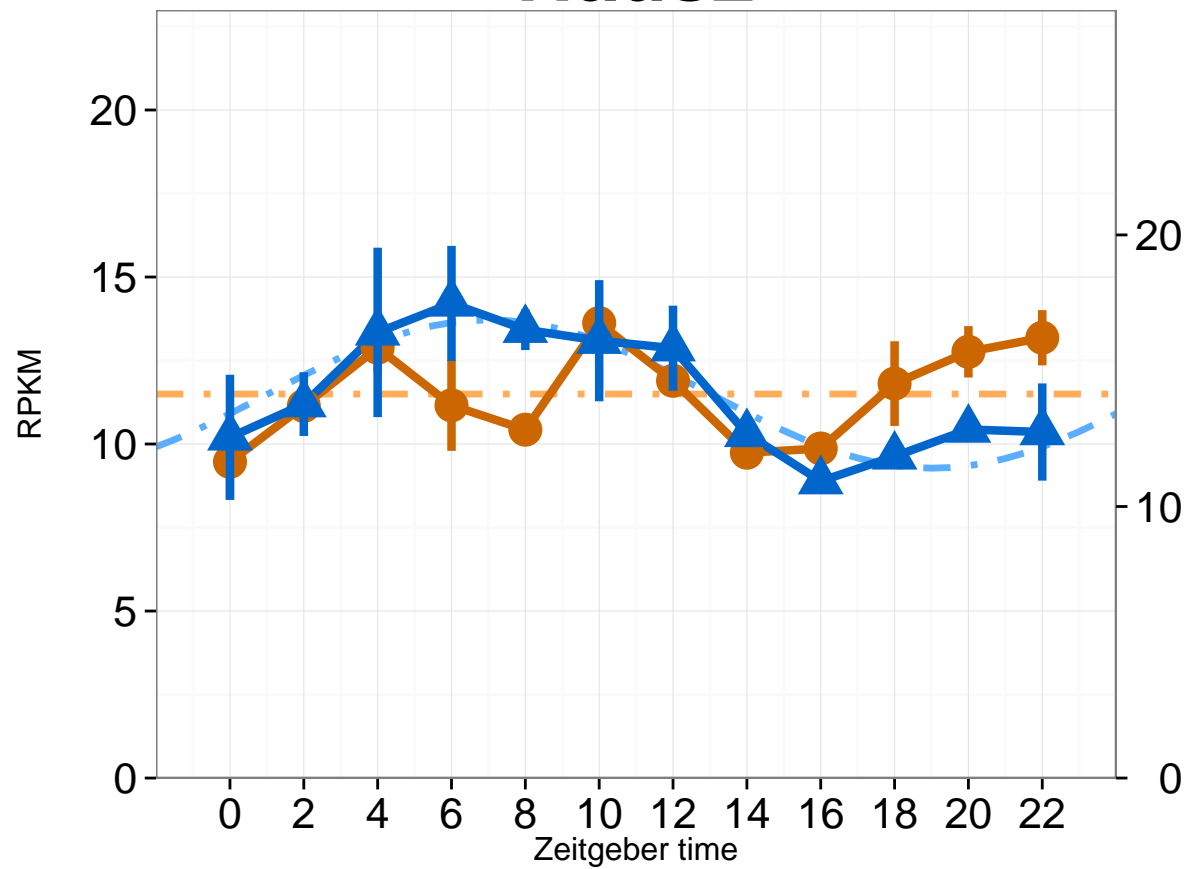

## Haus2

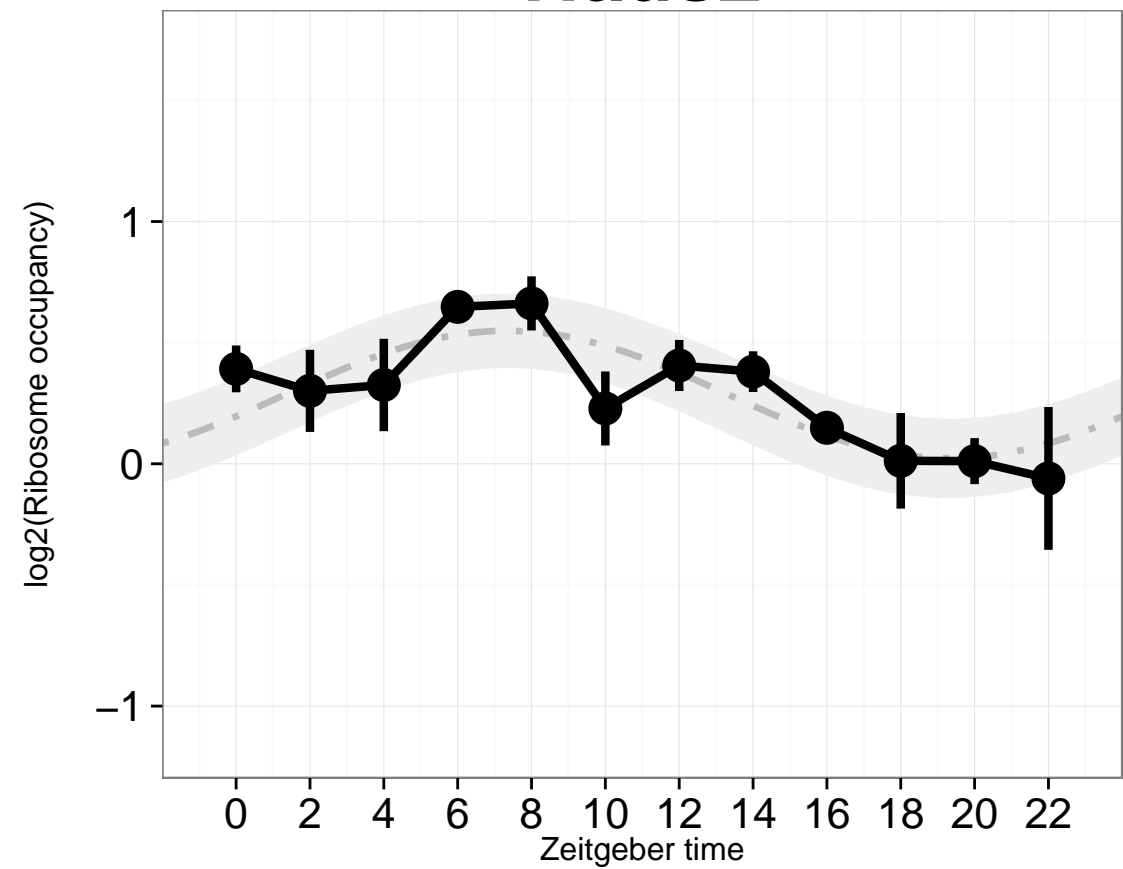

Supplement: Supplementary file 5370 [file 1]

## Neurl3

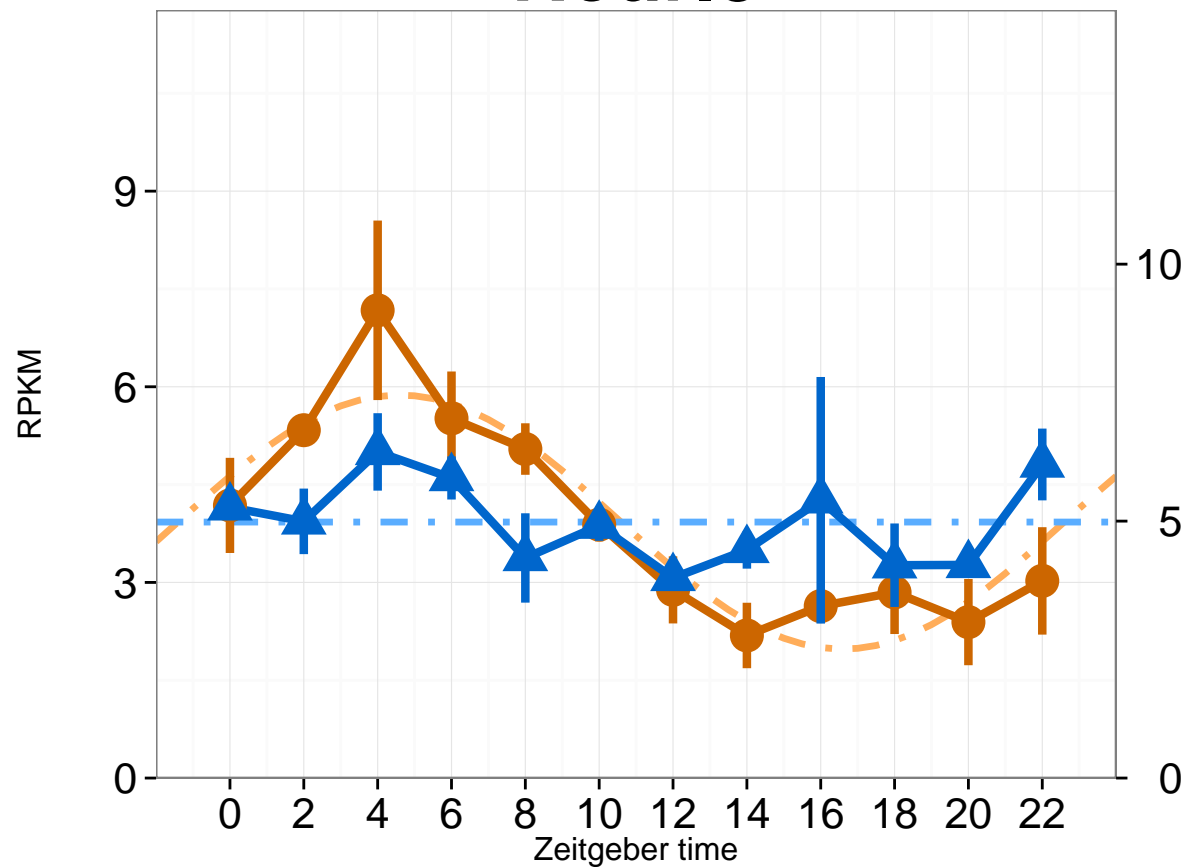

## Neurl3

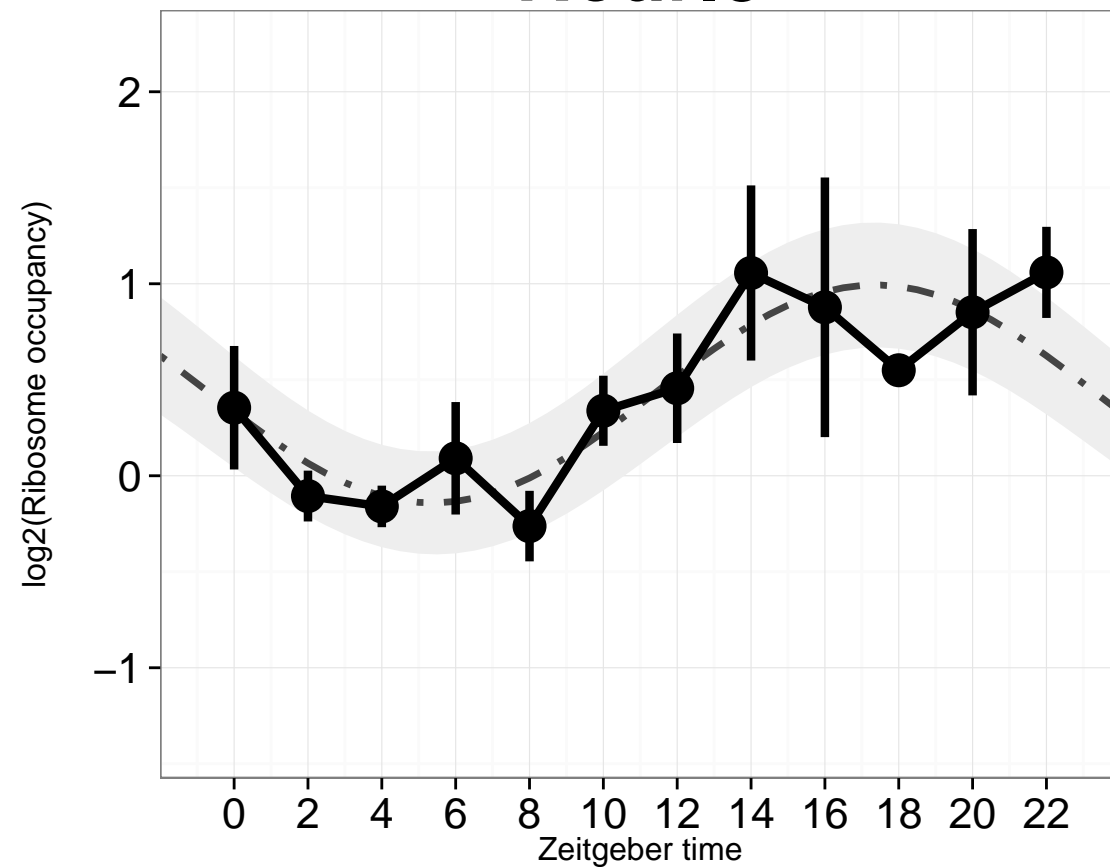

Supplement: Supplementary file 5371 [file 1]

## Apobec1

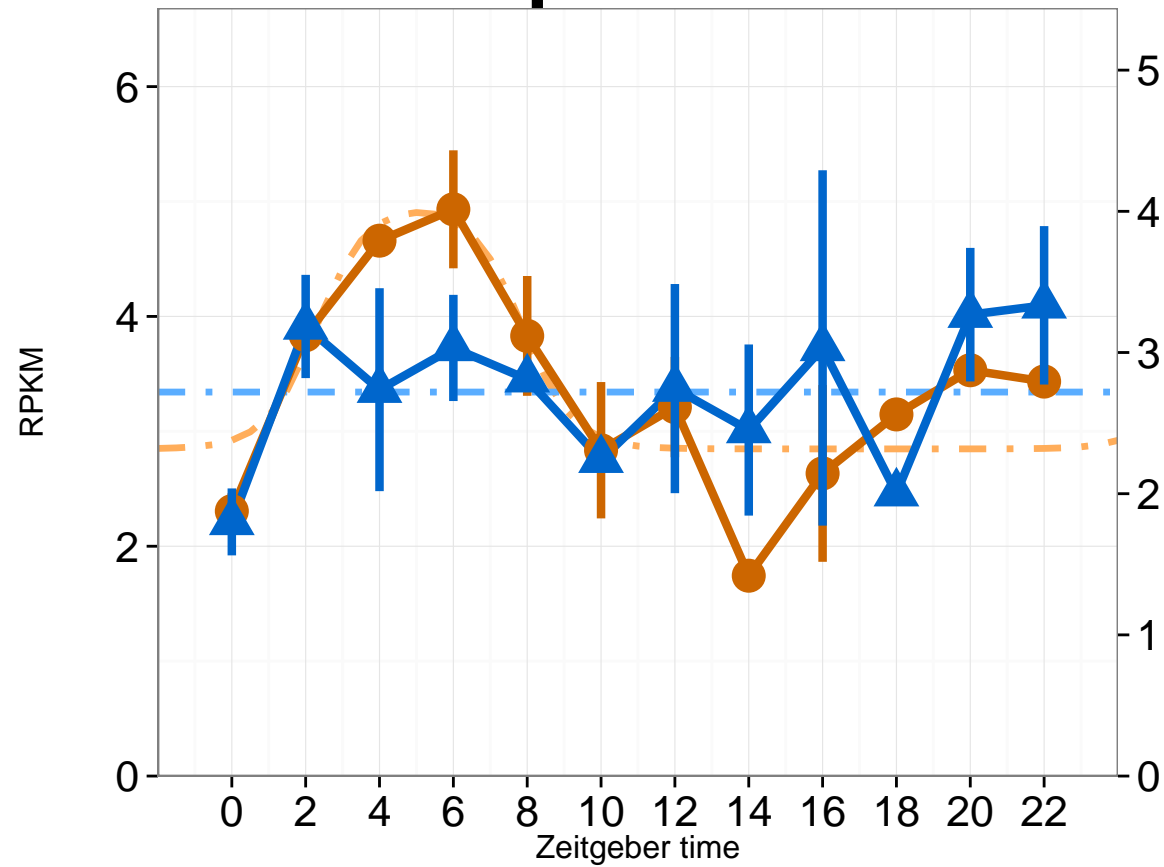

## Apobec1

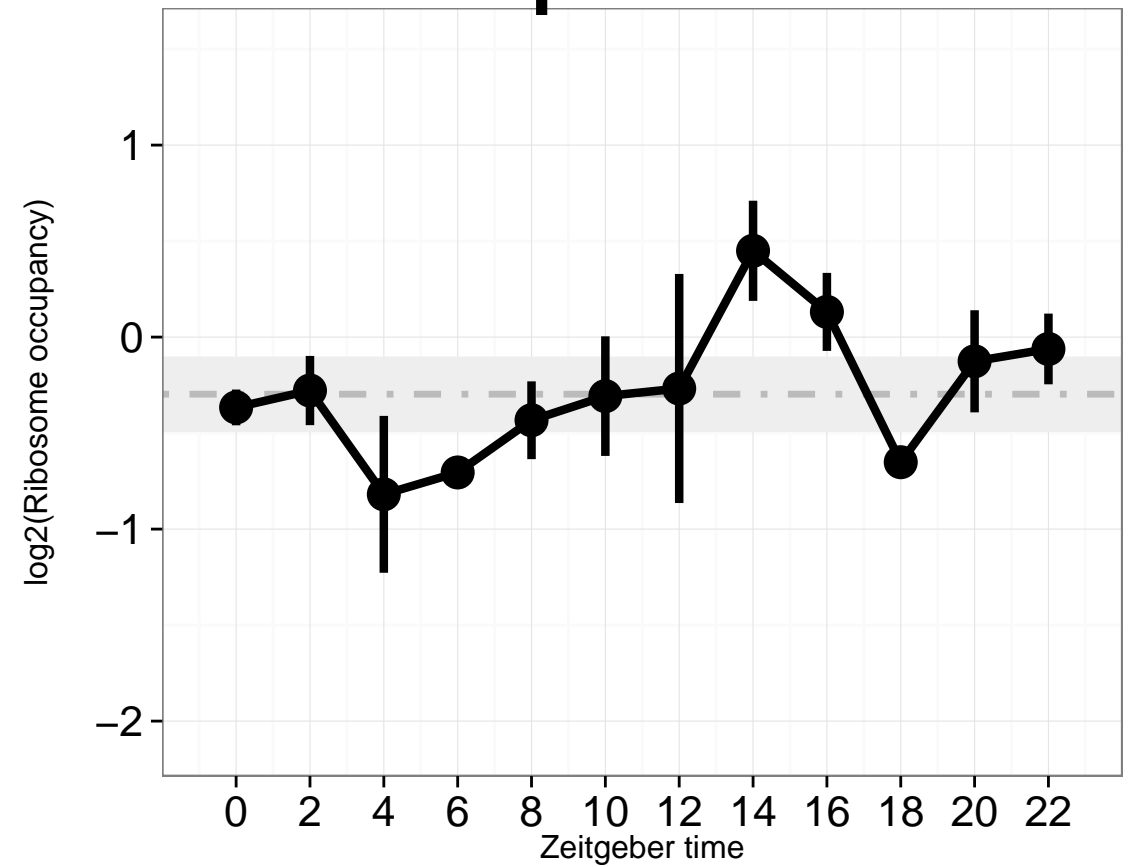

Supplement: Supplementary file 5372 [file 1]

# Parm1

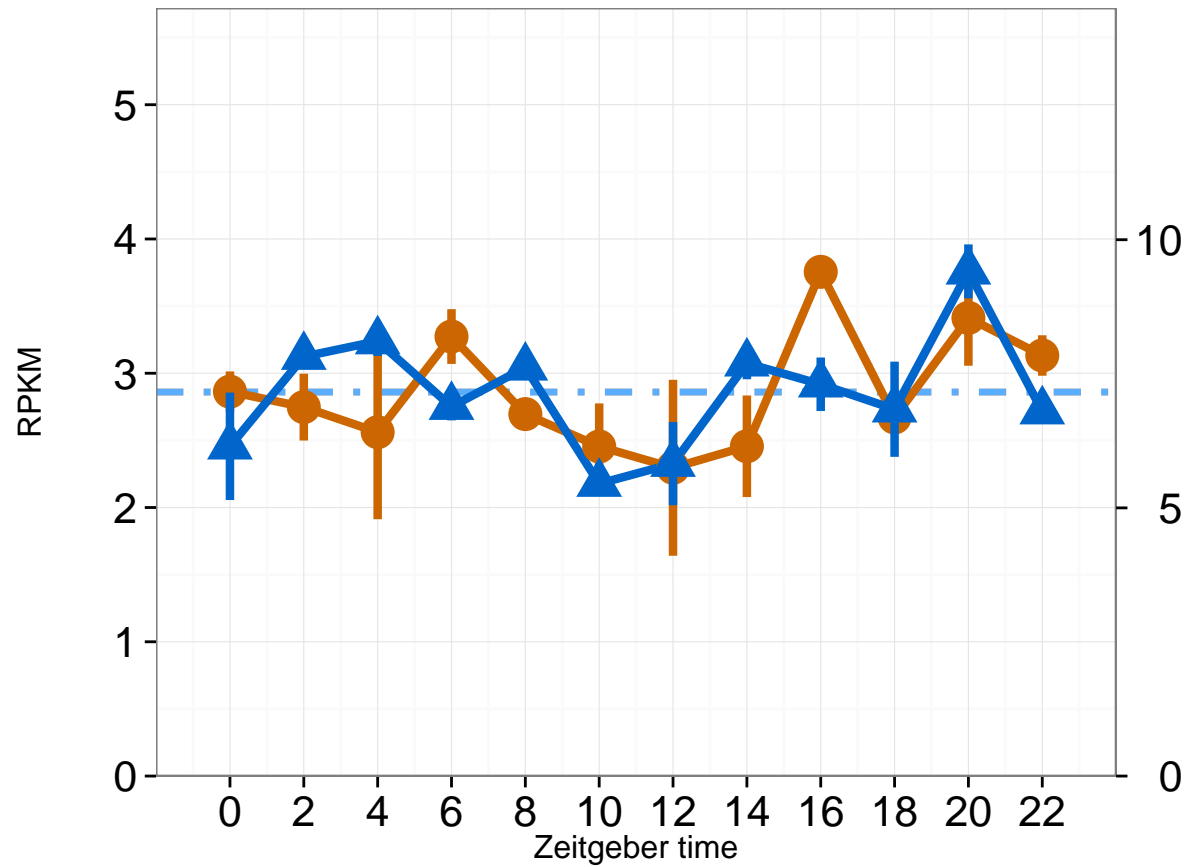

# Parm1

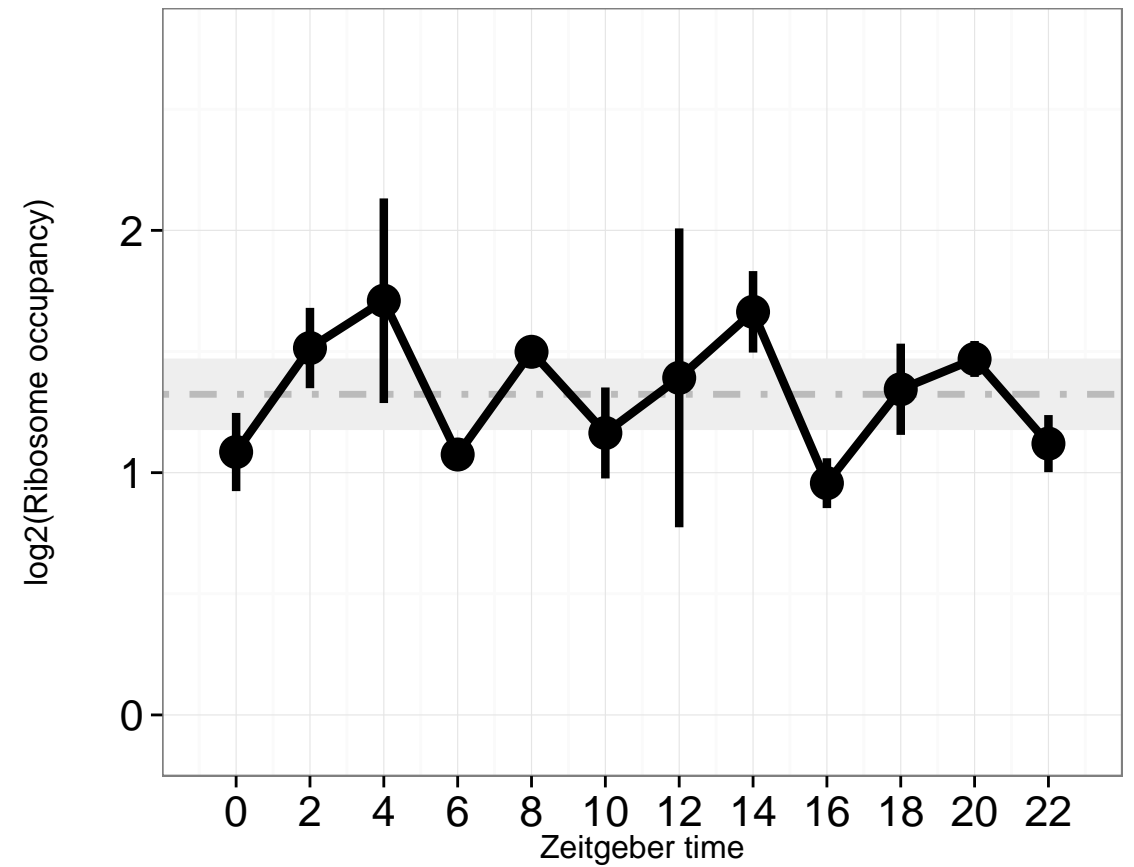

Supplement: Supplementary file 5373 [file 1]

## Ids

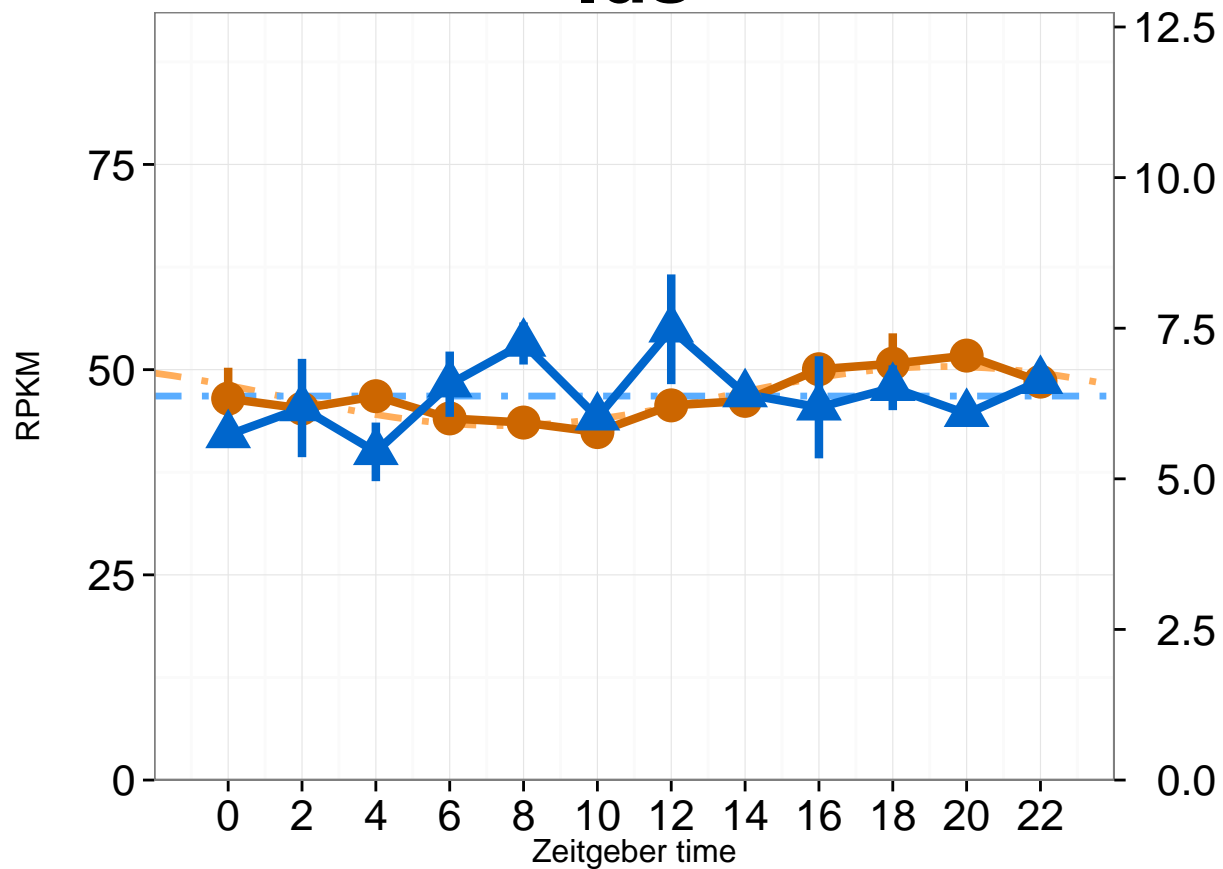

## Ids

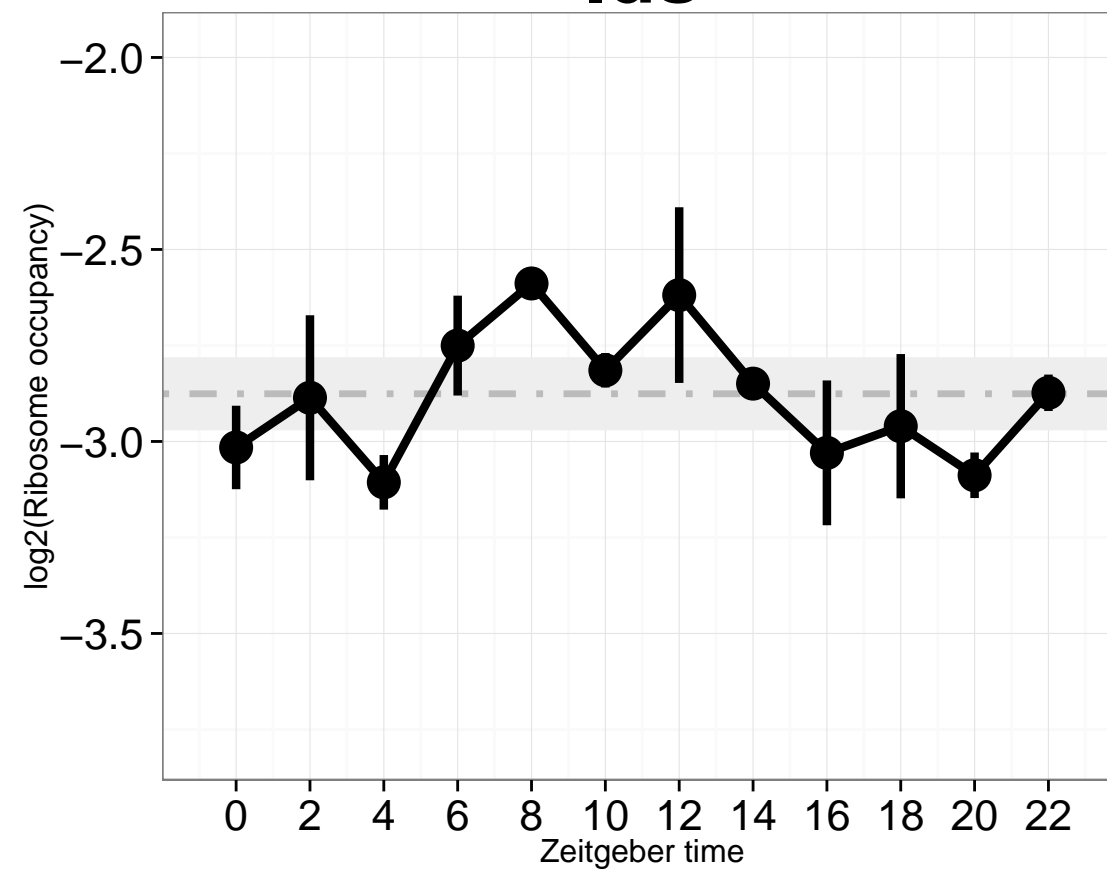

Supplement: Supplementary file 5374 [file 1]

# Ube2v1

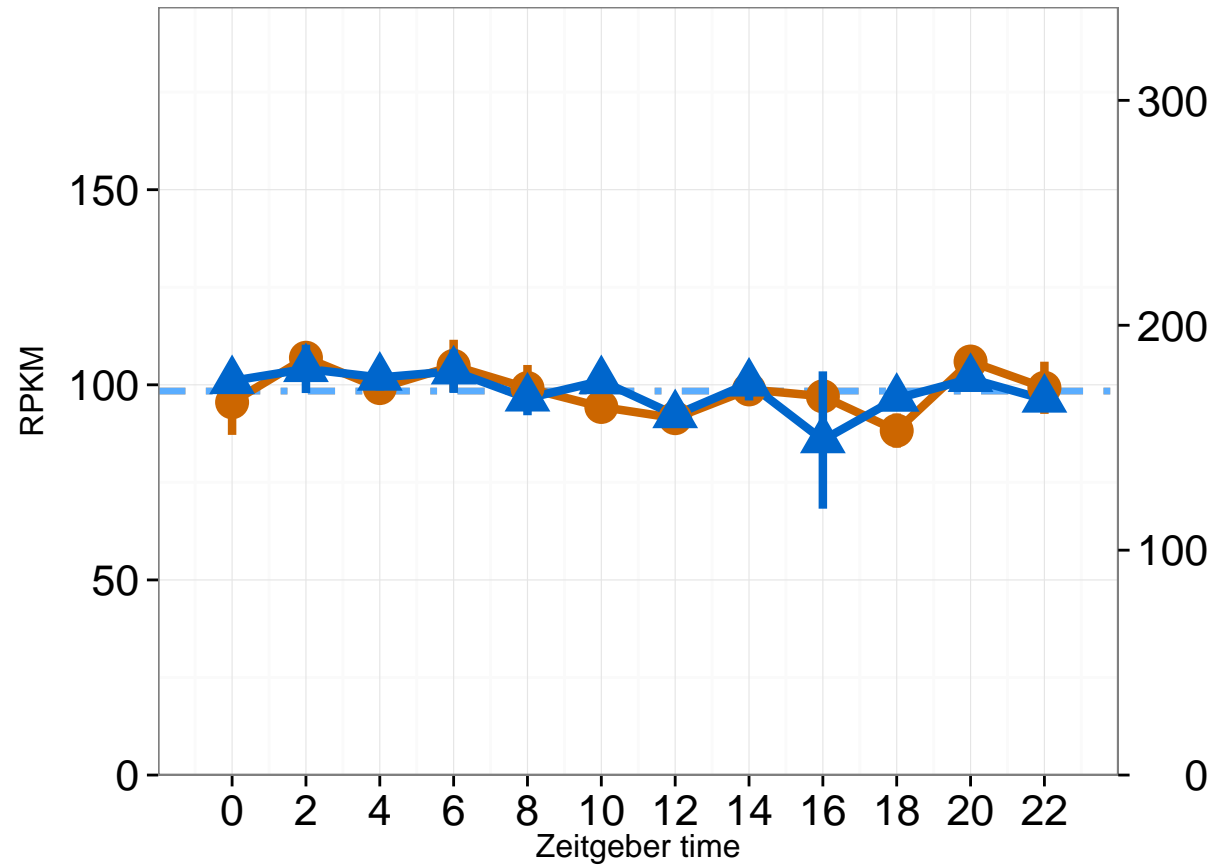

# Ube2v1

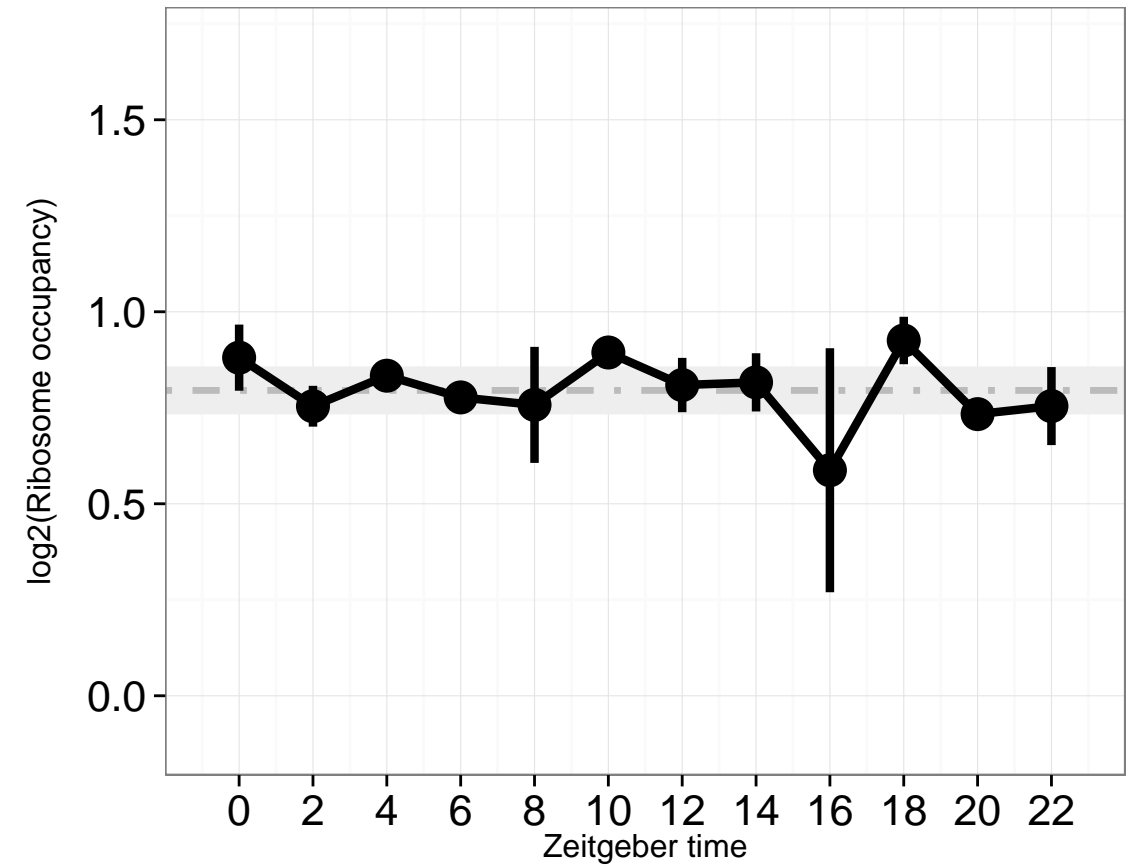

Supplement: Supplementary file 5375 [file 1]

## Erlin1

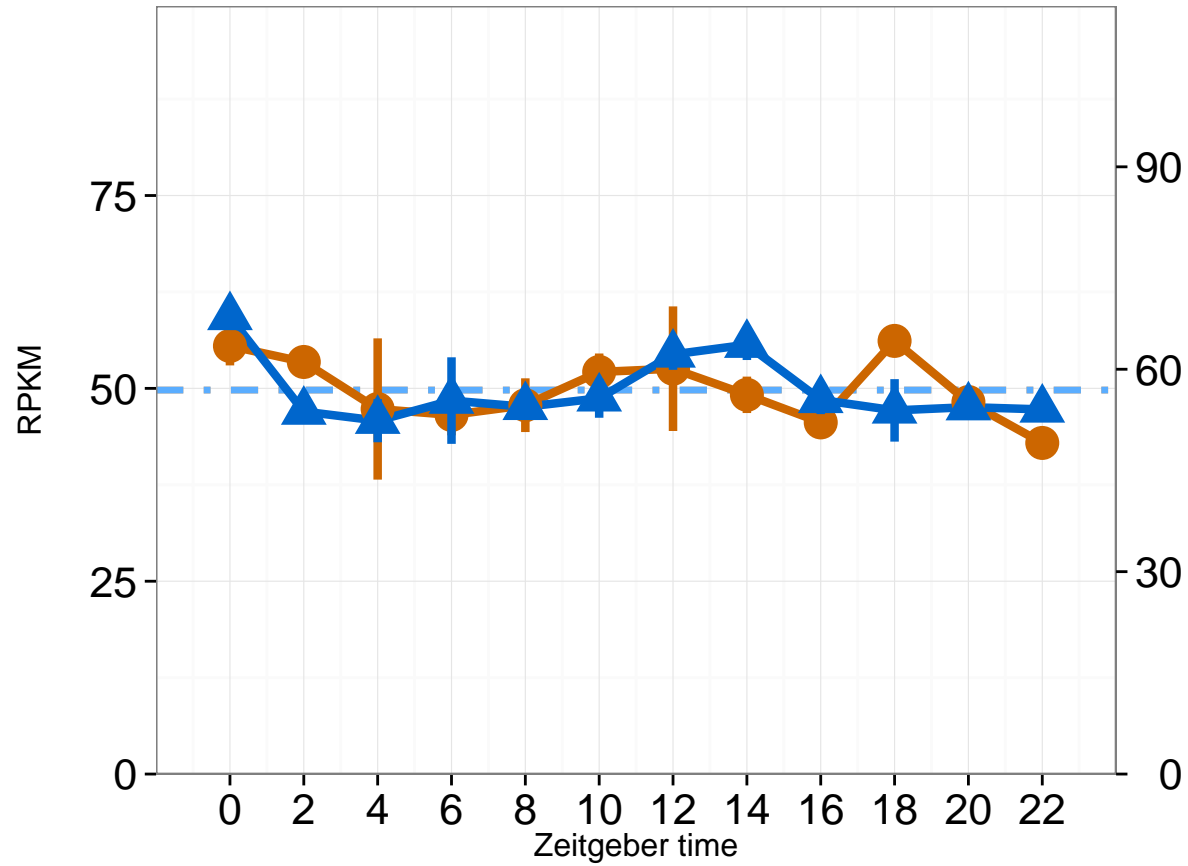

## Erlin1

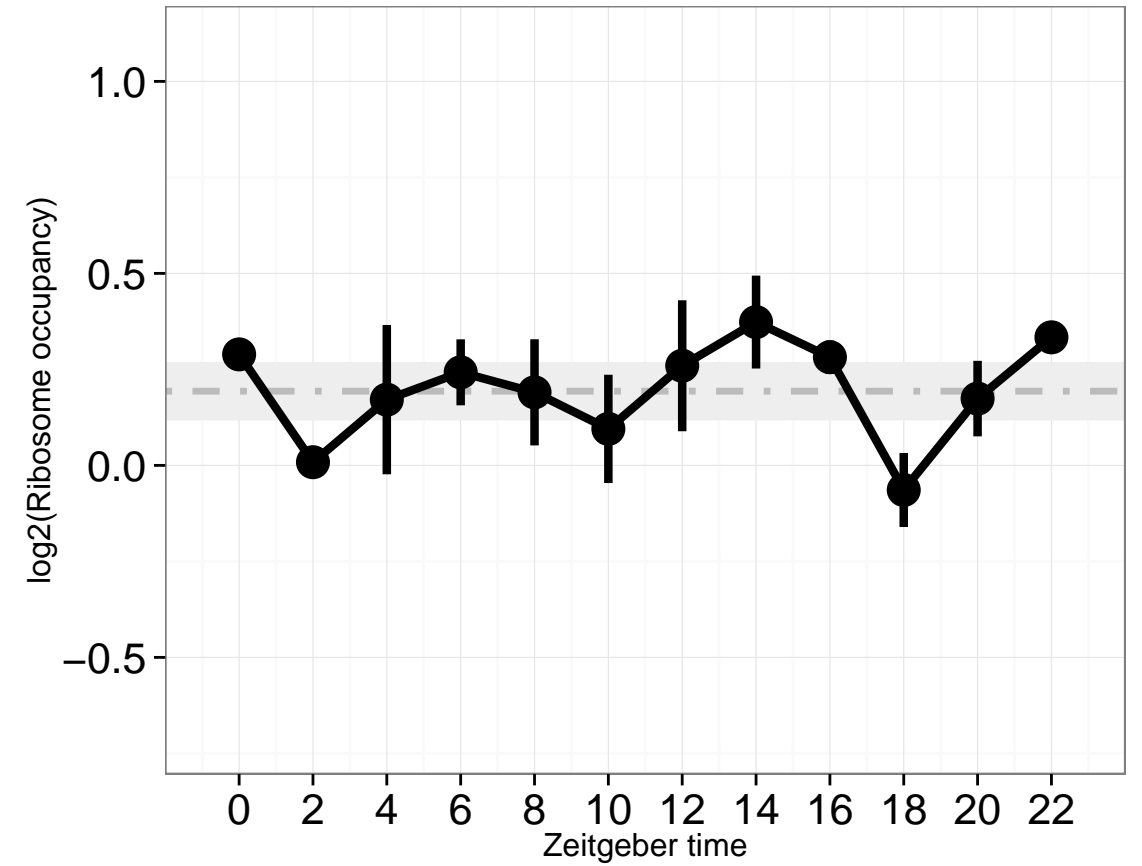

Supplement: Supplementary file 5376 [file 1]

## Ttc26

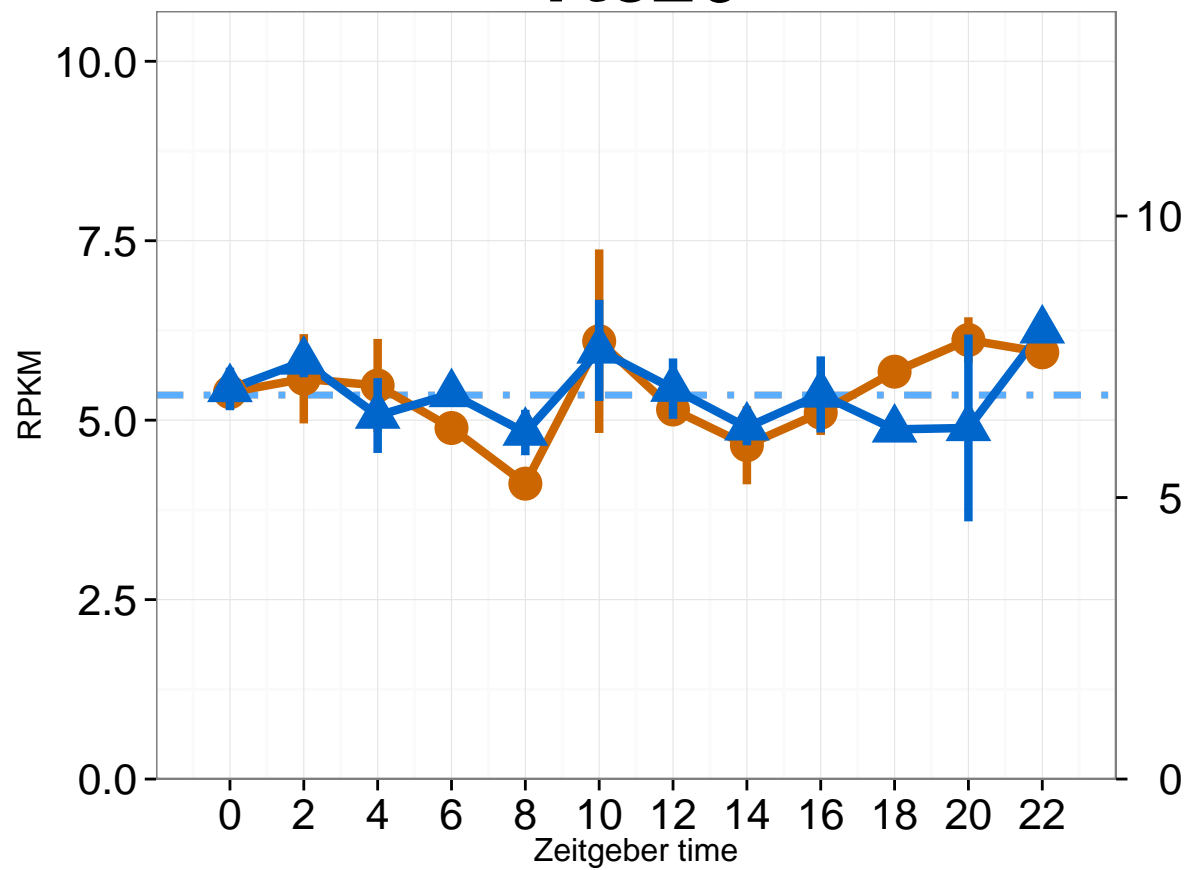

## Ttc26

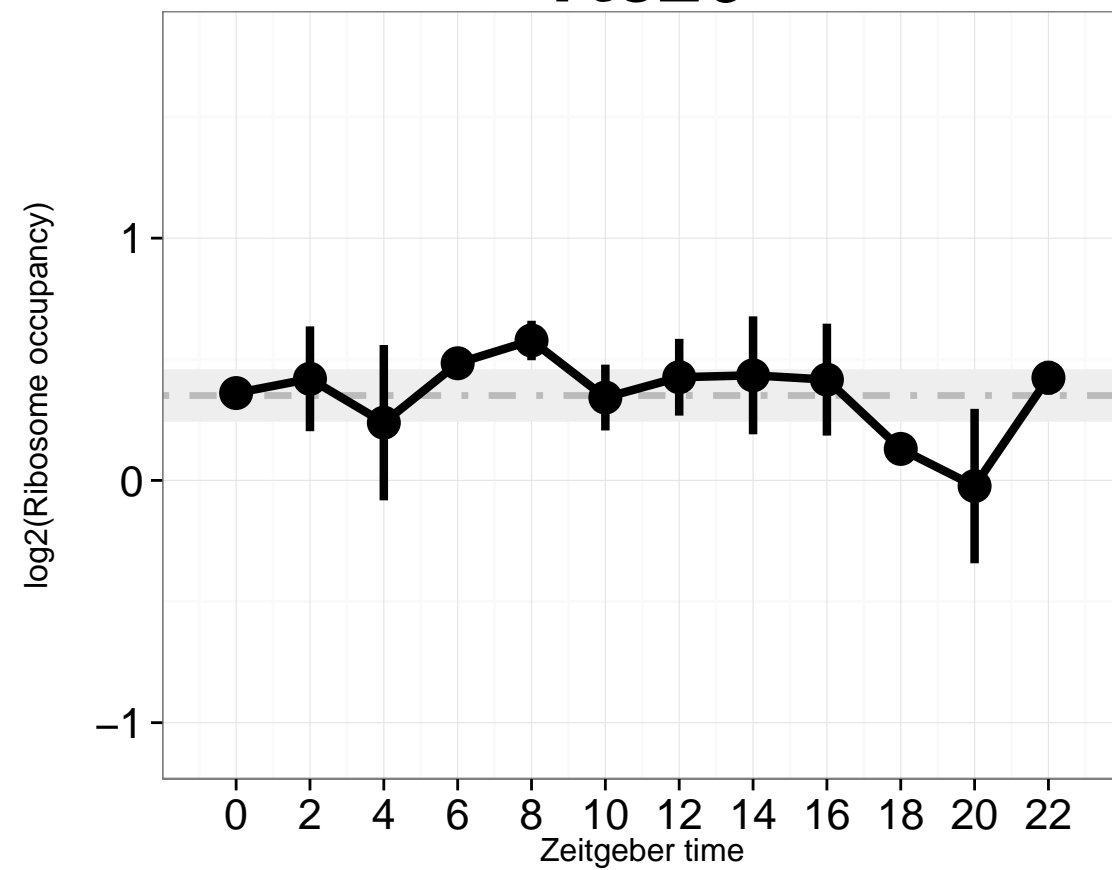

Supplement: Supplementary file 5377 [file 1]

# Zfp13

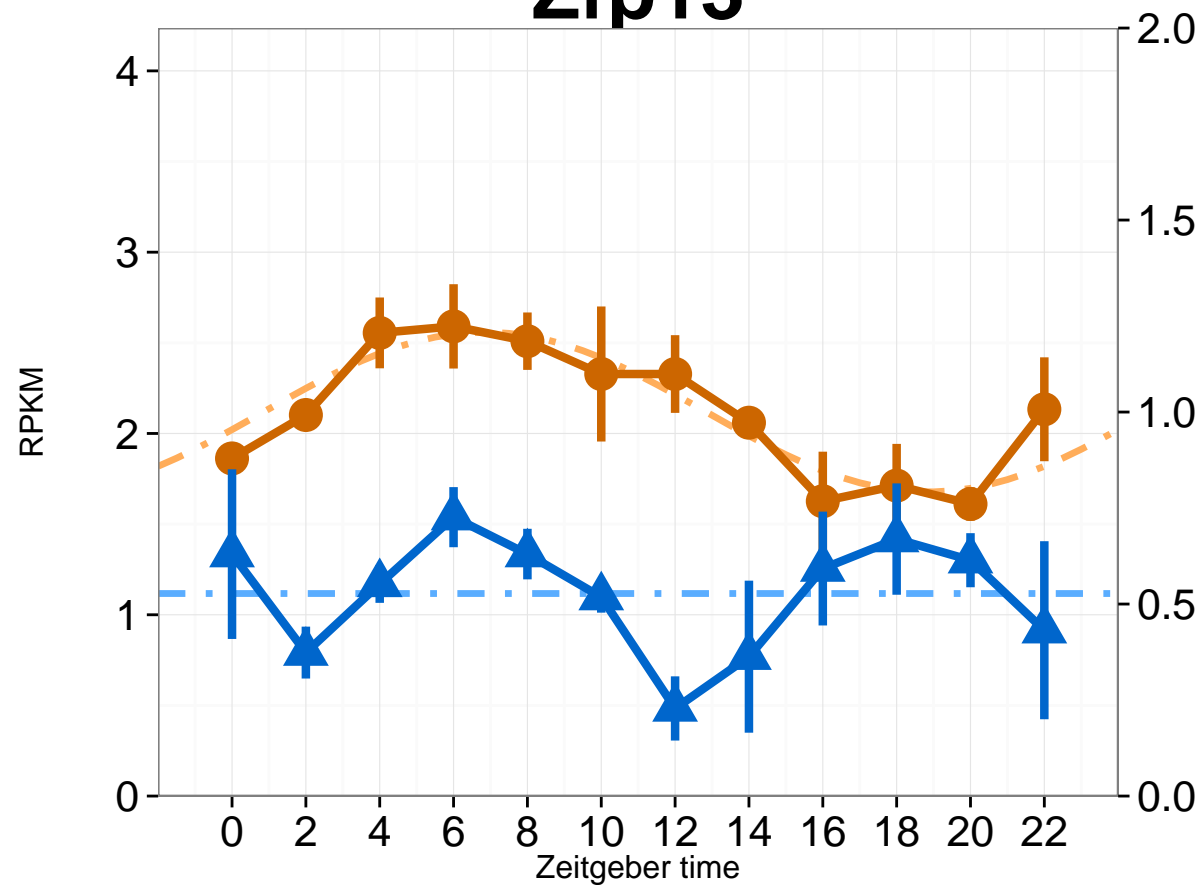

# Zfp13

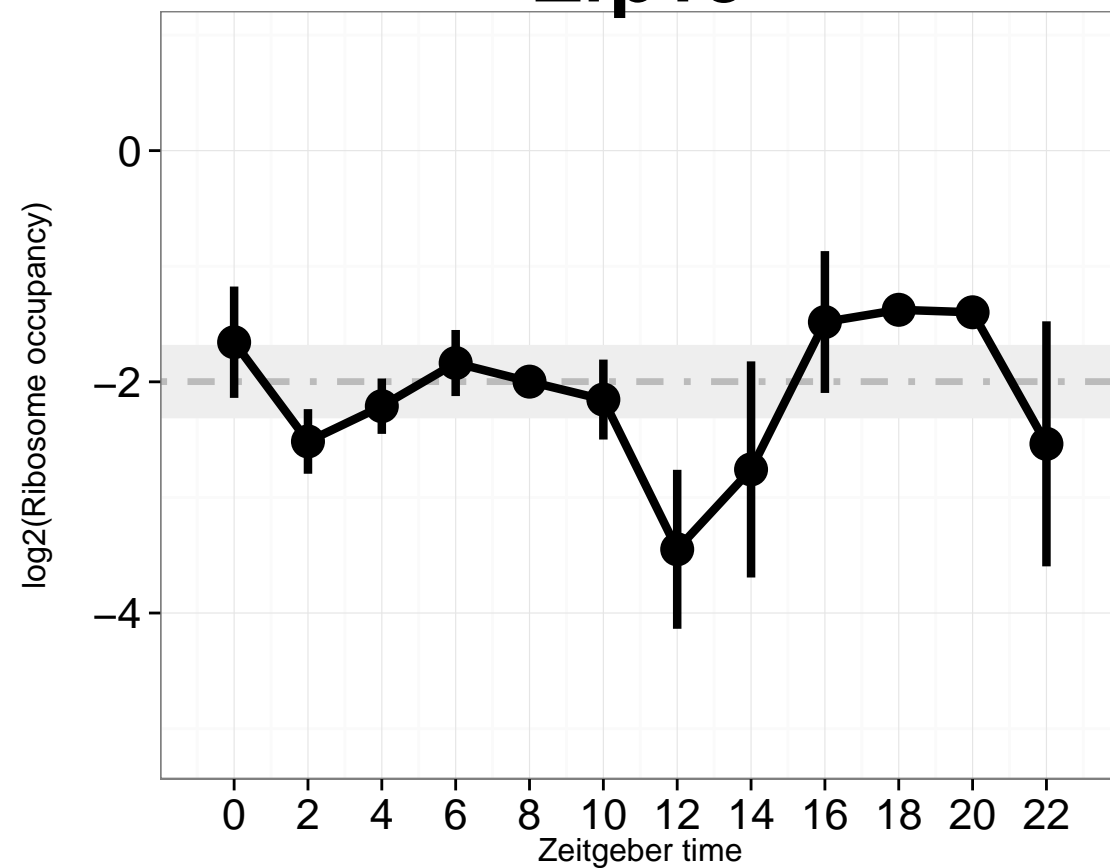

Supplement: Supplementary file 5378 [file 1]

## Ube2i

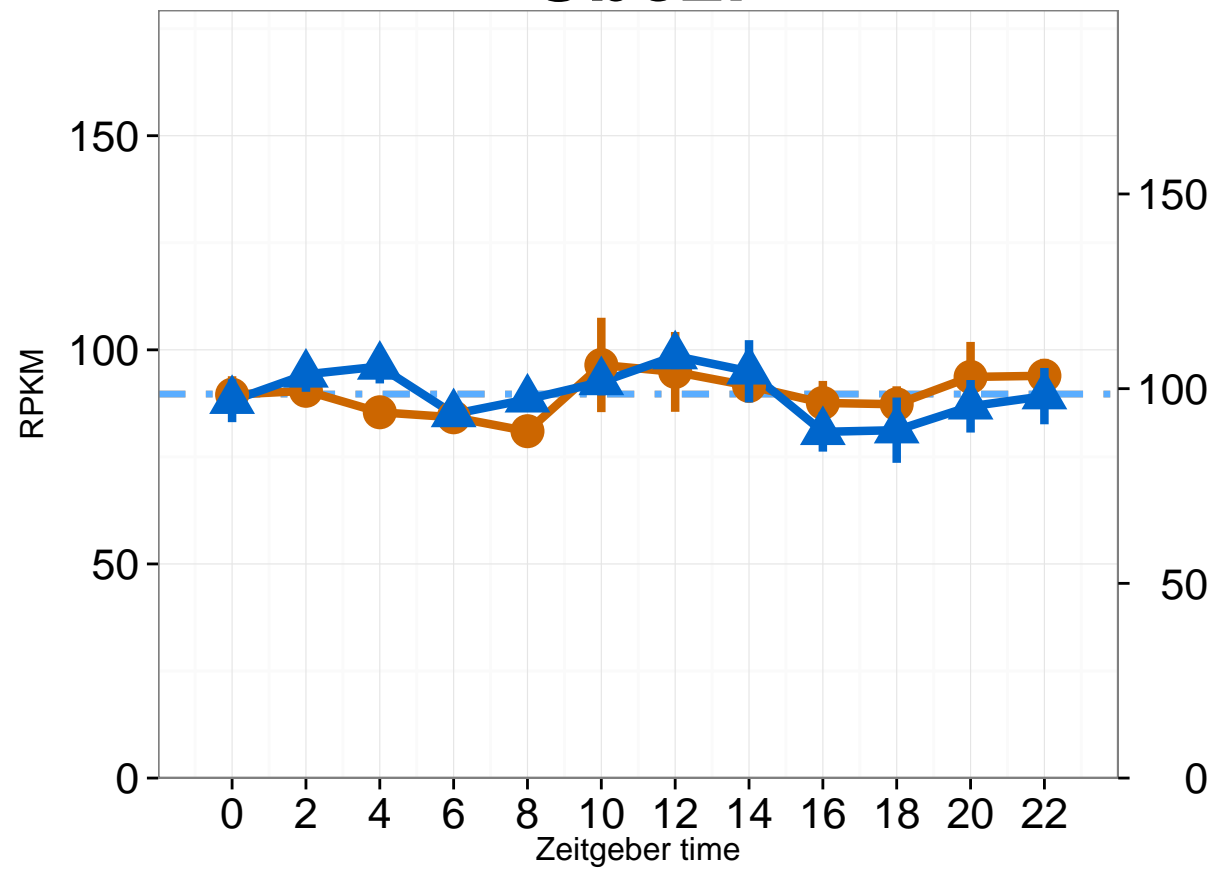

## Ube2i

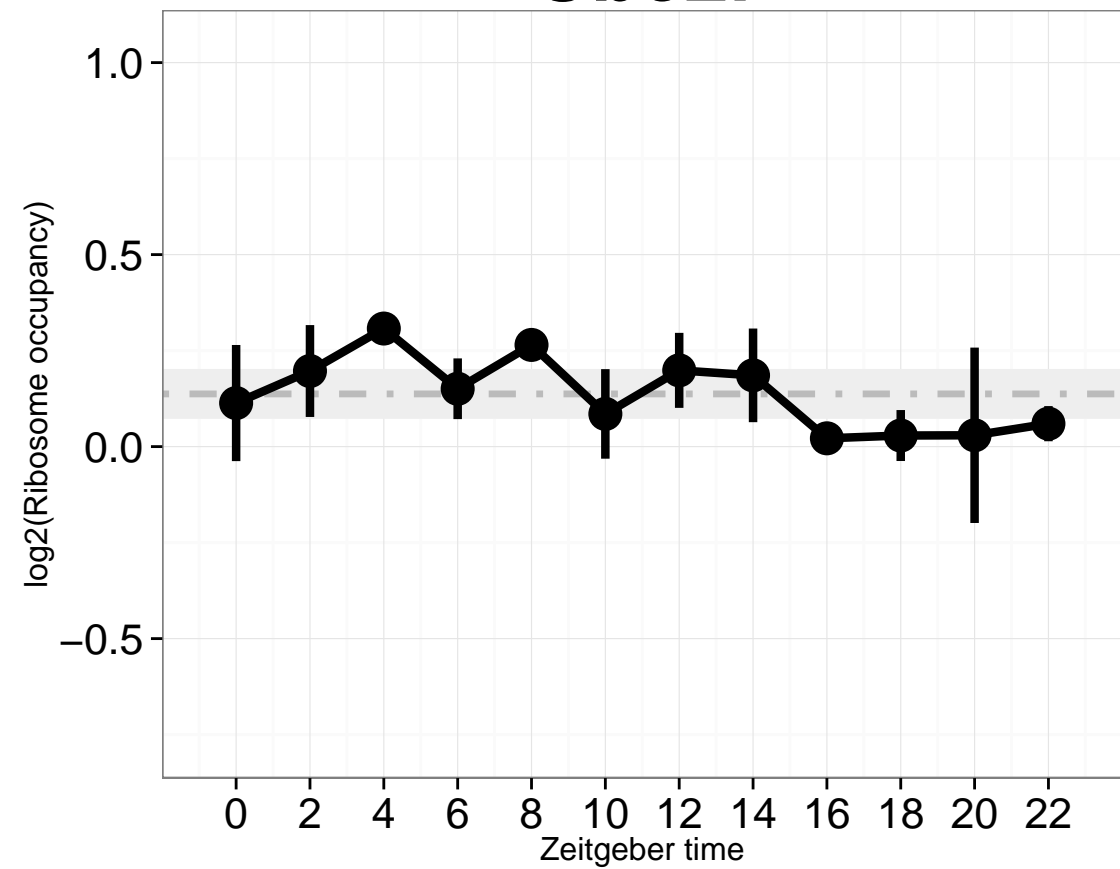

Supplement: Supplementary file 5379 [file 1]

## Selo

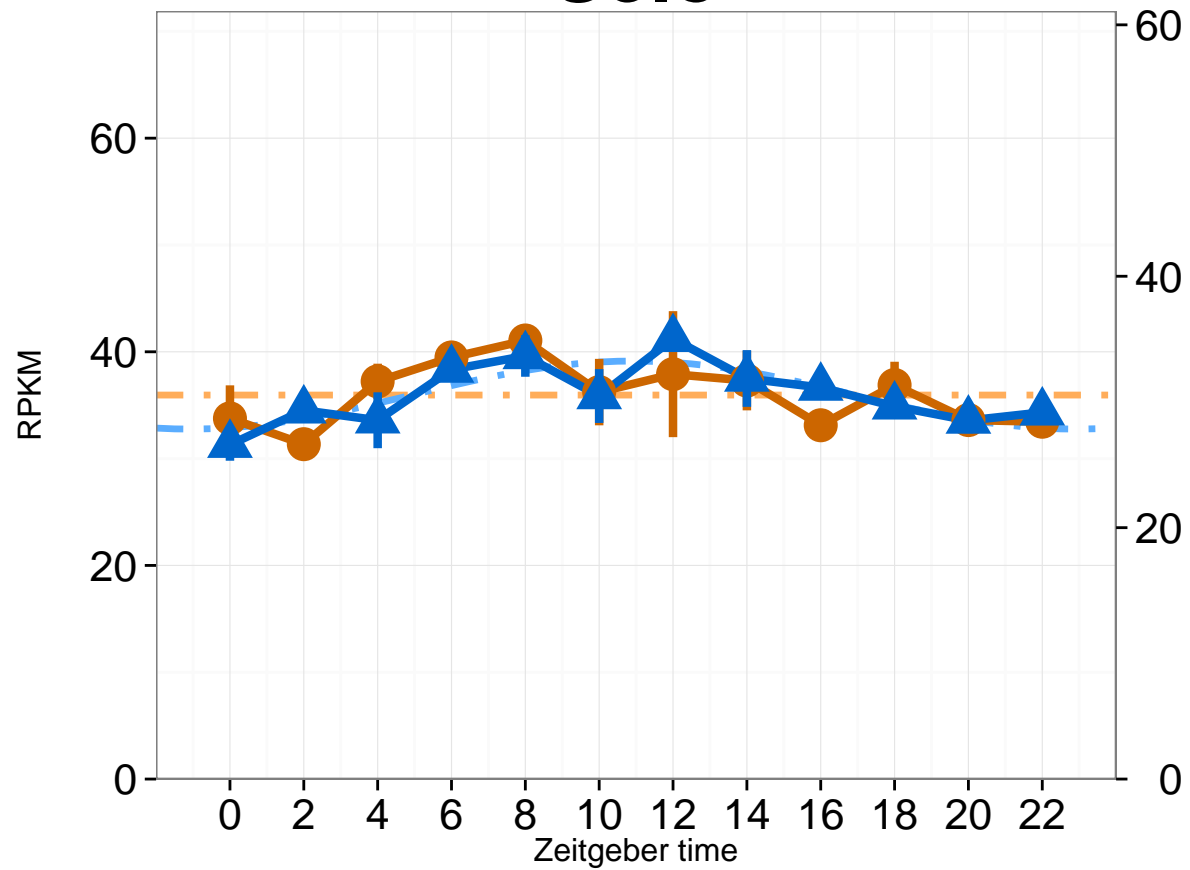

## Selo

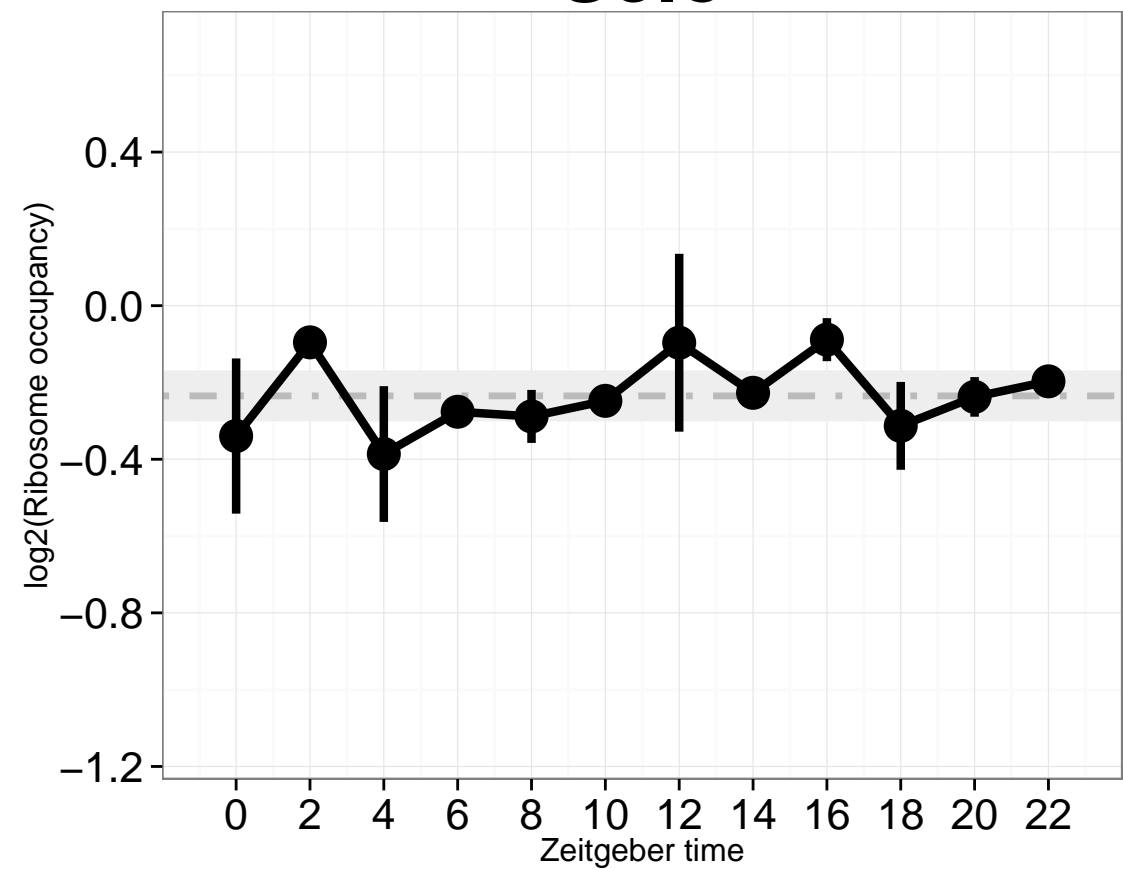

Supplement: Supplementary file 5380 [file 1]

## Acsl4

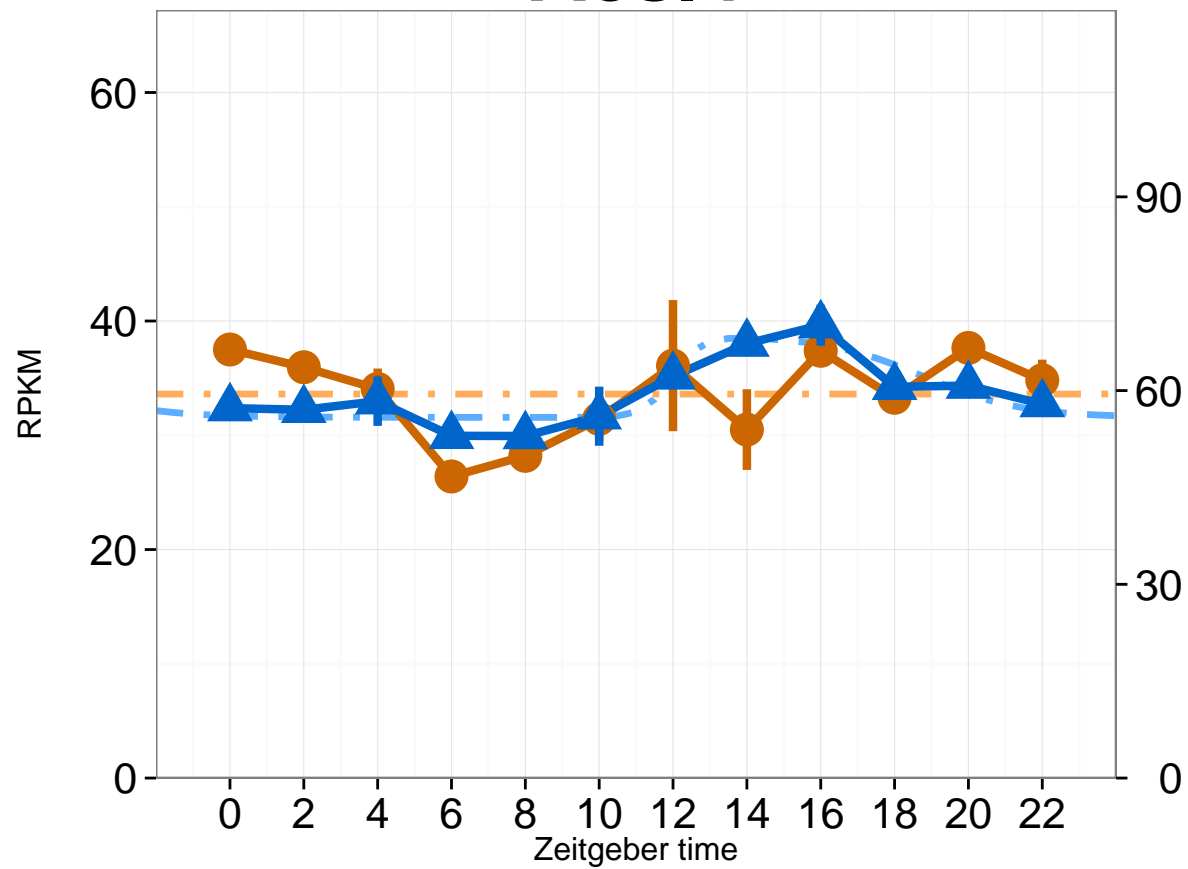

## Acsl4

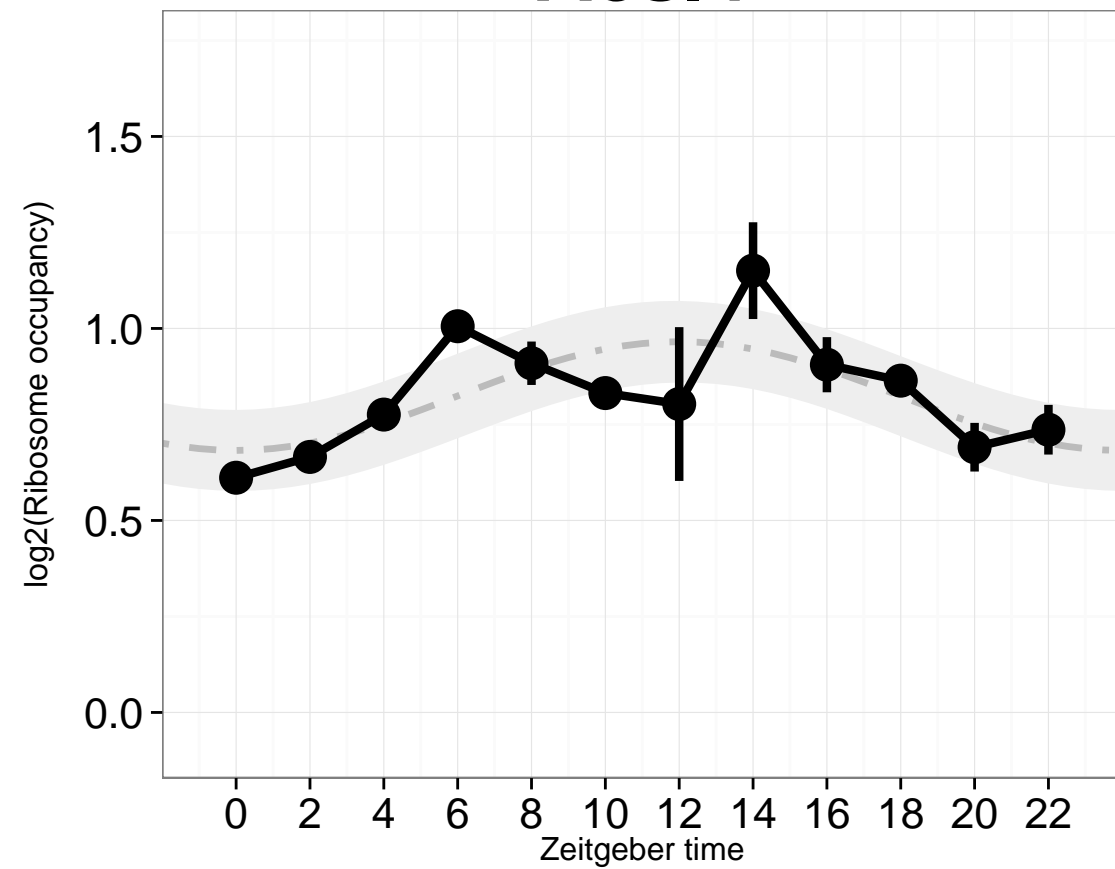

Supplement: Supplementary file 5381 [file 1]

# Asnsd1

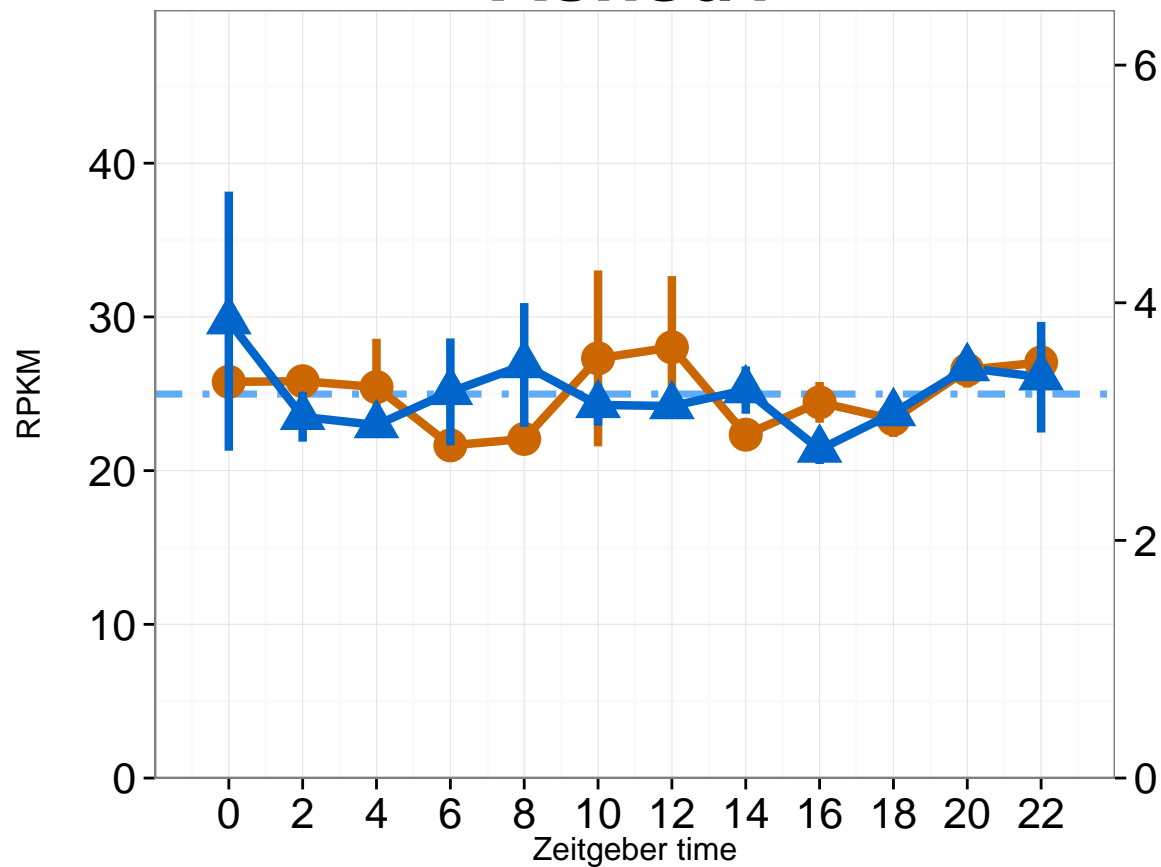

# Asnsd1

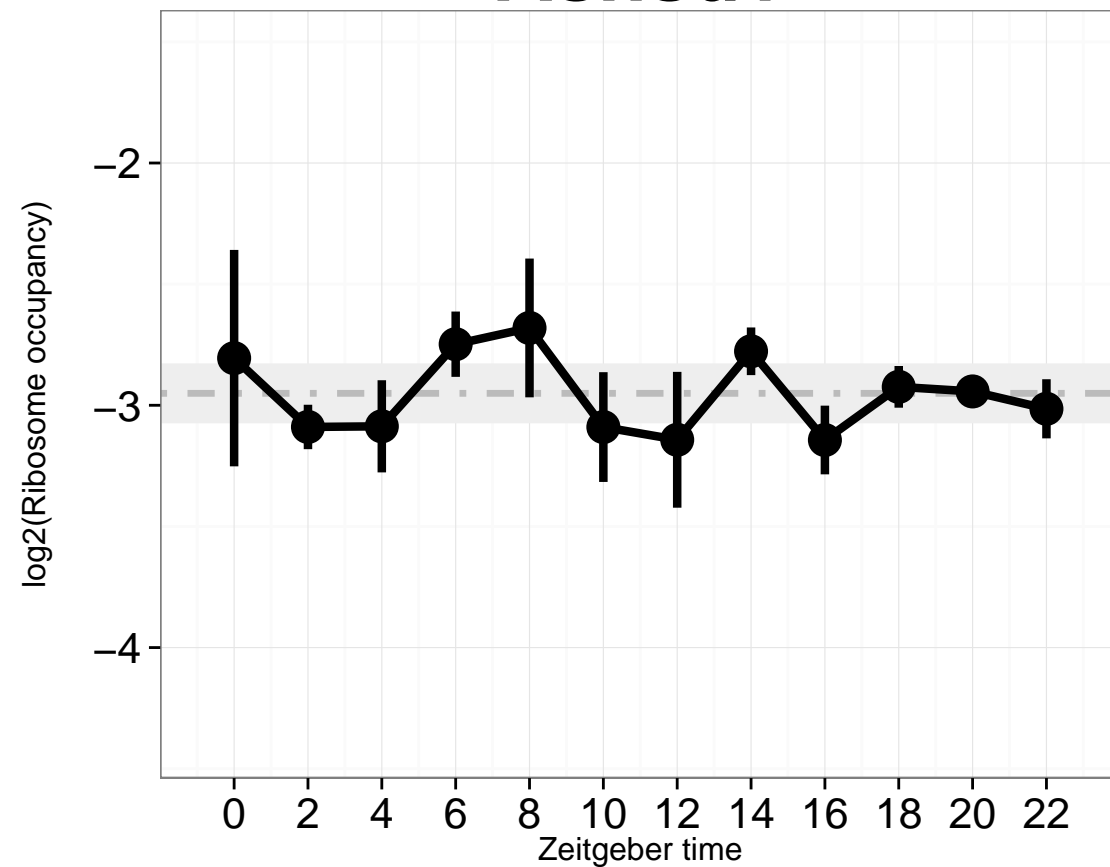

Supplement: Supplementary file 5382 [file 1]

## Dnah3

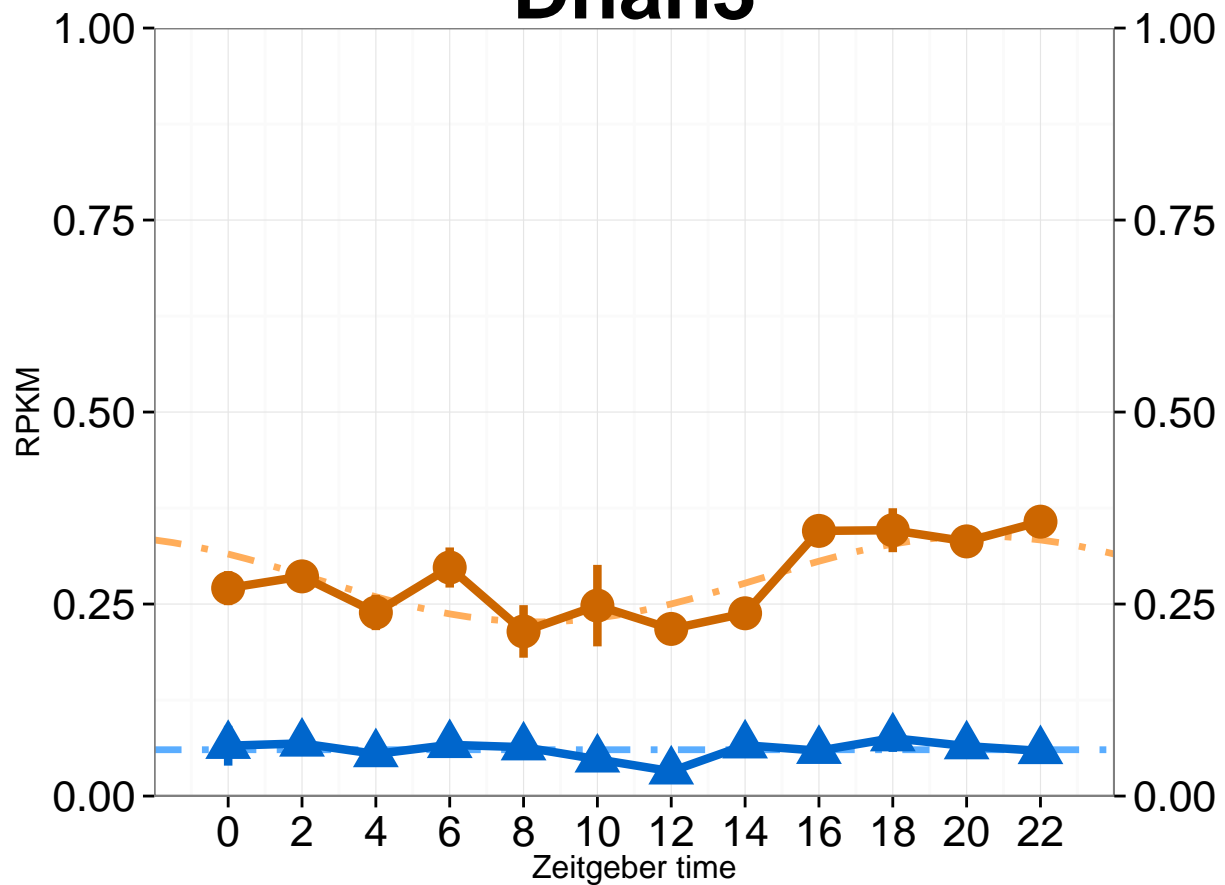

## Dnah3

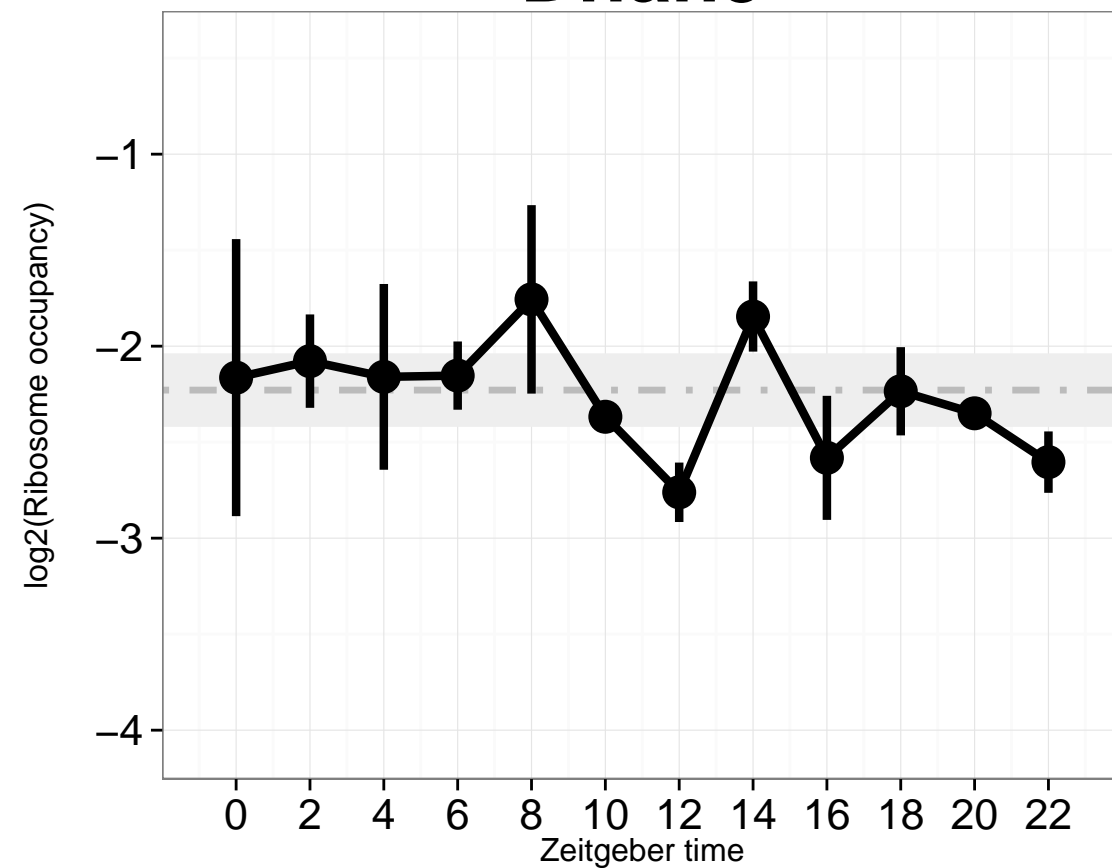

Supplement: Supplementary file 5383 [file 1]

# Cpxm1

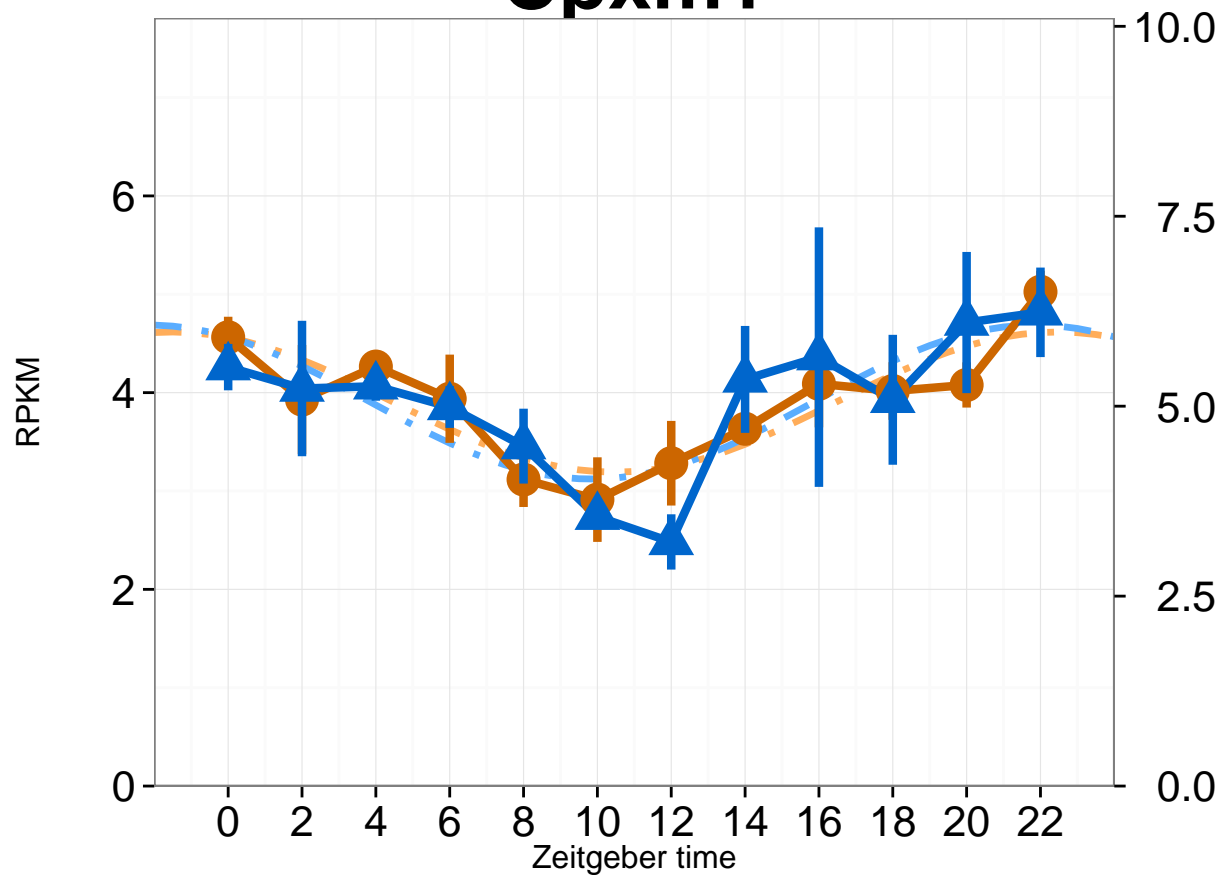

# Cpxm1

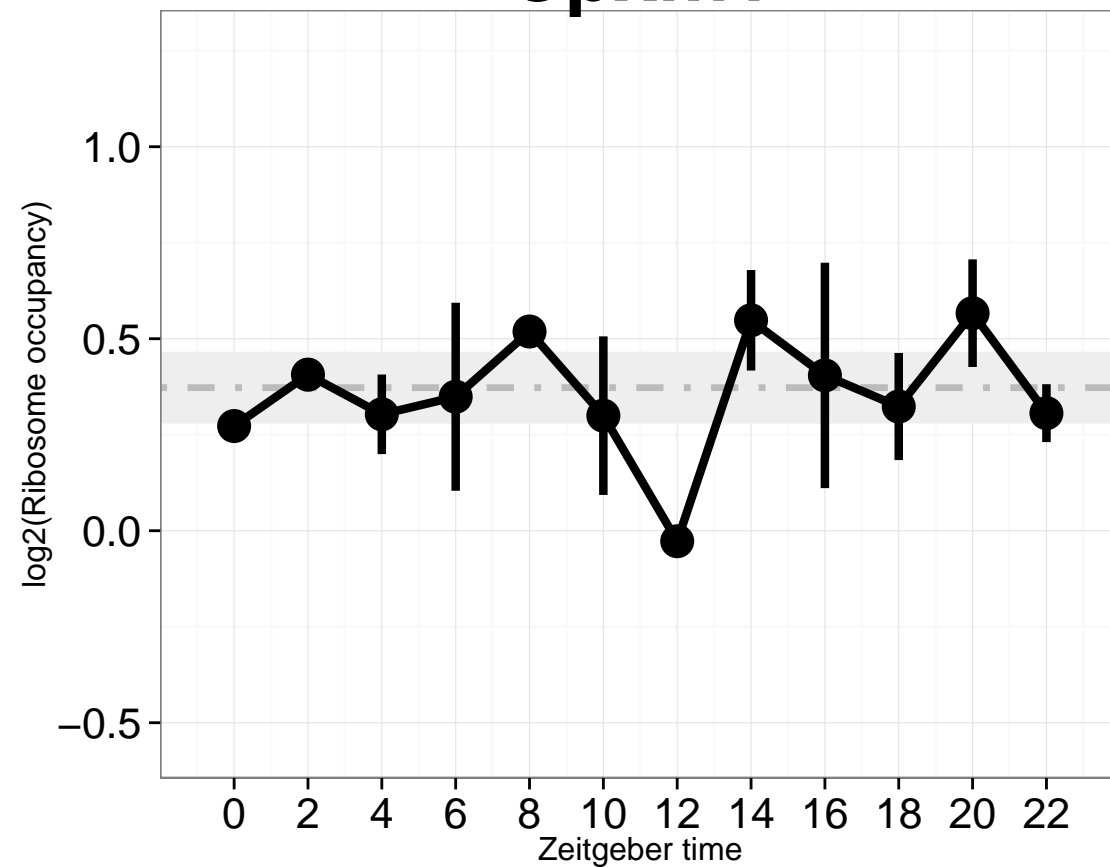

Supplement: Supplementary file 5384 [file 1]

## Nck2

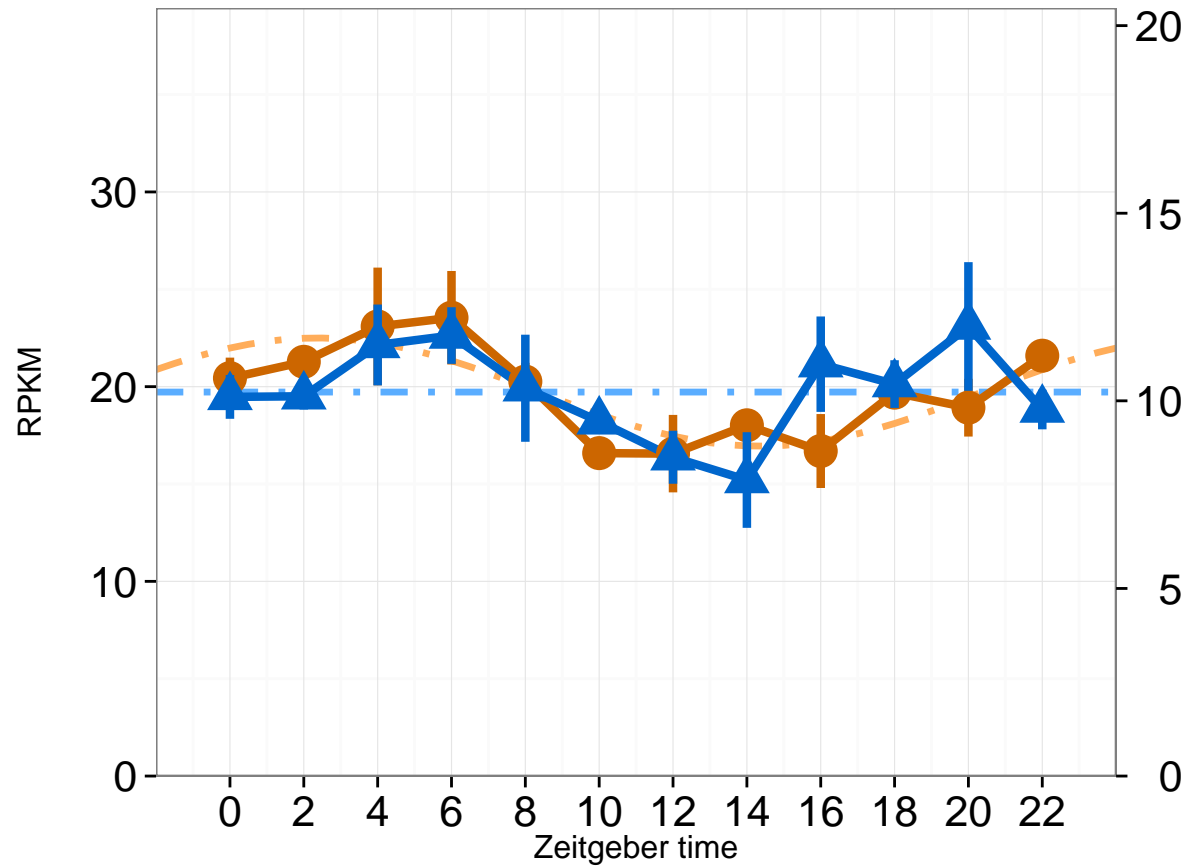

## Nck2

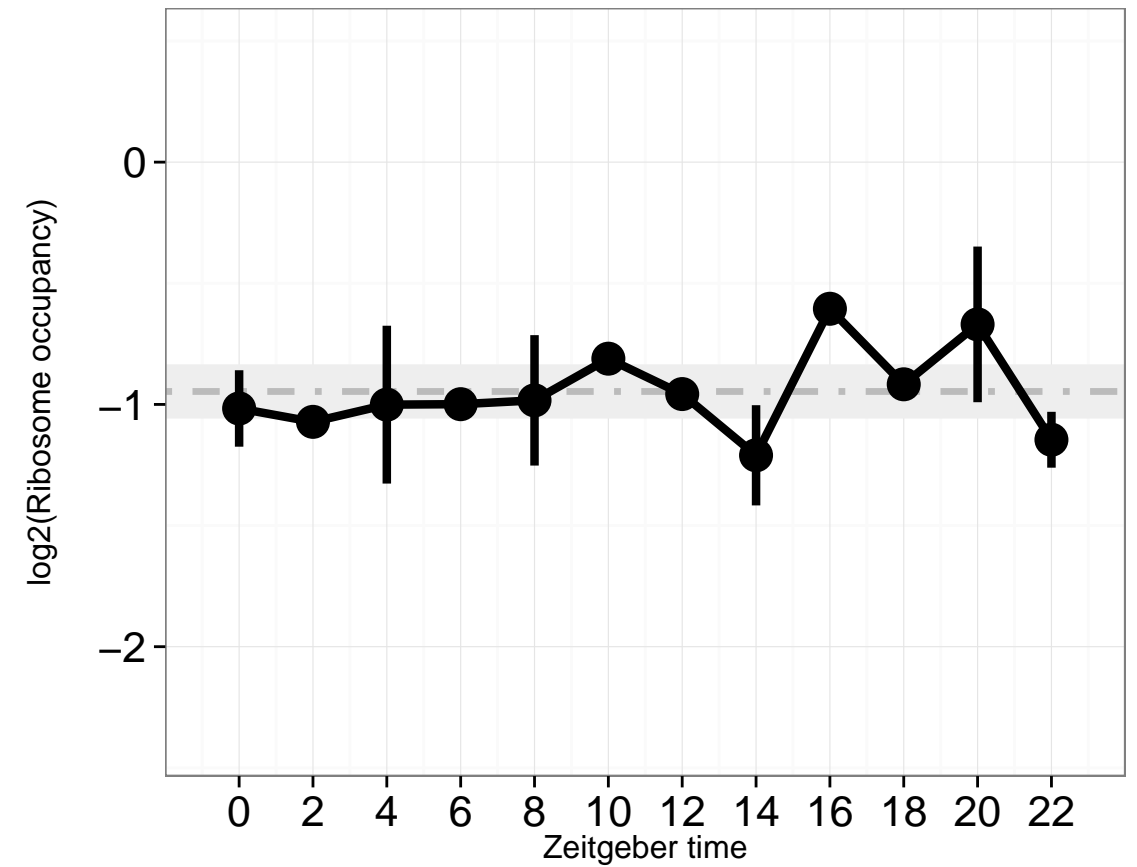

Supplement: Supplementary file 5385 [file 1]

**St7**

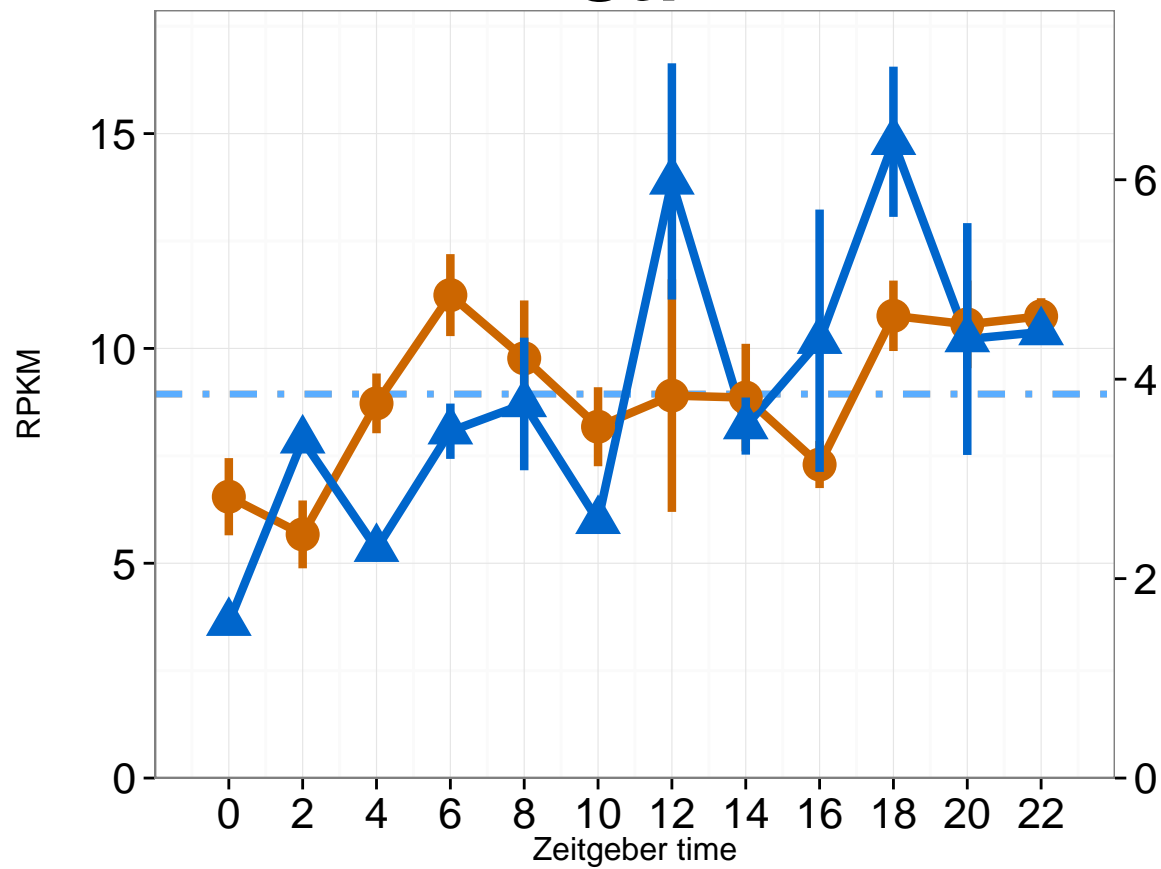

**St7**

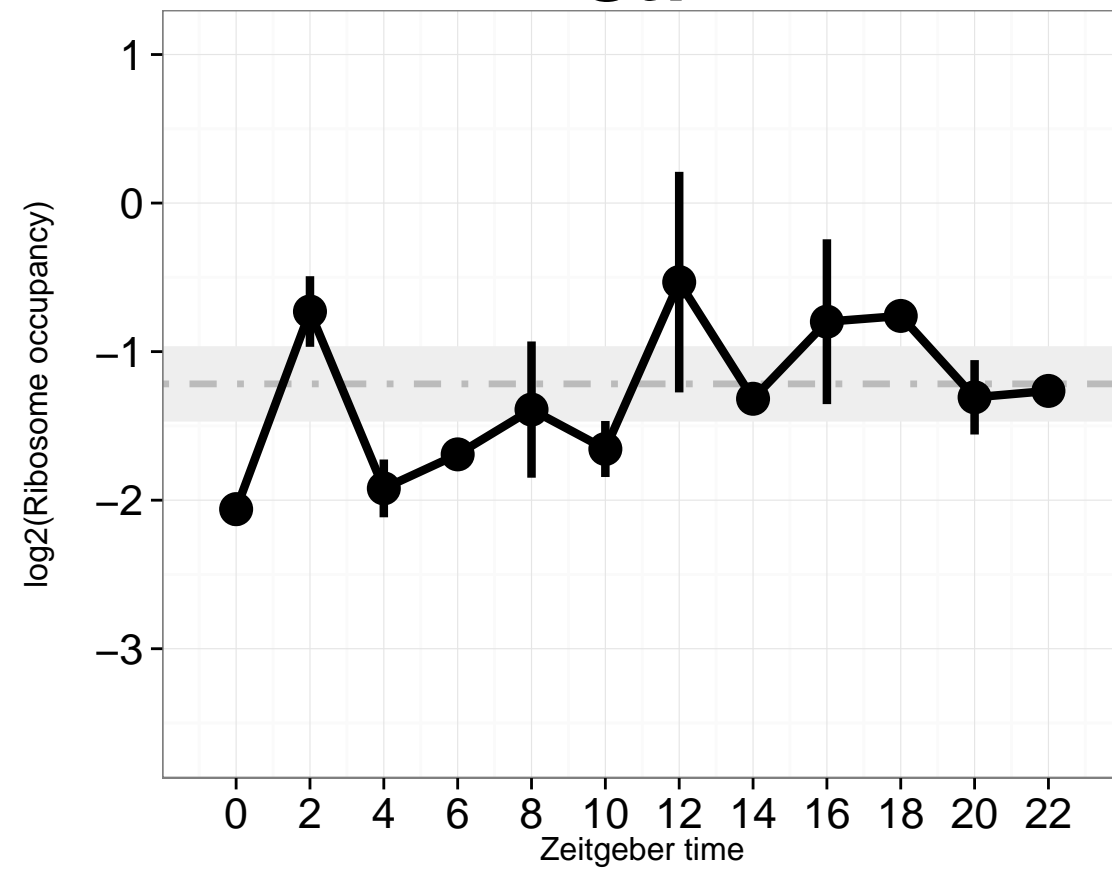

Supplement: Supplementary file 5386 [file 1]

## Prdm2

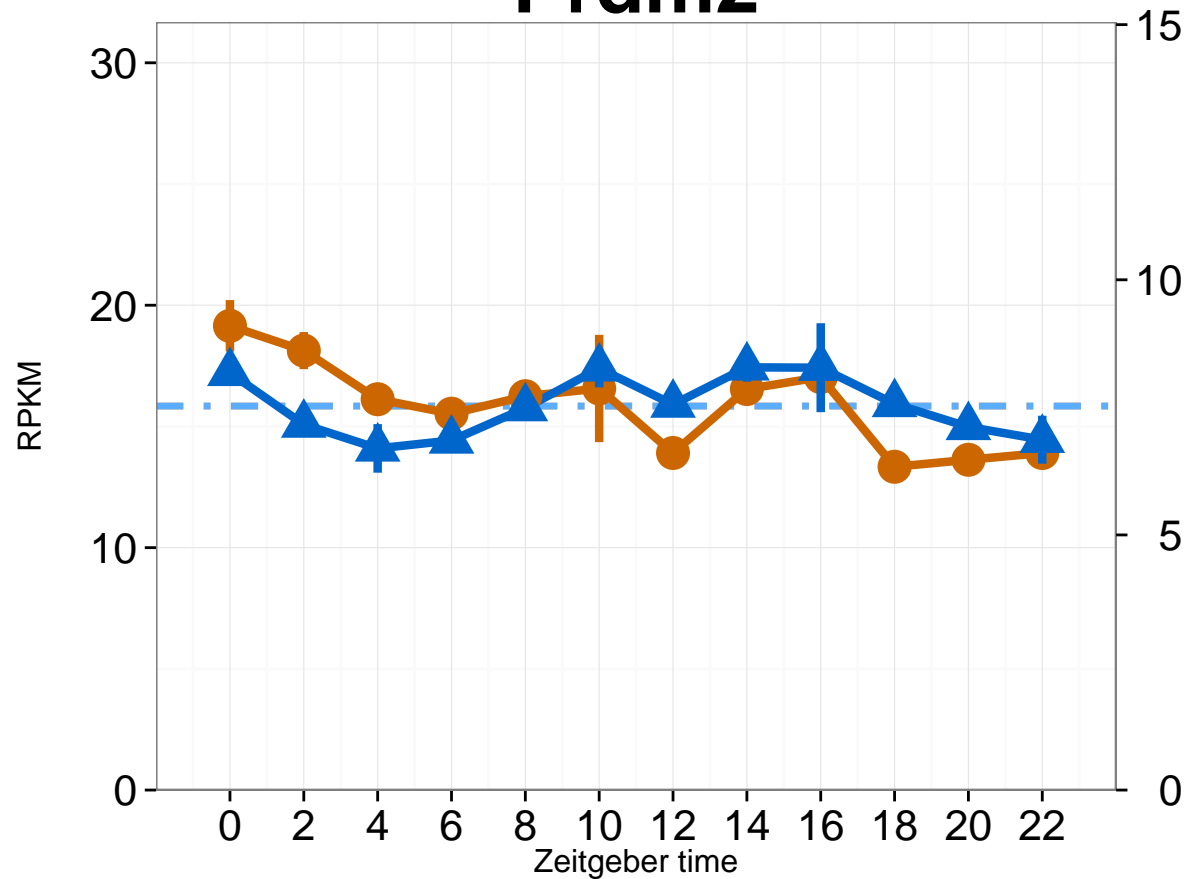

## Prdm2

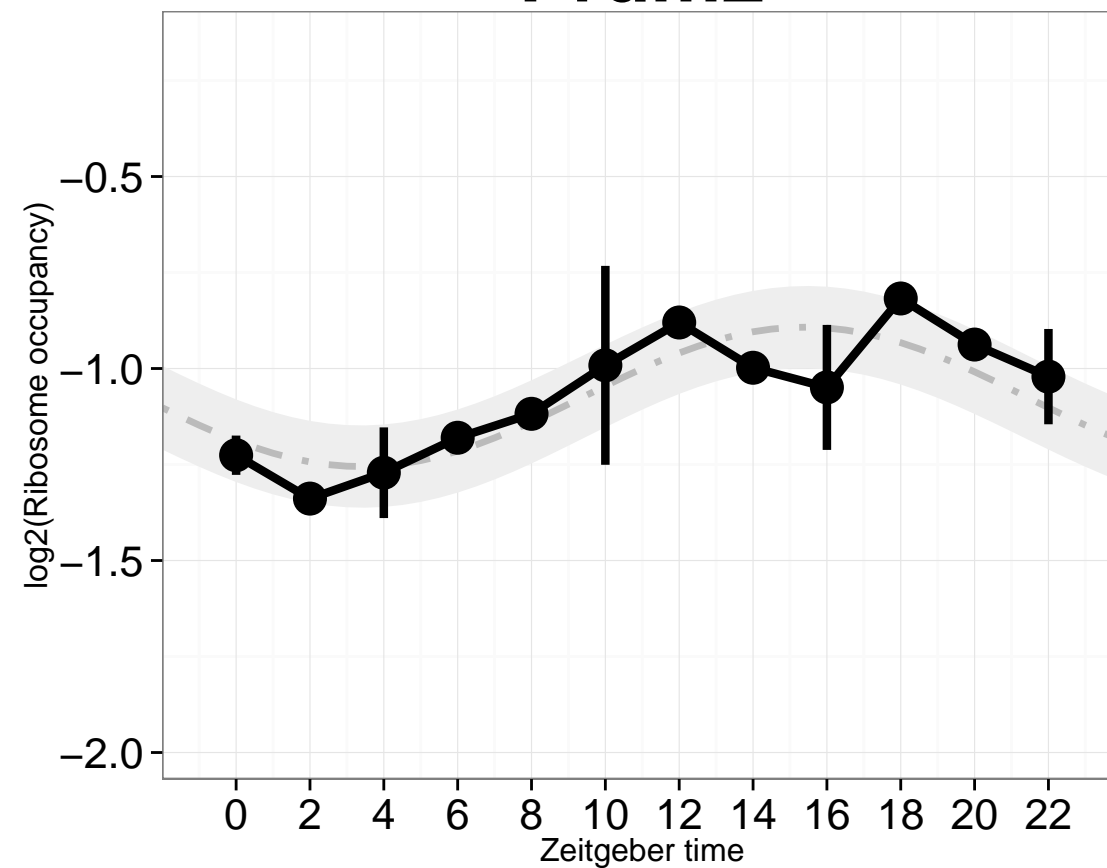

Supplement: Supplementary file 5387 [file 1]

# Atg14

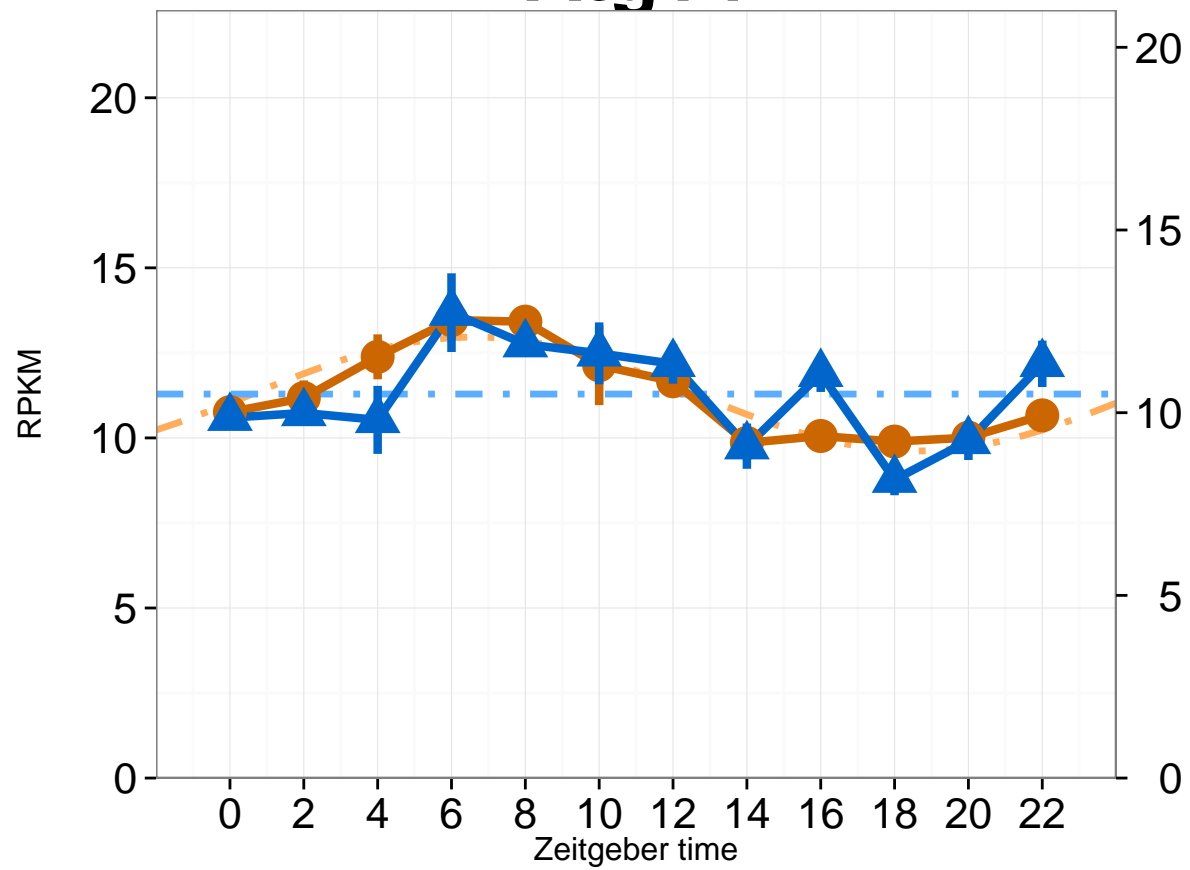

# Atg14

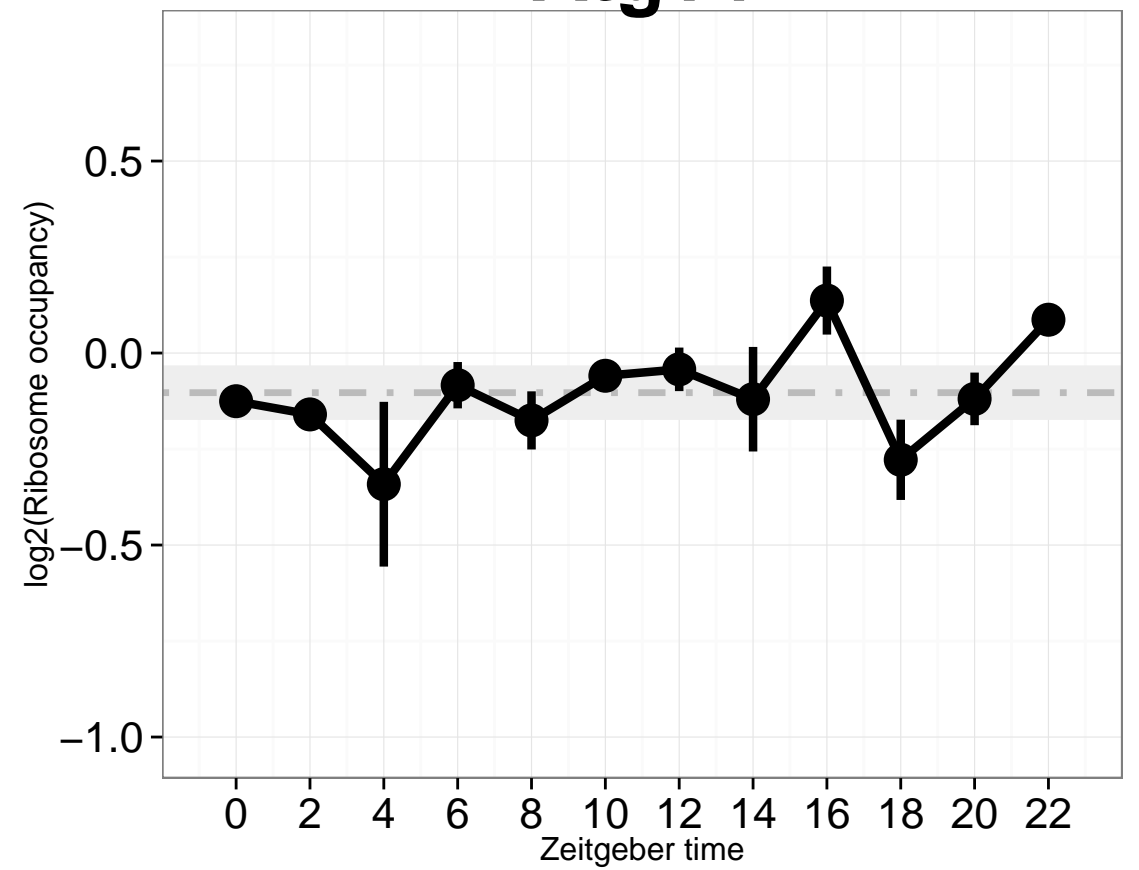

Supplement: Supplementary file 5388 [file 1]

## Wdr41

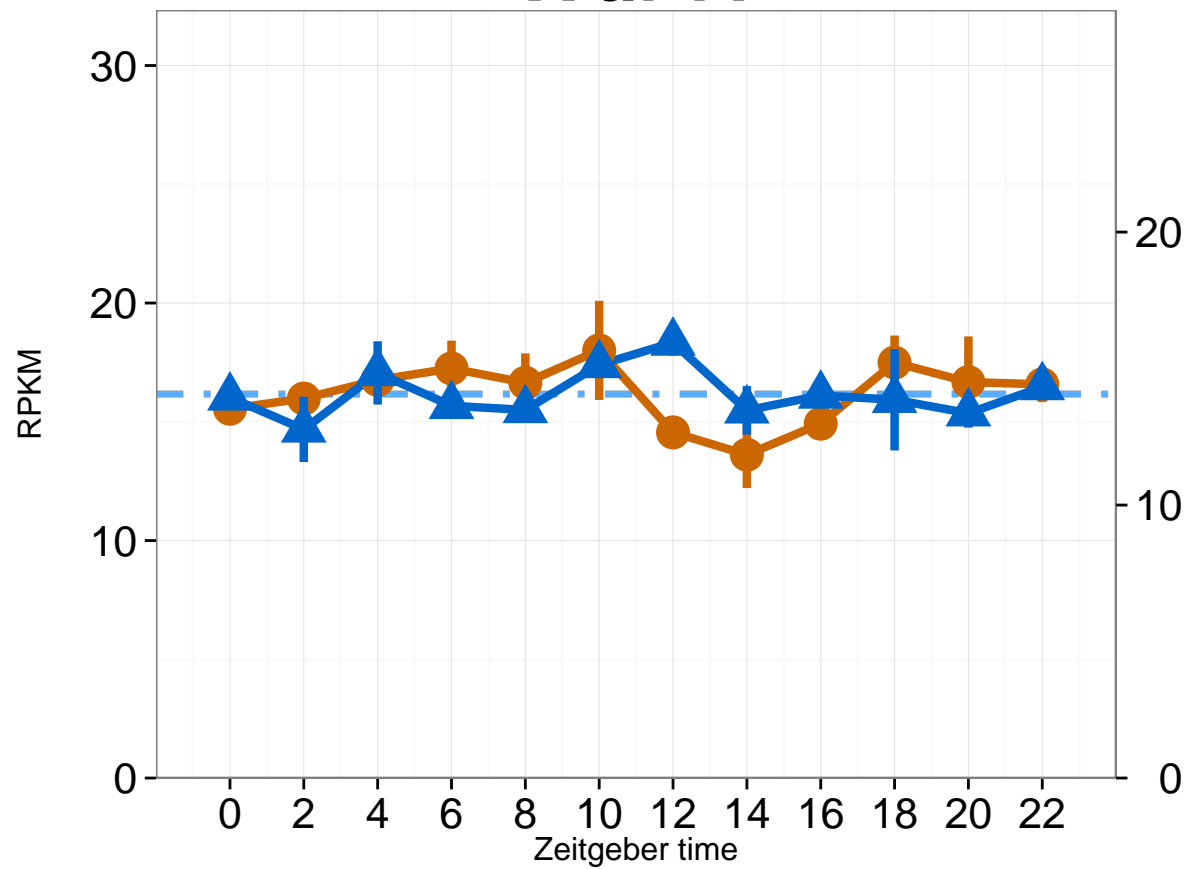

## Wdr41

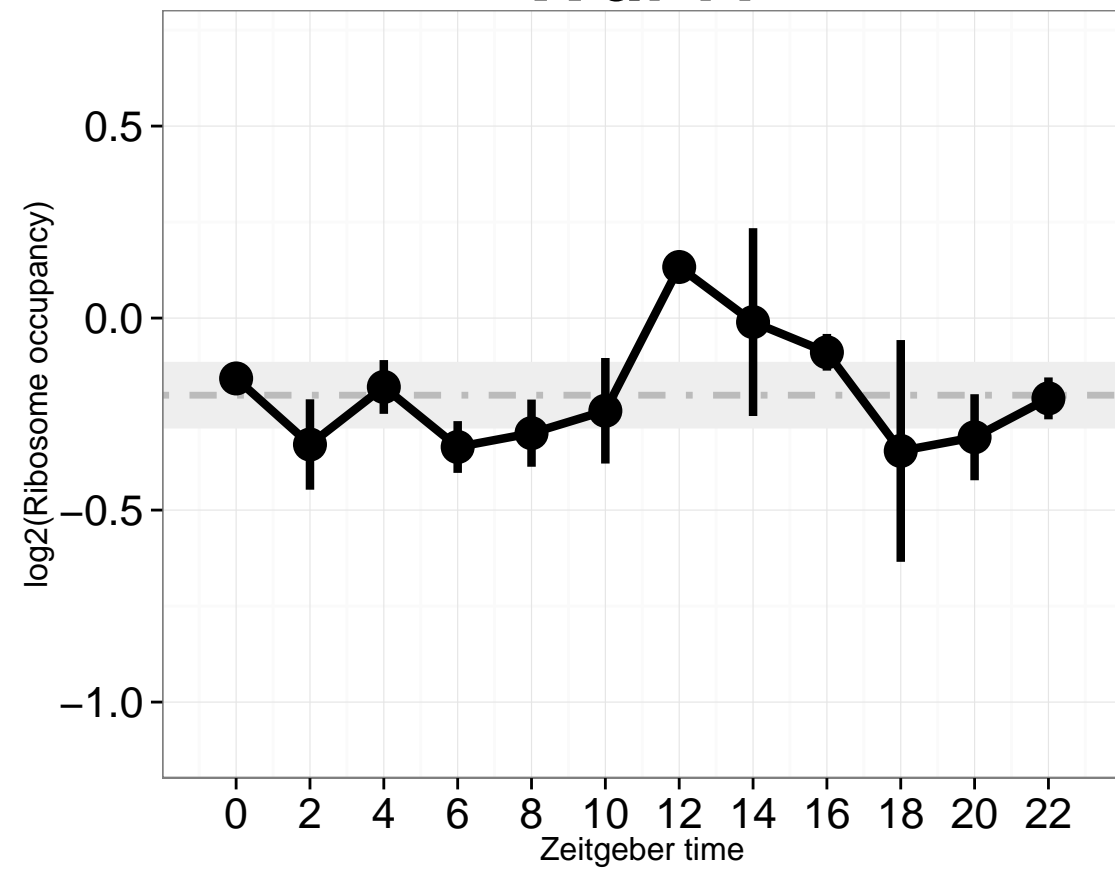

Supplement: Supplementary file 5389 [file 1]

# Stmn1

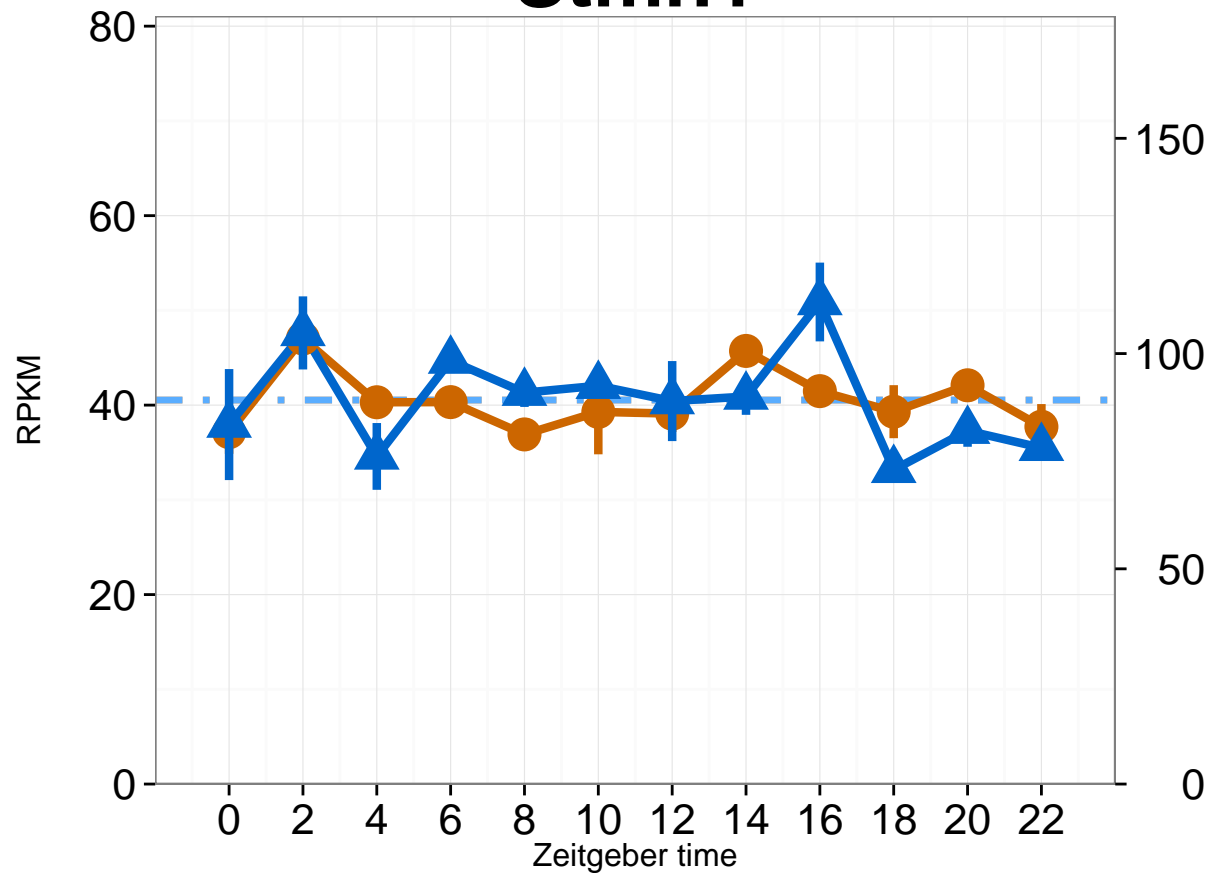

# Stmn1

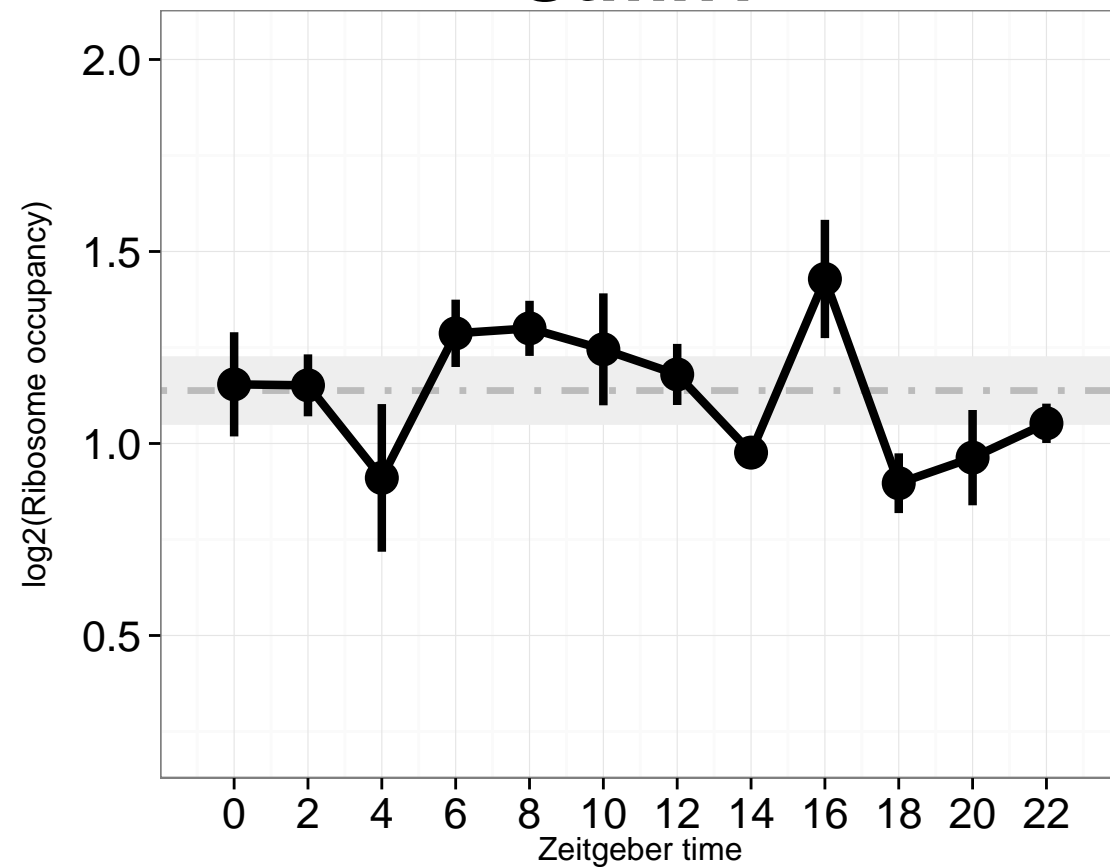

Supplement: Supplementary file 5390 [file 1]

## Rad54l2

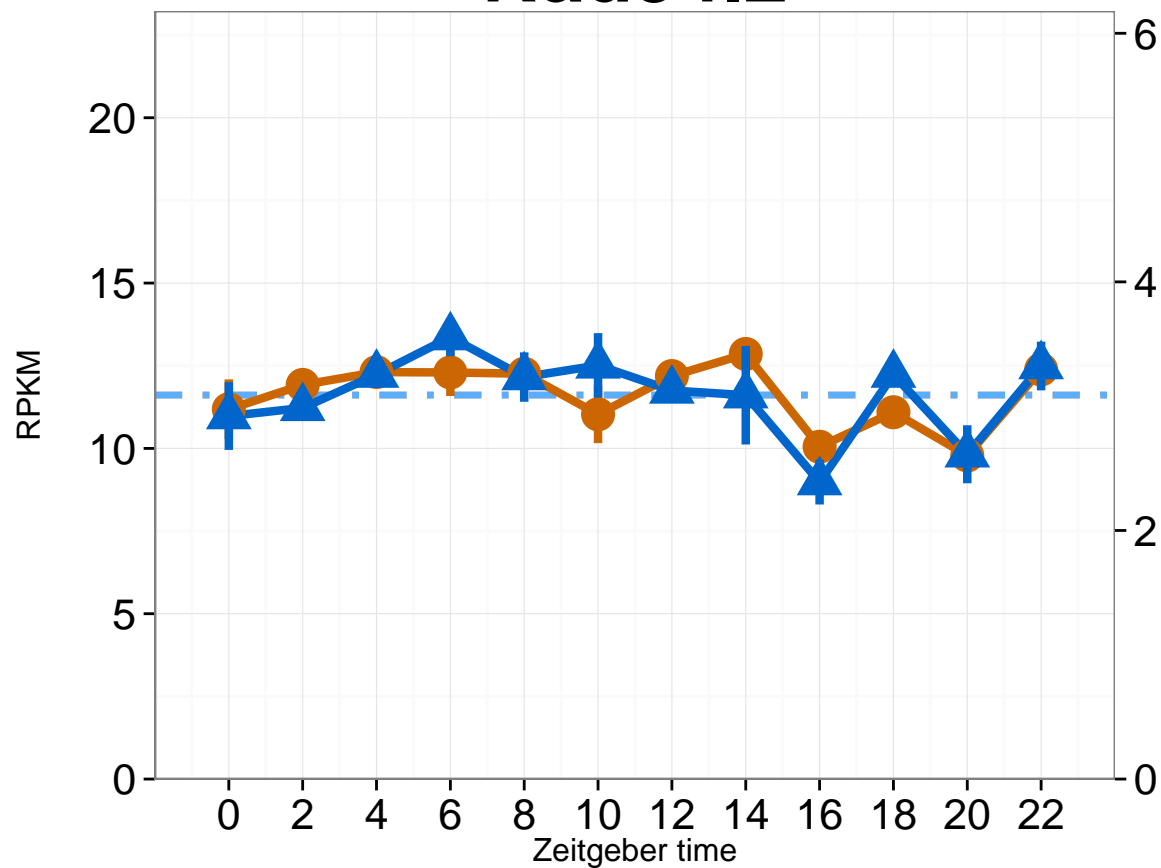

## Rad54l2

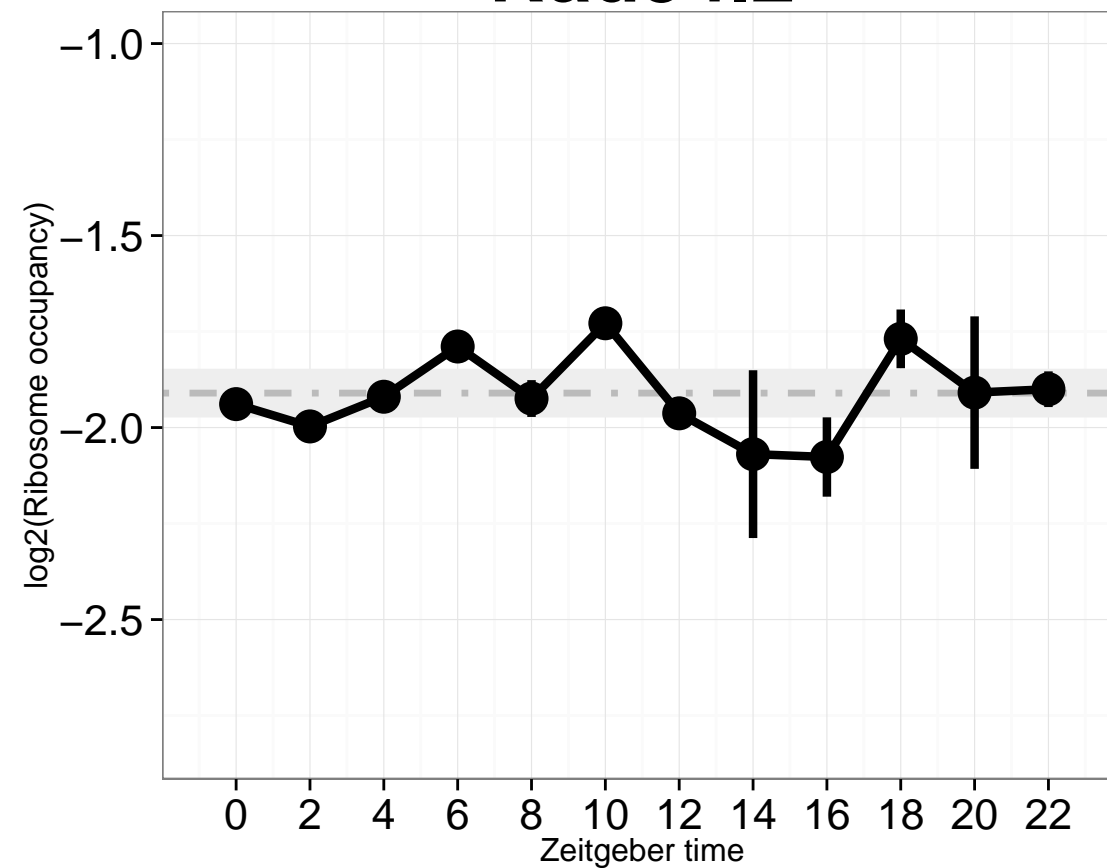

Supplement: Supplementary file 5391 [file 1]

# Slc35a3

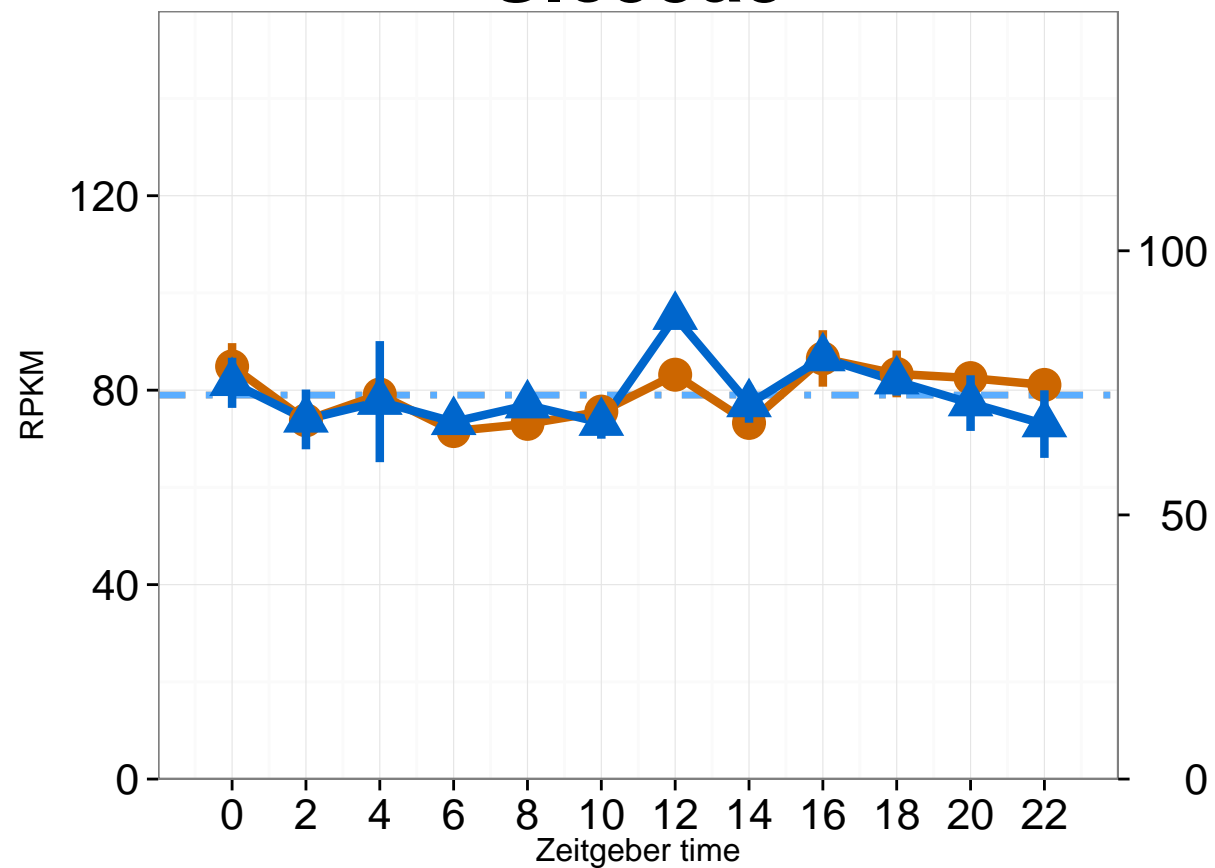

# Slc35a3

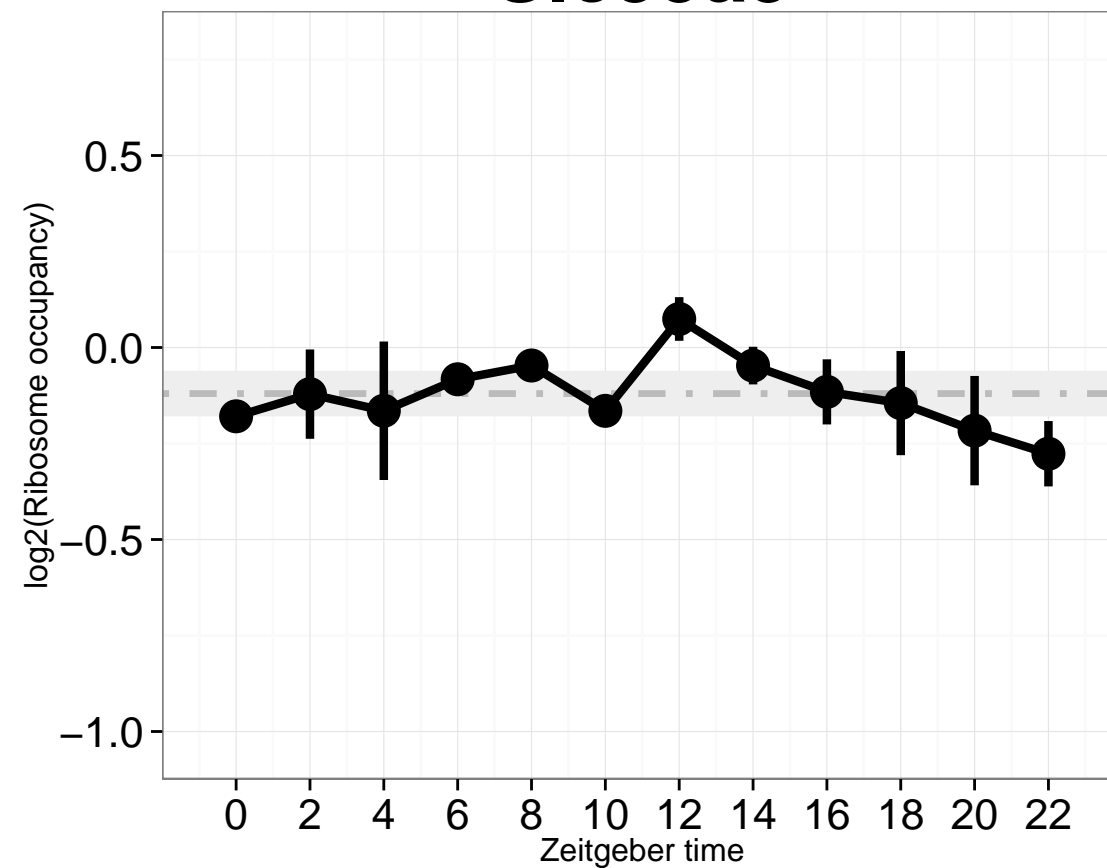

Supplement: Supplementary file 5392 [file 1]

## Med13l

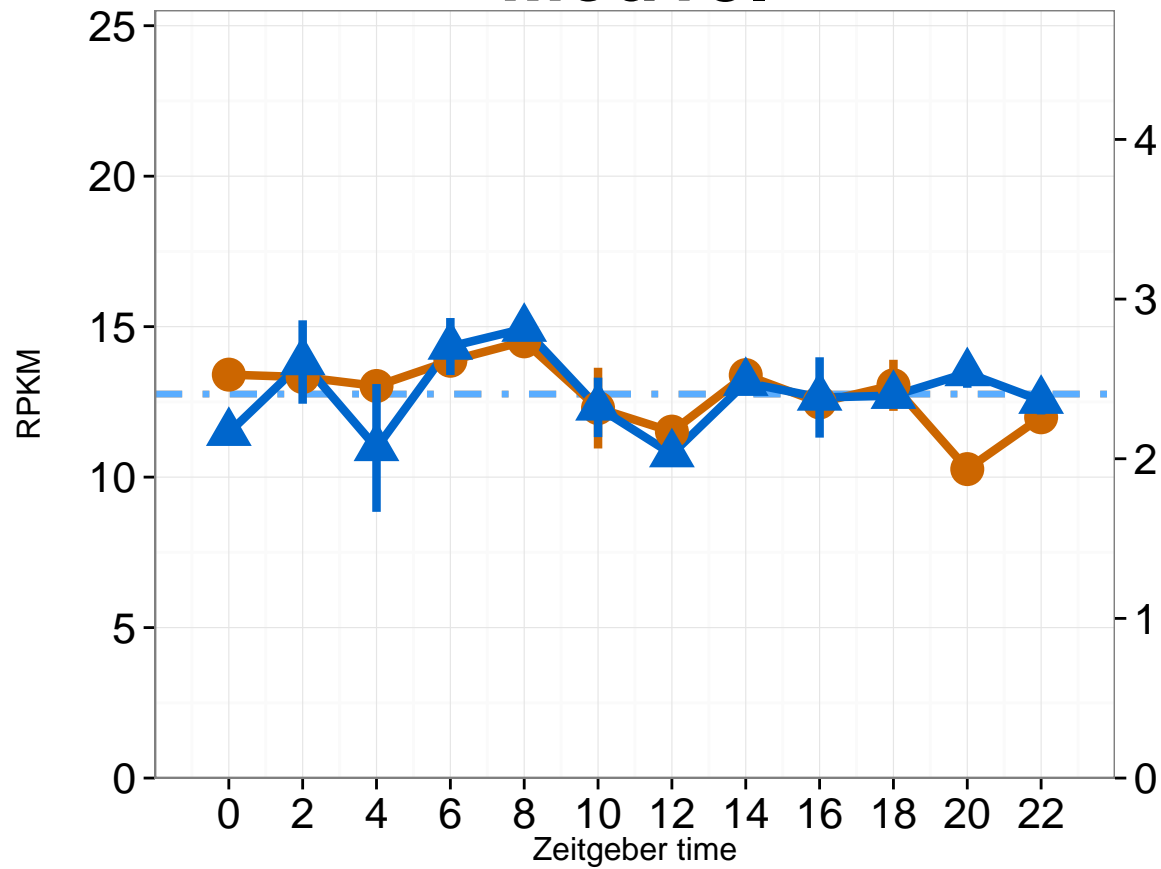

## Med13l

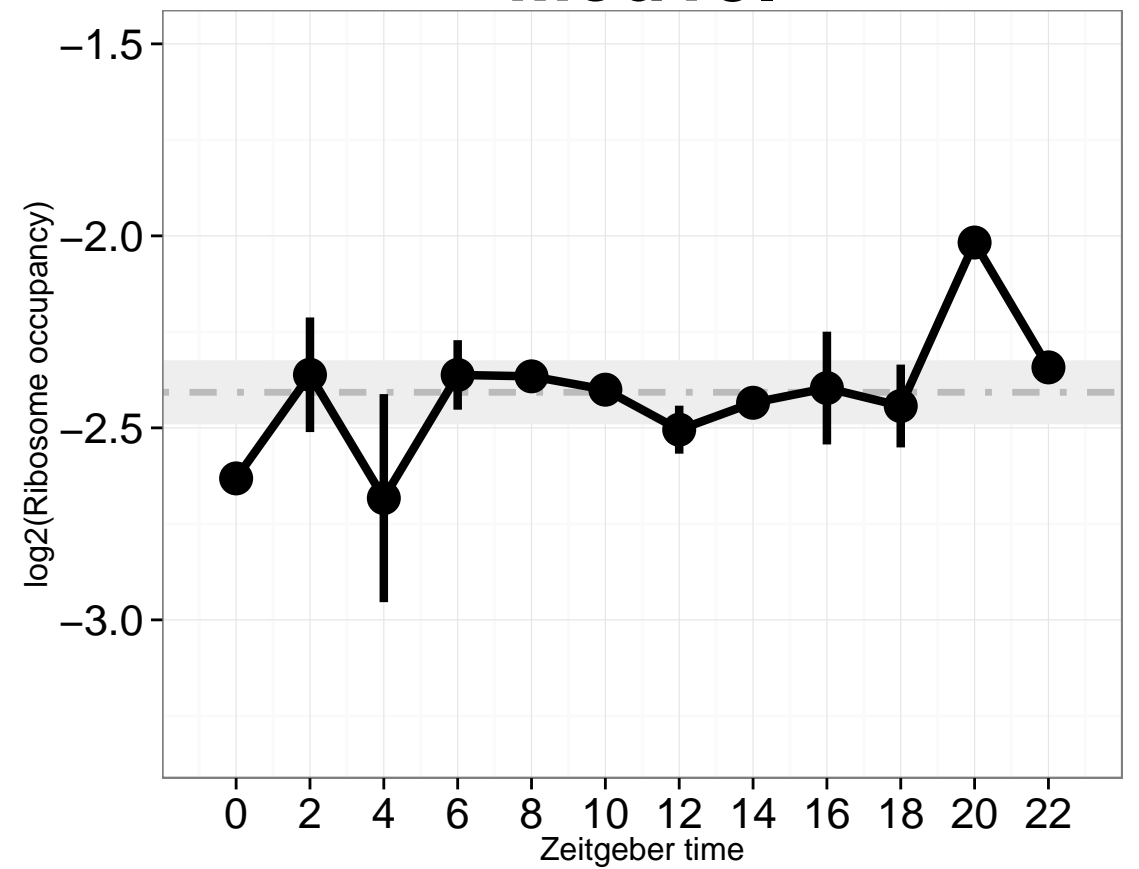

Supplement: Supplementary file 5393 [file 1]

## Gab2

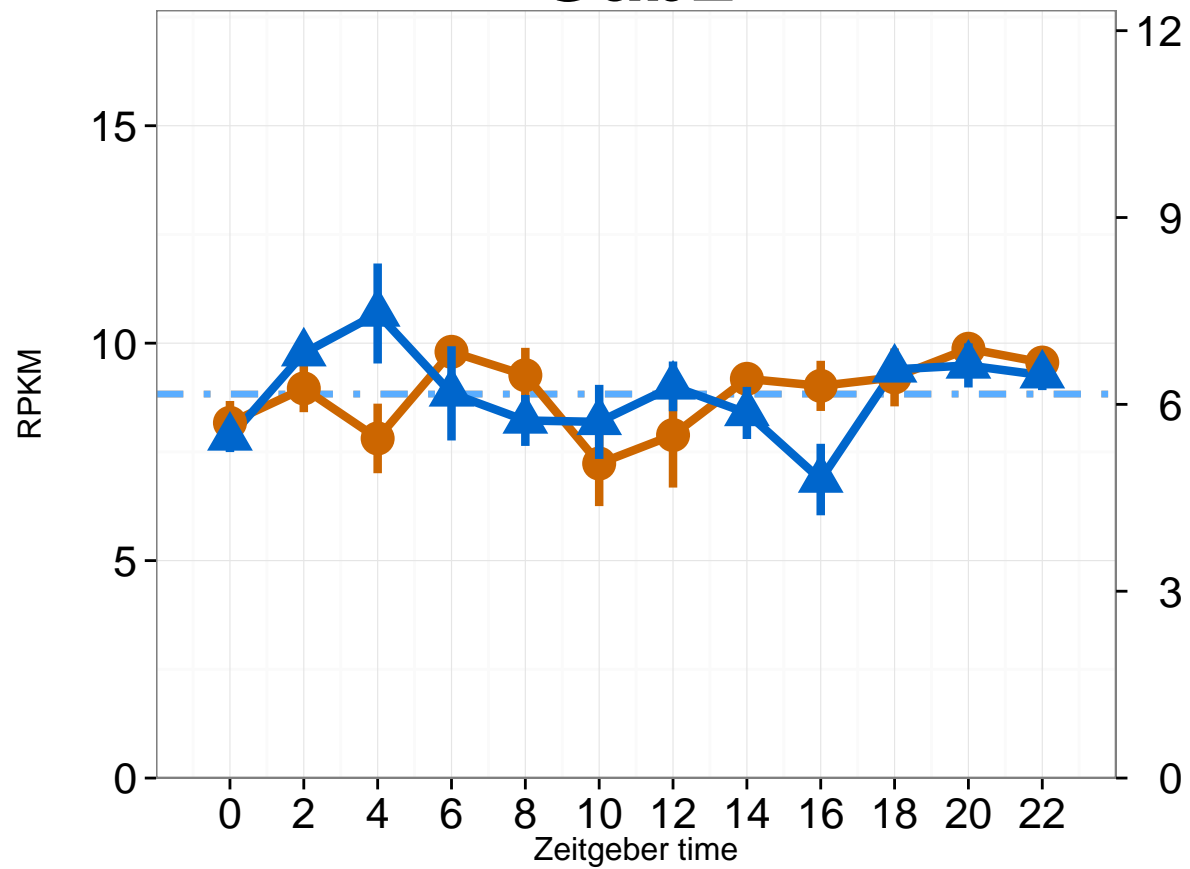

## Gab2

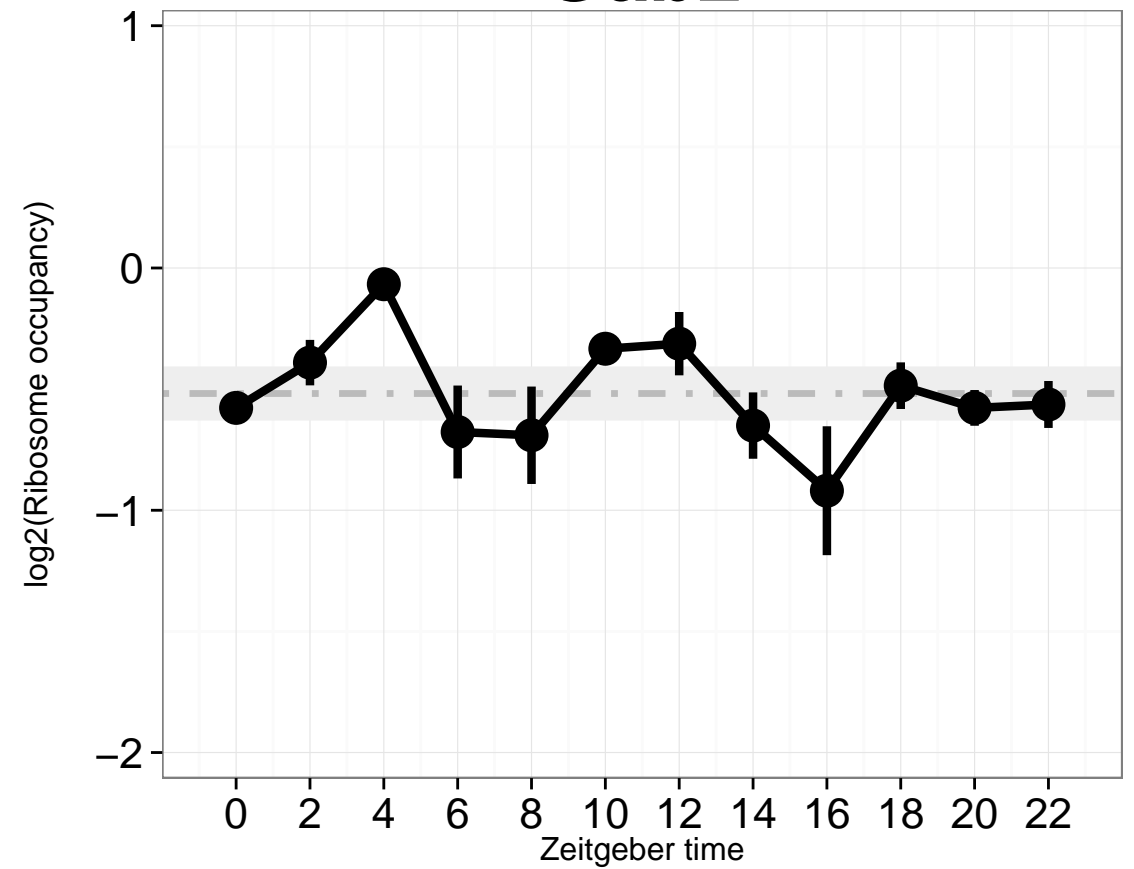

Supplement: Supplementary file 5394 [file 1]

## Pcdh1

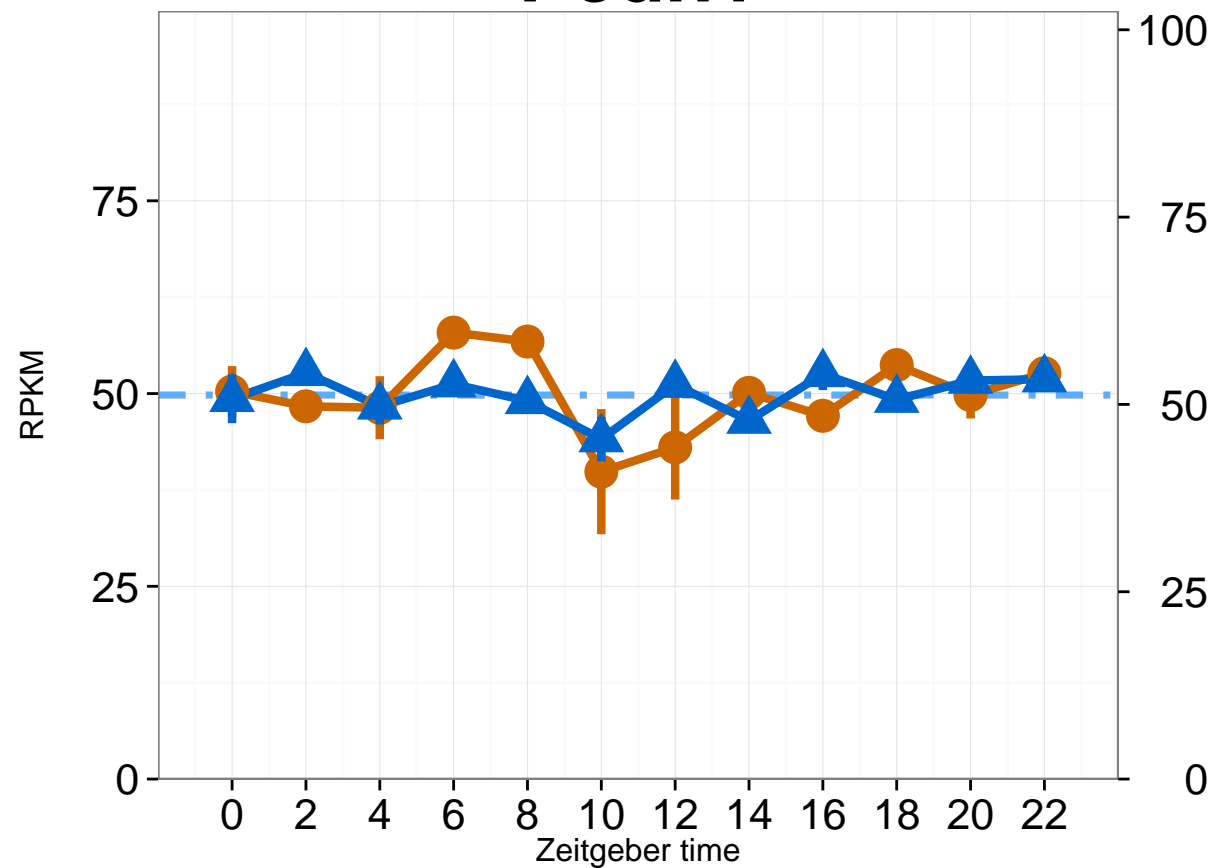

## Pcdh1

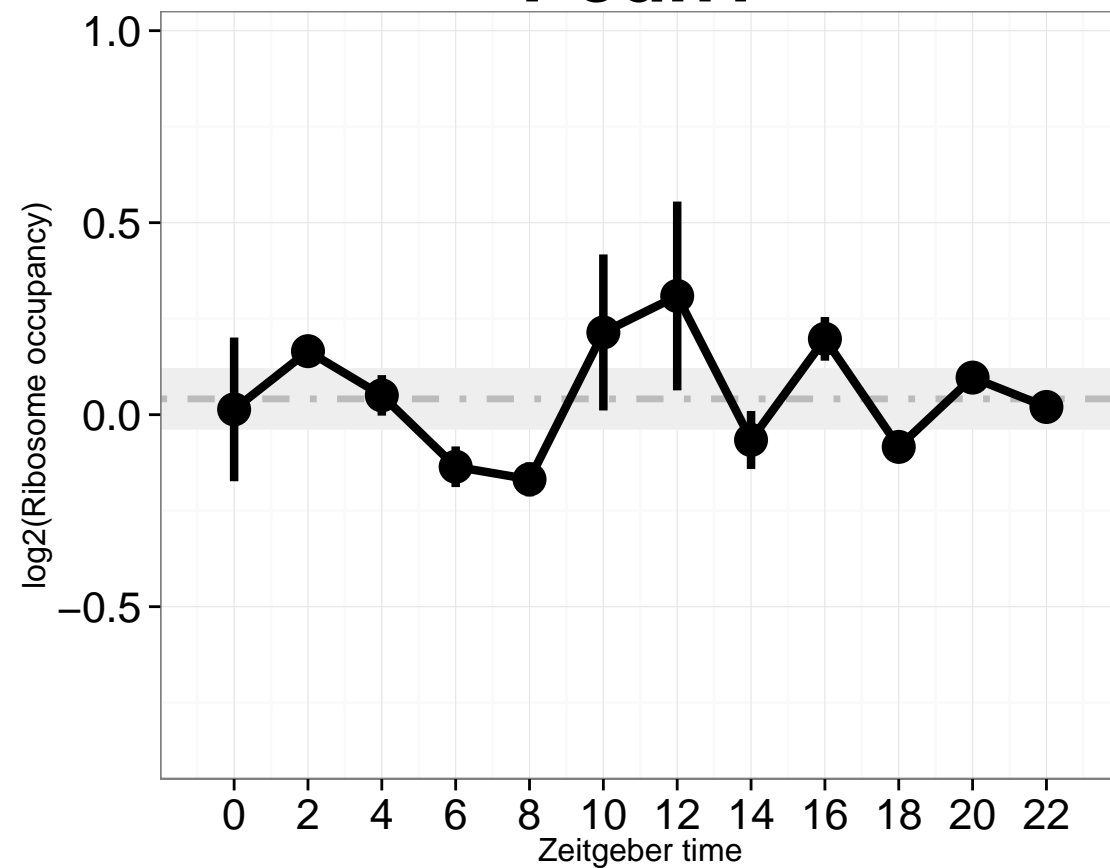

Supplement: Supplementary file 5395 [file 1]

# Nt5m

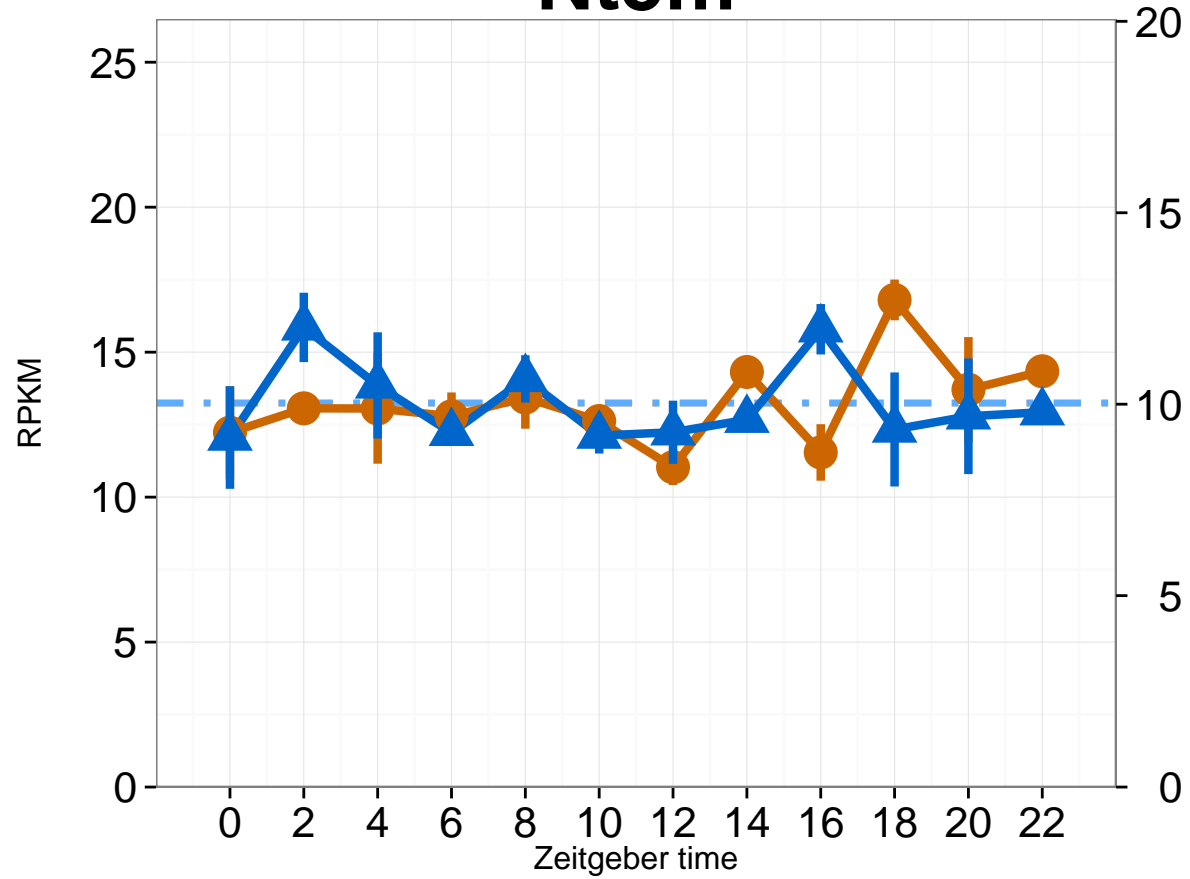

# Nt5m

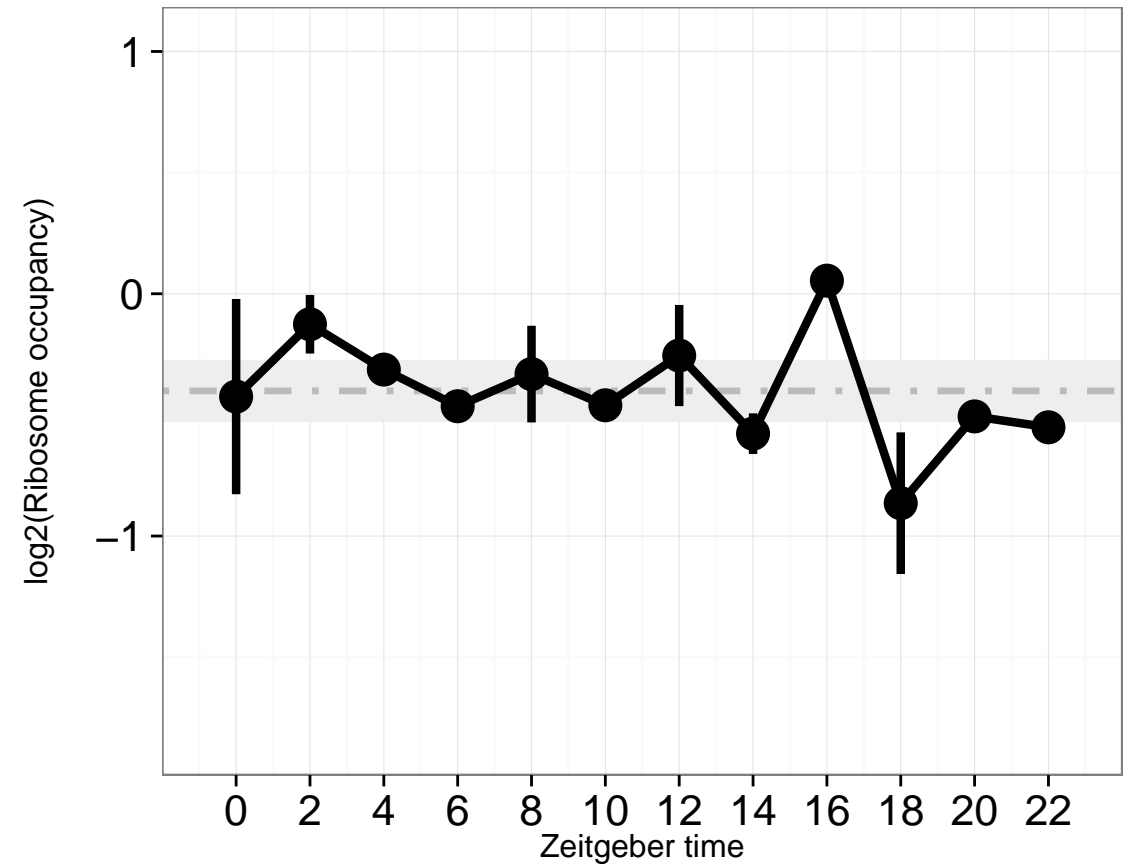

Supplement: Supplementary file 5396 [file 1]

# Ces1d

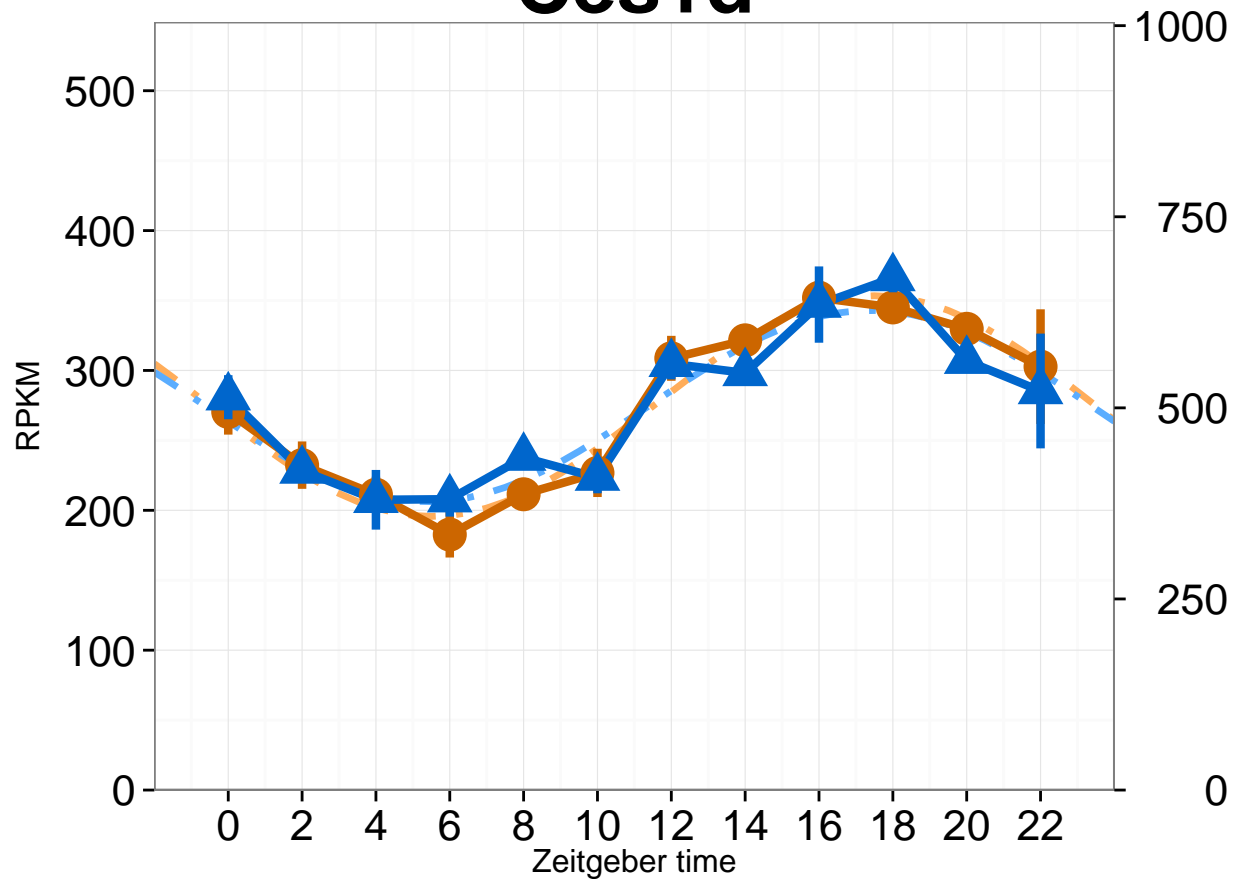

# Ces1d

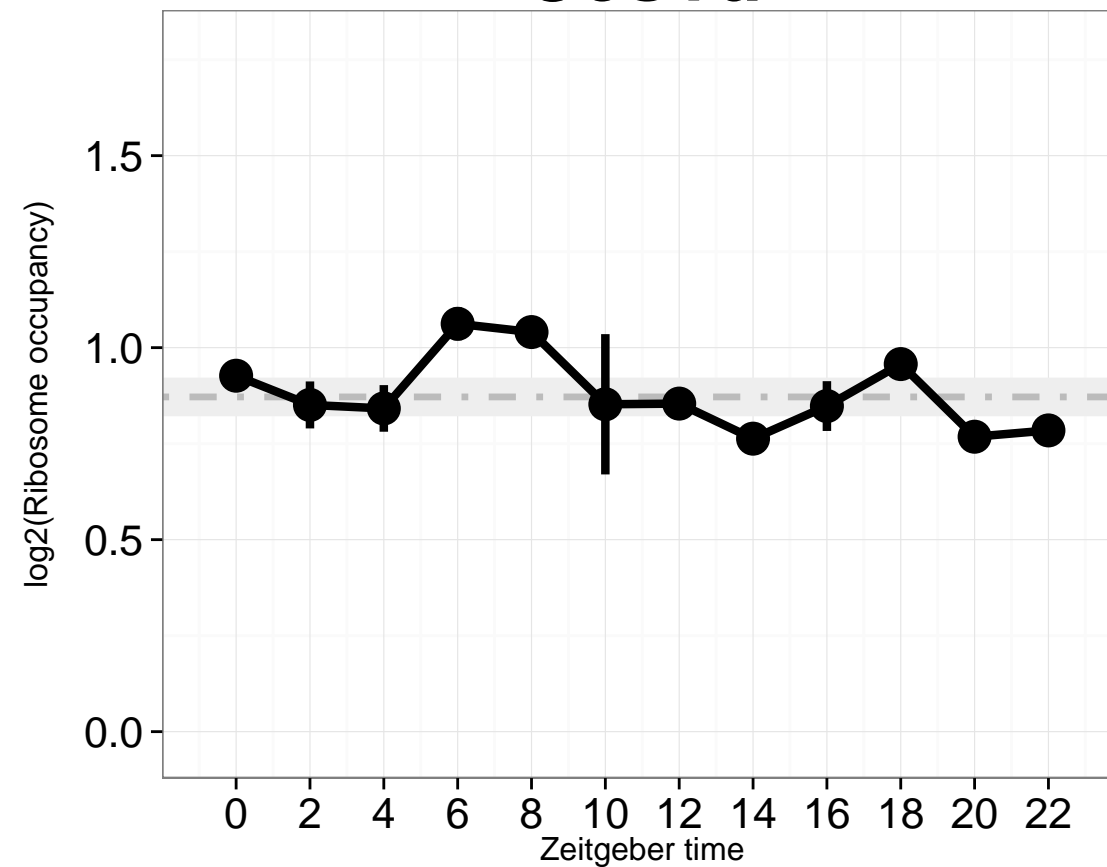

Supplement: Supplementary file 5397 [file 1]

## Phyh

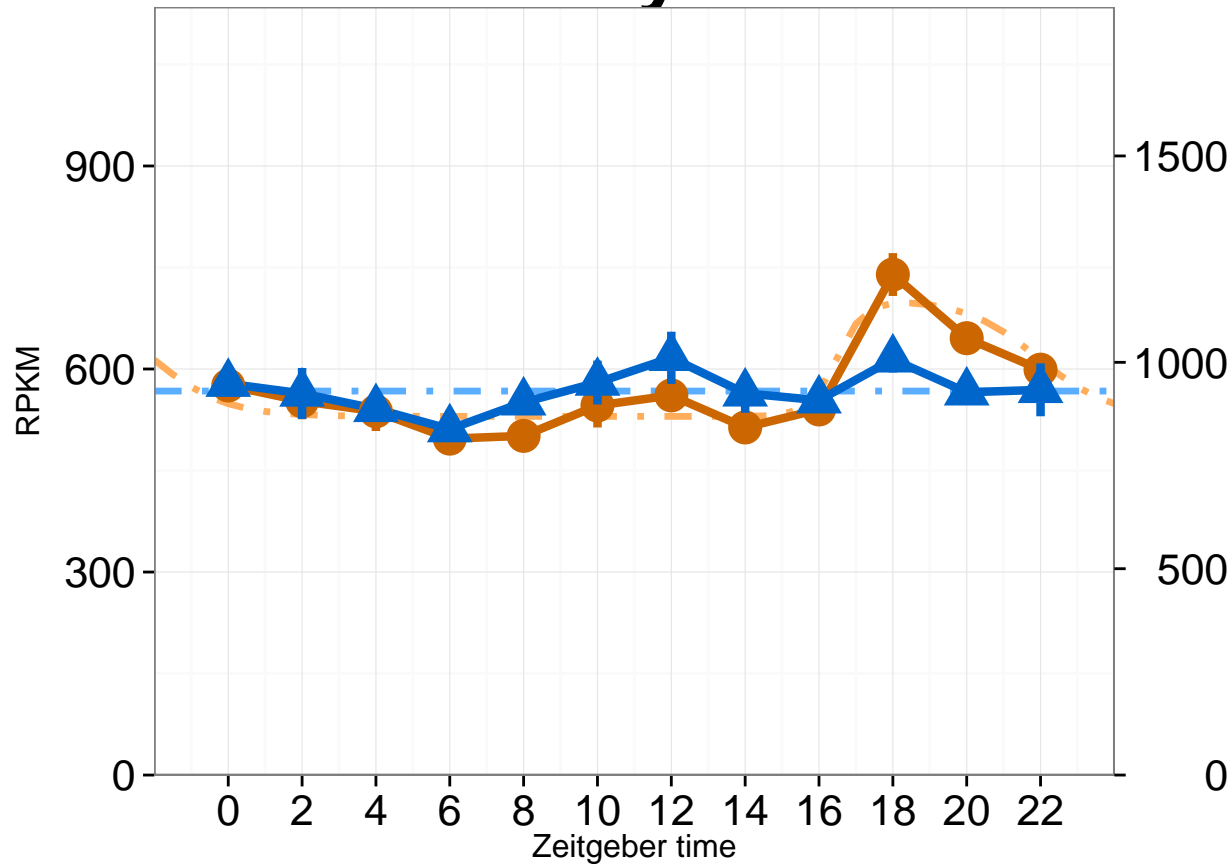

## Phyh

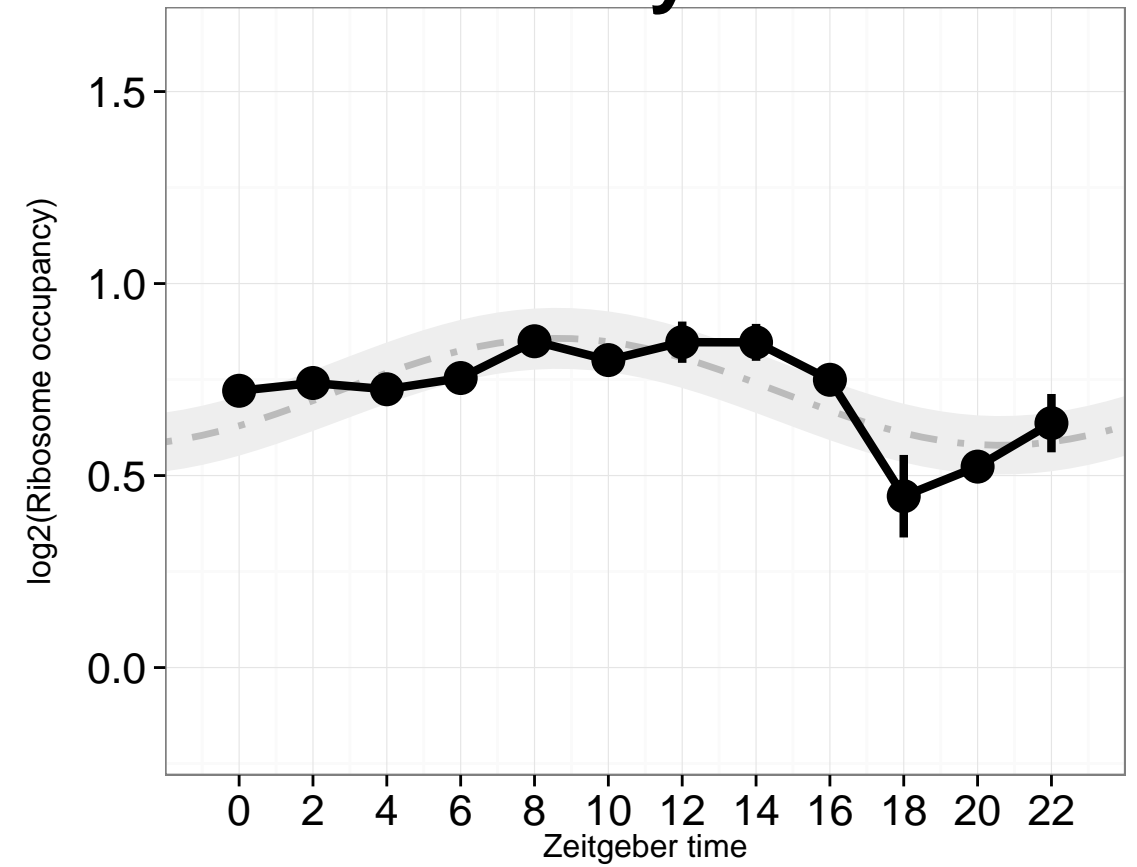

Supplement: Supplementary file 5398 [file 1]

# Mapk9

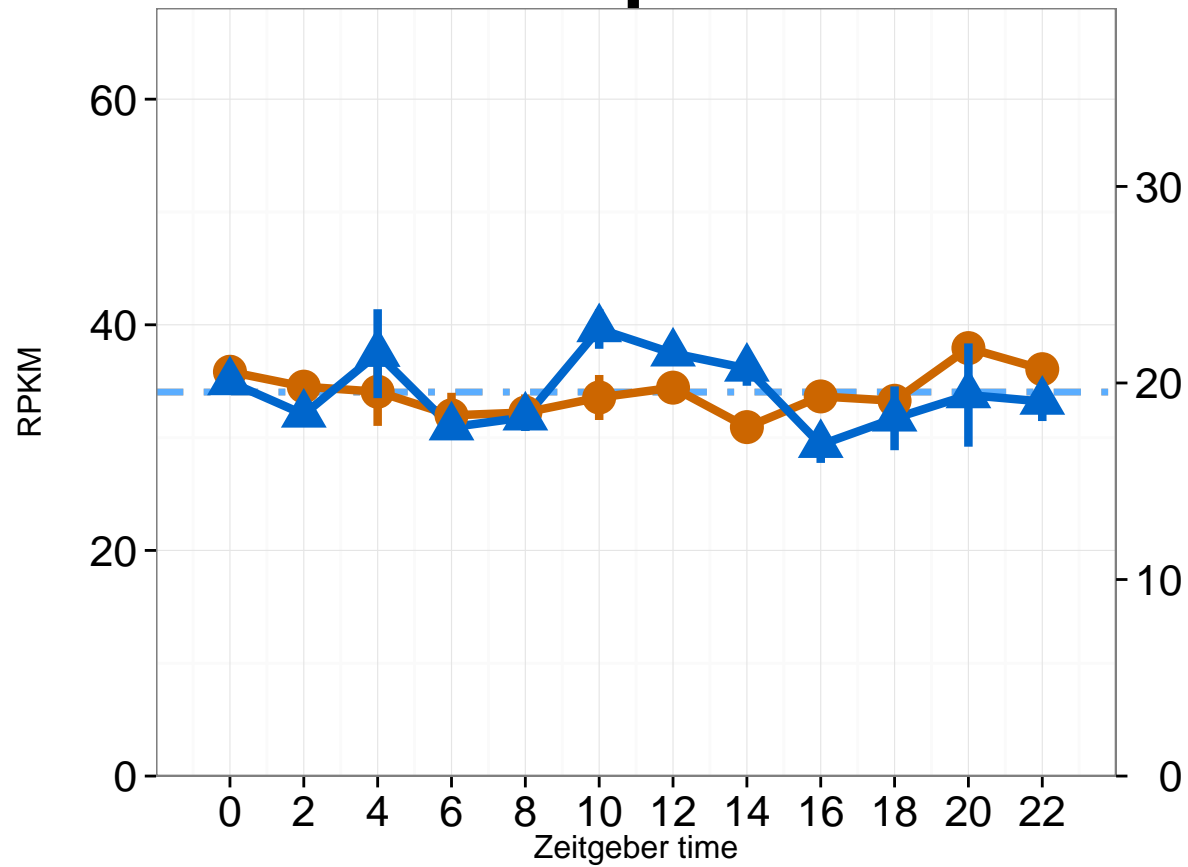

# Mapk9

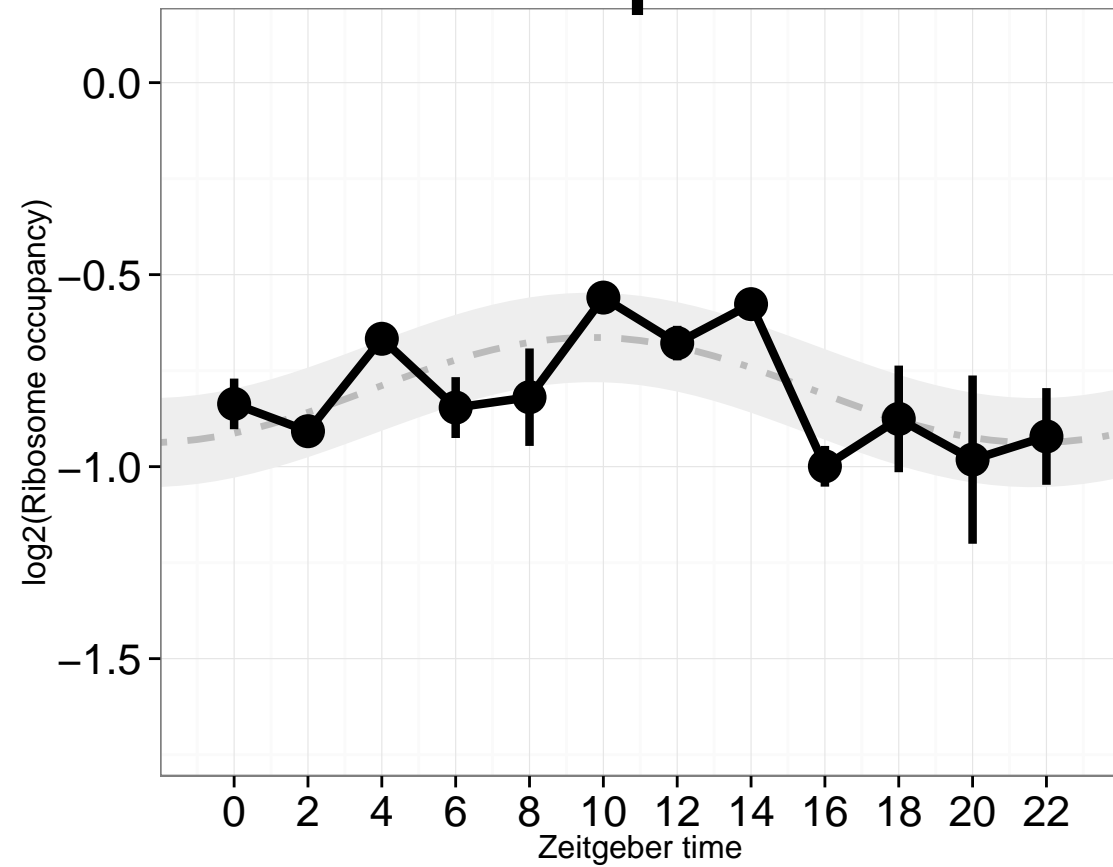

Supplement: Supplementary file 5399 [file 1]

**S100a8 TR**

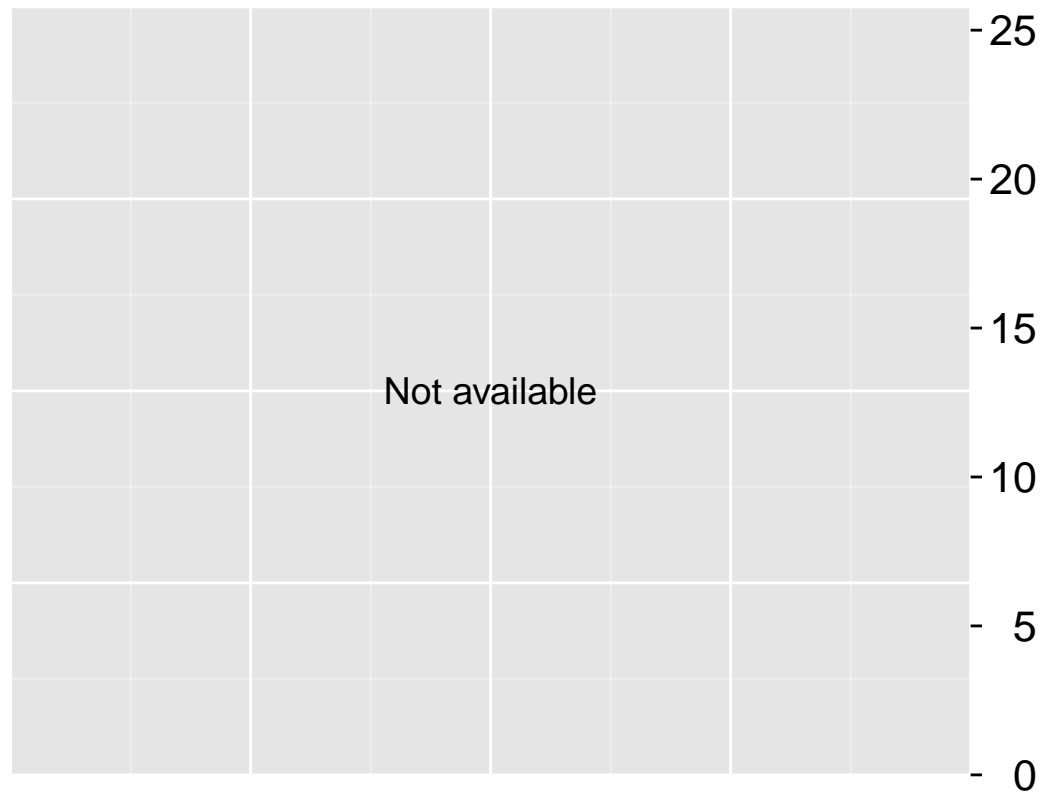

**S100a8 log2(Ribosome occupancy**

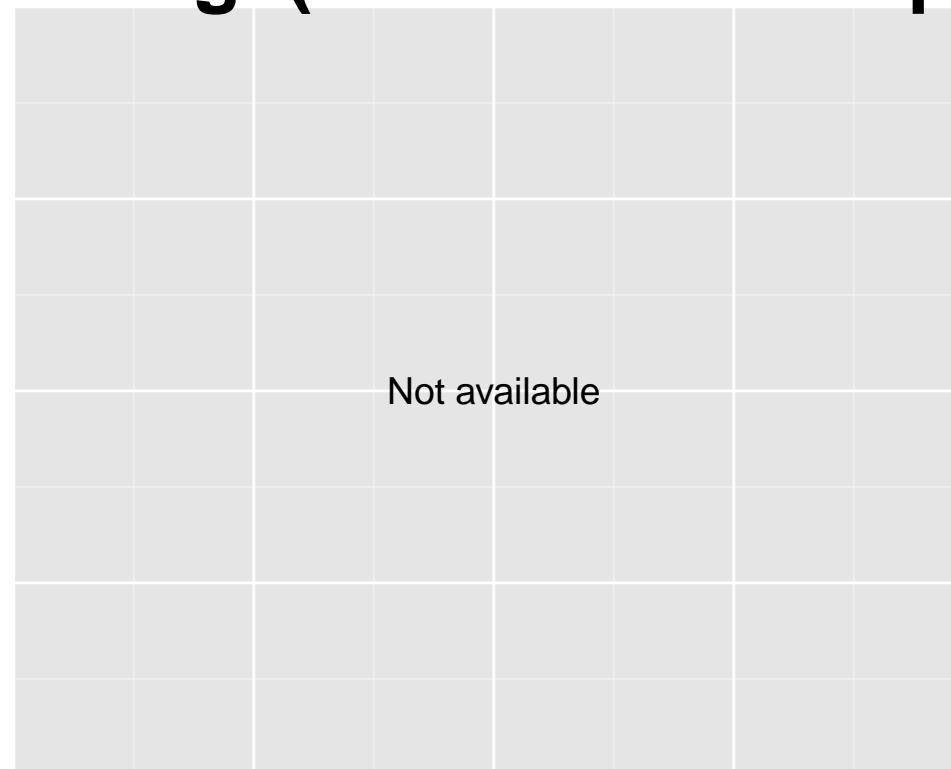

Supplement: Supplementary file 5400 [file 1]

## Psmd2

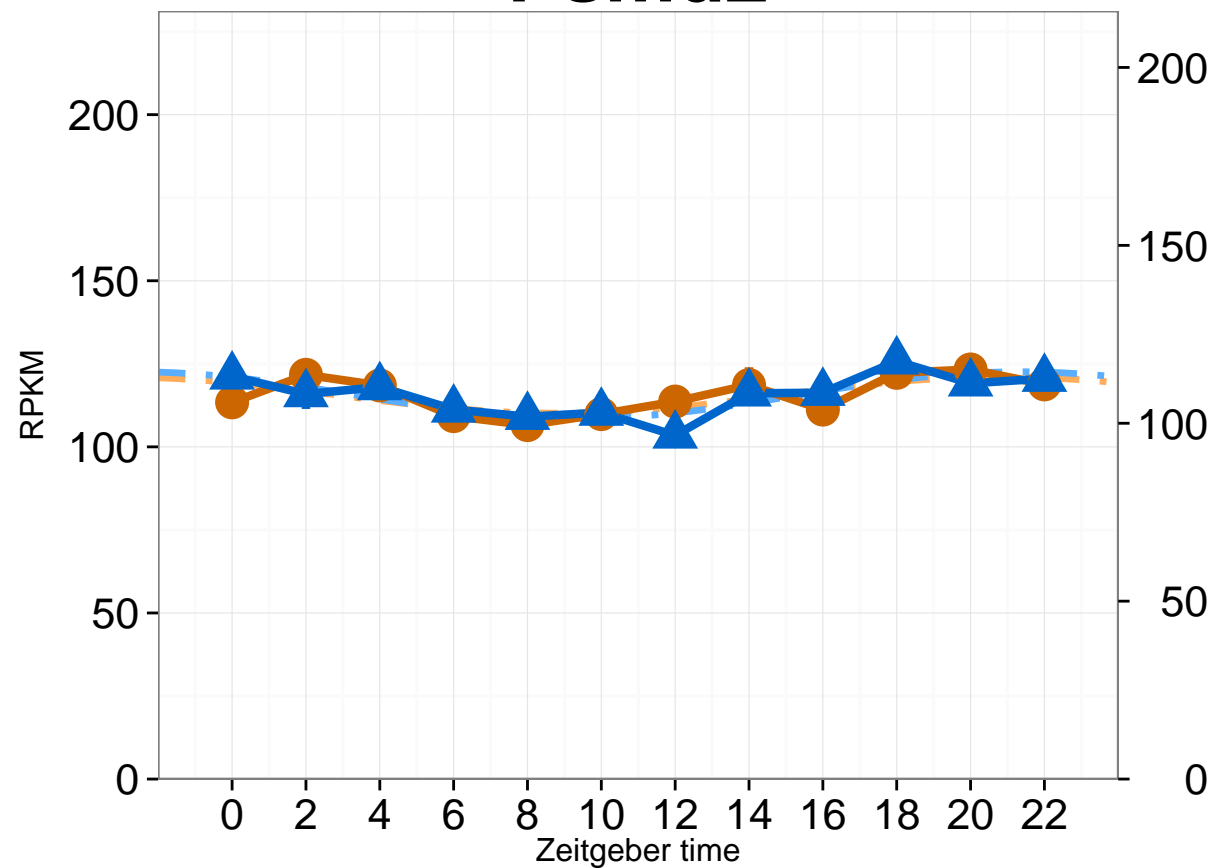

## Psmd2

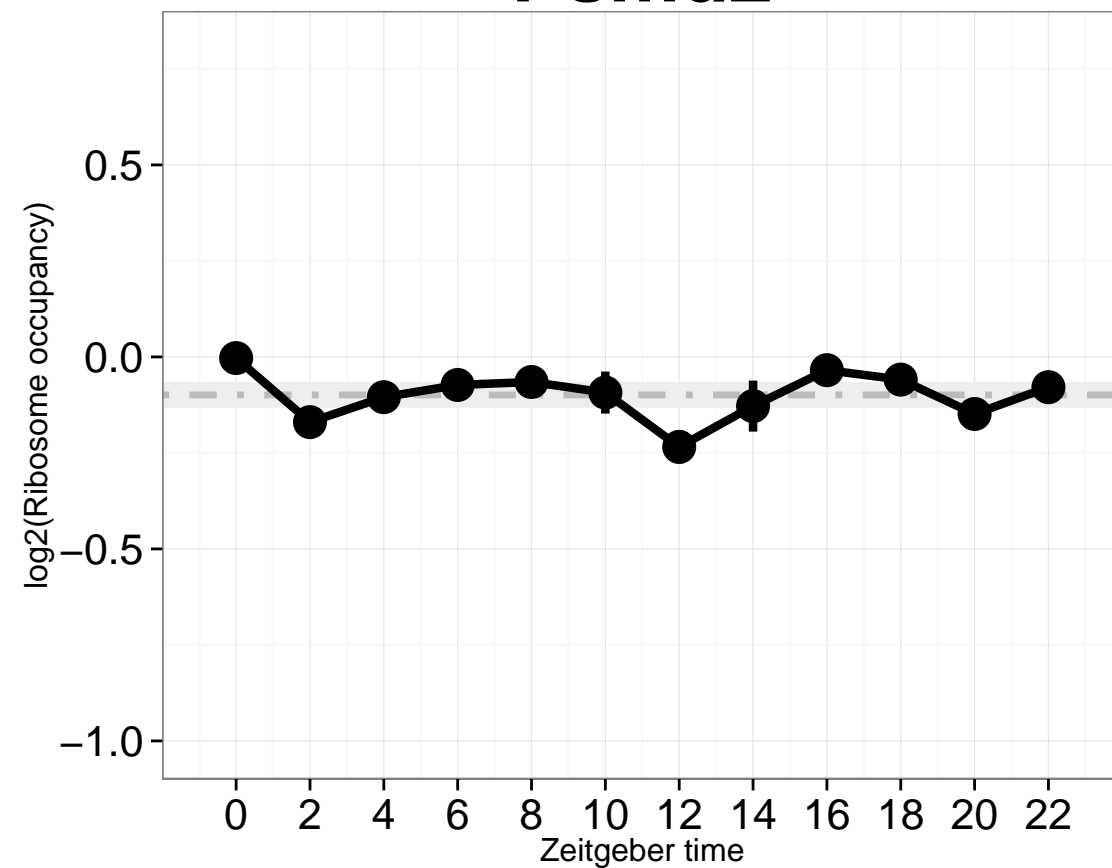

Supplement: Supplementary file 5401 [file 1]

## PapIn

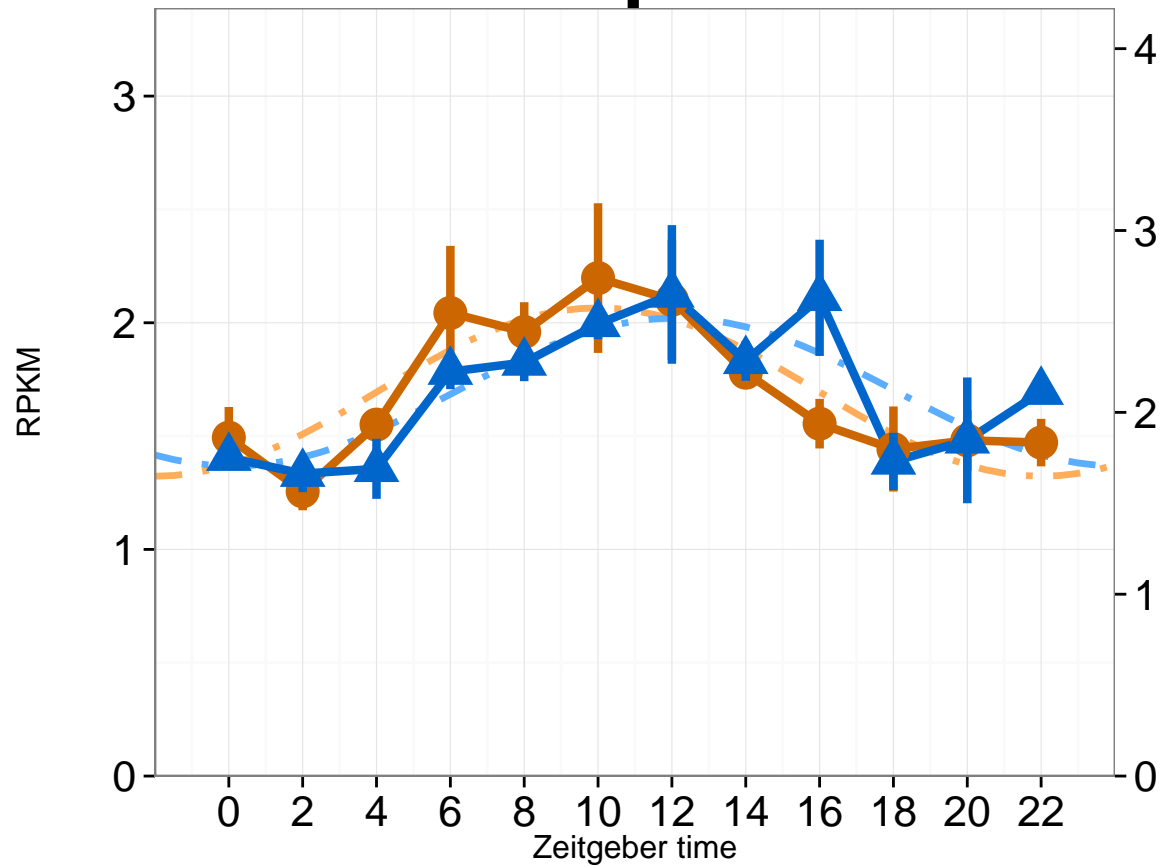

## PapIn

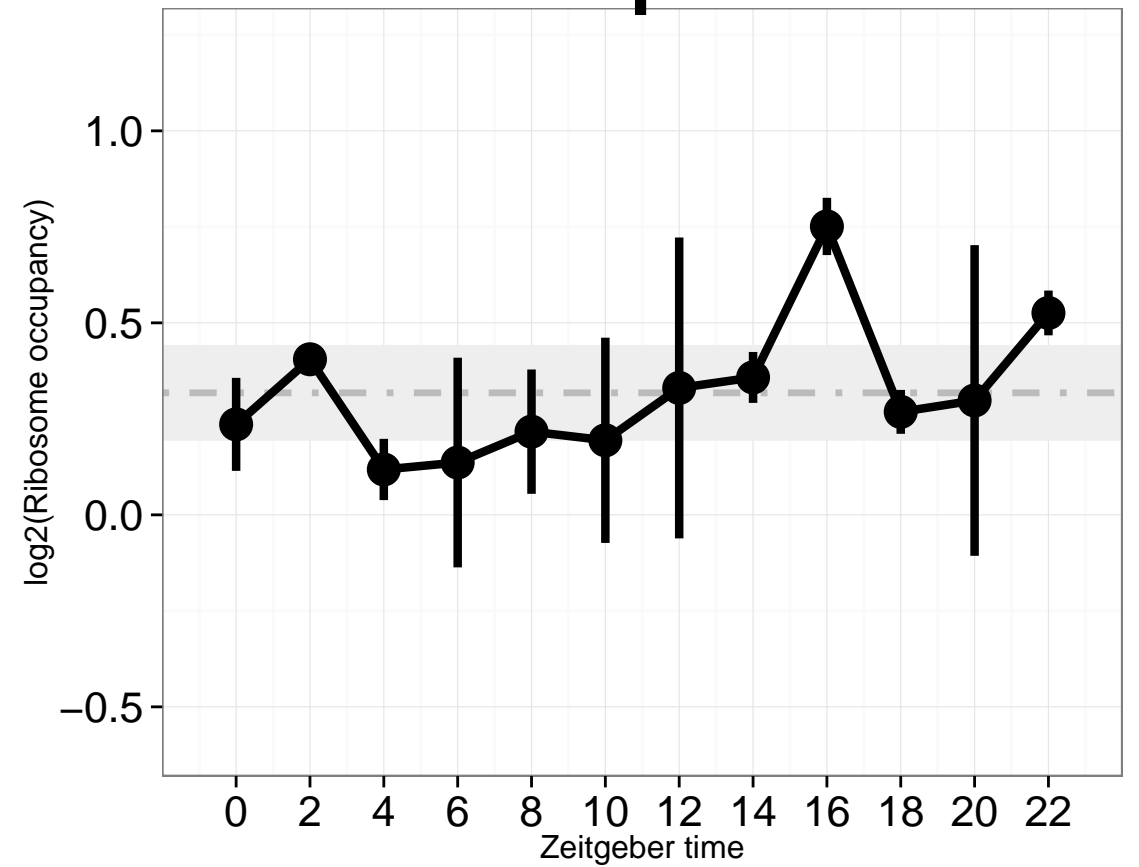

Supplement: Supplementary file 5402 [file 1]

# Prmt1

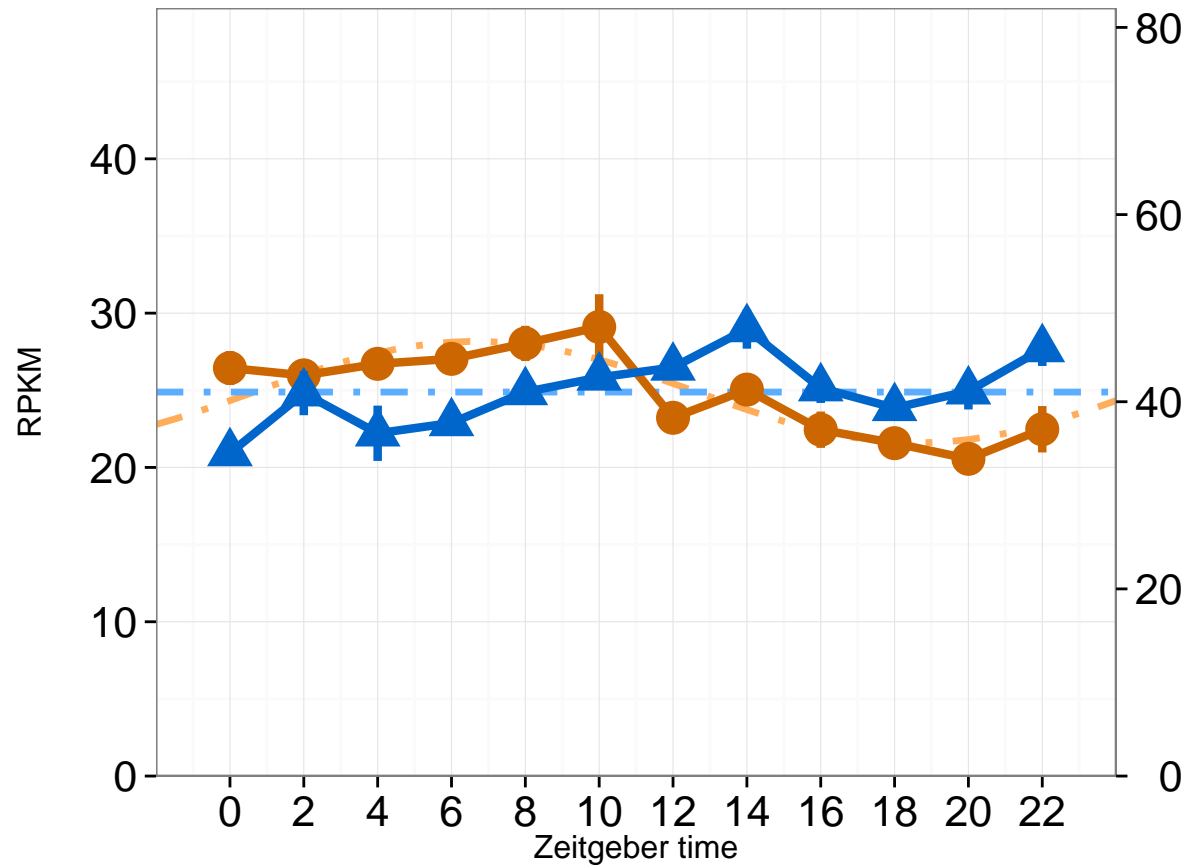

# Prmt1

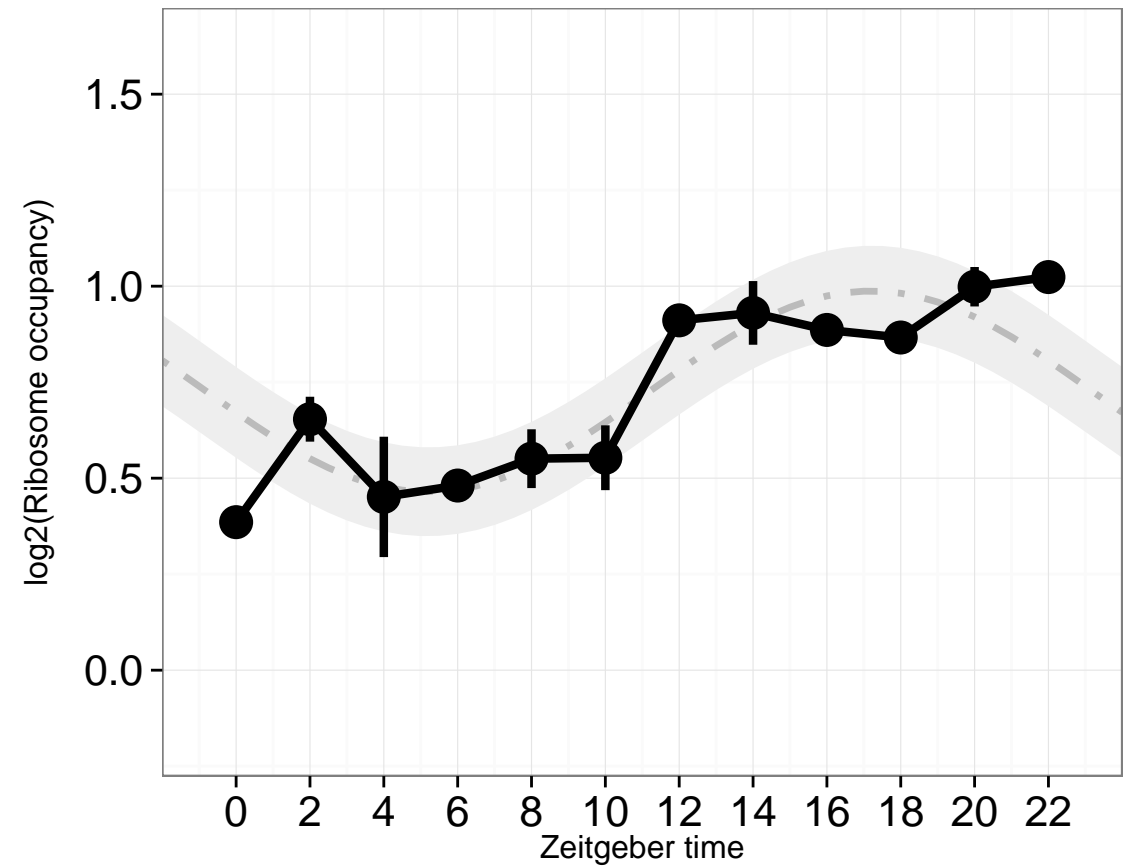

Supplement: Supplementary file 5403 [file 1]

## Chchd4

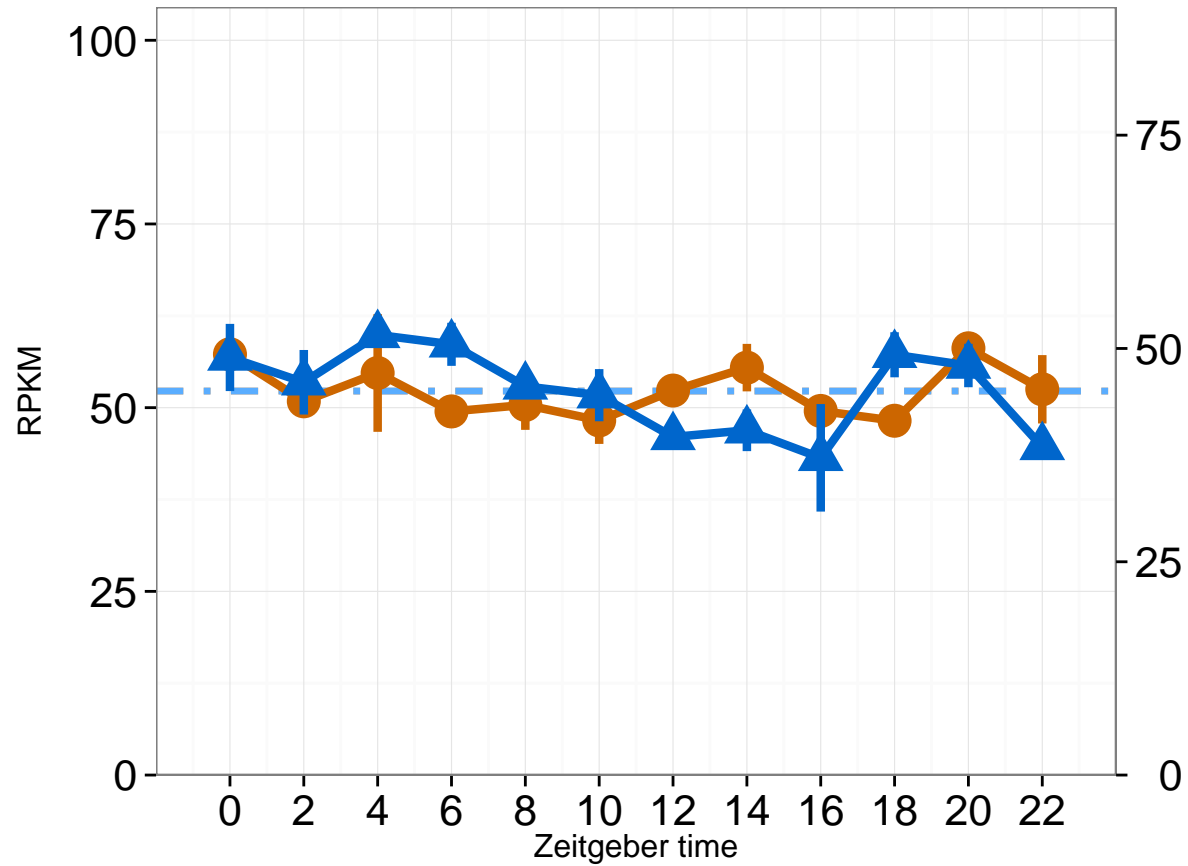

## Chchd4

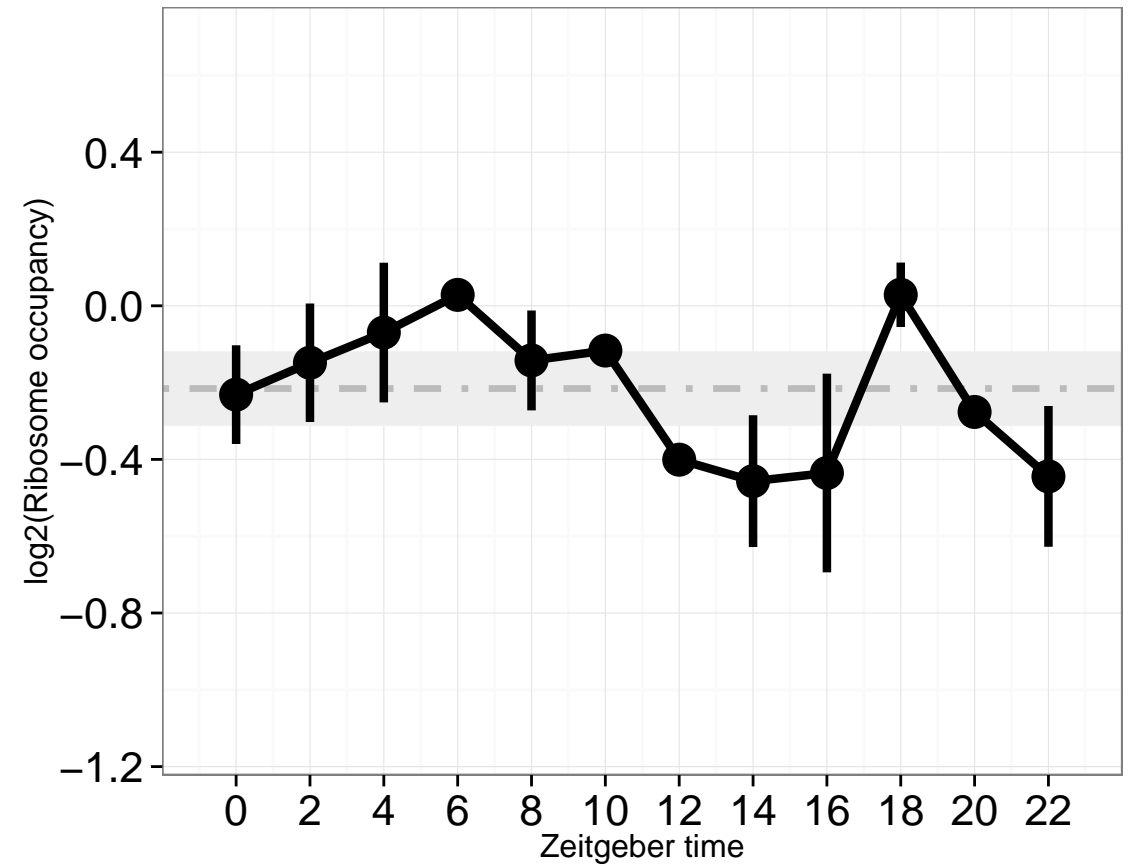

Supplement: Supplementary file 5404 [file 1]

## Tas1r3

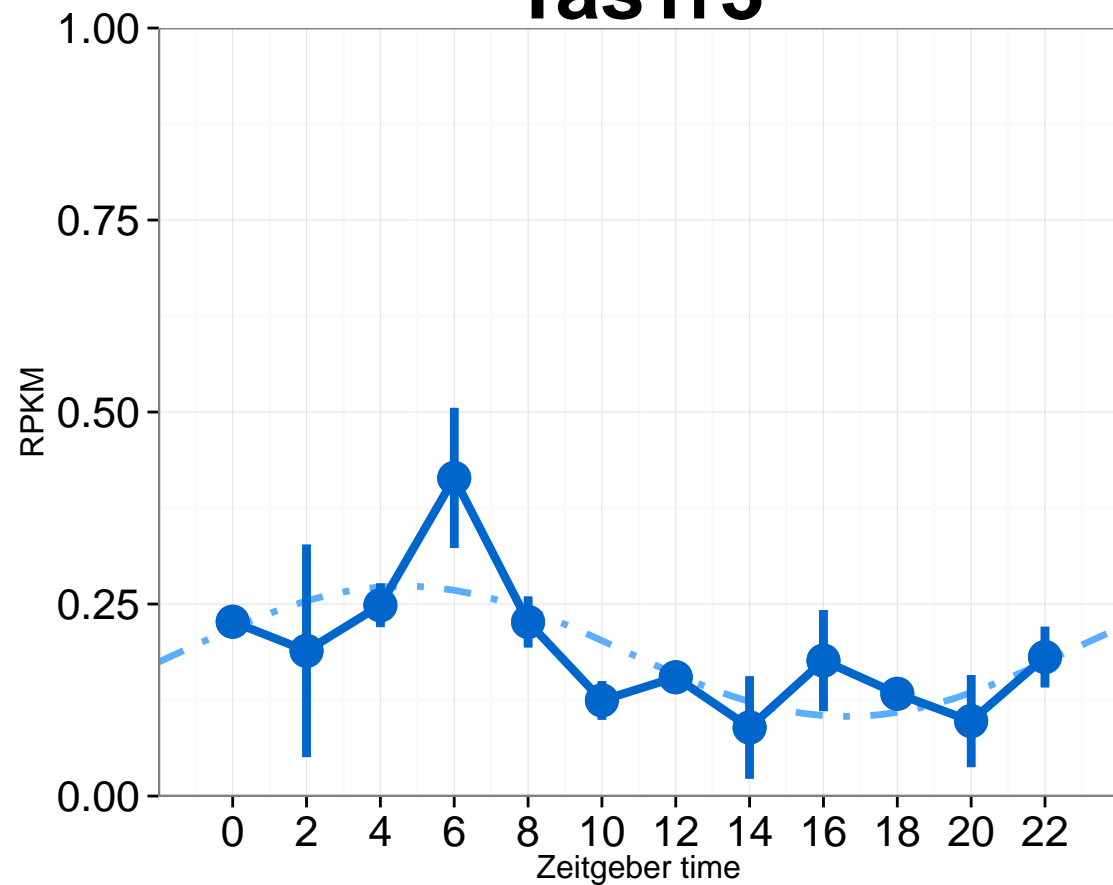

## Tas1r3 log2(Ribosome occupancy

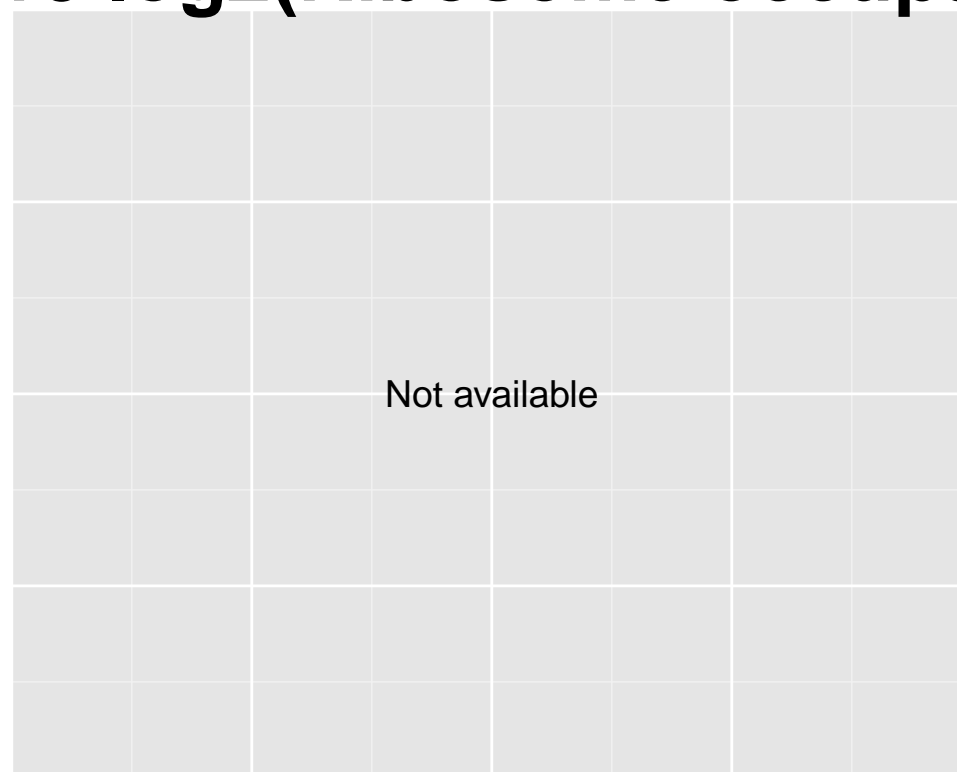

Supplement: Supplementary file 5405 [file 1]

## Engase

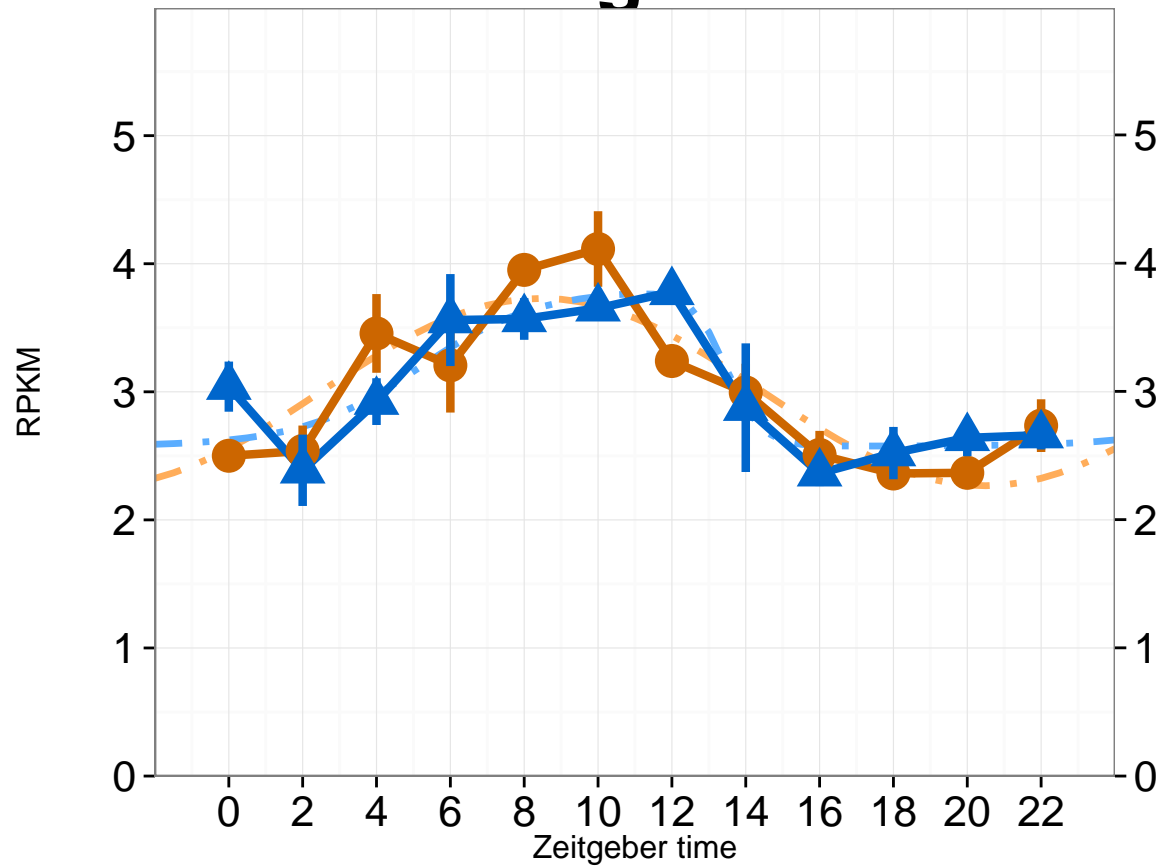

## Engase

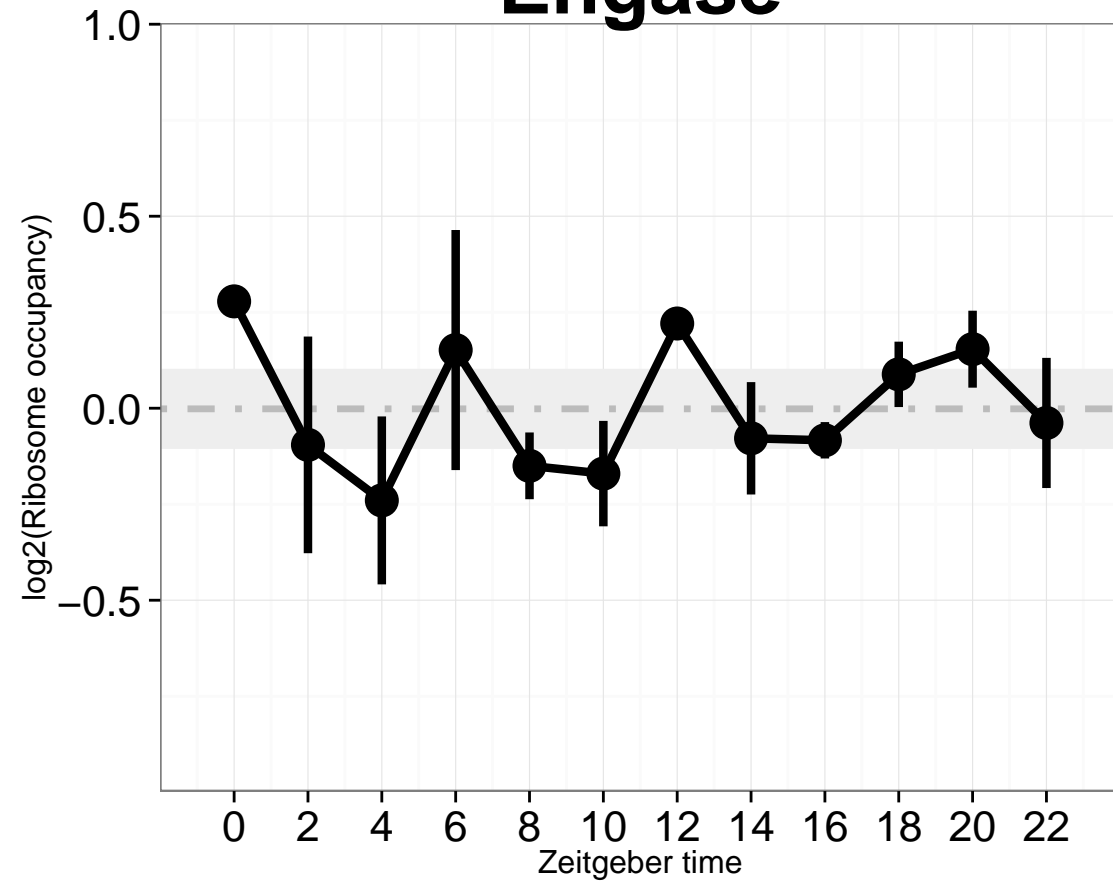

Supplement: Supplementary file 5406 [file 1]

# Zfp770

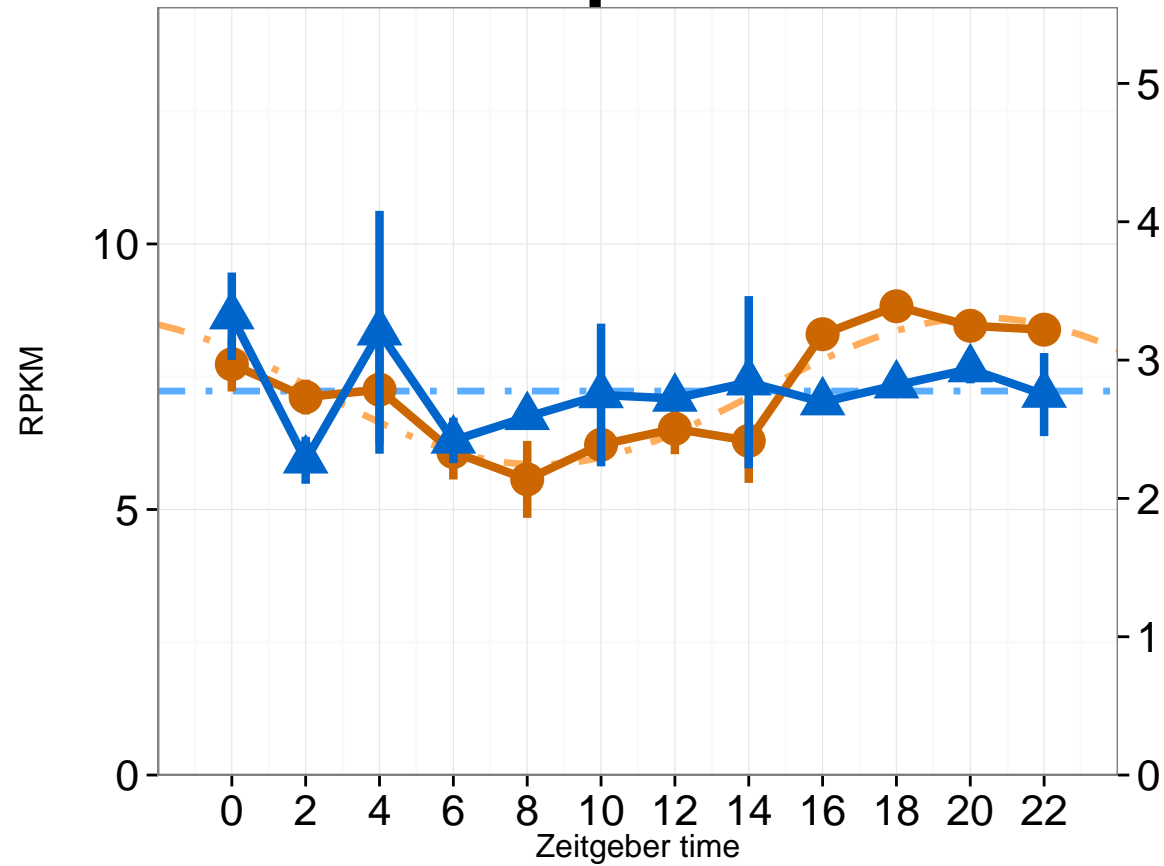

# Zfp770

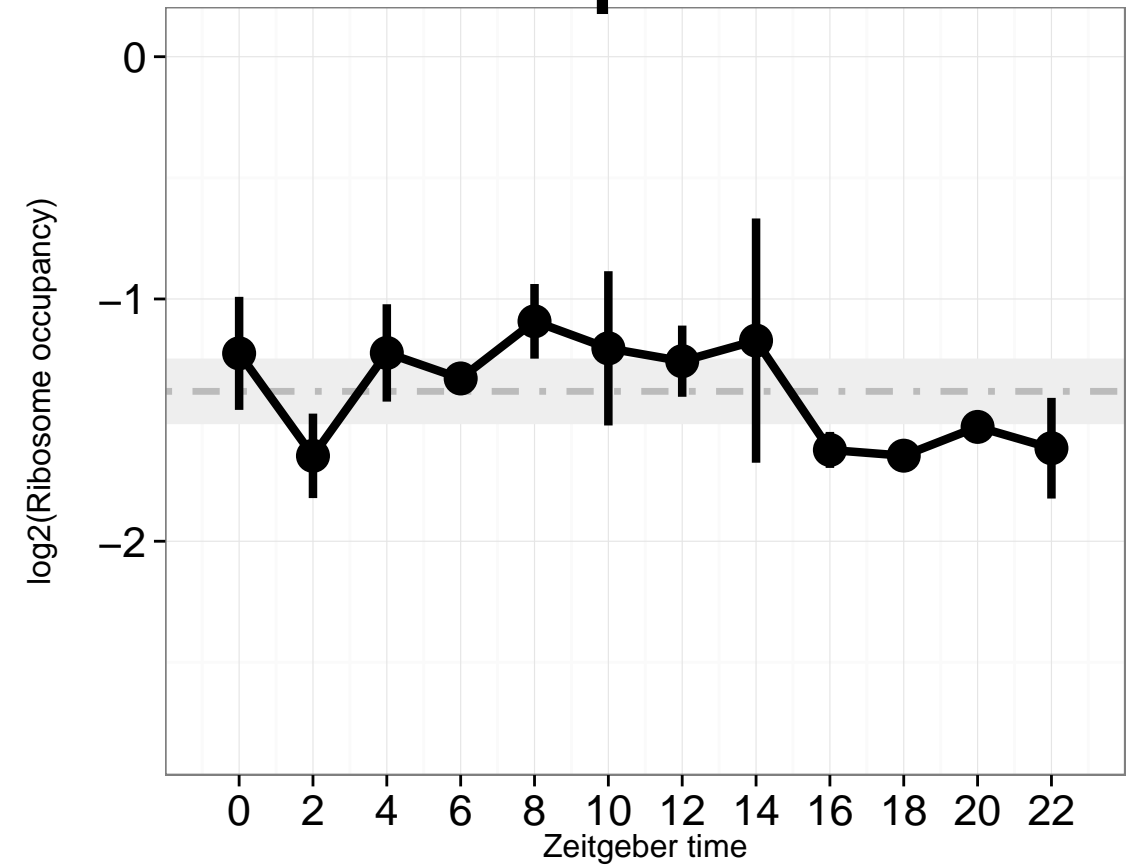

Supplement: Supplementary file 5407 [file 1]

# Atg4a

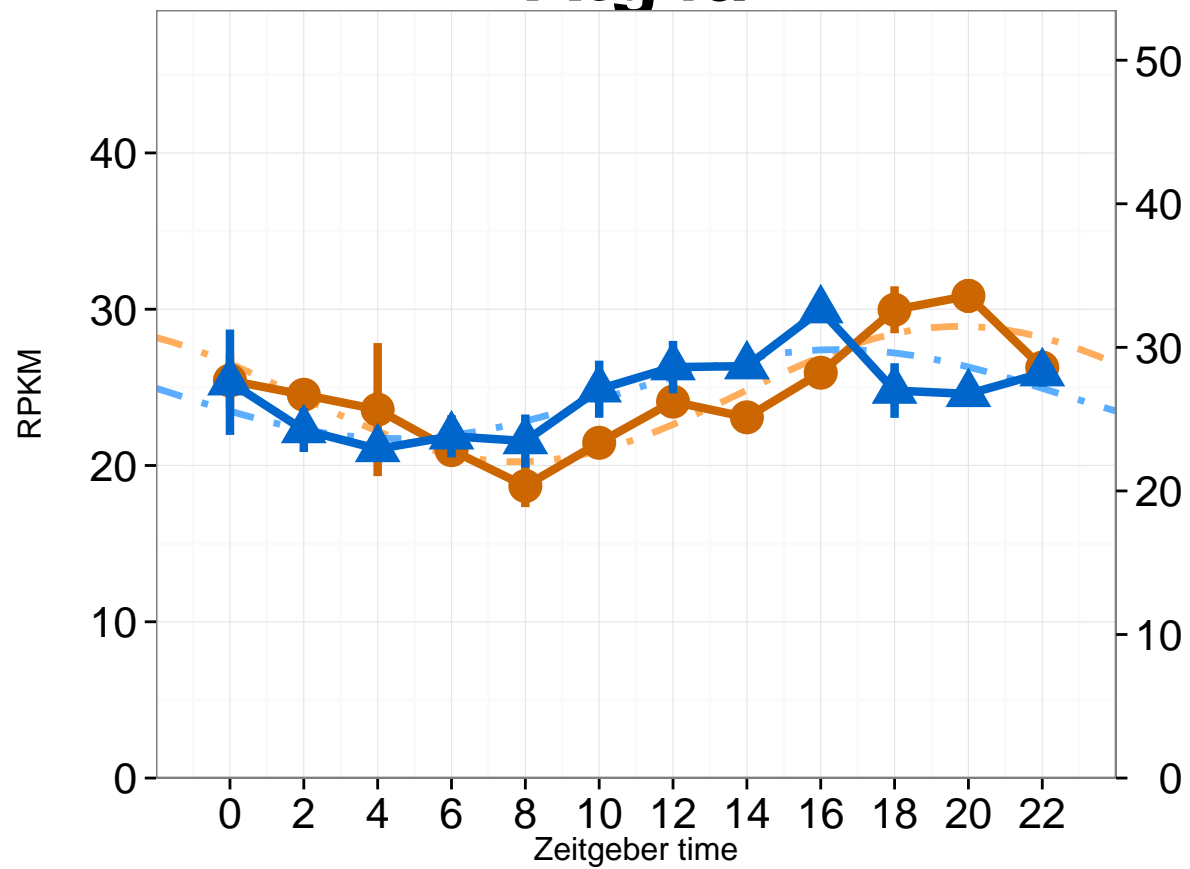

# Atg4a

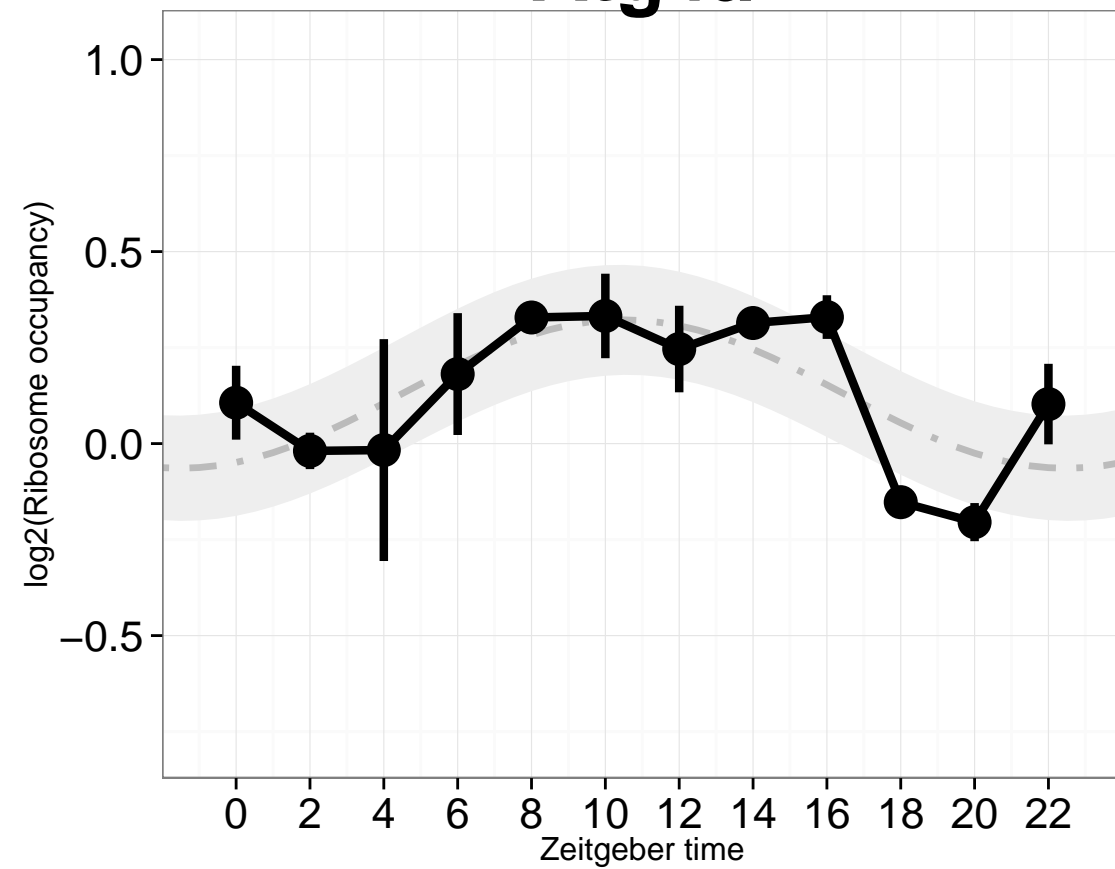

Supplement: Supplementary file 5408 [file 1]

# Ppp4r4

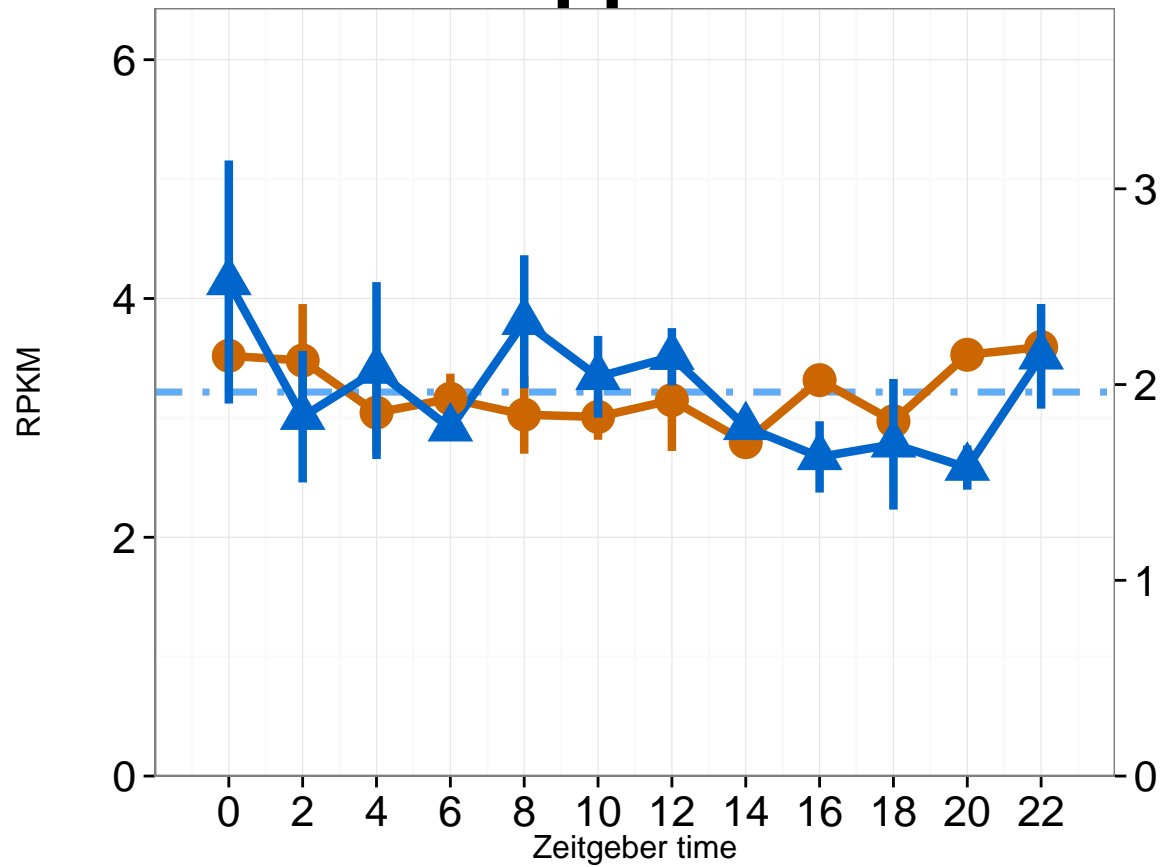

# Ppp4r4

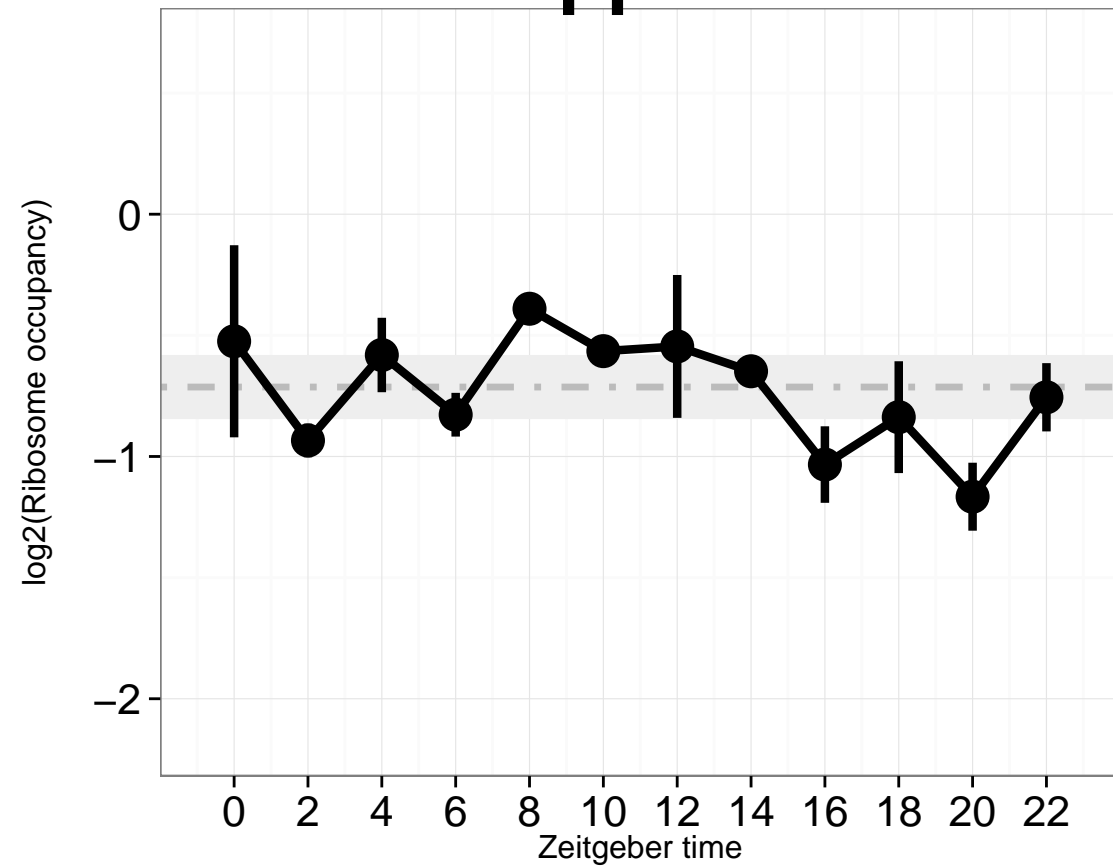

Supplement: Supplementary file 5409 [file 1]

## Pogz

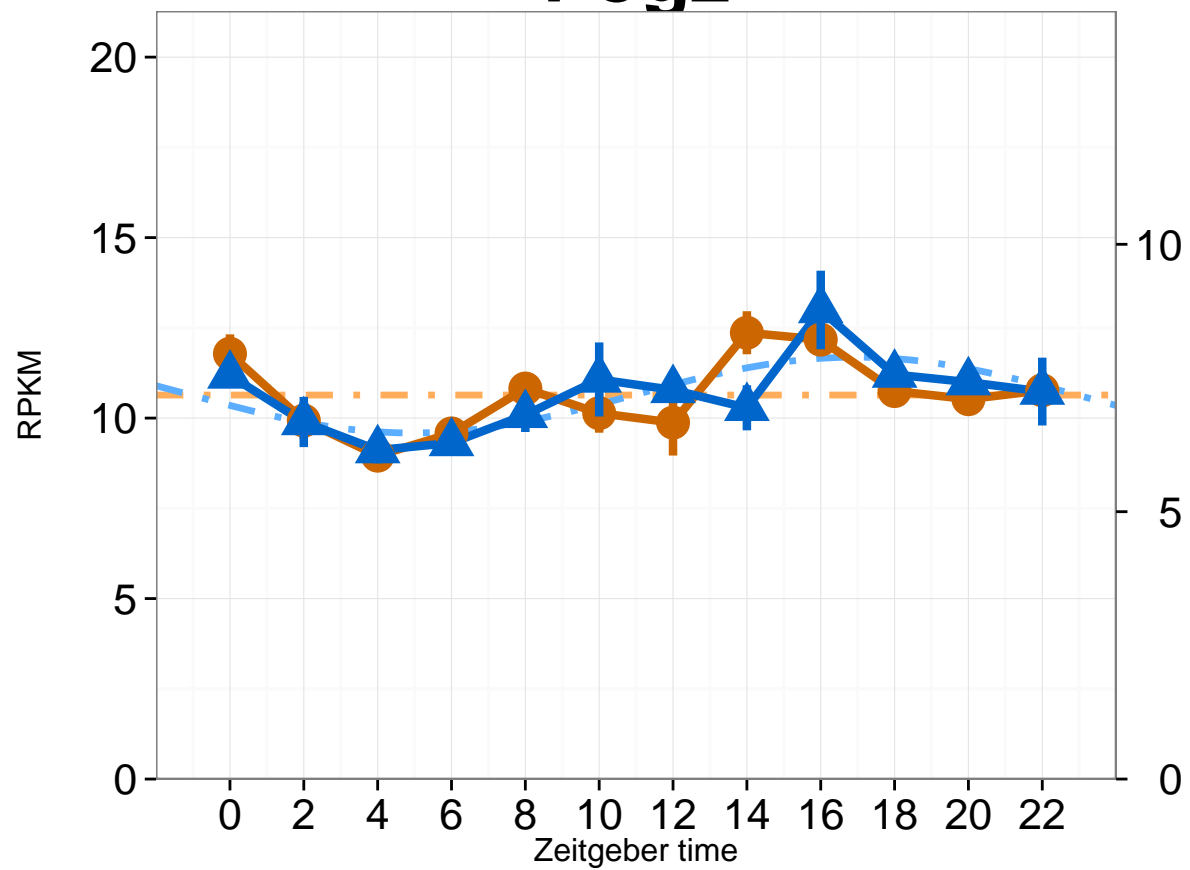

## Pogz

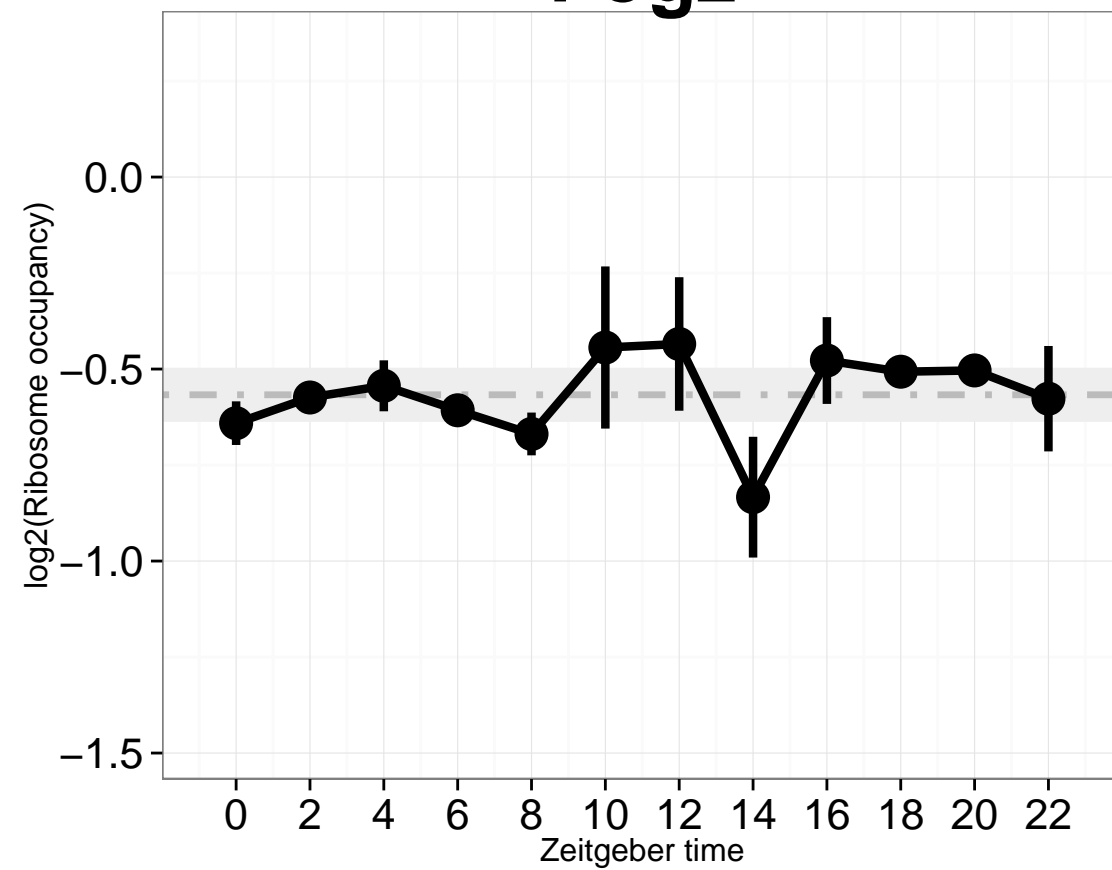

Supplement: Supplementary file 5410 [file 1]

# Laptm5

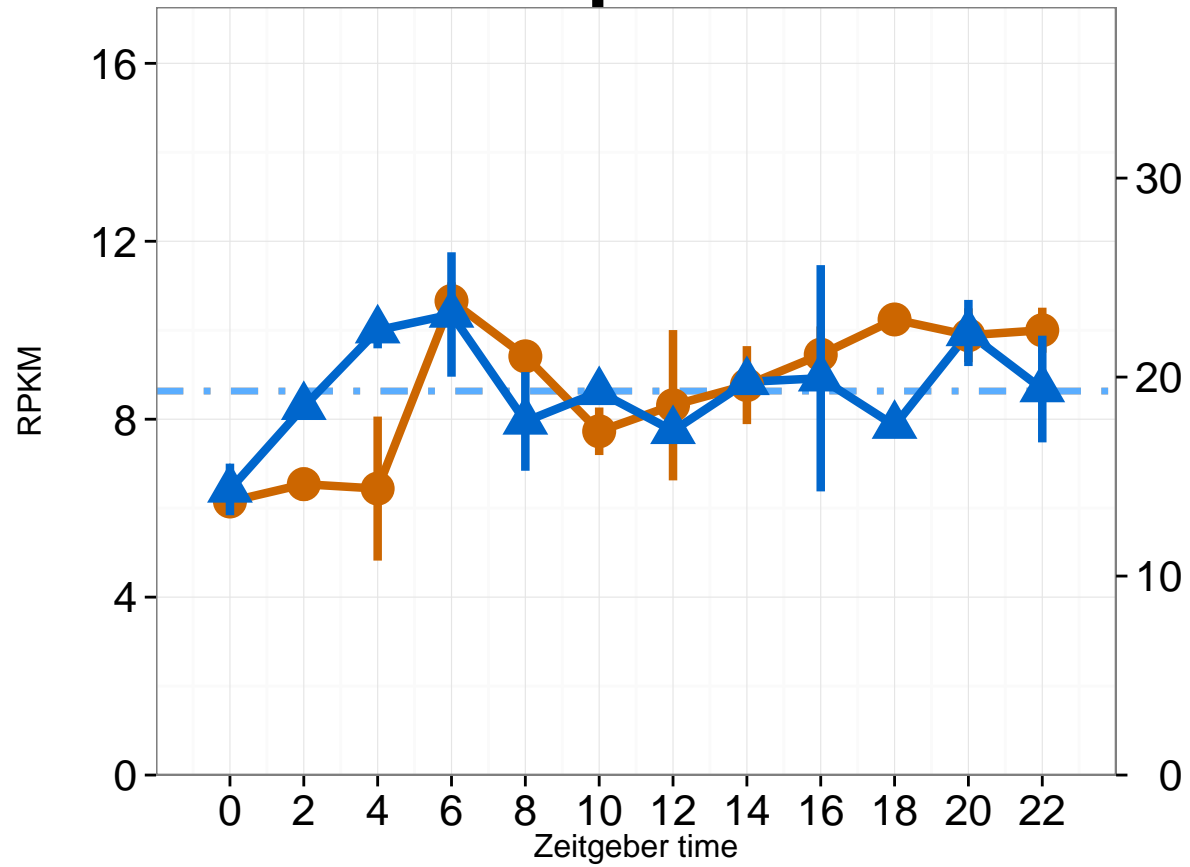

# Laptm5

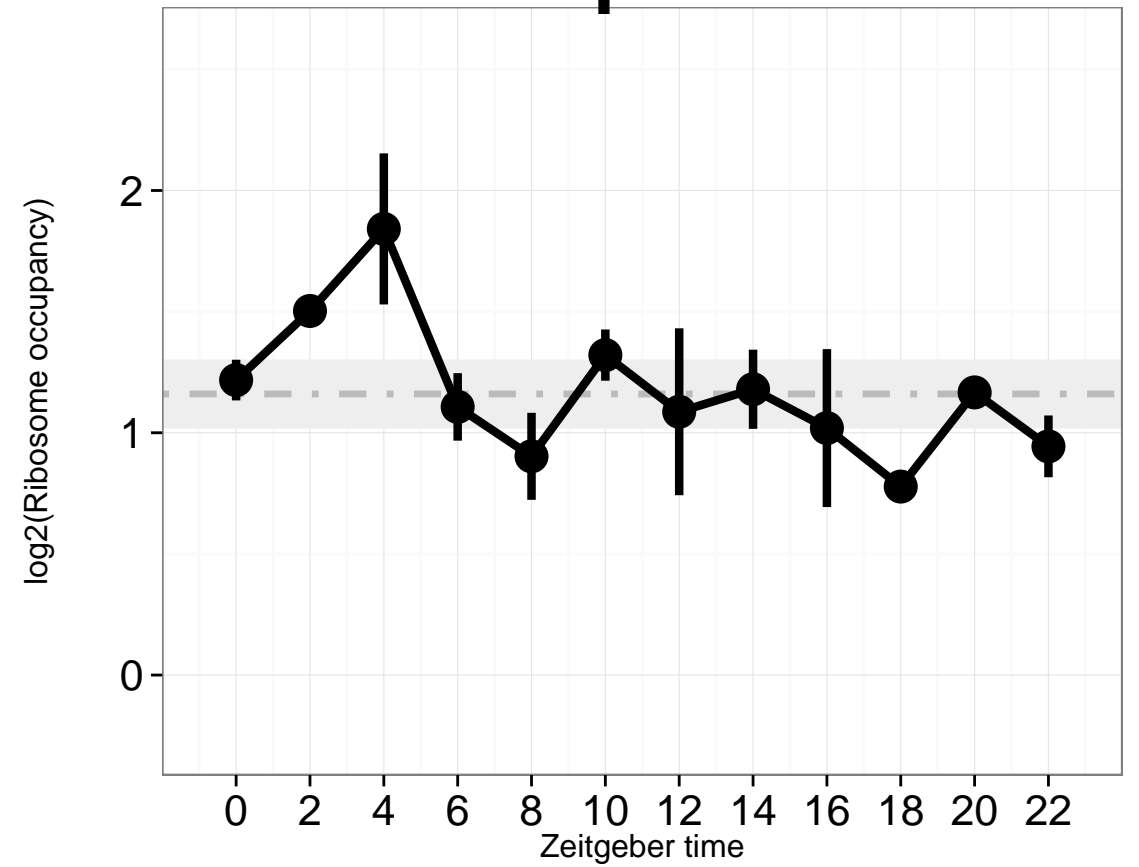

Supplement: Supplementary file 5411 [file 1]

## 4933411K16Rik

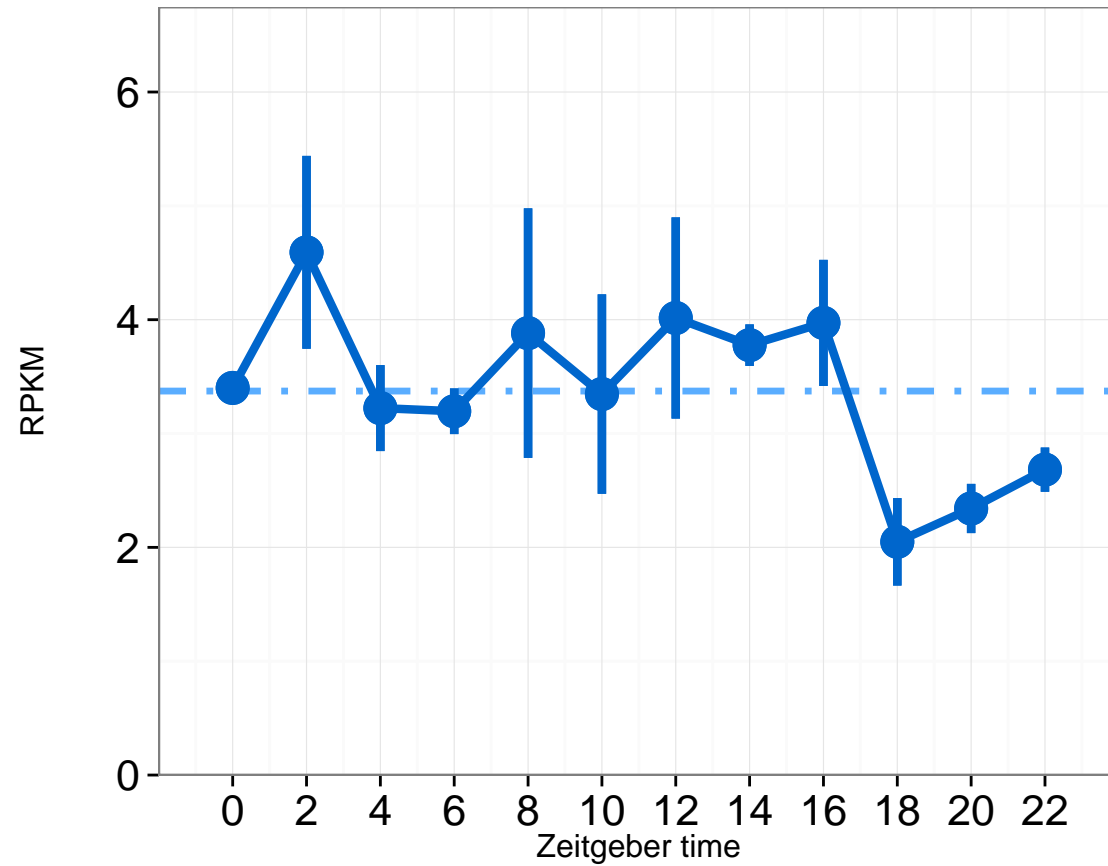

## 4933411K16Rik log2(Ribosome occup

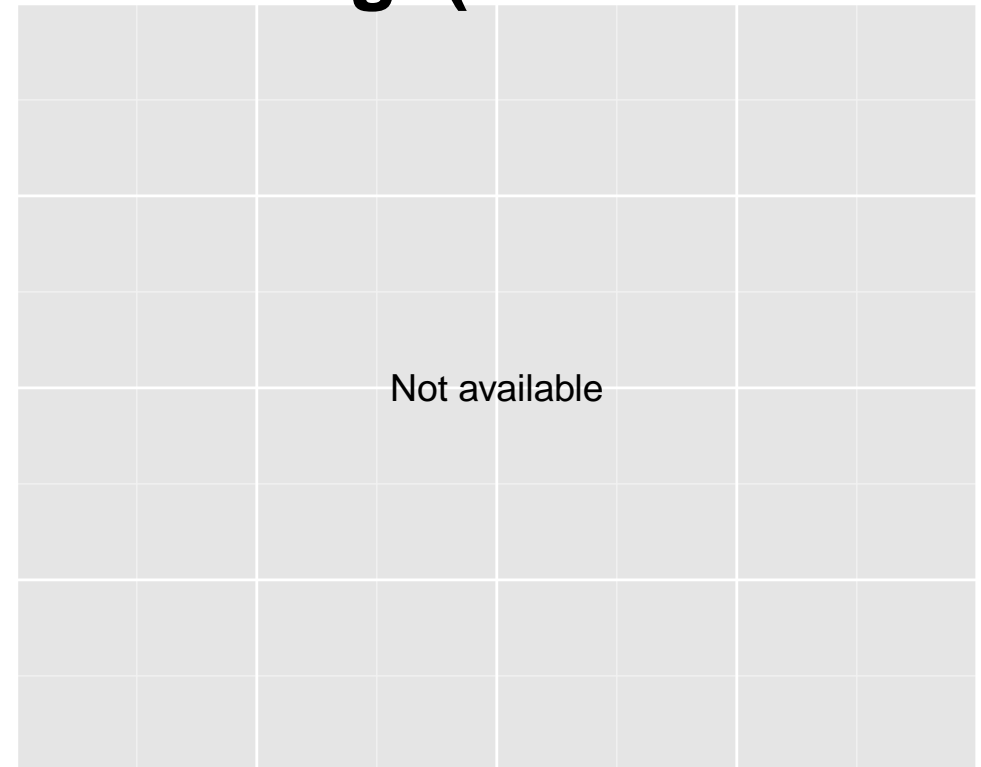

Supplement: Supplementary file 5412 [file 1]

# Rtn1

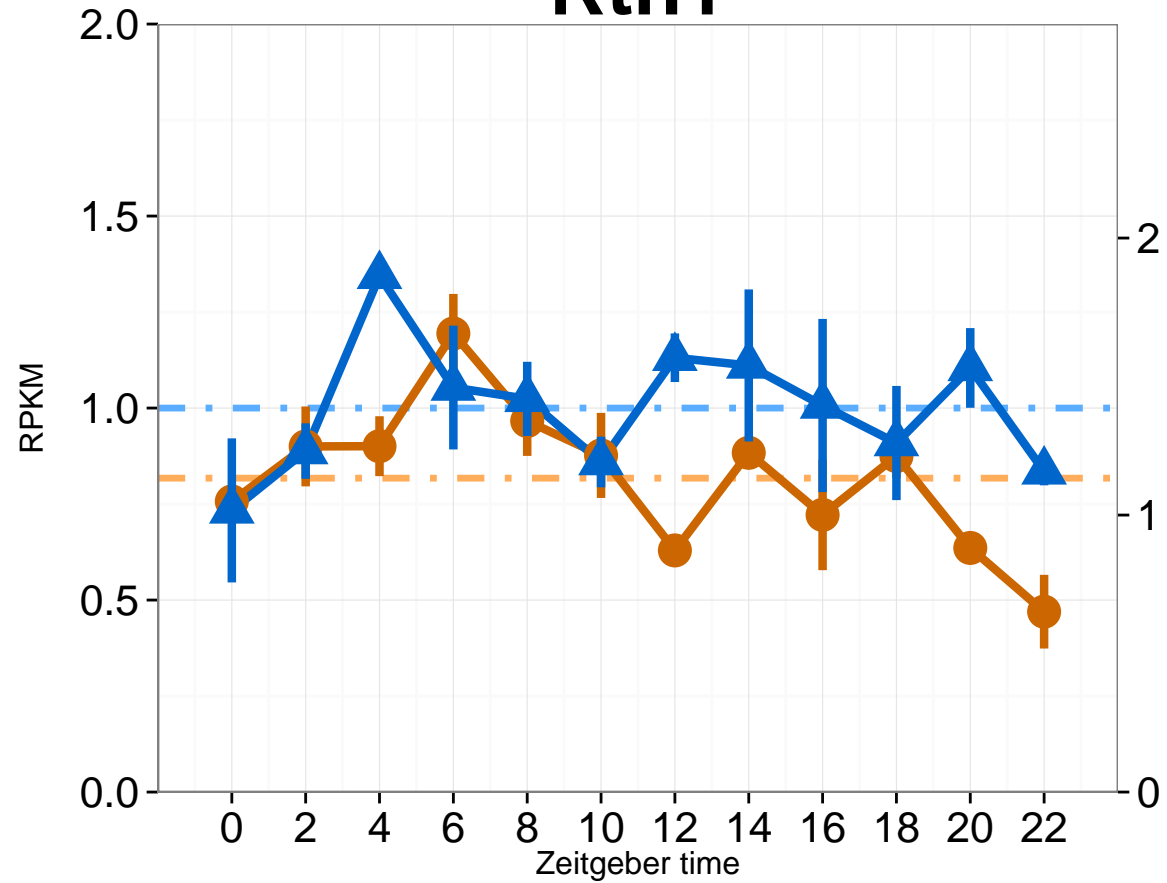

# Rtn1

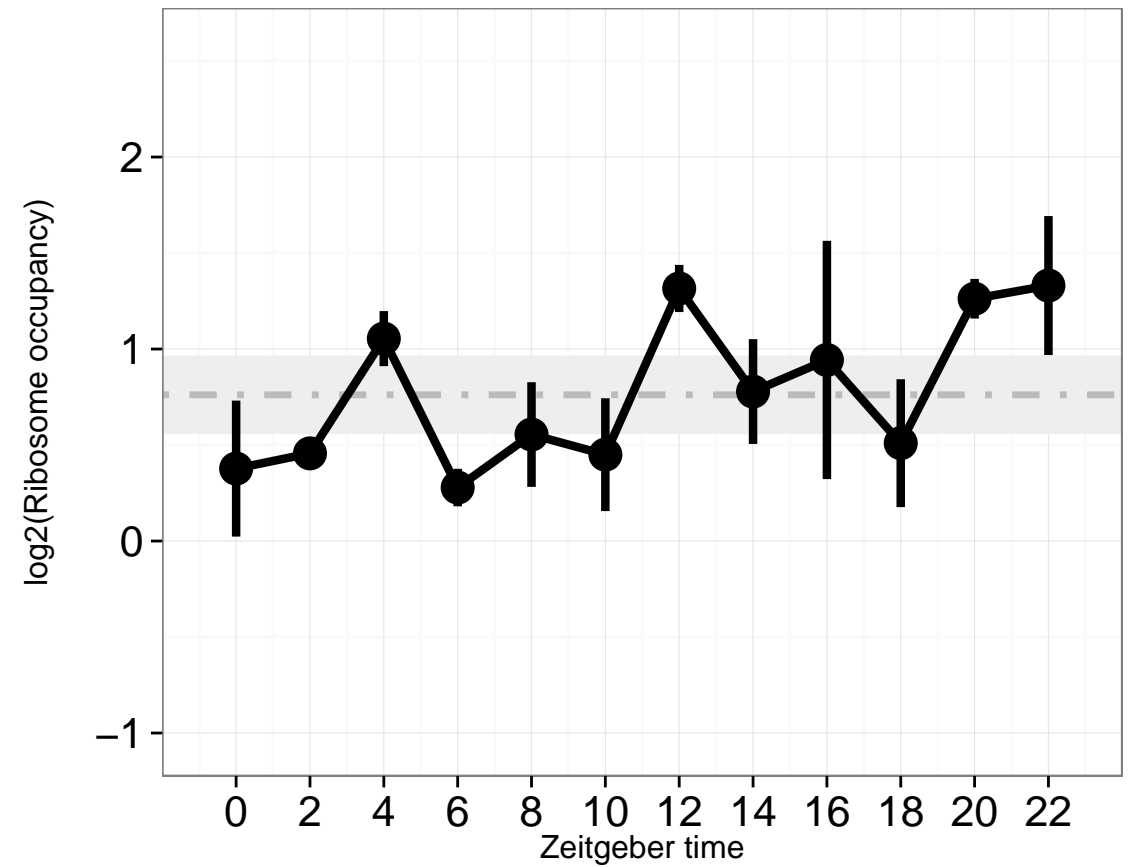

Supplement: Supplementary file 5413 [file 1]

# Tgfa

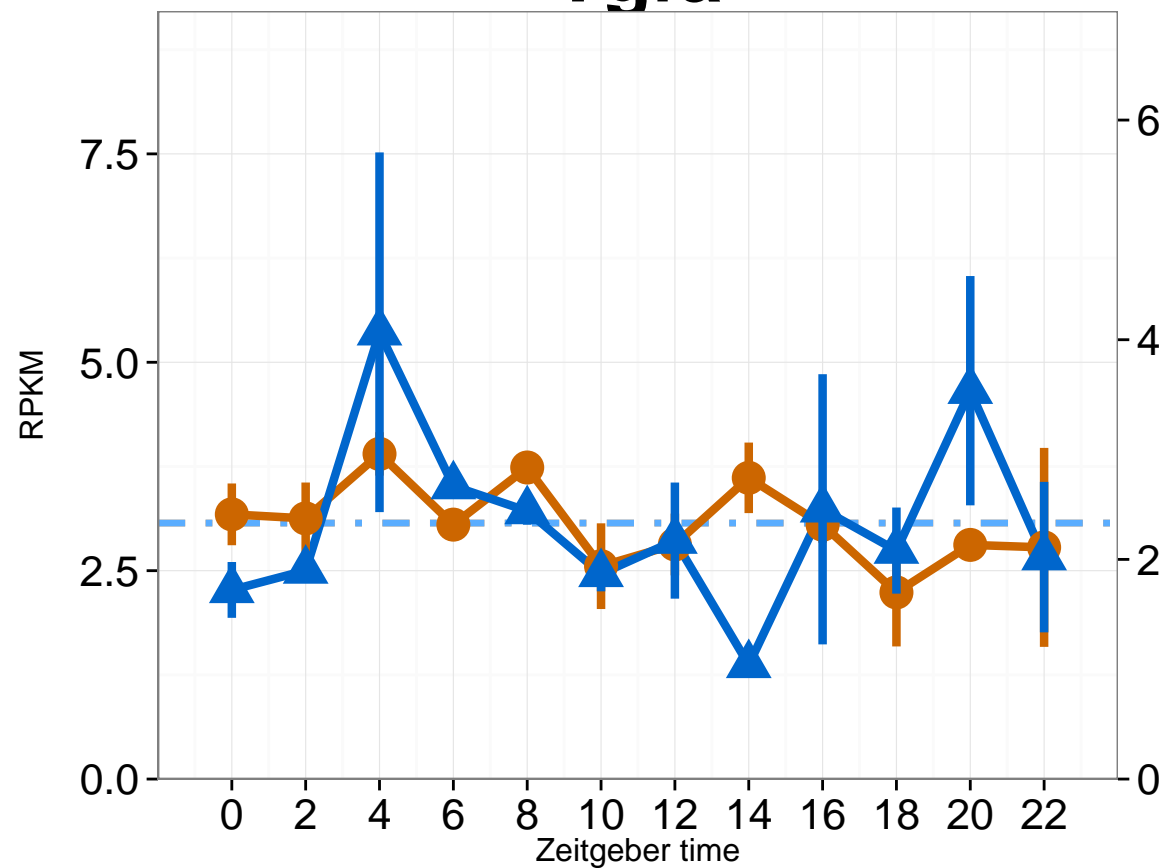

# Tgfa

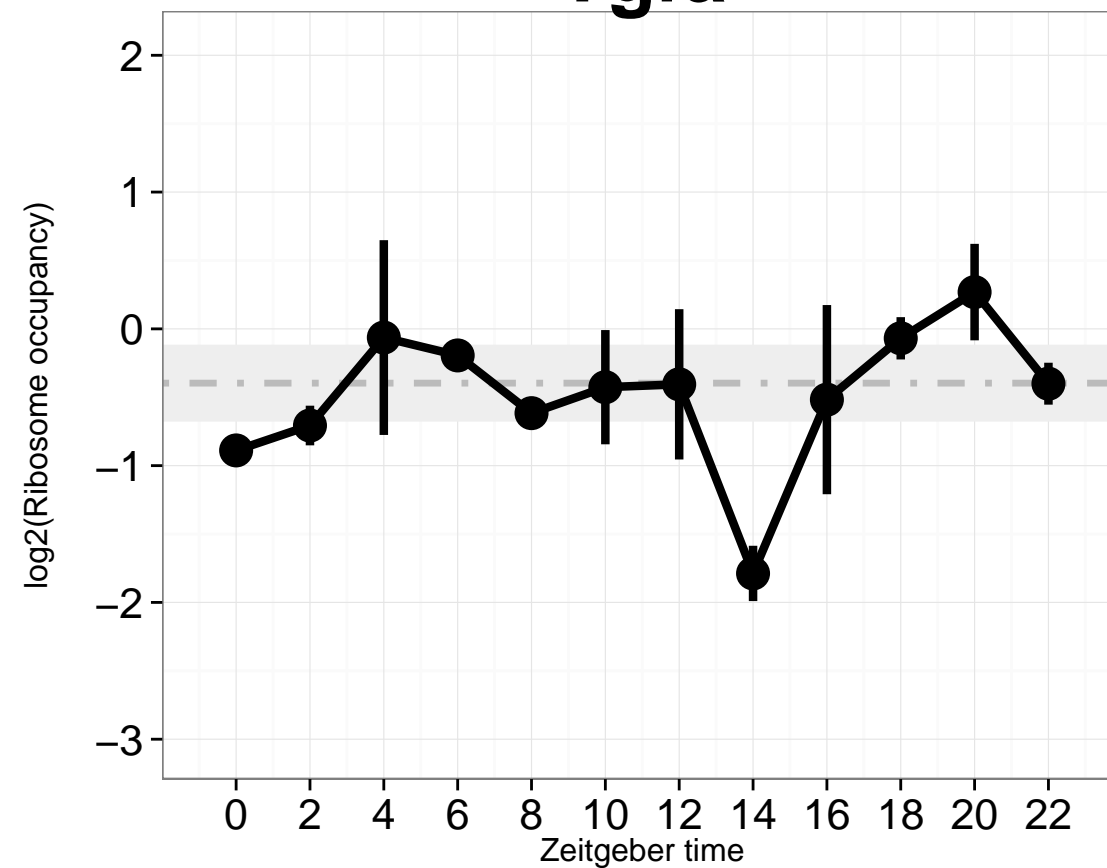

Supplement: Supplementary file 5414 [file 1]

## TII1

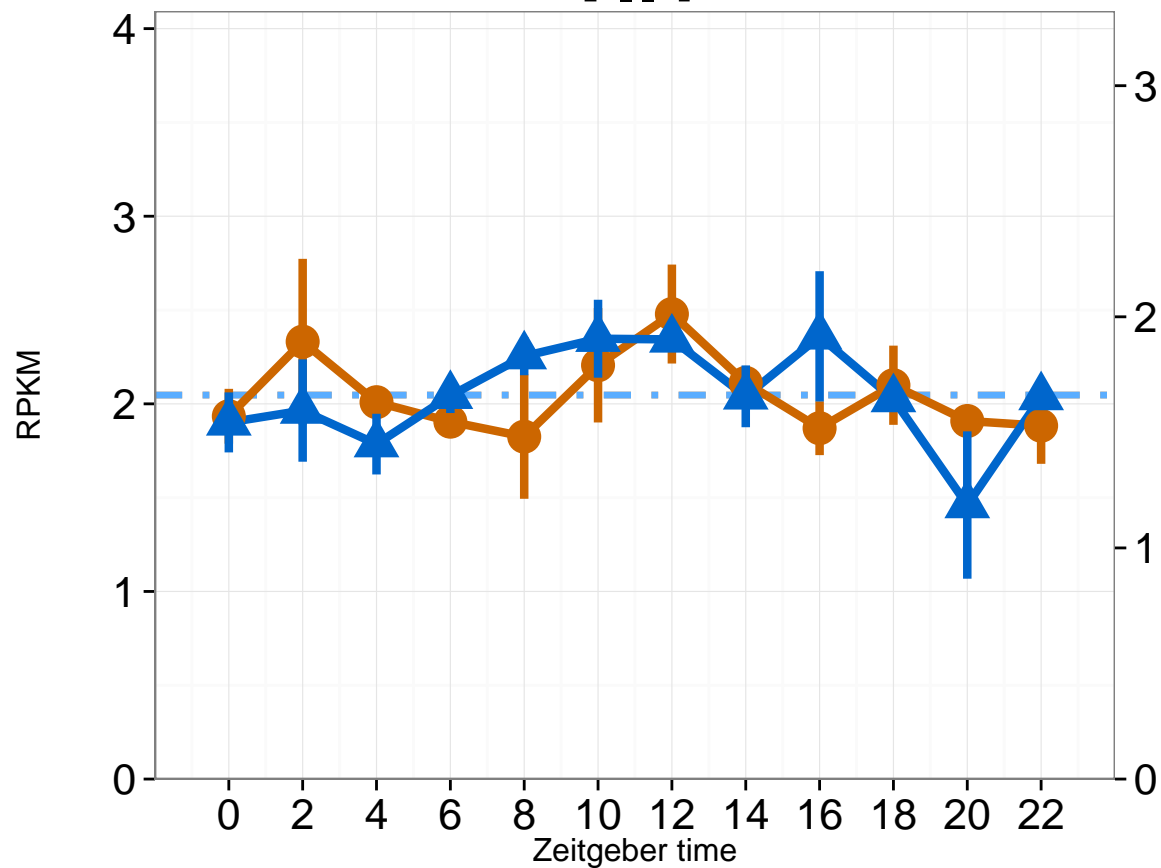

## TII1

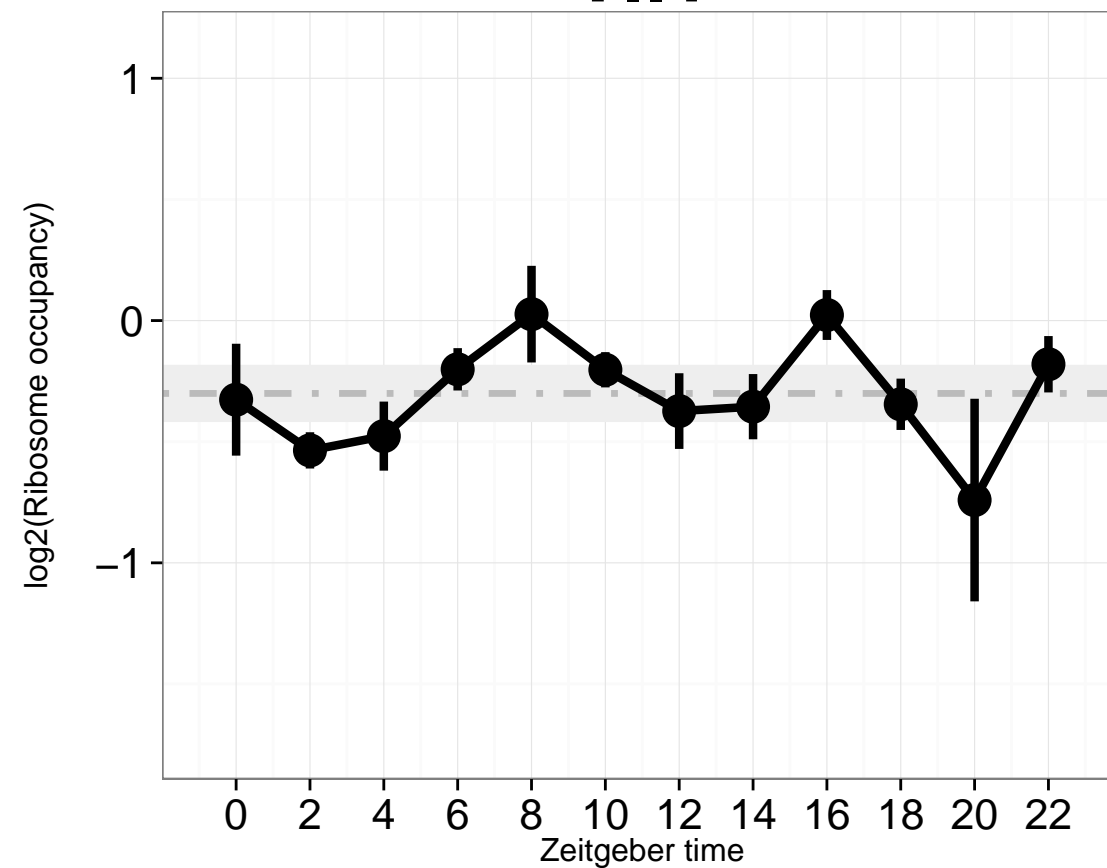

Supplement: Supplementary file 5415 [file 1]

# Tmc6

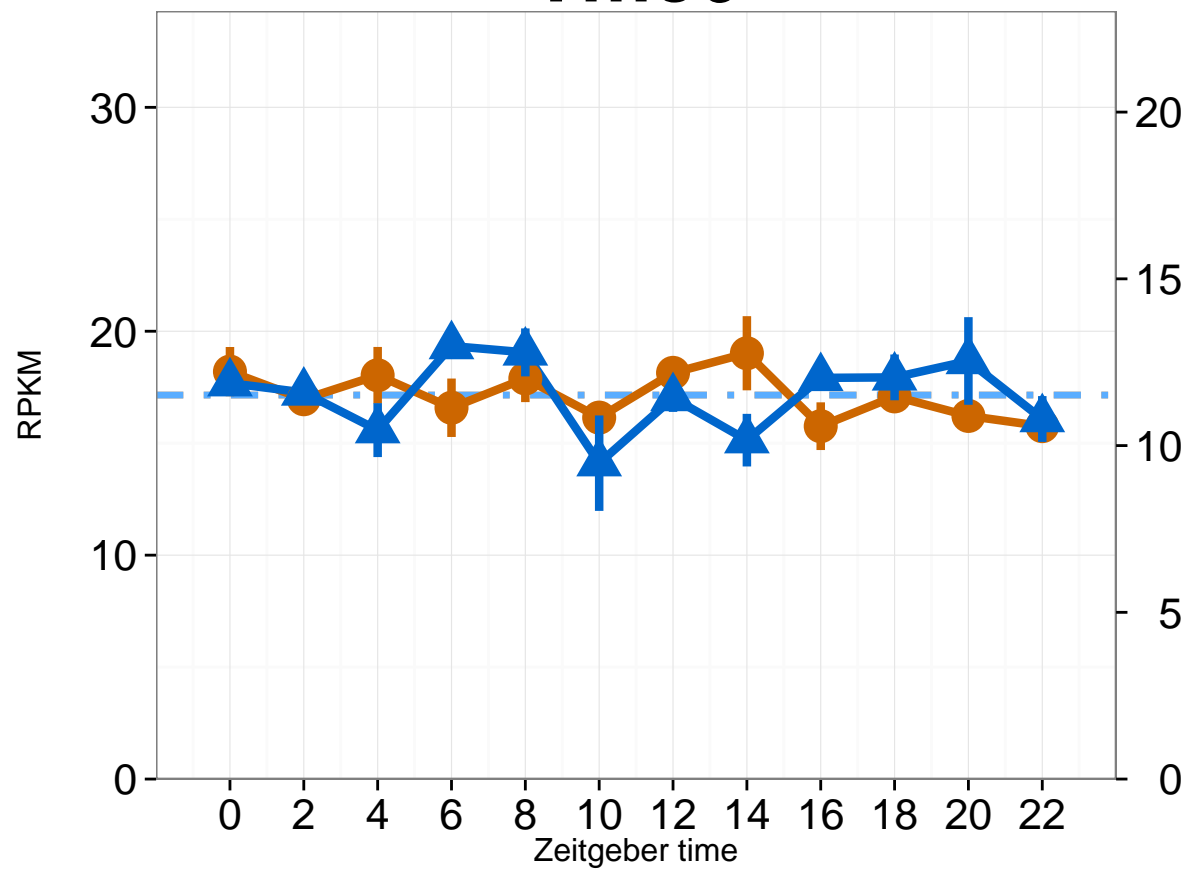

# Tmc6

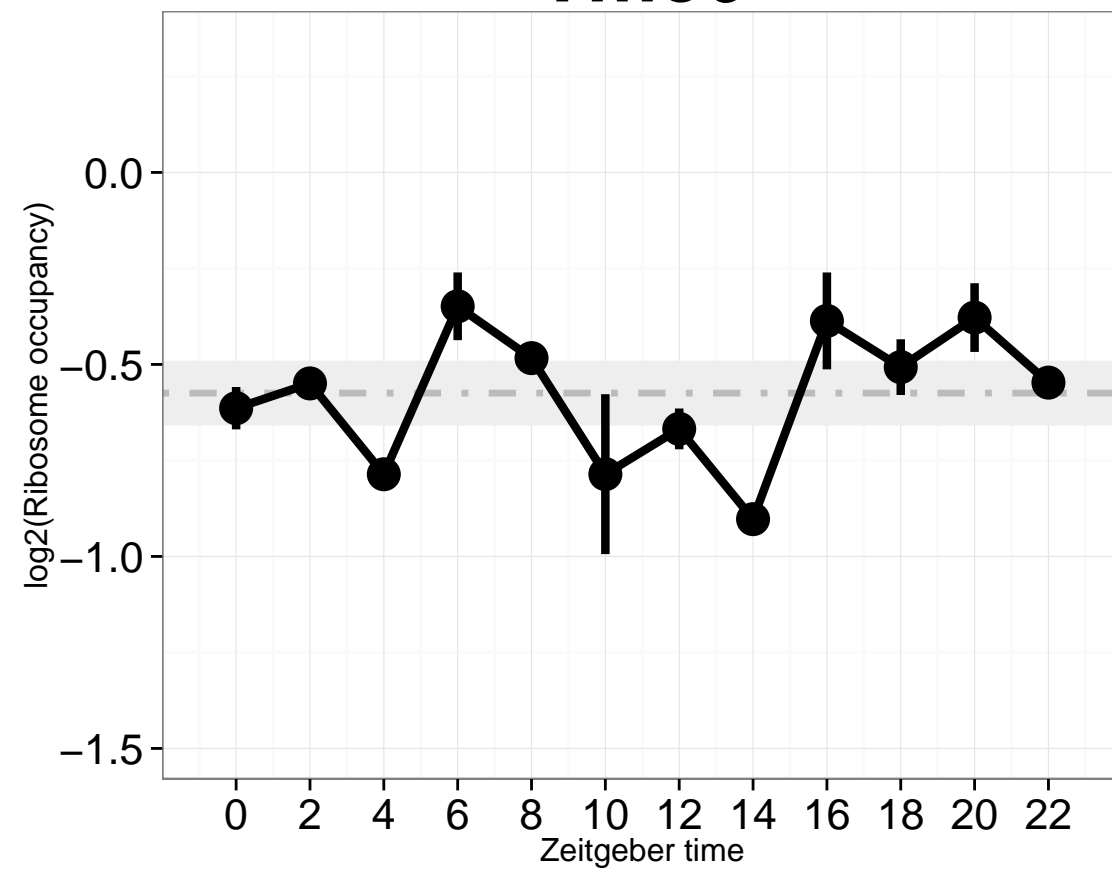

Supplement: Supplementary file 5416 [file 1]

# Hmmr

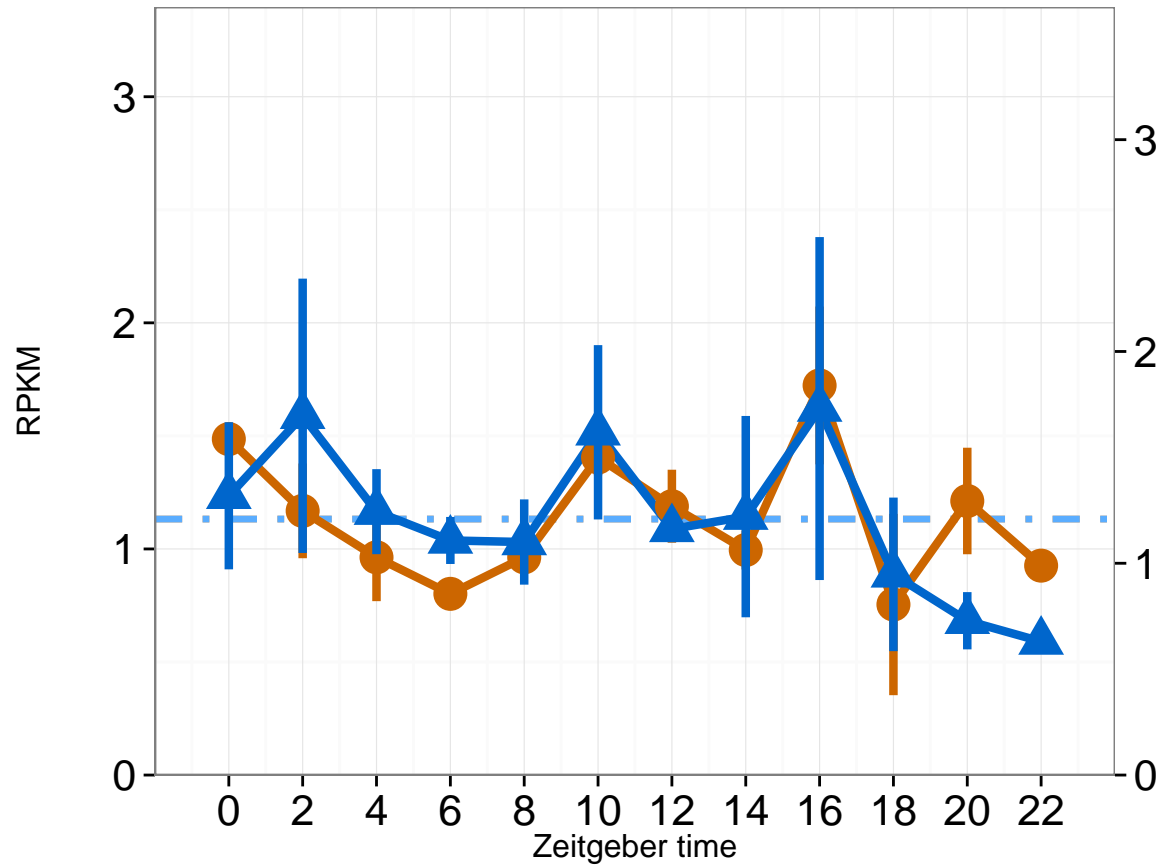

# Hmmr

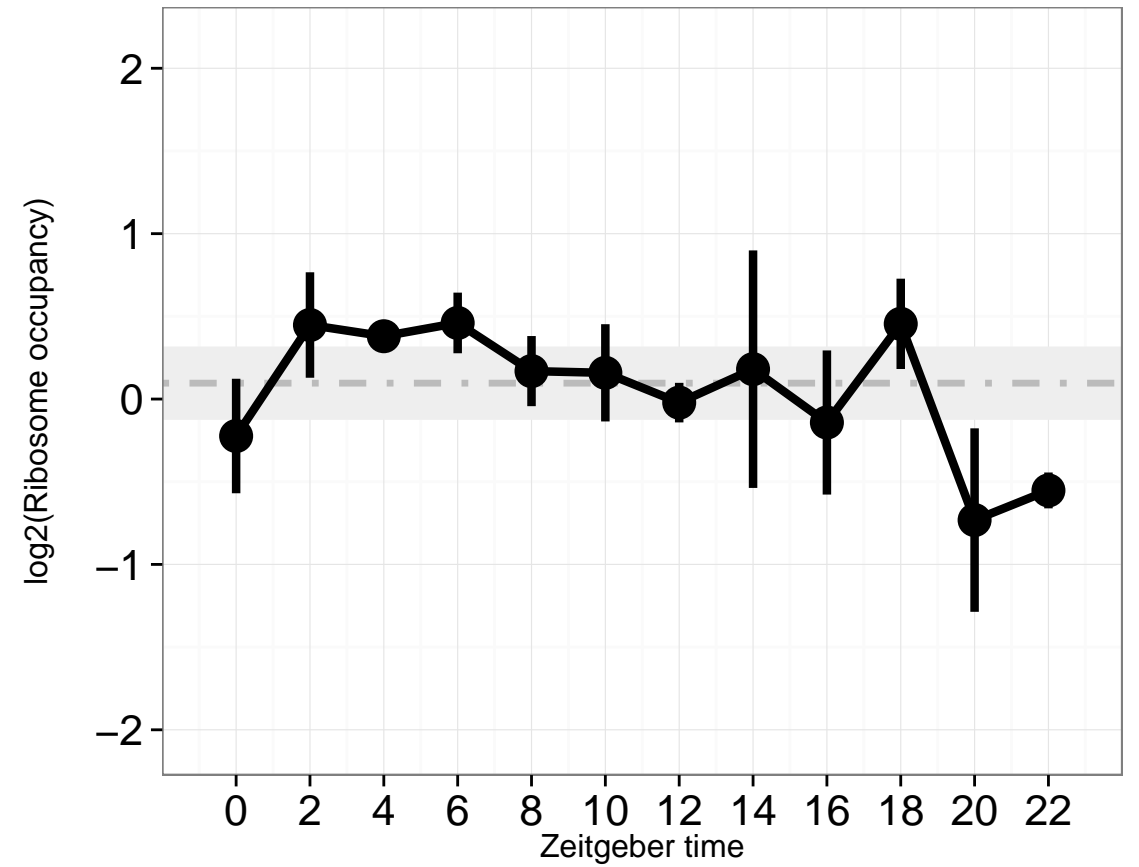

Supplement: Supplementary file 5417 [file 1]

# Cdkn2aip

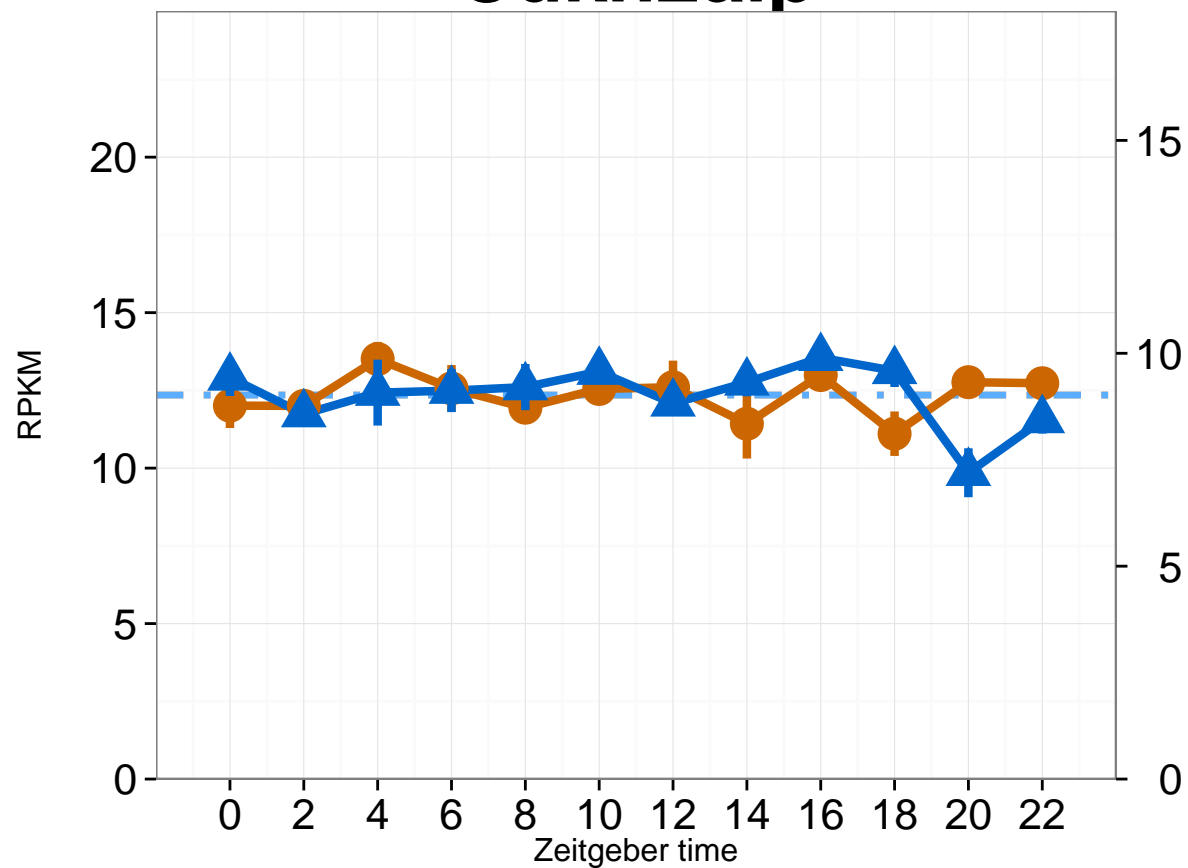

# Cdkn2aip

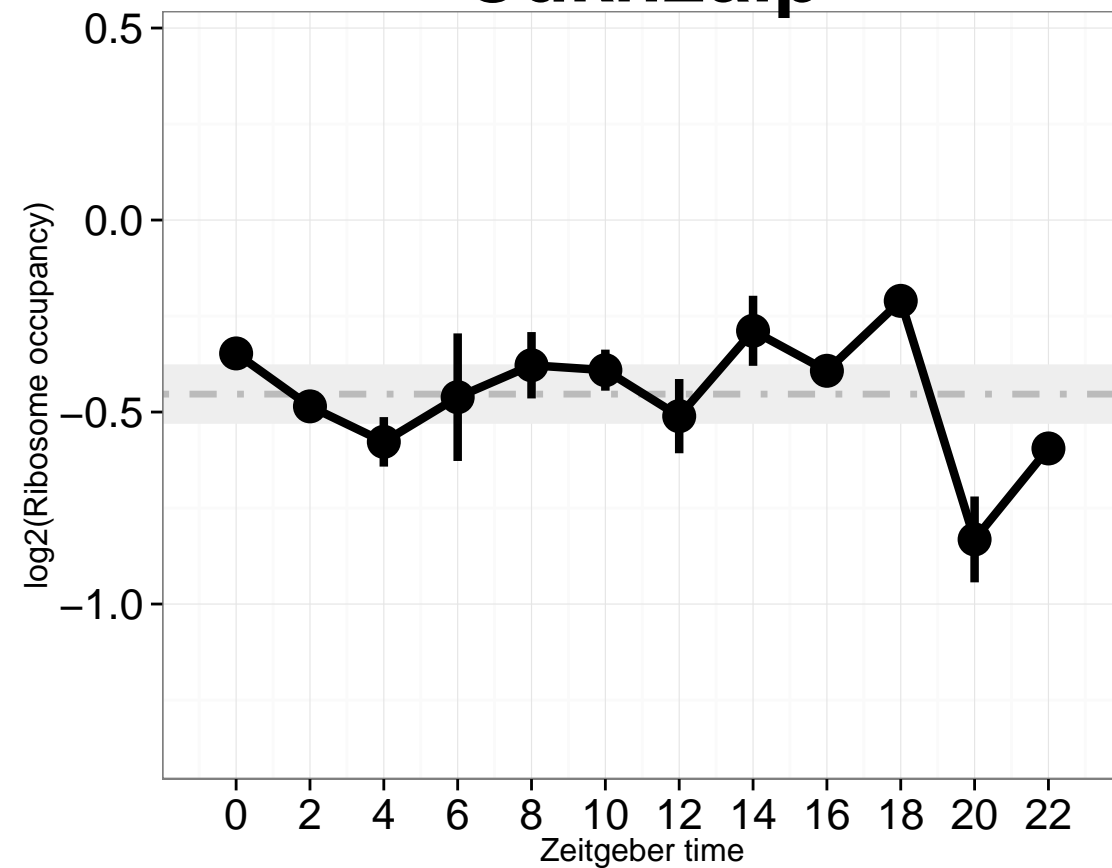

Supplement: Supplementary file 5418 [file 1]

## E2f3

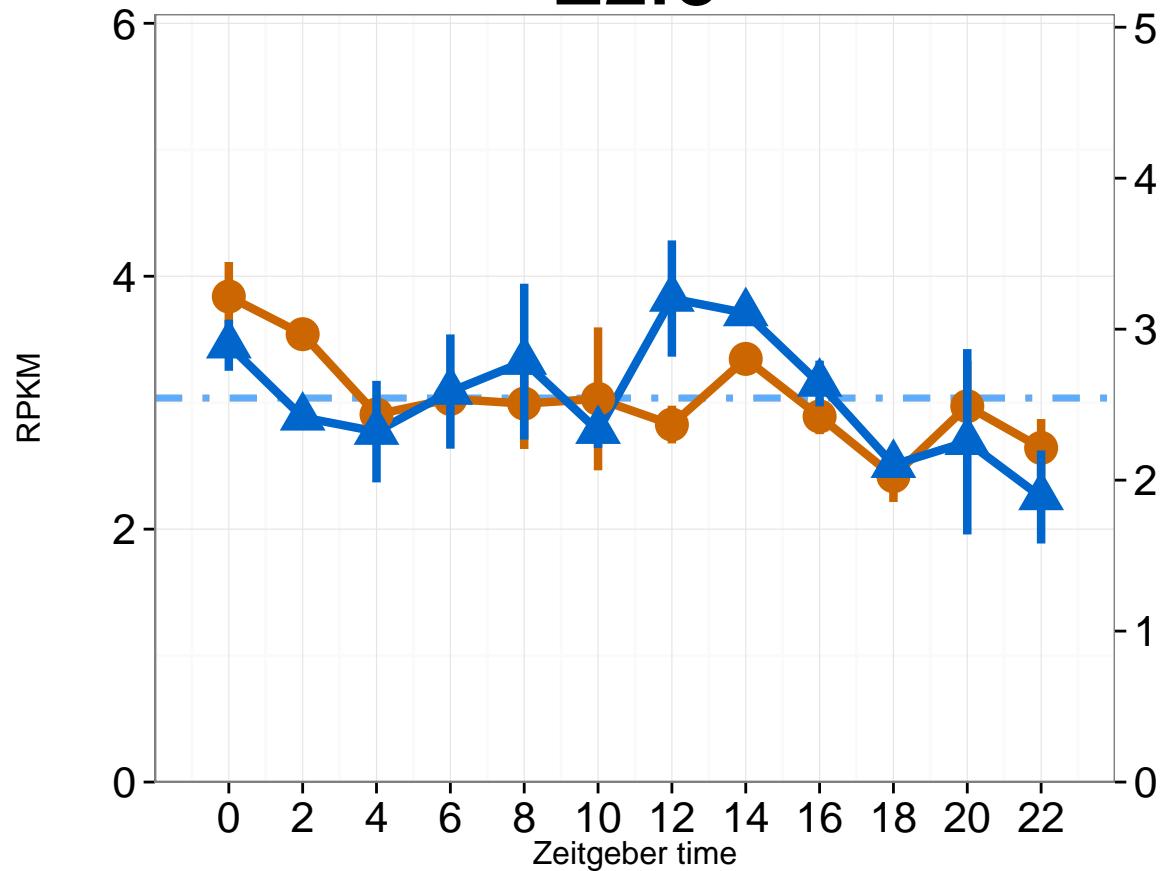

## E2f3

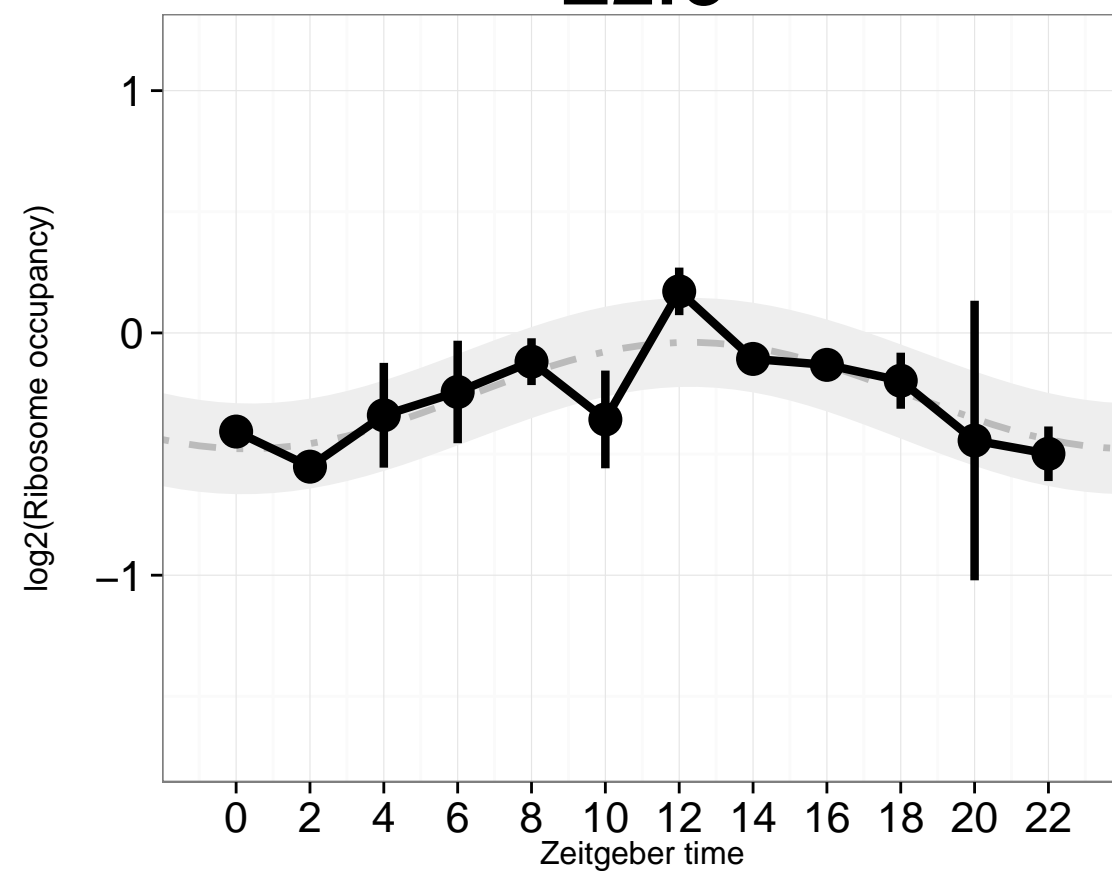

Supplement: Supplementary file 5419 [file 1]

## Tmpo

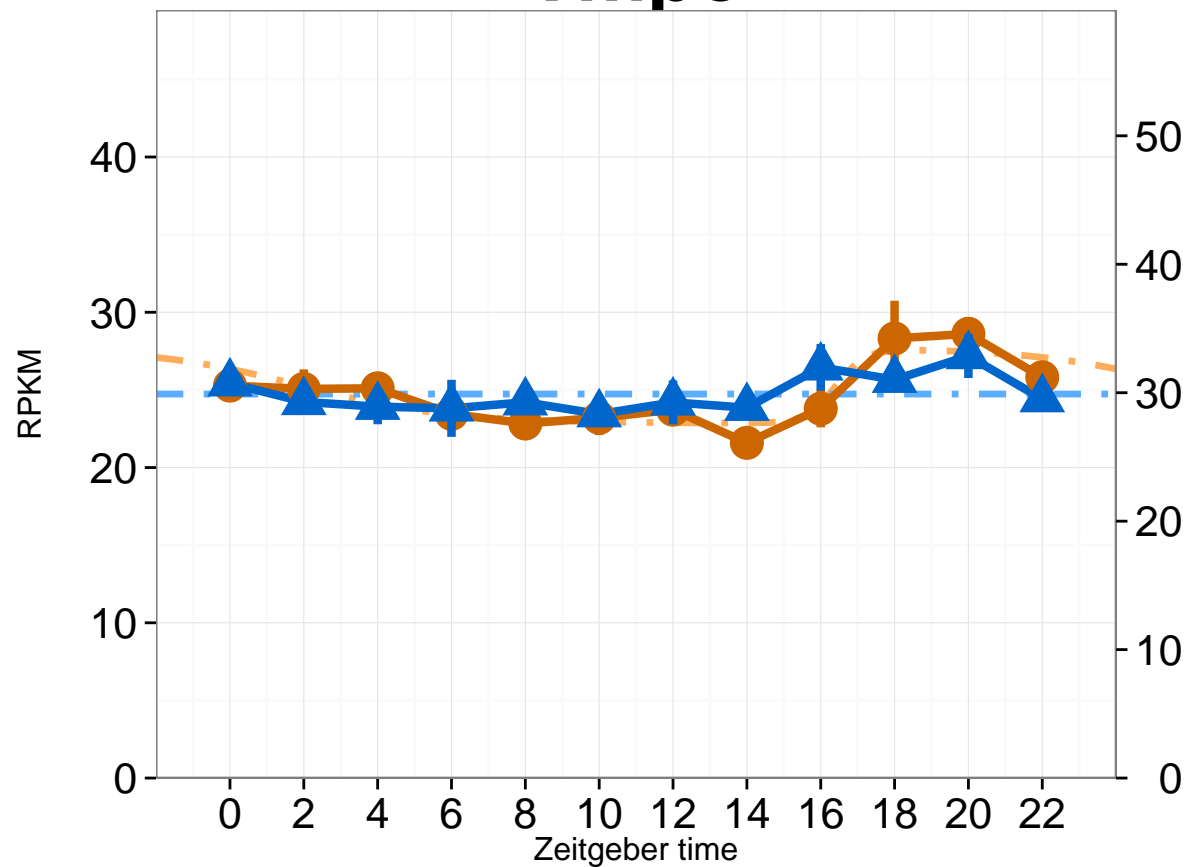

## Tmpo

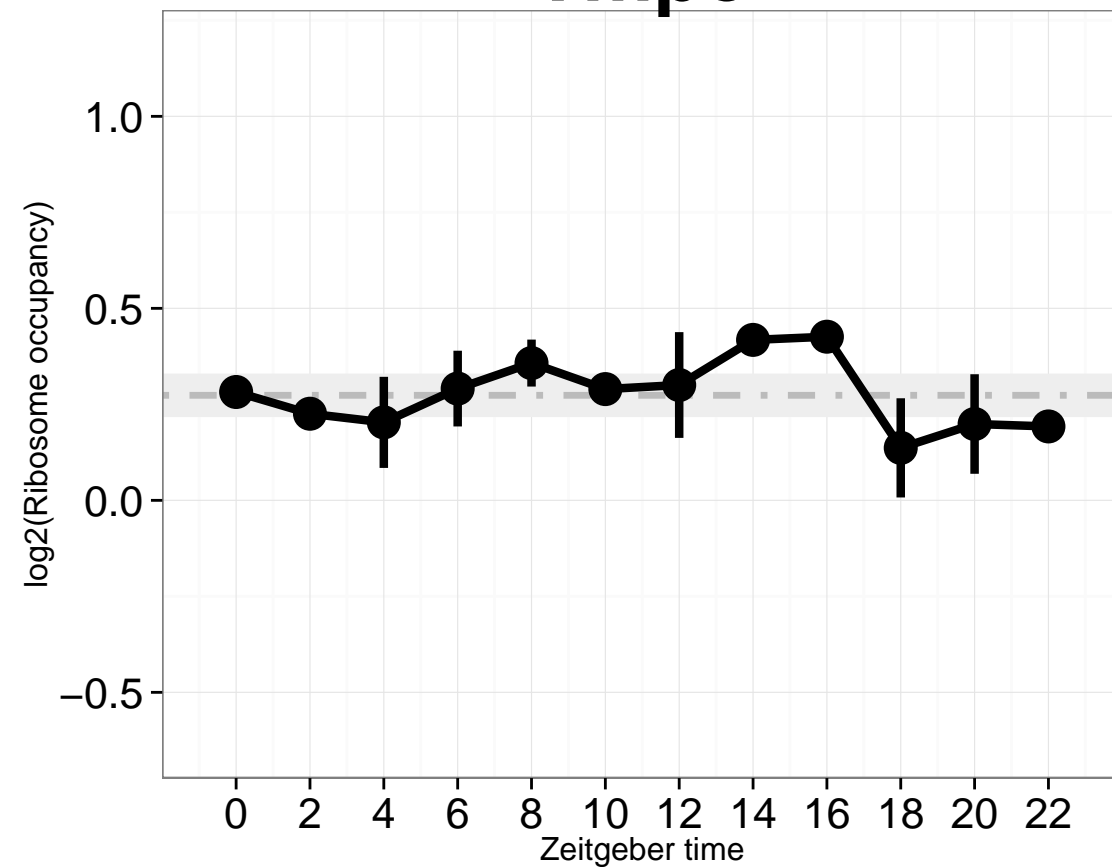

Supplement: Supplementary file 5420 [file 1]

# Zfr

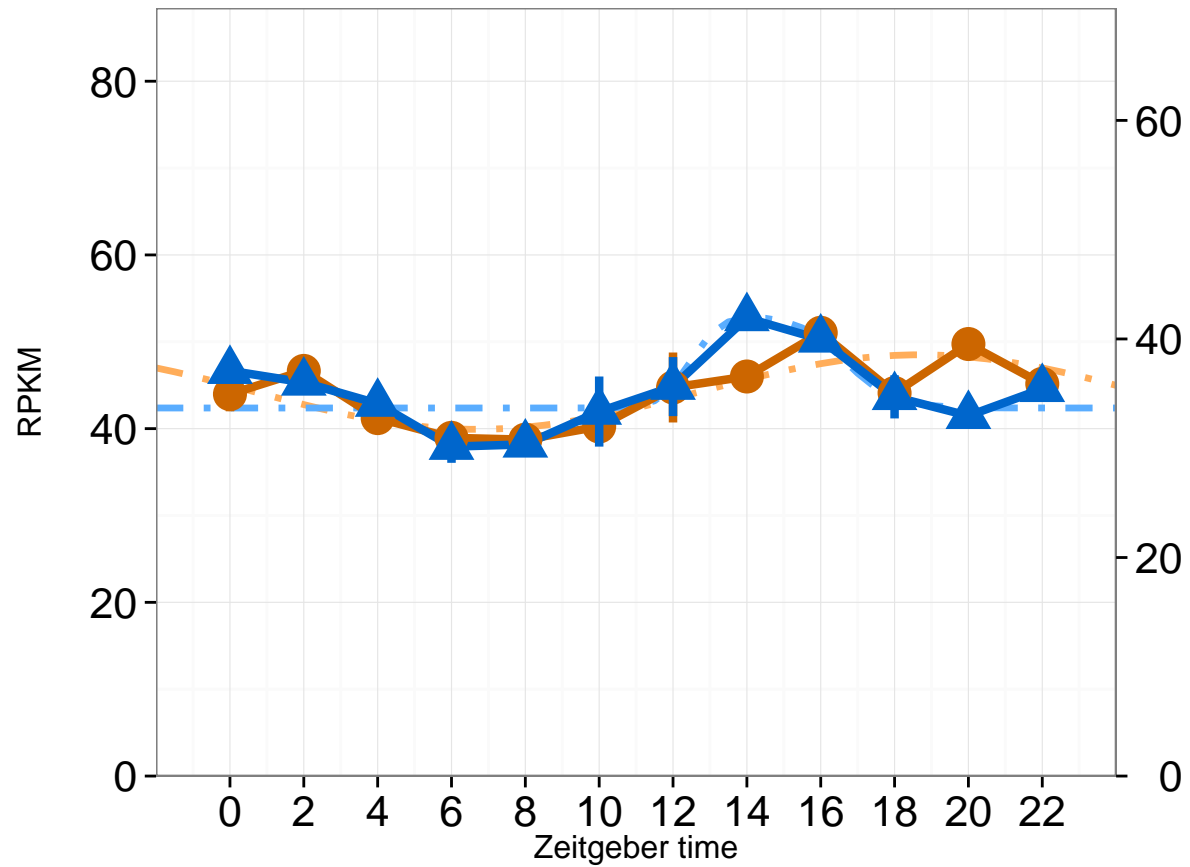

# Zfr

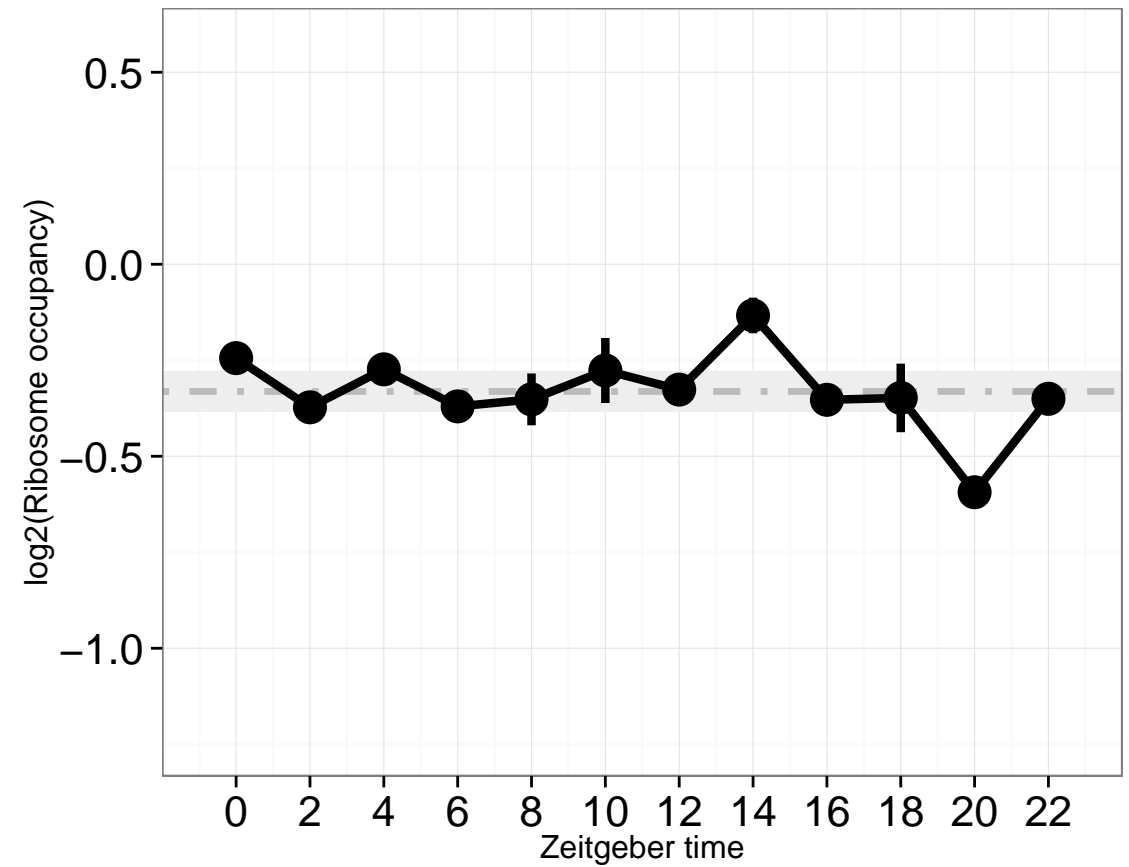

Supplement: Supplementary file 5421 [file 1]
