# Supplementary material (part 55 of 133)
Source: publisher figshare collection journal article supplement (https://springernature.figshare.com/articles/dataset/_/4903193)

# Srfbp1

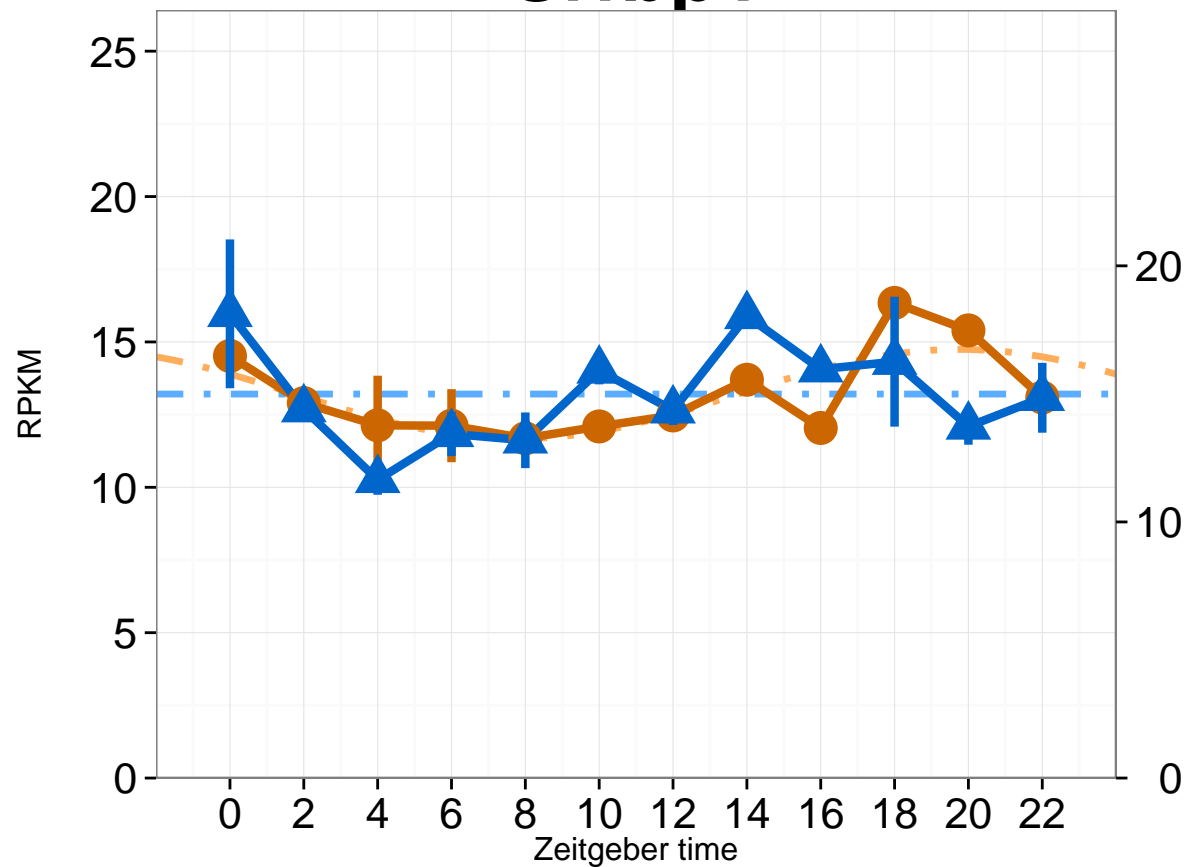

# Srfbp1

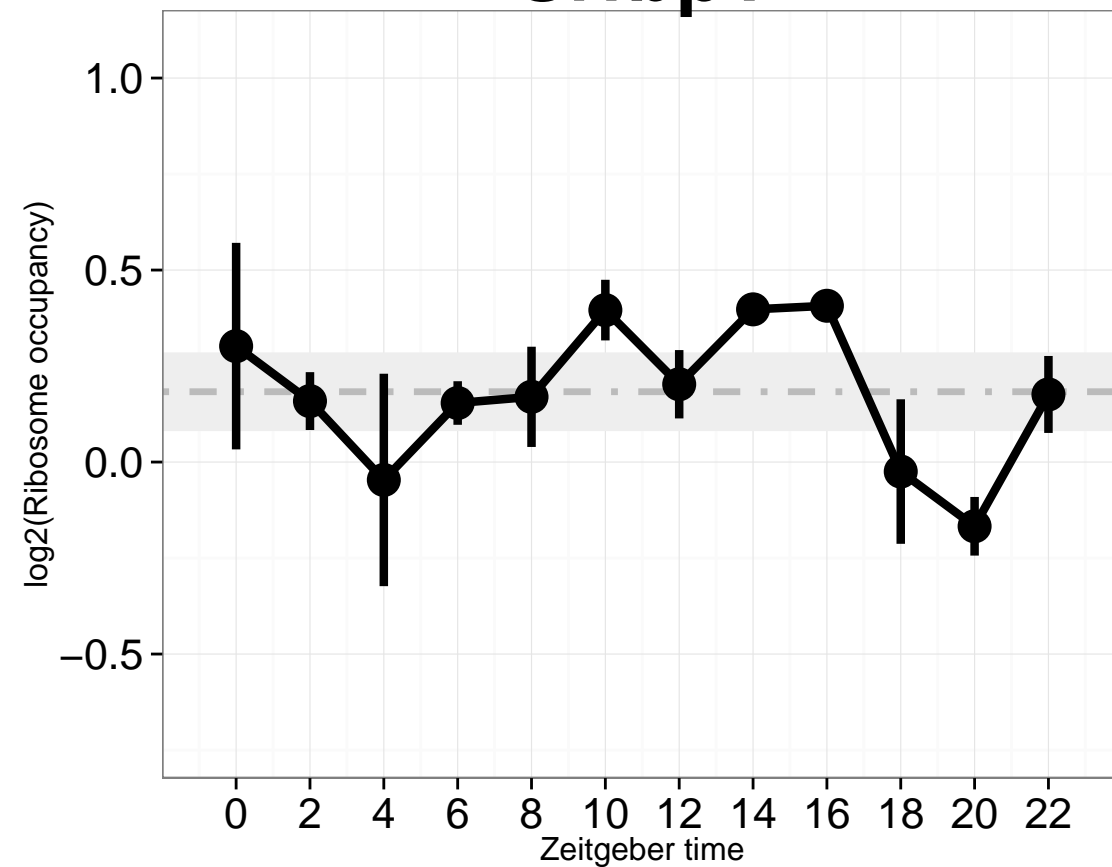

Supplement: Supplementary file 5422 [file 1]

# Kcnj12

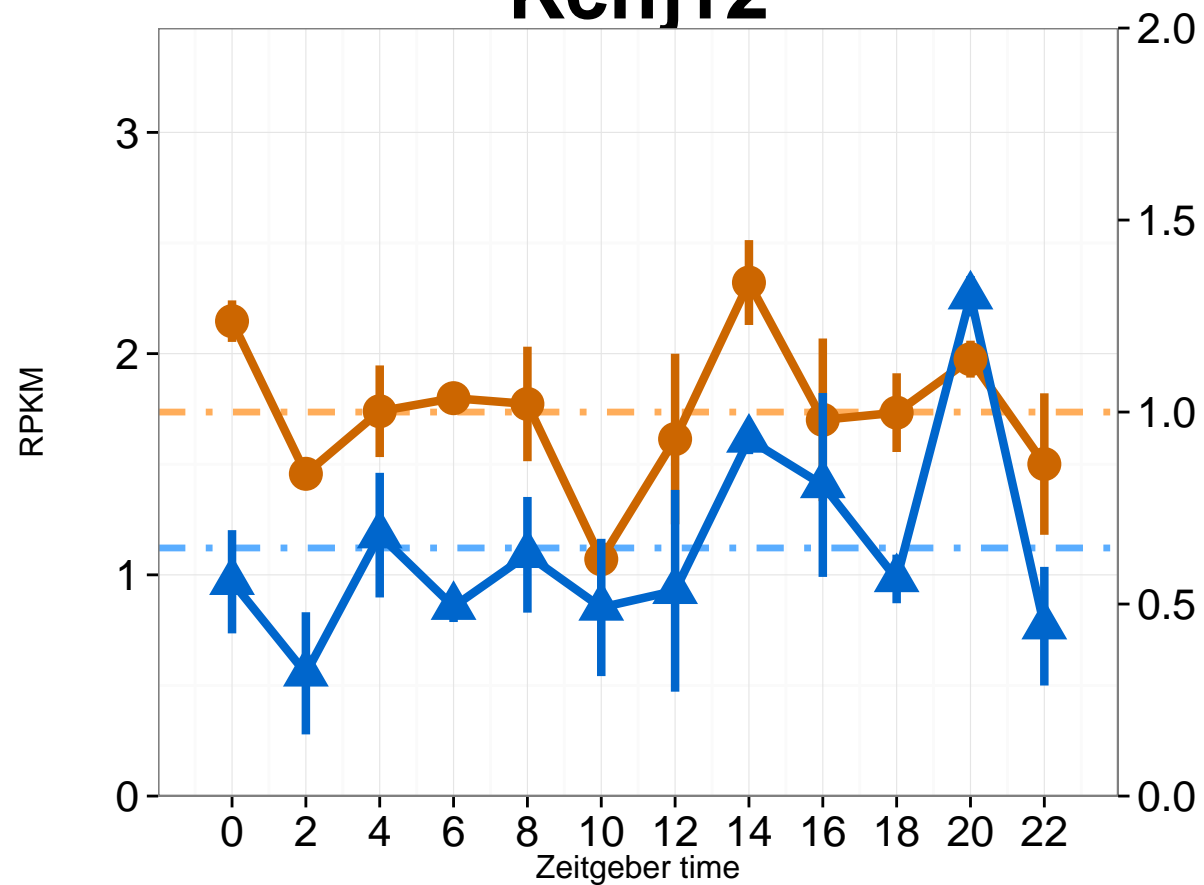

# Kcnj12

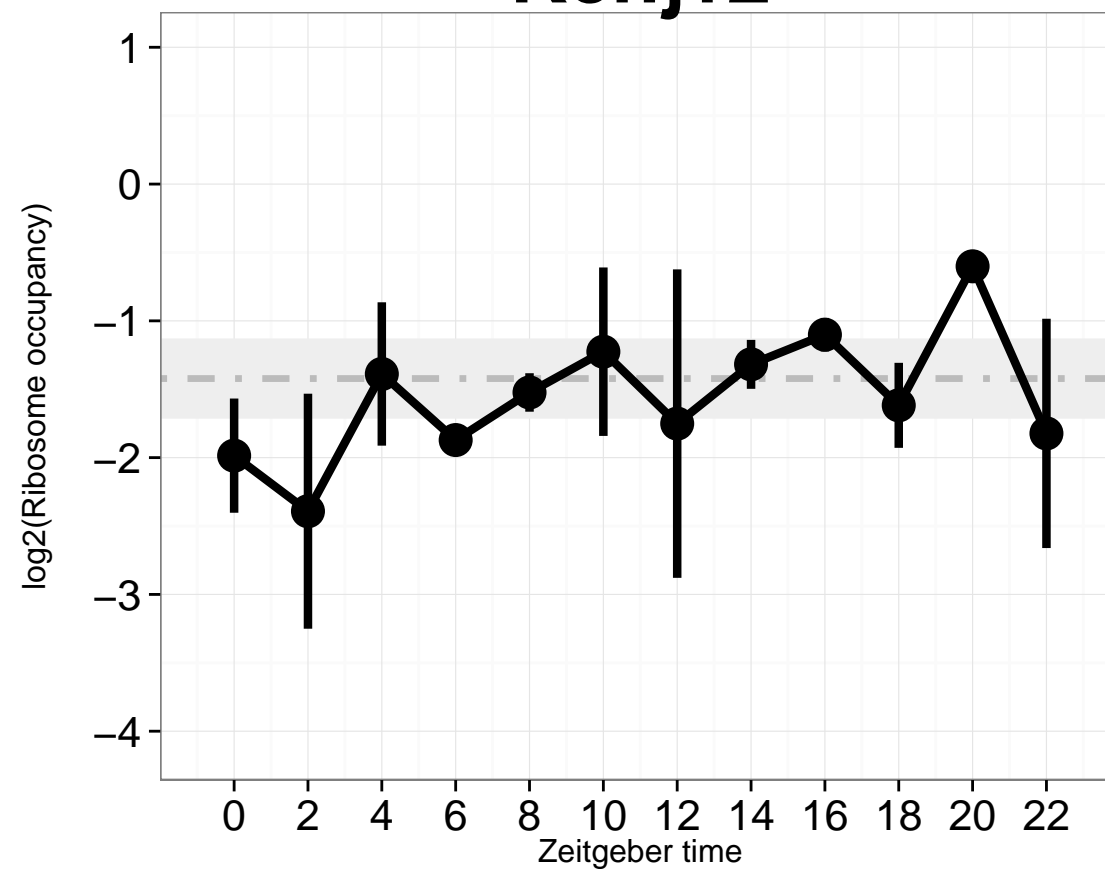

Supplement: Supplementary file 5423 [file 1]

## Chordc1

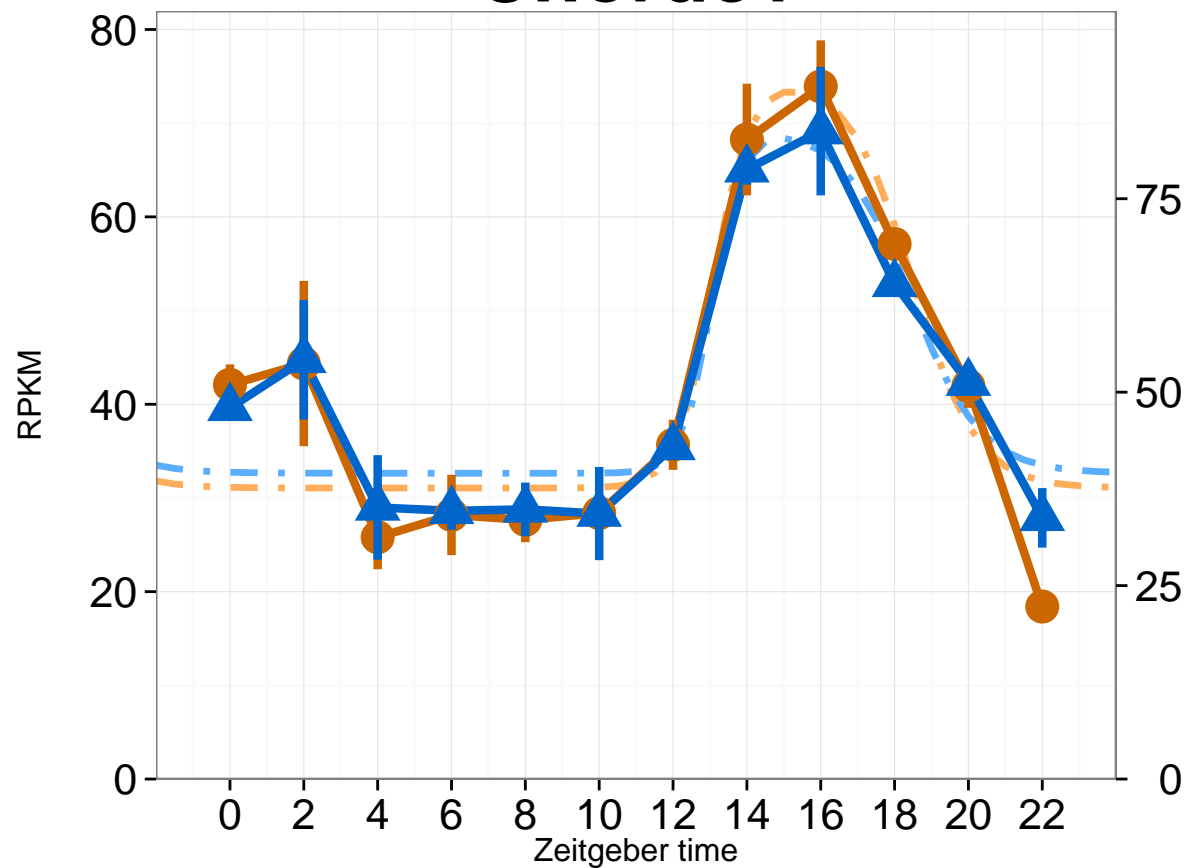

## Chordc1

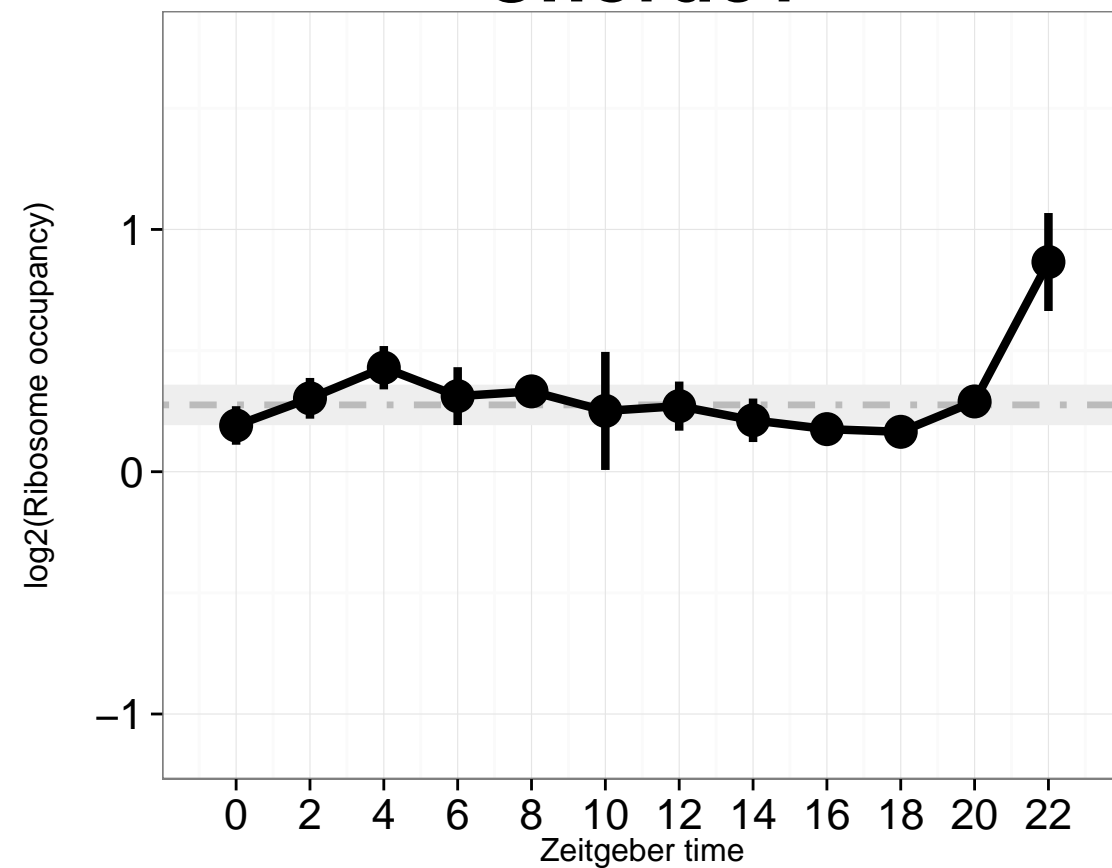

Supplement: Supplementary file 5424 [file 1]

# Sptlc3

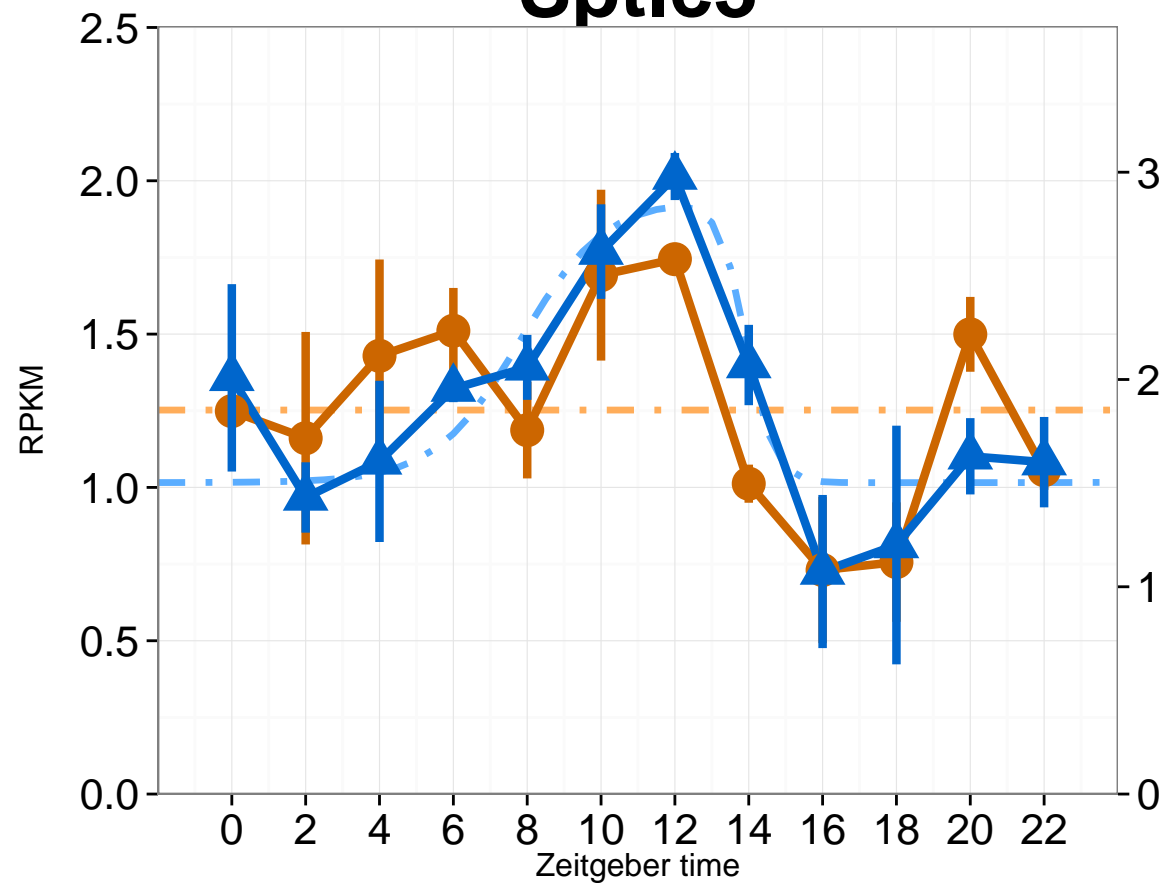

# Sptlc3

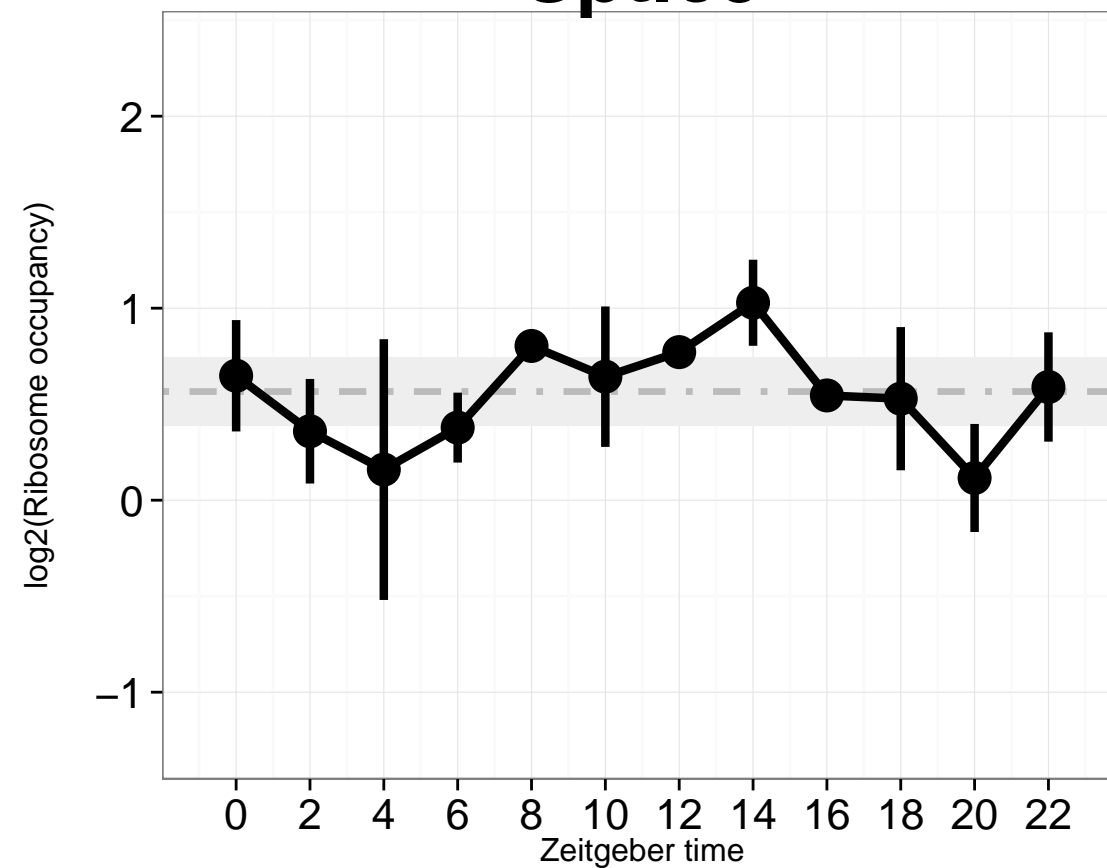

Supplement: Supplementary file 5425 [file 1]

## Cenpe

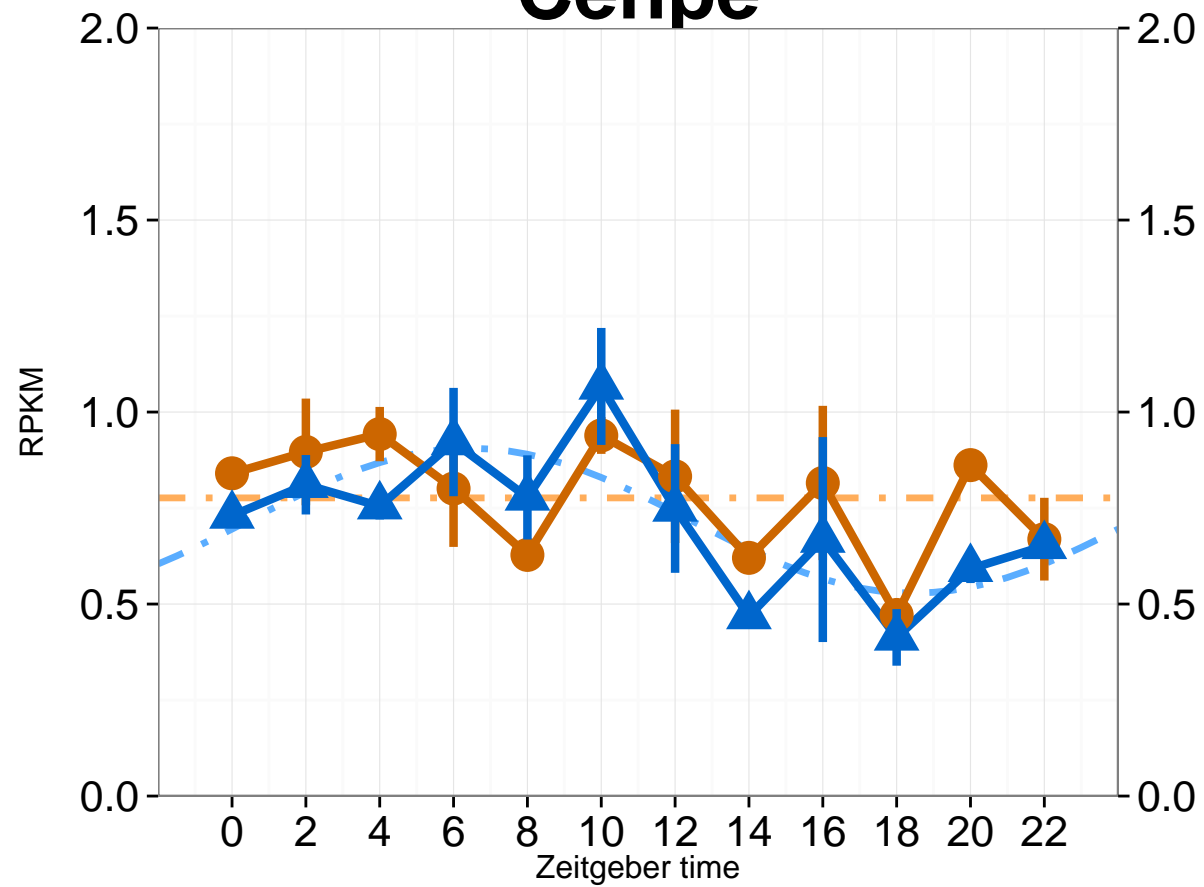

## Cenpe

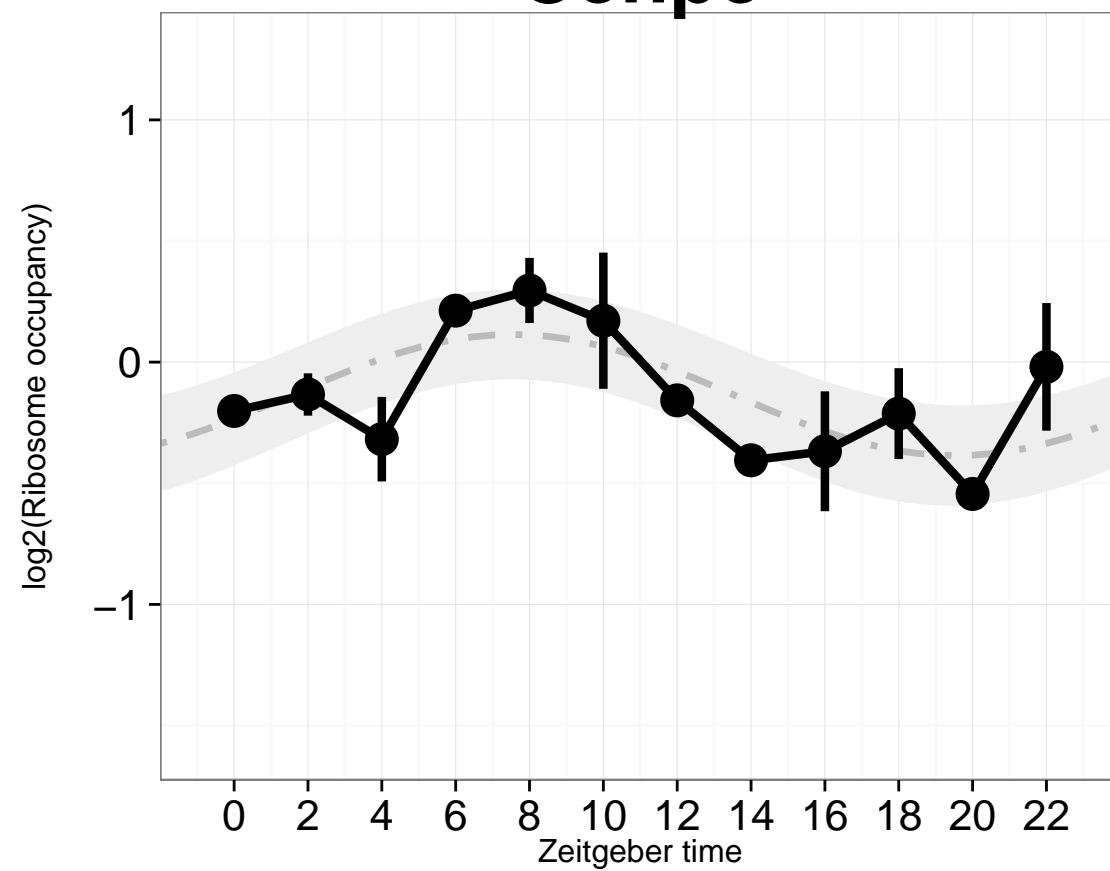

Supplement: Supplementary file 5426 [file 1]

## Marc1

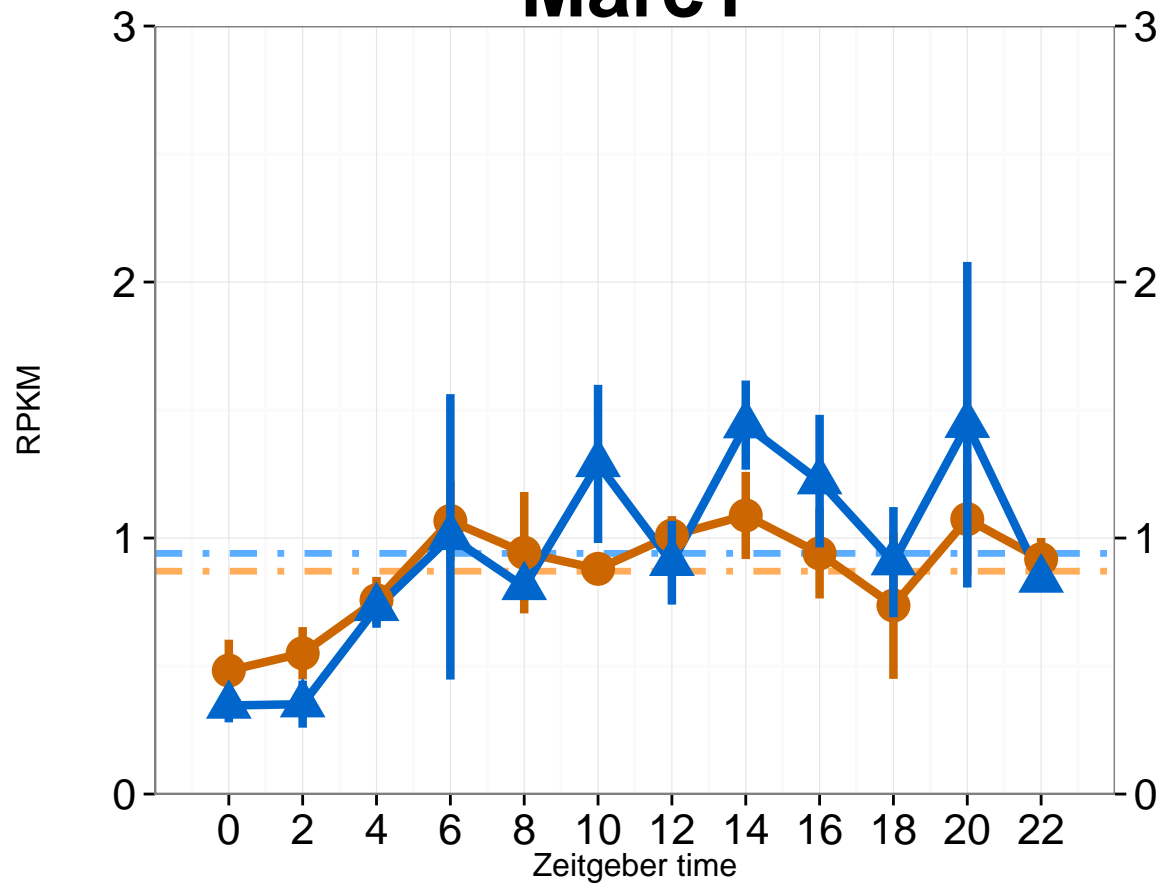

## Marc1

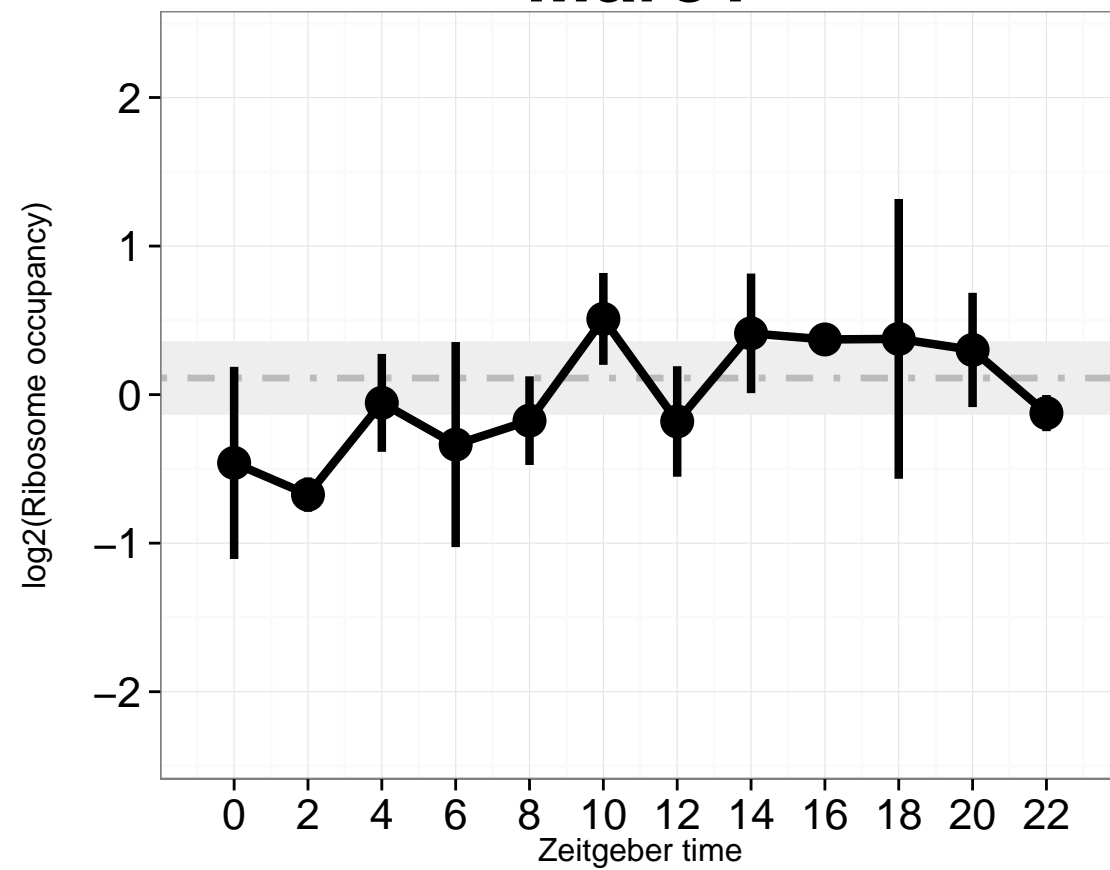

Supplement: Supplementary file 5427 [file 1]

## Cldn18

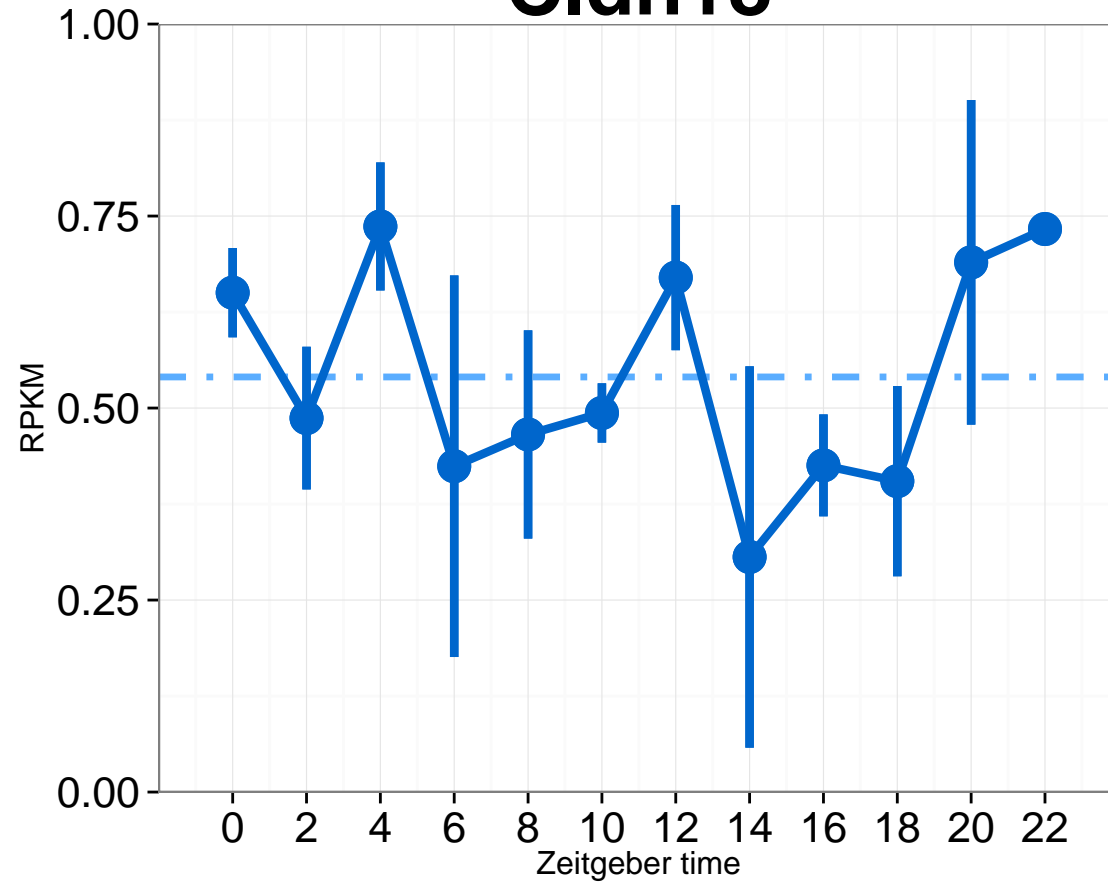

## Cldn18 log2(Ribosome occupancy

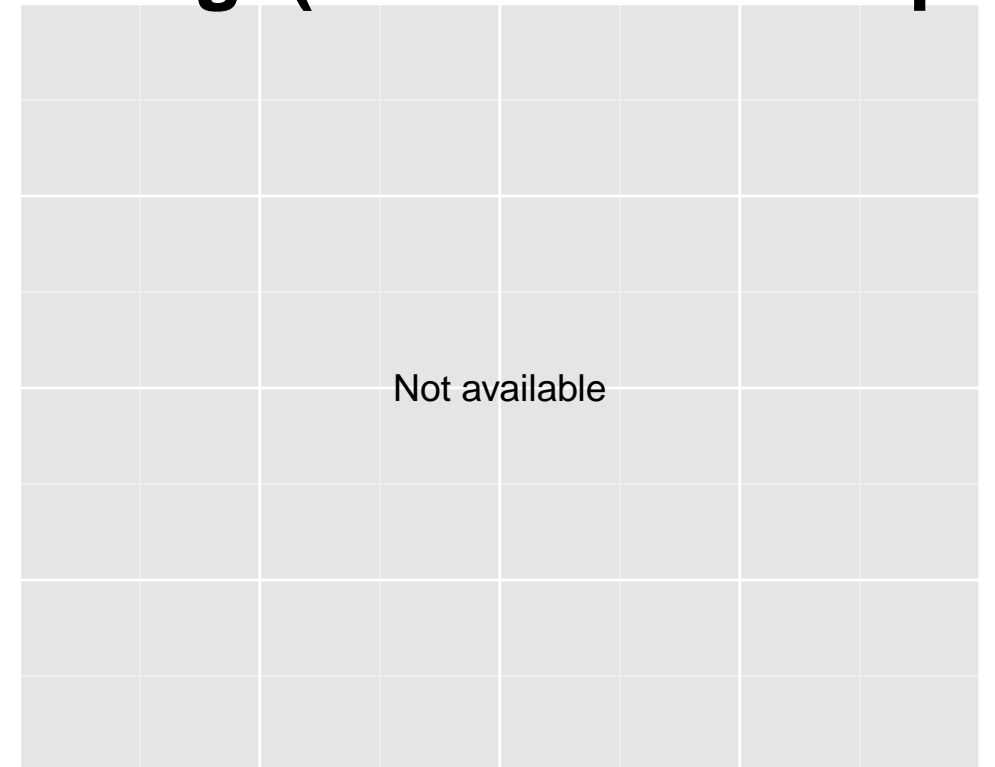

Supplement: Supplementary file 5428 [file 1]

# Twf1

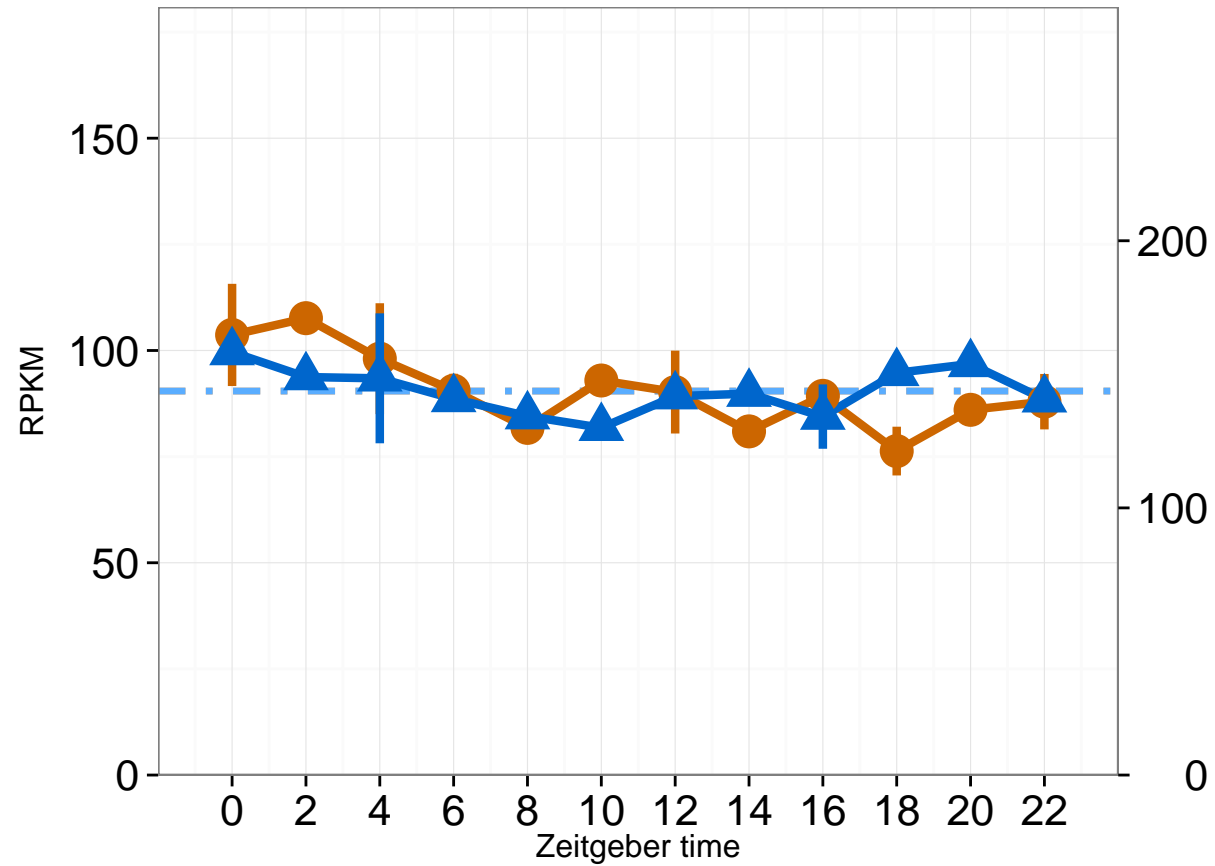

# Twf1

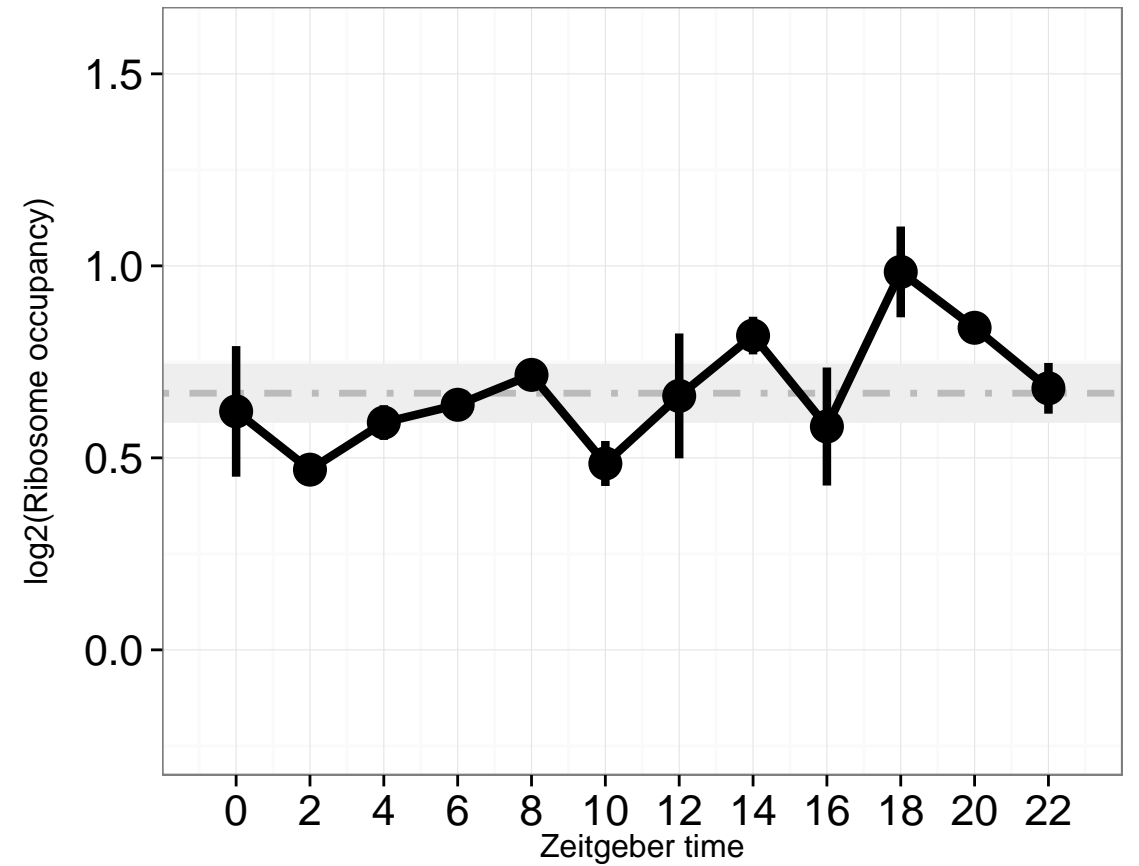

Supplement: Supplementary file 5429 [file 1]

# Sult2b1

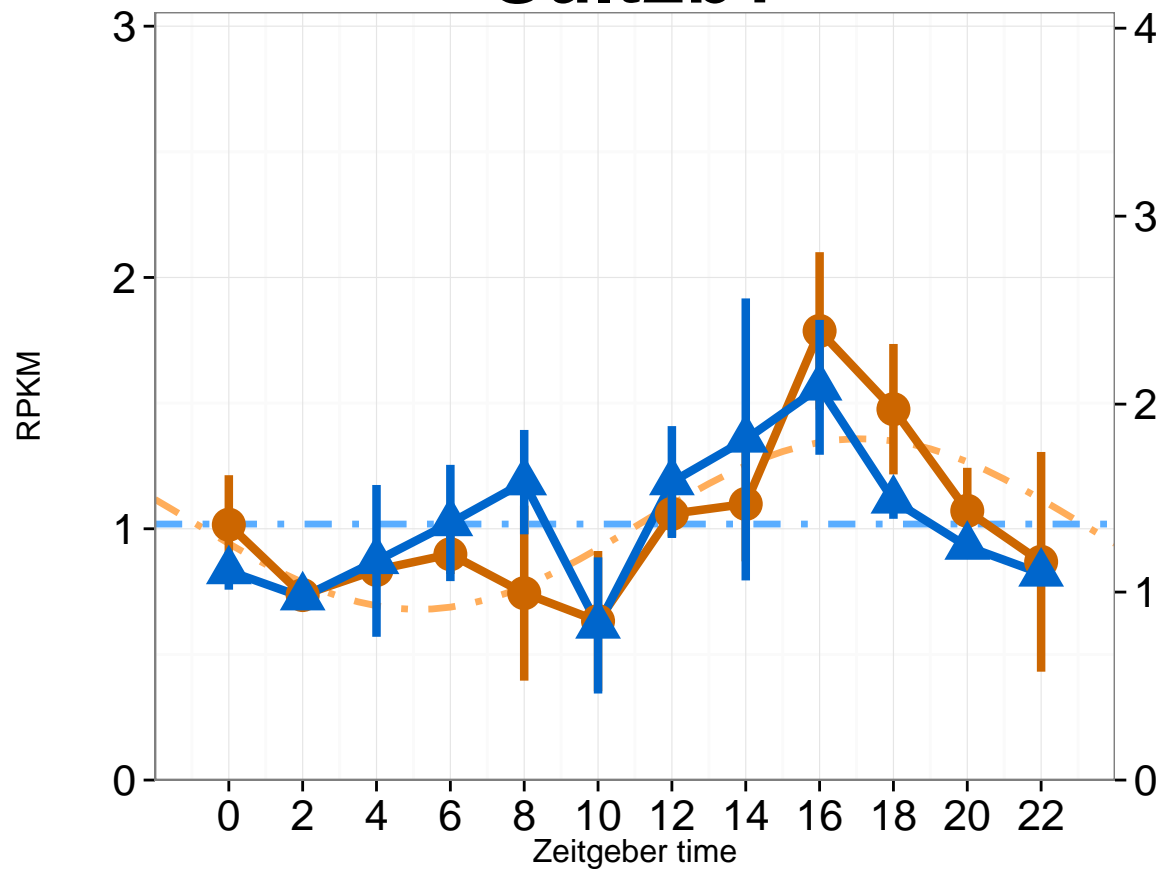

# Sult2b1

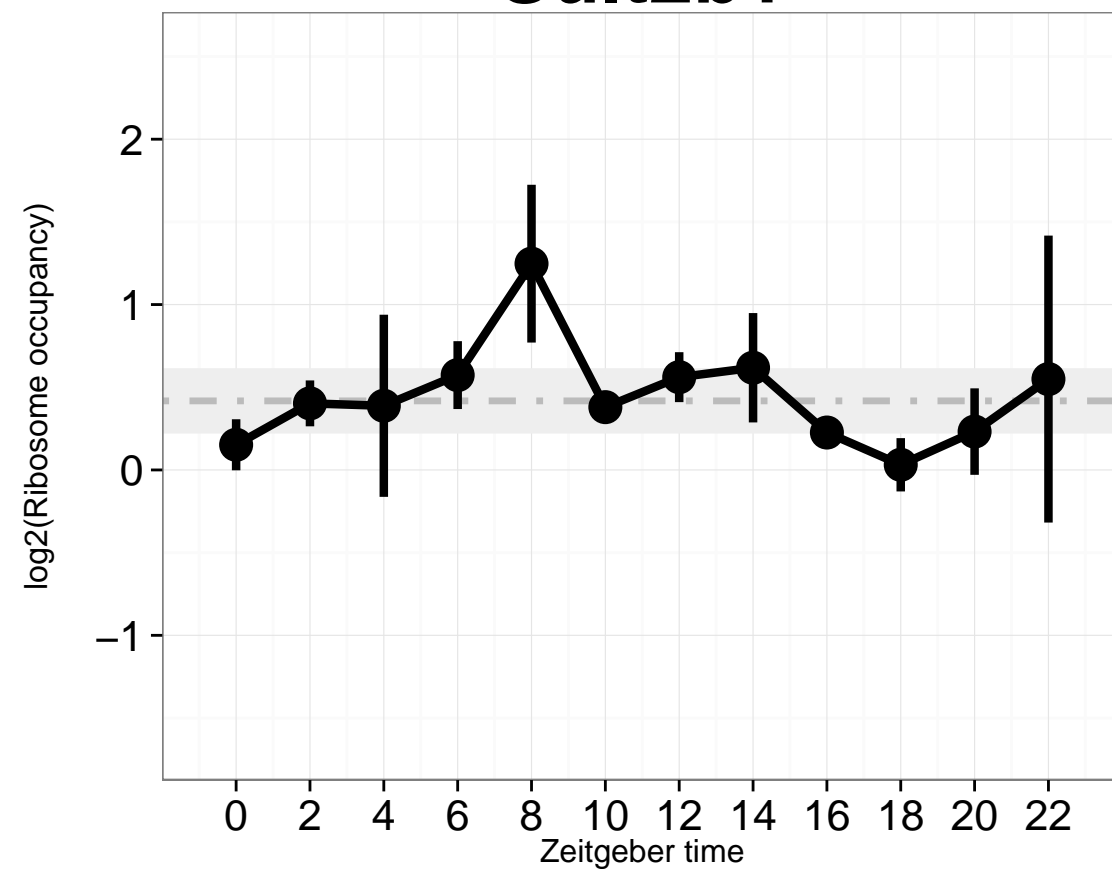

Supplement: Supplementary file 5430 [file 1]

# P4ha2

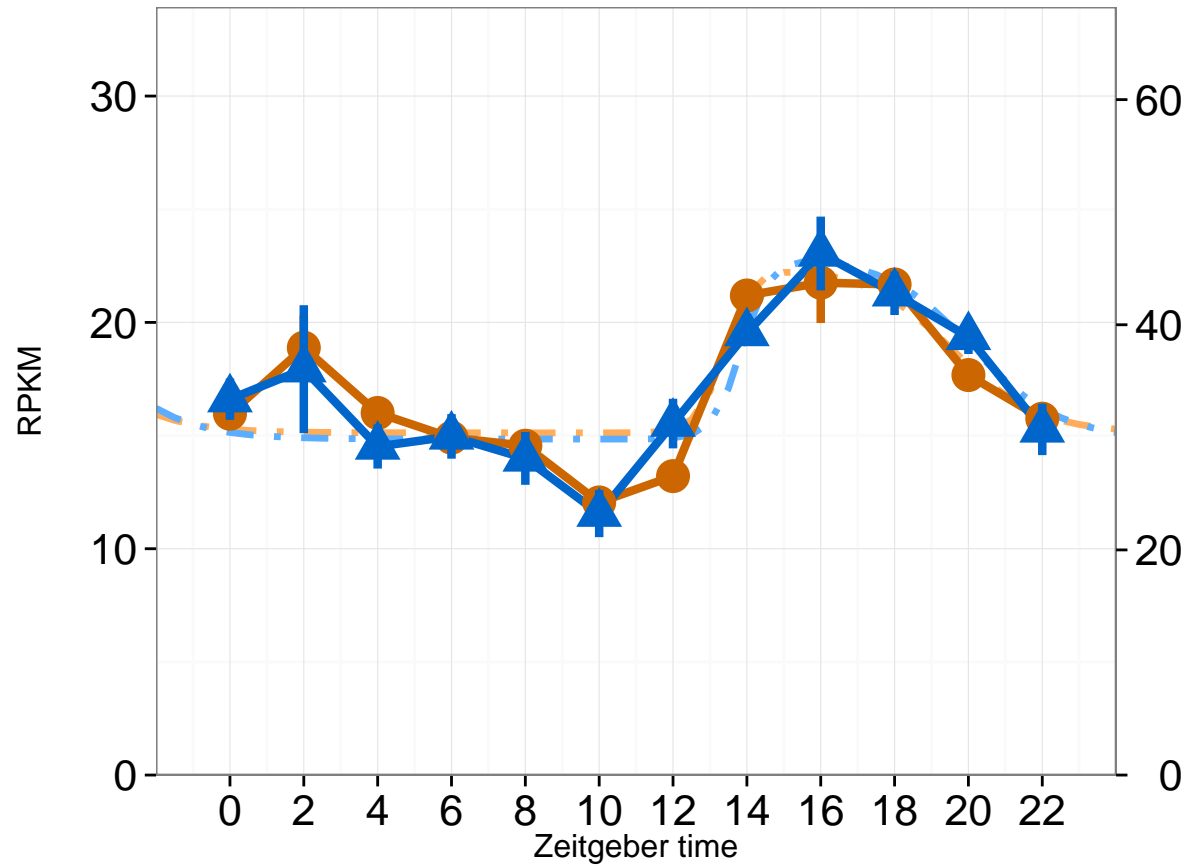

# P4ha2

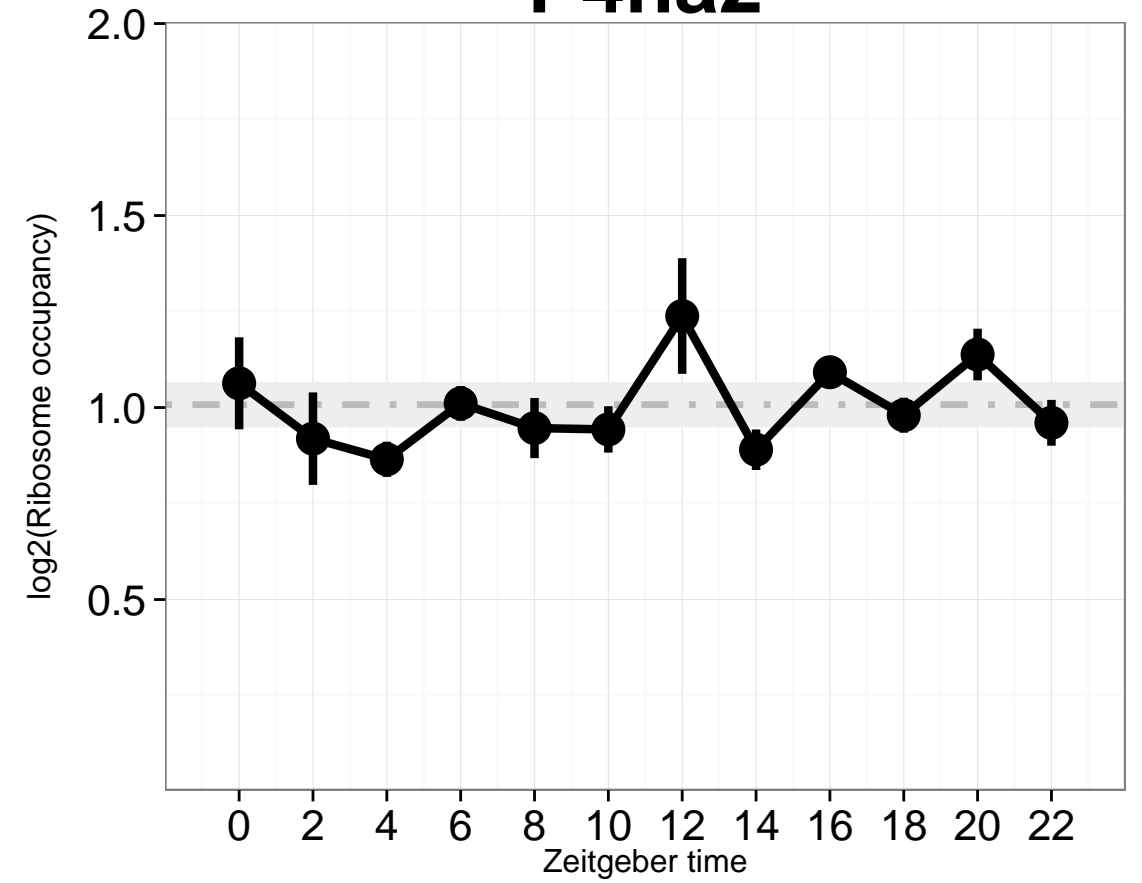

Supplement: Supplementary file 5431 [file 1]

# Gpat2

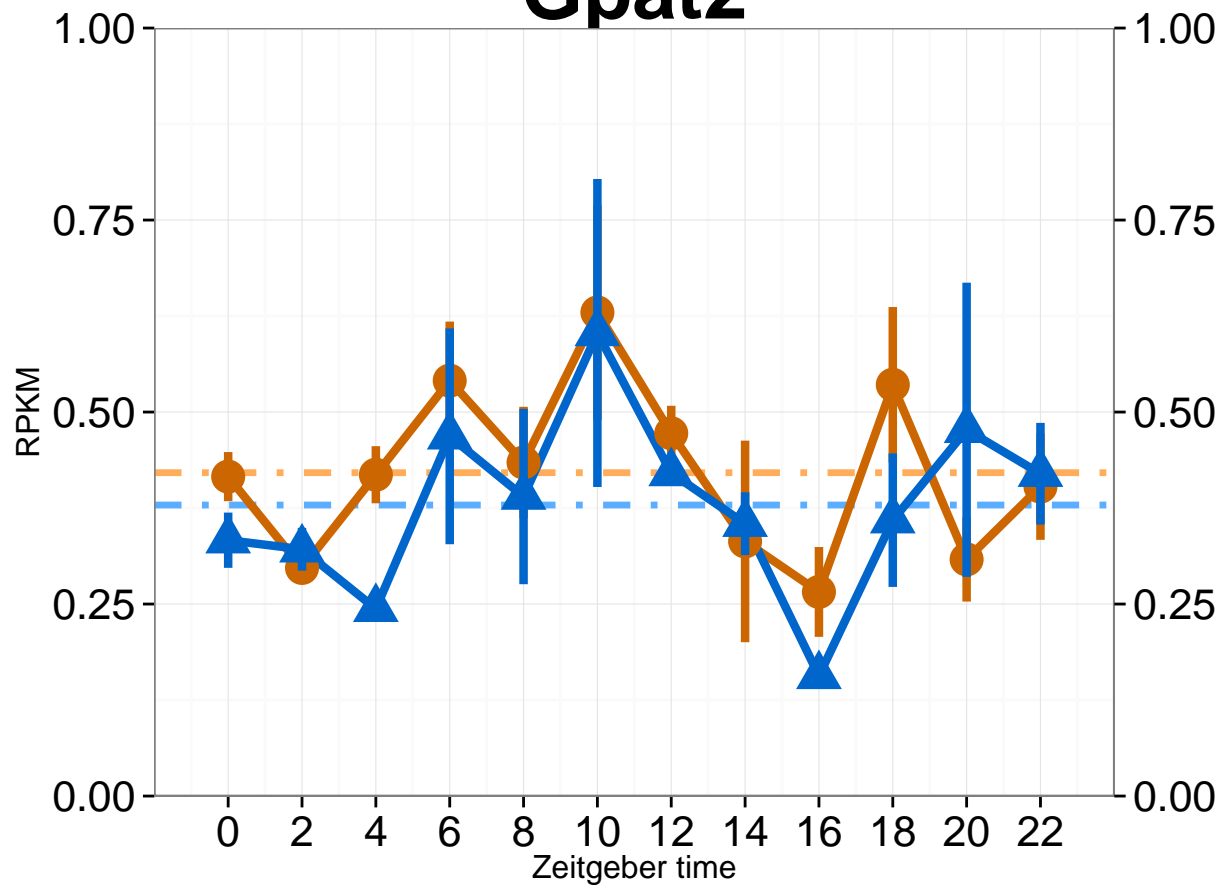

# Gpat2

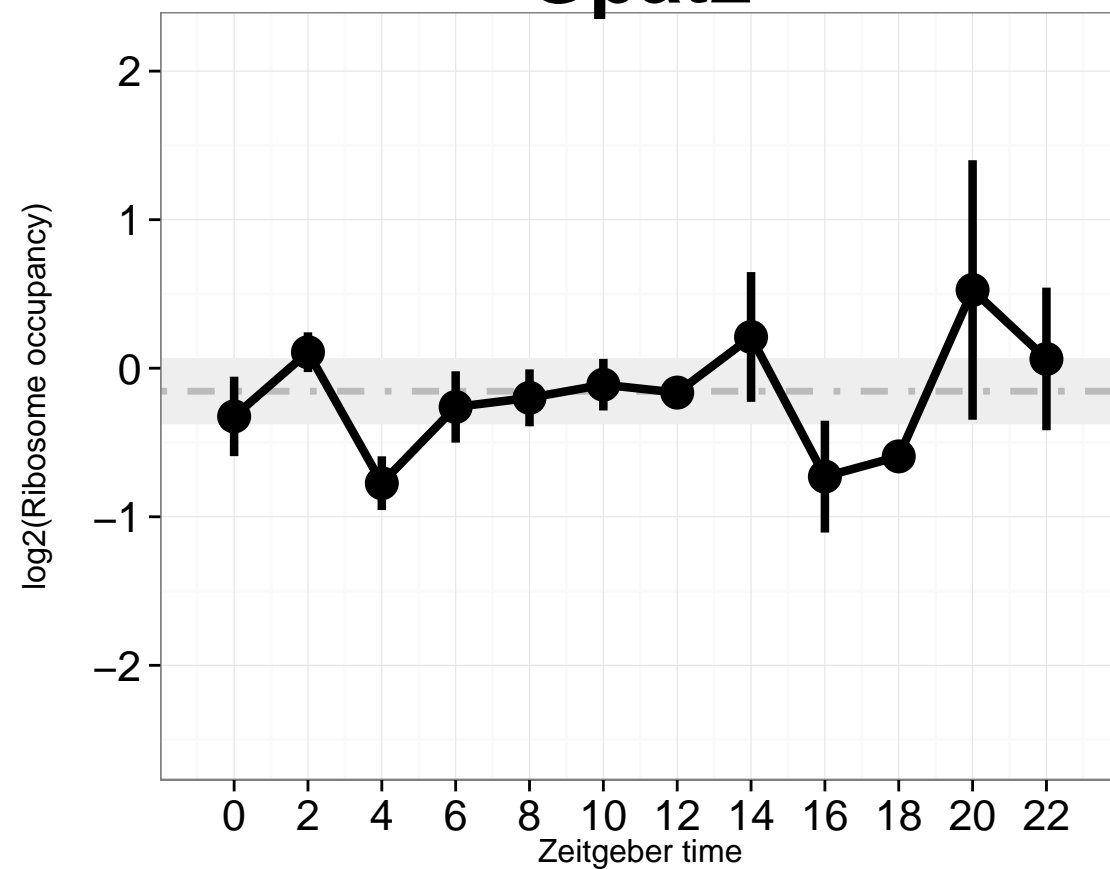

Supplement: Supplementary file 5432 [file 1]

## Psmd7

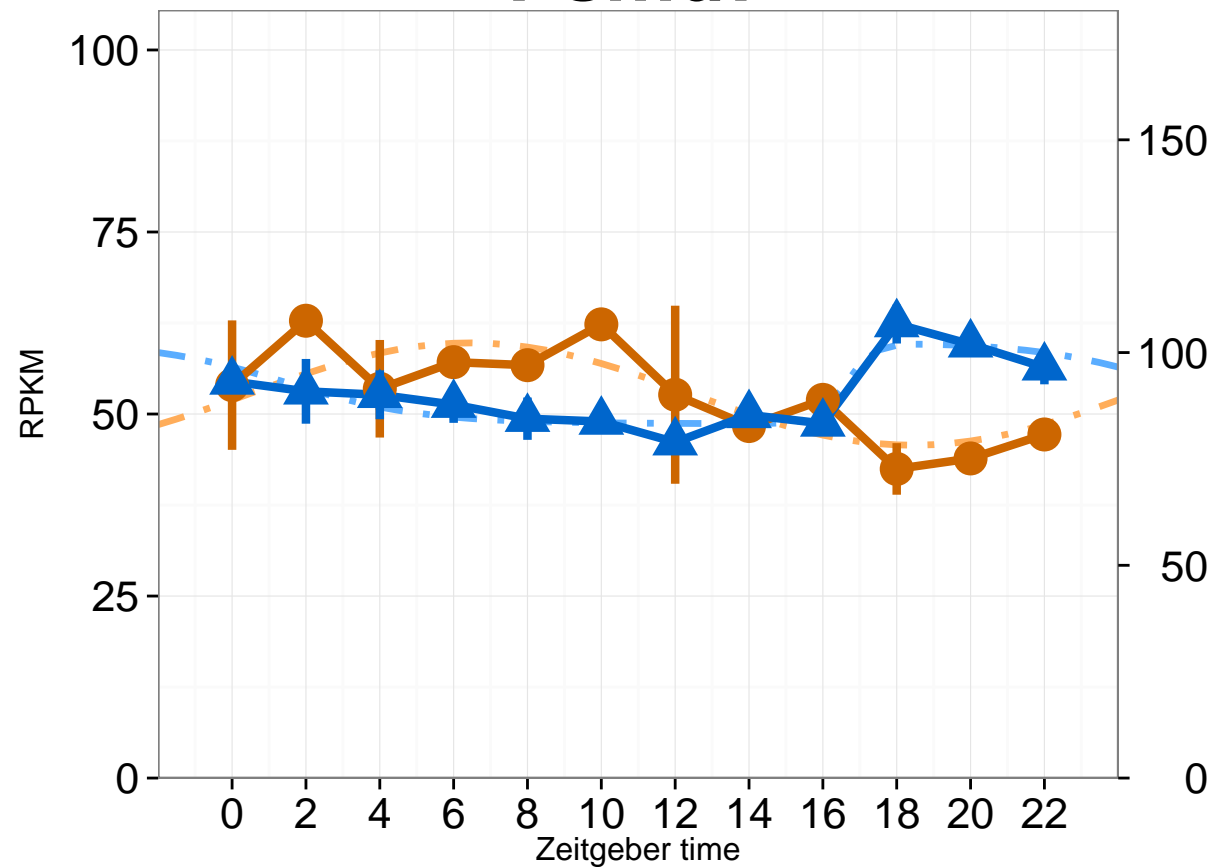

## Psmd7

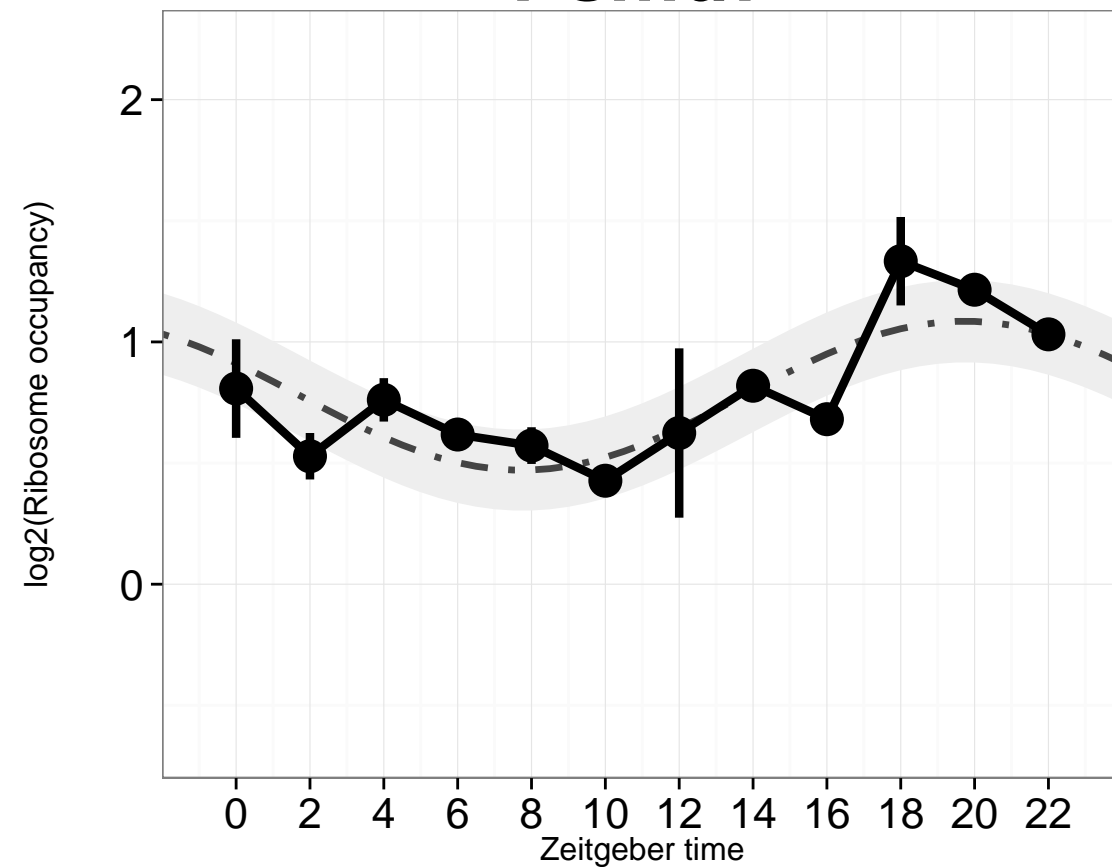

Supplement: Supplementary file 5433 [file 1]

# Rwdd4a

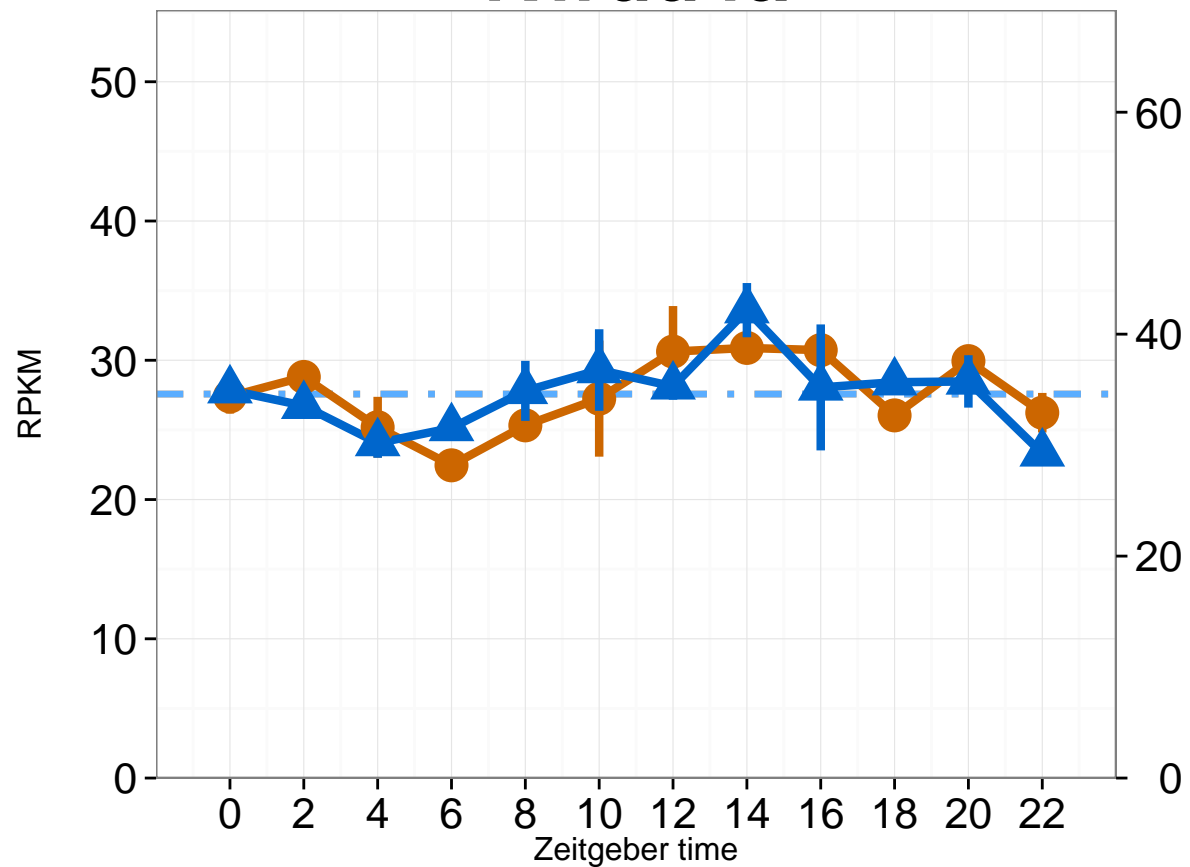

# Rwdd4a

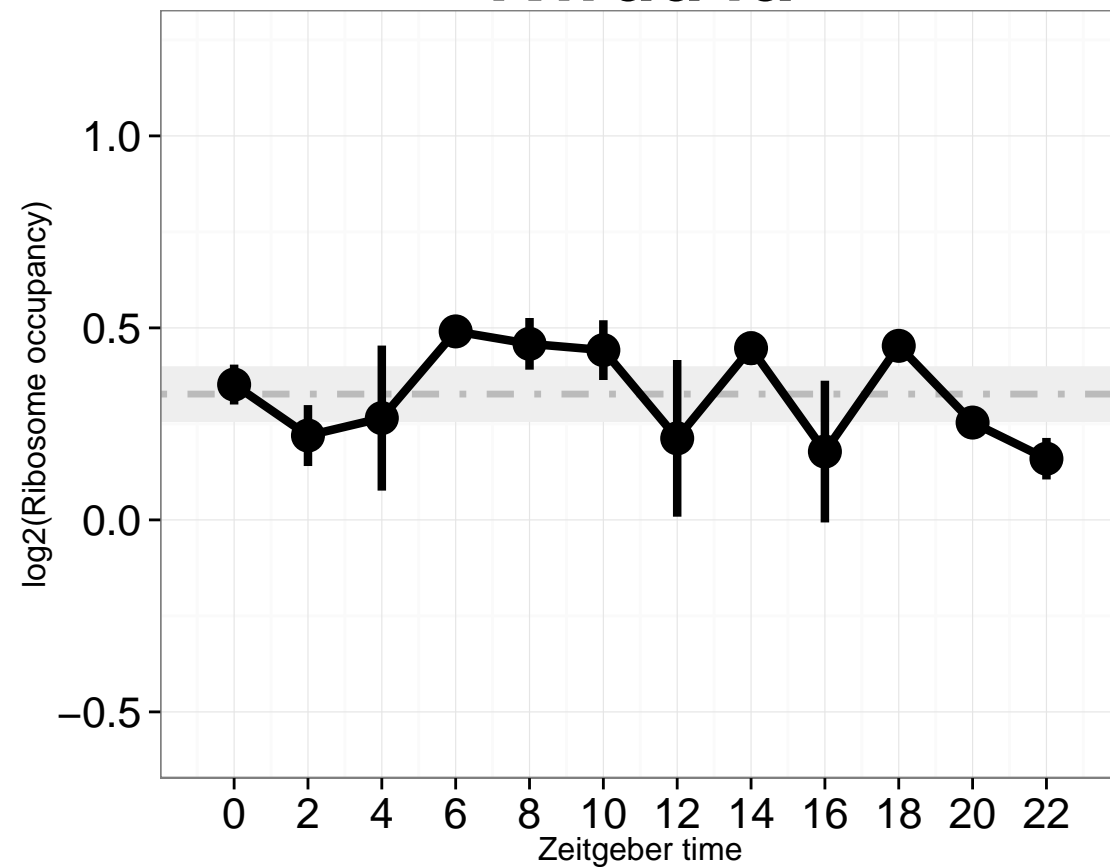

Supplement: Supplementary file 5434 [file 1]

## Pofut2

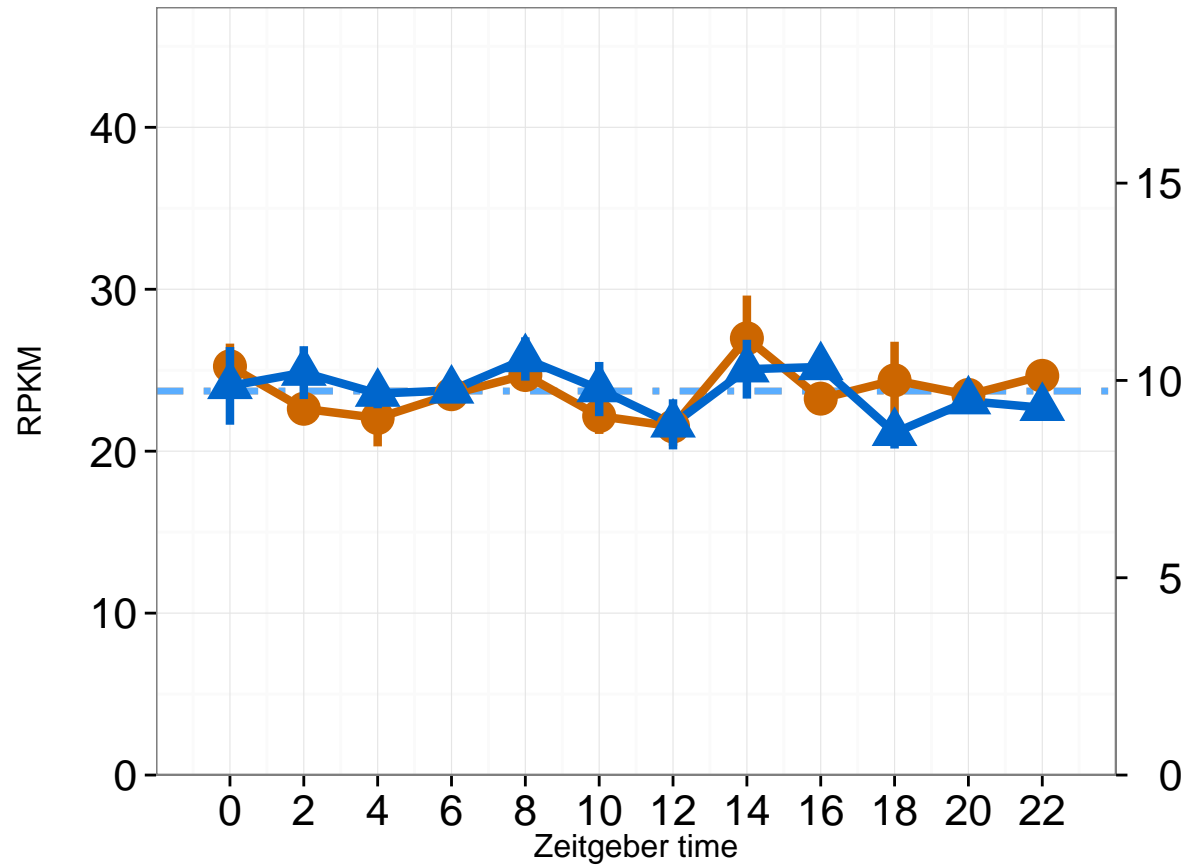

## Pofut2

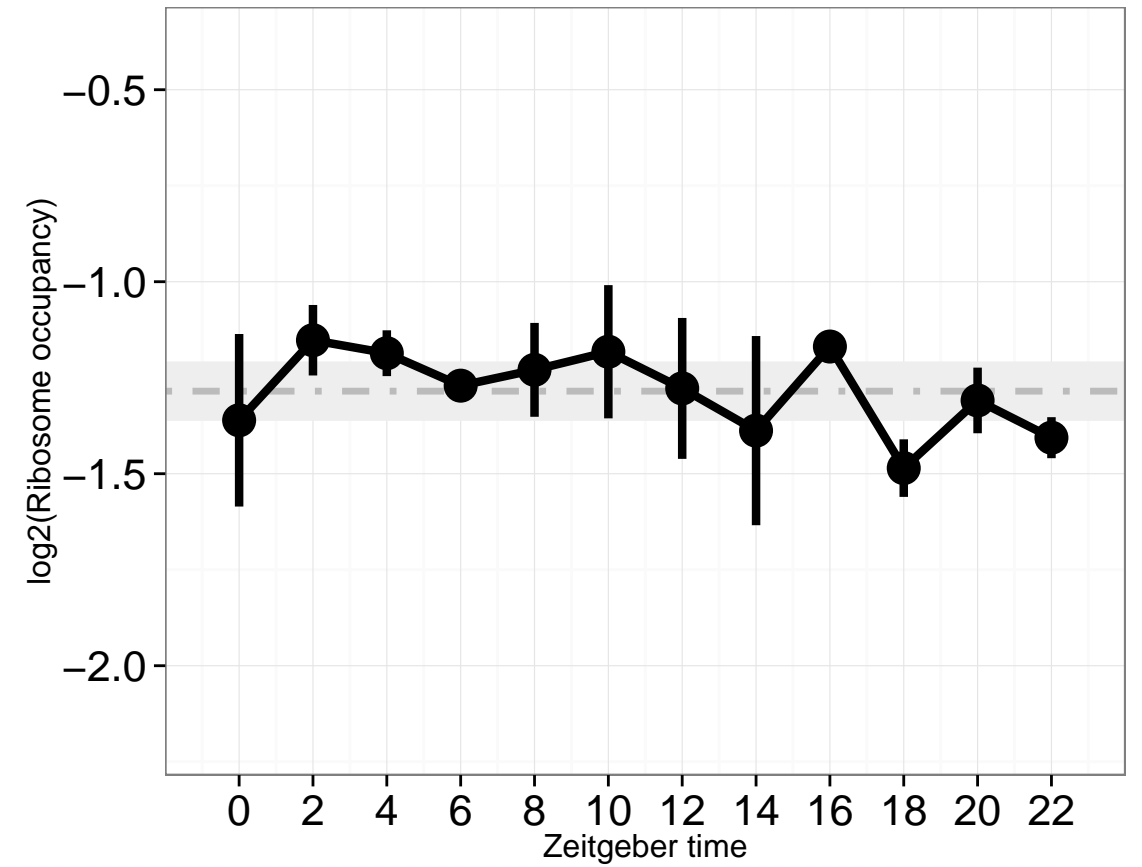

Supplement: Supplementary file 5435 [file 1]

## Chordc1

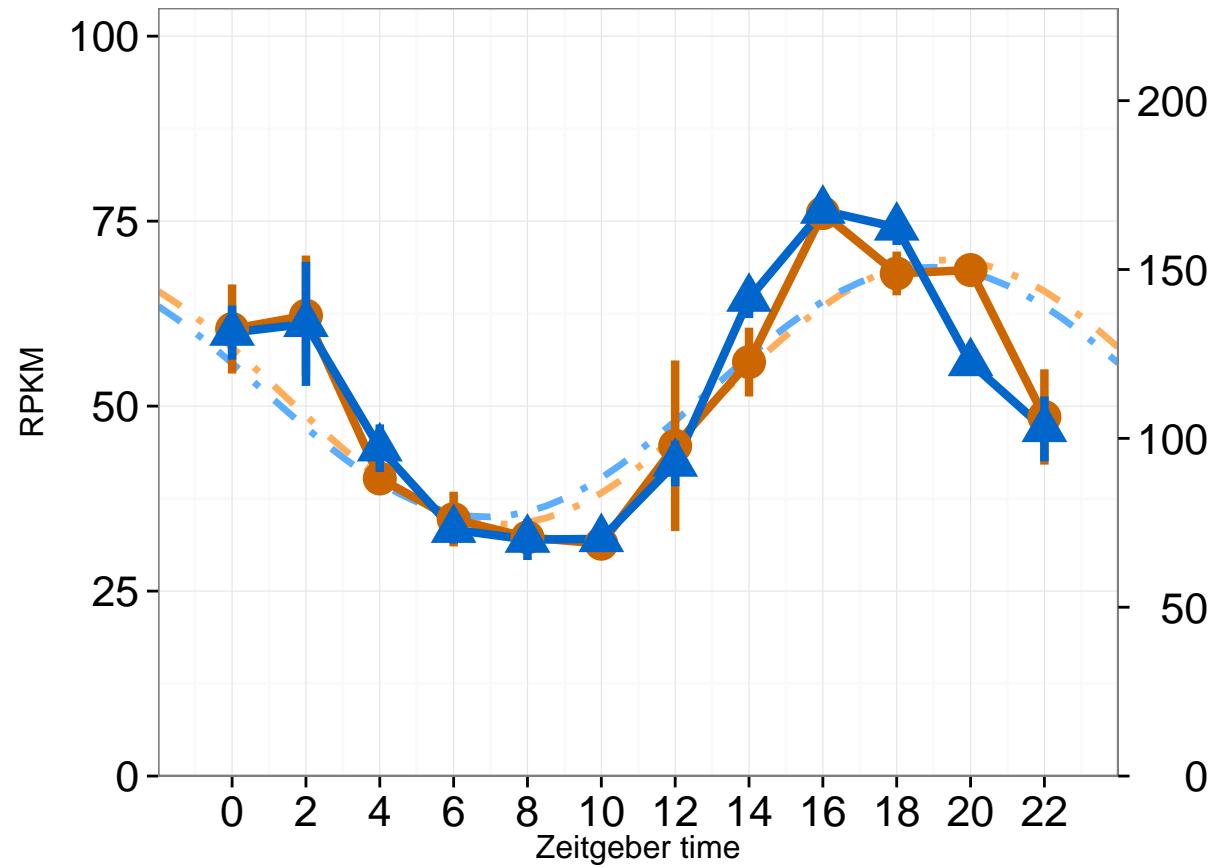

## Chordc1

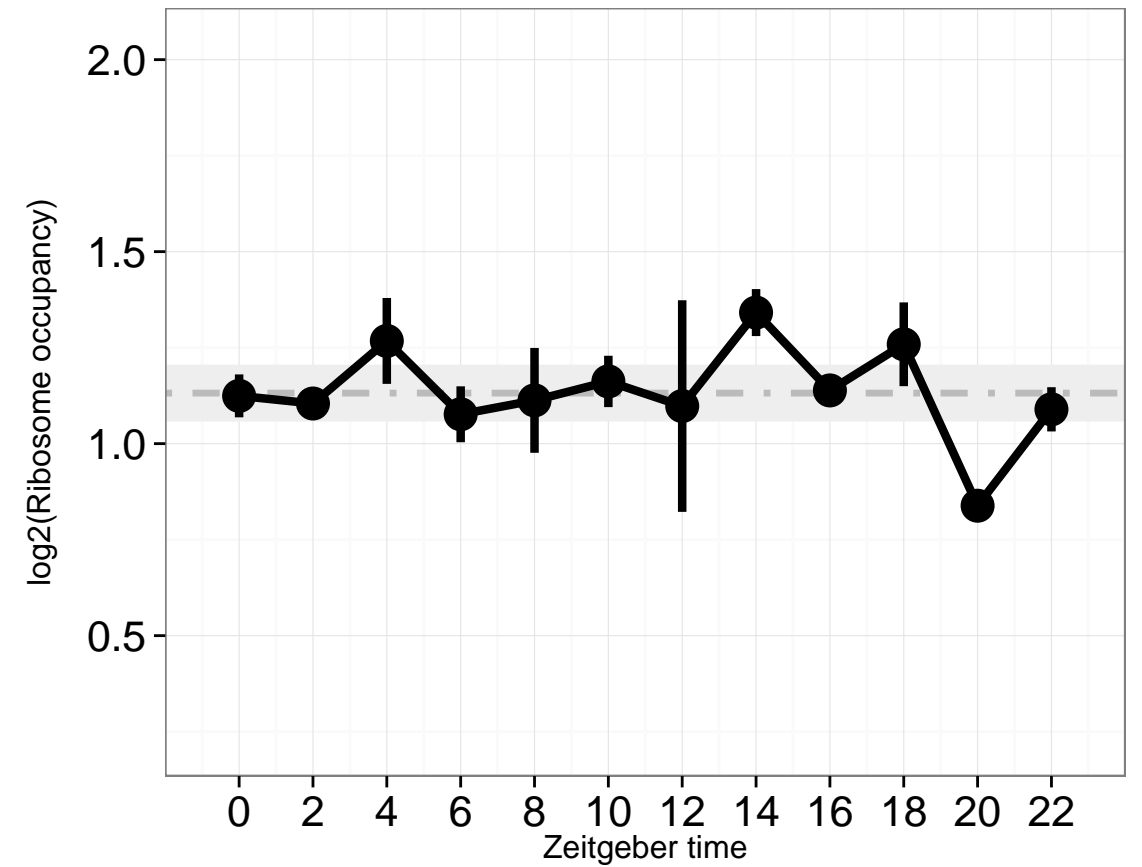

Supplement: Supplementary file 5436 [file 1]

## DII1

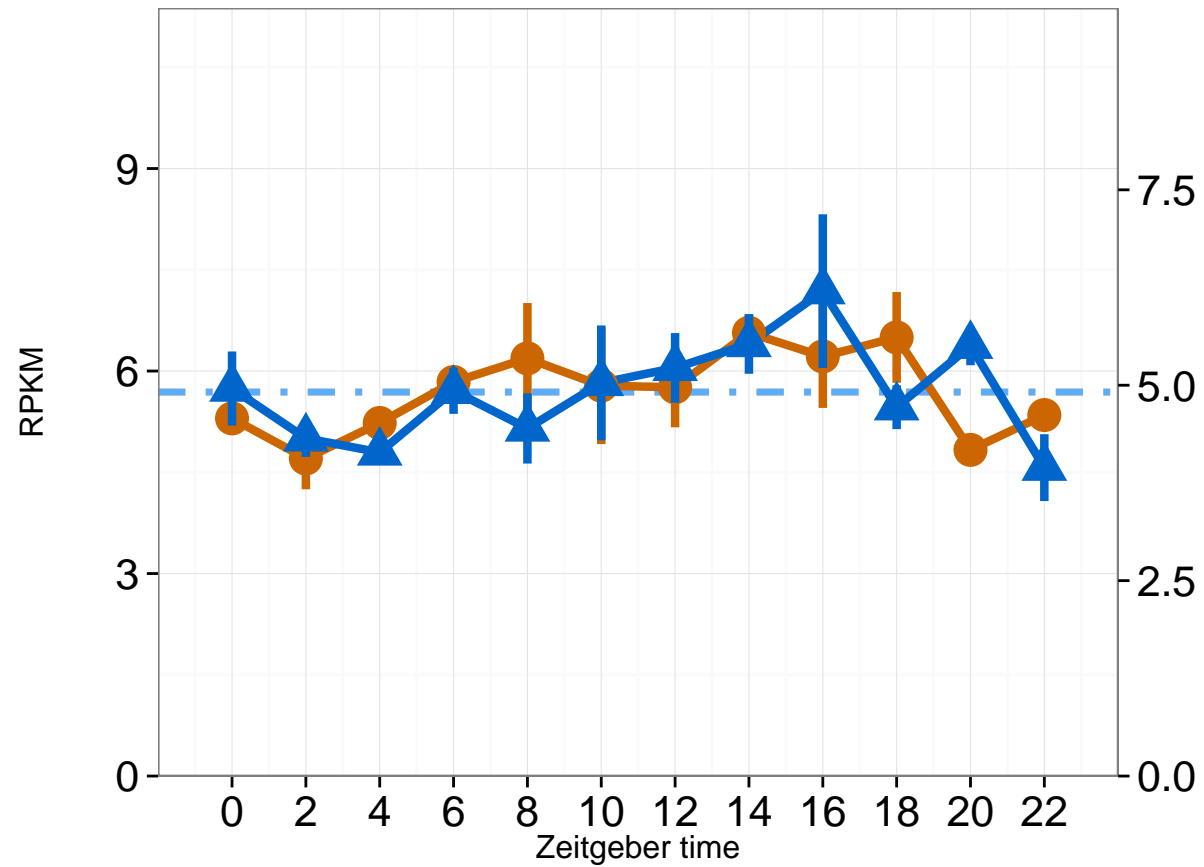

## DII1

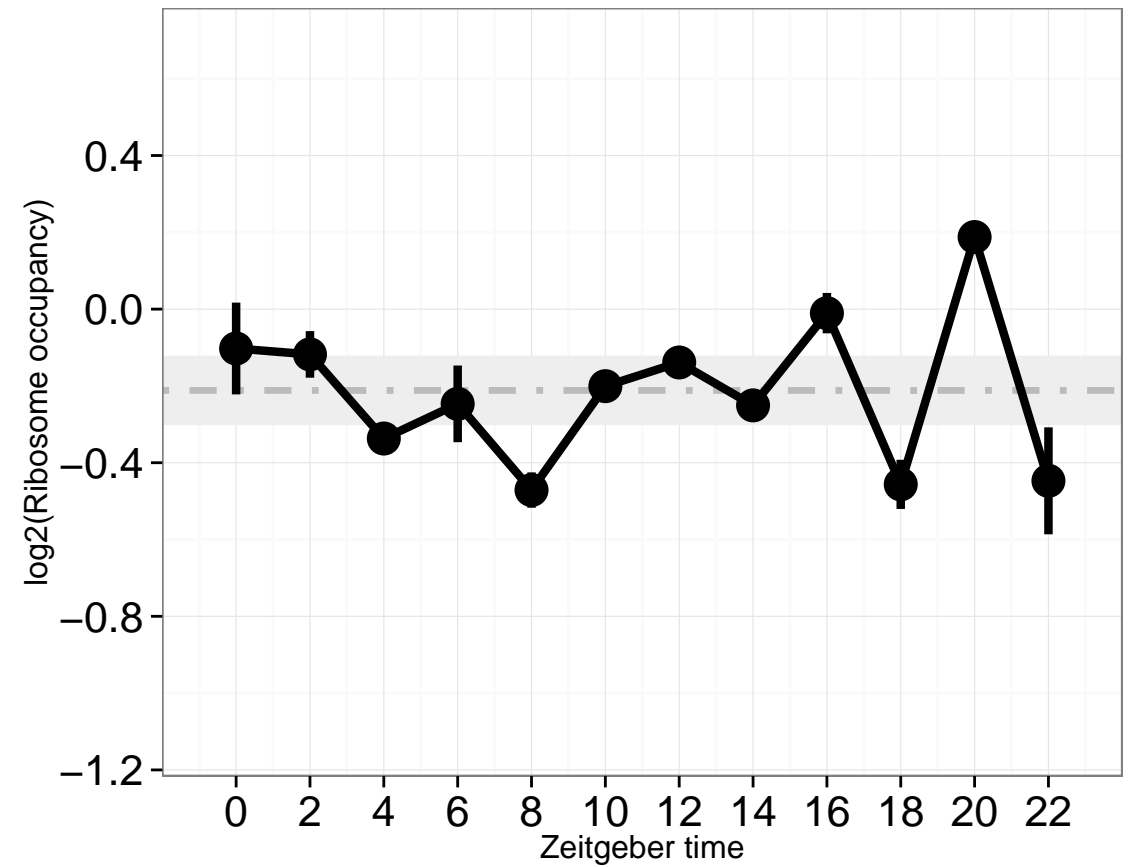

Supplement: Supplementary file 5437 [file 1]

# Hars

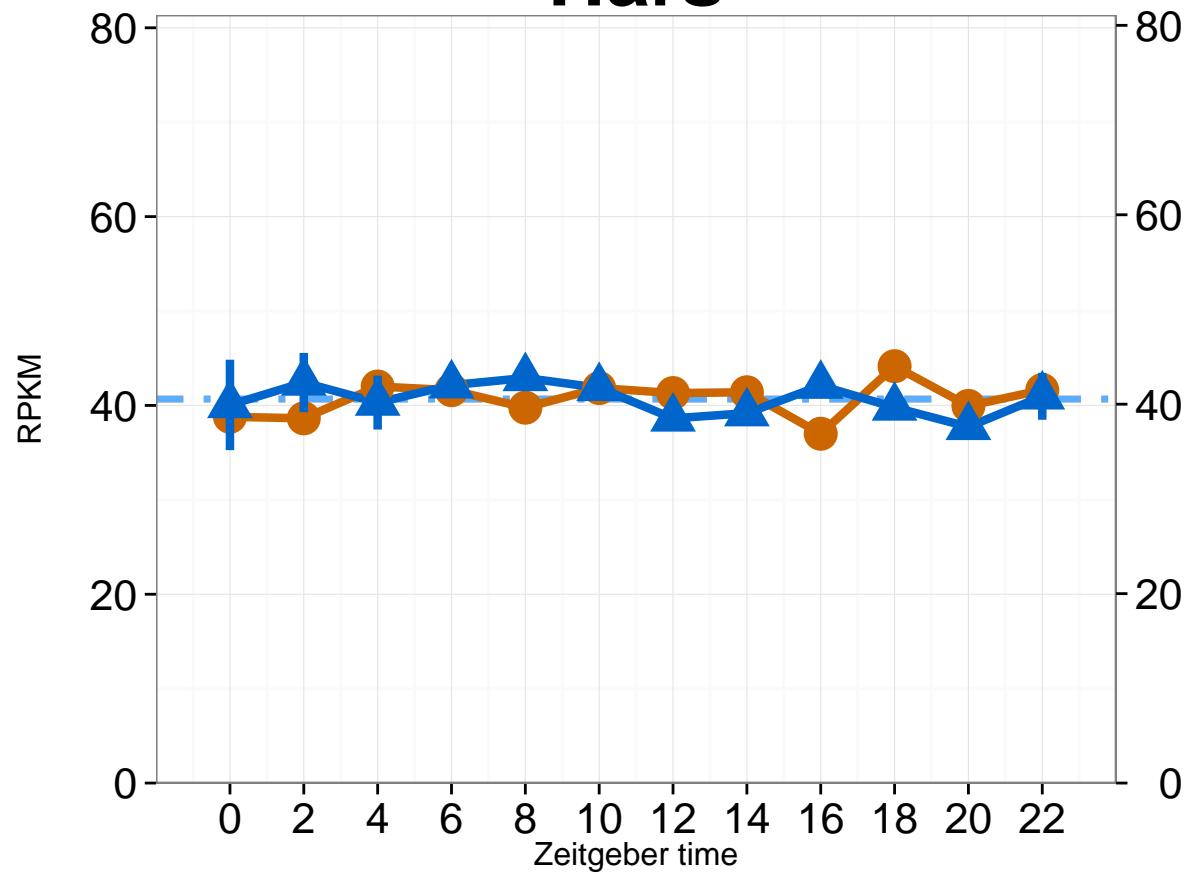

# Hars

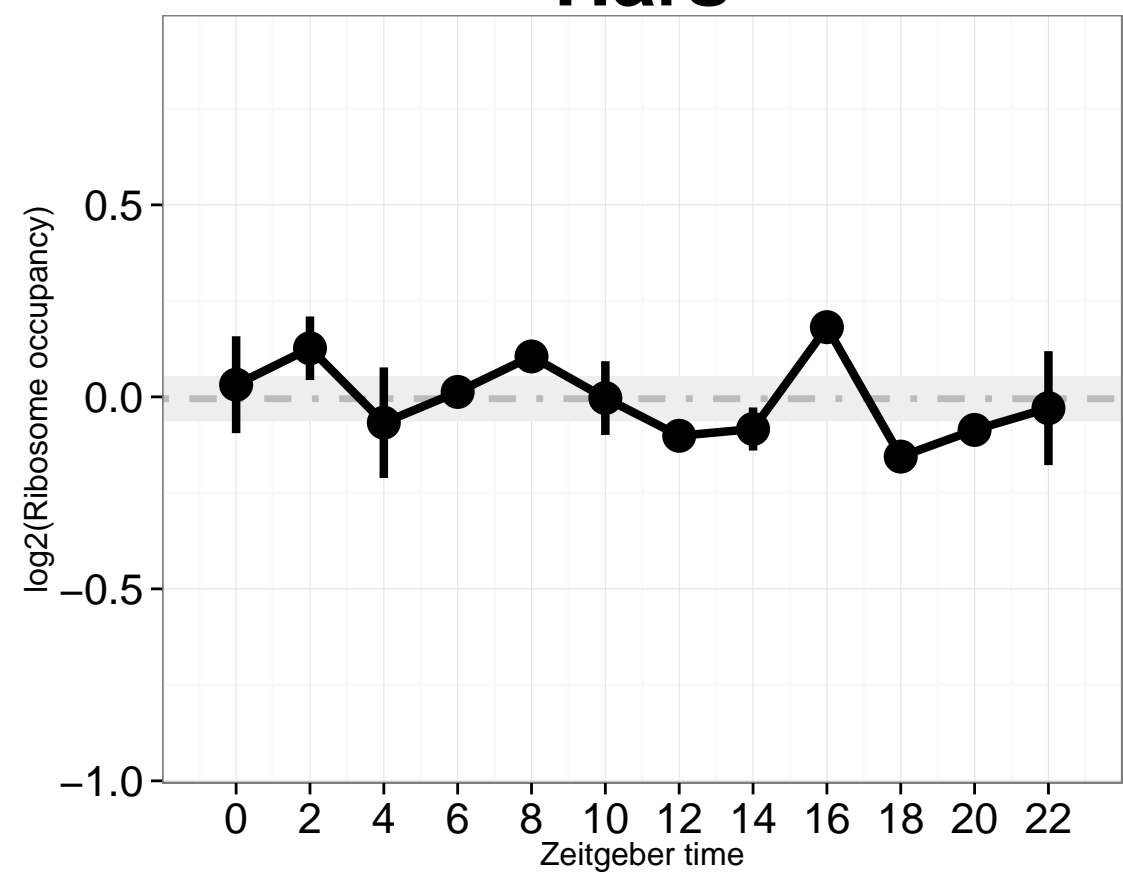

Supplement: Supplementary file 5438 [file 1]

# Zbed6

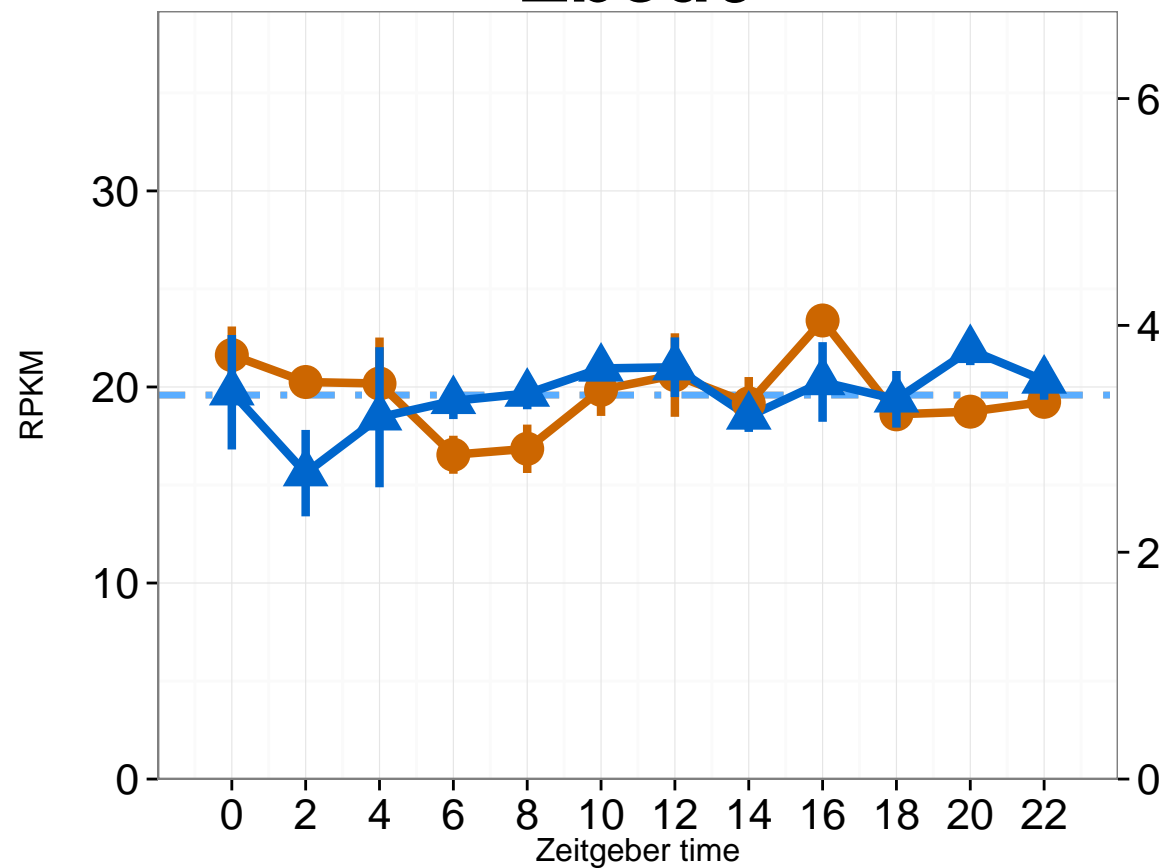

# Zbed6

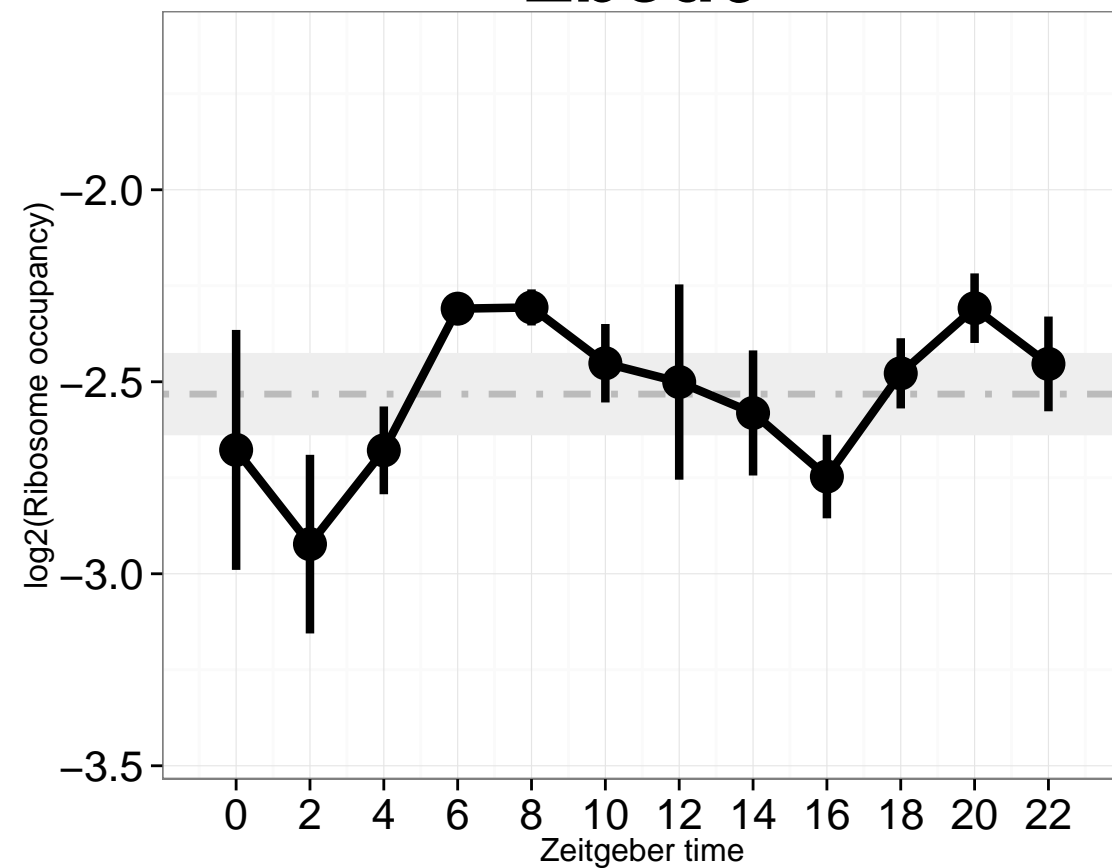

Supplement: Supplementary file 5439 [file 1]

# Psmb10

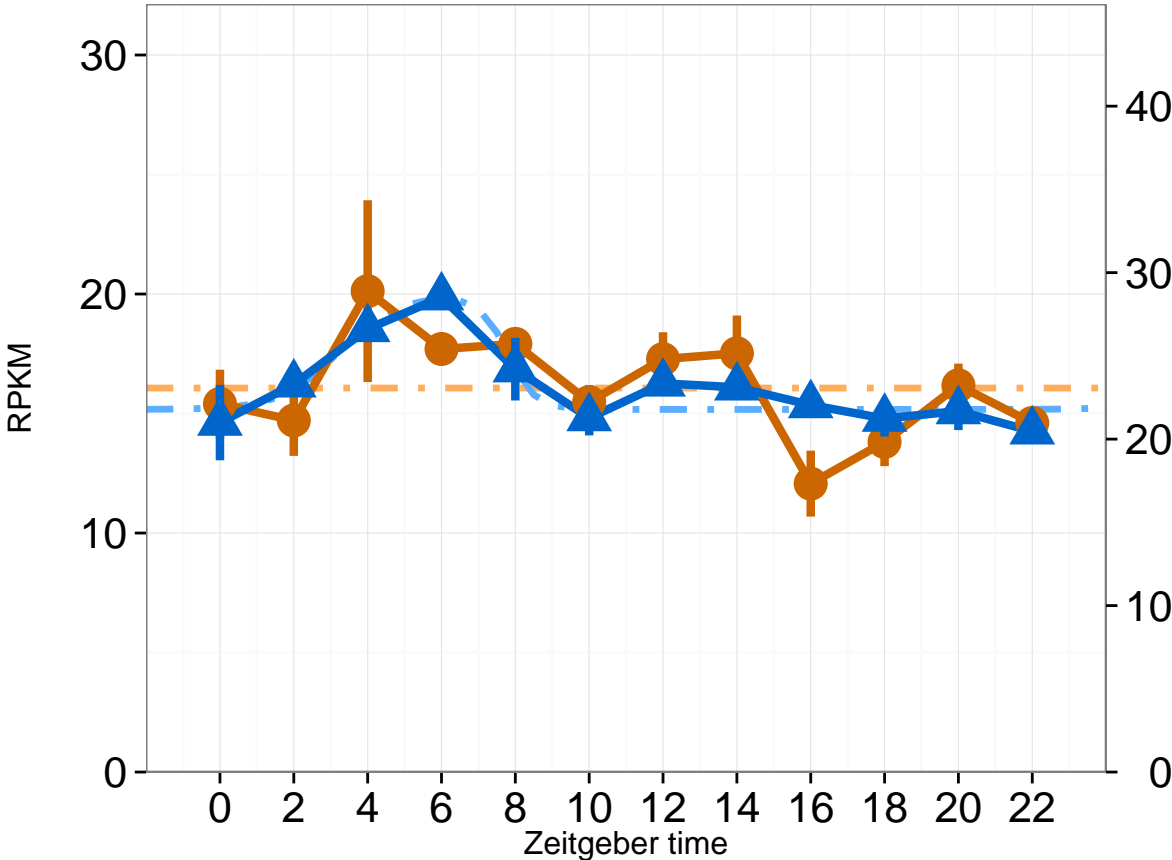

# Psmb10

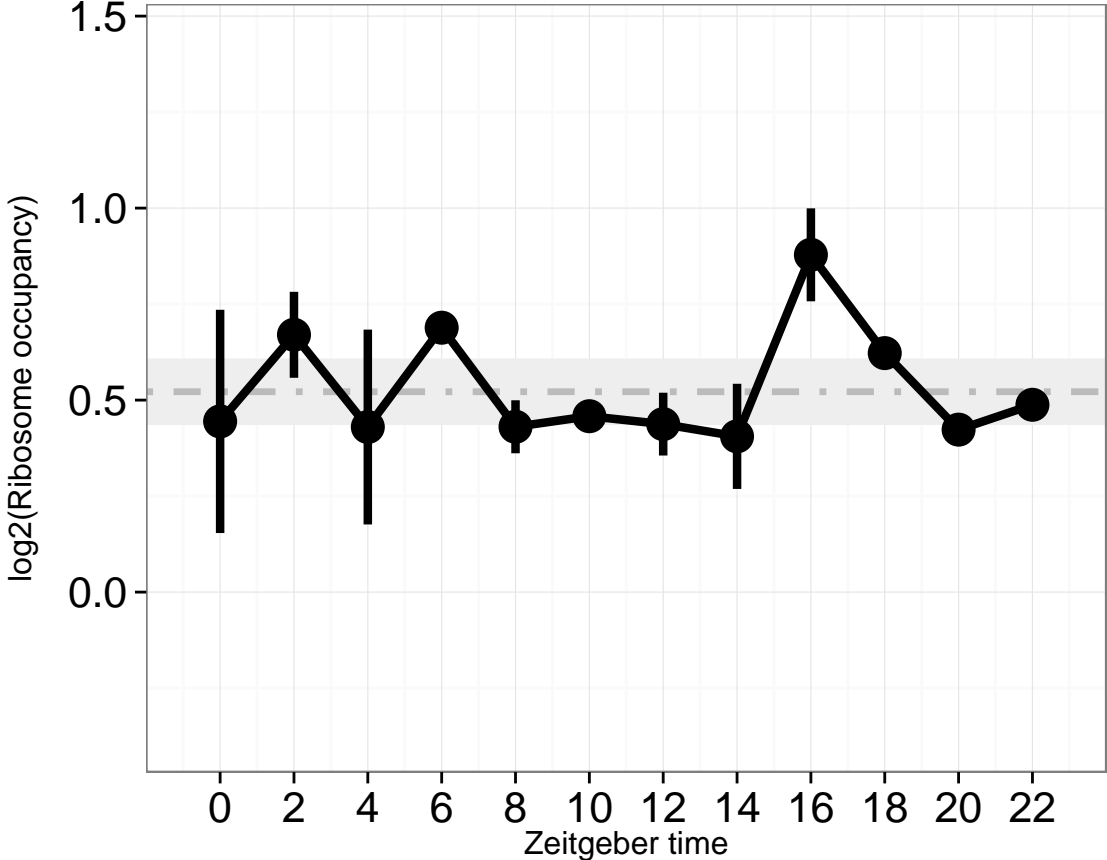

Supplement: Supplementary file 5440 [file 1]

## Ube2g2

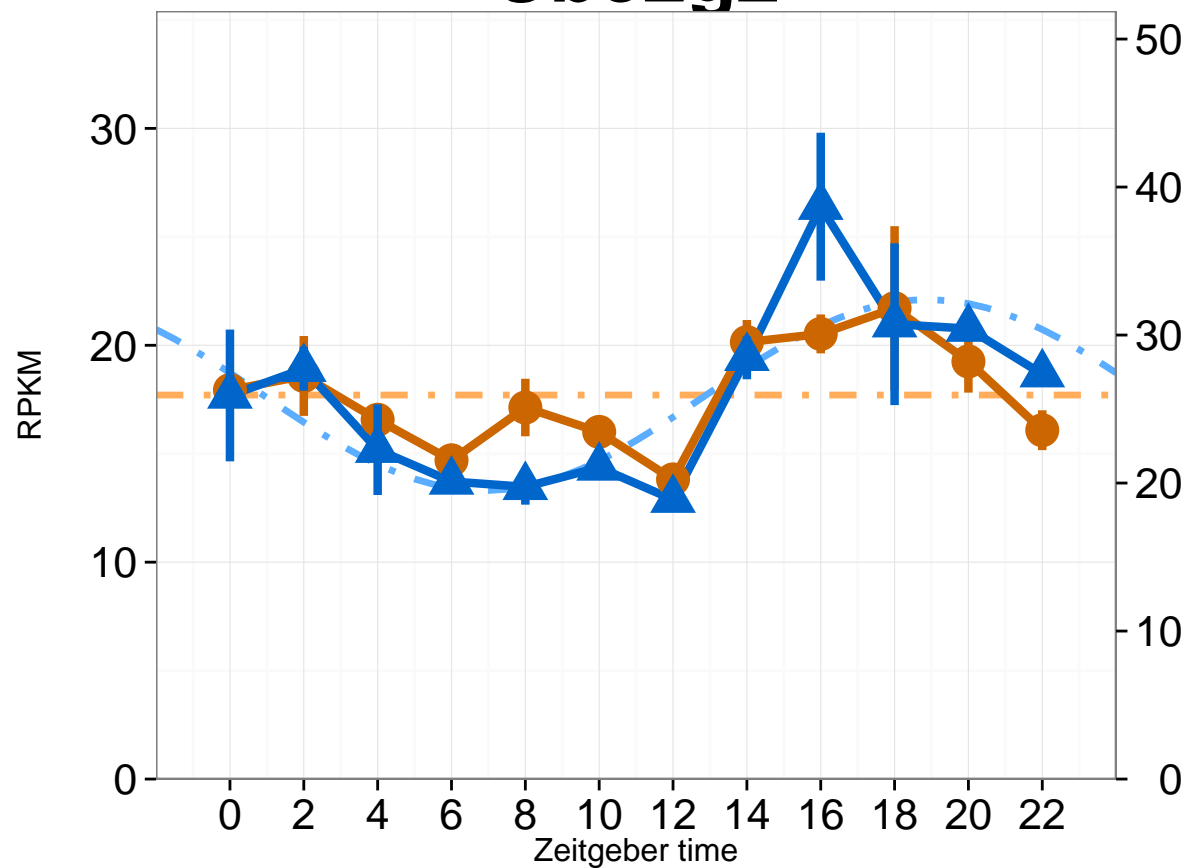

## Ube2g2

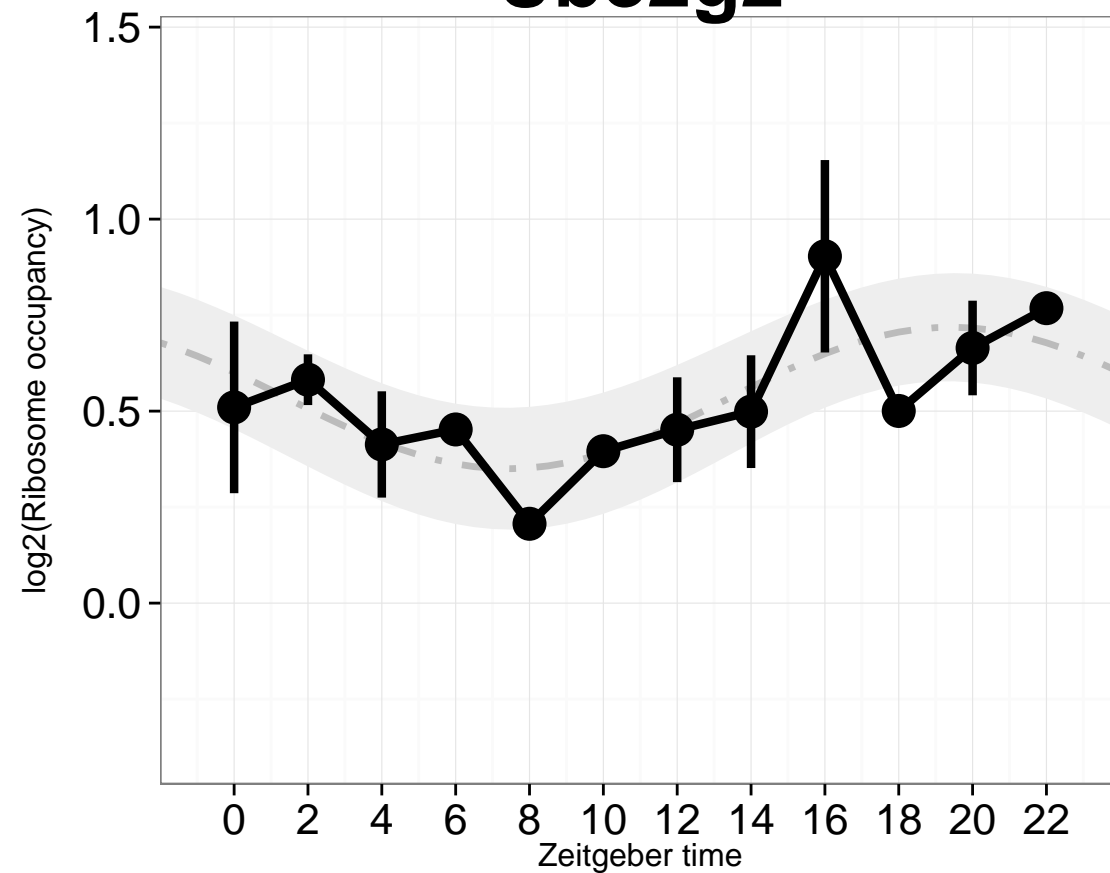

Supplement: Supplementary file 5441 [file 1]

# Mmp2

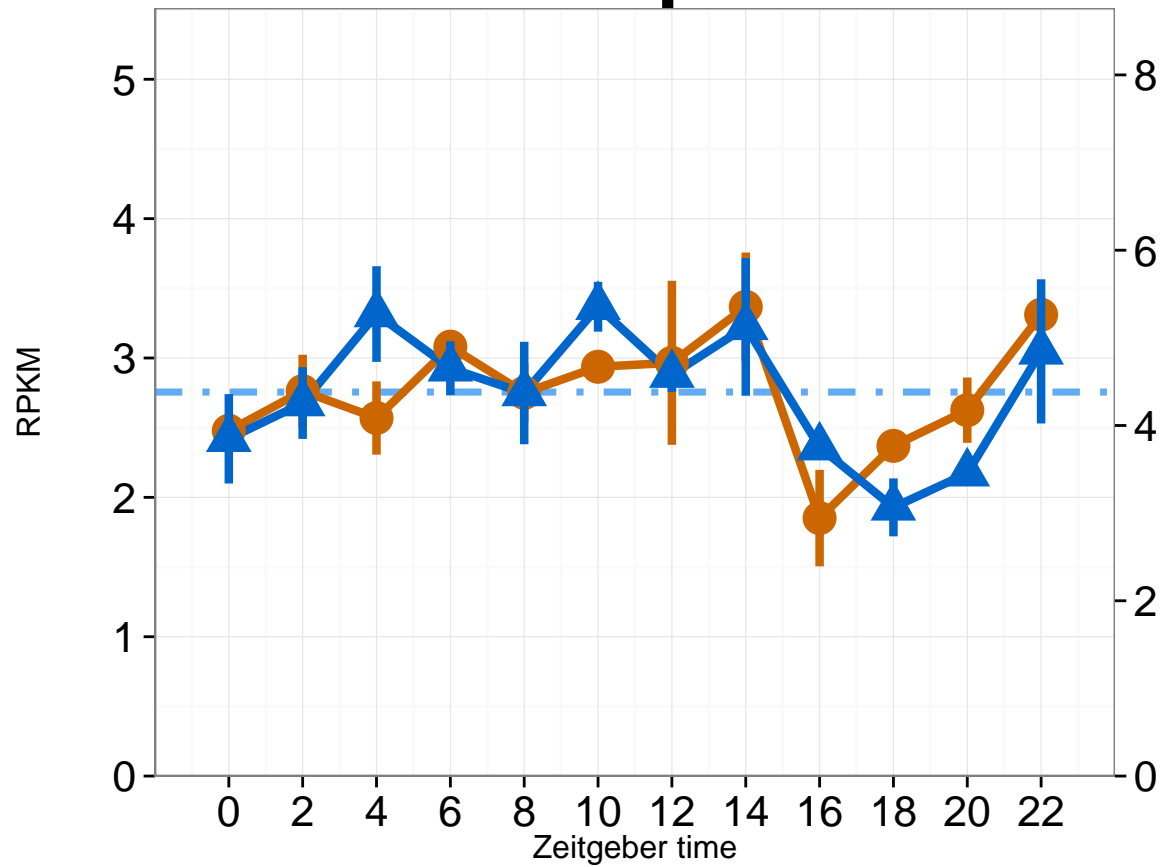

# Mmp2

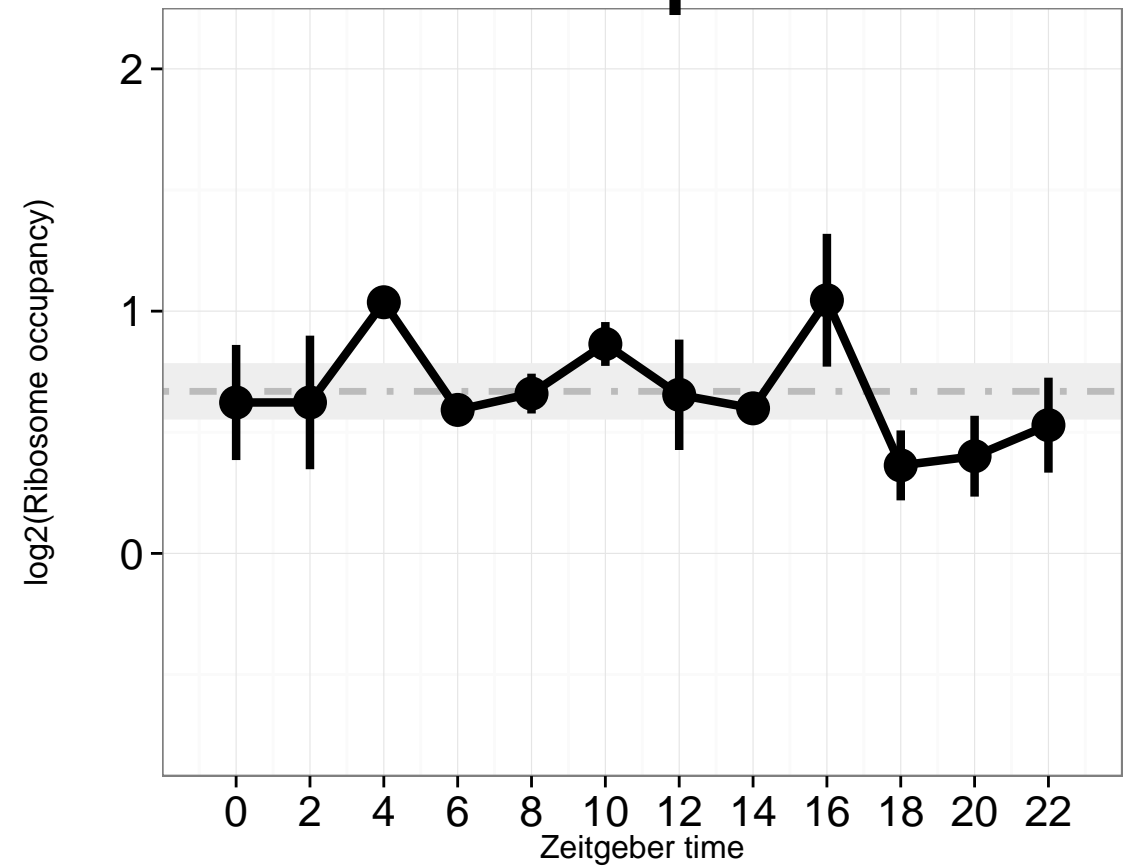

Supplement: Supplementary file 5442 [file 1]

## Etv3

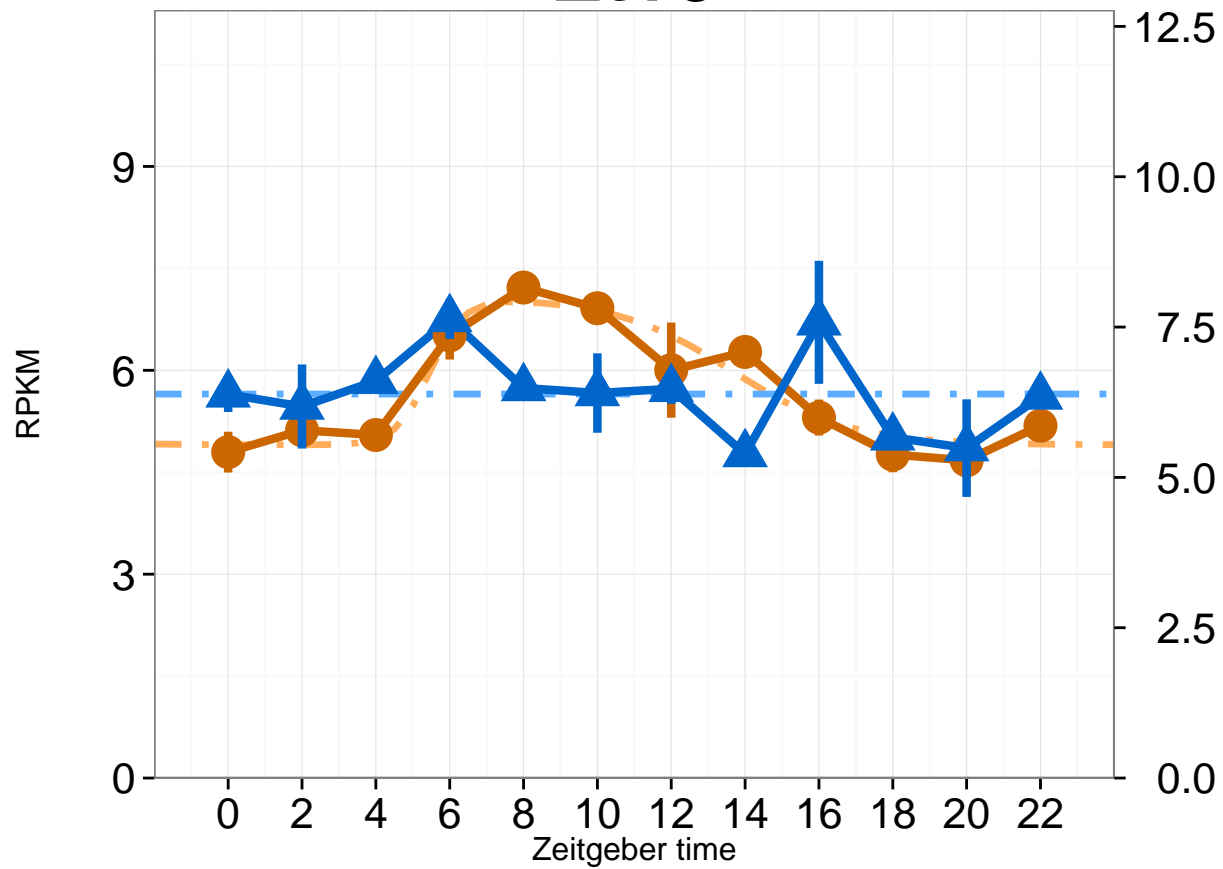

## Etv3

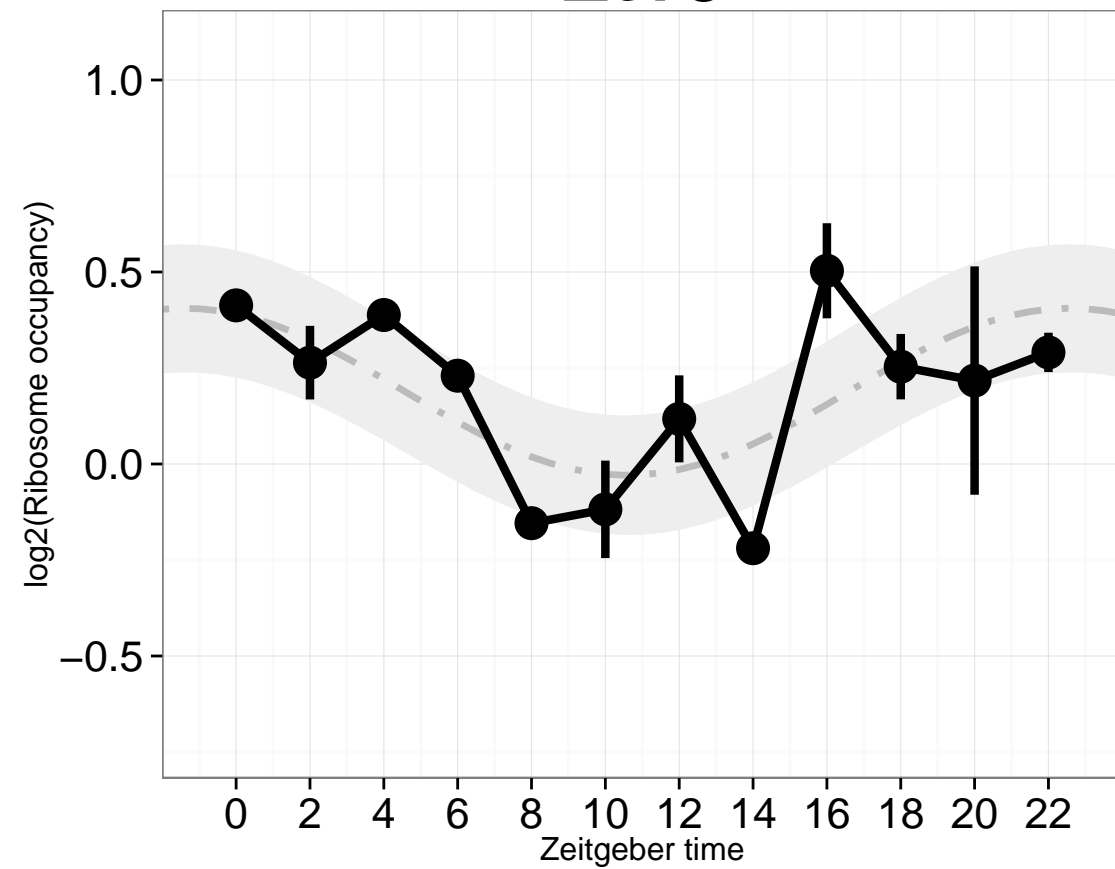

Supplement: Supplementary file 5443 [file 1]

## Arhgap42

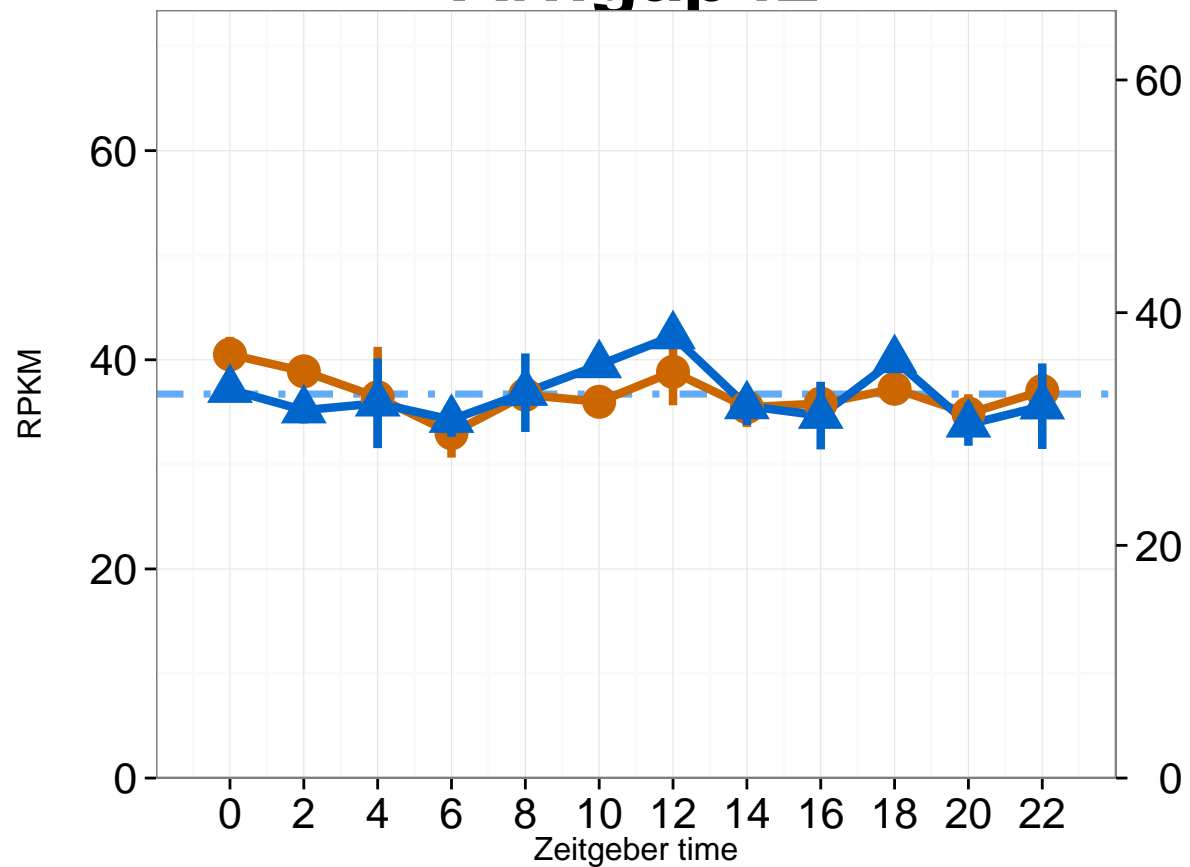

## Arhgap42

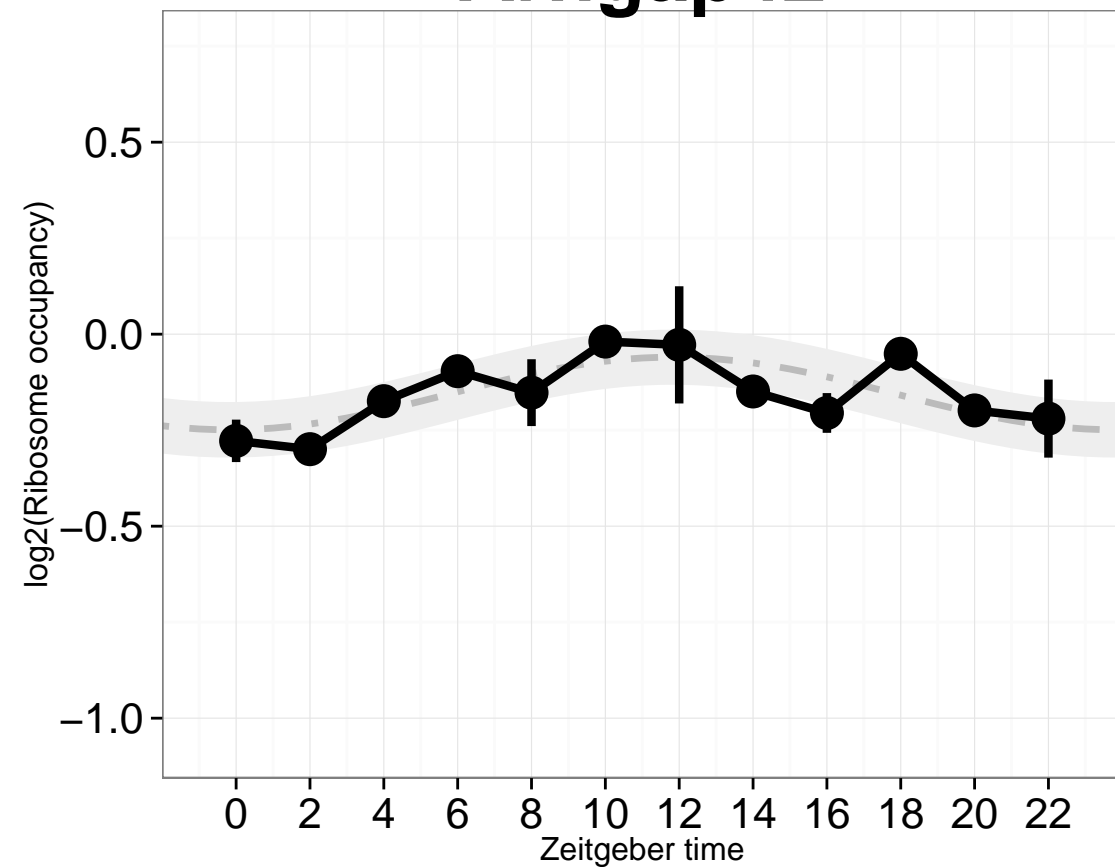

Supplement: Supplementary file 5444 [file 1]

# BC029214

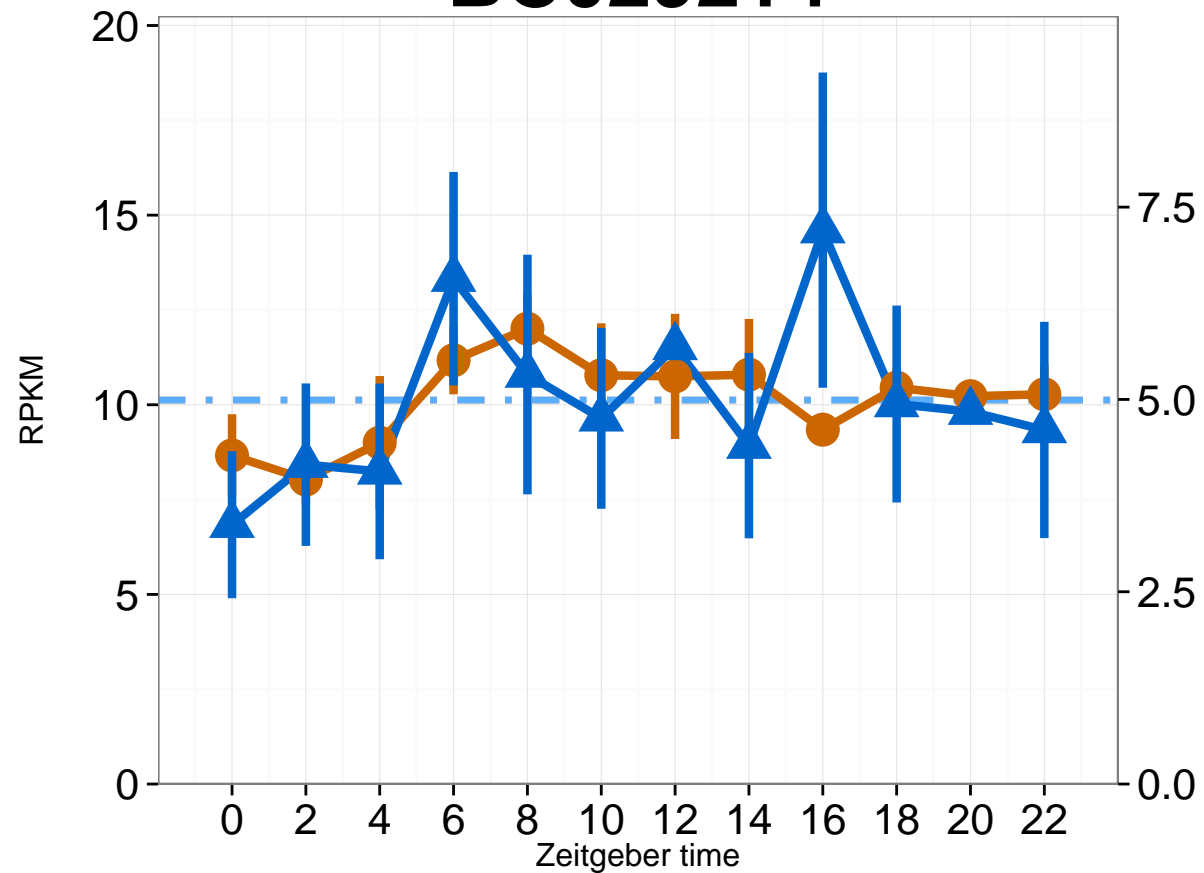

# BC029214

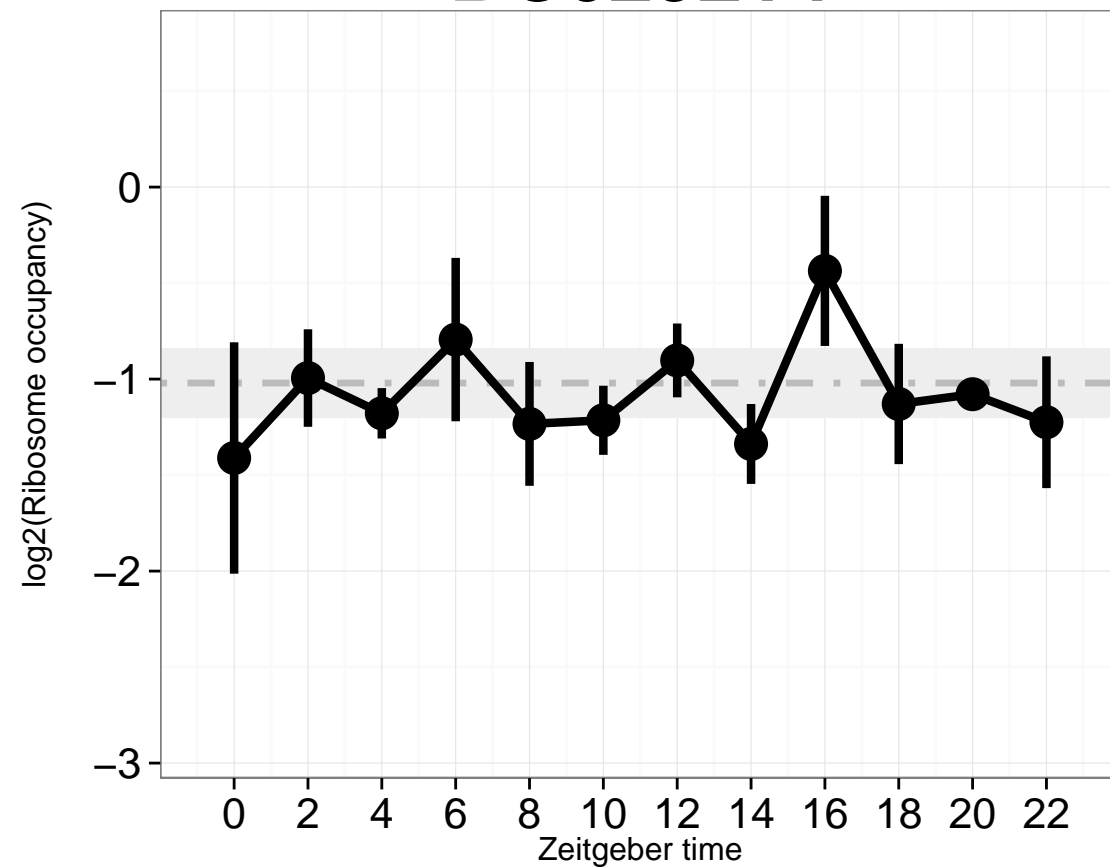

Supplement: Supplementary file 5445 [file 1]

# Usp21

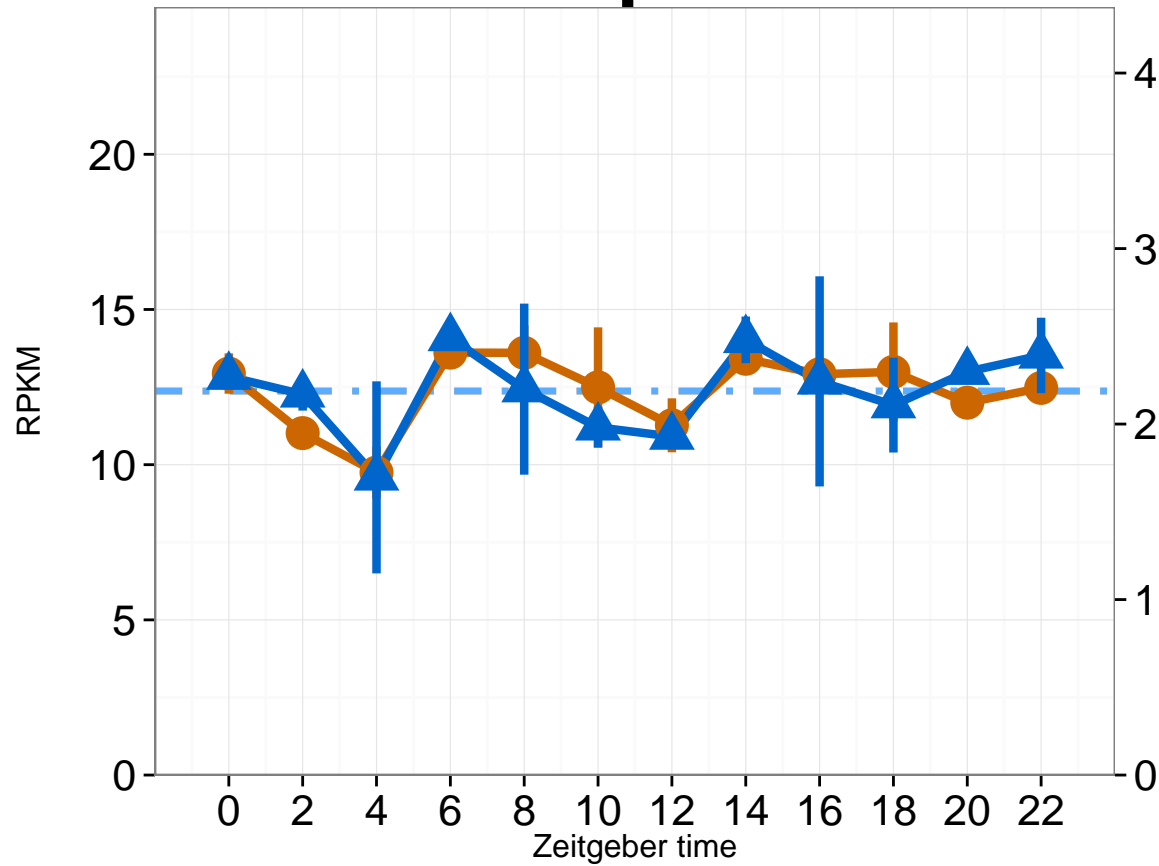

# Usp21

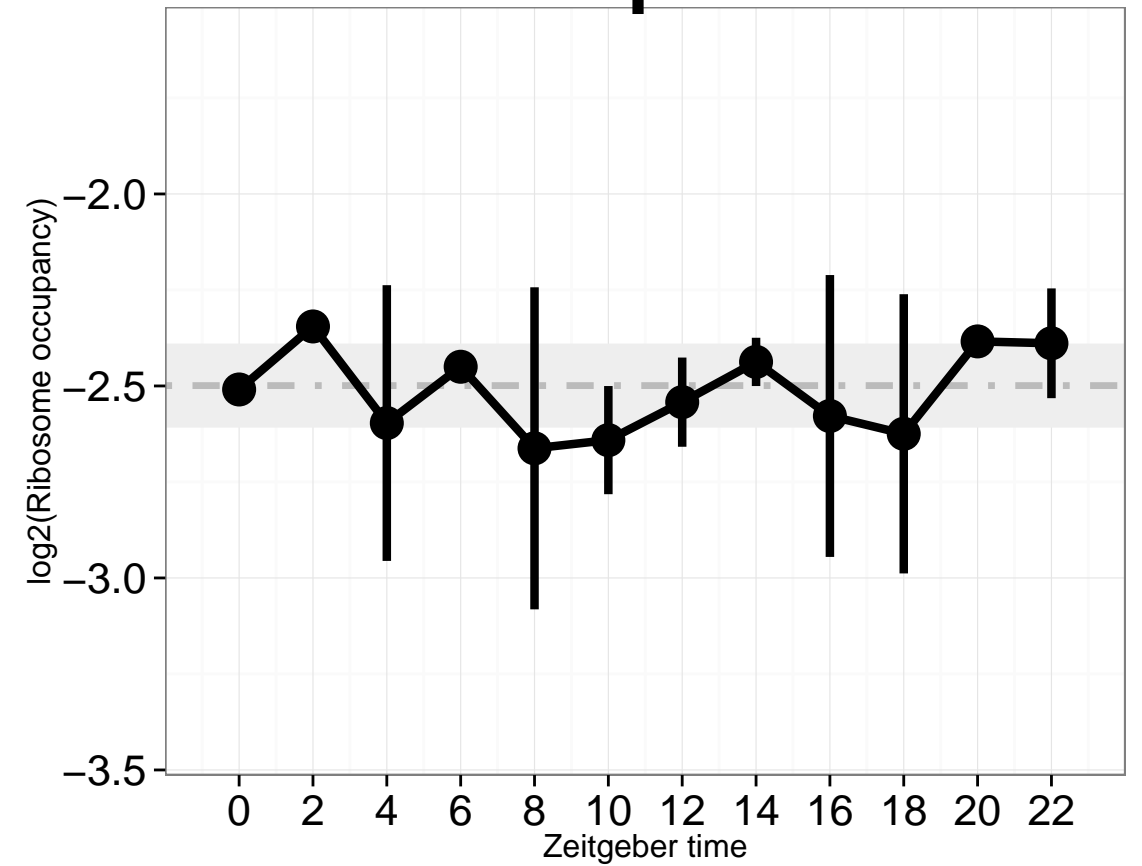

Supplement: Supplementary file 5446 [file 1]

## Wscd1

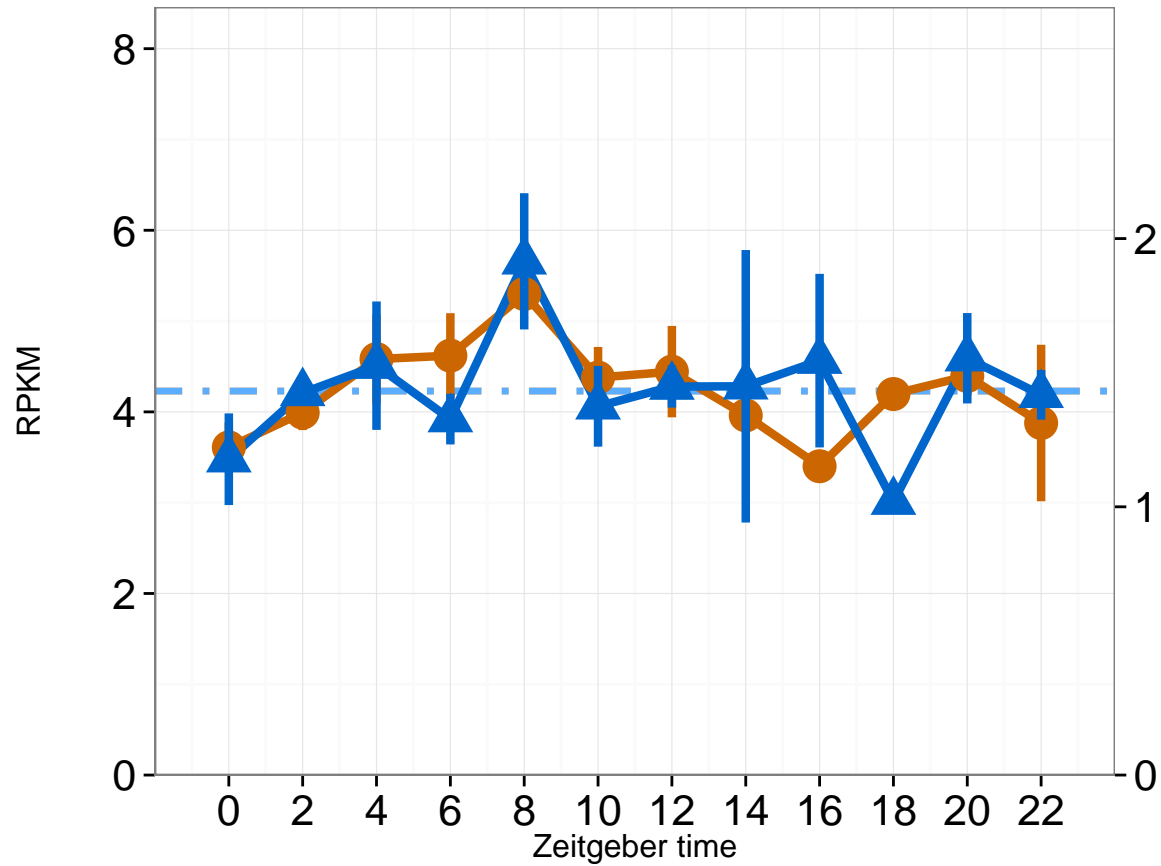

## Wscd1

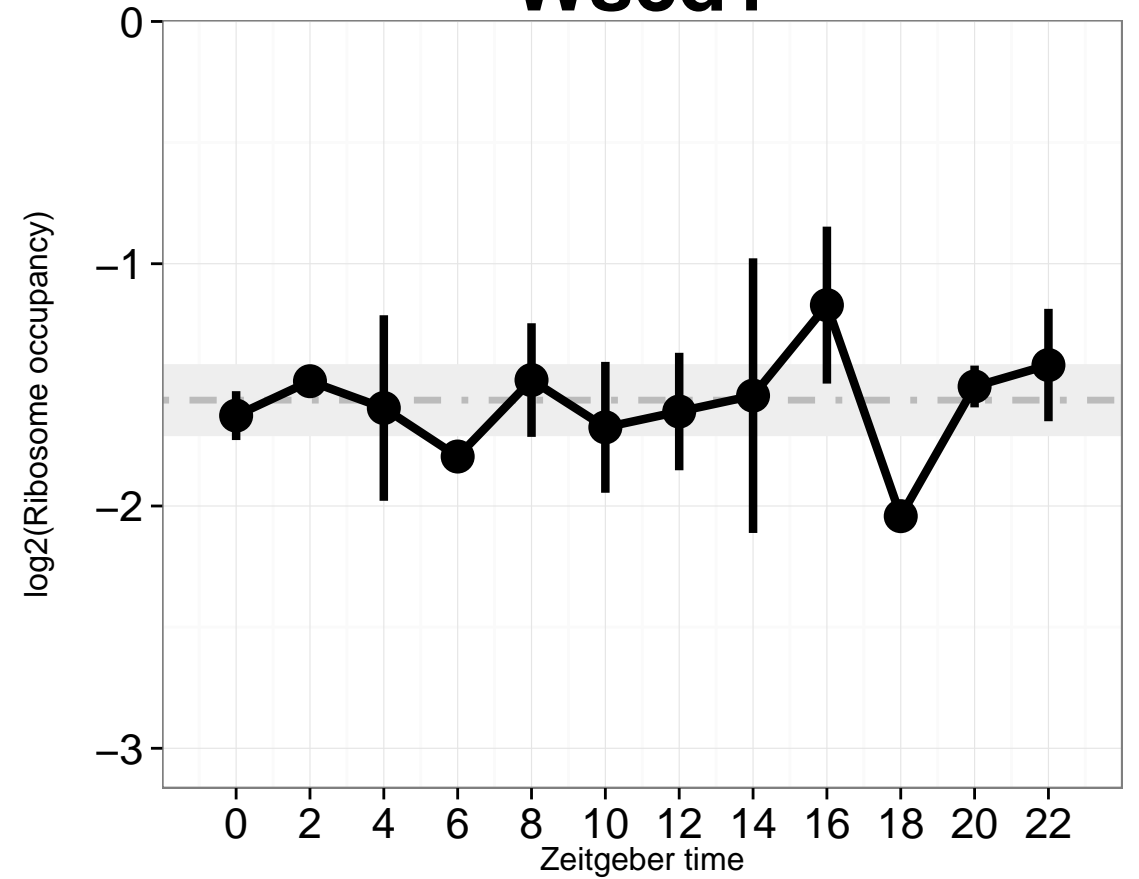

Supplement: Supplementary file 5447 [file 1]

## Nrm

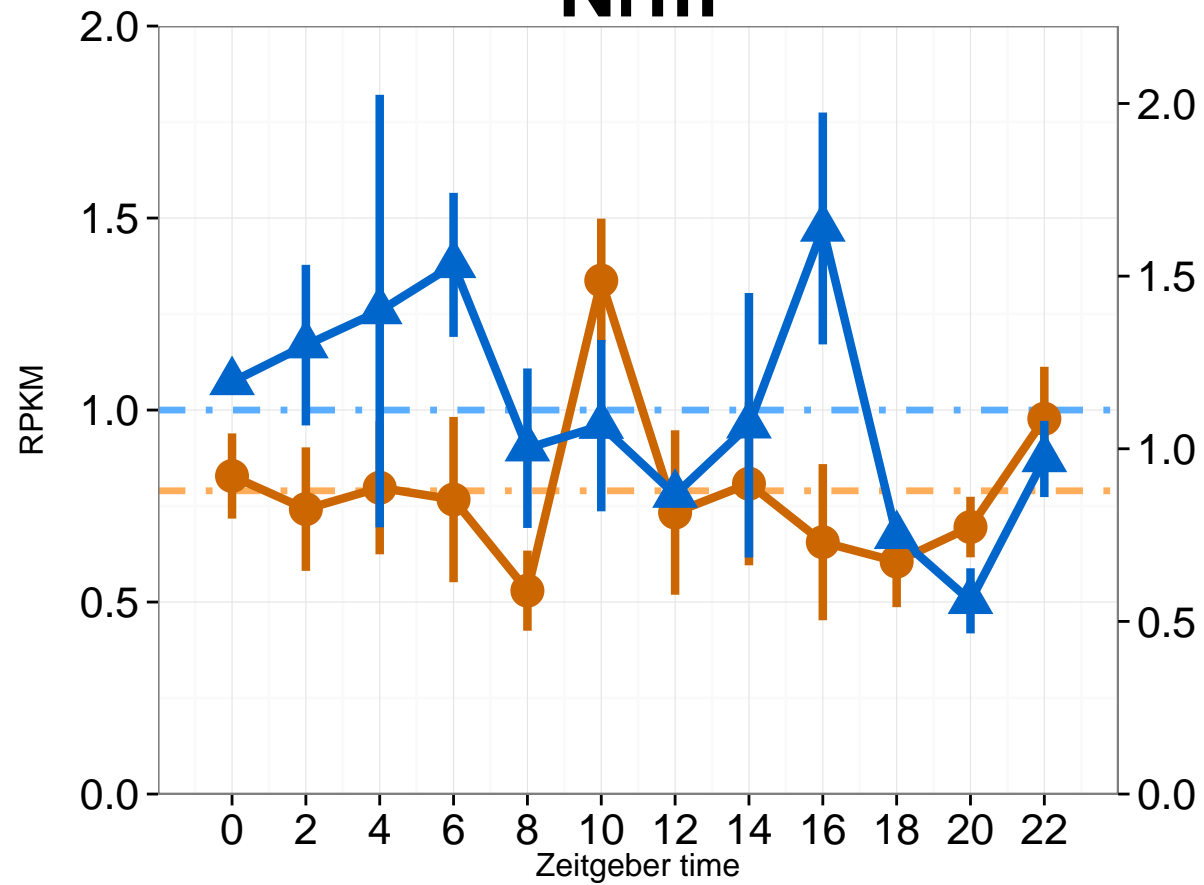

## Nrm

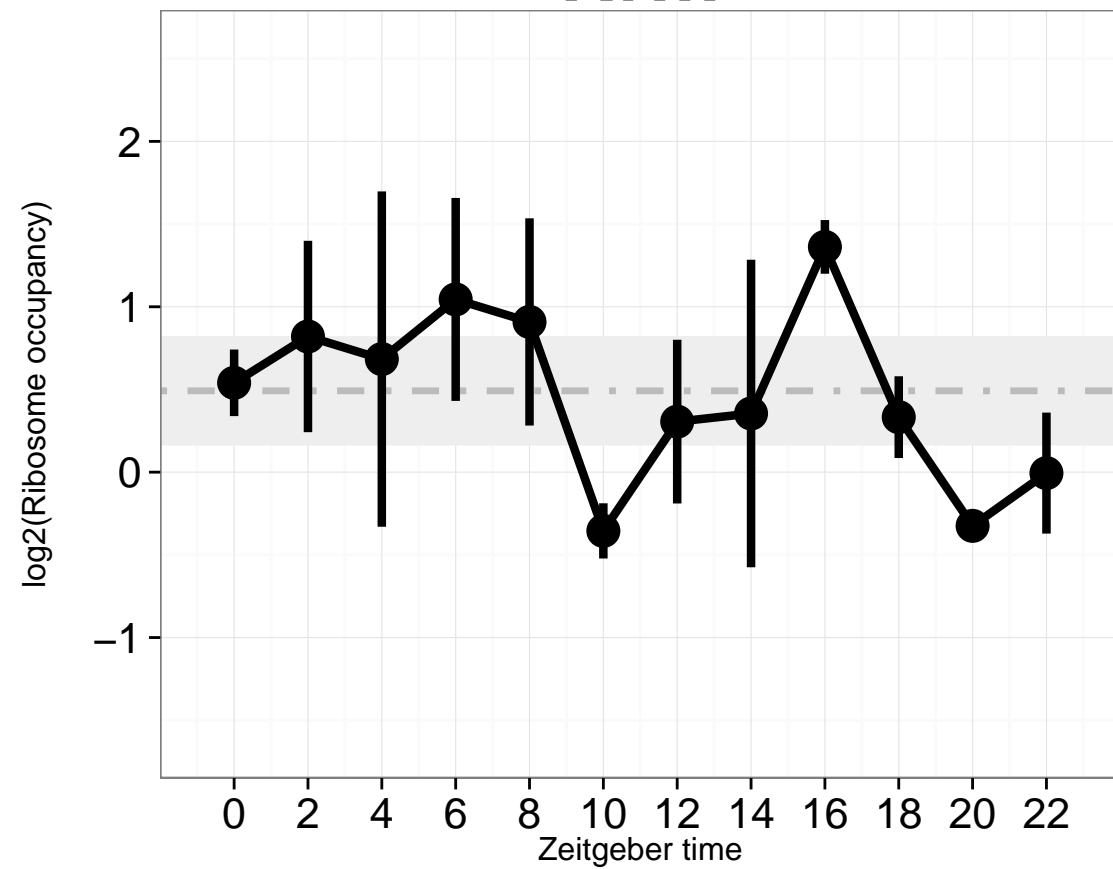

Supplement: Supplementary file 5448 [file 1]

# E130308A19Rik

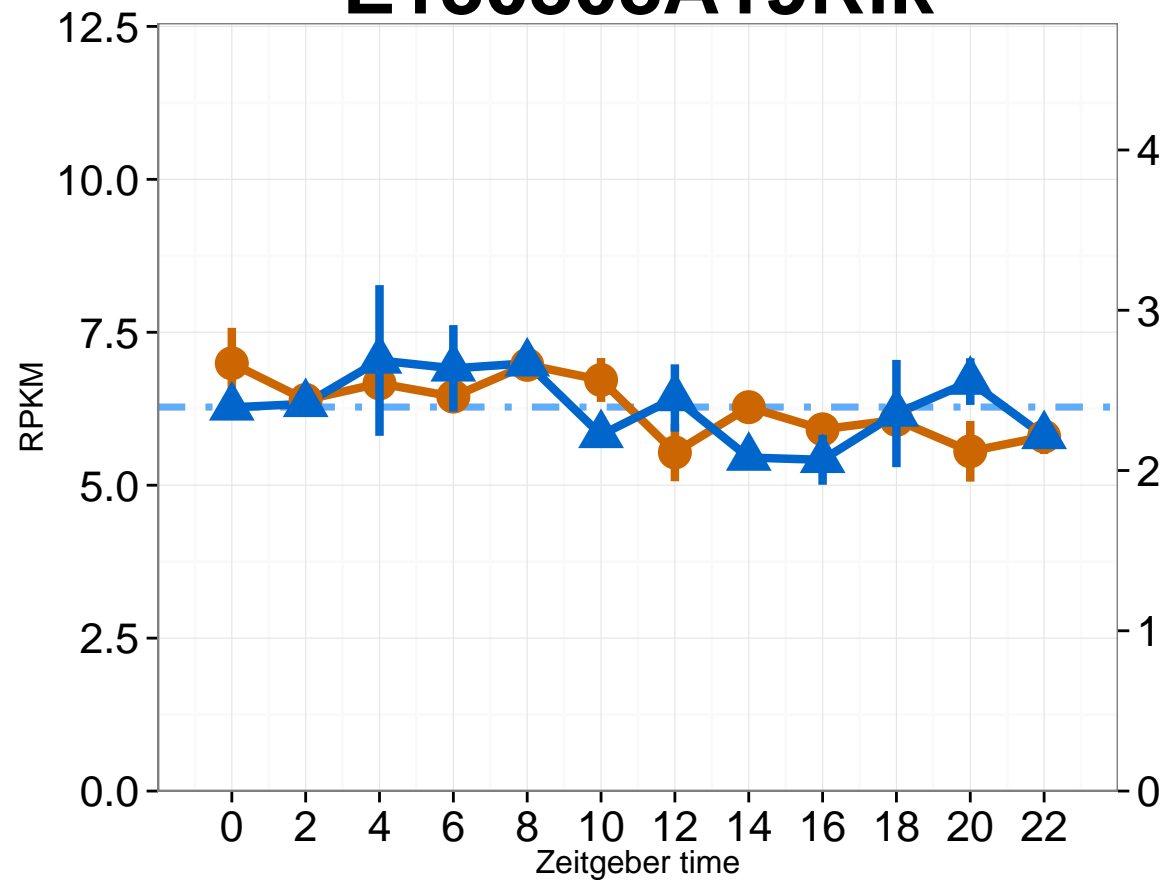

# E130308A19Rik

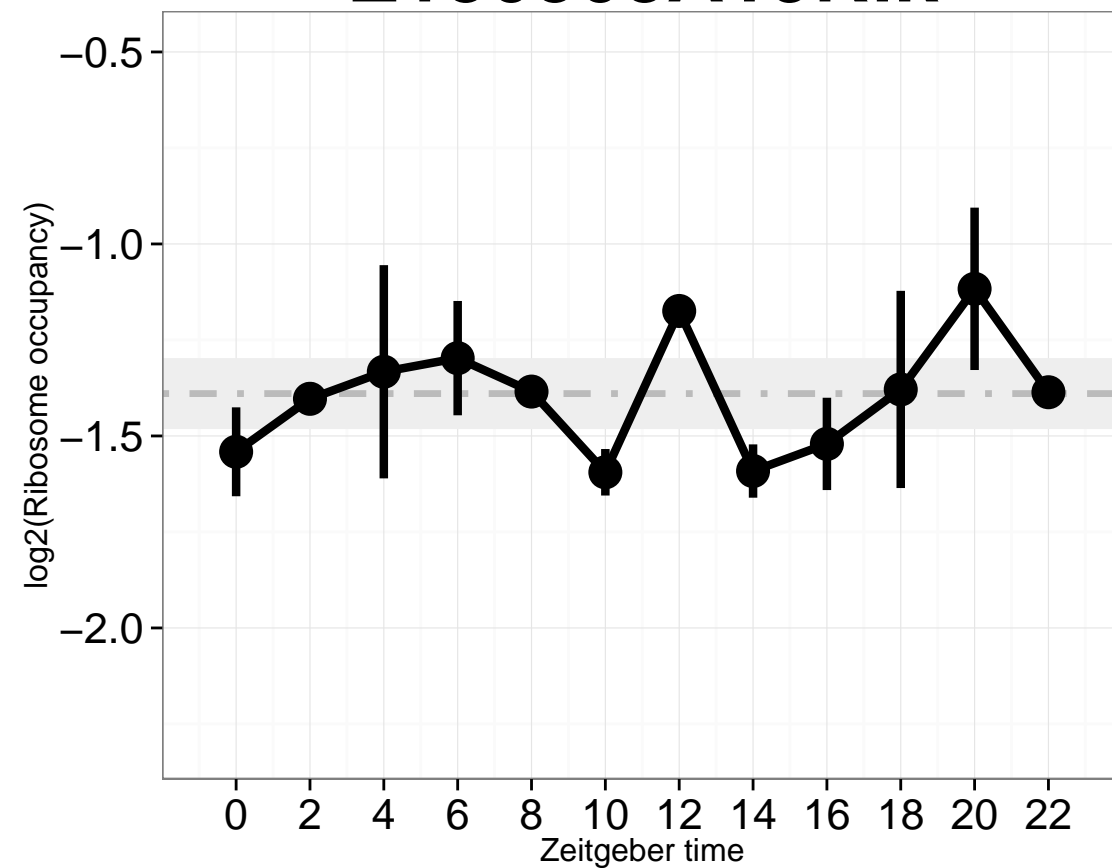

Supplement: Supplementary file 5449 [file 1]

## Hspd1

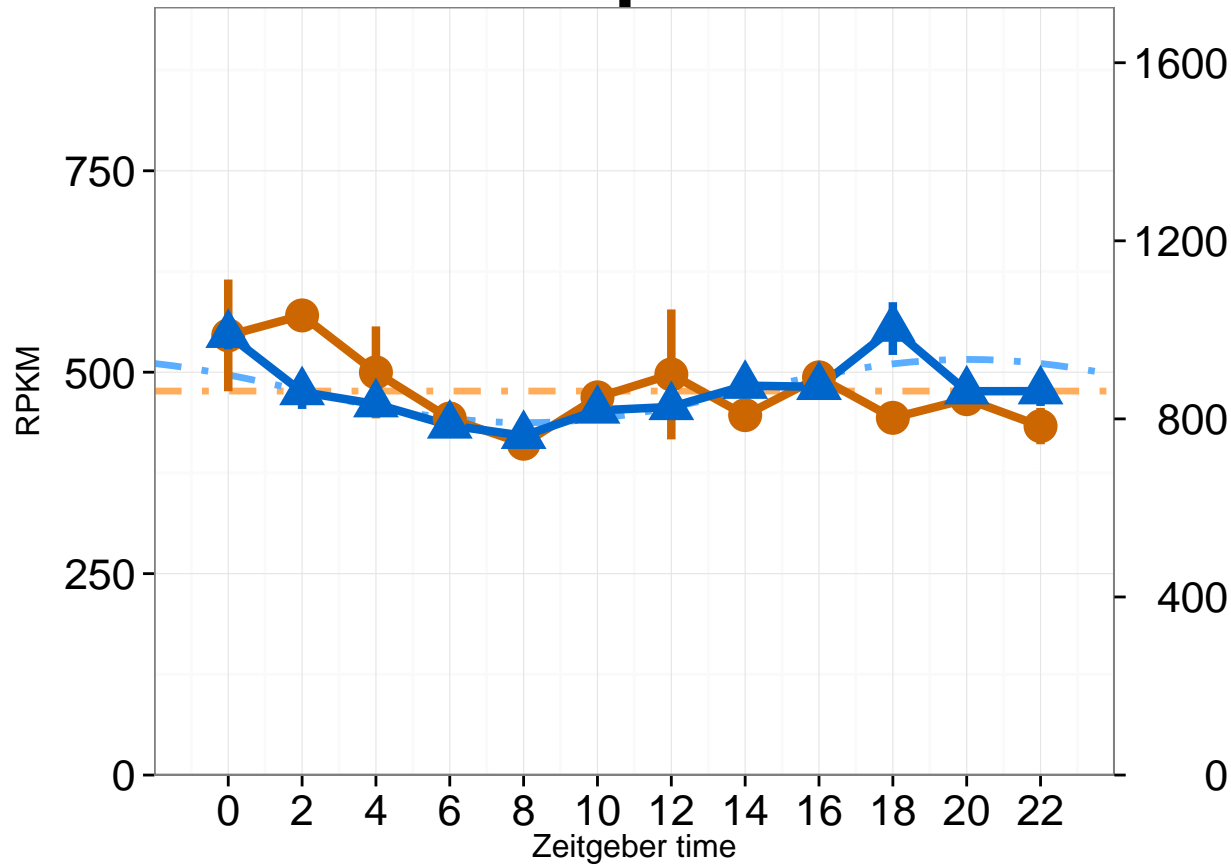

## Hspd1

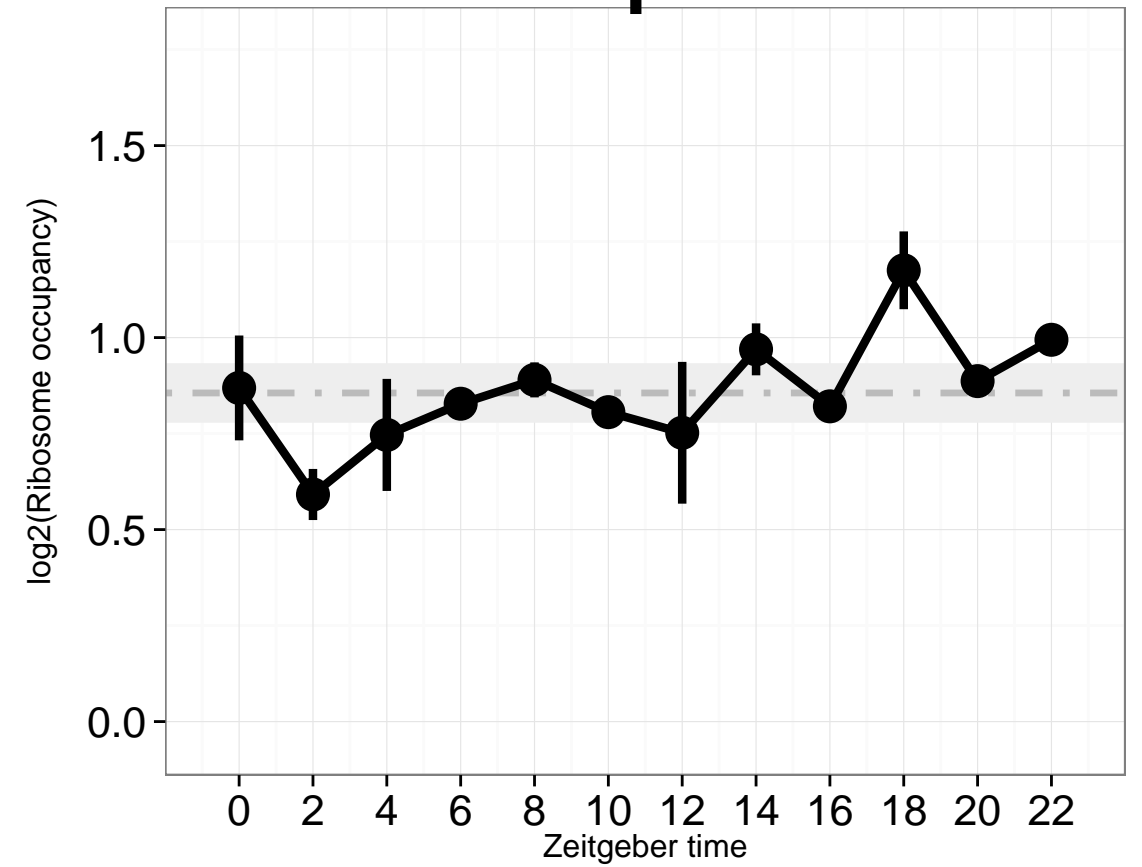

Supplement: Supplementary file 5450 [file 1]

## Enah

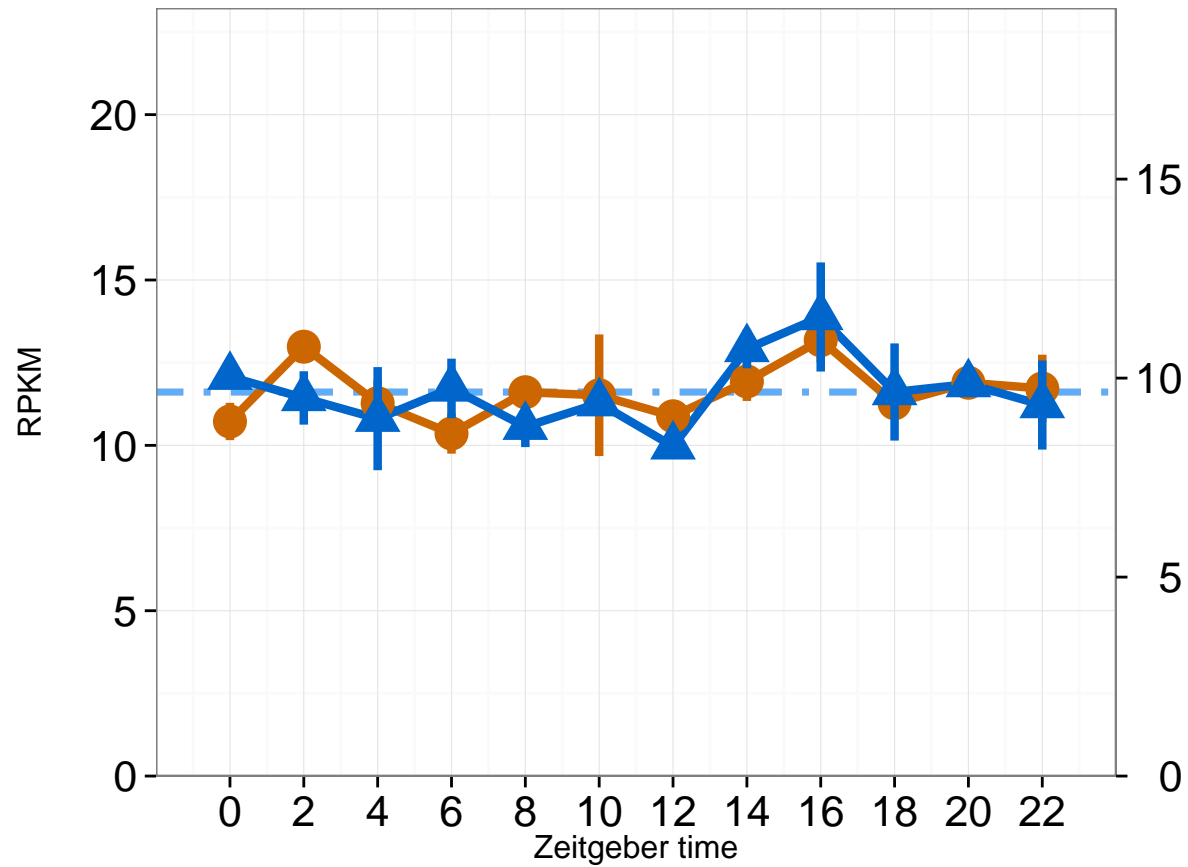

## Enah

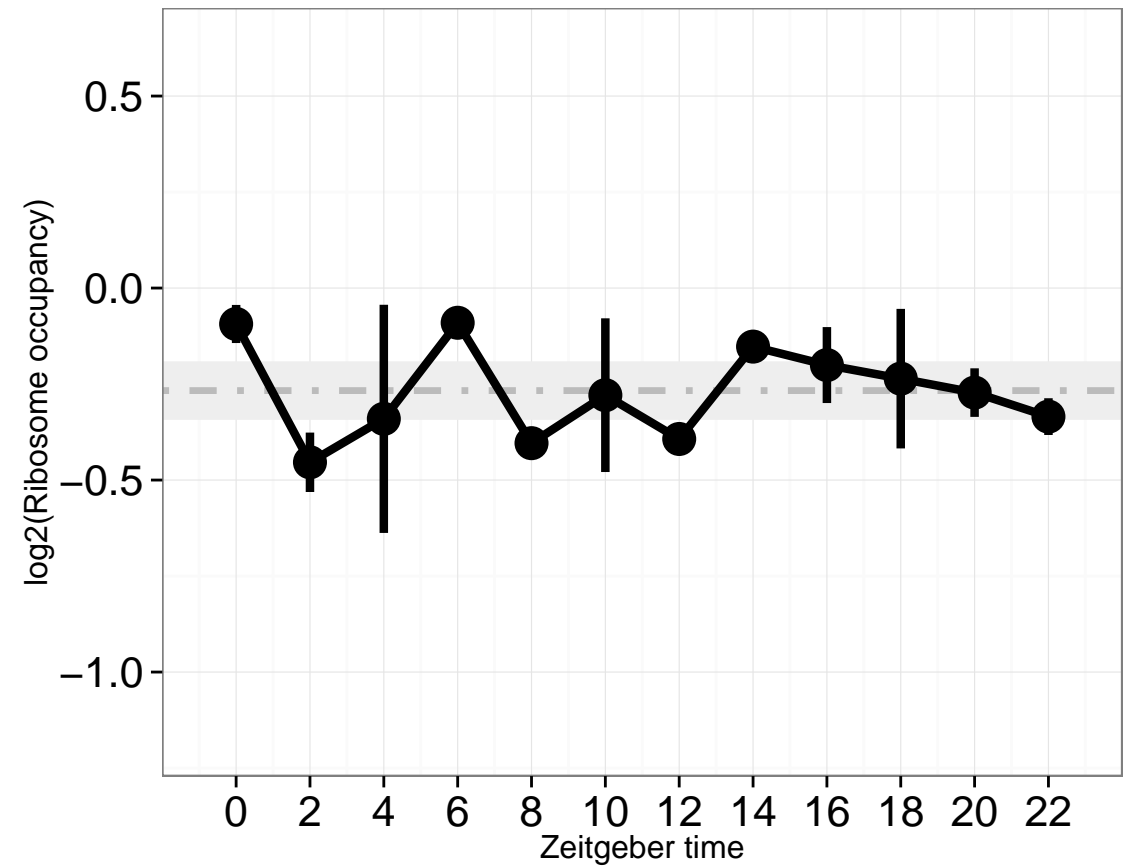

Supplement: Supplementary file 5451 [file 1]

1500012F01Rik

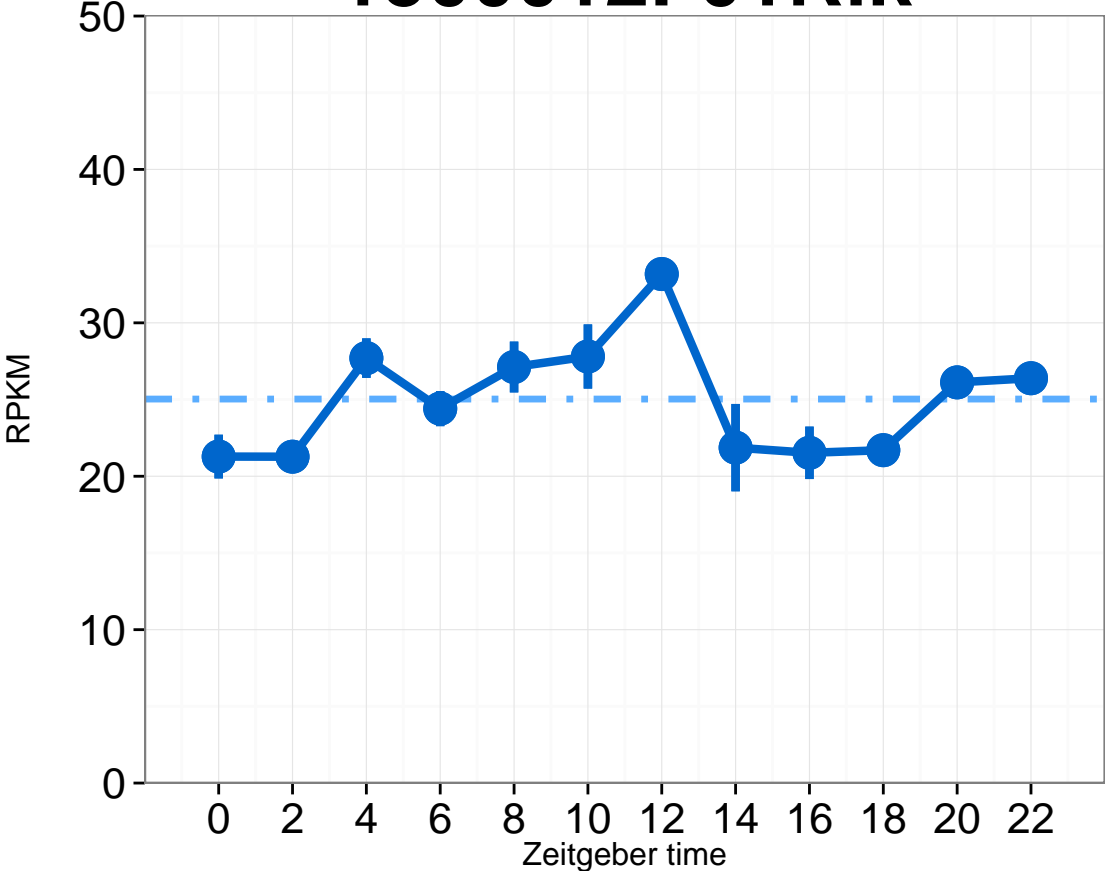

1500012F01Rik log2(Ribosome occupancy)

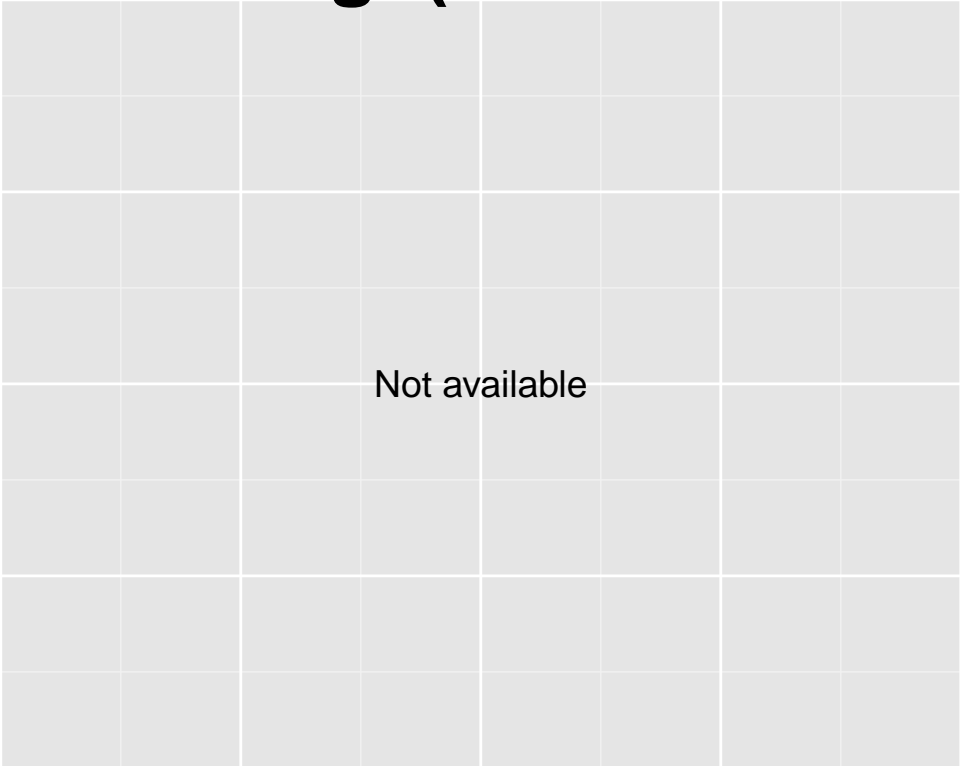

Supplement: Supplementary file 5452 [file 1]

# Hemk1

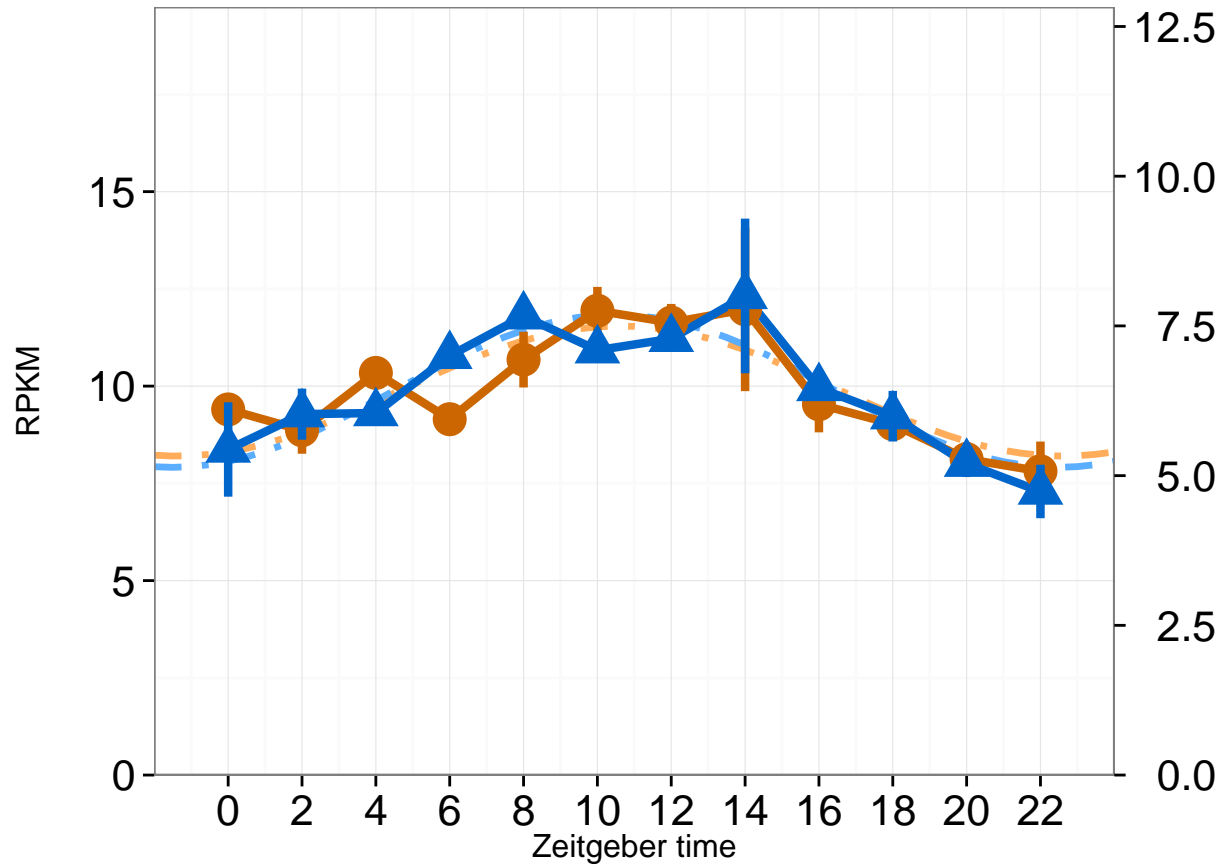

# Hemk1

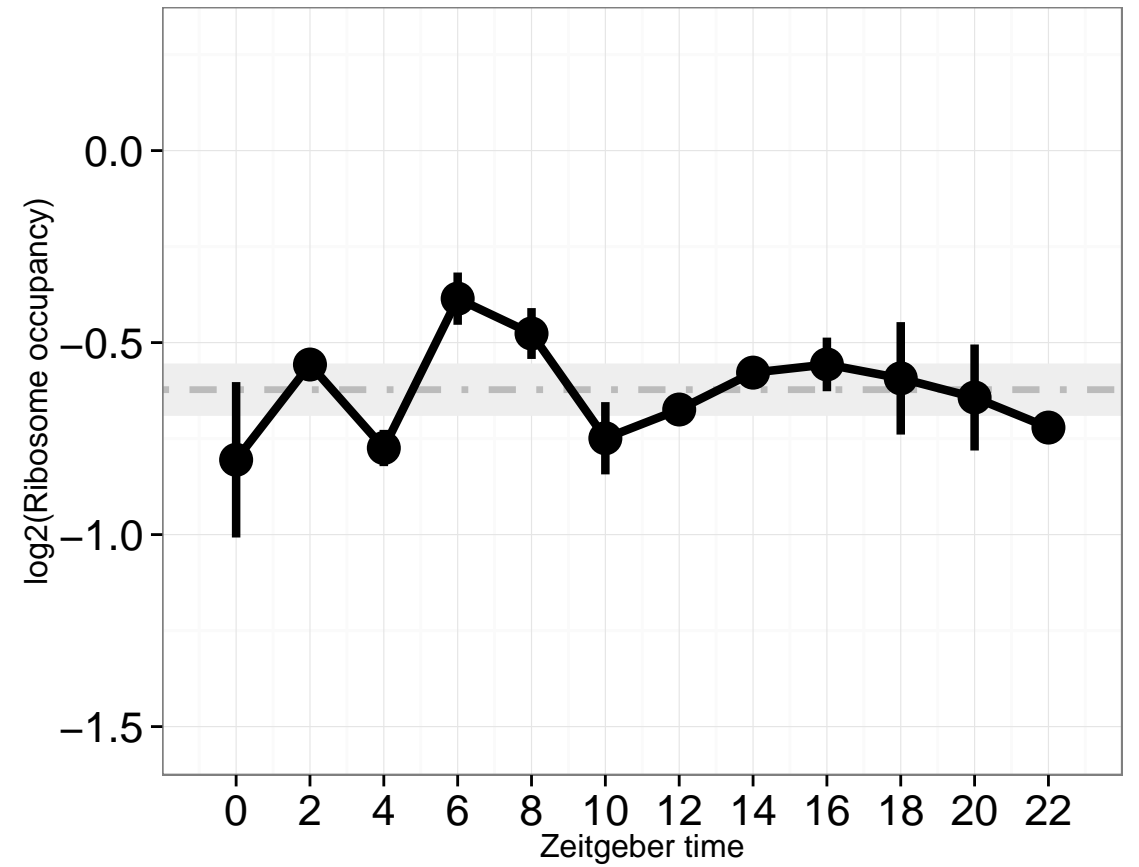

Supplement: Supplementary file 5453 [file 1]

# Zranb3

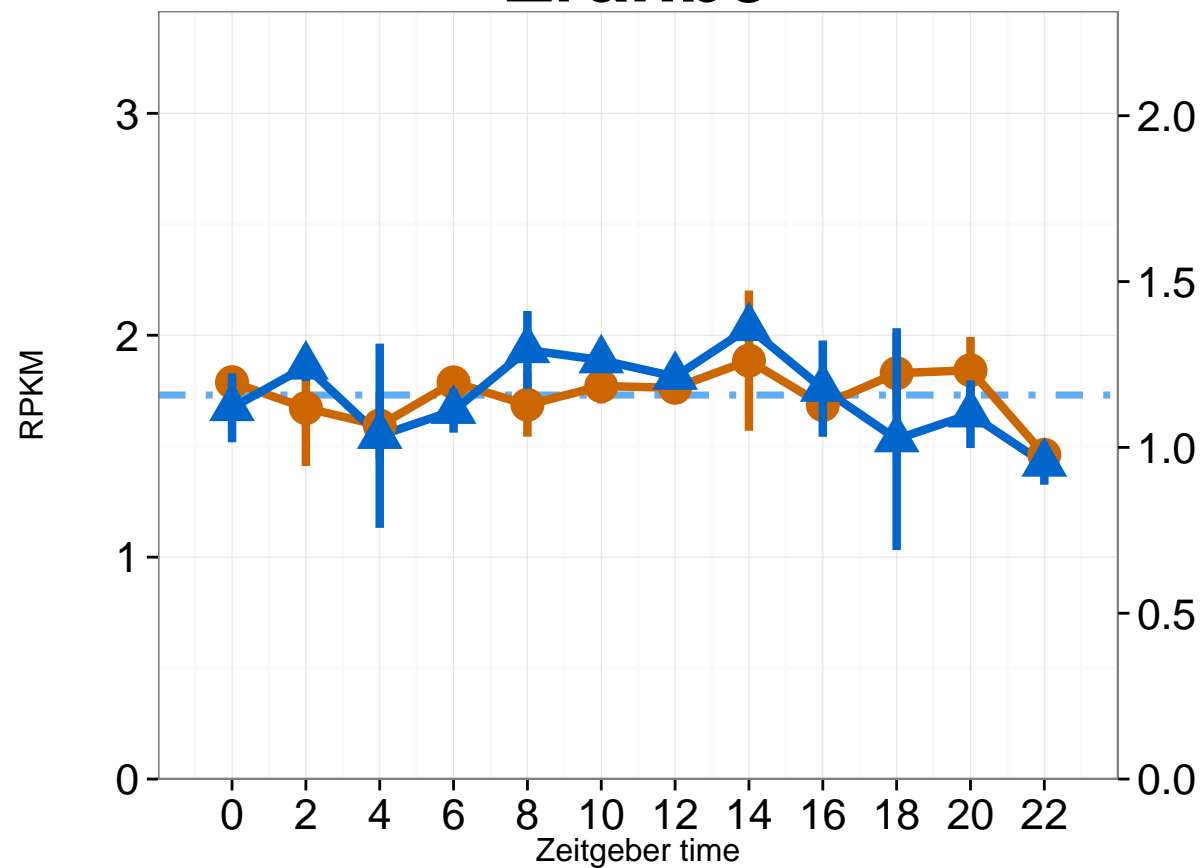

# Zranb3

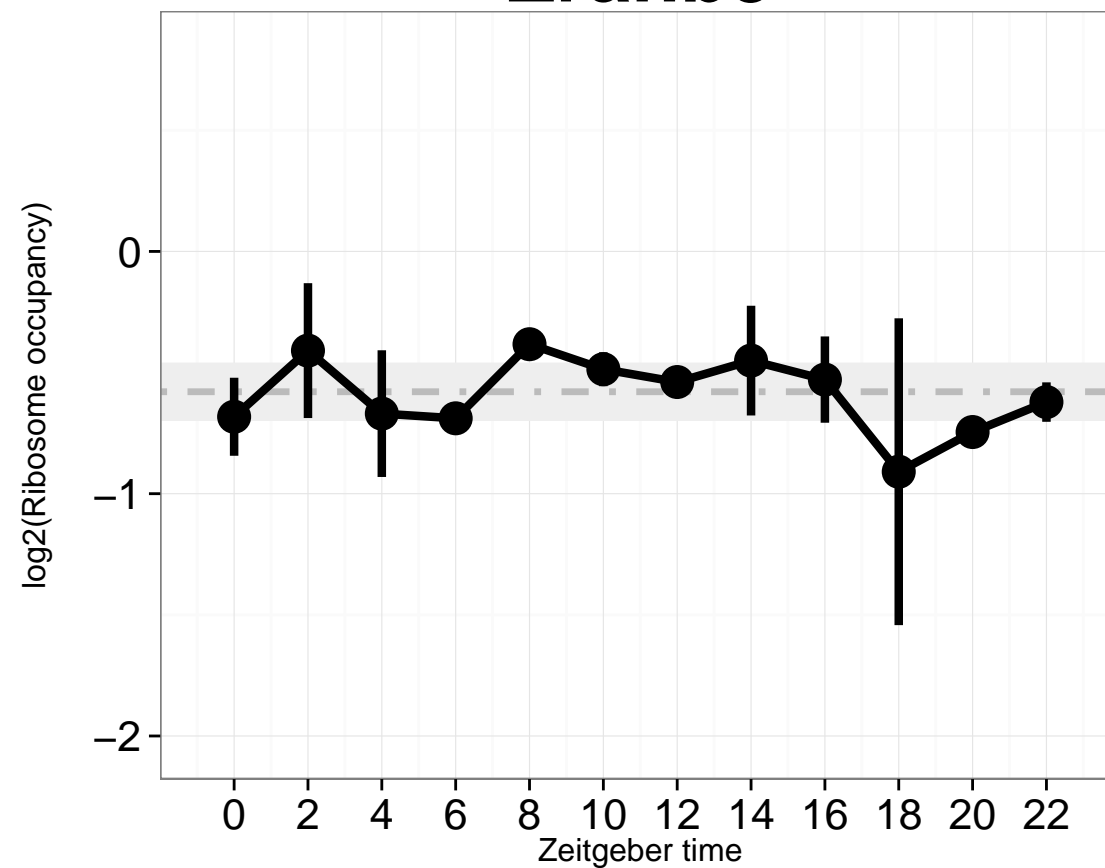

Supplement: Supplementary file 5454 [file 1]

# Zbtb26

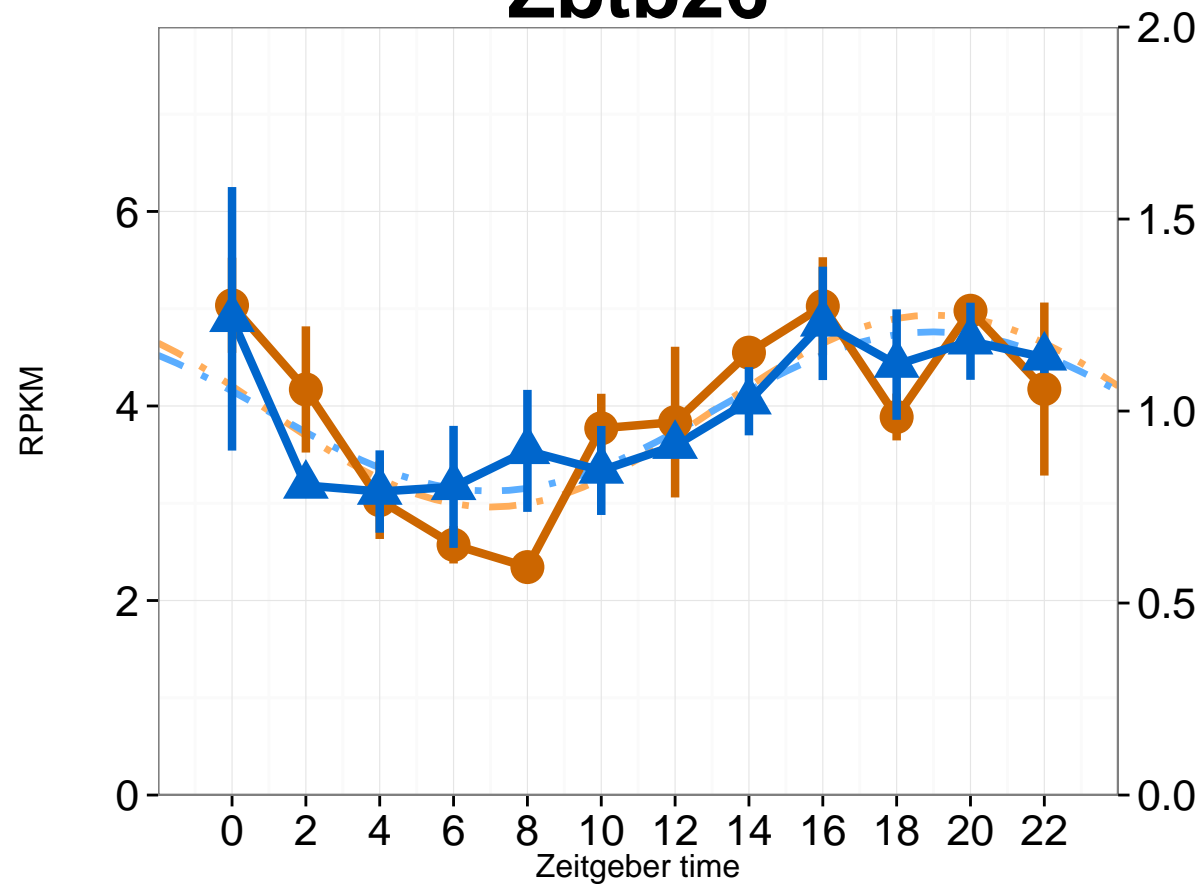

# Zbtb26

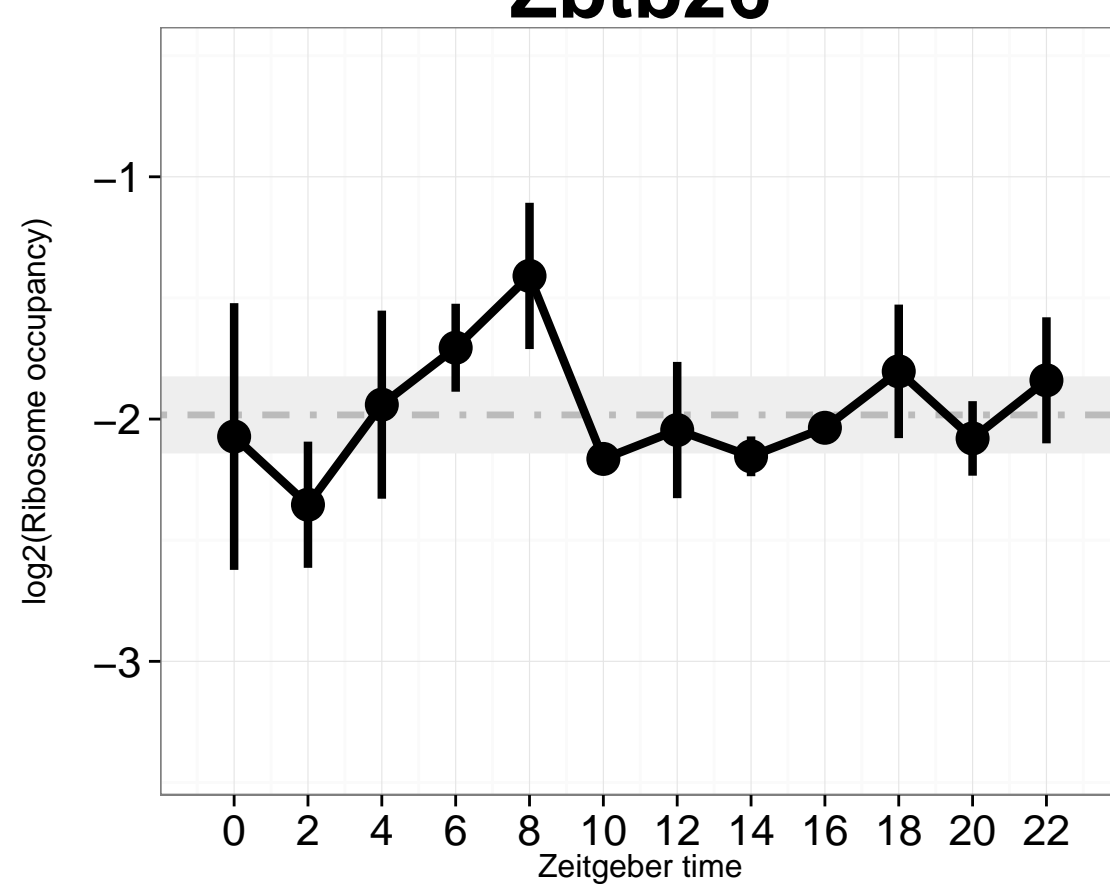

Supplement: Supplementary file 5455 [file 1]

# Col23a1

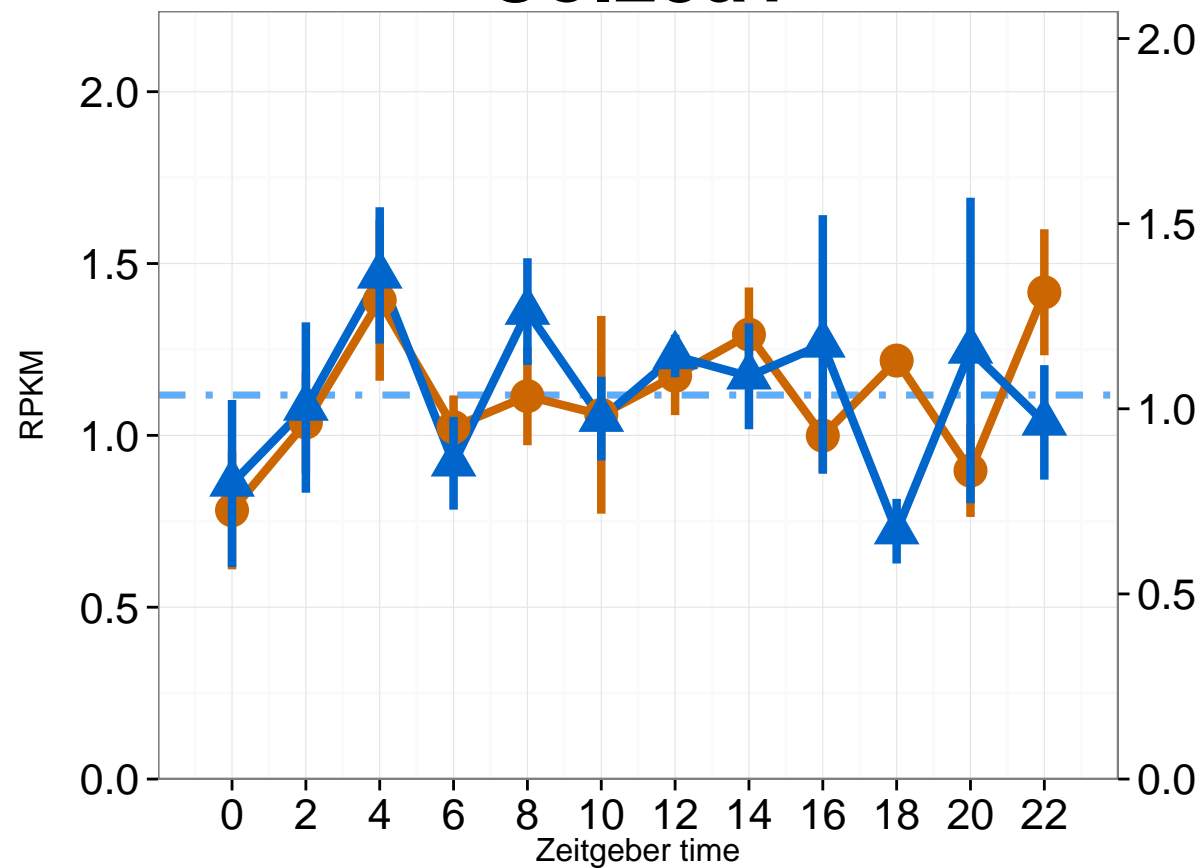

# Col23a1

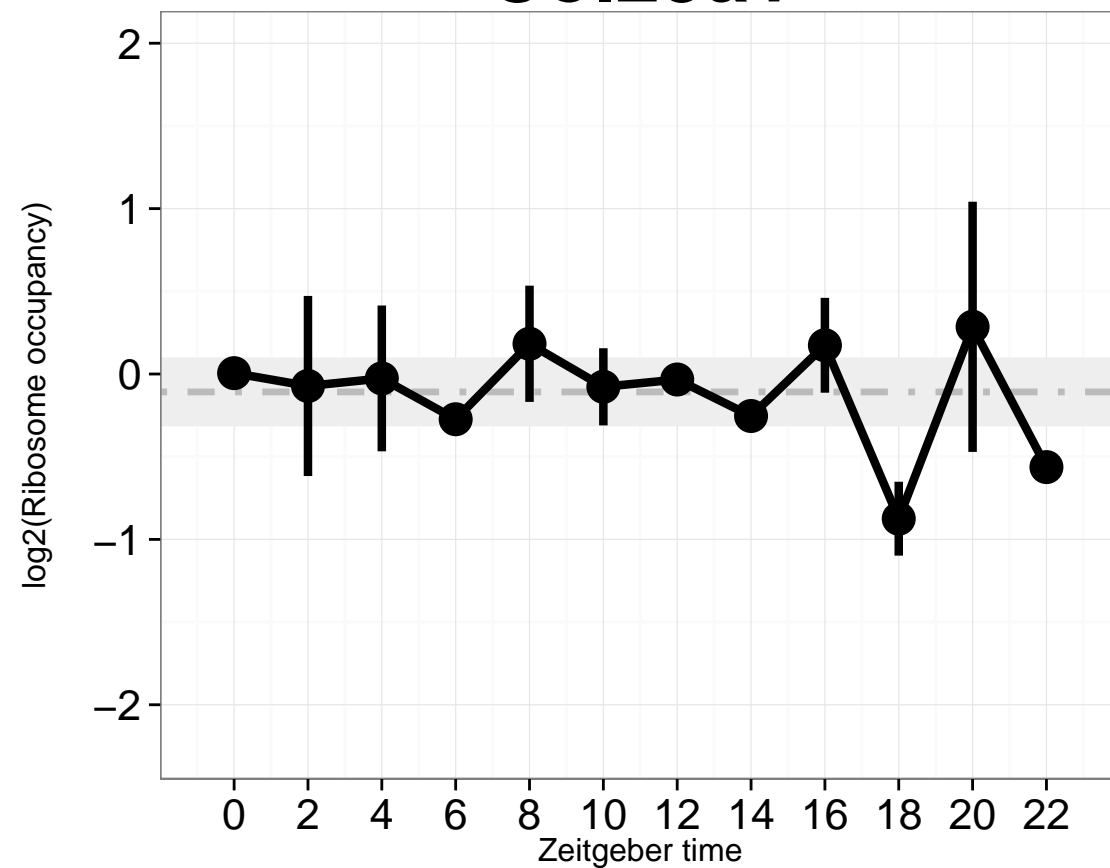

Supplement: Supplementary file 5456 [file 1]

## Dync1li2

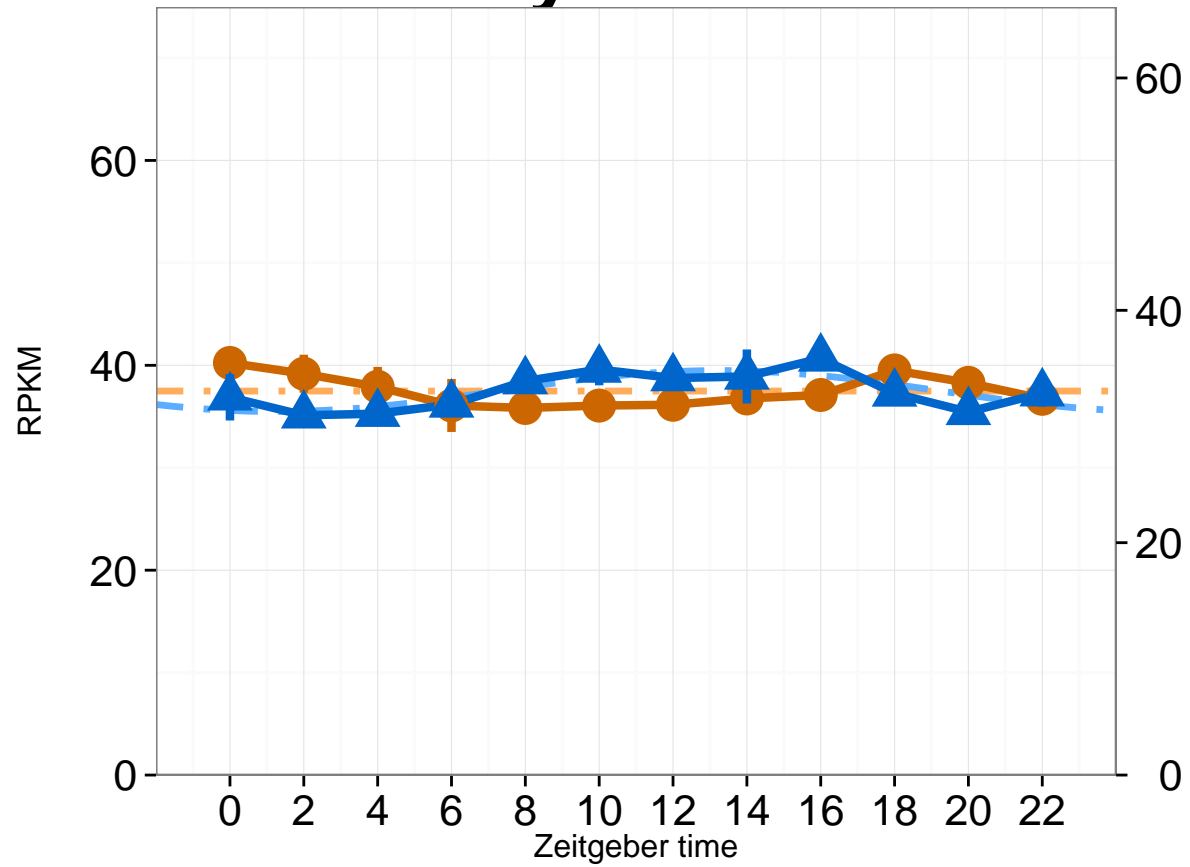

## Dync1li2

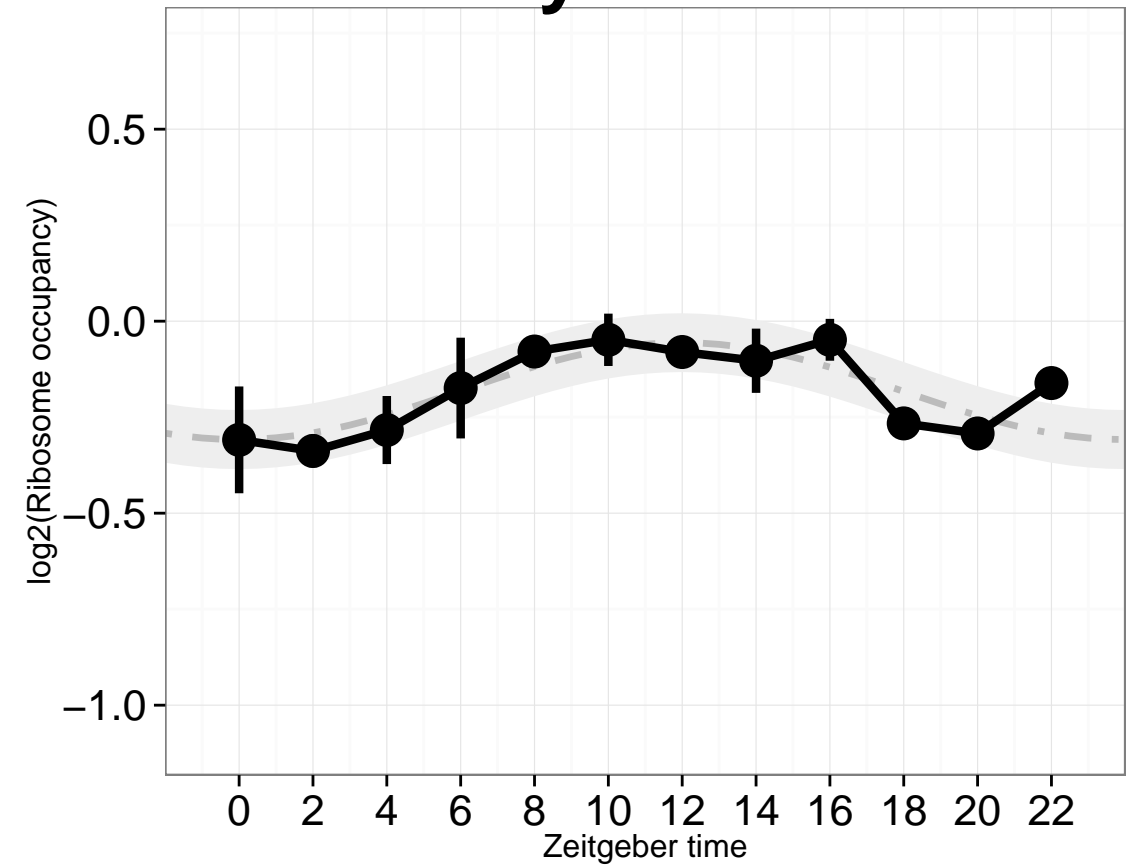

Supplement: Supplementary file 5457 [file 1]

## Eftud2

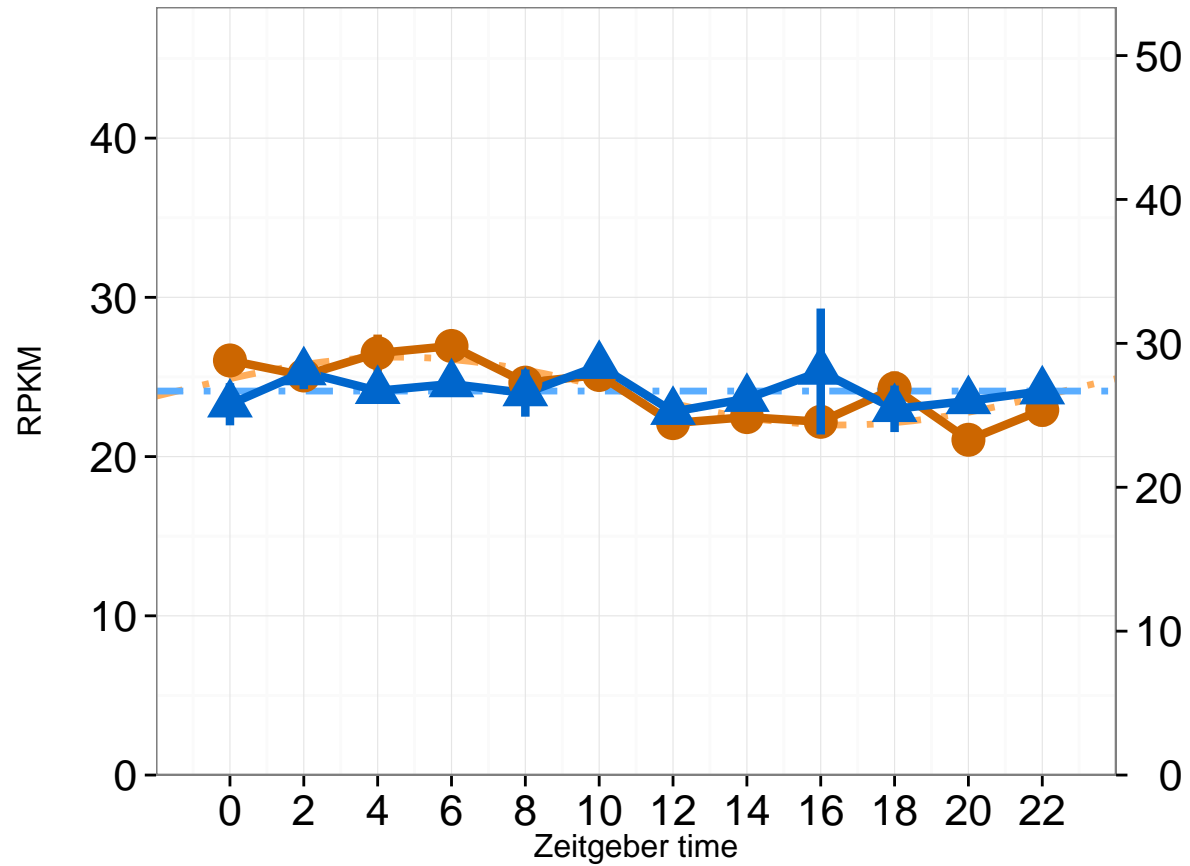

## Eftud2

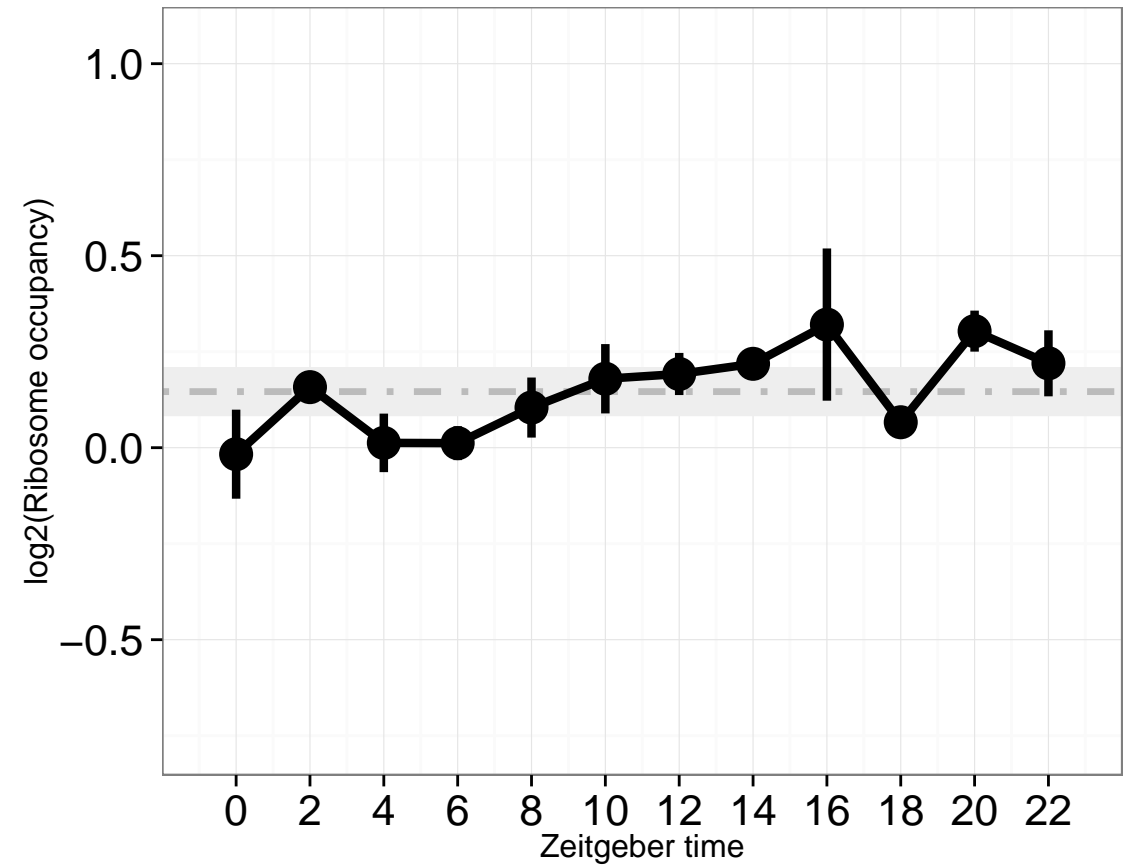

Supplement: Supplementary file 5458 [file 1]

# Nat8

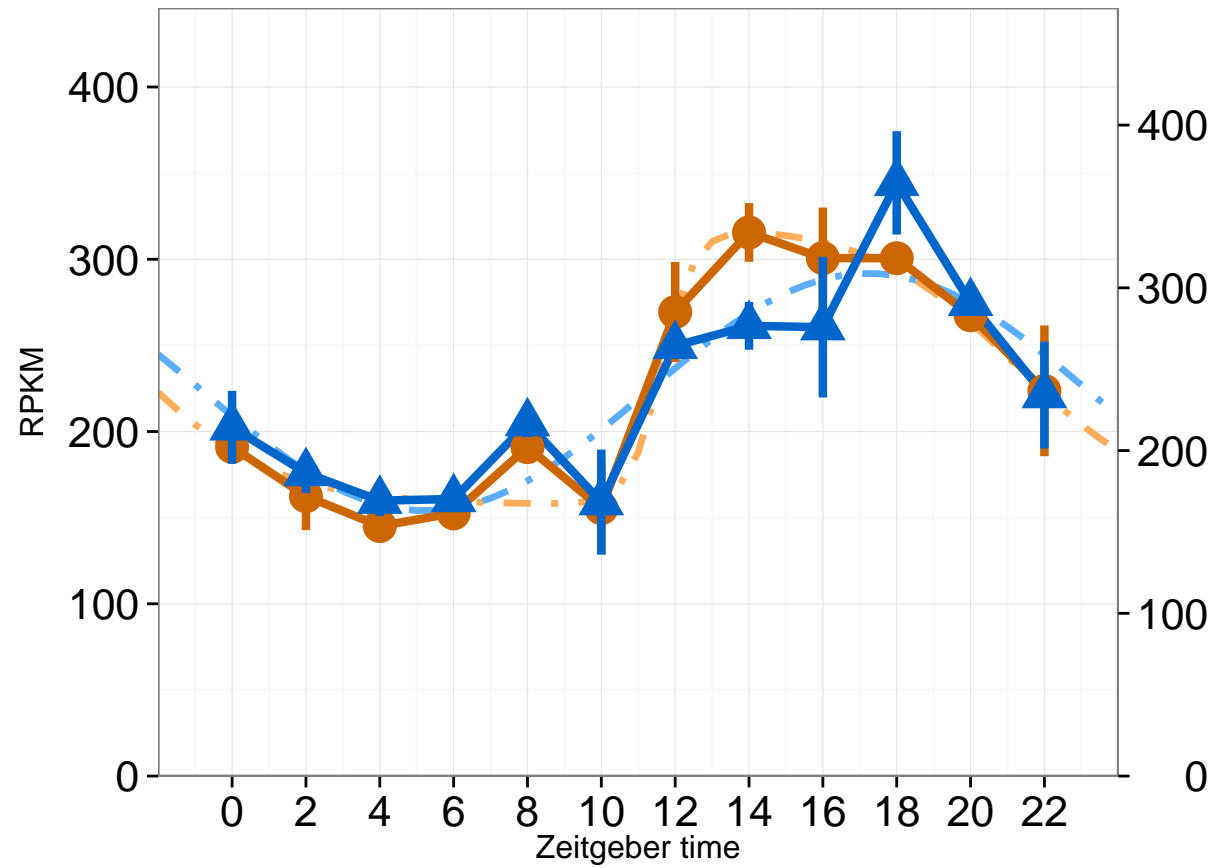

# Nat8

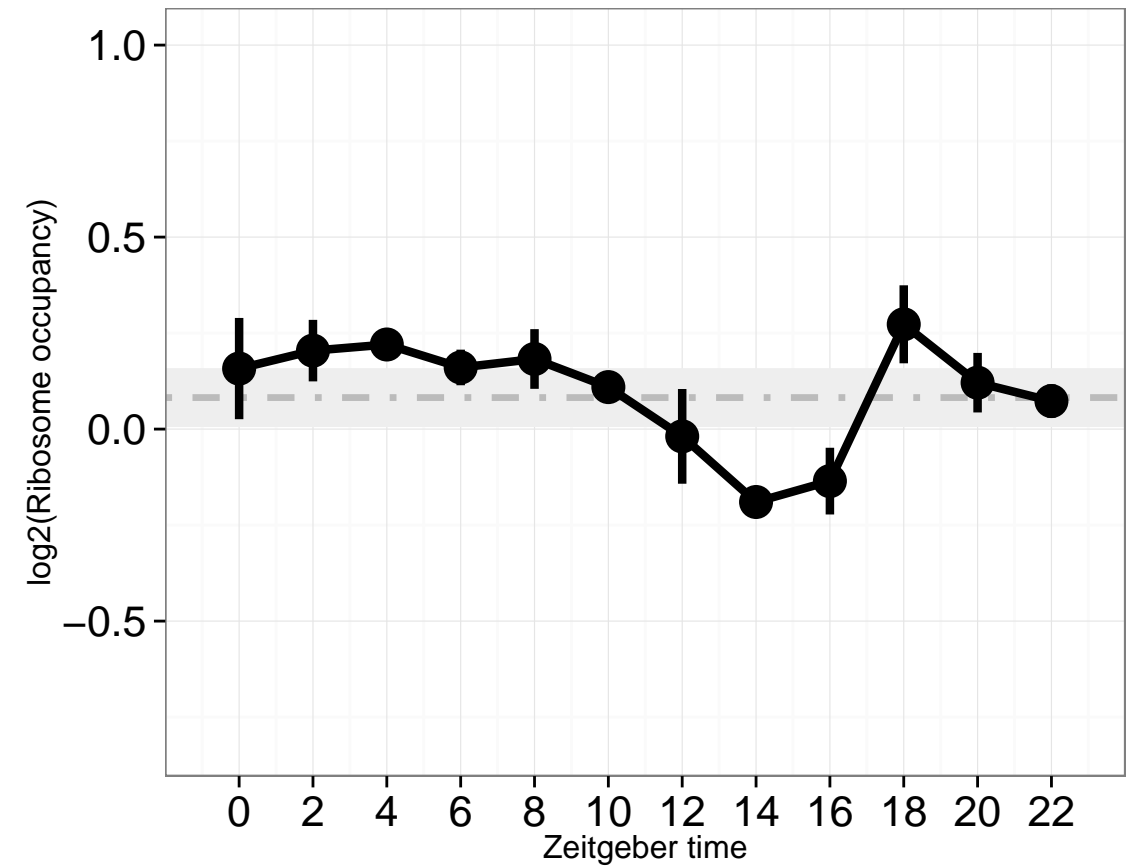

Supplement: Supplementary file 5459 [file 1]

# Ccar1

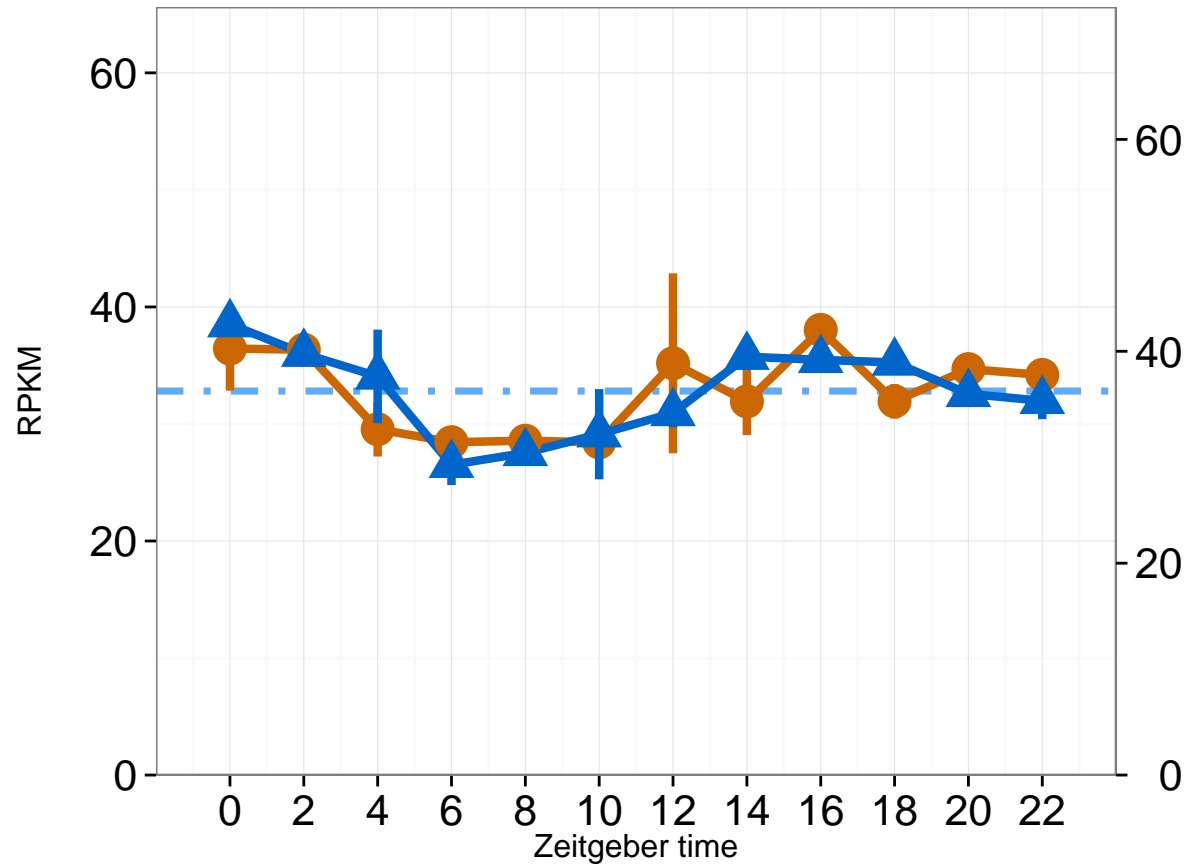

# Ccar1

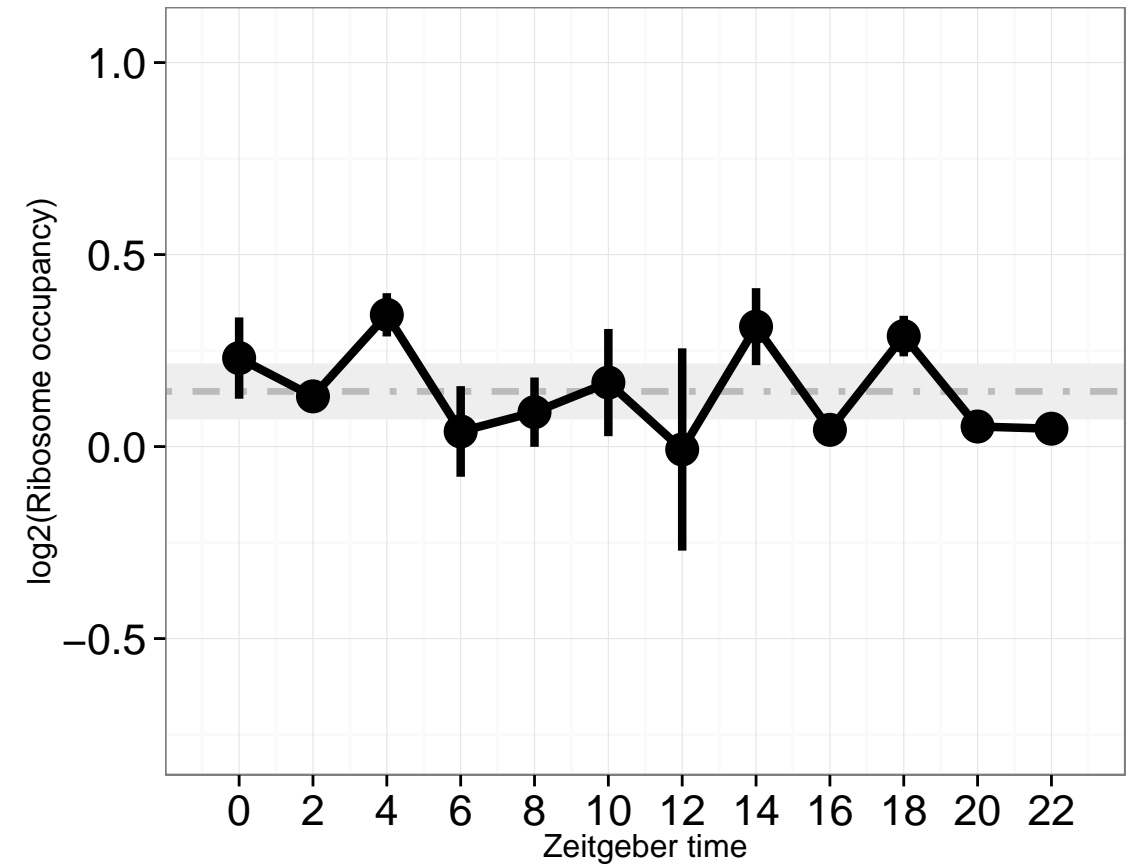

Supplement: Supplementary file 5460 [file 1]

# Ppm1j

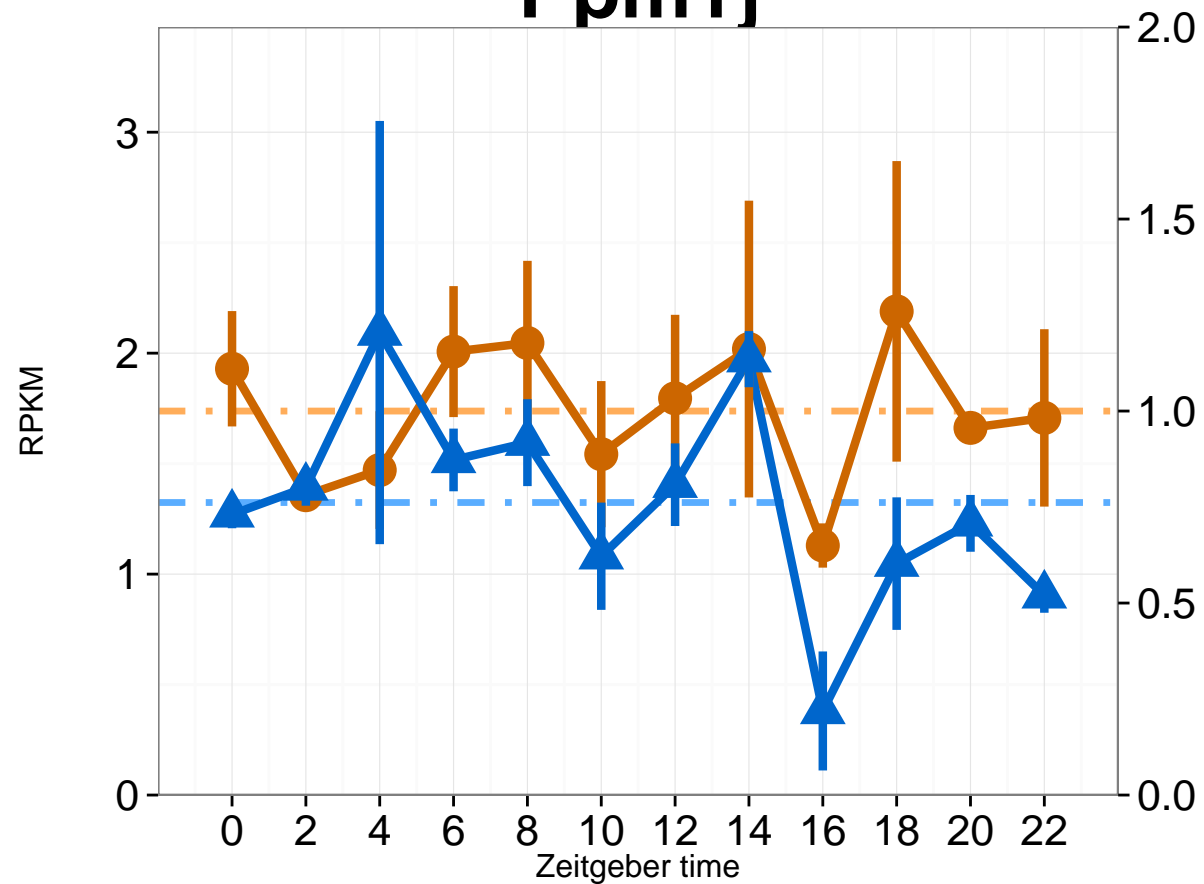

# Ppm1j

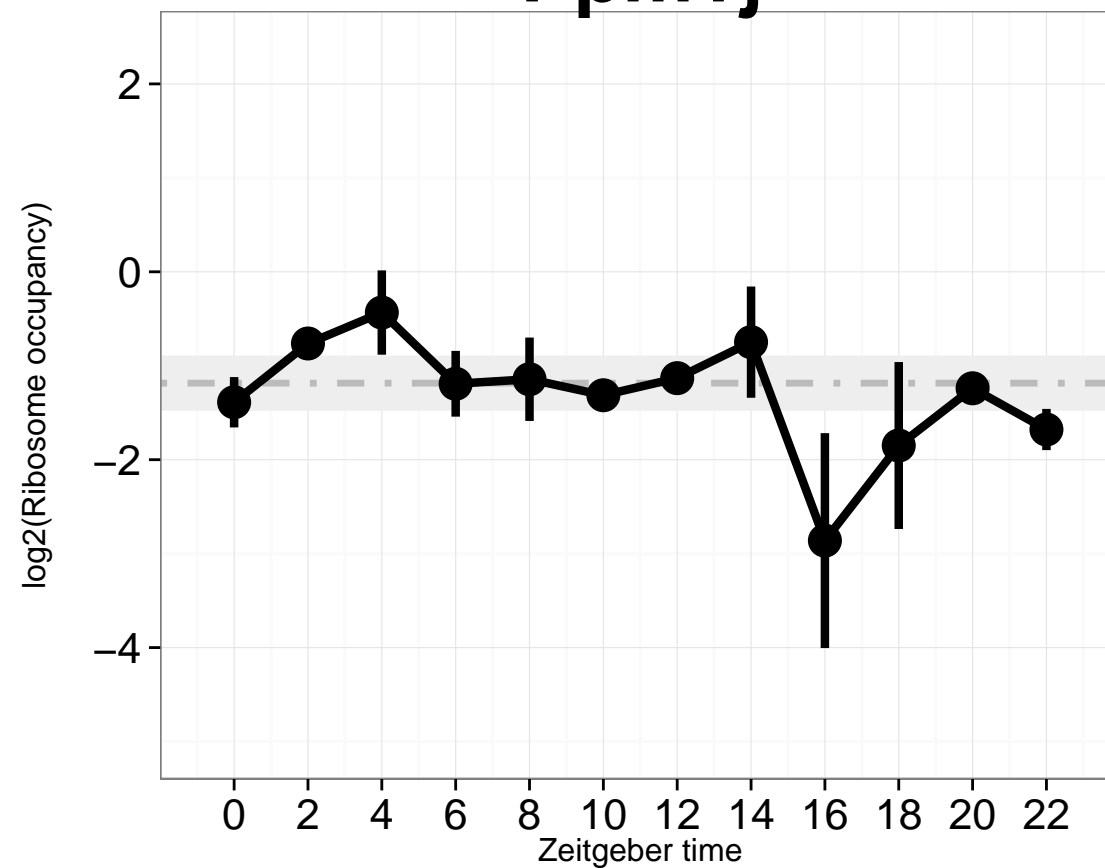

Supplement: Supplementary file 5461 [file 1]

# Ndufb11

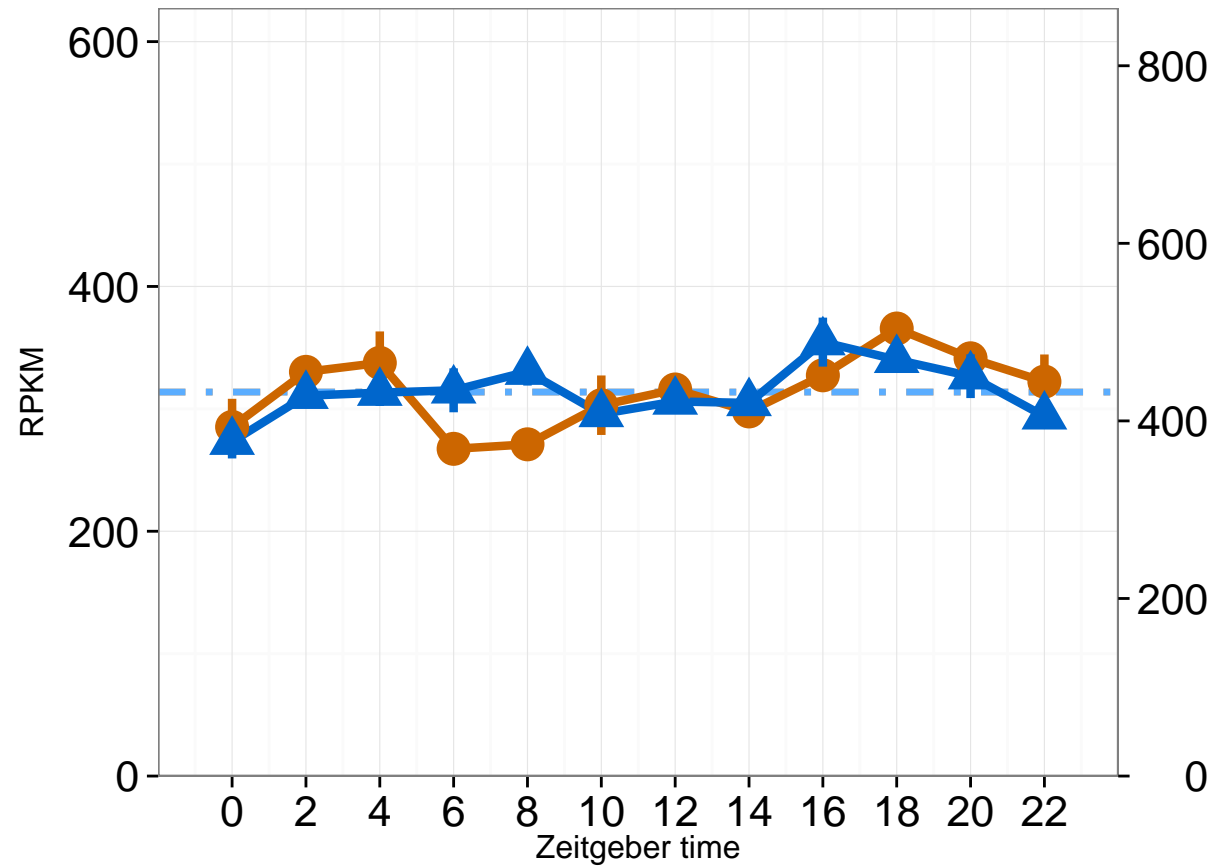

# Ndufb11

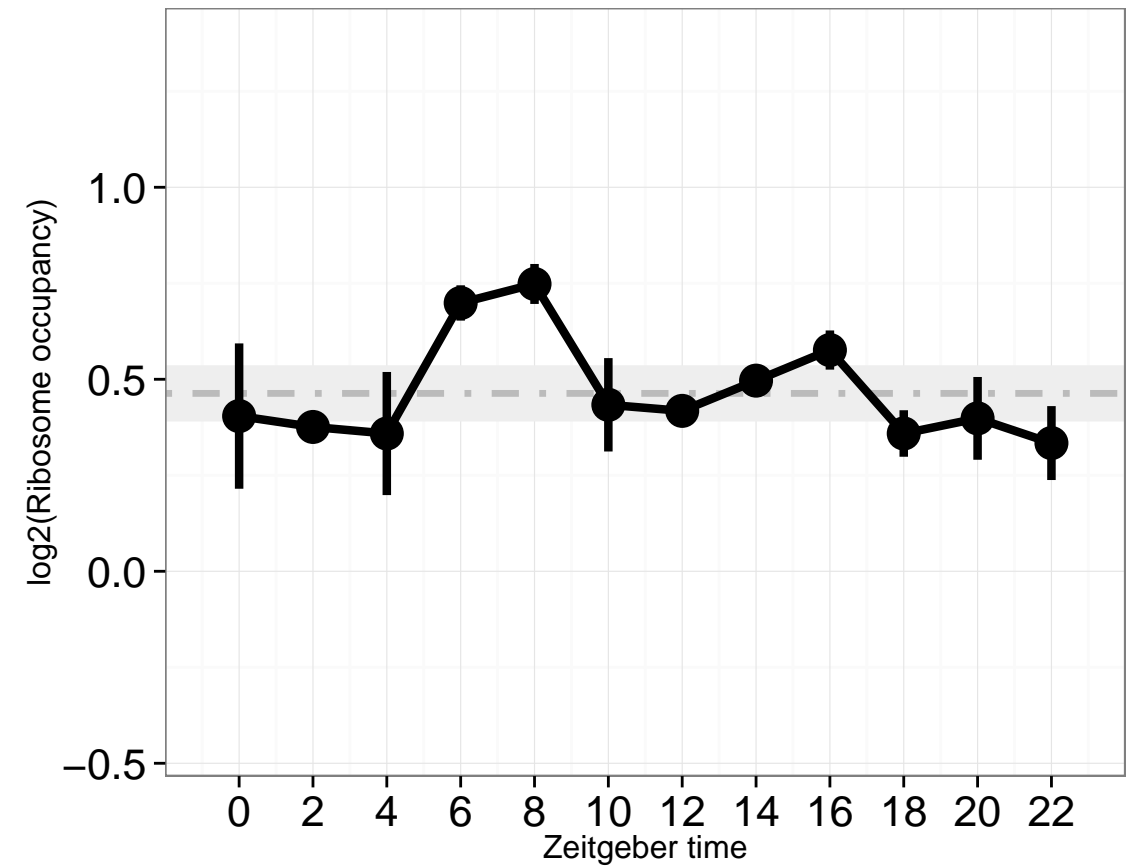

Supplement: Supplementary file 5462 [file 1]

# Pfkfb4

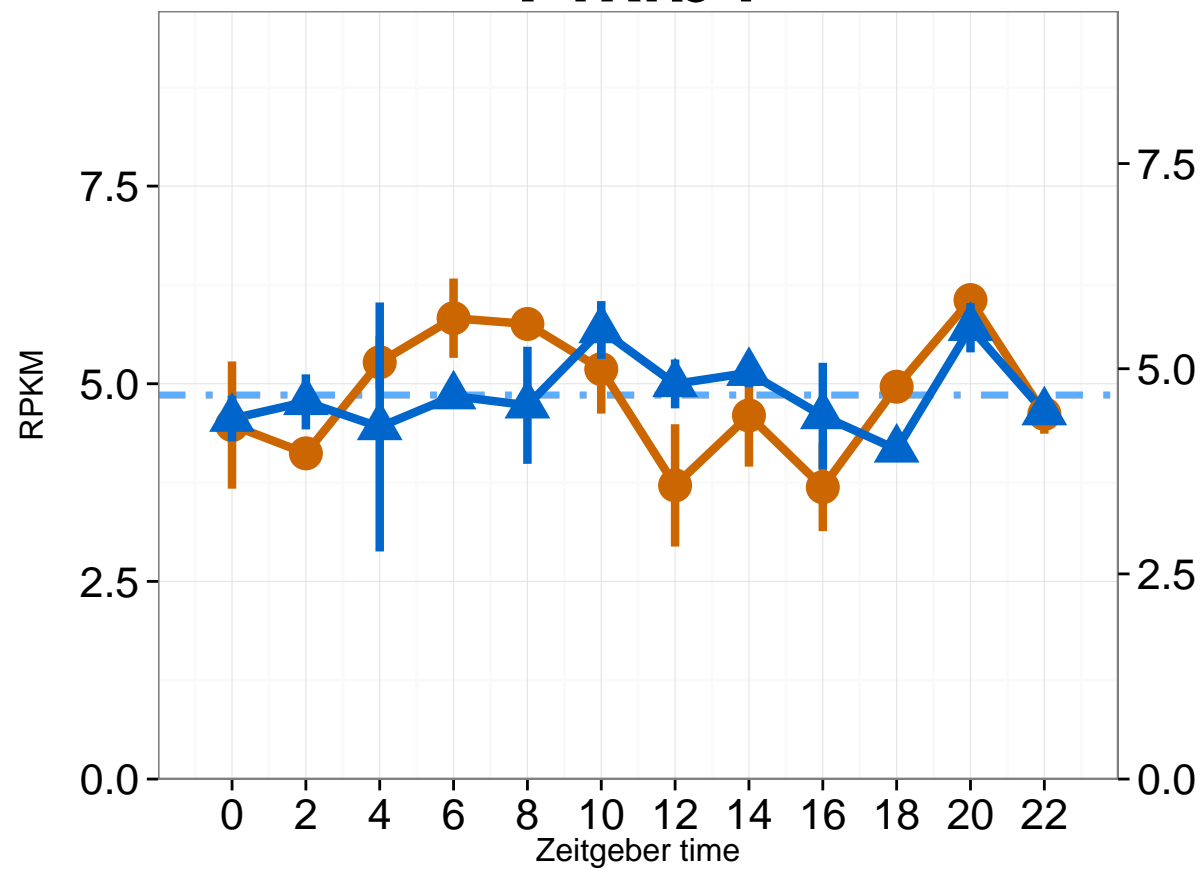

# Pfkfb4

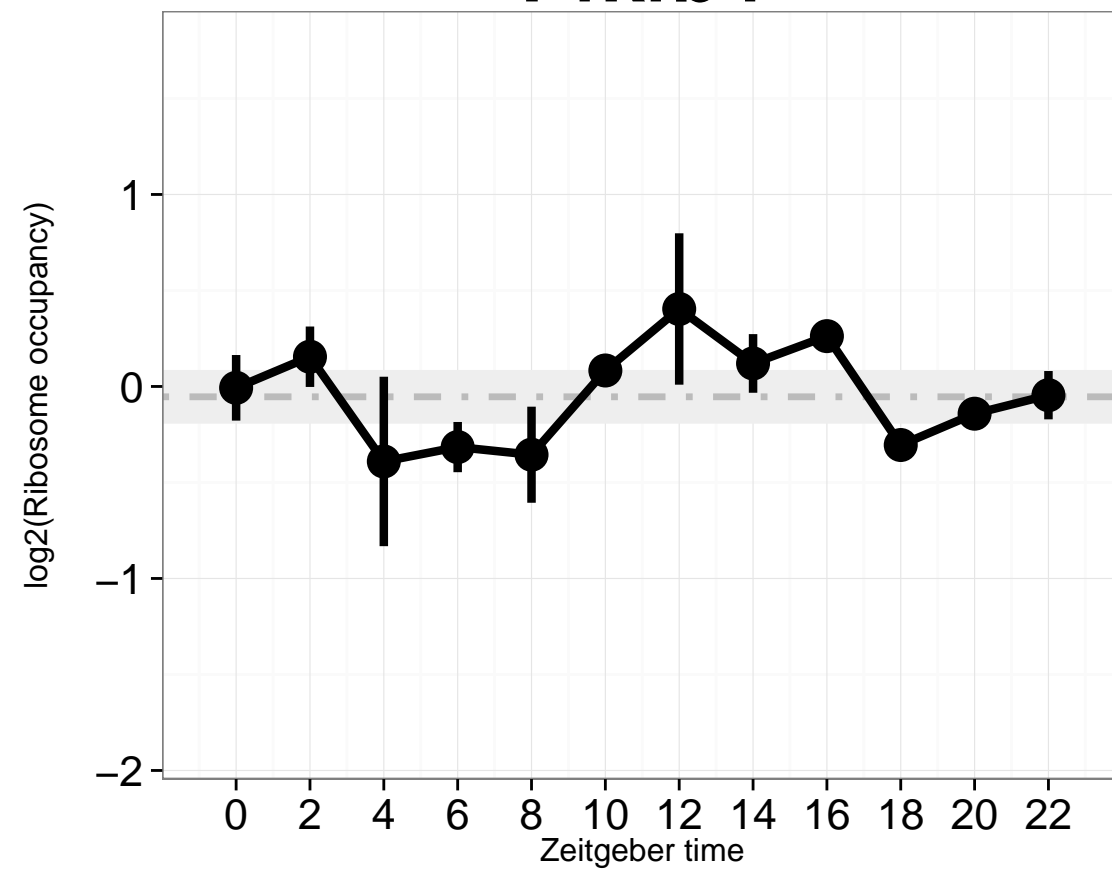

Supplement: Supplementary file 5463 [file 1]

# Clcc1

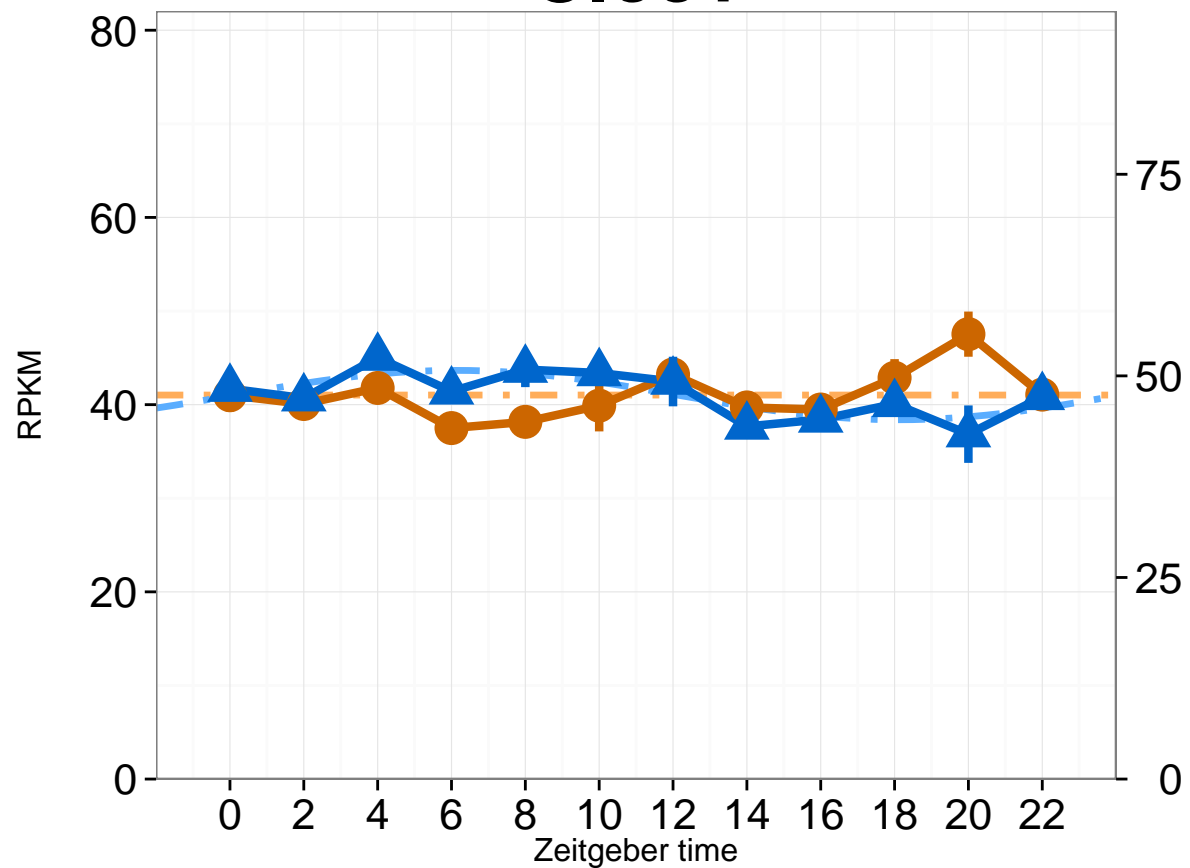

# Clcc1

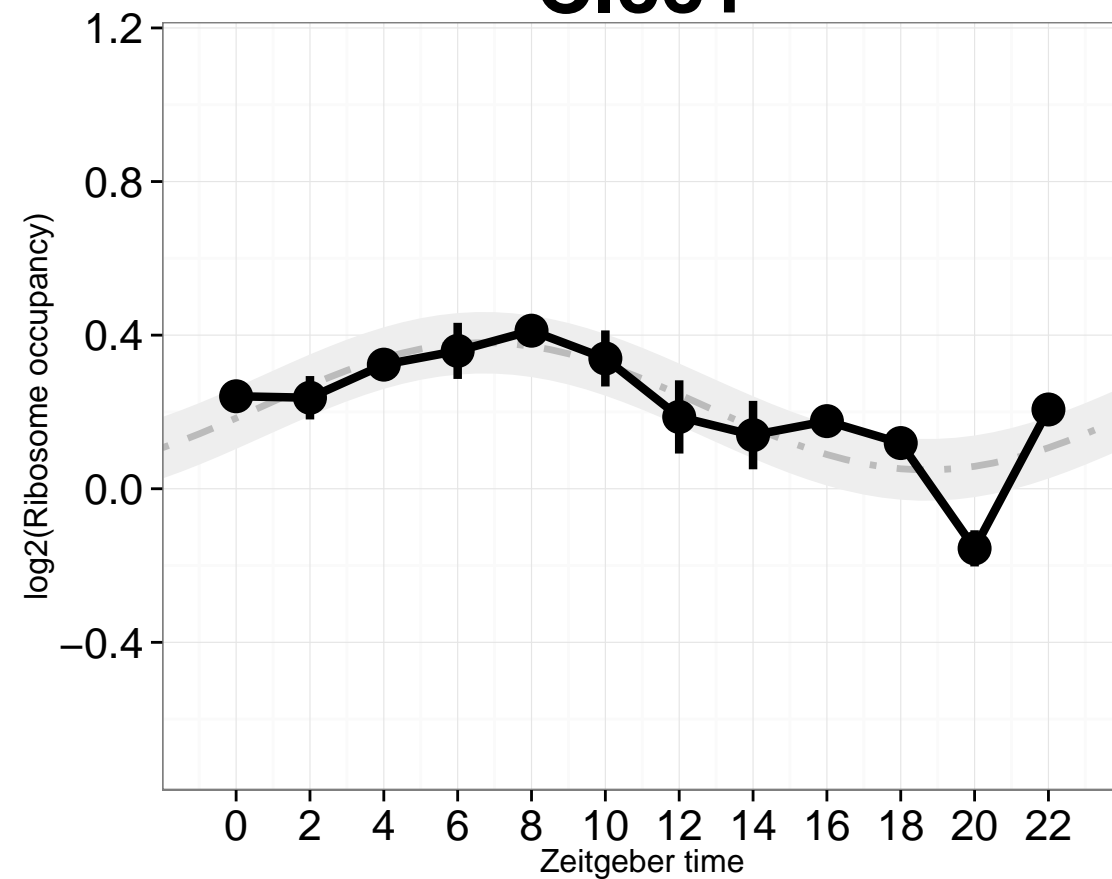

Supplement: Supplementary file 5464 [file 1]

## AW554918

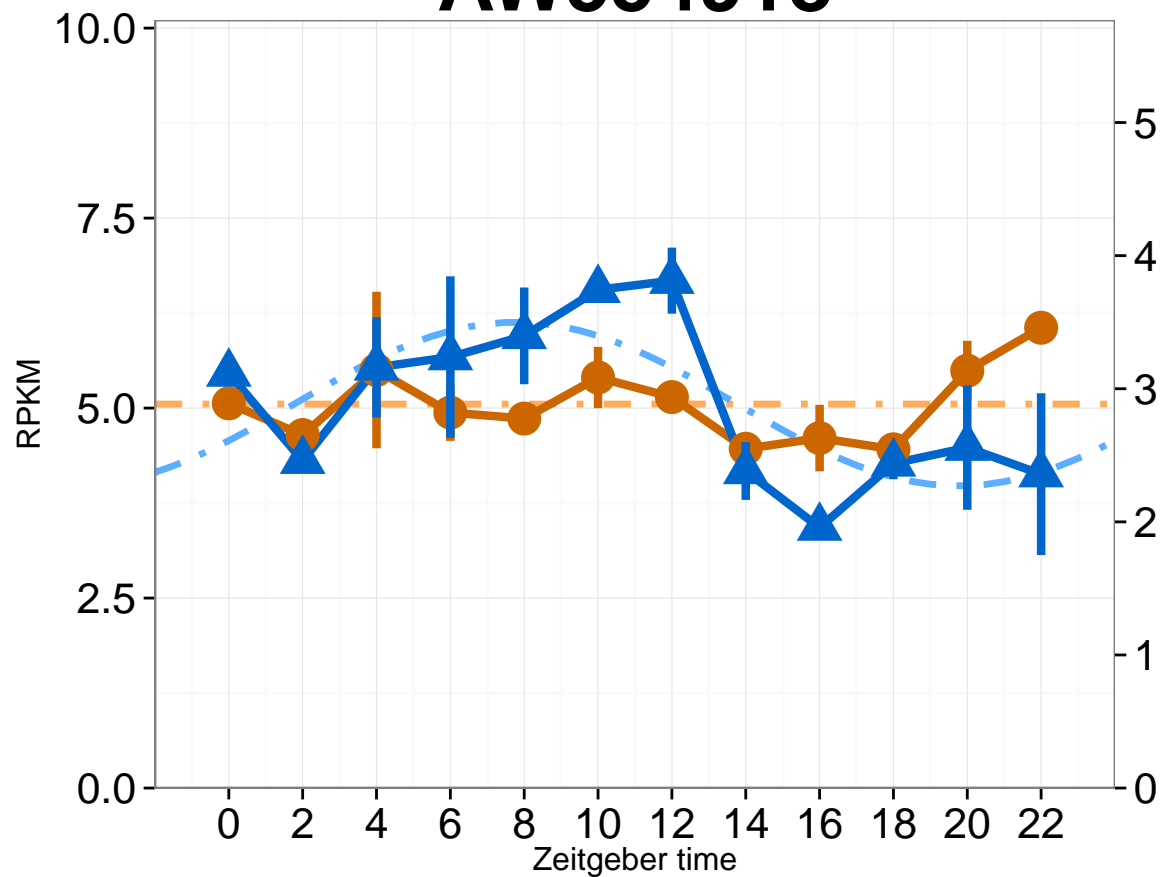

## AW554918

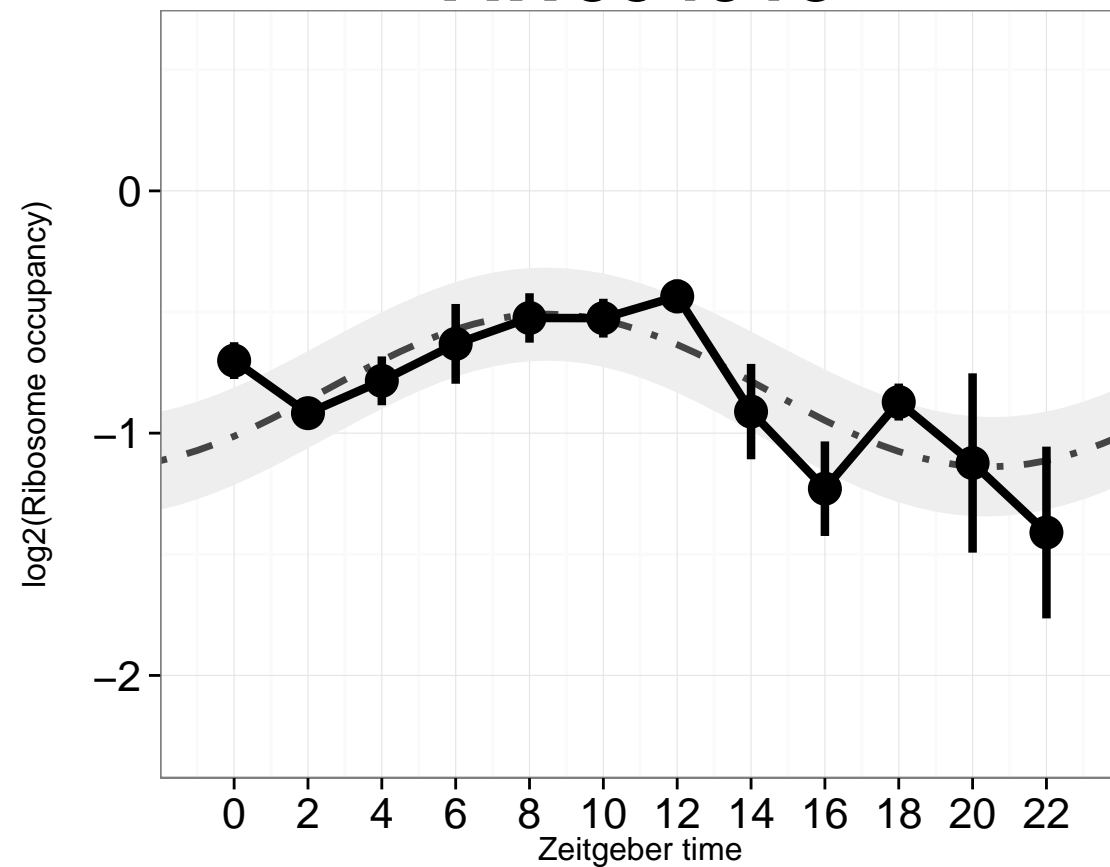

Supplement: Supplementary file 5465 [file 1]

# Minpp1

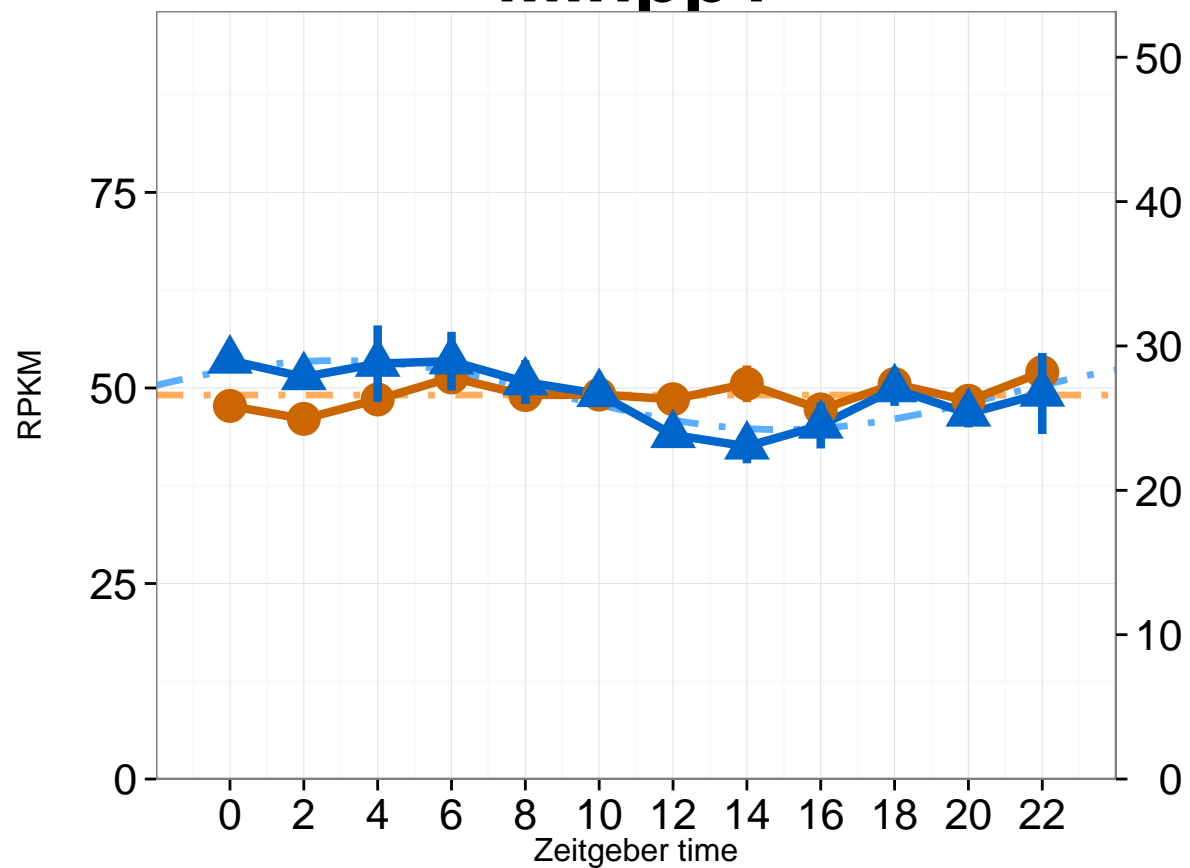

# Minpp1

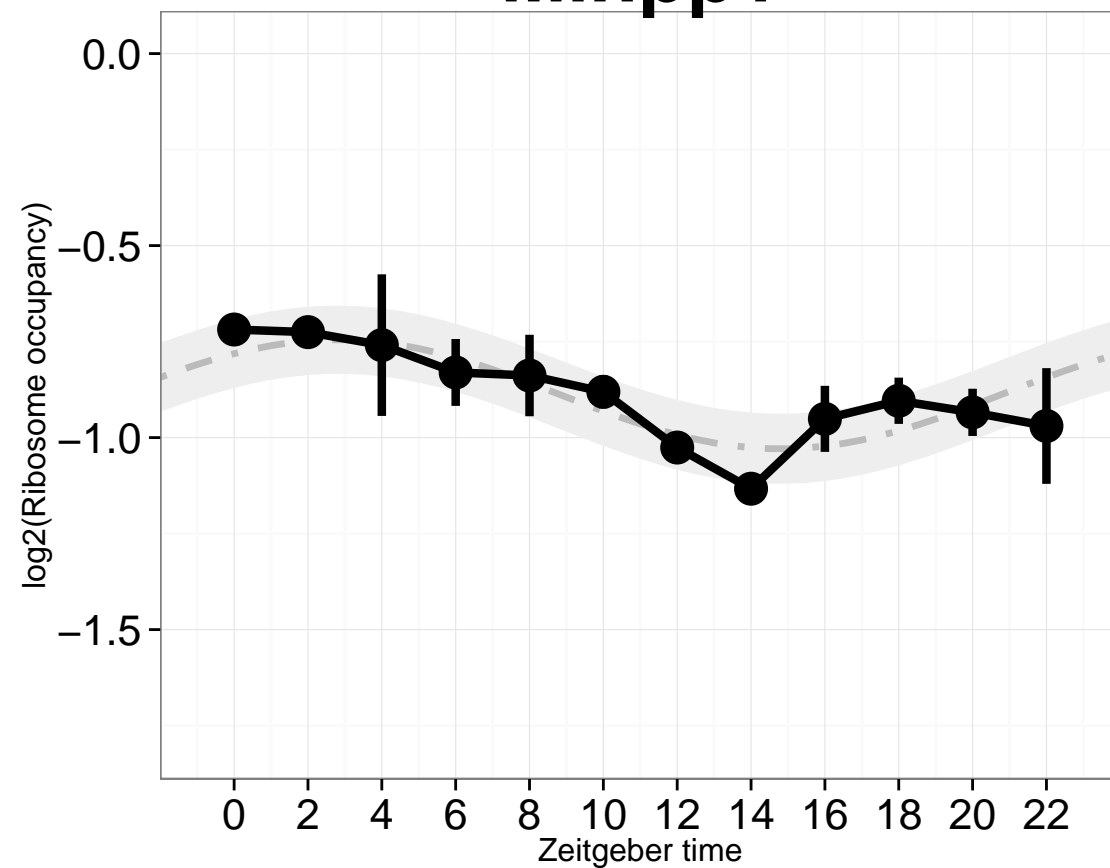

Supplement: Supplementary file 5466 [file 1]

## Stk17b

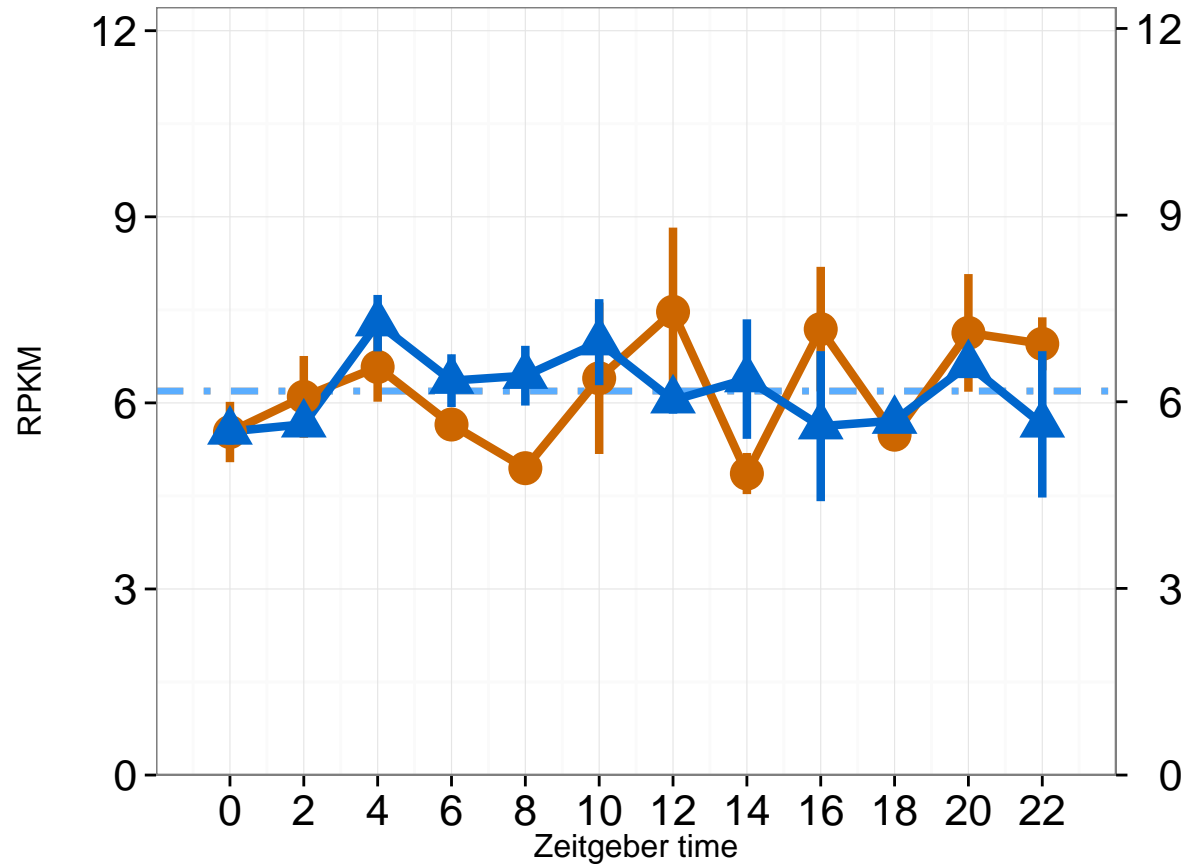

## Stk17b

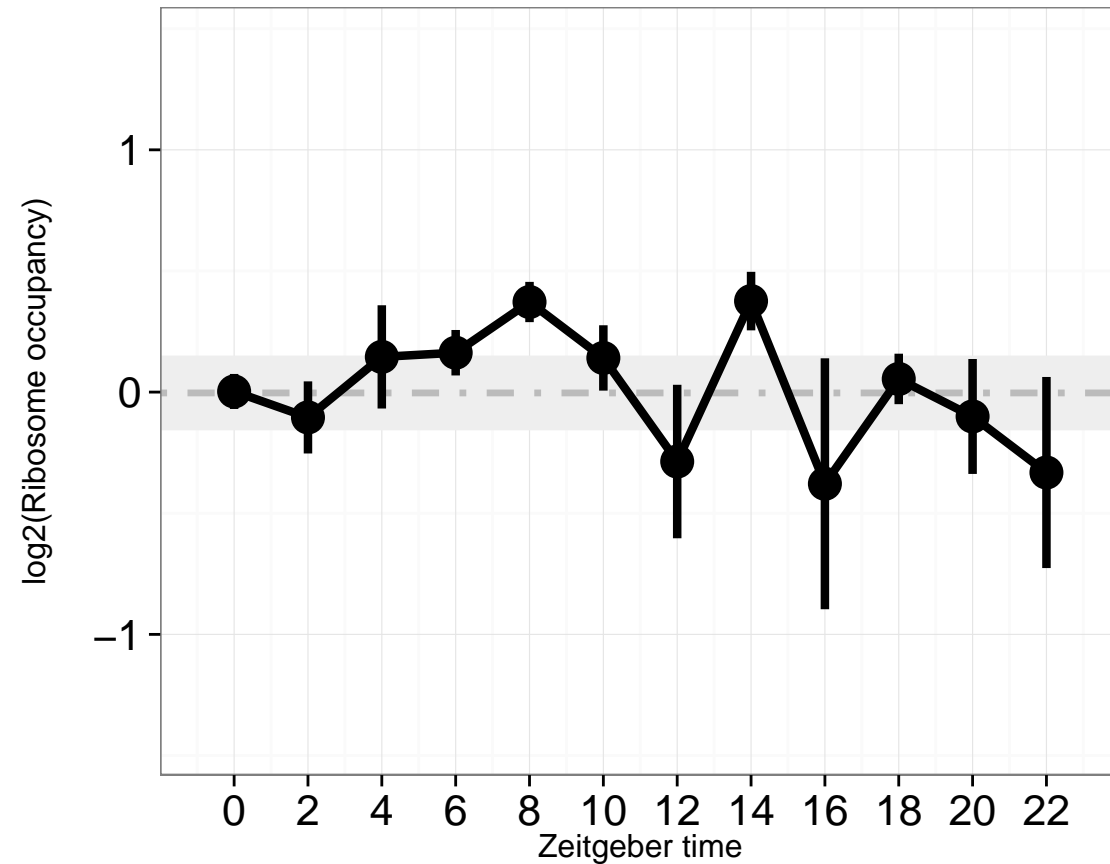

Supplement: Supplementary file 5467 [file 1]

# Gcc1

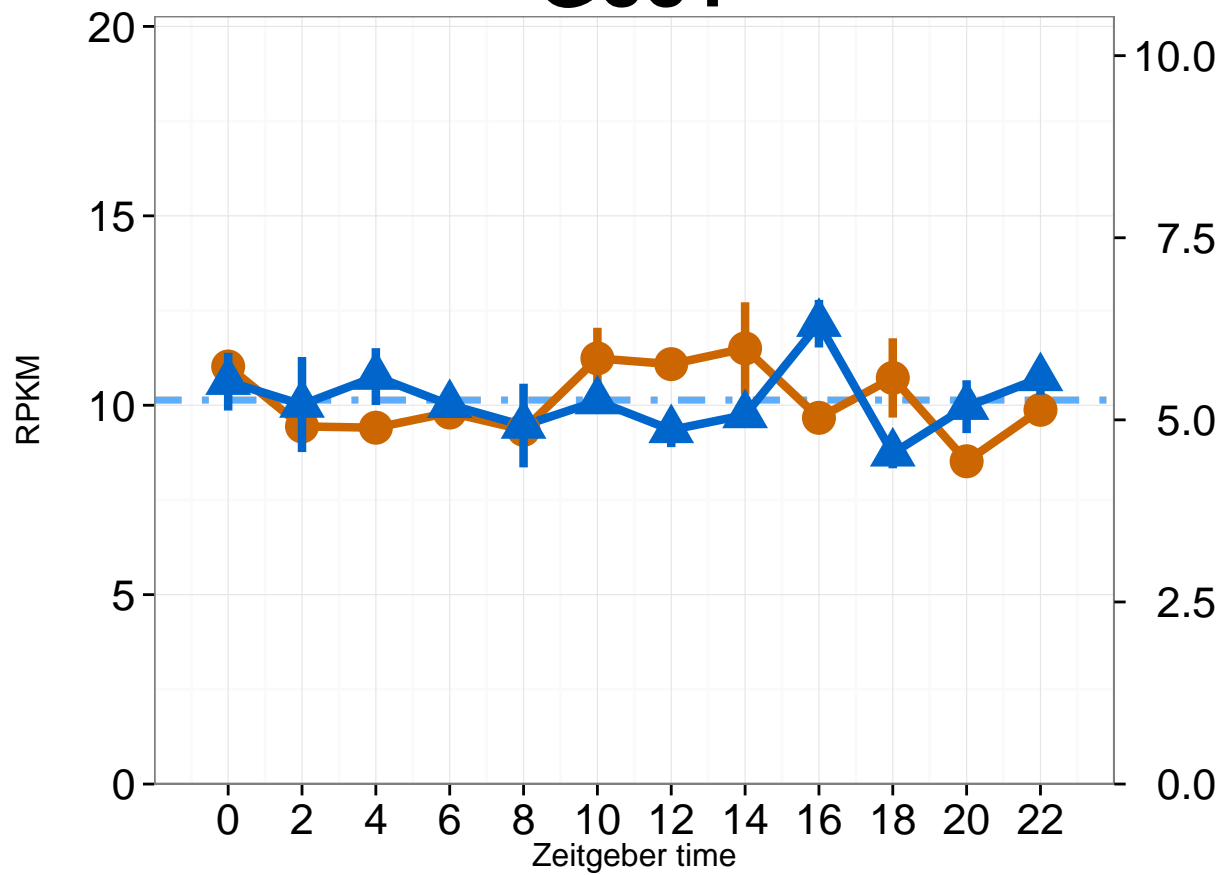

# Gcc1

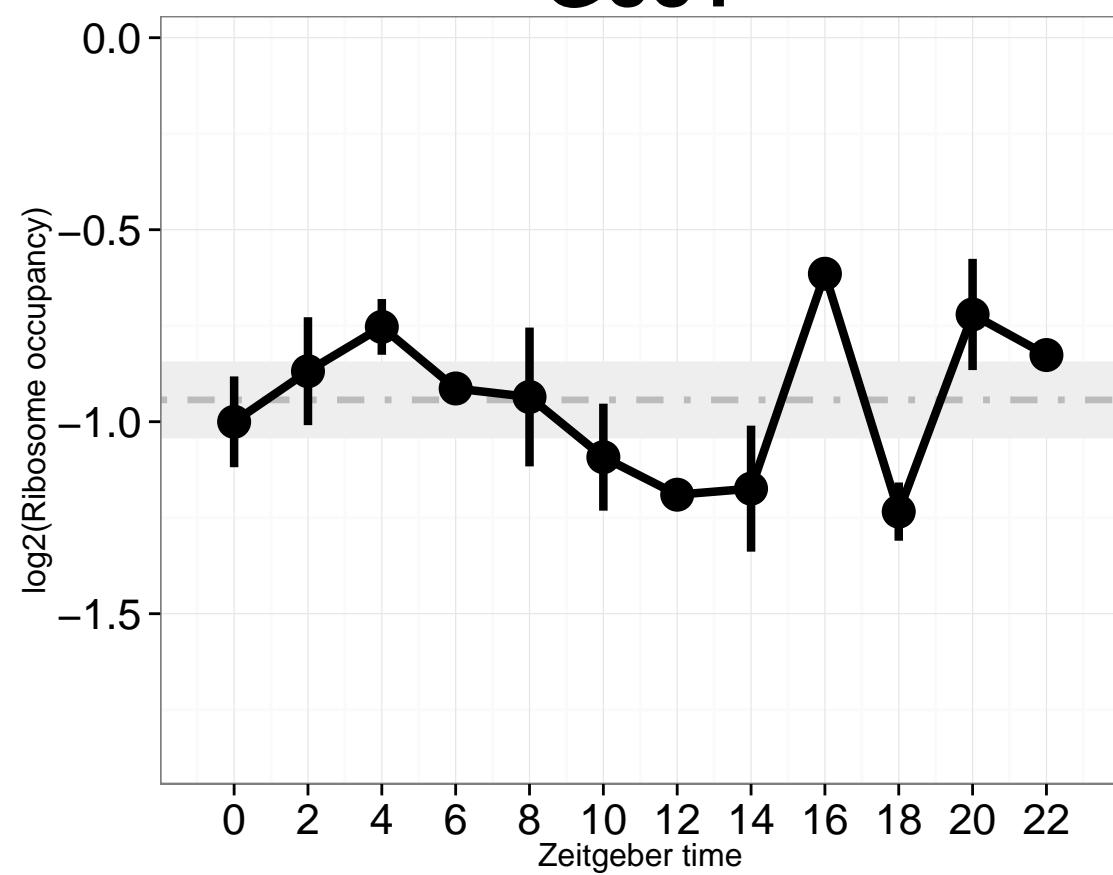

Supplement: Supplementary file 5468 [file 1]

## Dars

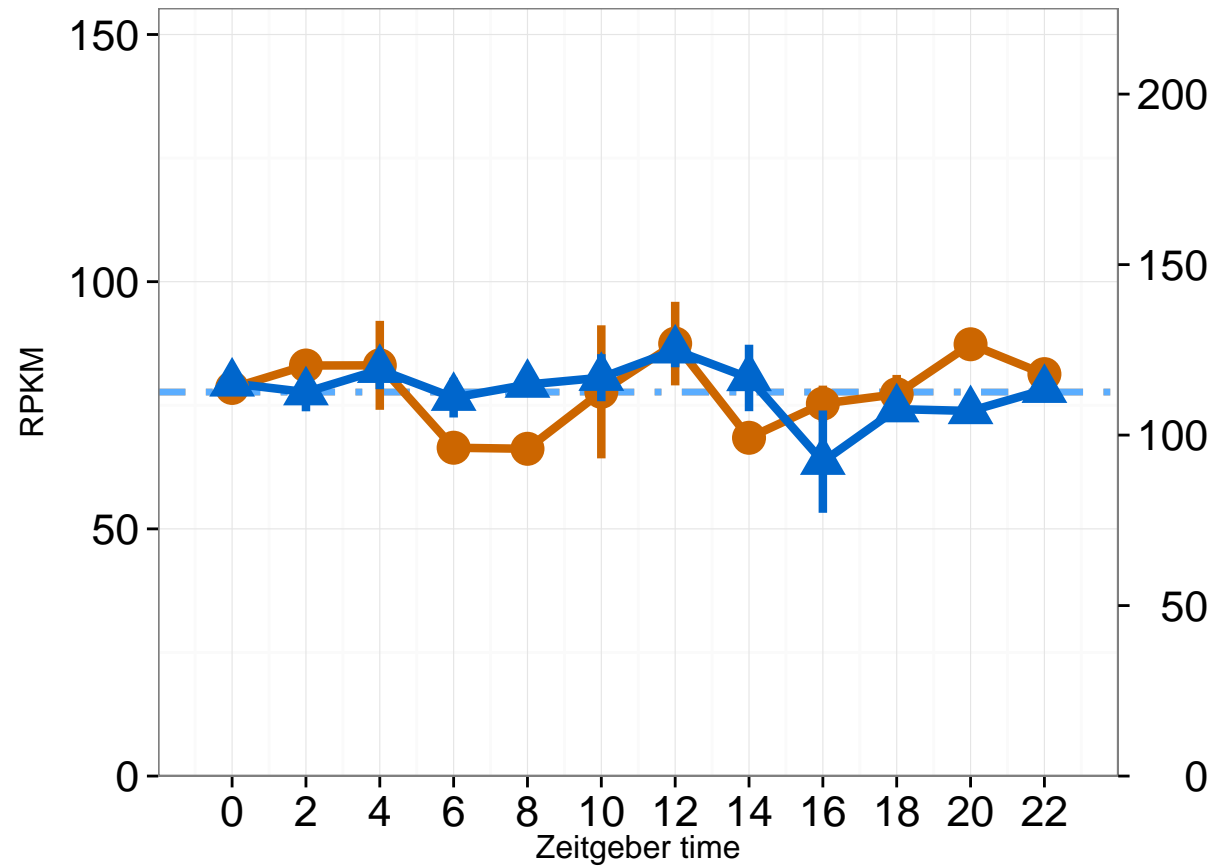

## Dars

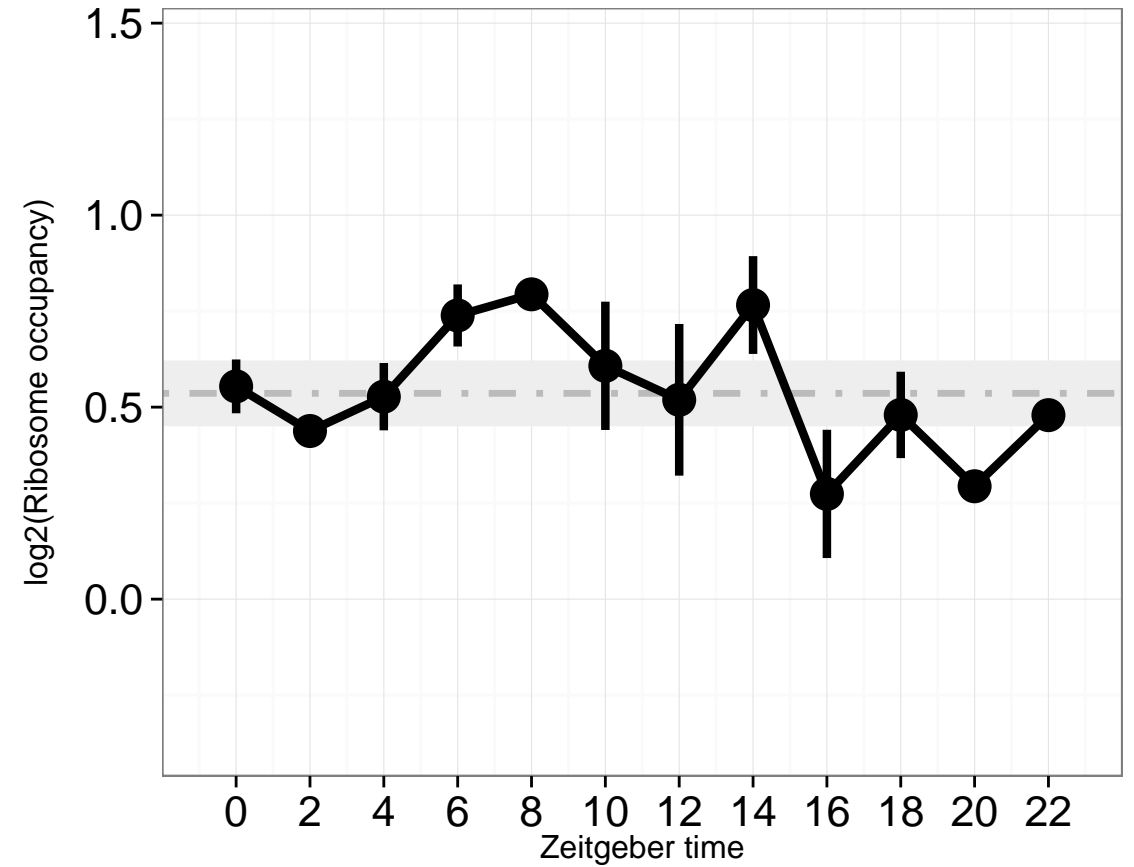

Supplement: Supplementary file 5469 [file 1]

# Btbd10

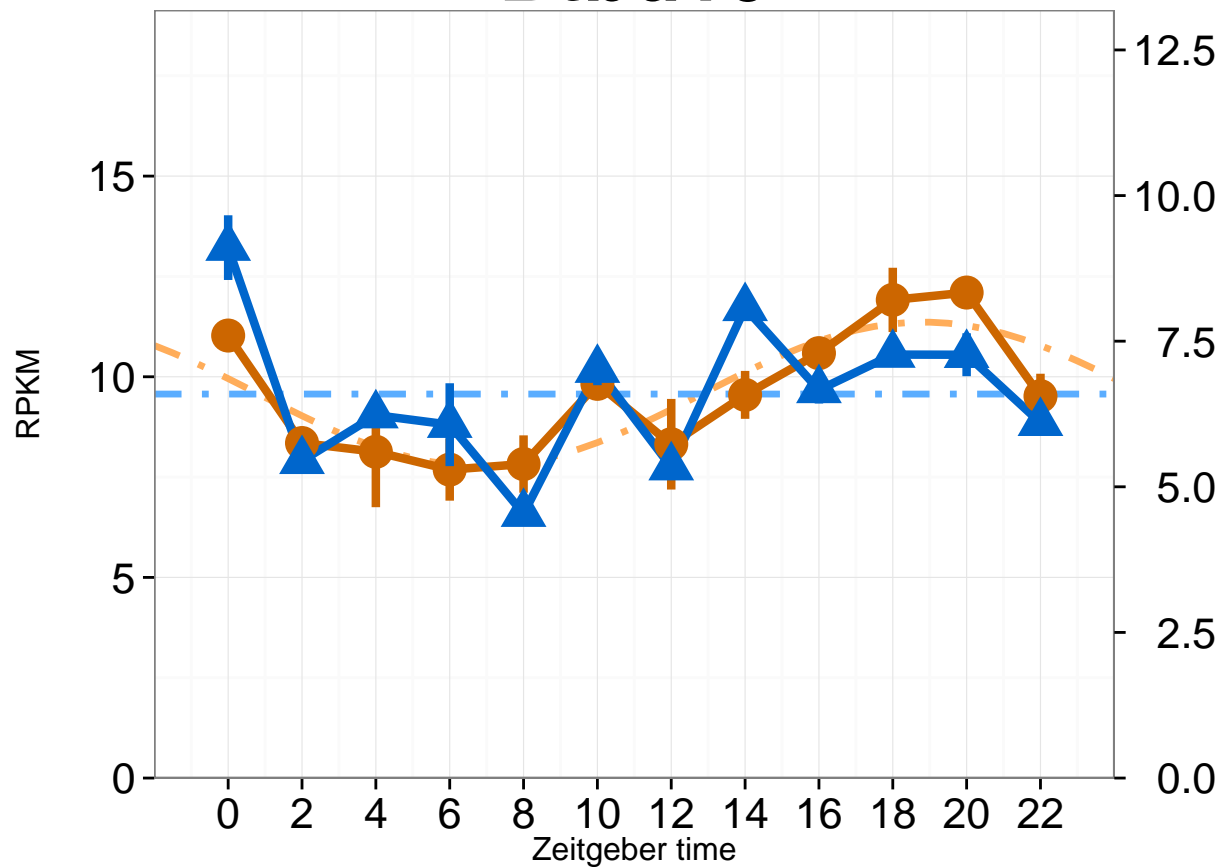

# Btbd10

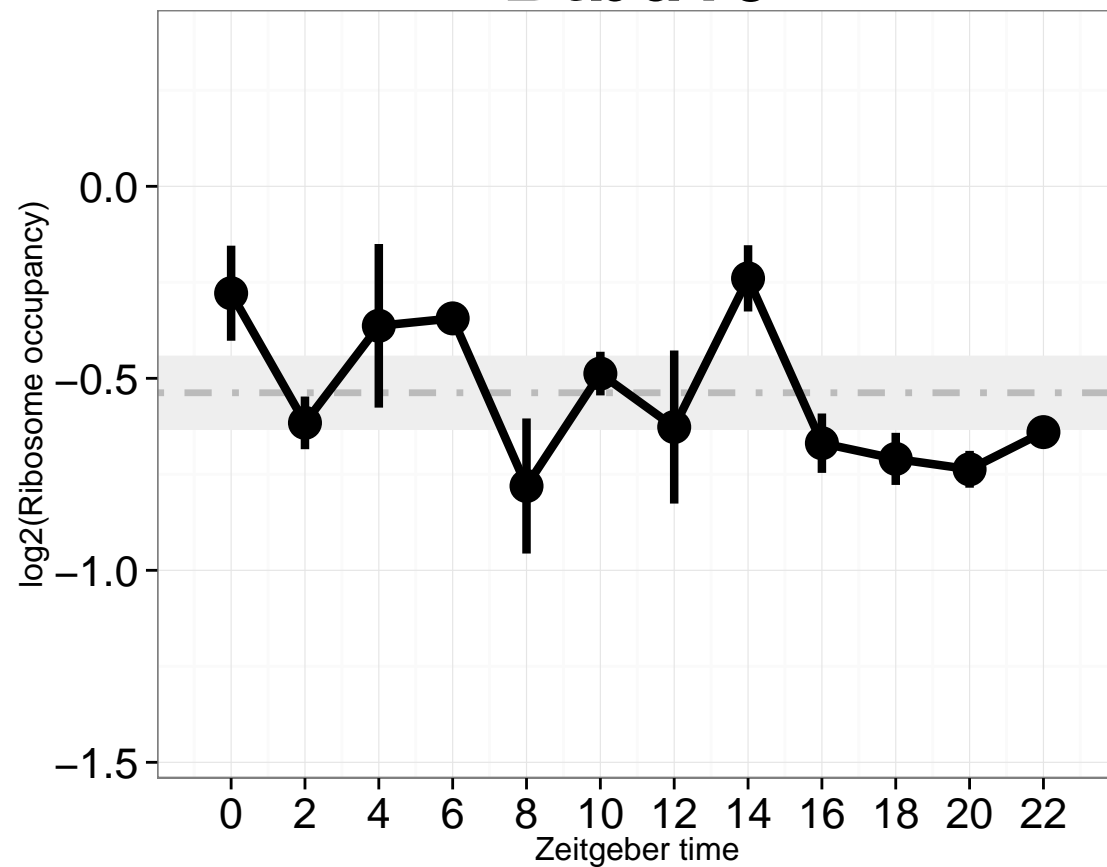

Supplement: Supplementary file 5470 [file 1]

## Bcl2

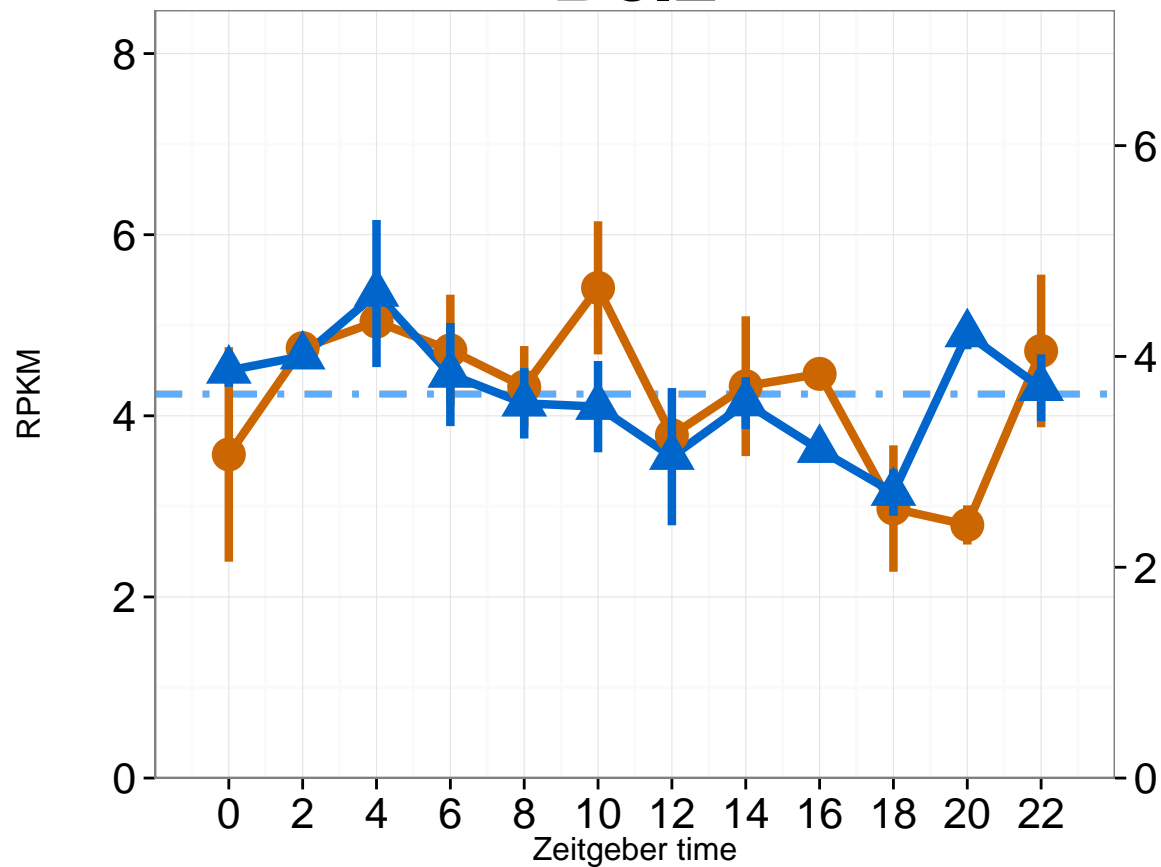

## Bcl2

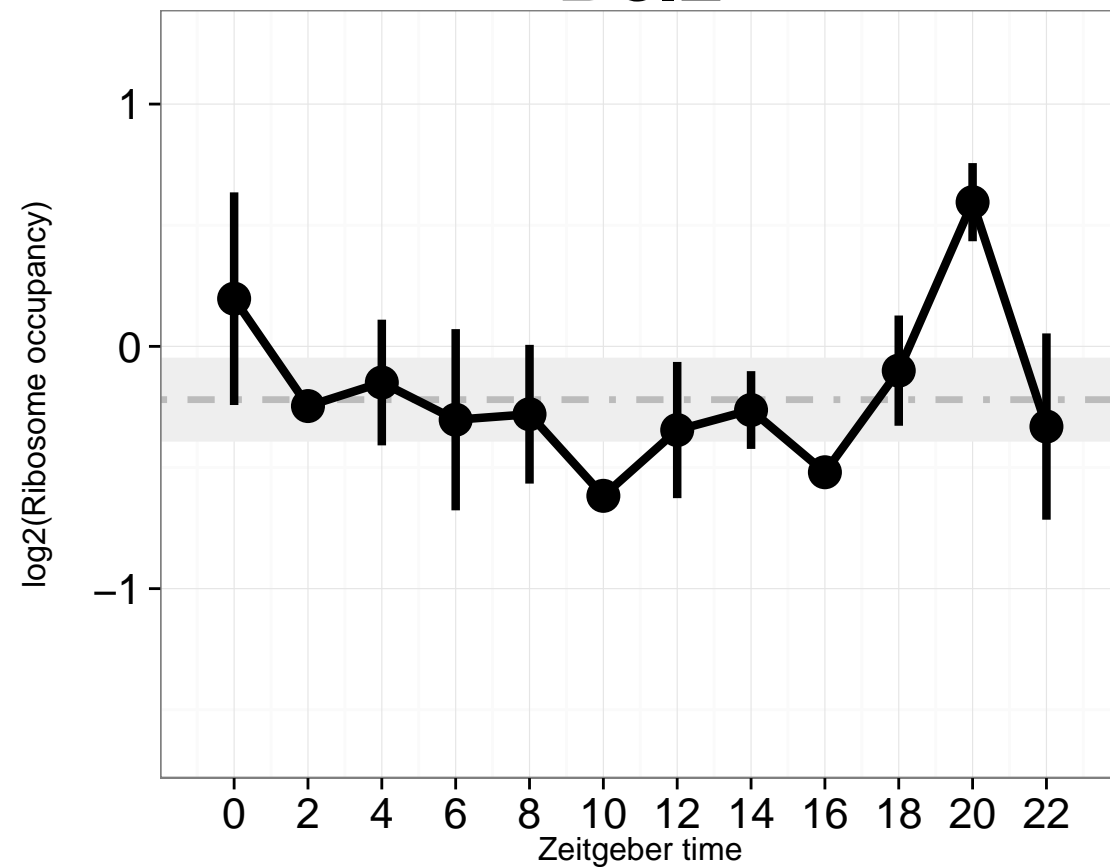

Supplement: Supplementary file 5471 [file 1]

# Chrna7

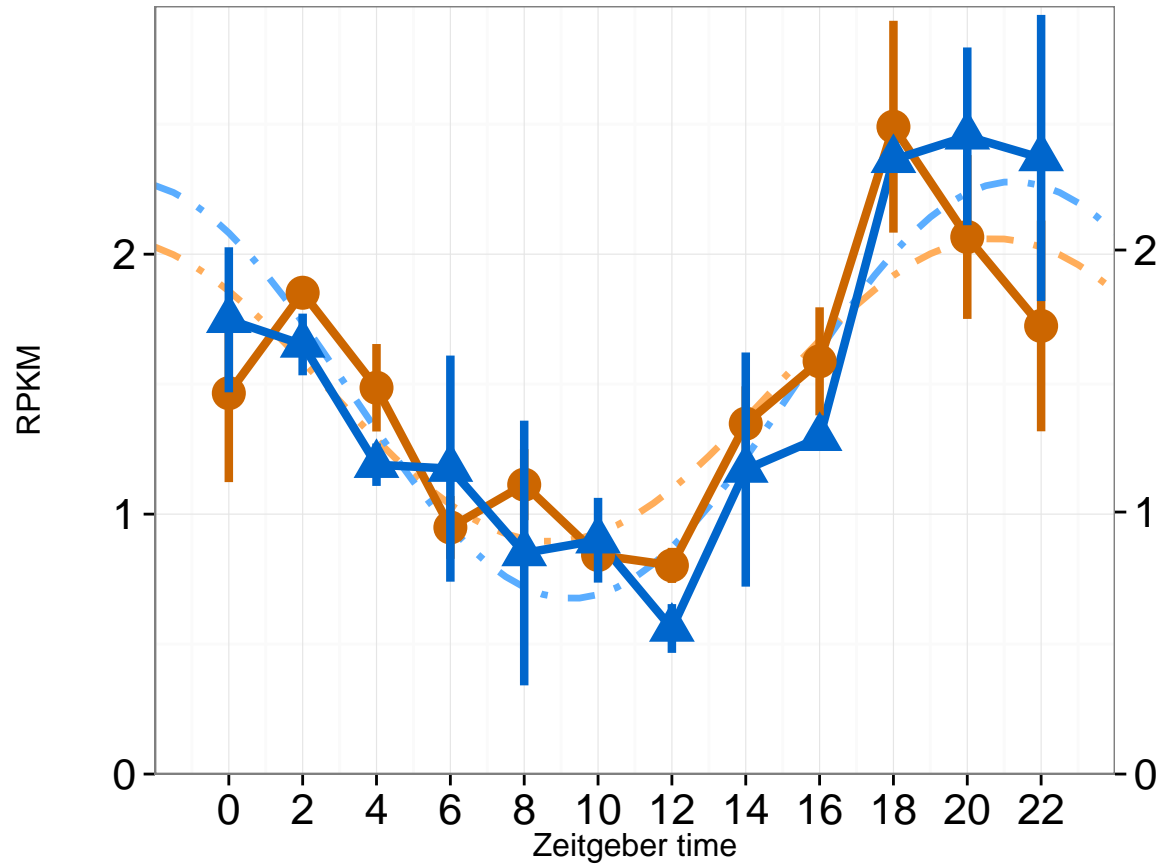

# Chrna7

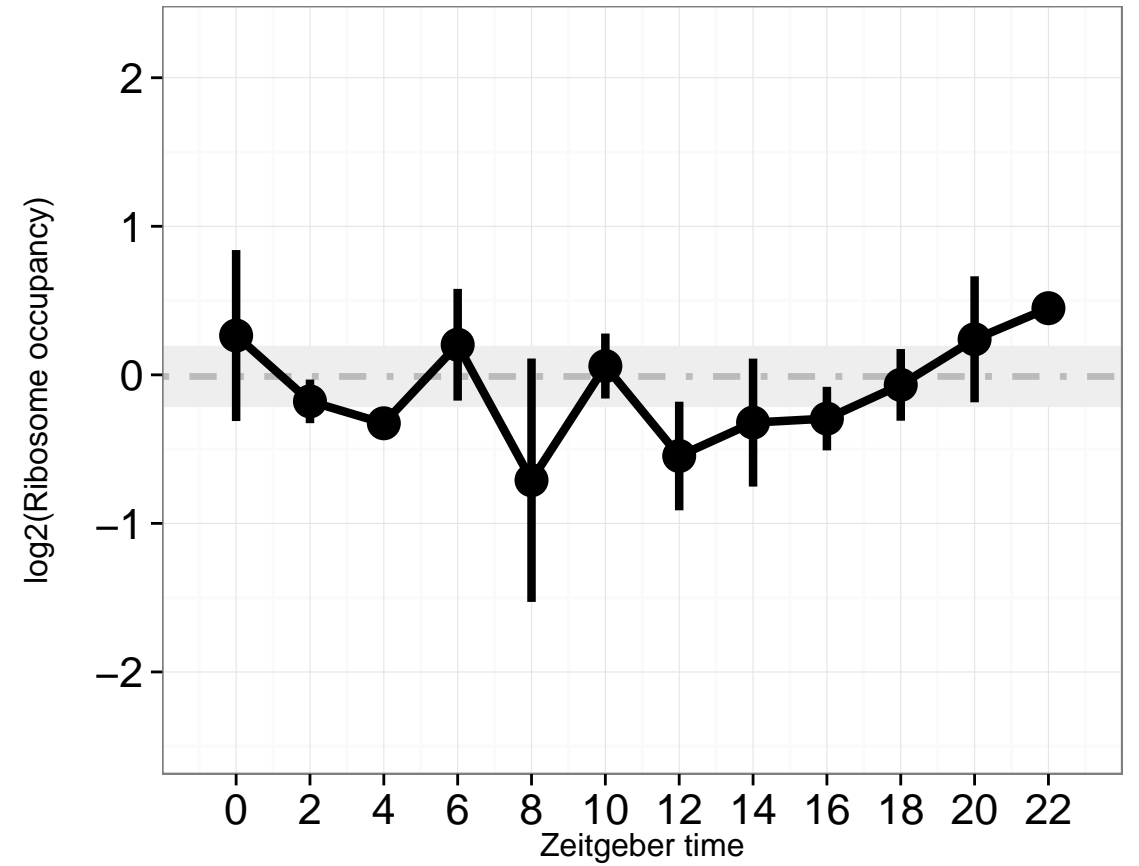

Supplement: Supplementary file 5472 [file 1]

## Mettl1

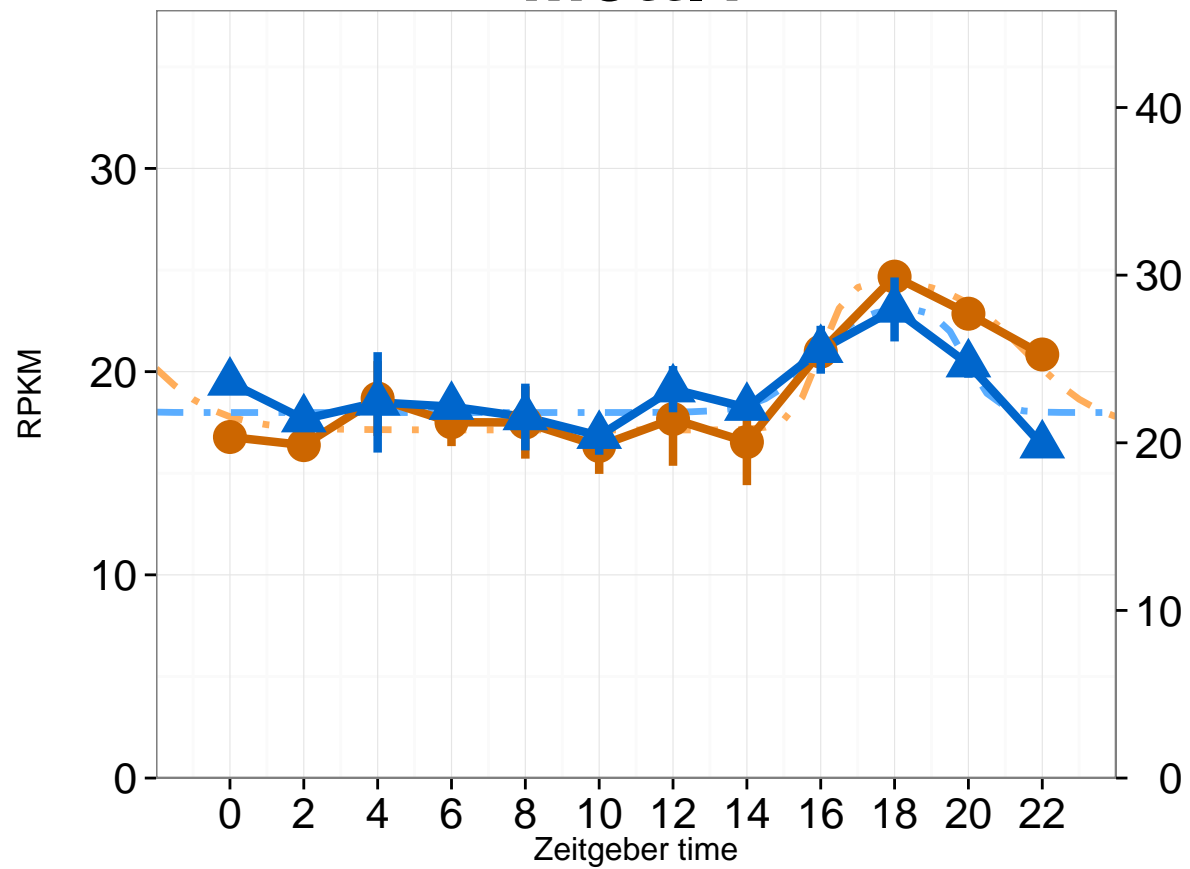

## Mettl1

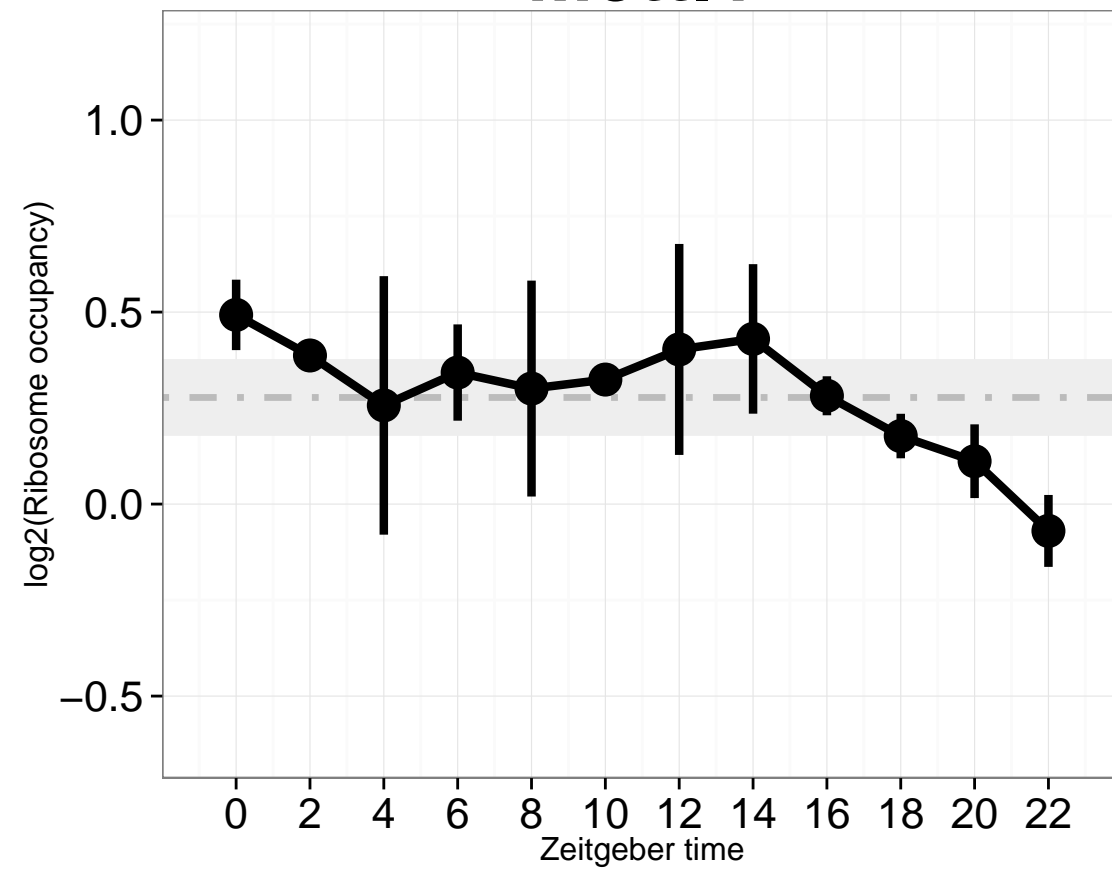

Supplement: Supplementary file 5473 [file 1]

## Raver2

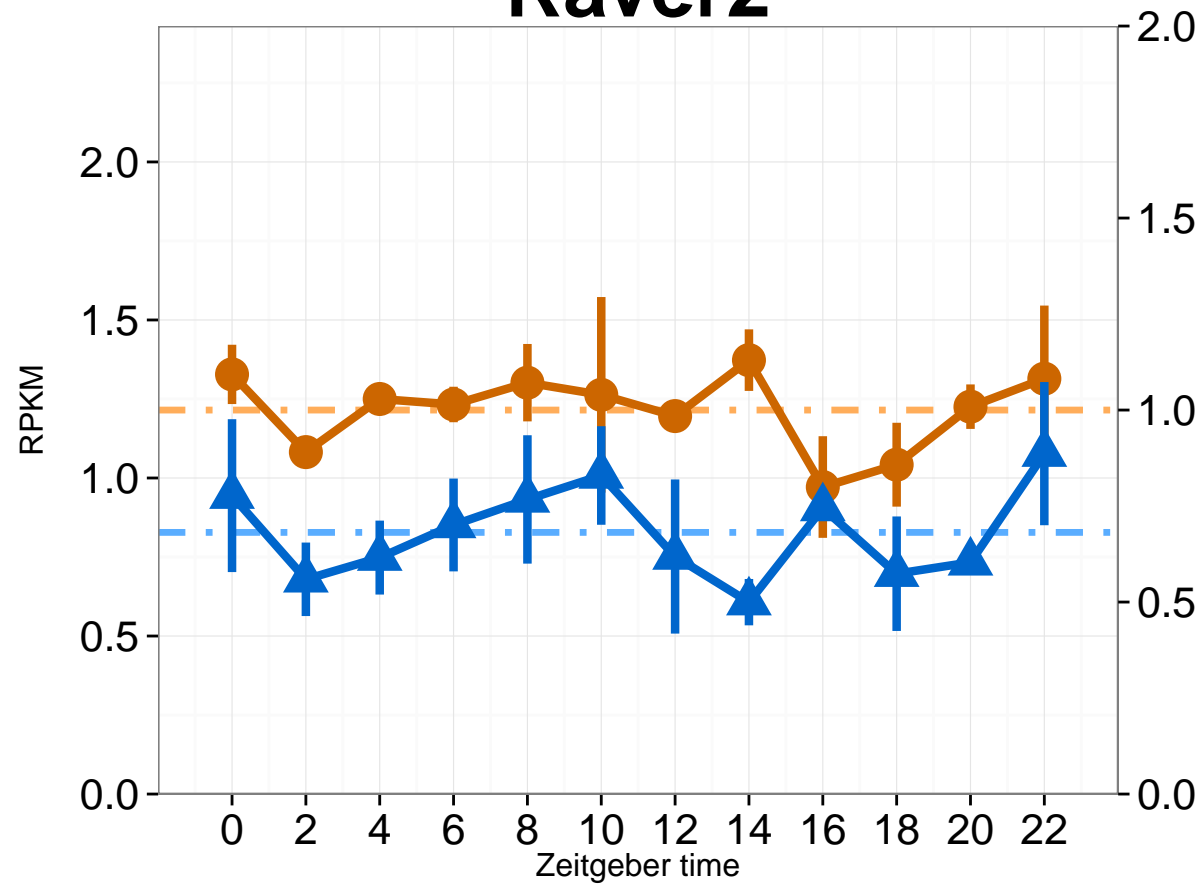

## Raver2

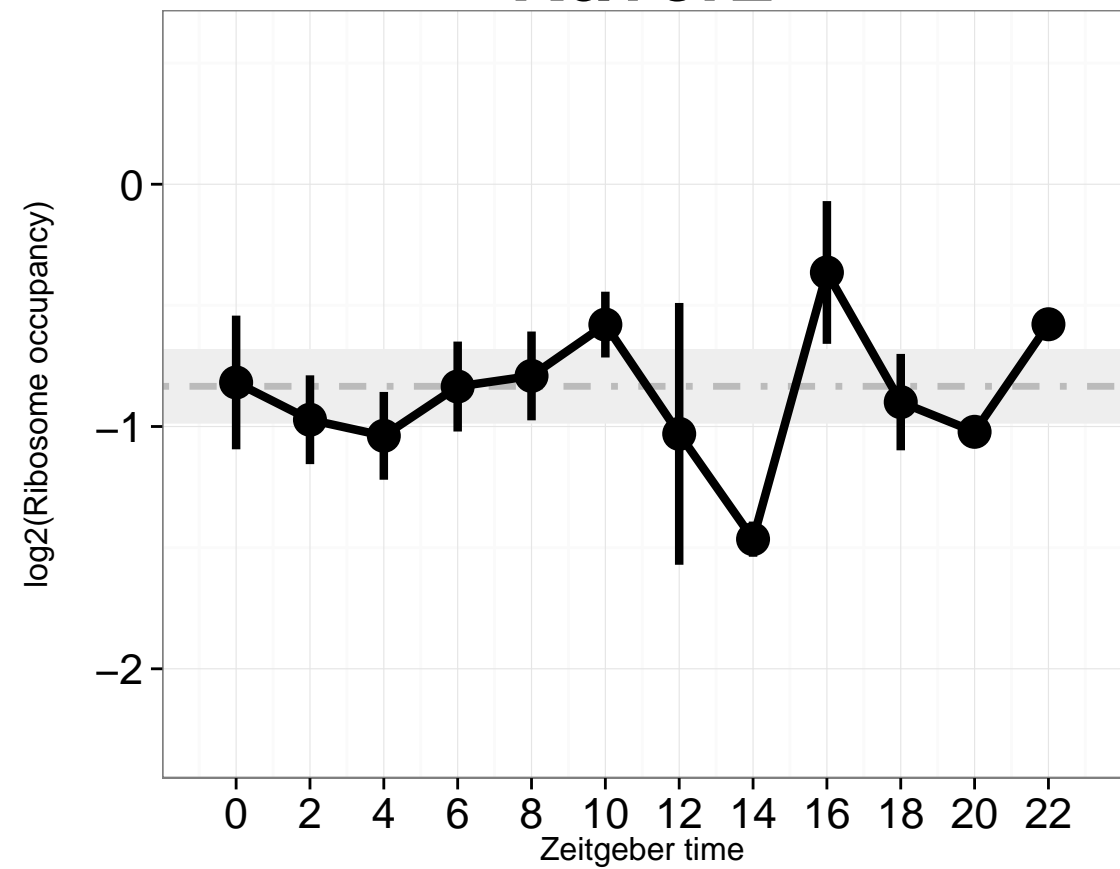

Supplement: Supplementary file 5474 [file 1]

## Frs2

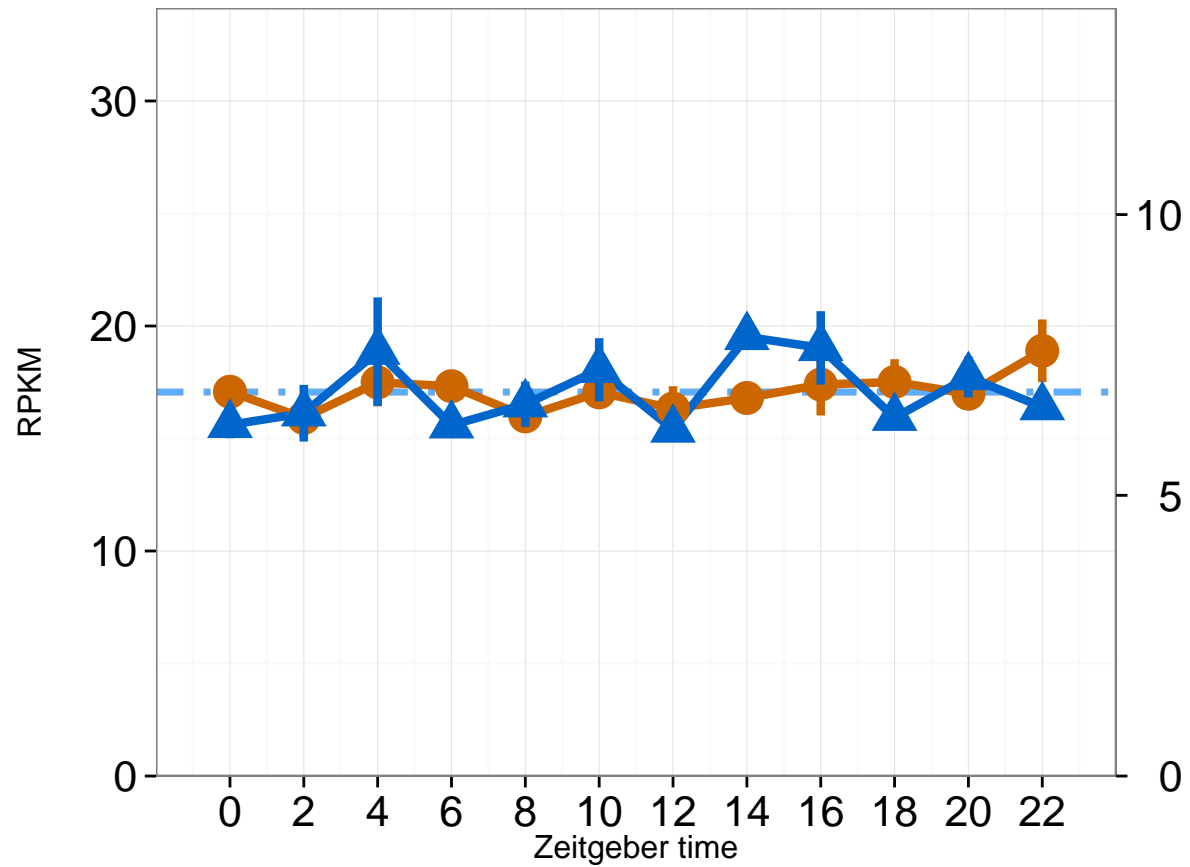

## Frs2

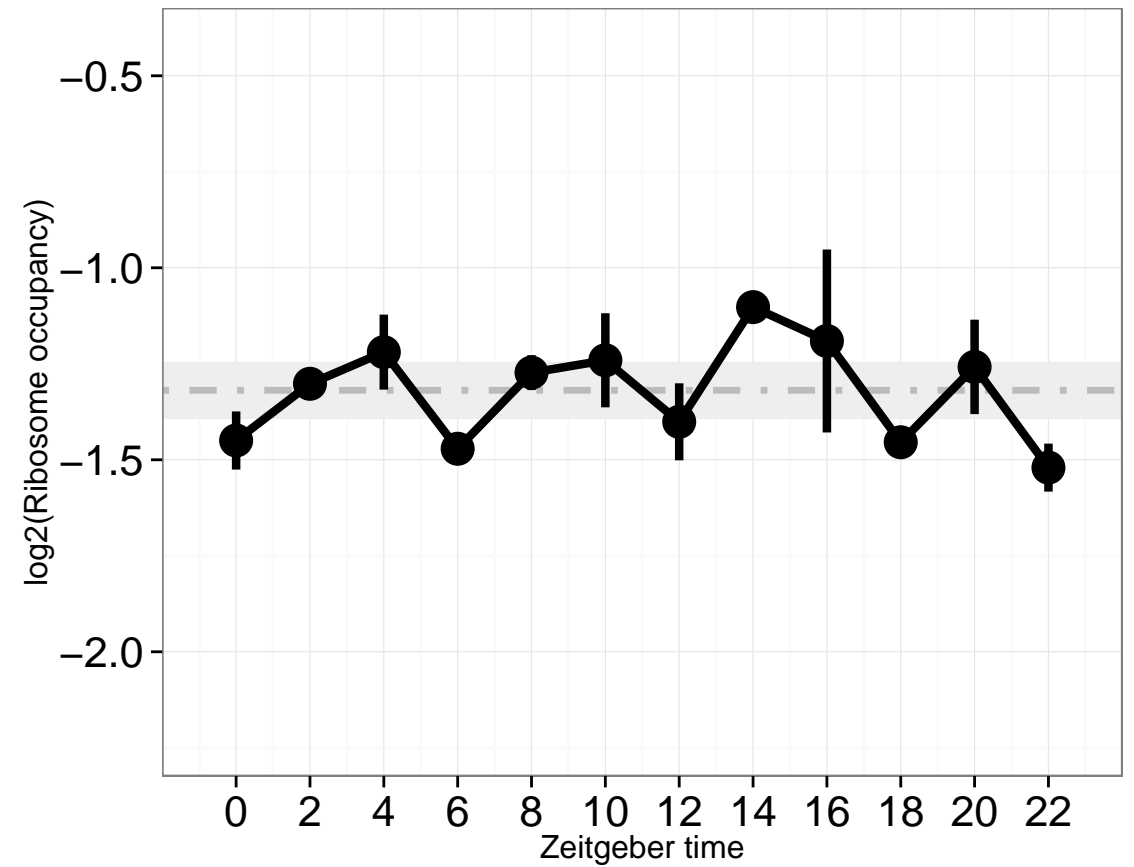

Supplement: Supplementary file 5475 [file 1]

## Casp8

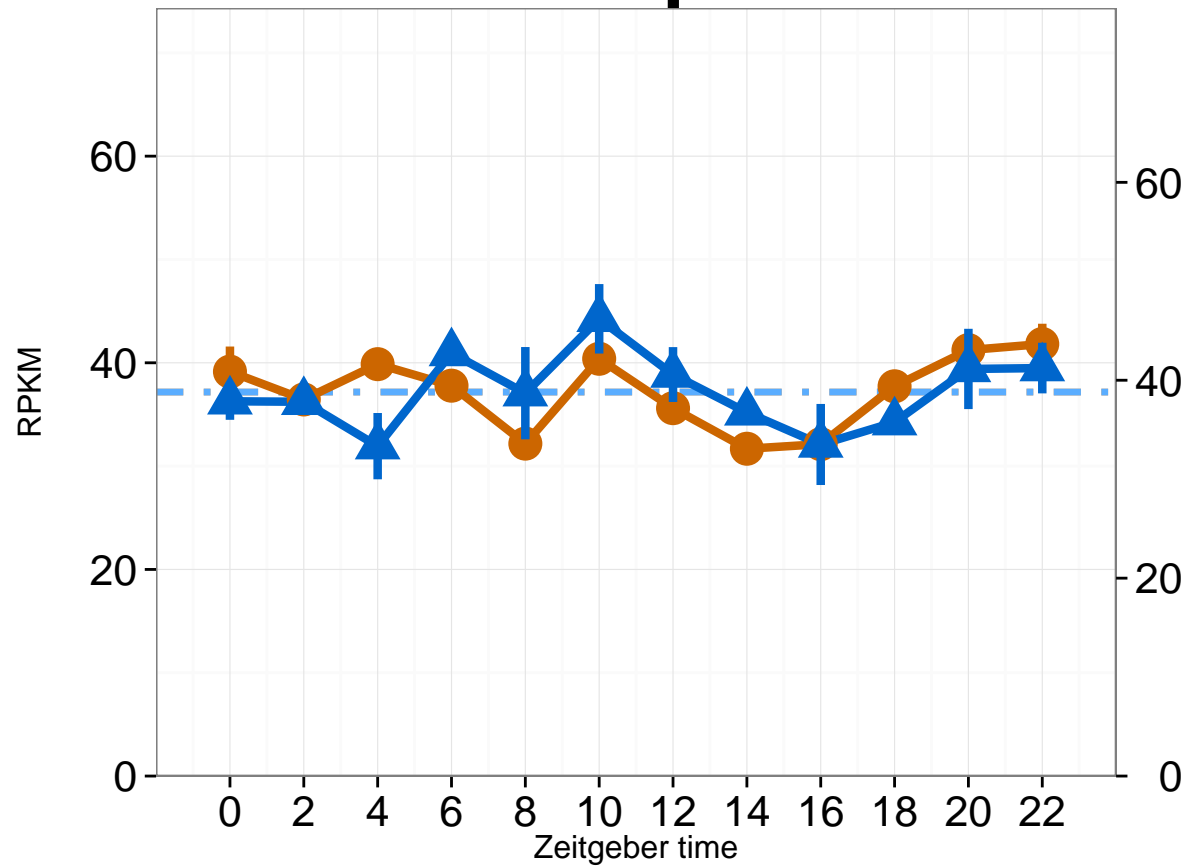

## Casp8

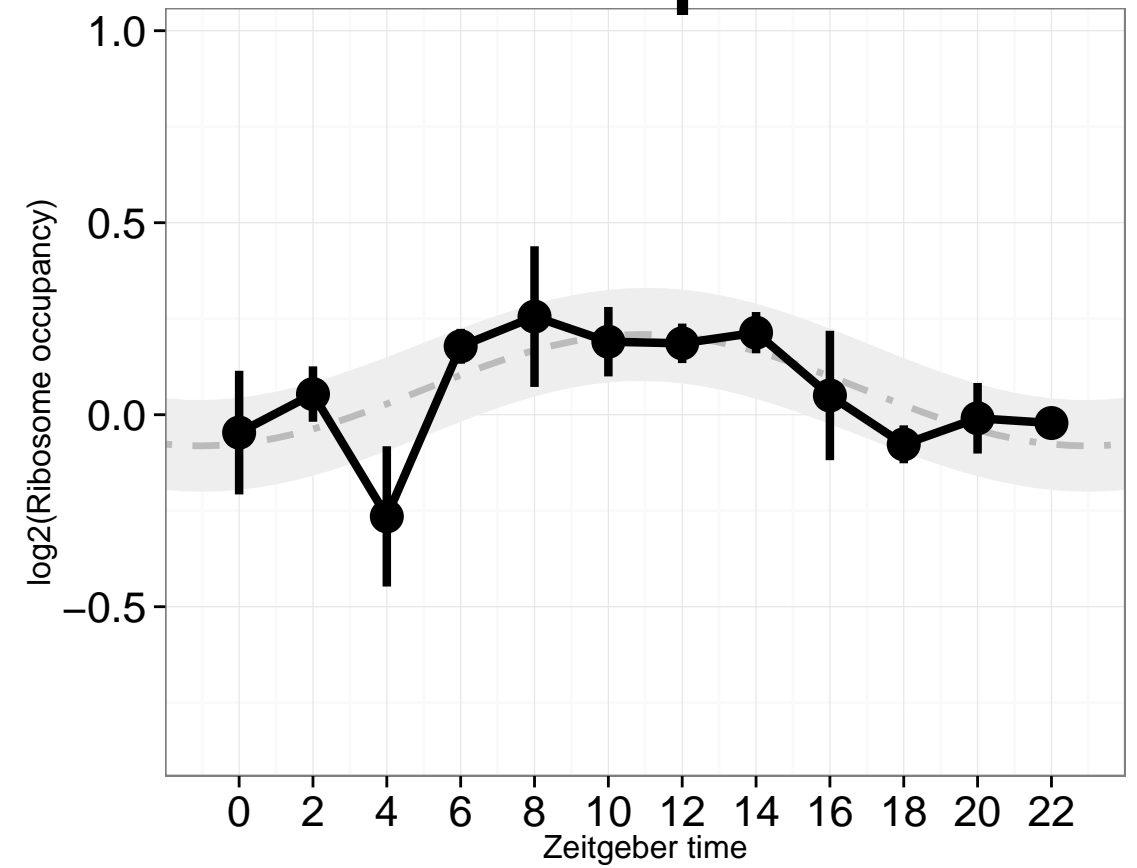

Supplement: Supplementary file 5476 [file 1]

# Tpp1

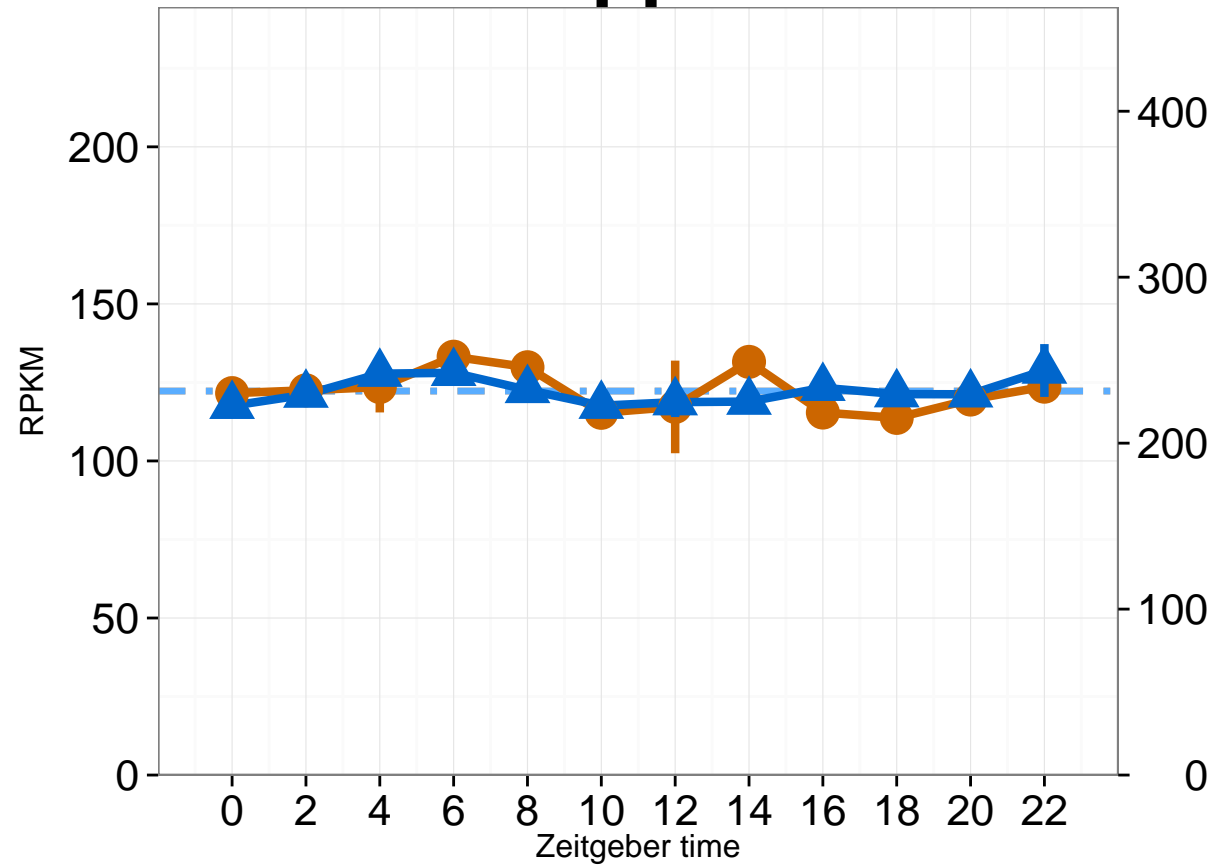

# Tpp1

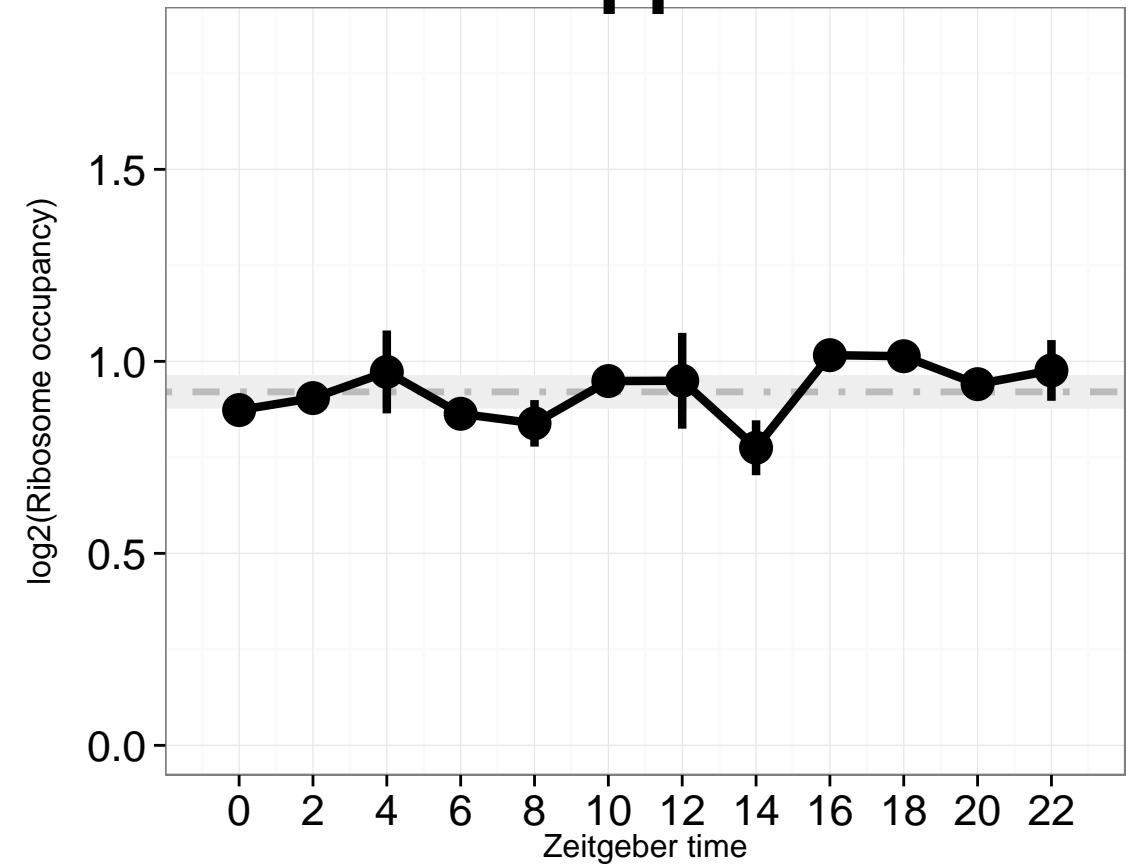

Supplement: Supplementary file 5477 [file 1]

## Mblac2

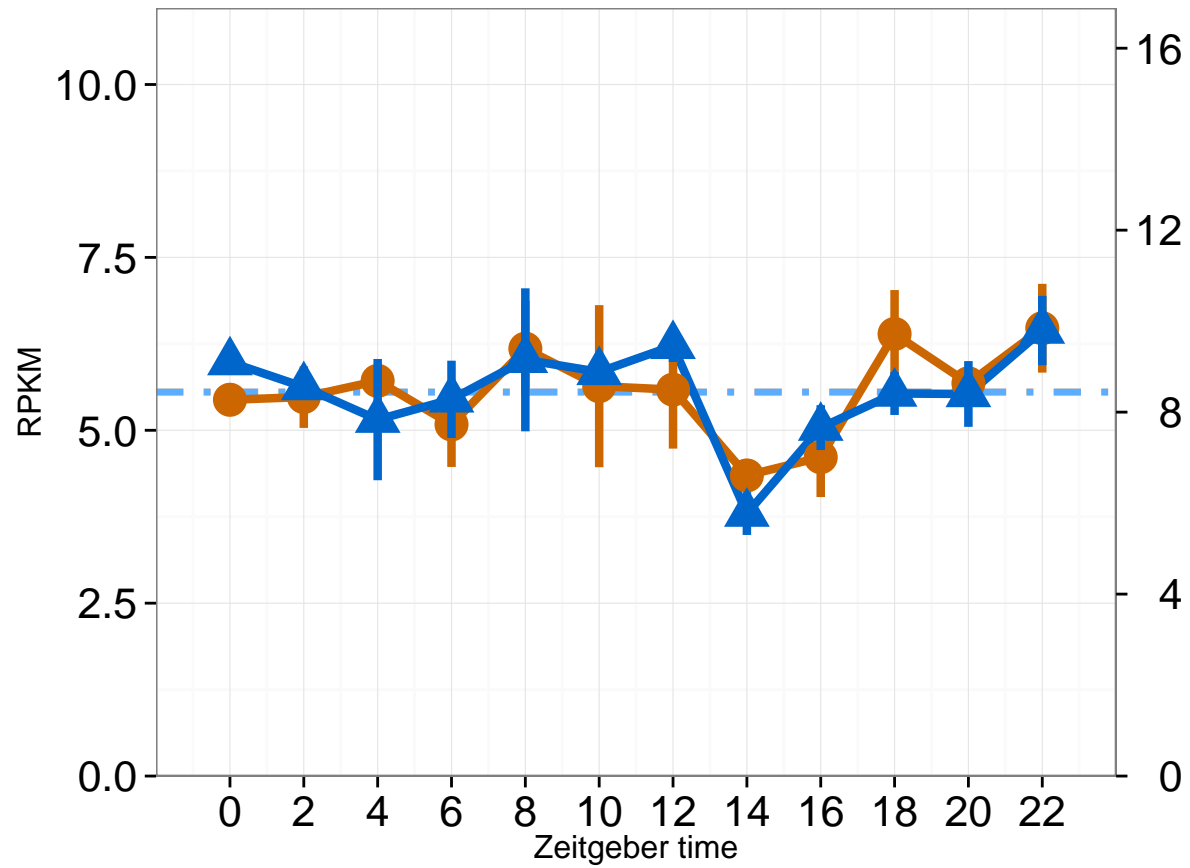

## Mblac2

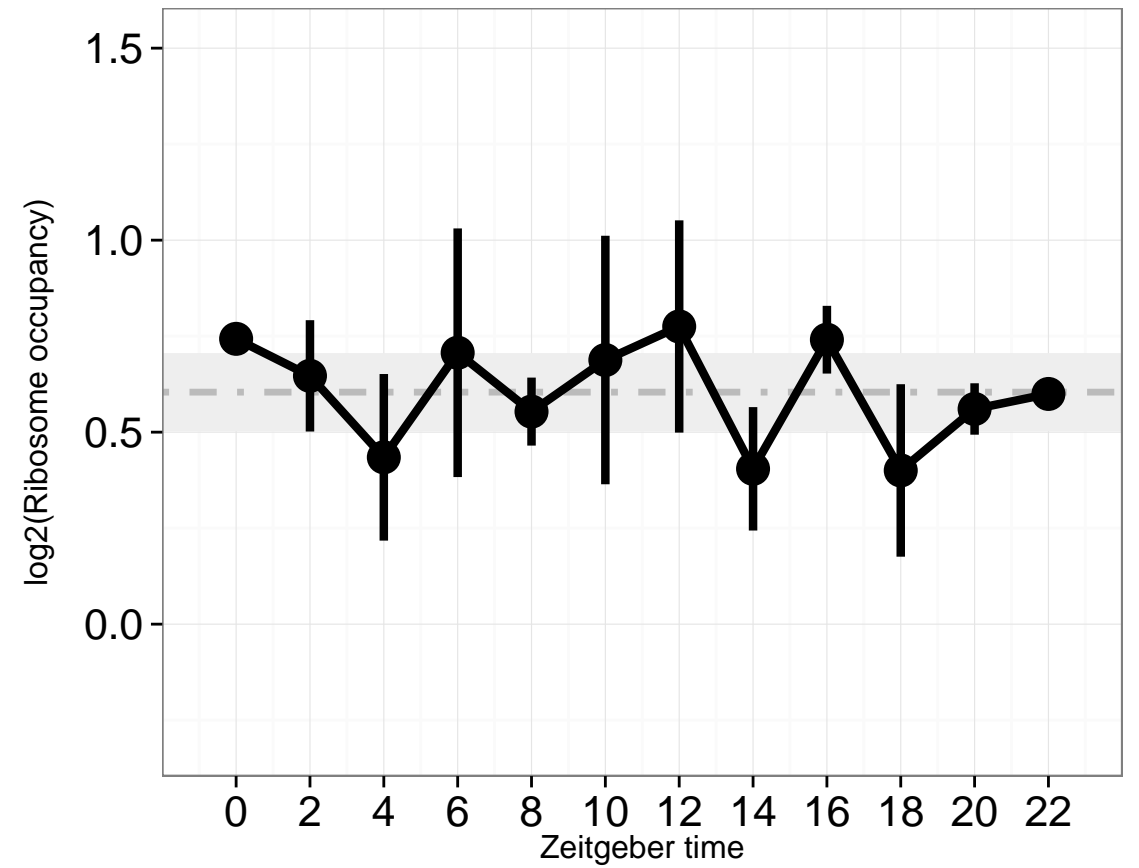

Supplement: Supplementary file 5478 [file 1]

# Cgrrf1

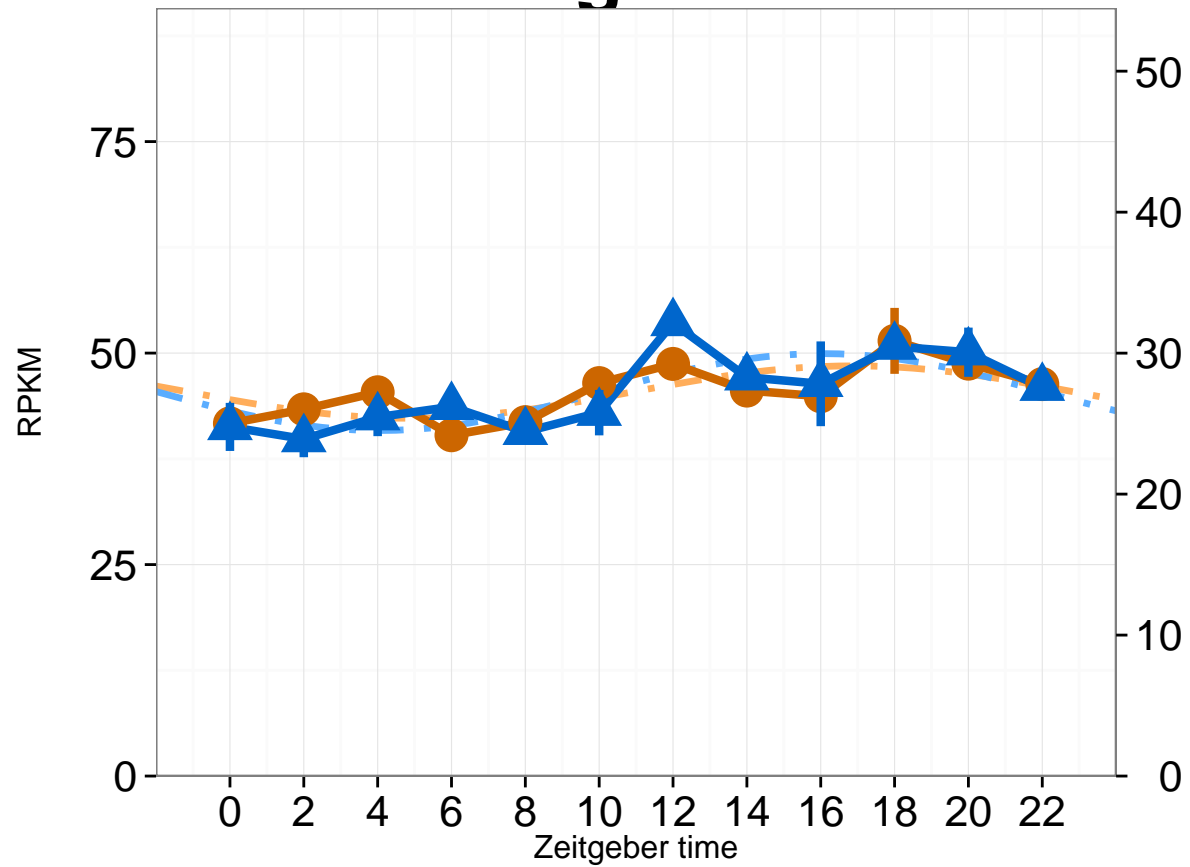

# Cgrrf1

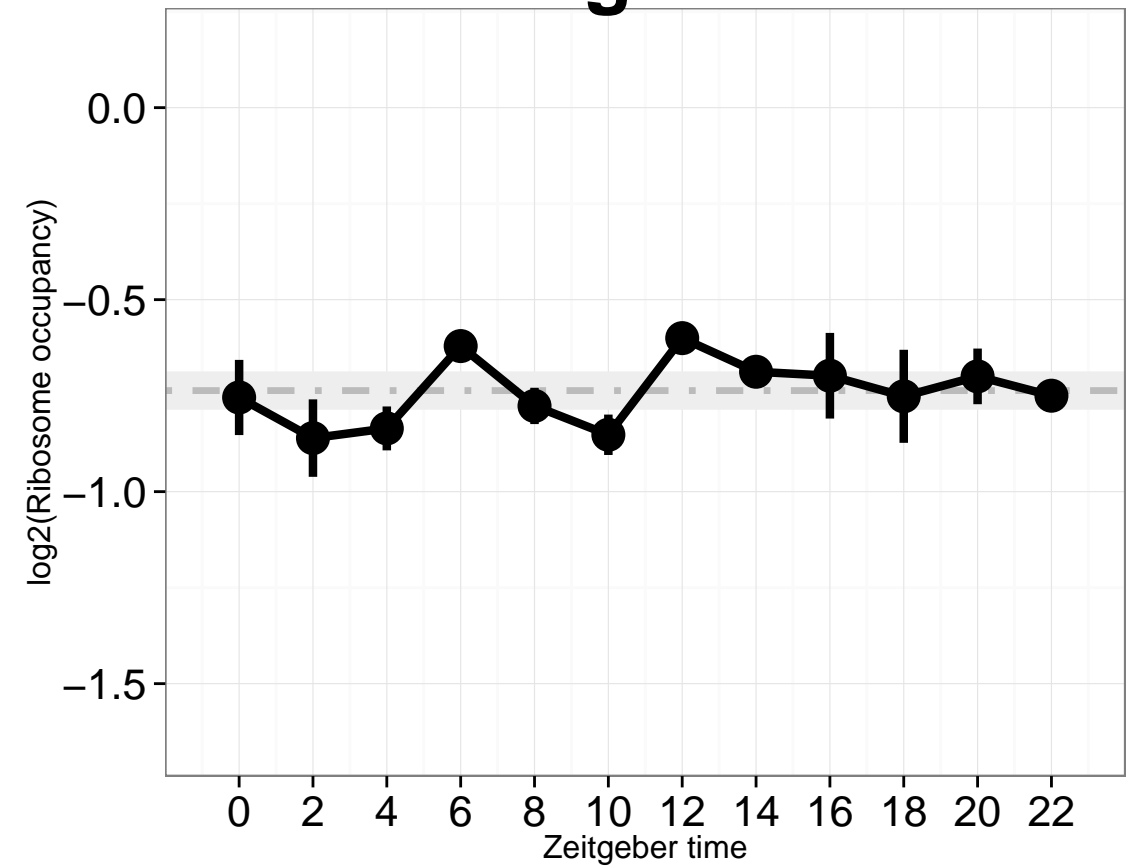

Supplement: Supplementary file 5479 [file 1]

**Col15a1**

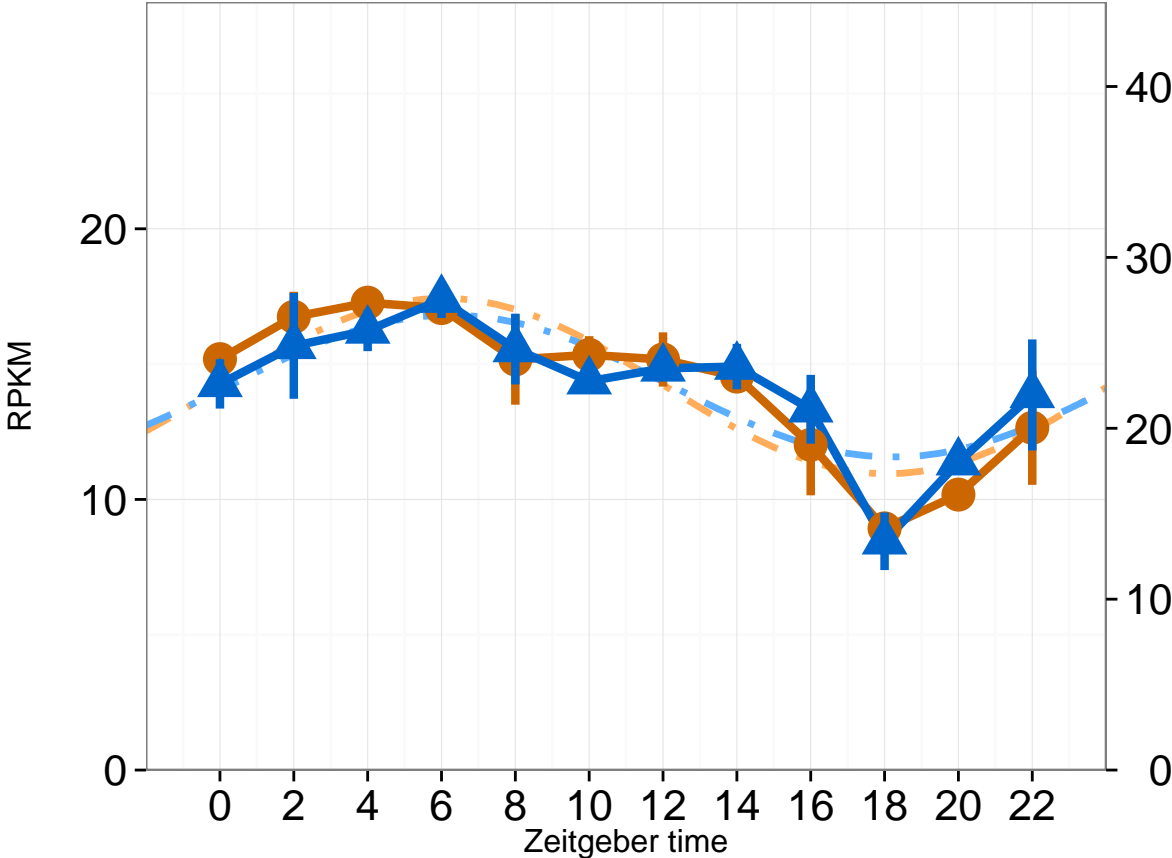

**Col15a1**

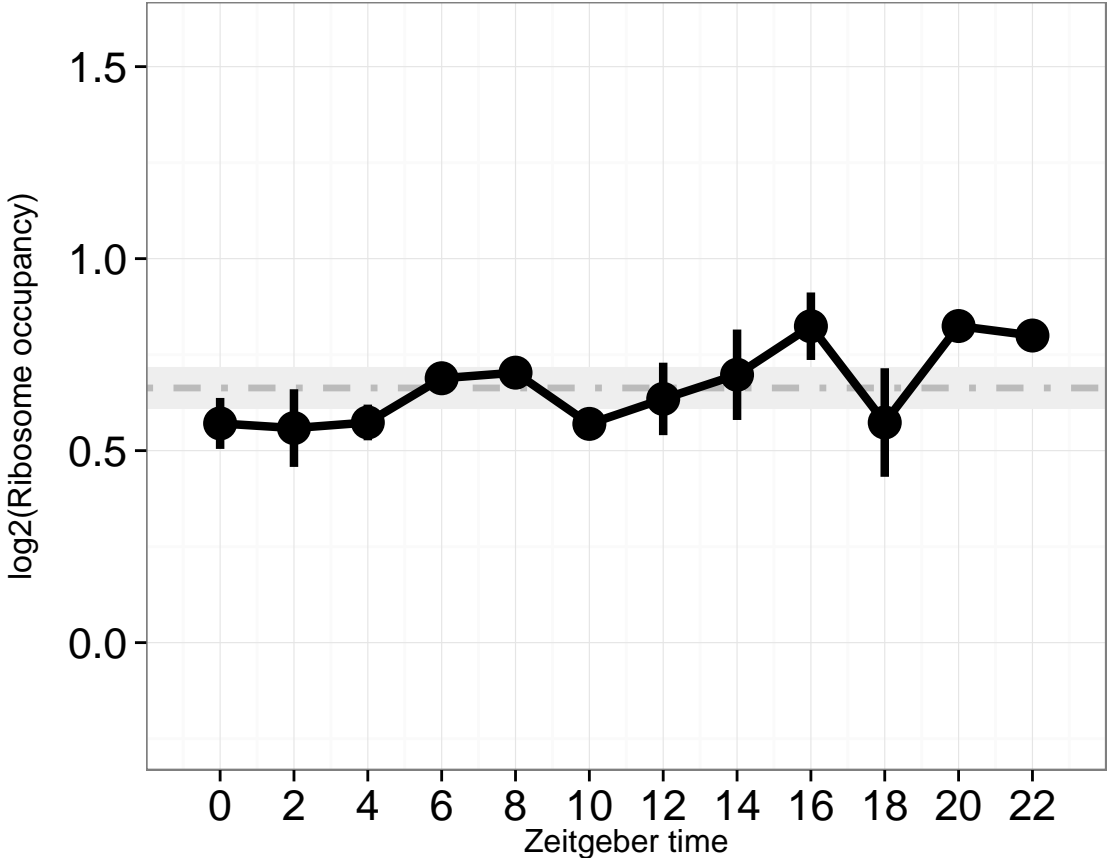

Supplement: Supplementary file 5480 [file 1]

# Pias2

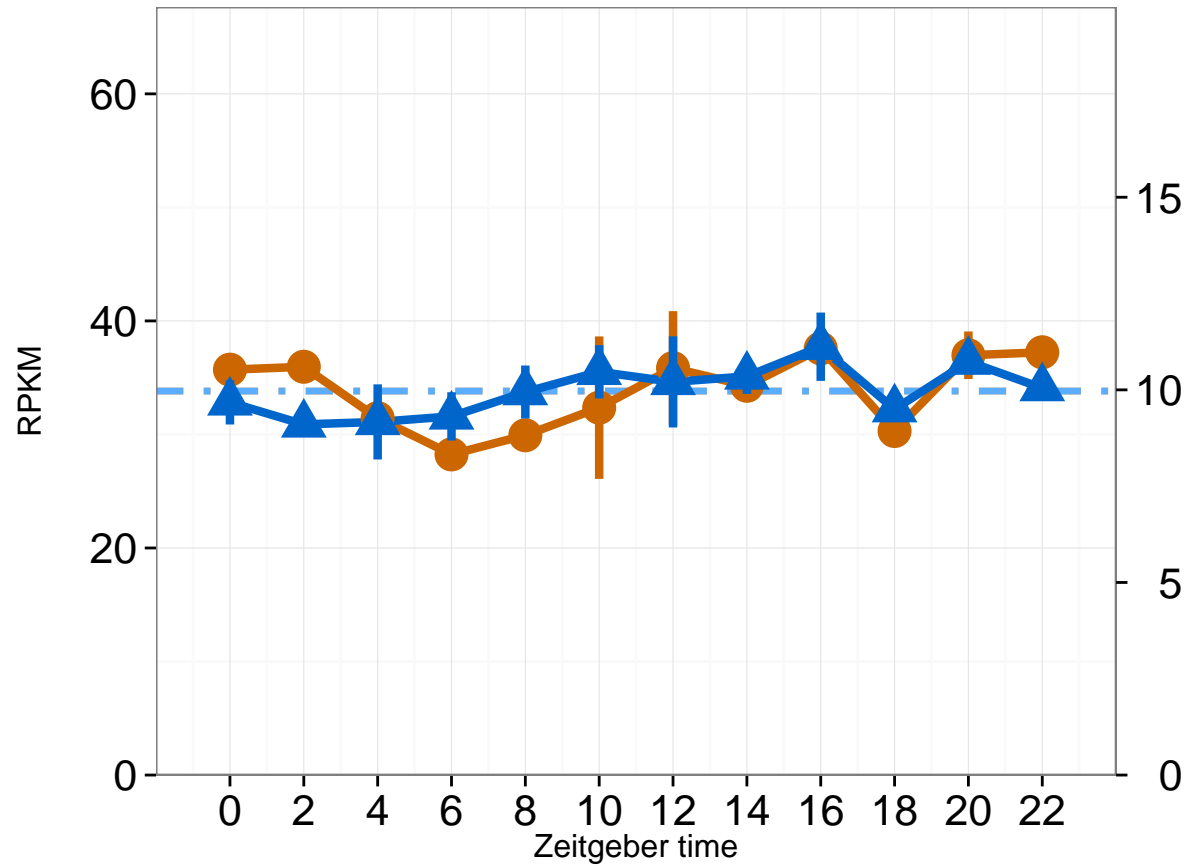

# Pias2

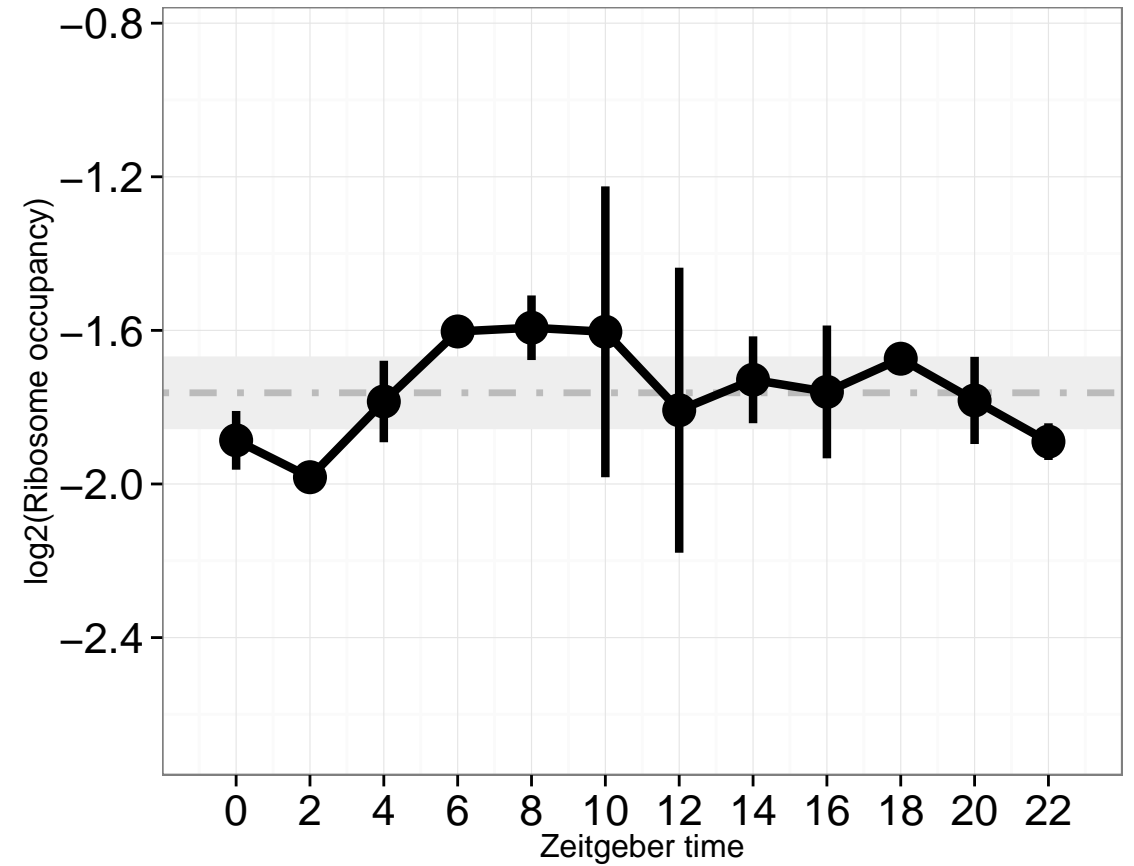

Supplement: Supplementary file 5481 [file 1]

# Dnase1l1

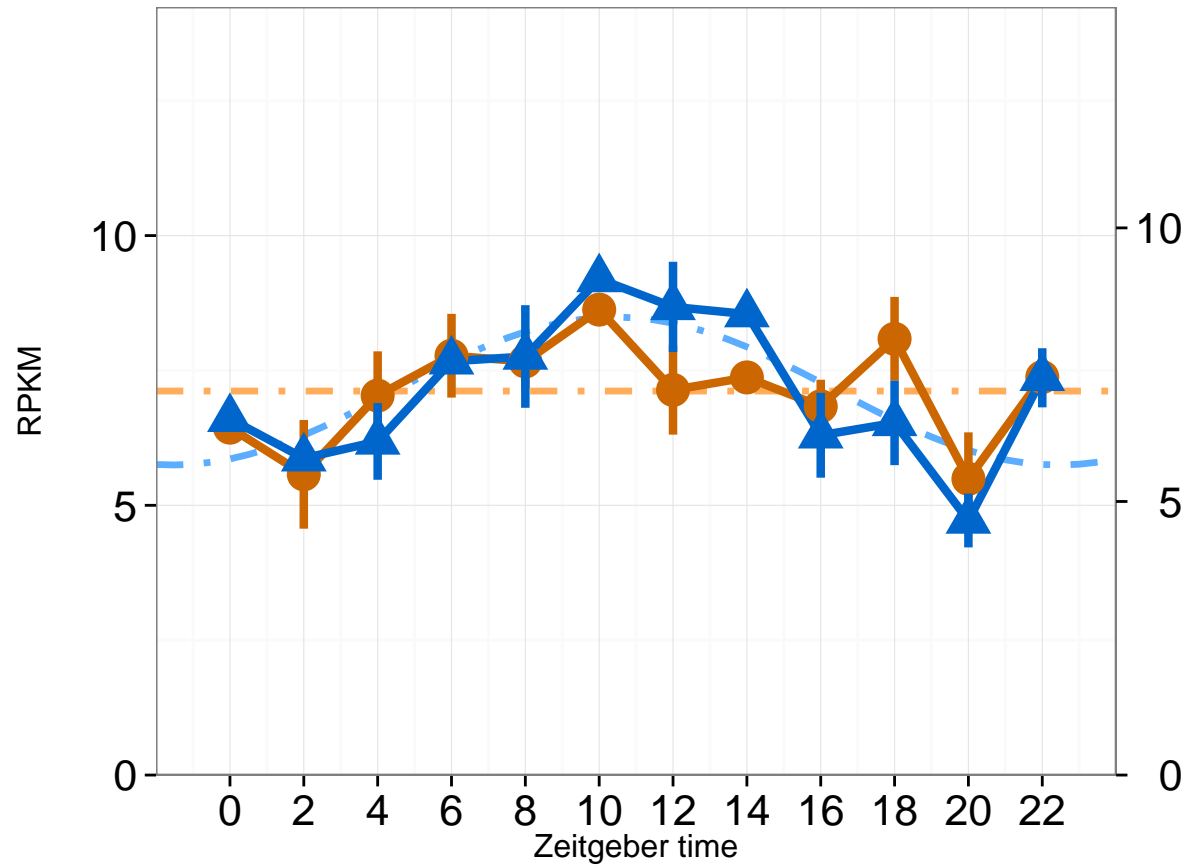

# Dnase1l1

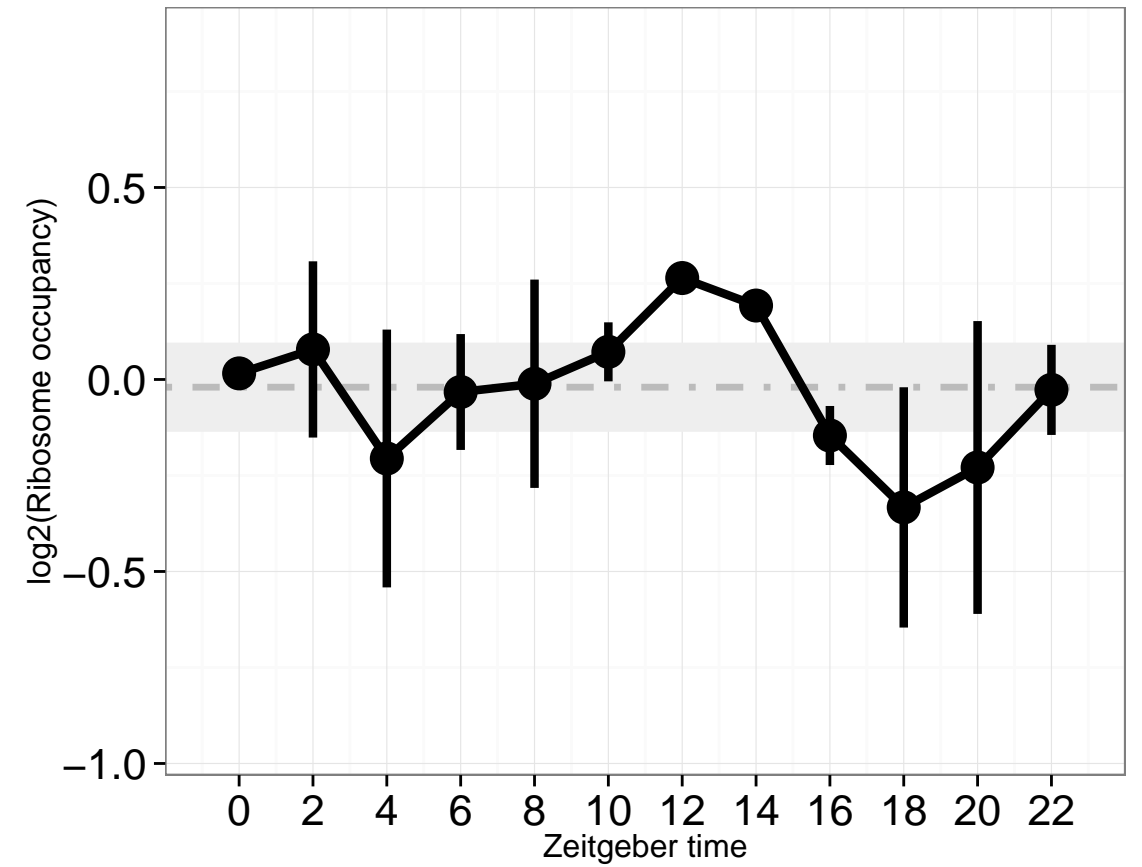

Supplement: Supplementary file 5482 [file 1]

# Zfp871

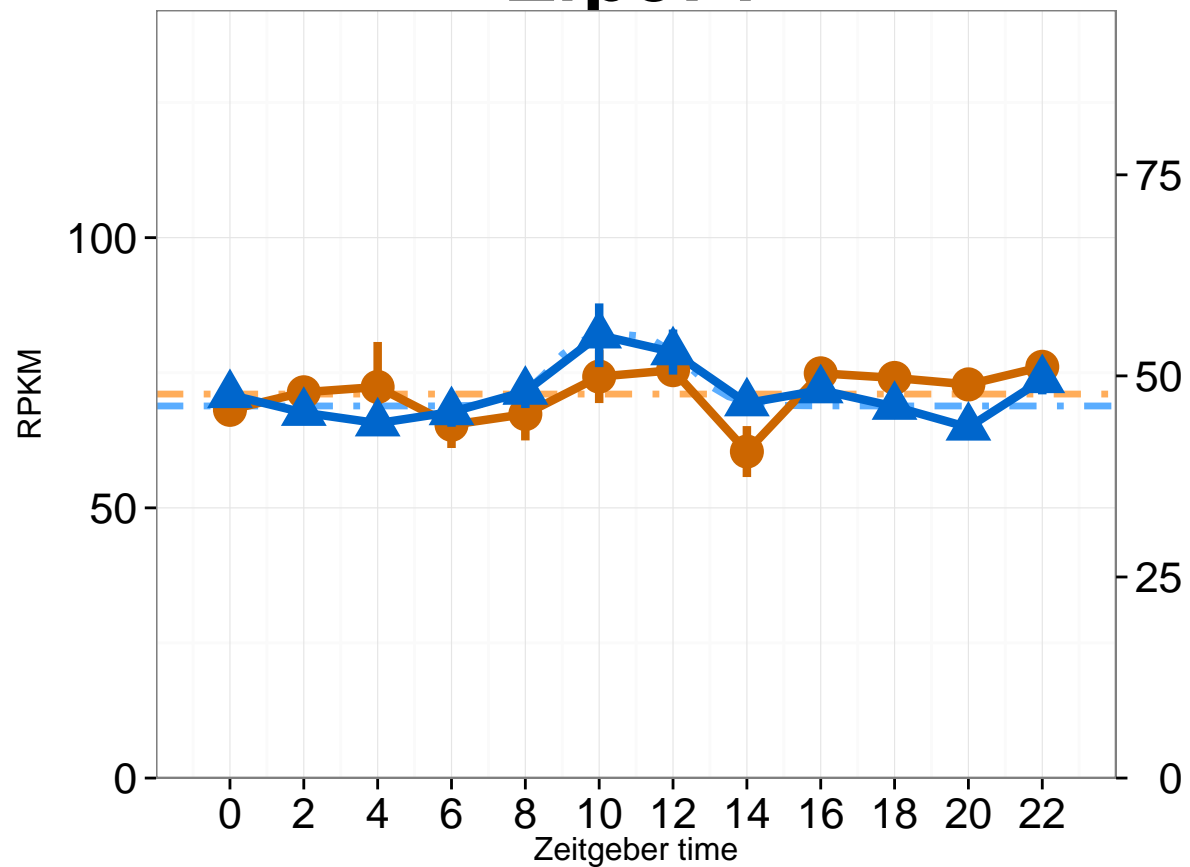

# Zfp871

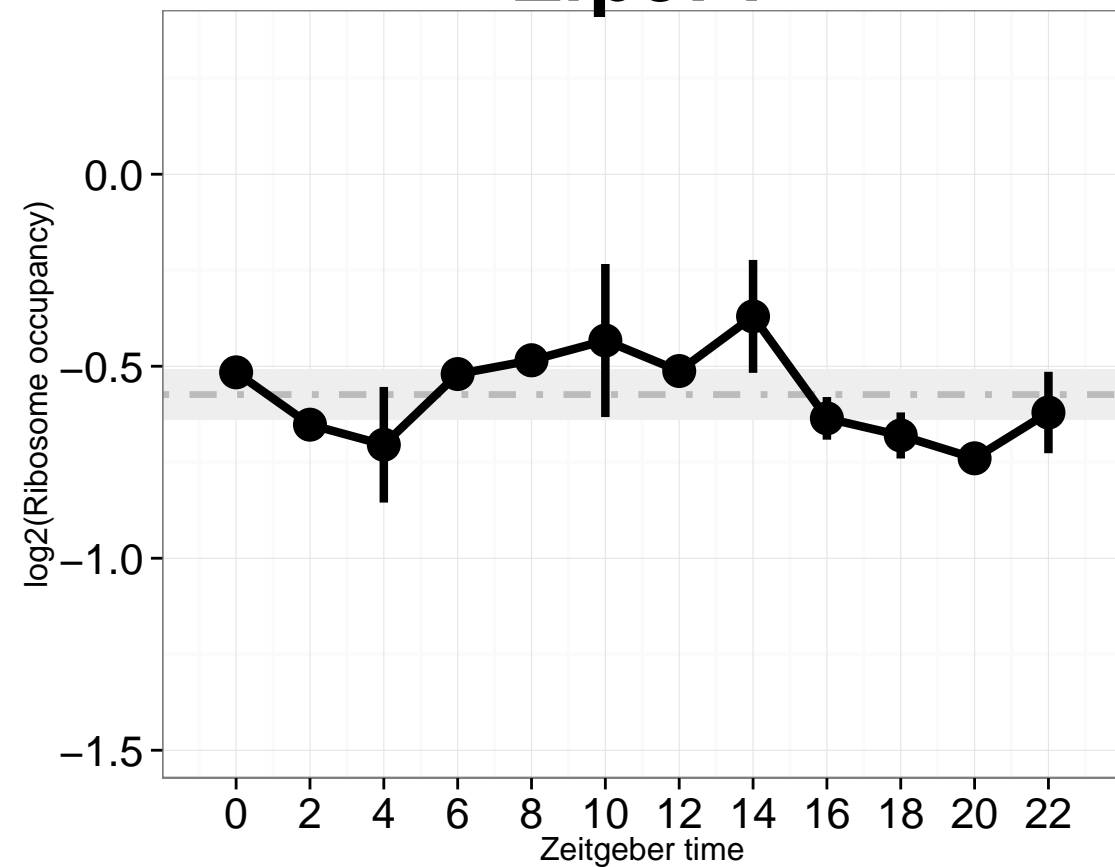

Supplement: Supplementary file 5483 [file 1]

# Tbc1d4

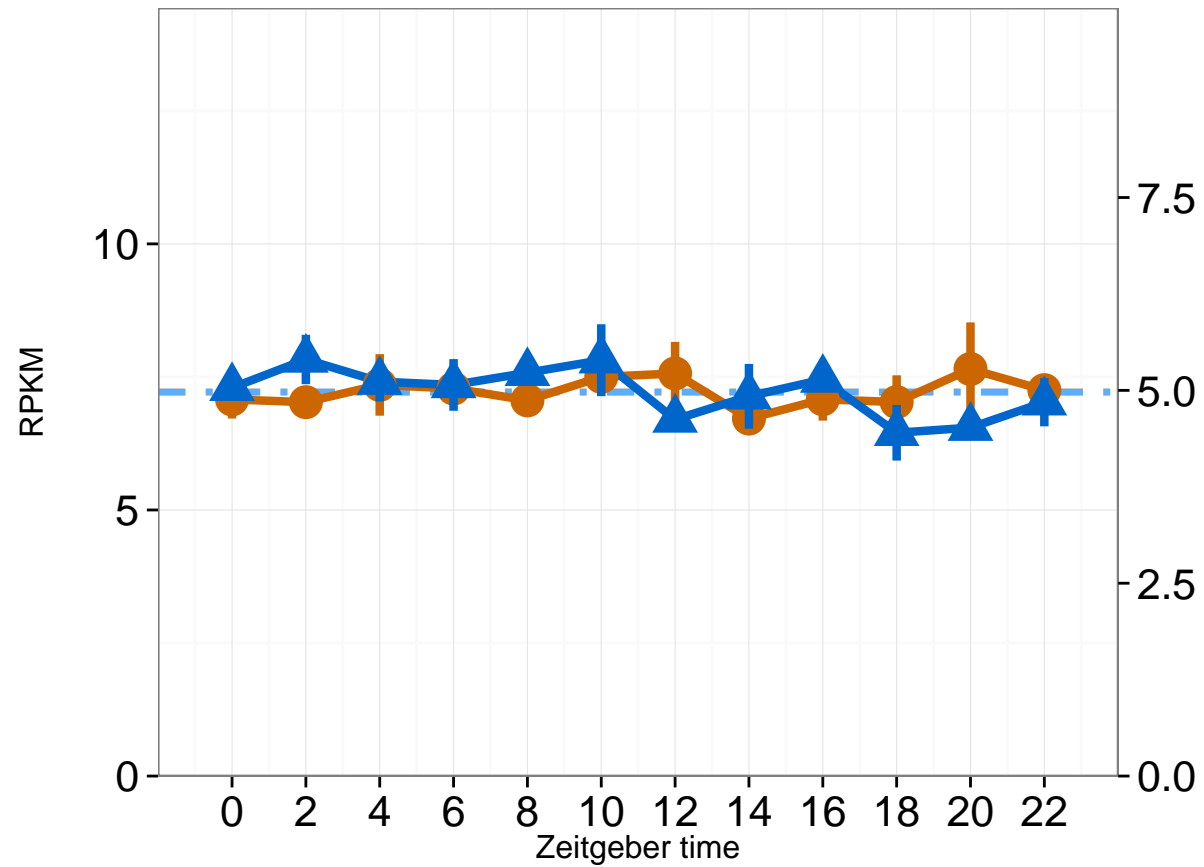

# Tbc1d4

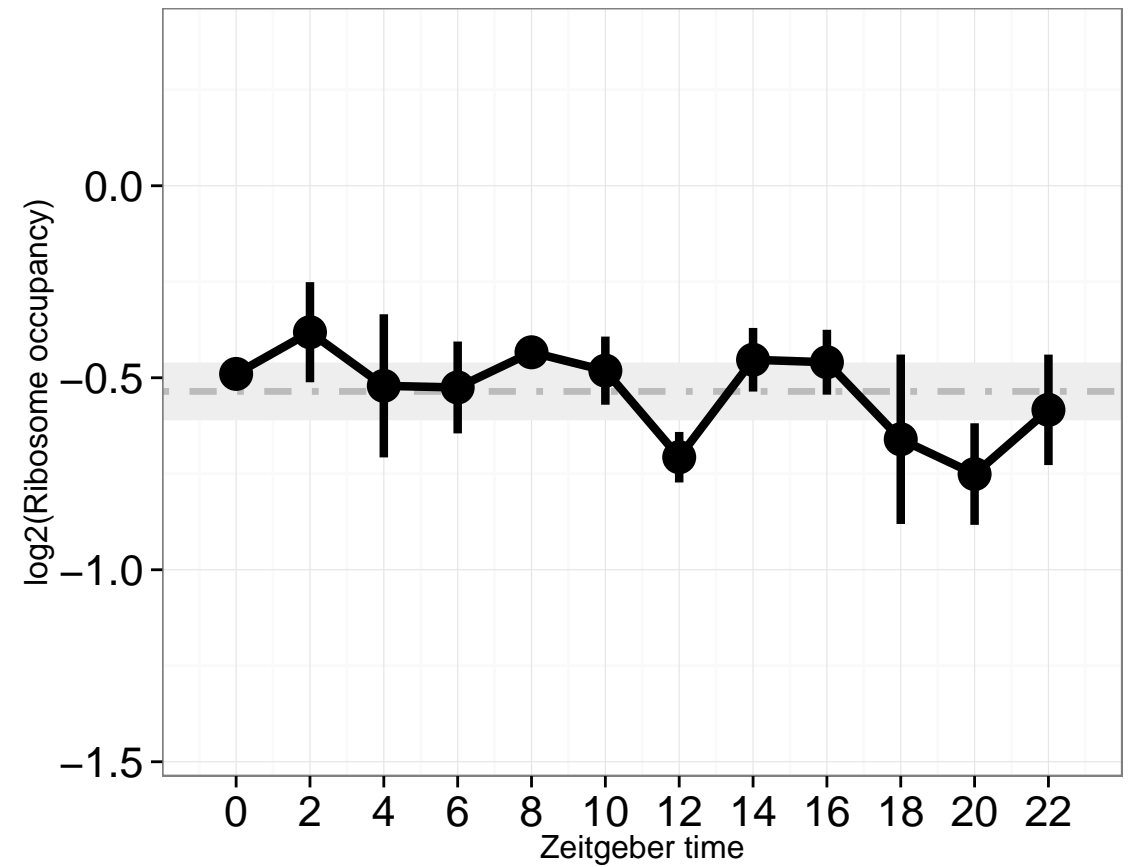

Supplement: Supplementary file 5484 [file 1]

## Peo1

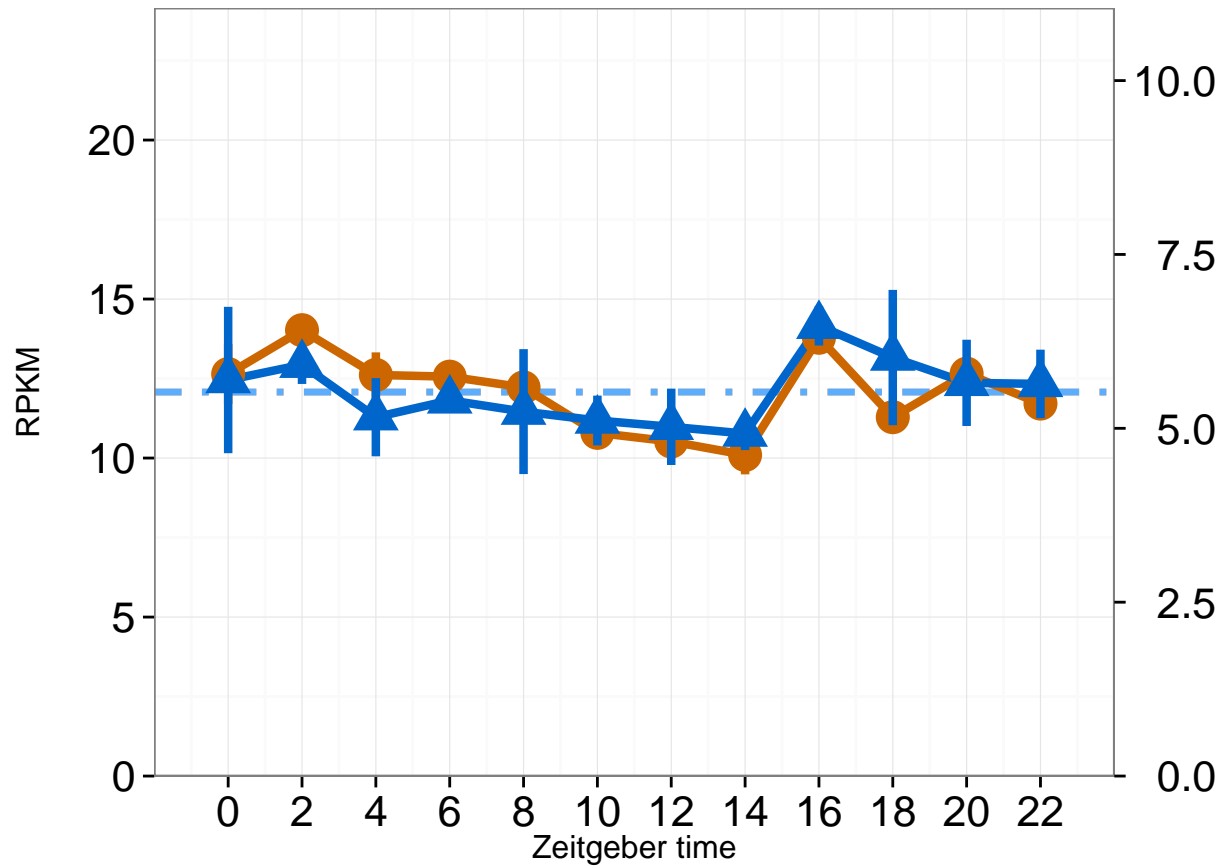

## Peo1

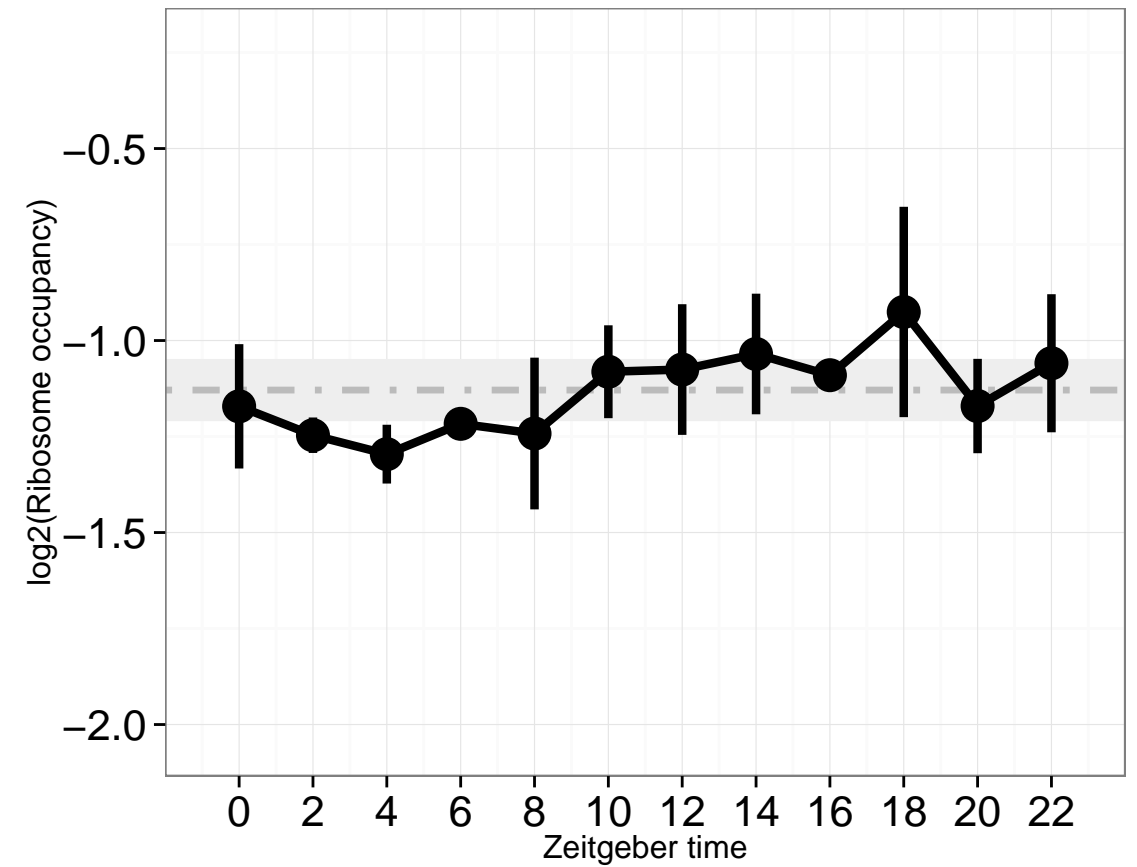

Supplement: Supplementary file 5485 [file 1]

# Mrpl42

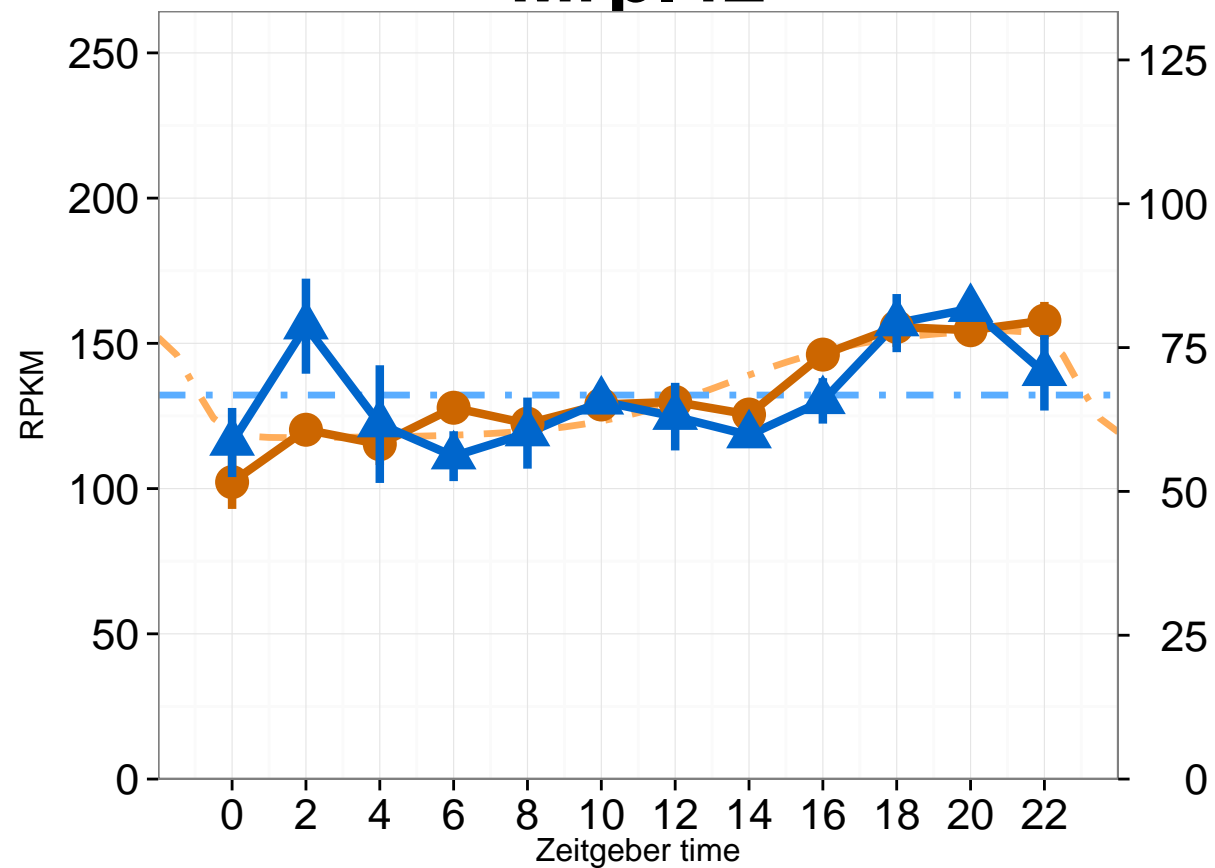

# Mrpl42

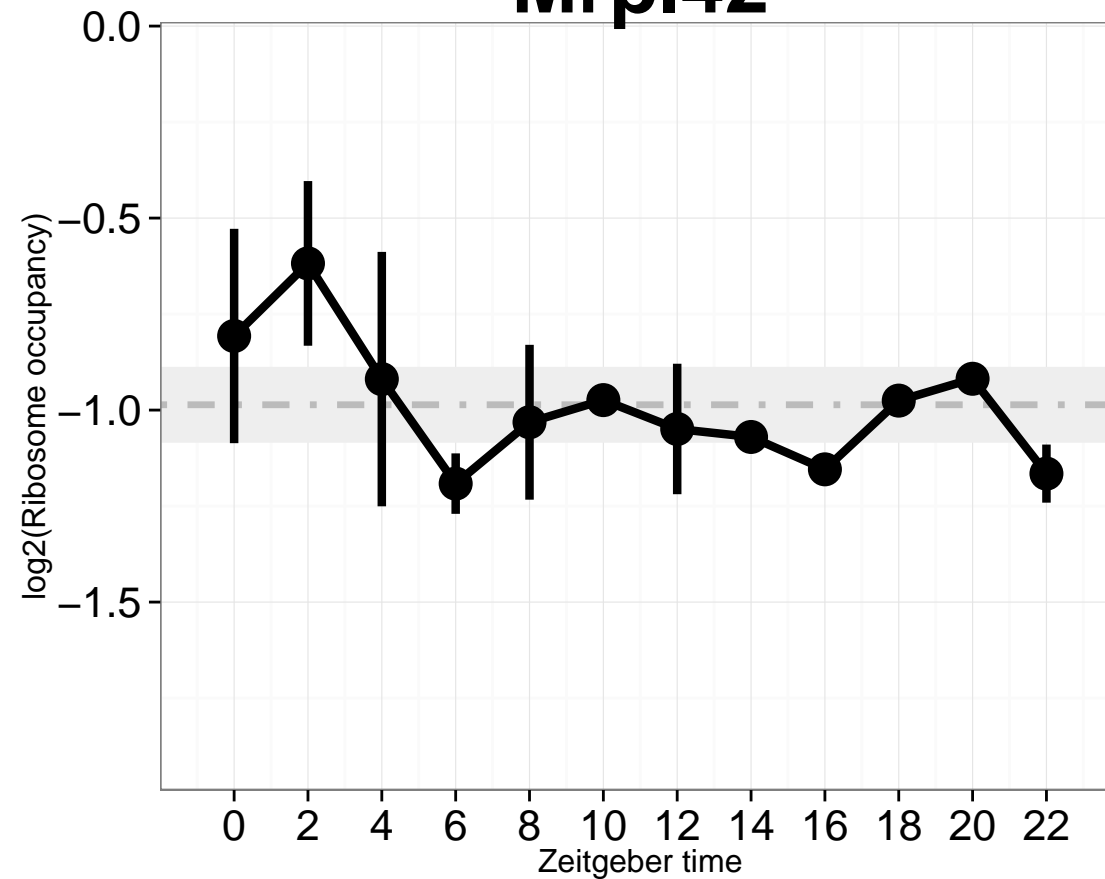

Supplement: Supplementary file 5486 [file 1]

# Prmt2

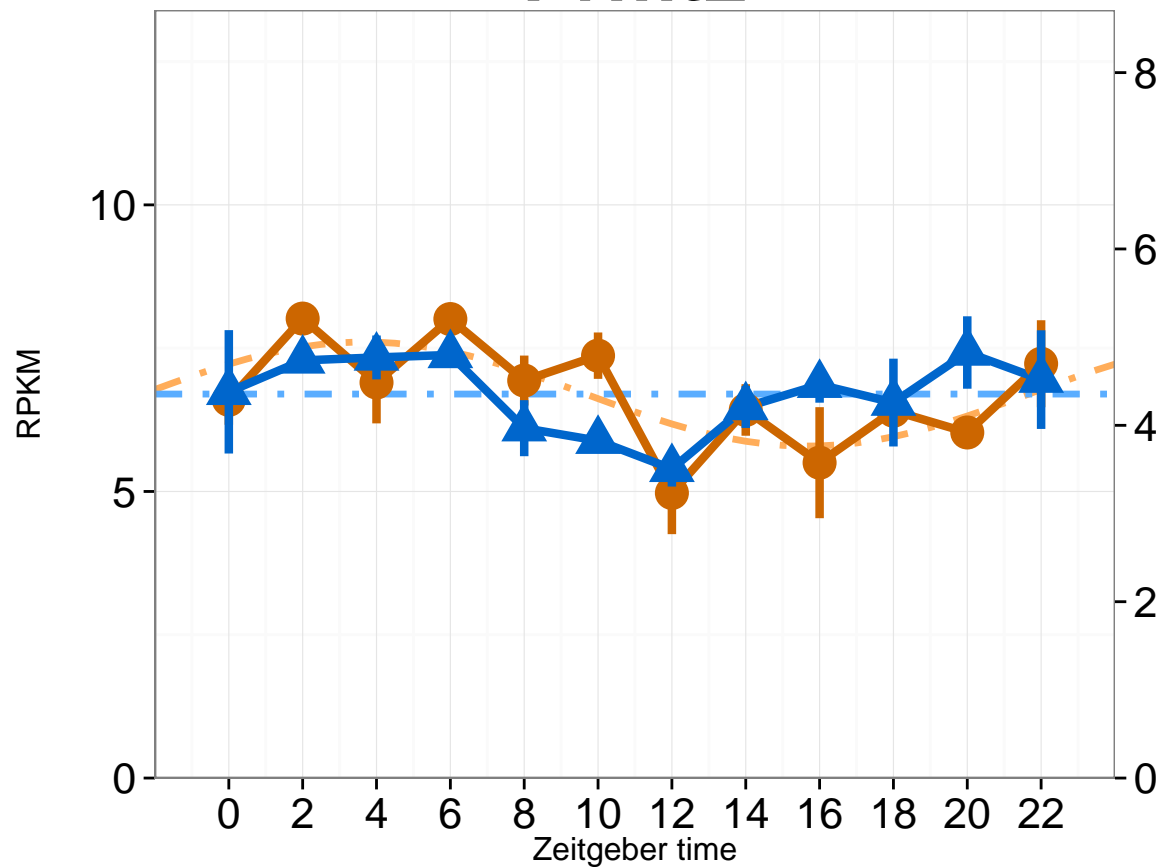

# Prmt2

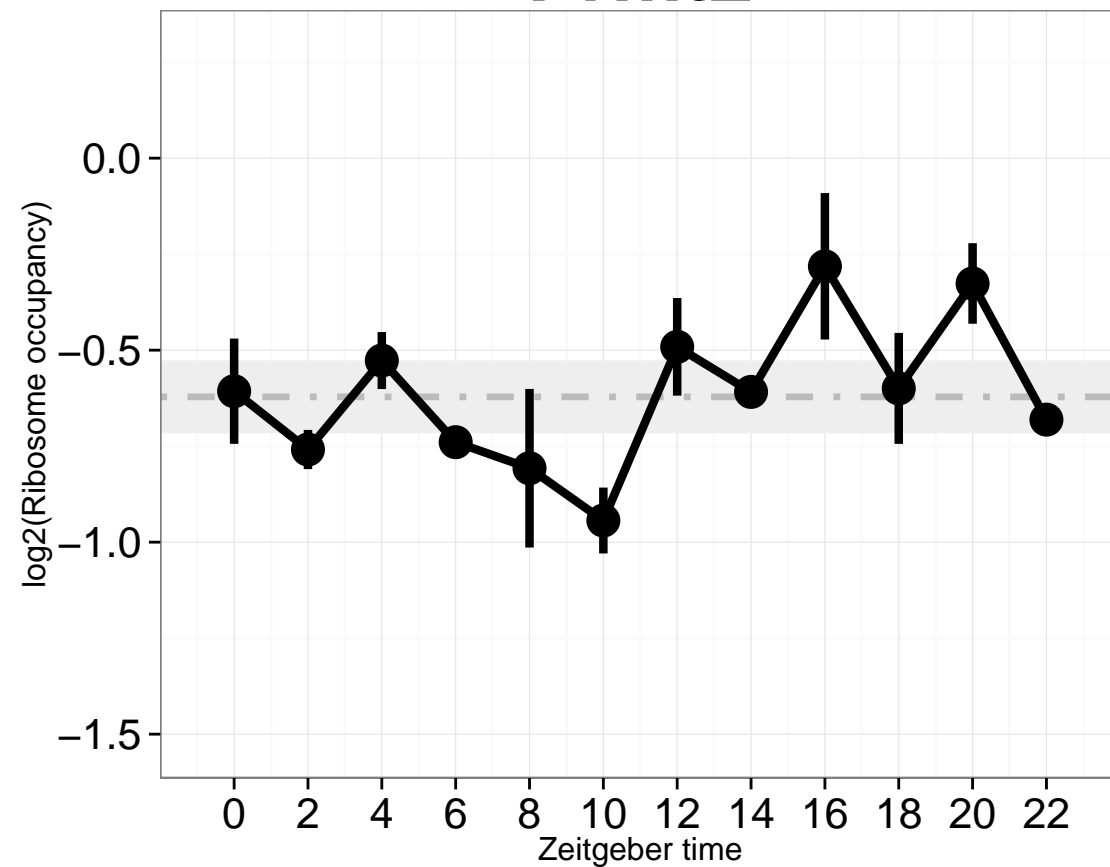

Supplement: Supplementary file 5487 [file 1]

## Casp12

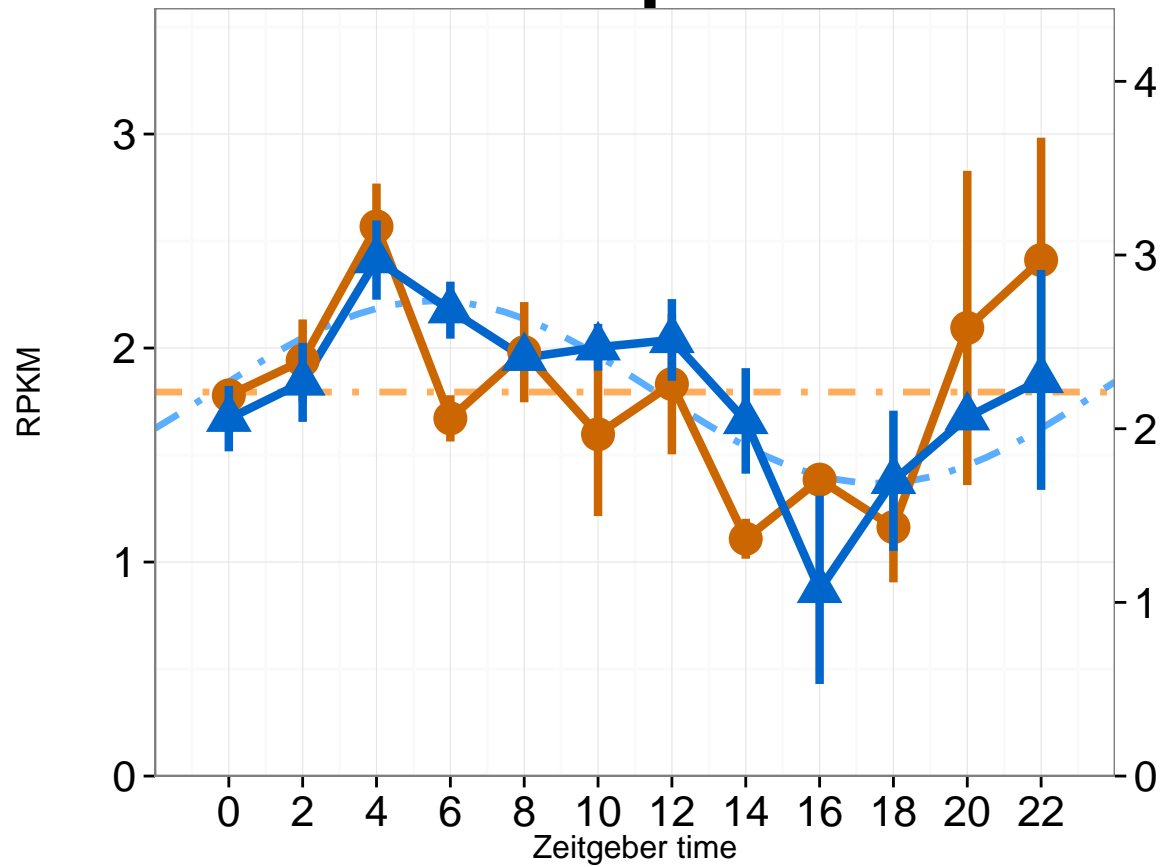

## Casp12

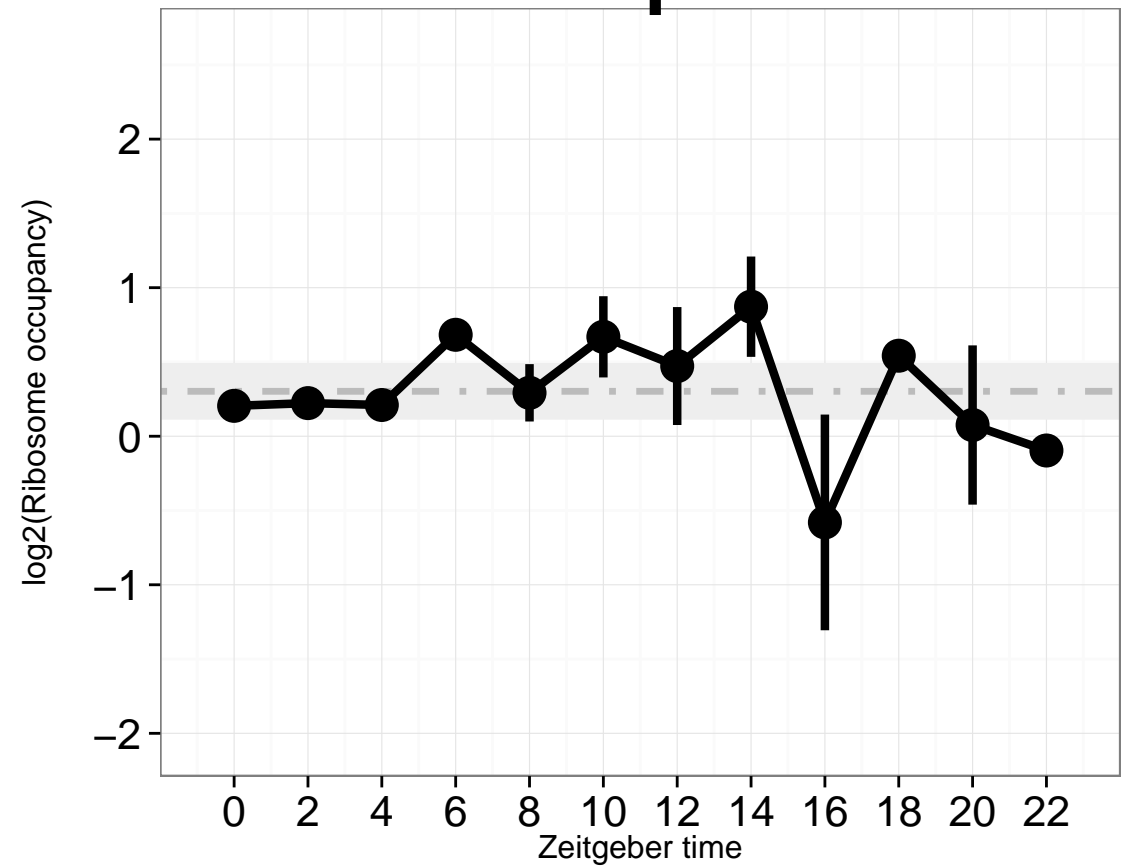

Supplement: Supplementary file 5488 [file 1]

## Pacsin3

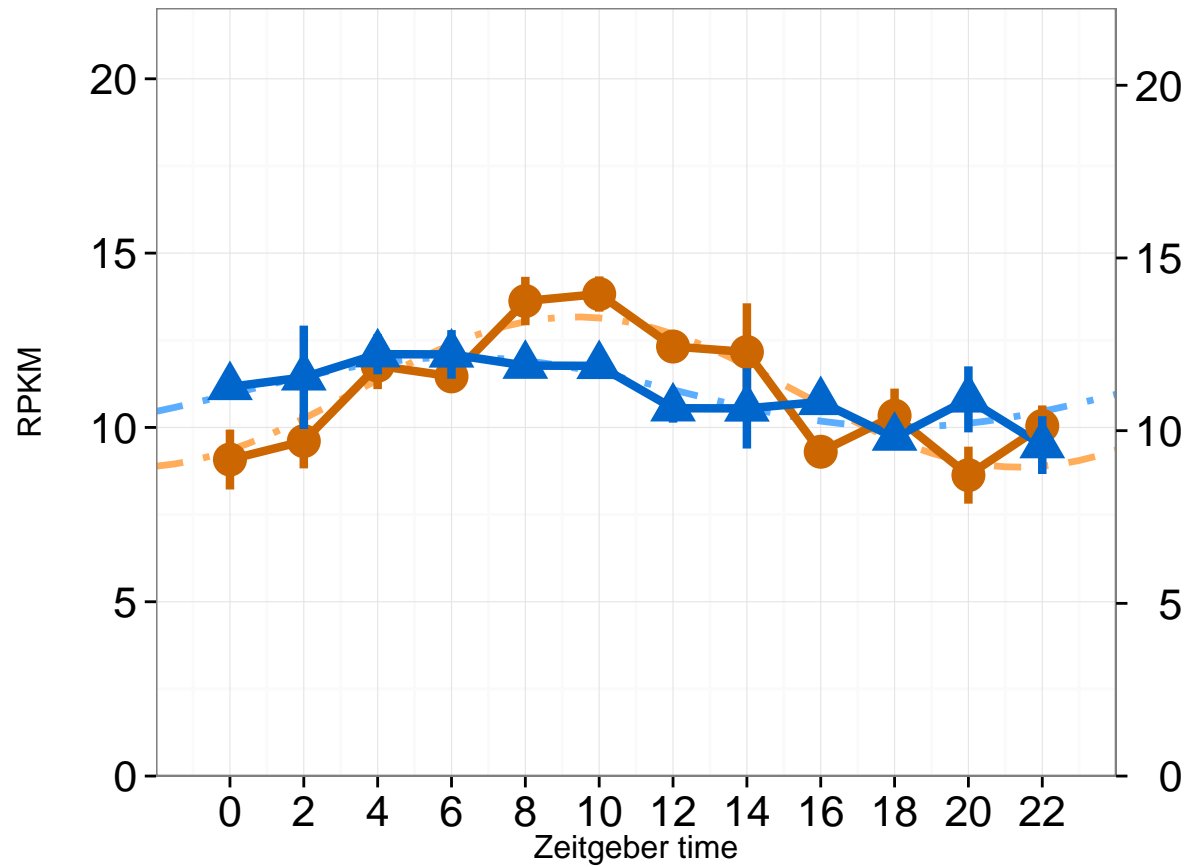

## Pacsin3

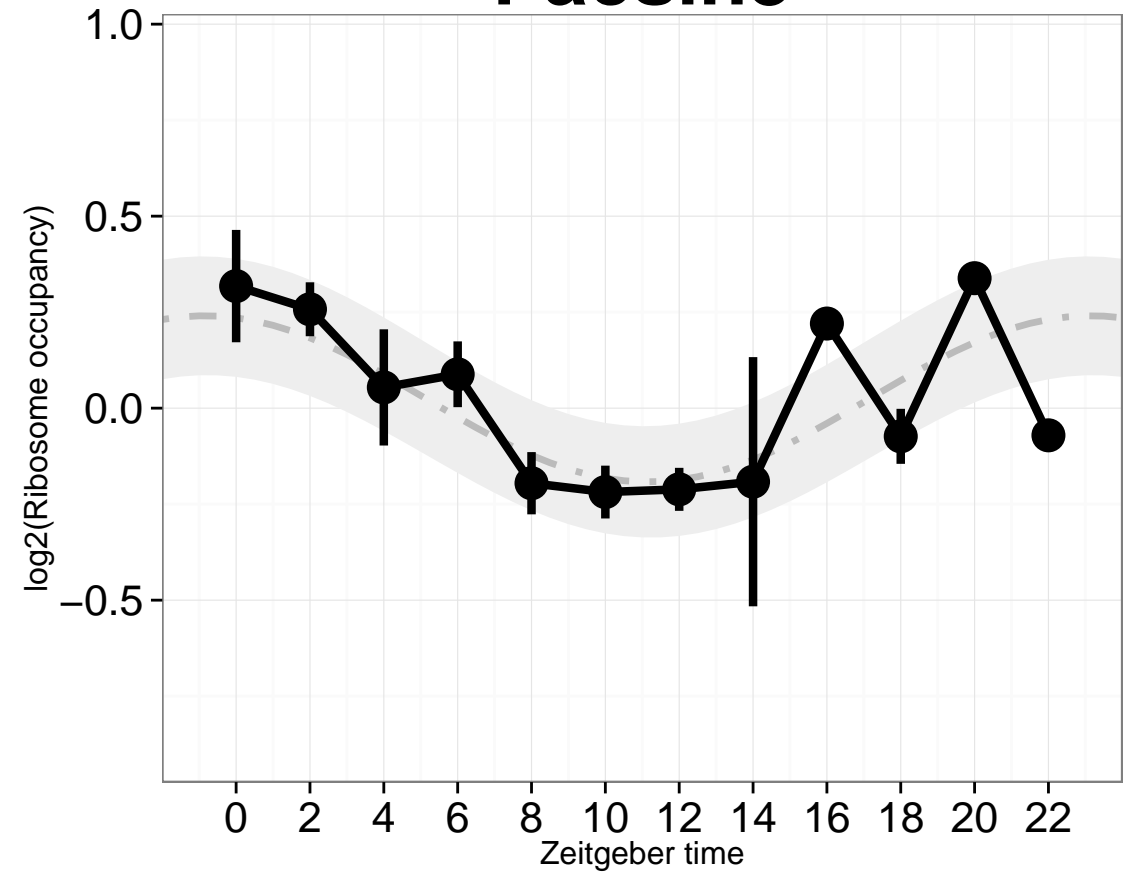

Supplement: Supplementary file 5489 [file 1]

## Abl2

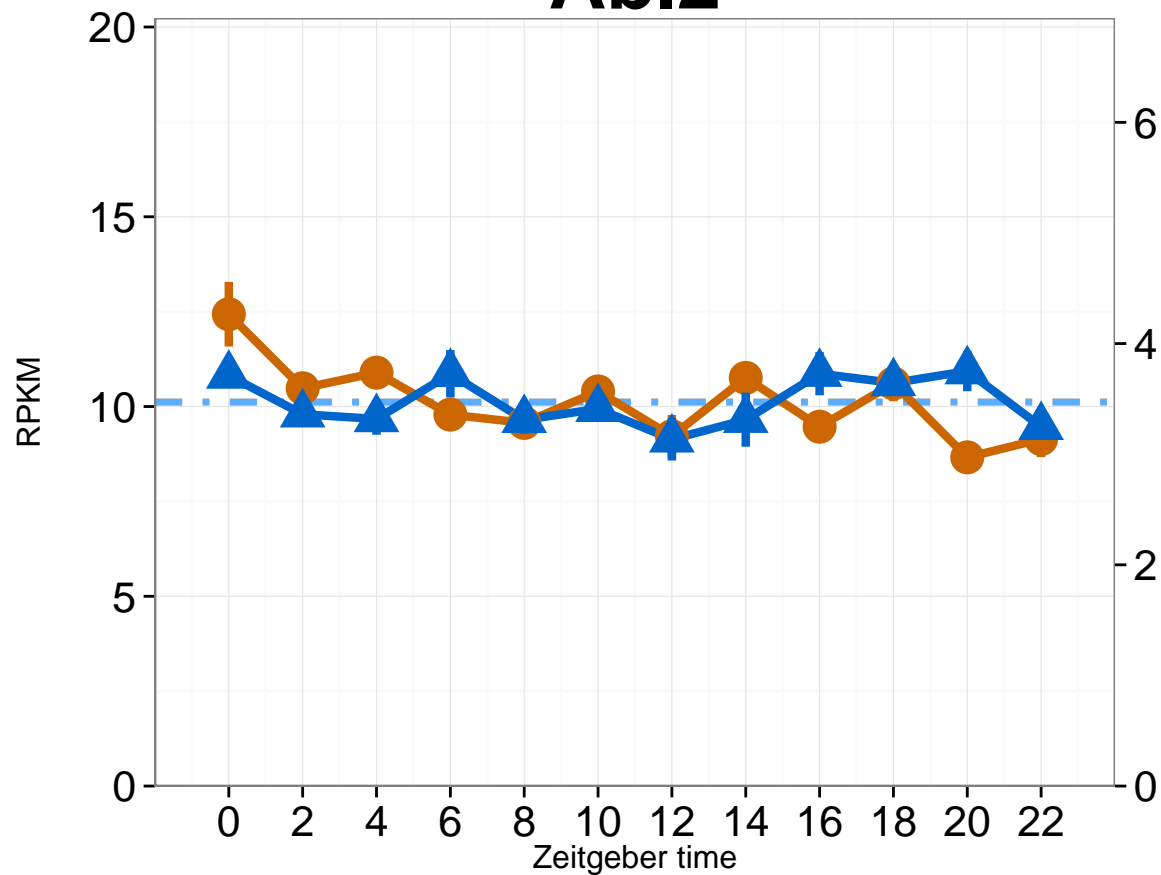

## Abl2

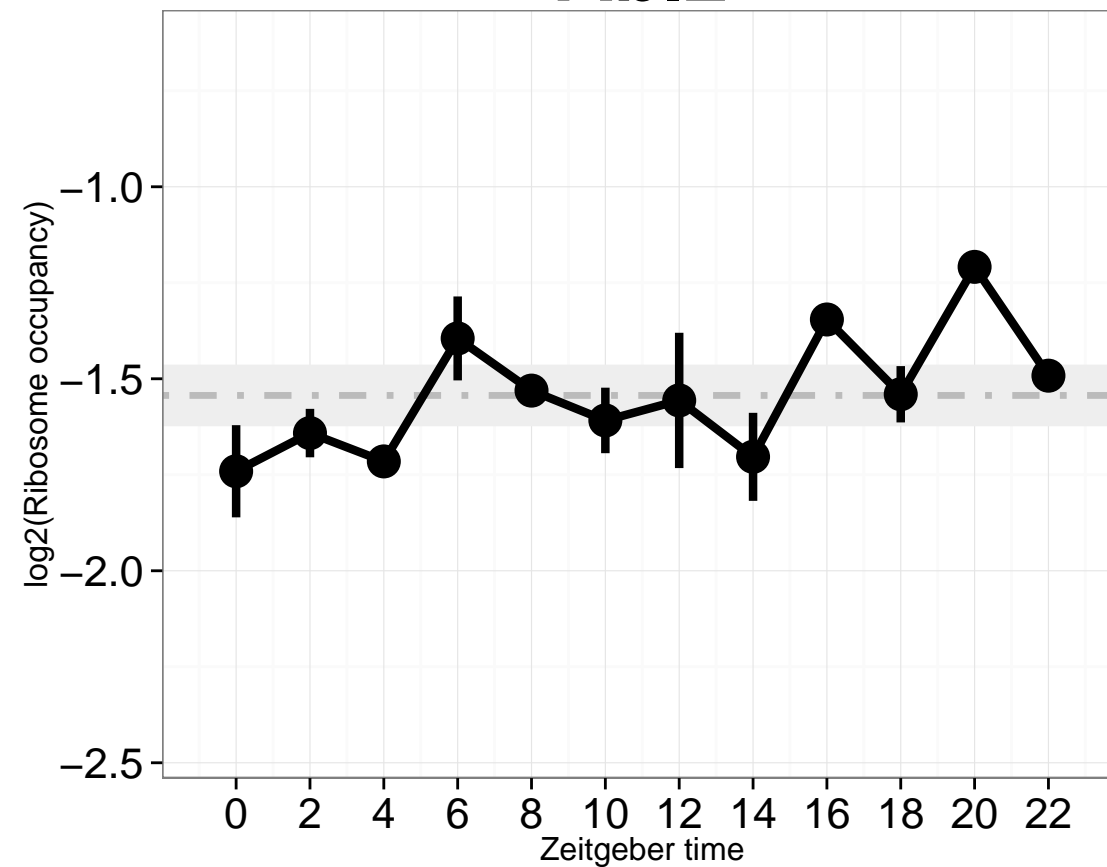

Supplement: Supplementary file 5490 [file 1]

## Cdc37

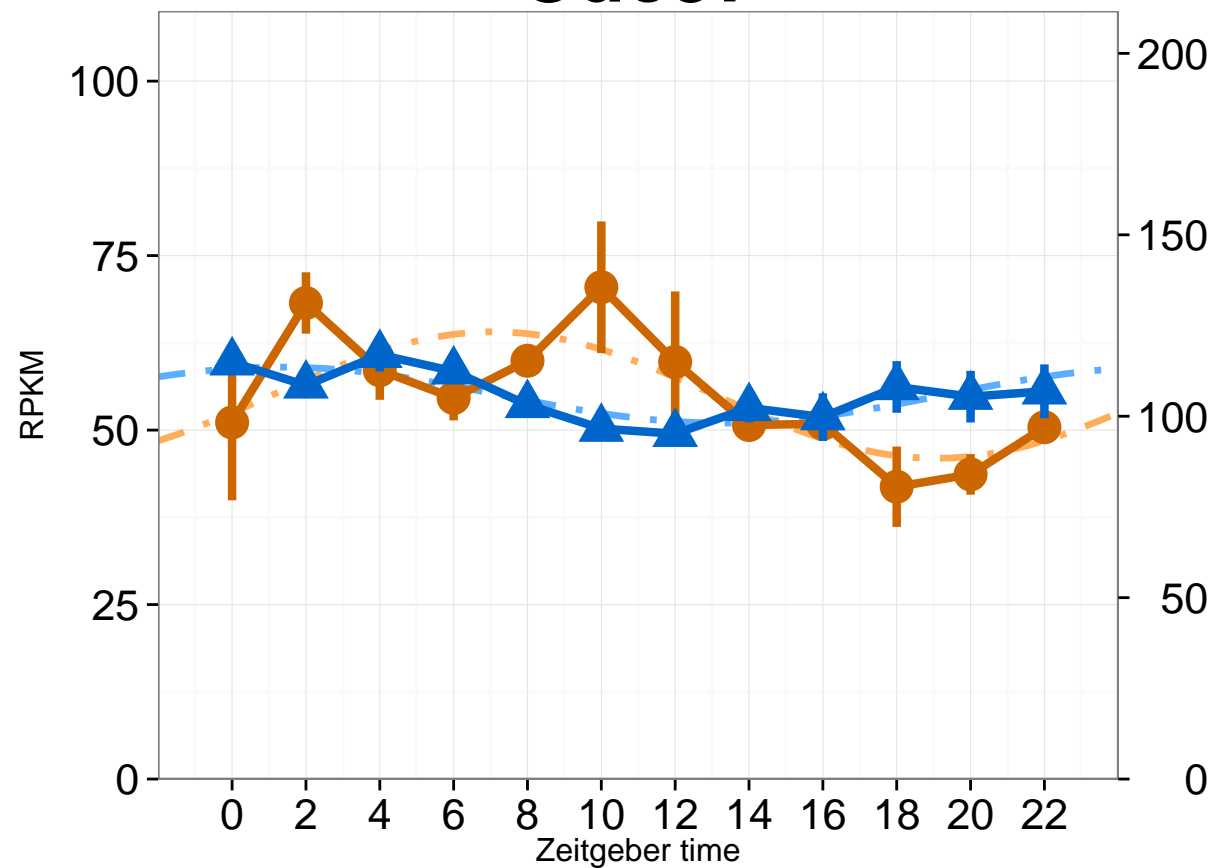

## Cdc37

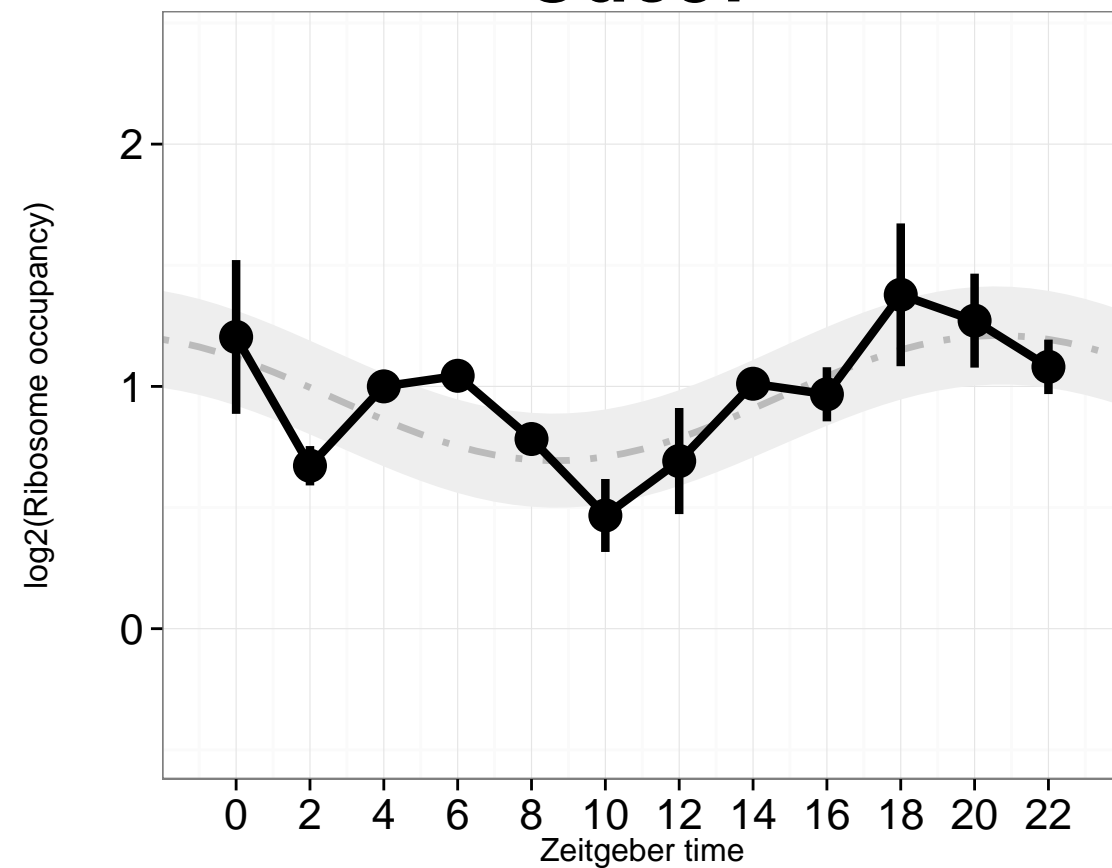

Supplement: Supplementary file 5491 [file 1]

## Cd9

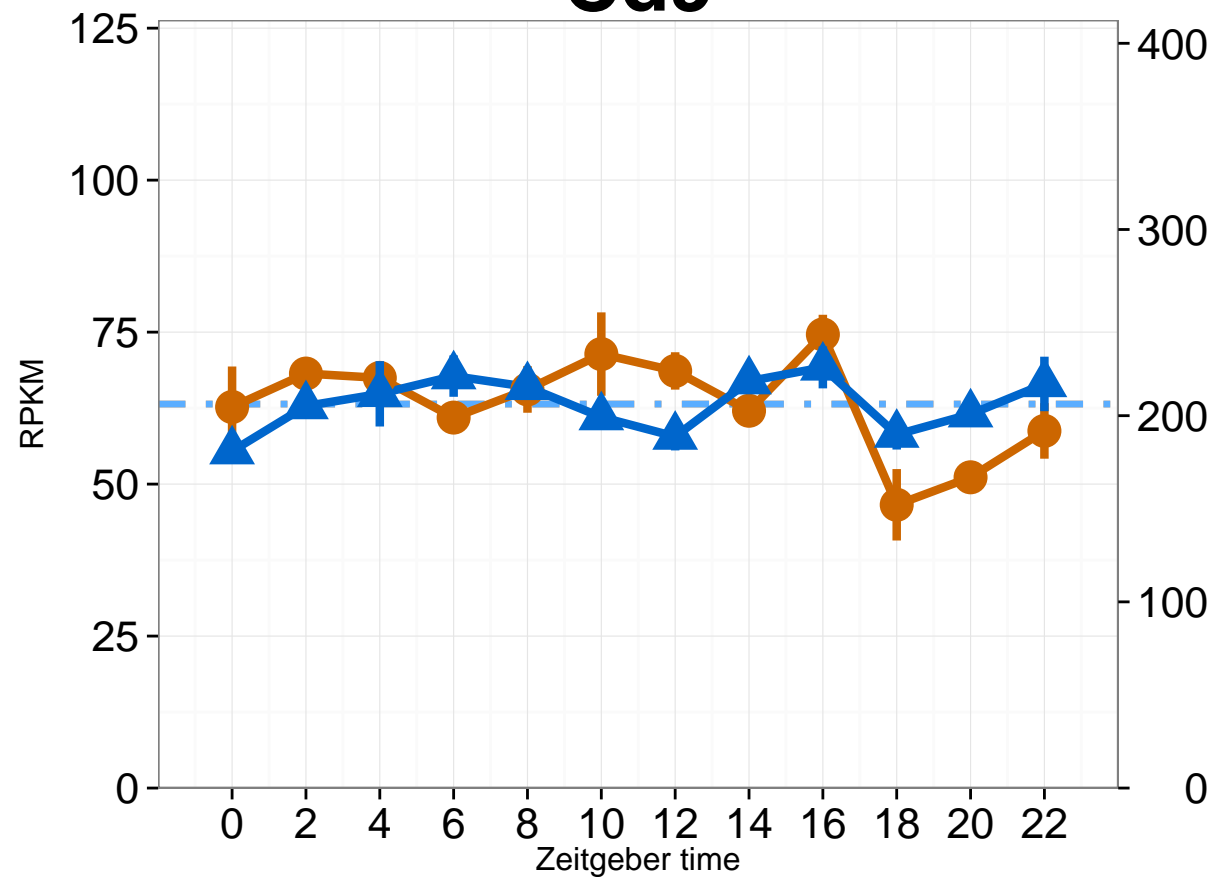

## Cd9

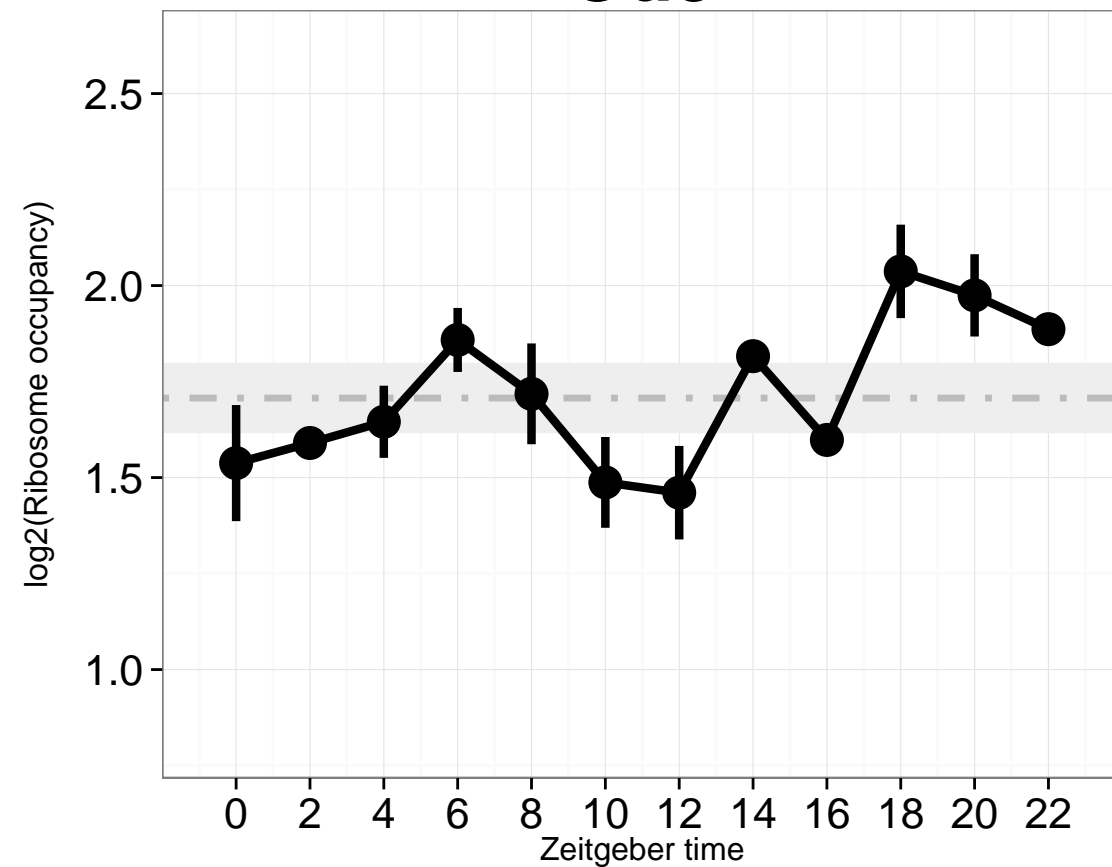

Supplement: Supplementary file 5492 [file 1]

# lqsec2

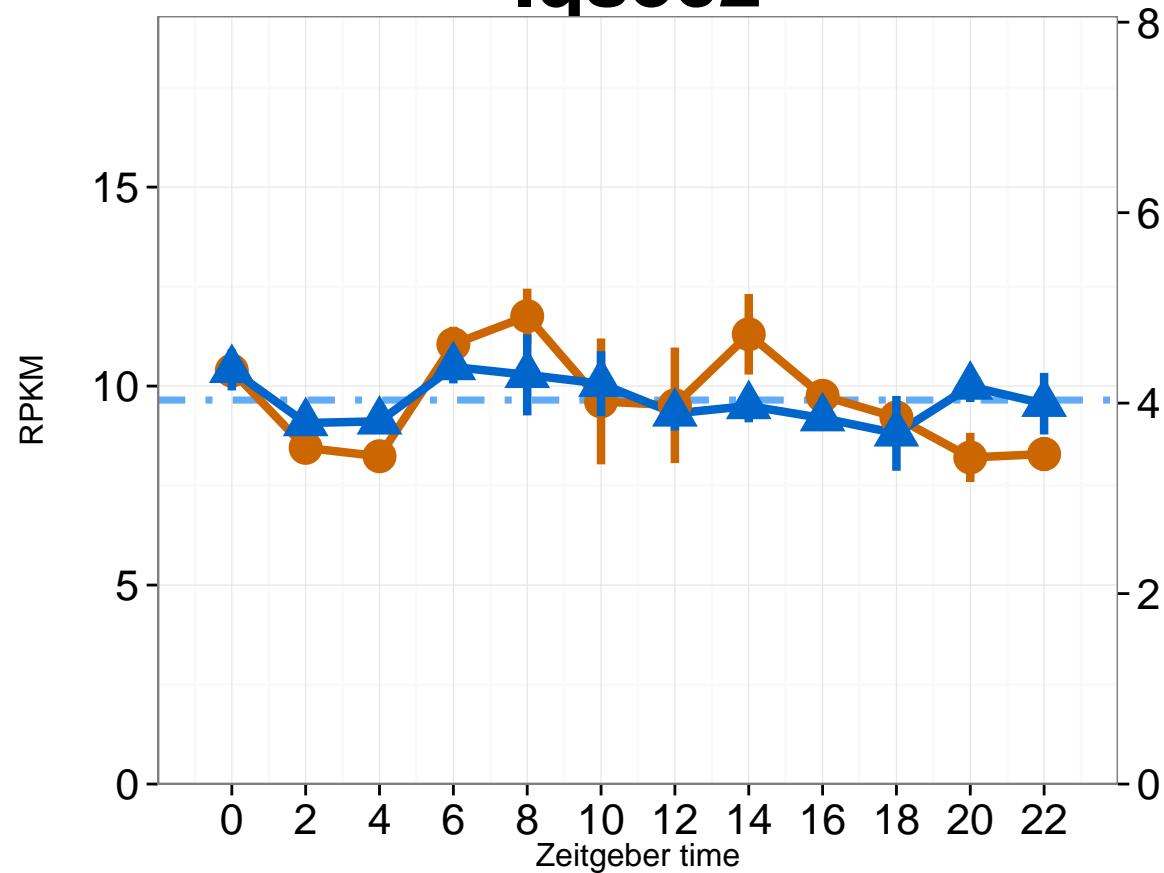

# lqsec2

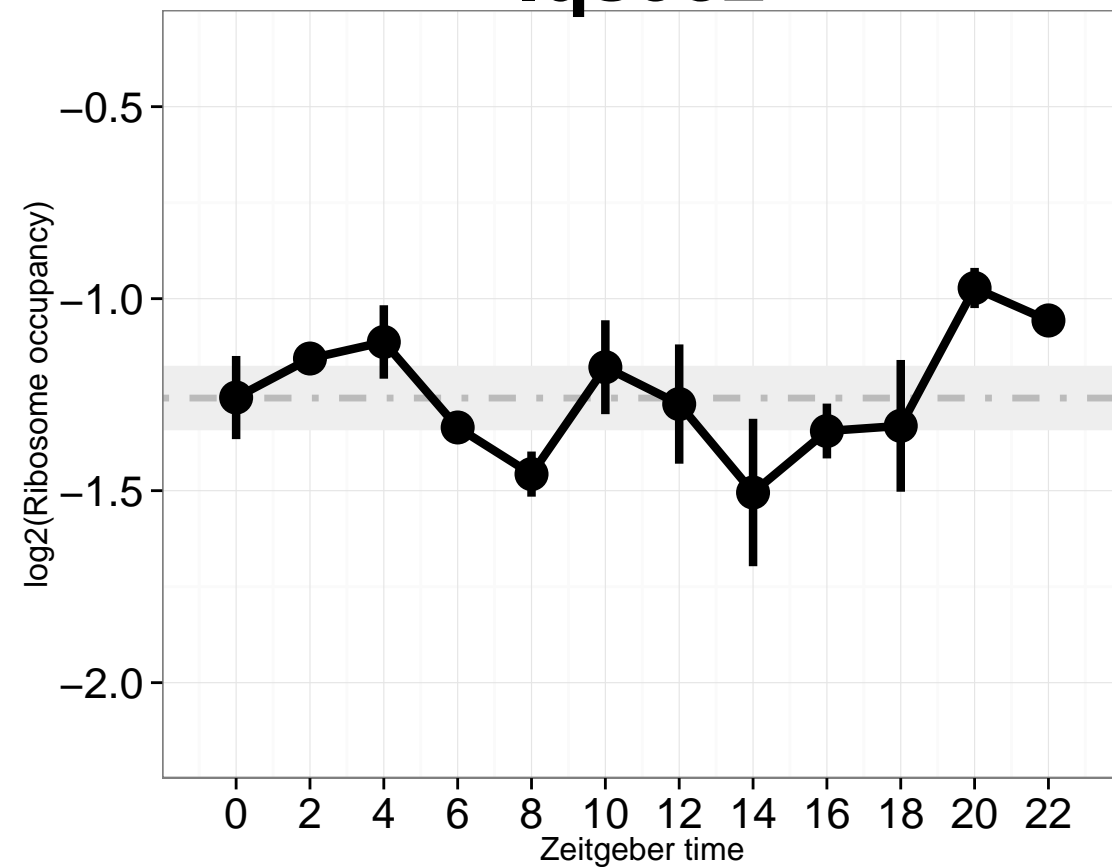

Supplement: Supplementary file 5493 [file 1]

## Pros1

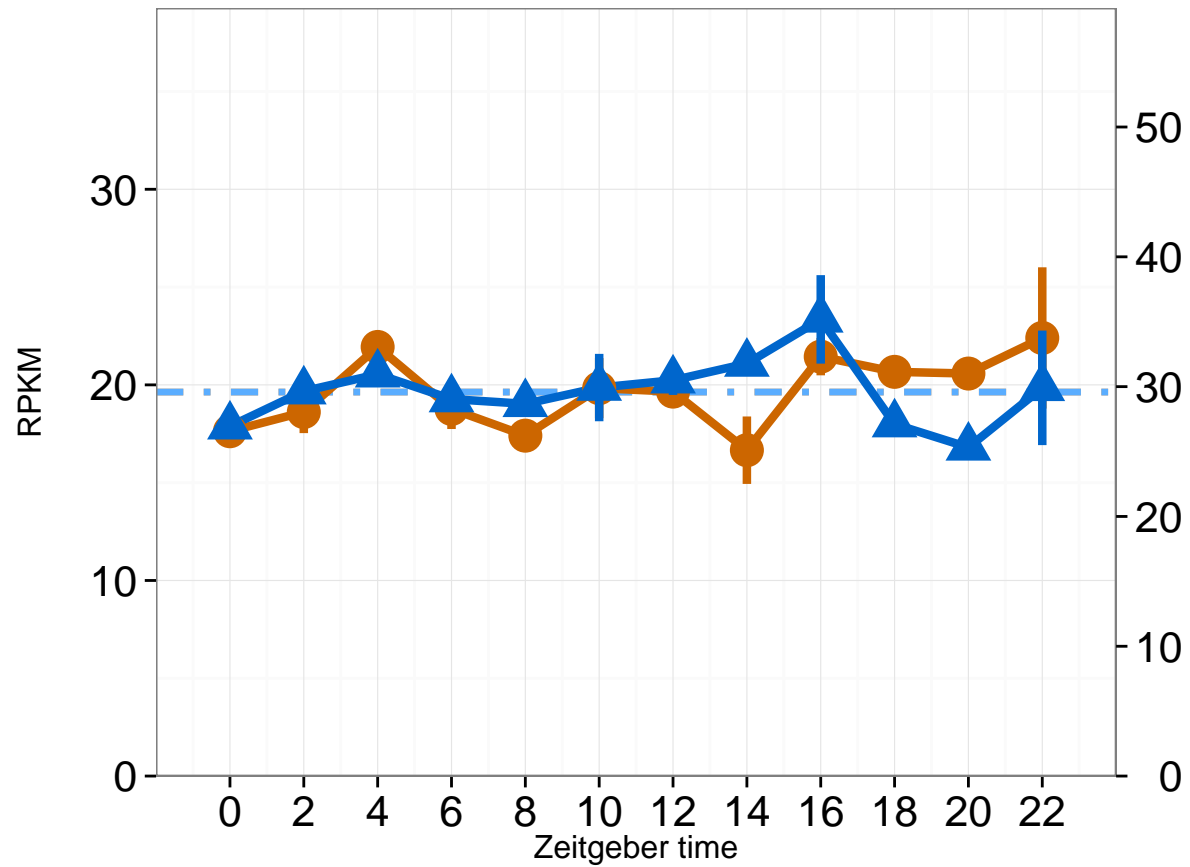

## Pros1

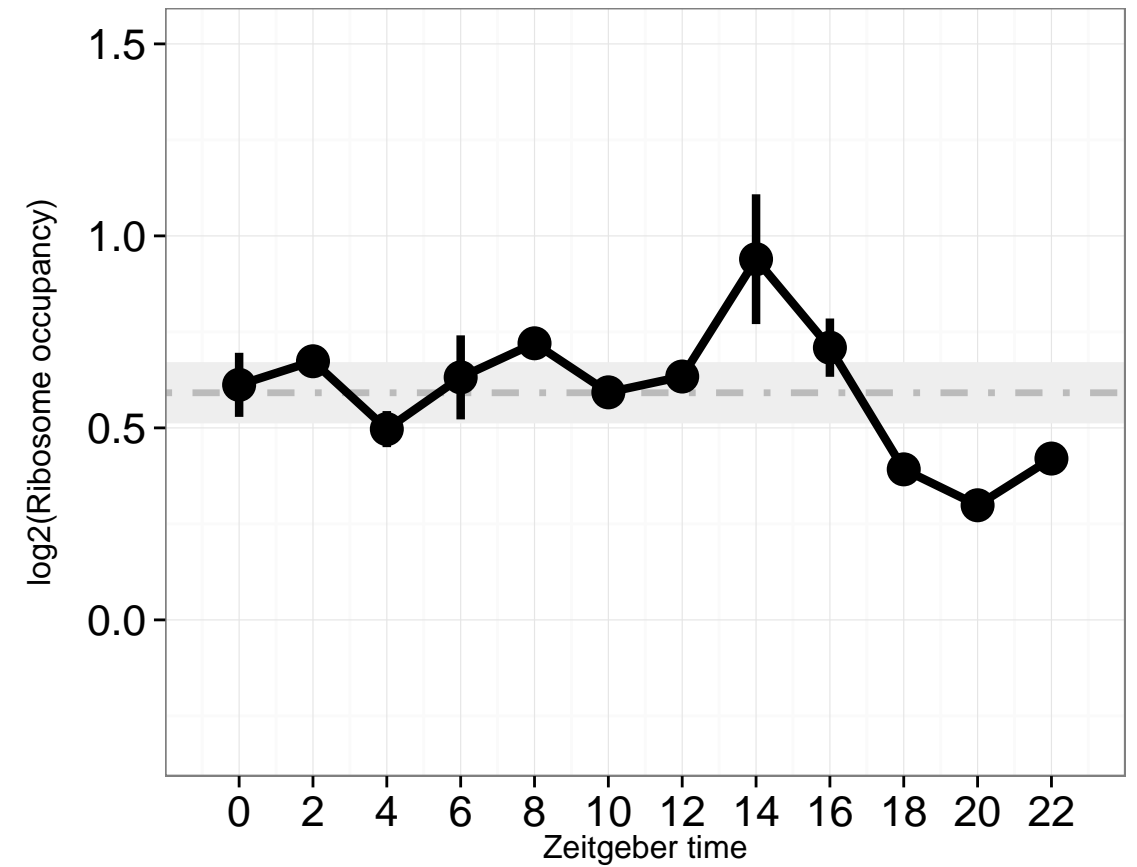

Supplement: Supplementary file 5494 [file 1]

## Nomo1

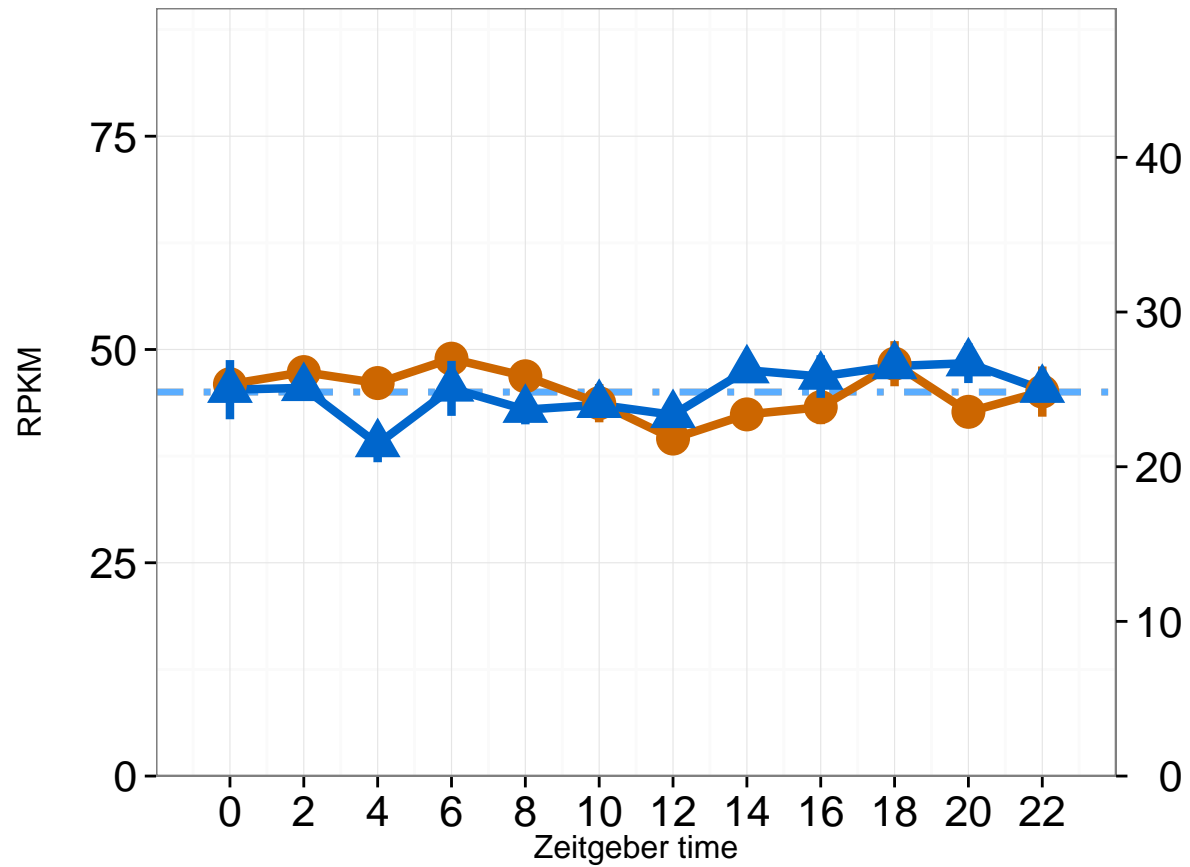

## Nomo1

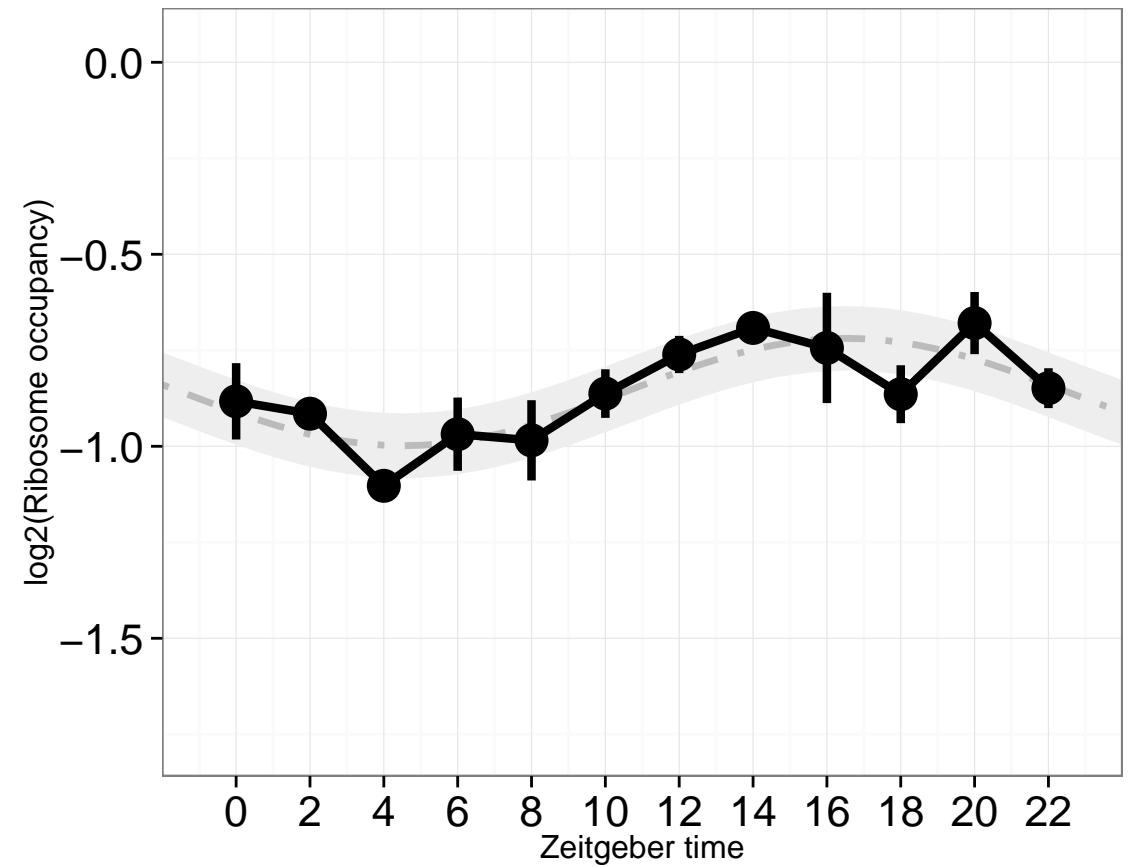

Supplement: Supplementary file 5495 [file 1]

# Magoh

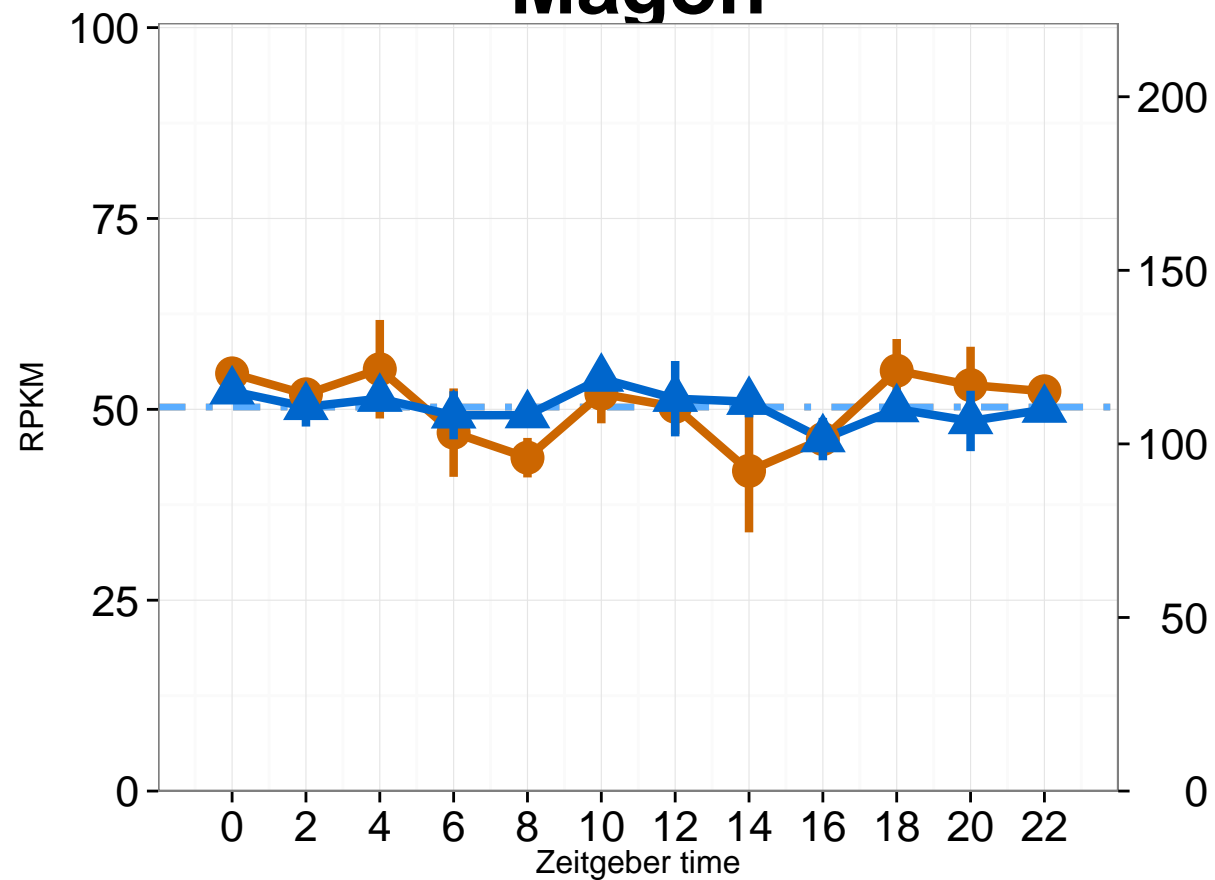

# Magoh

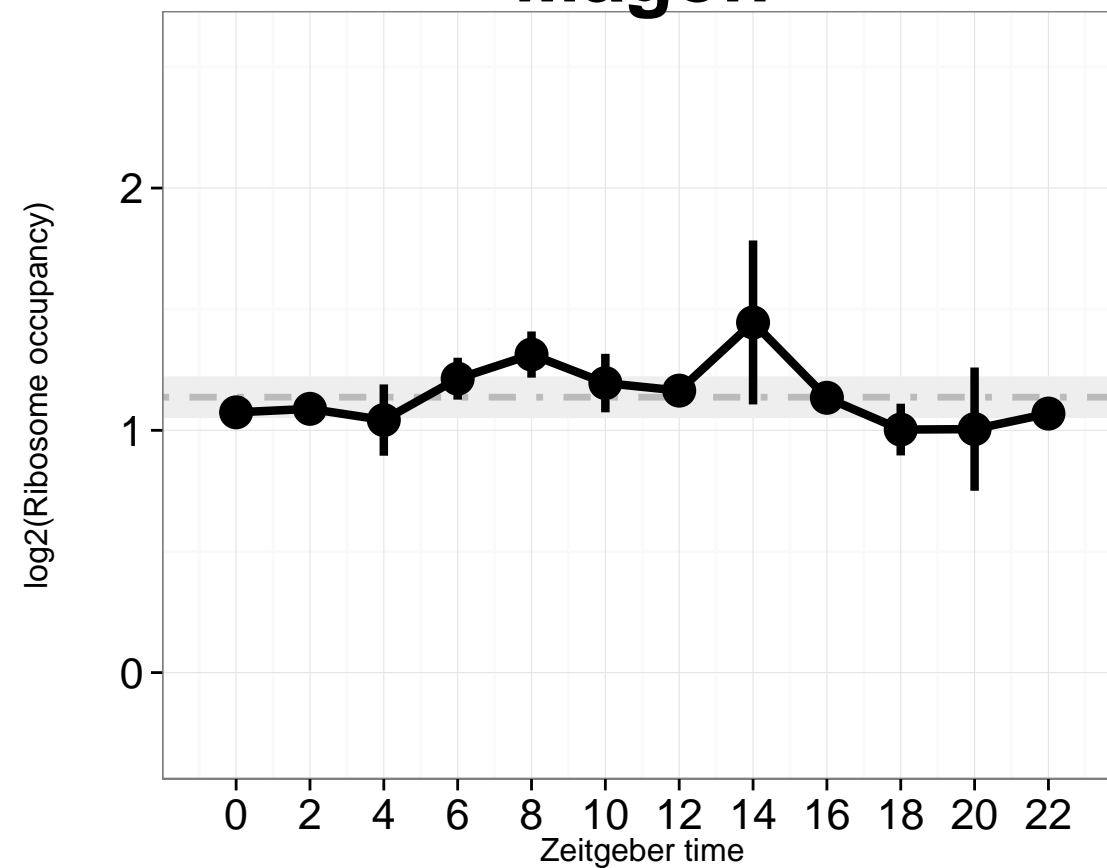

Supplement: Supplementary file 5496 [file 1]

## Cd53

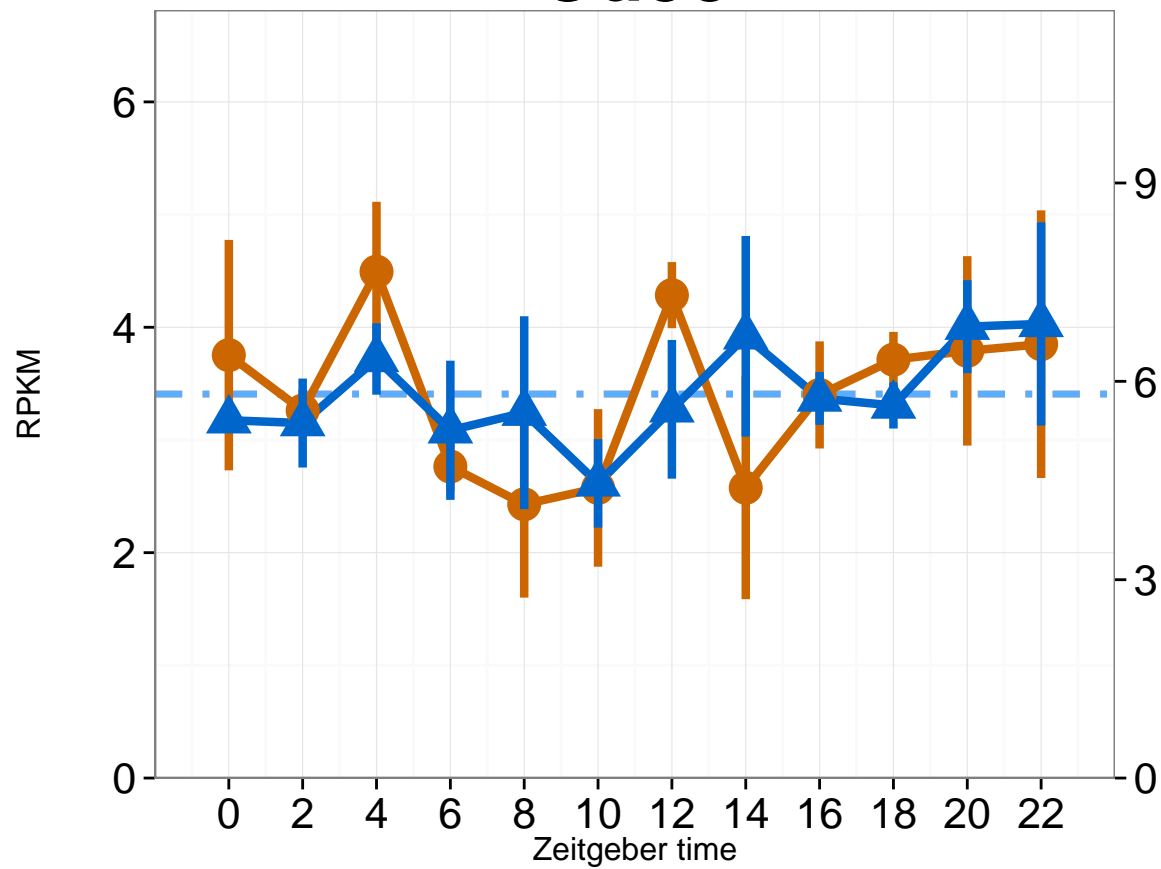

## Cd53

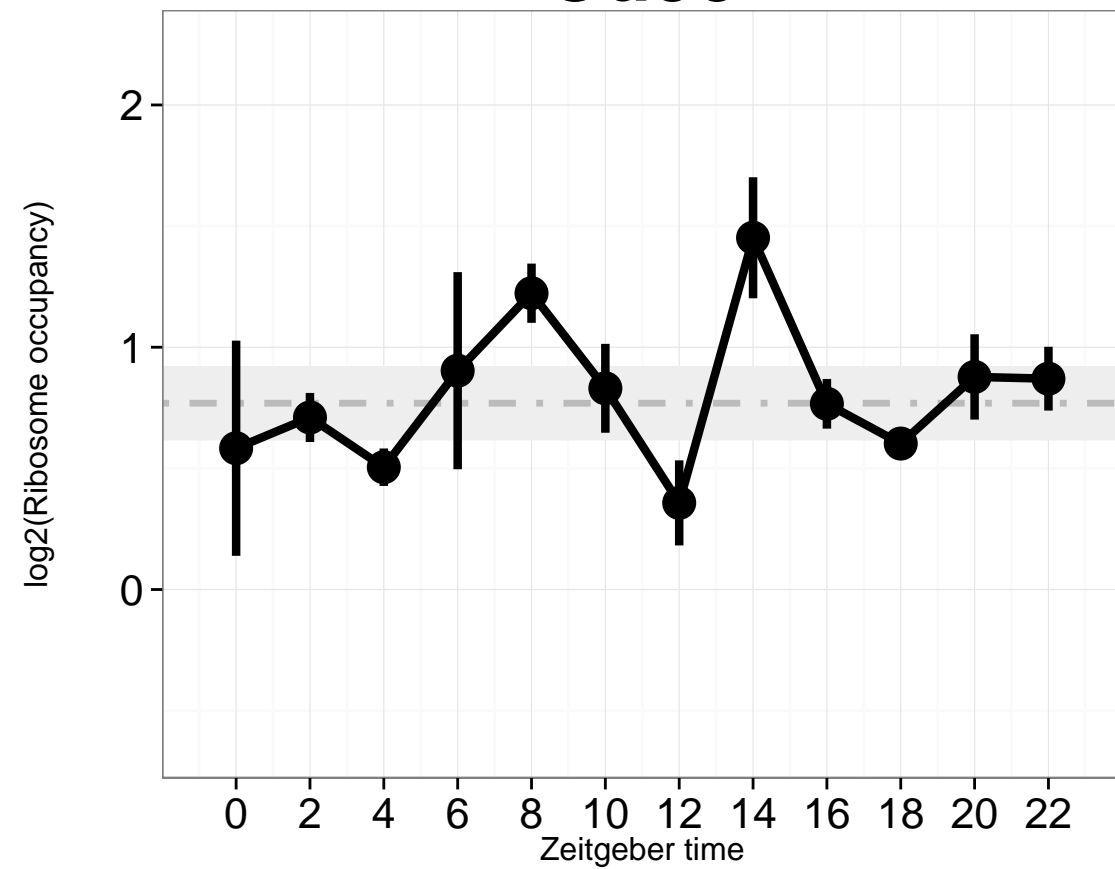

Supplement: Supplementary file 5497 [file 1]

# C1qtnf6

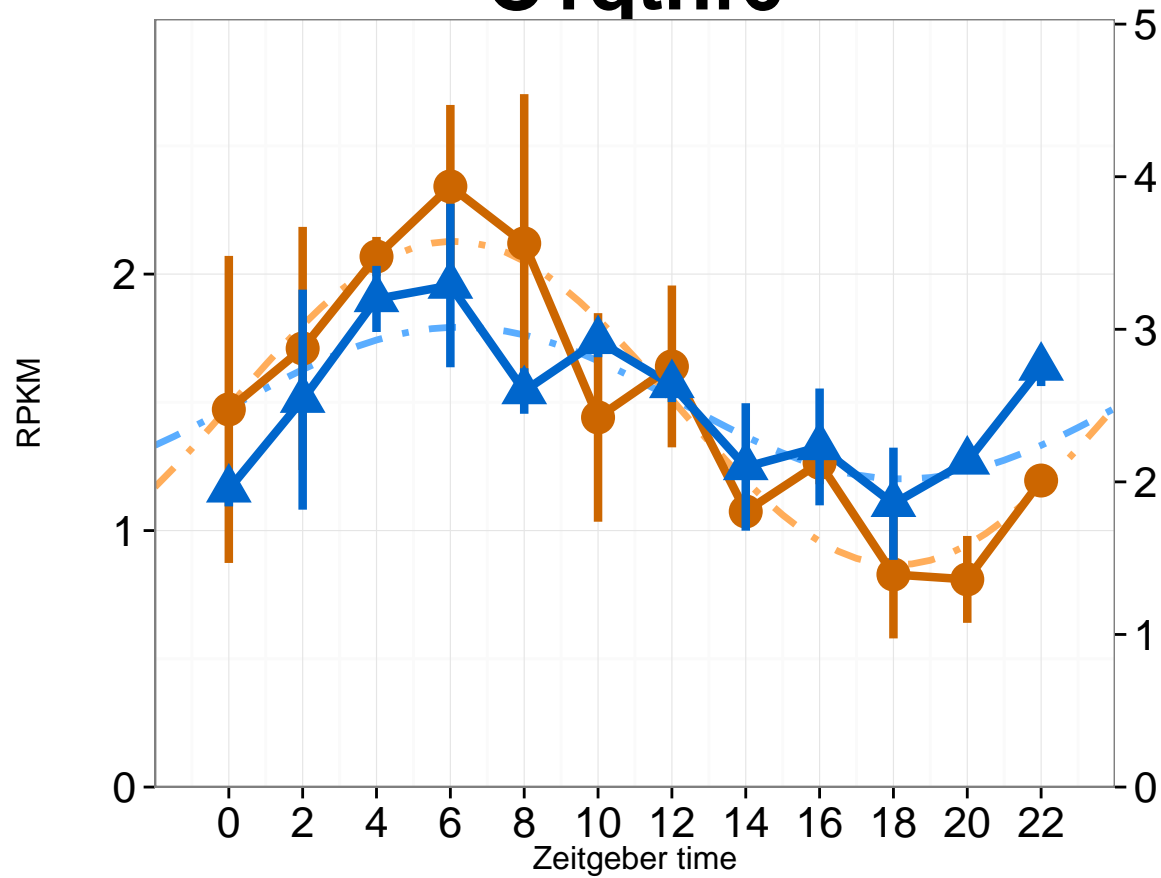

# C1qtnf6

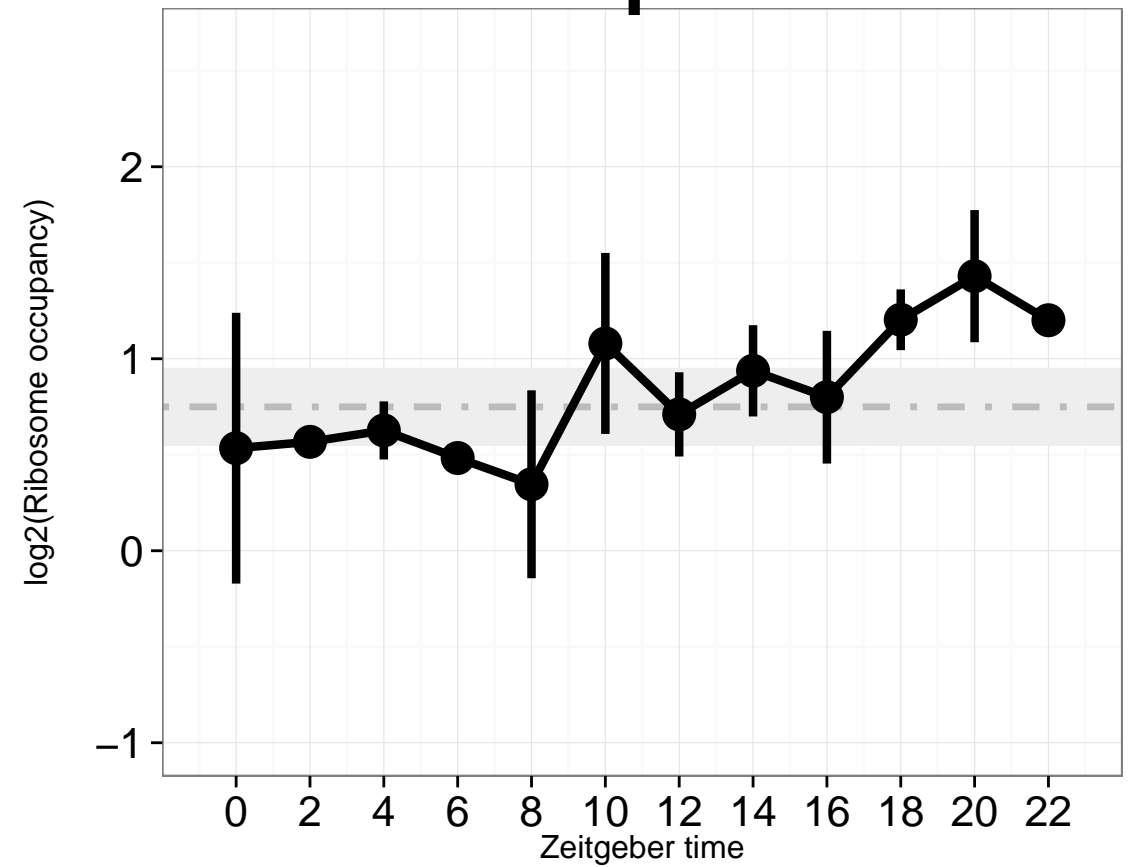

Supplement: Supplementary file 5498 [file 1]

## Cbwd1

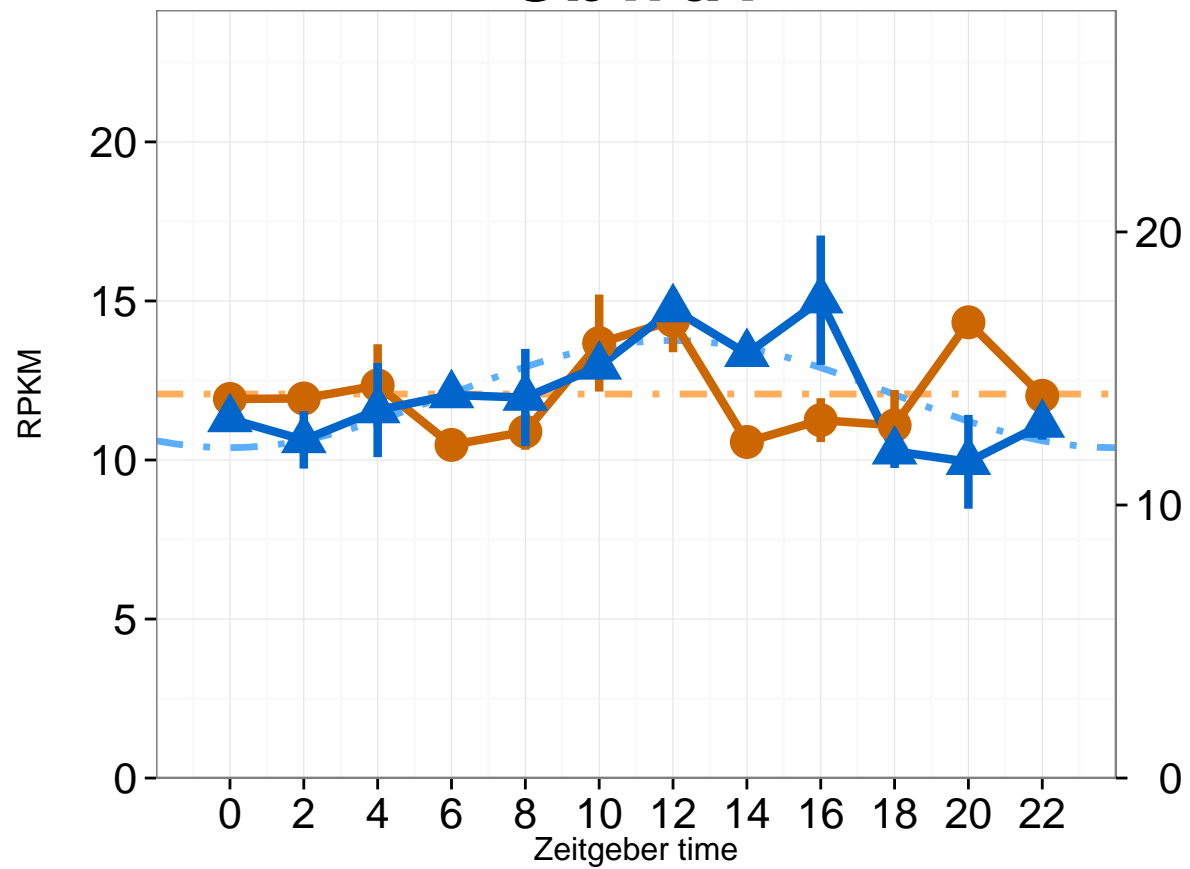

## Cbwd1

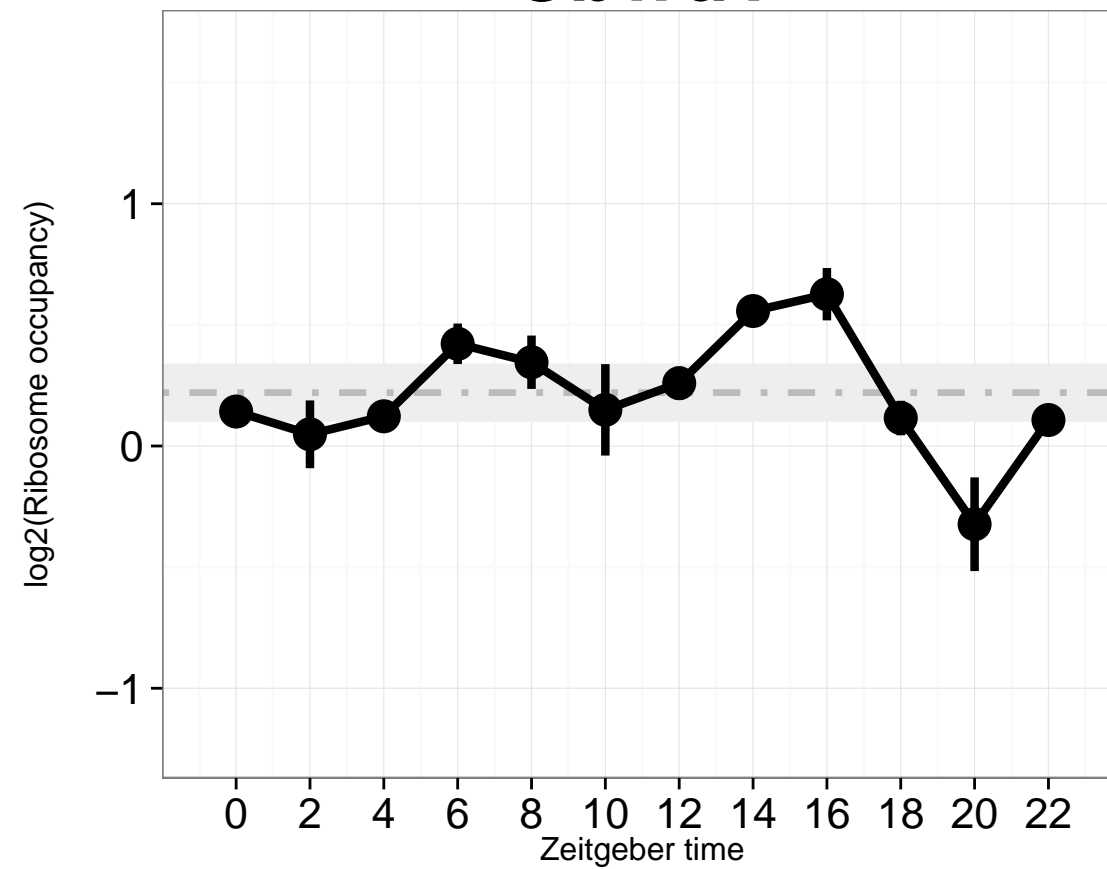

Supplement: Supplementary file 5499 [file 1]

## Slc22a15

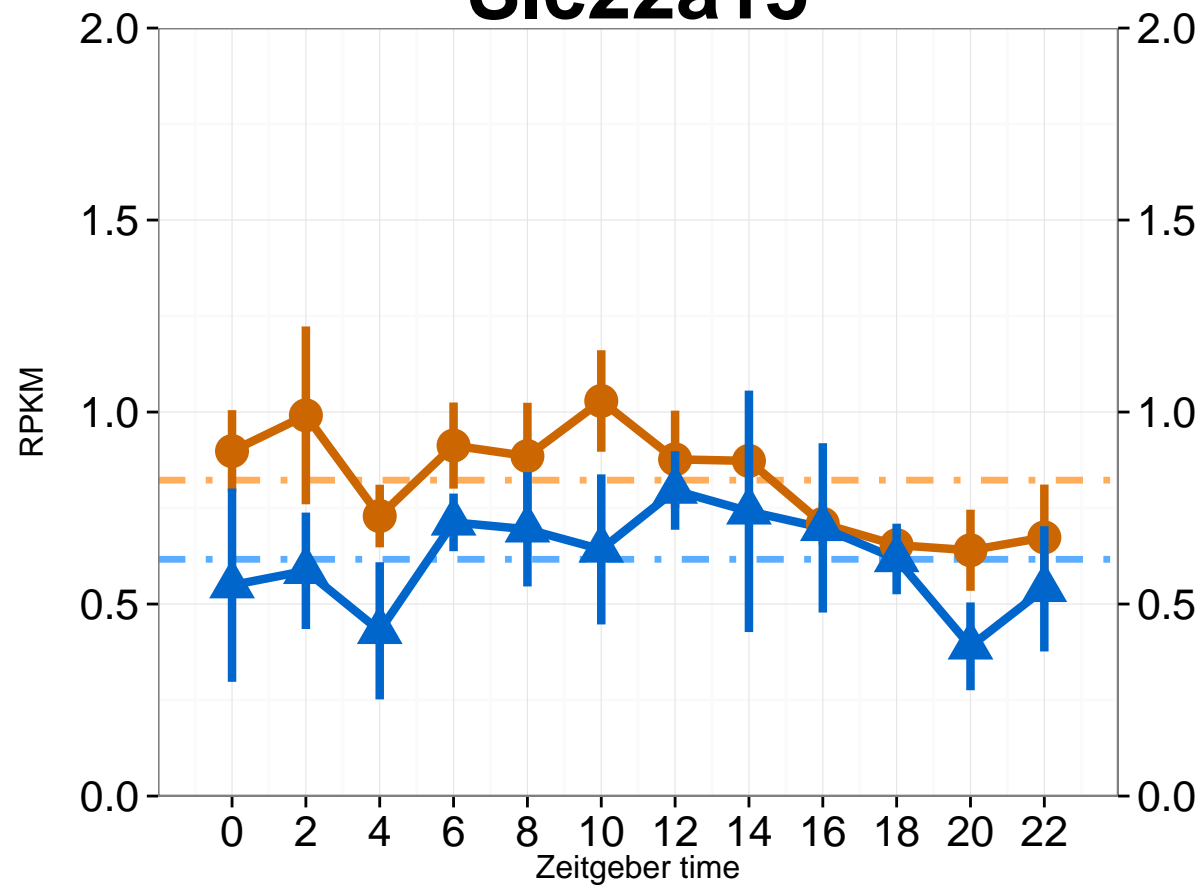

## Slc22a15

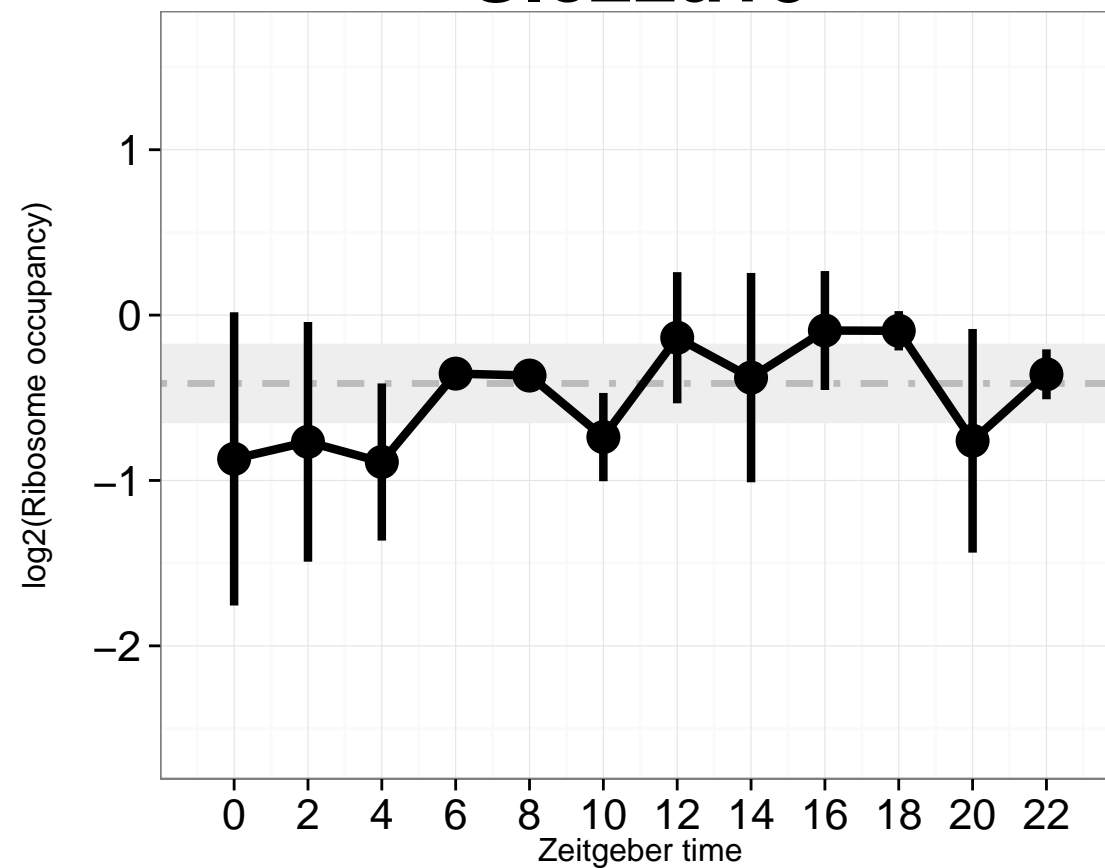

Supplement: Supplementary file 5500 [file 1]

# Lap3

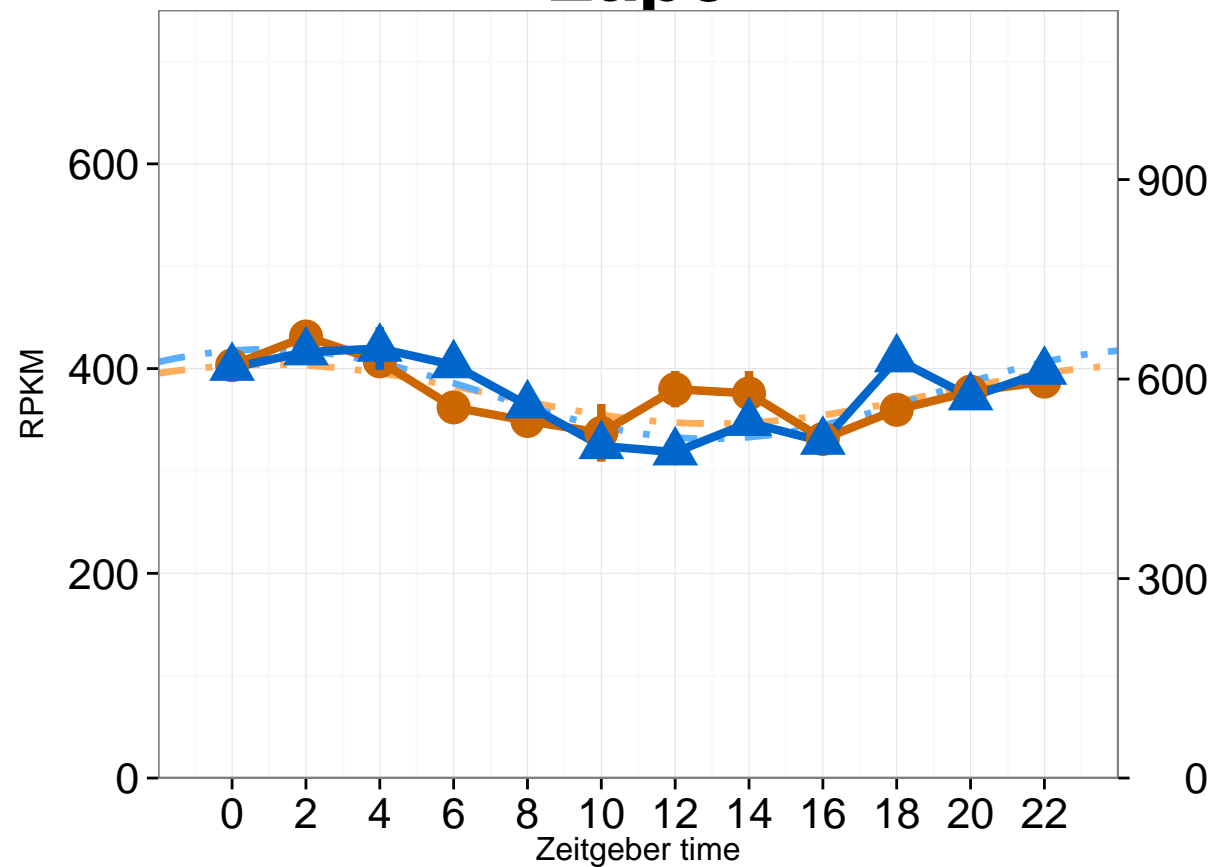

# Lap3

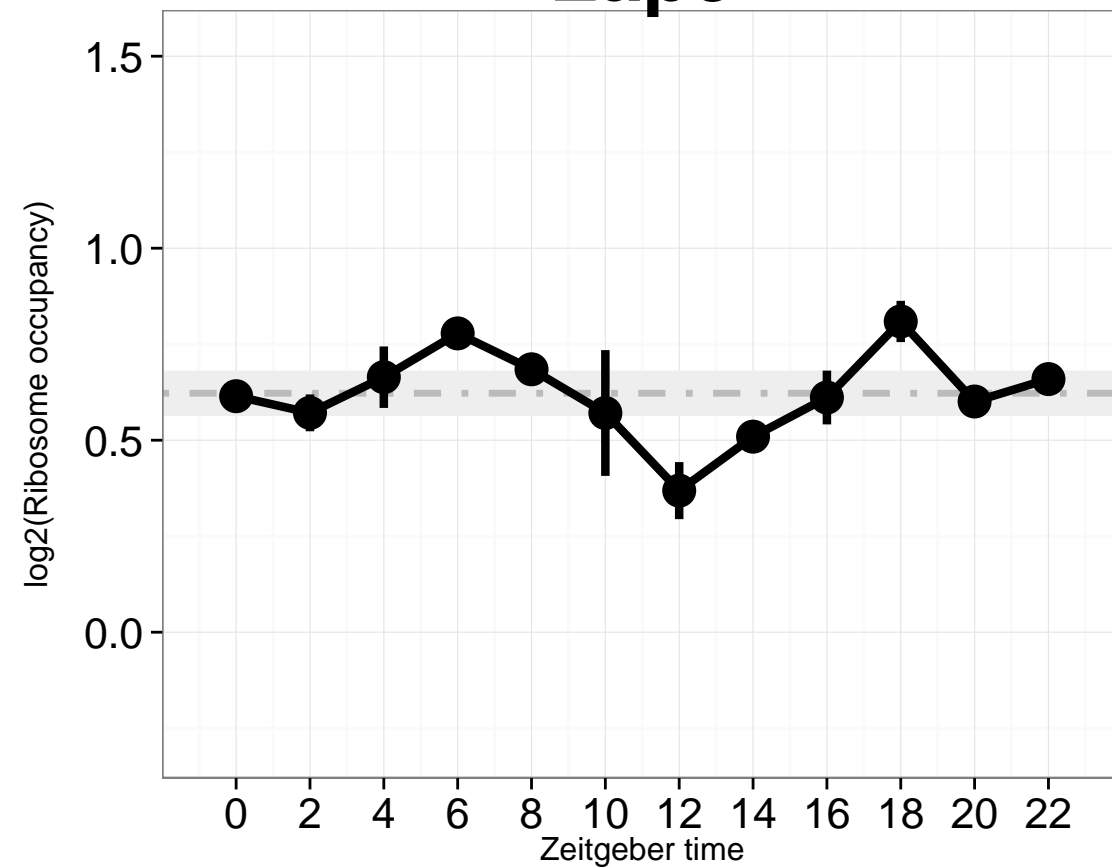

Supplement: Supplementary file 5501 [file 1]

# Idh3g

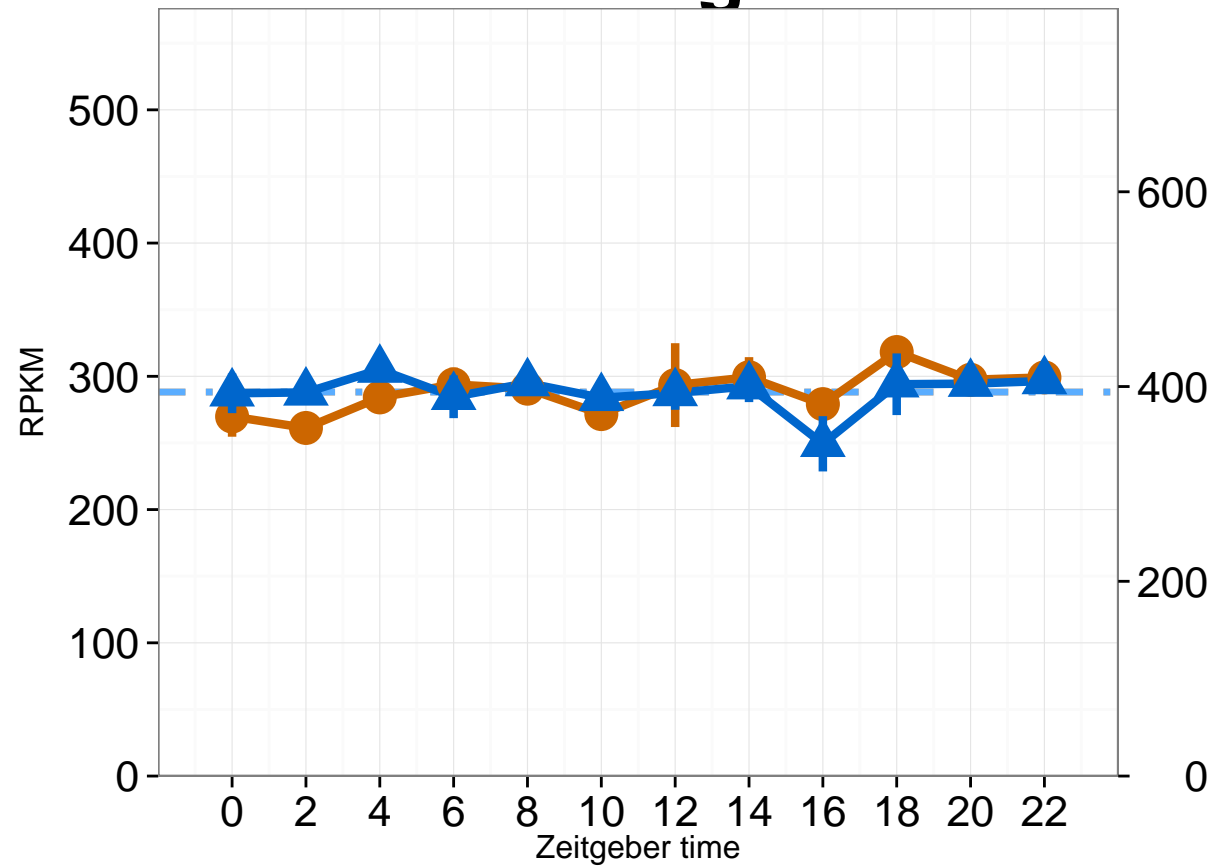

# Idh3g

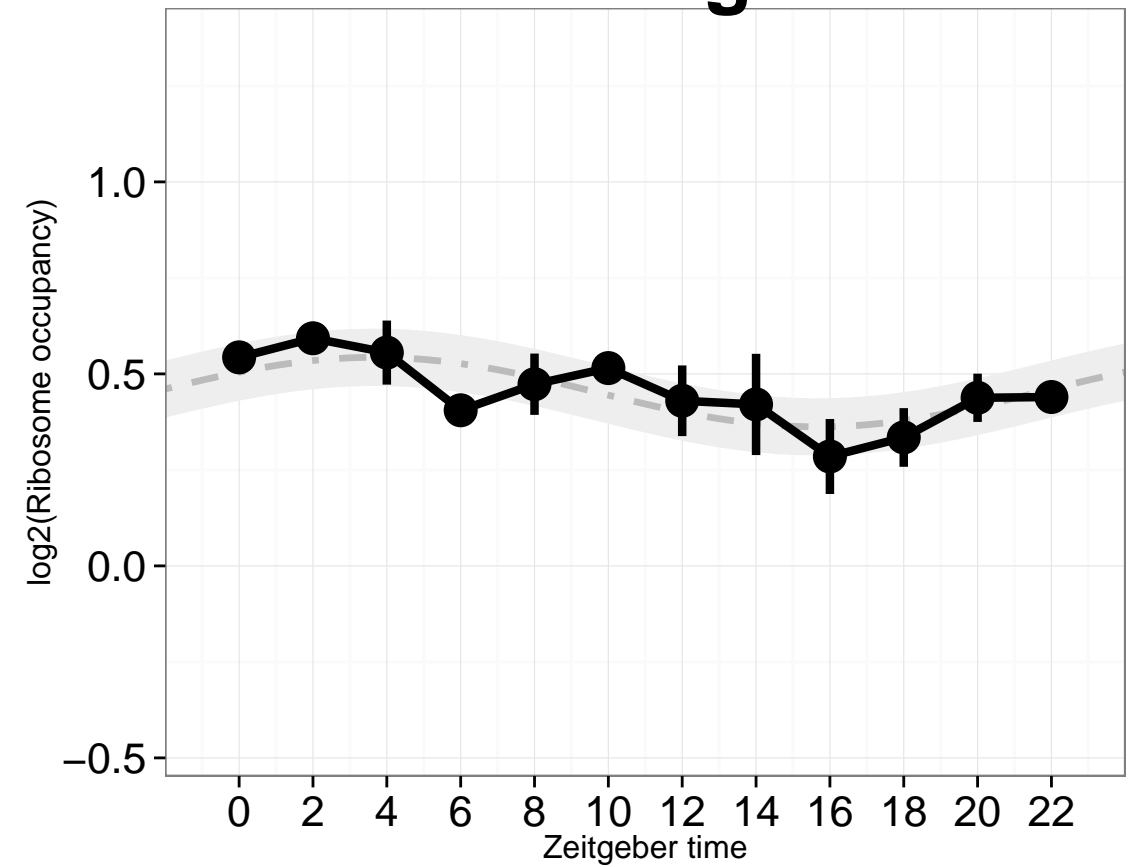

Supplement: Supplementary file 5502 [file 1]

## Gtf2h3

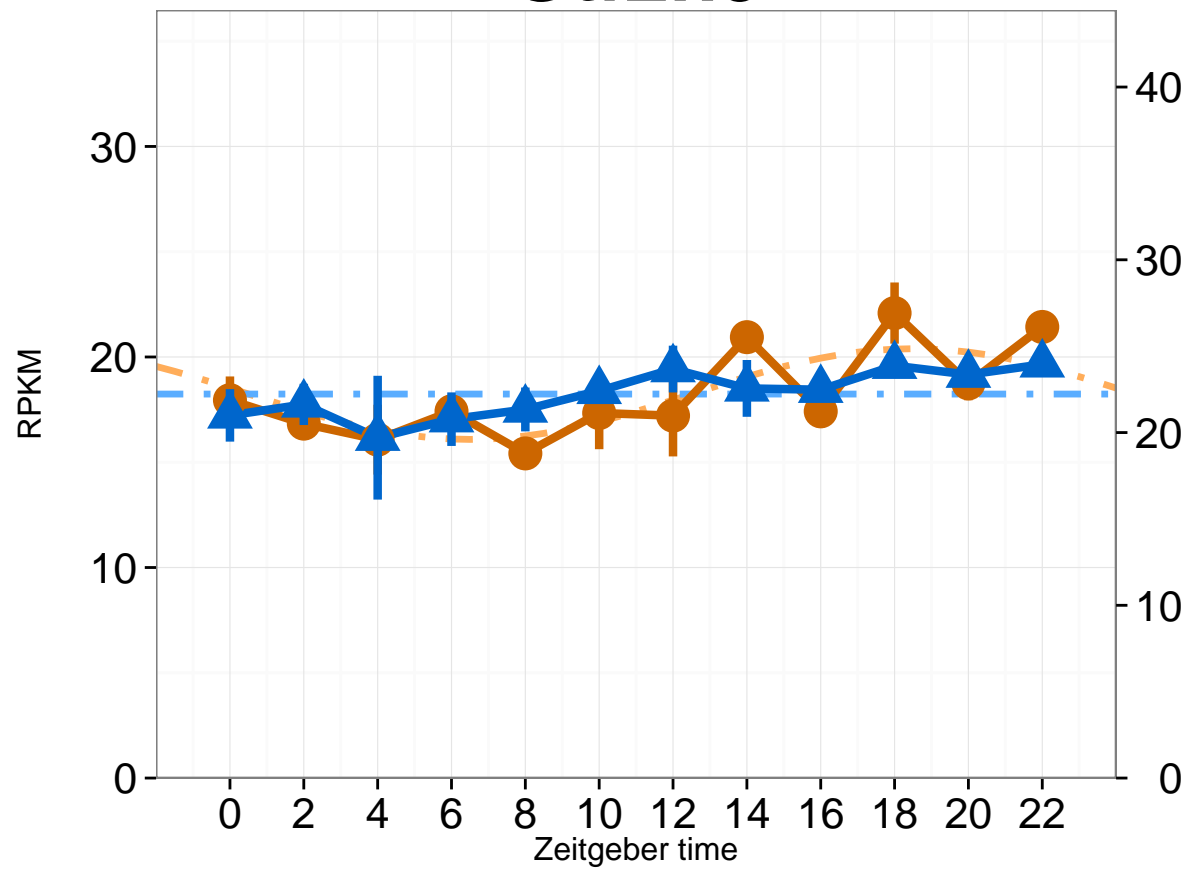

## Gtf2h3

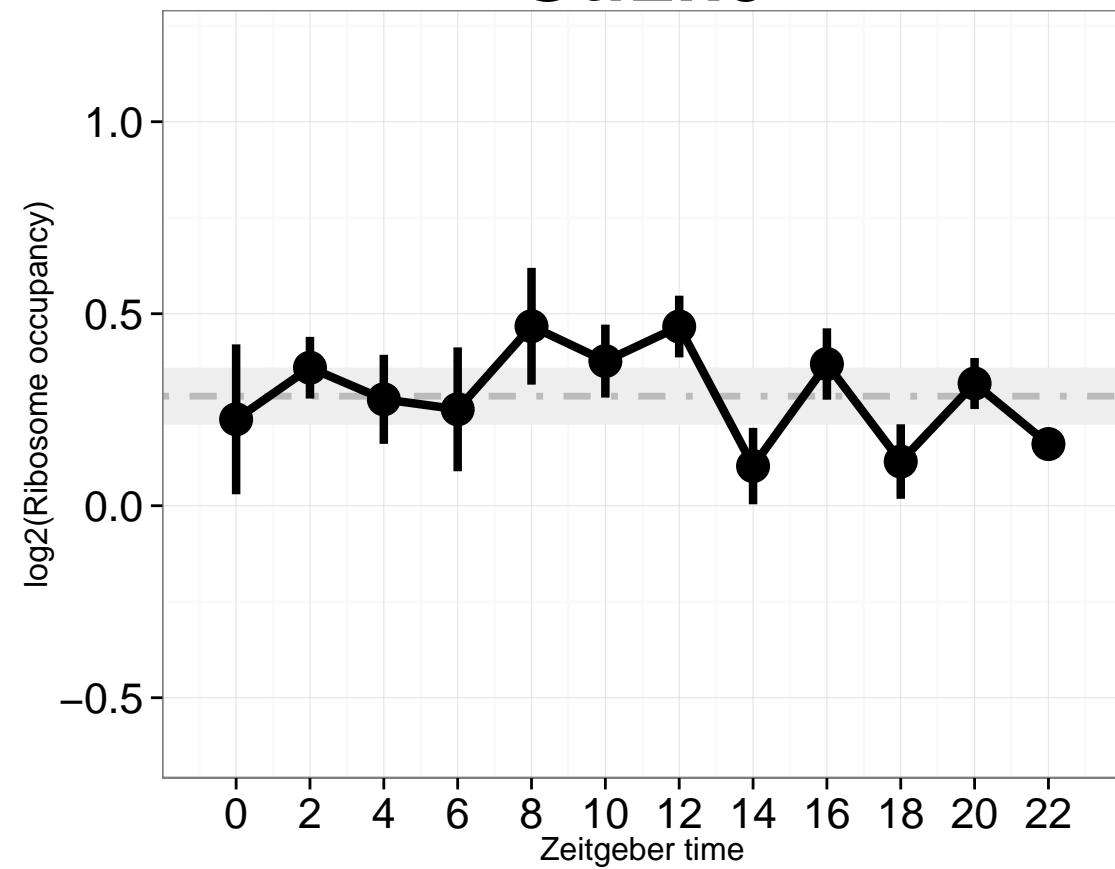

Supplement: Supplementary file 5503 [file 1]

# Ces2b

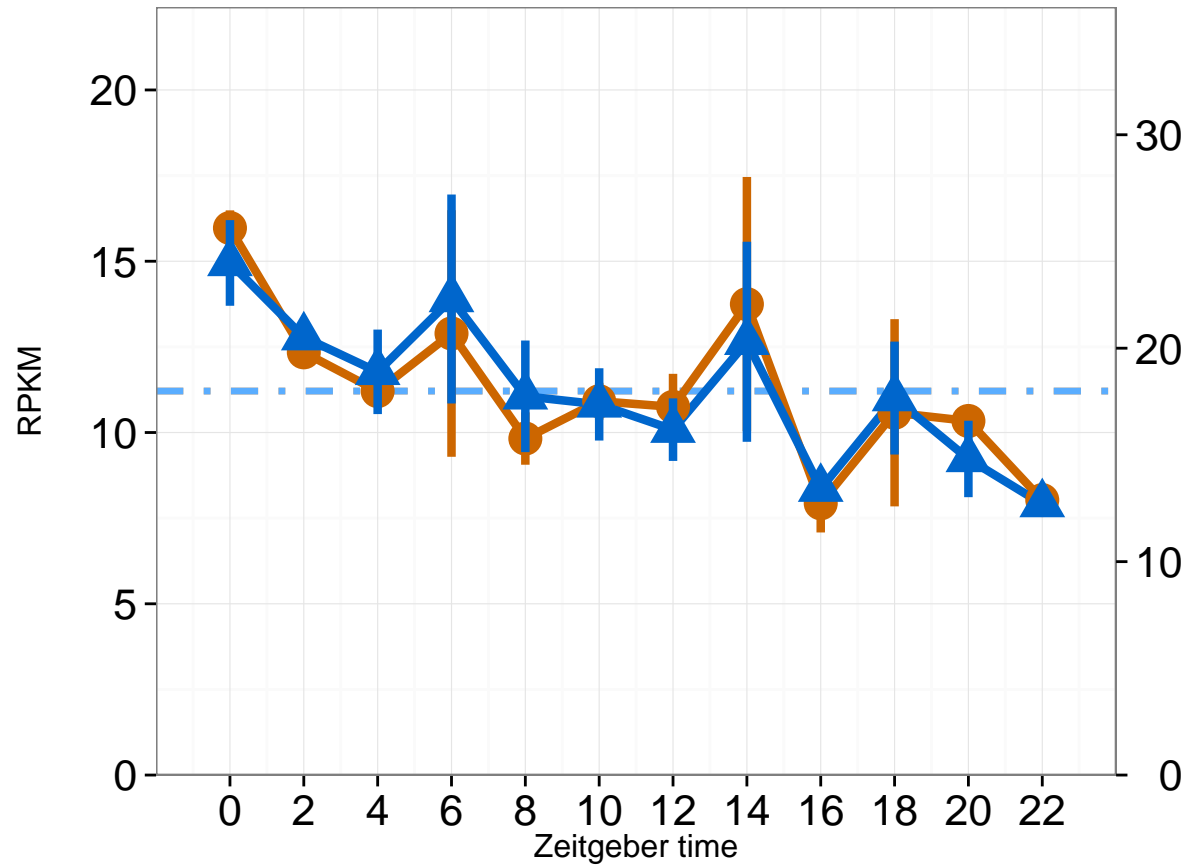

# Ces2b

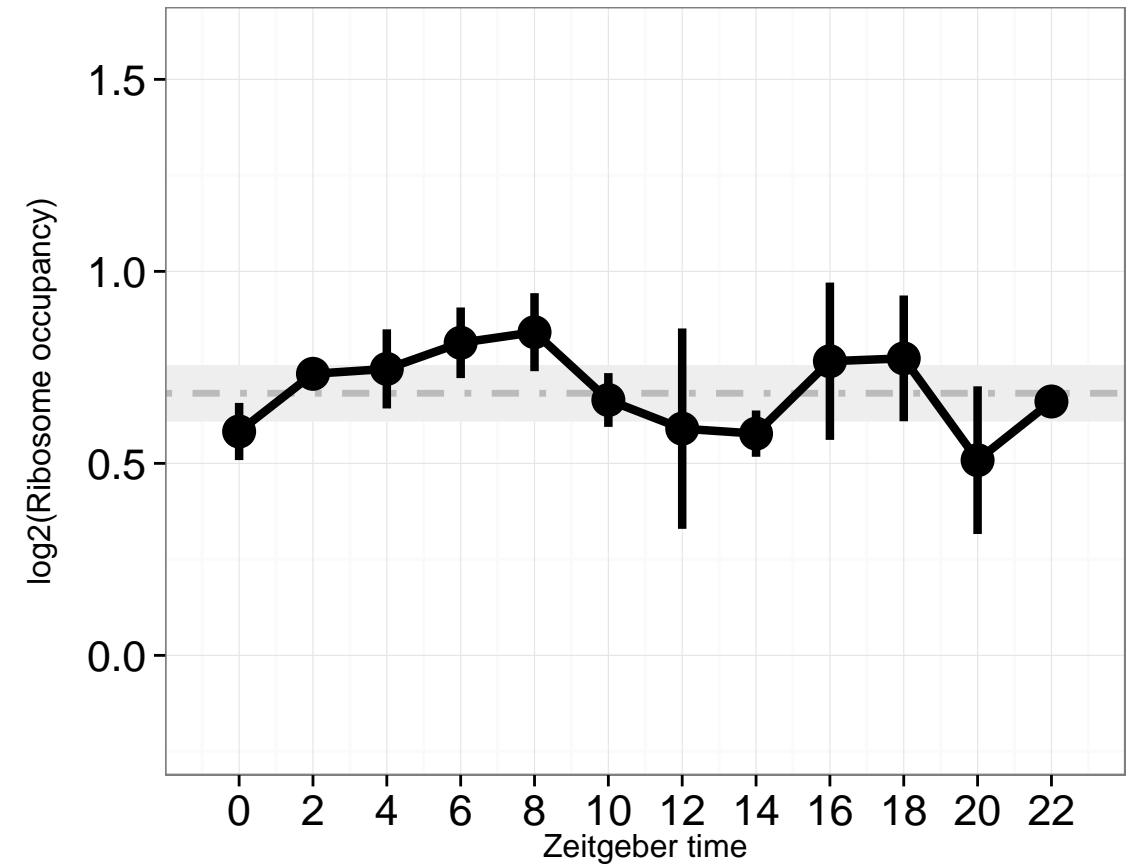

Supplement: Supplementary file 5504 [file 1]

## Med27

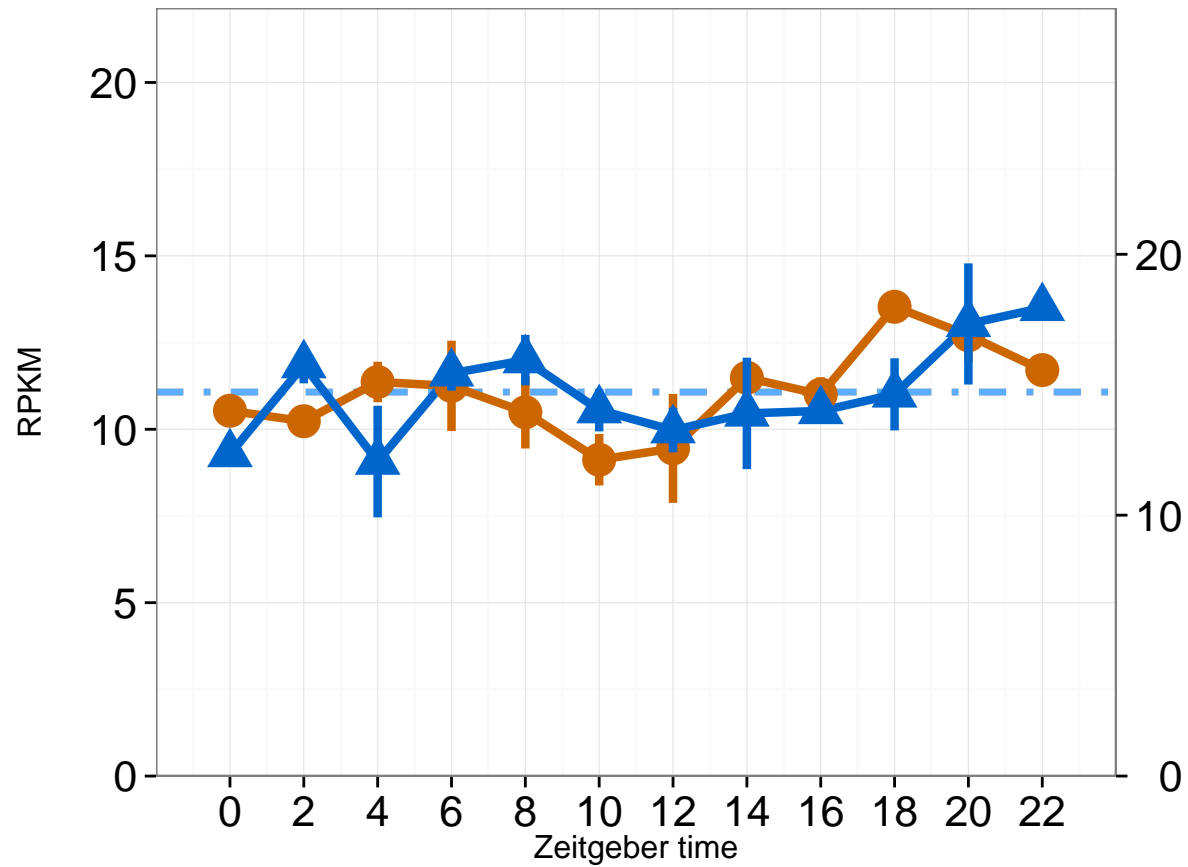

## Med27

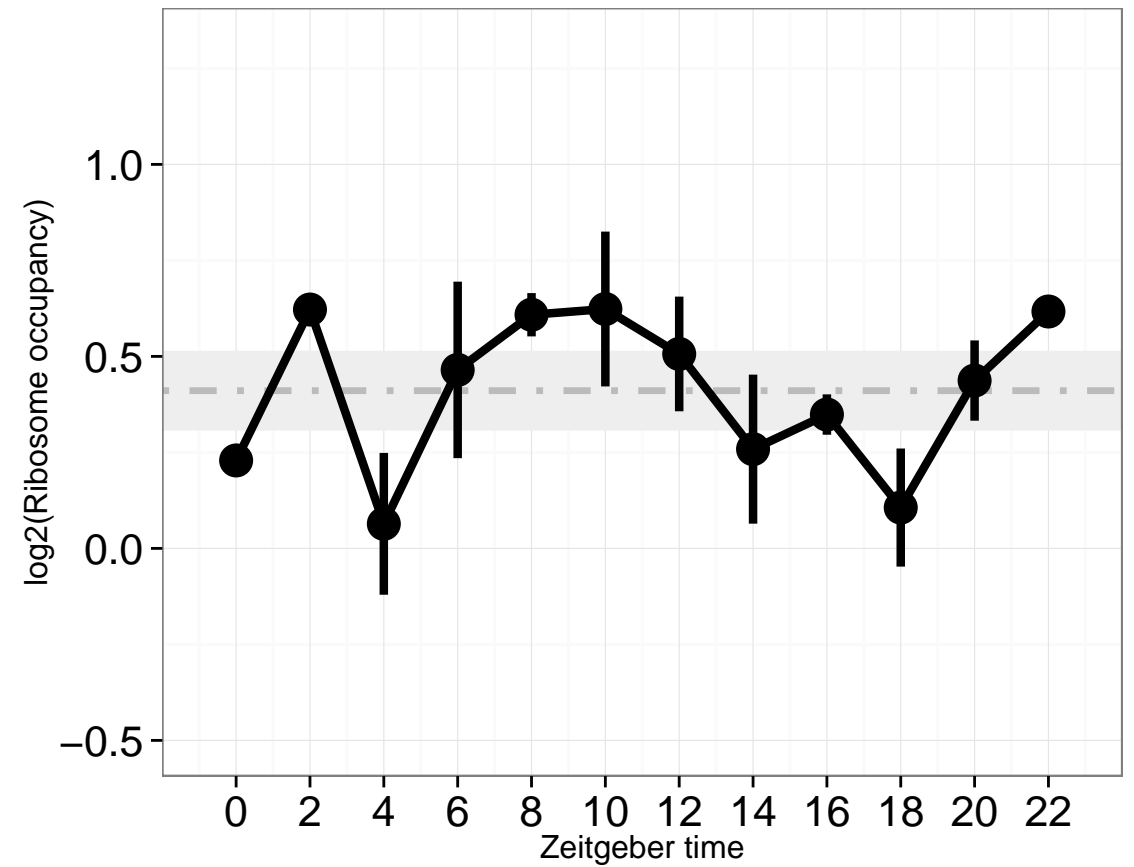

Supplement: Supplementary file 5505 [file 1]

# Col26a1

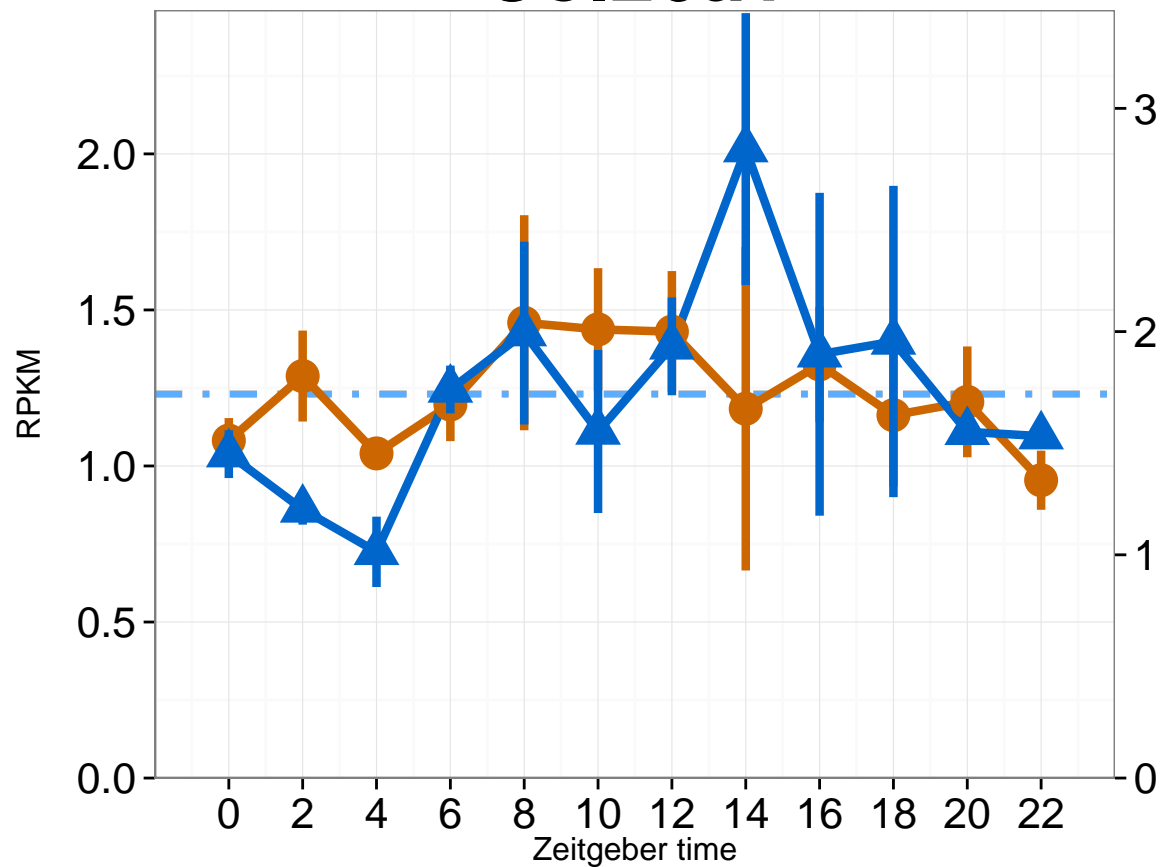

# Col26a1

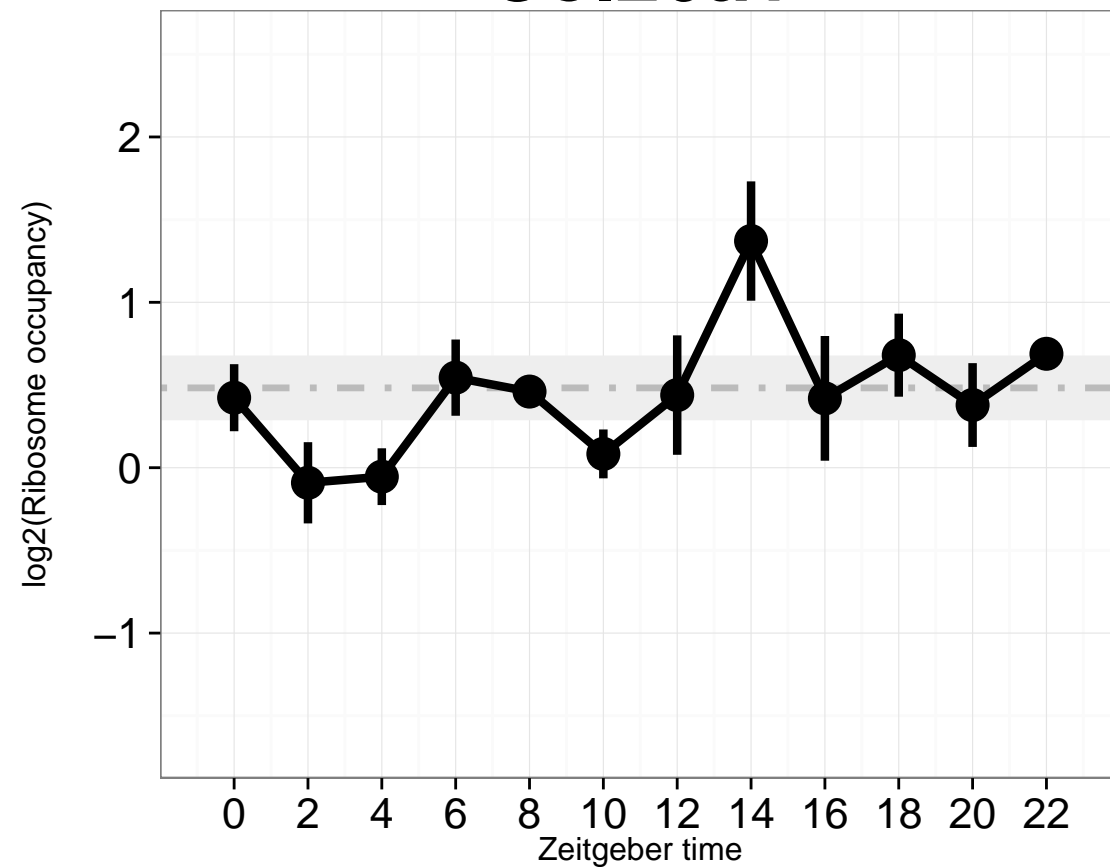

Supplement: Supplementary file 5506 [file 1]

## Erlec1

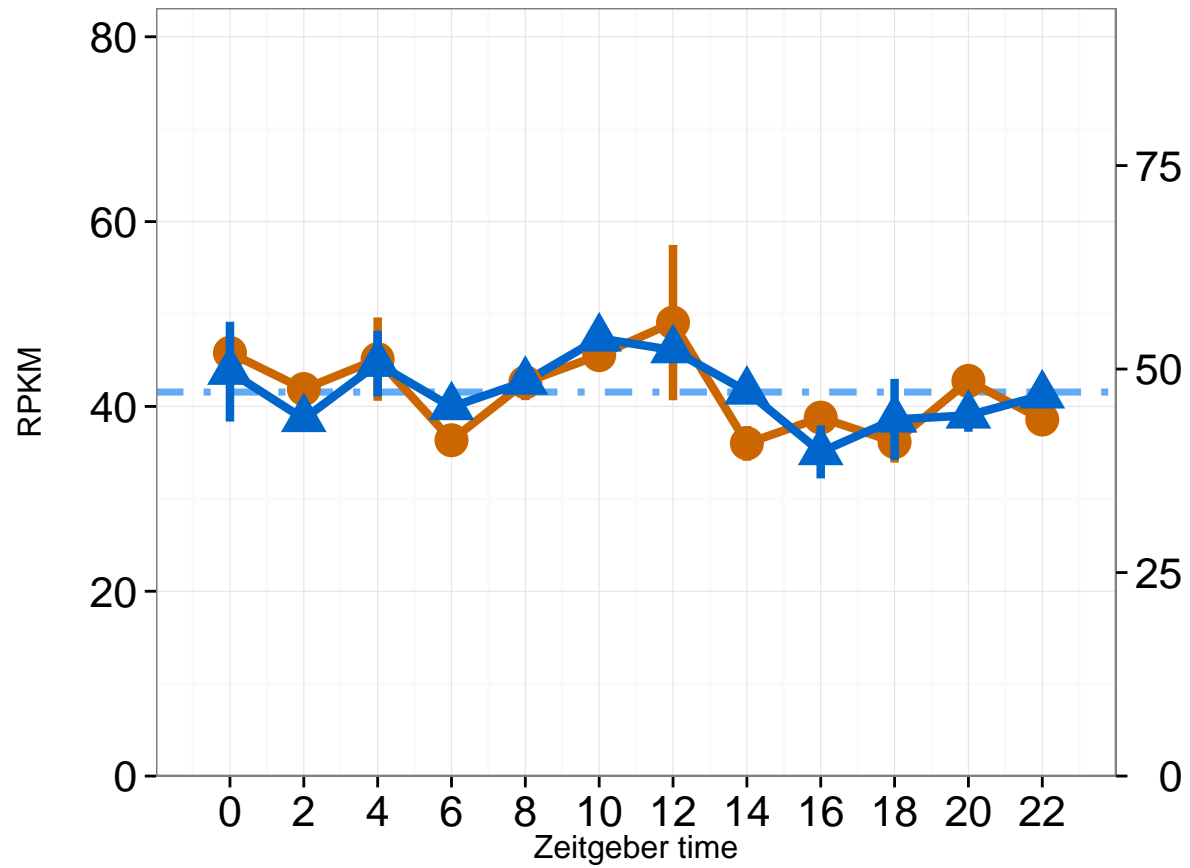

## Erlec1

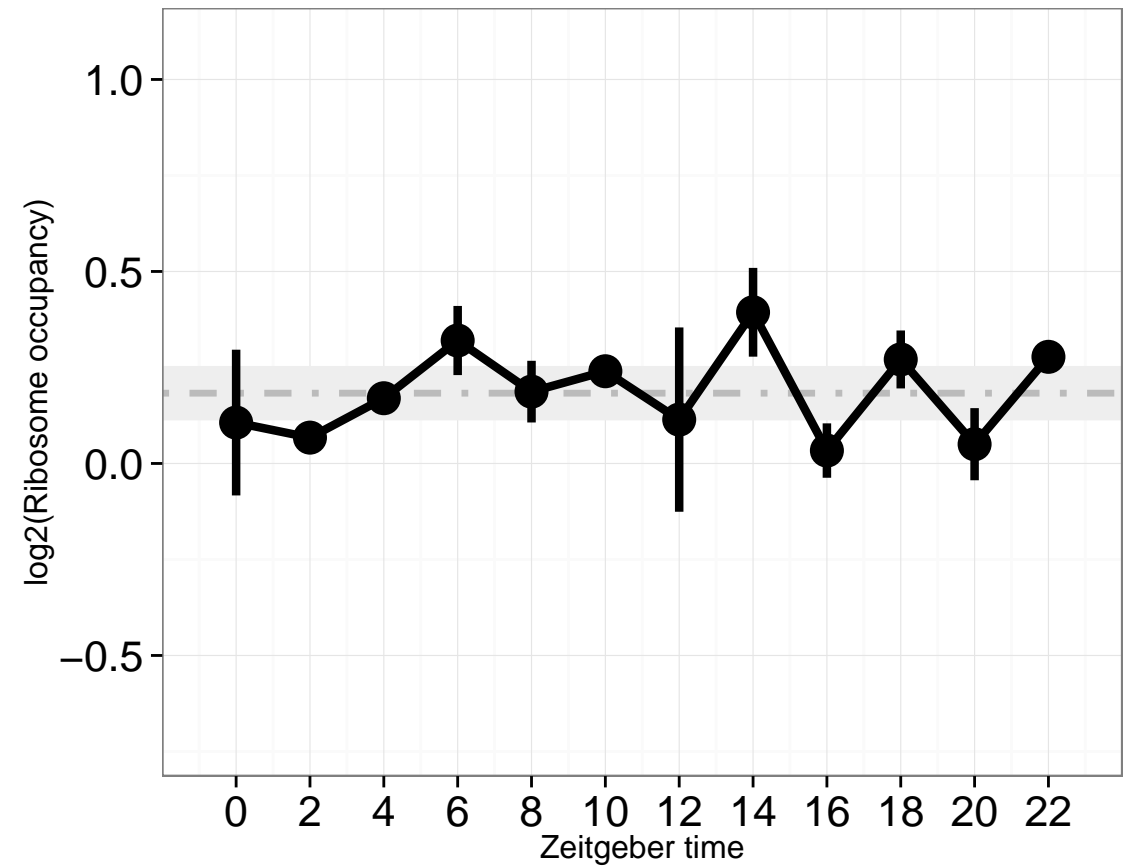

Supplement: Supplementary file 5507 [file 1]

# B4galt4

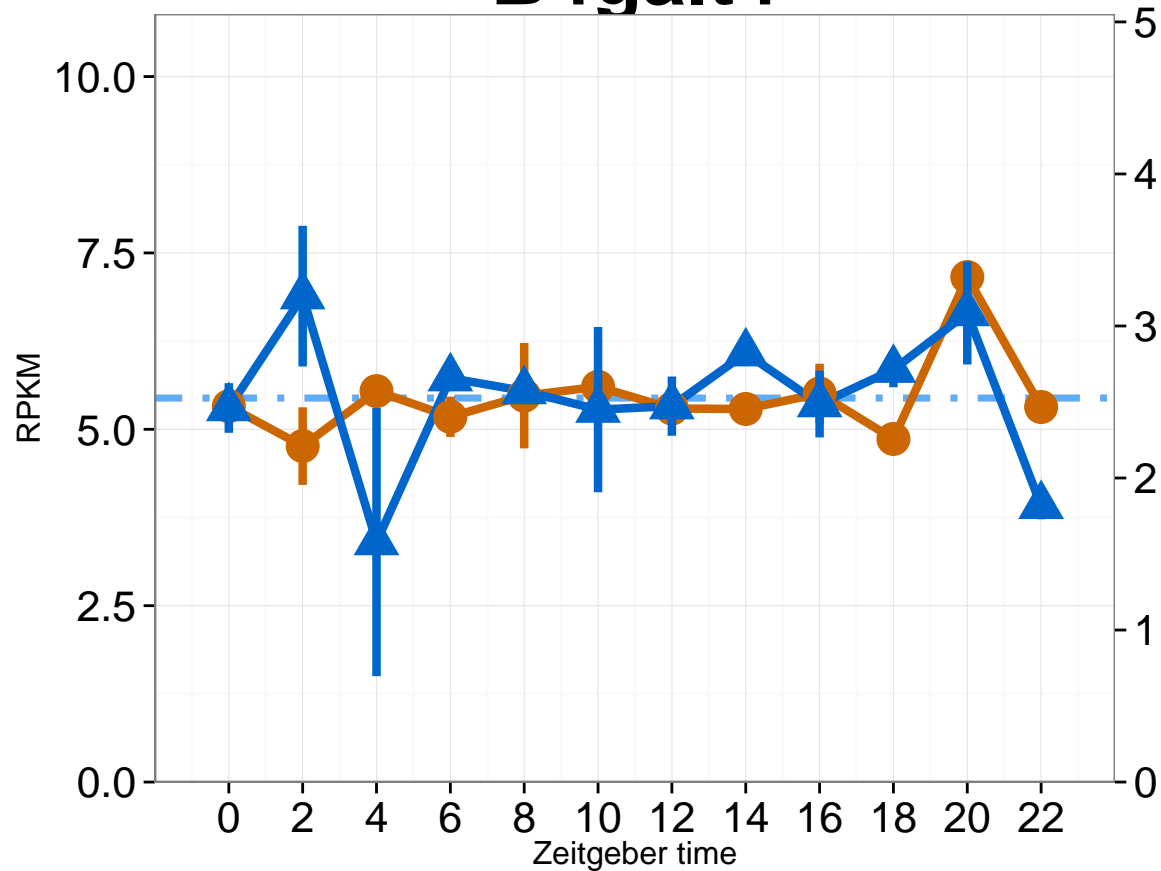

# B4galt4

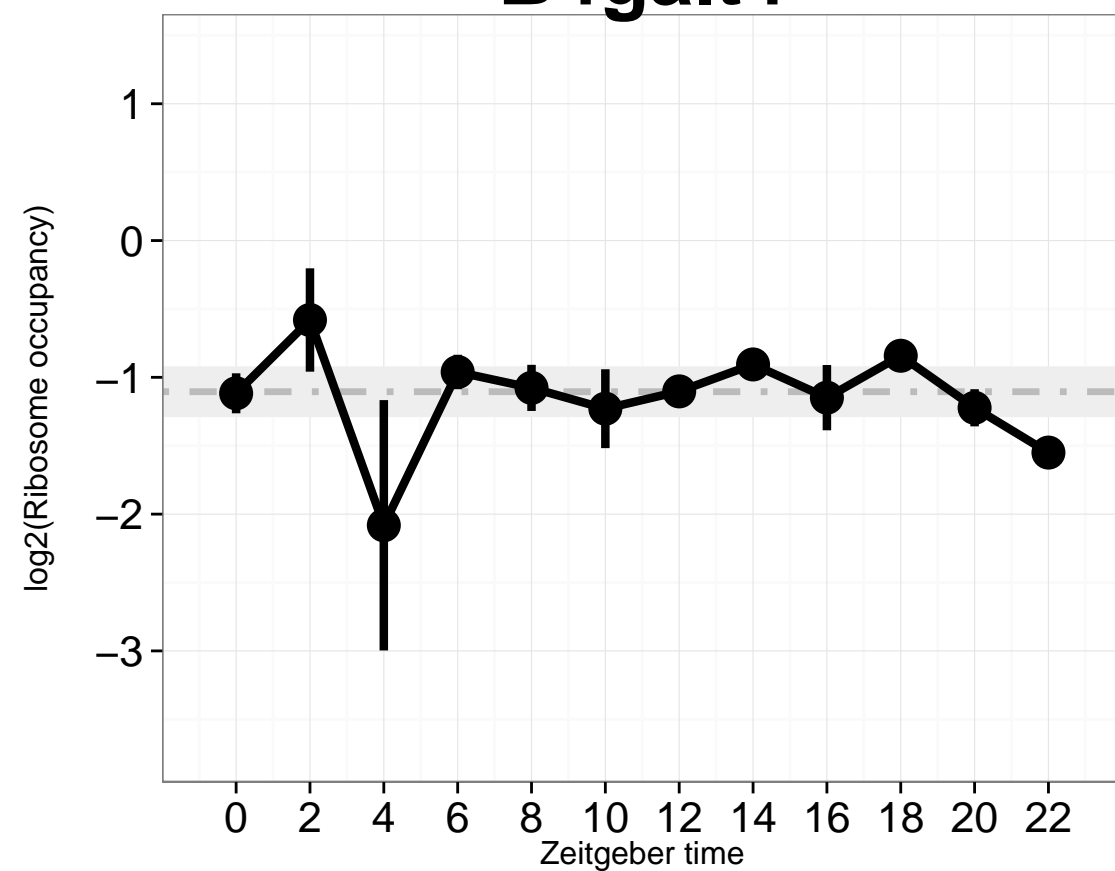

Supplement: Supplementary file 5508 [file 1]

## Ganc

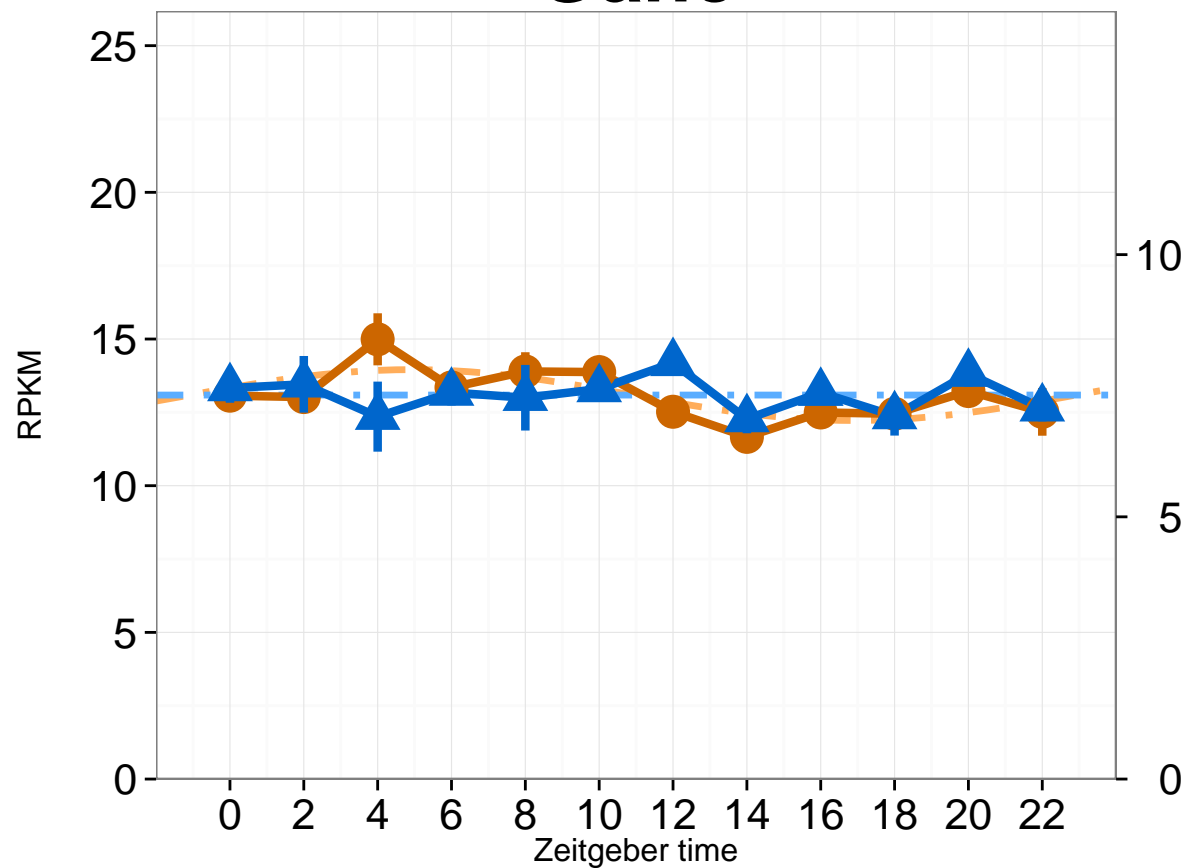

## Ganc

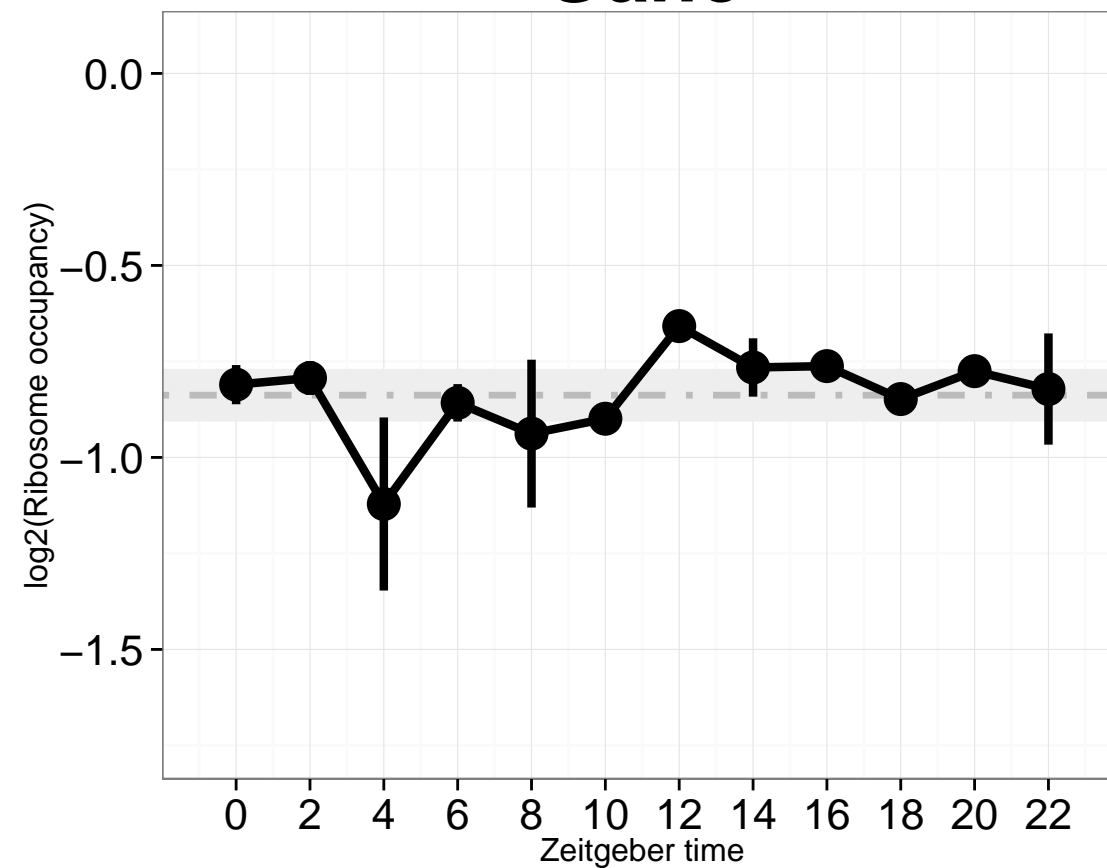

Supplement: Supplementary file 5509 [file 1]

# Atg16l2

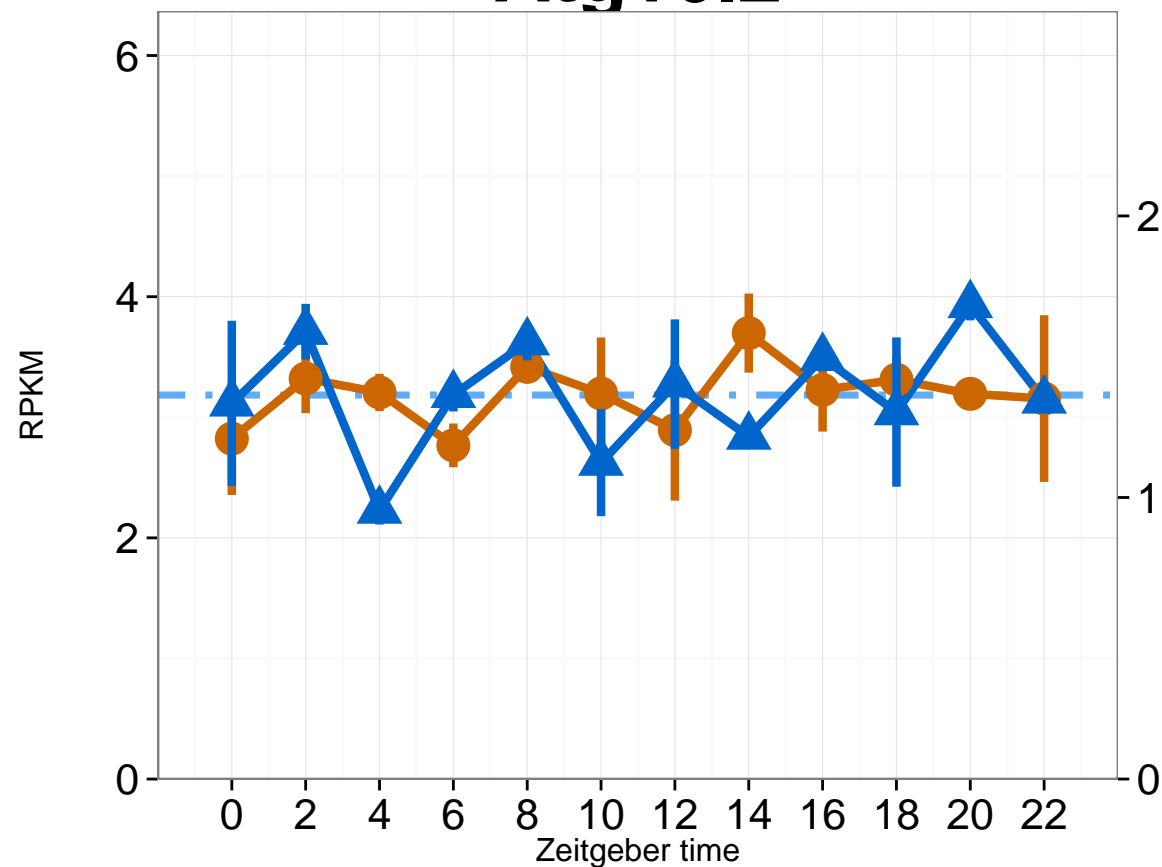

# Atg16l2

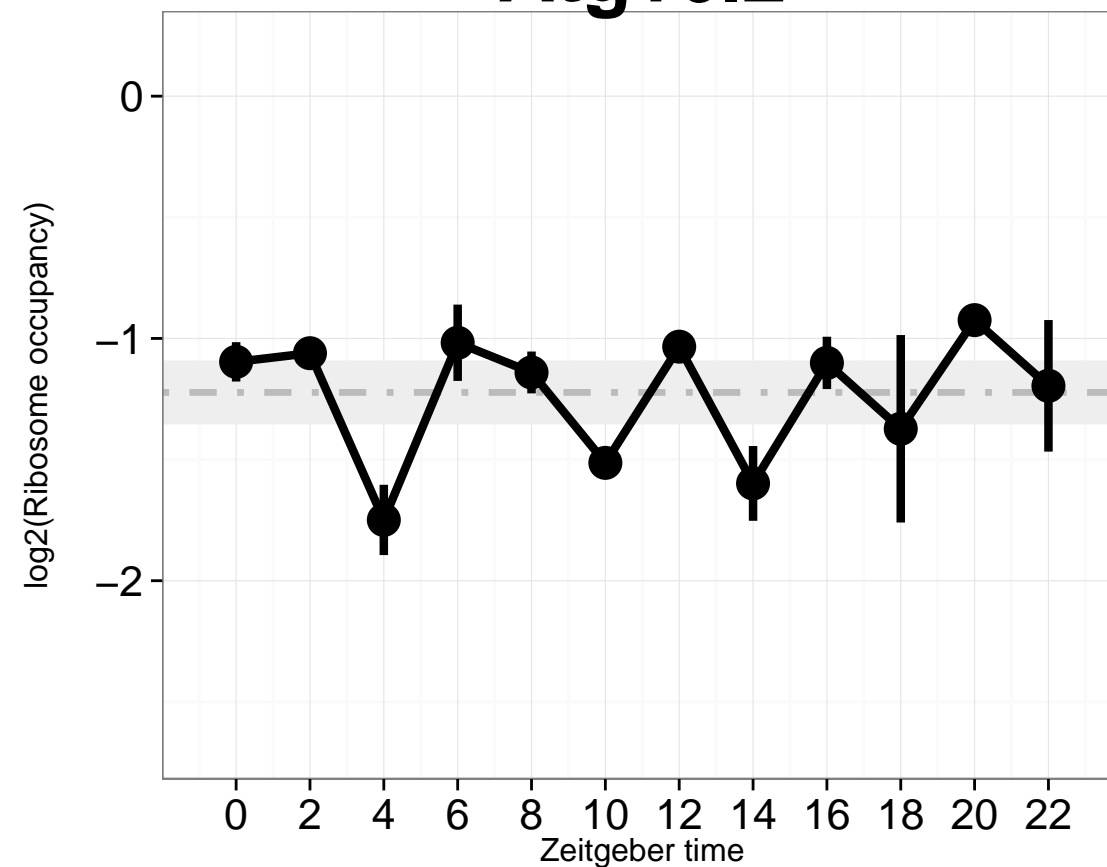

Supplement: Supplementary file 5510 [file 1]

## Olfm3

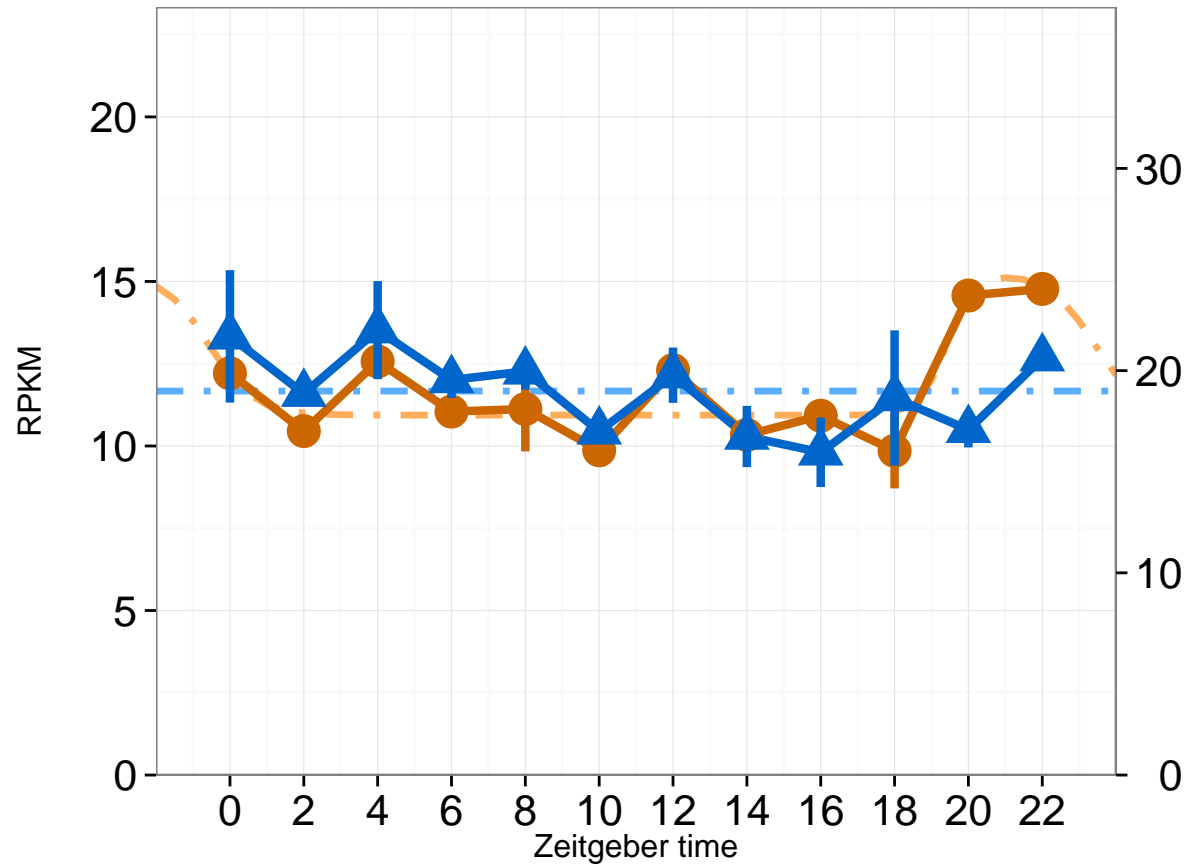

## Olfm3

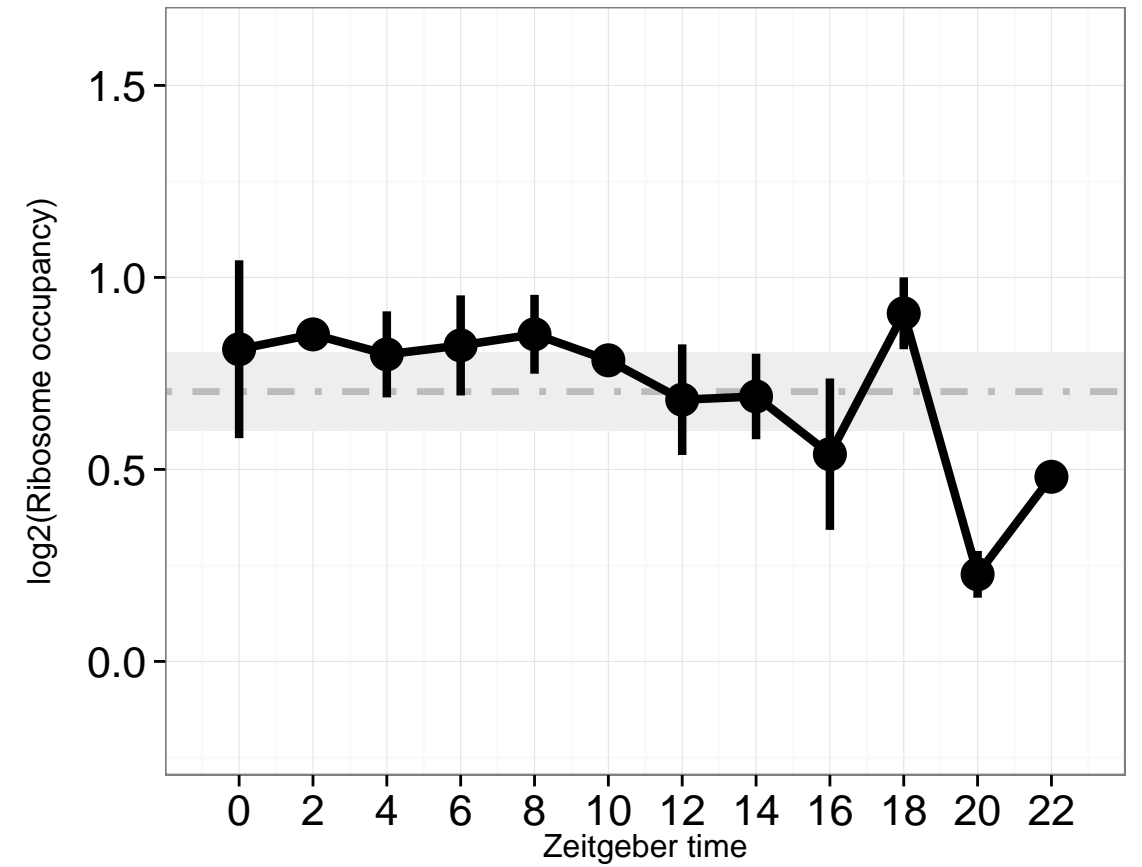

Supplement: Supplementary file 5511 [file 1]

**5430427O19Rik TR**

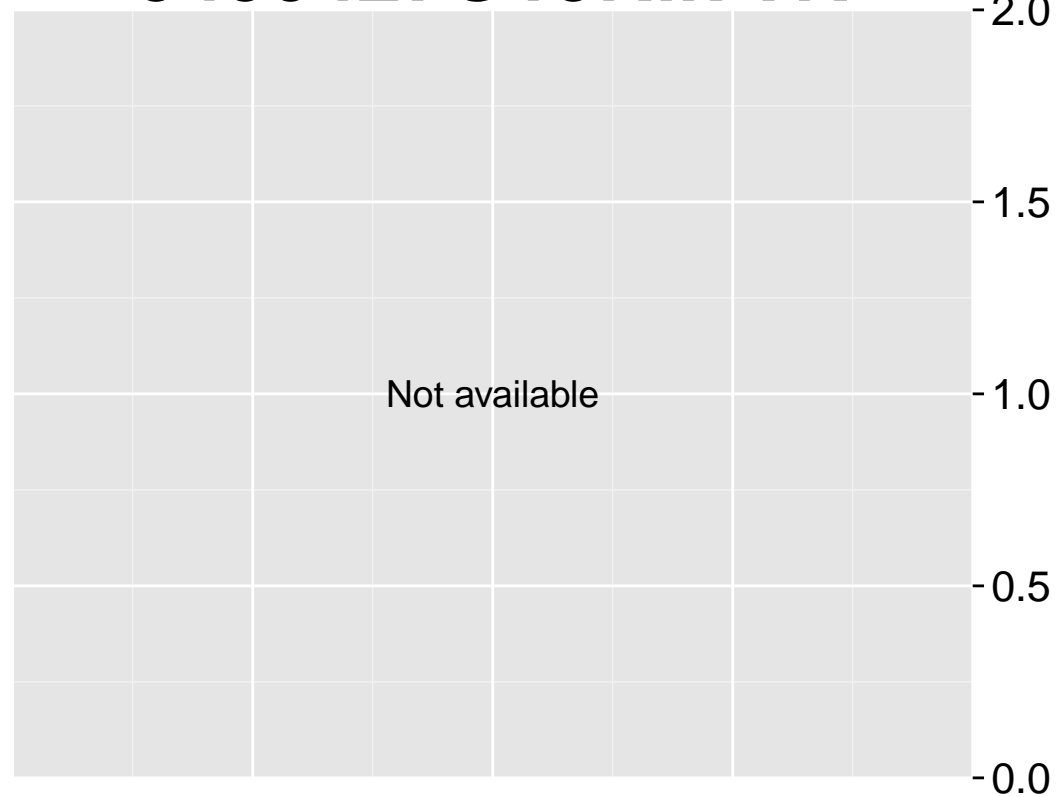

**5430427O19Rik log2(Ribosome occup**

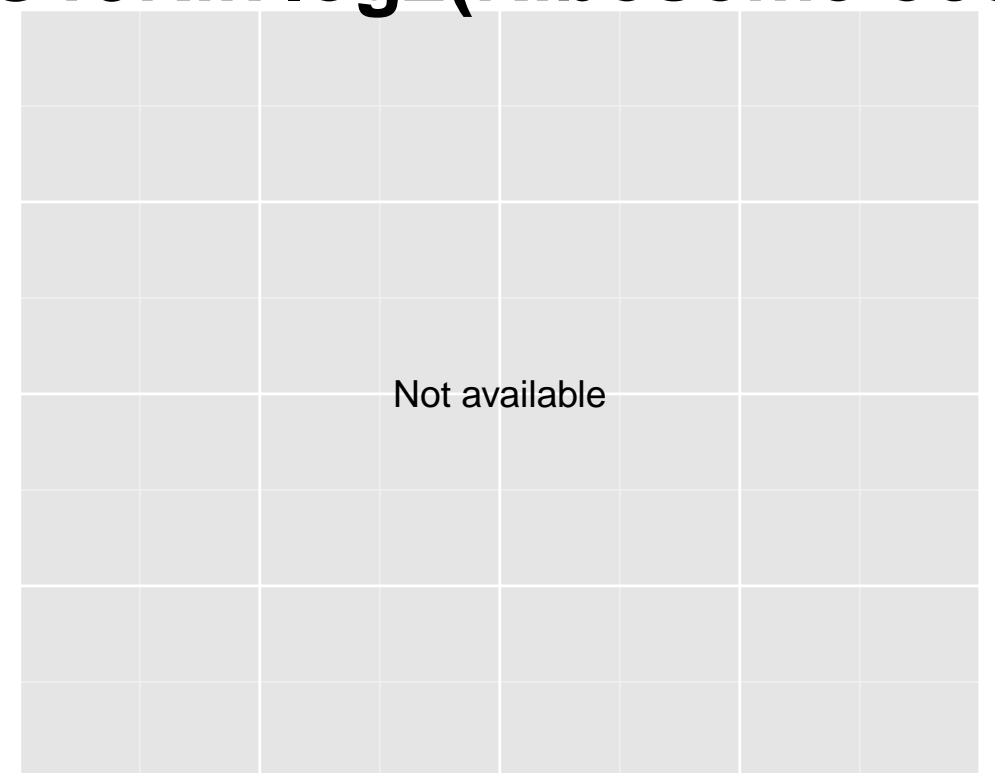

Supplement: Supplementary file 5512 [file 1]

## Snrpa1

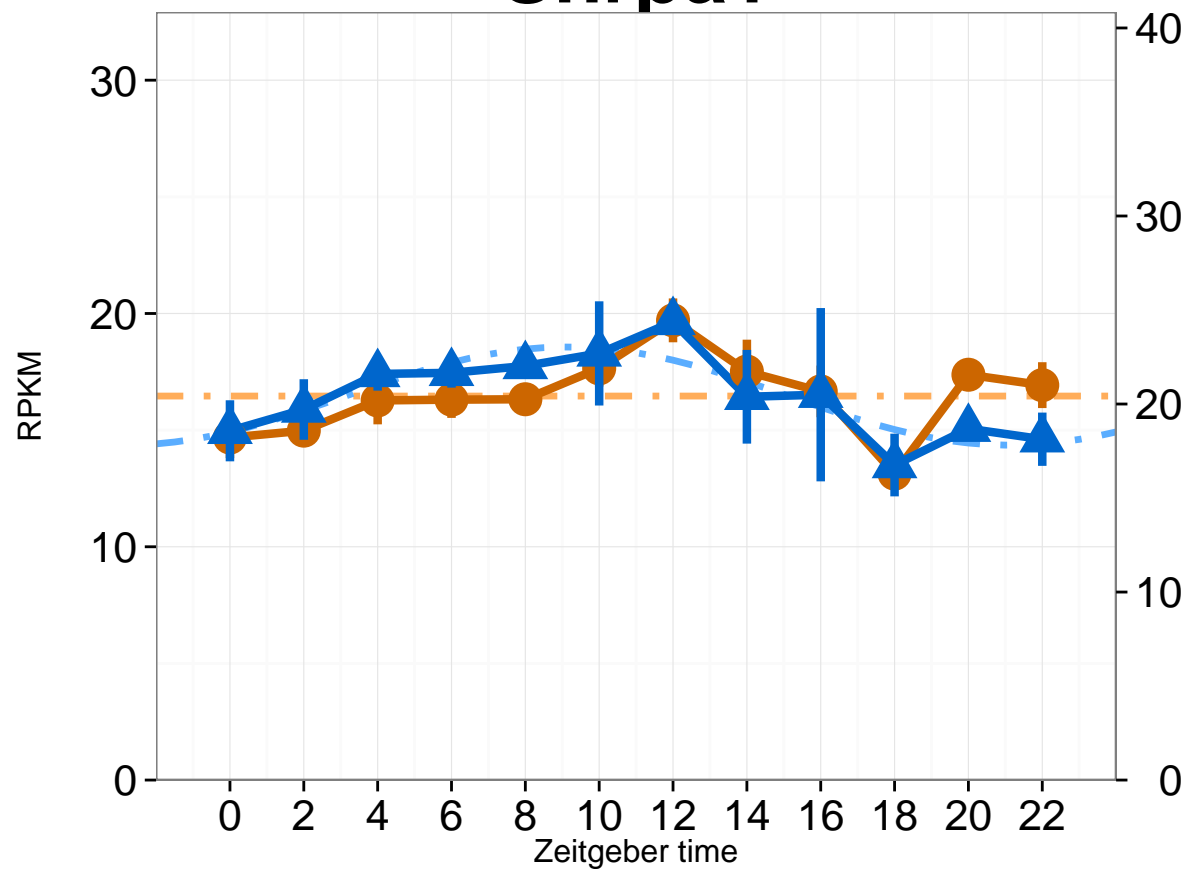

## Snrpa1

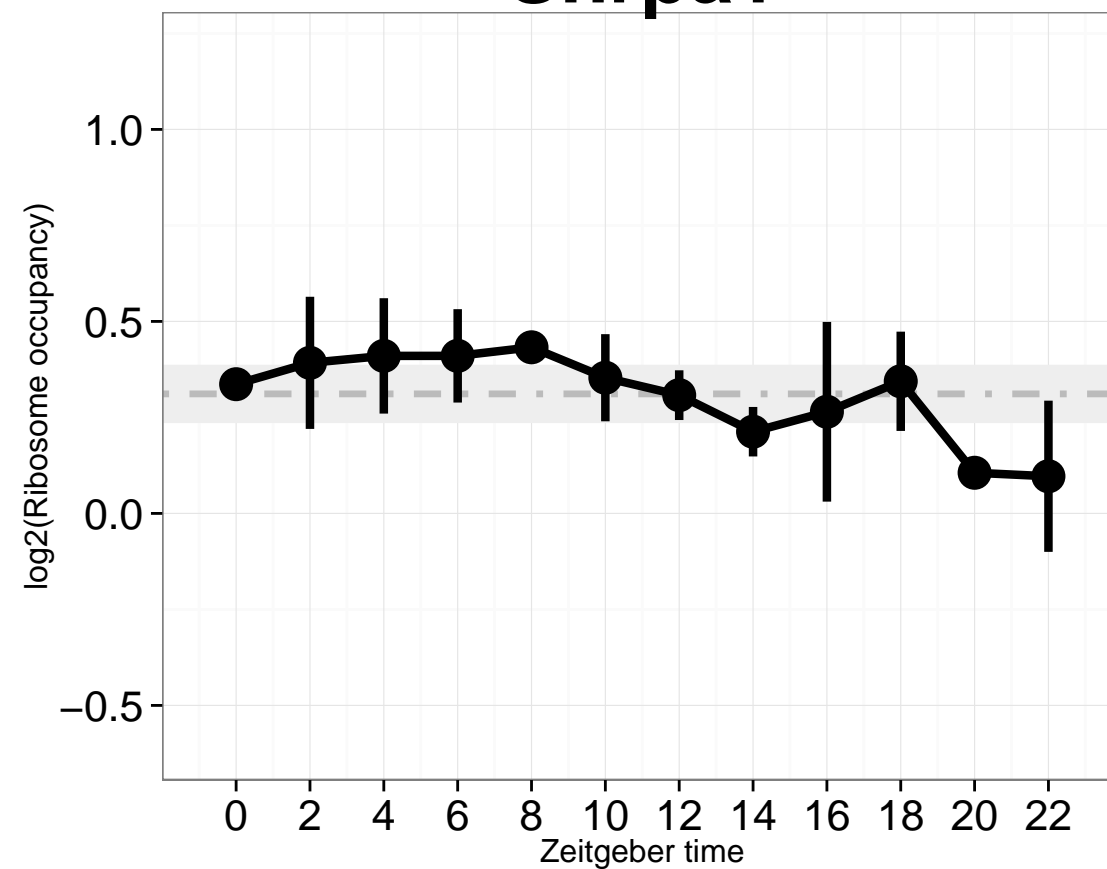

Supplement: Supplementary file 5513 [file 1]

# Park2

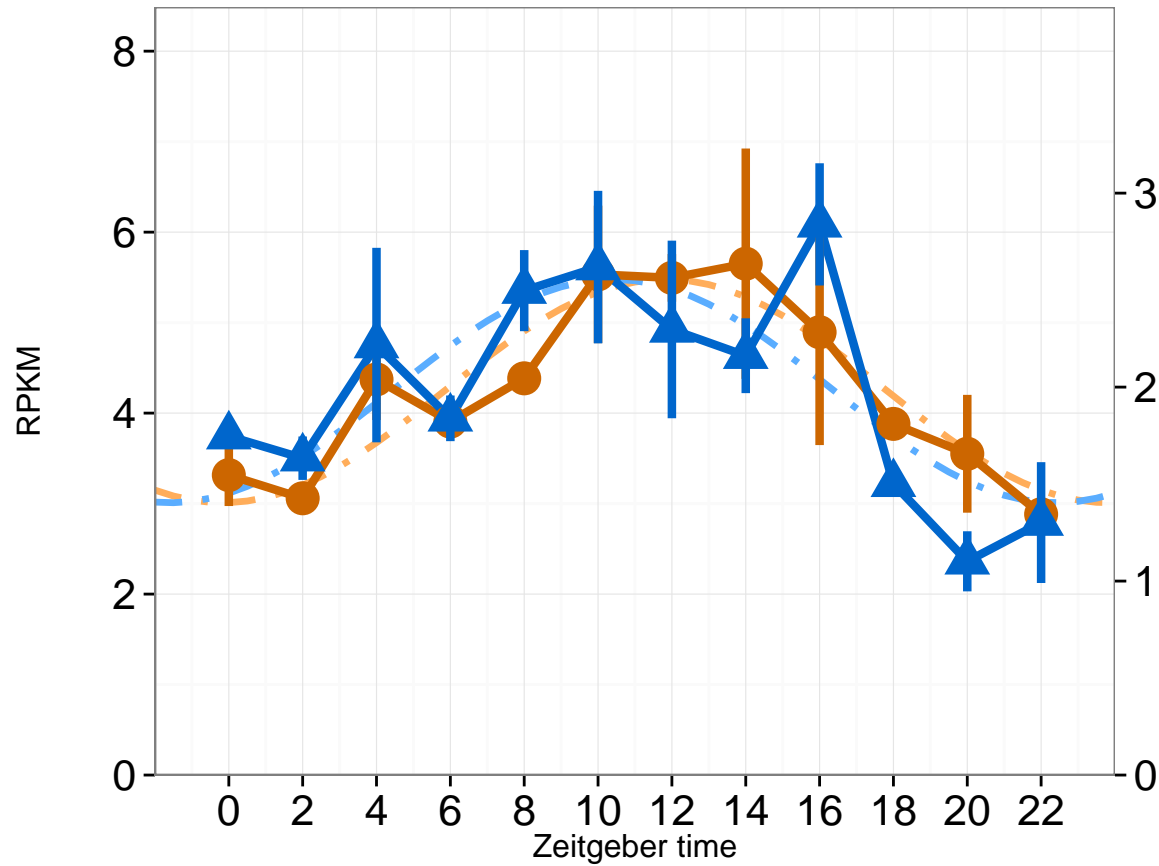

# Park2

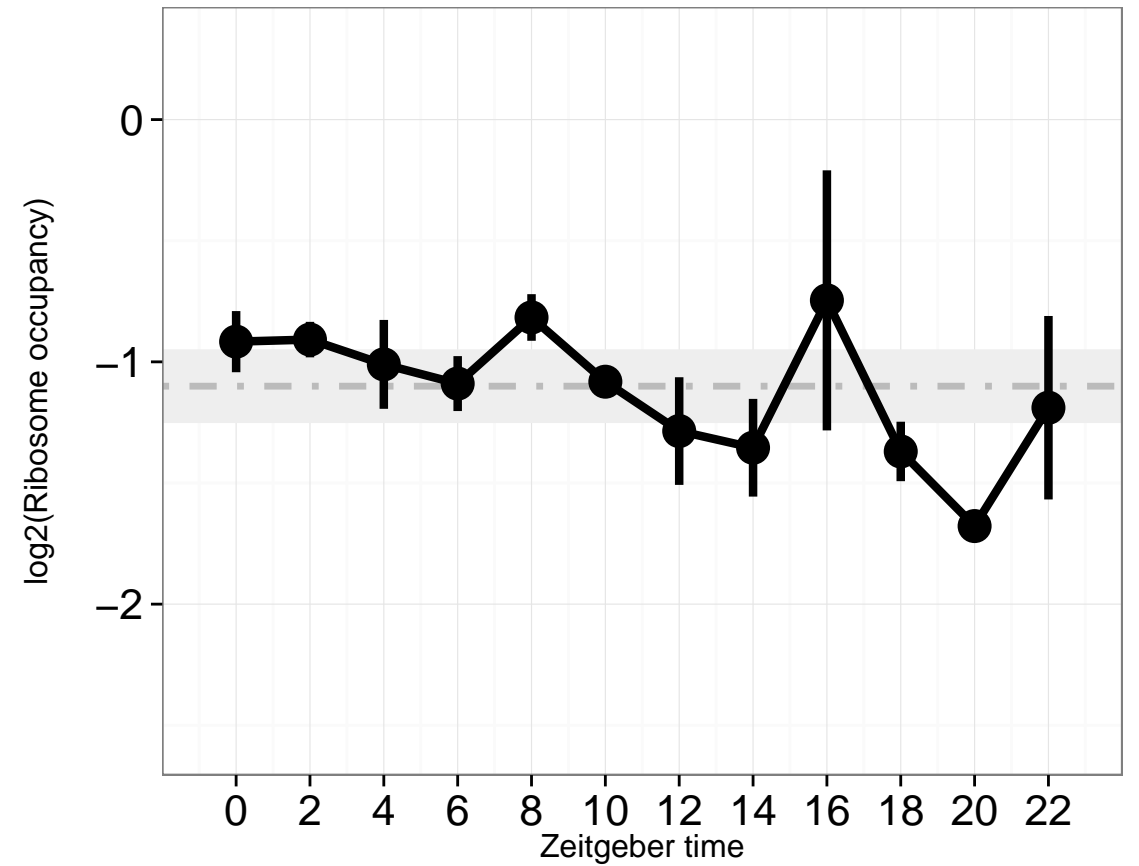

Supplement: Supplementary file 5514 [file 1]

## Gm4952

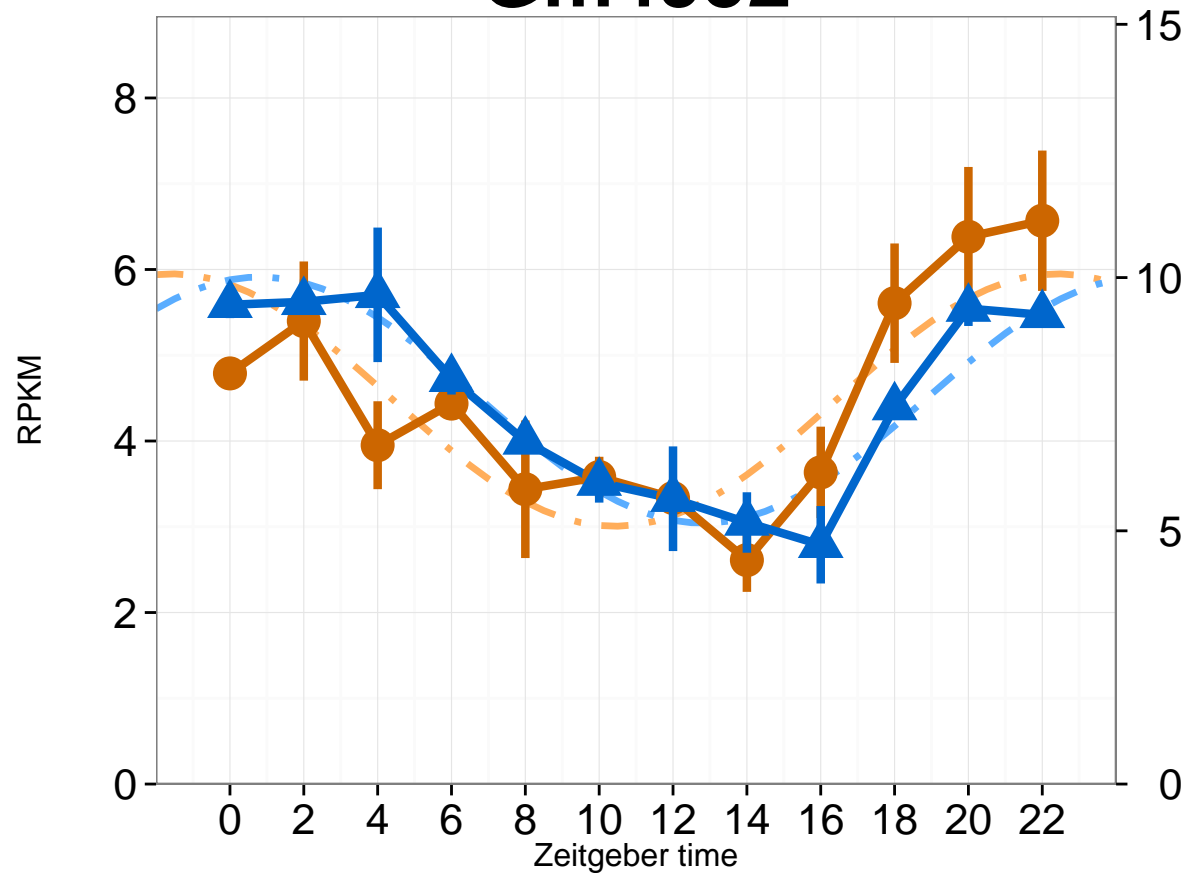

## Gm4952

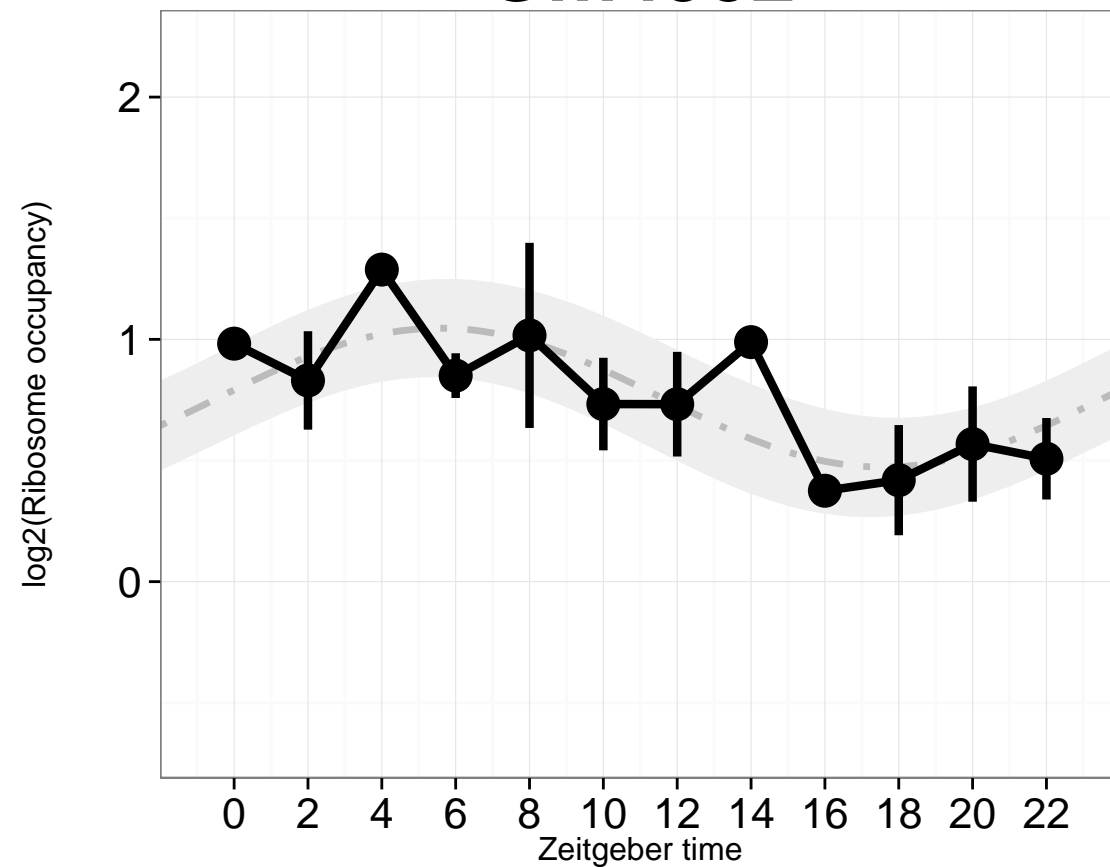

Supplement: Supplementary file 5515 [file 1]

# Gdf11

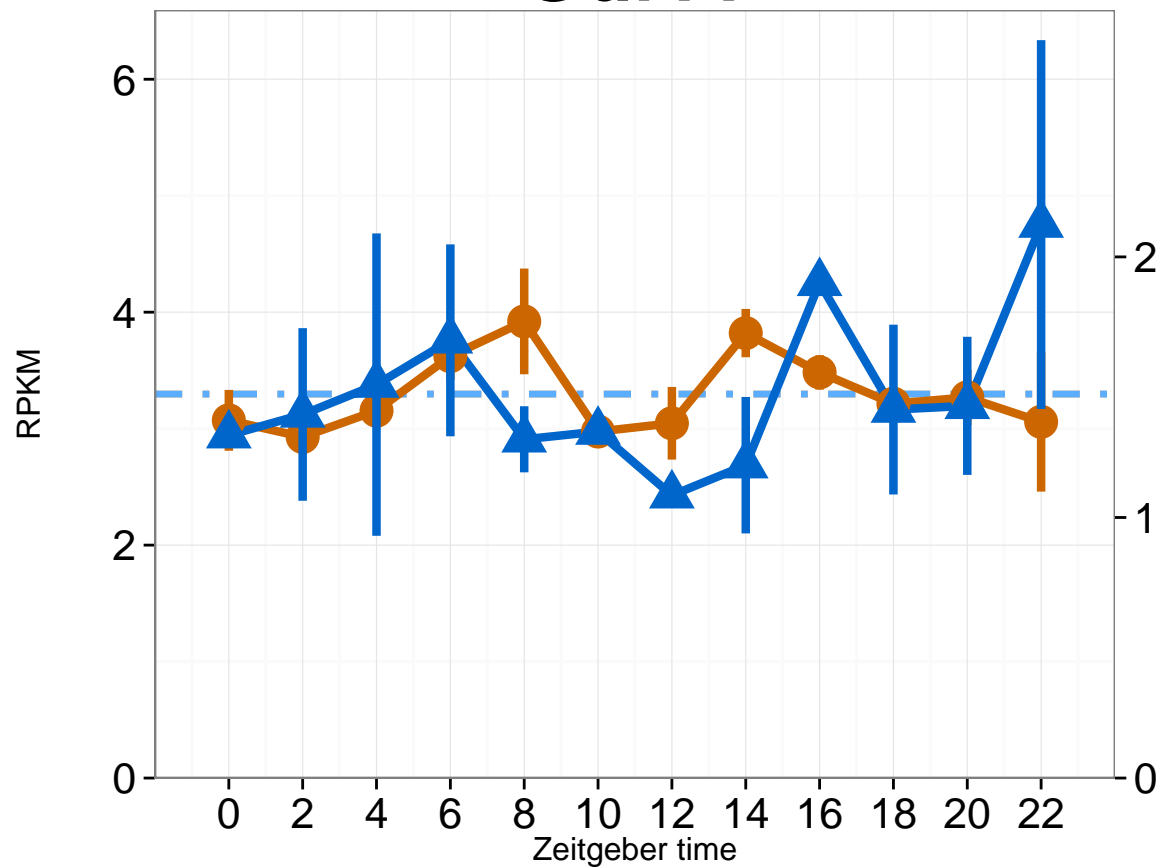

# Gdf11

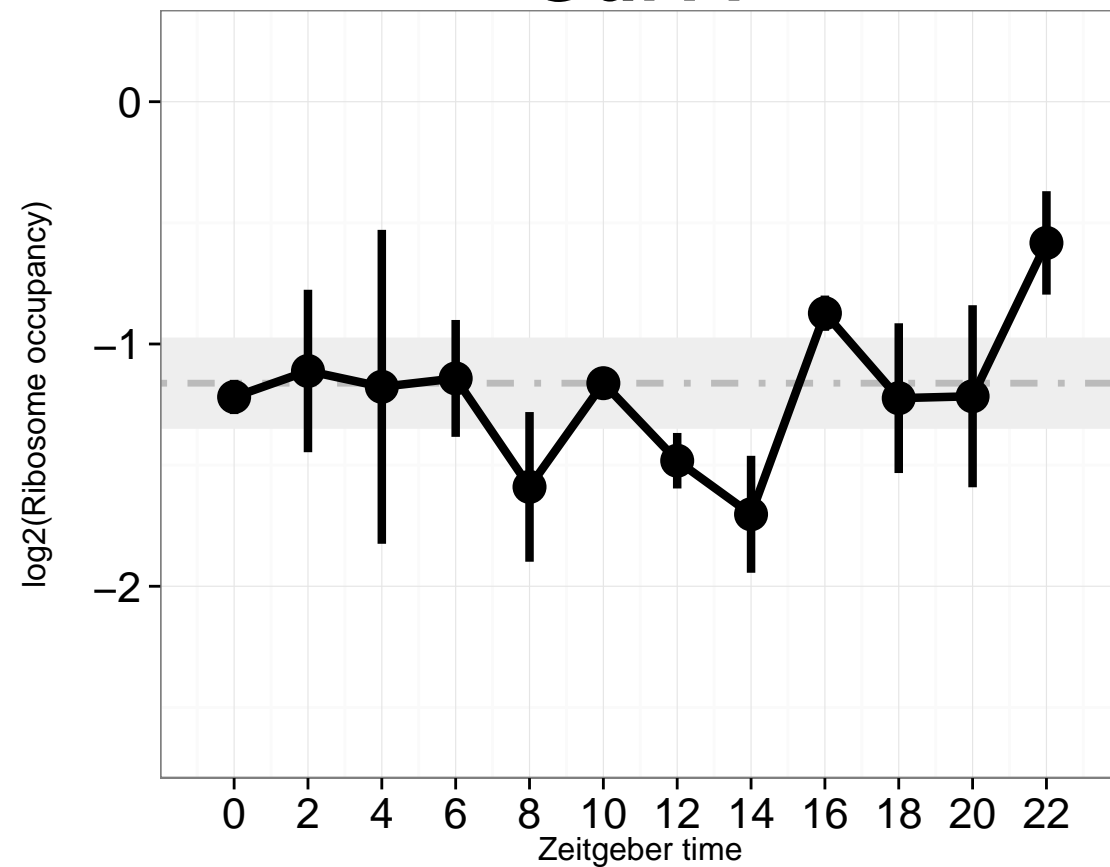

Supplement: Supplementary file 5516 [file 1]

## Trappc4

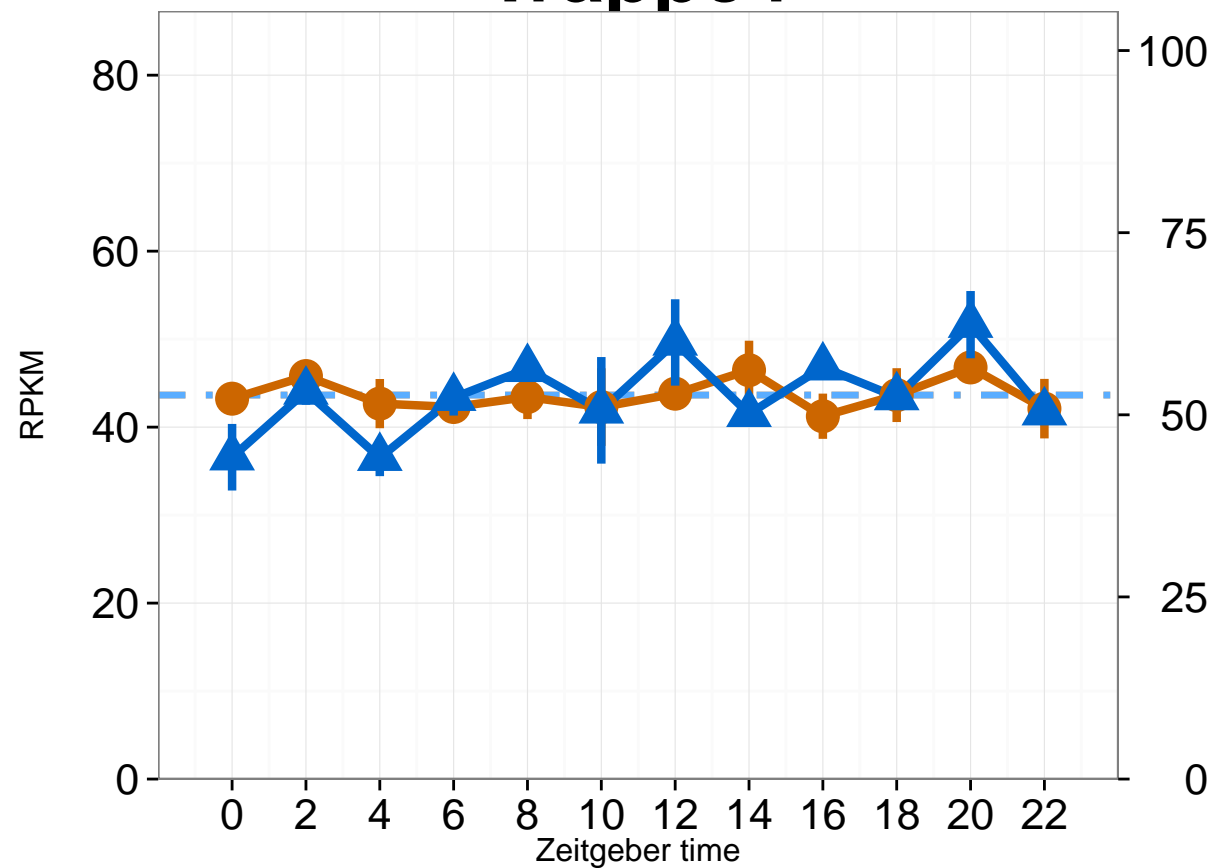

## Trappc4

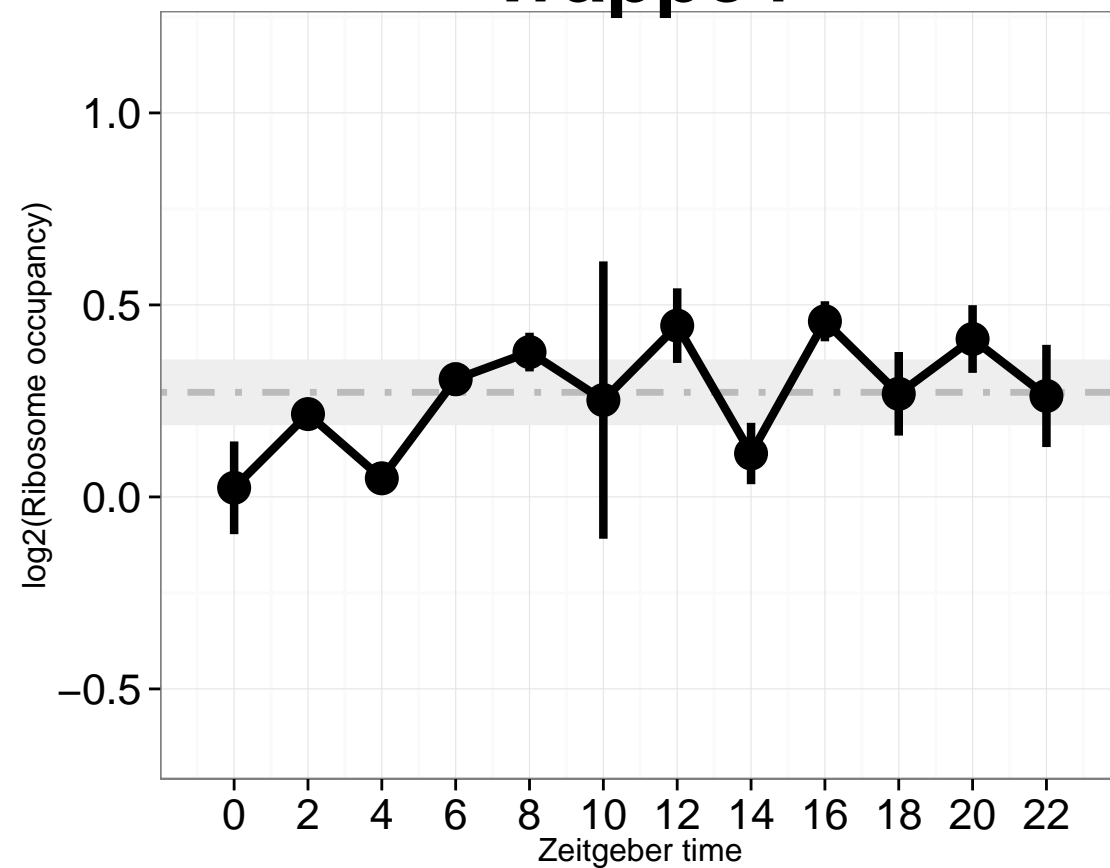

Supplement: Supplementary file 5517 [file 1]

# Dazap1

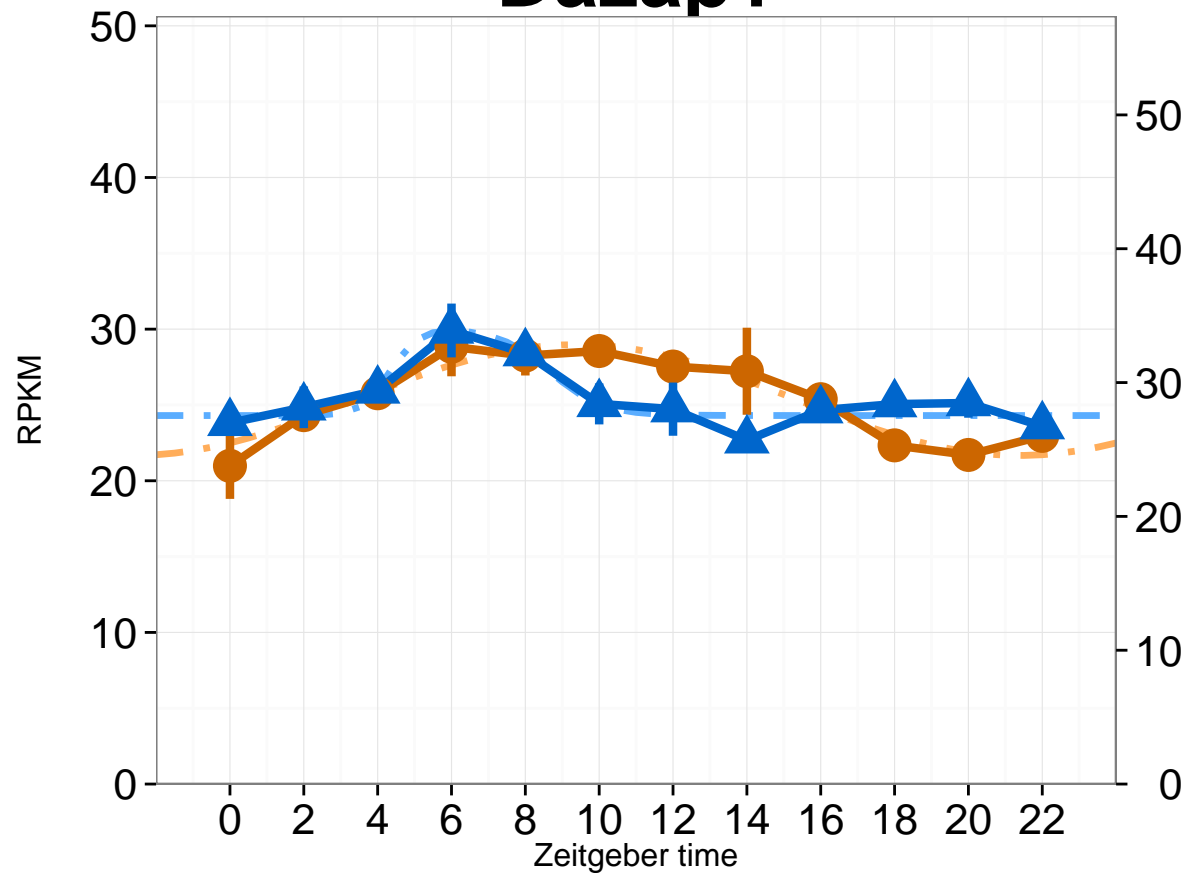

# Dazap1

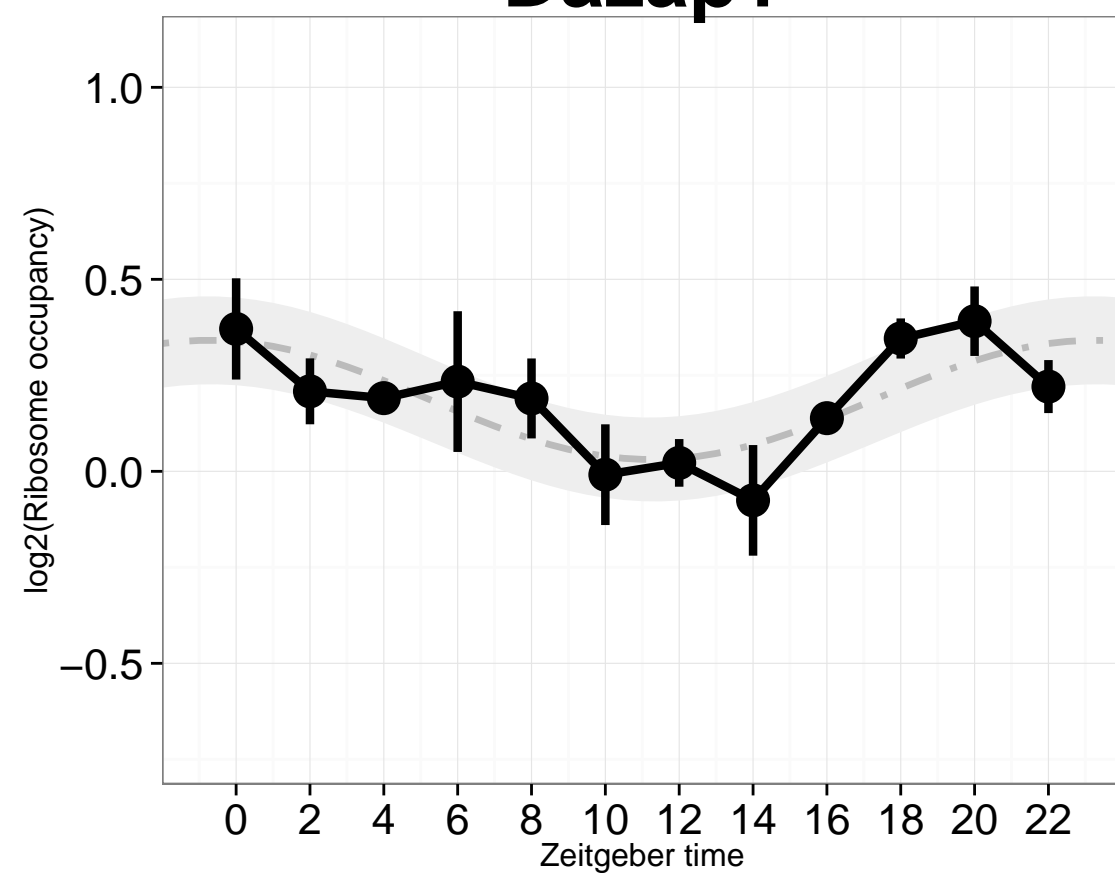

Supplement: Supplementary file 5518 [file 1]

## Ndutfaf4

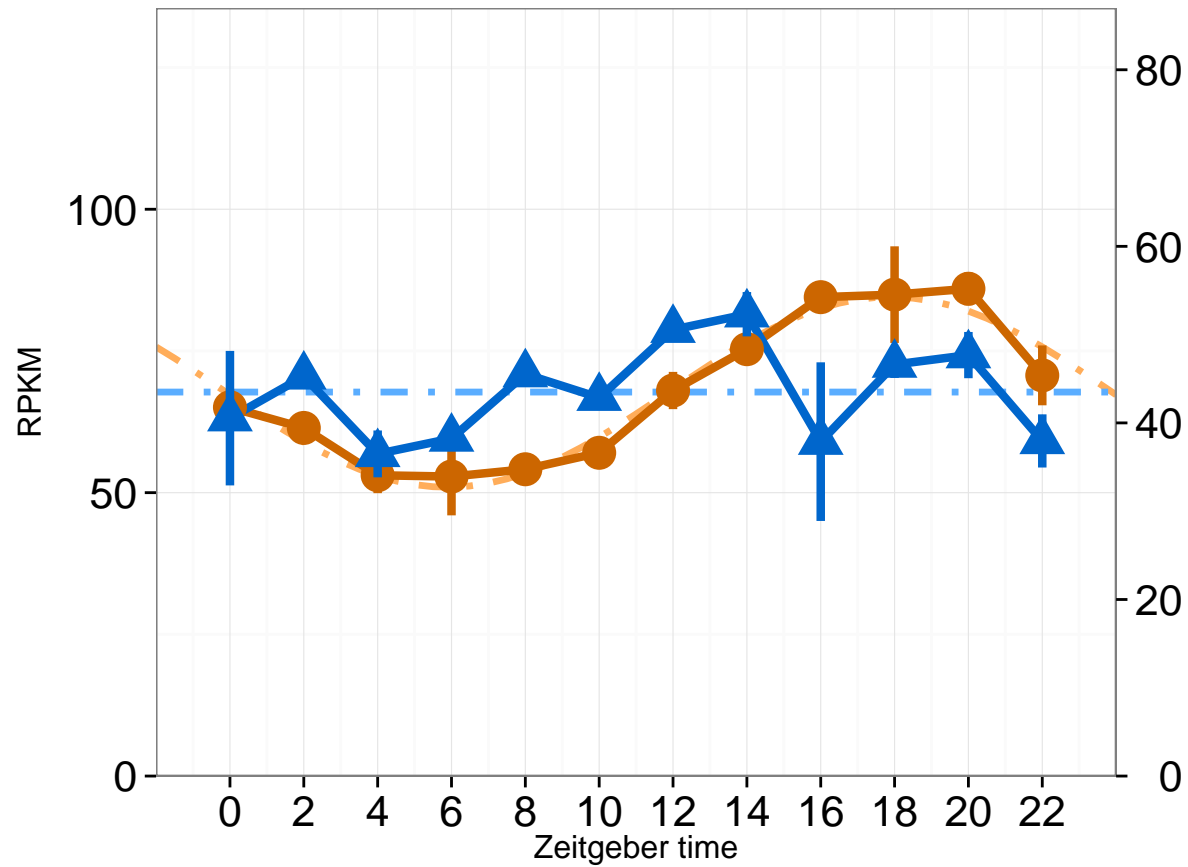

## Ndutfaf4

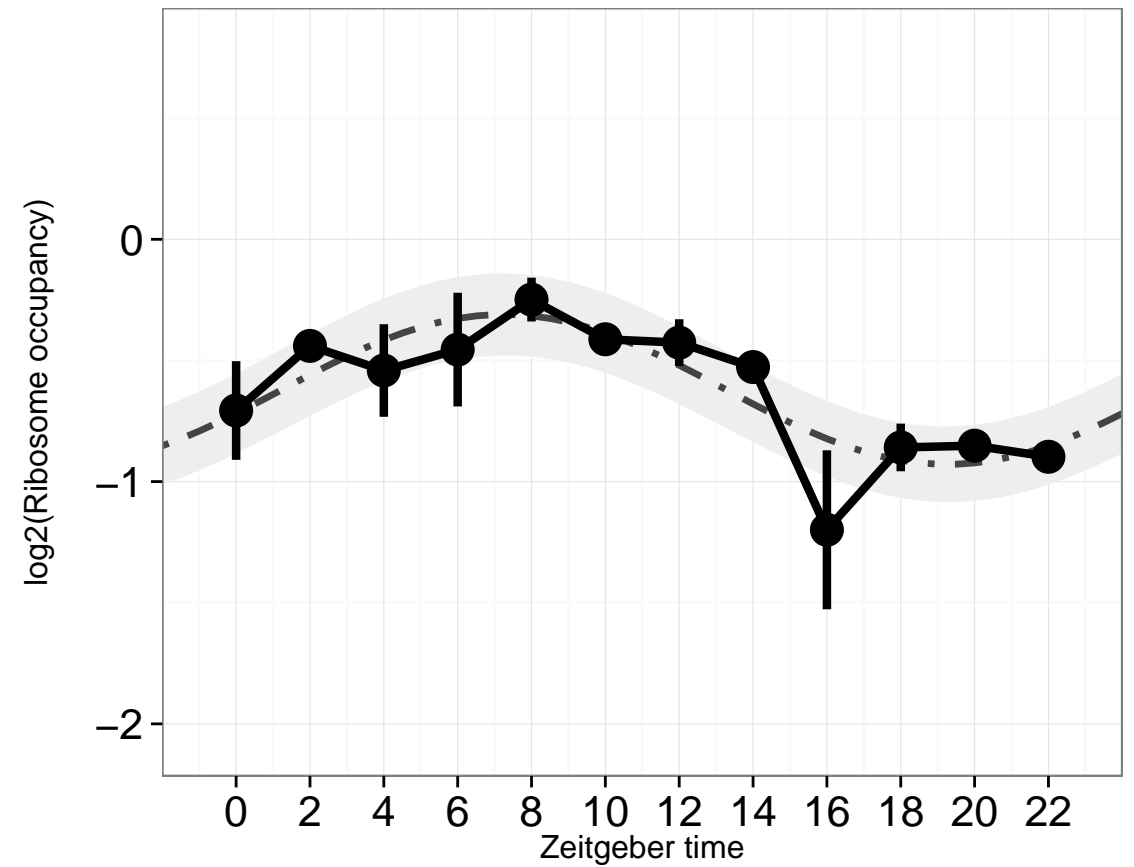

Supplement: Supplementary file 5519 [file 1]

**Ms4a6d TR**

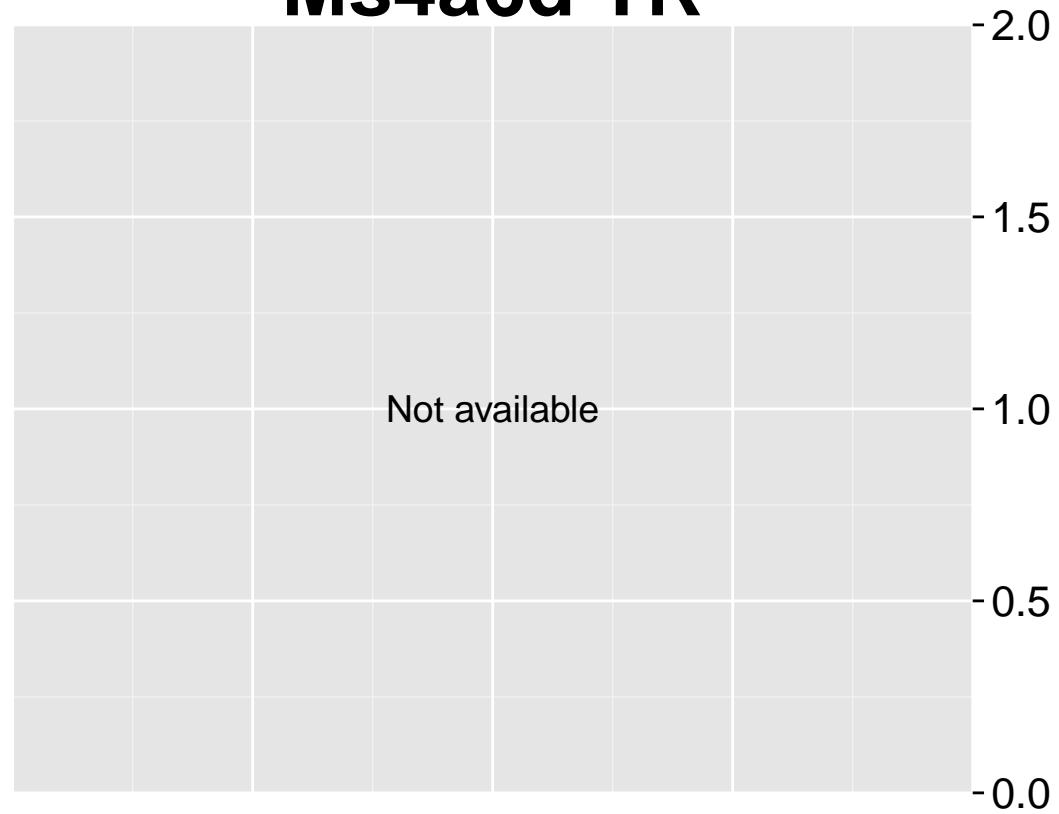

**Ms4a6d log2(Ribosome occupancy**

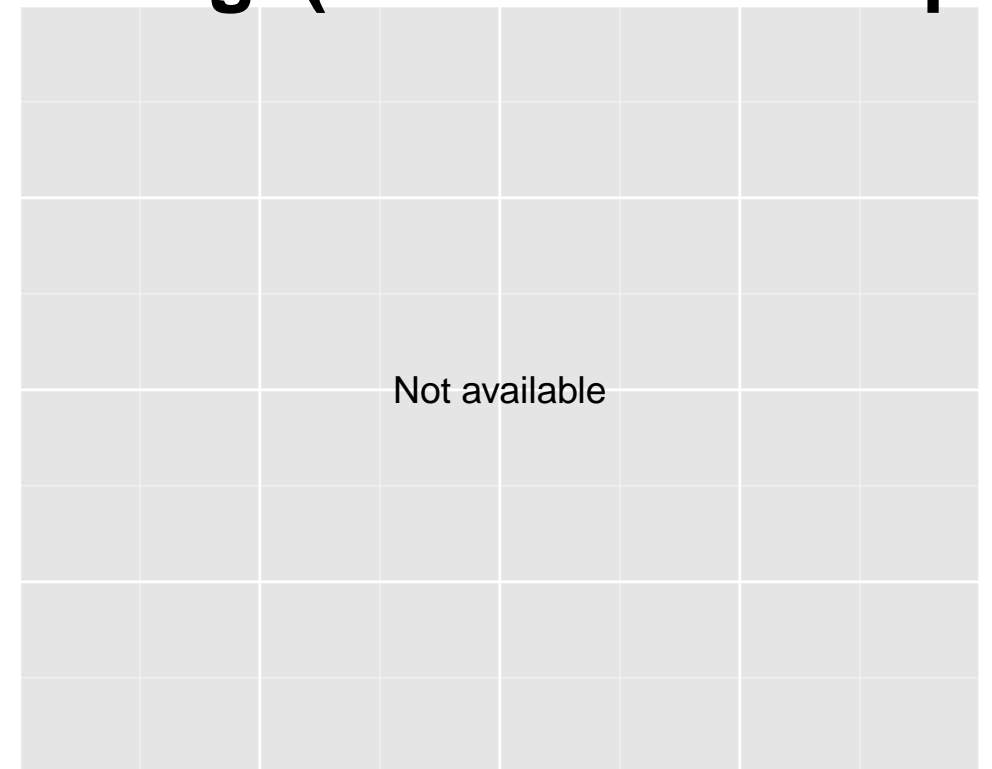

Supplement: Supplementary file 5520 [file 1]

# Kpna2

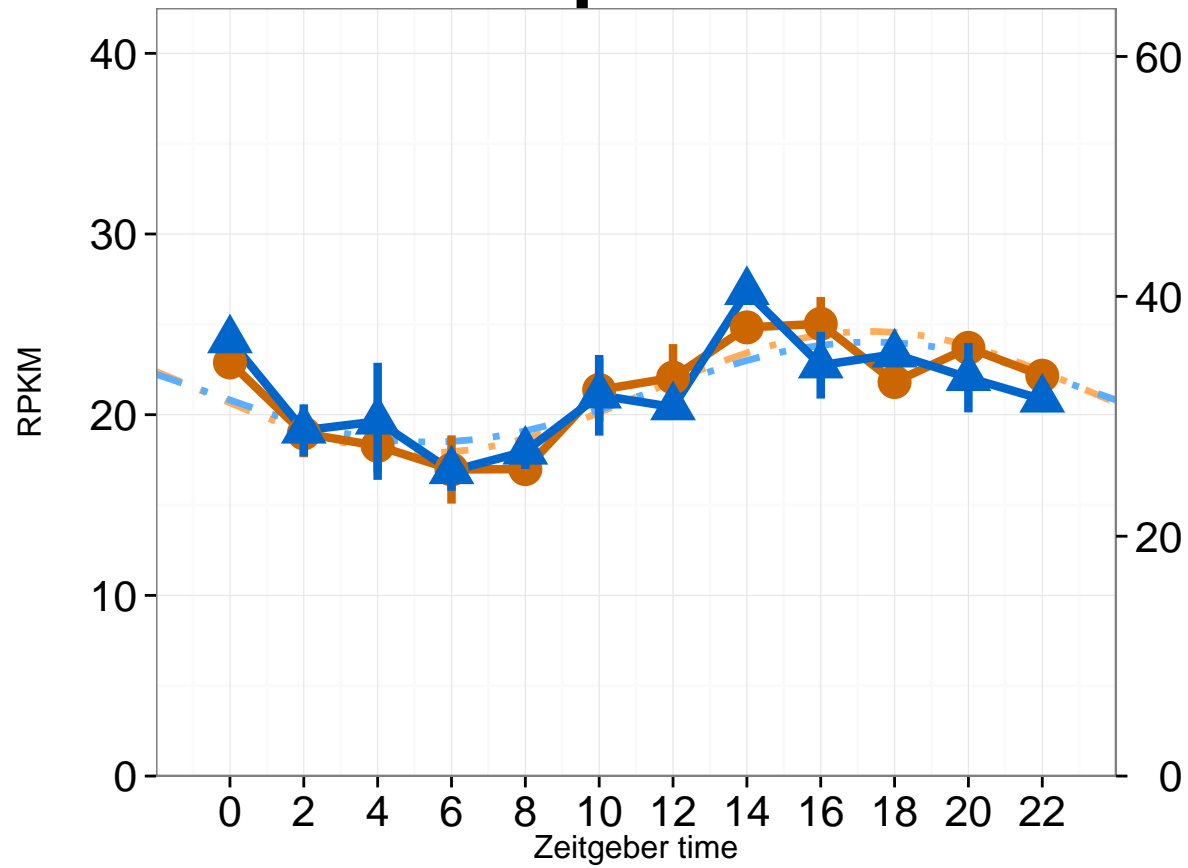

# Kpna2

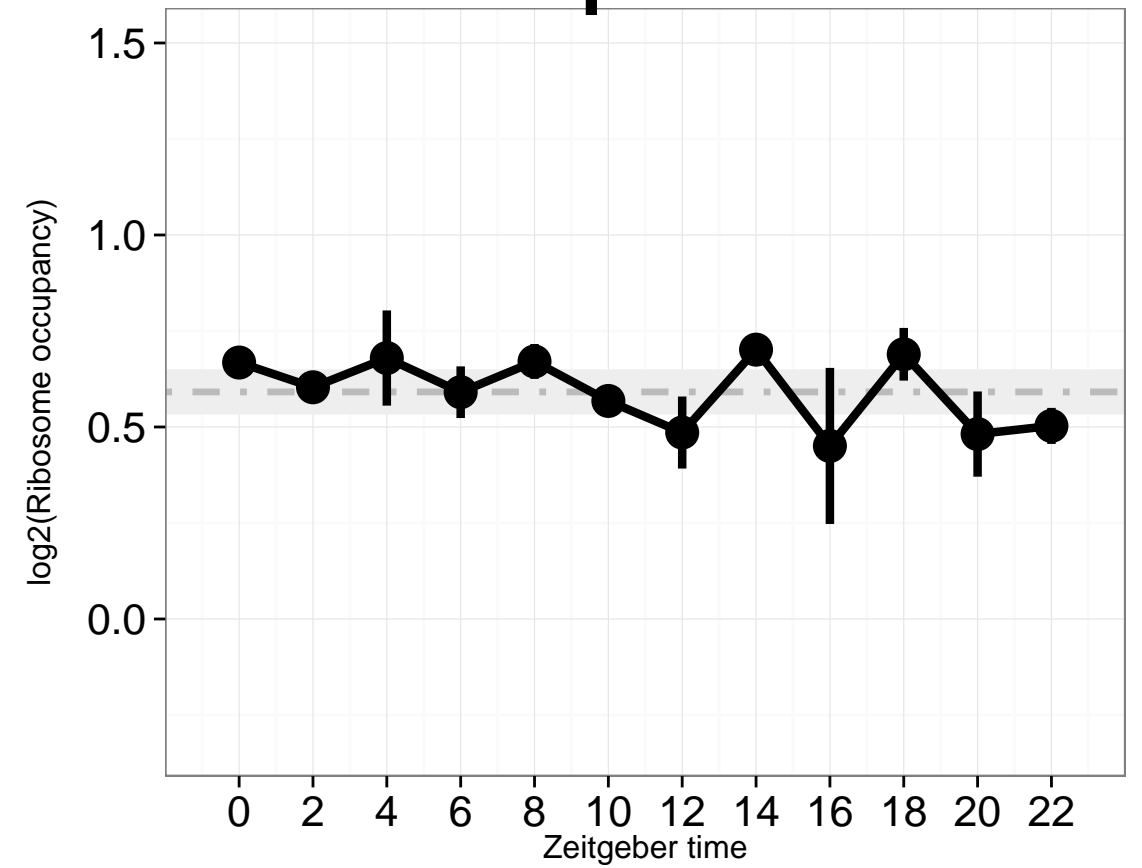

Supplement: Supplementary file 5521 [file 1]
