# Supplementary material (part 56 of 133)
Source: publisher figshare collection journal article supplement (https://springernature.figshare.com/articles/dataset/_/4903193)

# Aldoart1

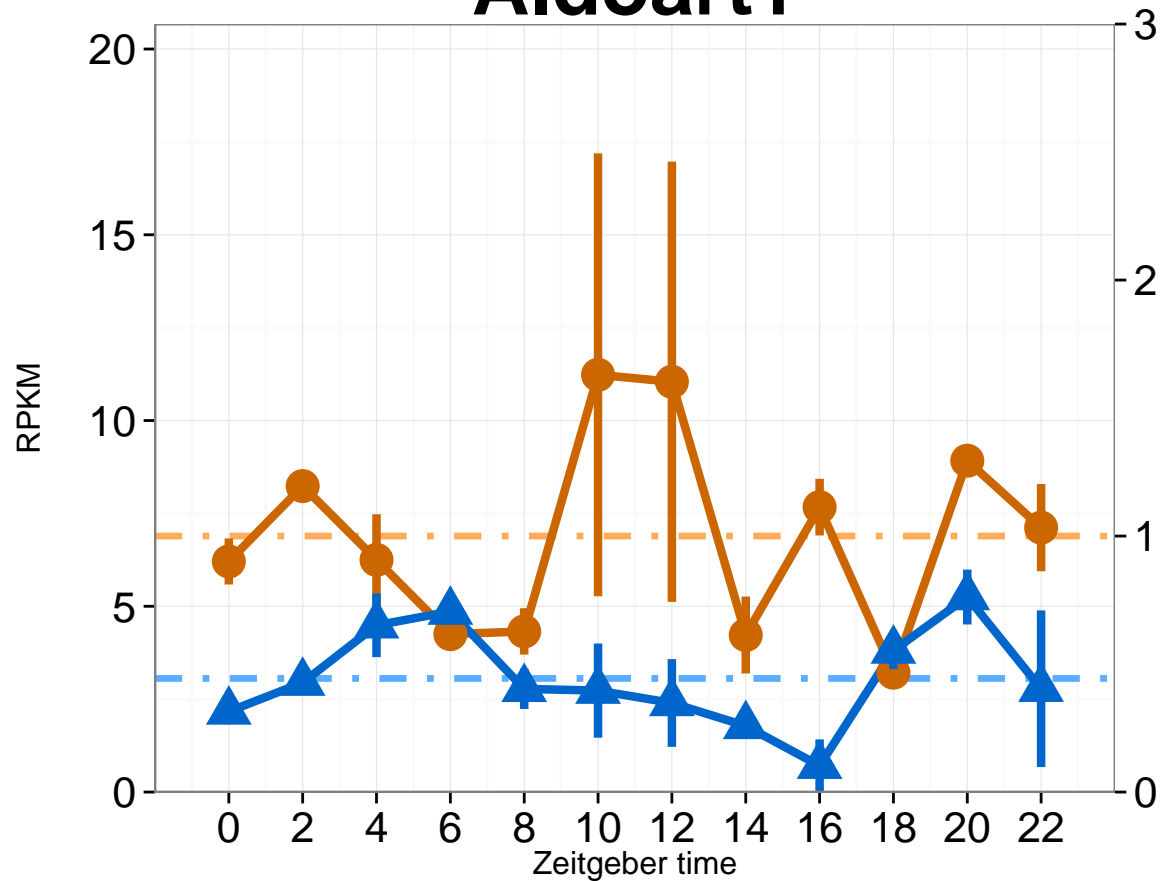

# Aldoart1

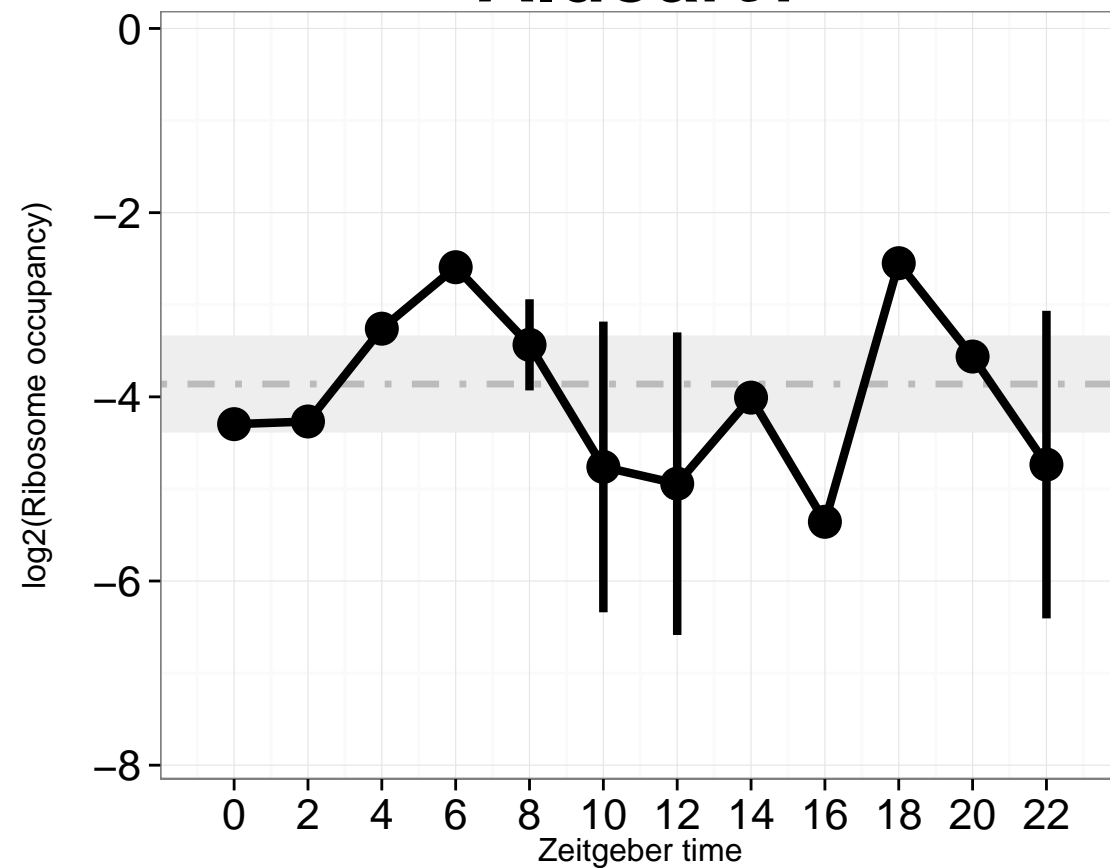

Supplement: Supplementary file 5522 [file 1]

# Slx1b

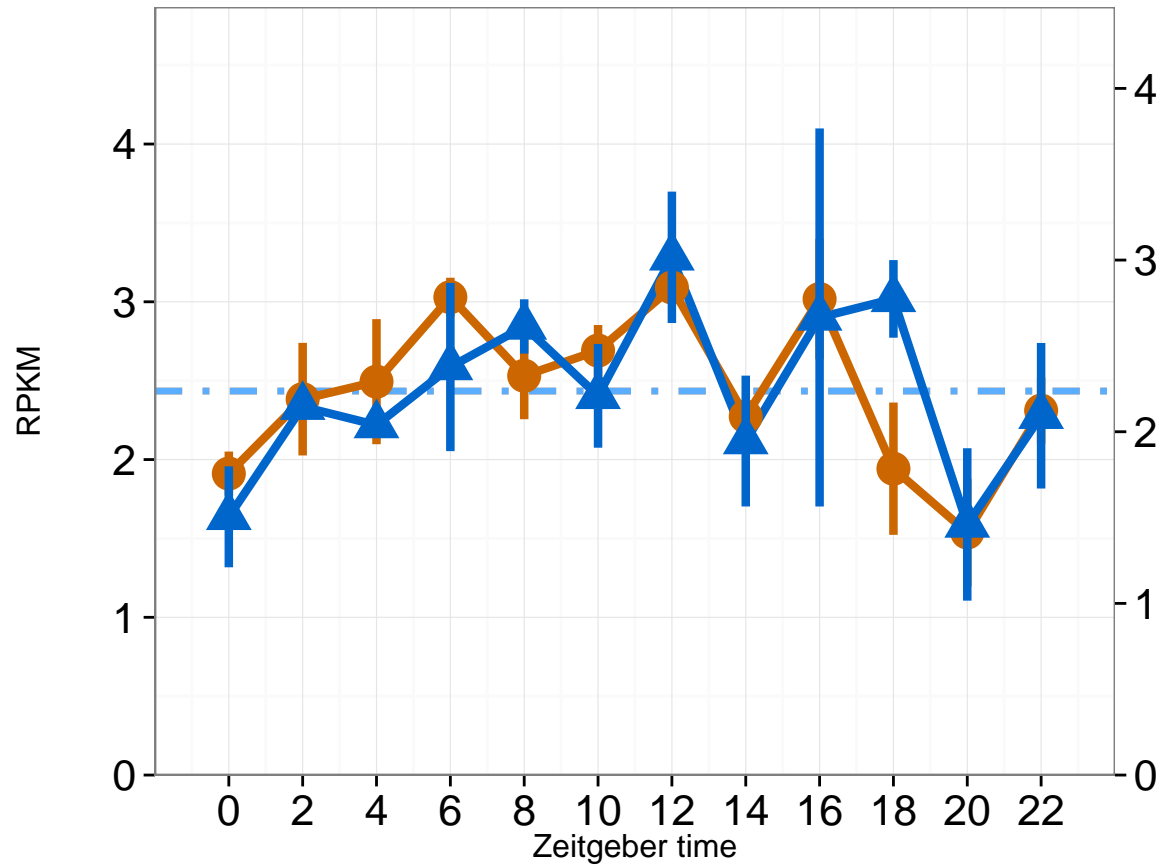

# Slx1b

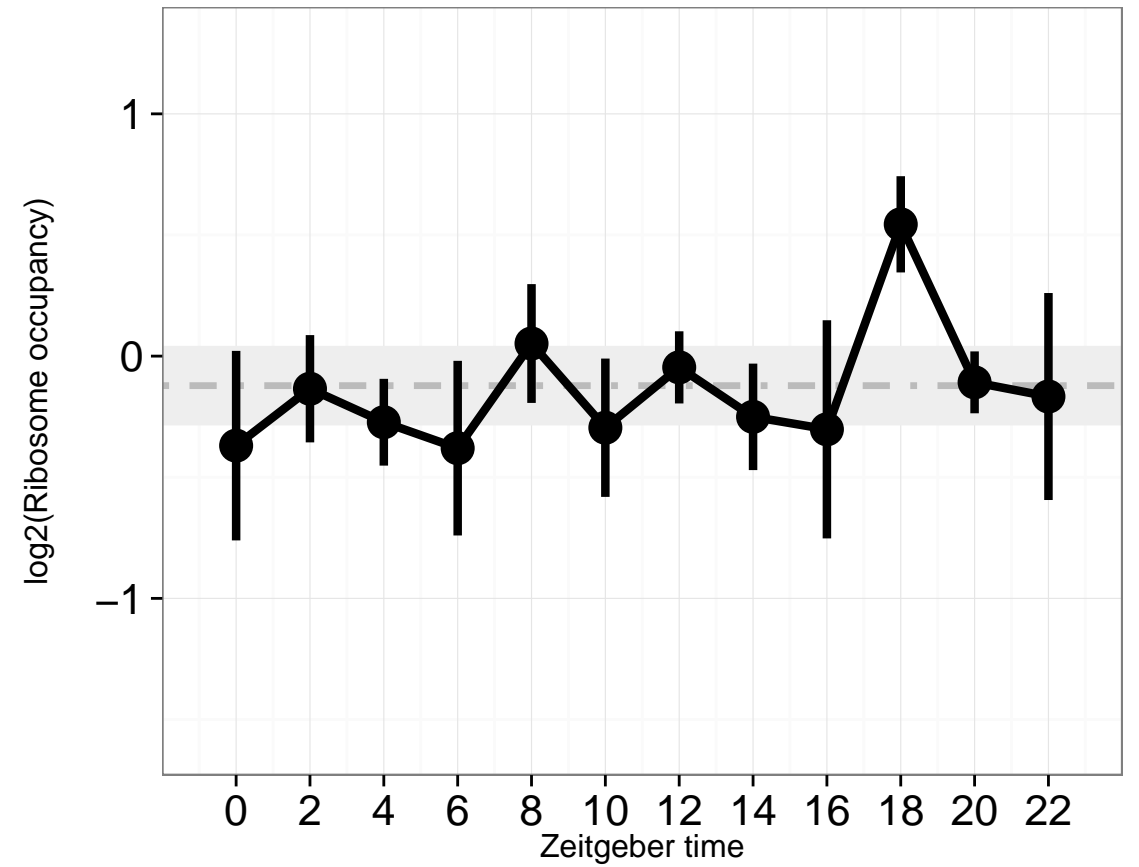

Supplement: Supplementary file 5523 [file 1]

## Nipal1

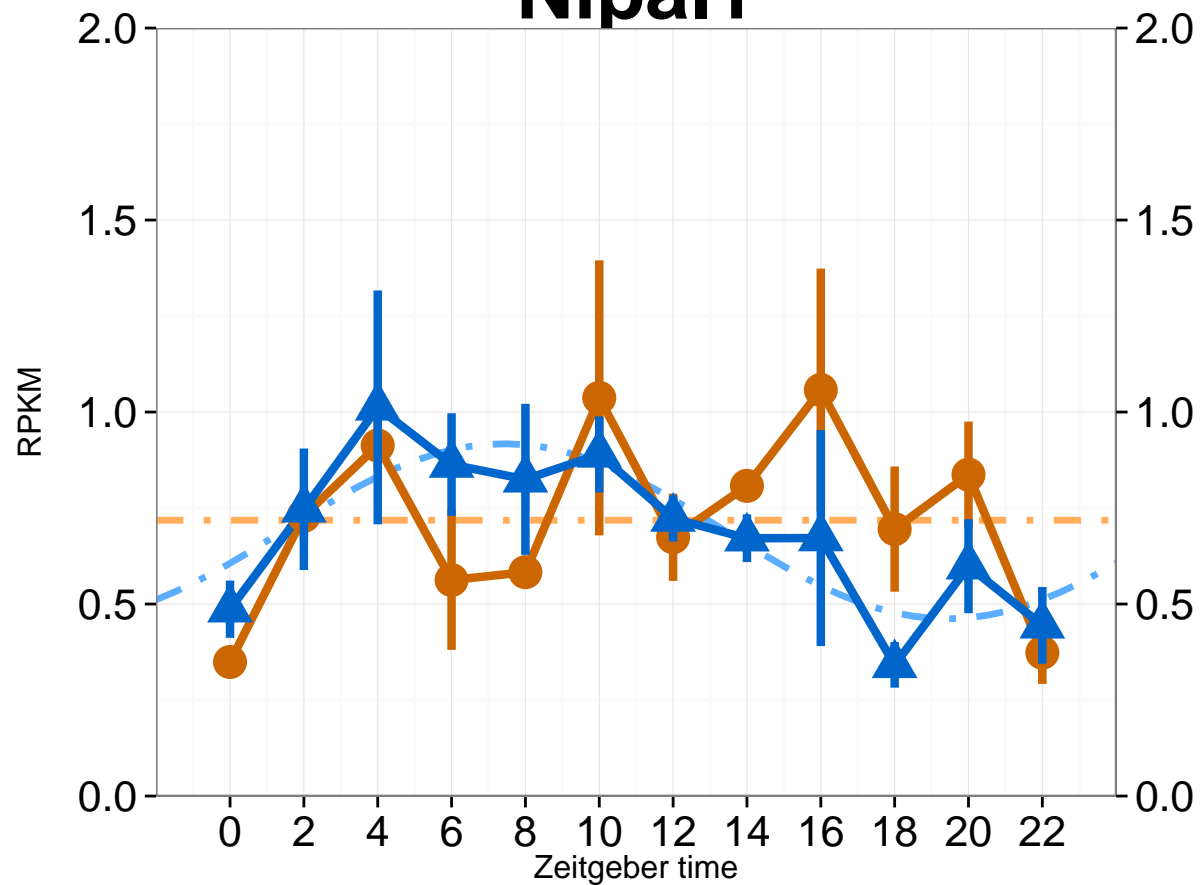

## Nipal1

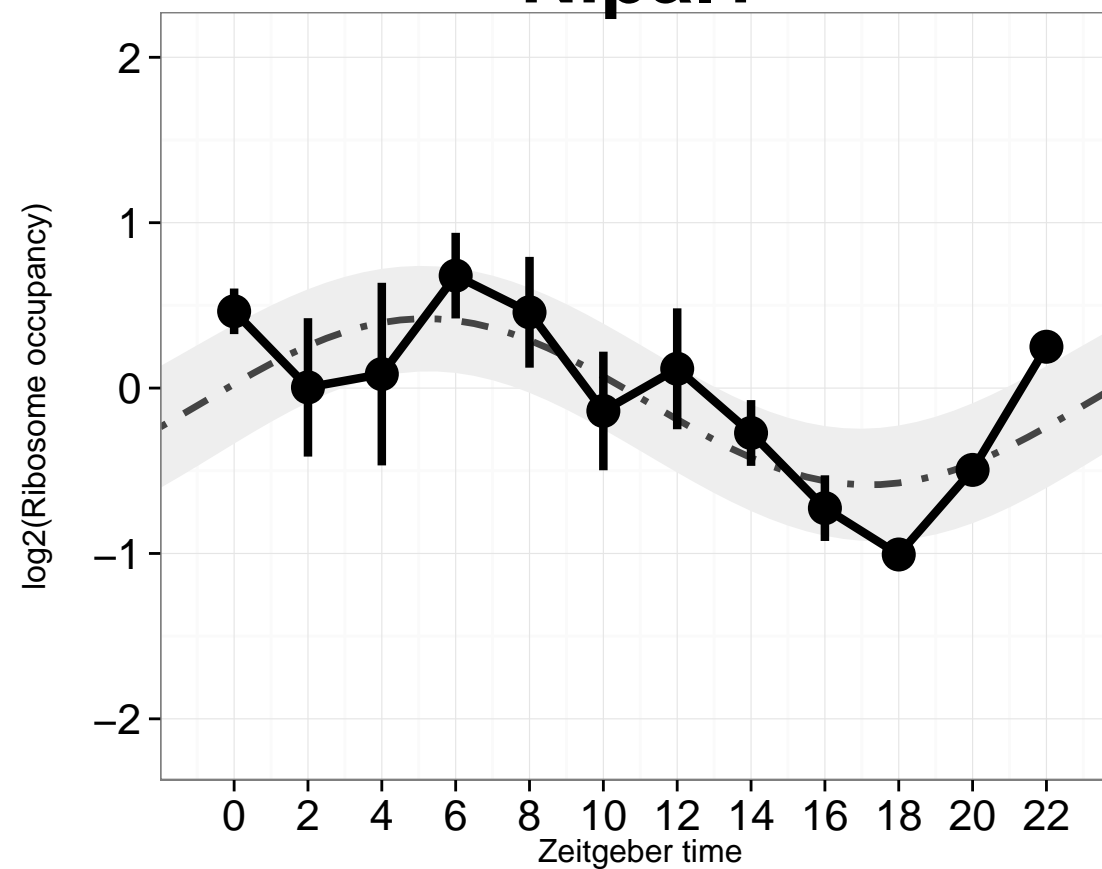

Supplement: Supplementary file 5524 [file 1]

**Gm1123 TR**

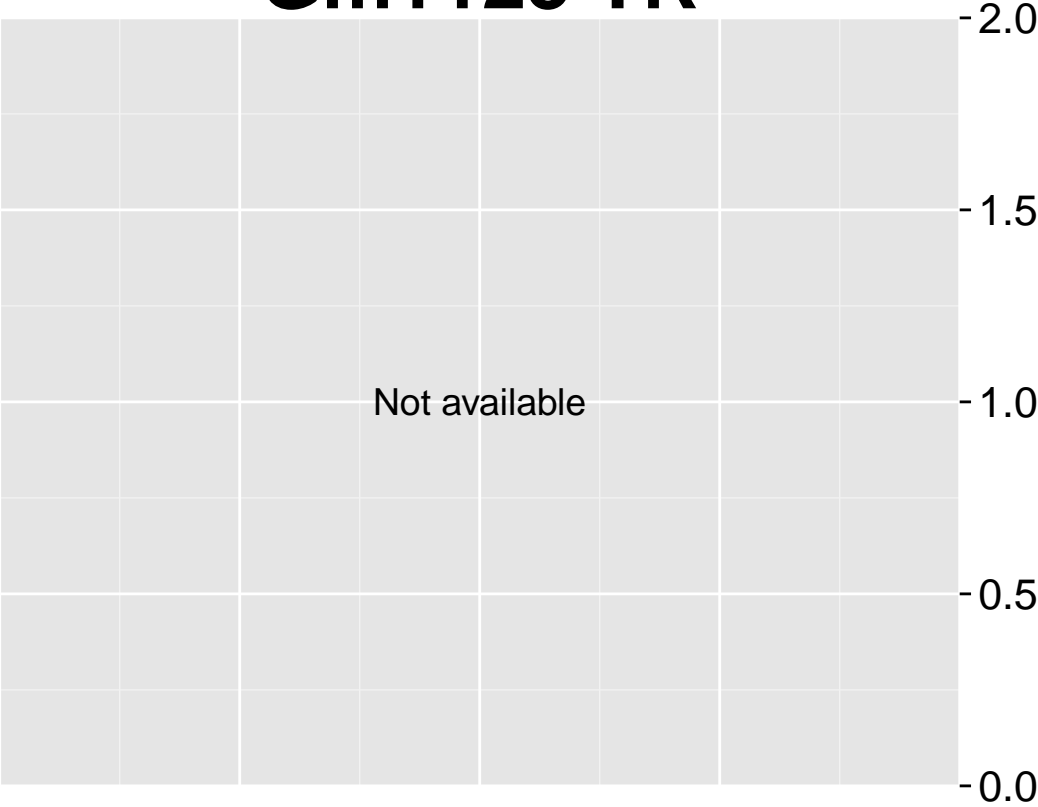

**Gm1123 log2(Ribosome occupanc**

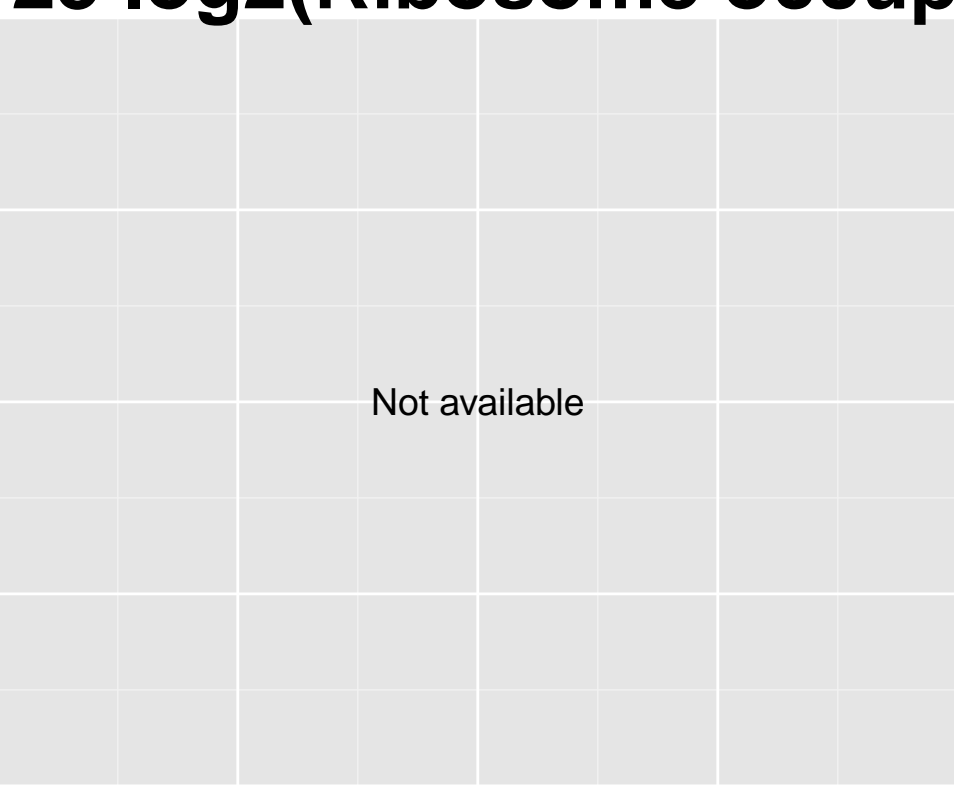

Supplement: Supplementary file 5525 [file 1]

# Pfkm

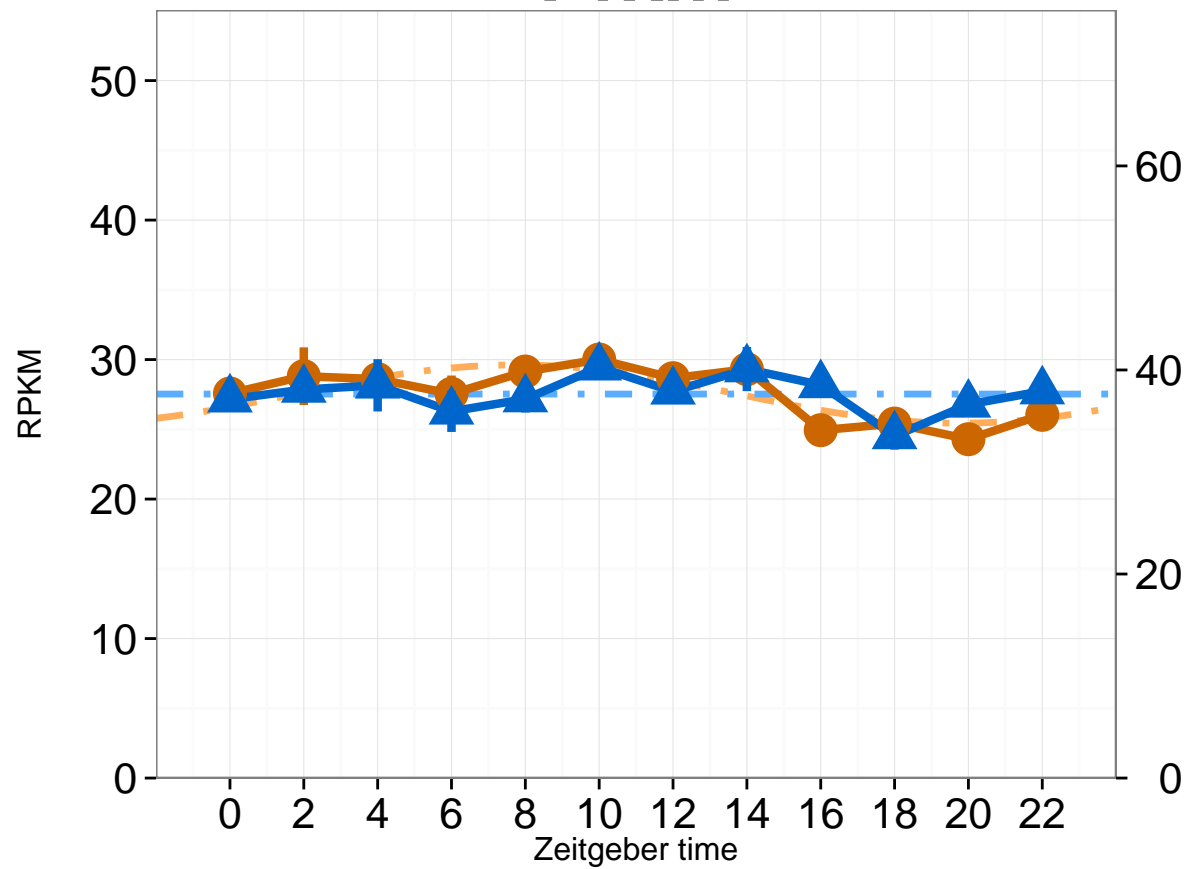

# Pfkm

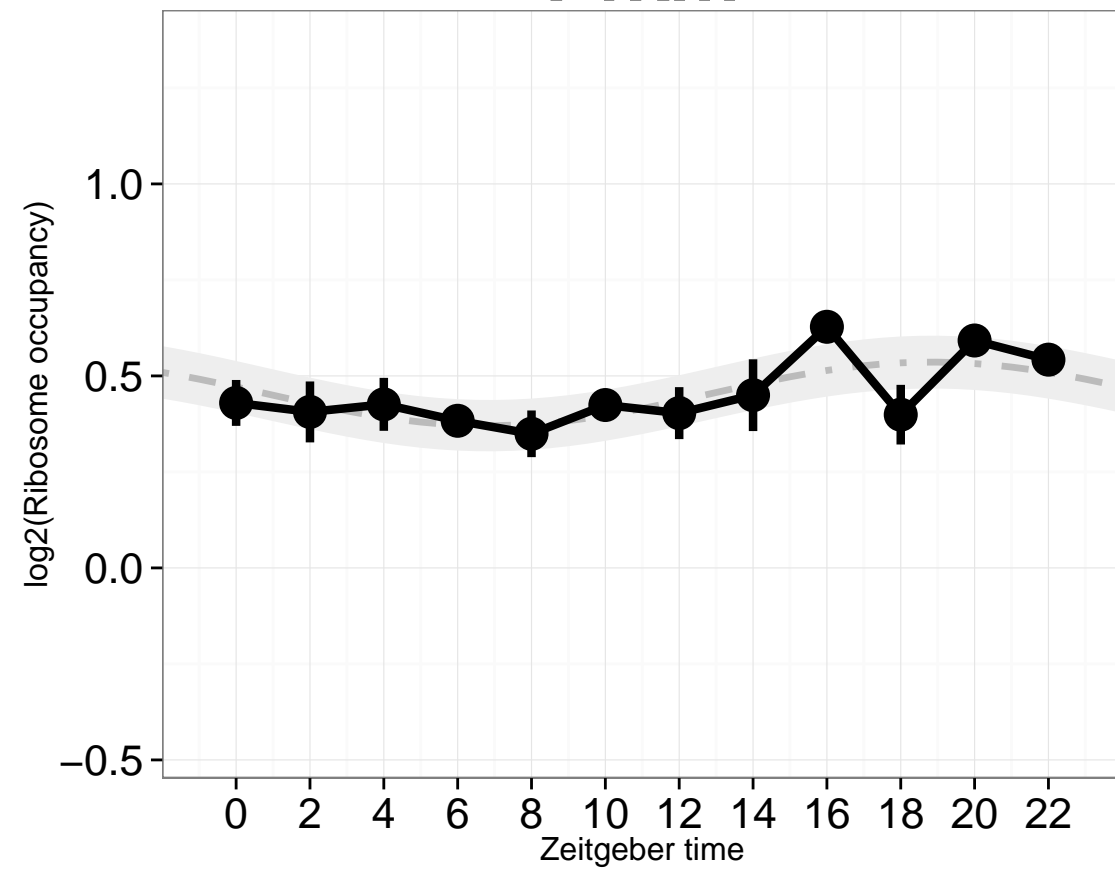

Supplement: Supplementary file 5526 [file 1]

# Cacnb2

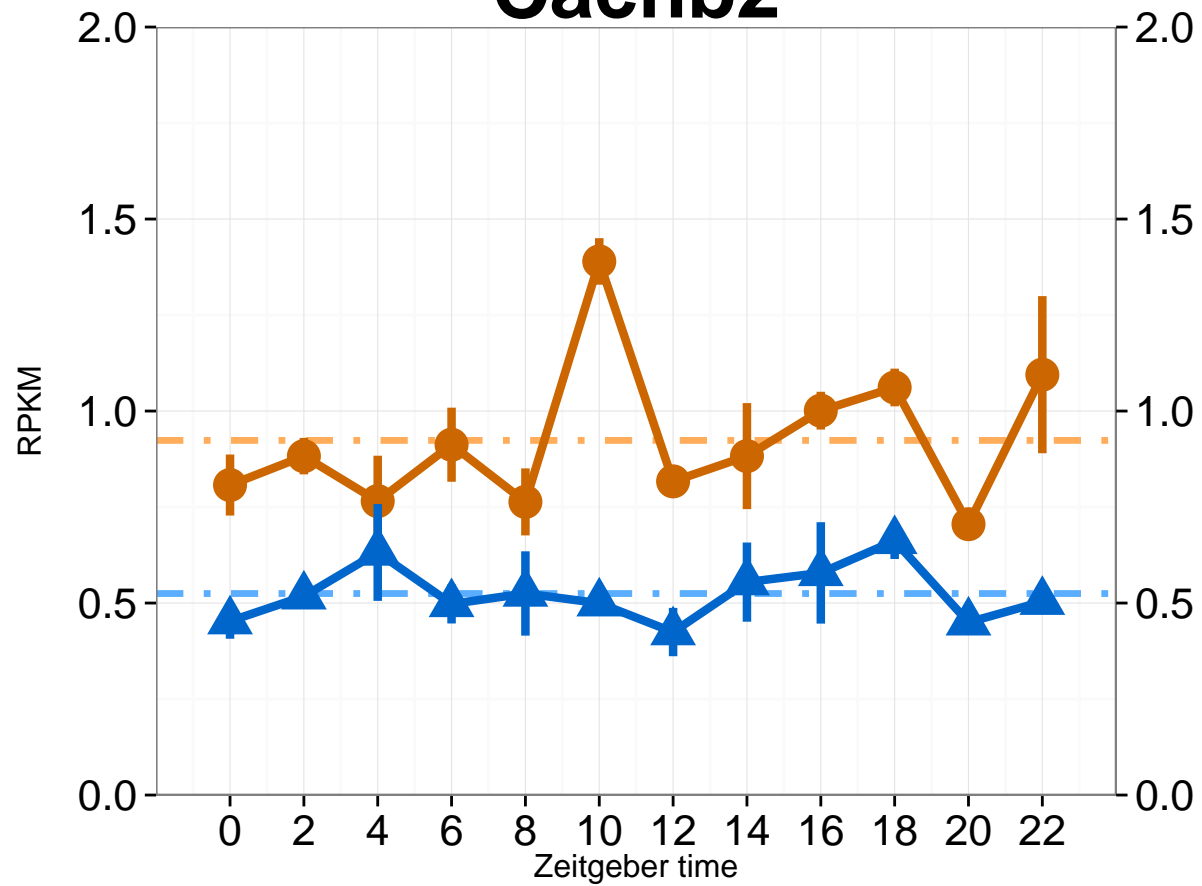

# Cacnb2

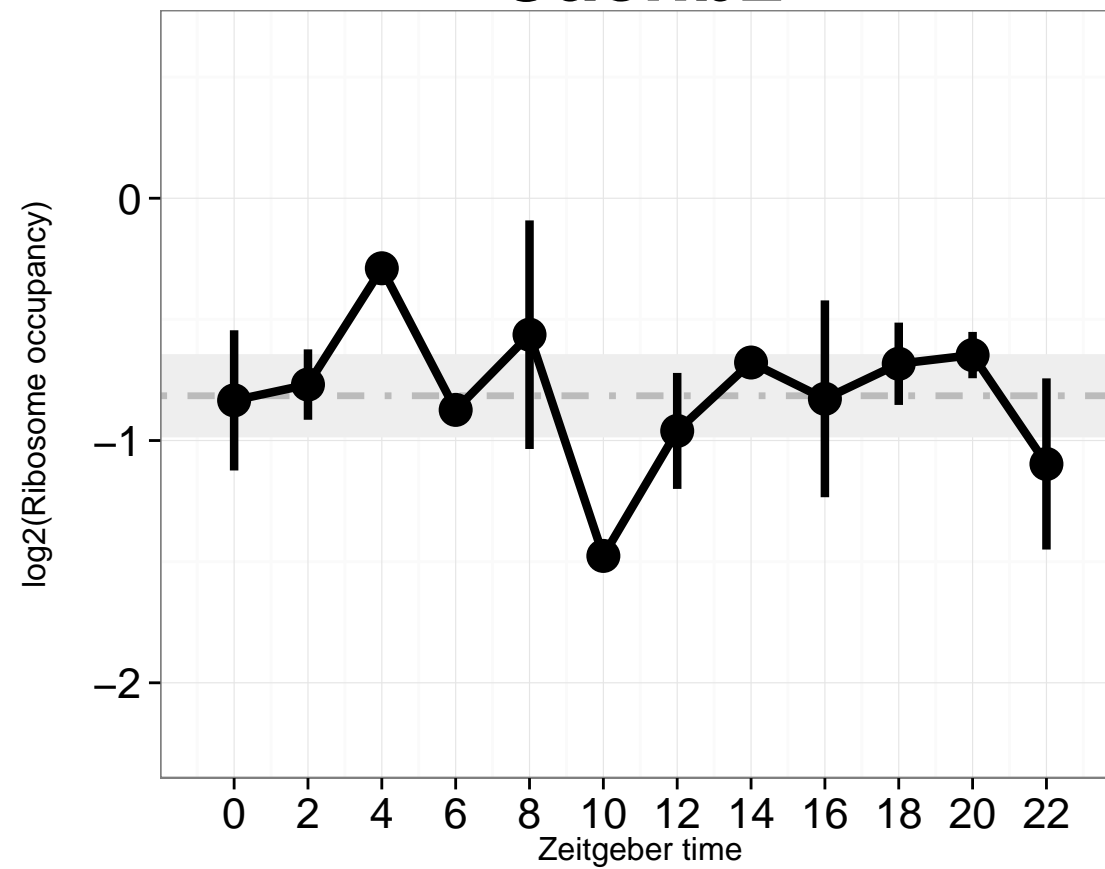

Supplement: Supplementary file 5527 [file 1]

## Dnajc30

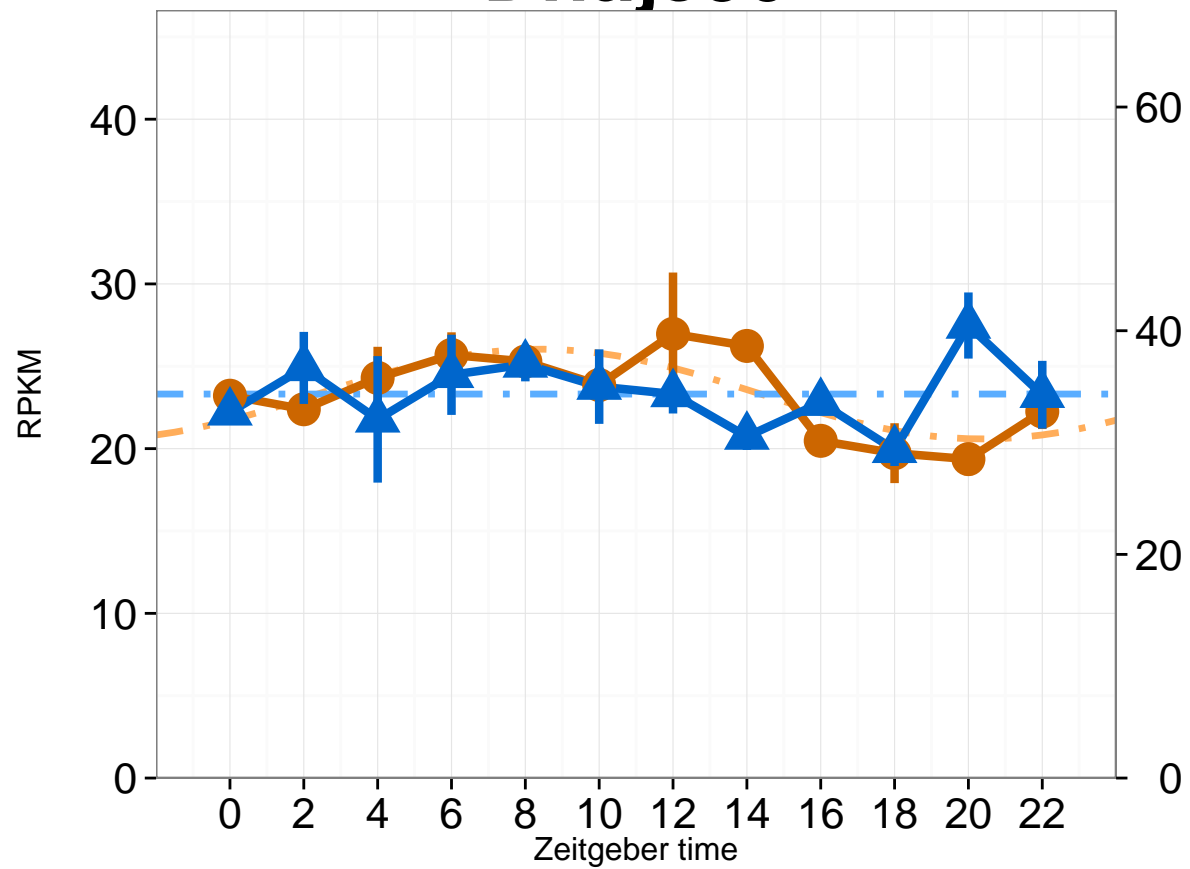

## Dnajc30

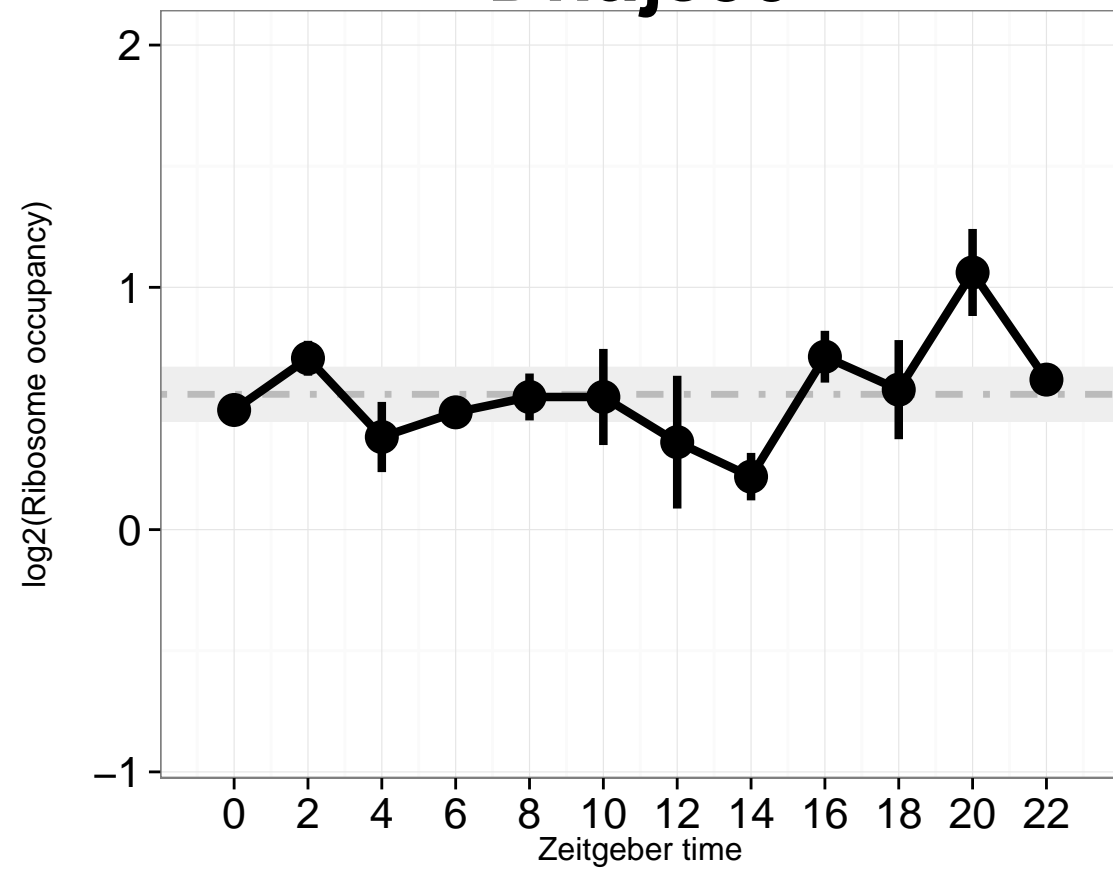

Supplement: Supplementary file 5528 [file 1]

# Lrriq1

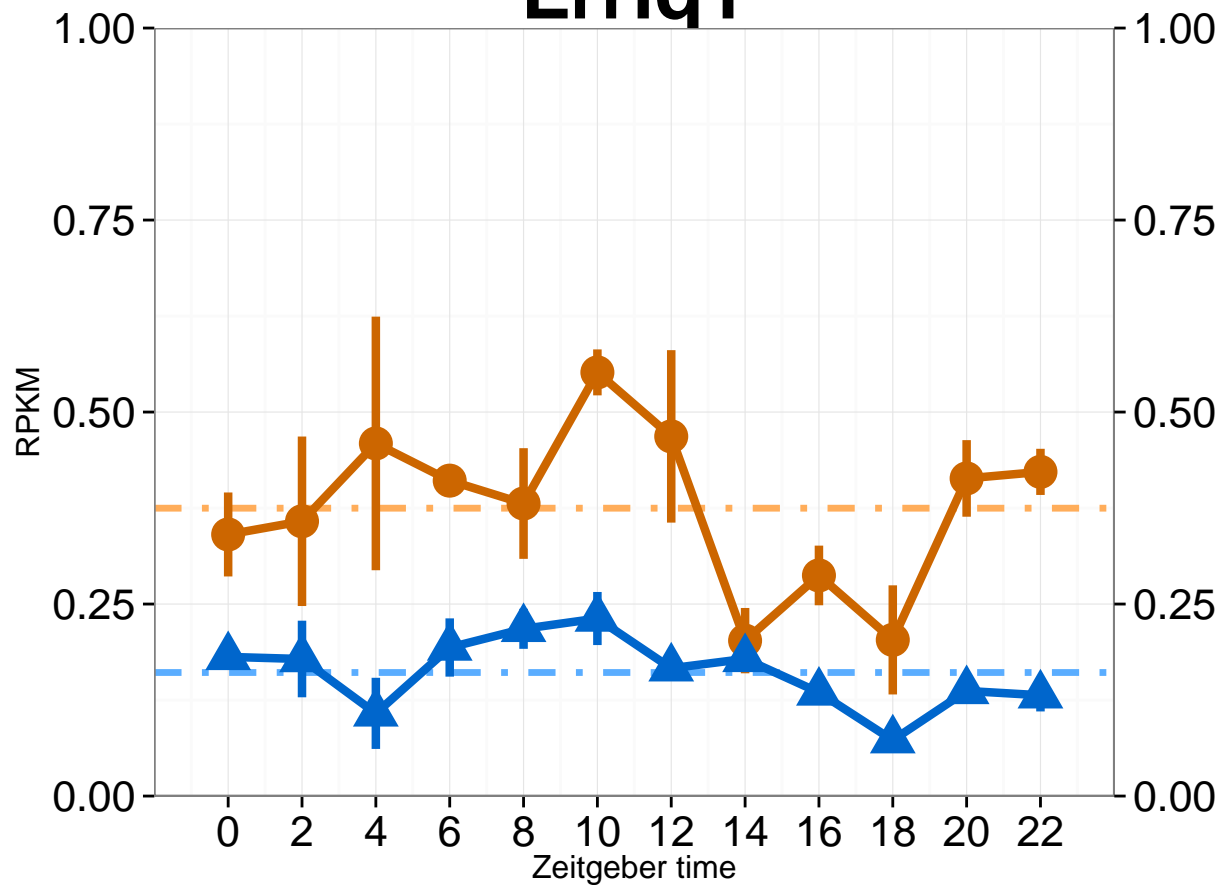

# Lrriq1

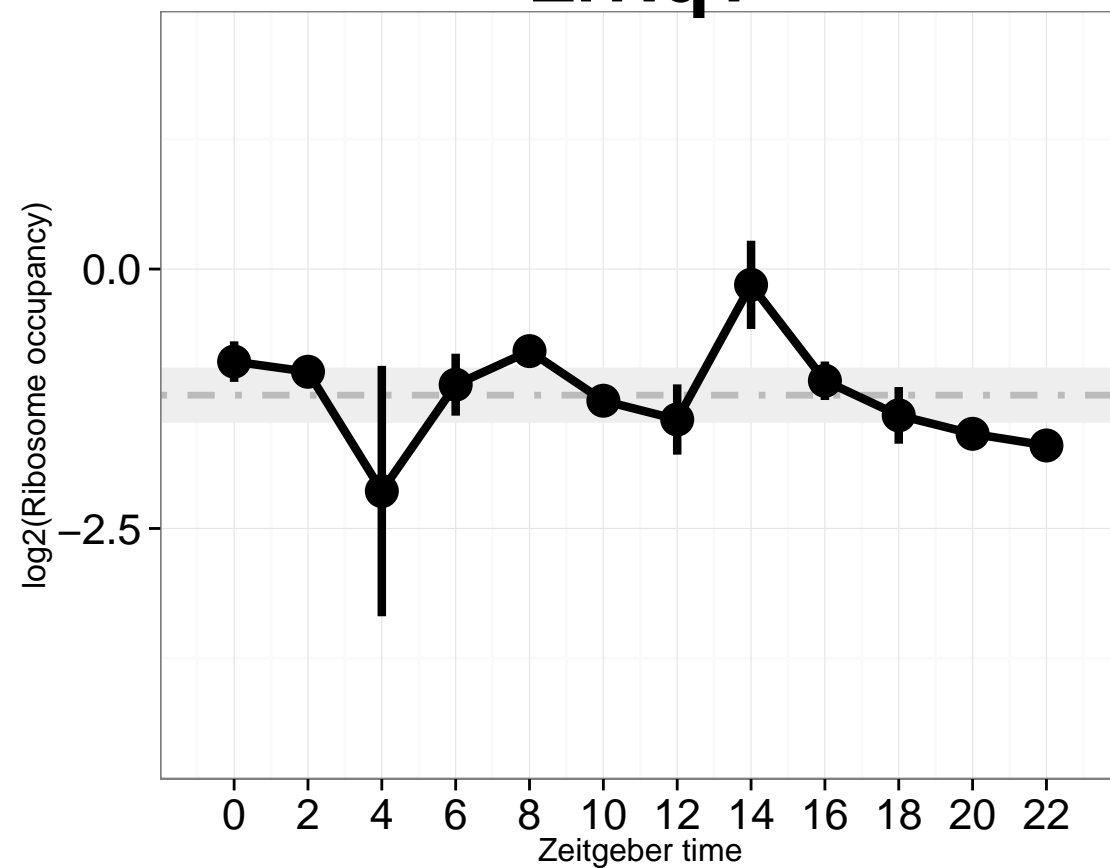

Supplement: Supplementary file 5529 [file 1]

## Wnt5a

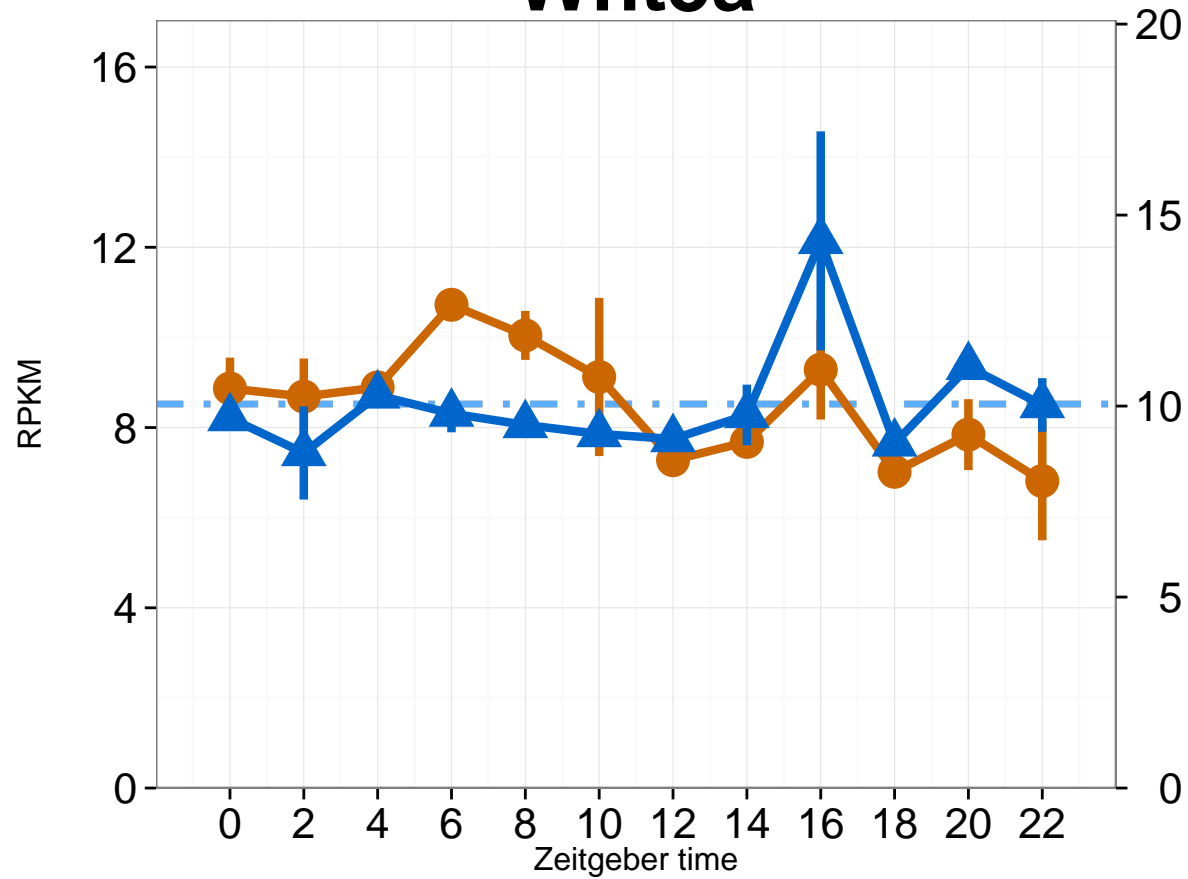

## Wnt5a

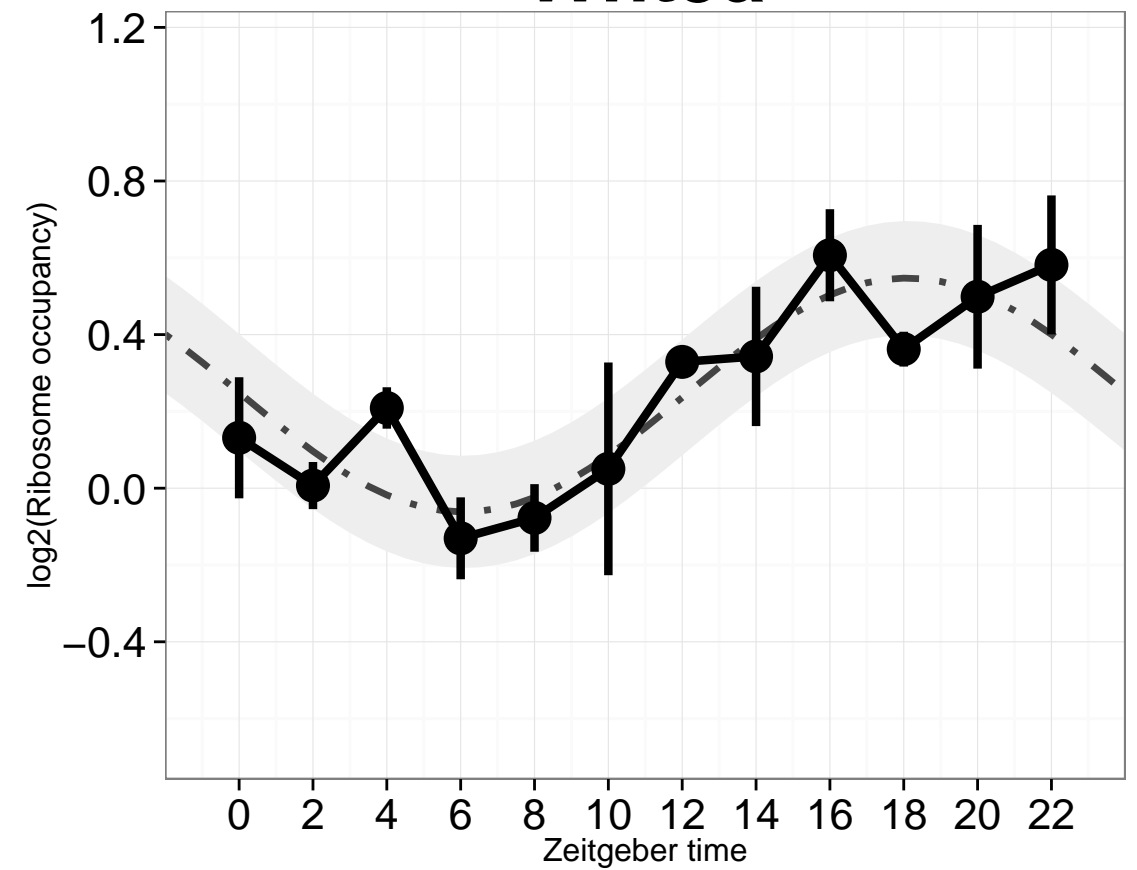

Supplement: Supplementary file 5530 [file 1]

## Il13ra1

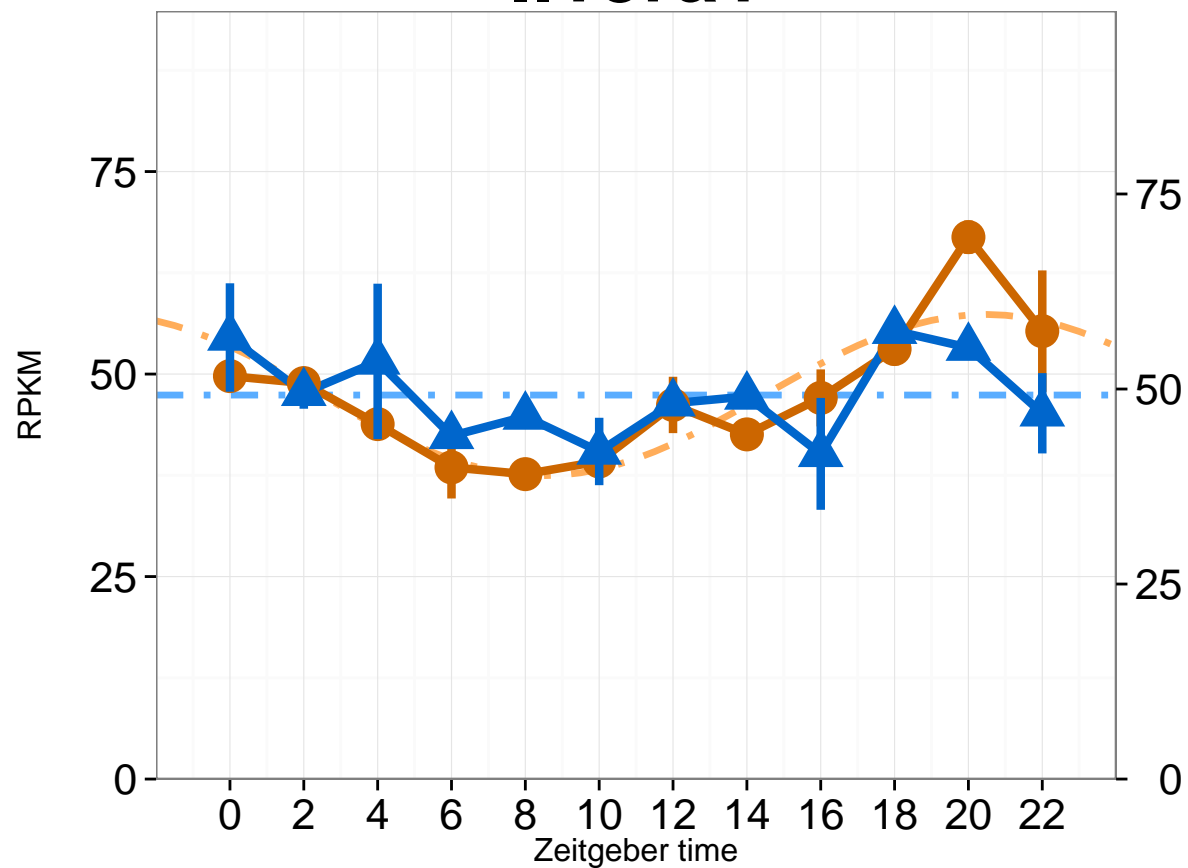

## Il13ra1

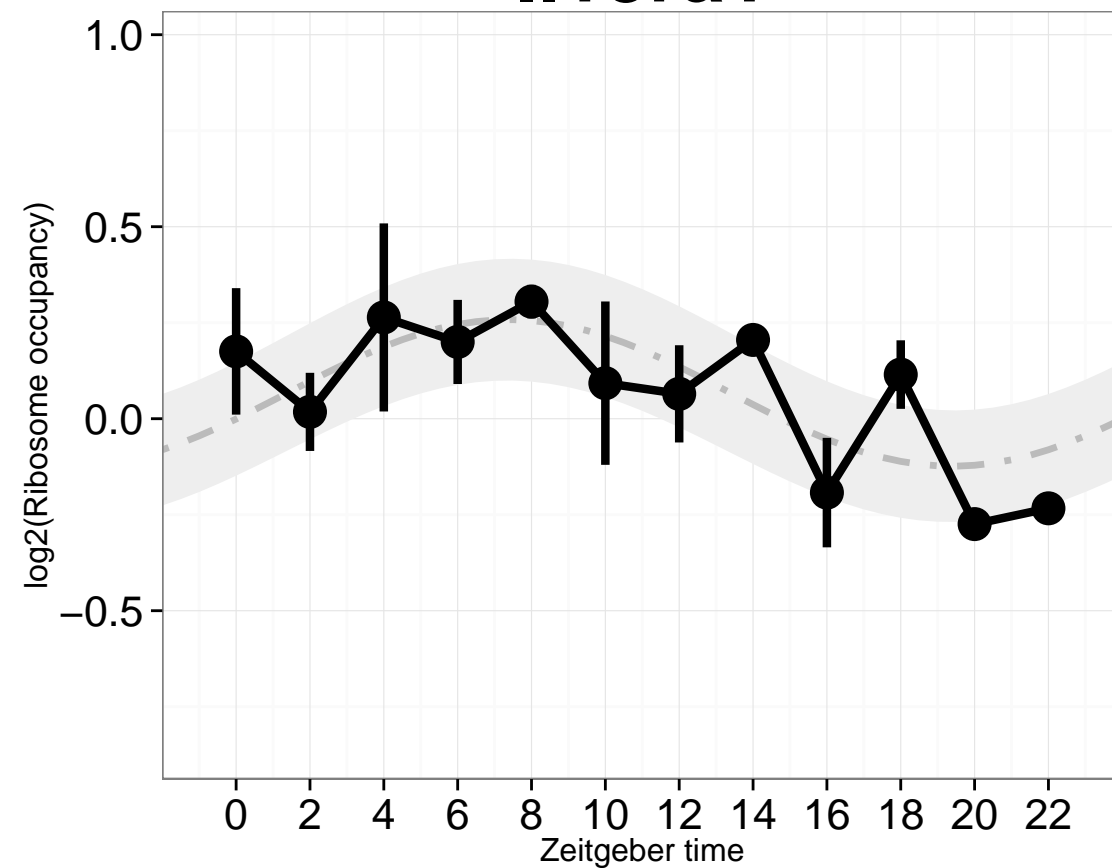

Supplement: Supplementary file 5531 [file 1]

## Mboat2

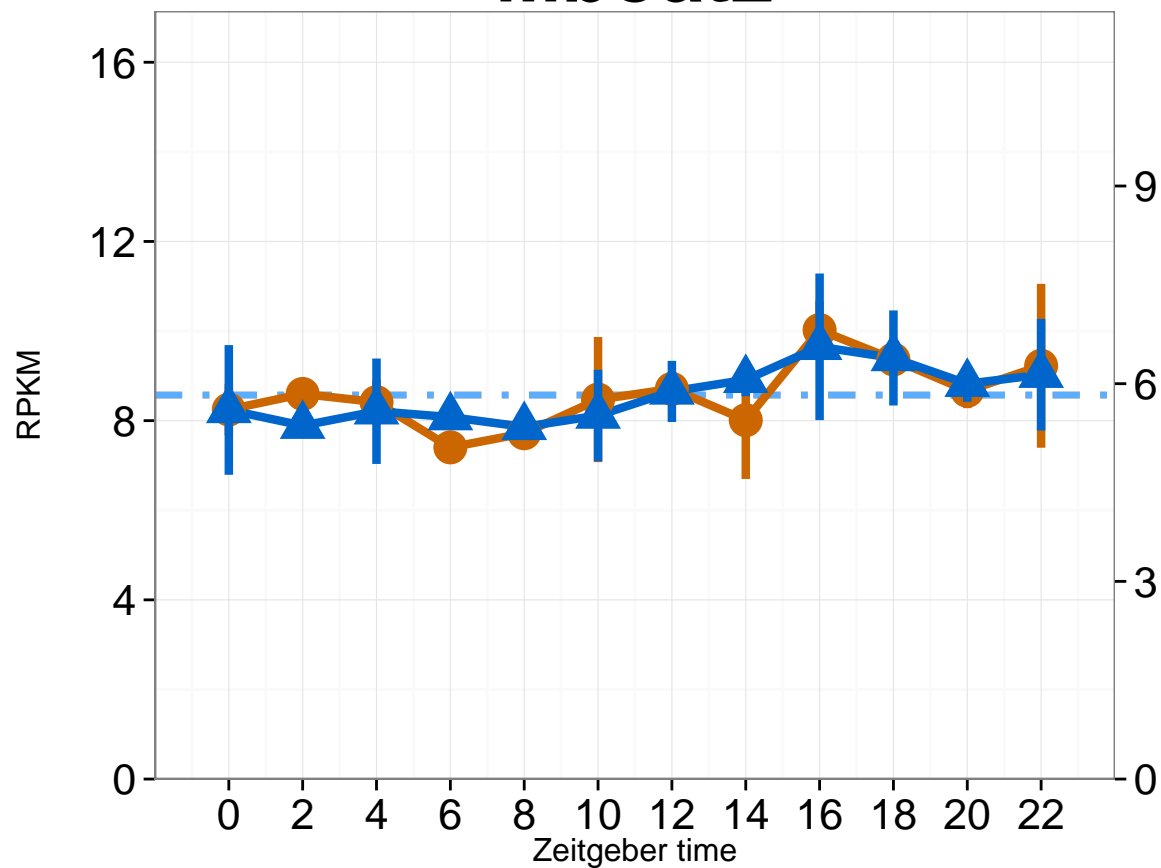

## Mboat2

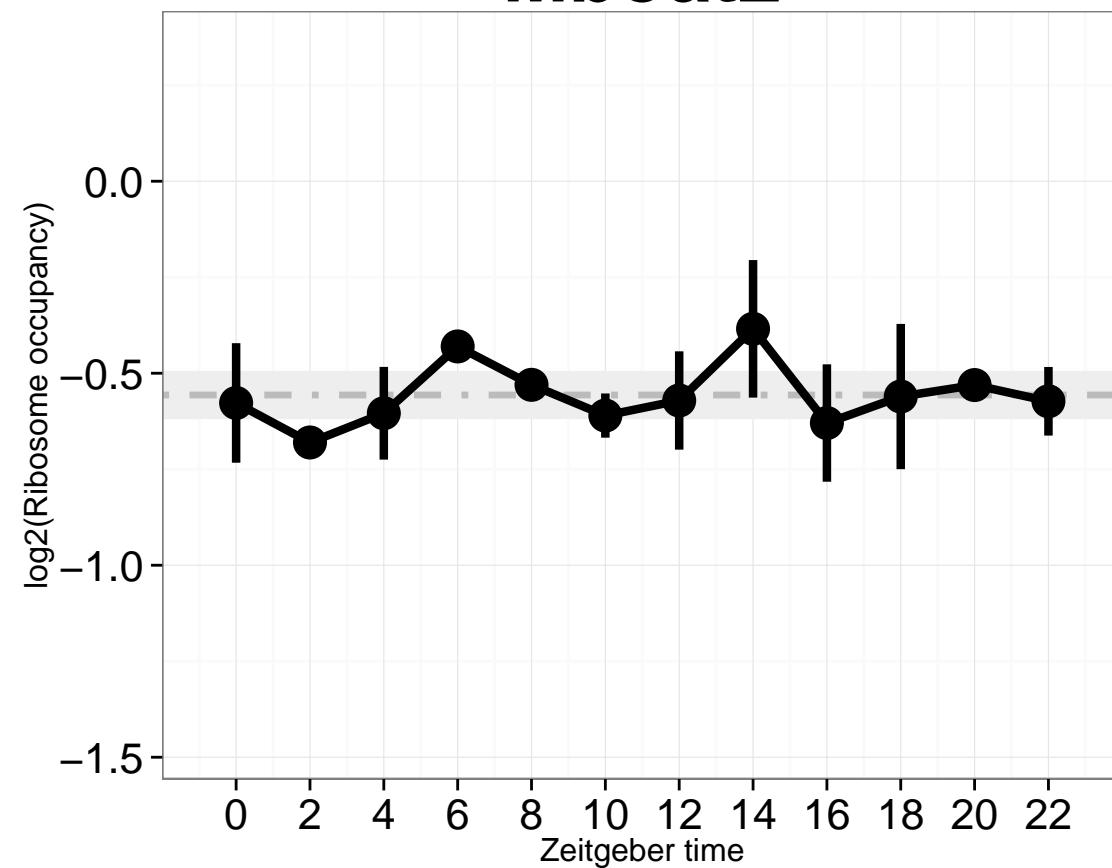

Supplement: Supplementary file 5532 [file 1]

## Ado

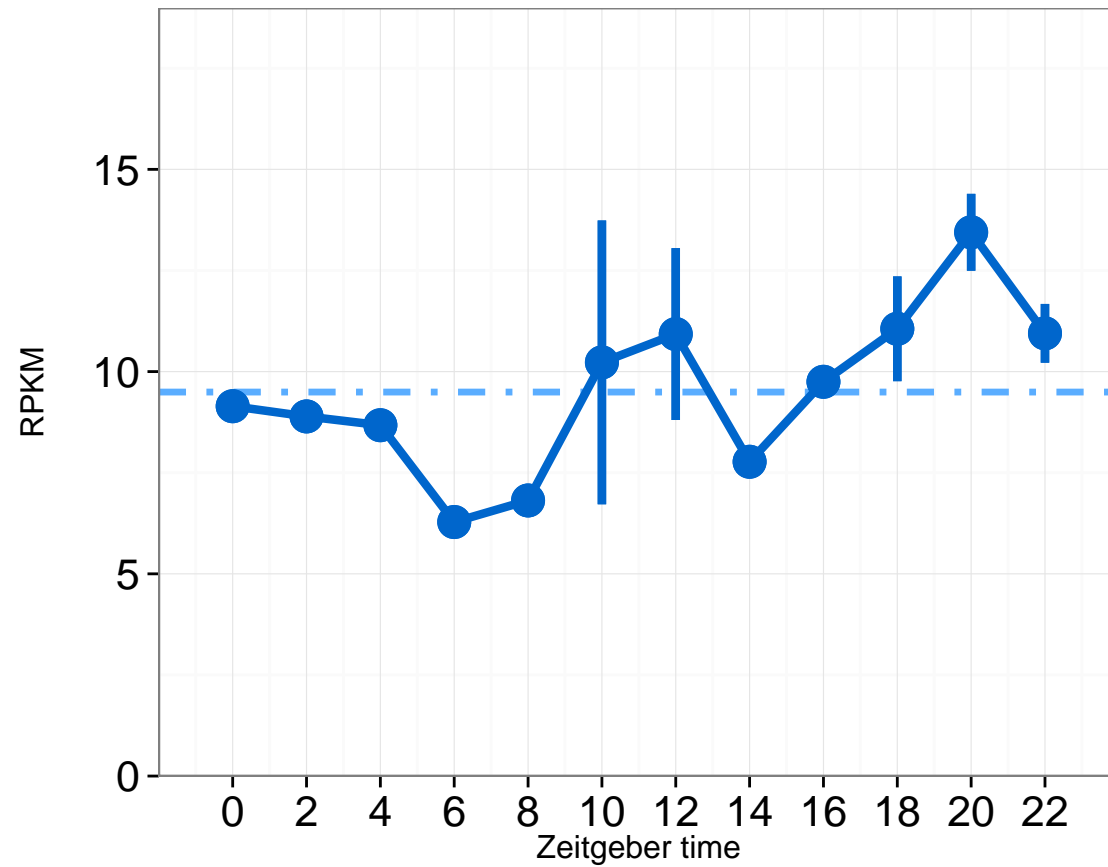

## Ado log2(Ribosome occupancy)

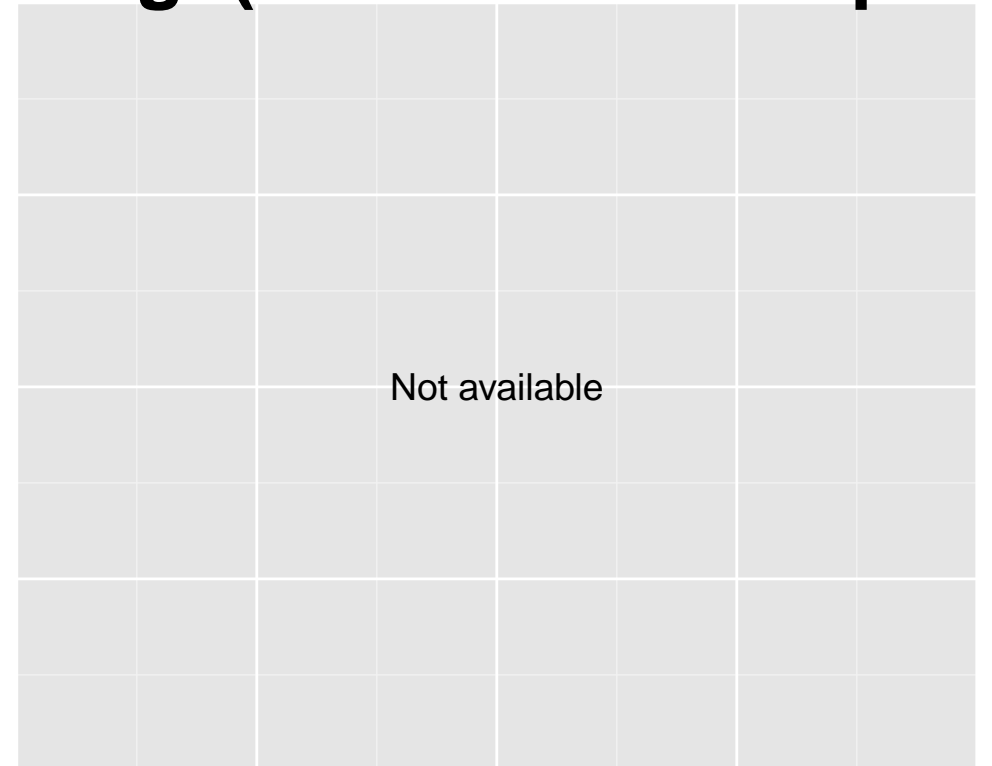

Supplement: Supplementary file 5533 [file 1]

## Sumf2

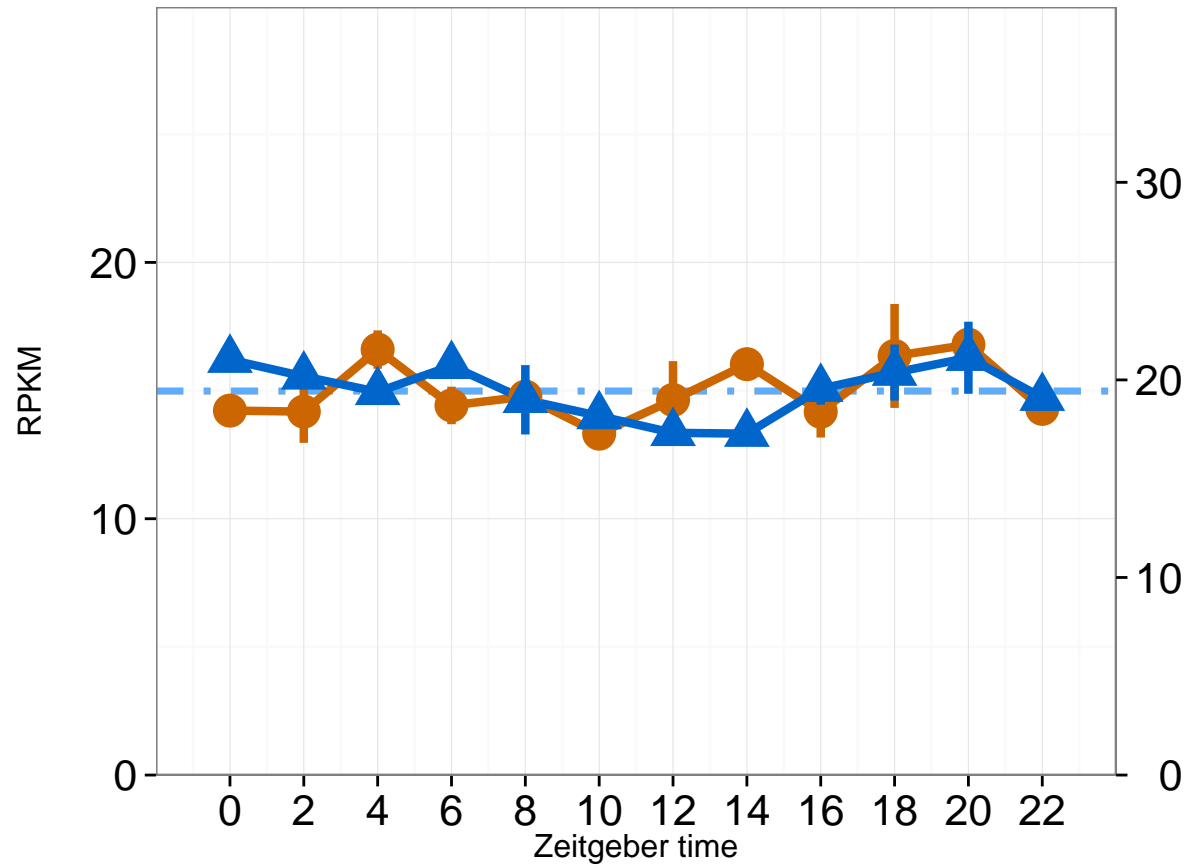

## Sumf2

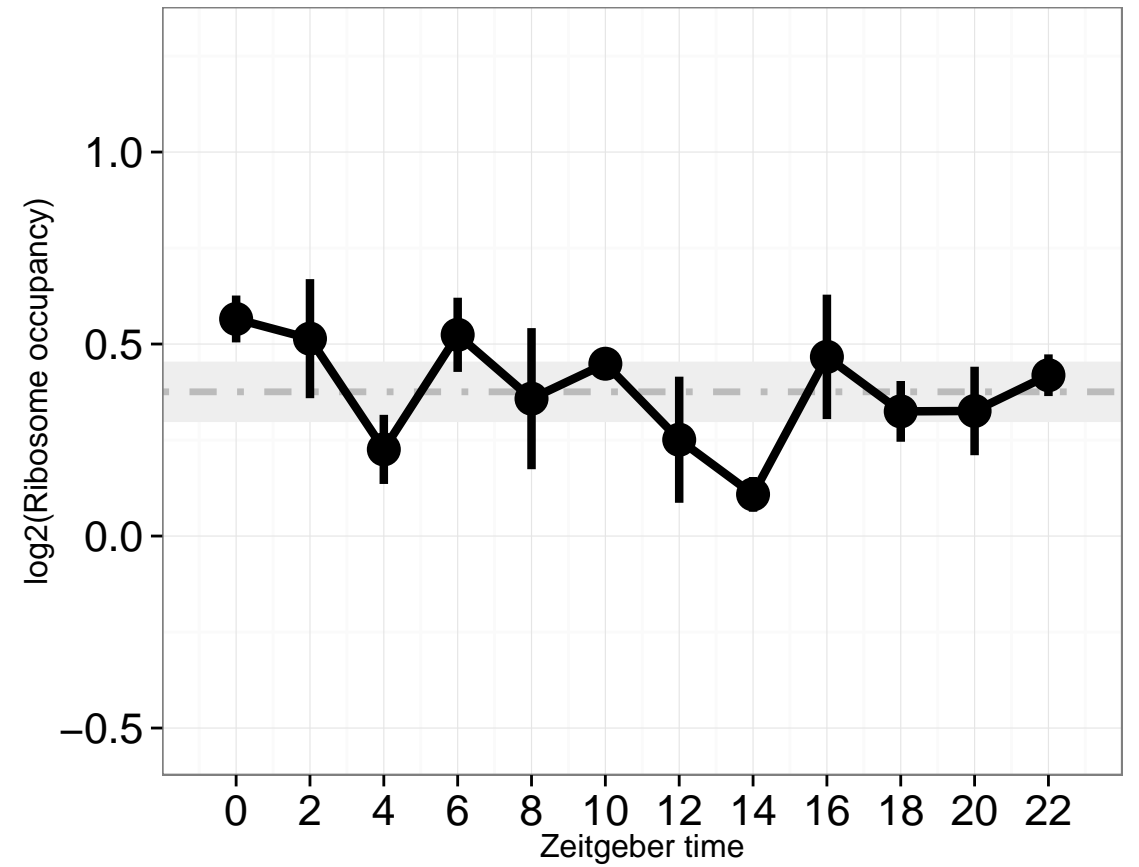

Supplement: Supplementary file 5534 [file 1]

# Lrsam1

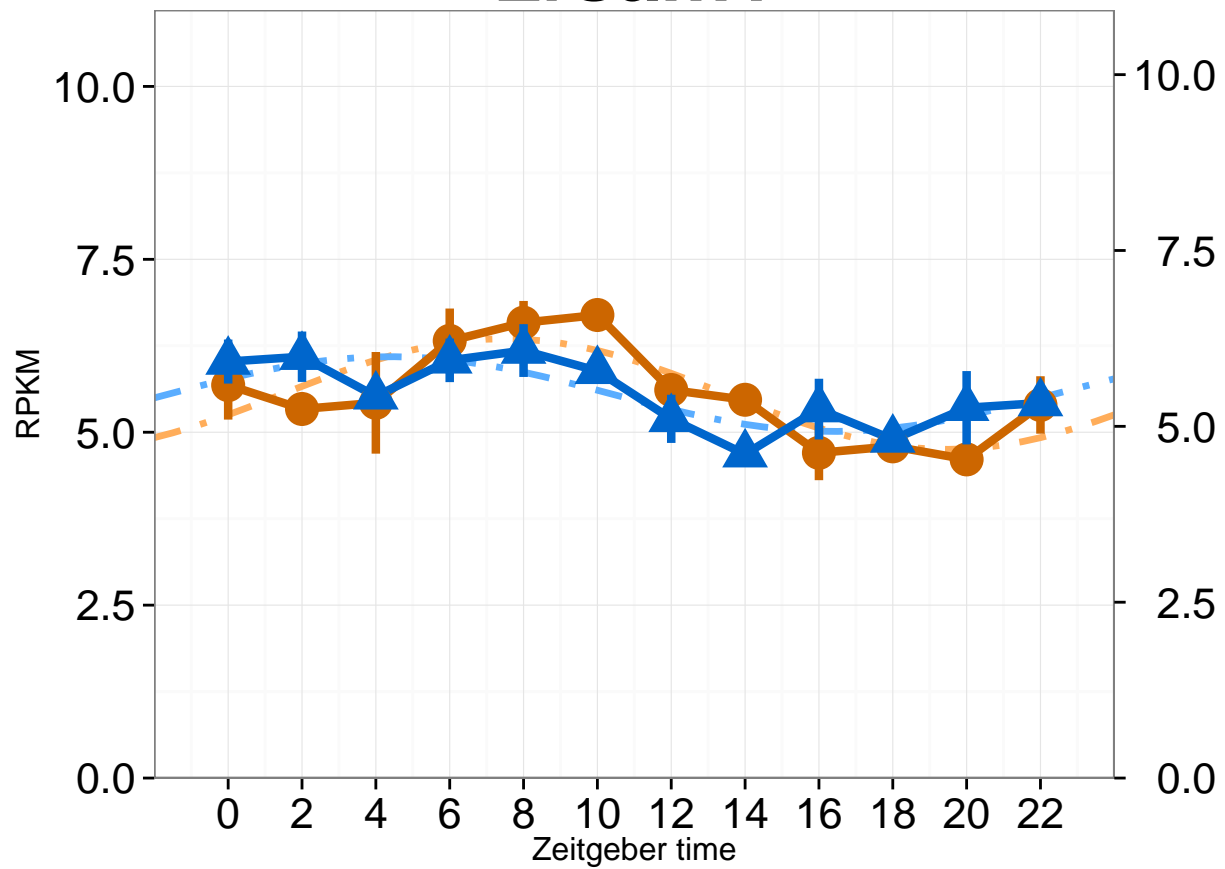

# Lrsam1

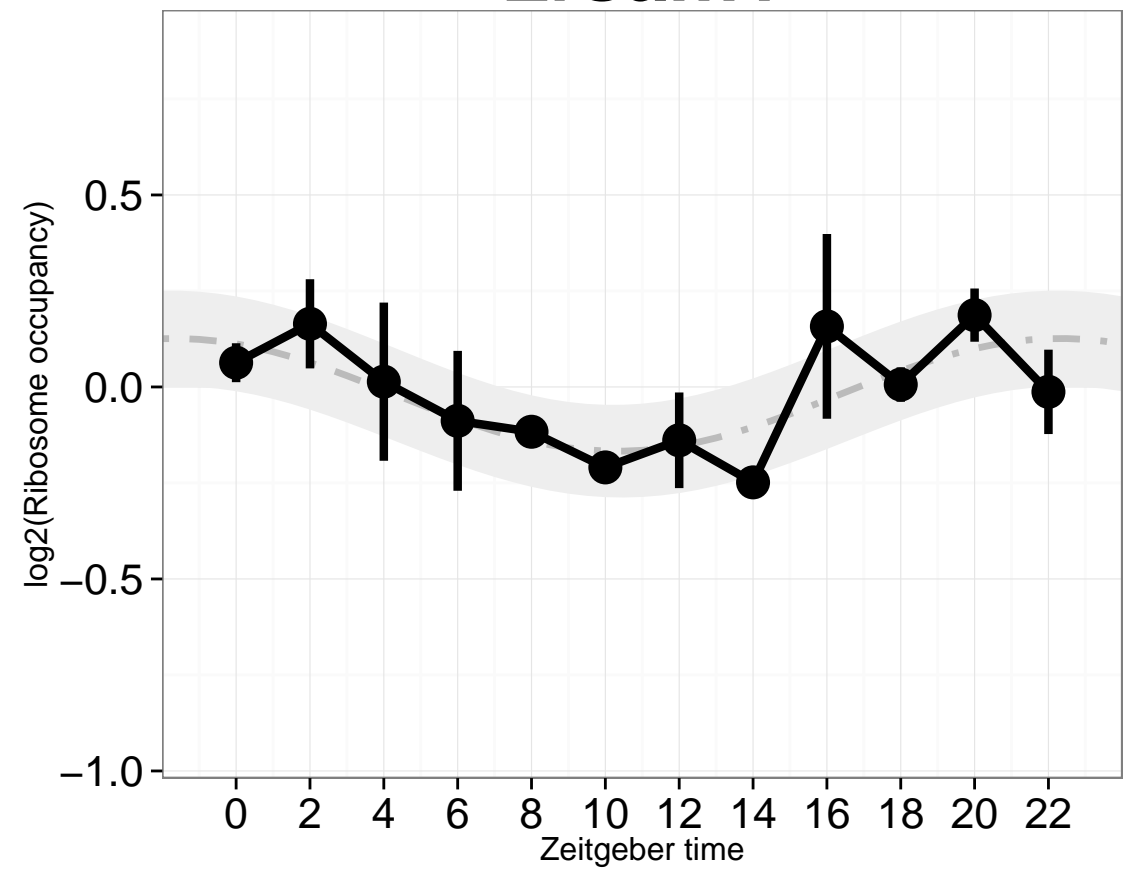

Supplement: Supplementary file 5535 [file 1]

## Cyb561

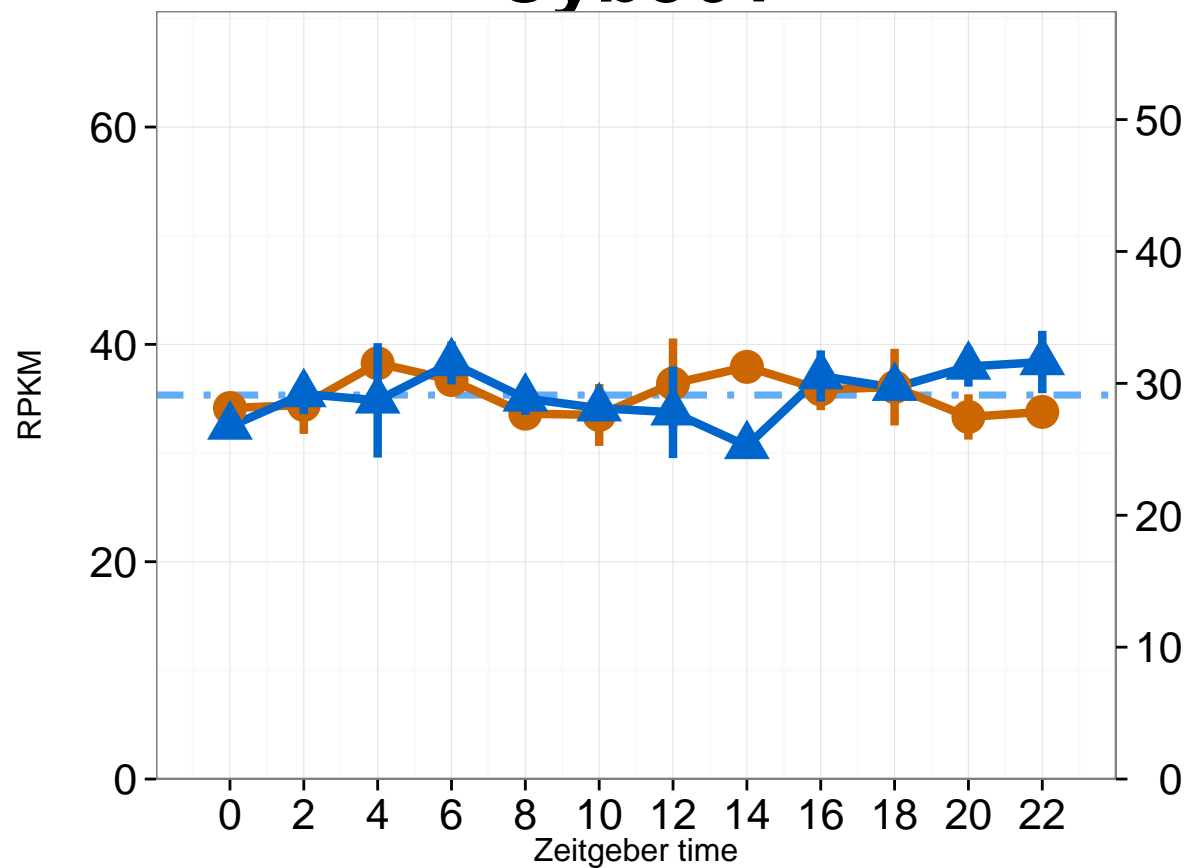

## Cyb561

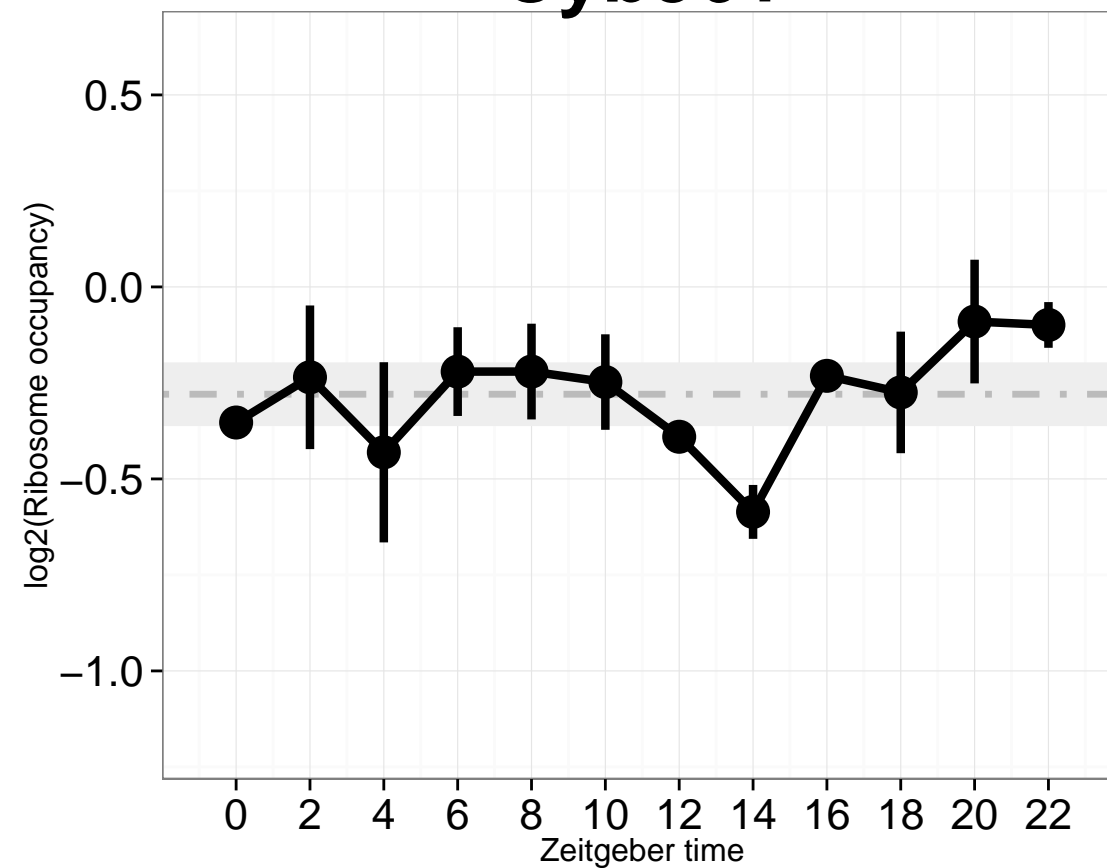

Supplement: Supplementary file 5536 [file 1]

## MiIt3

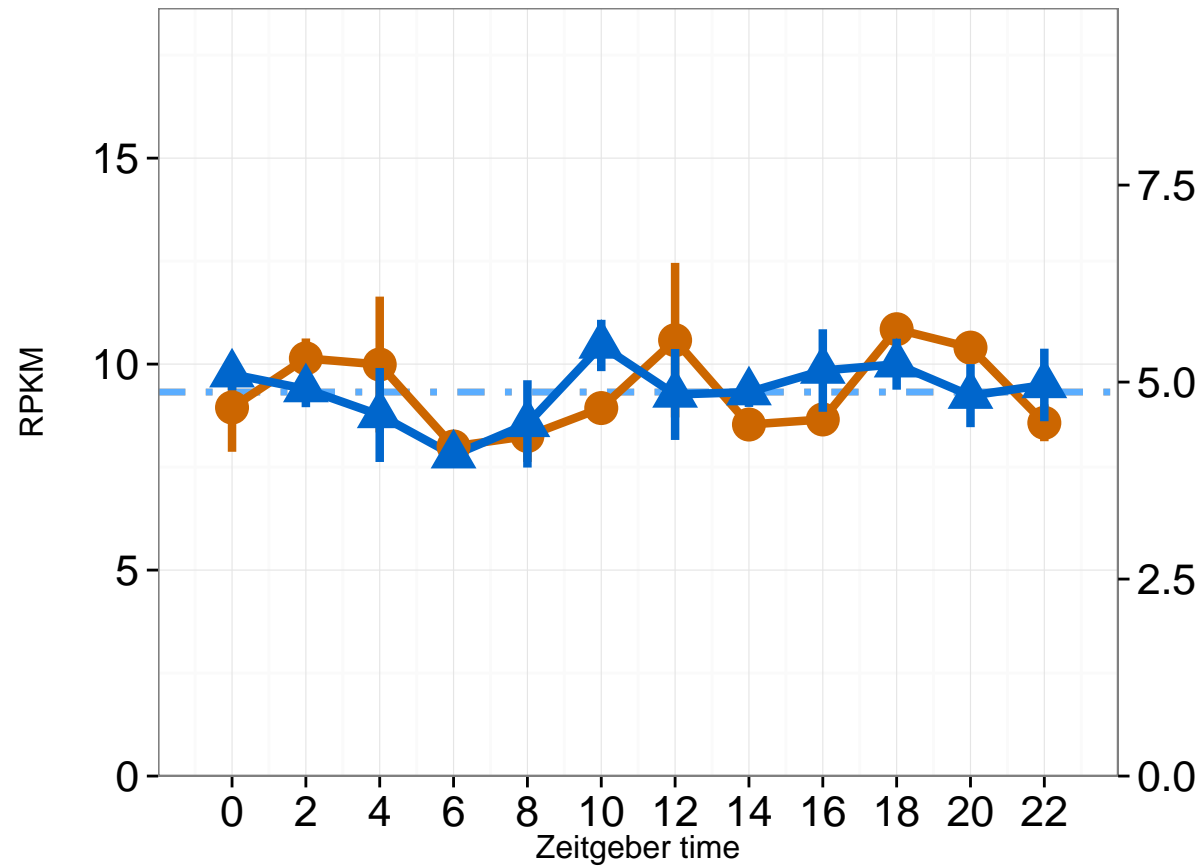

## MiIt3

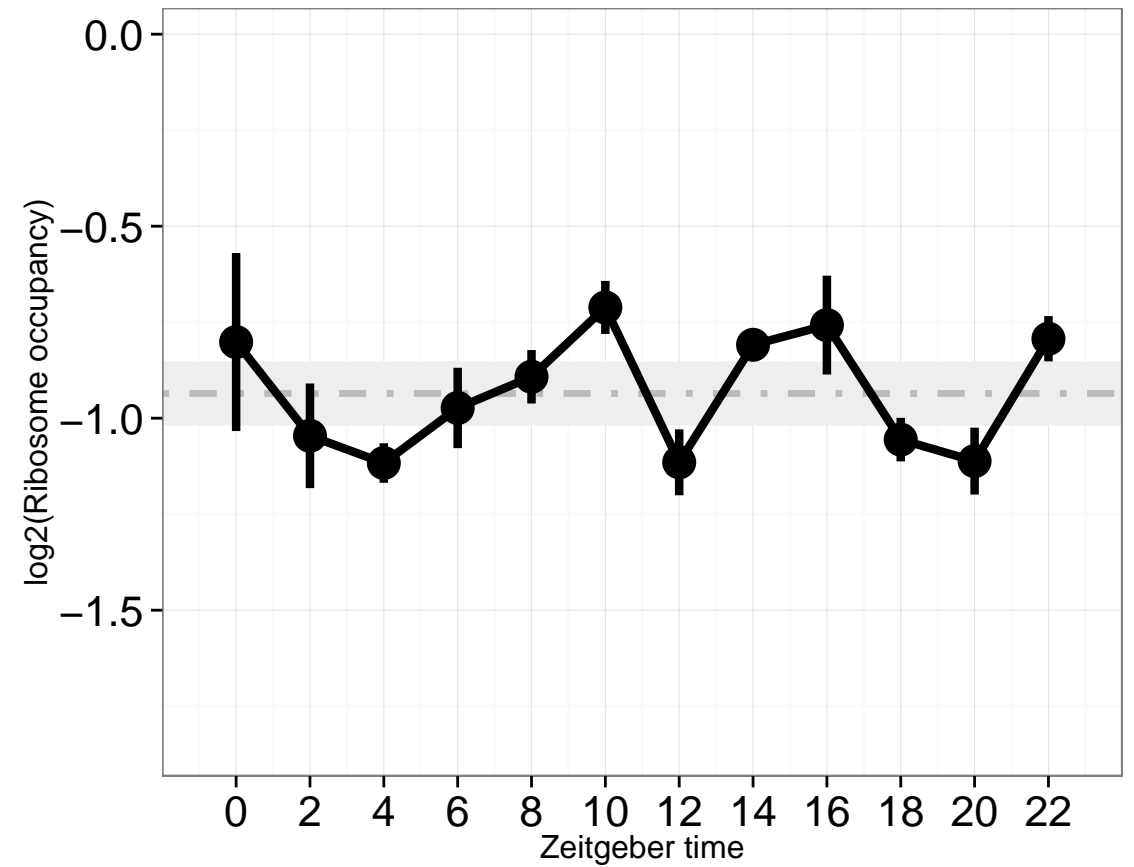

Supplement: Supplementary file 5537 [file 1]

## Kbtbd8

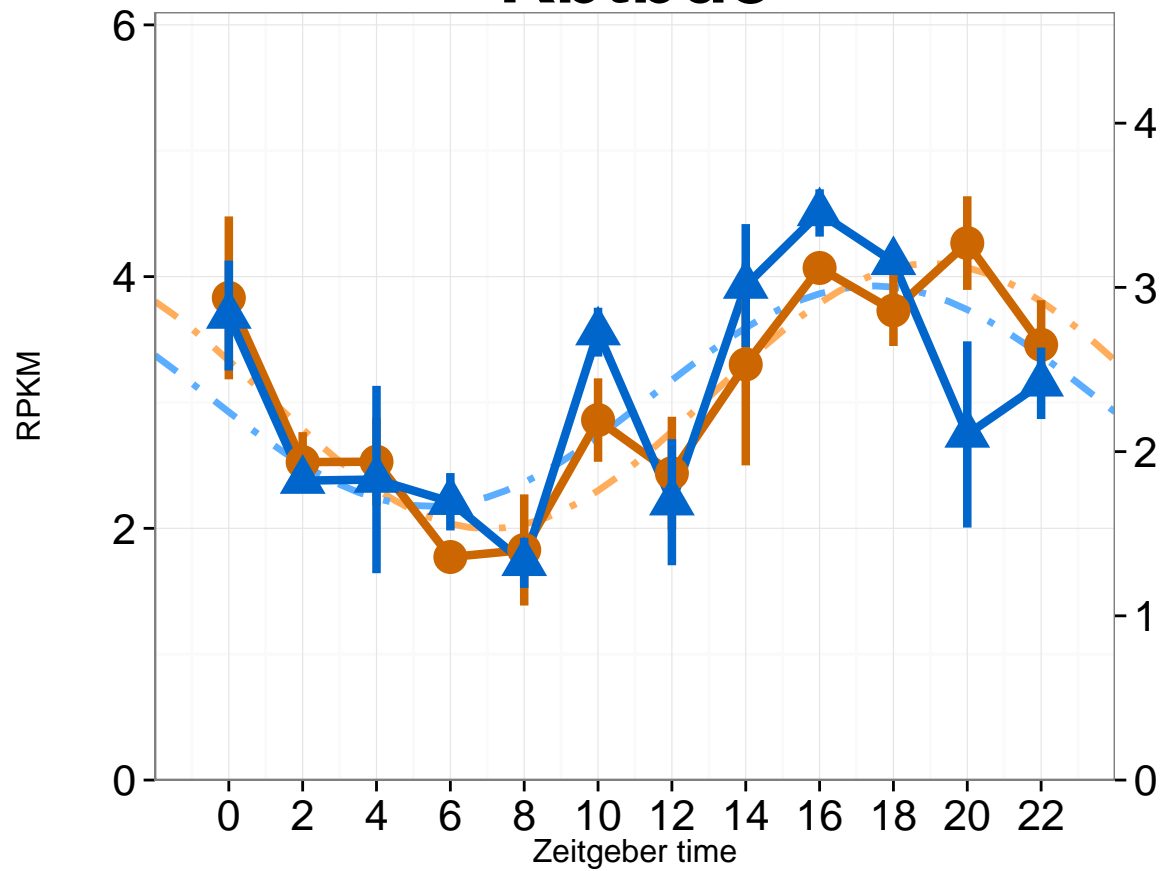

## Kbtbd8

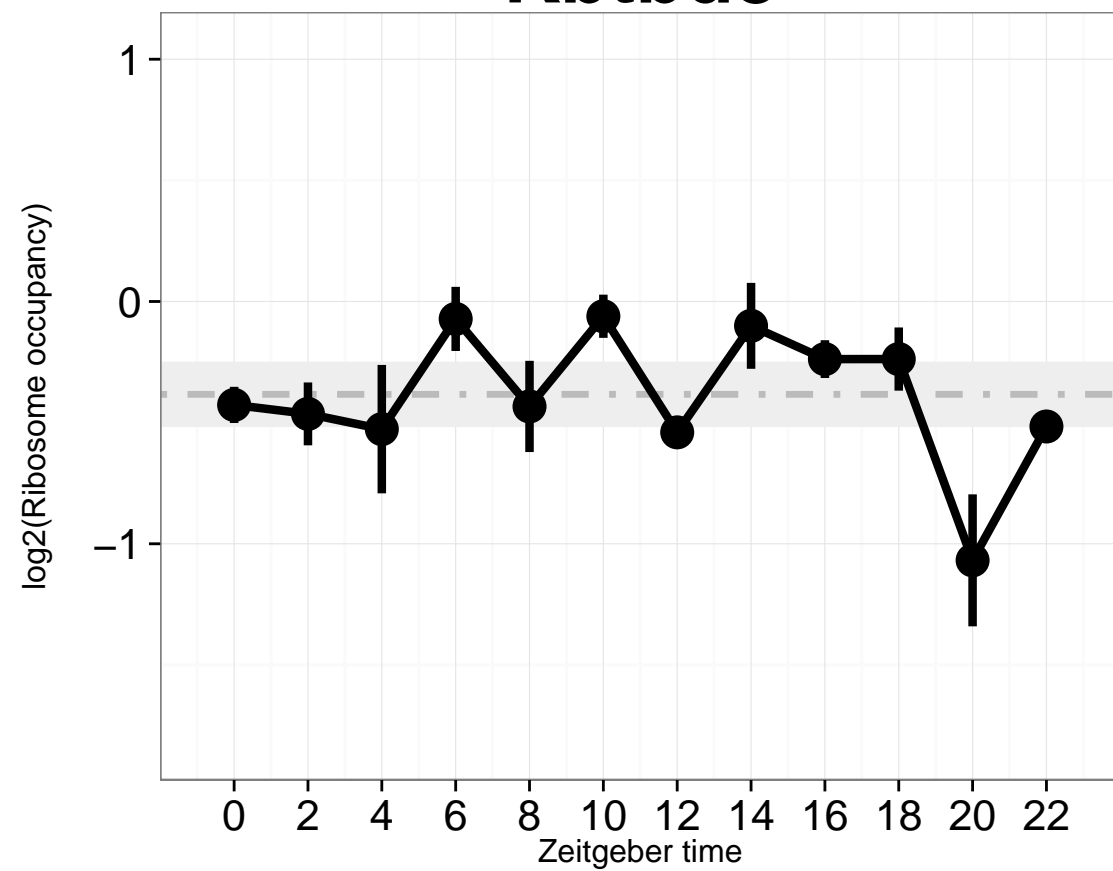

Supplement: Supplementary file 5538 [file 1]

# Zfp759

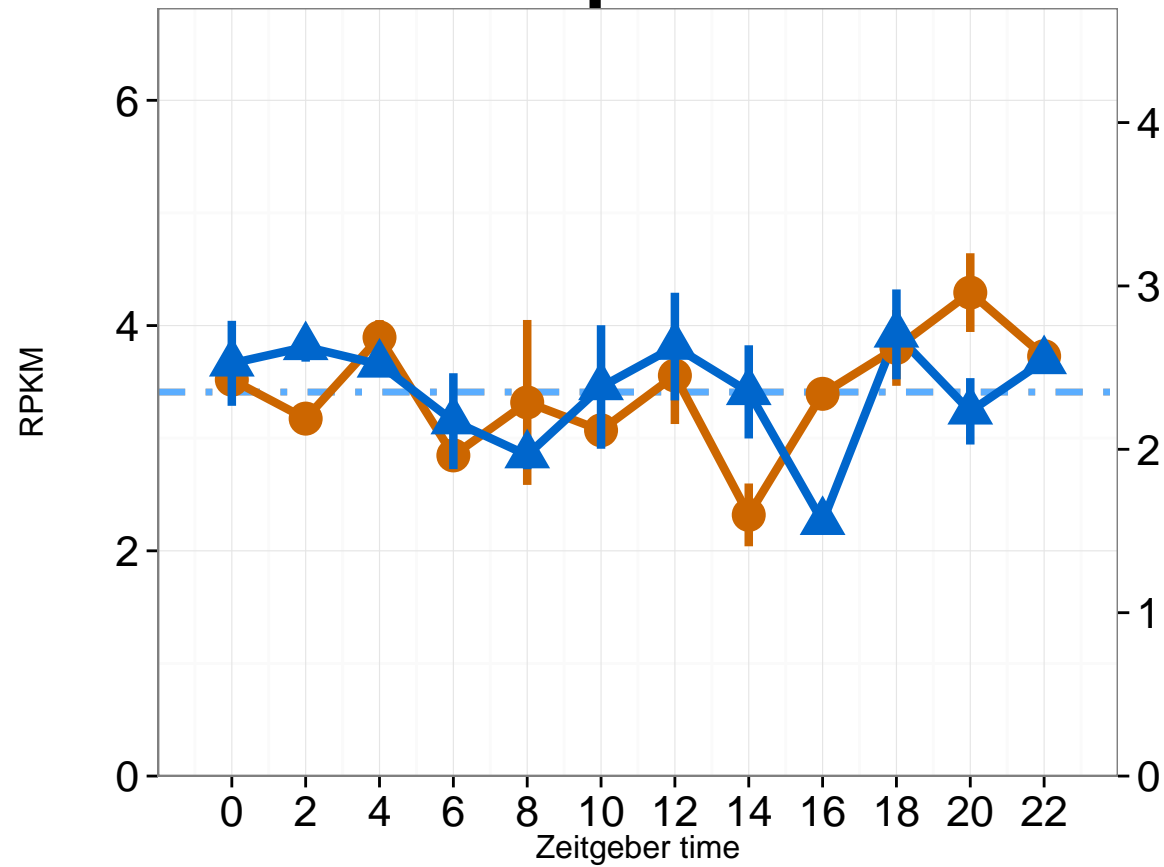

# Zfp759

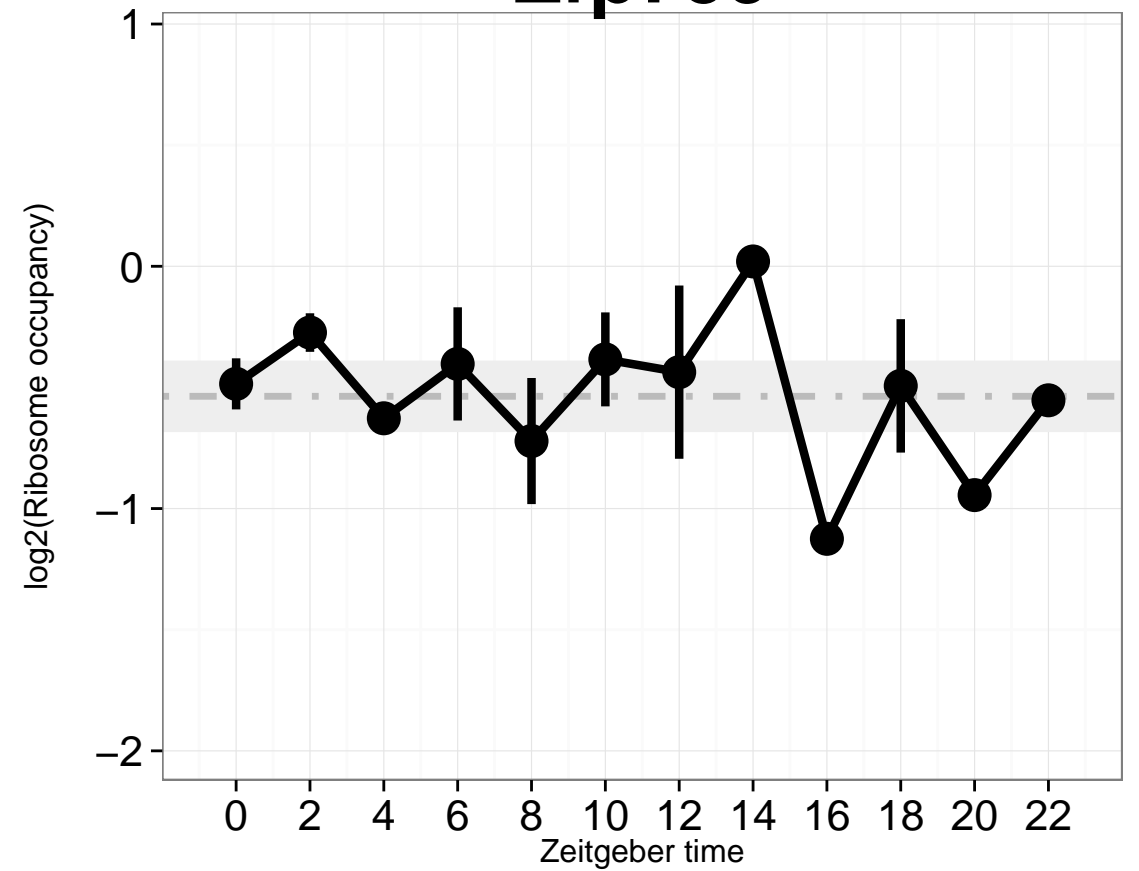

Supplement: Supplementary file 5539 [file 1]

## Brd7

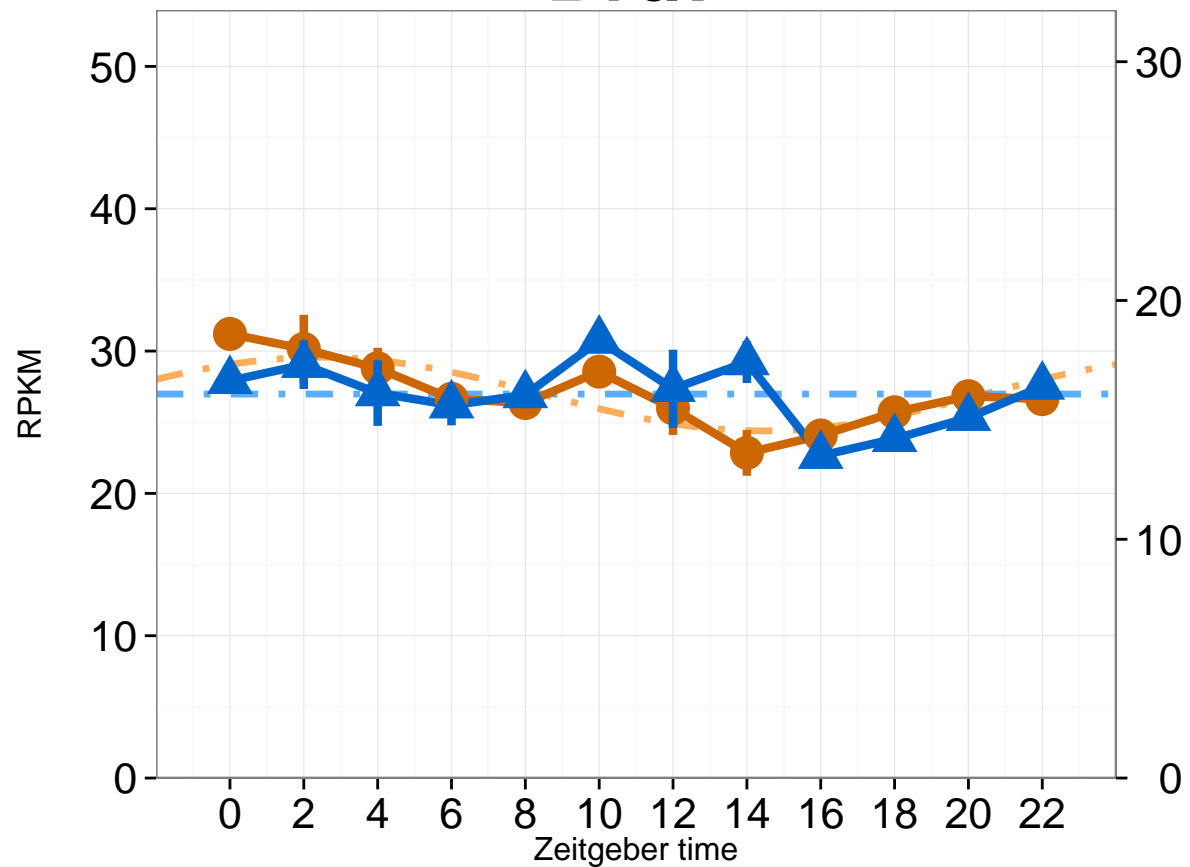

## Brd7

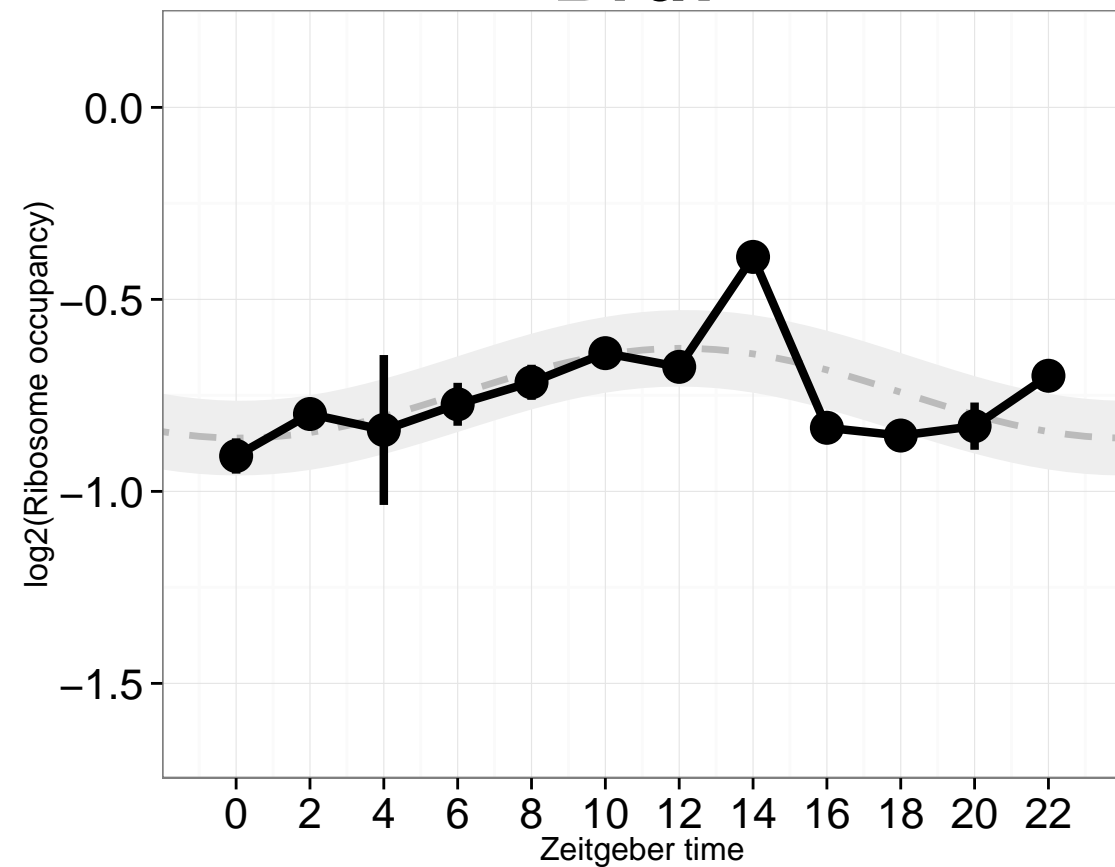

Supplement: Supplementary file 5540 [file 1]

# Krba1

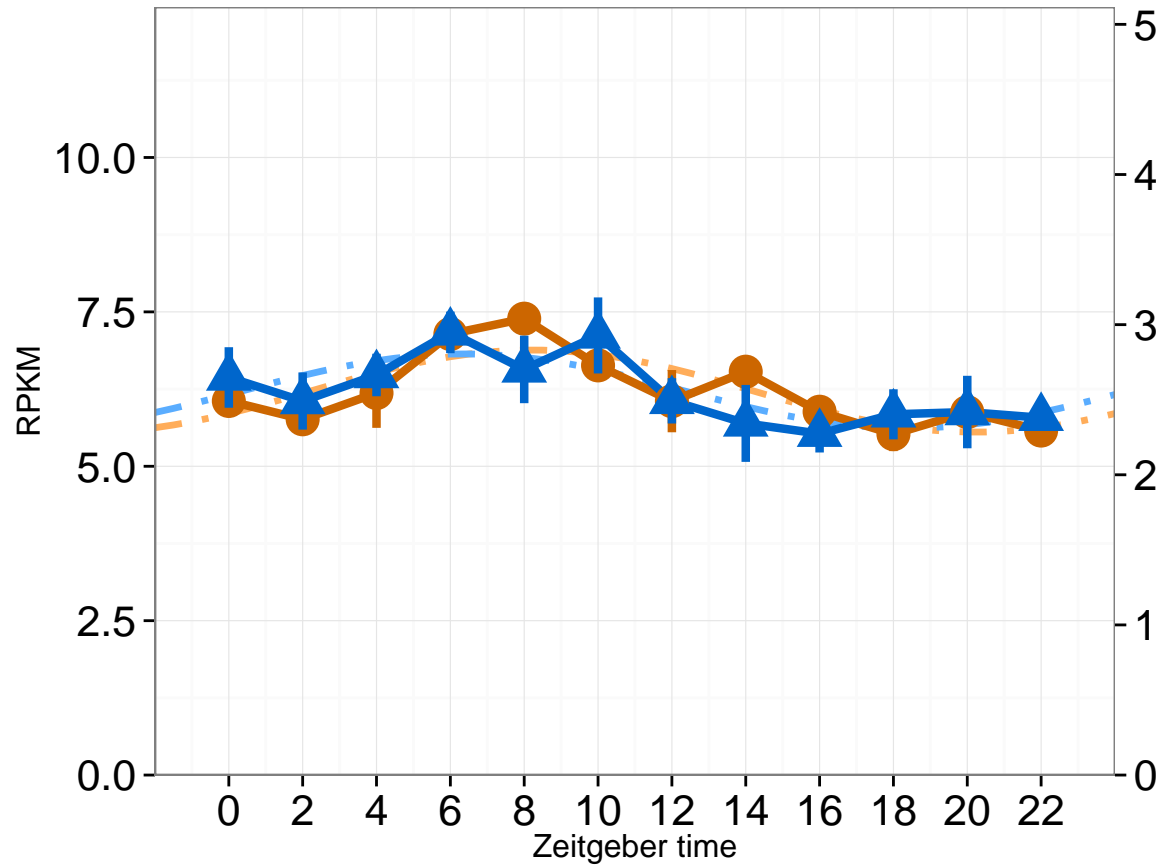

# Krba1

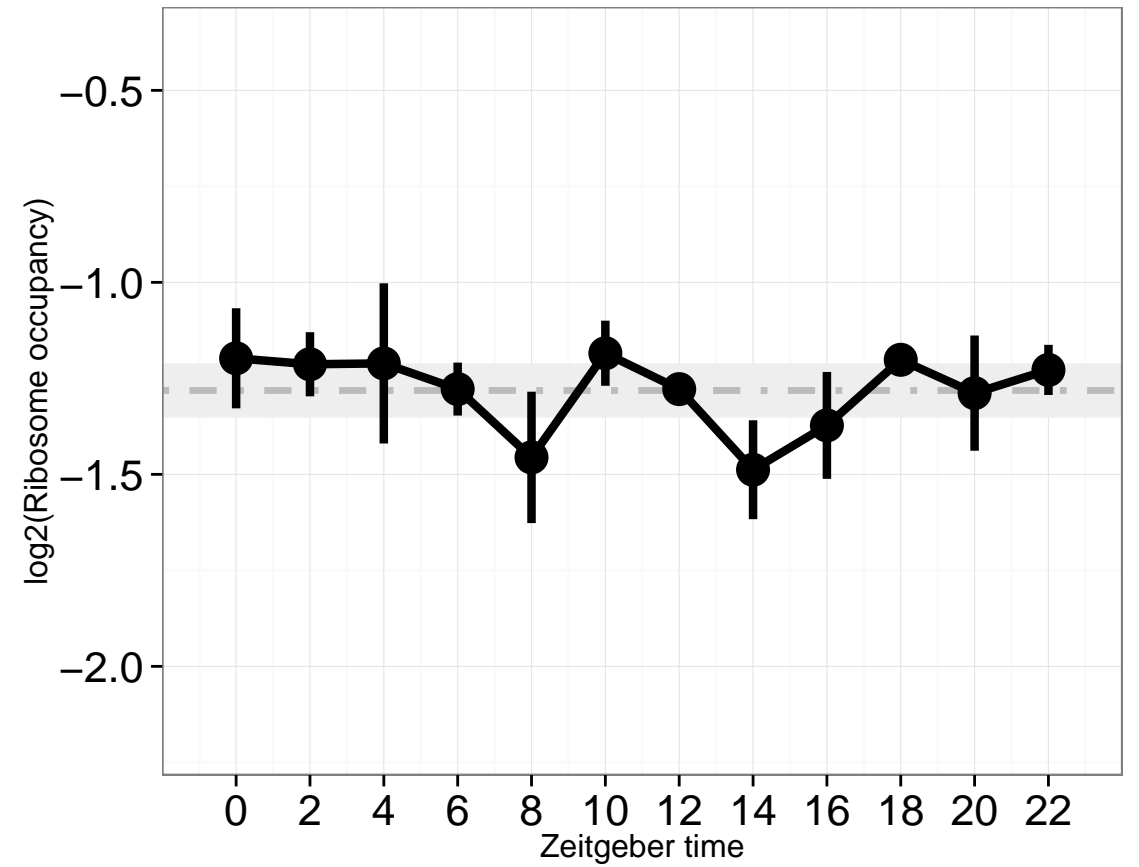

Supplement: Supplementary file 5541 [file 1]

# Adc

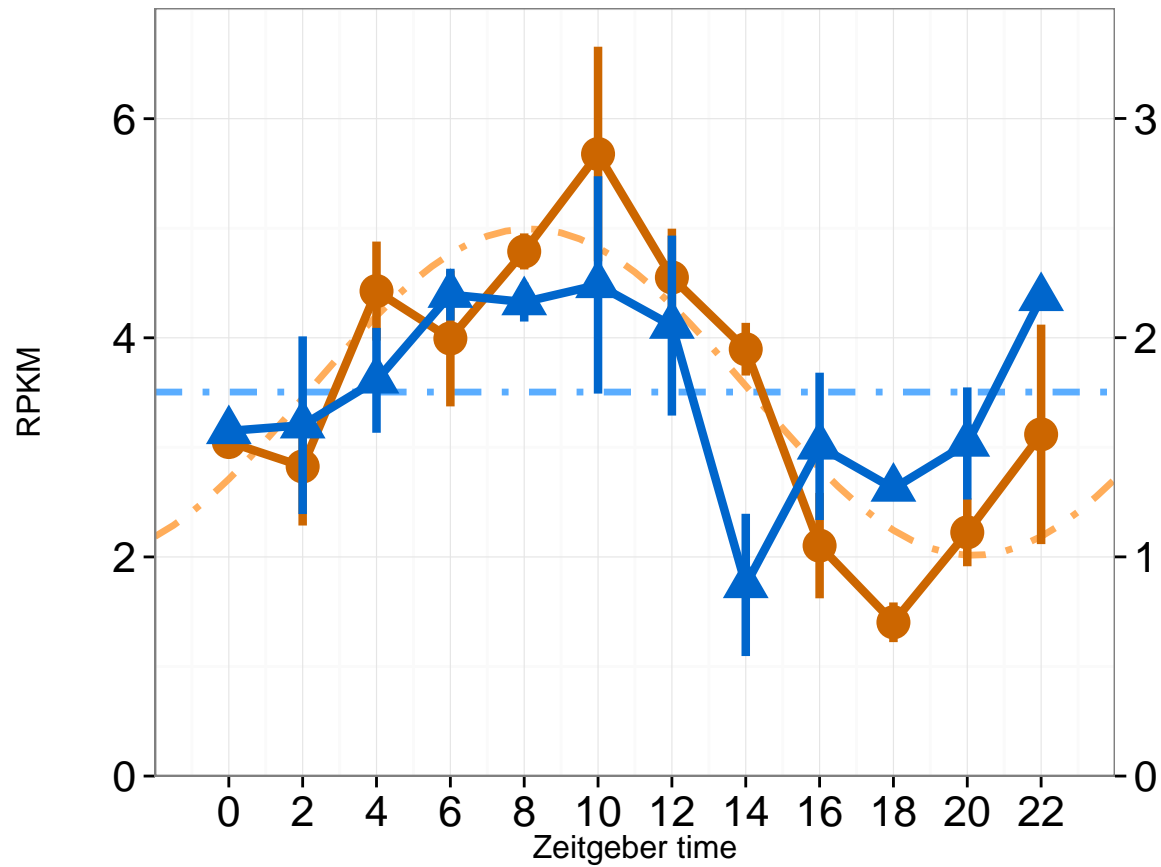

# Adc

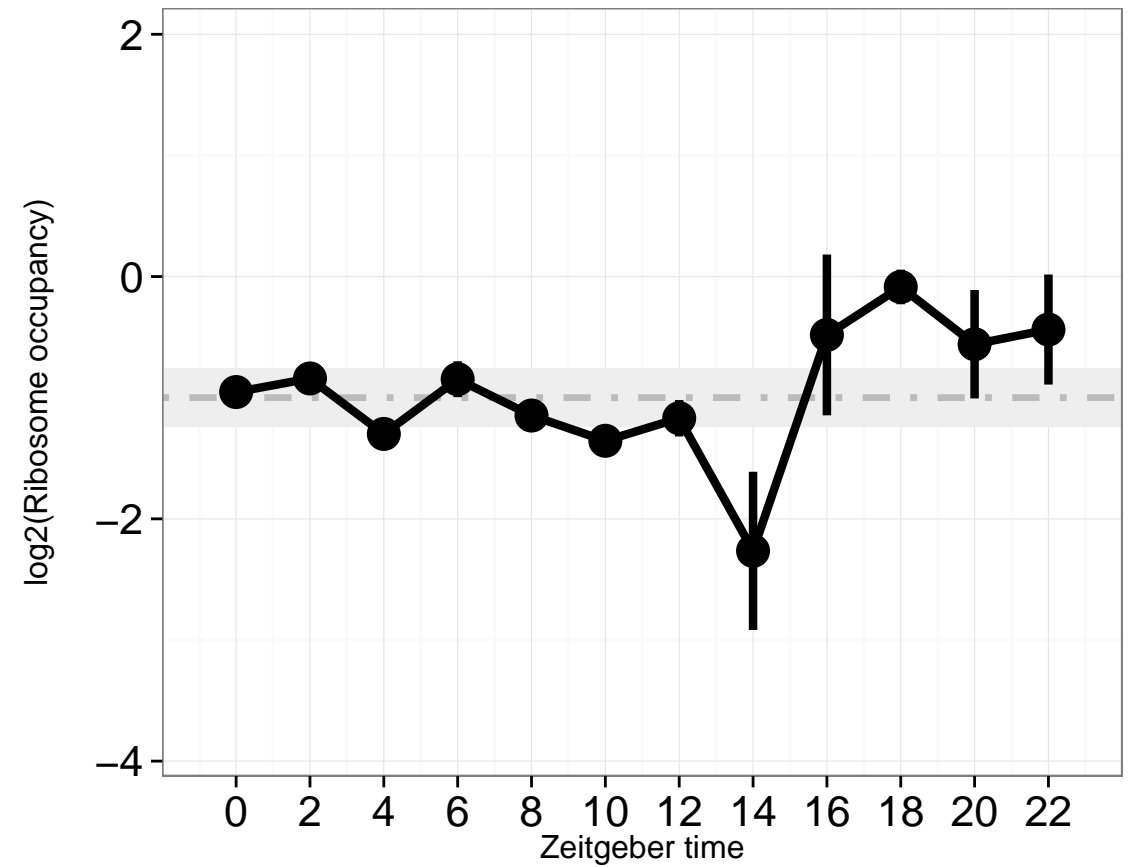

Supplement: Supplementary file 5542 [file 1]

# Skida1

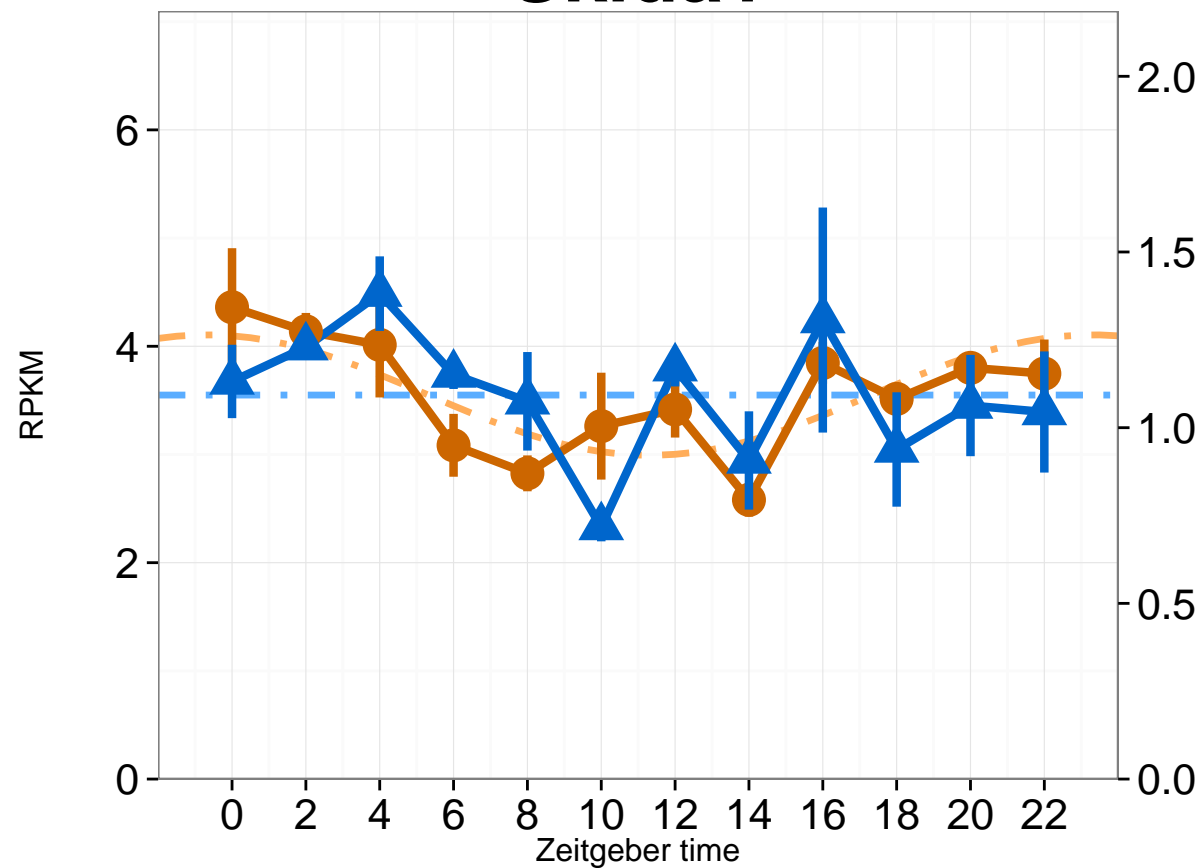

# Skida1

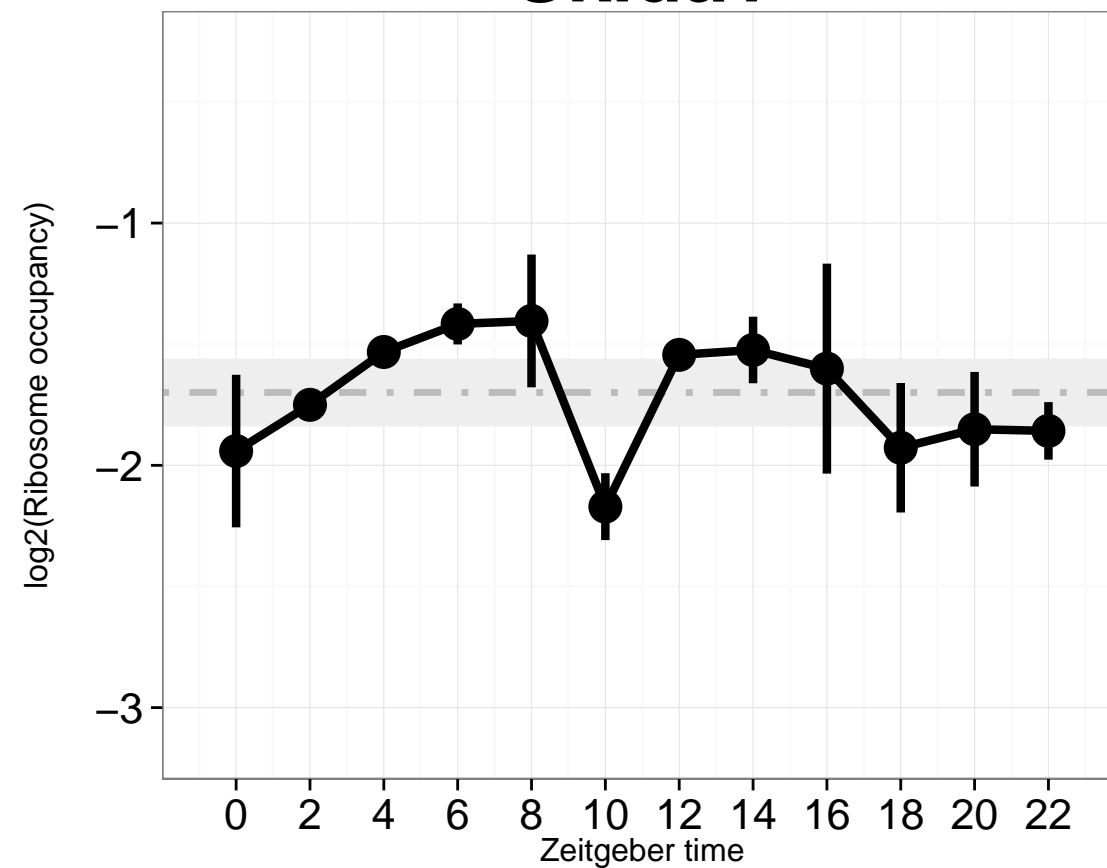

Supplement: Supplementary file 5543 [file 1]

# Ndrp1

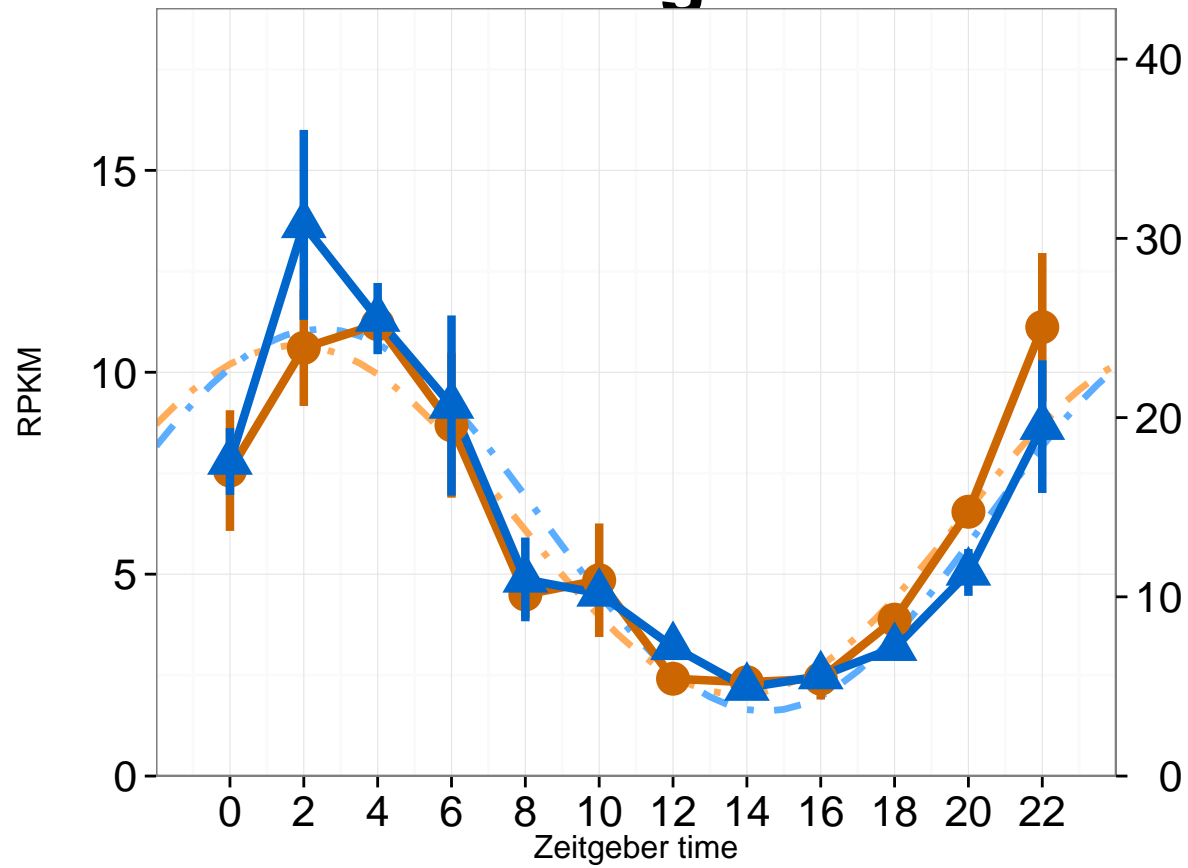

# Ndrp1

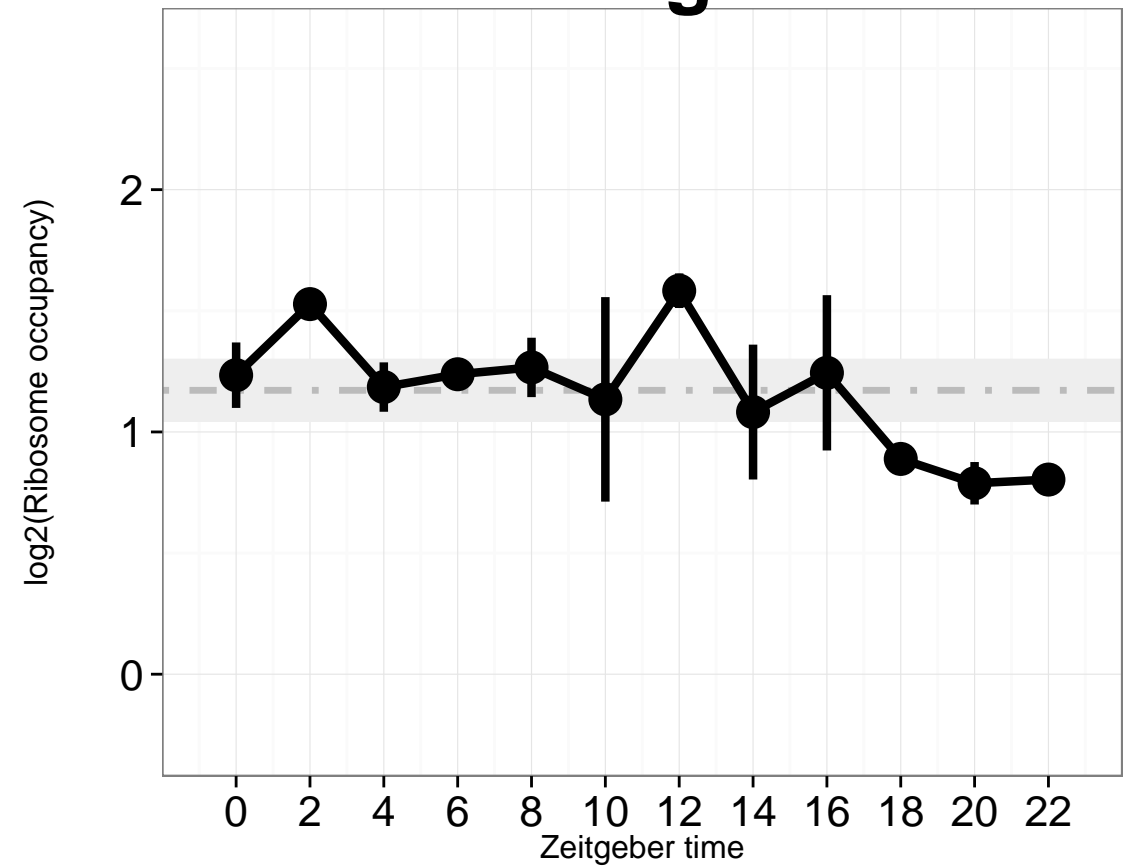

Supplement: Supplementary file 5544 [file 1]

# Ercc6l

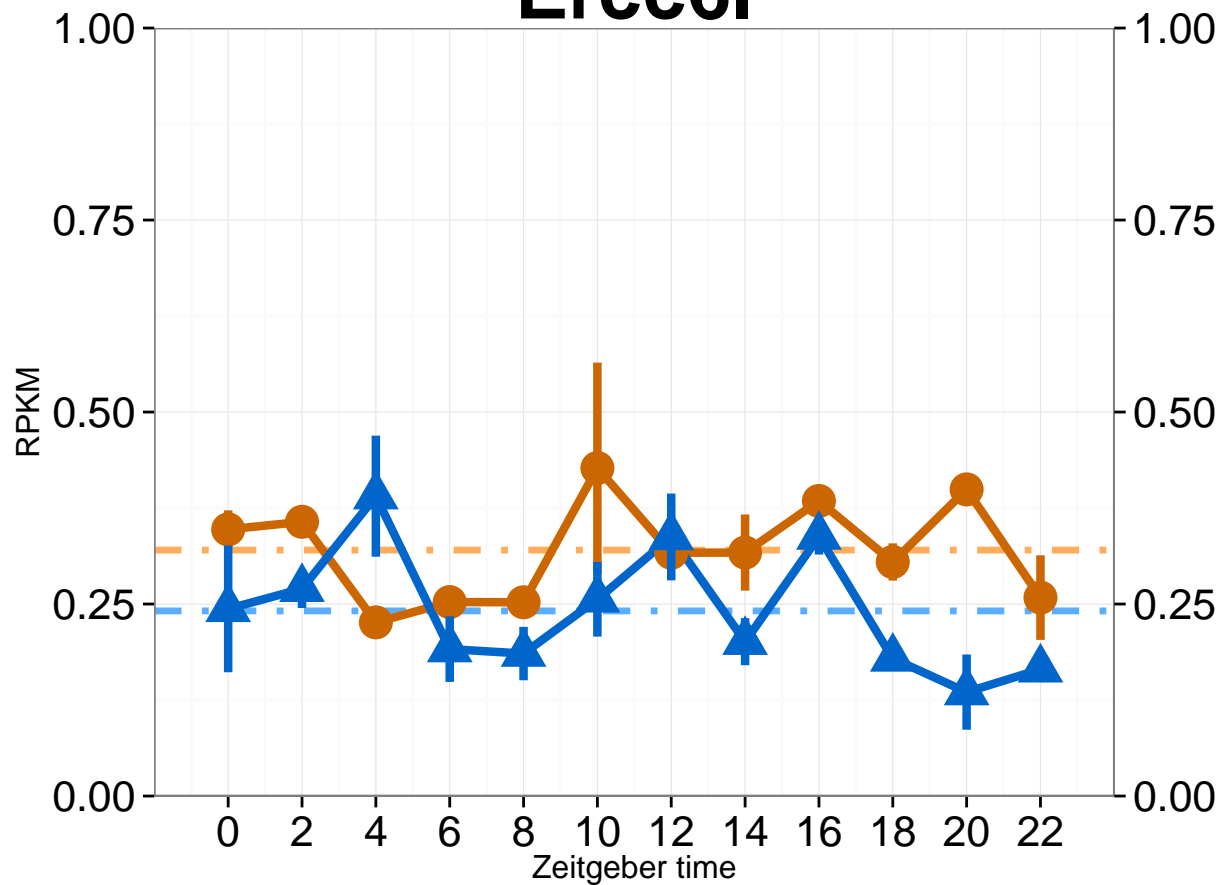

# Ercc6l

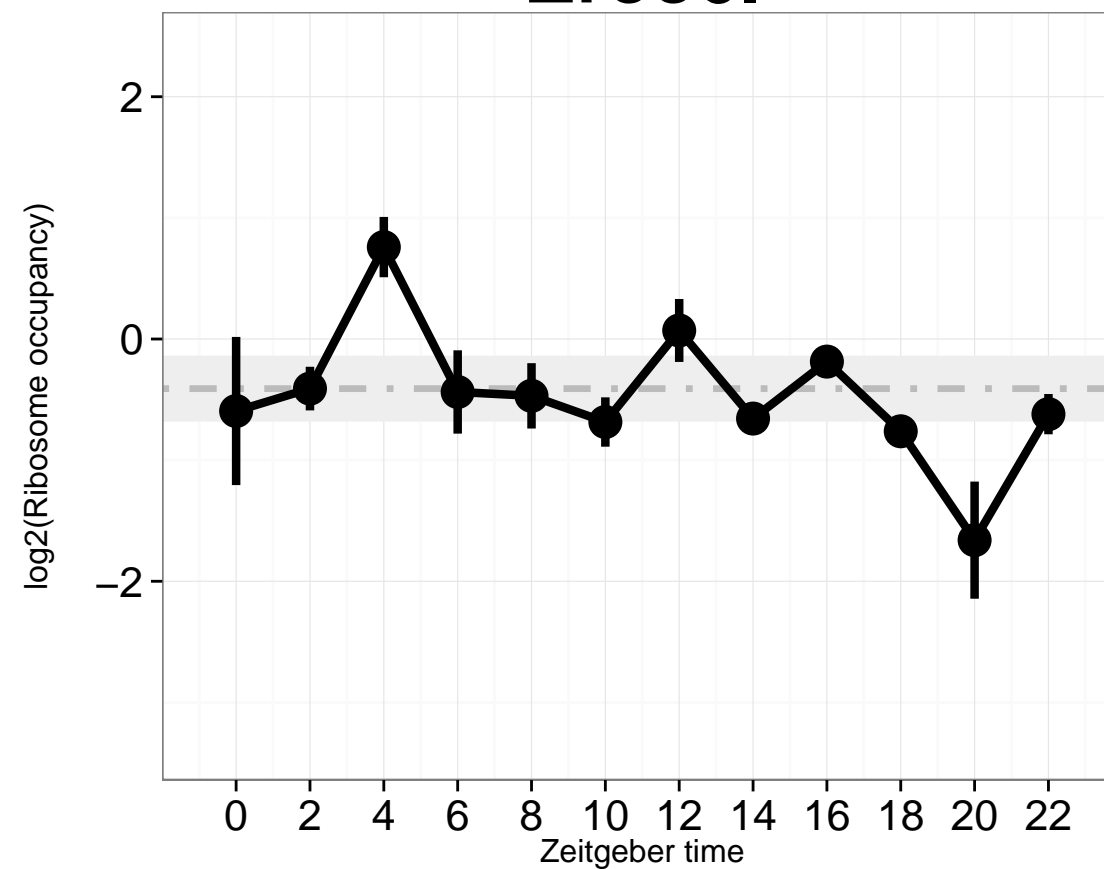

Supplement: Supplementary file 5545 [file 1]

# Cldn11

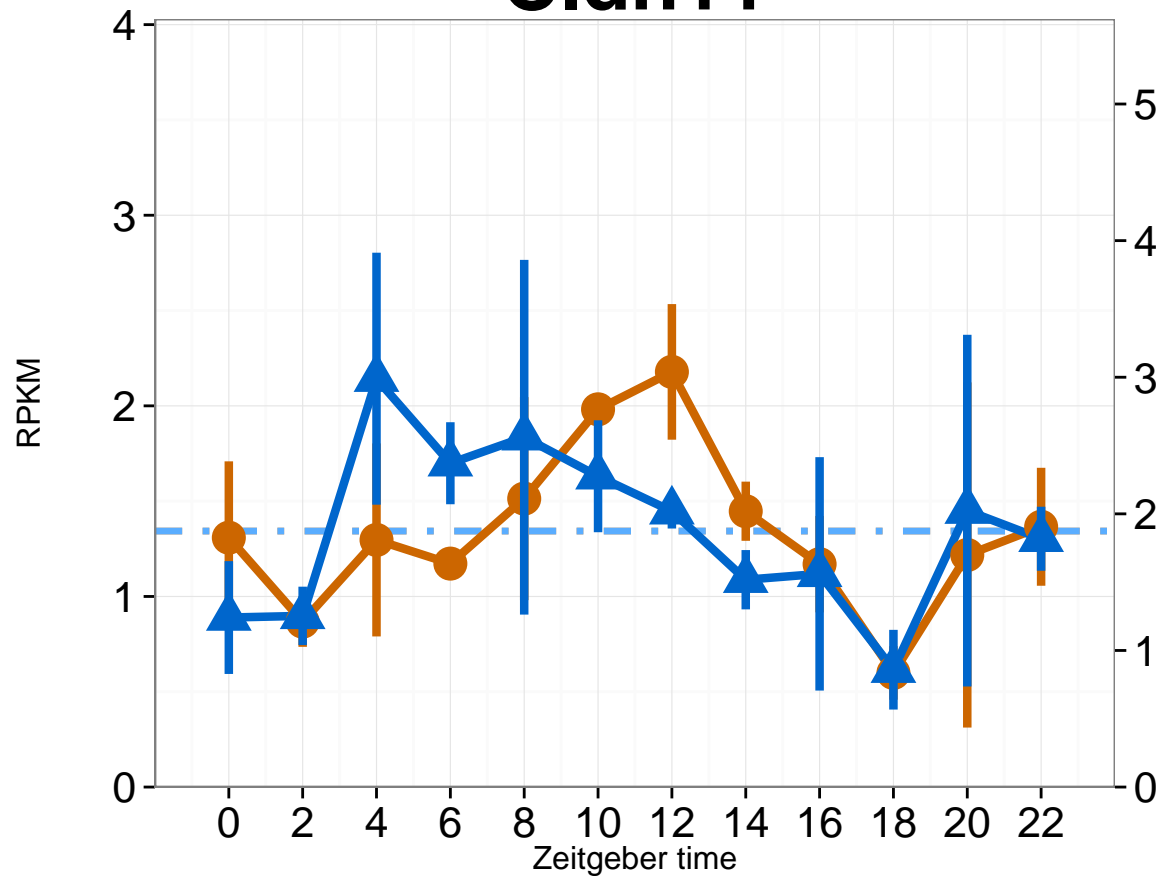

# Cldn11

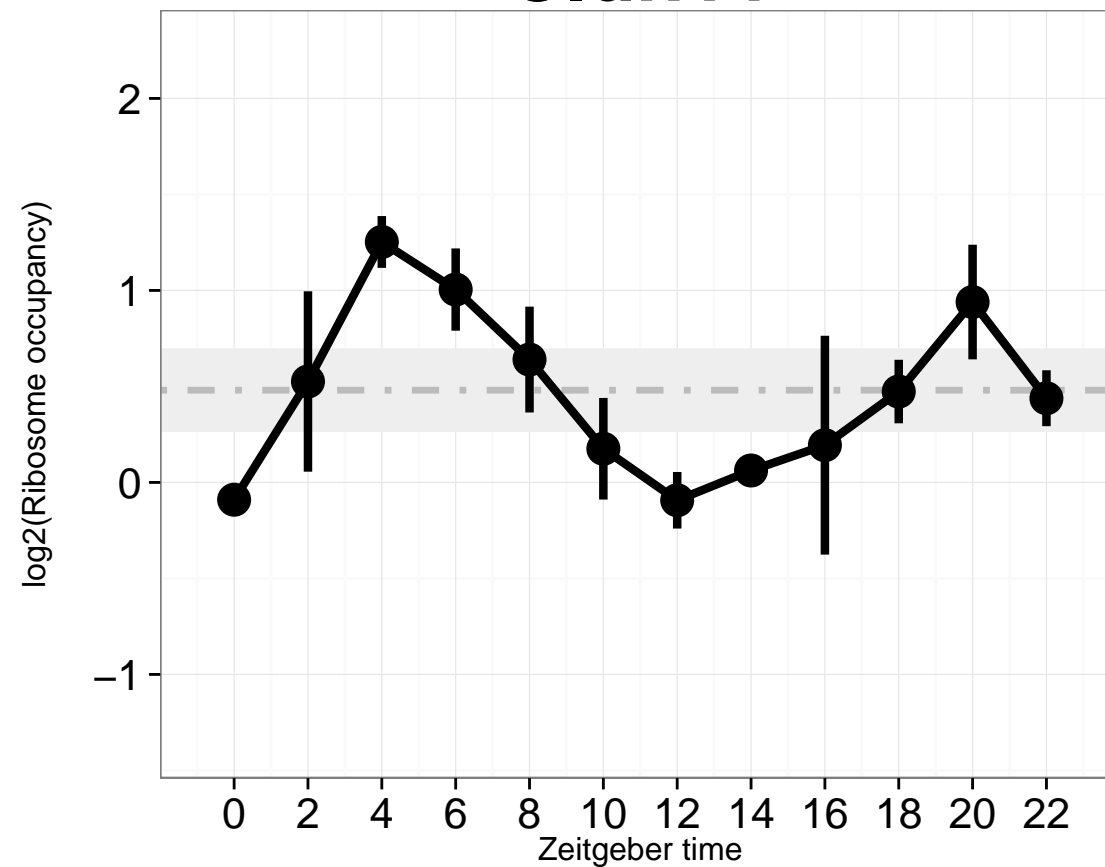

Supplement: Supplementary file 5546 [file 1]

## Cep152

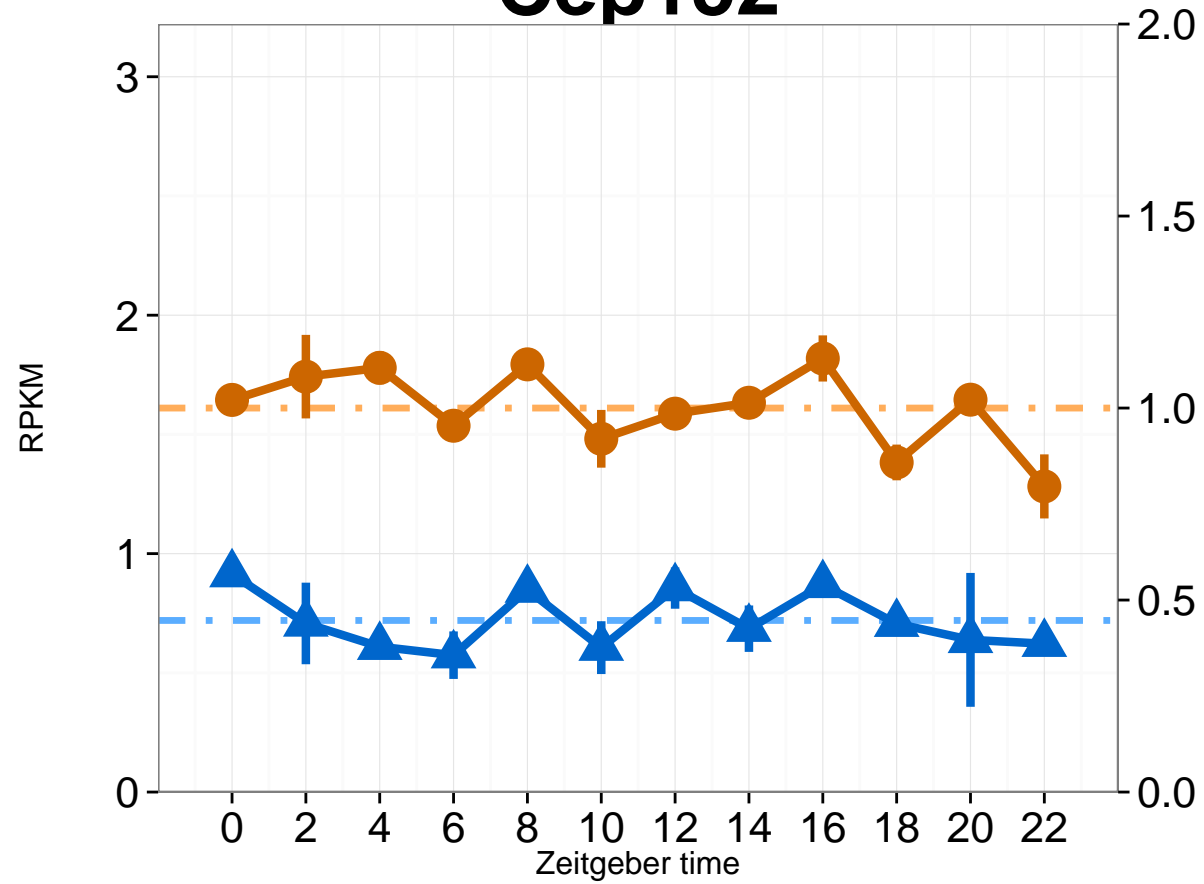

## Cep152

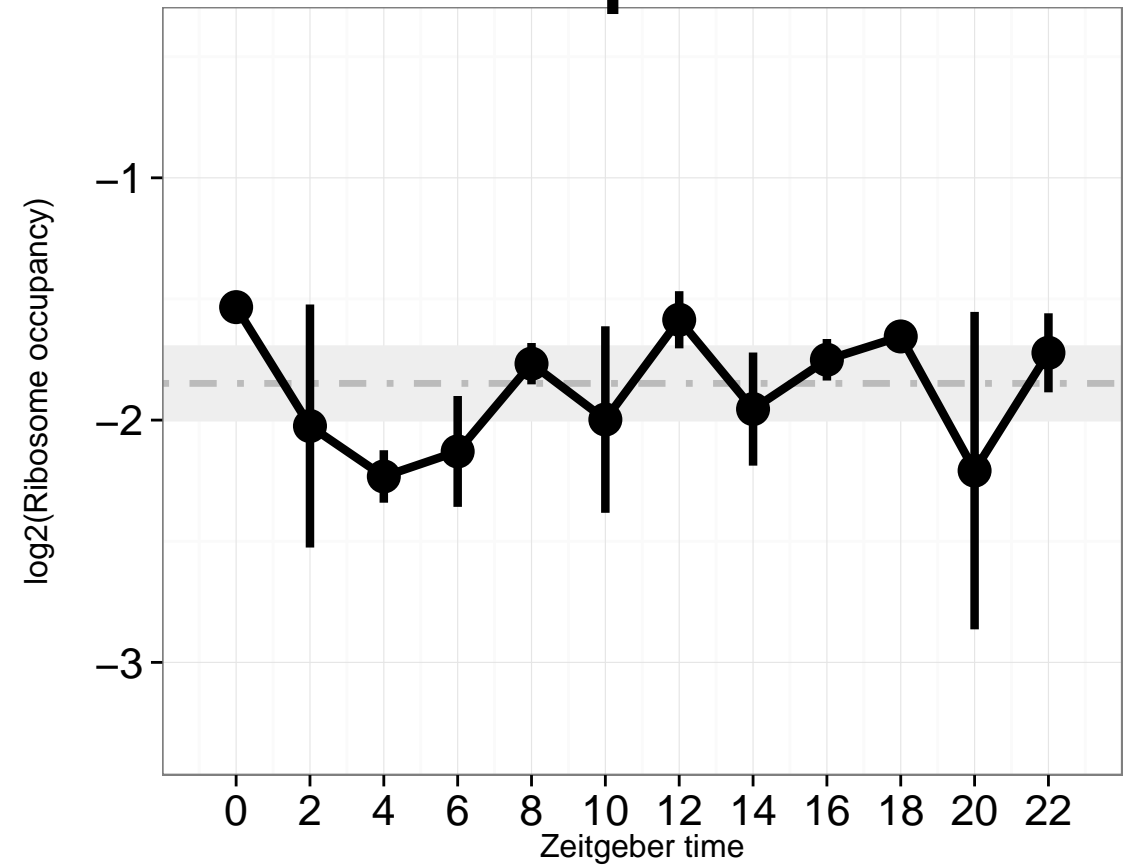

Supplement: Supplementary file 5547 [file 1]

# Hsp90aa1

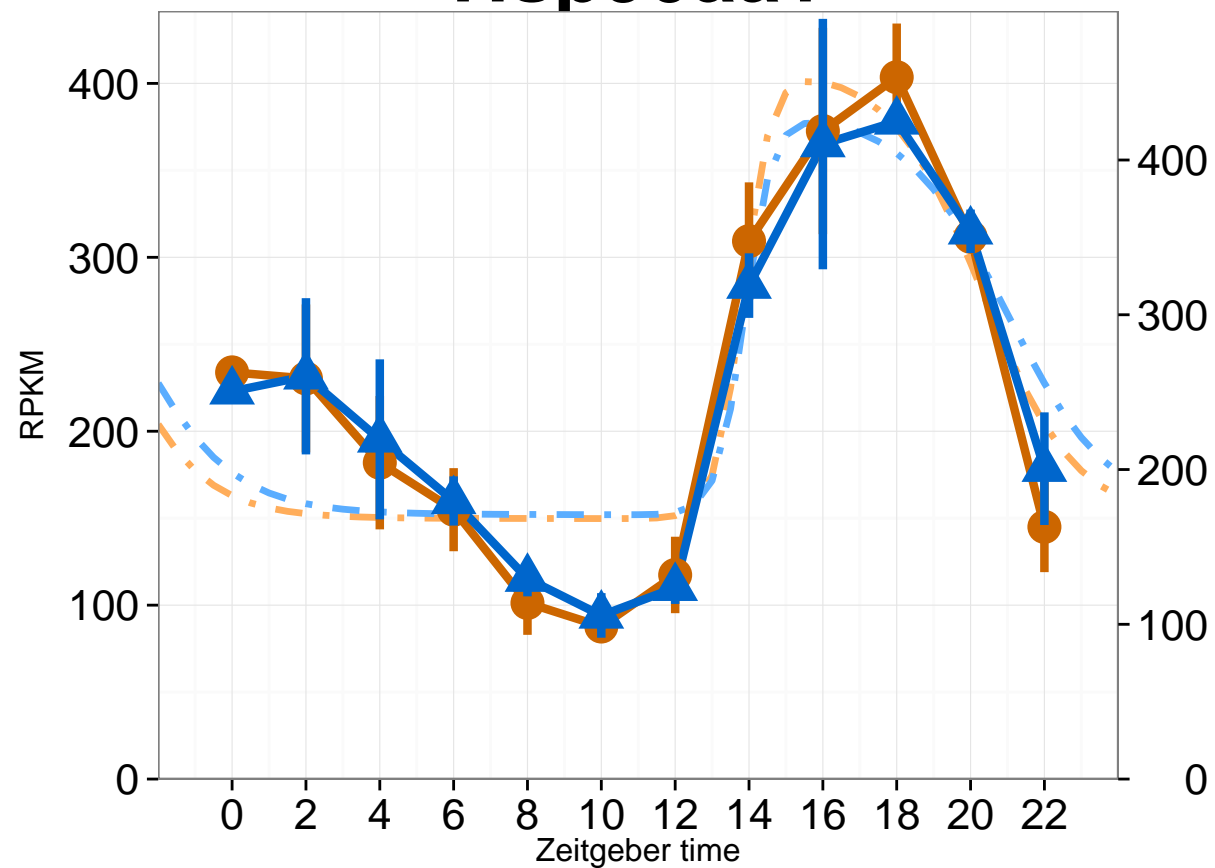

# Hsp90aa1

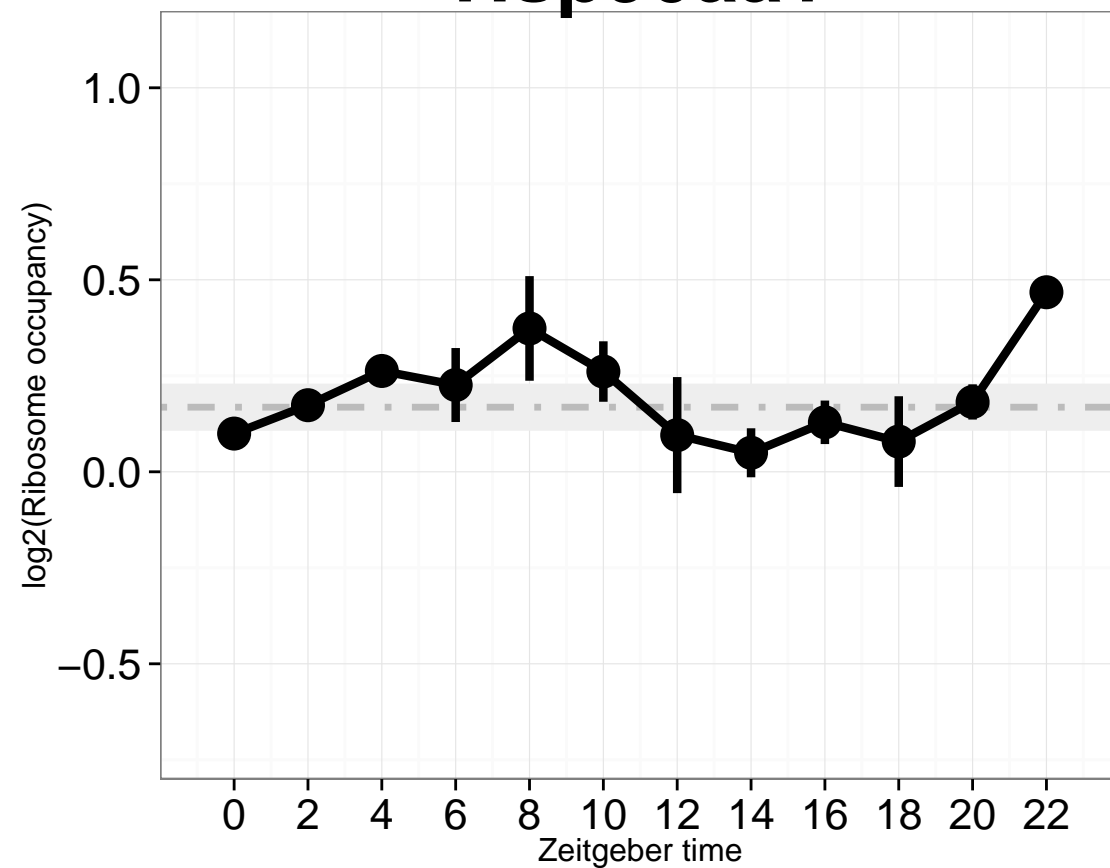

Supplement: Supplementary file 5548 [file 1]

# Tmx3

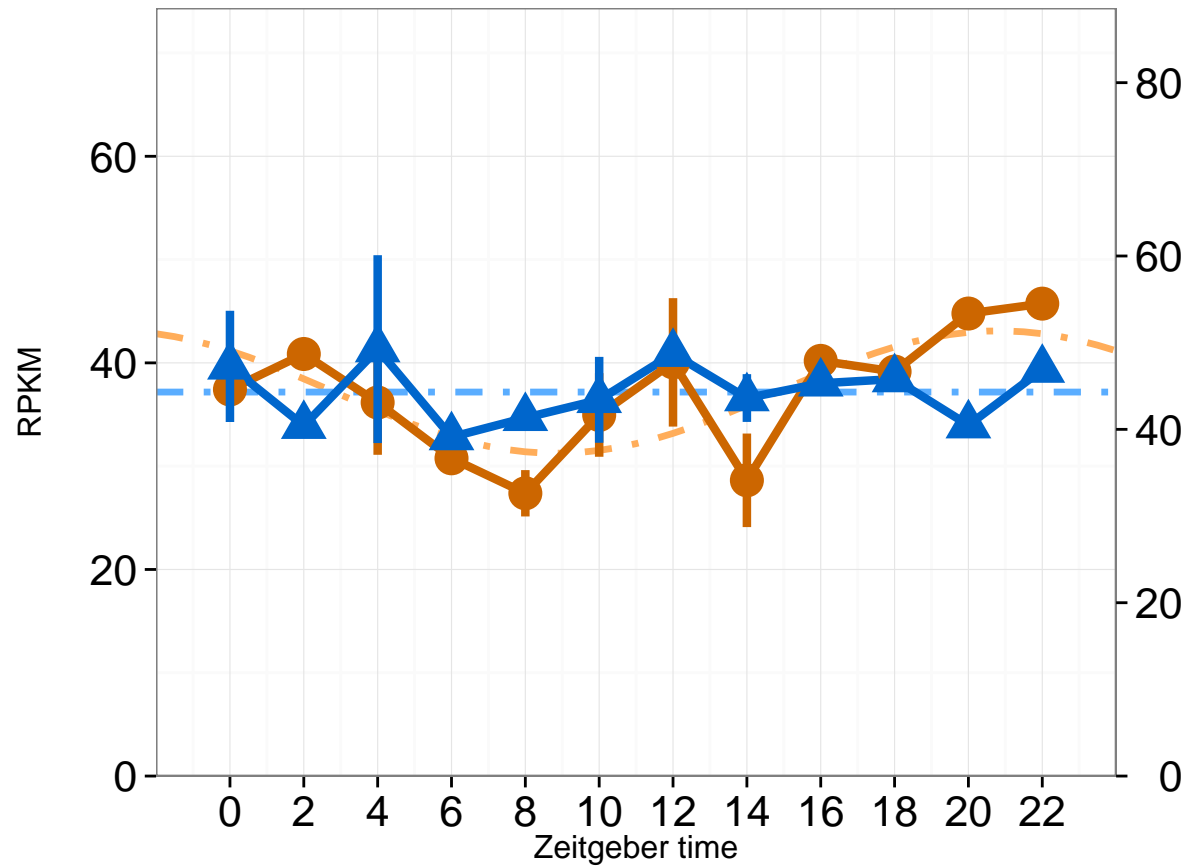

# Tmx3

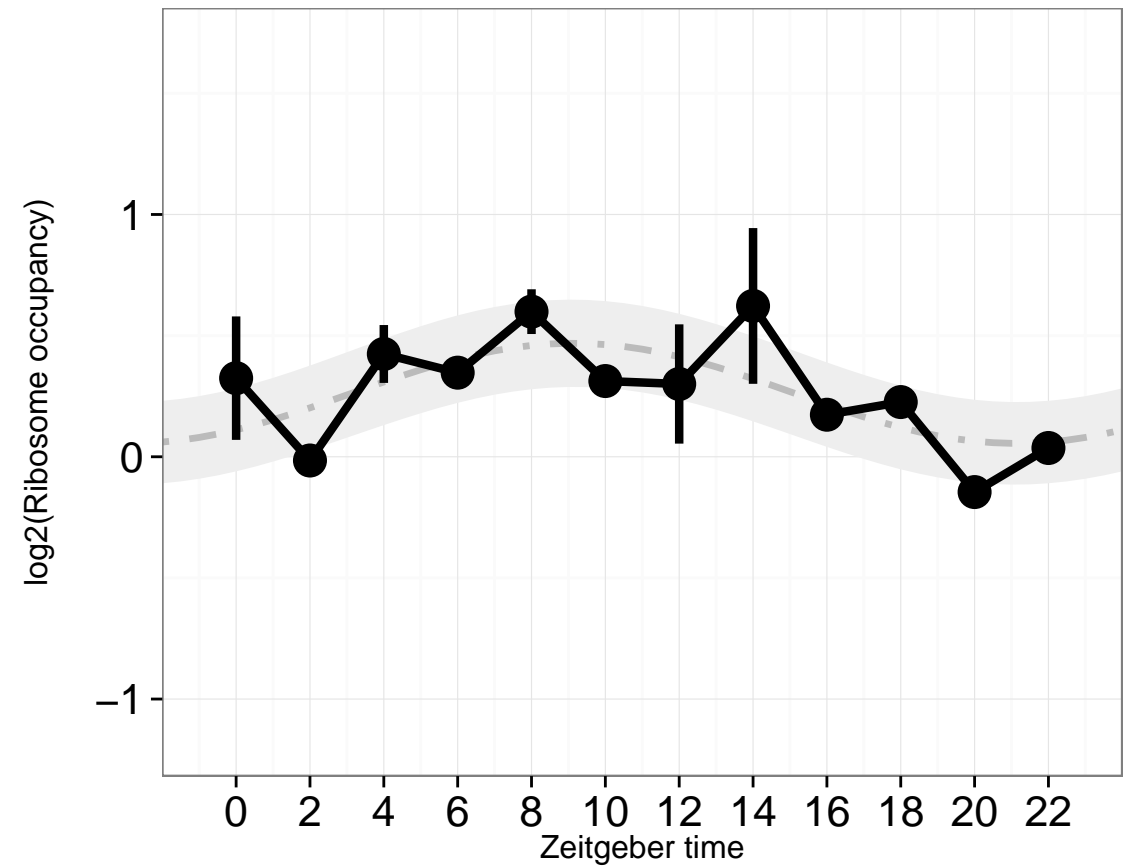

Supplement: Supplementary file 5549 [file 1]

# Lrrc25

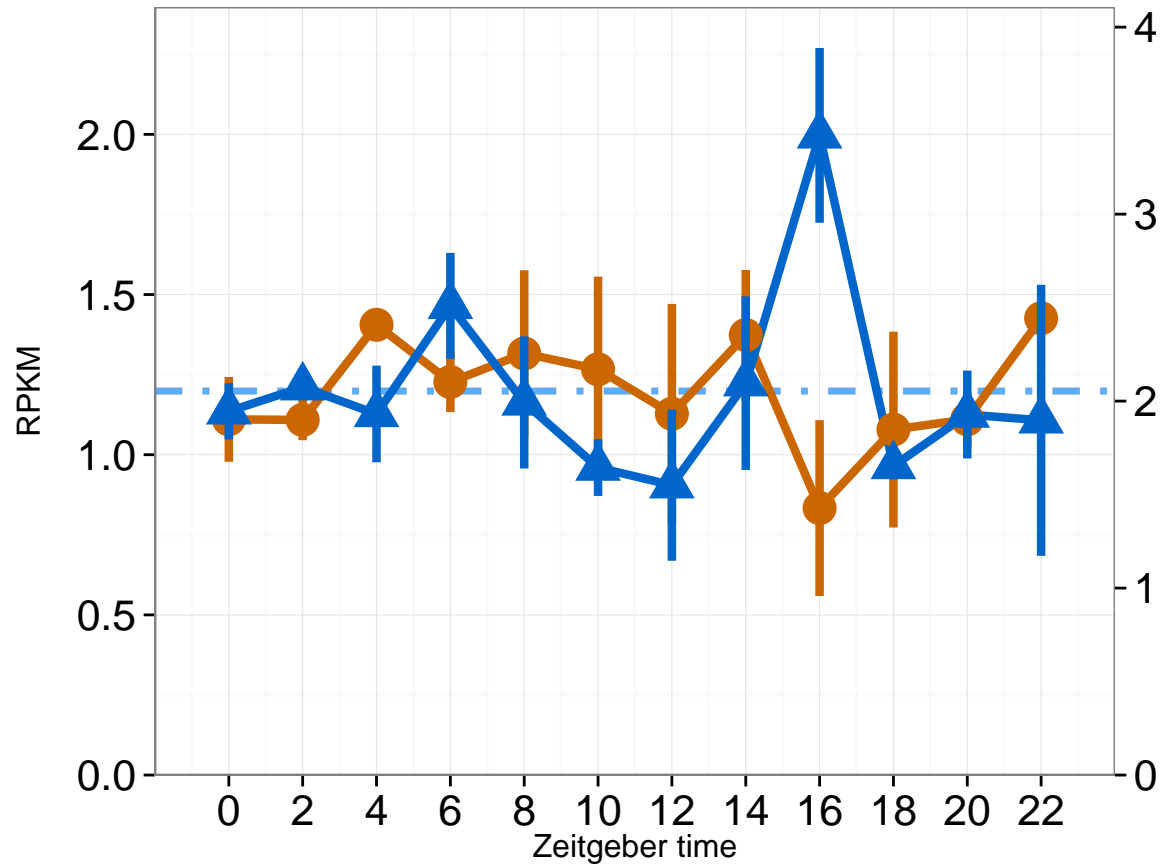

# Lrrc25

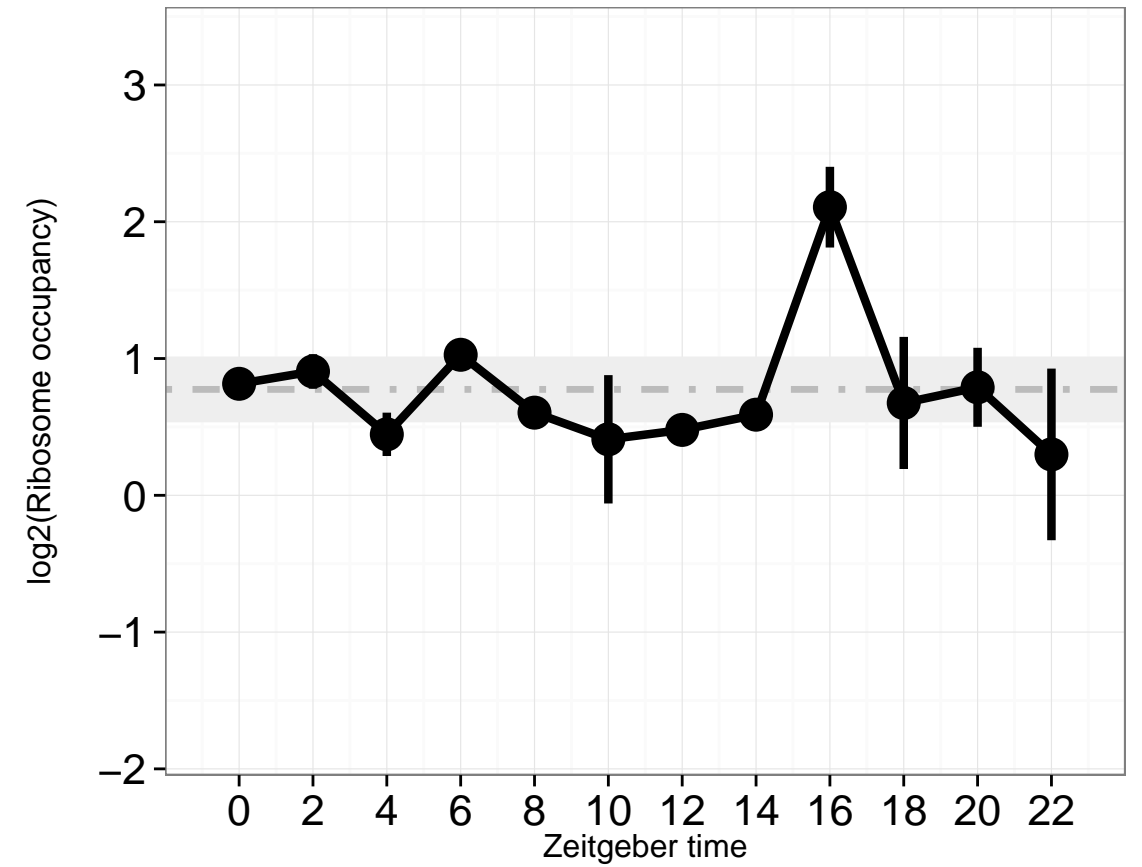

Supplement: Supplementary file 5550 [file 1]

## Wwc1

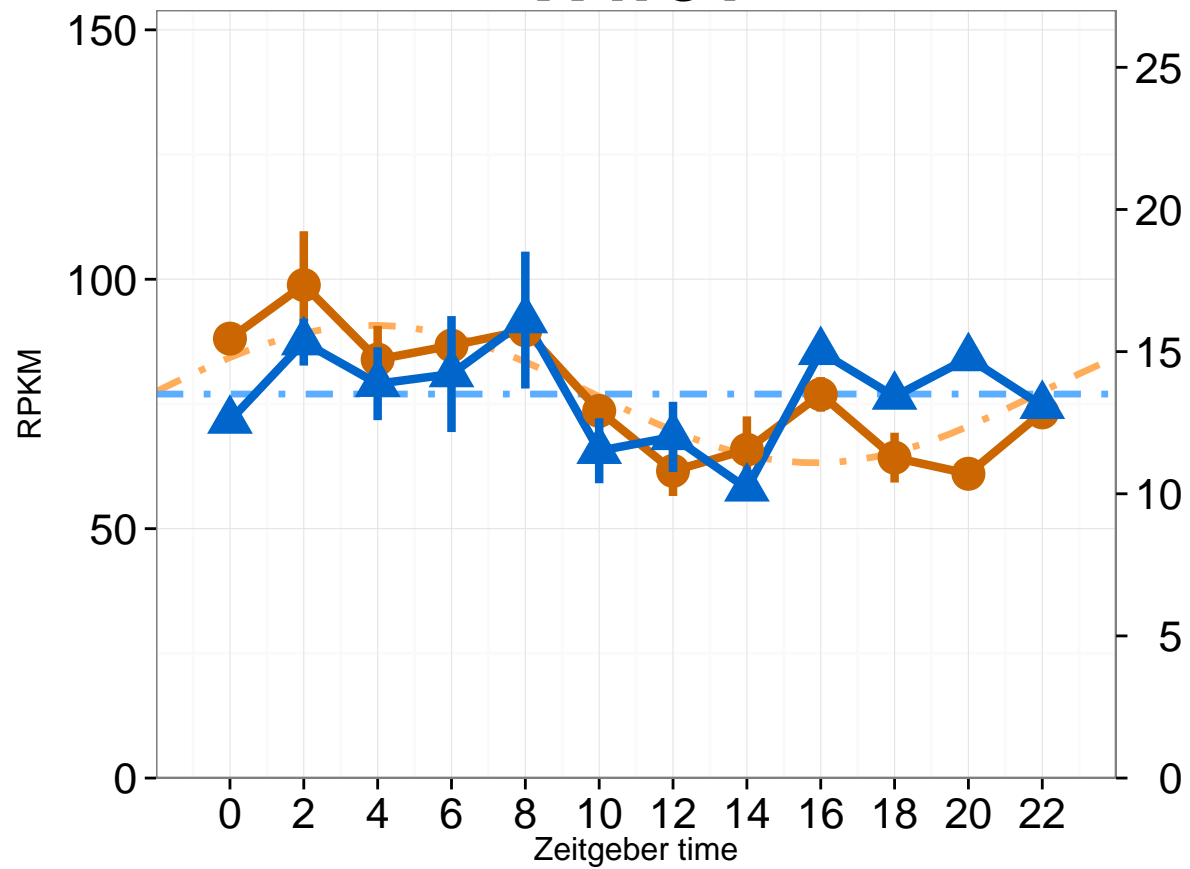

## Wwc1

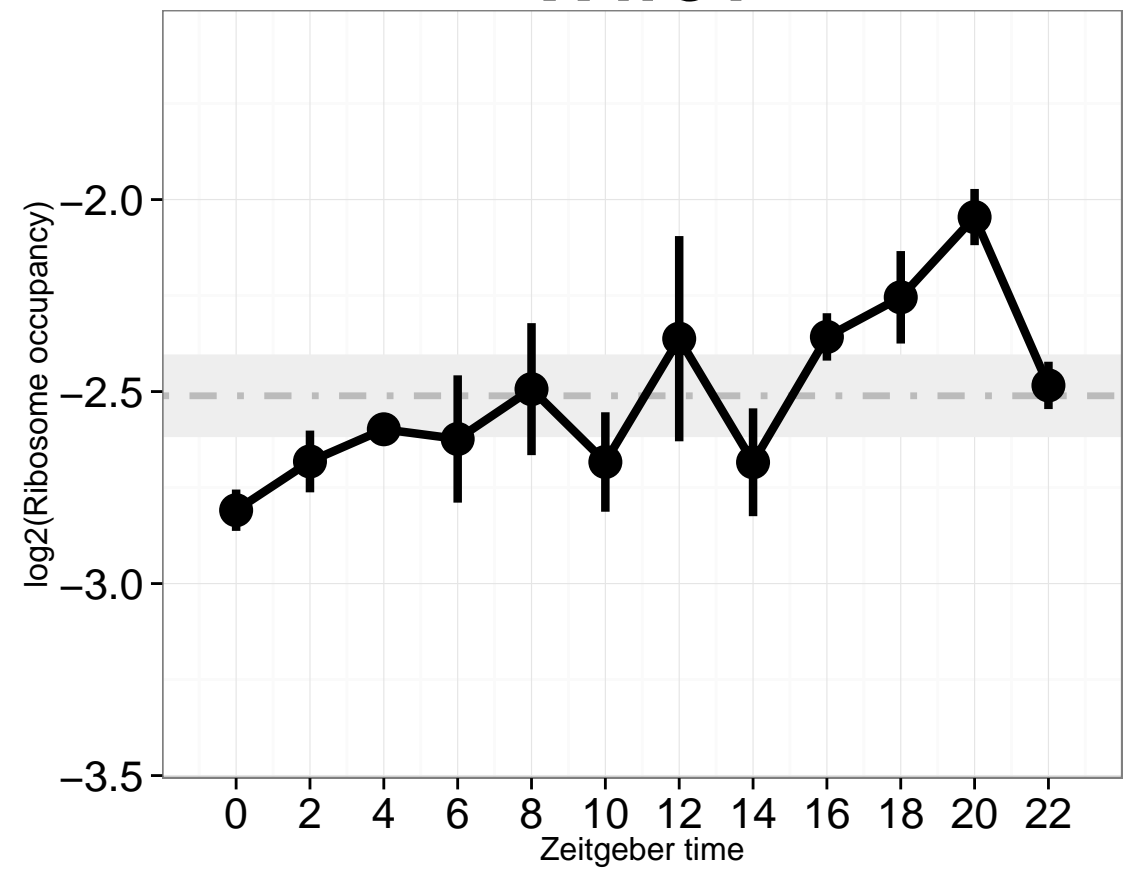

Supplement: Supplementary file 5552 [file 1]

# Wfdc15b

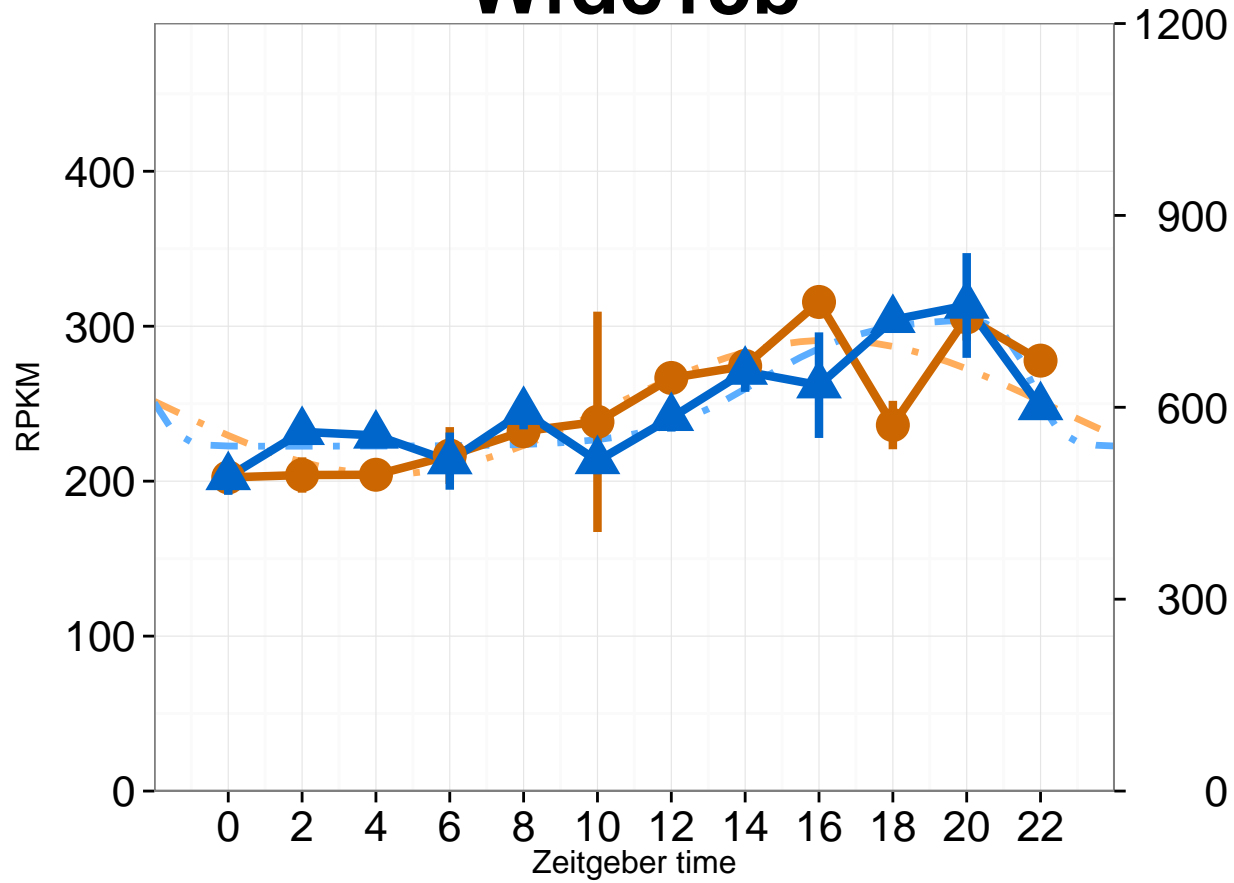

# Wfdc15b

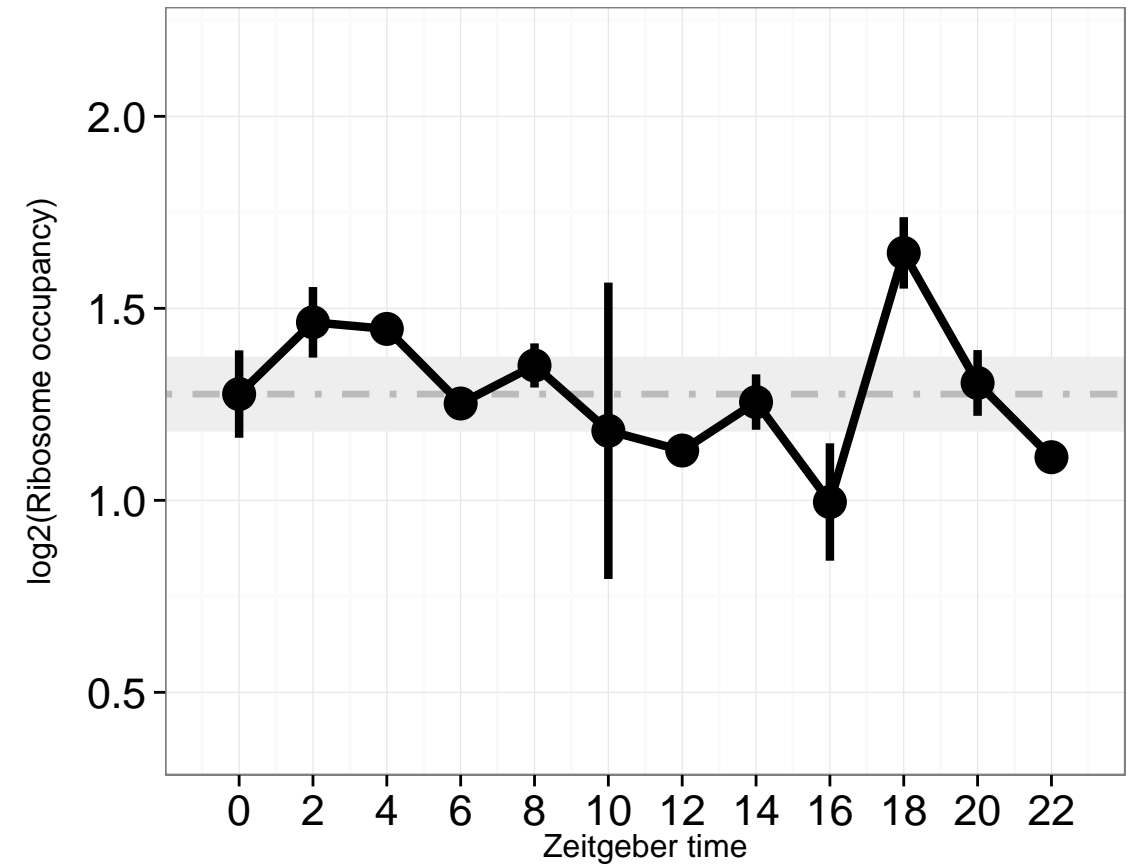

Supplement: Supplementary file 5553 [file 1]

## Scx

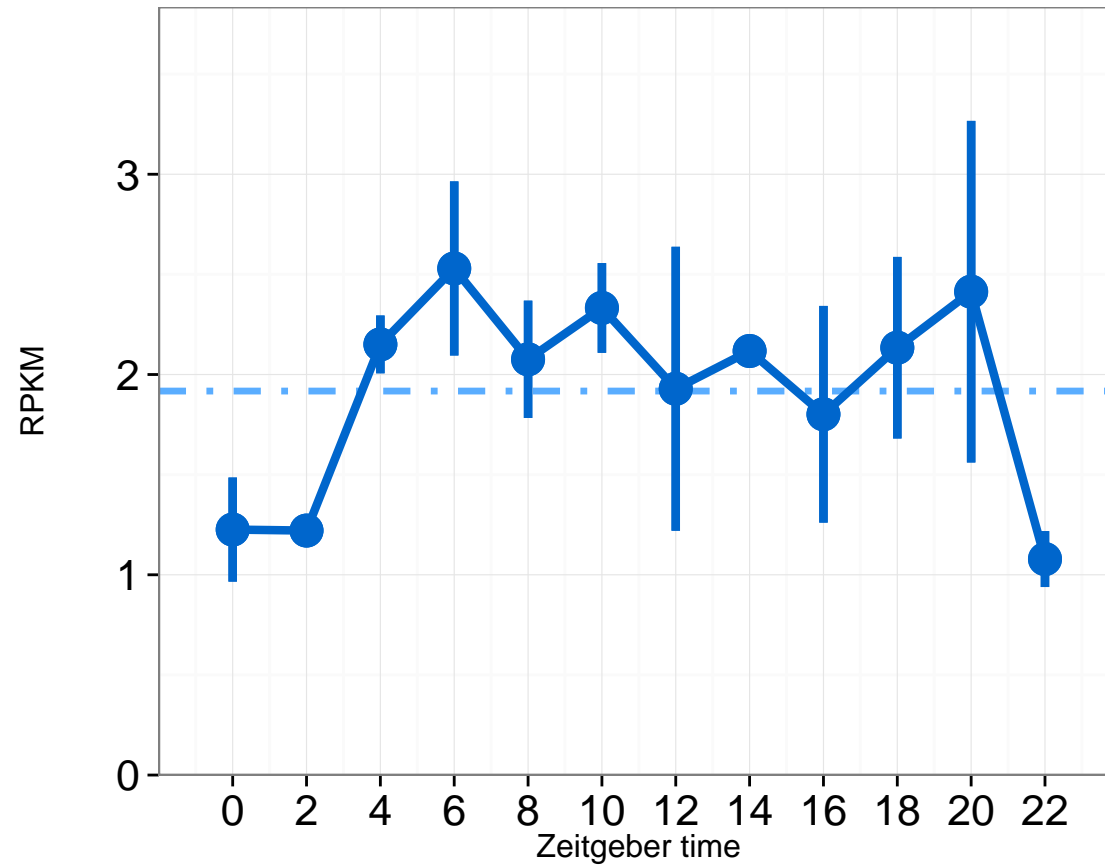

## Scx log2(Ribosome occupancy)

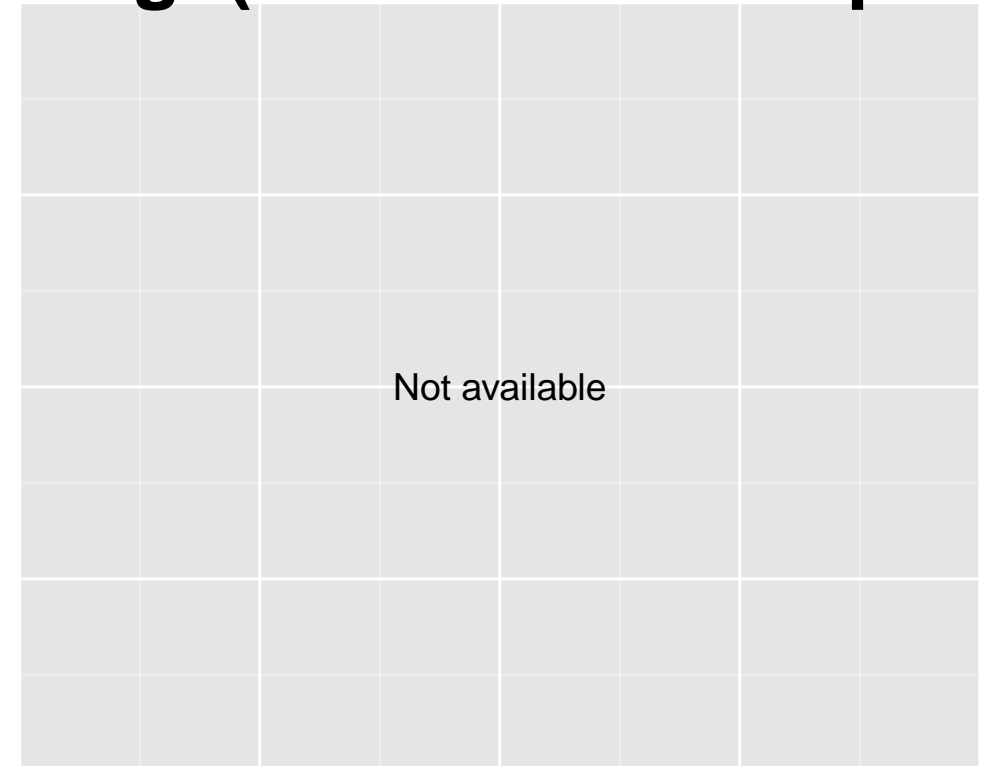

Supplement: Supplementary file 5554 [file 1]

## Sh3tc2

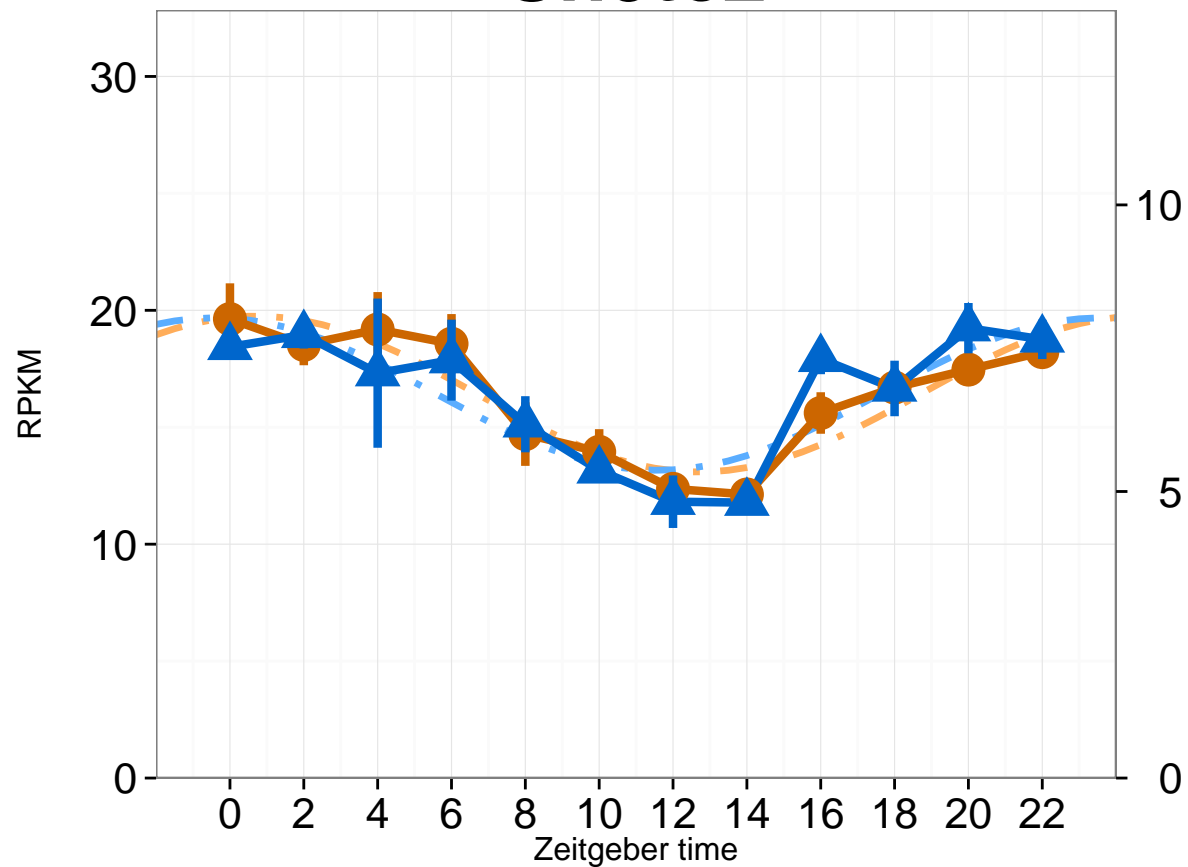

## Sh3tc2

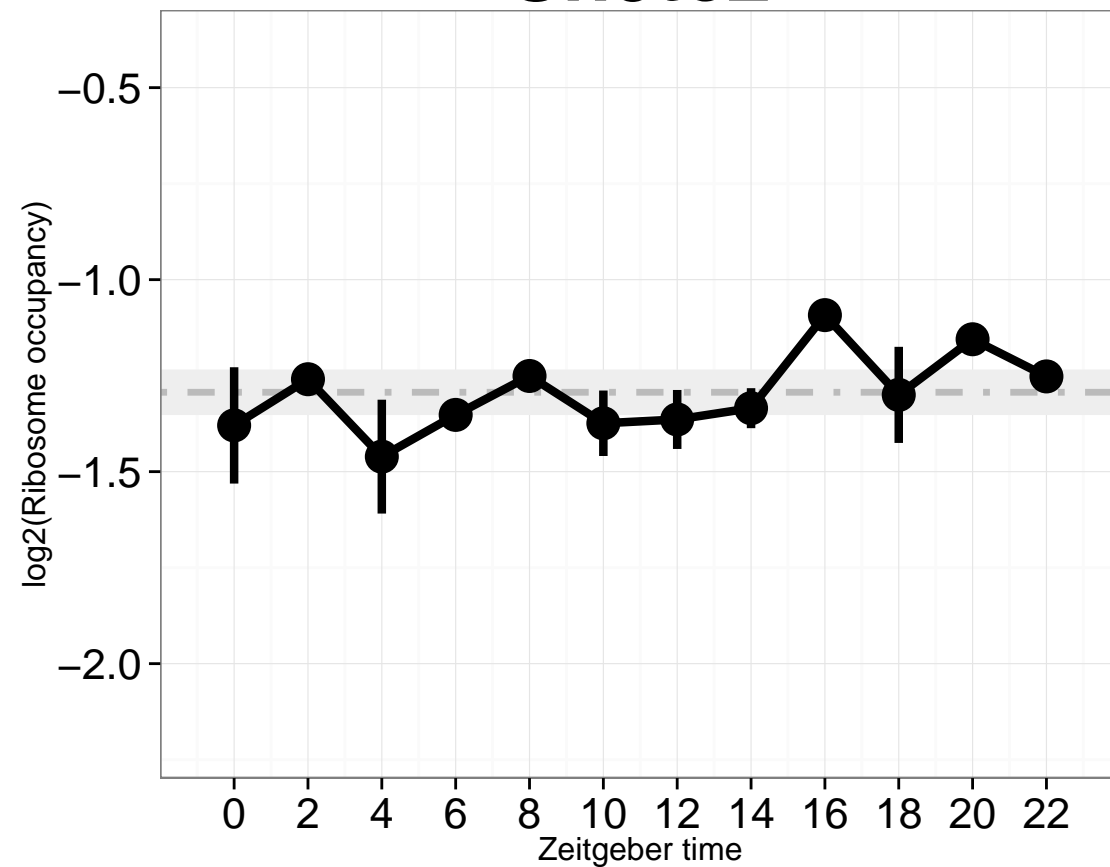

Supplement: Supplementary file 5555 [file 1]

# Dcp1b

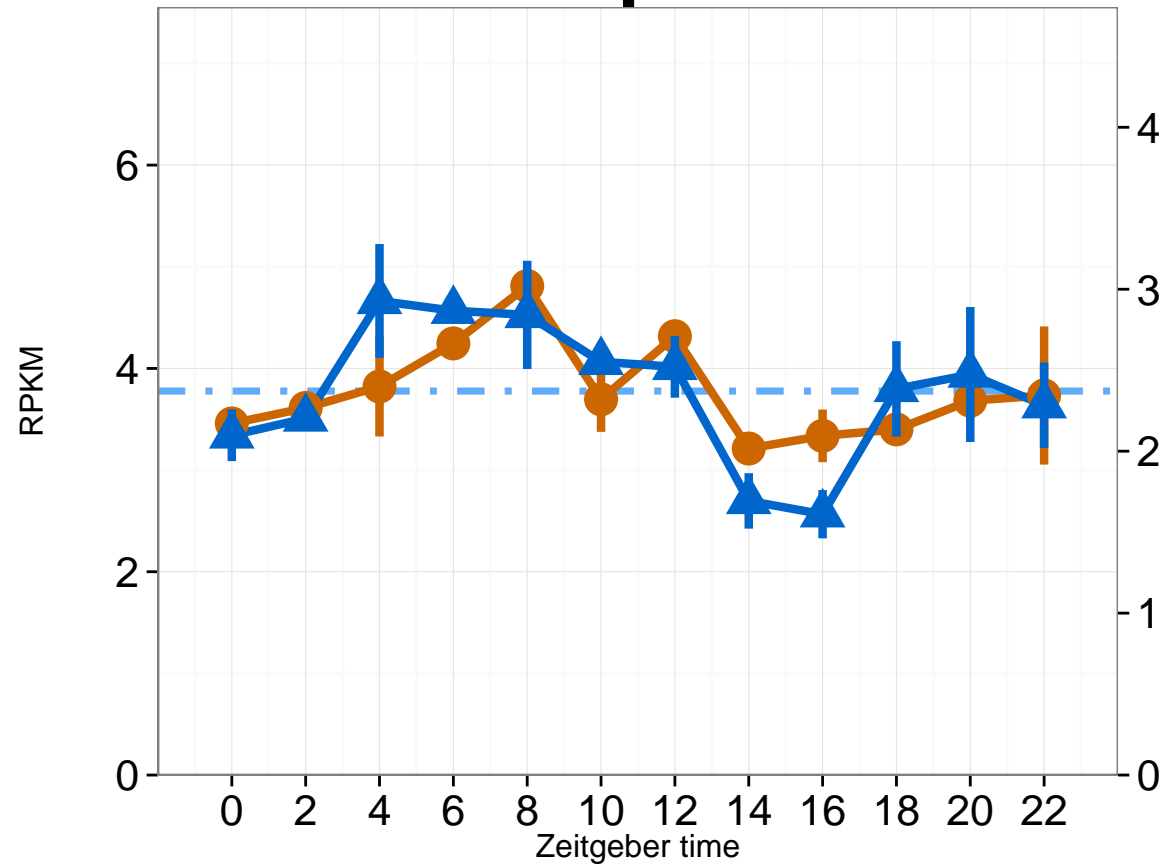

# Dcp1b

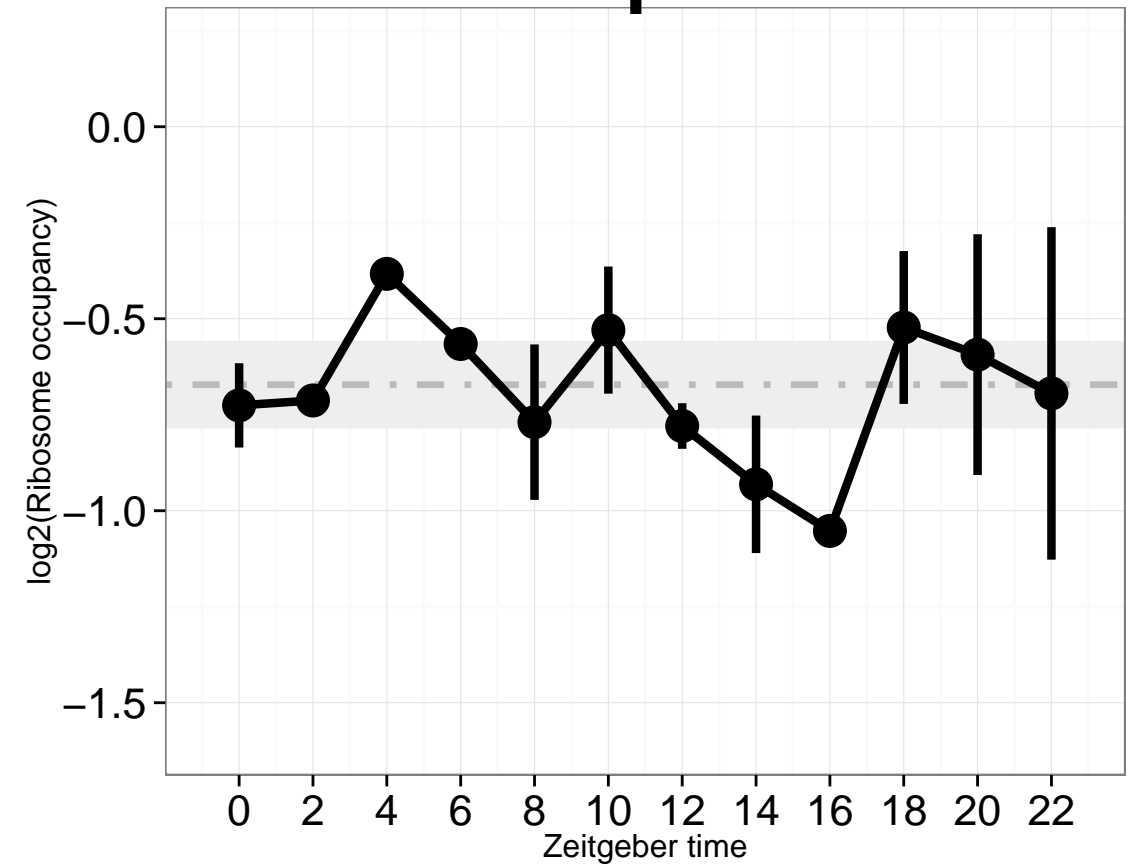

Supplement: Supplementary file 5556 [file 1]

## Fez2

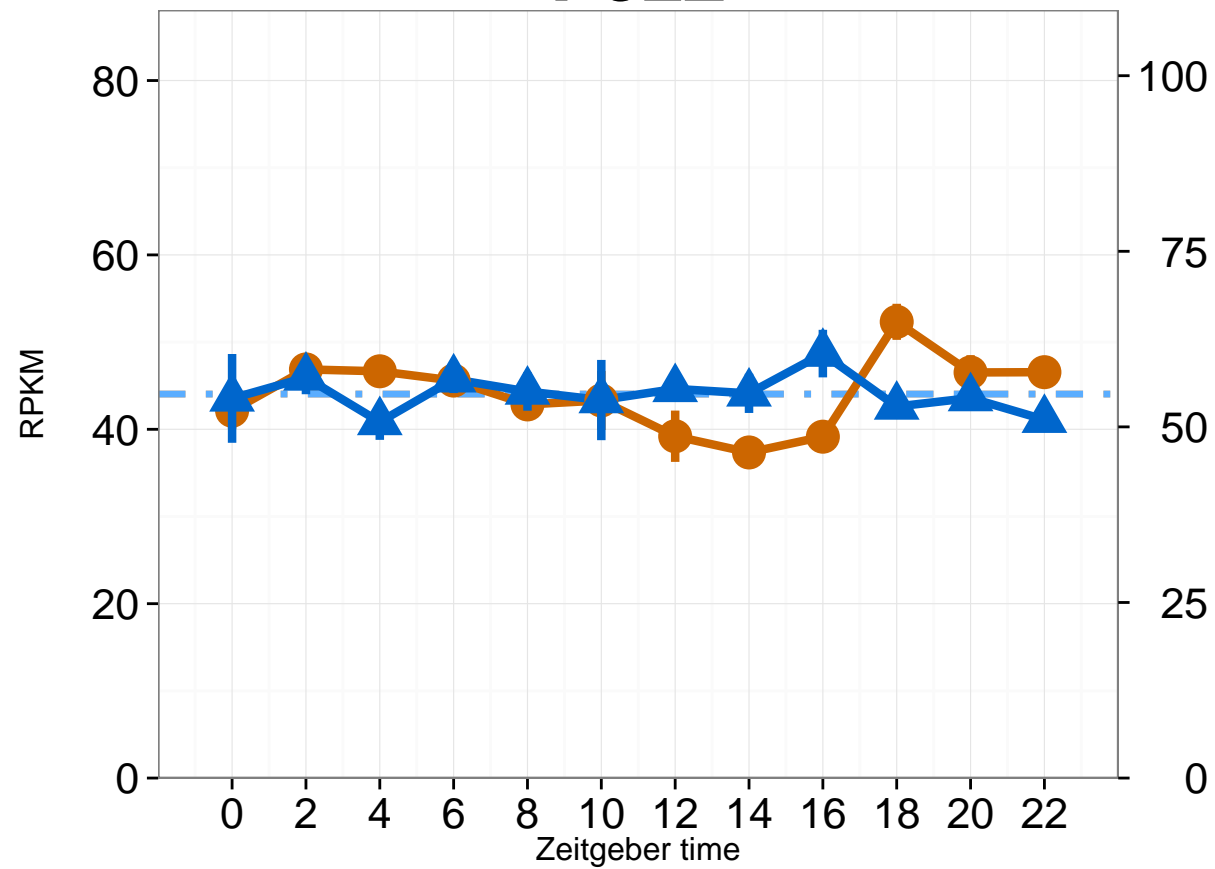

## Fez2

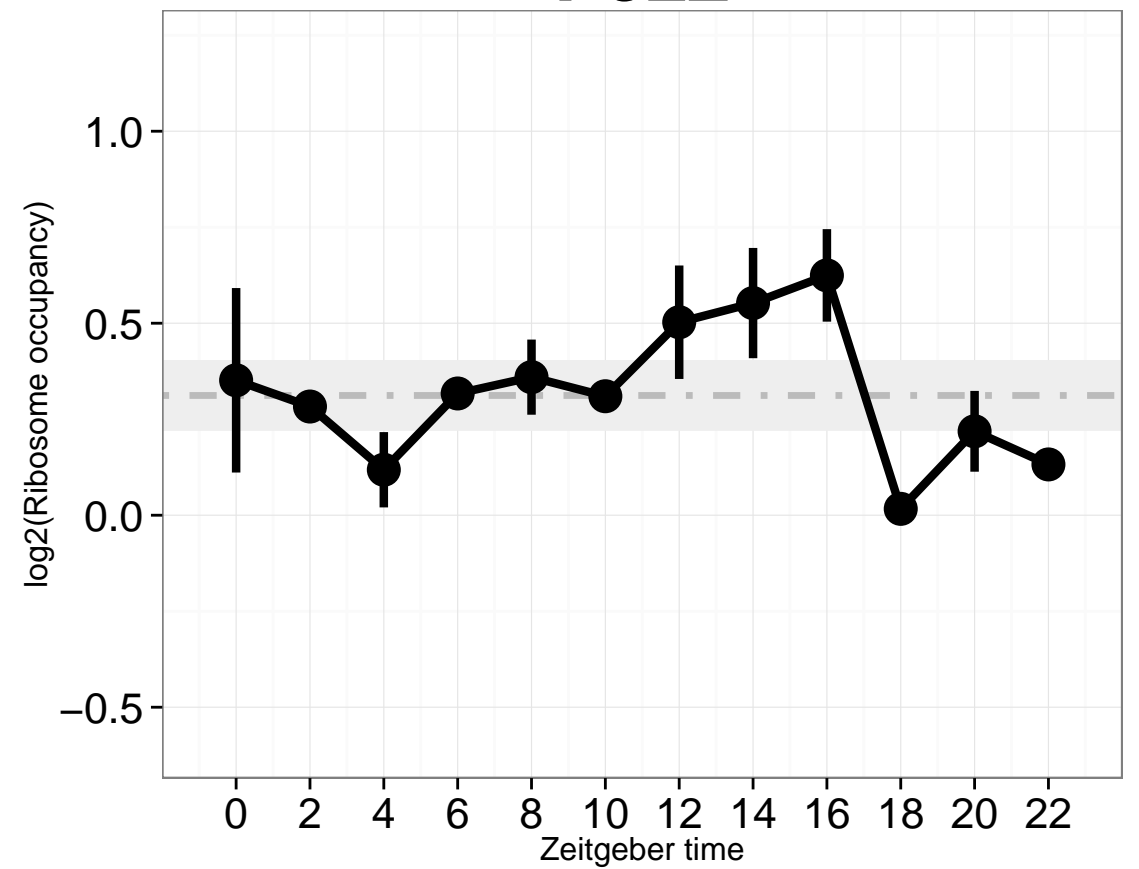

Supplement: Supplementary file 5557 [file 1]

# Synpo2l

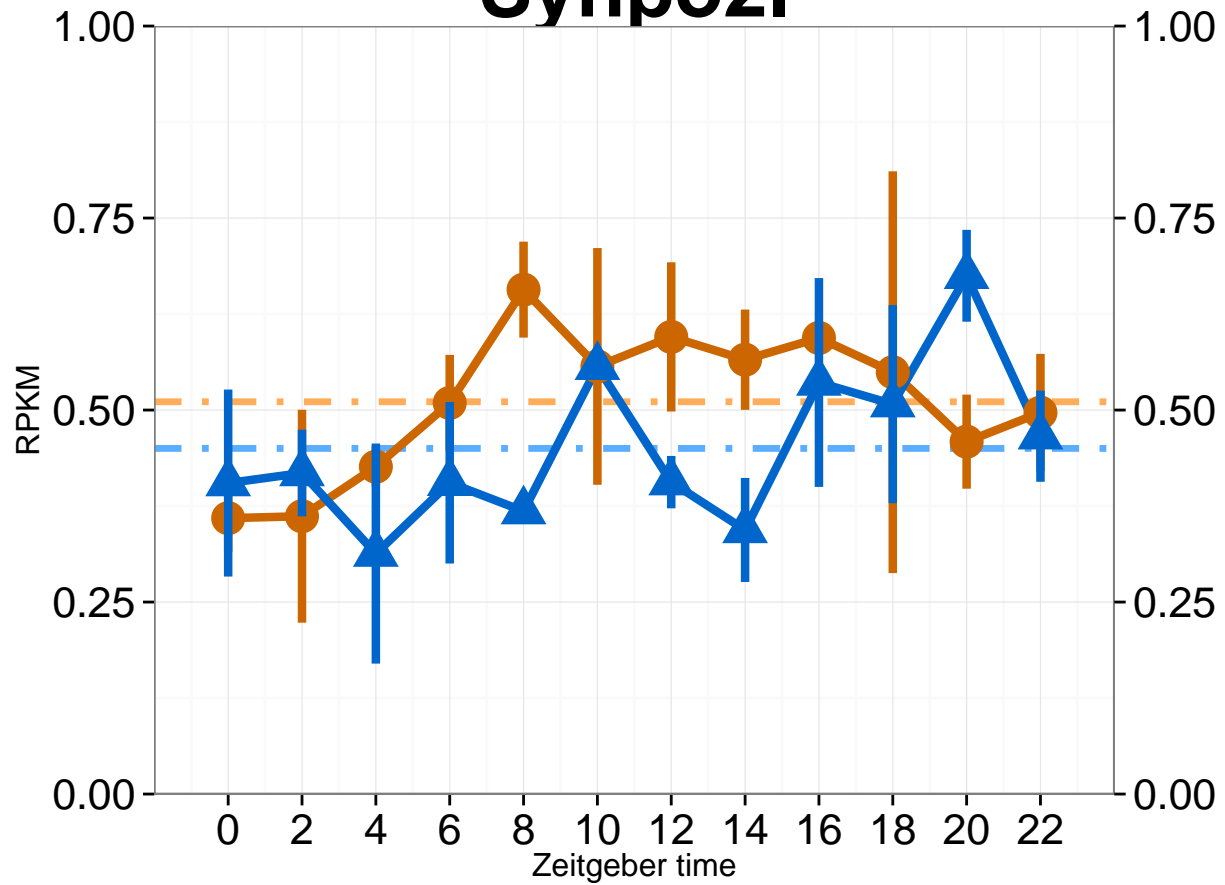

# Synpo2l

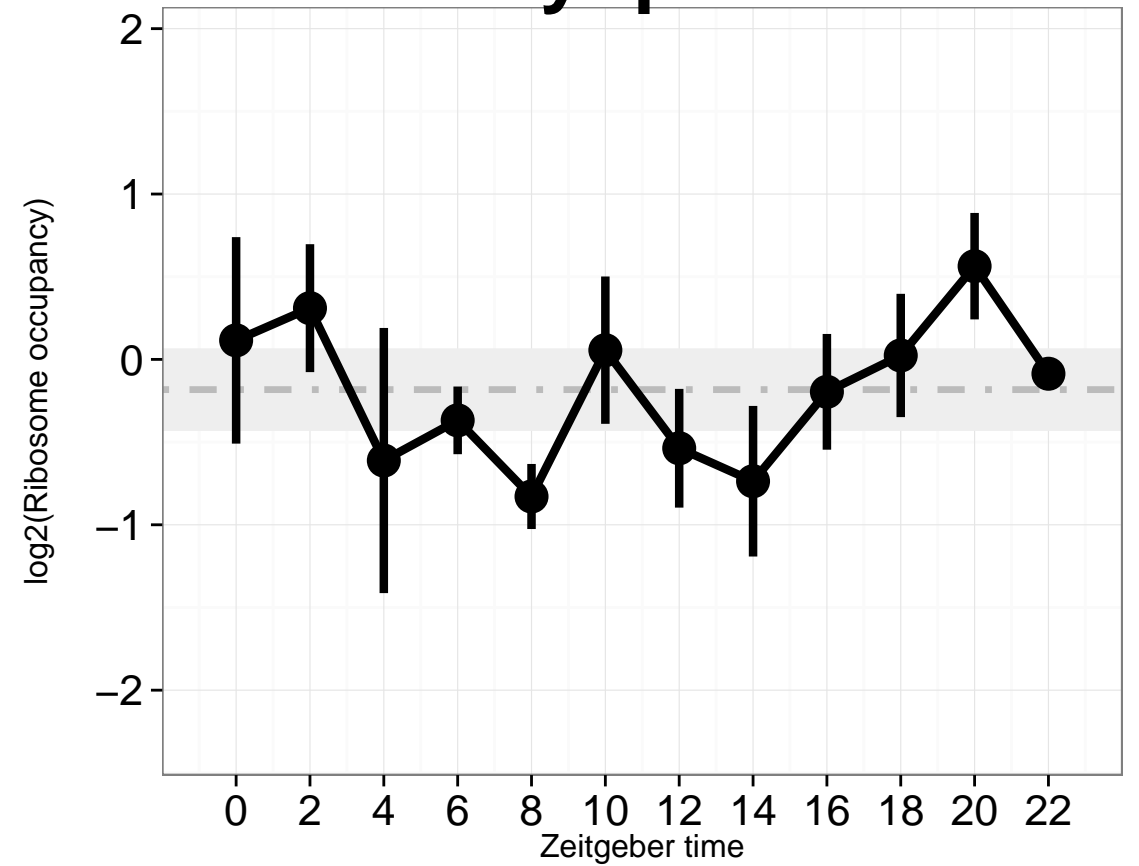

Supplement: Supplementary file 5558 [file 1]

## Vps26b

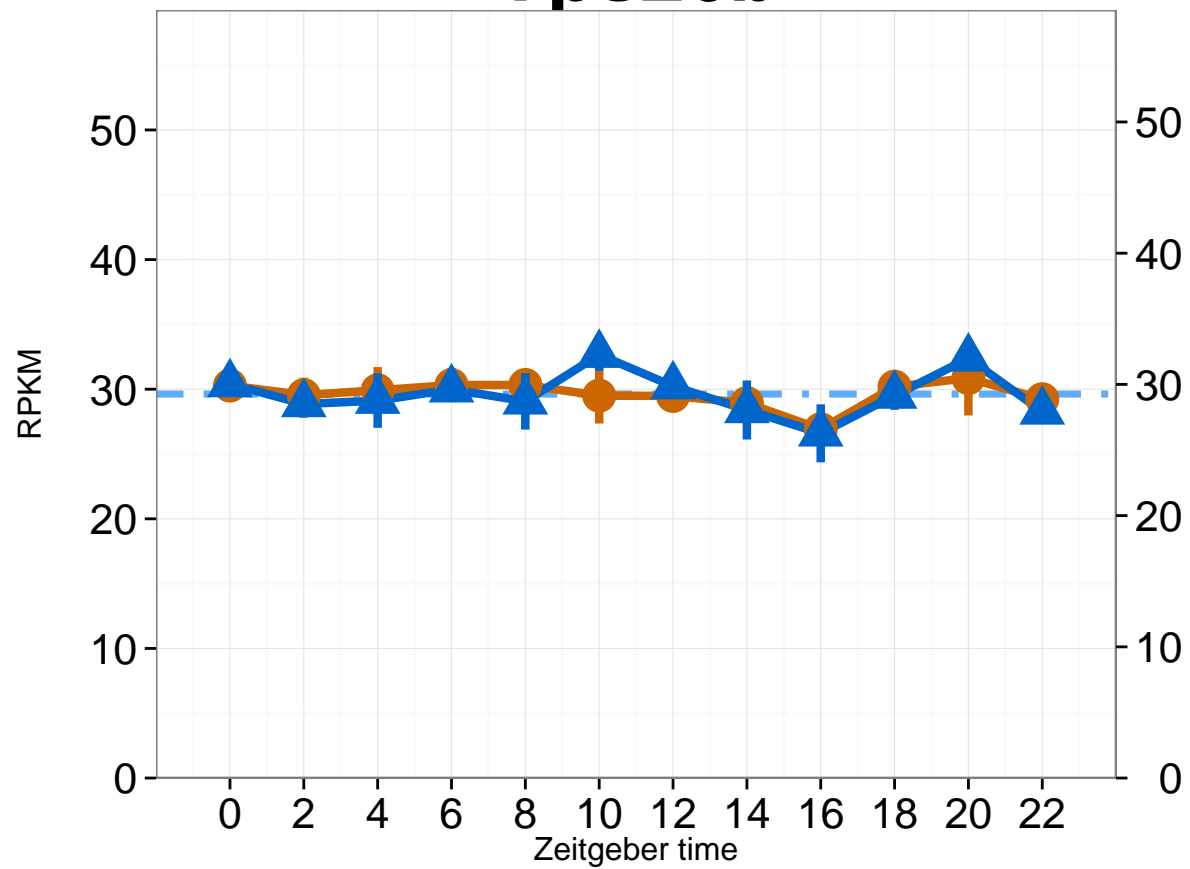

## Vps26b

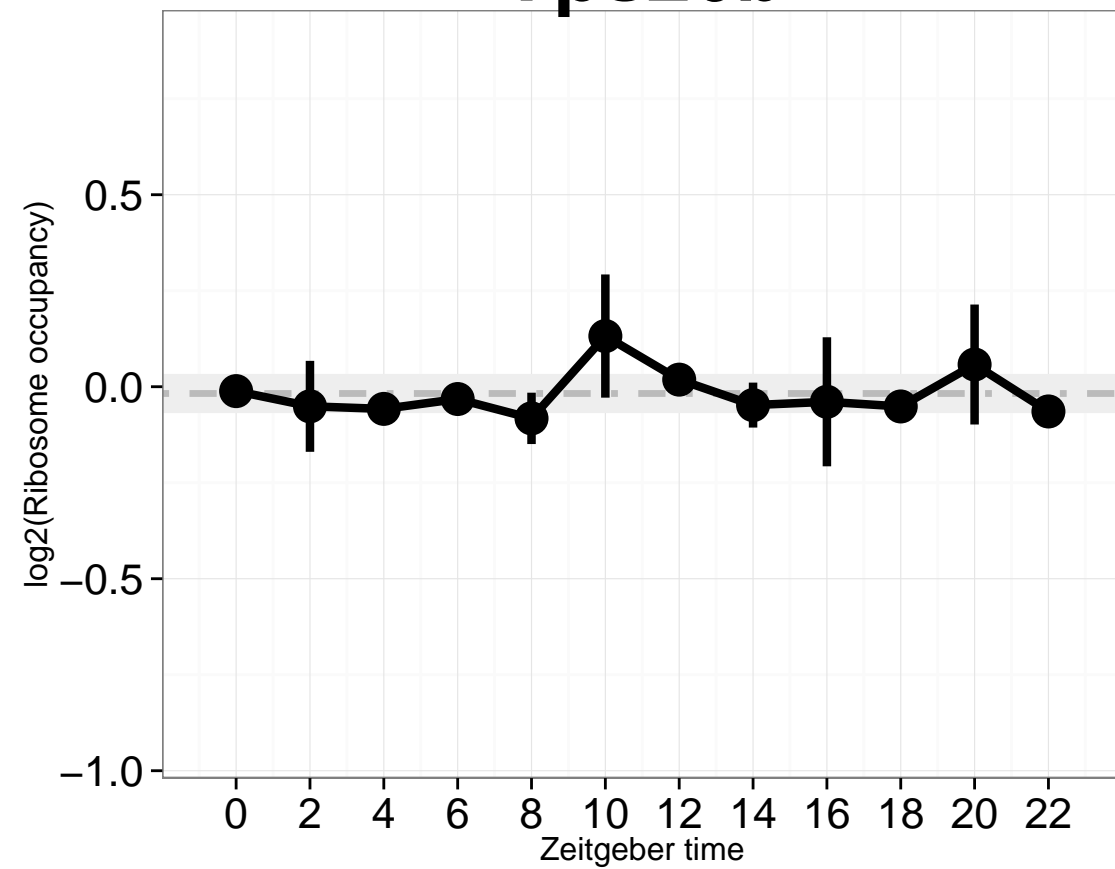

Supplement: Supplementary file 5559 [file 1]

## Phc2

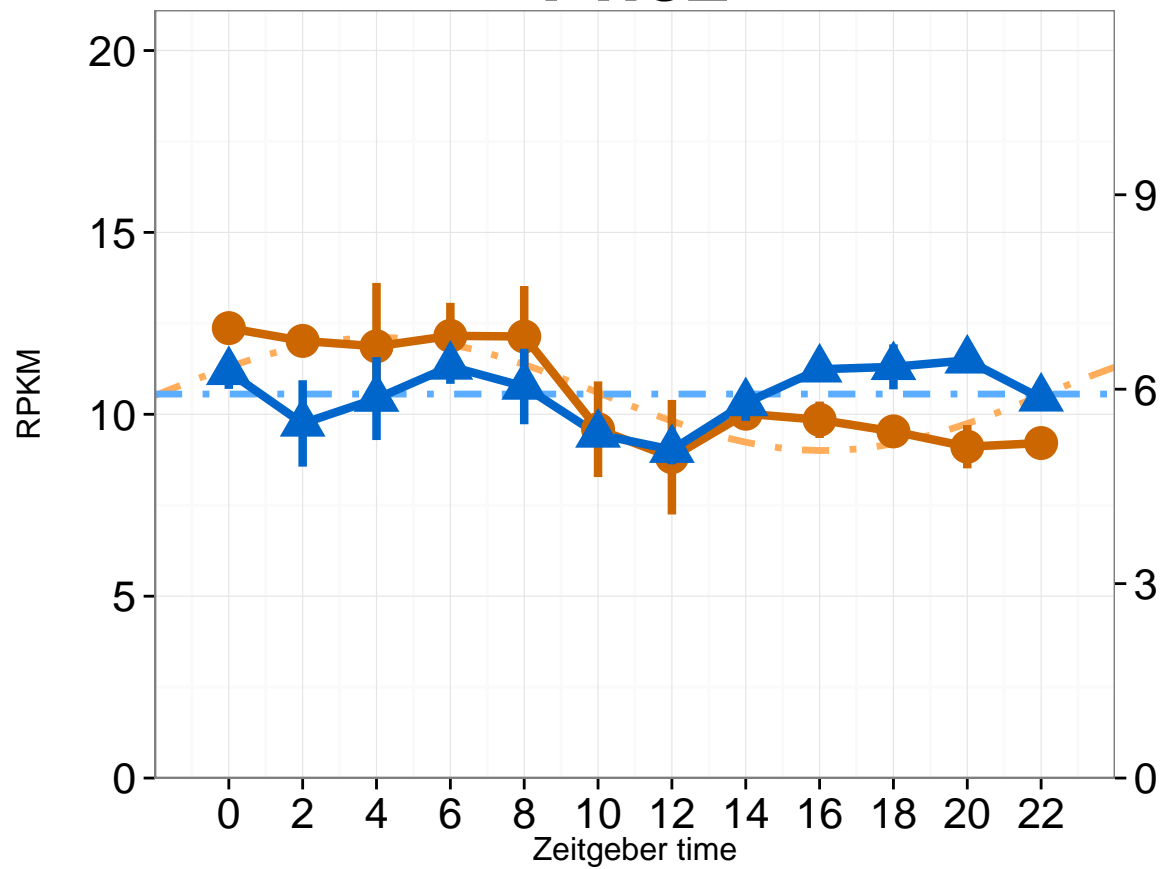

## Phc2

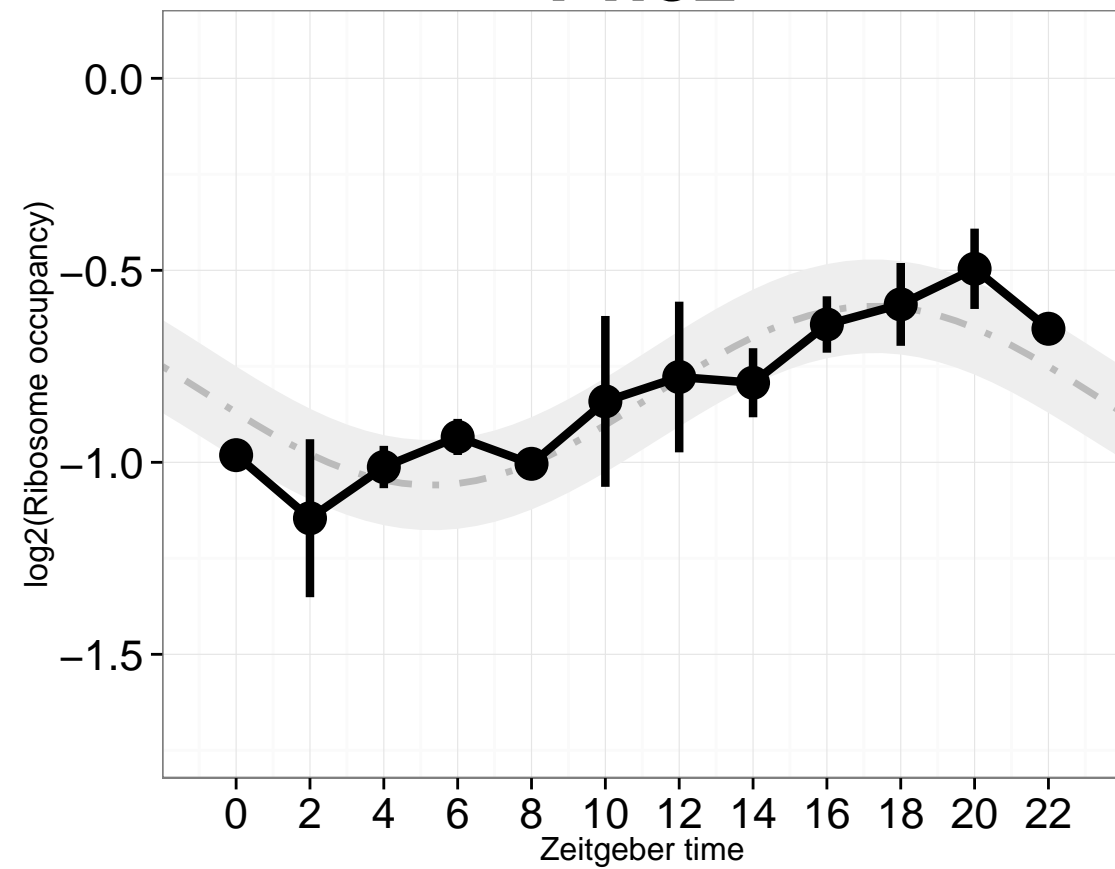

Supplement: Supplementary file 5560 [file 1]

# Zbtb16

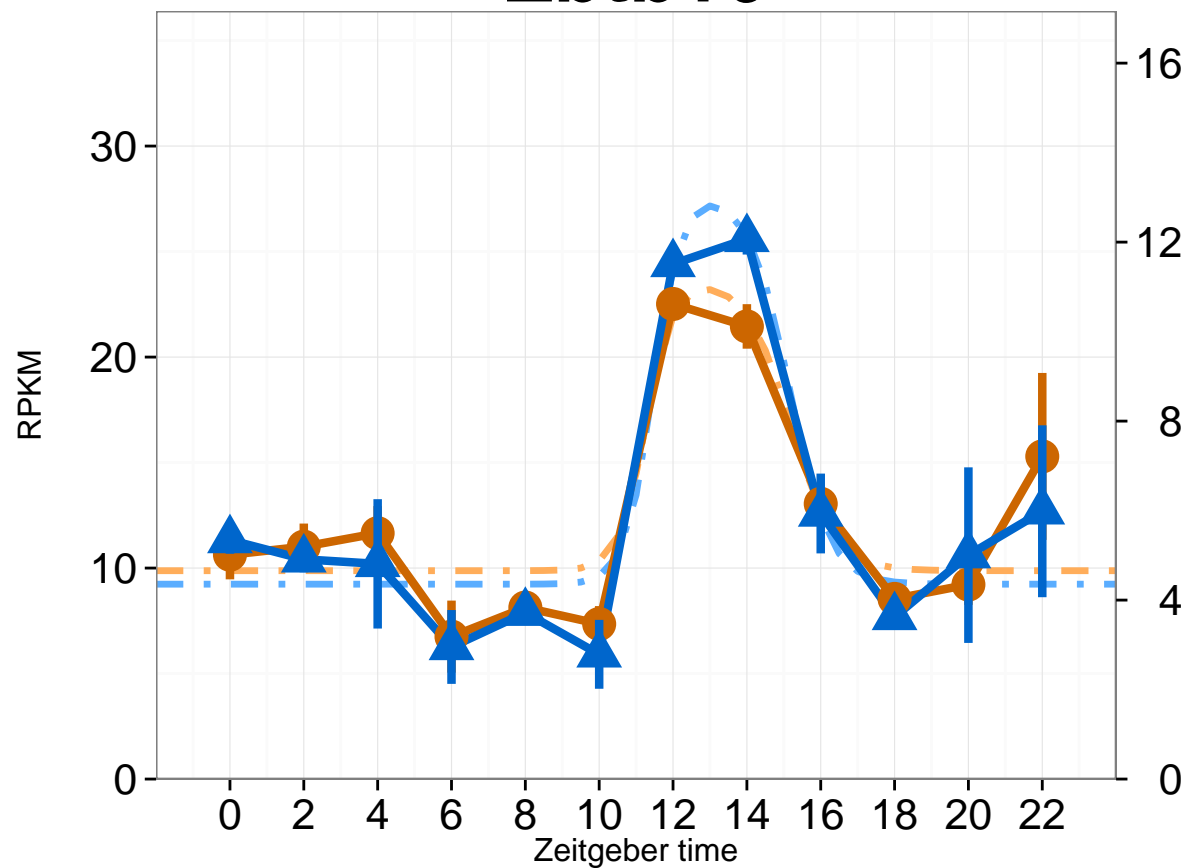

# Zbtb16

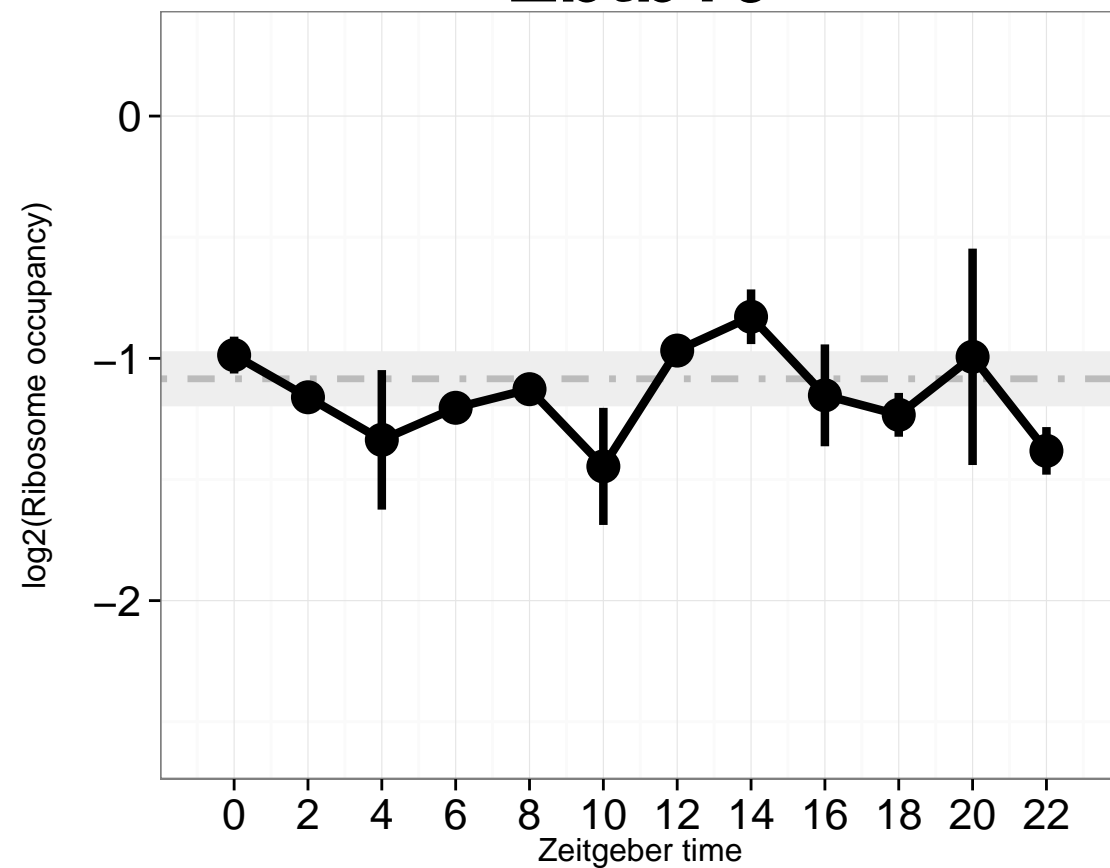

Supplement: Supplementary file 5561 [file 1]

# Dnaja1

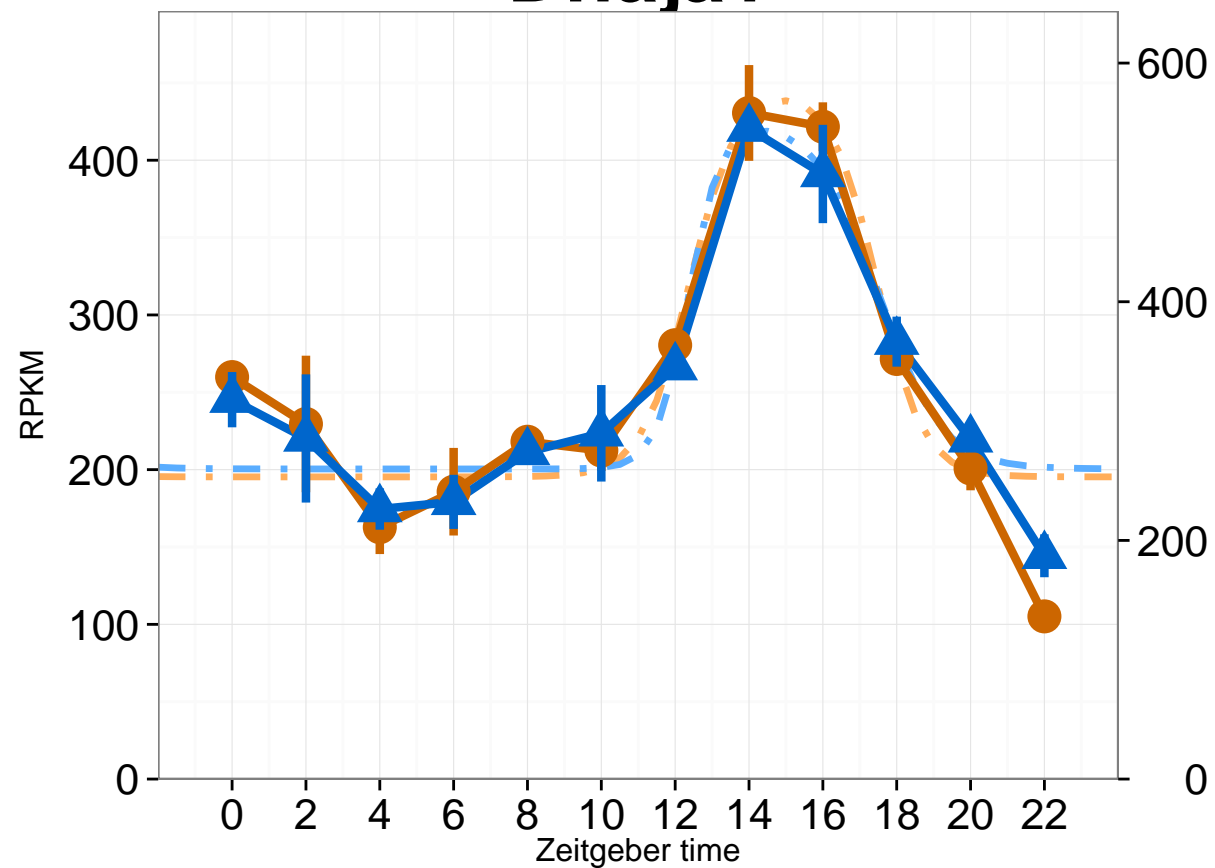

# Dnaja1

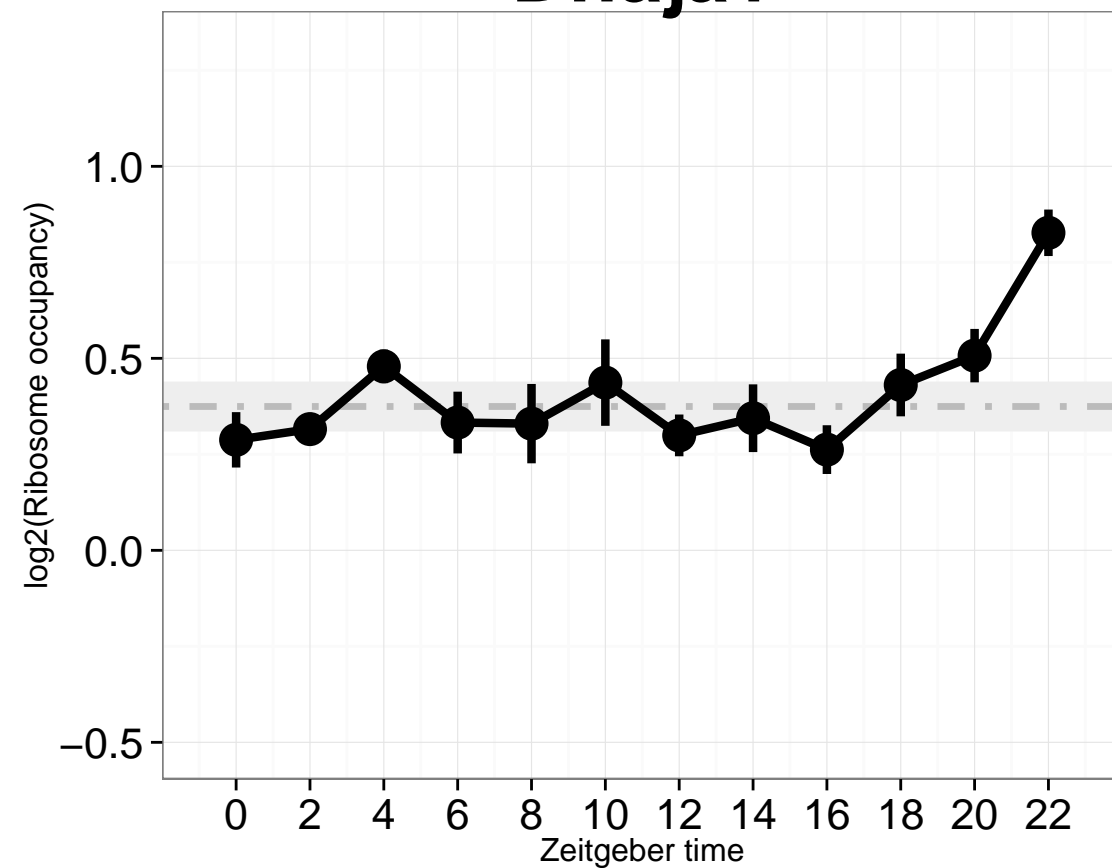

Supplement: Supplementary file 5562 [file 1]

## Pwp1

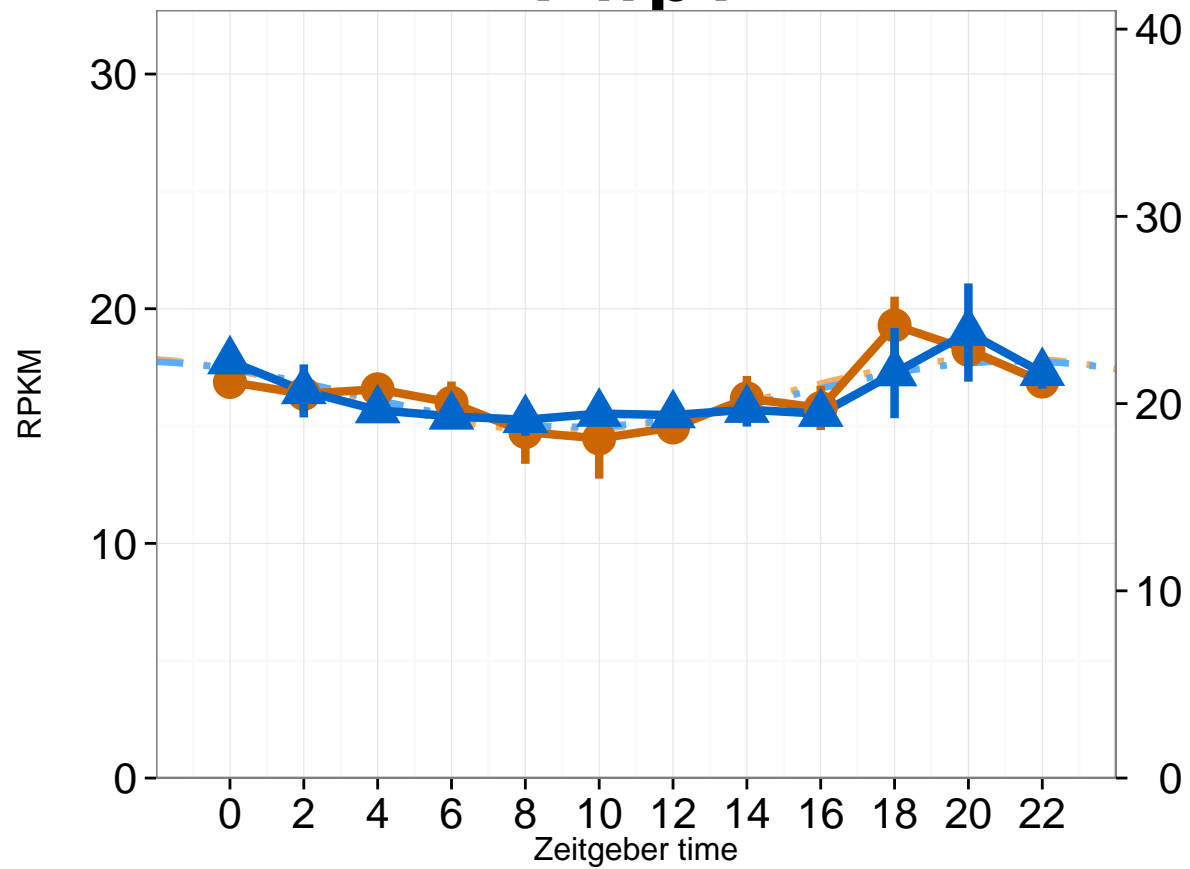

## Pwp1

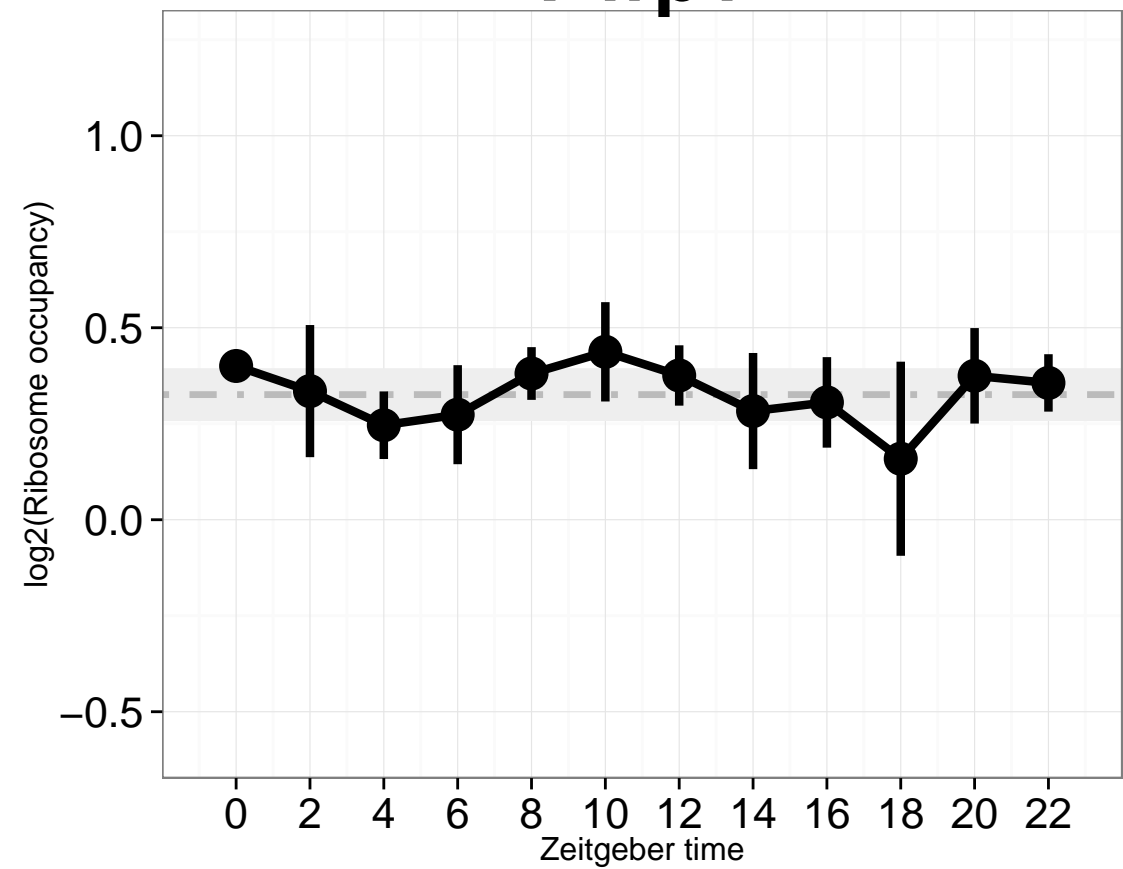

Supplement: Supplementary file 5563 [file 1]

# Hnrnp1

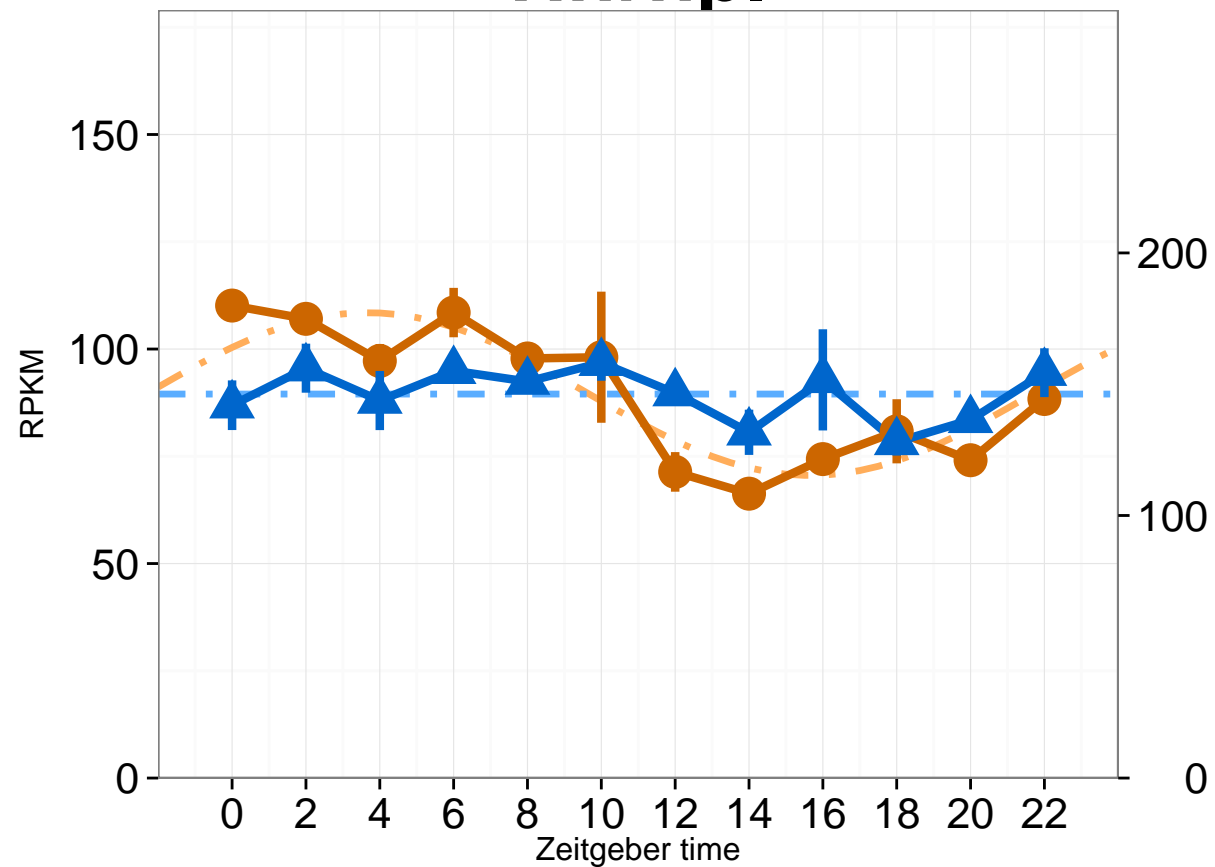

# Hnrnp1

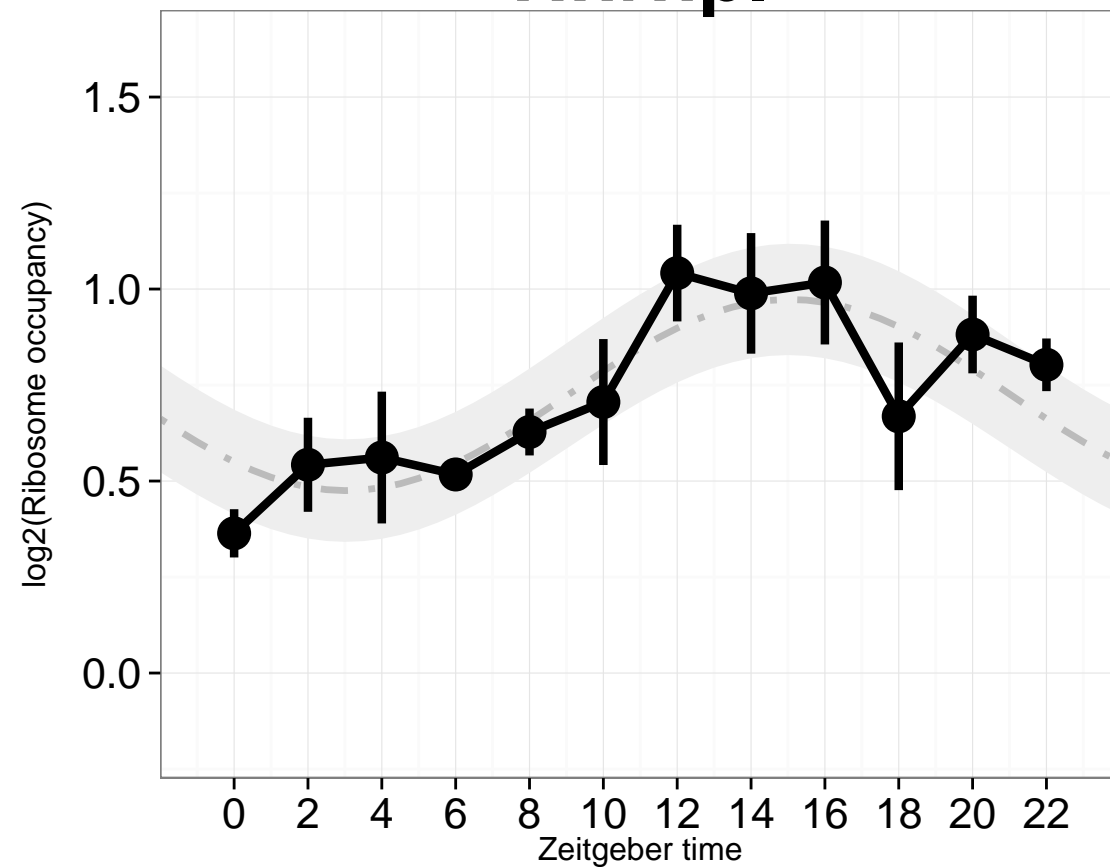

Supplement: Supplementary file 5564 [file 1]

## Krt15

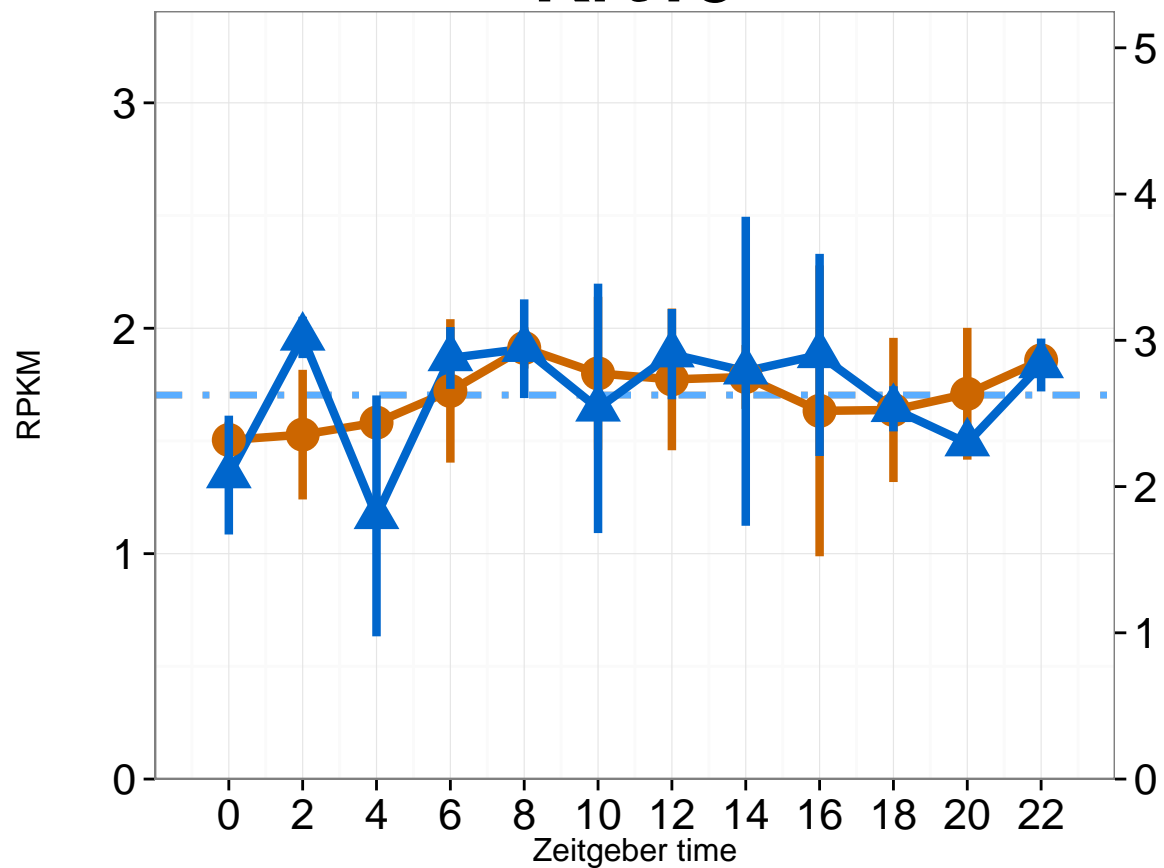

## Krt15

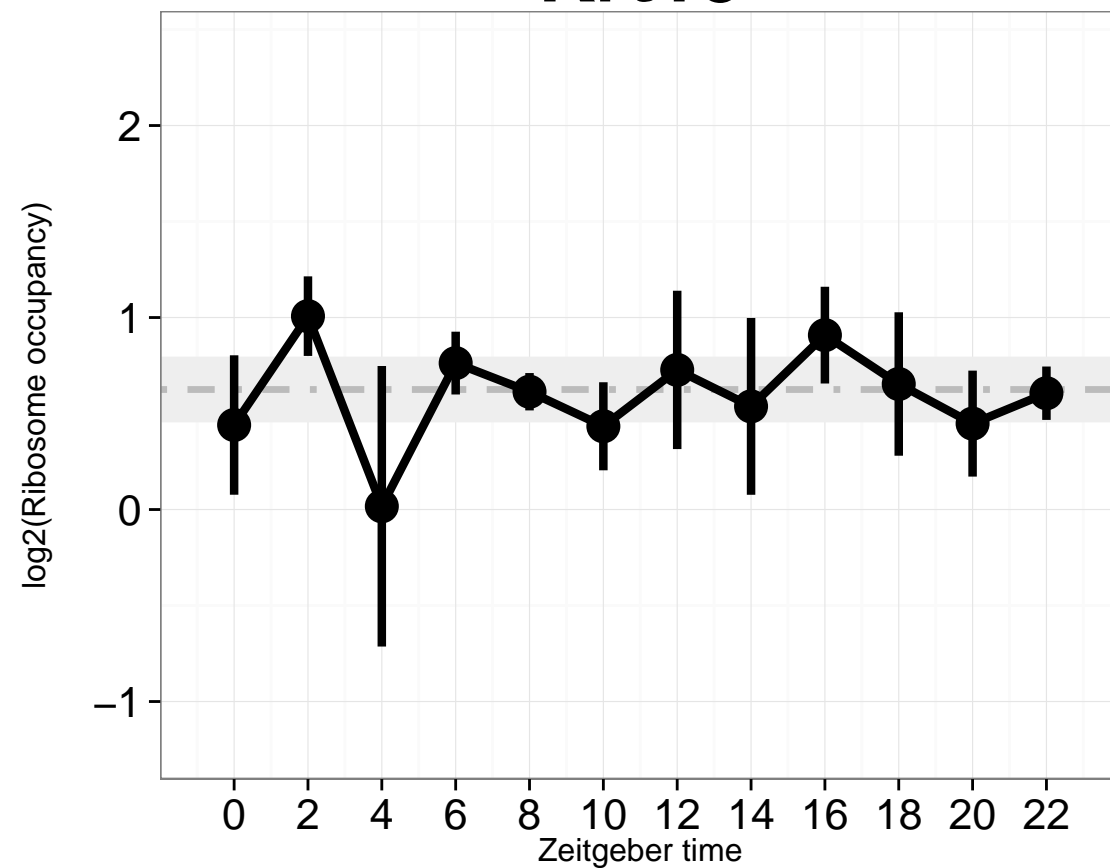

Supplement: Supplementary file 5565 [file 1]

# Csf2rb

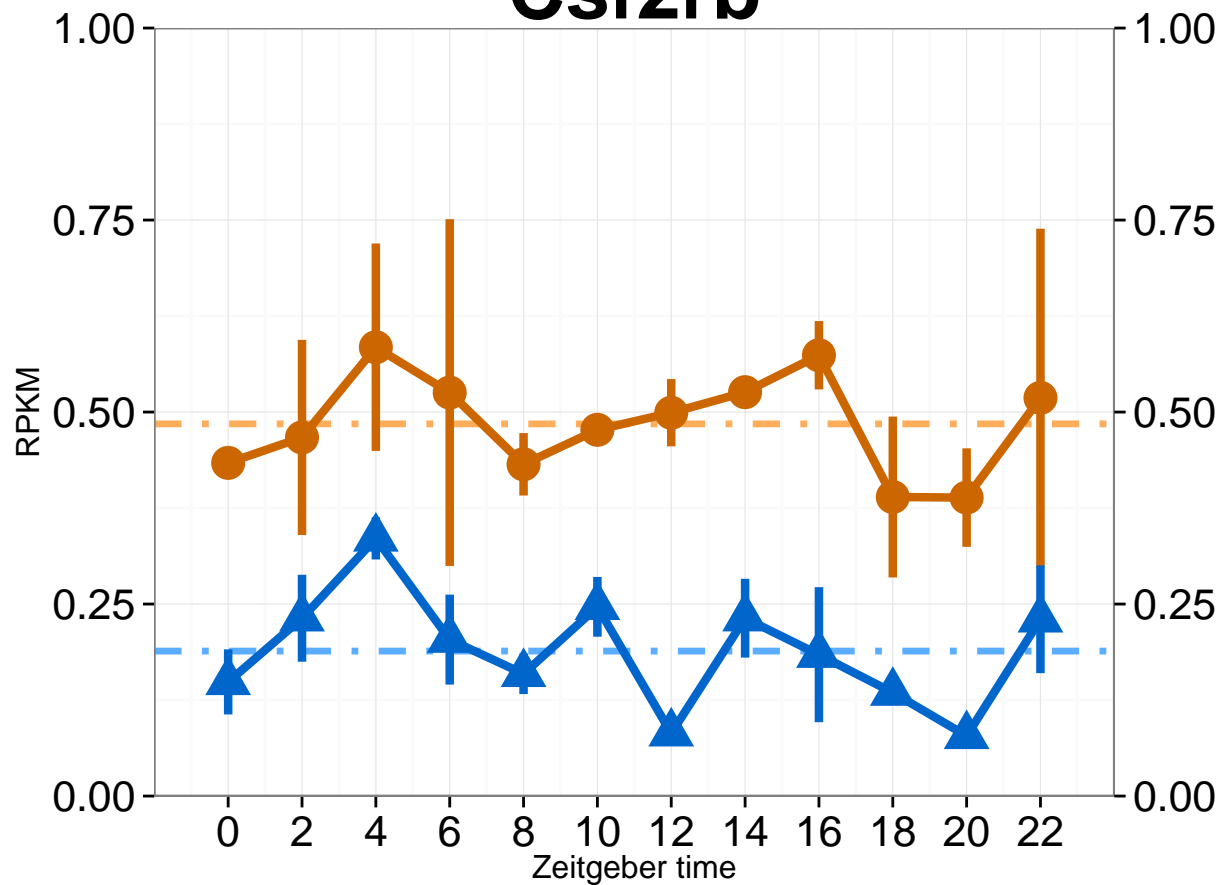

# Csf2rb

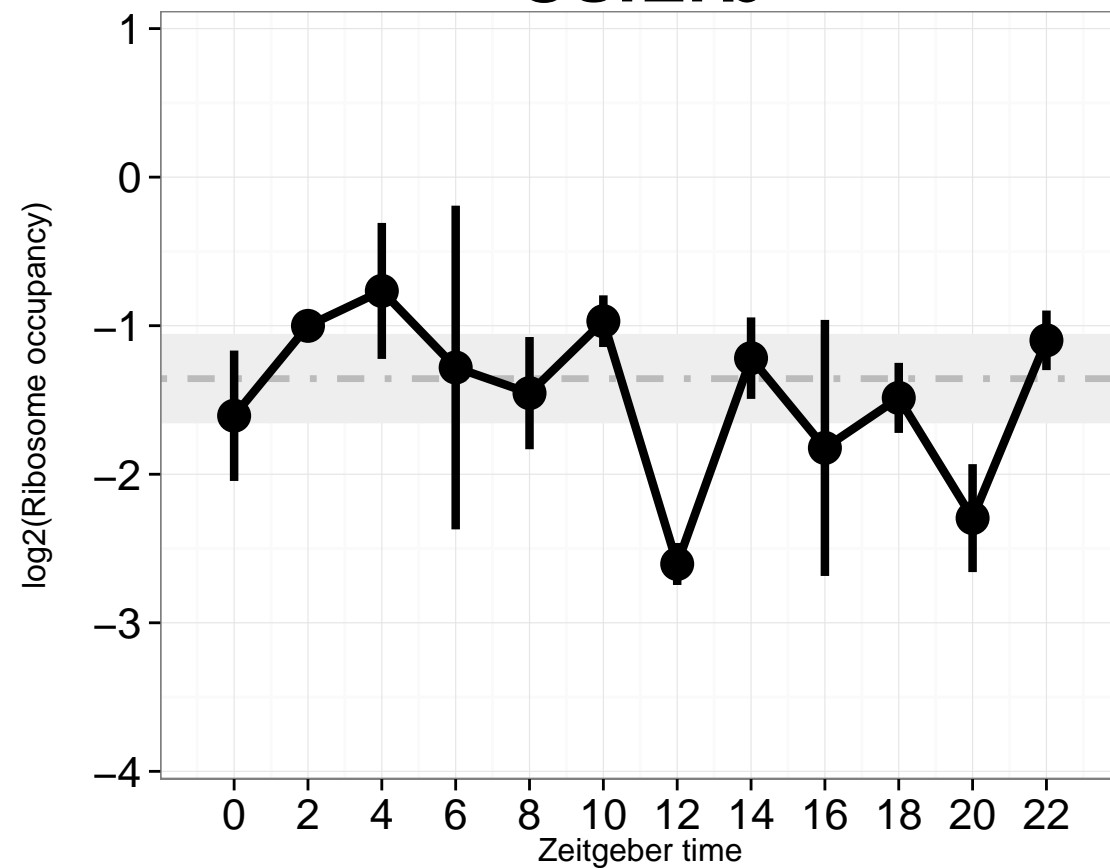

Supplement: Supplementary file 5566 [file 1]

## Rab8b

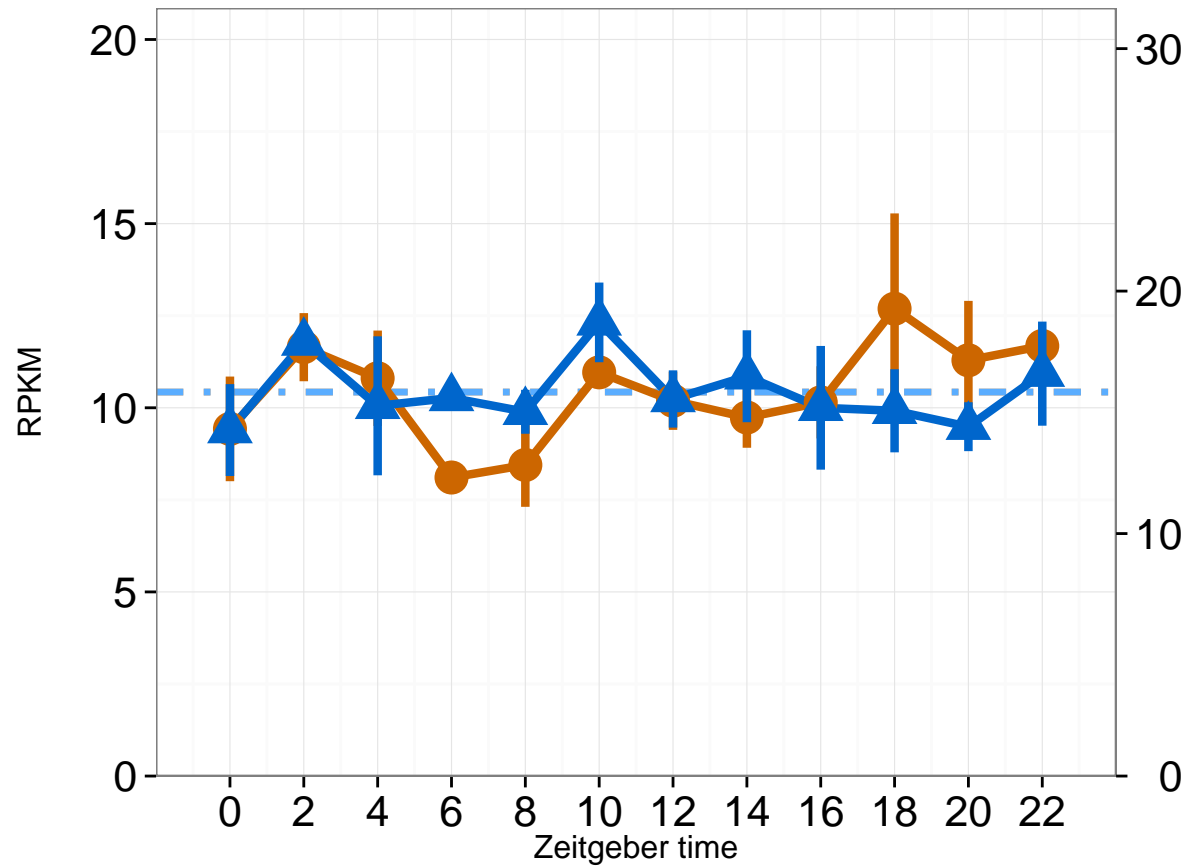

## Rab8b

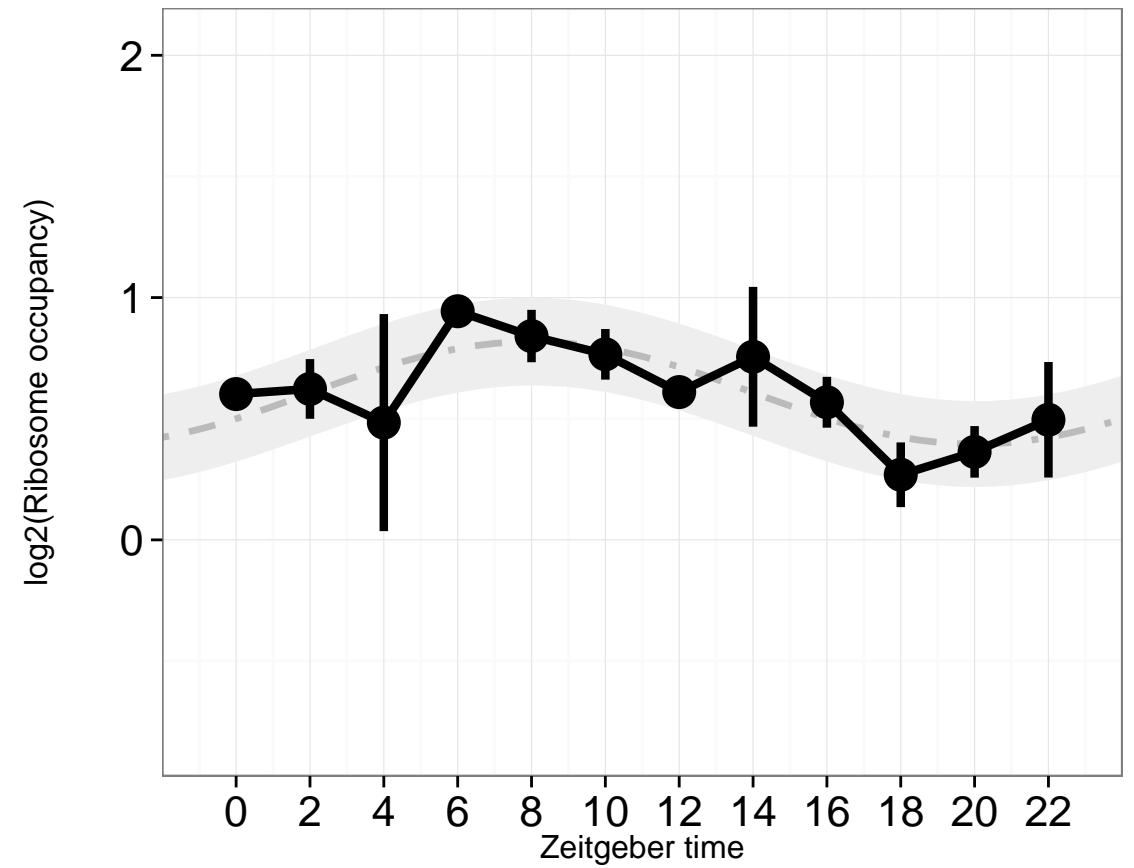

Supplement: Supplementary file 5567 [file 1]

# Shroom1

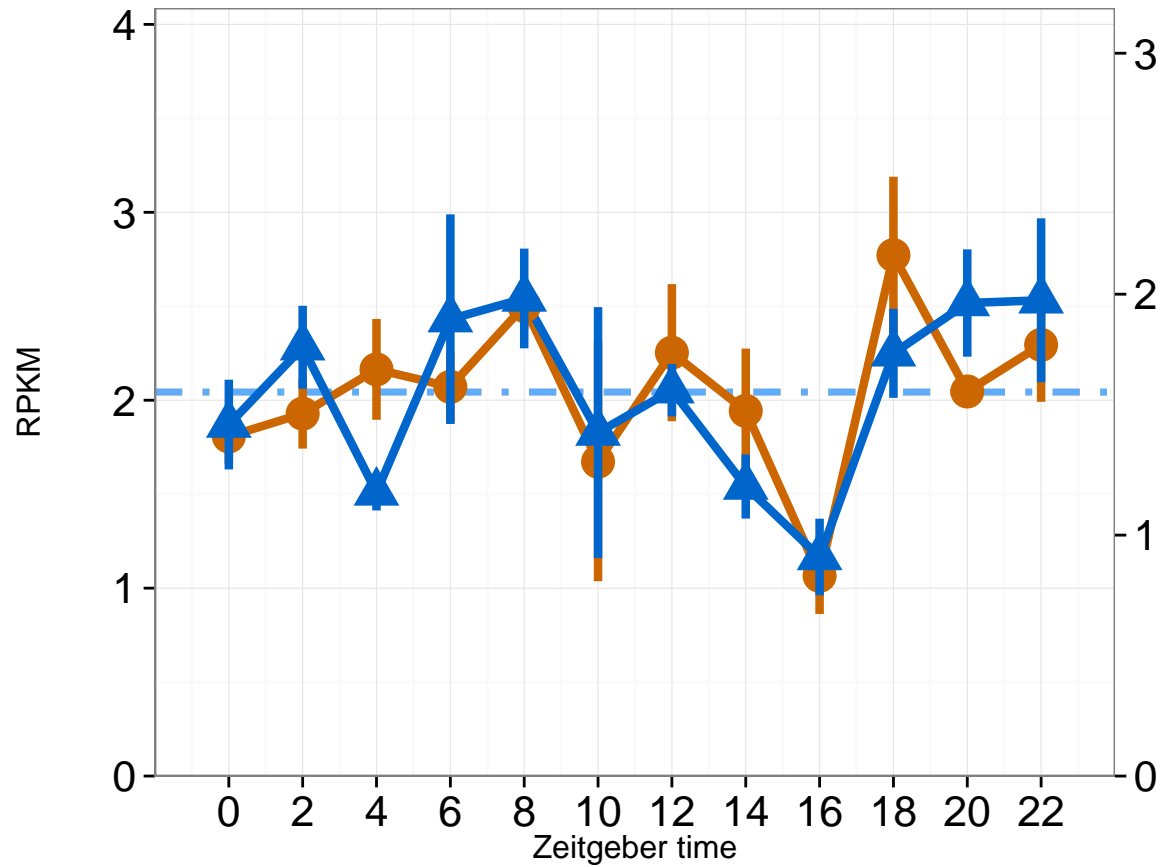

# Shroom1

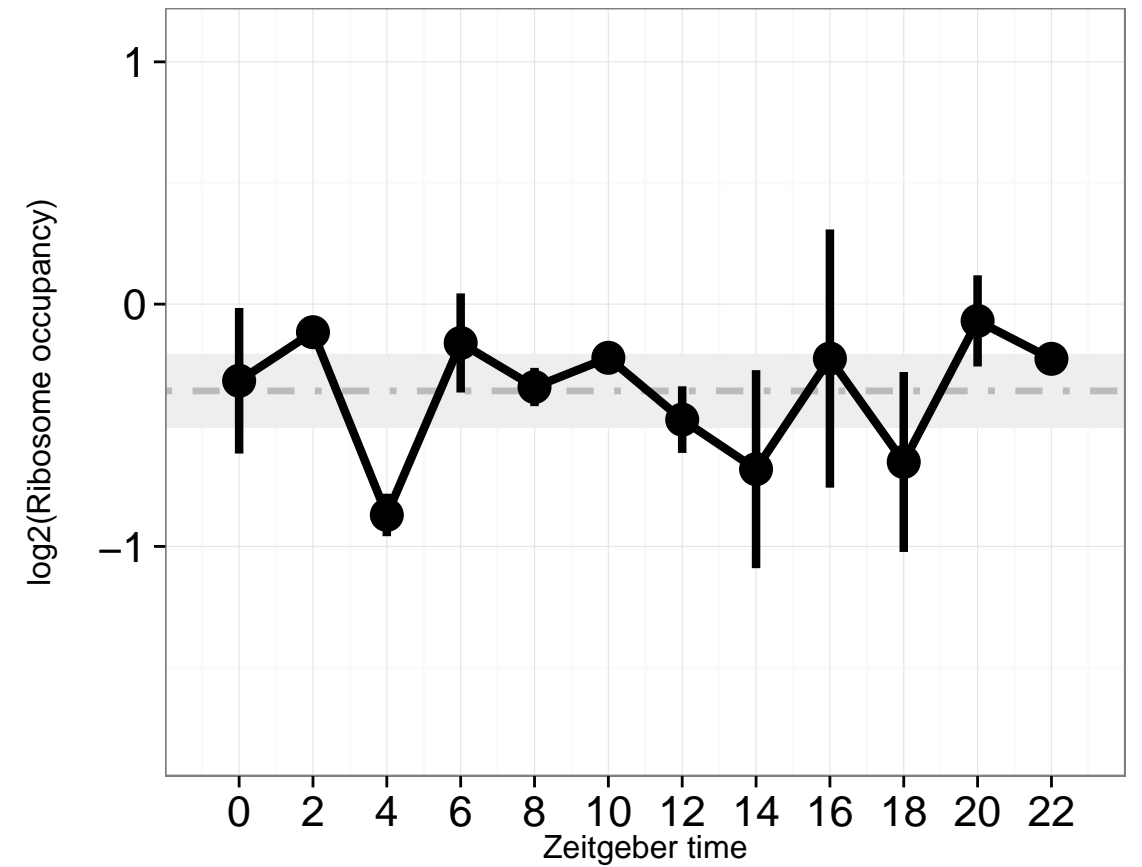

Supplement: Supplementary file 5568 [file 1]

## Pms2

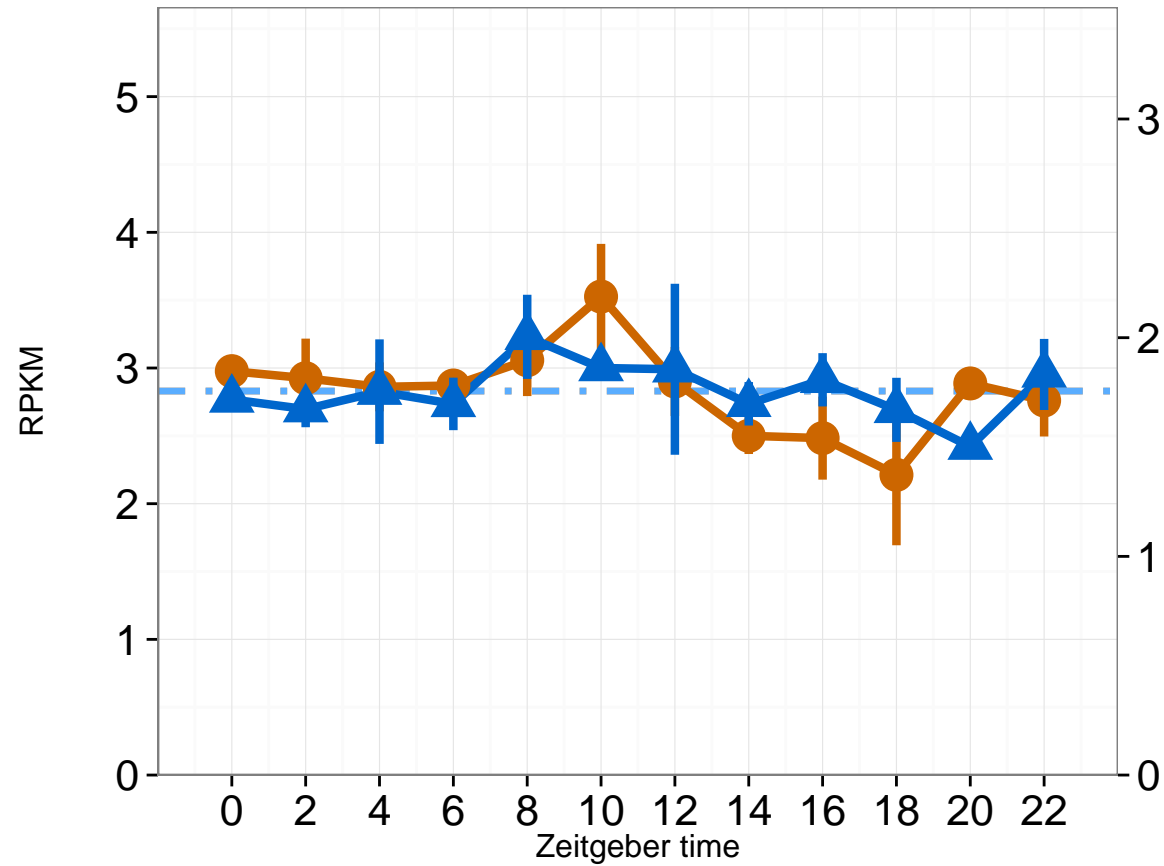

## Pms2

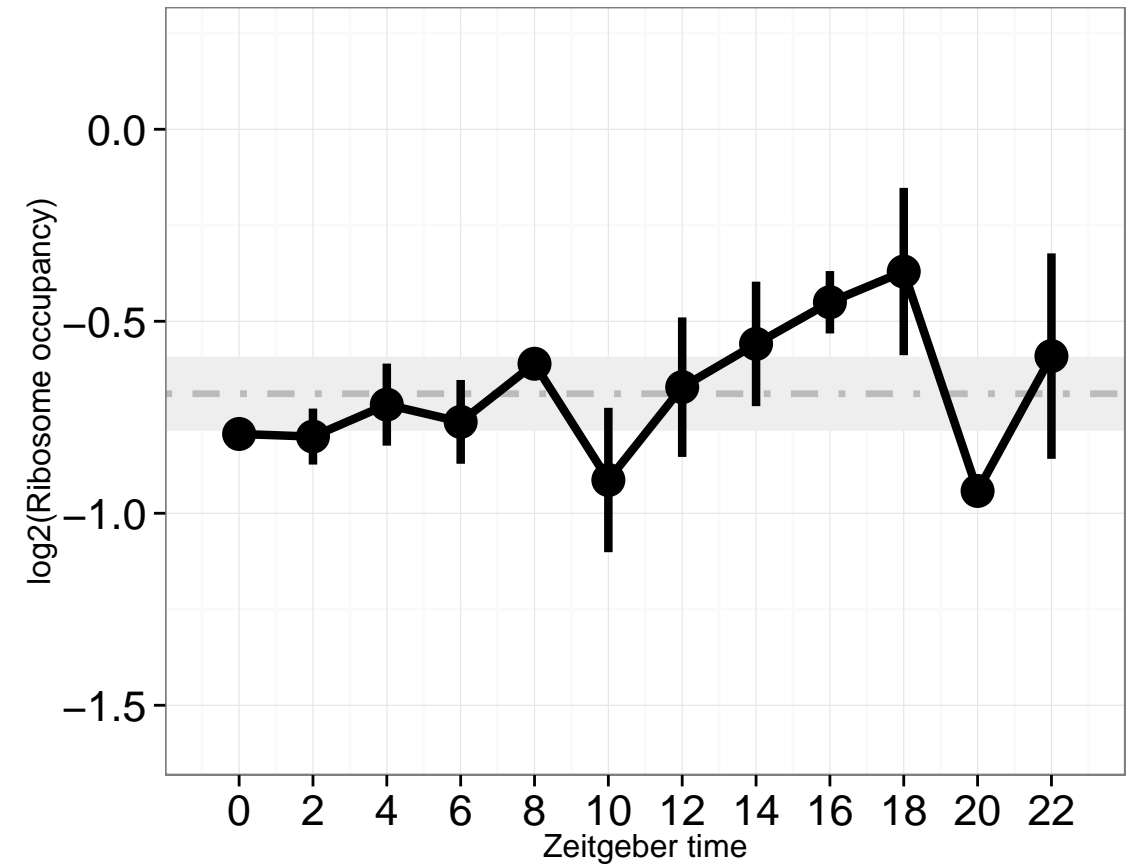

Supplement: Supplementary file 5569 [file 1]

# Gm4944

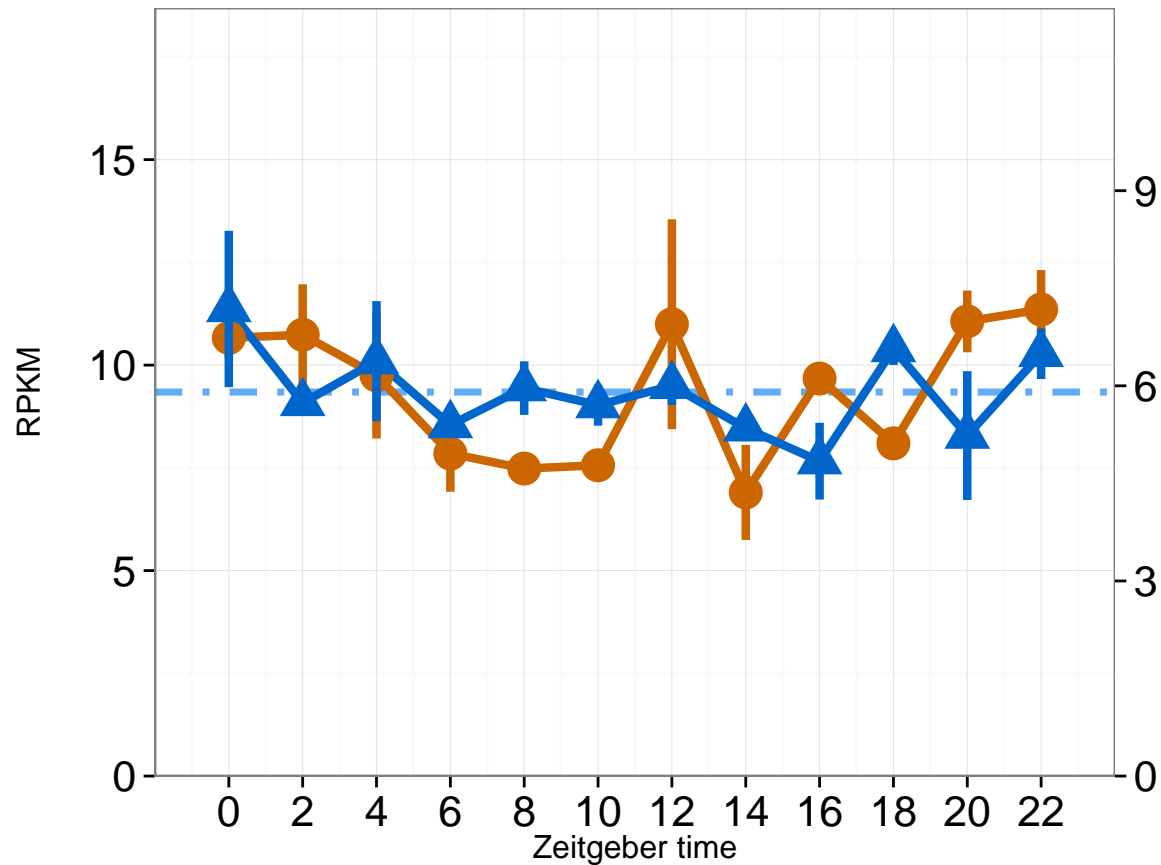

# Gm4944

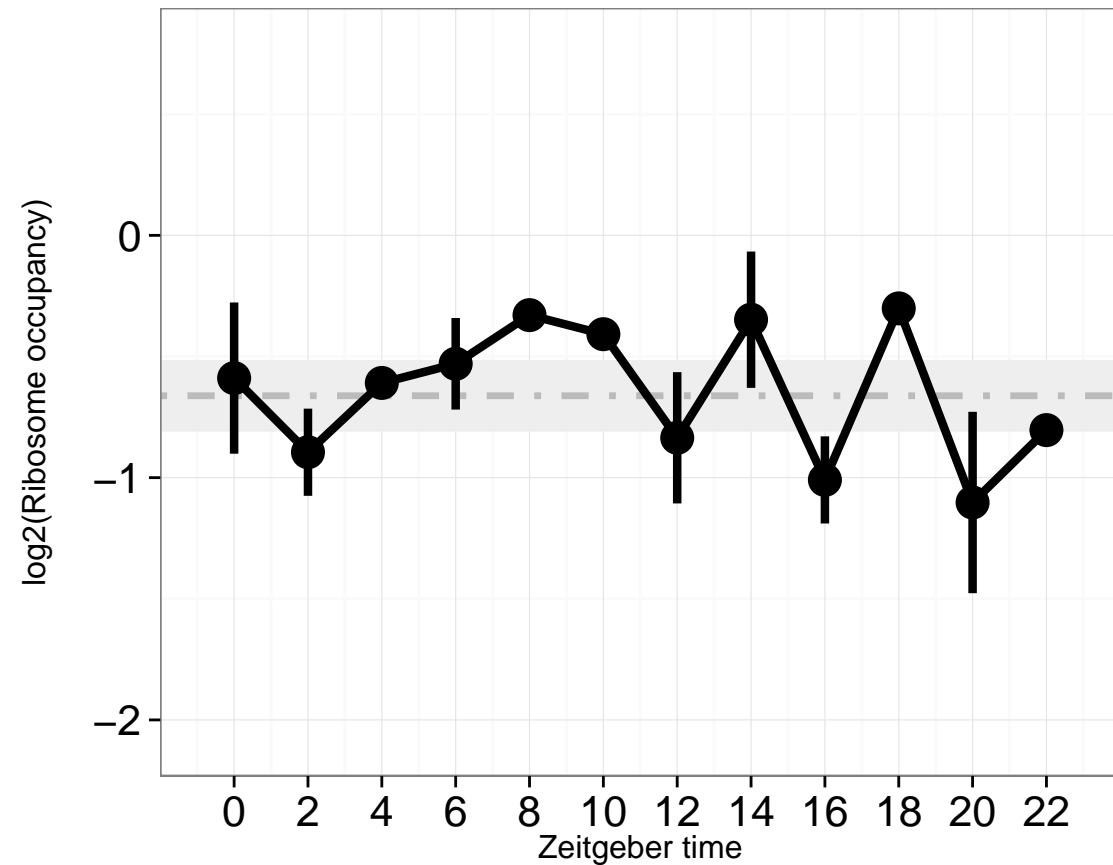

Supplement: Supplementary file 5570 [file 1]

## Dcaf8

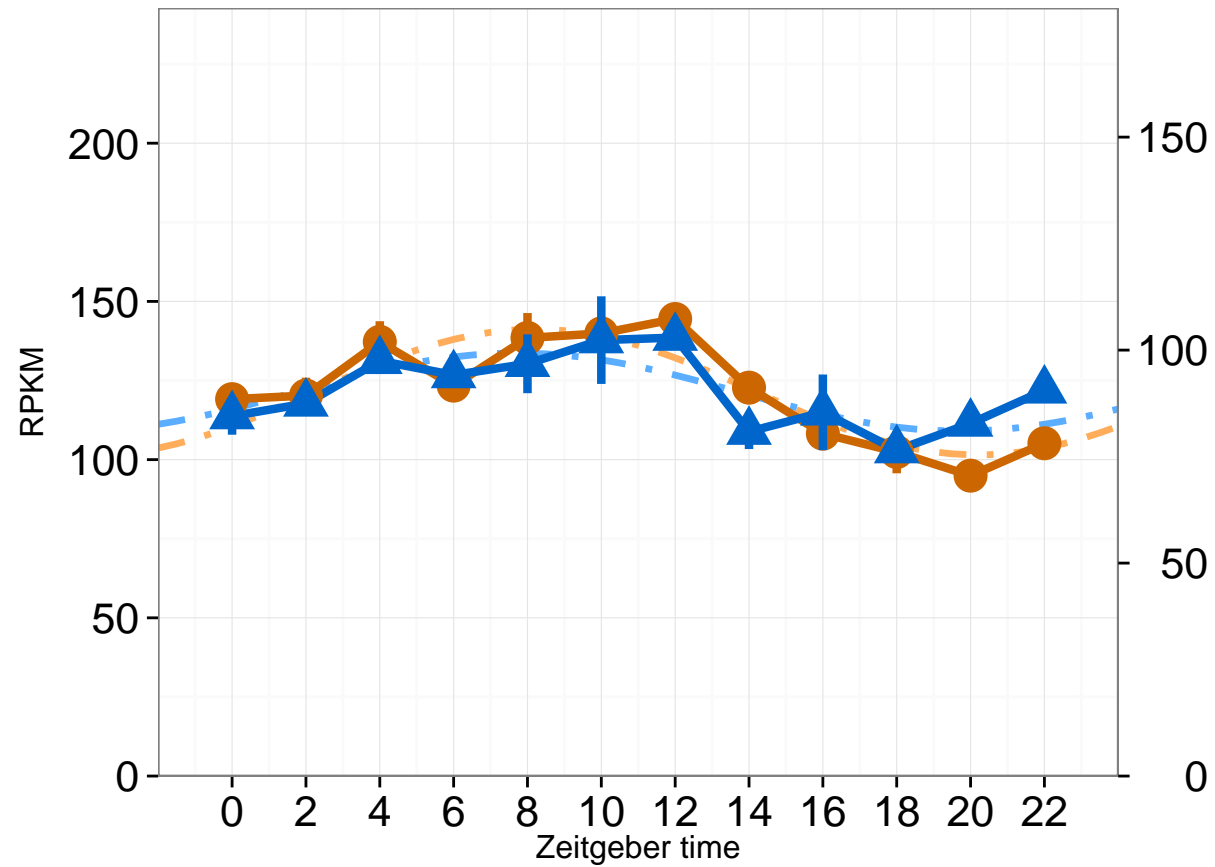

## Dcaf8

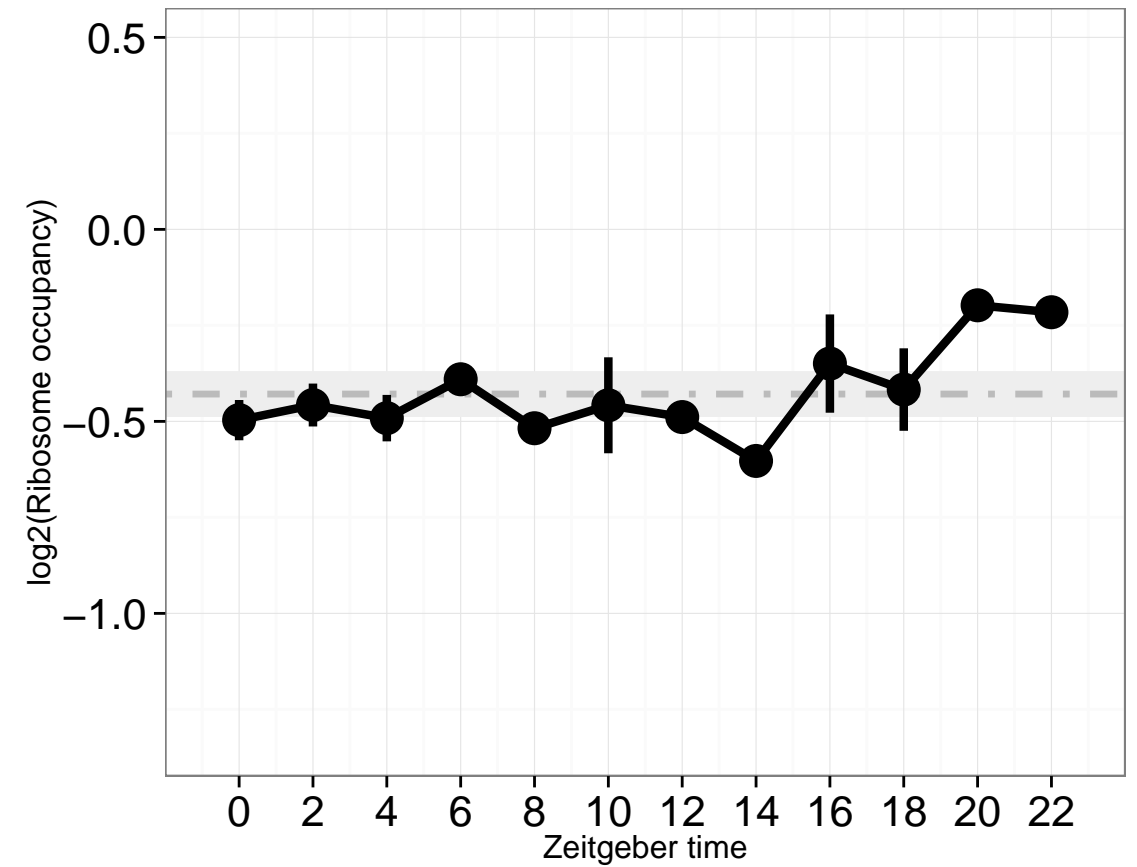

Supplement: Supplementary file 5571 [file 1]

## Pard6g

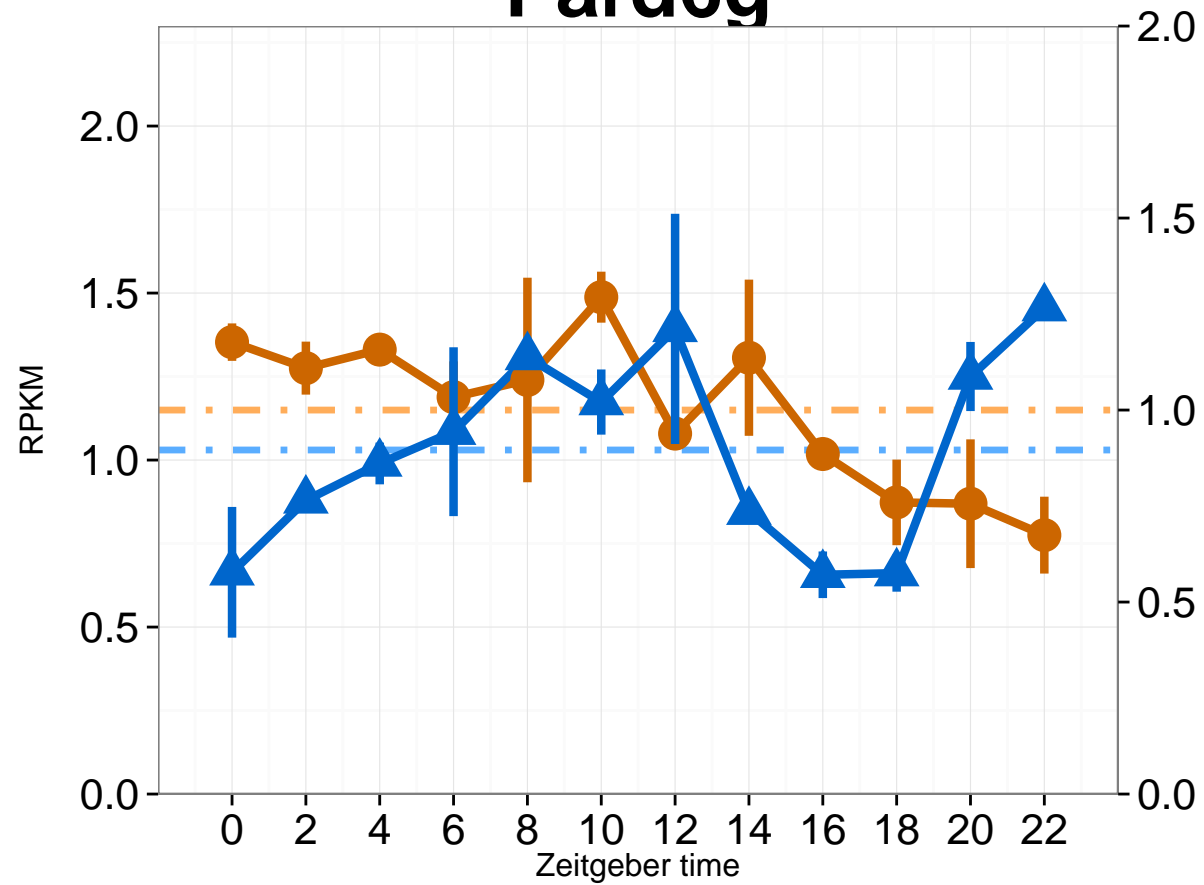

## Pard6g

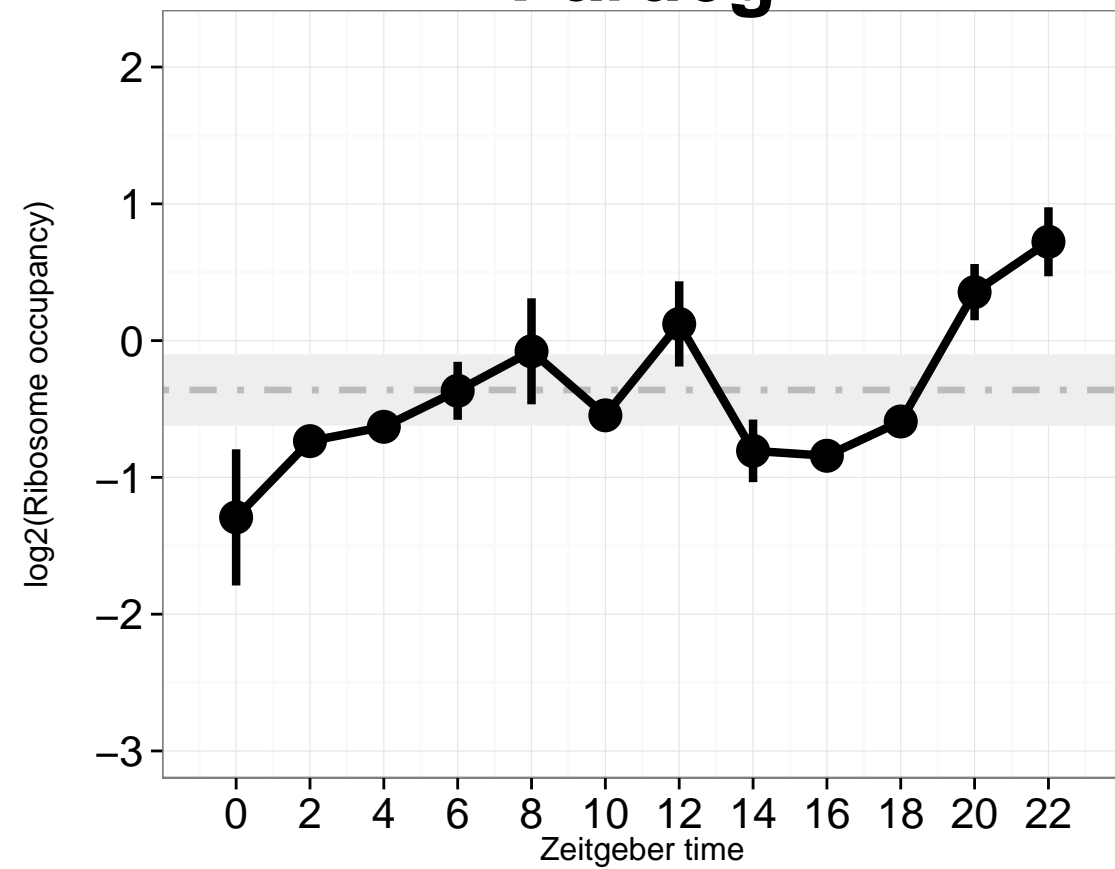

Supplement: Supplementary file 5572 [file 1]

## Dus1l

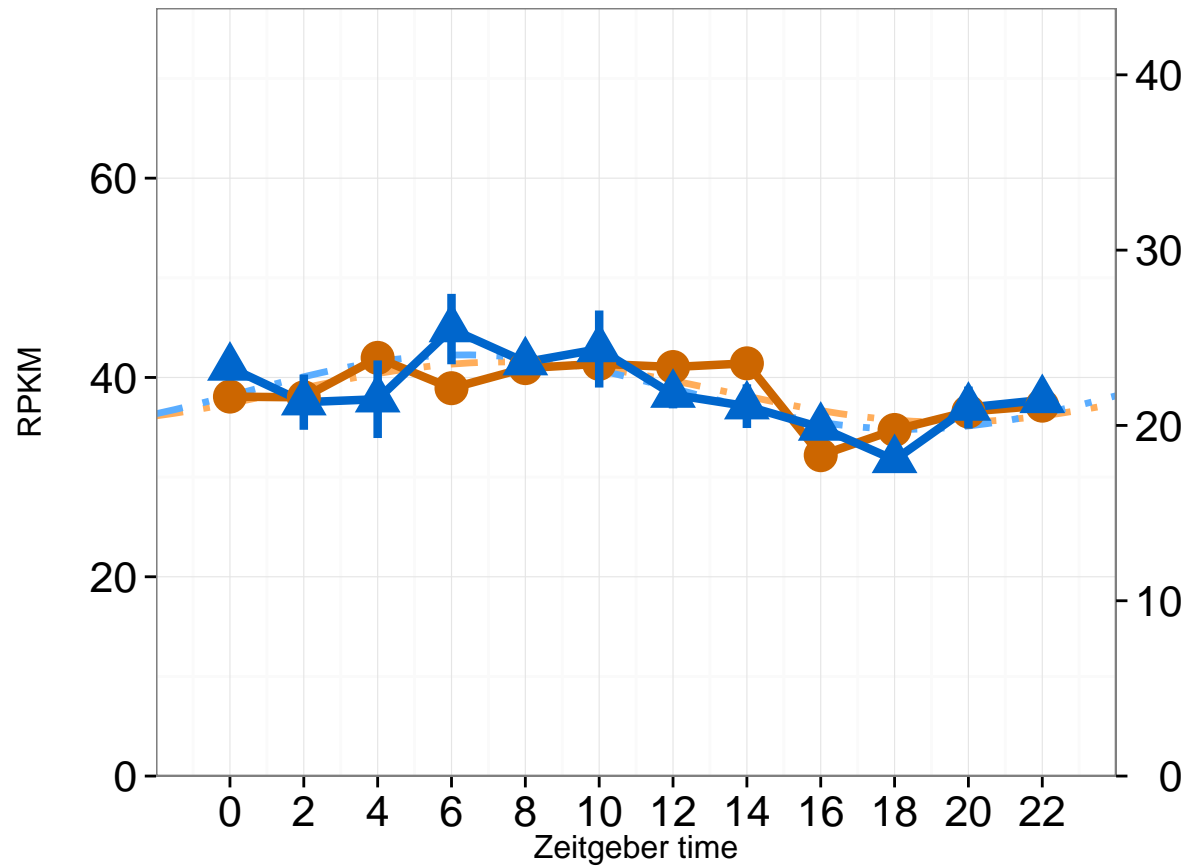

## Dus1l

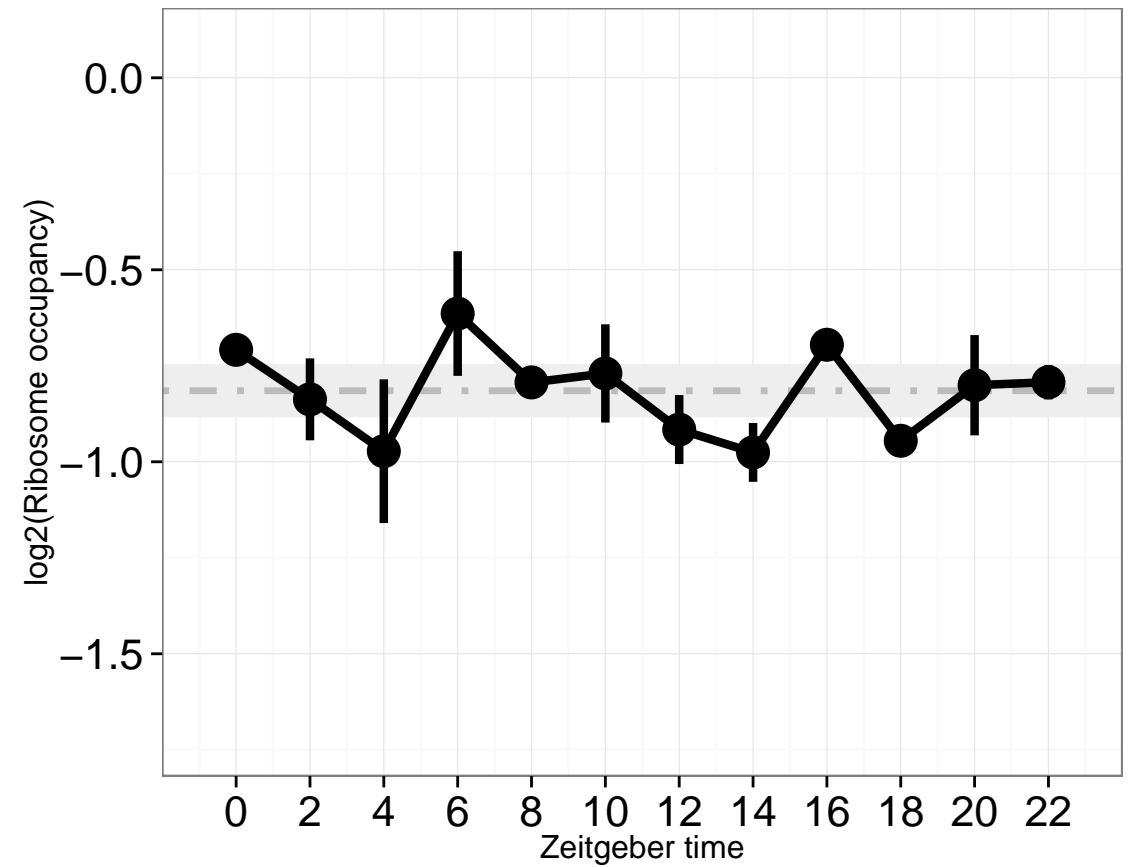

Supplement: Supplementary file 5573 [file 1]

# Cep120

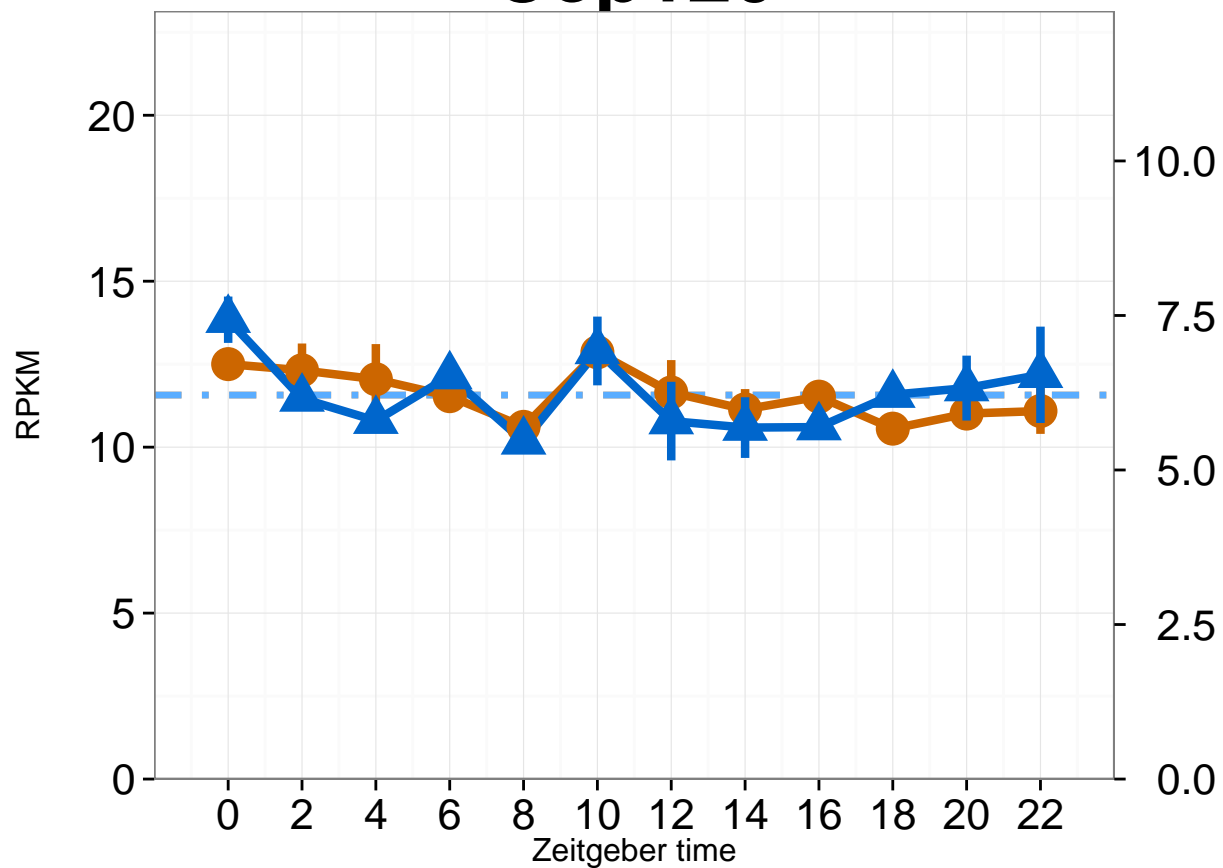

# Cep120

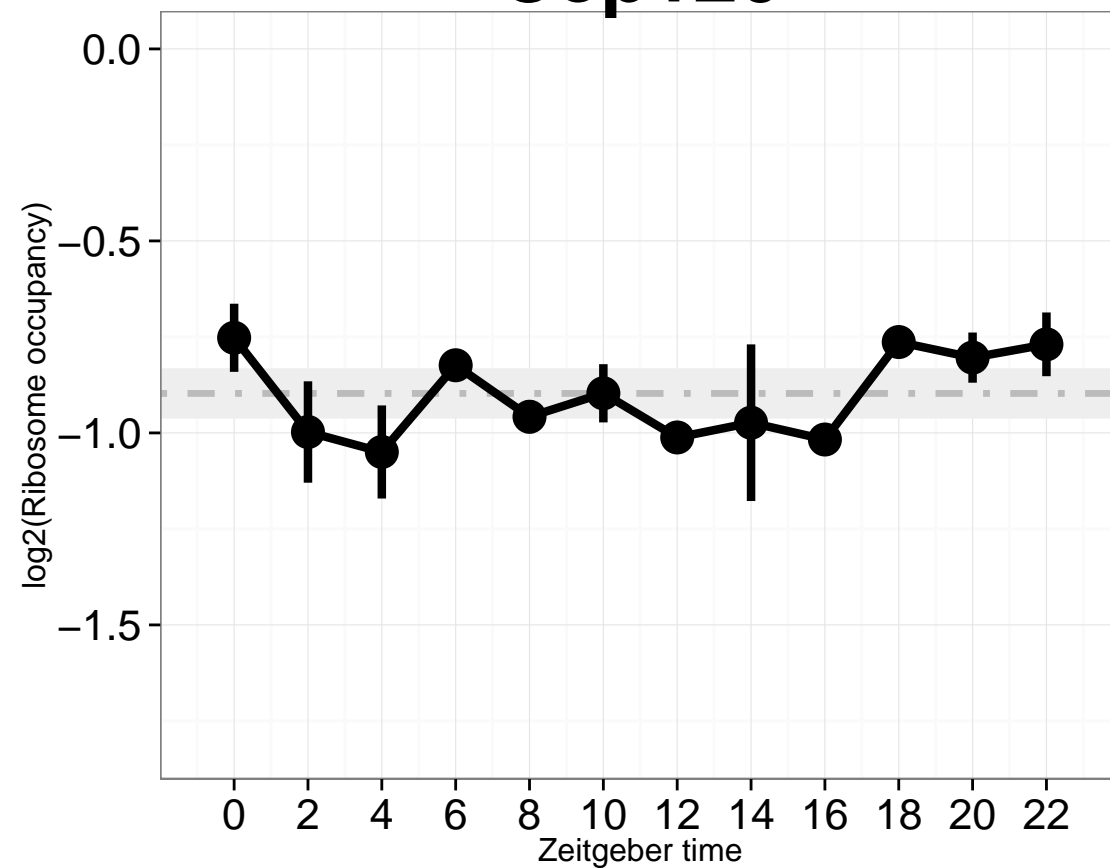

Supplement: Supplementary file 5574 [file 1]

# Fam229b

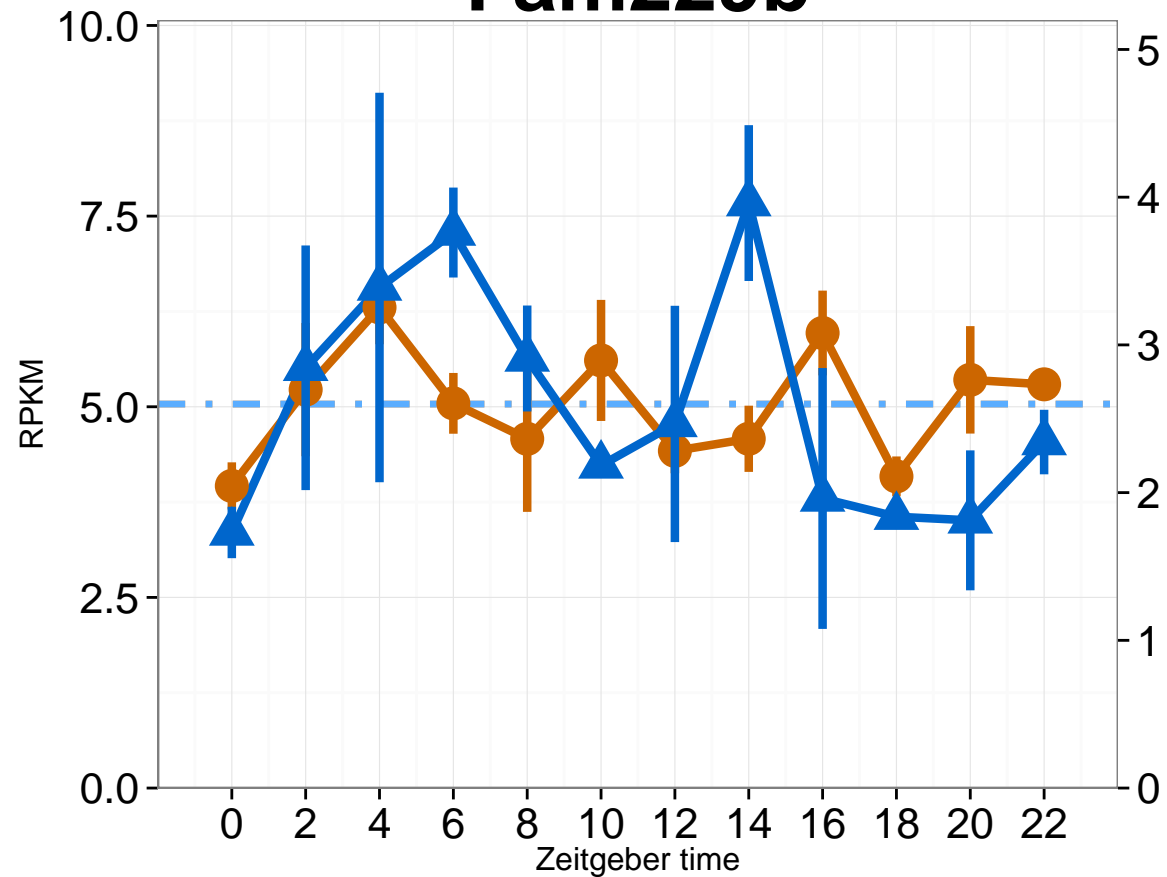

# Fam229b

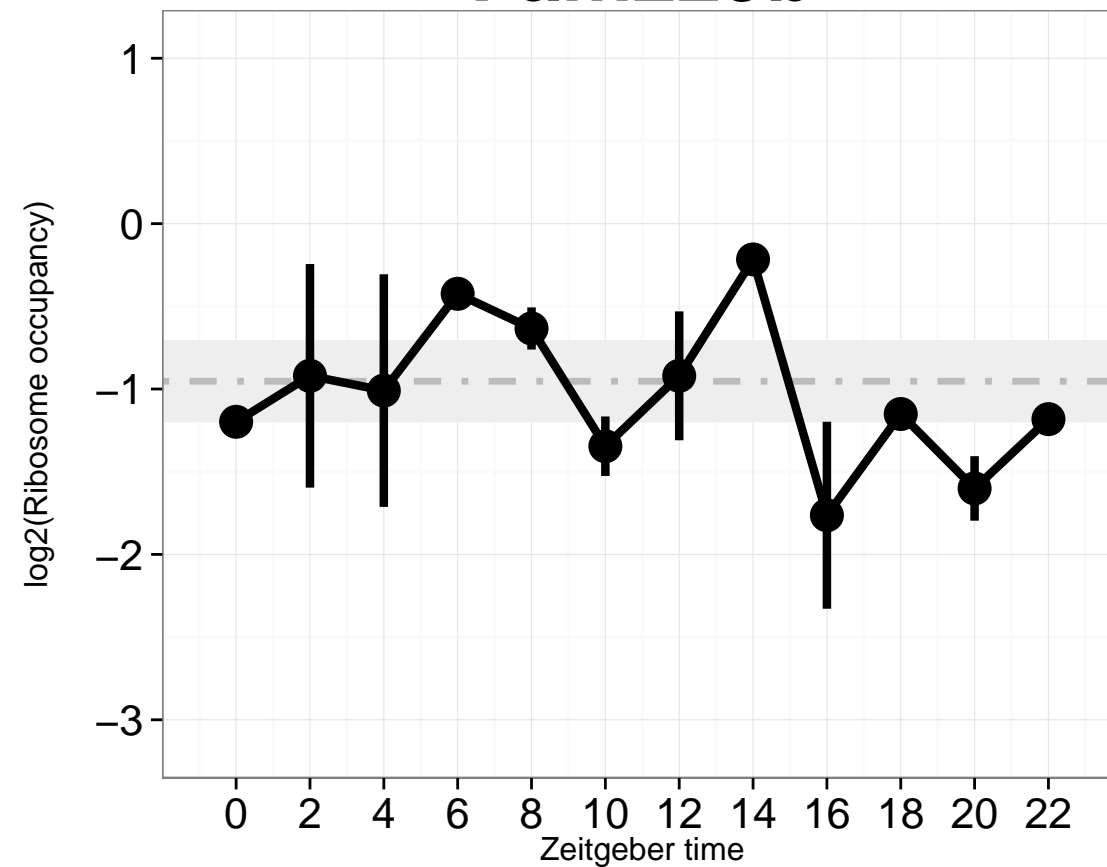

Supplement: Supplementary file 5575 [file 1]

# Tmem102

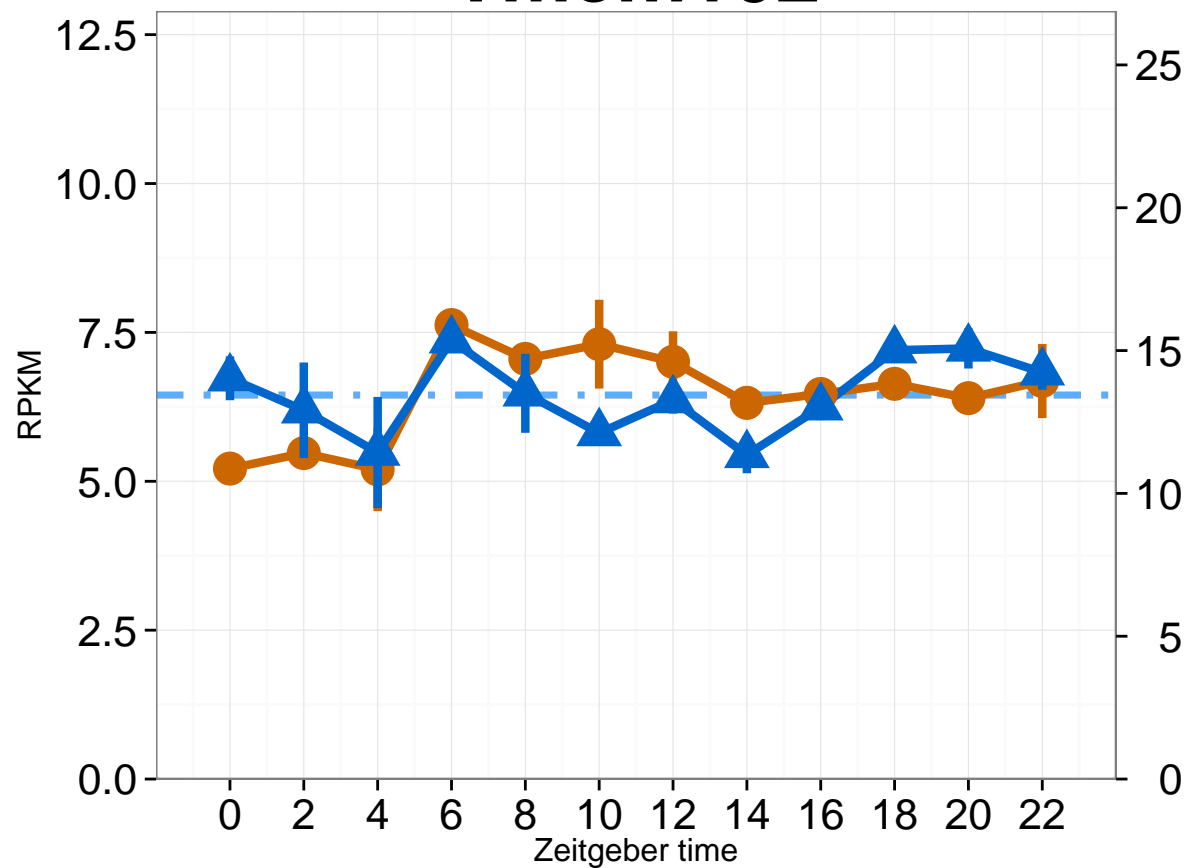

# Tmem102

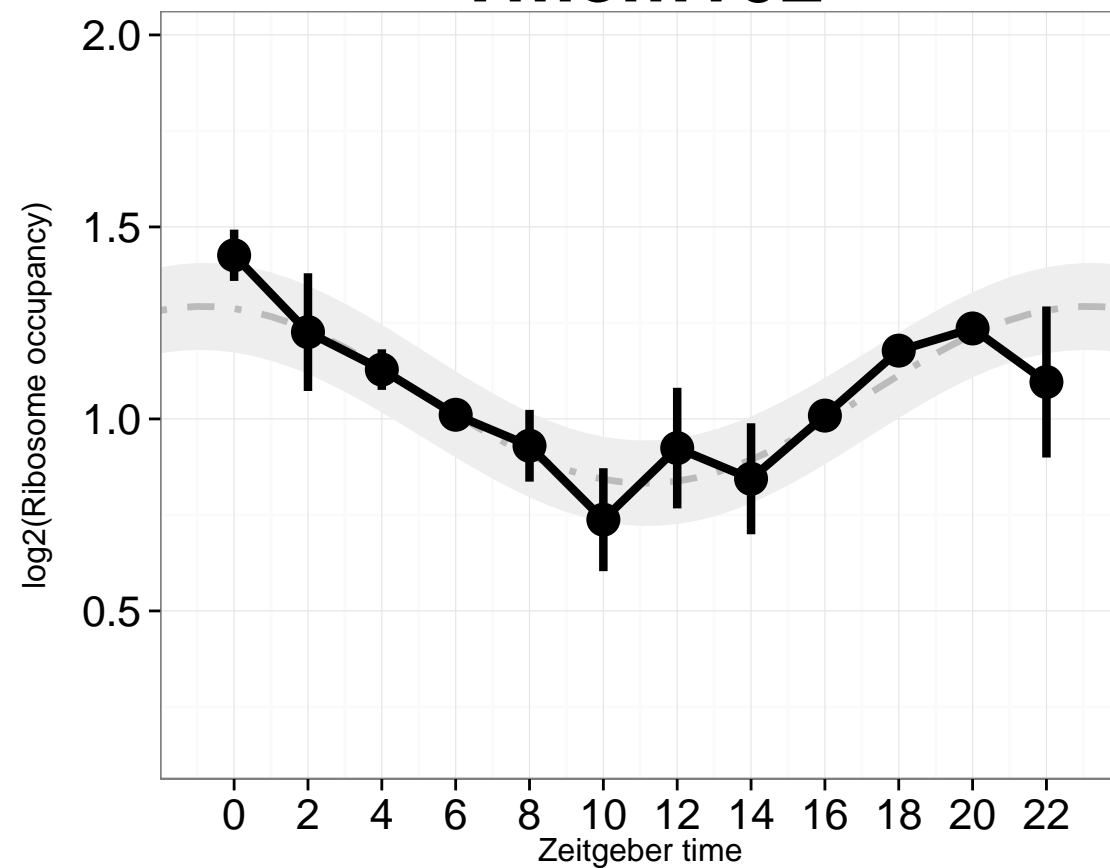

Supplement: Supplementary file 5576 [file 1]

# Cox7a2l

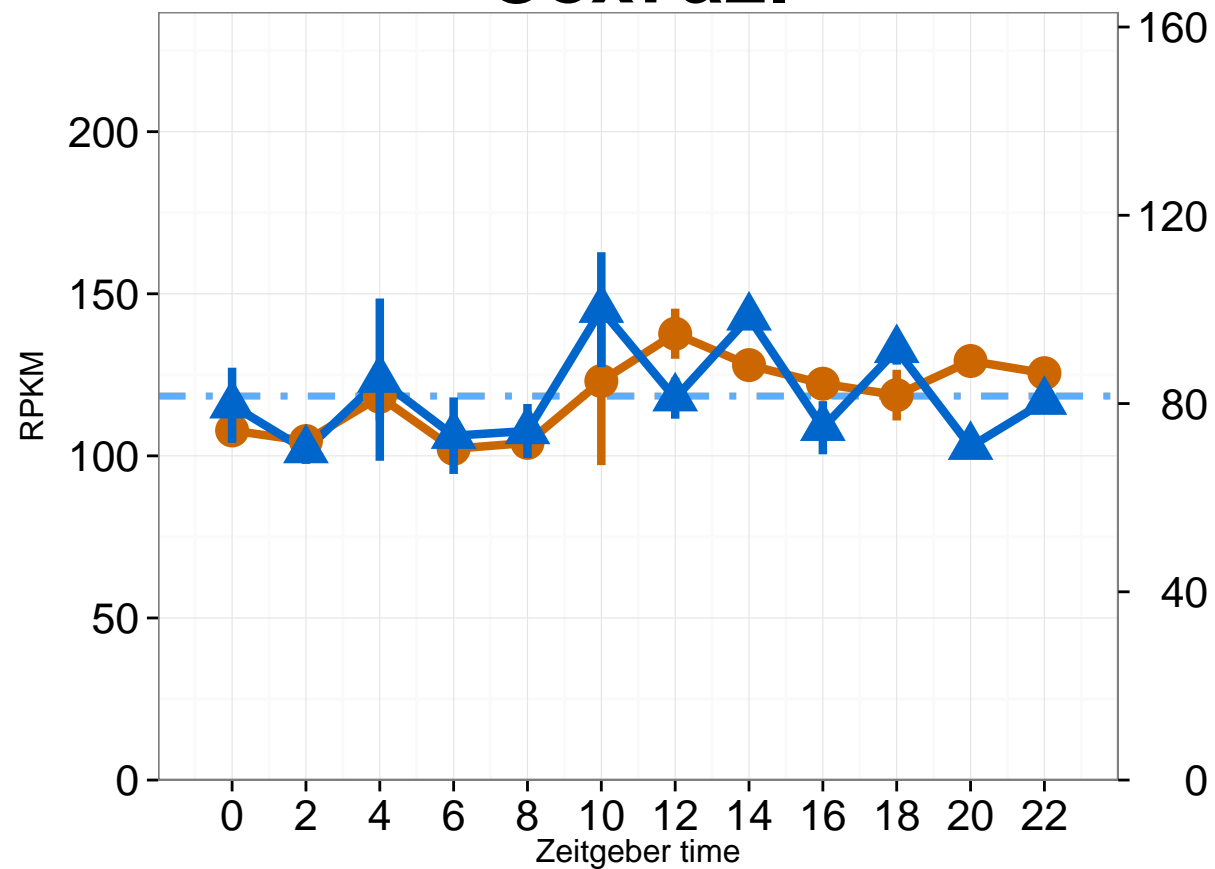

# Cox7a2l

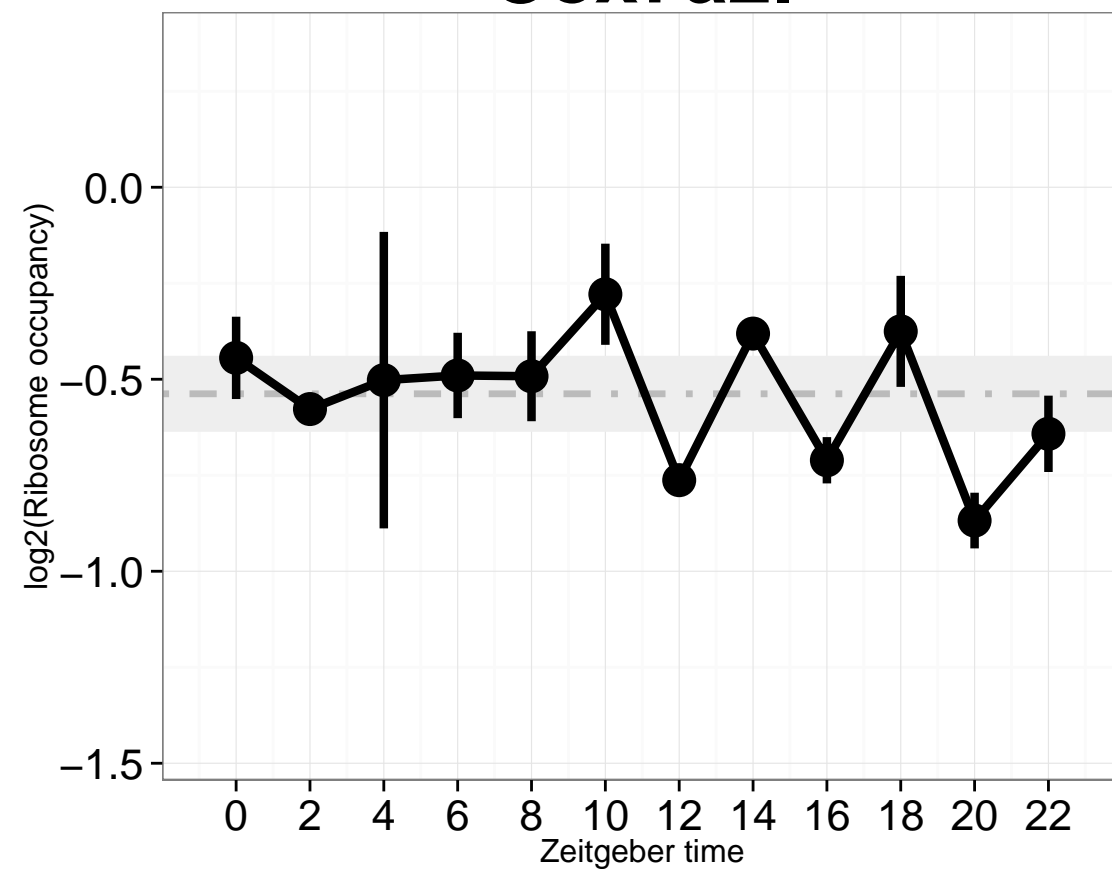

Supplement: Supplementary file 5577 [file 1]

# Mtmr14

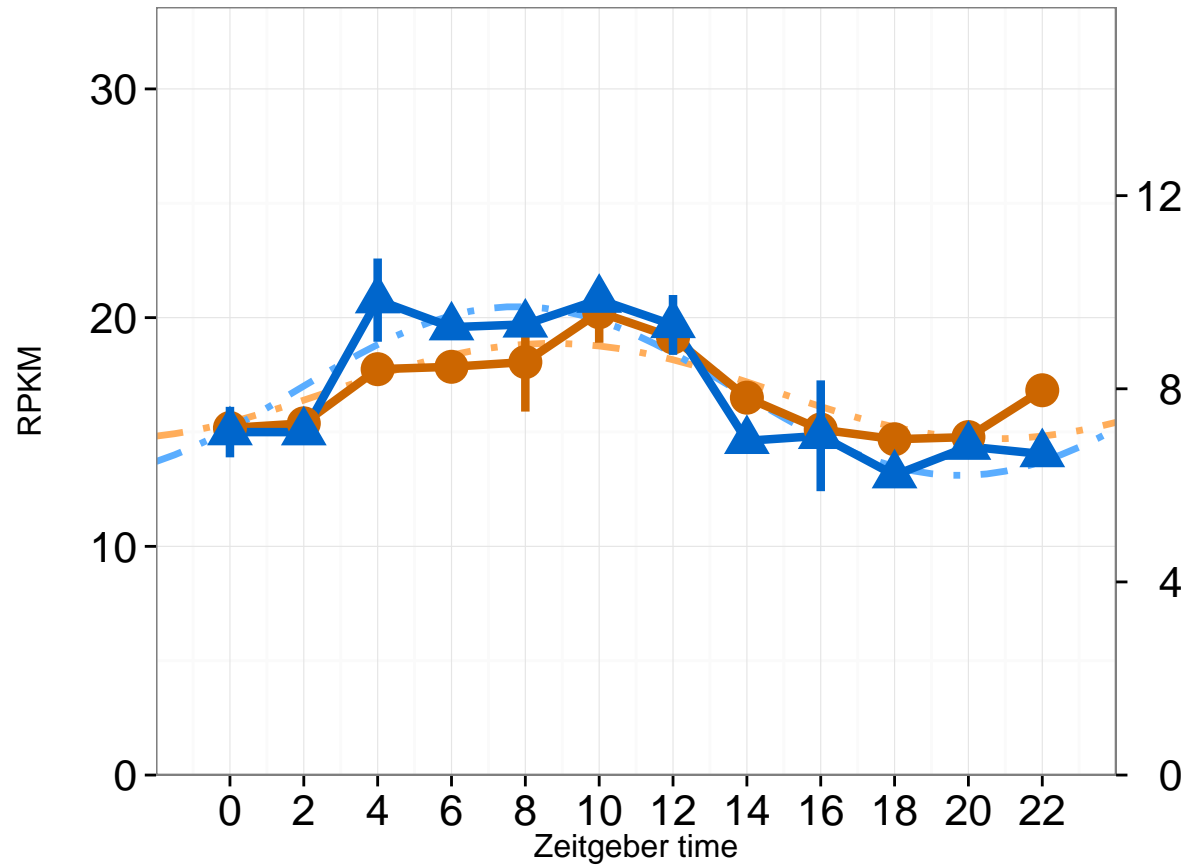

# Mtmr14

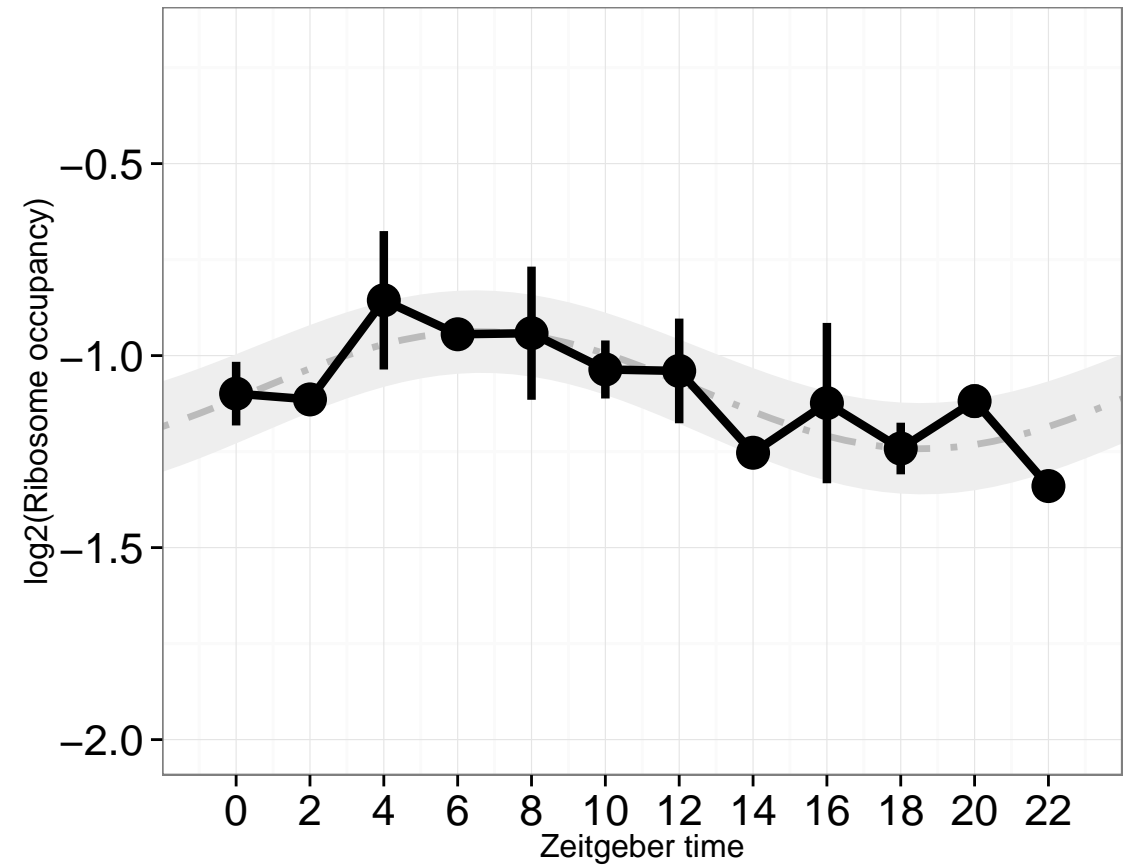

Supplement: Supplementary file 5578 [file 1]

## Cwh43

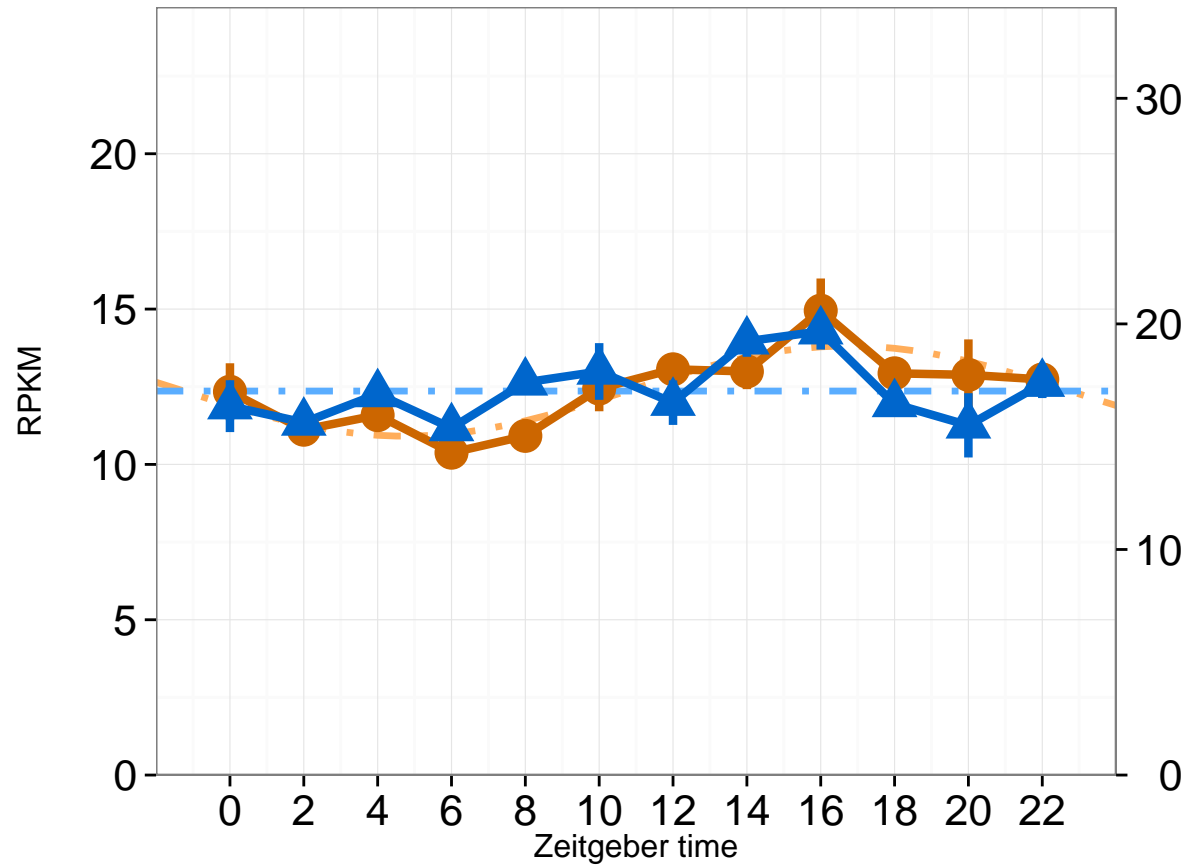

## Cwh43

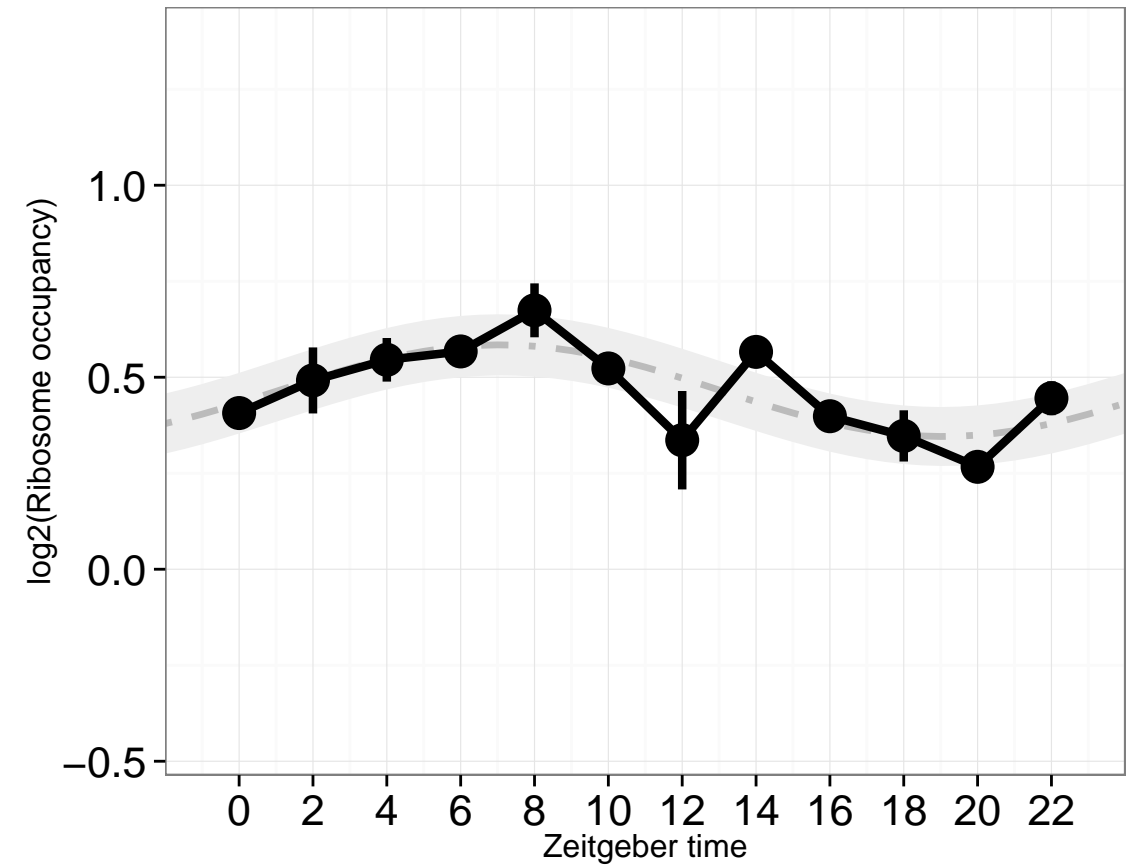

Supplement: Supplementary file 5579 [file 1]

# Pfkfb1

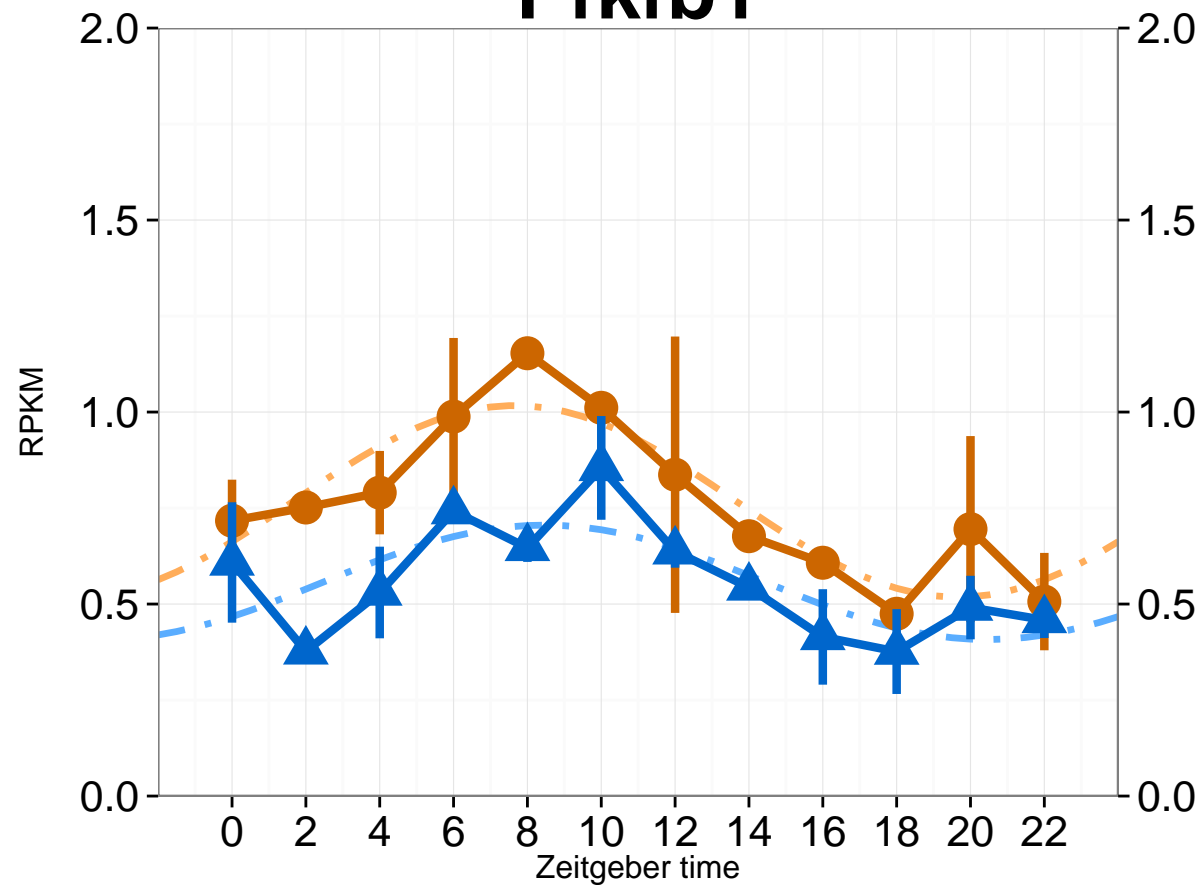

# Pfkfb1

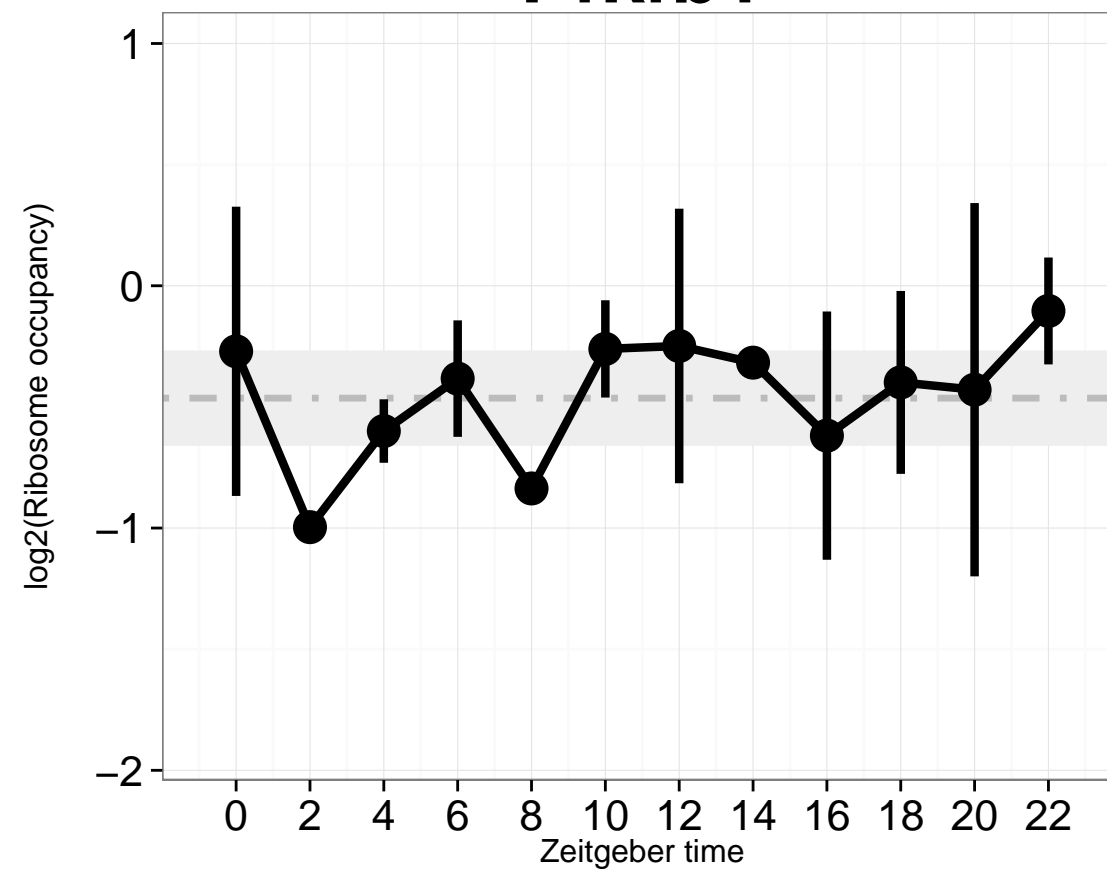

Supplement: Supplementary file 5580 [file 1]

## Tbk1

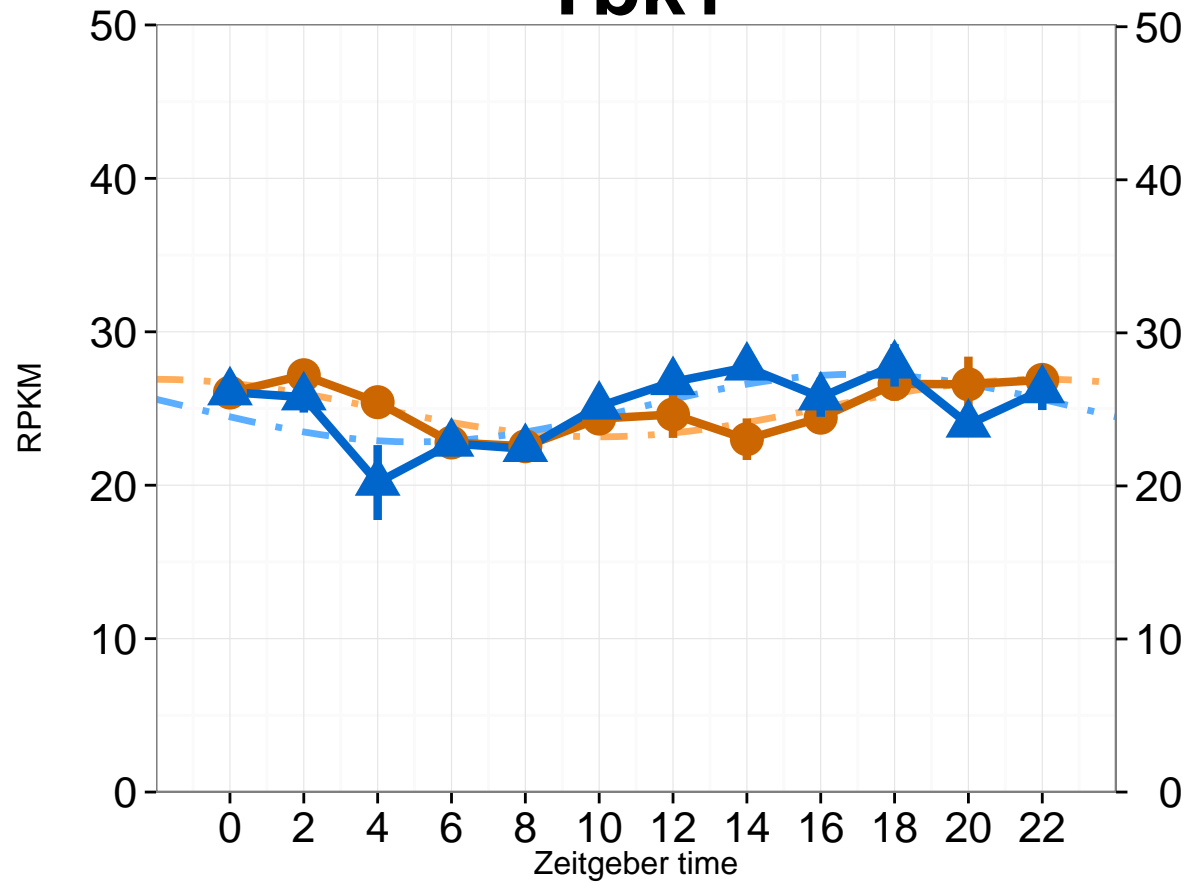

## Tbk1

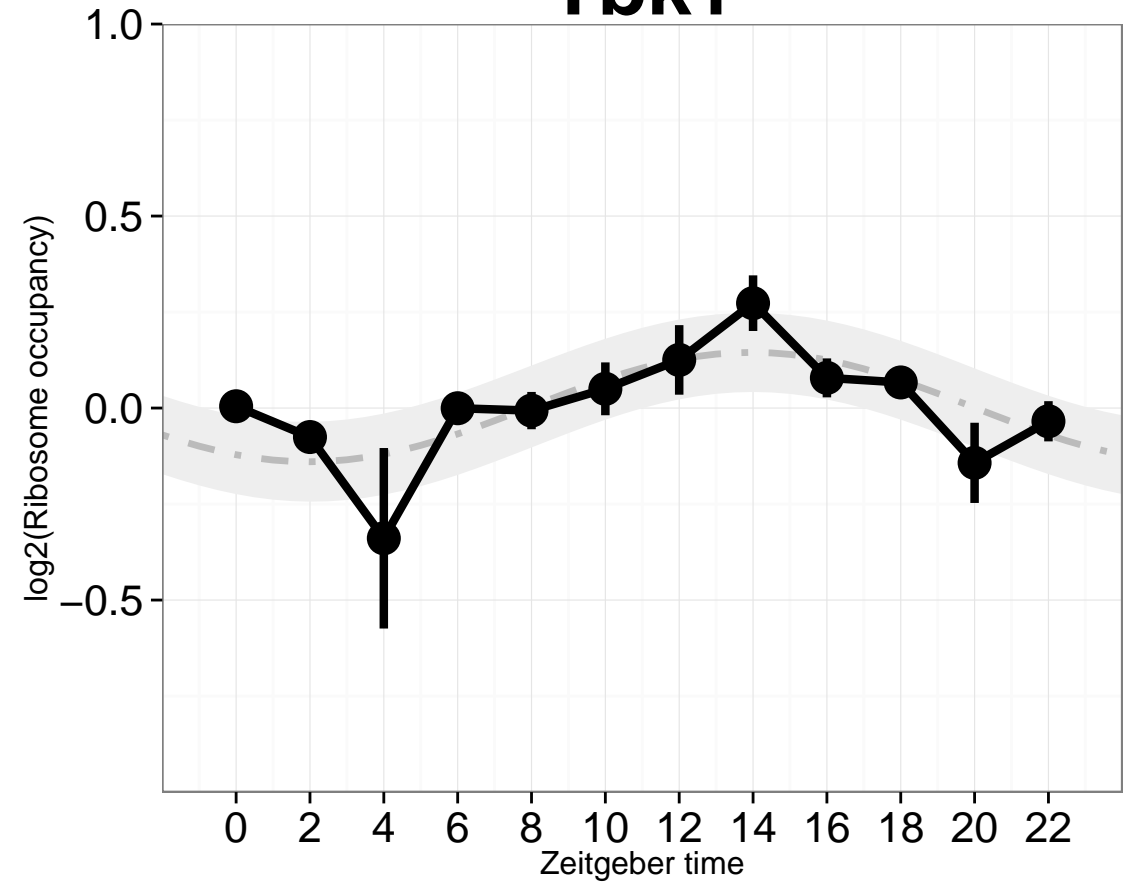

Supplement: Supplementary file 5581 [file 1]

# Col27a1

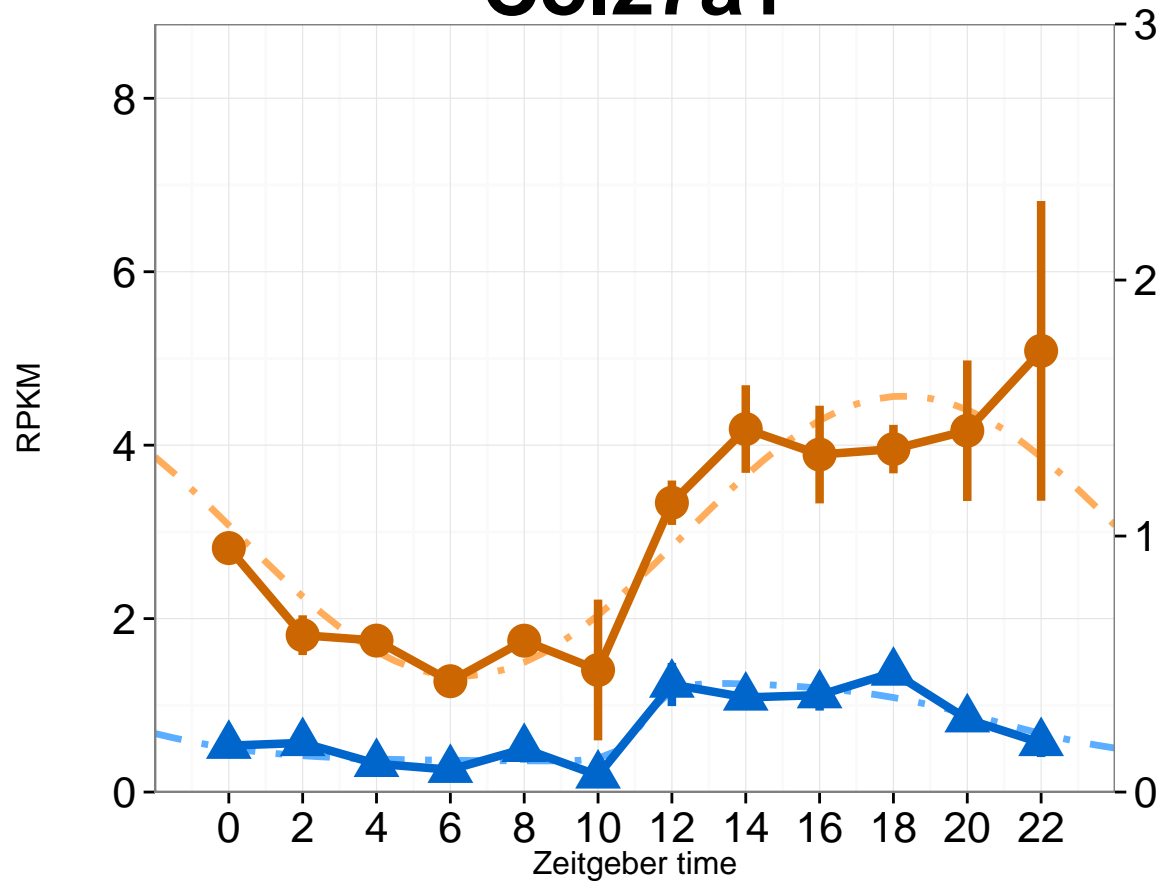

# Col27a1

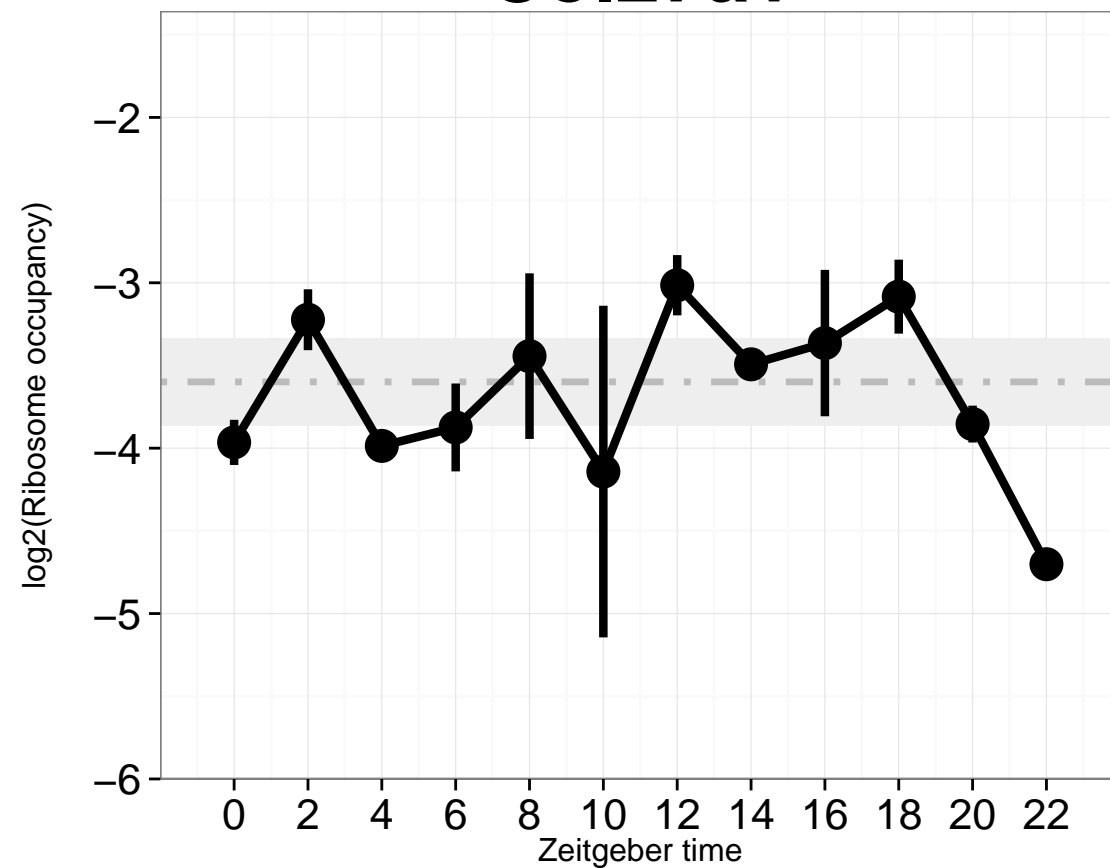

Supplement: Supplementary file 5582 [file 1]

## Slc27a4

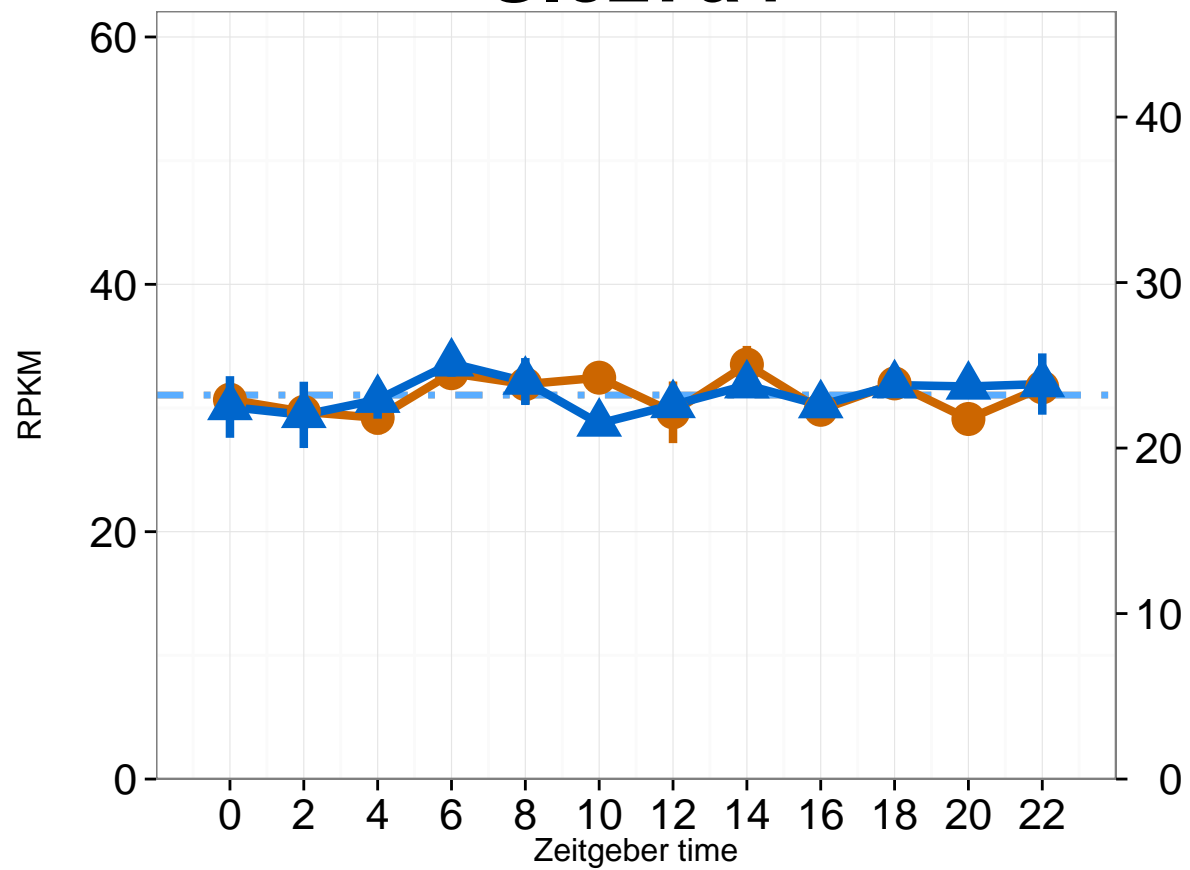

## Slc27a4

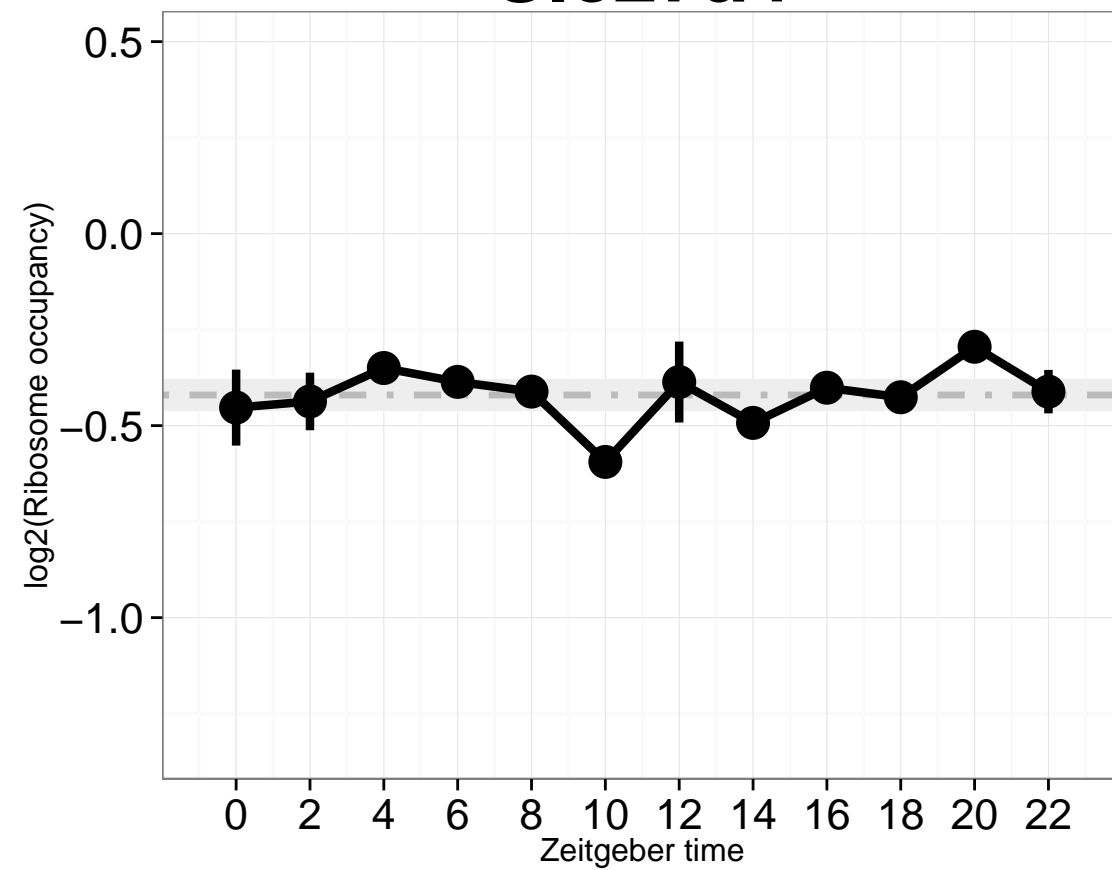

Supplement: Supplementary file 5583 [file 1]

# Fam20a

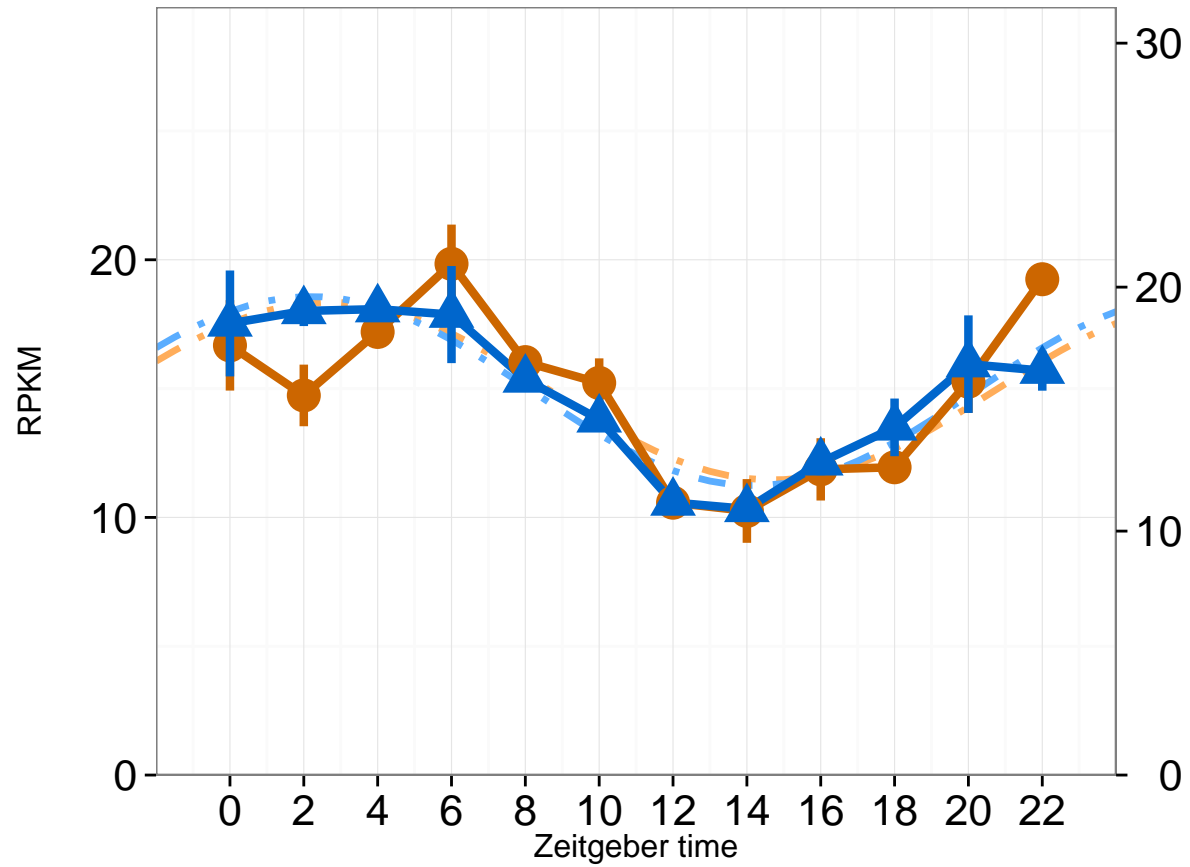

# Fam20a

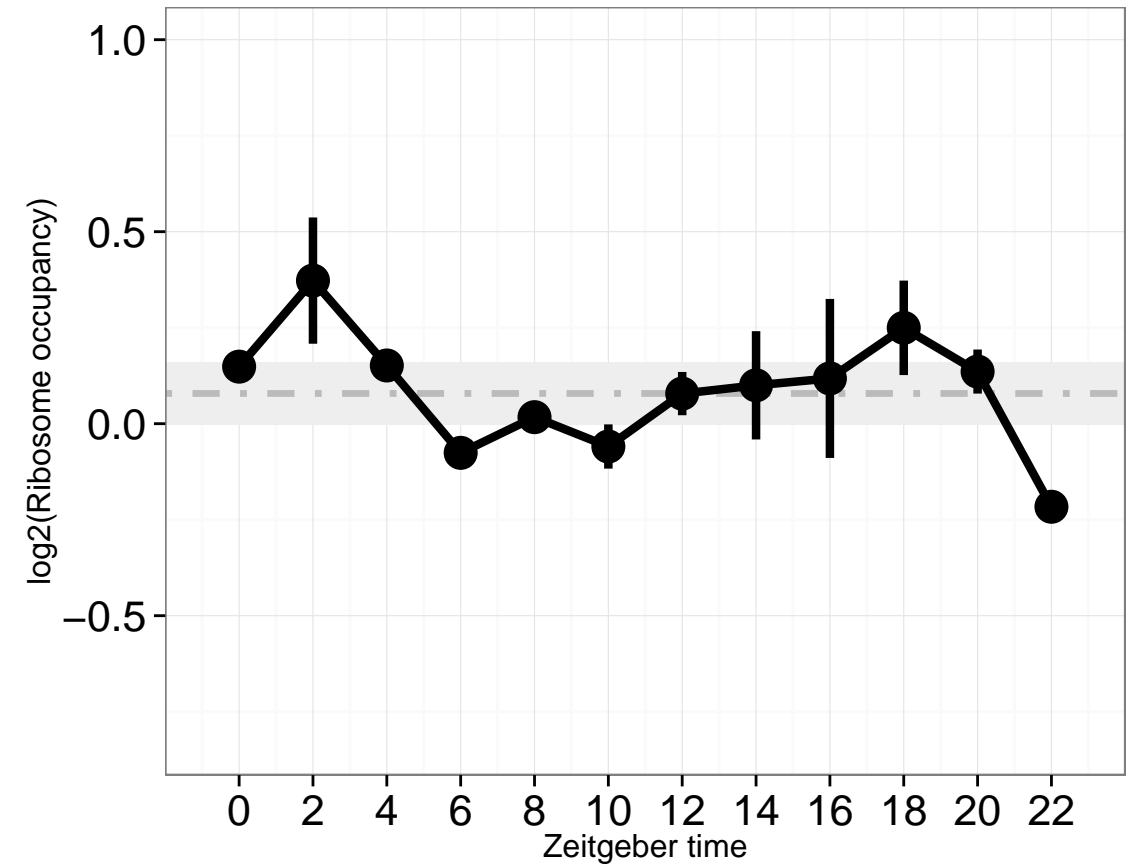

Supplement: Supplementary file 5584 [file 1]

# II18

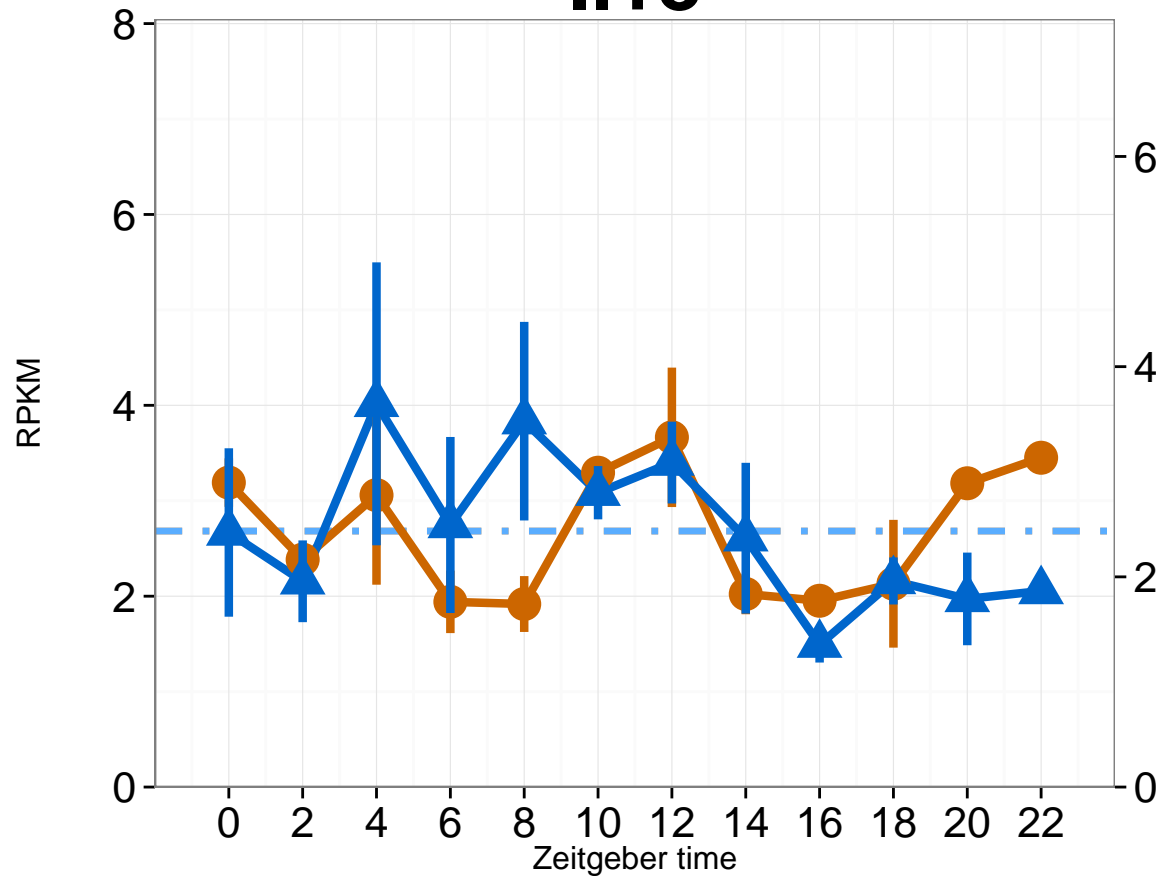

# II18

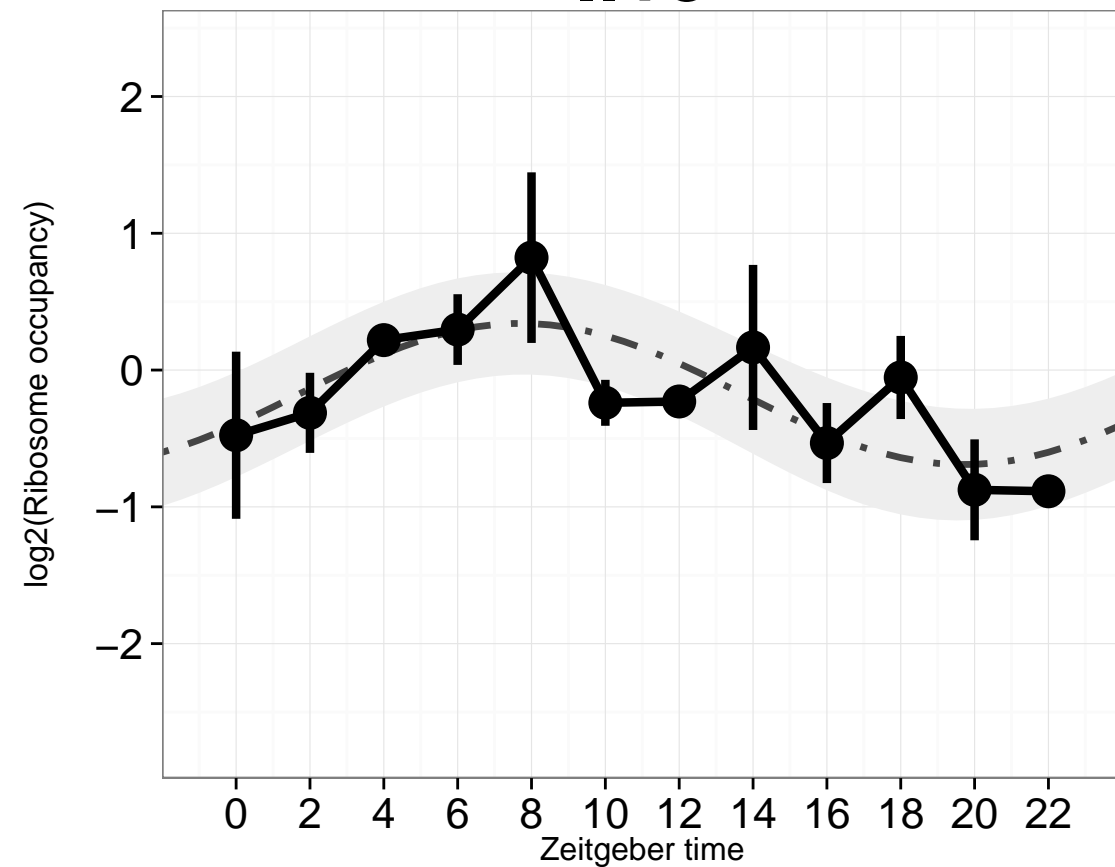

Supplement: Supplementary file 5585 [file 1]

## Itpripl2

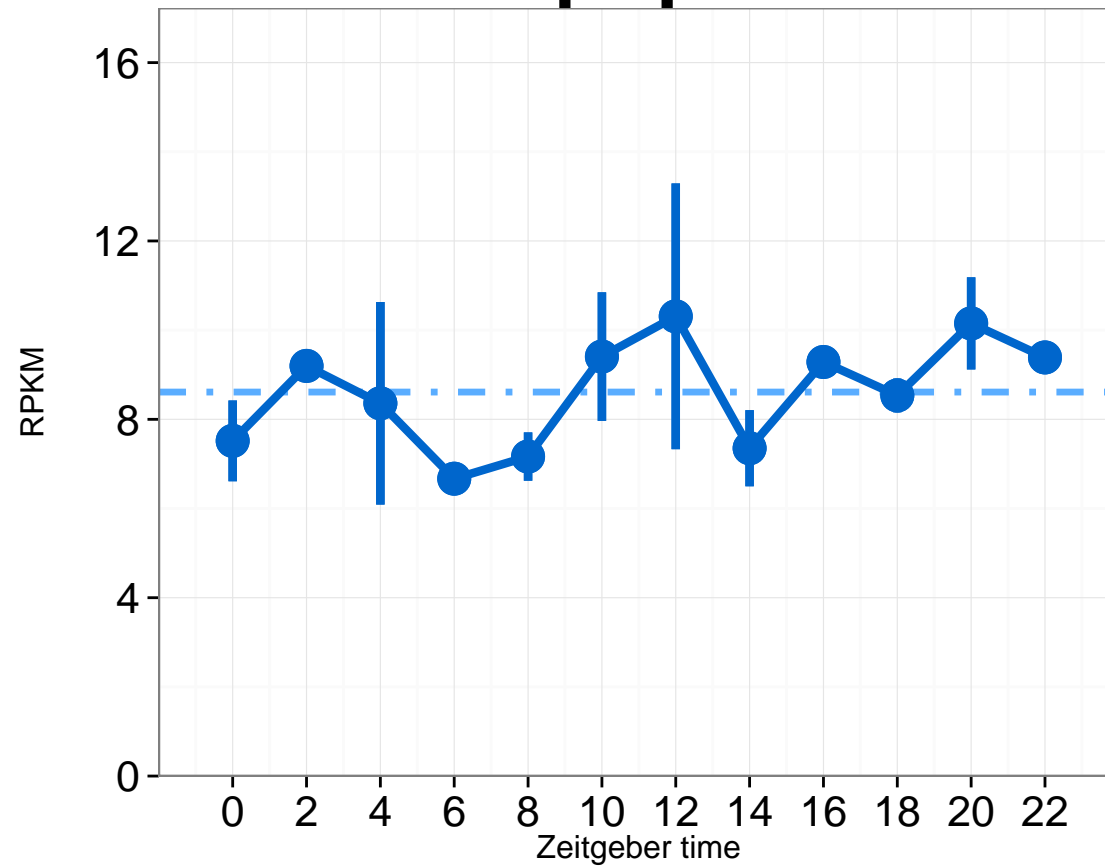

## Itpripl2 log2(Ribosome occupancy

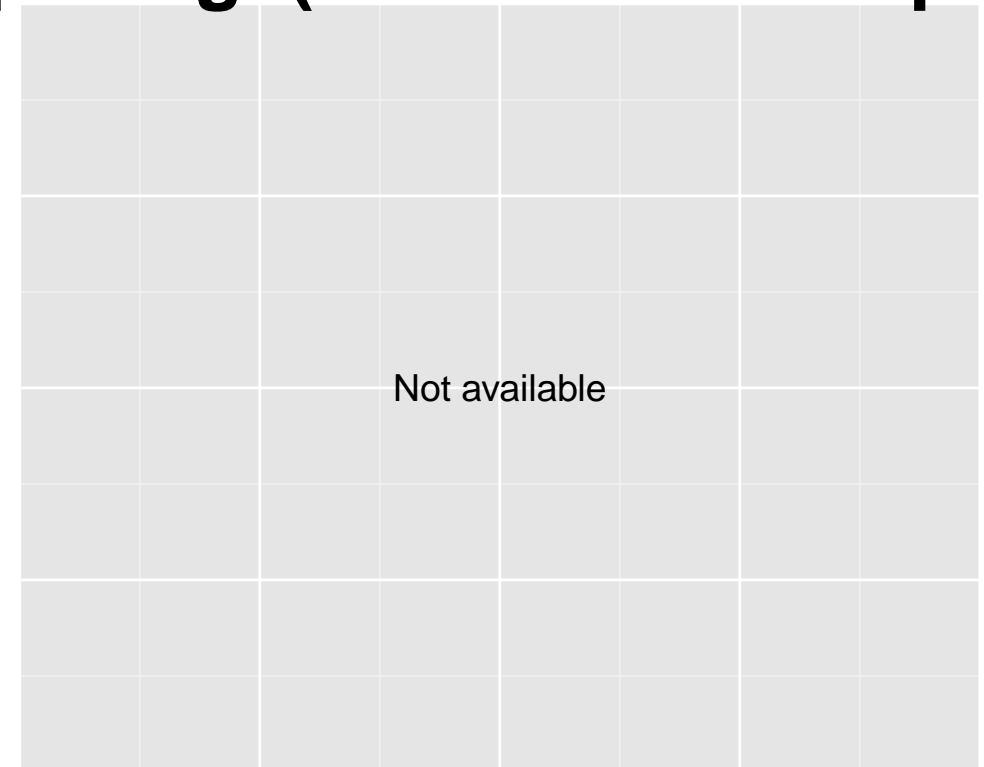

Supplement: Supplementary file 5586 [file 1]

# Usp34

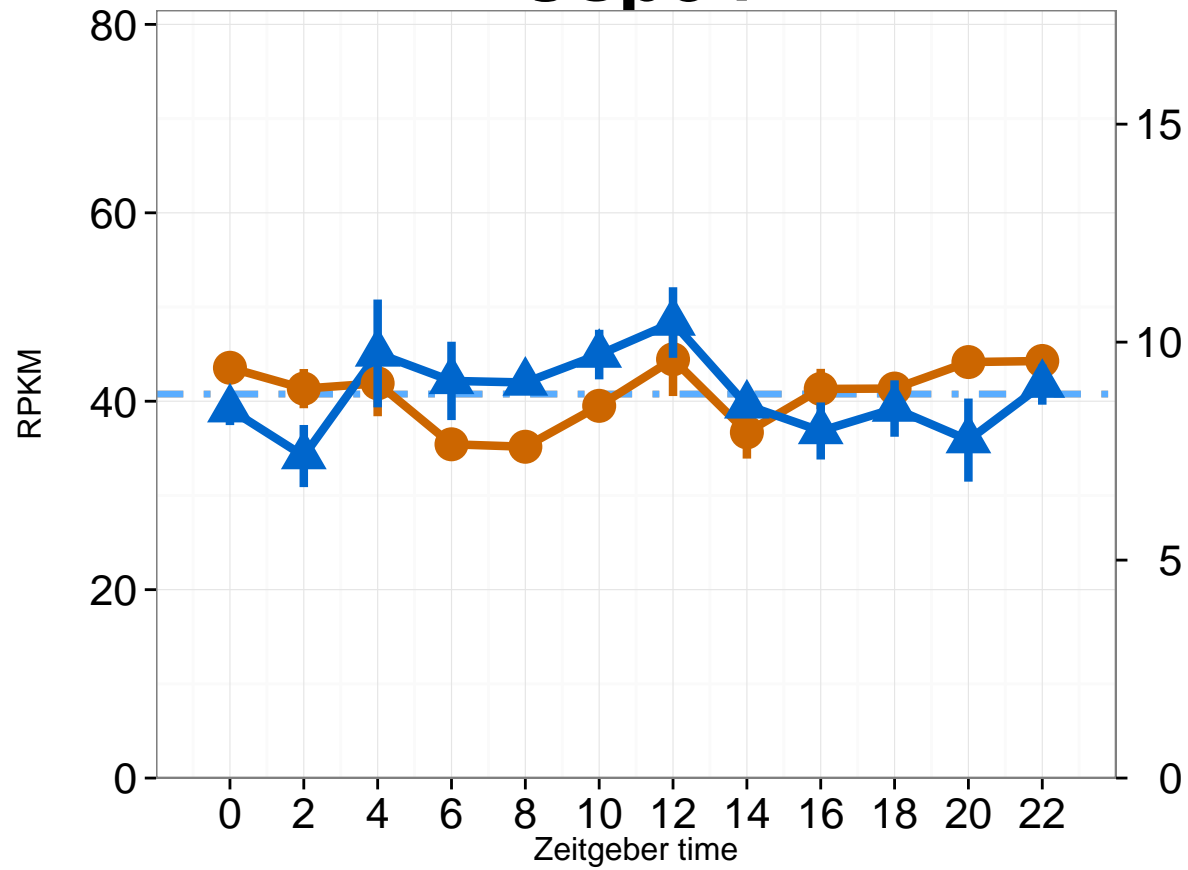

# Usp34

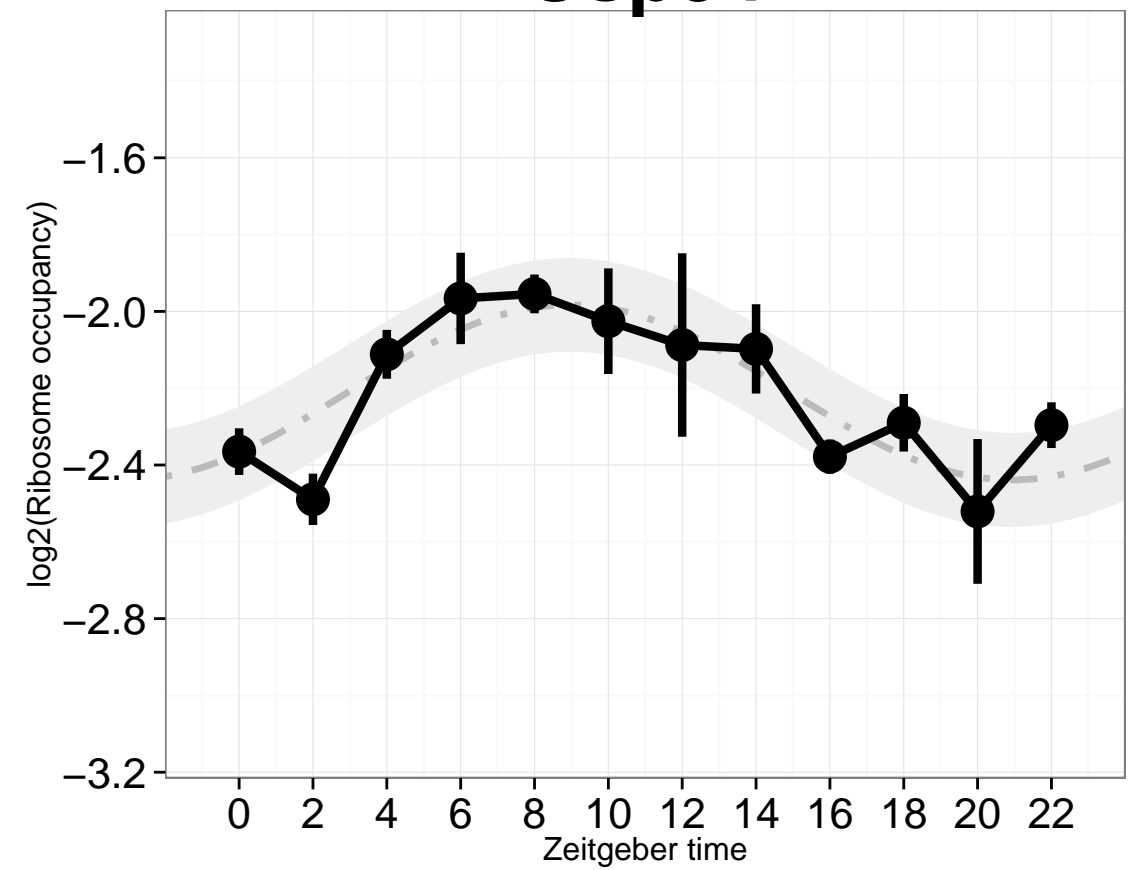

Supplement: Supplementary file 5587 [file 1]

## Klhl8

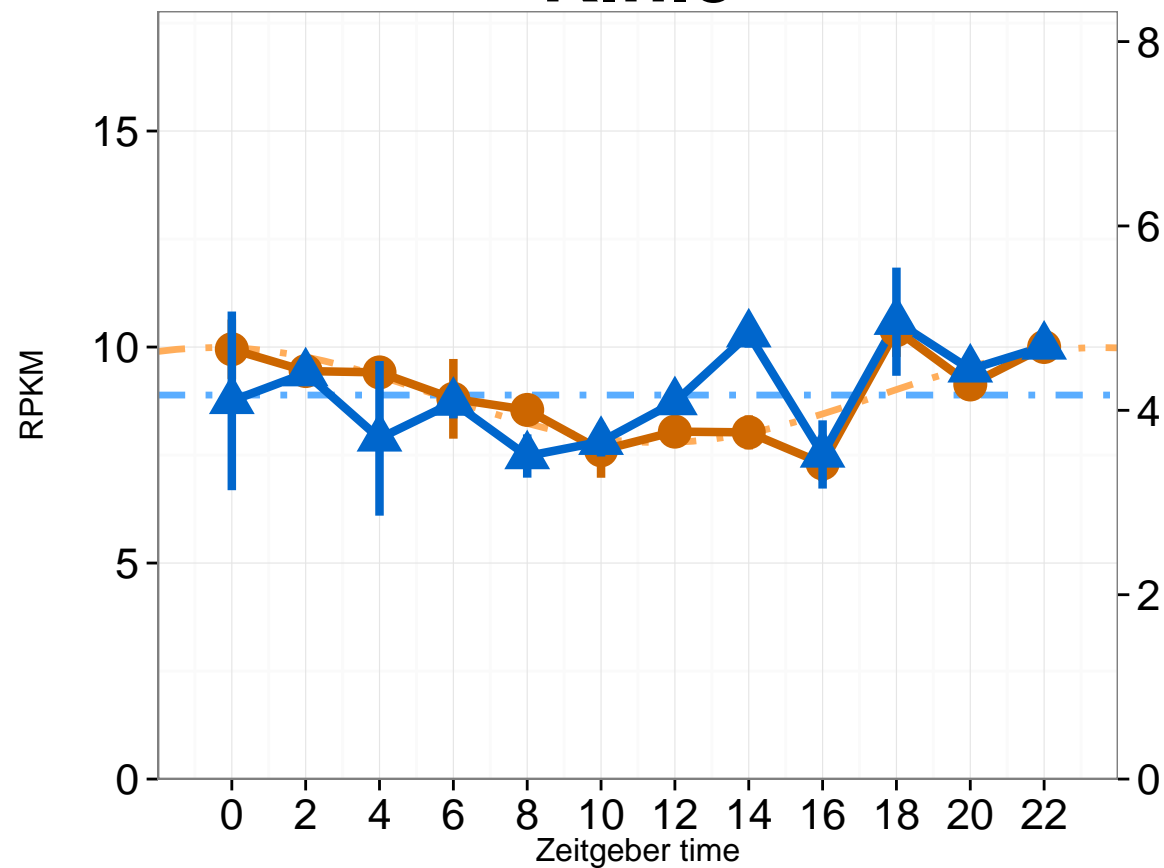

## Klhl8

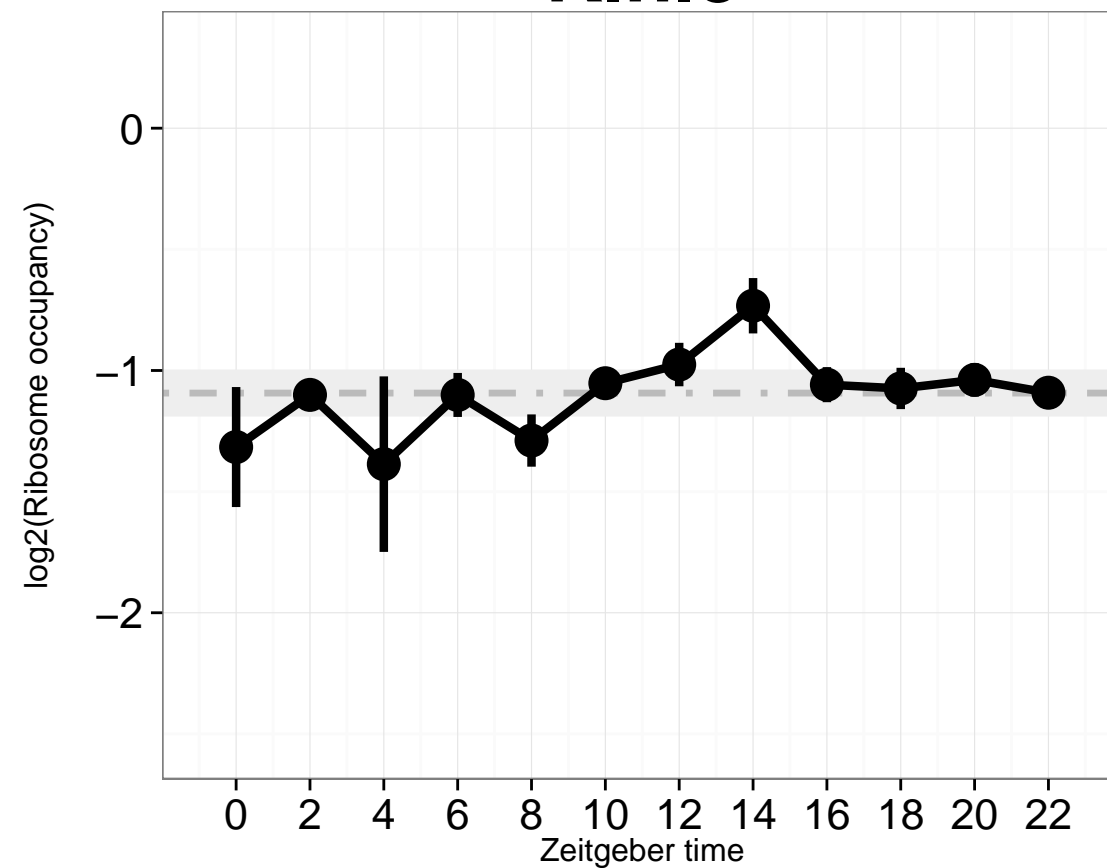

Supplement: Supplementary file 5588 [file 1]

# Uqcr10

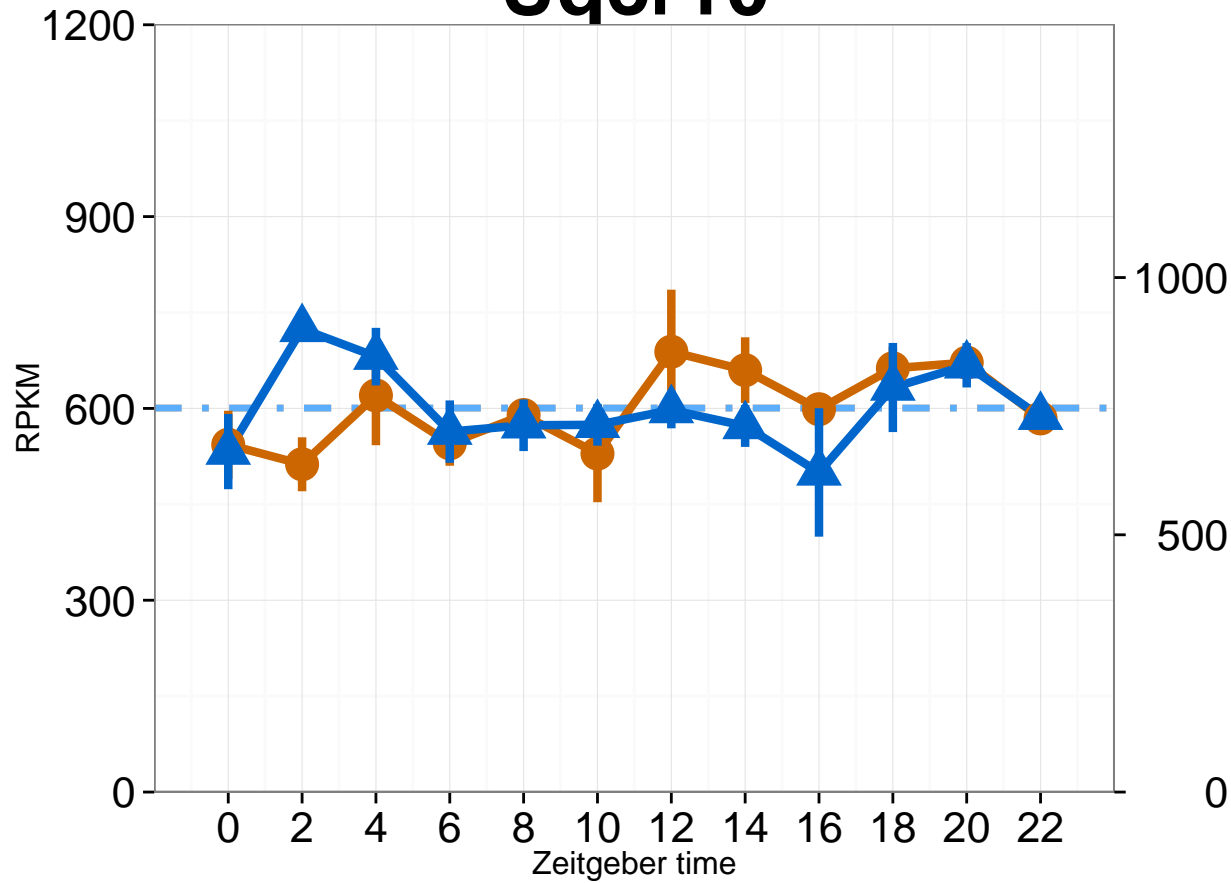

# Uqcr10

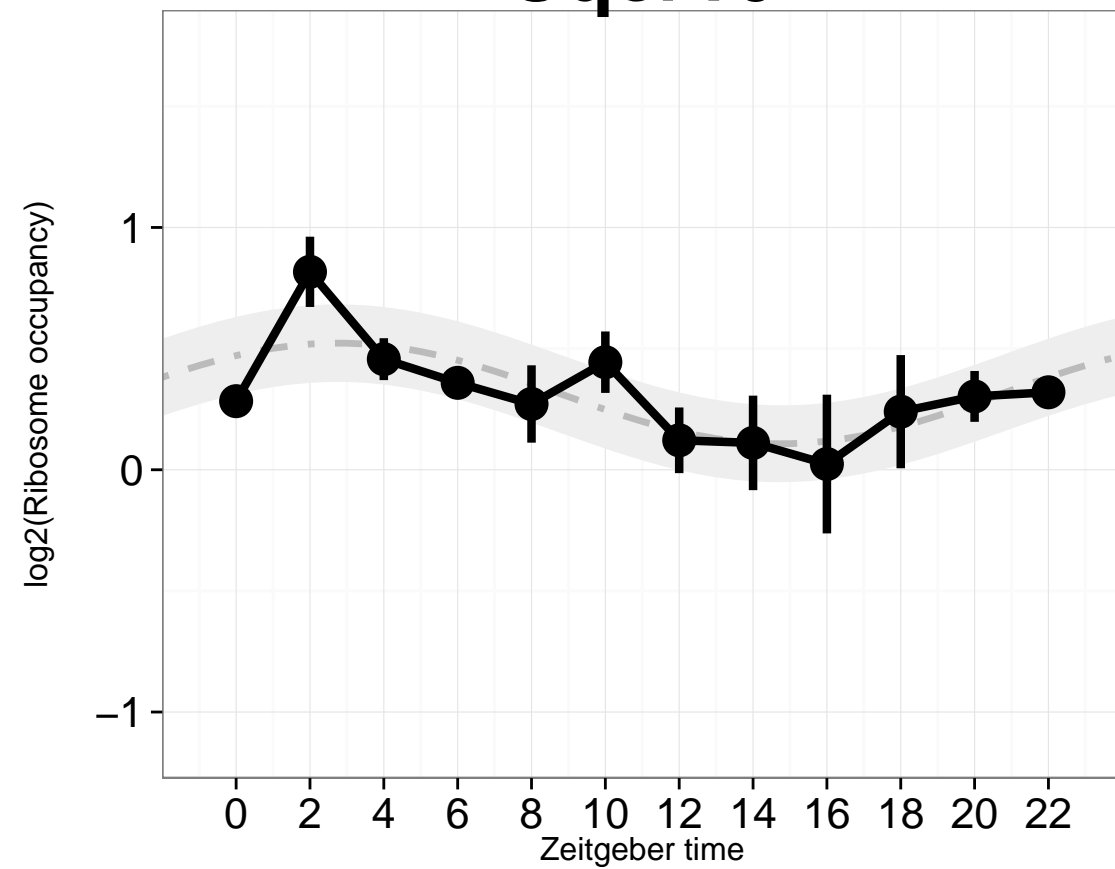

Supplement: Supplementary file 5589 [file 1]

# Atp1a1

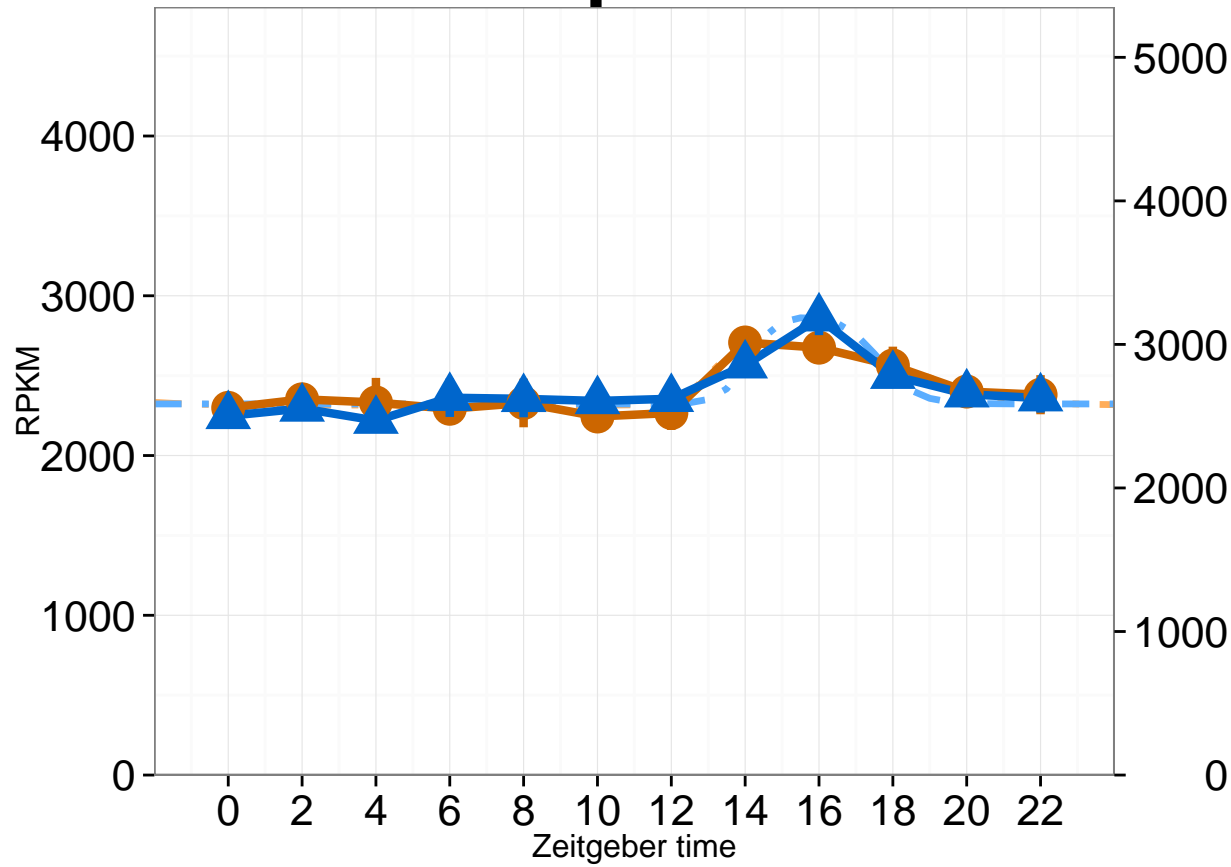

# Atp1a1

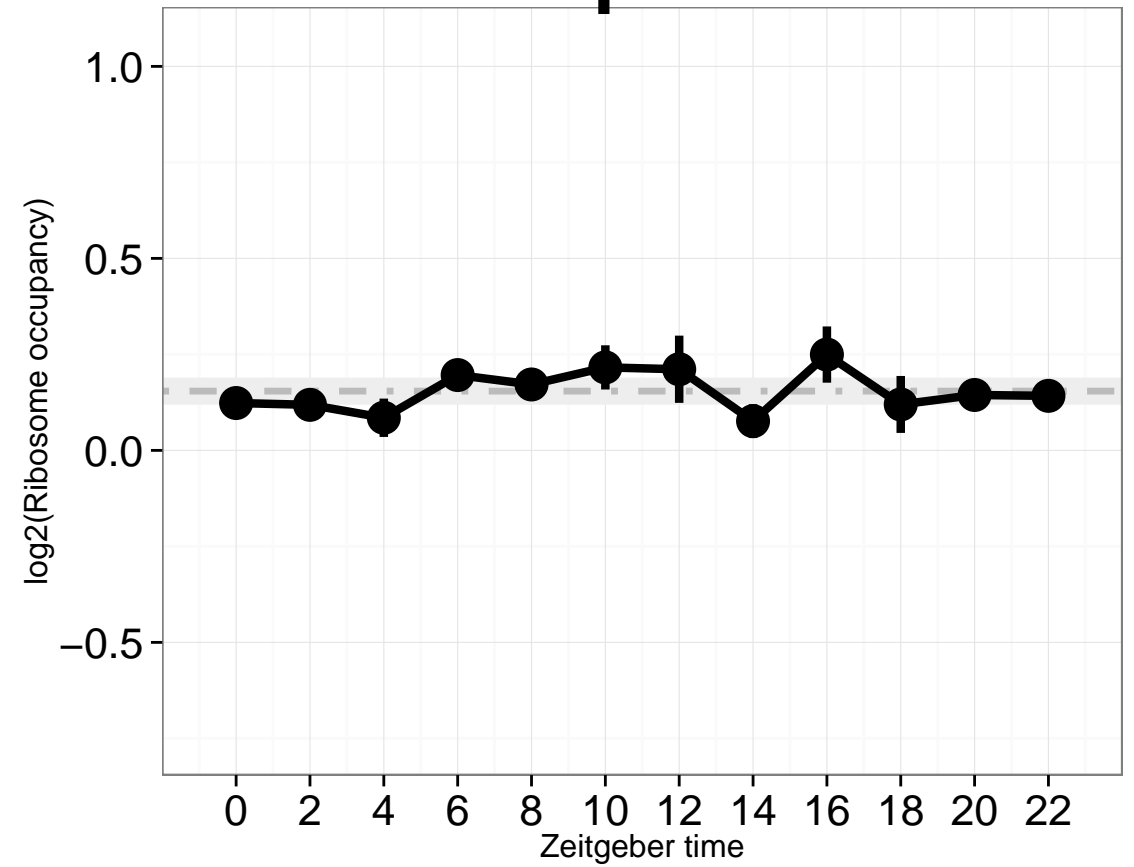

Supplement: Supplementary file 5590 [file 1]

# Gm17655

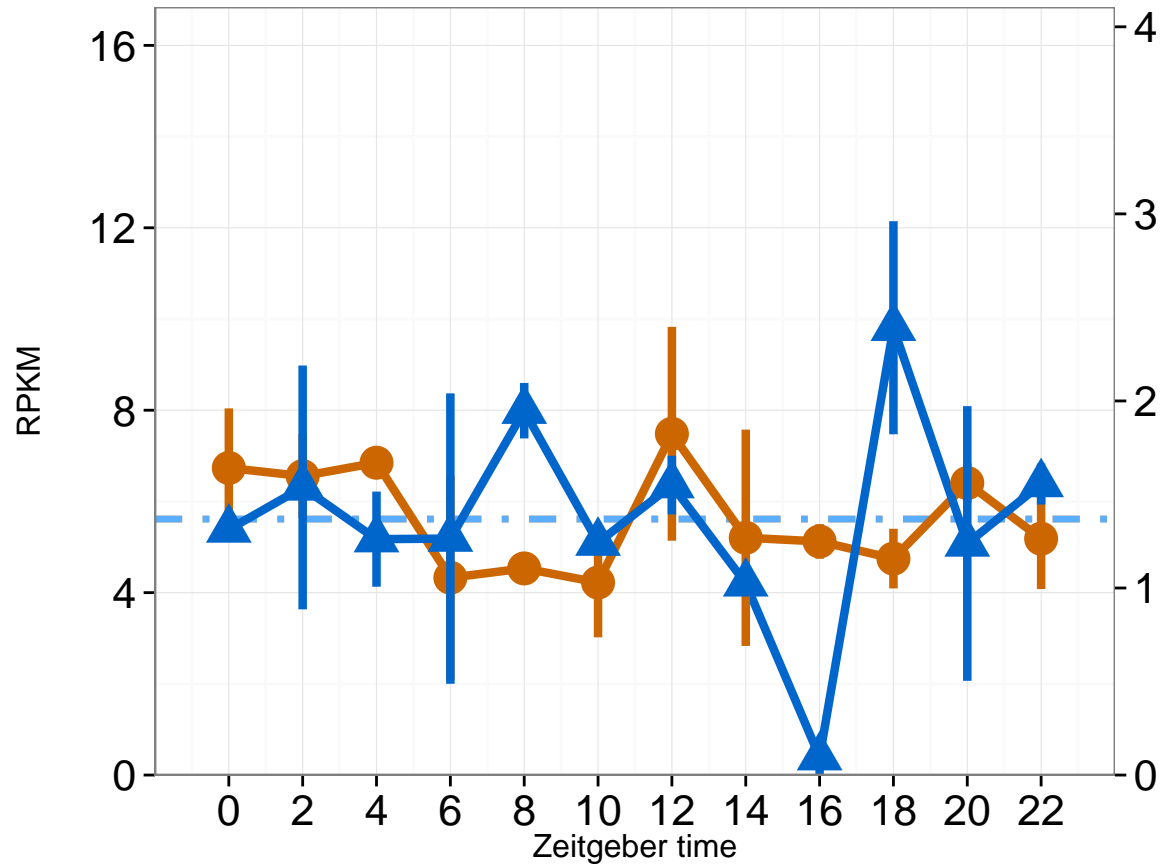

# Gm17655

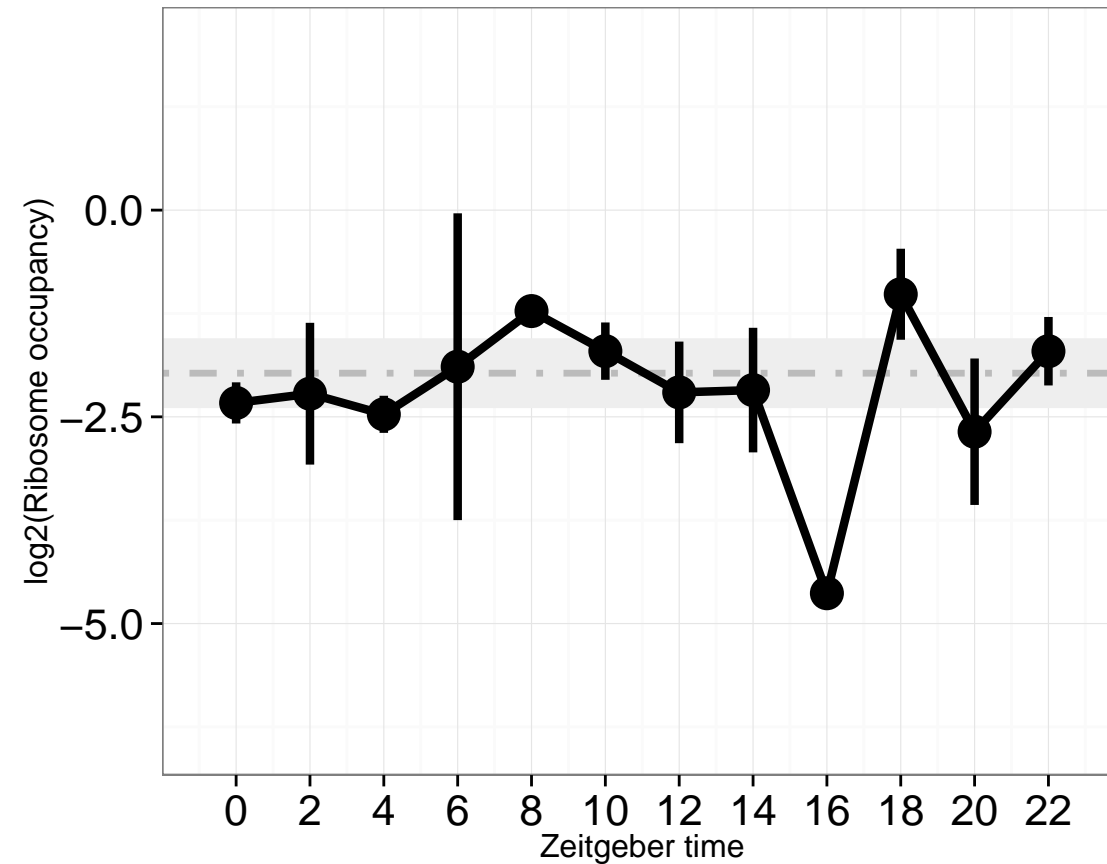

Supplement: Supplementary file 5591 [file 1]

# Cyp2f2

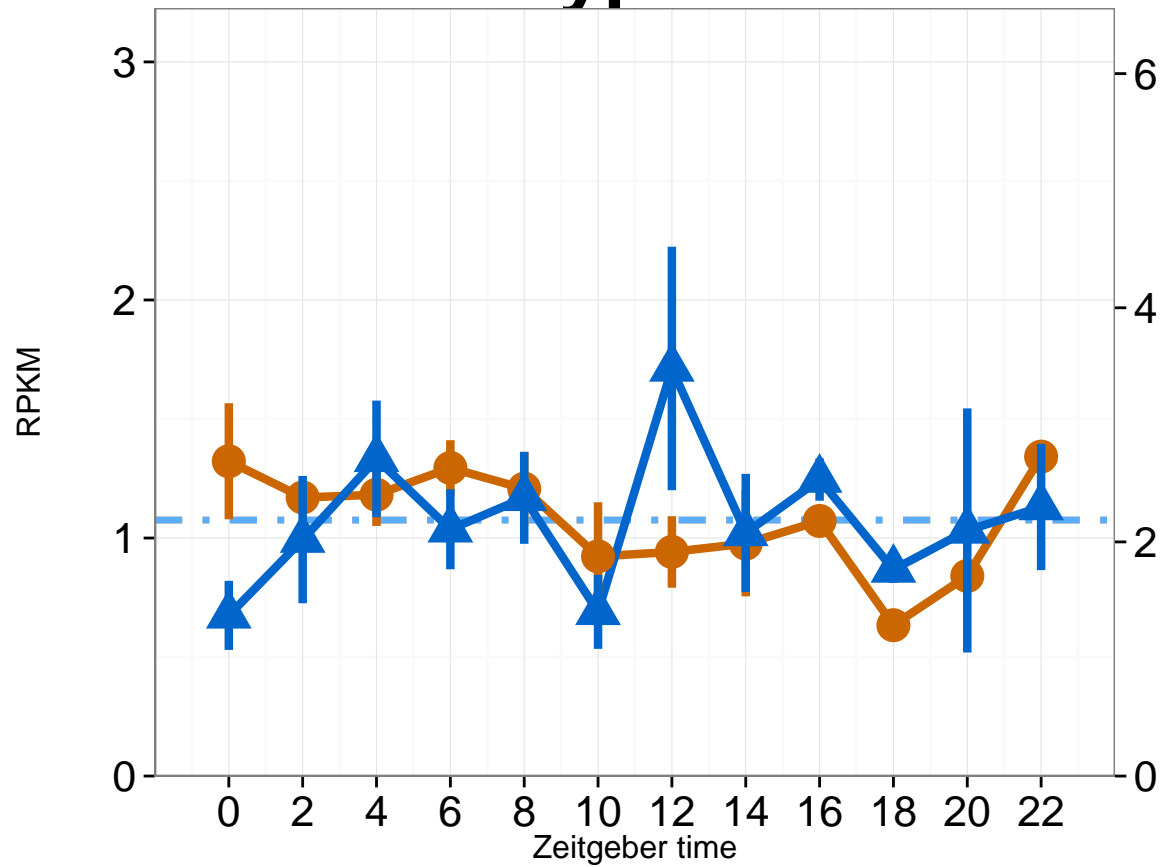

# Cyp2f2

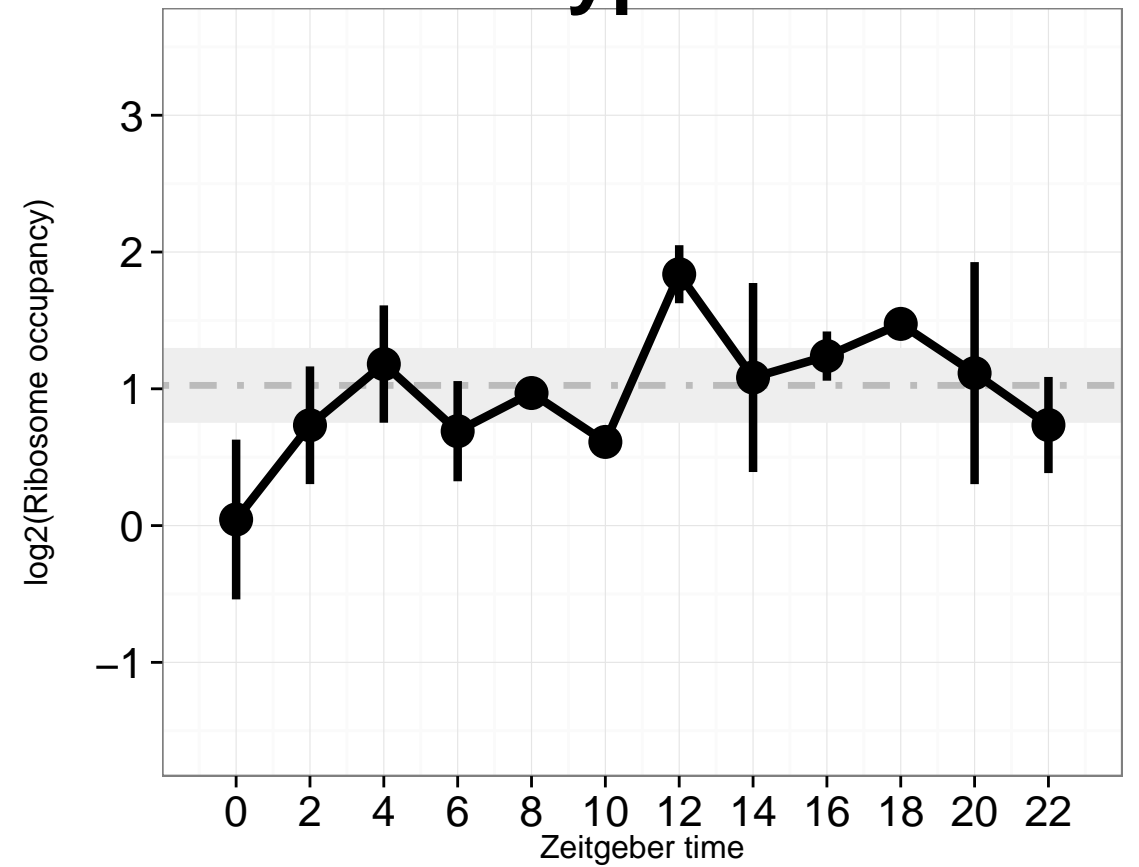

Supplement: Supplementary file 5592 [file 1]

## Pex11a

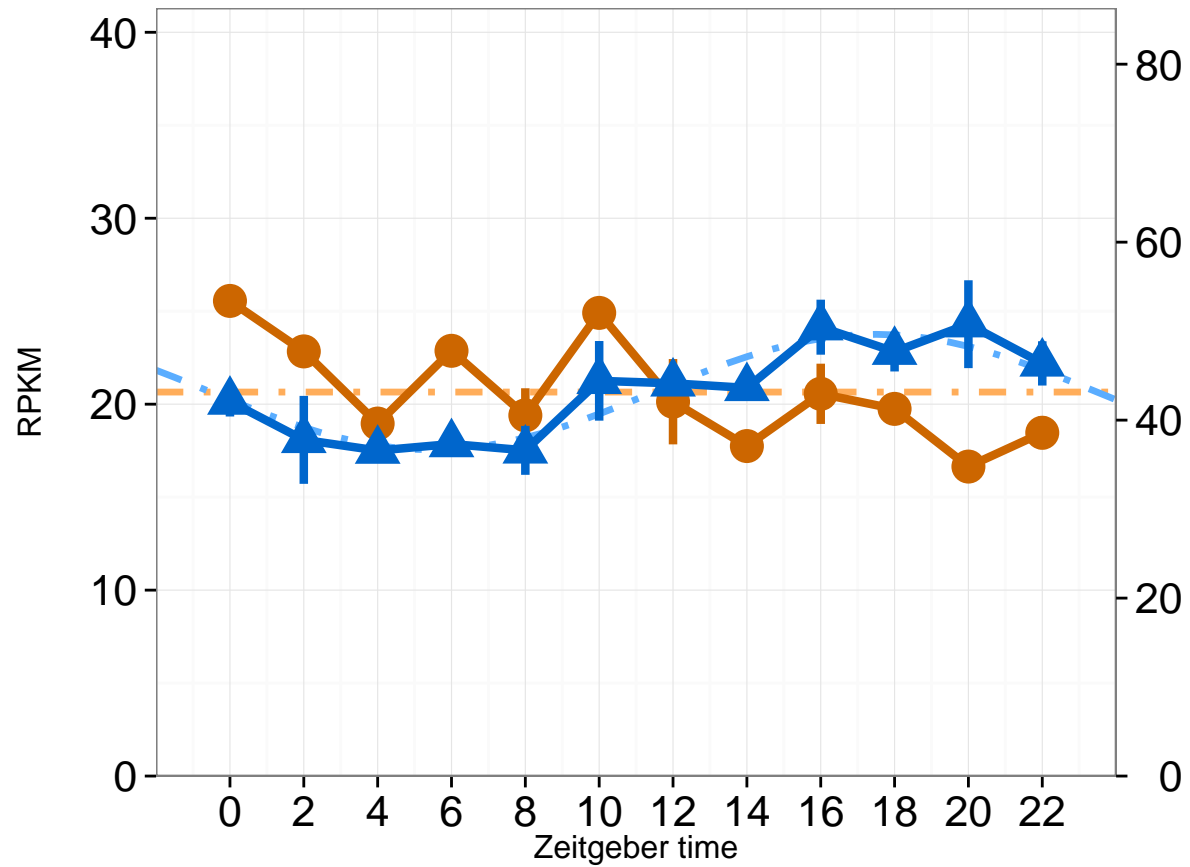

## Pex11a

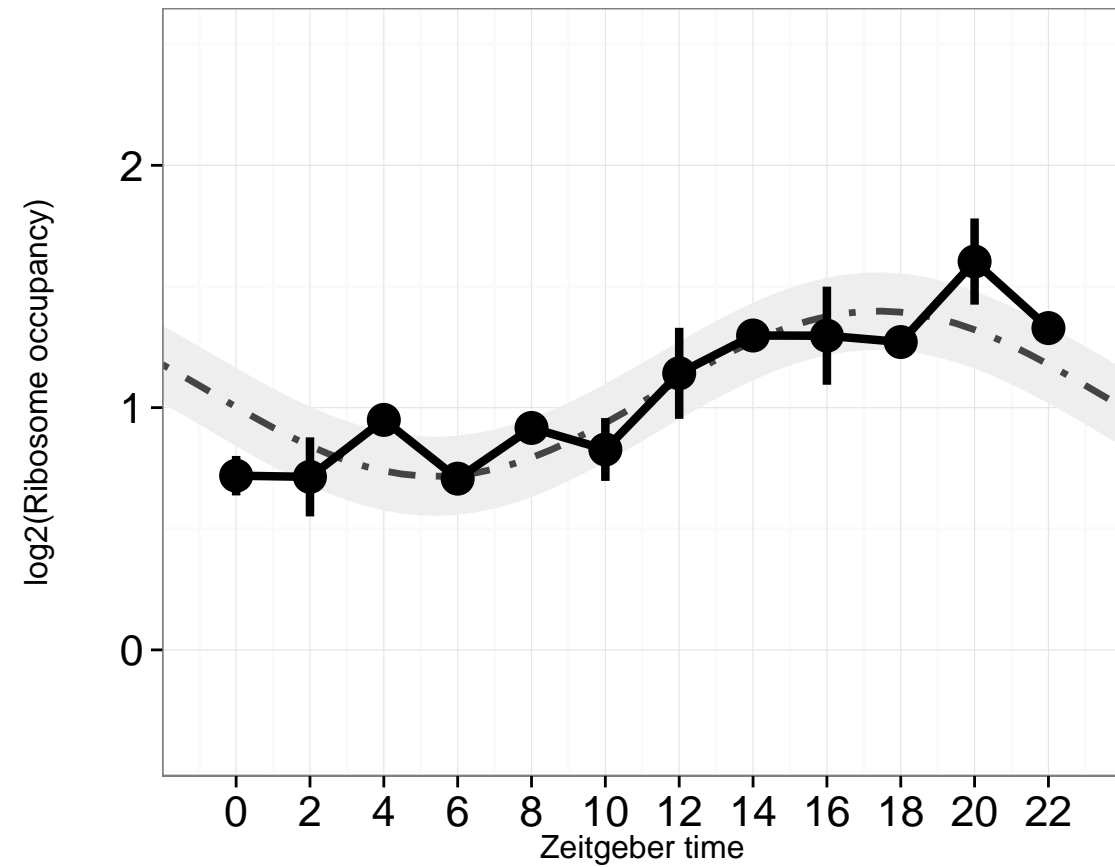

Supplement: Supplementary file 5593 [file 1]

# Msr1

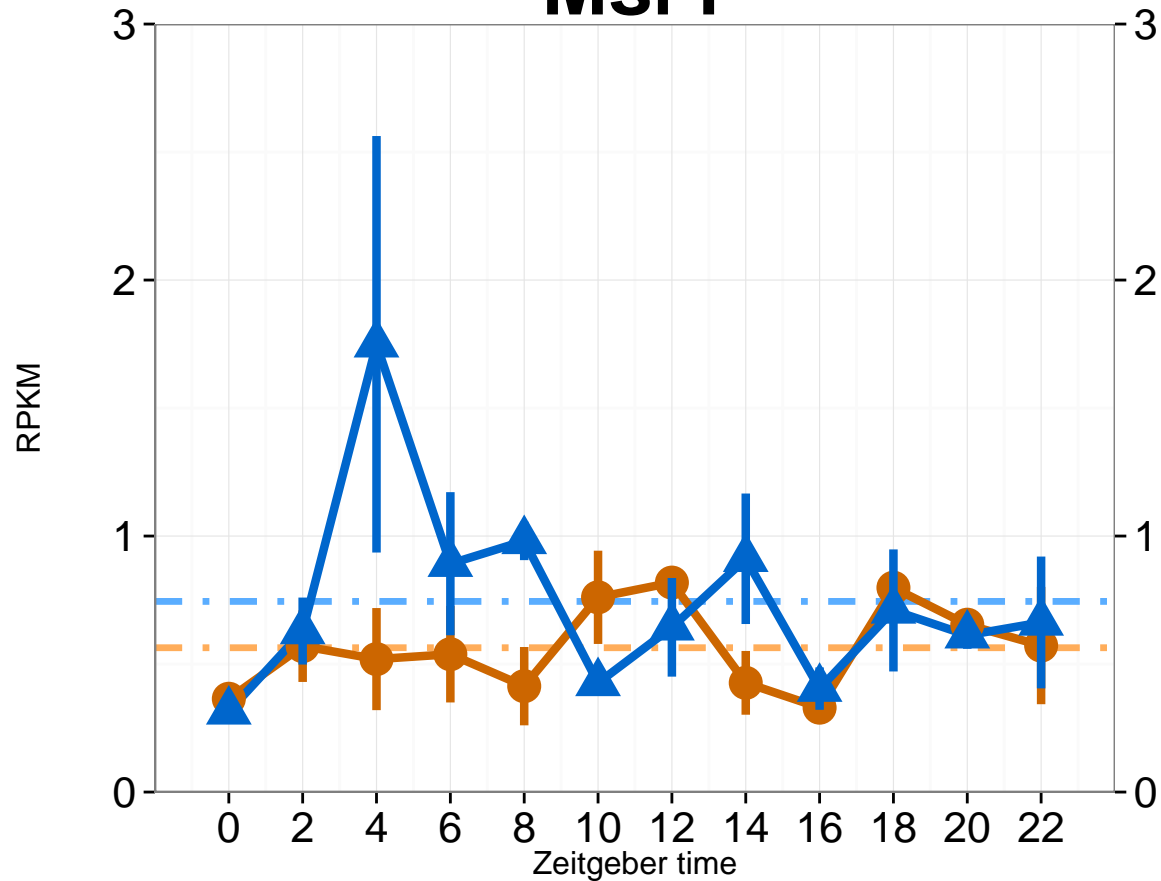

# Msr1

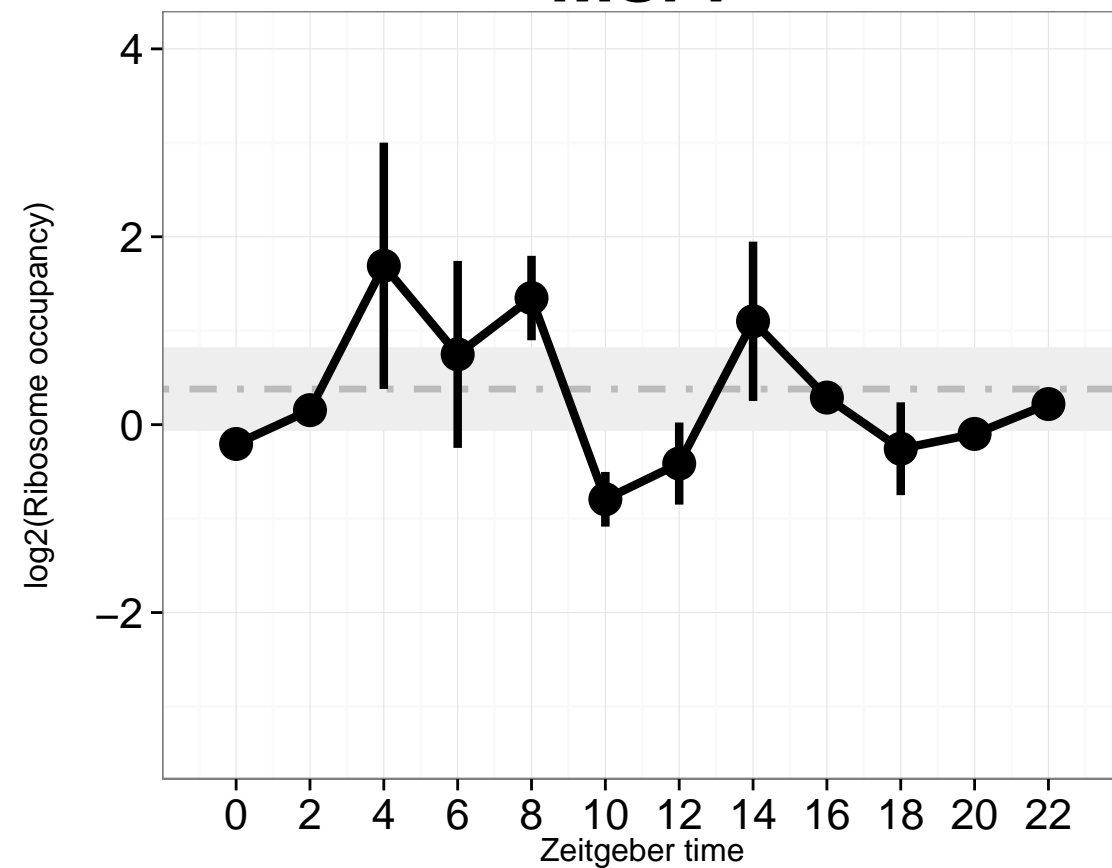

Supplement: Supplementary file 5594 [file 1]

# Sar1b

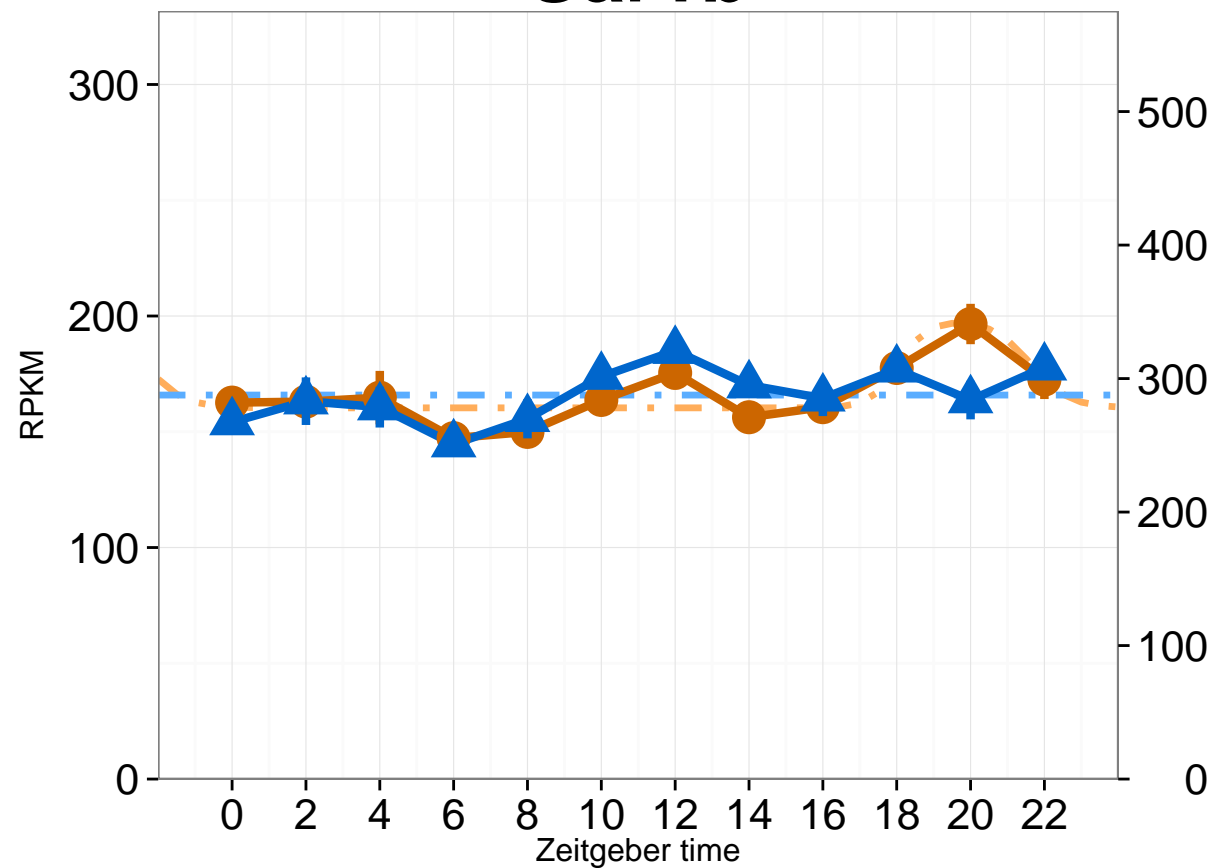

# Sar1b

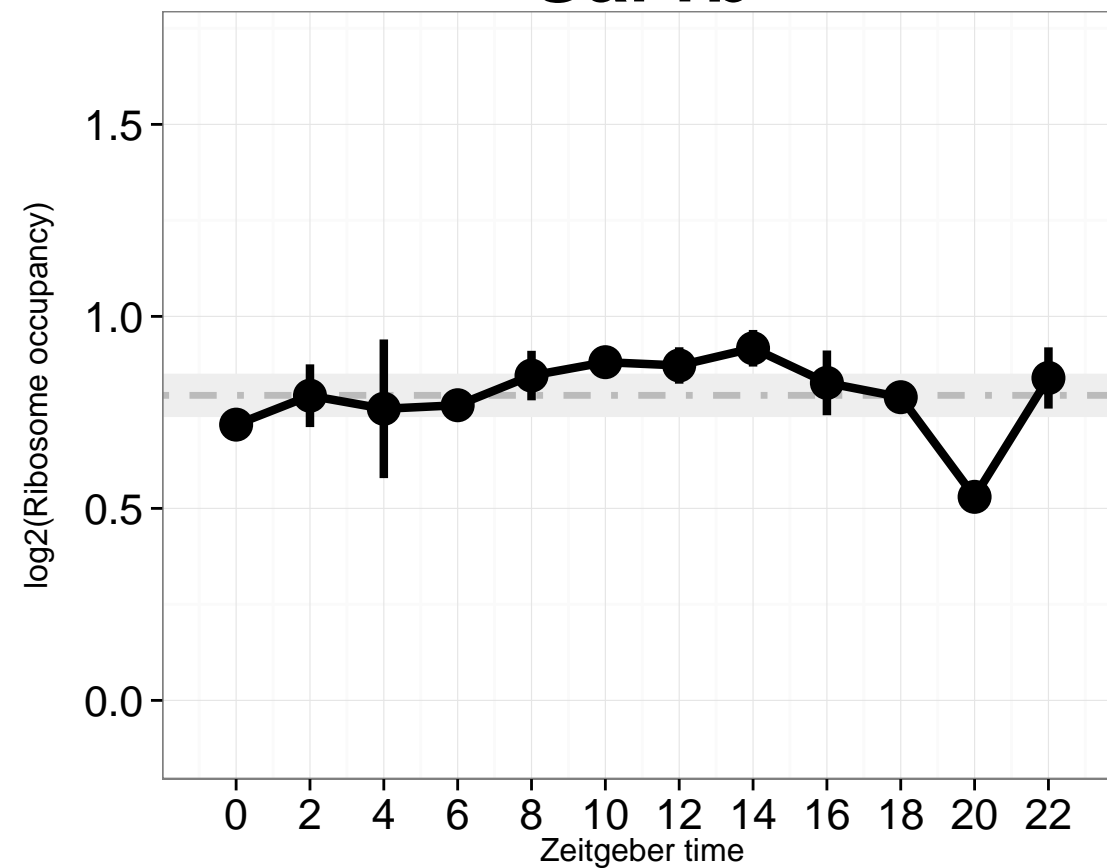

Supplement: Supplementary file 5595 [file 1]

## Tstd2

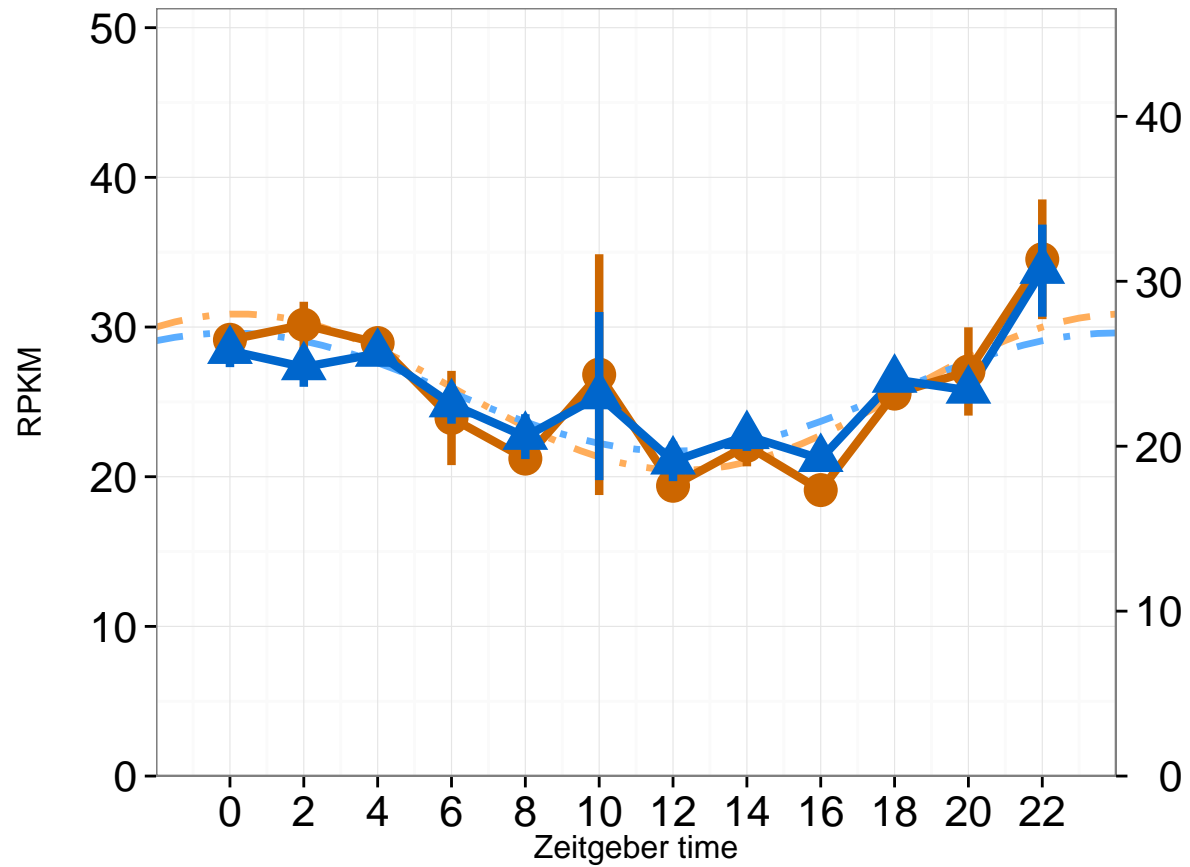

## Tstd2

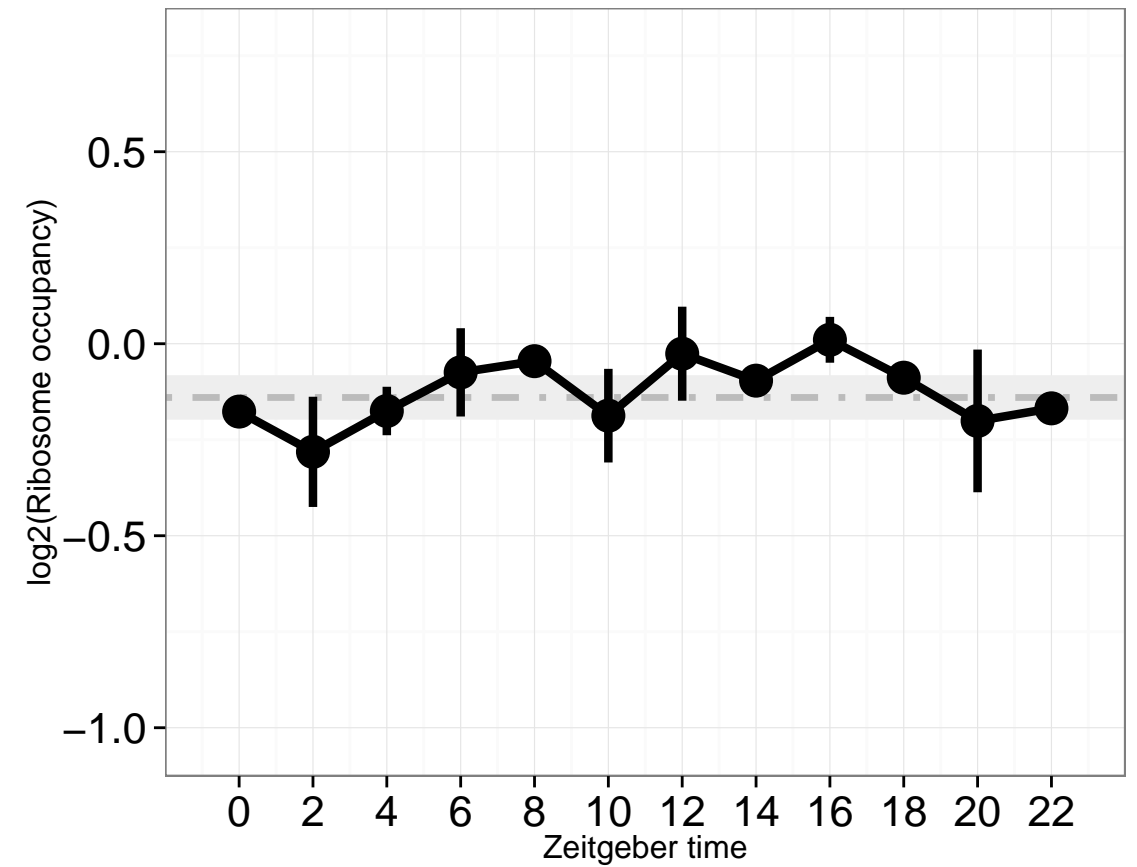

Supplement: Supplementary file 5596 [file 1]

# Extl1

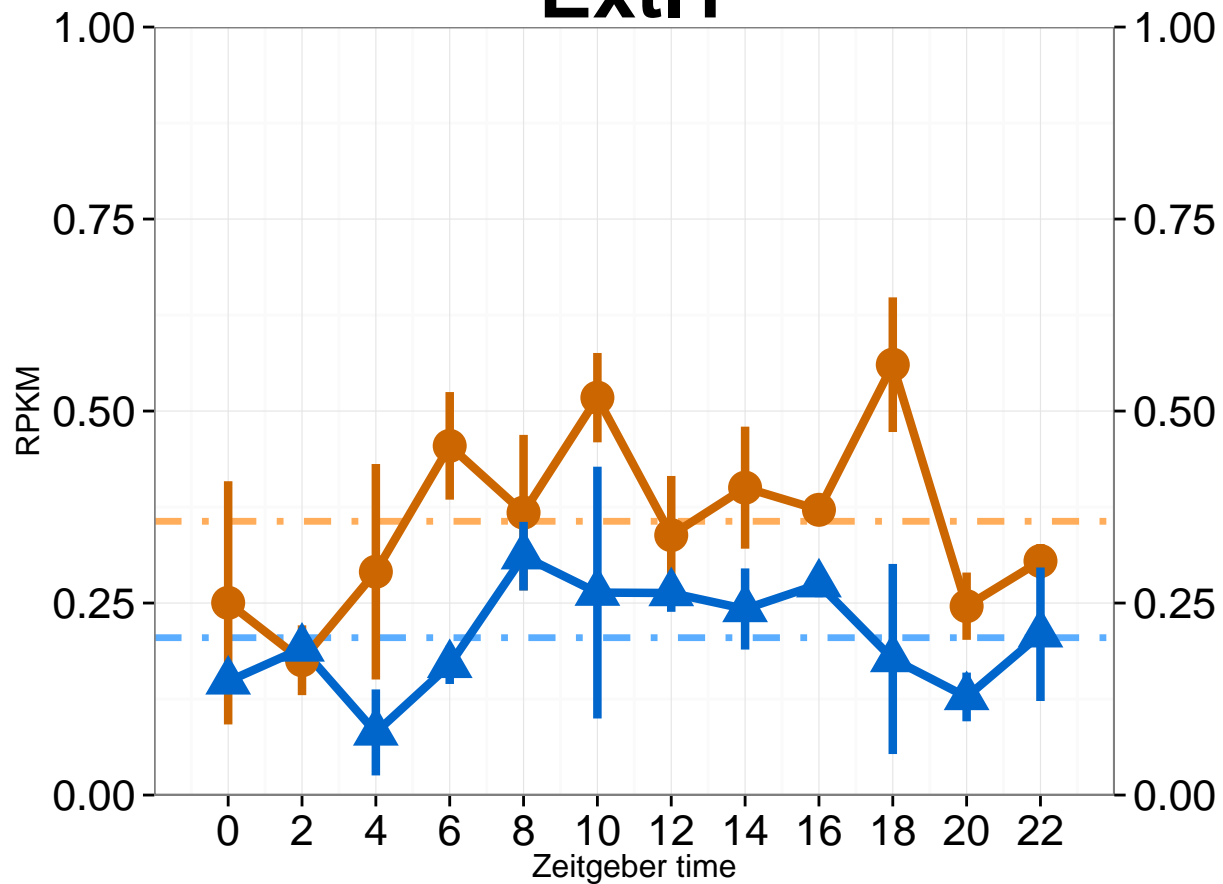

# Extl1

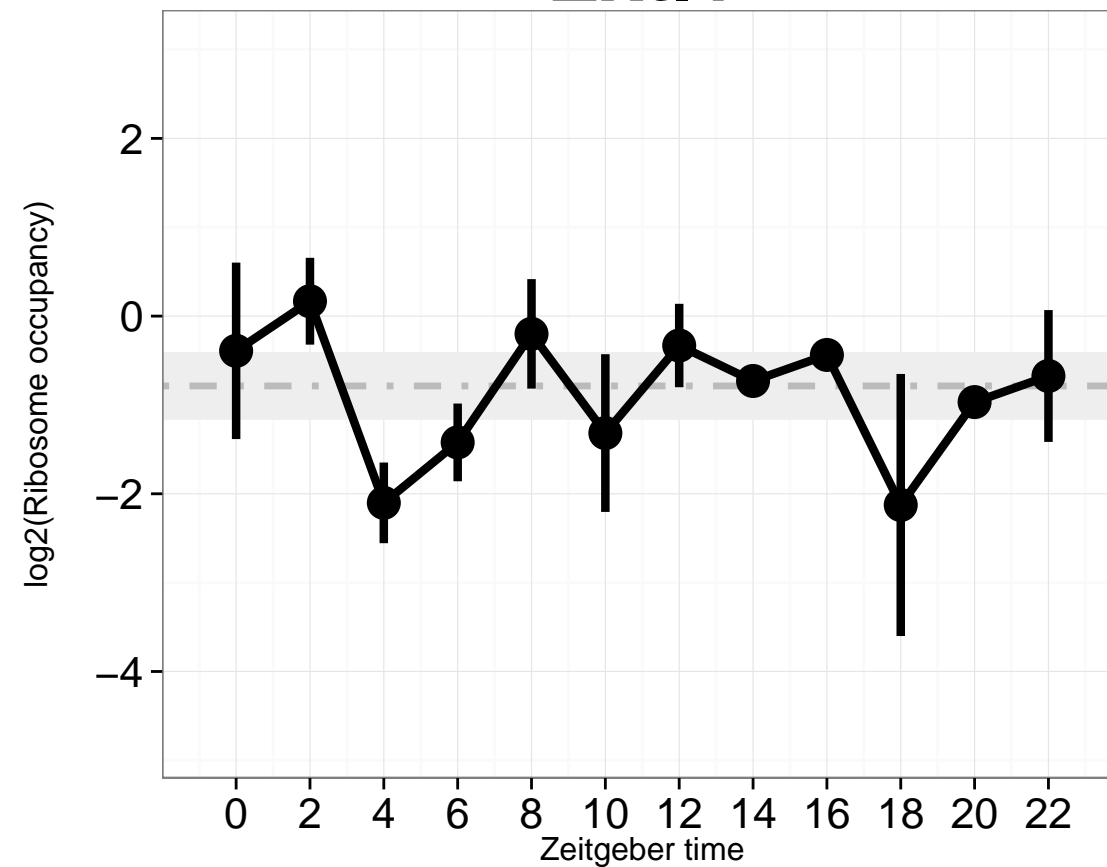

Supplement: Supplementary file 5597 [file 1]

**Cs**

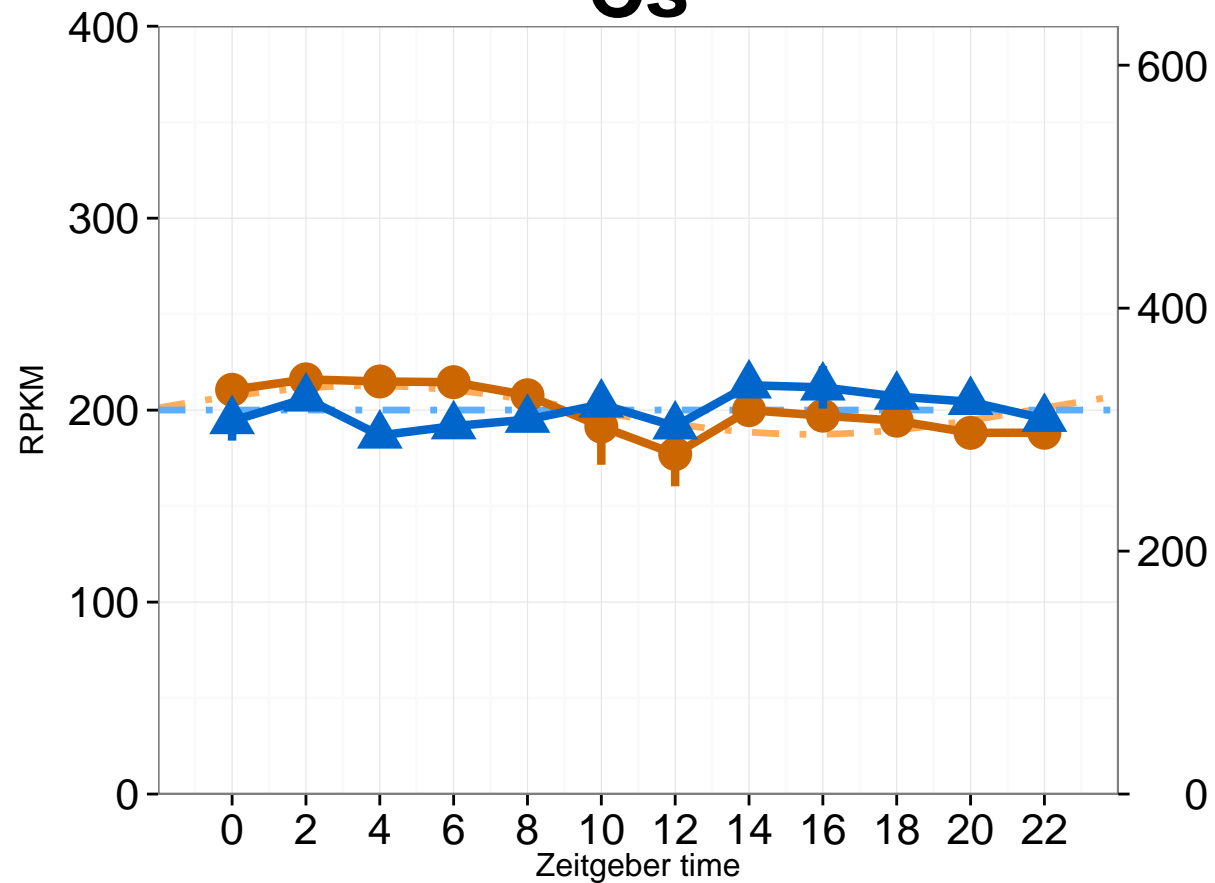

**Cs**

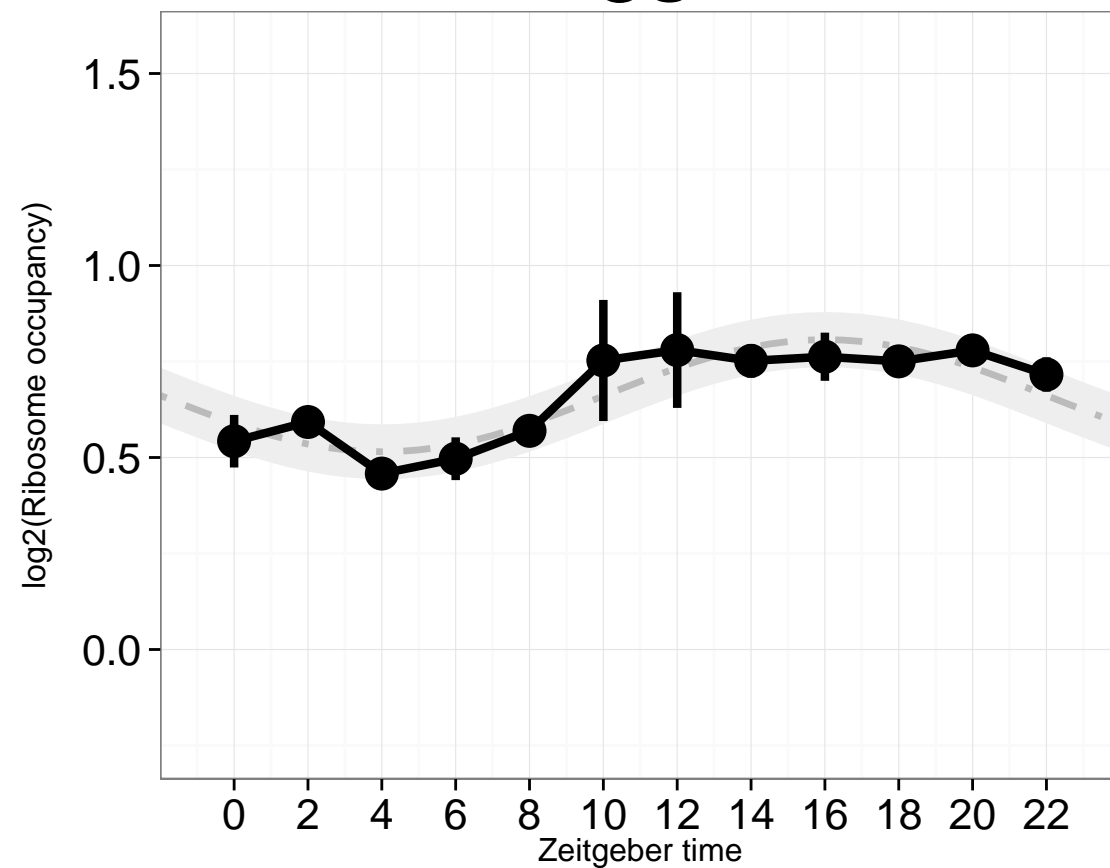

Supplement: Supplementary file 5598 [file 1]

# Fgf2

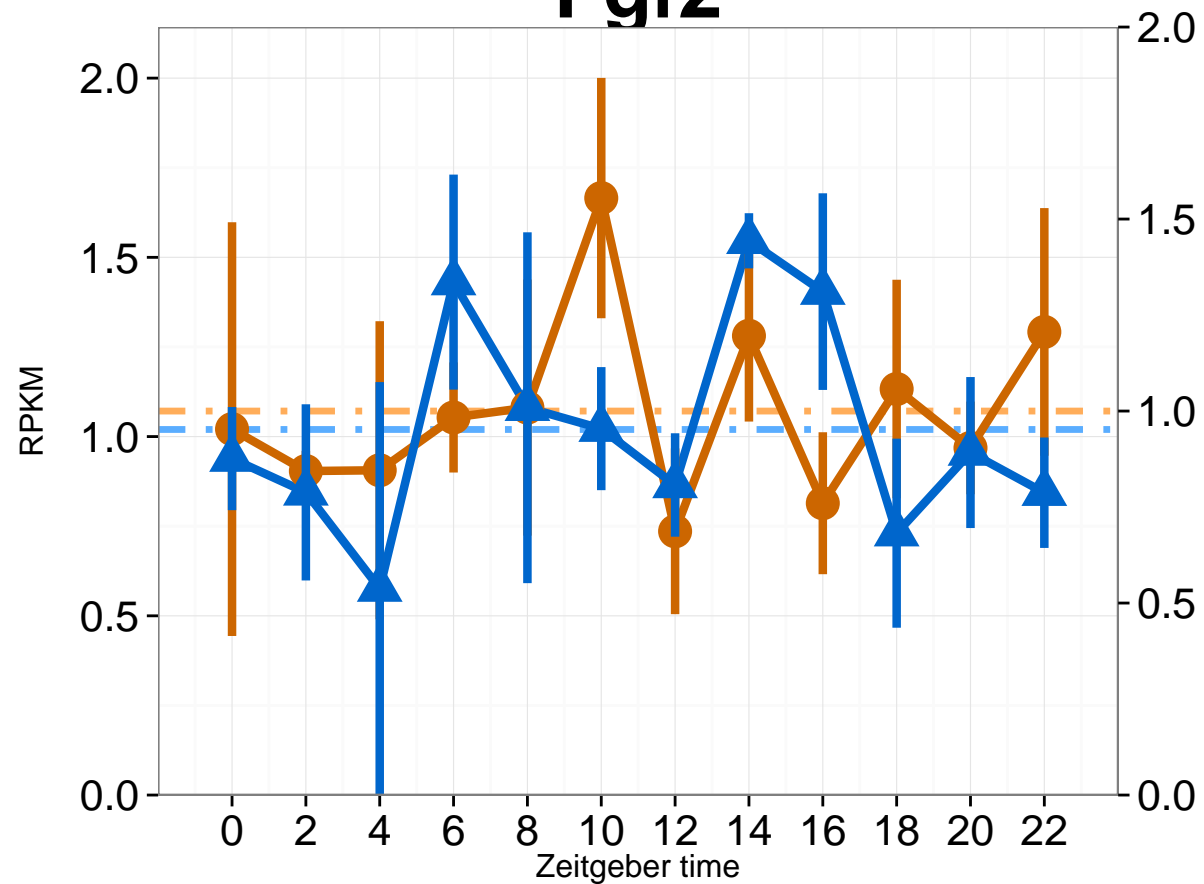

# Fgf2

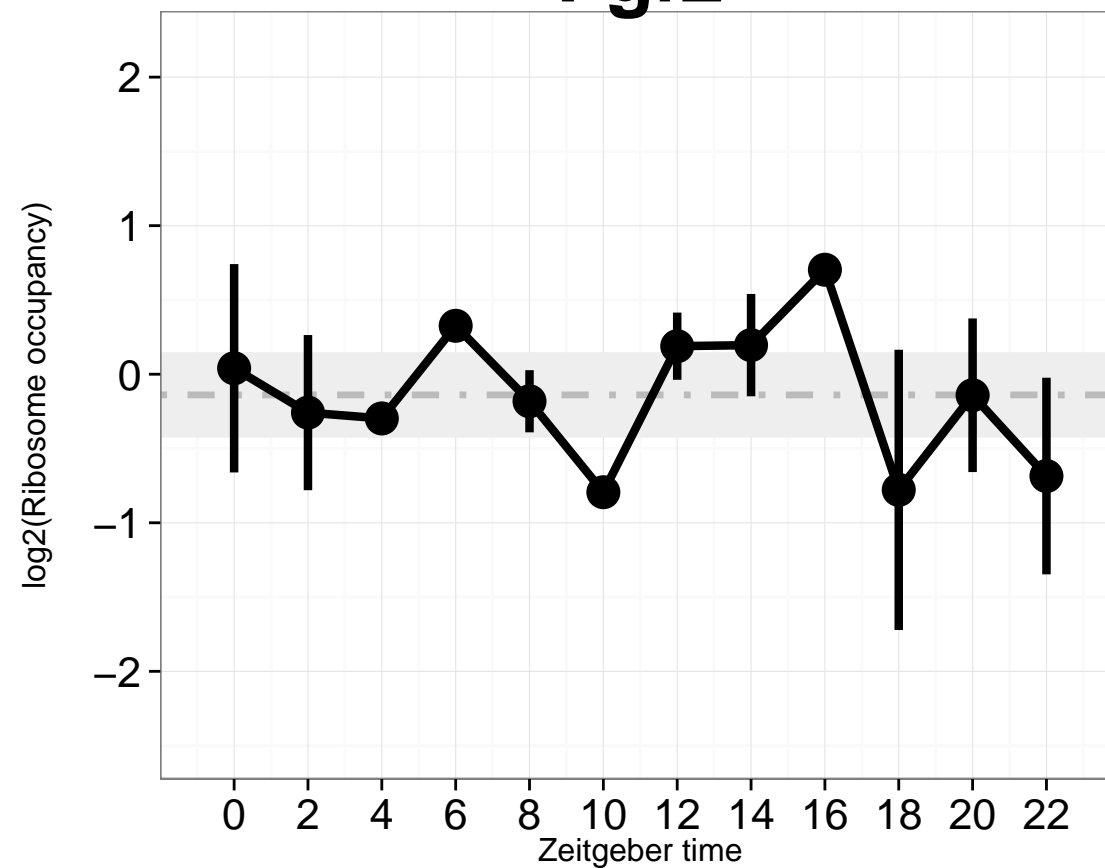

Supplement: Supplementary file 5599 [file 1]

## Kcne4

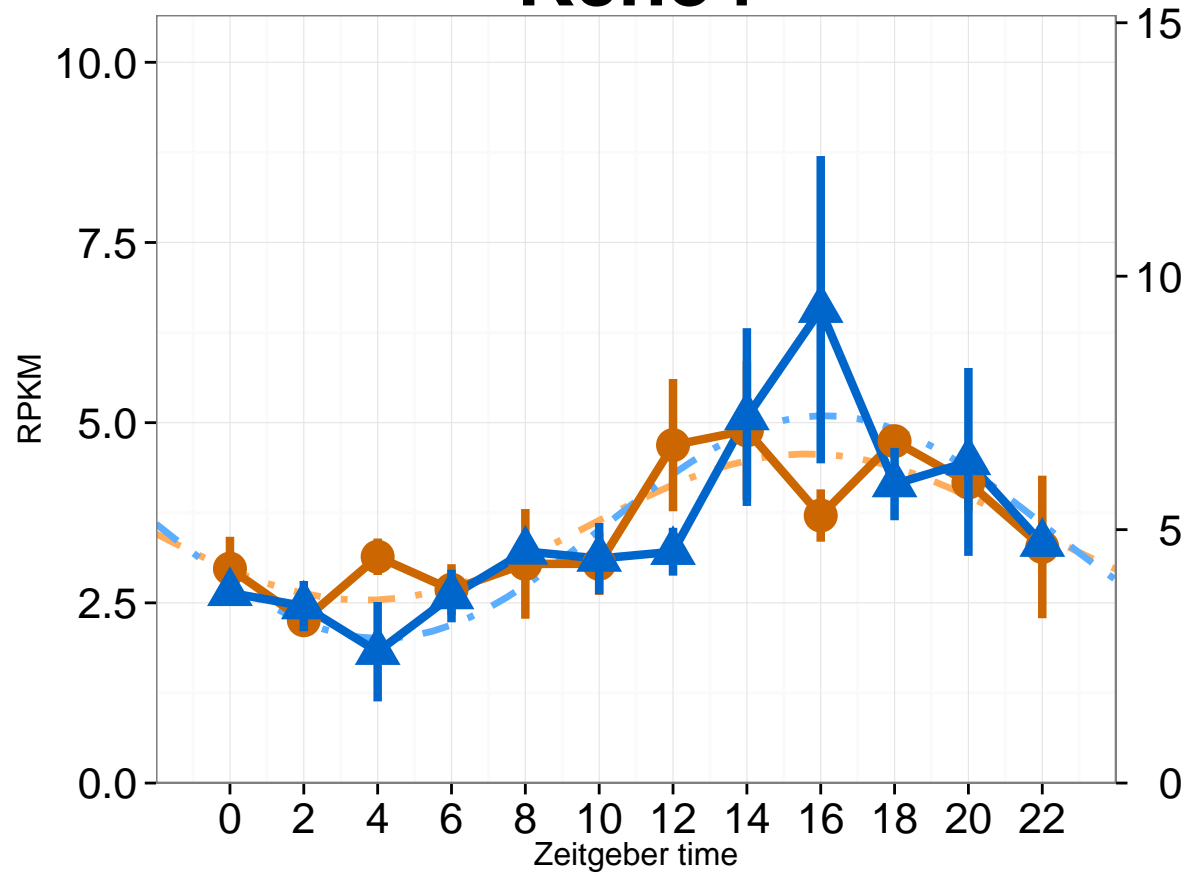

## Kcne4

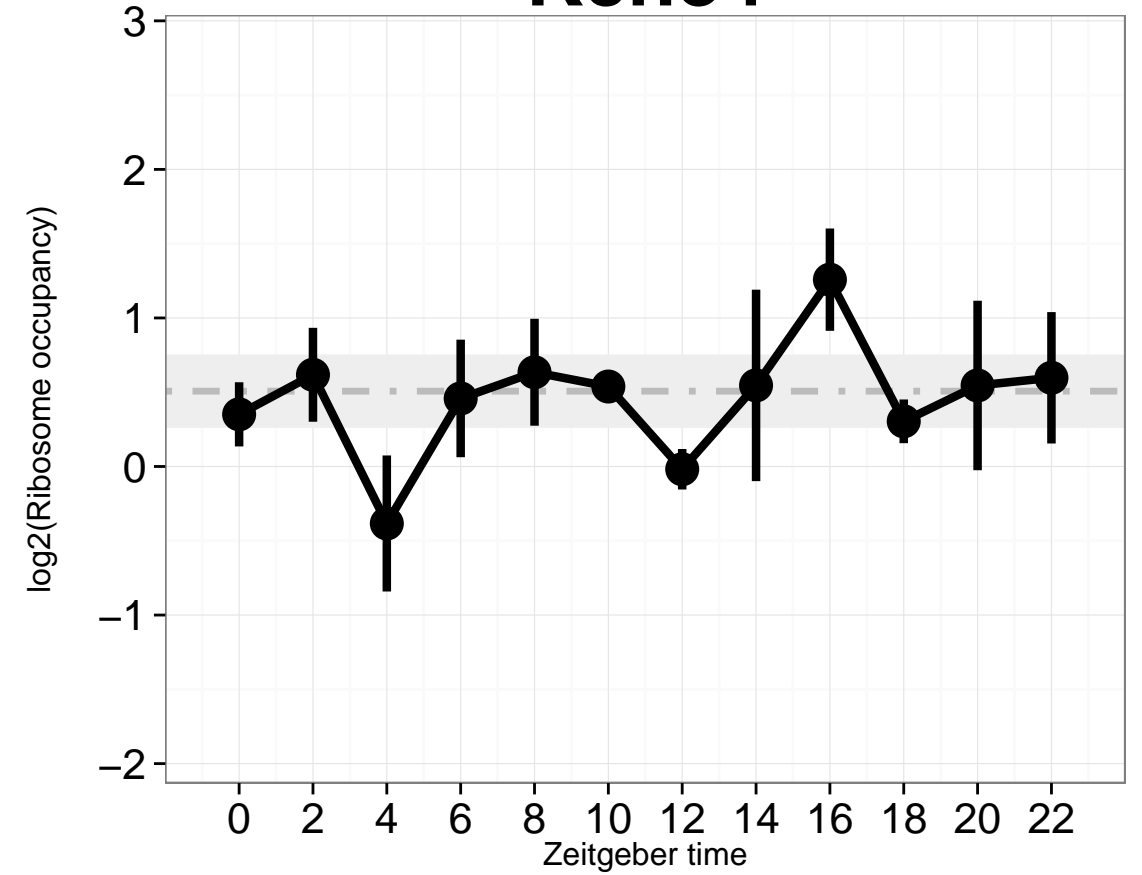

Supplement: Supplementary file 5600 [file 1]

## Kin

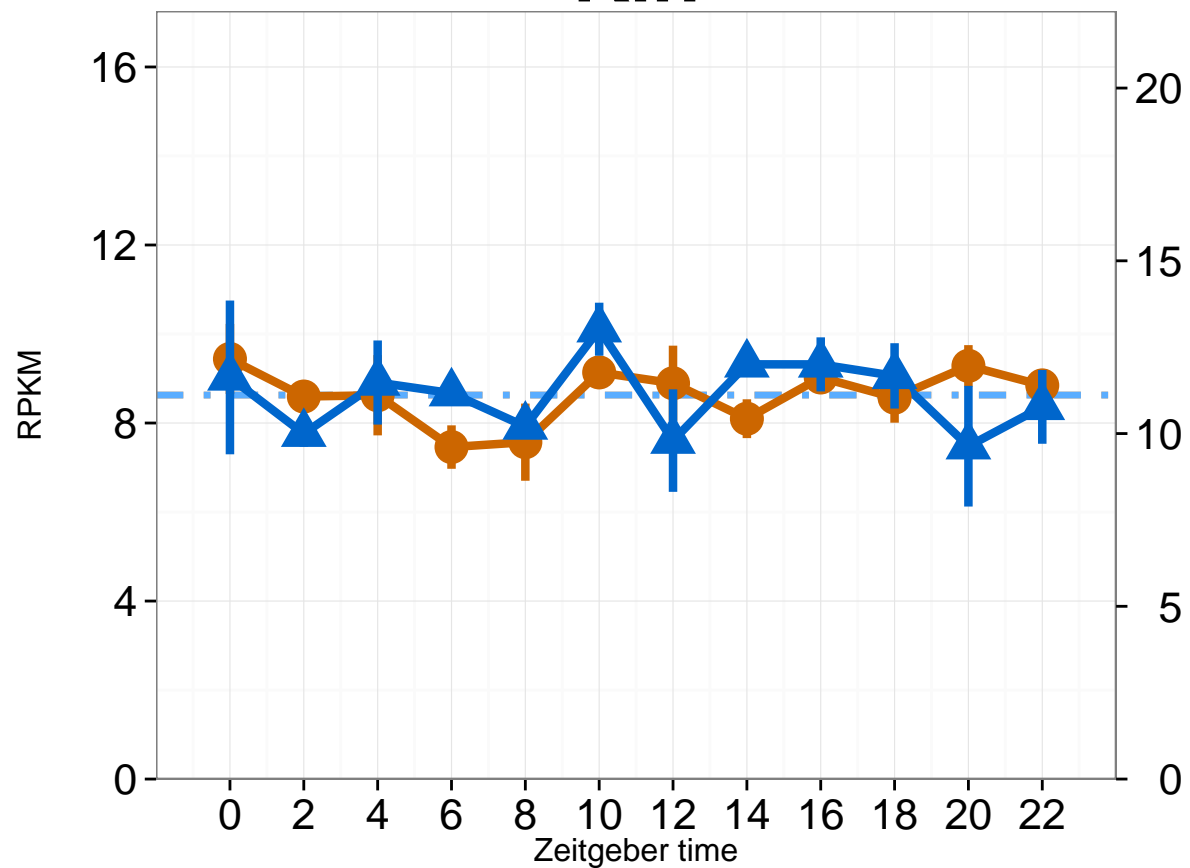

## Kin

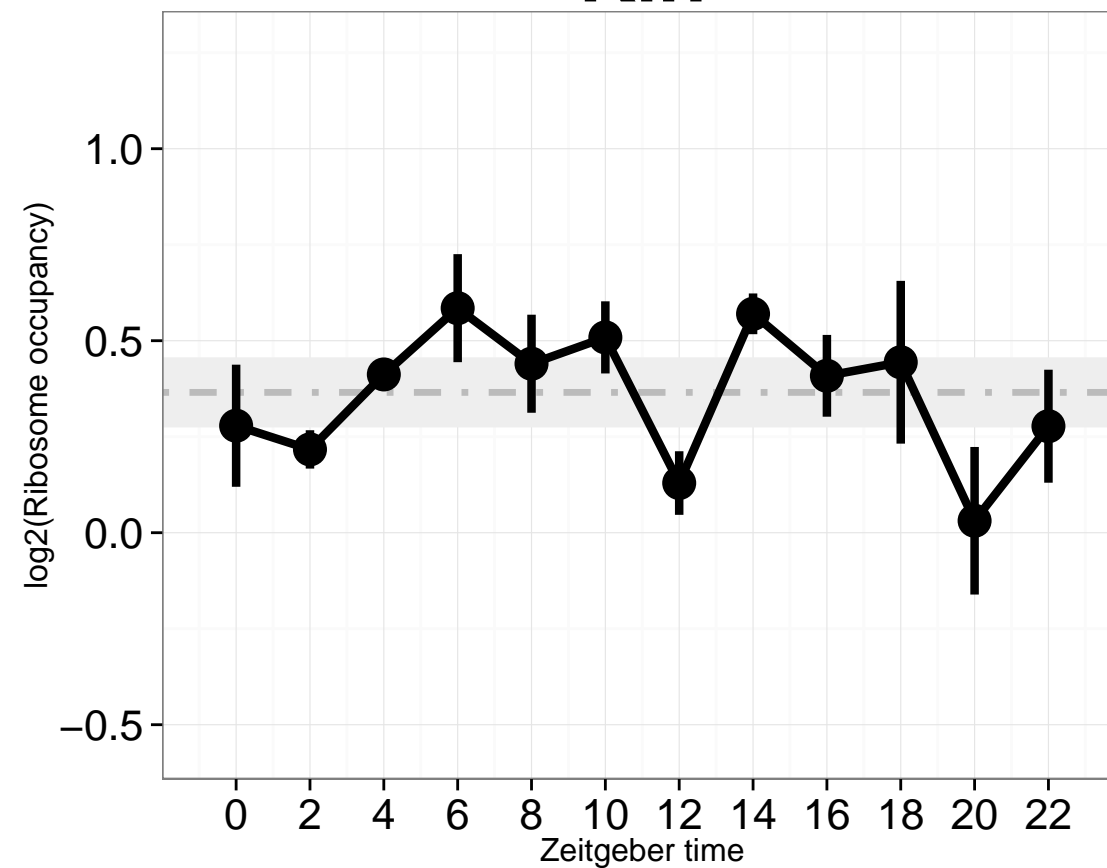

Supplement: Supplementary file 5601 [file 1]

## Ltv1

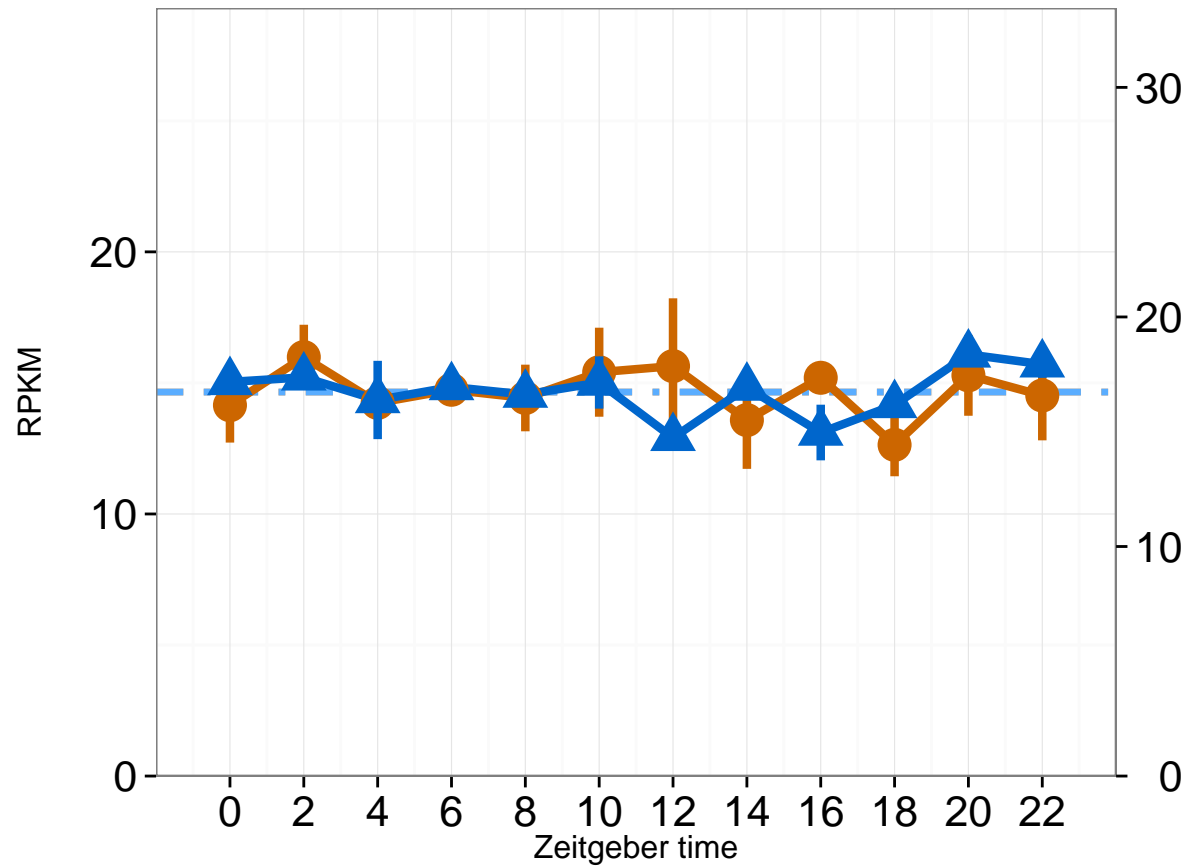

## Ltv1

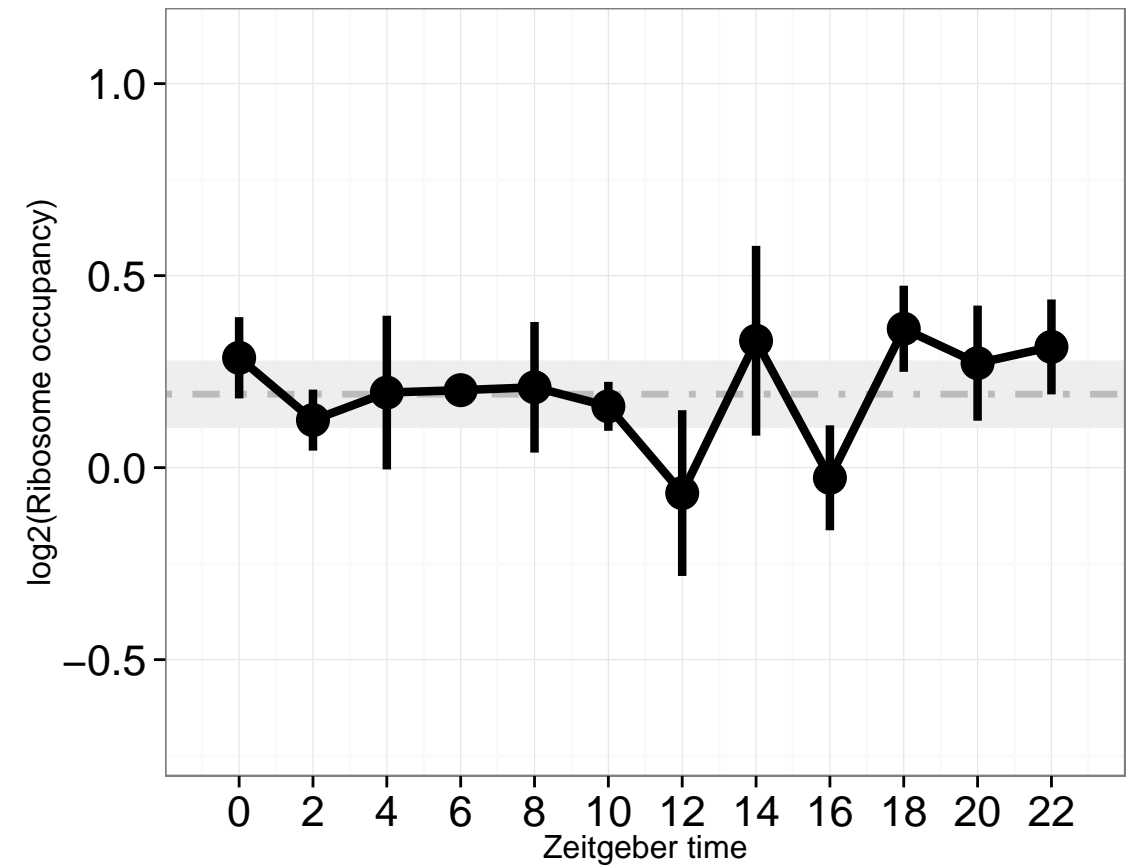

Supplement: Supplementary file 5602 [file 1]

# Ankrd37

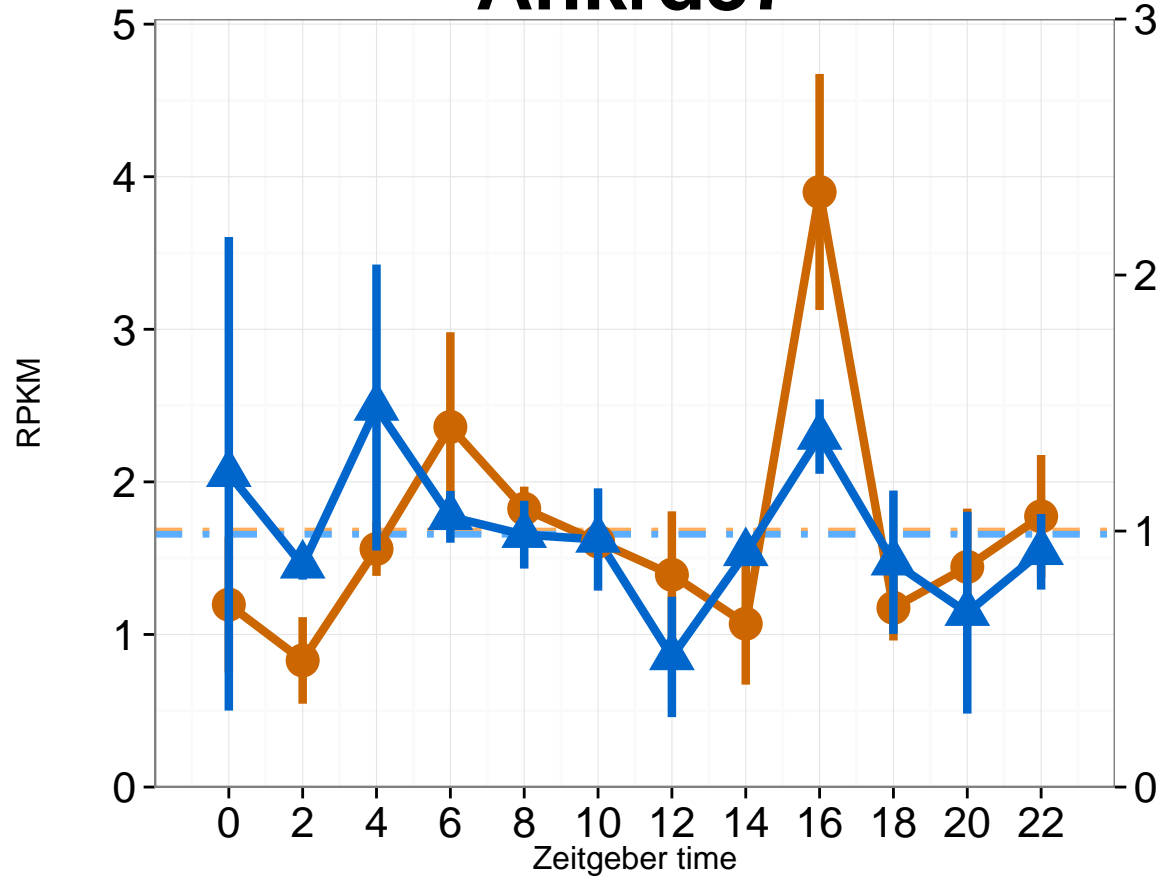

# Ankrd37

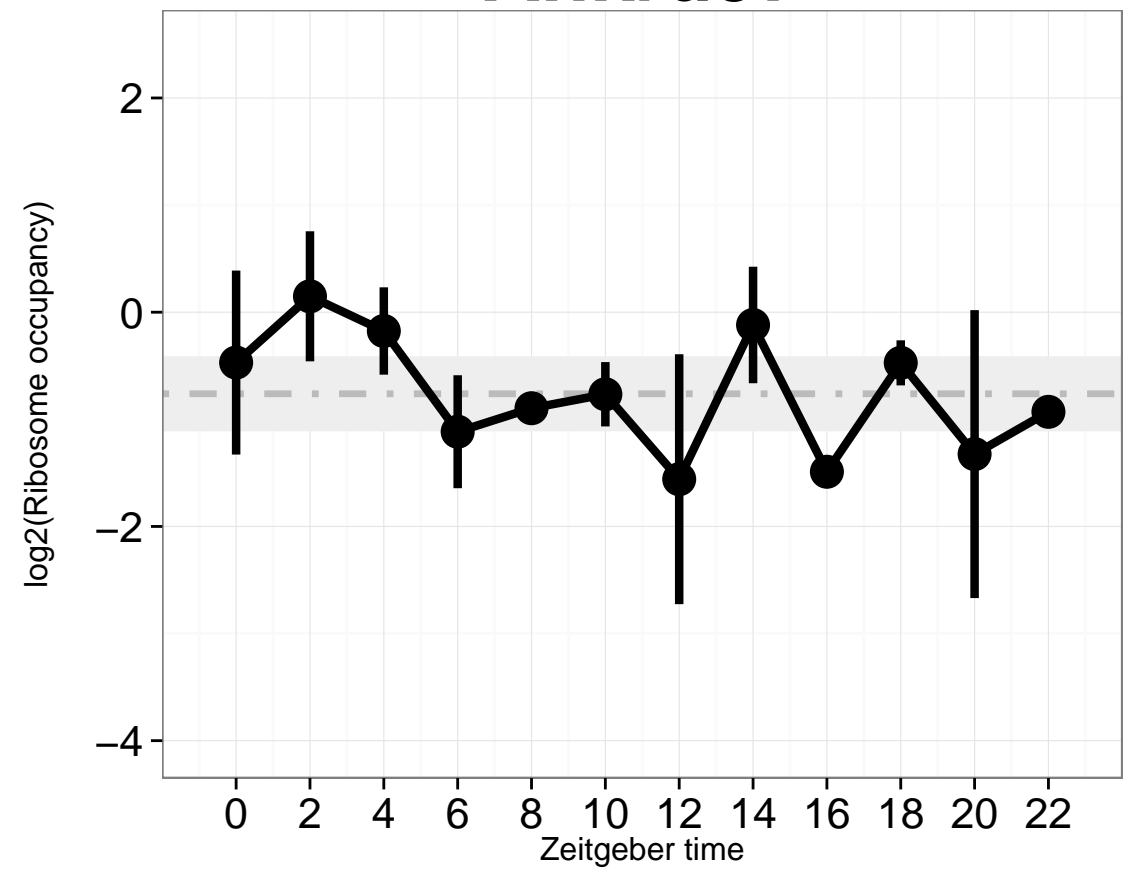

Supplement: Supplementary file 5603 [file 1]

## Eif2b2

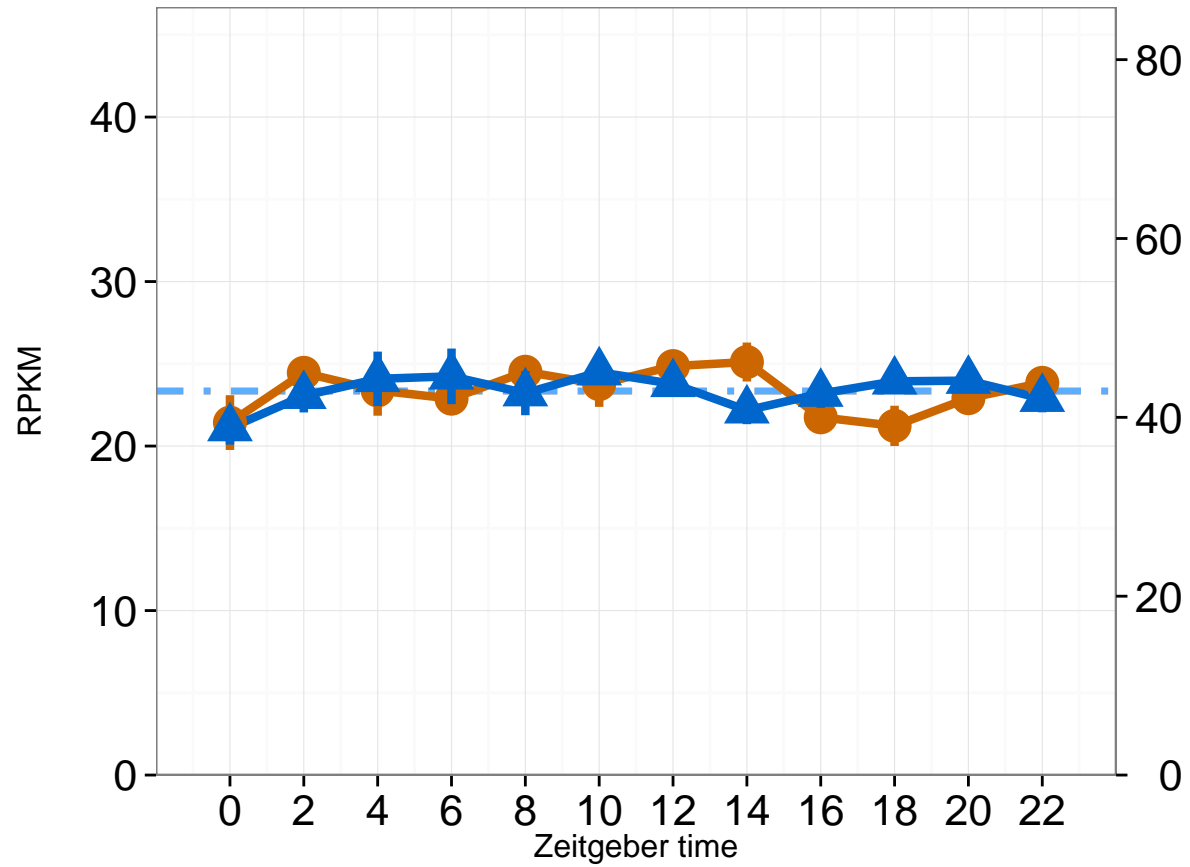

## Eif2b2

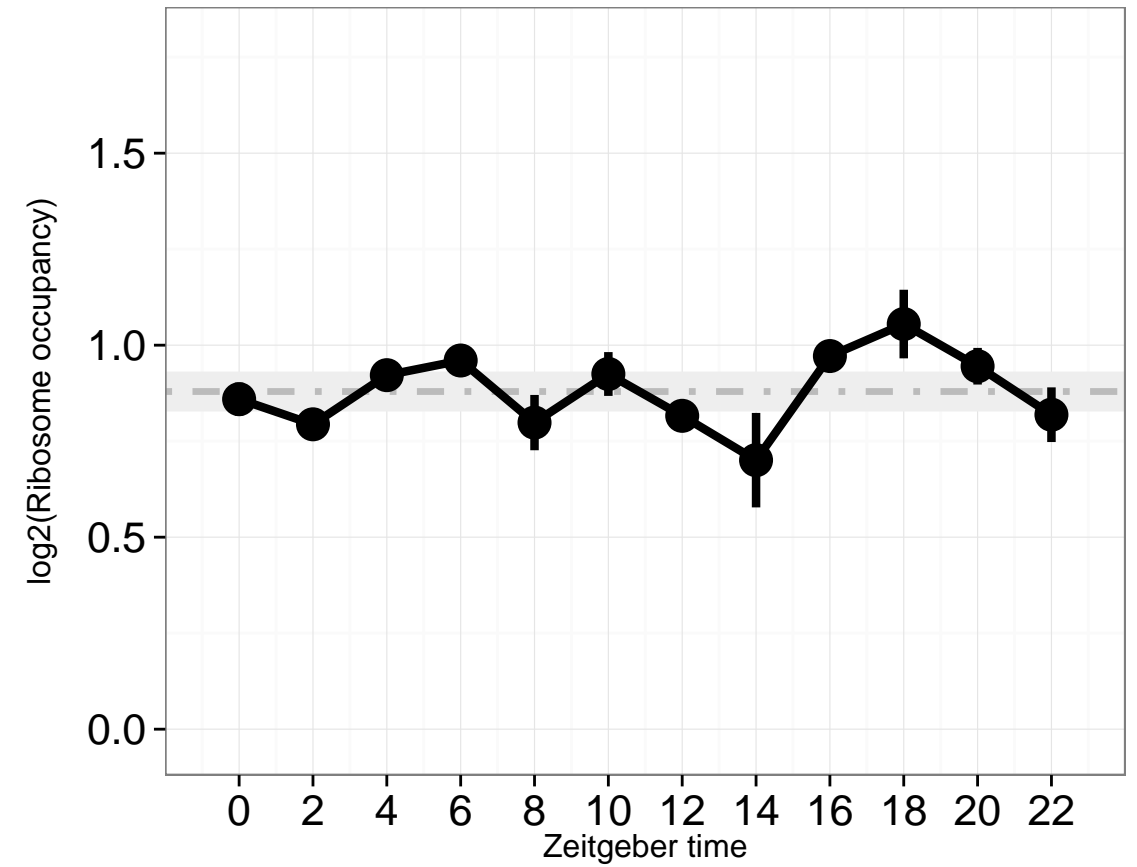

Supplement: Supplementary file 5604 [file 1]

## Hectd3

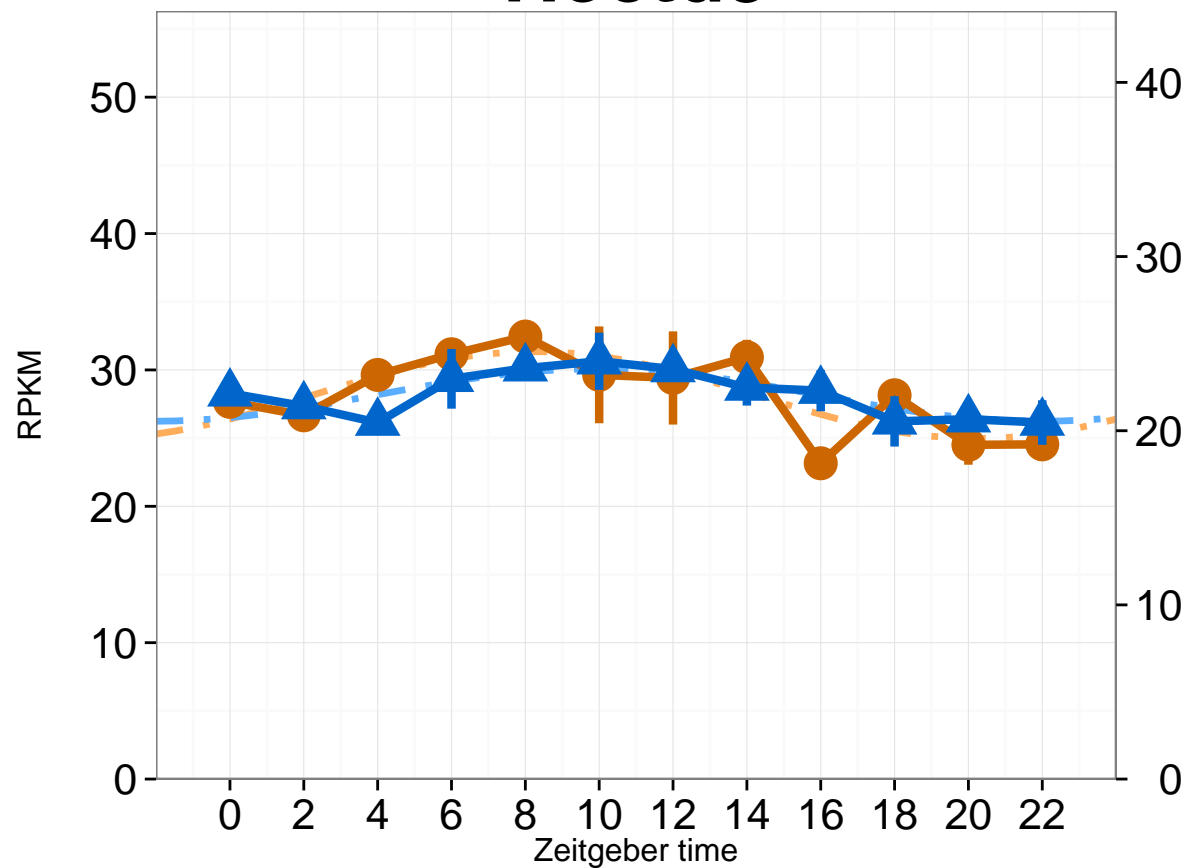

## Hectd3

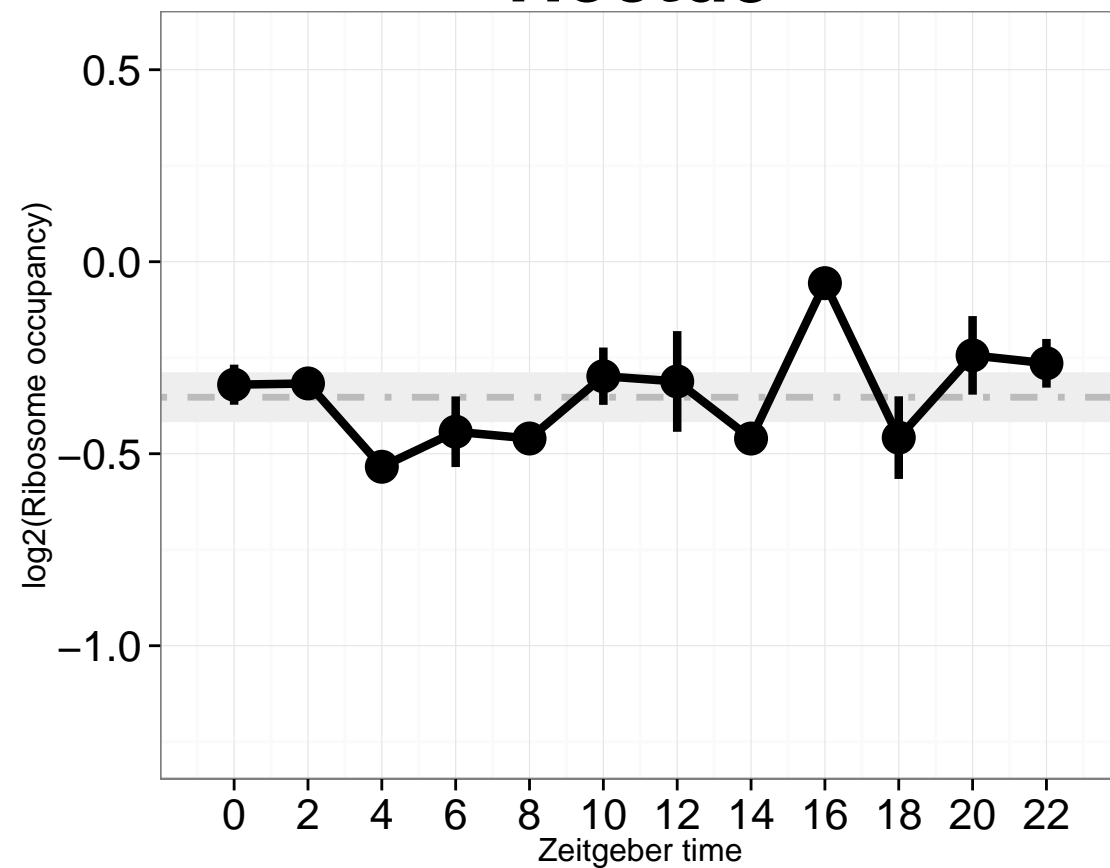

Supplement: Supplementary file 5605 [file 1]

# Irgm1

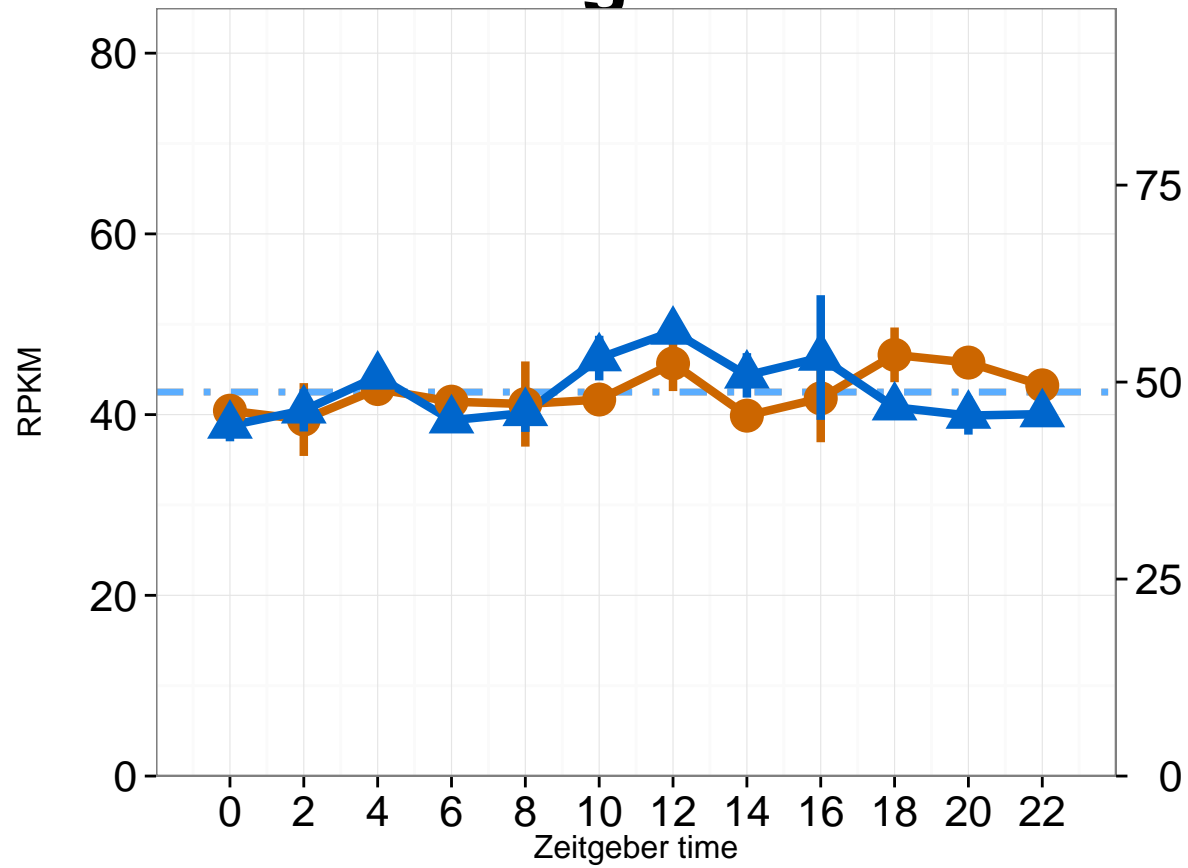

# Irgm1

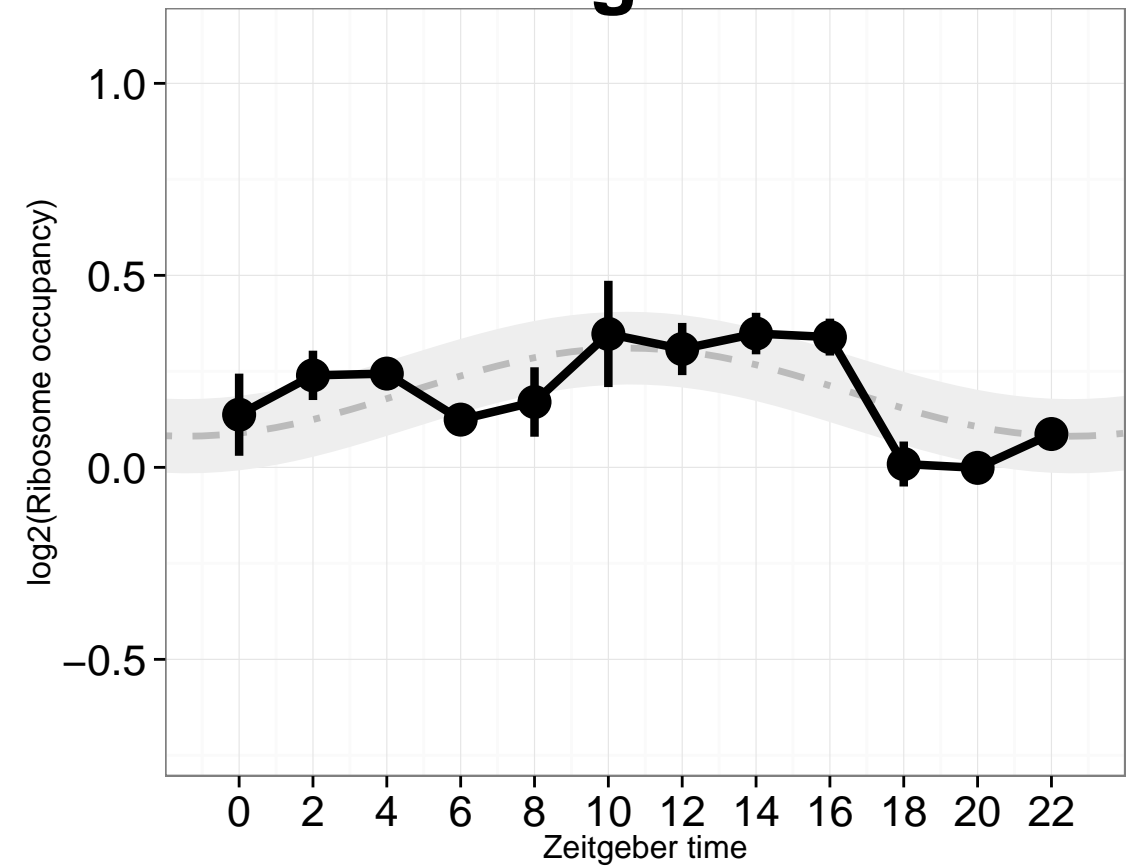

Supplement: Supplementary file 5606 [file 1]

# Hspa8

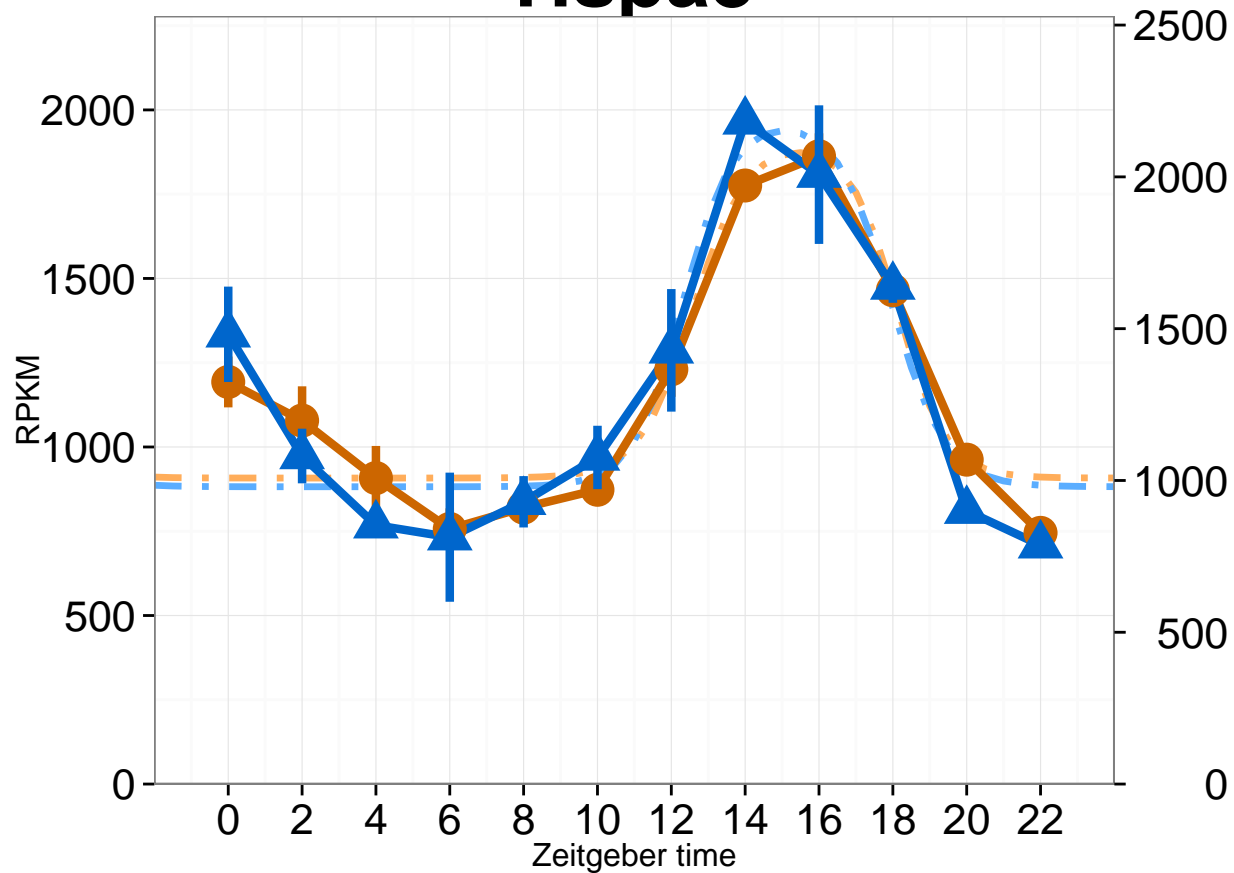

# Hspa8

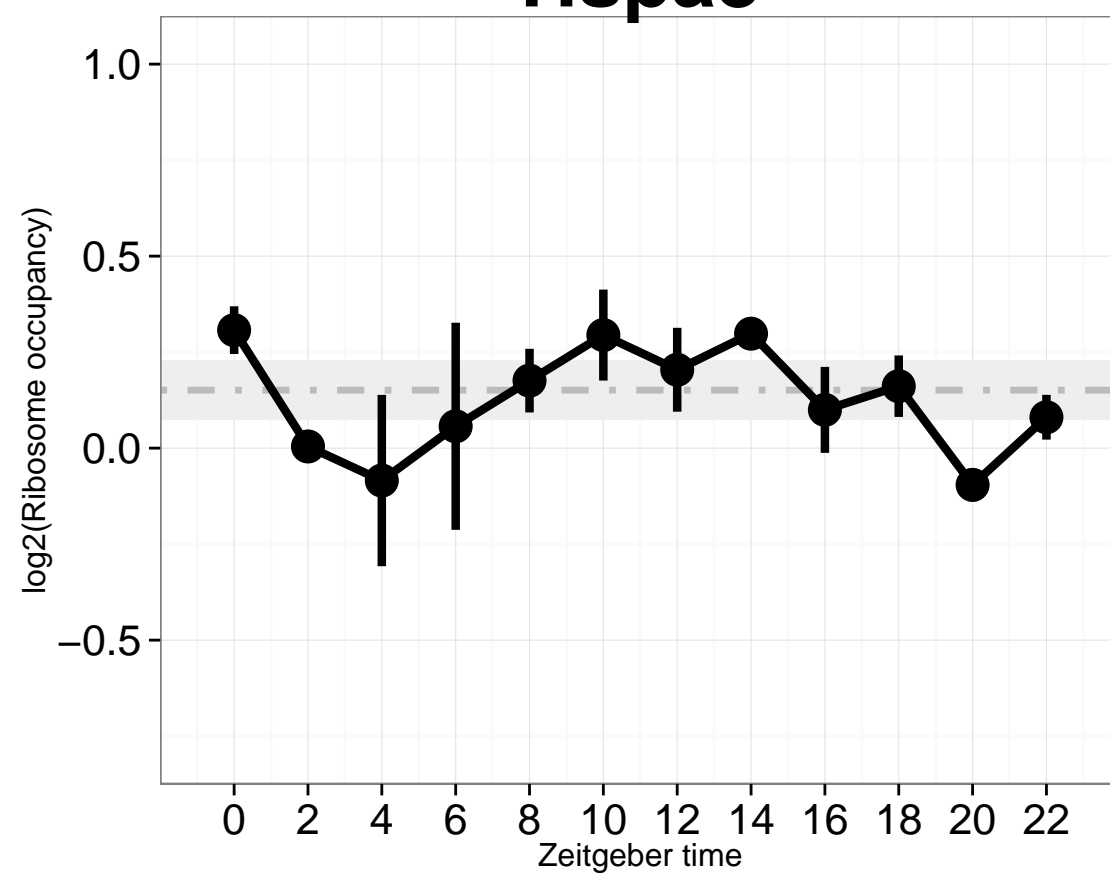

Supplement: Supplementary file 5607 [file 1]

## Mtdh

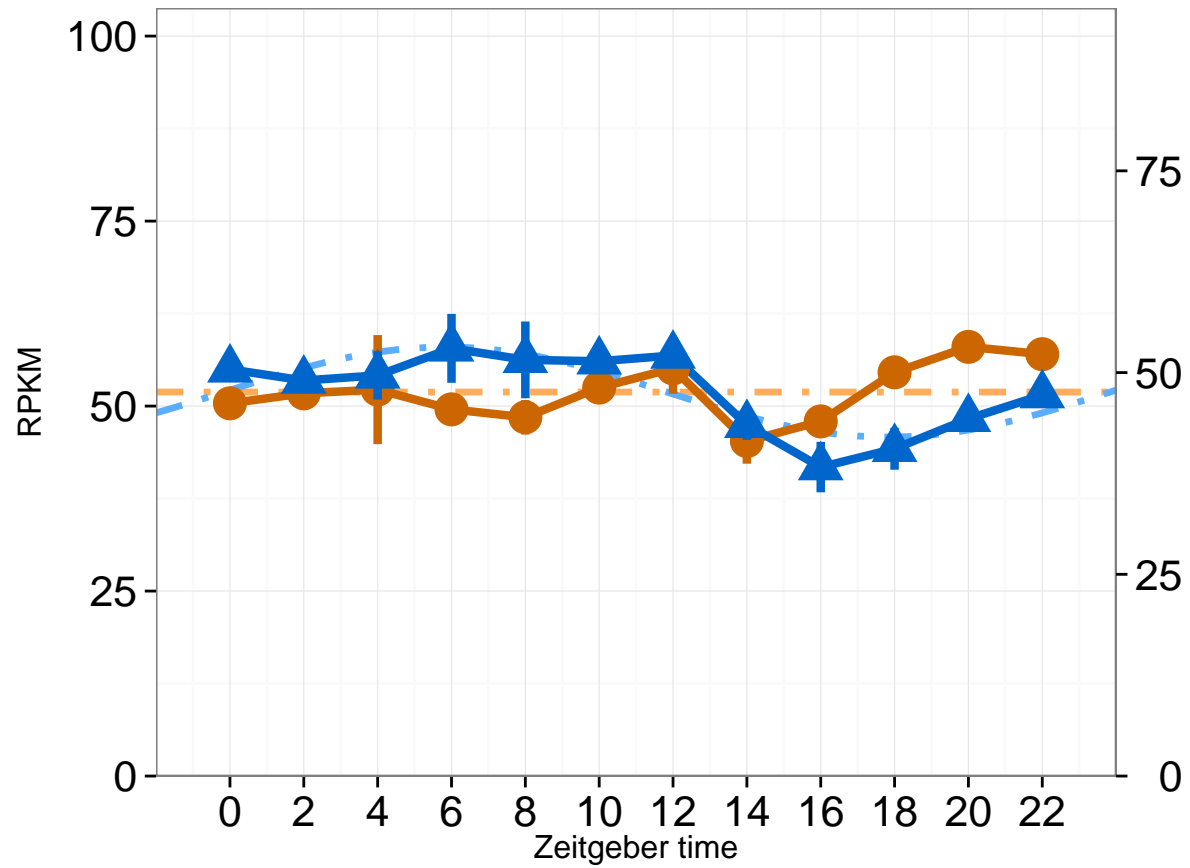

## Mtdh

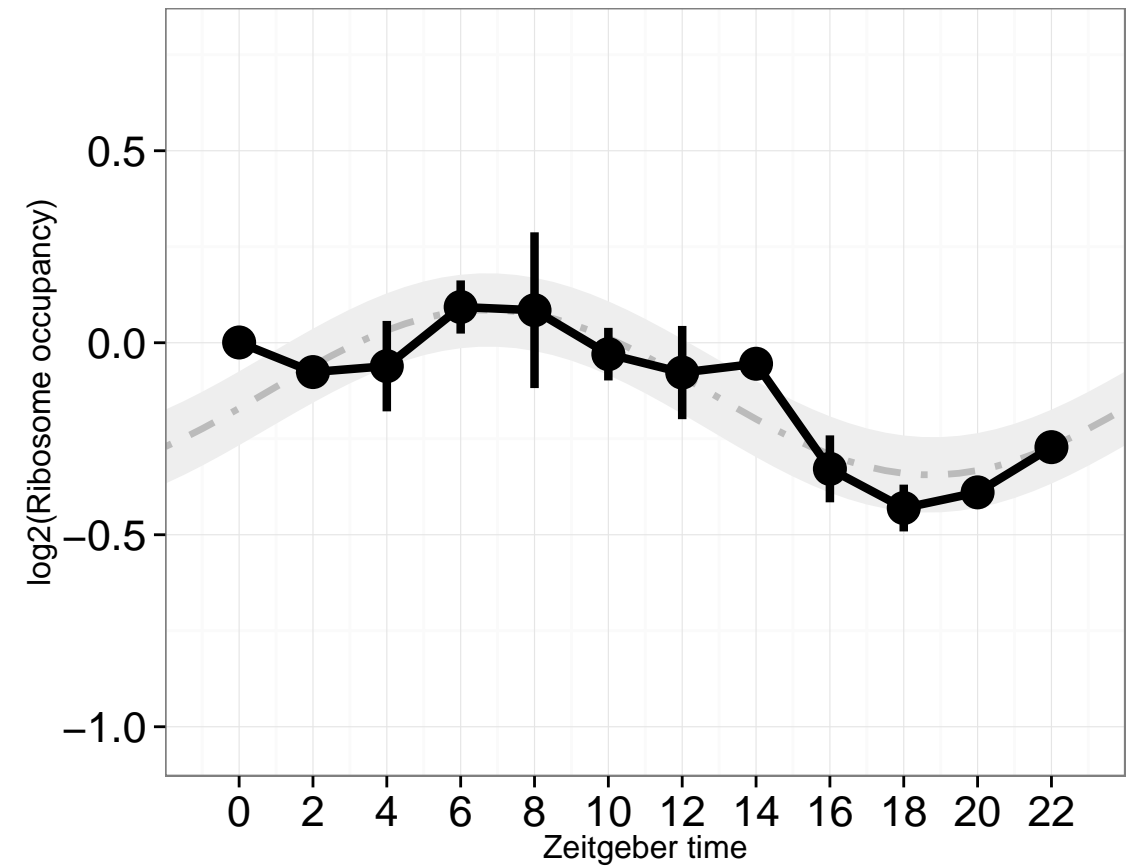

Supplement: Supplementary file 5608 [file 1]

# Wnt9a

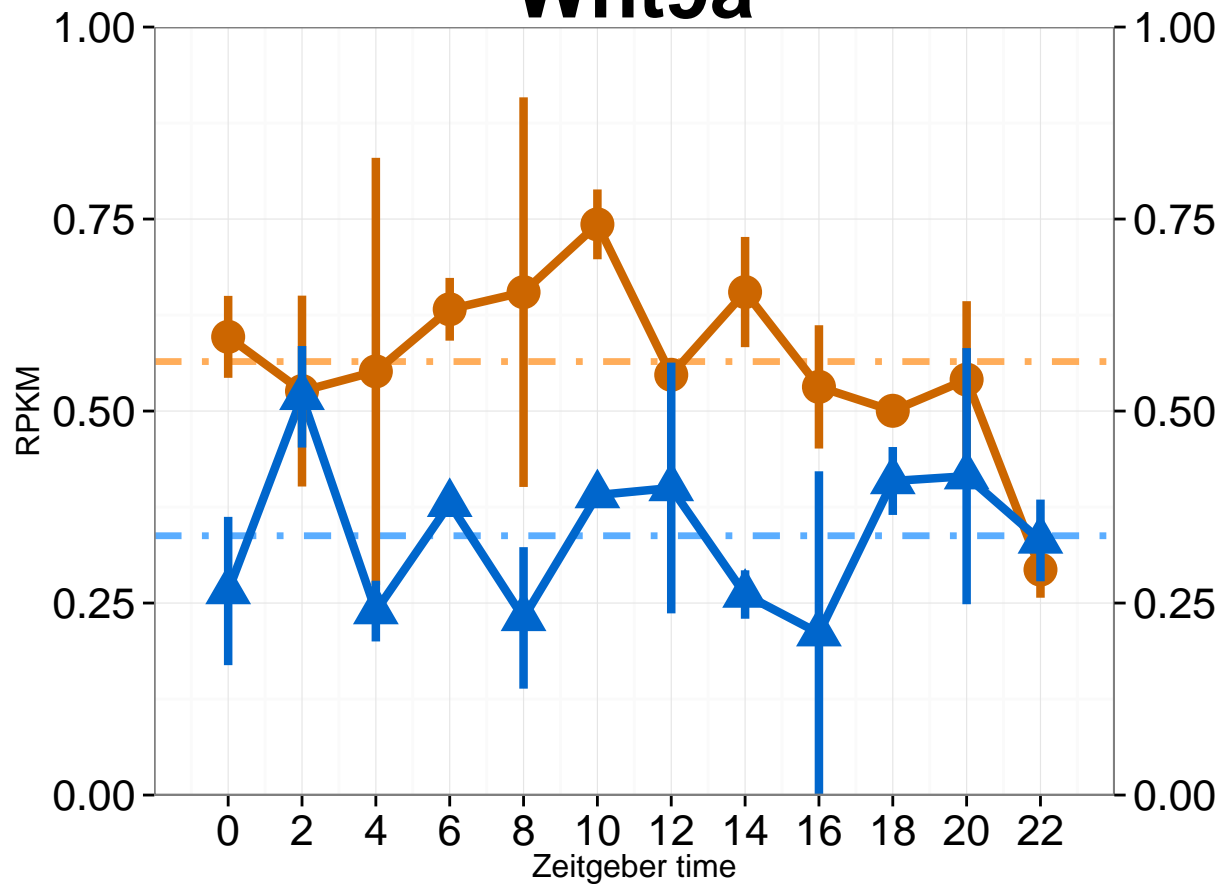

# Wnt9a

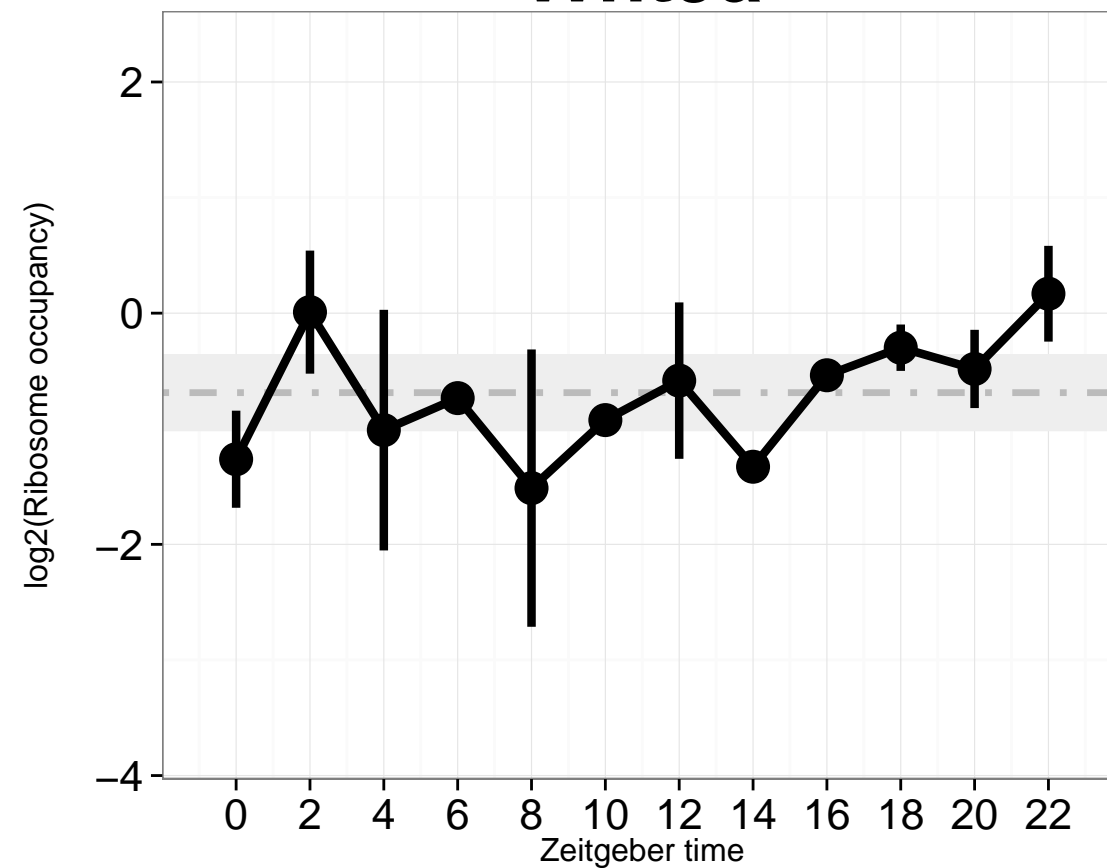

Supplement: Supplementary file 5609 [file 1]

# Abtb1

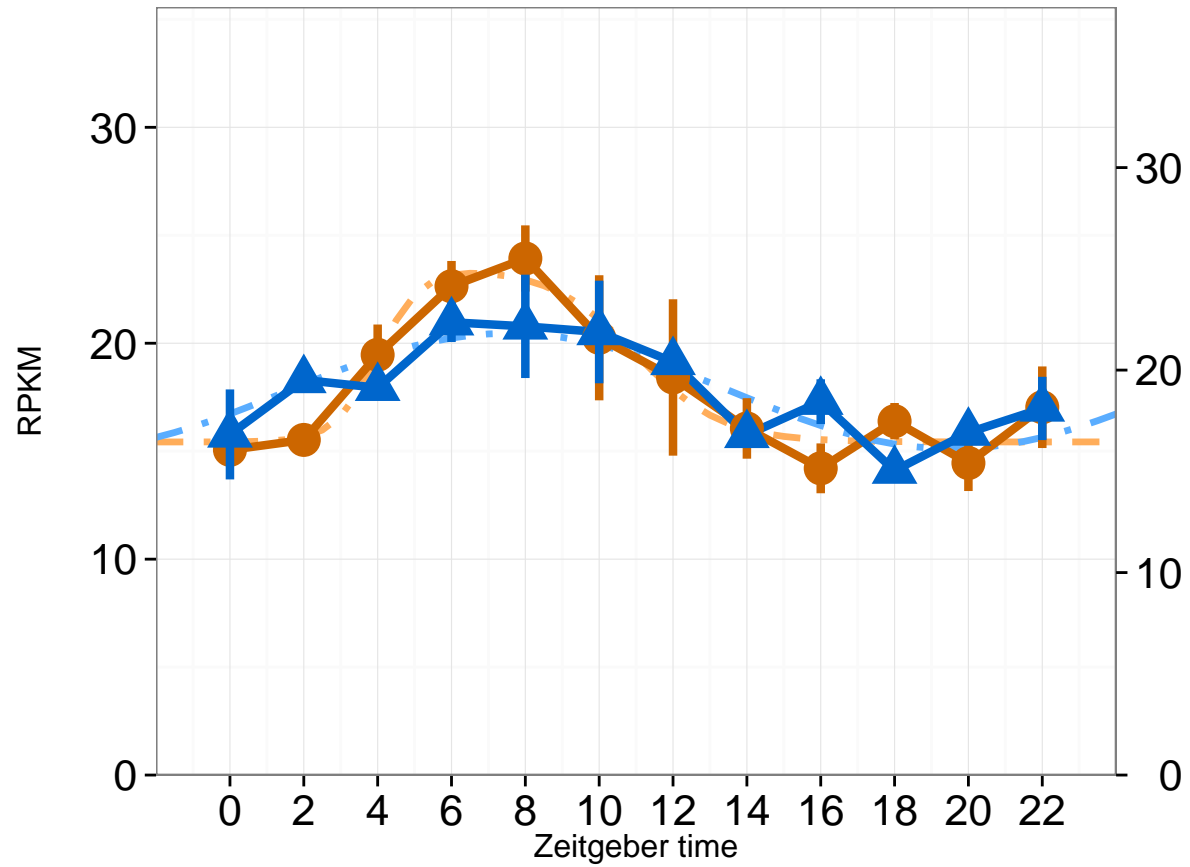

# Abtb1

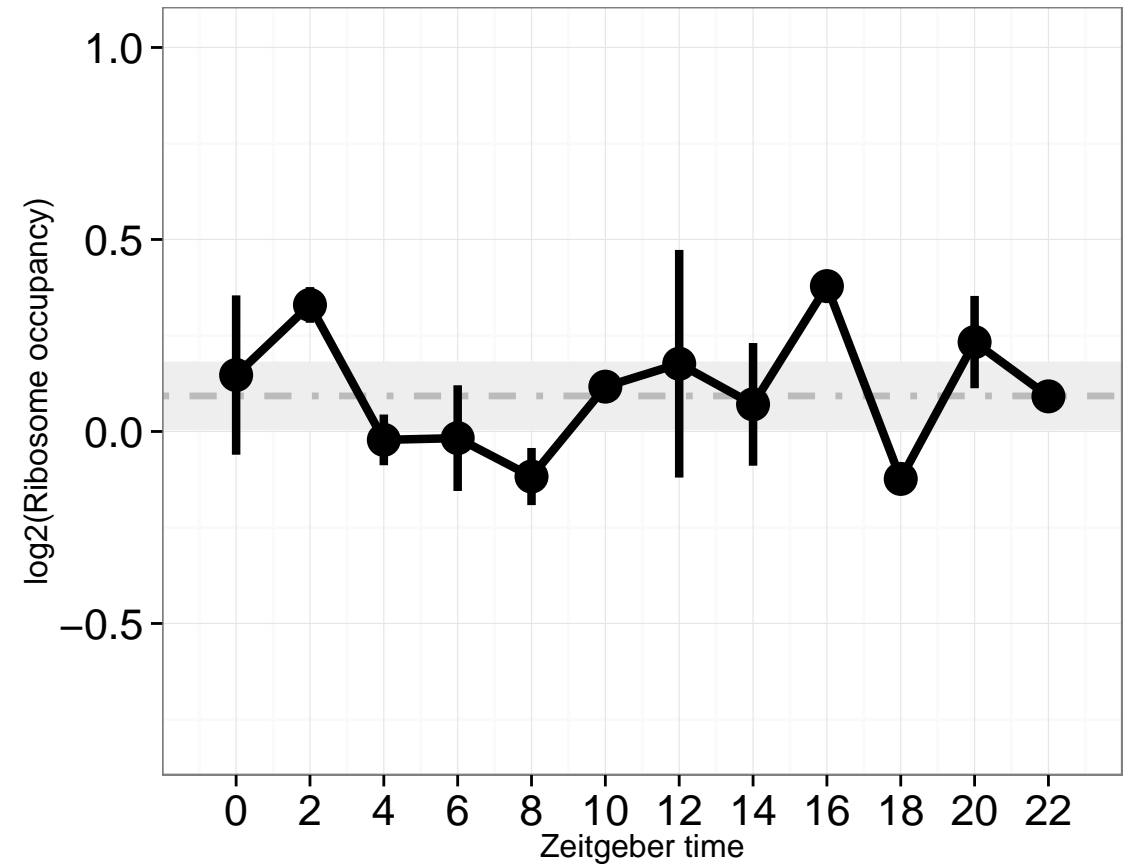

Supplement: Supplementary file 5610 [file 1]

# Srd5a1

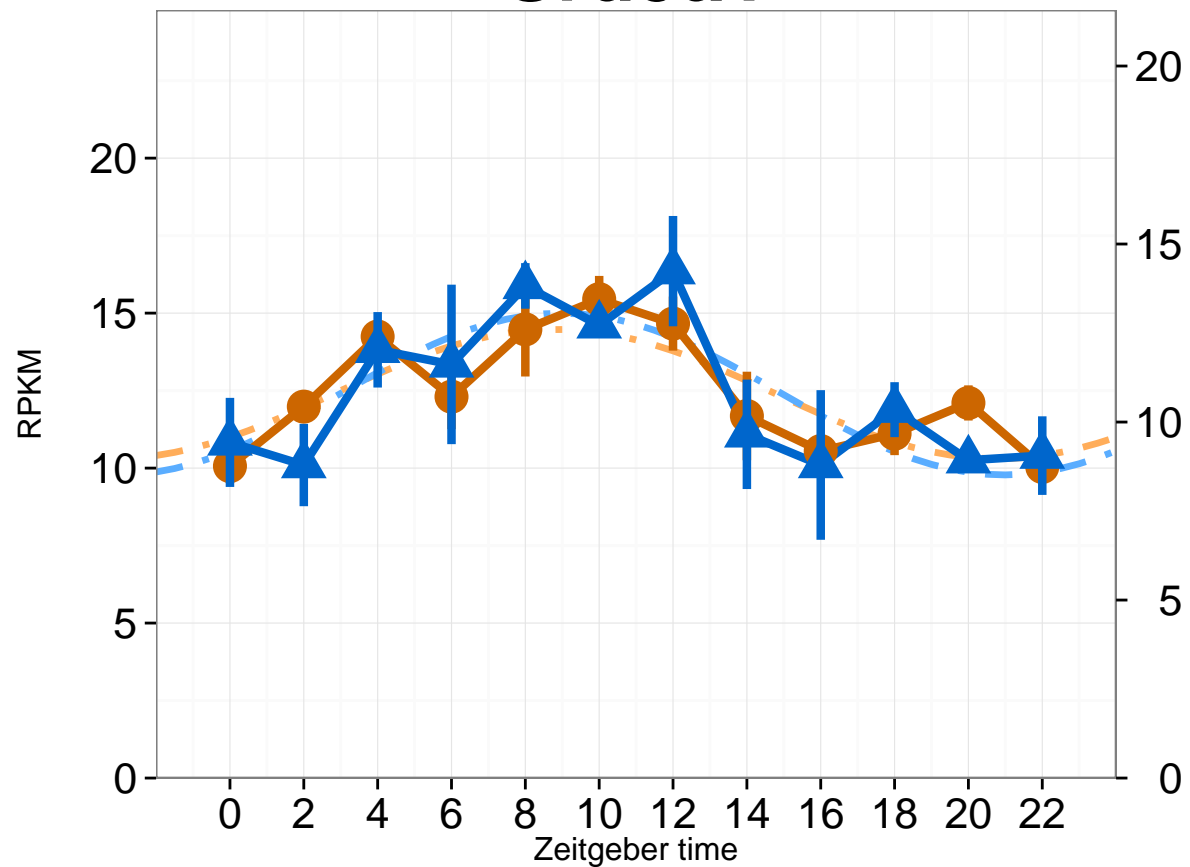

# Srd5a1

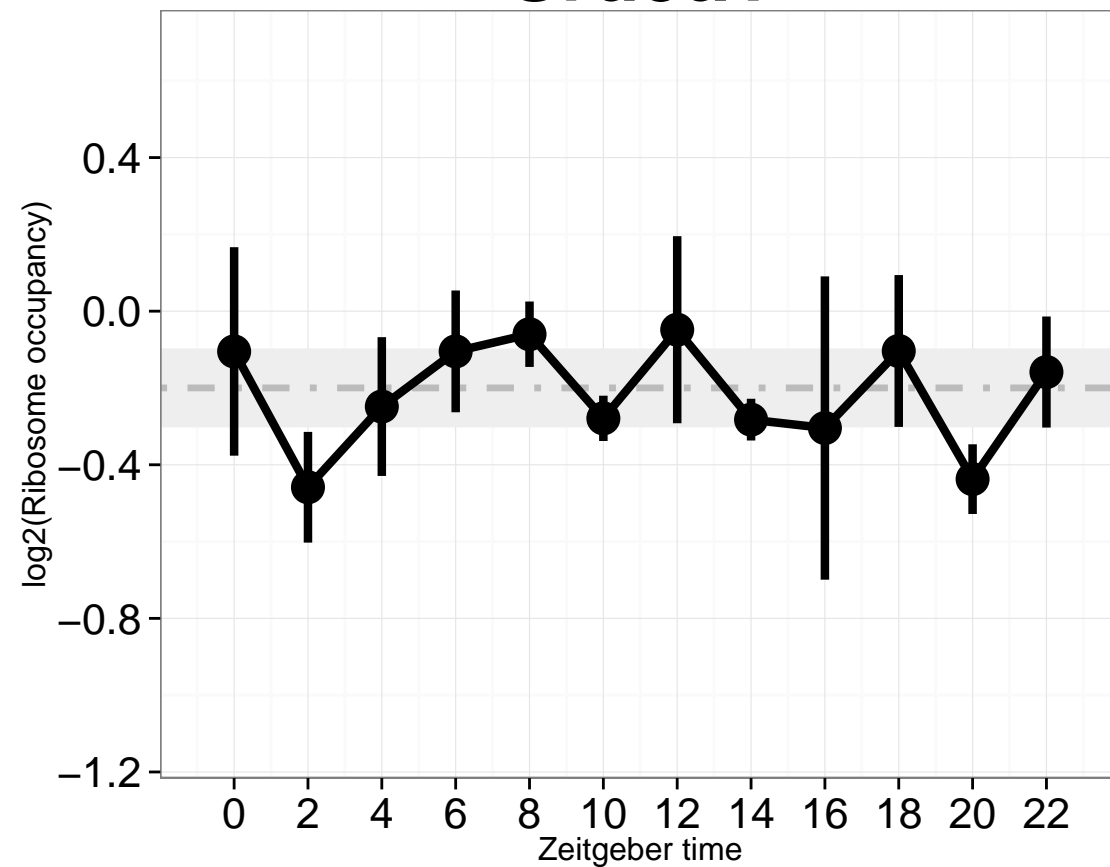

Supplement: Supplementary file 5611 [file 1]

## Smarcal1

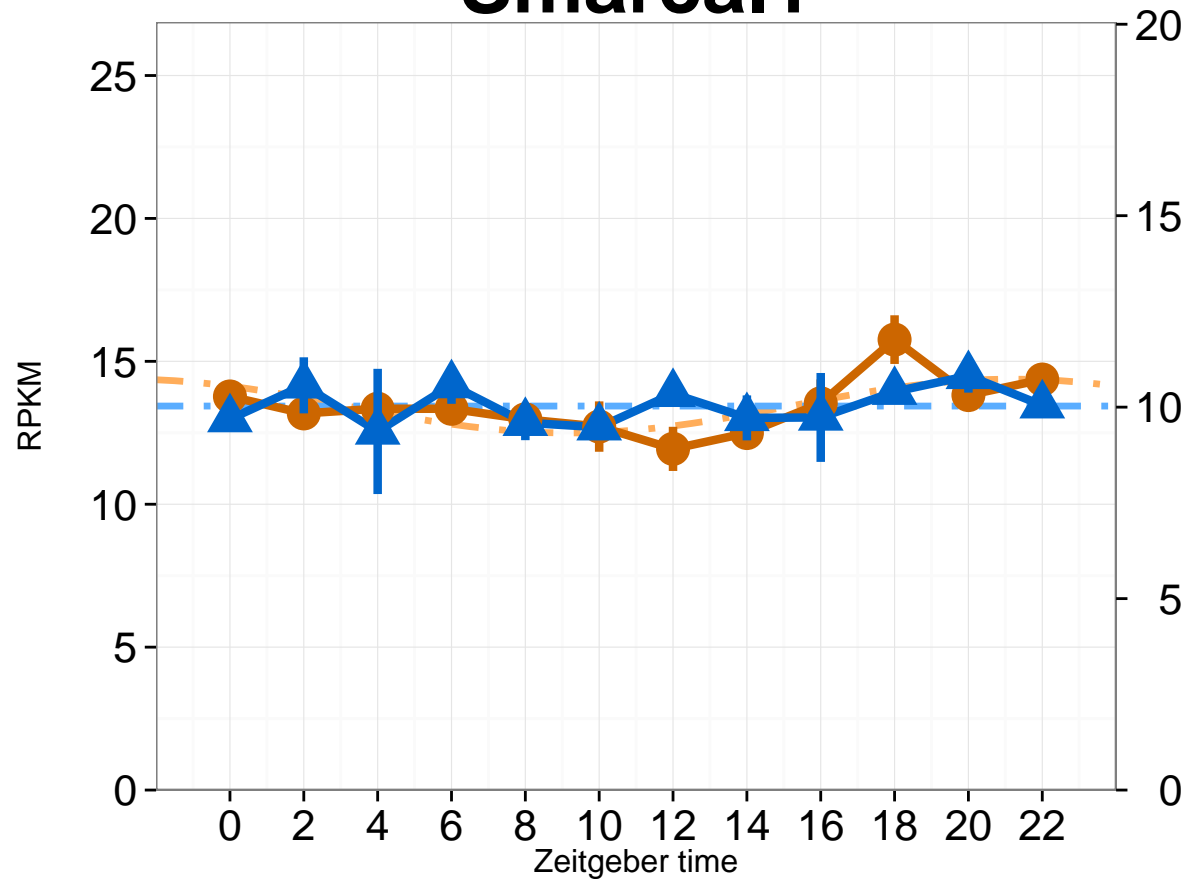

## Smarcal1

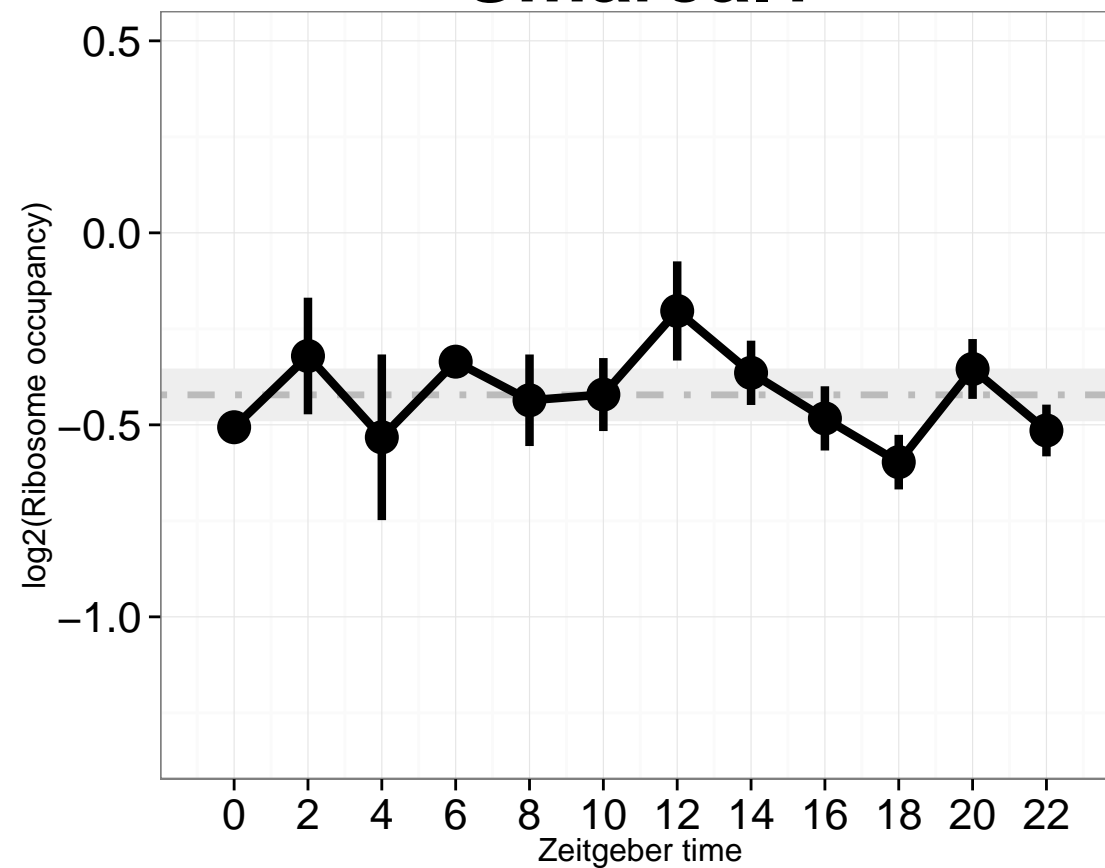

Supplement: Supplementary file 5612 [file 1]

# Cpt1c

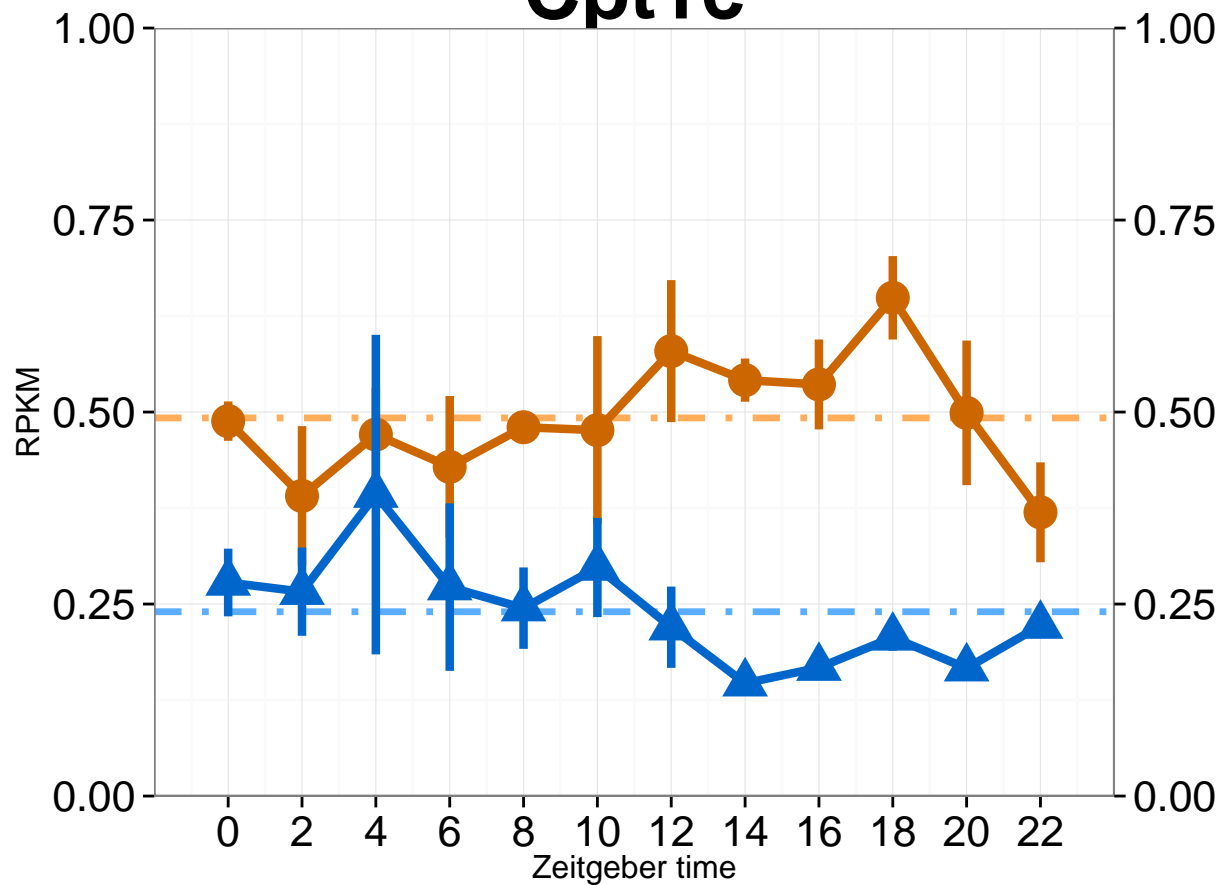

# Cpt1c

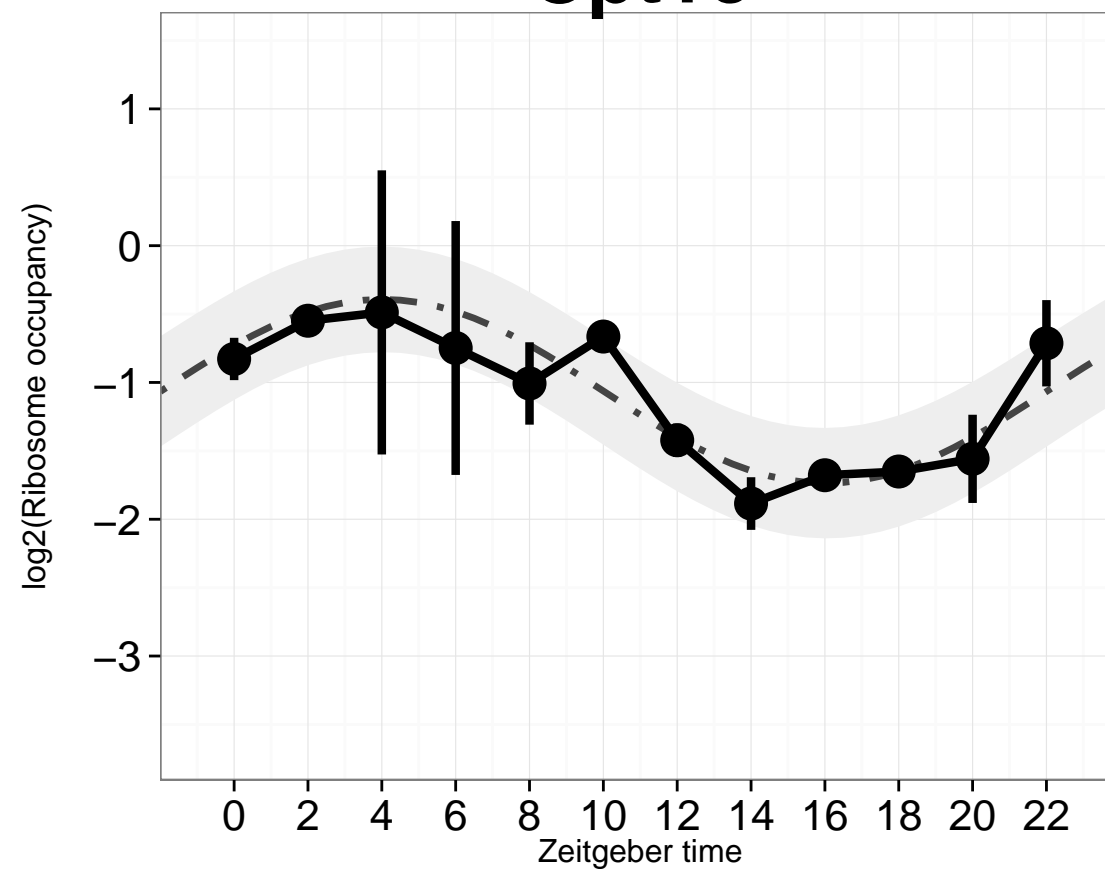

Supplement: Supplementary file 5613 [file 1]

# Phyhipl

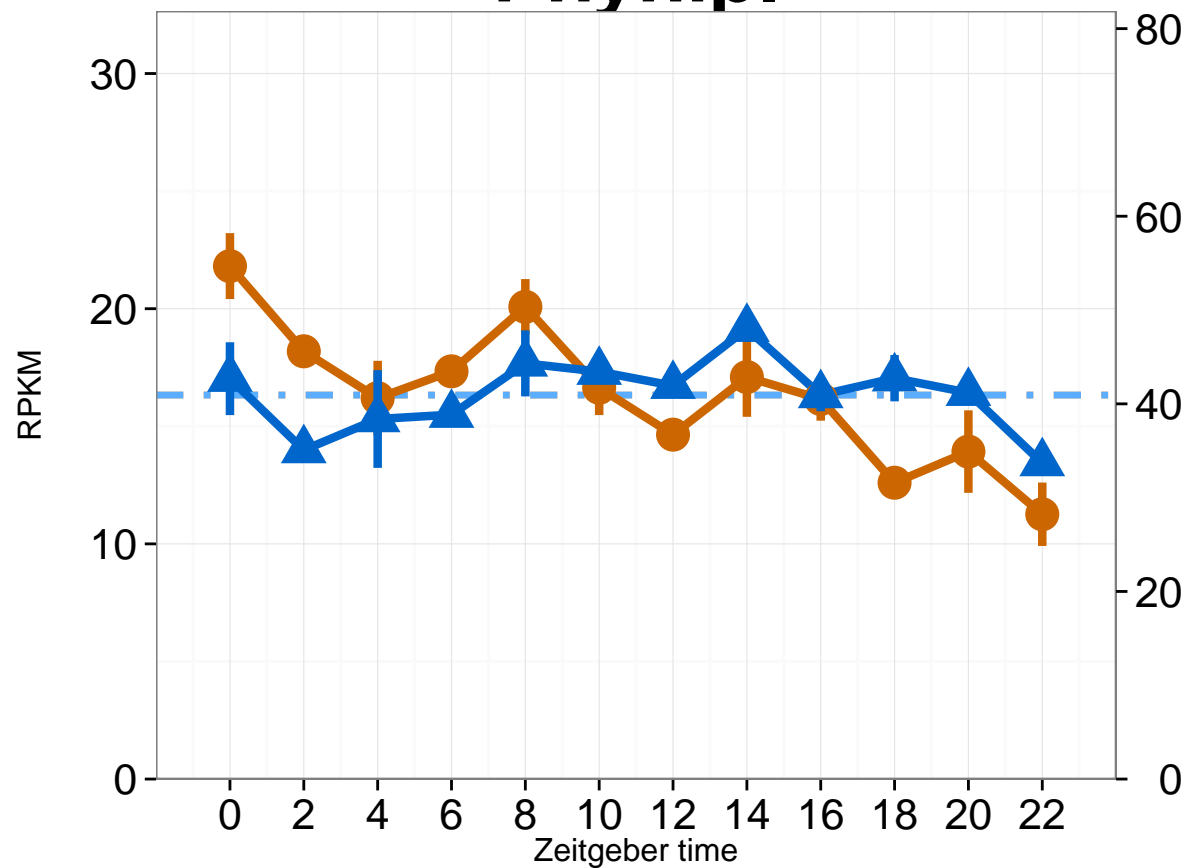

# Phyhipl

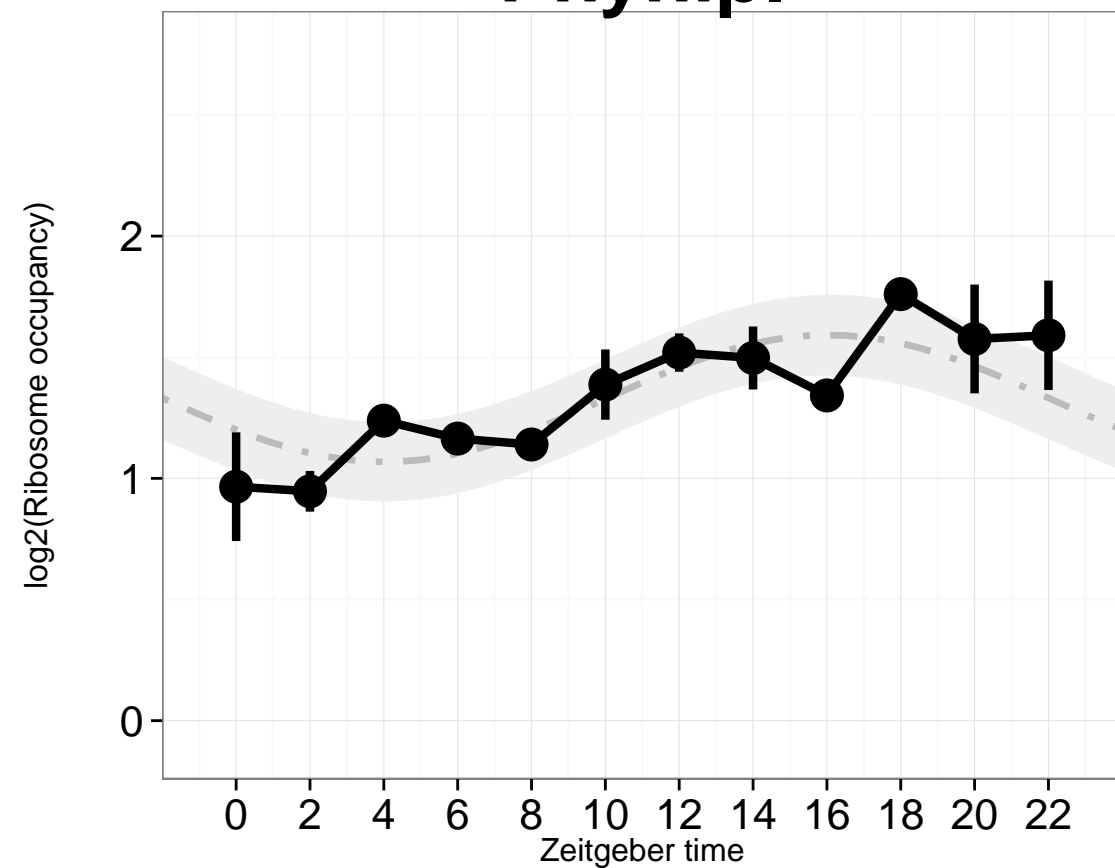

Supplement: Supplementary file 5614 [file 1]

# Hspa1a

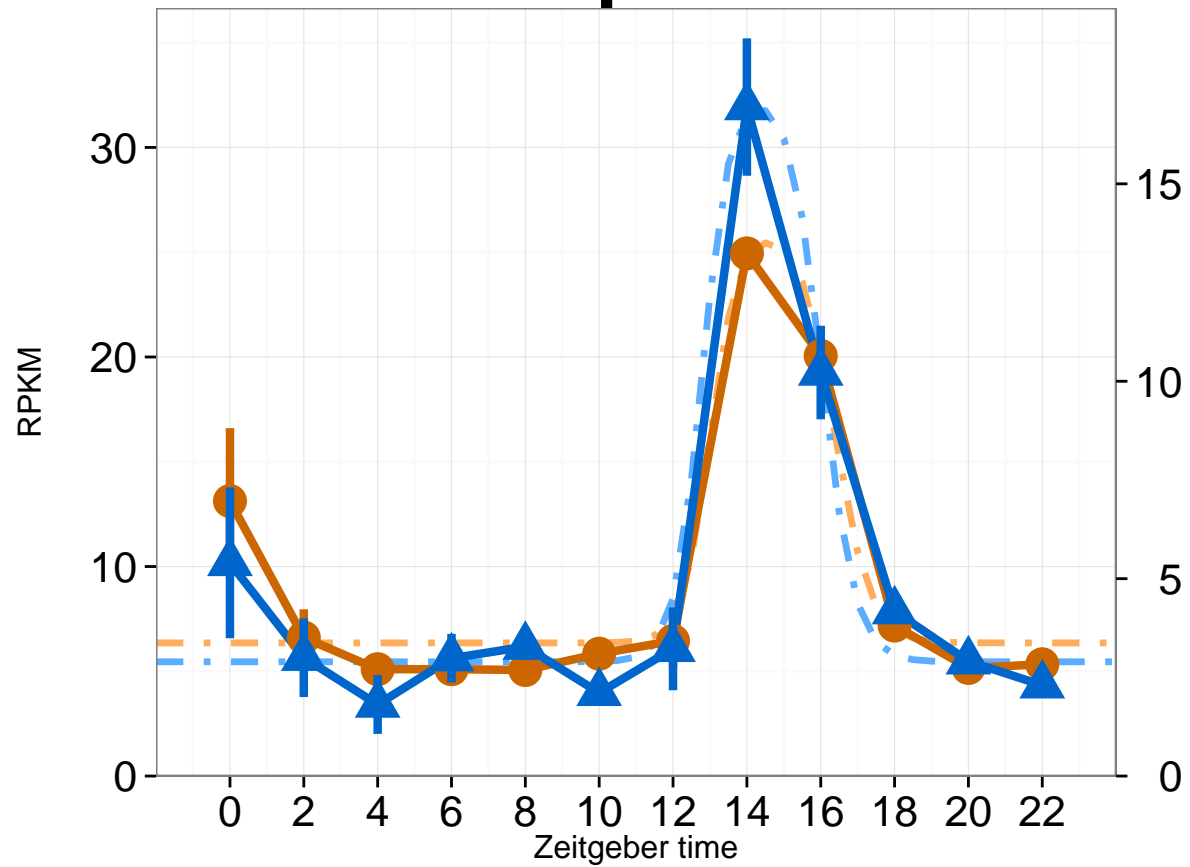

# Hspa1a

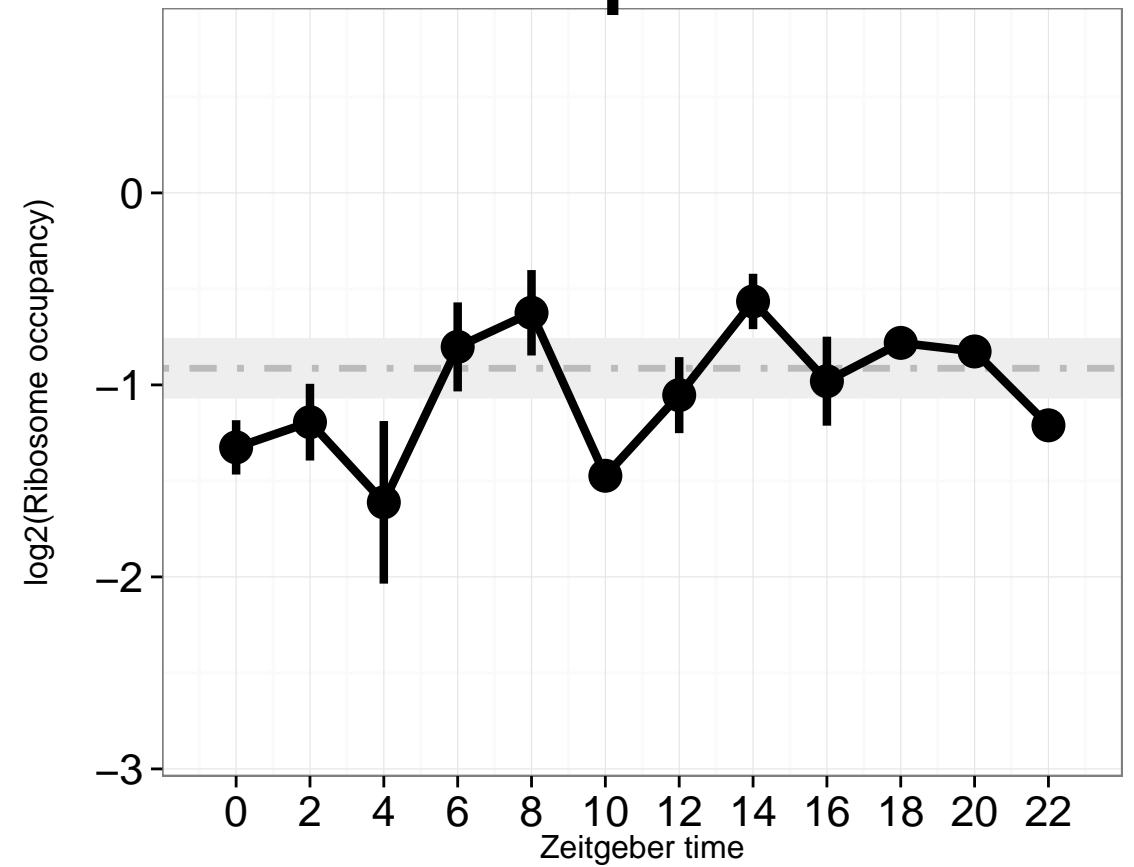

Supplement: Supplementary file 5615 [file 1]

# Itpr3

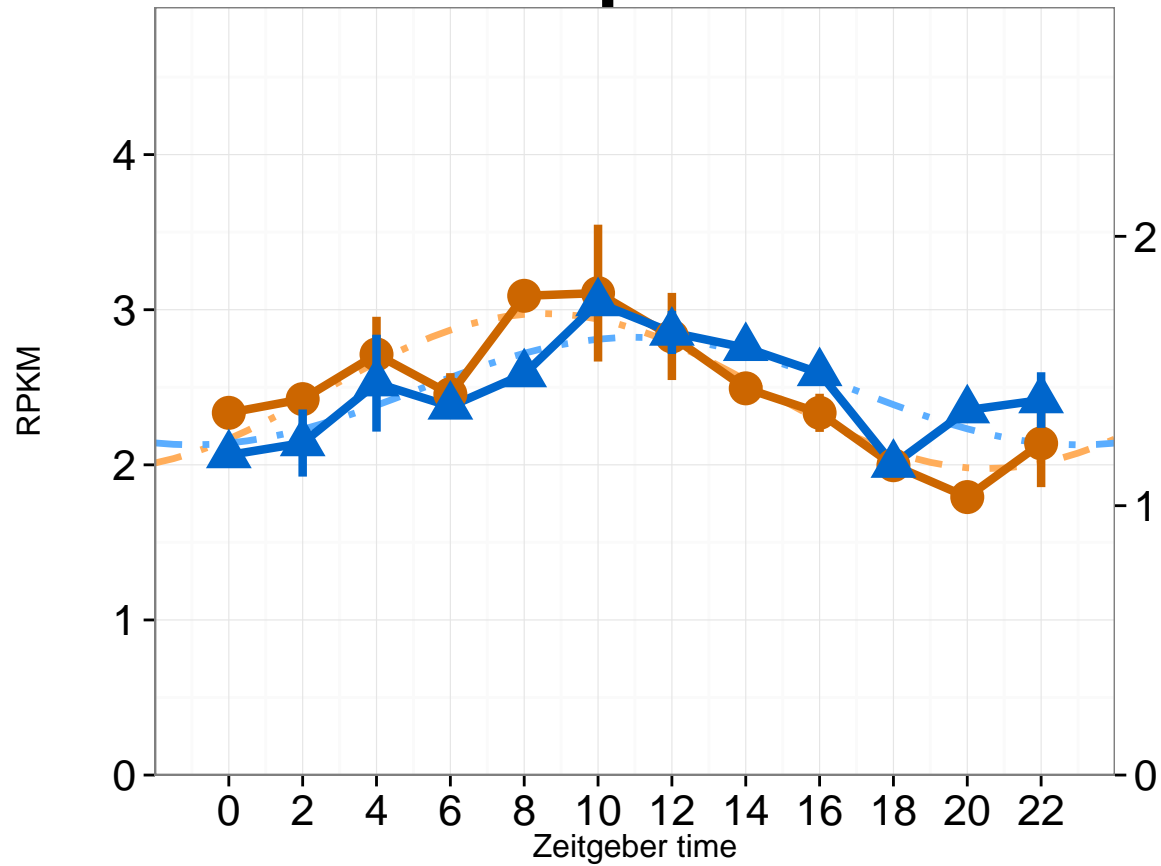

# Itpr3

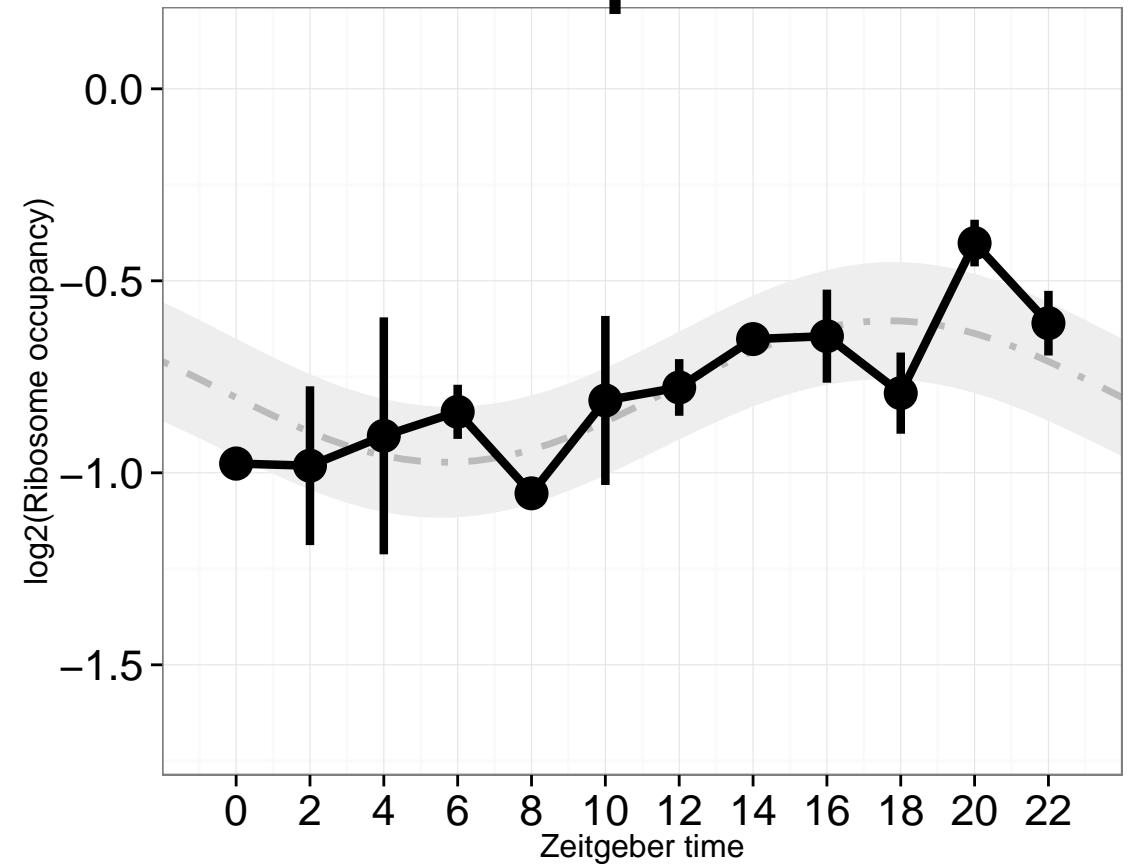

Supplement: Supplementary file 5616 [file 1]

## Plac8

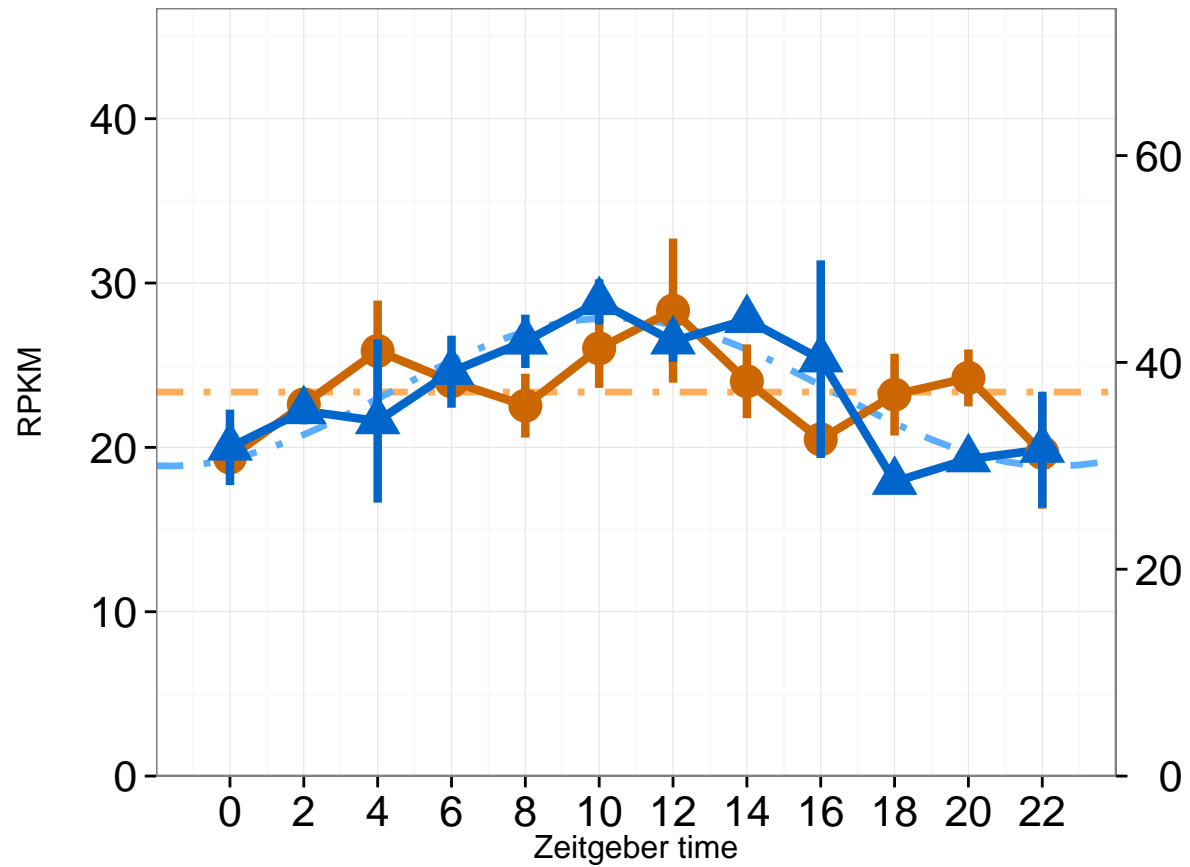

## Plac8

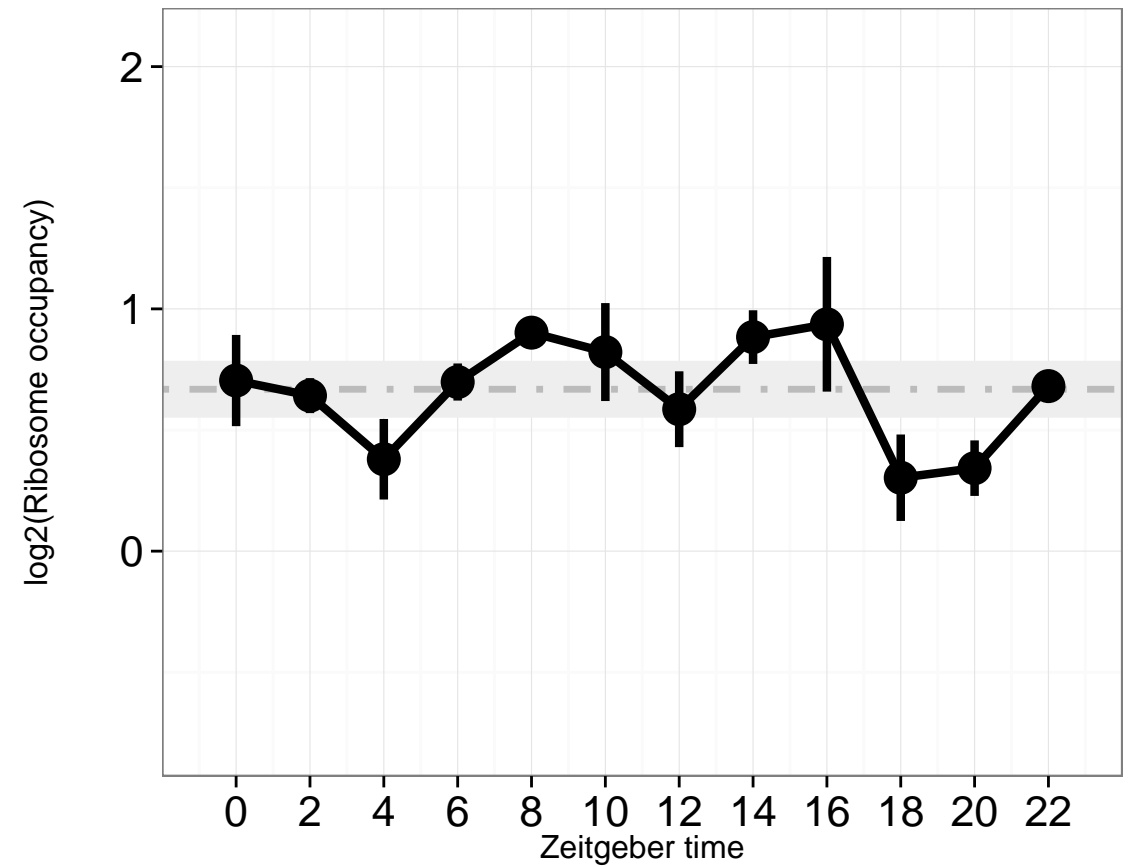

Supplement: Supplementary file 5617 [file 1]

# Phf13

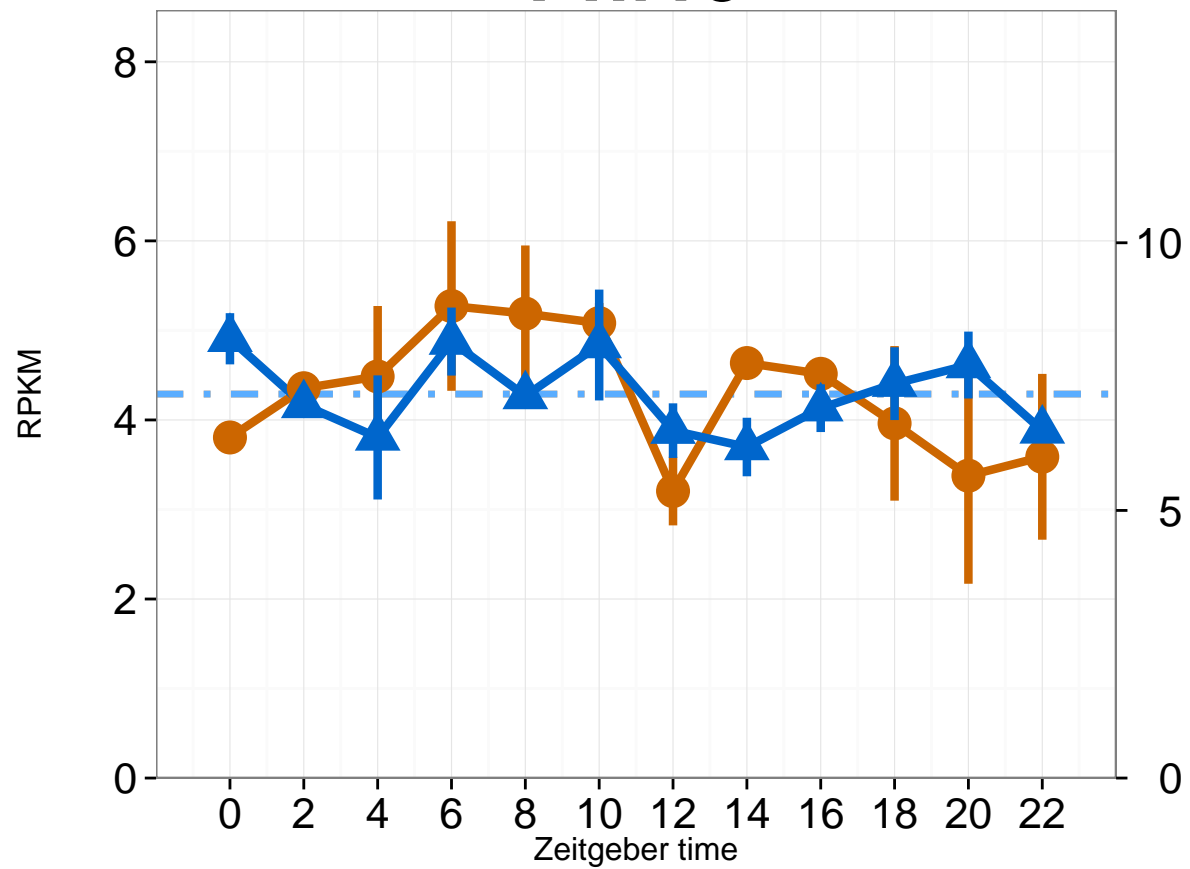

# Phf13

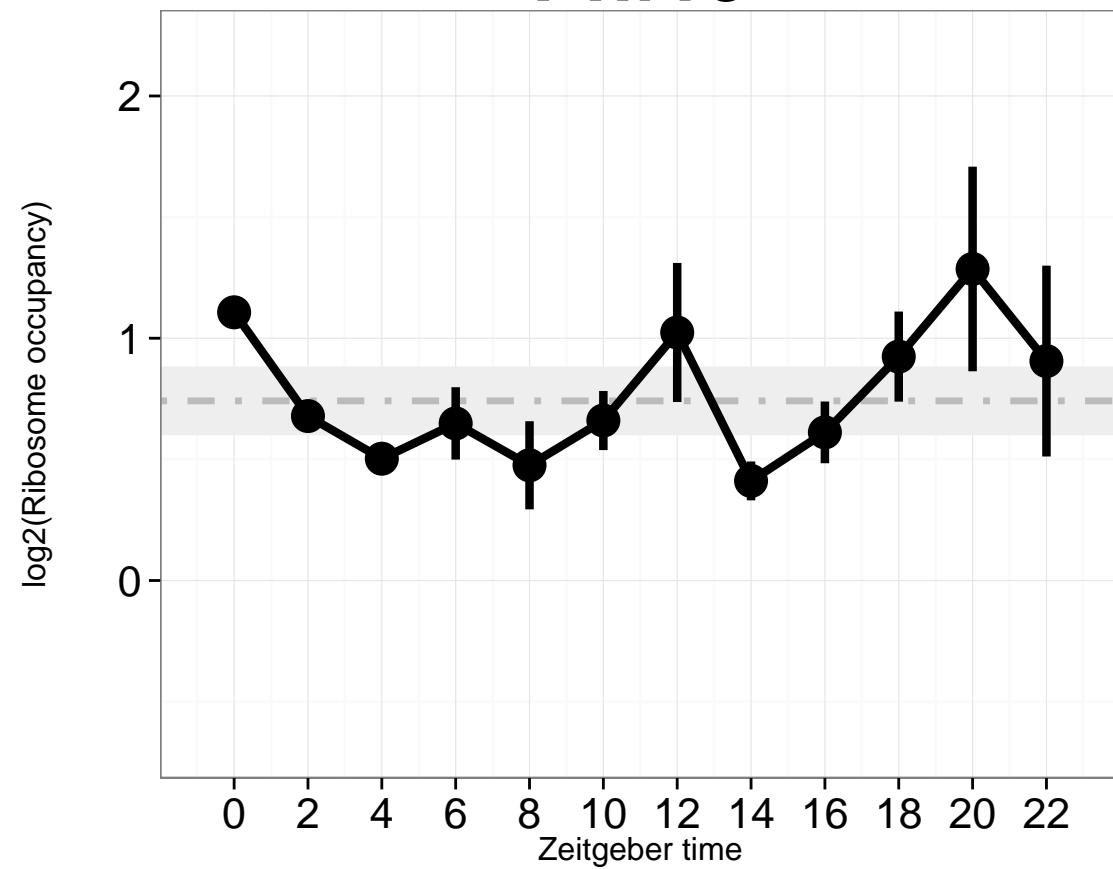

Supplement: Supplementary file 5618 [file 1]

# Zfp955b

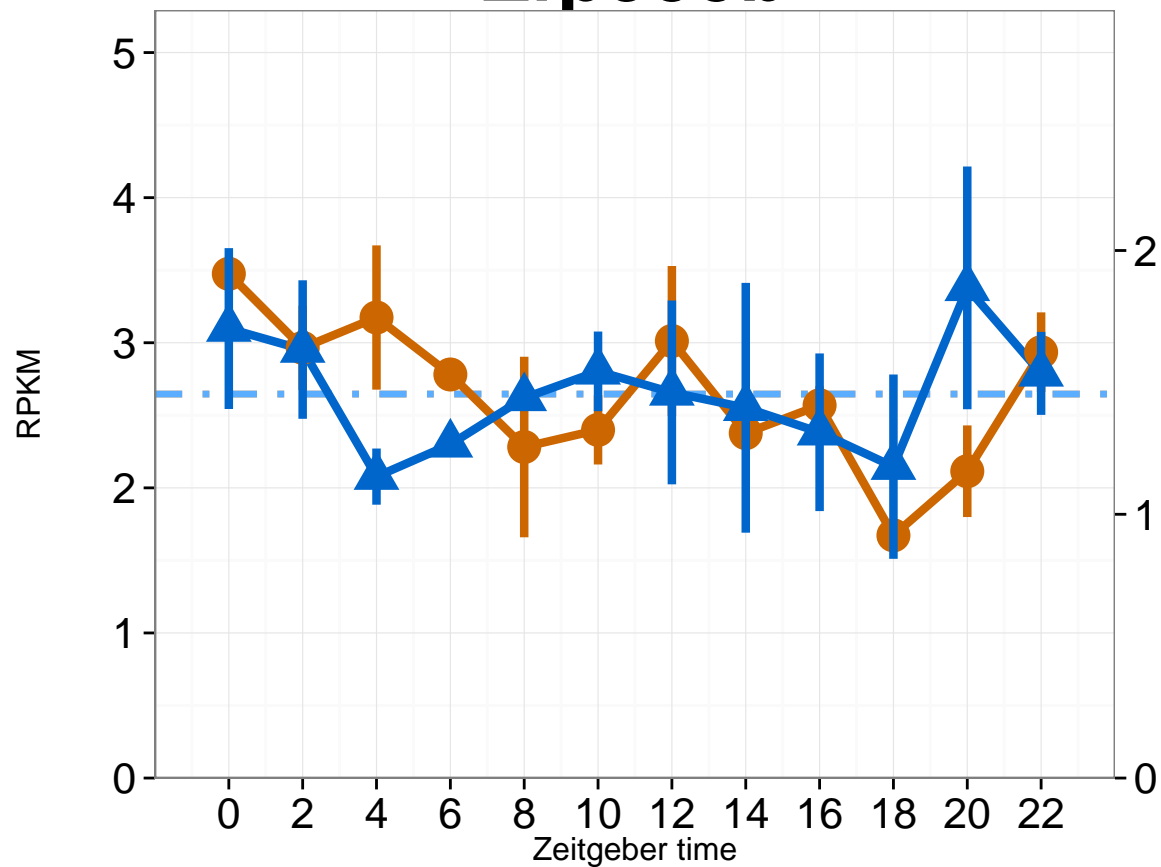

# Zfp955b

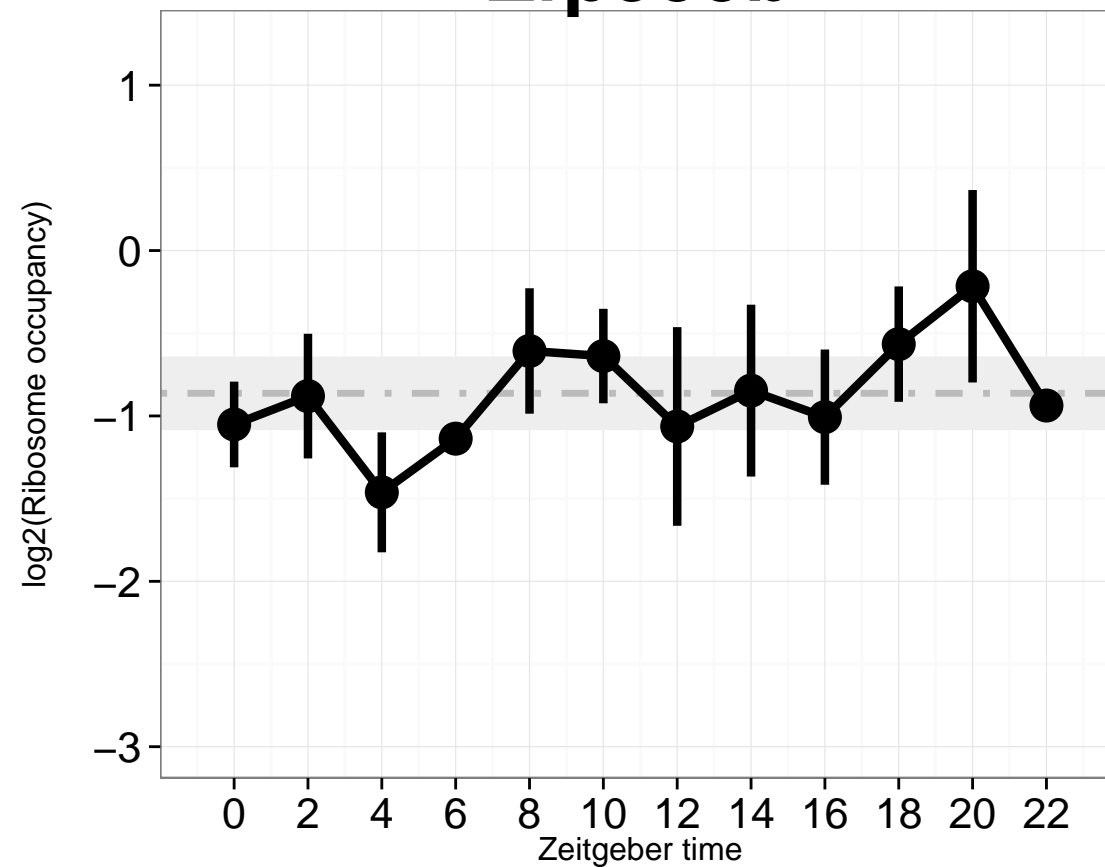

Supplement: Supplementary file 5619 [file 1]

# Fam83f

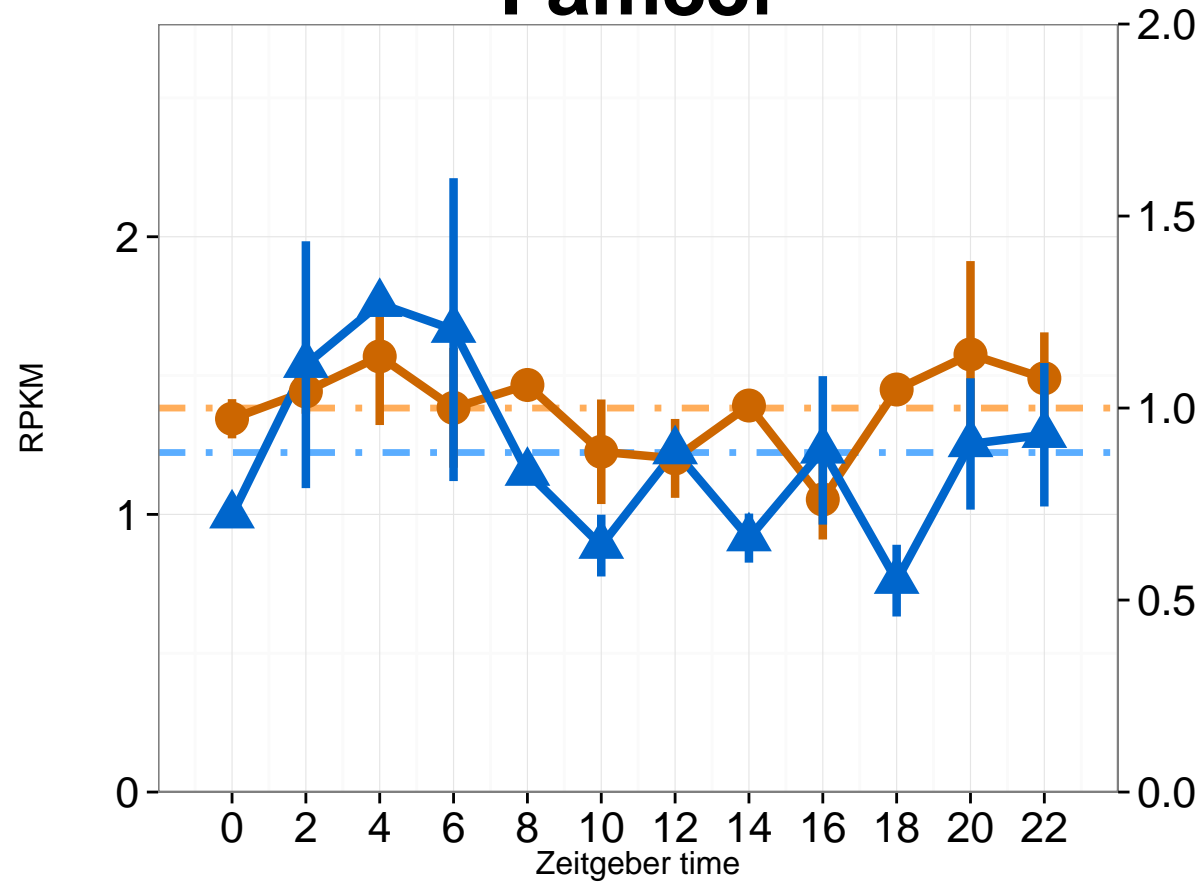

# Fam83f

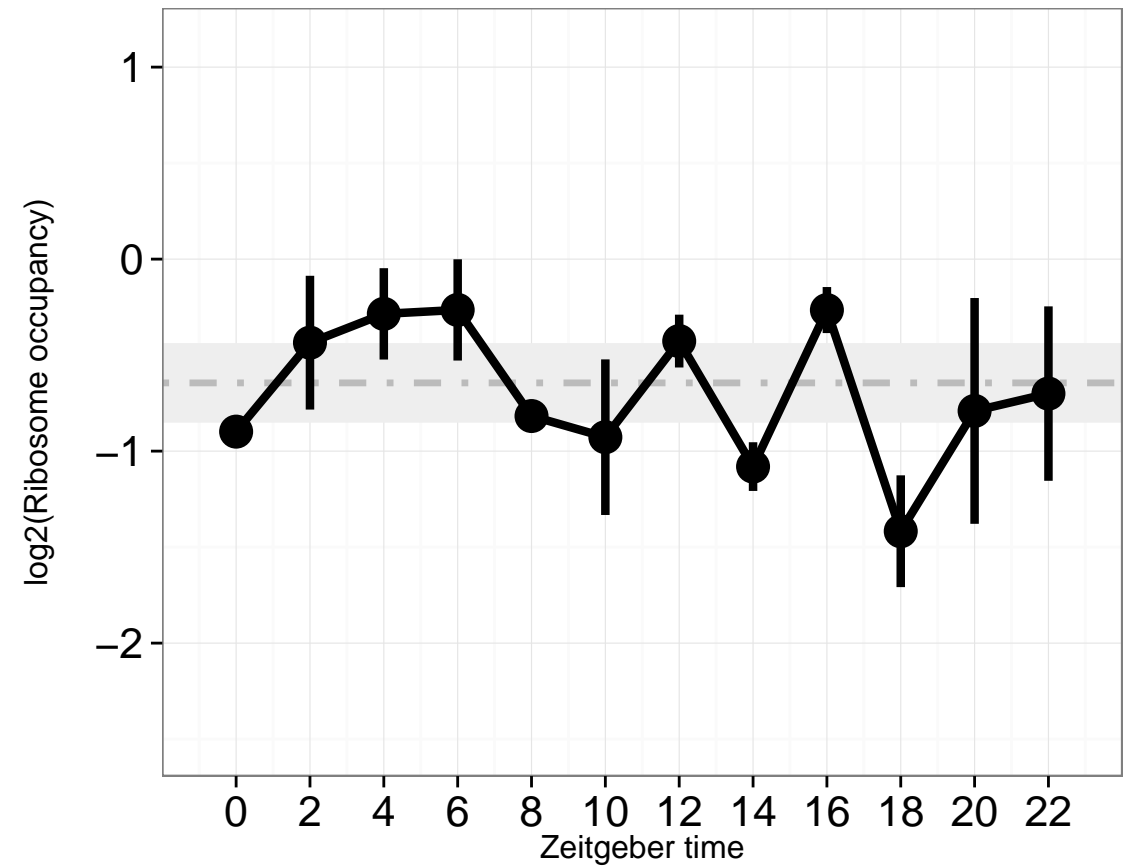

Supplement: Supplementary file 5620 [file 1]

## Rhbg

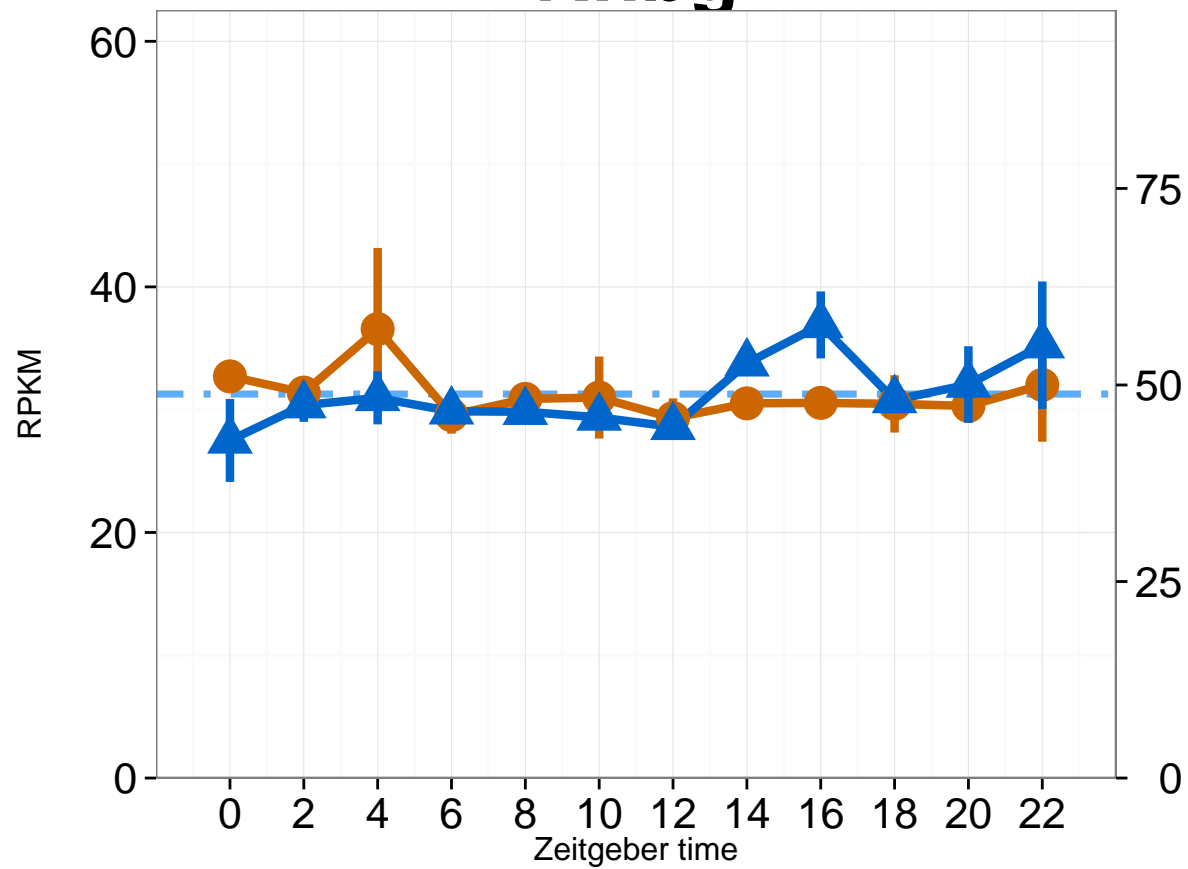

## Rhbg

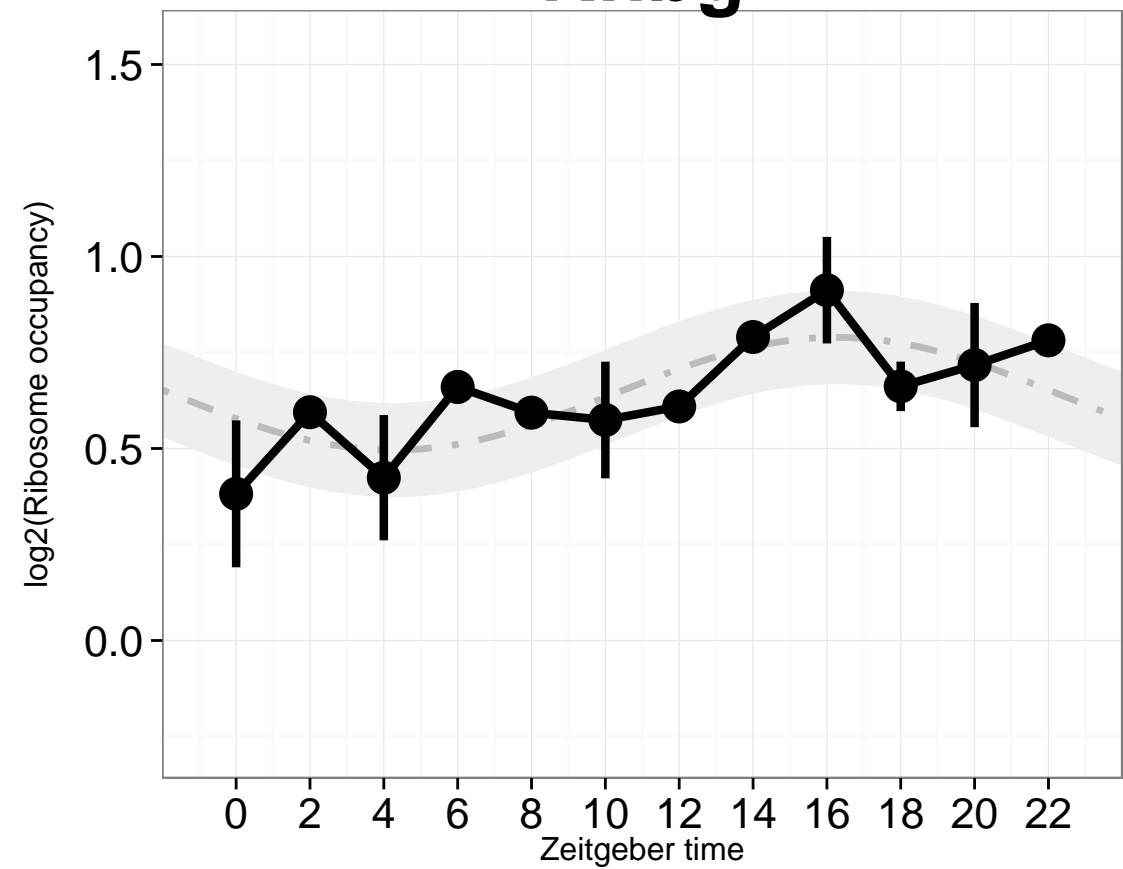

Supplement: Supplementary file 5621 [file 1]

# Cpeb4

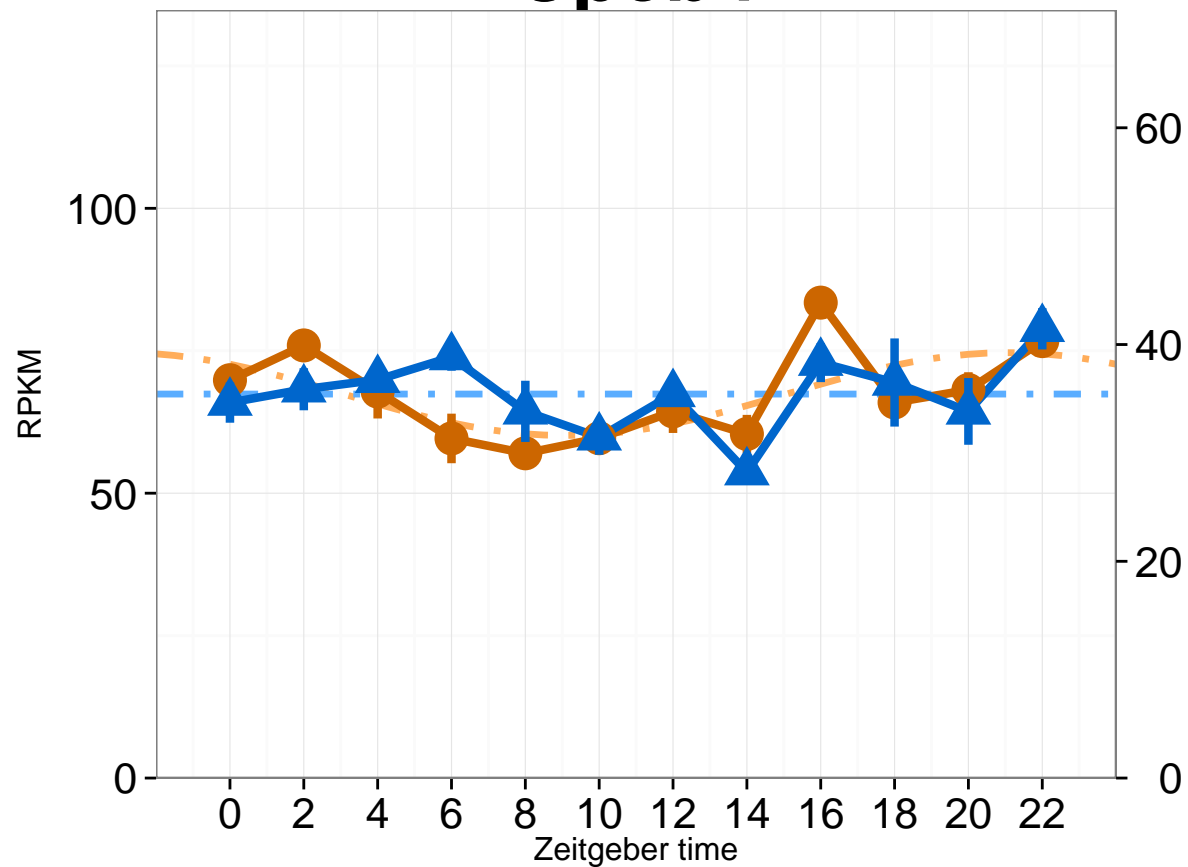

# Cpeb4

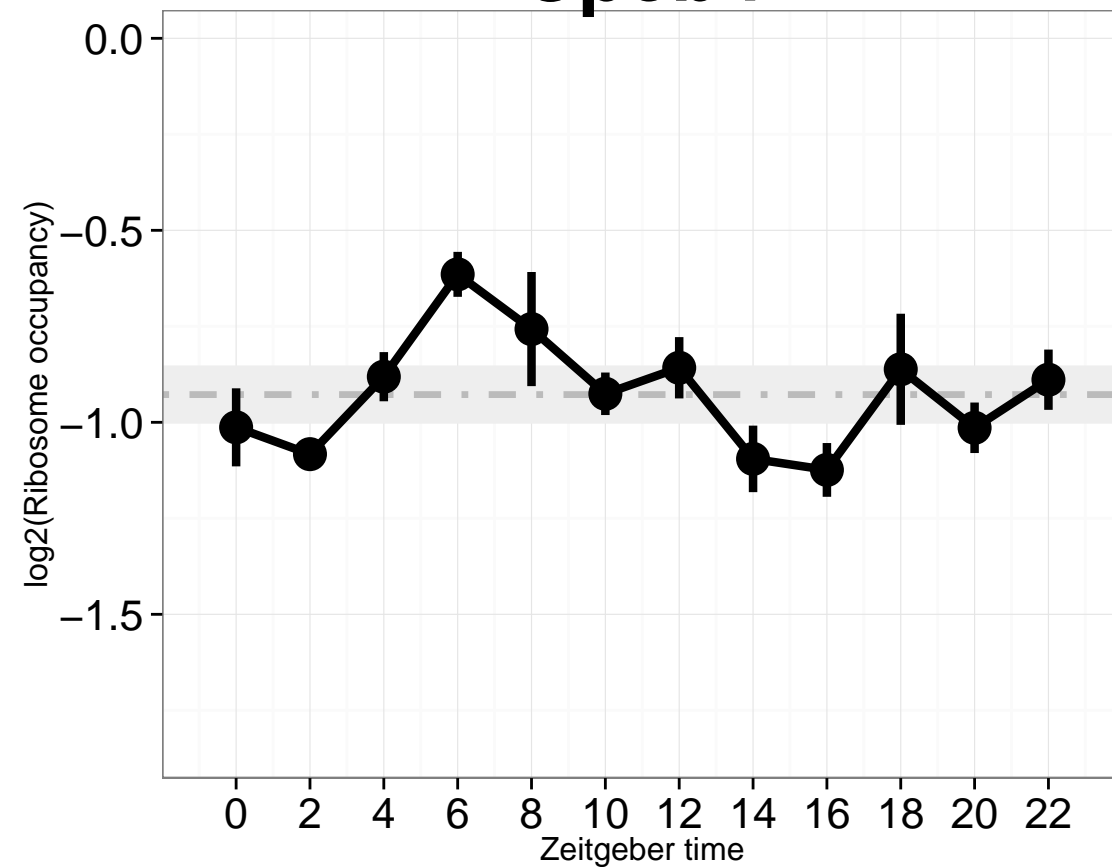

Supplement: Supplementary file 5622 [file 1]
