# Supplementary material (part 57 of 133)
Source: publisher figshare collection journal article supplement (https://springernature.figshare.com/articles/dataset/_/4903193)

## Commd2

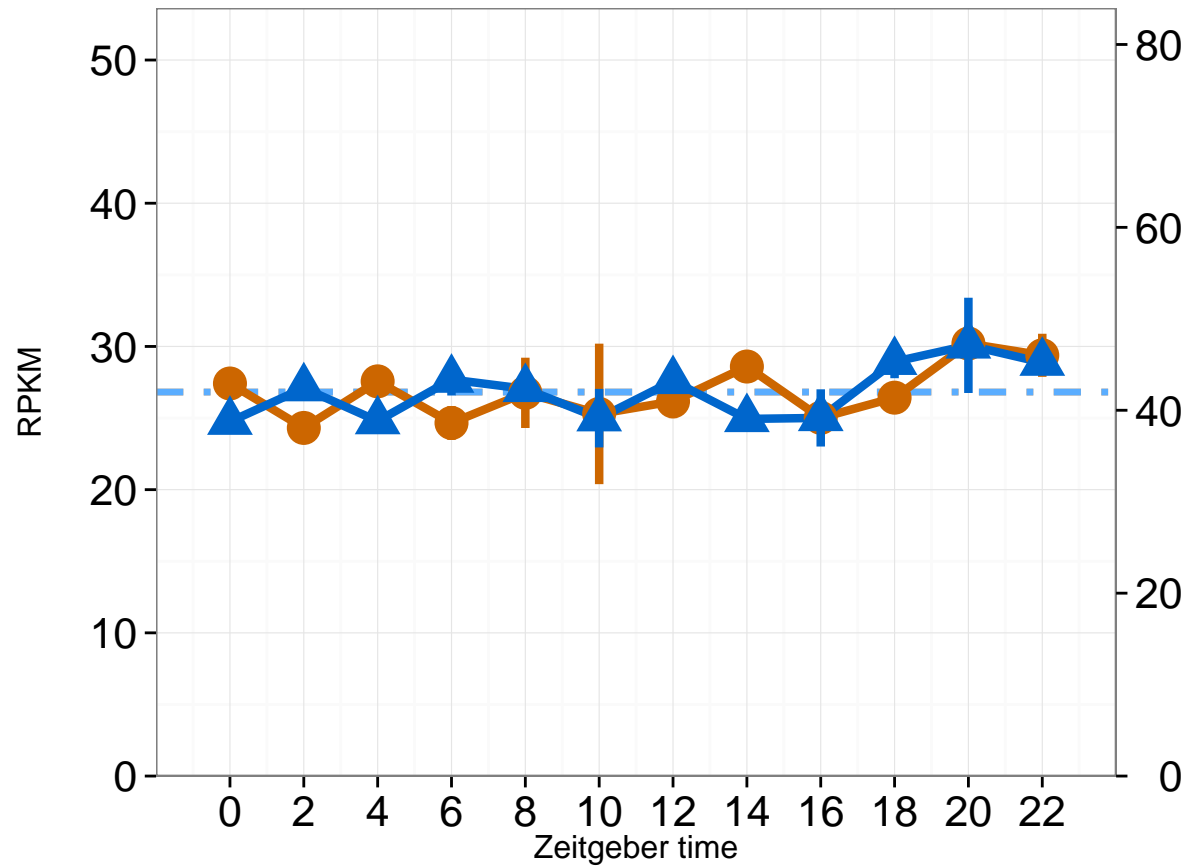

## Commd2

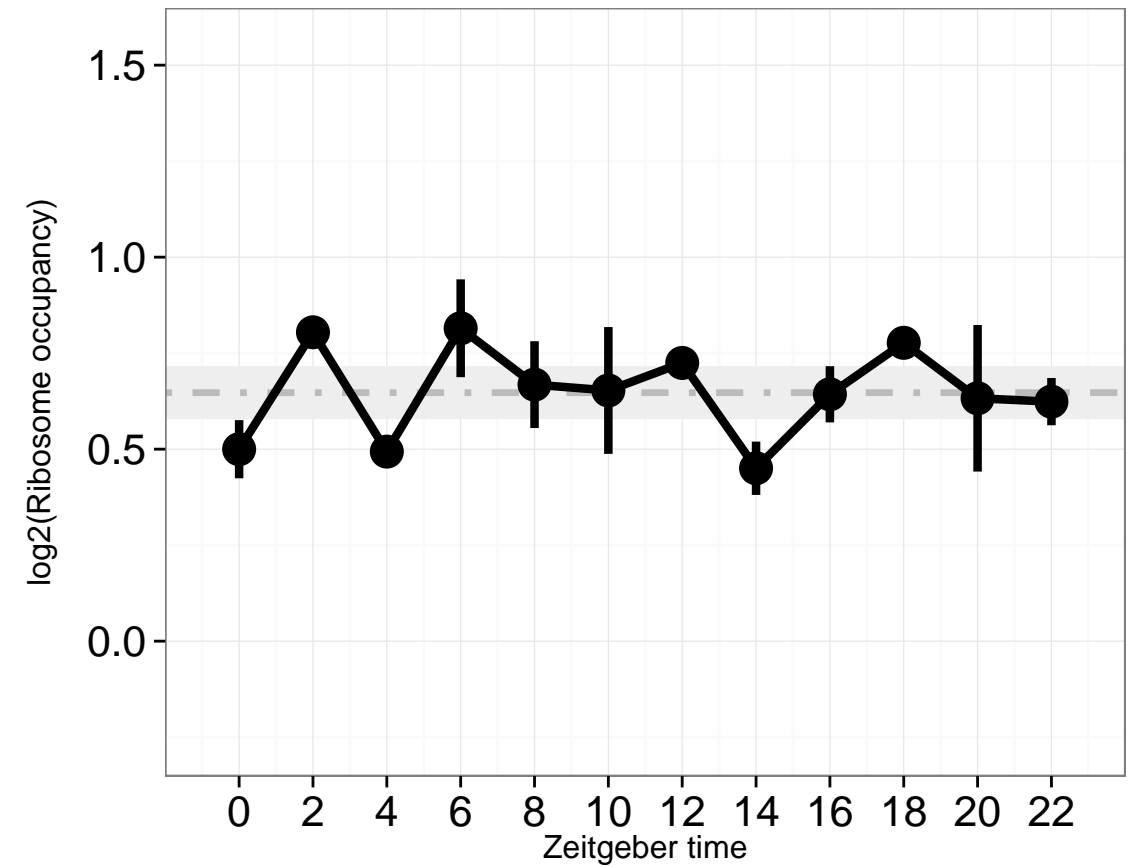

Supplement: Supplementary file 5623 [file 1]

# Lyrm1

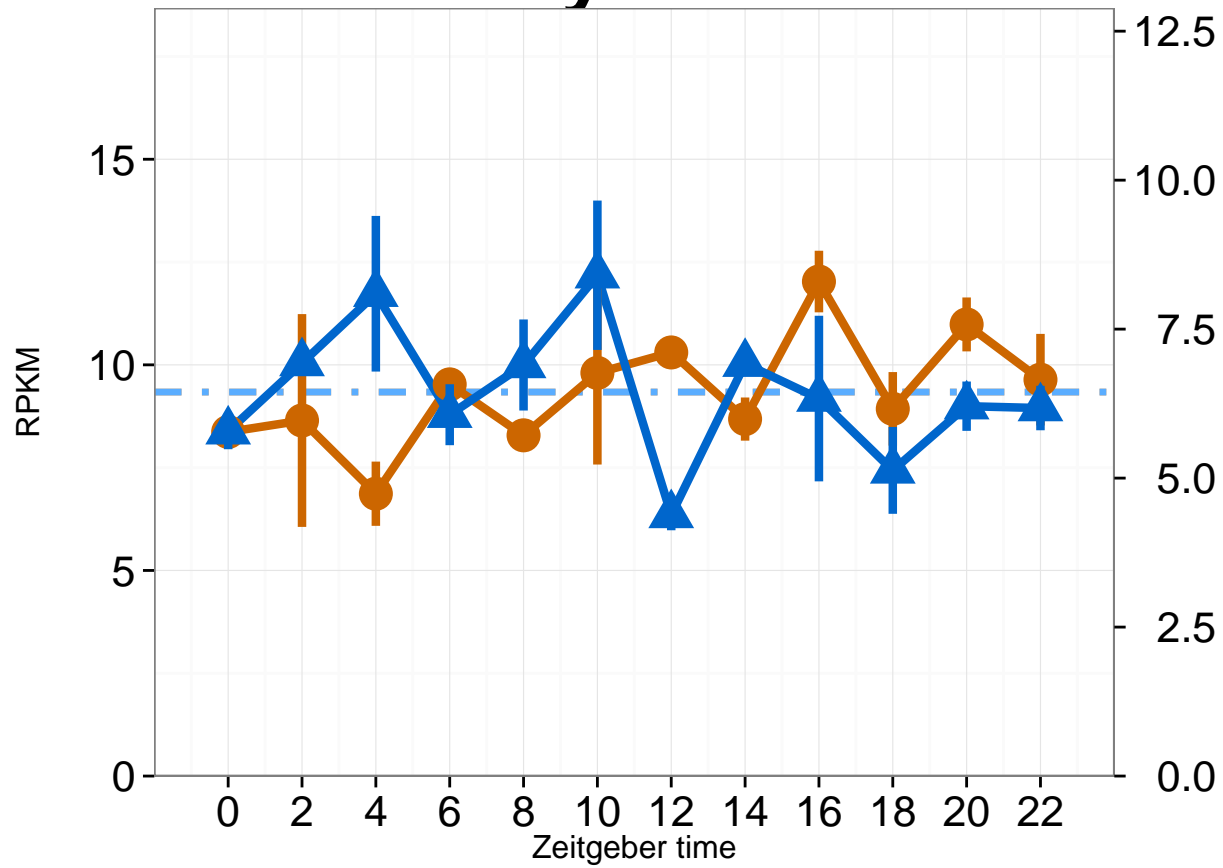

# Lyrm1

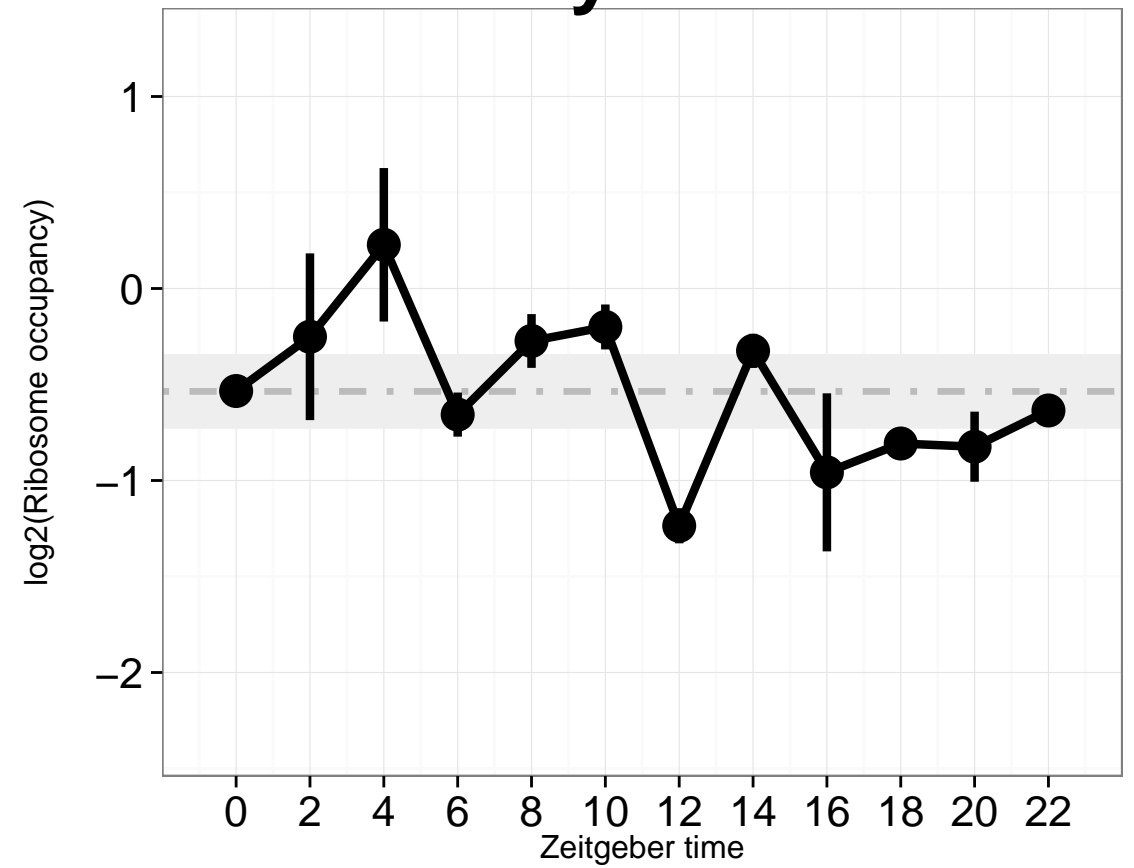

Supplement: Supplementary file 5624 [file 1]

## Tctn2

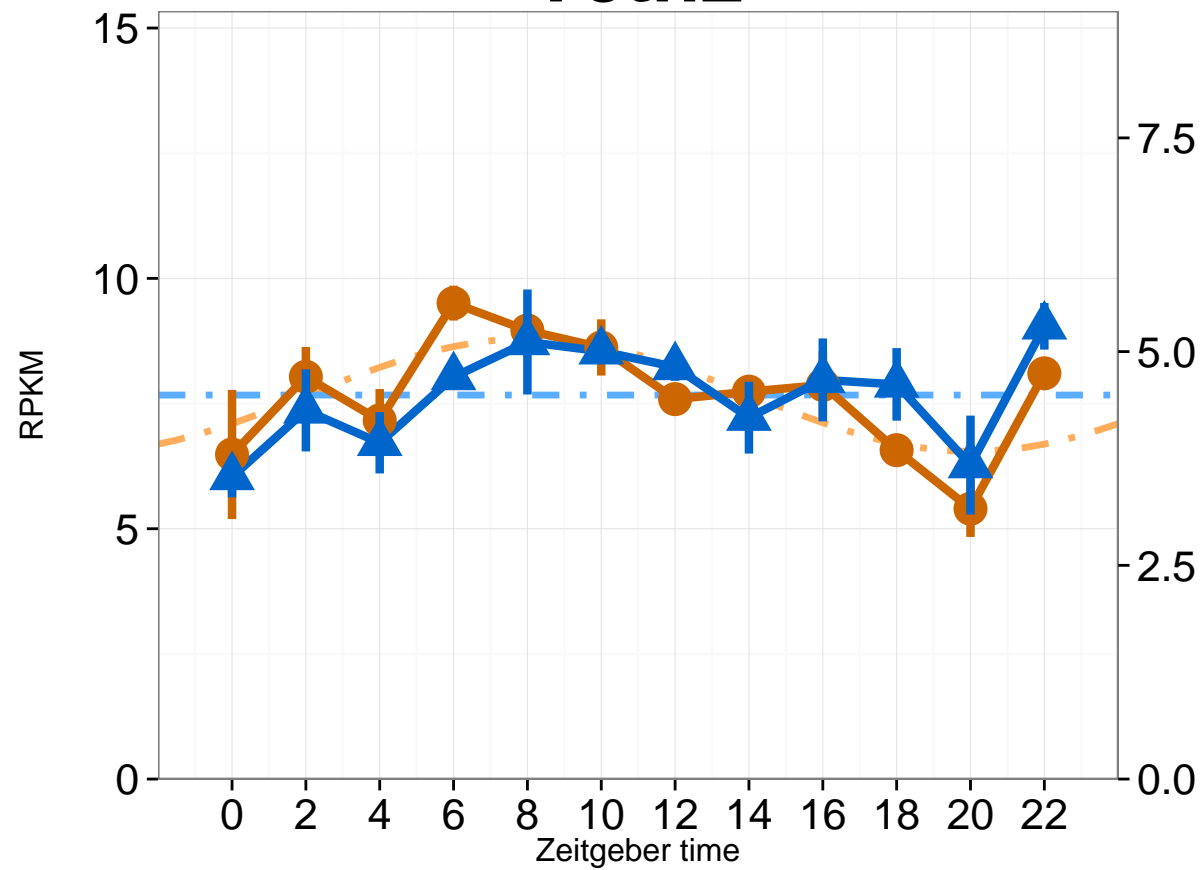

## Tctn2

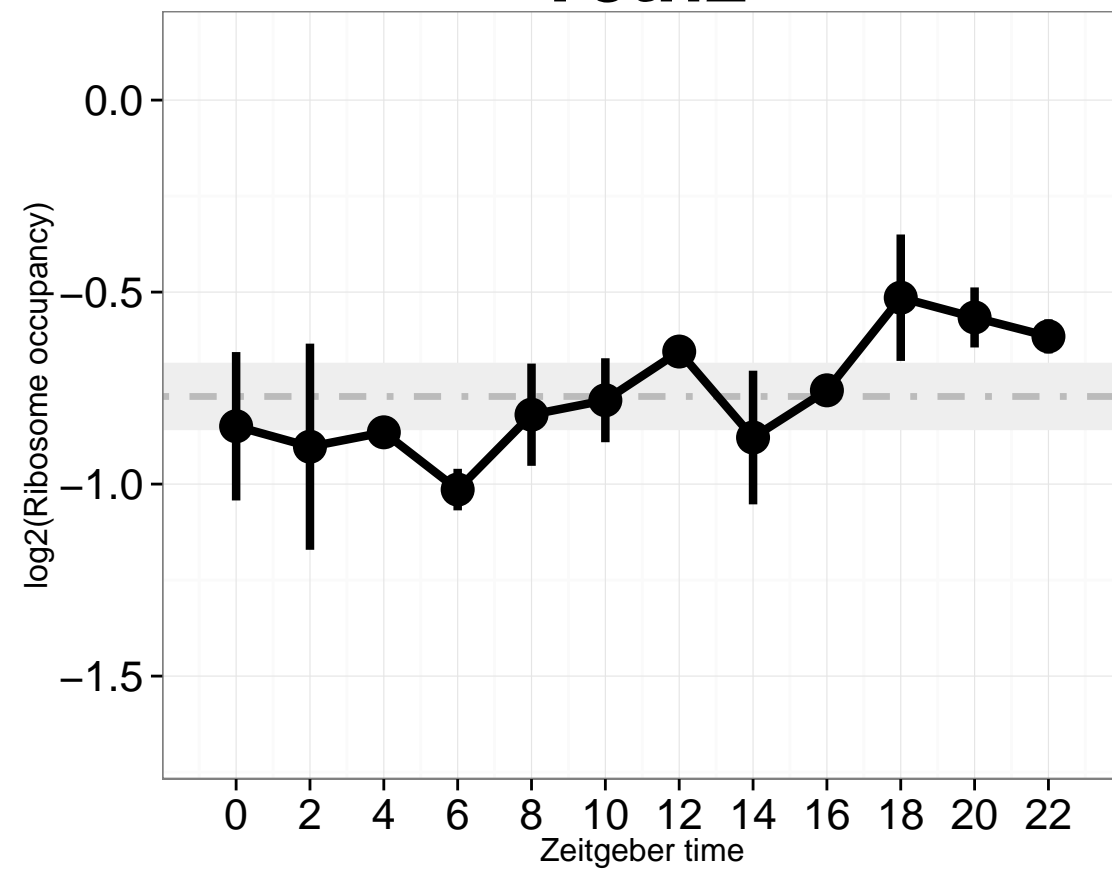

Supplement: Supplementary file 5625 [file 1]

## Sephs2

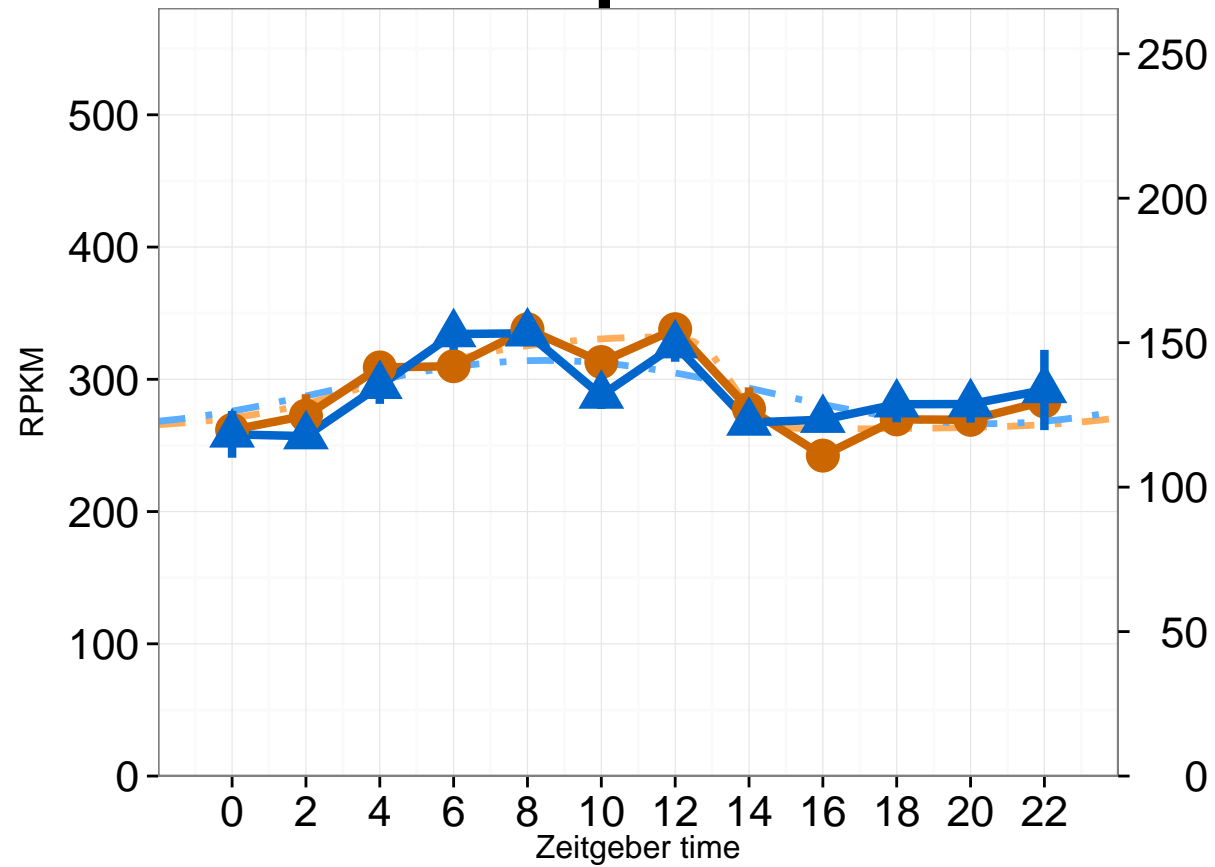

## Sephs2

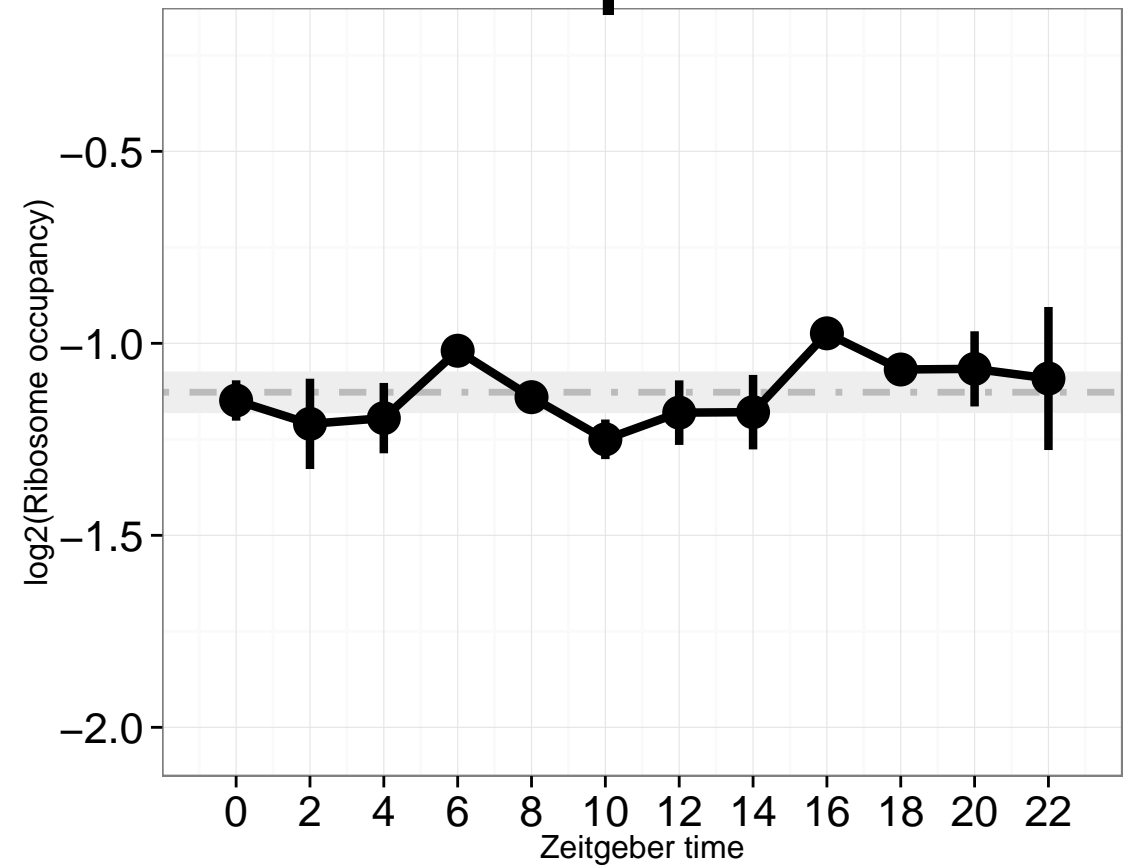

Supplement: Supplementary file 5626 [file 1]

**Hist1h3h TR**

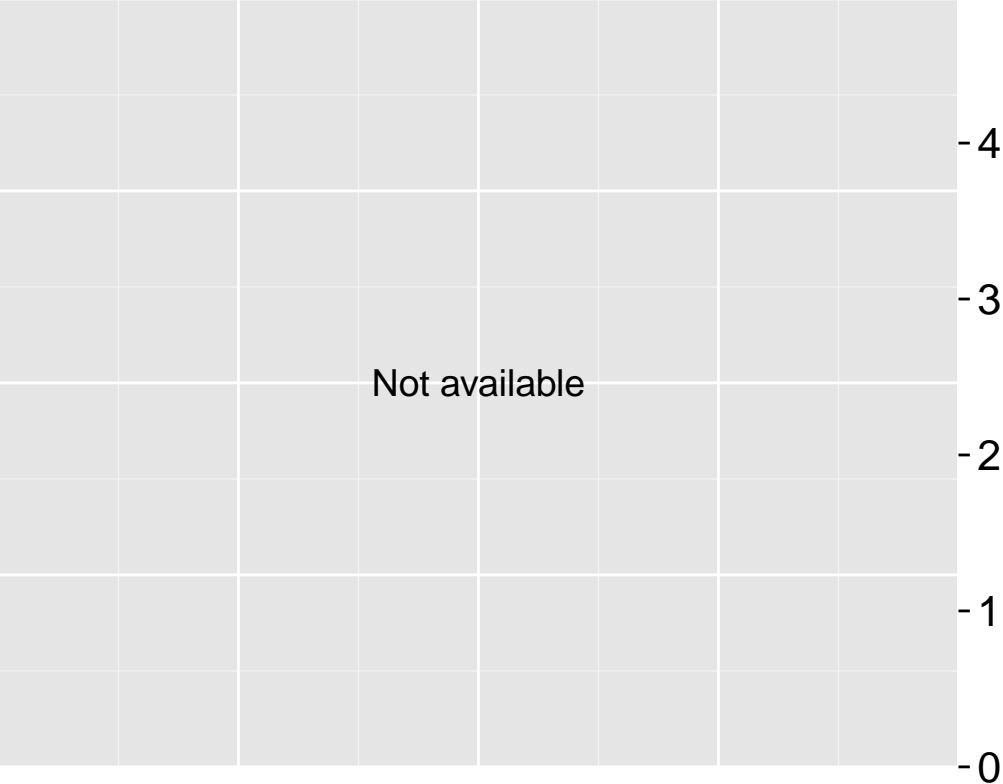

**Hist1h3h log2(Ribosome occupanc**

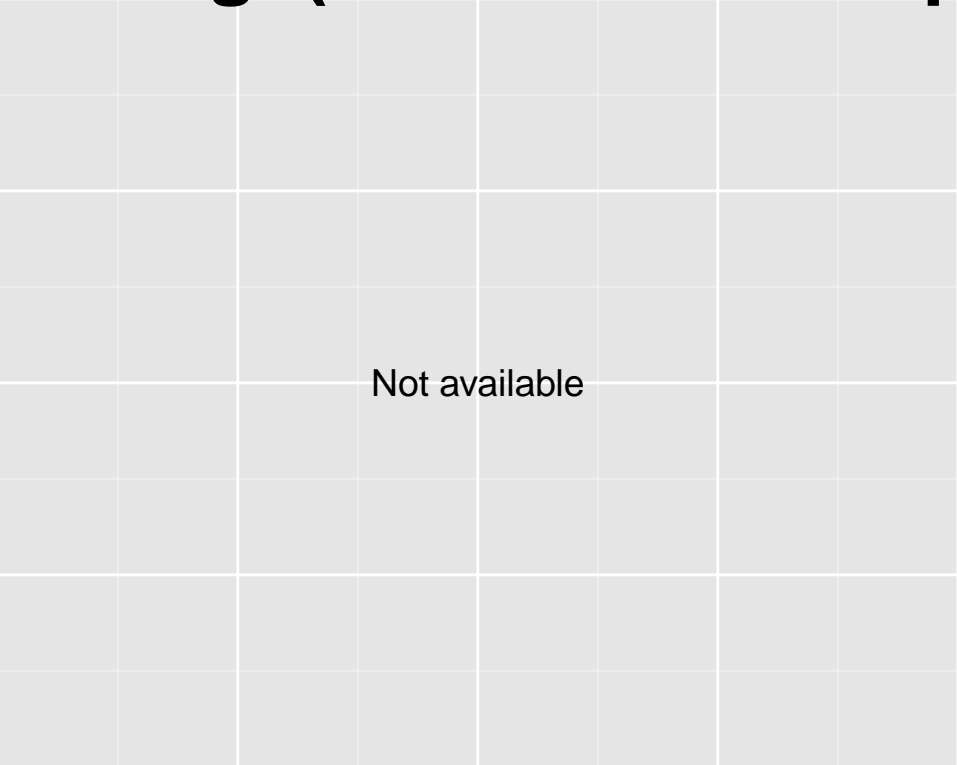

Supplement: Supplementary file 5627 [file 1]

## Rnf181

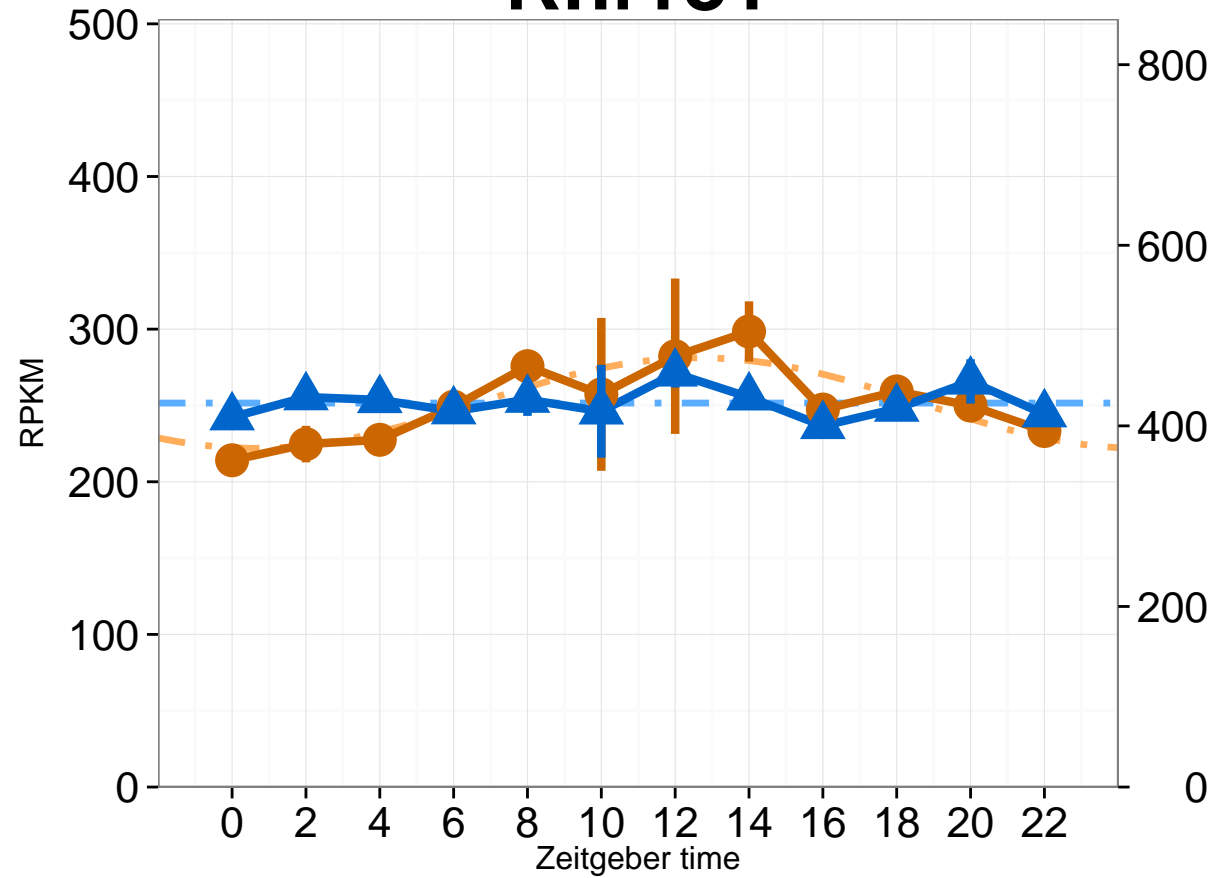

## Rnf181

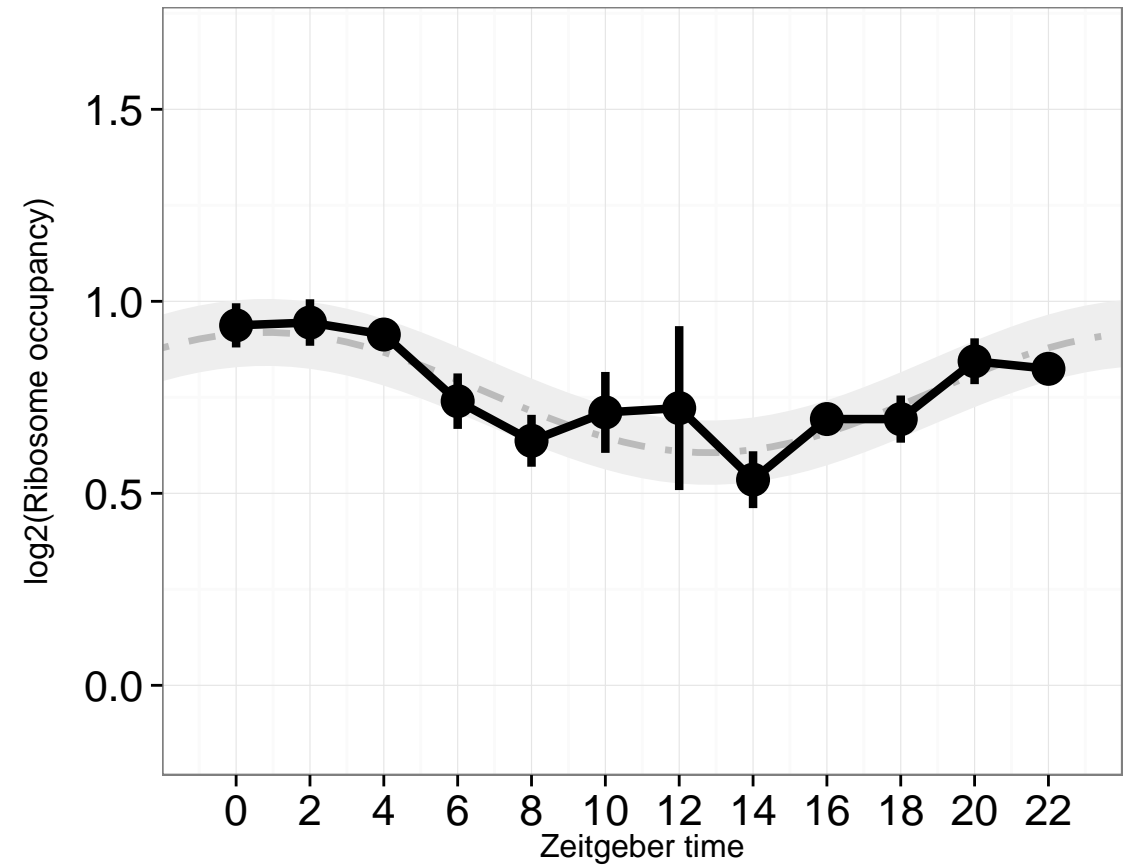

Supplement: Supplementary file 5628 [file 1]

## Alpk1

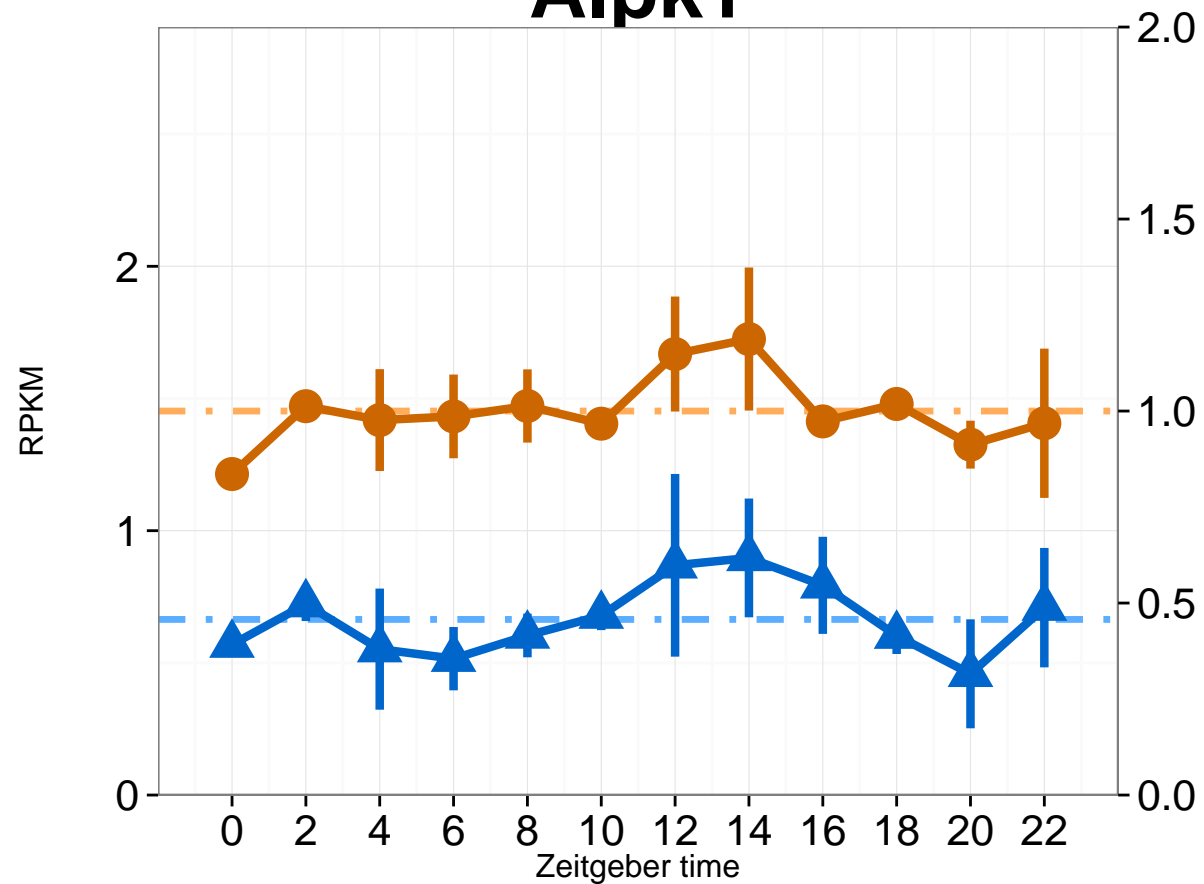

## Alpk1

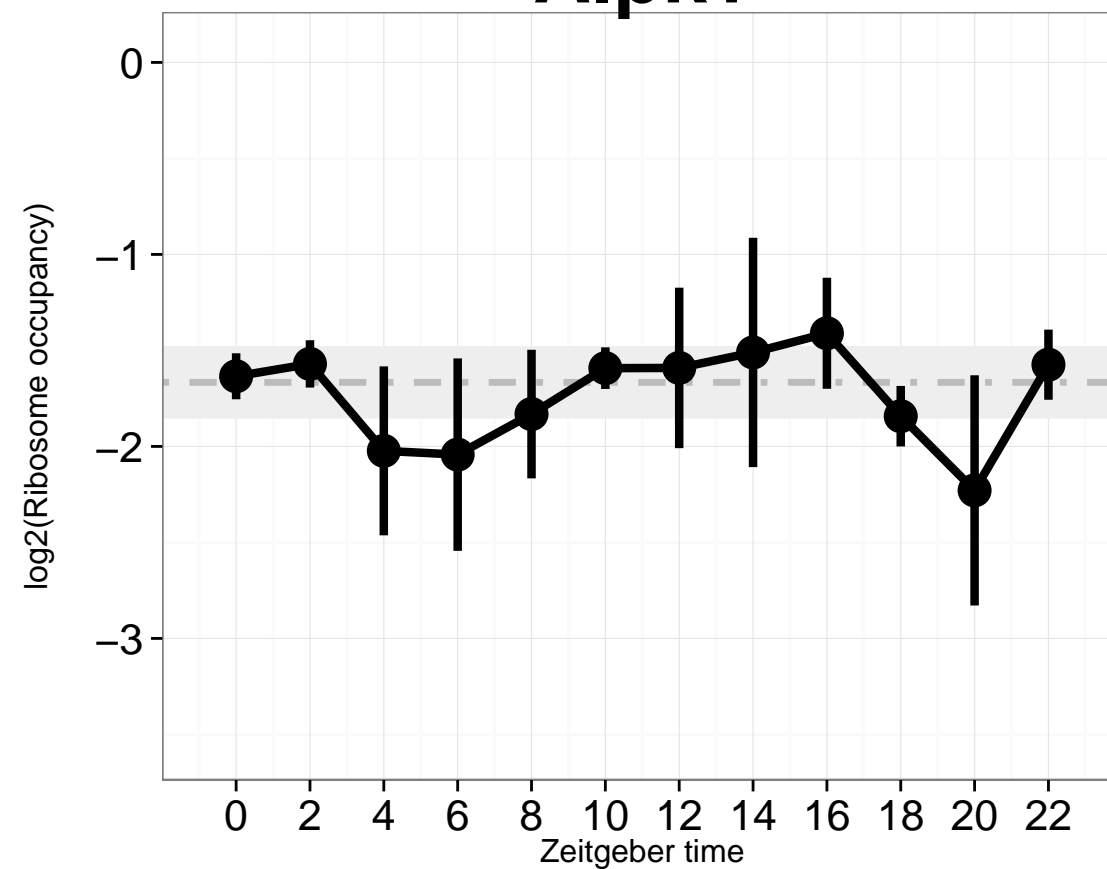

Supplement: Supplementary file 5629 [file 1]

# Pip5k1a

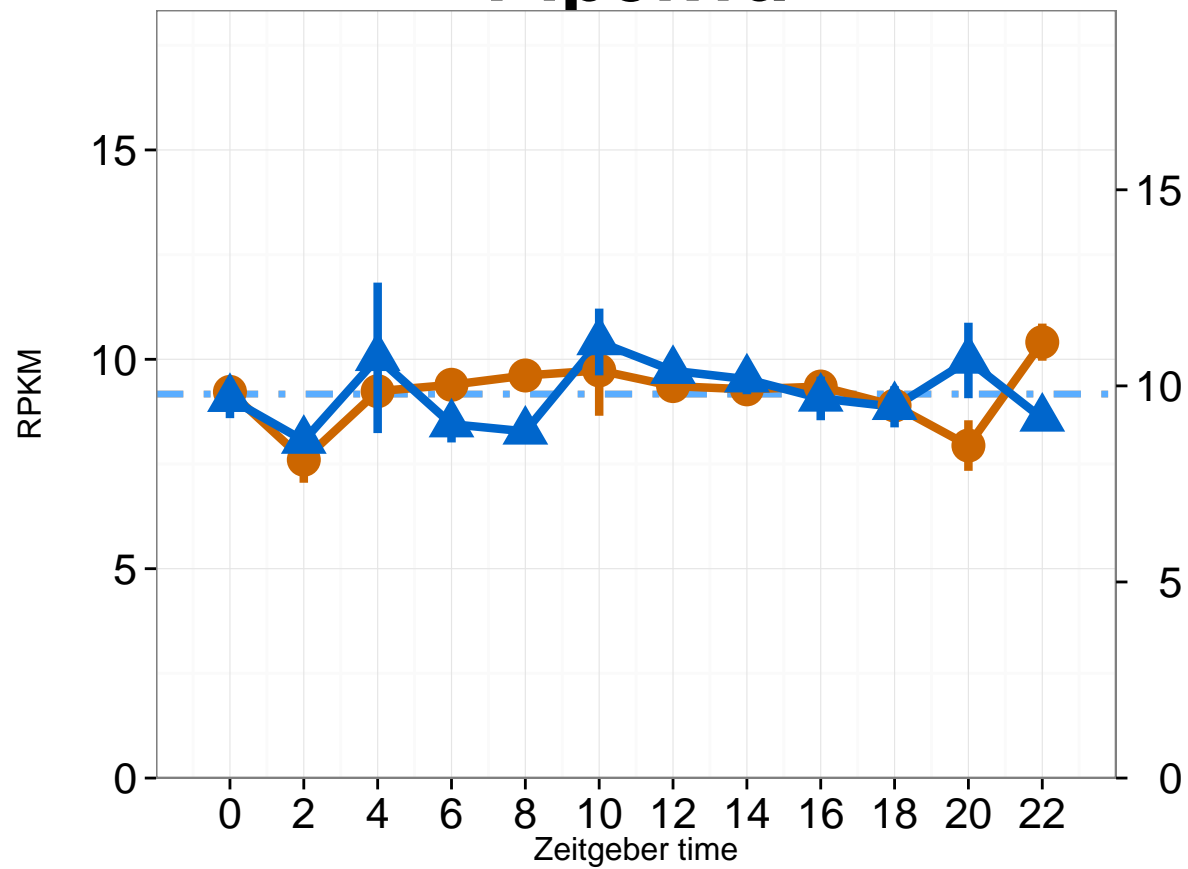

# Pip5k1a

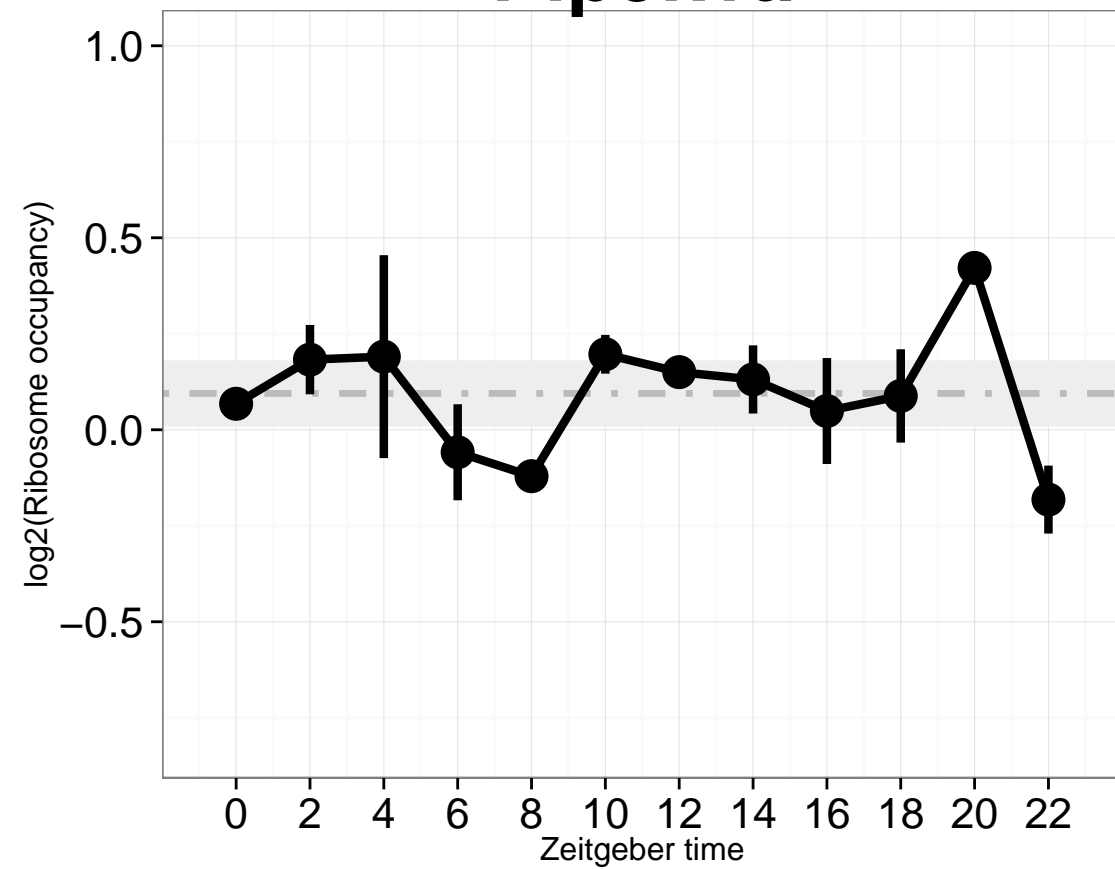

Supplement: Supplementary file 5630 [file 1]

## Scrn3

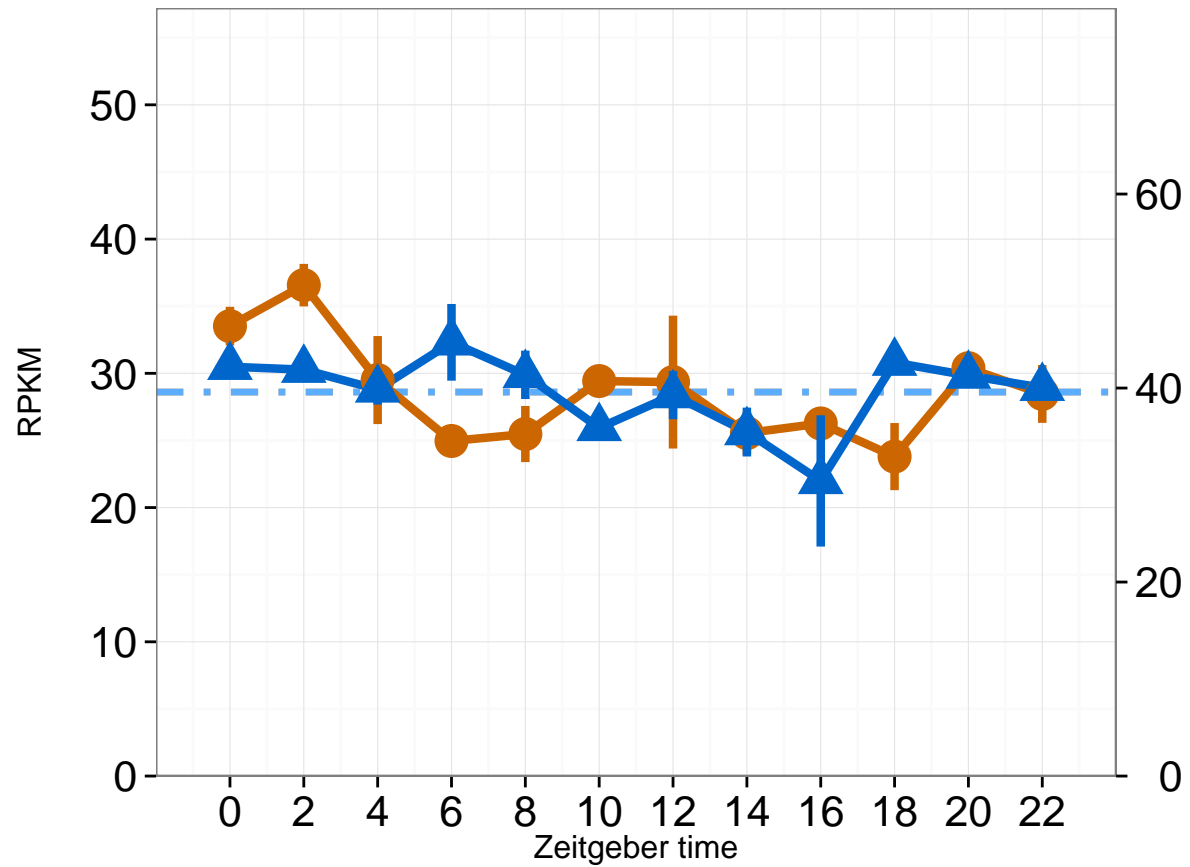

## Scrn3

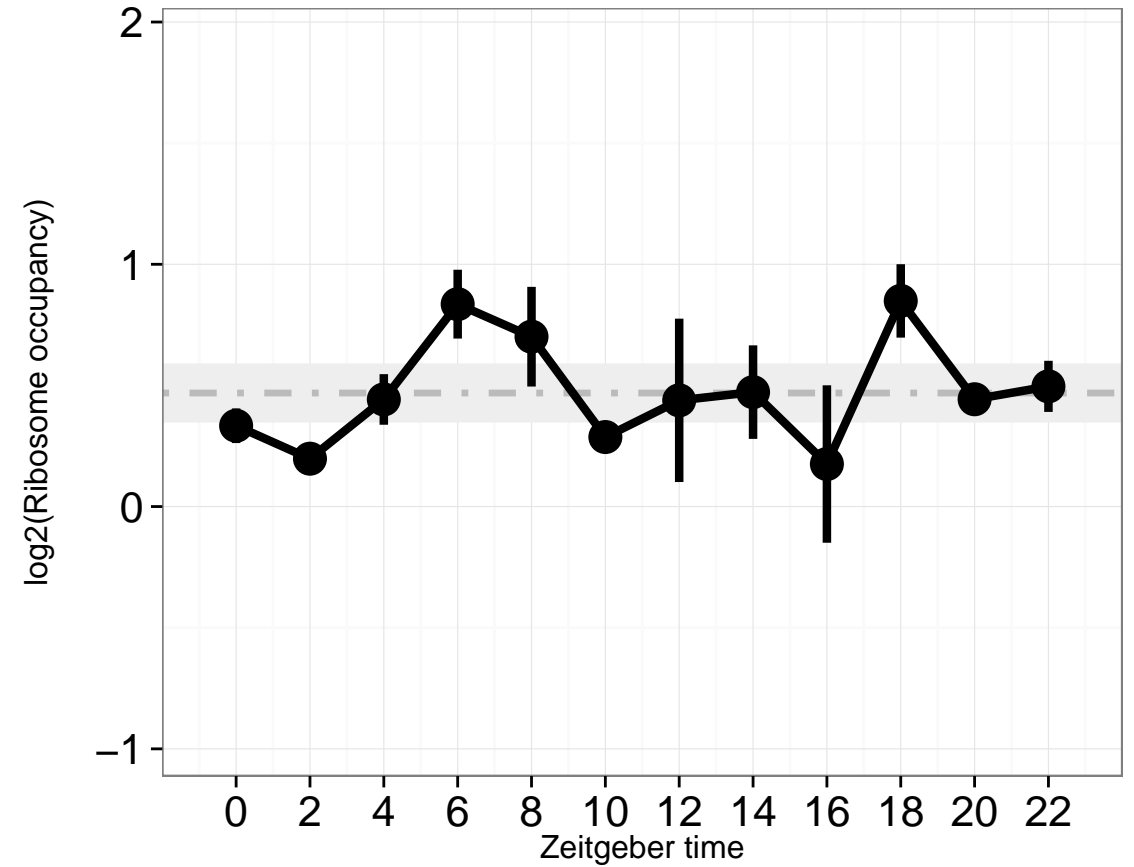

Supplement: Supplementary file 5631 [file 1]

## Adprm

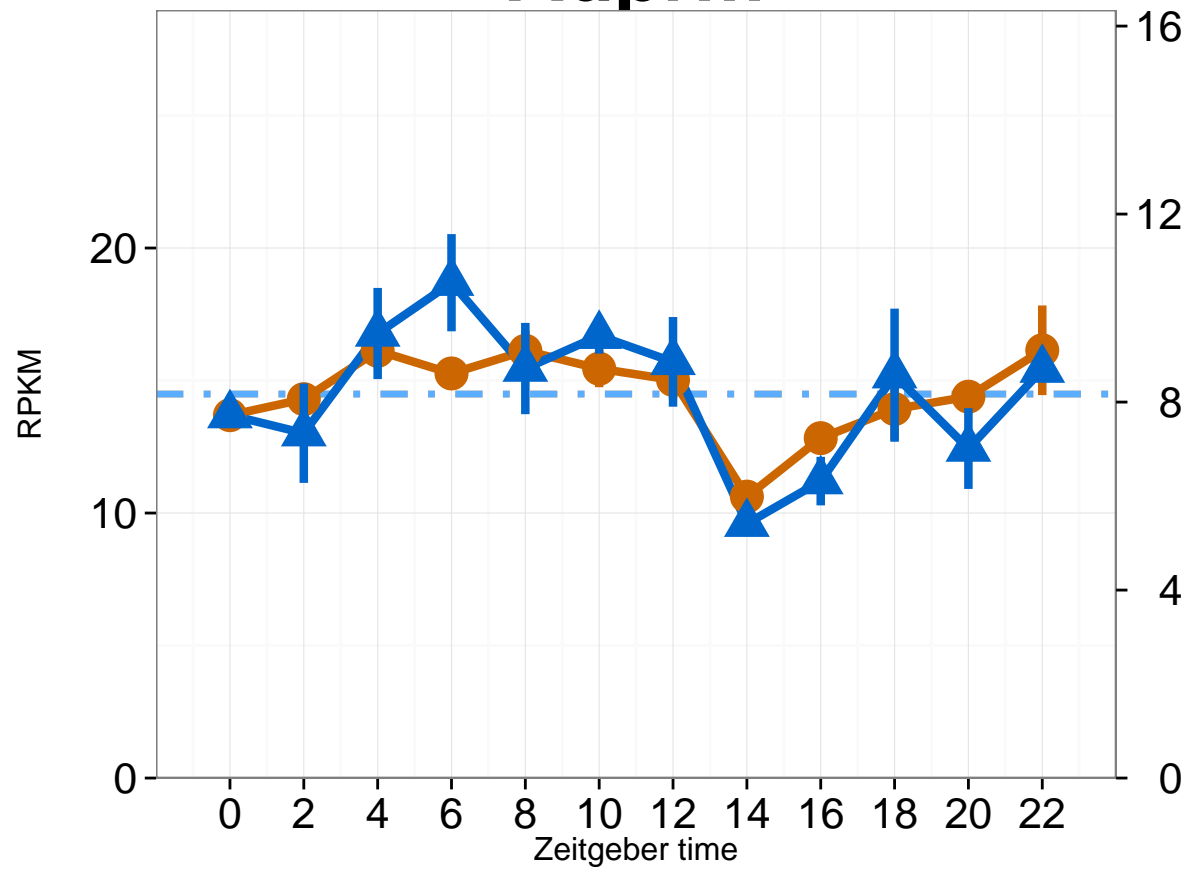

## Adprm

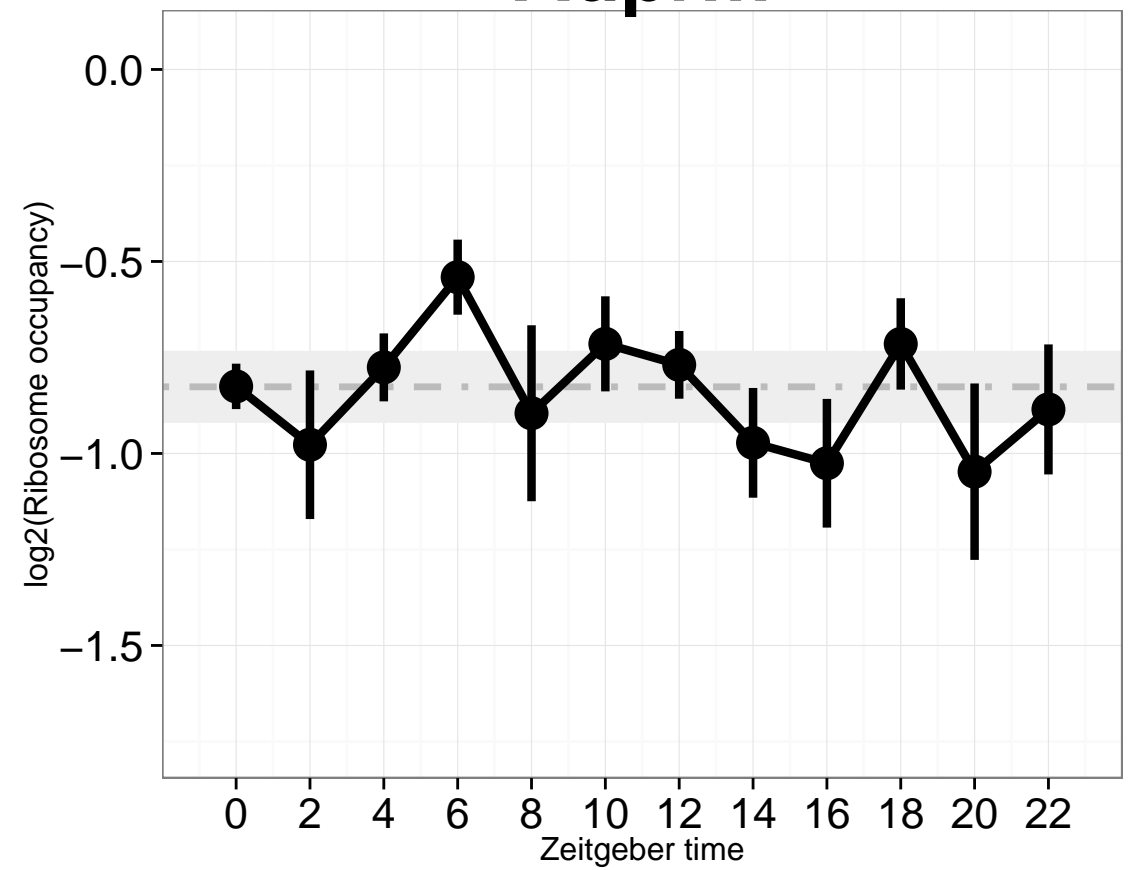

Supplement: Supplementary file 5632 [file 1]

## Slc29a3

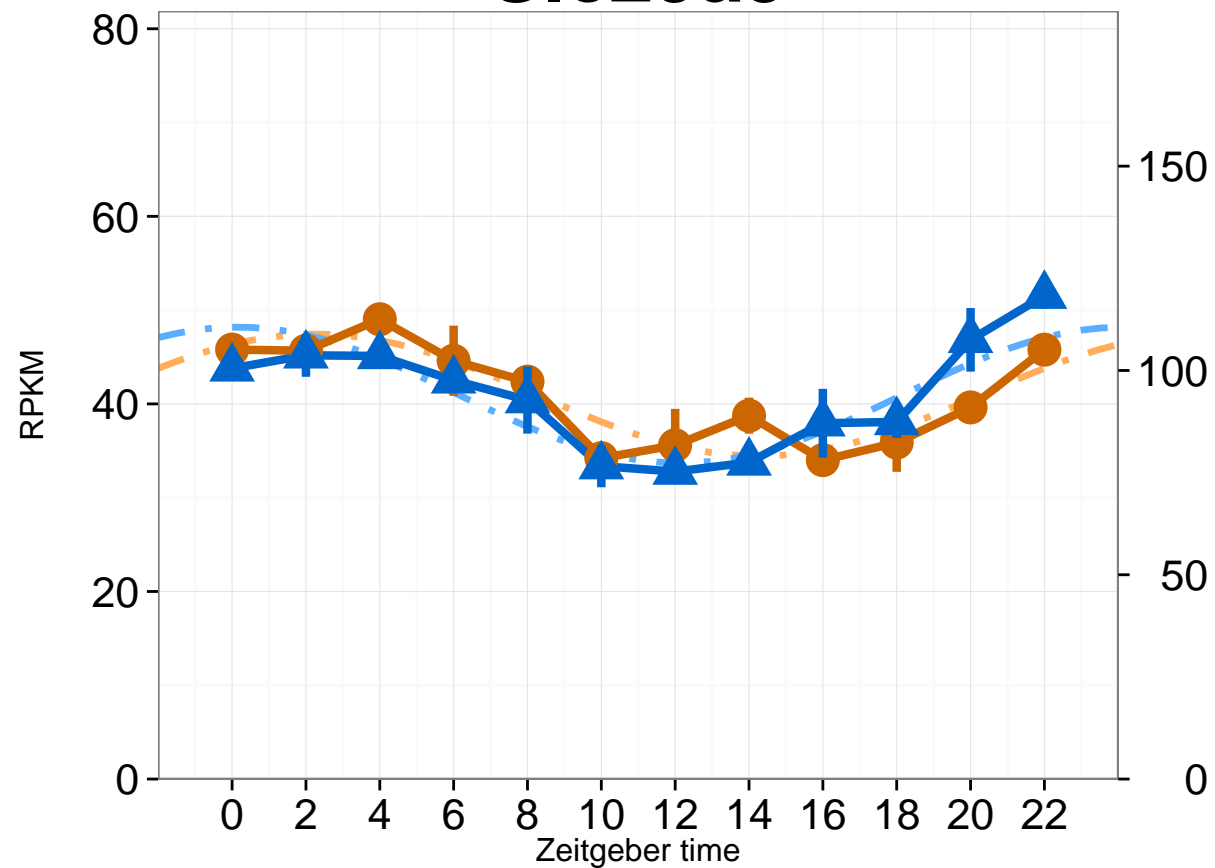

## Slc29a3

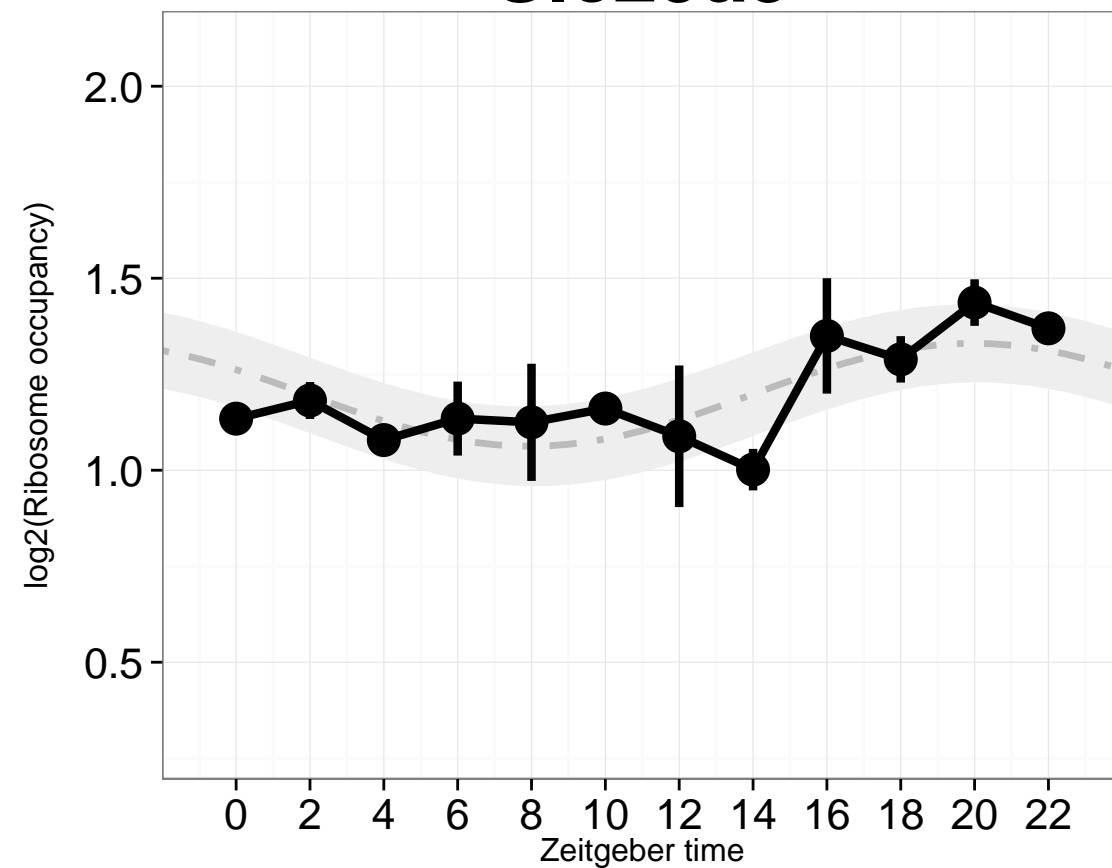

Supplement: Supplementary file 5633 [file 1]

# Cux2

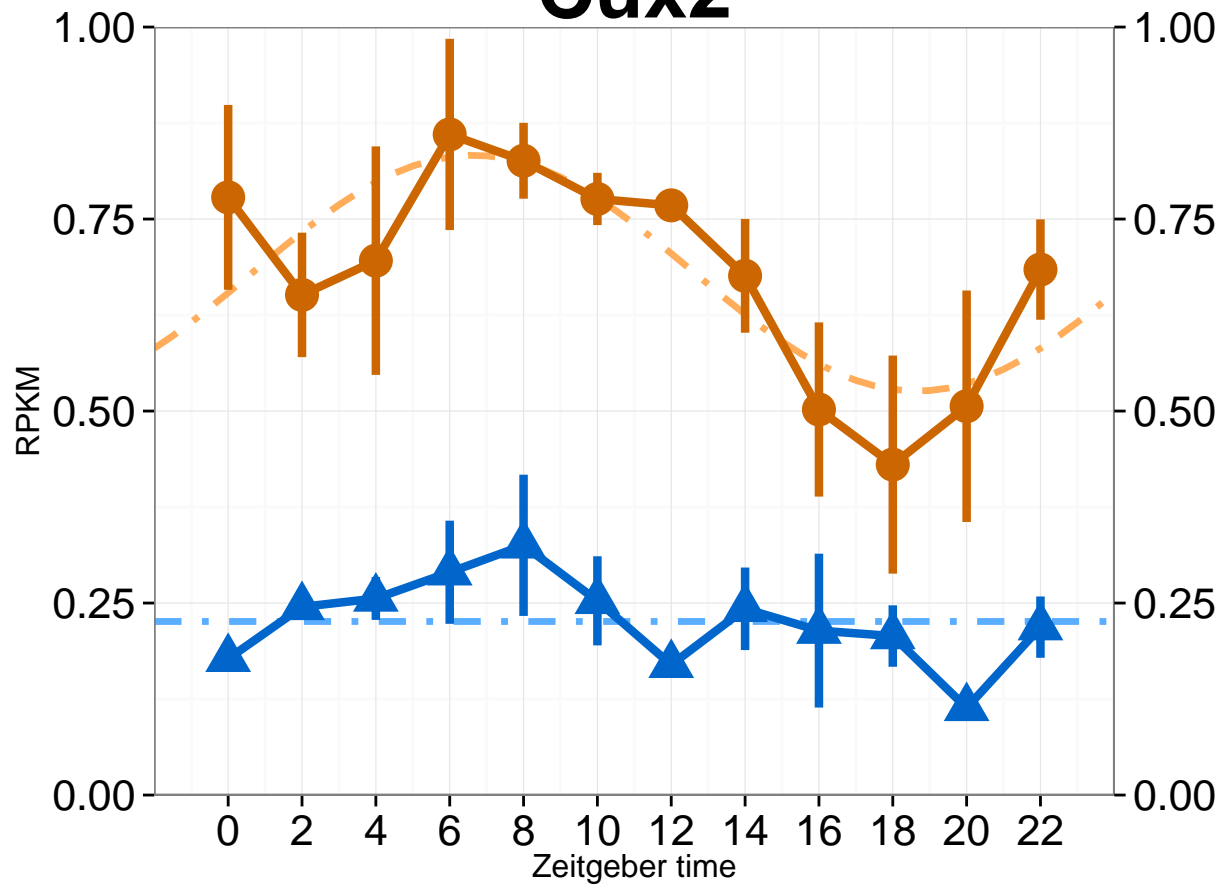

# Cux2

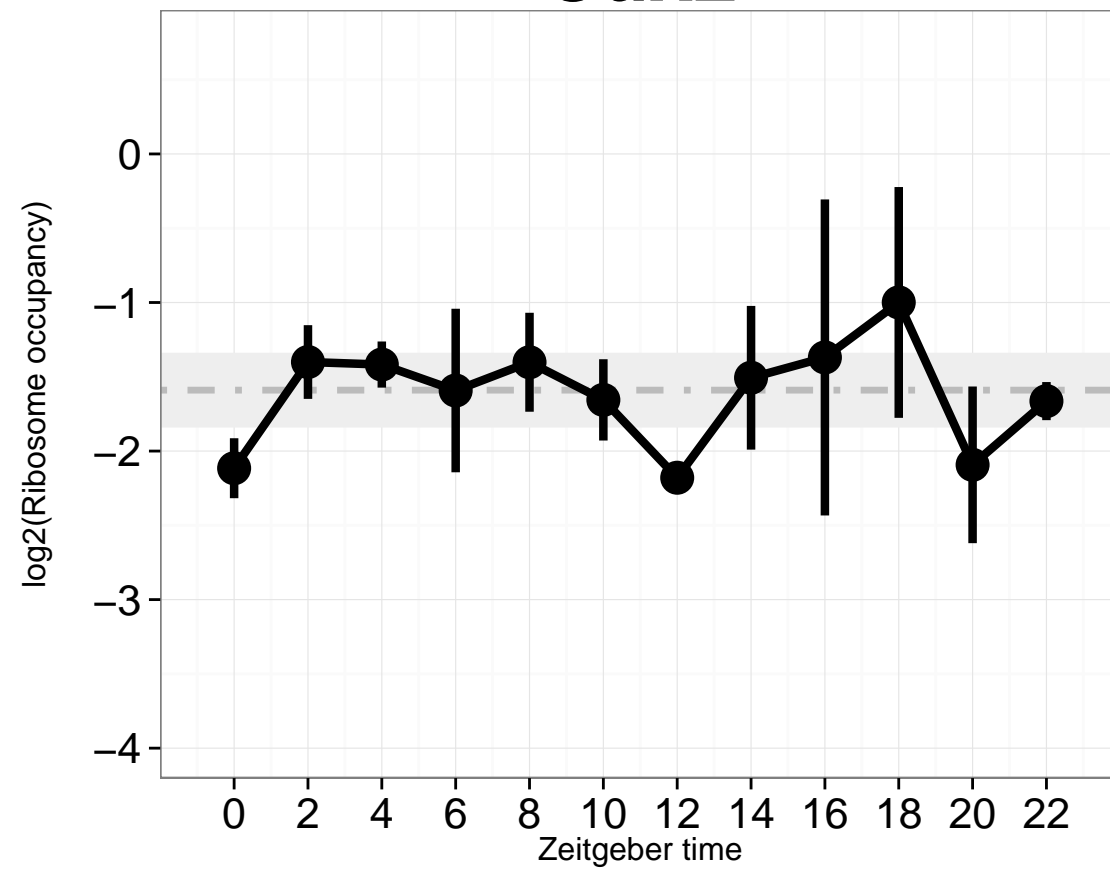

Supplement: Supplementary file 5634 [file 1]

## Rims2

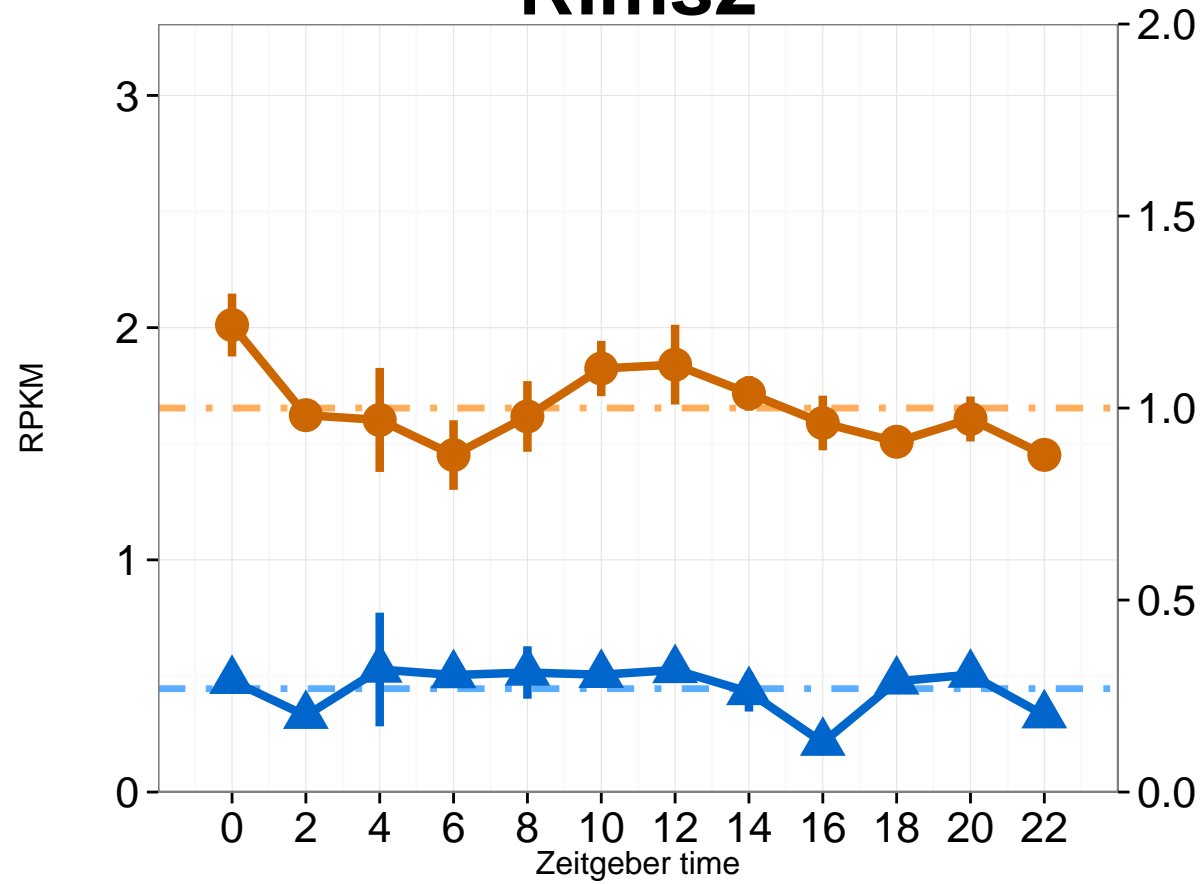

## Rims2

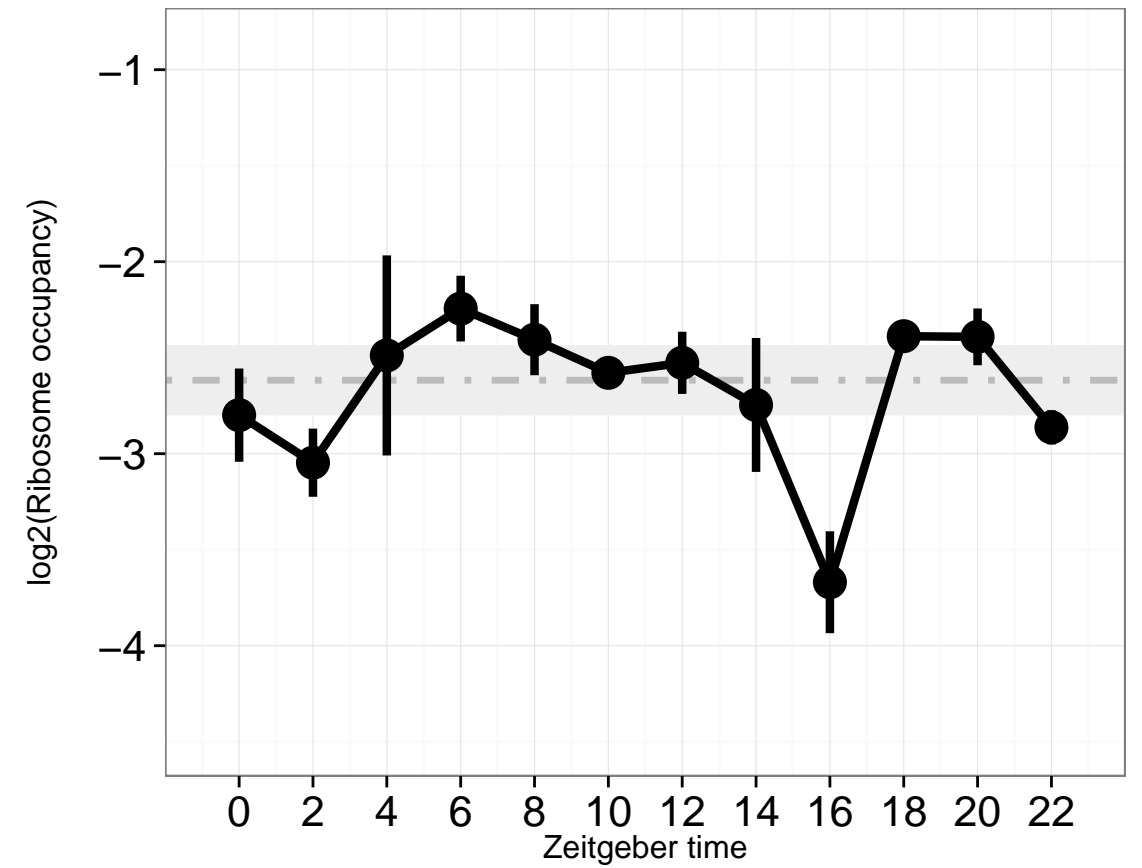

Supplement: Supplementary file 5635 [file 1]

## Adra2b

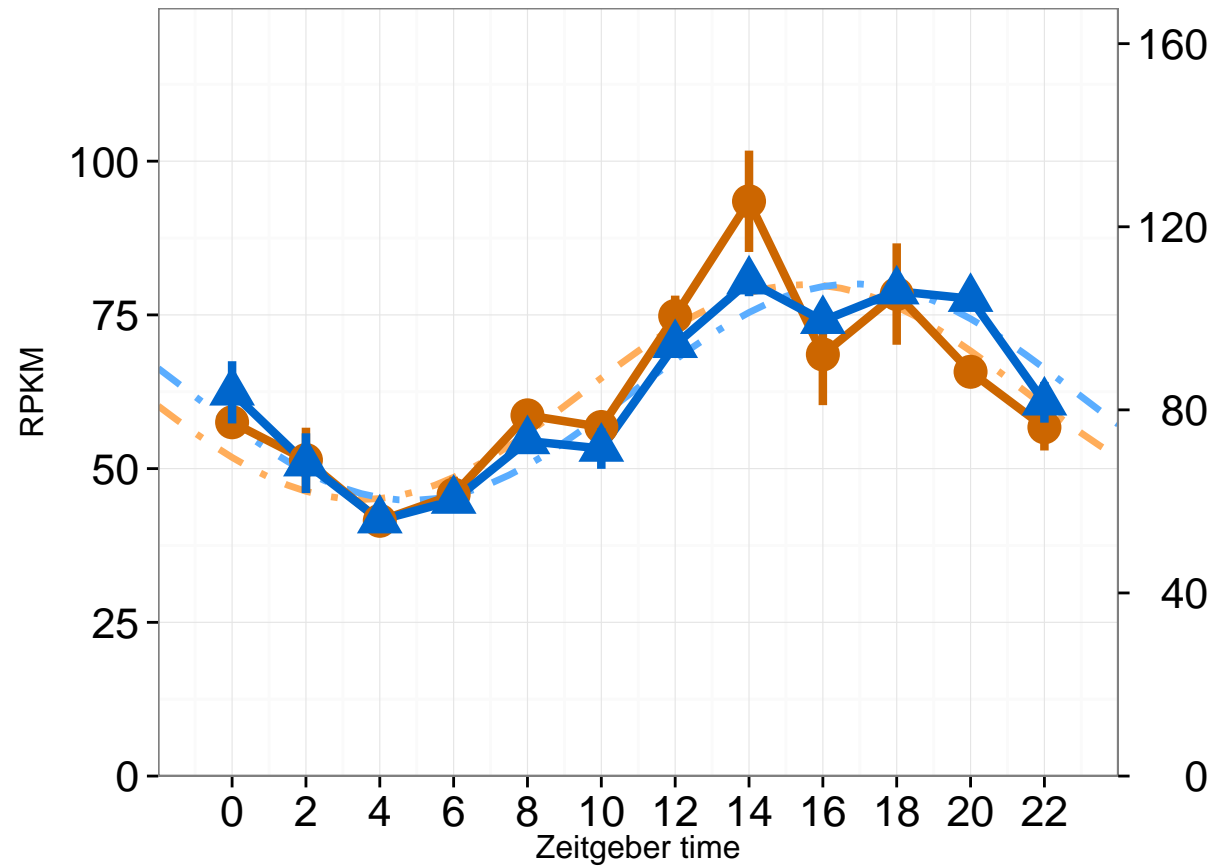

## Adra2b

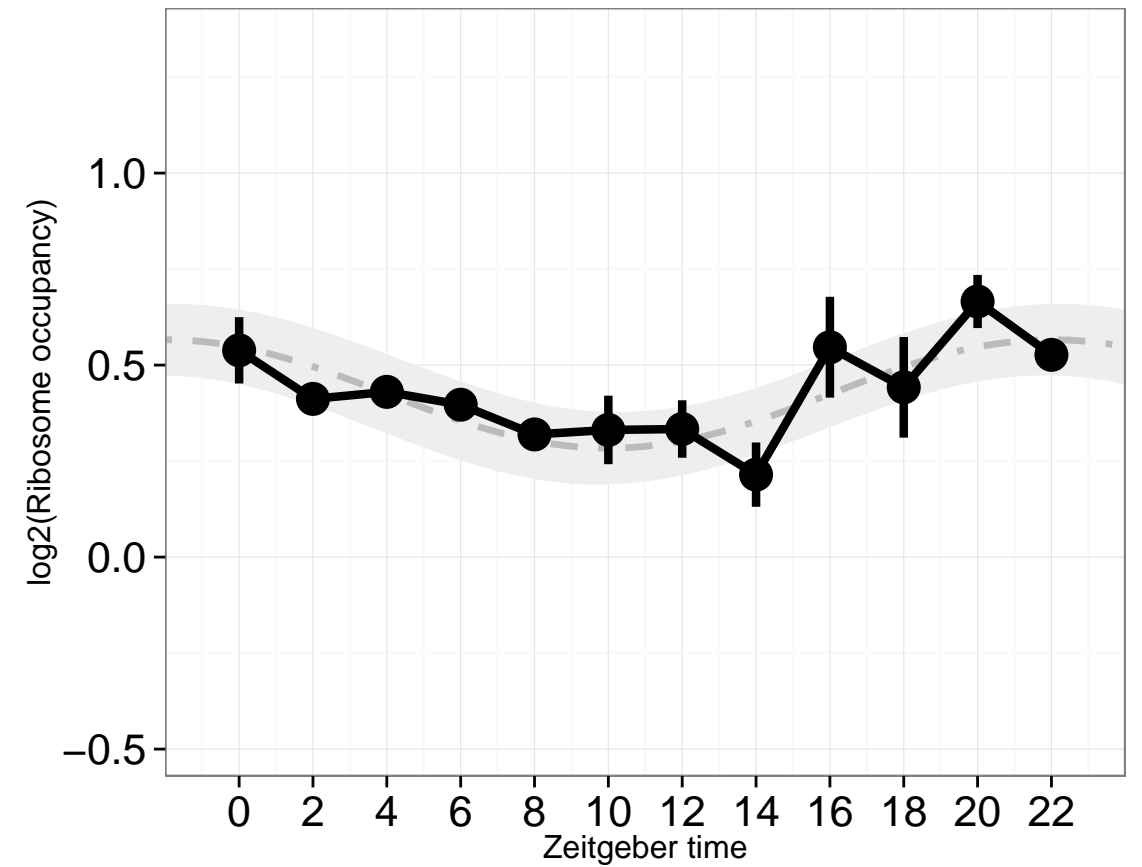

Supplement: Supplementary file 5636 [file 1]

# Tra2a

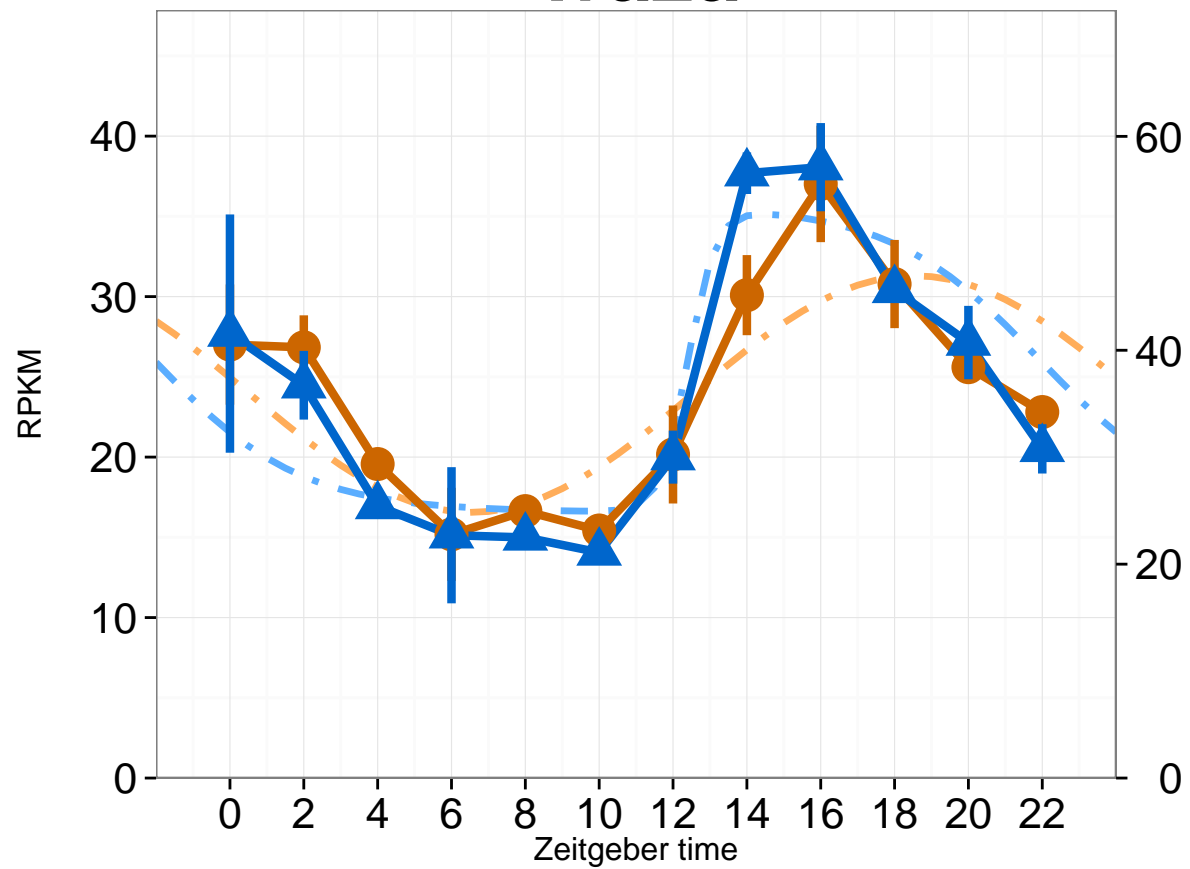

# Tra2a

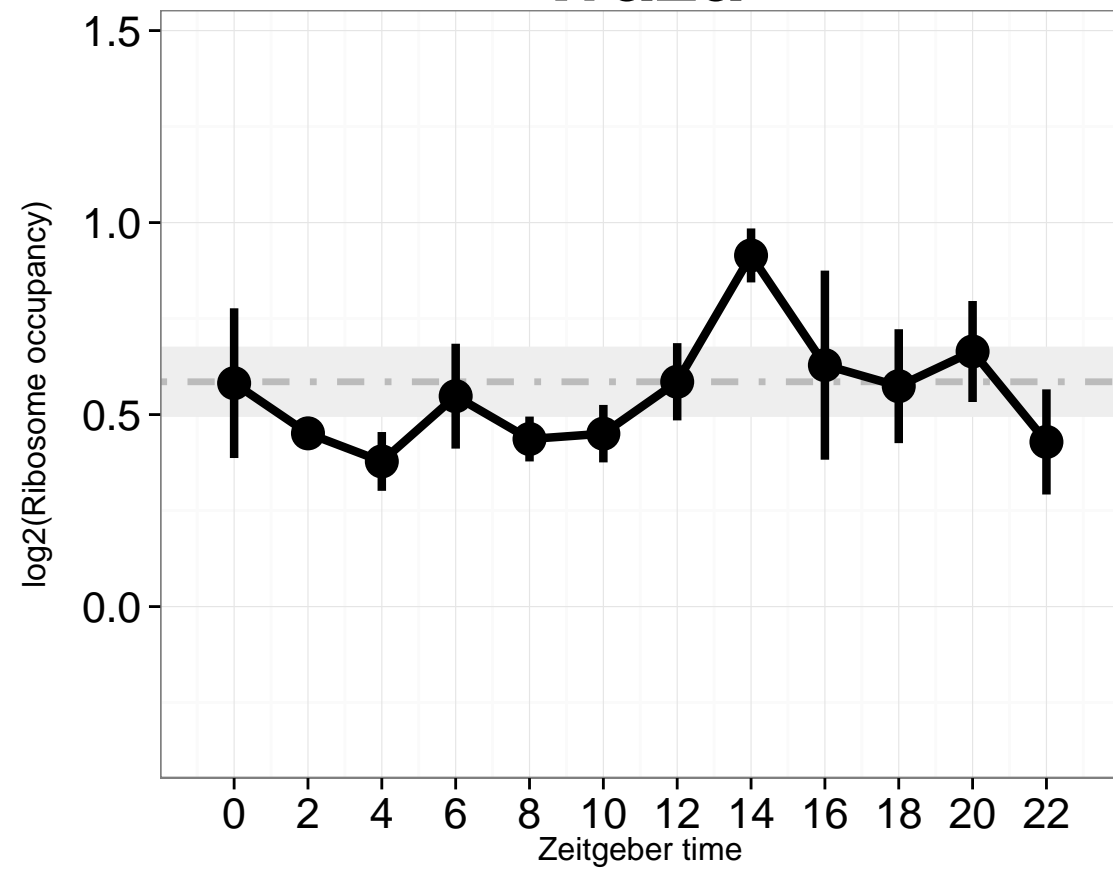

Supplement: Supplementary file 5637 [file 1]

# Cpt2

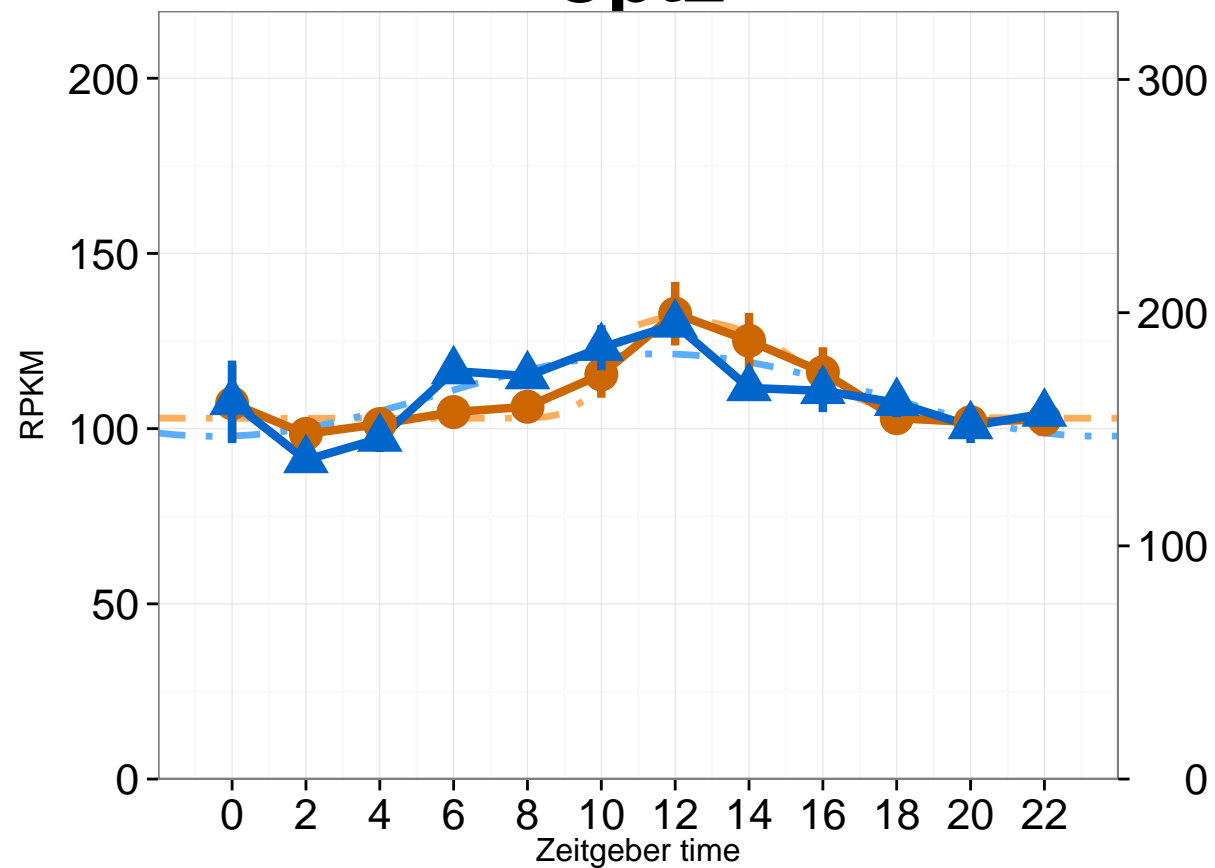

# Cpt2

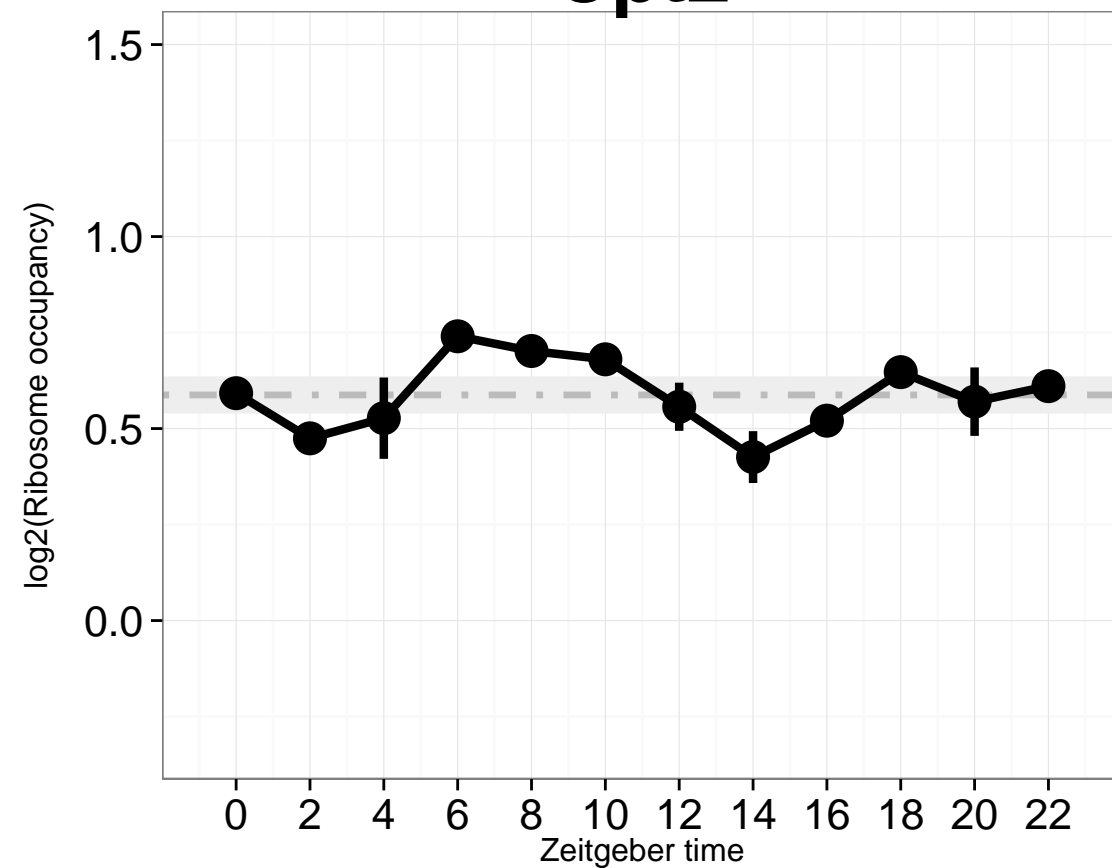

Supplement: Supplementary file 5638 [file 1]

## Foxo4

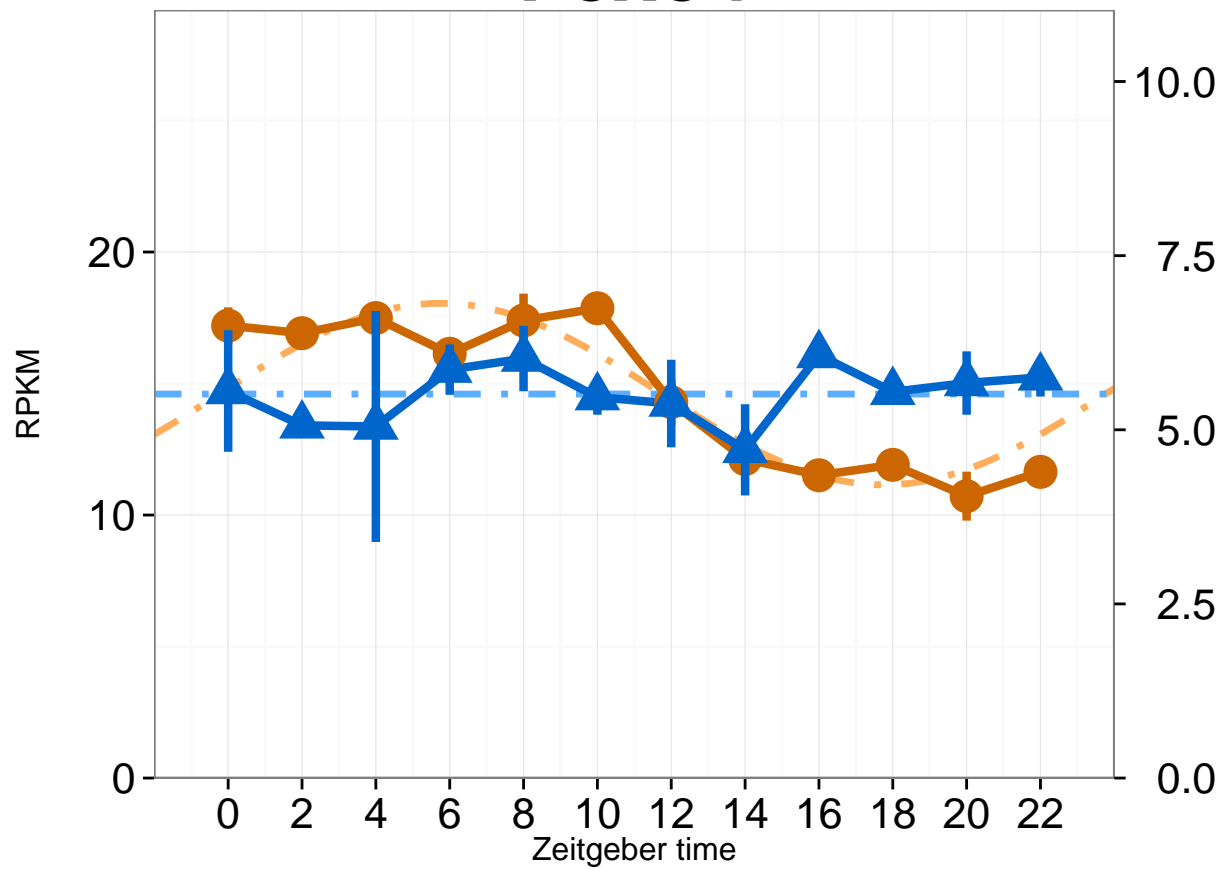

## Foxo4

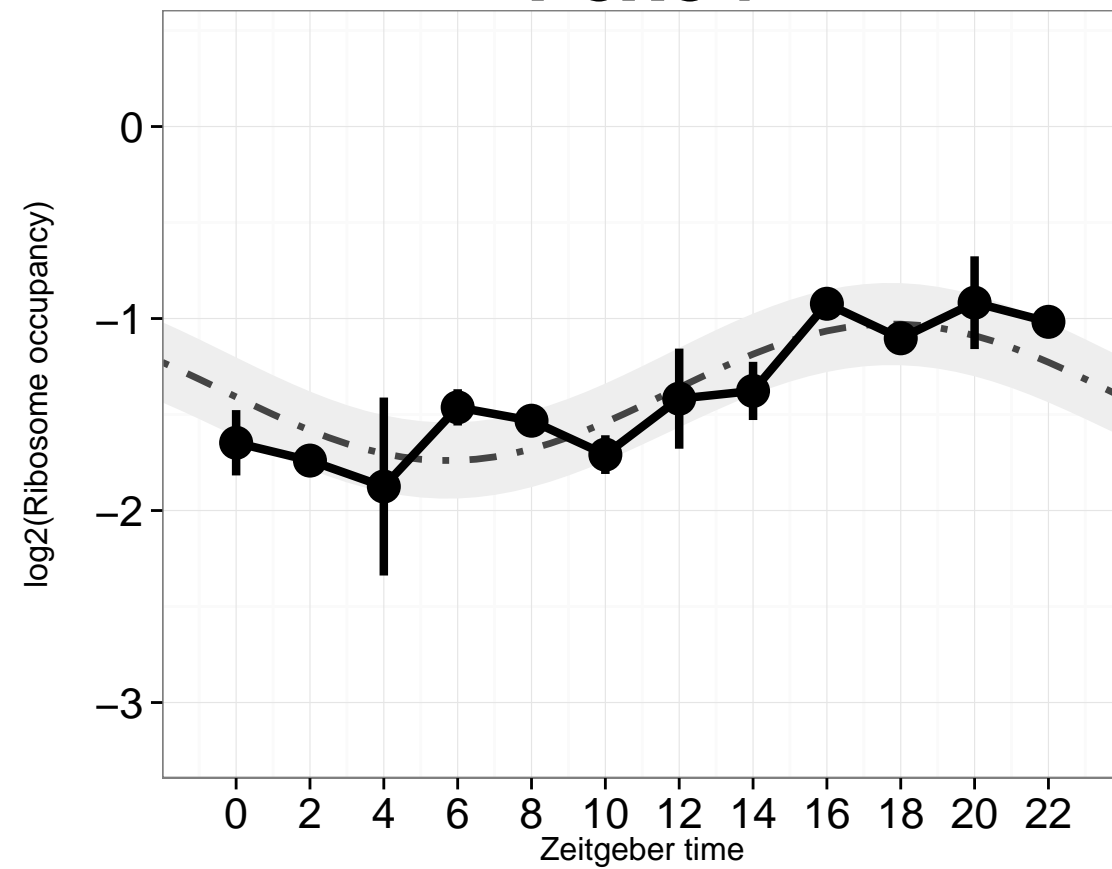

Supplement: Supplementary file 5639 [file 1]

## Erlin2

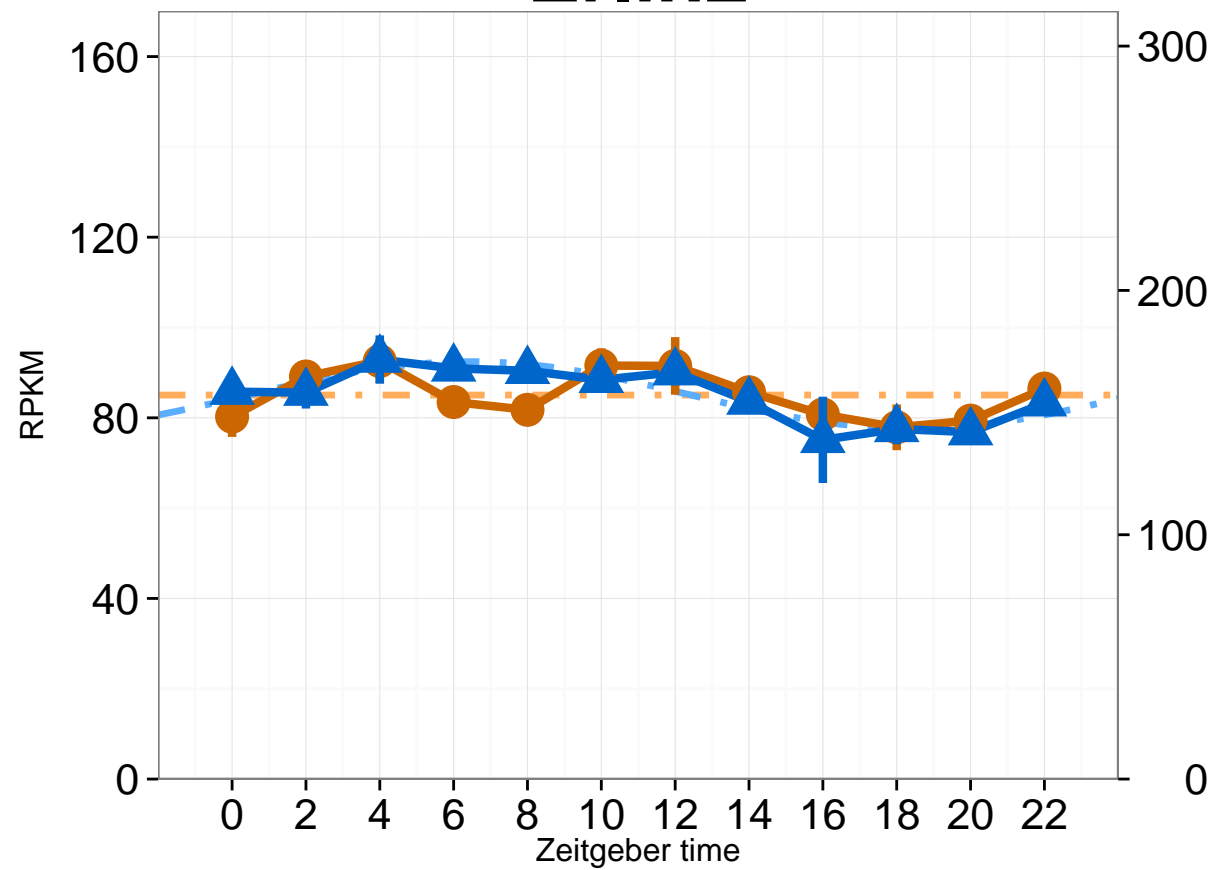

## Erlin2

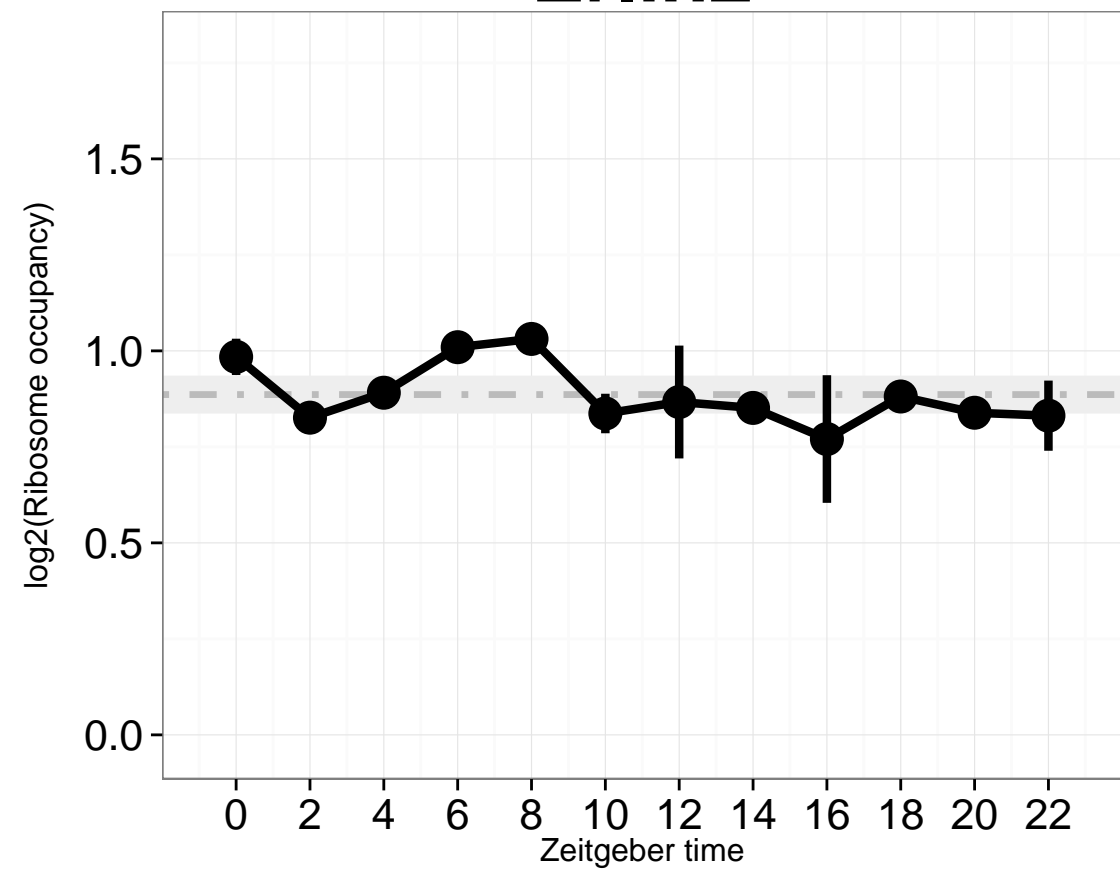

Supplement: Supplementary file 5640 [file 1]

# Epb4.1l4a

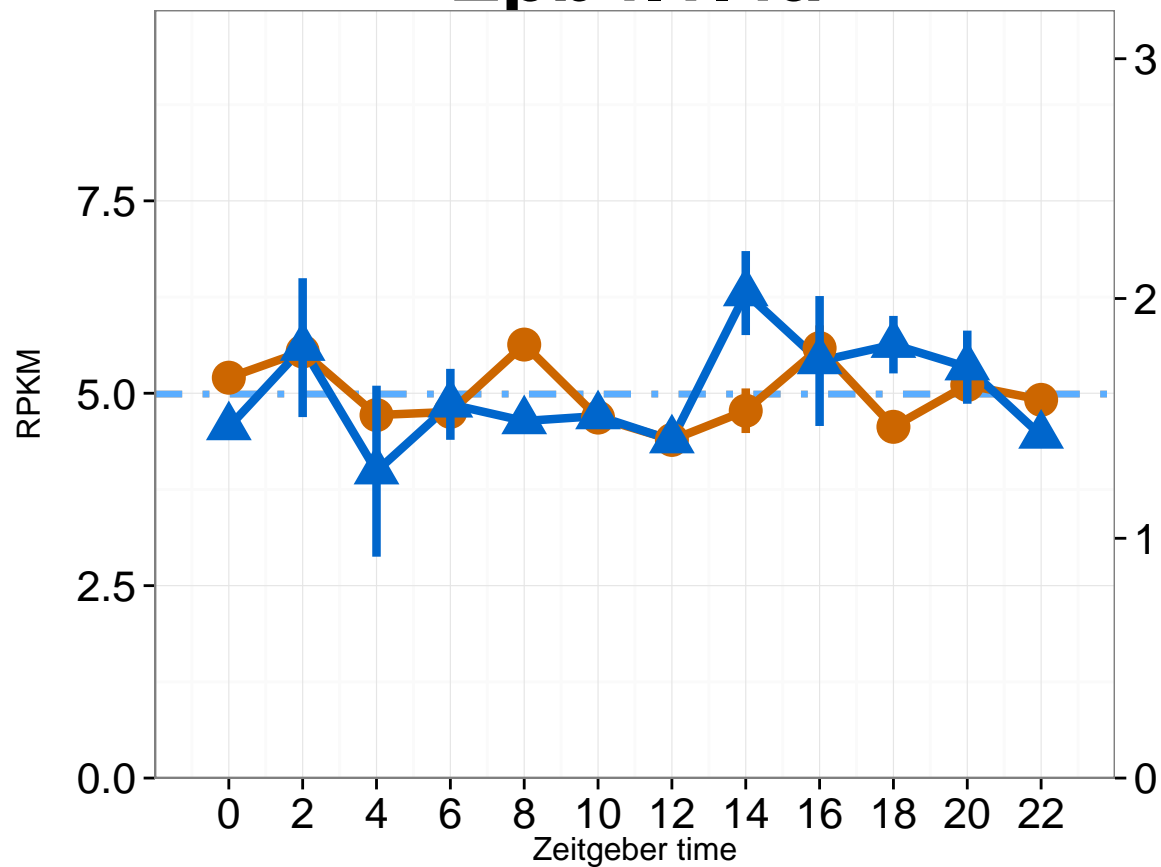

# Epb4.1l4a

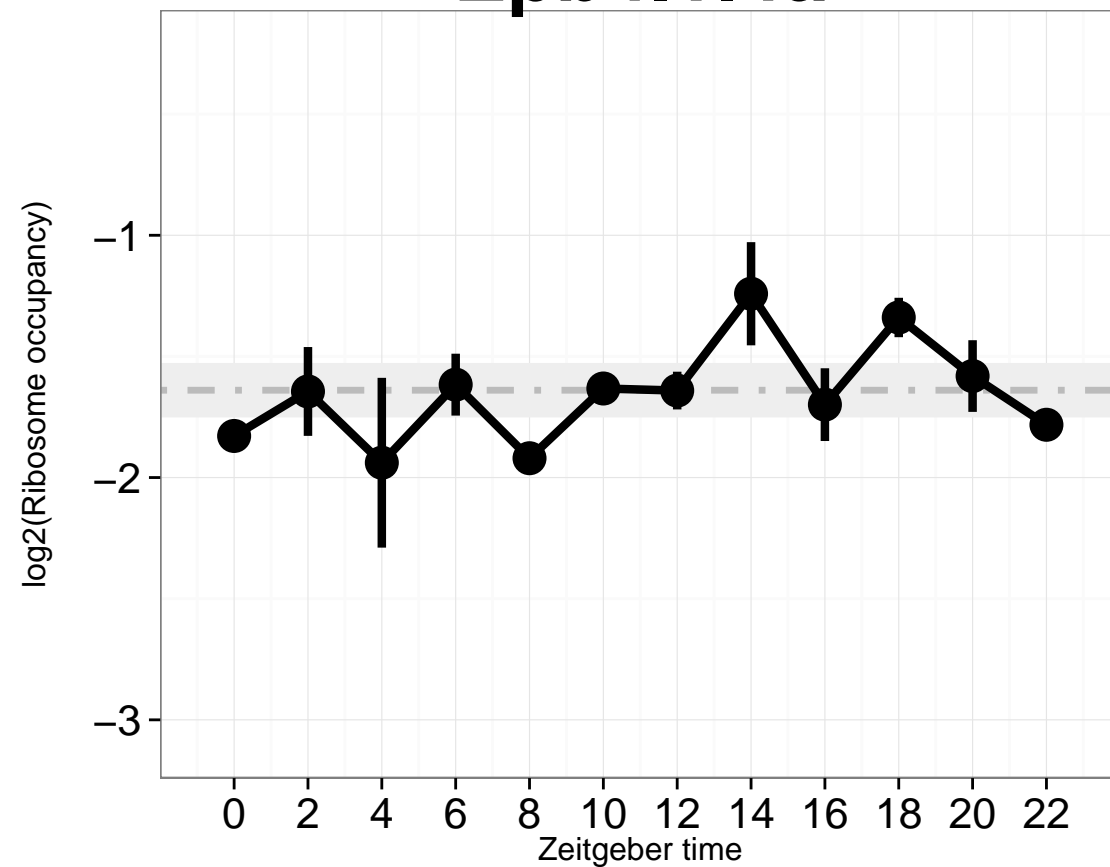

Supplement: Supplementary file 5641 [file 1]

## Gm4924

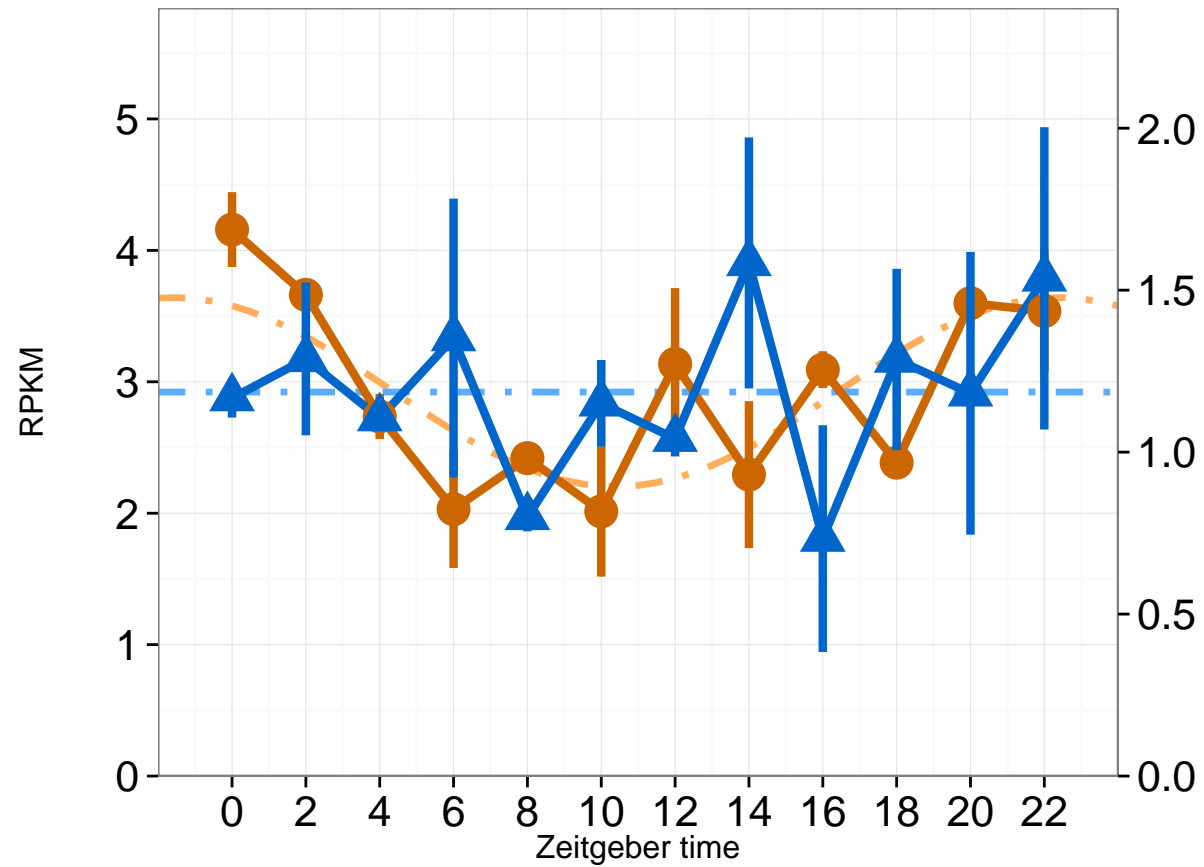

## Gm4924

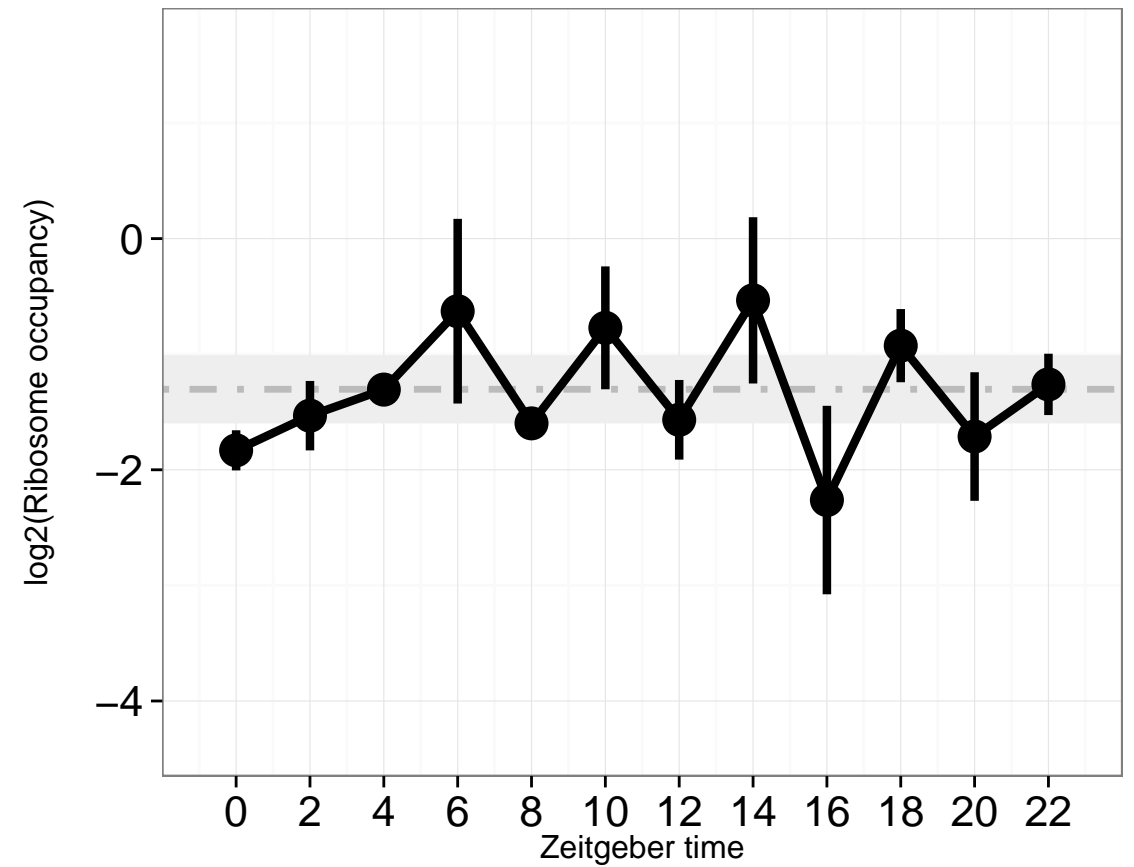

Supplement: Supplementary file 5642 [file 1]

# Atxn7l3

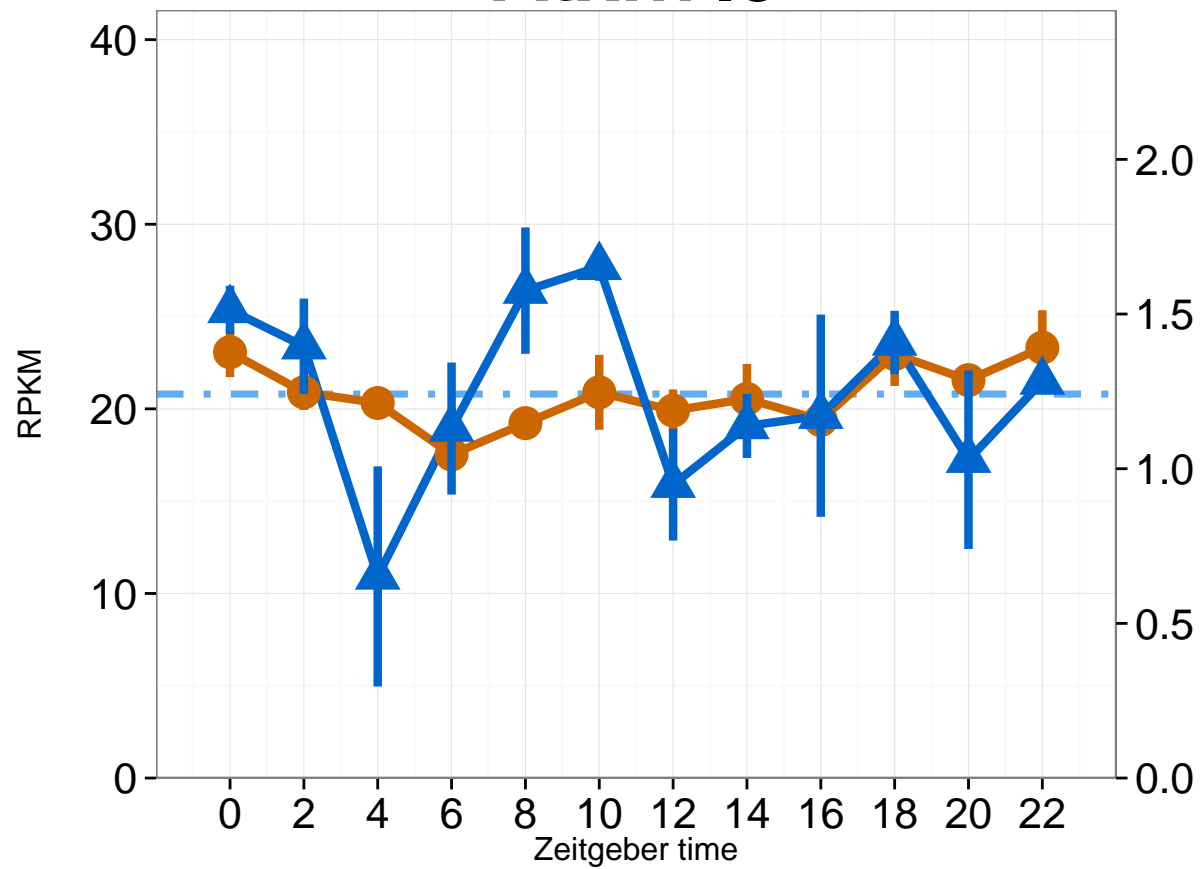

# Atxn7l3

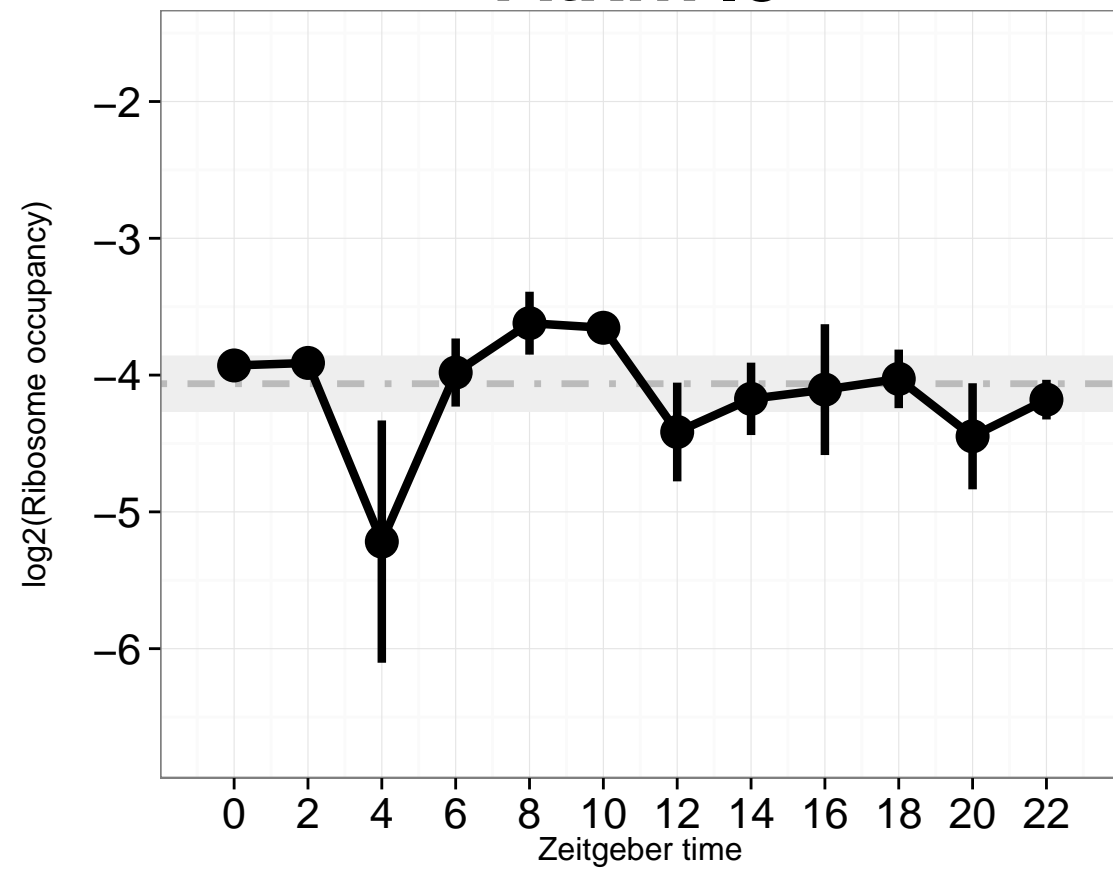

Supplement: Supplementary file 5643 [file 1]

# Vstm2a

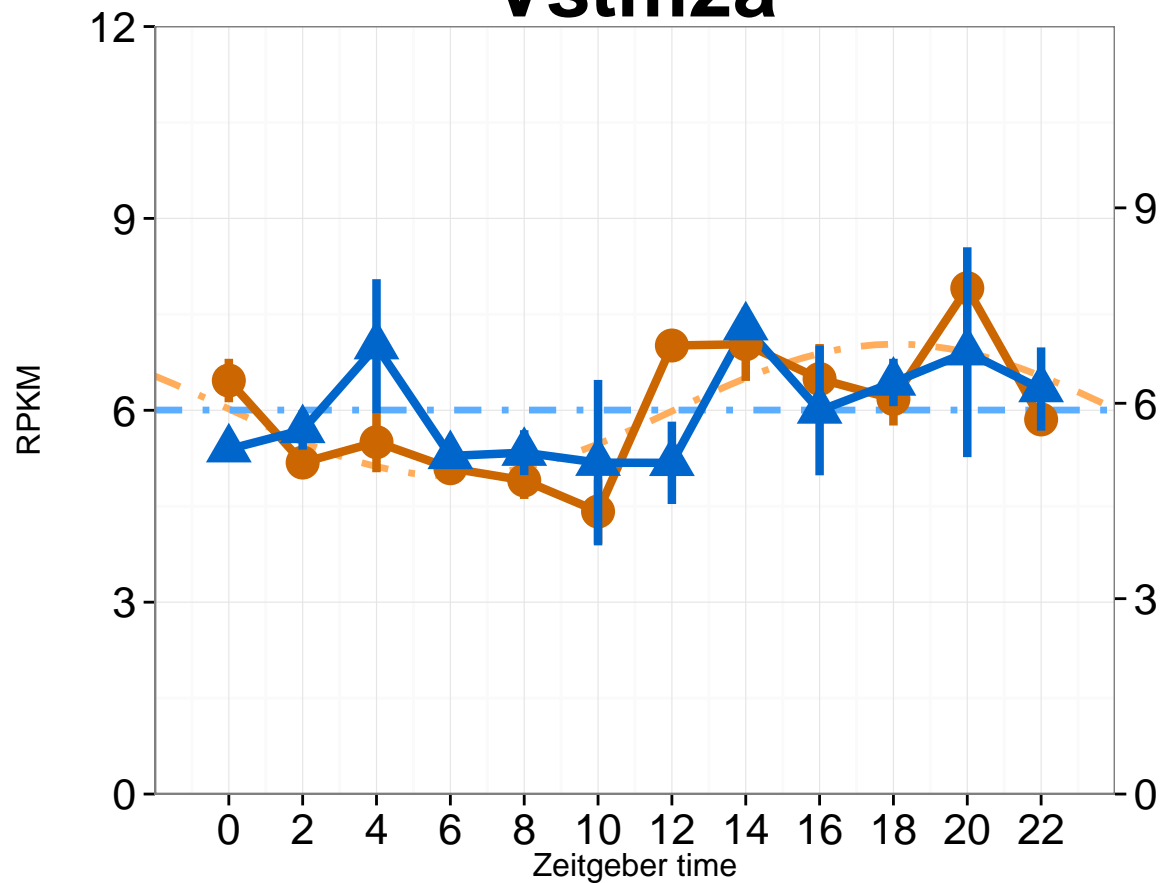

# Vstm2a

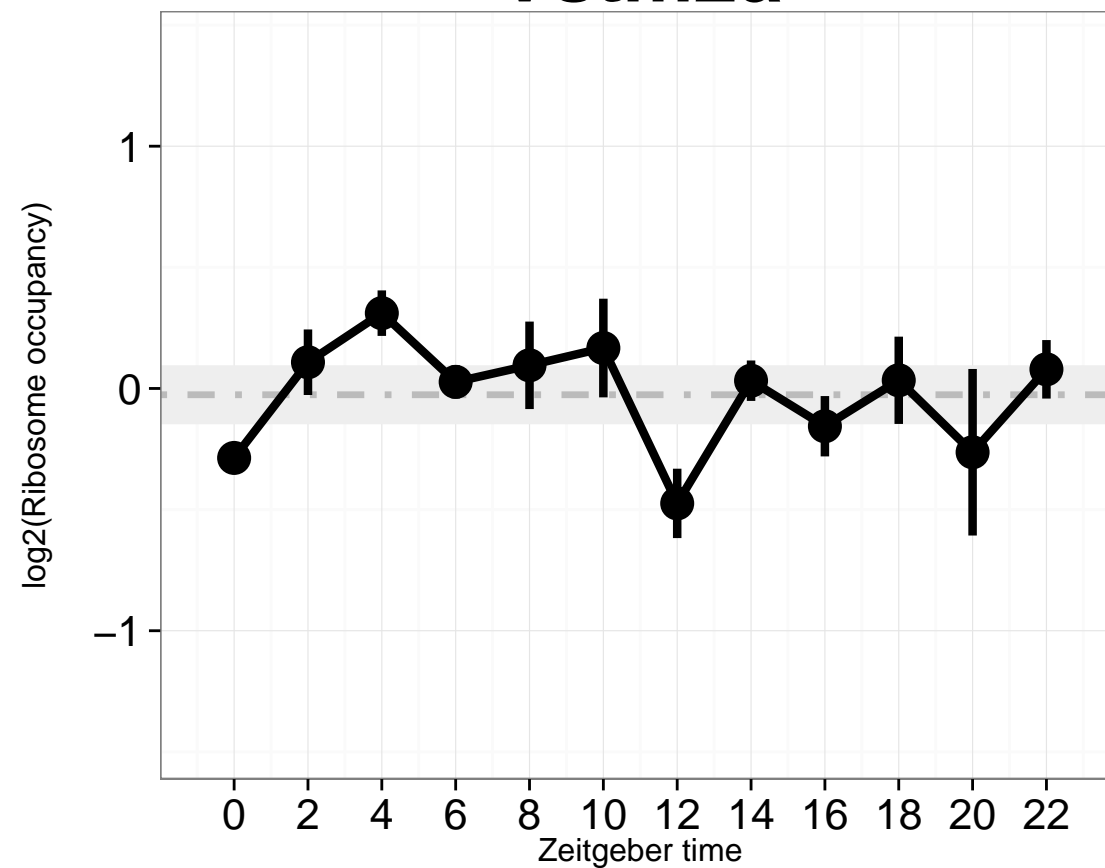

Supplement: Supplementary file 5644 [file 1]

## Rnf2

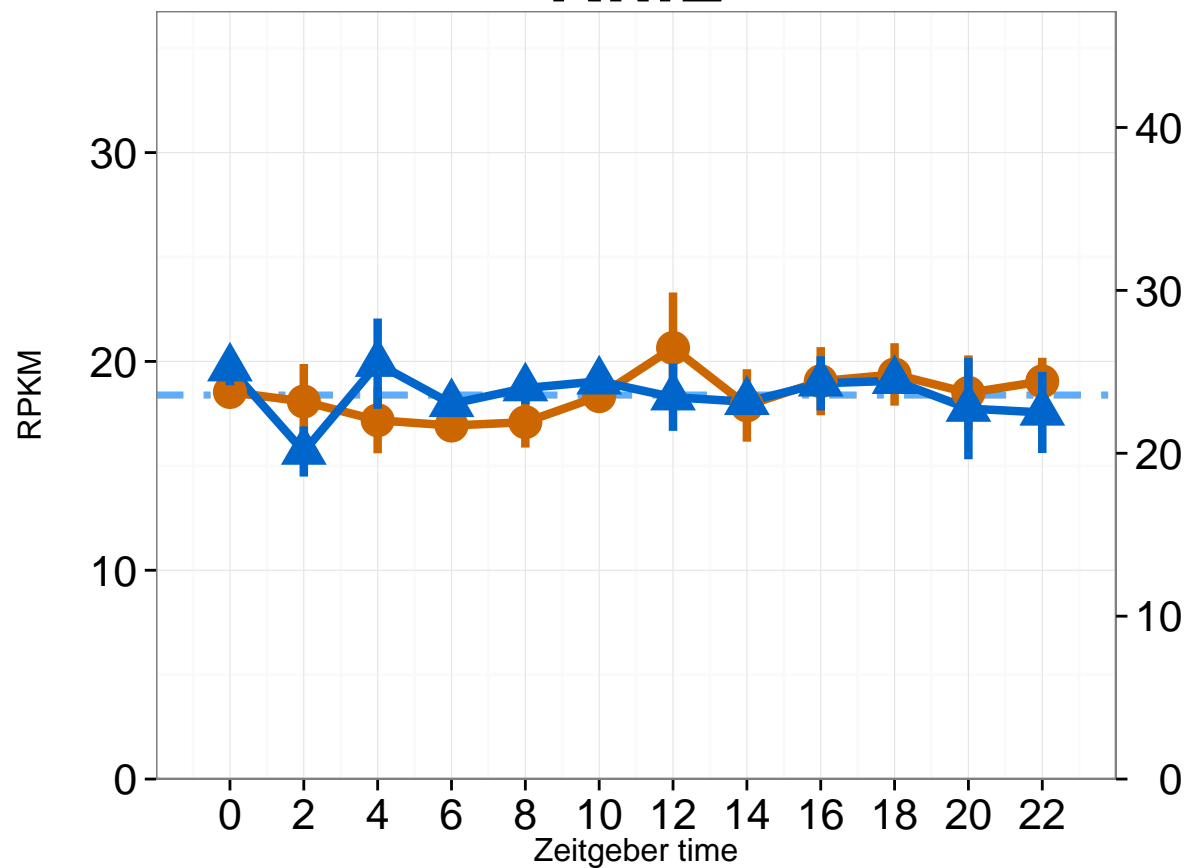

## Rnf2

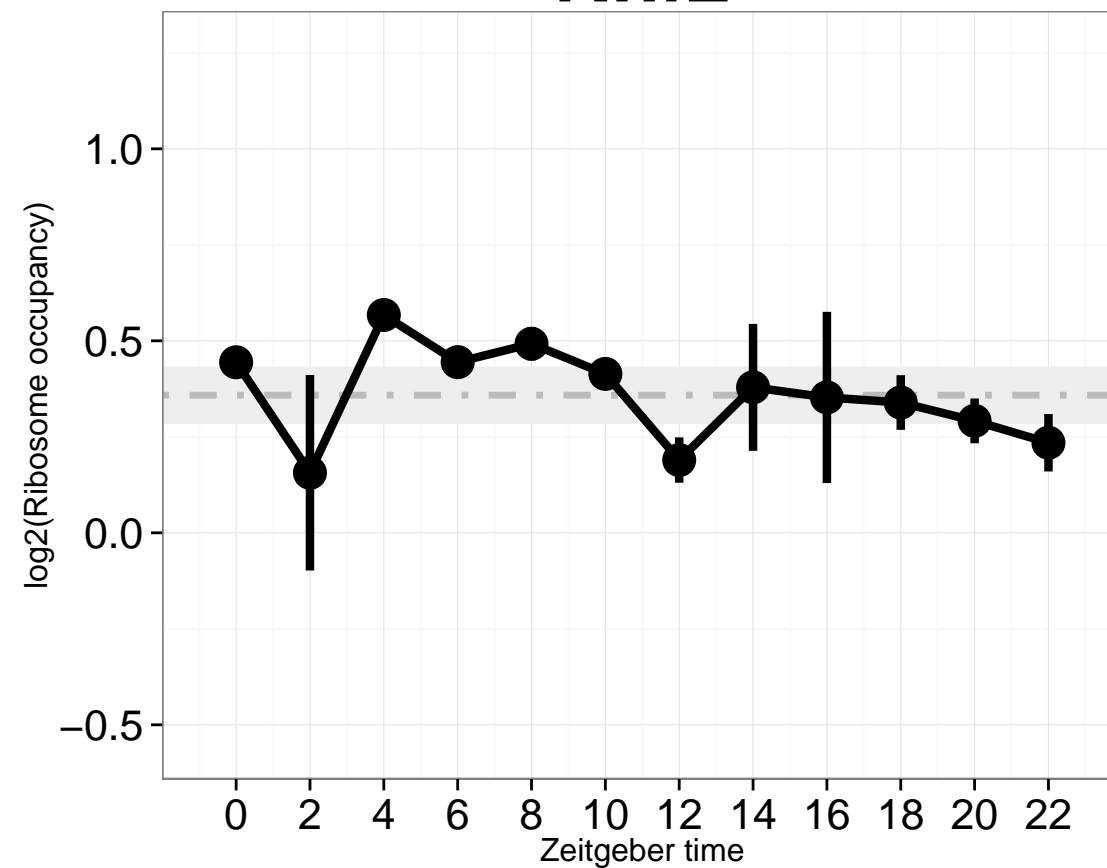

Supplement: Supplementary file 5645 [file 1]

## Galnt4

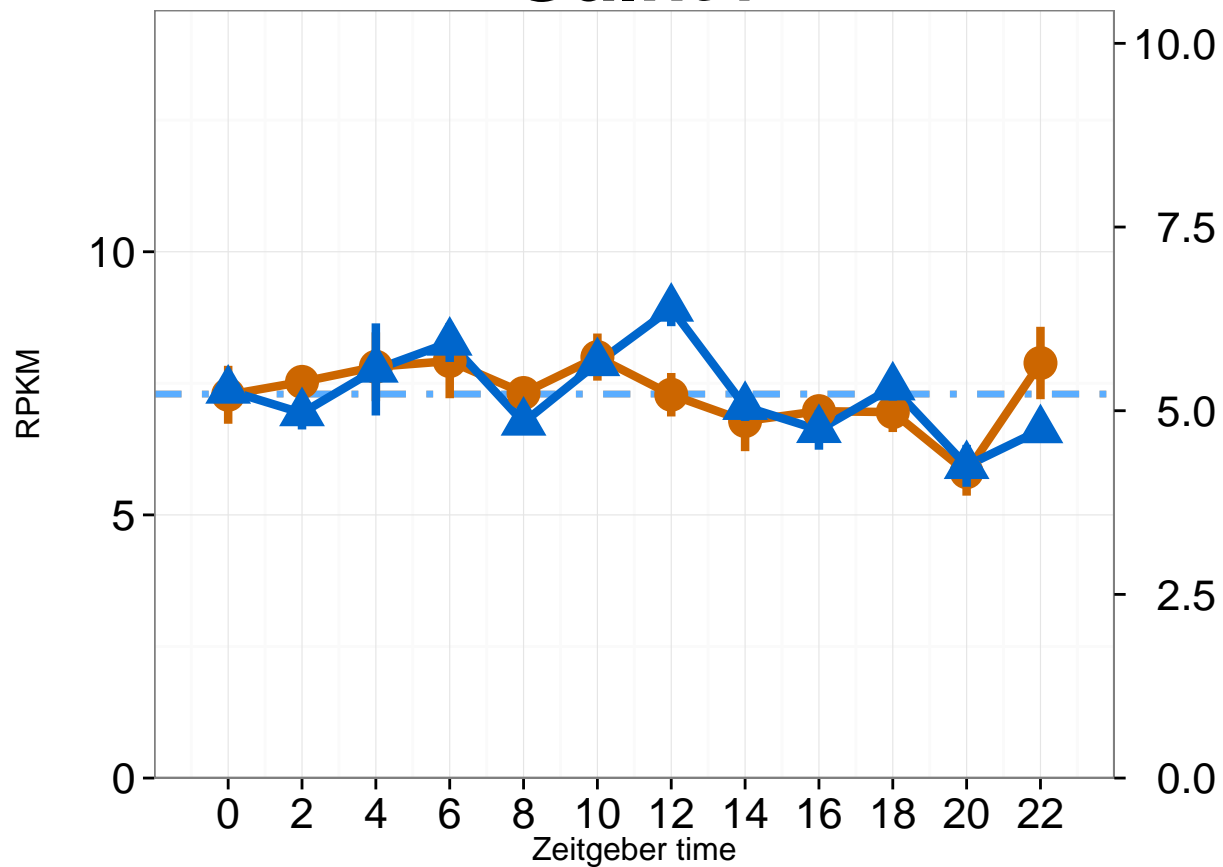

## Galnt4

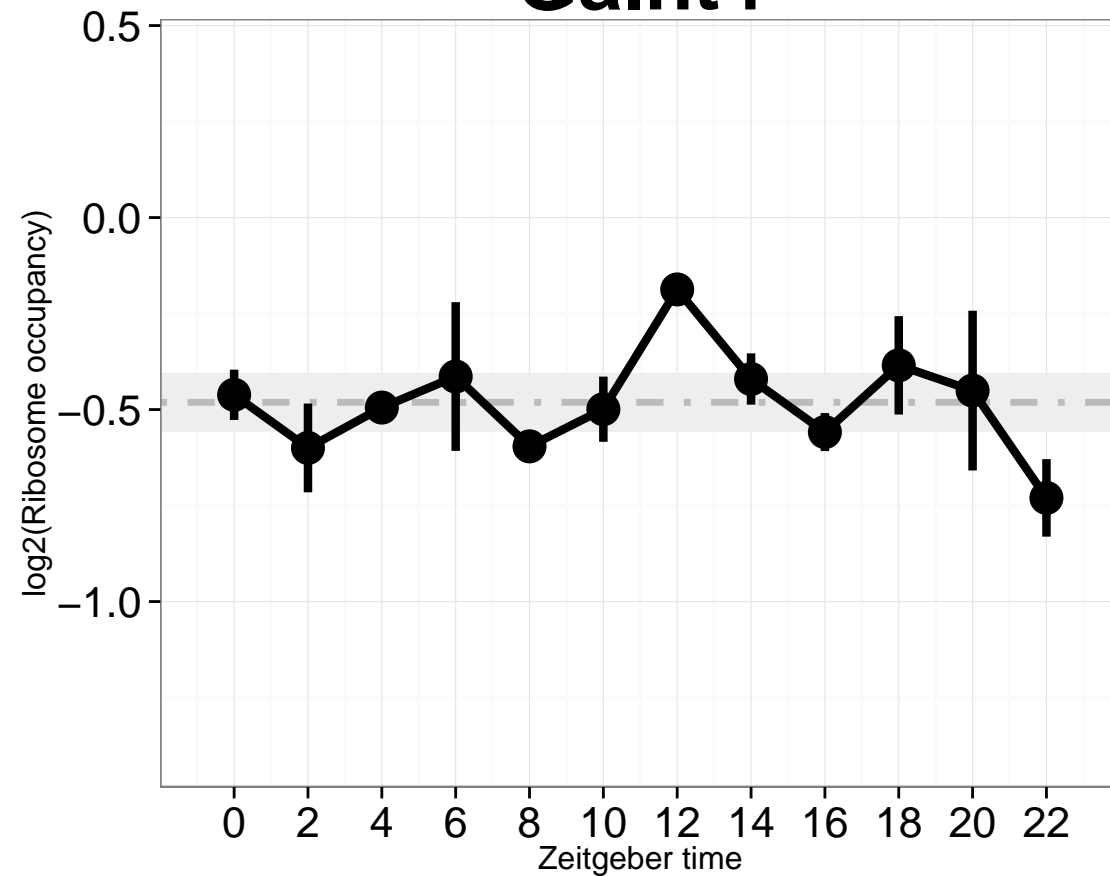

Supplement: Supplementary file 5646 [file 1]

## Acrbp

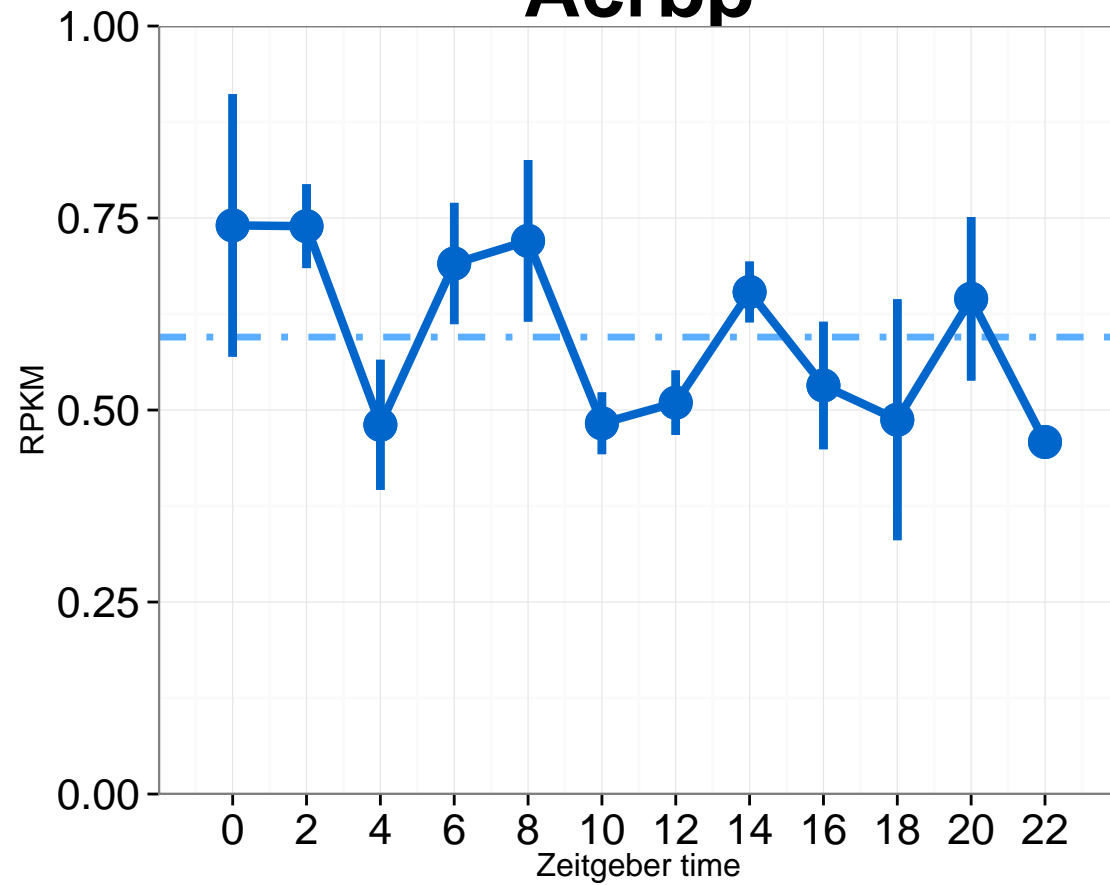

## Acrbp log2(Ribosome occupancy

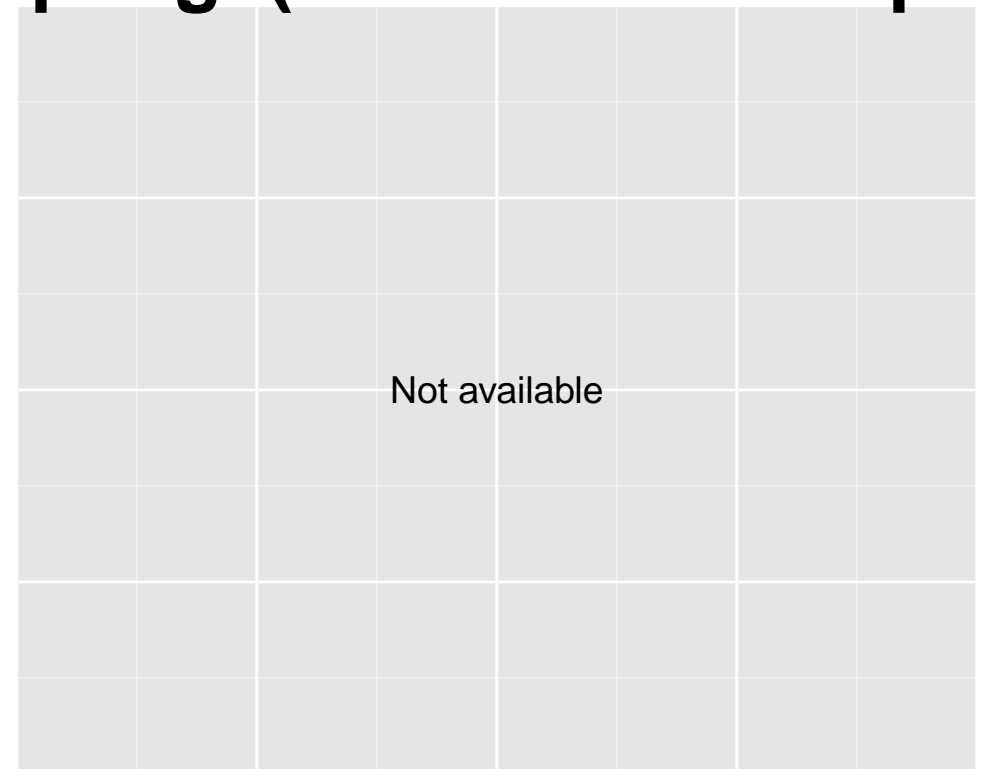

Supplement: Supplementary file 5647 [file 1]

## Rai2

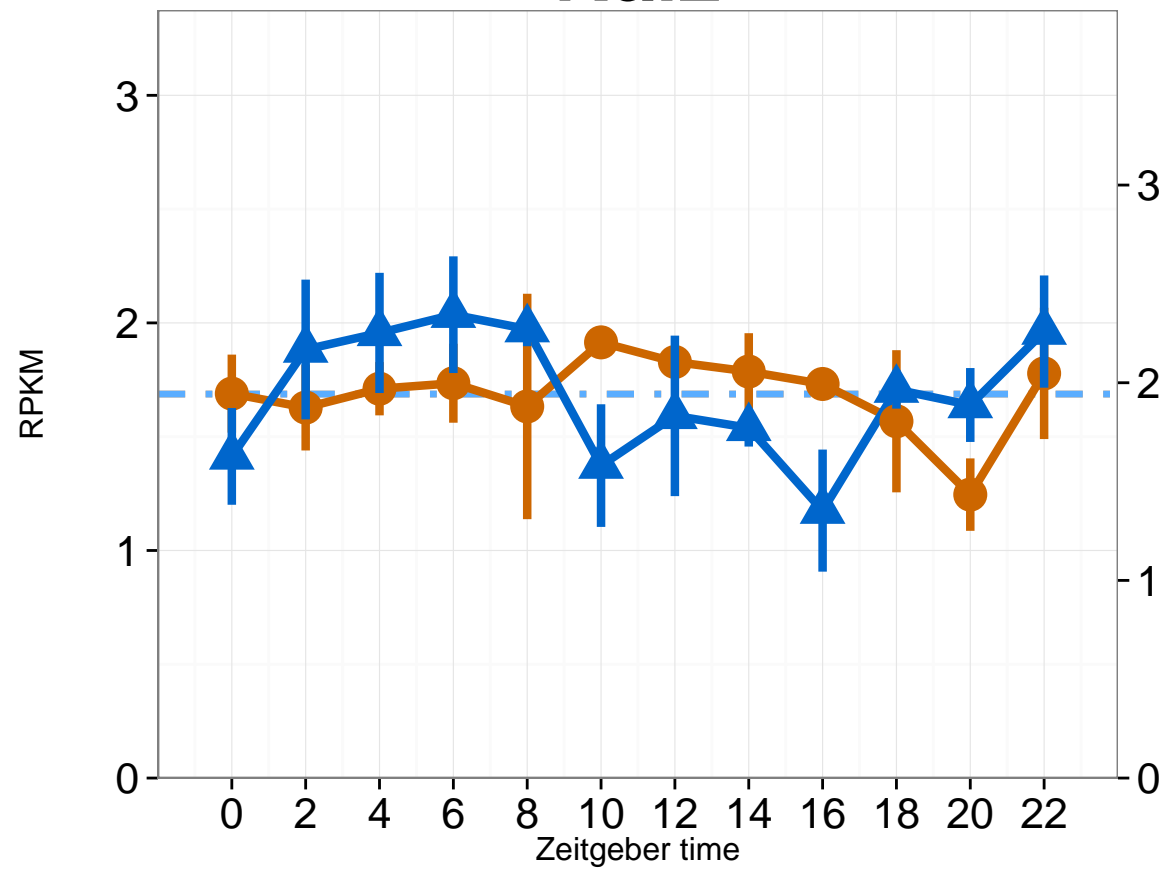

## Rai2

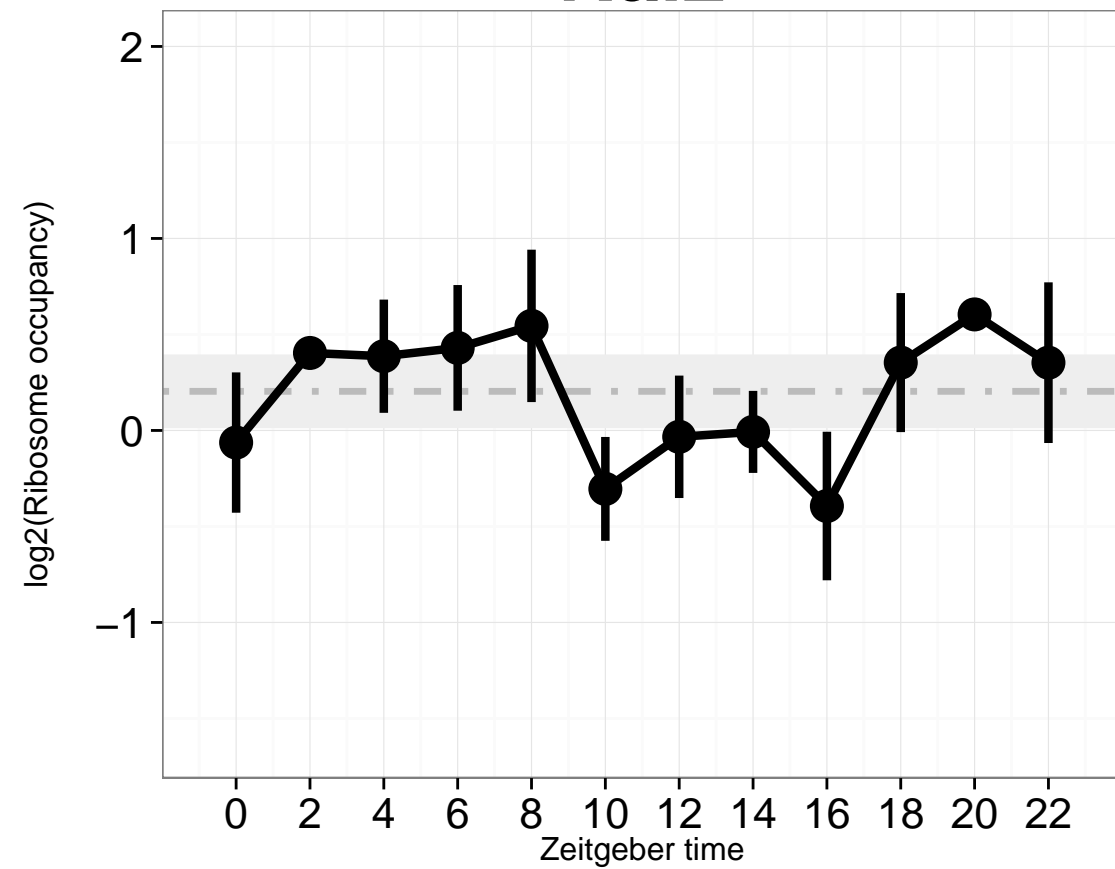

Supplement: Supplementary file 5648 [file 1]

## 4930503L19Rik

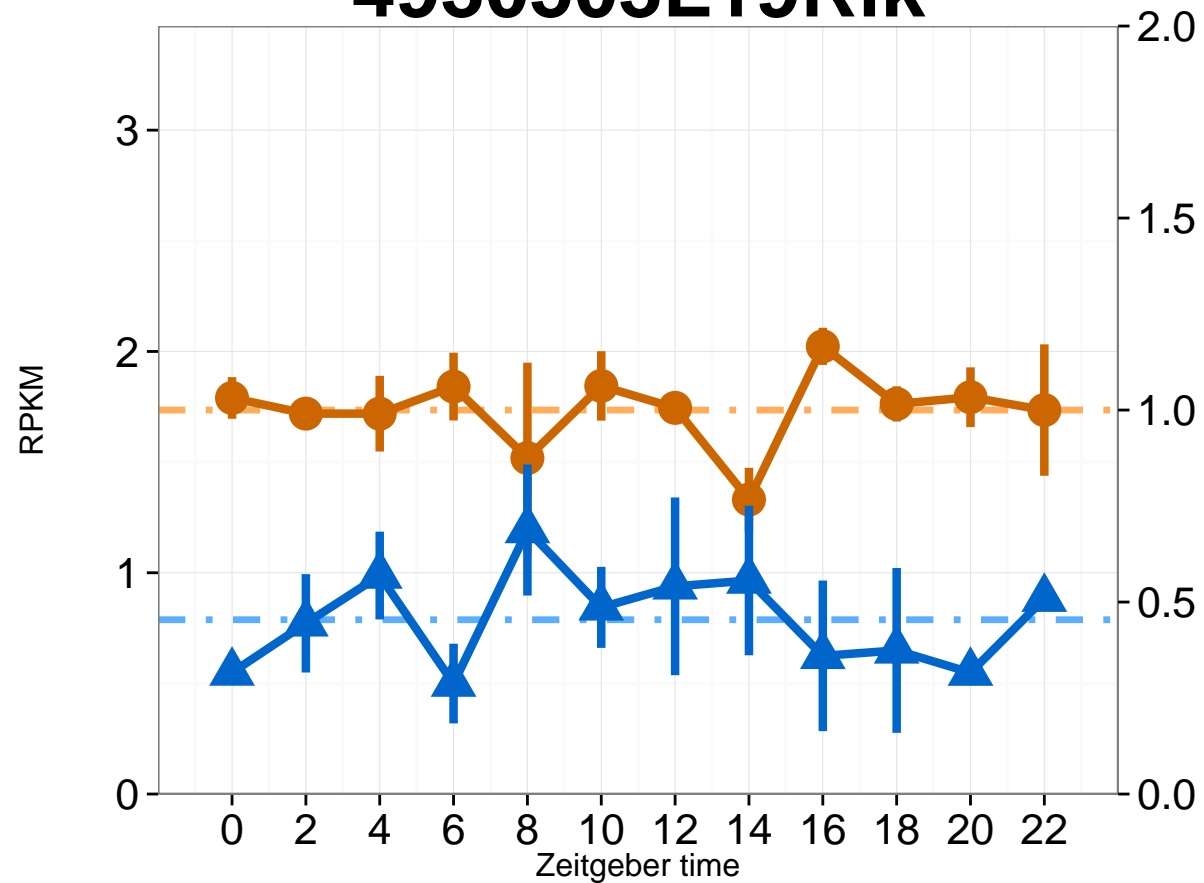

## 4930503L19Rik

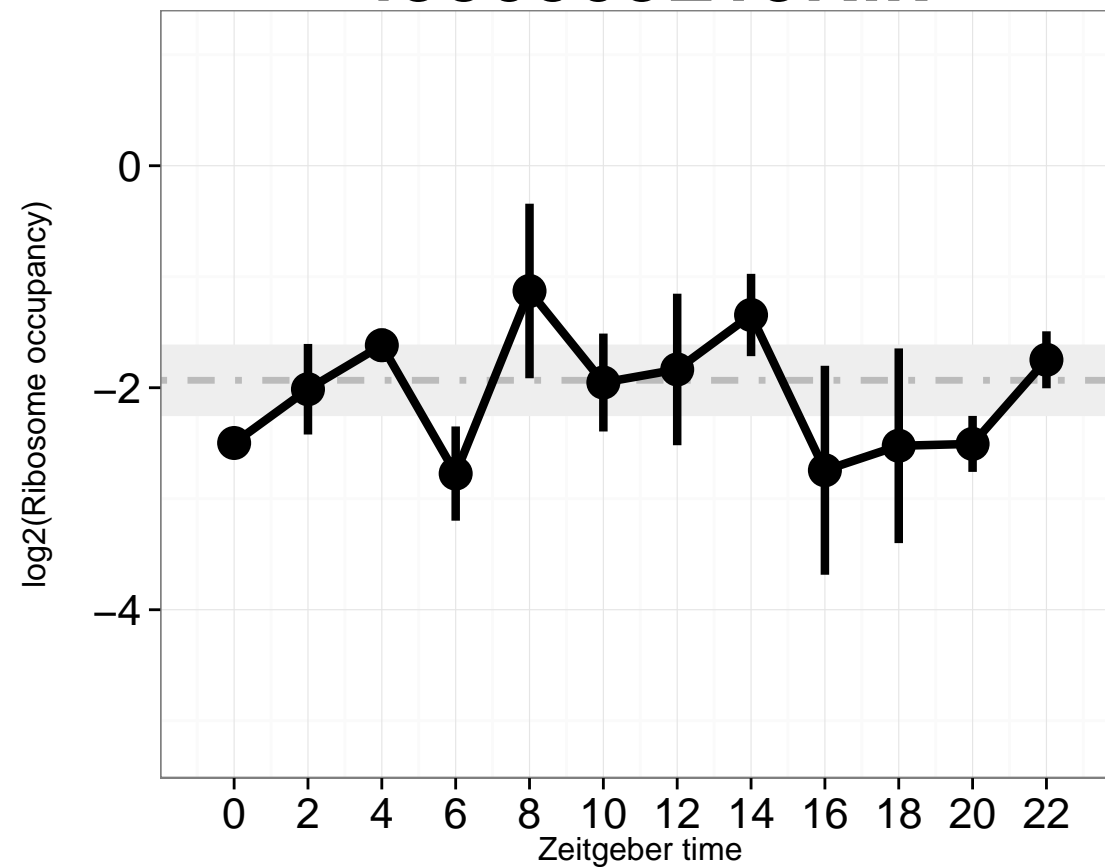

Supplement: Supplementary file 5649 [file 1]

## 2310009B15Rik

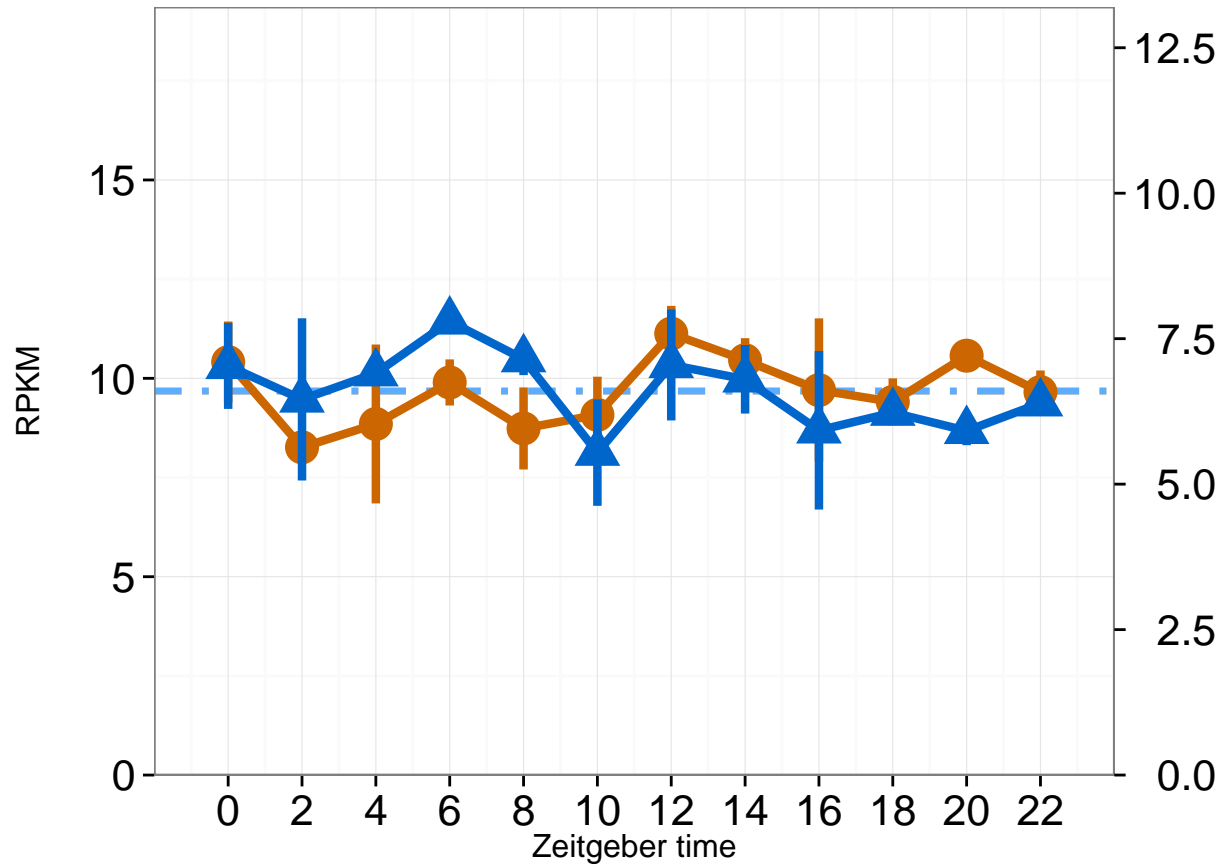

## 2310009B15Rik

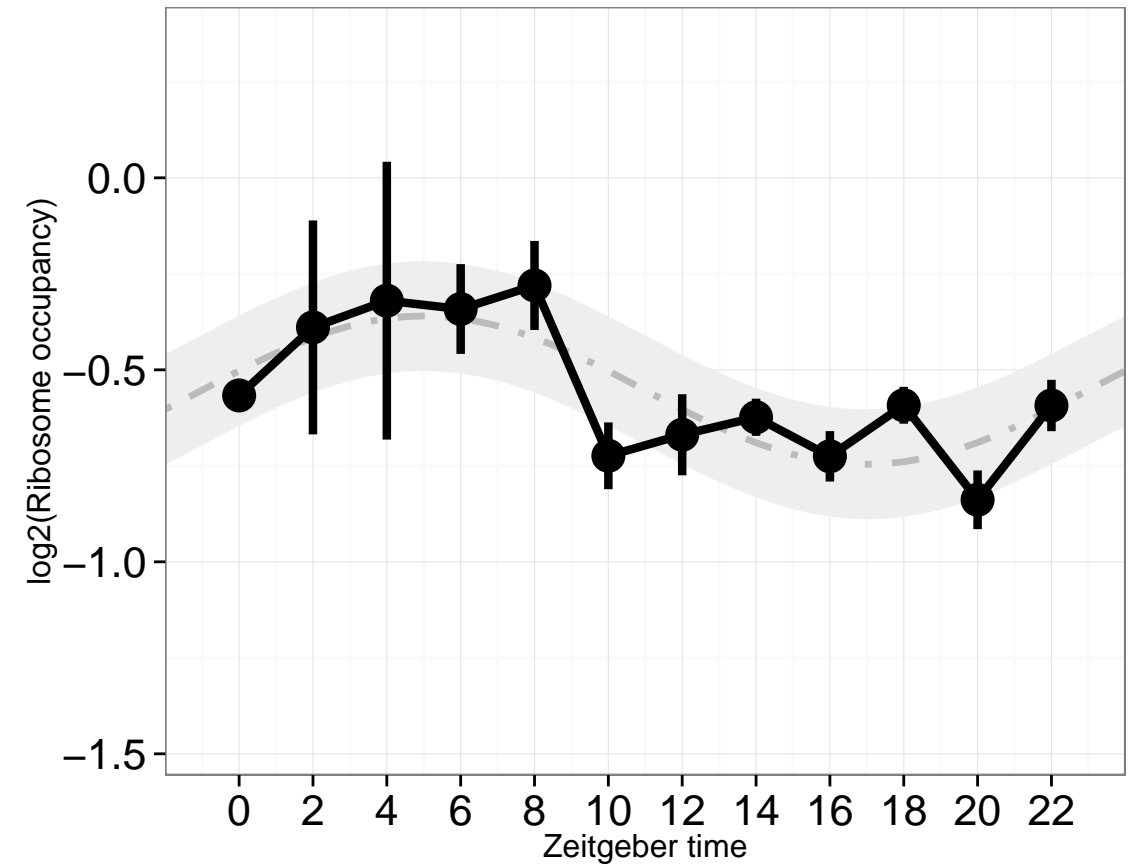

Supplement: Supplementary file 5650 [file 1]

## Nlrx1

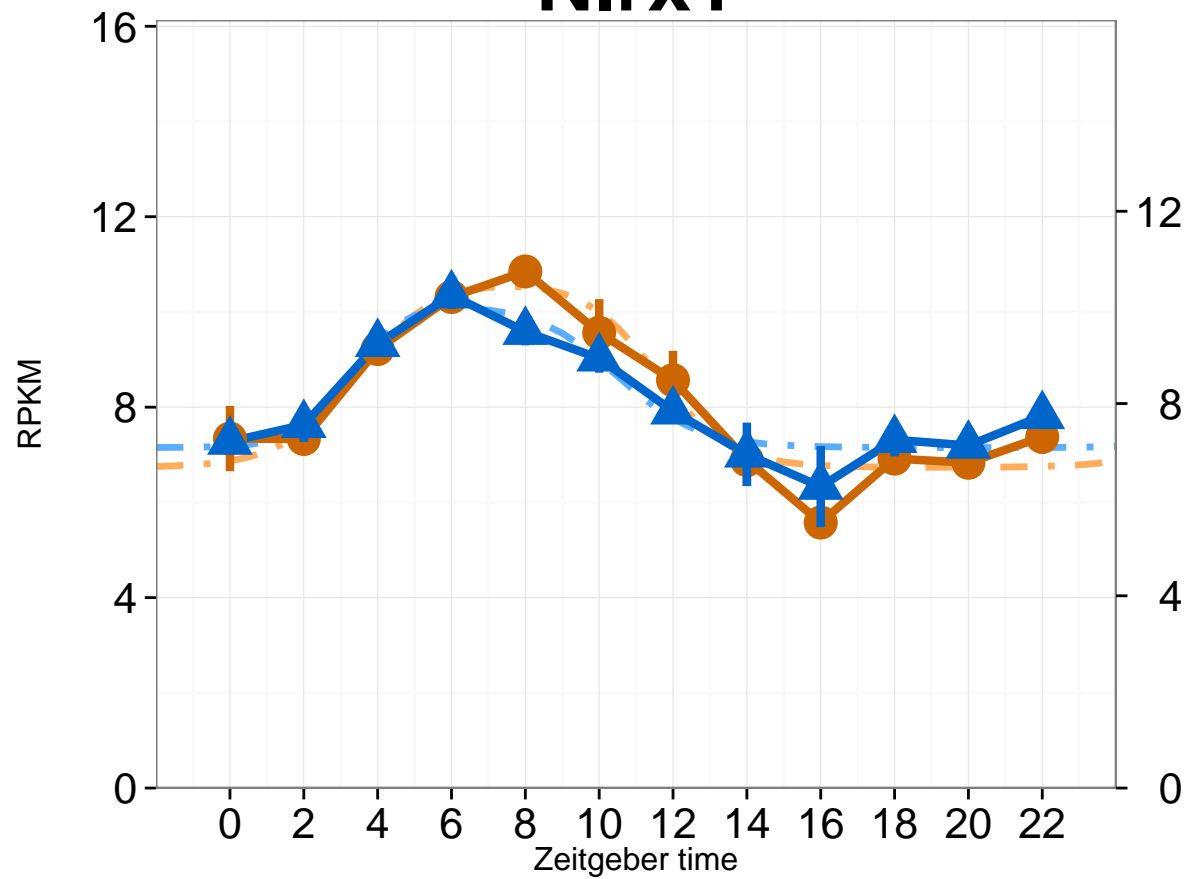

## Nlrx1

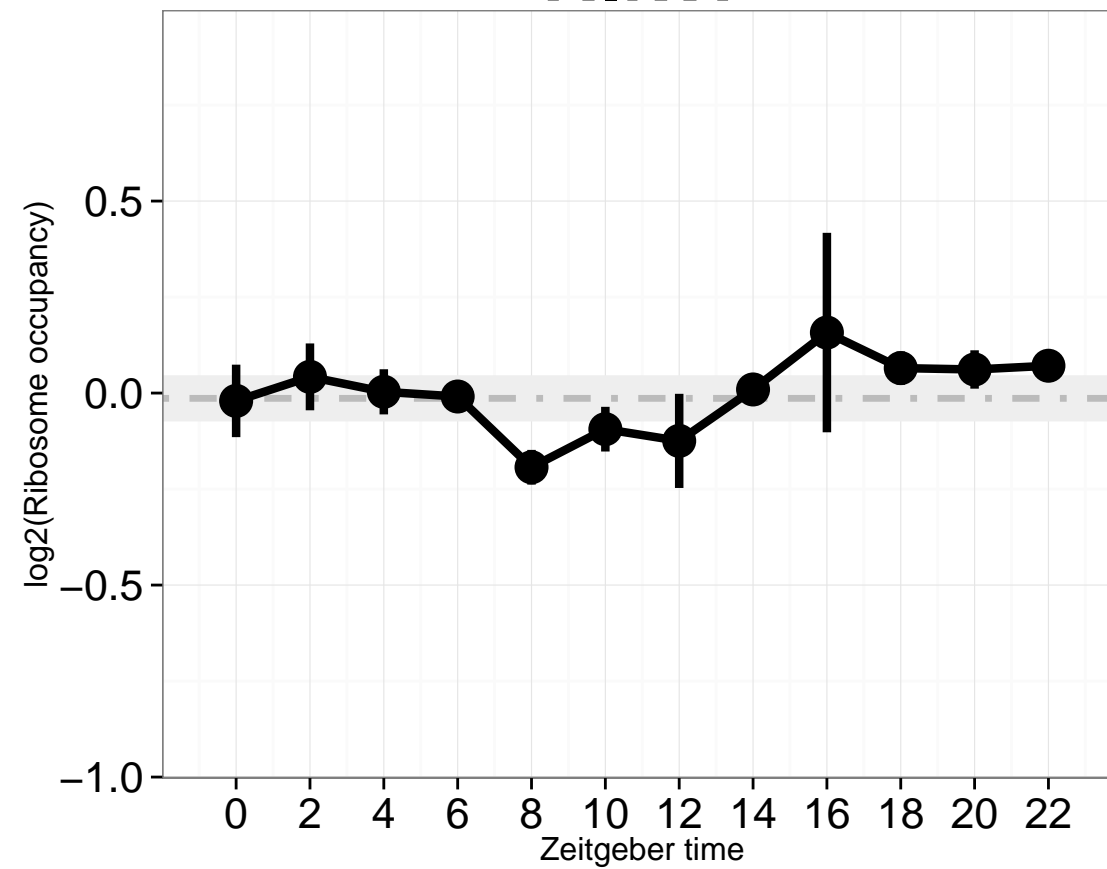

Supplement: Supplementary file 5651 [file 1]

## Wdtdc1

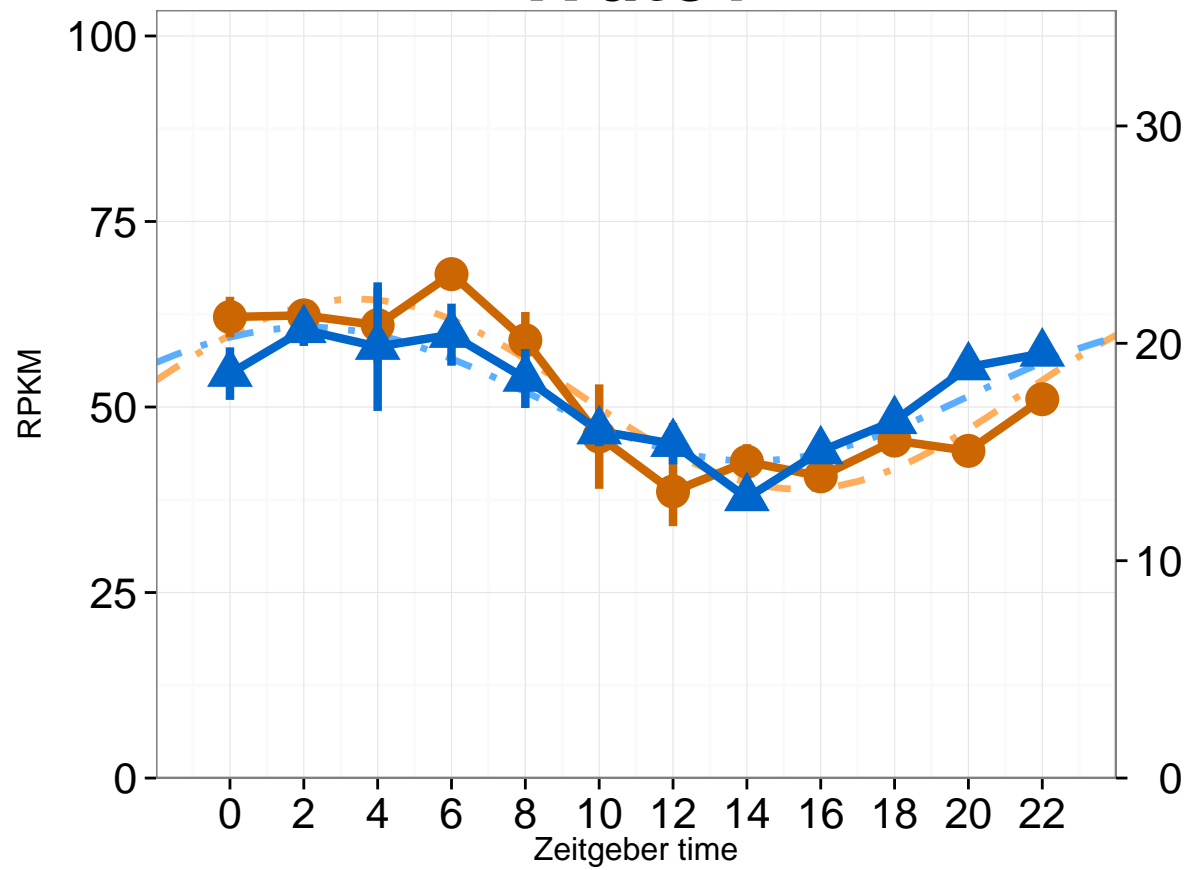

## Wdtdc1

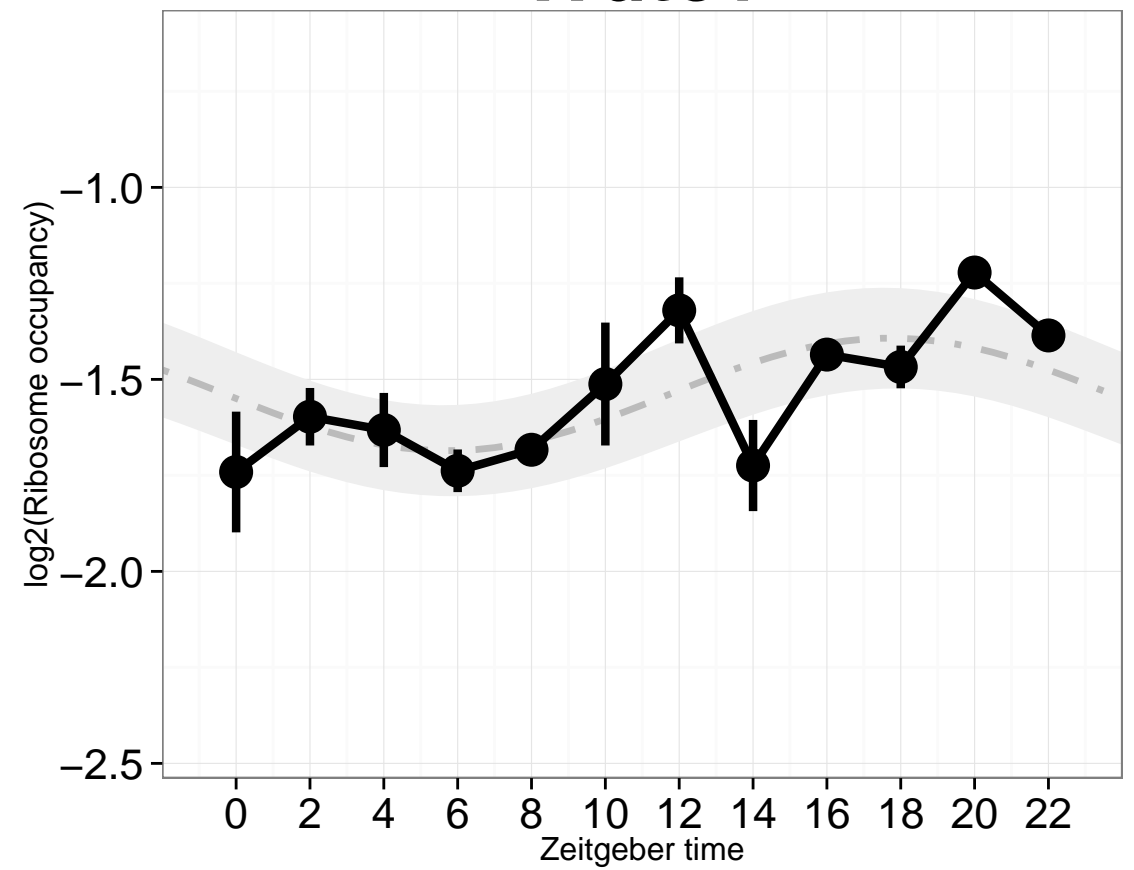

Supplement: Supplementary file 5652 [file 1]

# Dnaja2

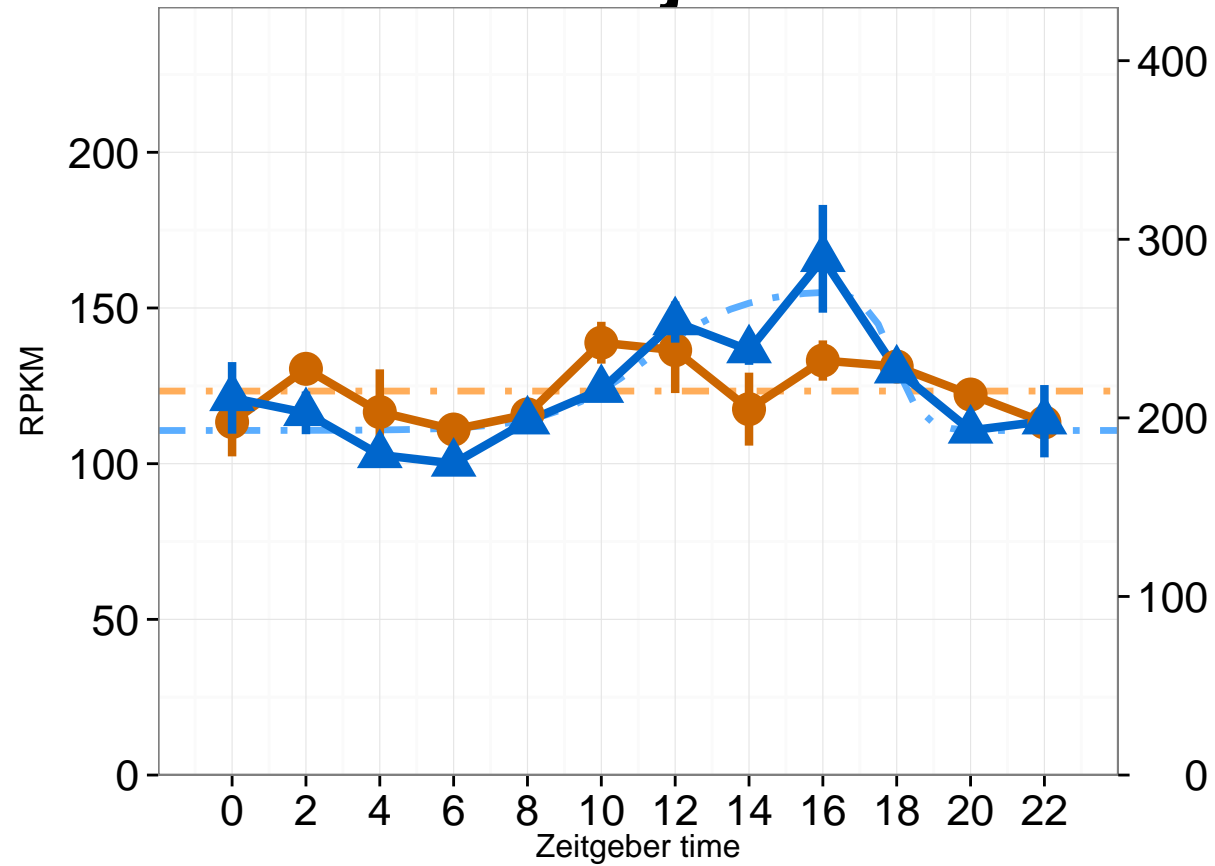

# Dnaja2

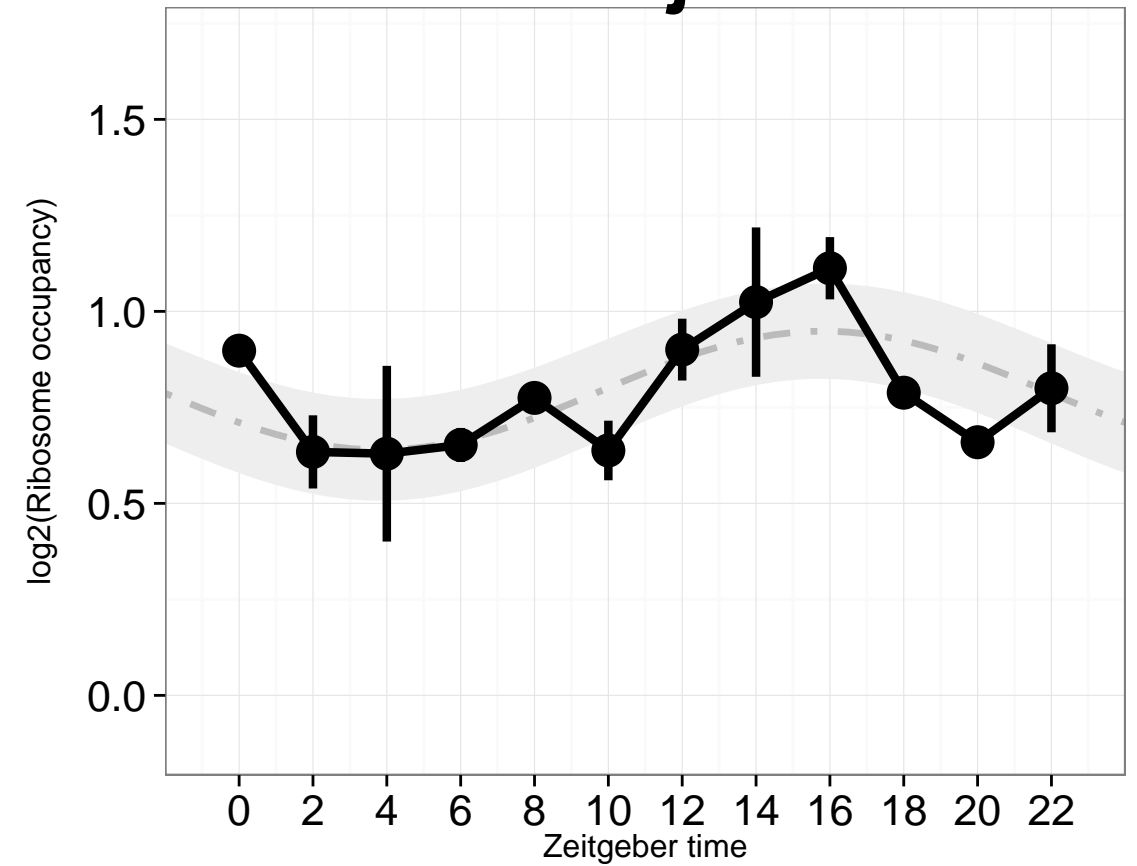

Supplement: Supplementary file 5653 [file 1]

## Mad2l1

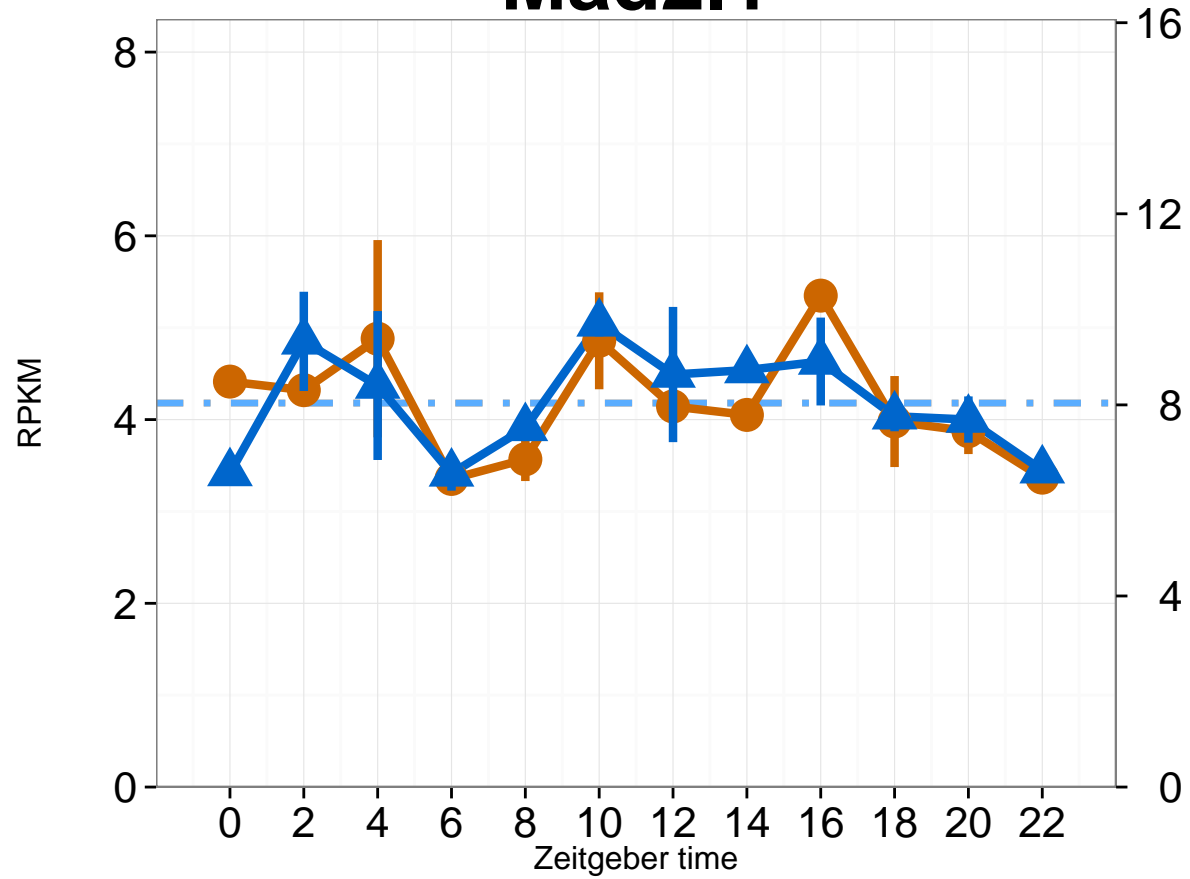

## Mad2l1

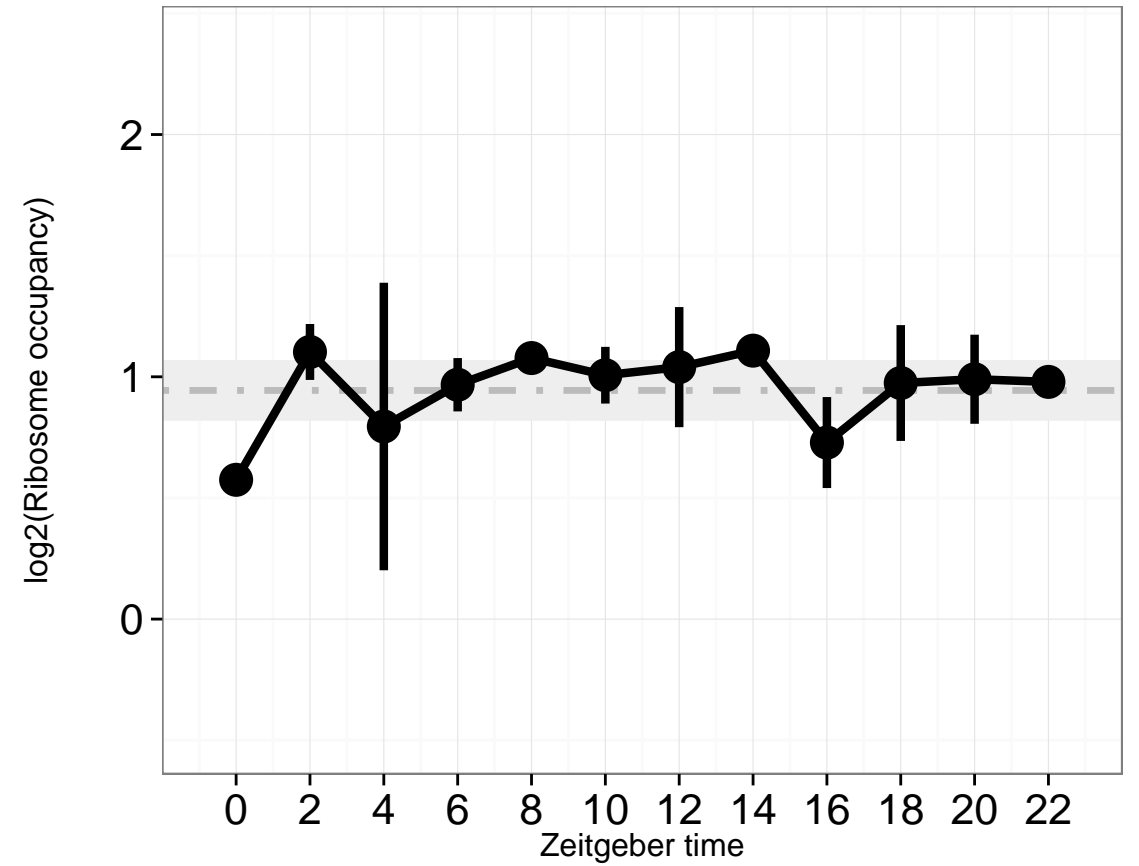

Supplement: Supplementary file 5654 [file 1]

## Usp4

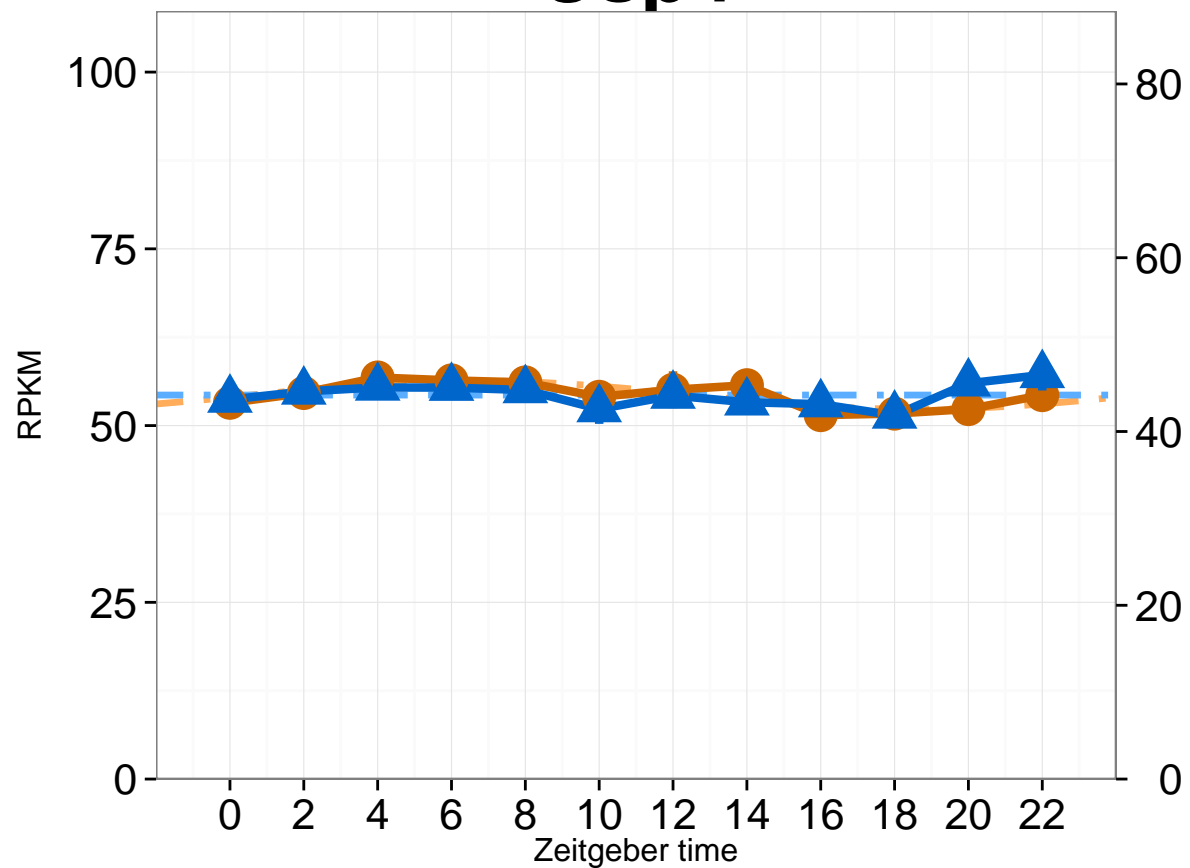

## Usp4

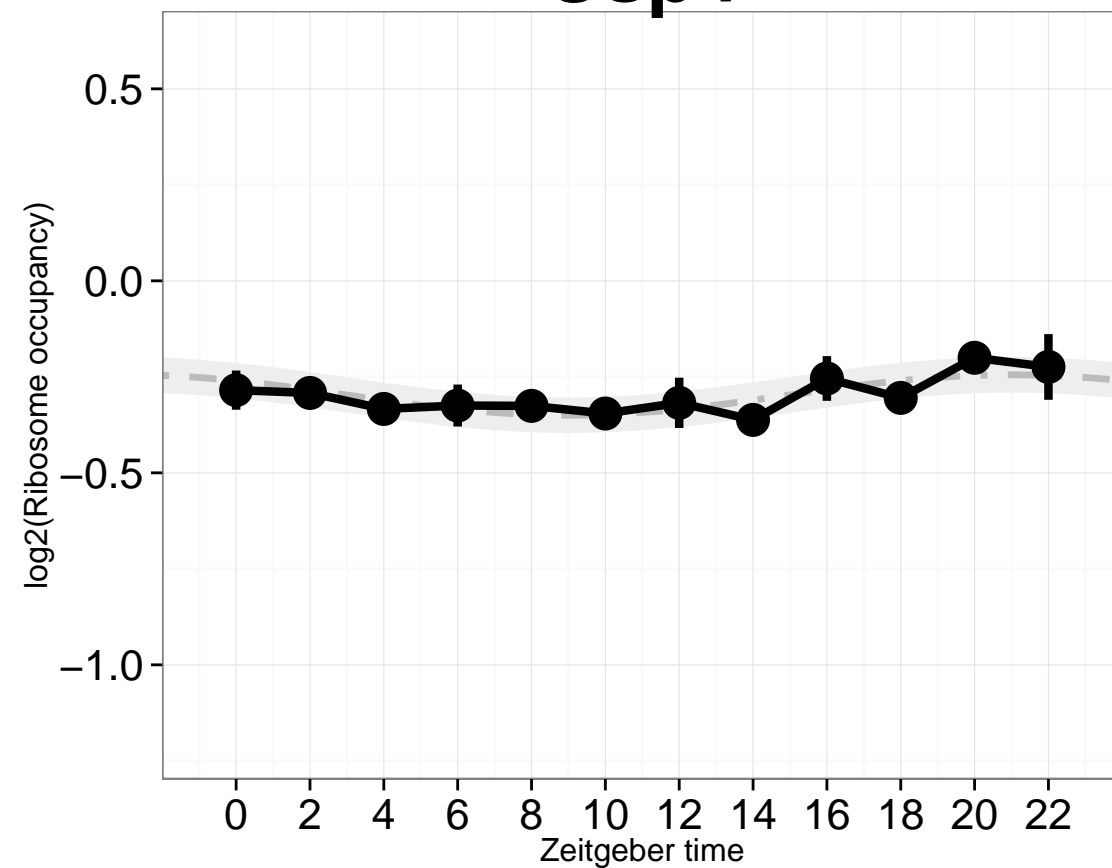

Supplement: Supplementary file 5655 [file 1]

# Klhdc8b

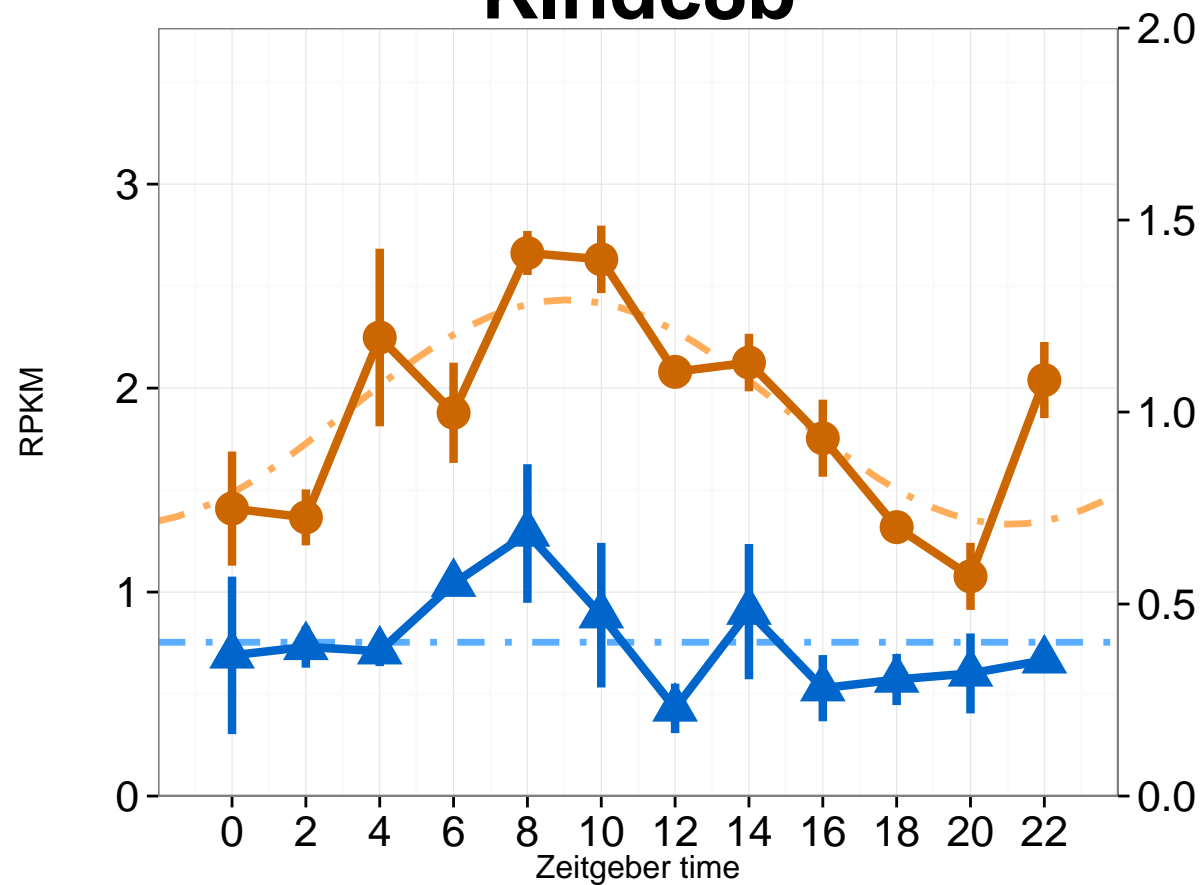

# Klhdc8b

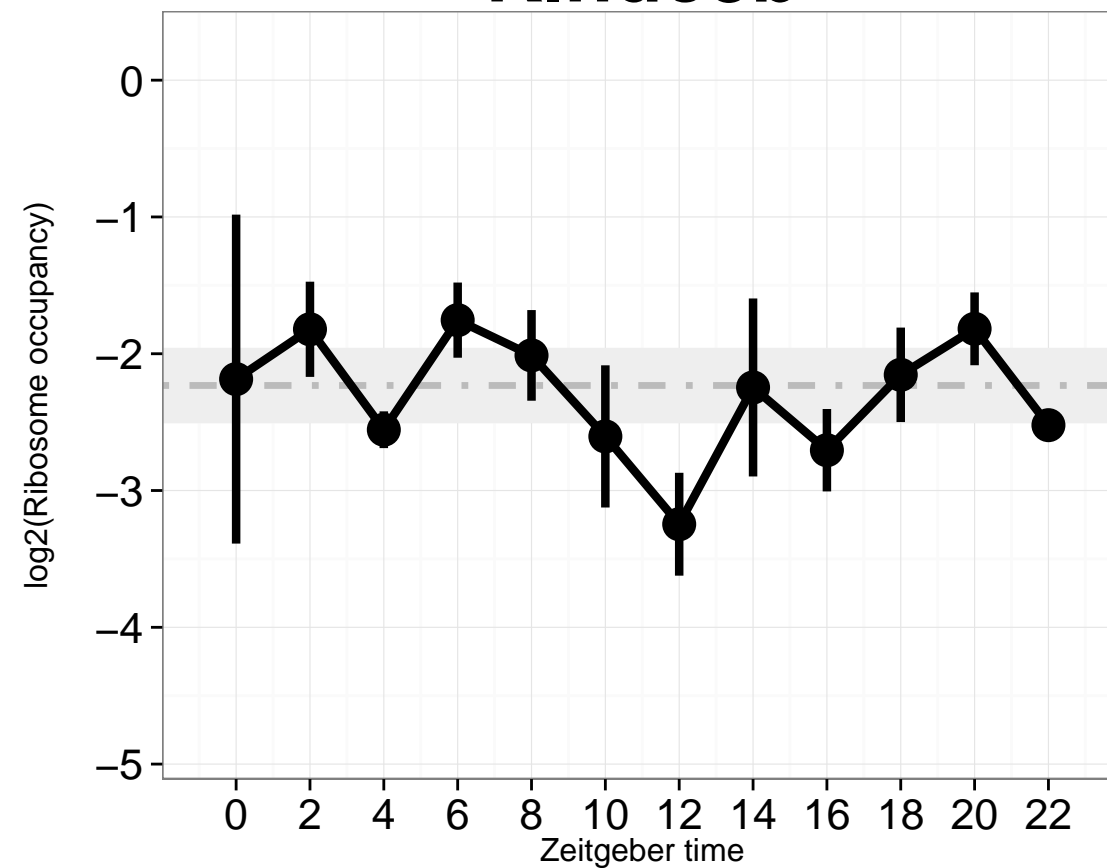

Supplement: Supplementary file 5656 [file 1]

## Nap1l3

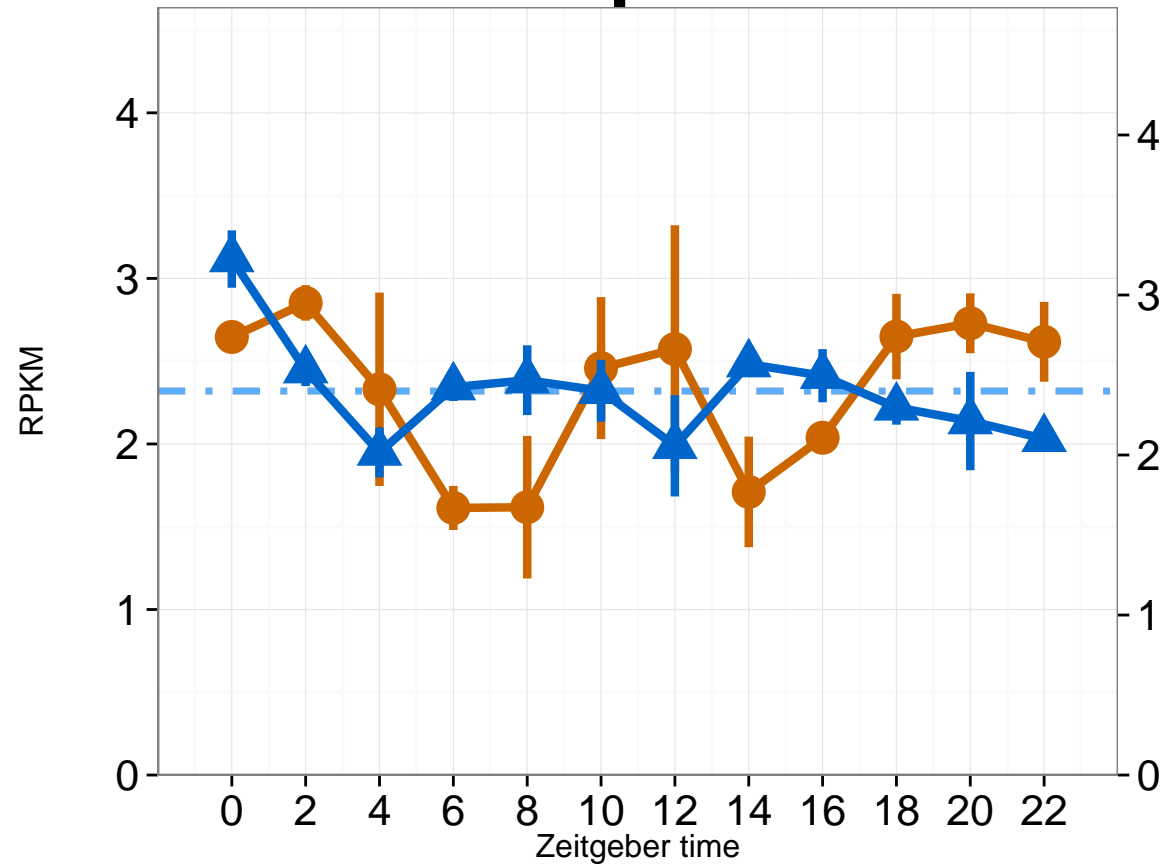

## Nap1l3

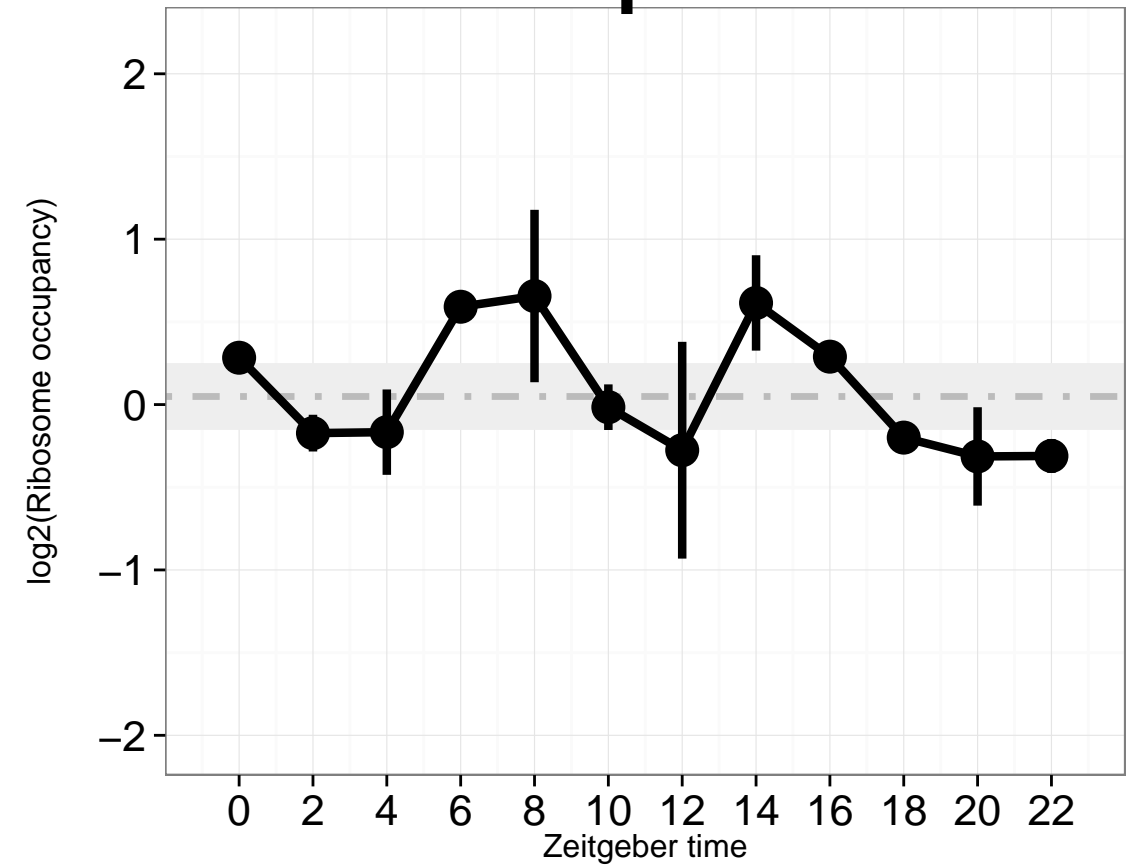

Supplement: Supplementary file 5657 [file 1]

# Fam76a

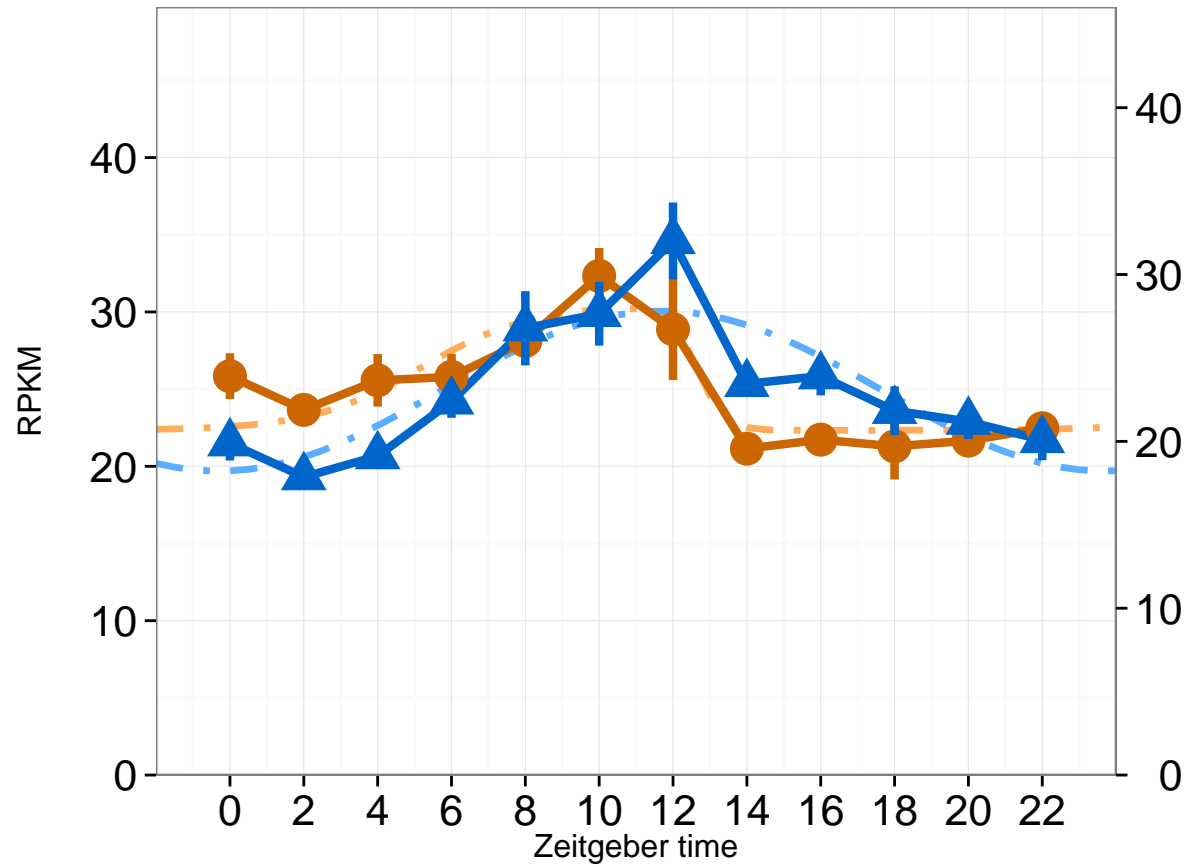

# Fam76a

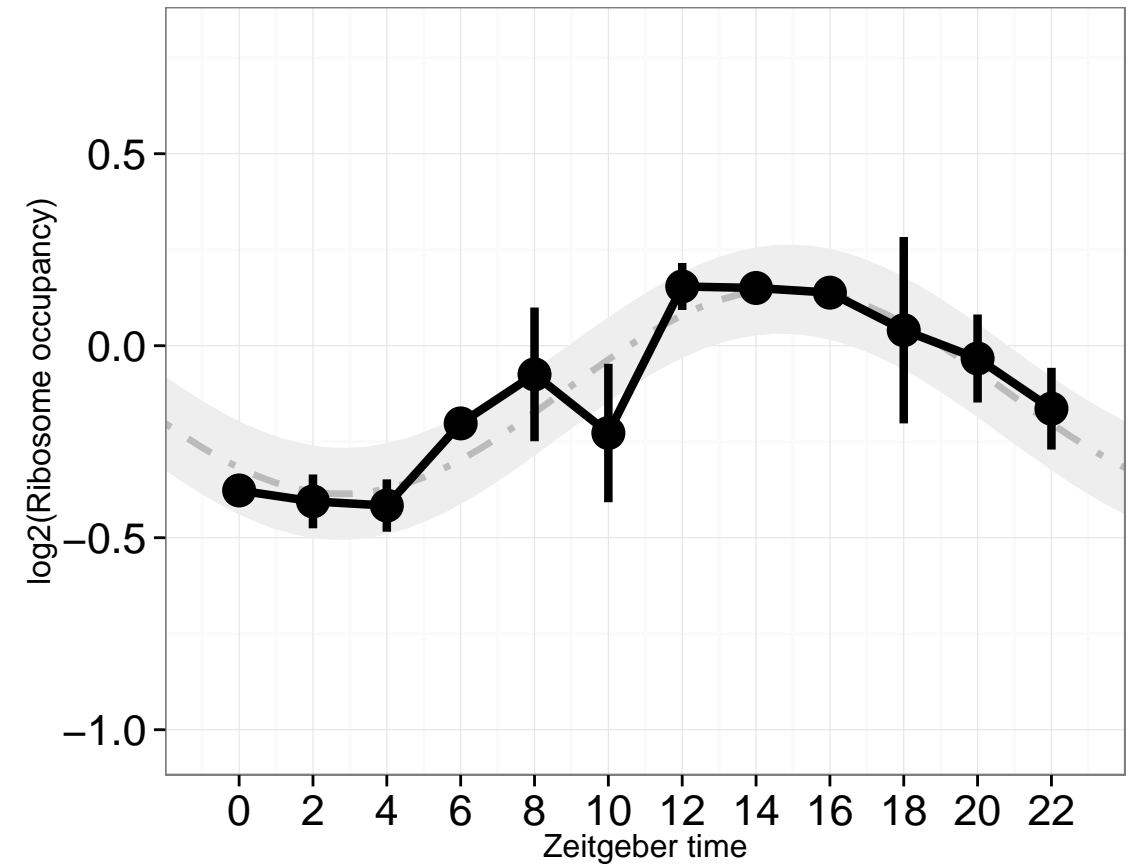

Supplement: Supplementary file 5658 [file 1]

# Zfp395

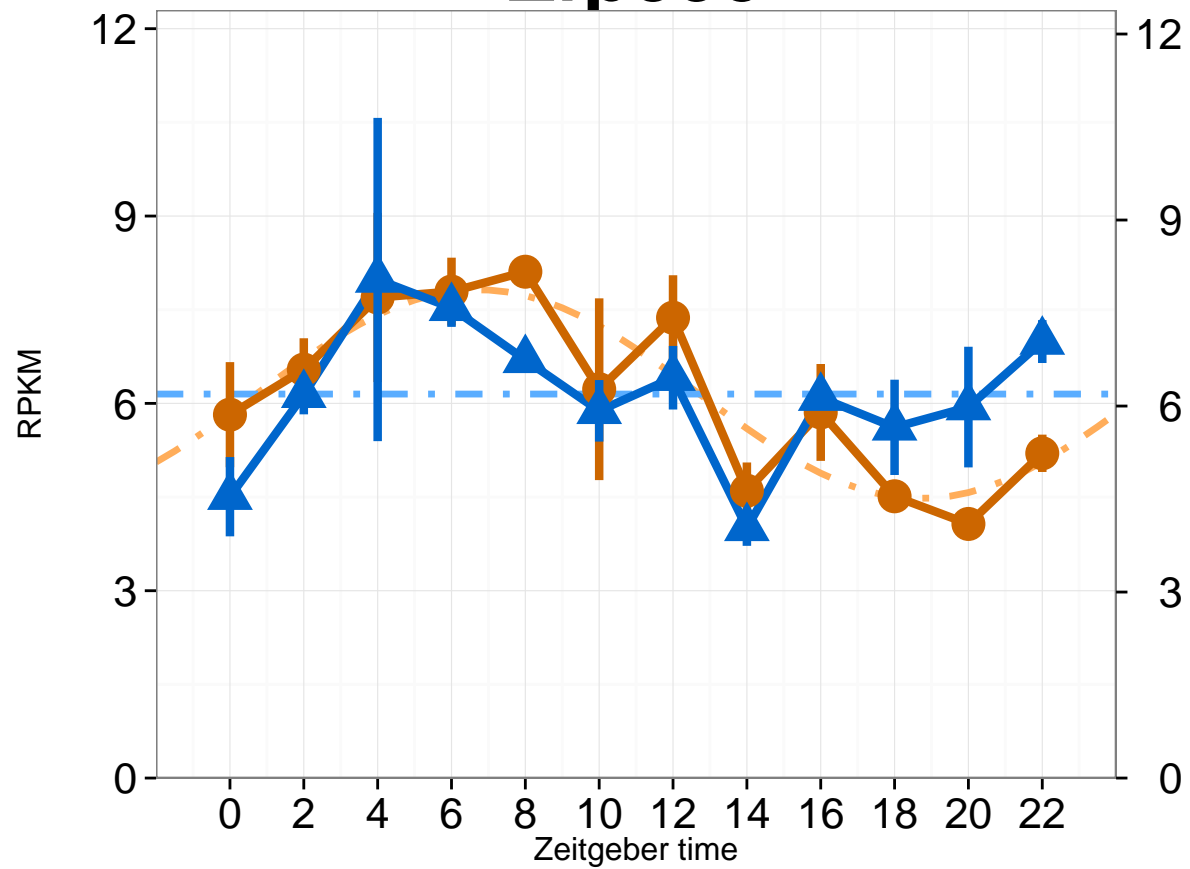

# Zfp395

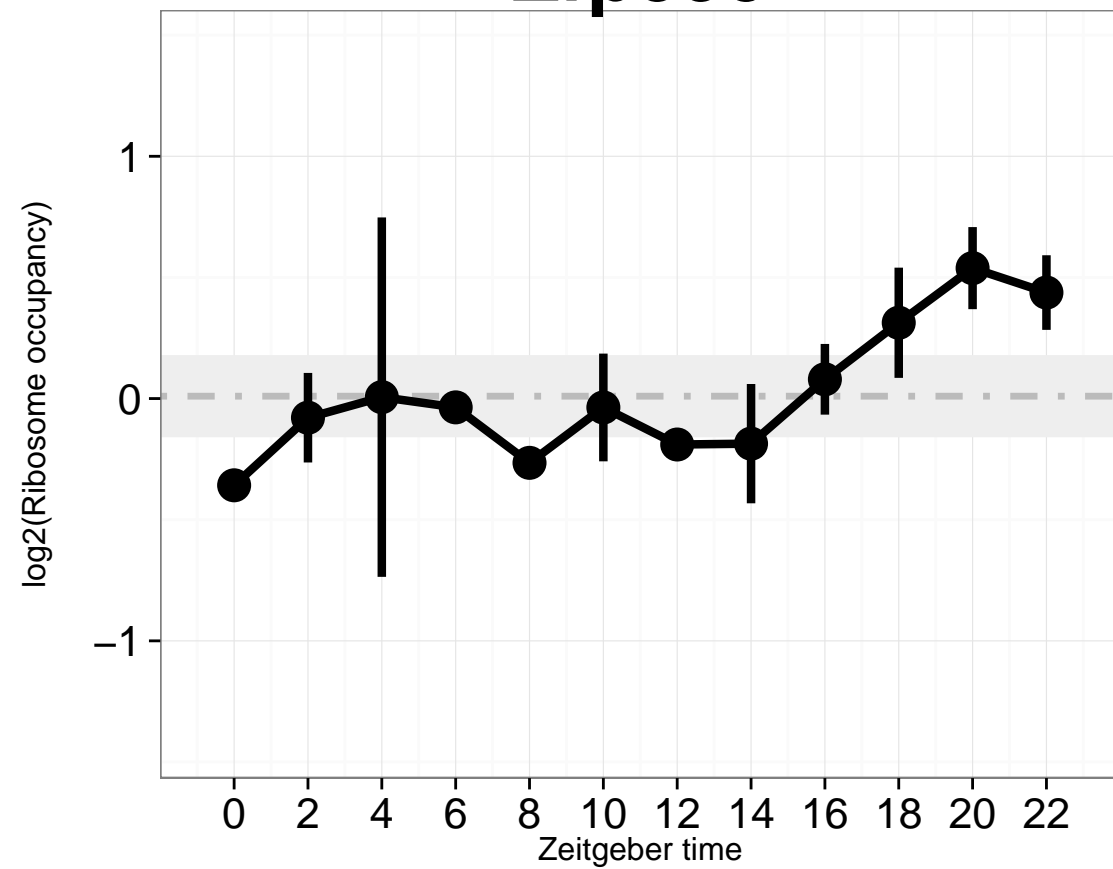

Supplement: Supplementary file 5659 [file 1]

## Dicer1

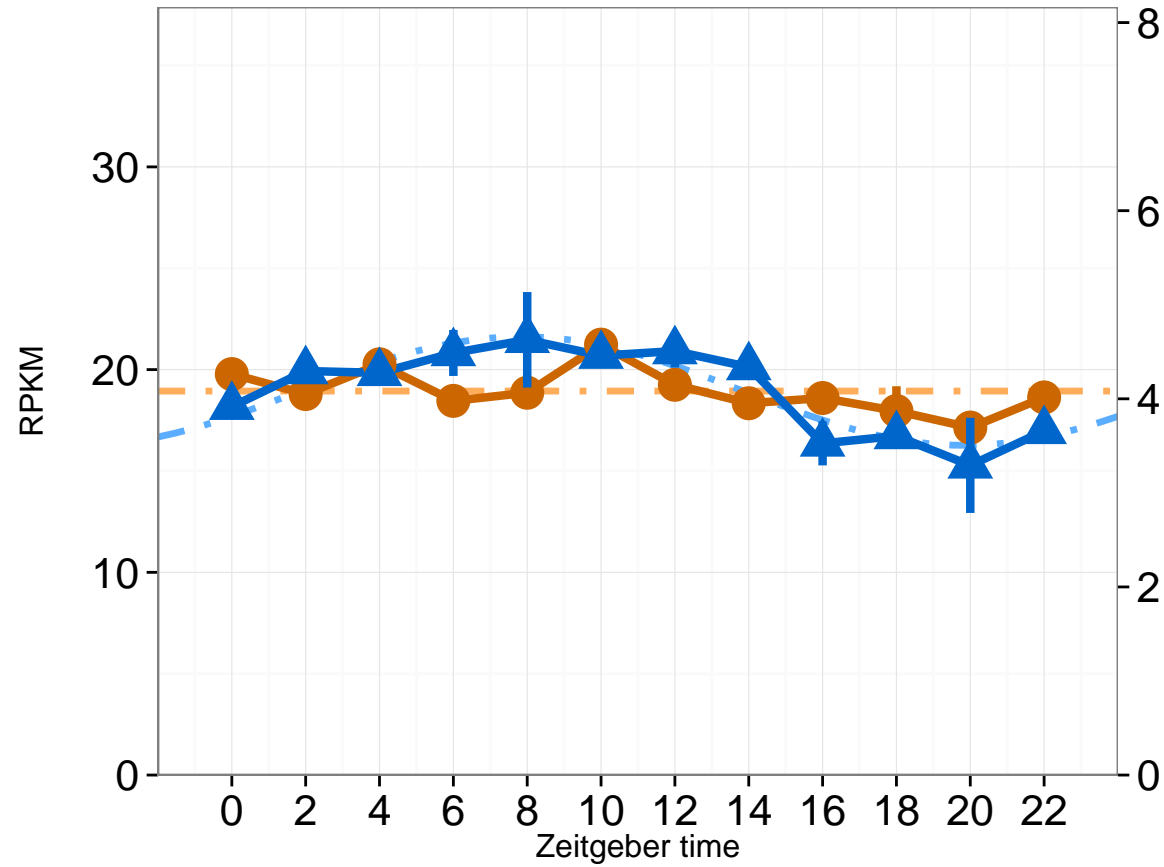

## Dicer1

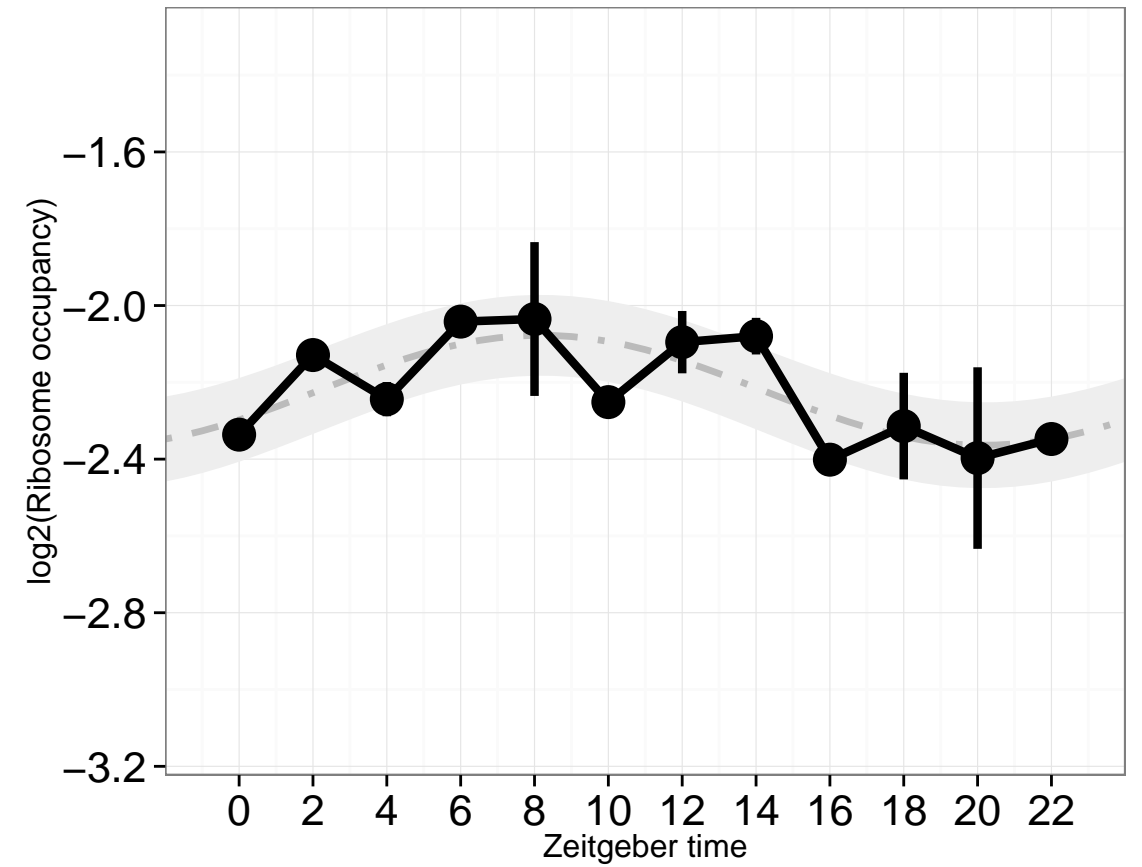

Supplement: Supplementary file 5660 [file 1]

## Parn

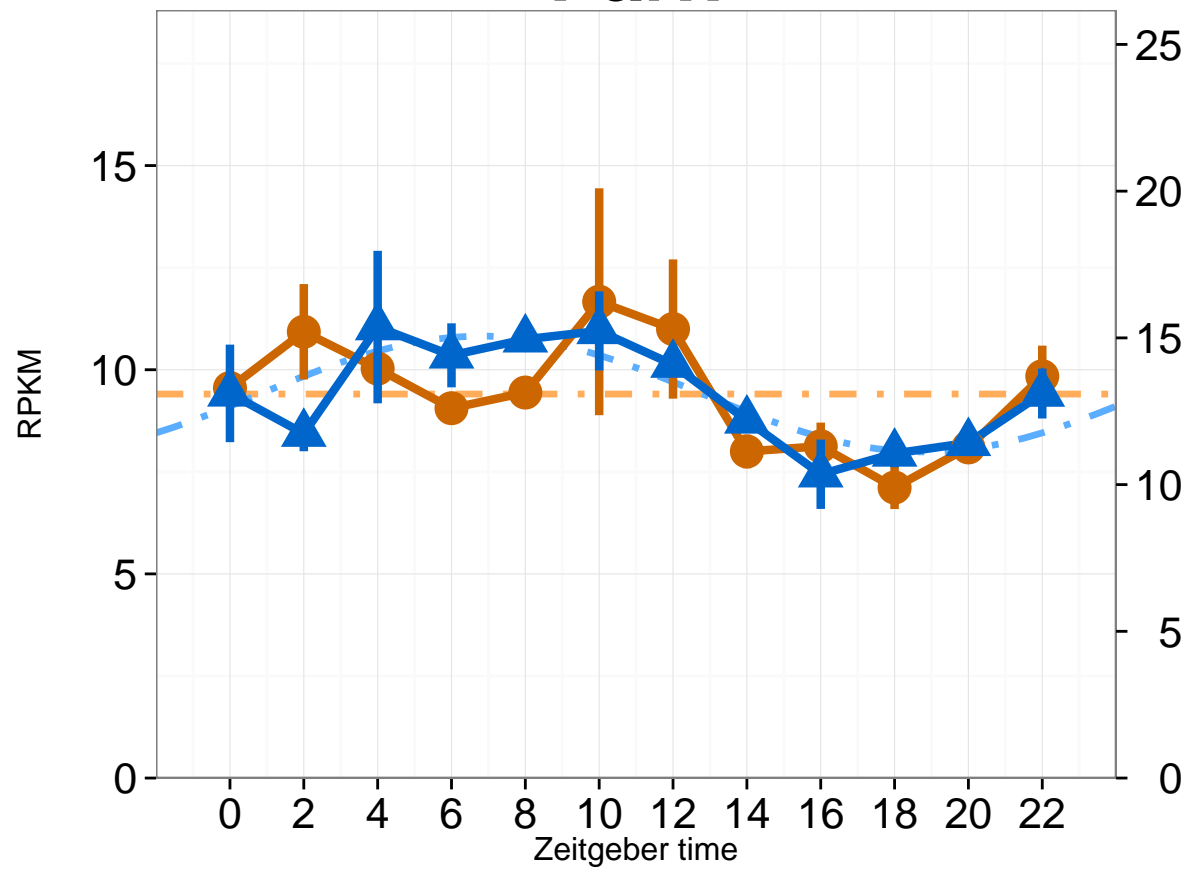

## Parn

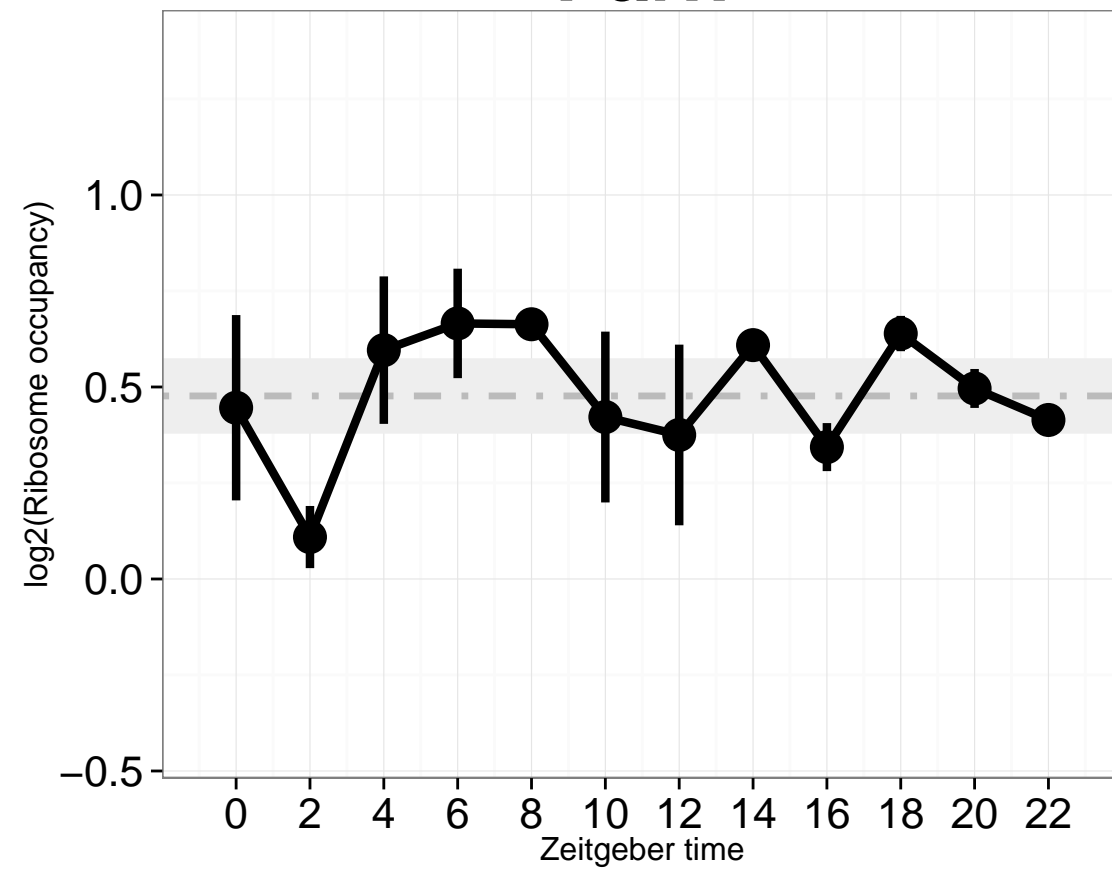

Supplement: Supplementary file 5661 [file 1]

## Myl6

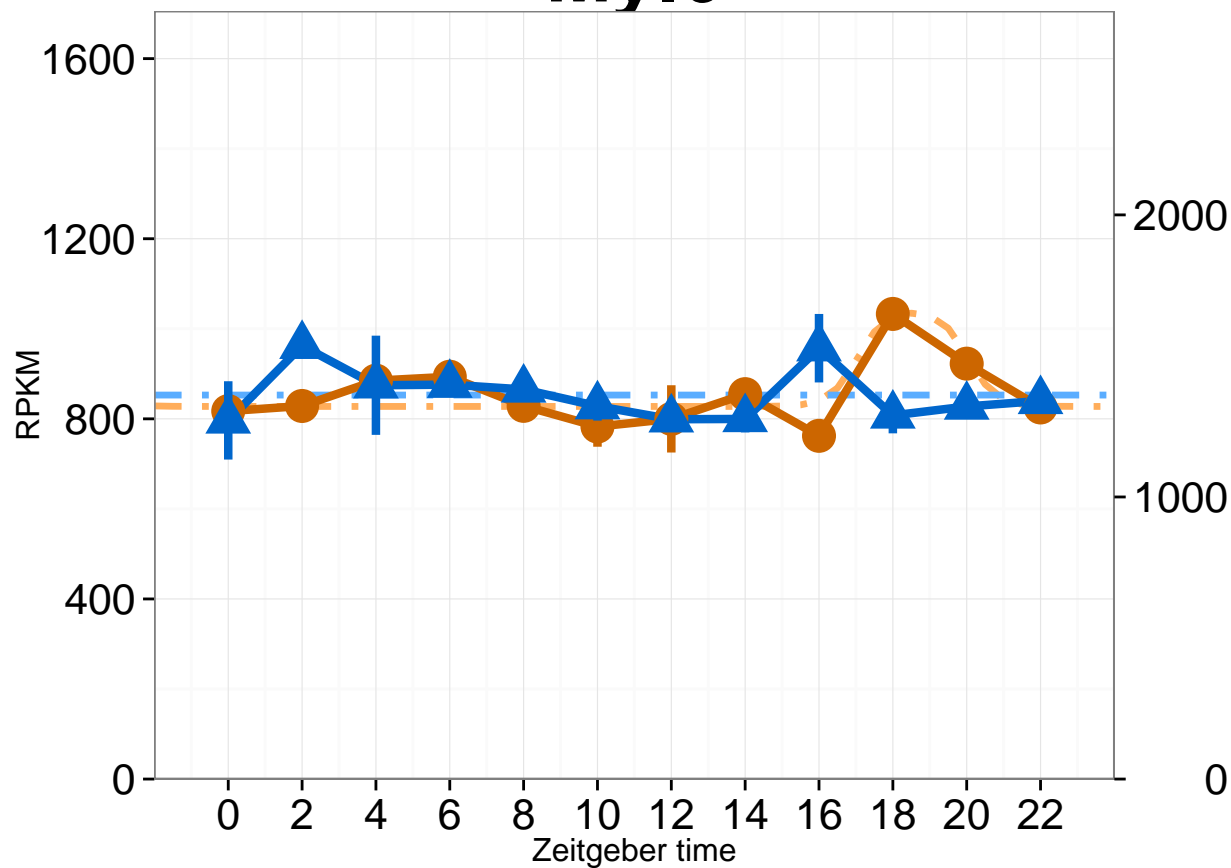

## Myl6

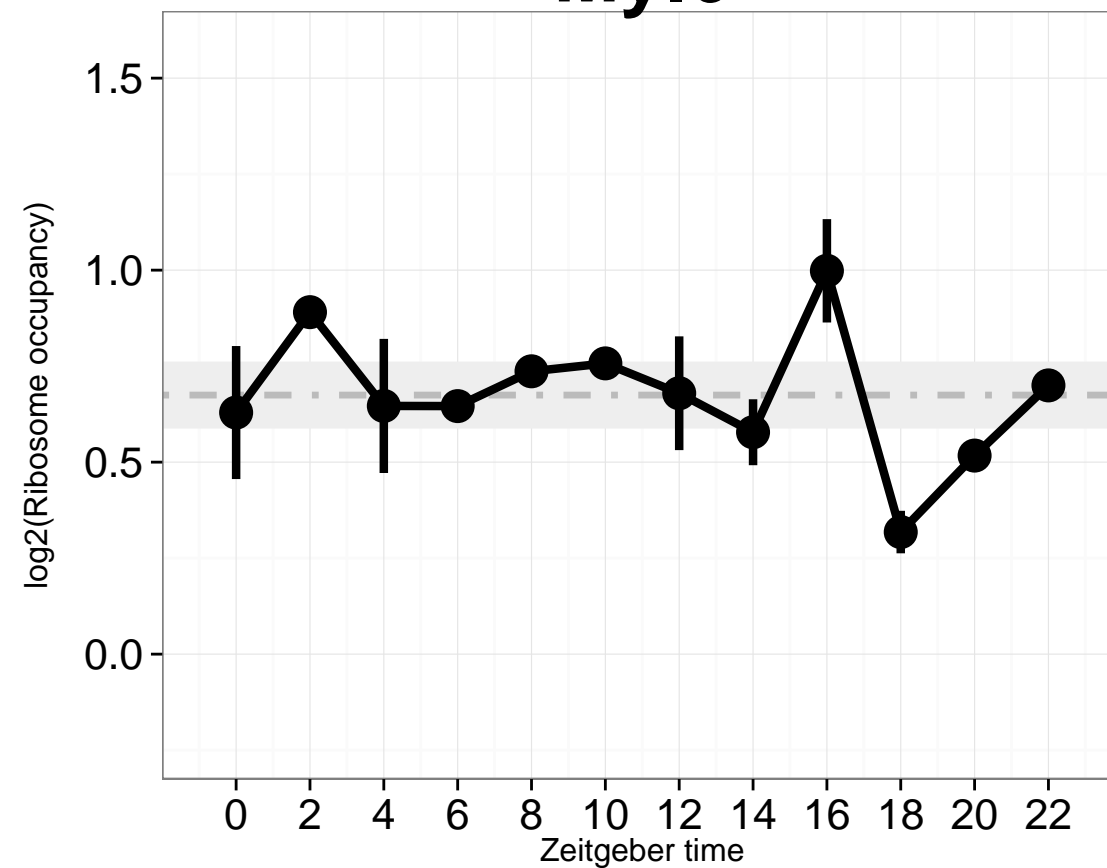

Supplement: Supplementary file 5662 [file 1]

# Hnrnpa2b1

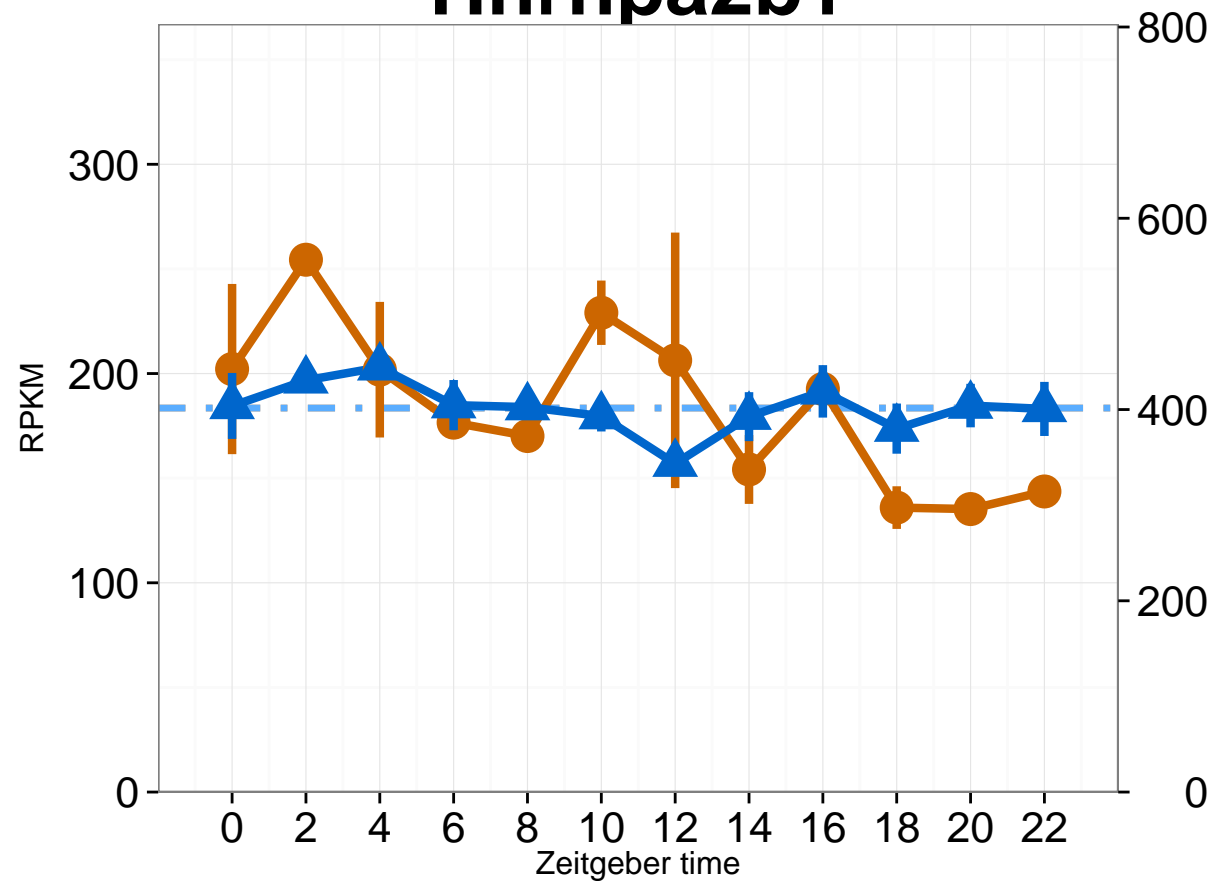

# Hnrnpa2b1

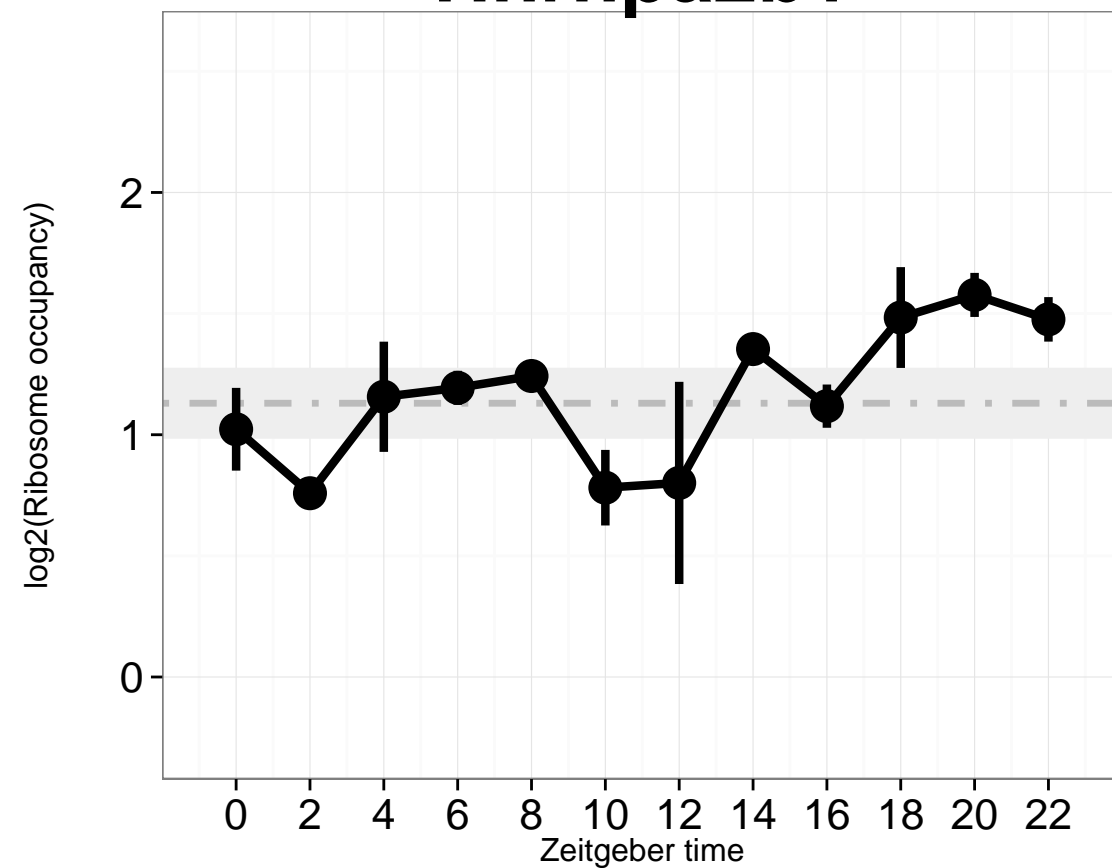

Supplement: Supplementary file 5663 [file 1]

## Cdca2

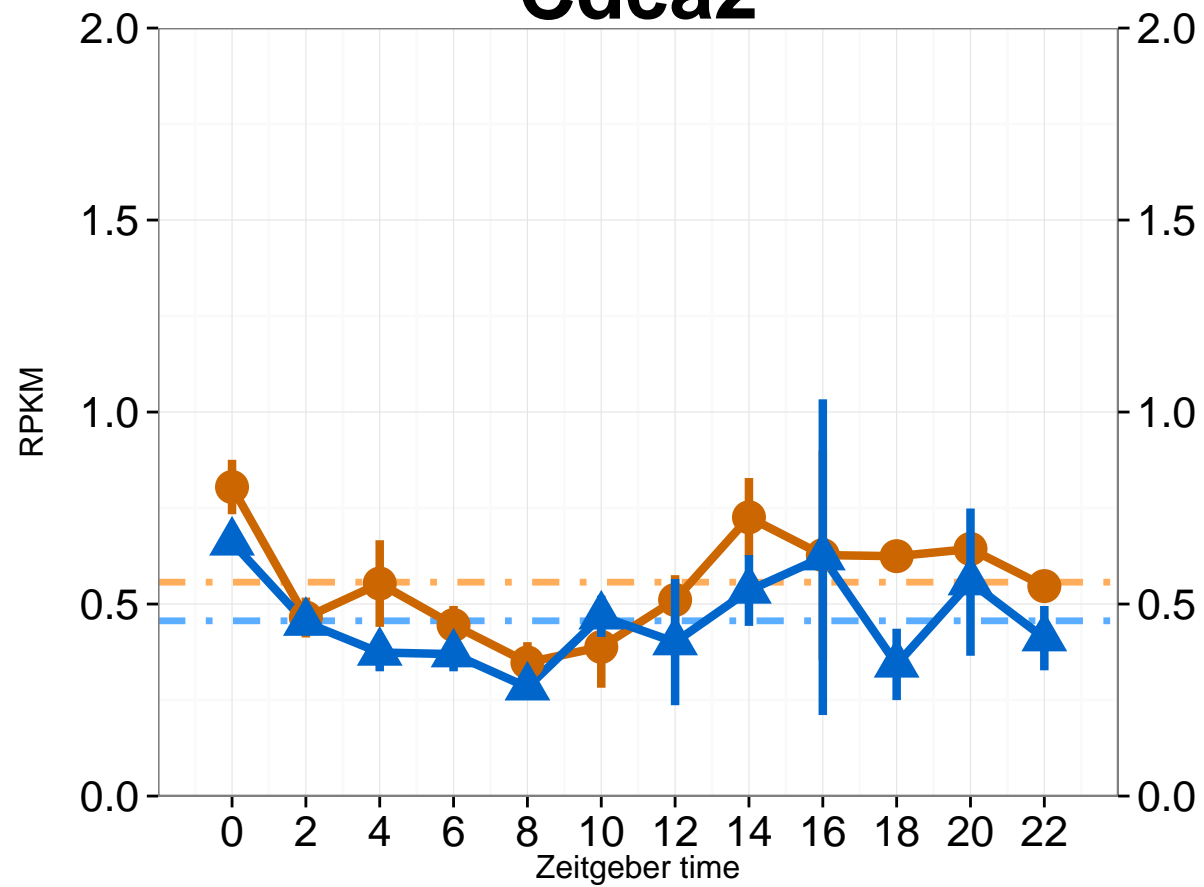

## Cdca2

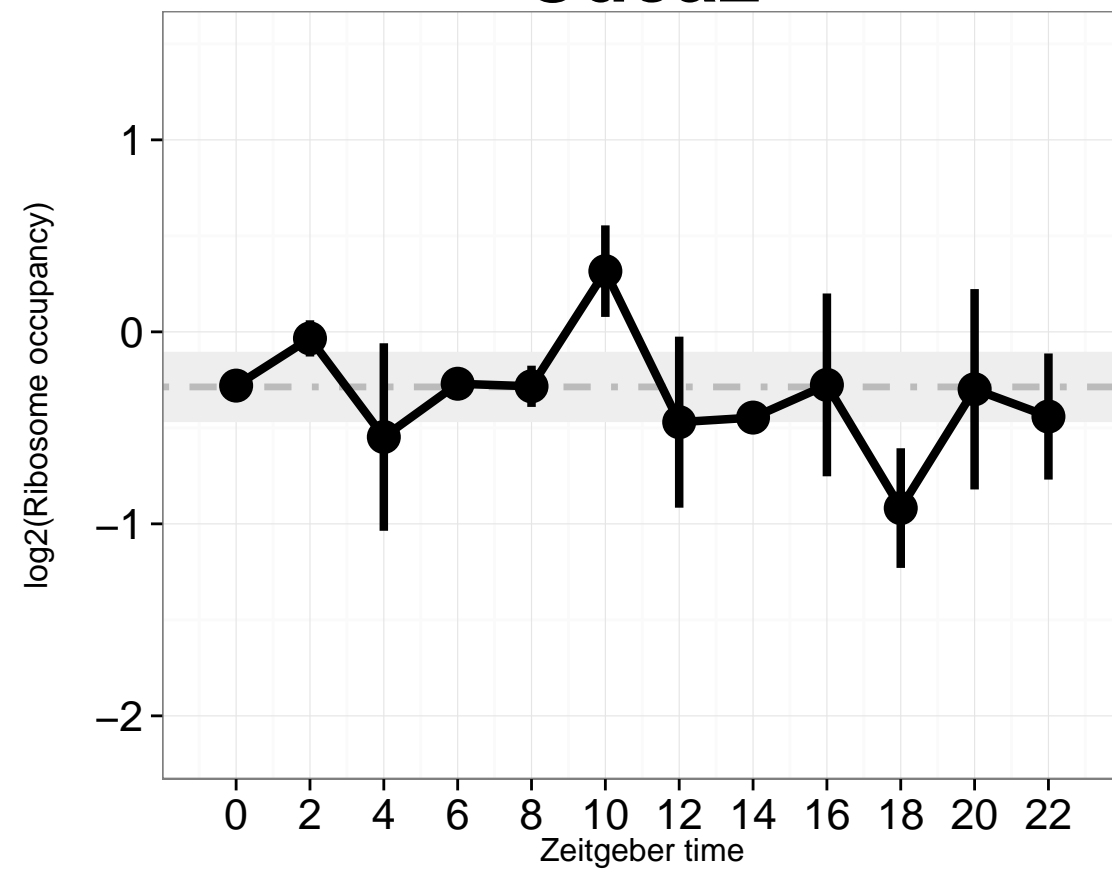

Supplement: Supplementary file 5664 [file 1]

# Rpl3

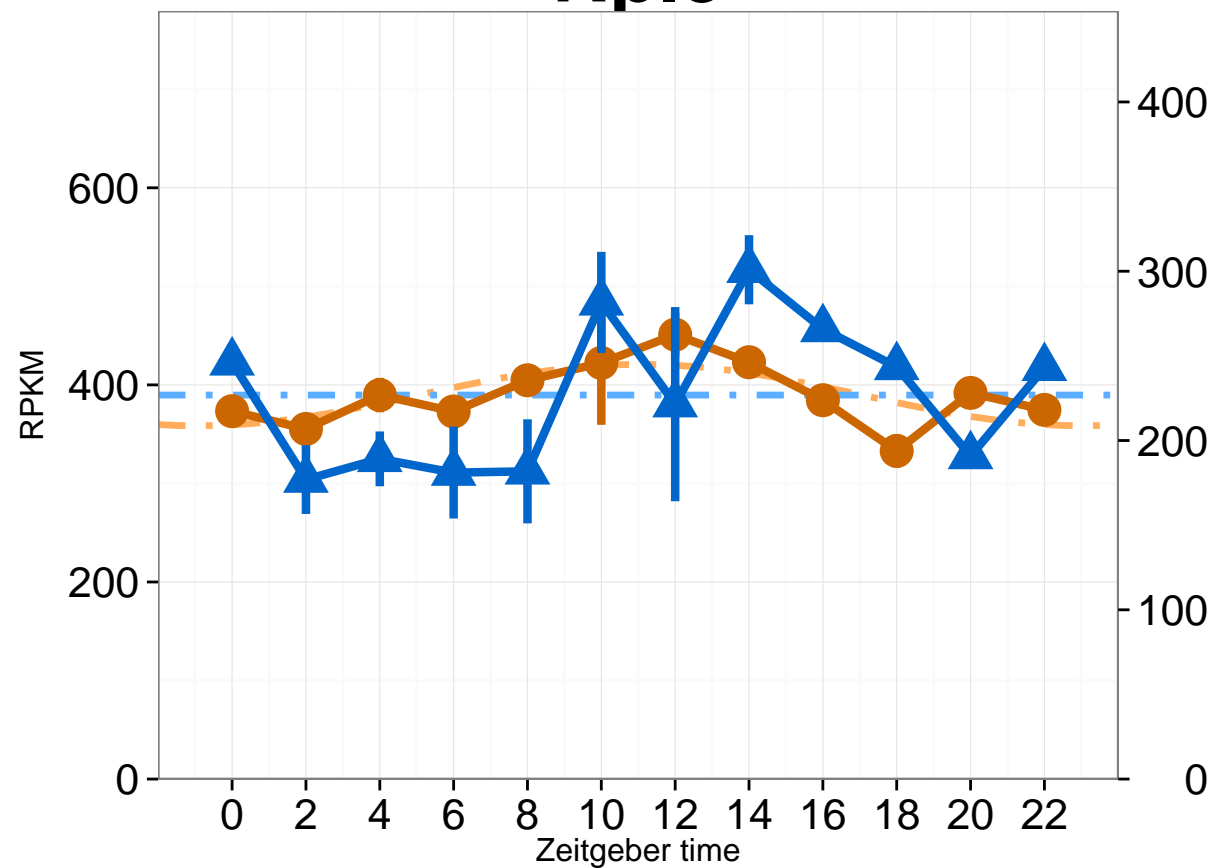

# Rpl3

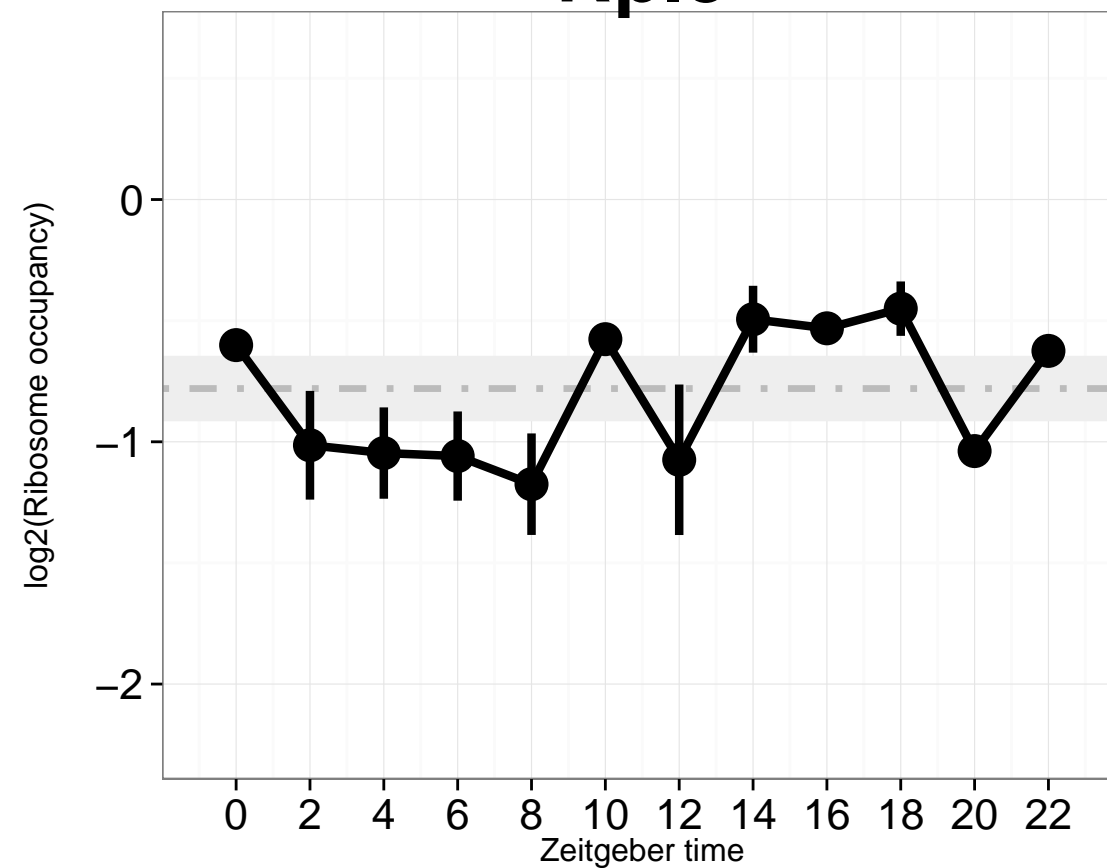

Supplement: Supplementary file 5665 [file 1]

# Arhgef6

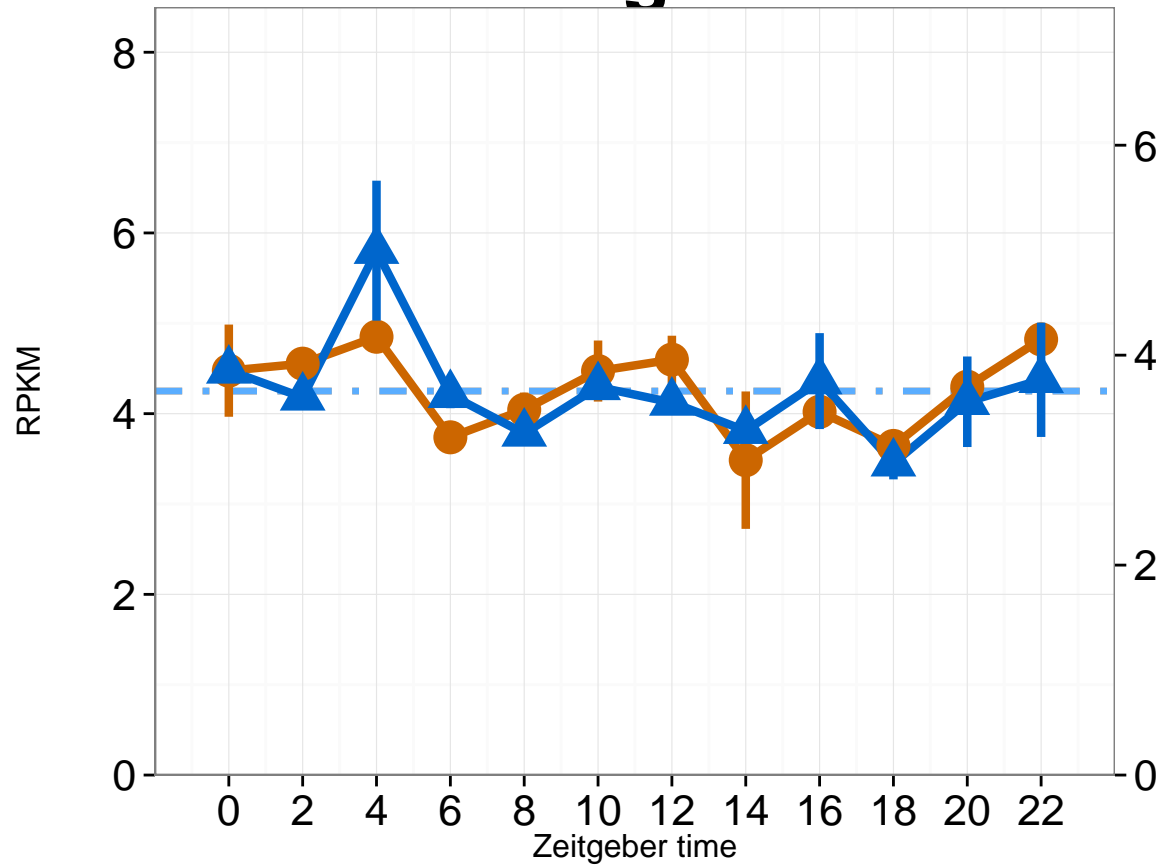

# Arhgef6

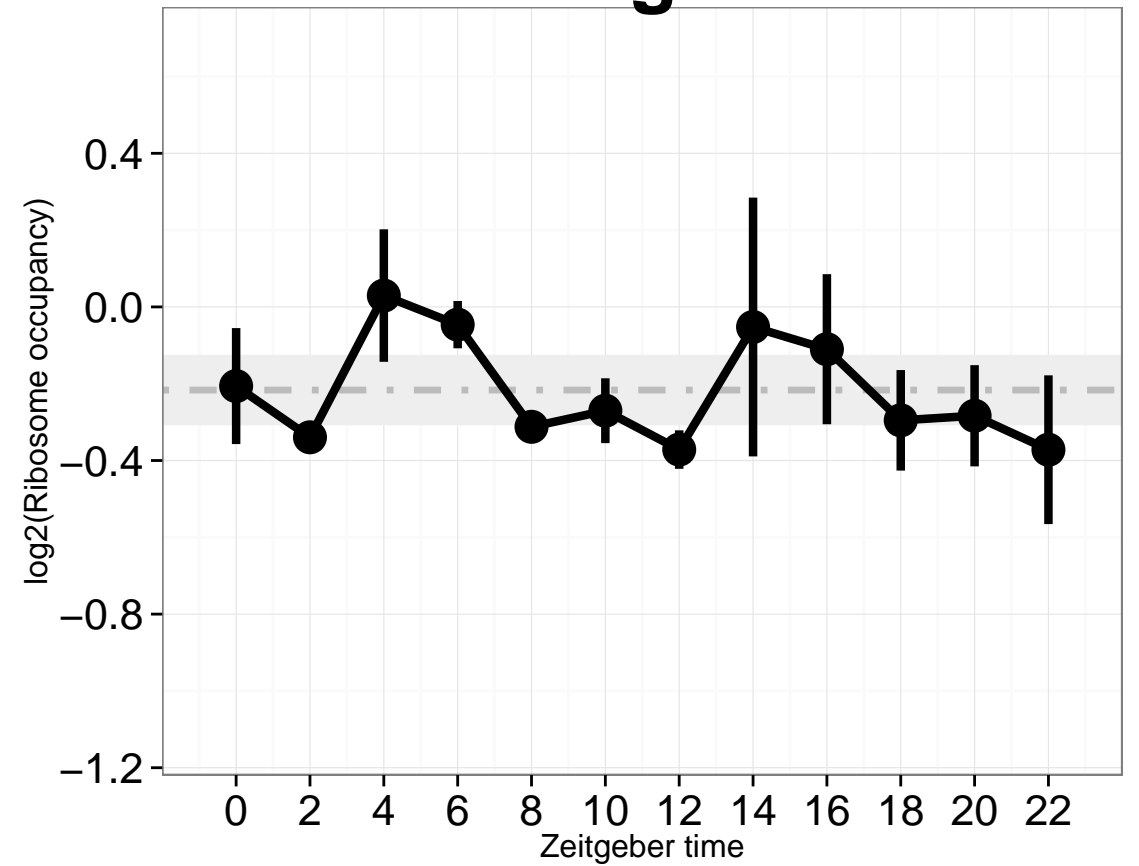

Supplement: Supplementary file 5666 [file 1]

## Tipin

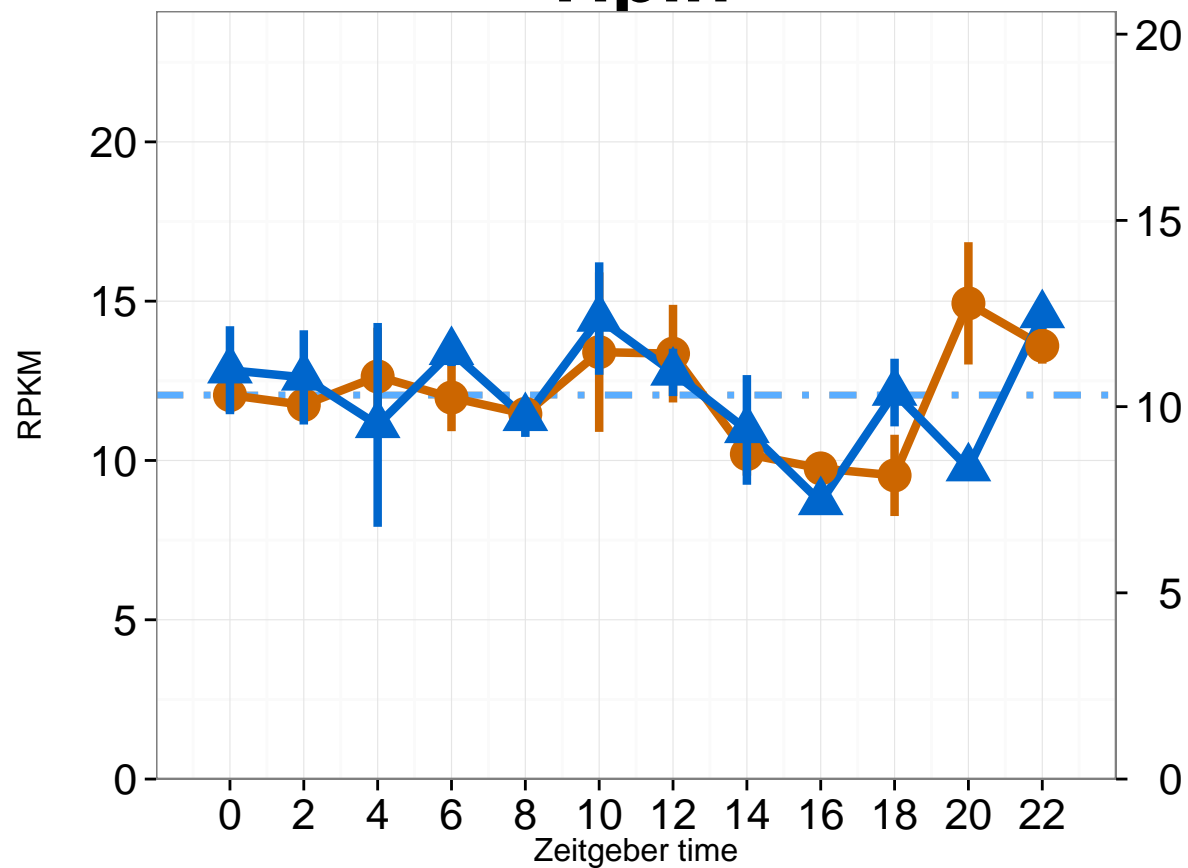

## Tipin

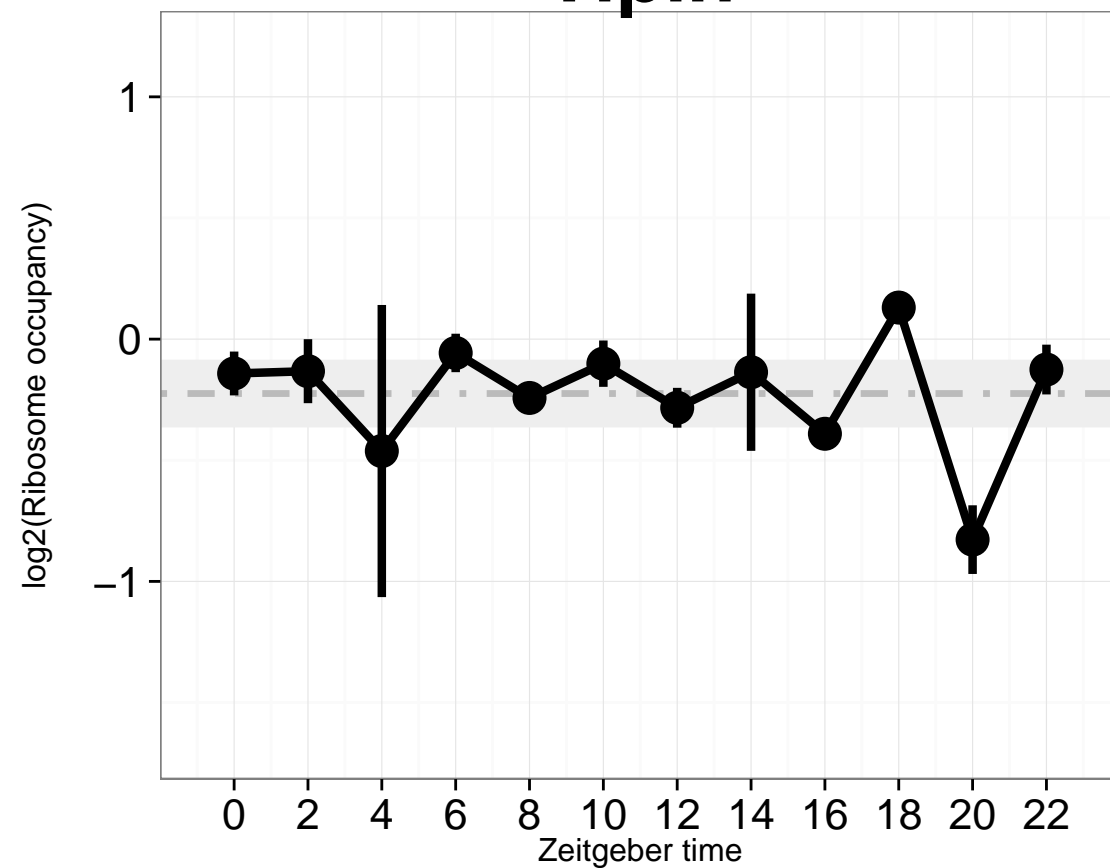

Supplement: Supplementary file 5667 [file 1]

# Tm2d2

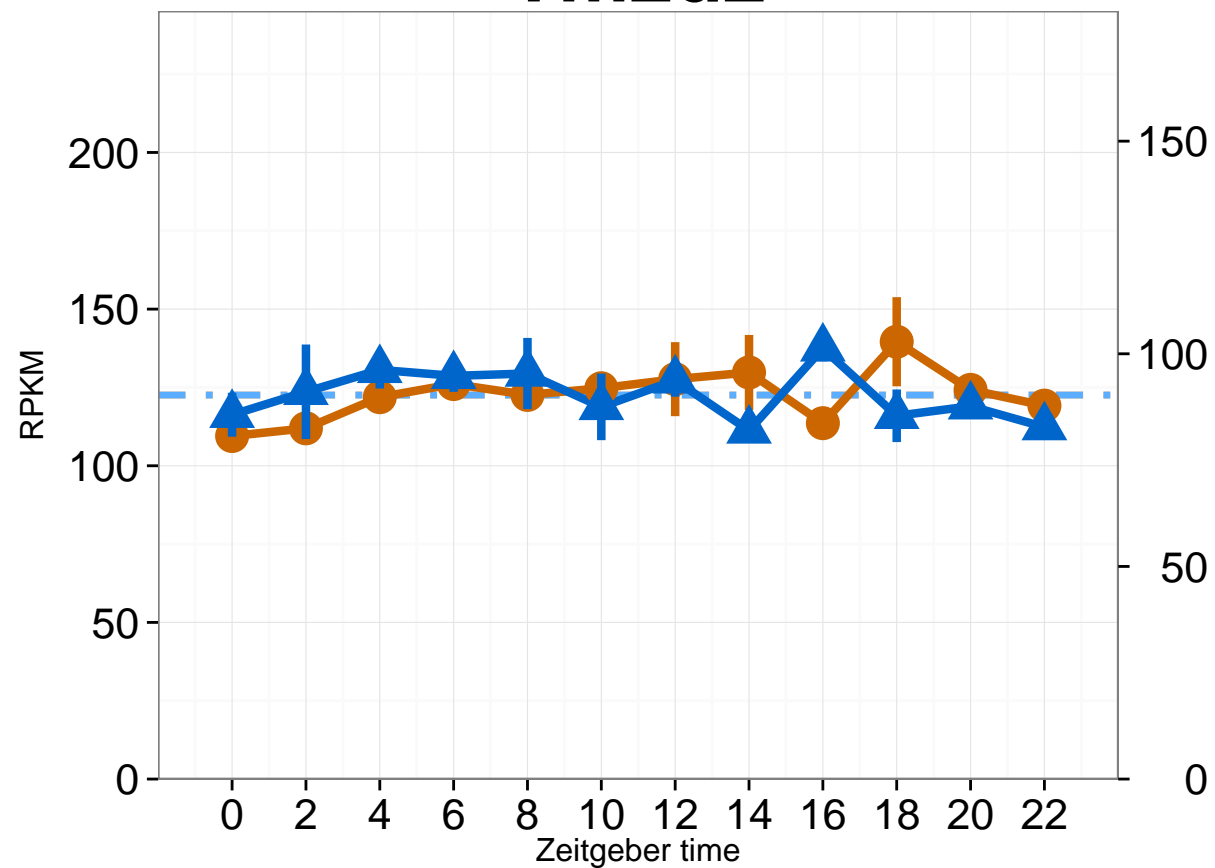

# Tm2d2

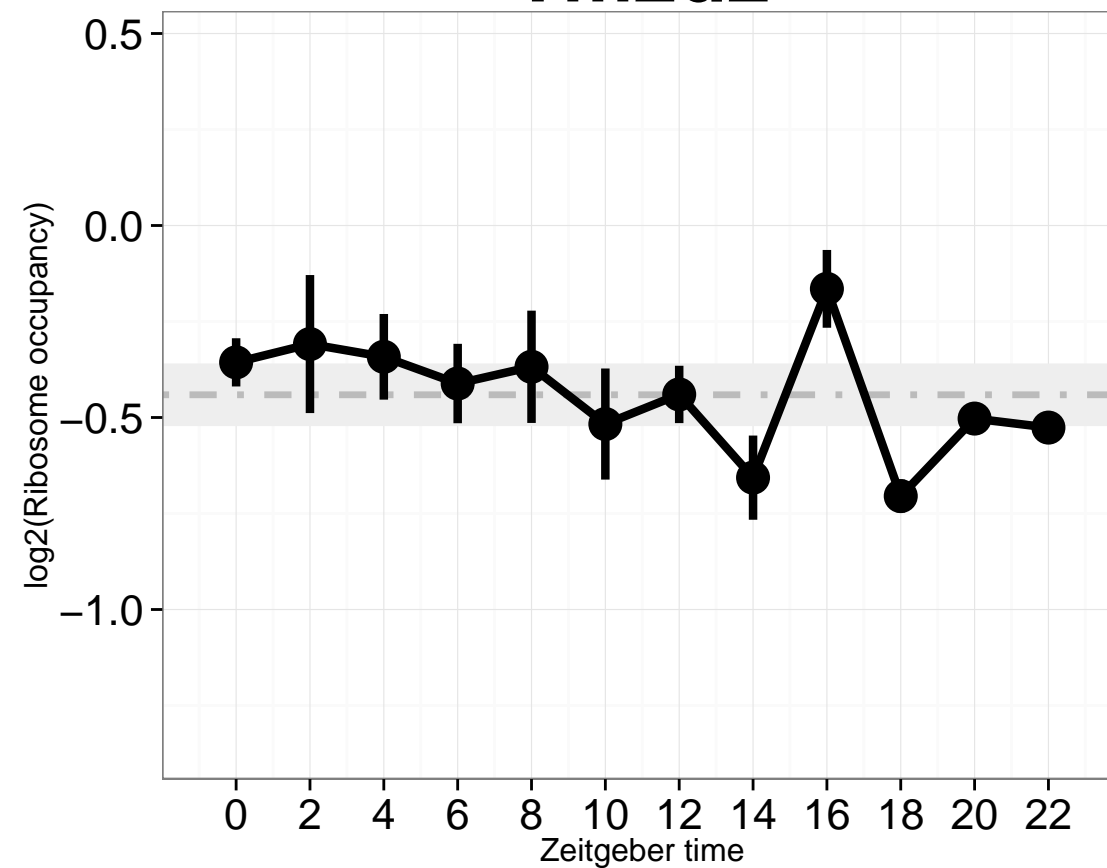

Supplement: Supplementary file 5668 [file 1]

# Tango6

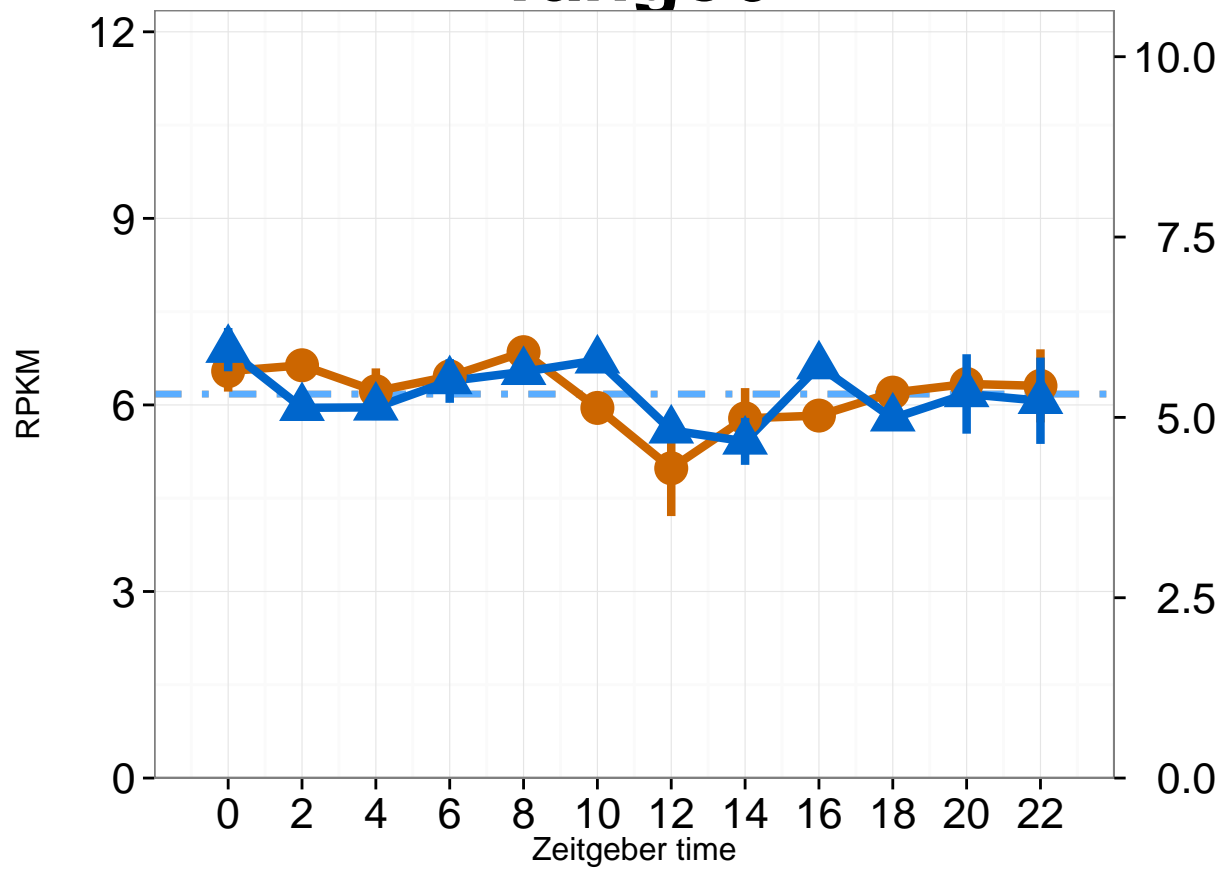

# Tango6

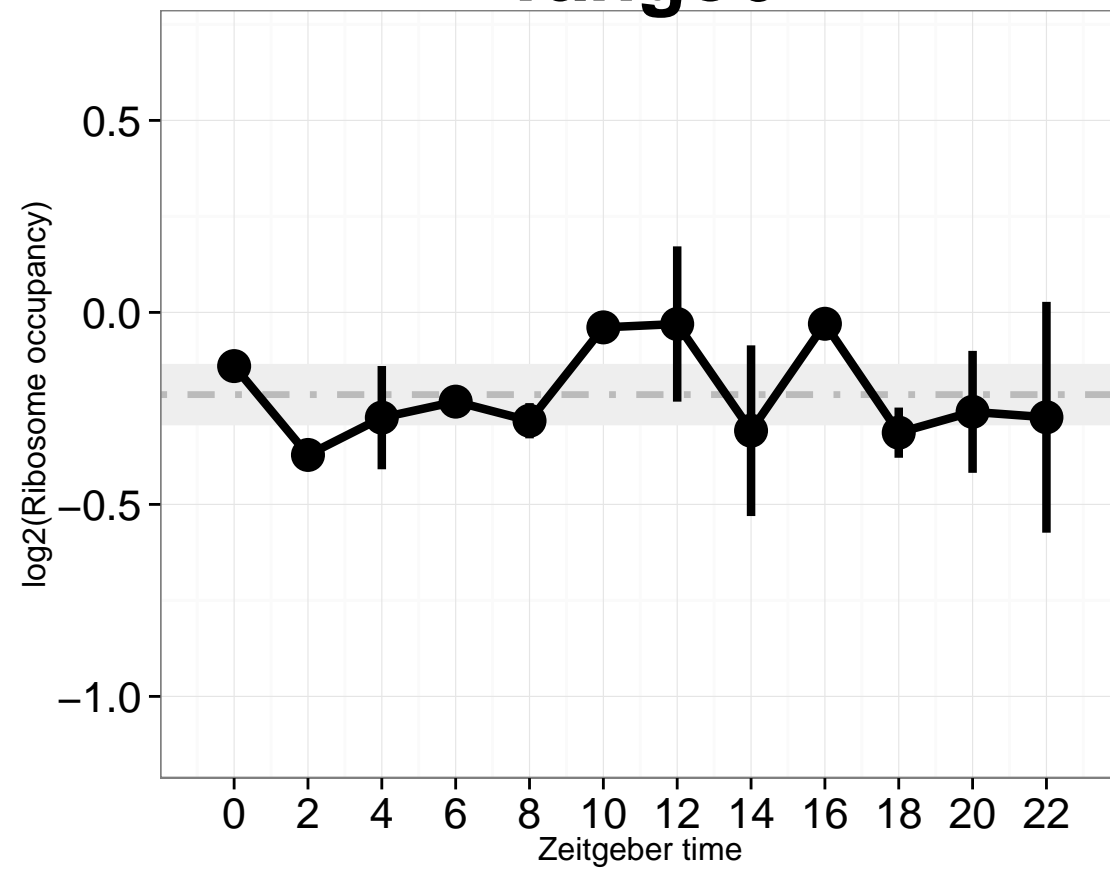

Supplement: Supplementary file 5669 [file 1]

## Lcor

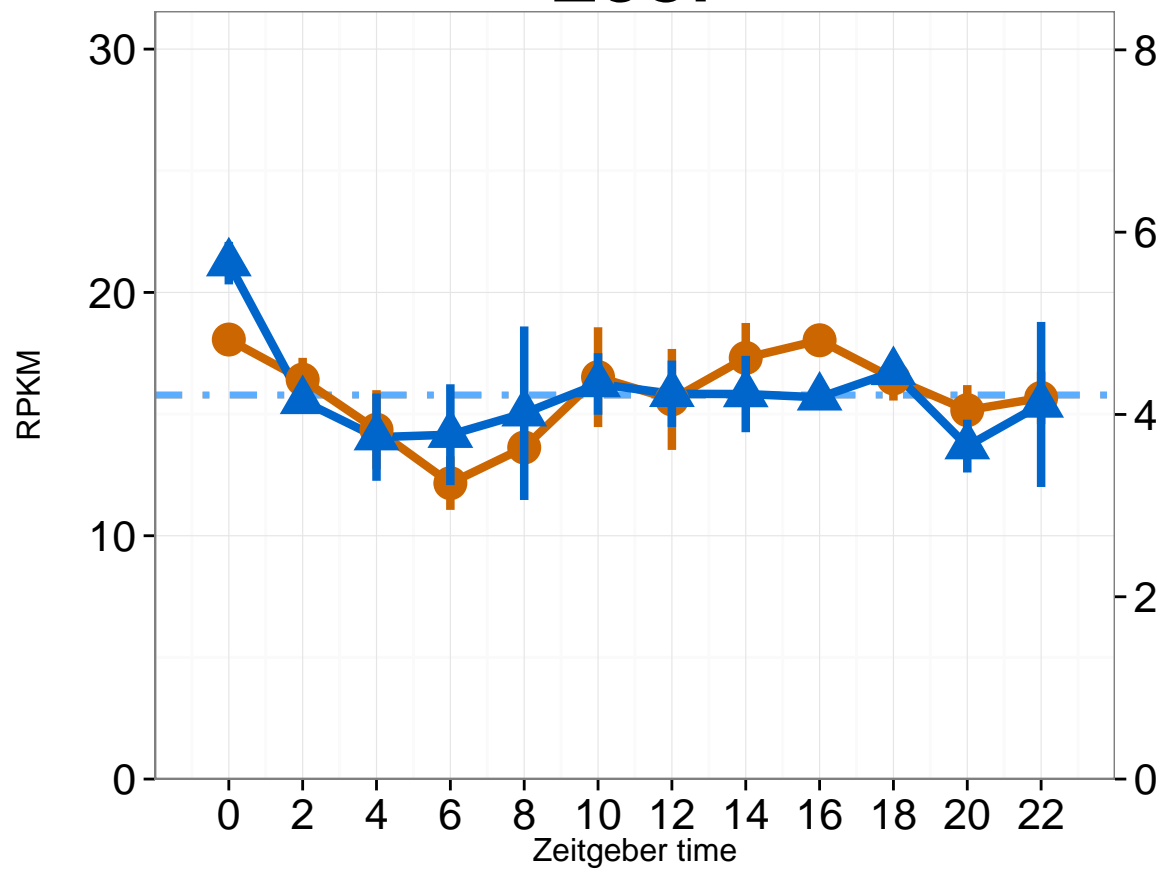

## Lcor

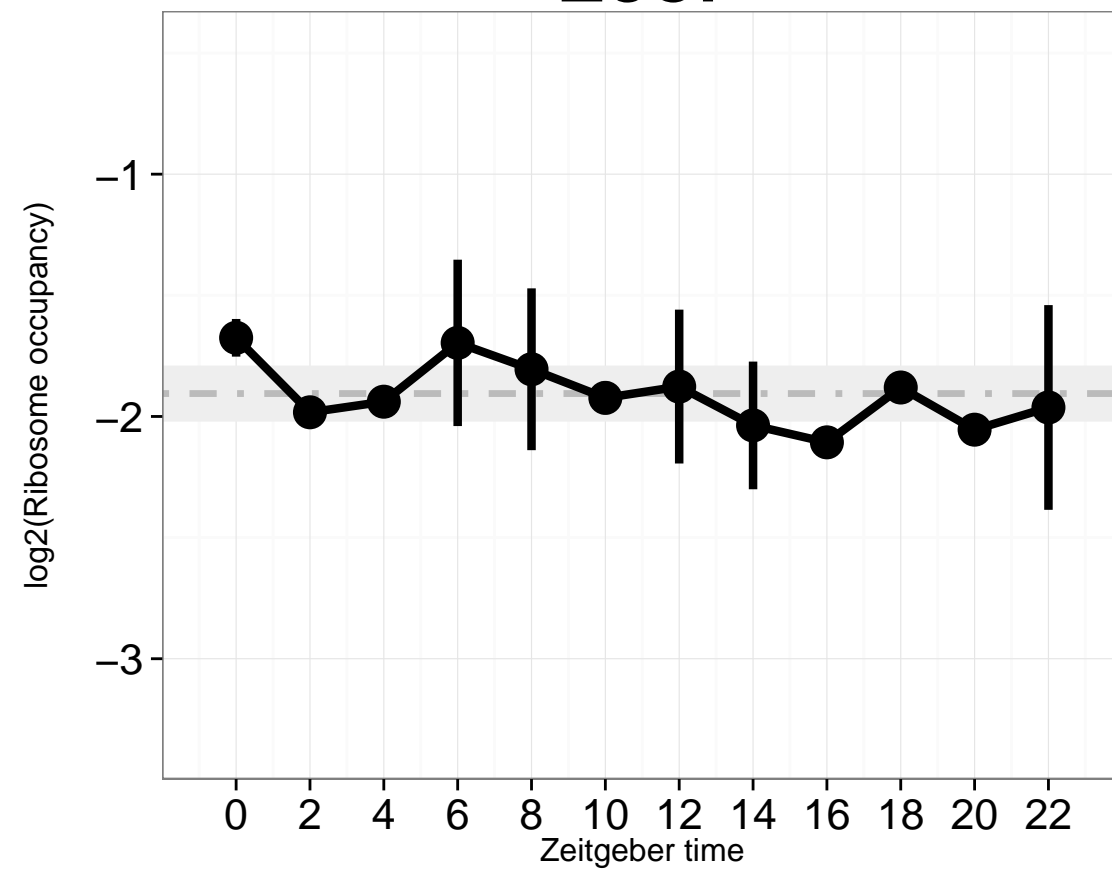

Supplement: Supplementary file 5670 [file 1]

# Ugt8a

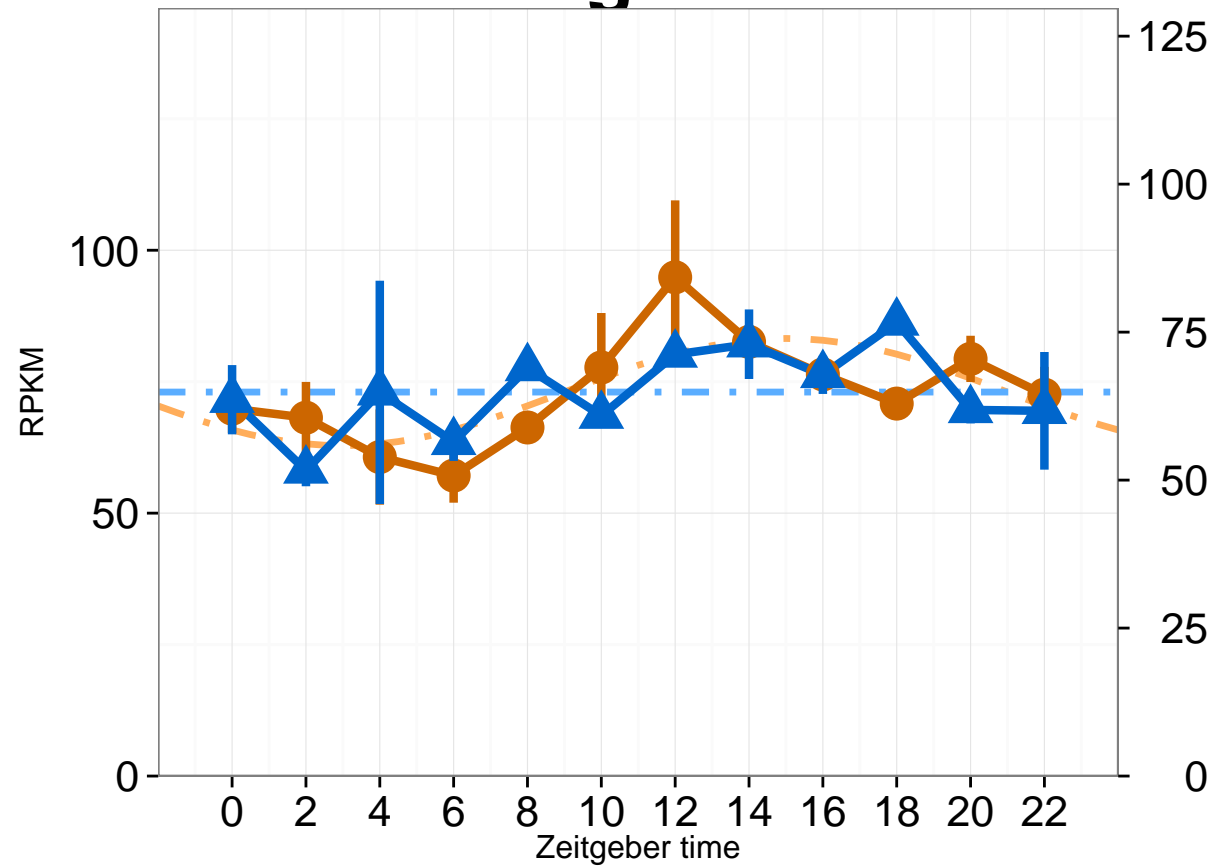

# Ugt8a

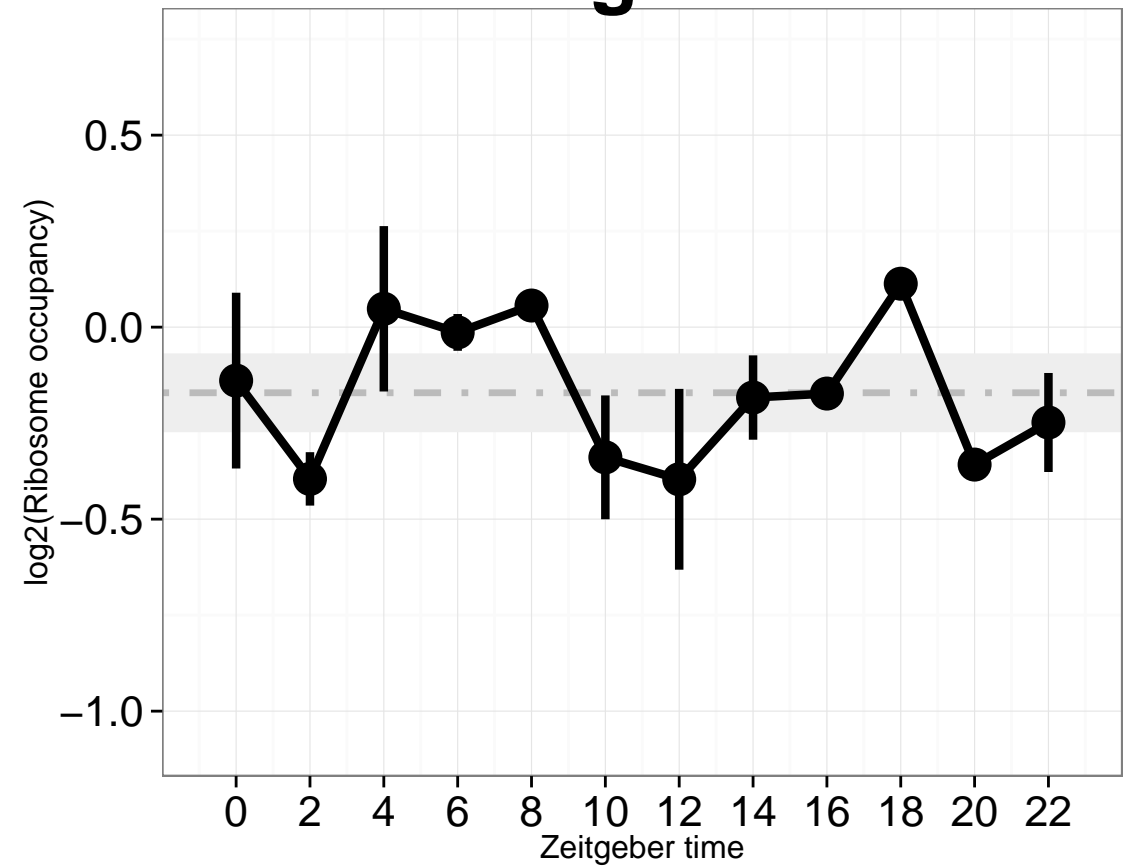

Supplement: Supplementary file 5671 [file 1]

## Brd8

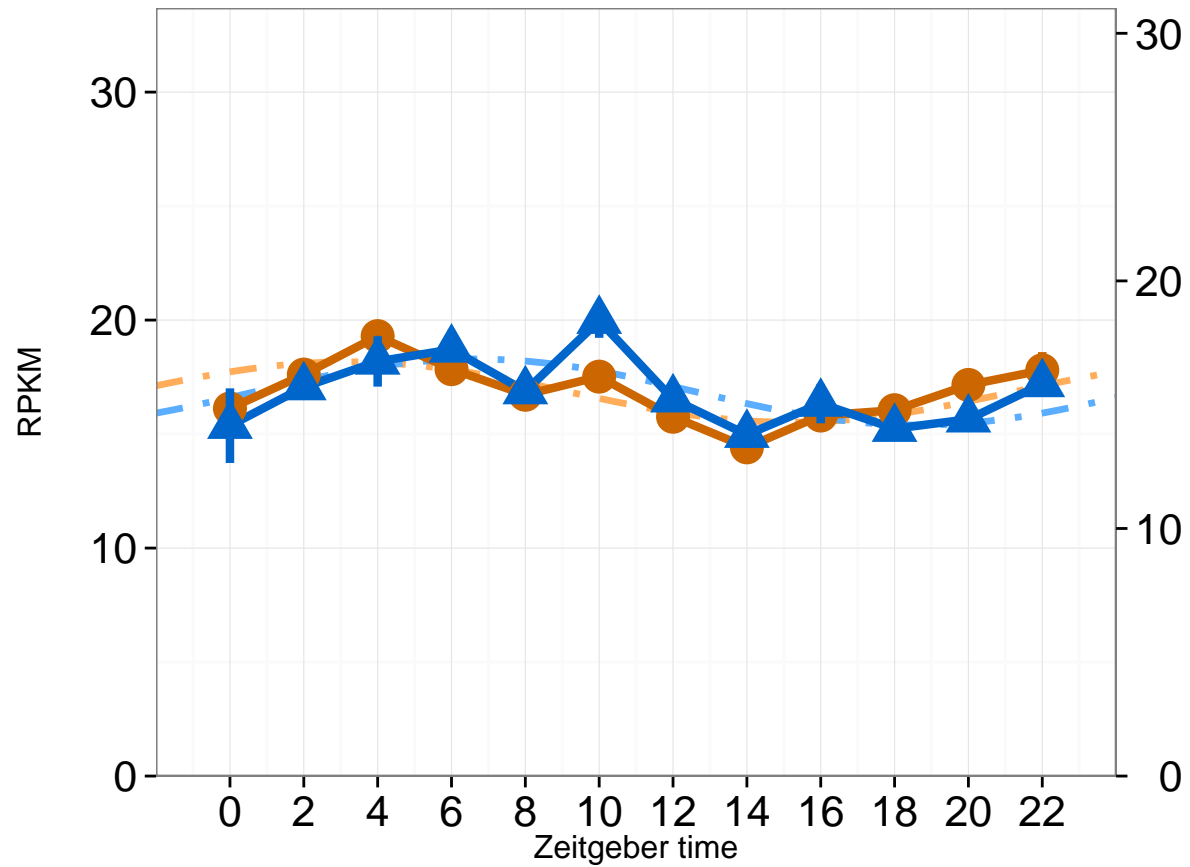

## Brd8

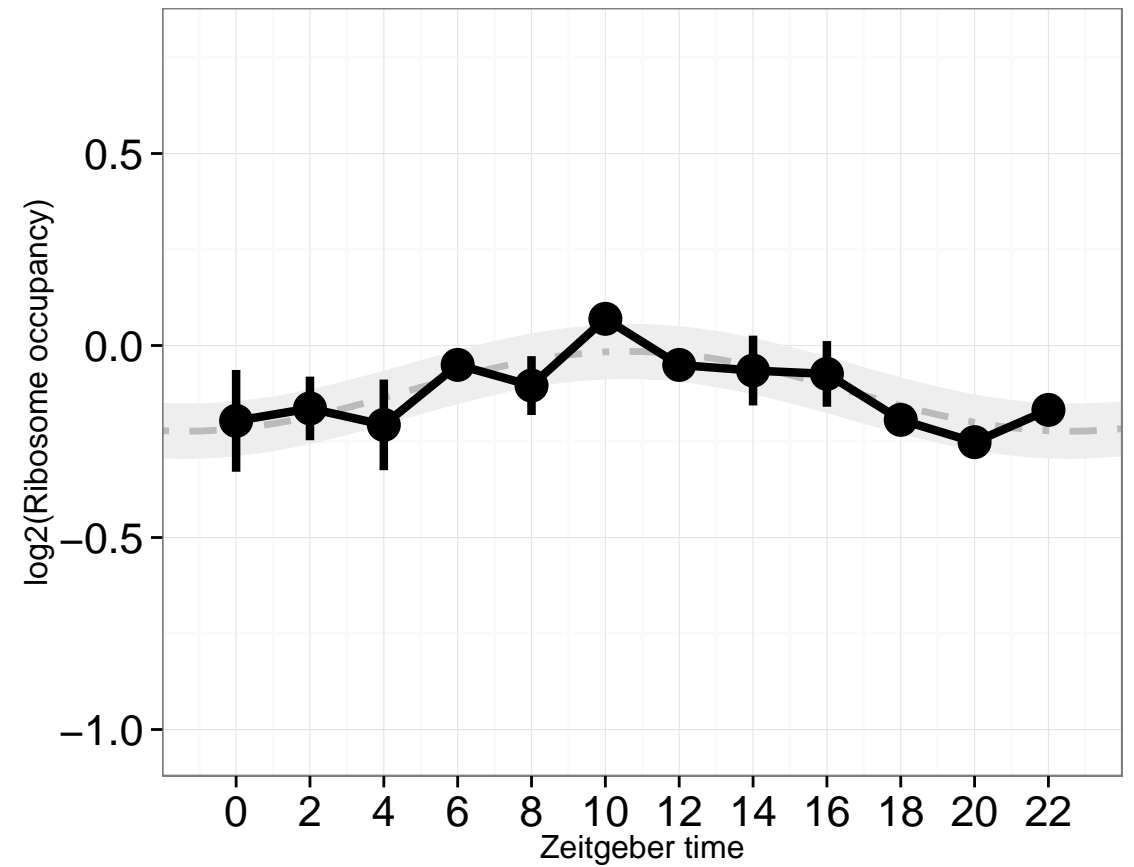

Supplement: Supplementary file 5672 [file 1]

# Cenpq

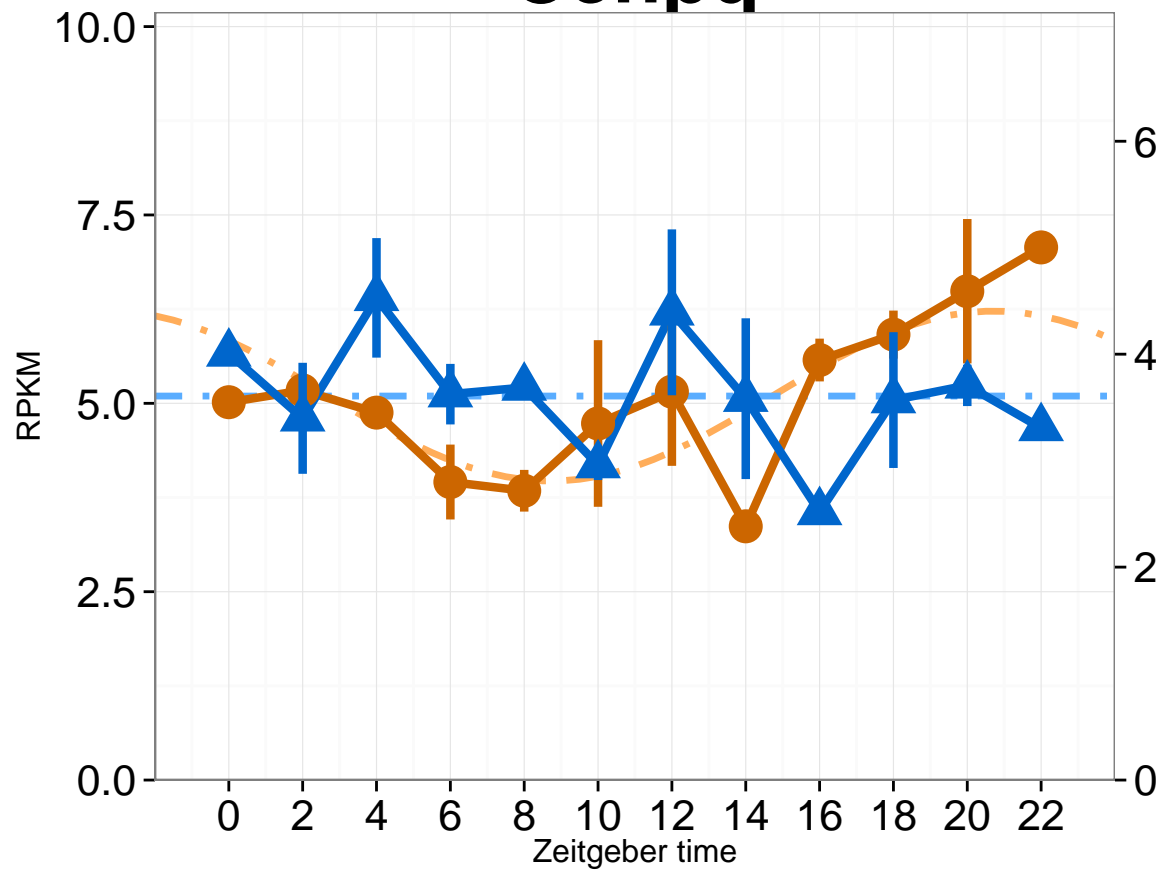

# Cenpq

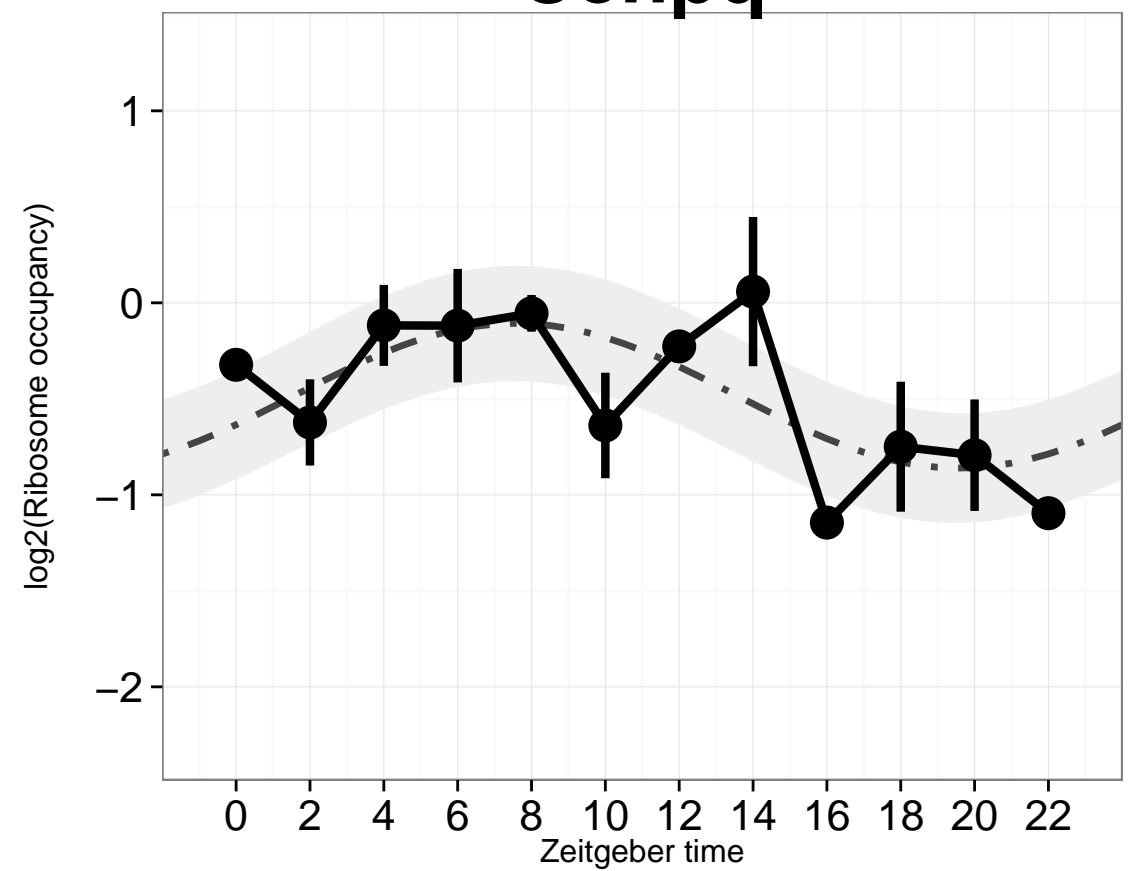

Supplement: Supplementary file 5673 [file 1]

# Gtf3c6

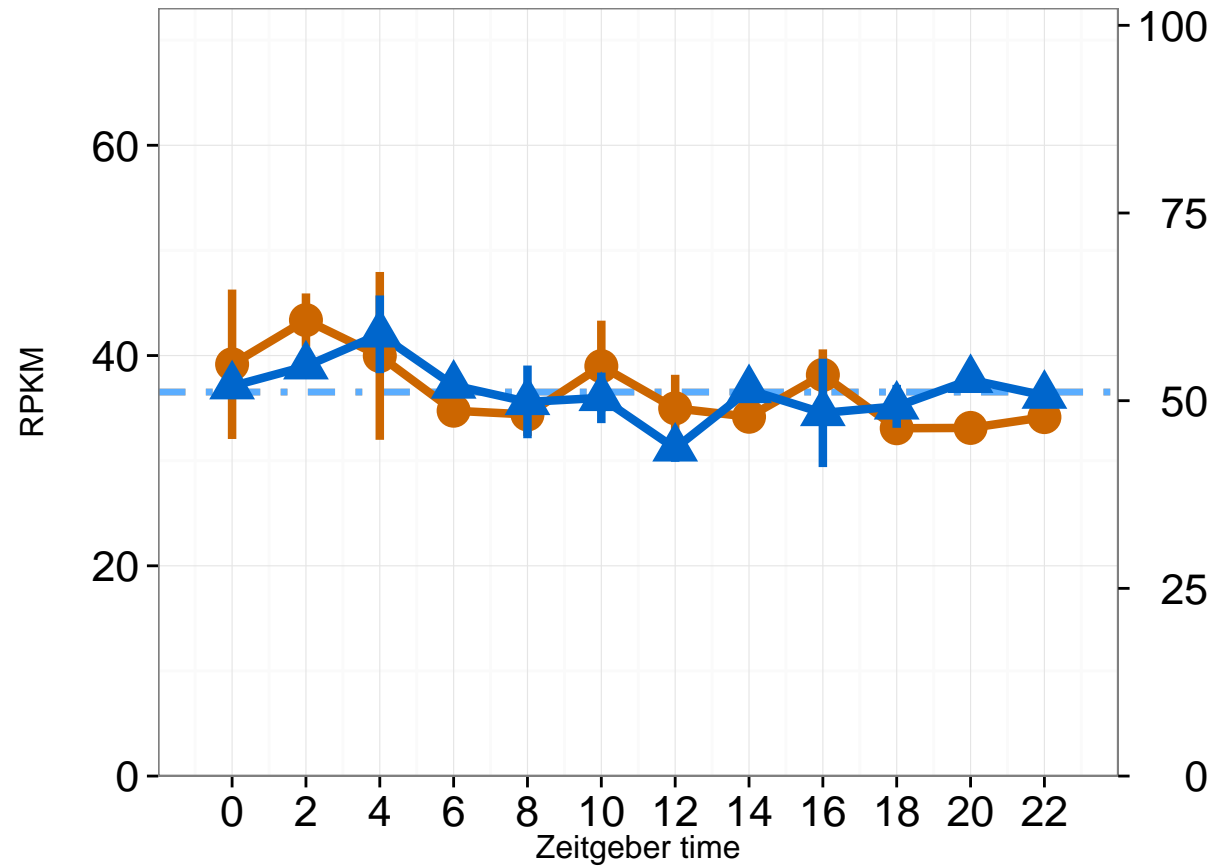

# Gtf3c6

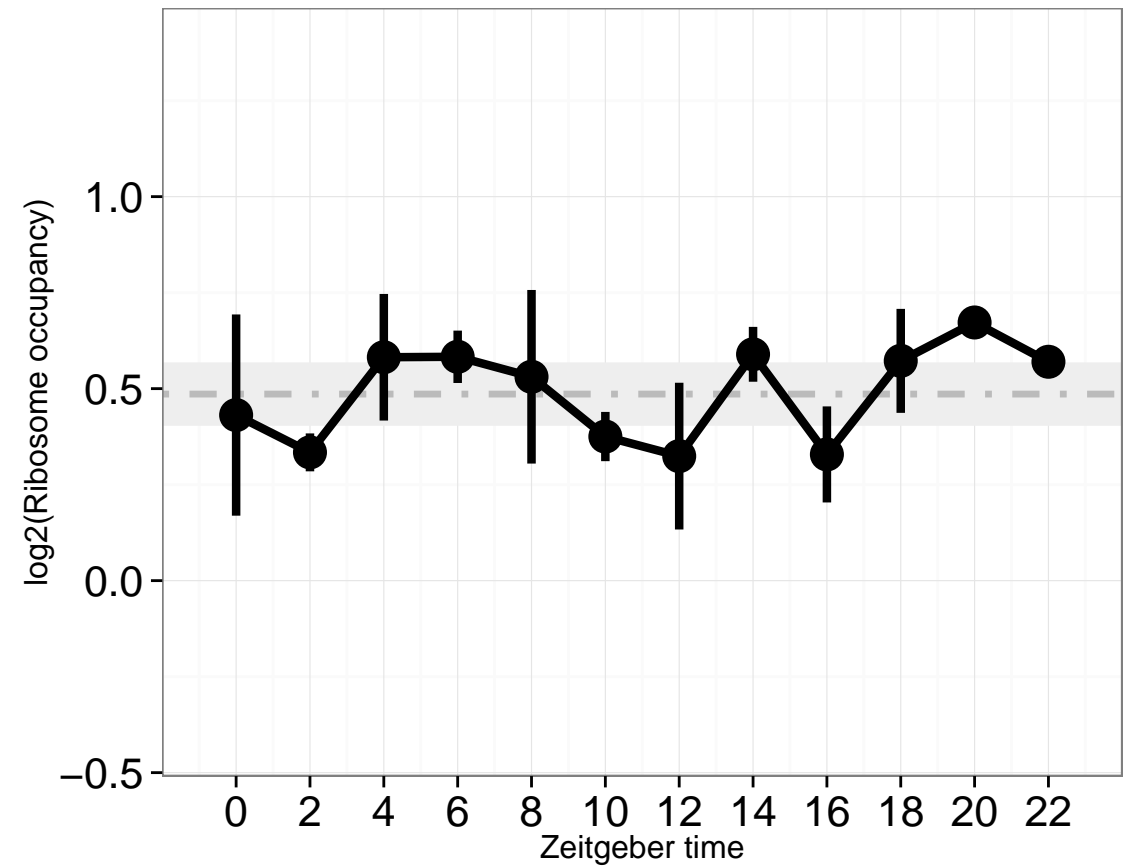

Supplement: Supplementary file 5674 [file 1]

# Steap1

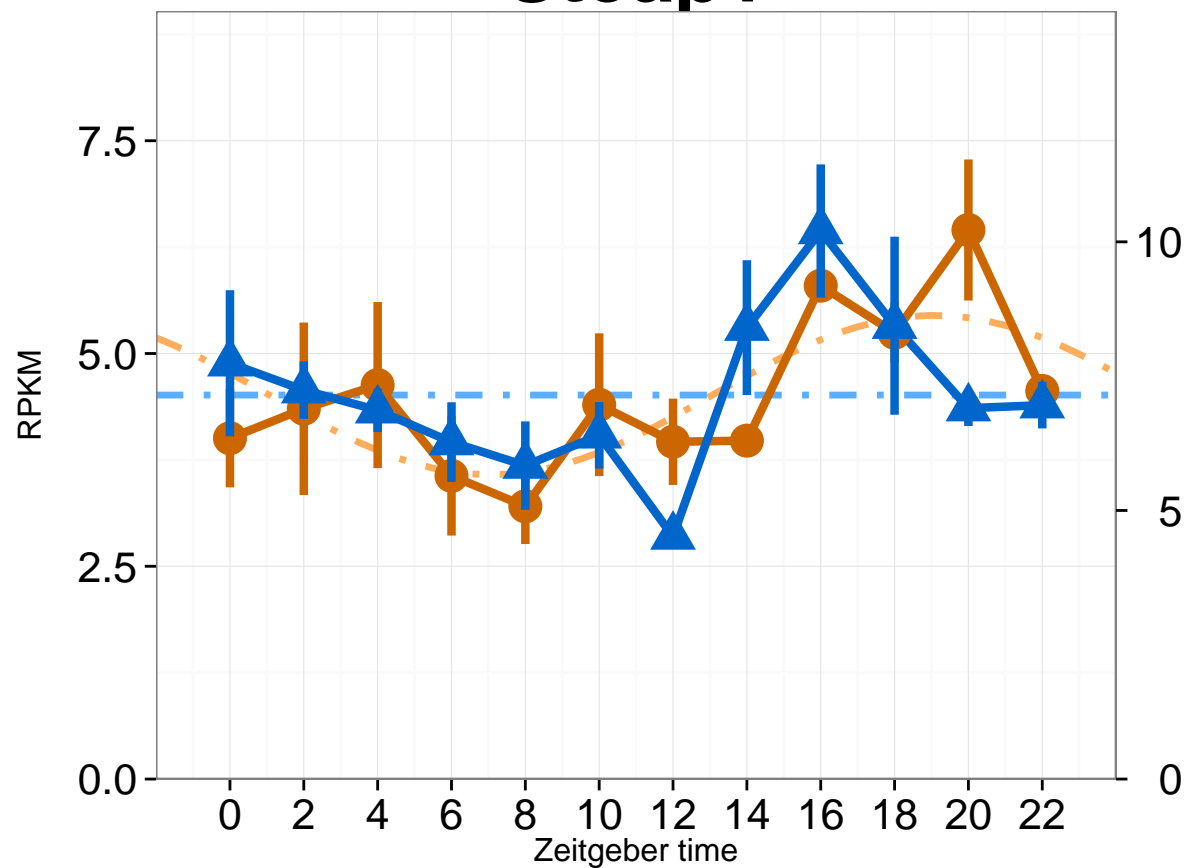

# Steap1

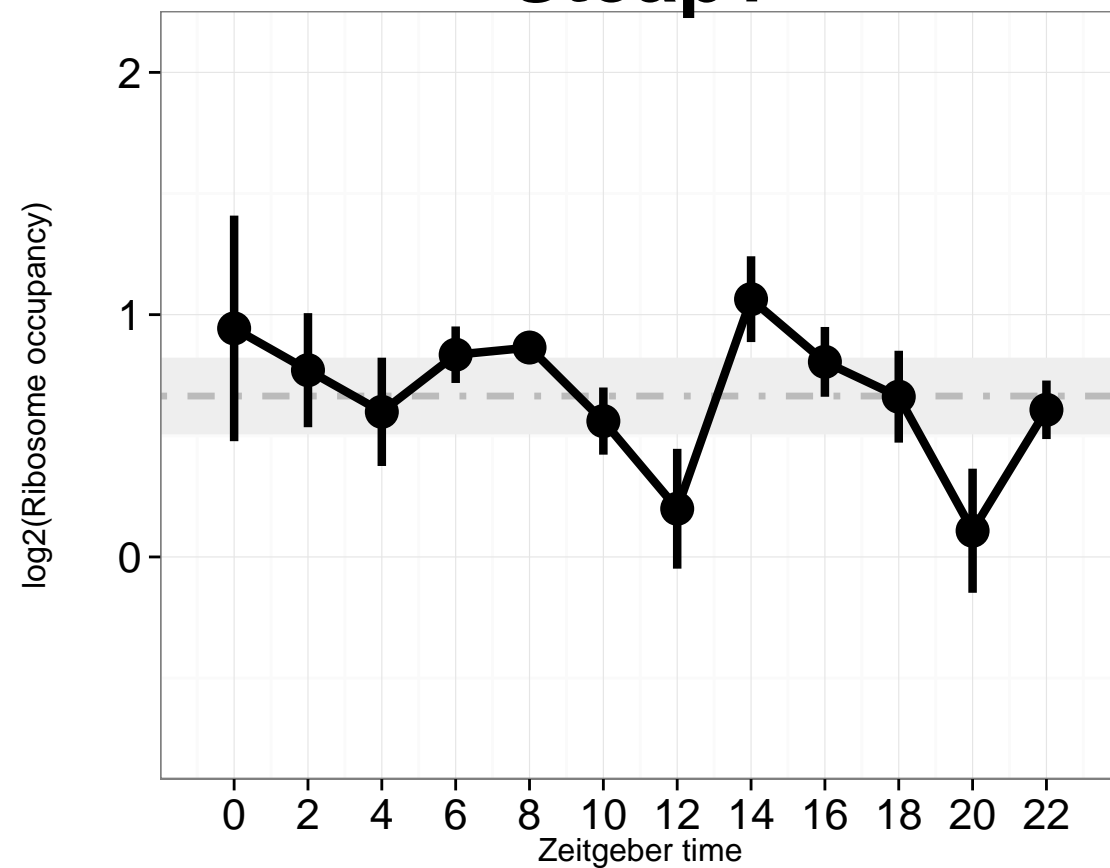

Supplement: Supplementary file 5675 [file 1]

# Dgcr6

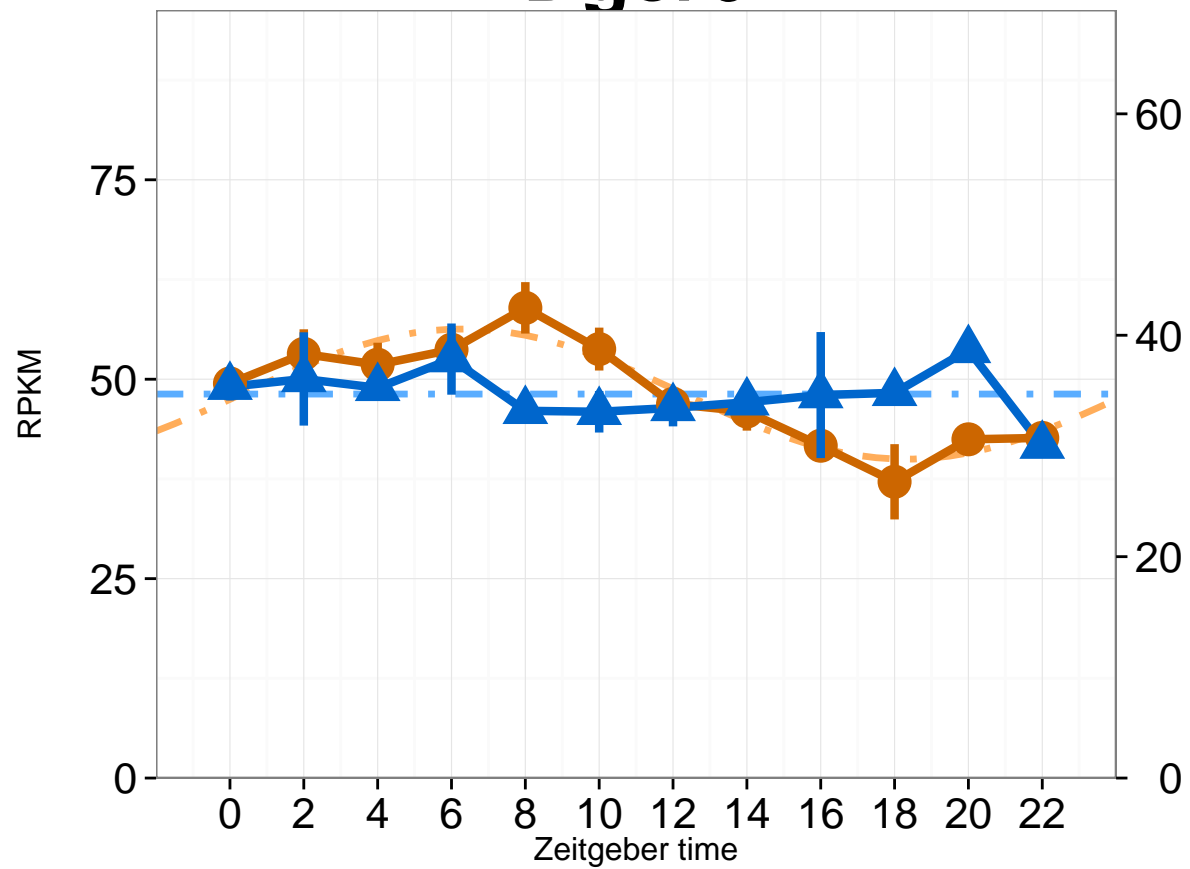

# Dgcr6

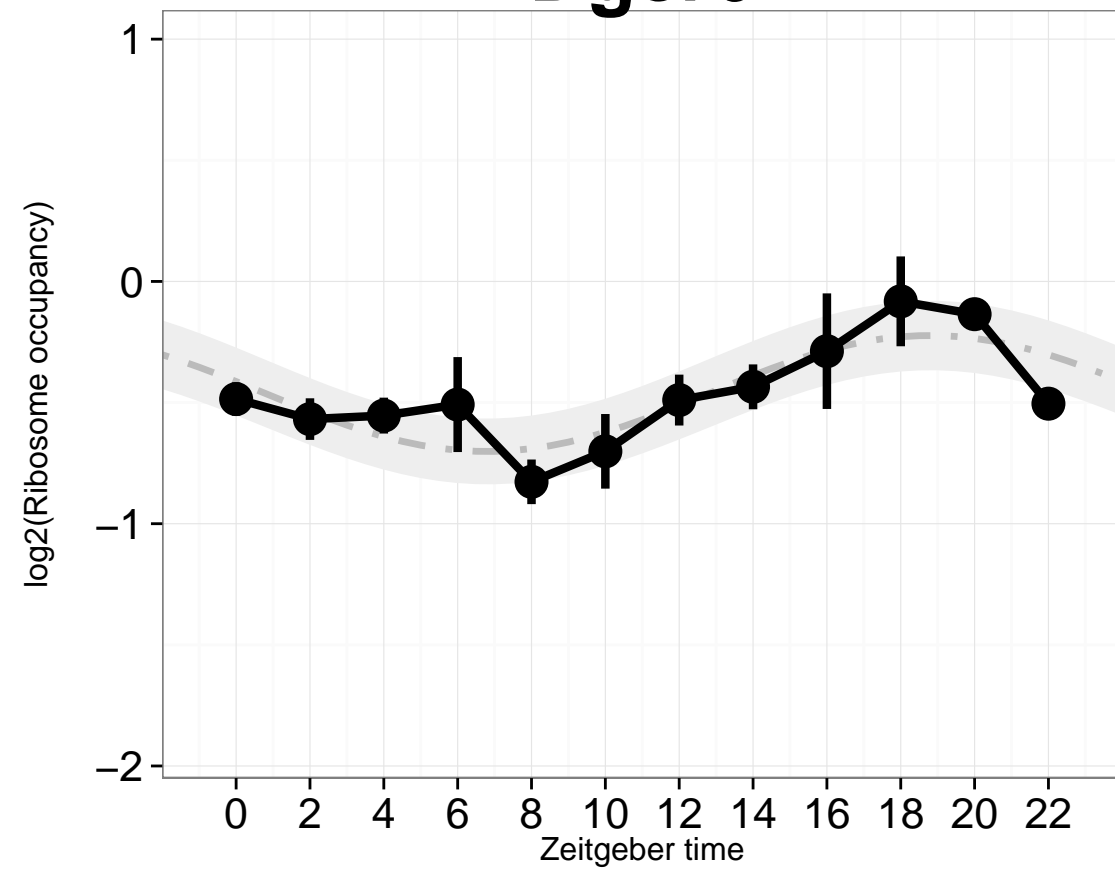

Supplement: Supplementary file 5676 [file 1]

## Bclaf1

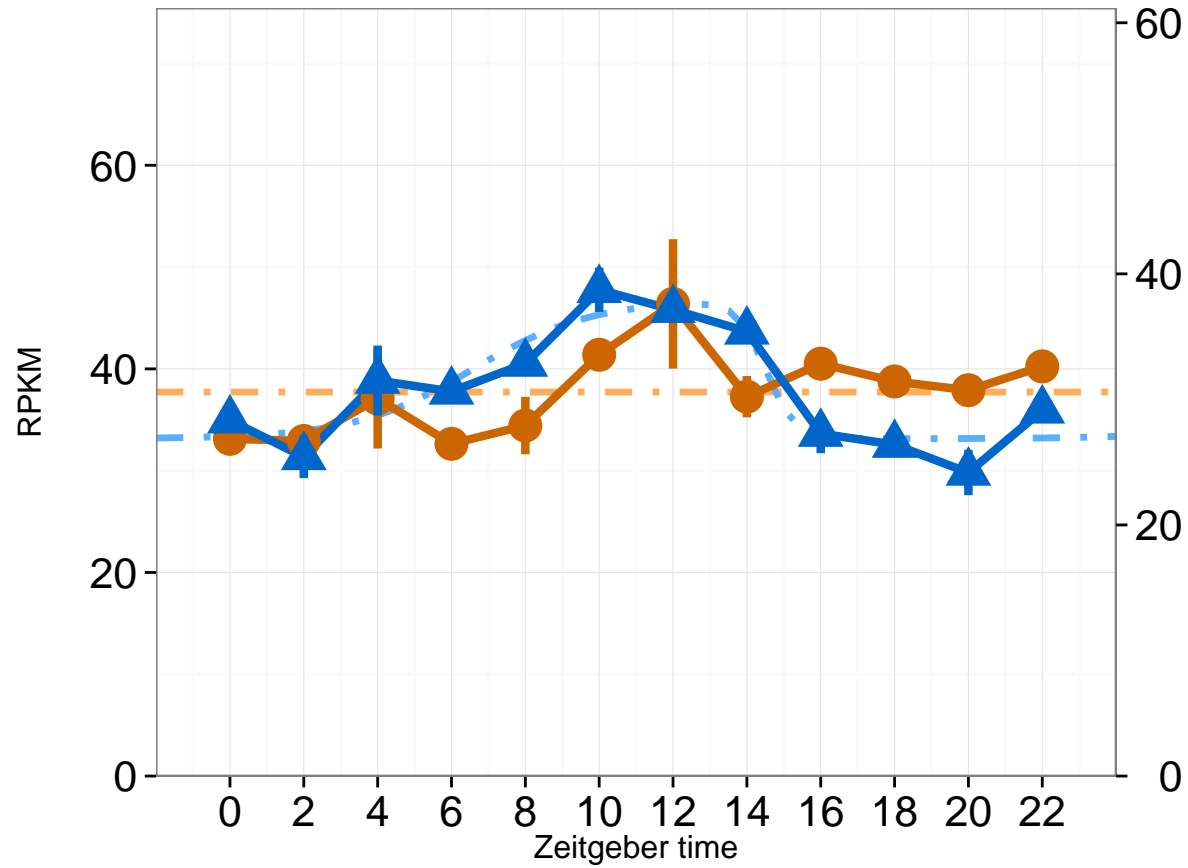

## Bclaf1

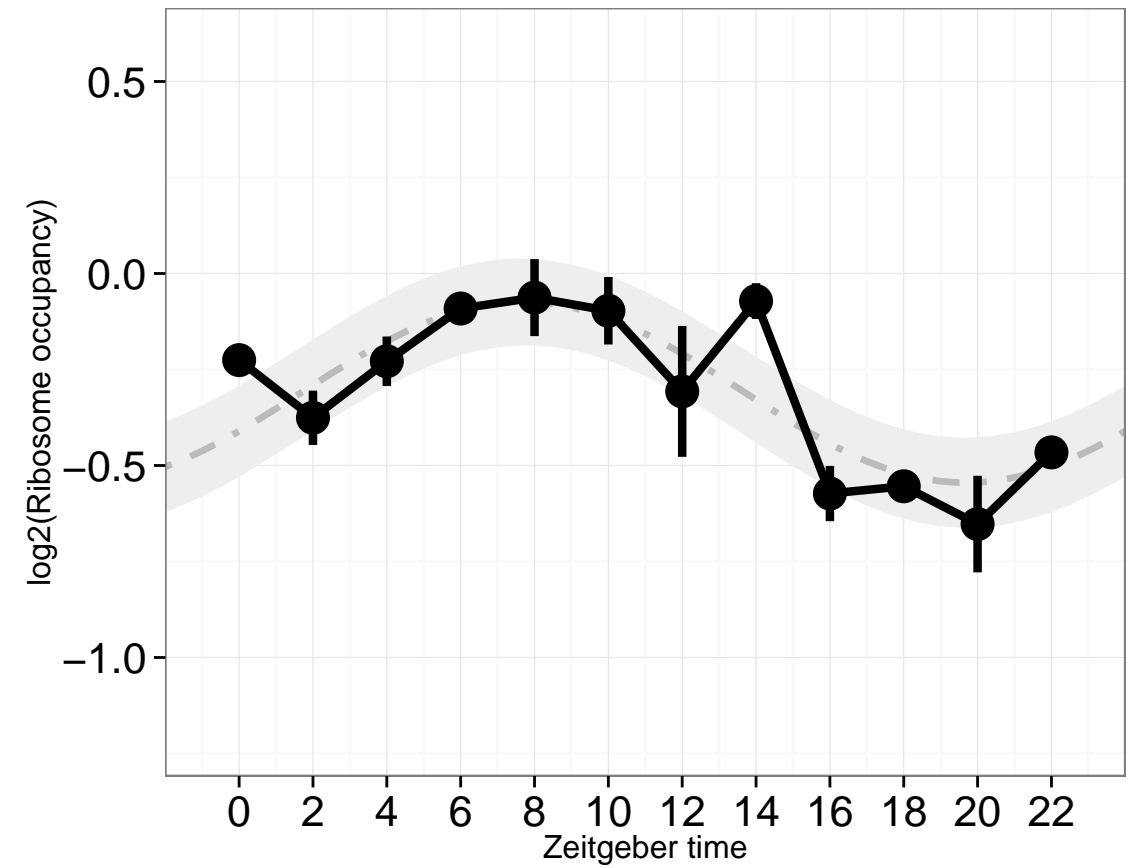

Supplement: Supplementary file 5677 [file 1]

# Alg3

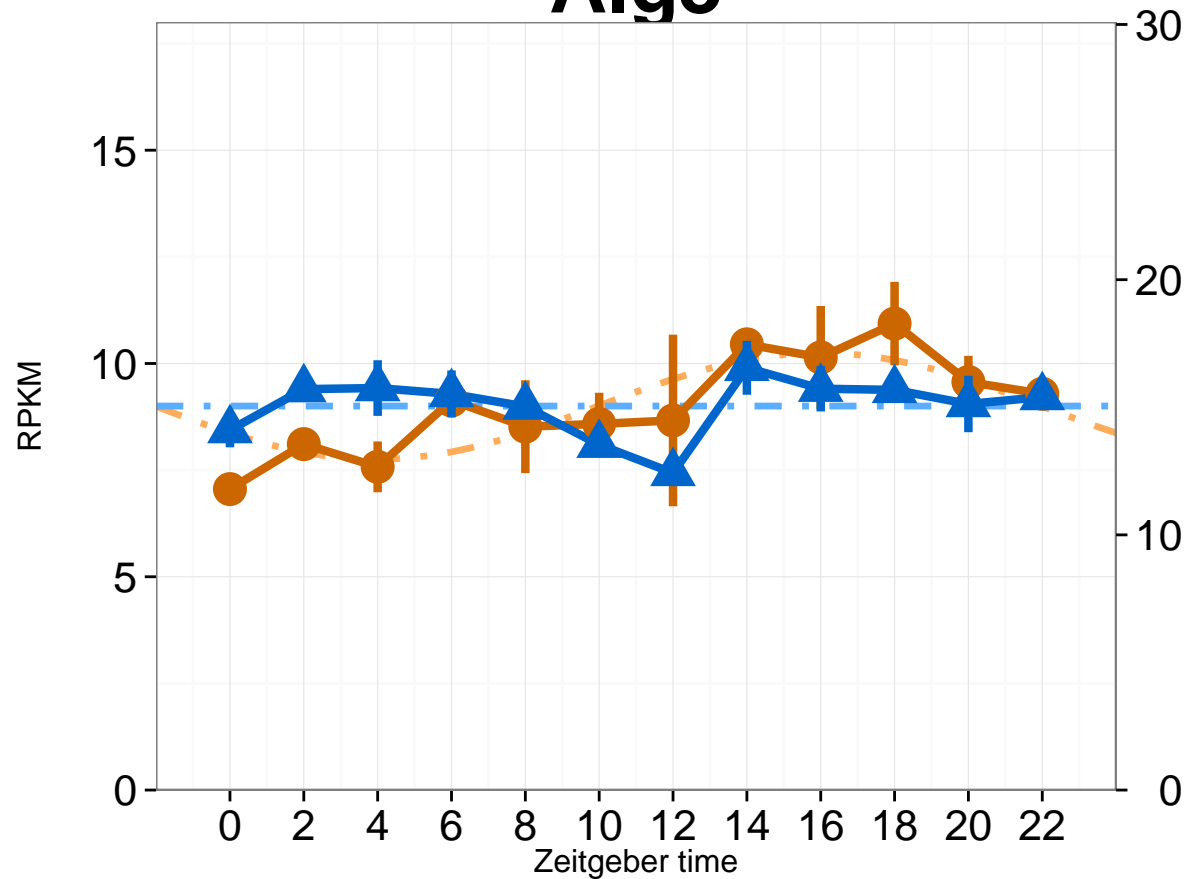

# Alg3

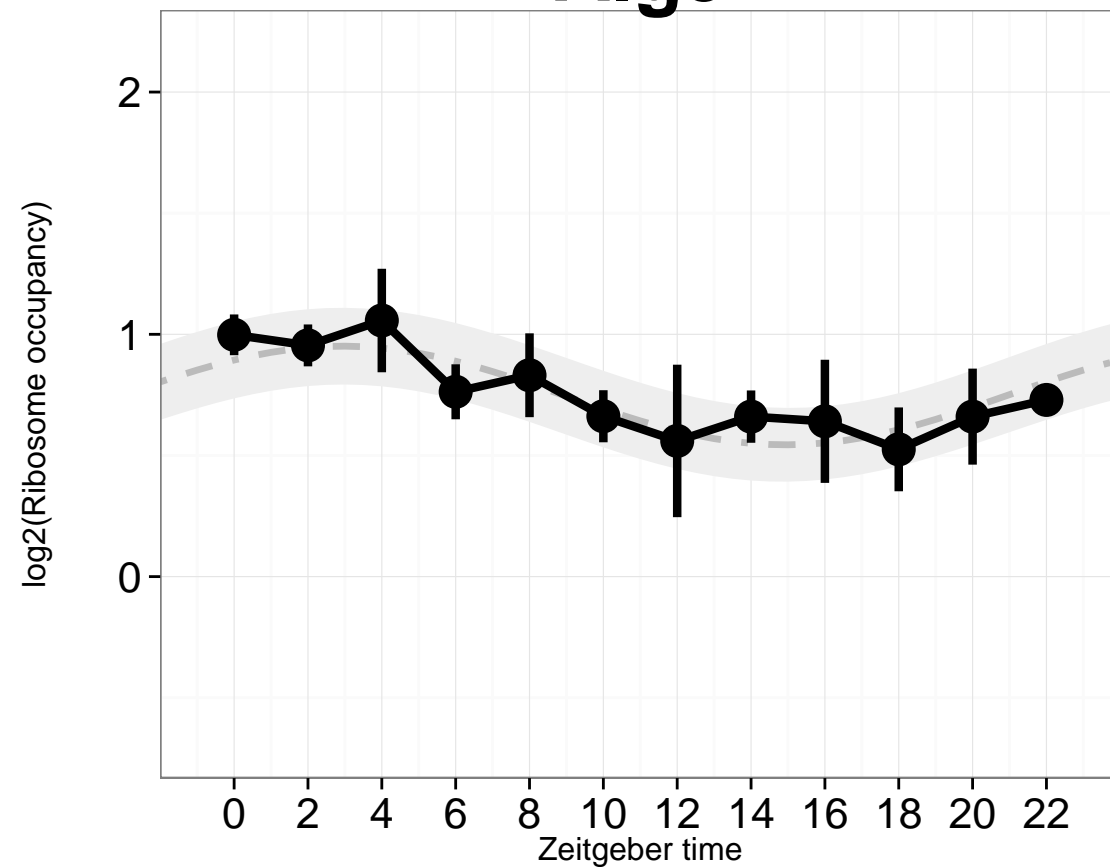

Supplement: Supplementary file 5678 [file 1]

# Ptpn14

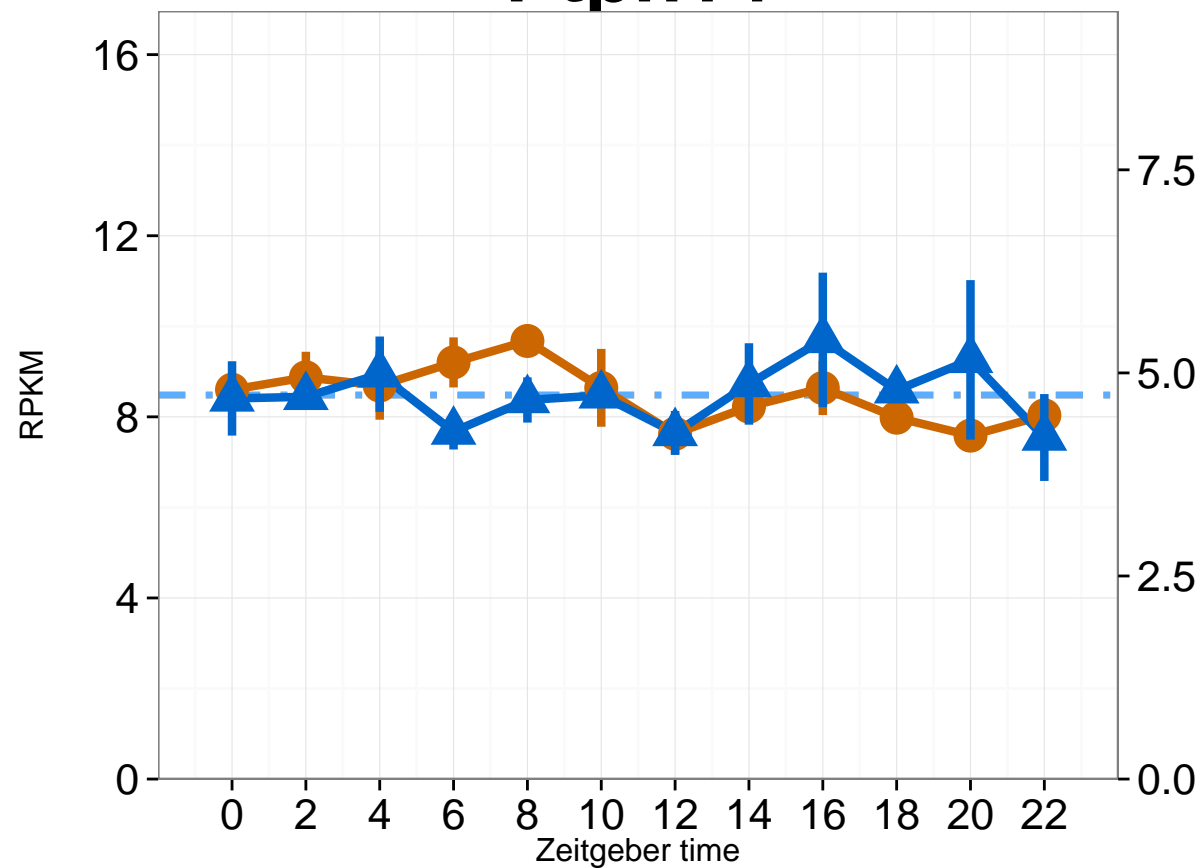

# Ptpn14

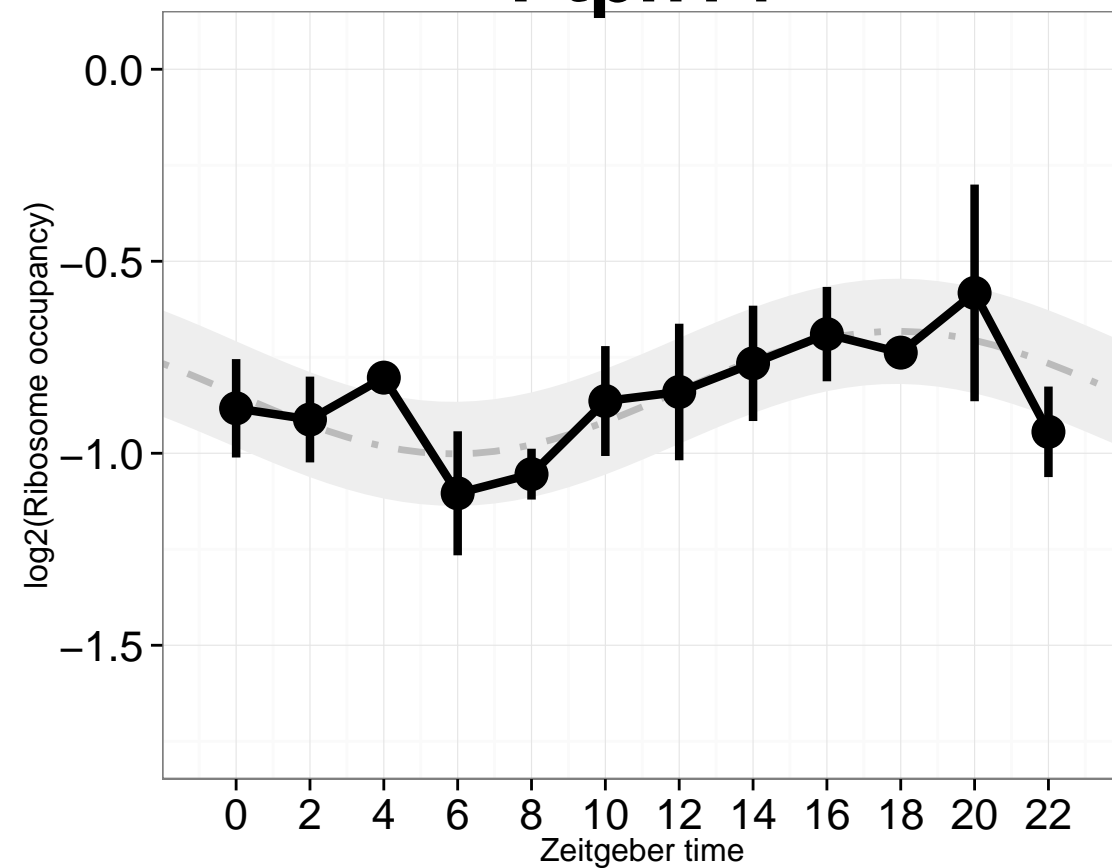

Supplement: Supplementary file 5679 [file 1]

# C030046E11Rik

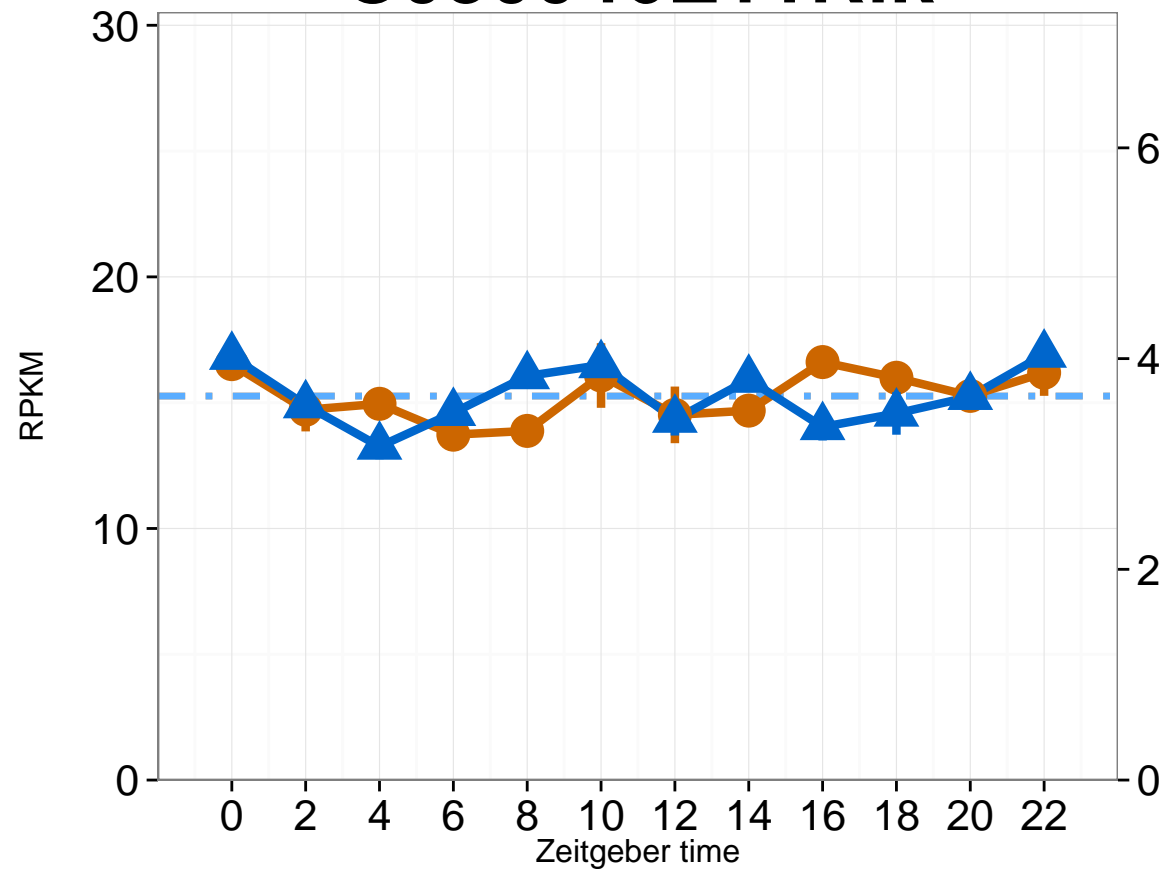

# C030046E11Rik

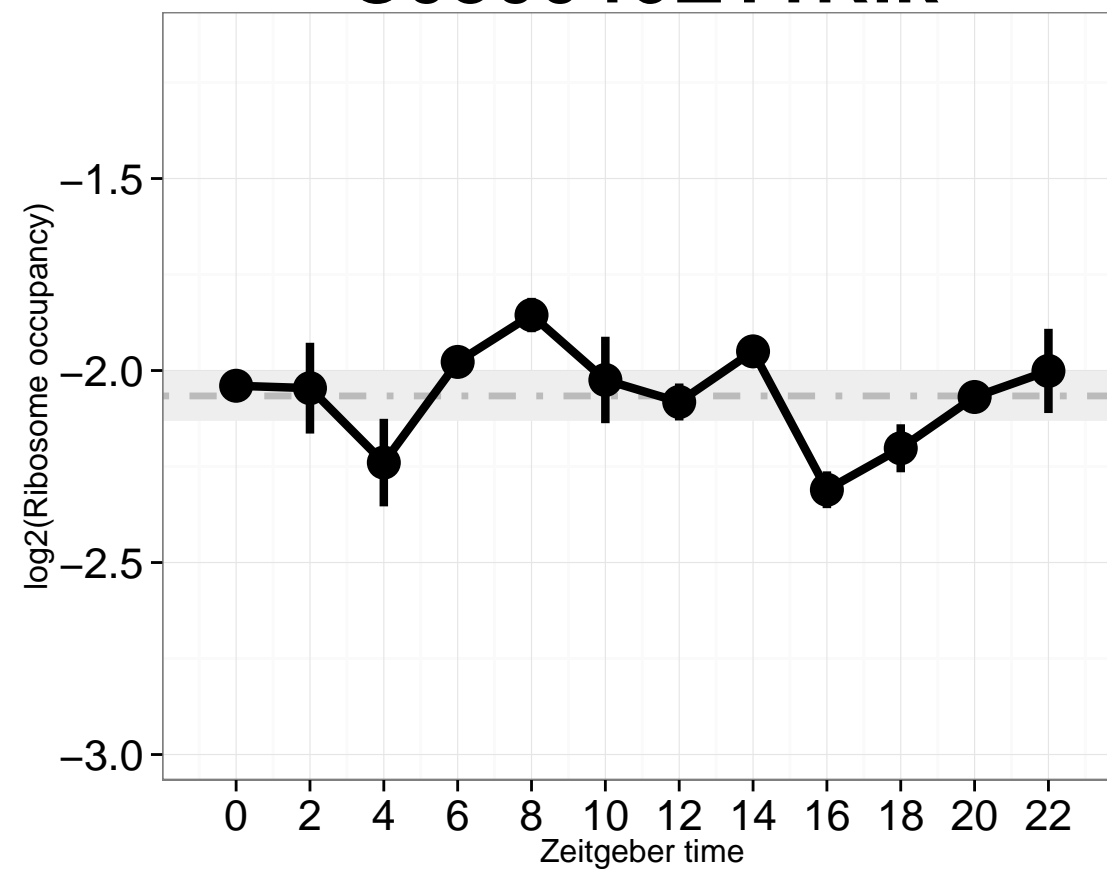

Supplement: Supplementary file 5680 [file 1]

## Clint1

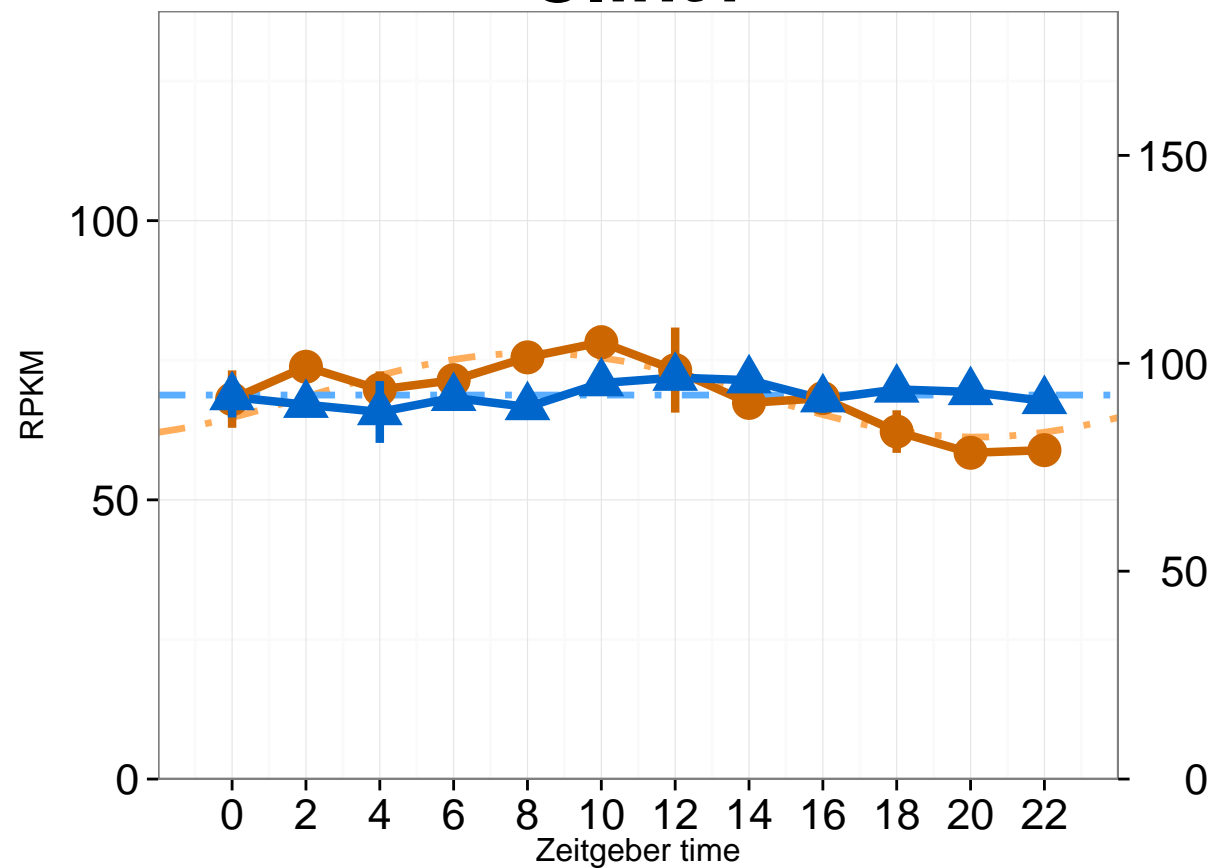

## Clint1

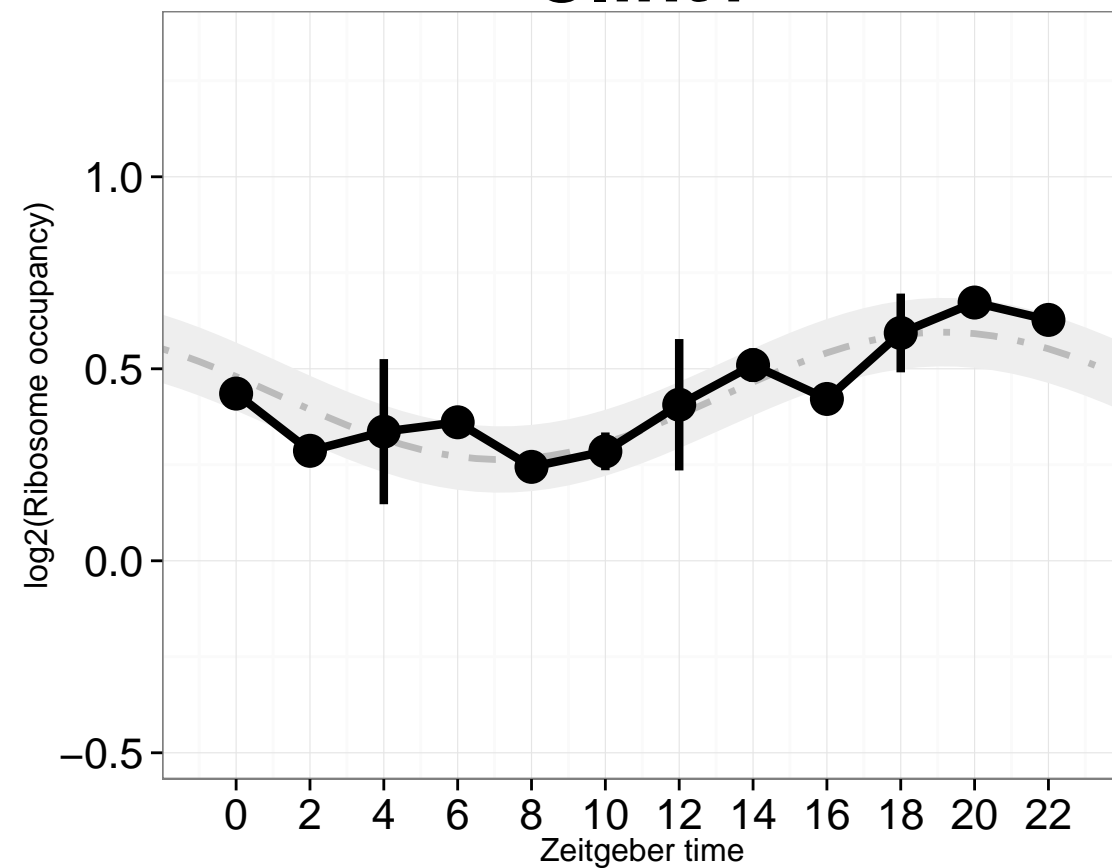

Supplement: Supplementary file 5681 [file 1]

## Ppdpf

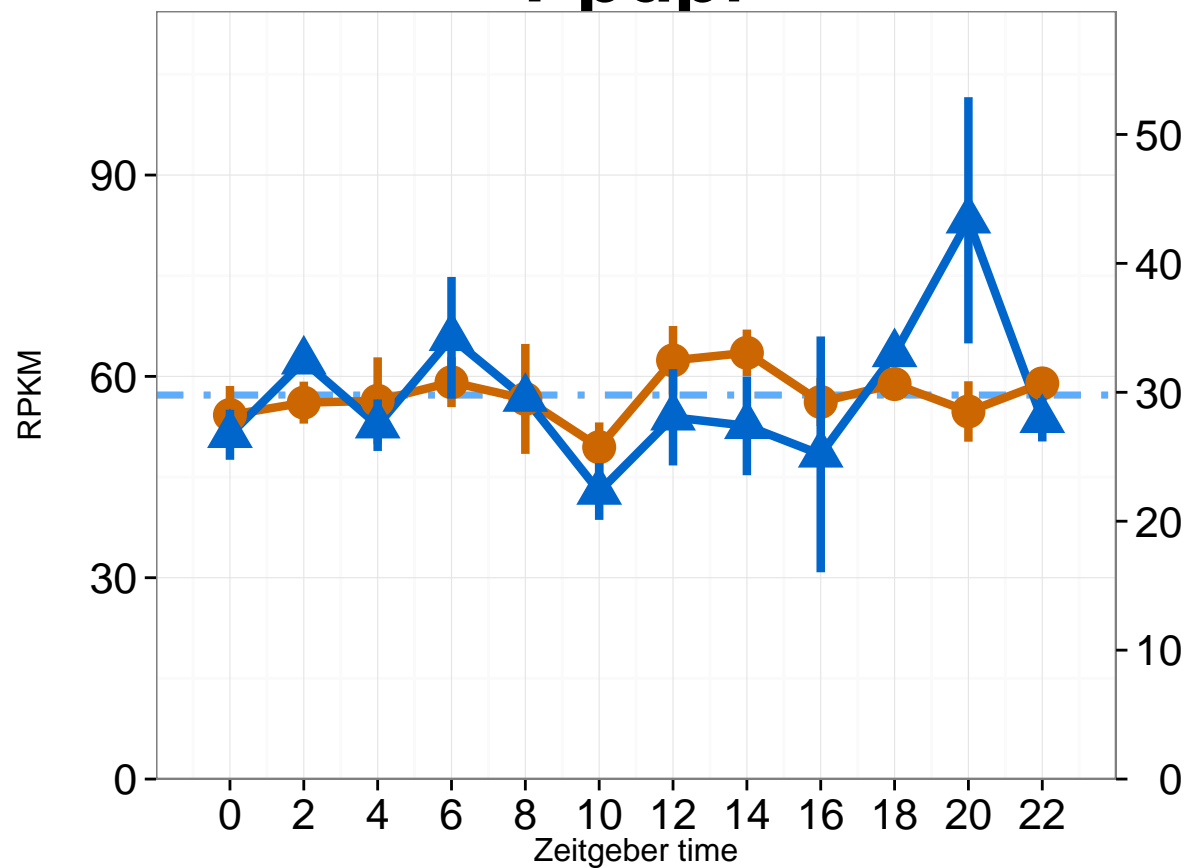

## Ppdpf

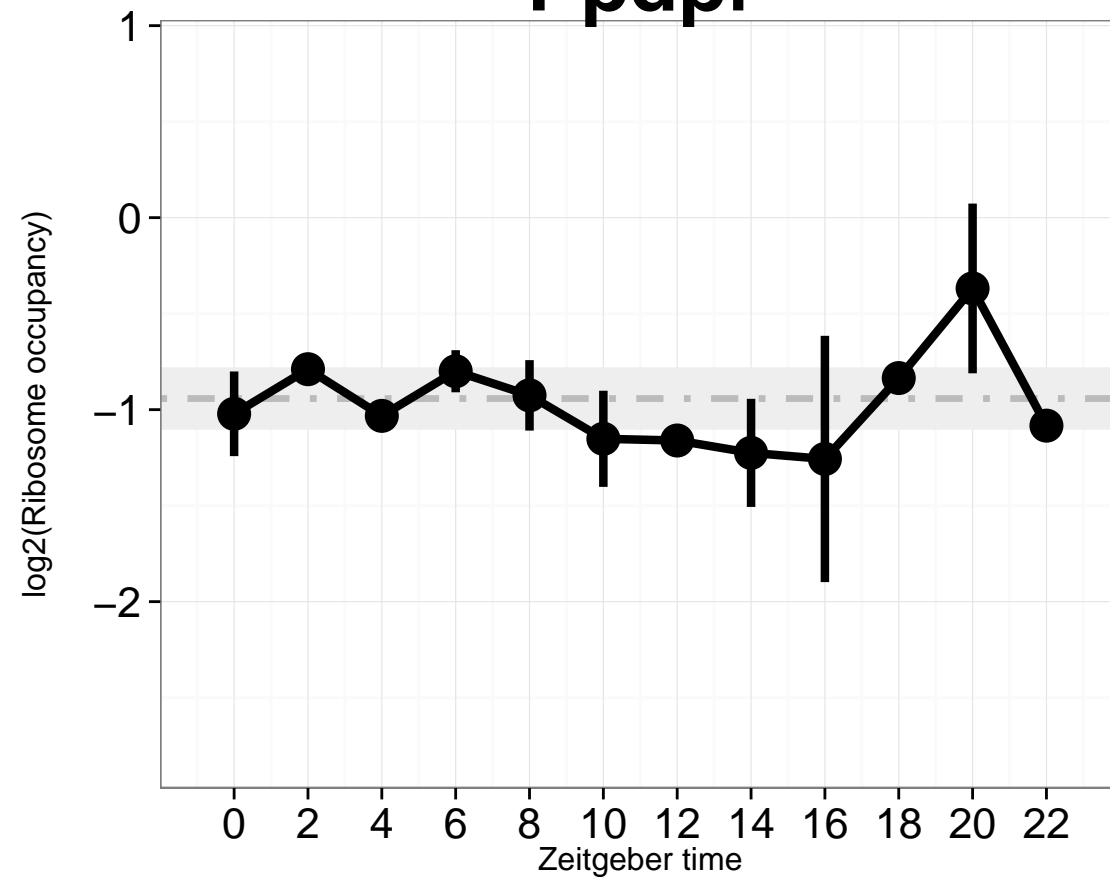

Supplement: Supplementary file 5682 [file 1]

# Tom1

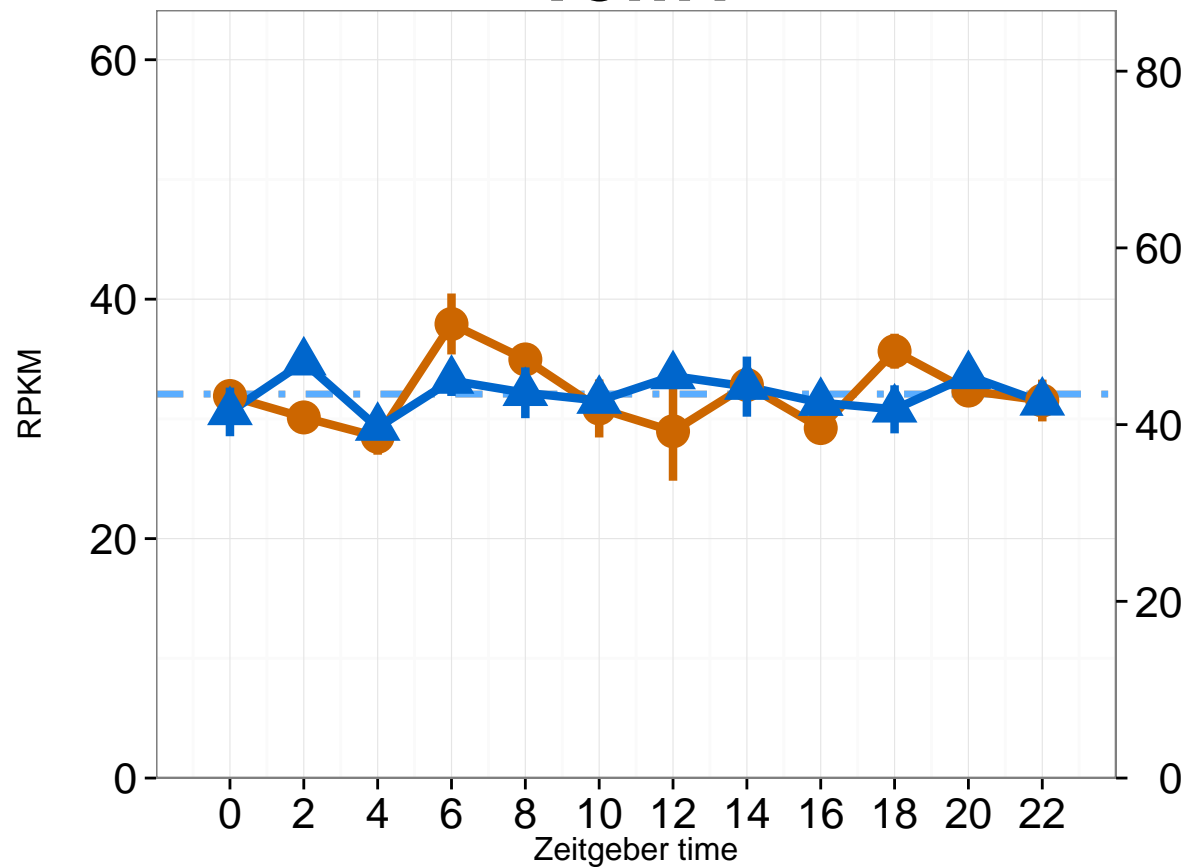

# Tom1

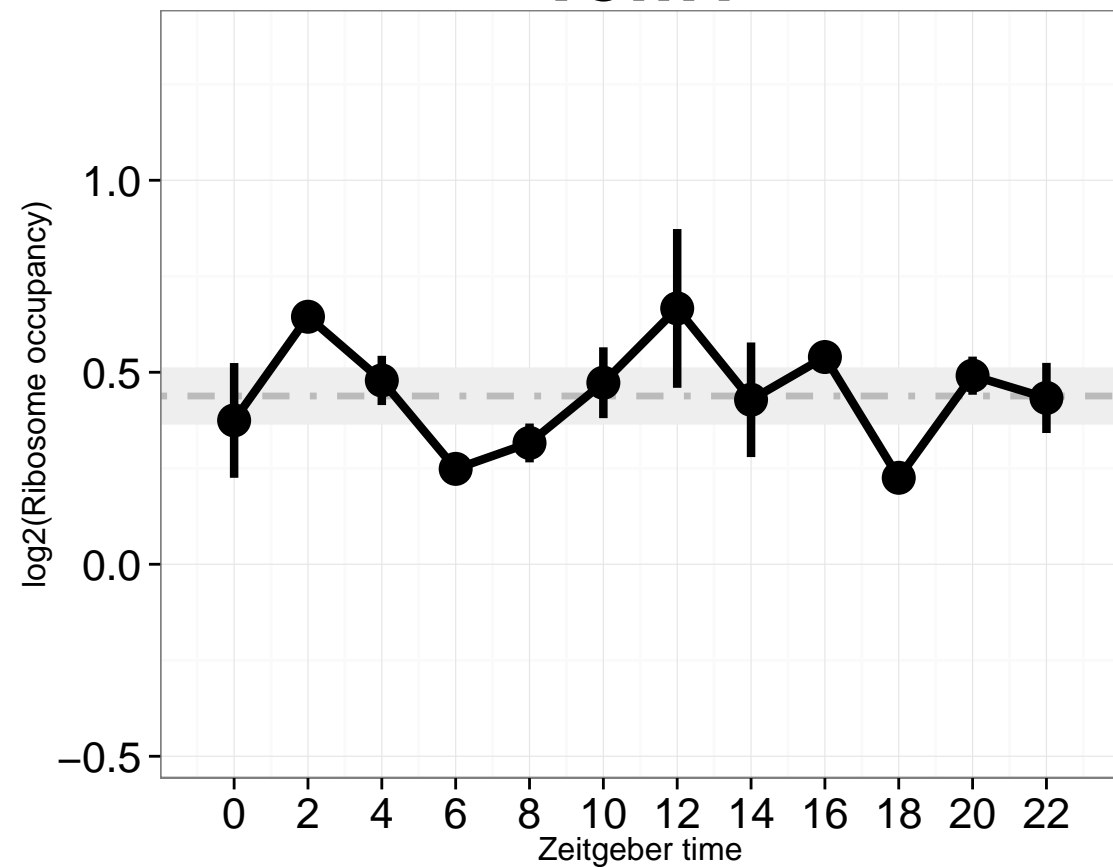

Supplement: Supplementary file 5683 [file 1]

# Cyp2d12

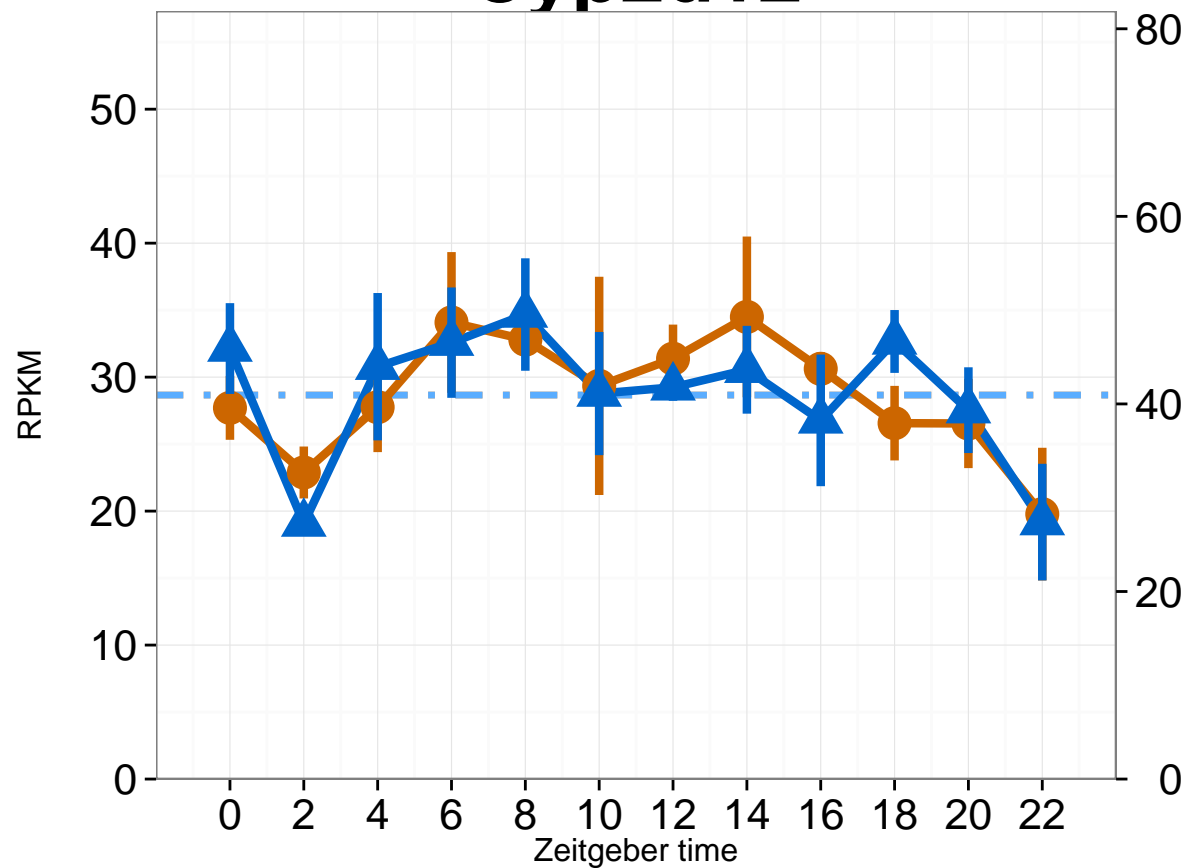

# Cyp2d12

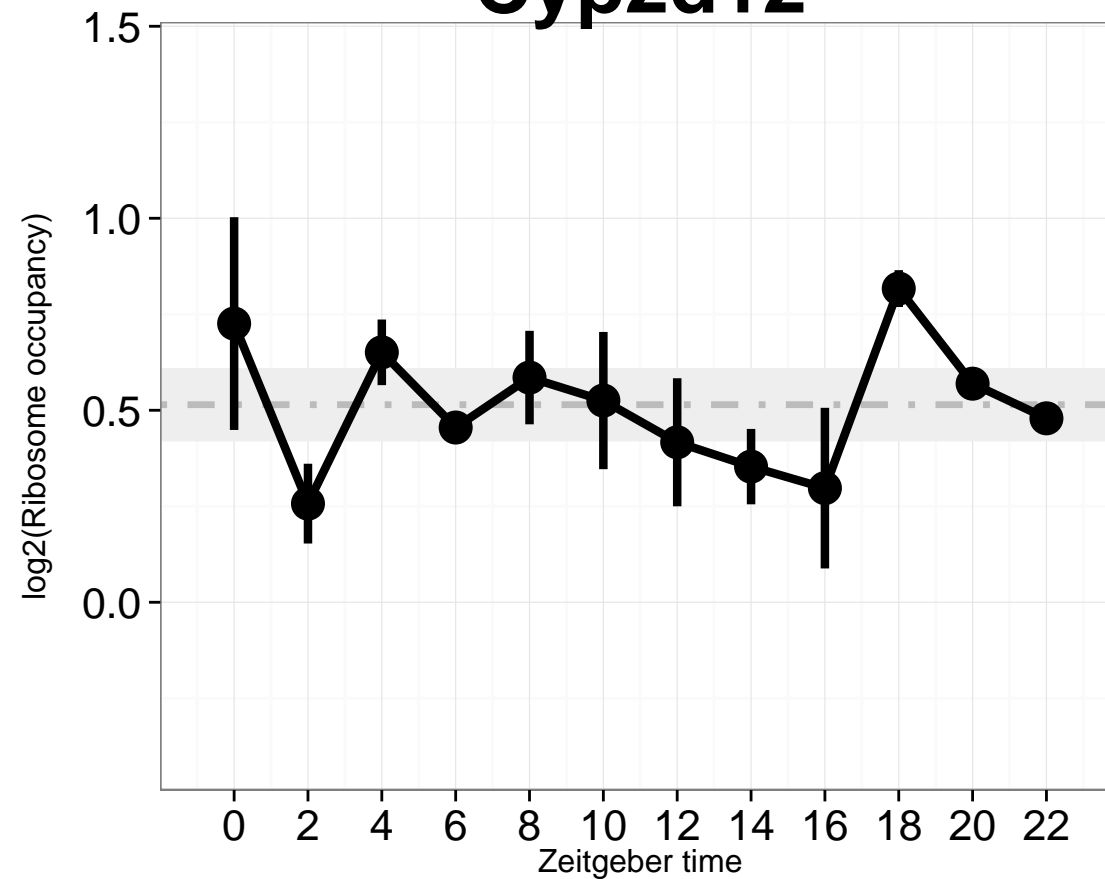

Supplement: Supplementary file 5684 [file 1]

## Zfhx3

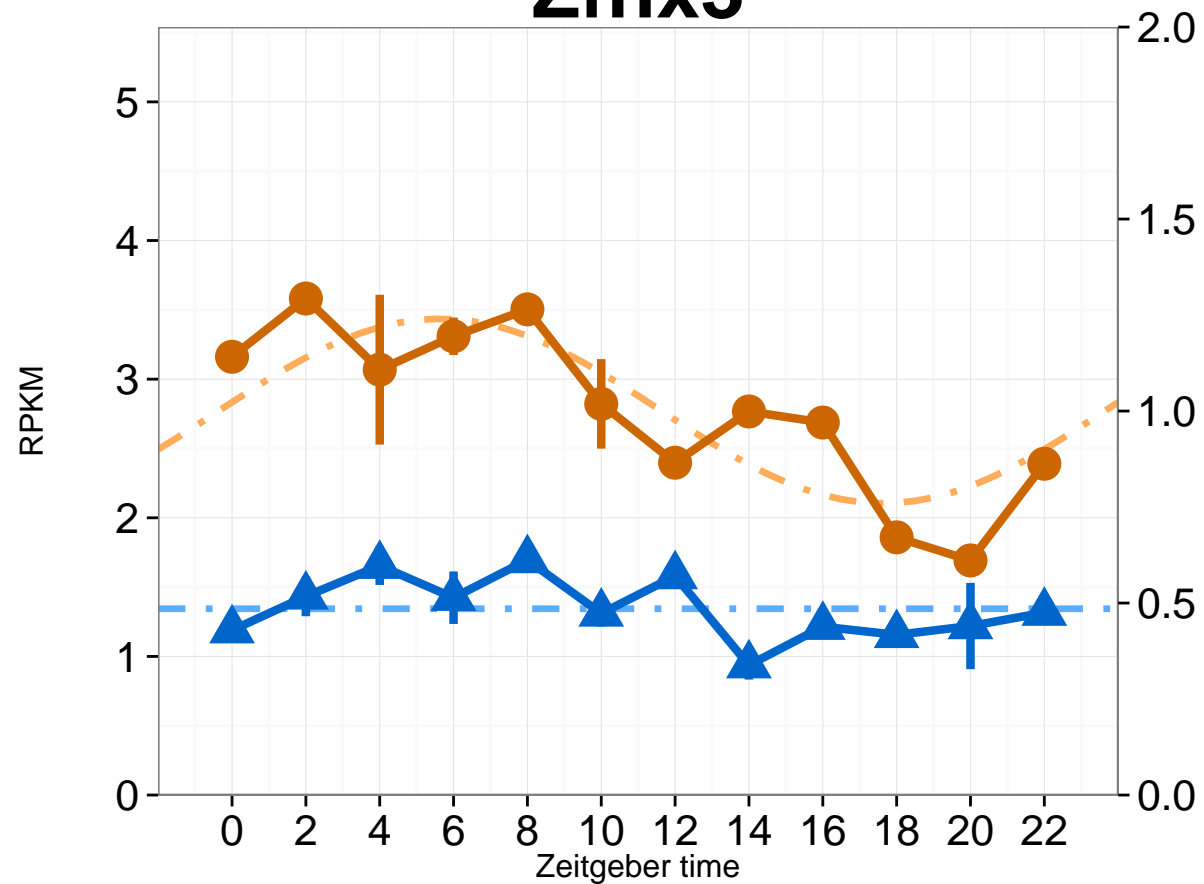

## Zfhx3

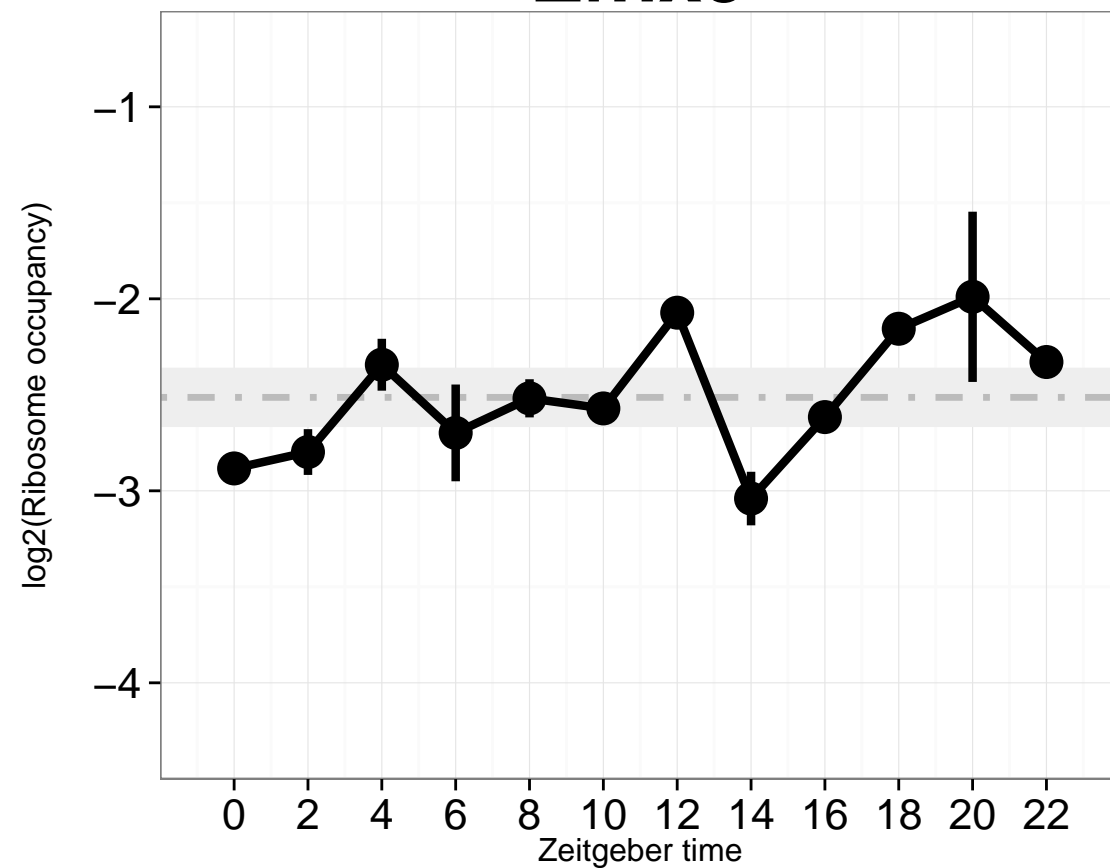

Supplement: Supplementary file 5685 [file 1]

## Sirt5

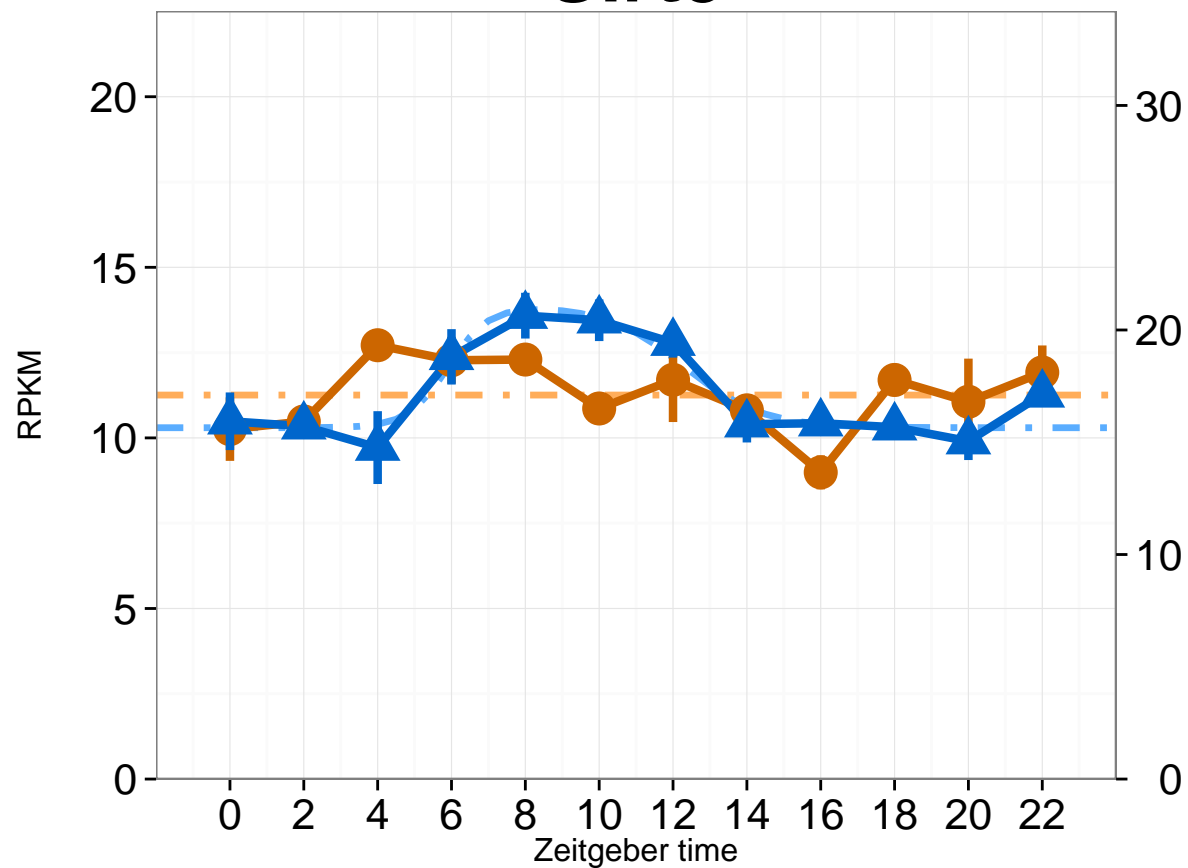

## Sirt5

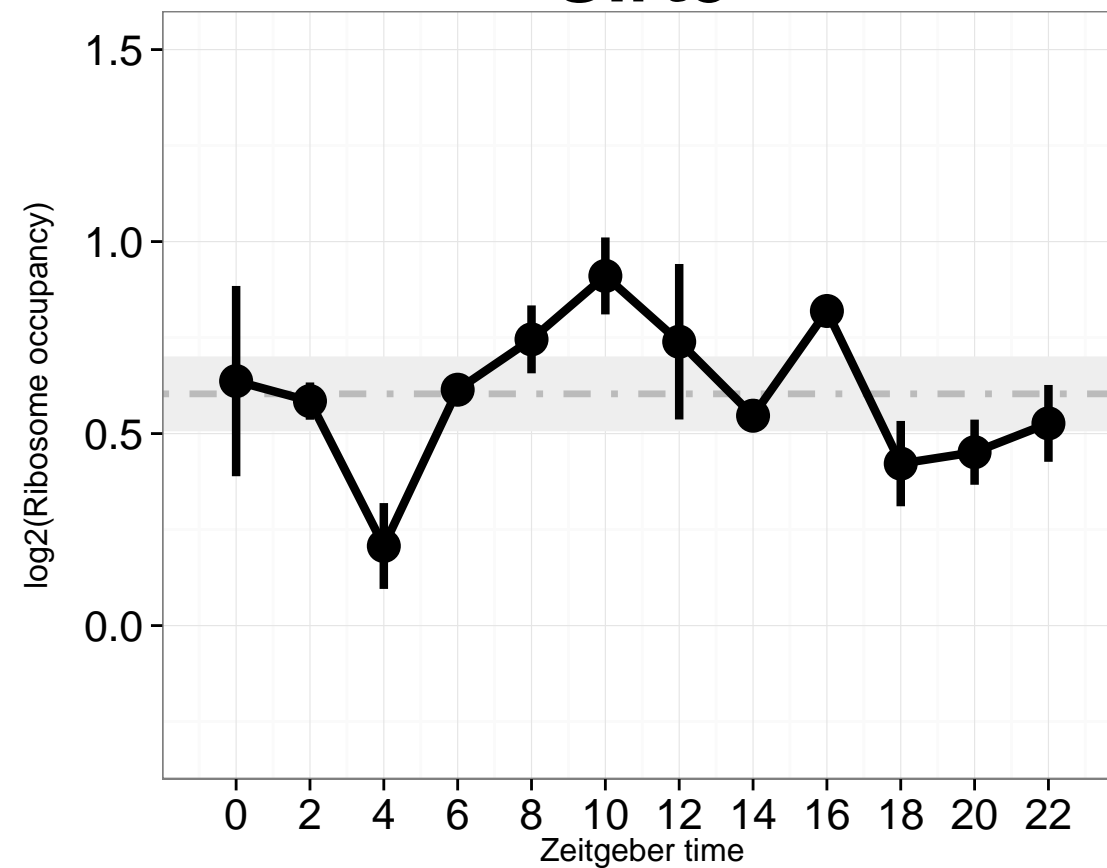

Supplement: Supplementary file 5686 [file 1]

# Rps8

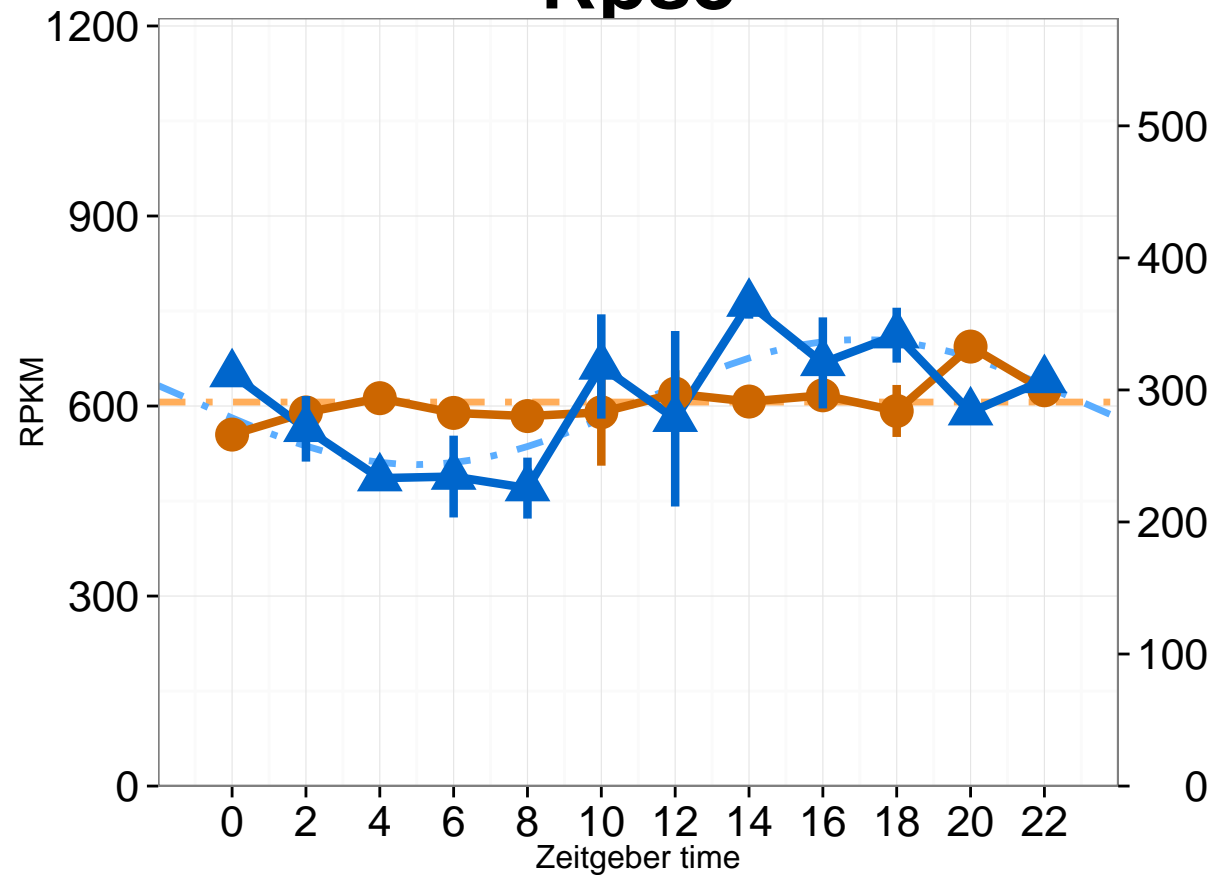

# Rps8

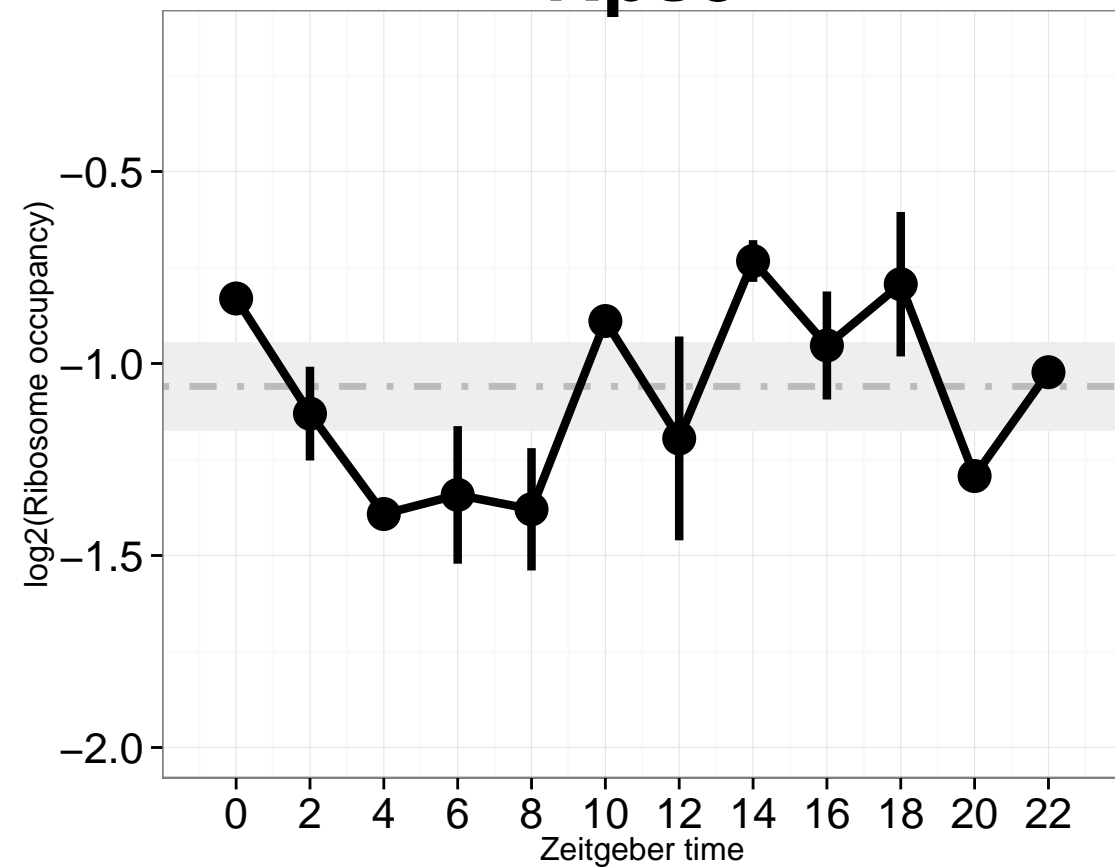

Supplement: Supplementary file 5687 [file 1]

# Tmod3

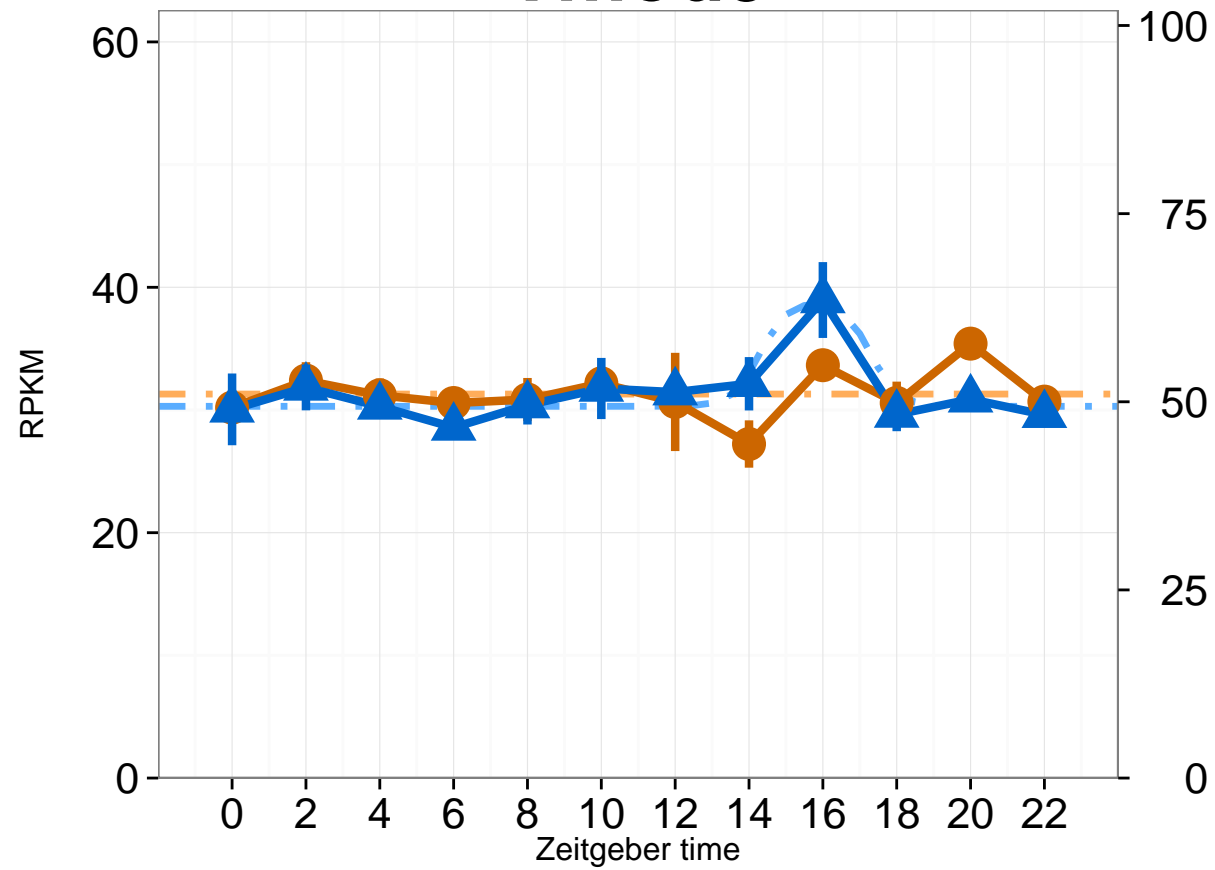

# Tmod3

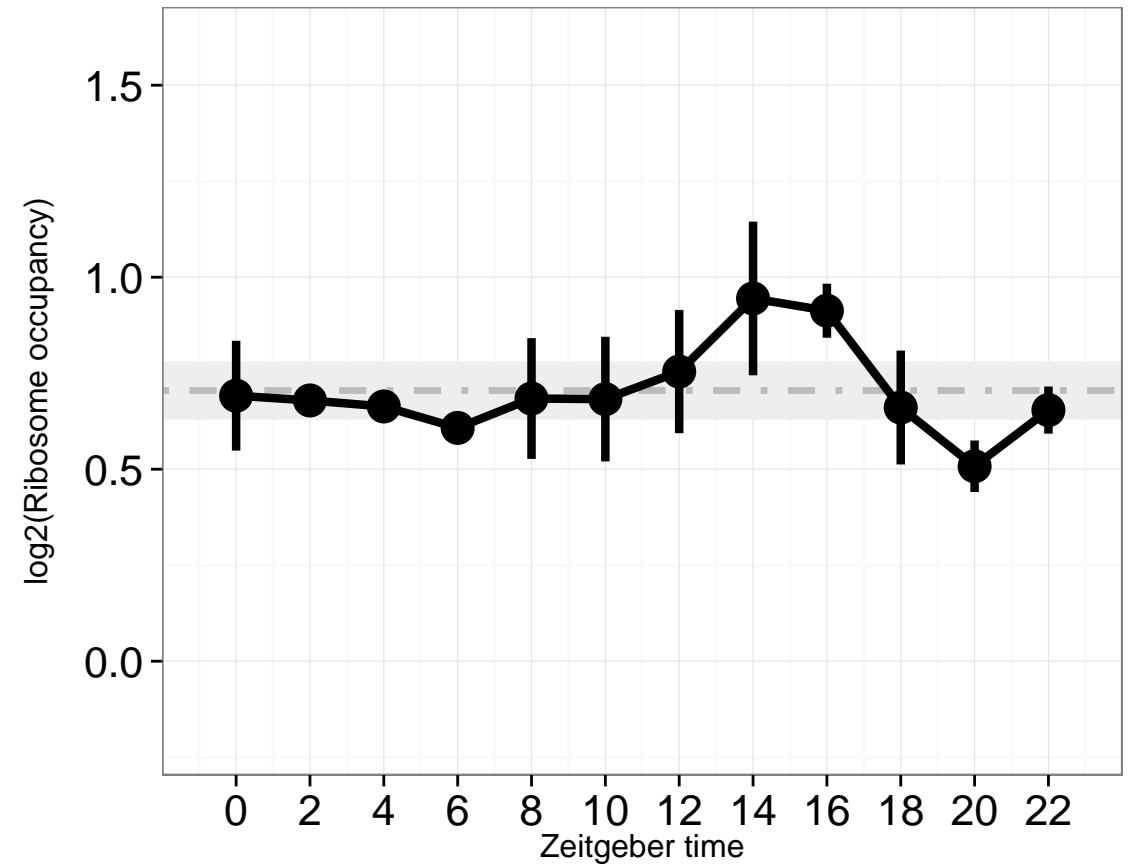

Supplement: Supplementary file 5688 [file 1]

# Gm340

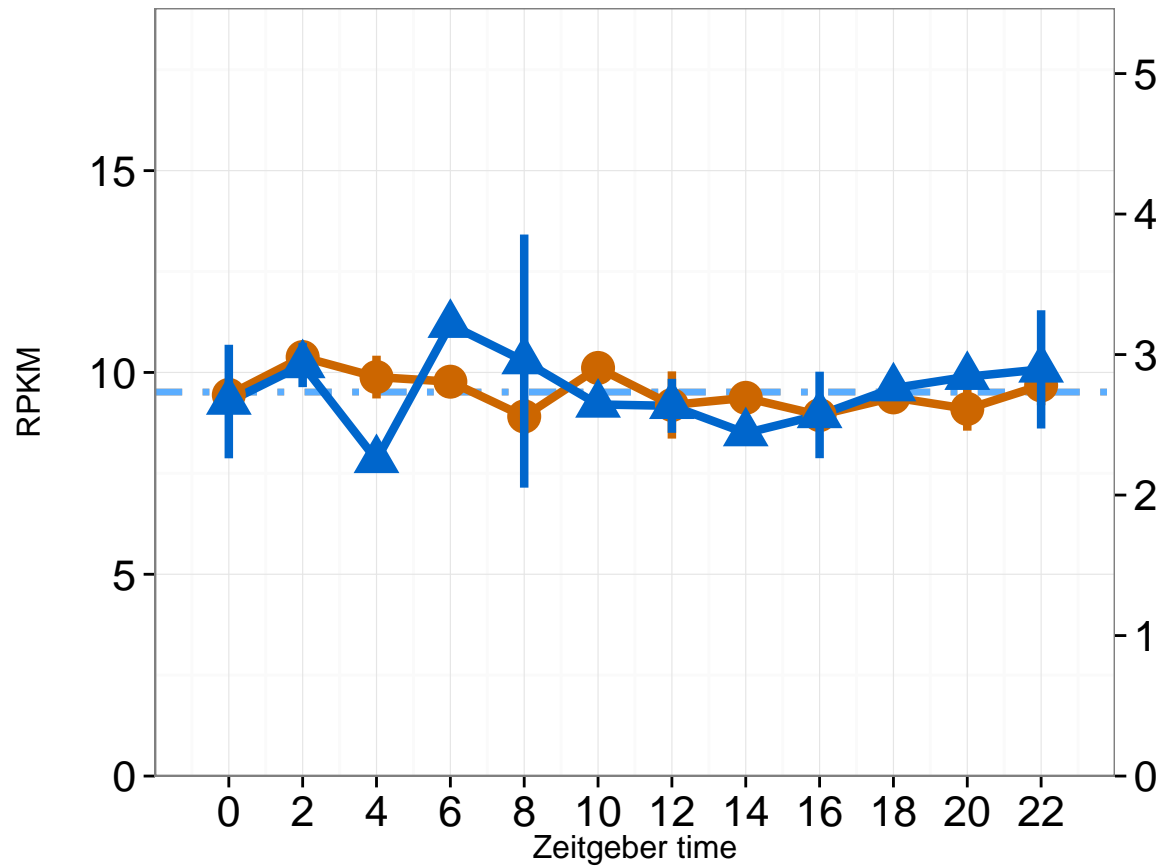

# Gm340

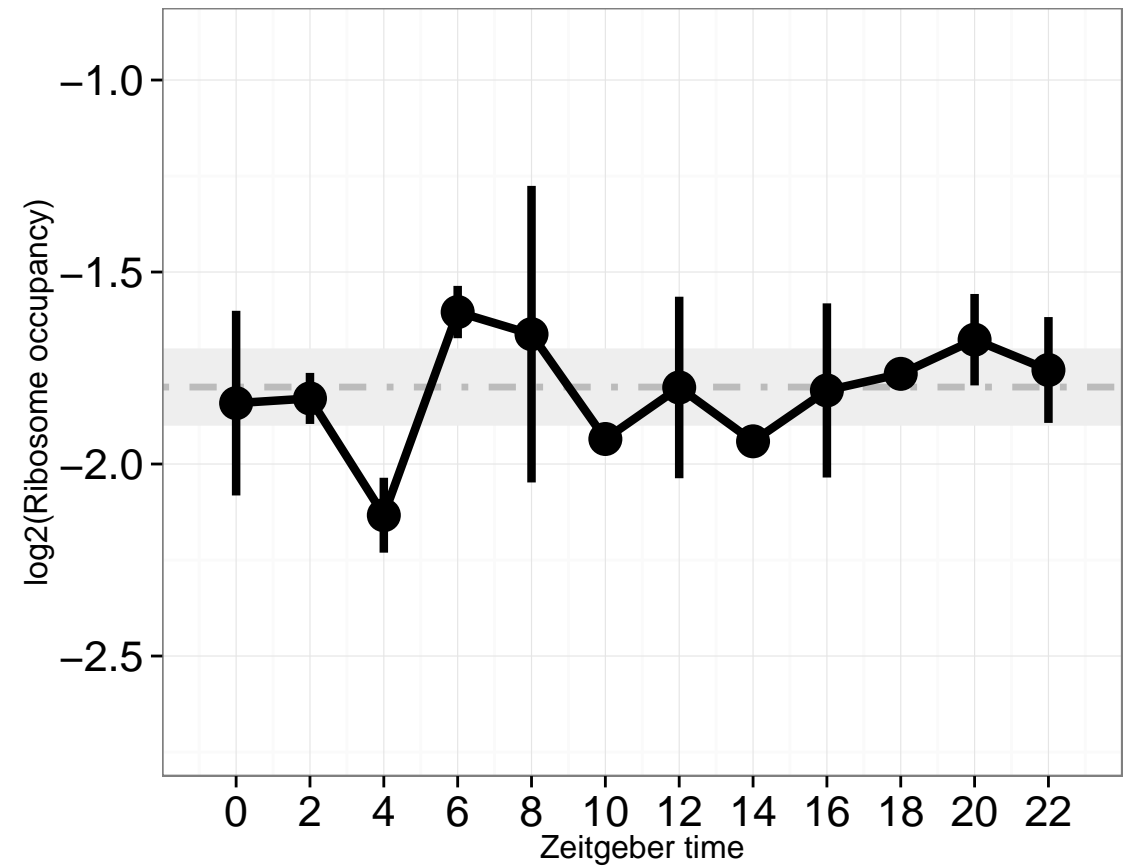

Supplement: Supplementary file 5689 [file 1]

## Svil

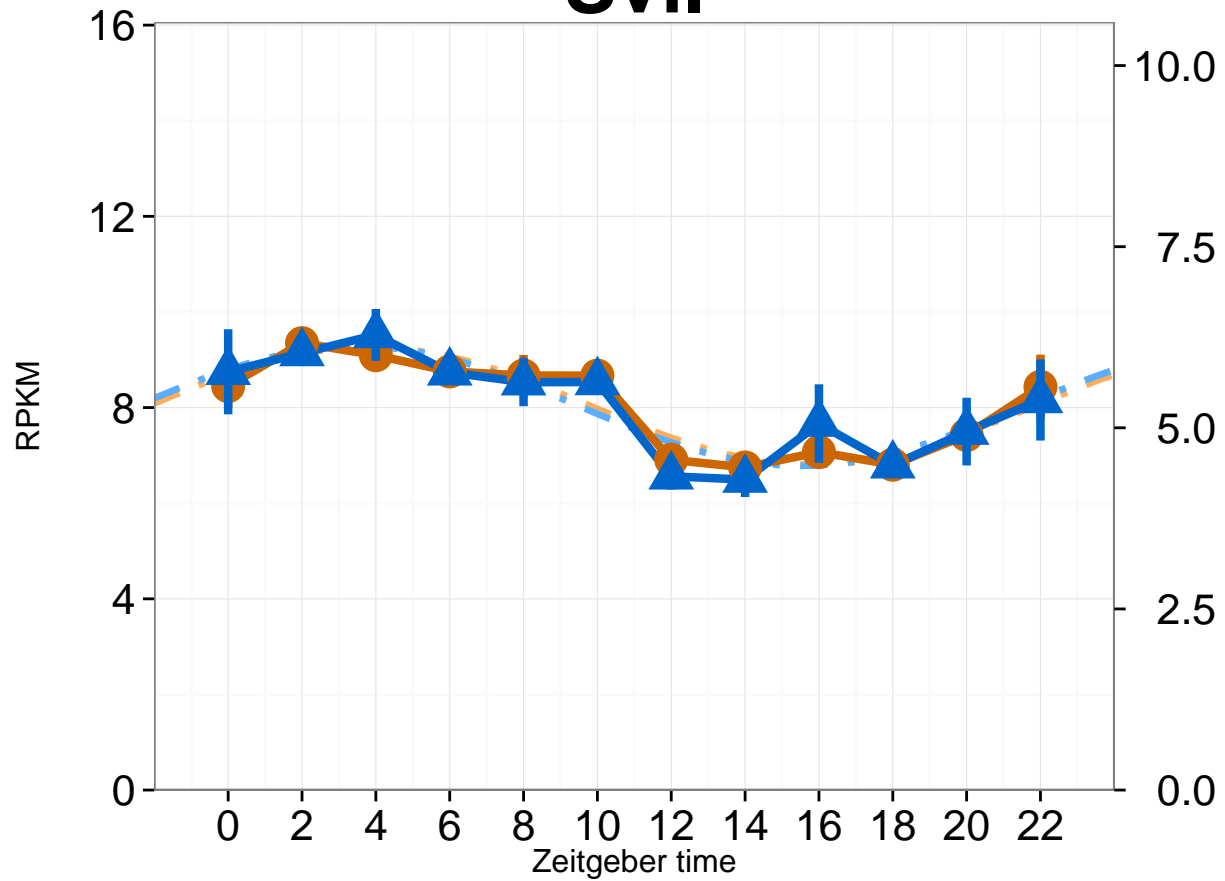

## Svil

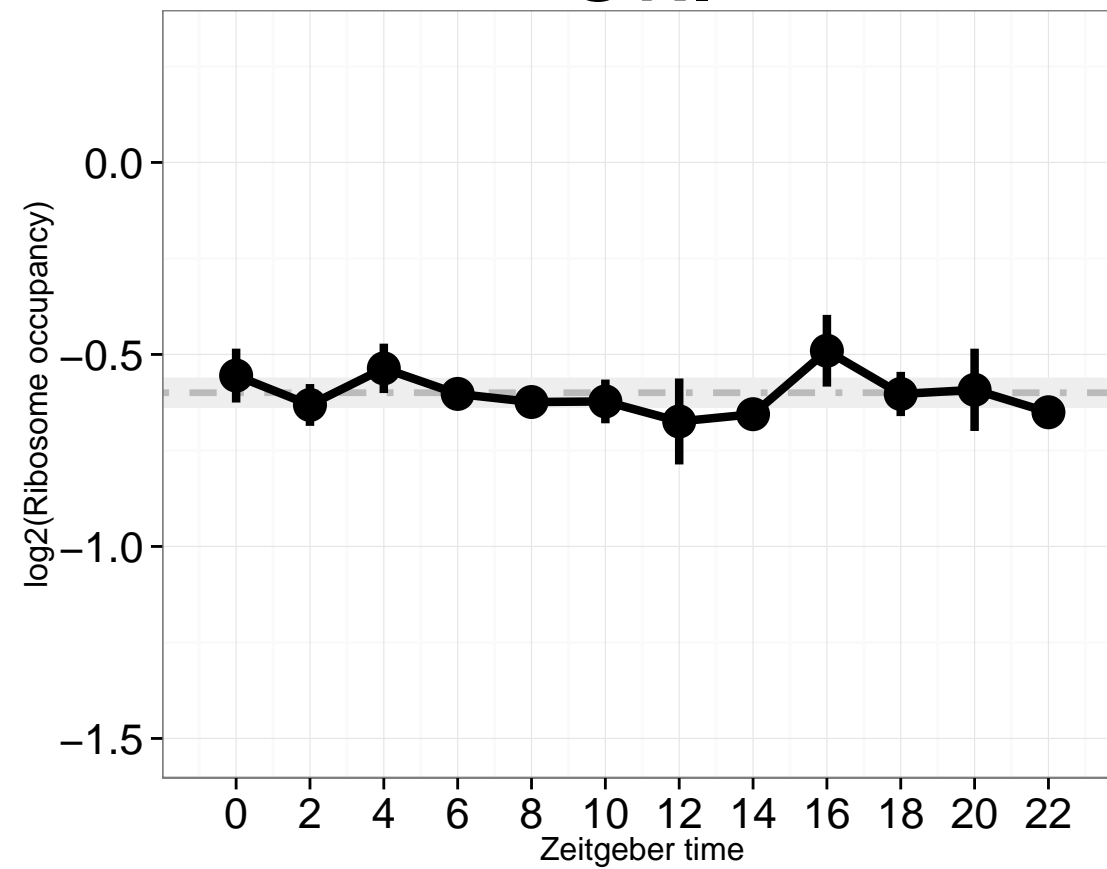

Supplement: Supplementary file 5690 [file 1]

## Tecr

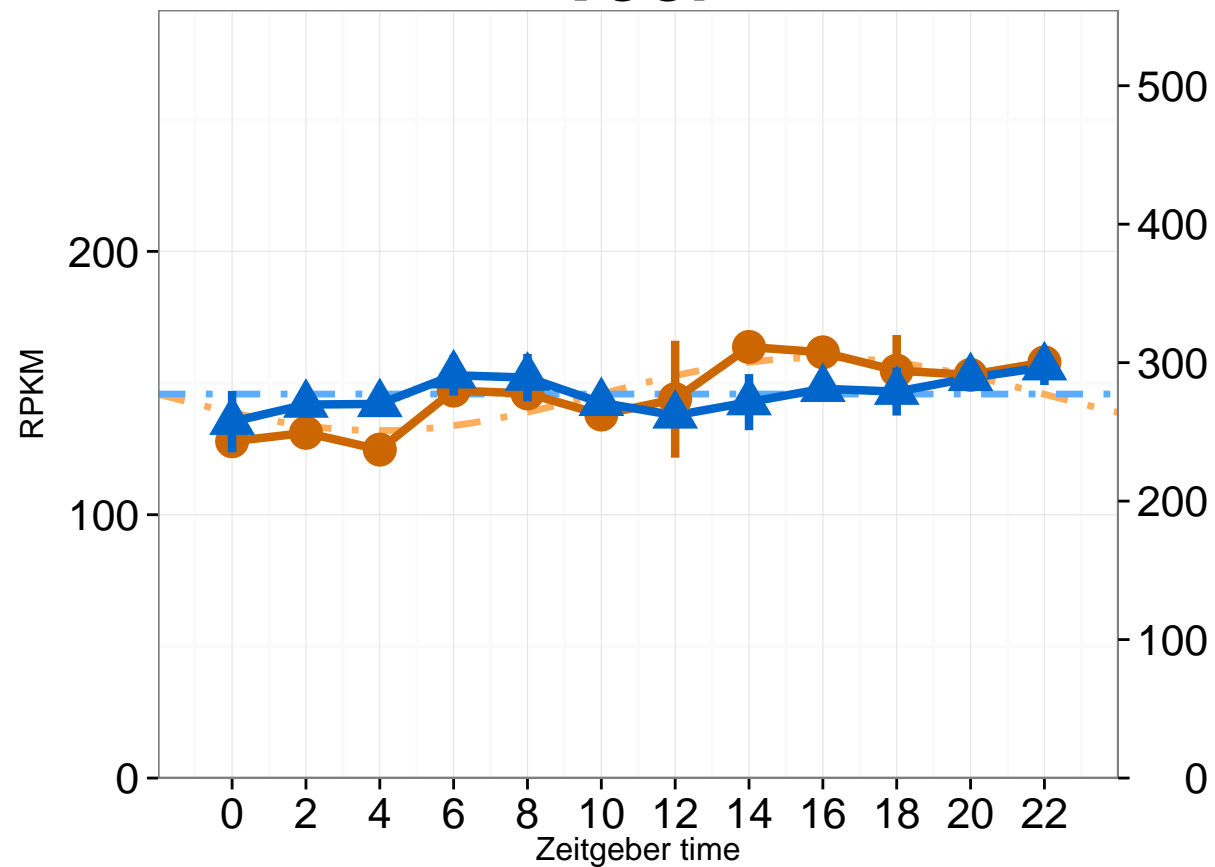

## Tecr

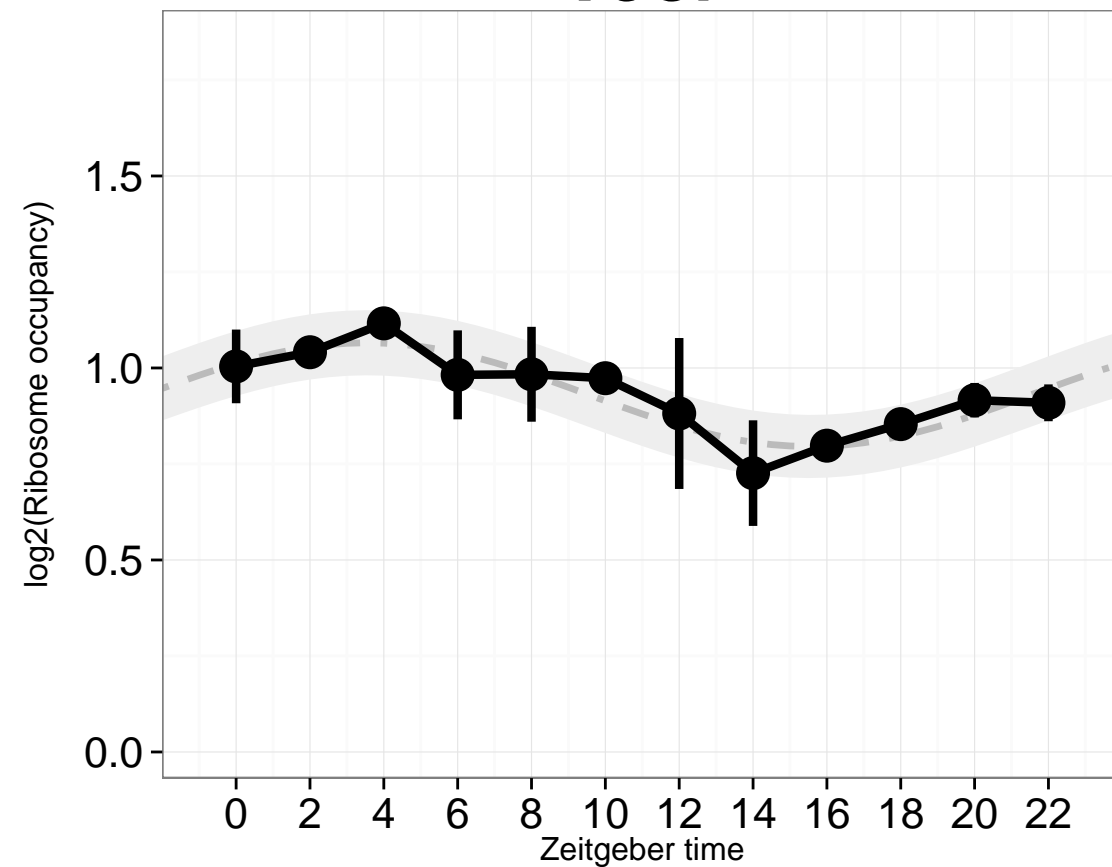

Supplement: Supplementary file 5691 [file 1]

# Reep3

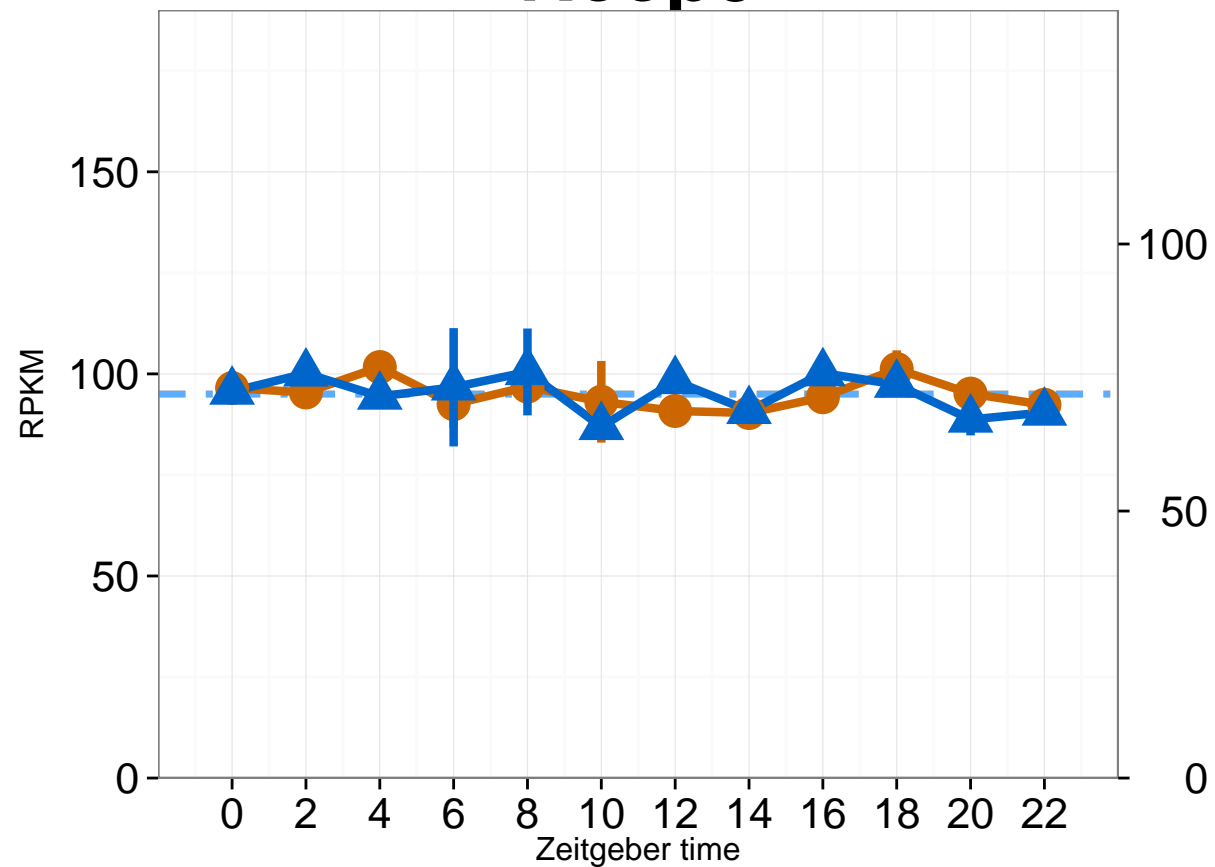

# Reep3

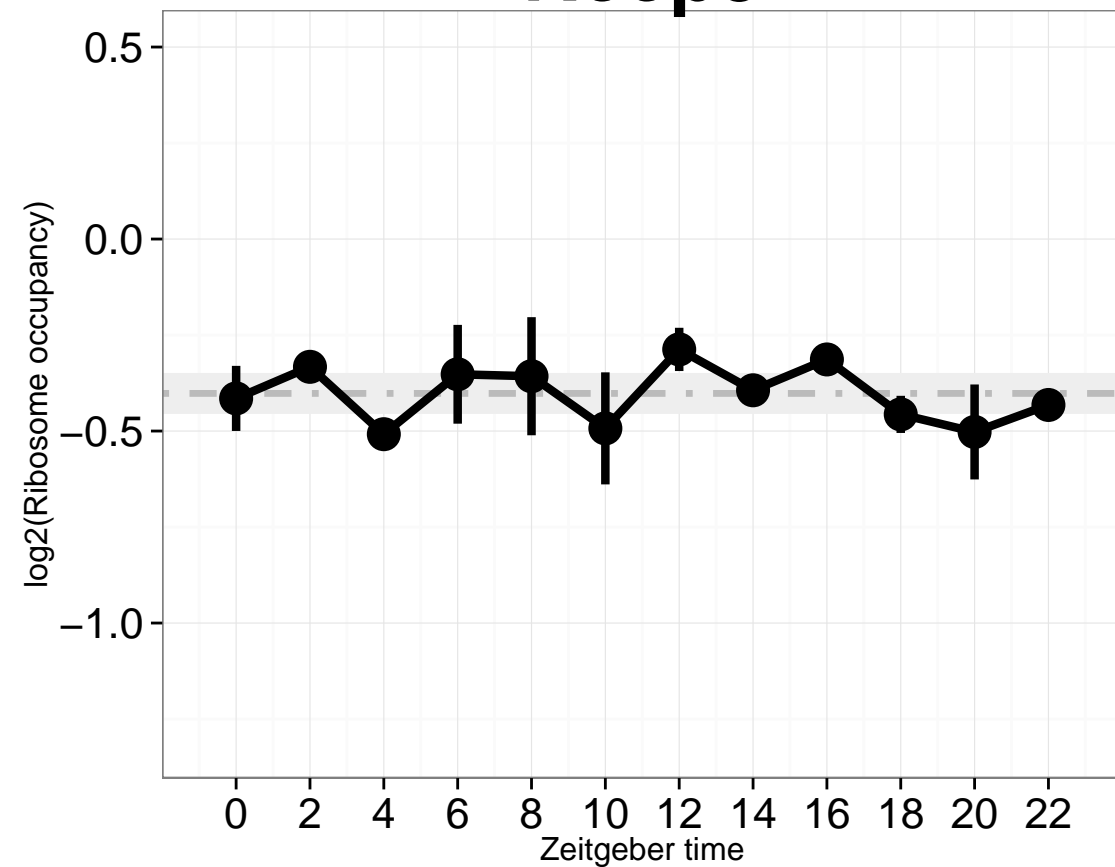

Supplement: Supplementary file 5692 [file 1]

## Dnajb1

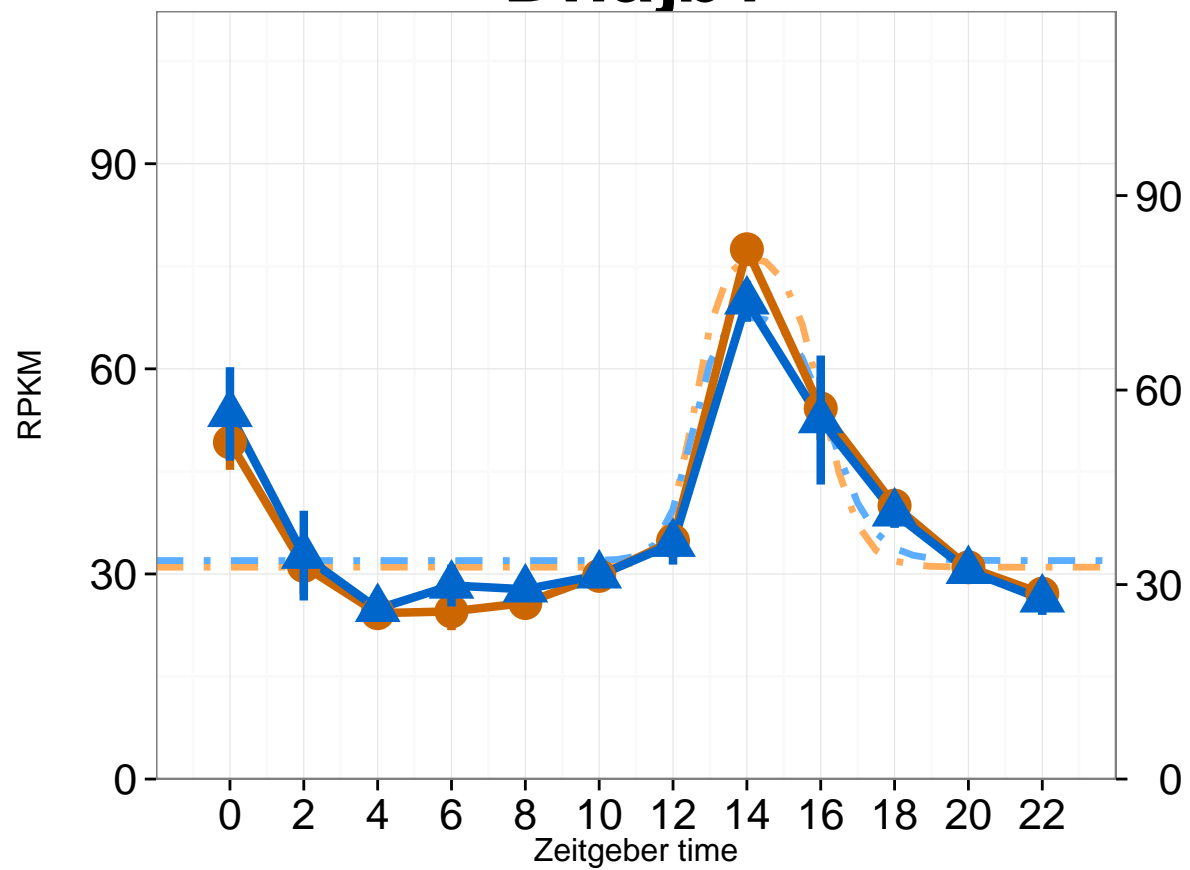

## Dnajb1

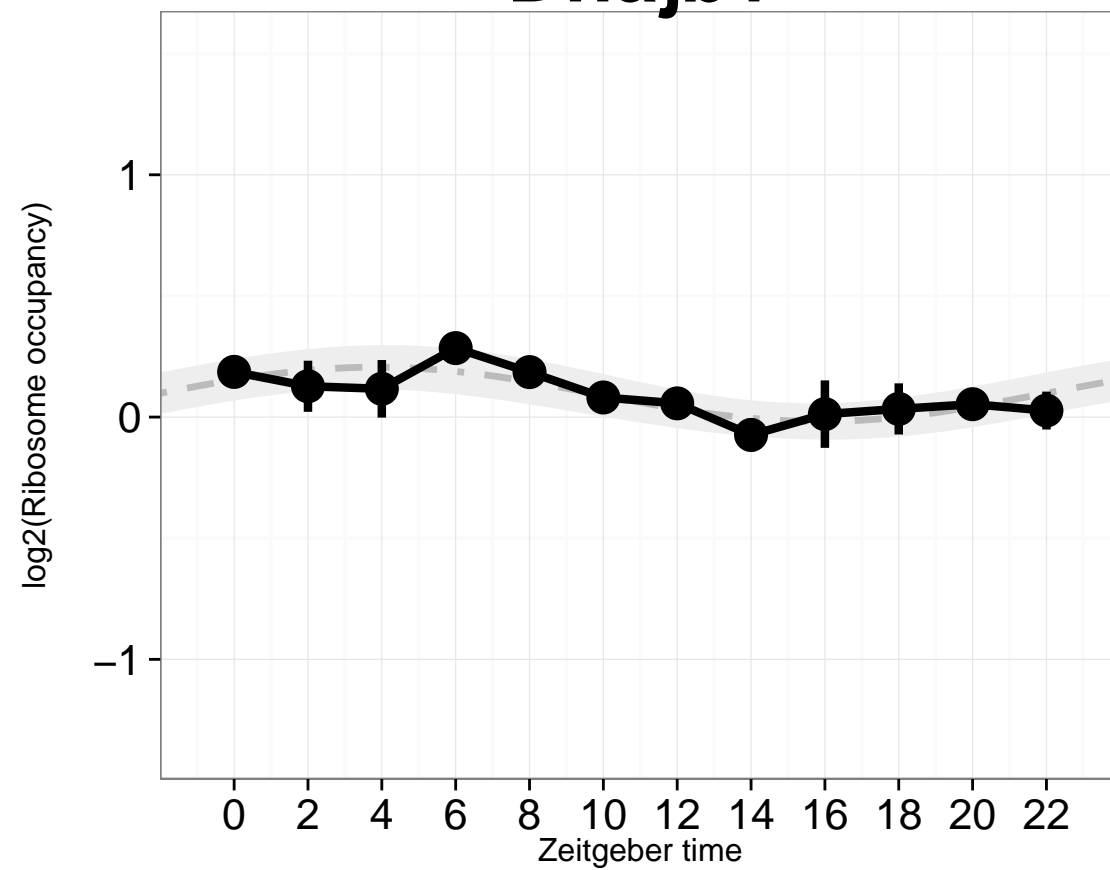

Supplement: Supplementary file 5693 [file 1]

# Gnb2l1

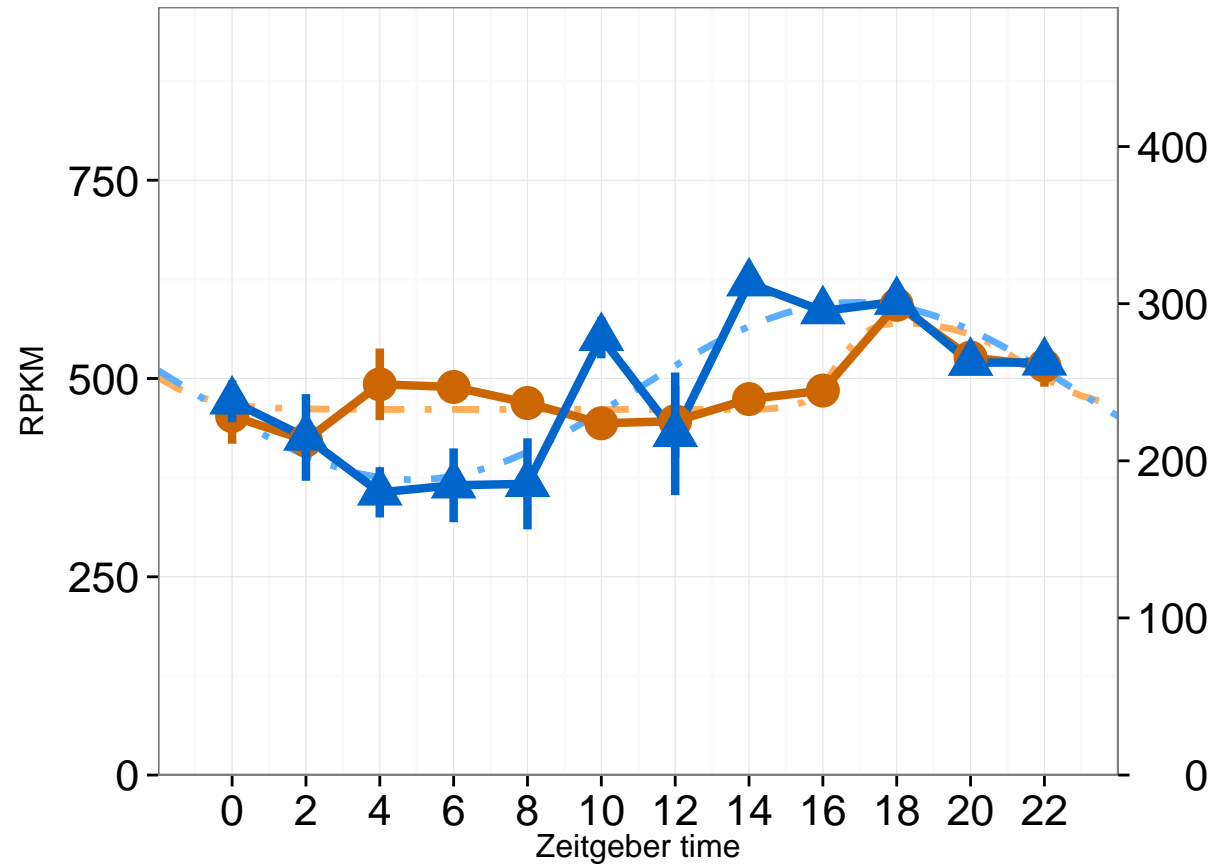

# Gnb2l1

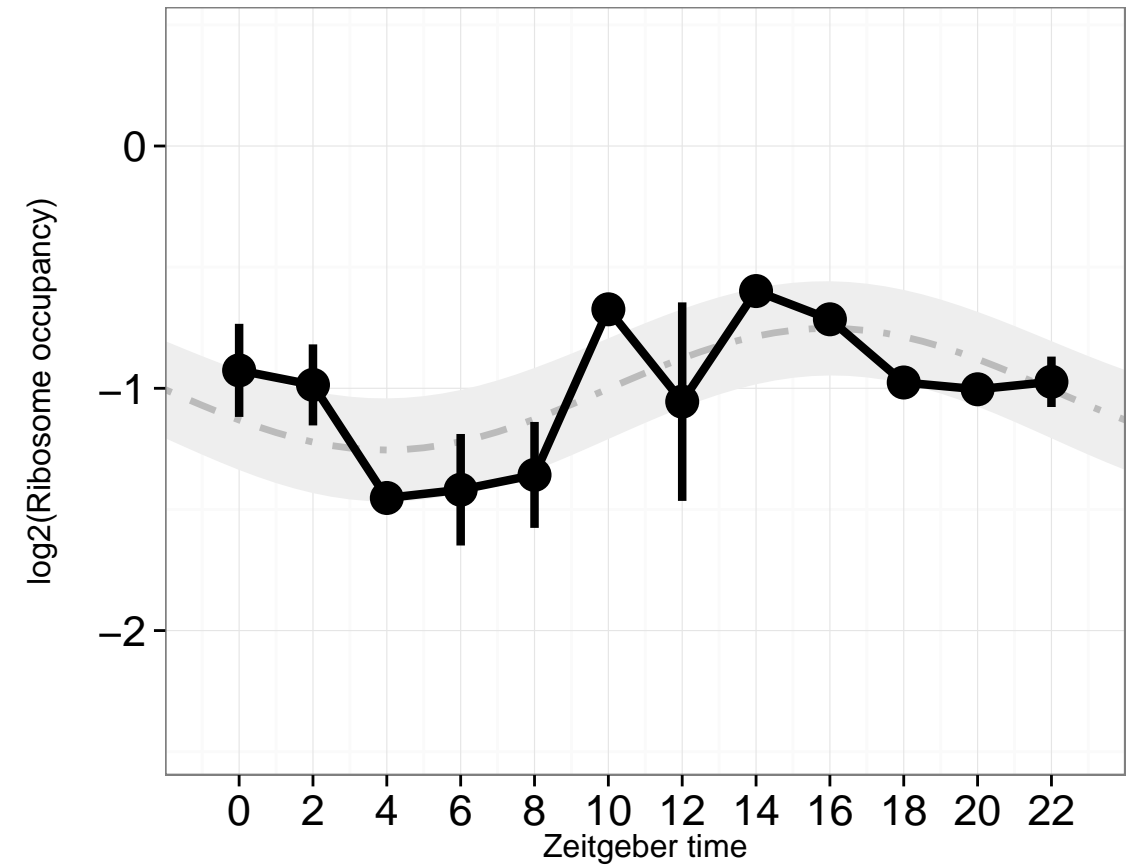

Supplement: Supplementary file 5694 [file 1]

## Tmem60

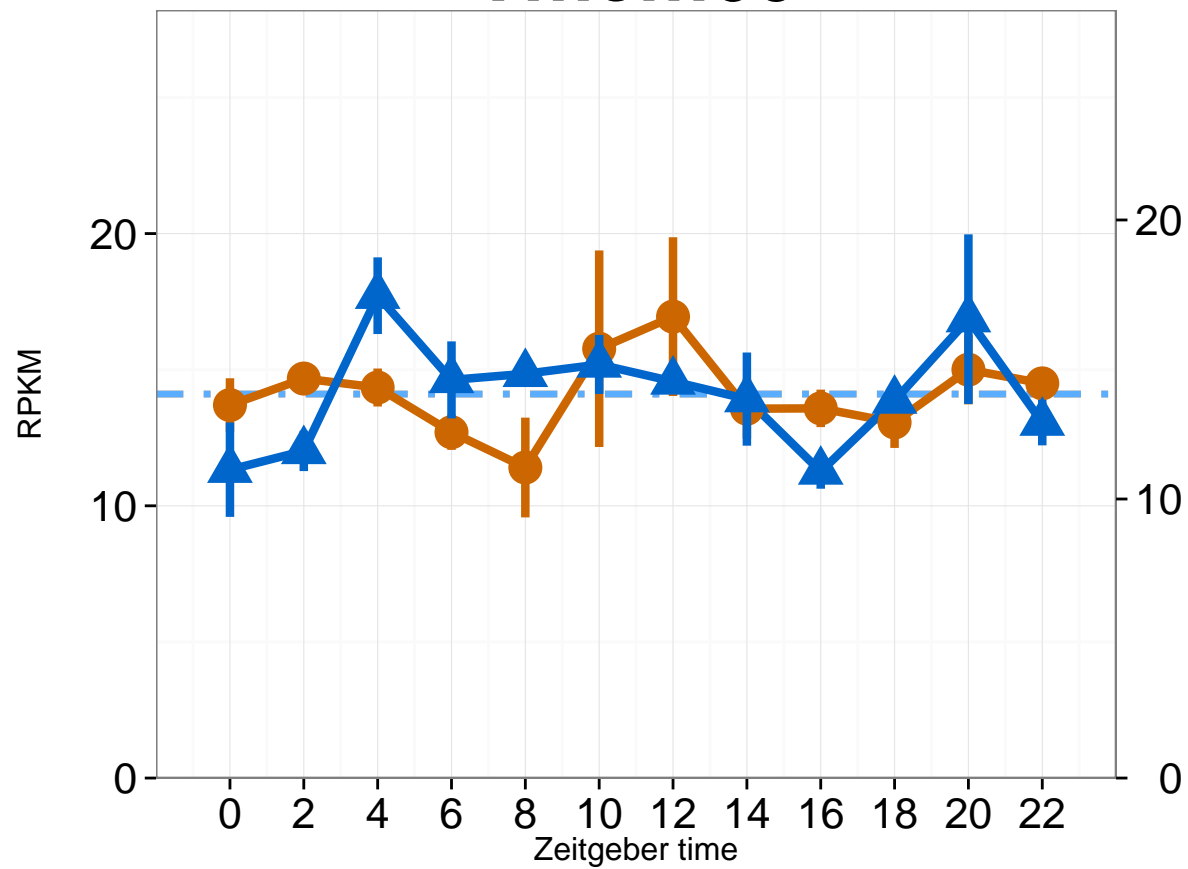

## Tmem60

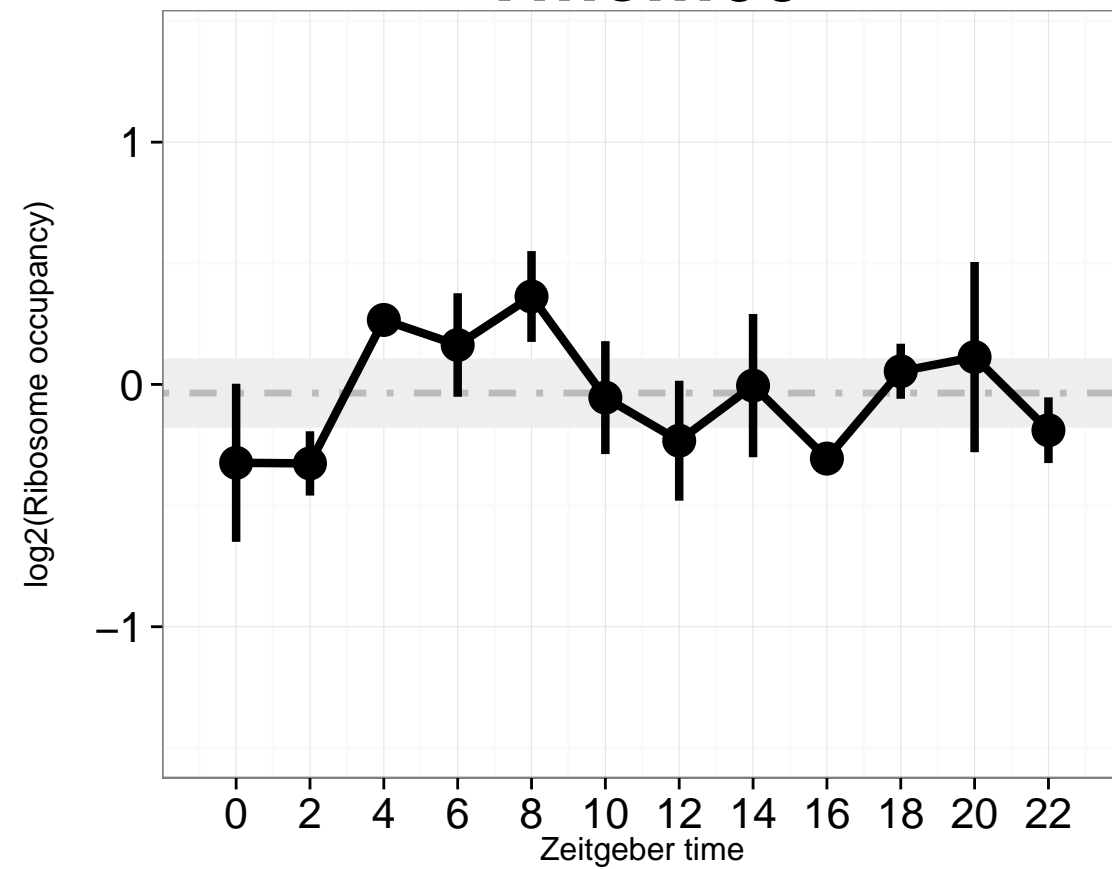

Supplement: Supplementary file 5695 [file 1]

## Ctss

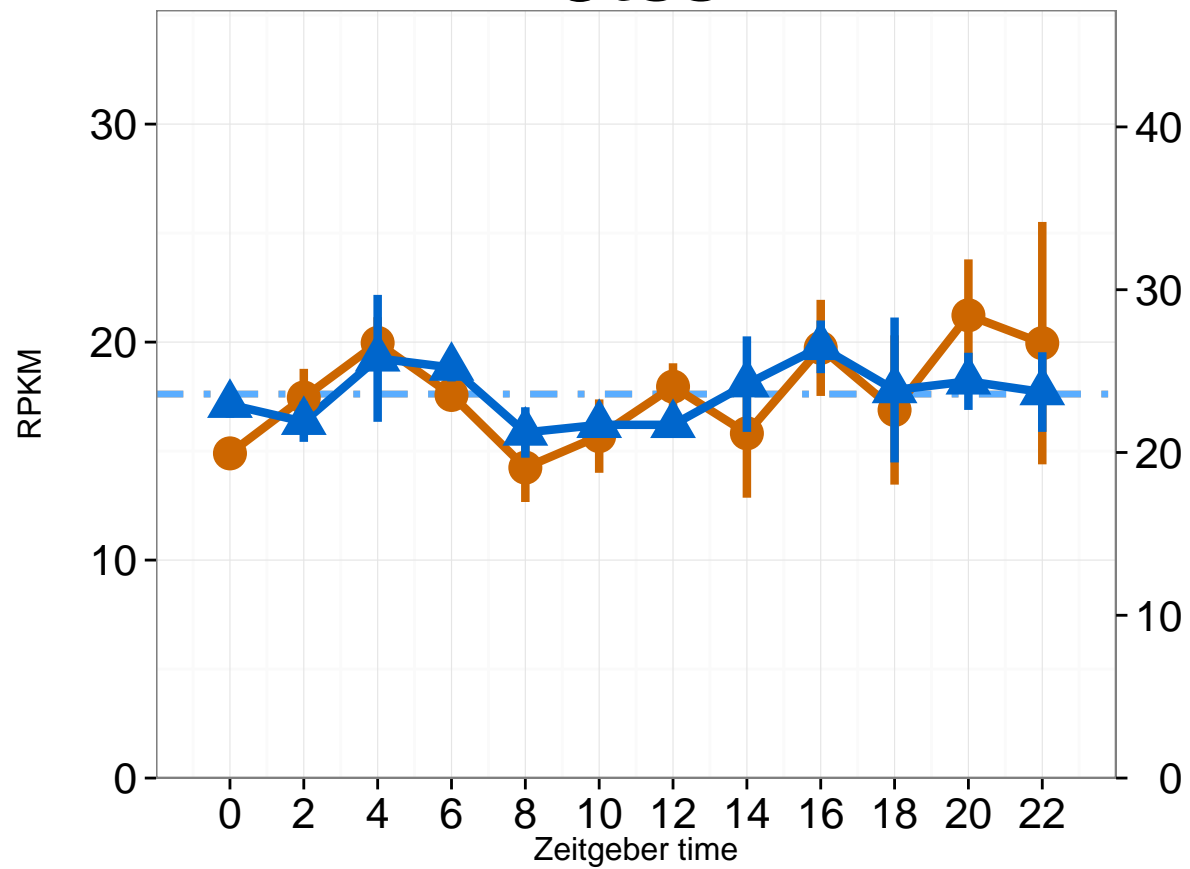

## Ctss

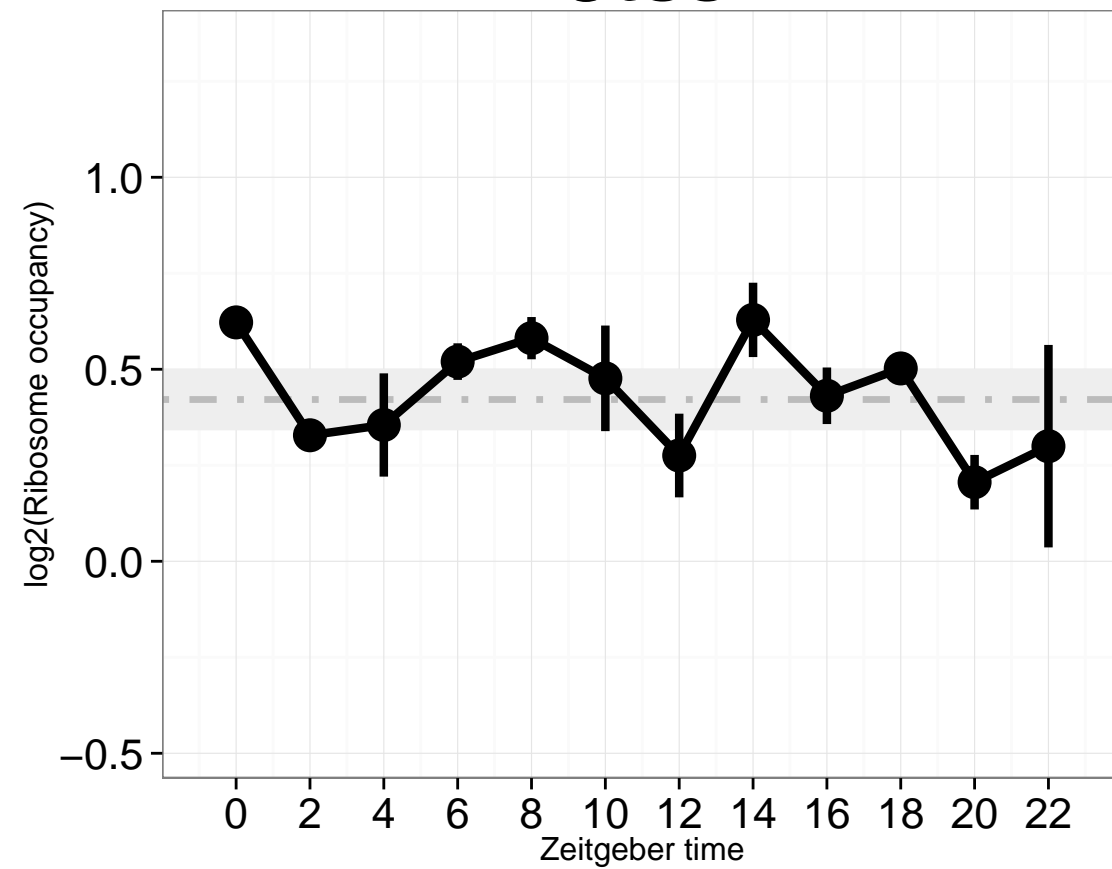

Supplement: Supplementary file 5696 [file 1]

# Map3k7

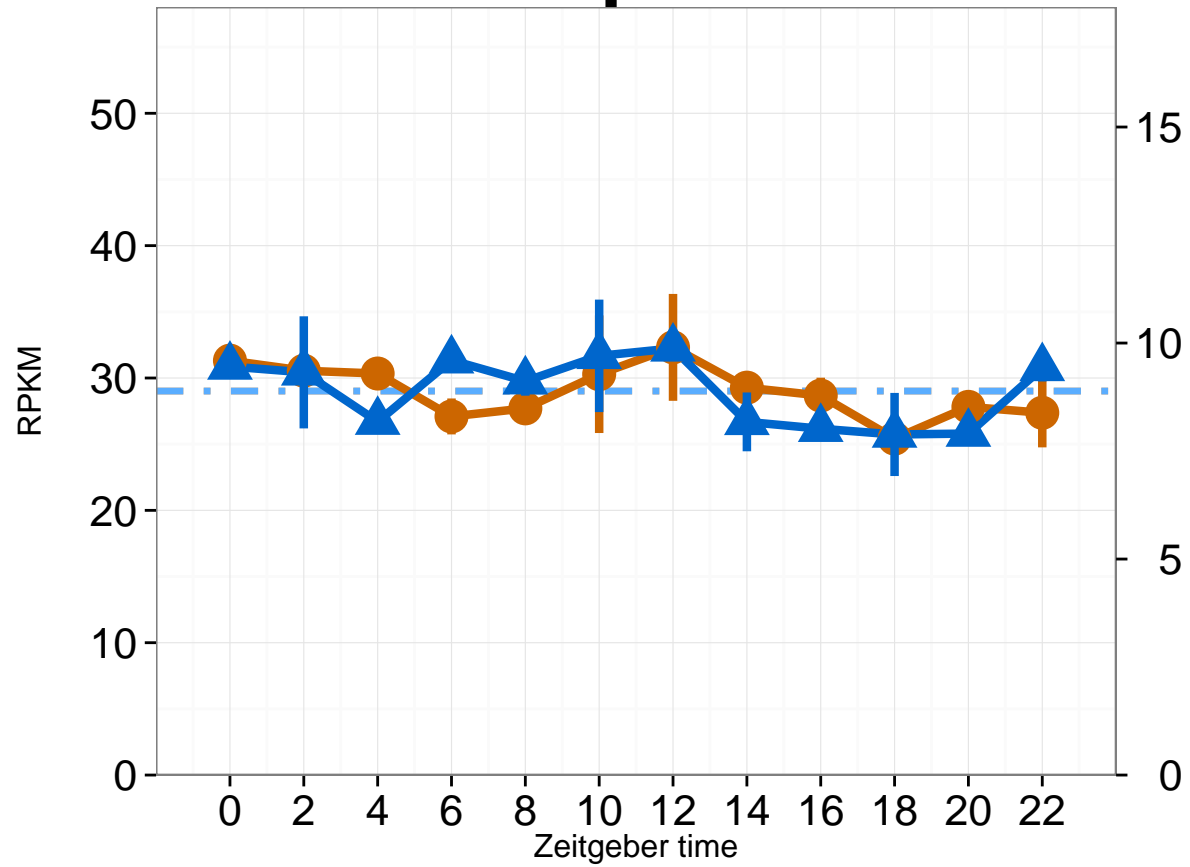

# Map3k7

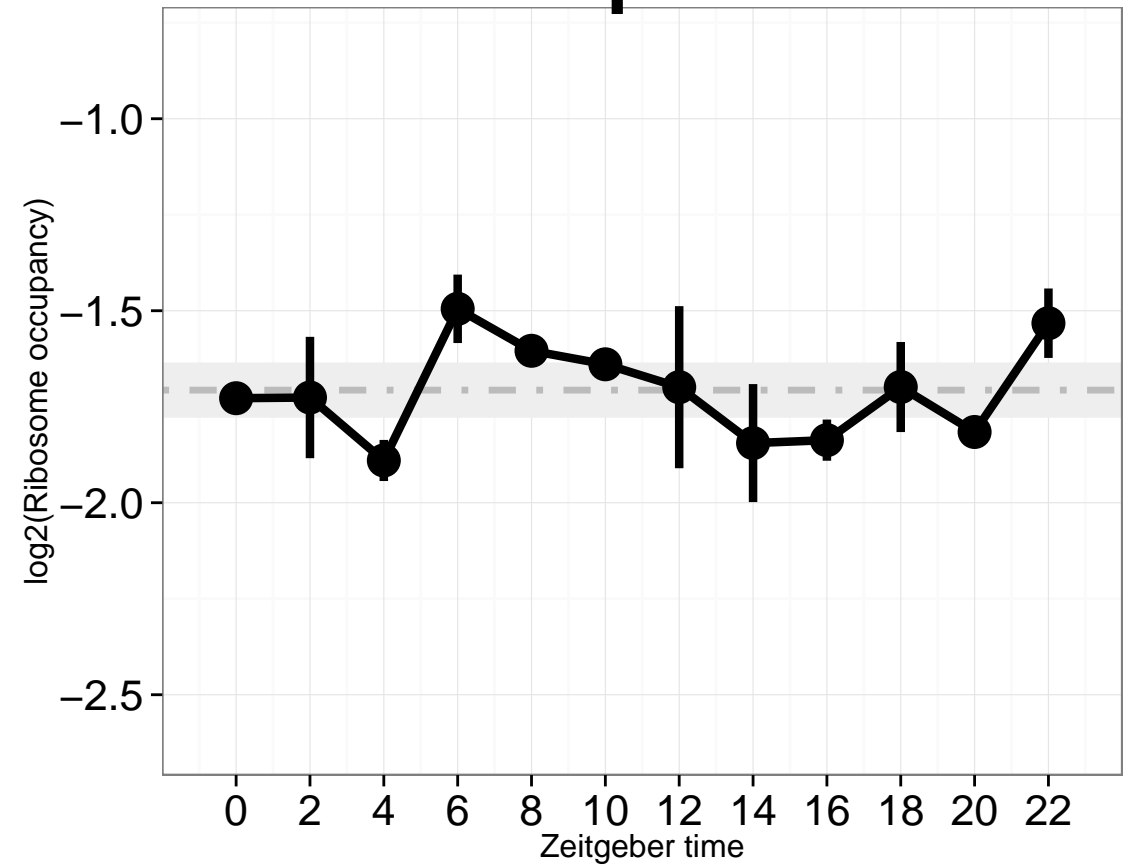

Supplement: Supplementary file 5697 [file 1]

## BC017158

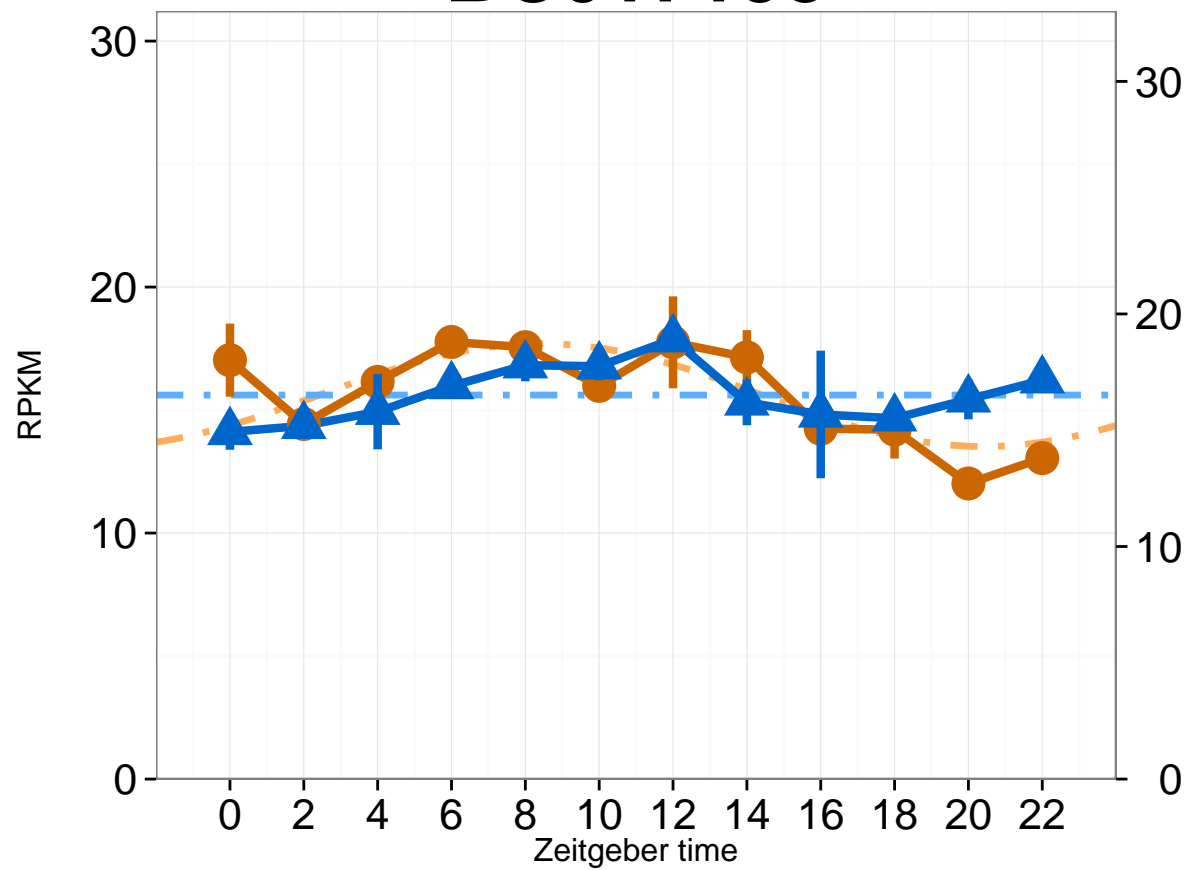

## BC017158

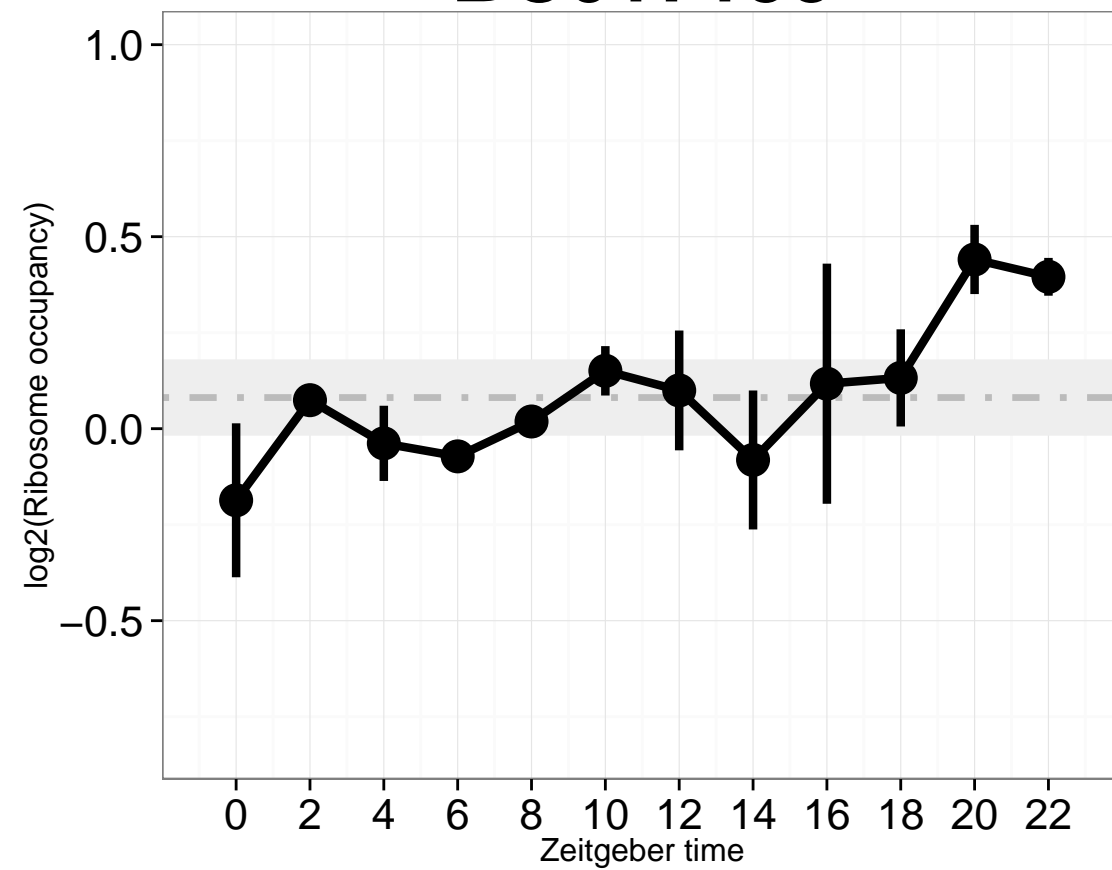

Supplement: Supplementary file 5698 [file 1]

## Ldhd

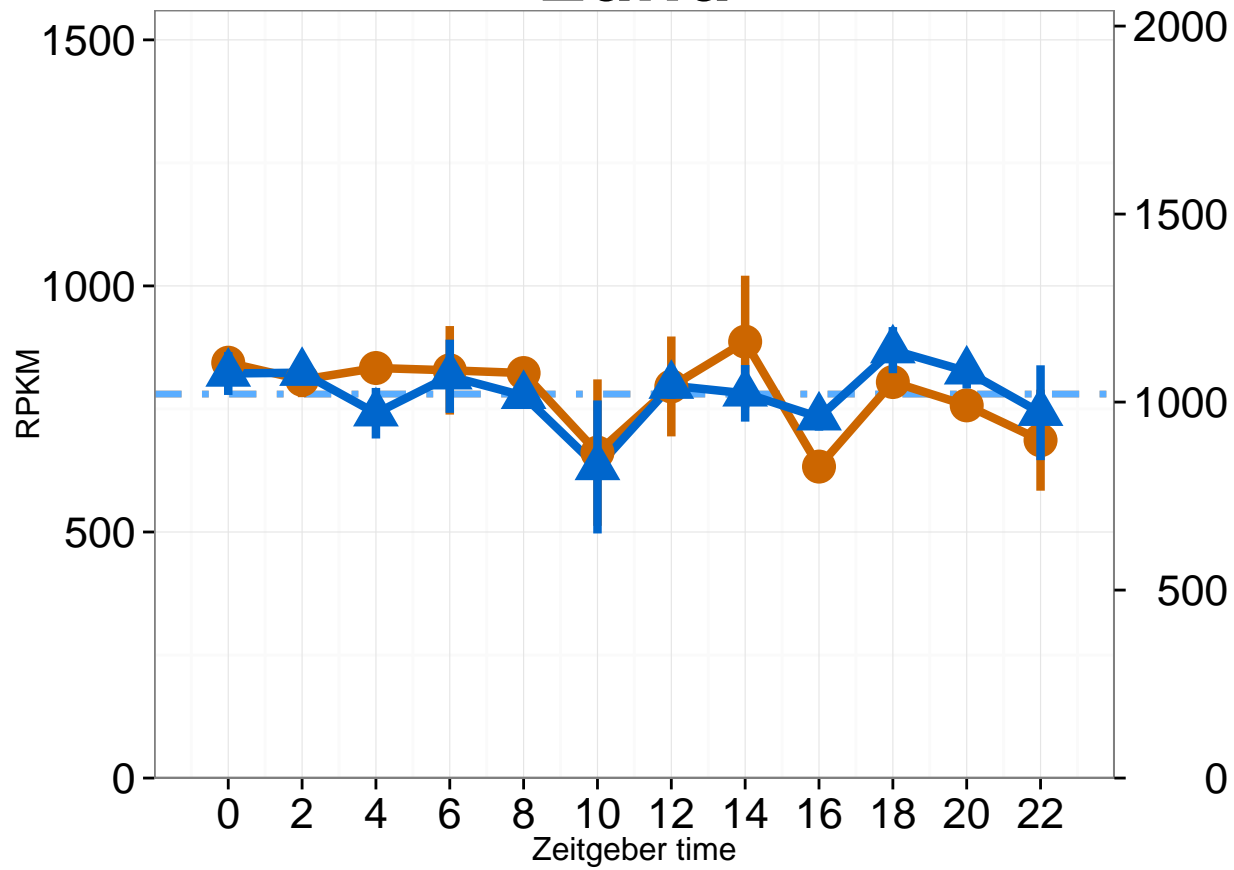

## Ldhd

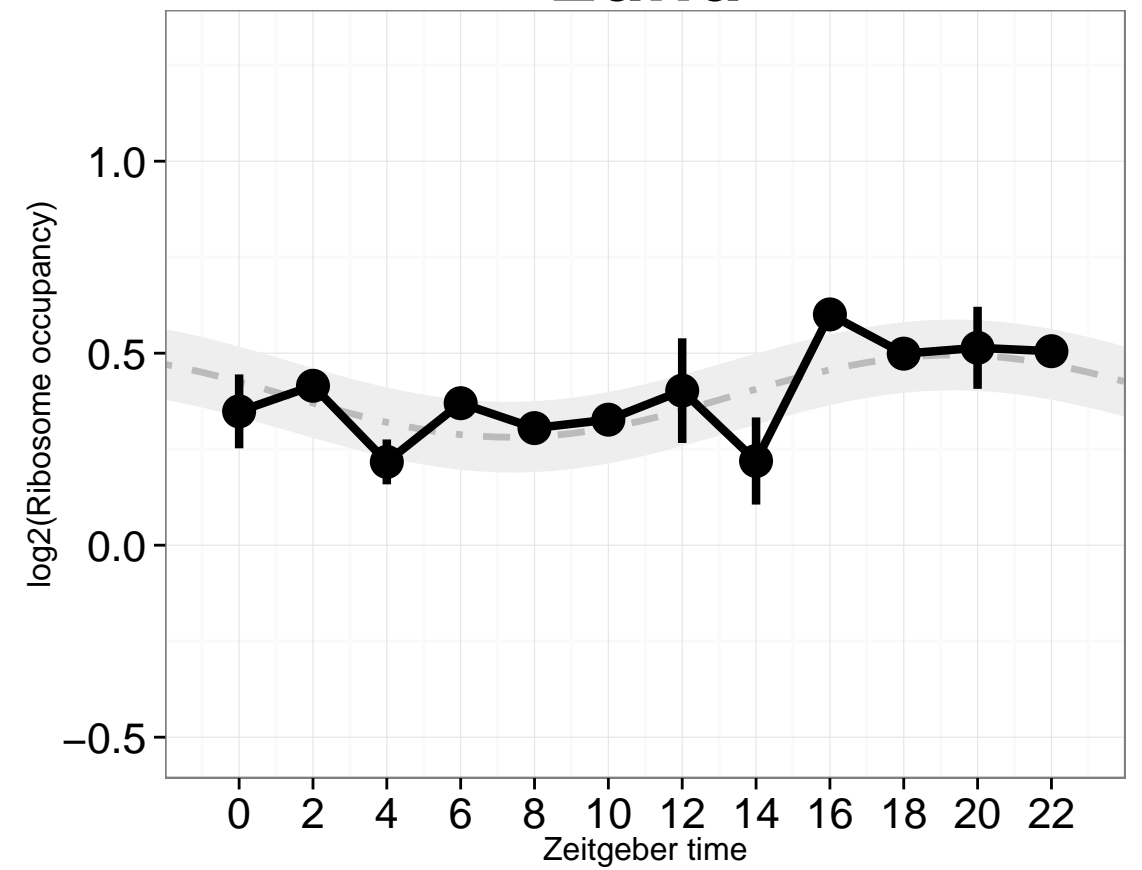

Supplement: Supplementary file 5699 [file 1]

# Gtf2e1

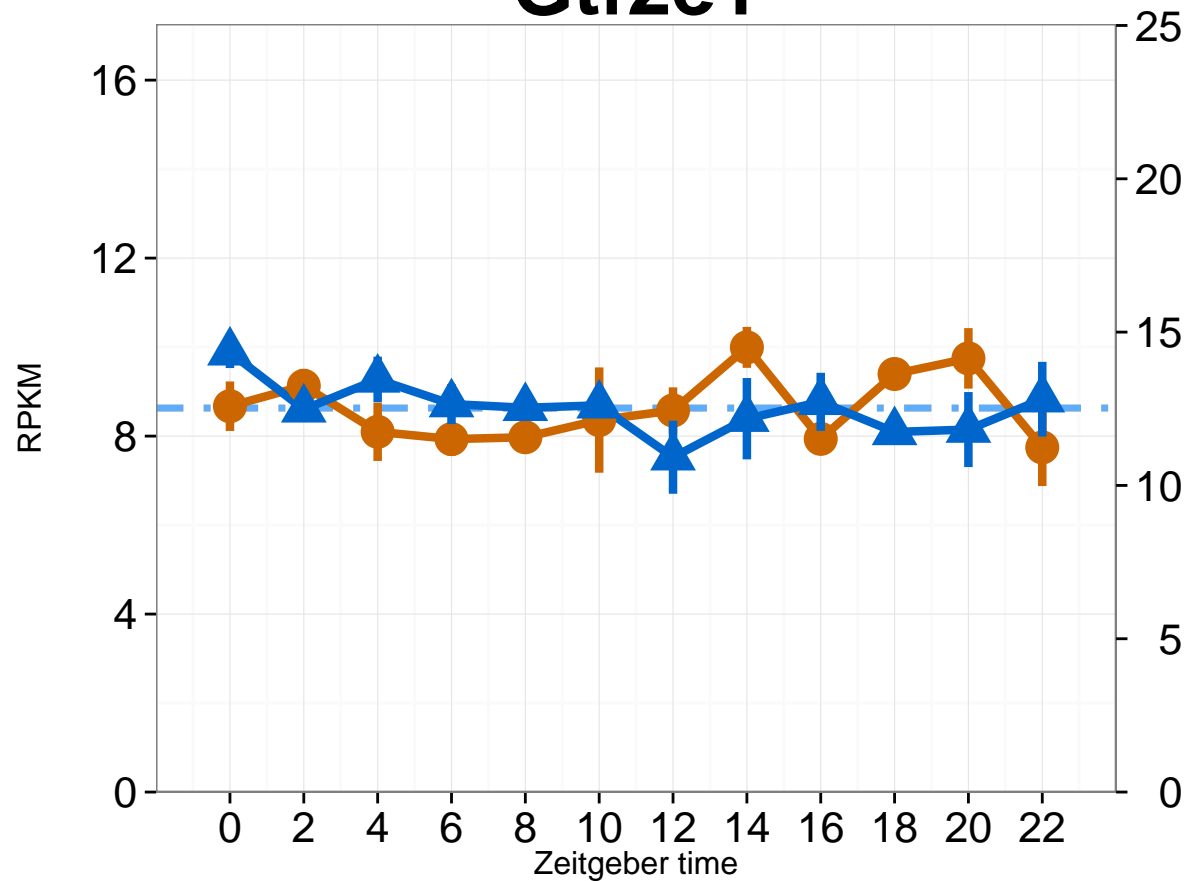

# Gtf2e1

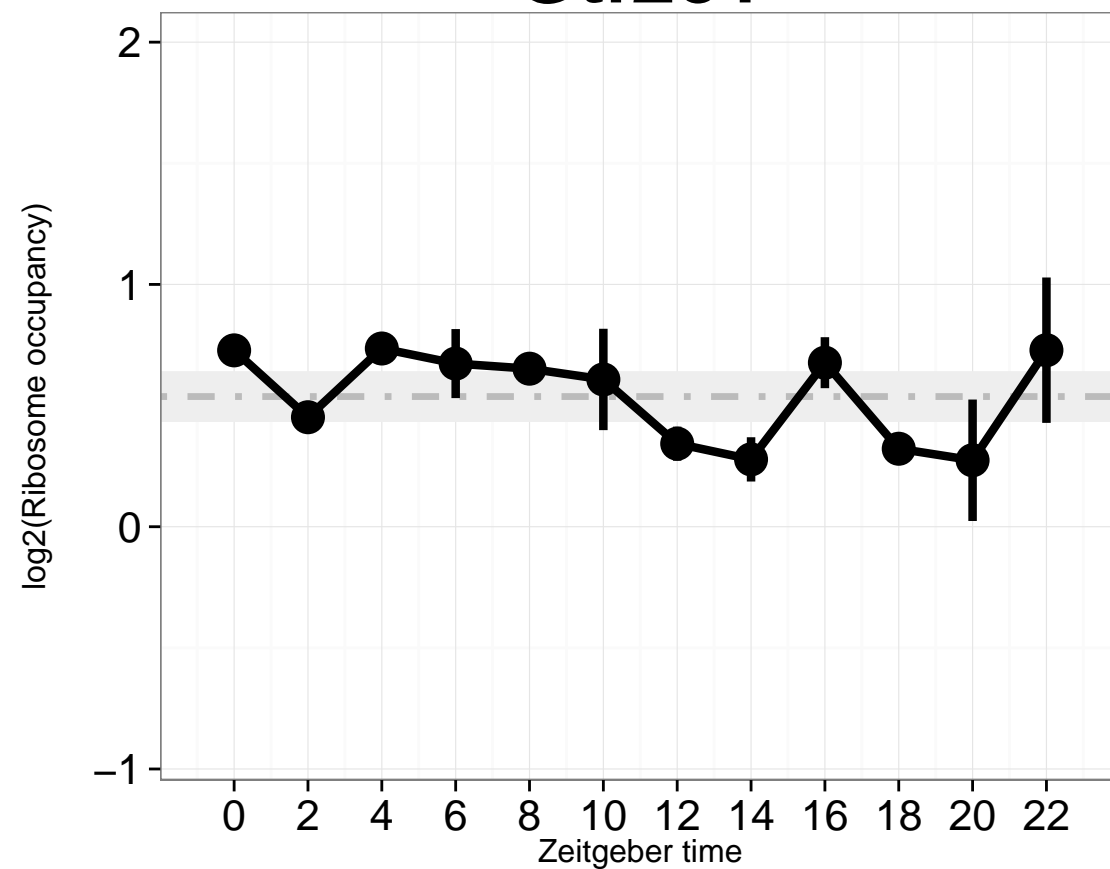

Supplement: Supplementary file 5700 [file 1]

# Tor3a

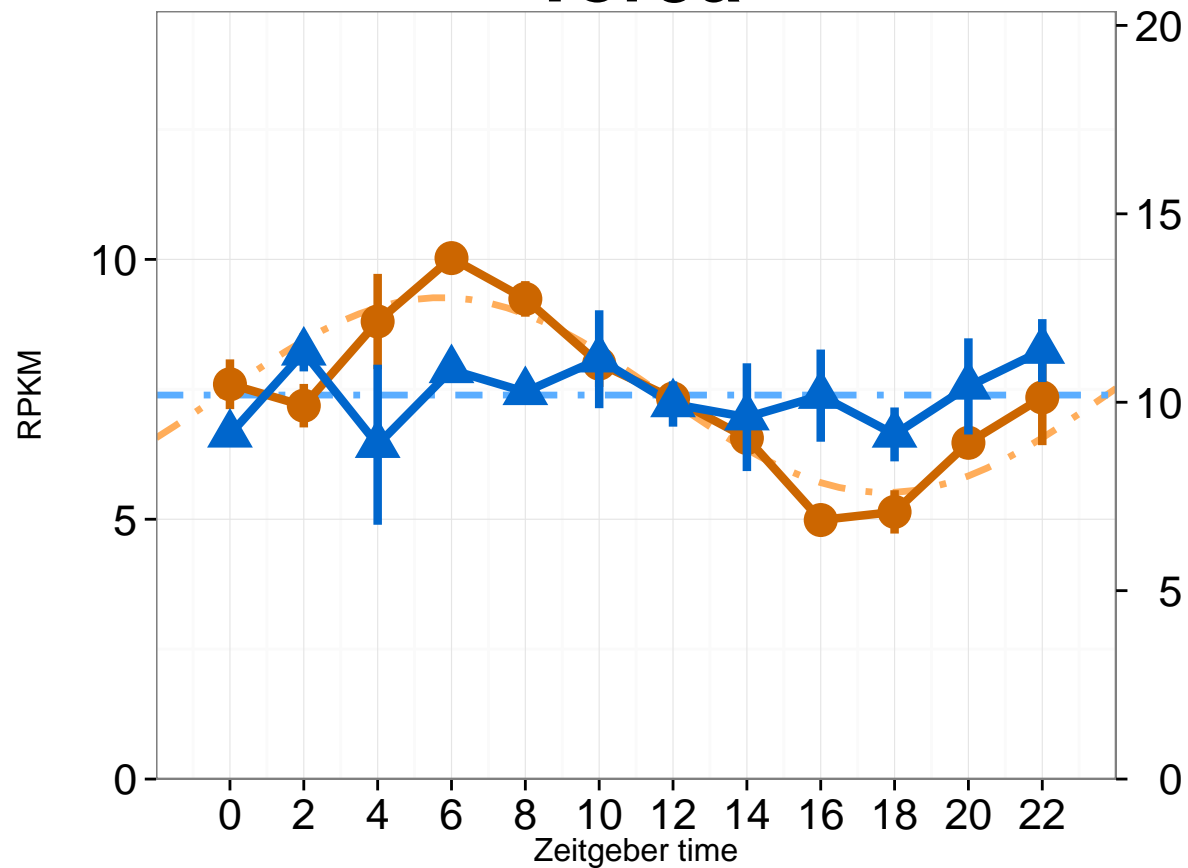

# Tor3a

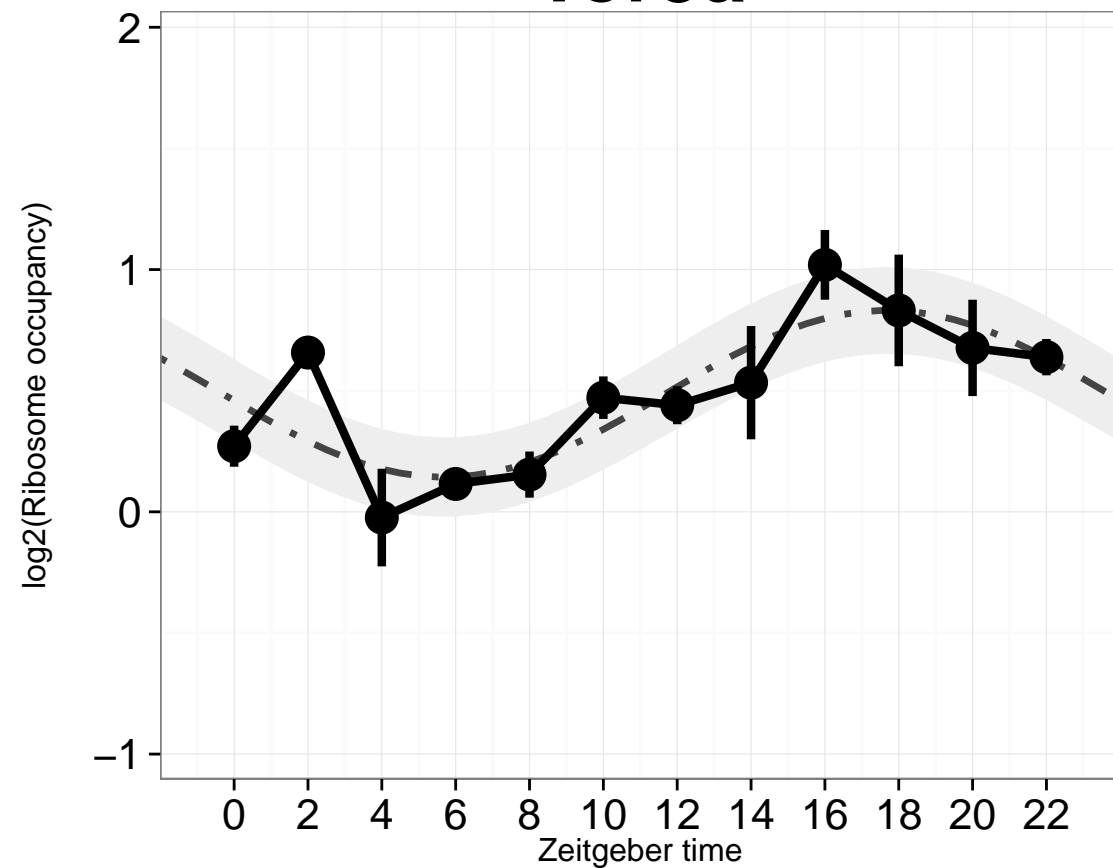

Supplement: Supplementary file 5701 [file 1]

# Zfp335

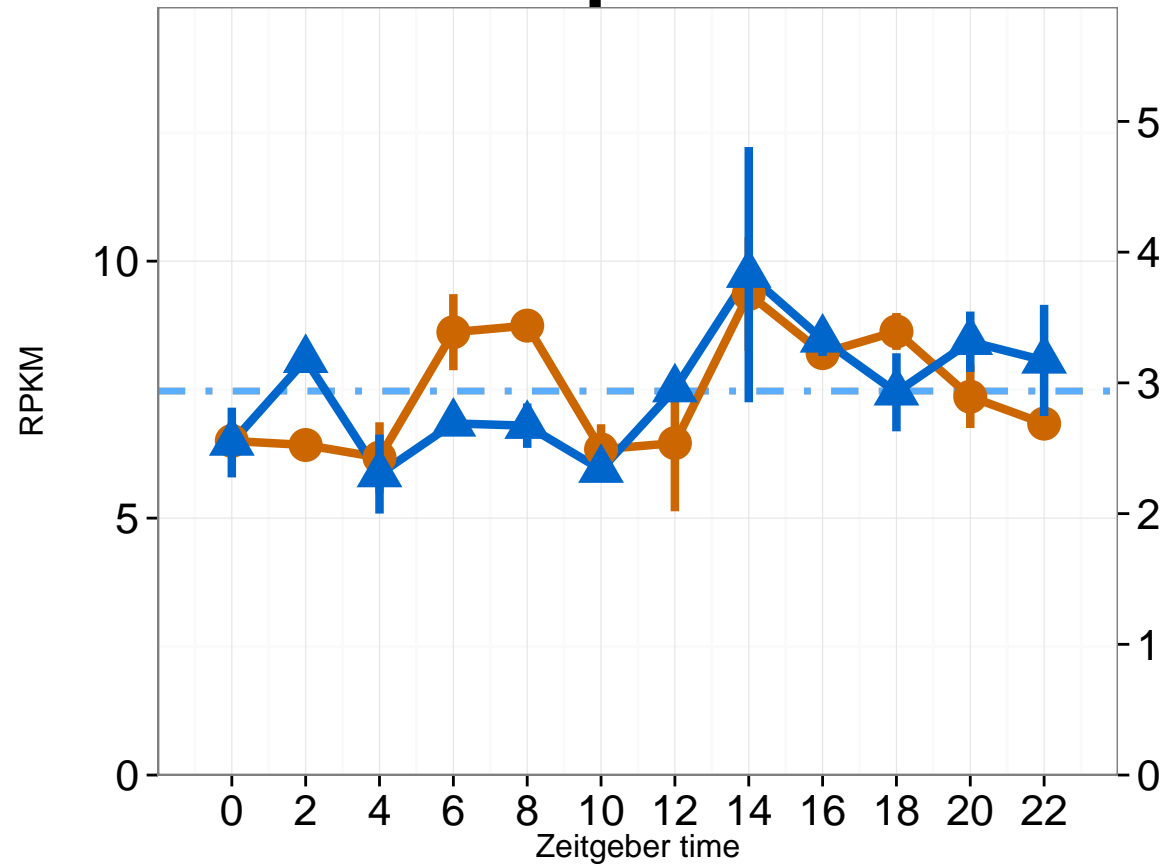

# Zfp335

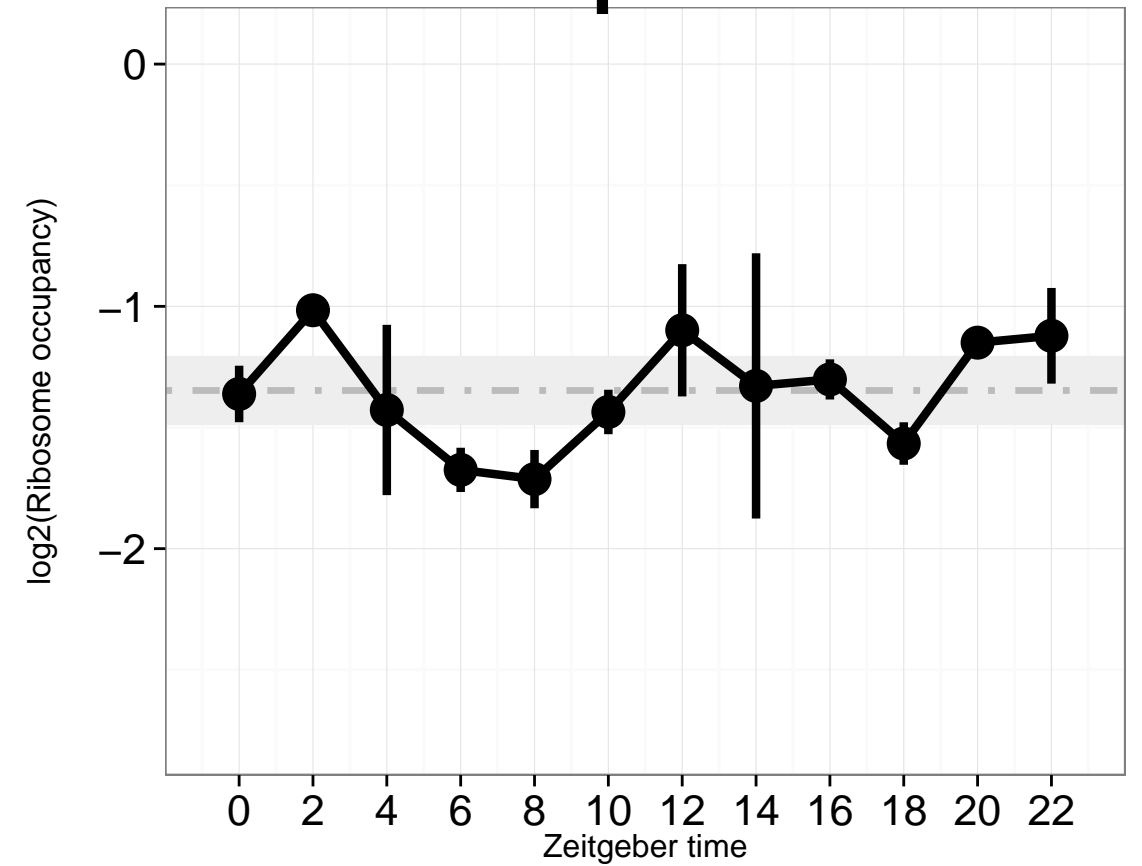

Supplement: Supplementary file 5702 [file 1]

## Abhd17b

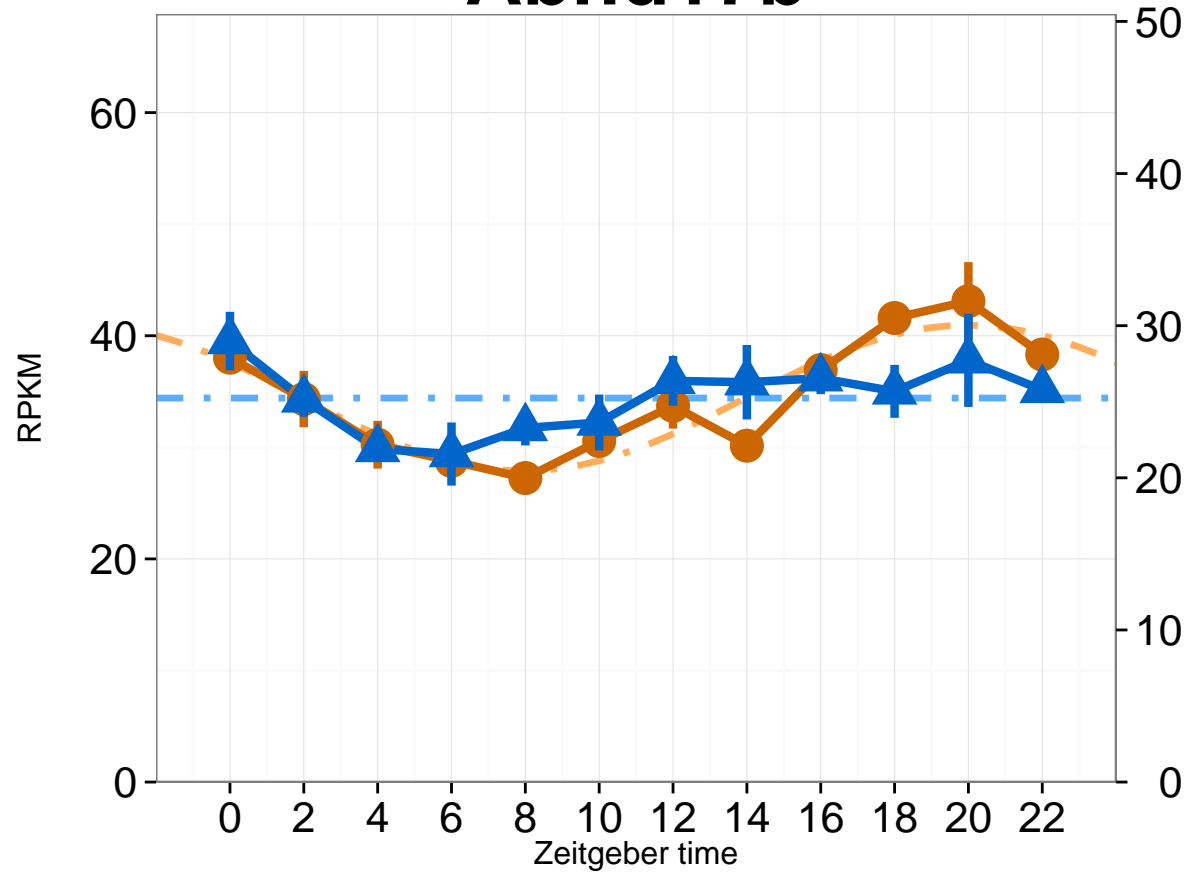

## Abhd17b

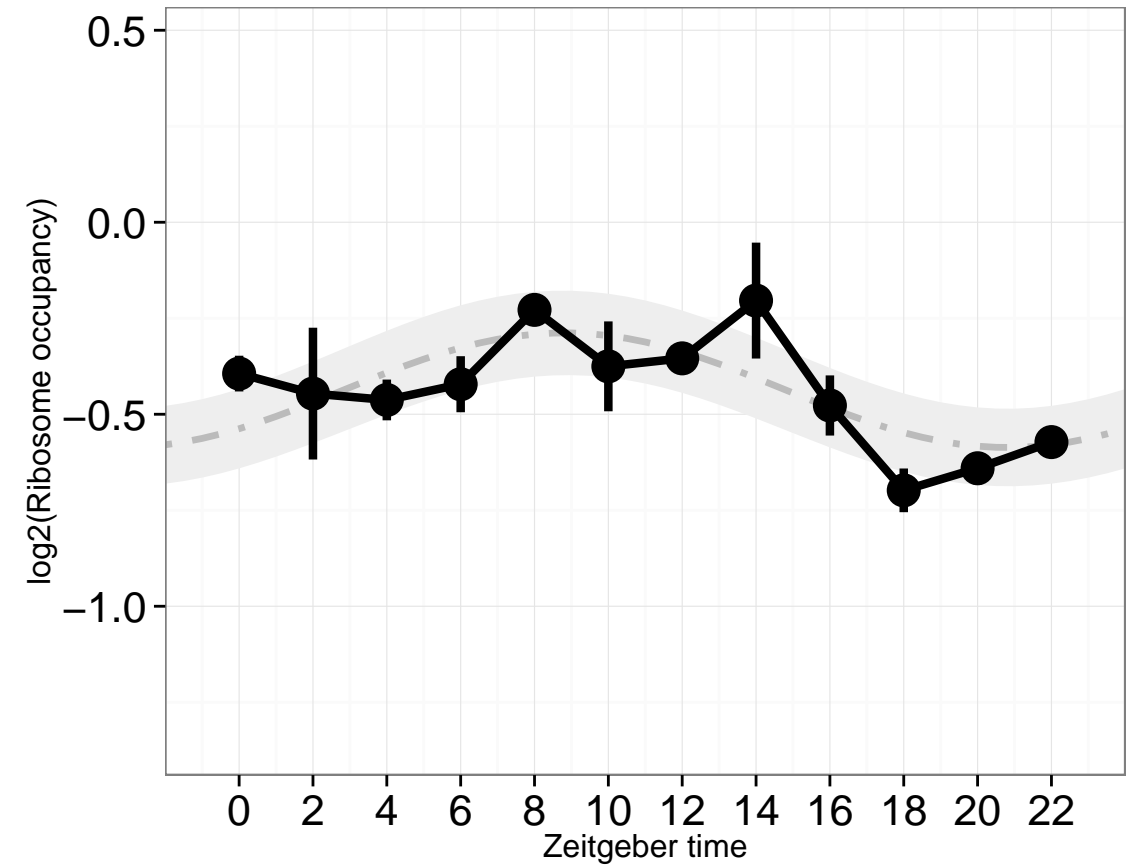

Supplement: Supplementary file 5703 [file 1]

# Tmem180

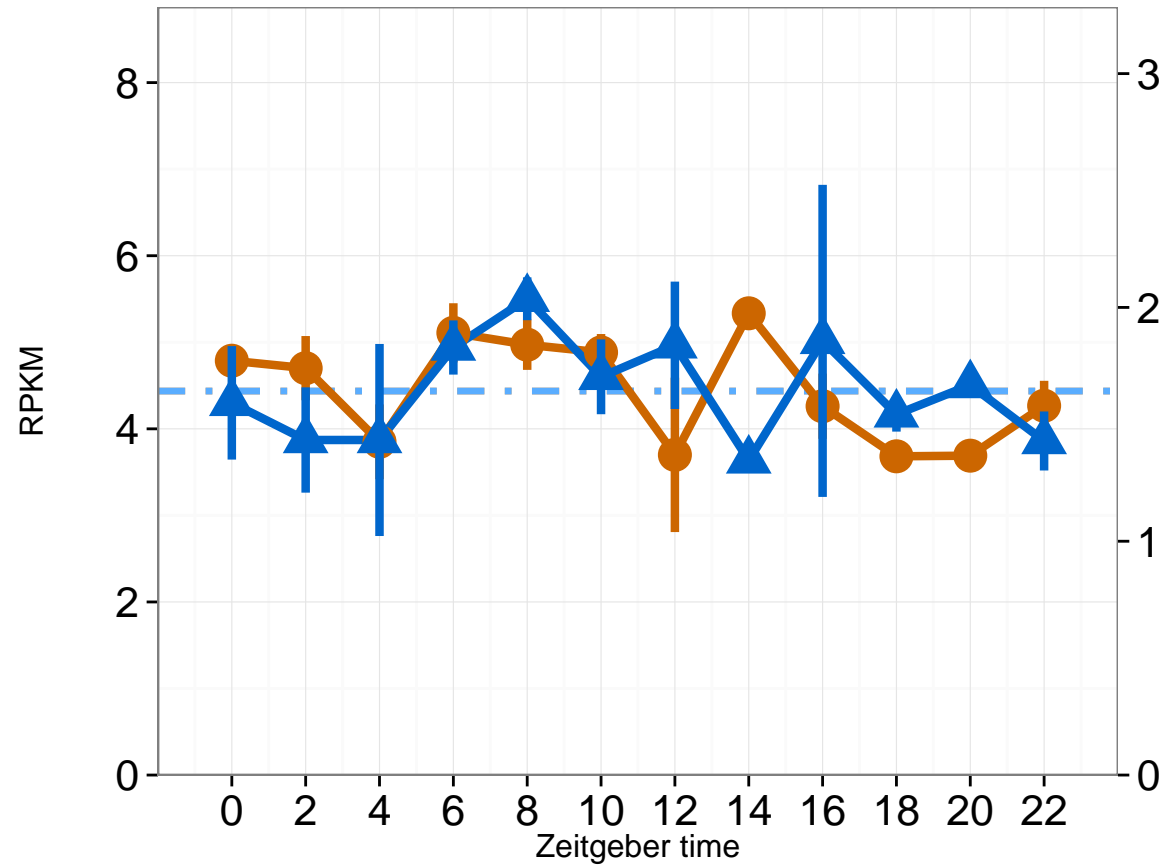

# Tmem180

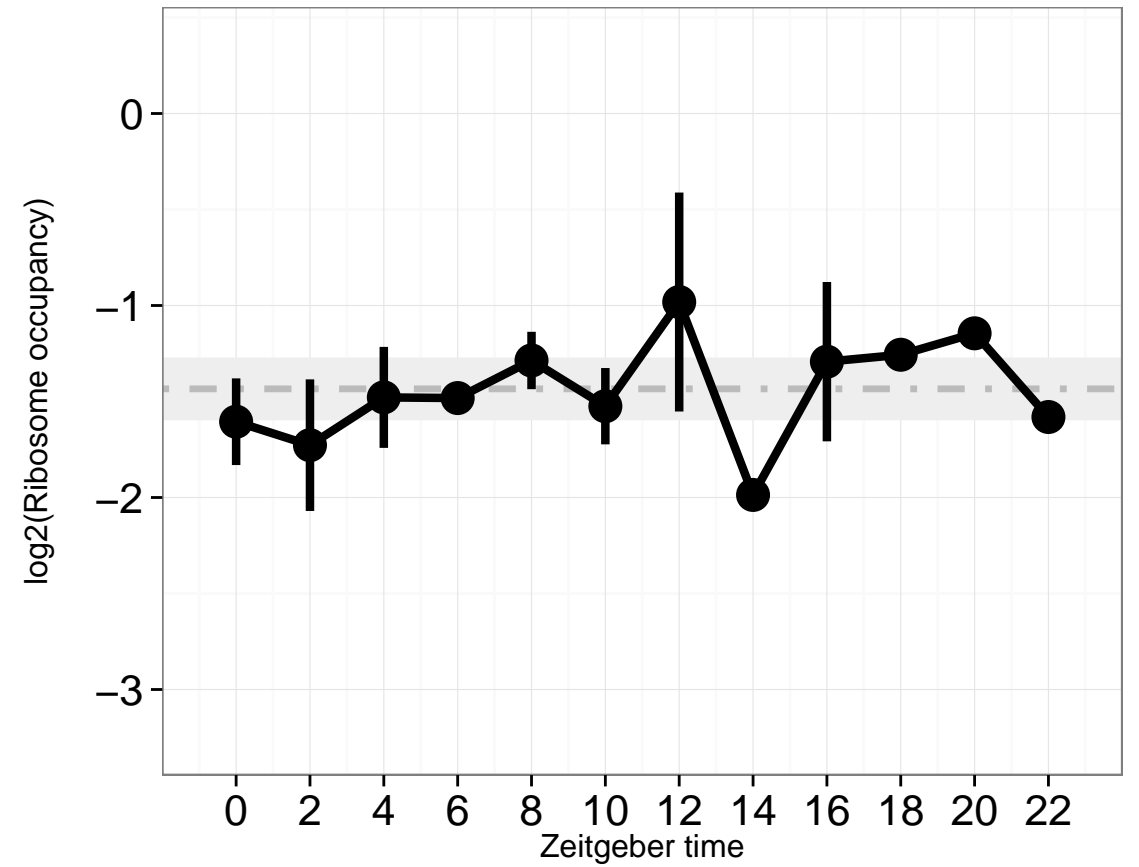

Supplement: Supplementary file 5704 [file 1]

## E2f6

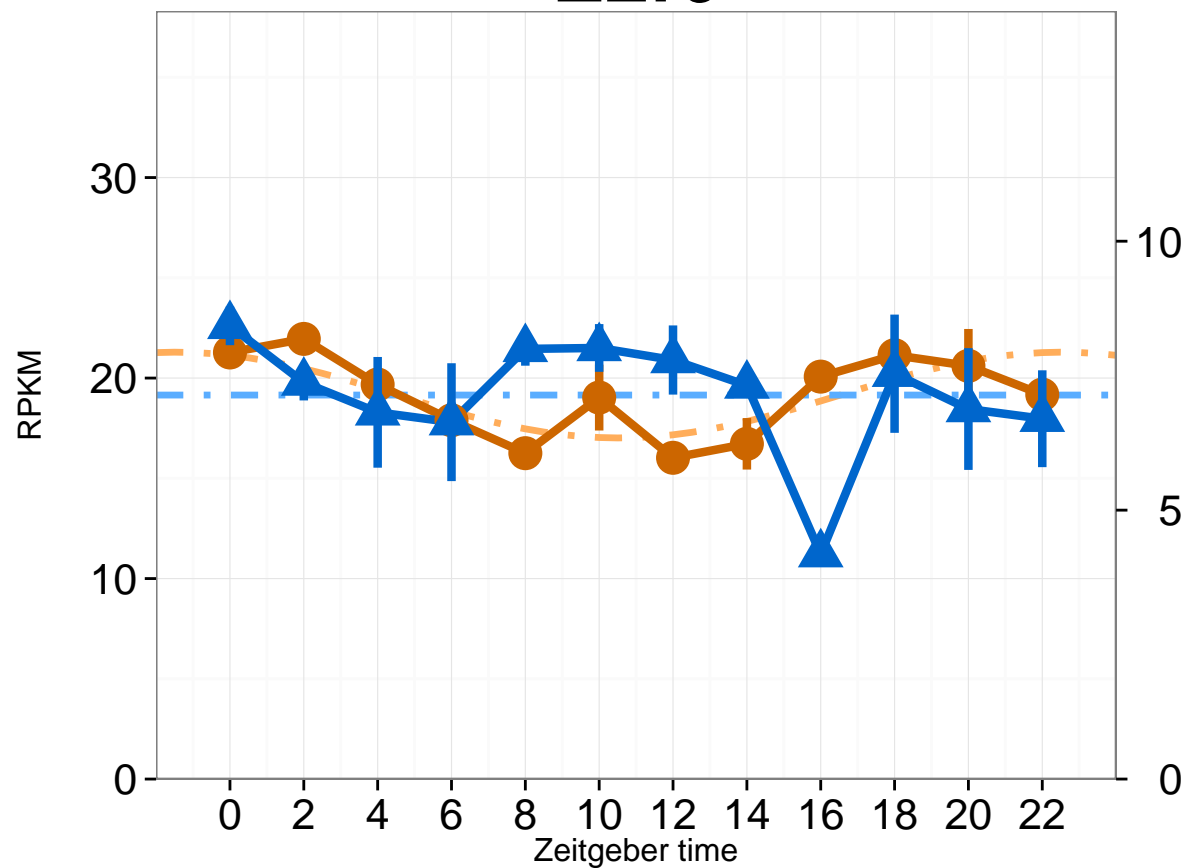

## E2f6

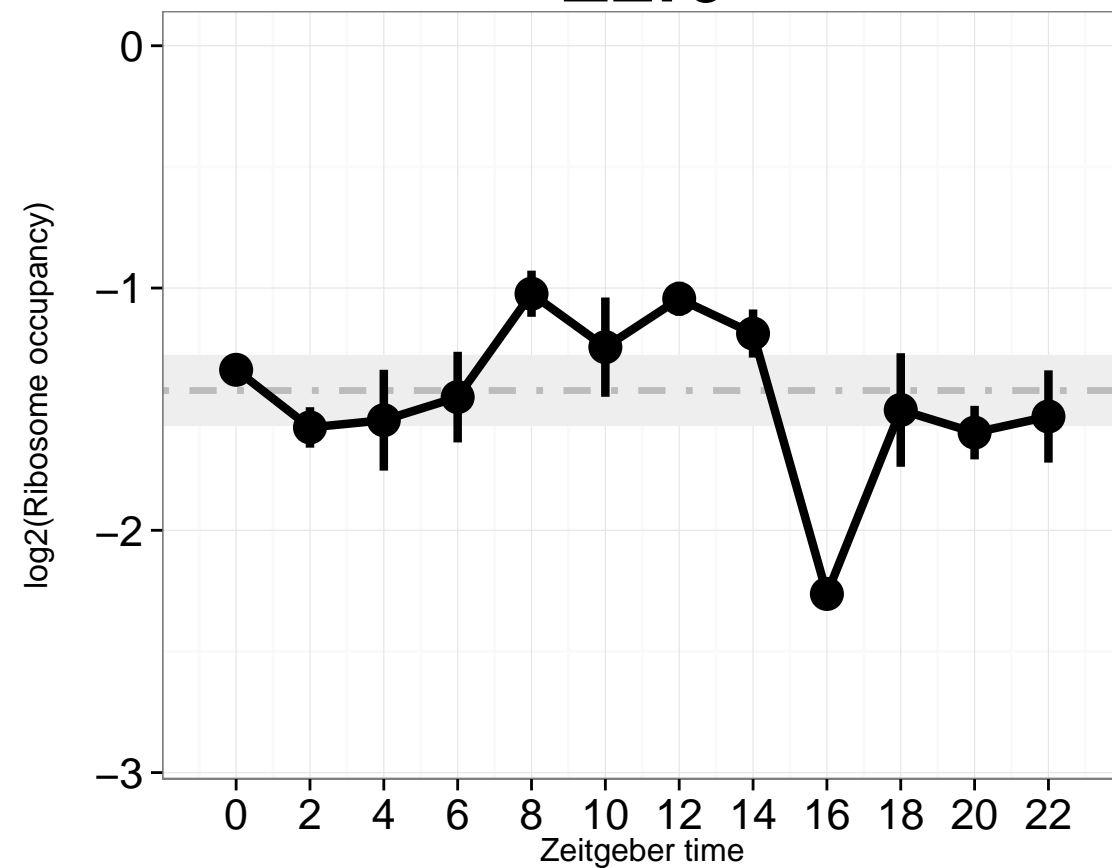

Supplement: Supplementary file 5705 [file 1]

## Ppil3

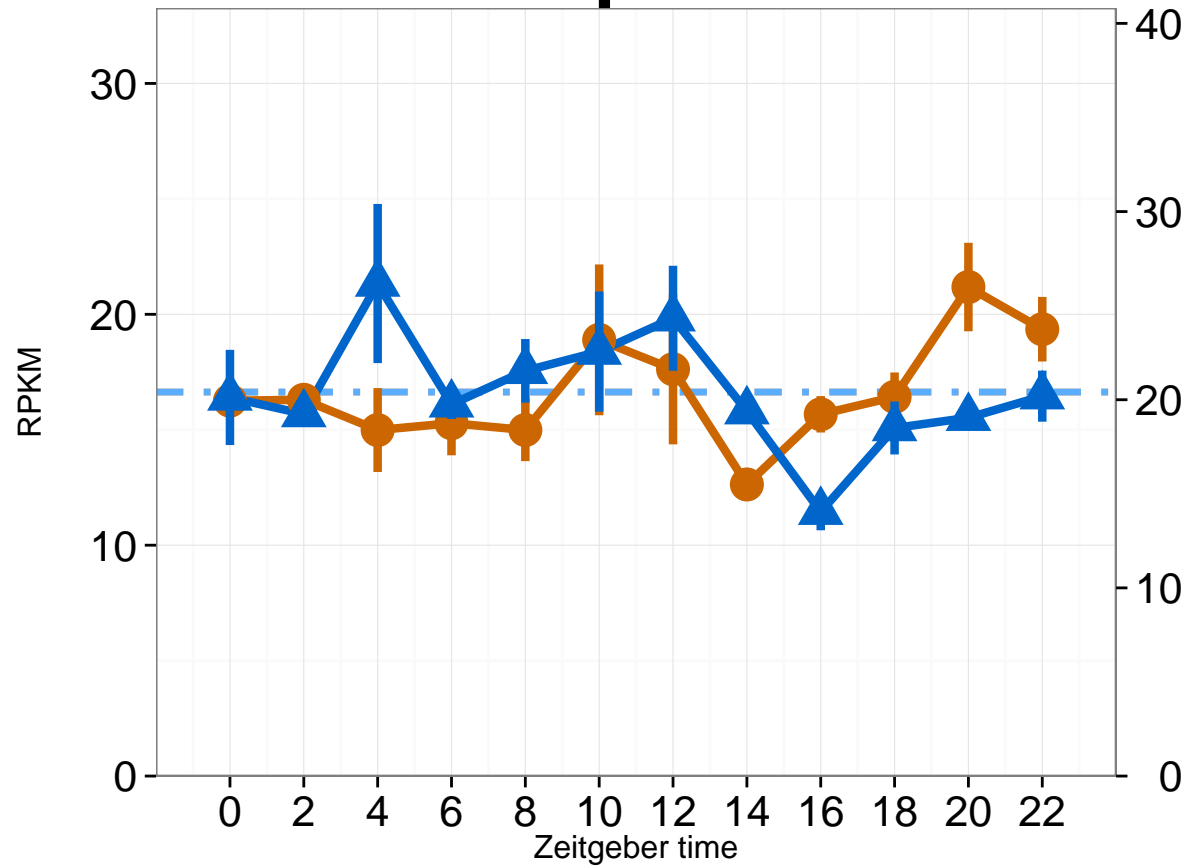

## Ppil3

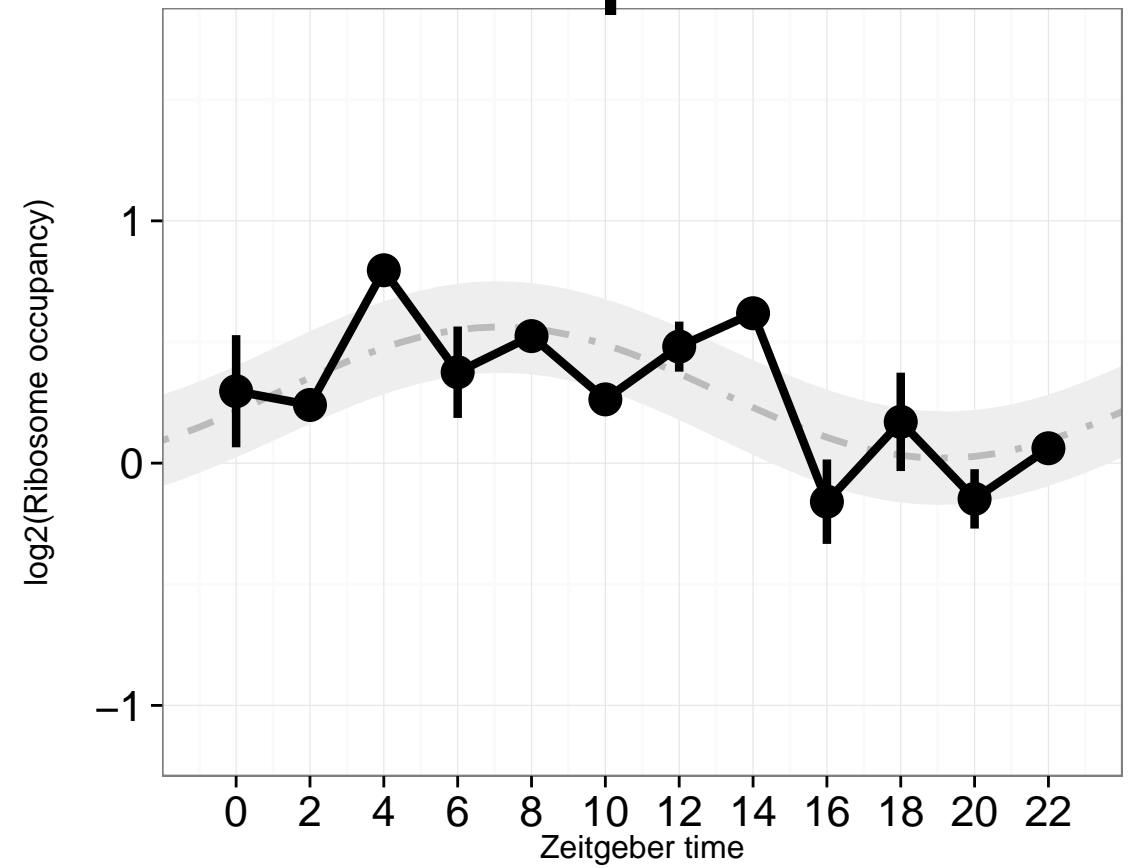

Supplement: Supplementary file 5706 [file 1]

# Satb2

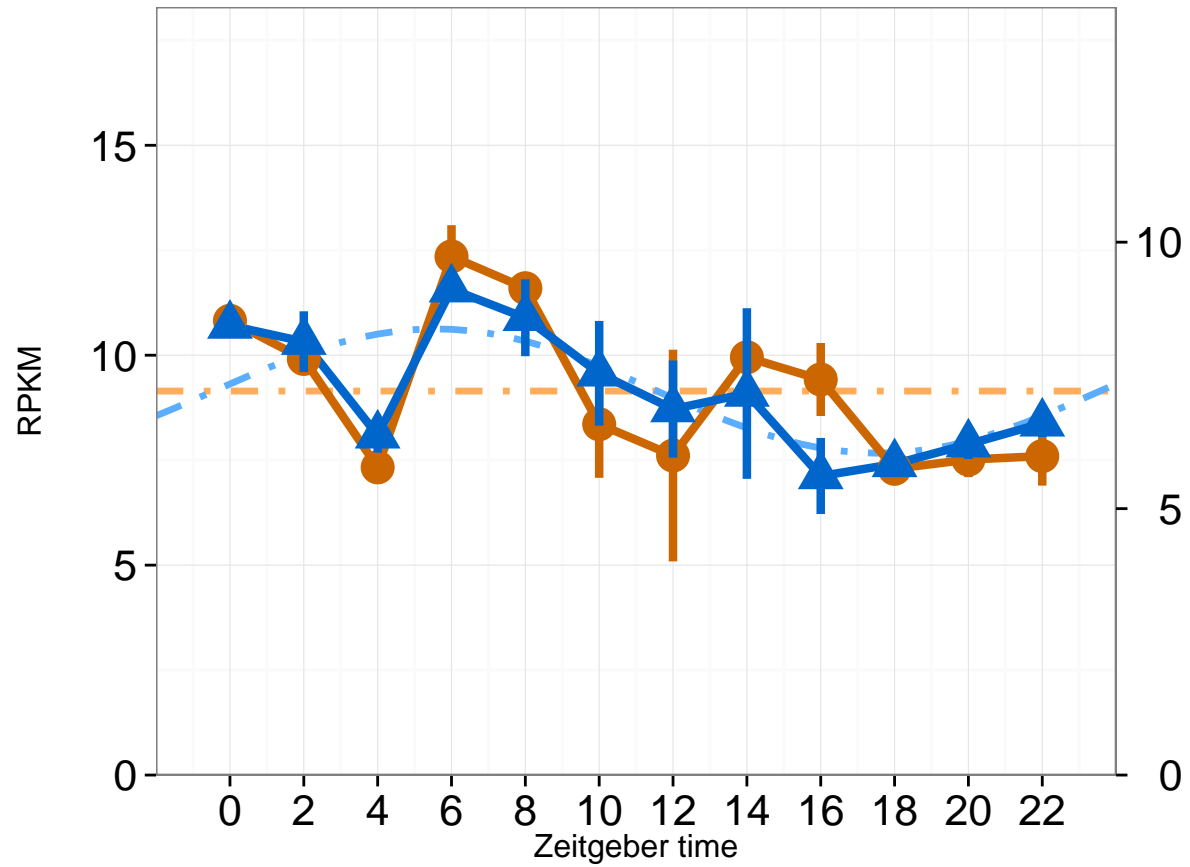

# Satb2

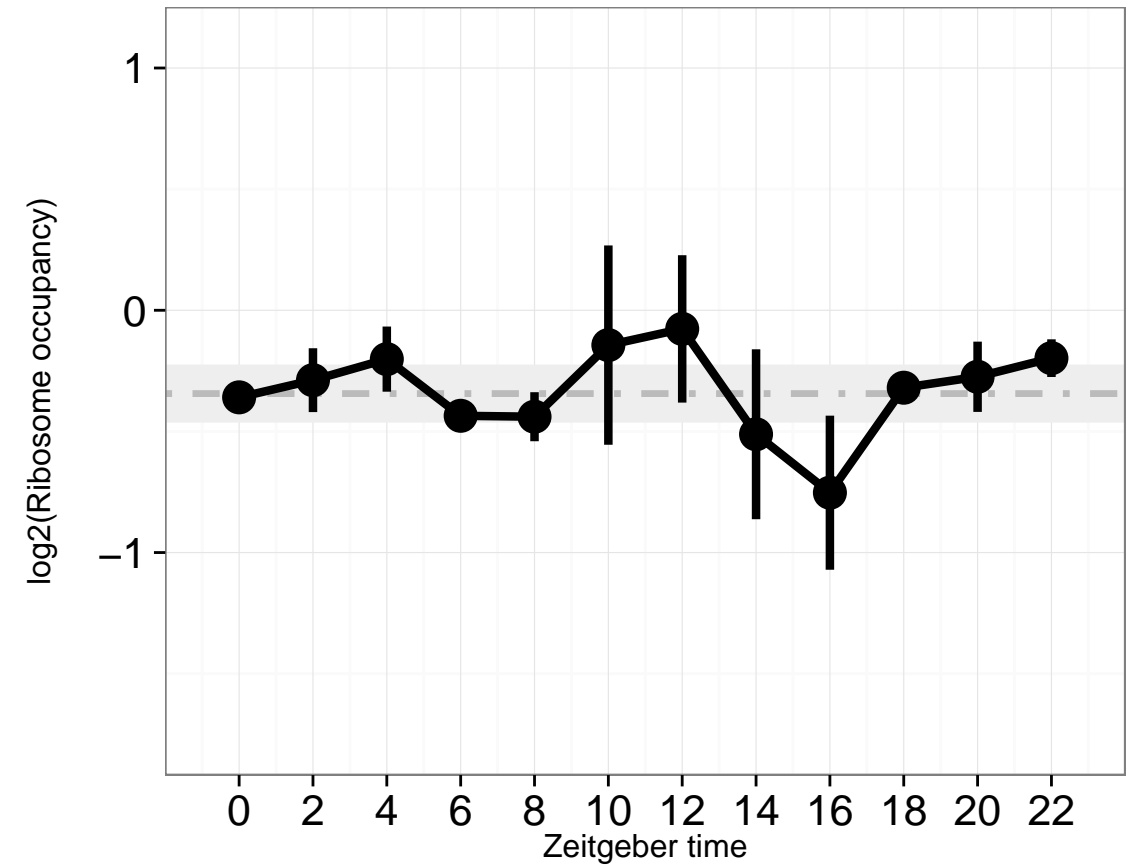

Supplement: Supplementary file 5707 [file 1]

# Aph1a

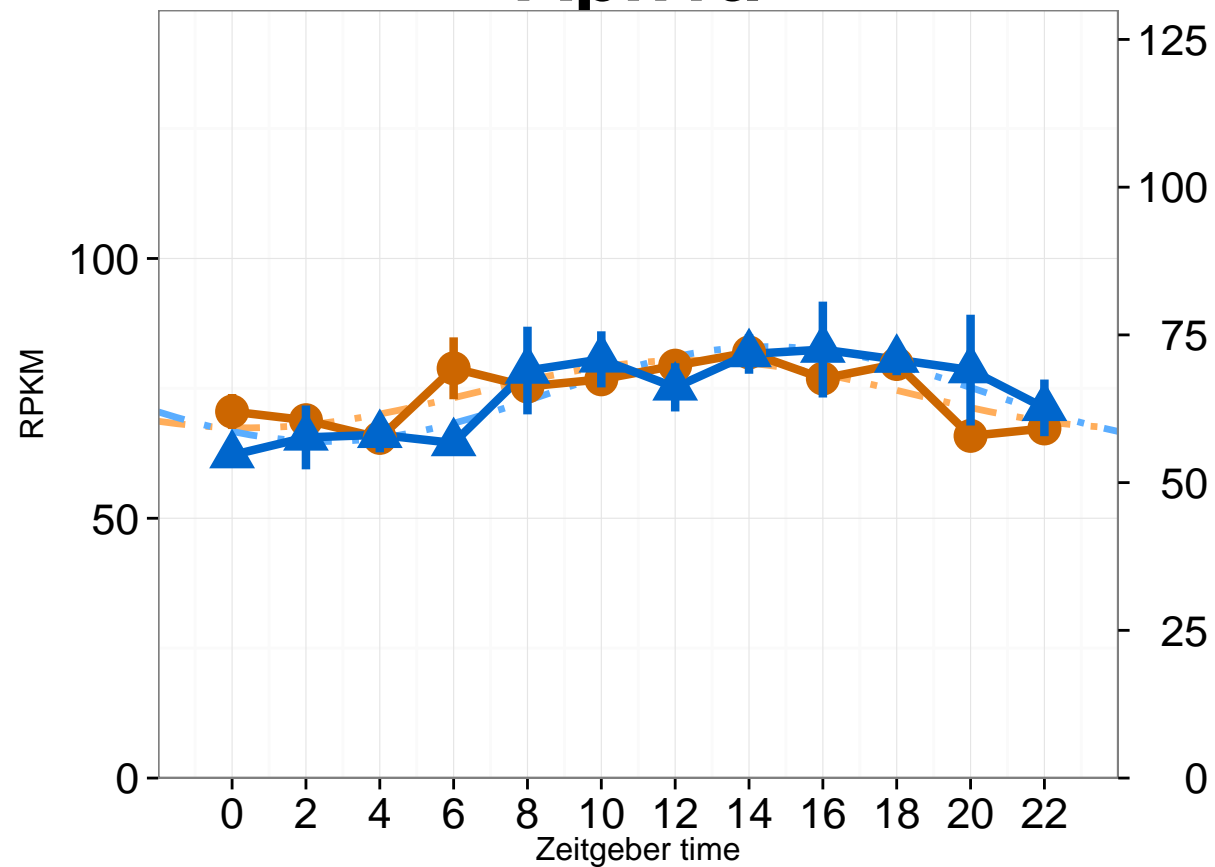

# Aph1a

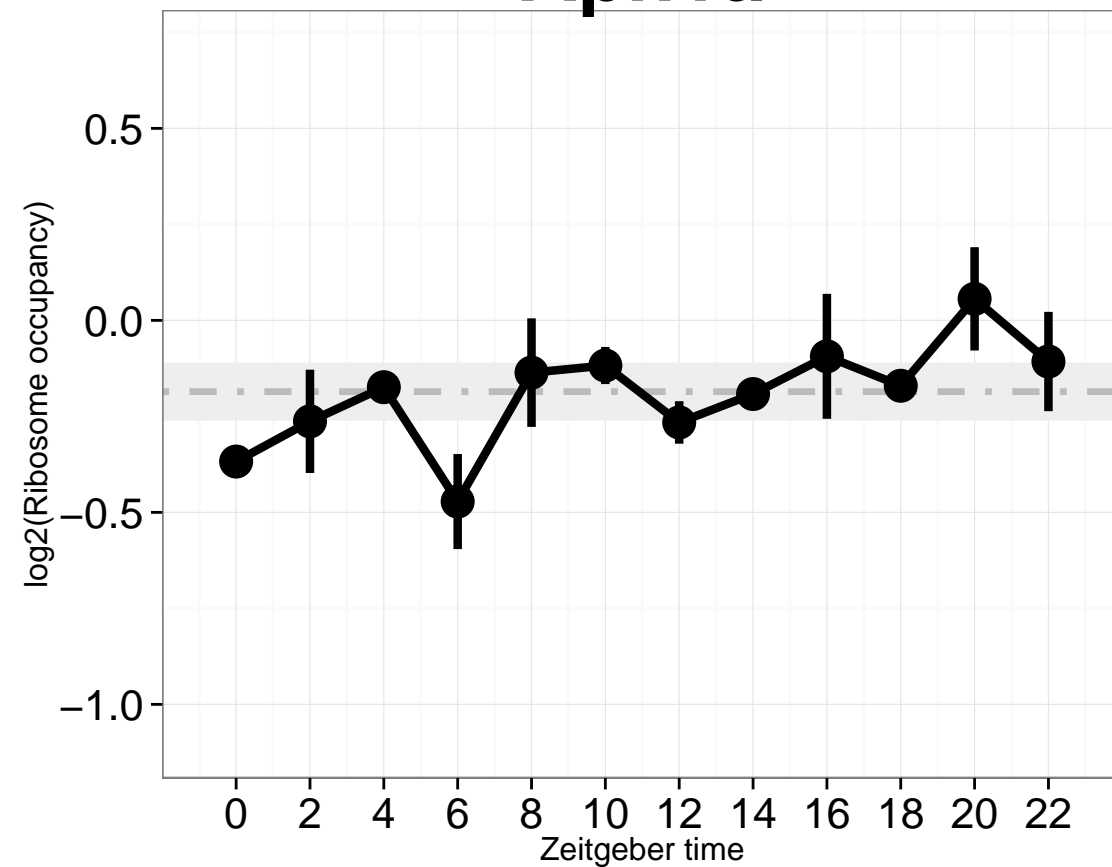

Supplement: Supplementary file 5708 [file 1]

## Aspm

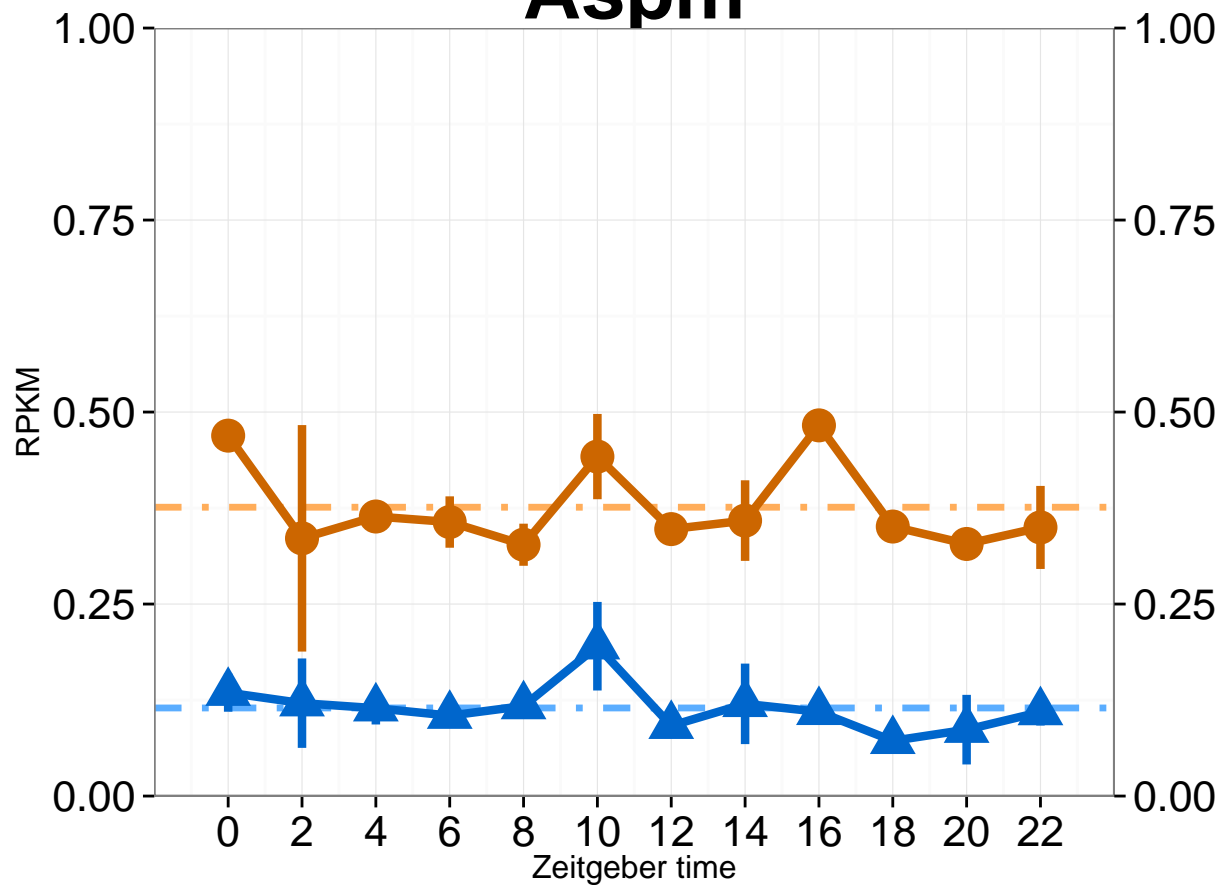

## Aspm

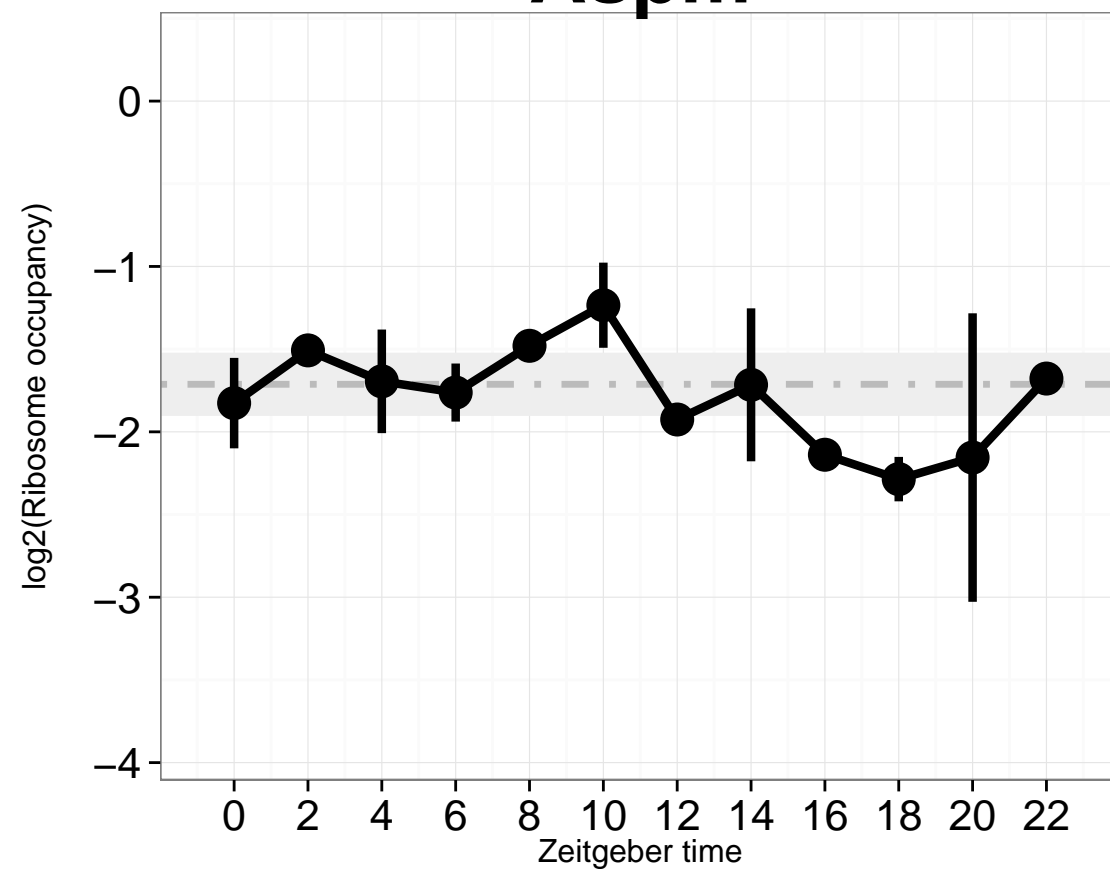

Supplement: Supplementary file 5709 [file 1]

## Zcchc24

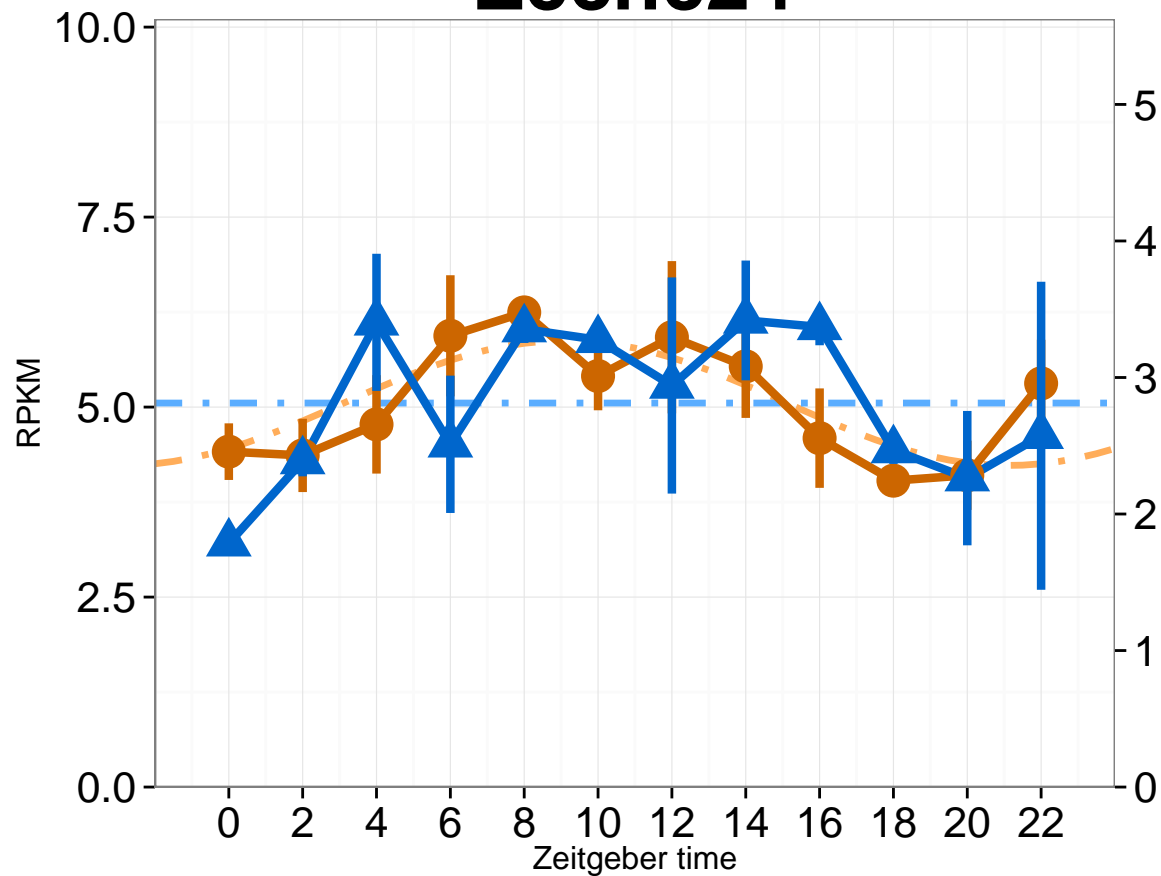

## Zcchc24

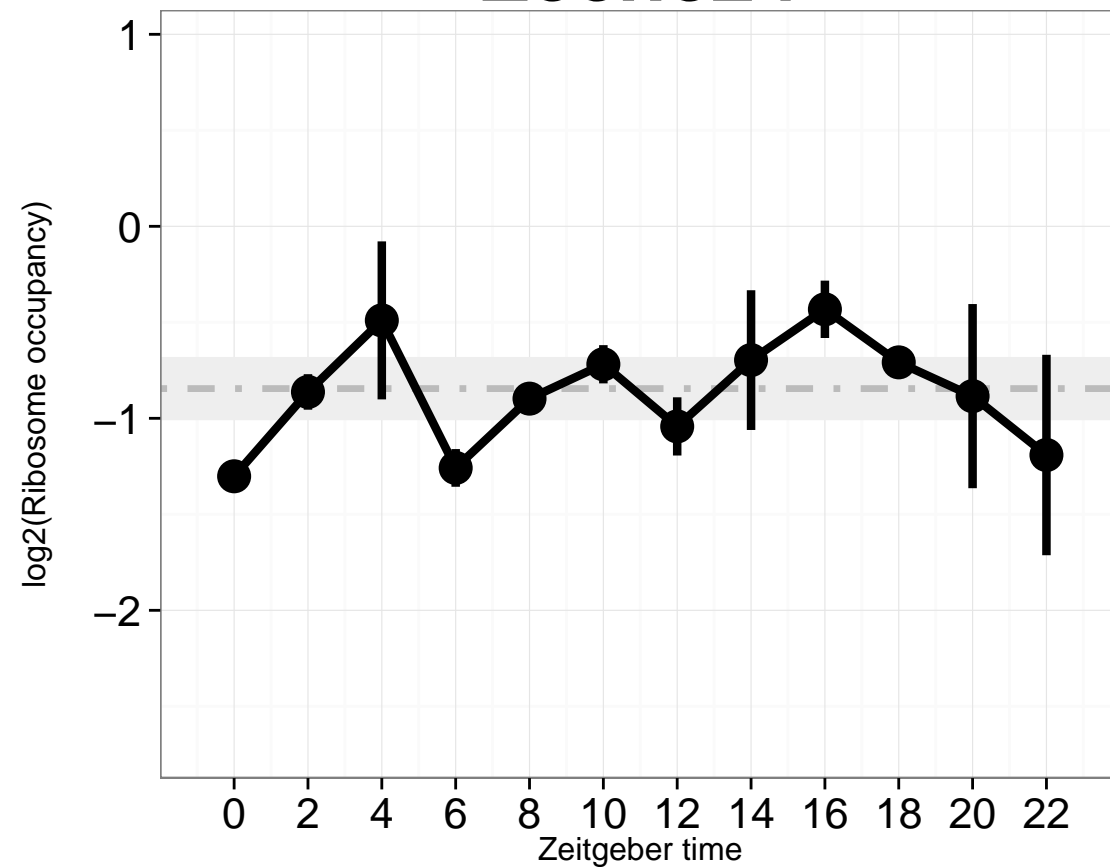

Supplement: Supplementary file 5710 [file 1]

# Pappa2

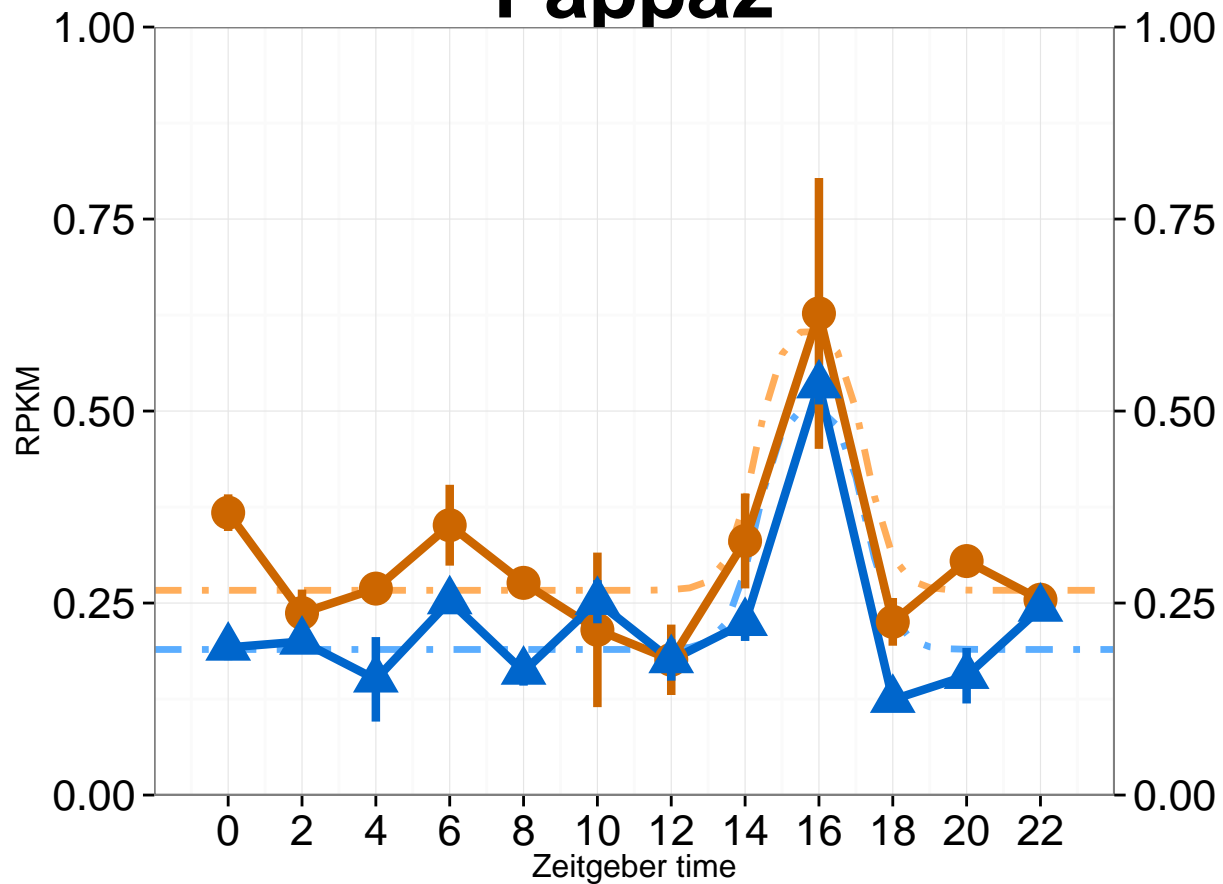

# Pappa2

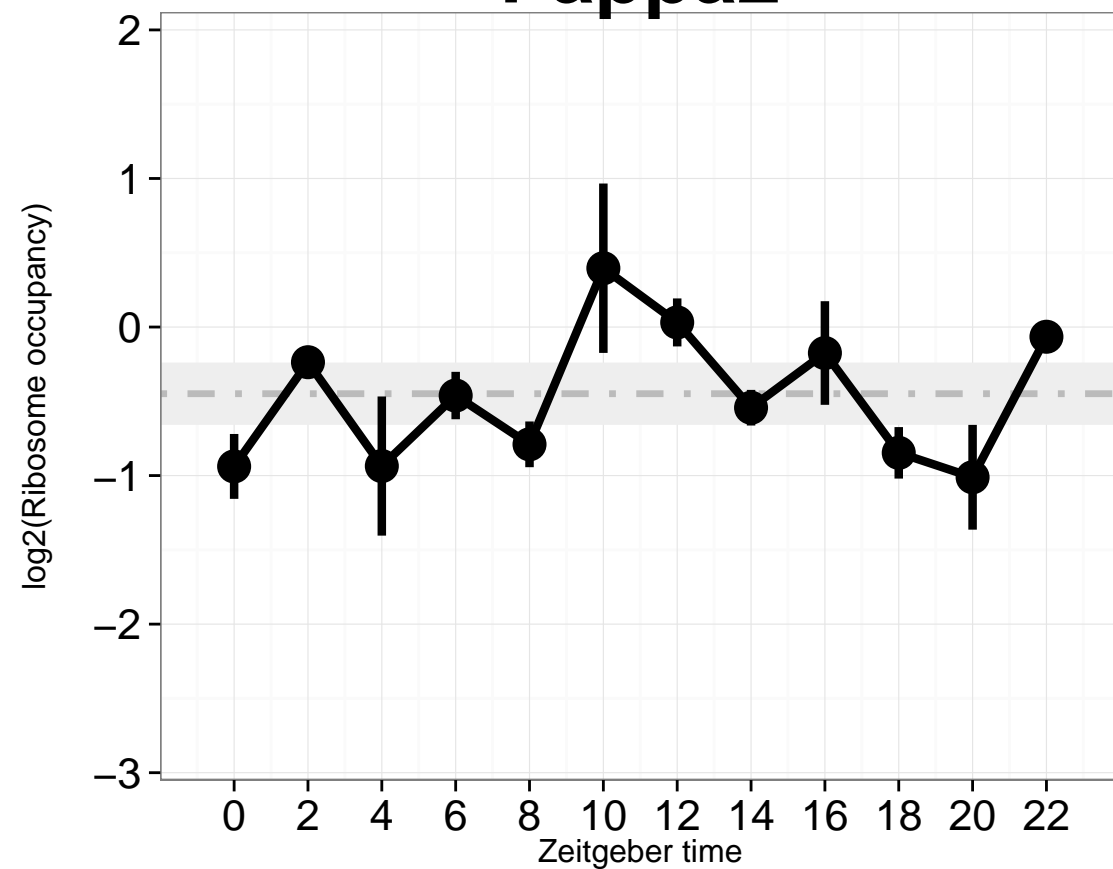

Supplement: Supplementary file 5711 [file 1]

## Batf3

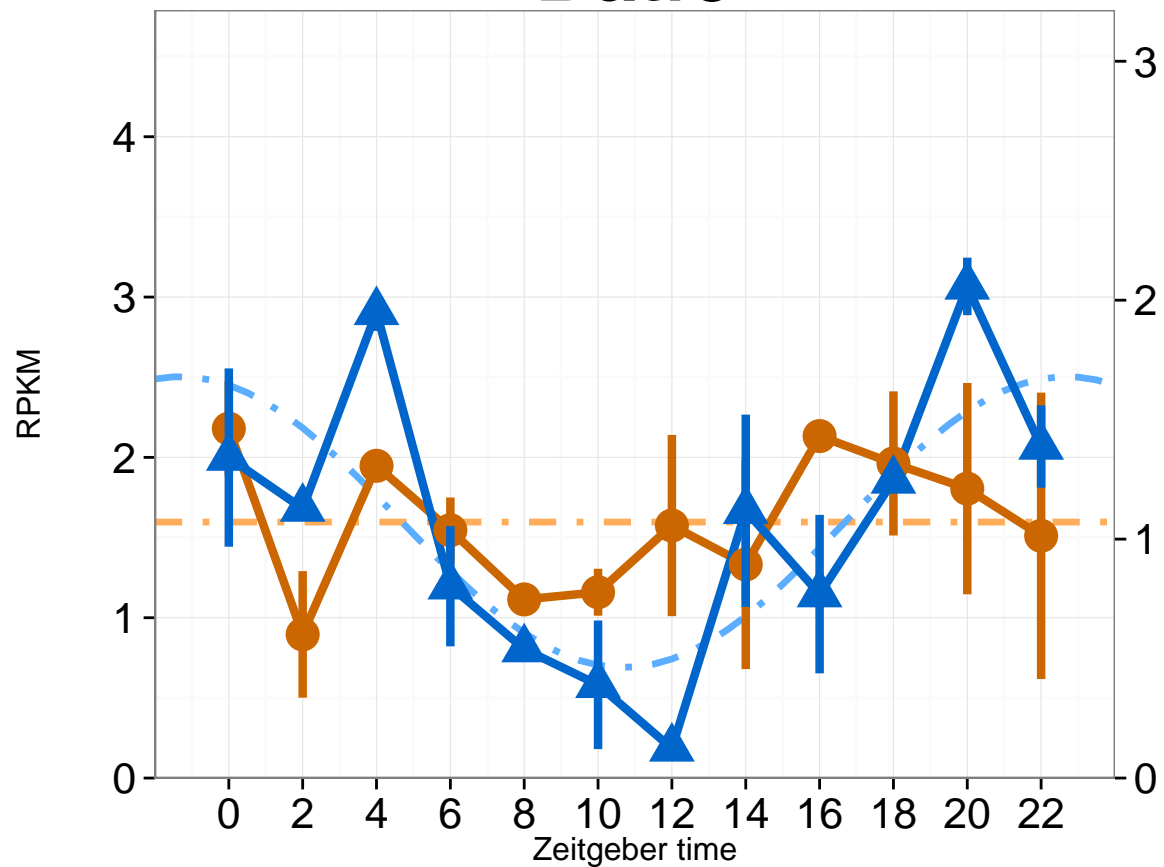

## Batf3

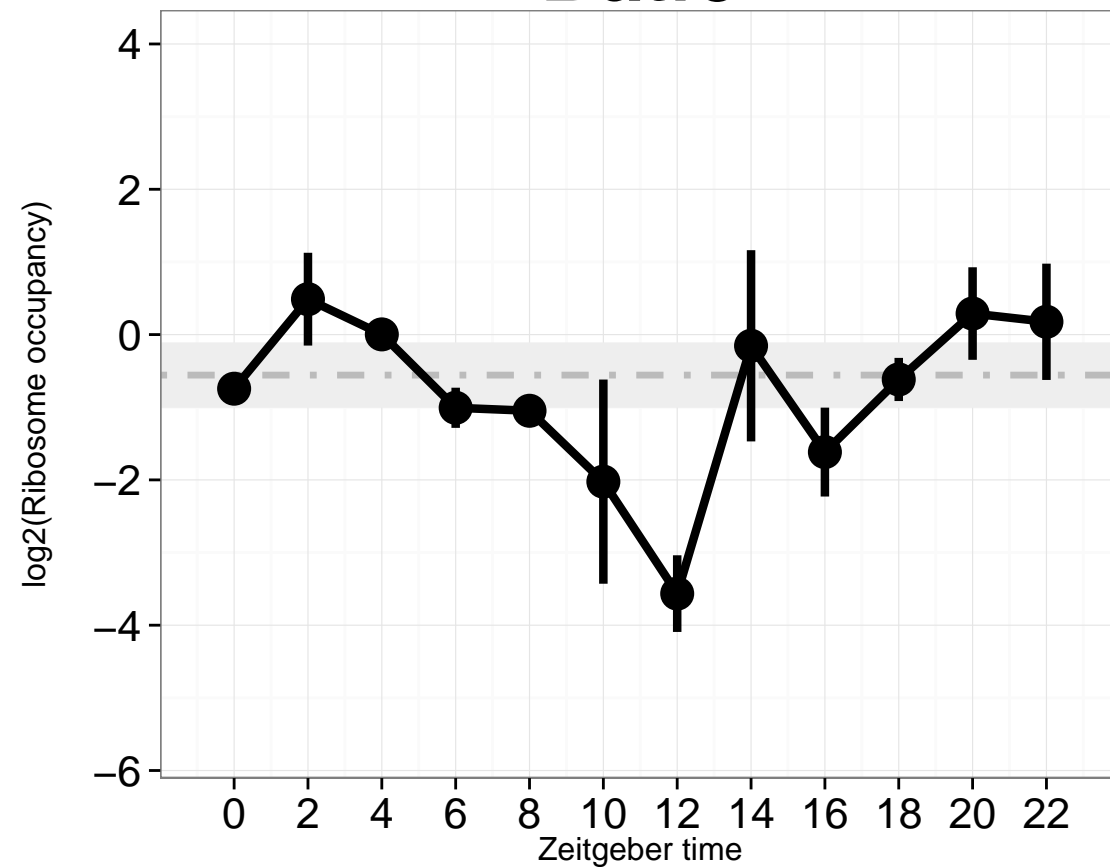

Supplement: Supplementary file 5712 [file 1]

## Mrps27

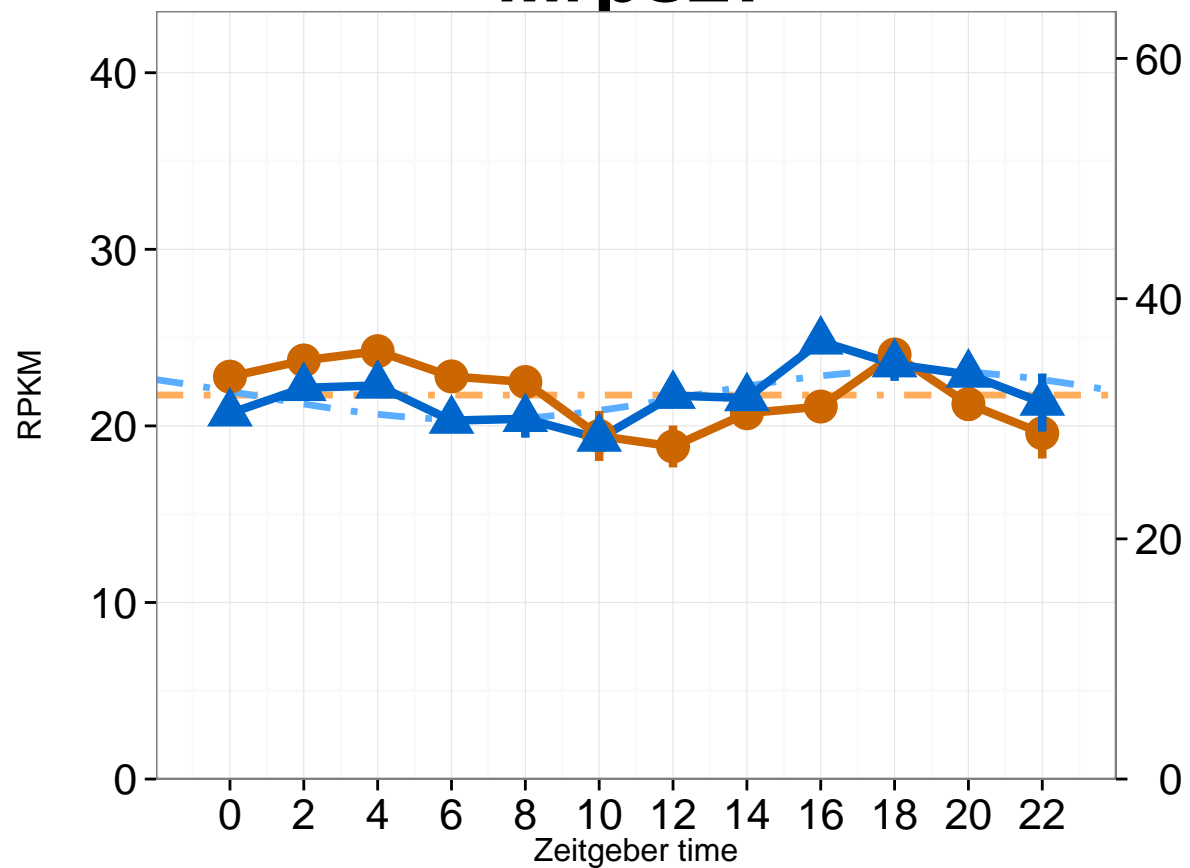

## Mrps27

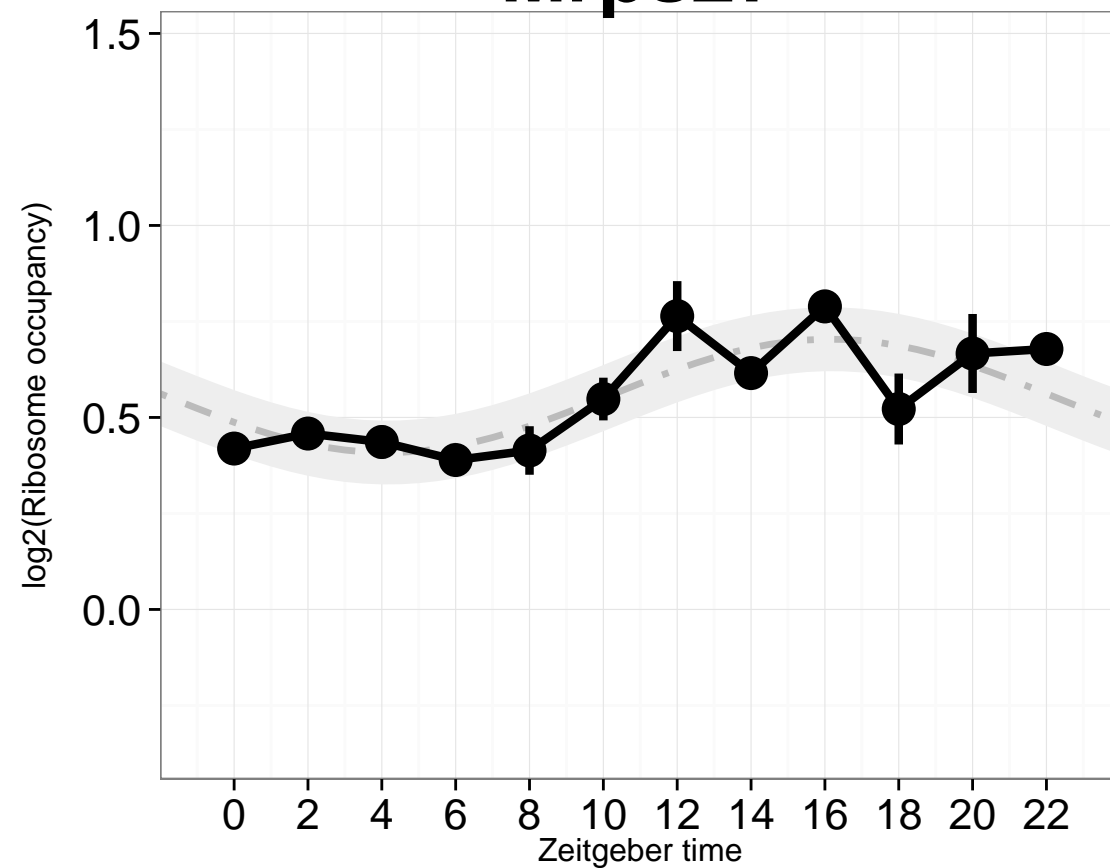

Supplement: Supplementary file 5713 [file 1]

# Ercc6

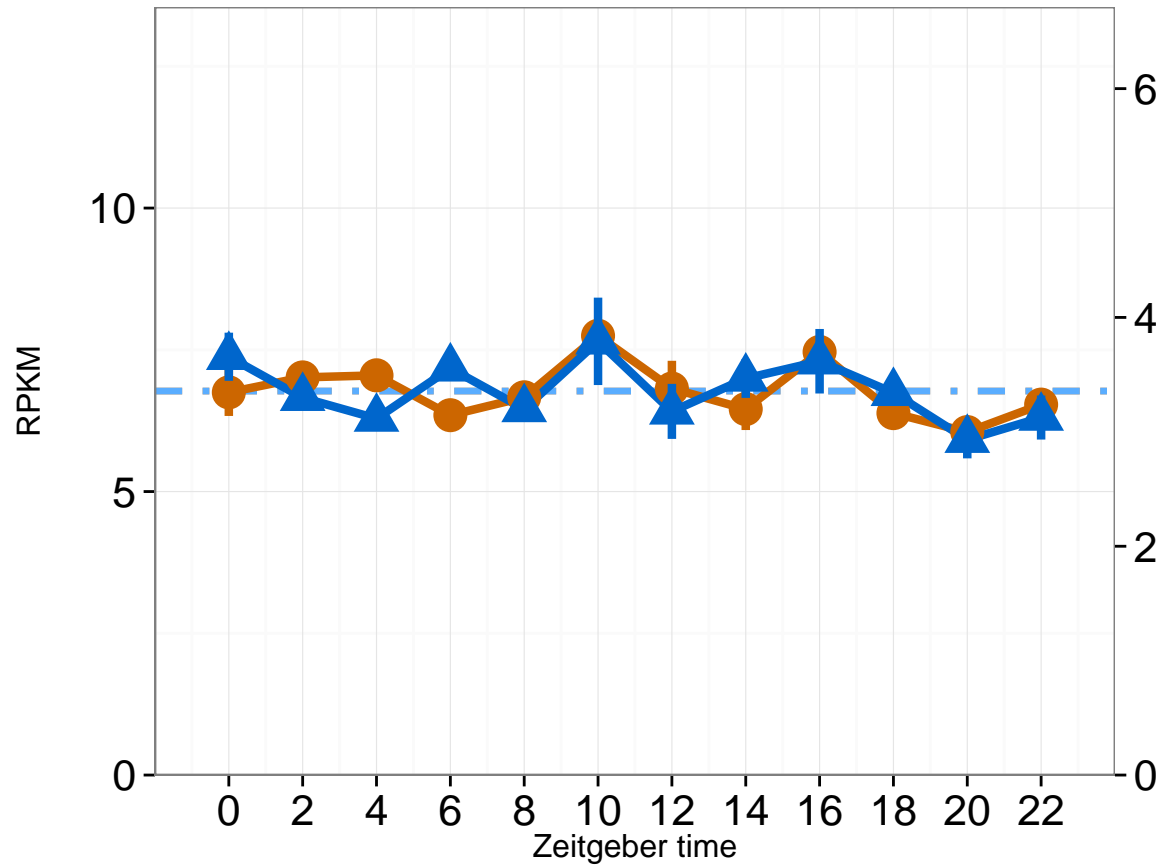

# Ercc6

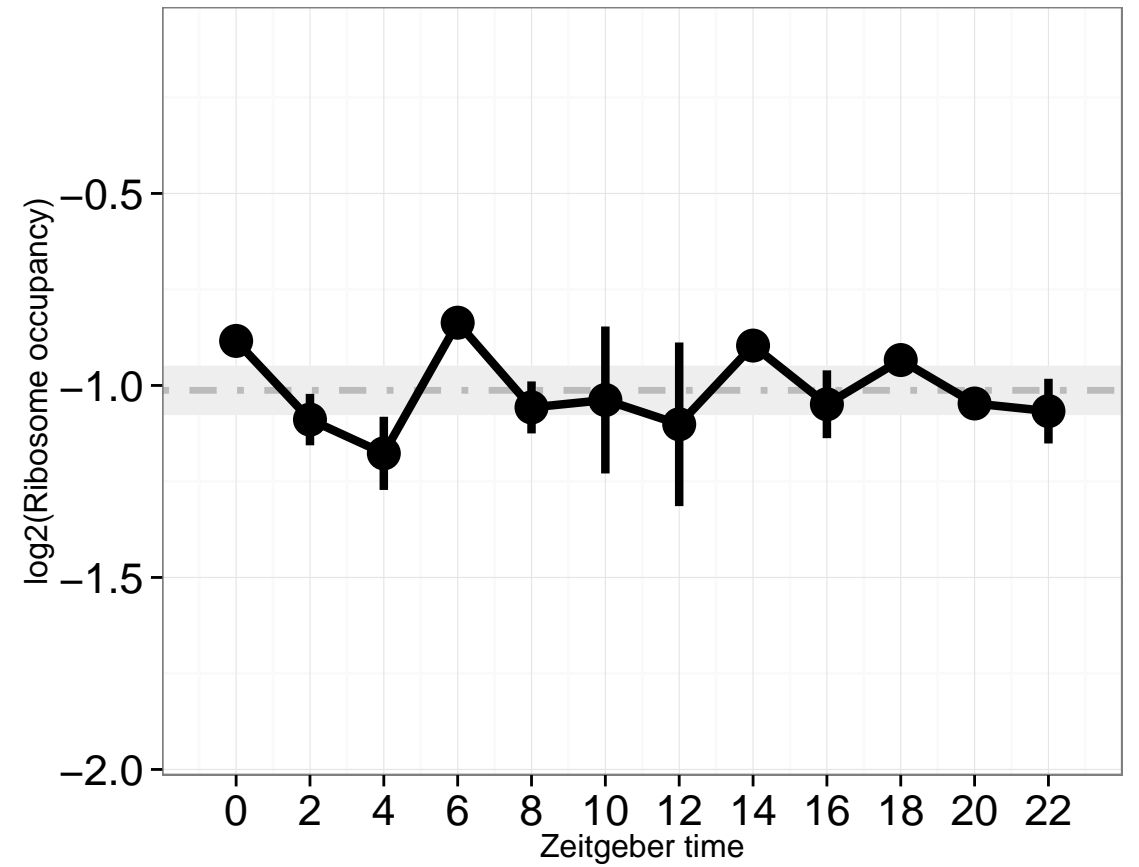

Supplement: Supplementary file 5714 [file 1]

## MIh3

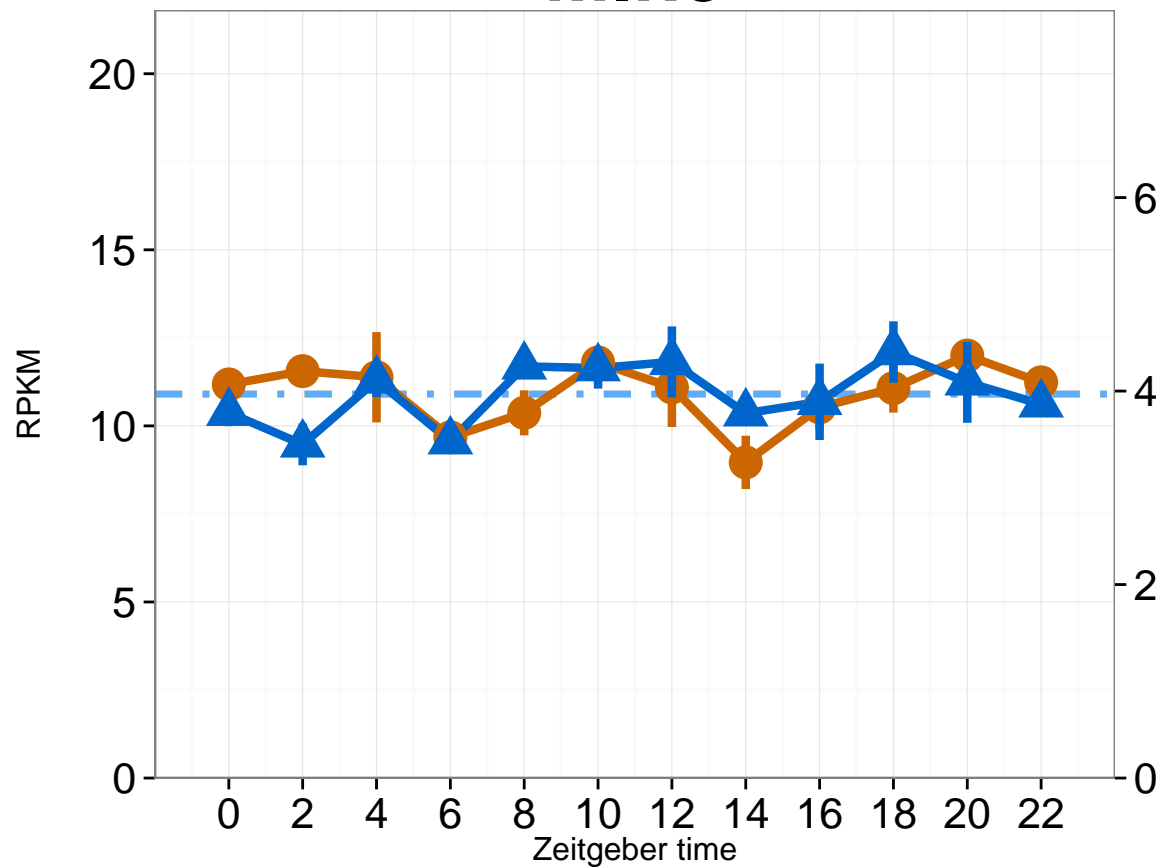

## MIh3

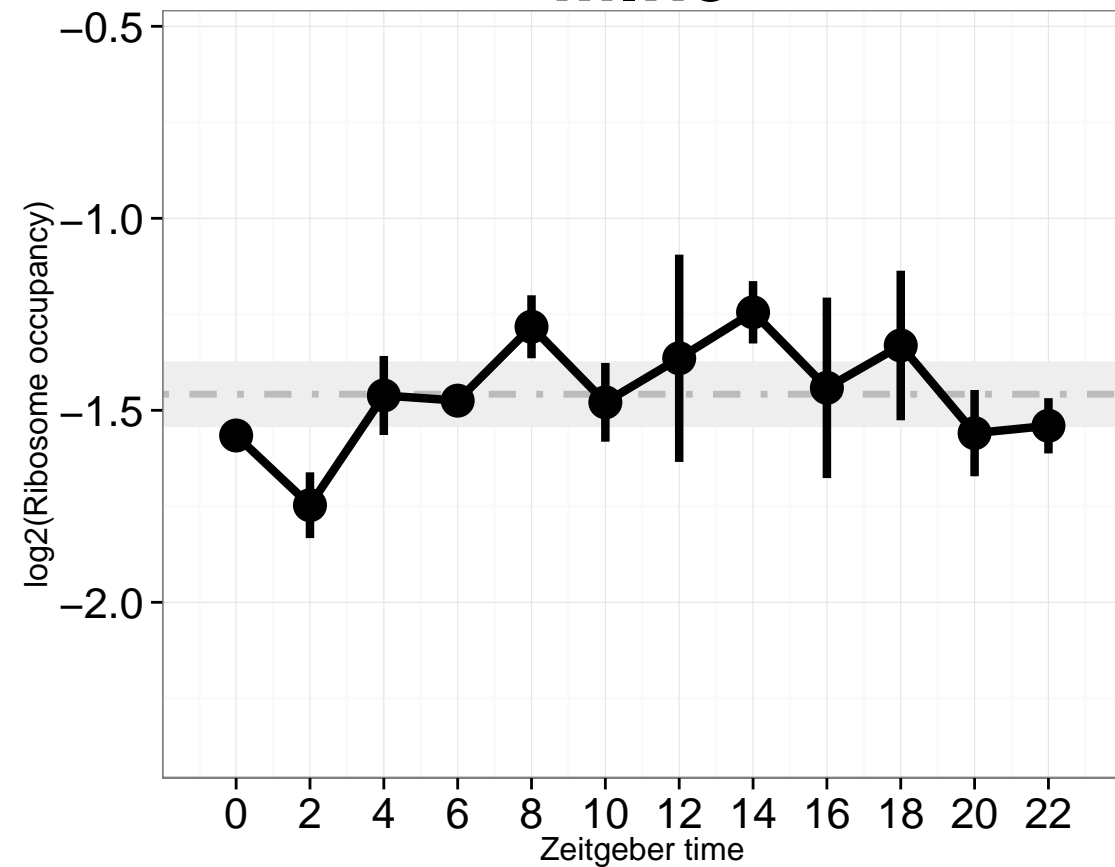

Supplement: Supplementary file 5715 [file 1]

## Lph

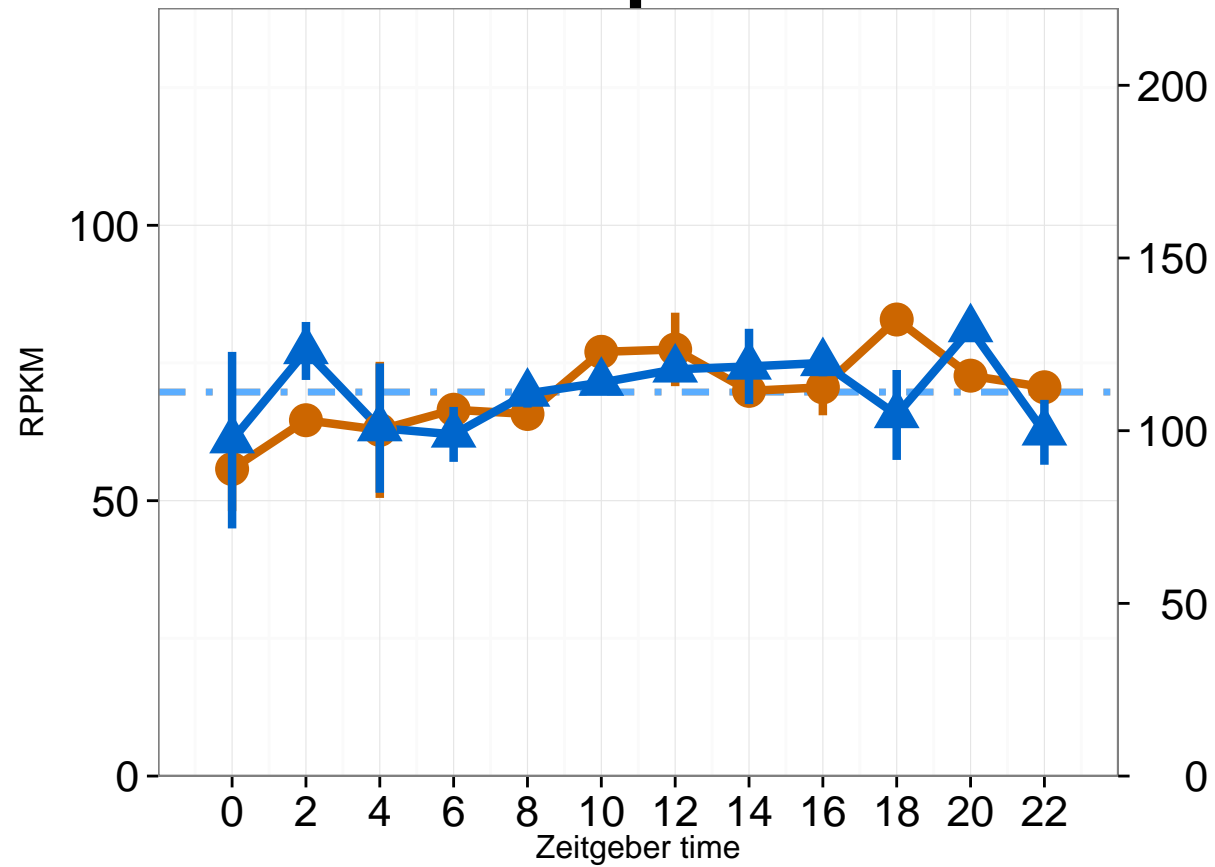

## Lph

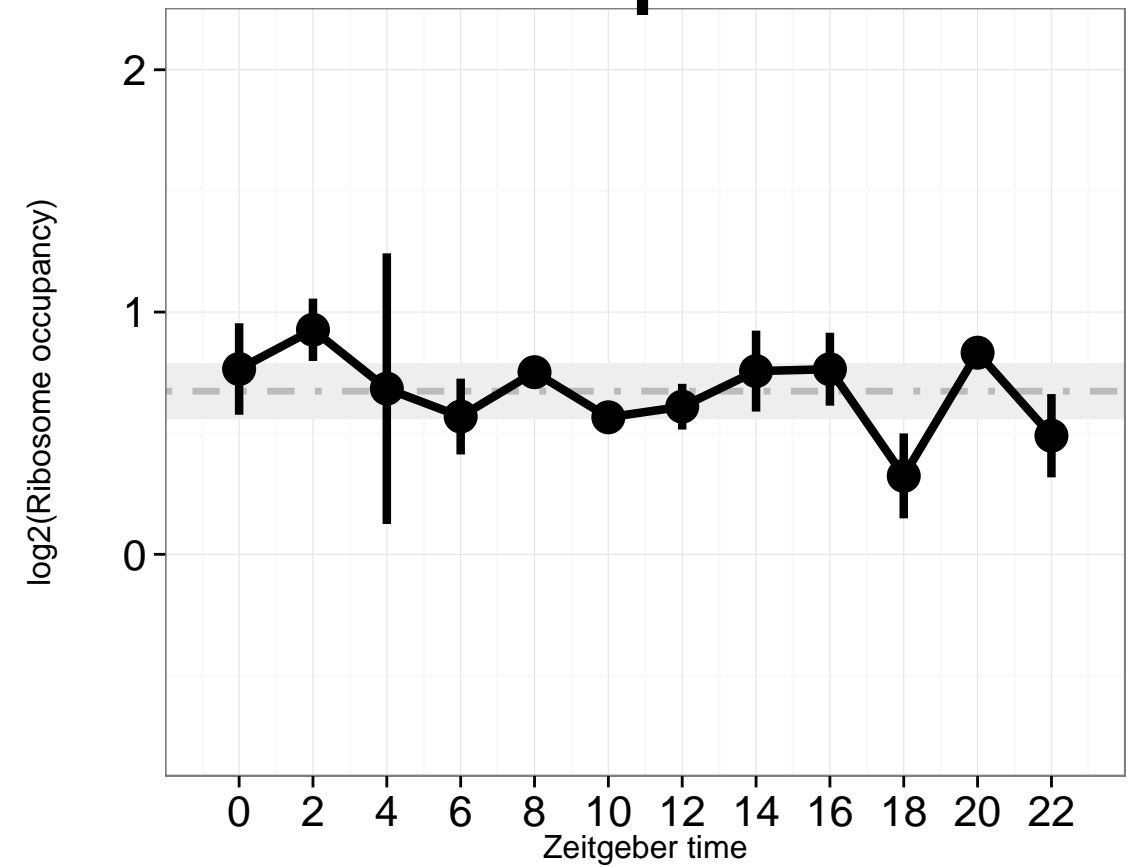

Supplement: Supplementary file 5716 [file 1]

# Zfp763

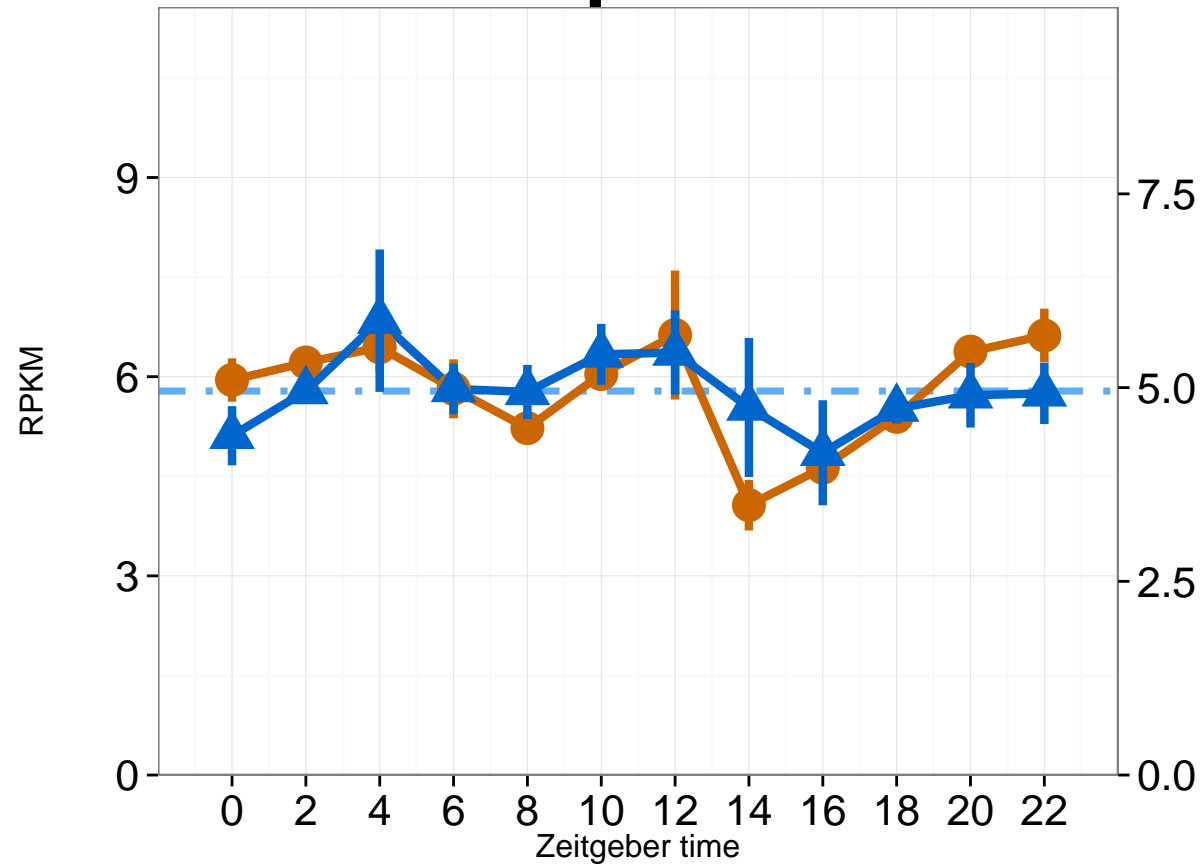

# Zfp763

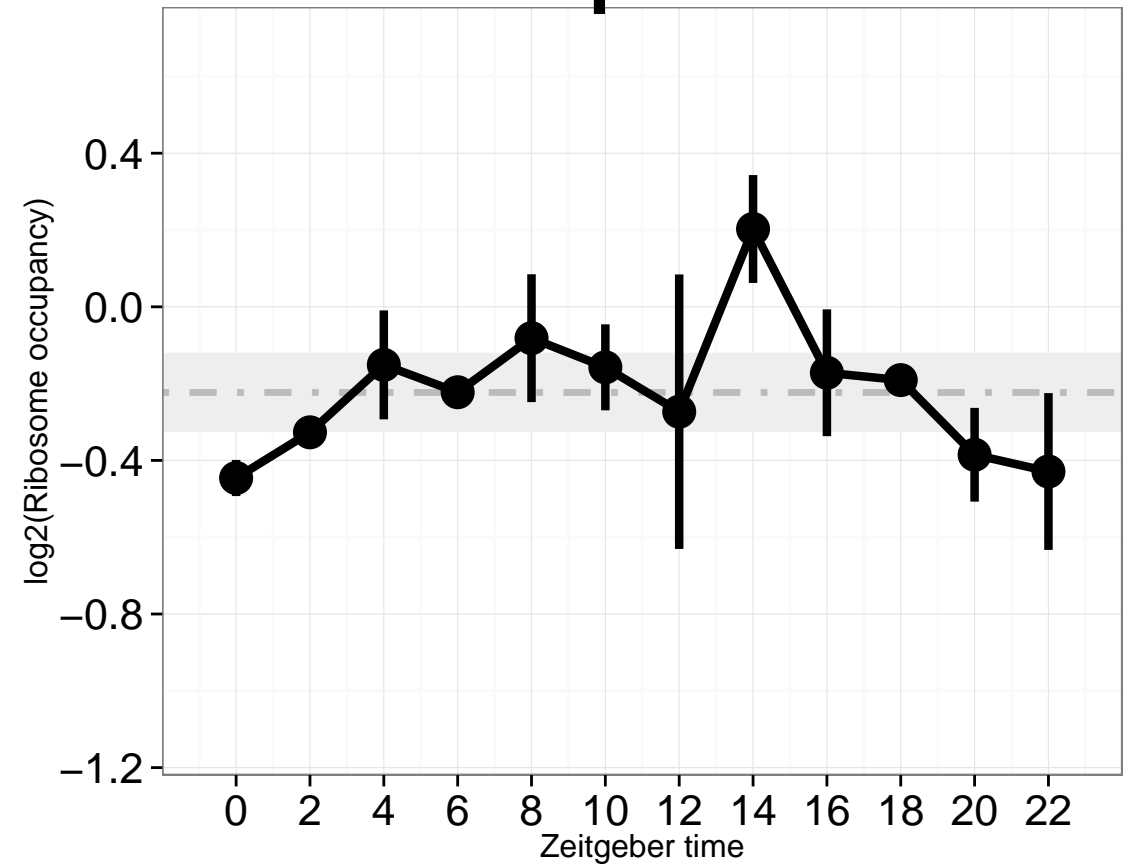

Supplement: Supplementary file 5717 [file 1]

# Zfp459

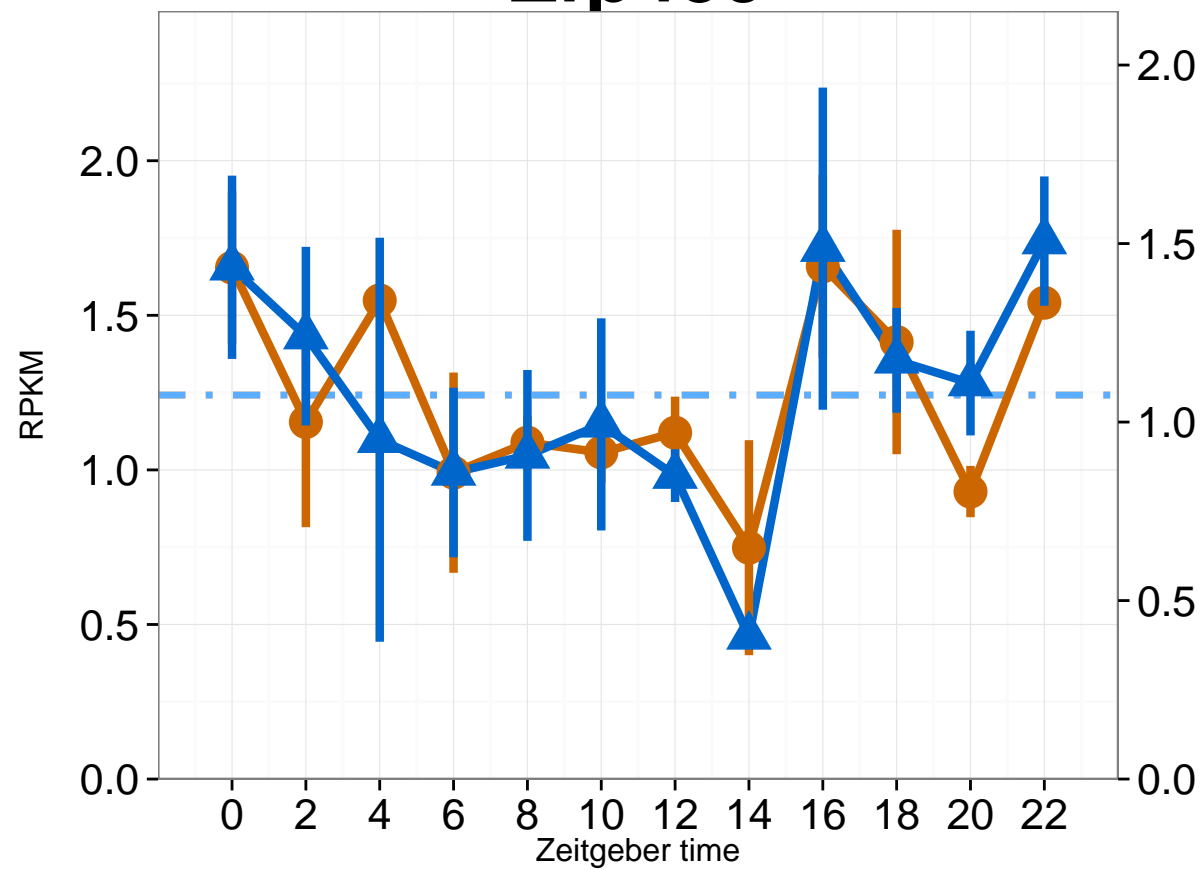

# Zfp459

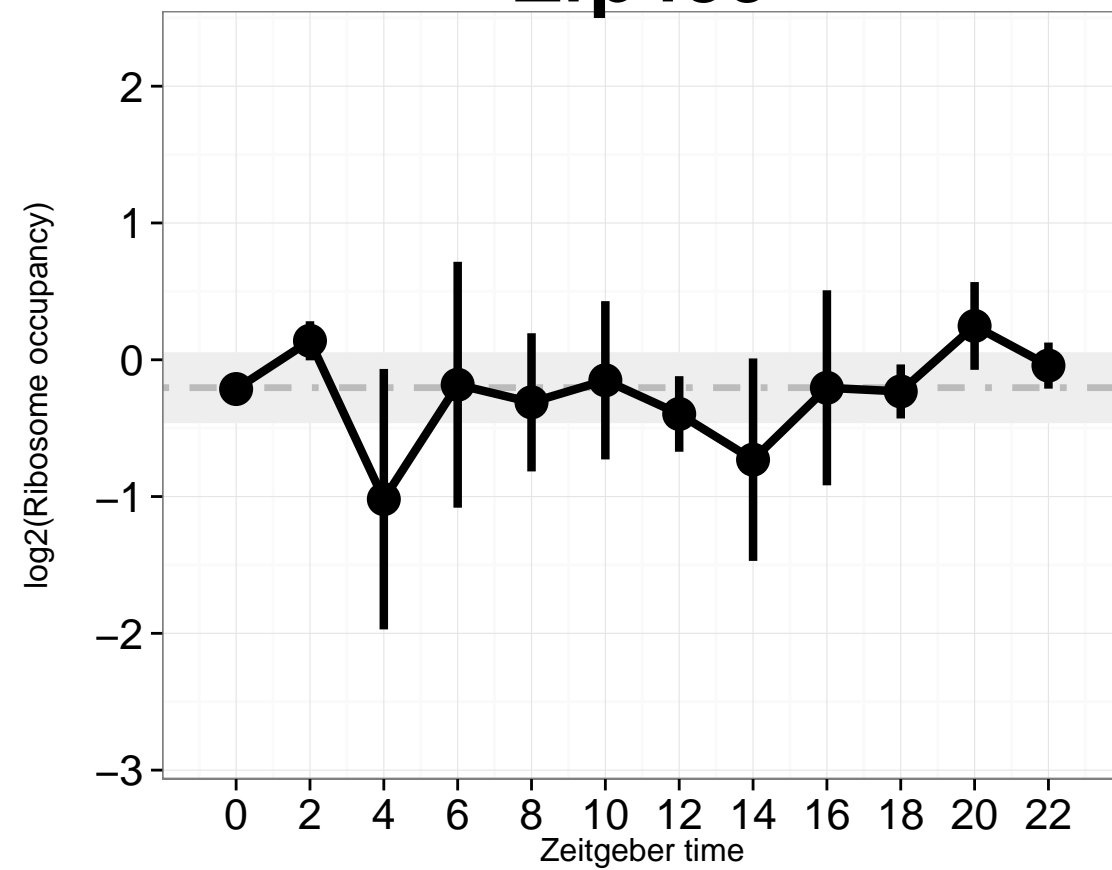

Supplement: Supplementary file 5718 [file 1]

# Bloc1s5

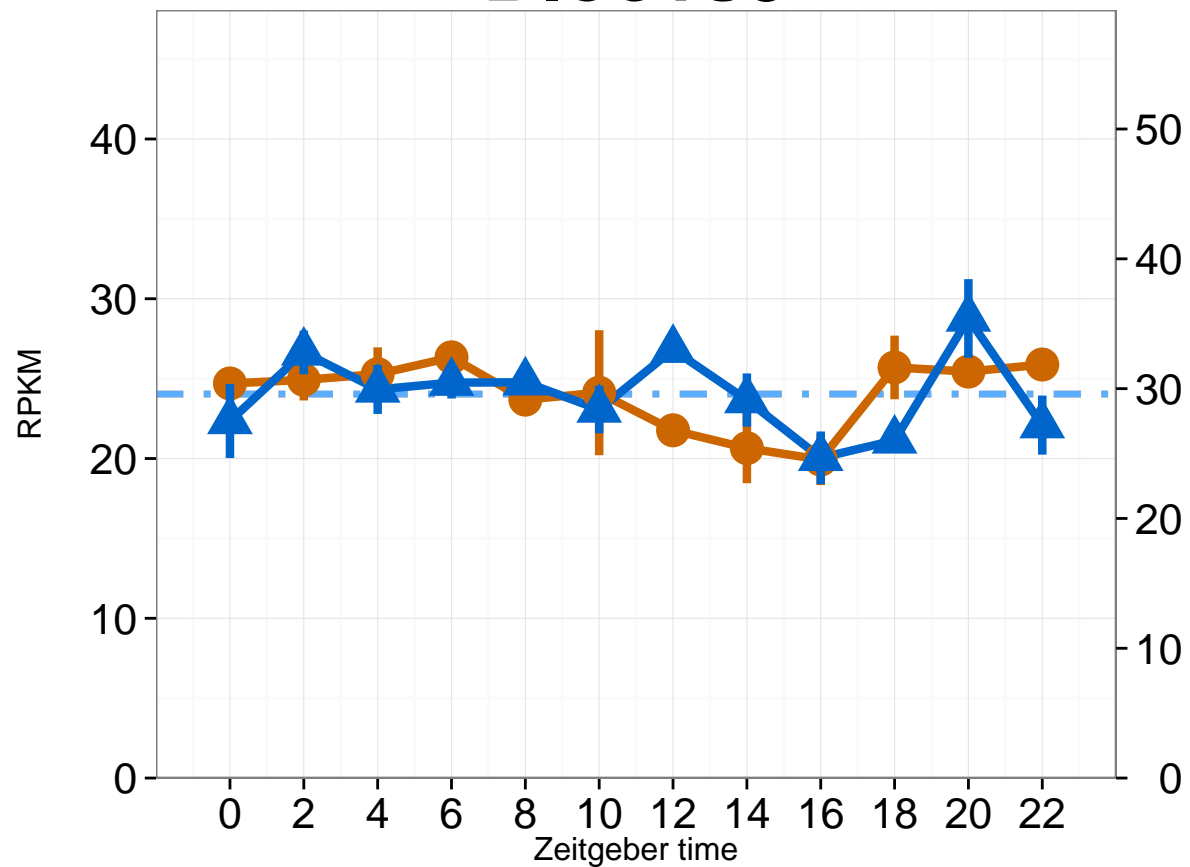

# Bloc1s5

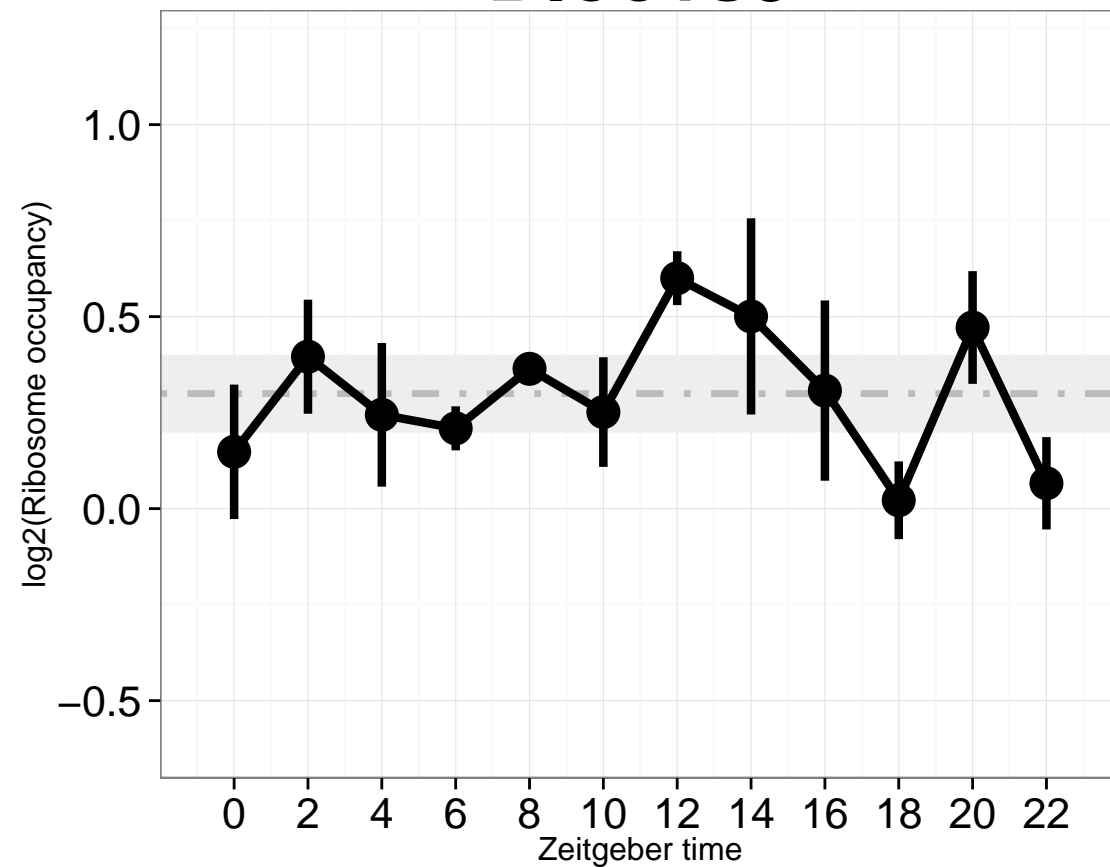

Supplement: Supplementary file 5719 [file 1]

## Arl14ep

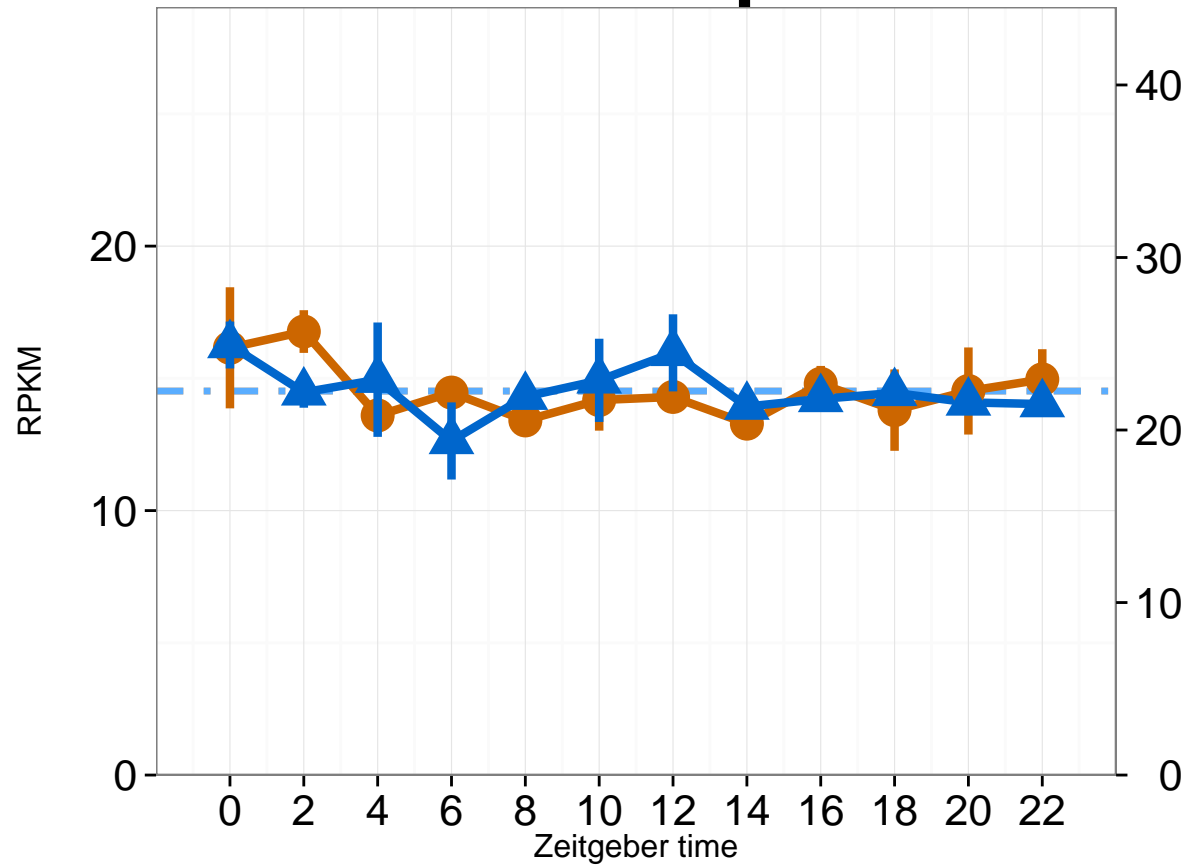

## Arl14ep

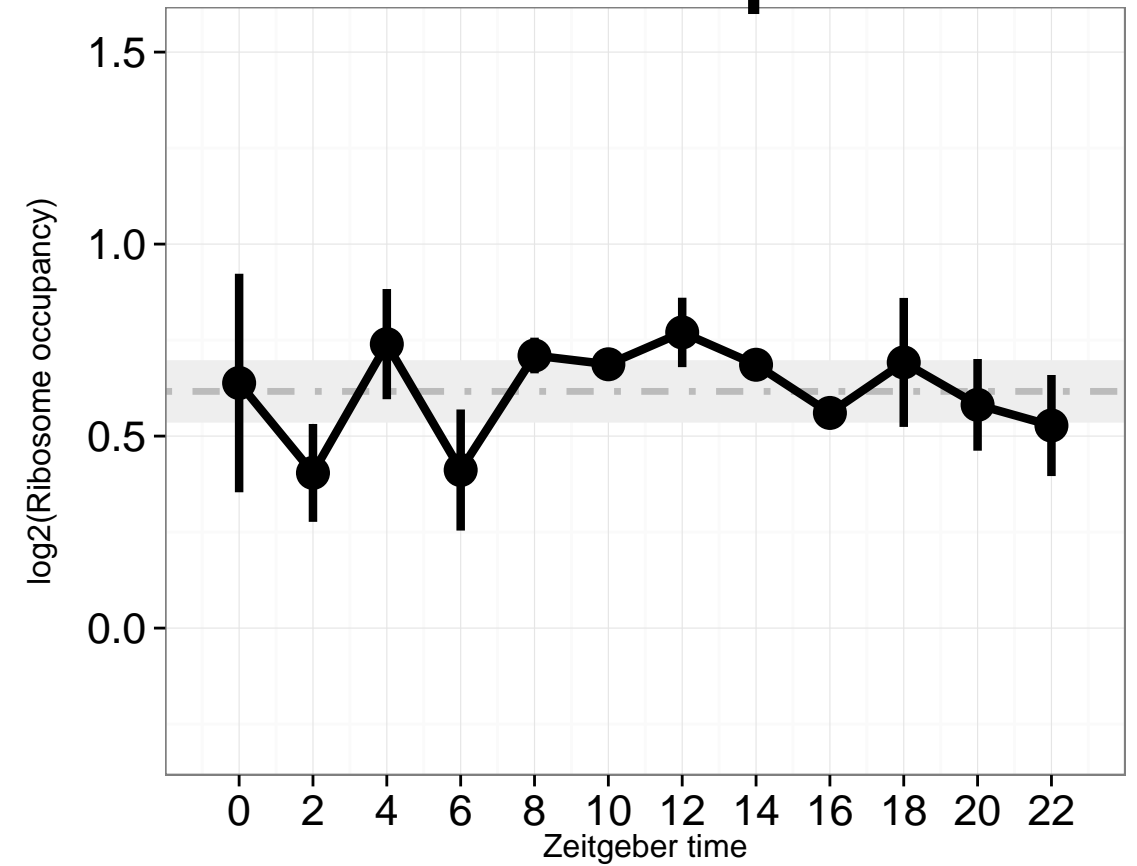

Supplement: Supplementary file 5720 [file 1]

## Smek1

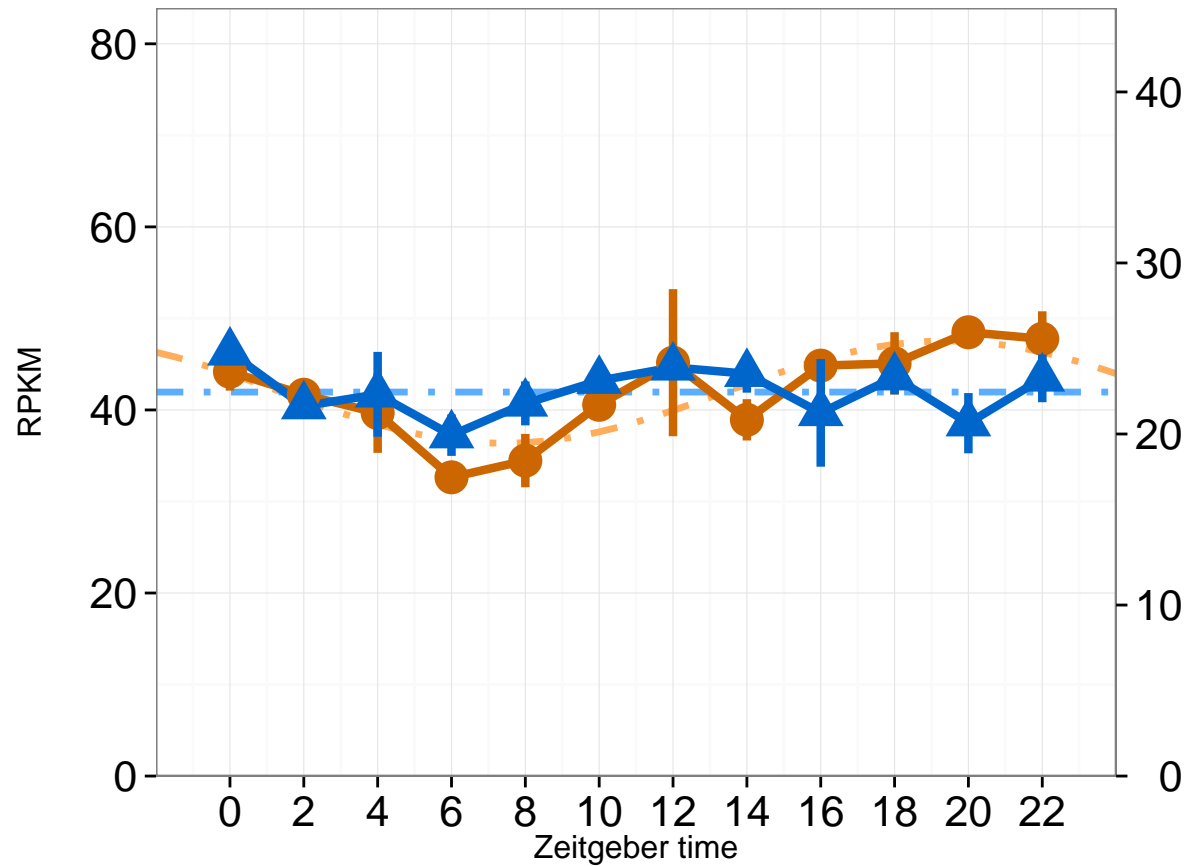

## Smek1

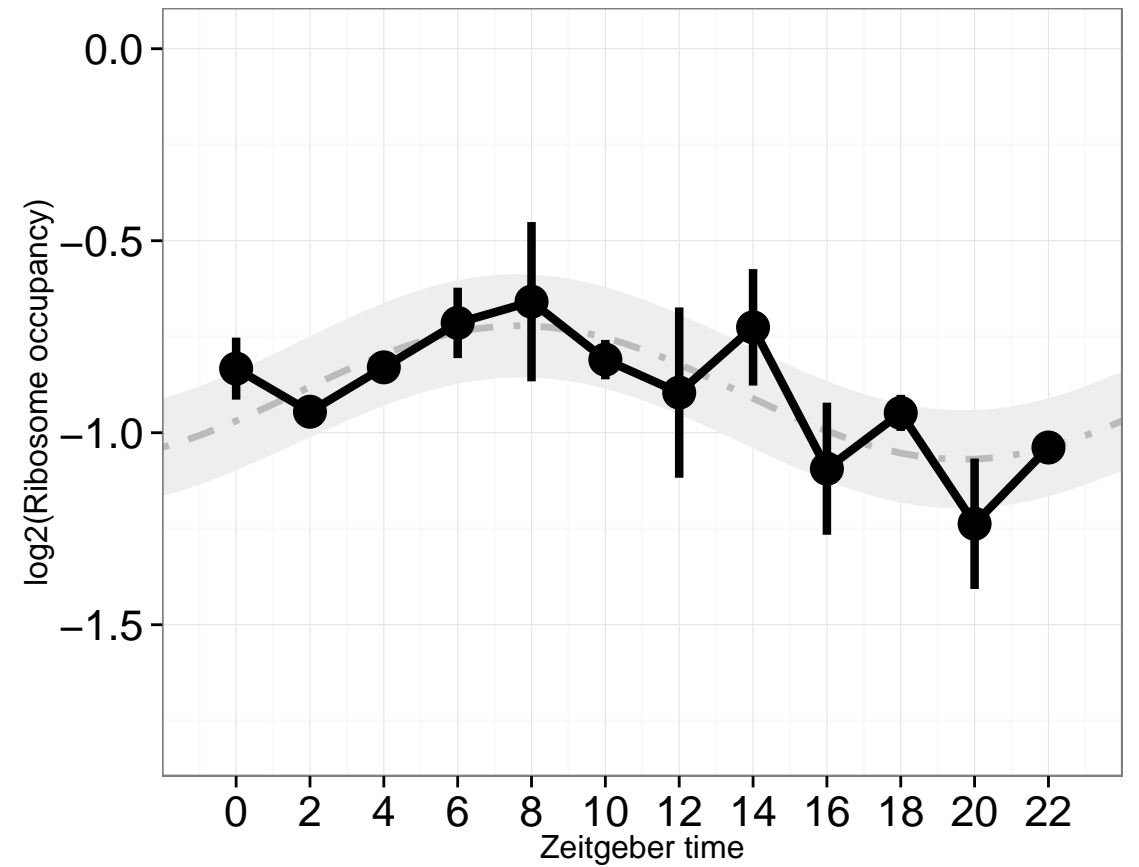

Supplement: Supplementary file 5721 [file 1]

## Med7

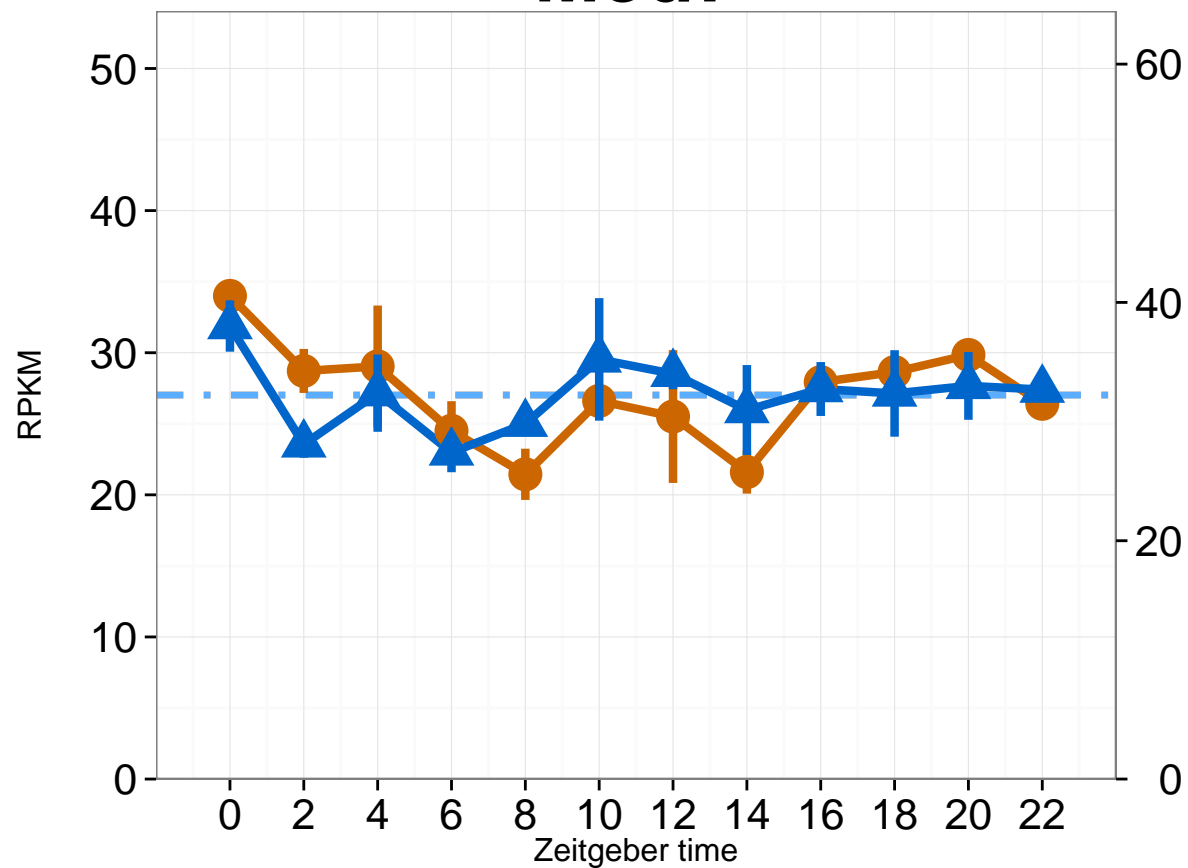

## Med7

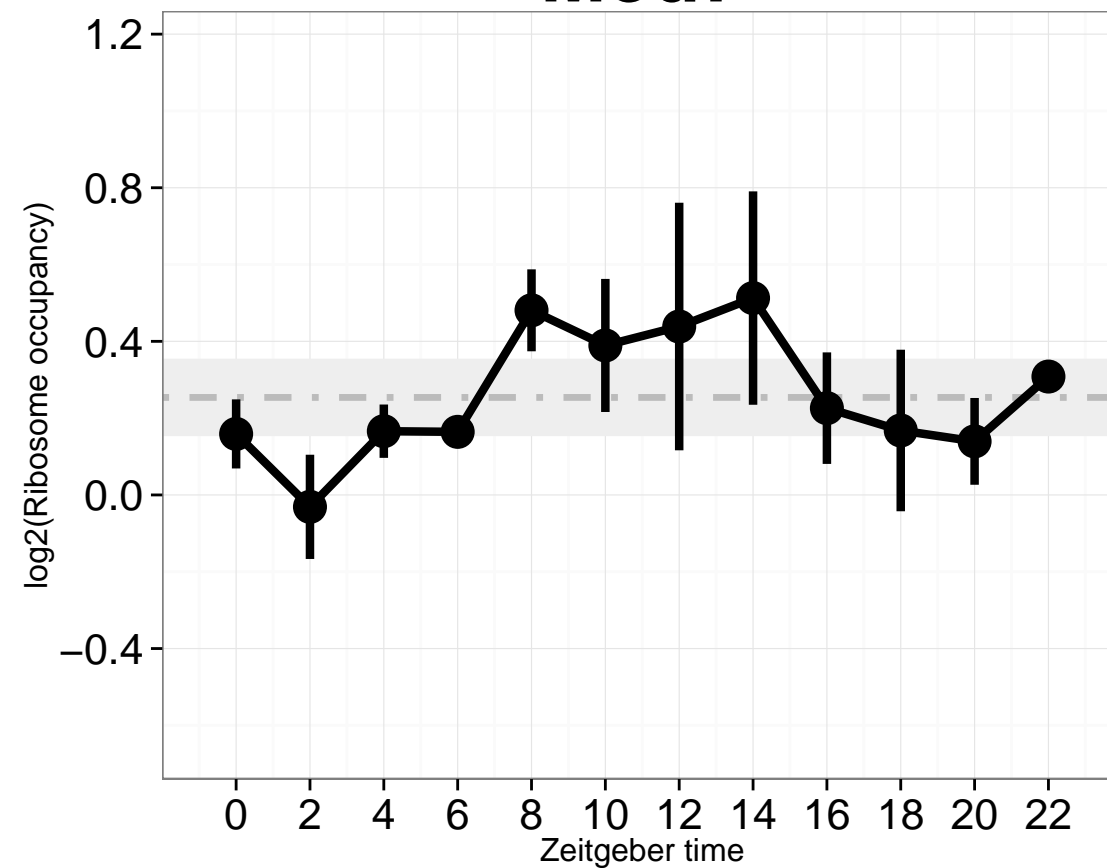

Supplement: Supplementary file 5722 [file 1]
