# Supplementary material (part 58 of 133)
Source: publisher figshare collection journal article supplement (https://springernature.figshare.com/articles/dataset/_/4903193)

## Serpinf2

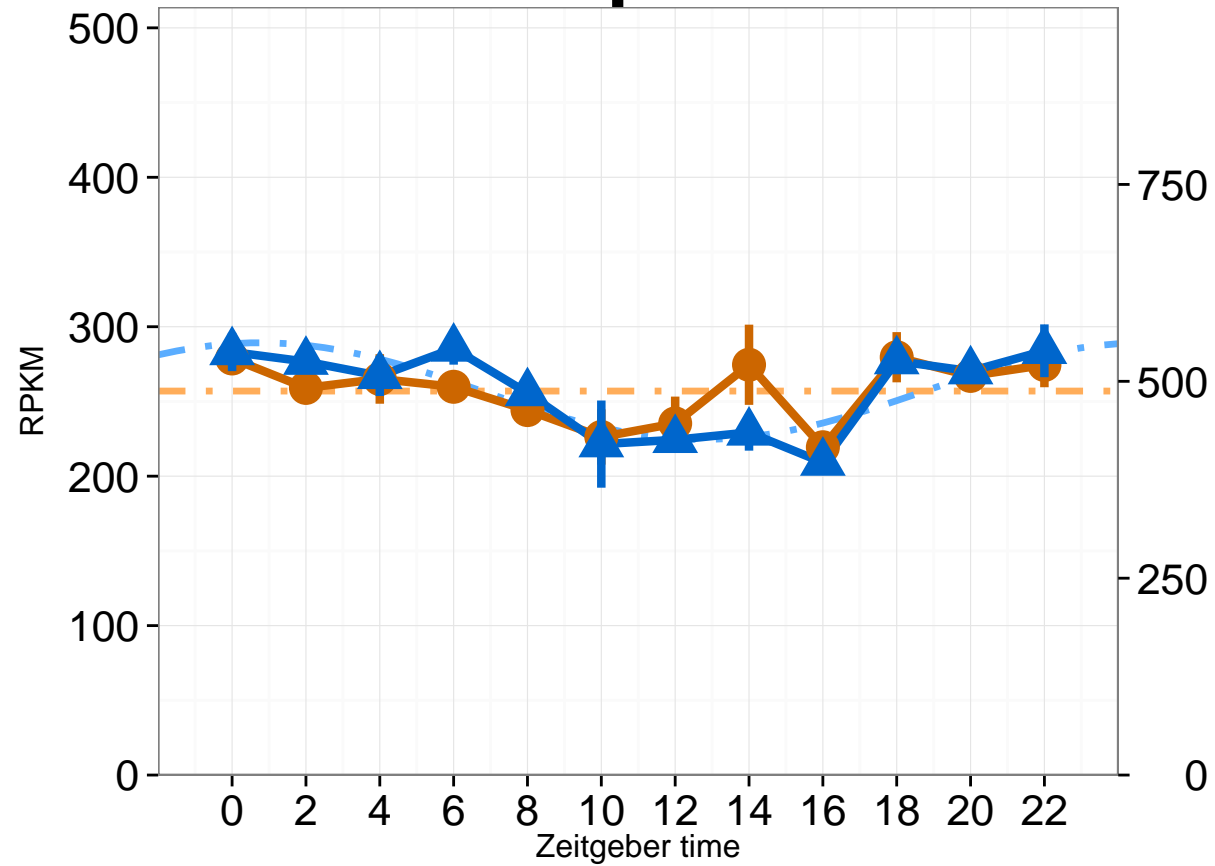

## Serpinf2

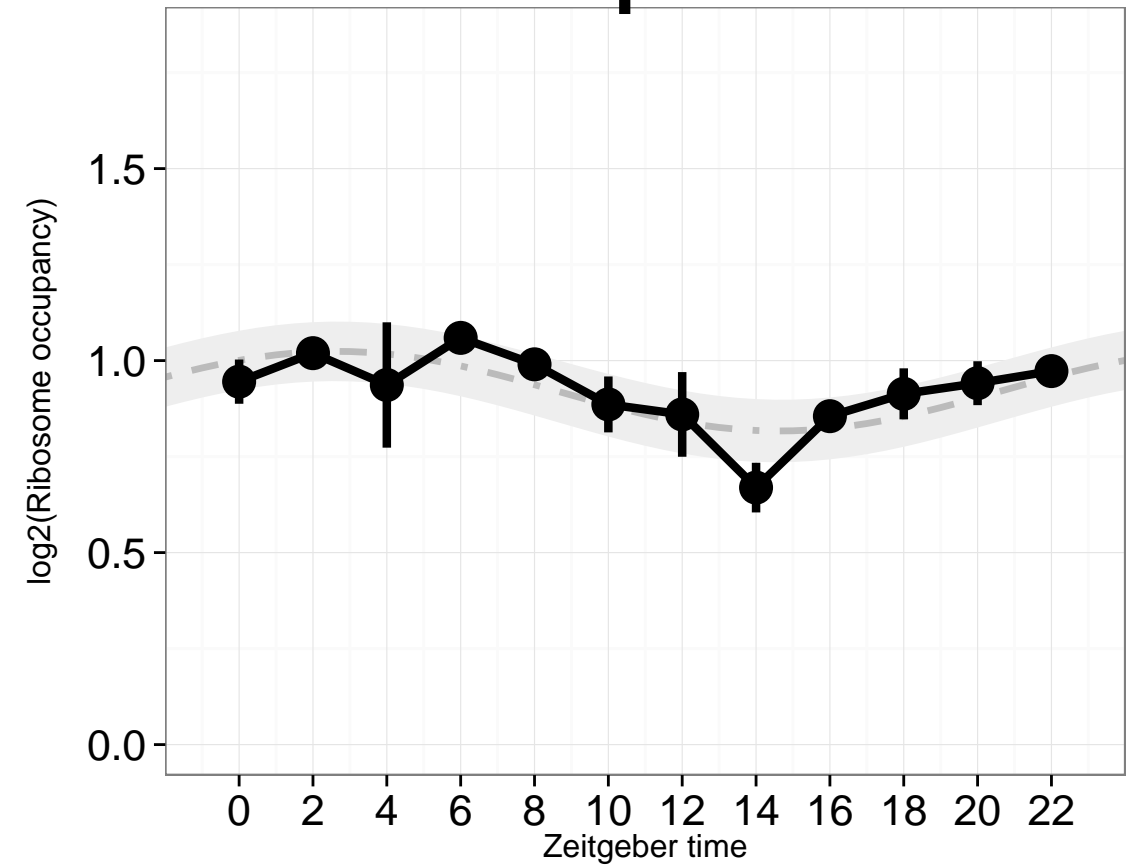

Supplement: Supplementary file 5723 [file 1]

## Synpo2

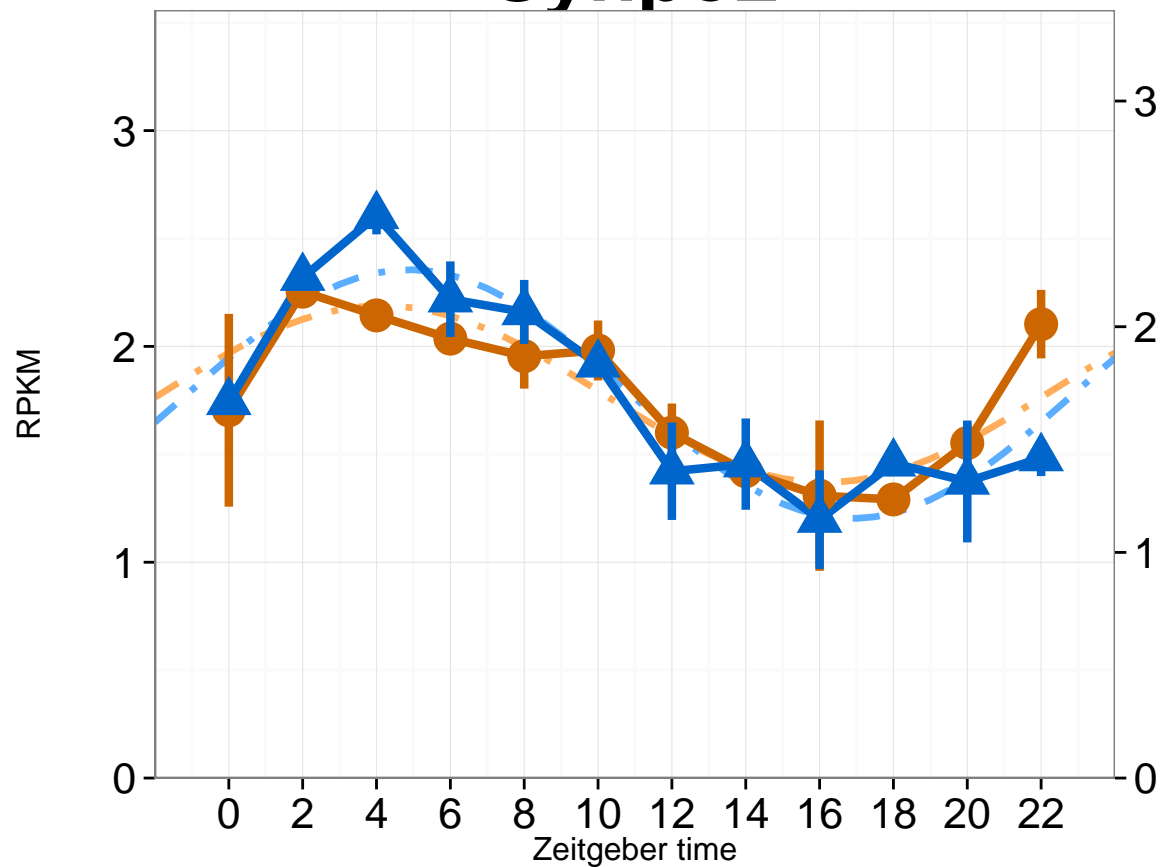

## Synpo2

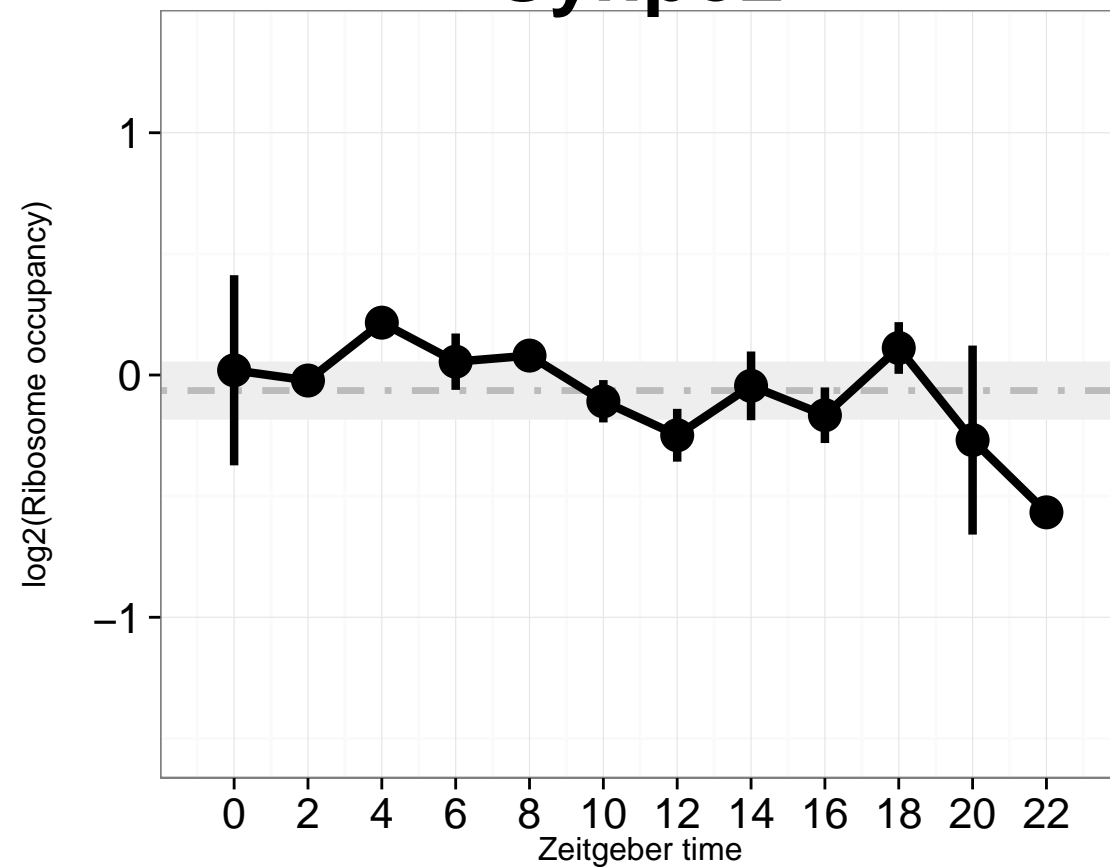

Supplement: Supplementary file 5724 [file 1]

**Fgf12 TR**

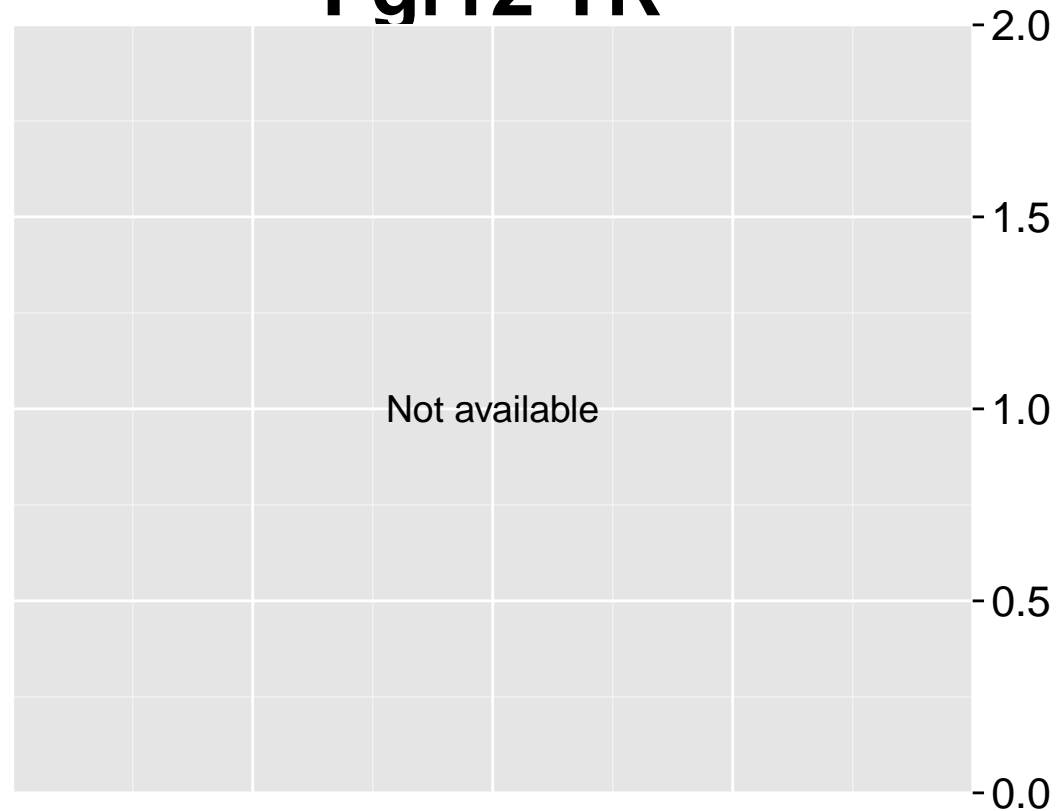

**Fgf12 log2(Ribosome occupancy)**

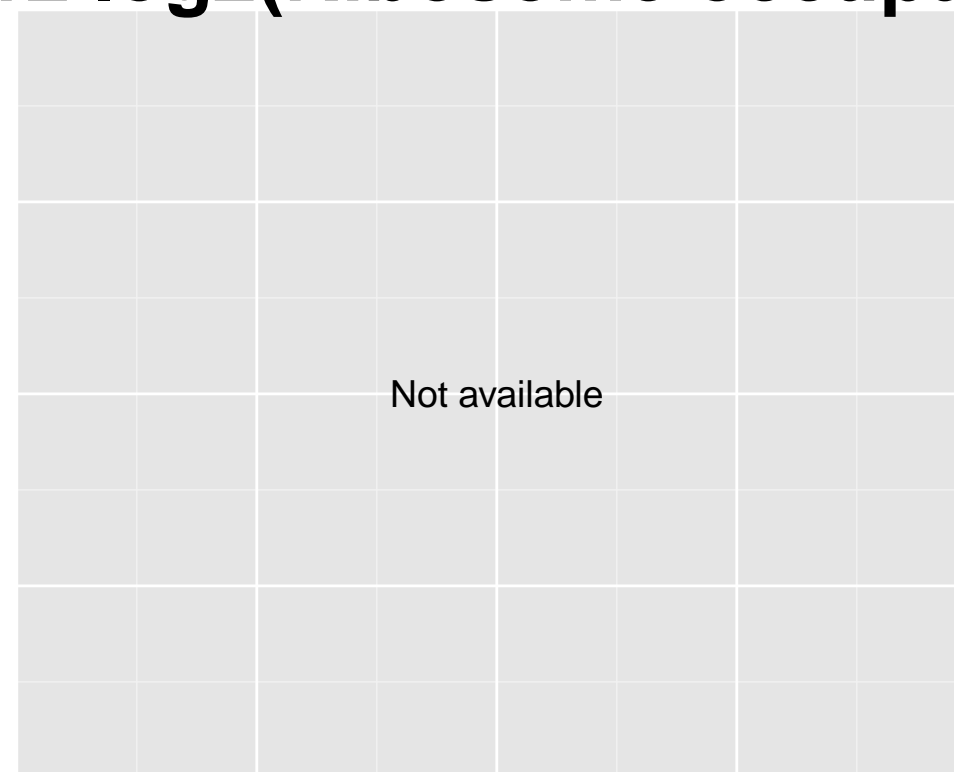

Supplement: Supplementary file 5725 [file 1]

## Ccz1

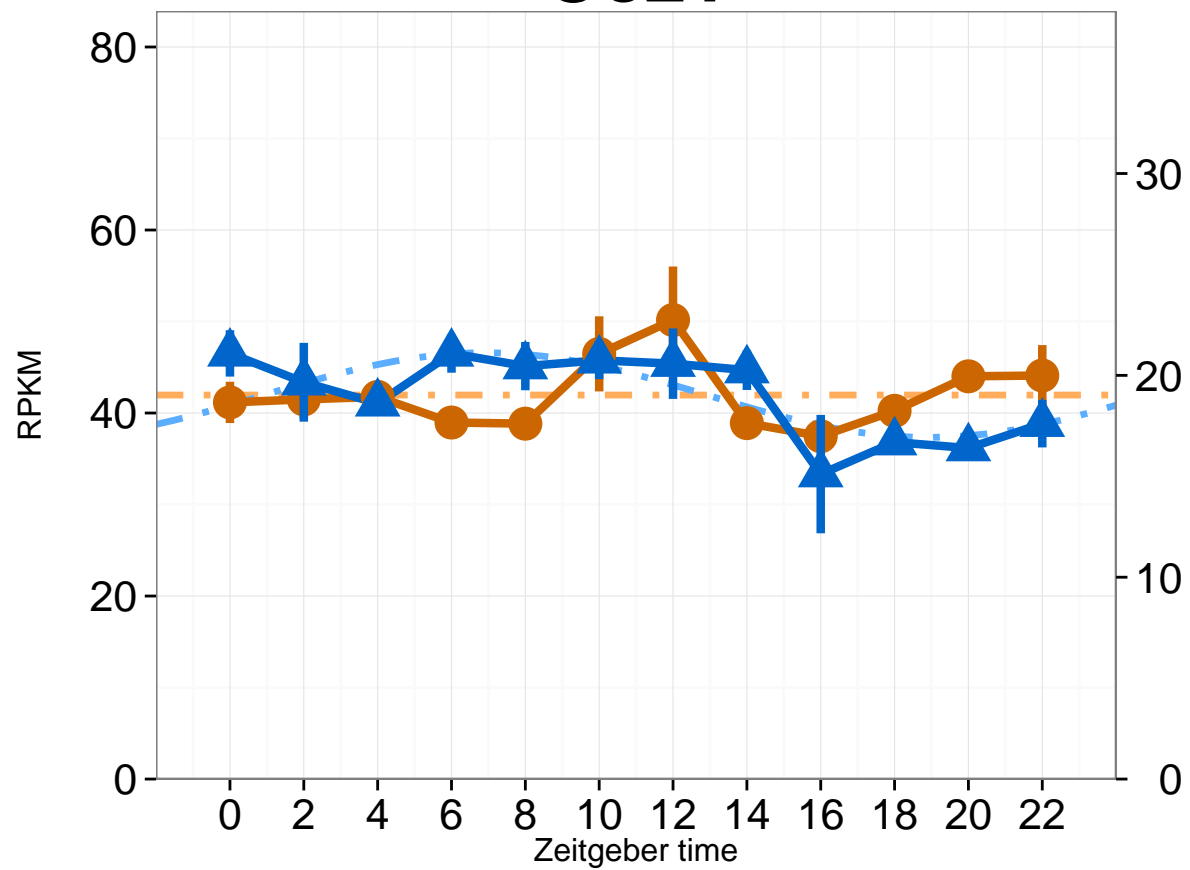

## Ccz1

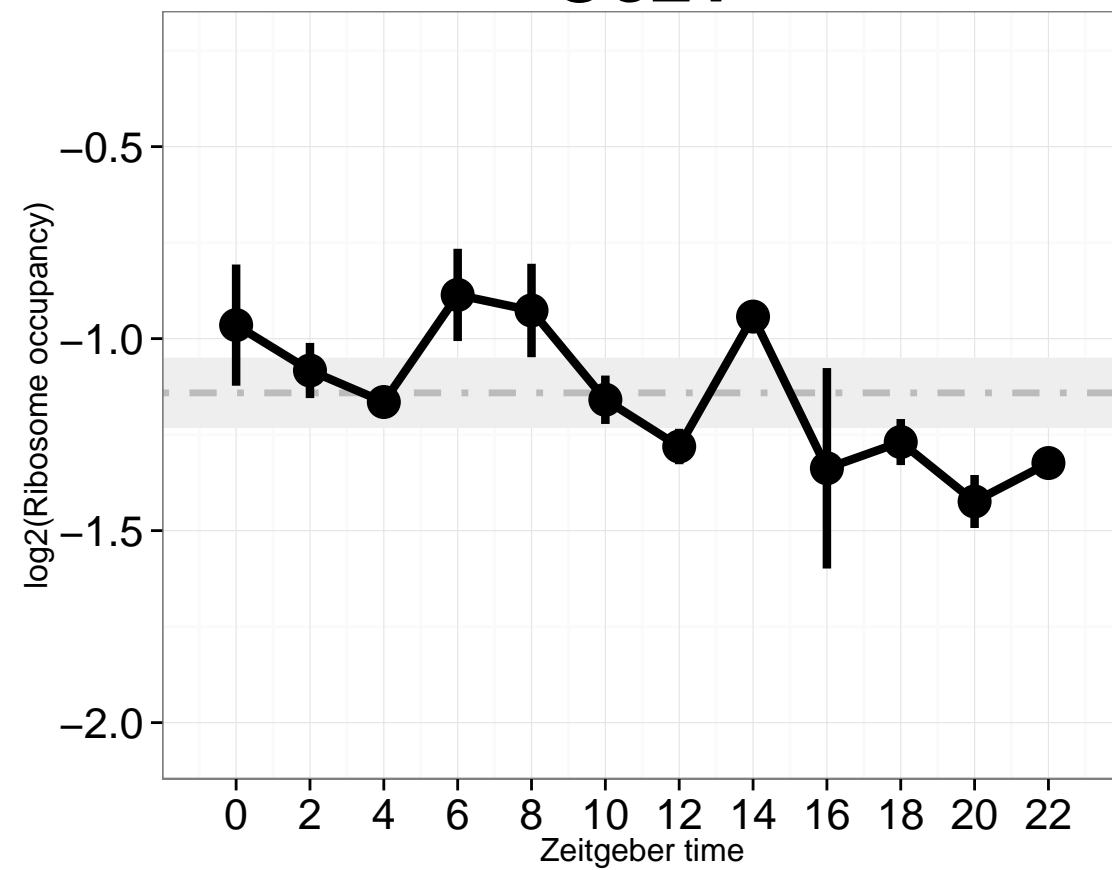

Supplement: Supplementary file 5726 [file 1]

# Snrpc

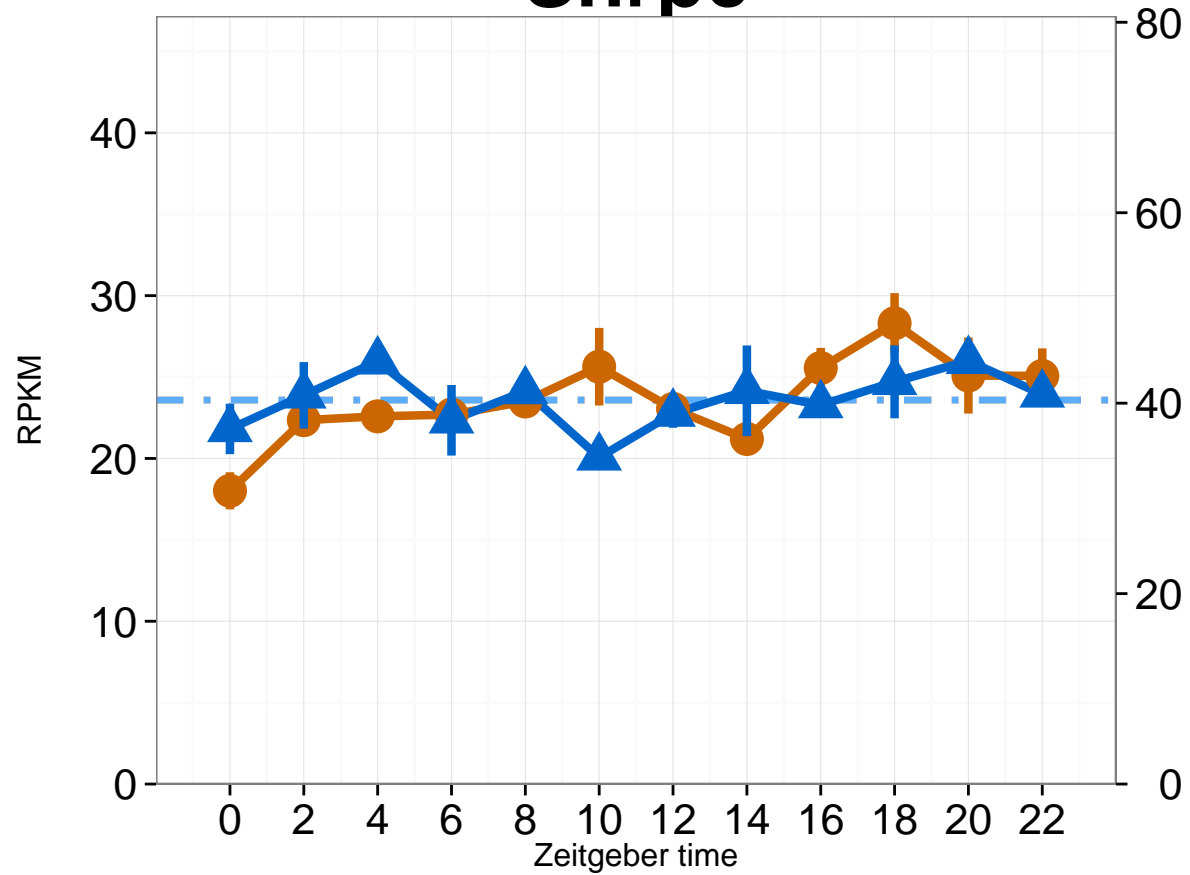

# Snrpc

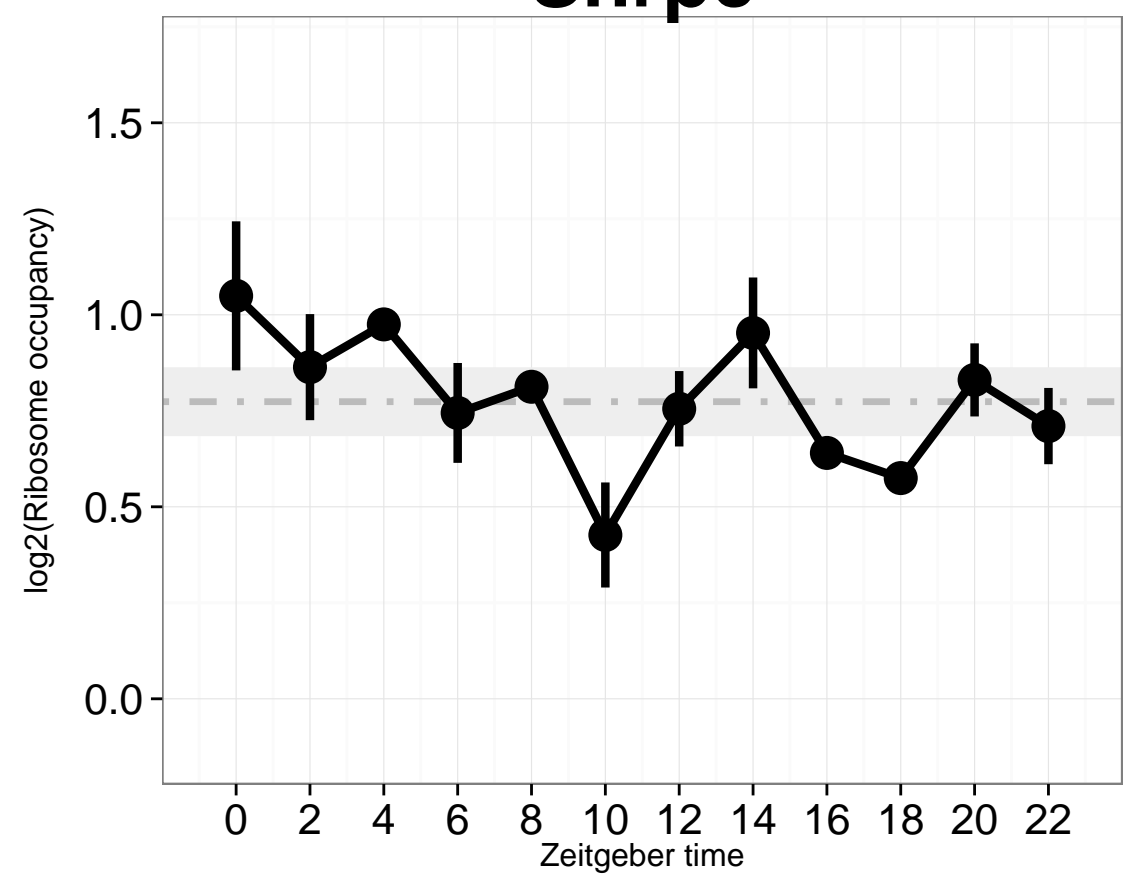

Supplement: Supplementary file 5727 [file 1]

## Stk4

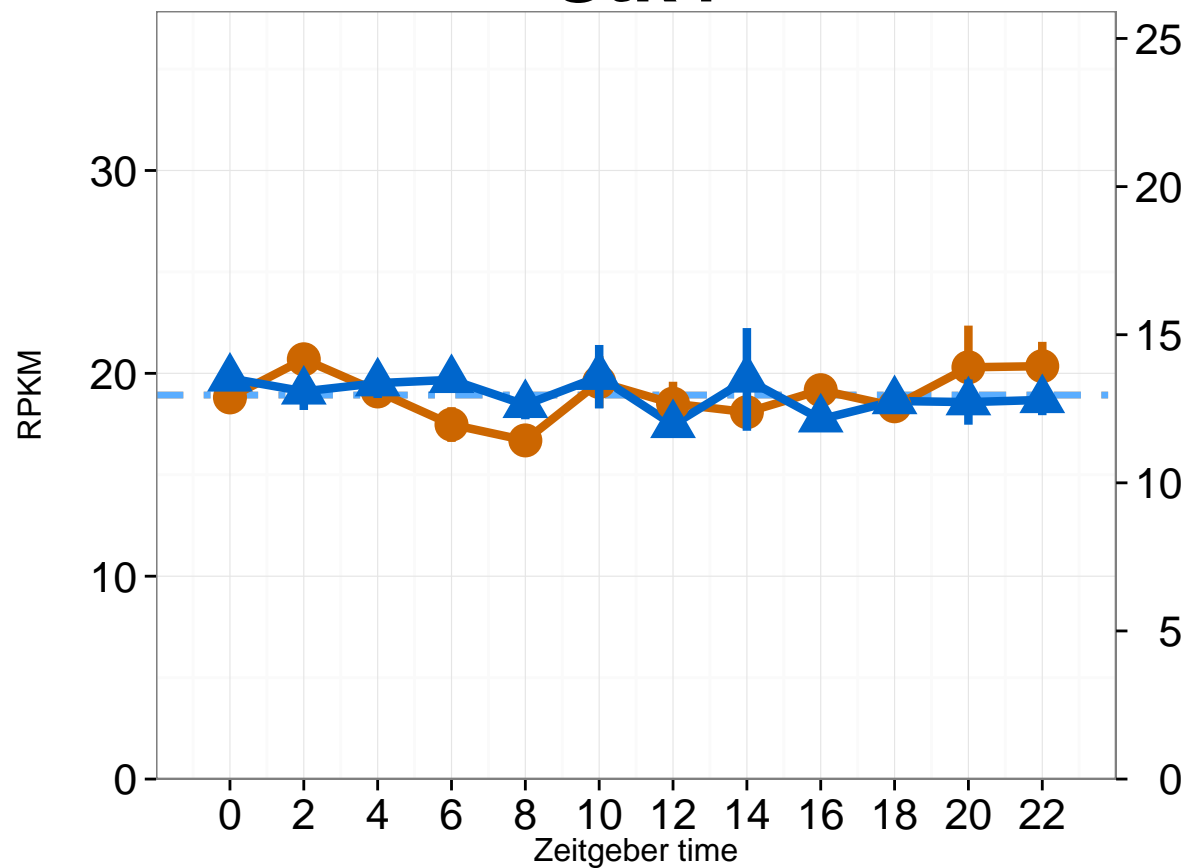

## Stk4

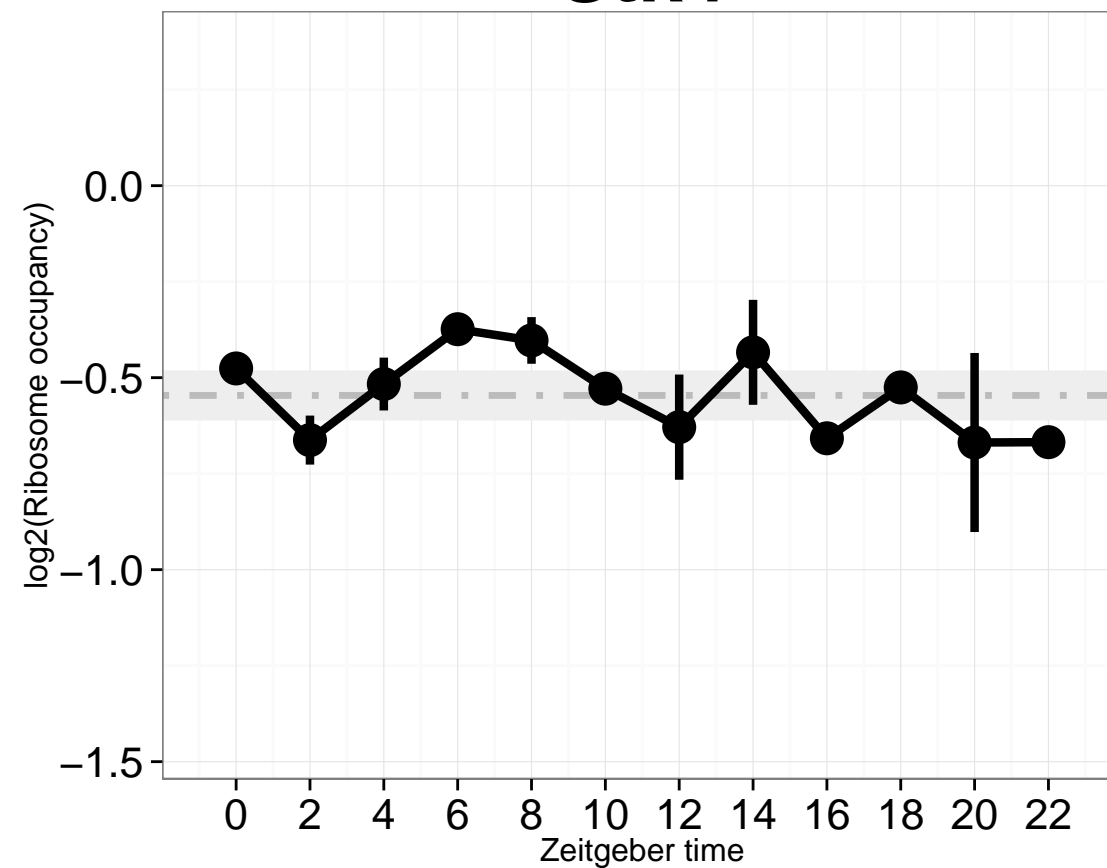

Supplement: Supplementary file 5728 [file 1]

## Gmpr

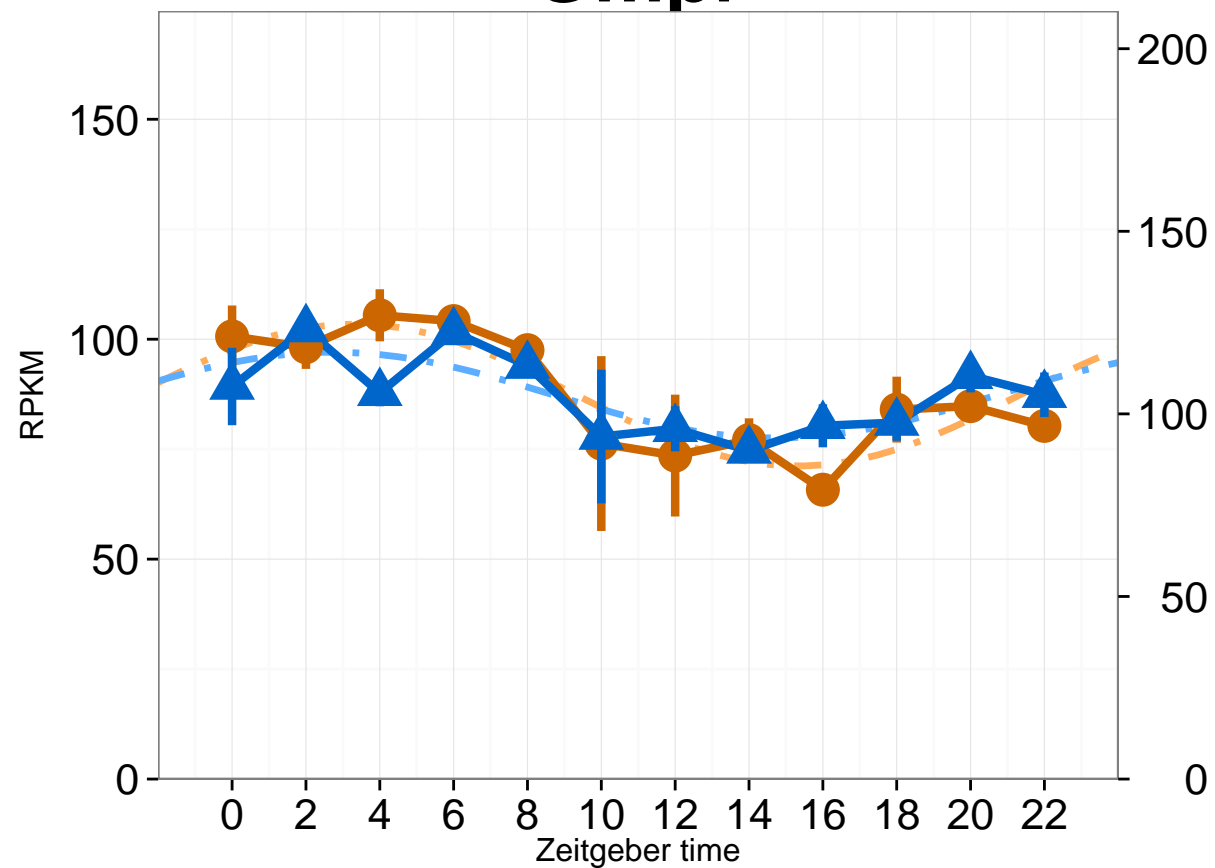

## Gmpr

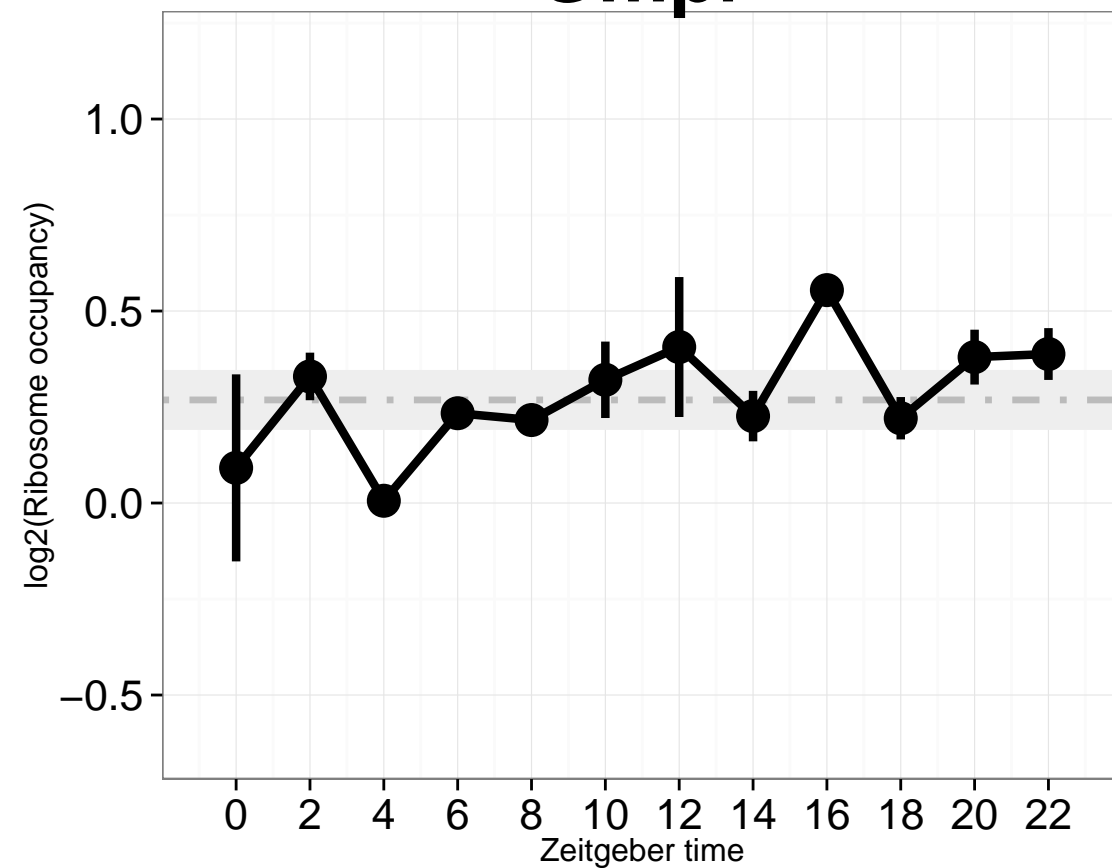

Supplement: Supplementary file 5729 [file 1]

## Gins4

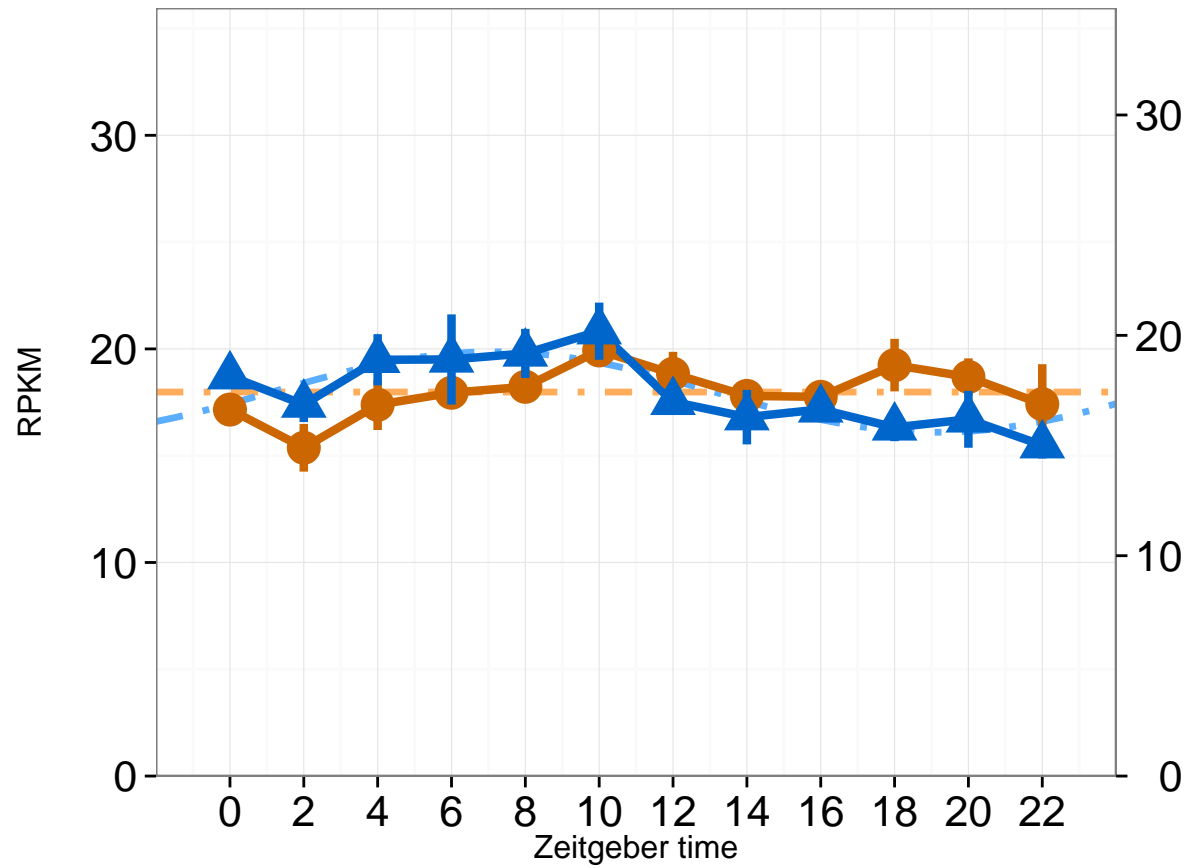

## Gins4

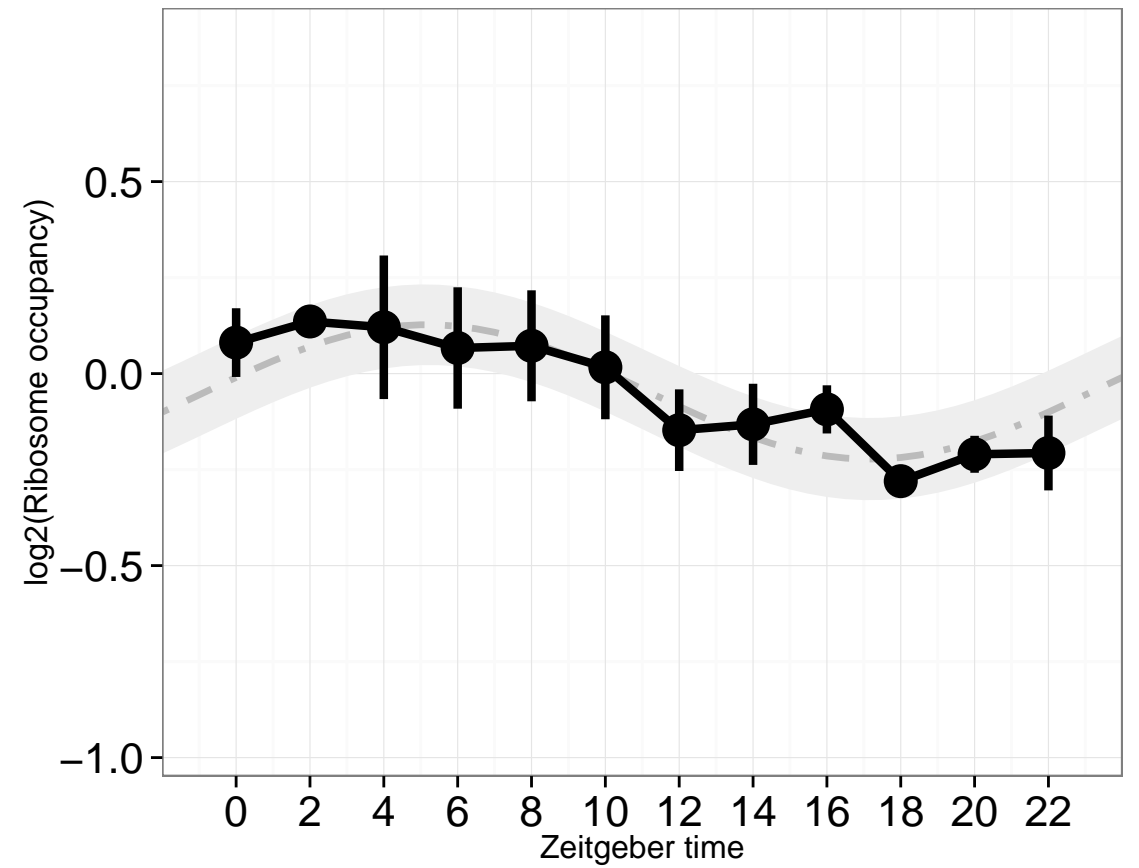

Supplement: Supplementary file 5730 [file 1]

## Cbfa2t2

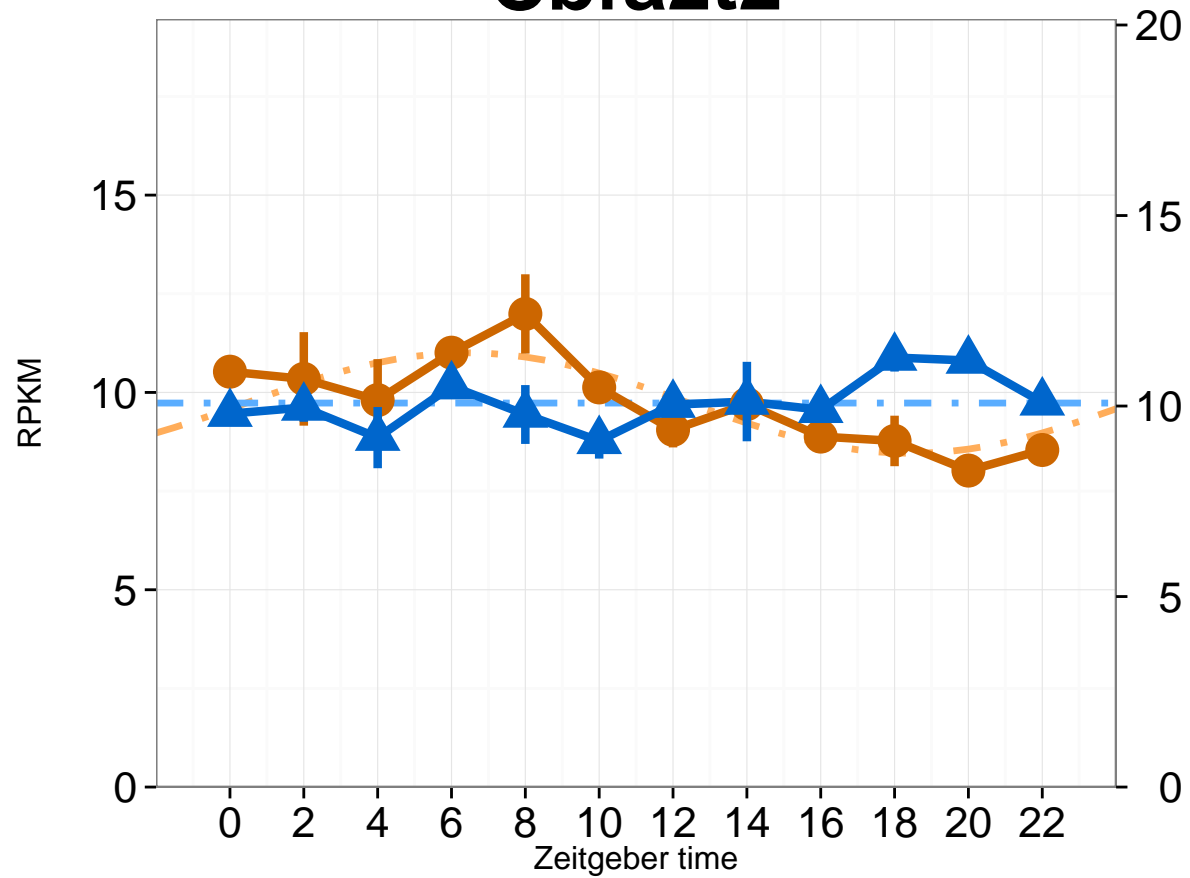

## Cbfa2t2

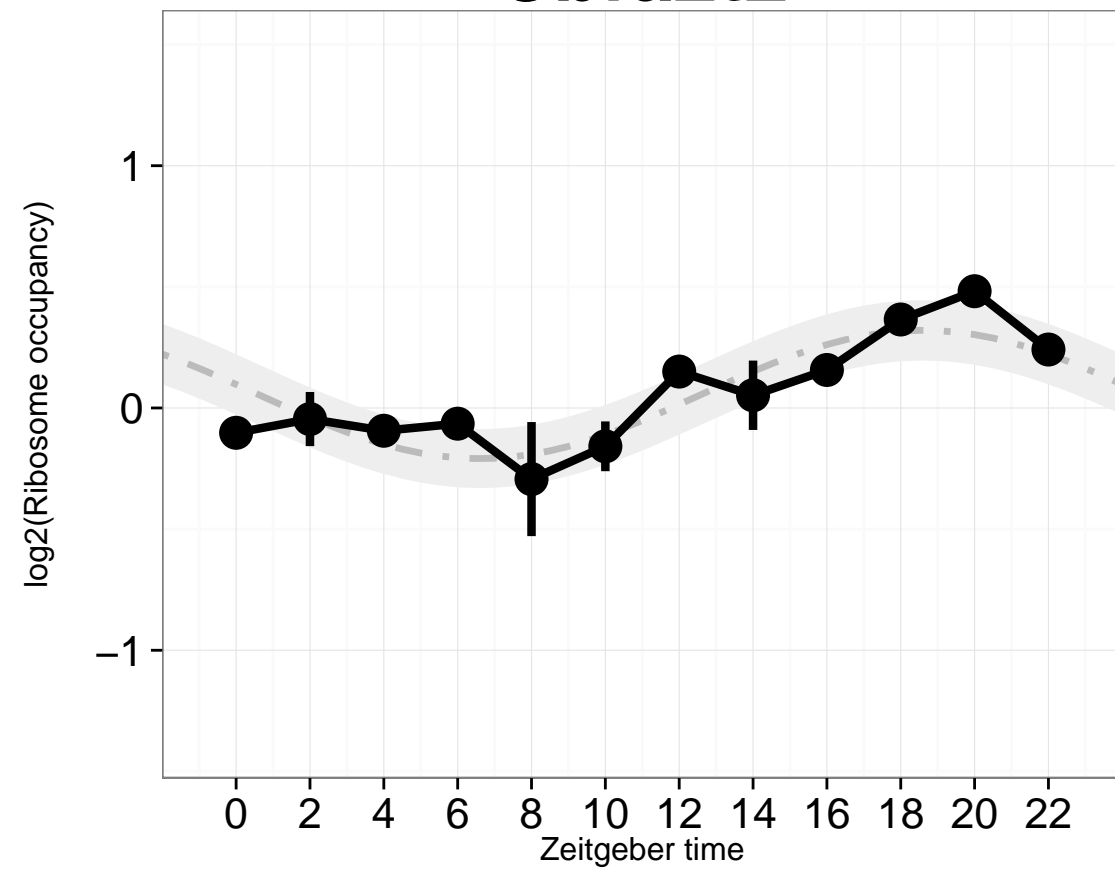

Supplement: Supplementary file 5731 [file 1]

# Aim1

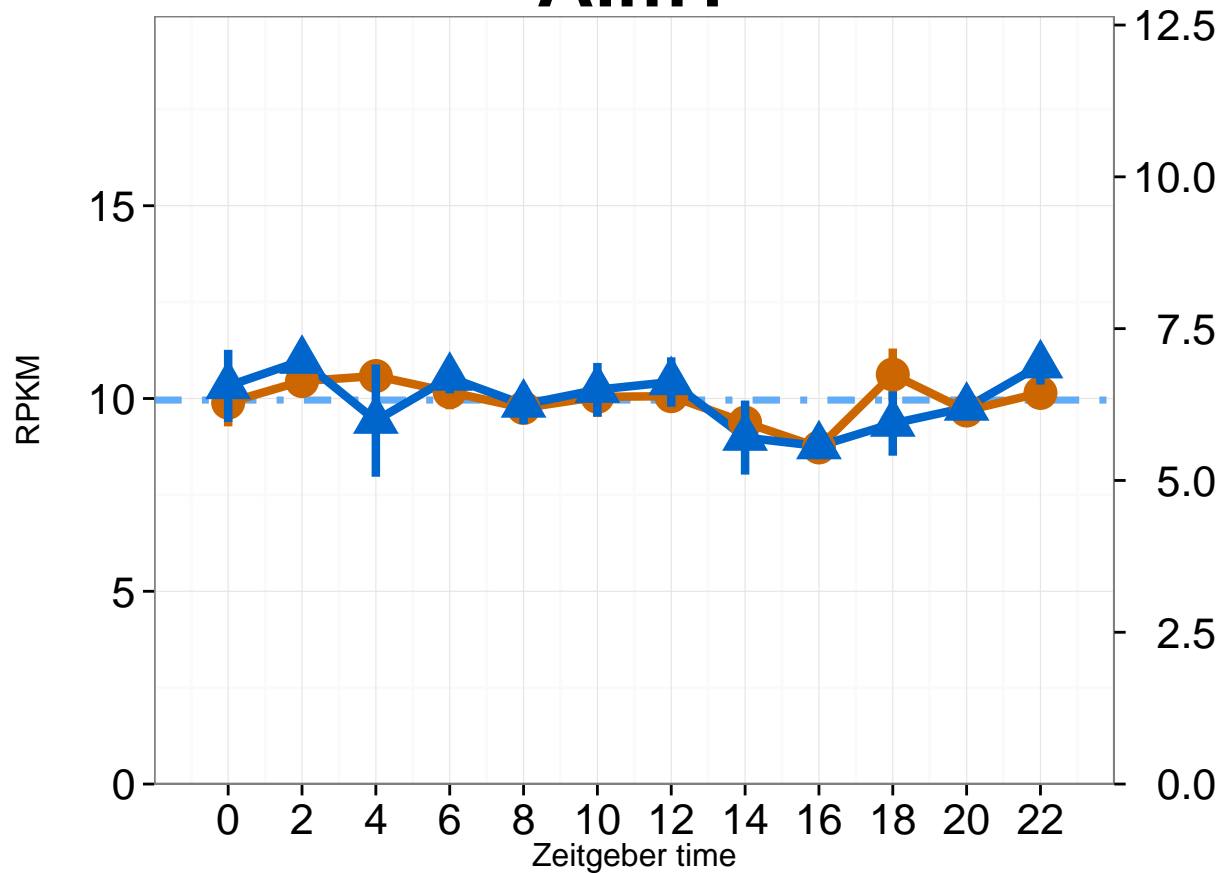

# Aim1

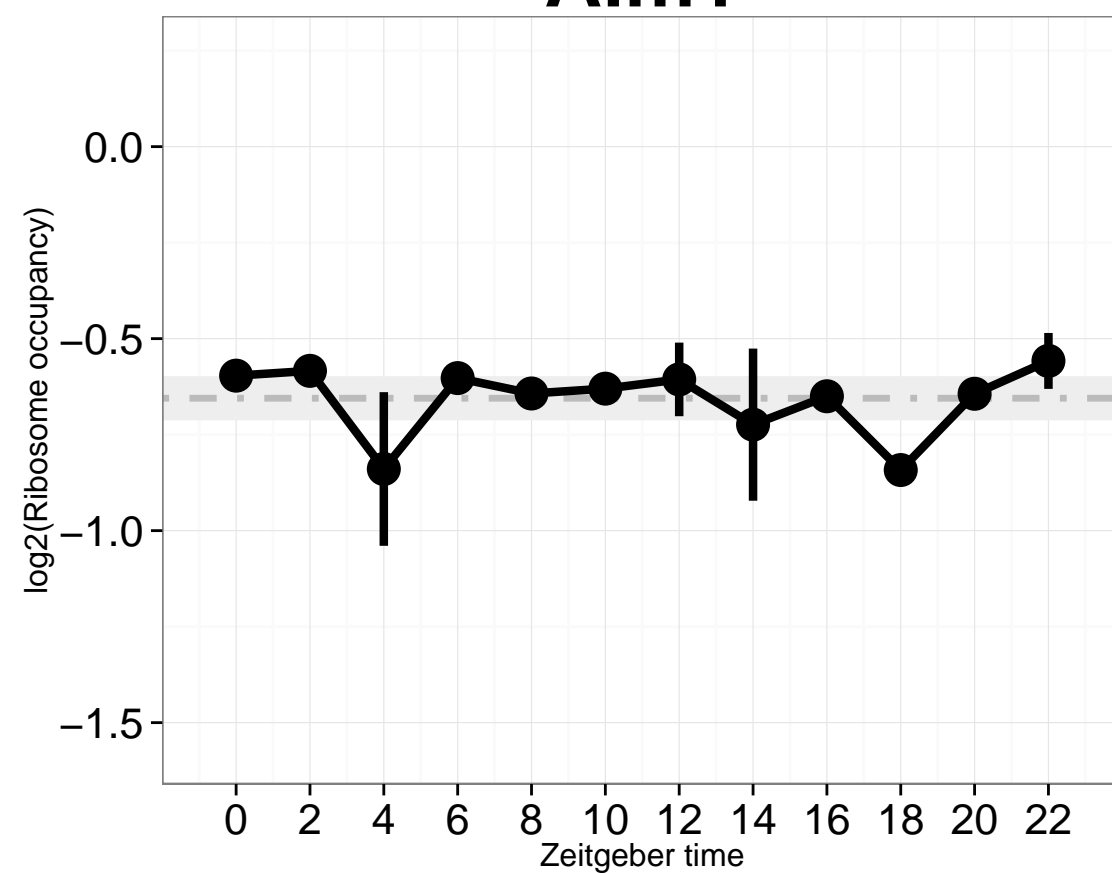

Supplement: Supplementary file 5732 [file 1]

# Fgfr3

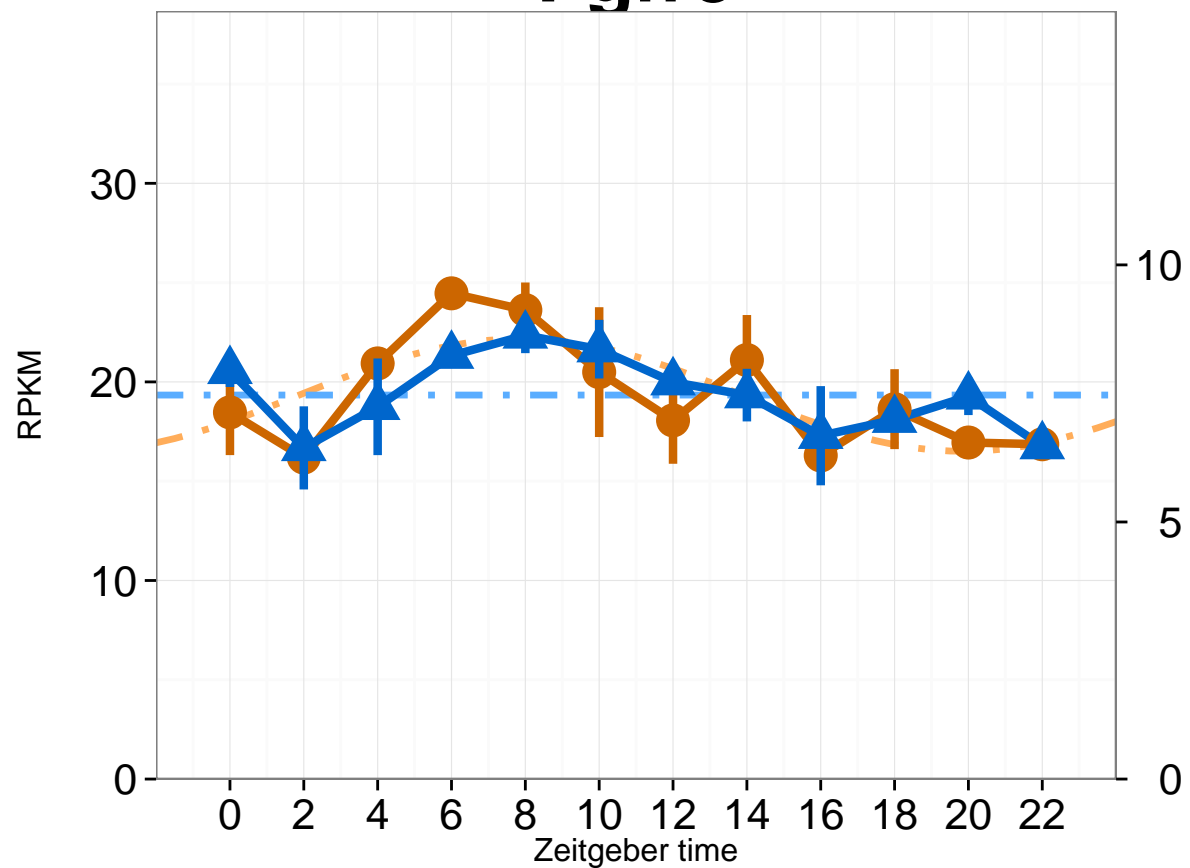

# Fgfr3

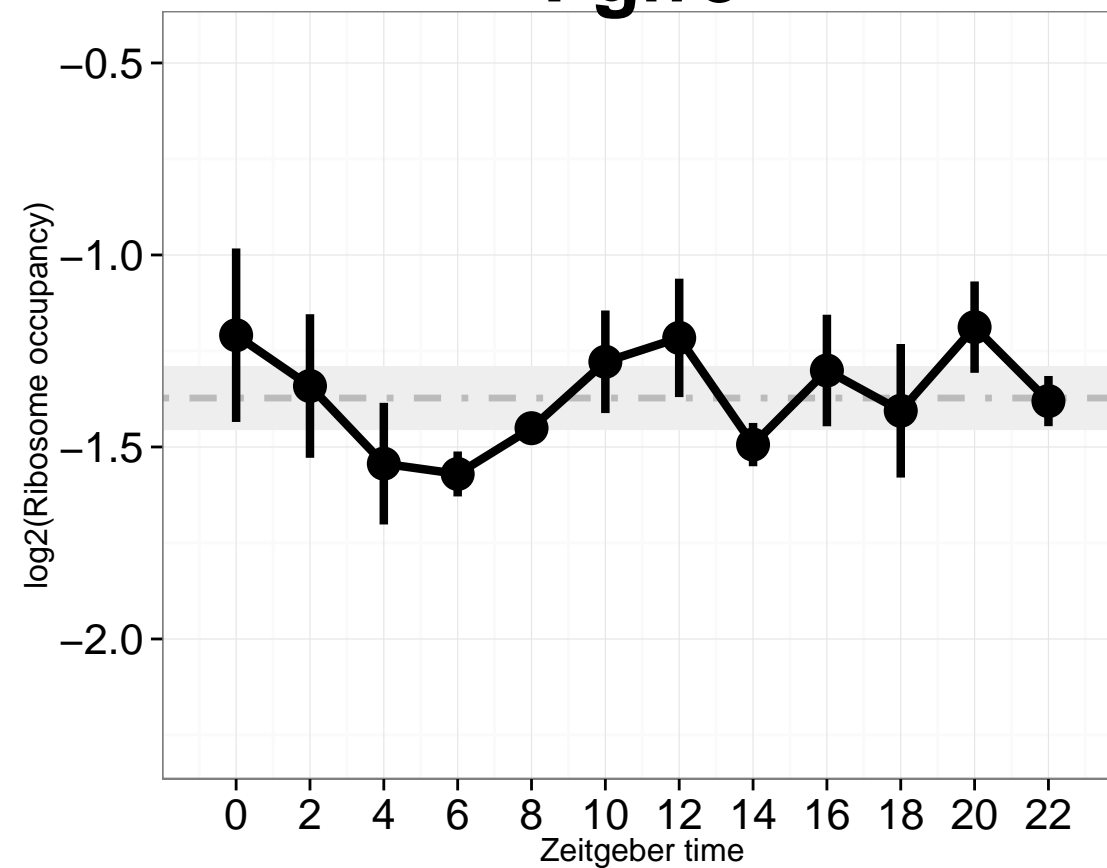

Supplement: Supplementary file 5733 [file 1]

**Ttl**

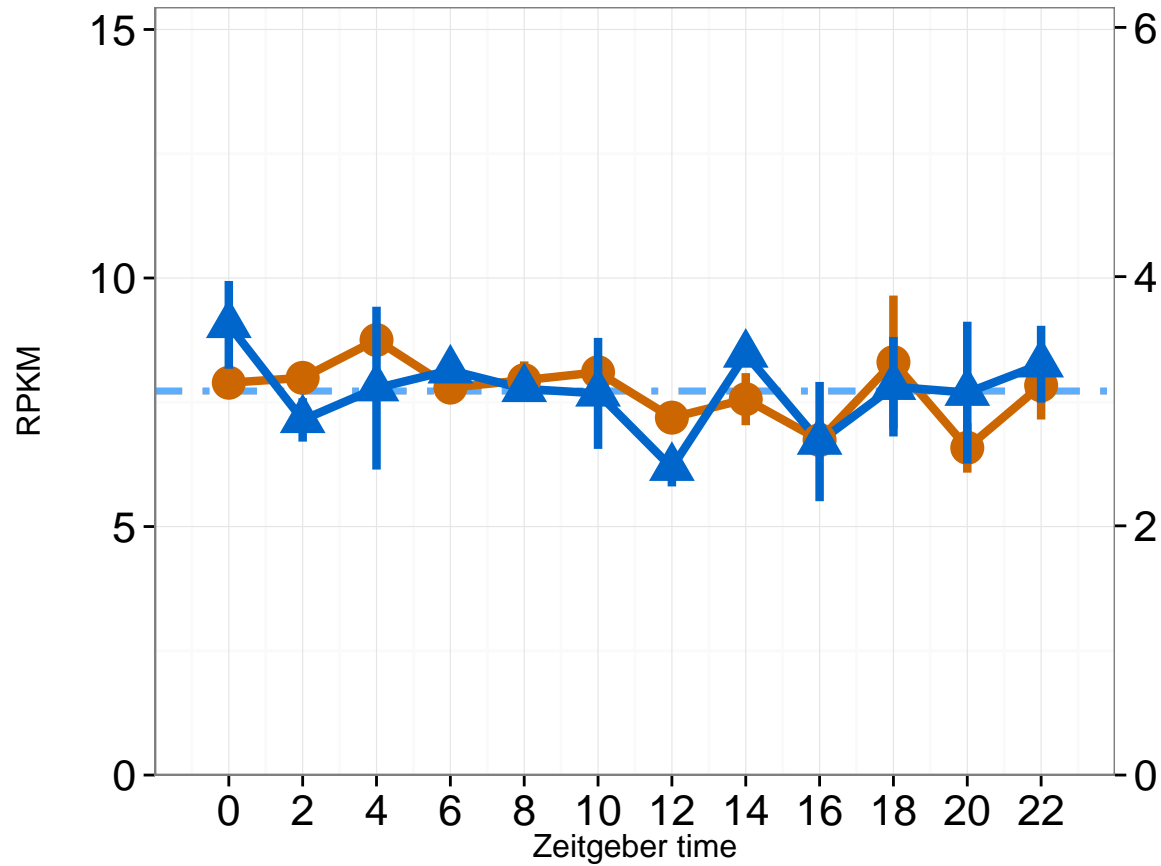

**Ttl**

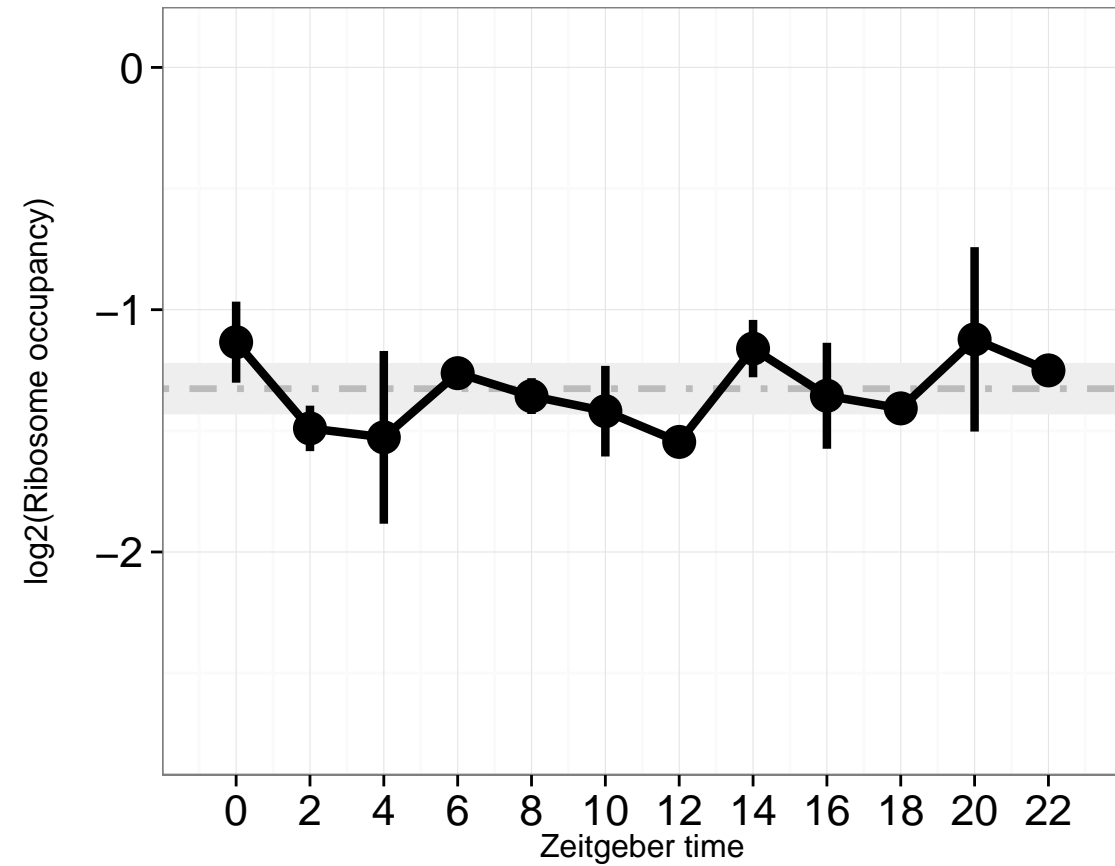

Supplement: Supplementary file 5734 [file 1]

# Lrrc14

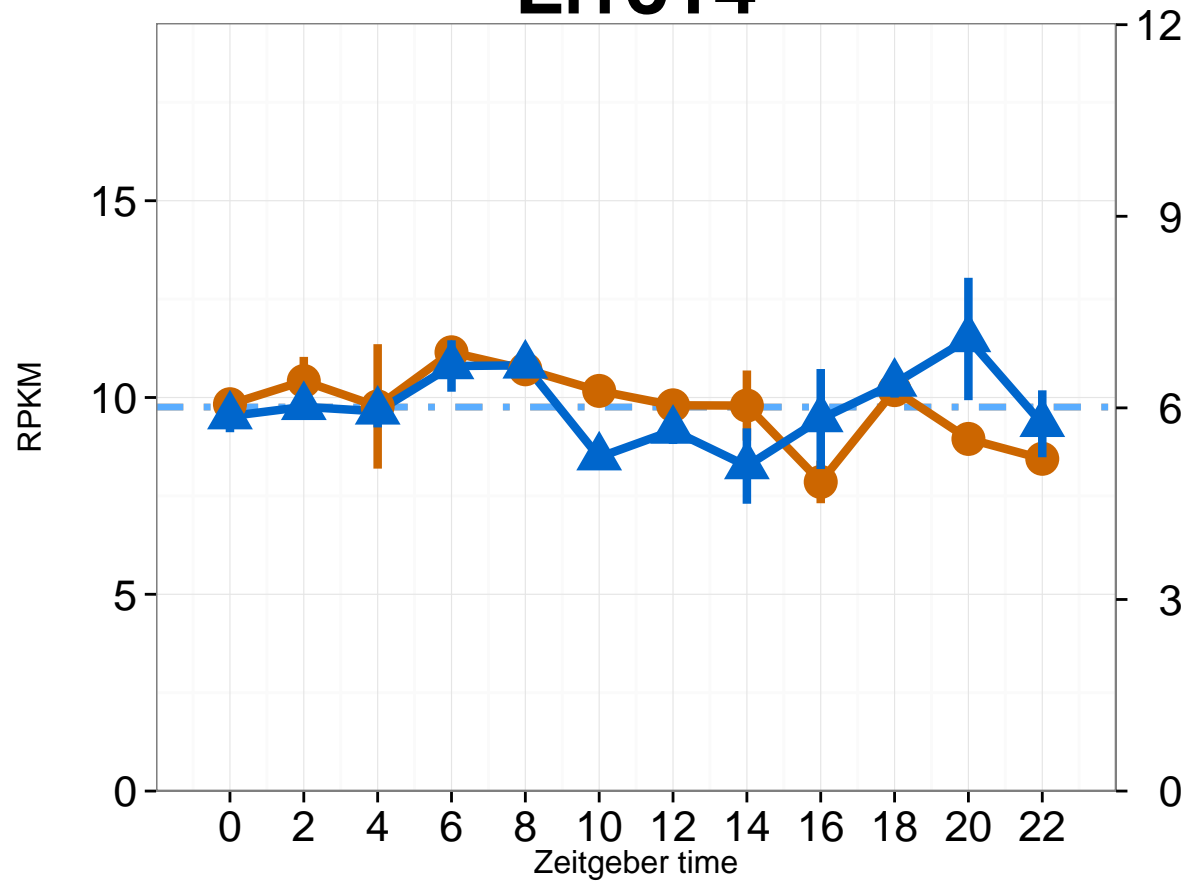

# Lrrc14

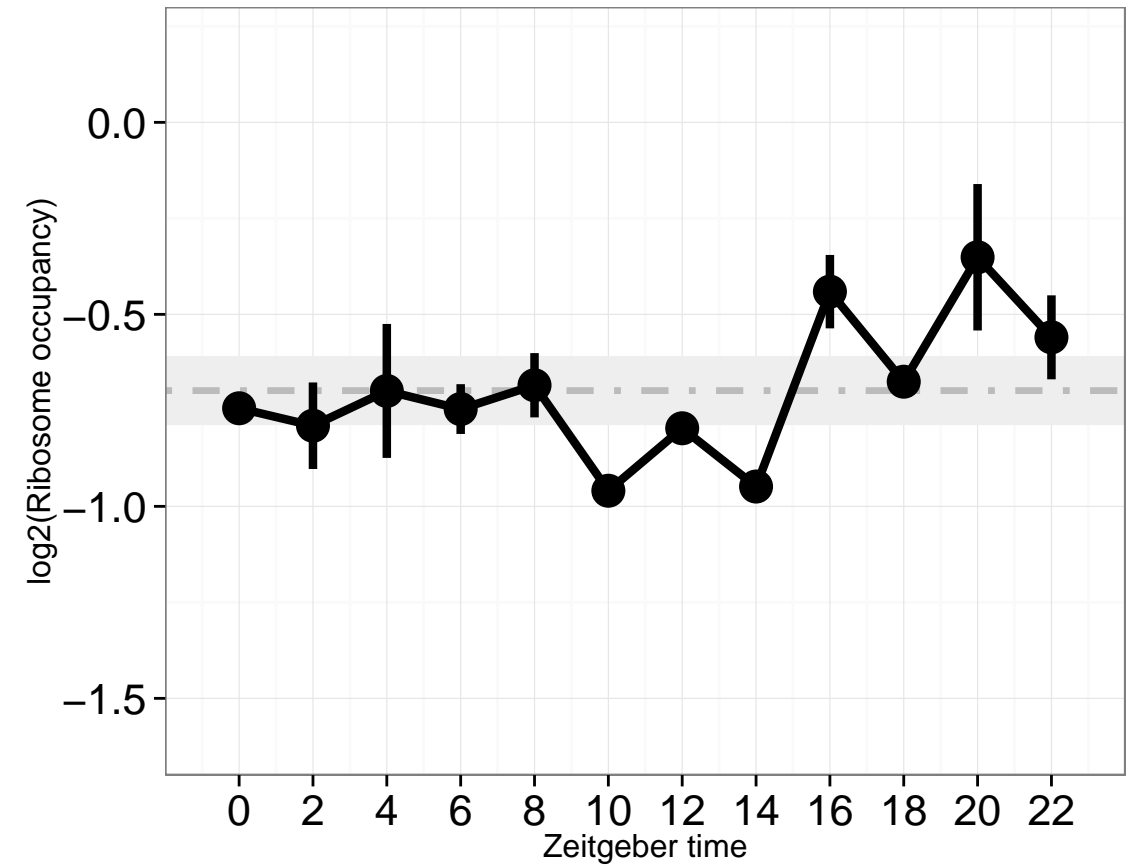

Supplement: Supplementary file 5735 [file 1]

# Gucy1a3

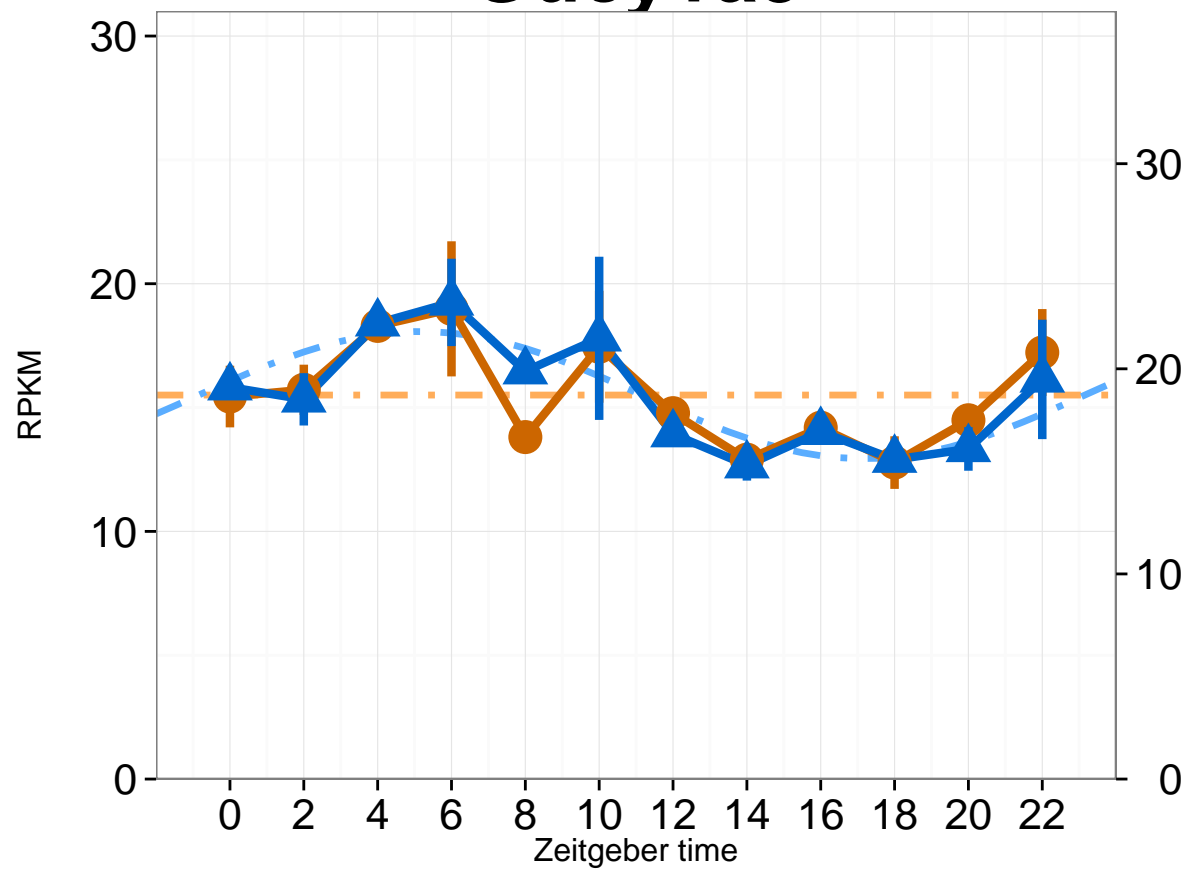

# Gucy1a3

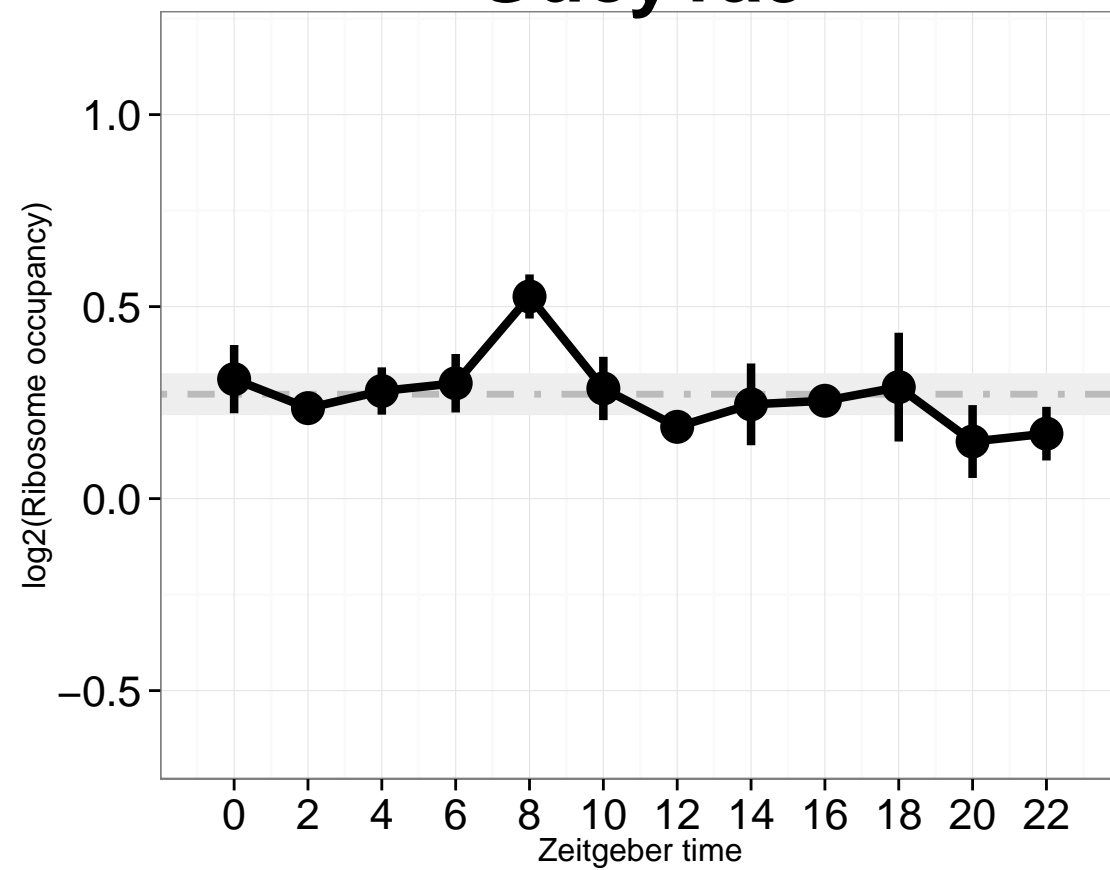

Supplement: Supplementary file 5736 [file 1]

## Foxj2

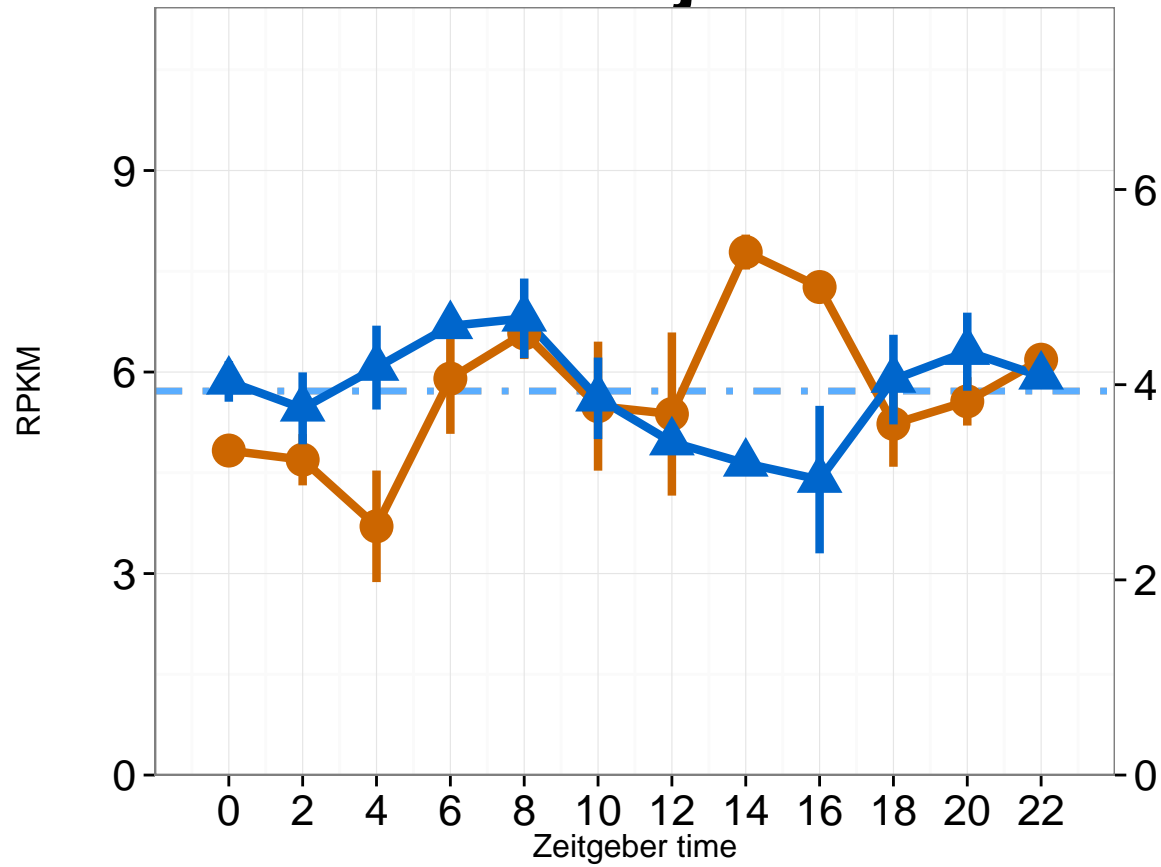

## Foxj2

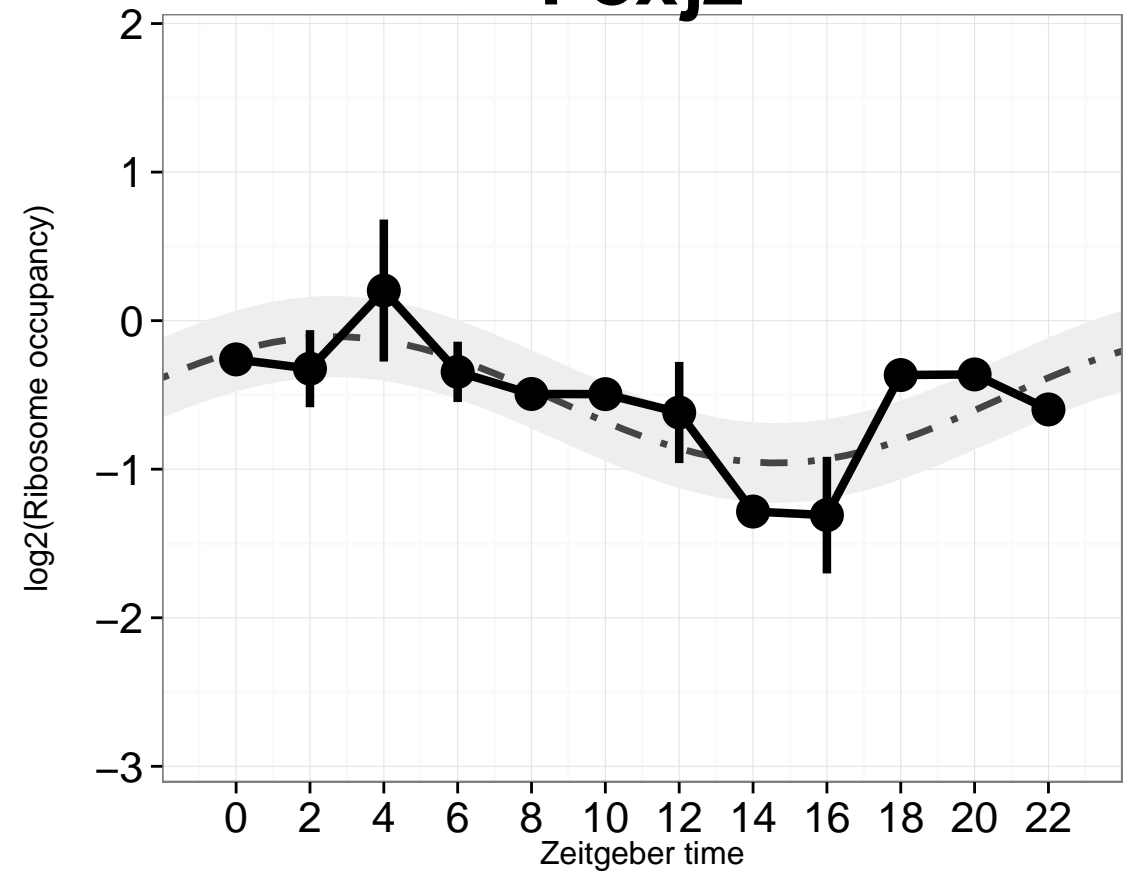

Supplement: Supplementary file 5737 [file 1]

## Acer2

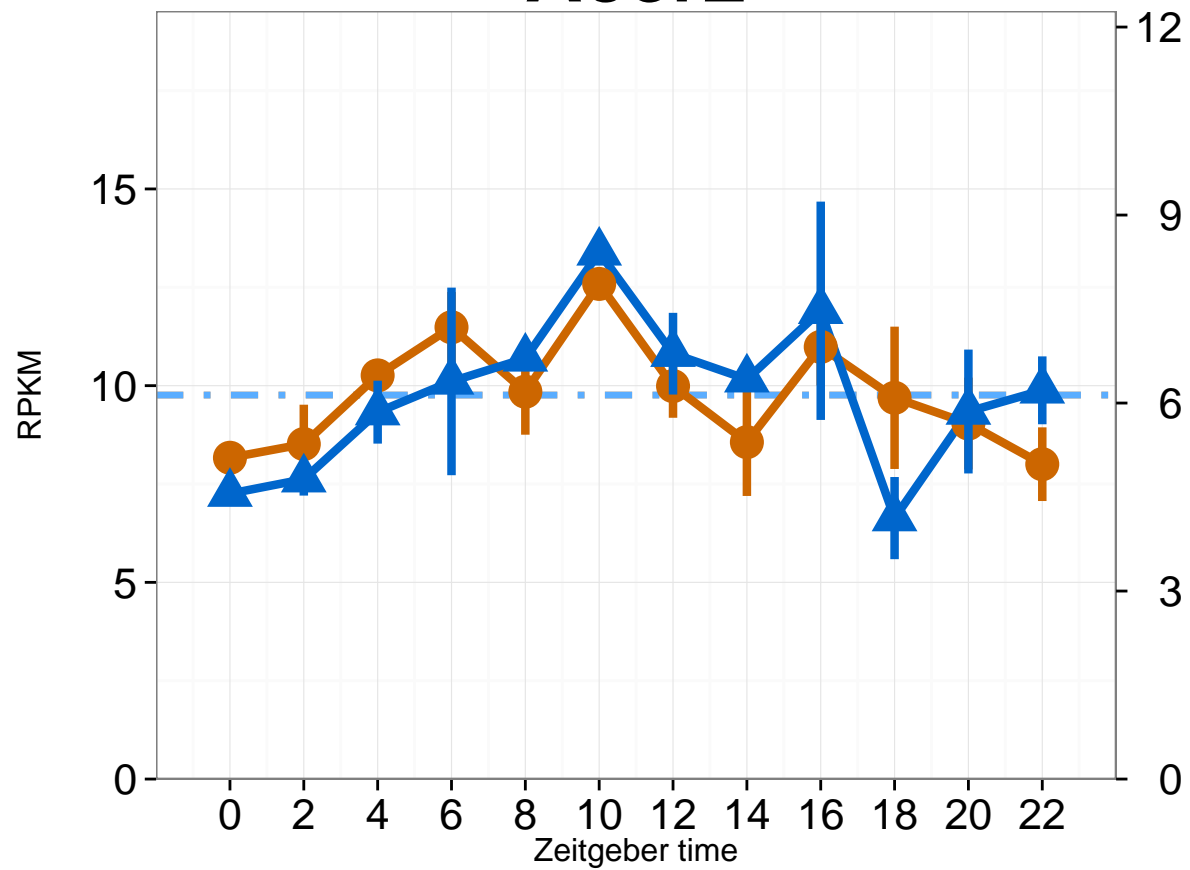

## Acer2

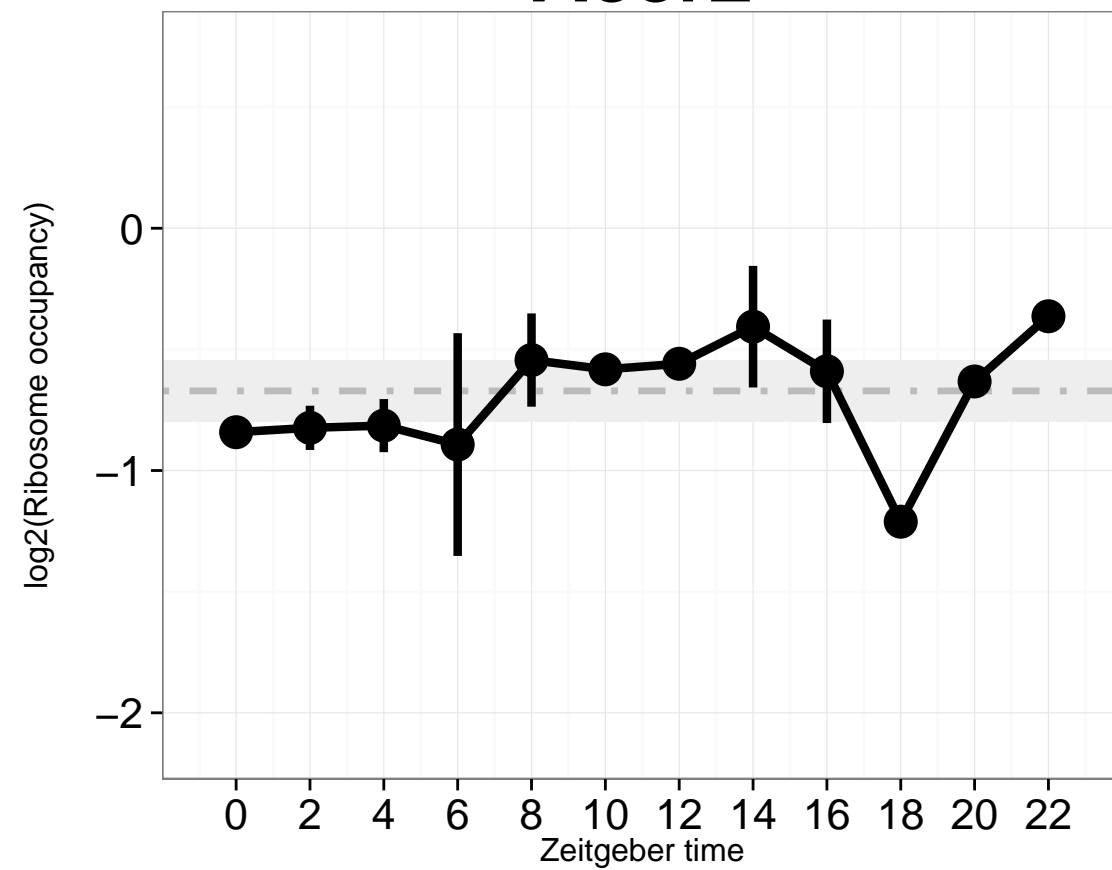

Supplement: Supplementary file 5738 [file 1]

## Gm11992

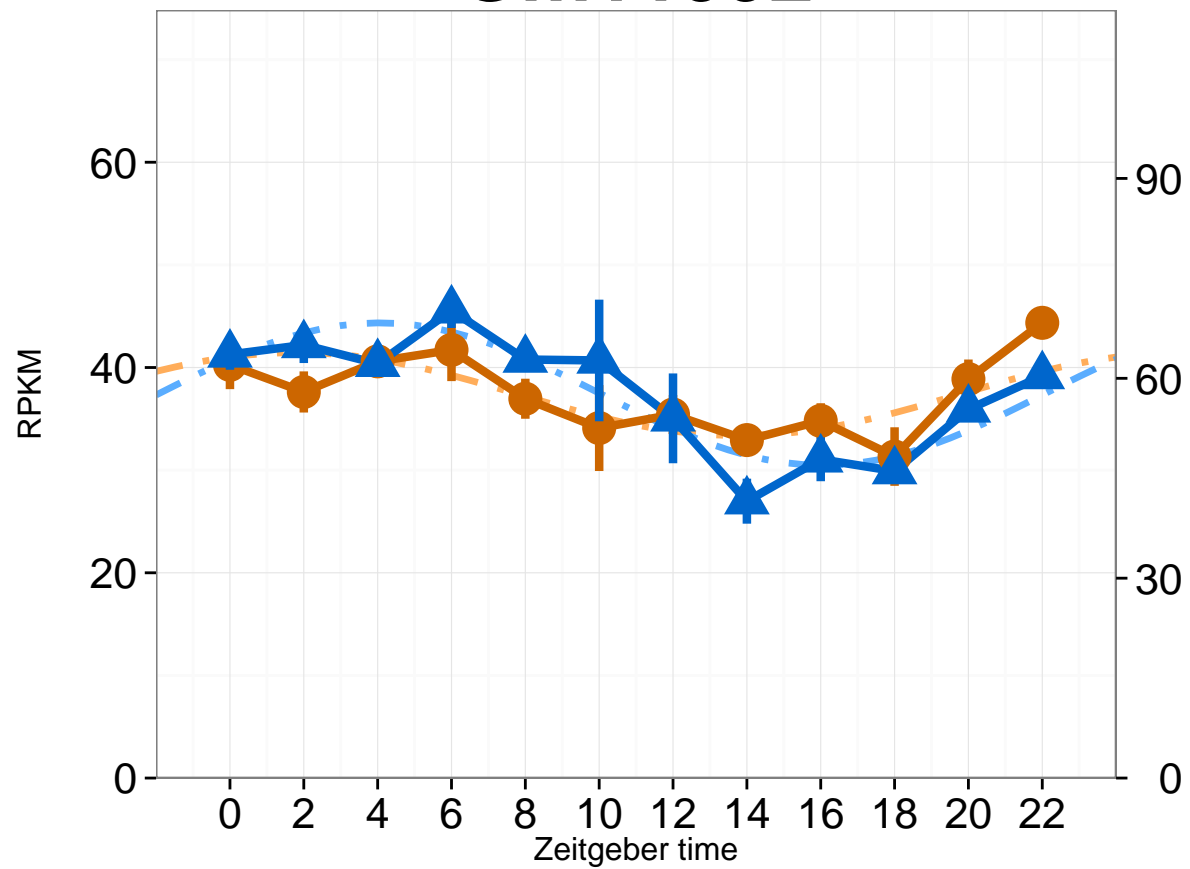

## Gm11992

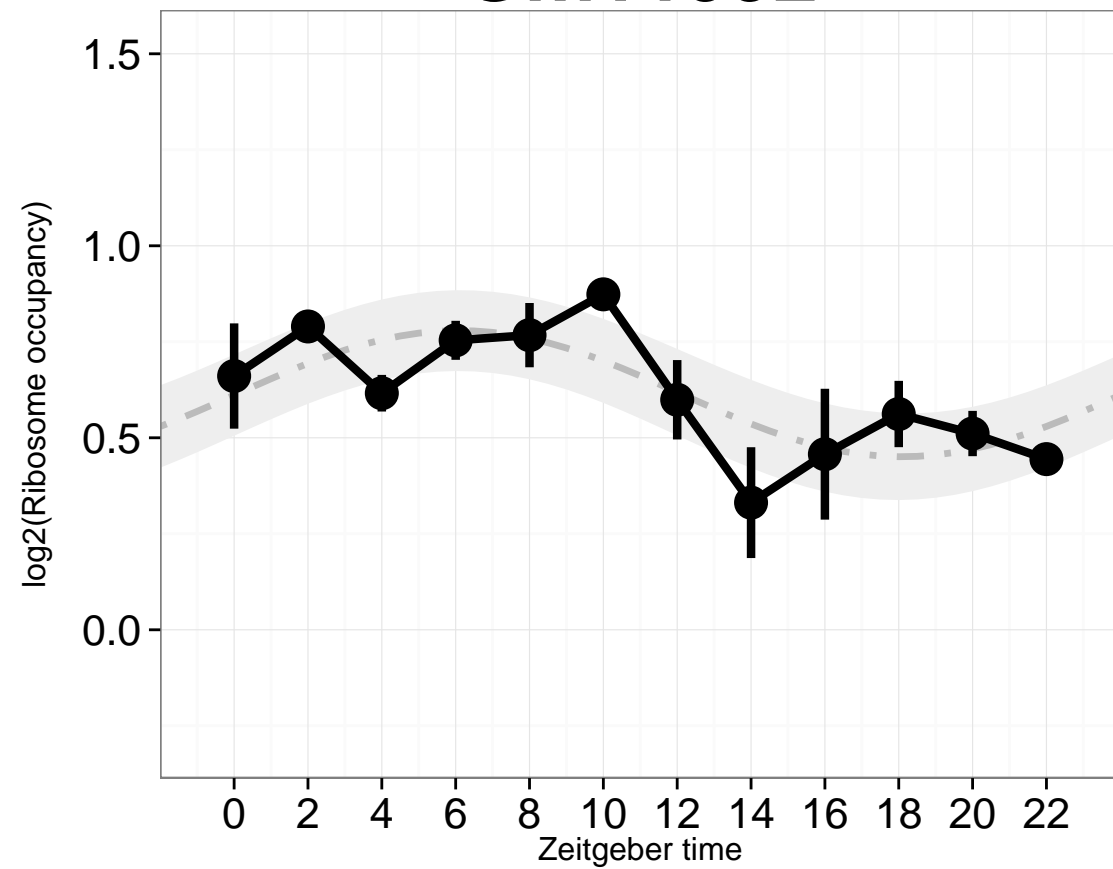

Supplement: Supplementary file 5739 [file 1]

## Cab39l

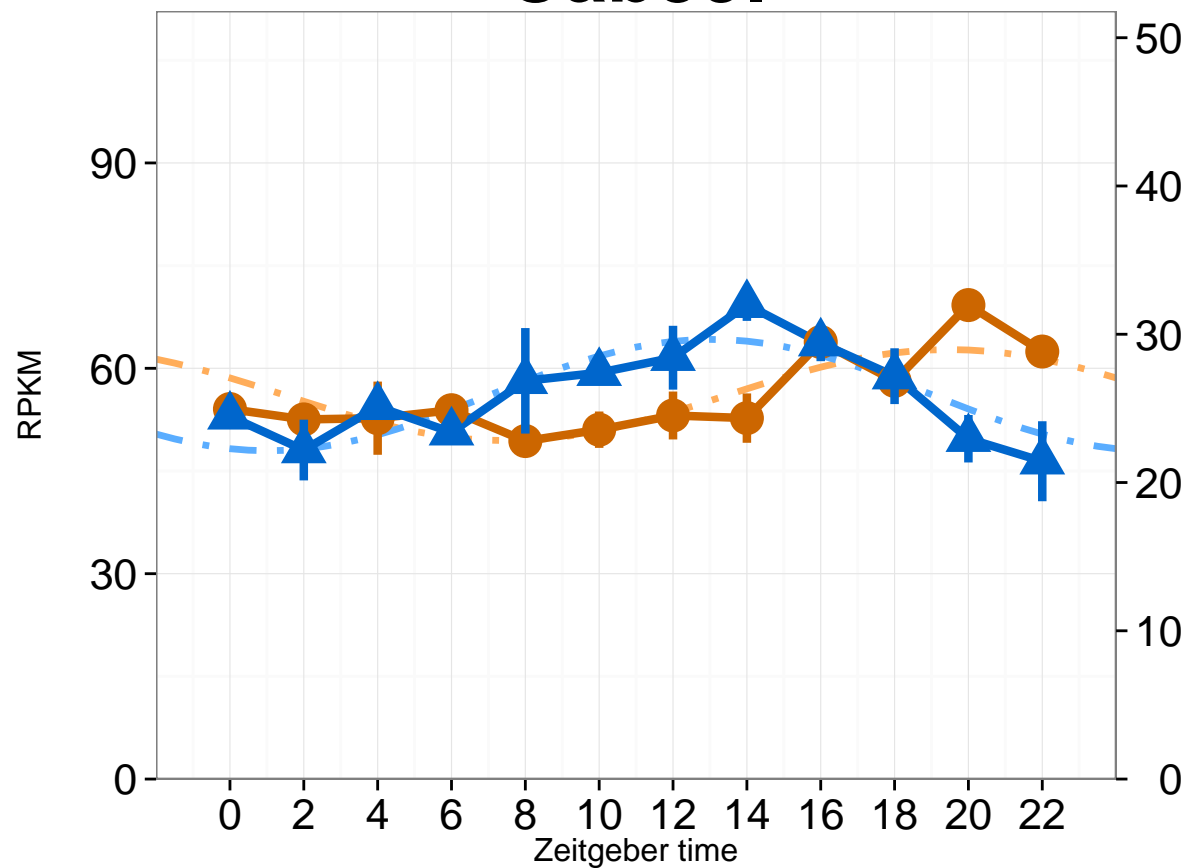

## Cab39l

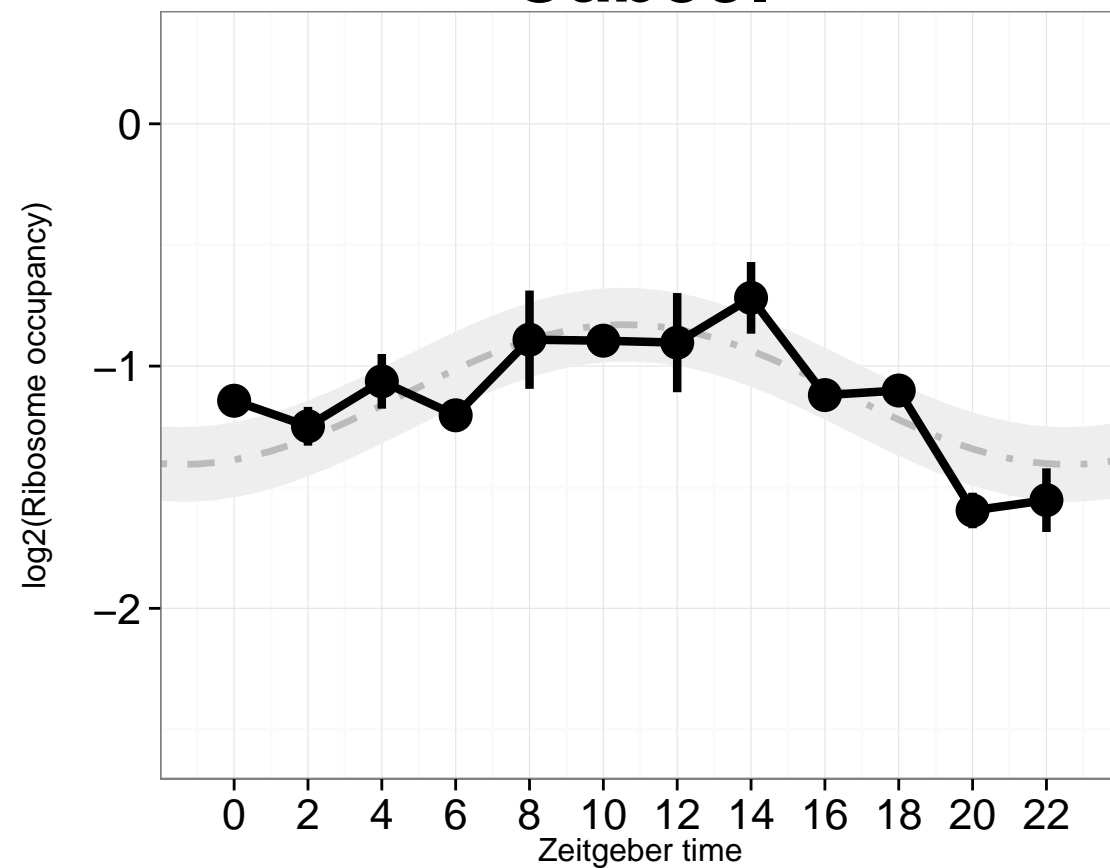

Supplement: Supplementary file 5740 [file 1]

## Emr1

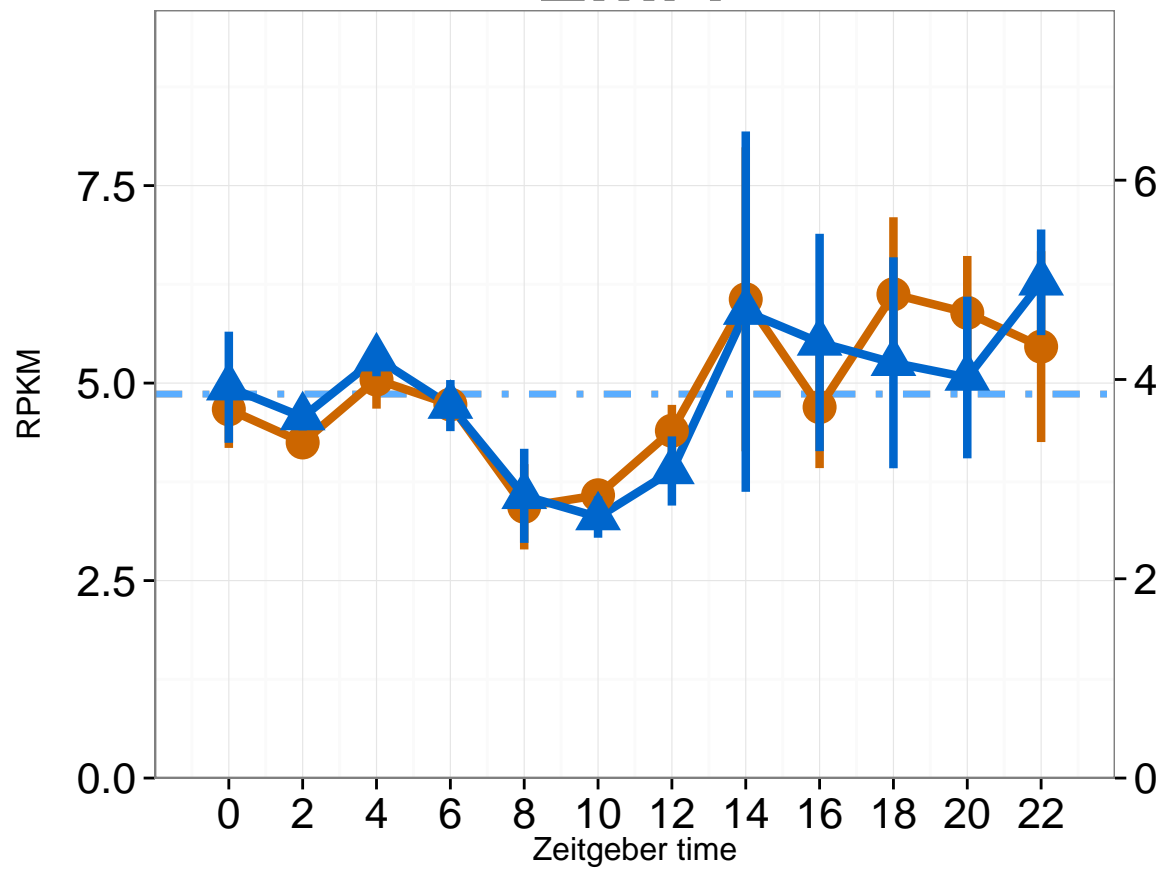

## Emr1

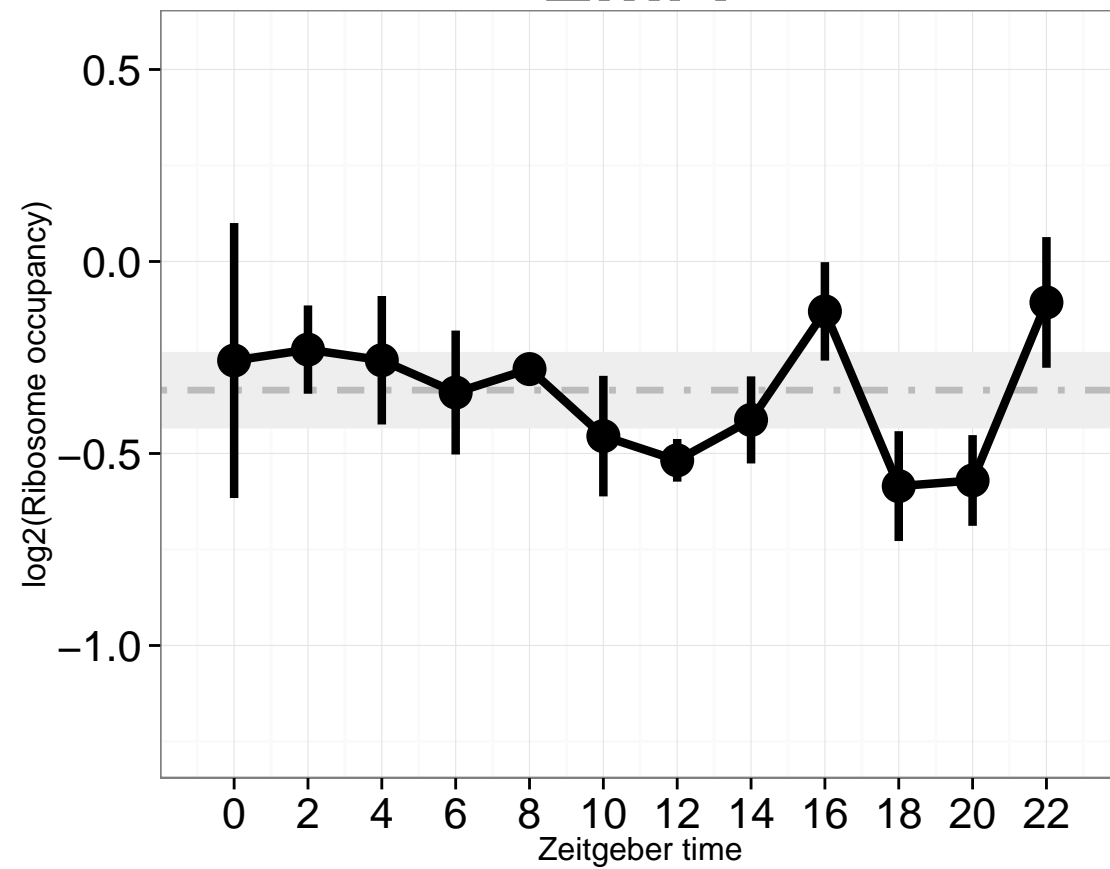

Supplement: Supplementary file 5741 [file 1]

# Kcng2

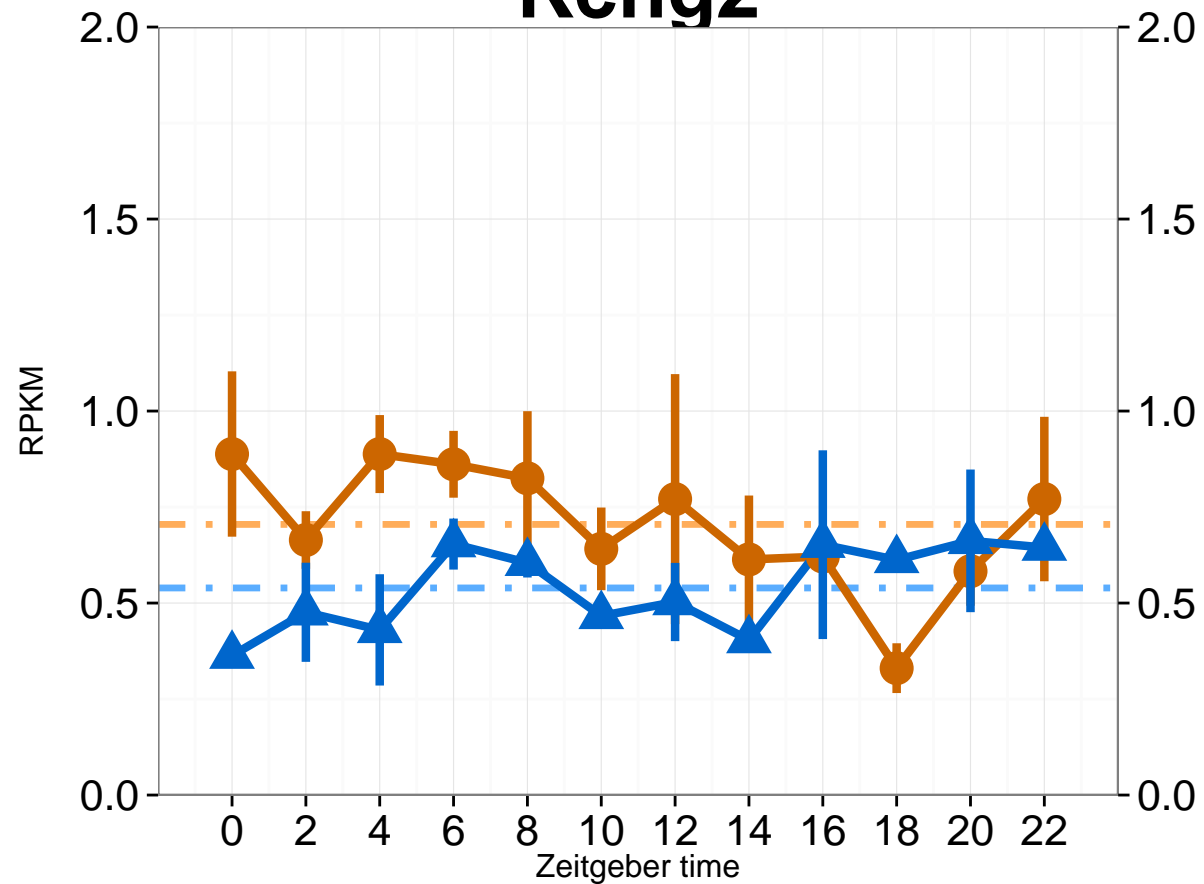

# Kcng2

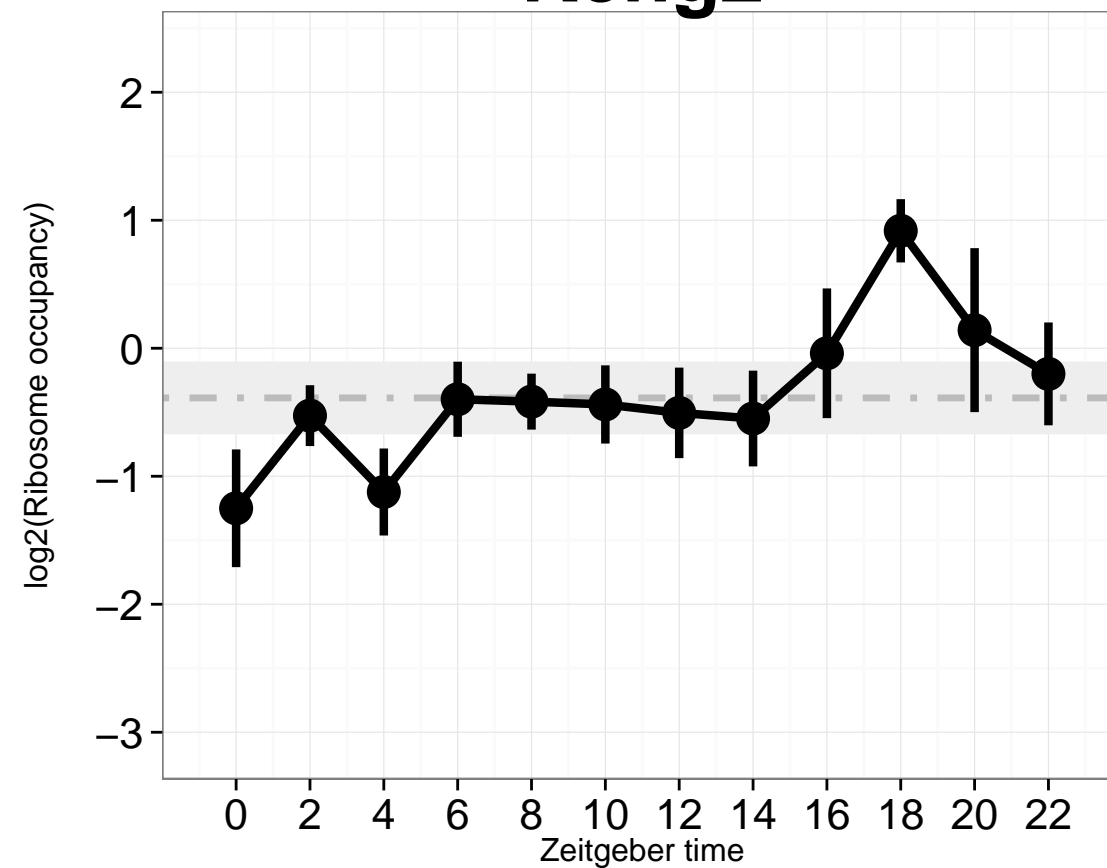

Supplement: Supplementary file 5742 [file 1]

# Tmem106b

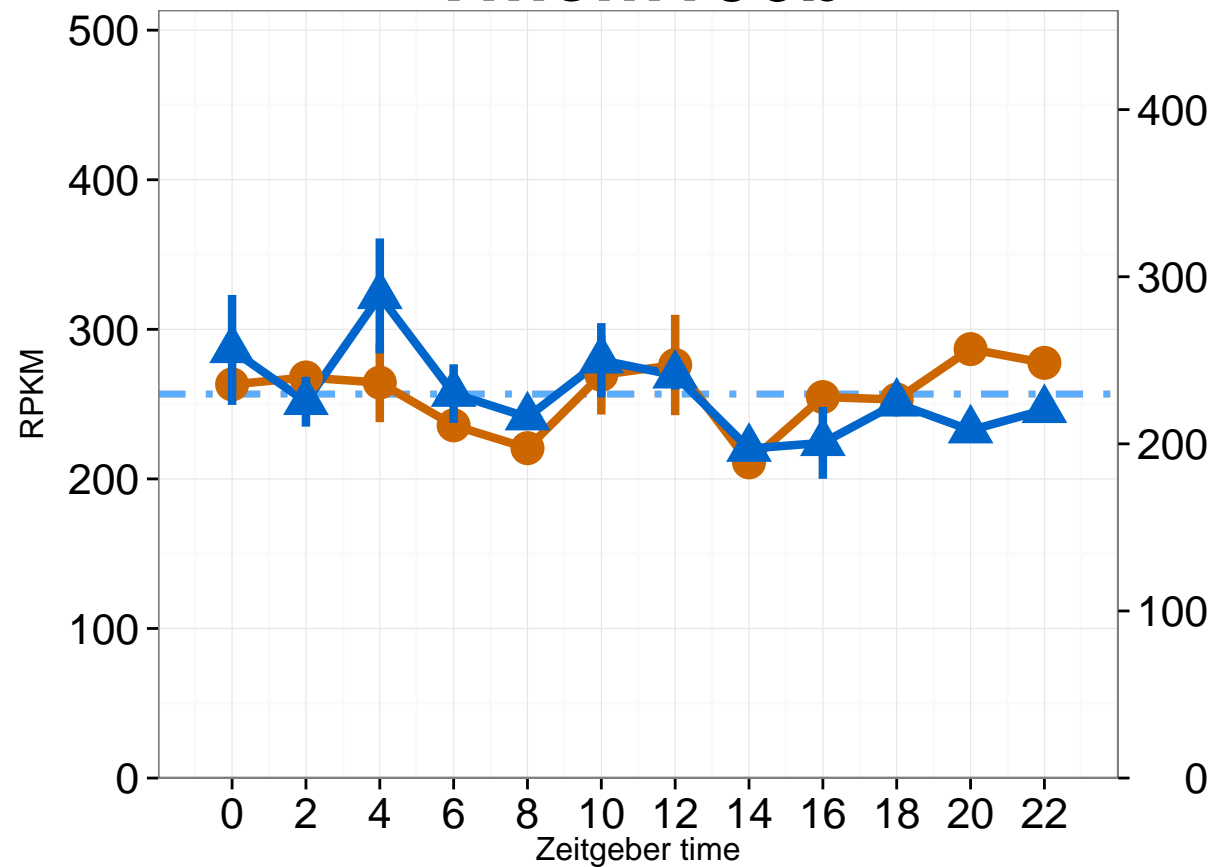

# Tmem106b

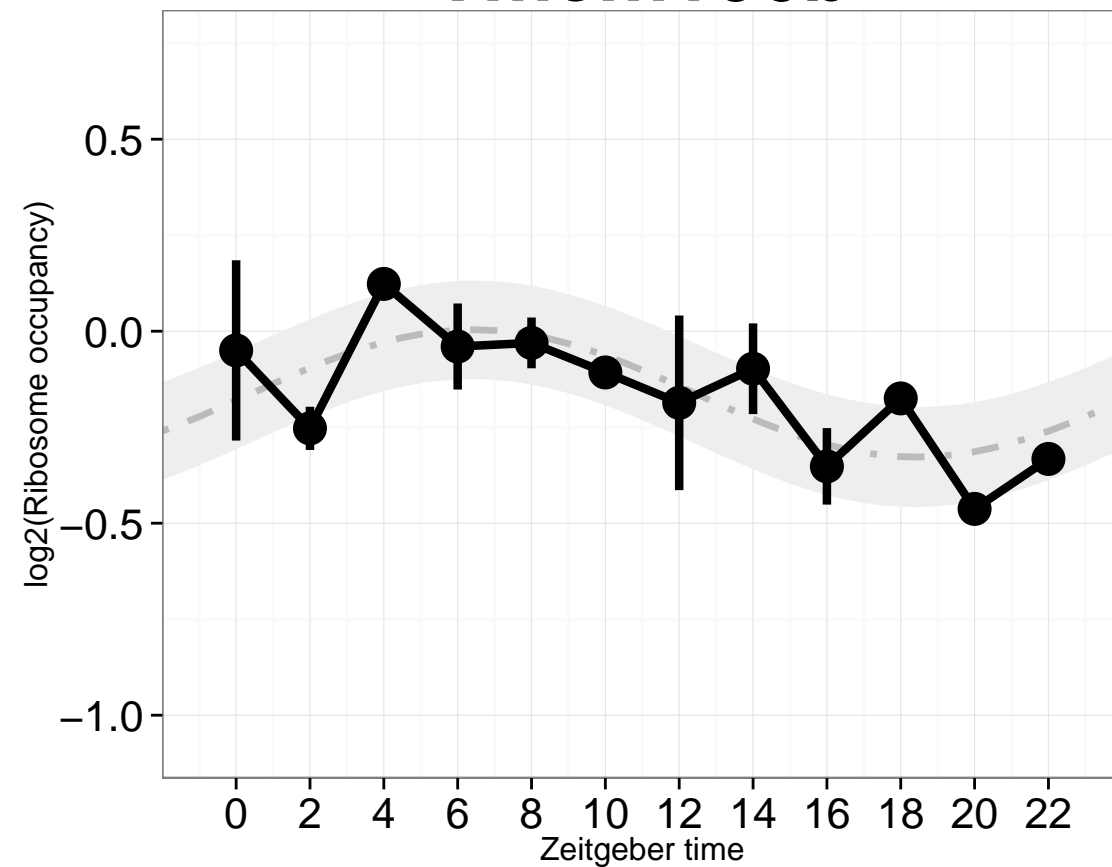

Supplement: Supplementary file 5743 [file 1]

# Cyp4a12b

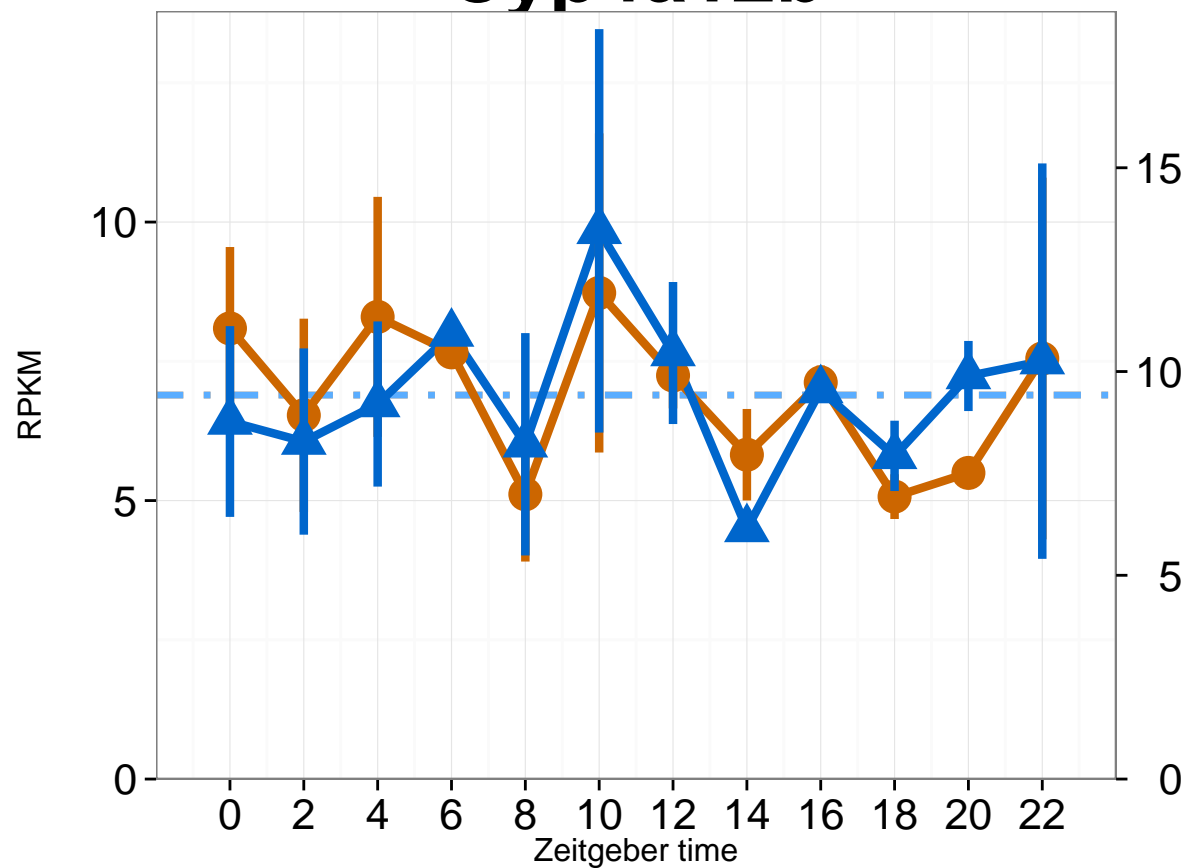

# Cyp4a12b

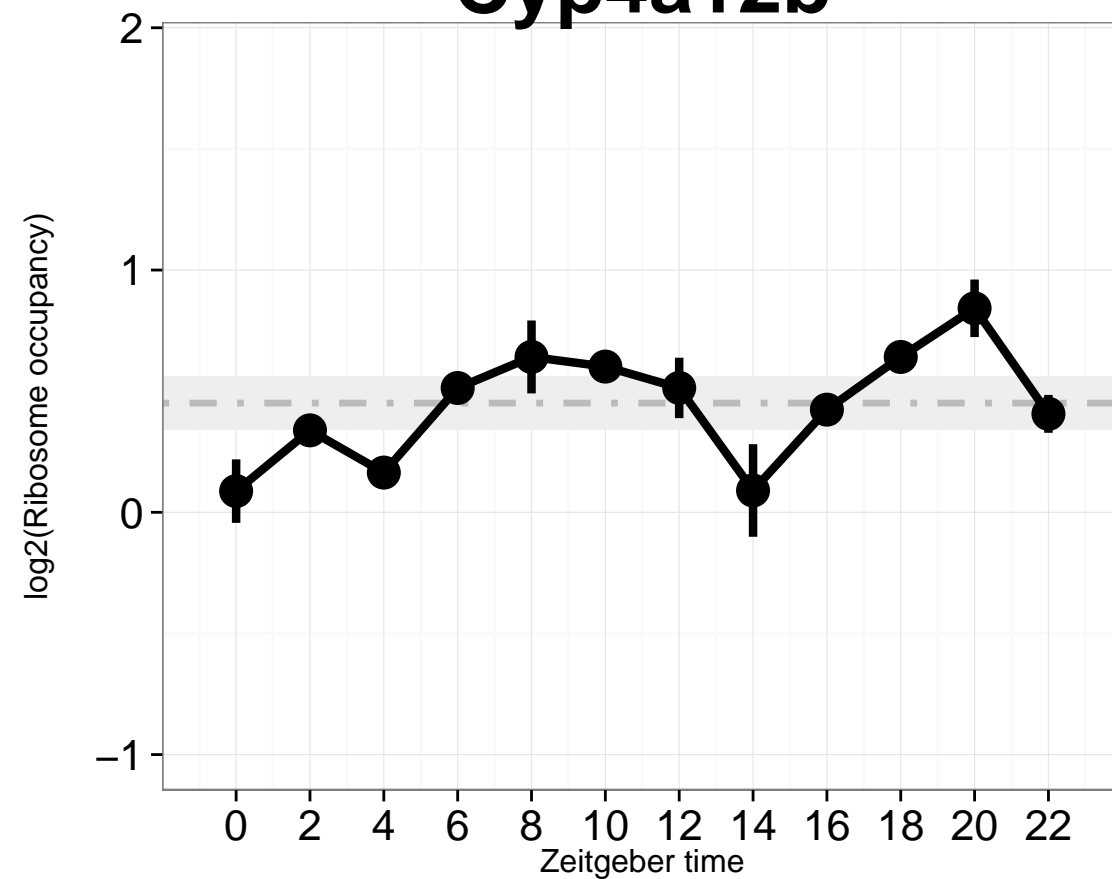

Supplement: Supplementary file 5744 [file 1]

**Trib3 TR**

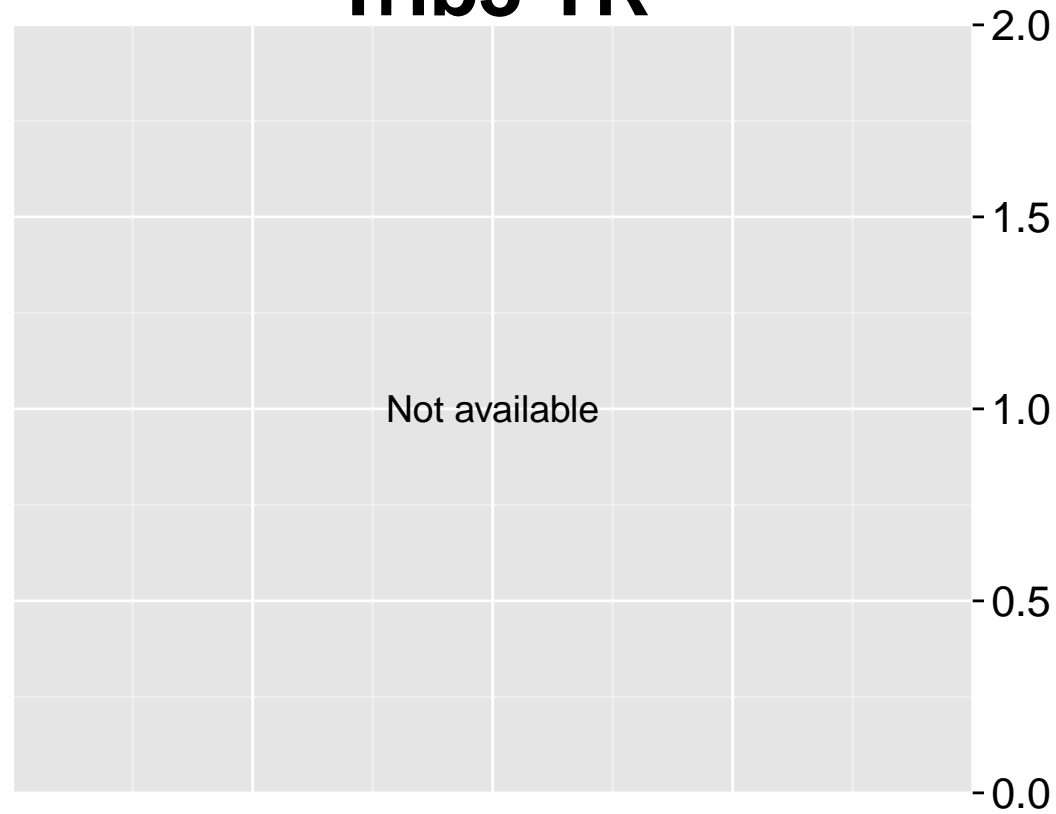

**Trib3 log2(Ribosome occupancy)**

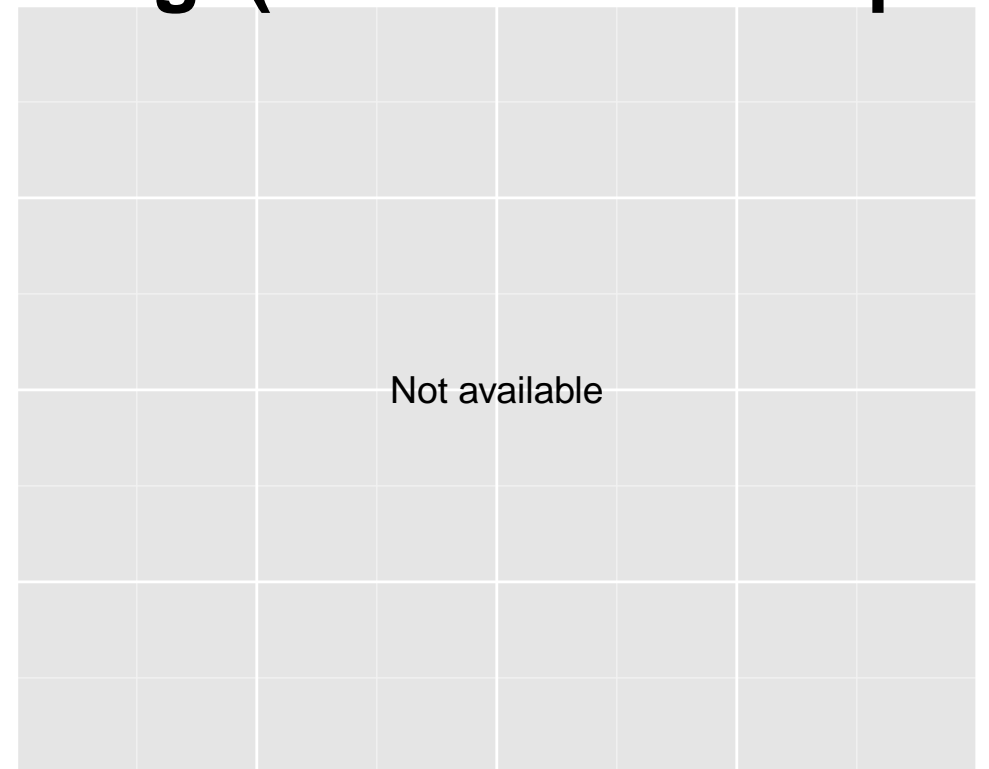

Supplement: Supplementary file 5745 [file 1]

## Glrx

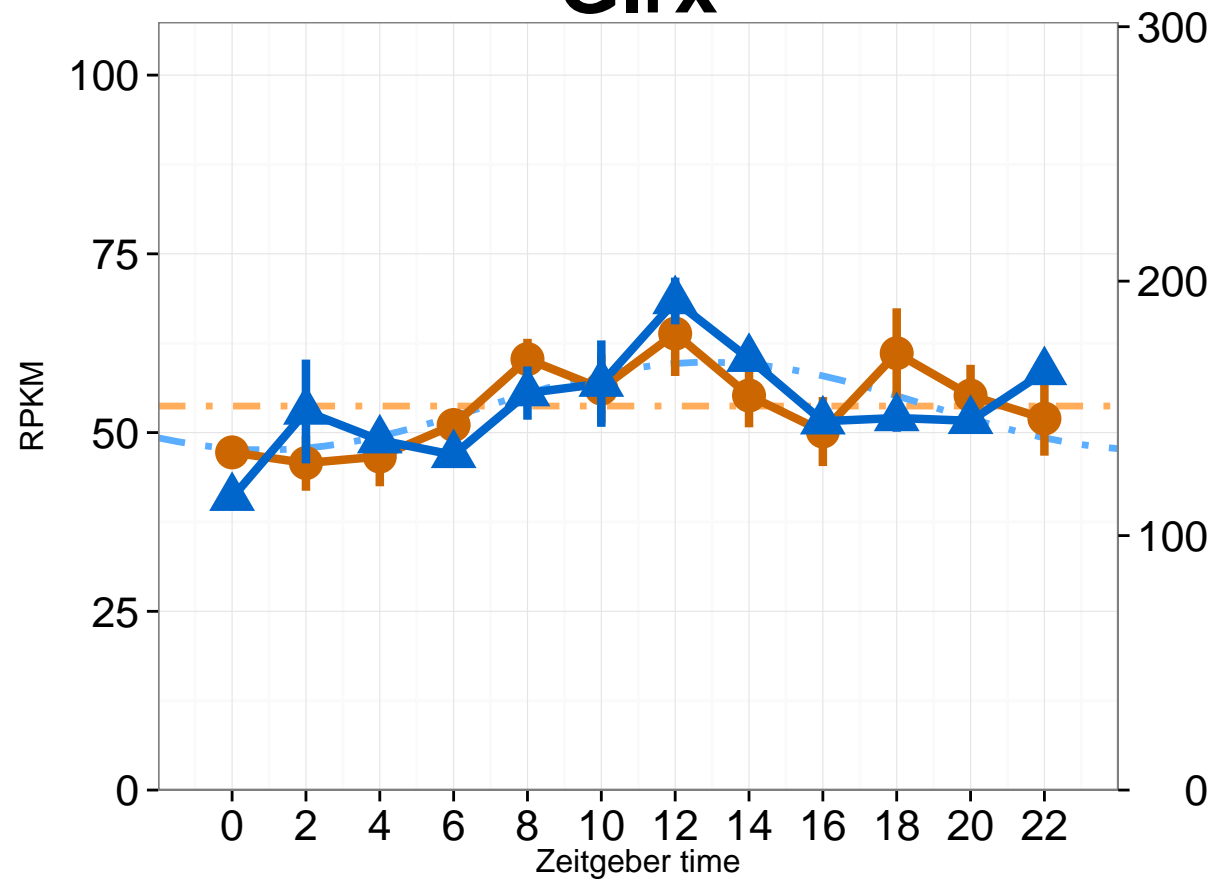

## Glrx

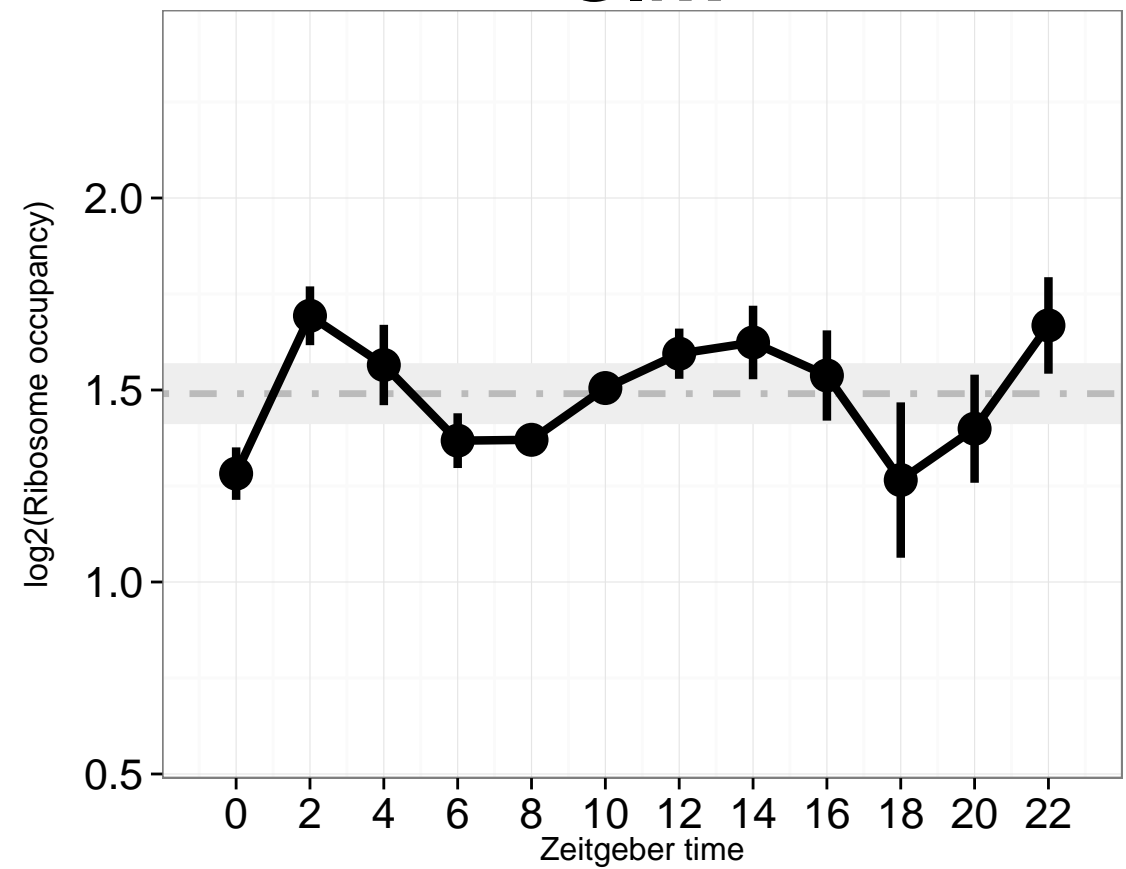

Supplement: Supplementary file 5746 [file 1]

## Cbr4

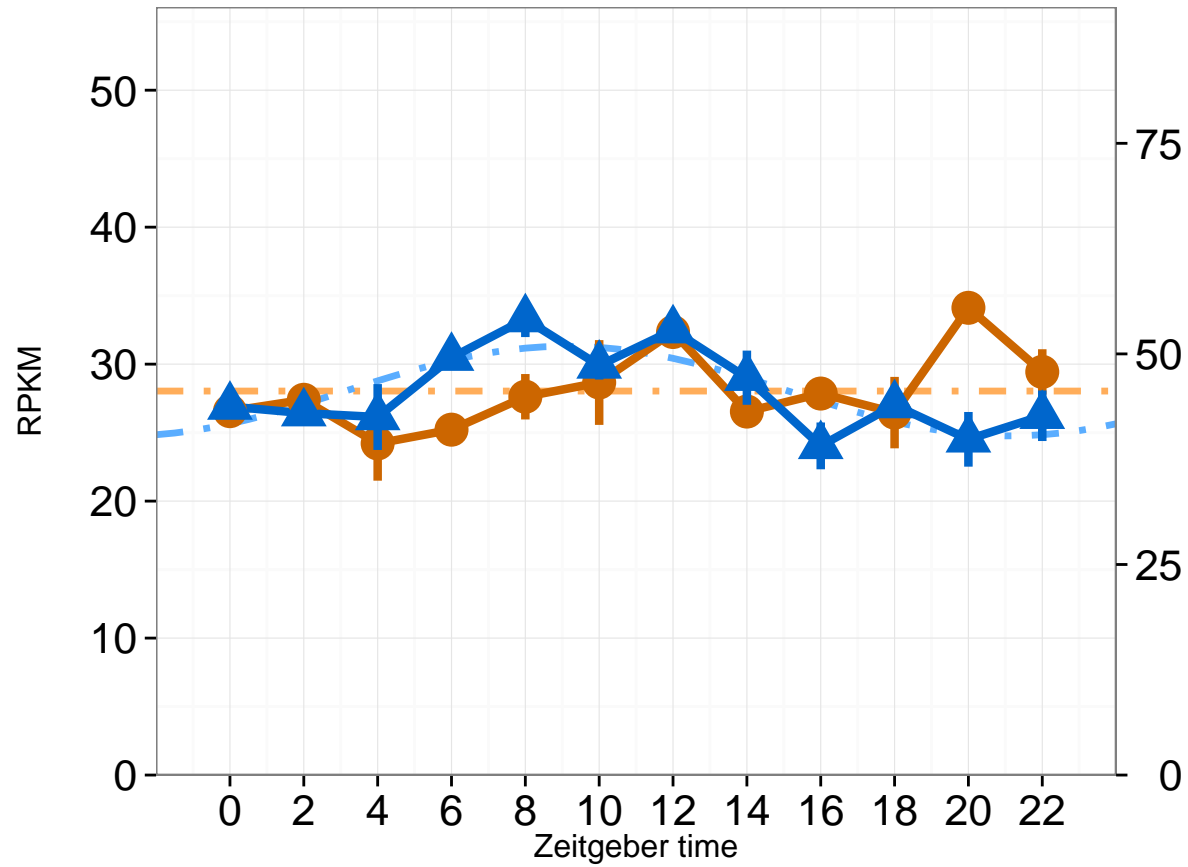

## Cbr4

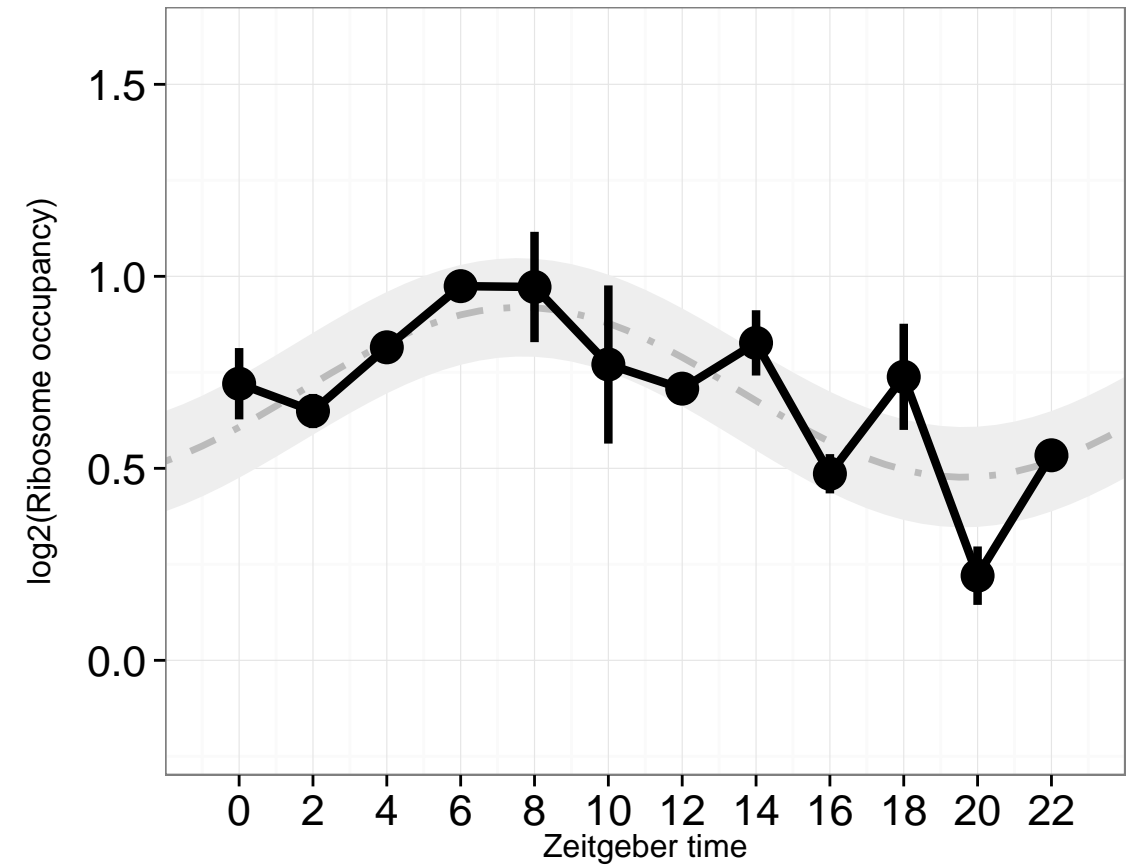

Supplement: Supplementary file 5747 [file 1]

## Nxt1

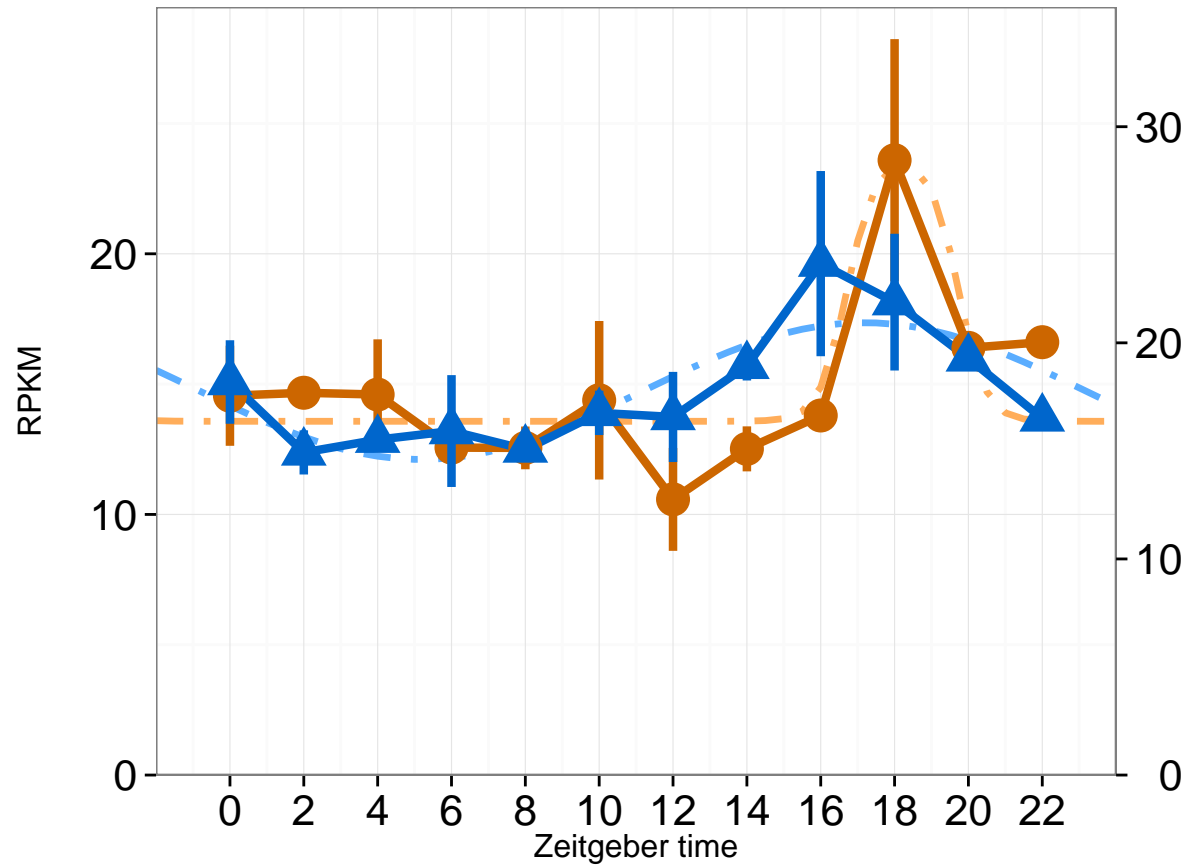

## Nxt1

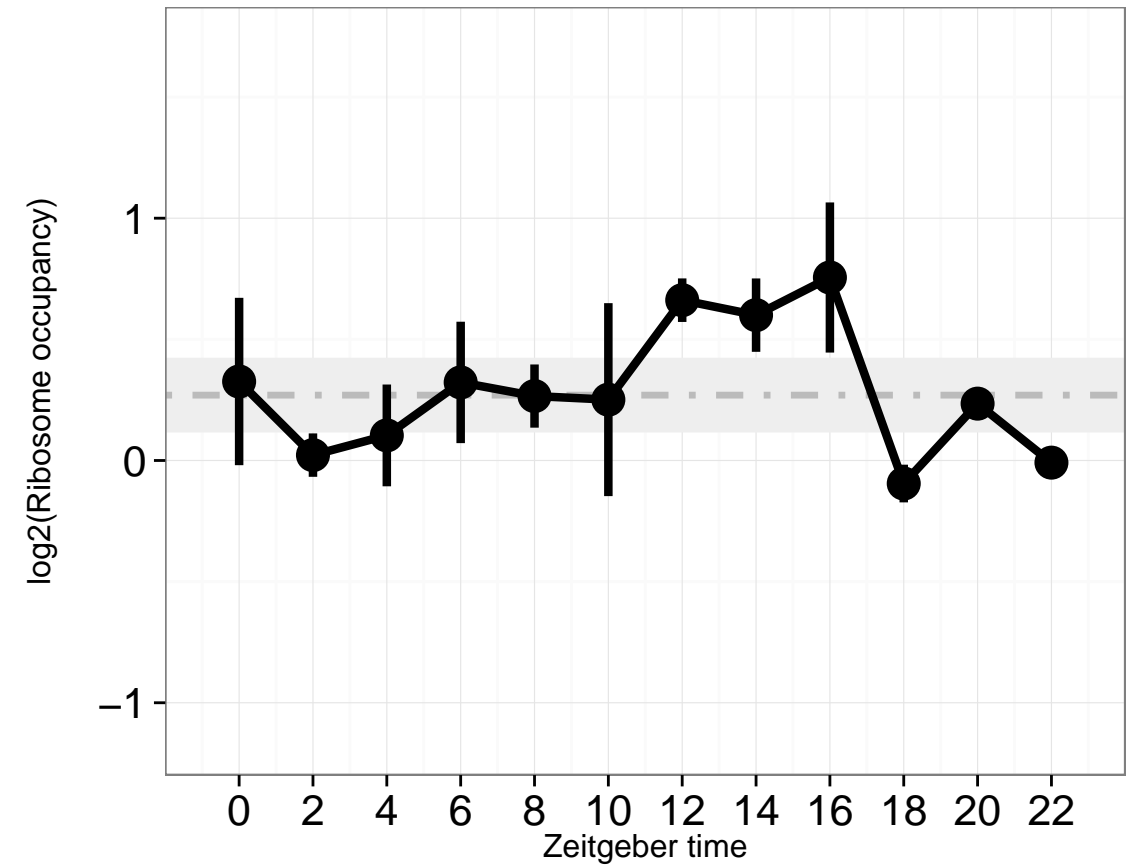

Supplement: Supplementary file 5748 [file 1]

# Rnf113a2

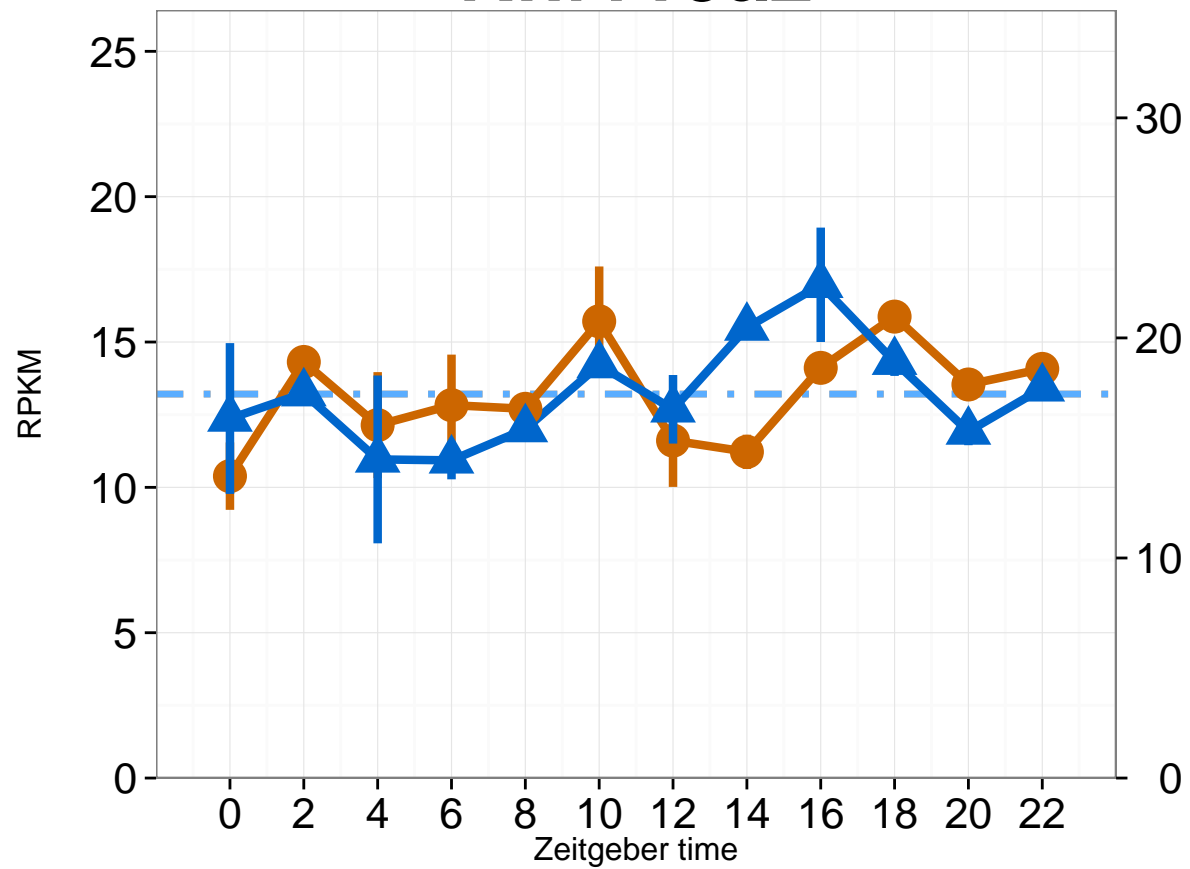

# Rnf113a2

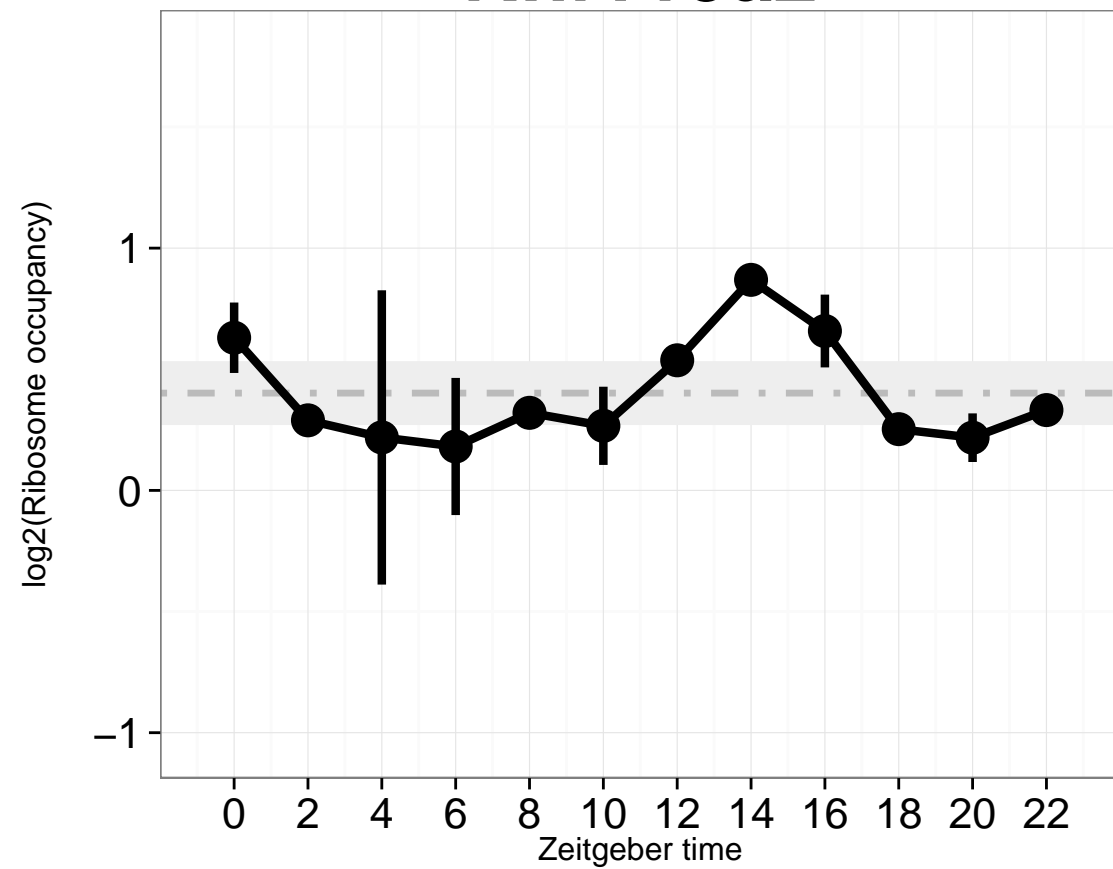

Supplement: Supplementary file 5749 [file 1]

# Vps26a

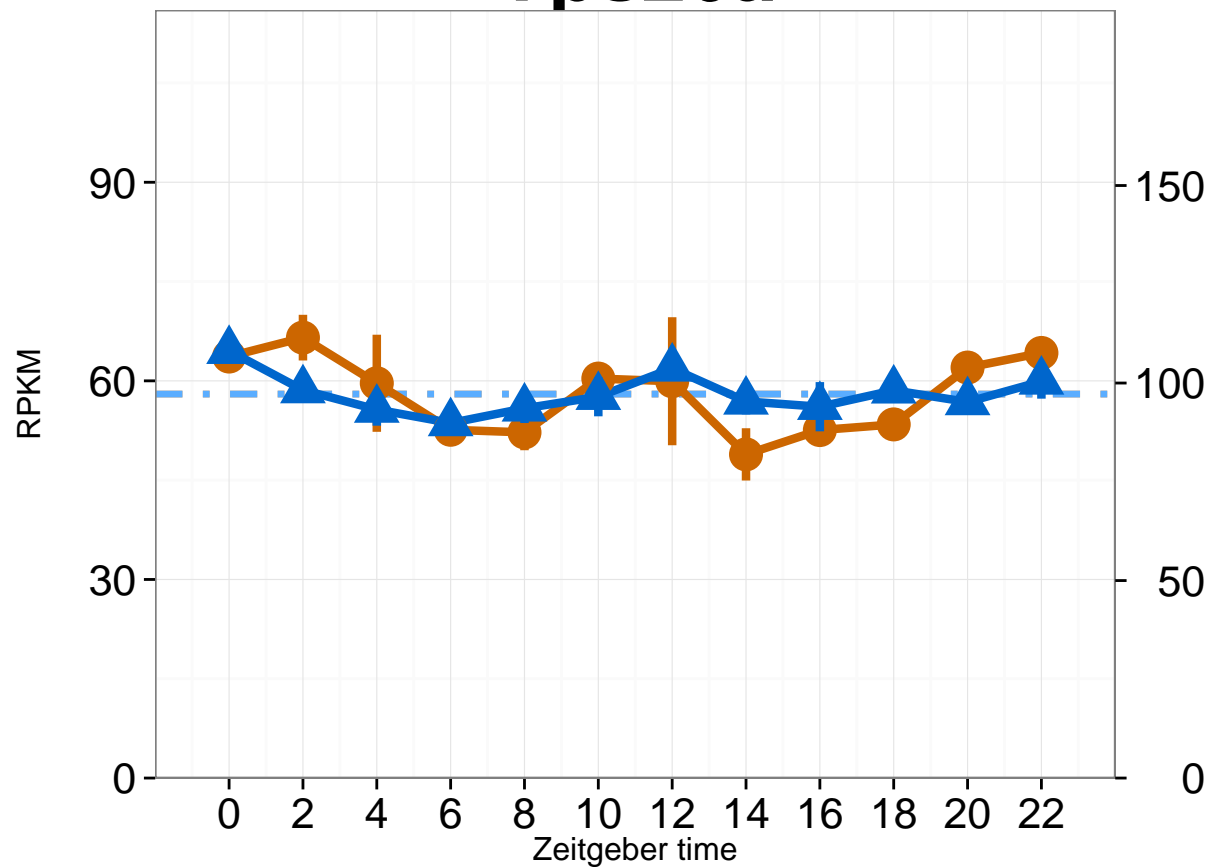

# Vps26a

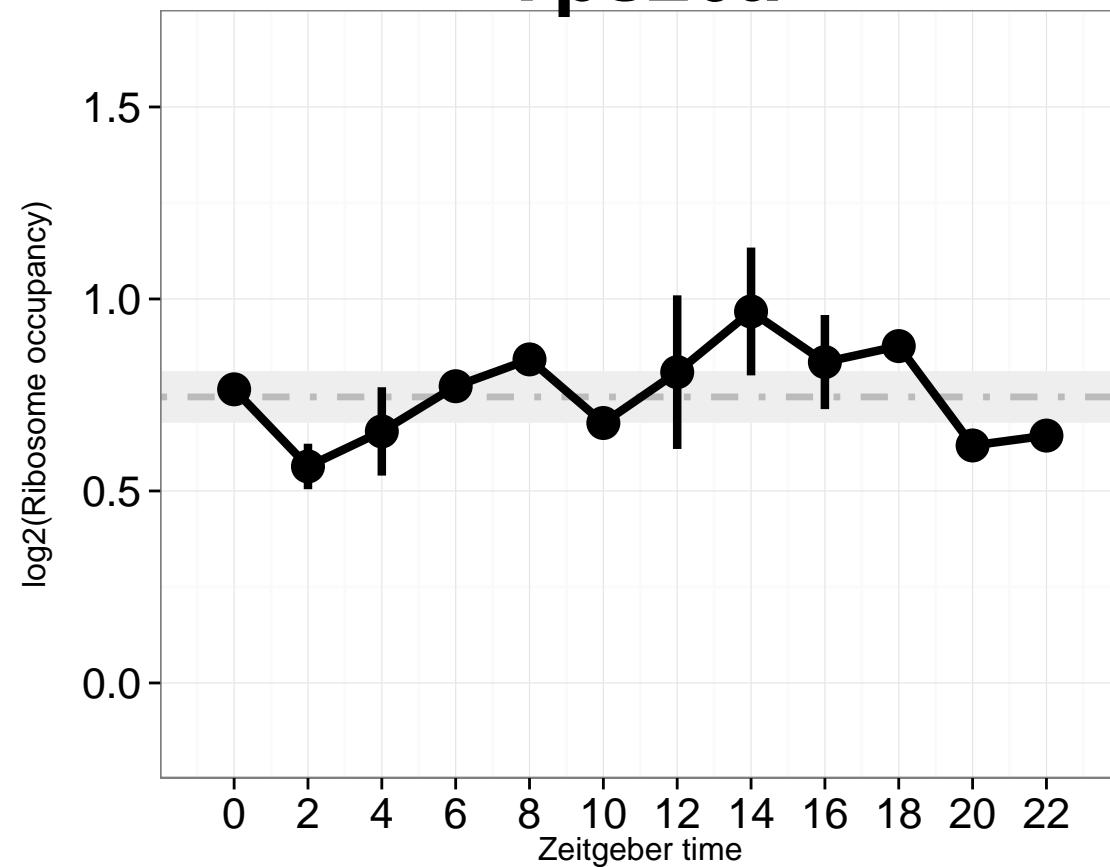

Supplement: Supplementary file 5750 [file 1]

## Aif1

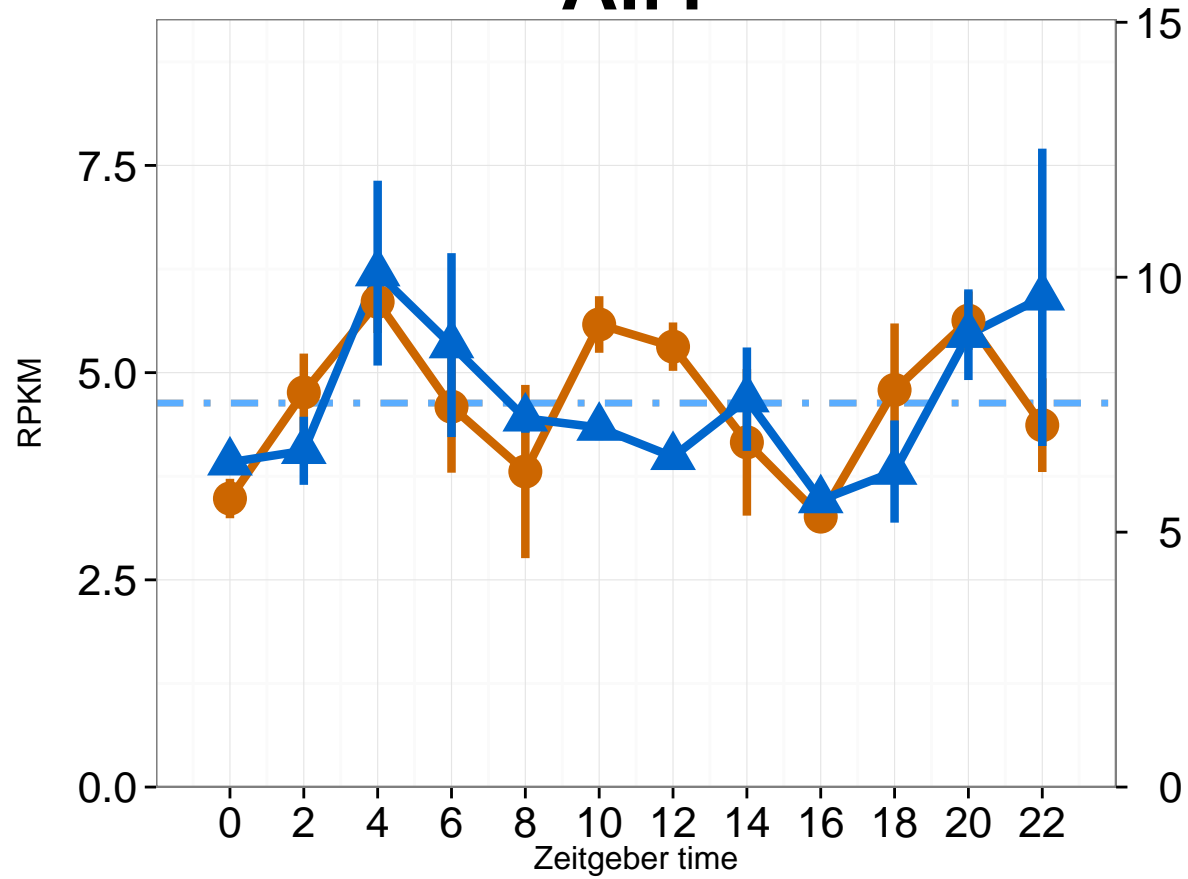

## Aif1

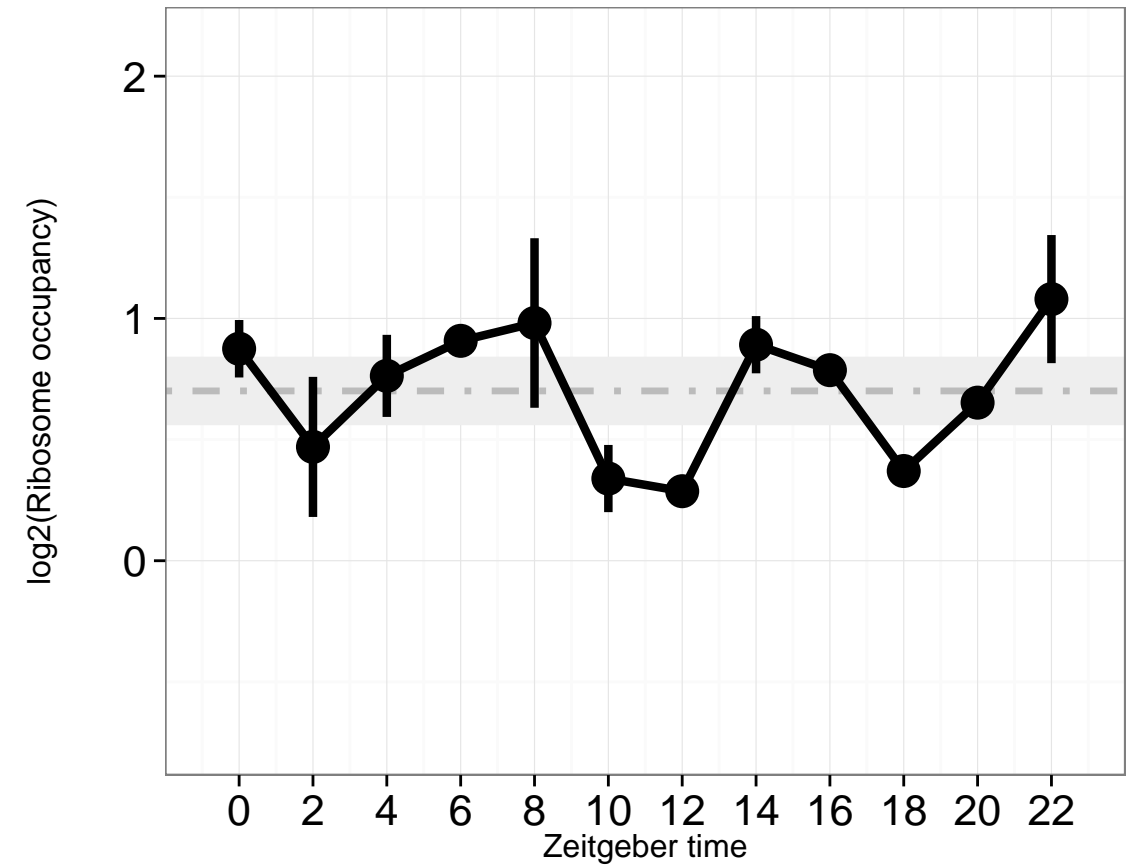

Supplement: Supplementary file 5751 [file 1]

## Acot8

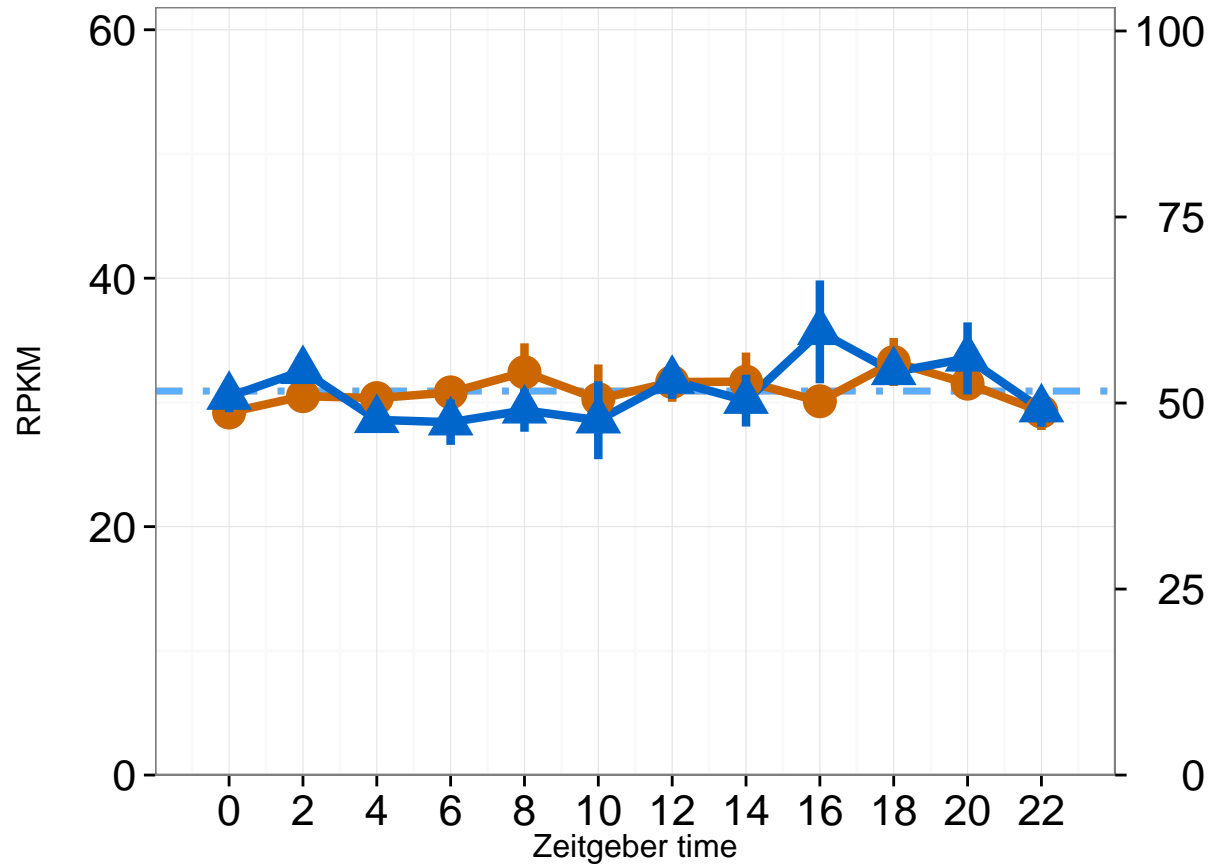

## Acot8

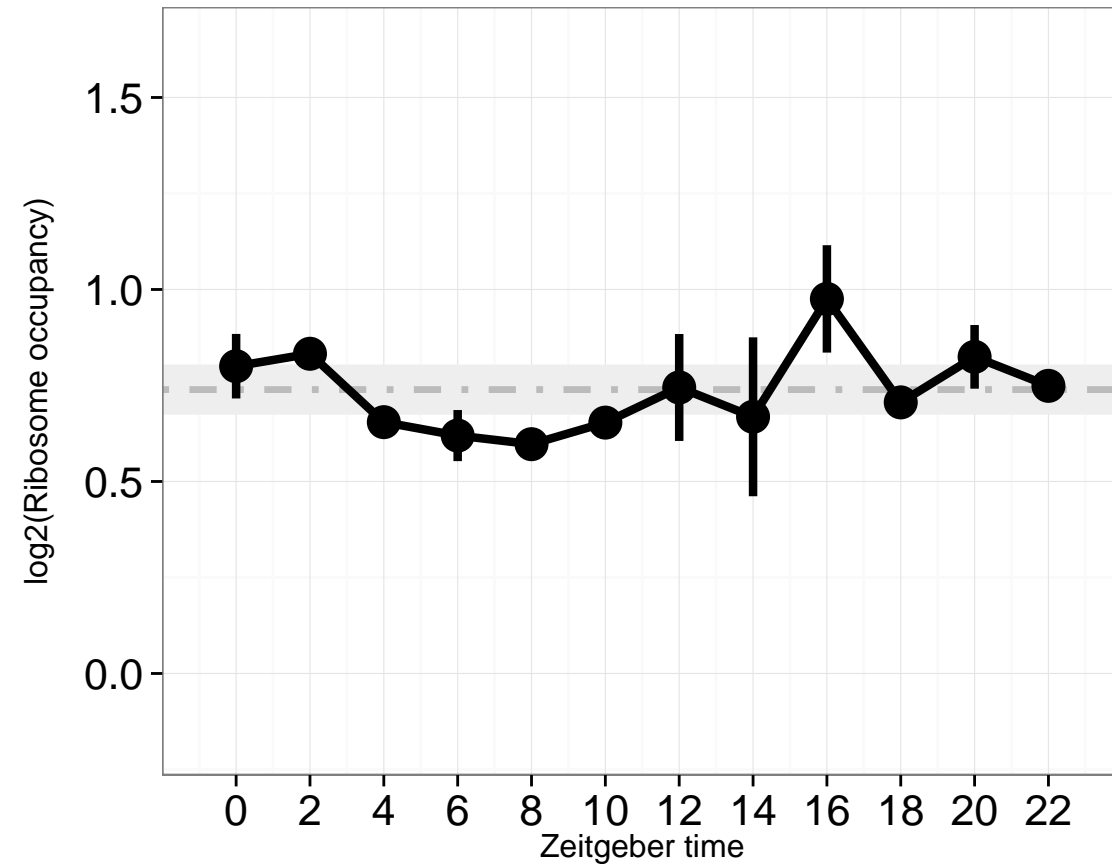

Supplement: Supplementary file 5752 [file 1]

## Ntn1

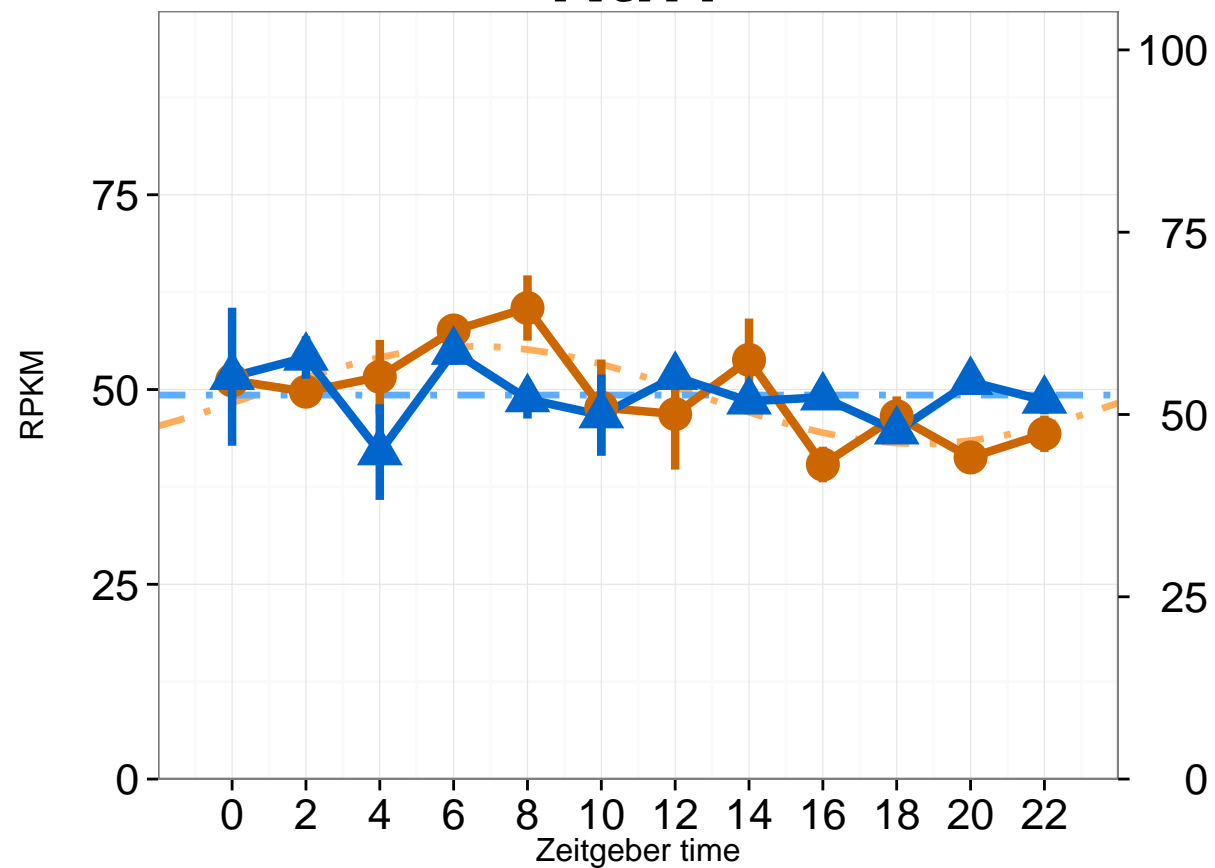

## Ntn1

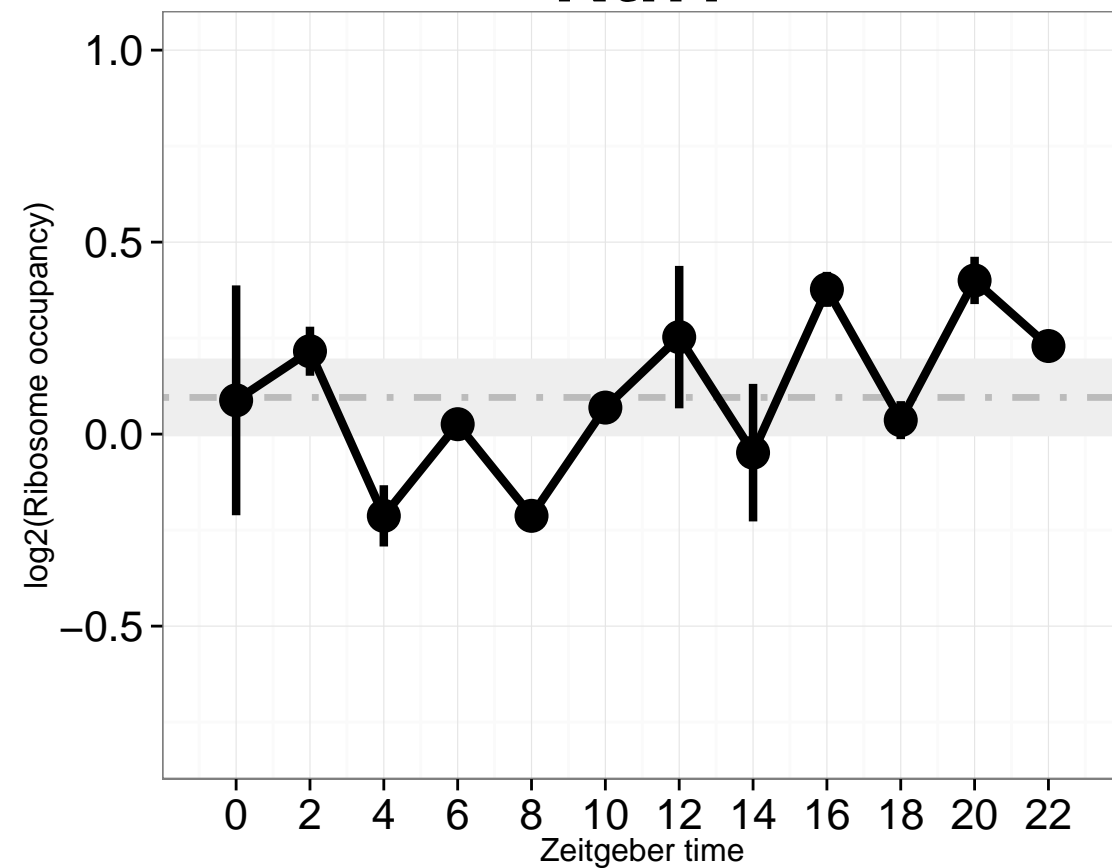

Supplement: Supplementary file 5753 [file 1]

## Axl

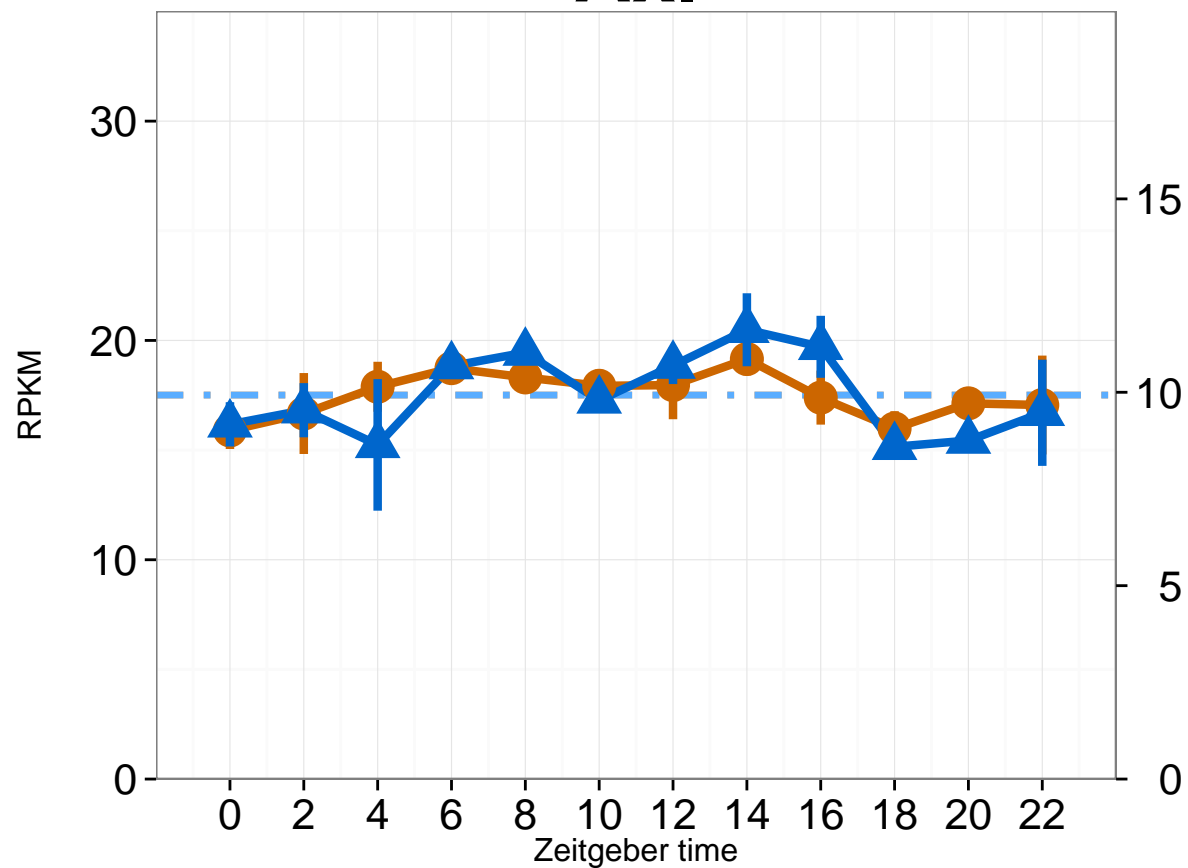

## Axl

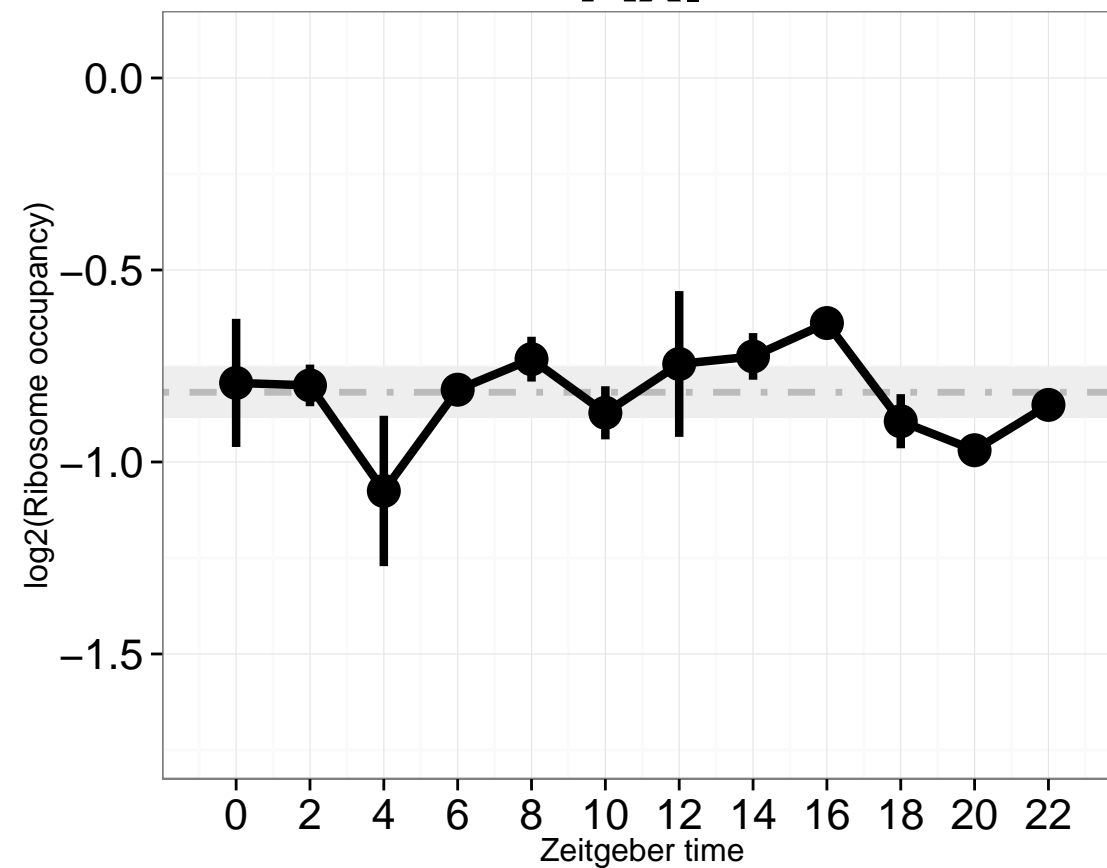

Supplement: Supplementary file 5754 [file 1]

# Vwa8

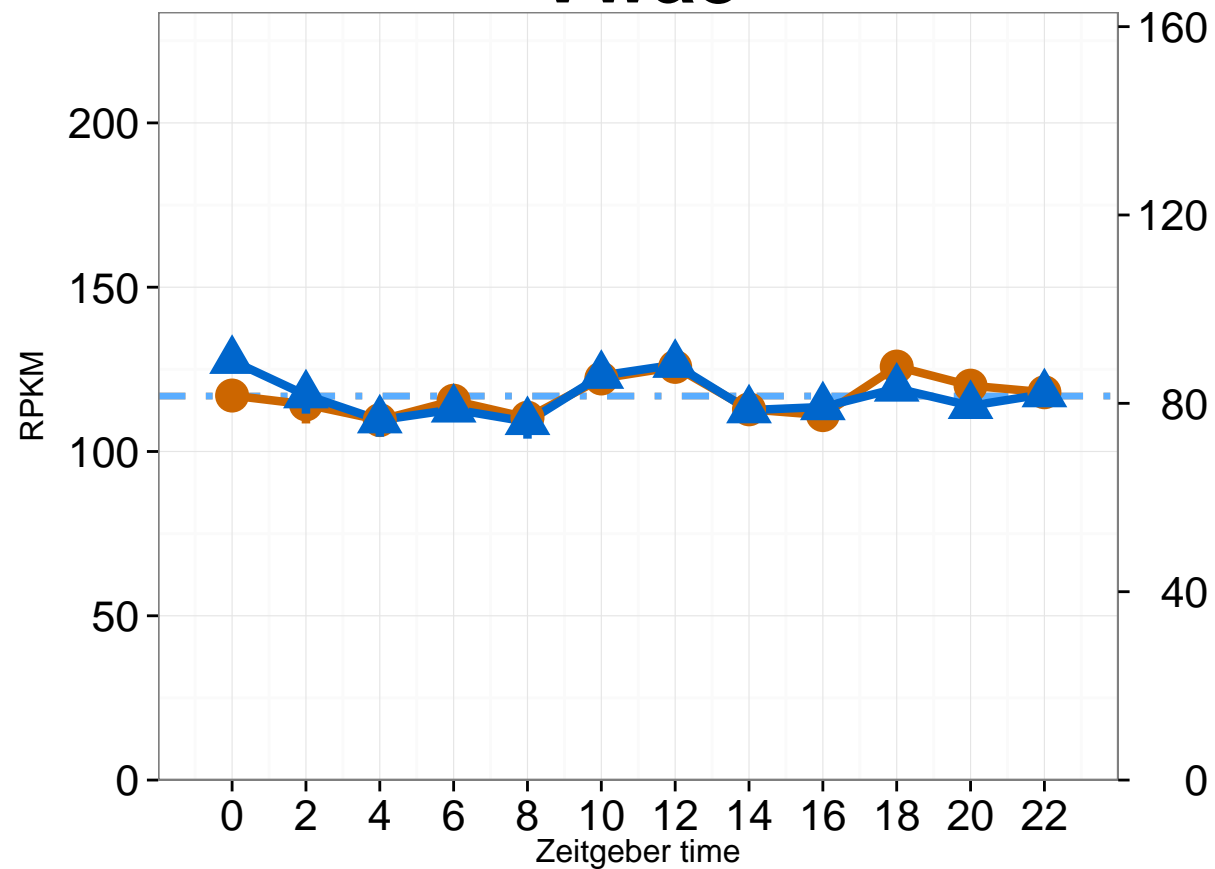

# Vwa8

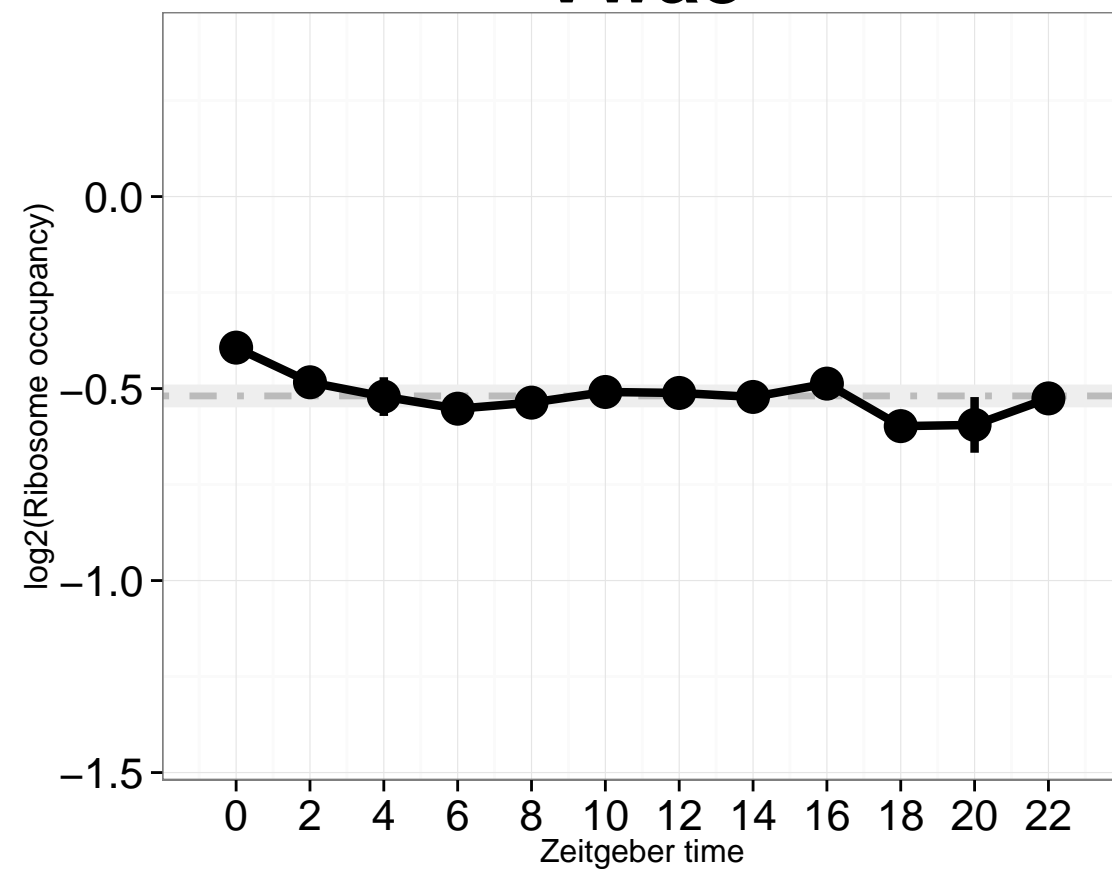

Supplement: Supplementary file 5755 [file 1]

# Mfap4

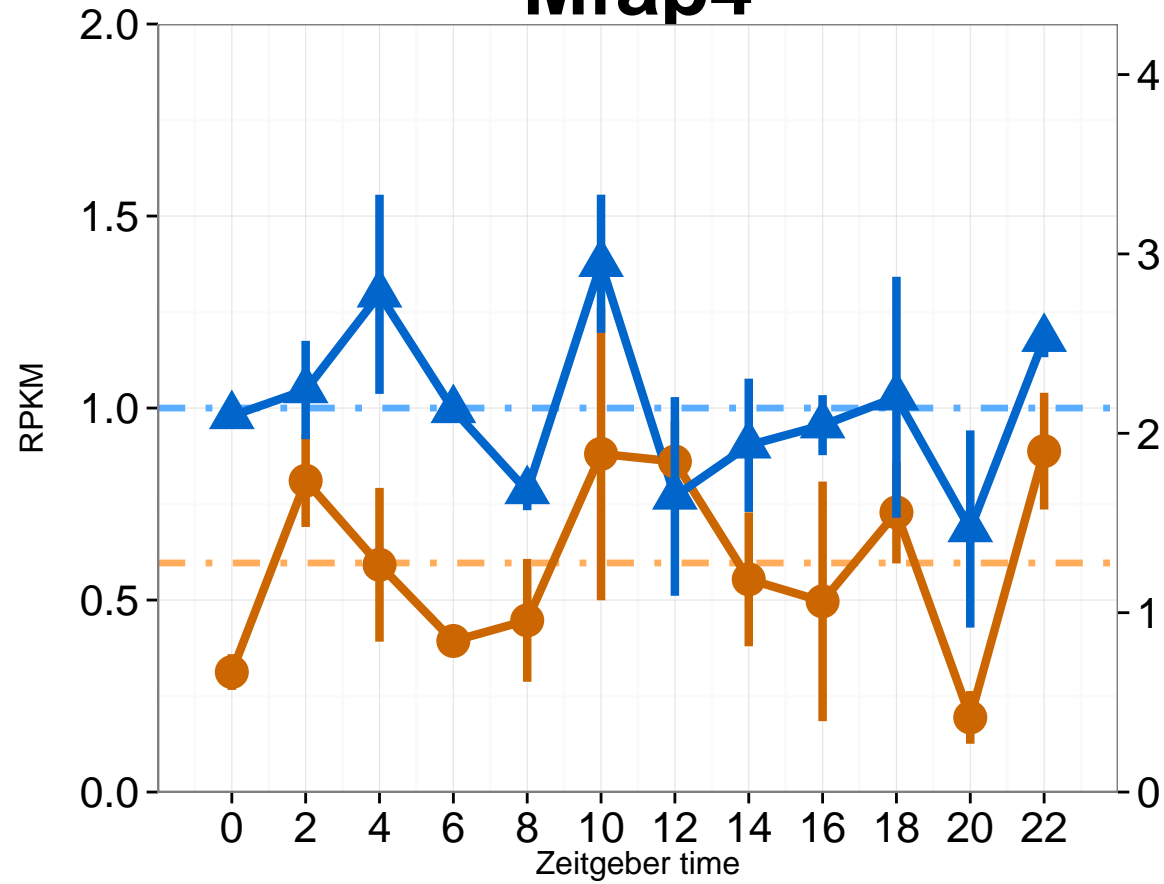

# Mfap4

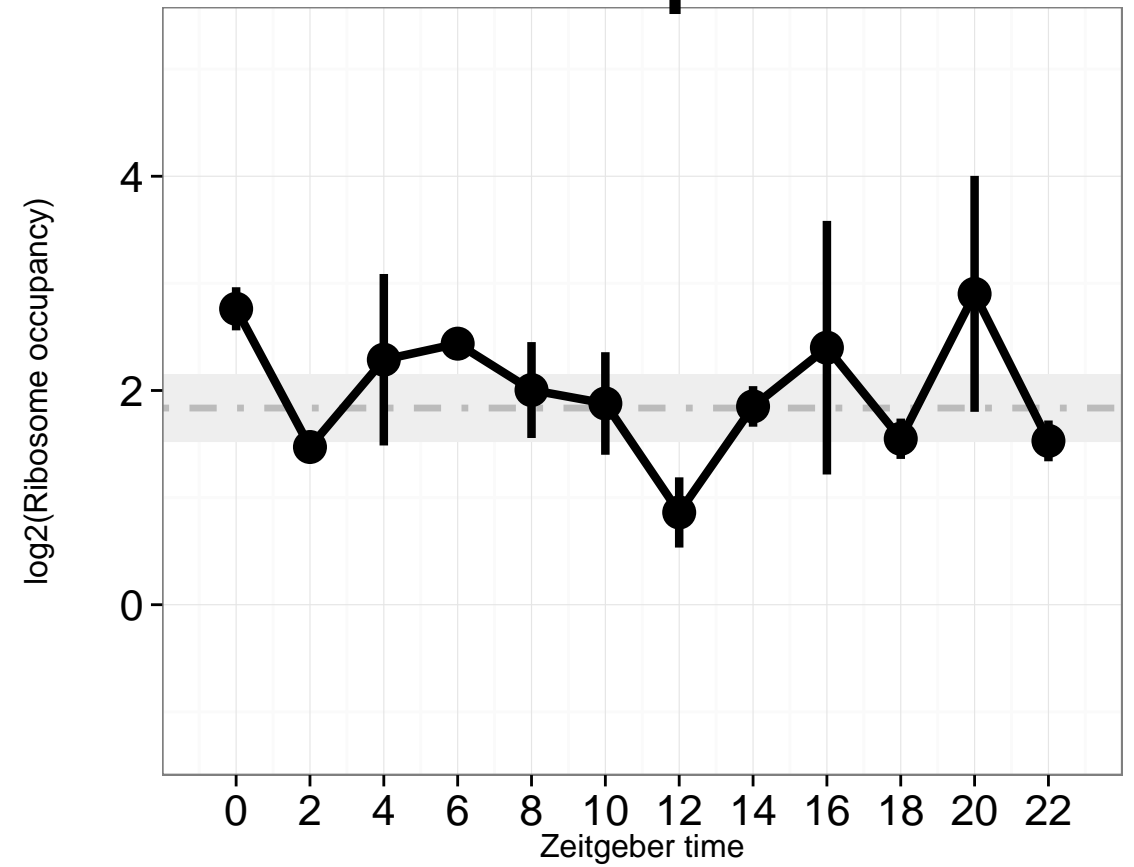

Supplement: Supplementary file 5756 [file 1]

## Itih3

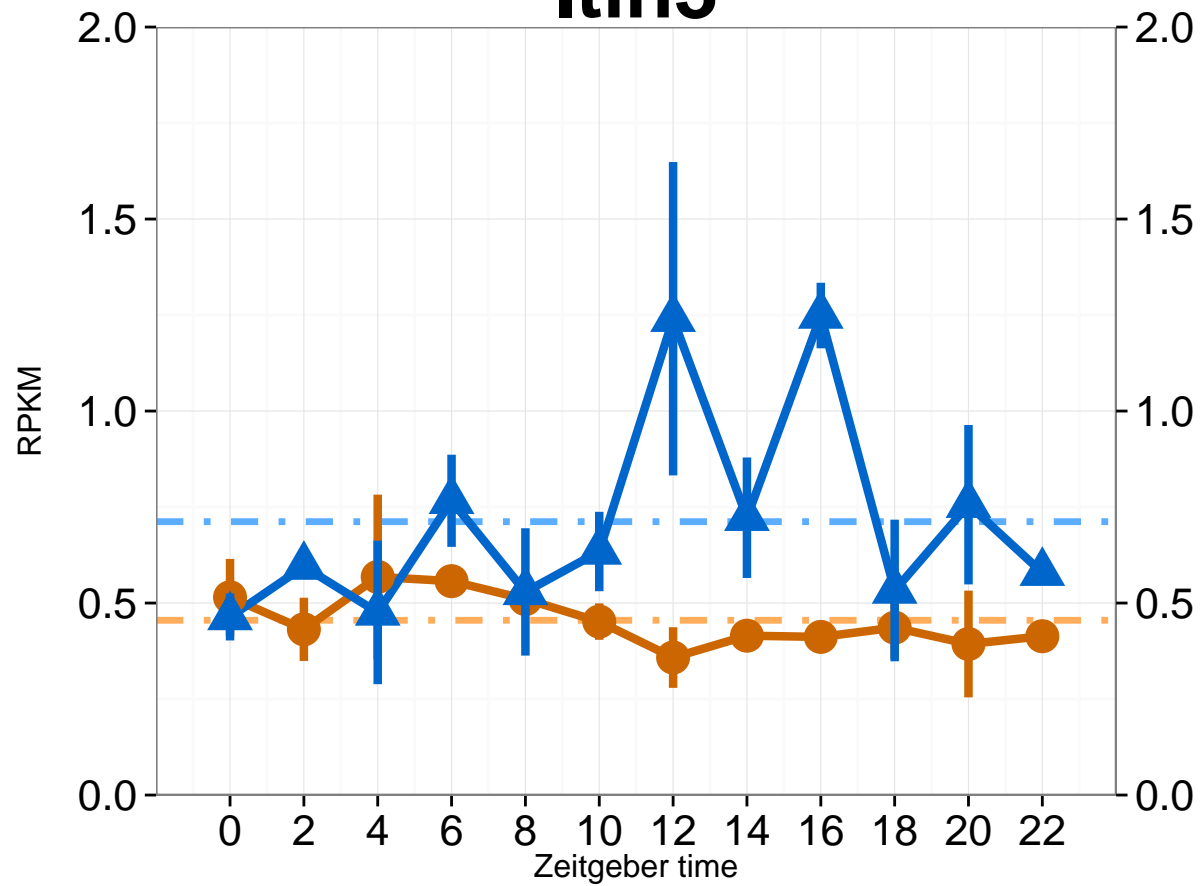

## Itih3

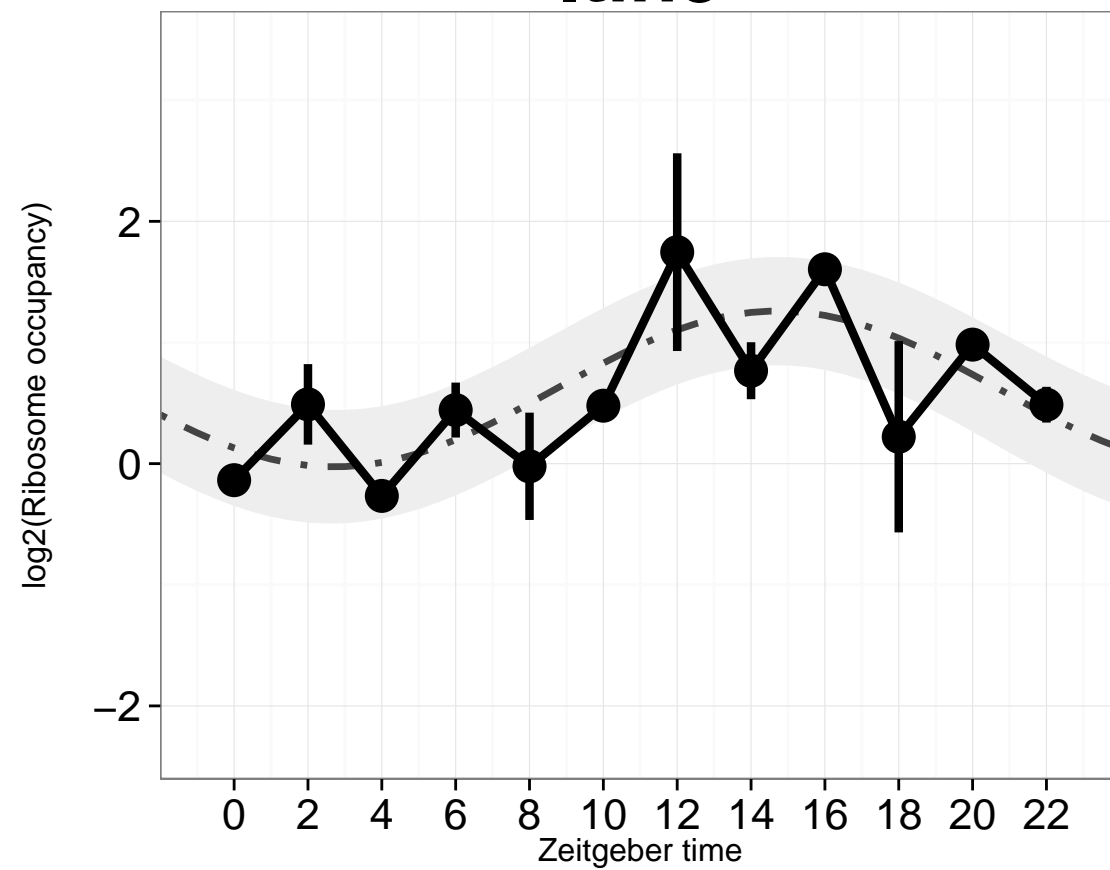

Supplement: Supplementary file 5757 [file 1]

## Mcc

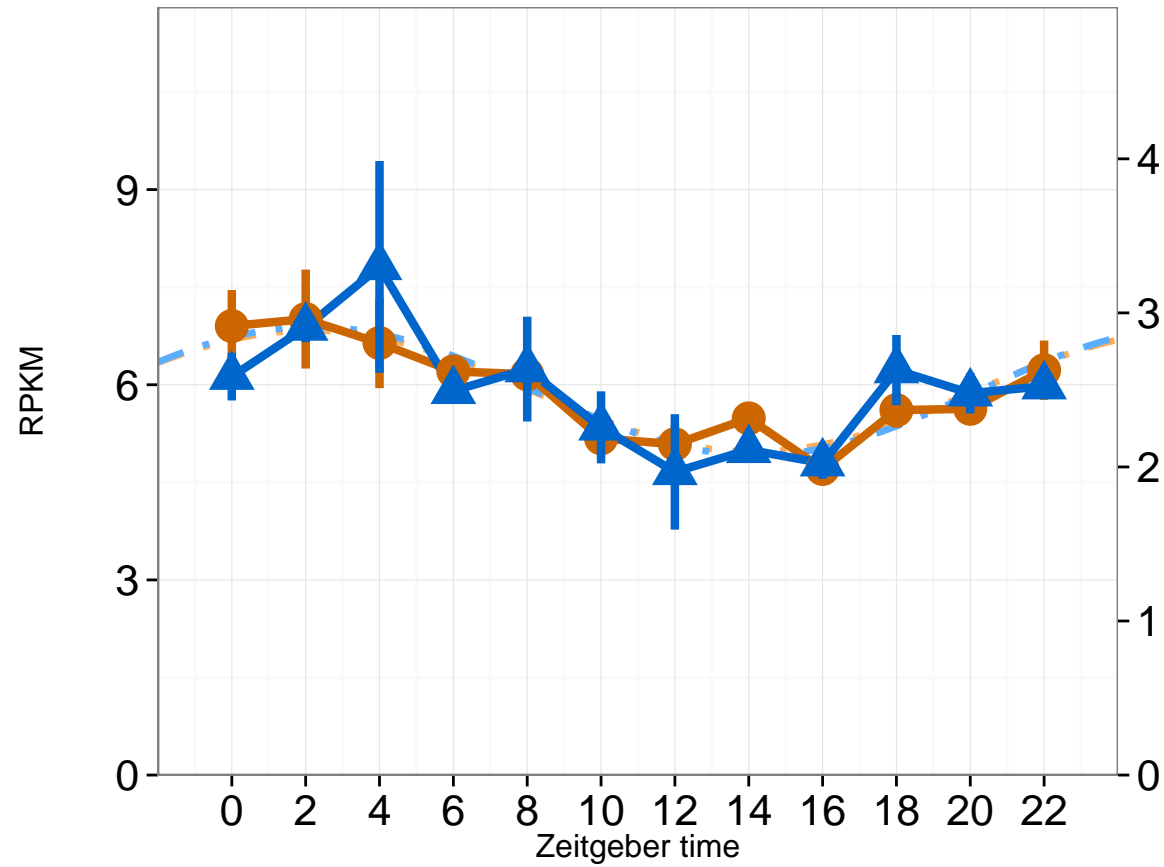

## Mcc

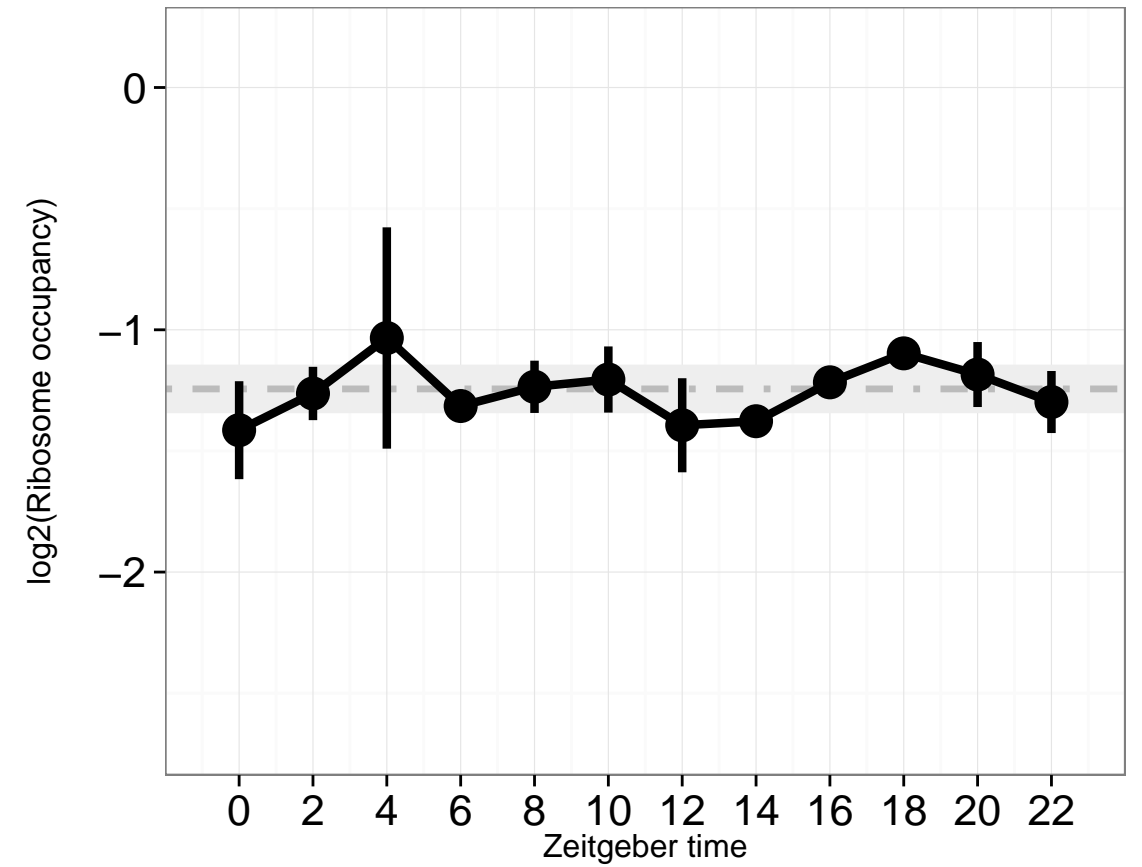

Supplement: Supplementary file 5758 [file 1]

# Gpatch3

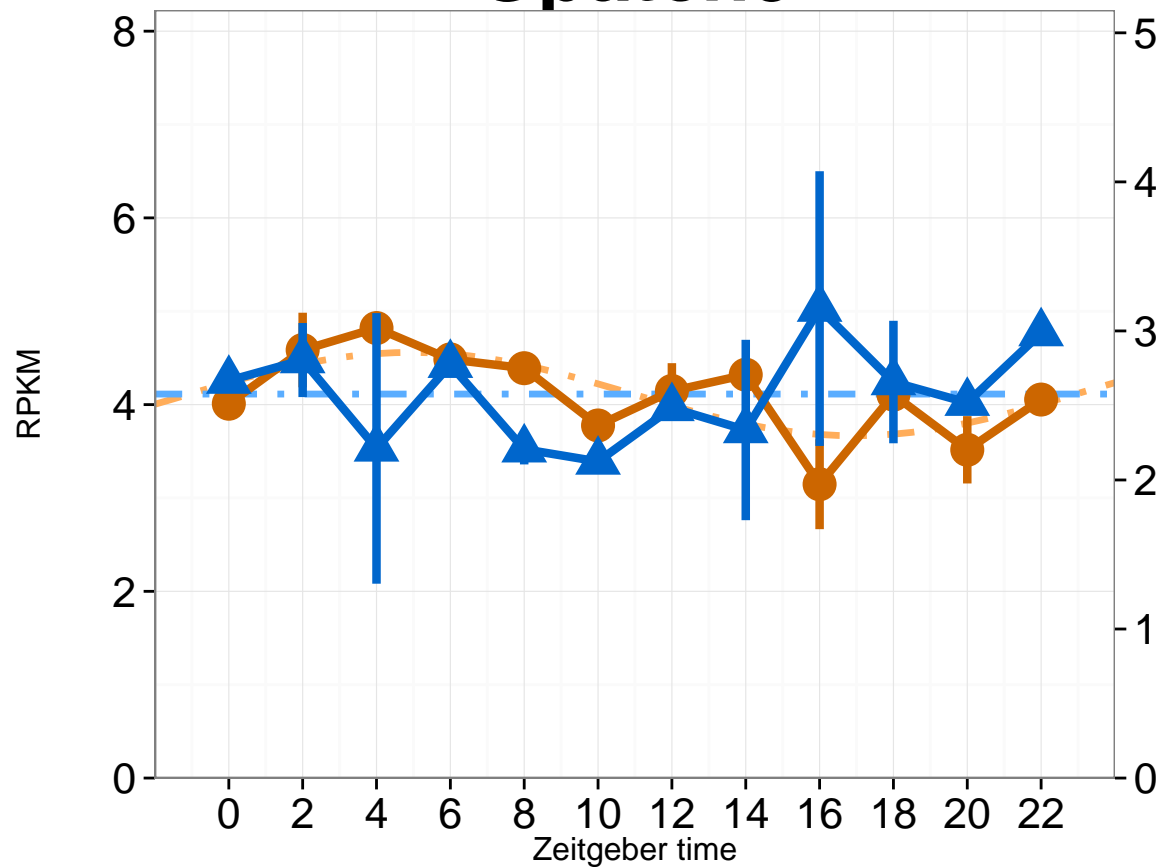

# Gpatch3

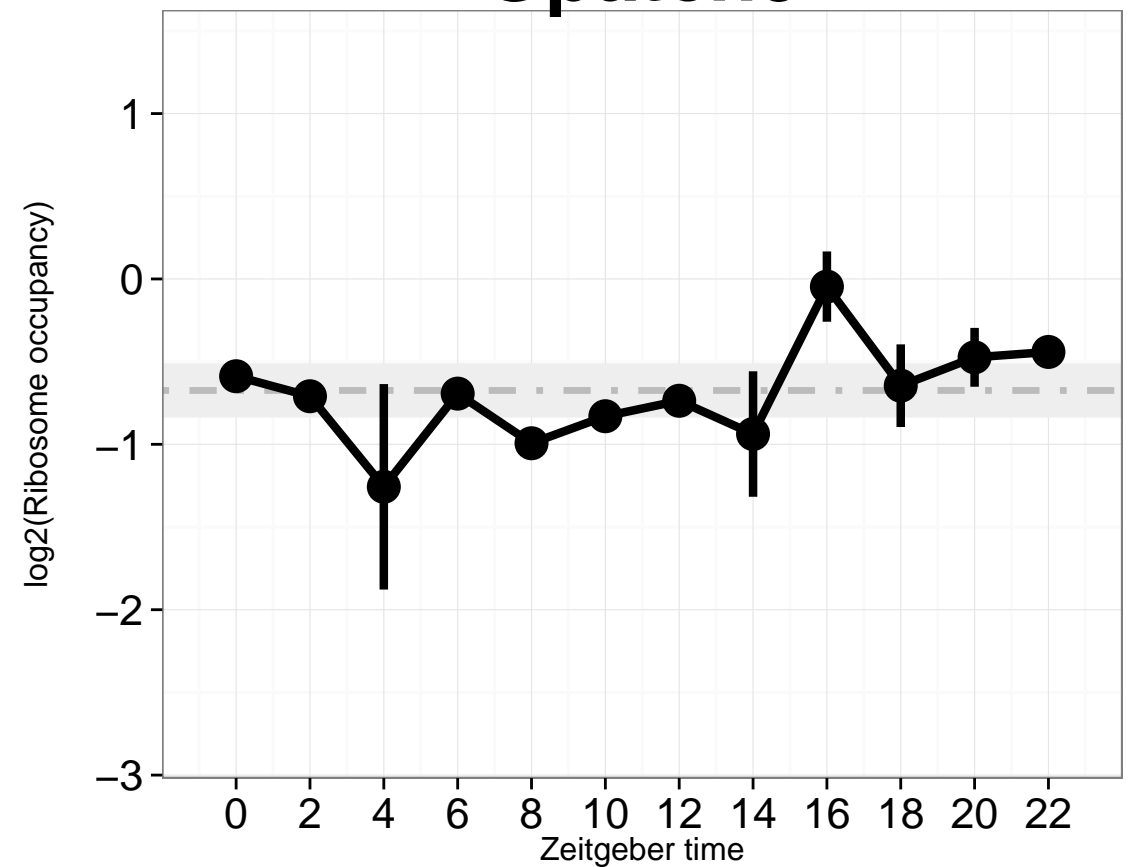

Supplement: Supplementary file 5759 [file 1]

## Dusp7

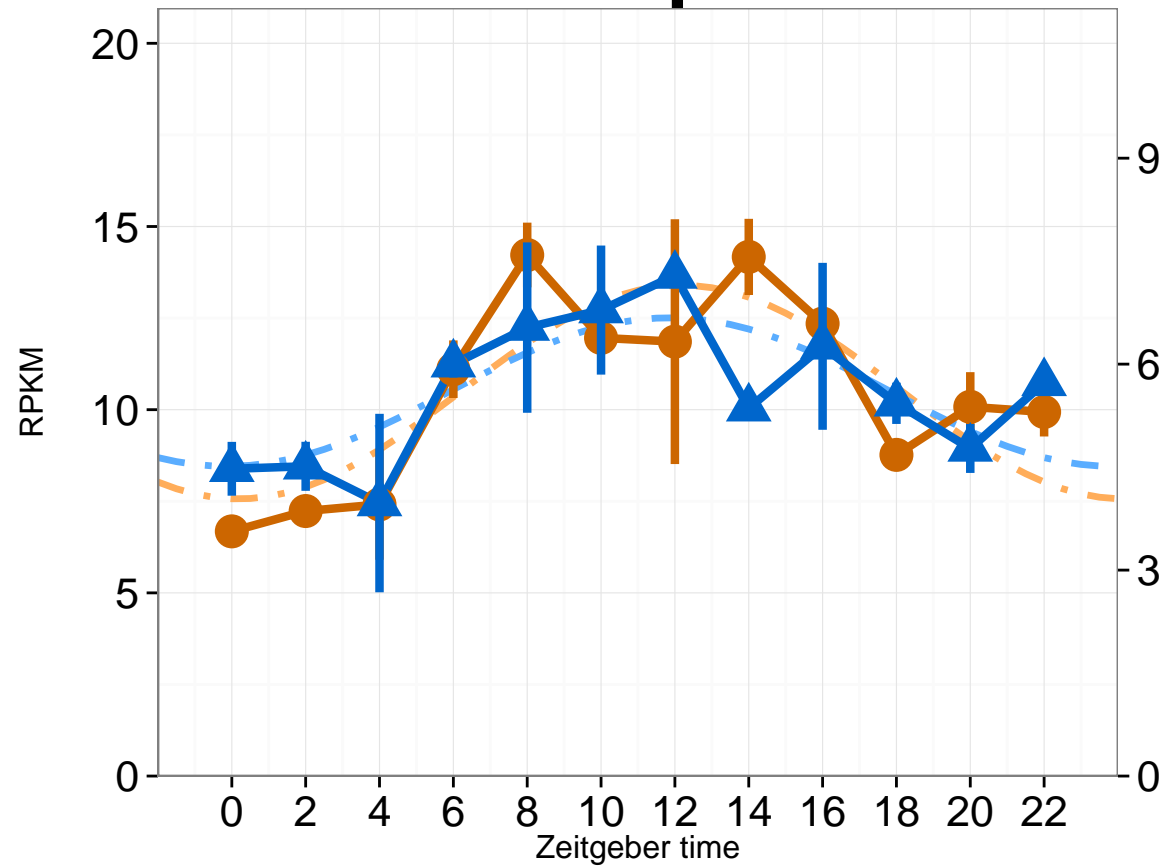

## Dusp7

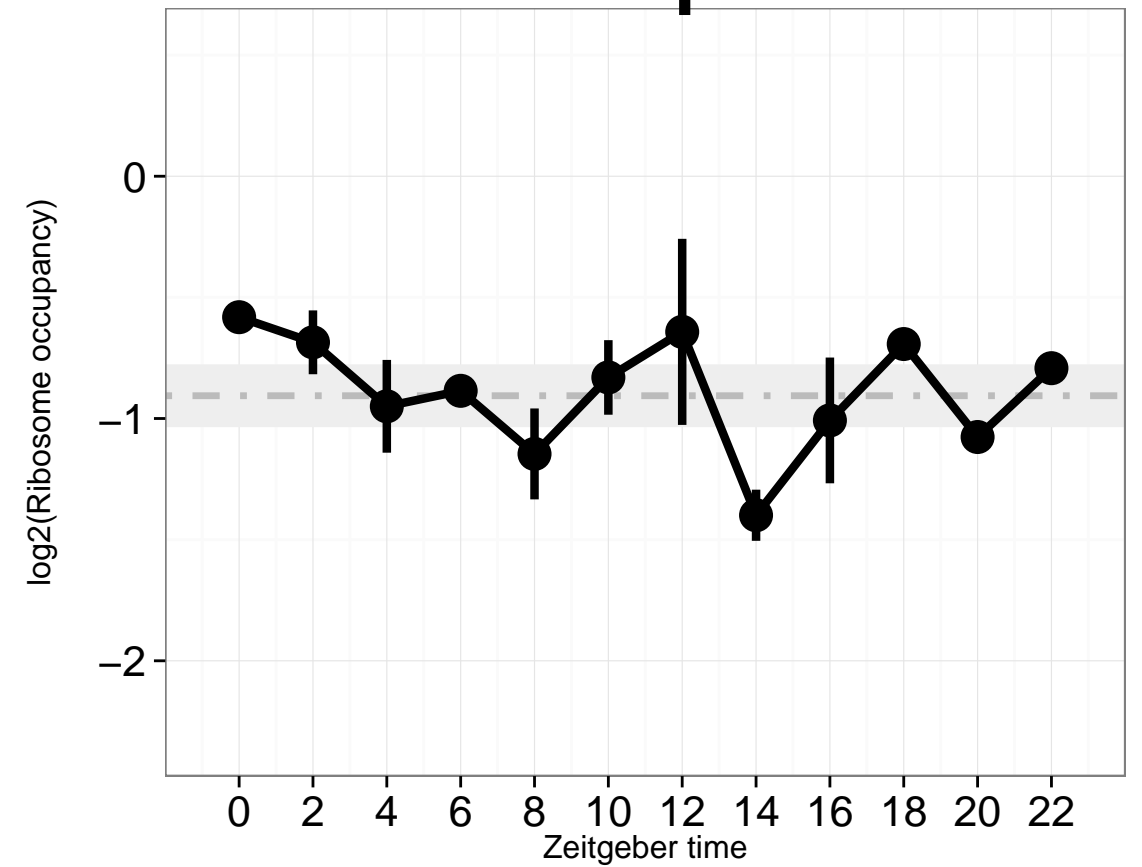

Supplement: Supplementary file 5760 [file 1]

# Hpgds

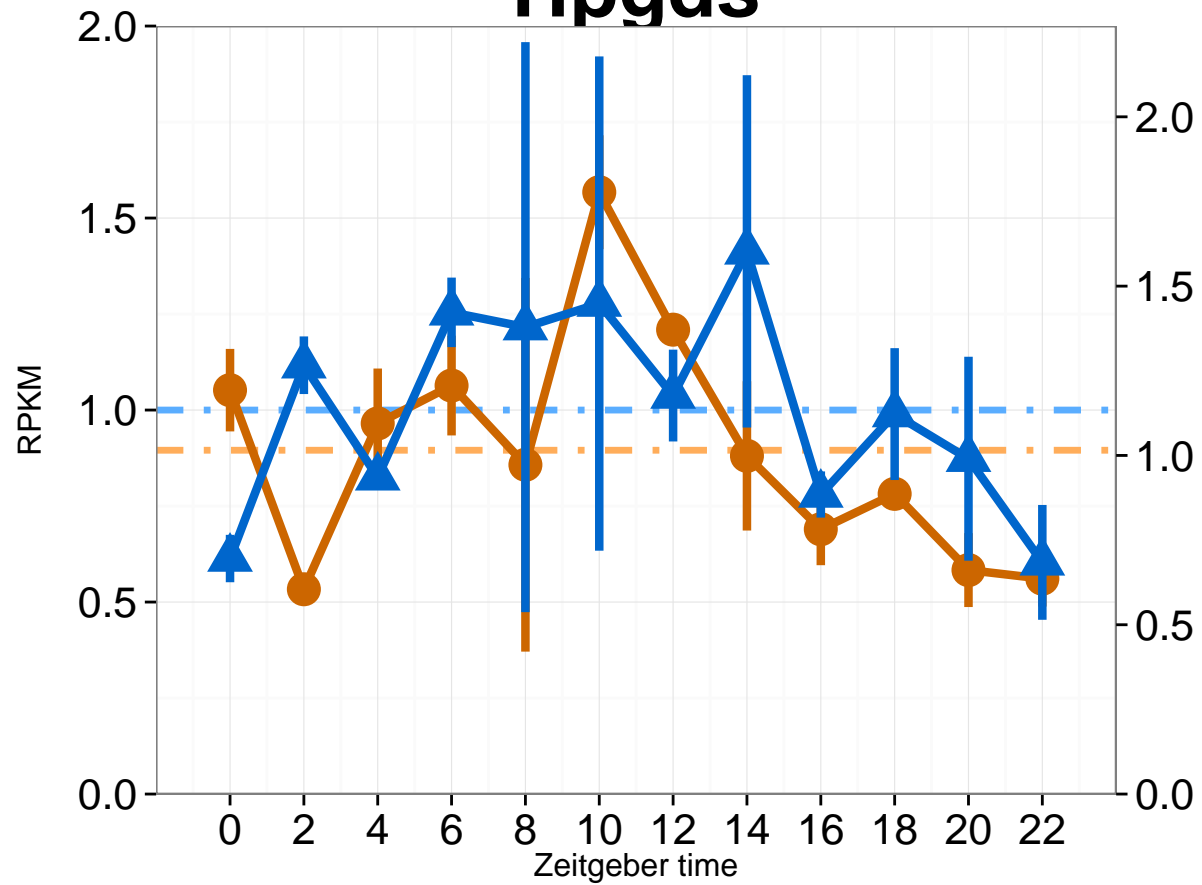

# Hpgds

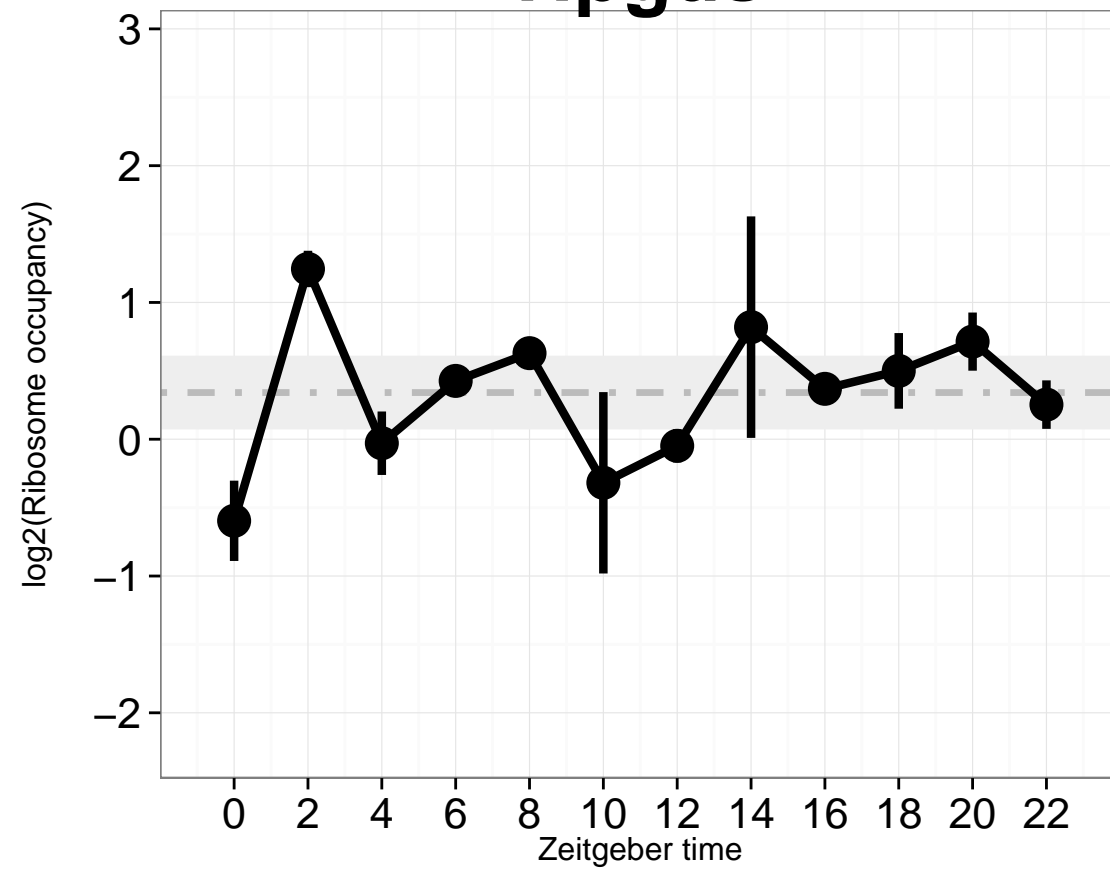

Supplement: Supplementary file 5761 [file 1]

## Gstm7

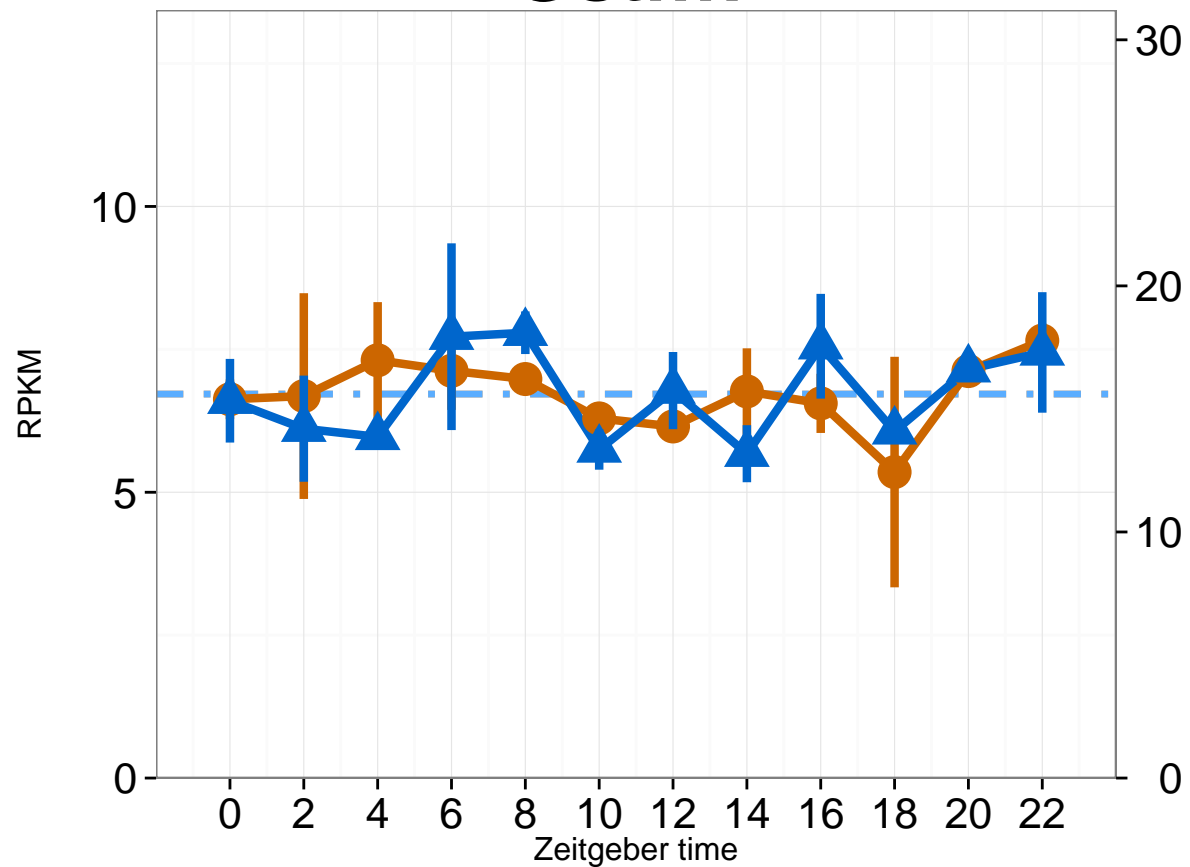

## Gstm7

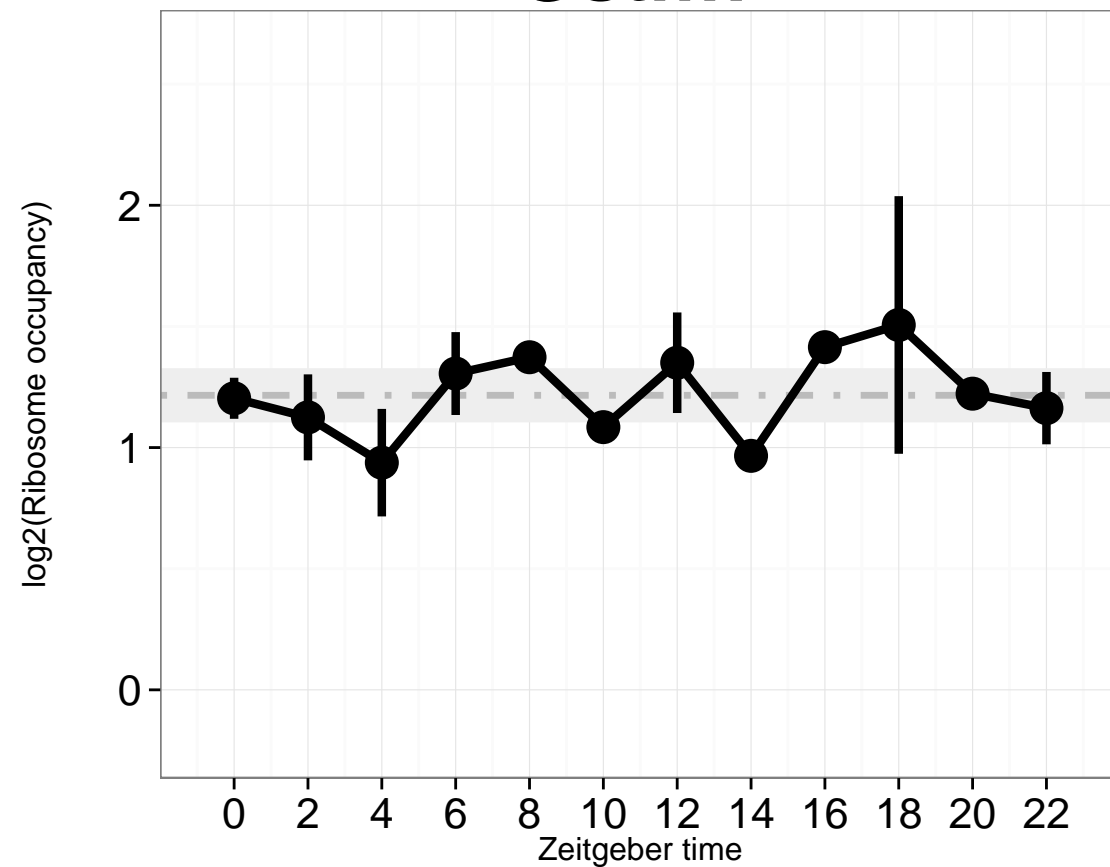

Supplement: Supplementary file 5762 [file 1]

# Edil3

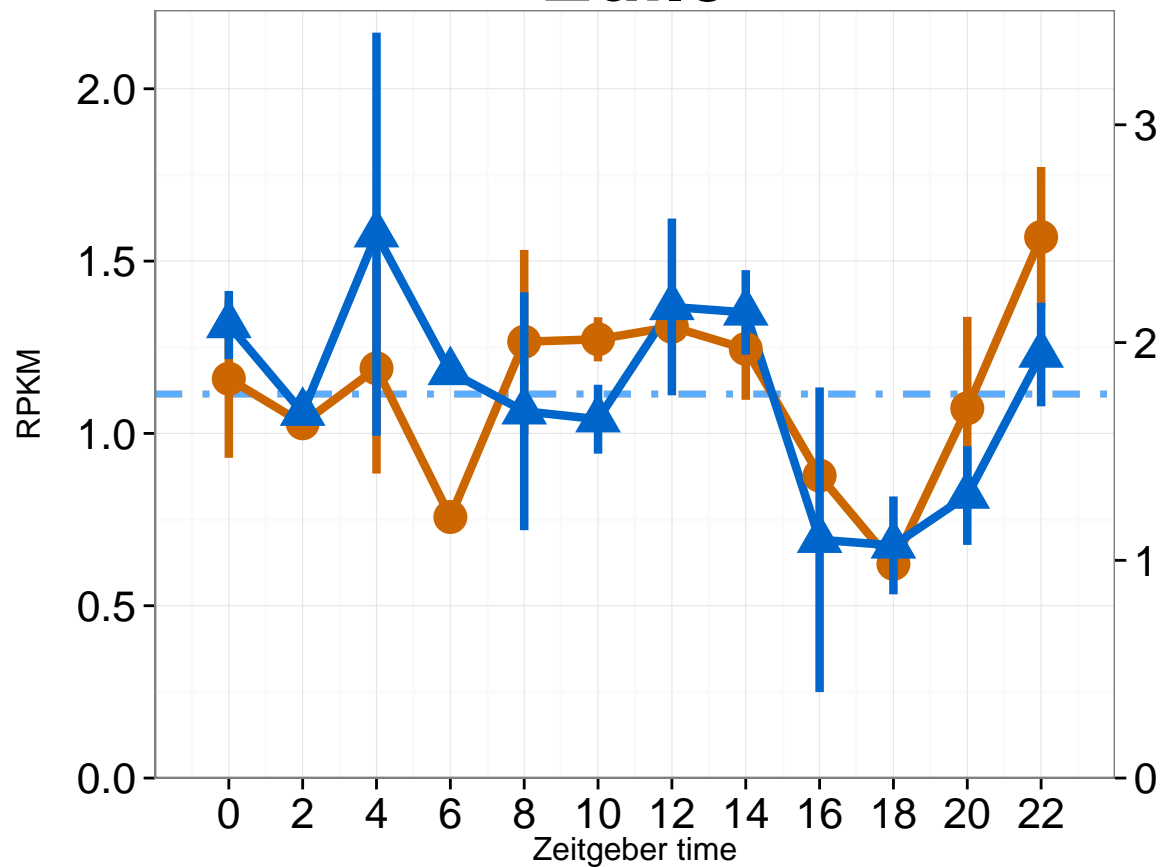

# Edil3

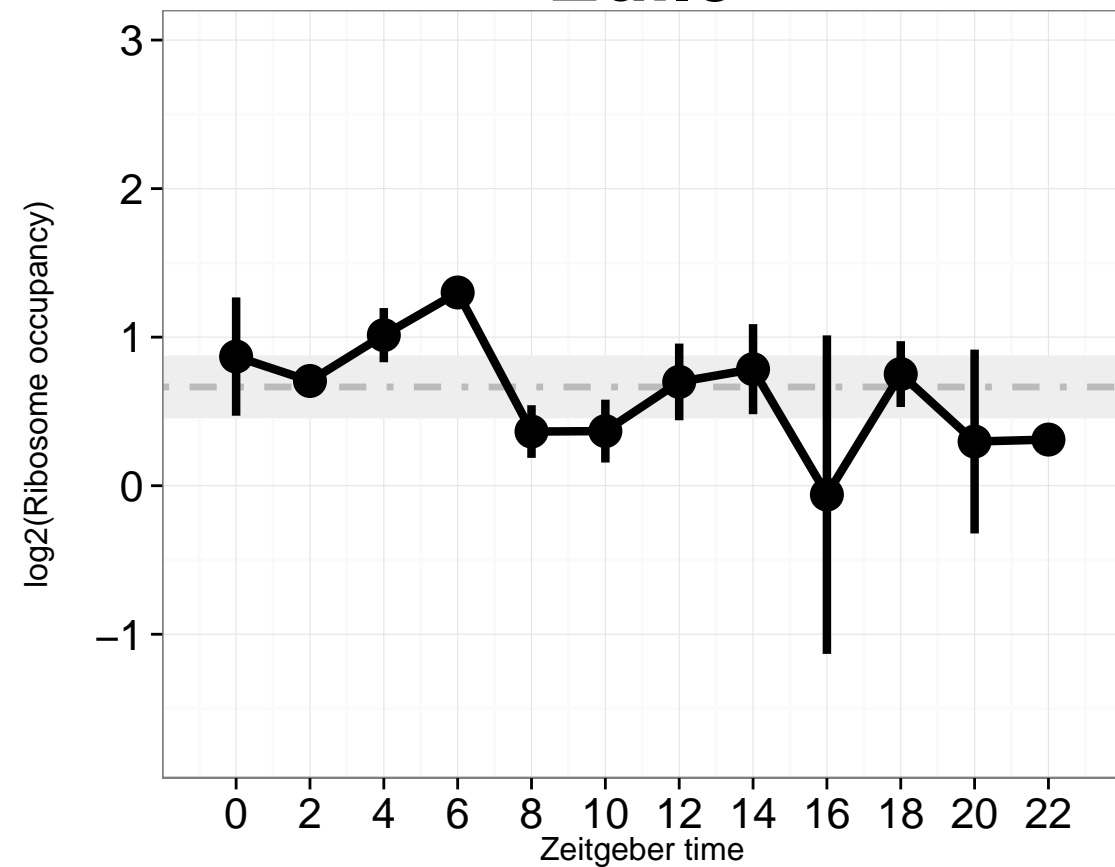

Supplement: Supplementary file 5763 [file 1]

## Rhoj

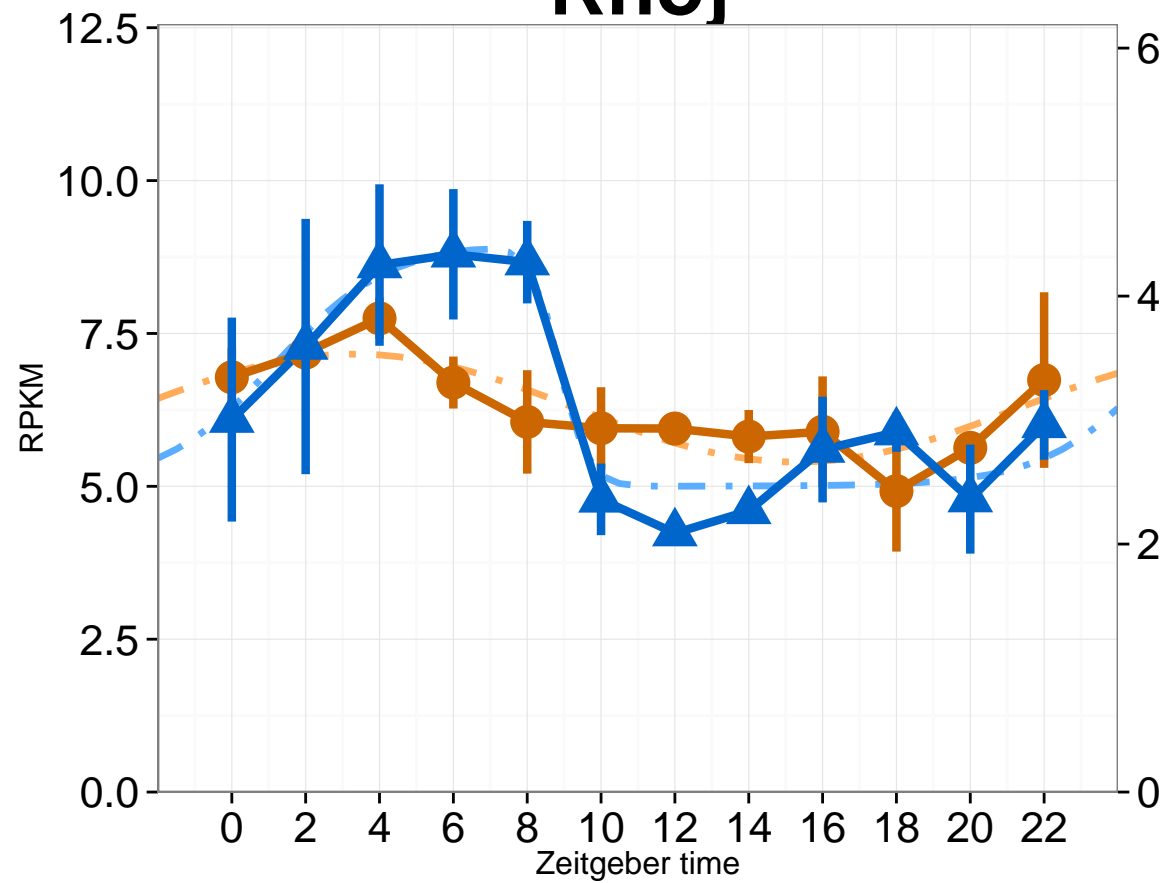

## Rhoj

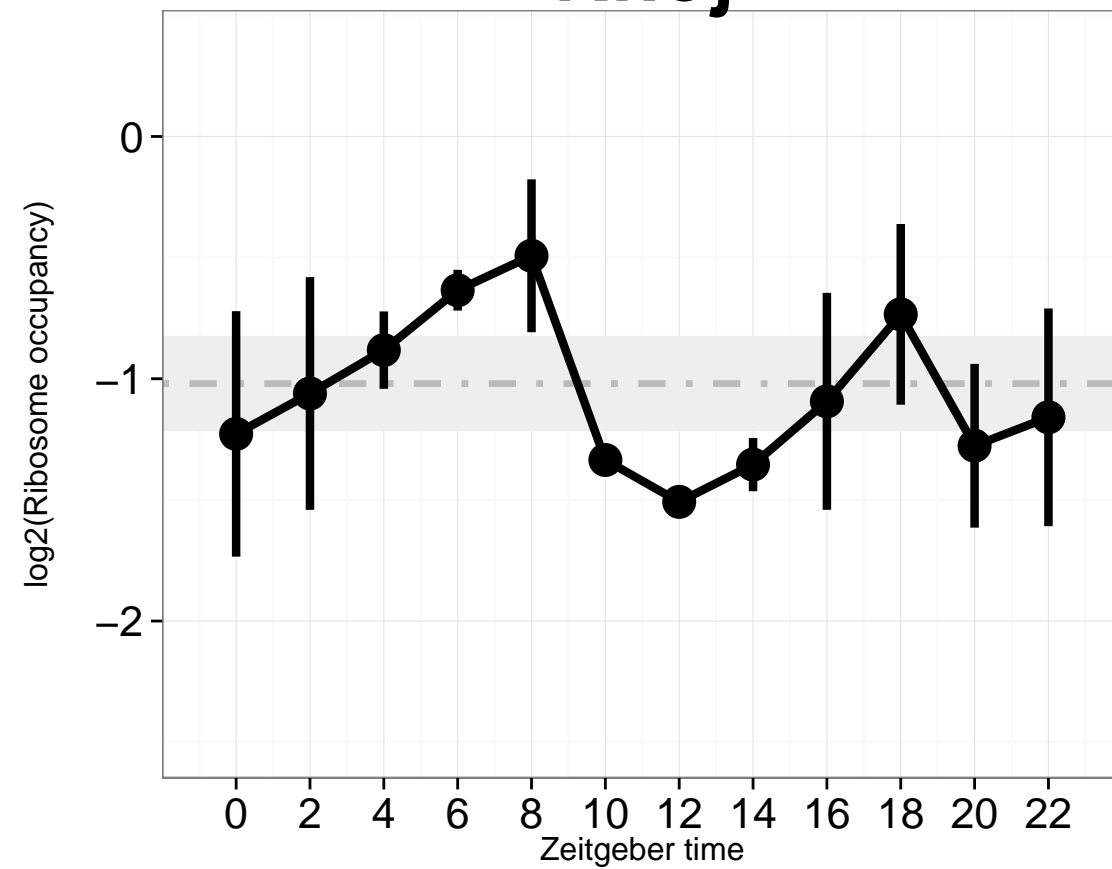

Supplement: Supplementary file 5764 [file 1]

## Sde2

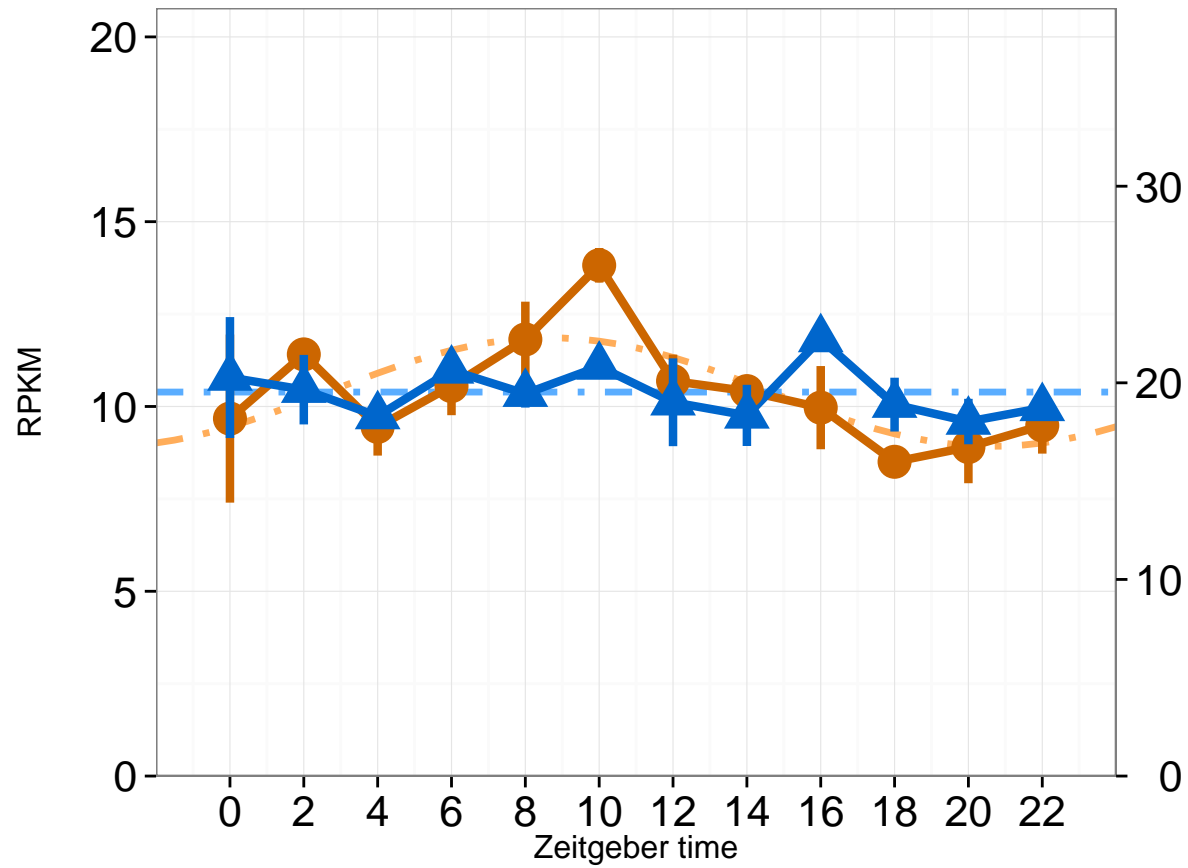

## Sde2

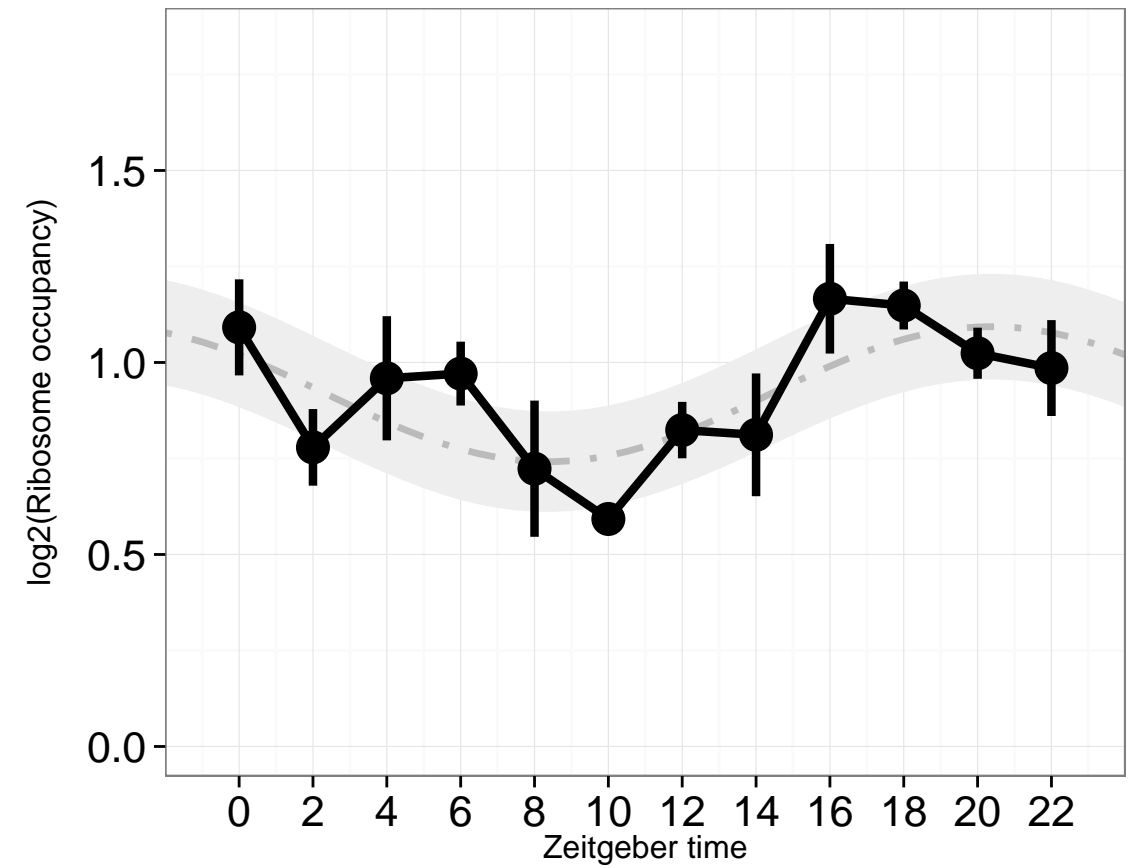

Supplement: Supplementary file 5765 [file 1]

# Rsad2

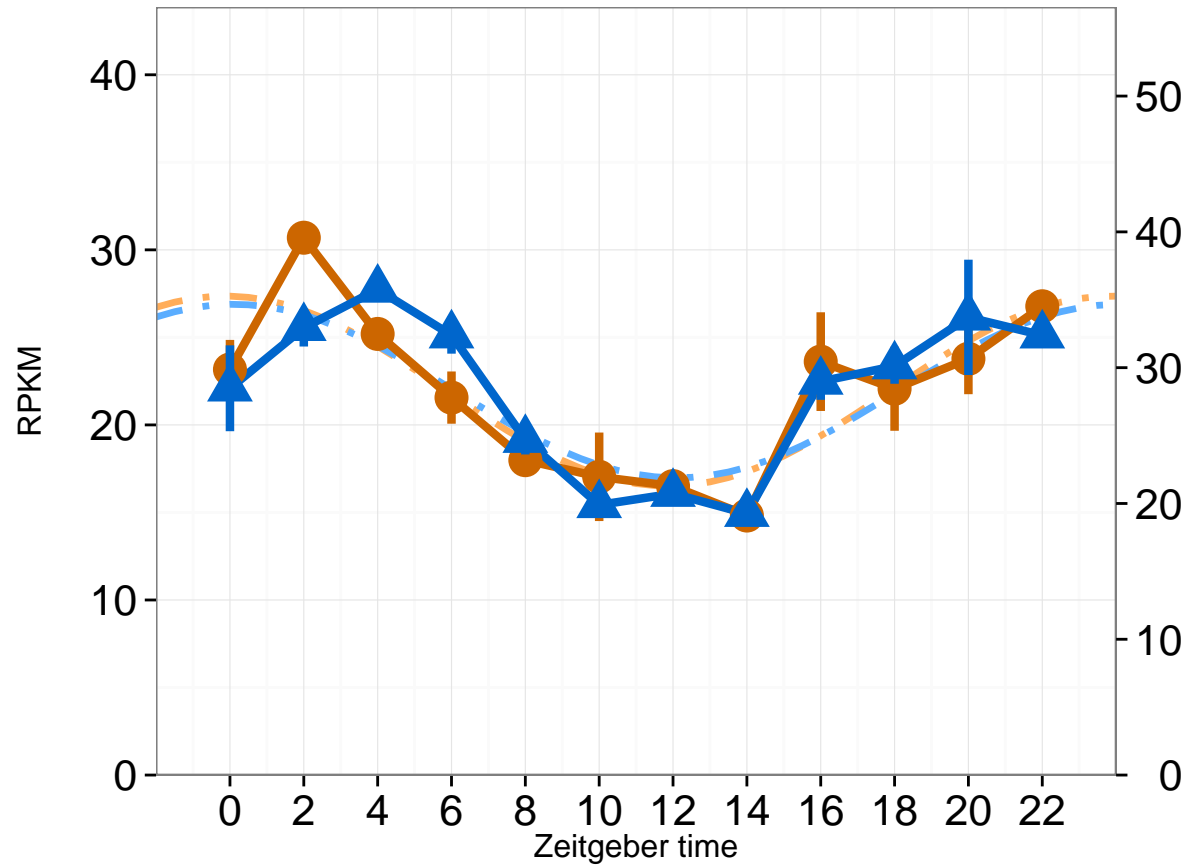

# Rsad2

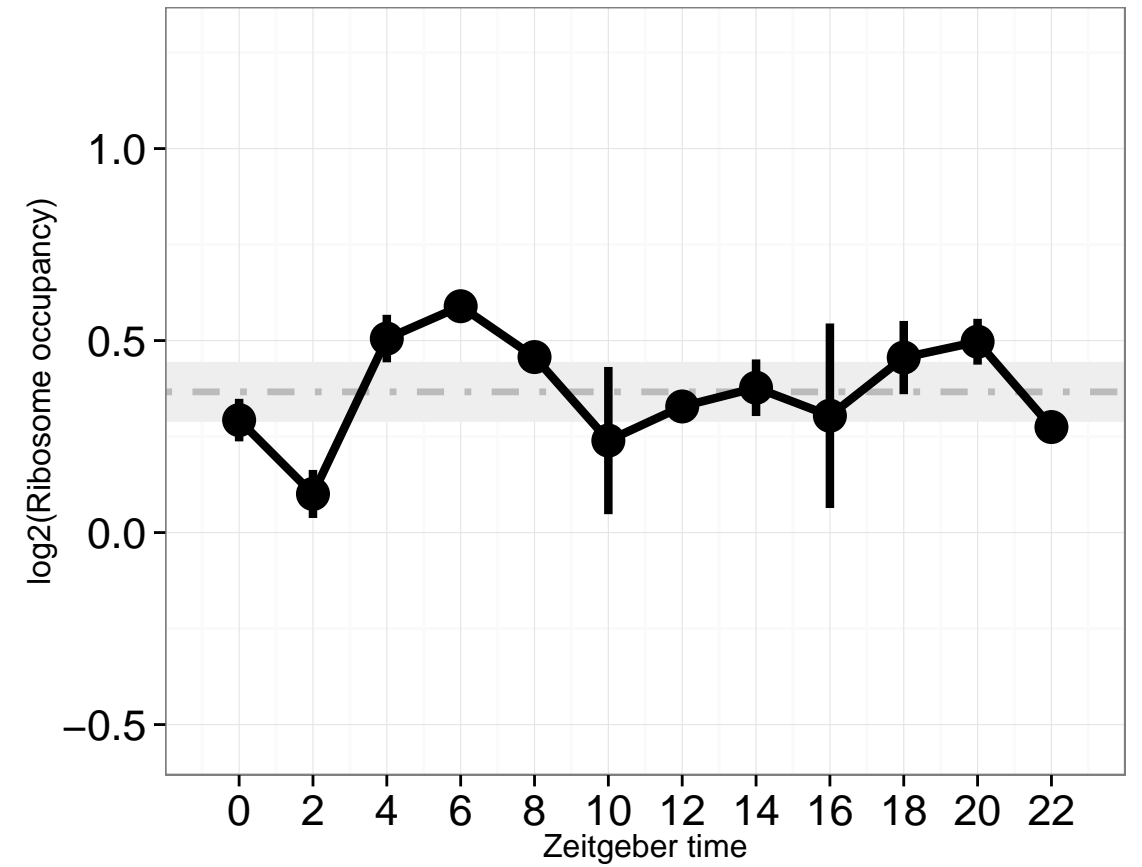

Supplement: Supplementary file 5766 [file 1]

## Tceb1

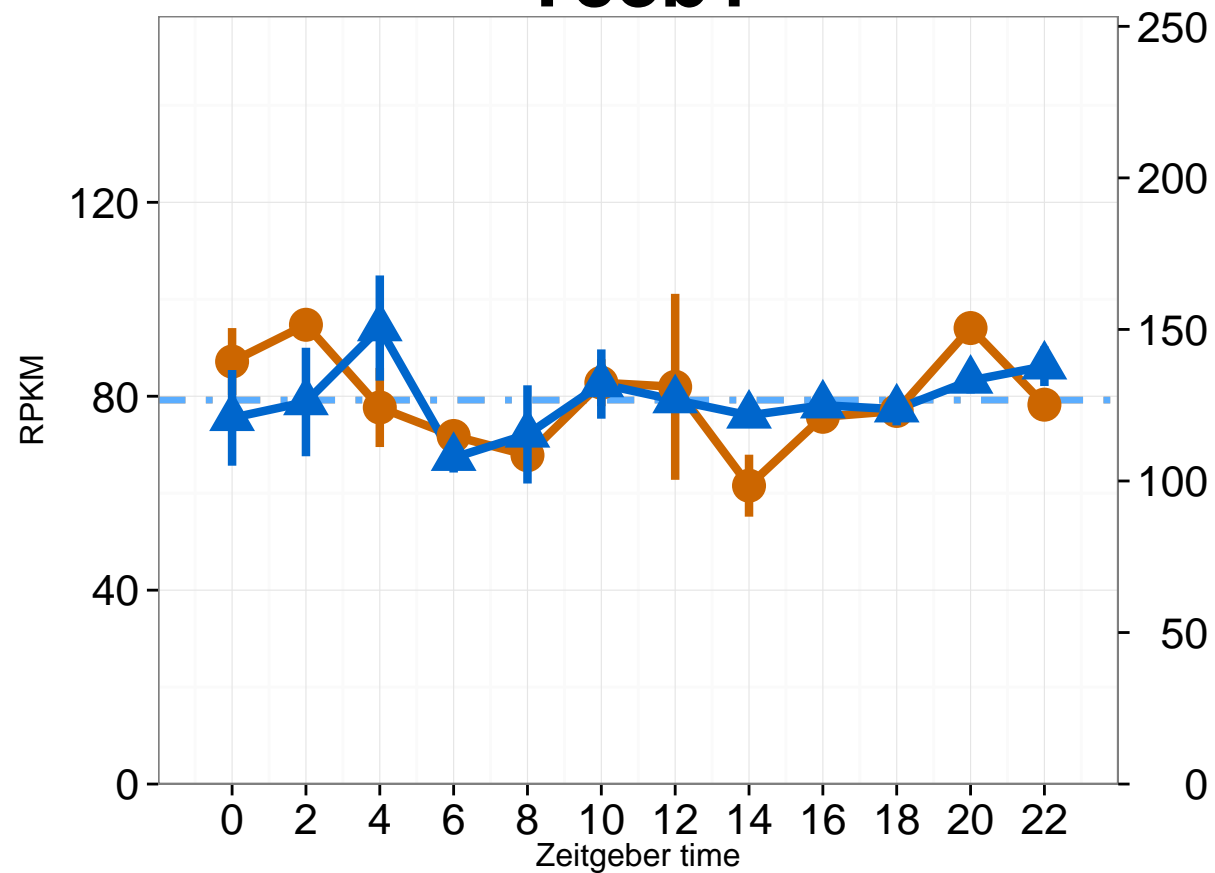

## Tceb1

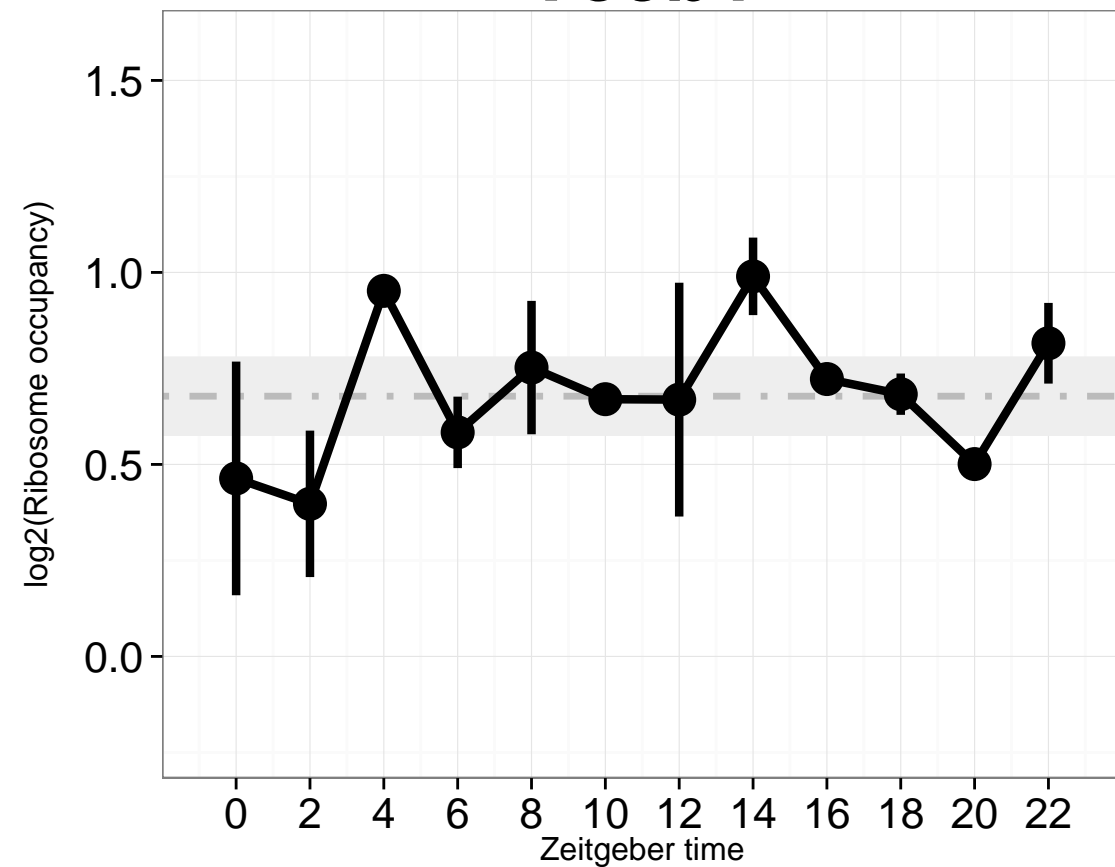

Supplement: Supplementary file 5767 [file 1]

## Grm7

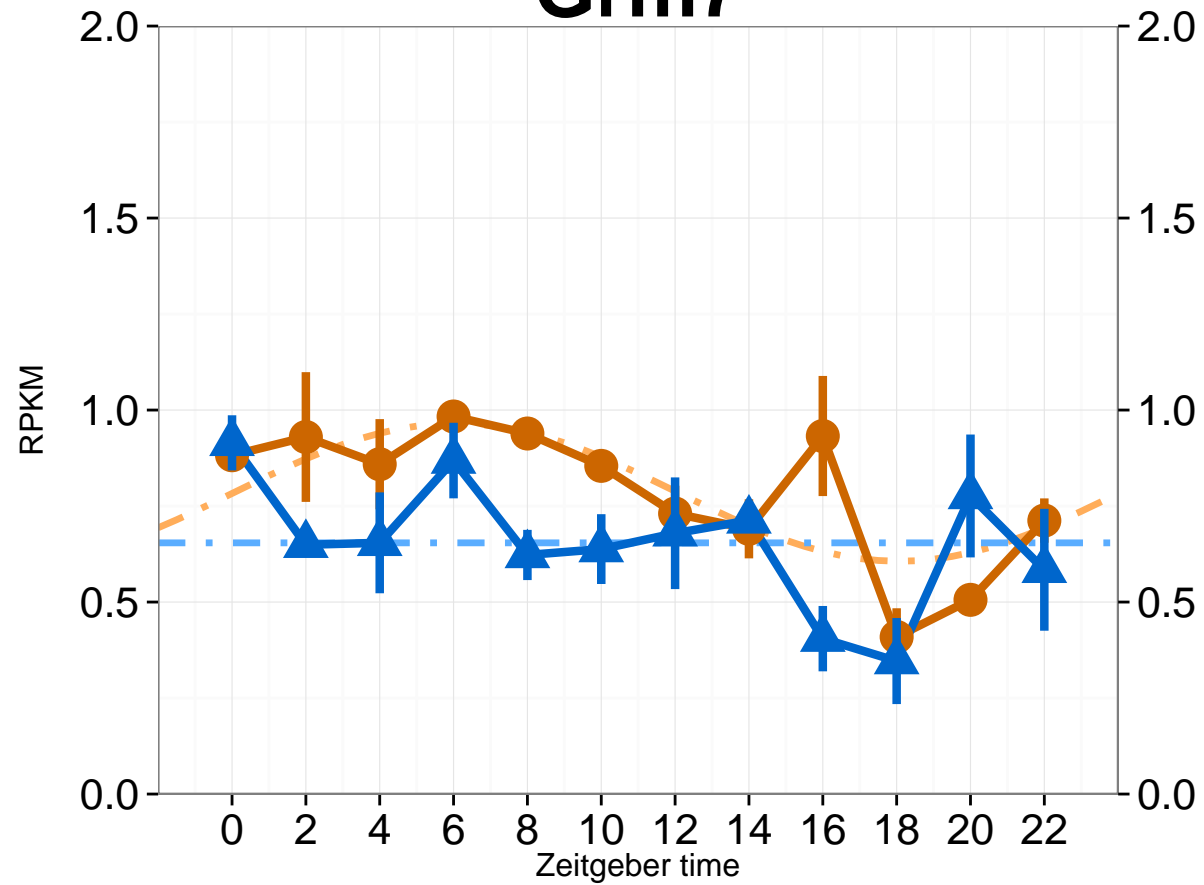

## Grm7

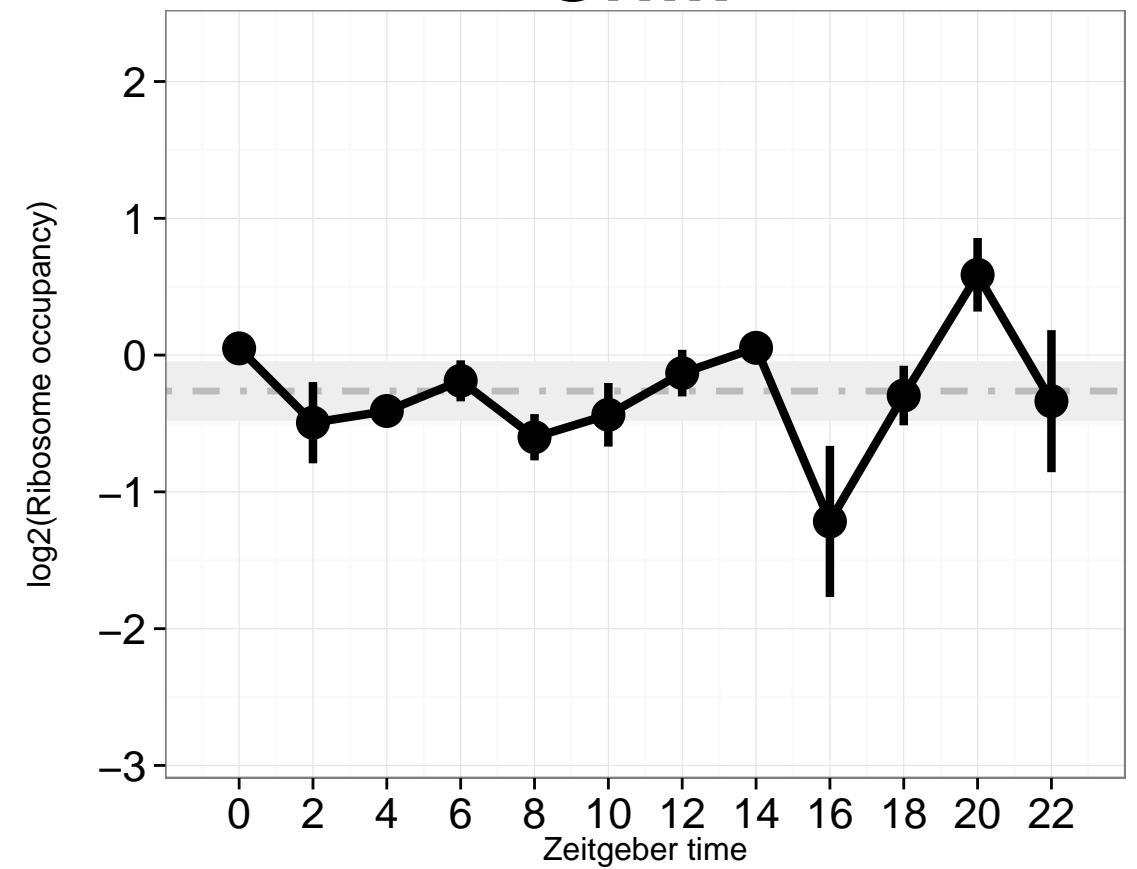

Supplement: Supplementary file 5768 [file 1]

## Pnpla6

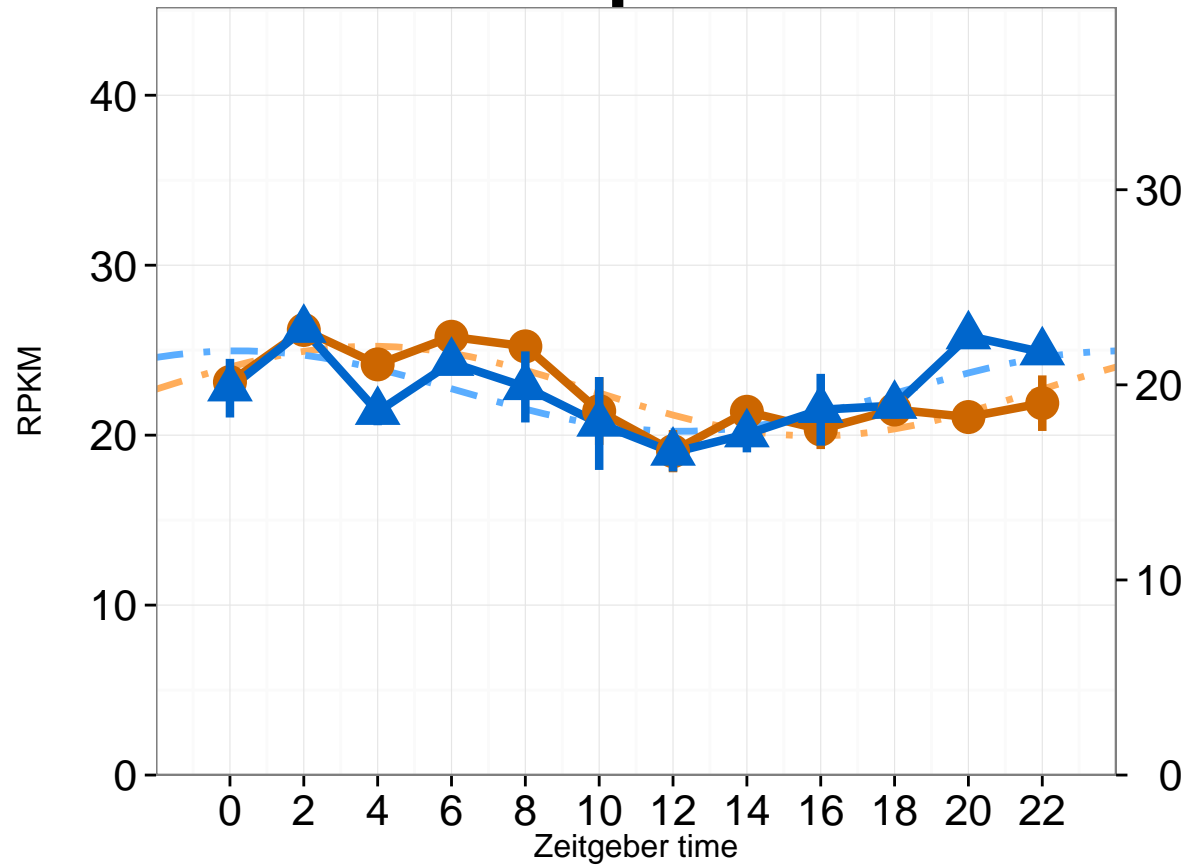

## Pnpla6

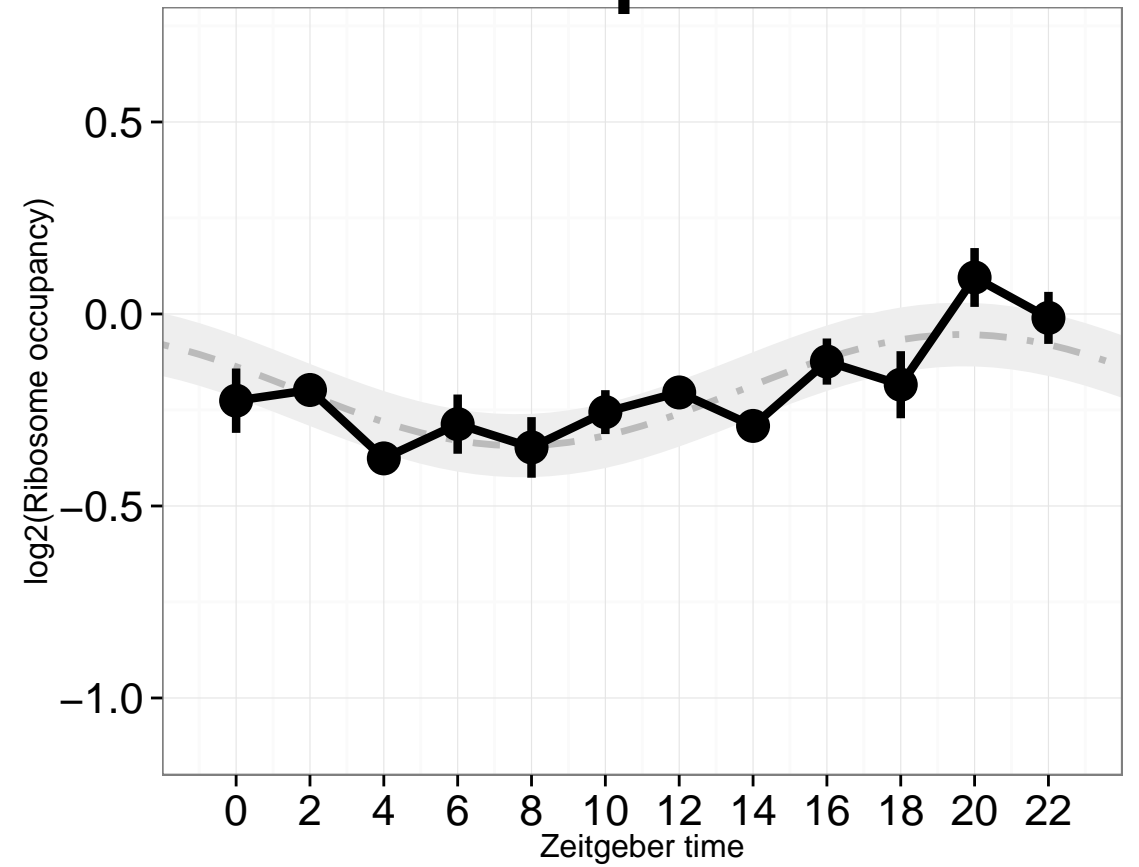

Supplement: Supplementary file 5769 [file 1]

## Fen1

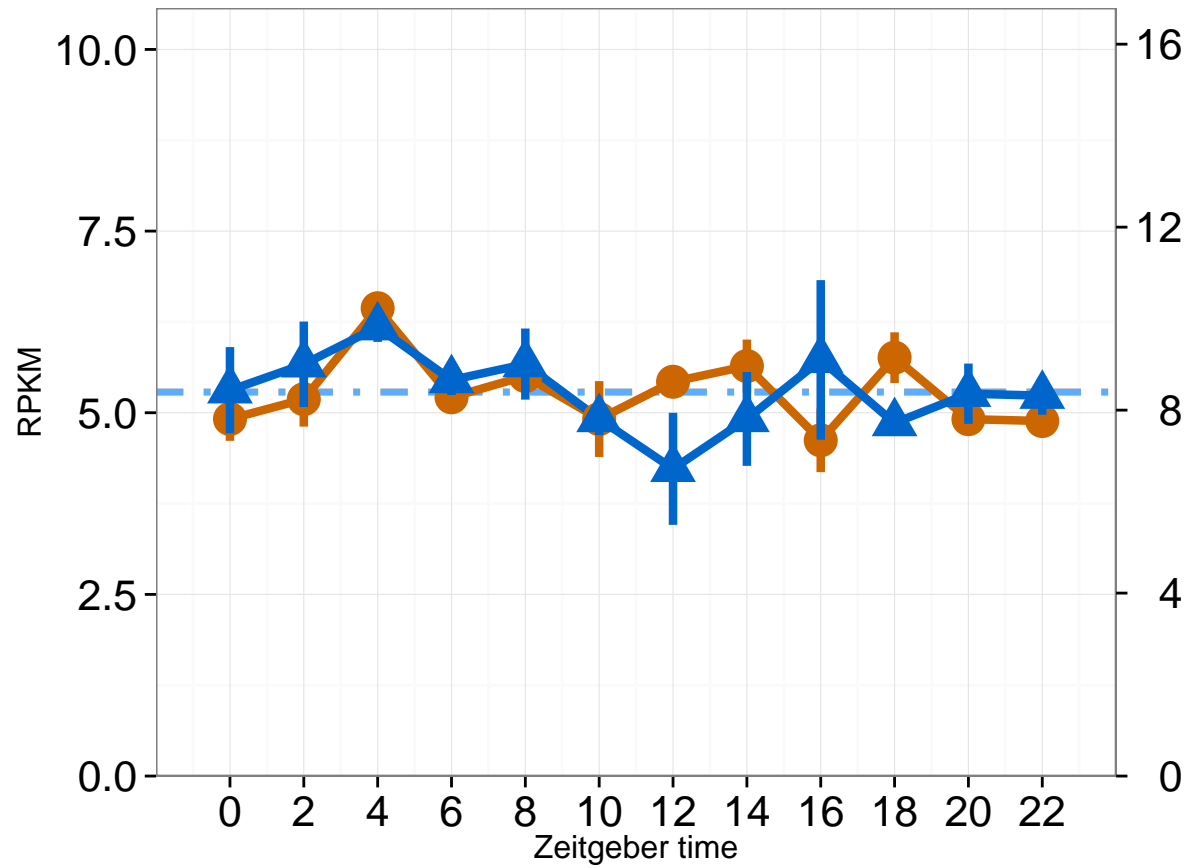

## Fen1

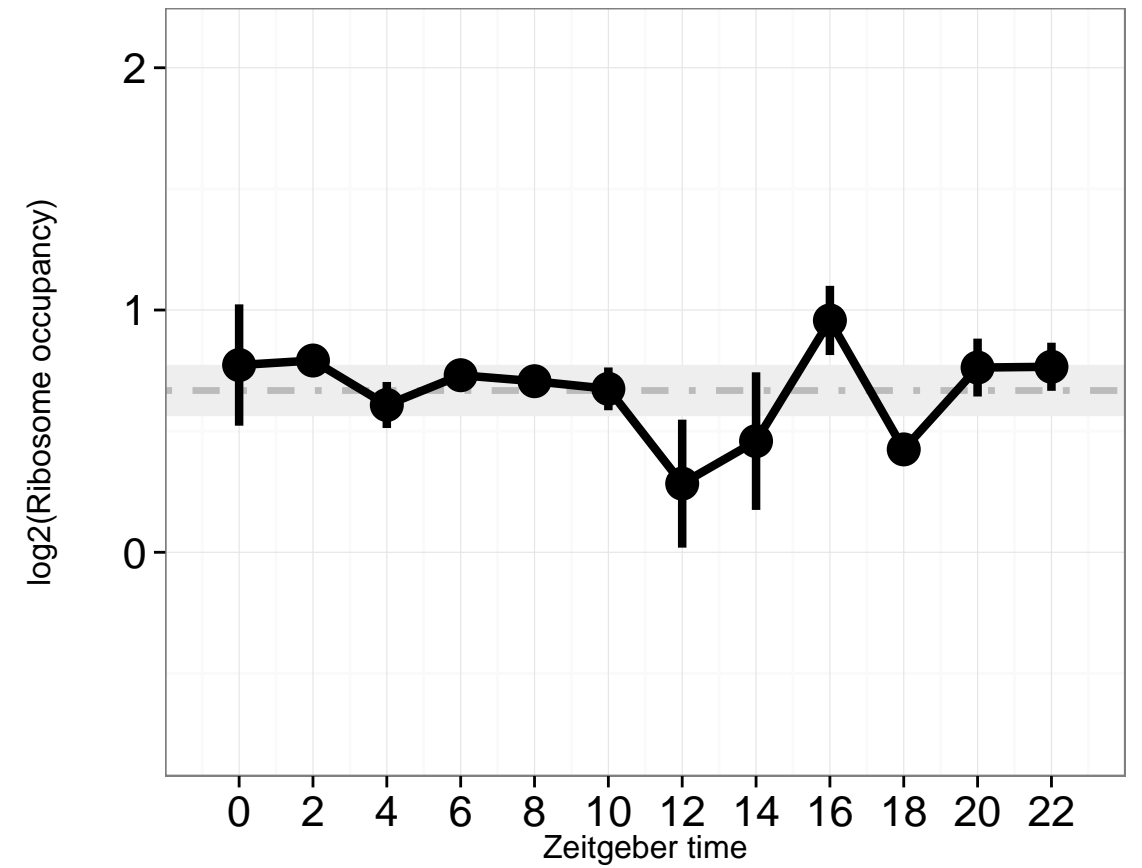

Supplement: Supplementary file 5770 [file 1]

# Zfp524

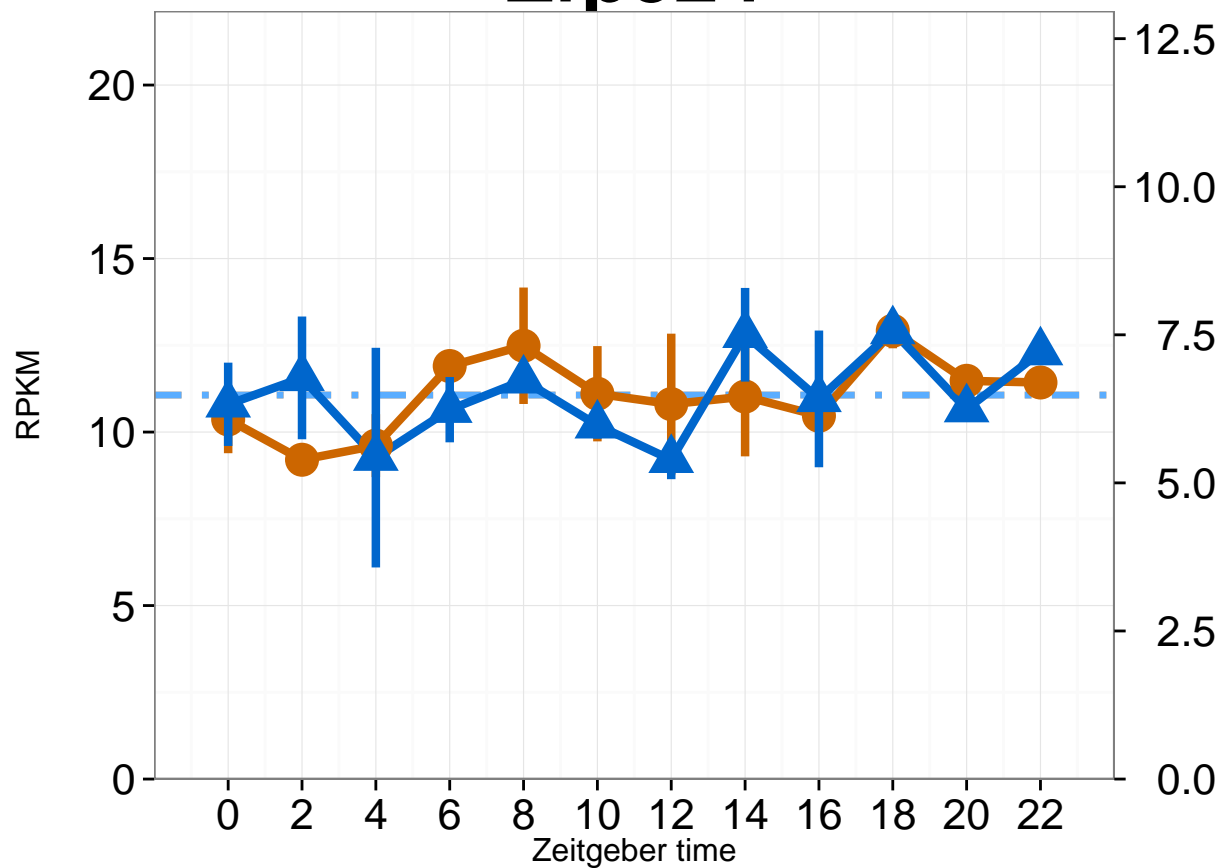

# Zfp524

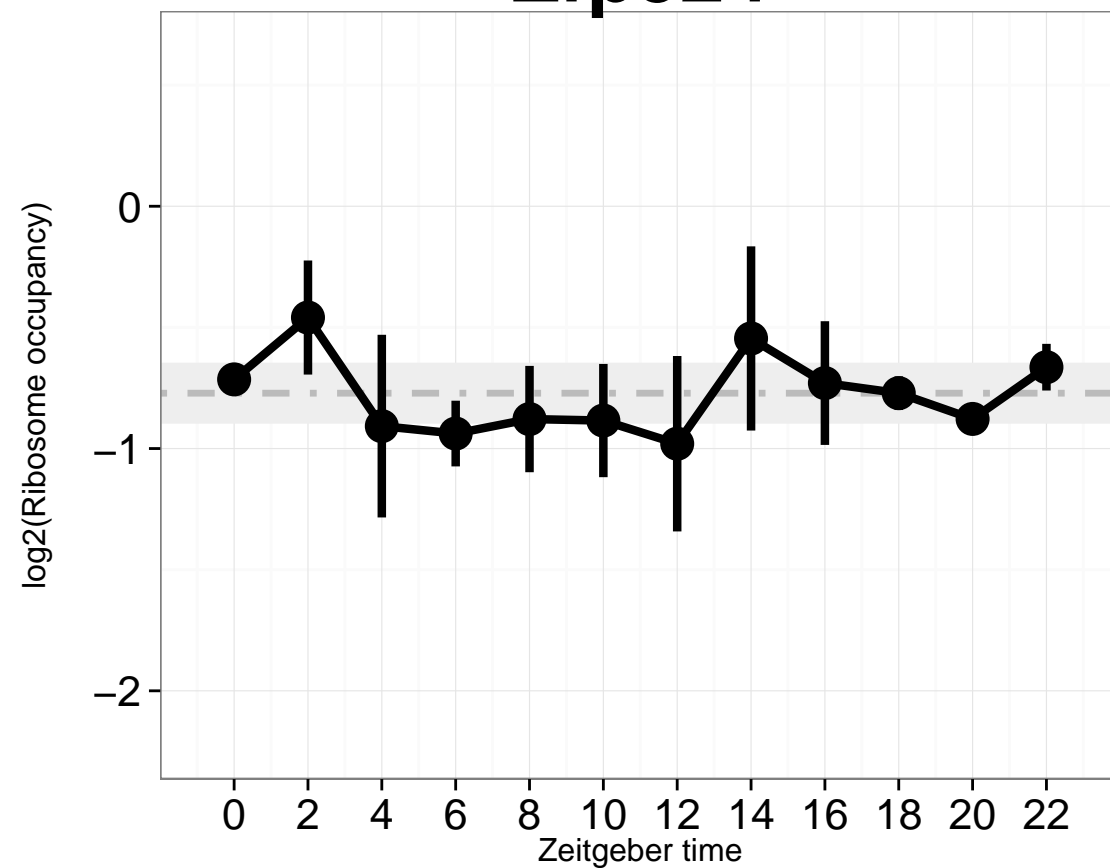

Supplement: Supplementary file 5771 [file 1]

# Cdk5rap3

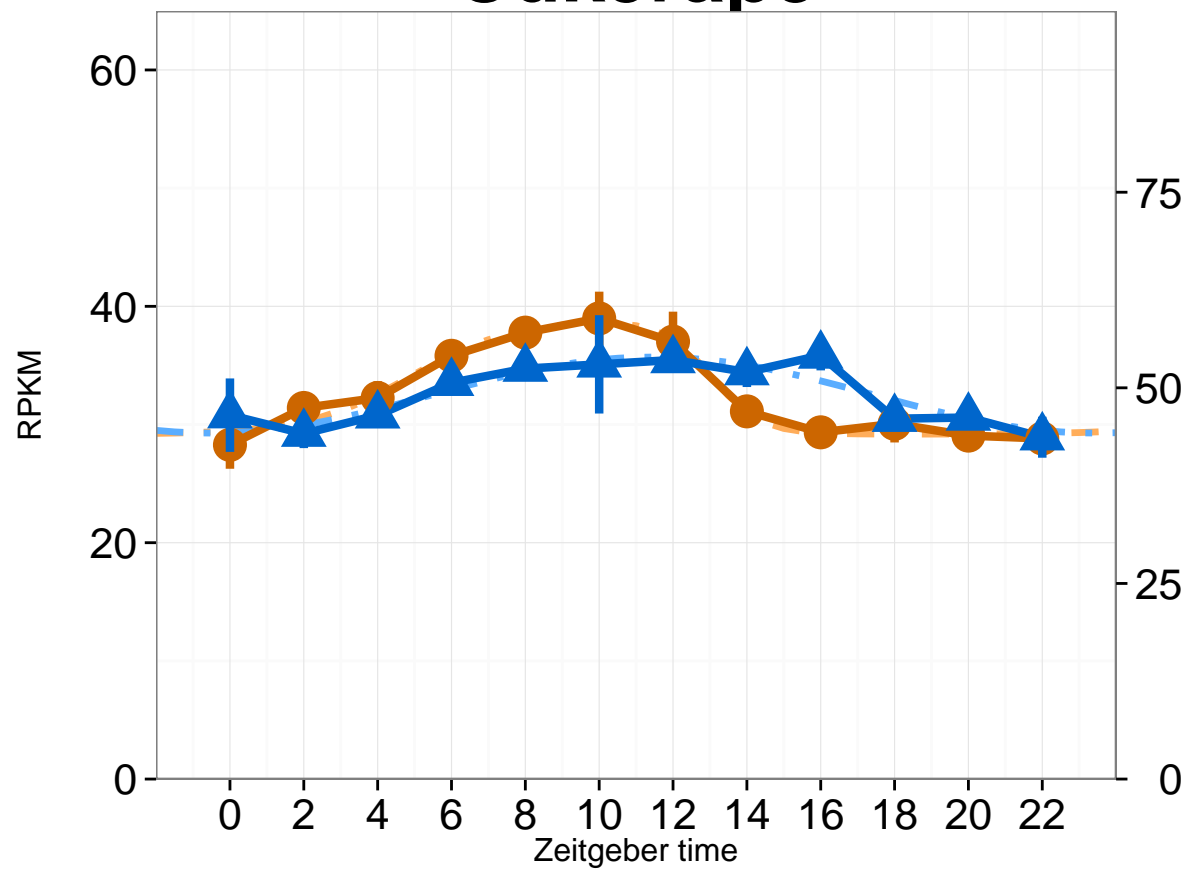

# Cdk5rap3

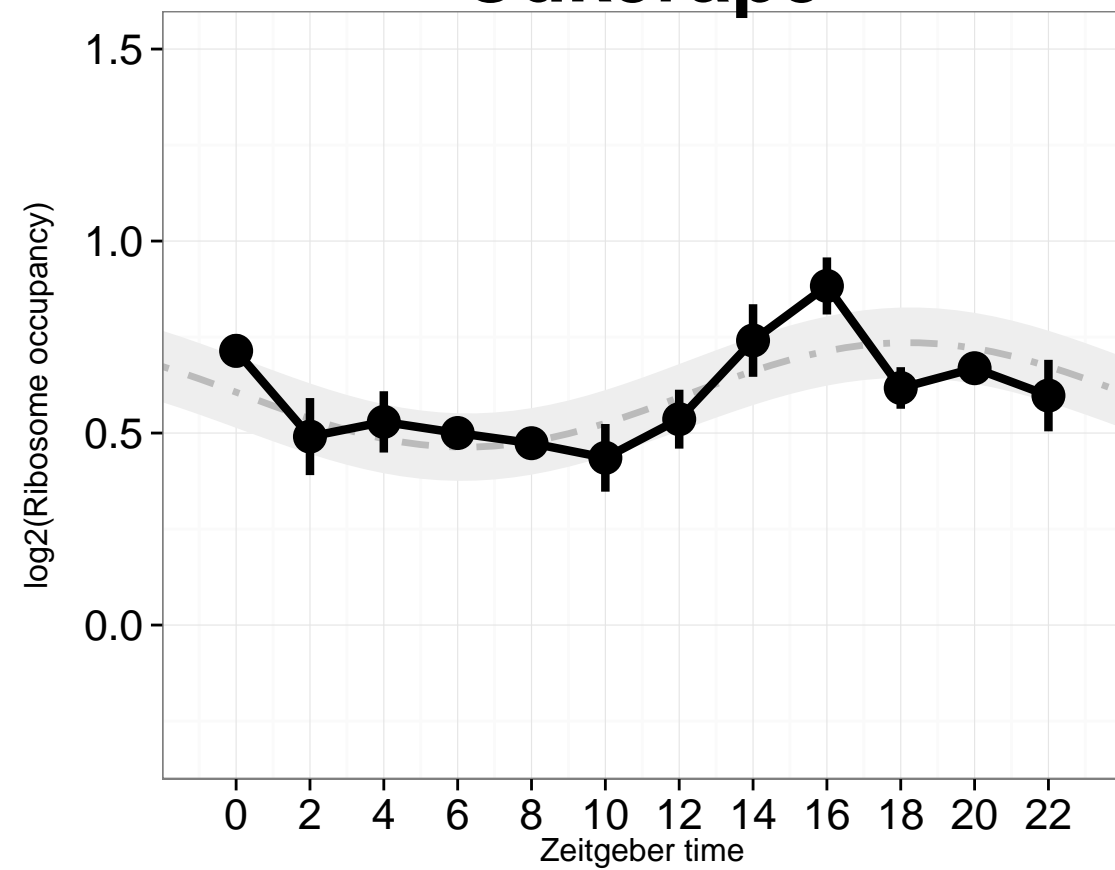

Supplement: Supplementary file 5772 [file 1]

## Crb2

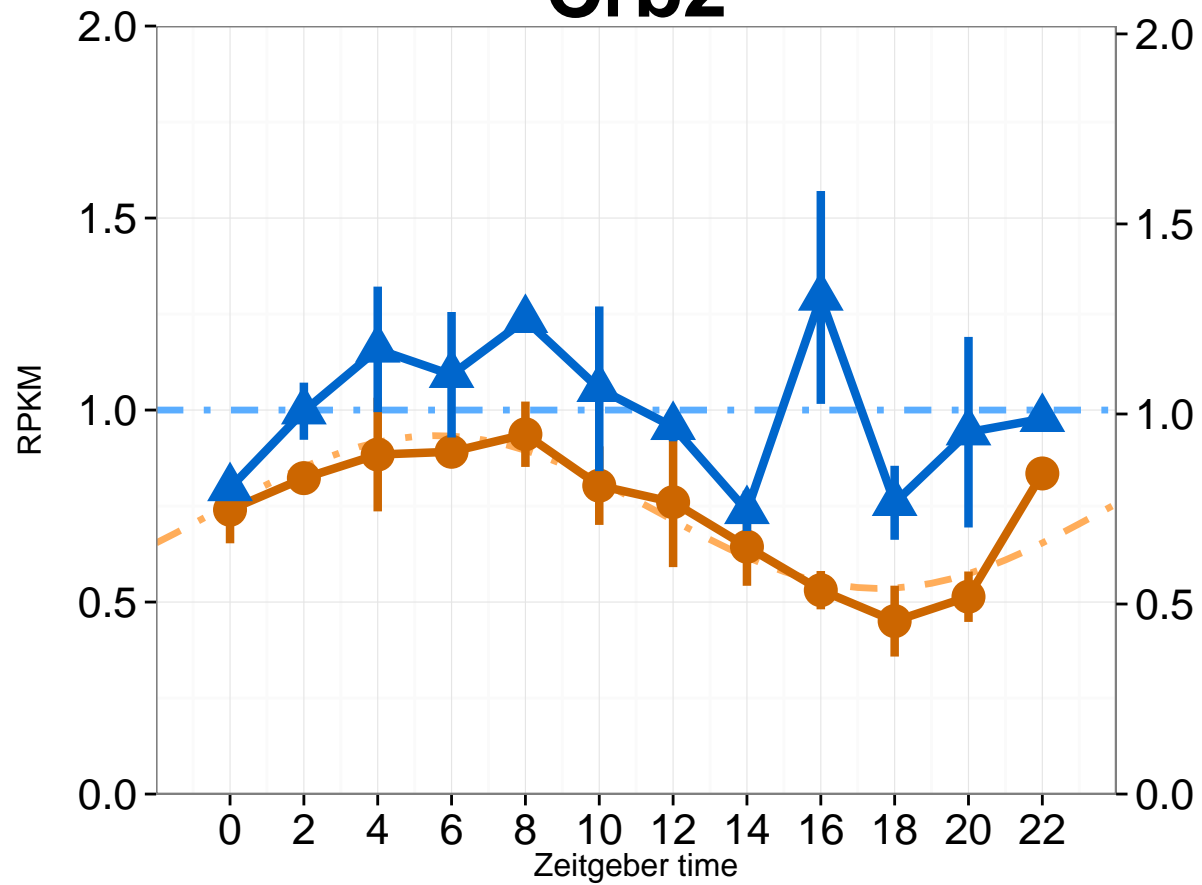

## Crb2

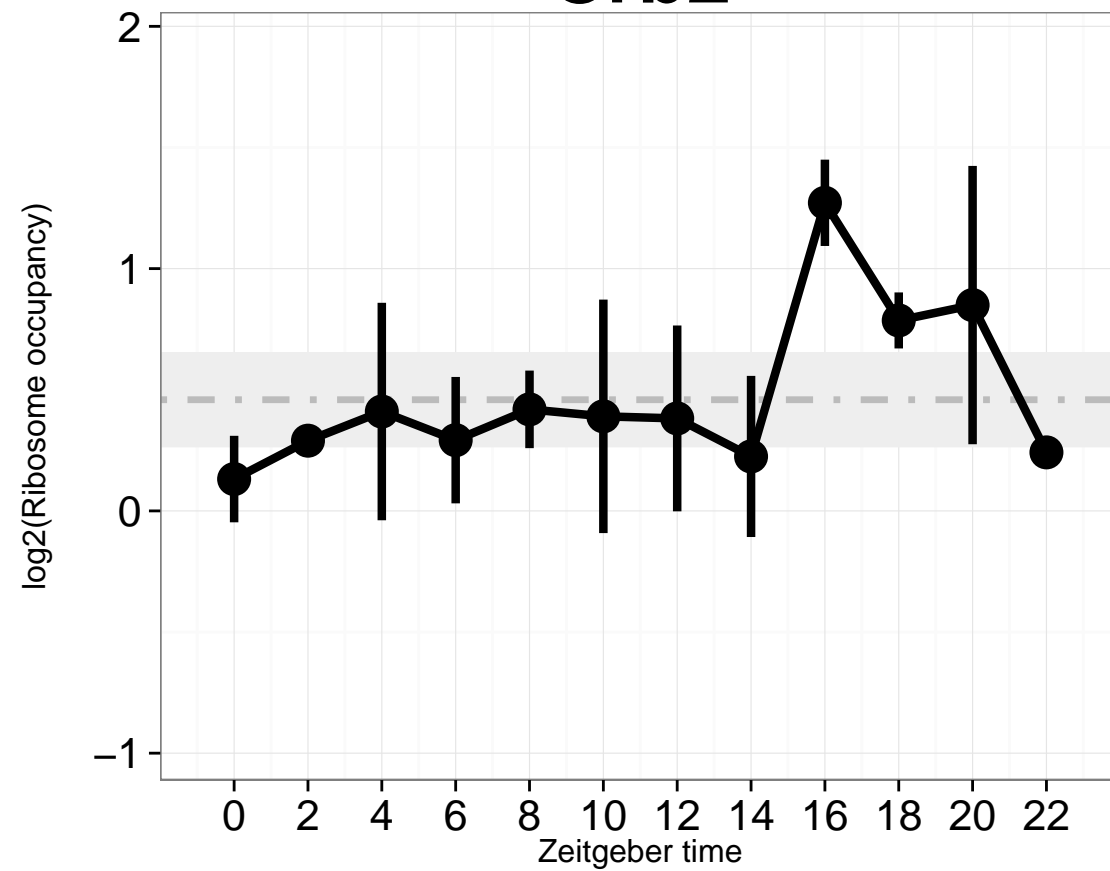

Supplement: Supplementary file 5773 [file 1]

# Pck1

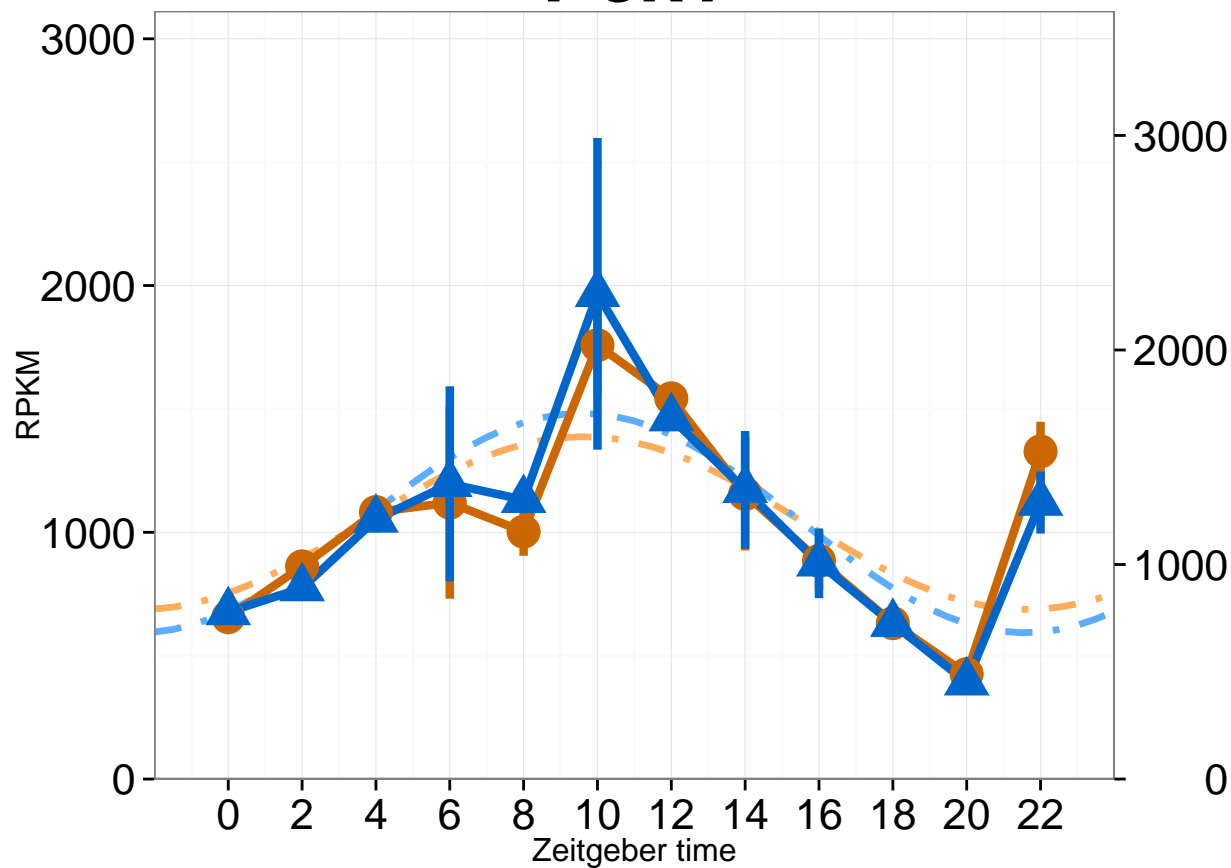

# Pck1

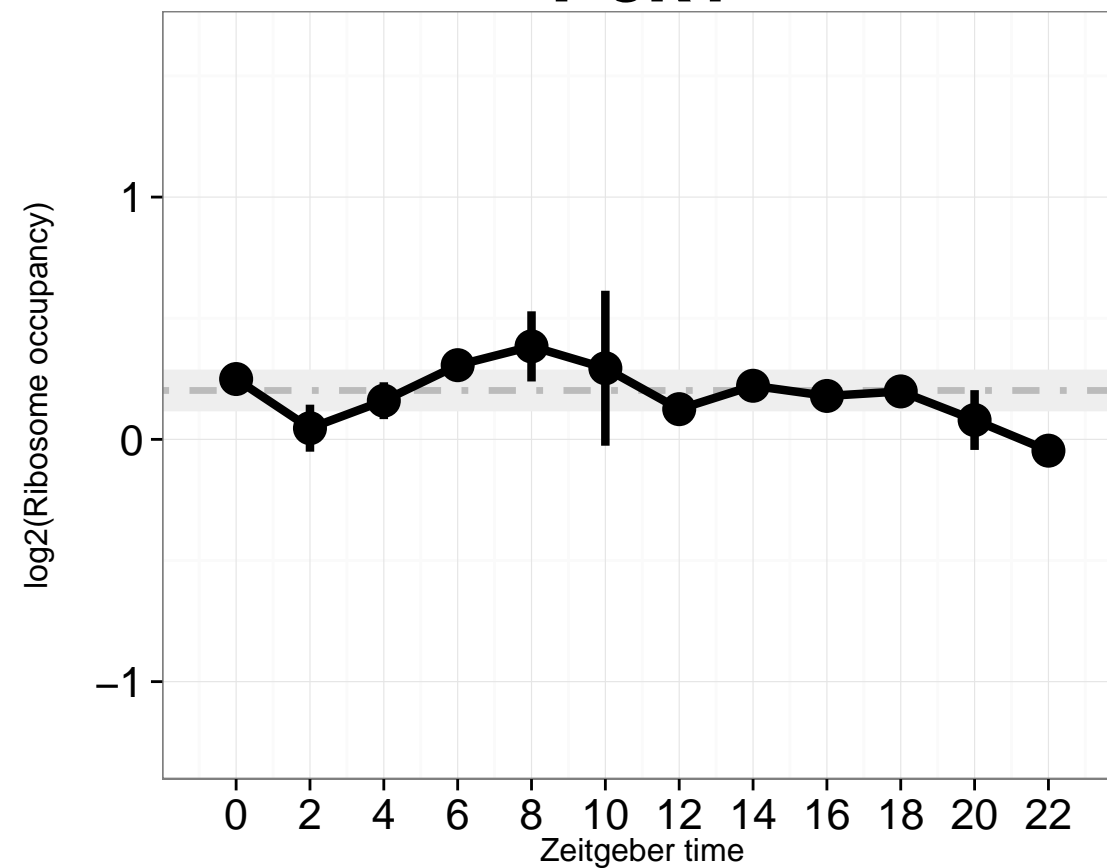

Supplement: Supplementary file 5774 [file 1]

# Rps11

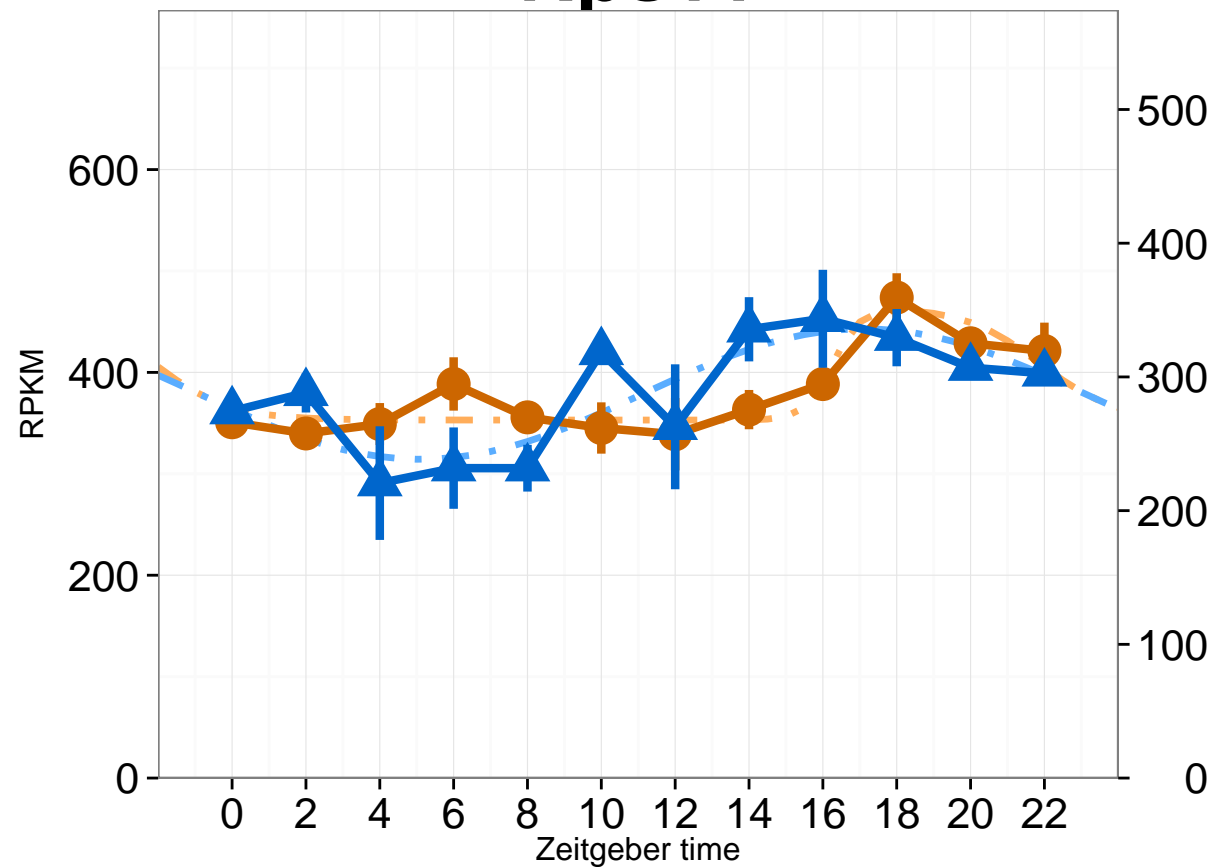

# Rps11

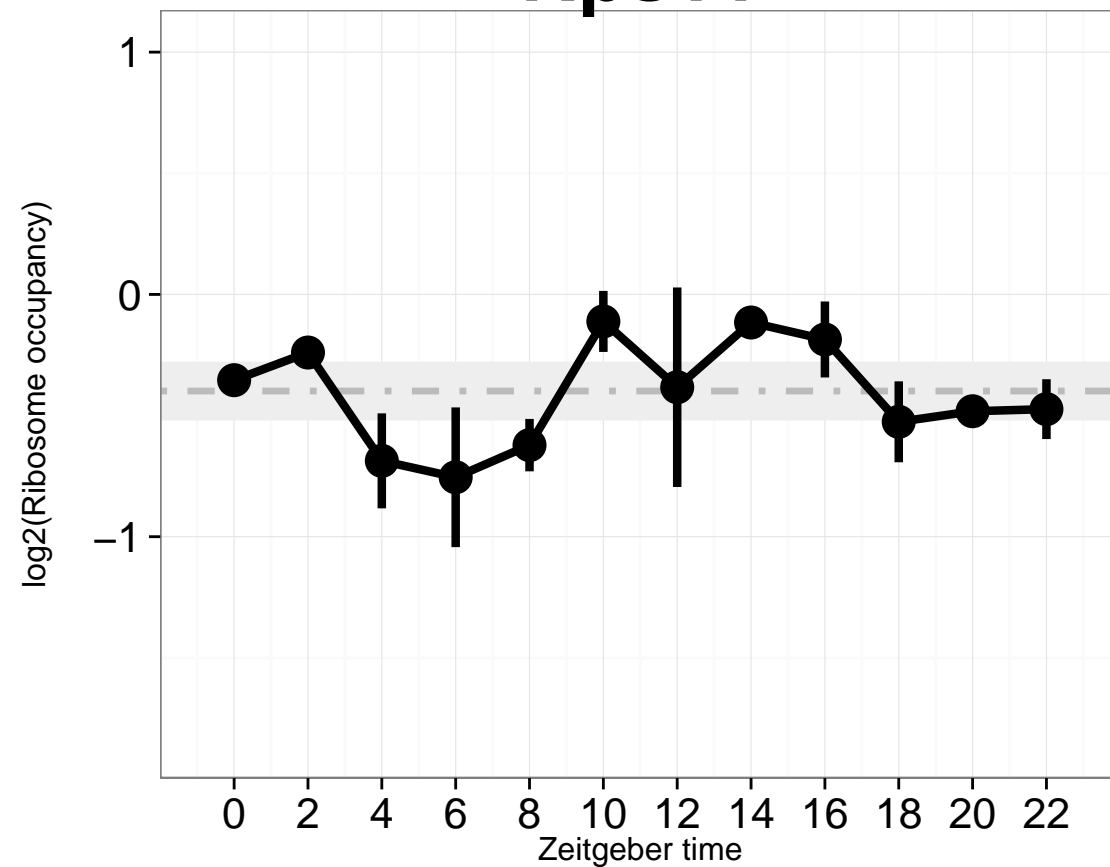

Supplement: Supplementary file 5775 [file 1]

# Rpl38

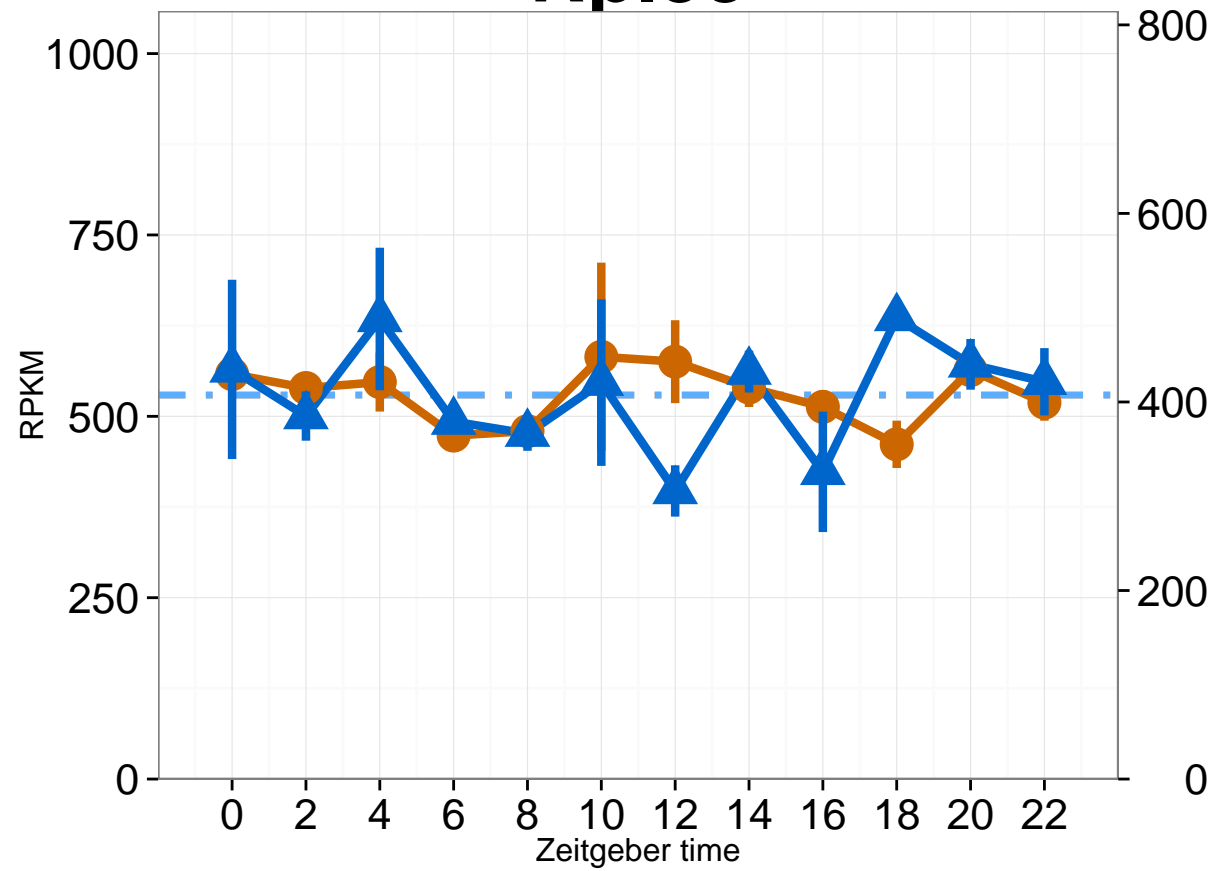

# Rpl38

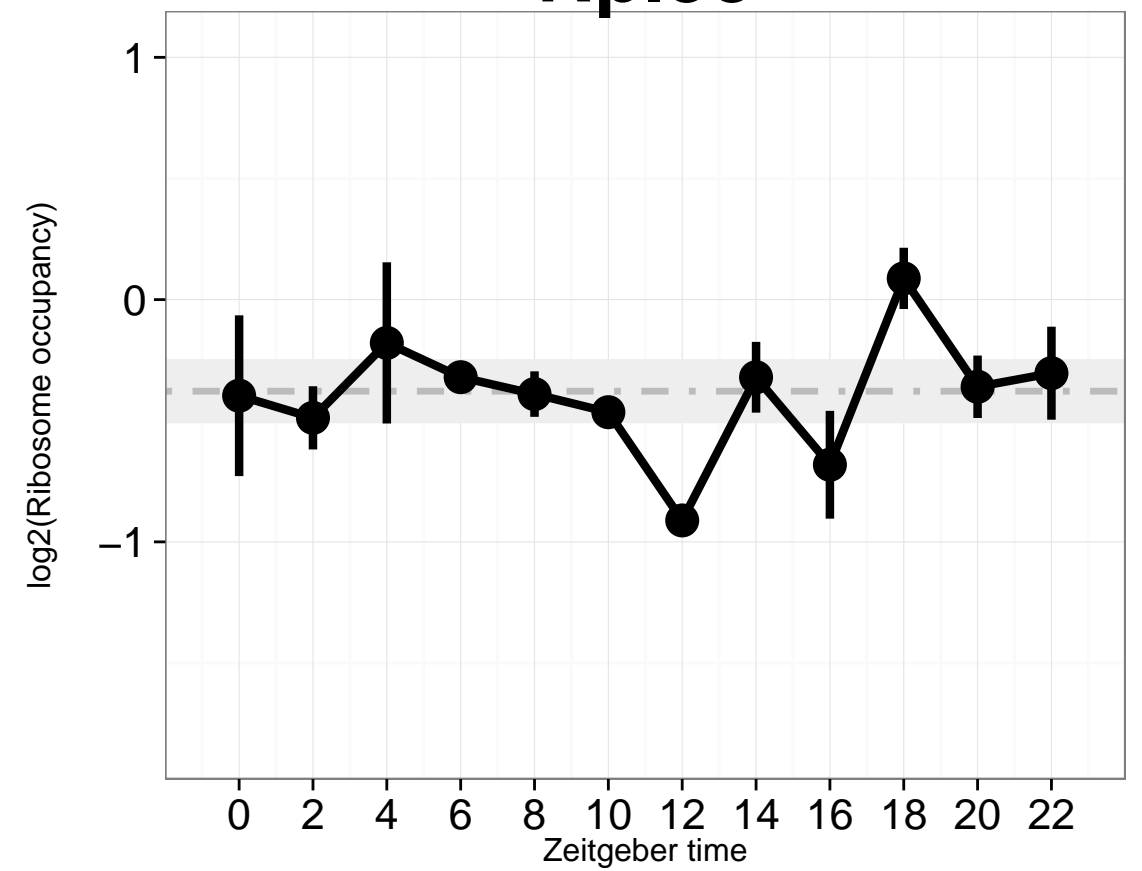

Supplement: Supplementary file 5776 [file 1]

# D630045J12Rik

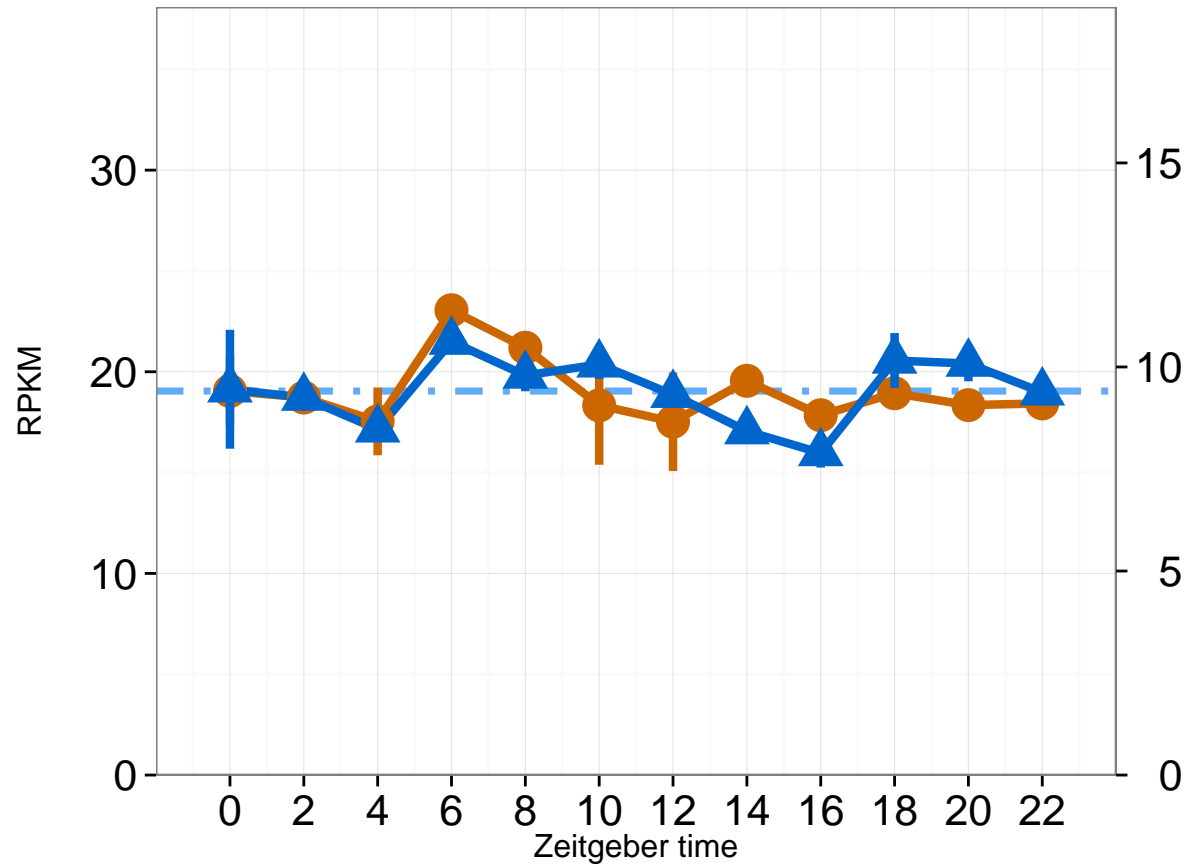

# D630045J12Rik

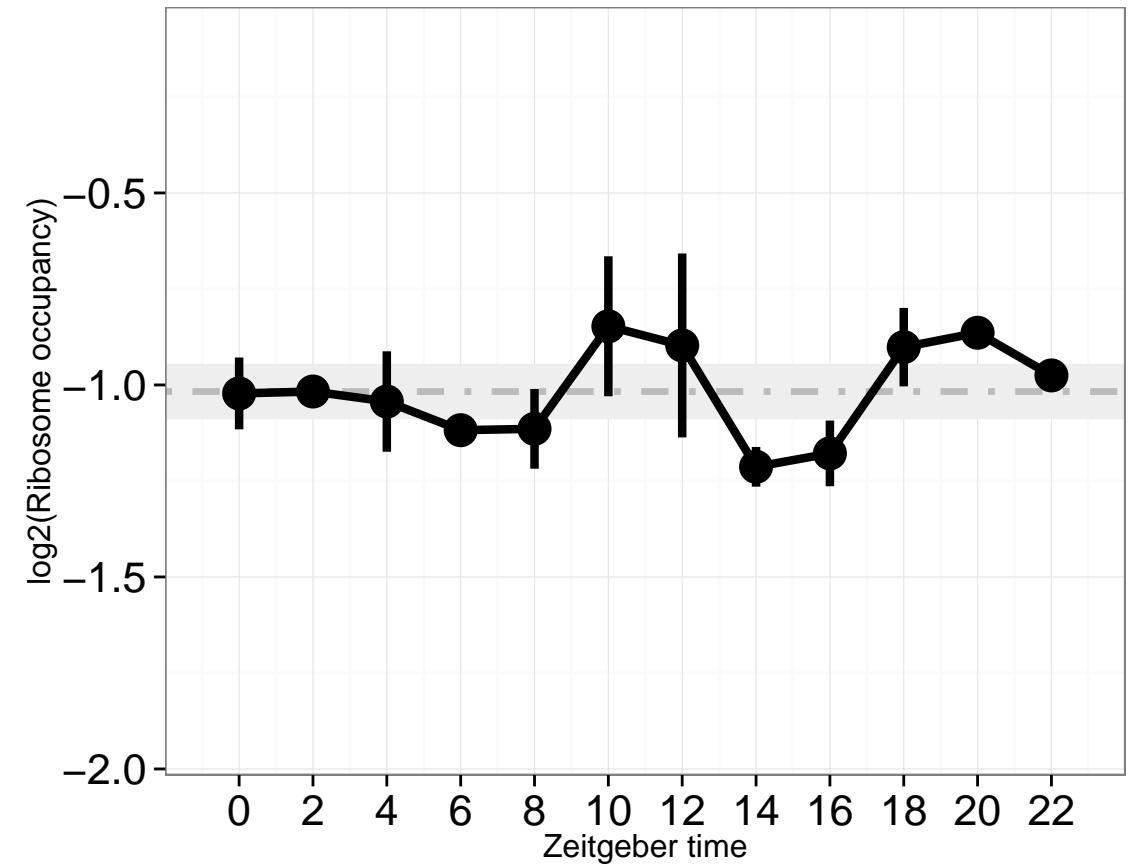

Supplement: Supplementary file 5777 [file 1]

# Fam219b

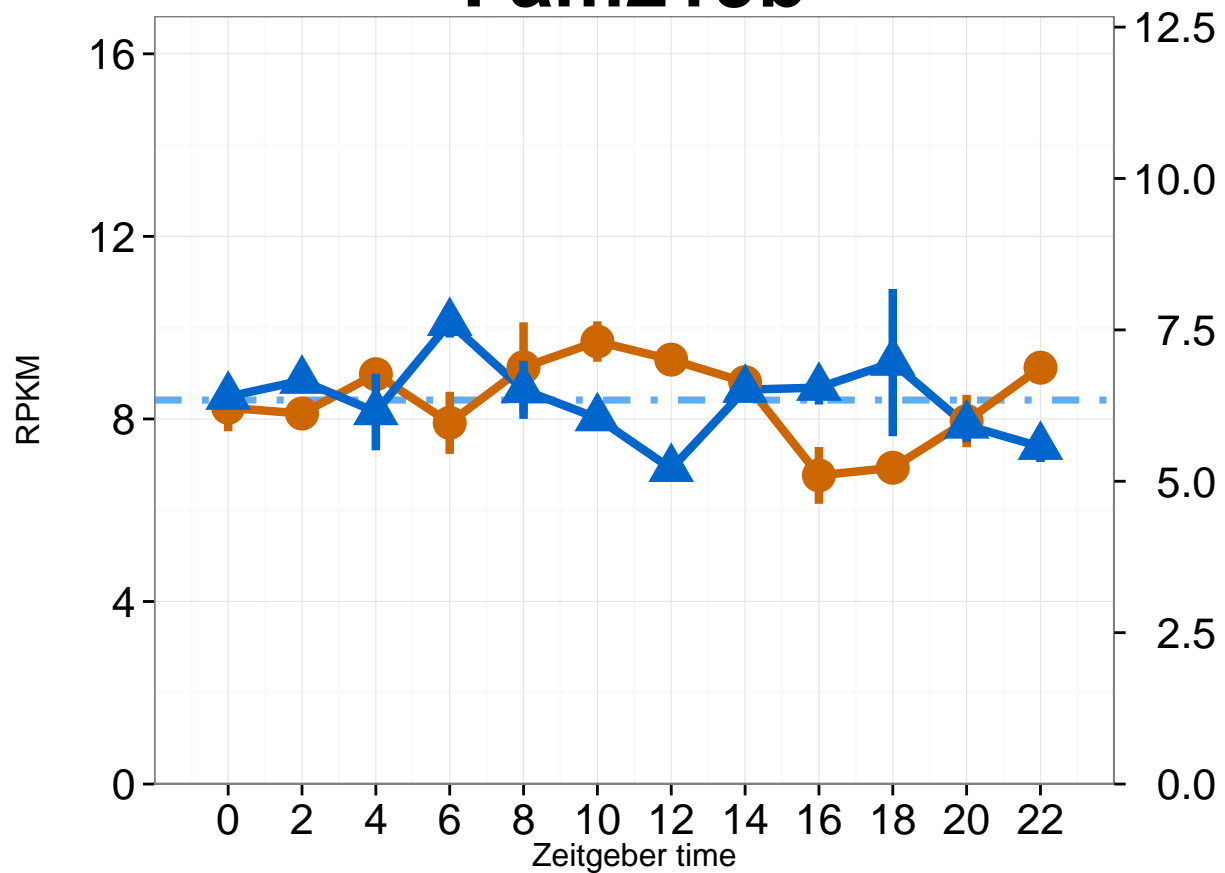

# Fam219b

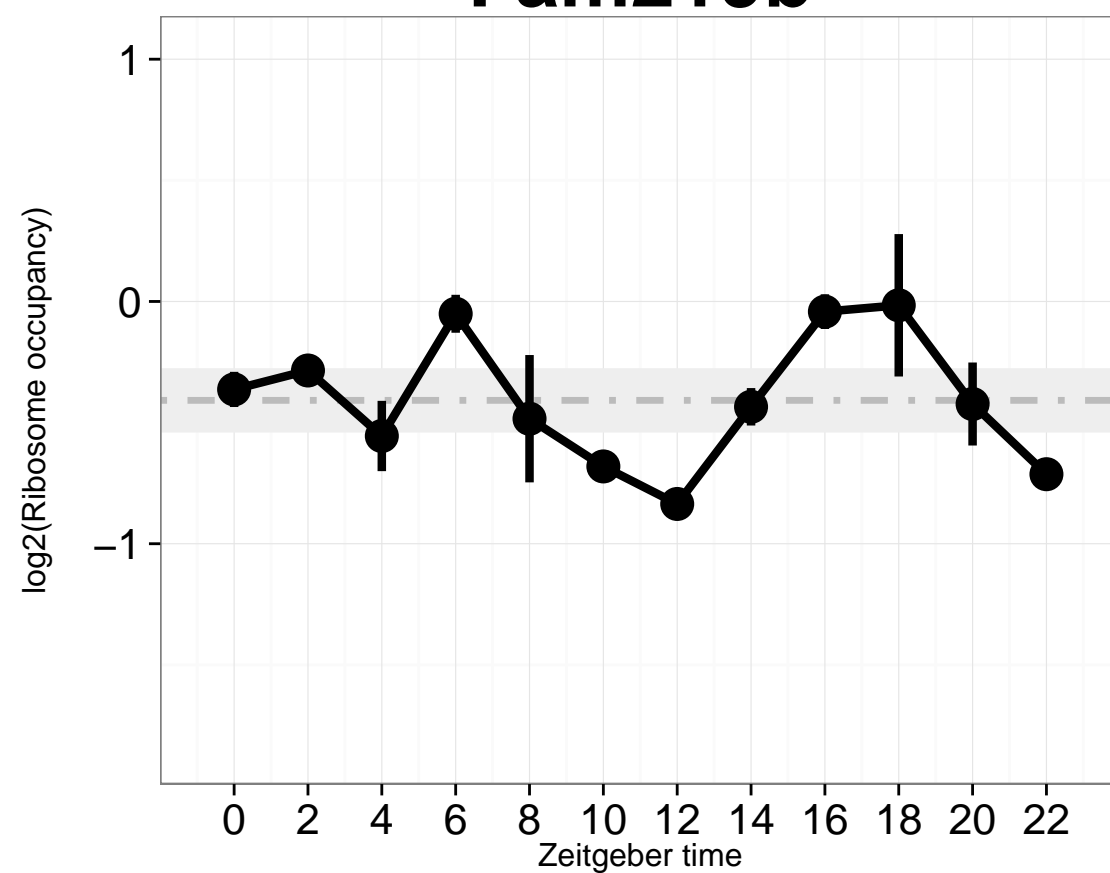

Supplement: Supplementary file 5778 [file 1]

## Cdc27

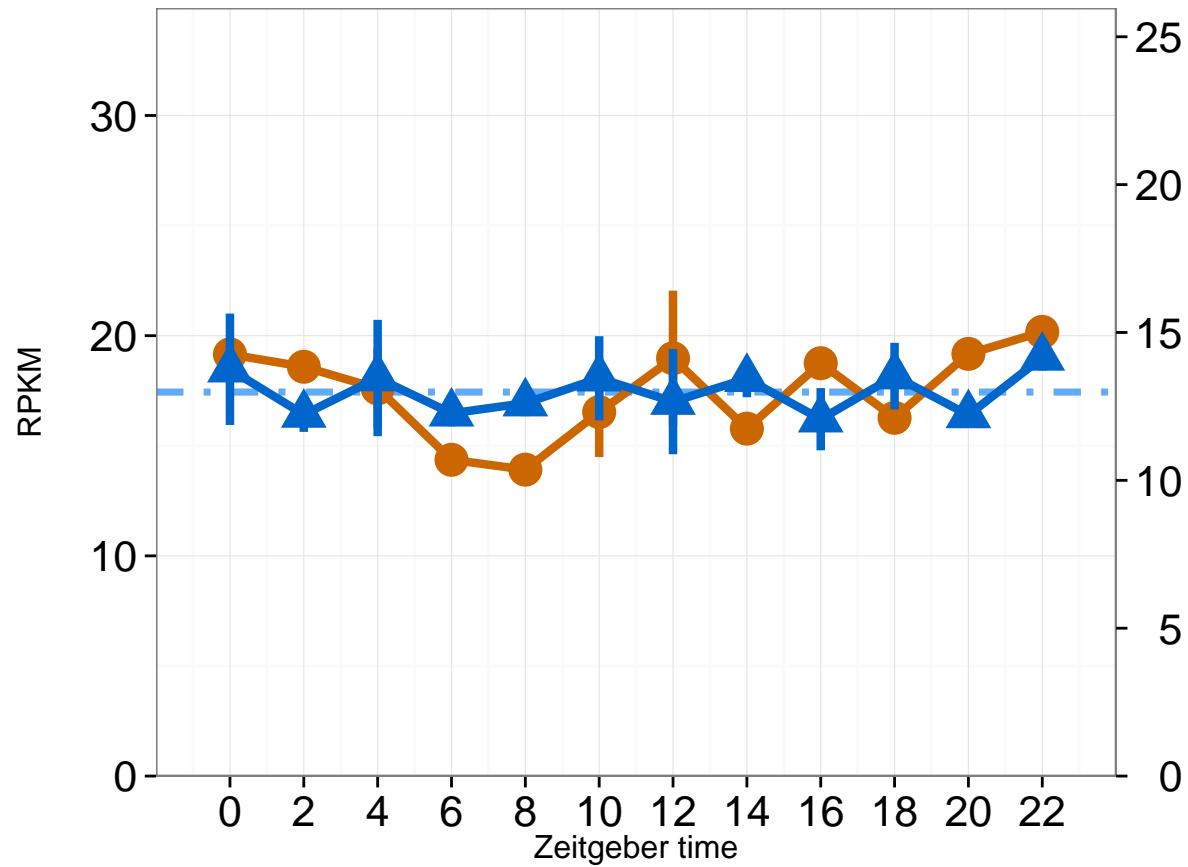

## Cdc27

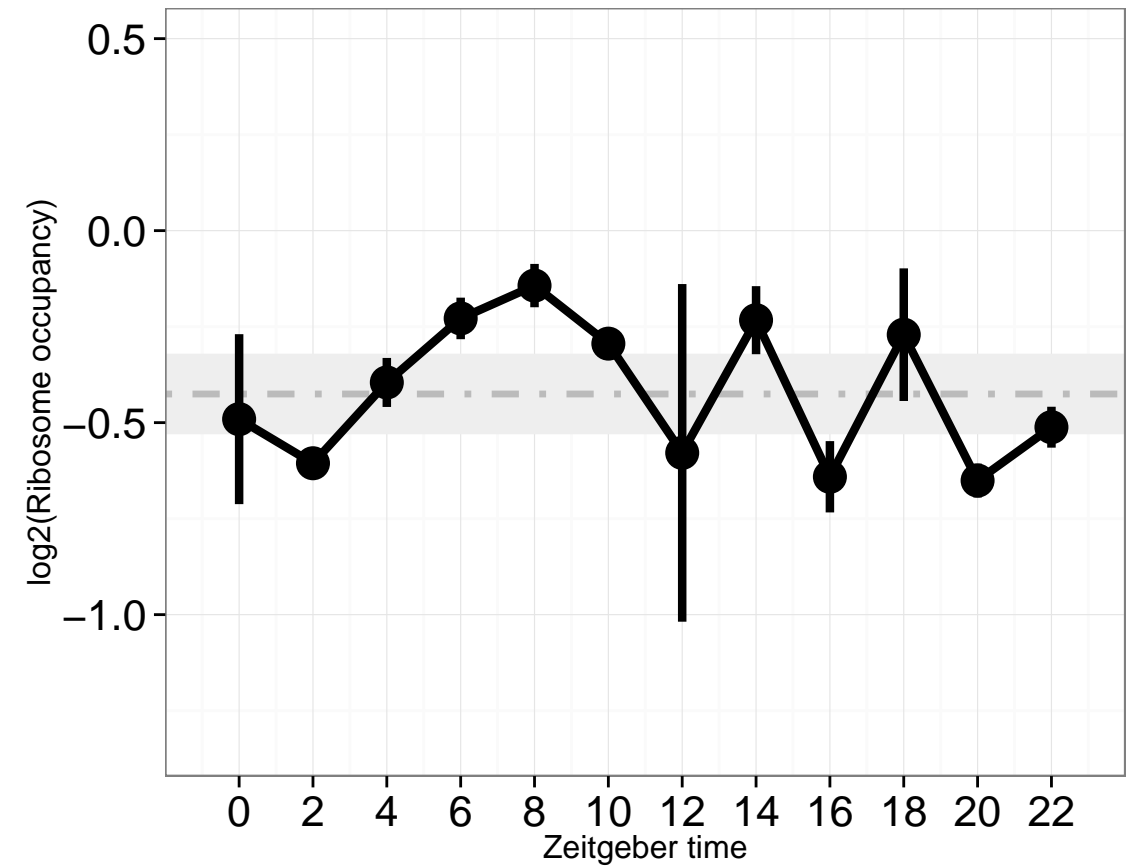

Supplement: Supplementary file 5779 [file 1]

## Sfi1

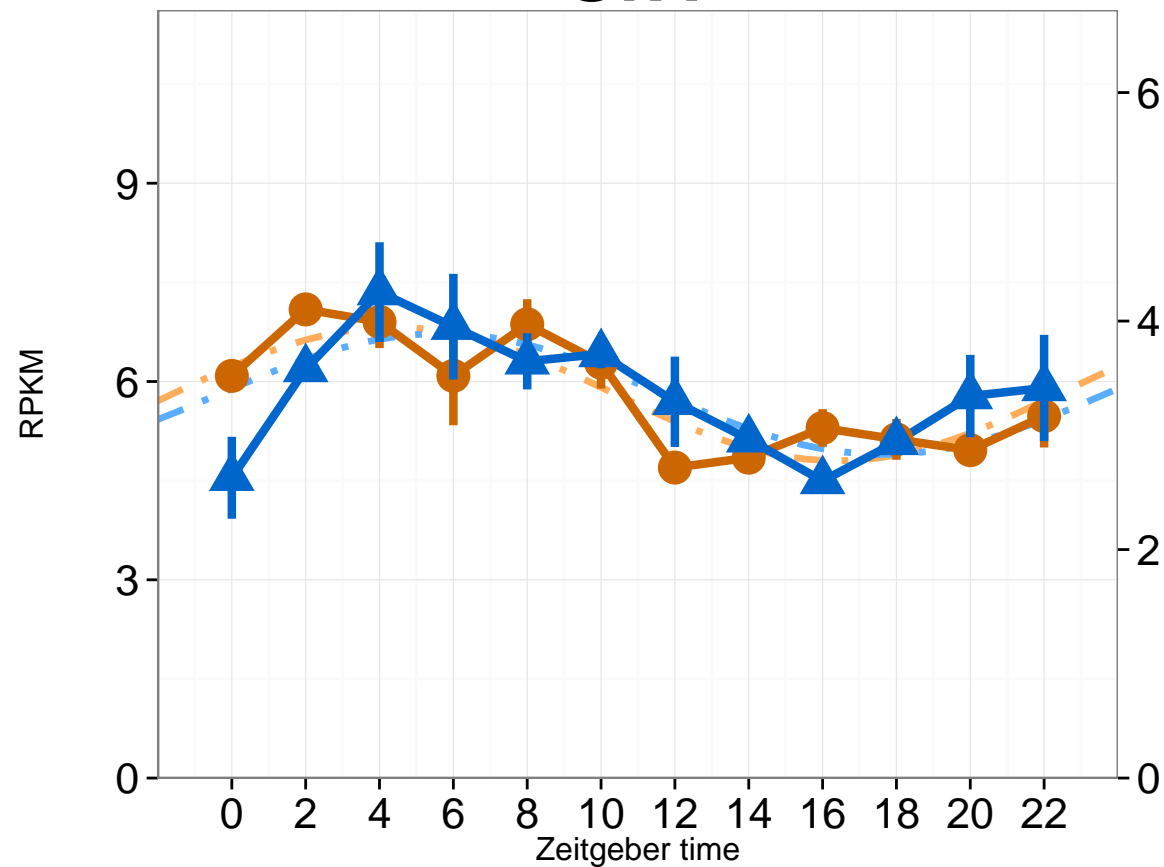

## Sfi1

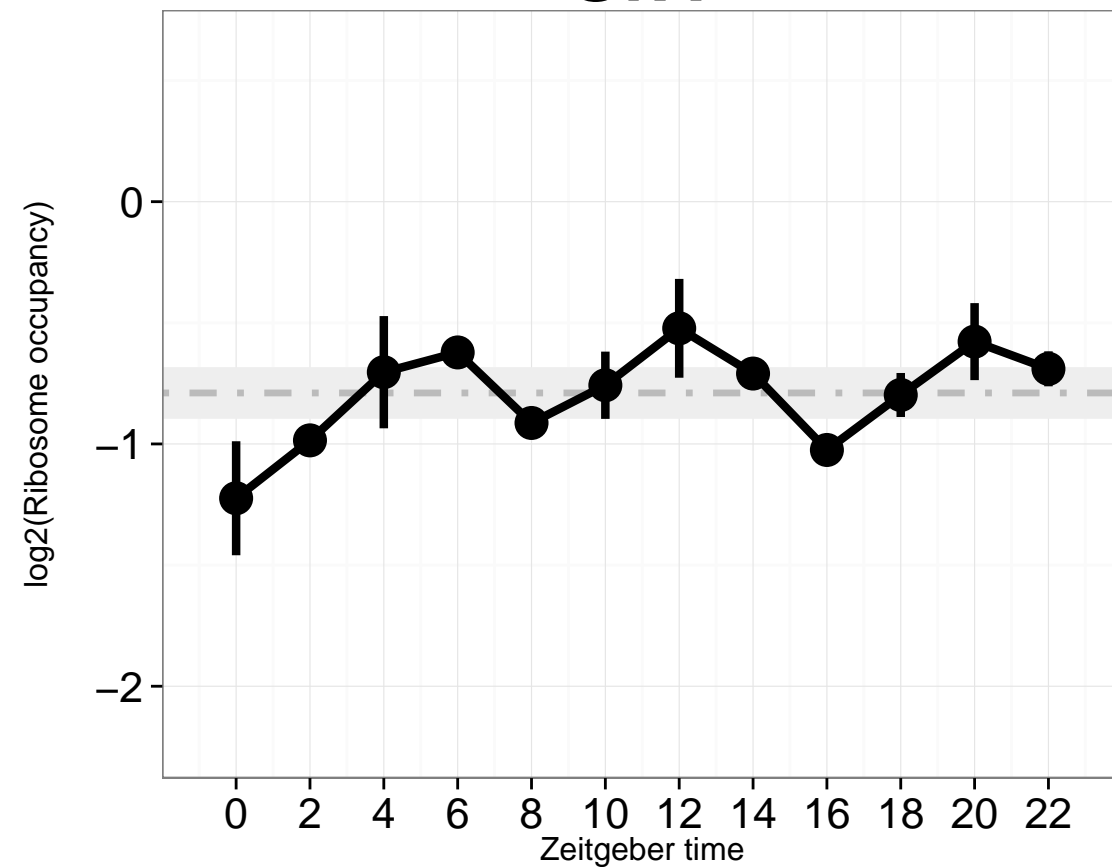

Supplement: Supplementary file 5780 [file 1]

## Rnft1

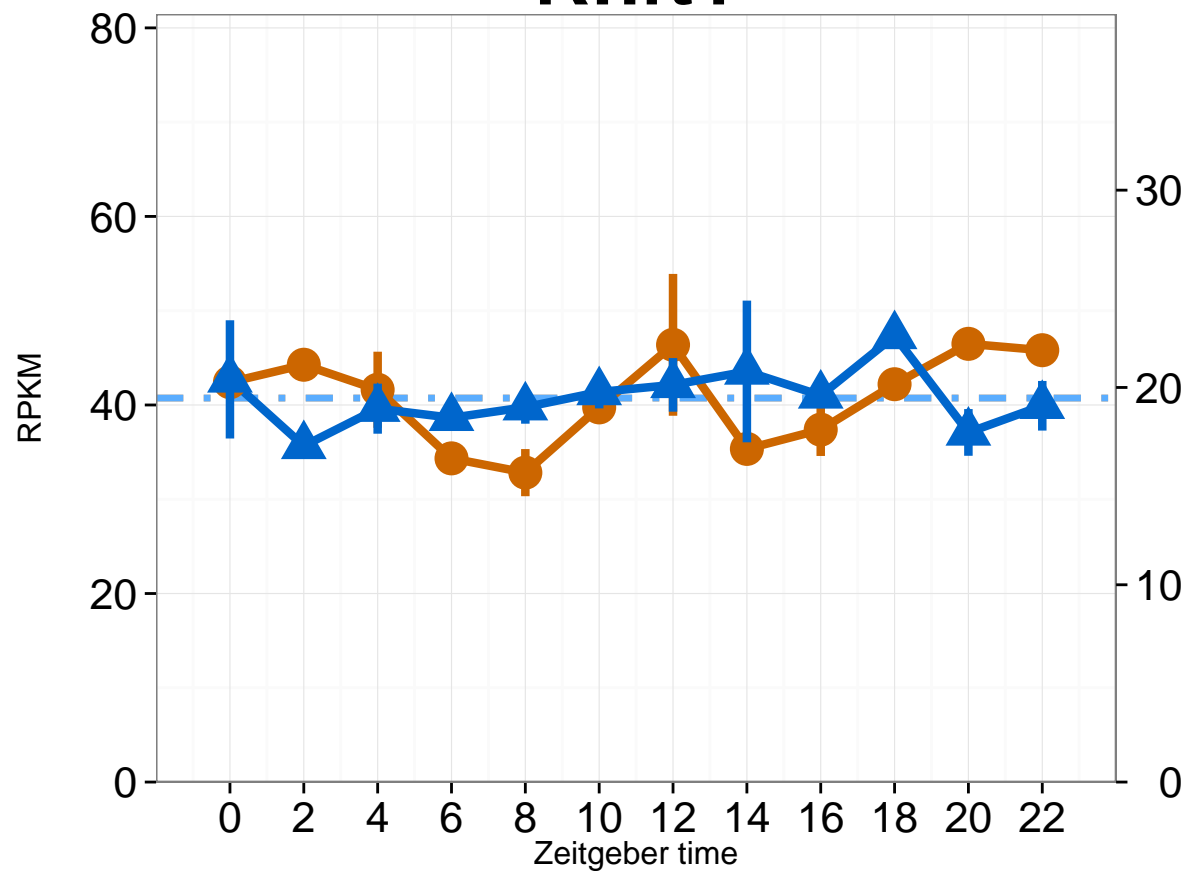

## Rnft1

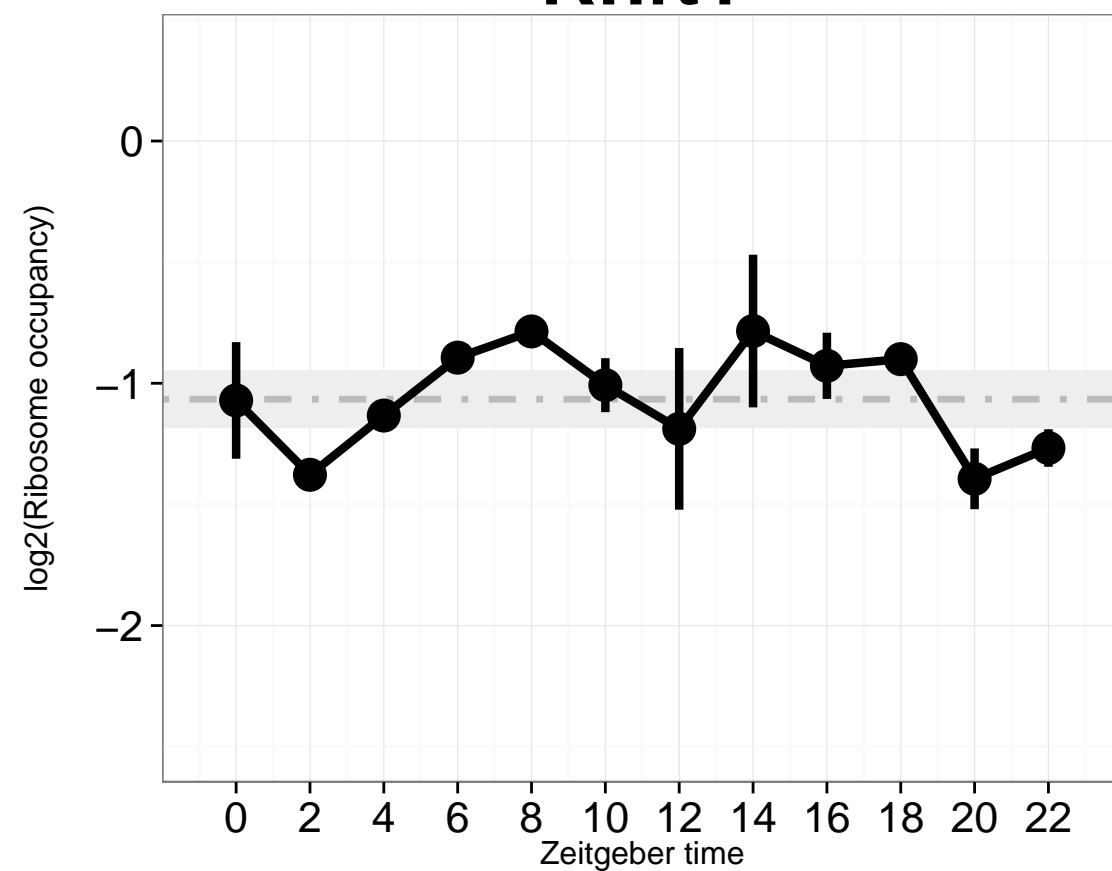

Supplement: Supplementary file 5781 [file 1]

# Ahi1

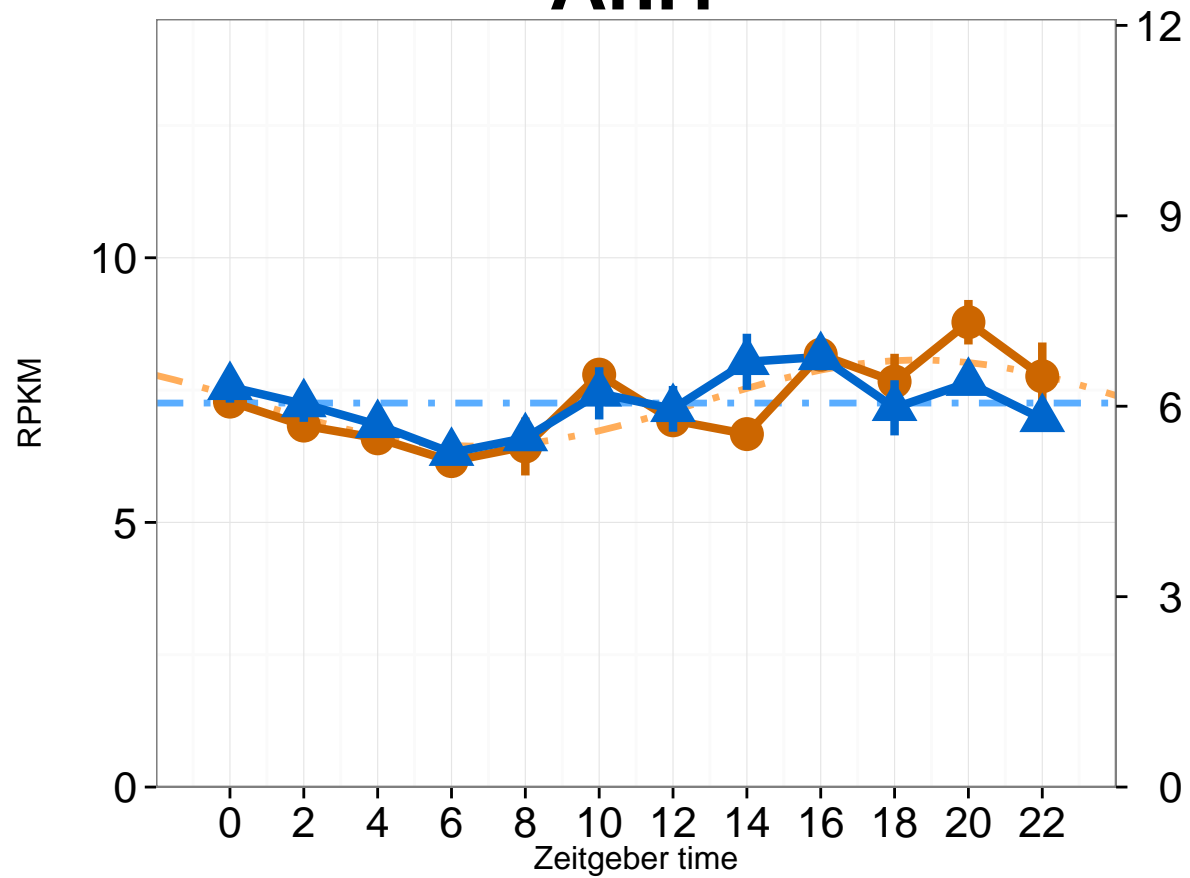

# Ahi1

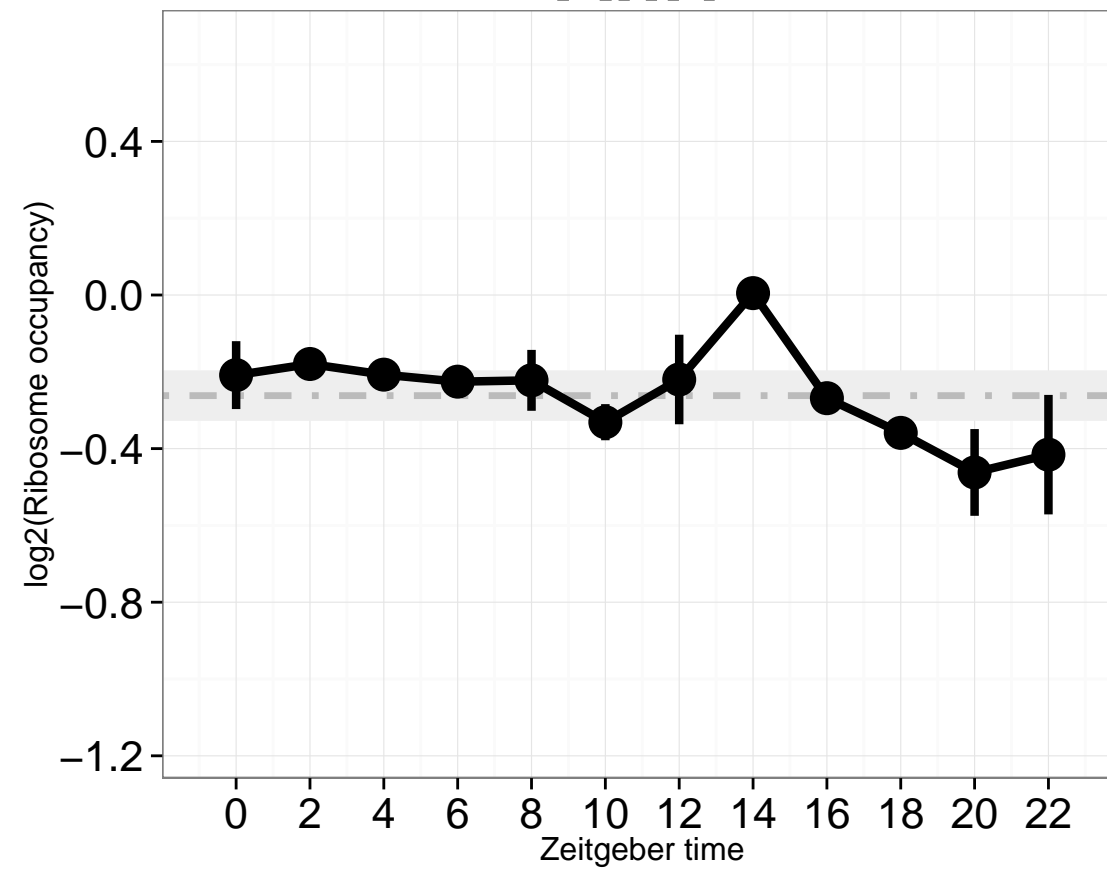

Supplement: Supplementary file 5782 [file 1]

# Trim25

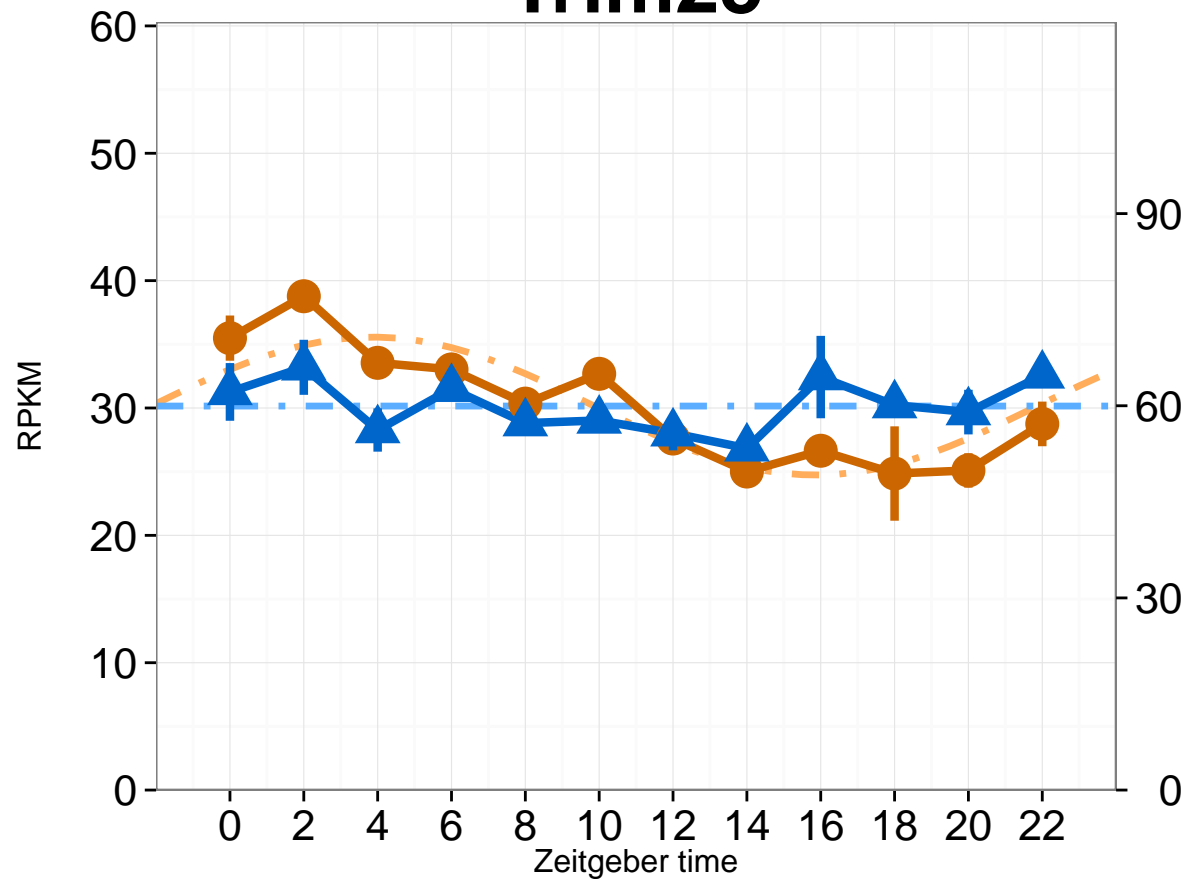

# Trim25

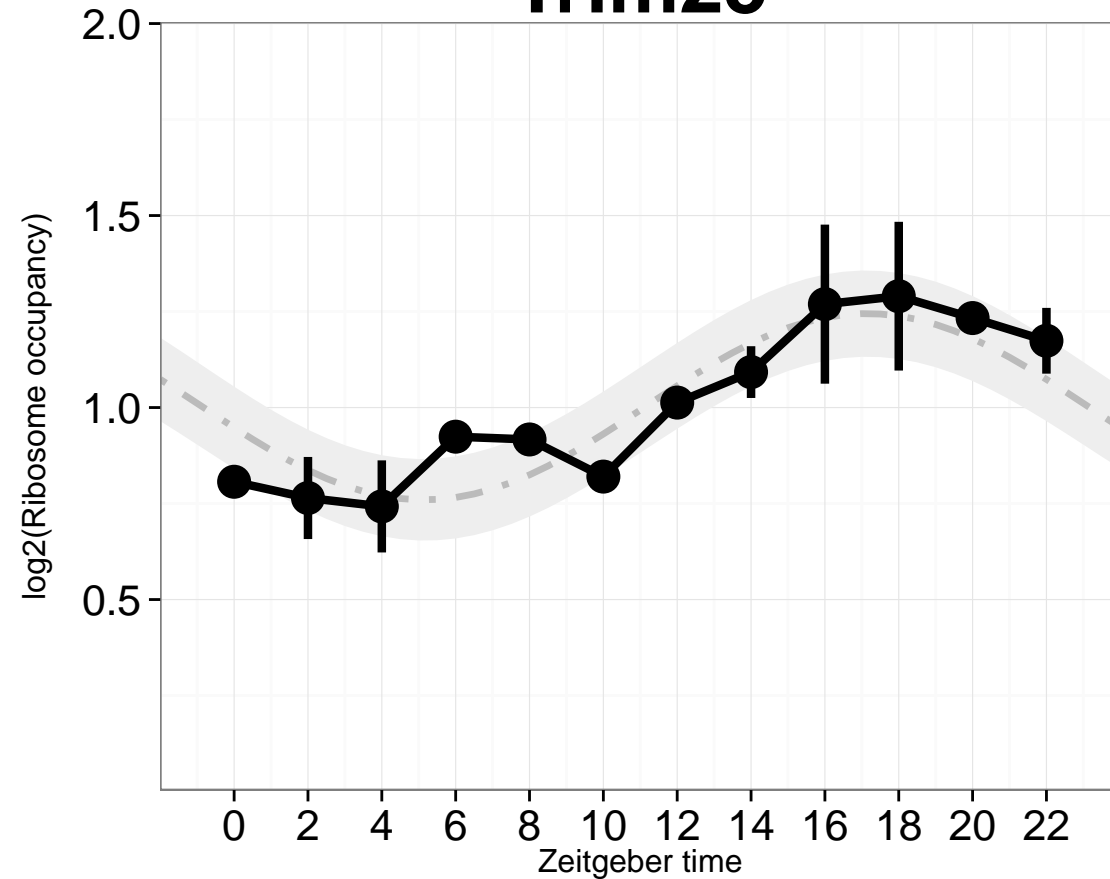

Supplement: Supplementary file 5783 [file 1]

## Marcks

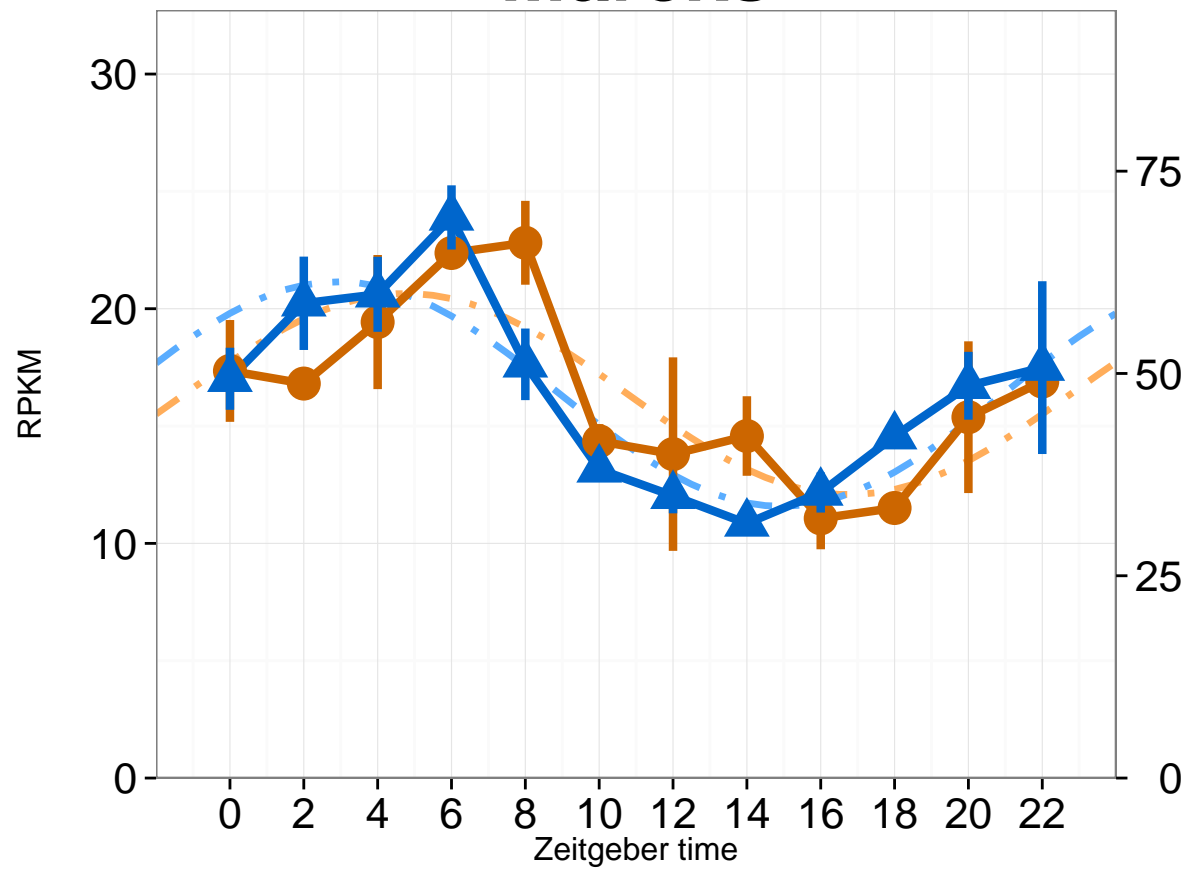

## Marcks

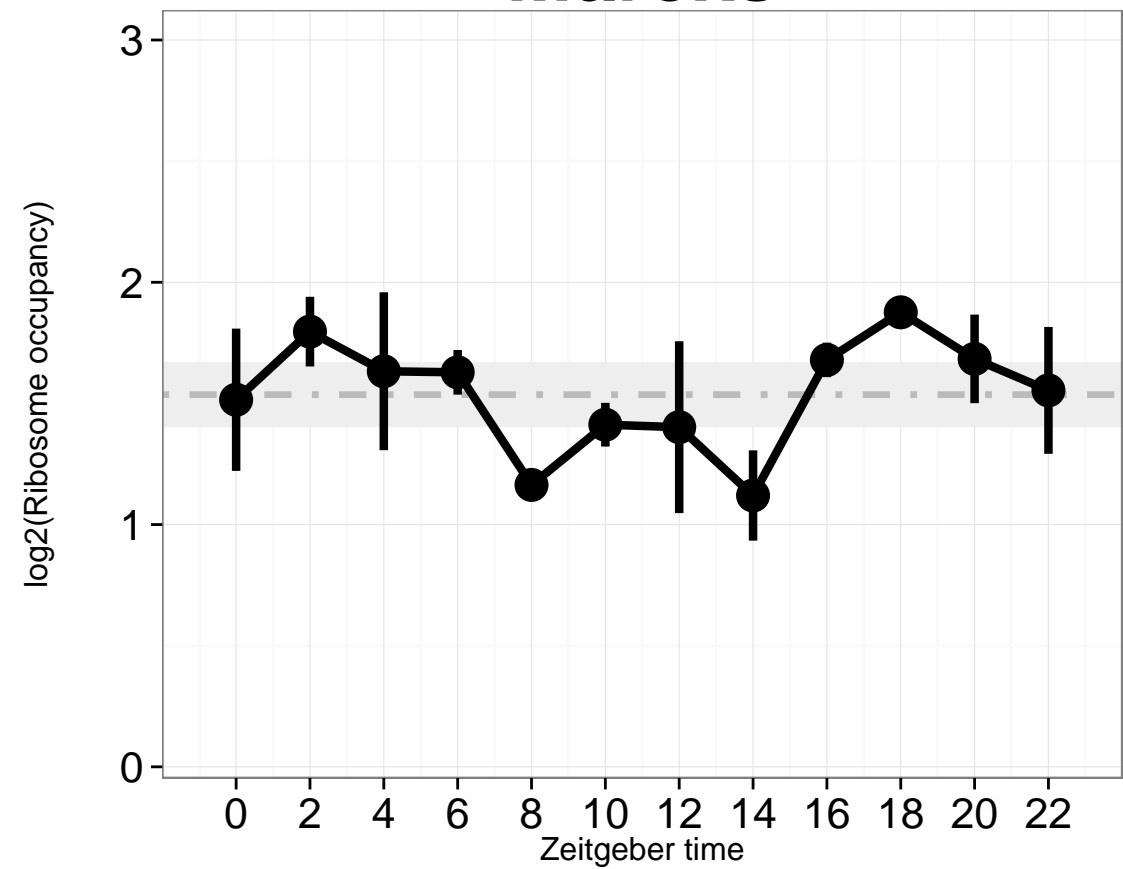

Supplement: Supplementary file 5784 [file 1]

## Ss18

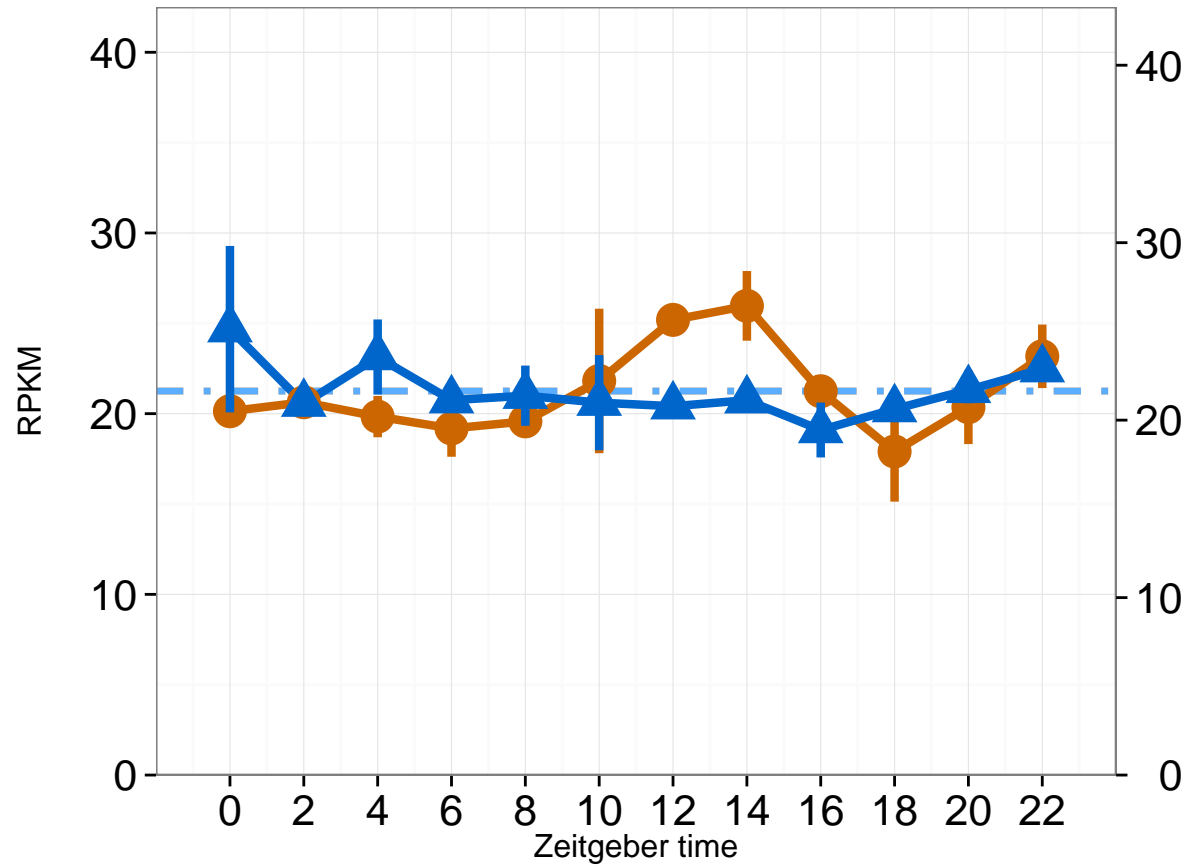

## Ss18

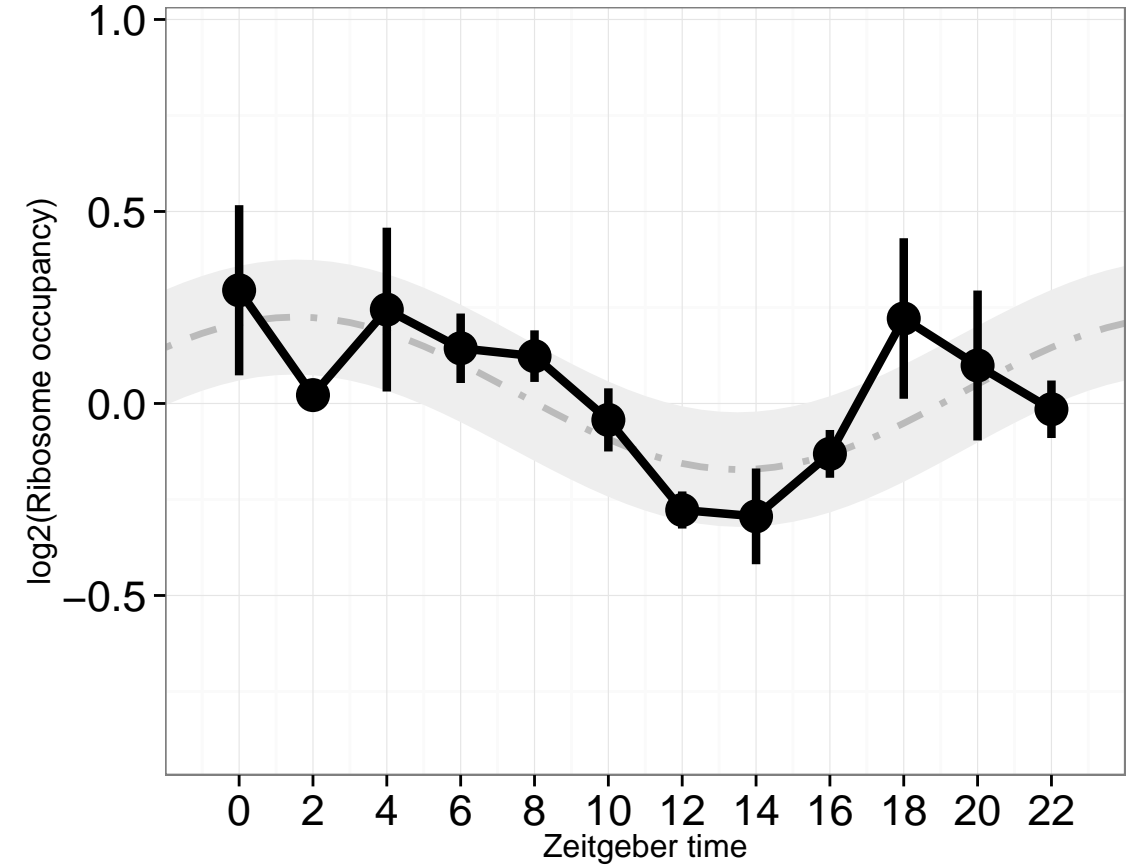

Supplement: Supplementary file 5785 [file 1]

# Arhgap19

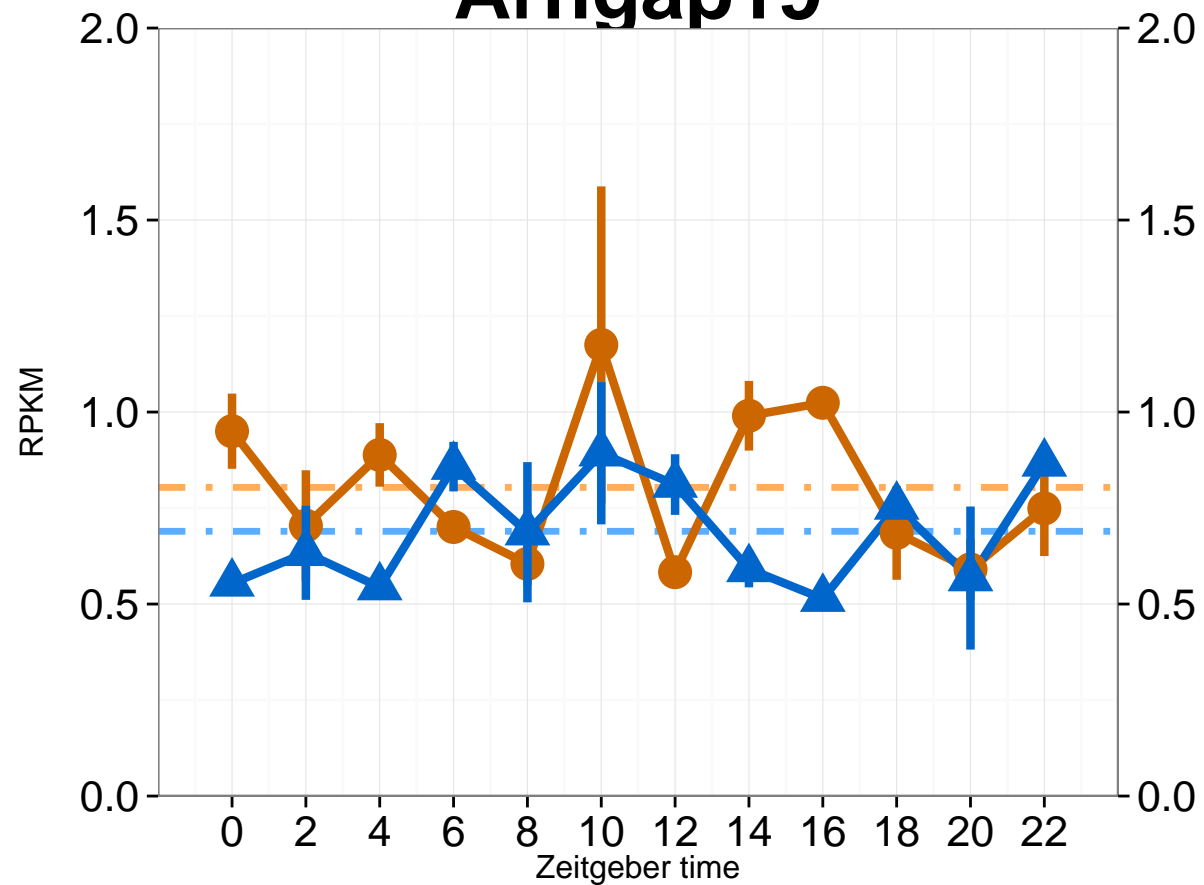

# Arhgap19

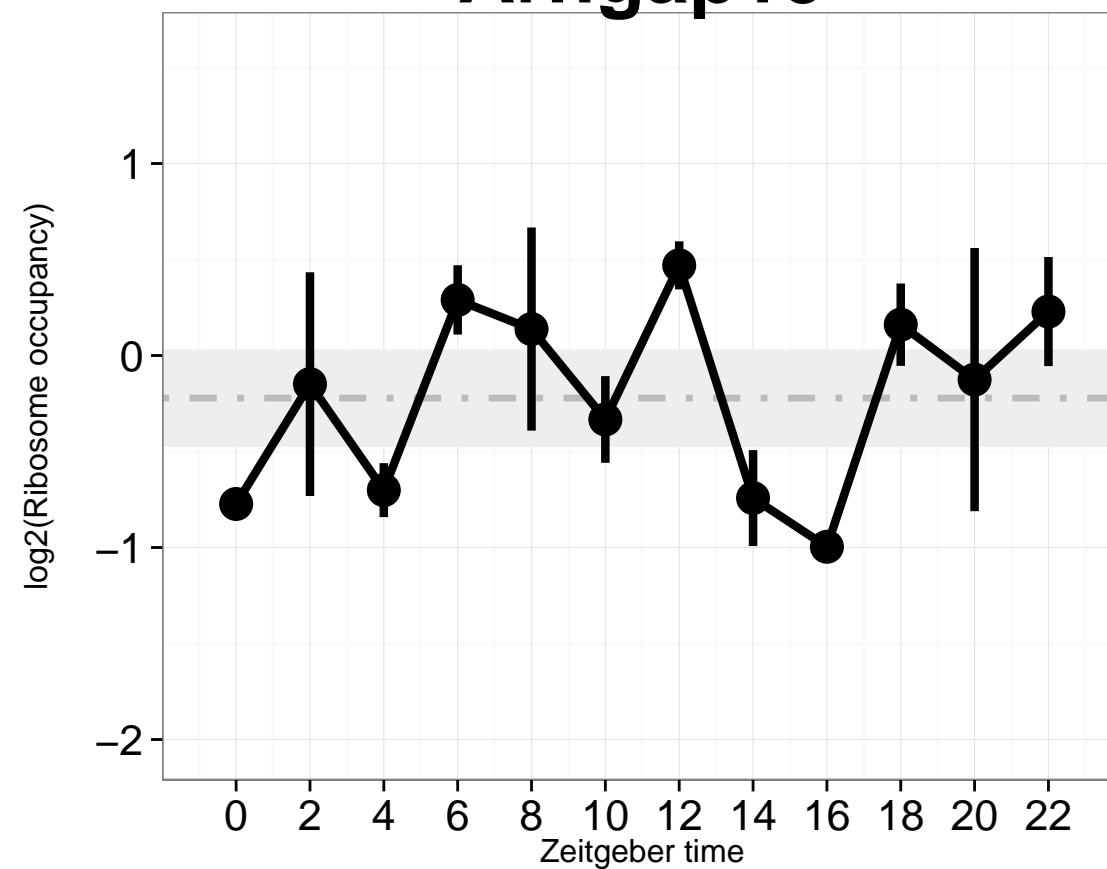

Supplement: Supplementary file 5786 [file 1]

## Cln5

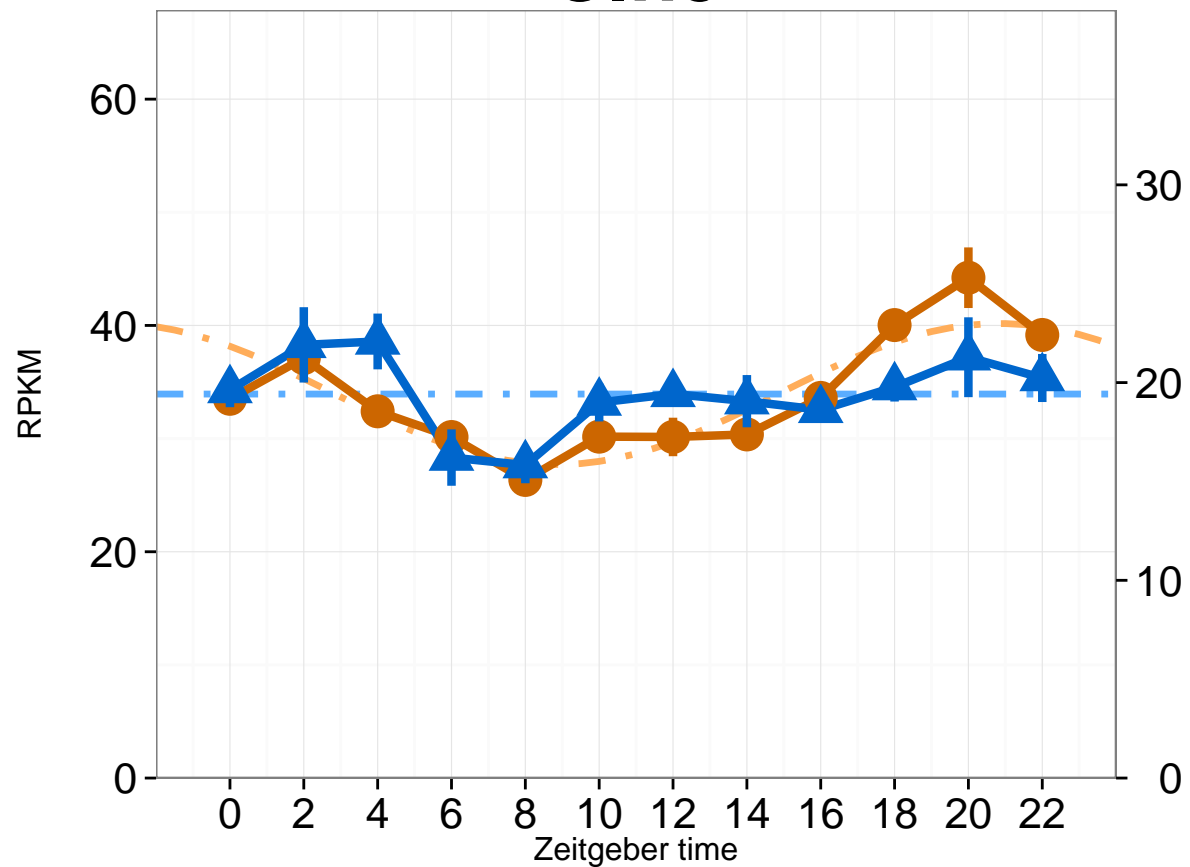

## Cln5

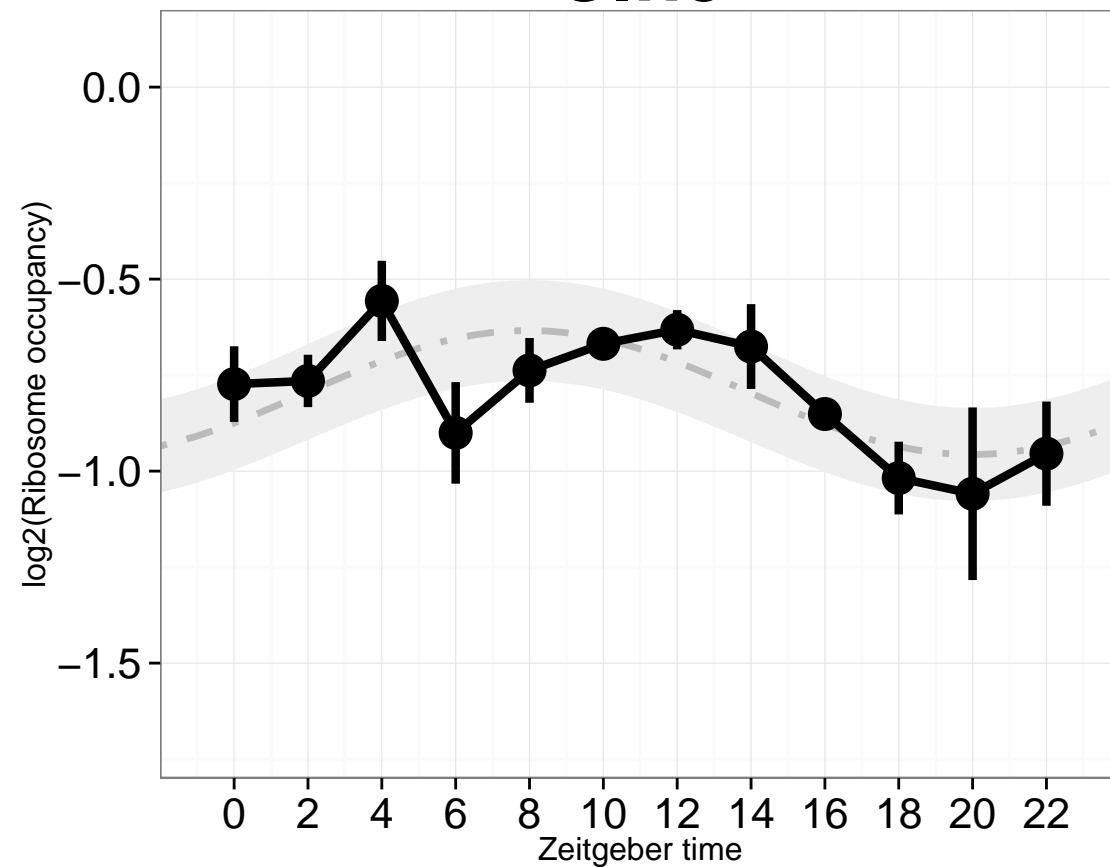

Supplement: Supplementary file 5787 [file 1]

## Boc

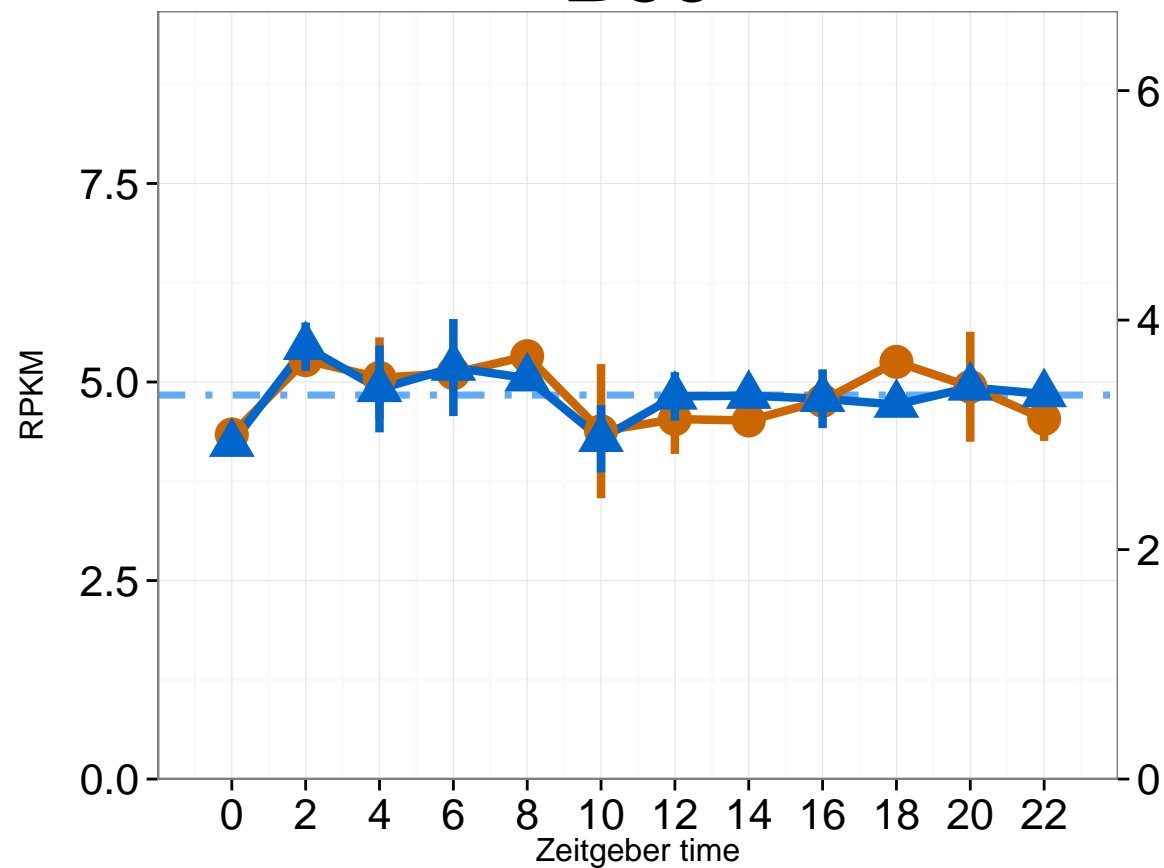

## Boc

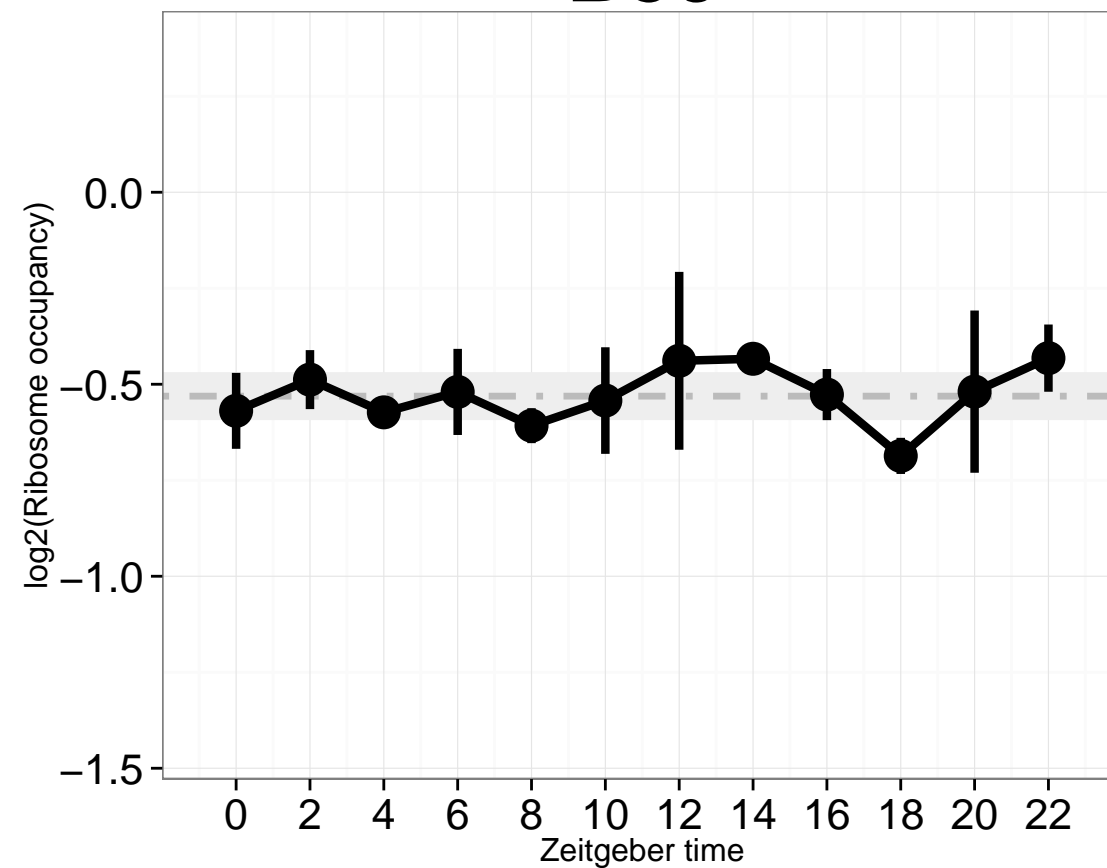

Supplement: Supplementary file 5788 [file 1]

## Amdhd1

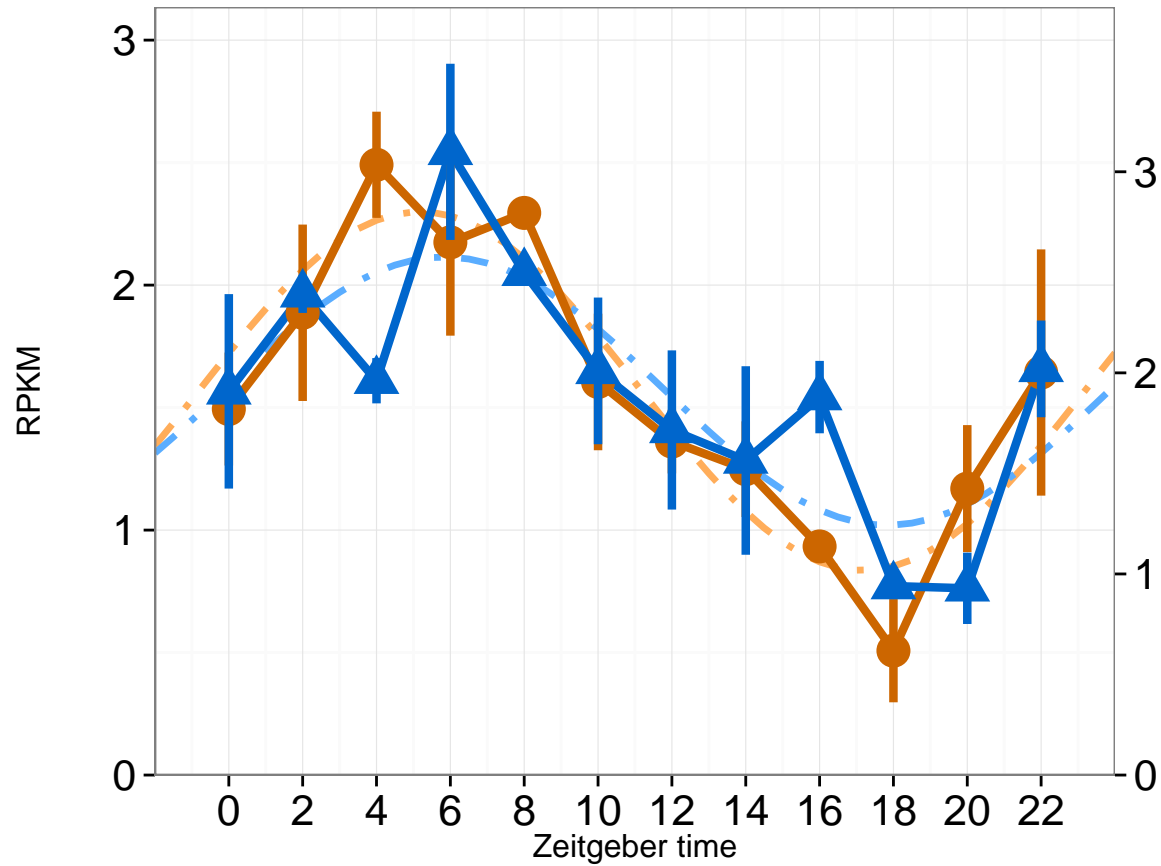

## Amdhd1

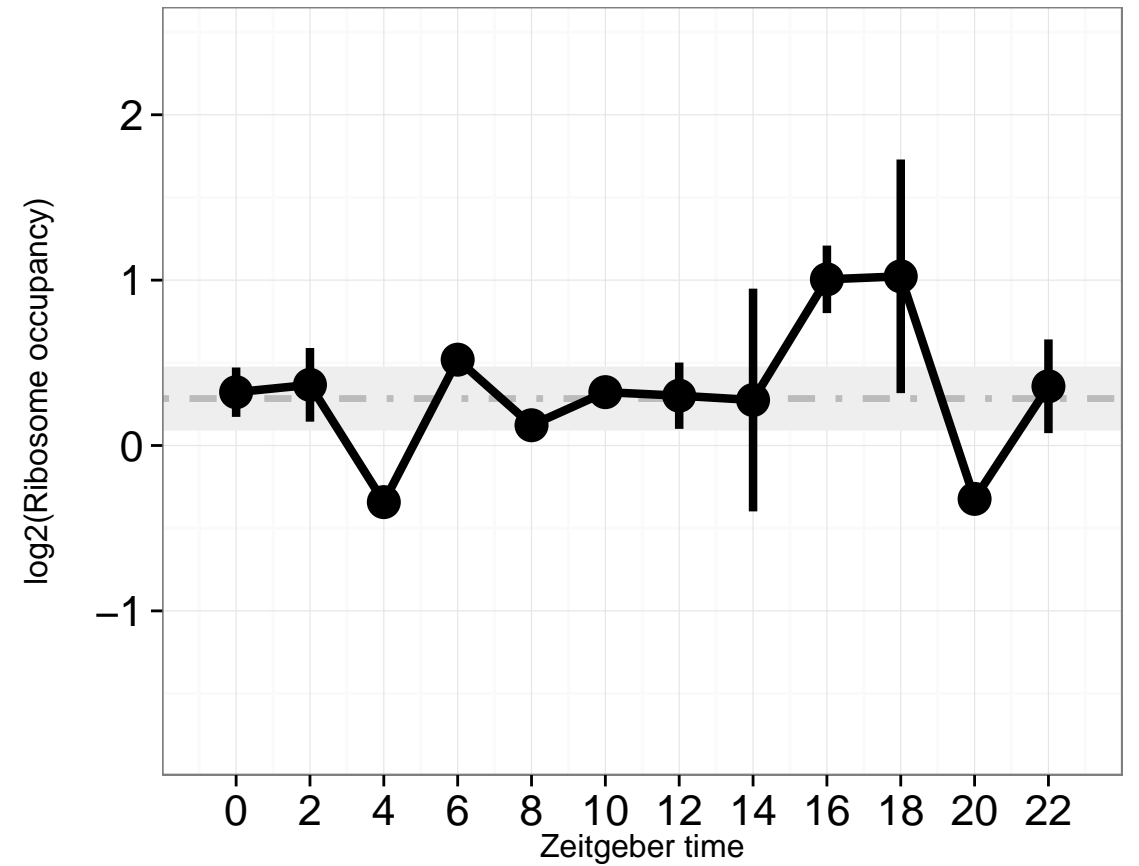

Supplement: Supplementary file 5789 [file 1]

# Abcb1b

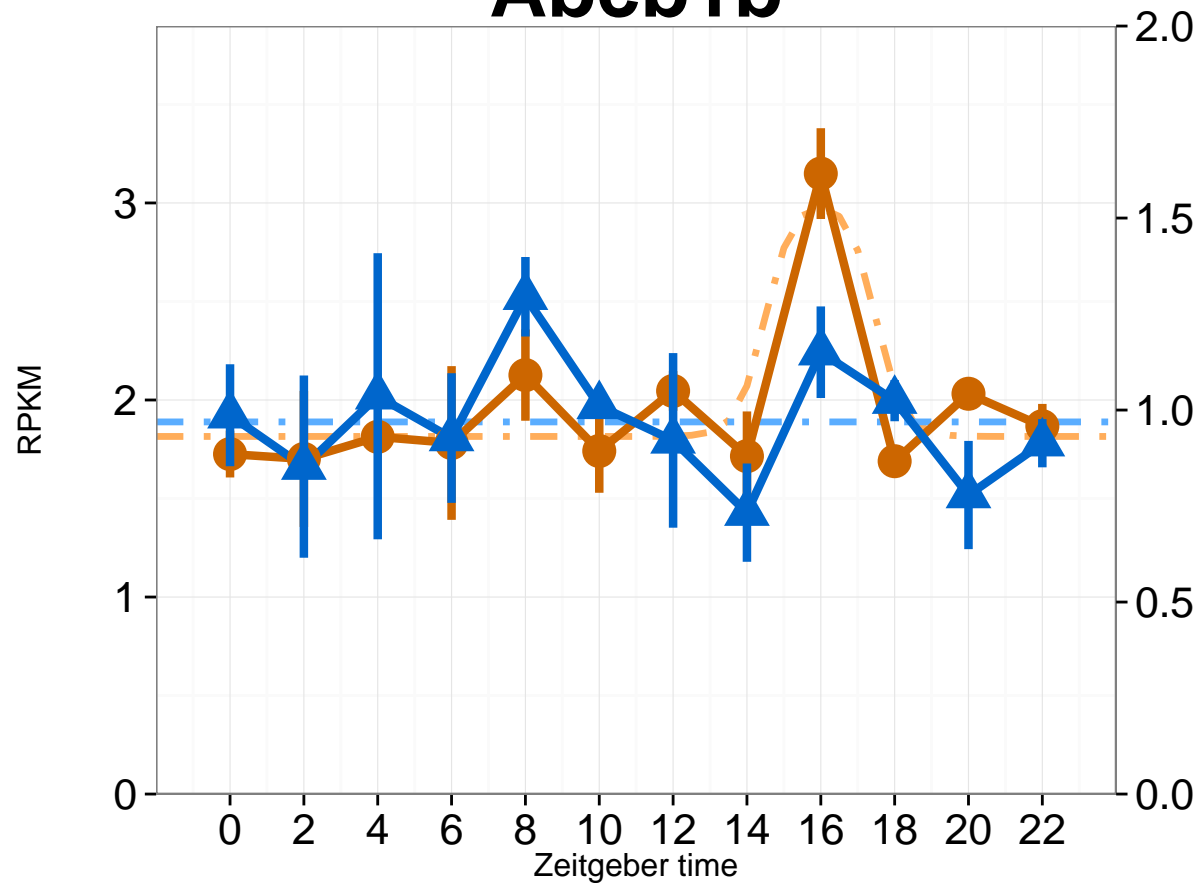

# Abcb1b

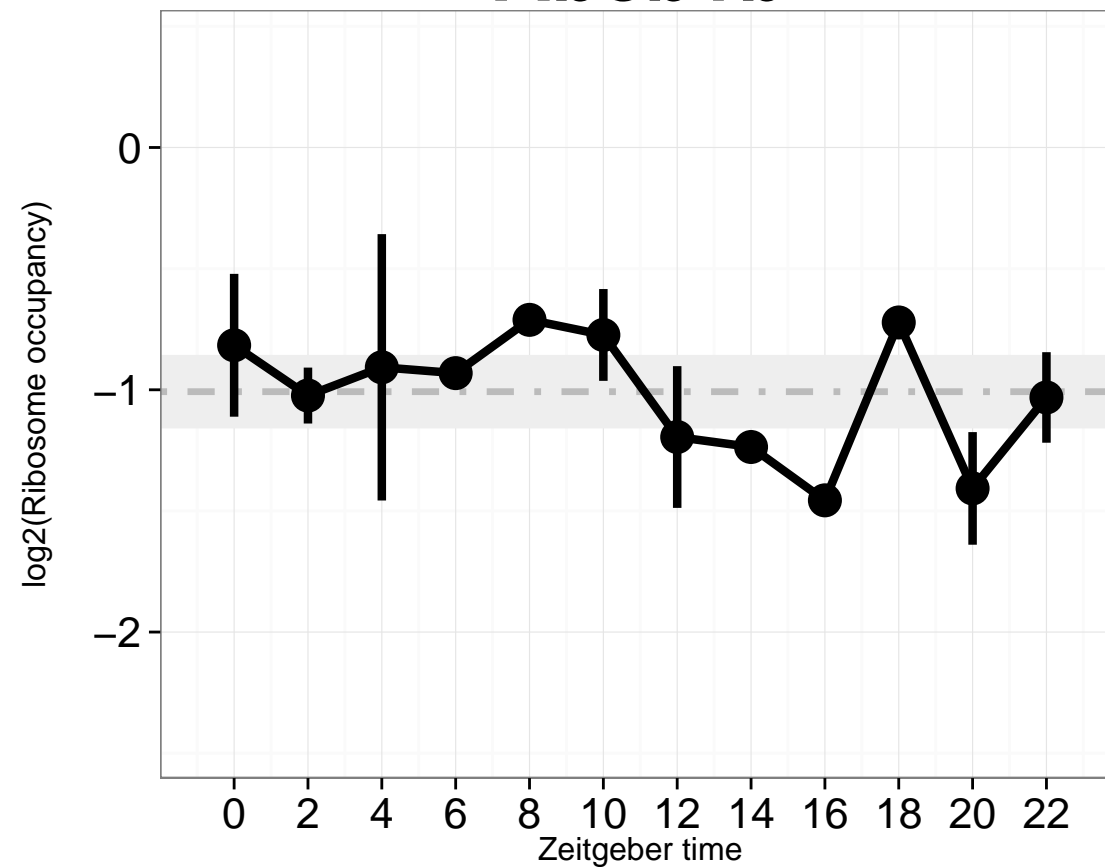

Supplement: Supplementary file 5790 [file 1]

# Sh3d21

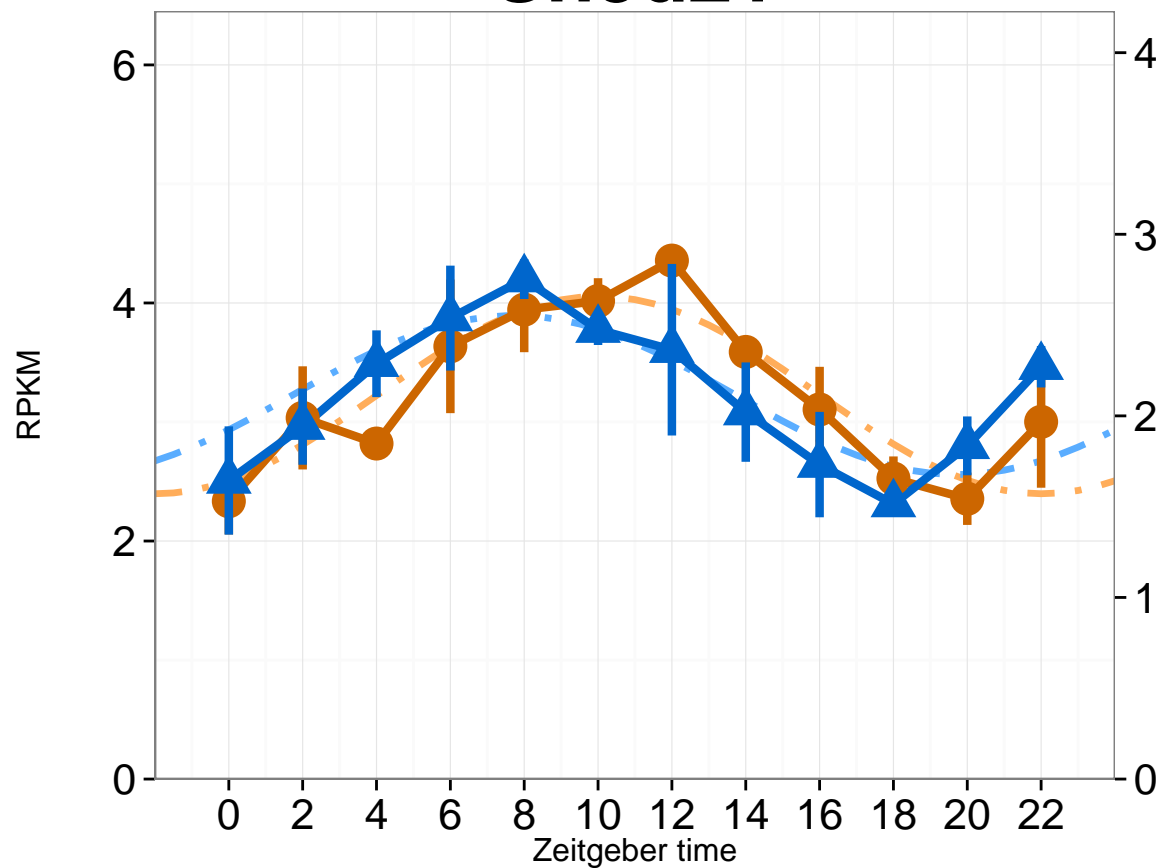

# Sh3d21

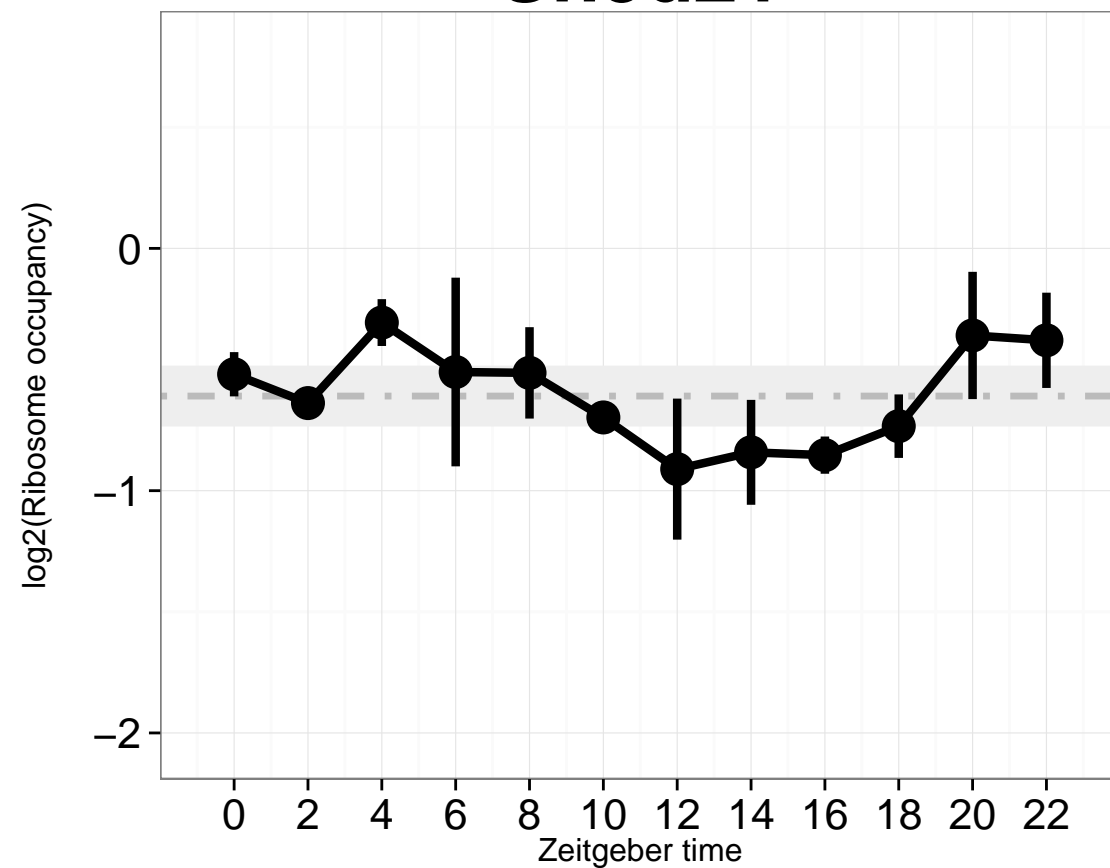

Supplement: Supplementary file 5791 [file 1]

# Abcb9

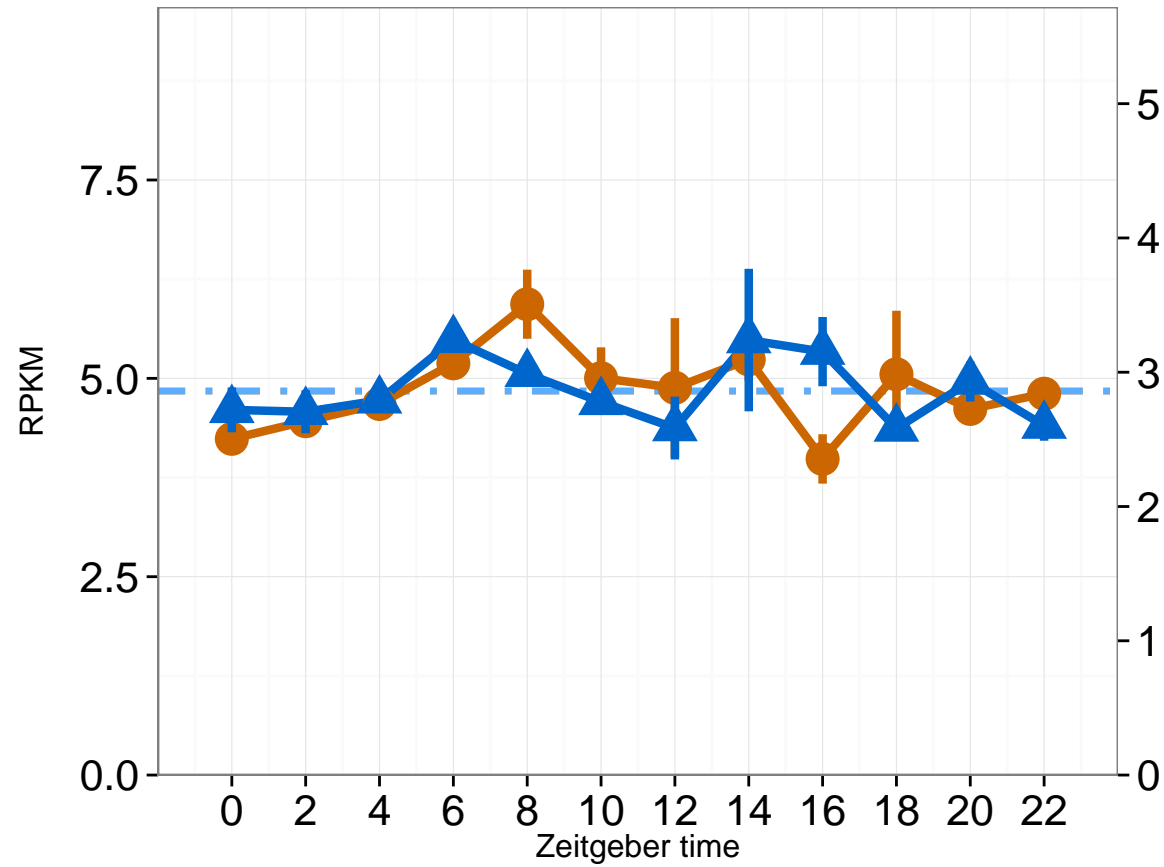

# Abcb9

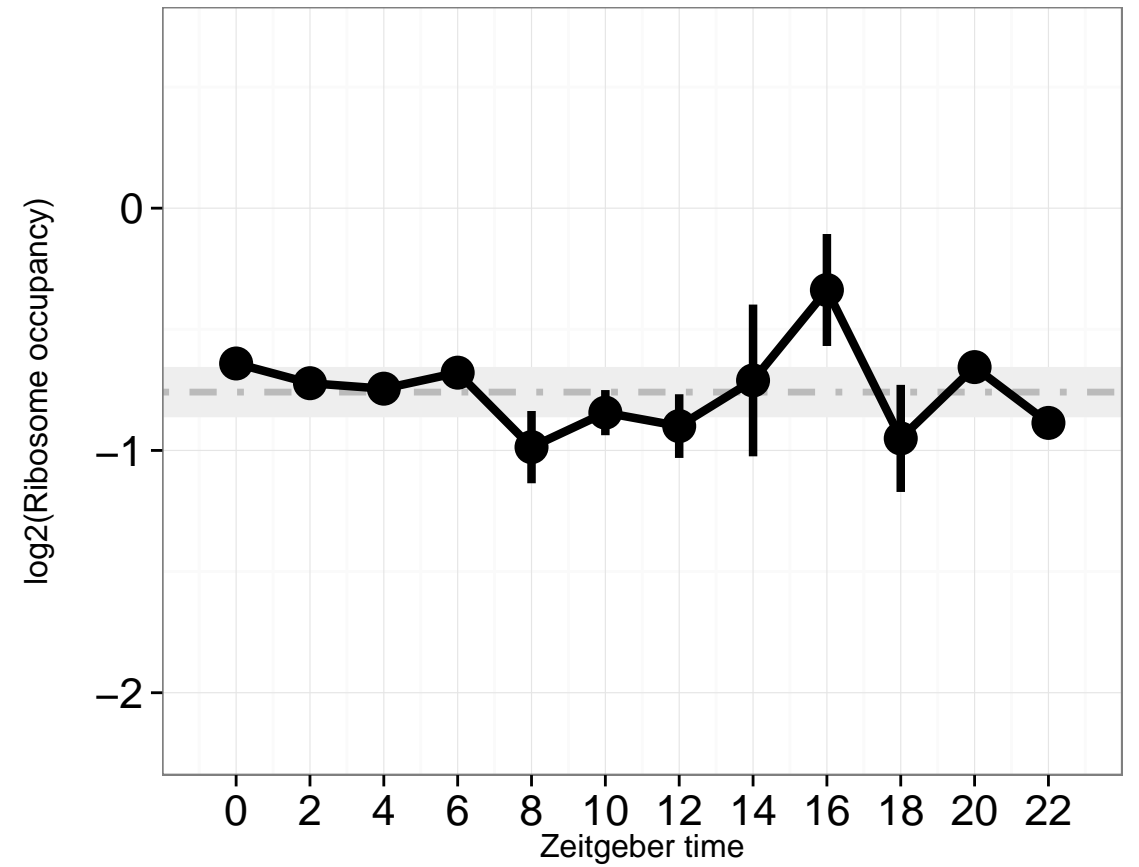

Supplement: Supplementary file 5792 [file 1]

## Gnl1

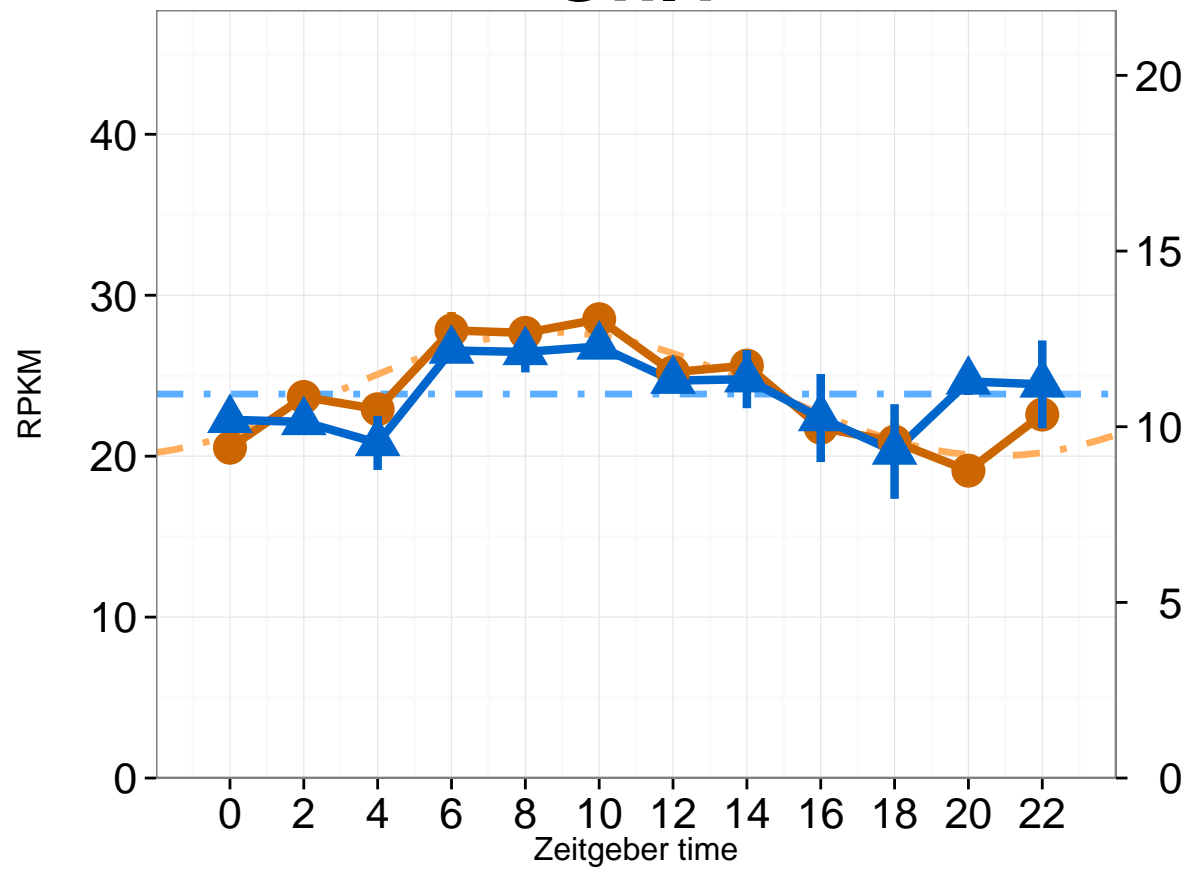

## Gnl1

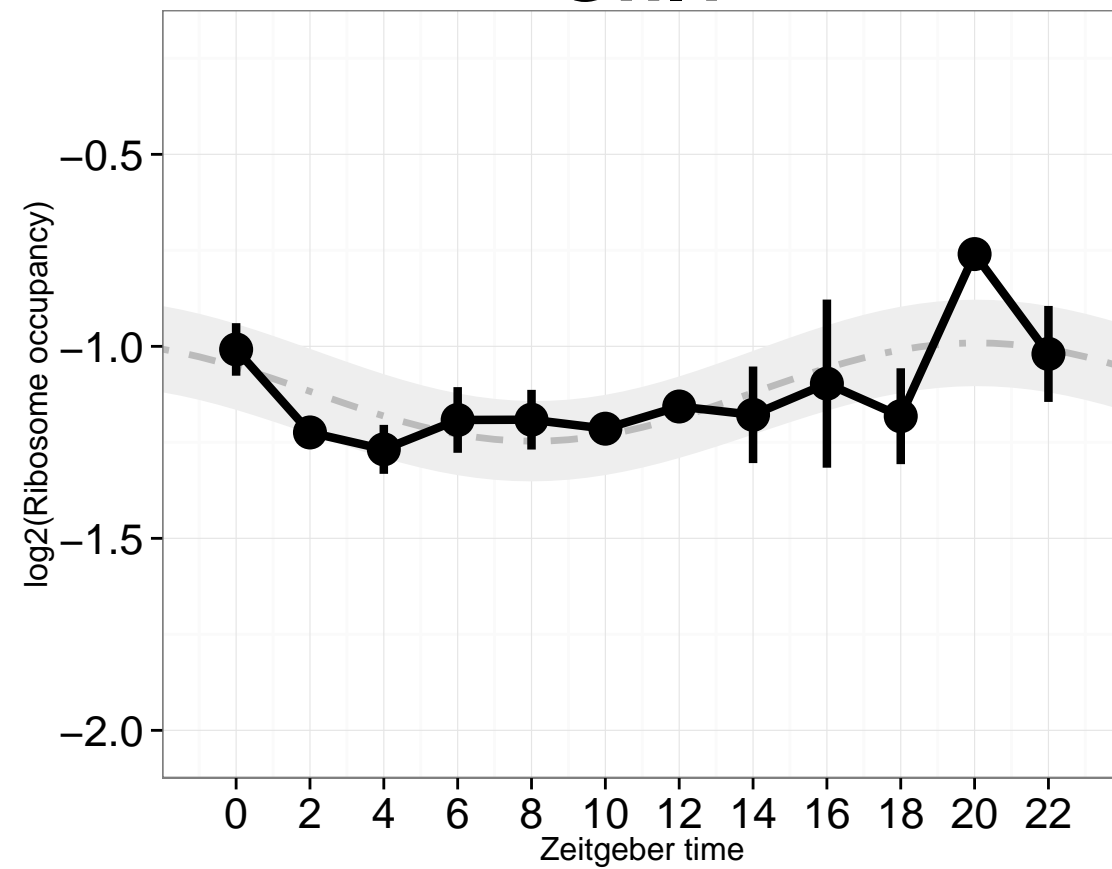

Supplement: Supplementary file 5793 [file 1]

# Nusap1

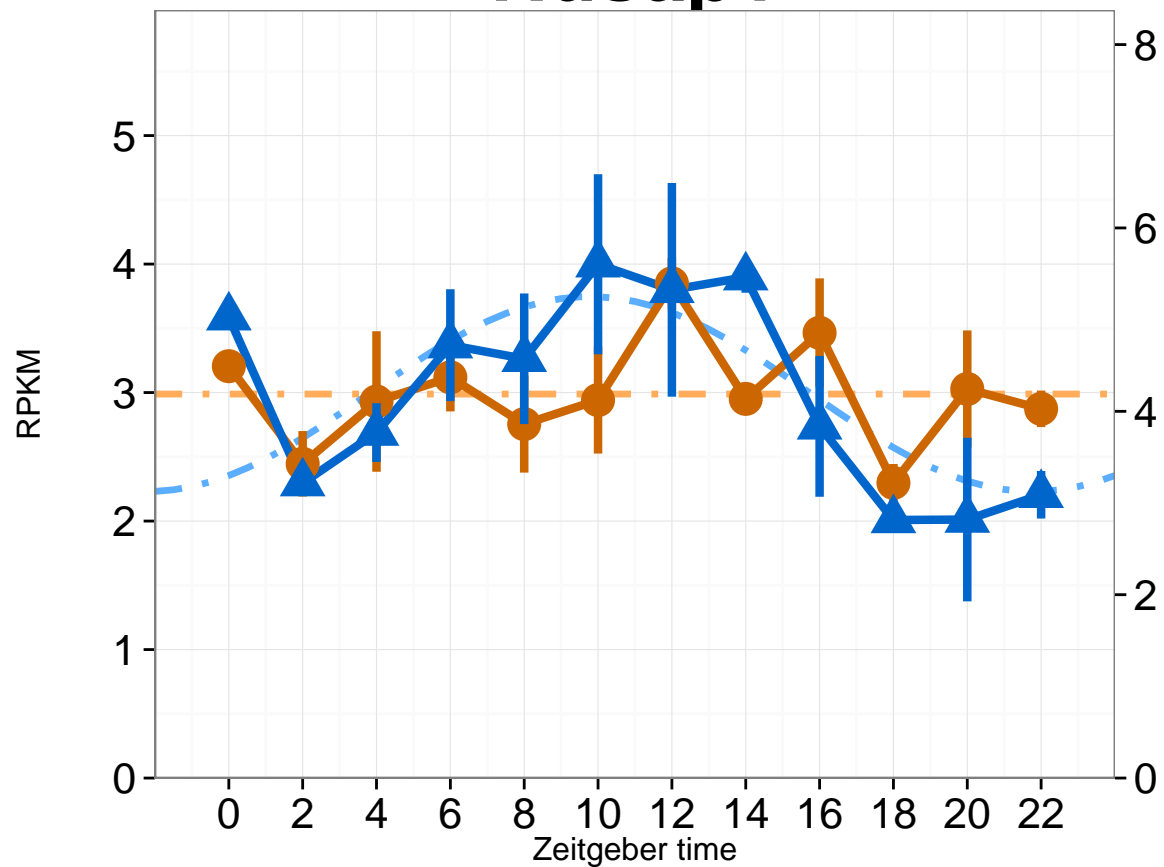

# Nusap1

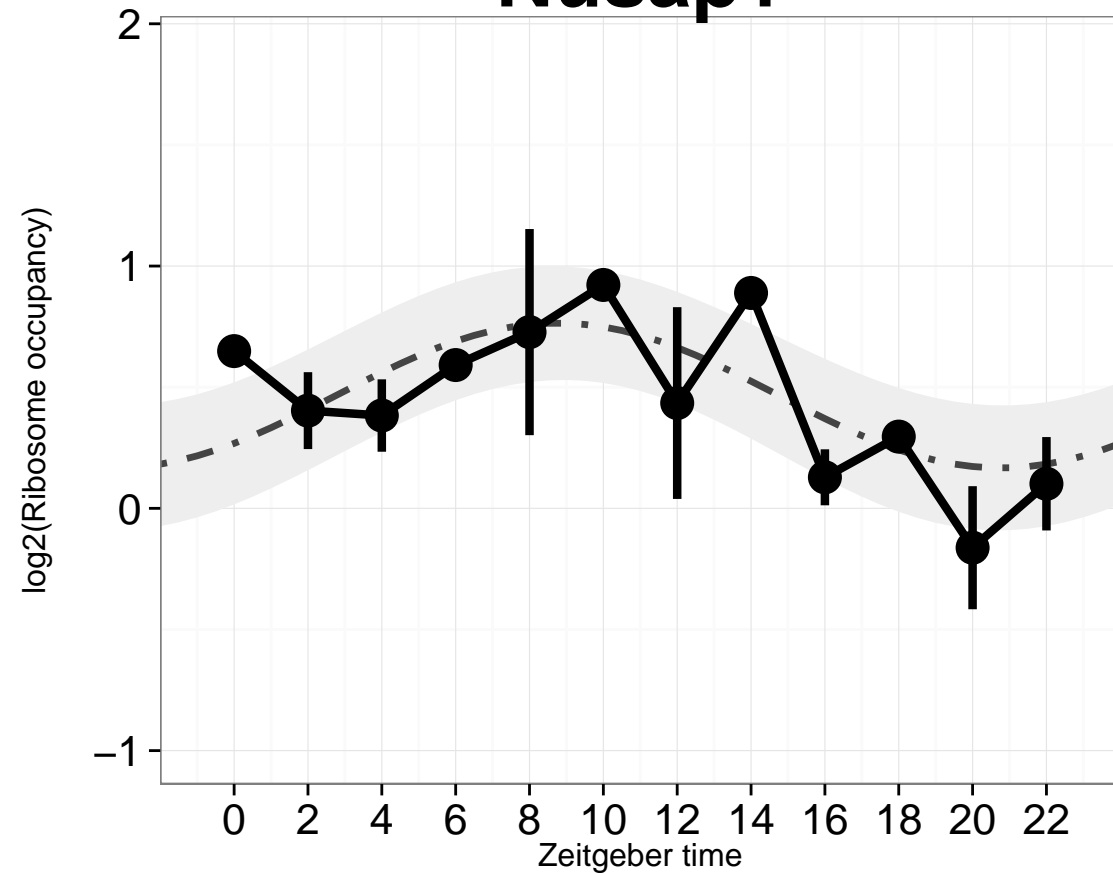

Supplement: Supplementary file 5794 [file 1]

# Tmem128

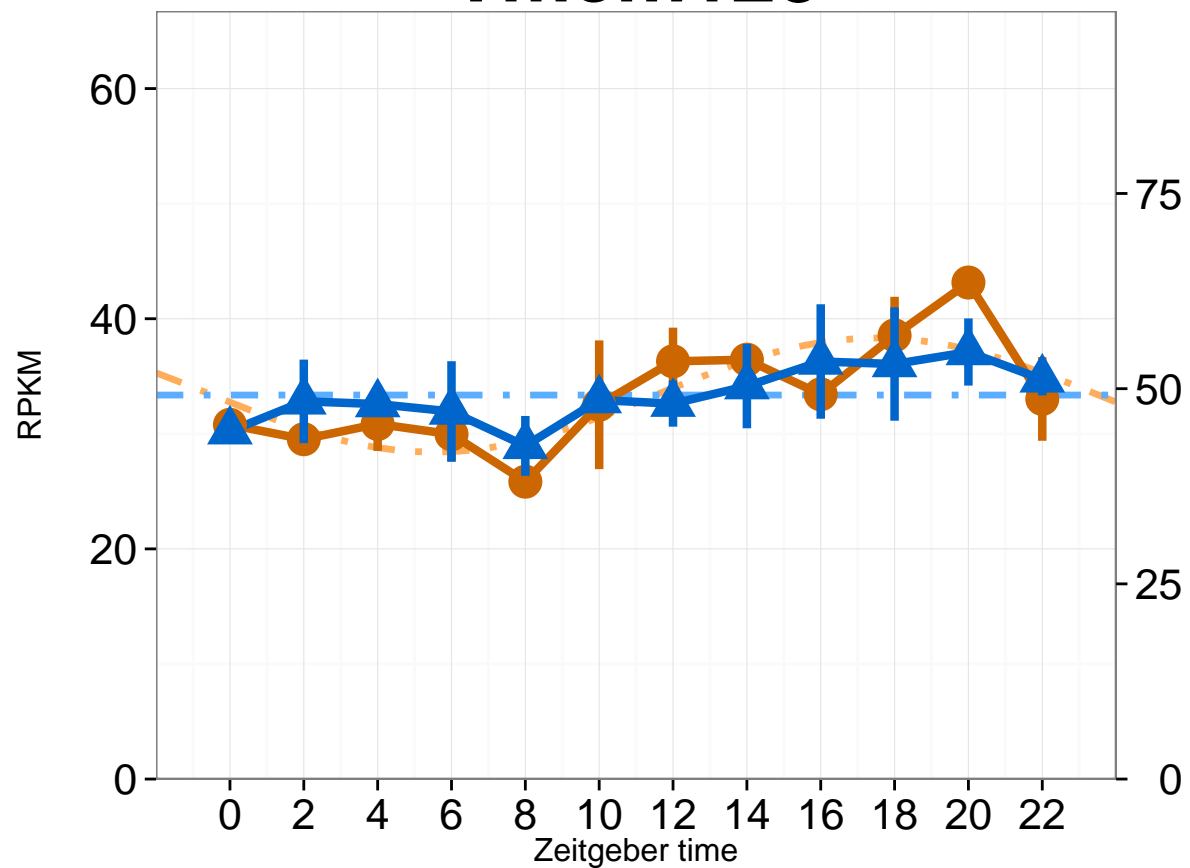

# Tmem128

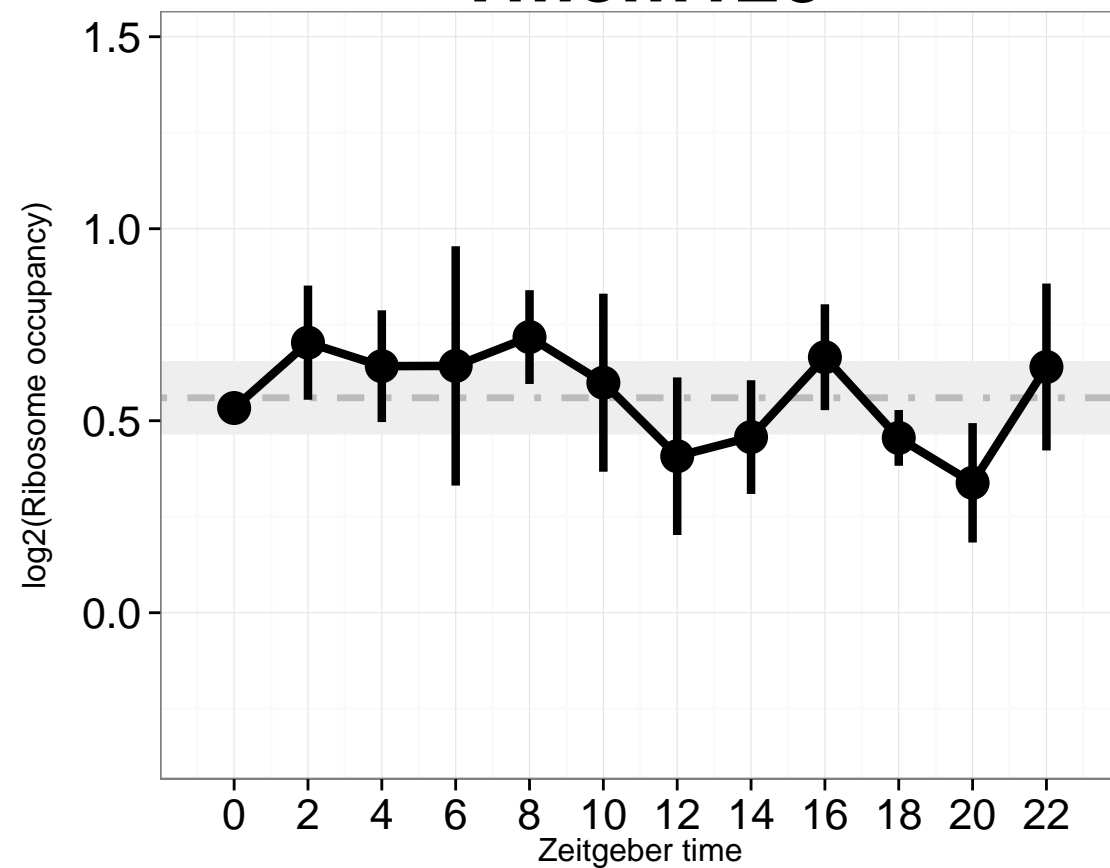

Supplement: Supplementary file 5795 [file 1]

## Ugt2a1

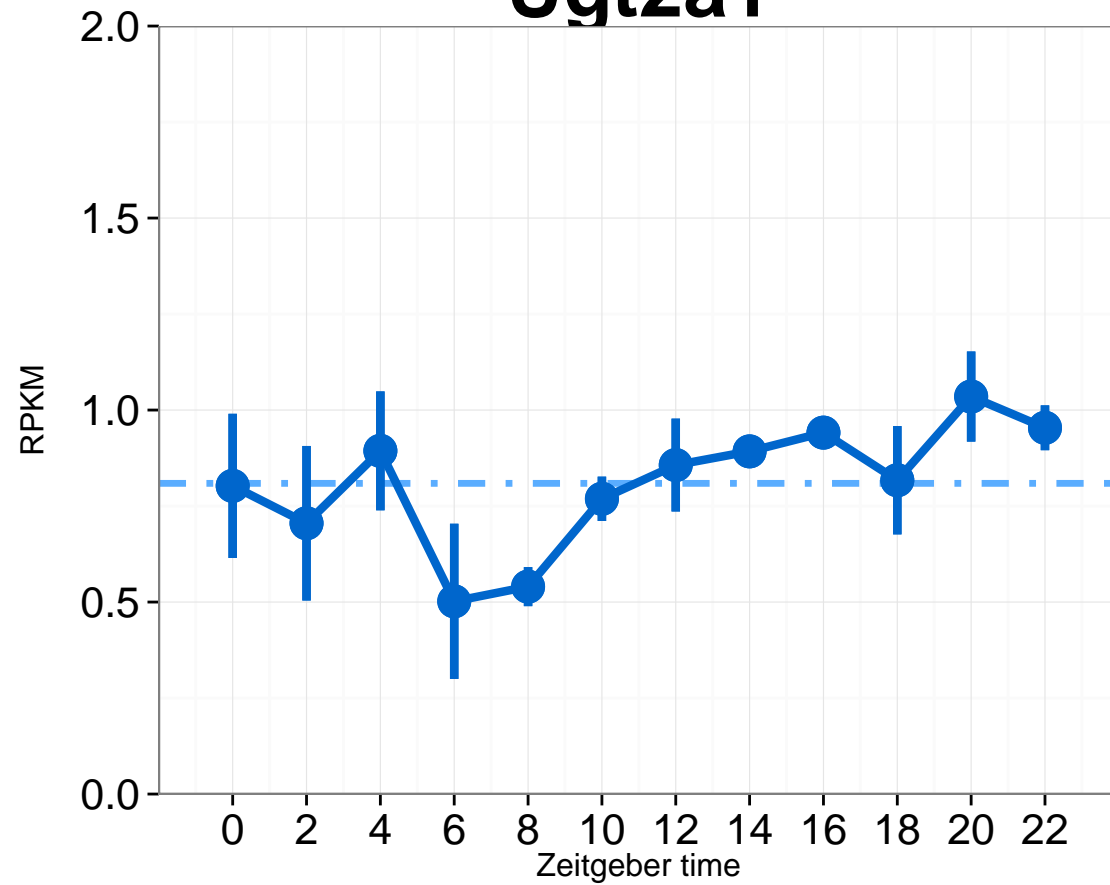

## Ugt2a1 log2(Ribosome occupancy

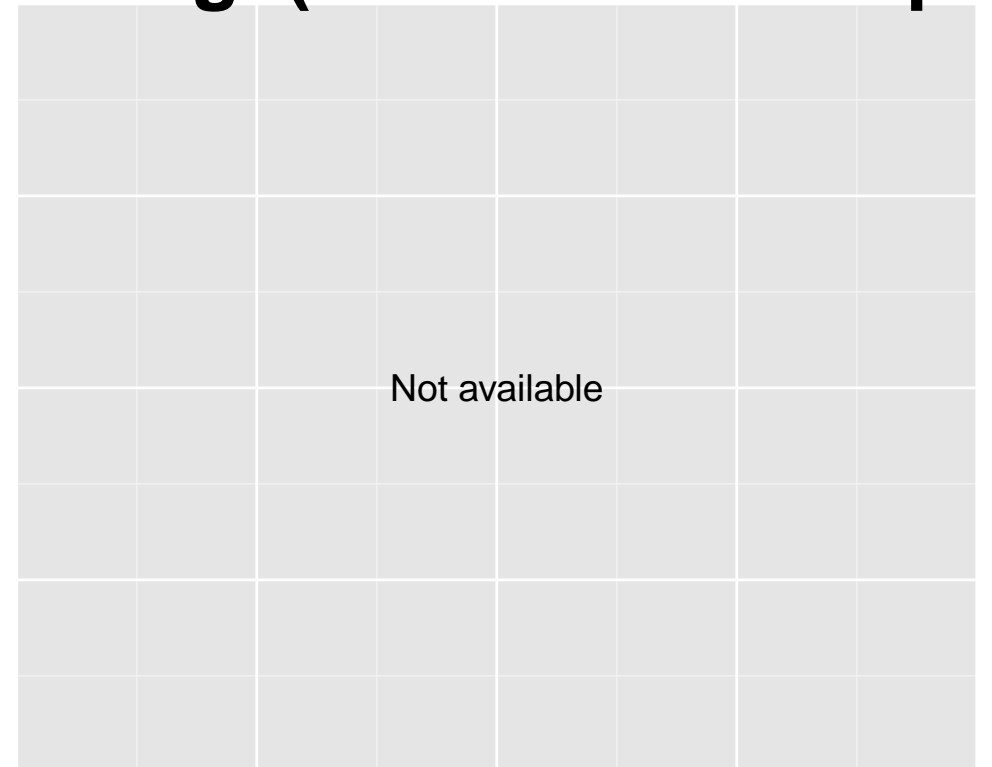

Supplement: Supplementary file 5796 [file 1]

# Tlk2

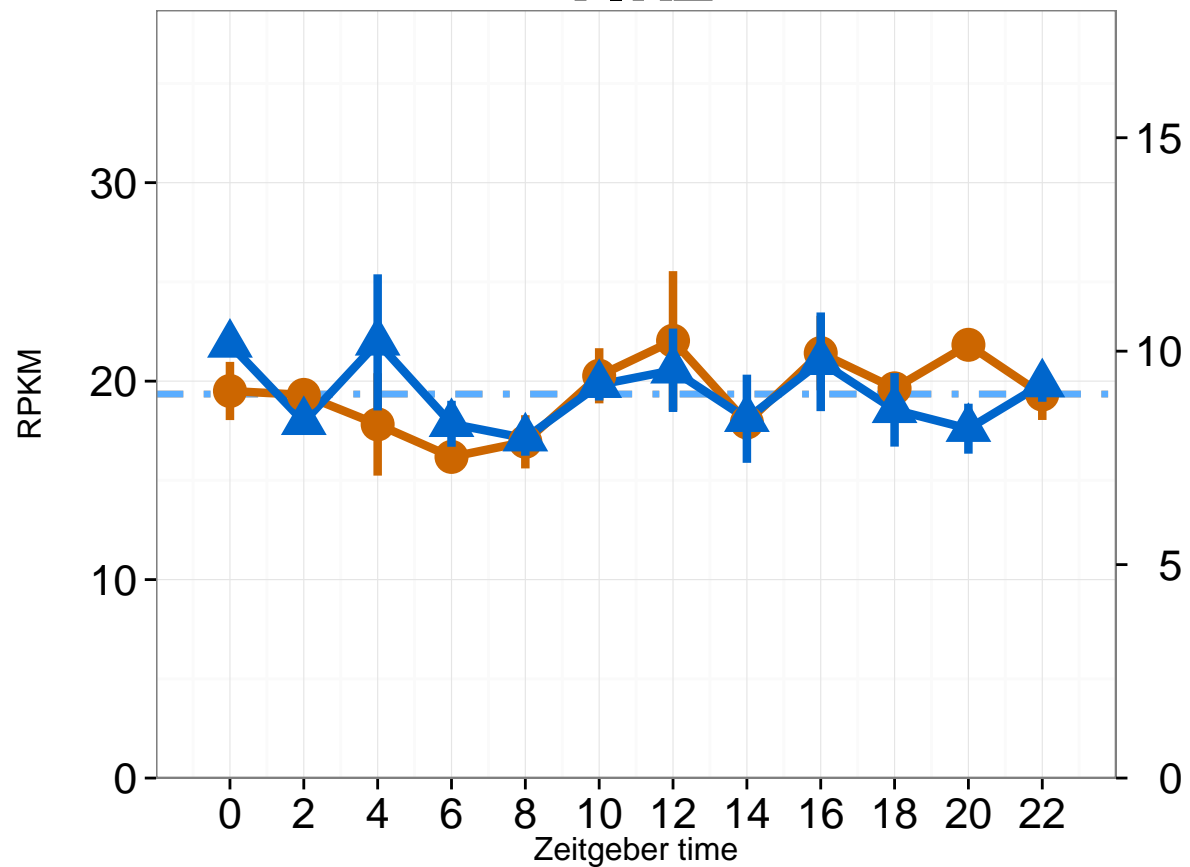

# Tlk2

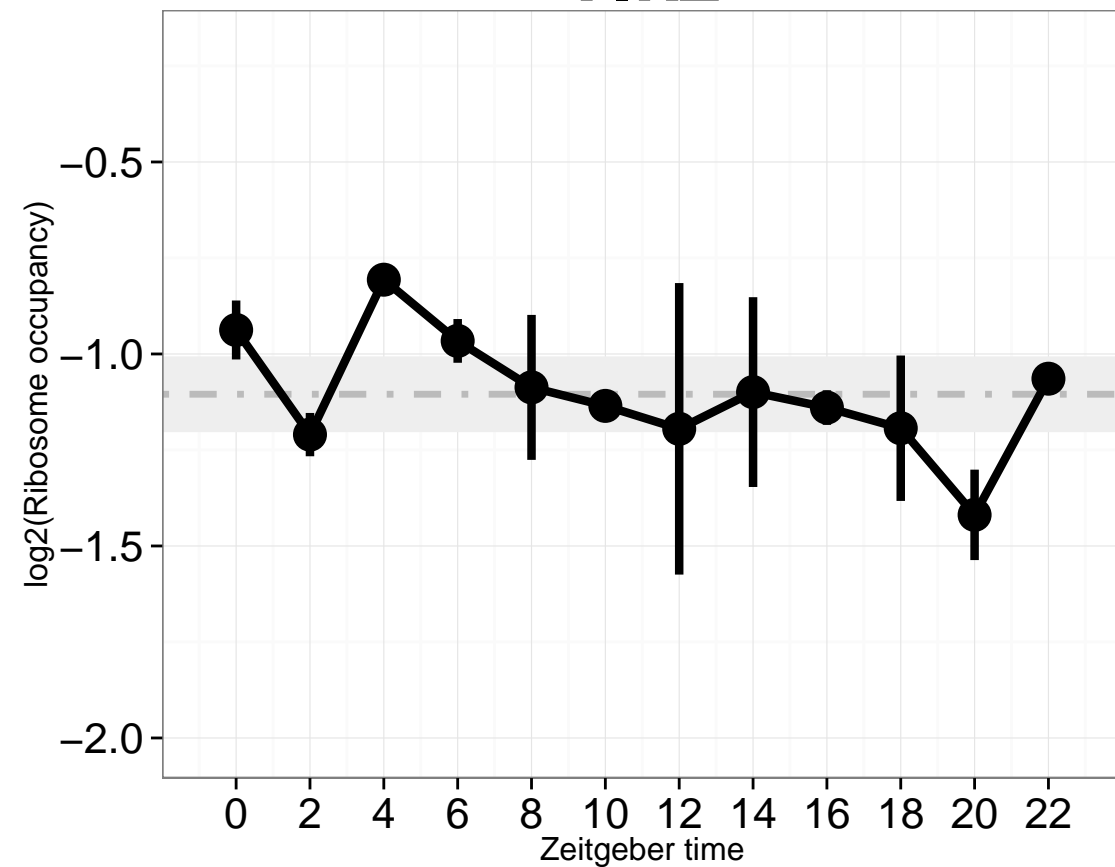

Supplement: Supplementary file 5797 [file 1]

# Hace1

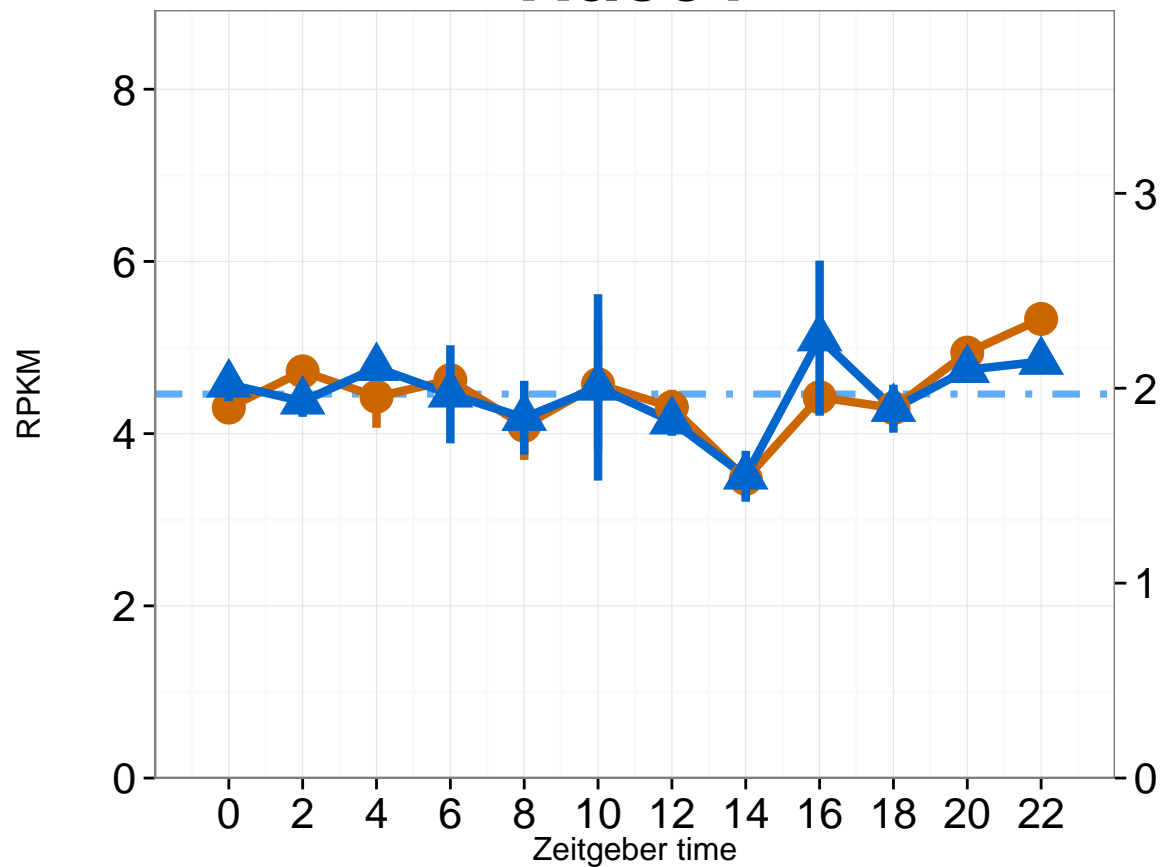

# Hace1

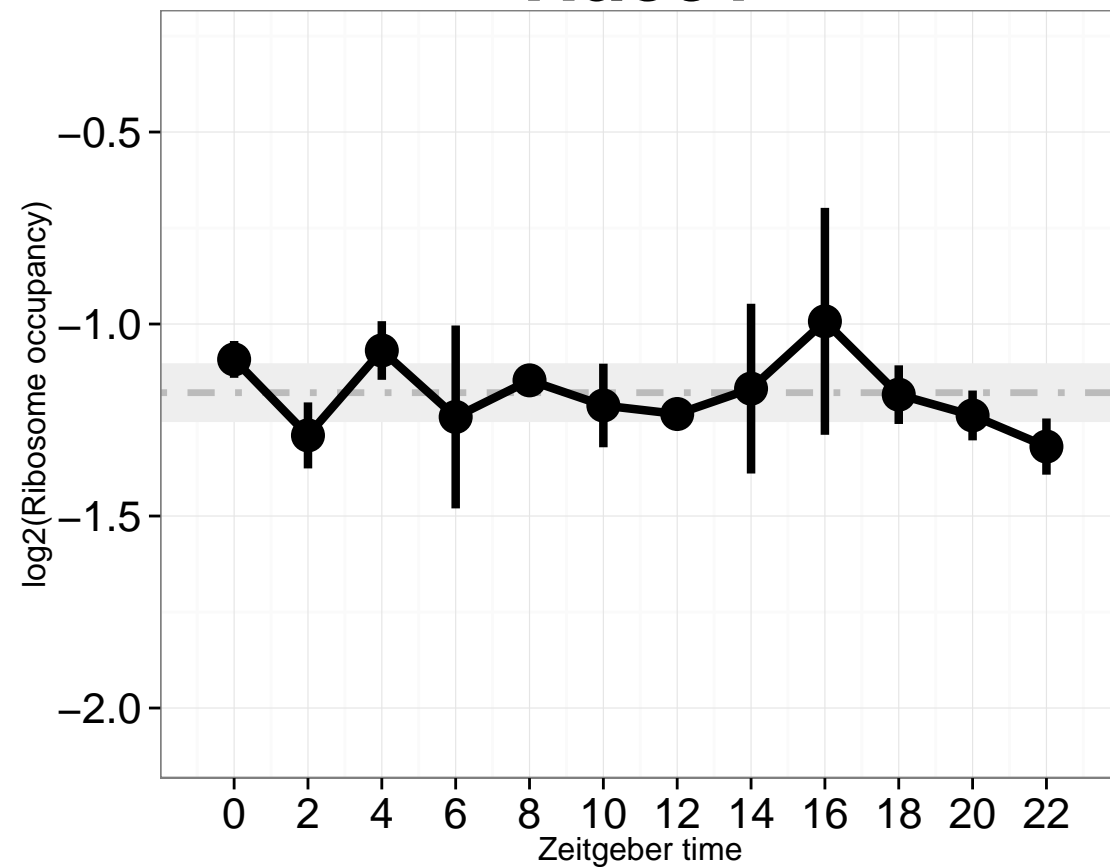

Supplement: Supplementary file 5798 [file 1]

## Rbm15b

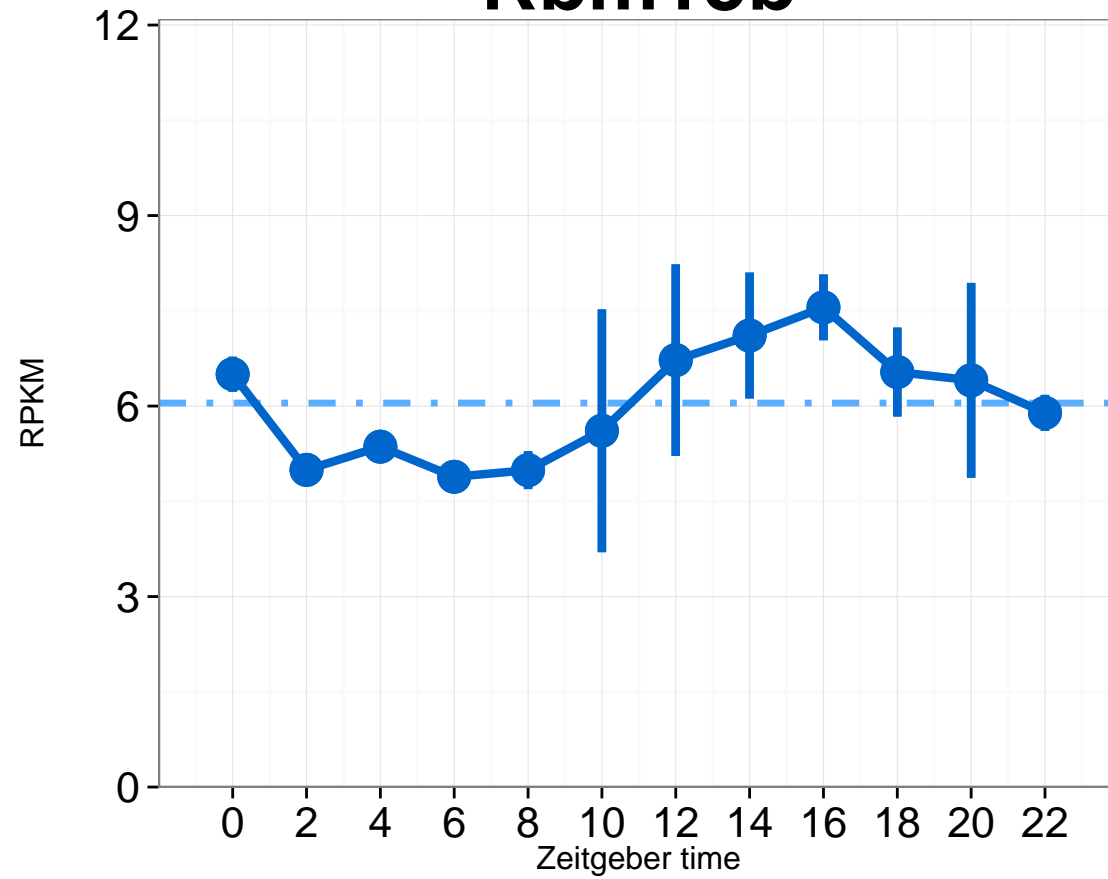

## Rbm15b log2(Ribosome occupanc

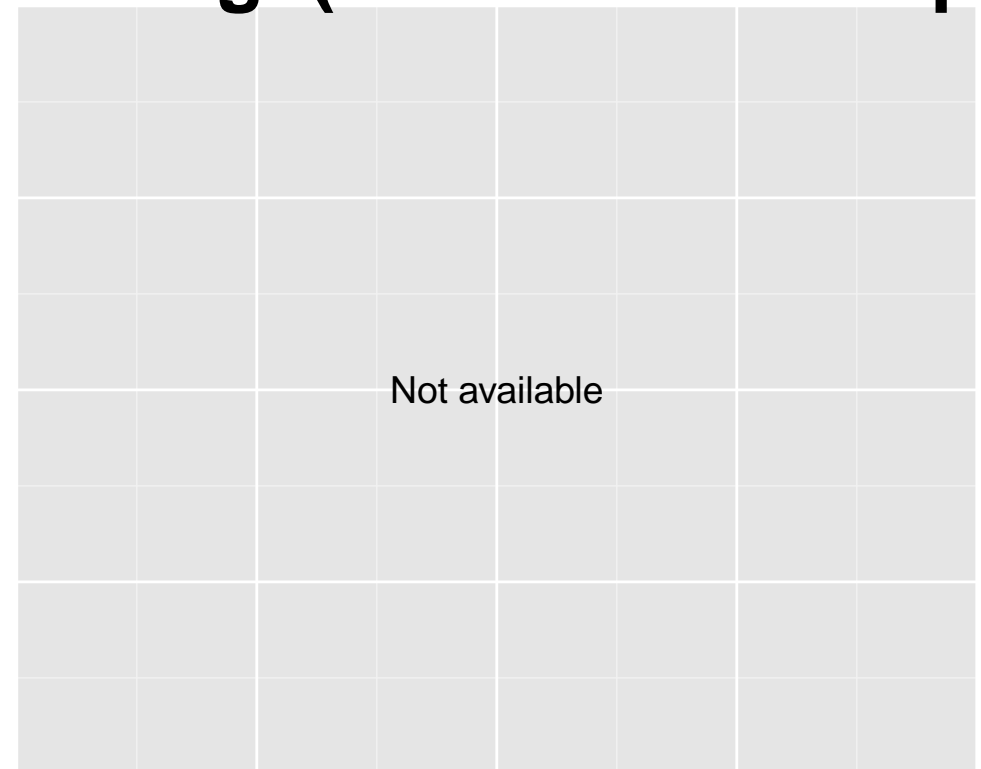

Supplement: Supplementary file 5799 [file 1]

## Afap1l1

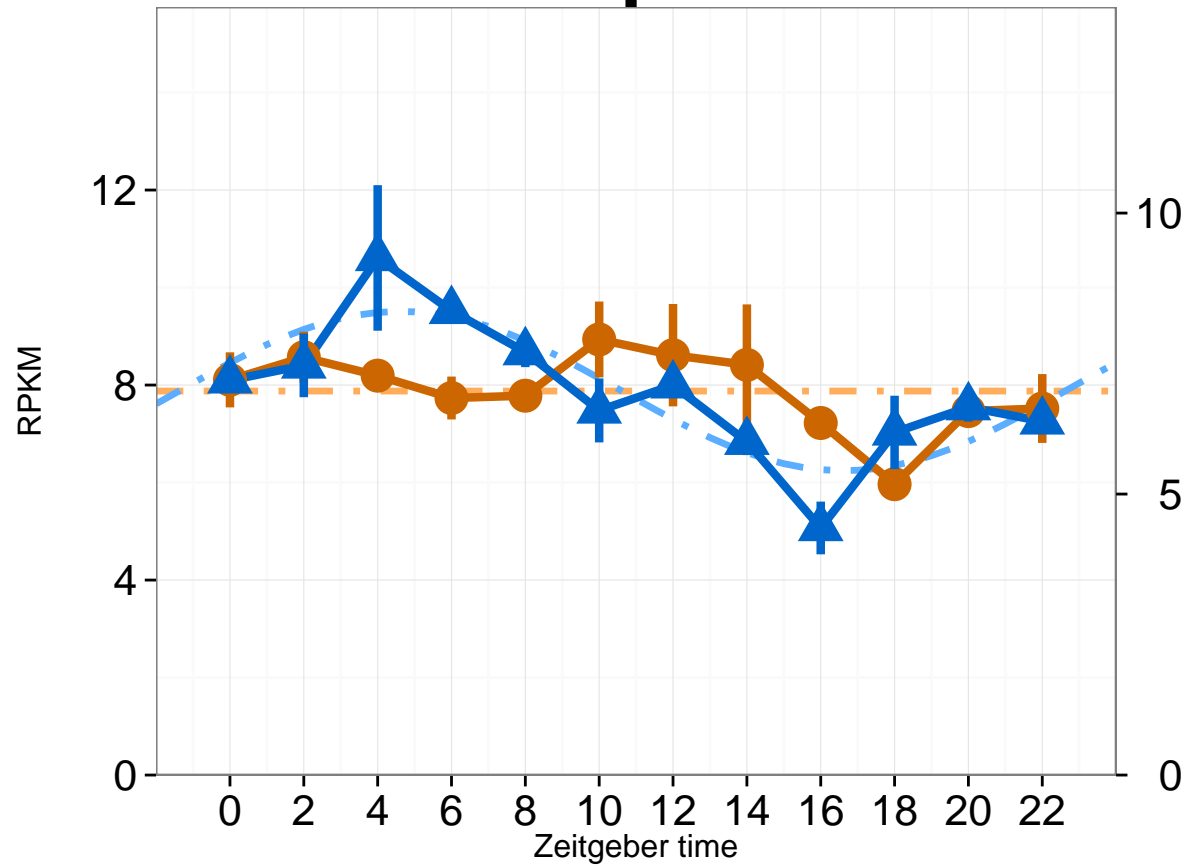

## Afap1l1

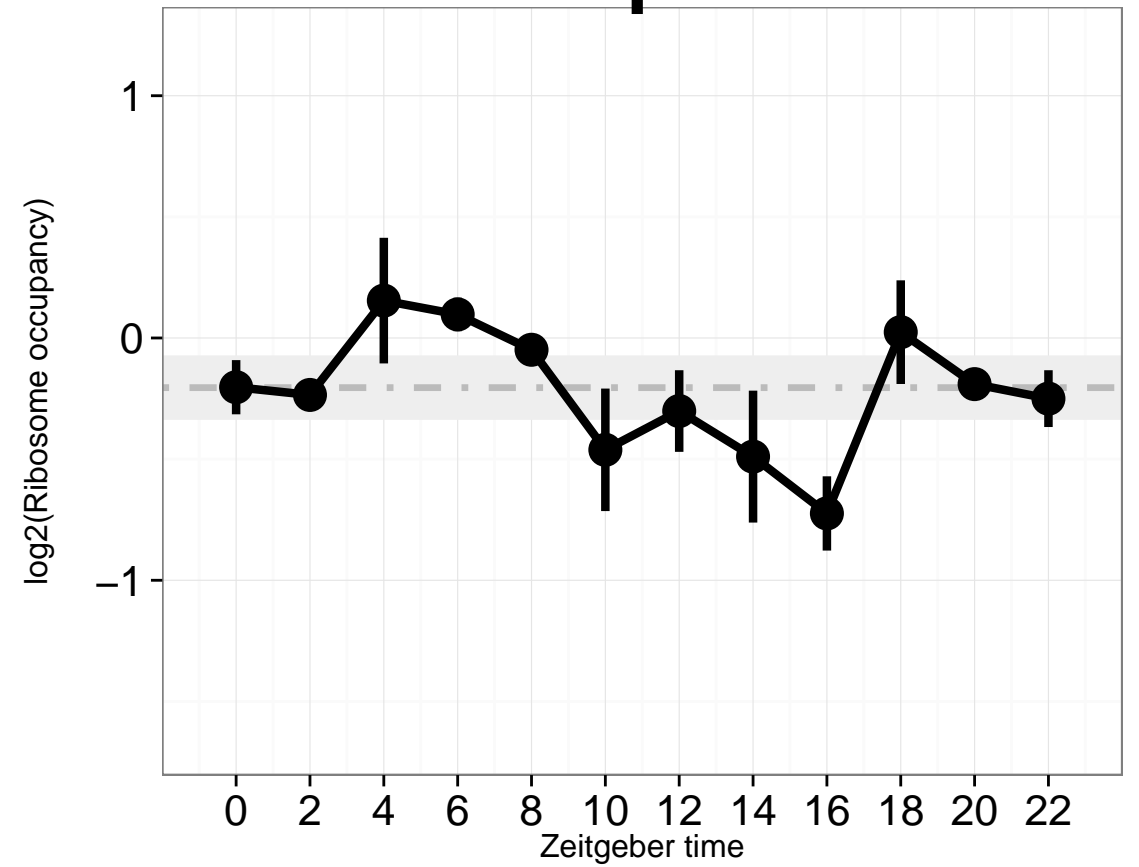

Supplement: Supplementary file 5800 [file 1]

## Sec61g

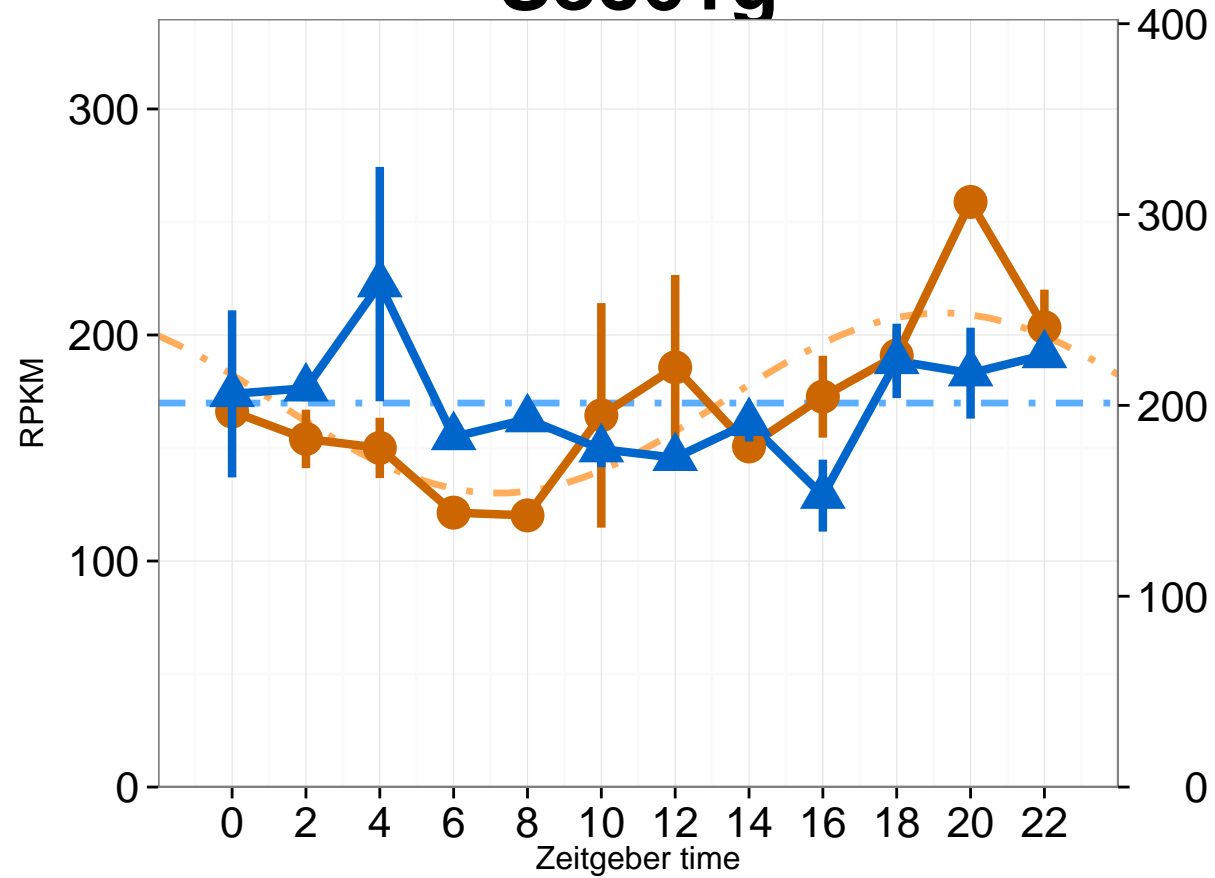

## Sec61g

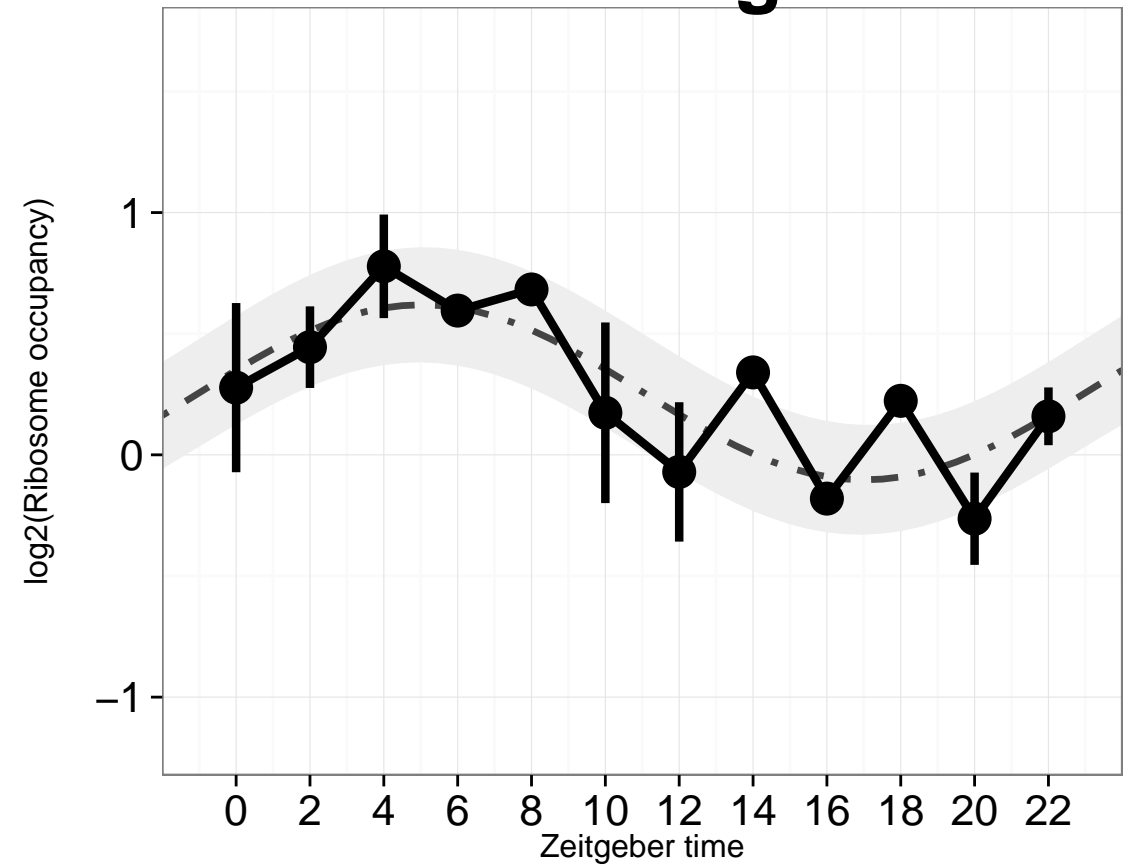

Supplement: Supplementary file 5801 [file 1]

# Agfg1

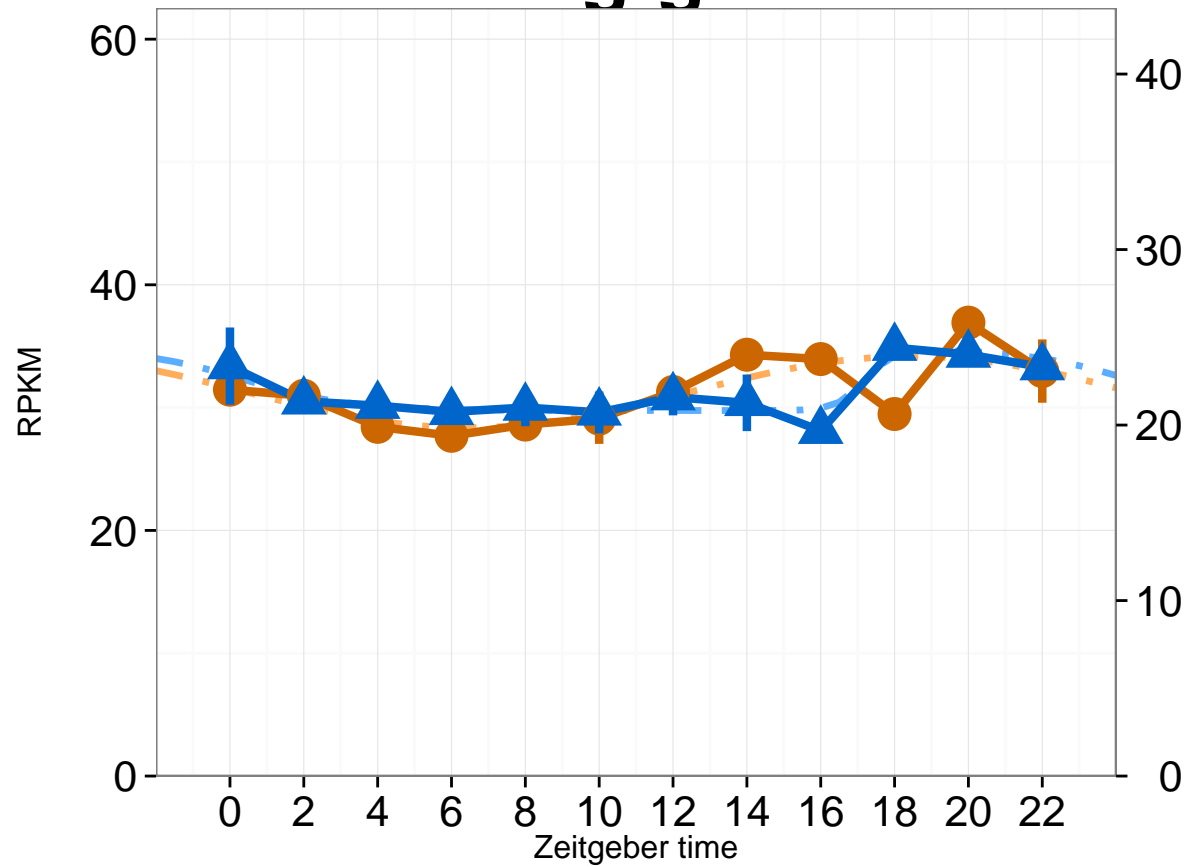

# Agfg1

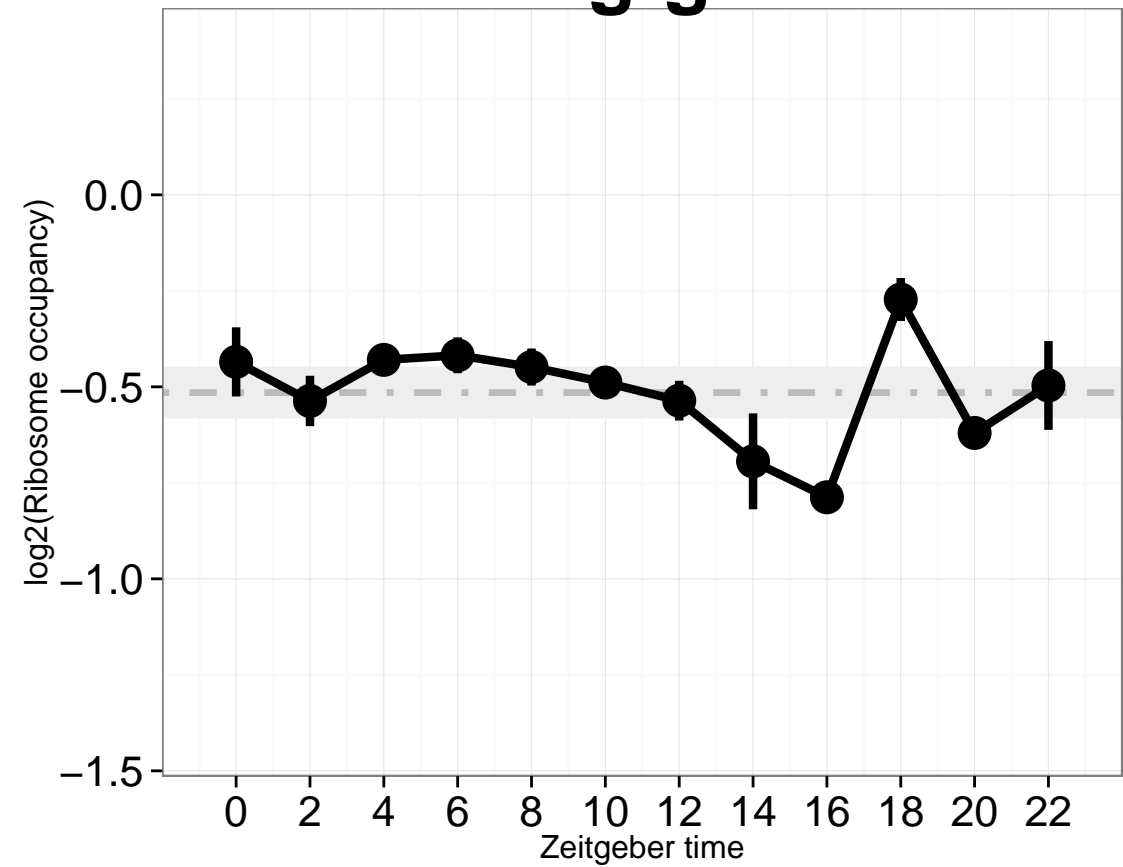

Supplement: Supplementary file 5802 [file 1]

# Adam19

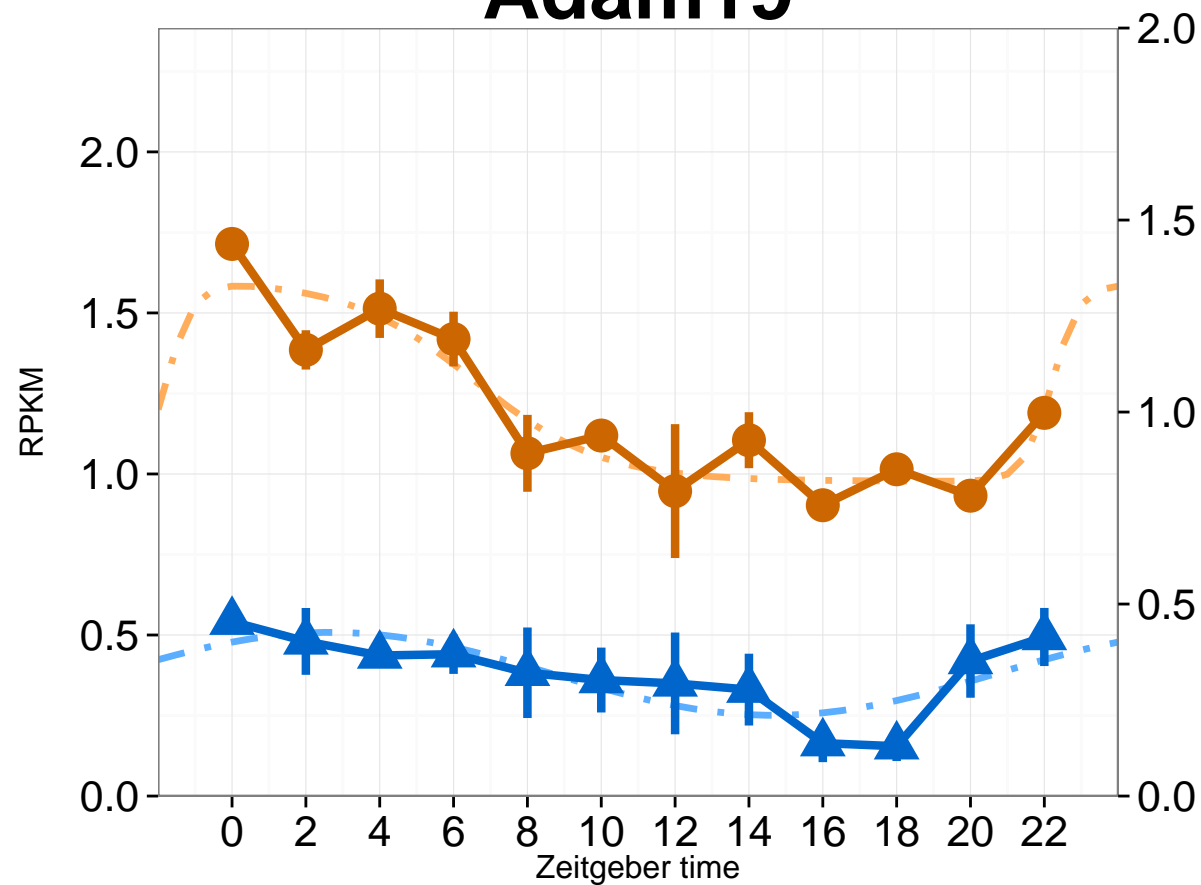

# Adam19

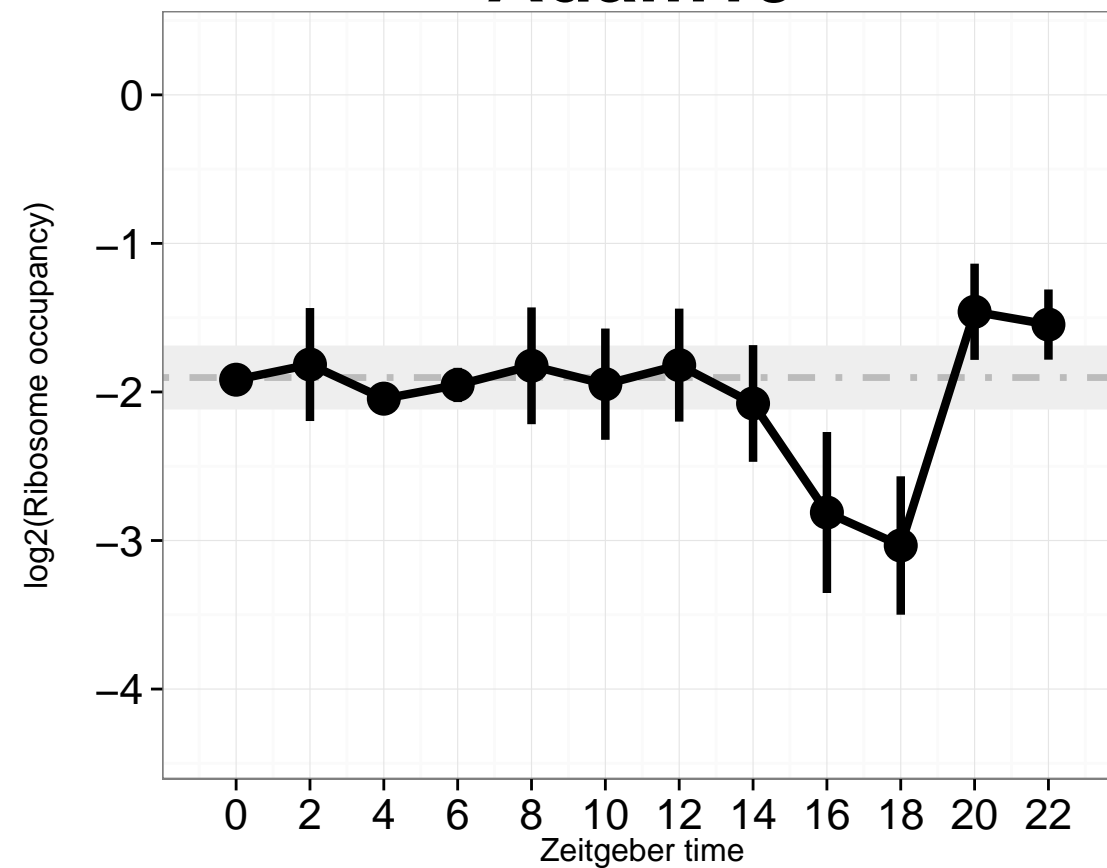

Supplement: Supplementary file 5803 [file 1]

# Kbtbd11

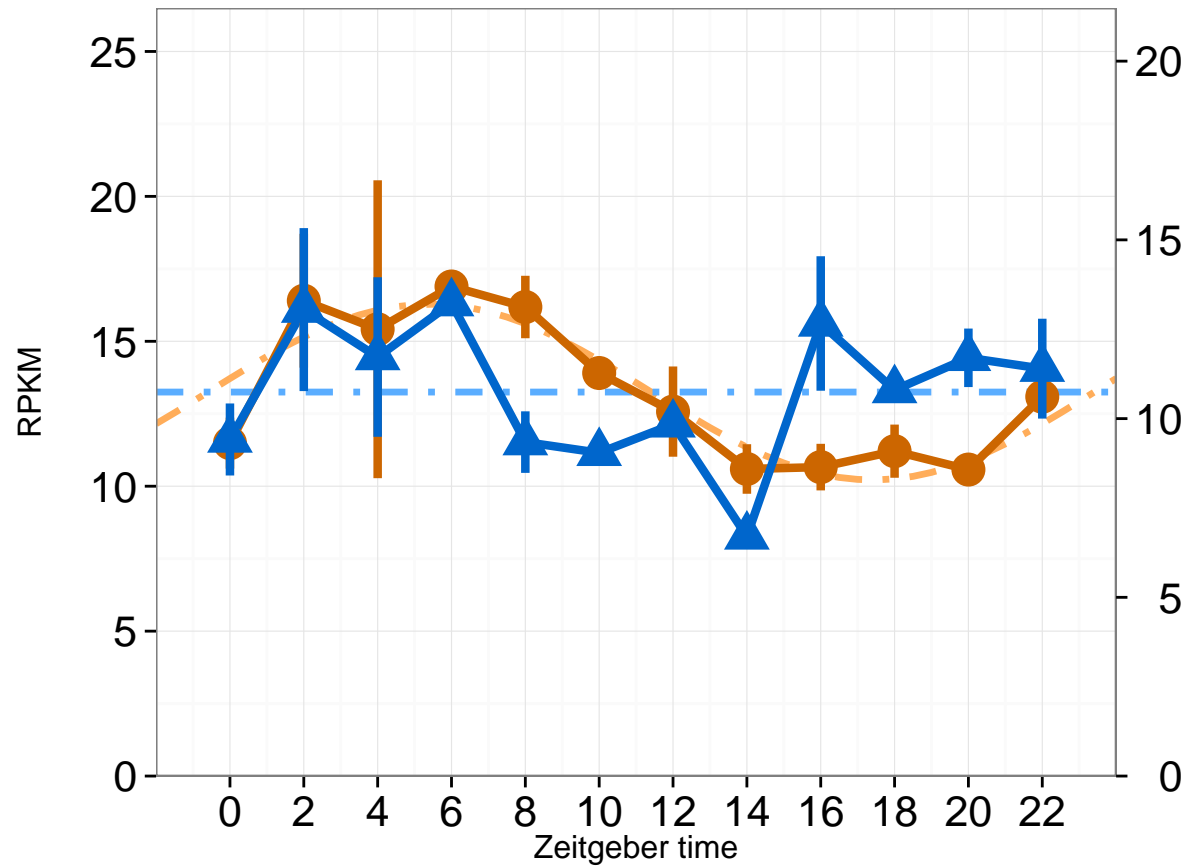

# Kbtbd11

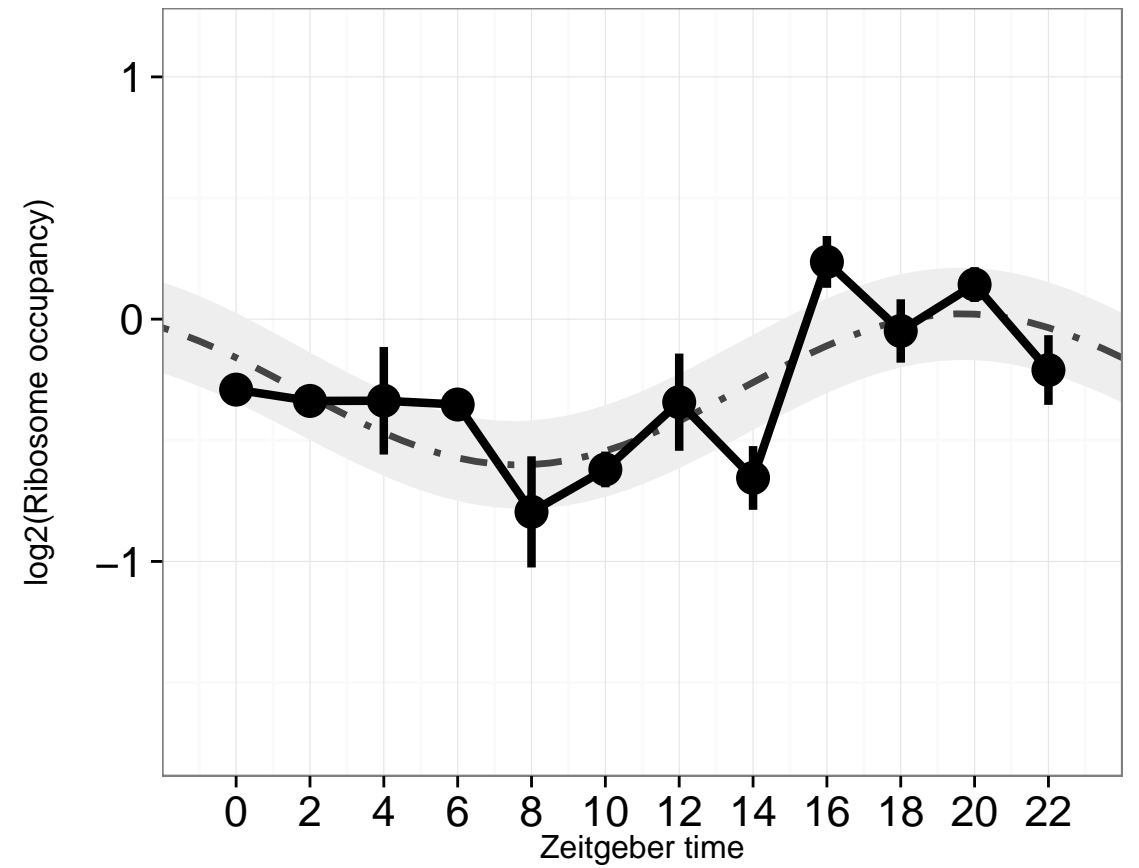

Supplement: Supplementary file 5804 [file 1]

## Ocel1

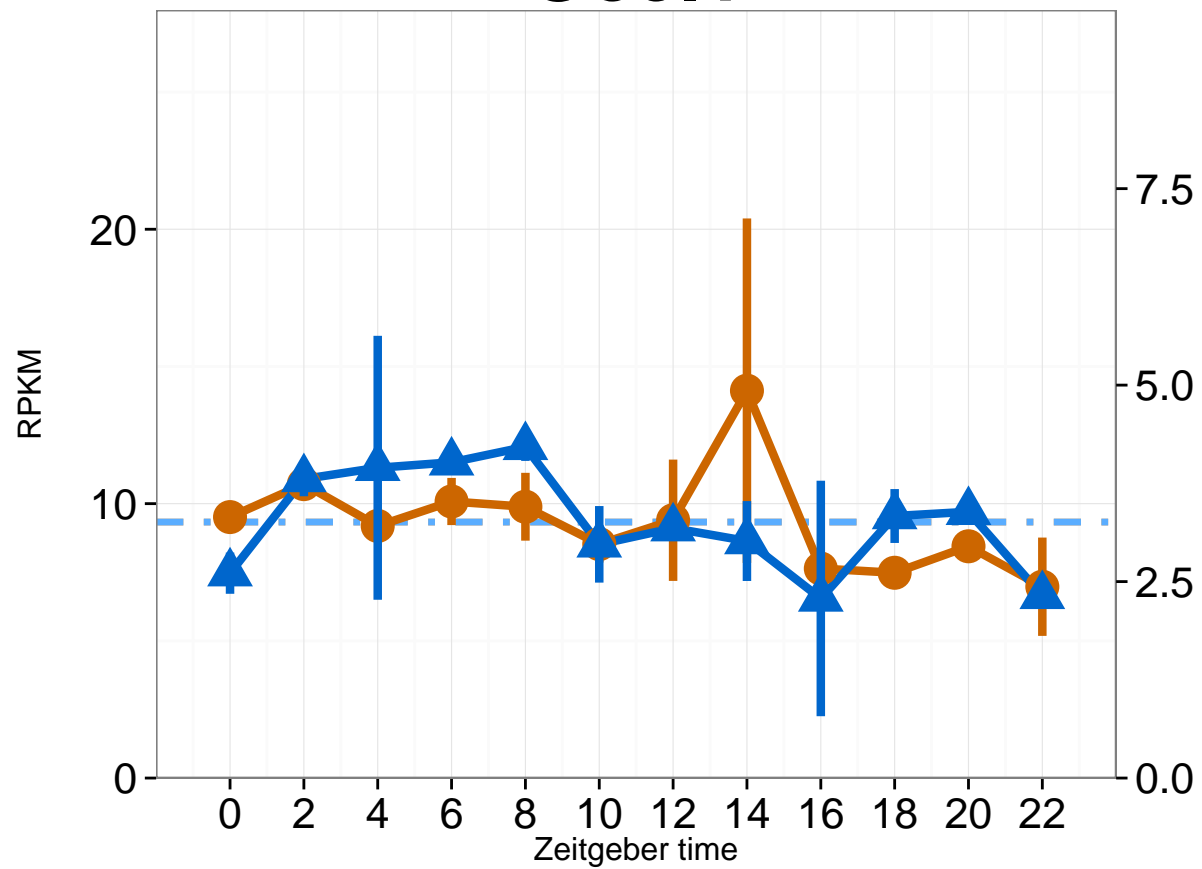

## Ocel1

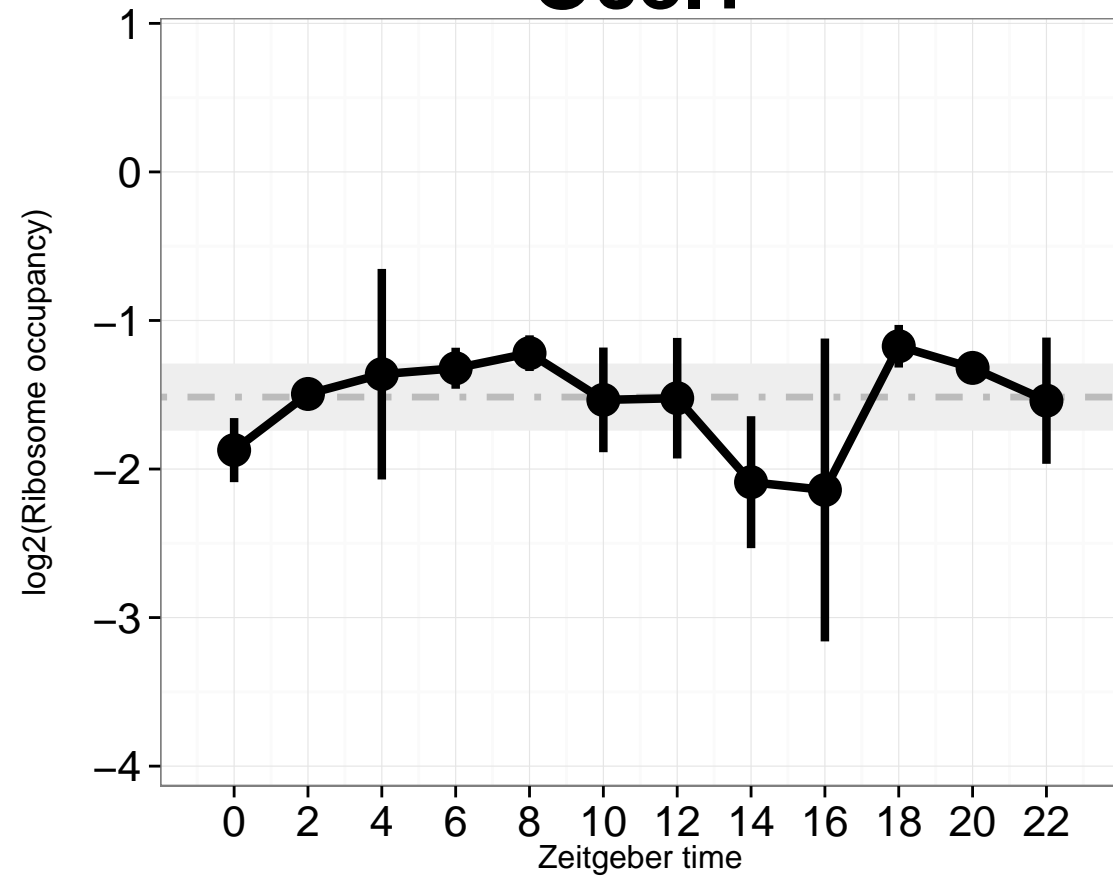

Supplement: Supplementary file 5805 [file 1]

# Nxph3

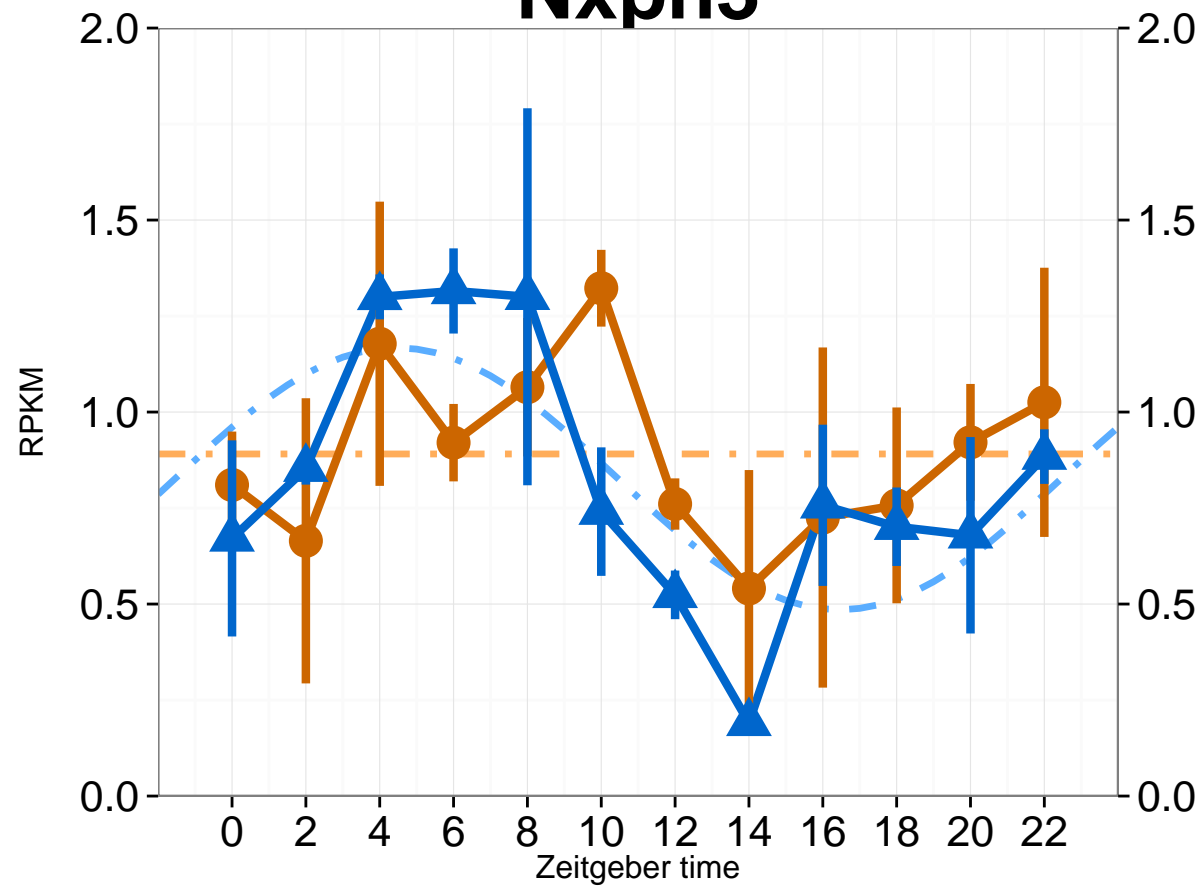

# Nxph3

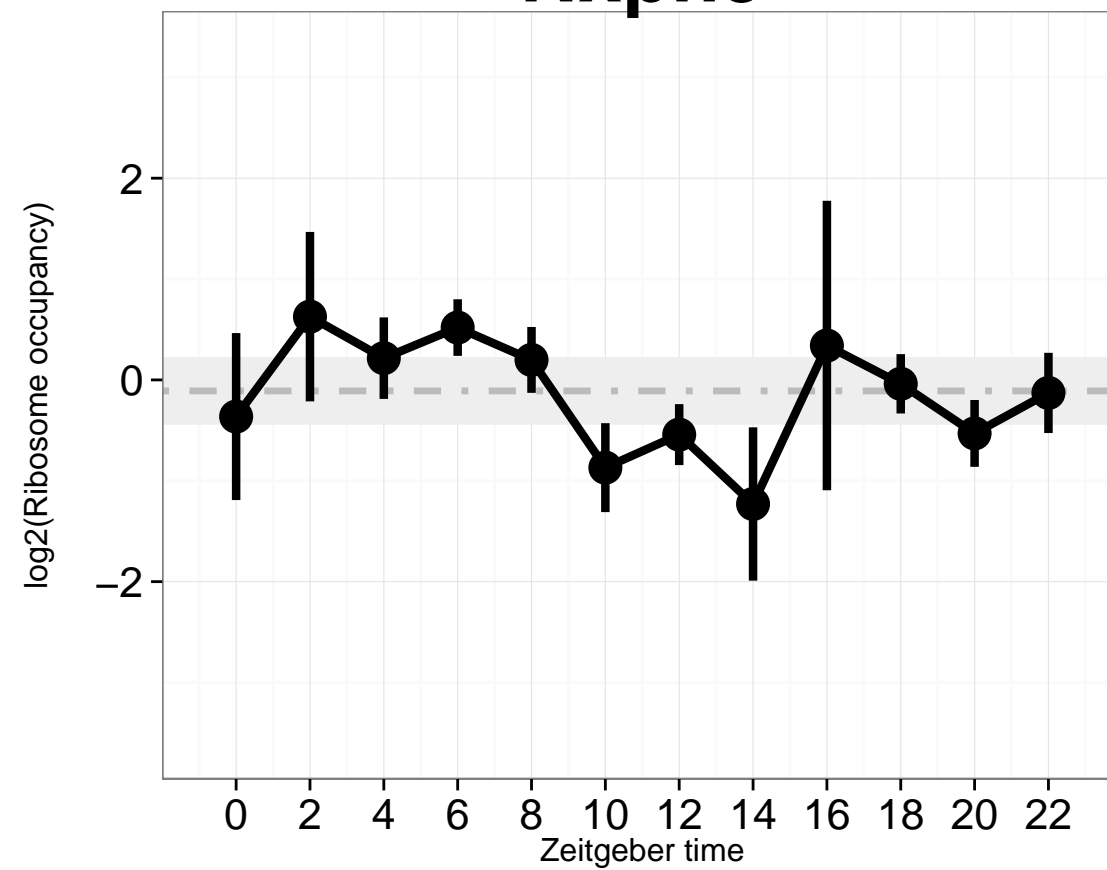

Supplement: Supplementary file 5806 [file 1]

# Rrp1b

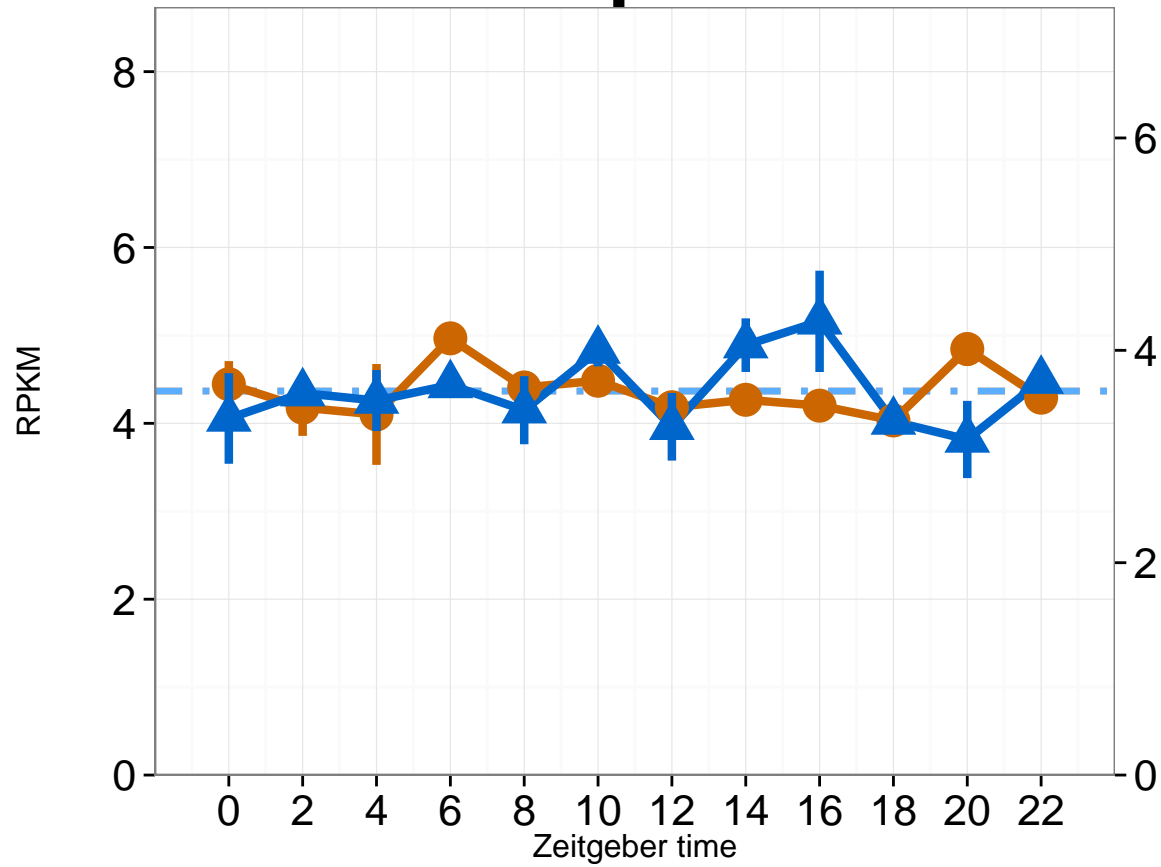

# Rrp1b

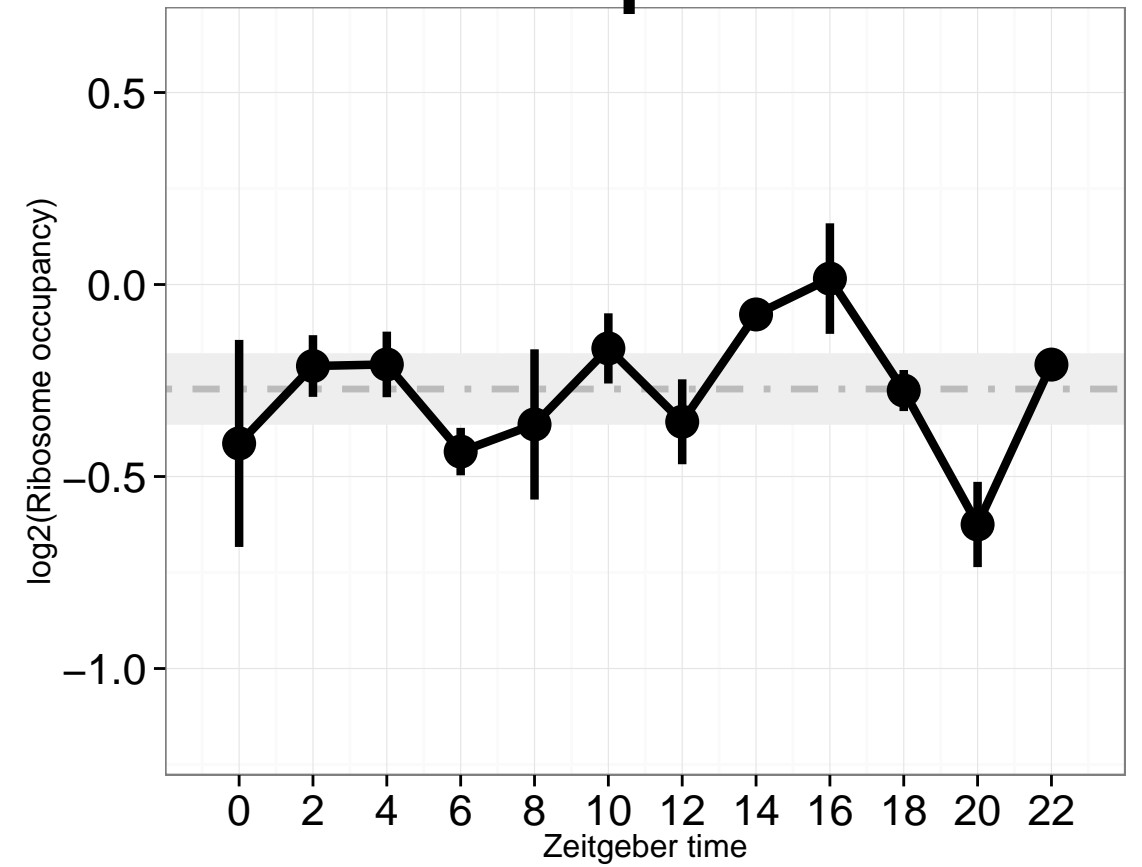

Supplement: Supplementary file 5807 [file 1]

# Cntn1

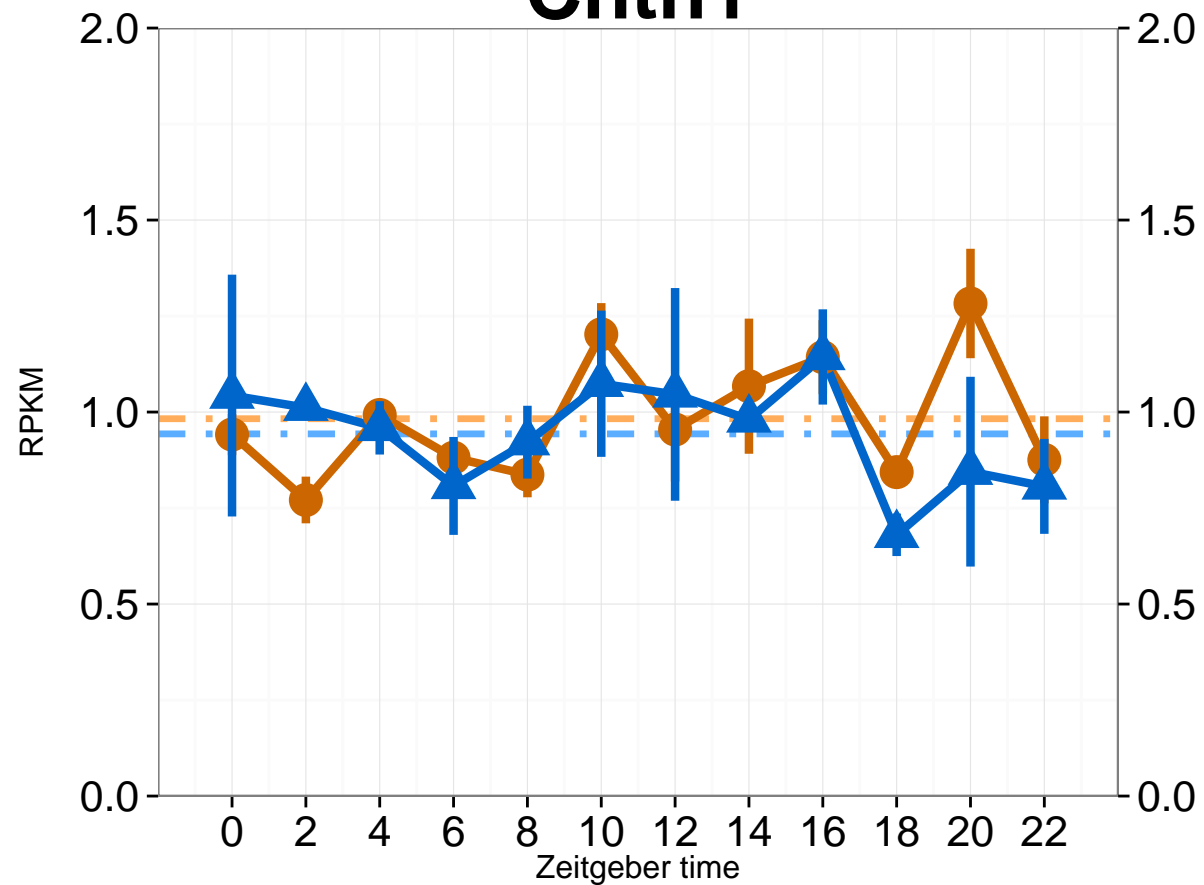

# Cntn1

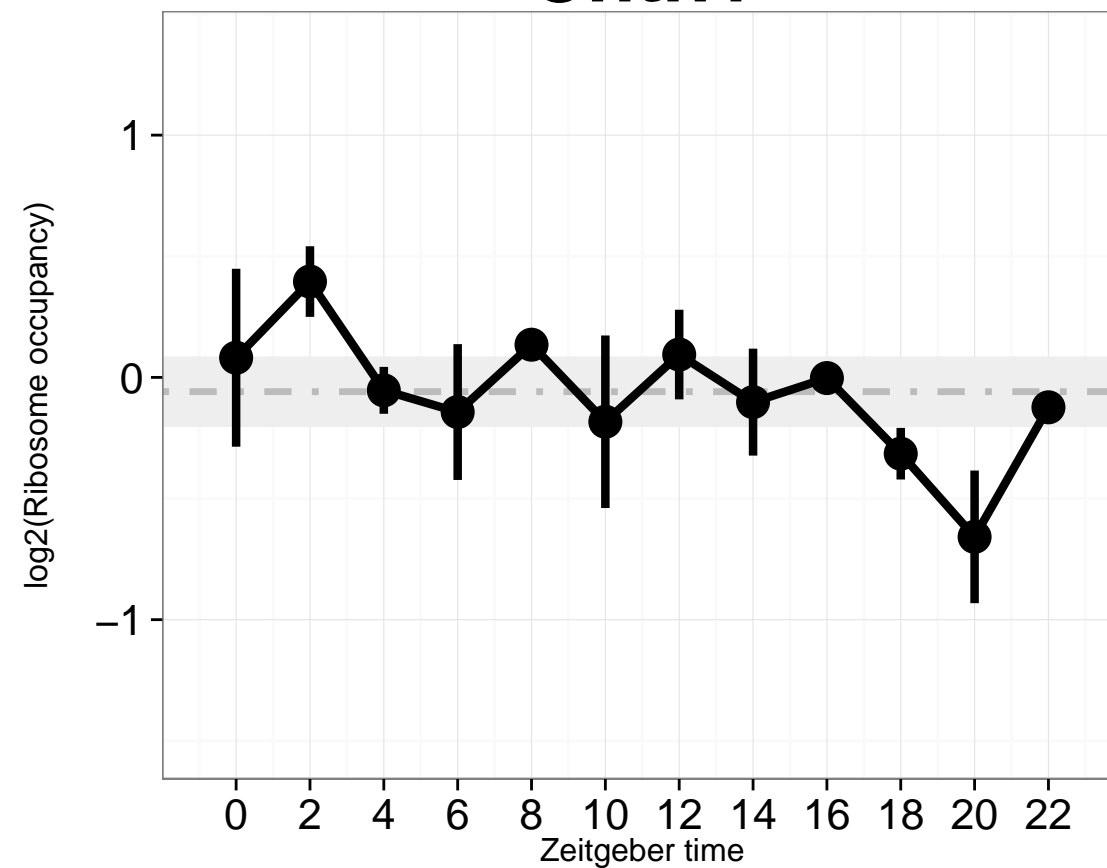

Supplement: Supplementary file 5808 [file 1]

# Spata1

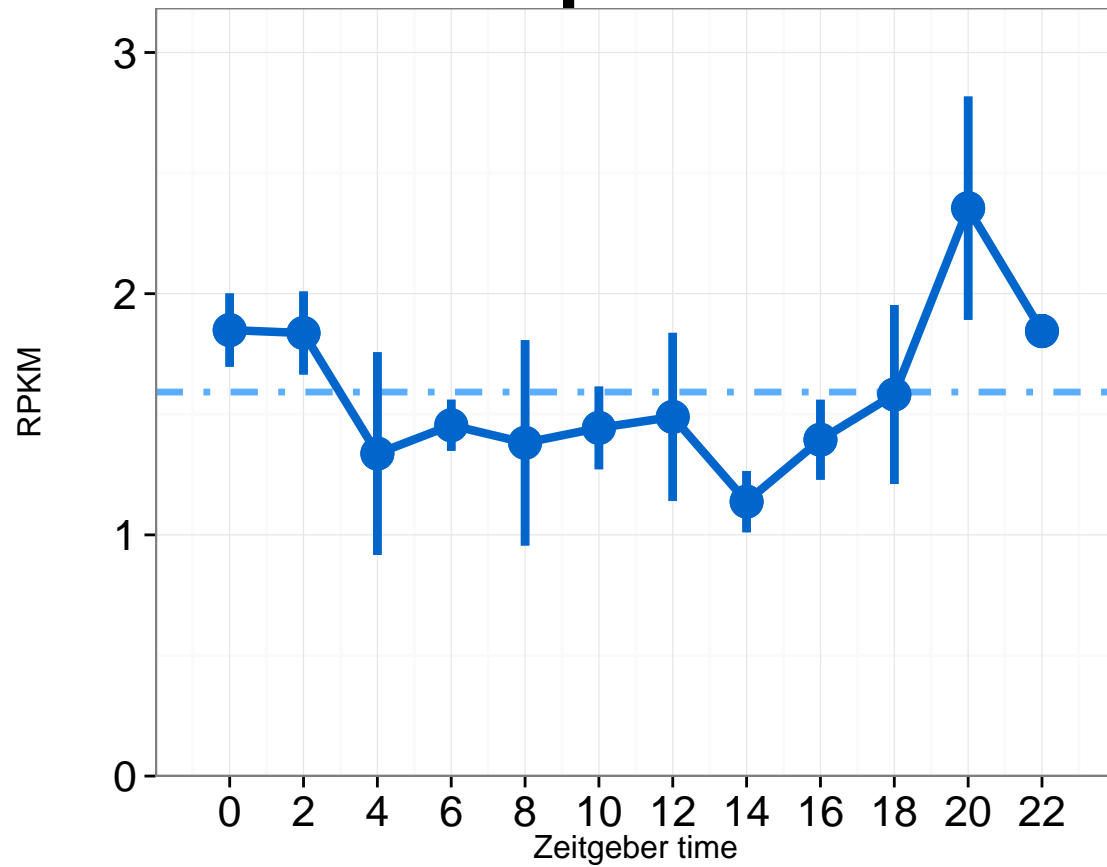

# Spata1 log2(Ribosome occupancy)

Supplement: Supplementary file 5809 [file 1]

# Grhl3 TR

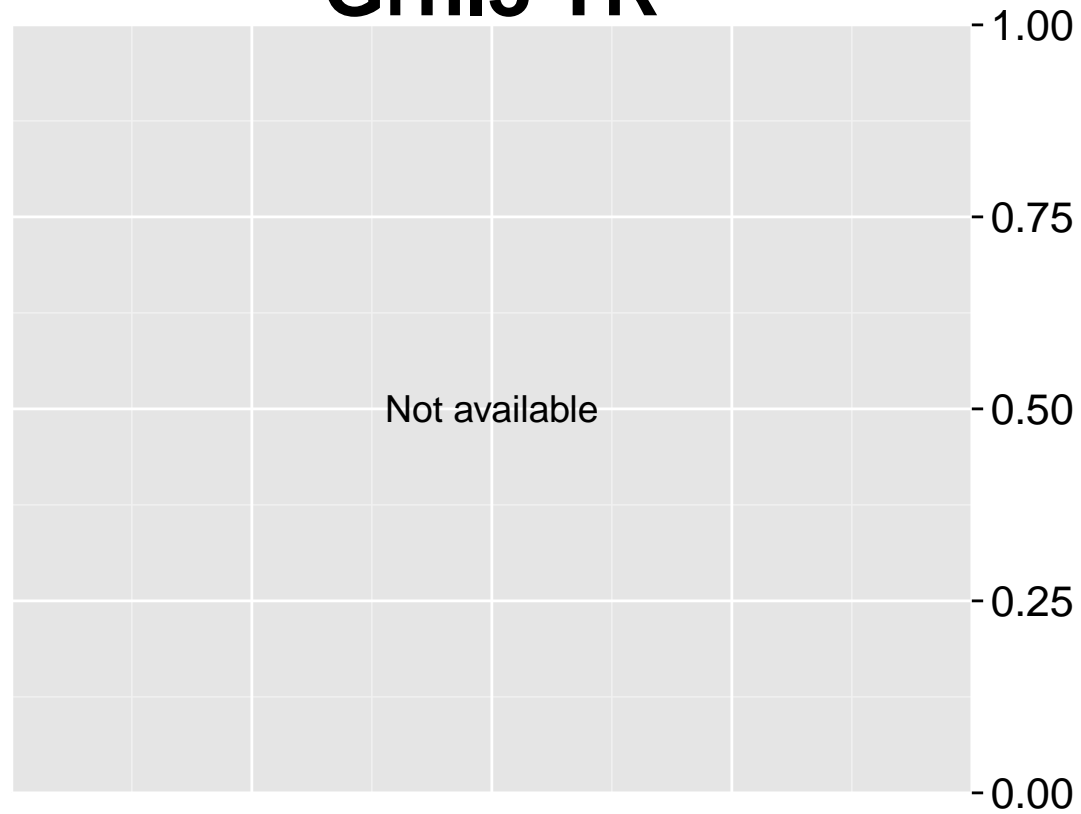

# Grhl3 log2(Ribosome occupancy)

Supplement: Supplementary file 5810 [file 1]

## Ang

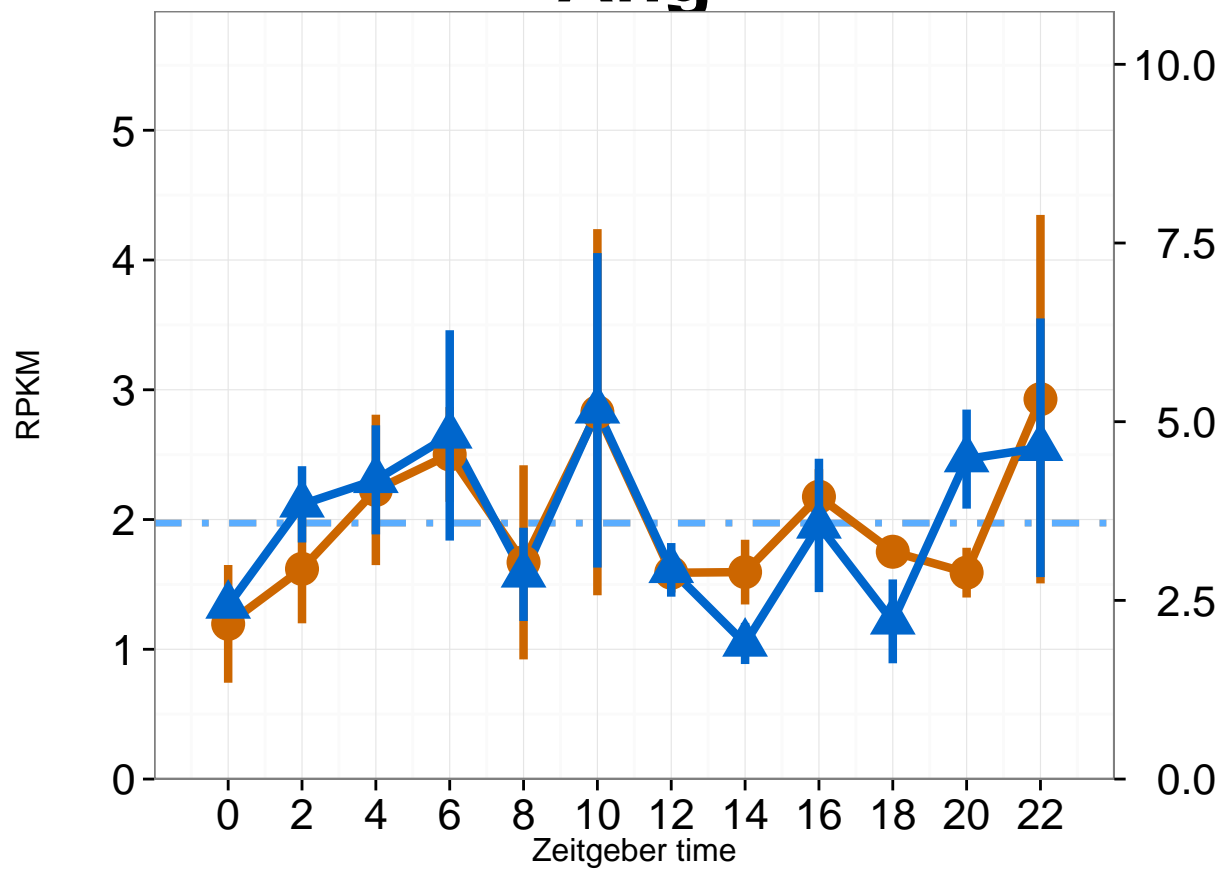

## Ang

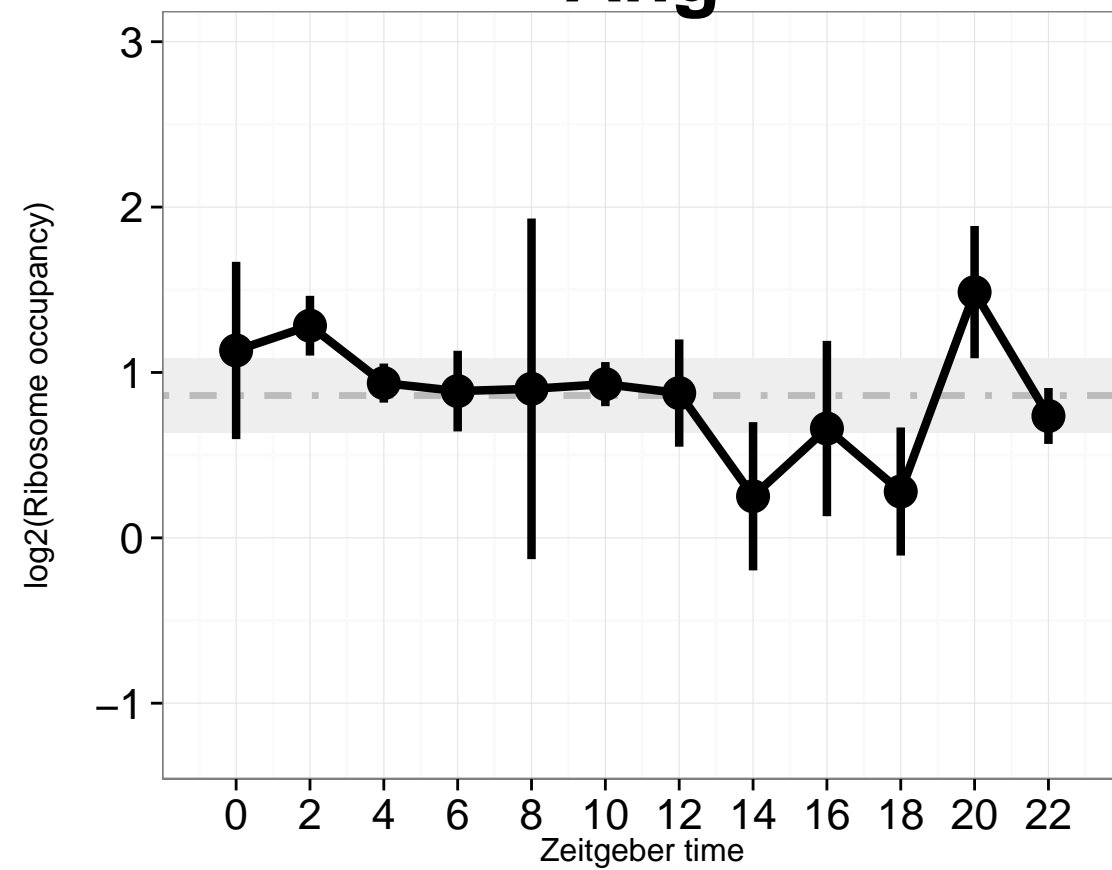

Supplement: Supplementary file 5811 [file 1]

# Rbm27

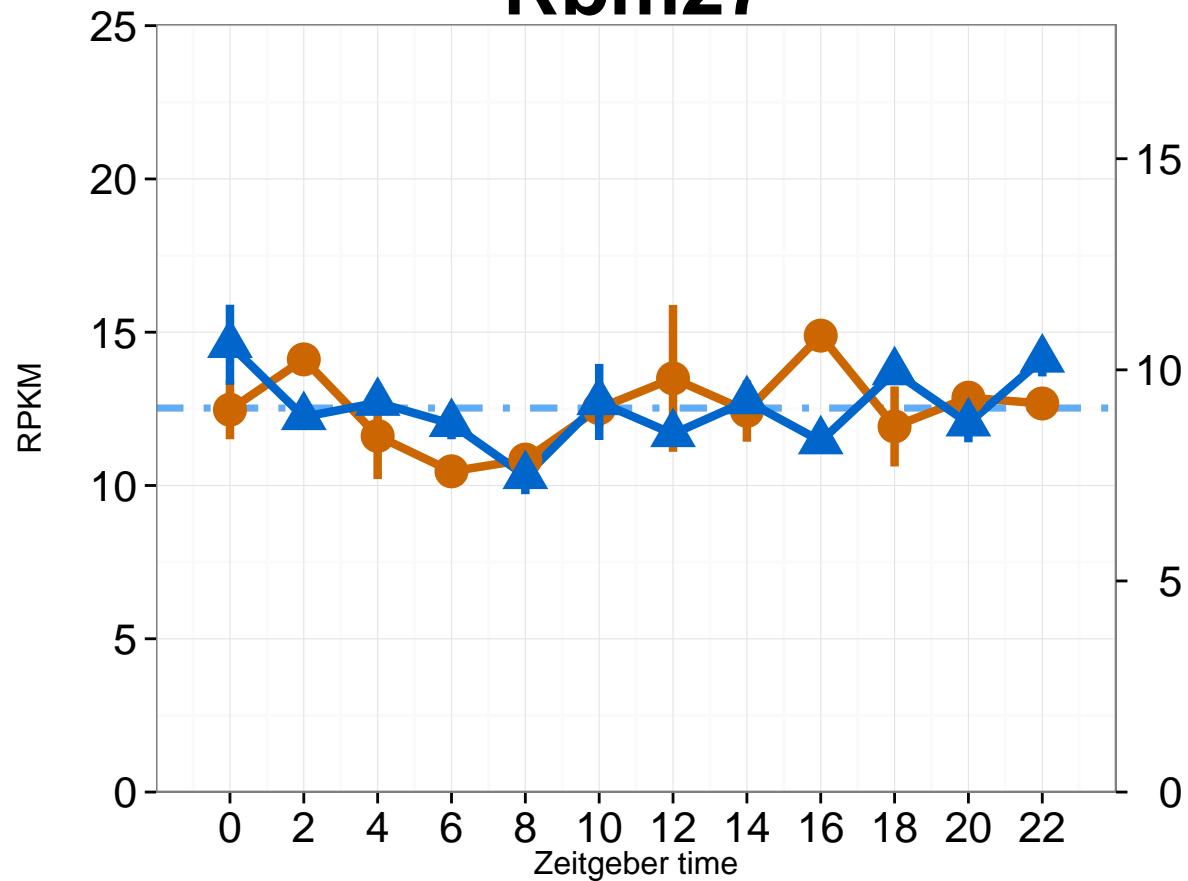

# Rbm27

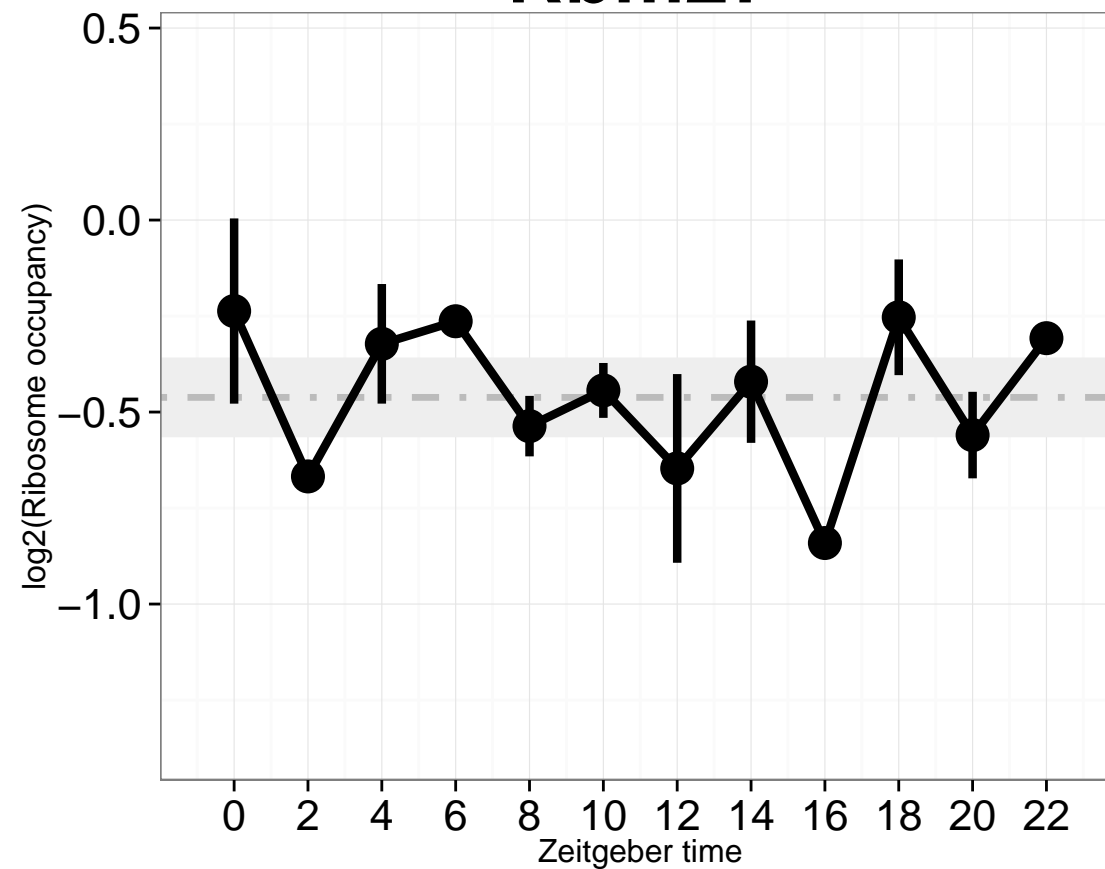

Supplement: Supplementary file 5812 [file 1]

# Rpa3

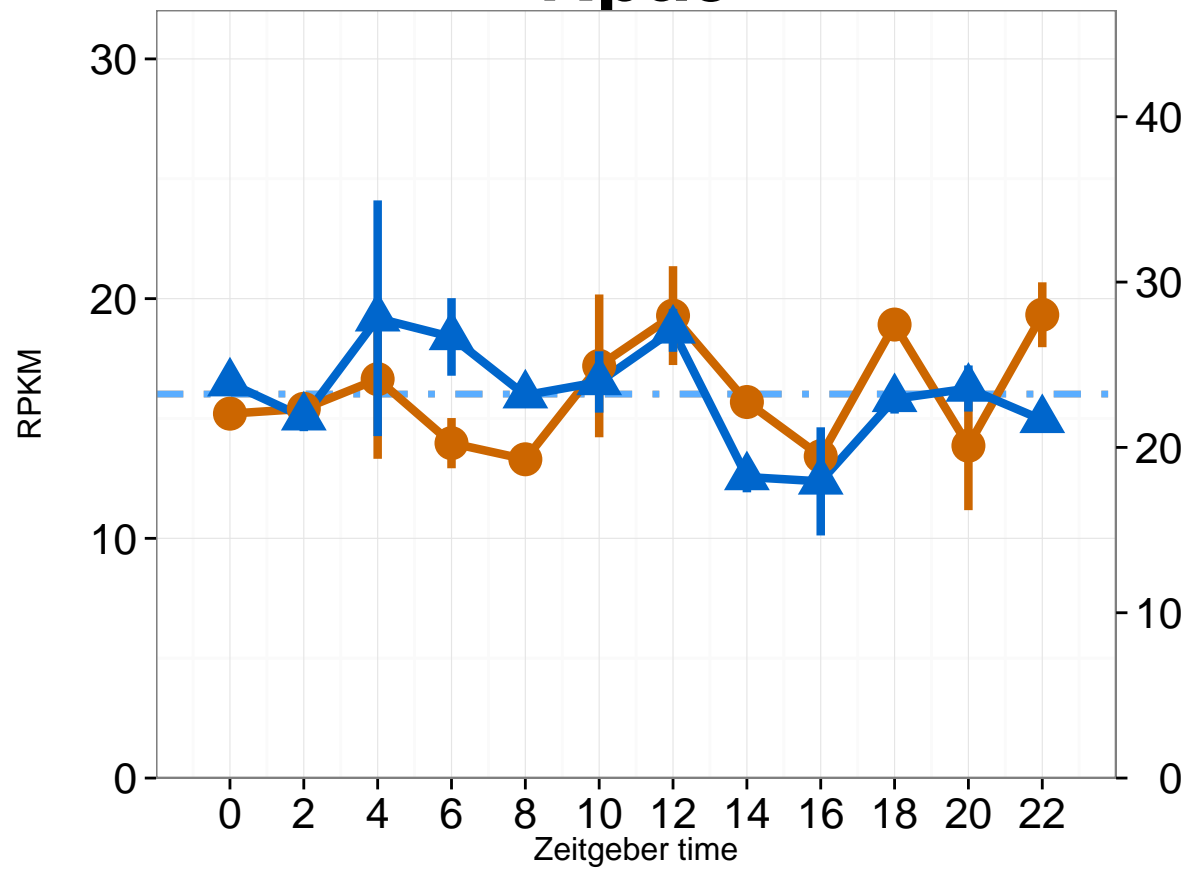

# Rpa3

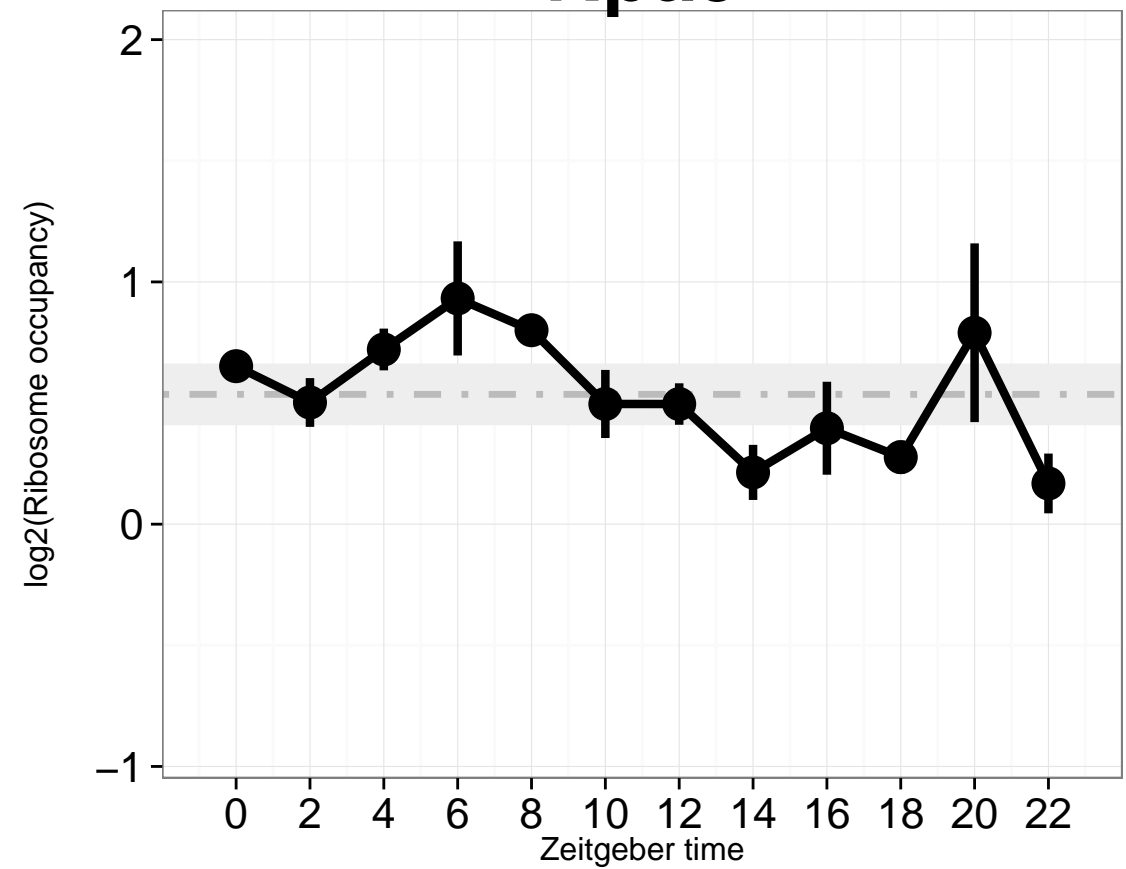

Supplement: Supplementary file 5813 [file 1]

# Ap5z1

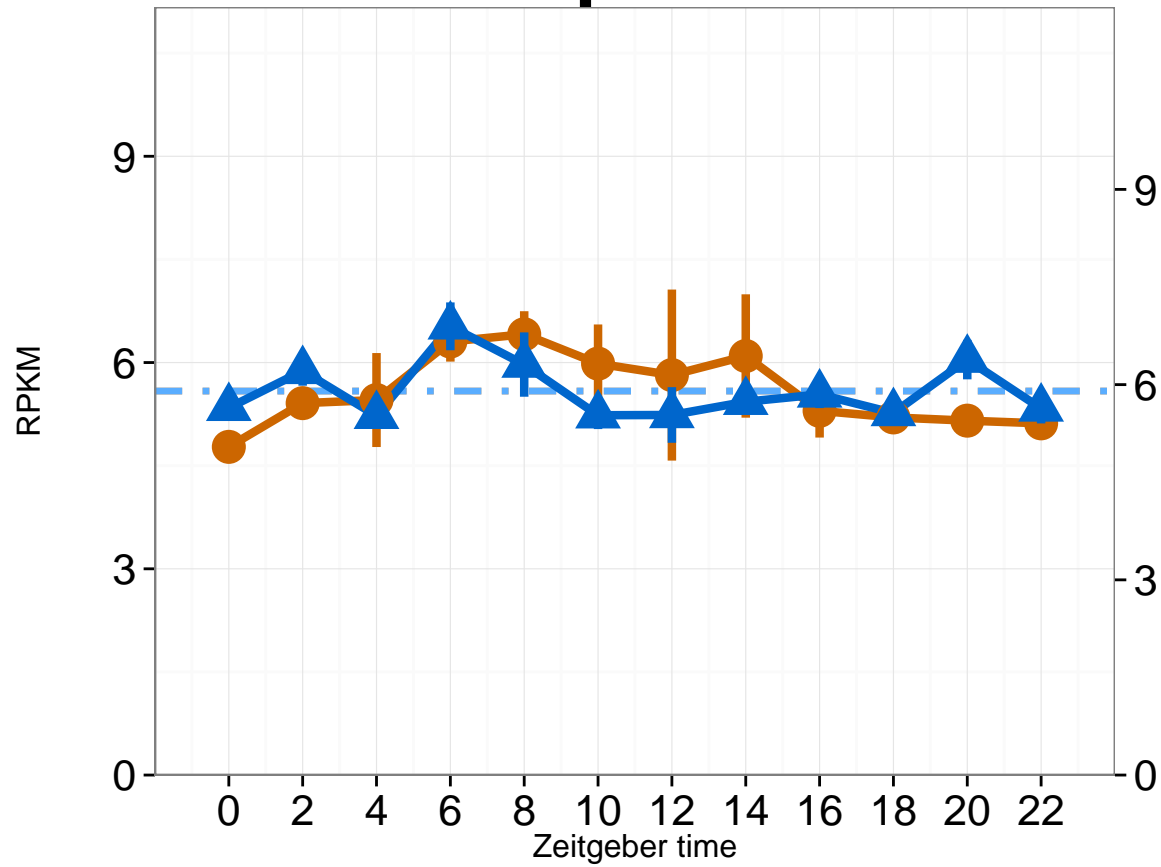

# Ap5z1

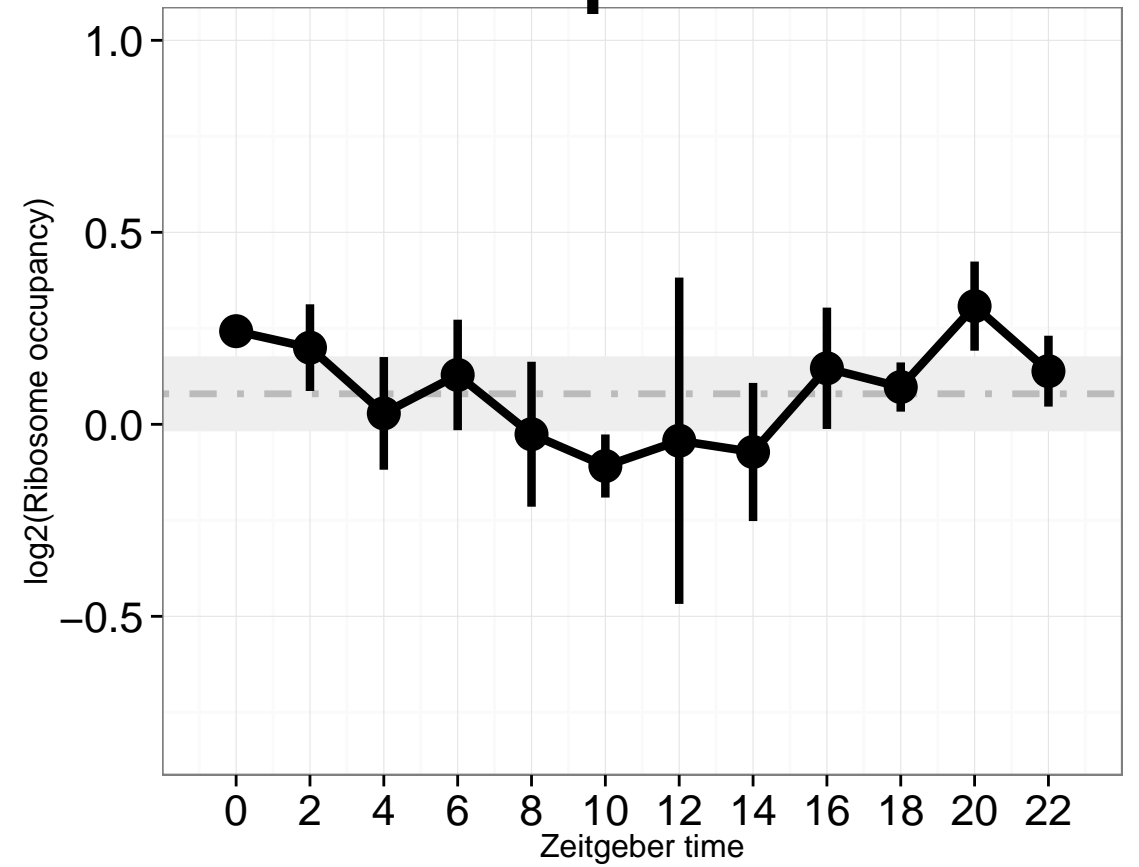

Supplement: Supplementary file 5814 [file 1]

## D630036H23Rik

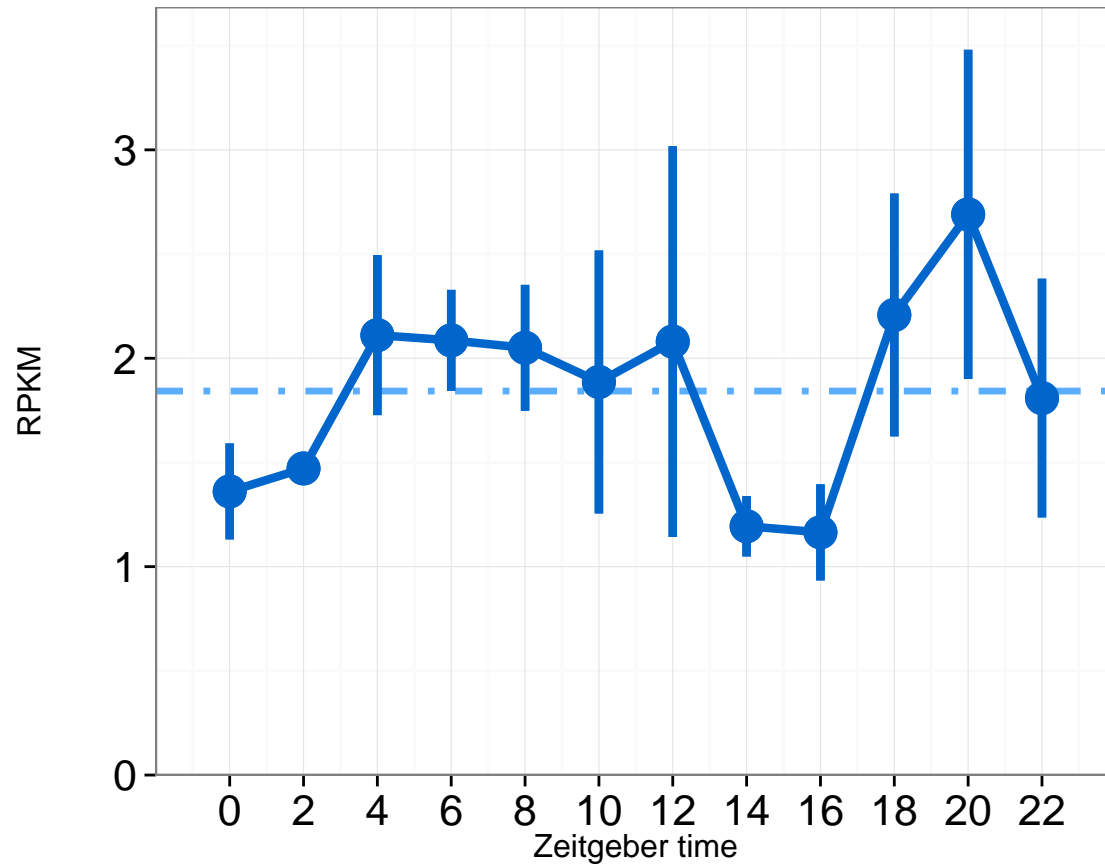

## D630036H23Rik log2(Ribosome occup

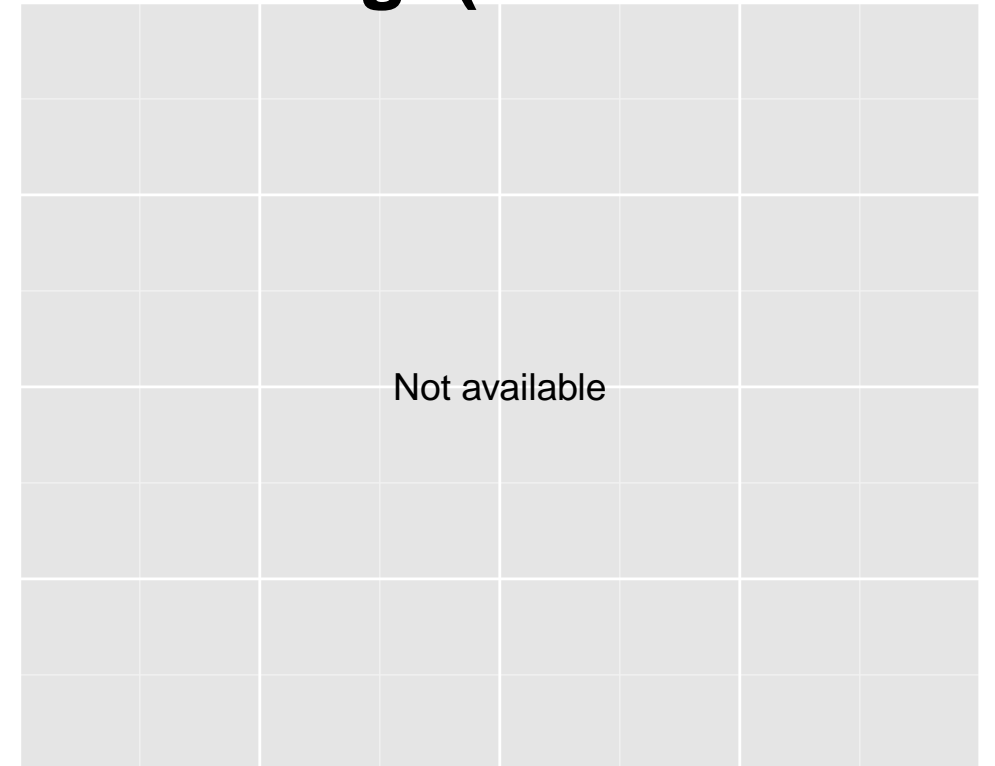

Supplement: Supplementary file 5815 [file 1]

## D130040H23Rik

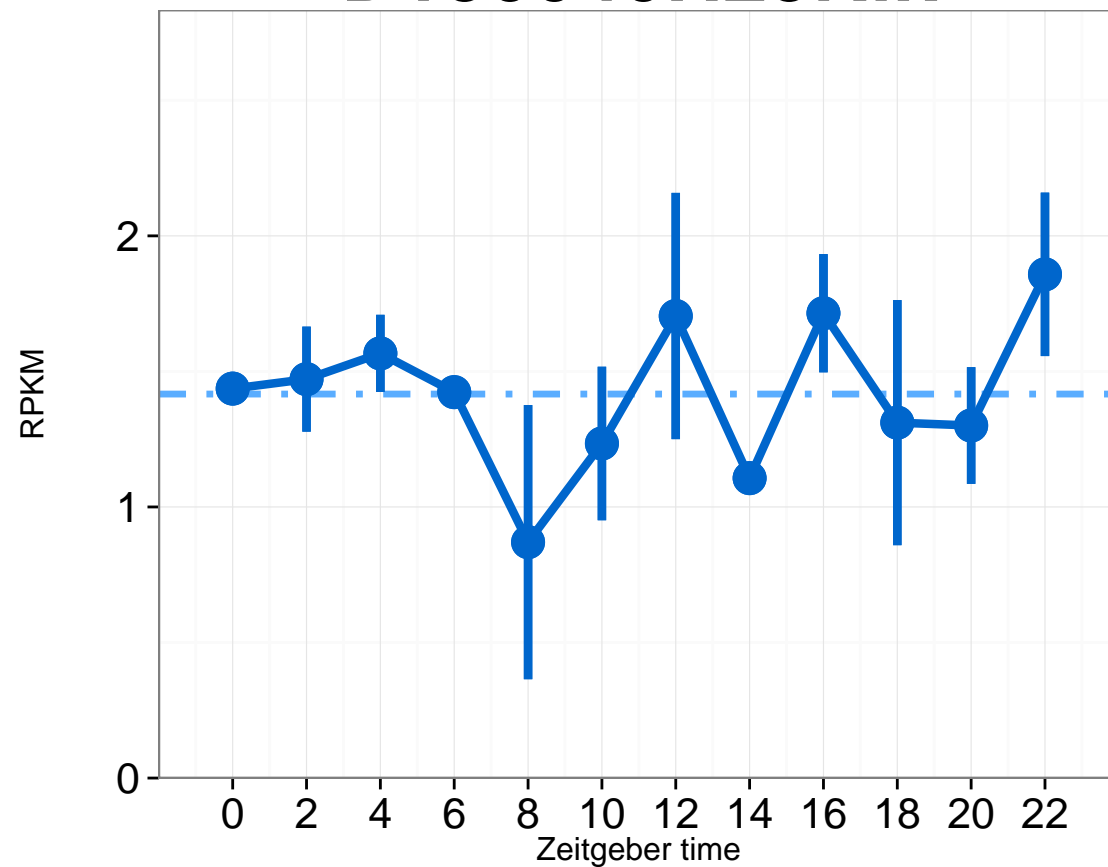

## D130040H23Rik log2(Ribosome occup

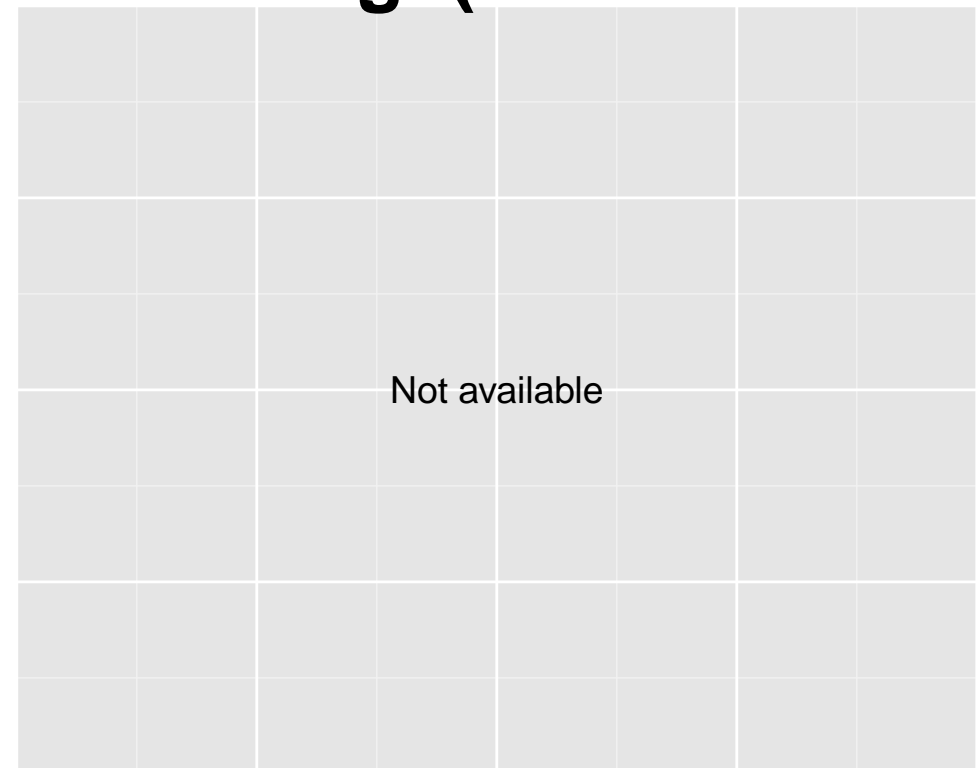

Supplement: Supplementary file 5816 [file 1]

# Sfxn5

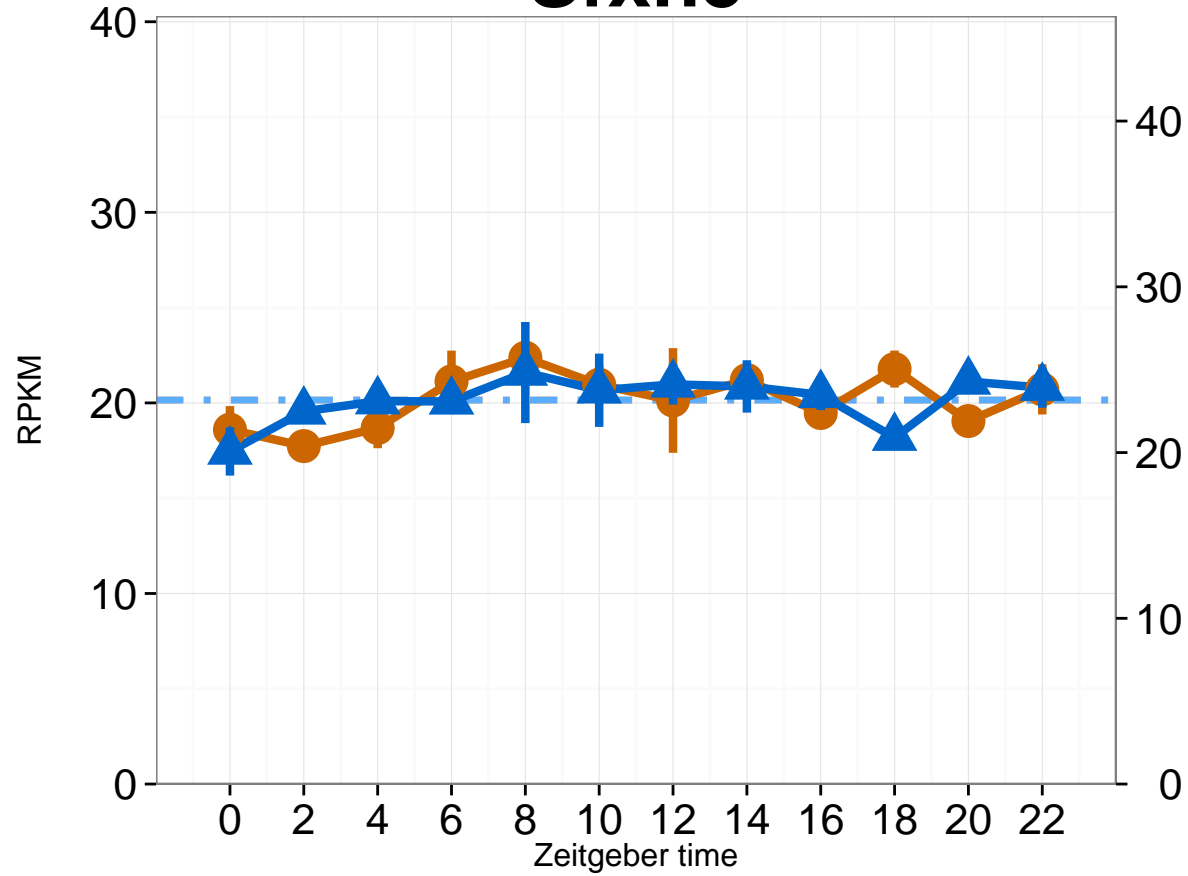

# Sfxn5

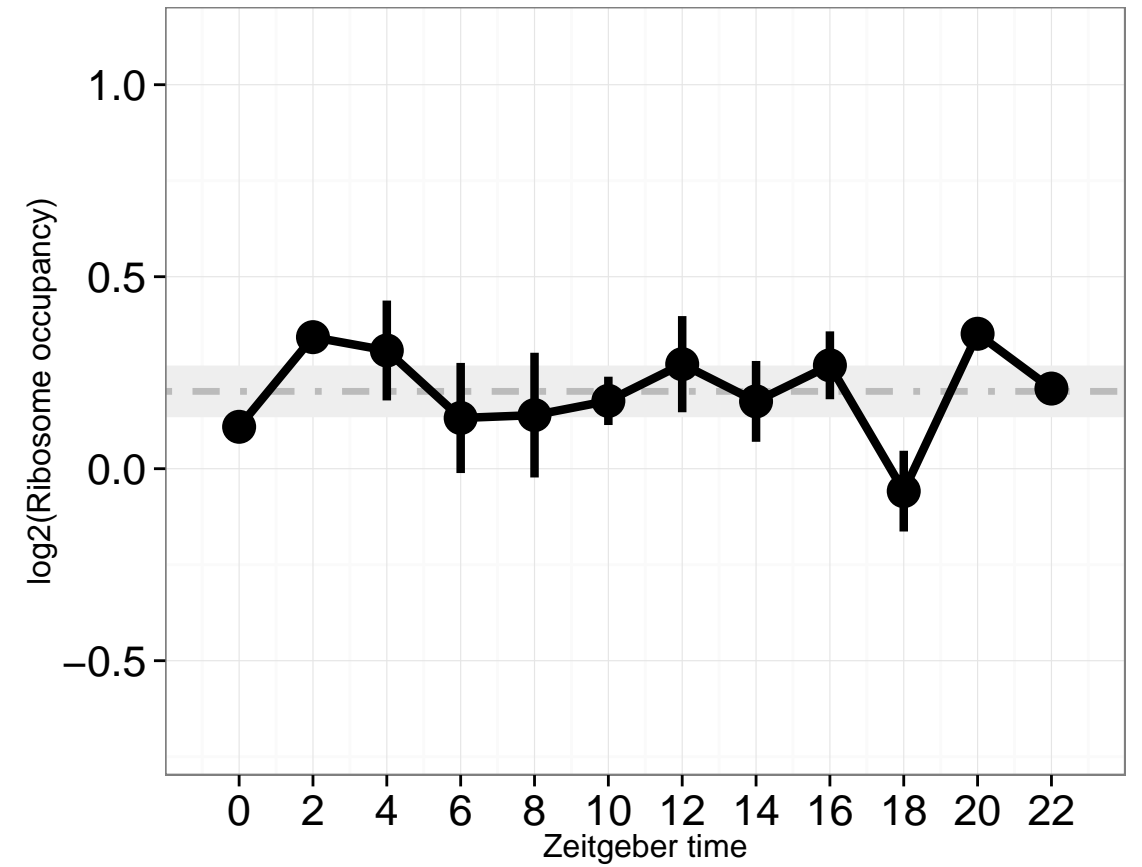

Supplement: Supplementary file 5817 [file 1]

# Rgs10

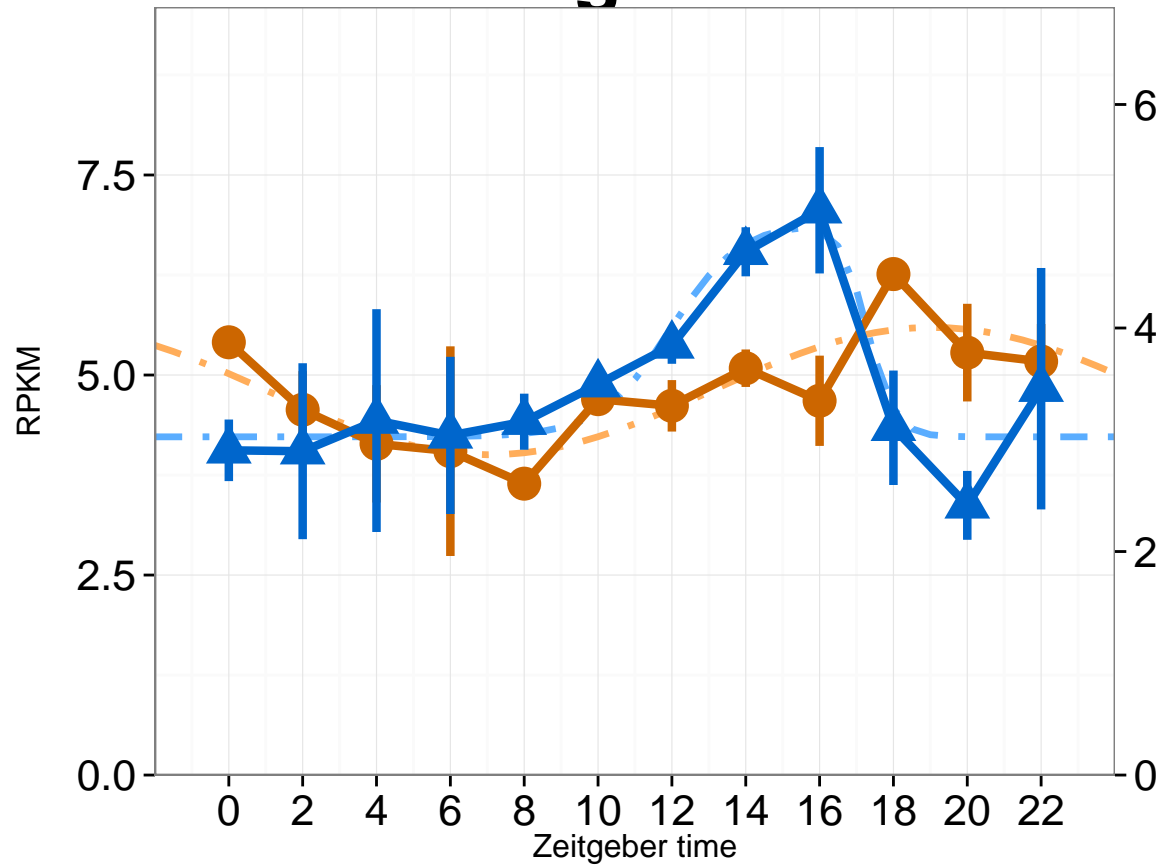

# Rgs10

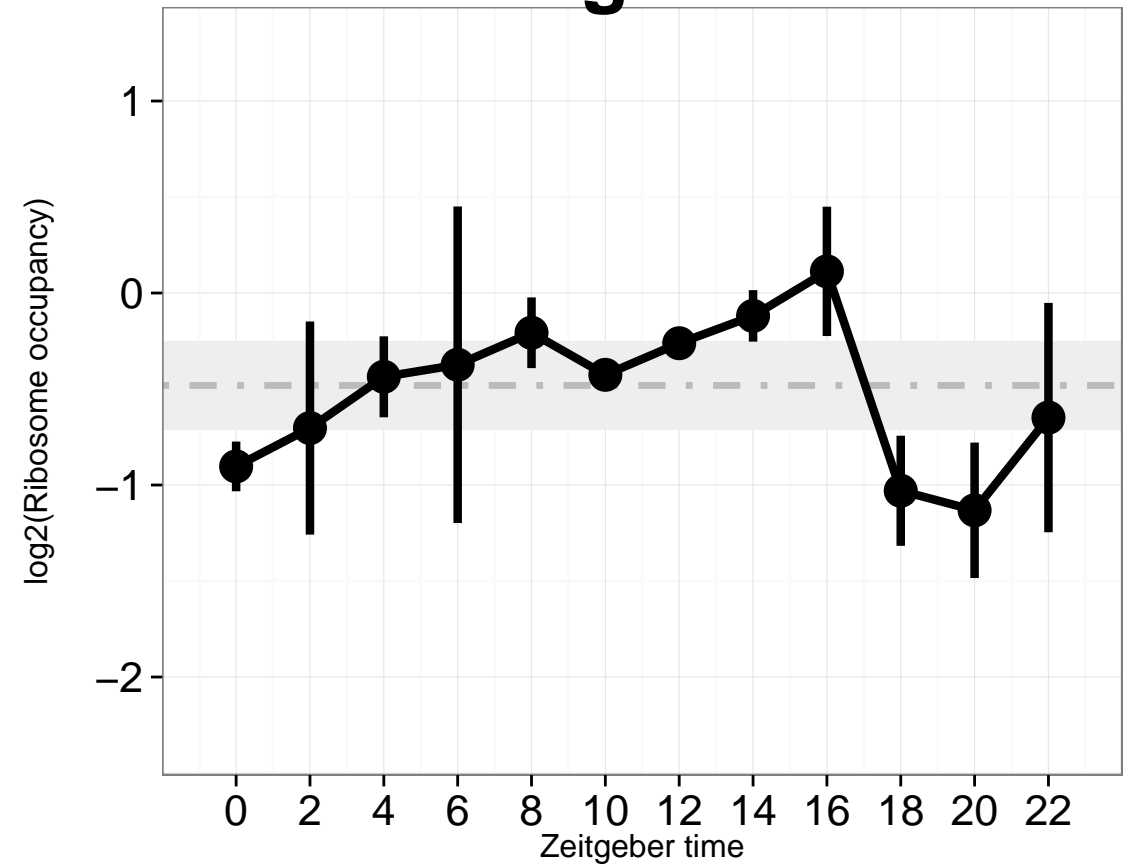

Supplement: Supplementary file 5818 [file 1]

# Fam120b

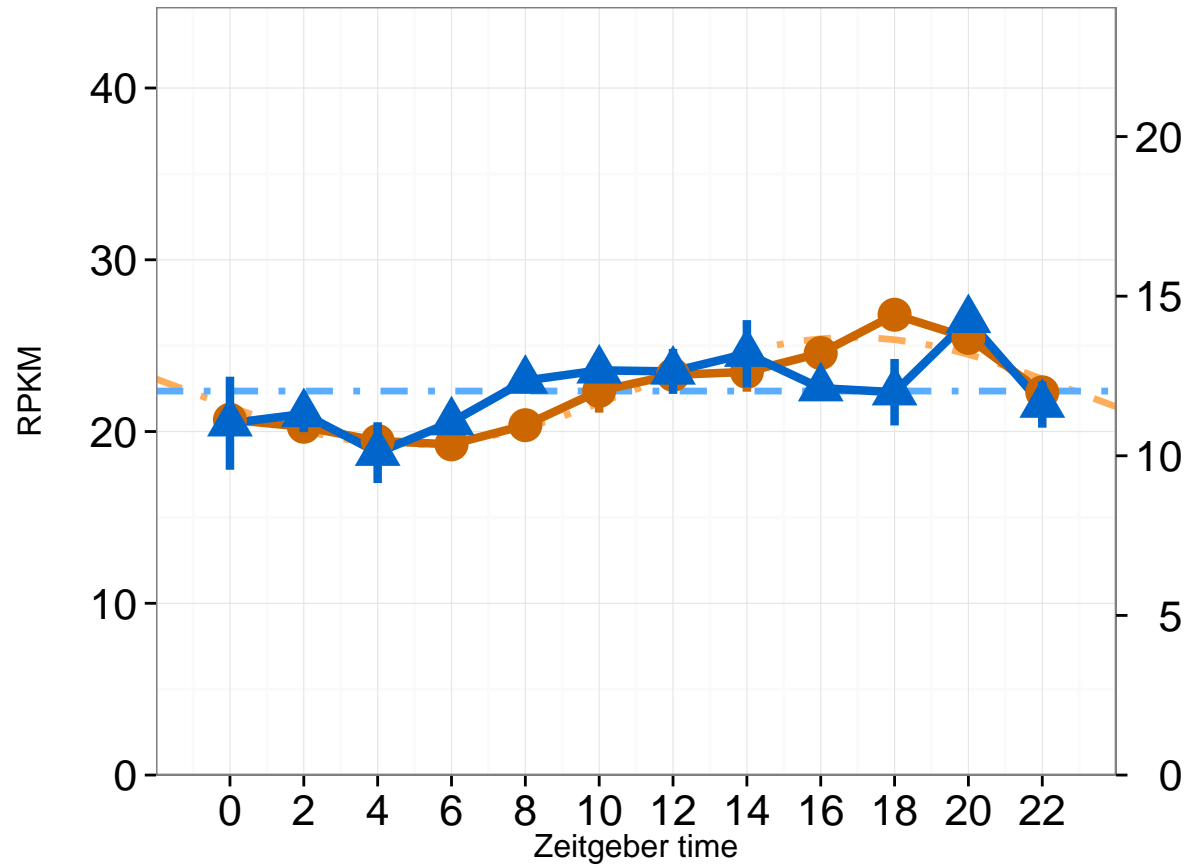

# Fam120b

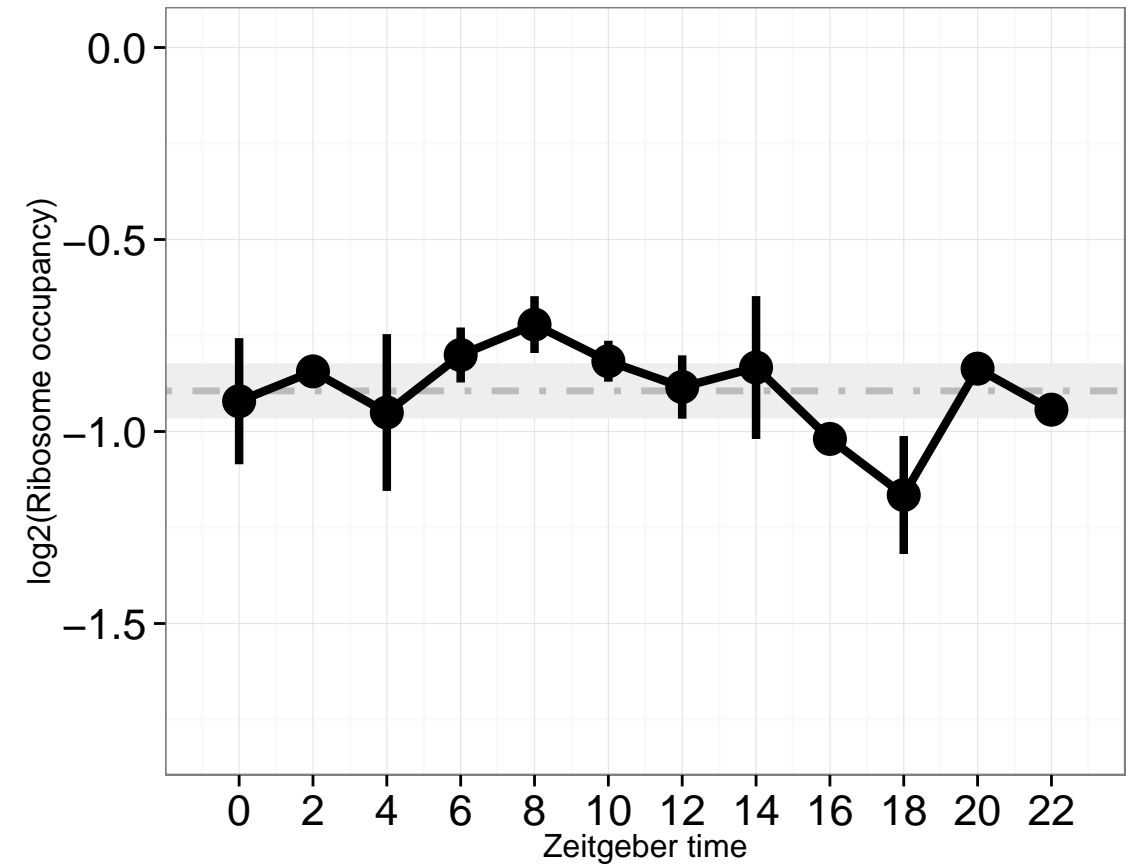

Supplement: Supplementary file 5819 [file 1]

# S1pr4

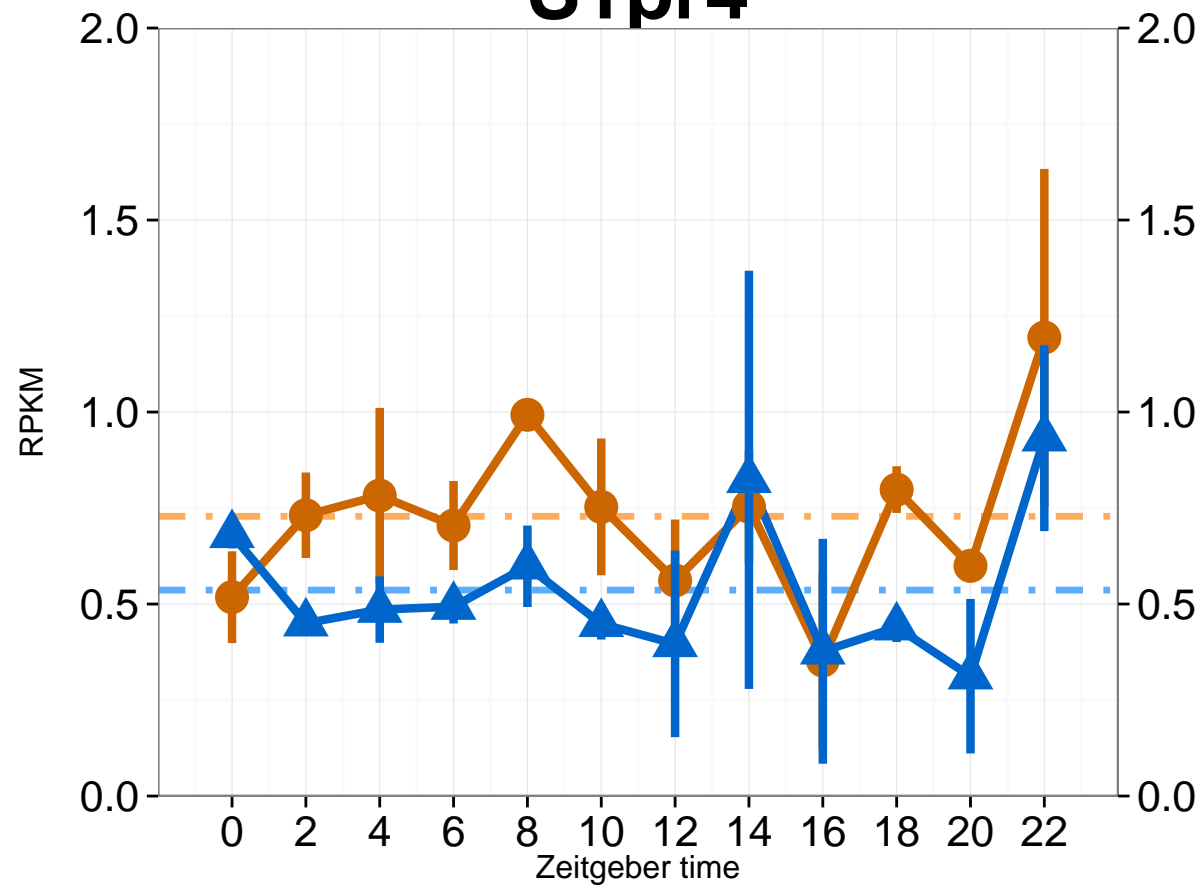

# S1pr4

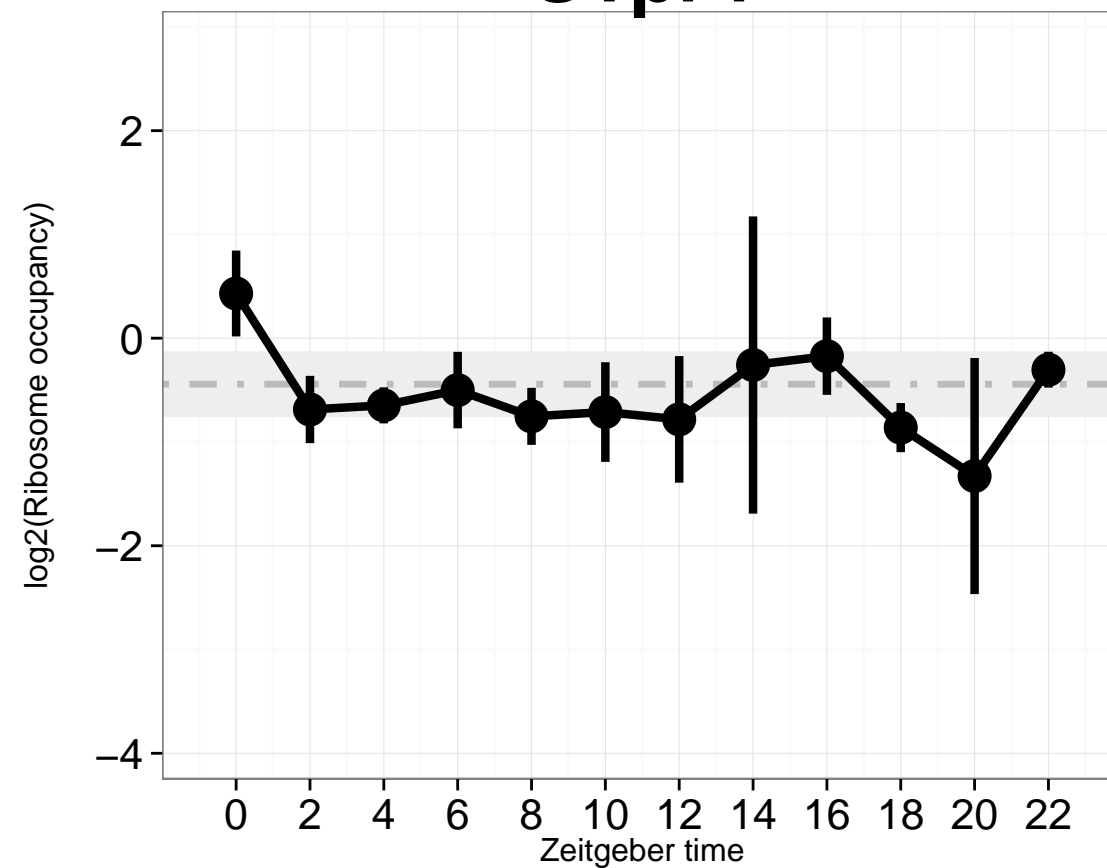

Supplement: Supplementary file 5820 [file 1]

## Xpo6

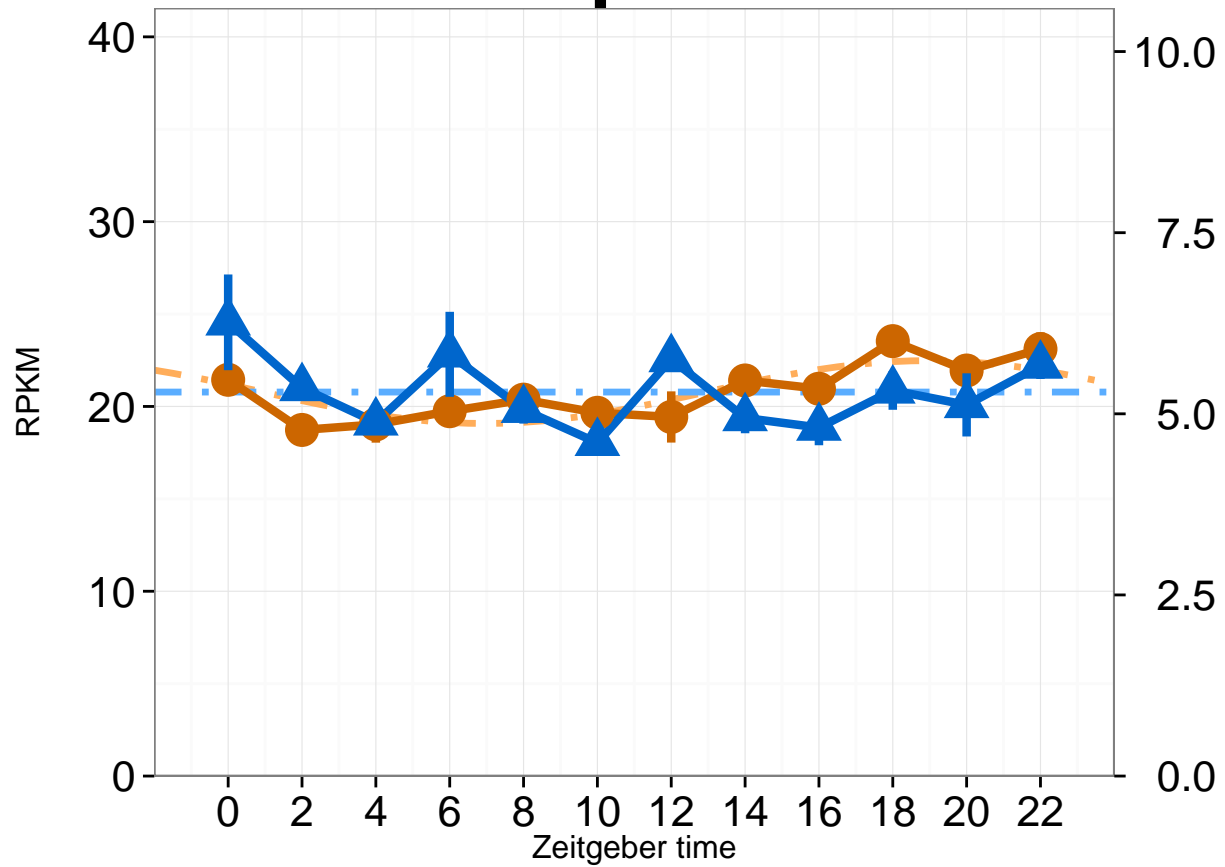

## Xpo6

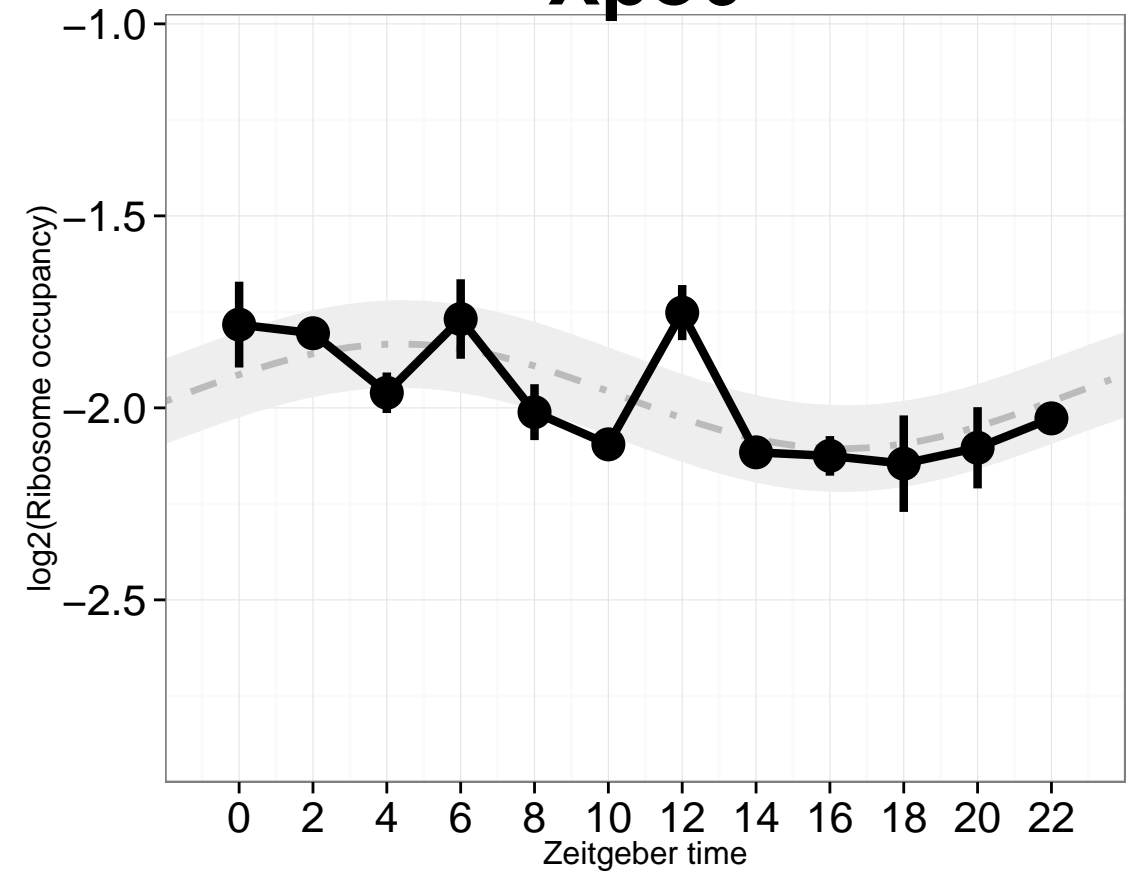

Supplement: Supplementary file 5821 [file 1]

# Dnajc7

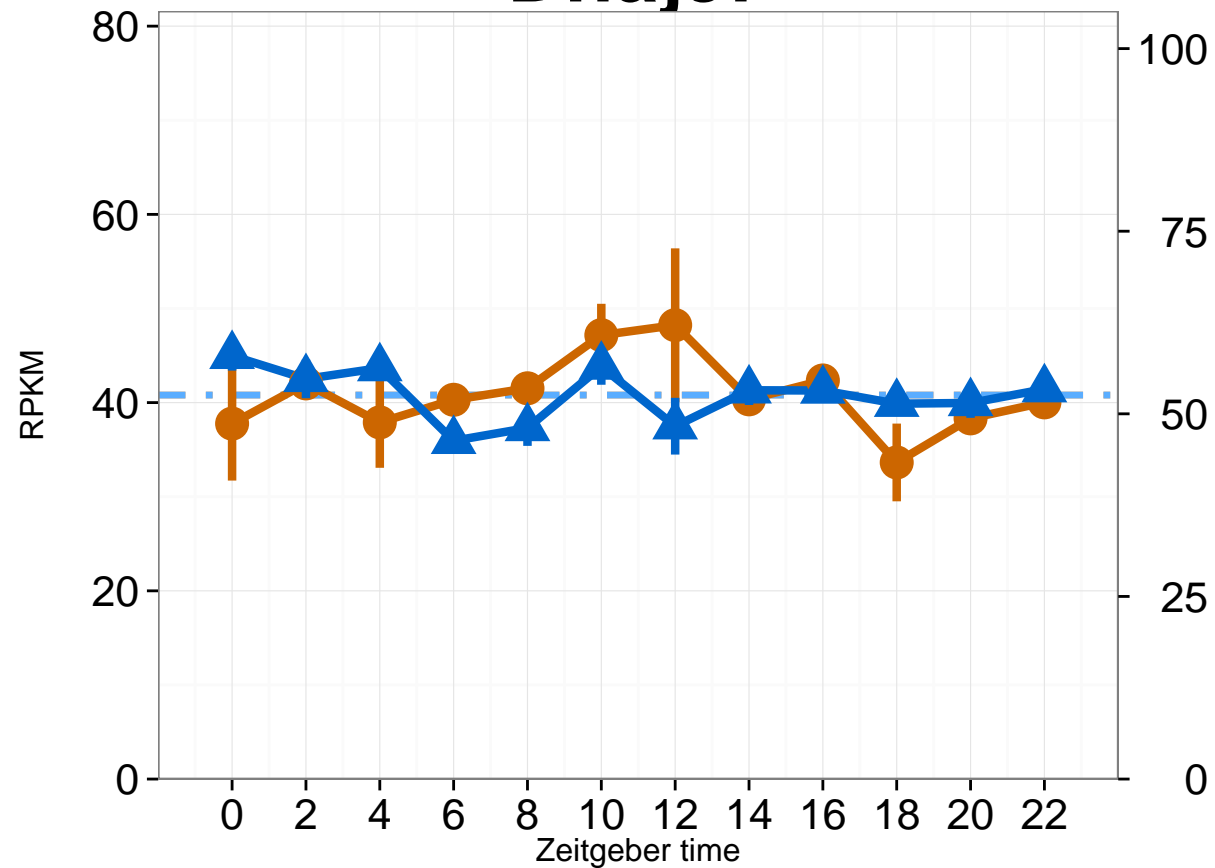

# Dnajc7

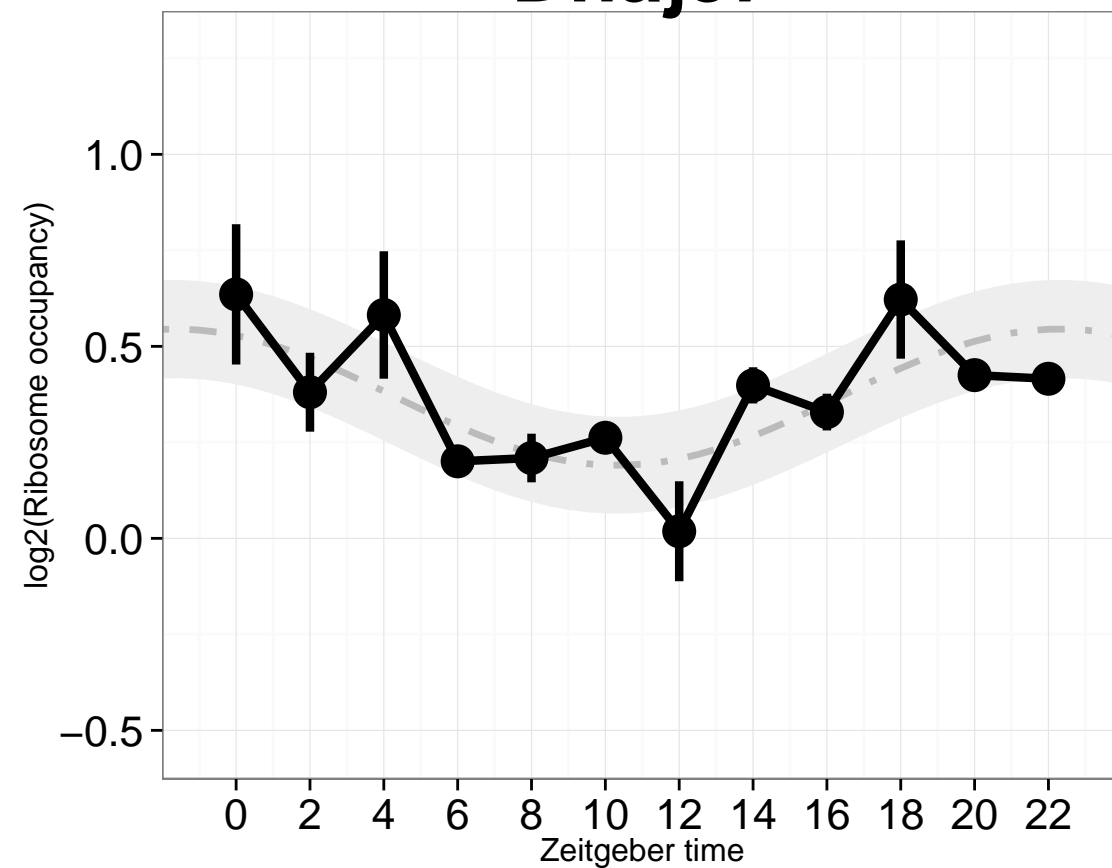

Supplement: Supplementary file 5822 [file 1]
