# Supplementary material (part 59 of 133)
Source: publisher figshare collection journal article supplement (https://springernature.figshare.com/articles/dataset/_/4903193)

## Gnao1

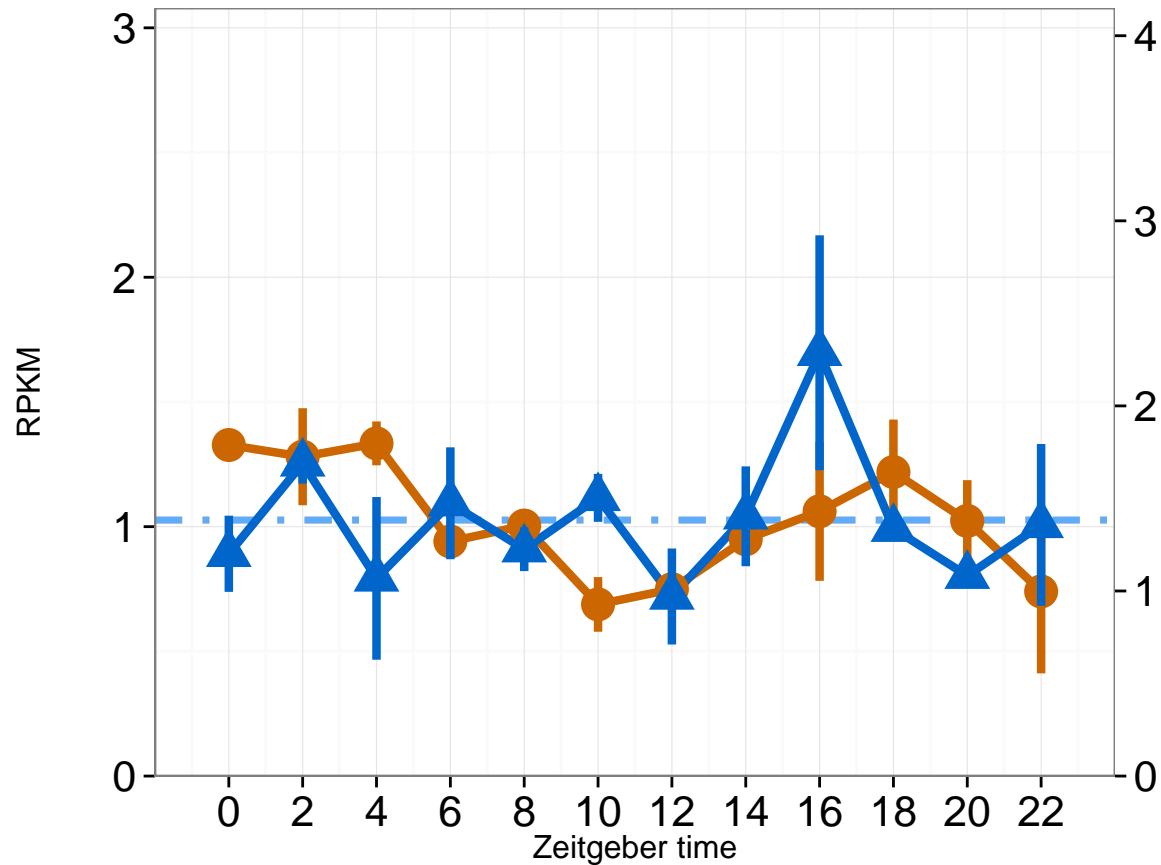

## Gnao1

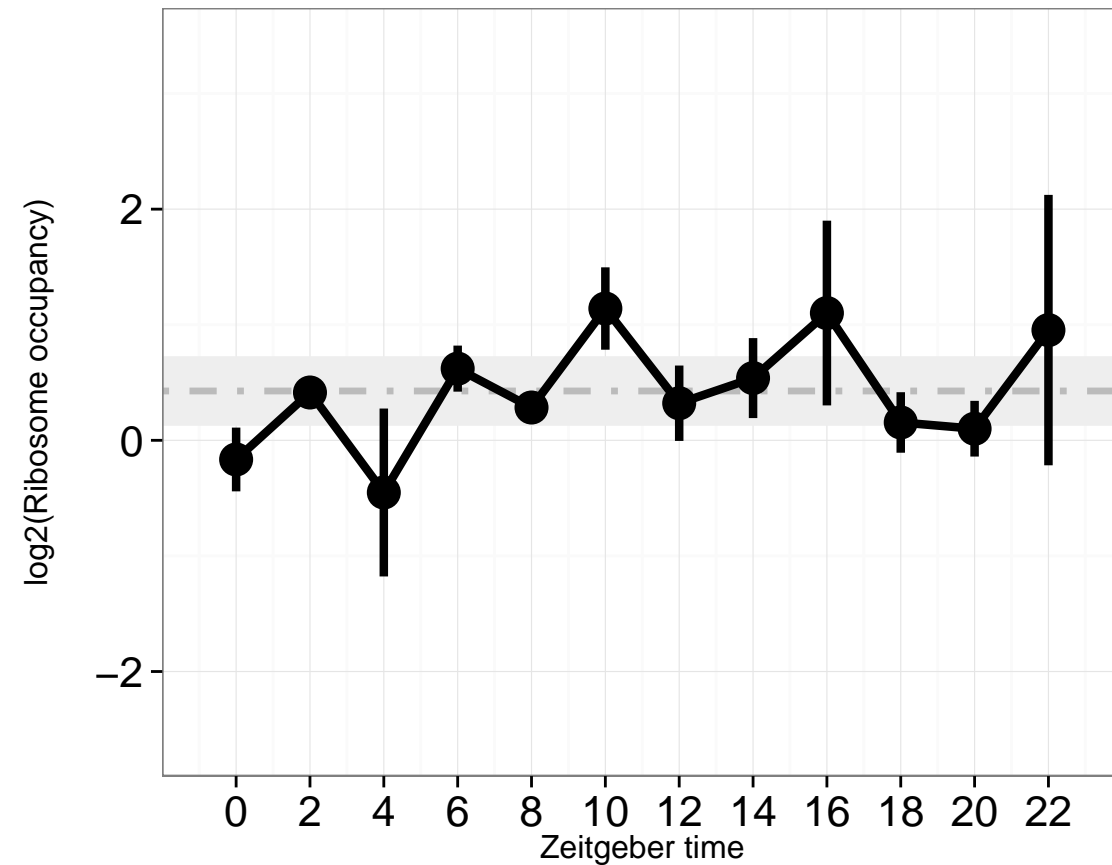

Supplement: Supplementary file 5823 [file 1]

# Tmem117

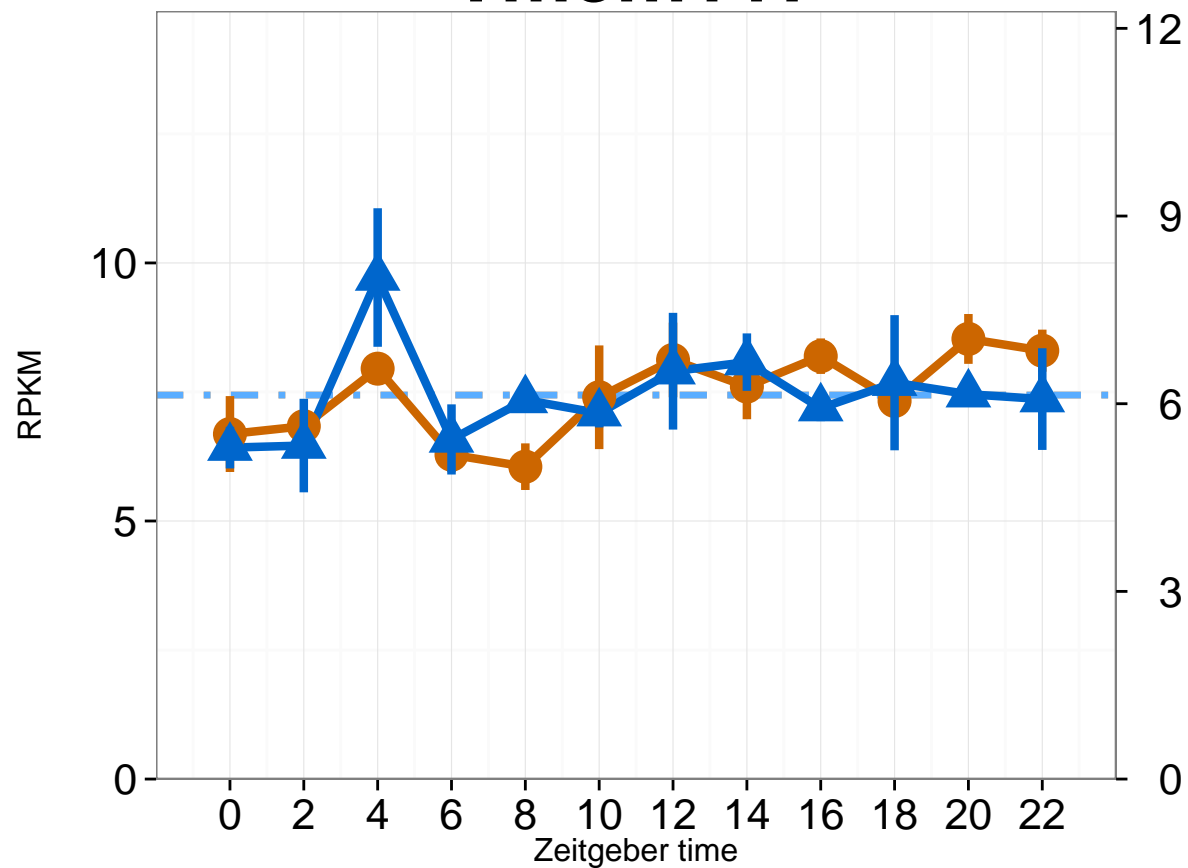

# Tmem117

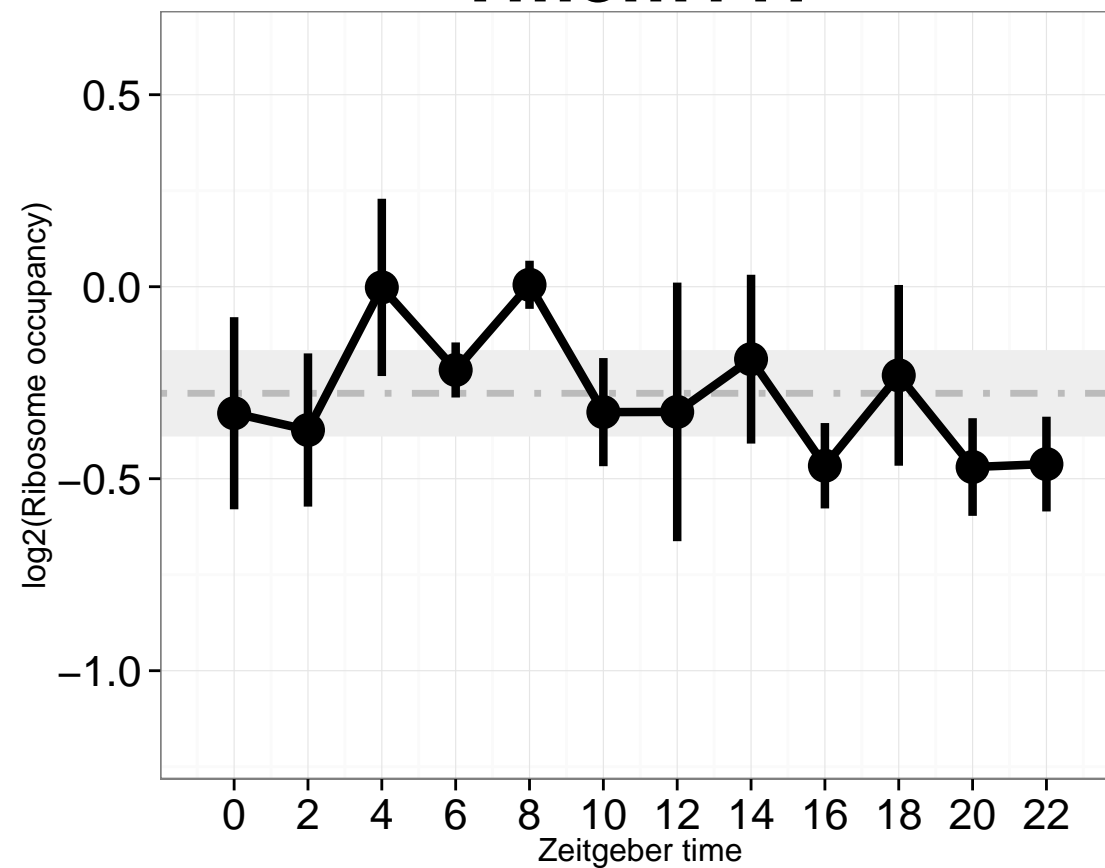

Supplement: Supplementary file 5824 [file 1]

## Pid1

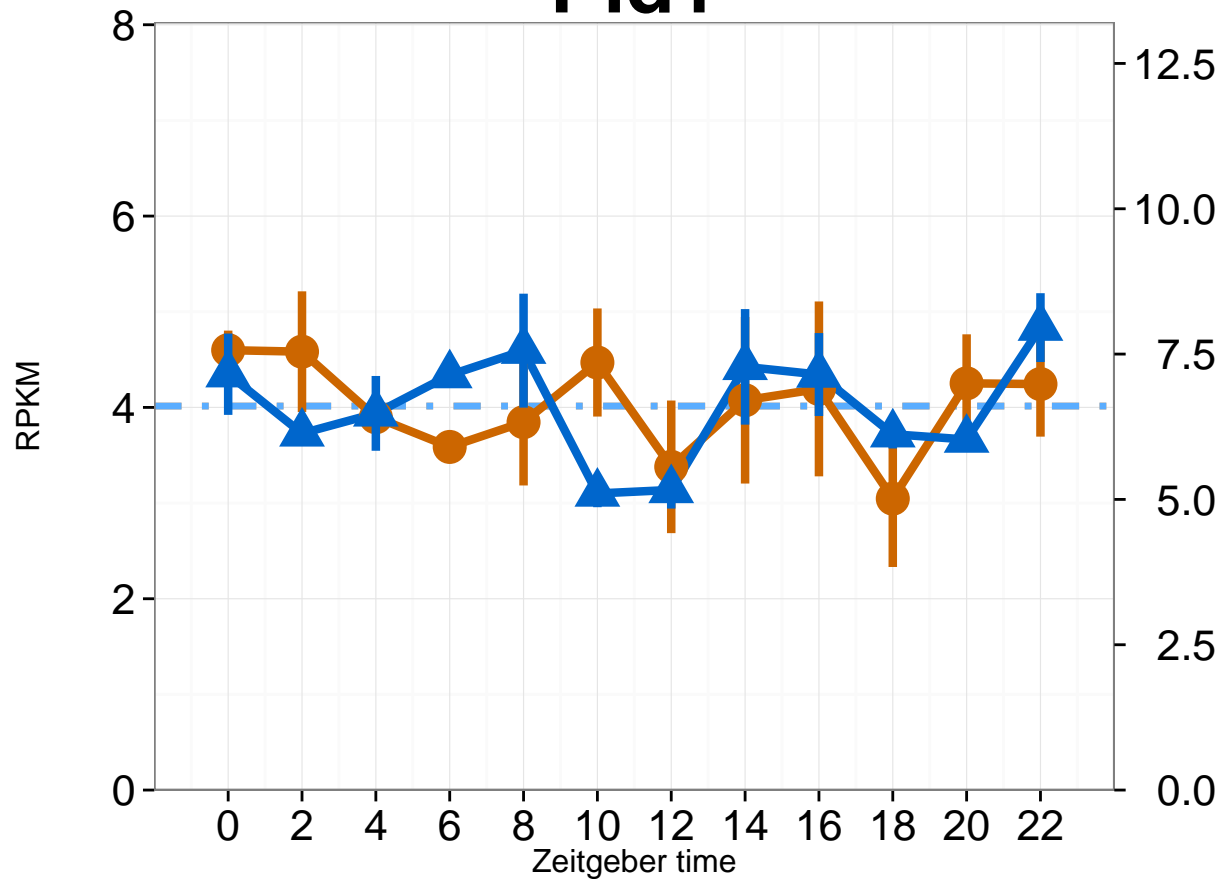

## Pid1

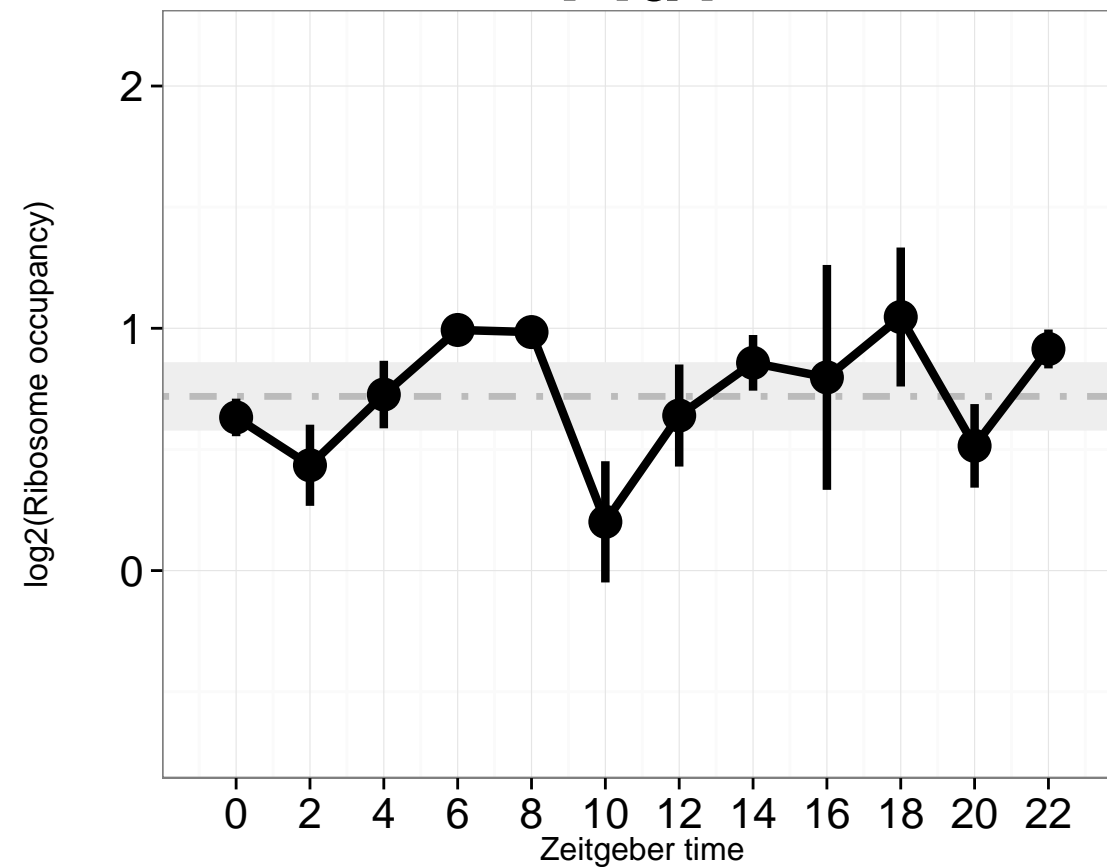

Supplement: Supplementary file 5825 [file 1]

## Trove2

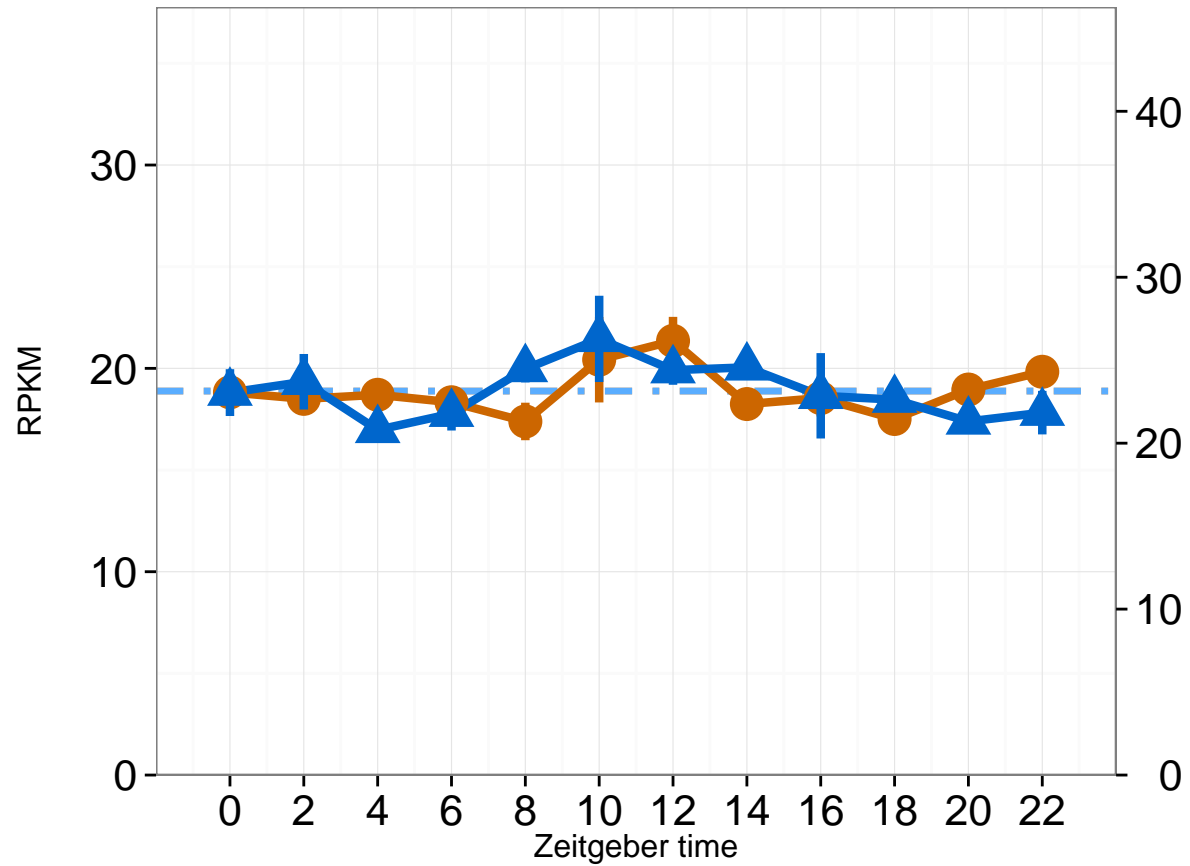

## Trove2

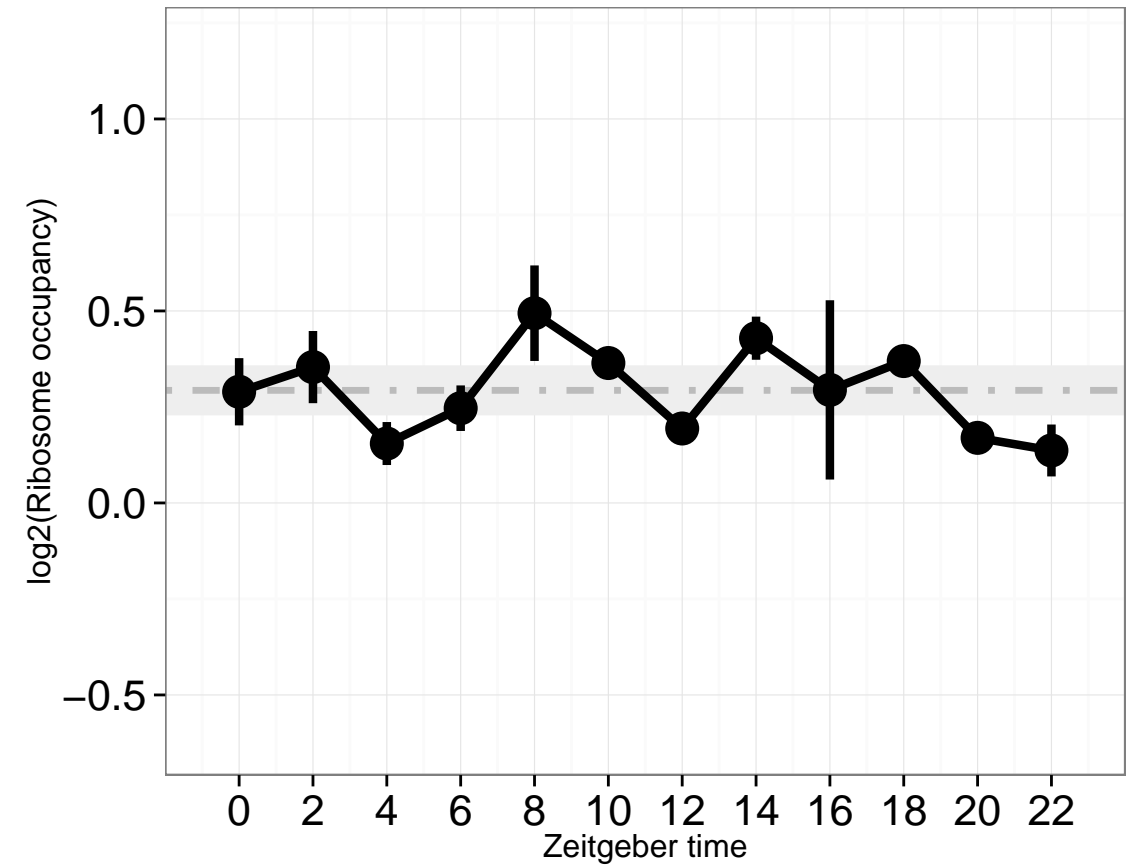

Supplement: Supplementary file 5826 [file 1]

# Galnt15

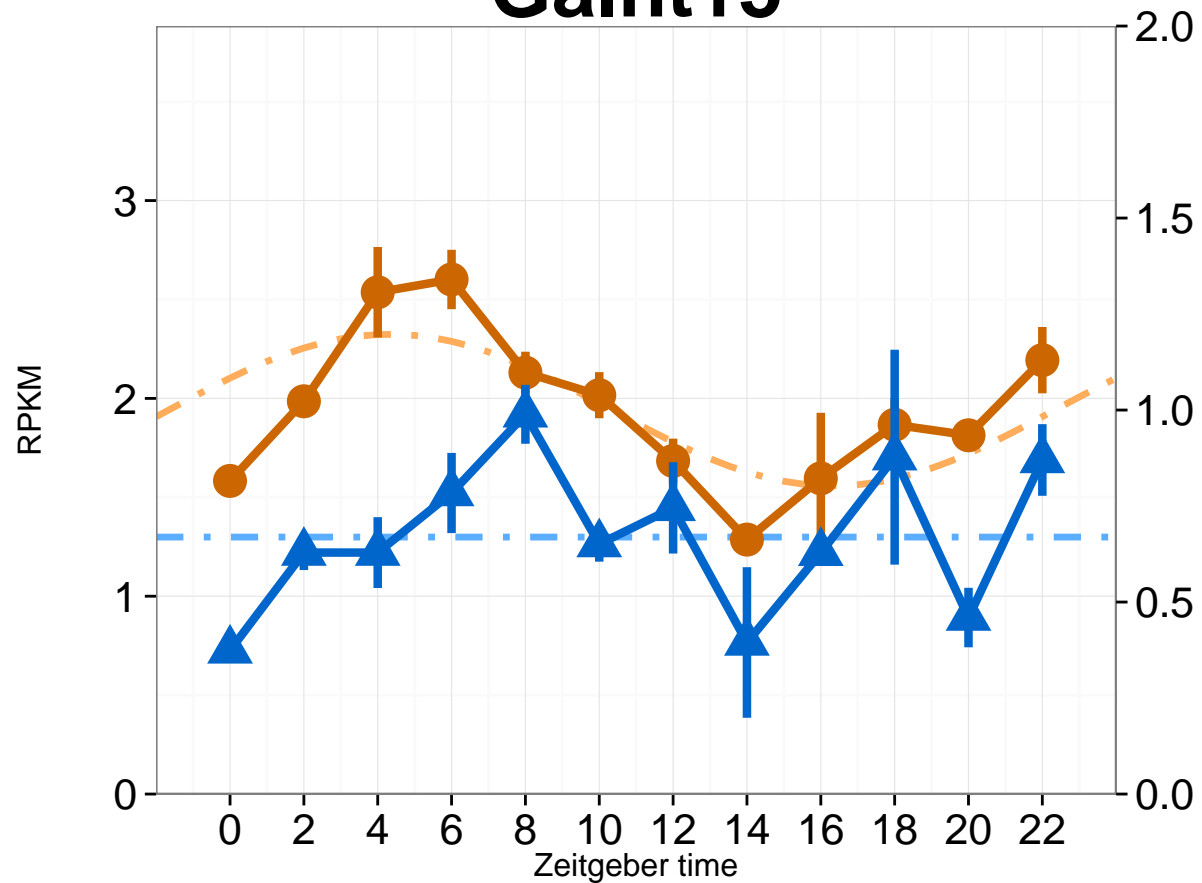

# Galnt15

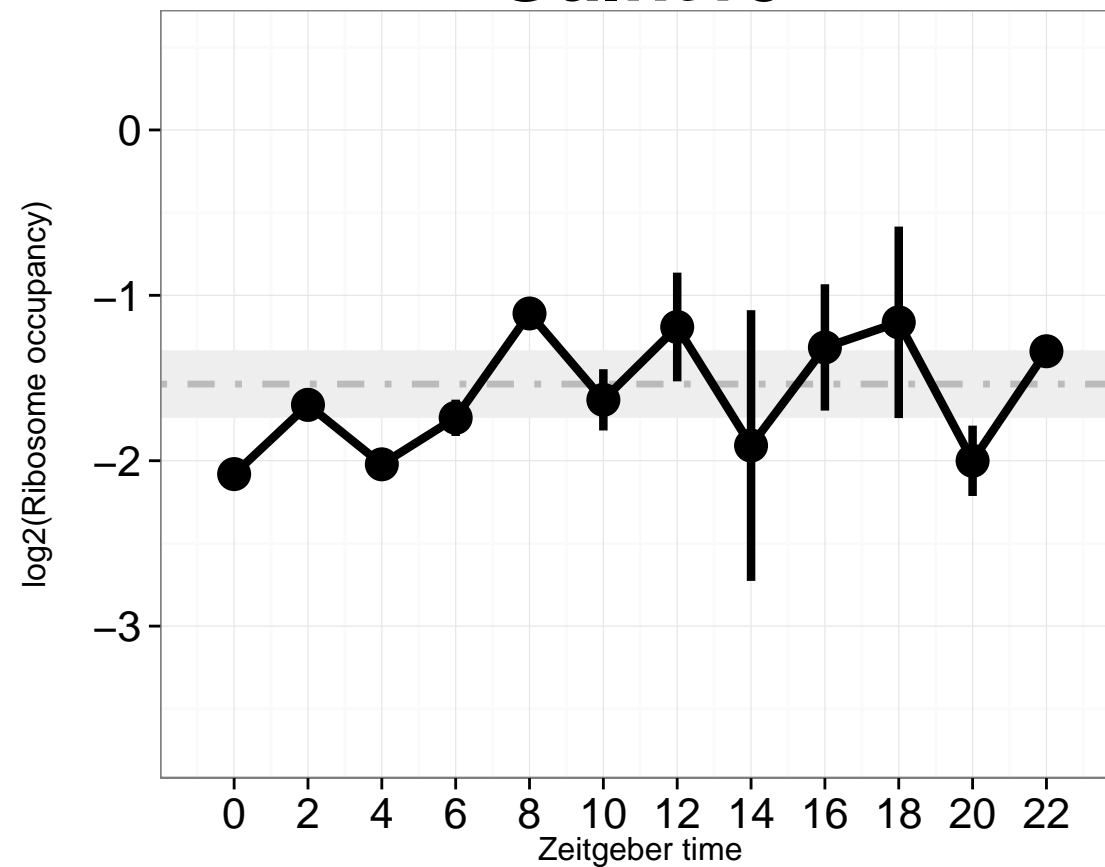

Supplement: Supplementary file 5827 [file 1]

# Mfsd7b

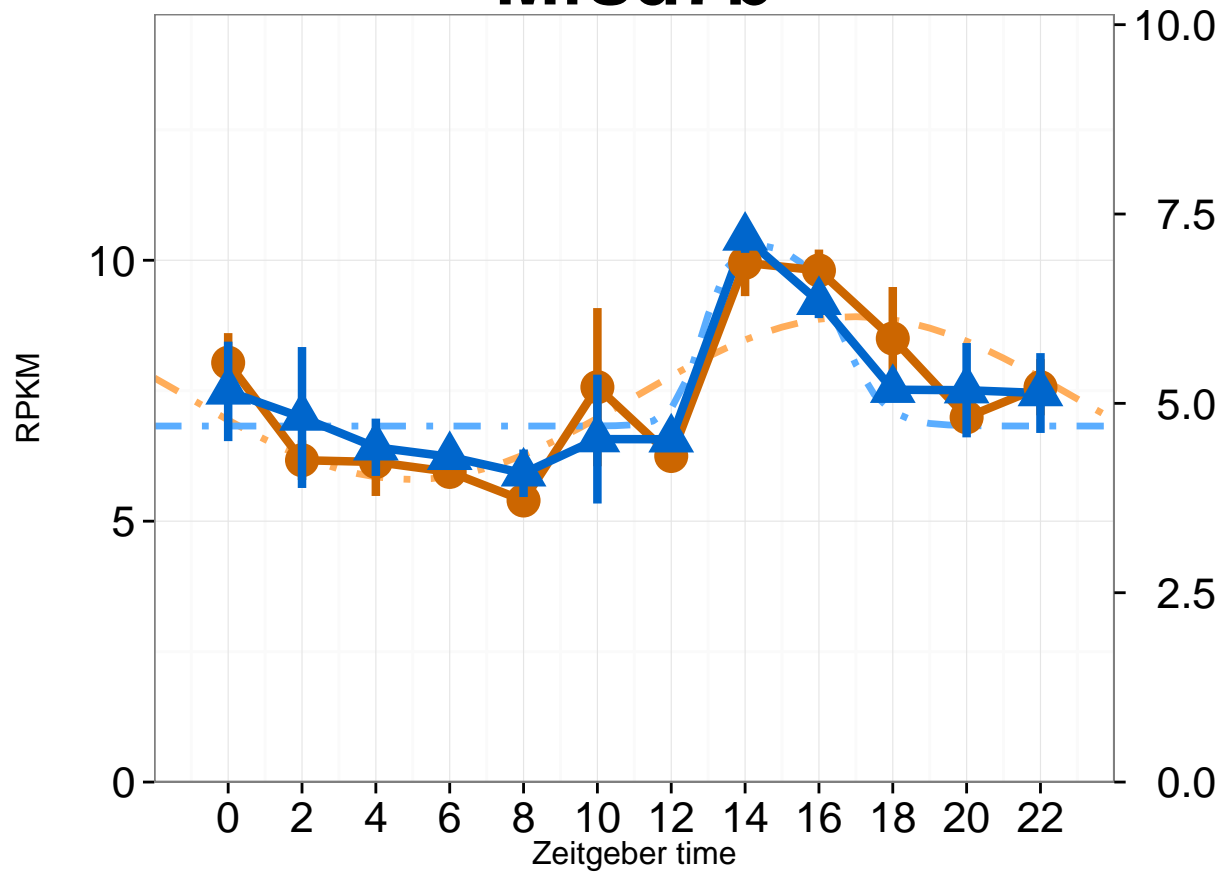

# Mfsd7b

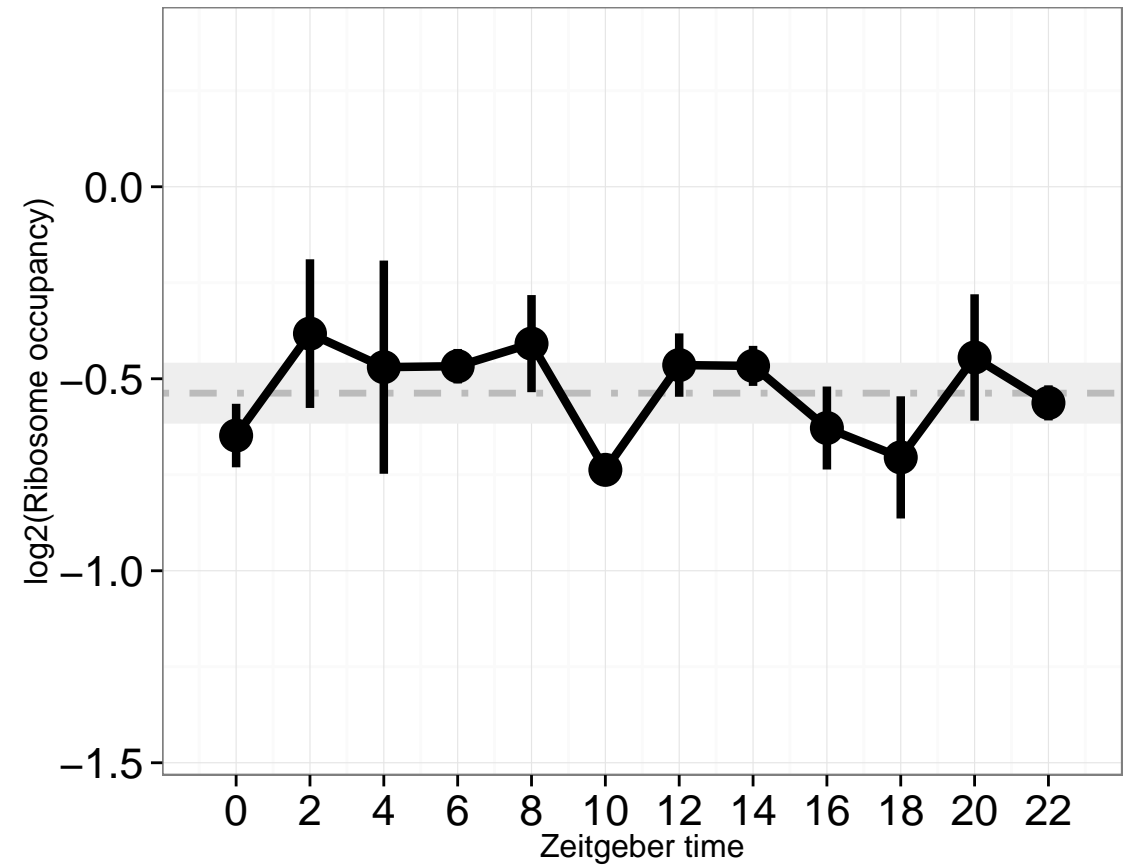

Supplement: Supplementary file 5828 [file 1]

## Anks1b

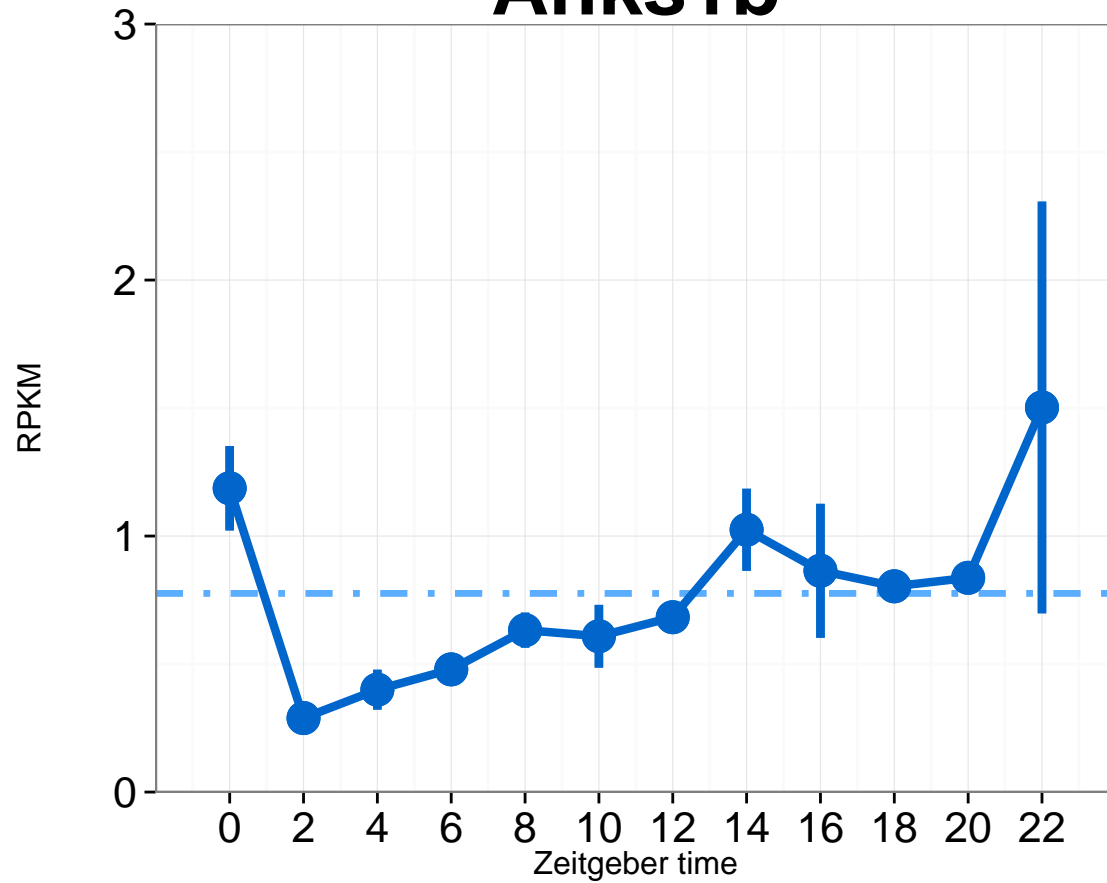

## Anks1b log2(Ribosome occupancy)

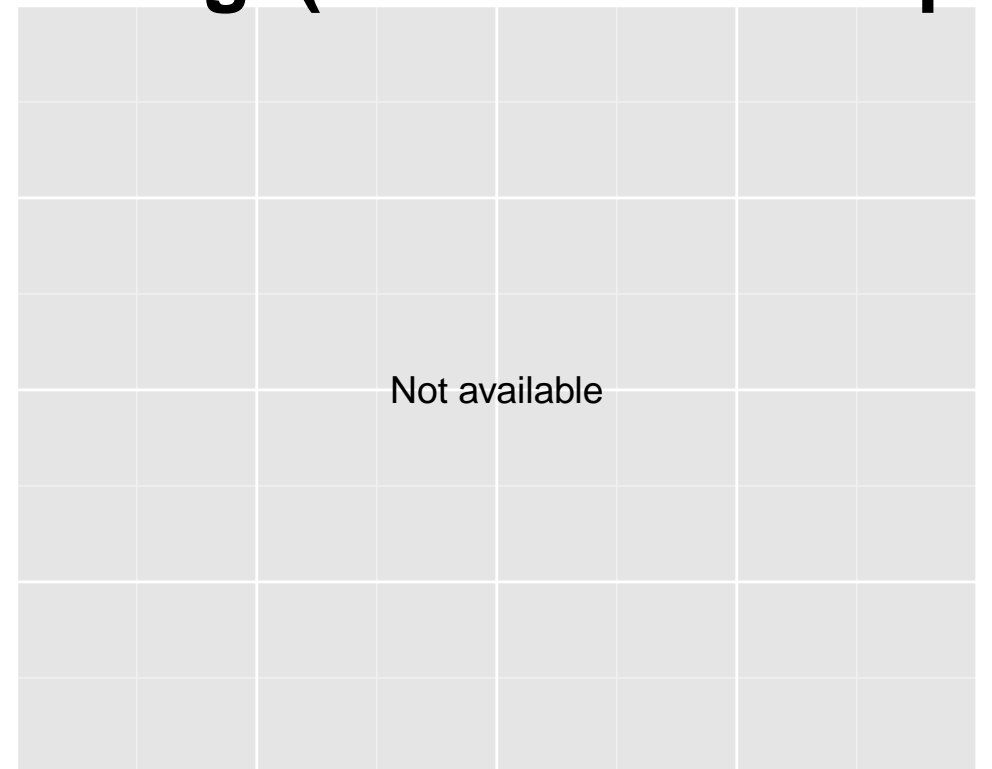

Supplement: Supplementary file 5829 [file 1]

# Mpped1

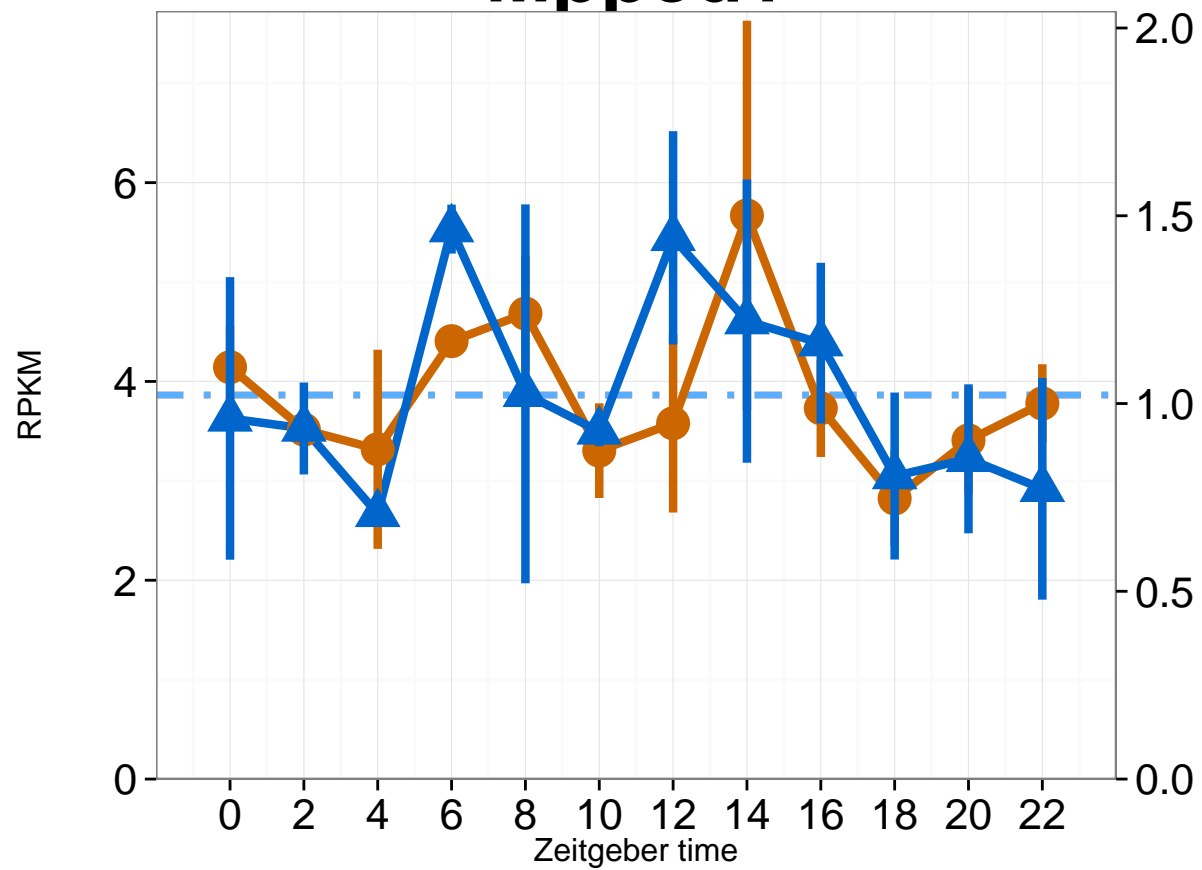

# Mpped1

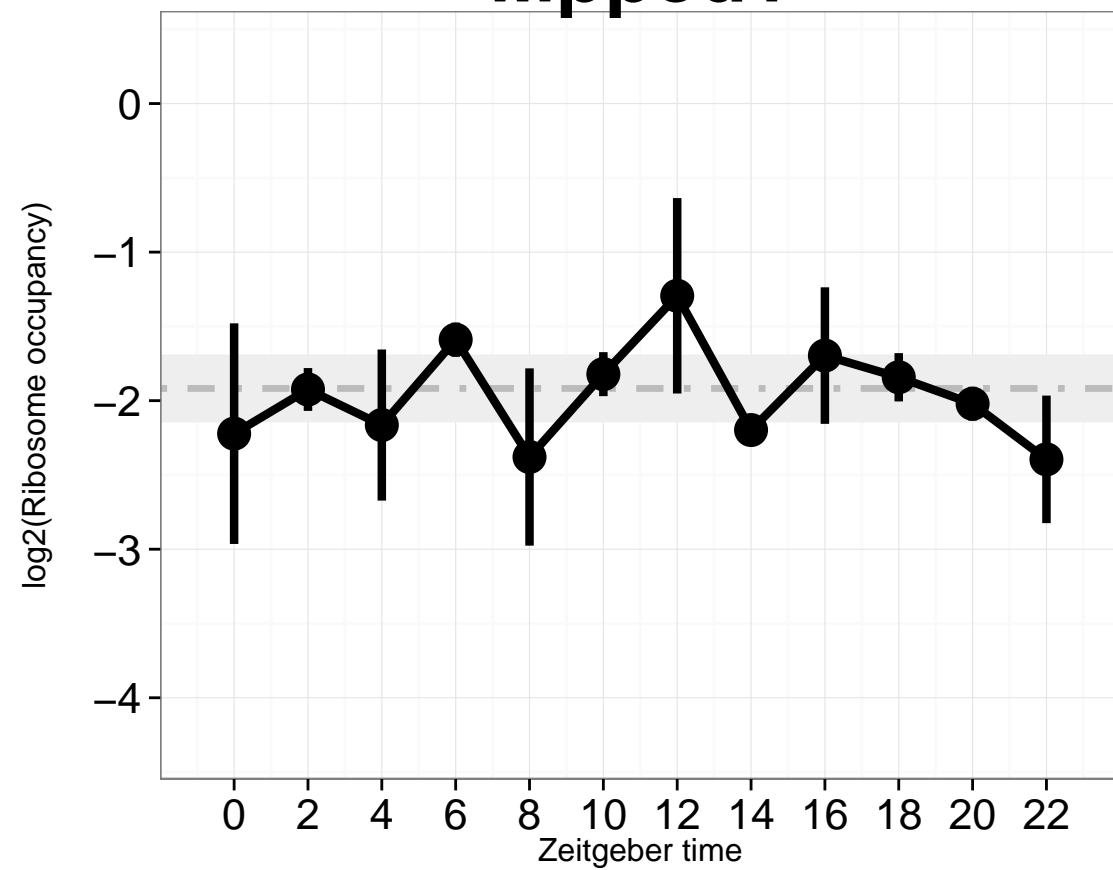

Supplement: Supplementary file 5830 [file 1]

# Atf4

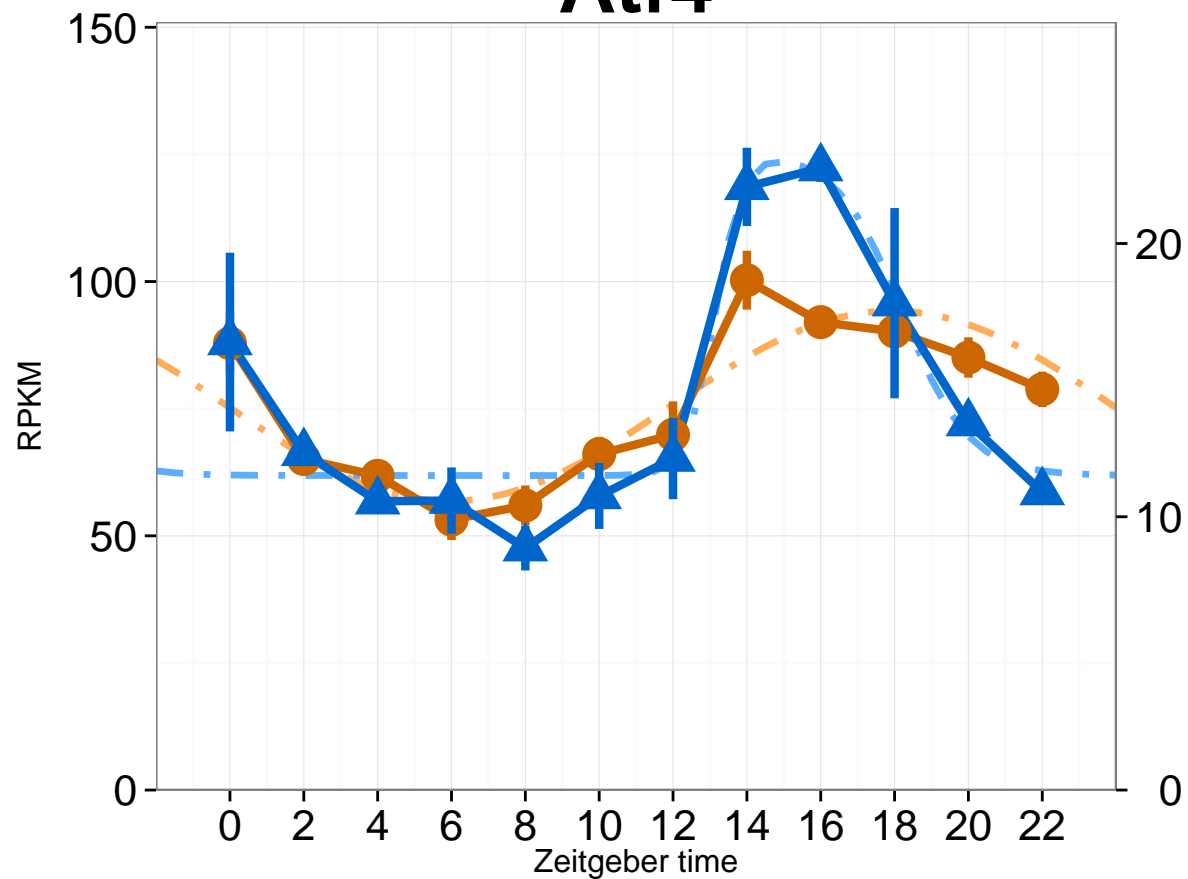

# Atf4

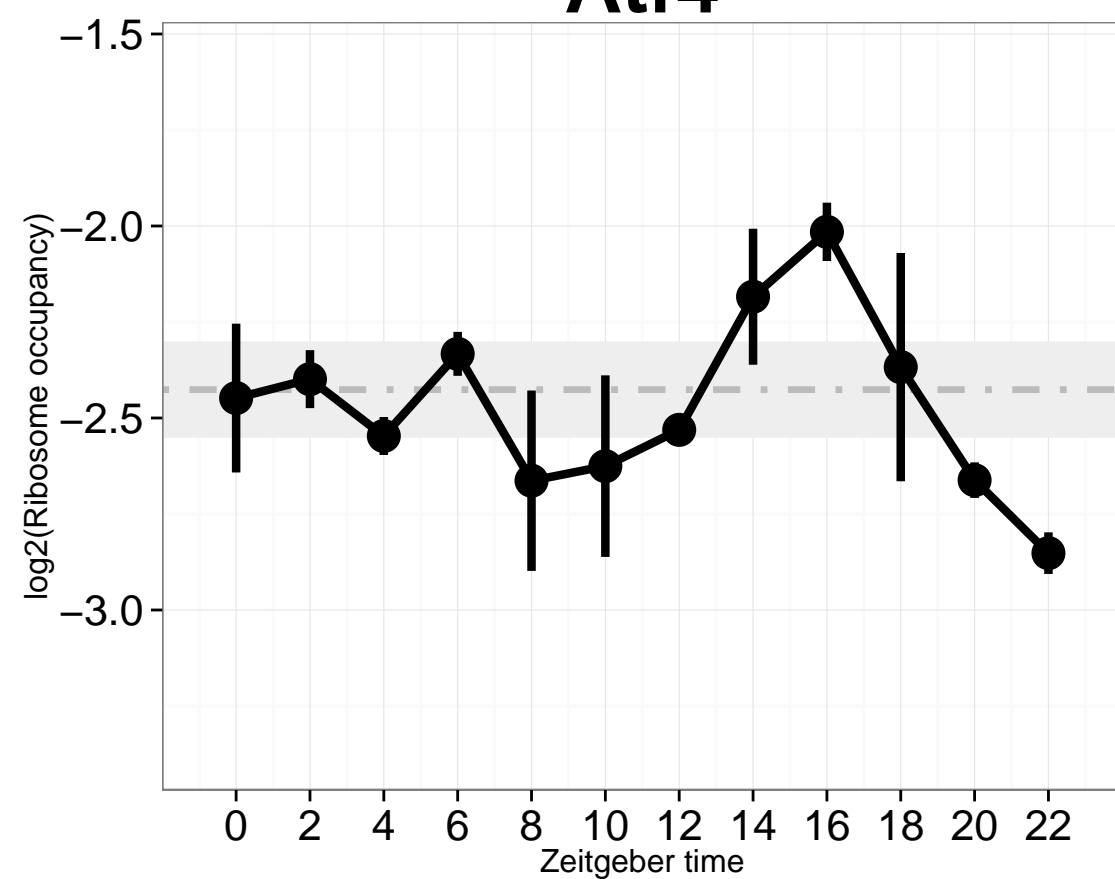

Supplement: Supplementary file 5831 [file 1]

## Ccdc107

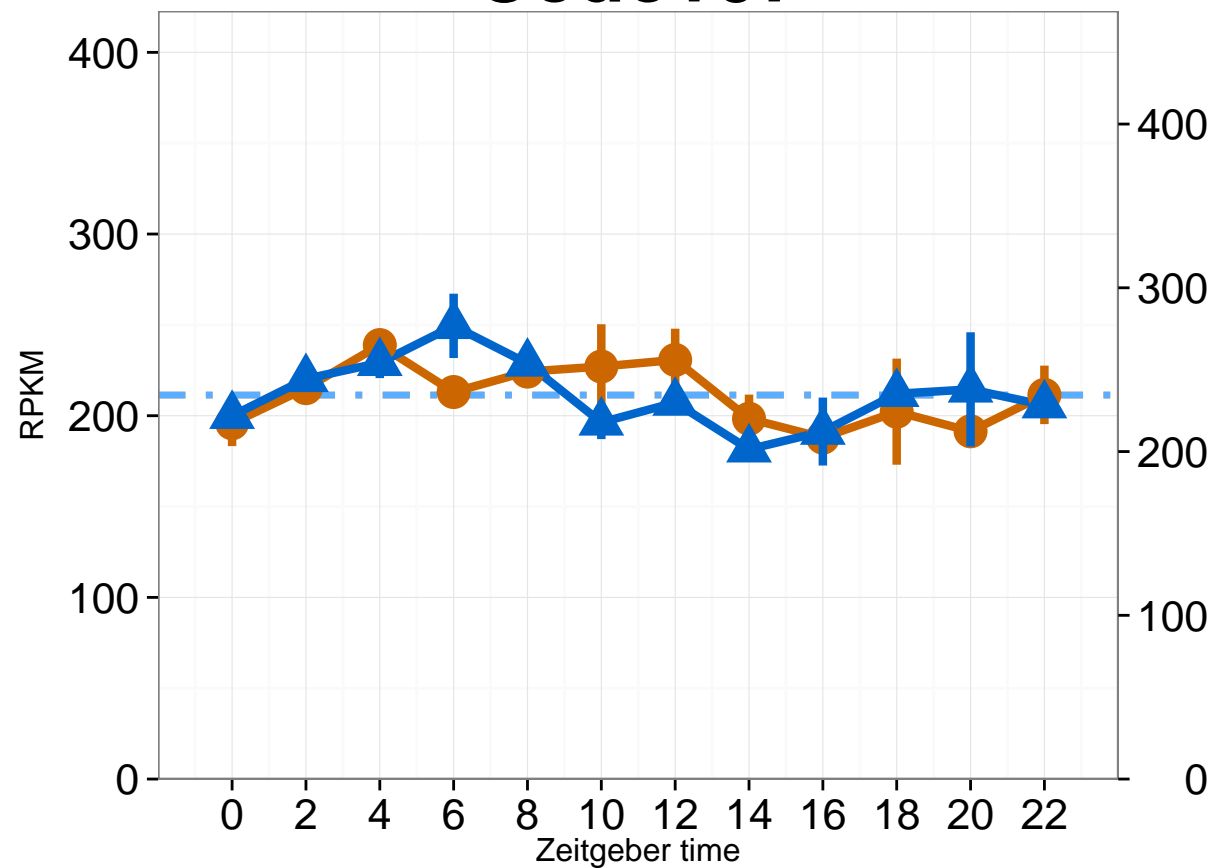

## Ccdc107

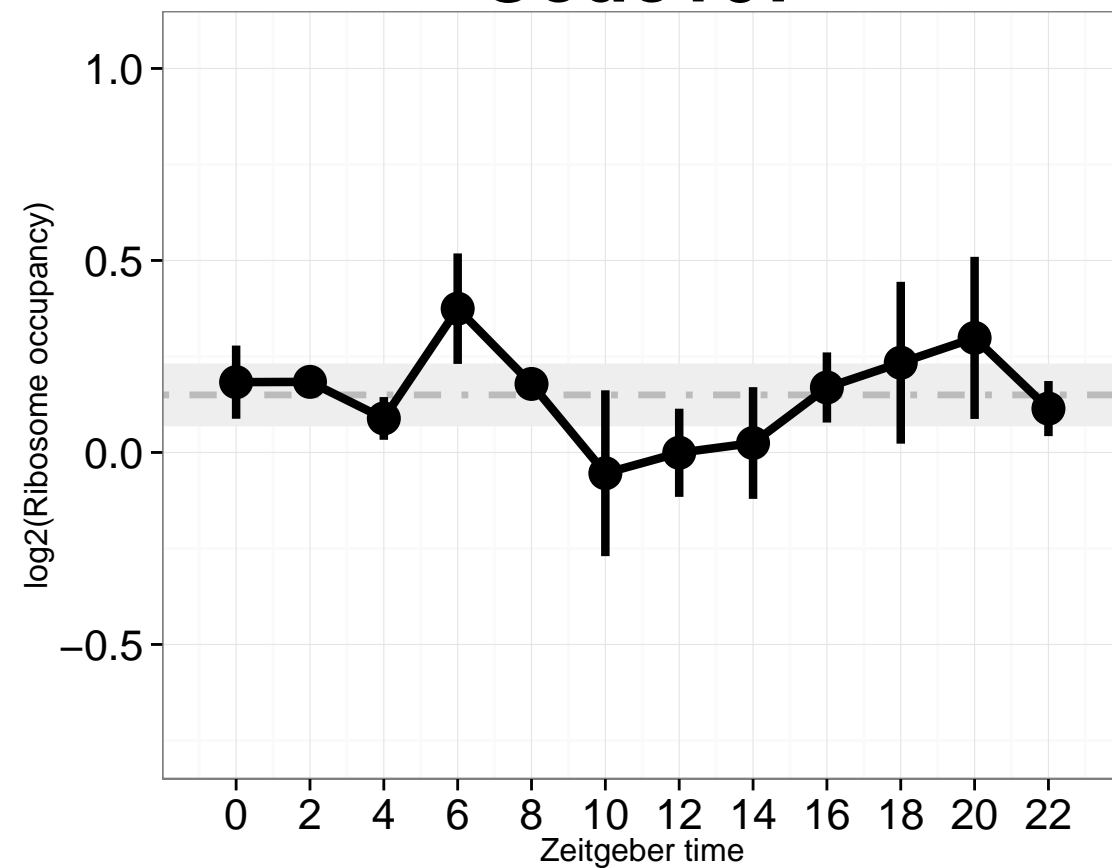

Supplement: Supplementary file 5832 [file 1]

# Atpaf2

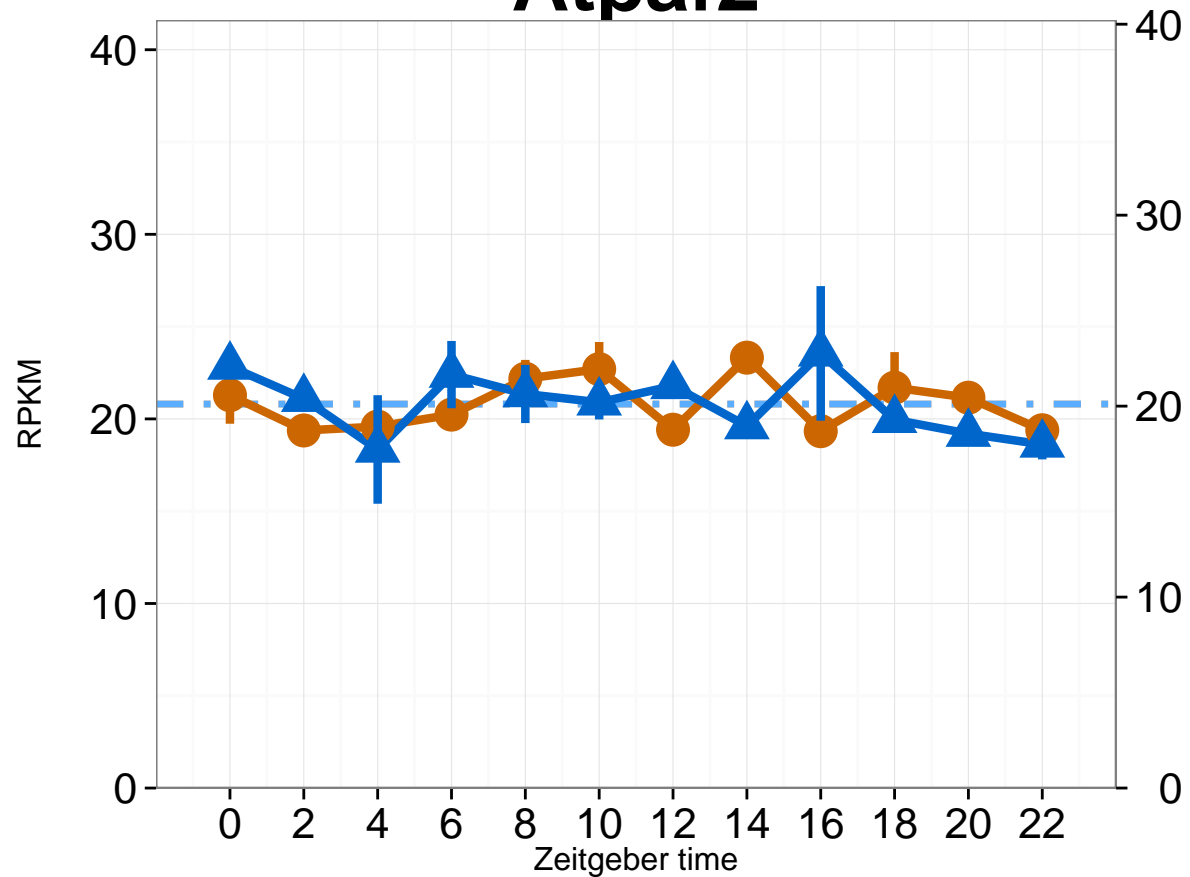

# Atpaf2

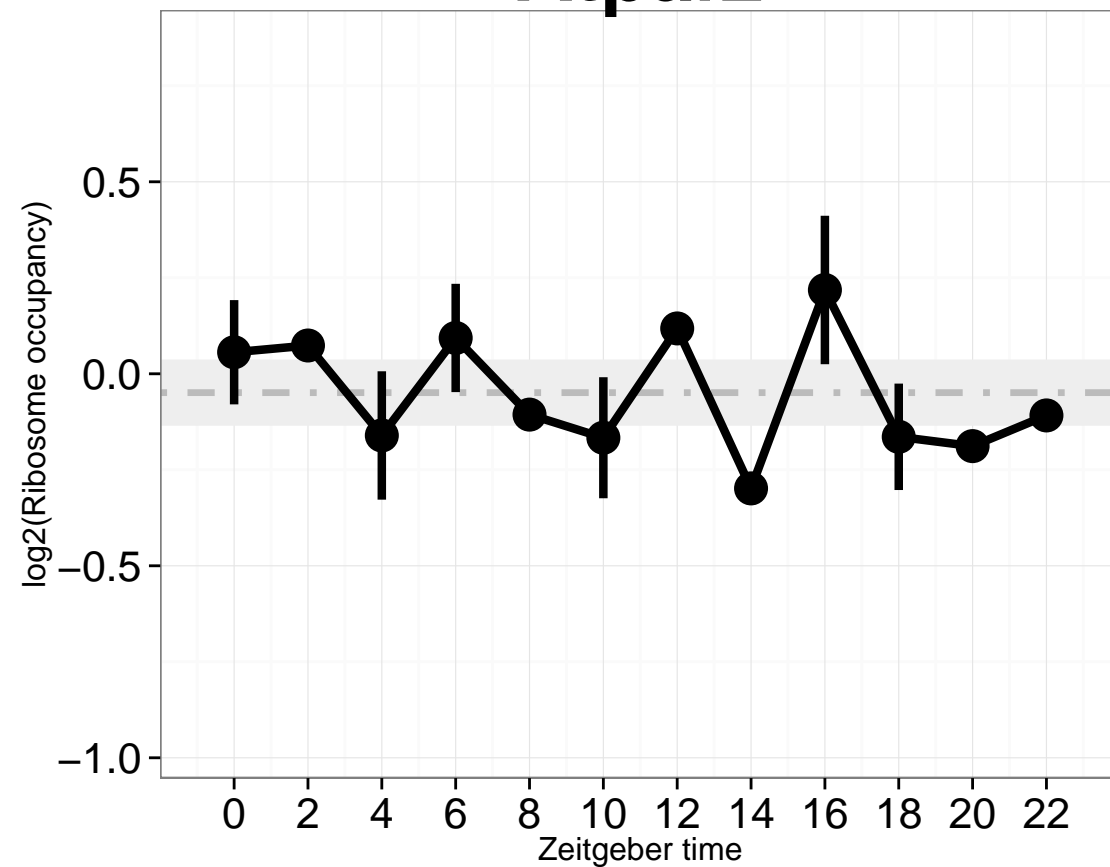

Supplement: Supplementary file 5833 [file 1]

# Akr1c18

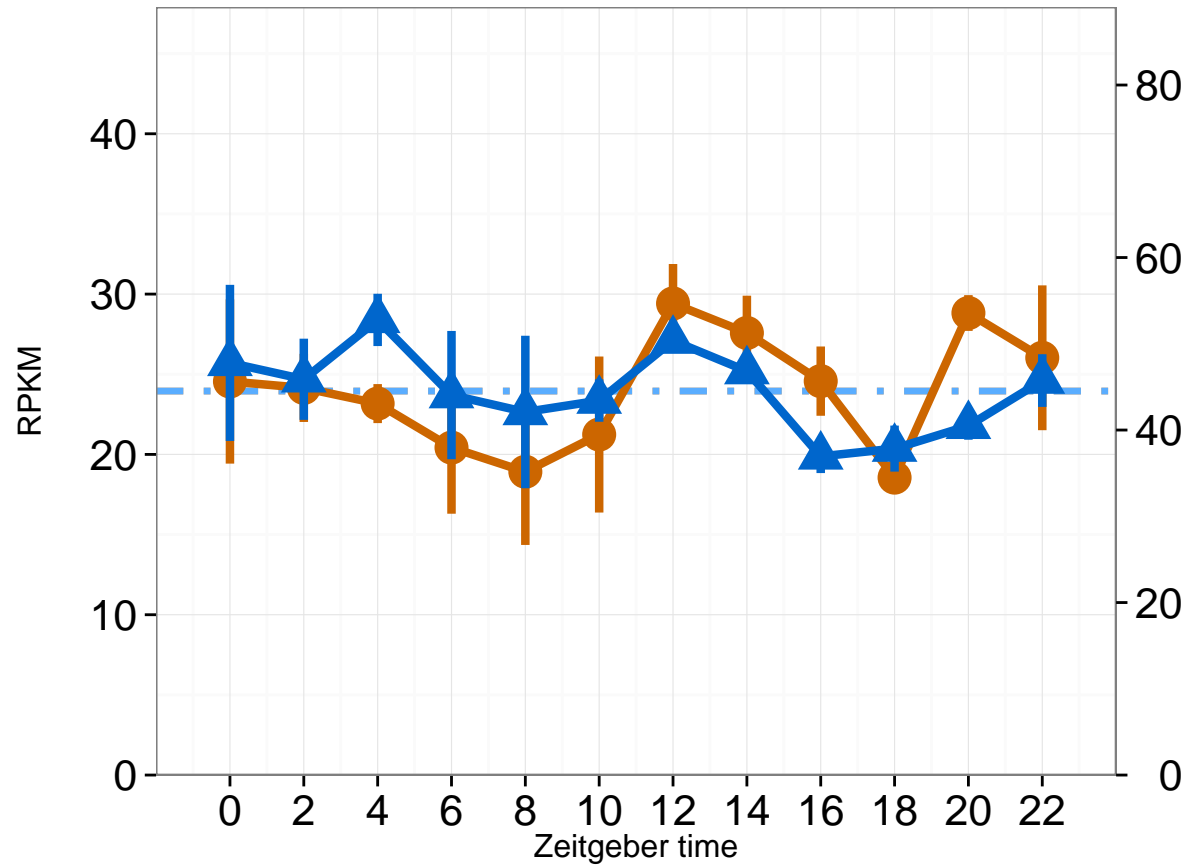

# Akr1c18

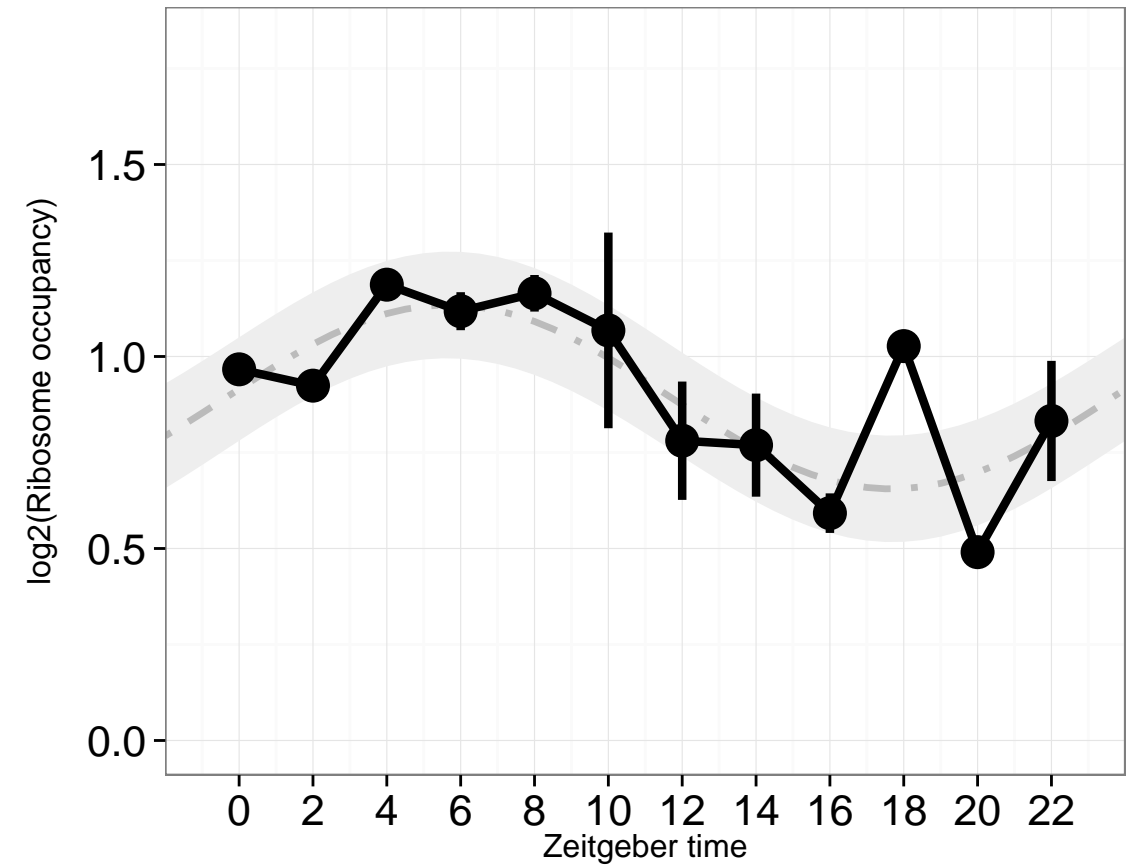

Supplement: Supplementary file 5834 [file 1]

## Phyhip

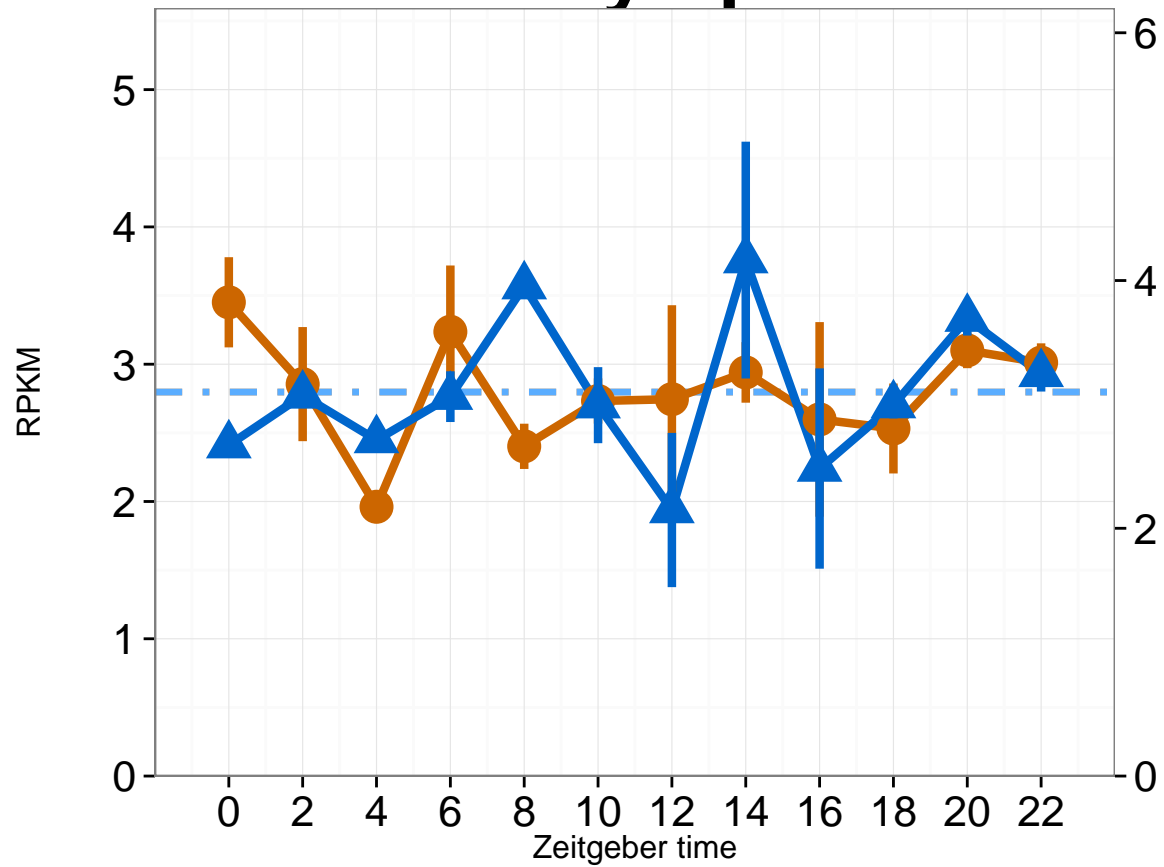

## Phyhip

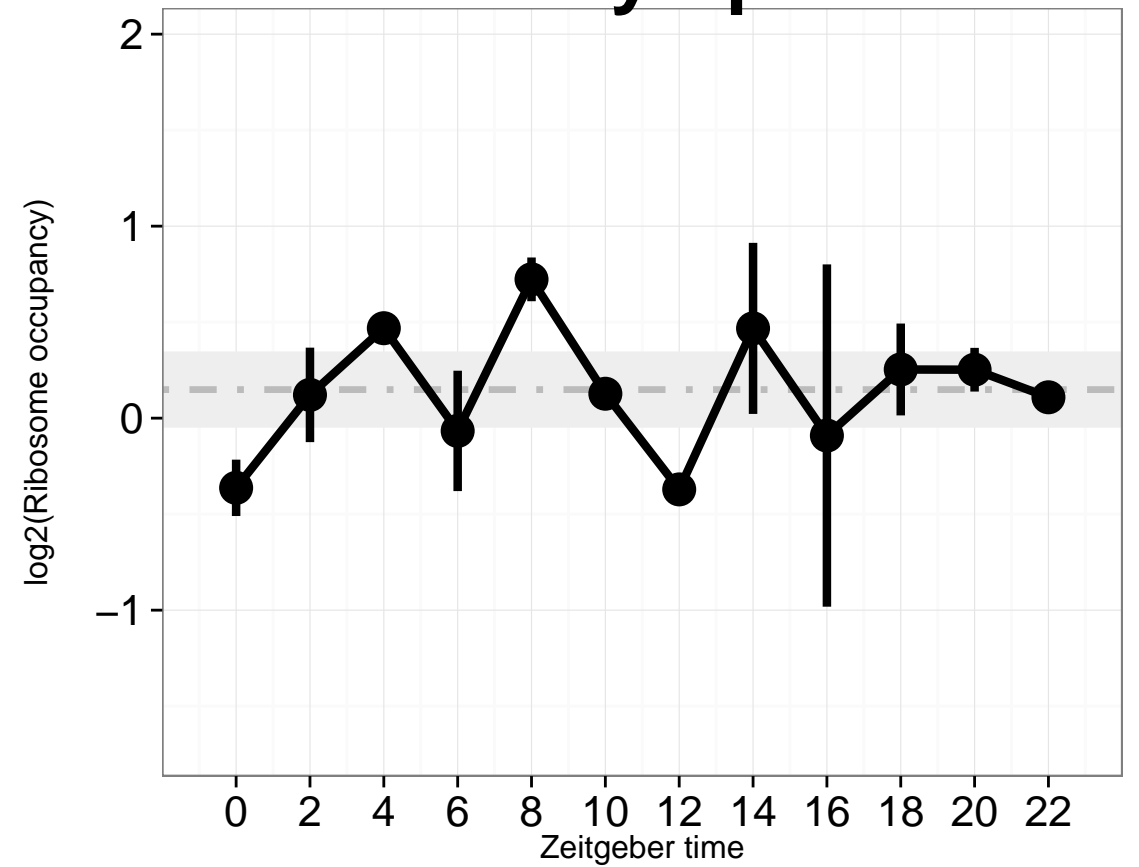

Supplement: Supplementary file 5835 [file 1]

# Mcm3ap

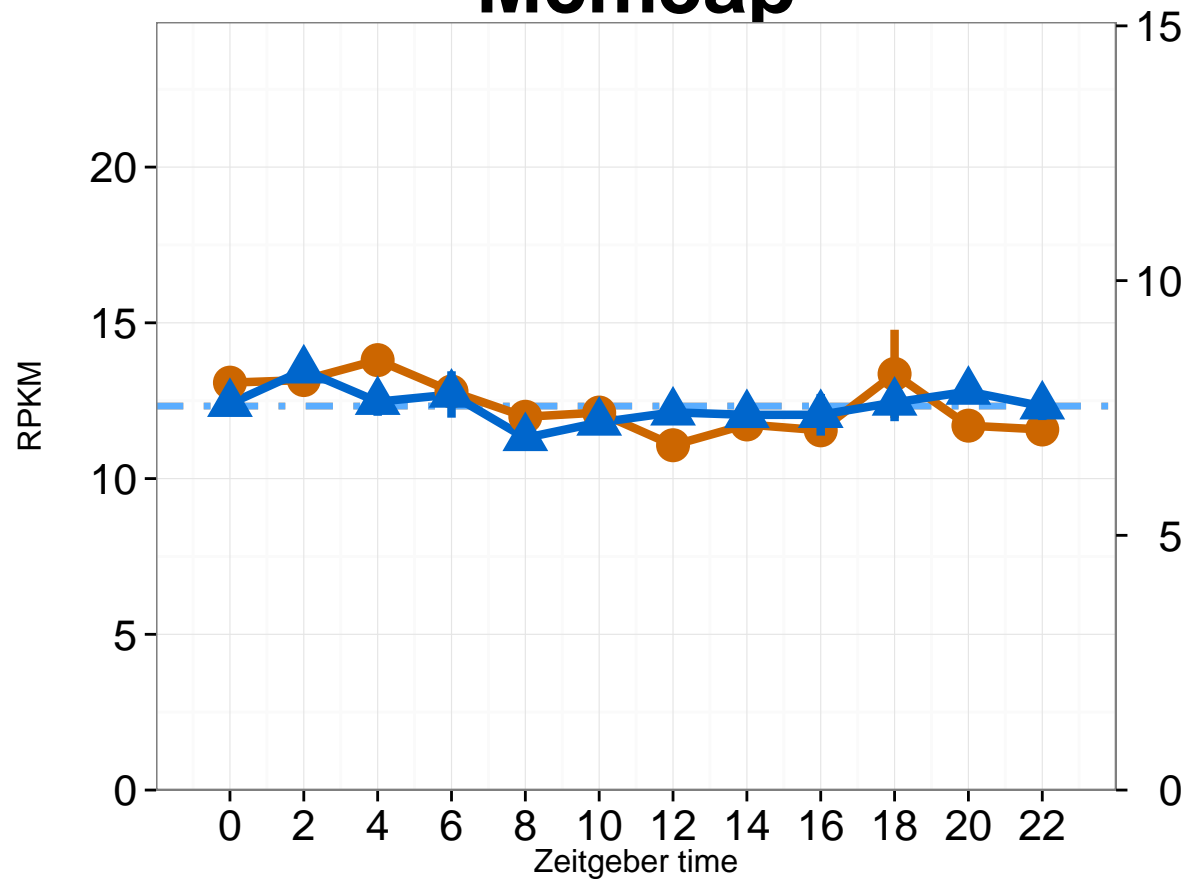

# Mcm3ap

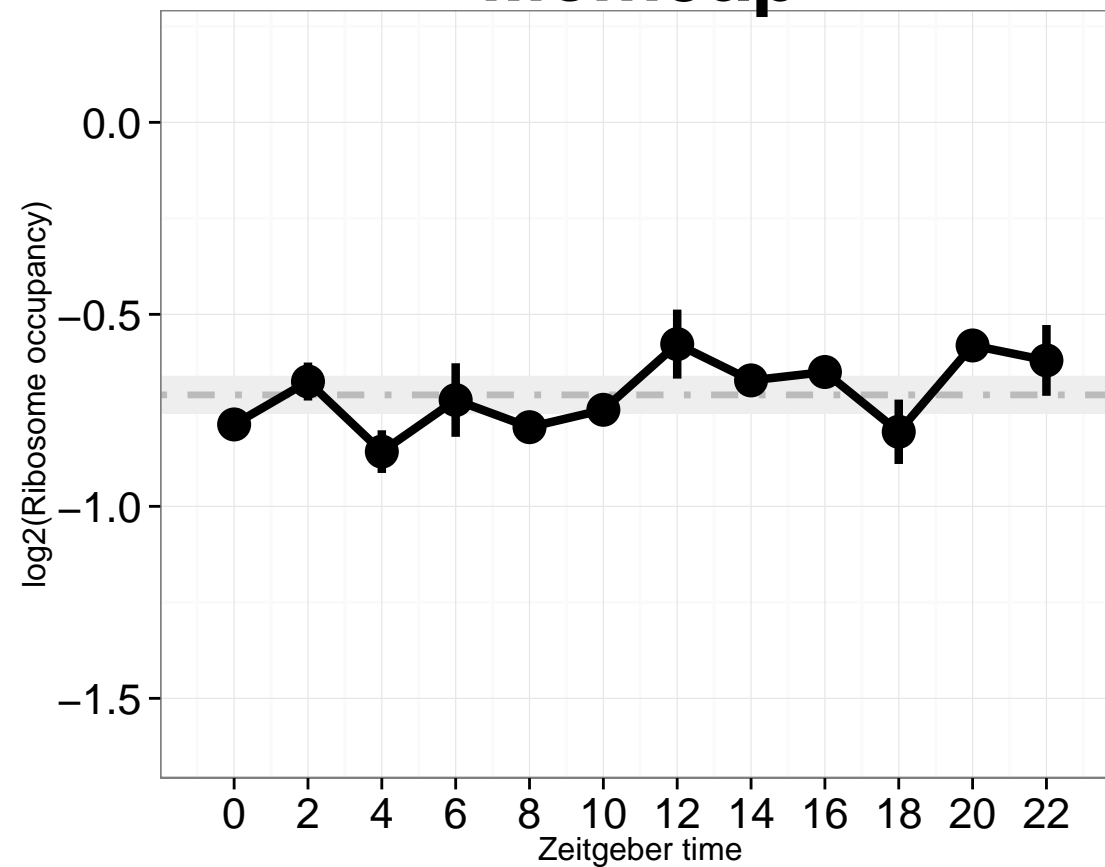

Supplement: Supplementary file 5836 [file 1]

# Pik3ca

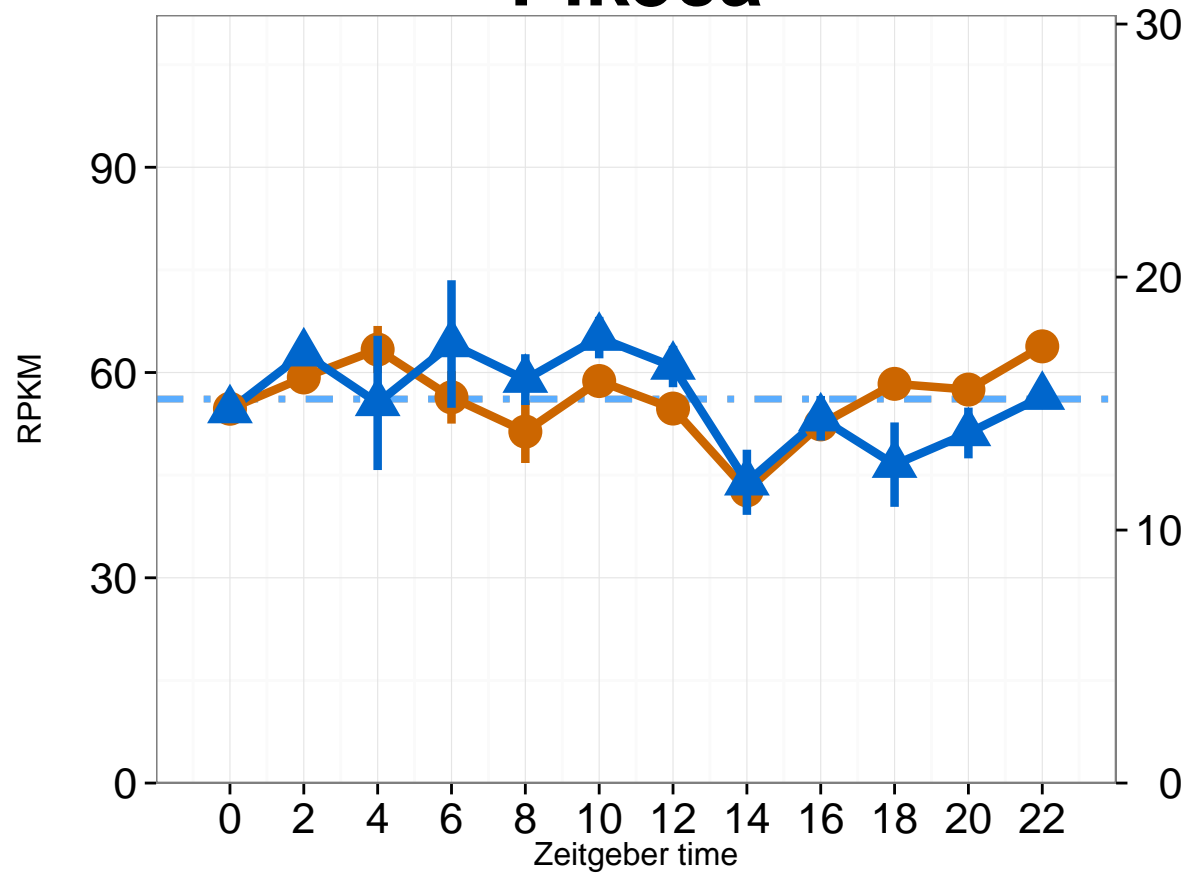

# Pik3ca

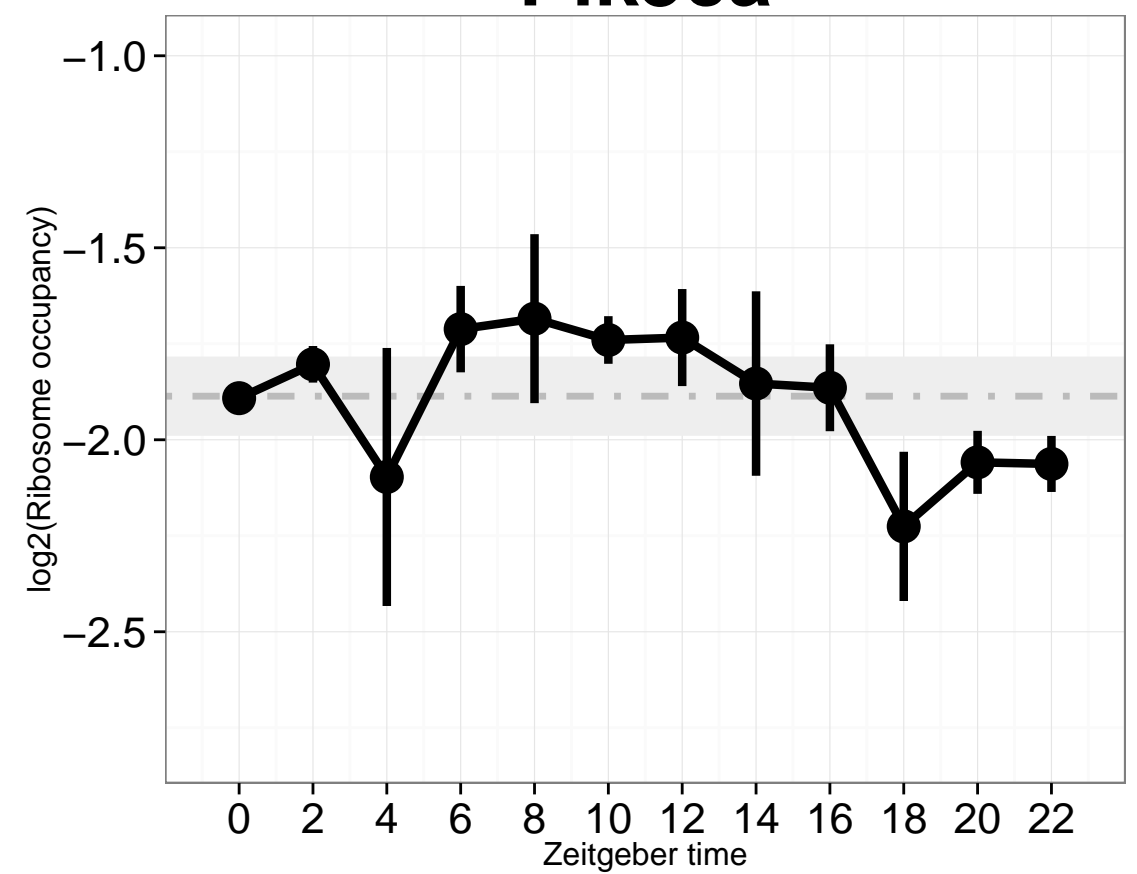

Supplement: Supplementary file 5837 [file 1]

## Med24

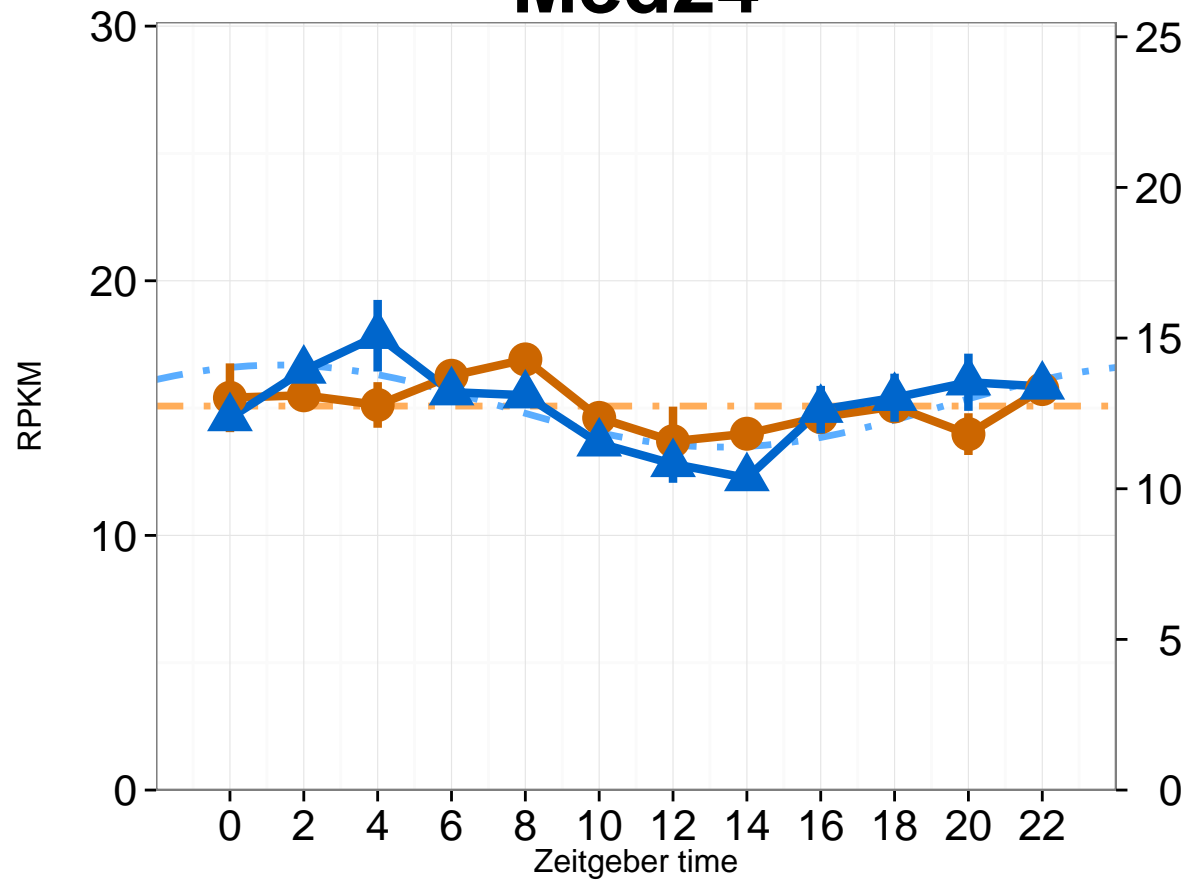

## Med24

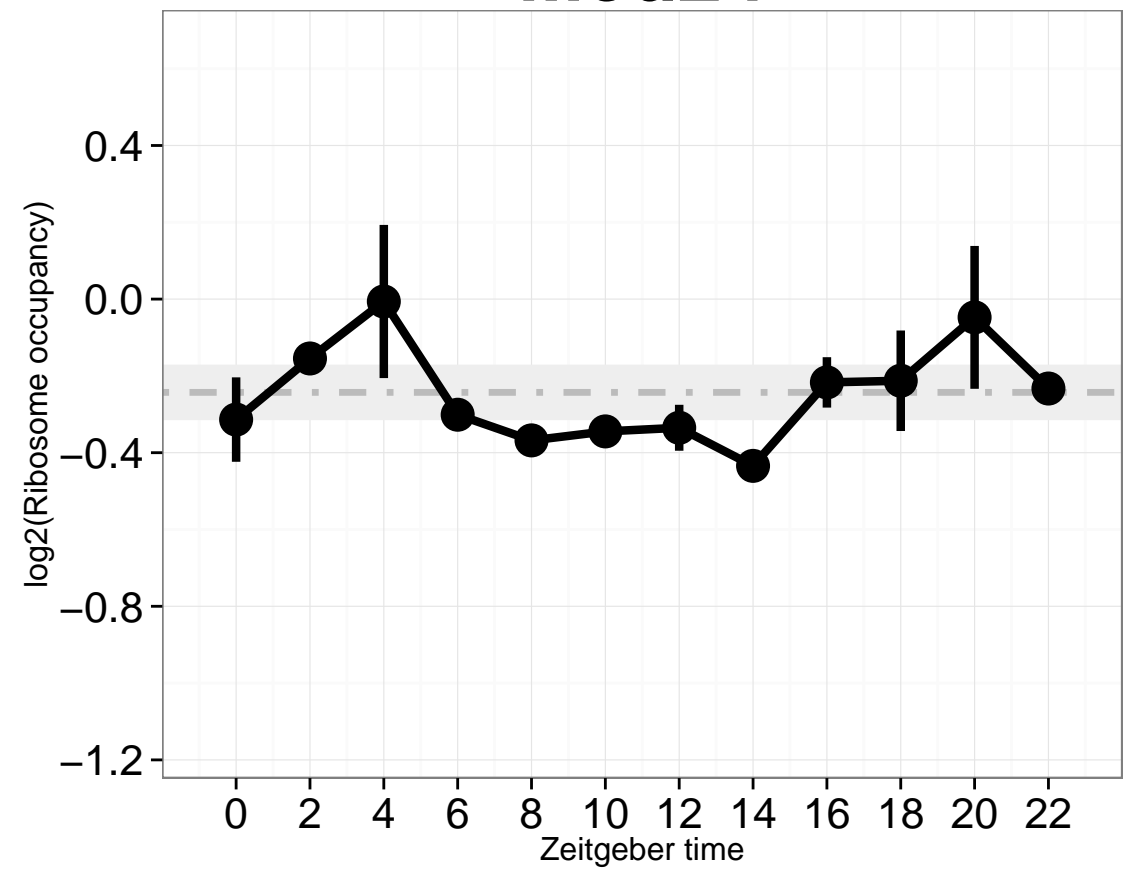

Supplement: Supplementary file 5838 [file 1]

## Rhoq

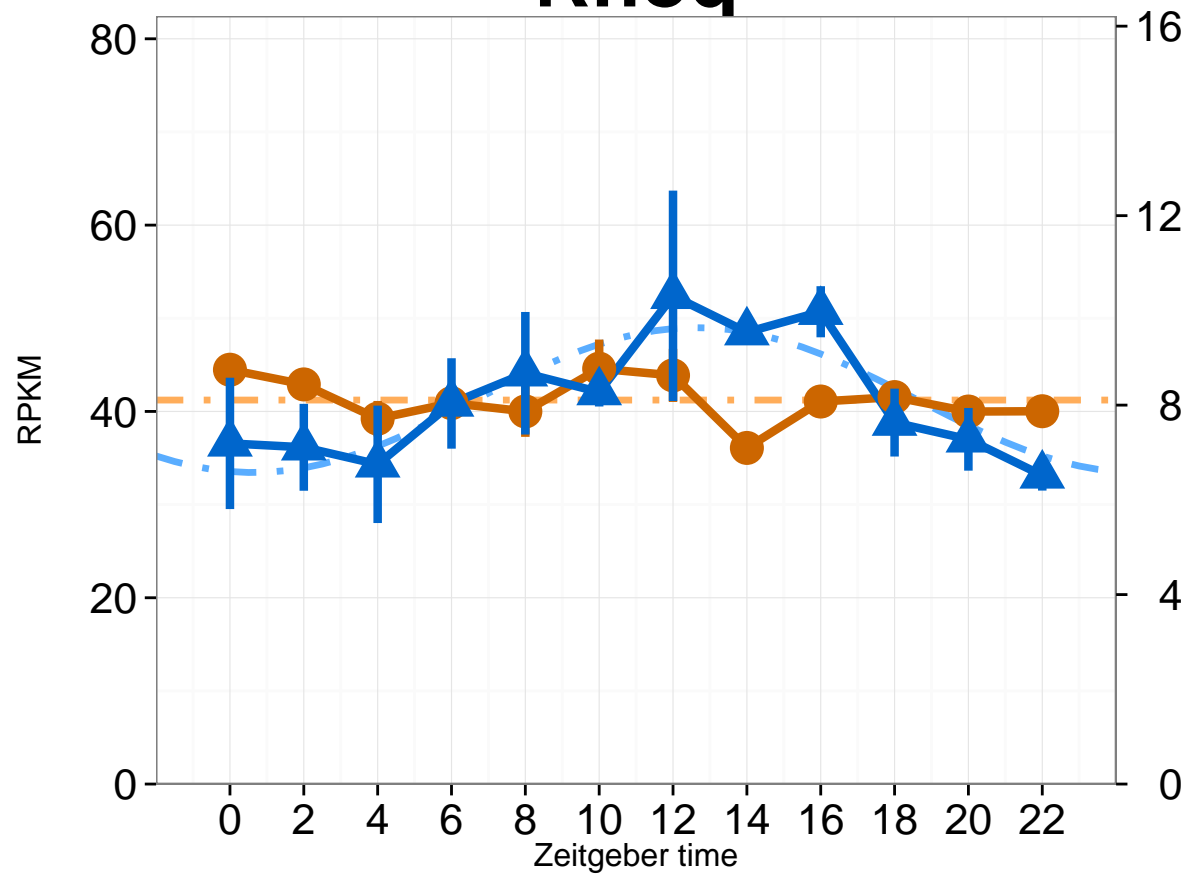

## Rhoq

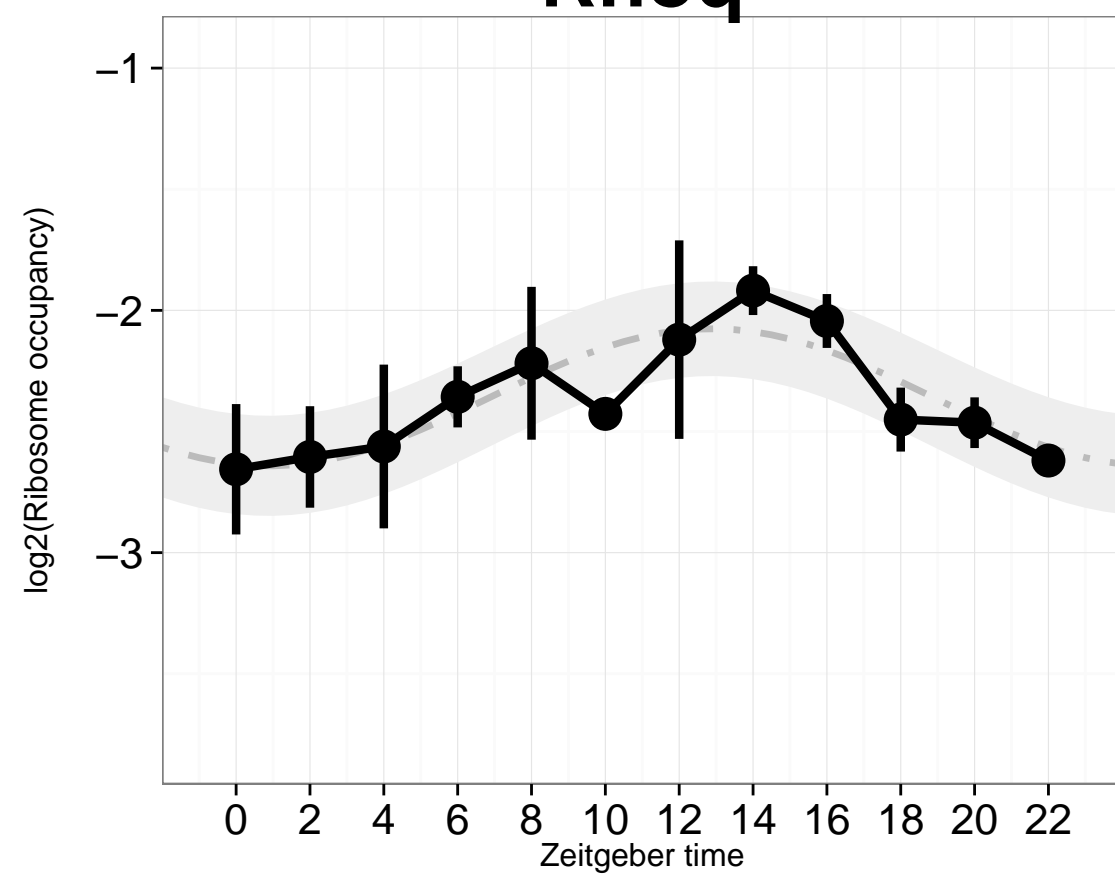

Supplement: Supplementary file 5839 [file 1]

# Zfp612

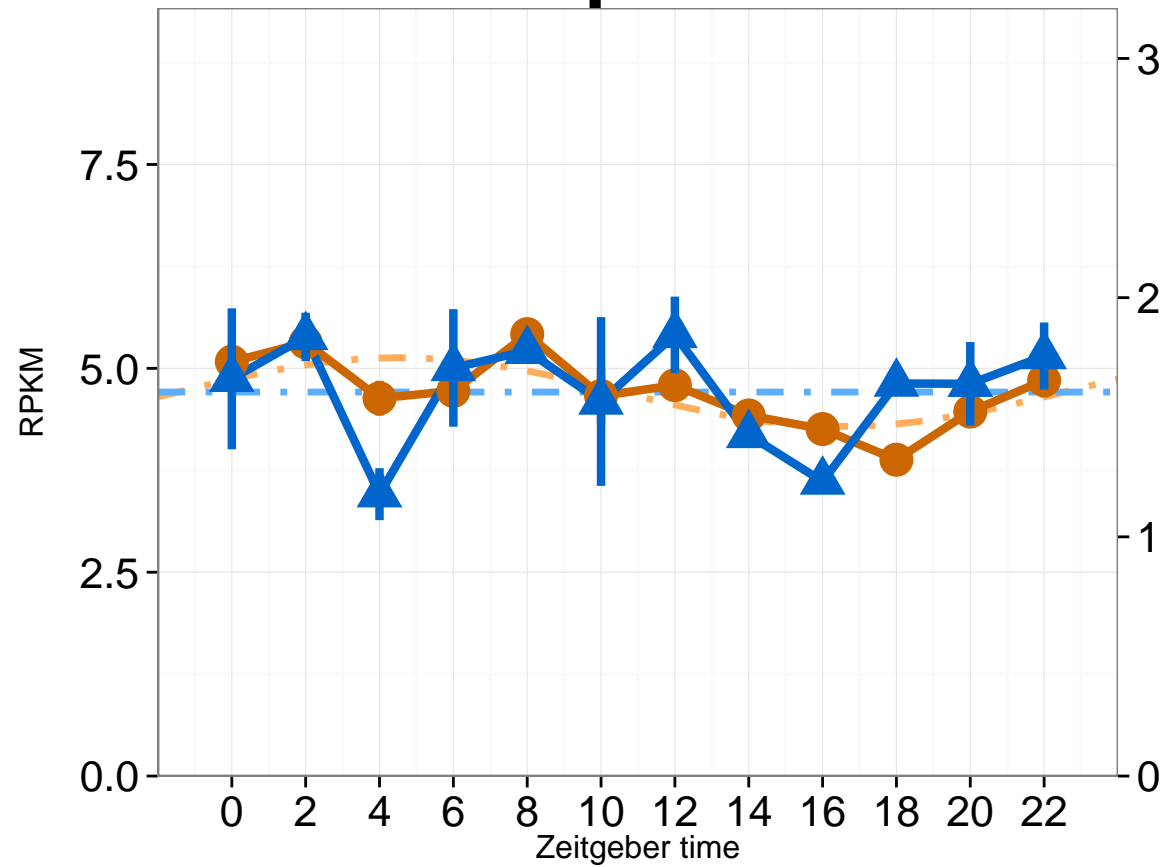

# Zfp612

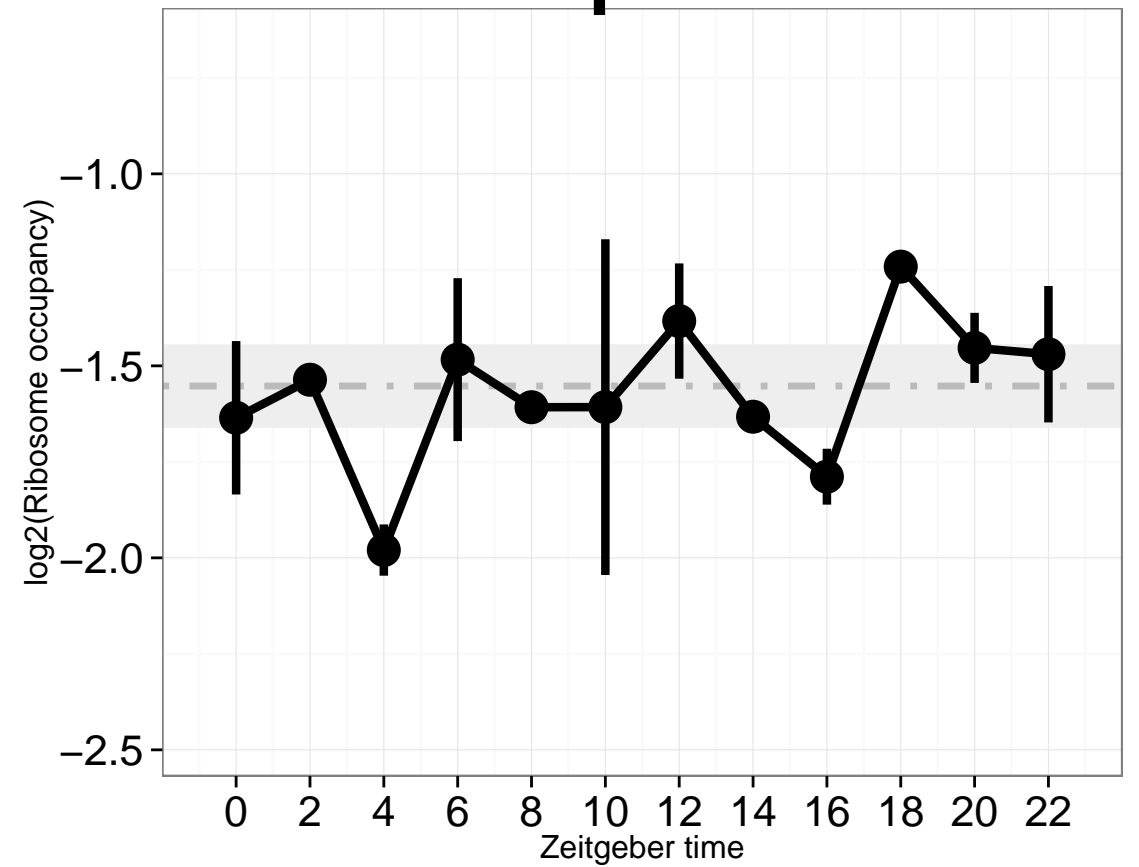

Supplement: Supplementary file 5840 [file 1]

# Itpr1

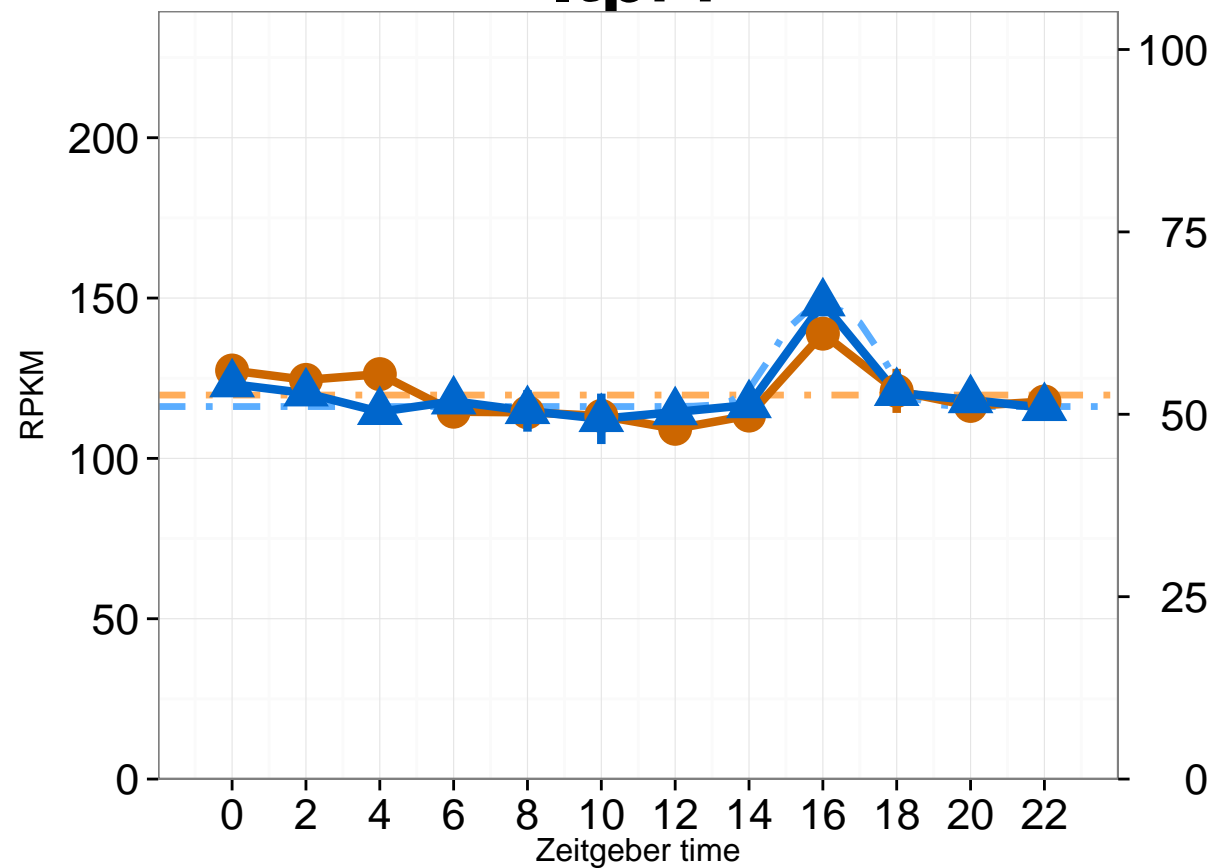

# Itpr1

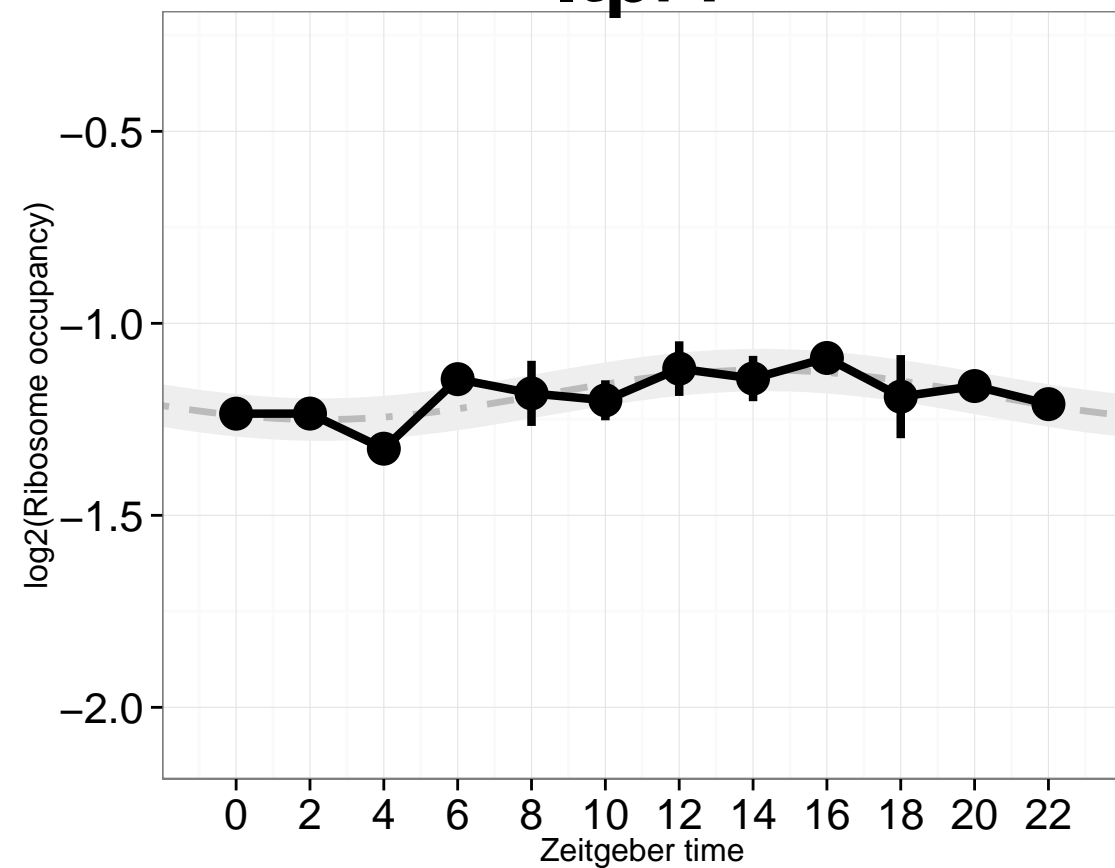

Supplement: Supplementary file 5841 [file 1]

## Pcif1

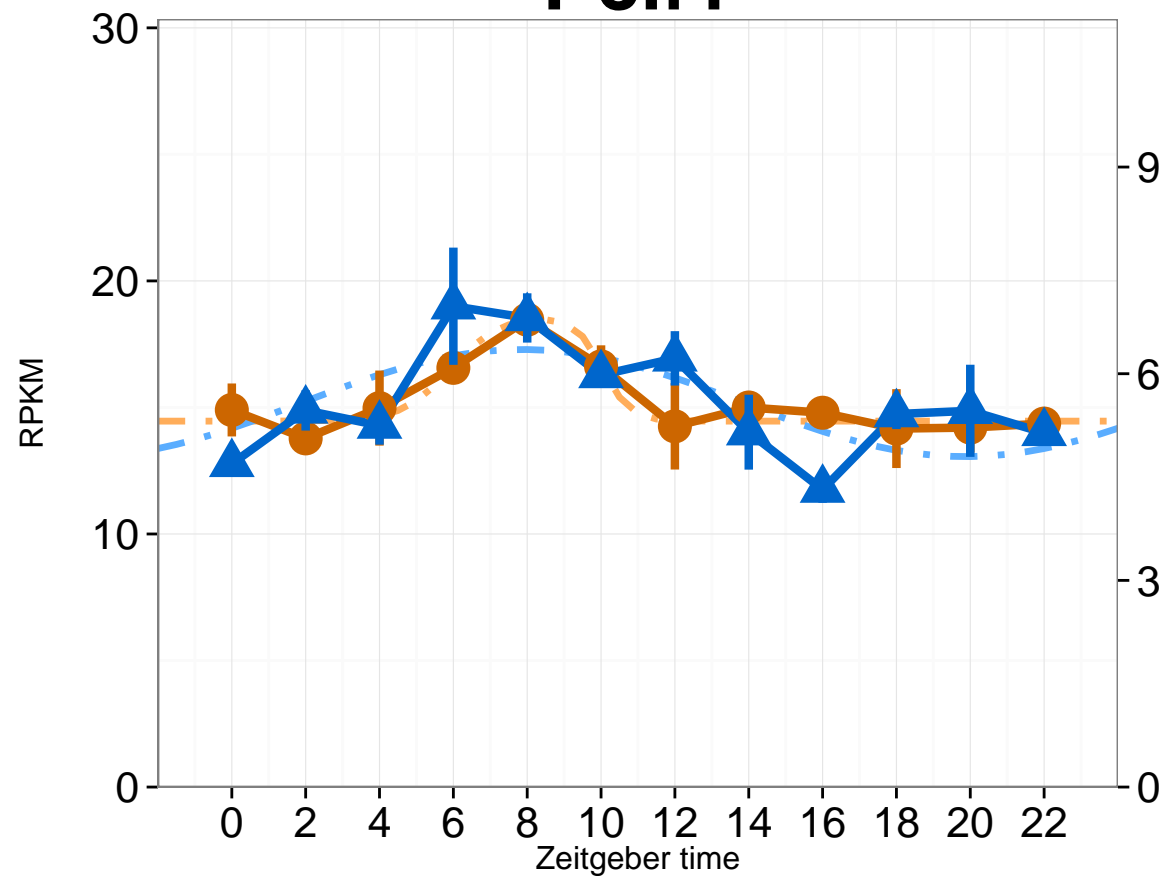

## Pcif1

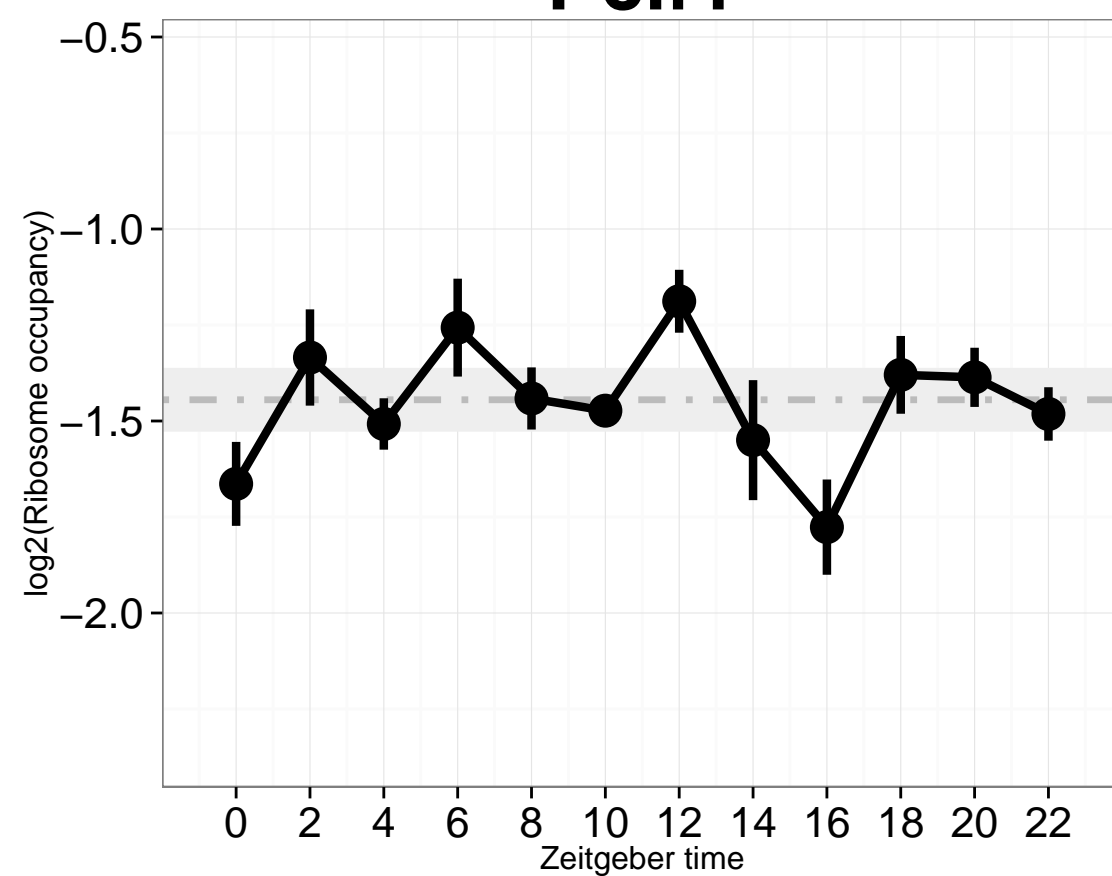

Supplement: Supplementary file 5842 [file 1]

## Palld

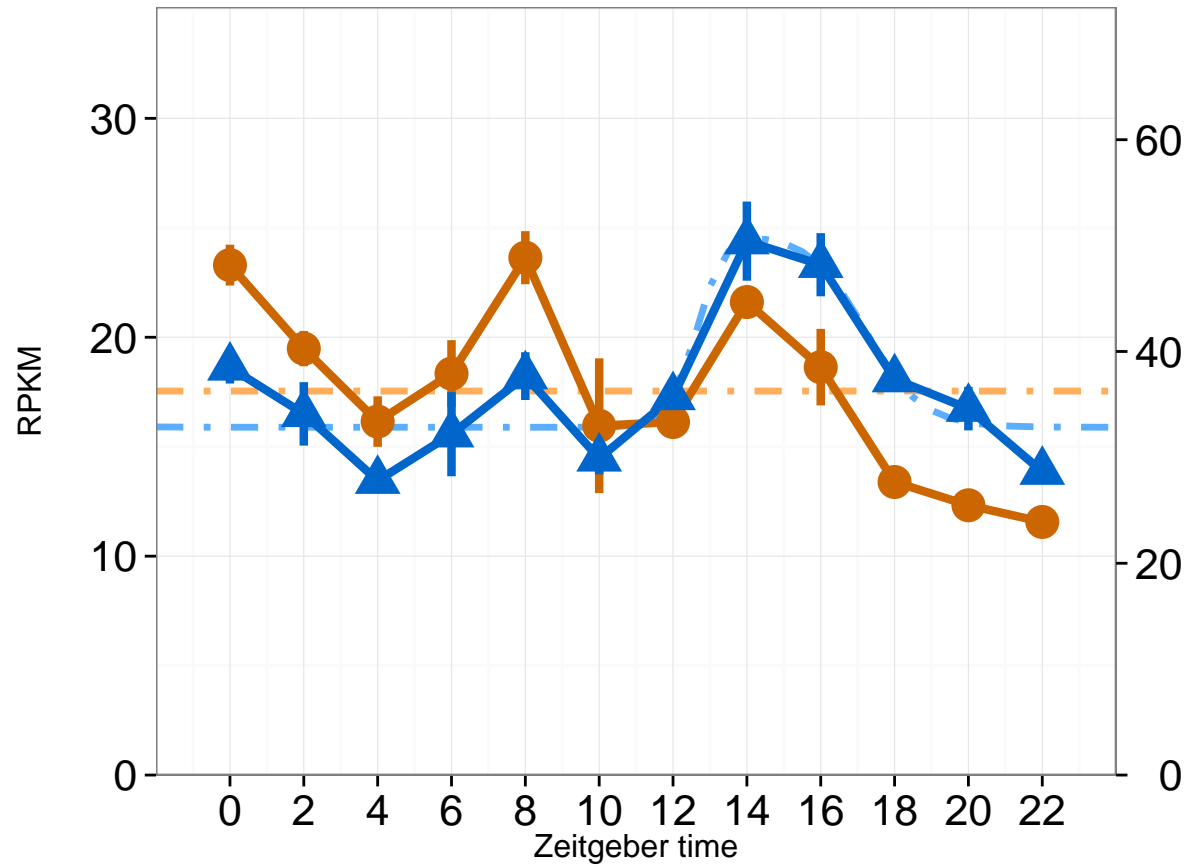

## Palld

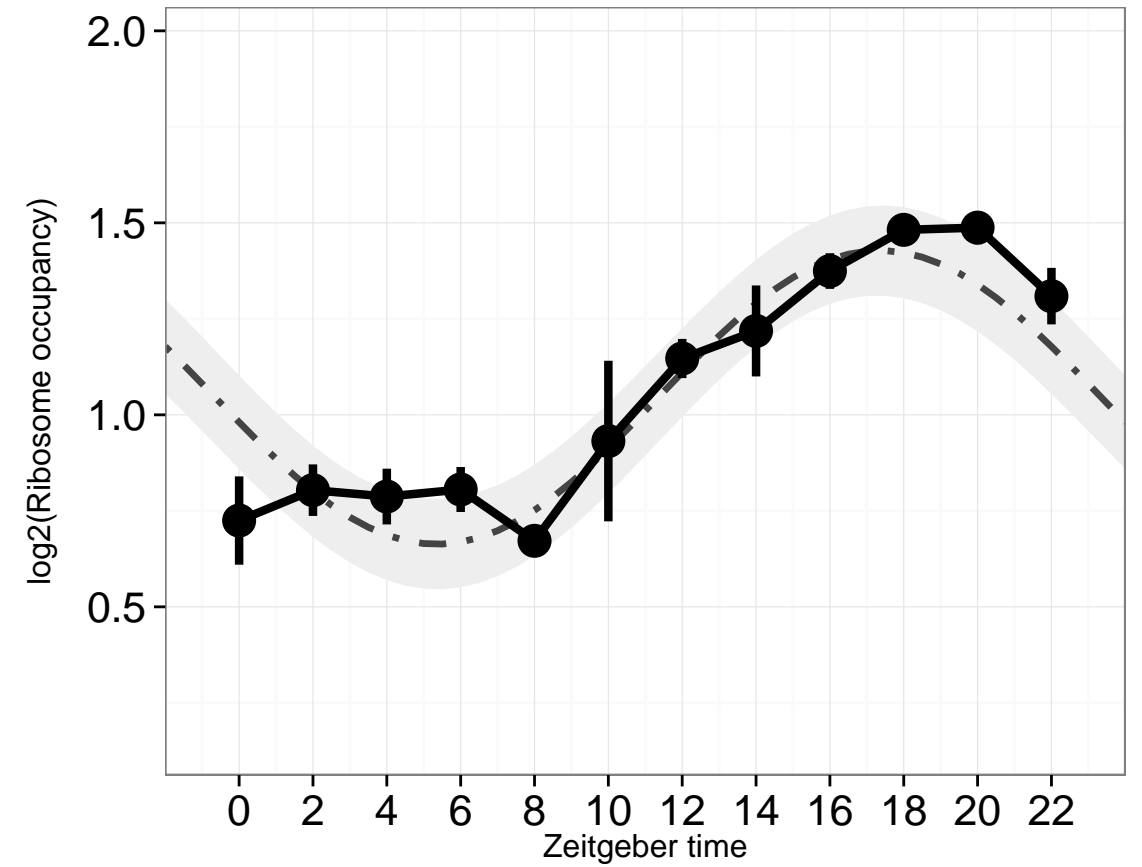

Supplement: Supplementary file 5843 [file 1]

# Tcp11l1

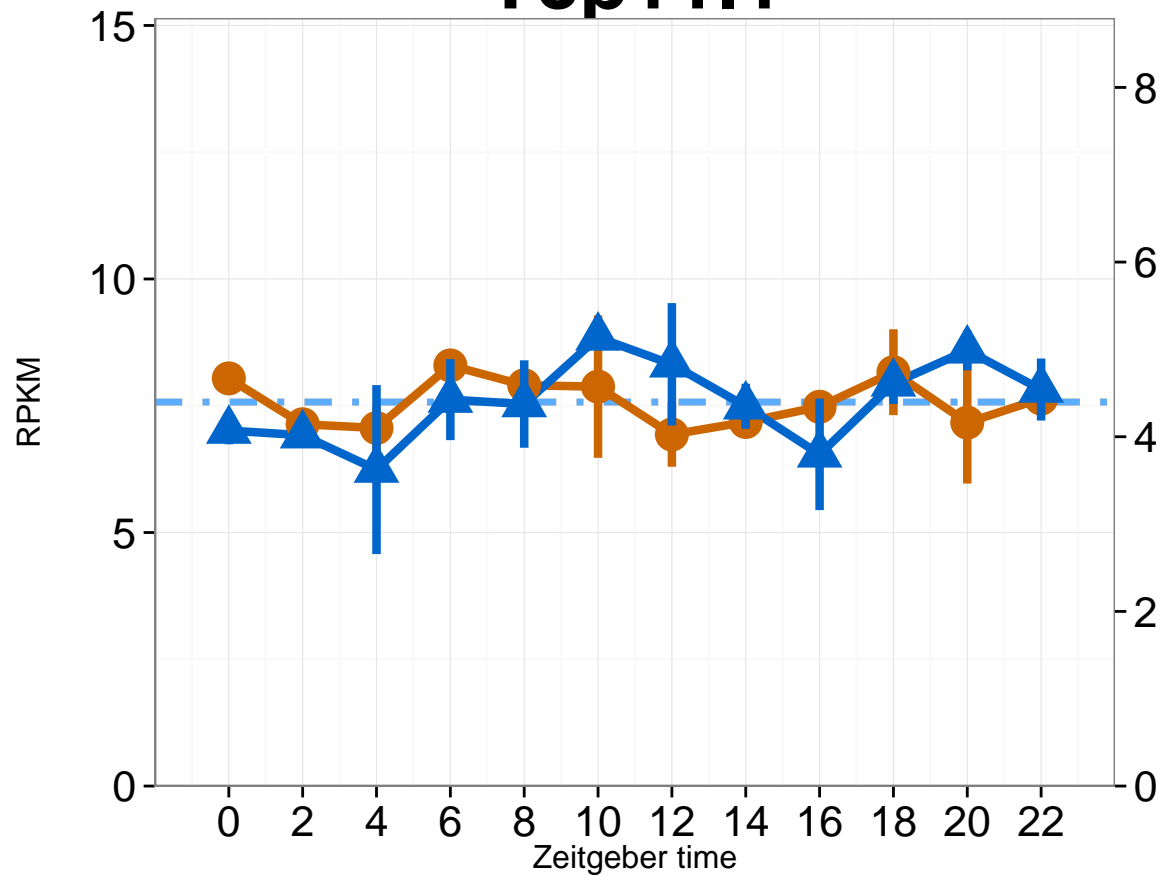

# Tcp11l1

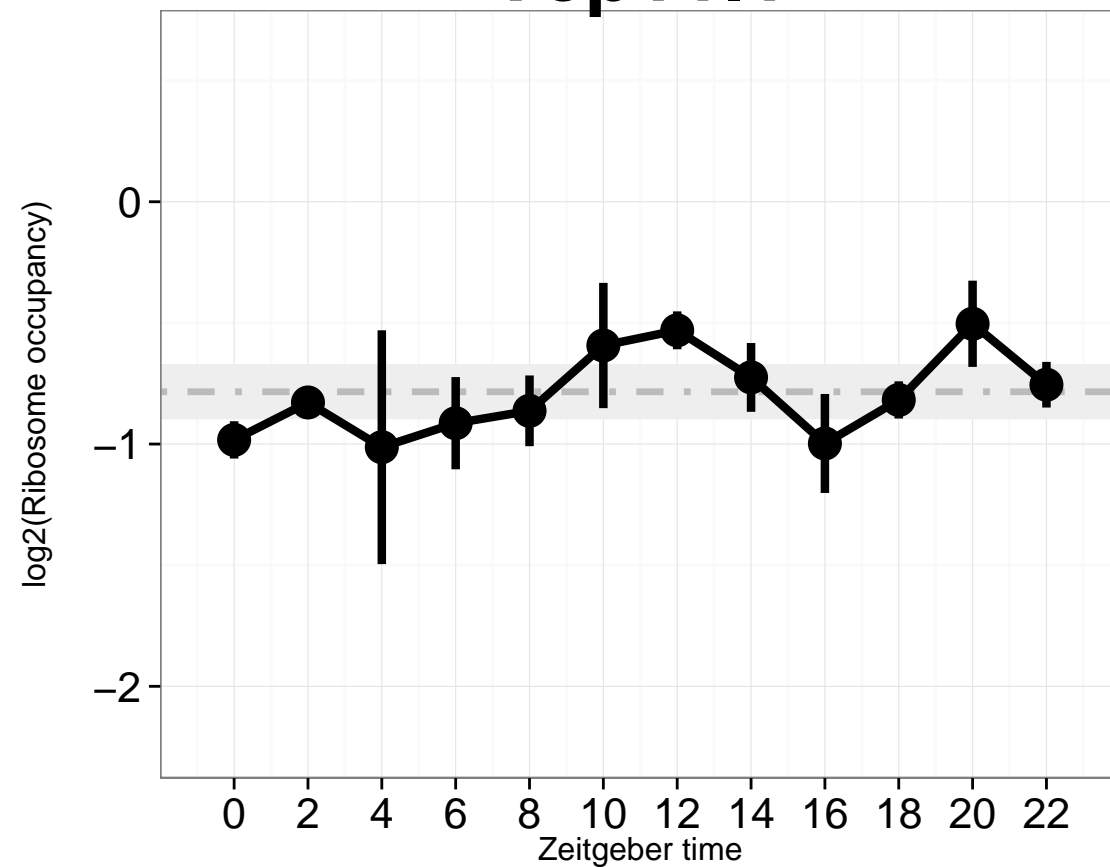

Supplement: Supplementary file 5844 [file 1]

# Btbd6

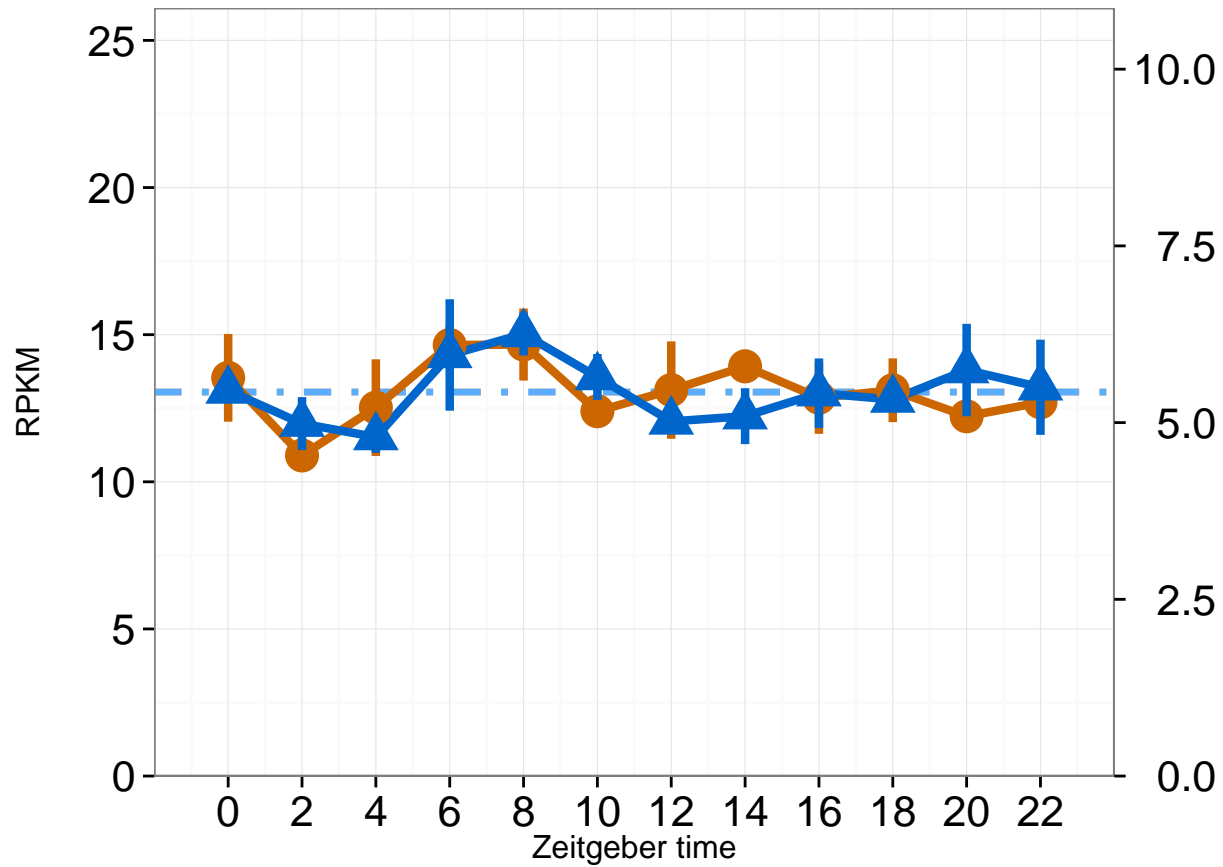

# Btbd6

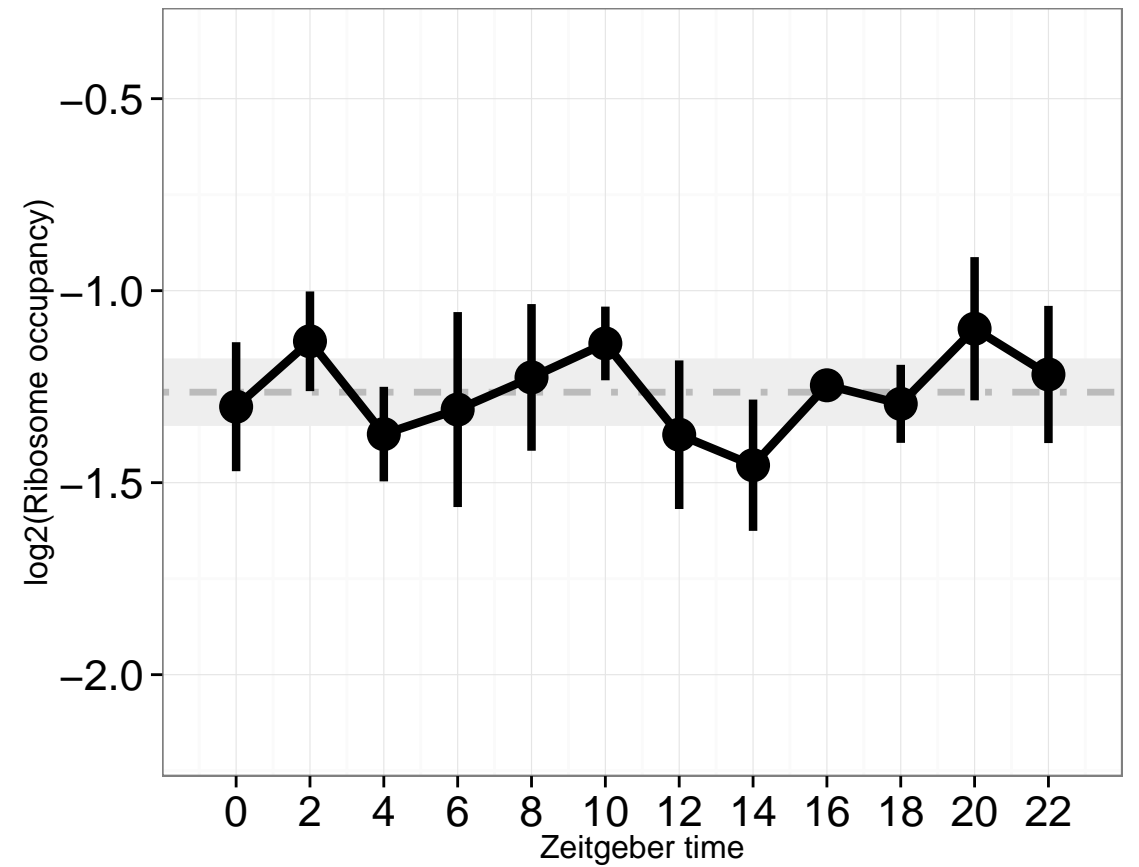

Supplement: Supplementary file 5845 [file 1]

# Brca1

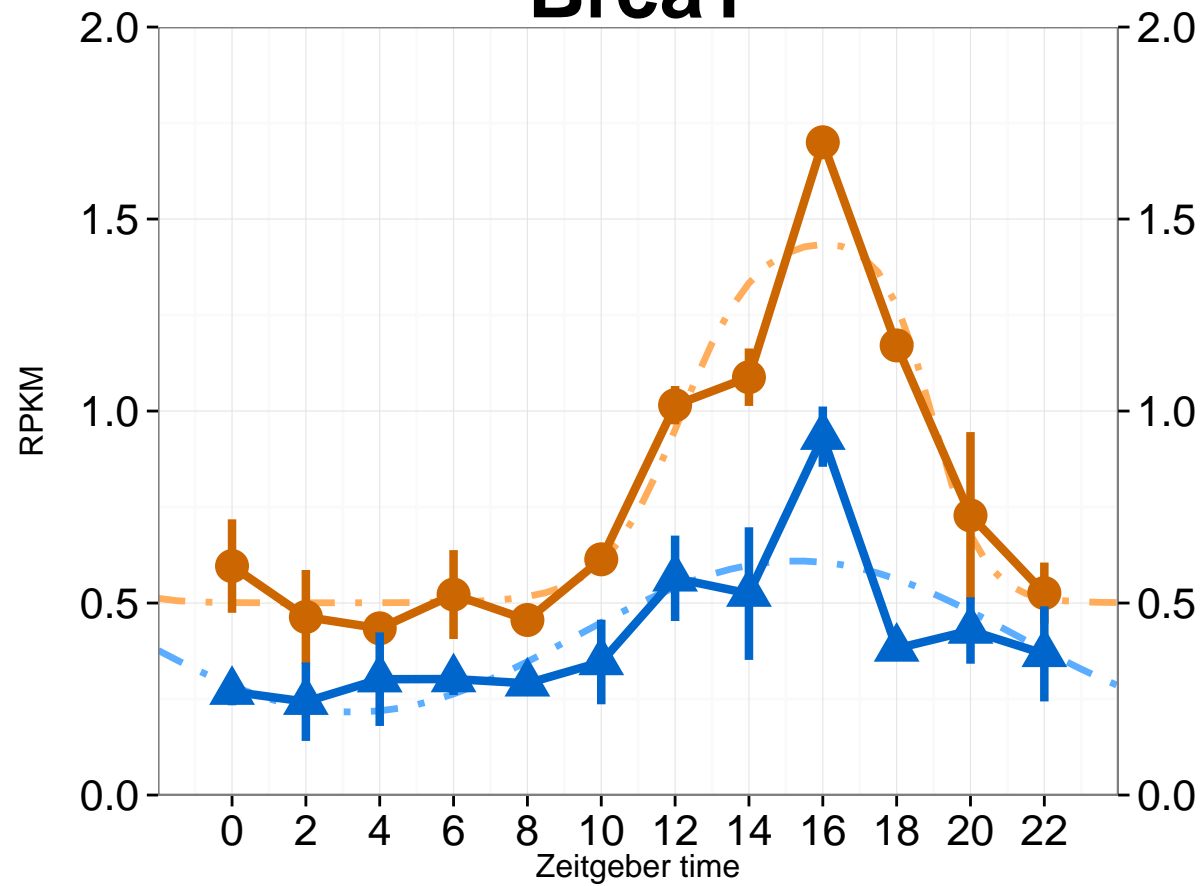

# Brca1

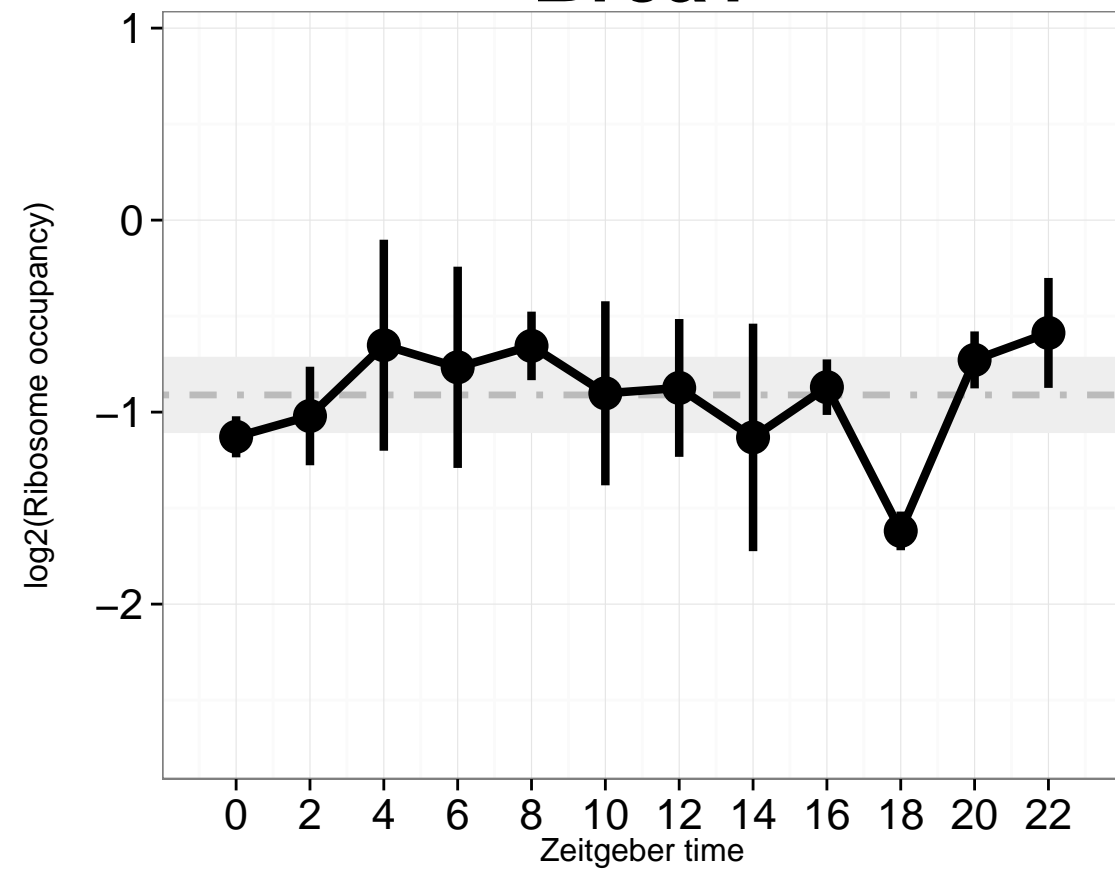

Supplement: Supplementary file 5846 [file 1]

## Crnkl1

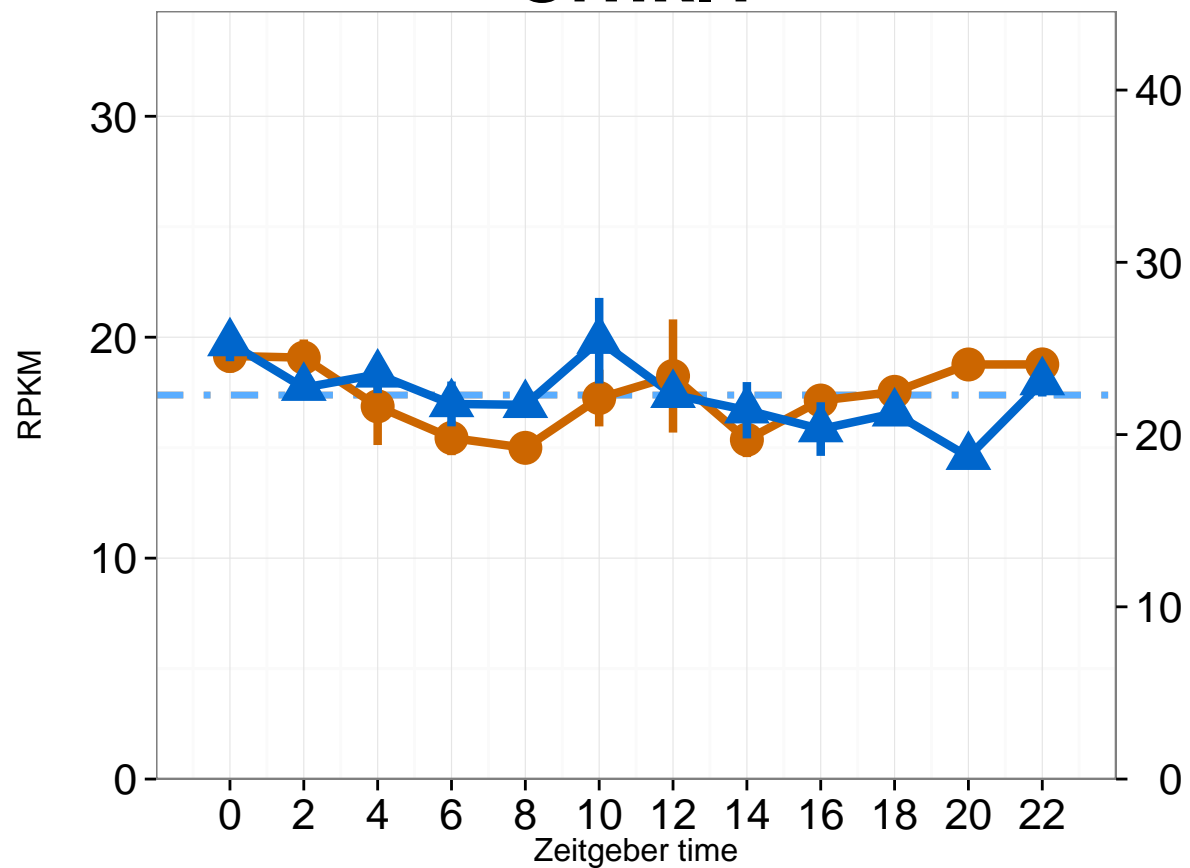

## Crnkl1

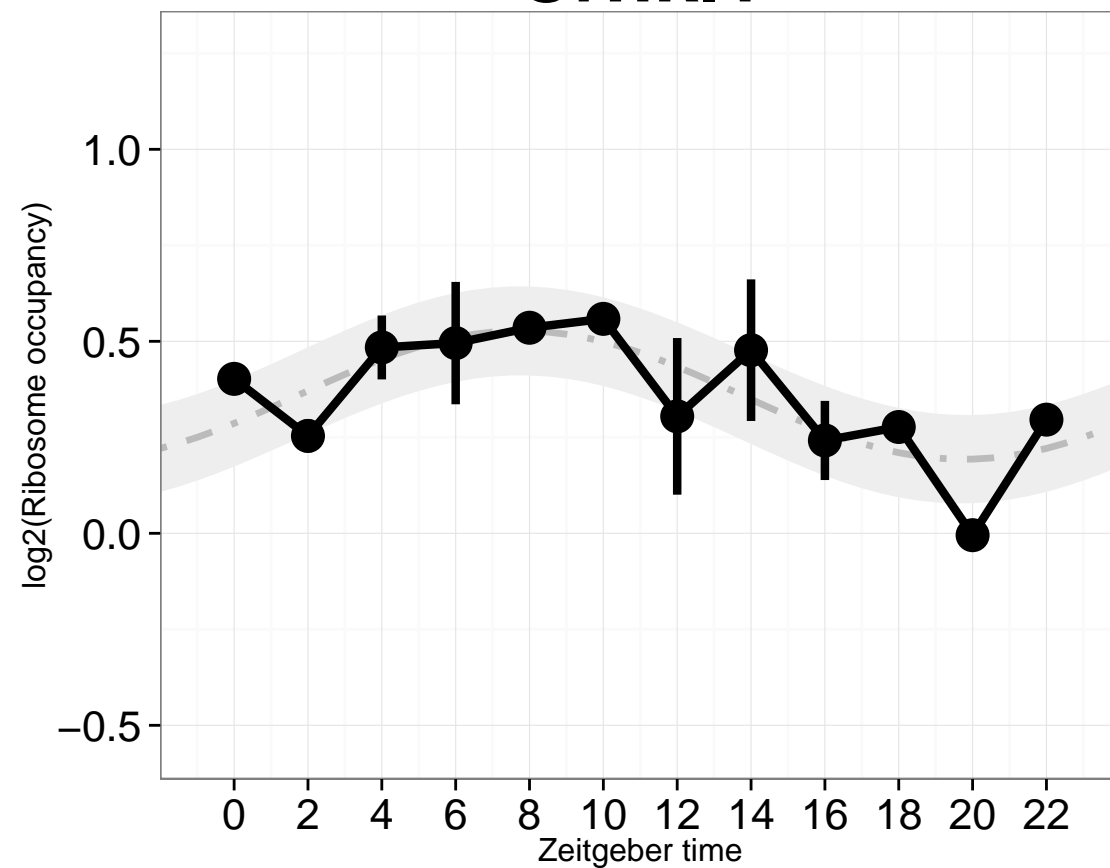

Supplement: Supplementary file 5847 [file 1]

## Atg7

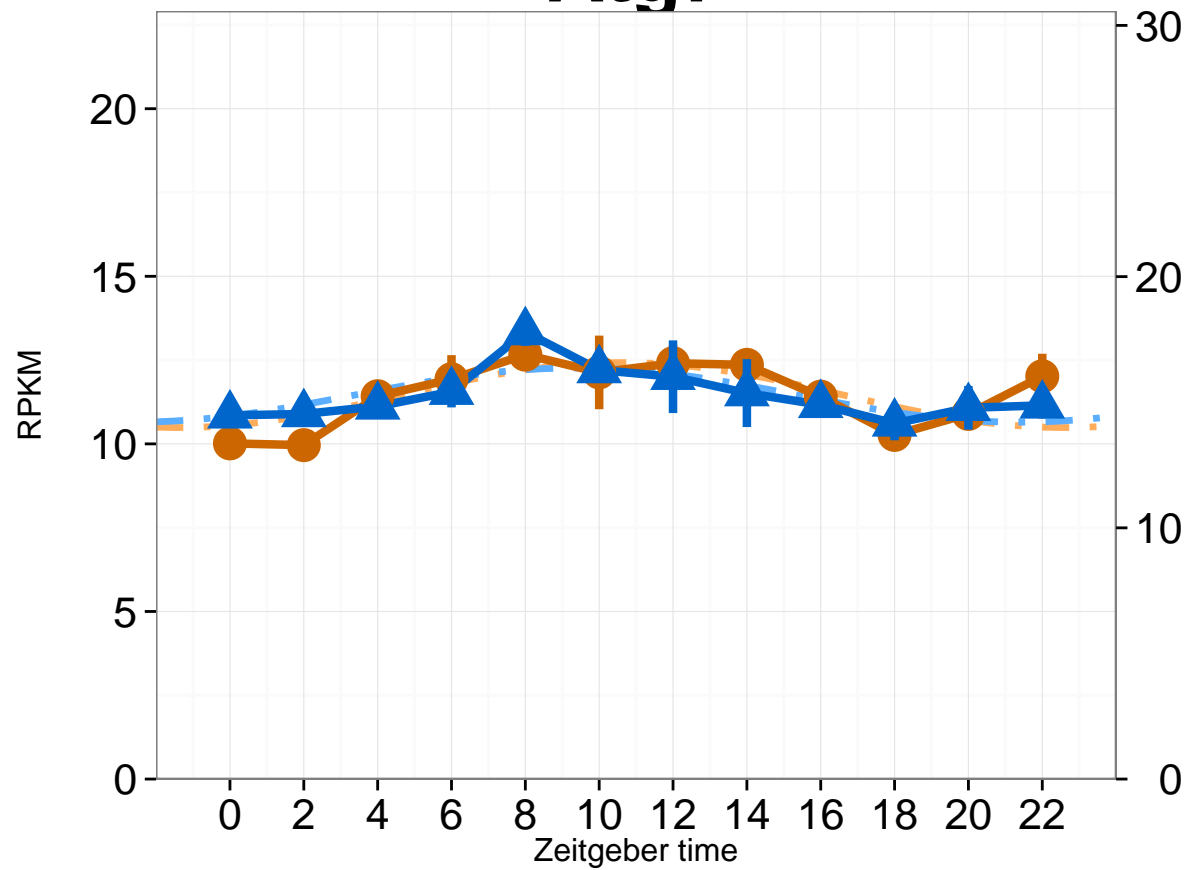

## Atg7

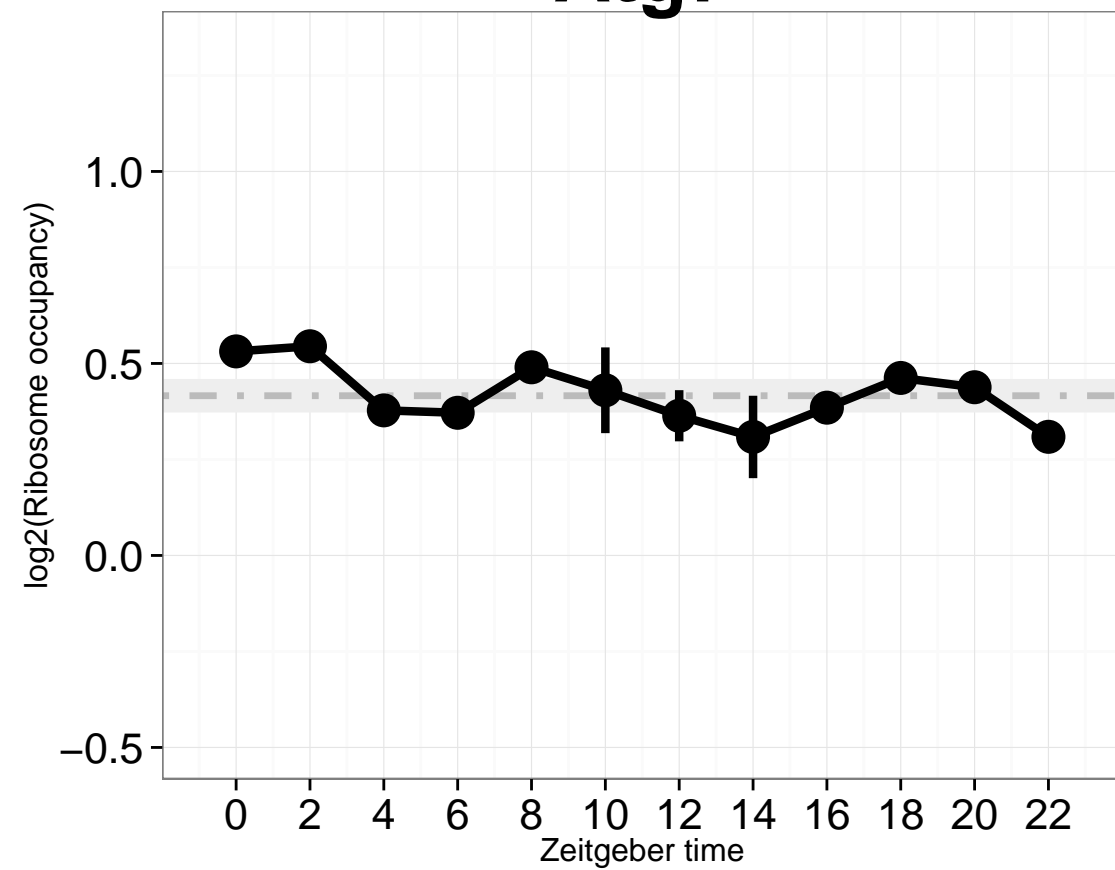

Supplement: Supplementary file 5848 [file 1]

# Lonp1

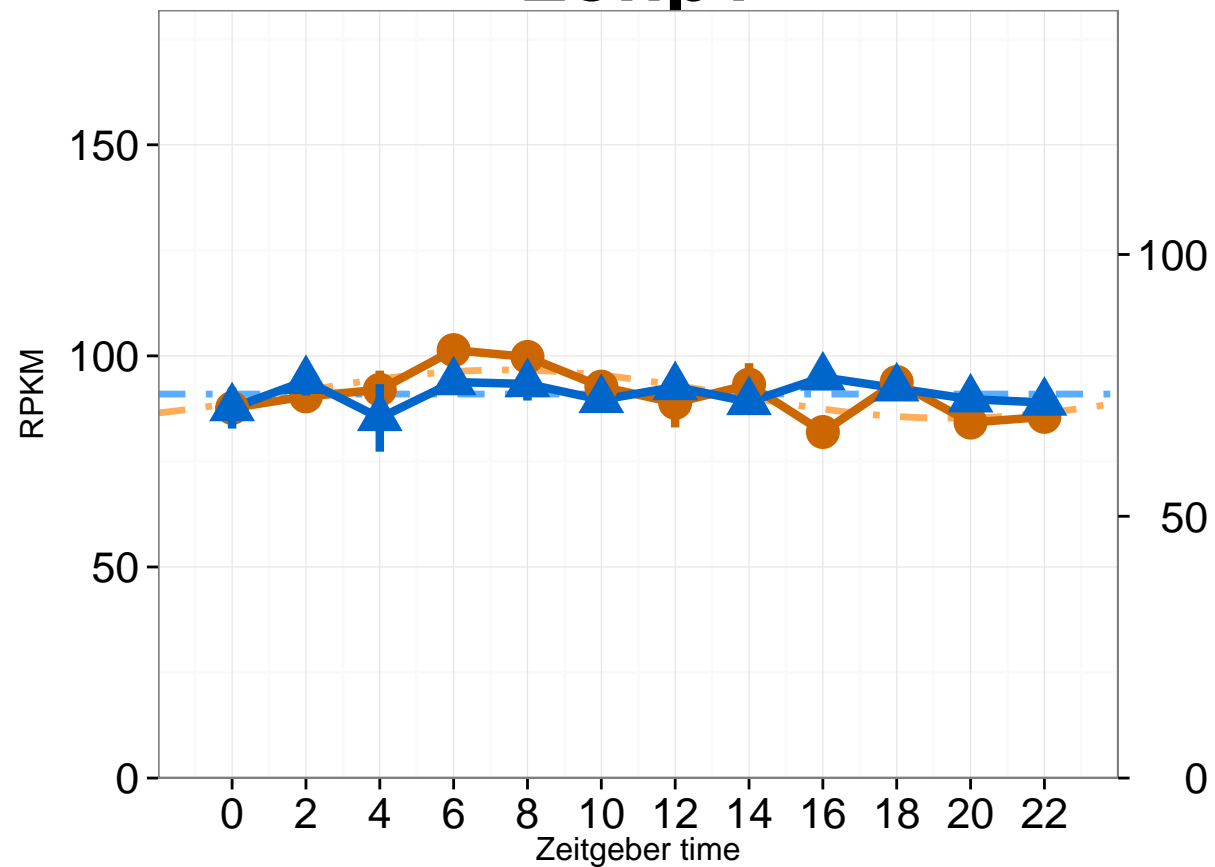

# Lonp1

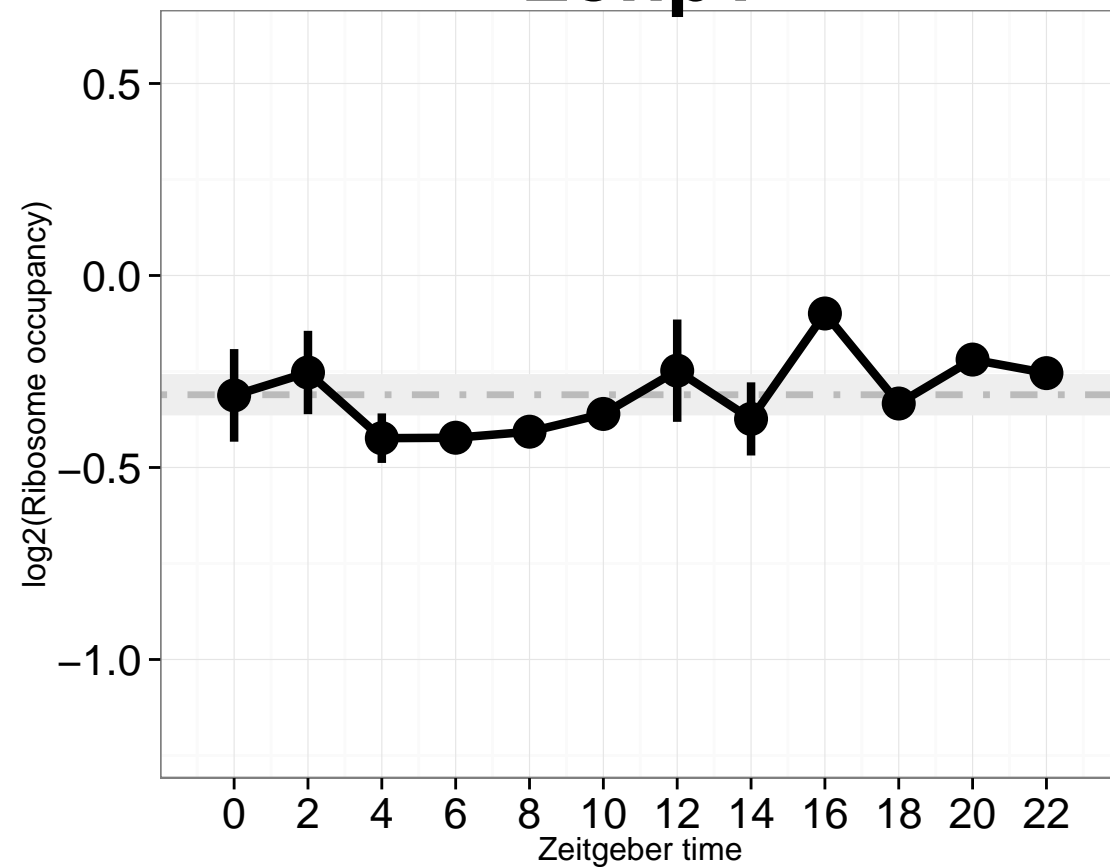

Supplement: Supplementary file 5849 [file 1]

# Tysnd1

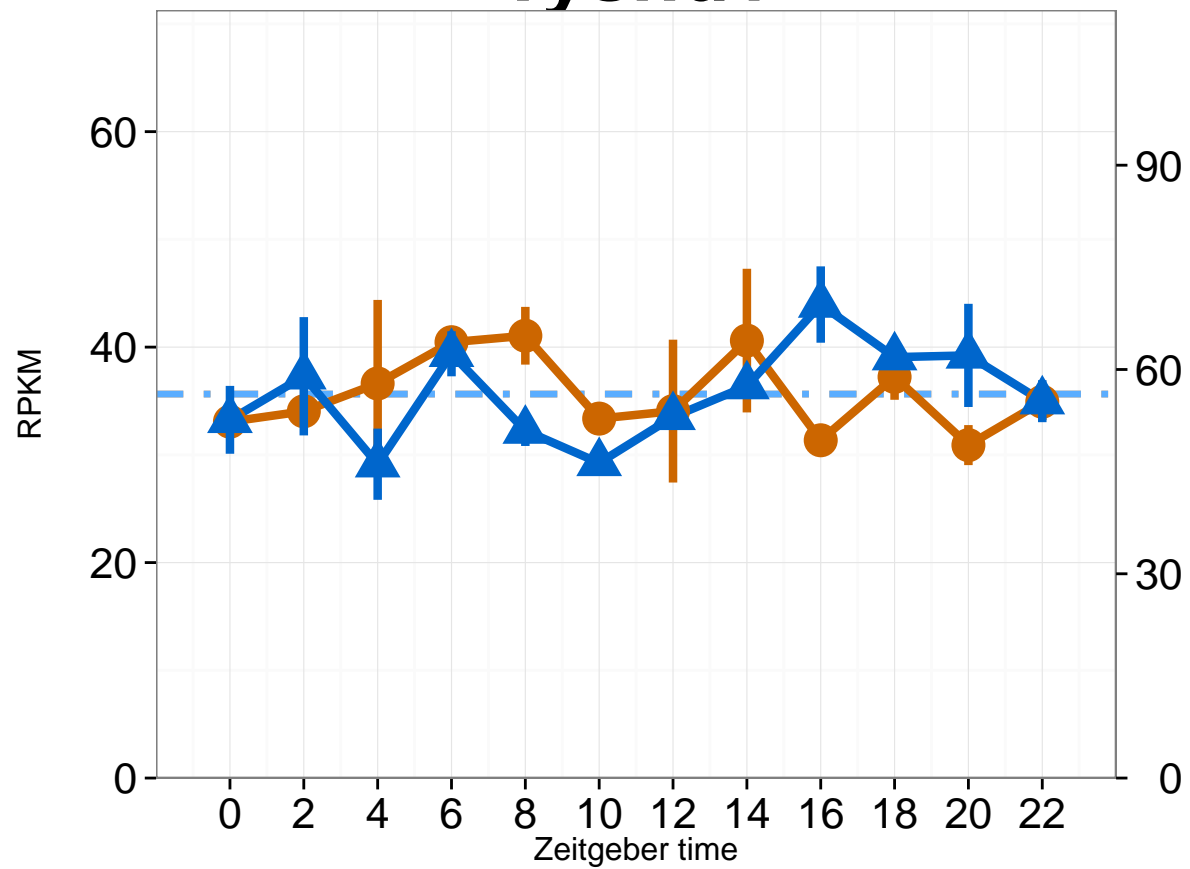

# Tysnd1

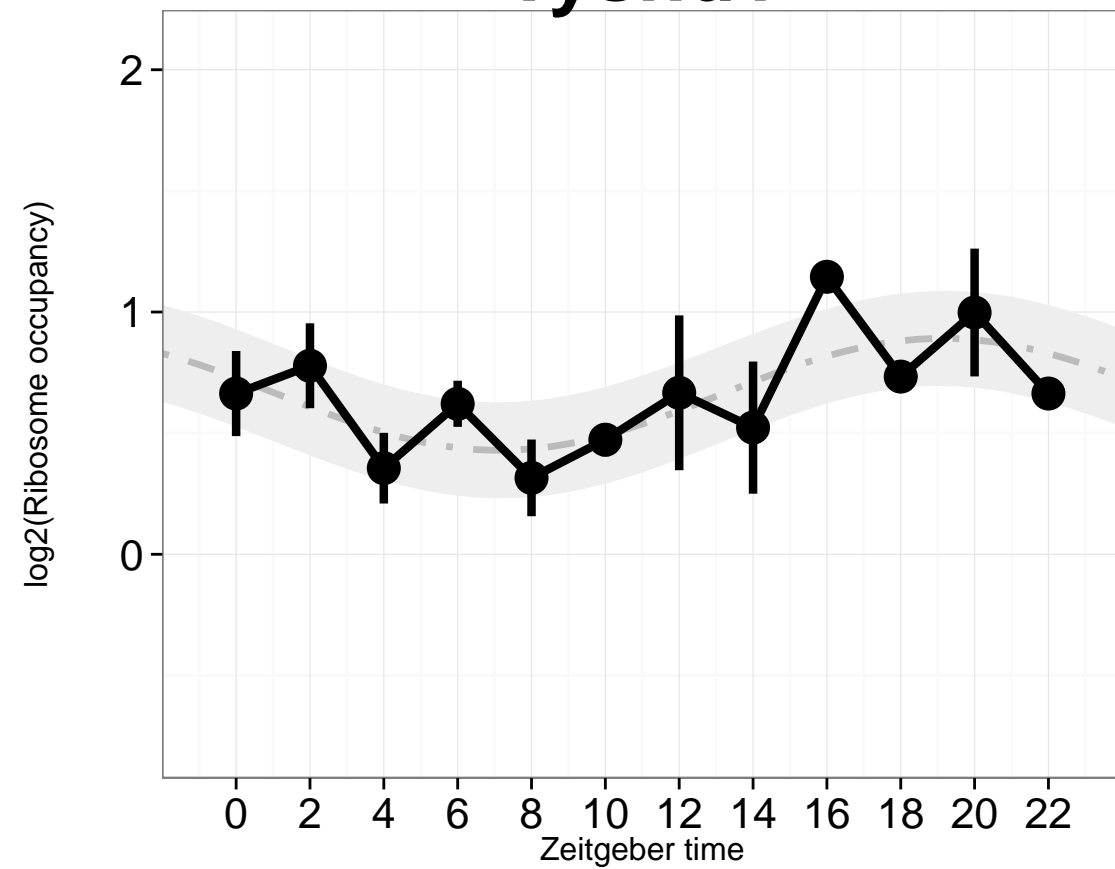

Supplement: Supplementary file 5850 [file 1]

## Ccdc142

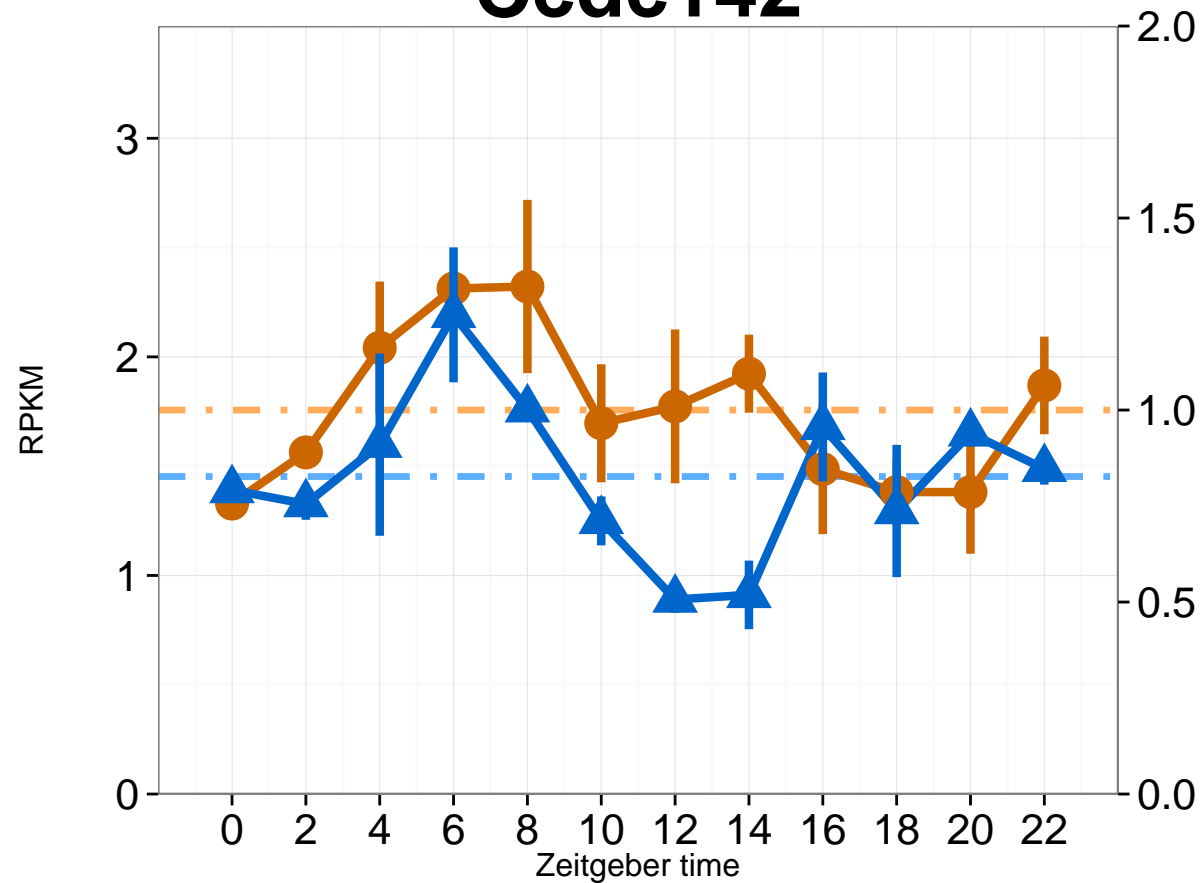

## Ccdc142

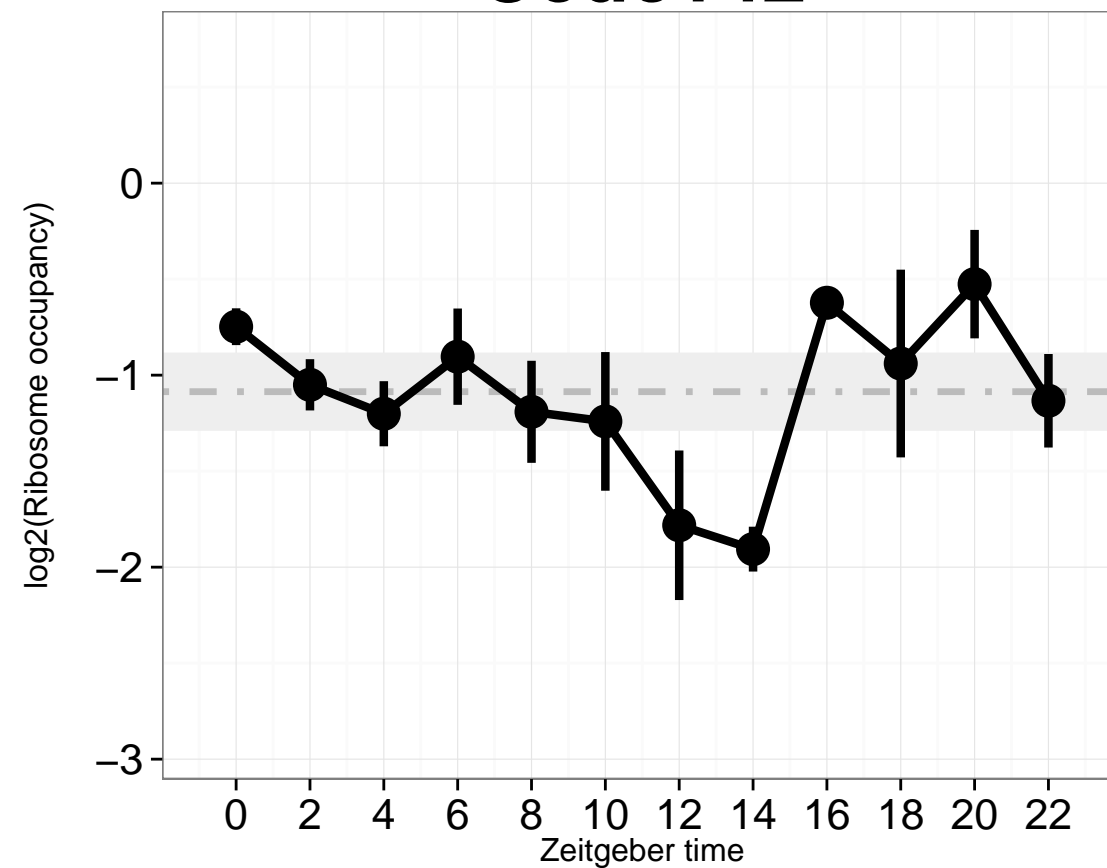

Supplement: Supplementary file 5851 [file 1]

## Kng2

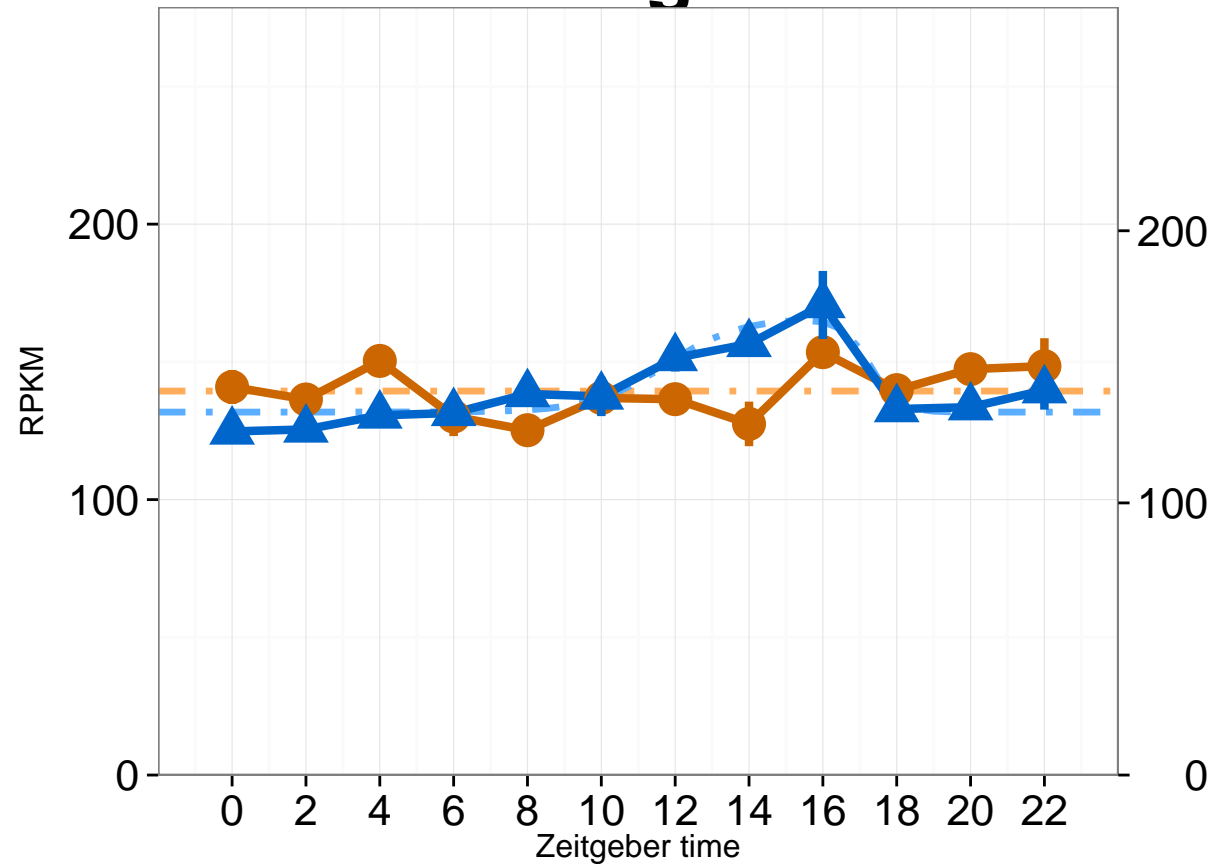

## Kng2

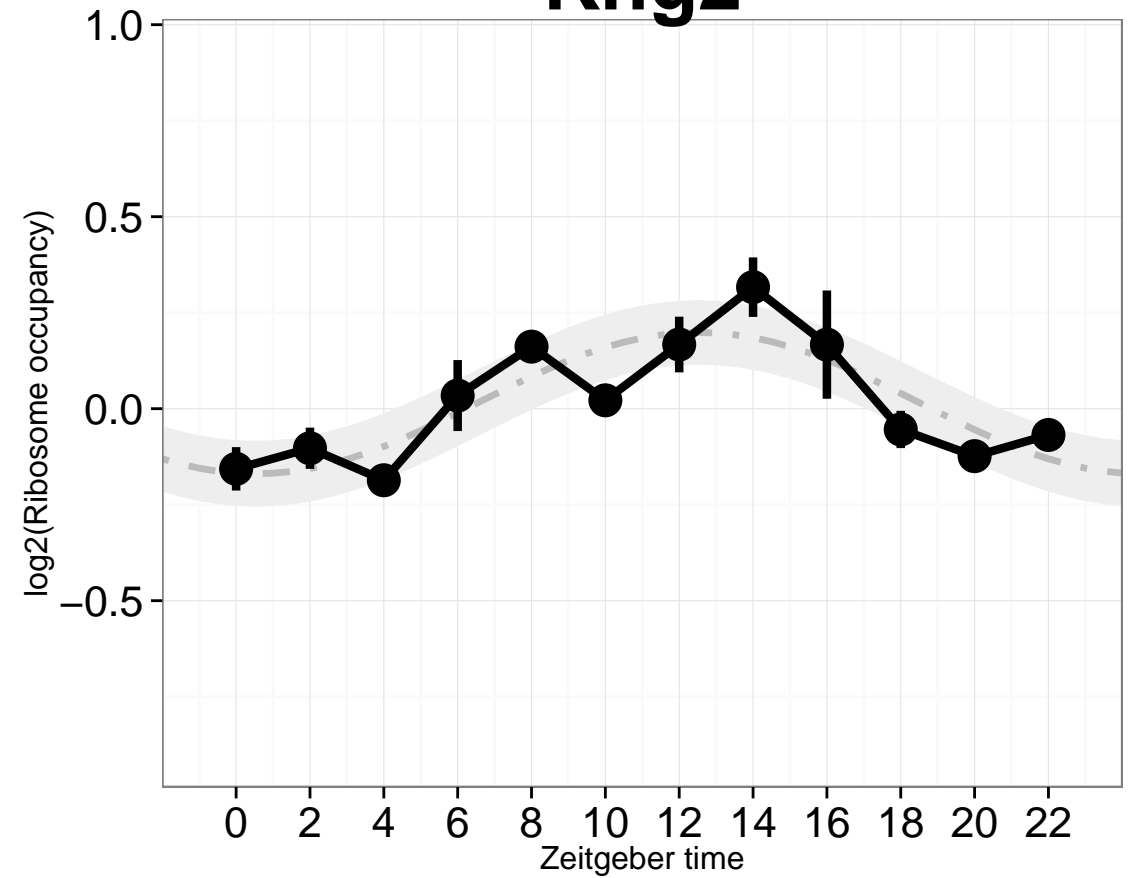

Supplement: Supplementary file 5852 [file 1]

## Pus10

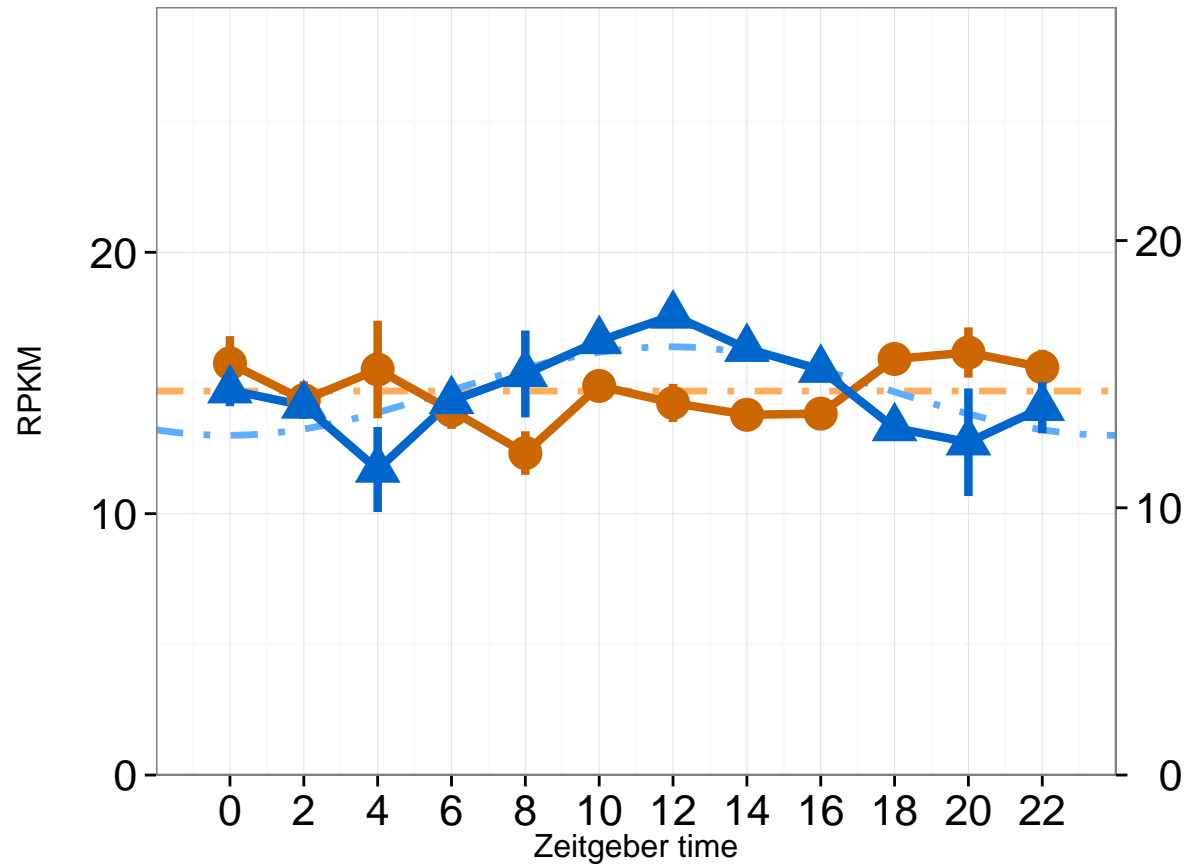

## Pus10

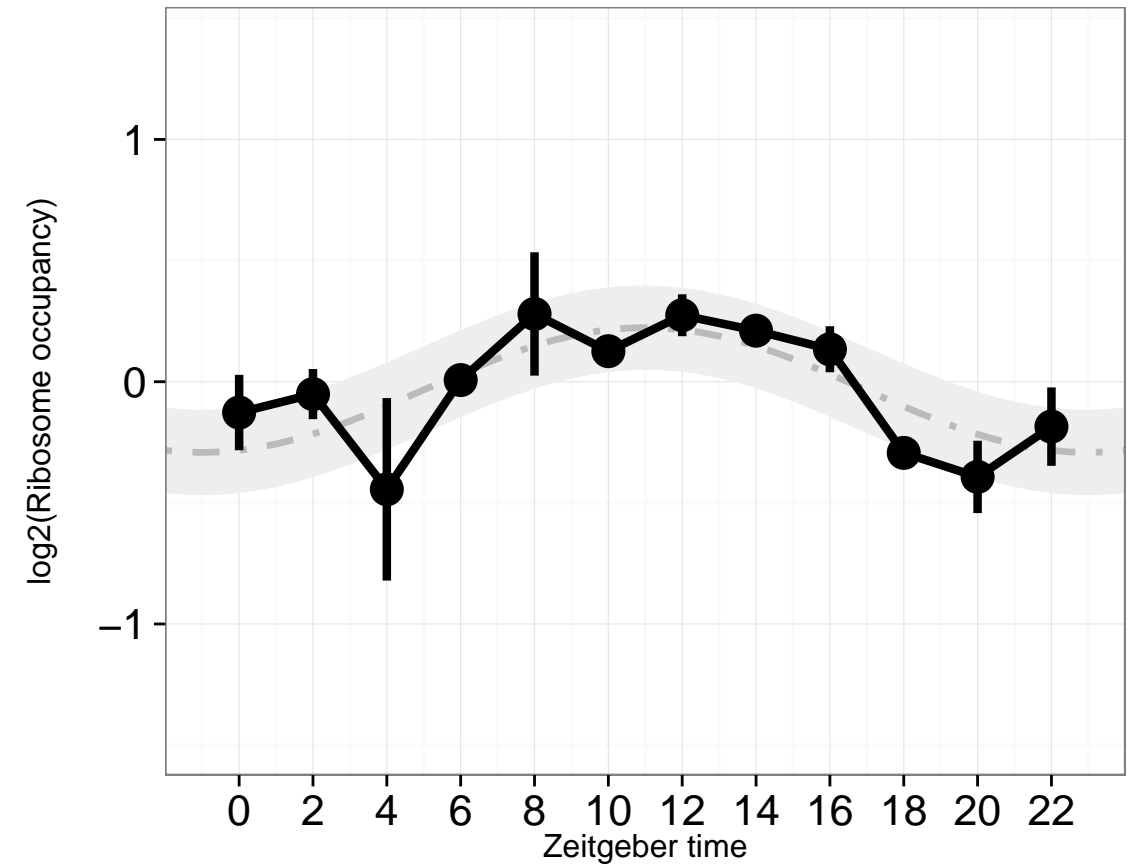

Supplement: Supplementary file 5853 [file 1]

## Tars

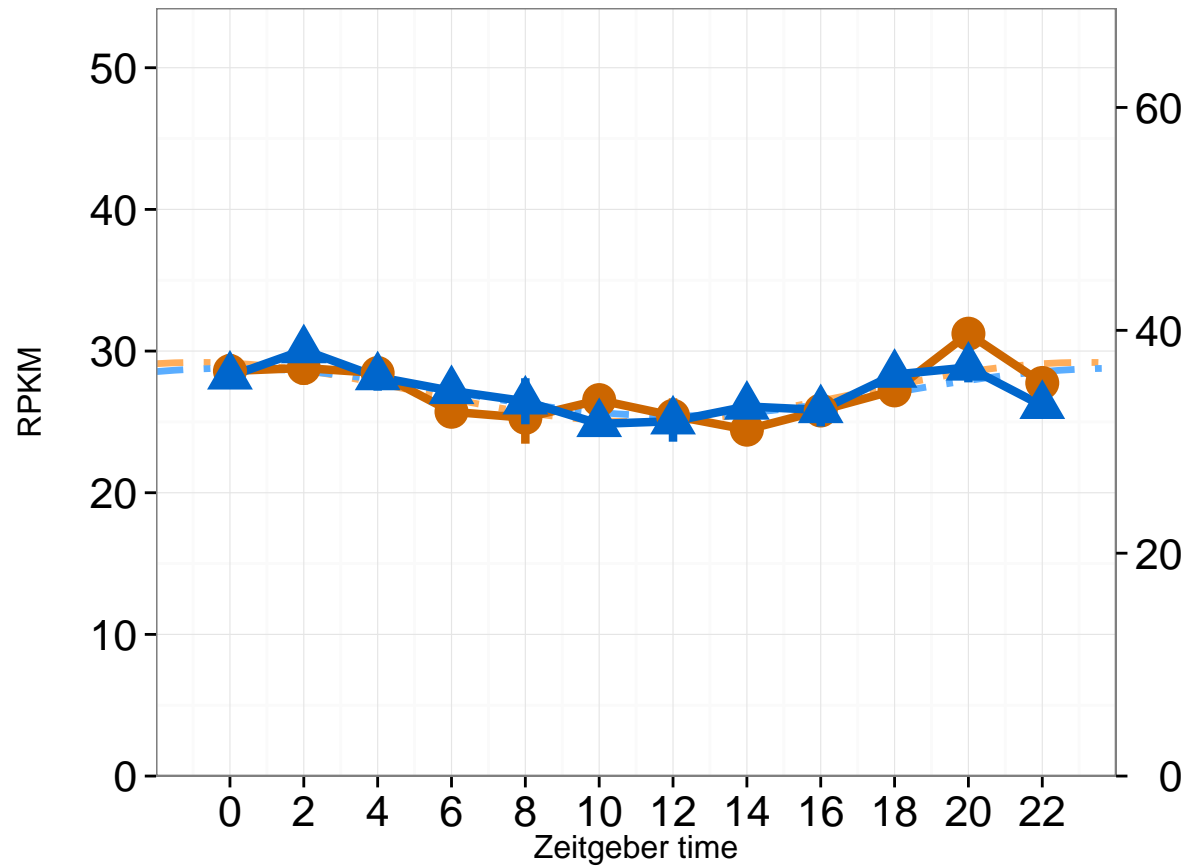

## Tars

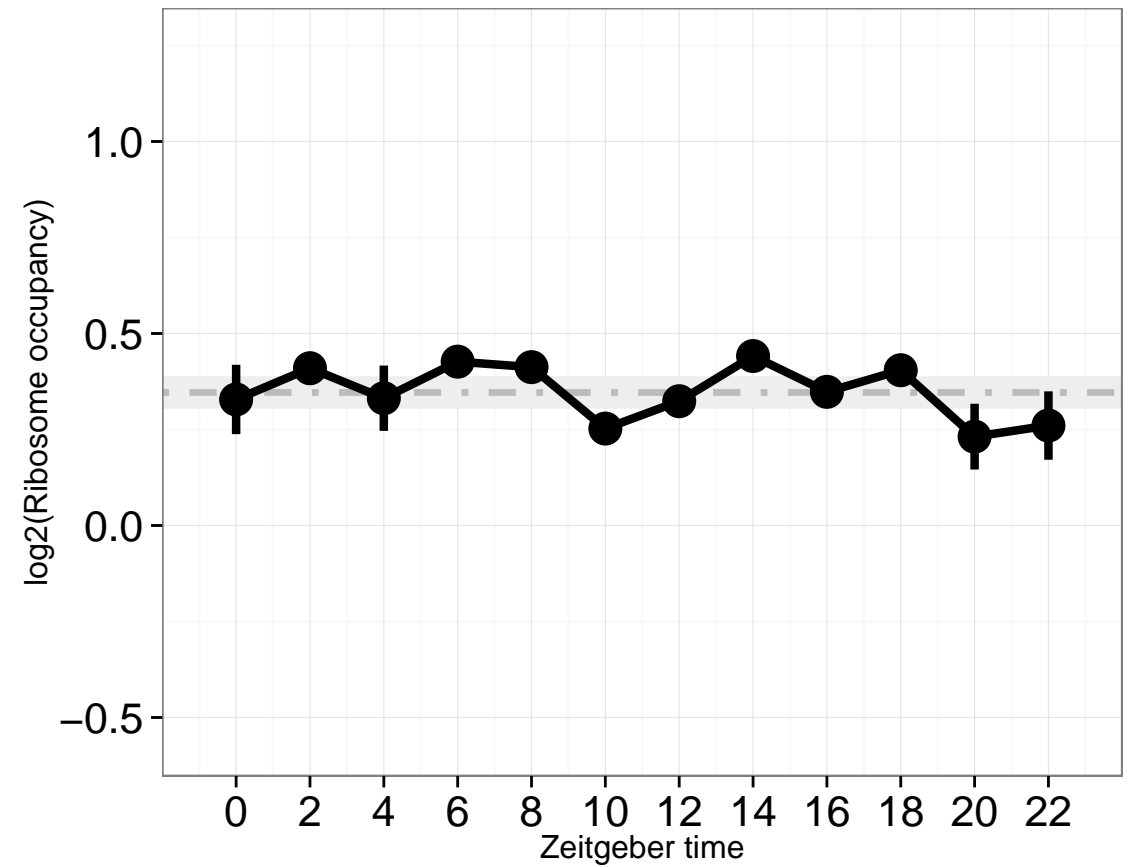

Supplement: Supplementary file 5854 [file 1]

## Stom

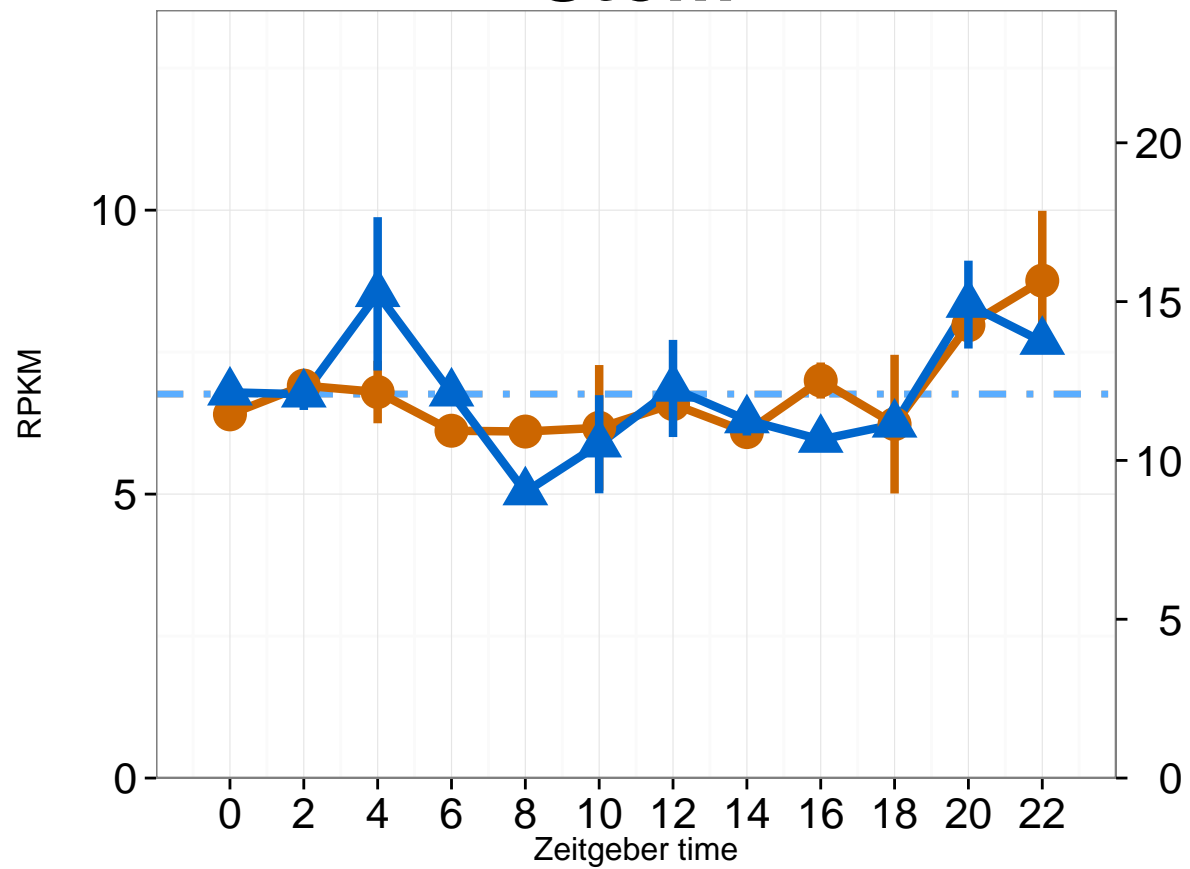

## Stom

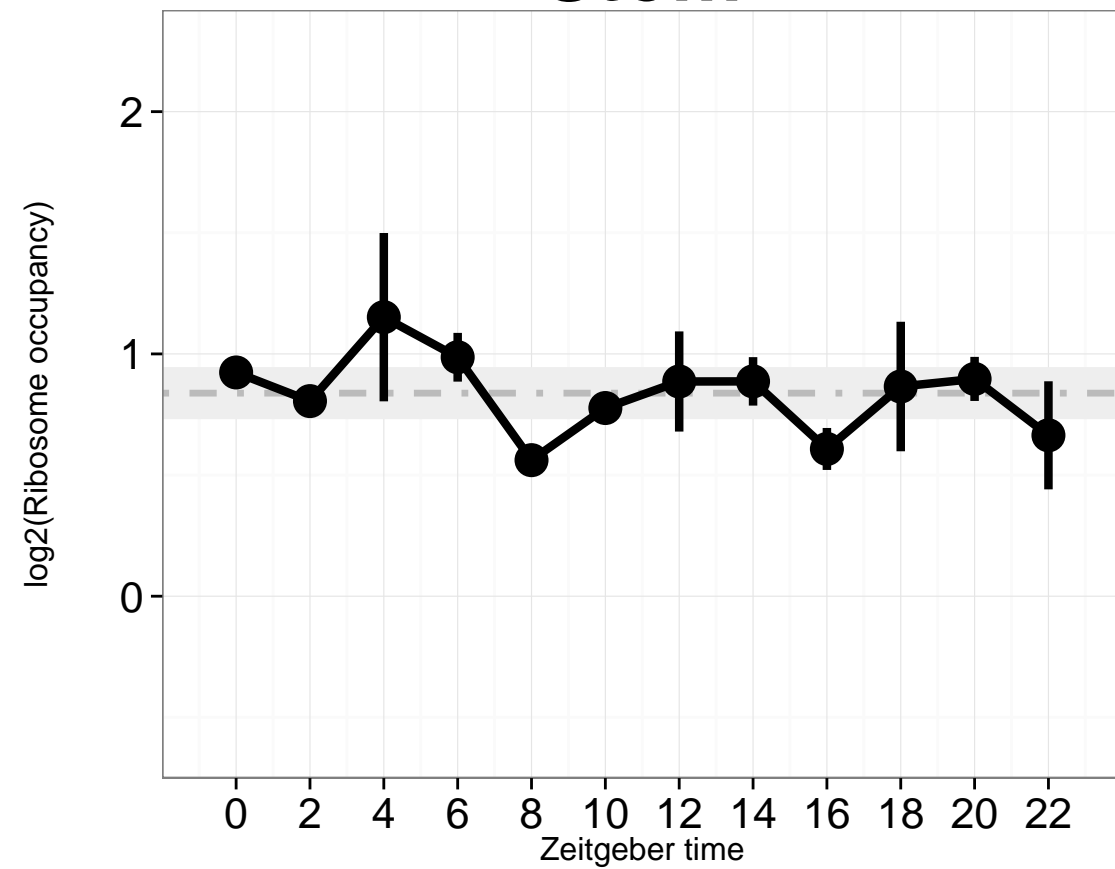

Supplement: Supplementary file 5855 [file 1]

## Zufsp

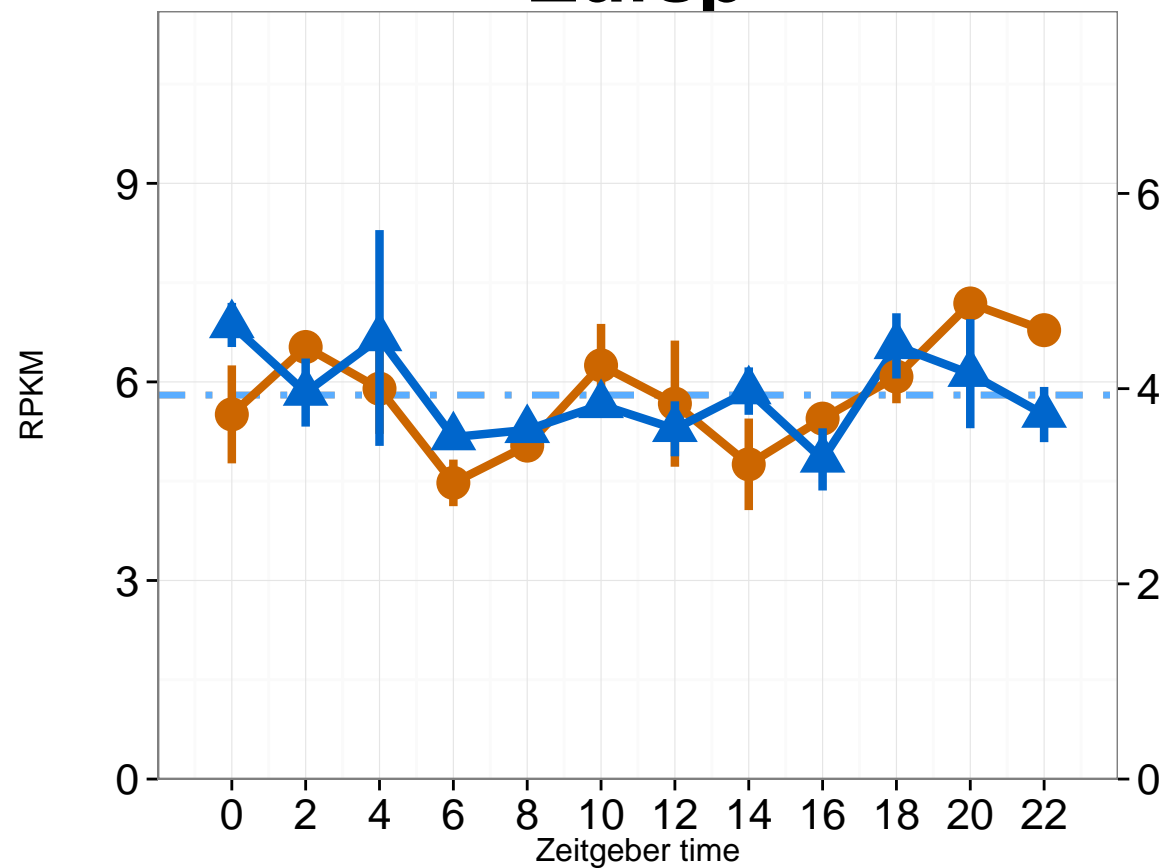

## Zufsp

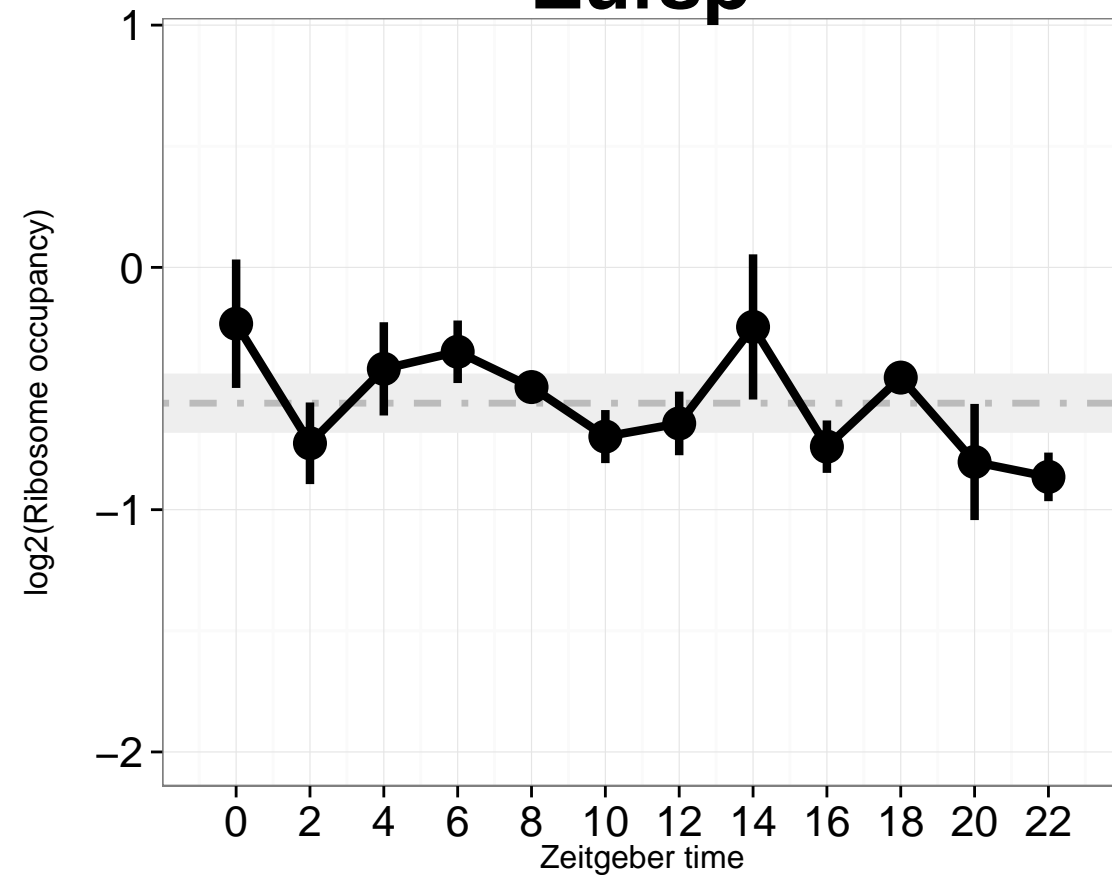

Supplement: Supplementary file 5856 [file 1]

## Pelo

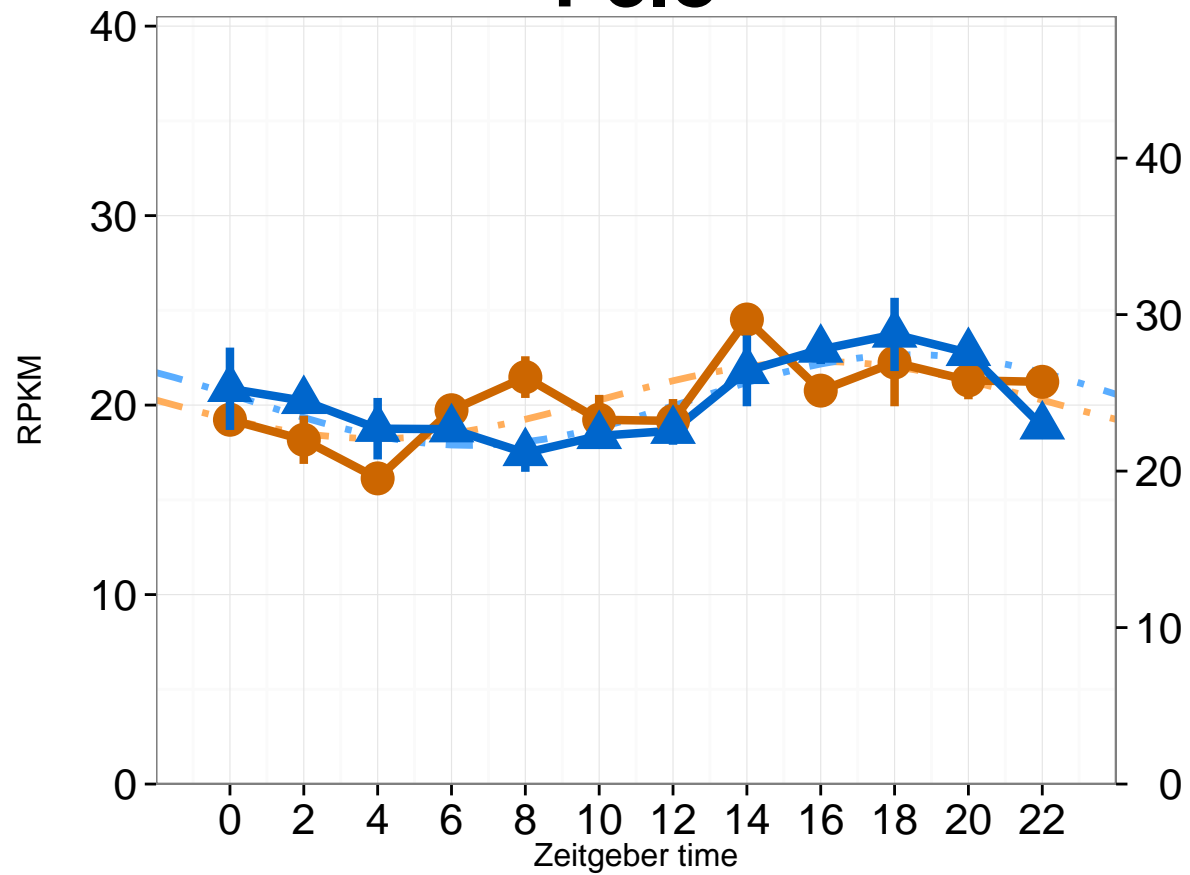

## Pelo

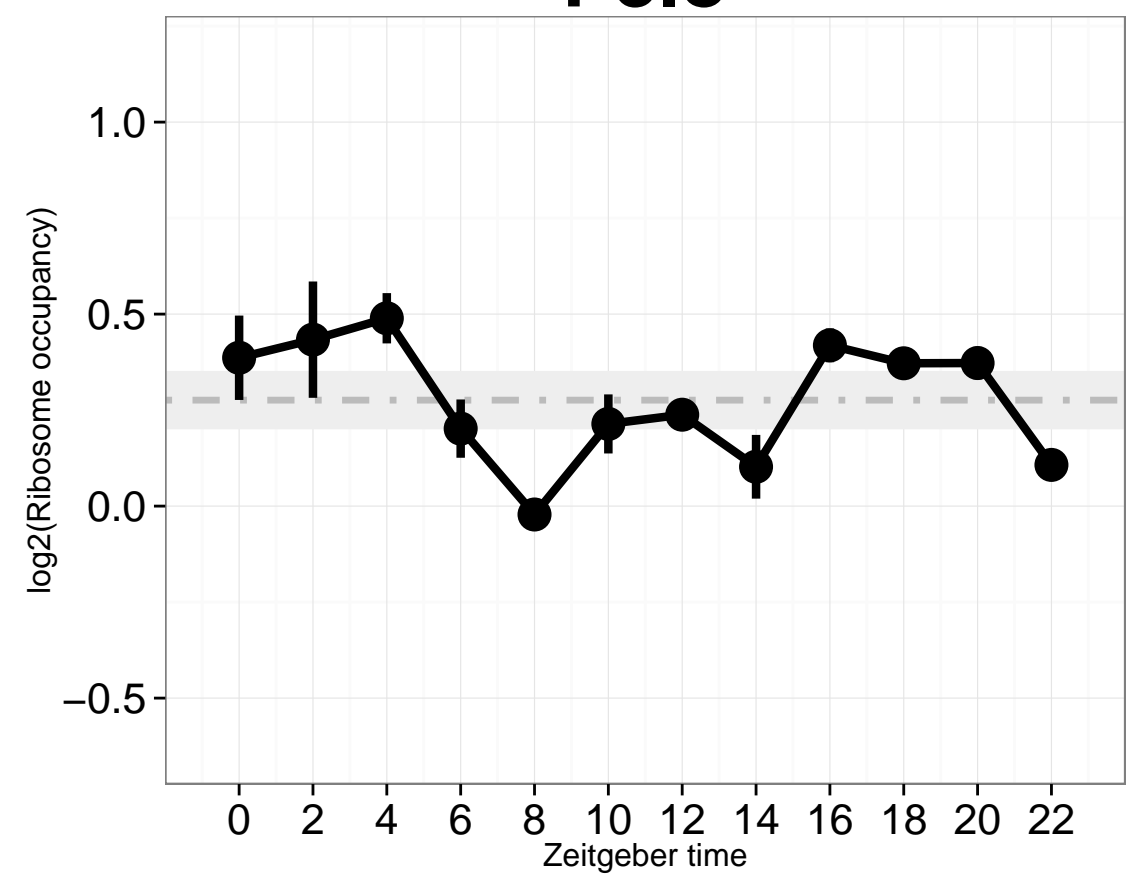

Supplement: Supplementary file 5857 [file 1]

# Prdm10

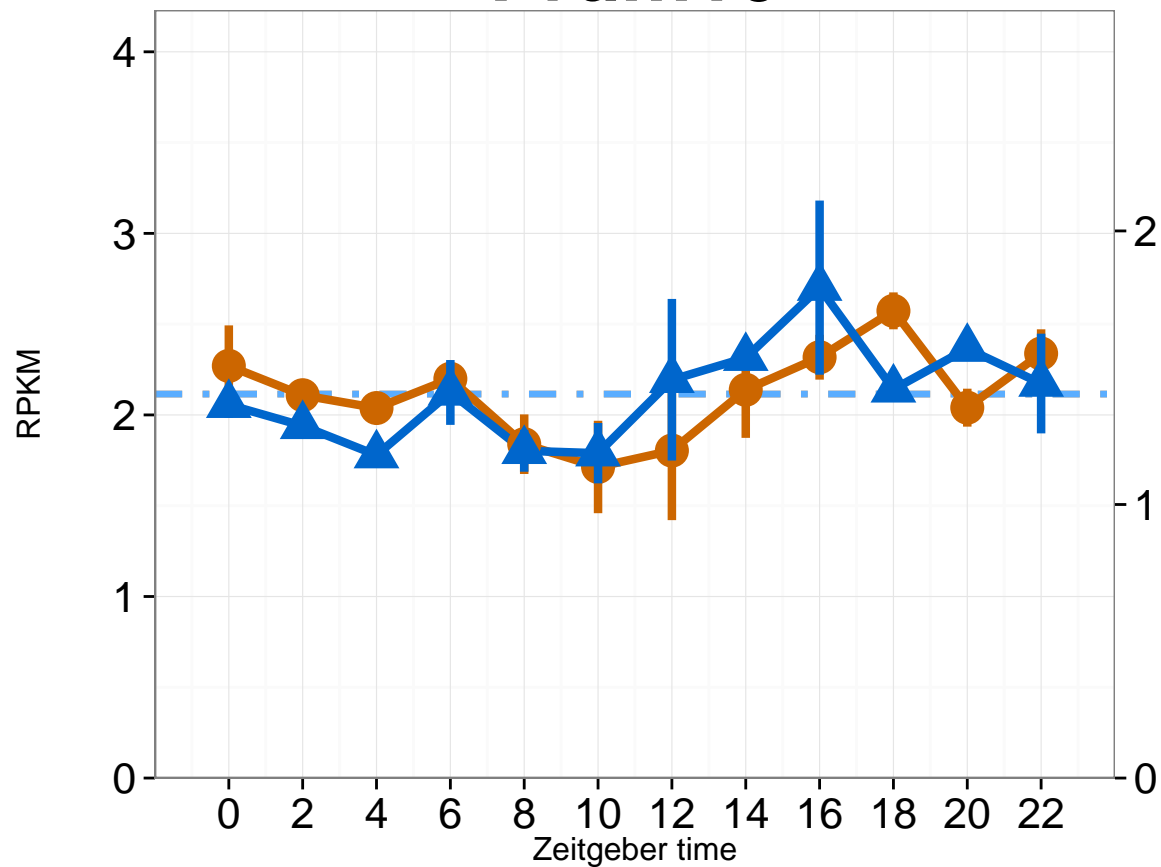

# Prdm10

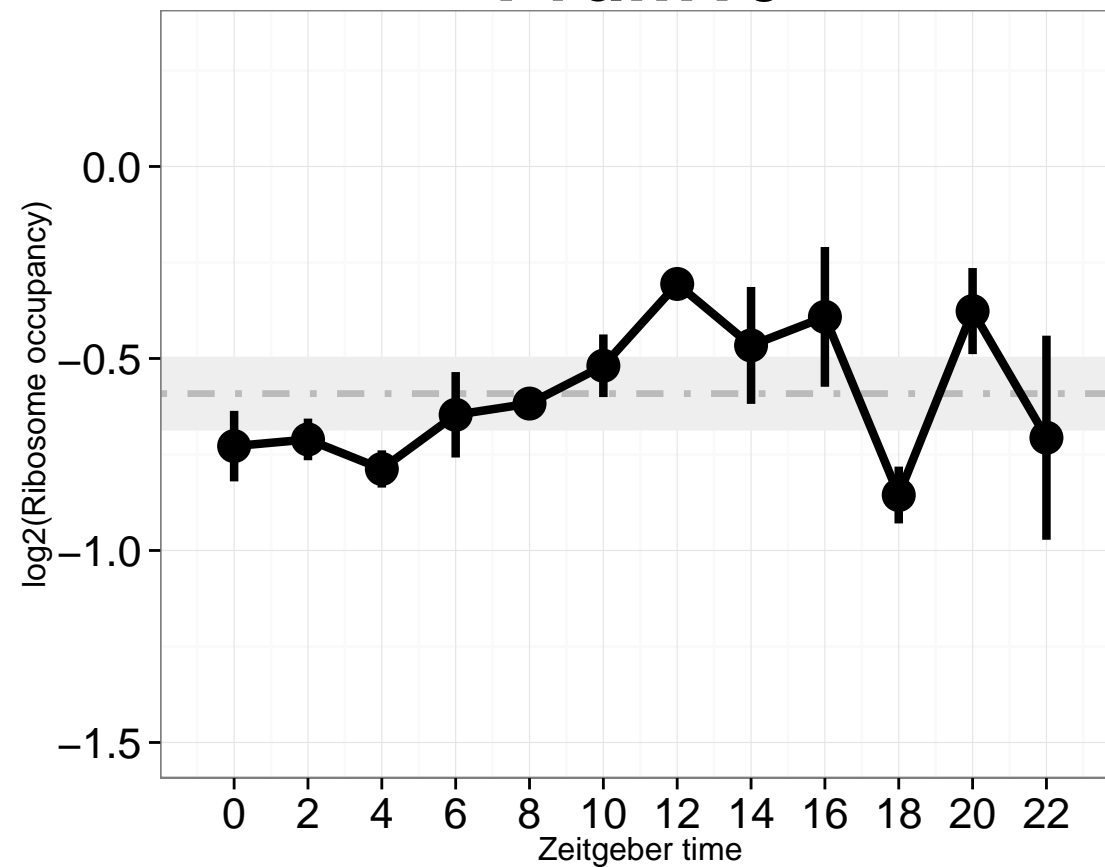

Supplement: Supplementary file 5858 [file 1]

## Fcamr

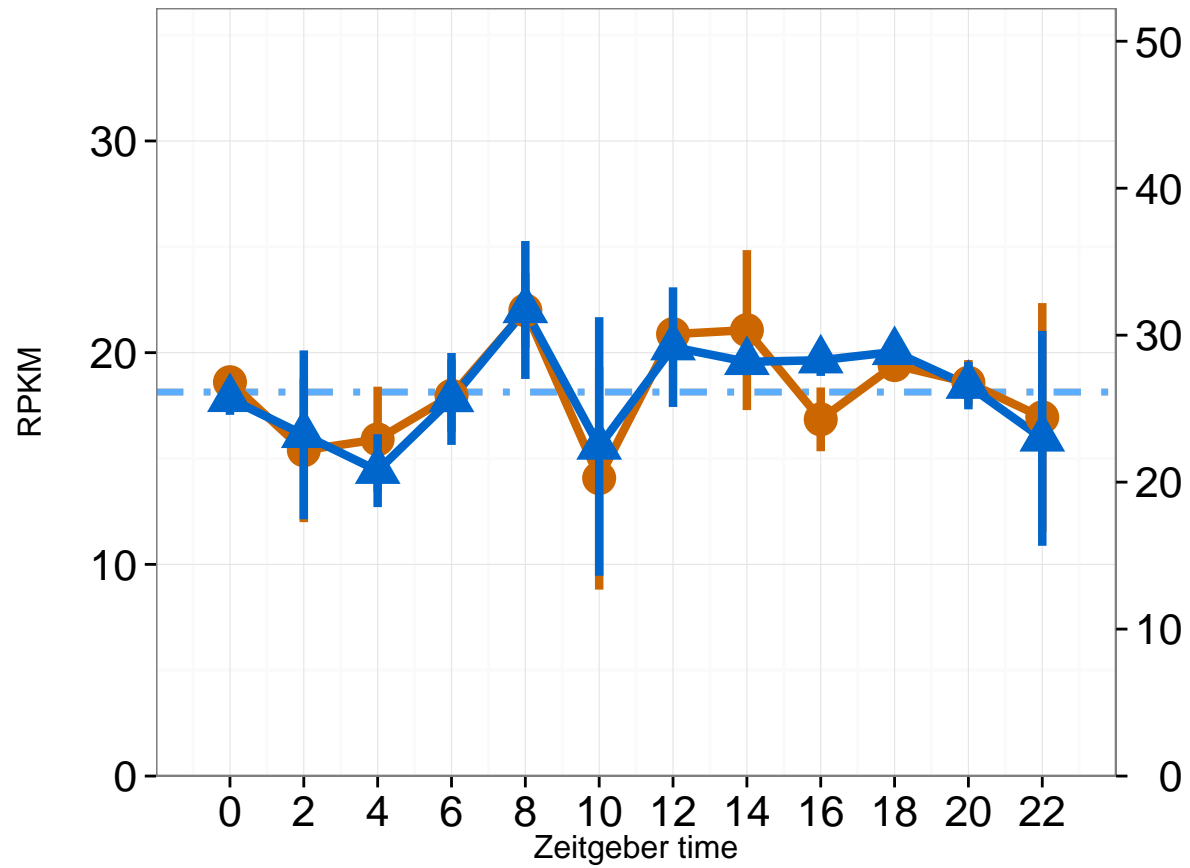

## Fcamr

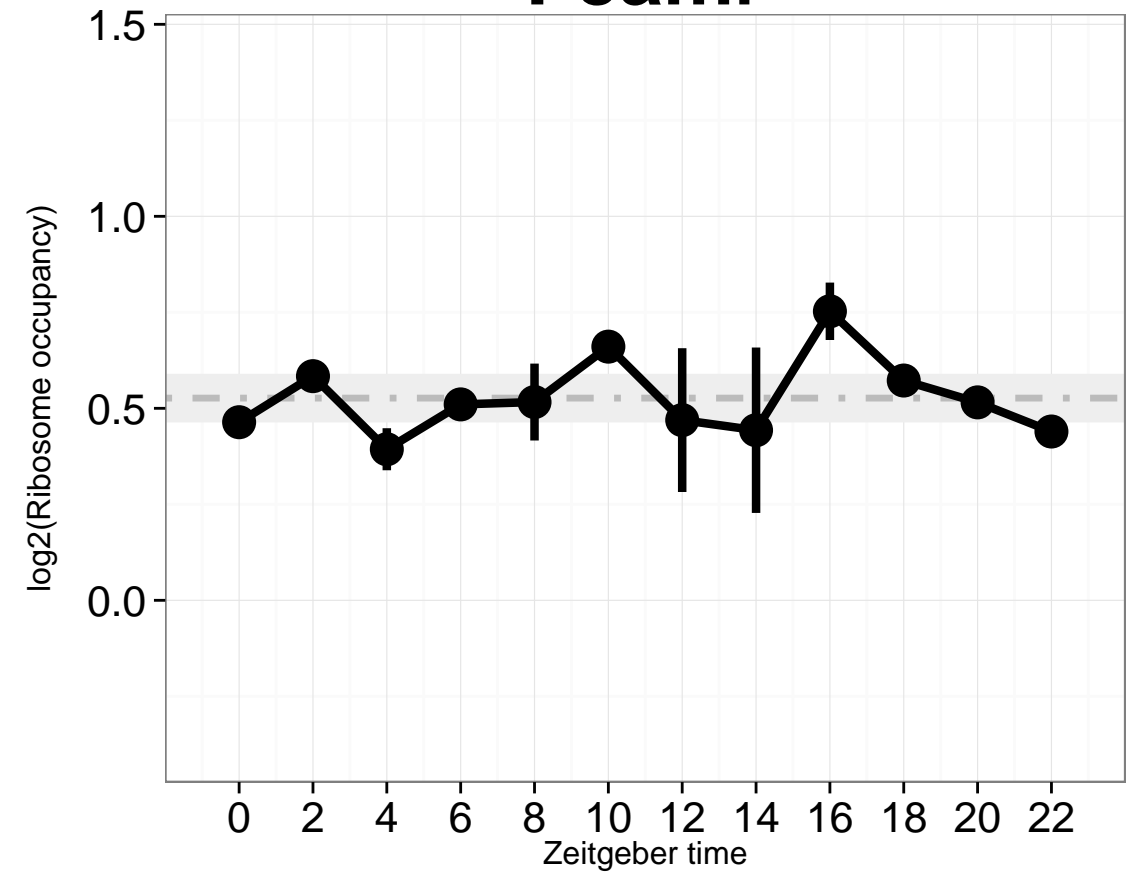

Supplement: Supplementary file 5859 [file 1]

# Cacna2d1

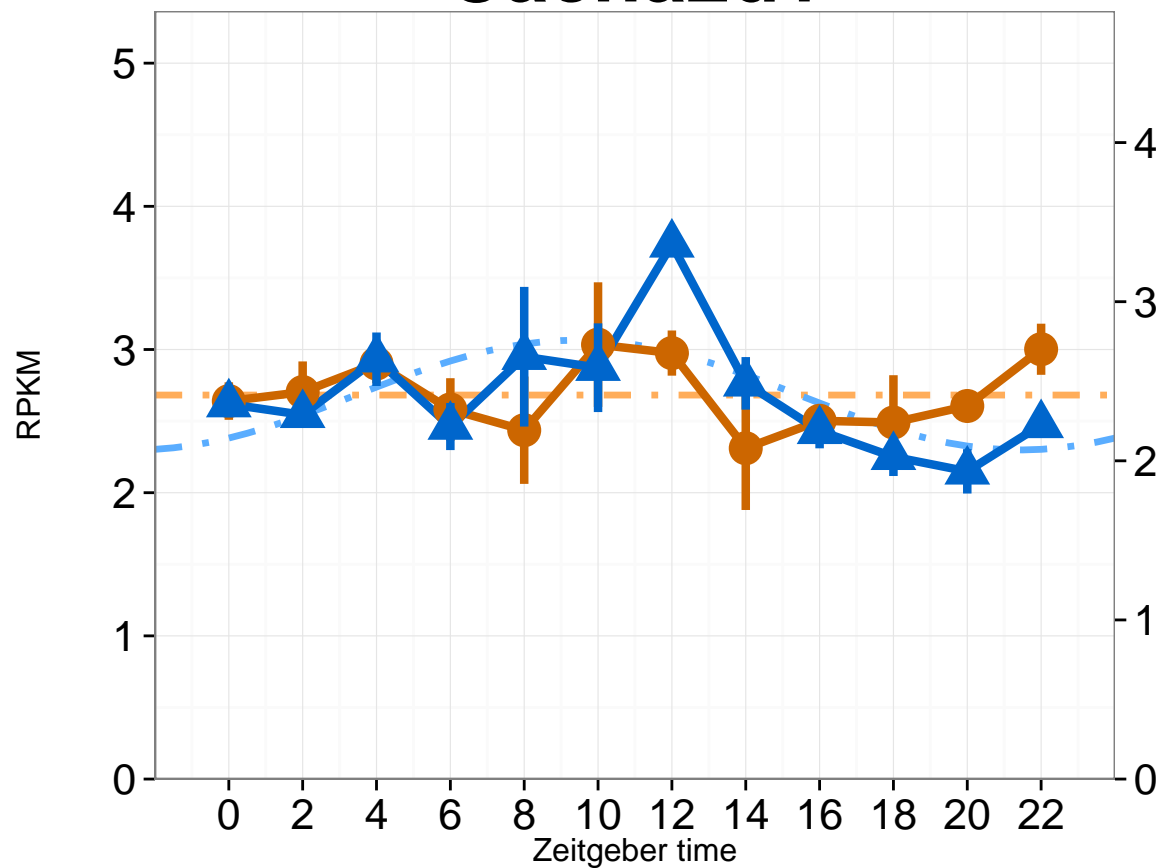

# Cacna2d1

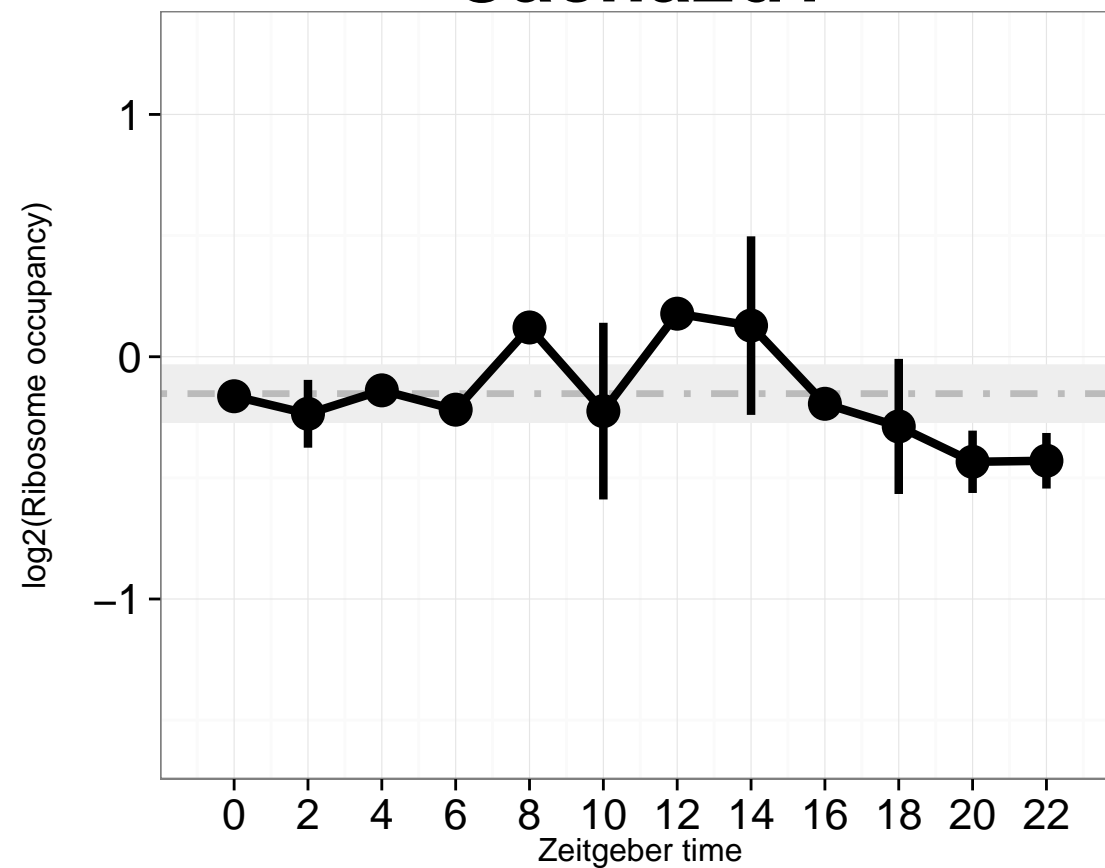

Supplement: Supplementary file 5860 [file 1]

# Arrb2

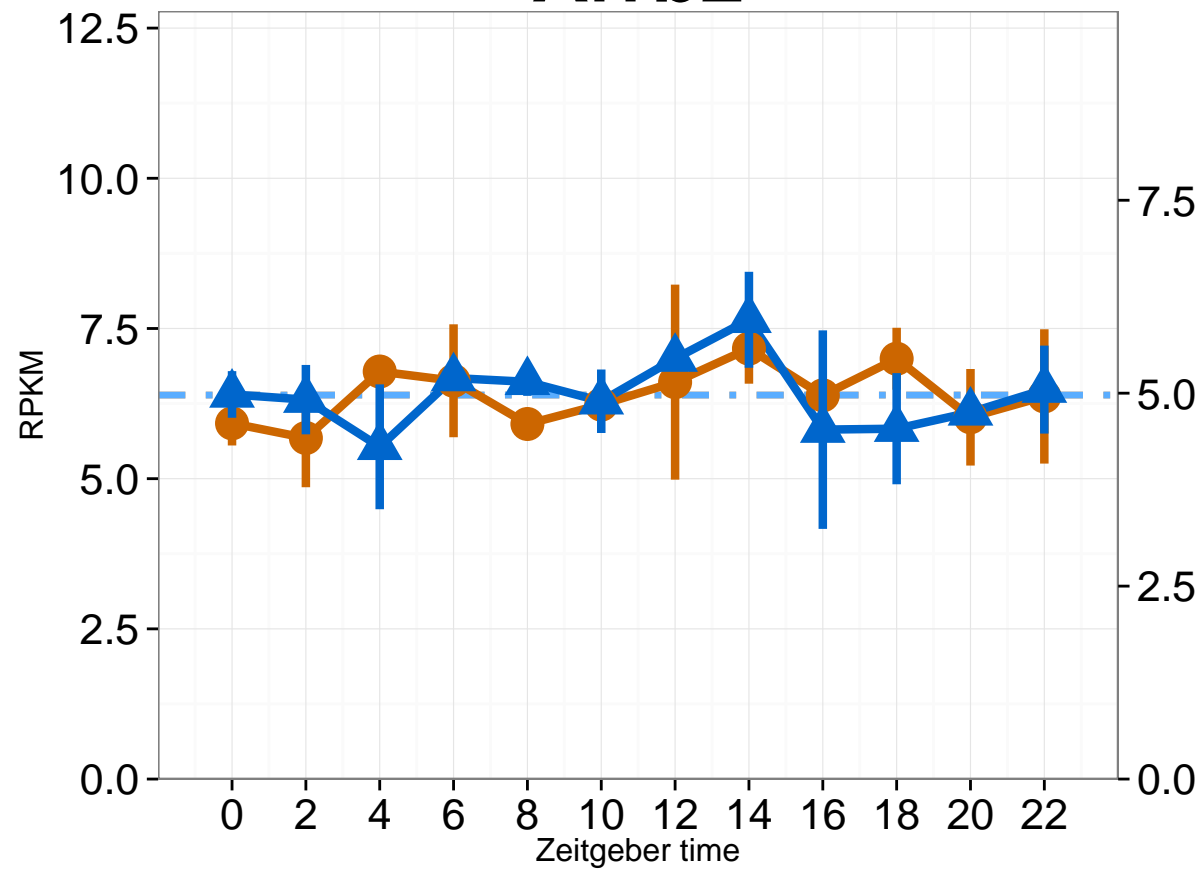

# Arrb2

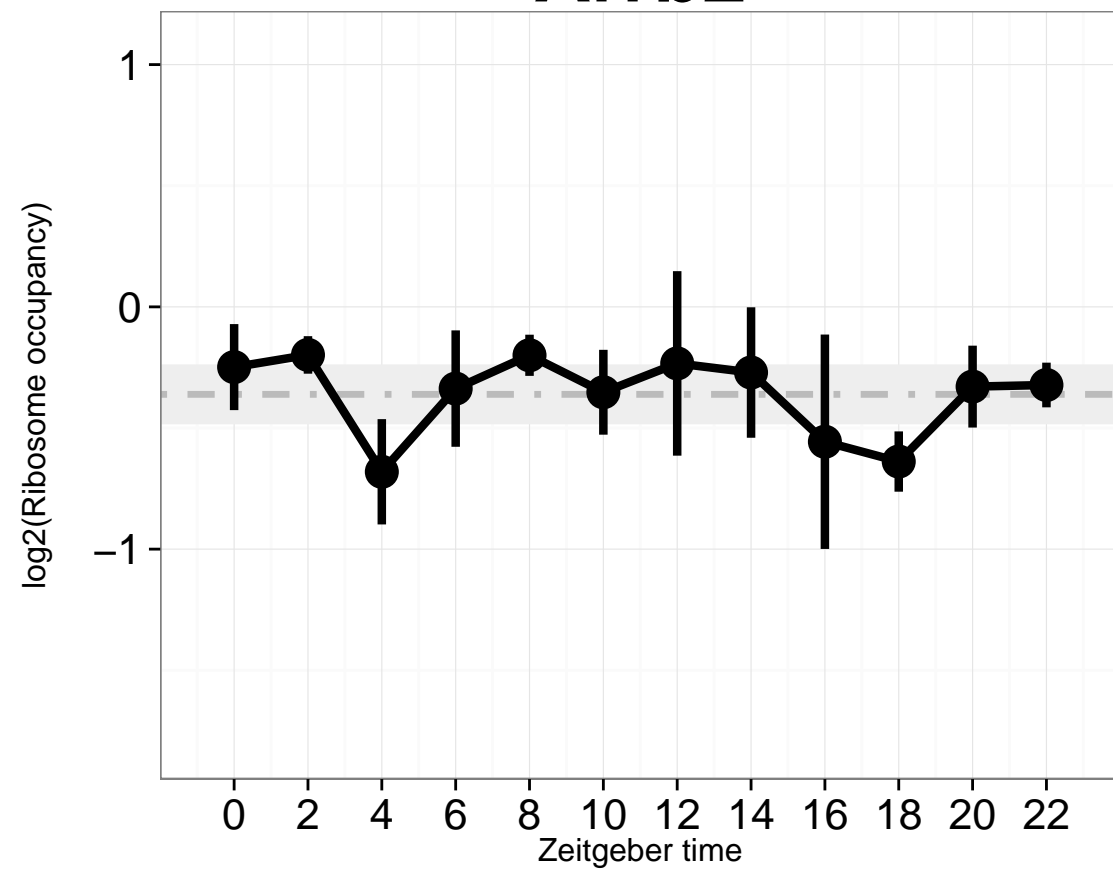

Supplement: Supplementary file 5861 [file 1]

# Agfg2

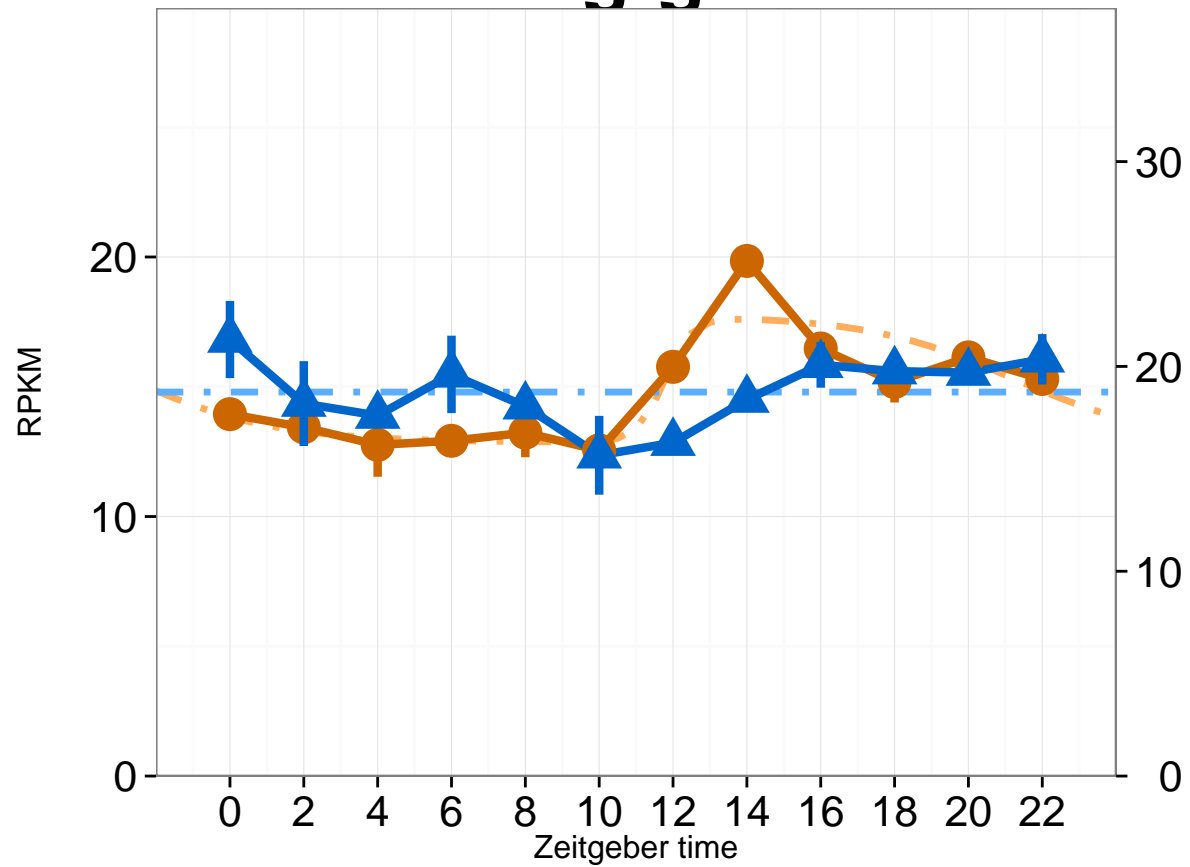

# Agfg2

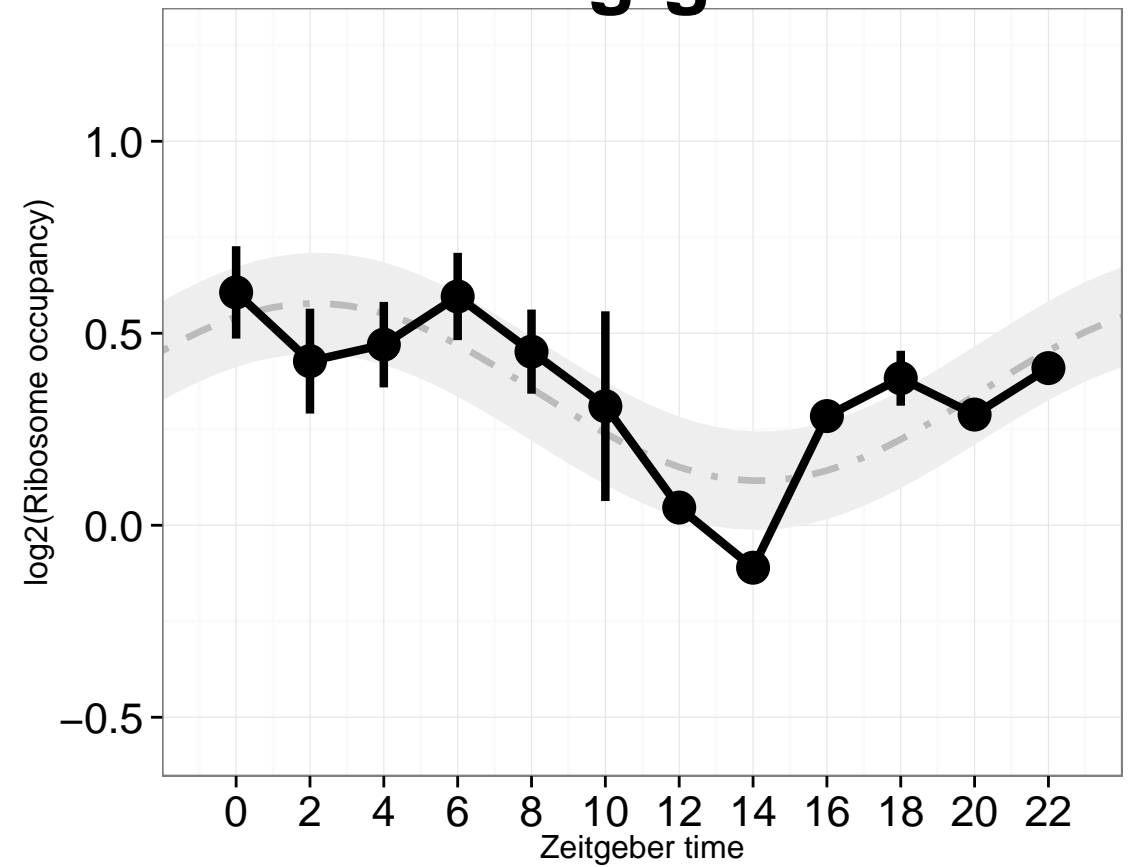

Supplement: Supplementary file 5862 [file 1]

## Klf7

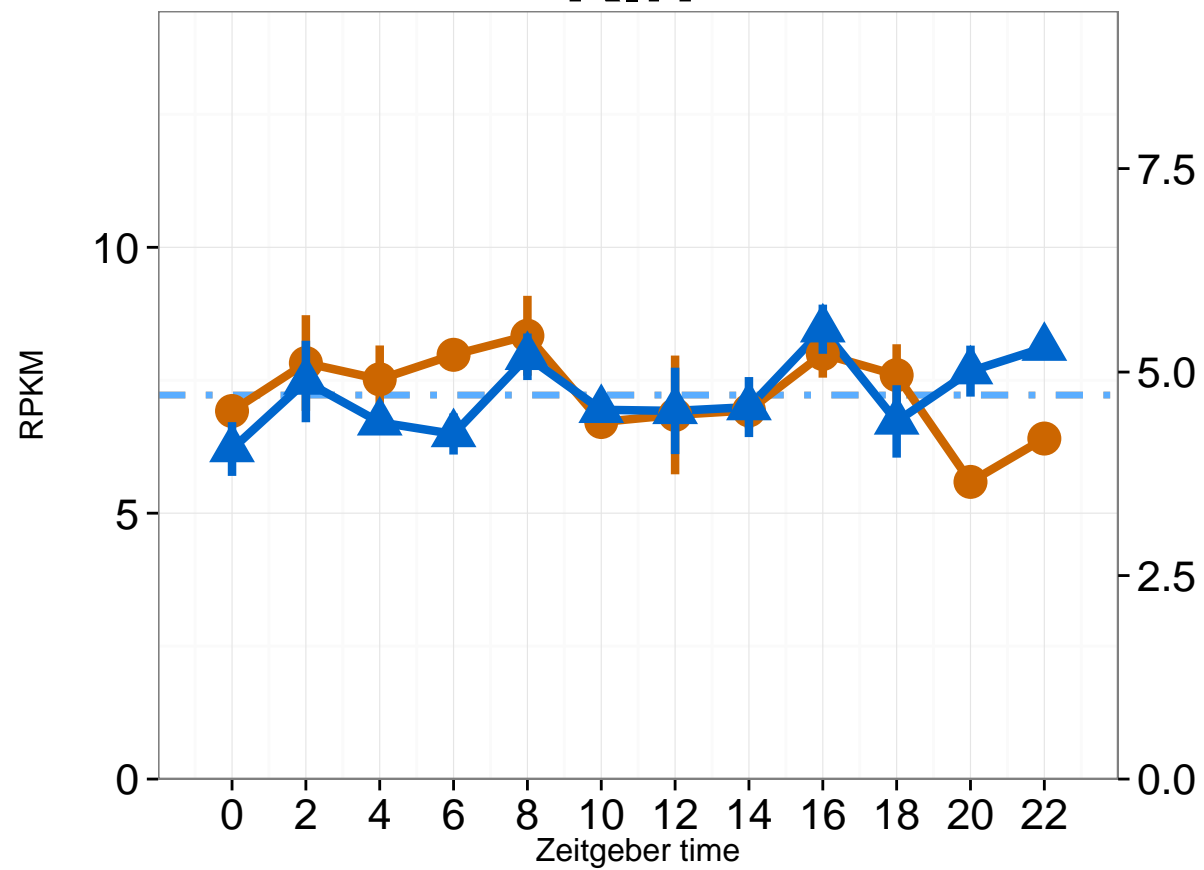

## Klf7

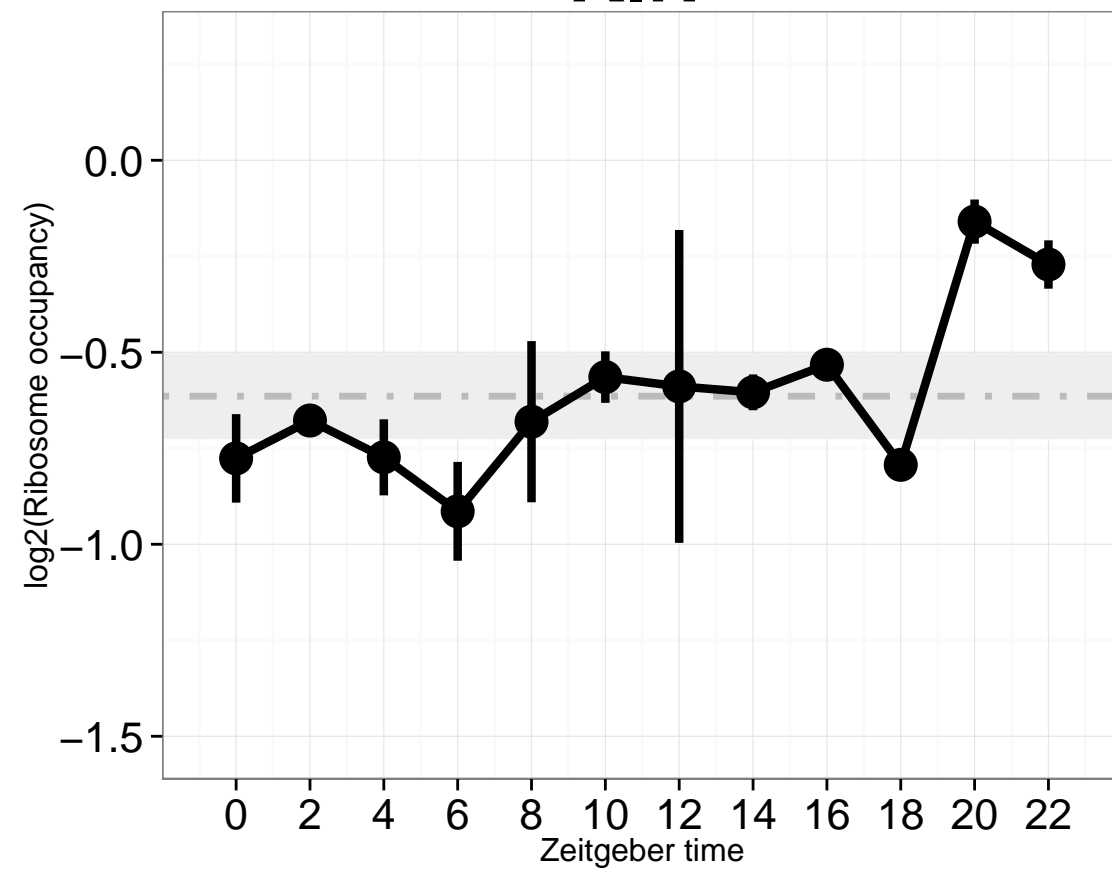

Supplement: Supplementary file 5863 [file 1]

## Lox

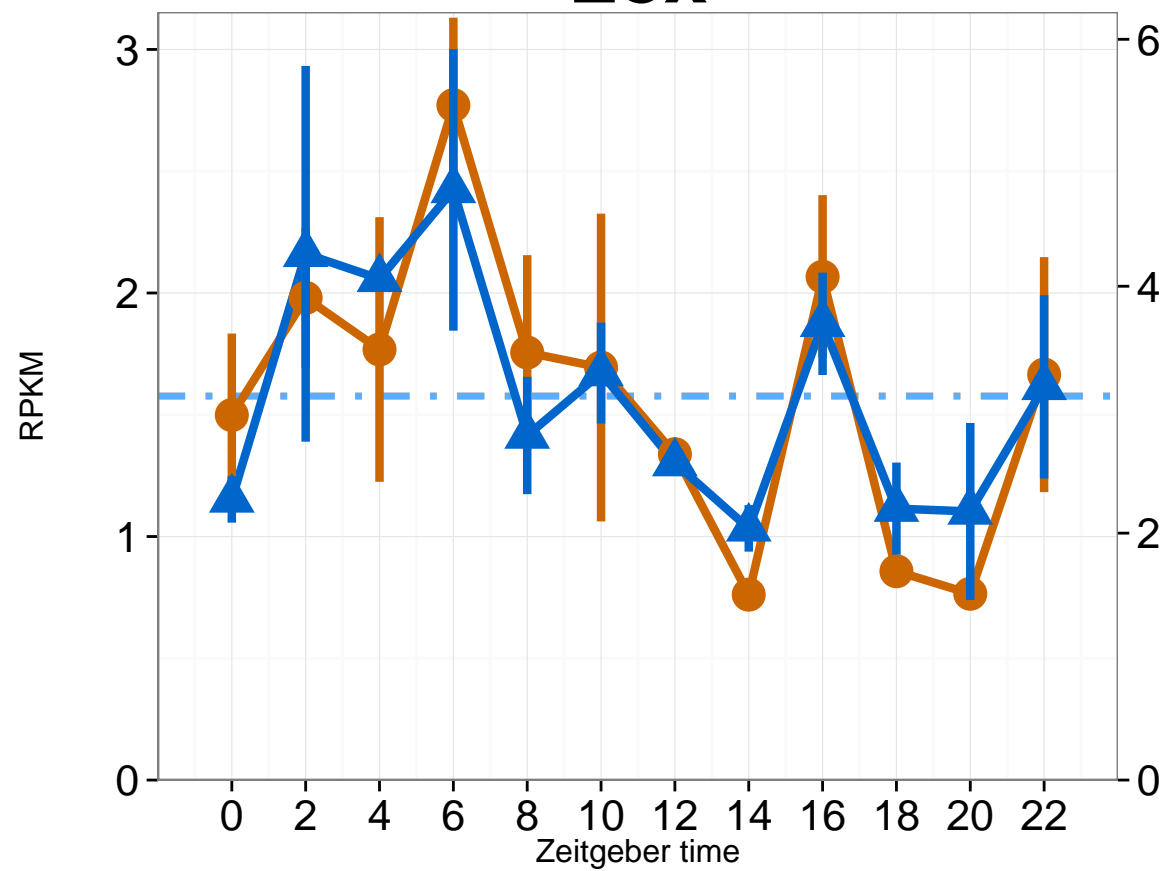

## Lox

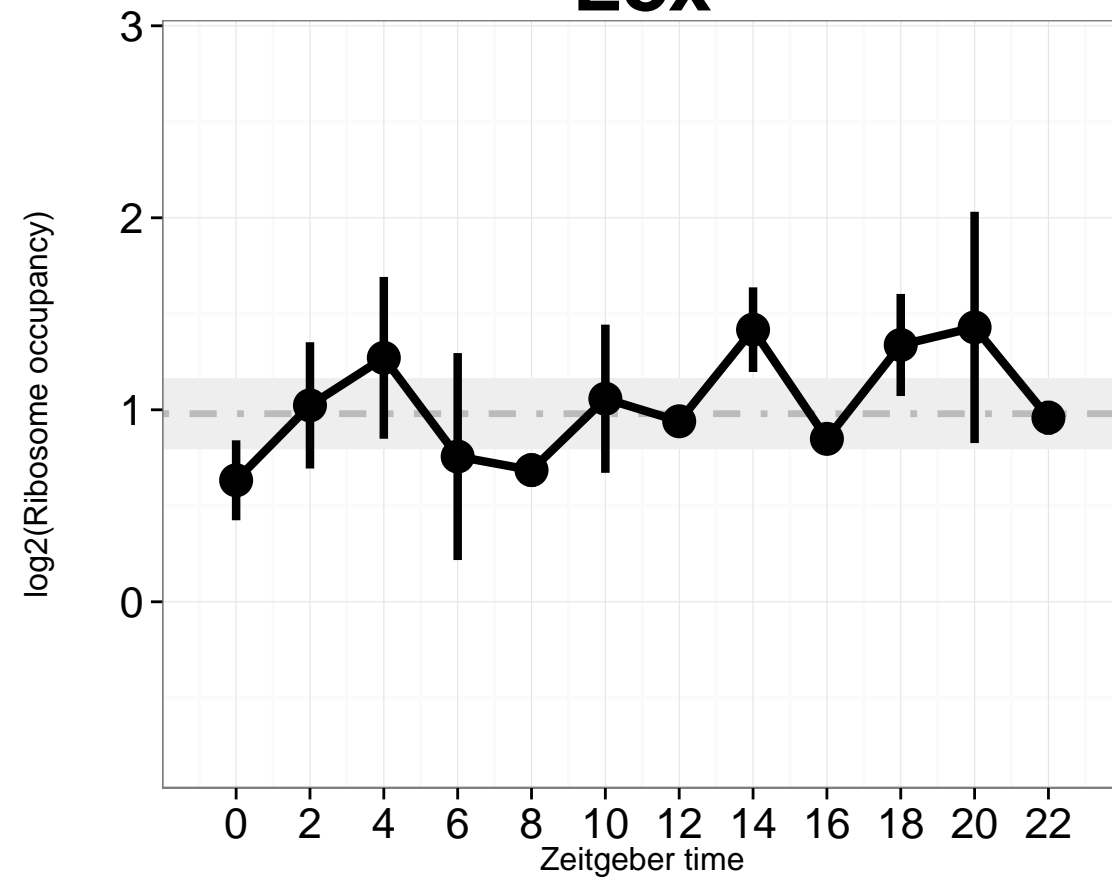

Supplement: Supplementary file 5864 [file 1]

## Agl

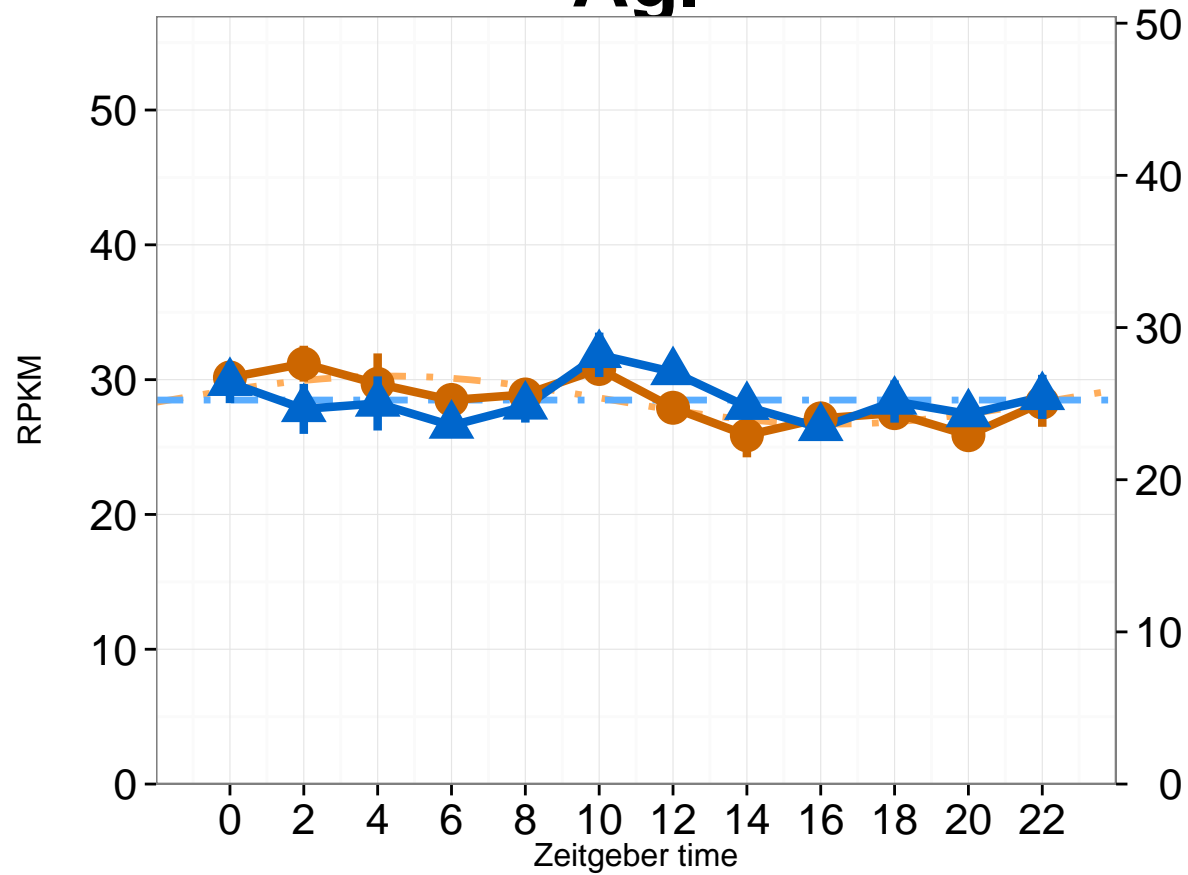

## Agl

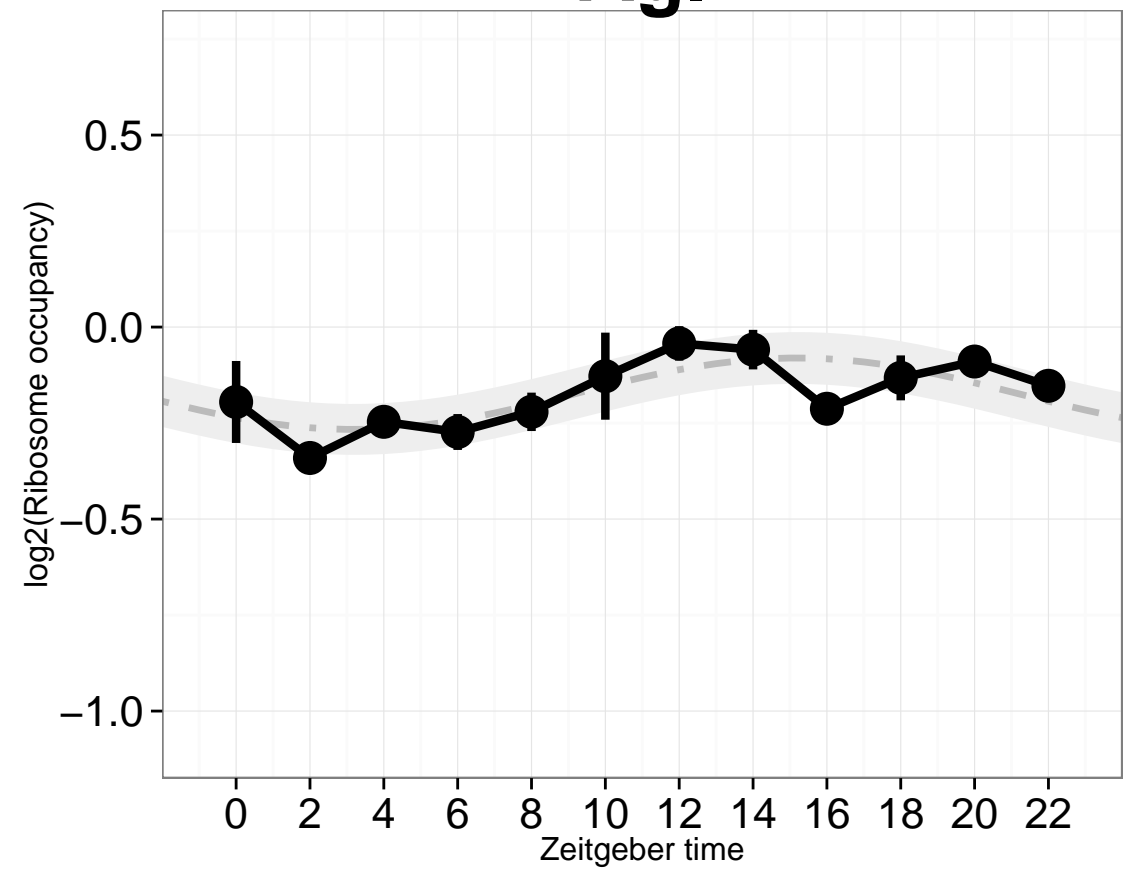

Supplement: Supplementary file 5865 [file 1]

## Lamb1

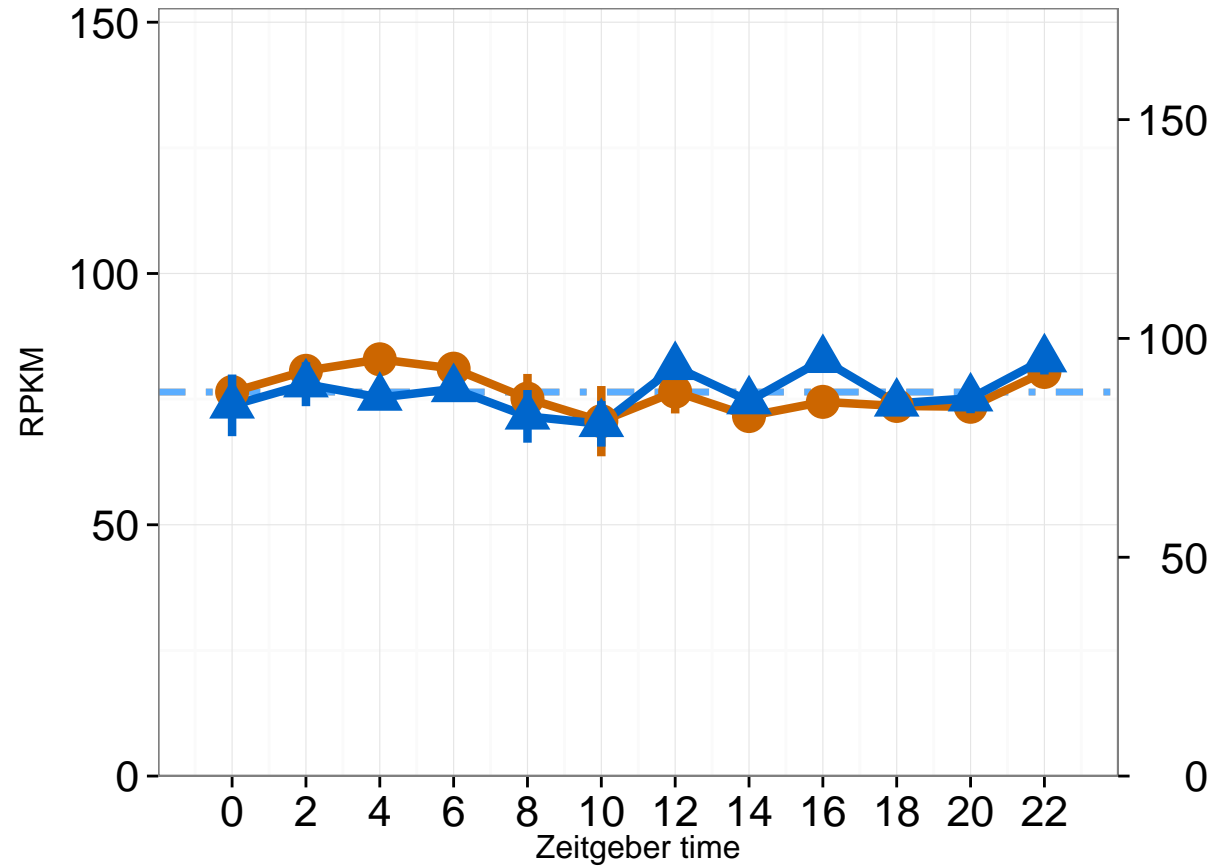

## Lamb1

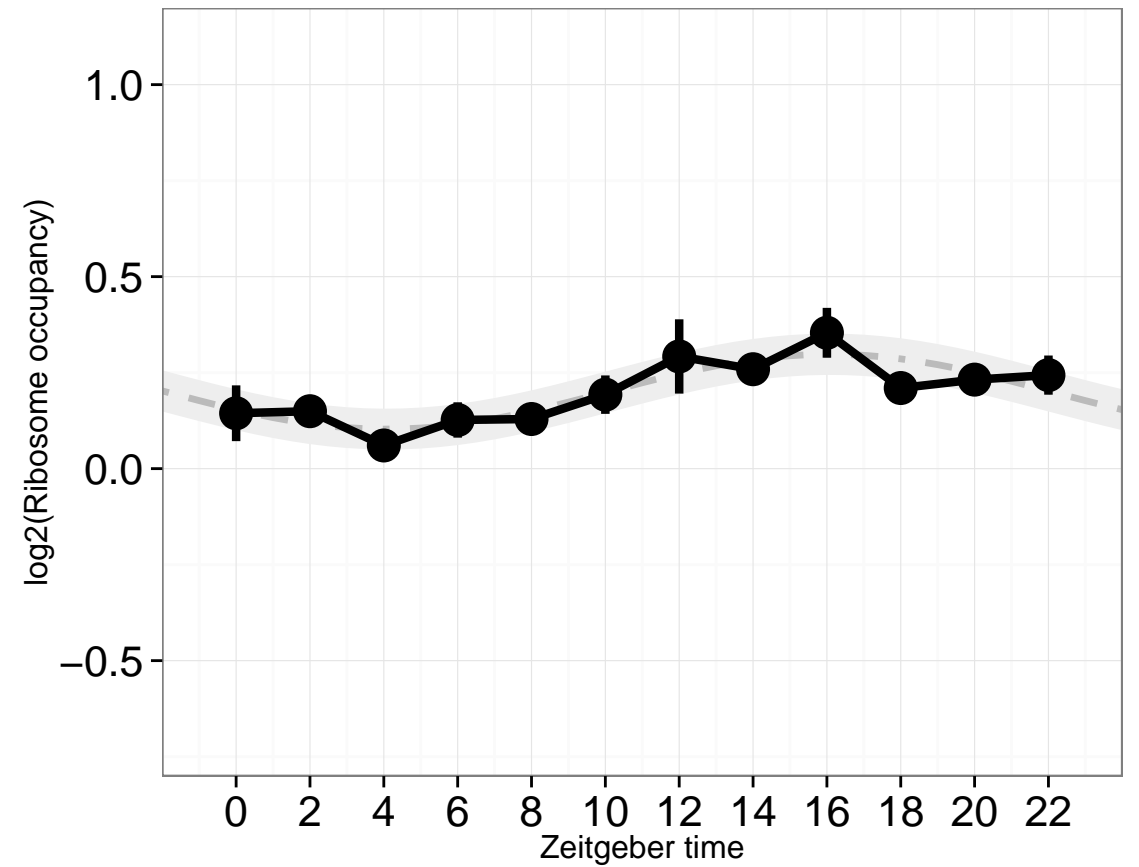

Supplement: Supplementary file 5866 [file 1]

# Cyp3a11

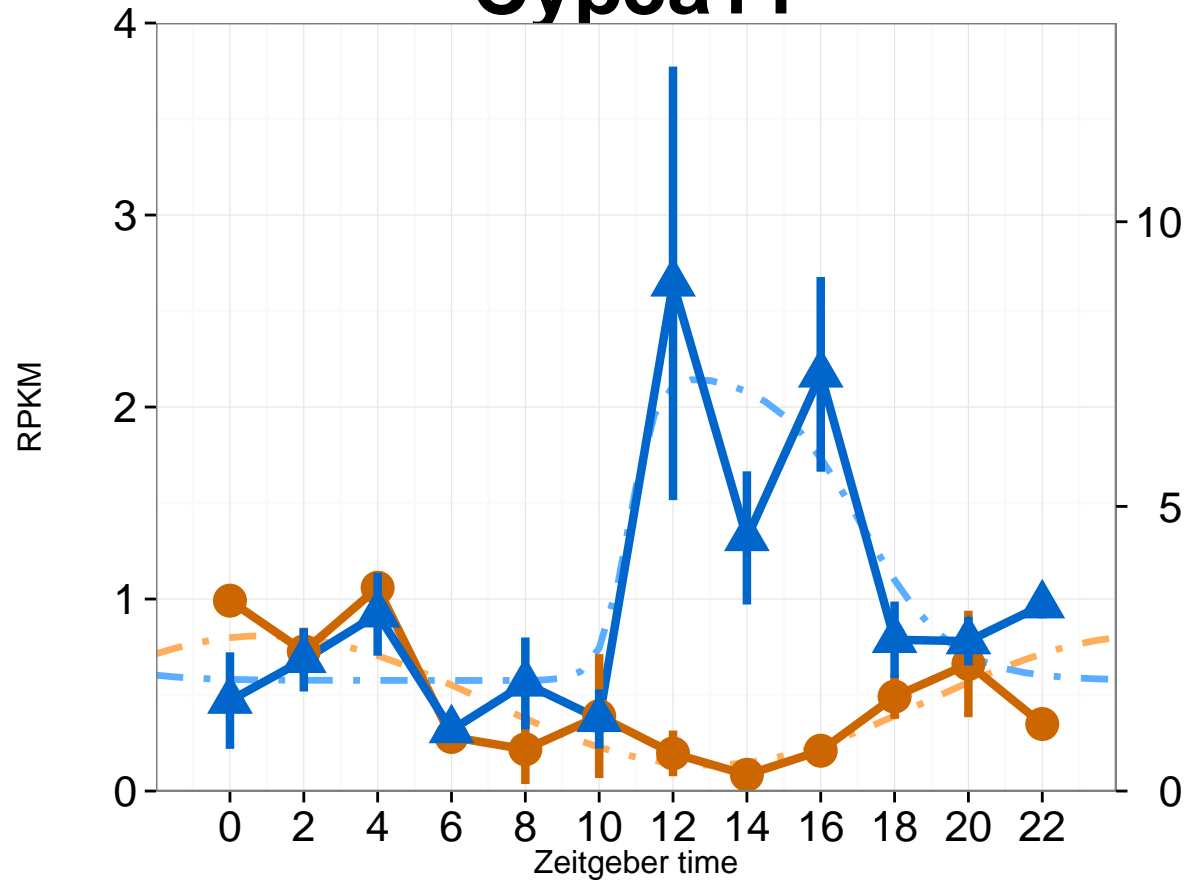

# Cyp3a11

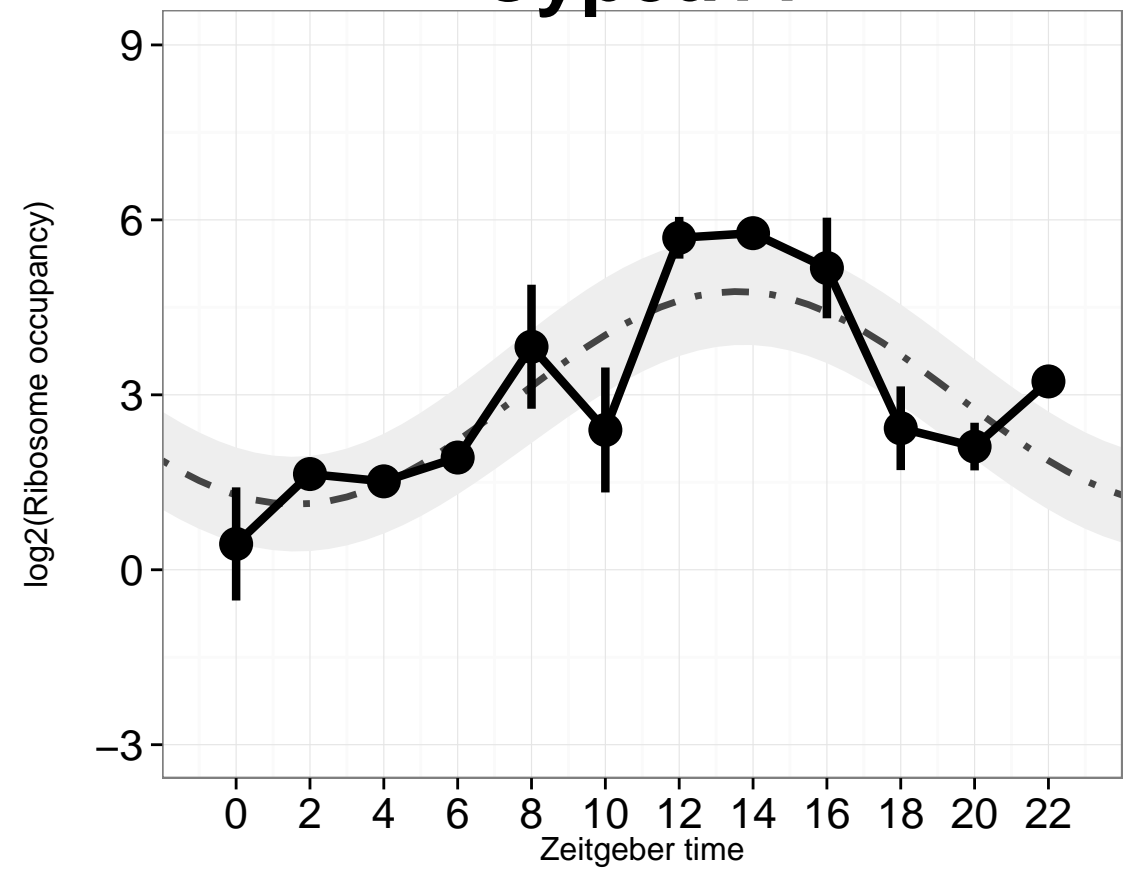

Supplement: Supplementary file 5867 [file 1]

## Ltbp3

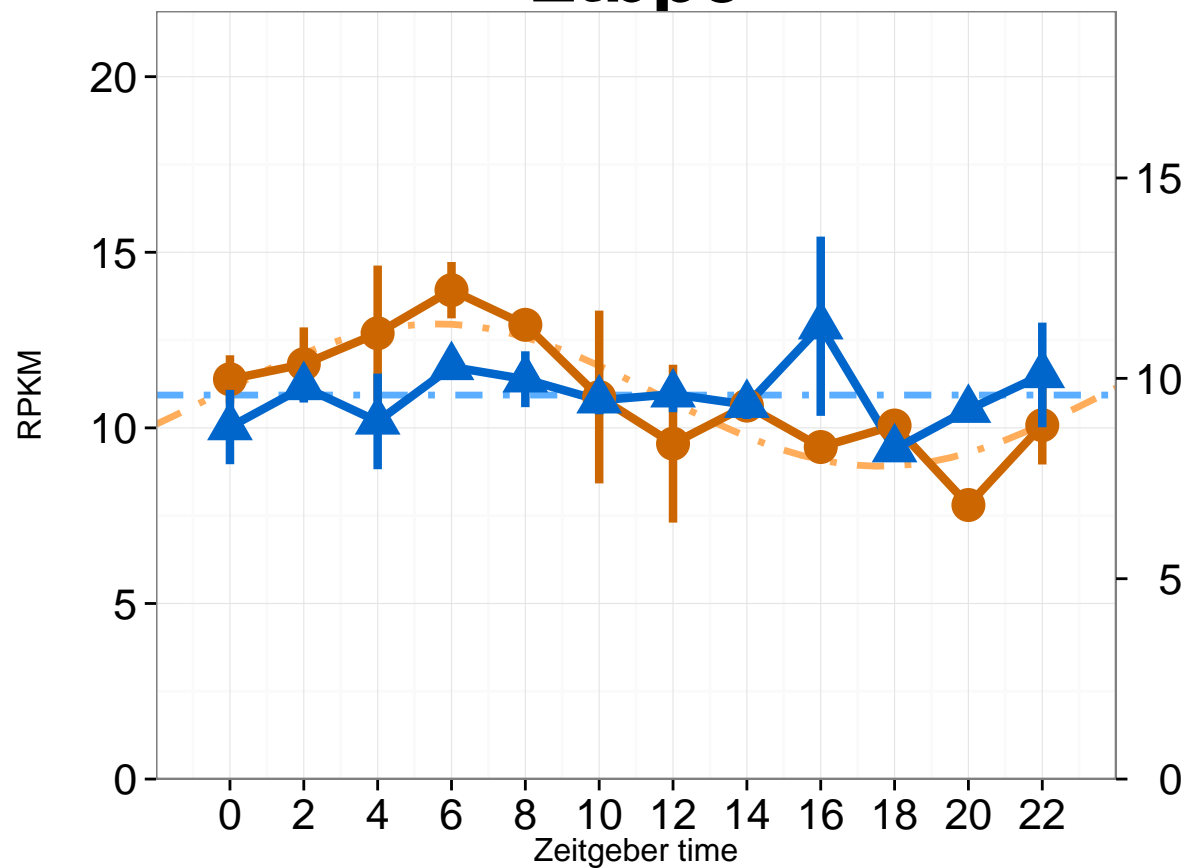

## Ltbp3

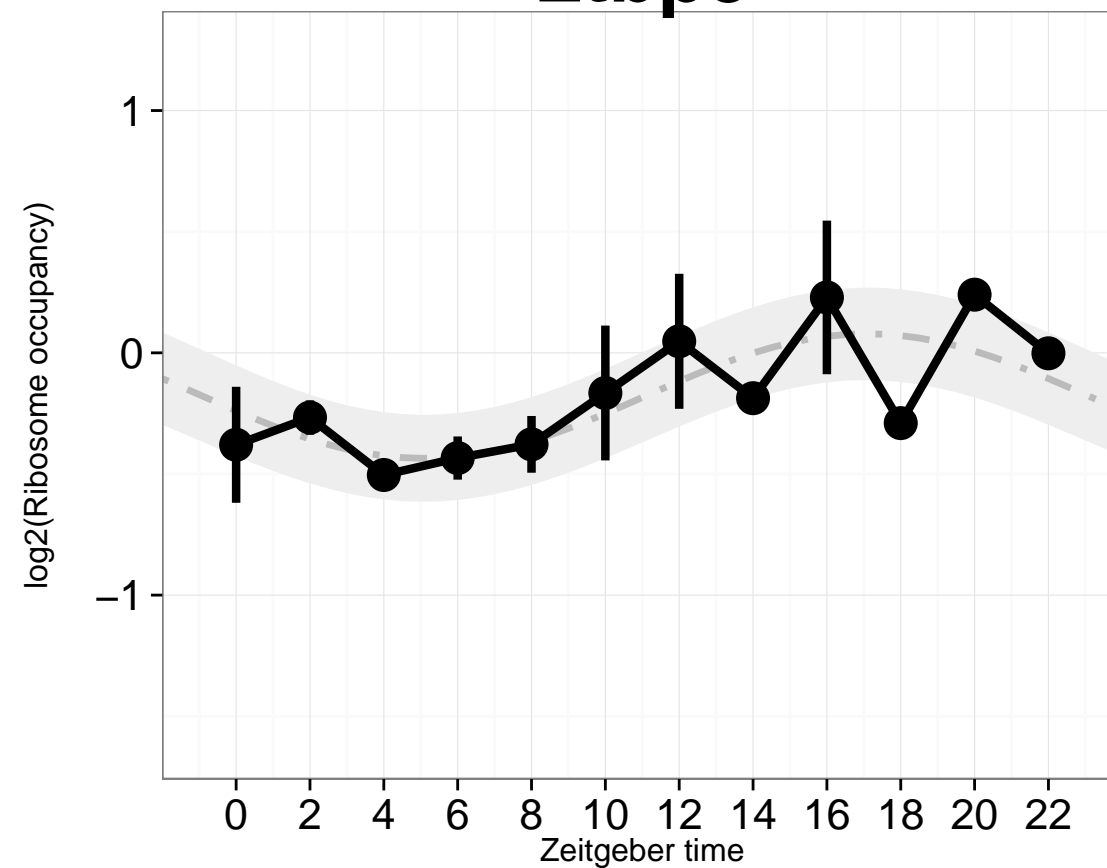

Supplement: Supplementary file 5868 [file 1]

# Ppp4c

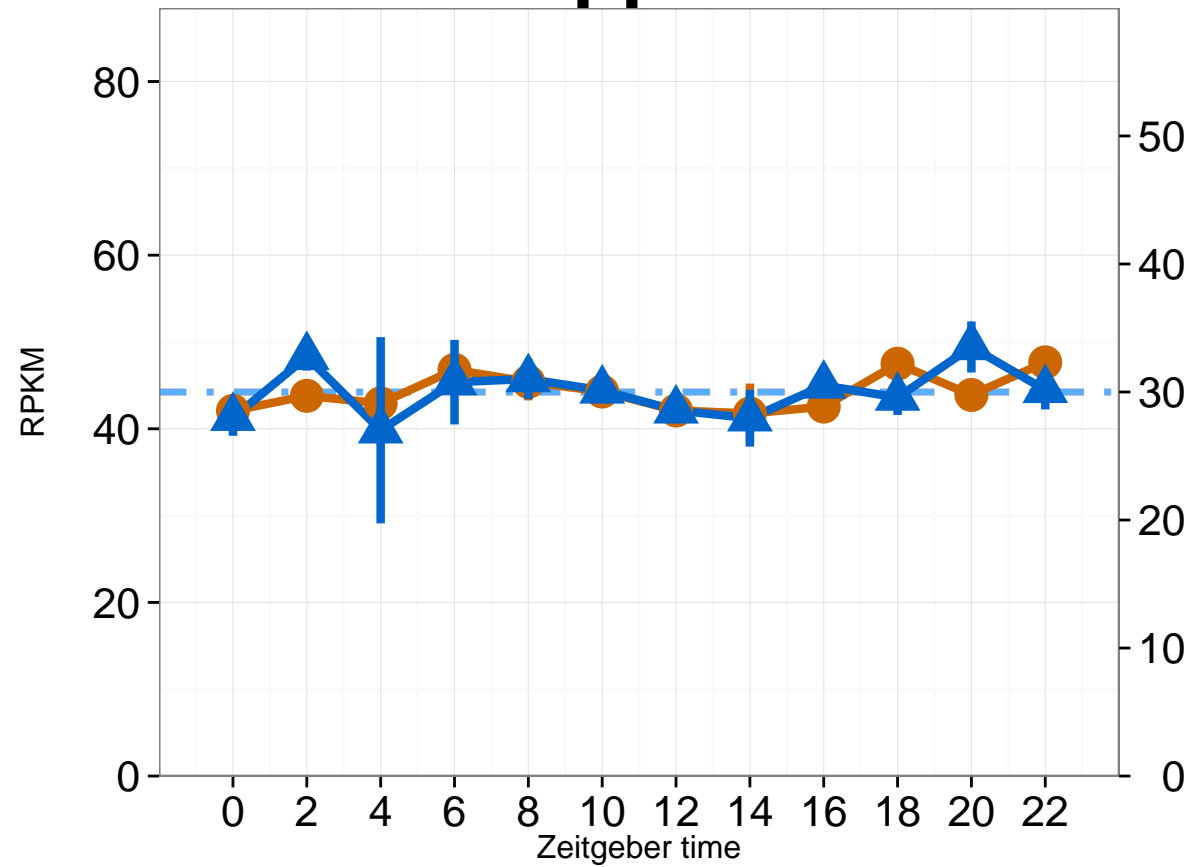

# Ppp4c

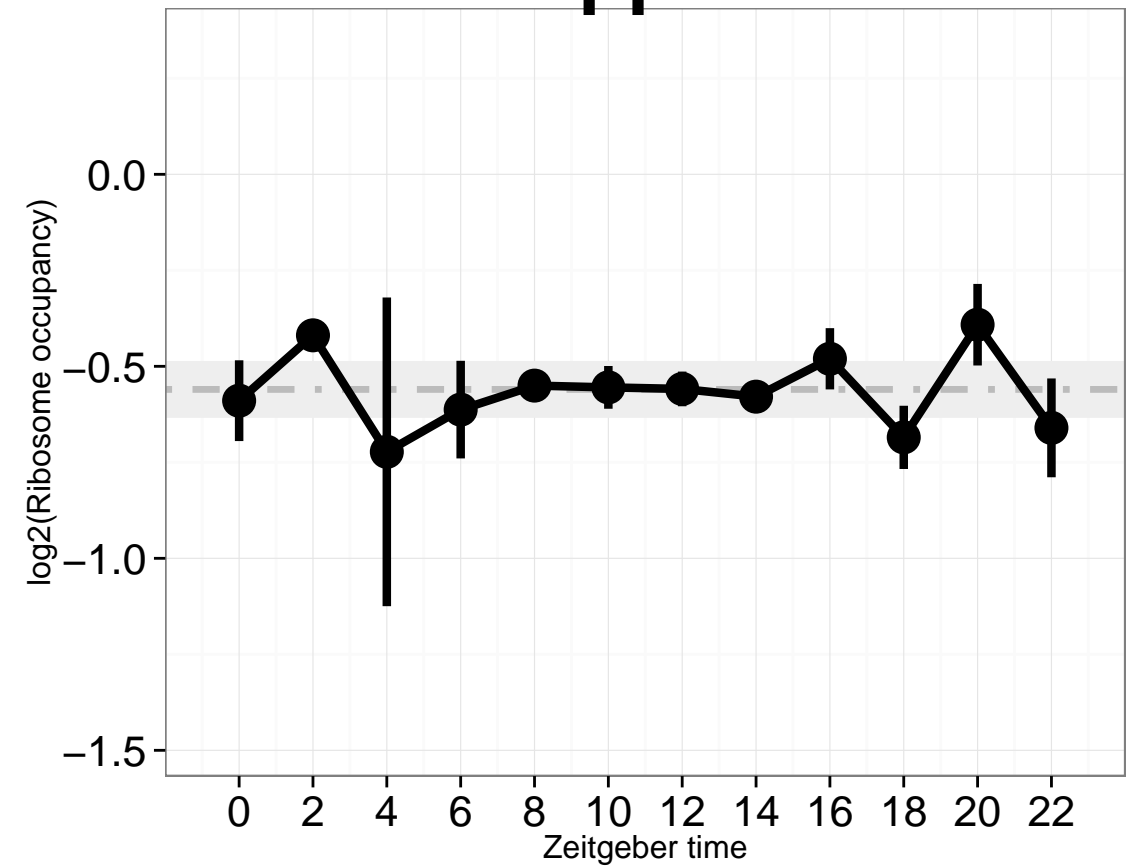

Supplement: Supplementary file 5869 [file 1]

# Col4a5

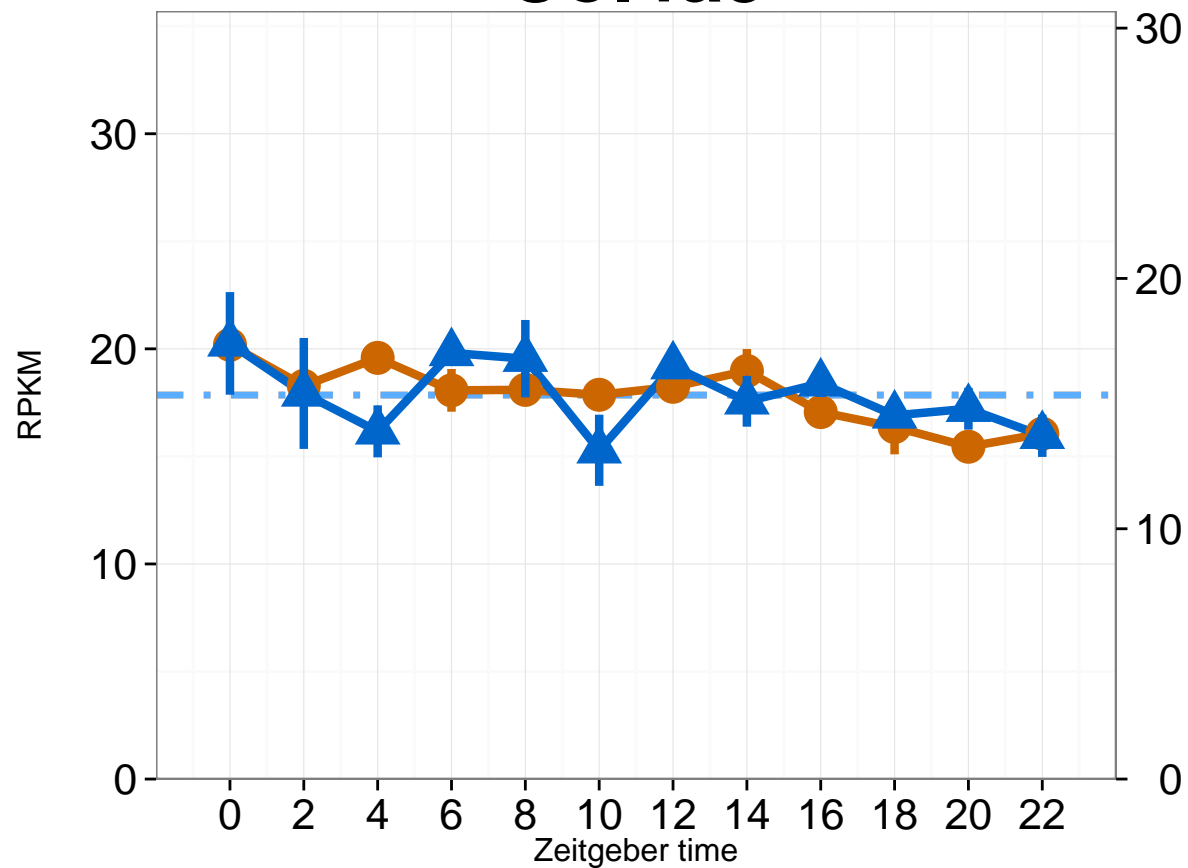

# Col4a5

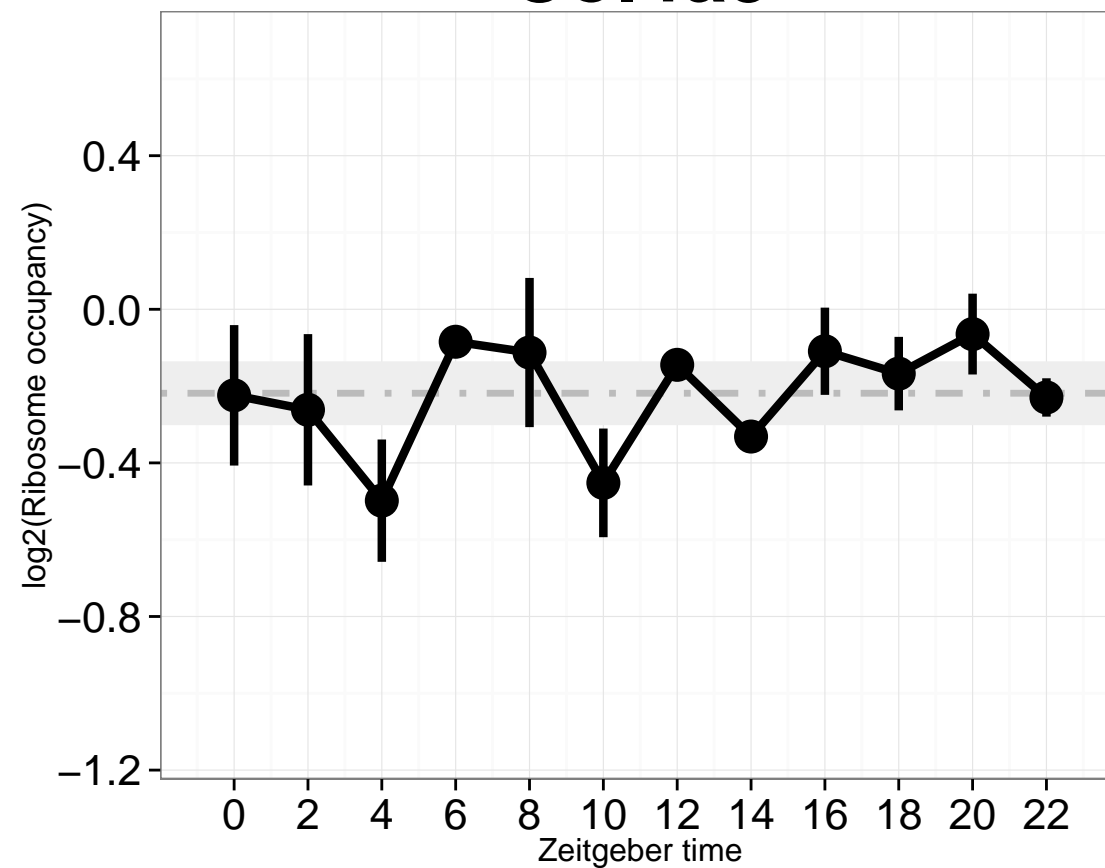

Supplement: Supplementary file 5870 [file 1]

## Htati2

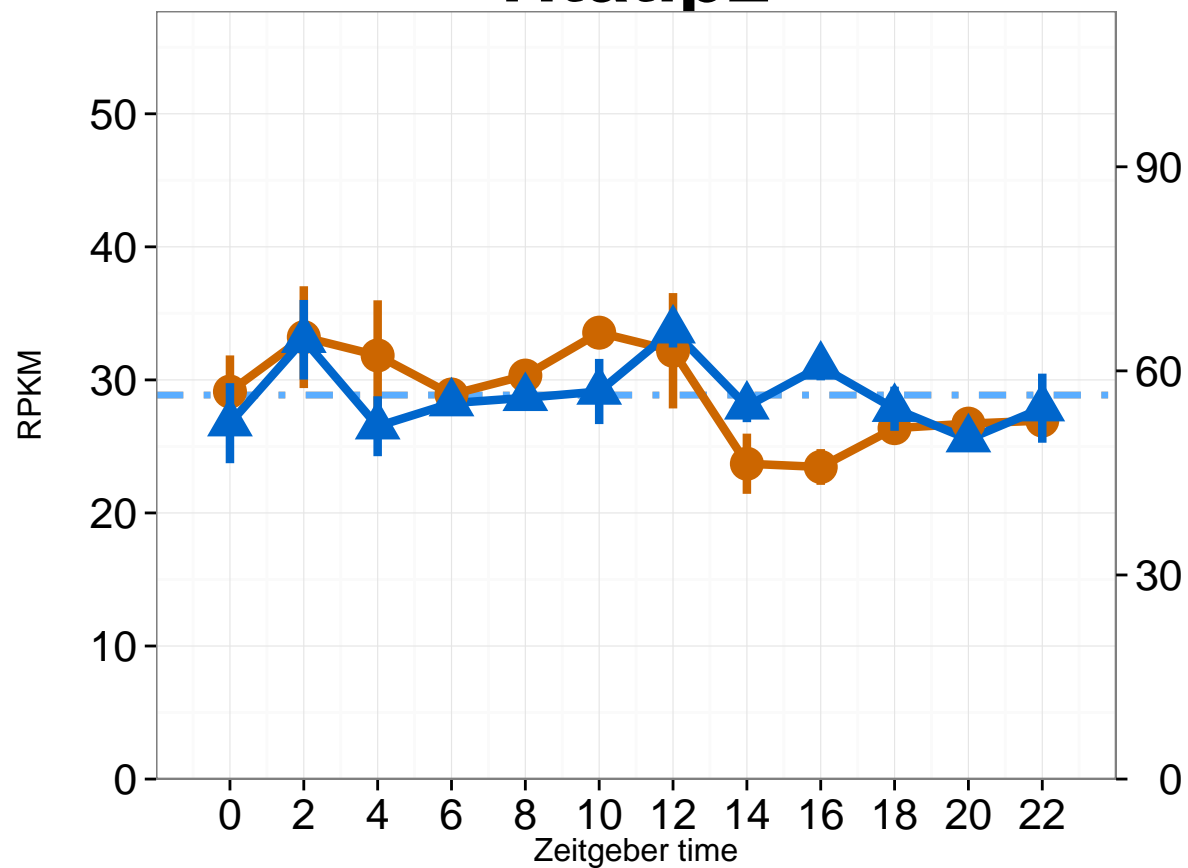

## Htati2

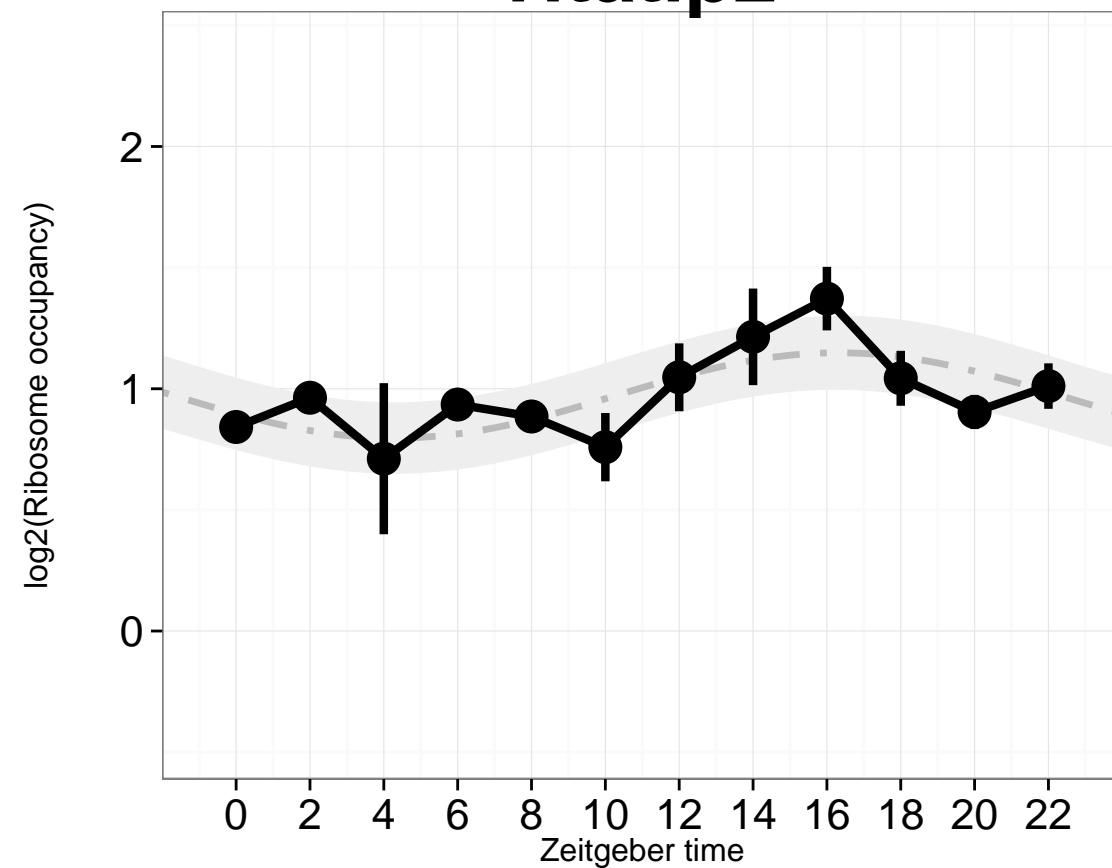

Supplement: Supplementary file 5871 [file 1]

## Eogt

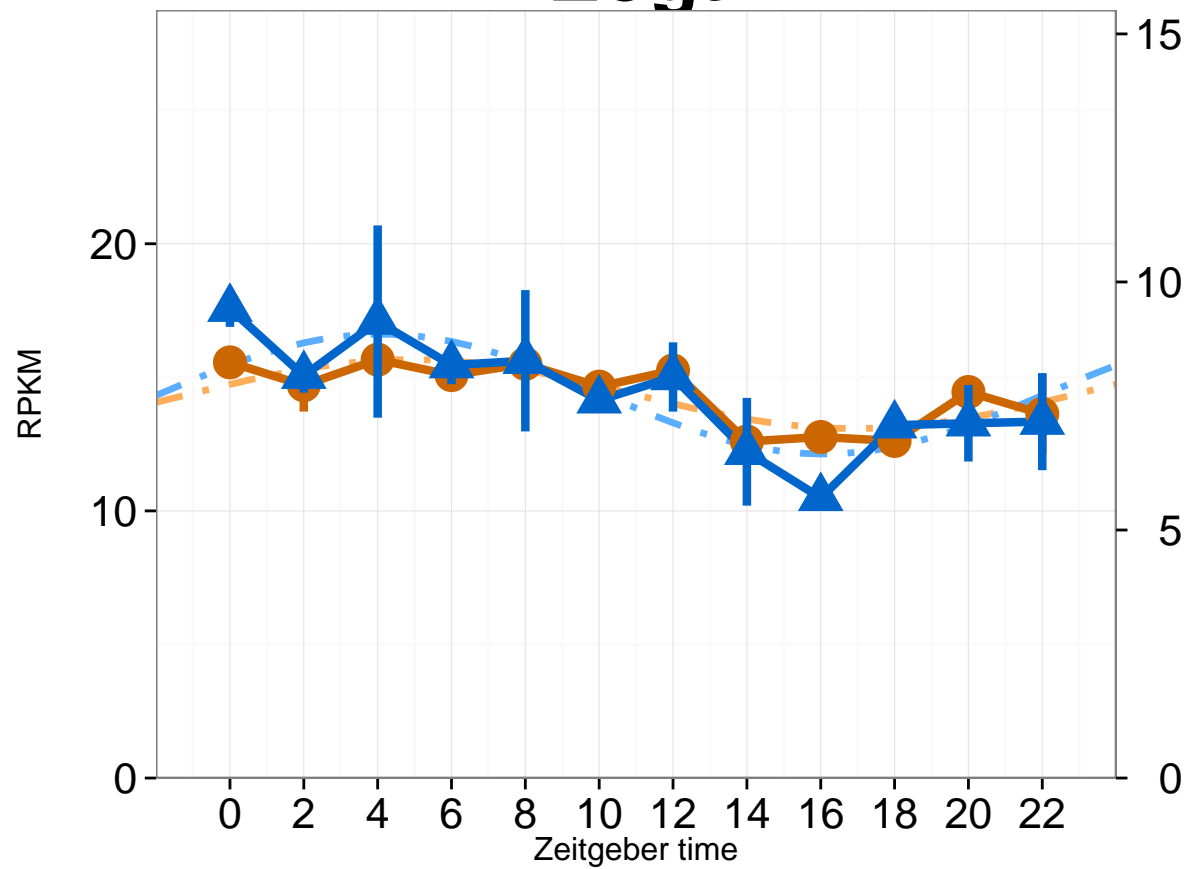

## Eogt

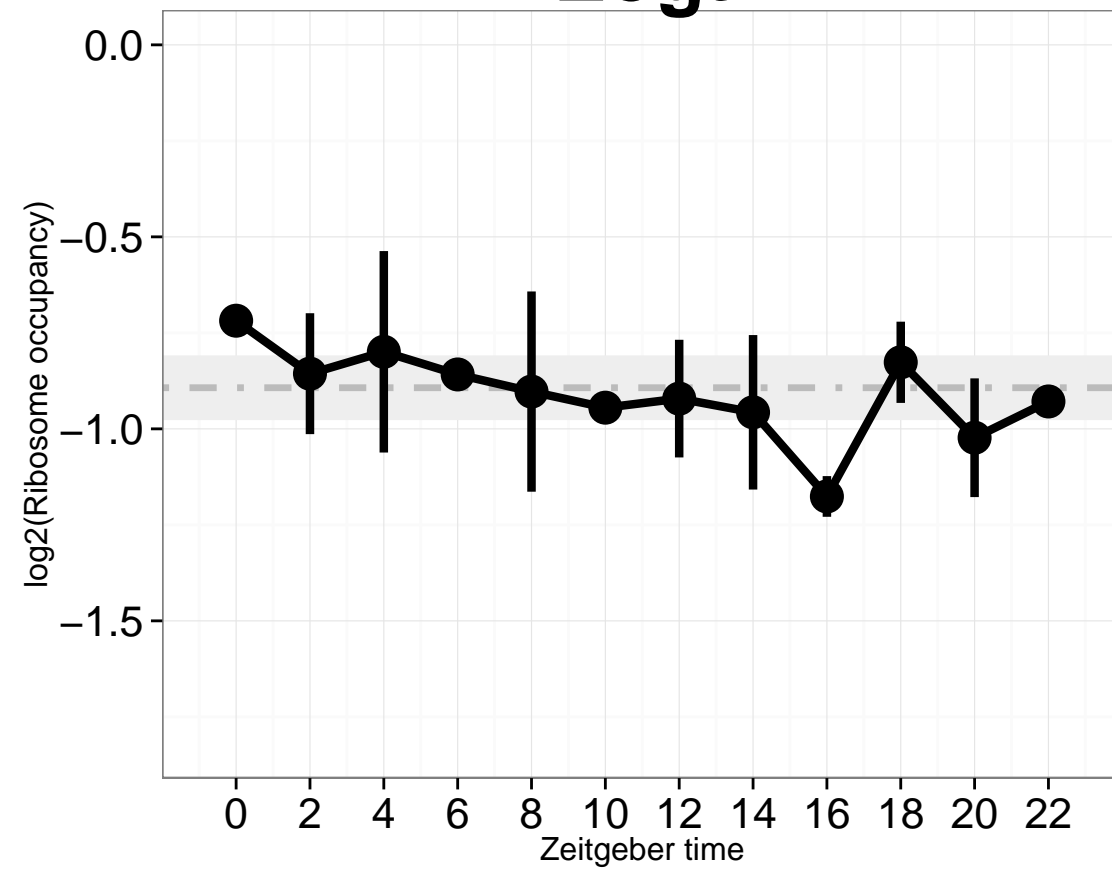

Supplement: Supplementary file 5872 [file 1]

## Klf13

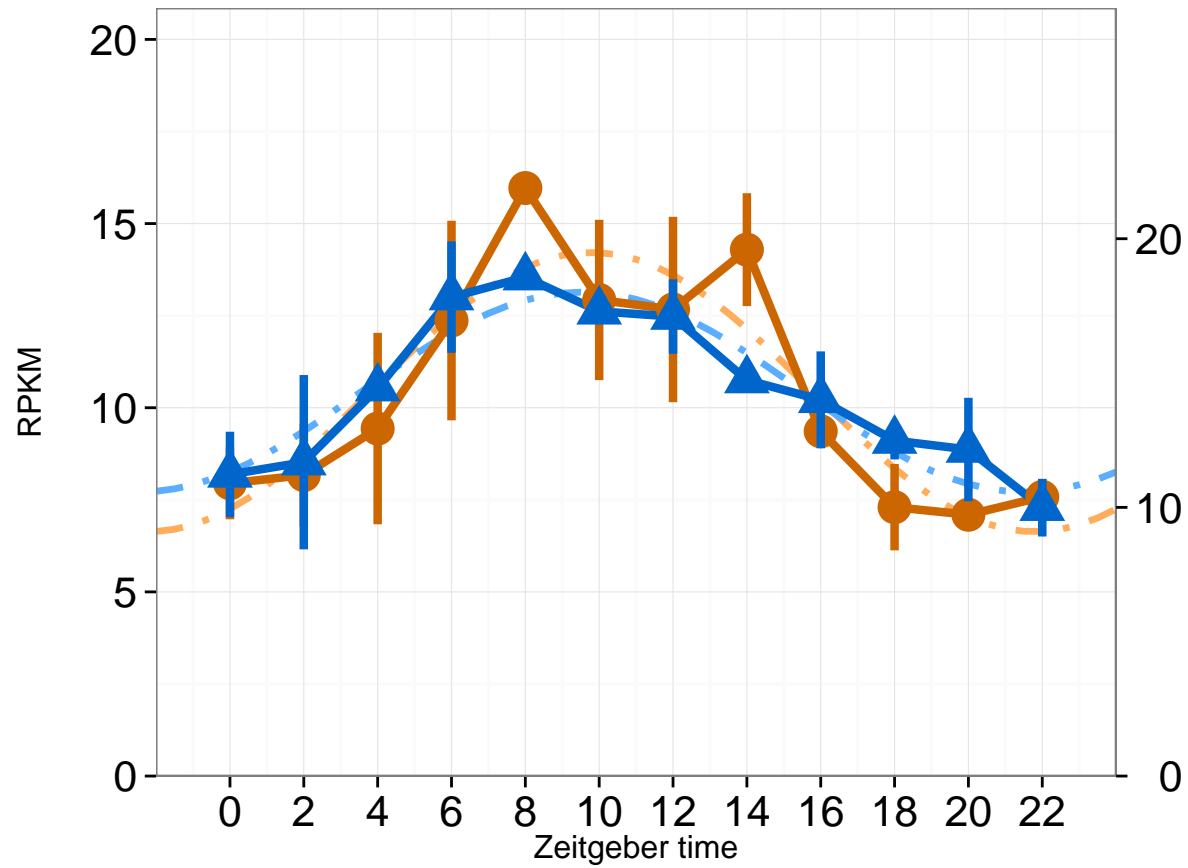

## Klf13

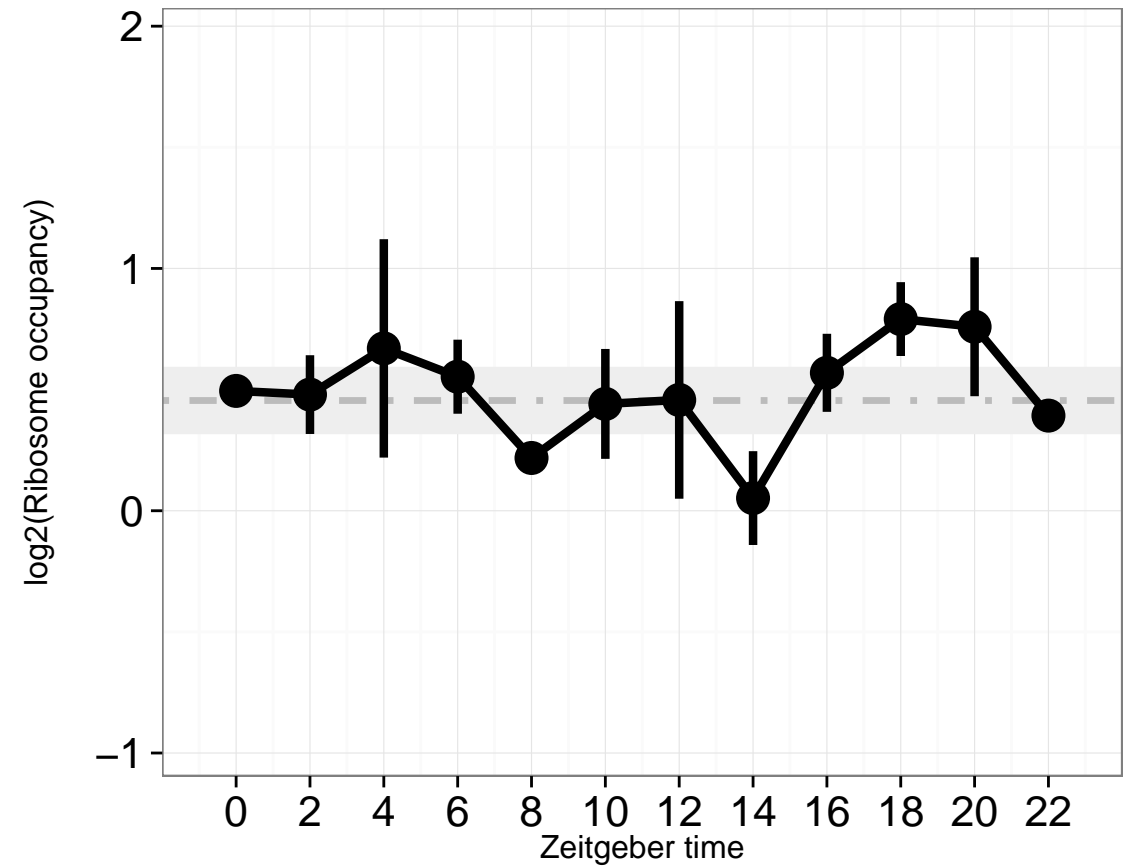

Supplement: Supplementary file 5873 [file 1]

## Nelfa

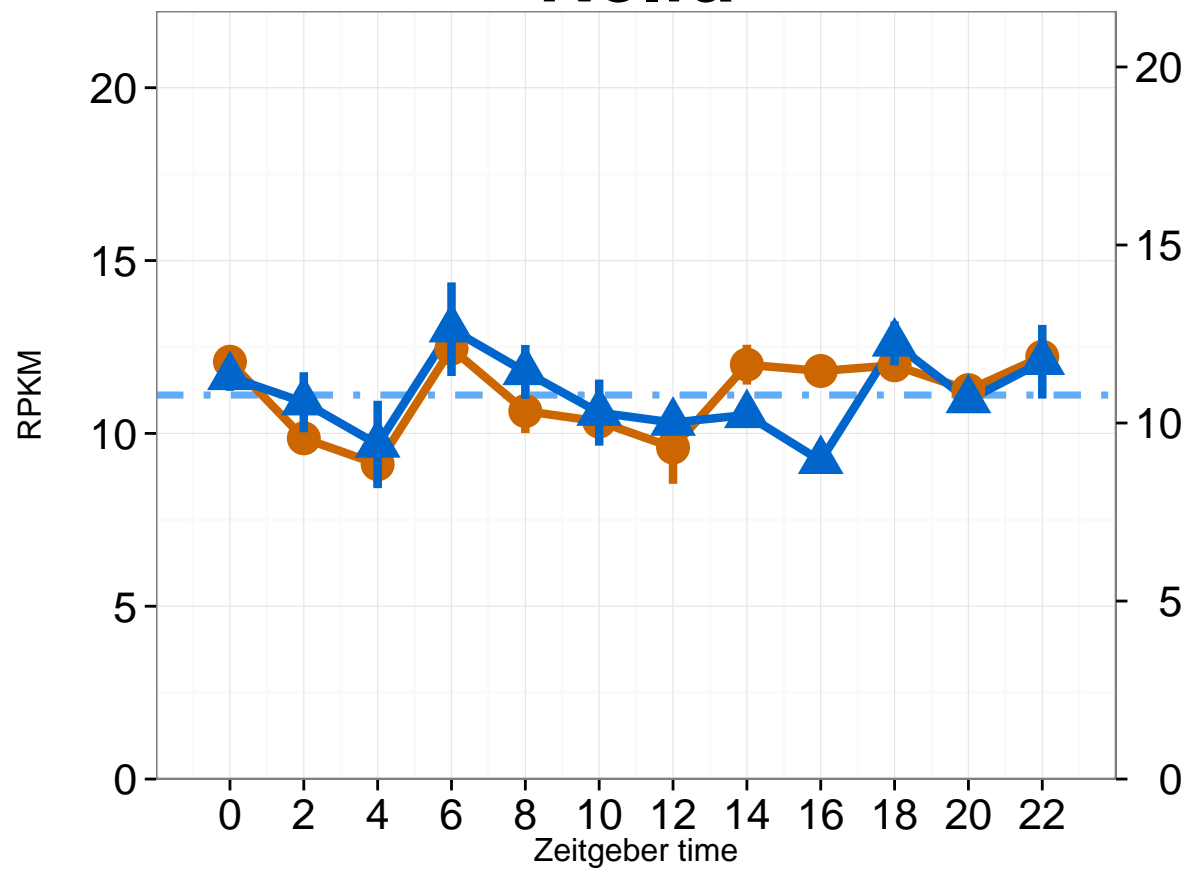

## Nelfa

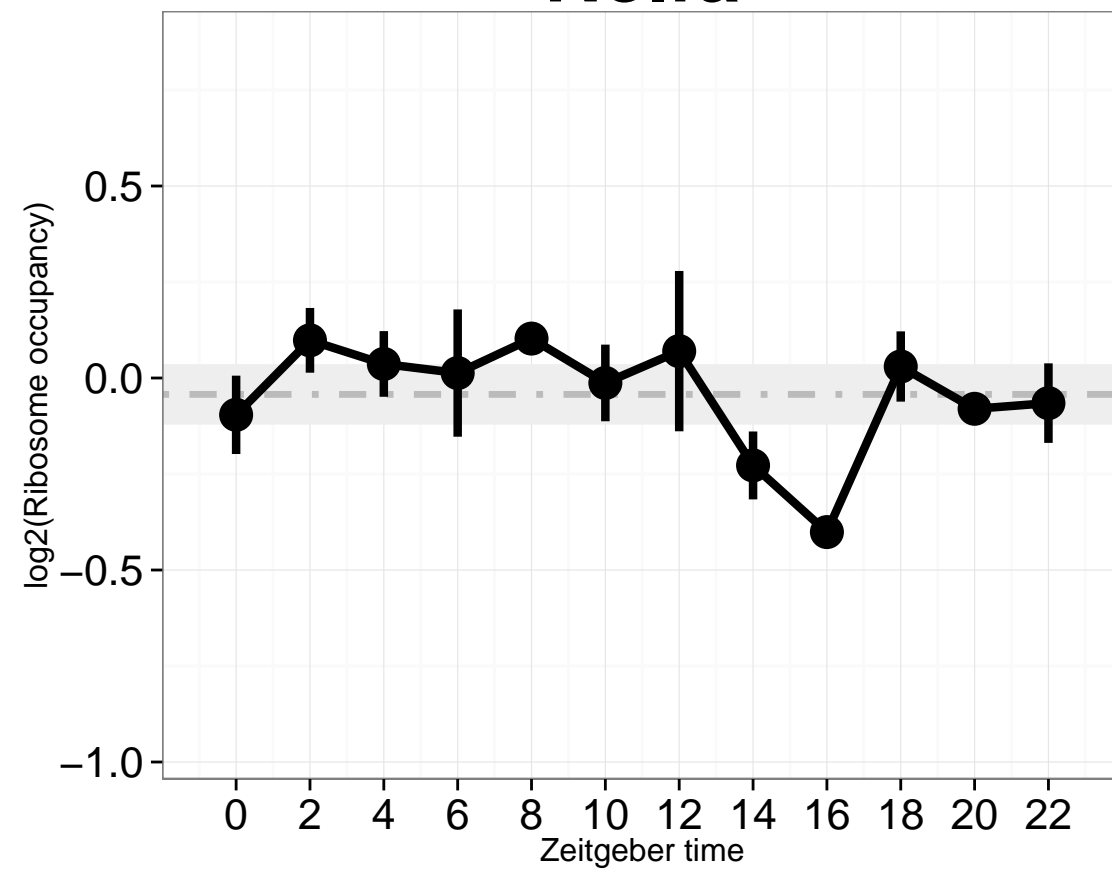

Supplement: Supplementary file 5874 [file 1]

# Mrps5

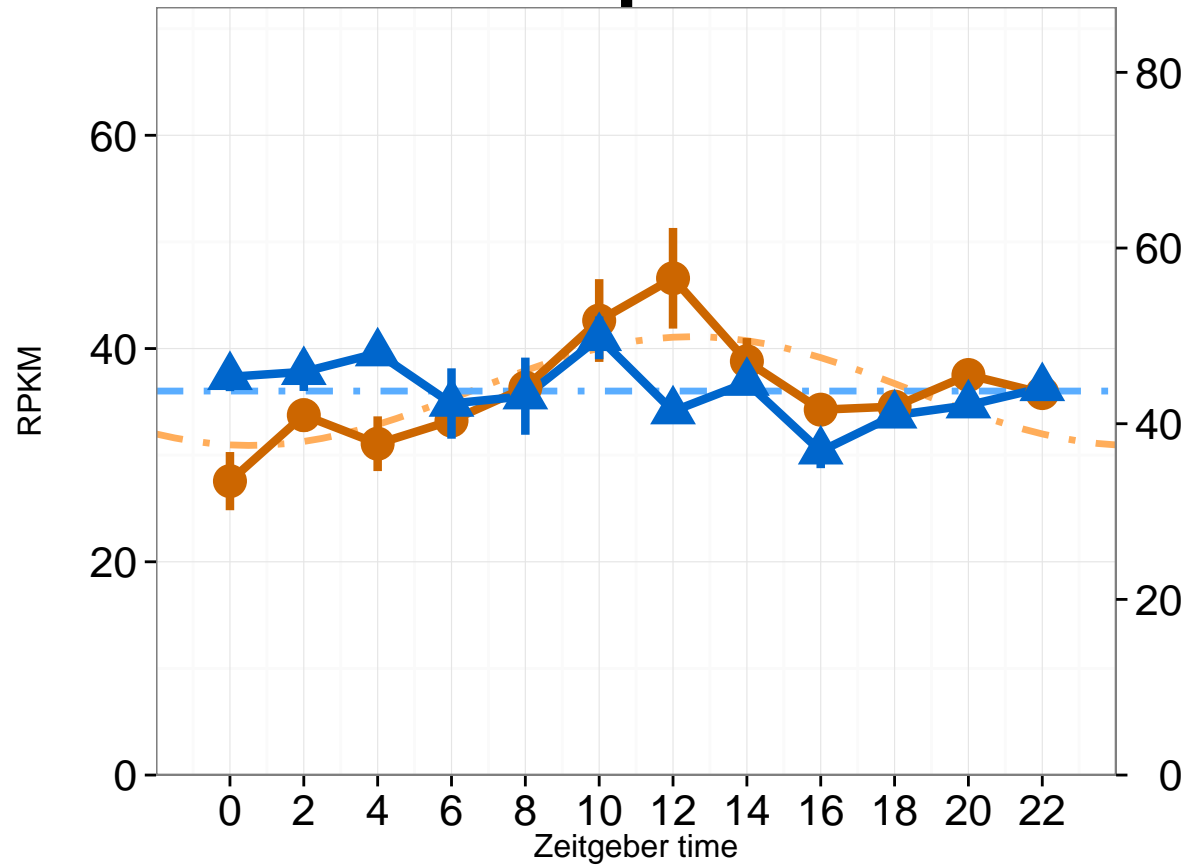

# Mrps5

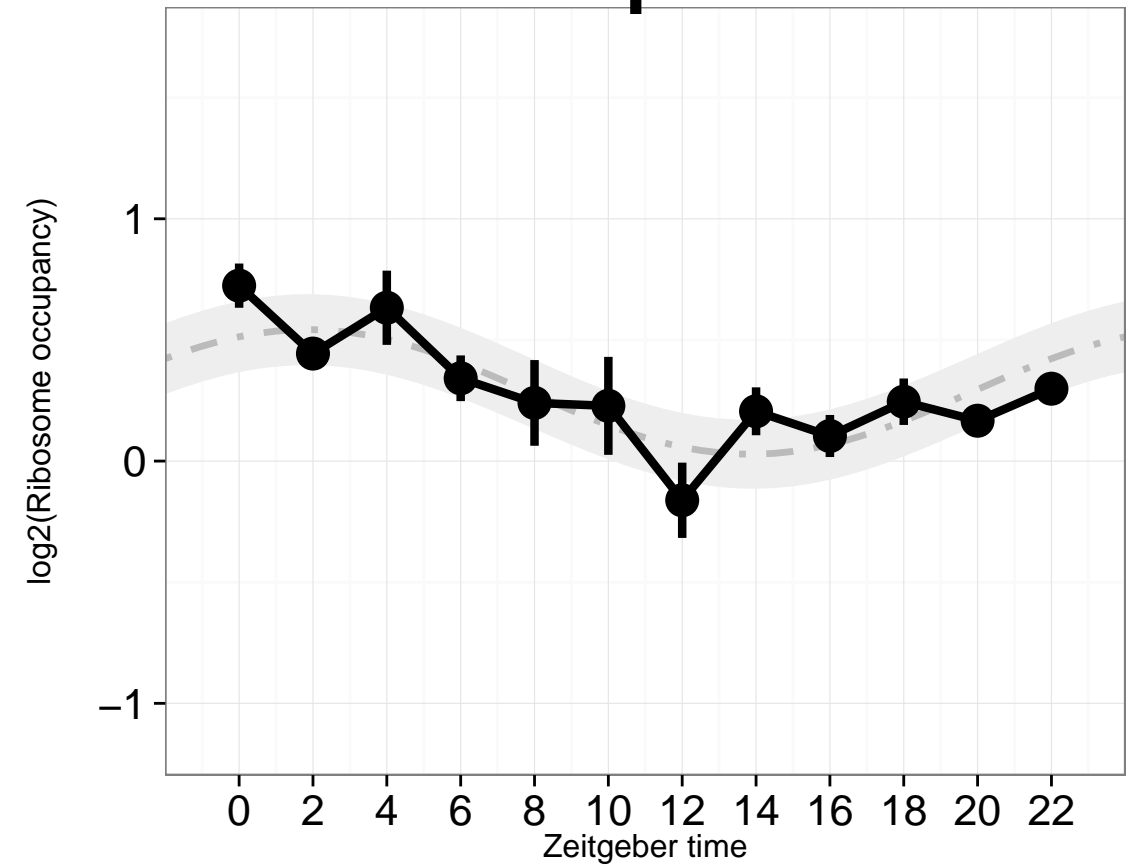

Supplement: Supplementary file 5875 [file 1]

## Ubl5

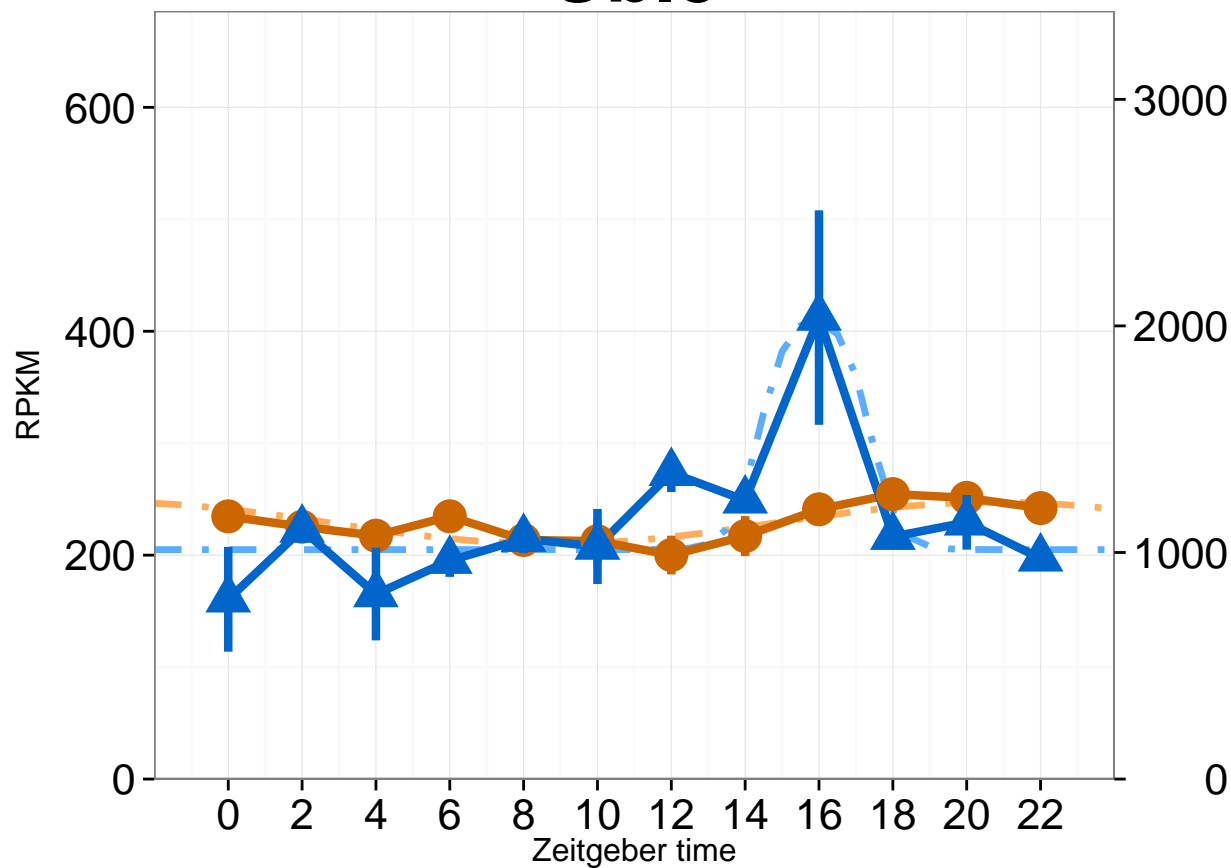

## Ubl5

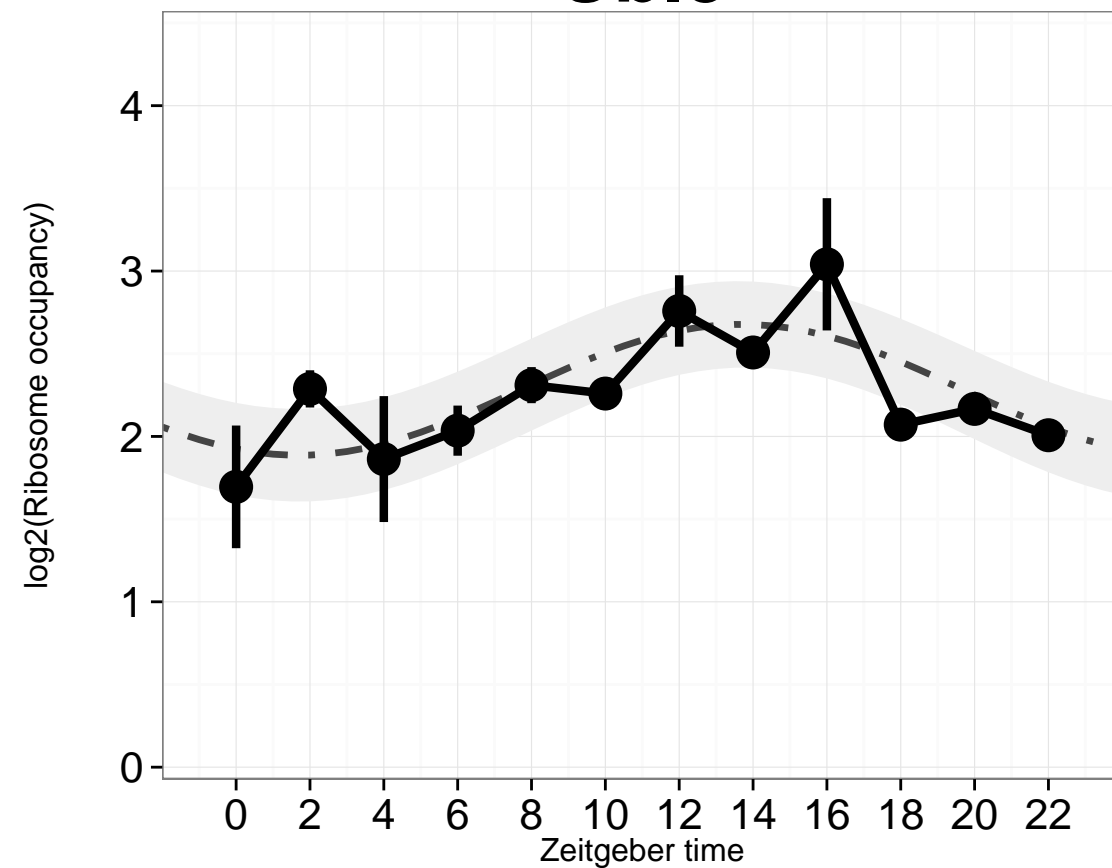

Supplement: Supplementary file 5876 [file 1]

# Ccdc134

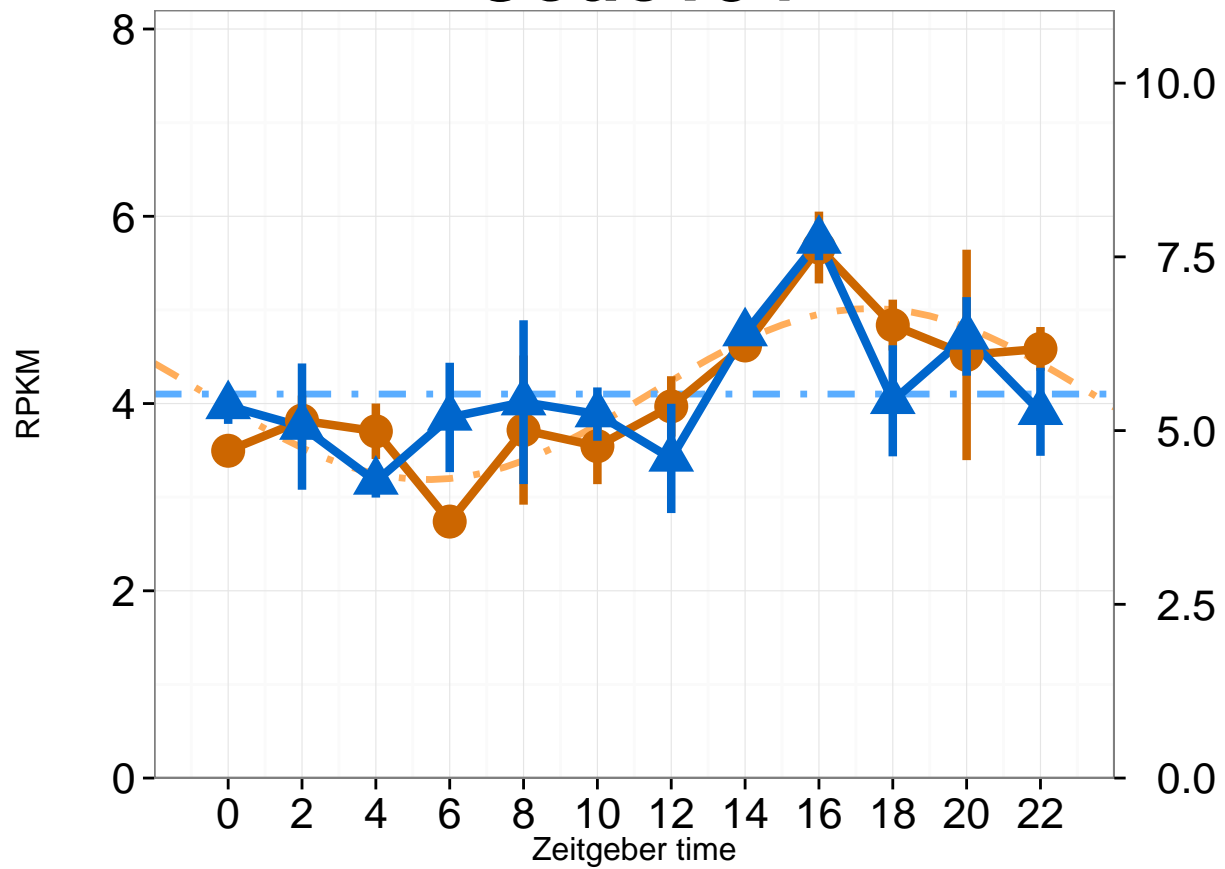

# Ccdc134

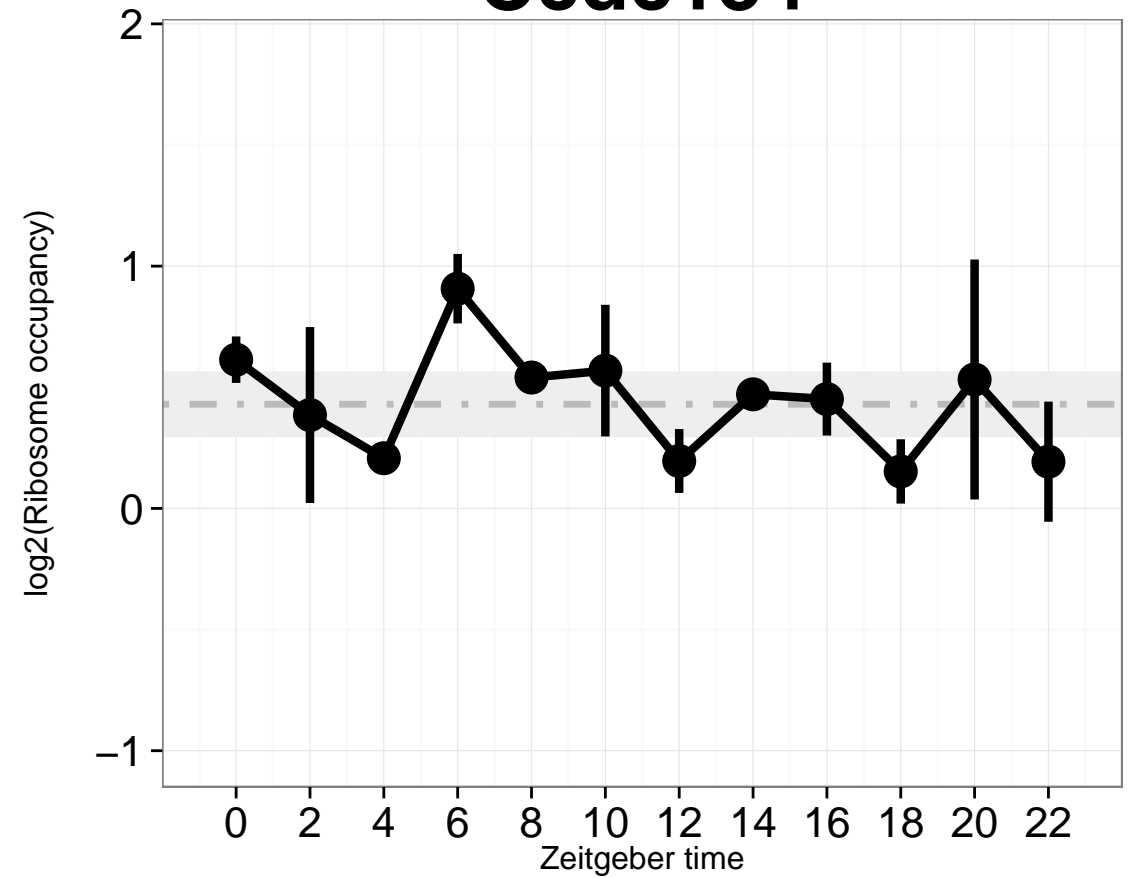

Supplement: Supplementary file 5877 [file 1]

# Acbd4

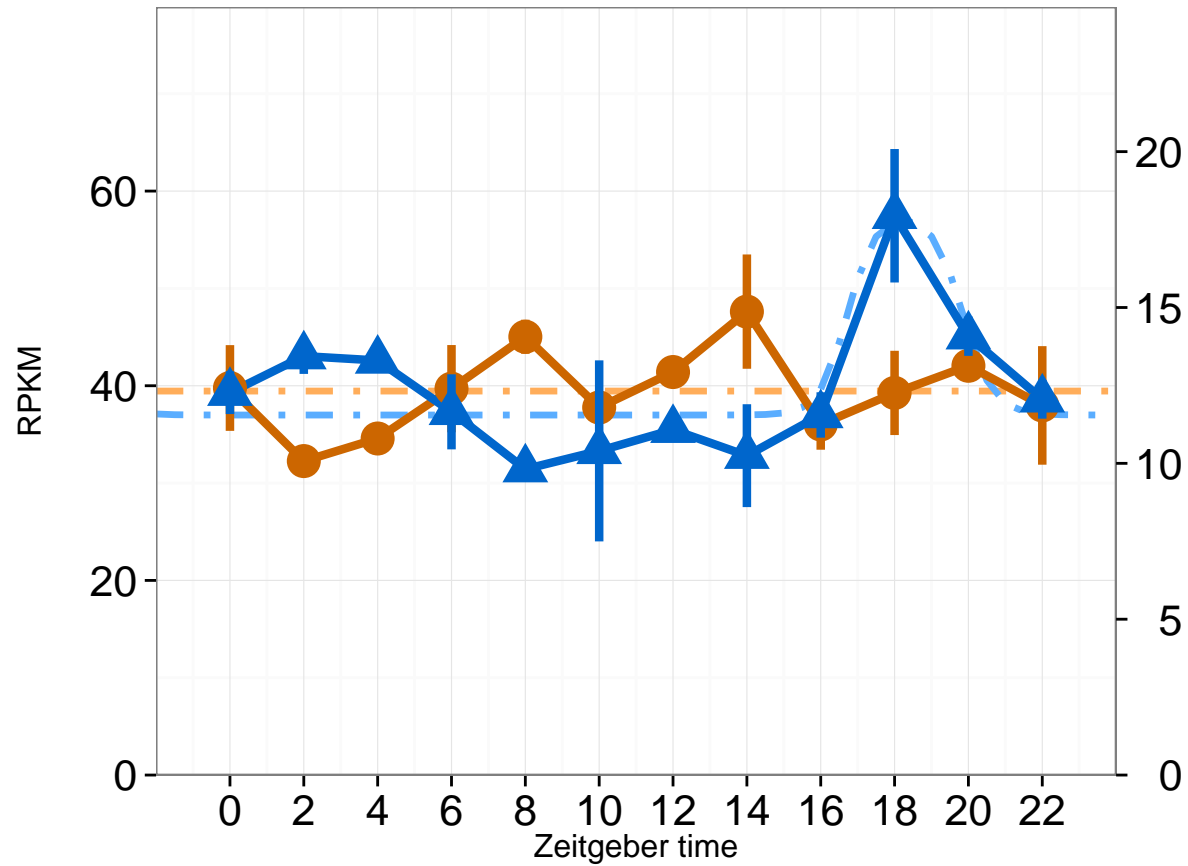

# Acbd4

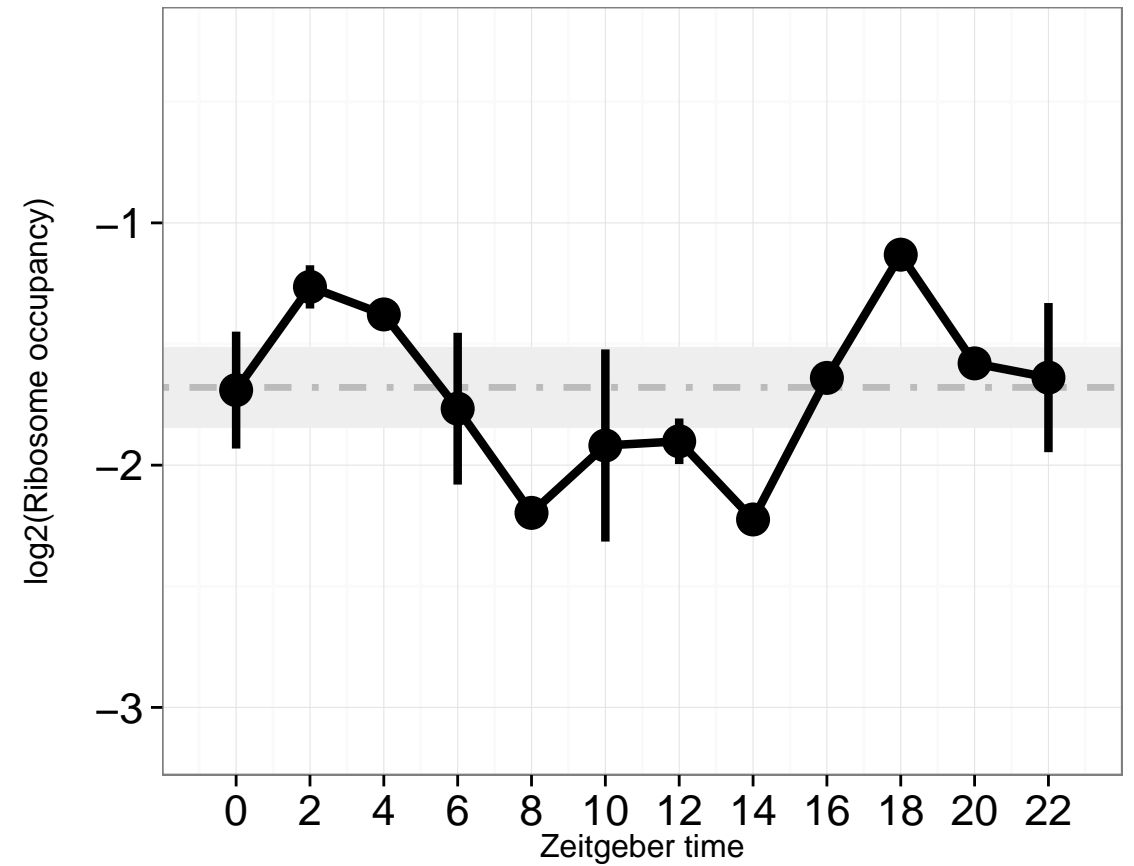

Supplement: Supplementary file 5878 [file 1]

## Cul4a

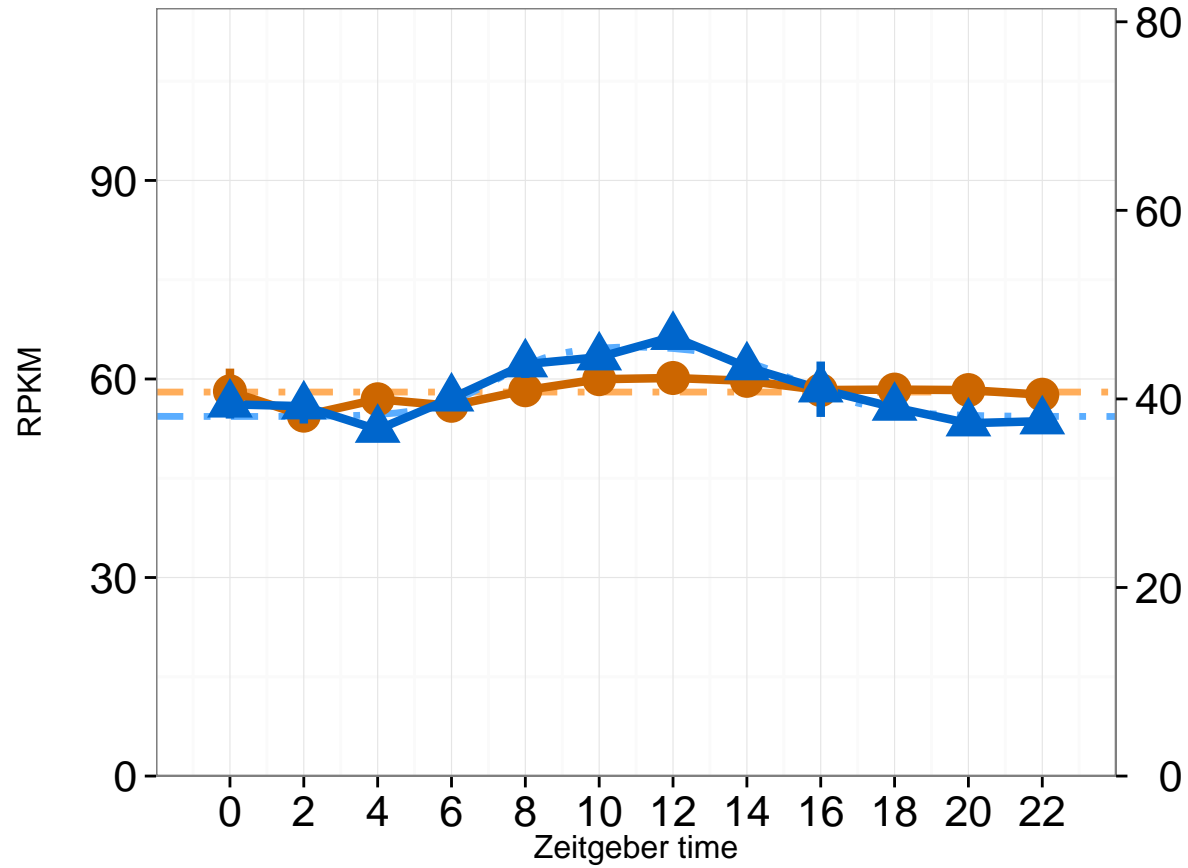

## Cul4a

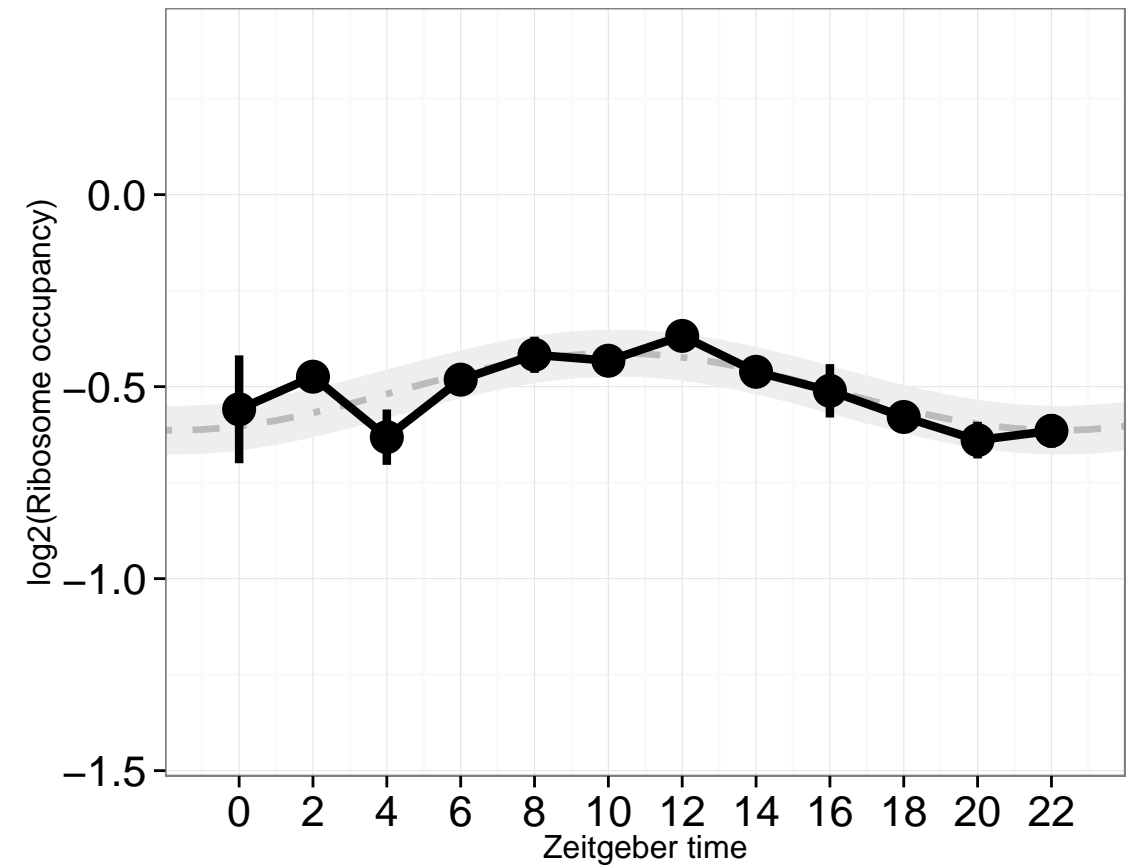

Supplement: Supplementary file 5879 [file 1]

## Ddx5

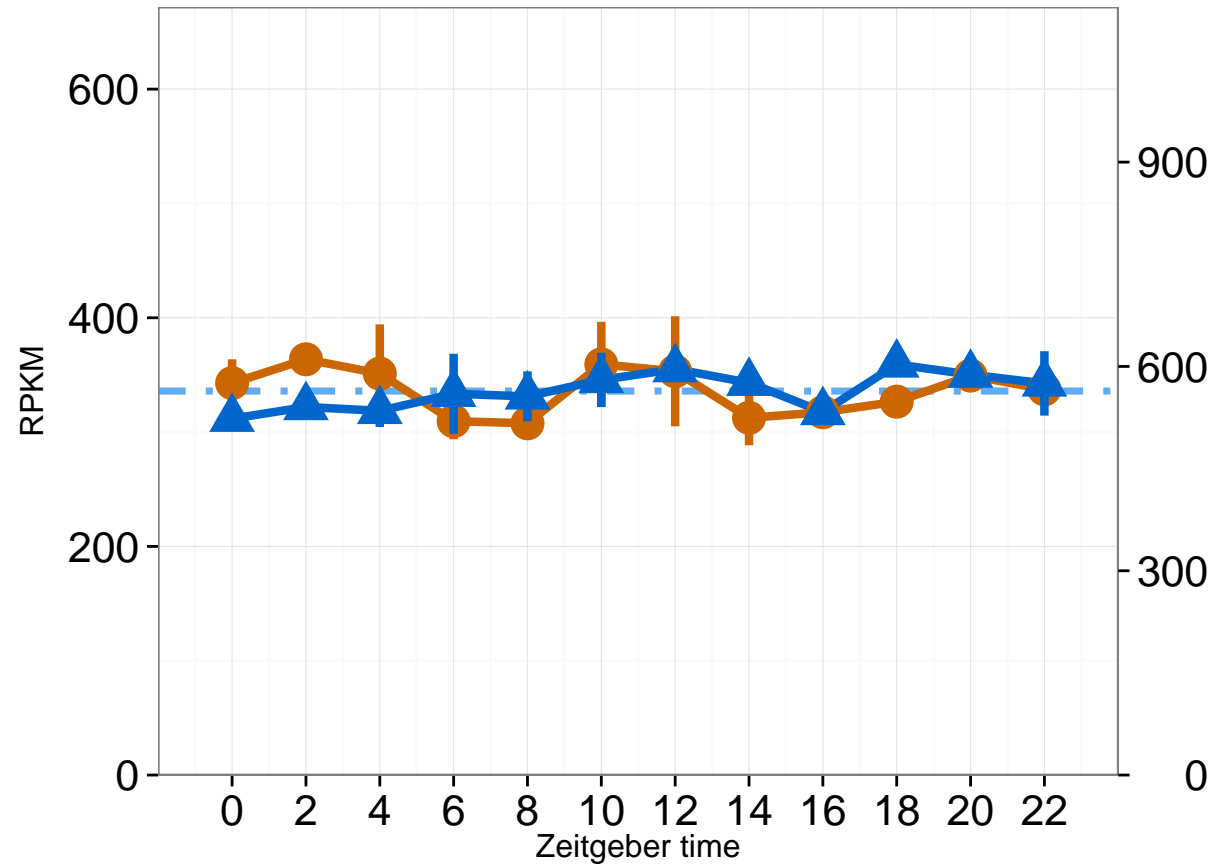

## Ddx5

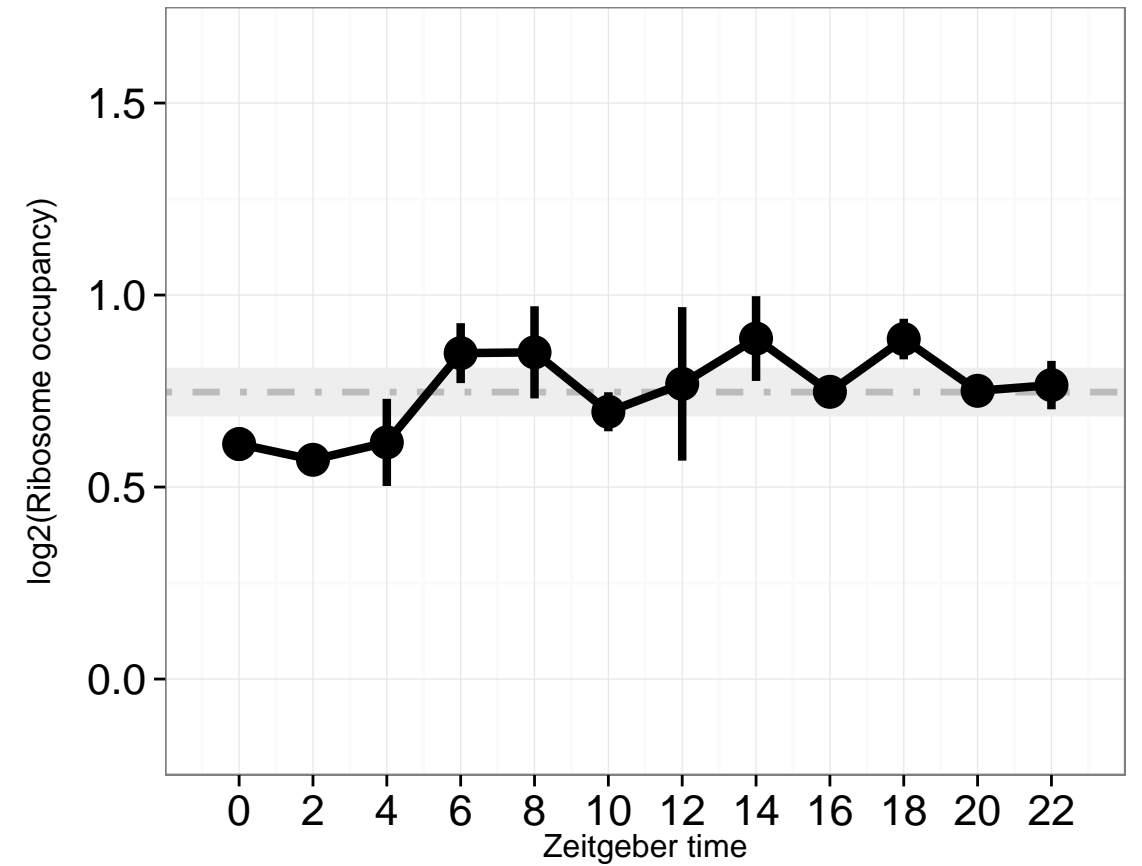

Supplement: Supplementary file 5880 [file 1]

**Mat1a TR**

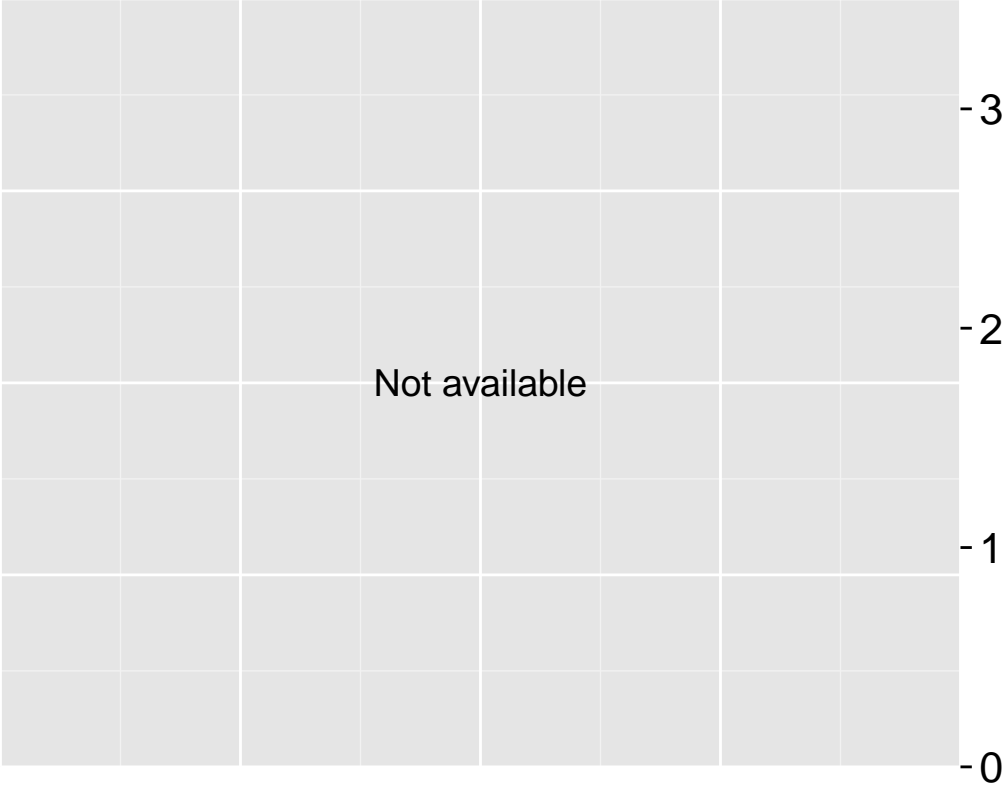

**Mat1a log2(Ribosome occupancy**

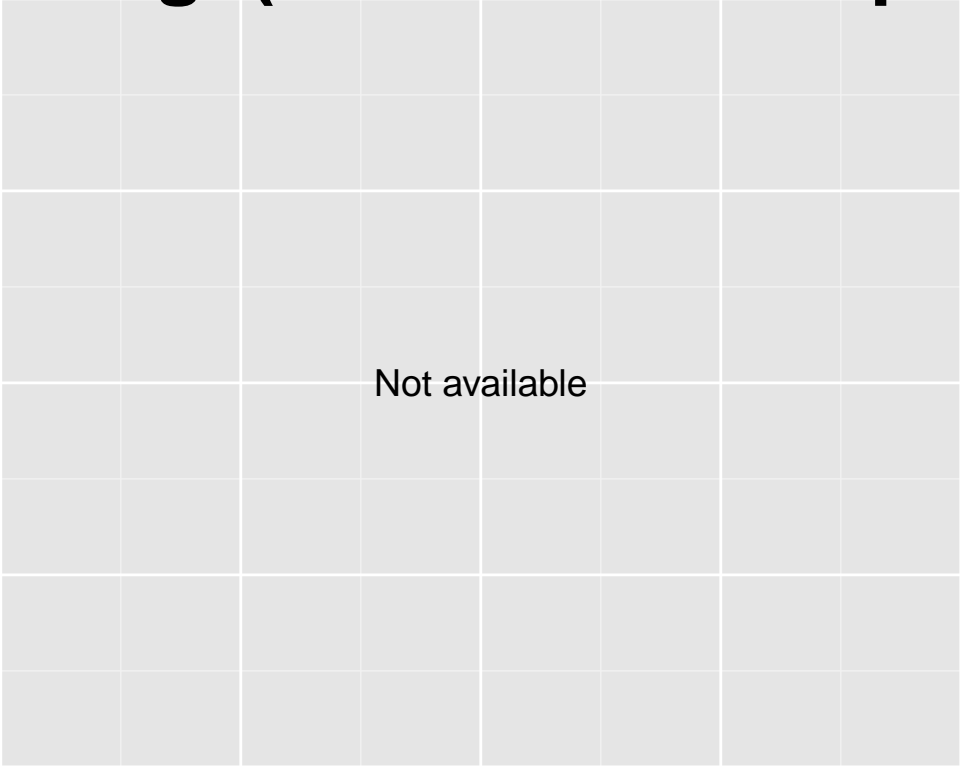

Supplement: Supplementary file 5881 [file 1]

## Mycbp

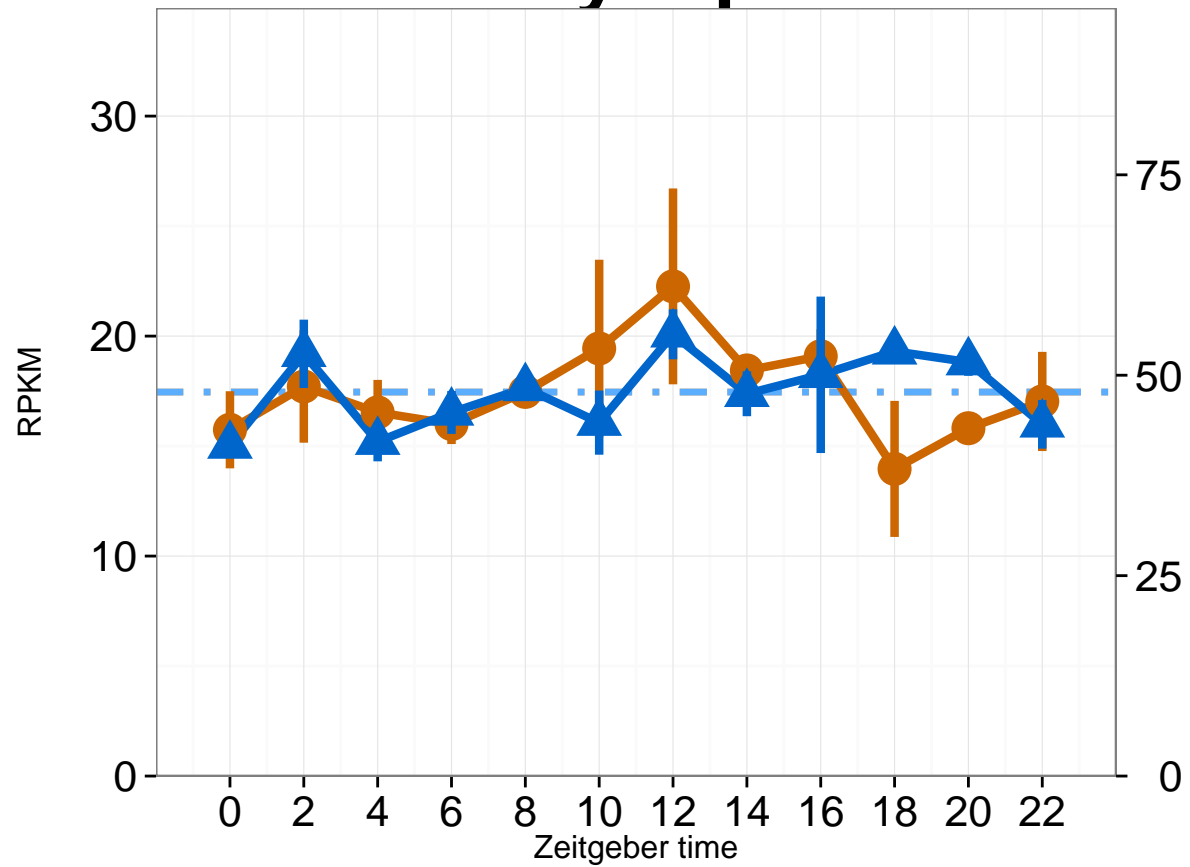

## Mycbp

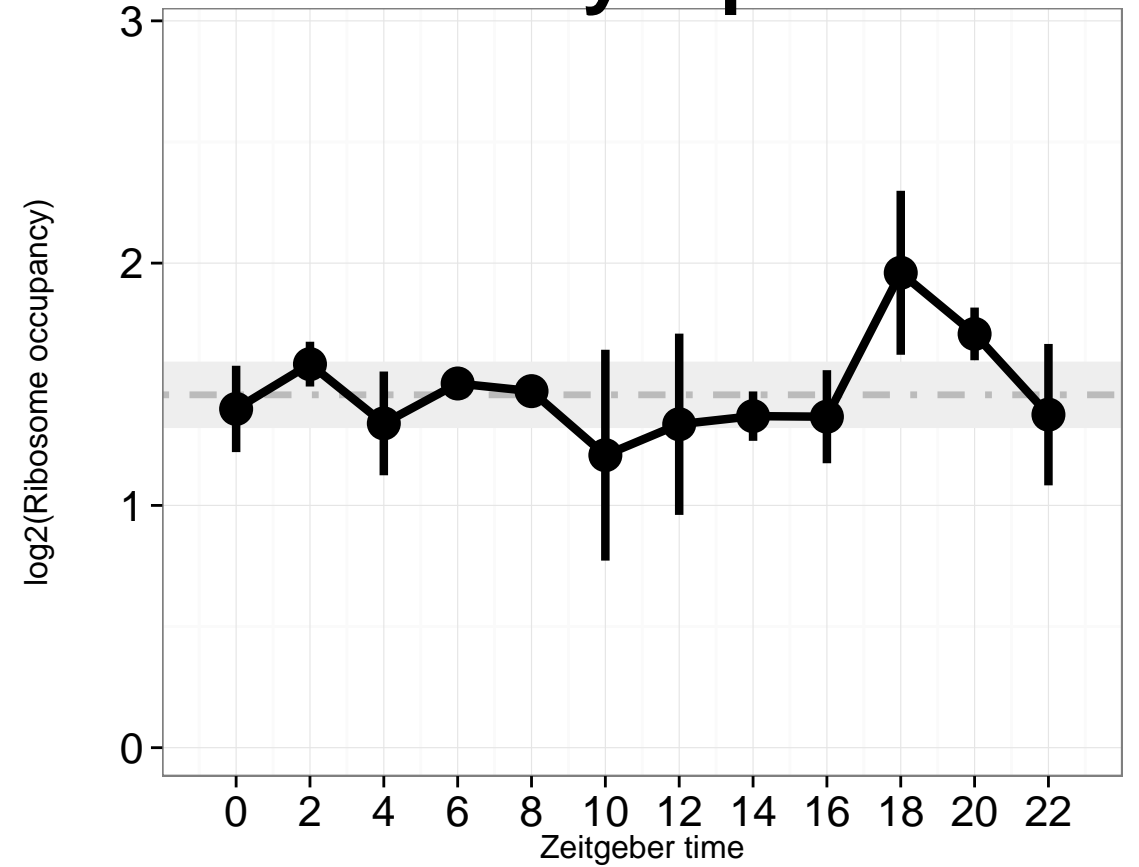

Supplement: Supplementary file 5882 [file 1]

# Itgb3

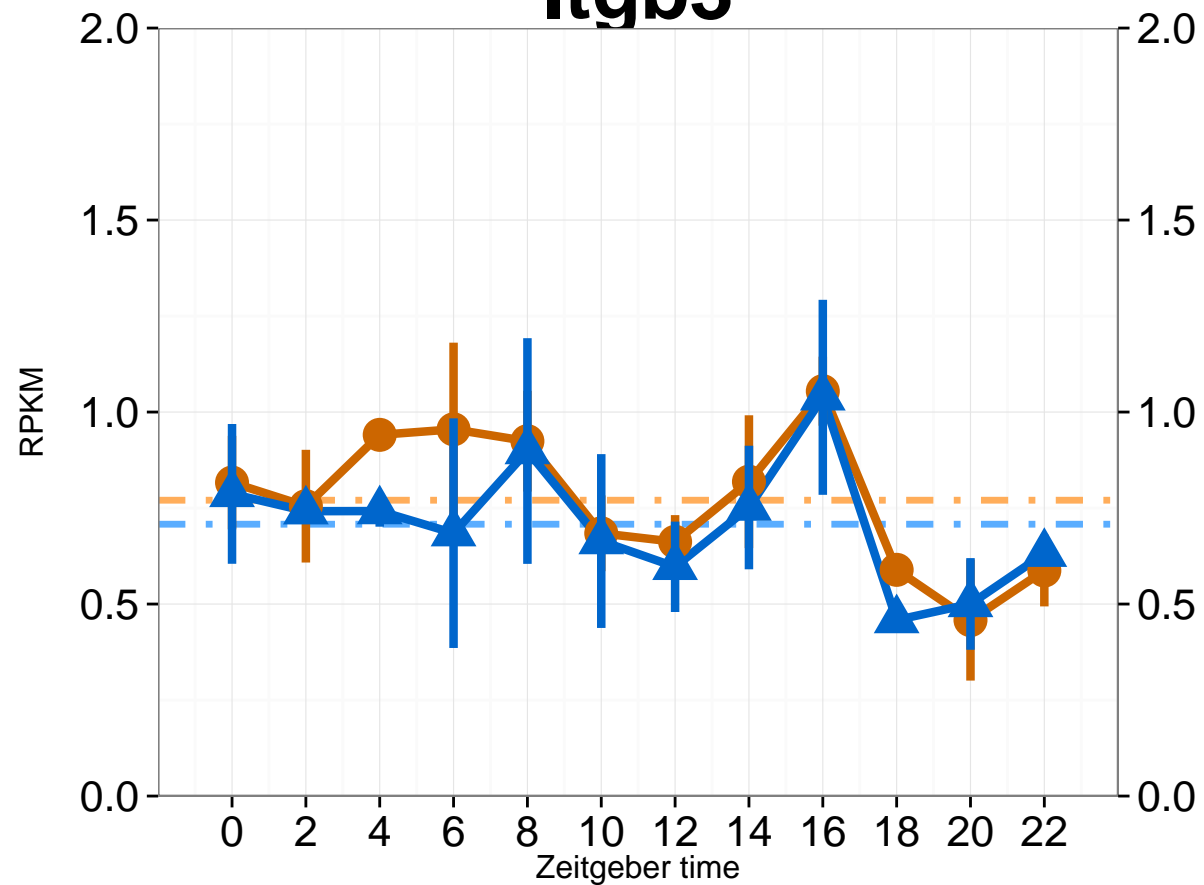

# Itgb3

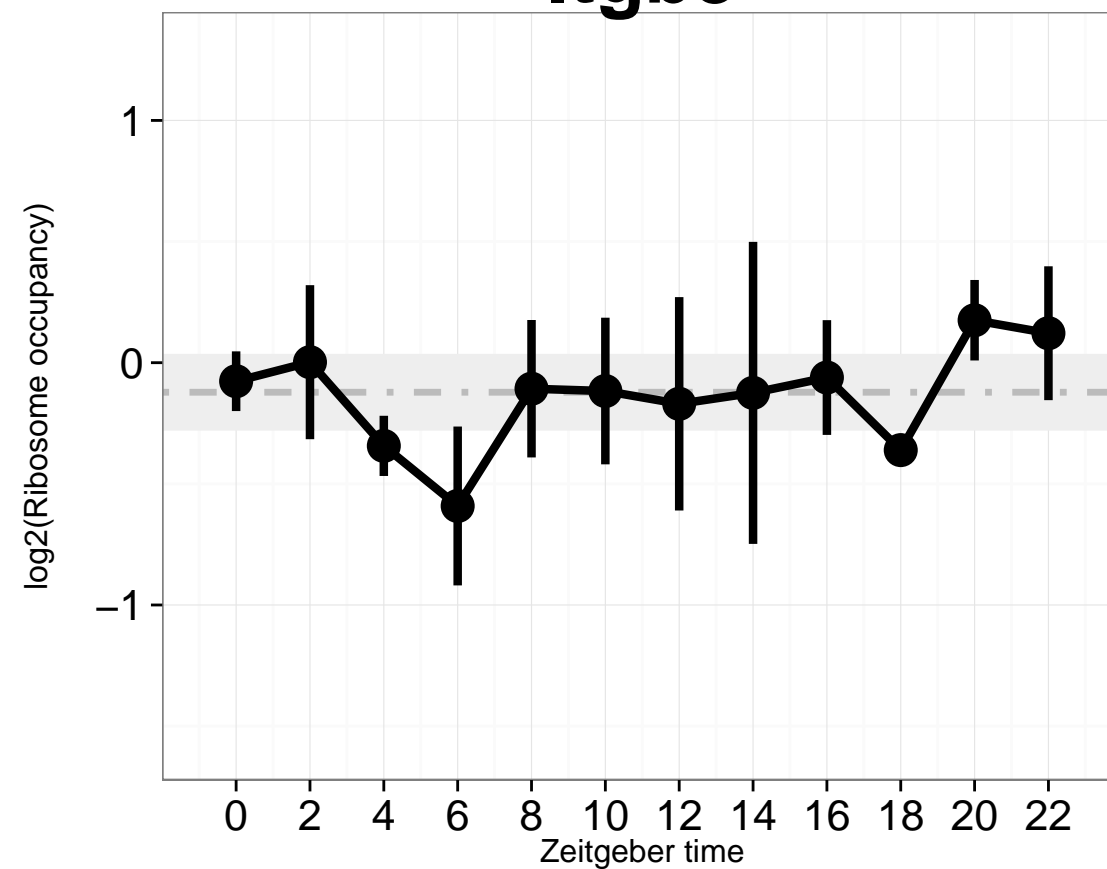

Supplement: Supplementary file 5883 [file 1]

## Med1

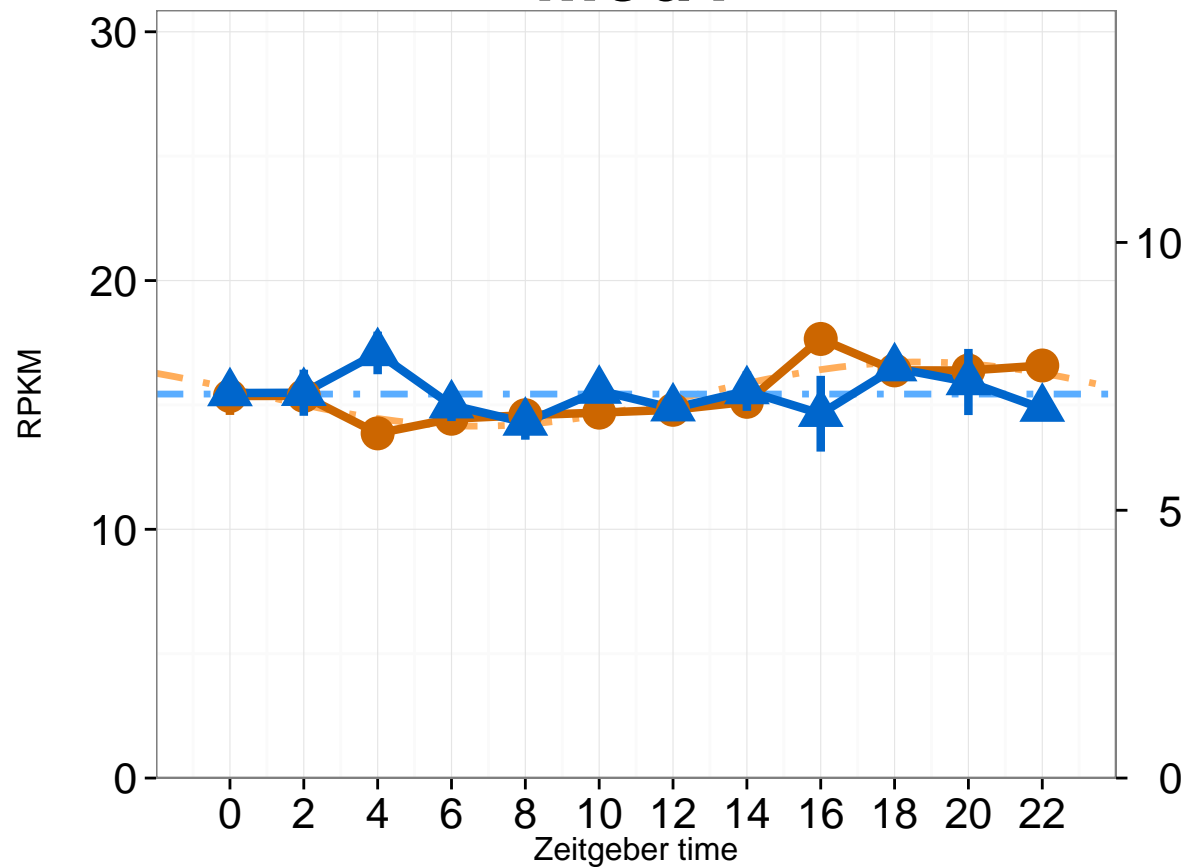

## Med1

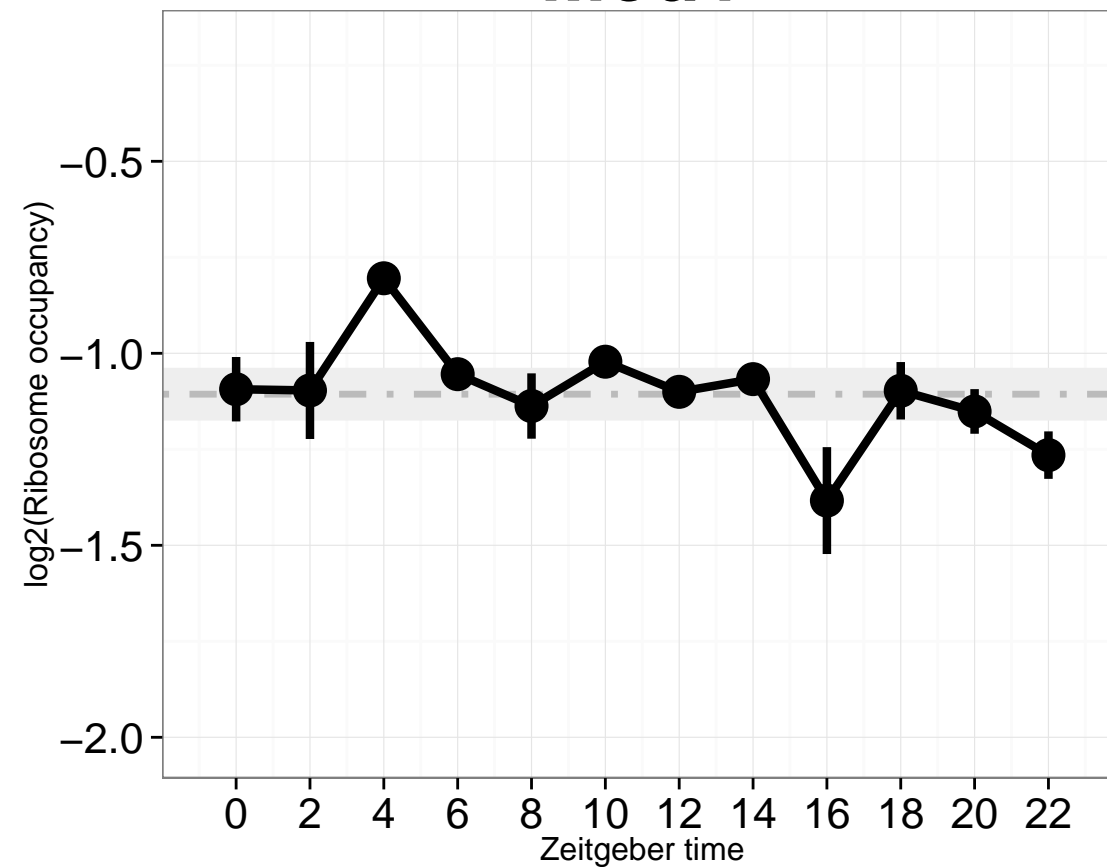

Supplement: Supplementary file 5884 [file 1]

**Ddt**

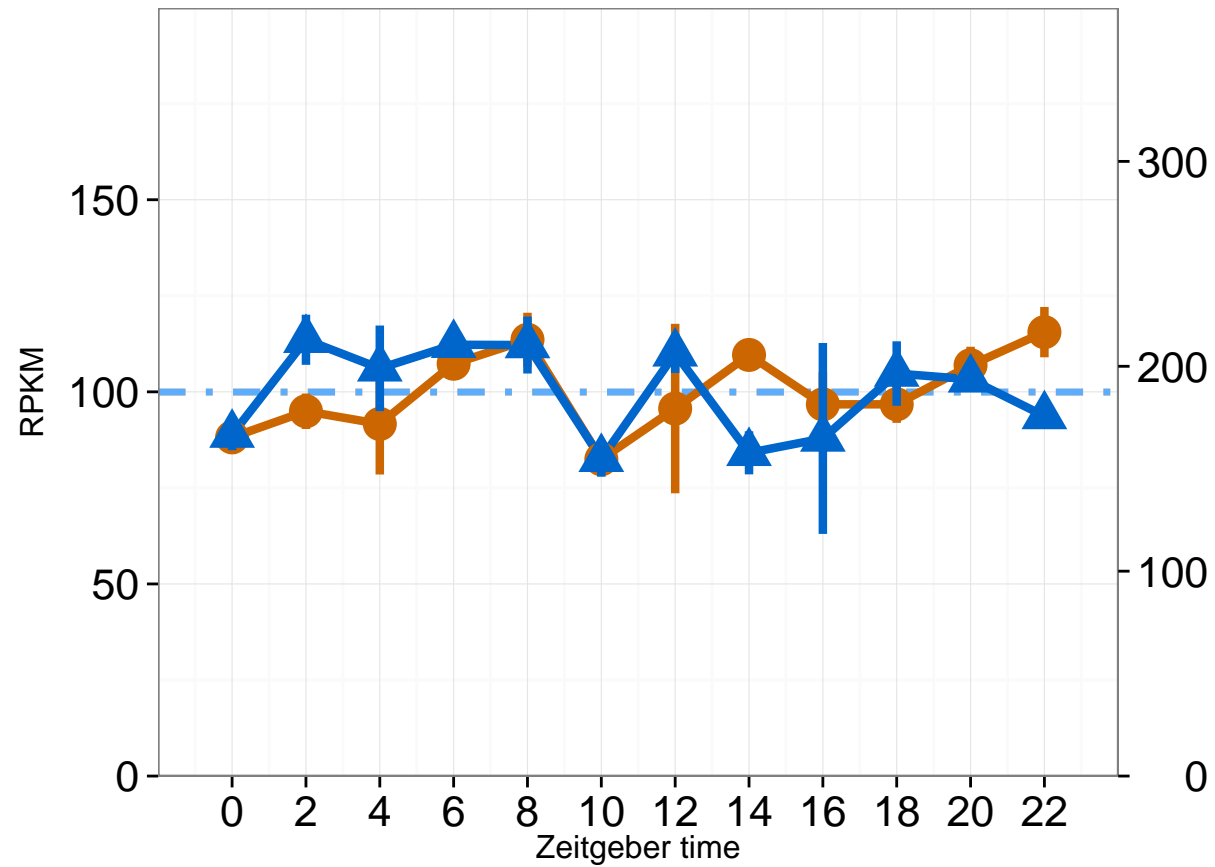

**Ddt**

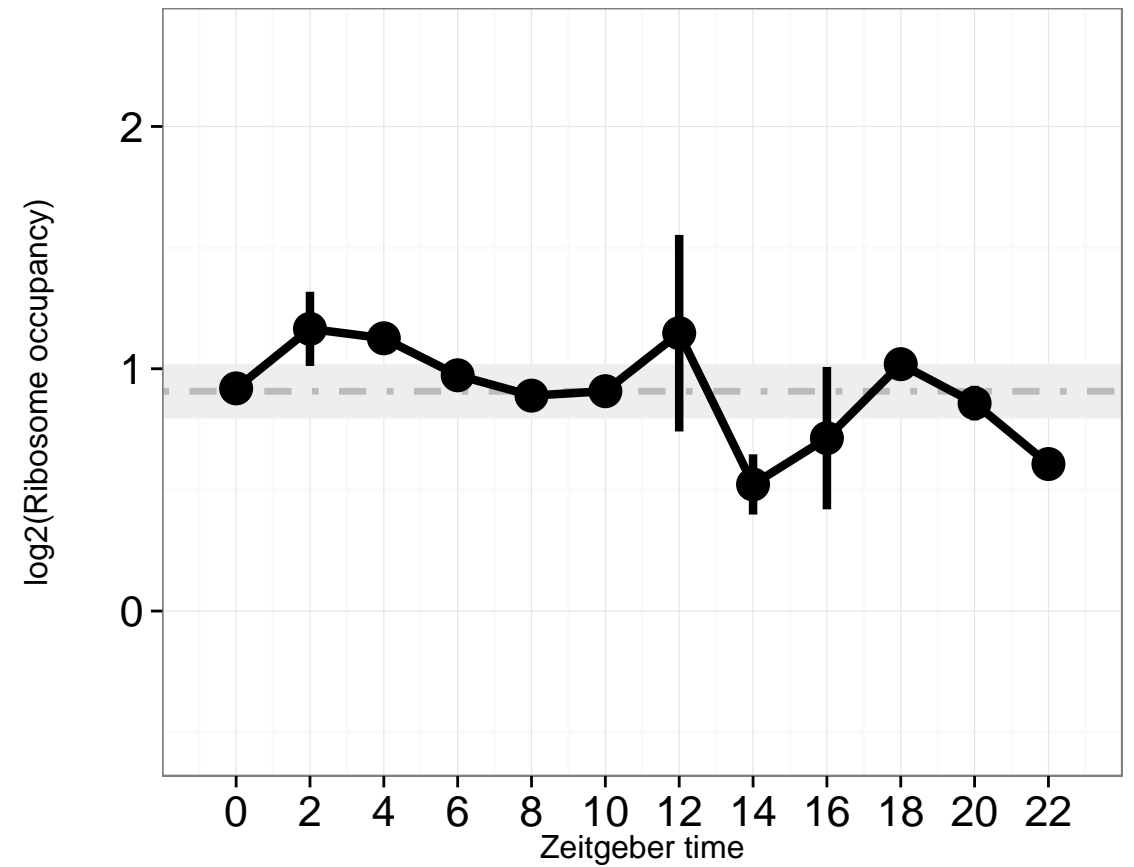

Supplement: Supplementary file 5885 [file 1]

## Prpsap1

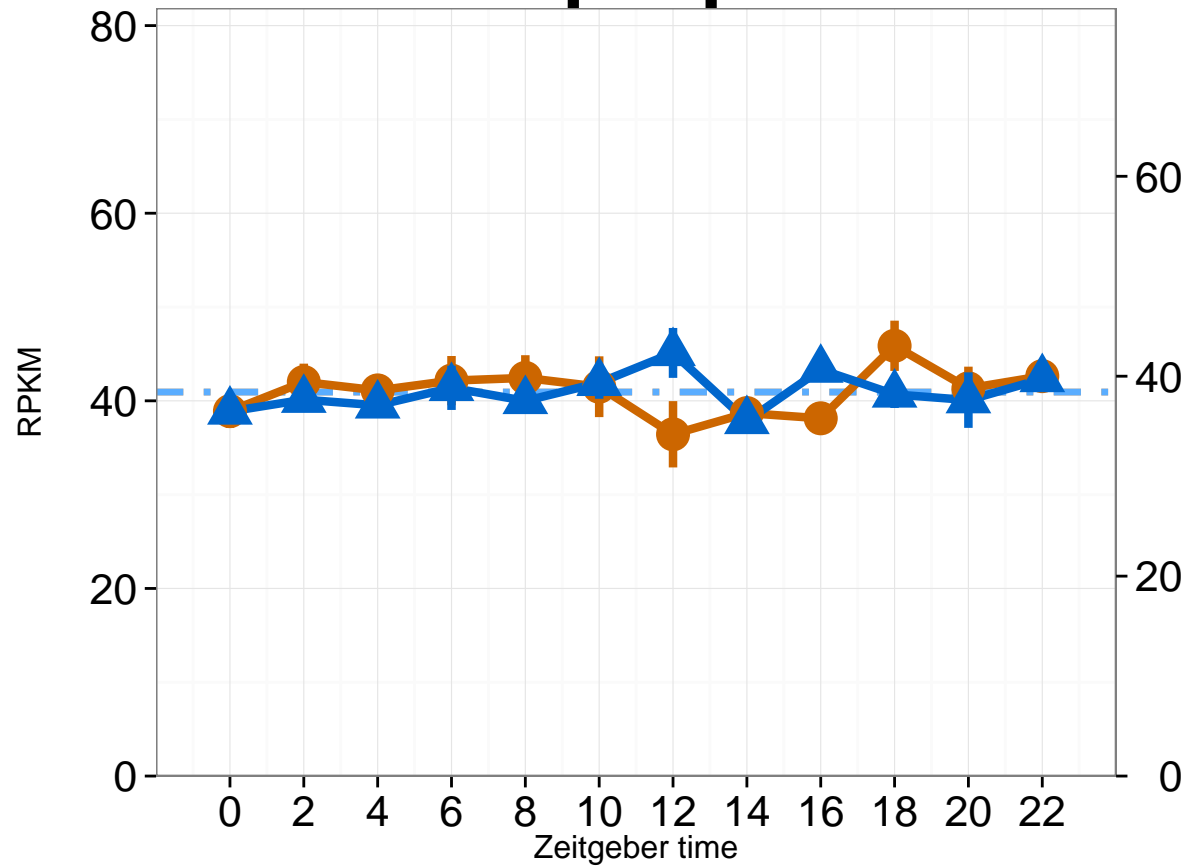

## Prpsap1

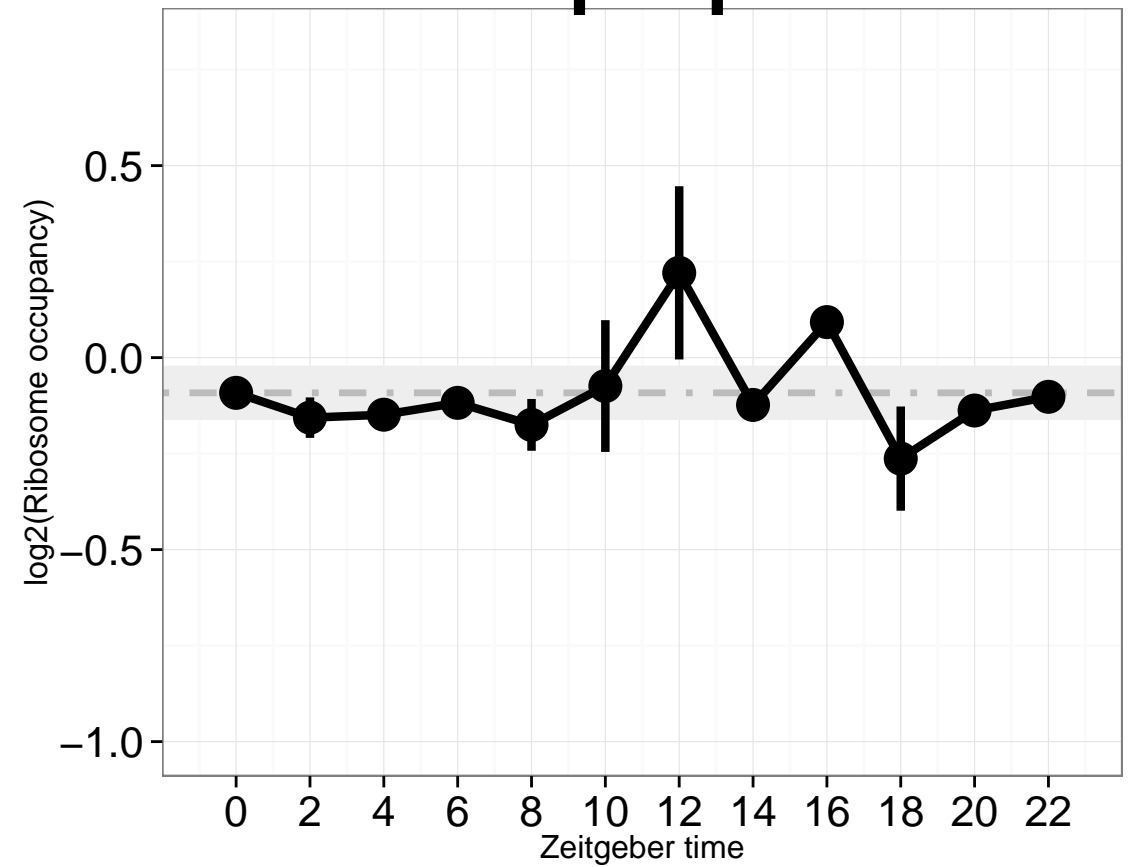

Supplement: Supplementary file 5886 [file 1]

# Abca8b

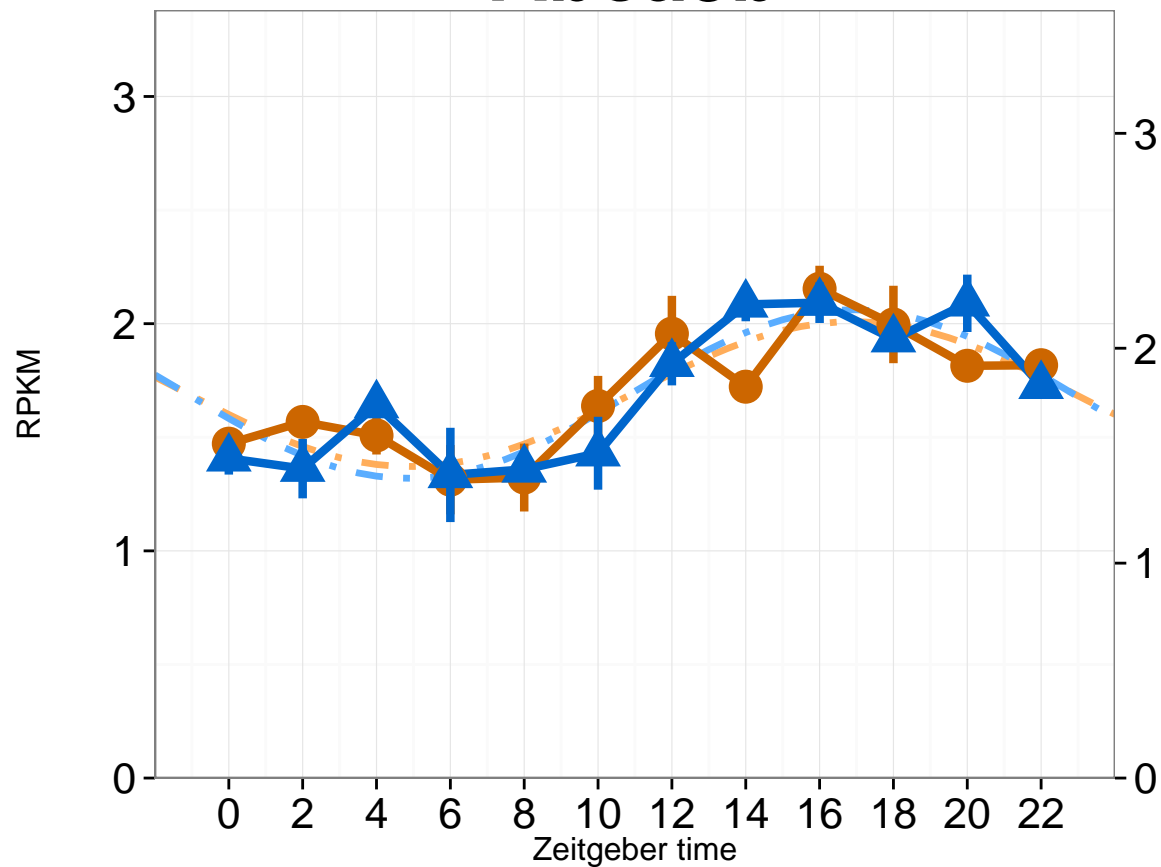

# Abca8b

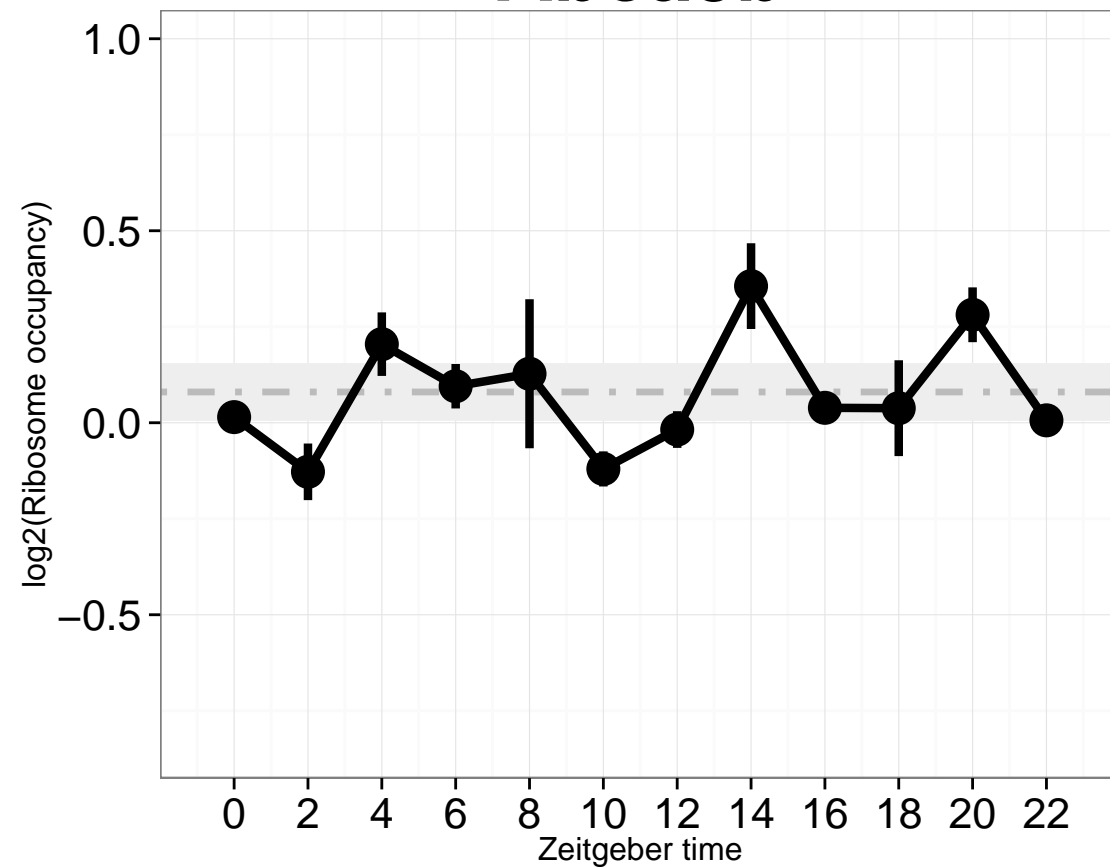

Supplement: Supplementary file 5887 [file 1]

# Prim1

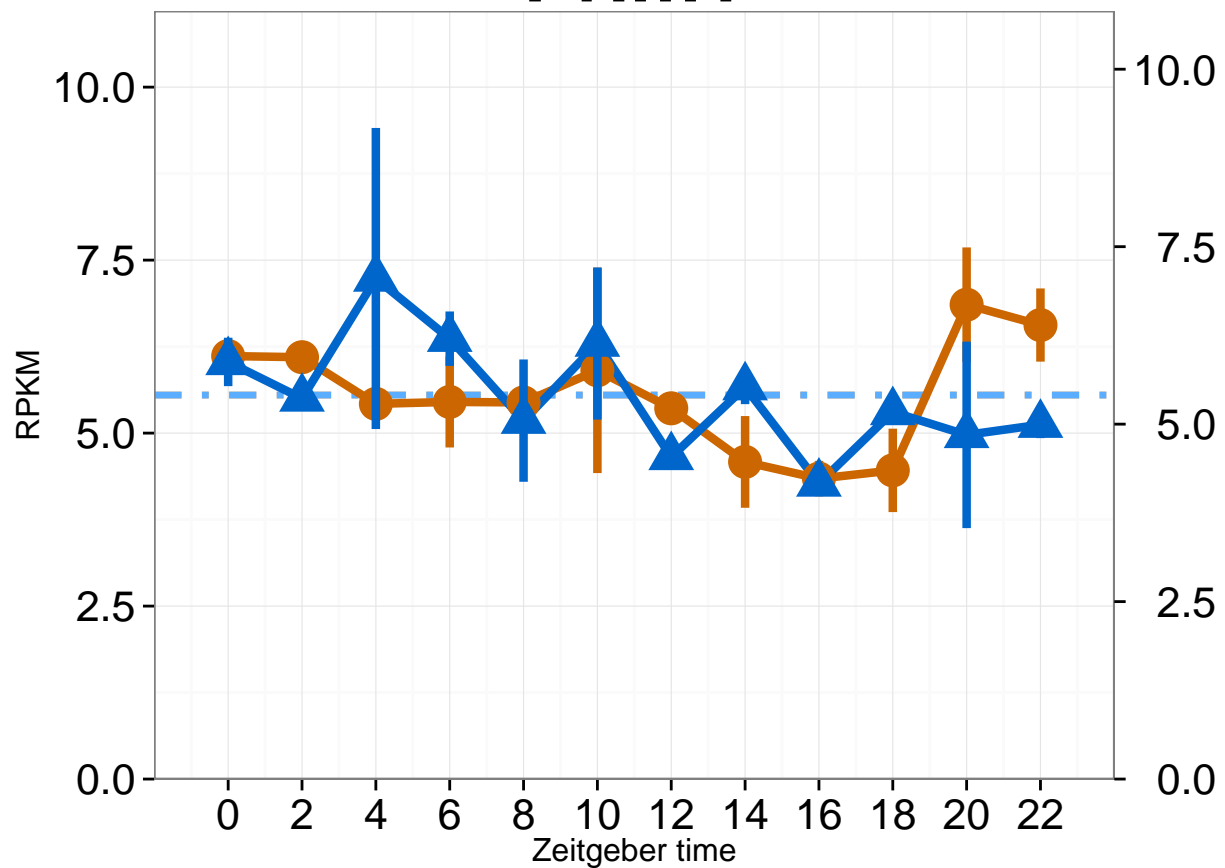

# Prim1

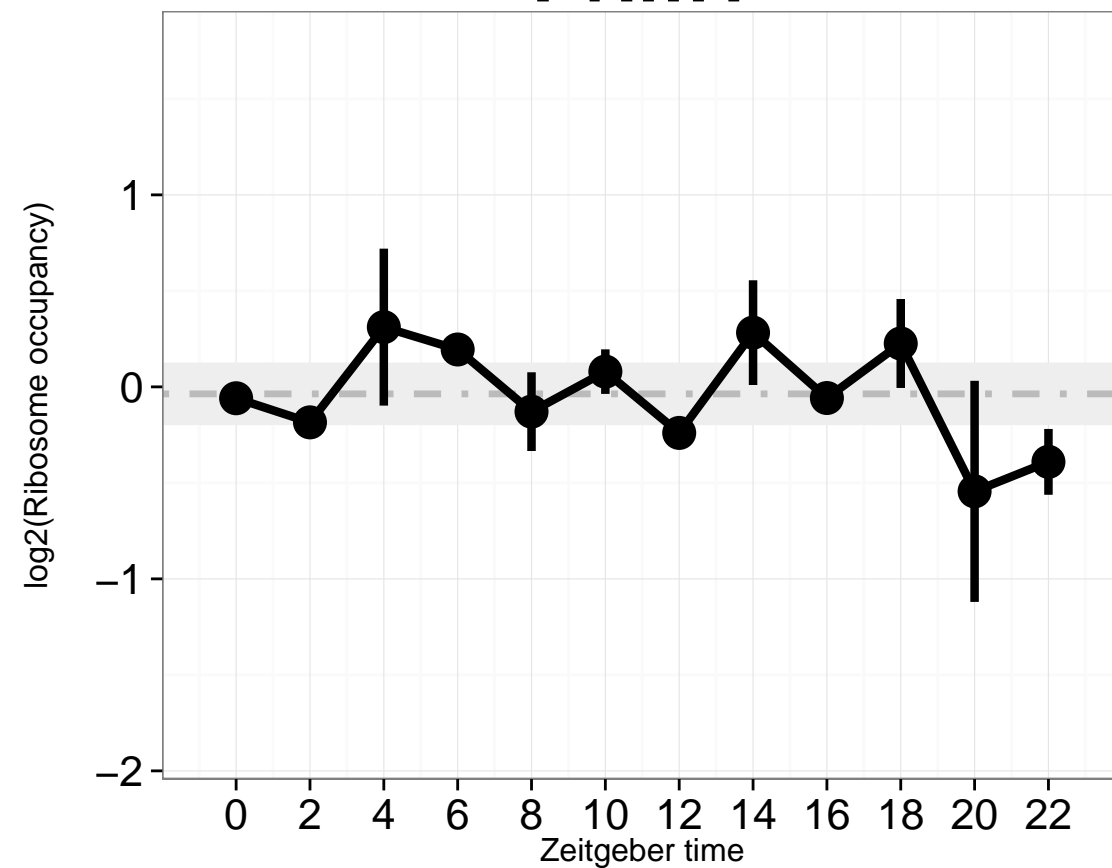

Supplement: Supplementary file 5888 [file 1]

## Tmsb10

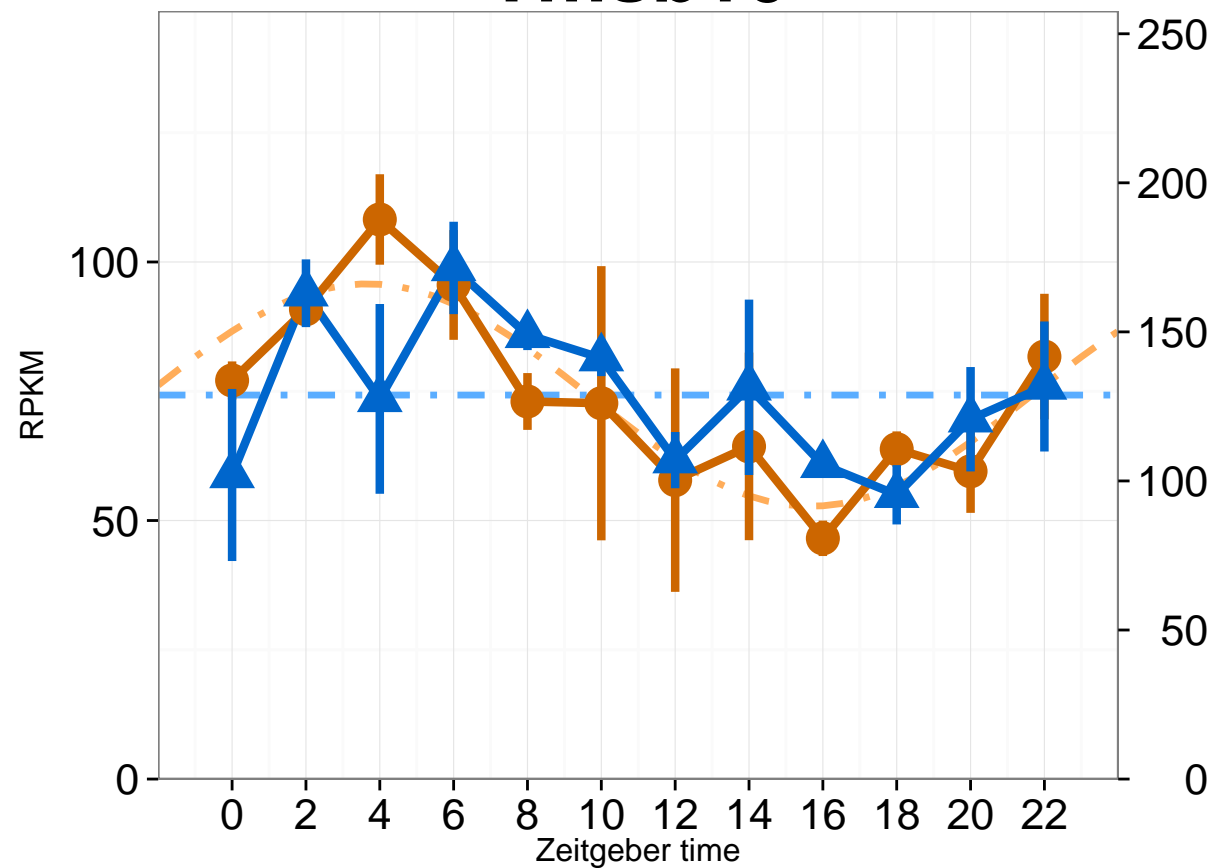

## Tmsb10

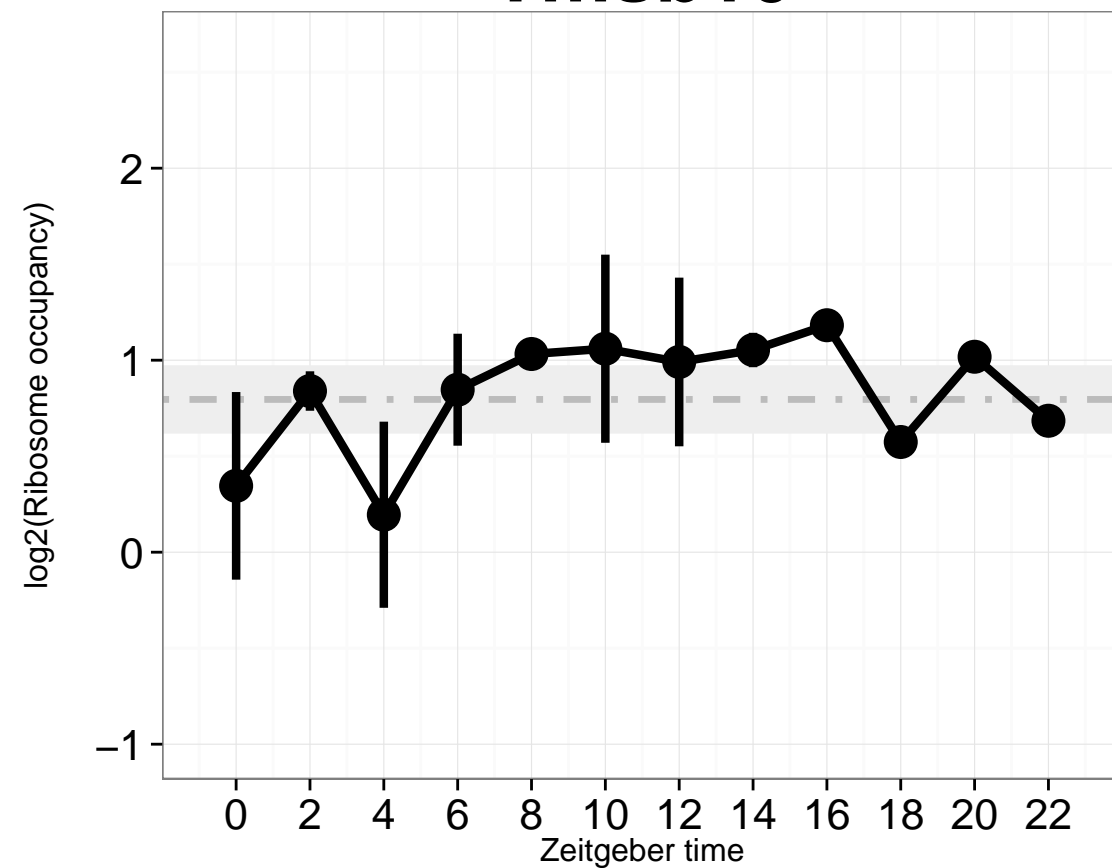

Supplement: Supplementary file 5889 [file 1]

# Plxna1

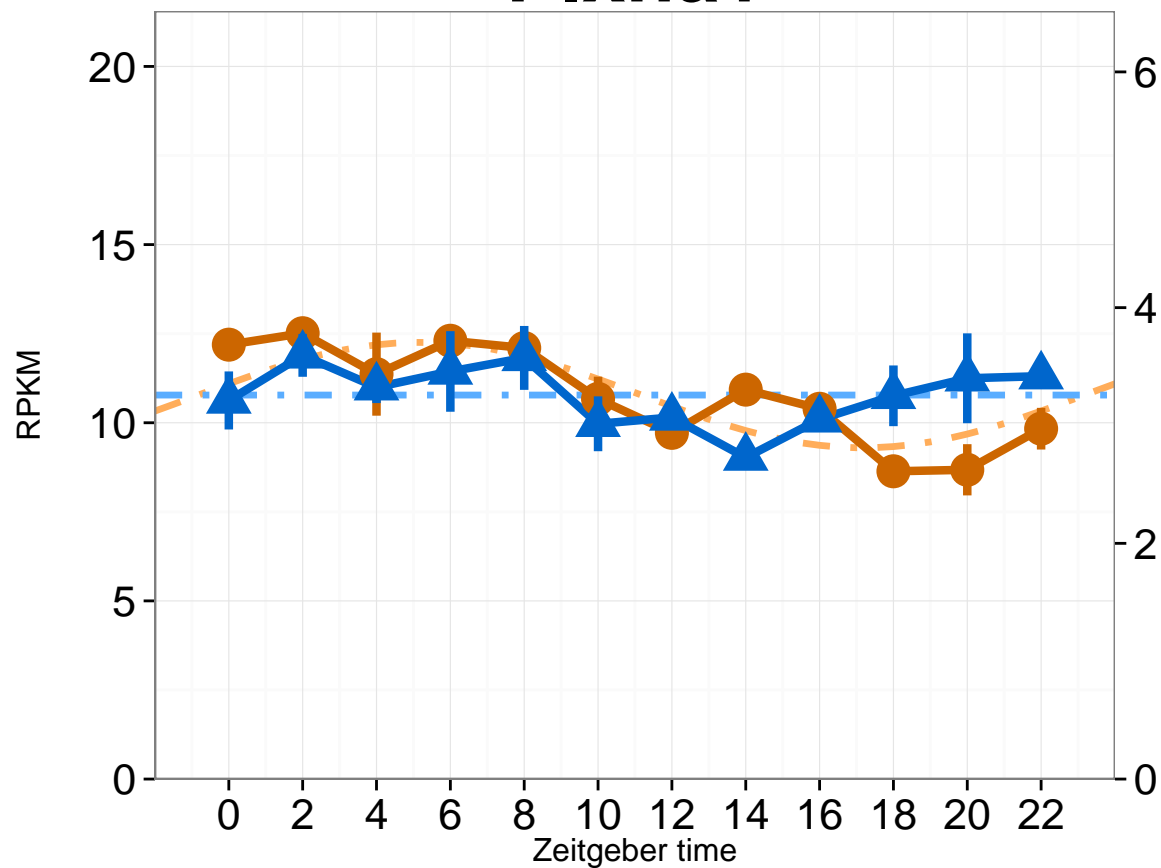

# Plxna1

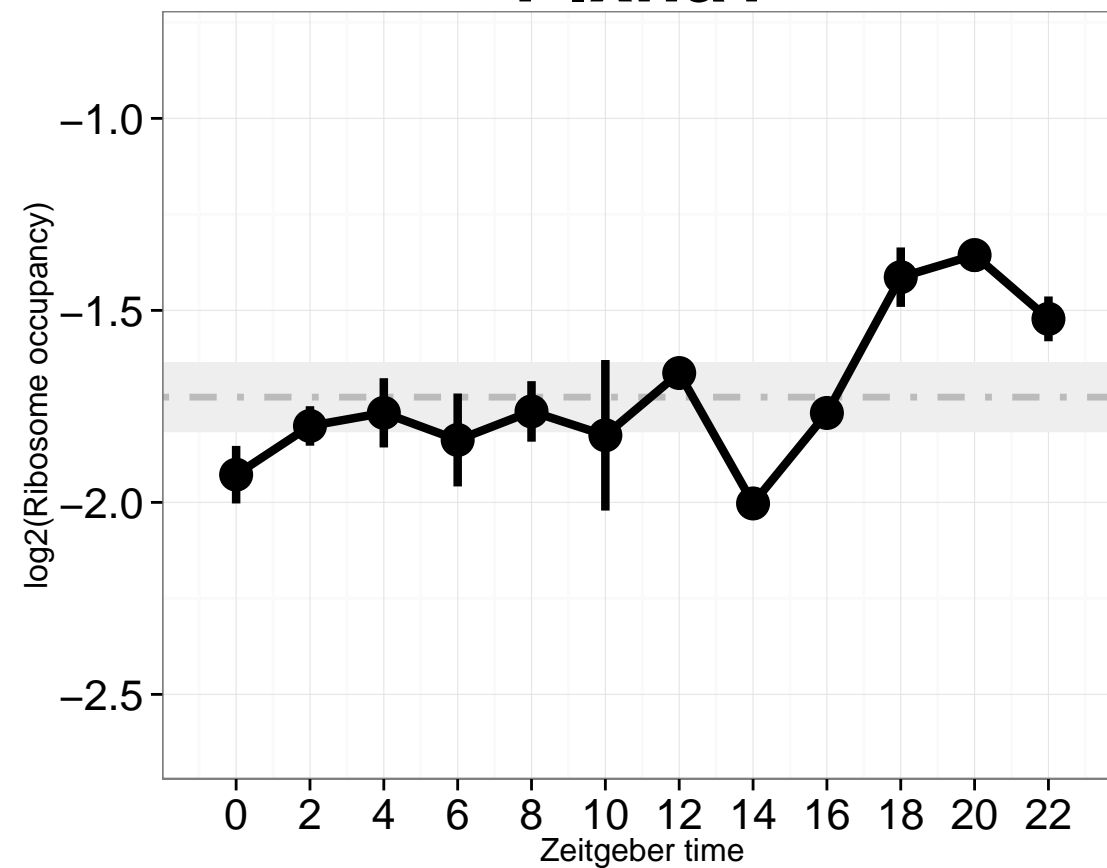

Supplement: Supplementary file 5890 [file 1]

## Syn3

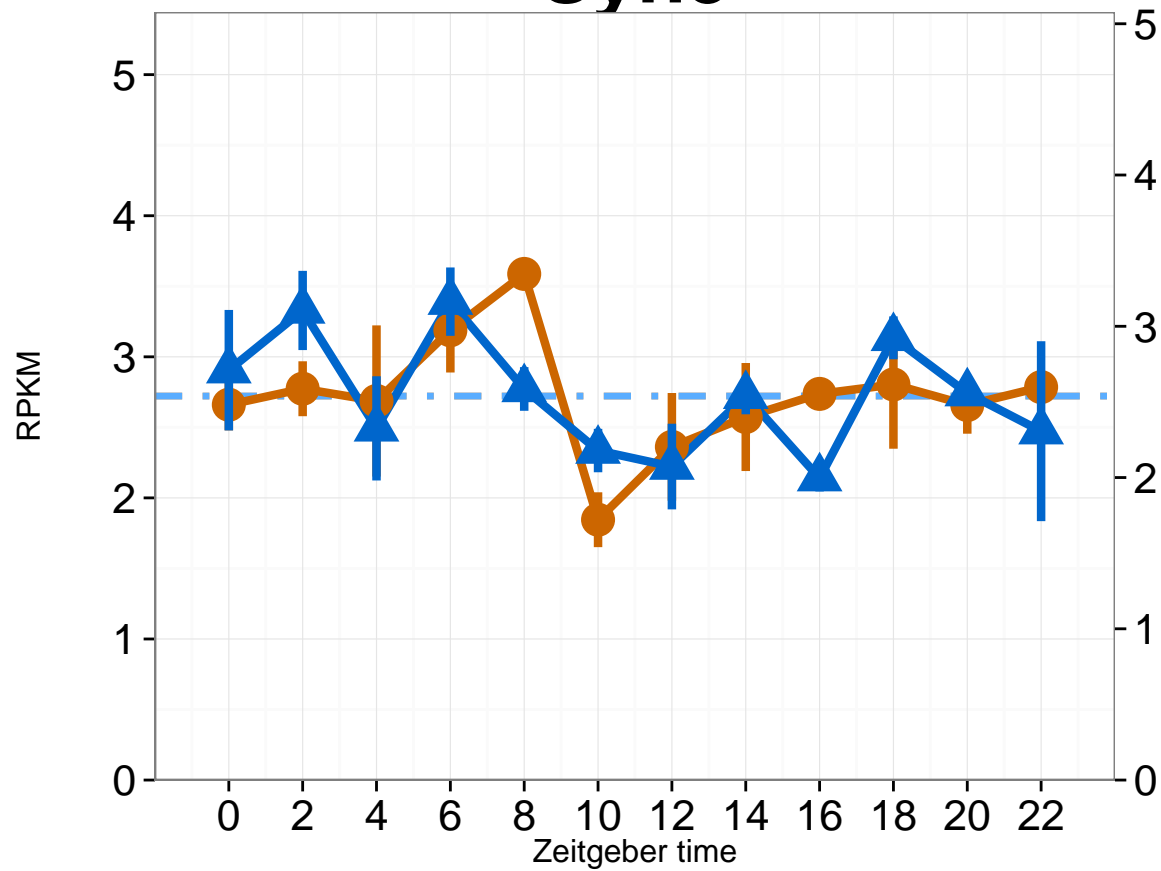

## Syn3

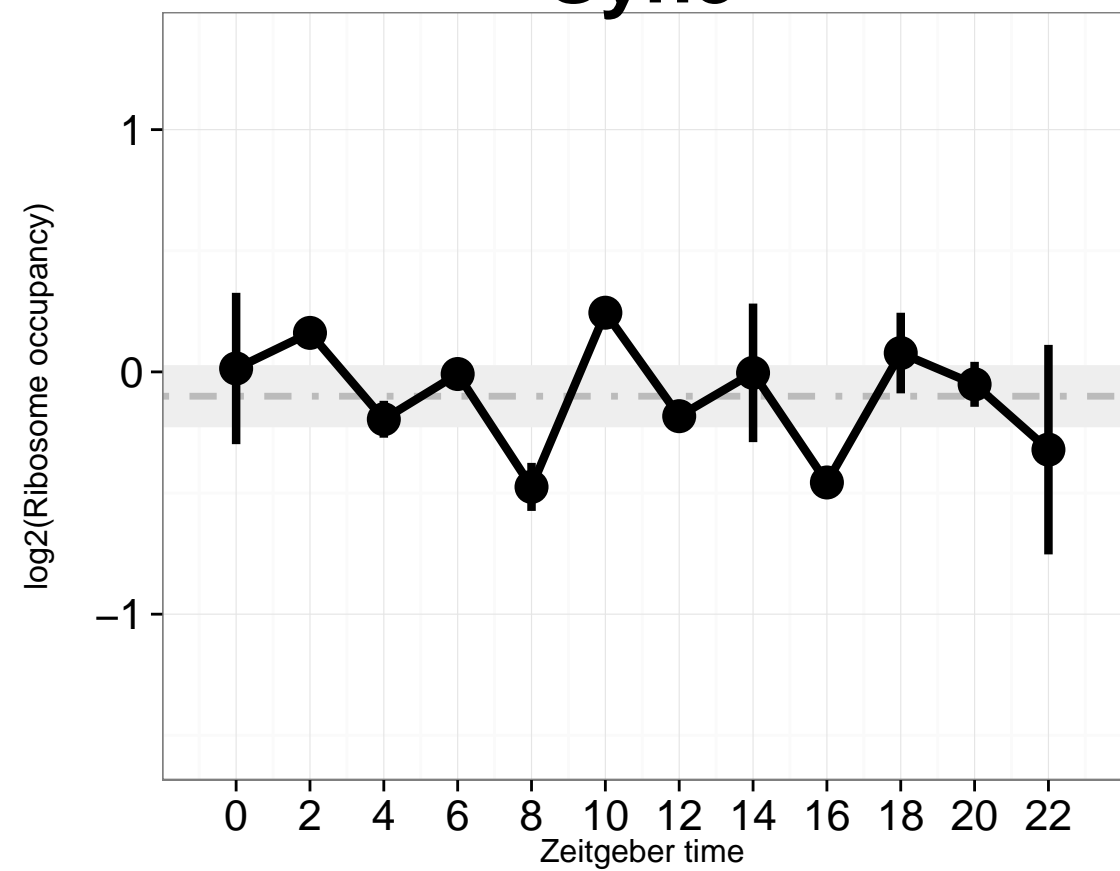

Supplement: Supplementary file 5891 [file 1]

# Dennd5a

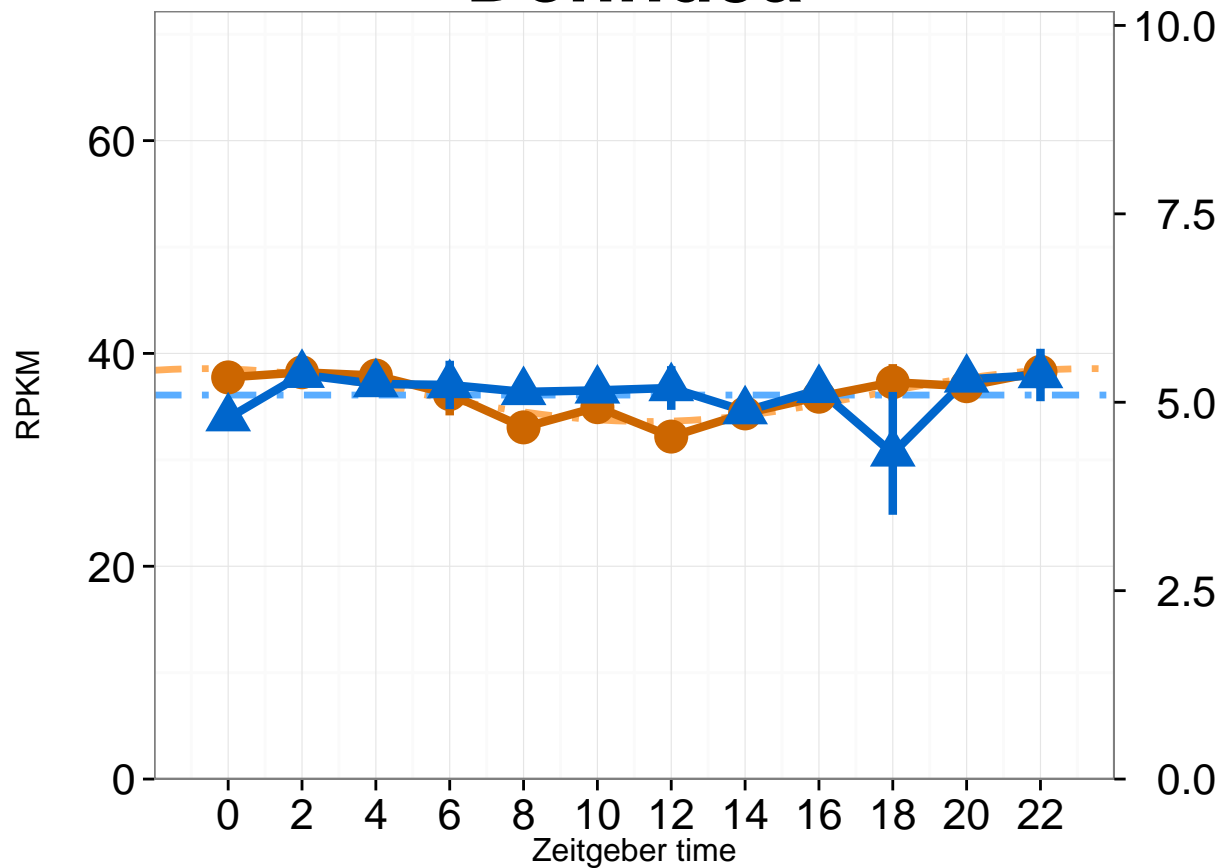

# Dennd5a

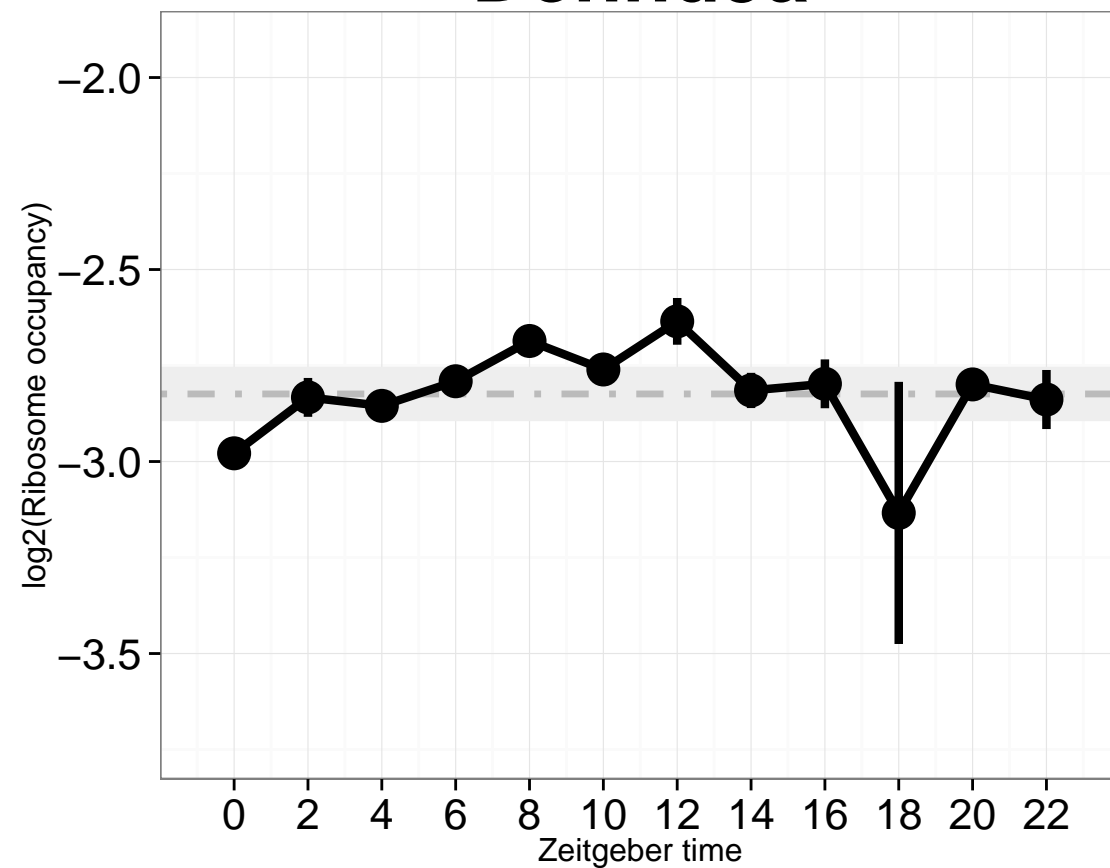

Supplement: Supplementary file 5892 [file 1]

# Hlf

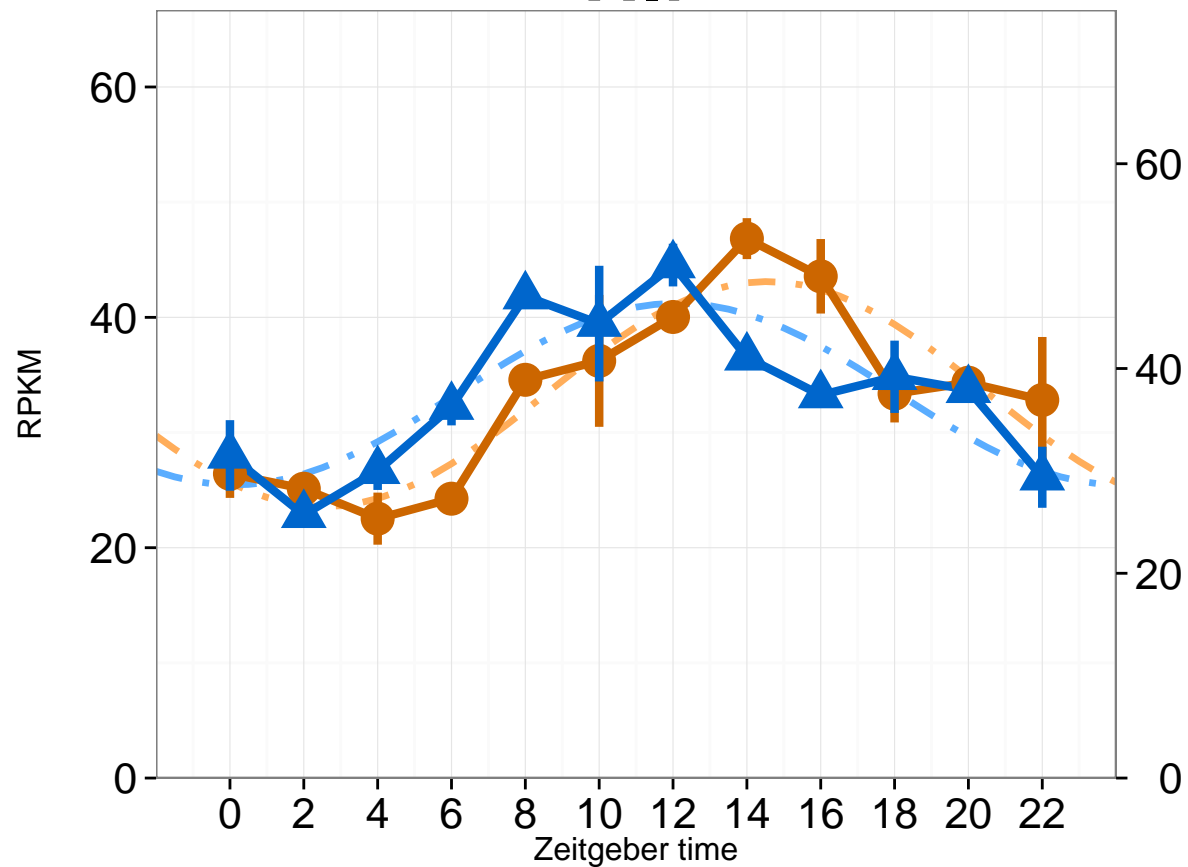

# Hlf

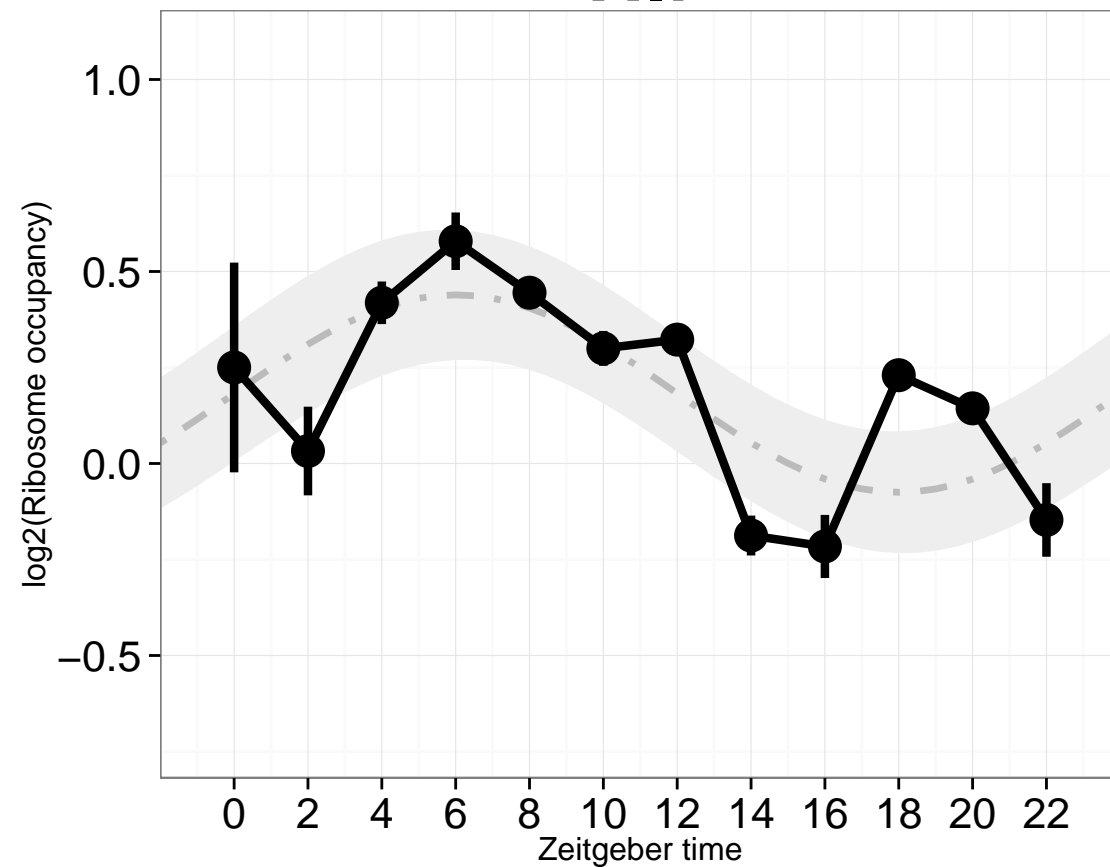

Supplement: Supplementary file 5893 [file 1]

## Fam53b

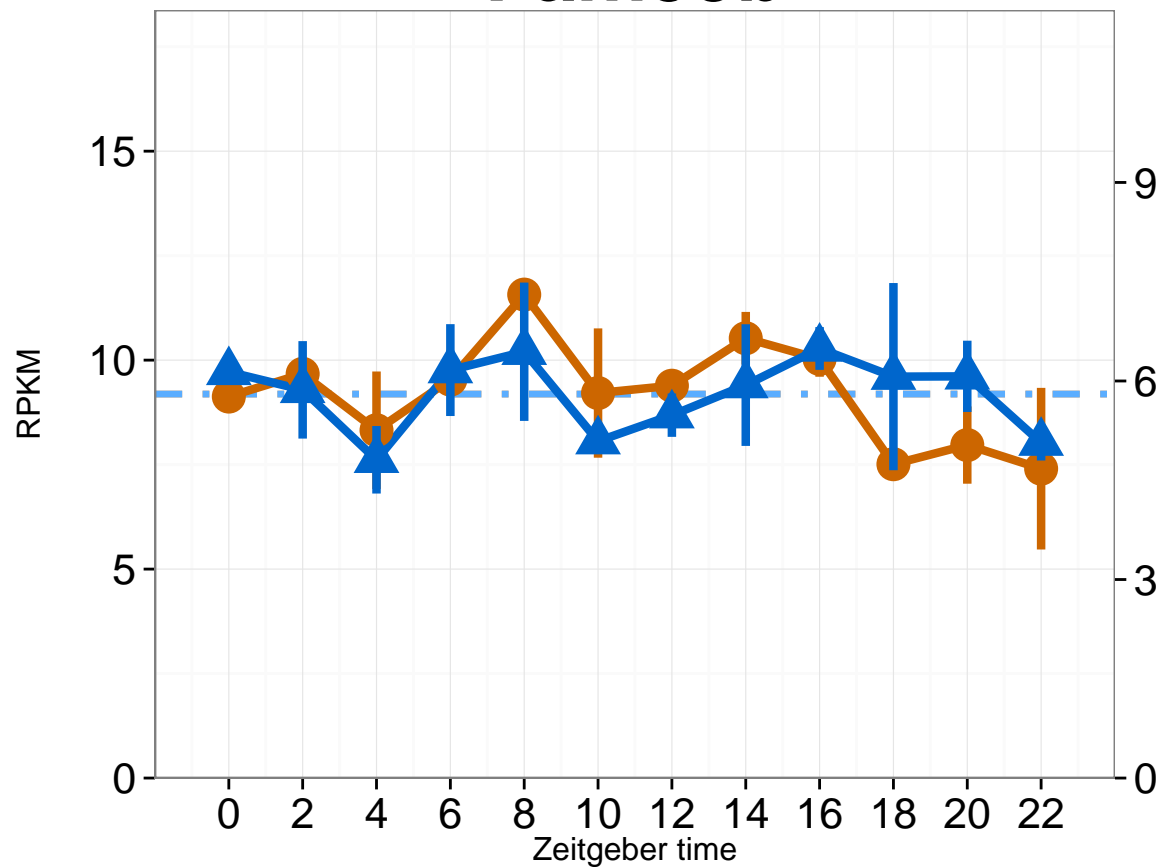

## Fam53b

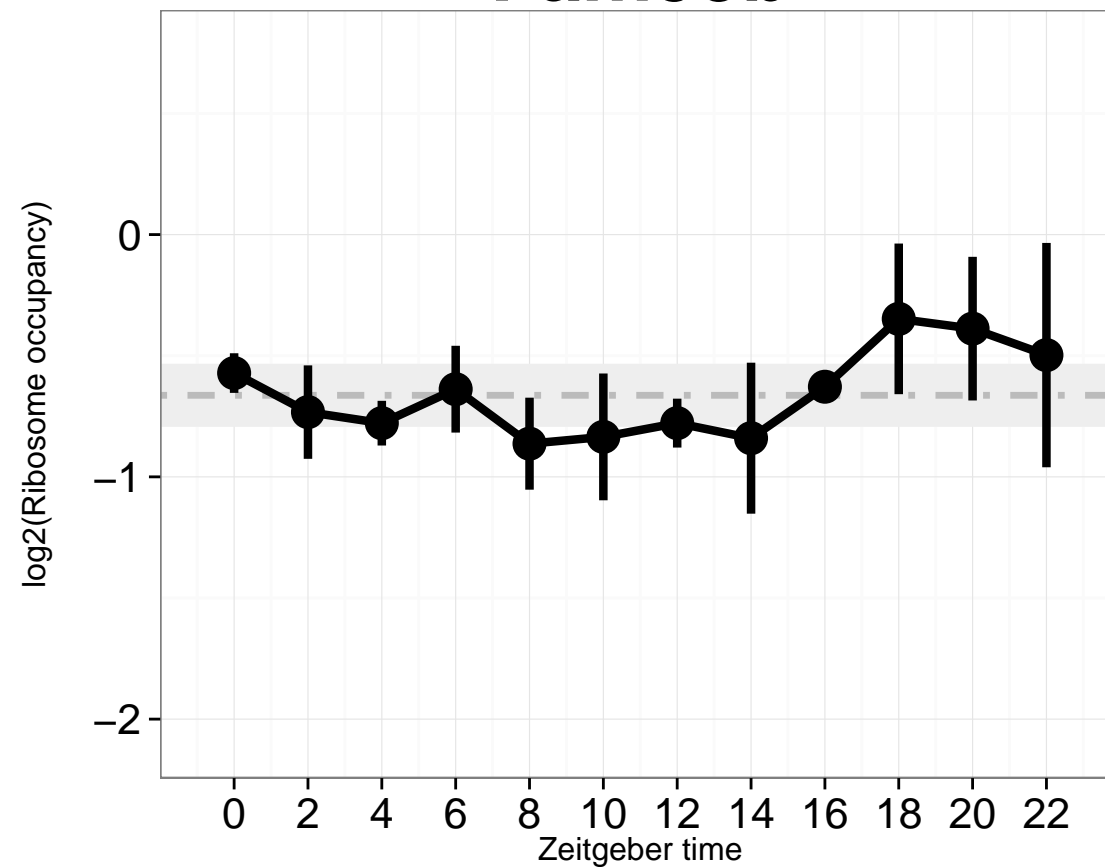

Supplement: Supplementary file 5894 [file 1]

# 1810013L24Rik

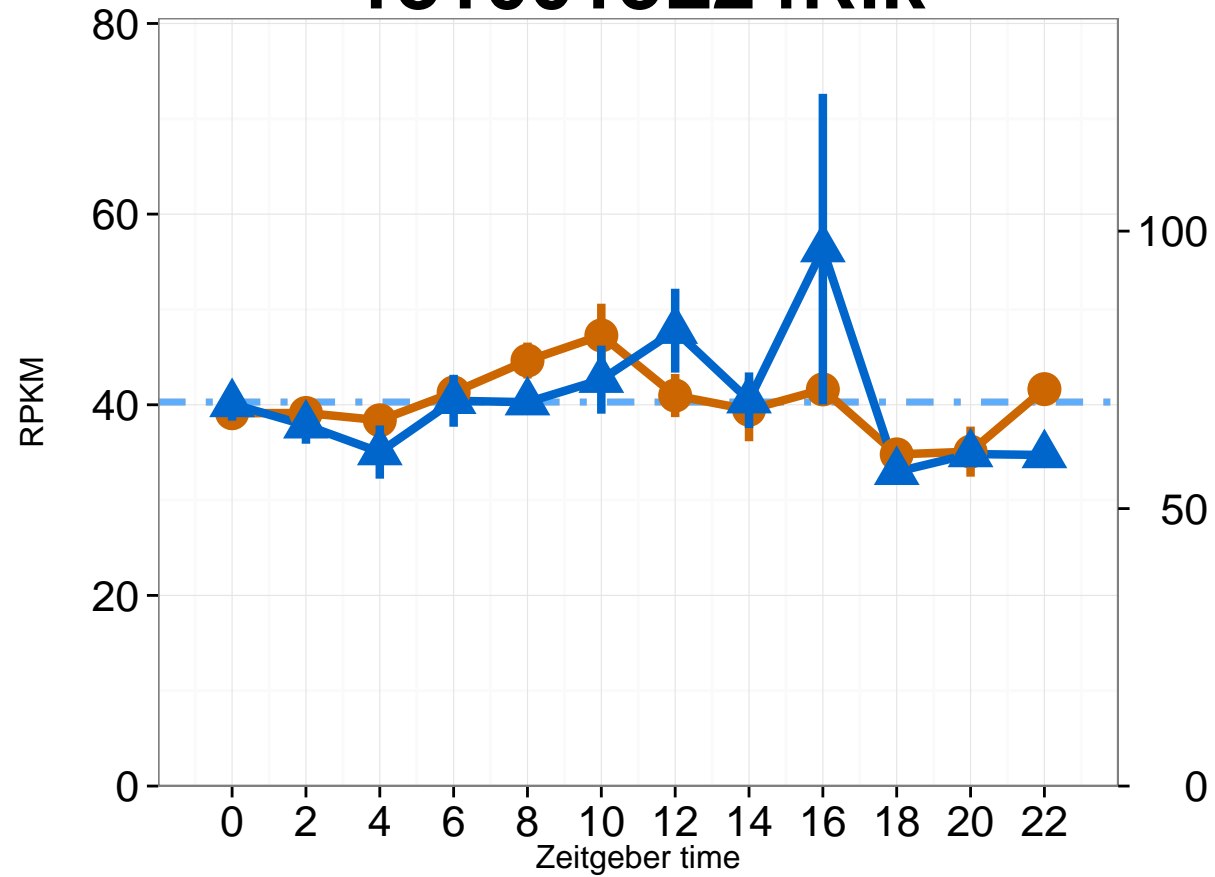

# 1810013L24Rik

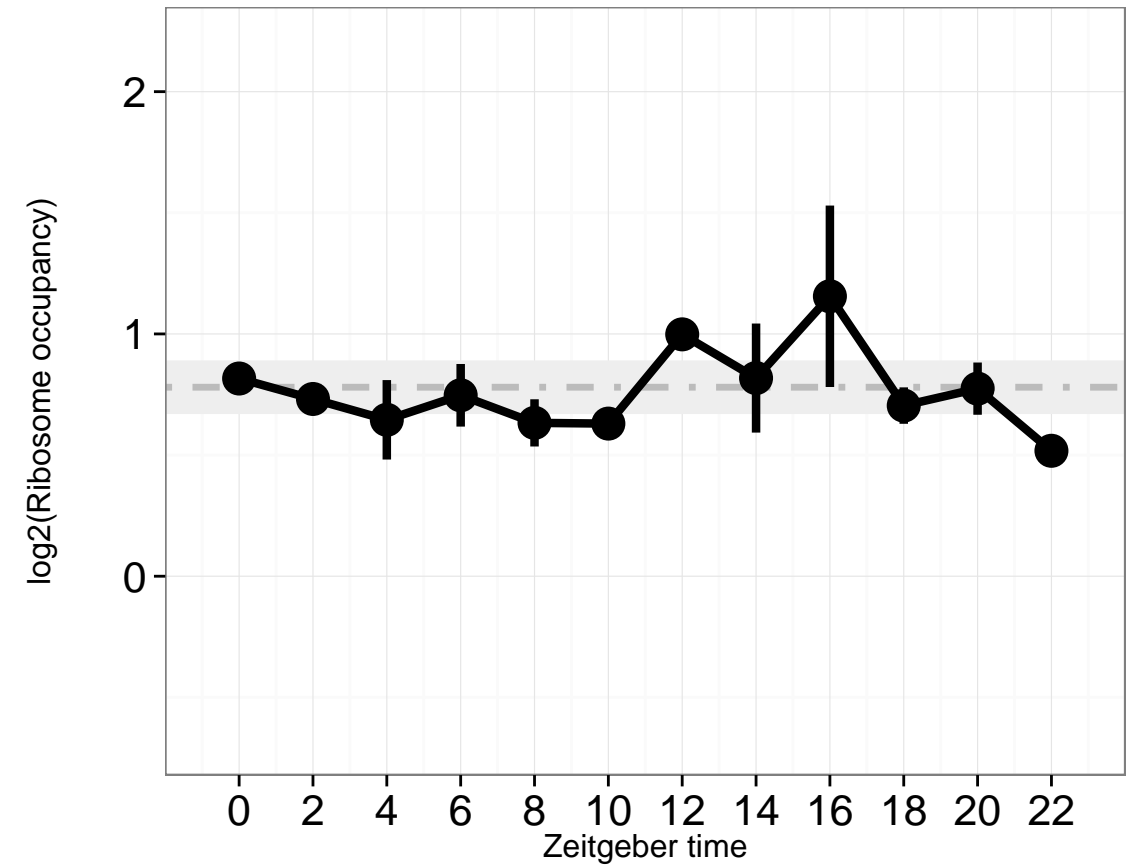

Supplement: Supplementary file 5895 [file 1]

## Brwd3

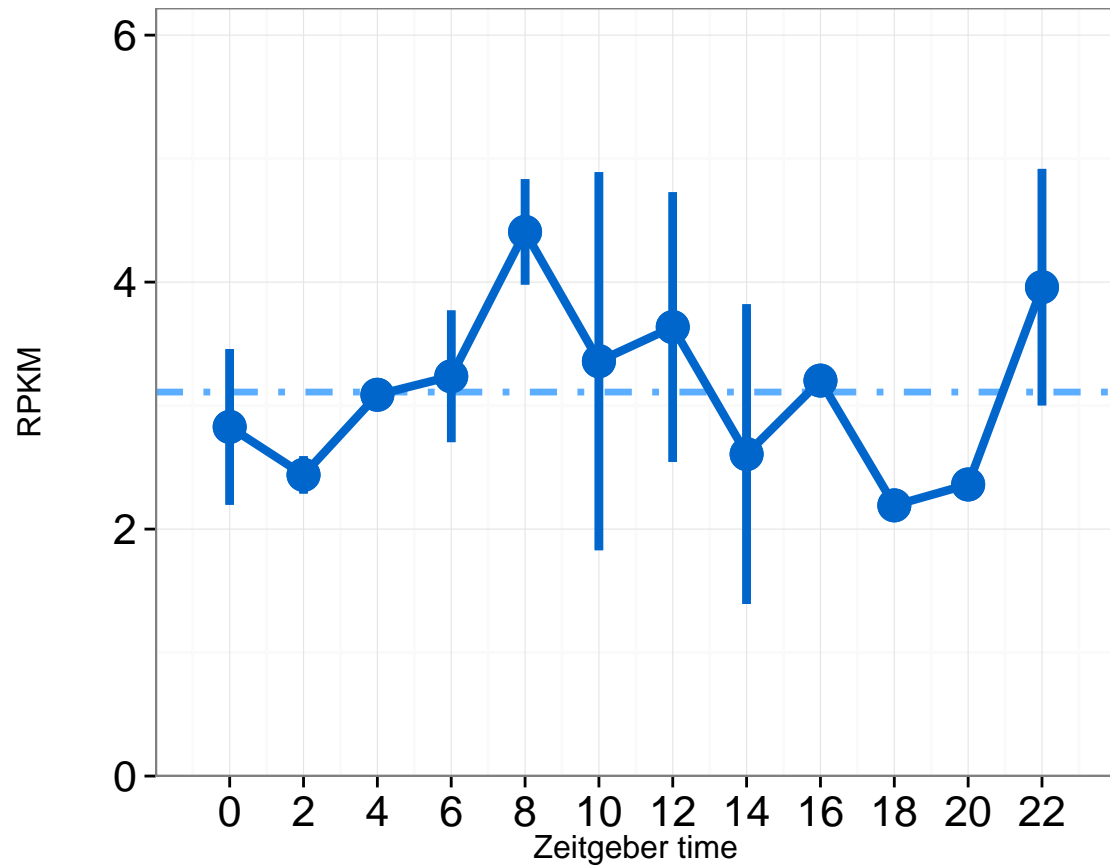

## Brwd3 log2(Ribosome occupancy

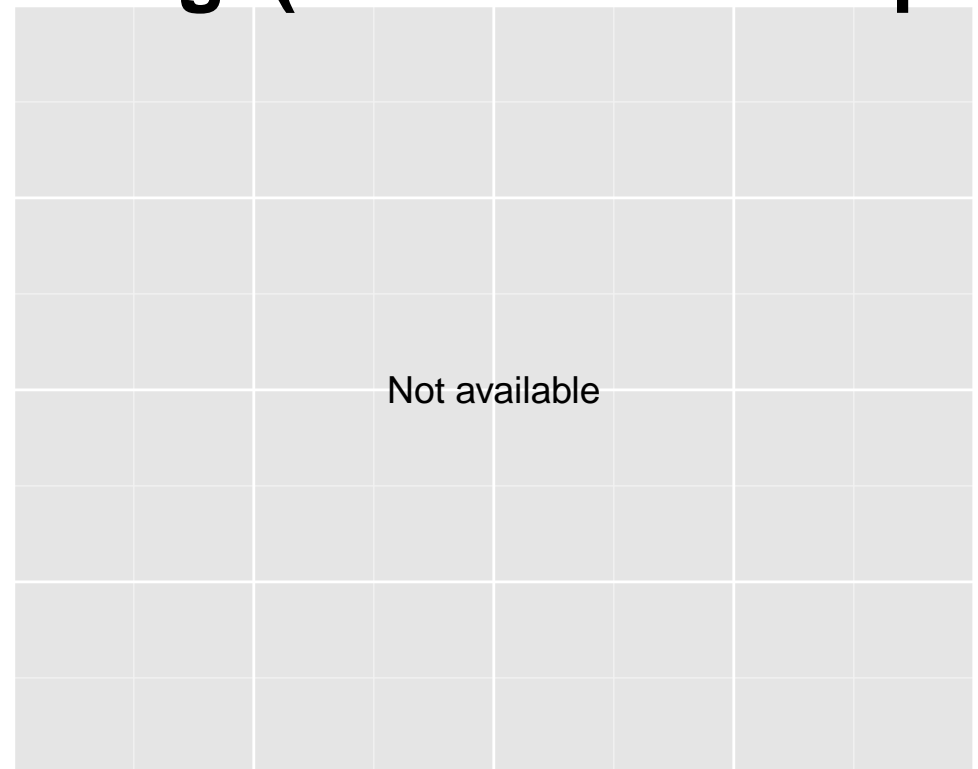

Supplement: Supplementary file 5896 [file 1]

## Snupn

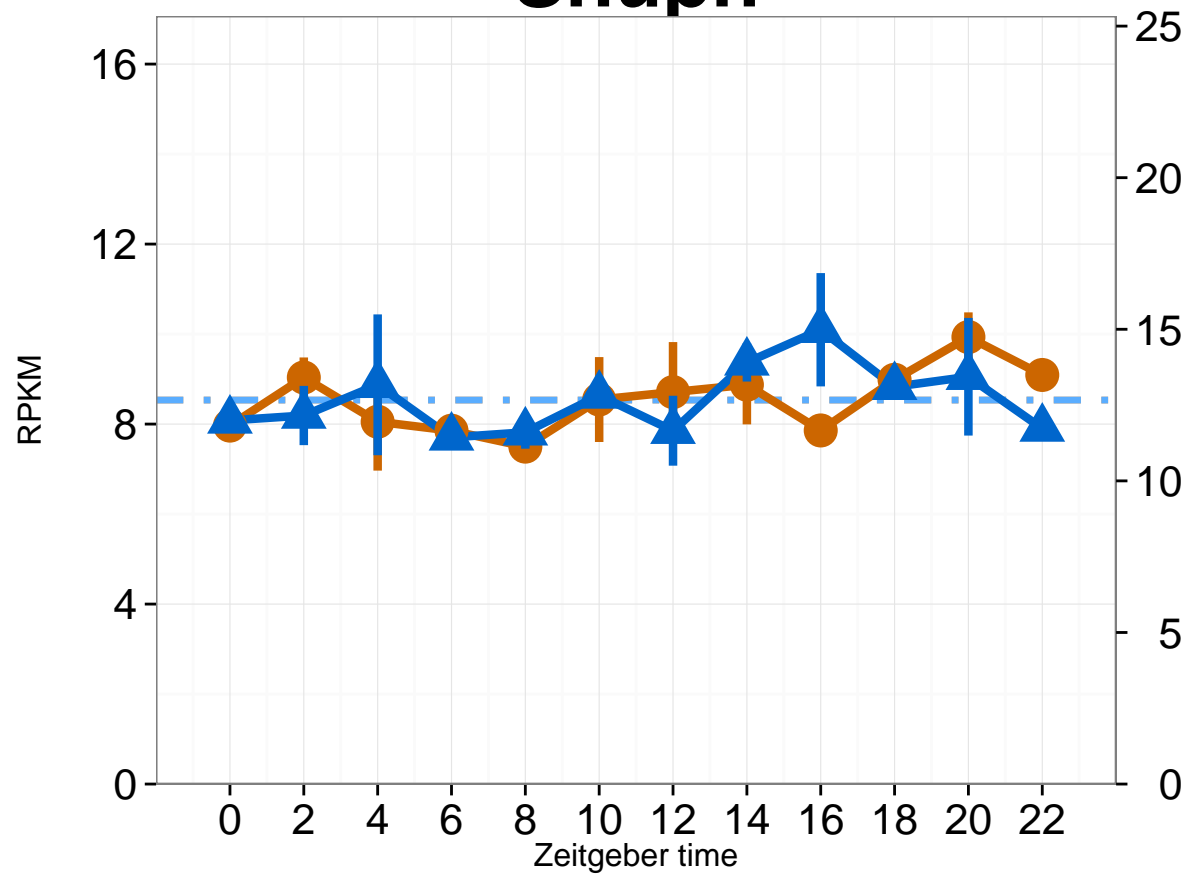

## Snupn

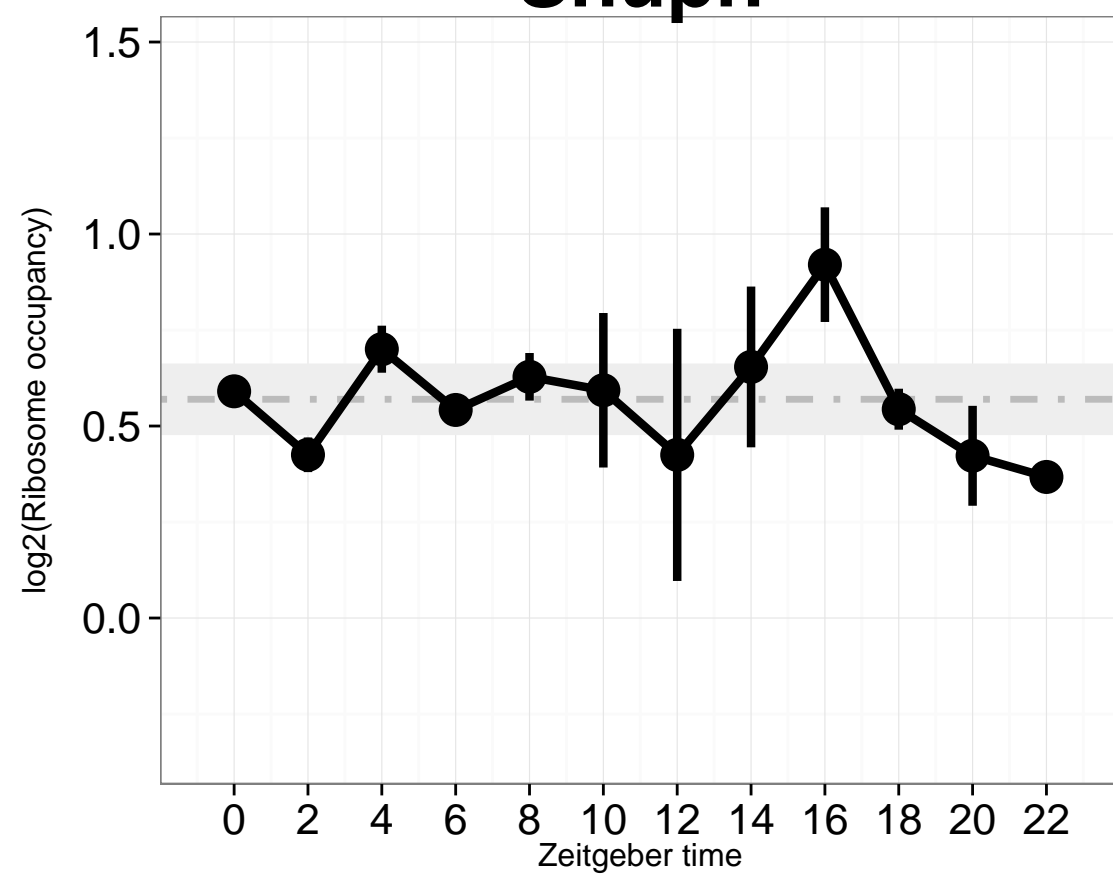

Supplement: Supplementary file 5897 [file 1]

# Zfp217

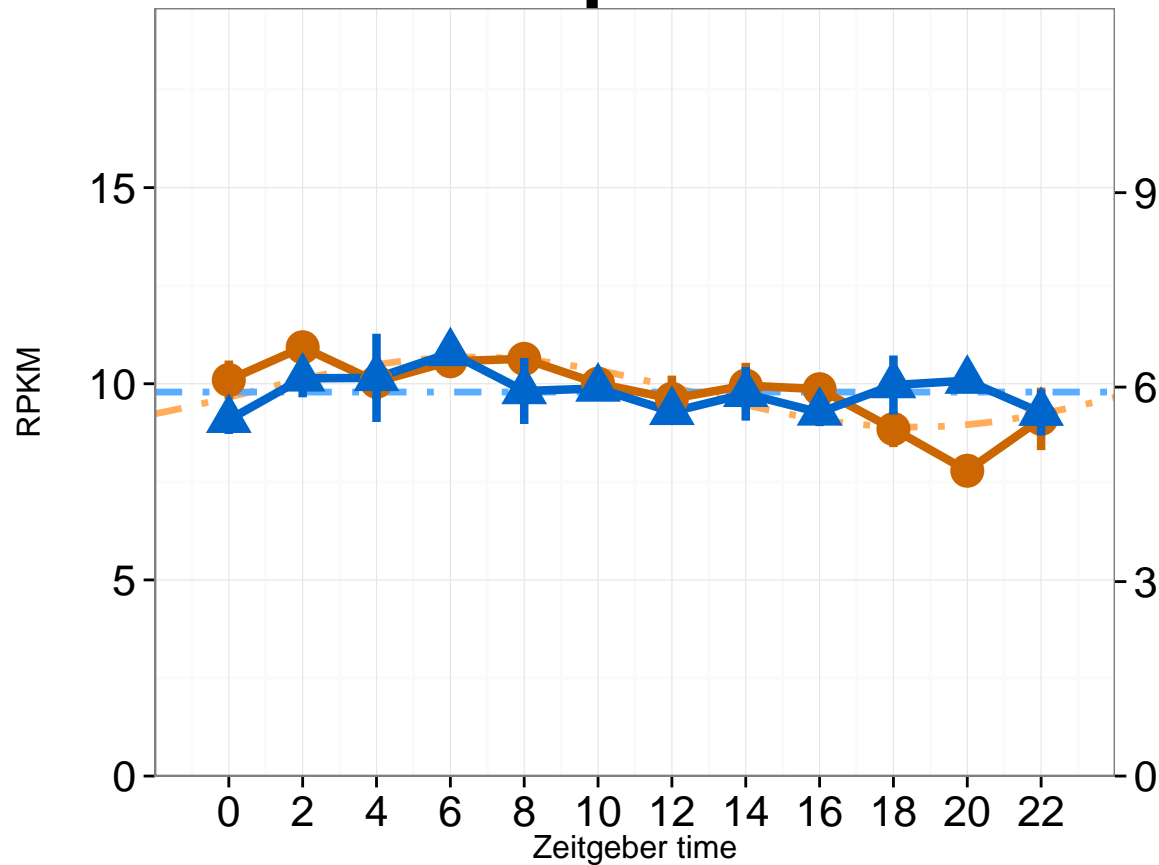

# Zfp217

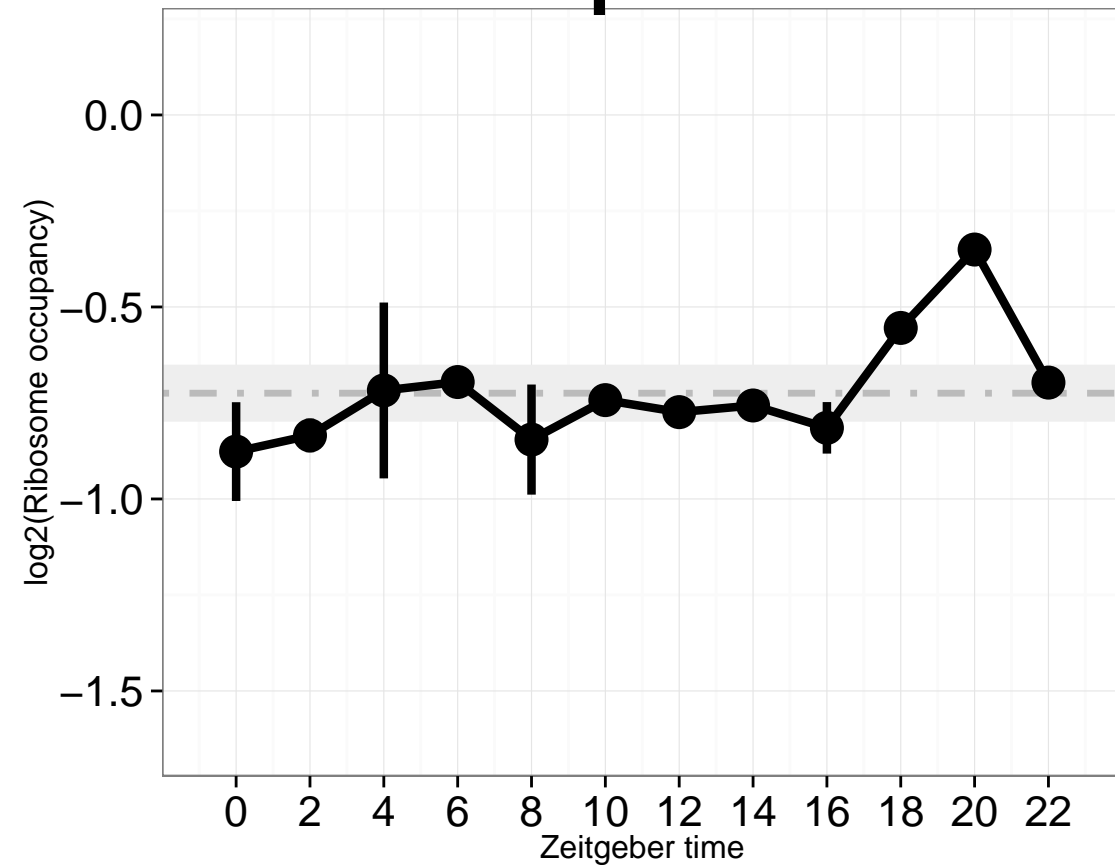

Supplement: Supplementary file 5898 [file 1]

# Rpusd2

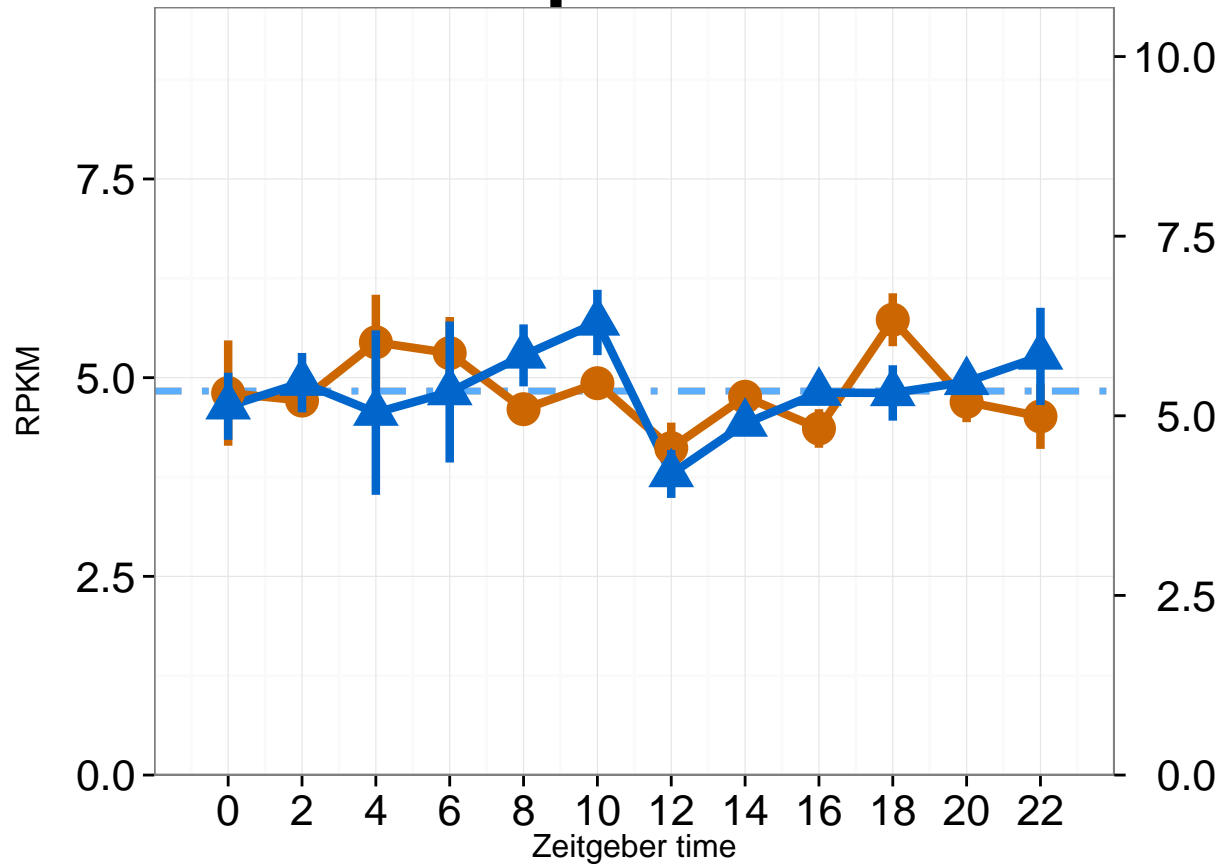

# Rpusd2

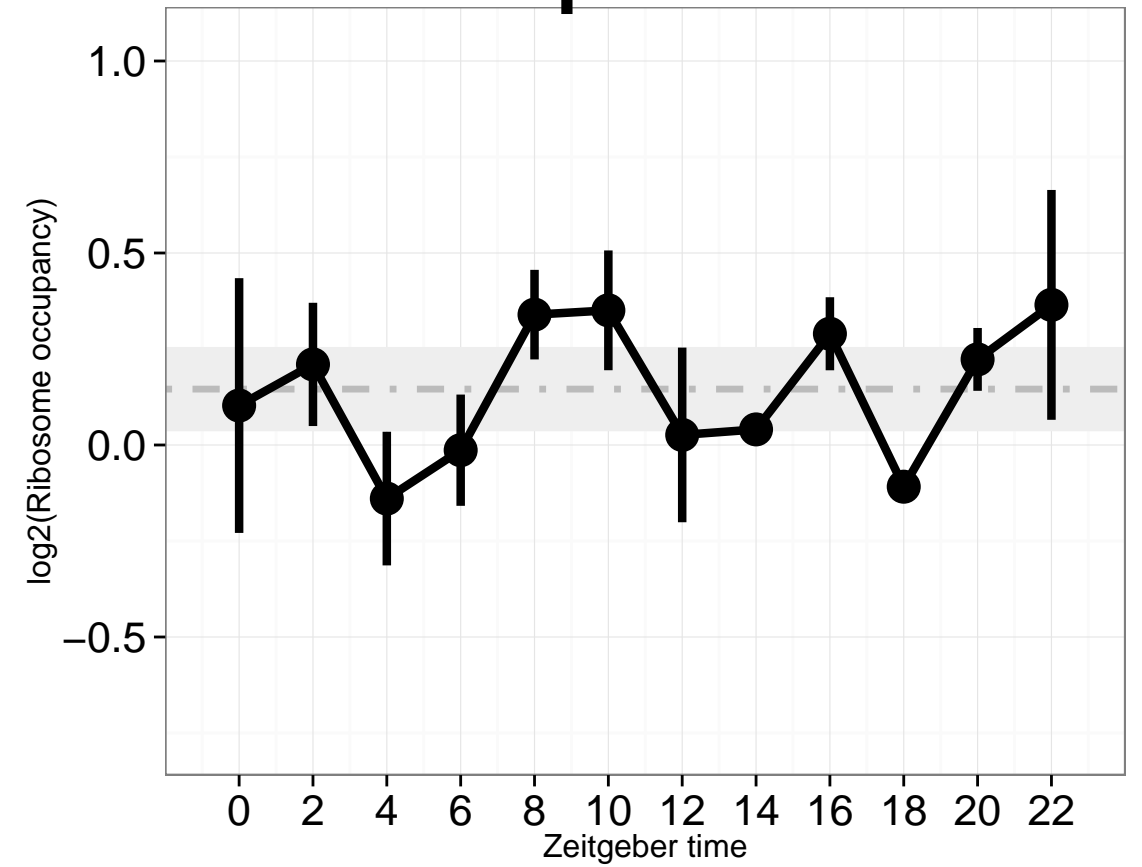

Supplement: Supplementary file 5899 [file 1]

## Il1b

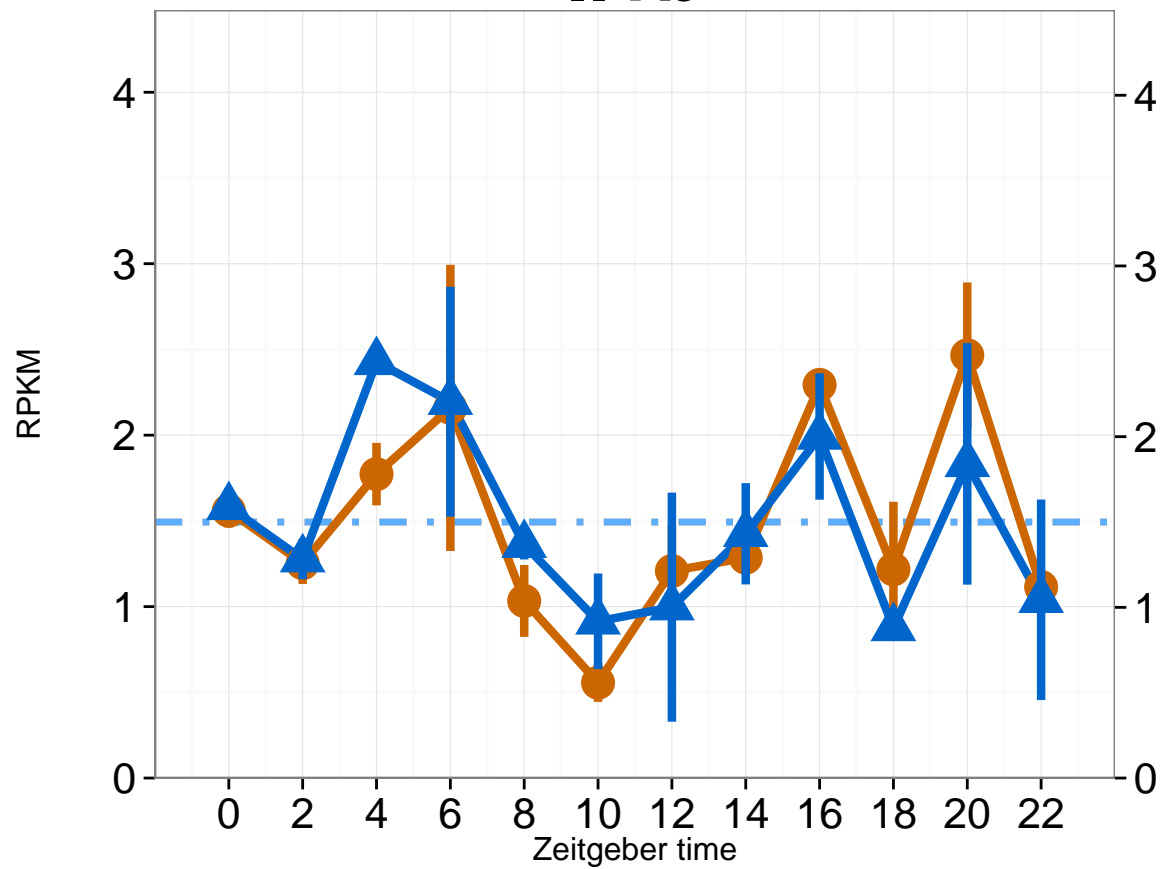

## Il1b

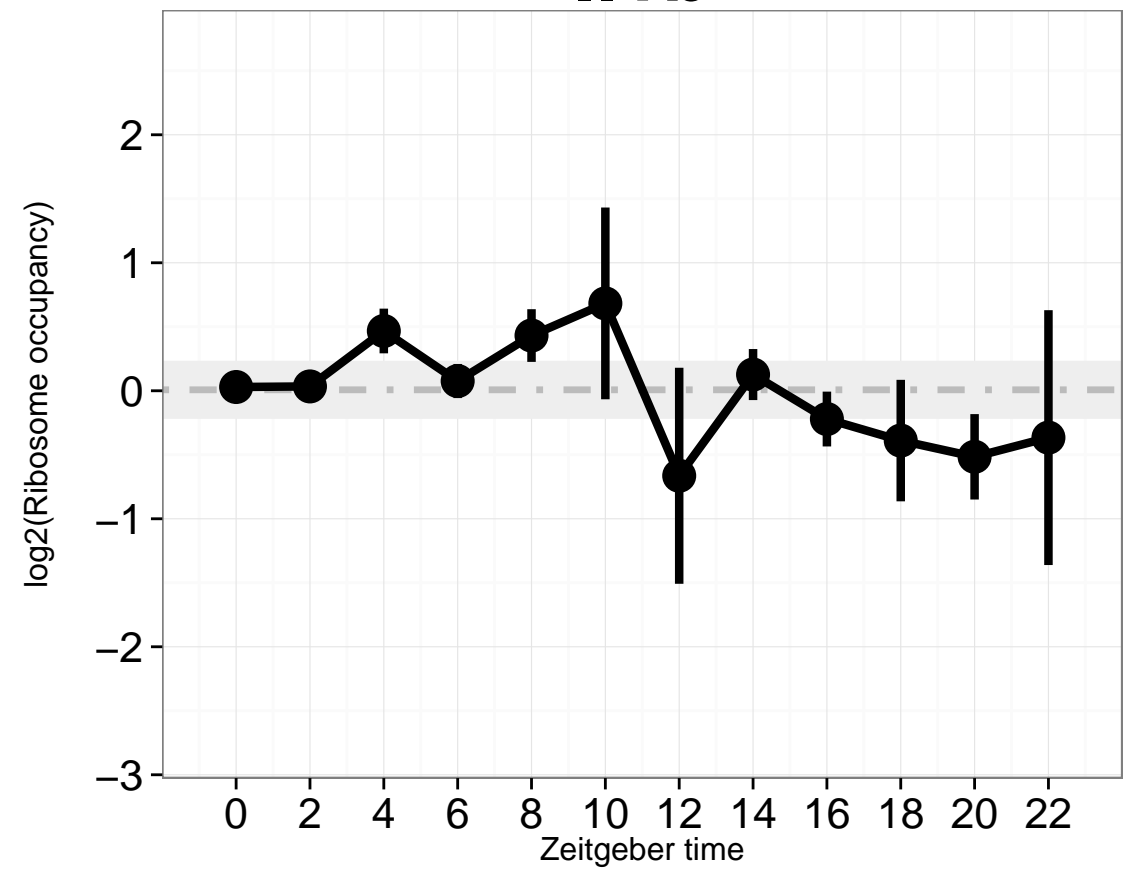

Supplement: Supplementary file 5900 [file 1]

# Oasl1

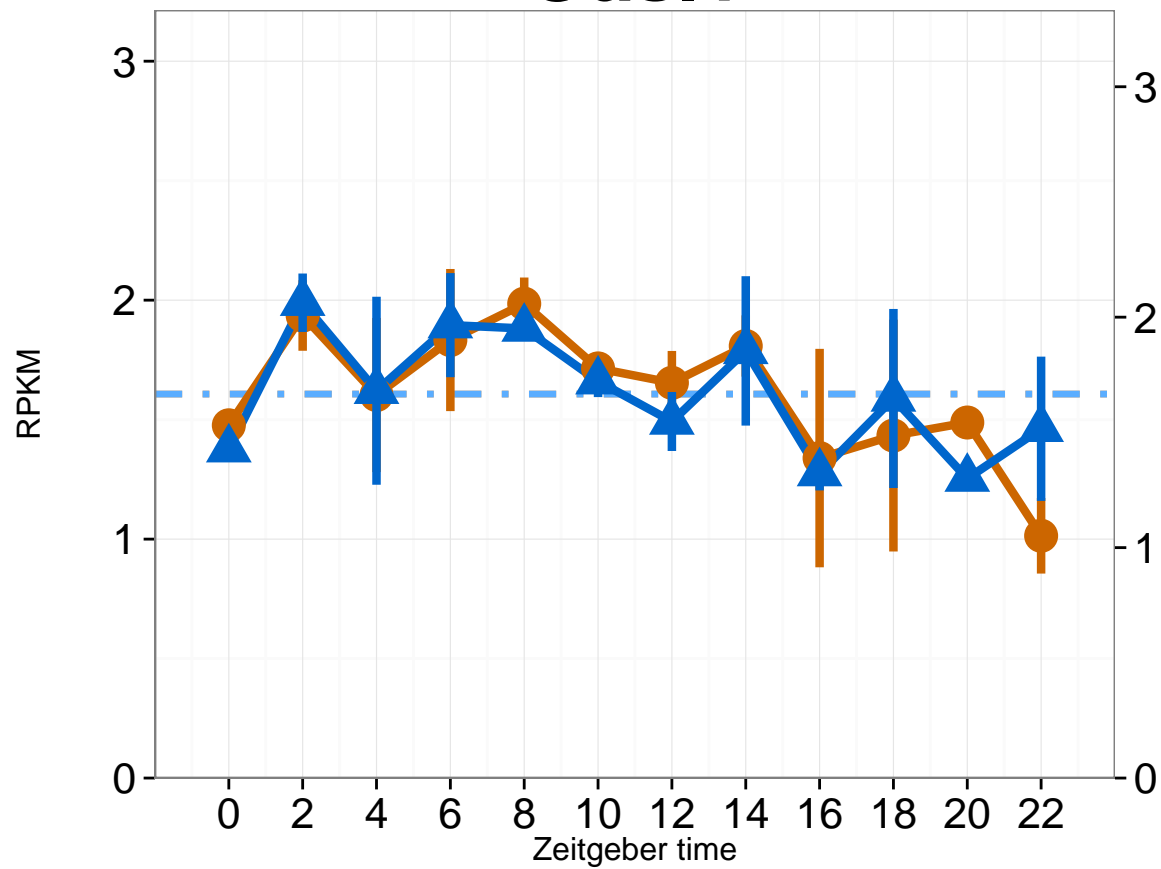

# Oasl1

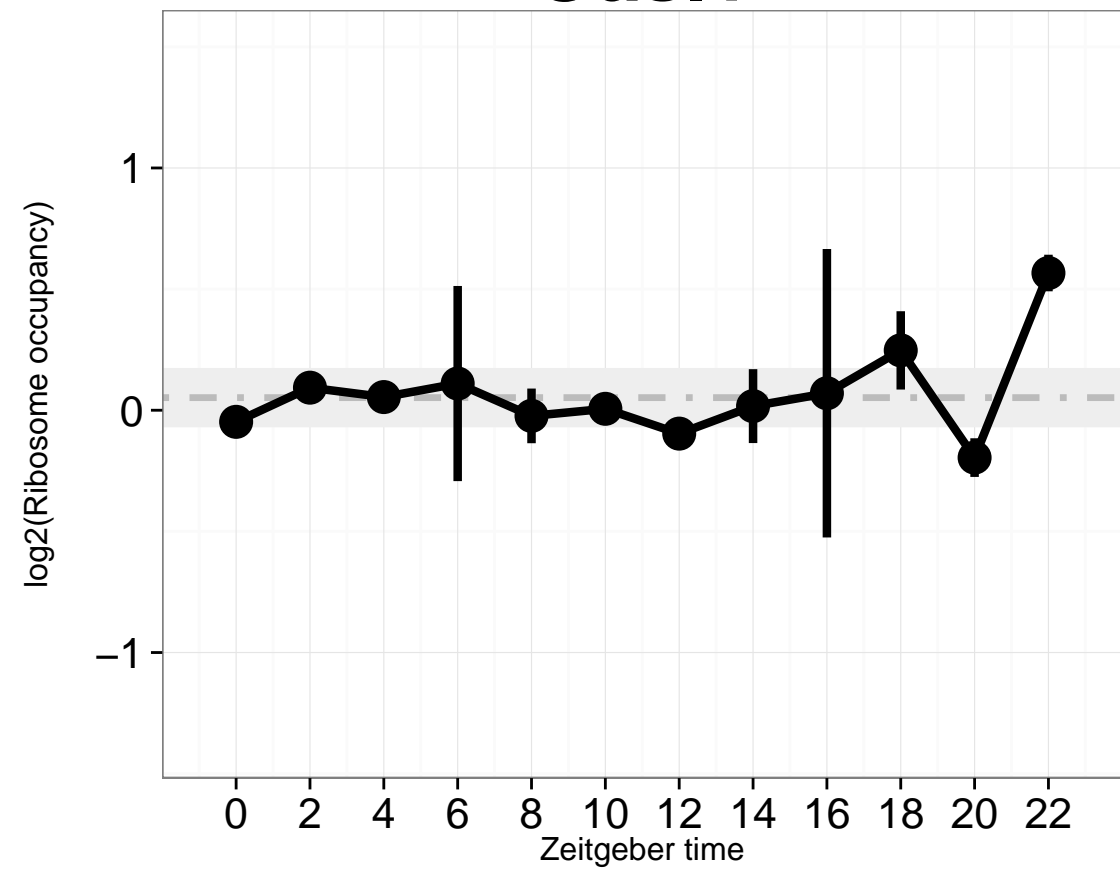

Supplement: Supplementary file 5901 [file 1]

## Ndufs4

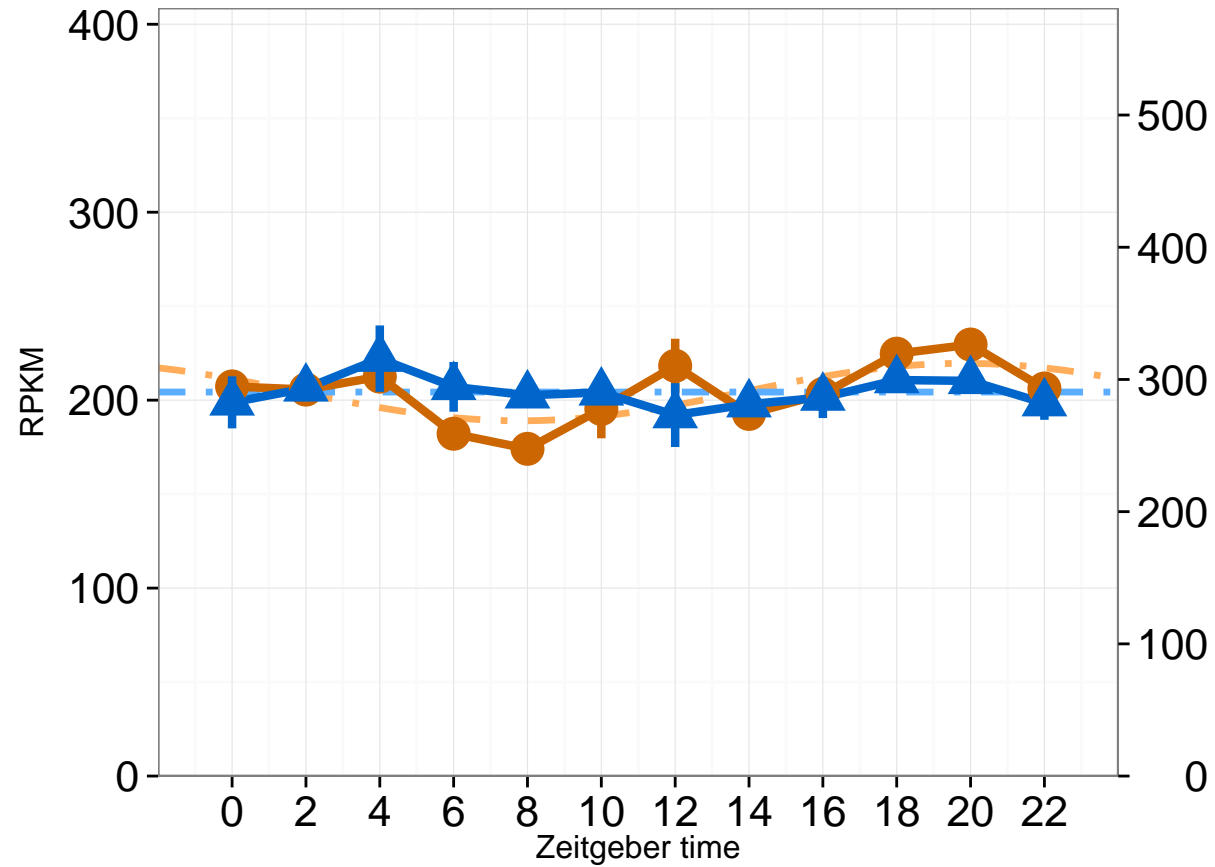

## Ndufs4

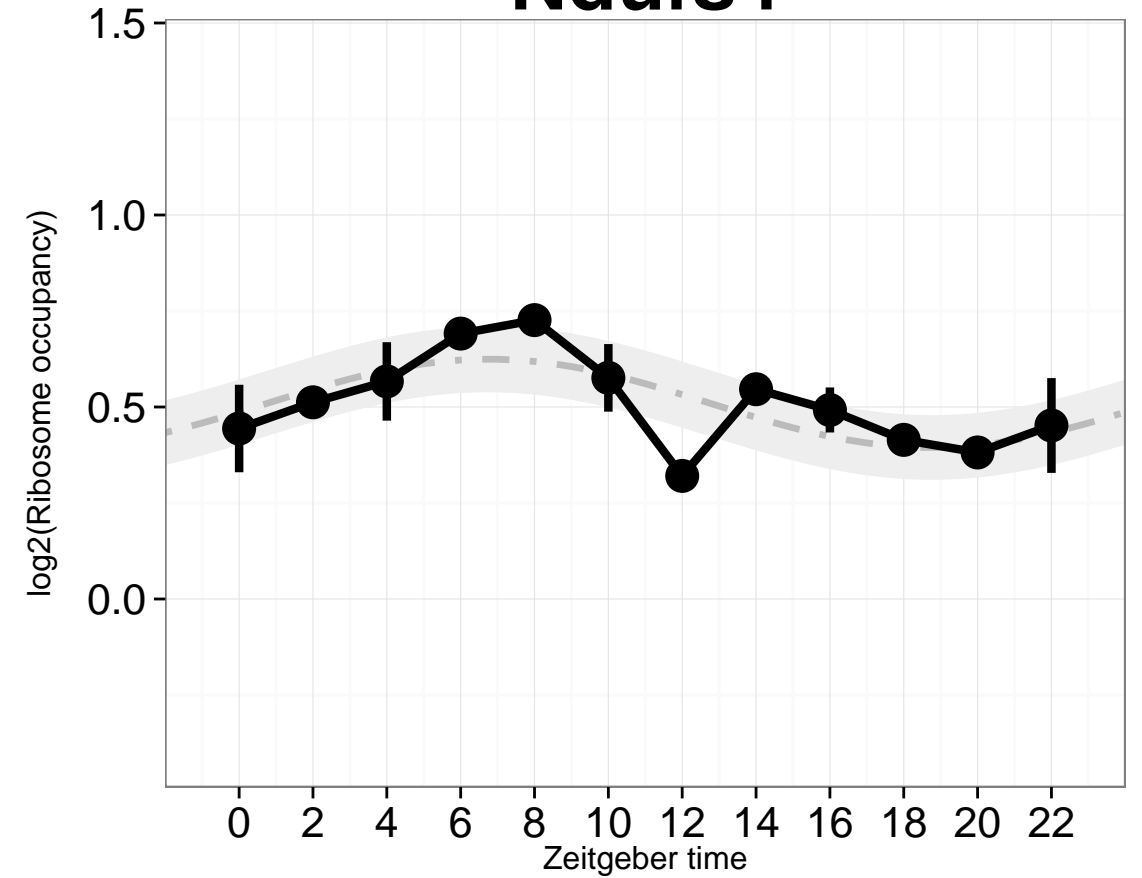

Supplement: Supplementary file 5902 [file 1]

## Gnptg

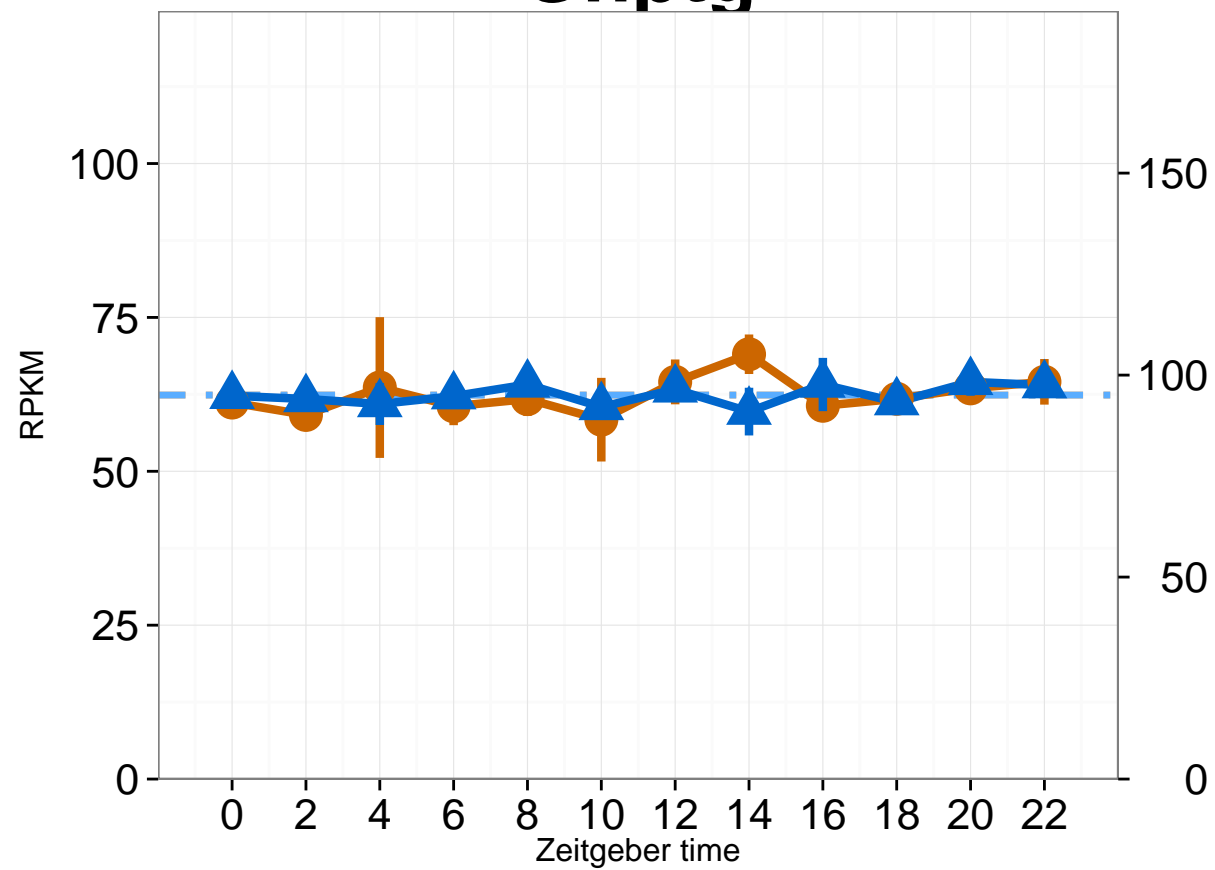

## Gnptg

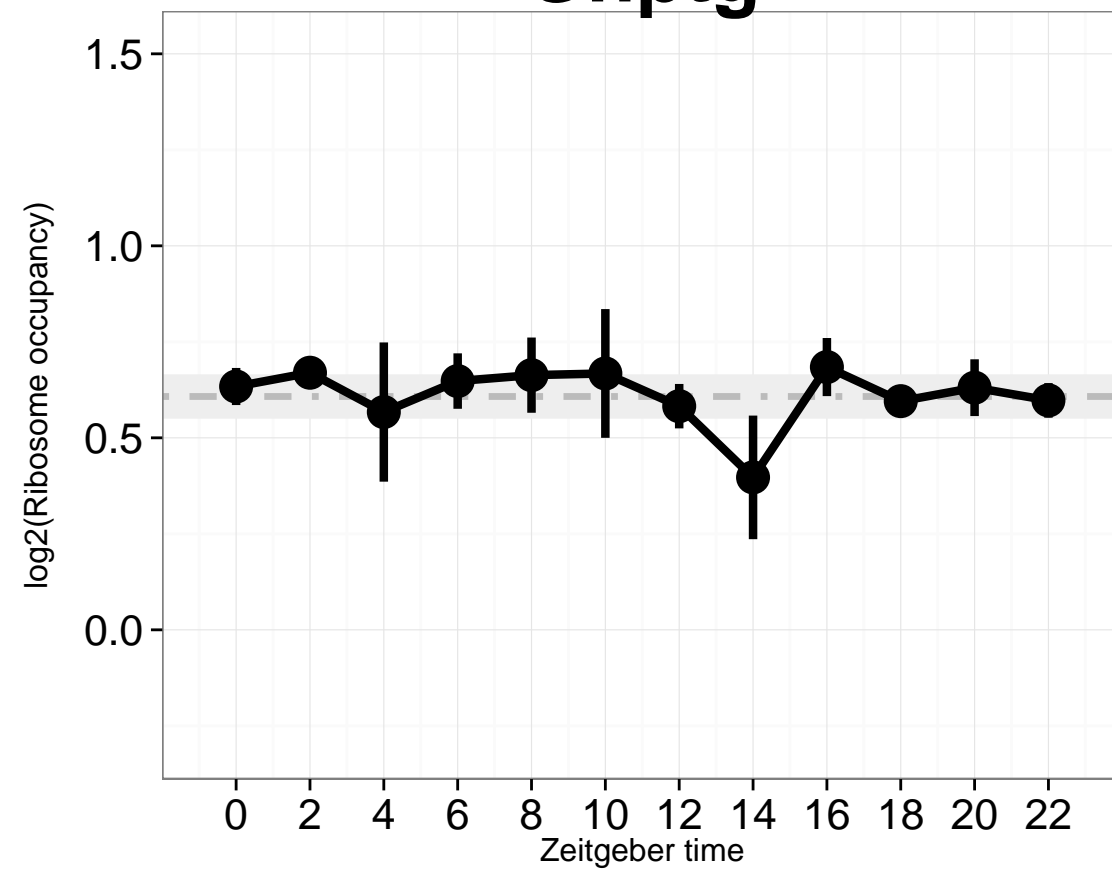

Supplement: Supplementary file 5903 [file 1]

## Cenpo

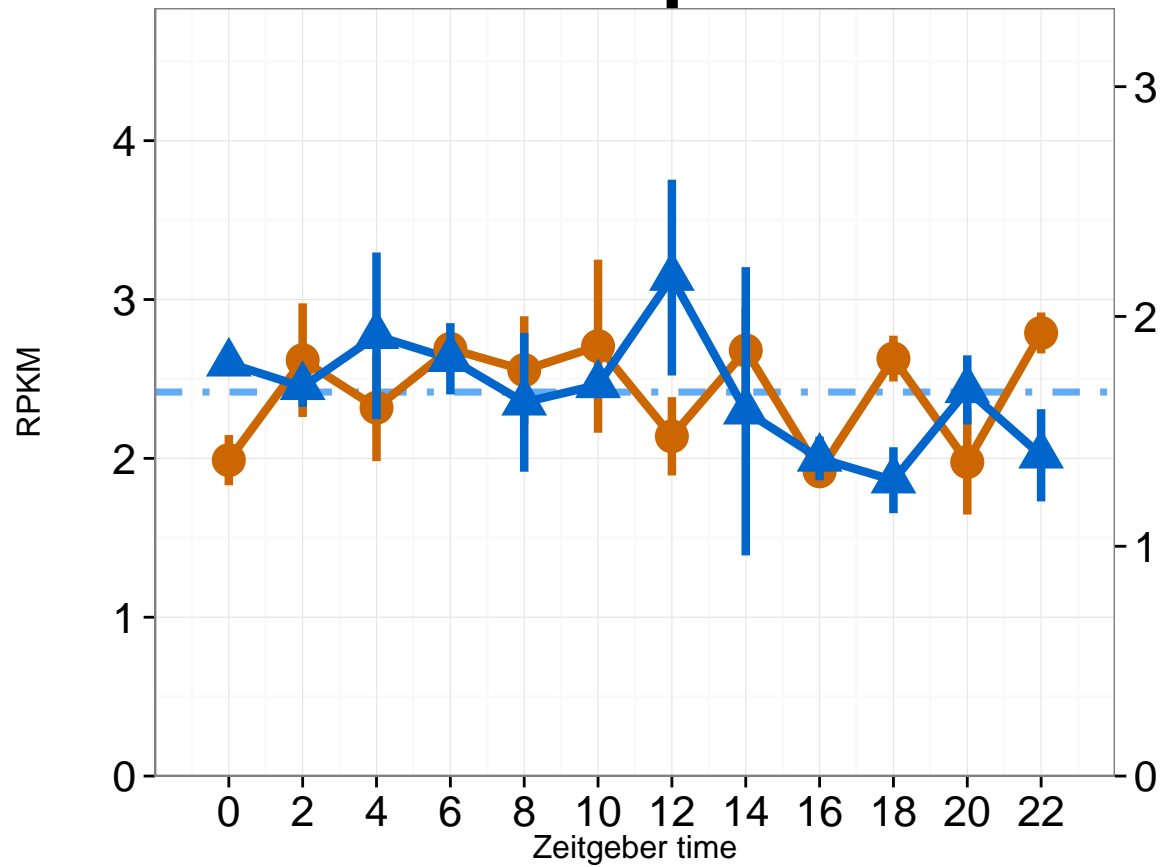

## Cenpo

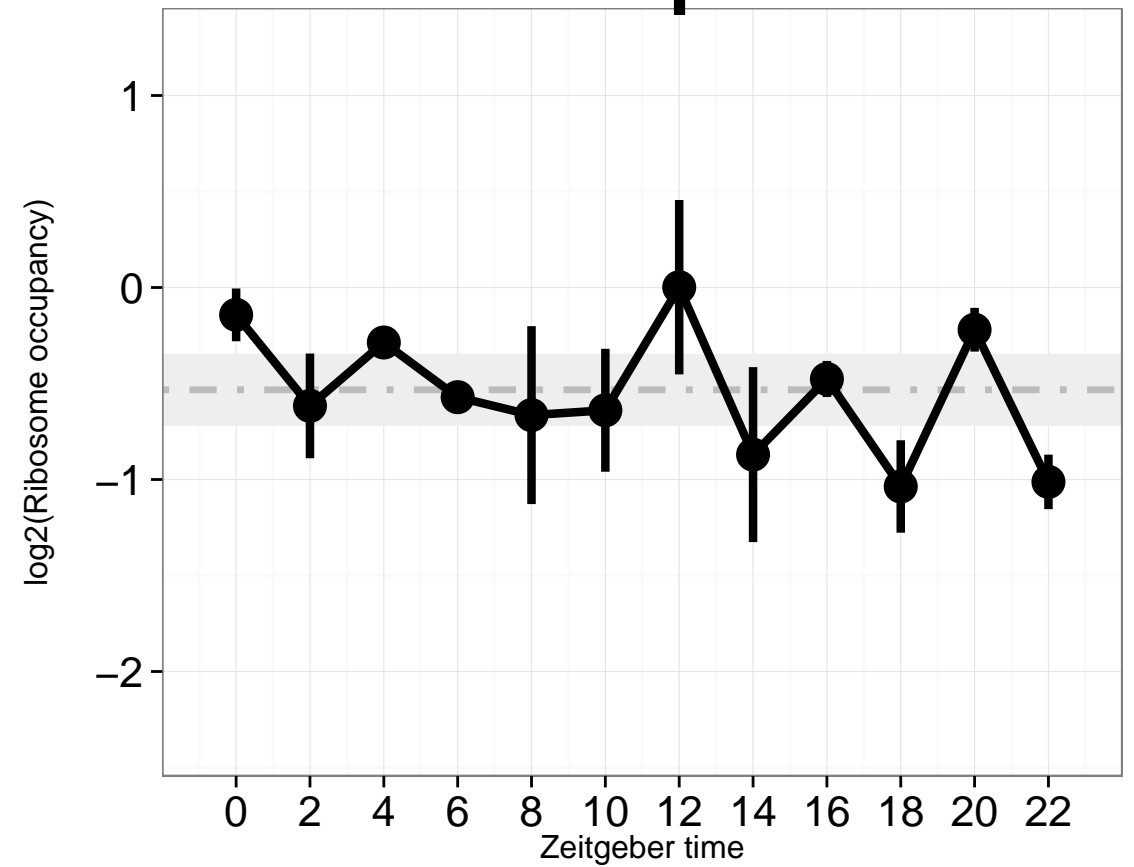

Supplement: Supplementary file 5904 [file 1]

# Tmem63b

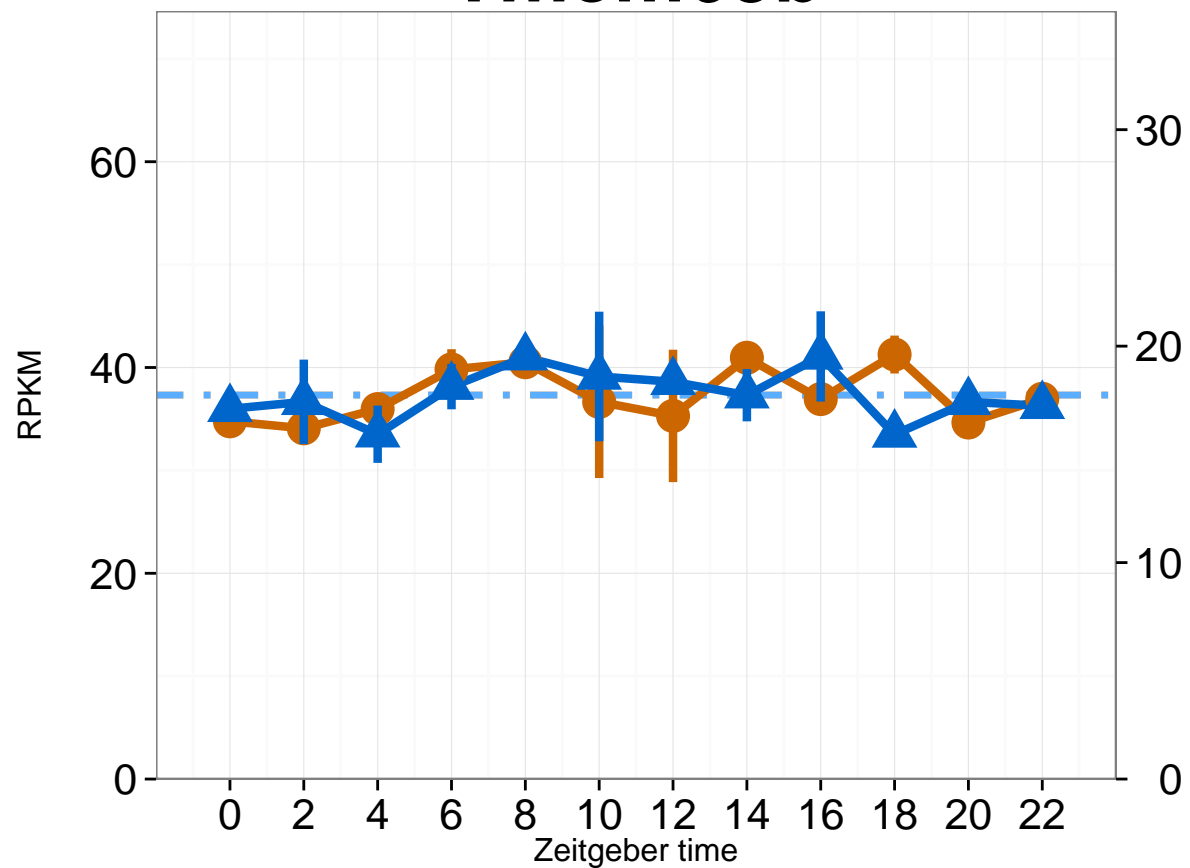

# Tmem63b

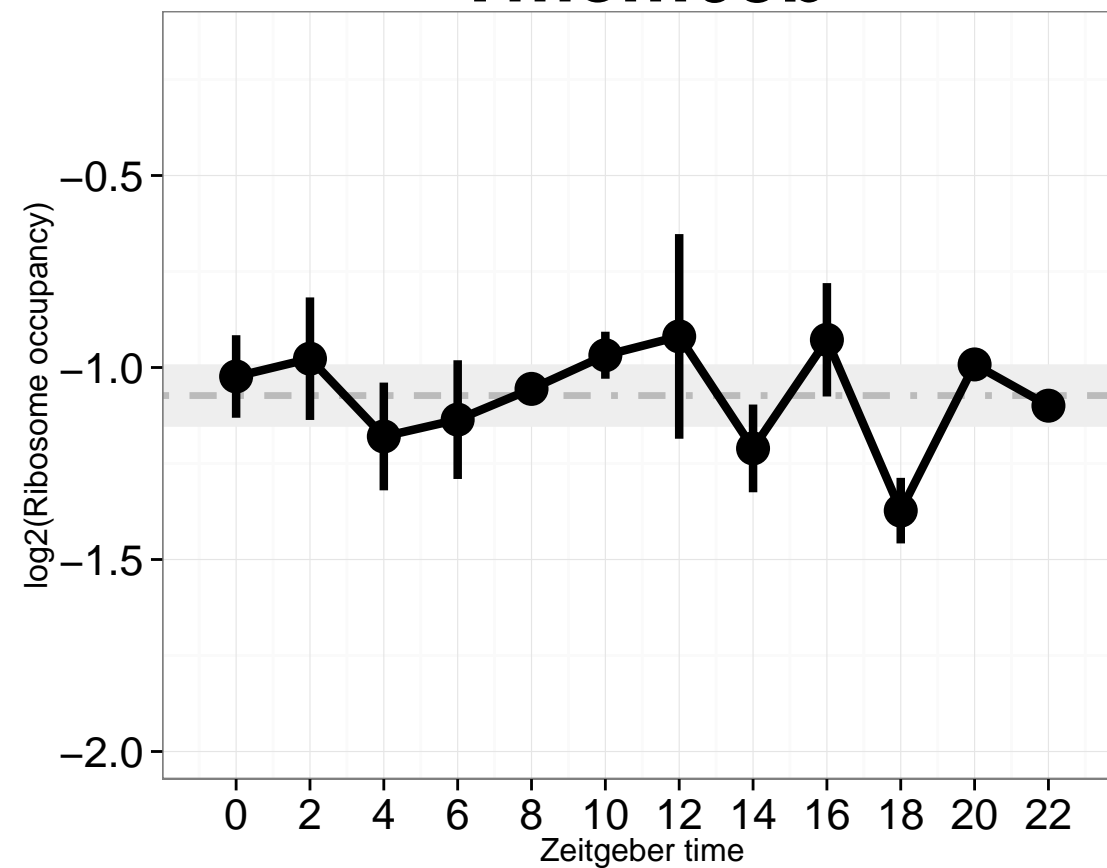

Supplement: Supplementary file 5905 [file 1]

# Zfp689

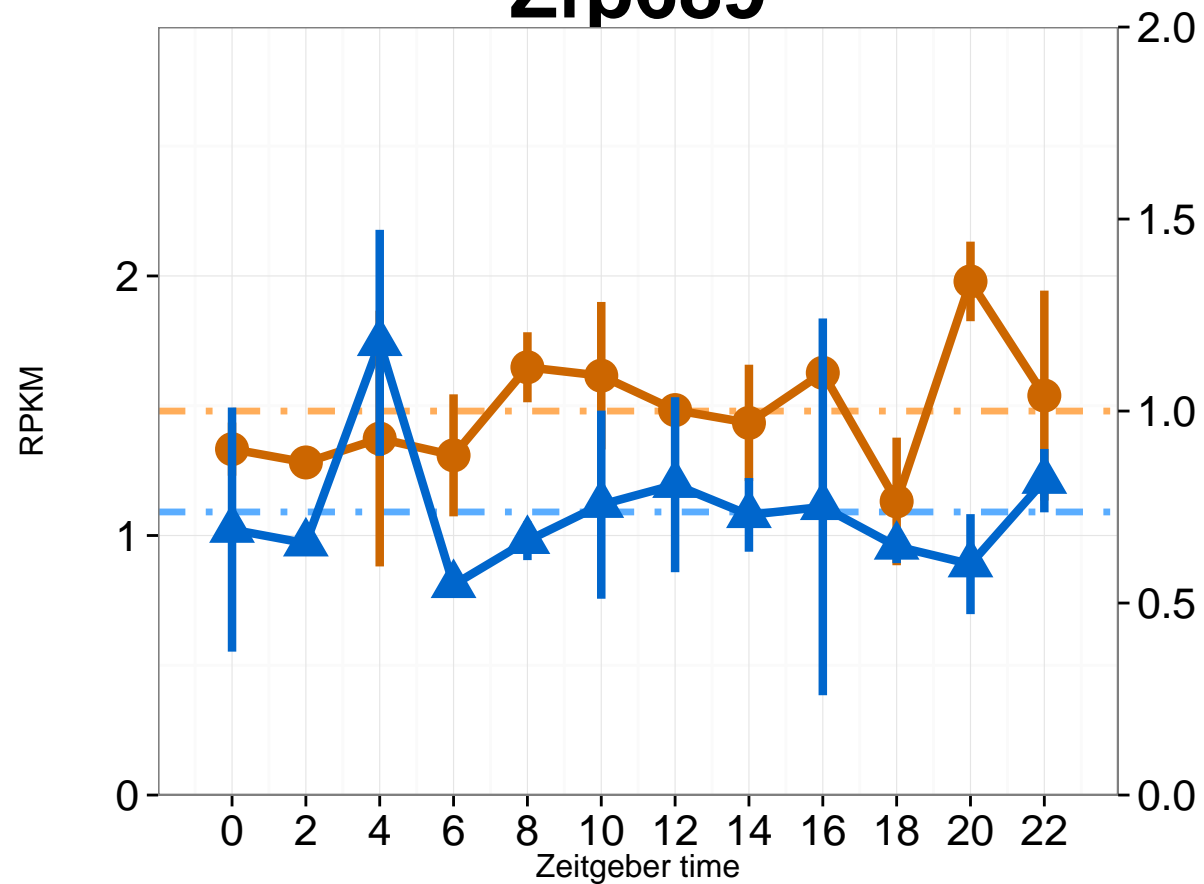

# Zfp689

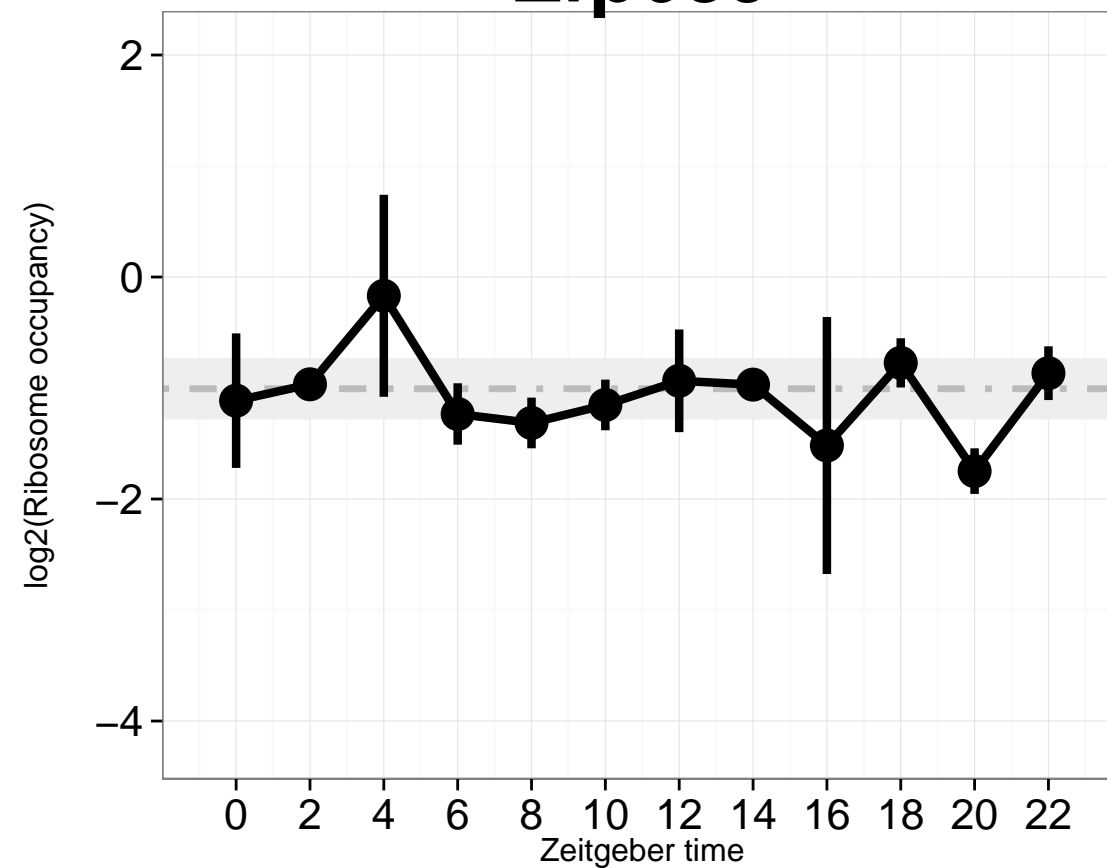

Supplement: Supplementary file 5906 [file 1]

## Pdhb

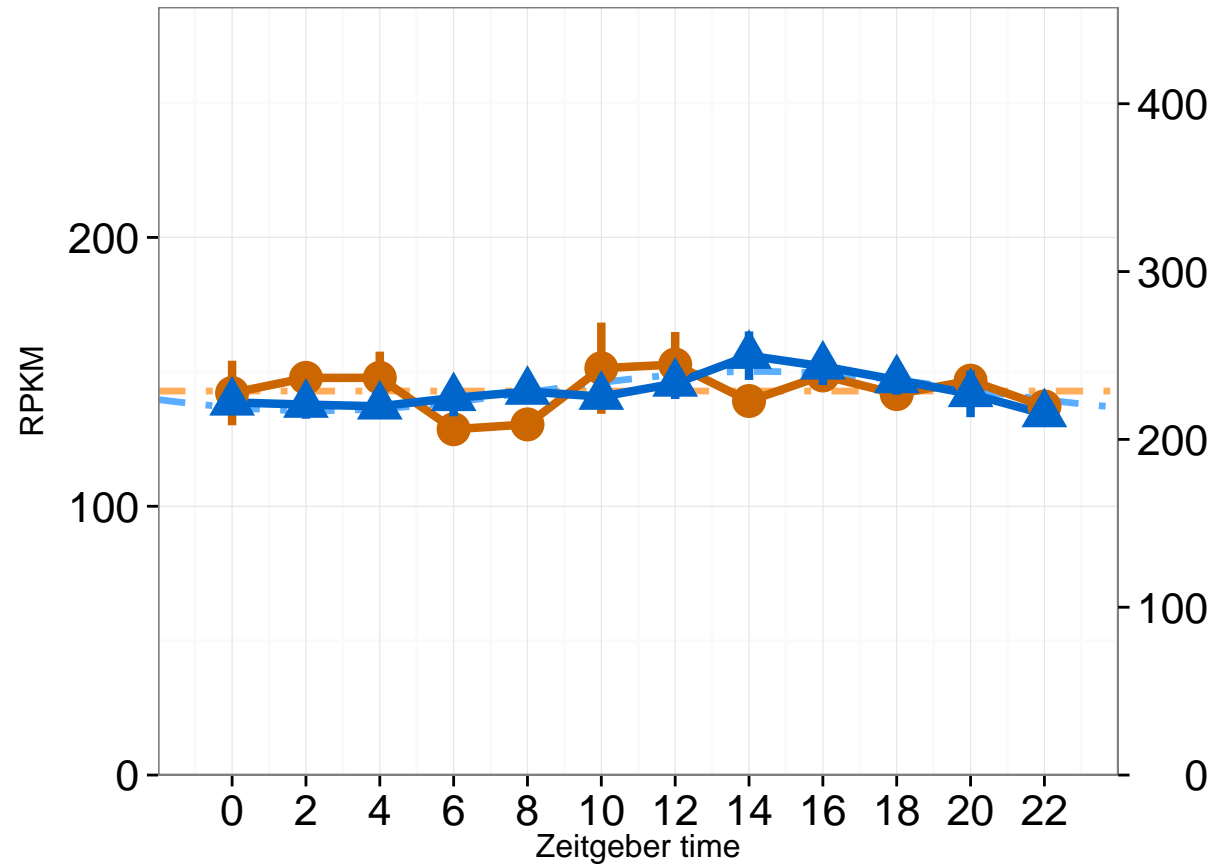

## Pdhb

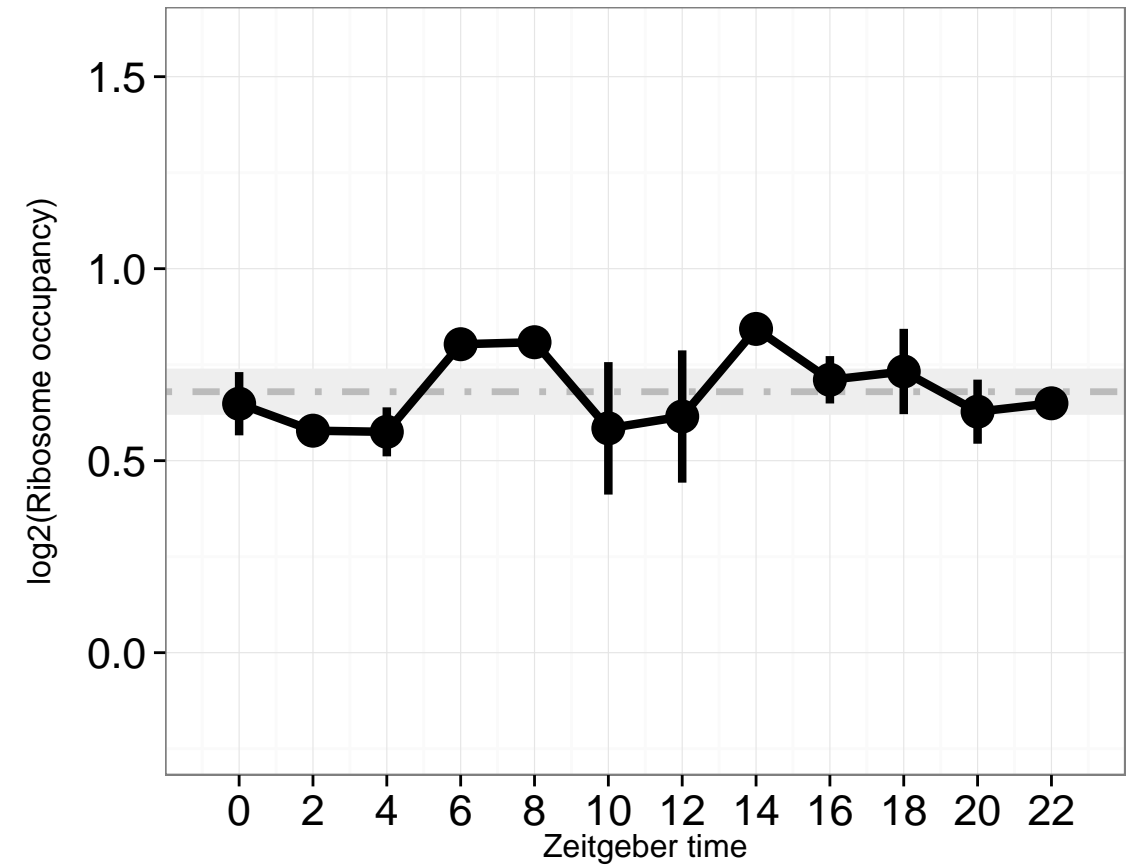

Supplement: Supplementary file 5907 [file 1]

## Zbtb1

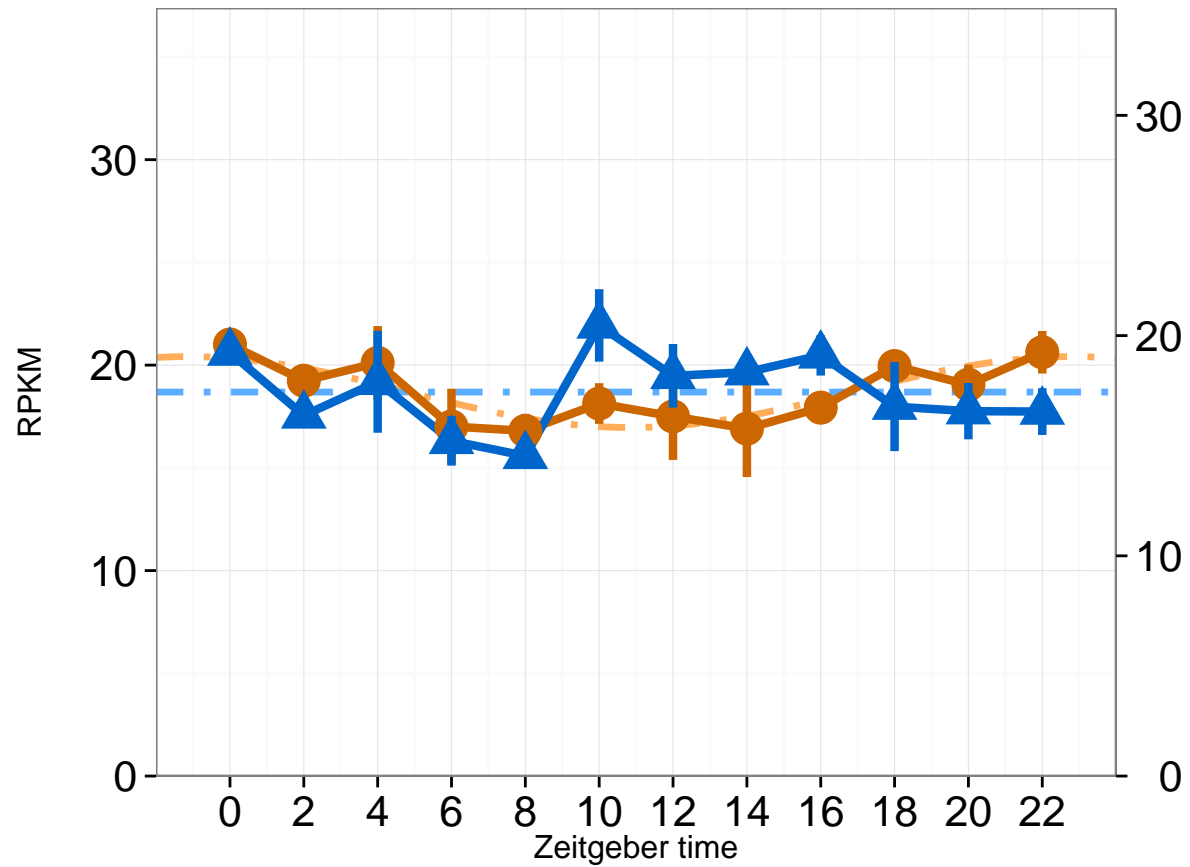

## Zbtb1

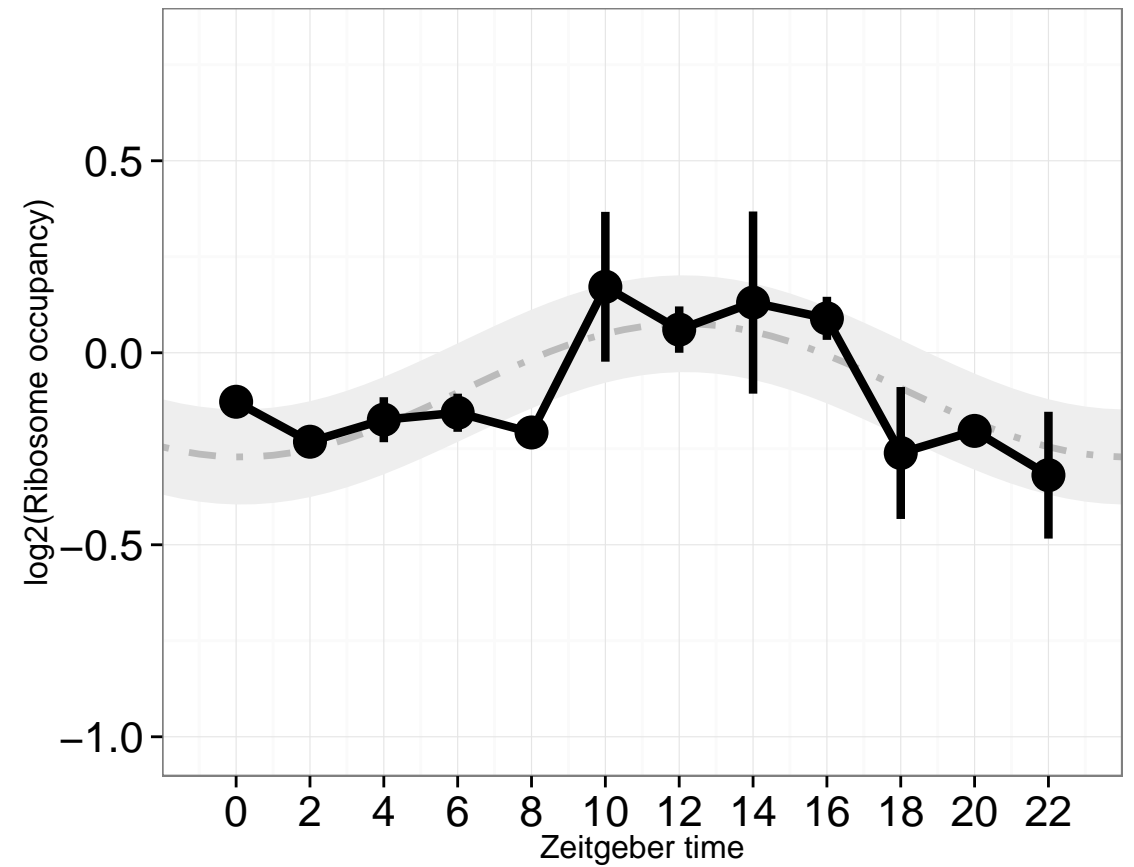

Supplement: Supplementary file 5908 [file 1]

# B4galt5

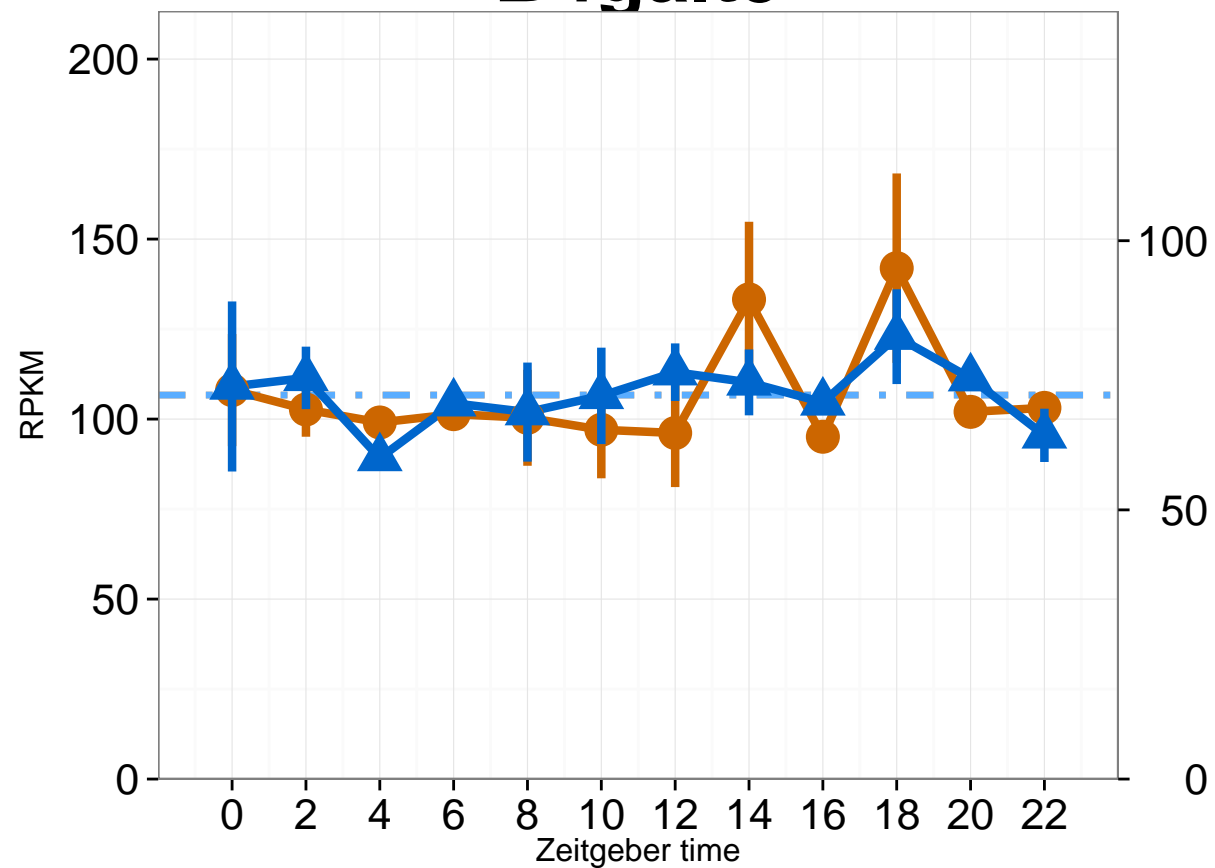

# B4galt5

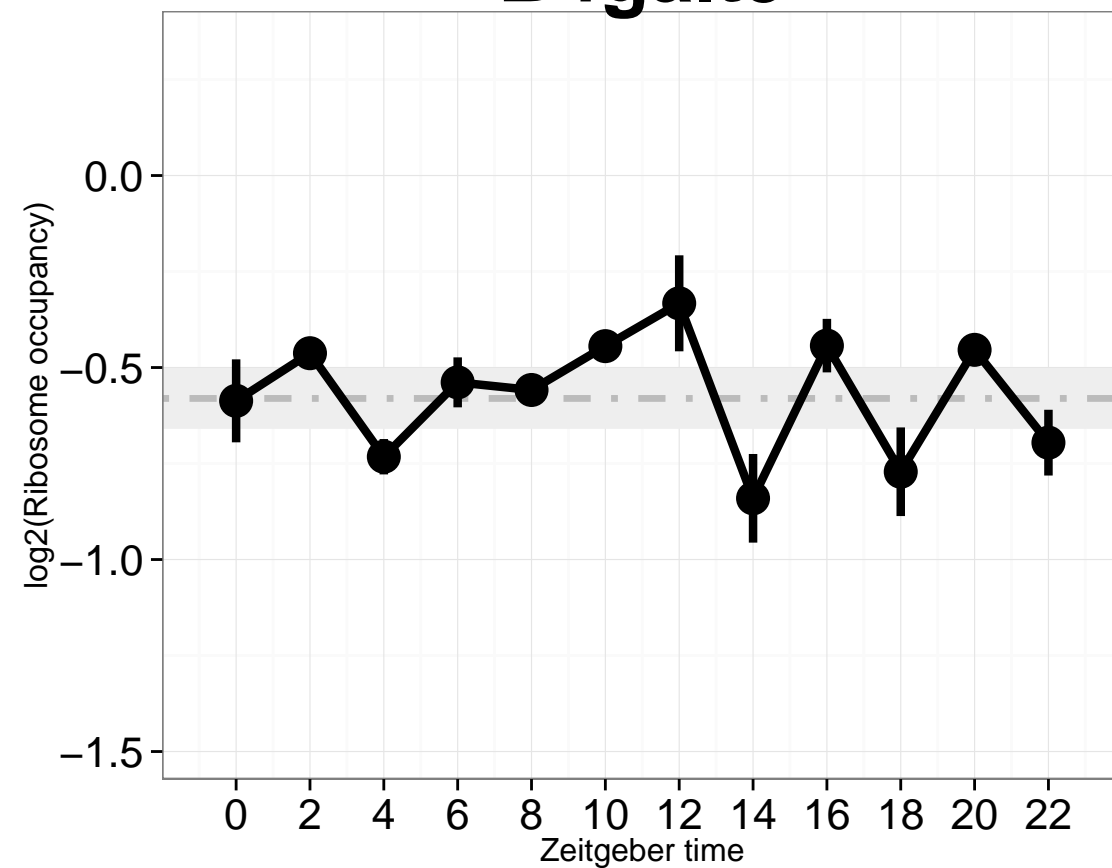

Supplement: Supplementary file 5909 [file 1]

## Scfd2

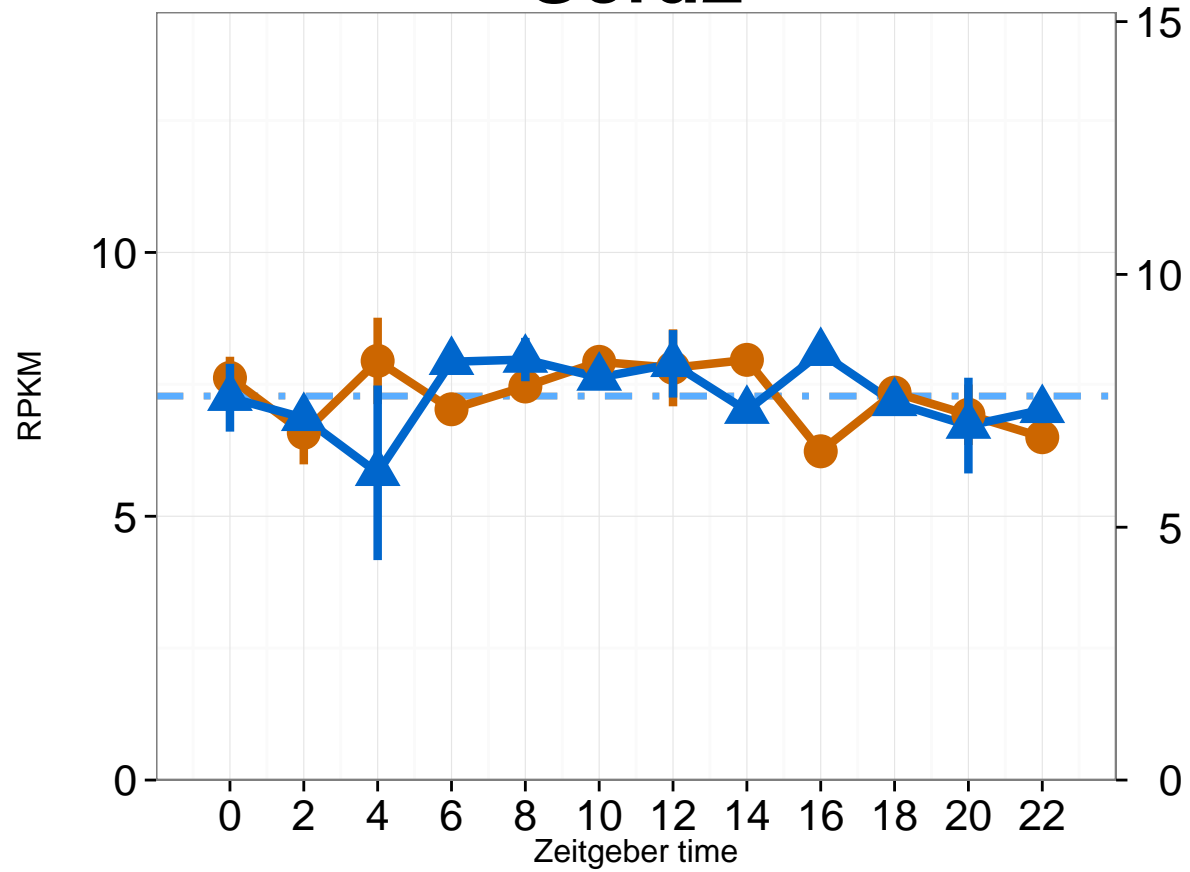

## Scfd2

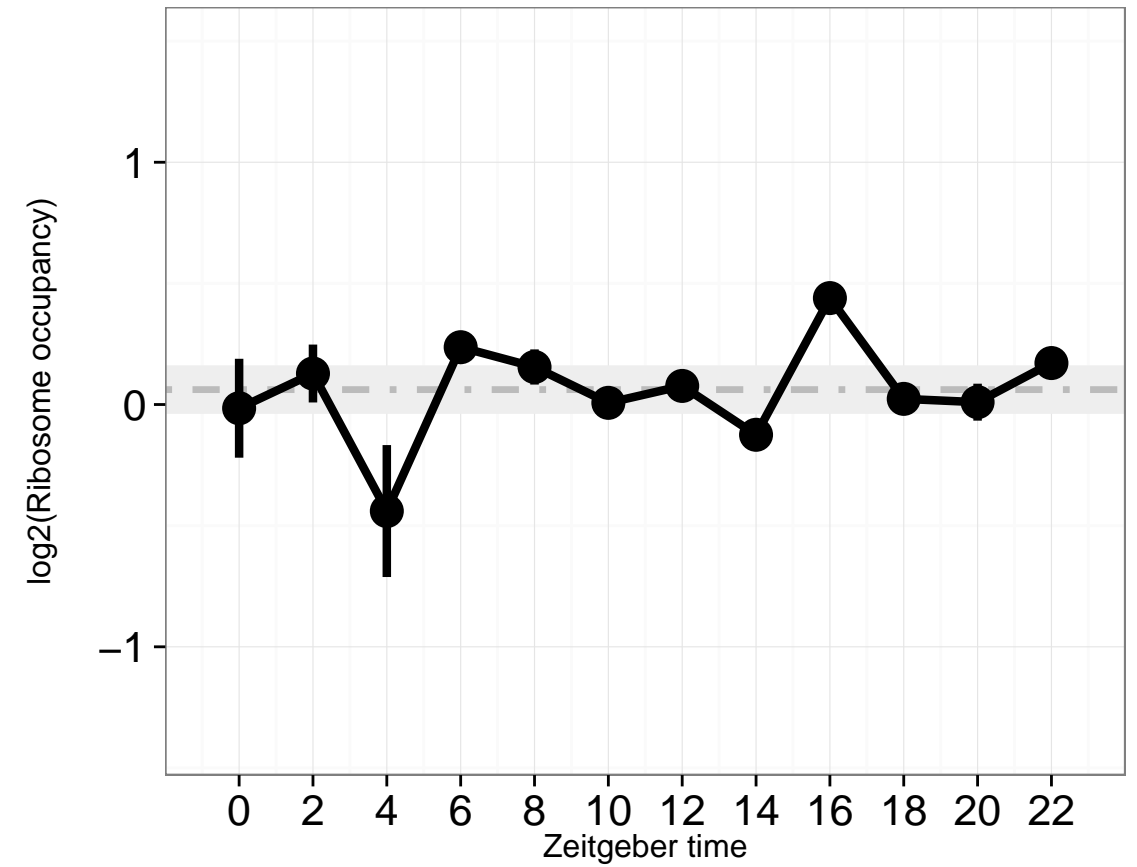

Supplement: Supplementary file 5910 [file 1]

## Stat1

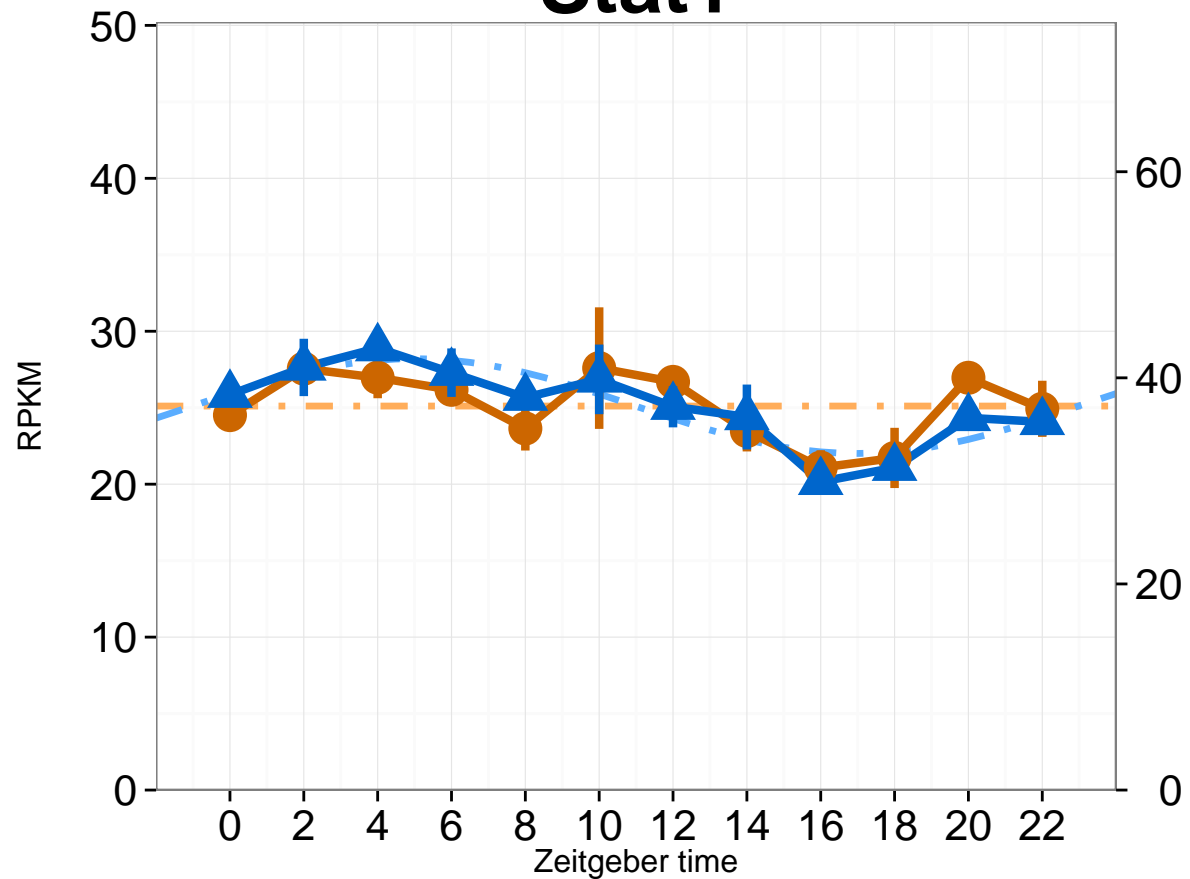

## Stat1

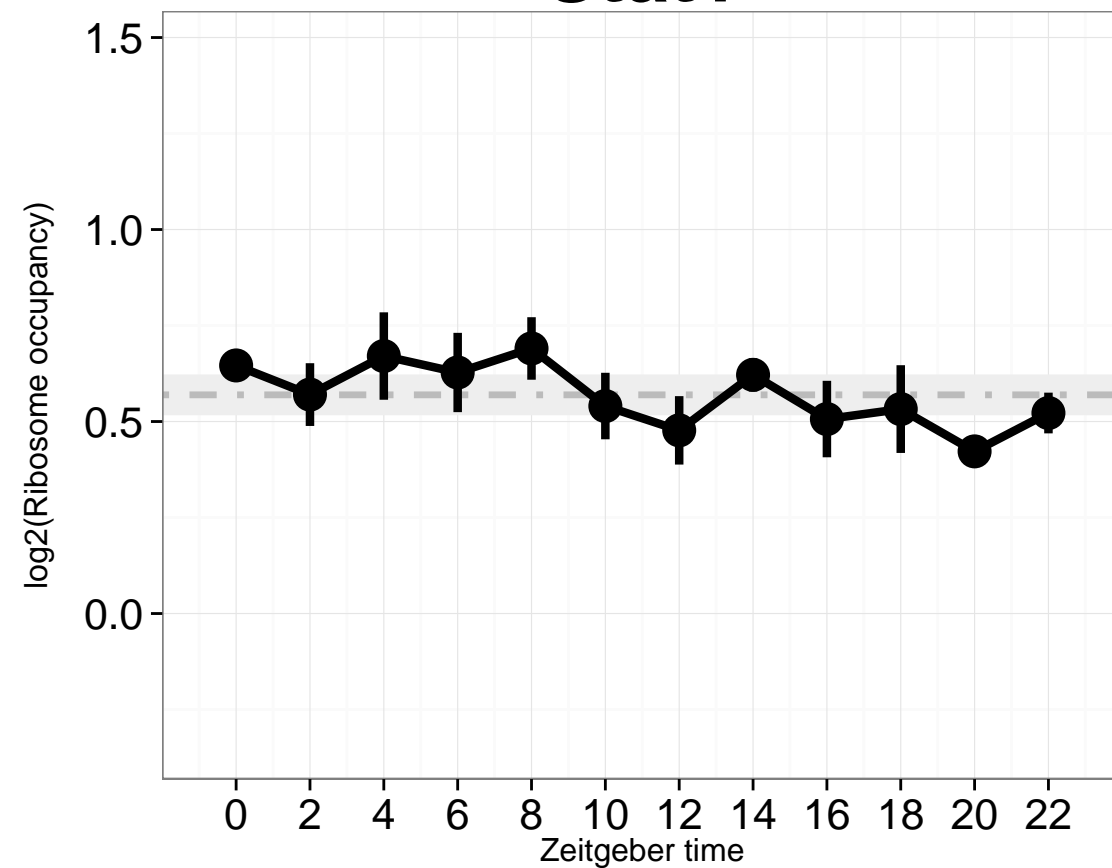

Supplement: Supplementary file 5911 [file 1]

## Cwc27

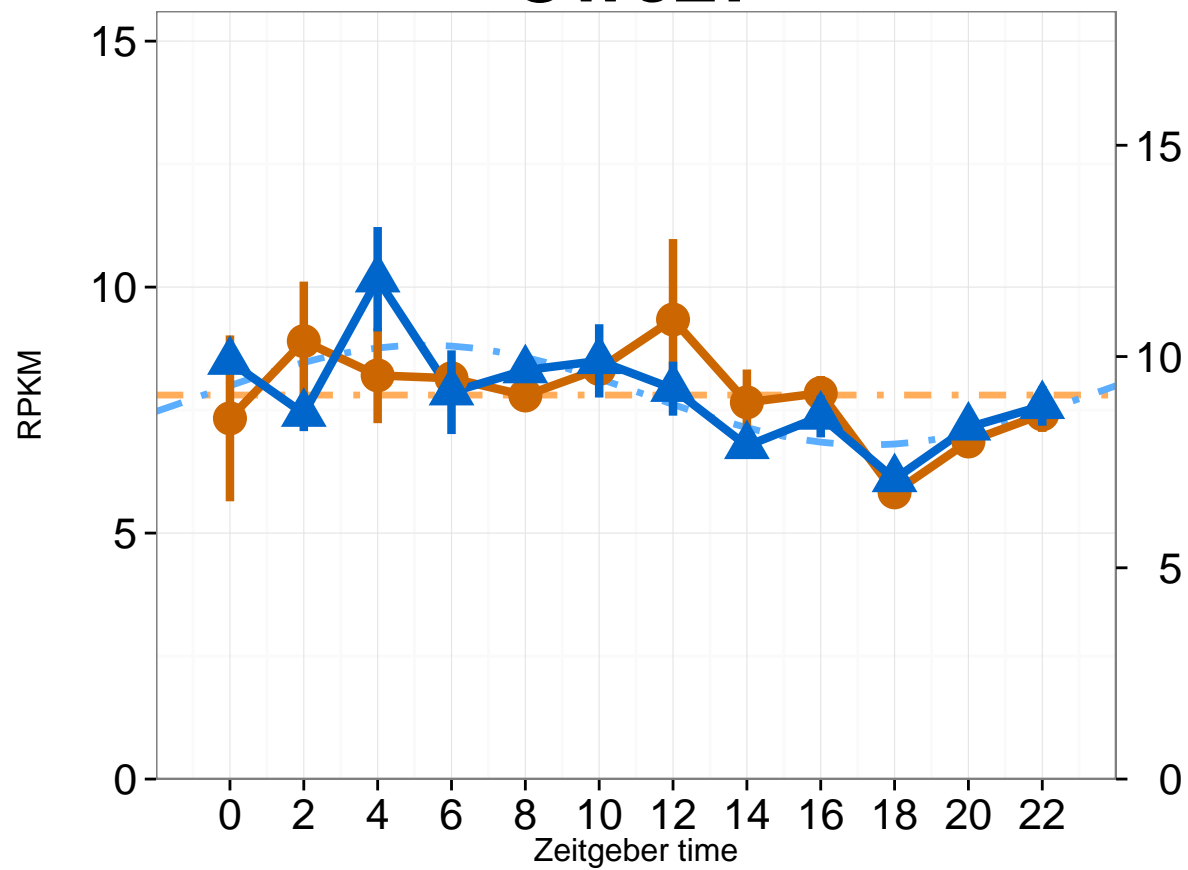

## Cwc27

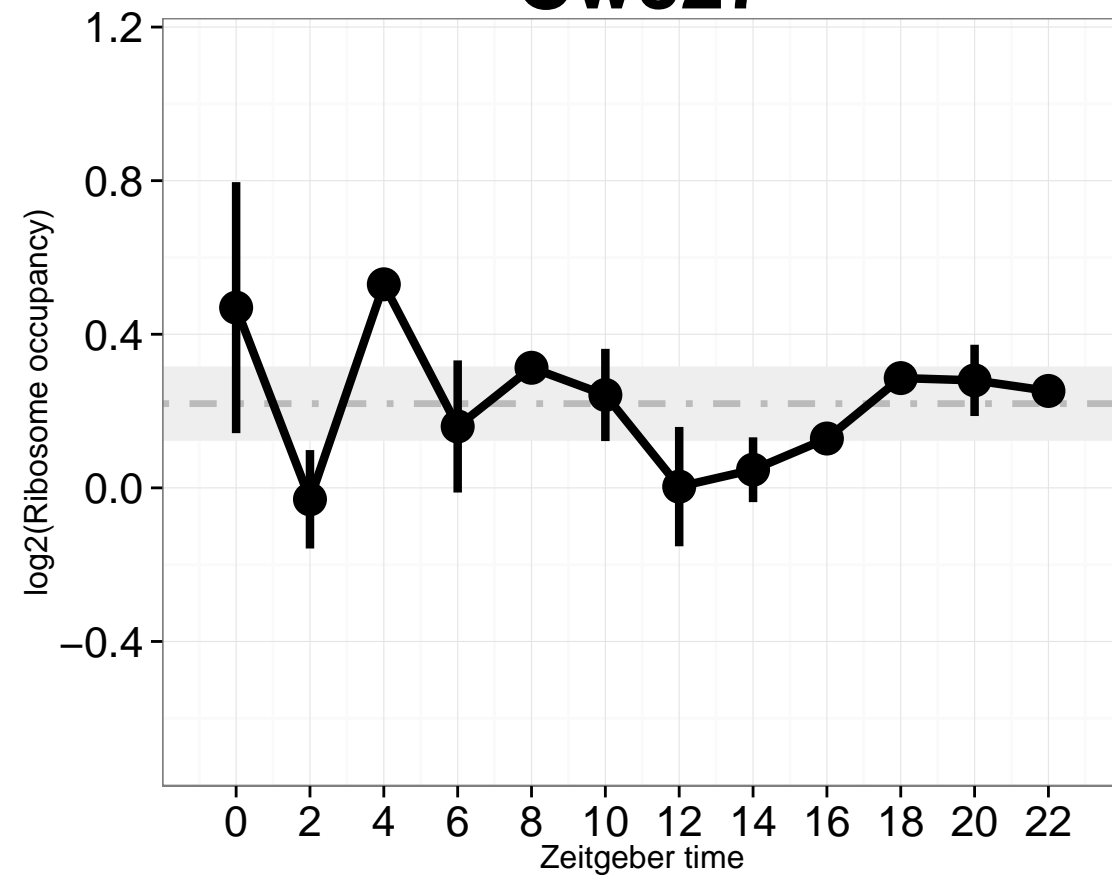

Supplement: Supplementary file 5912 [file 1]

# Ift122

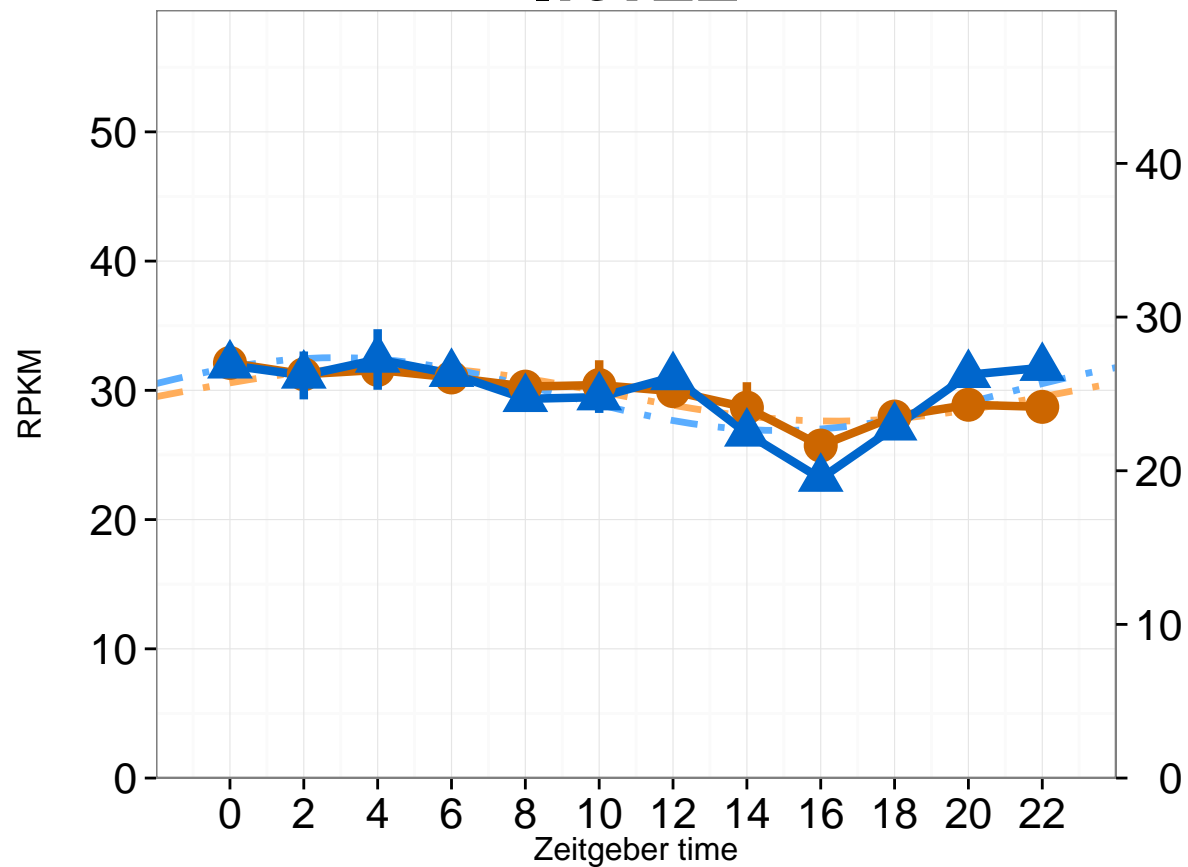

# Ift122

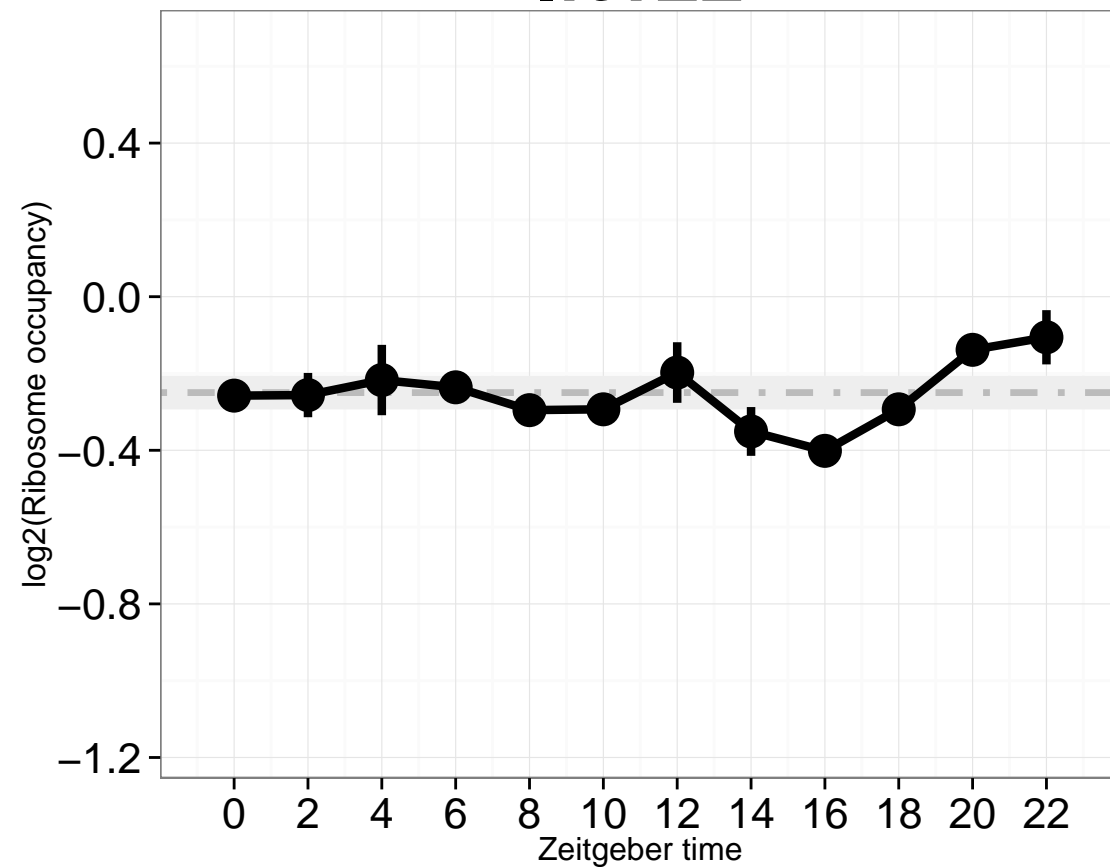

Supplement: Supplementary file 5913 [file 1]

## Il5ra

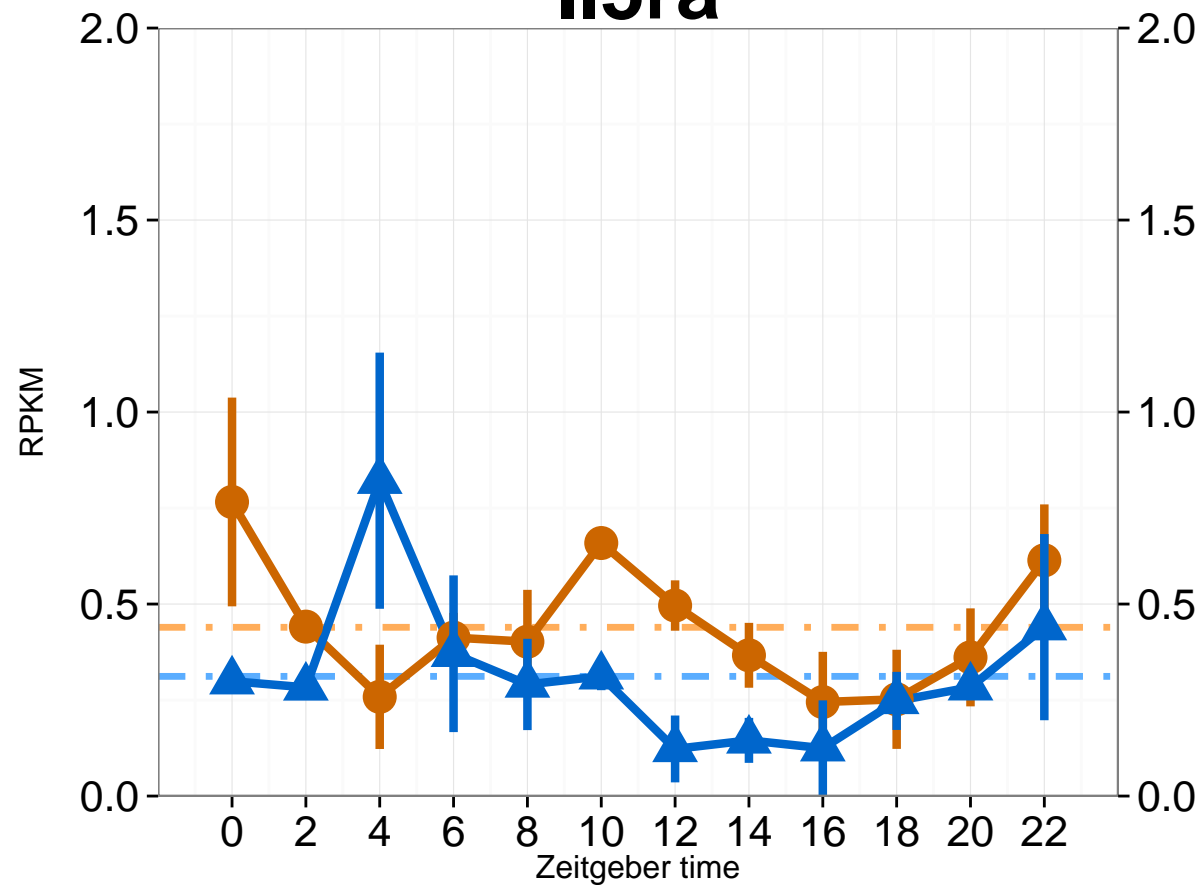

## Il5ra

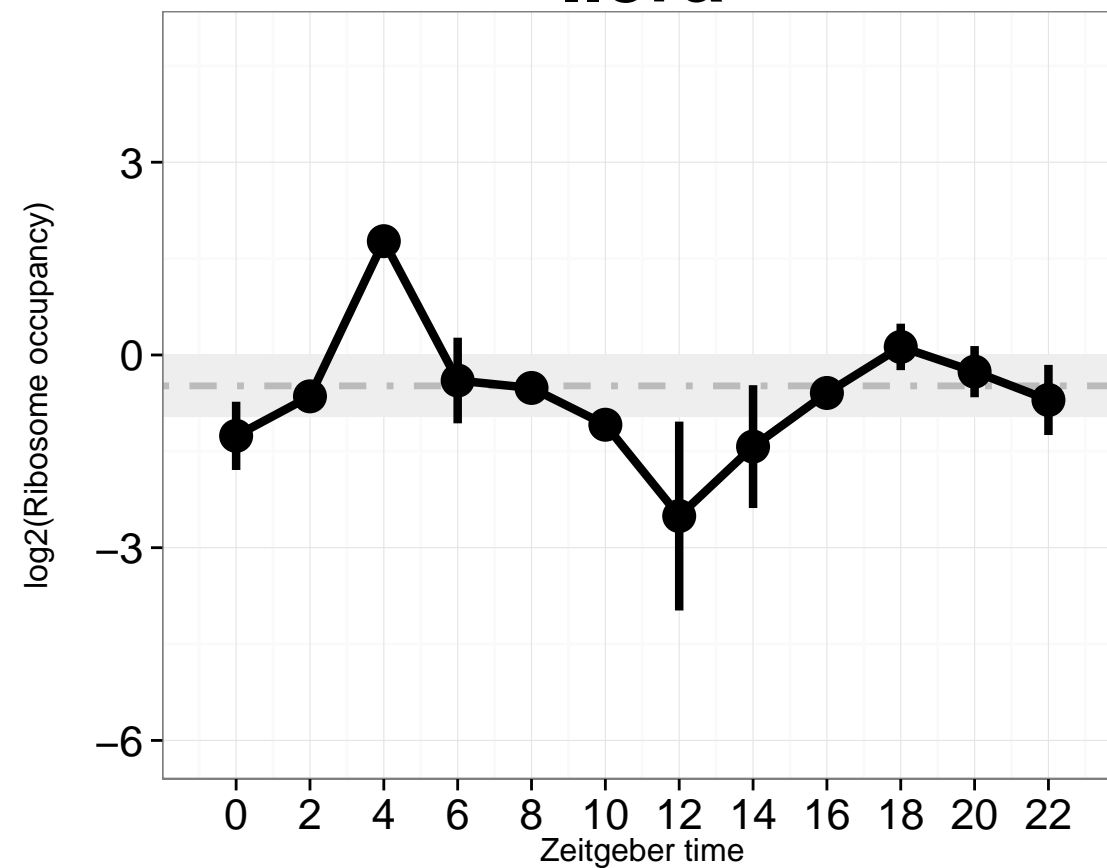

Supplement: Supplementary file 5914 [file 1]

# Zfp120

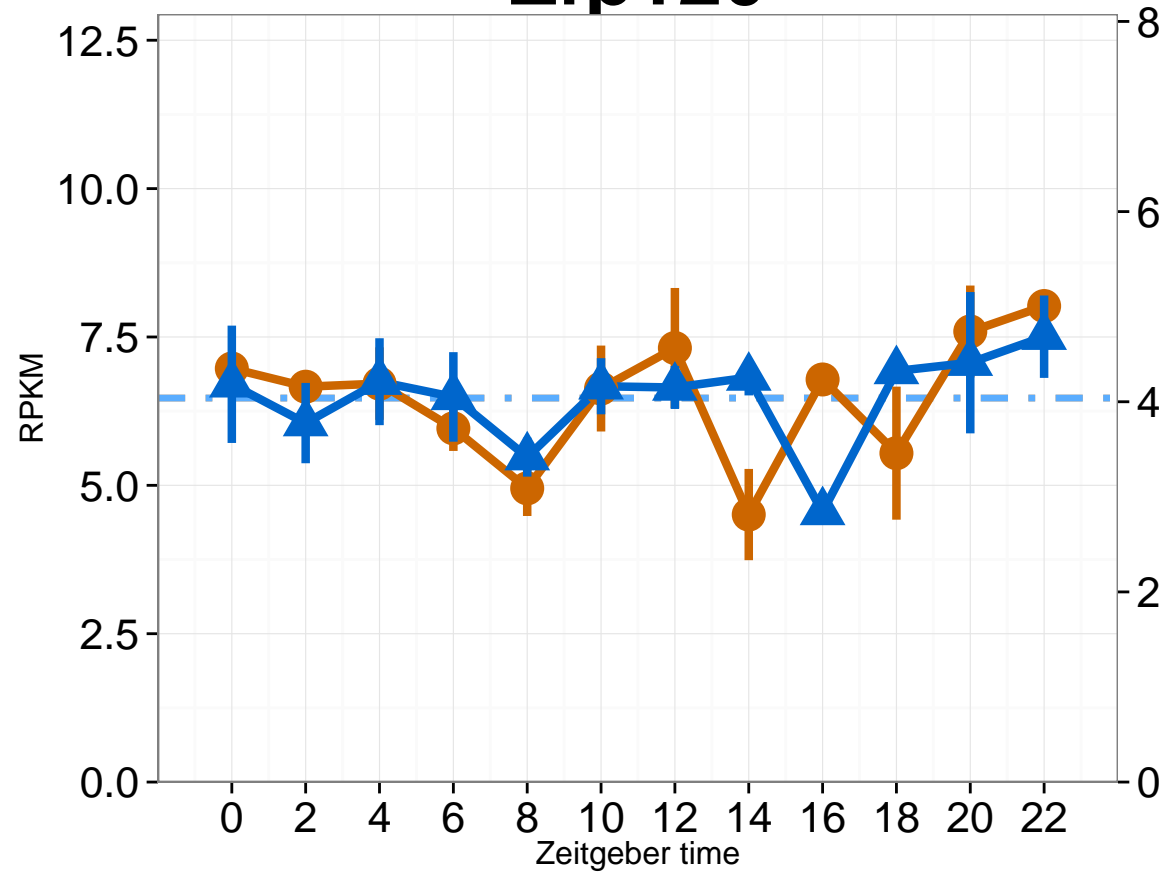

# Zfp120

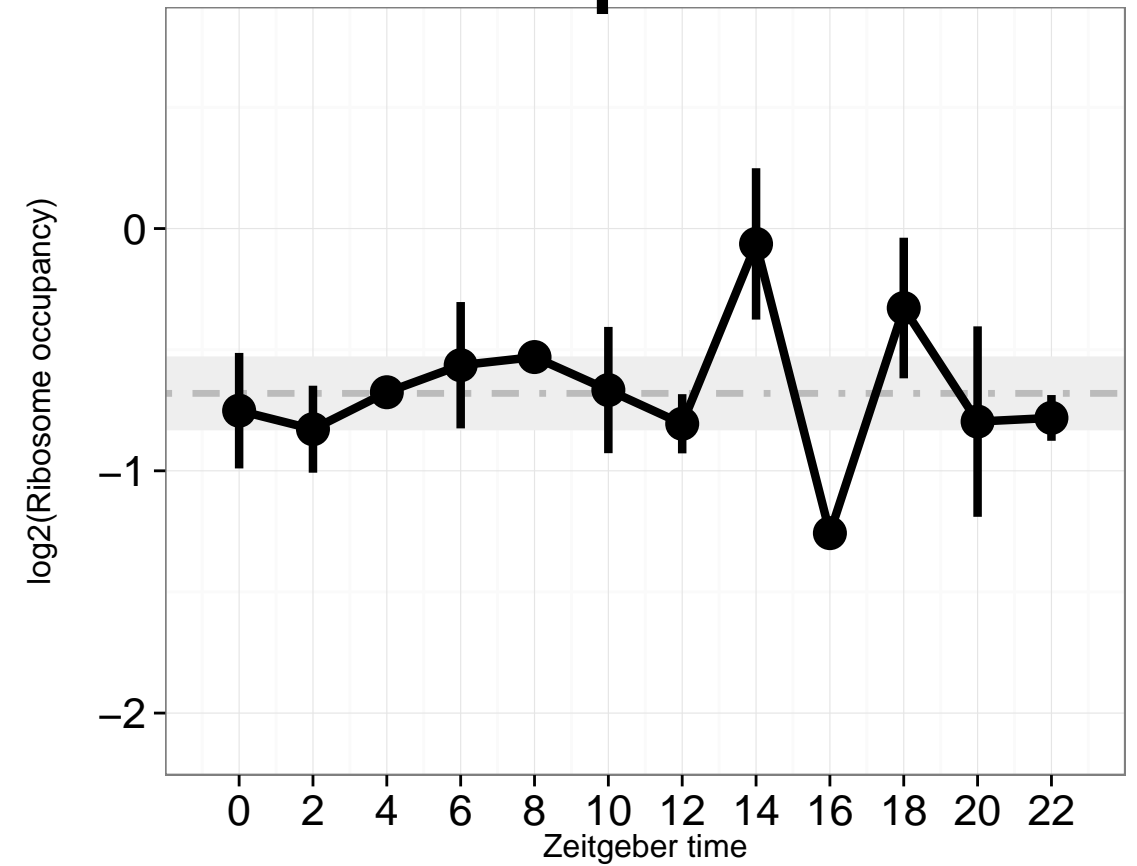

Supplement: Supplementary file 5915 [file 1]

# Elp6

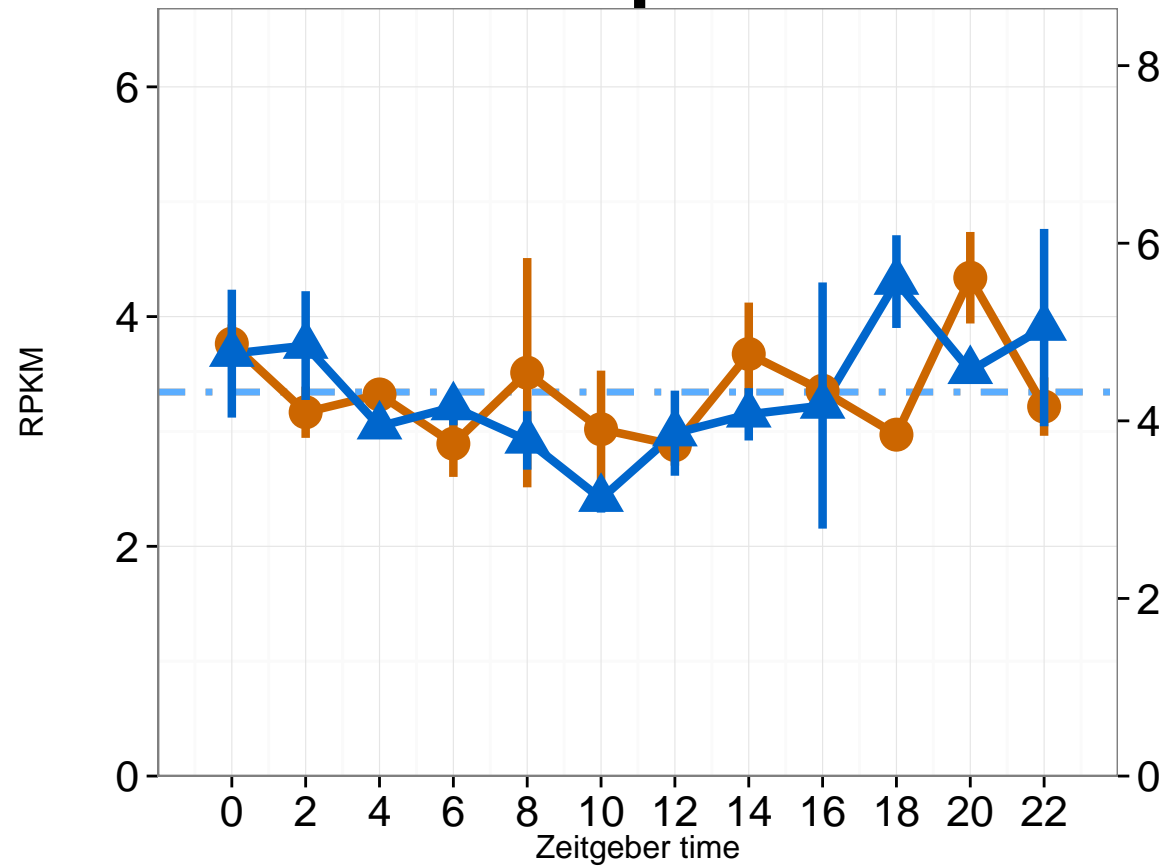

# Elp6

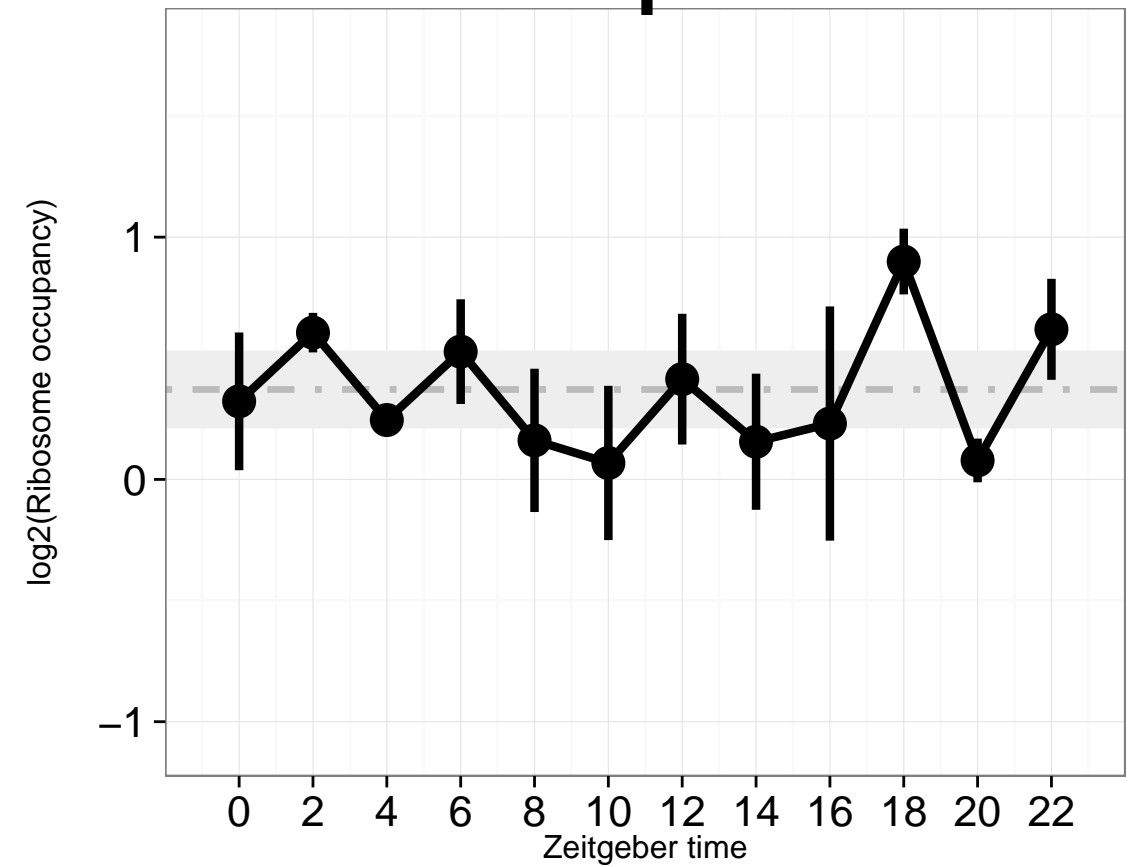

Supplement: Supplementary file 5916 [file 1]

## Arg2

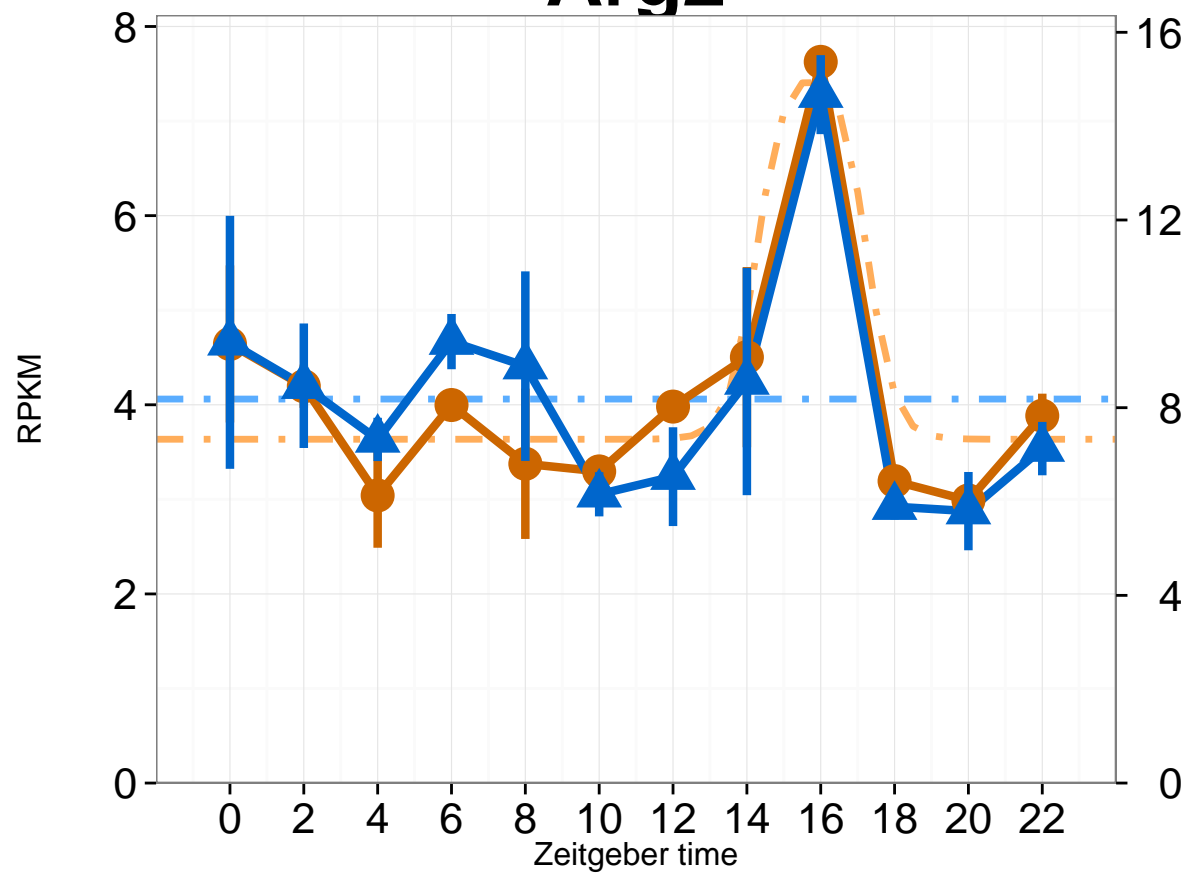

## Arg2

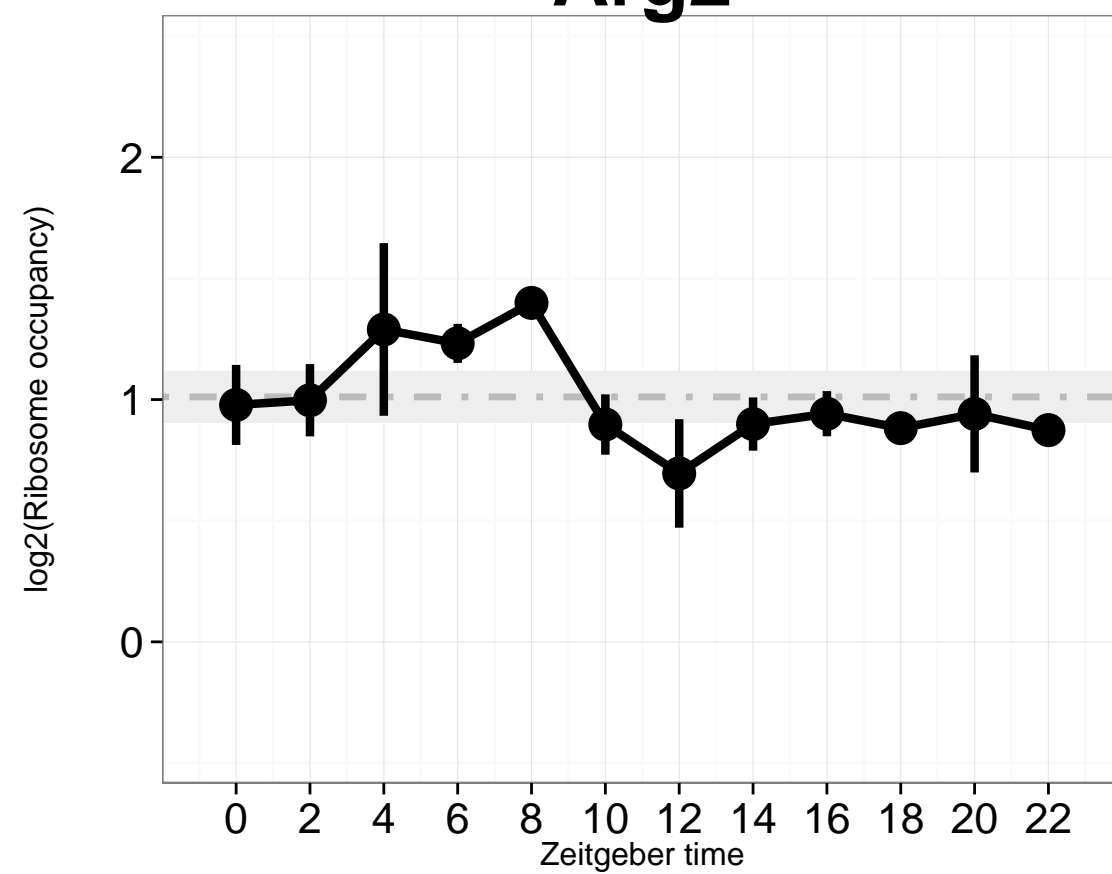

Supplement: Supplementary file 5917 [file 1]

**Fam212b TR**

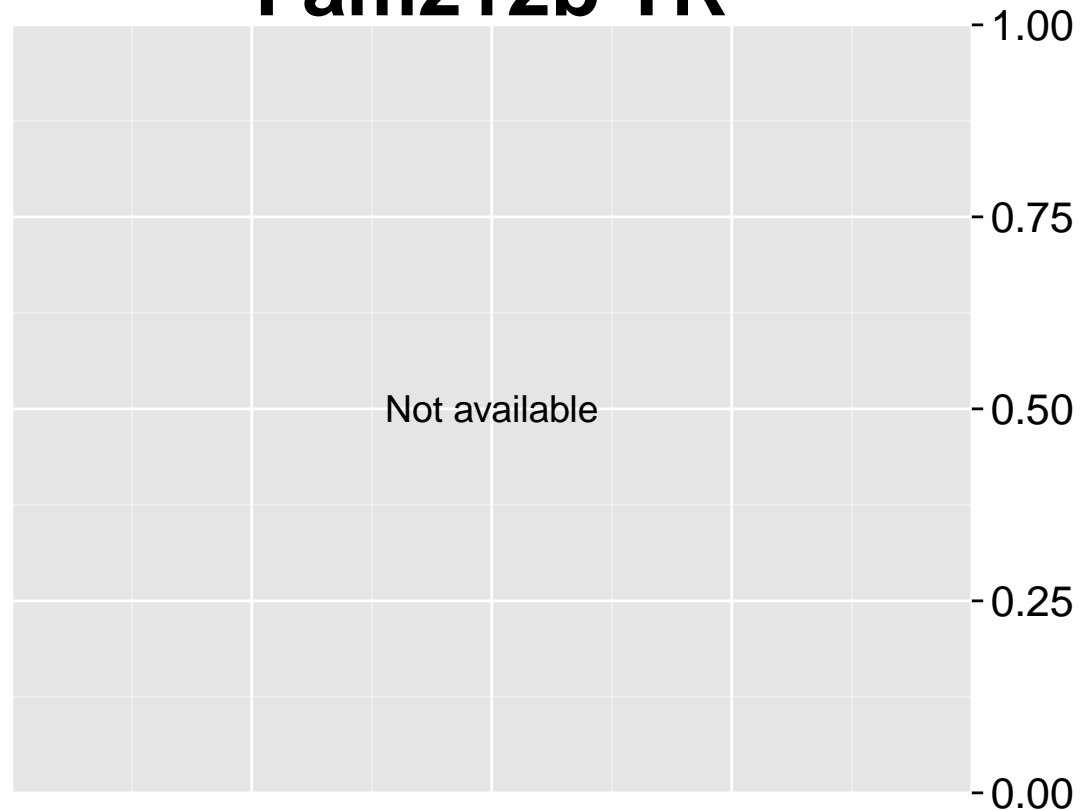

**Fam212b log2(Ribosome occupanc**

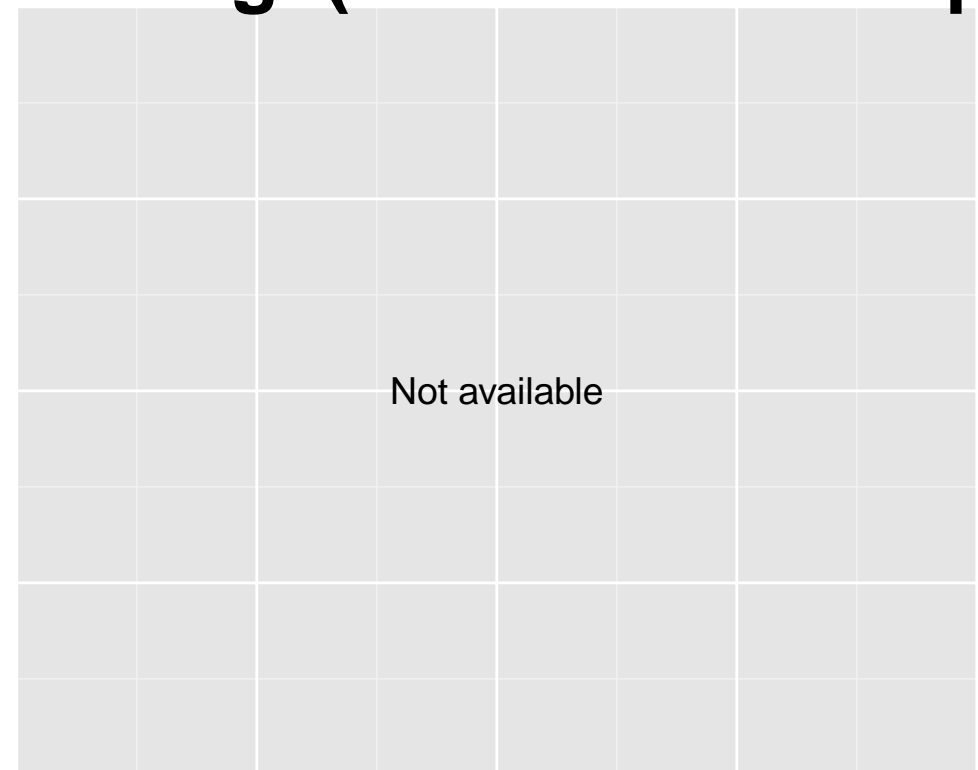

Supplement: Supplementary file 5918 [file 1]

## Tmem216

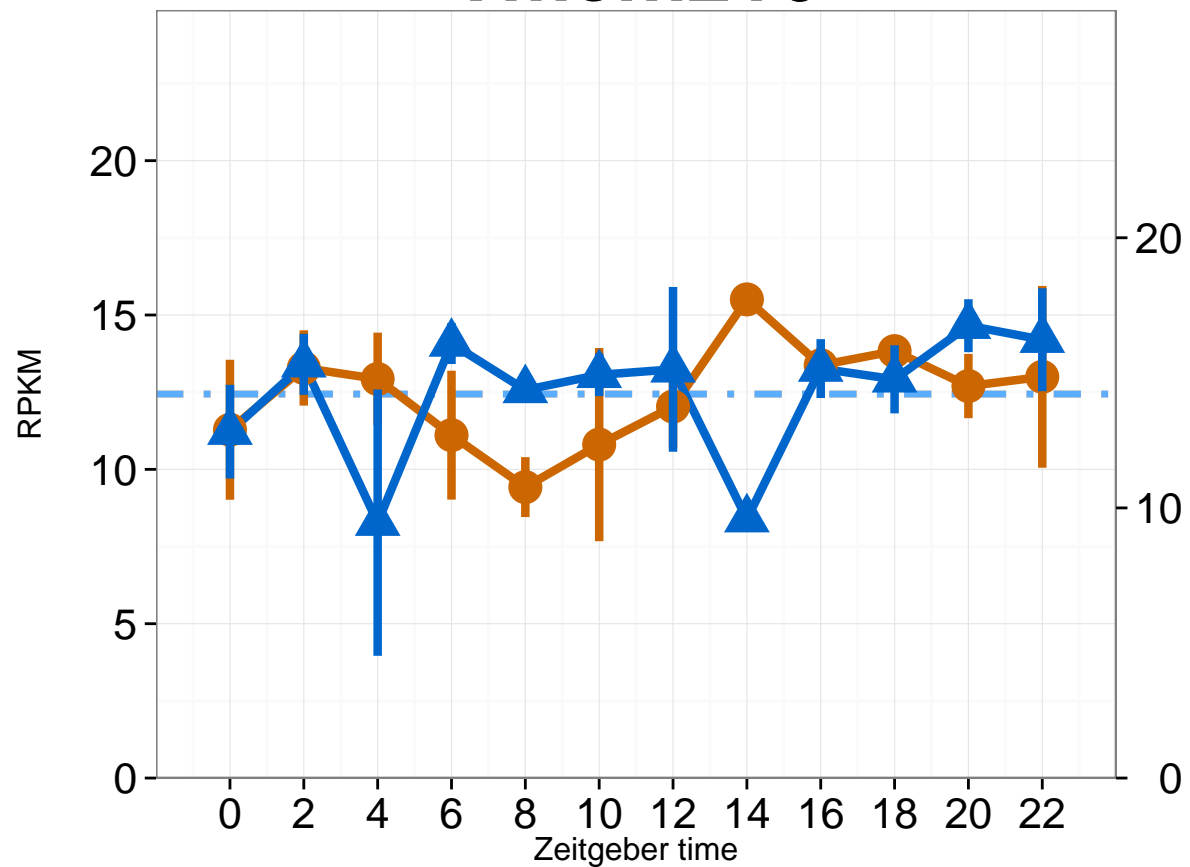

## Tmem216

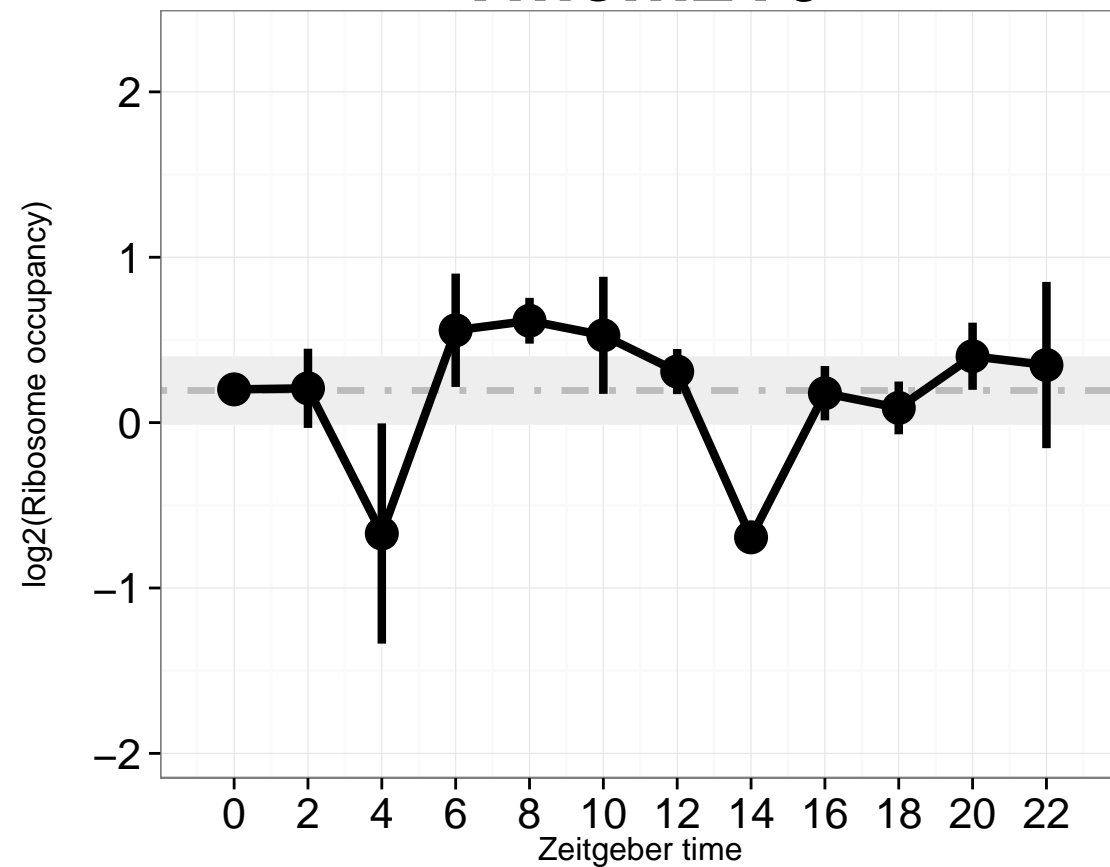

Supplement: Supplementary file 5919 [file 1]

## Sparc

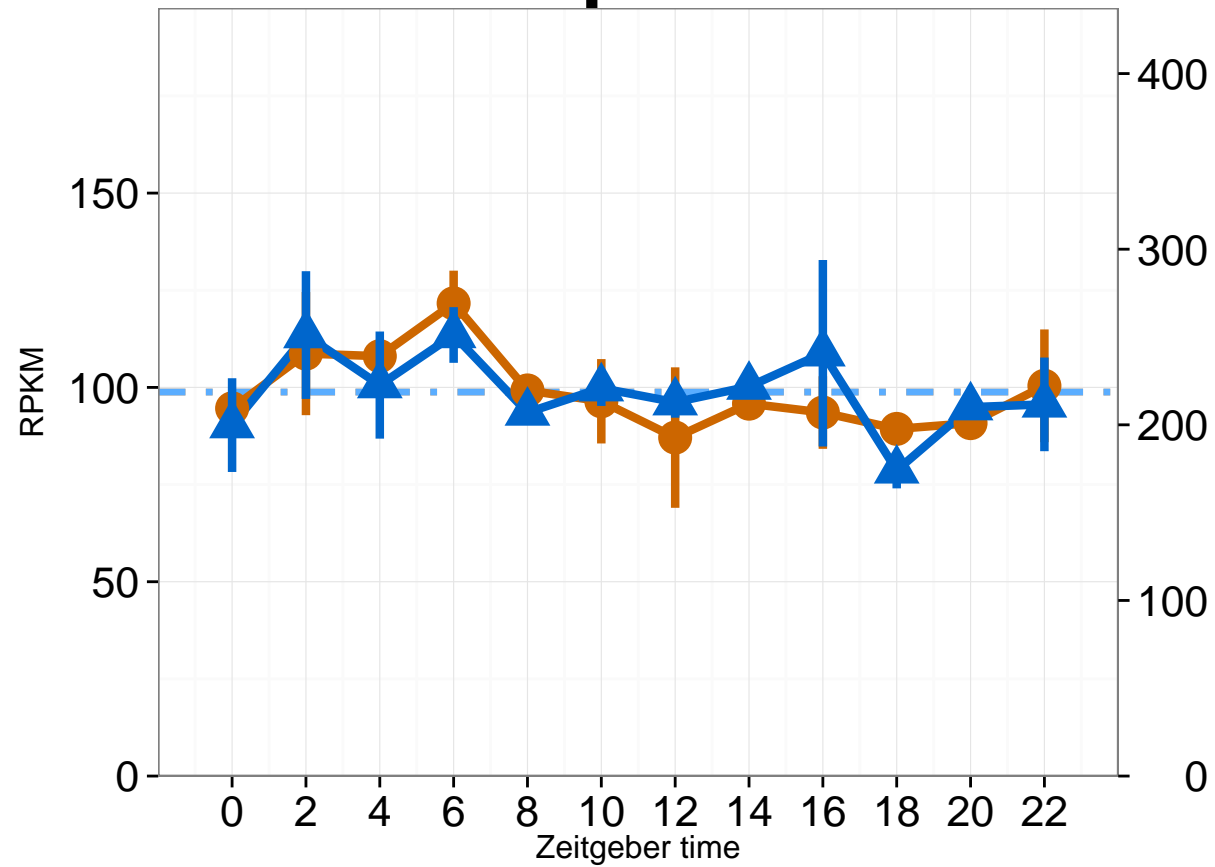

## Sparc

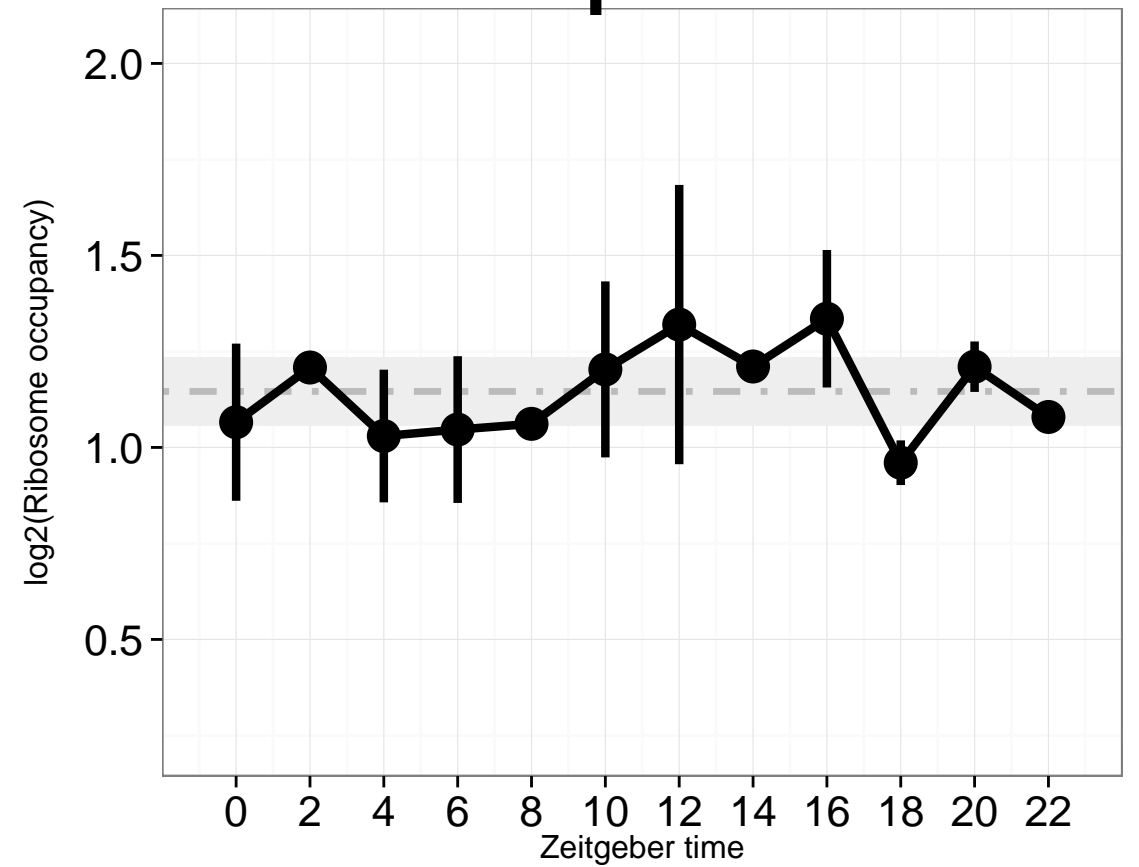

Supplement: Supplementary file 5920 [file 1]

# Tbc1d10a

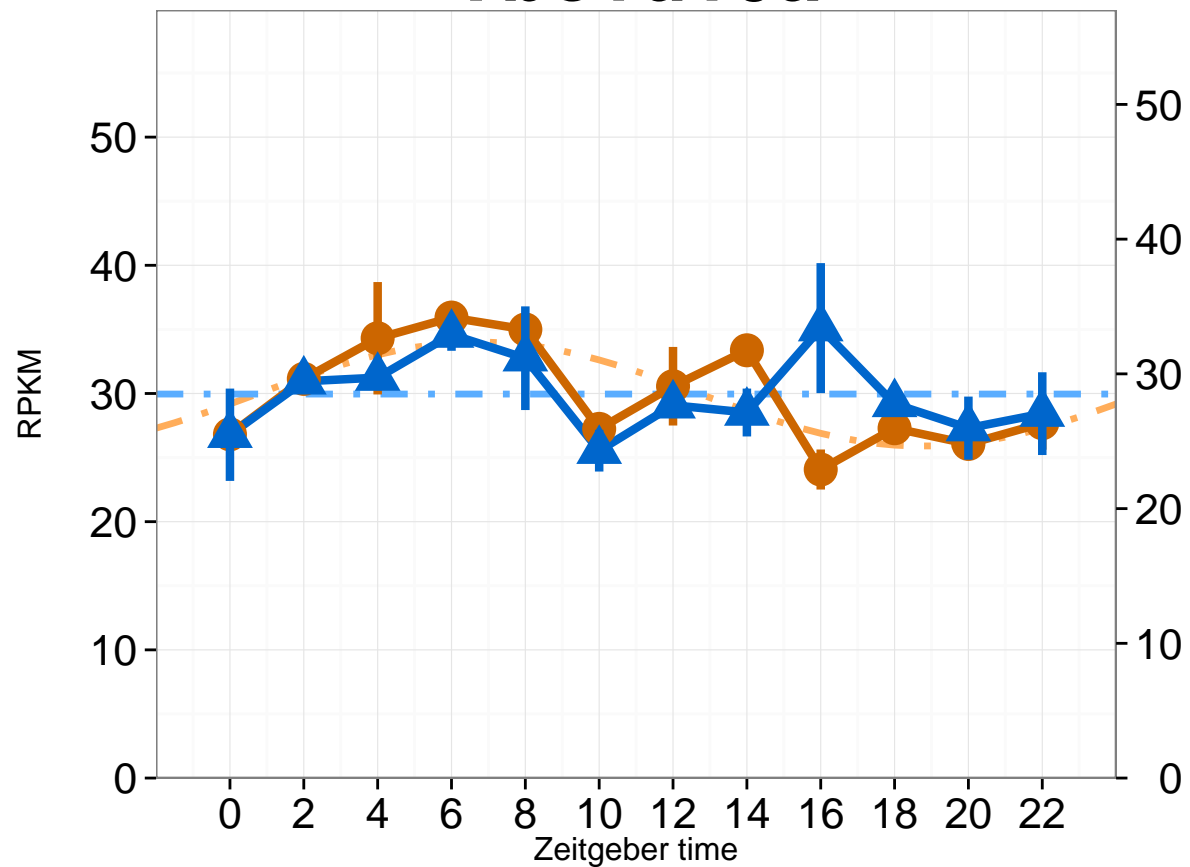

# Tbc1d10a

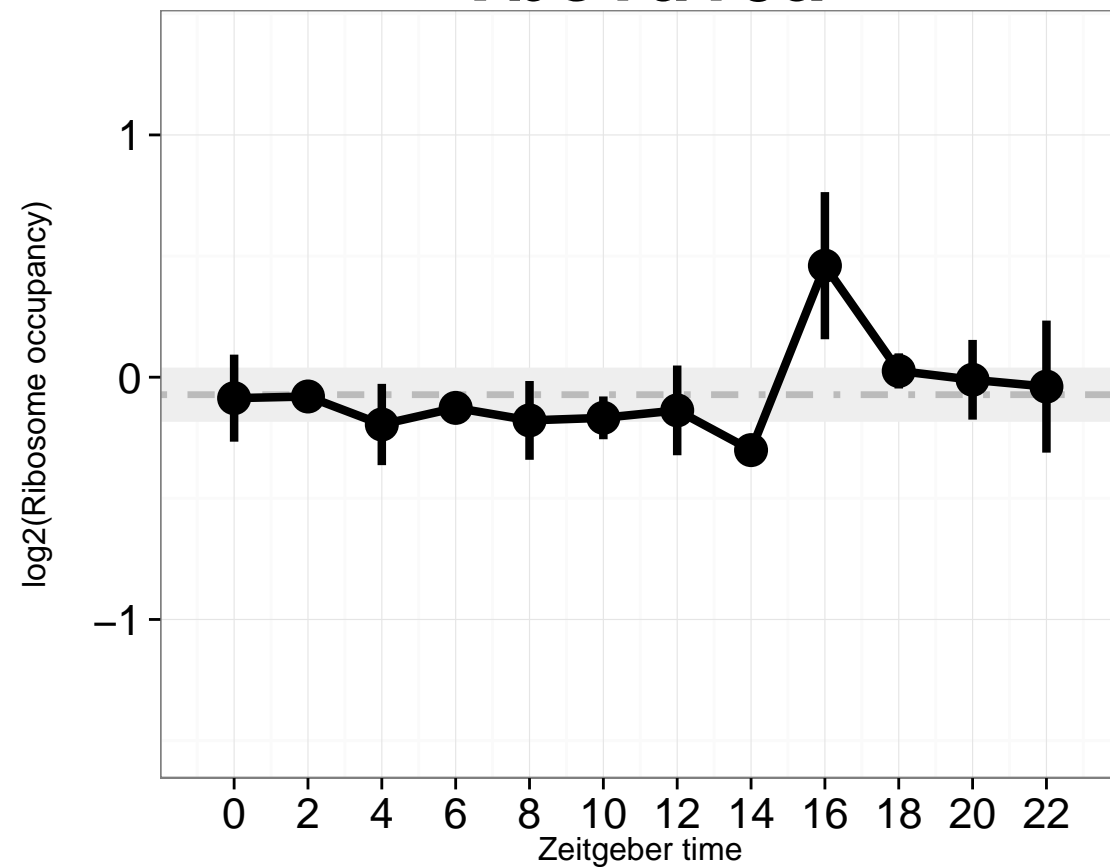

Supplement: Supplementary file 5921 [file 1]

## Dcps

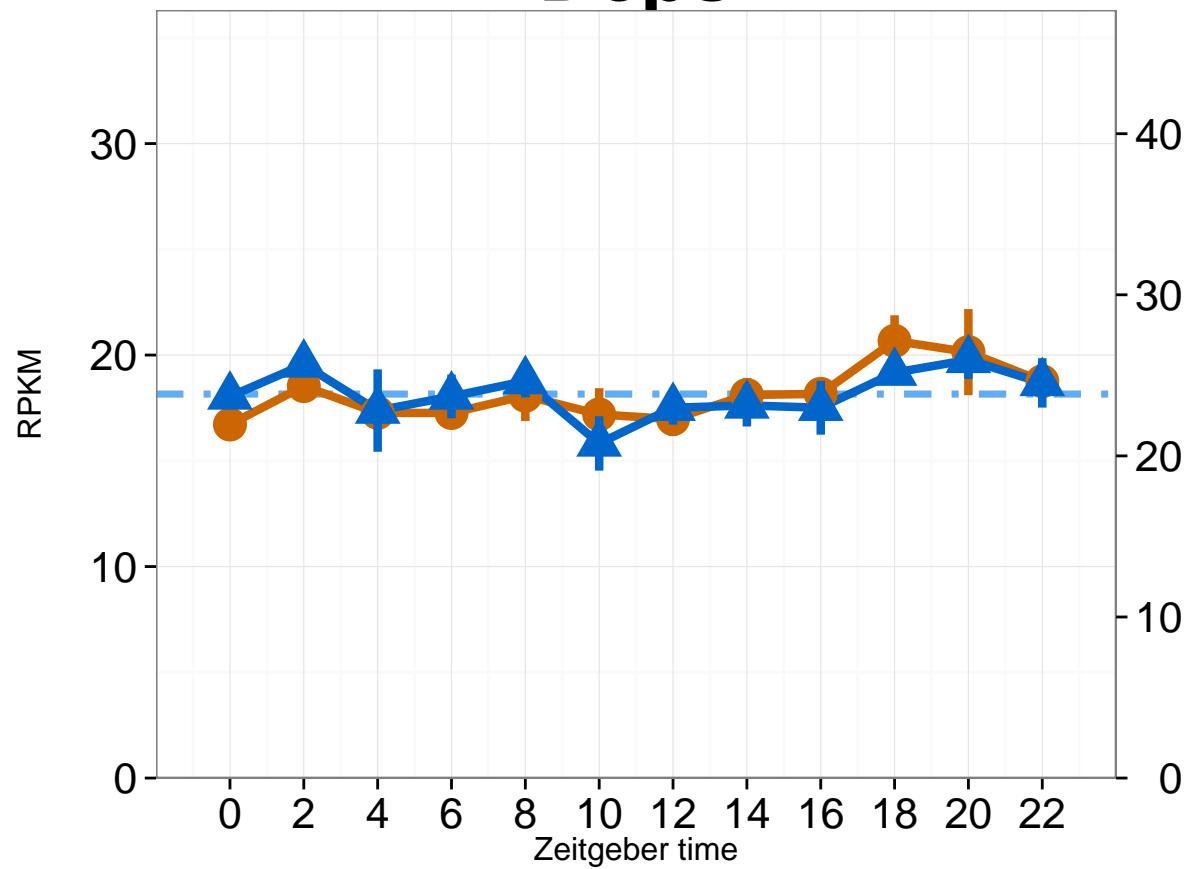

## Dcps

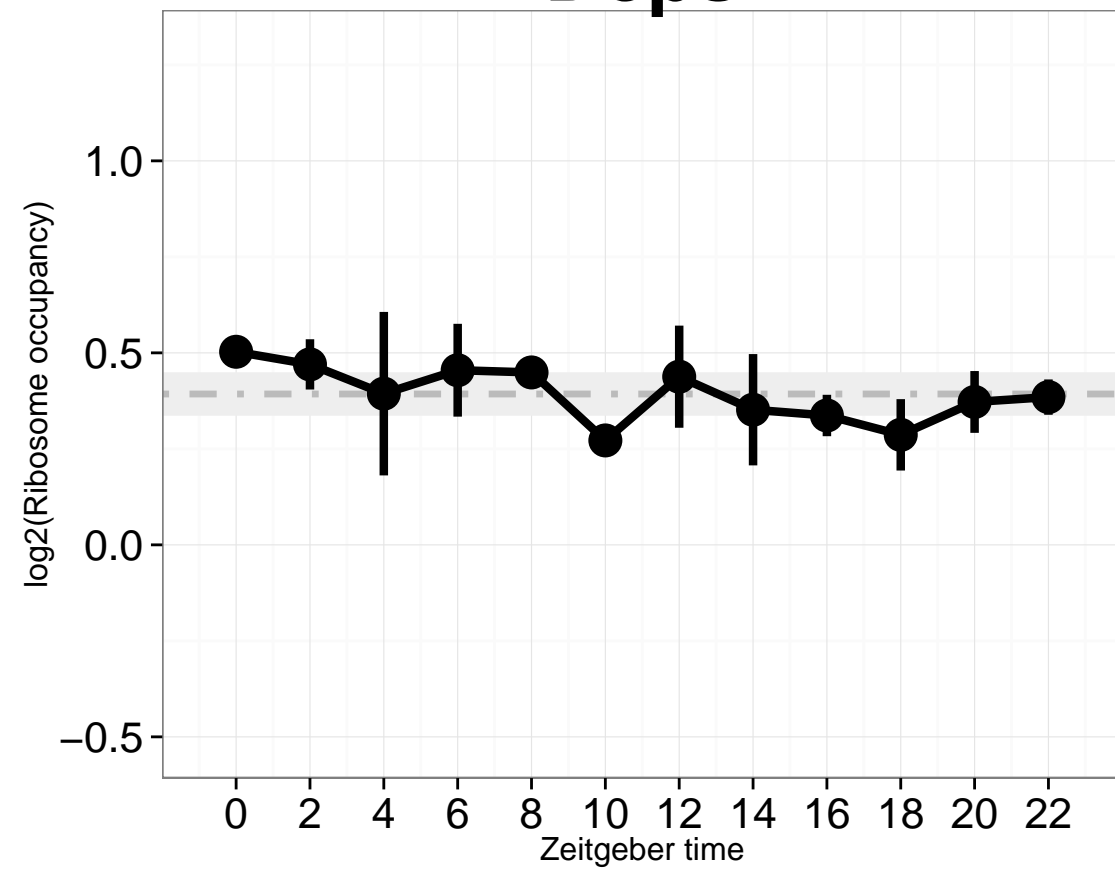

Supplement: Supplementary file 5922 [file 1]
