# Supplementary material (part 60 of 133)
Source: publisher figshare collection journal article supplement (https://springernature.figshare.com/articles/dataset/_/4903193)

## Timeless

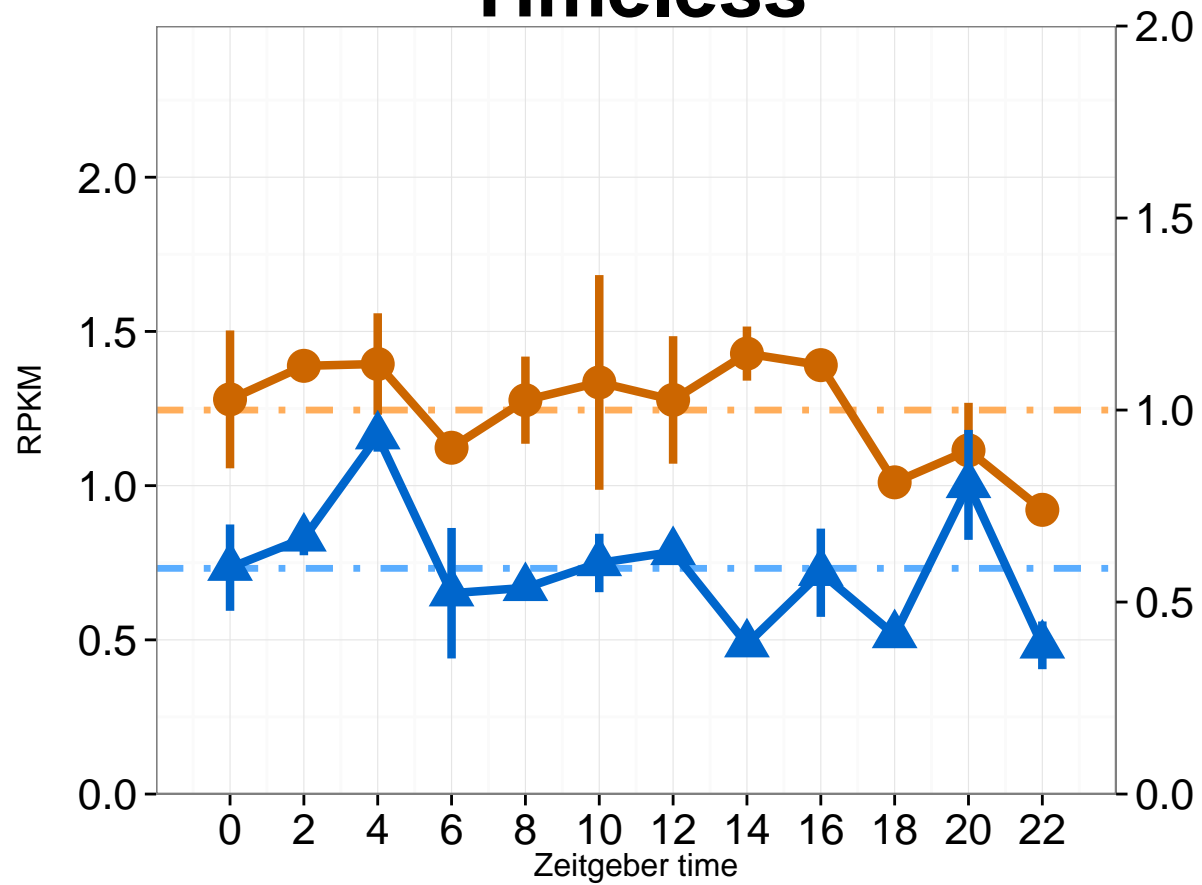

## Timeless

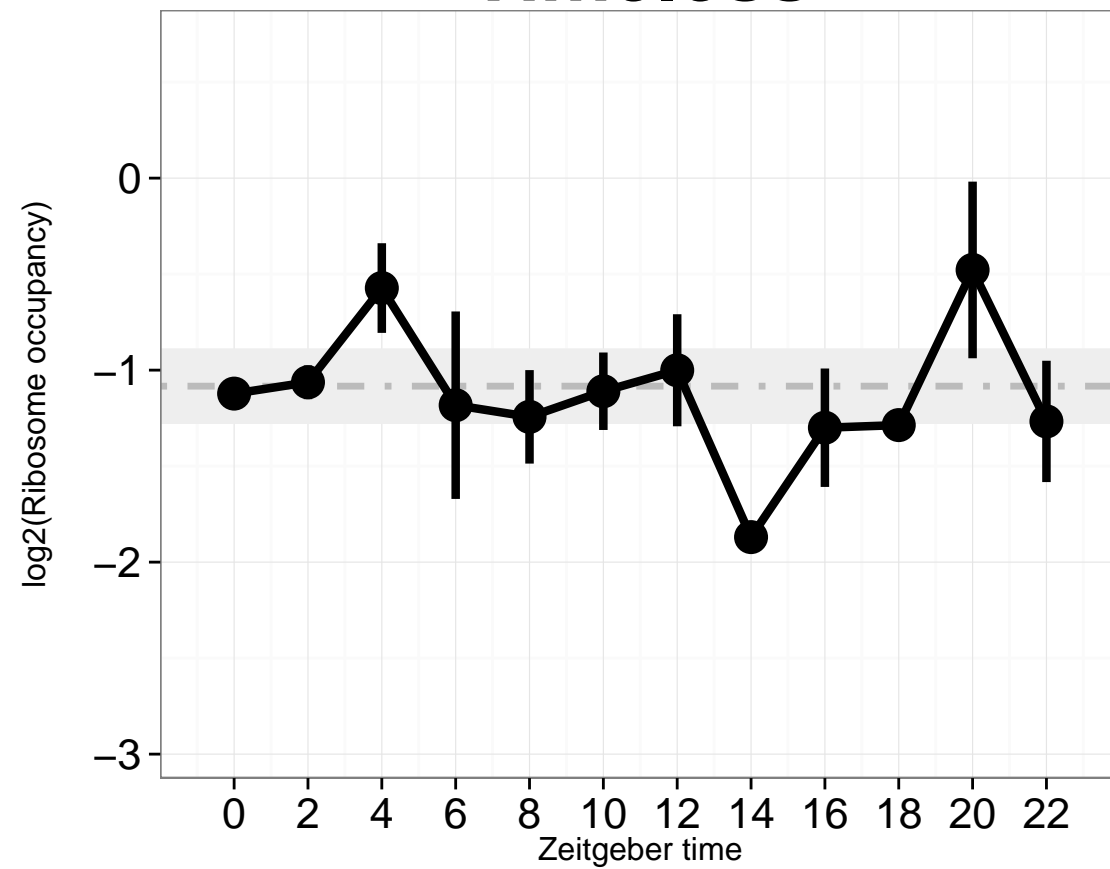

Supplement: Supplementary file 5923 [file 1]

## Narfl

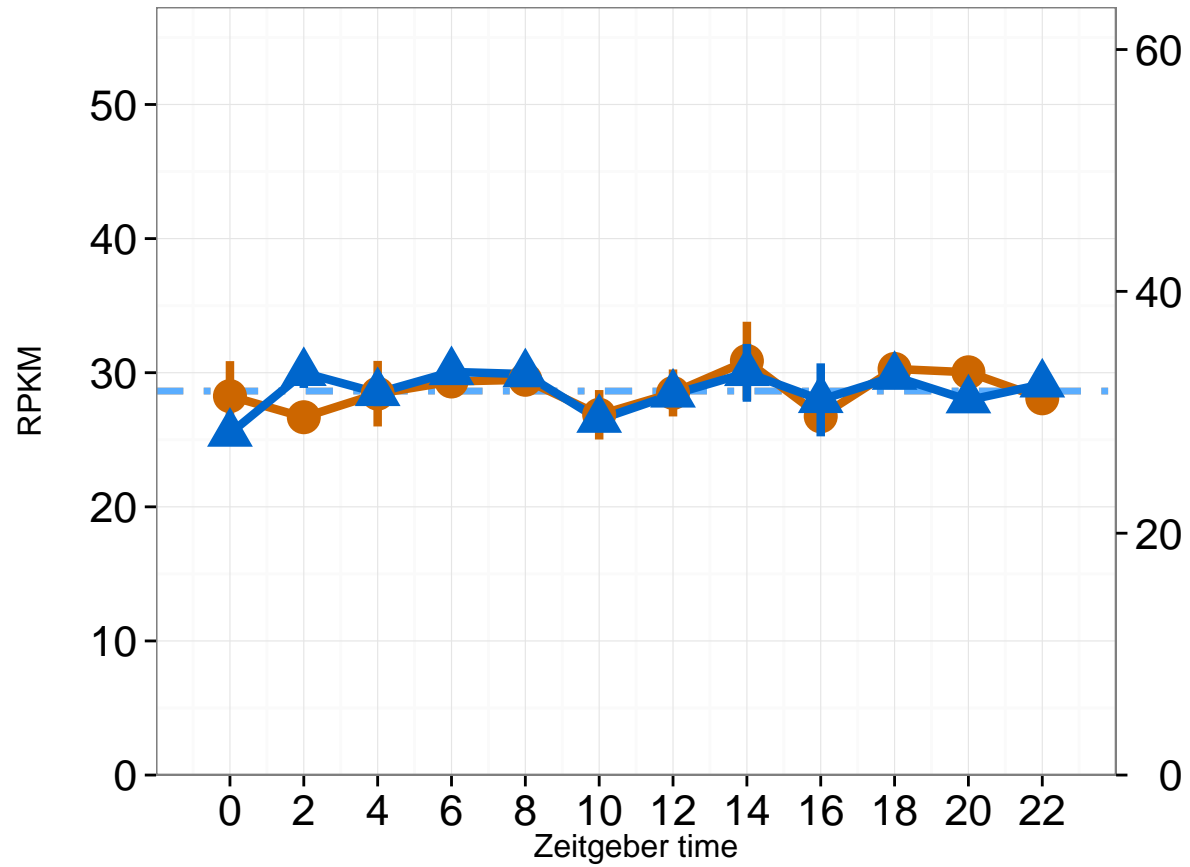

## Narfl

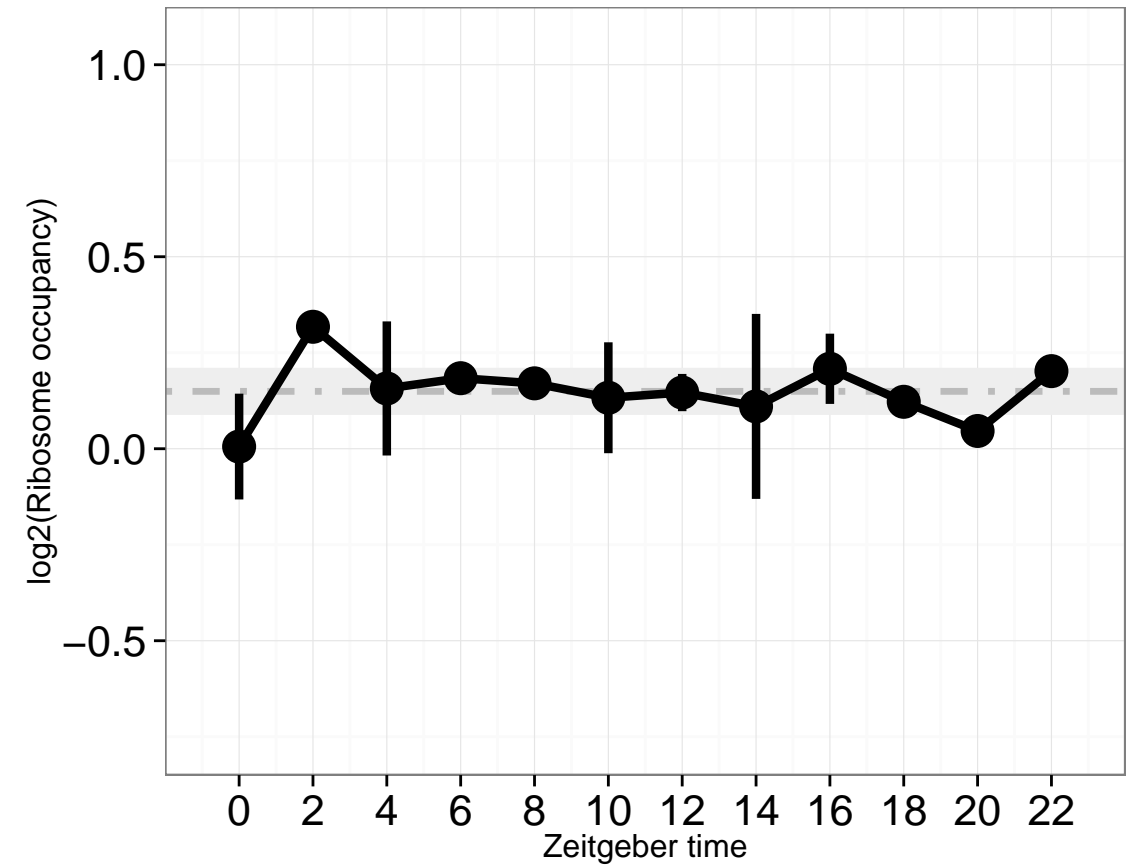

Supplement: Supplementary file 5924 [file 1]

## Nt5e

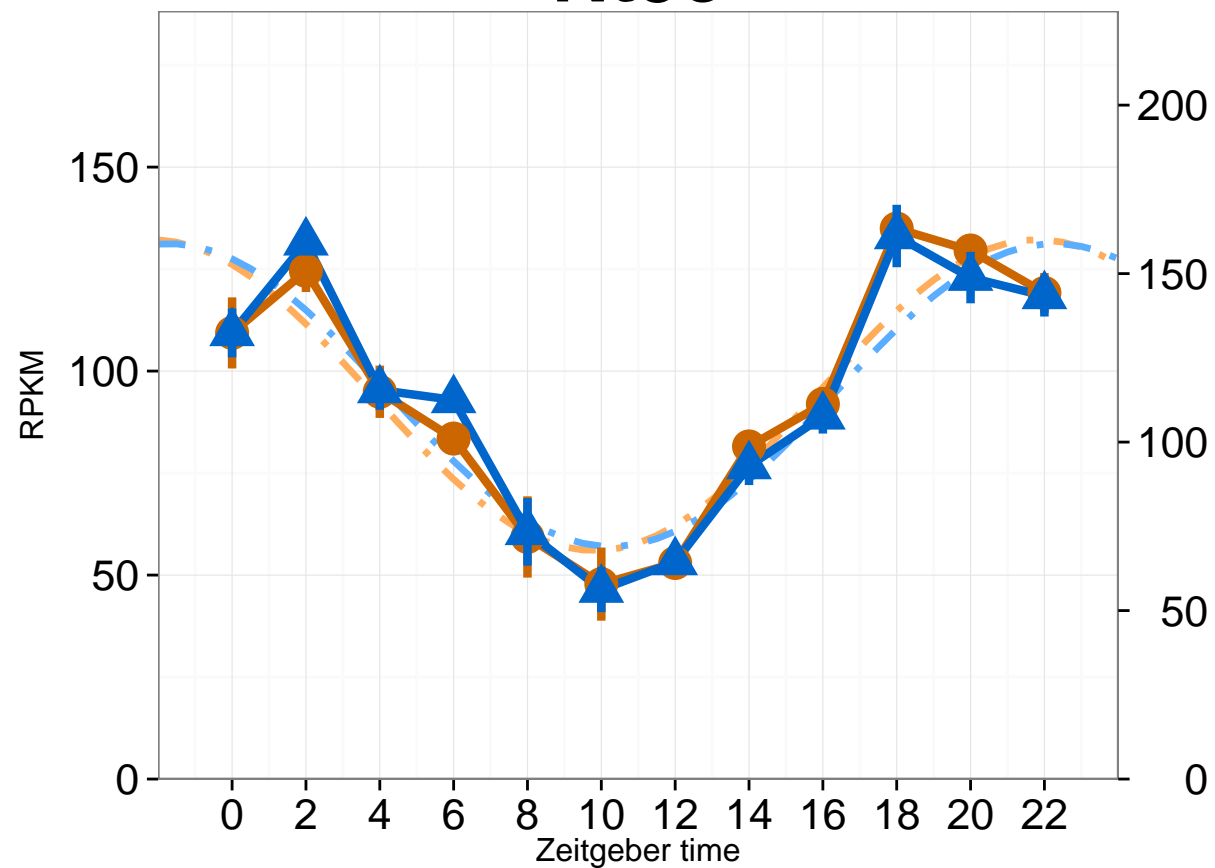

## Nt5e

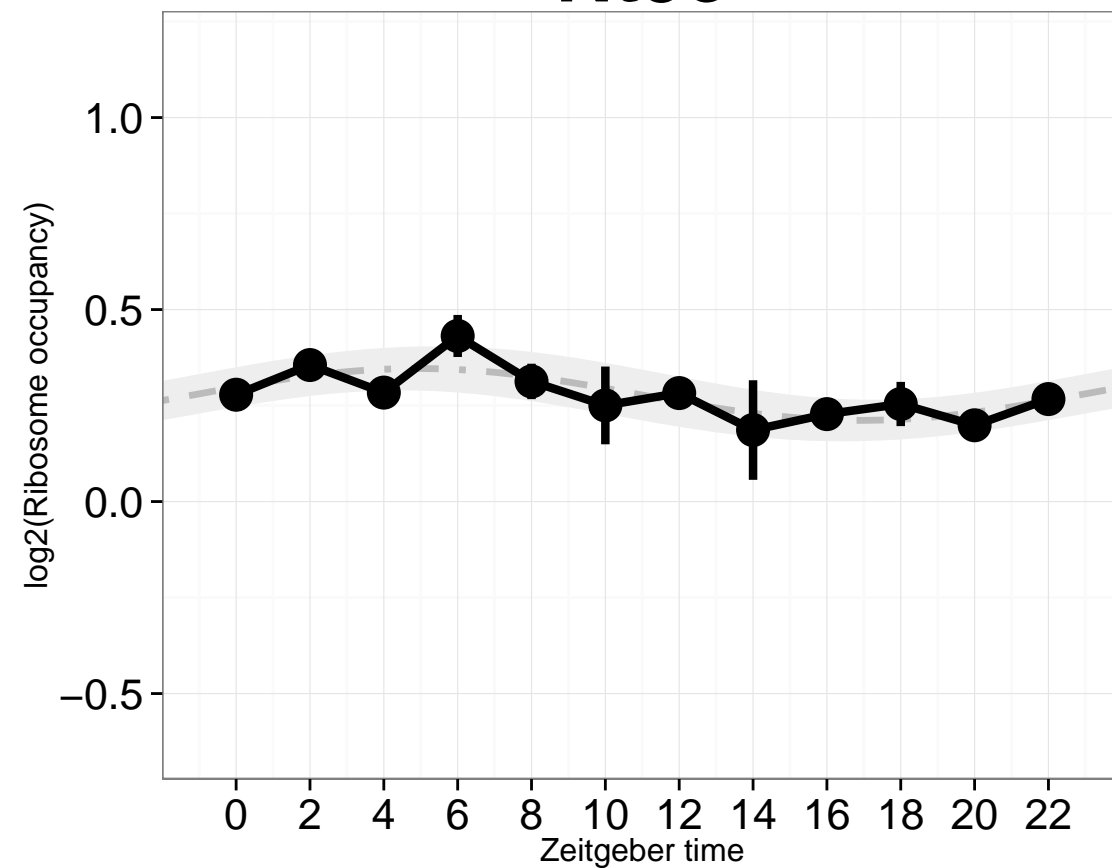

Supplement: Supplementary file 5925 [file 1]

## Mapk13

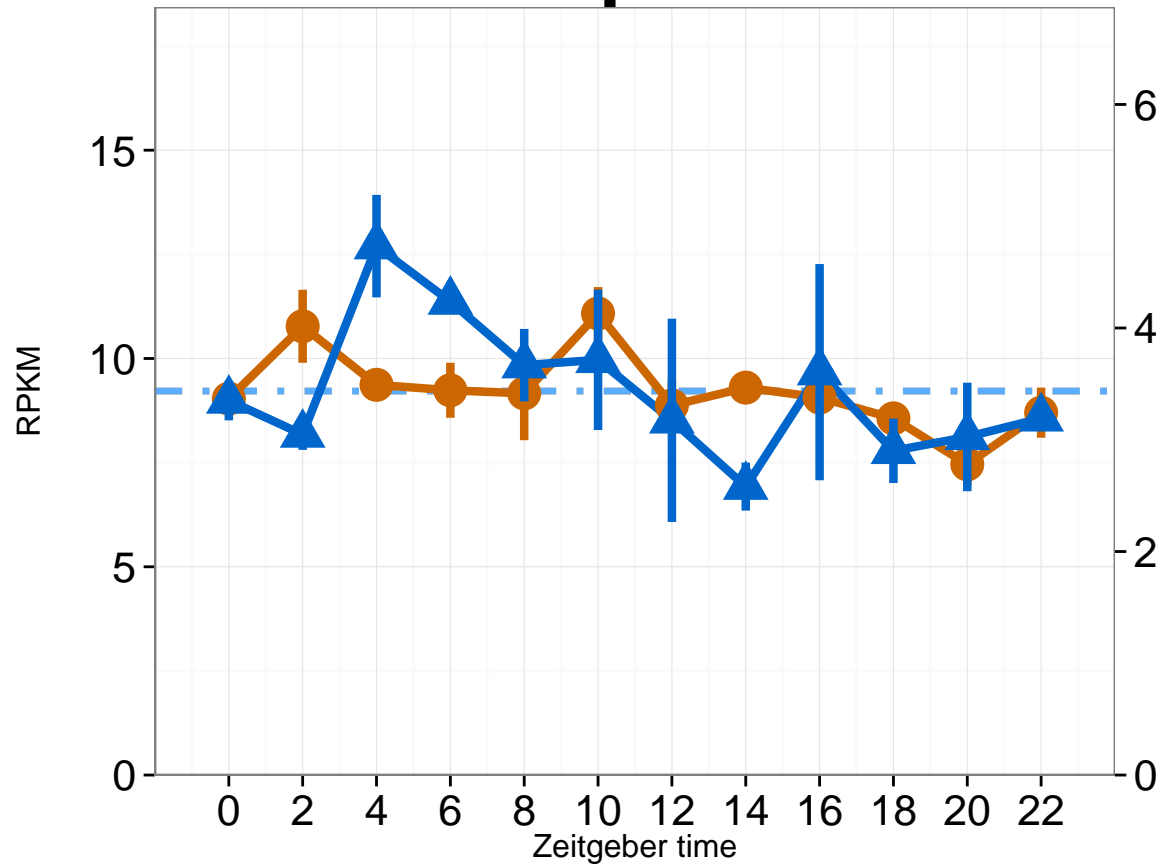

## Mapk13

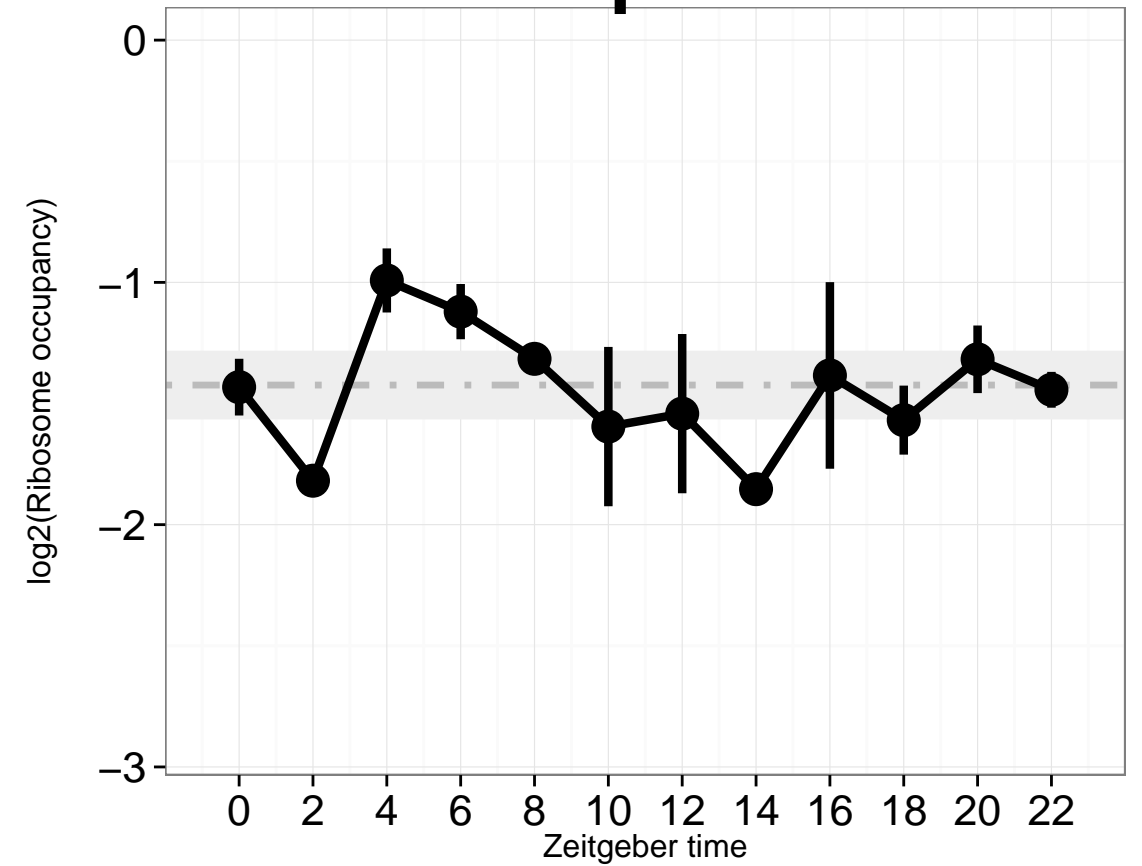

Supplement: Supplementary file 5926 [file 1]

## Hnrnpc

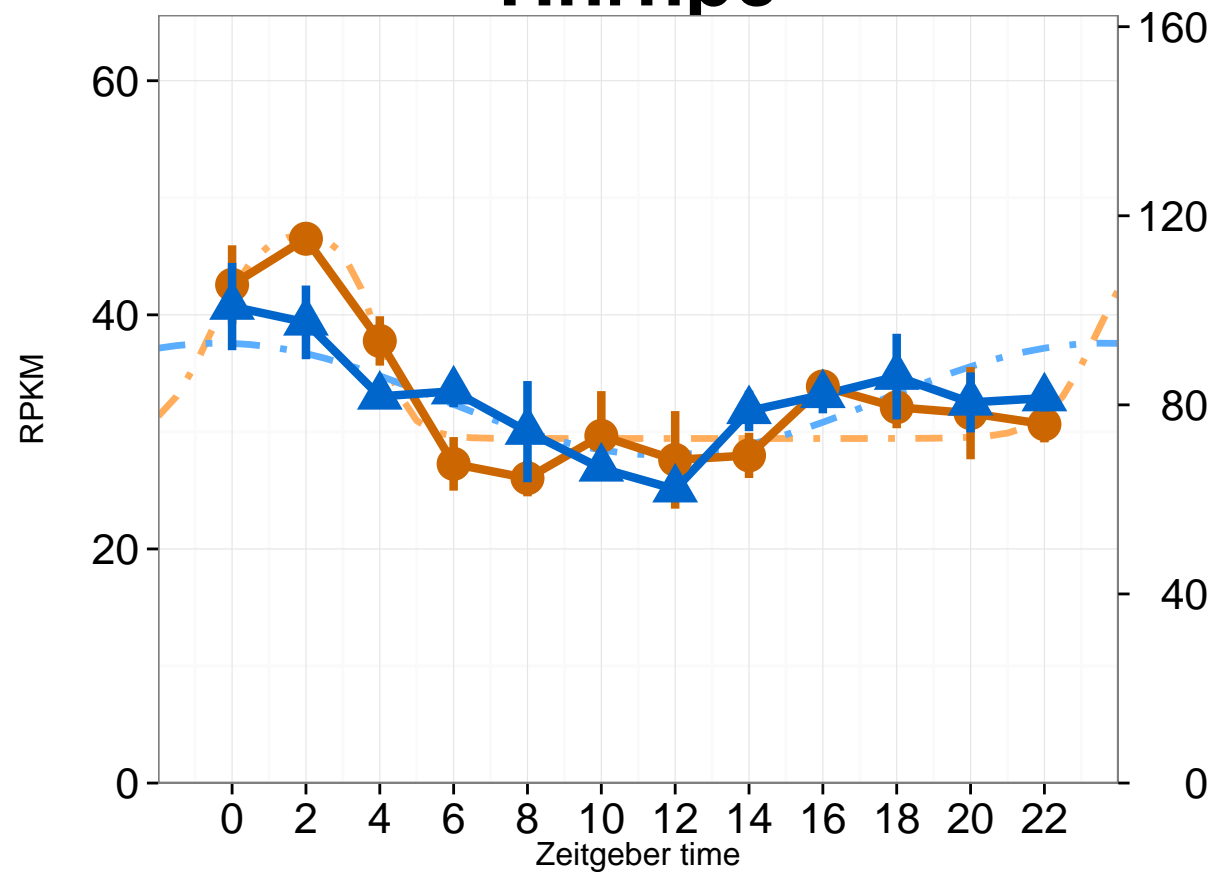

## Hnrnpc

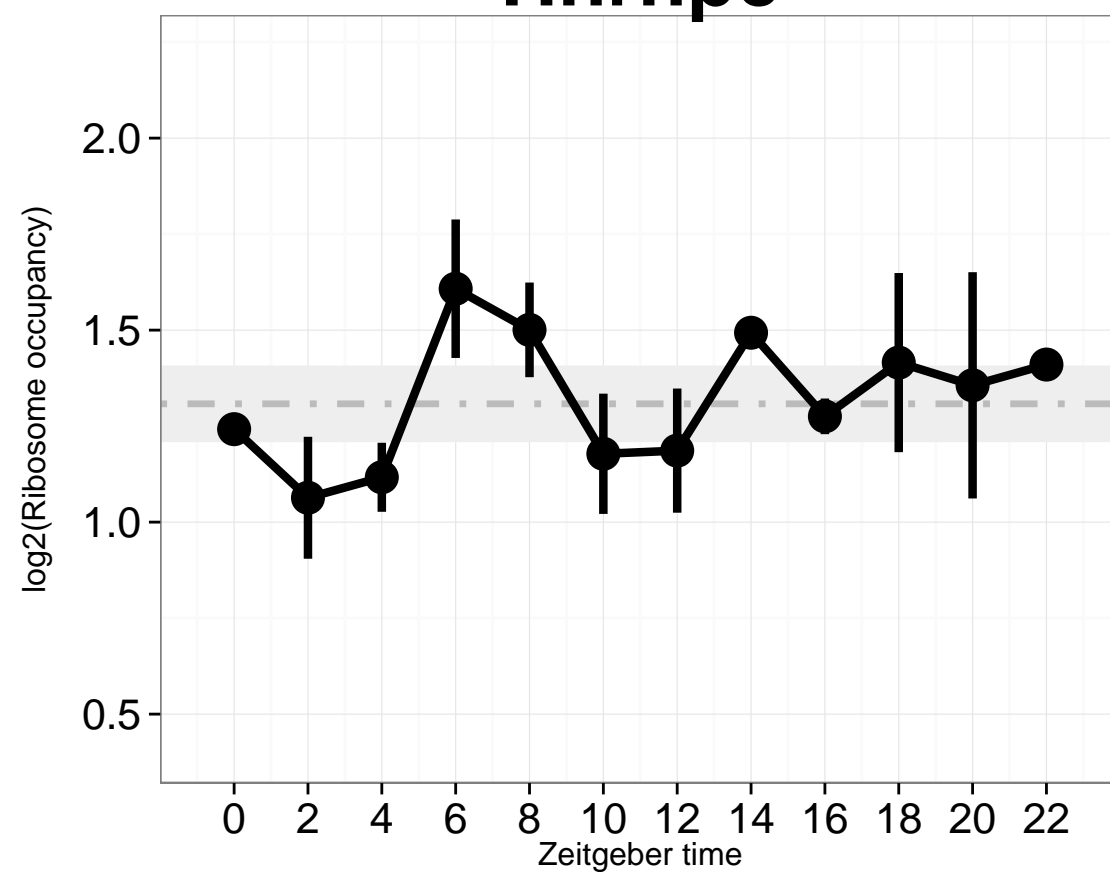

Supplement: Supplementary file 5927 [file 1]

# Gnb4

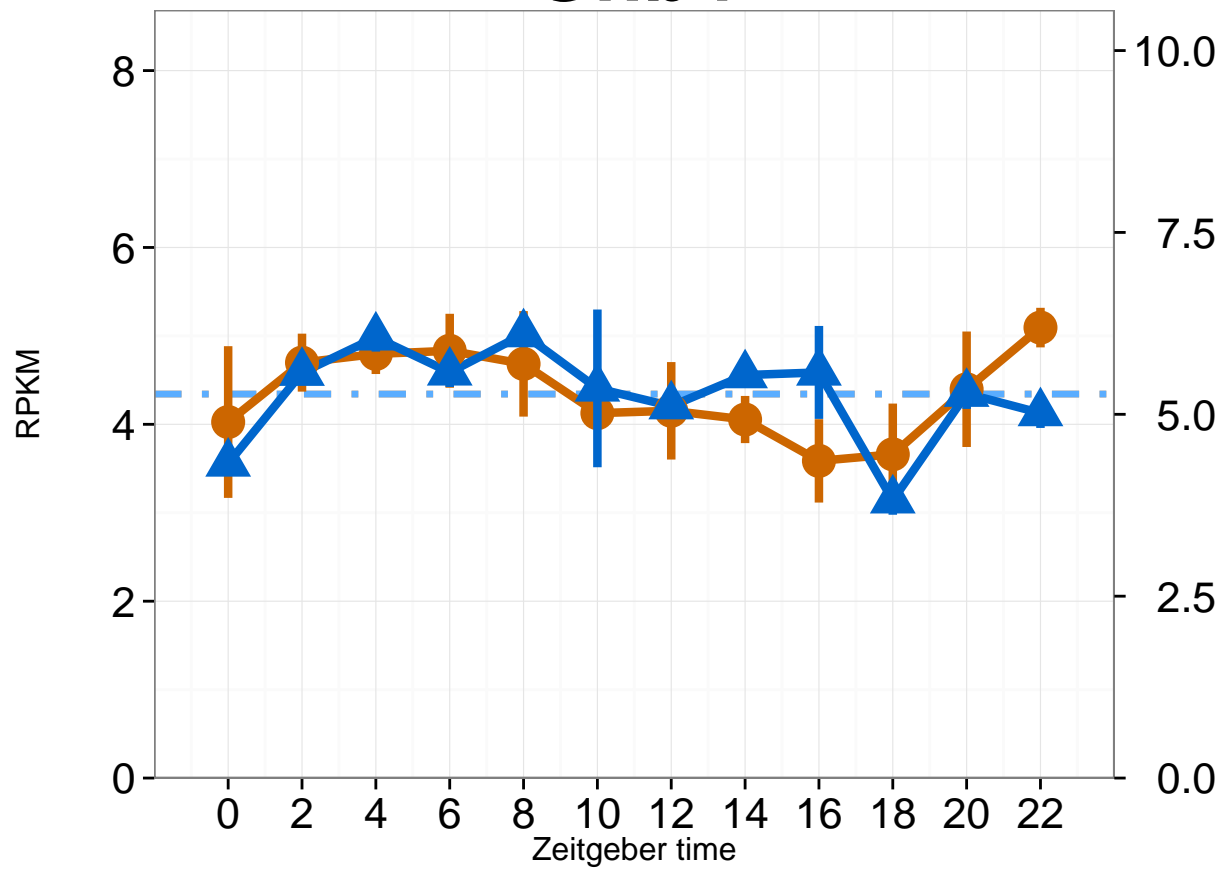

# Gnb4

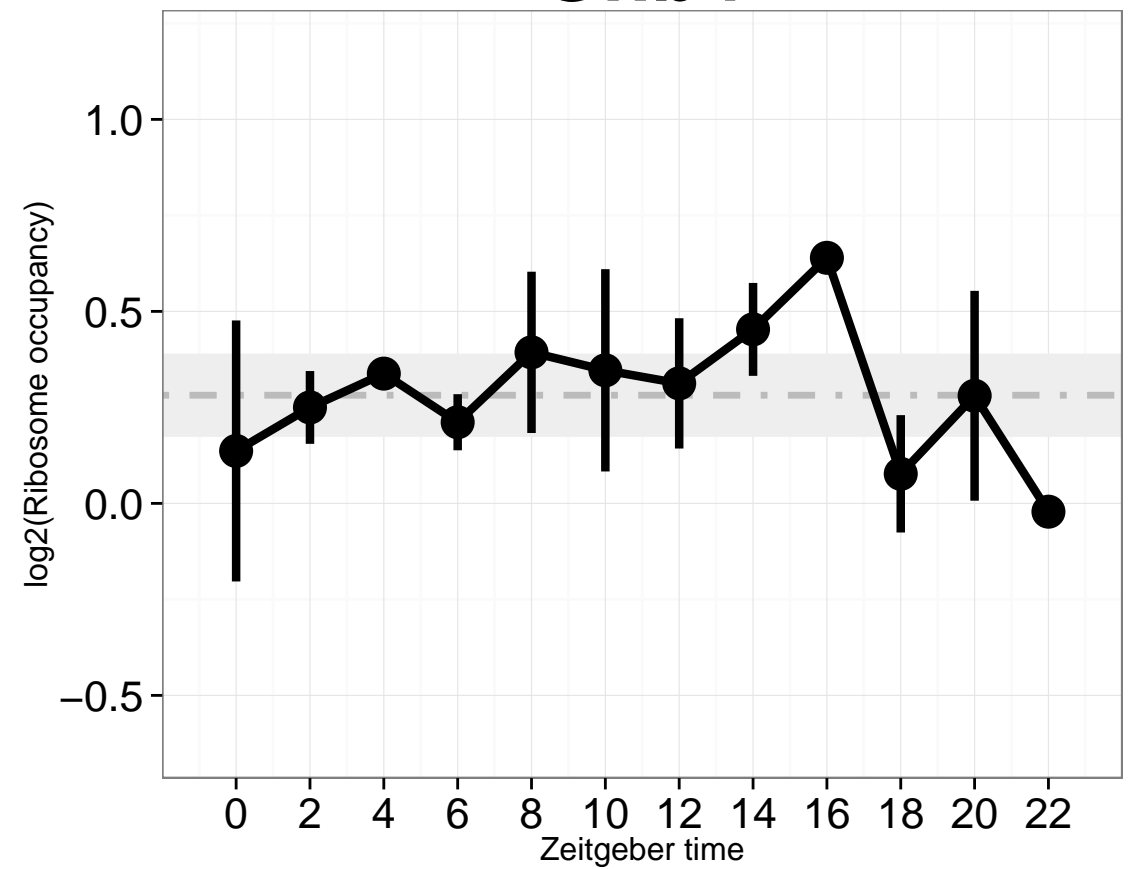

Supplement: Supplementary file 5928 [file 1]

## Grhl2

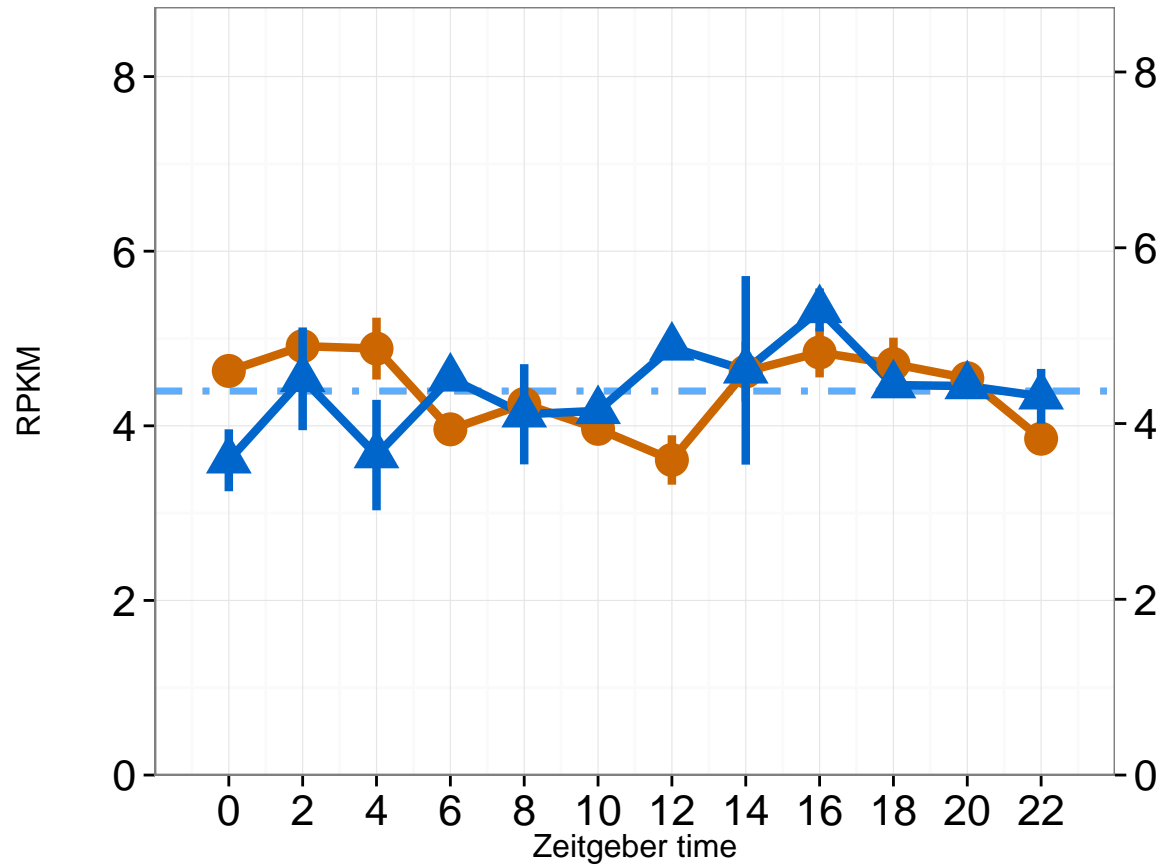

## Grhl2

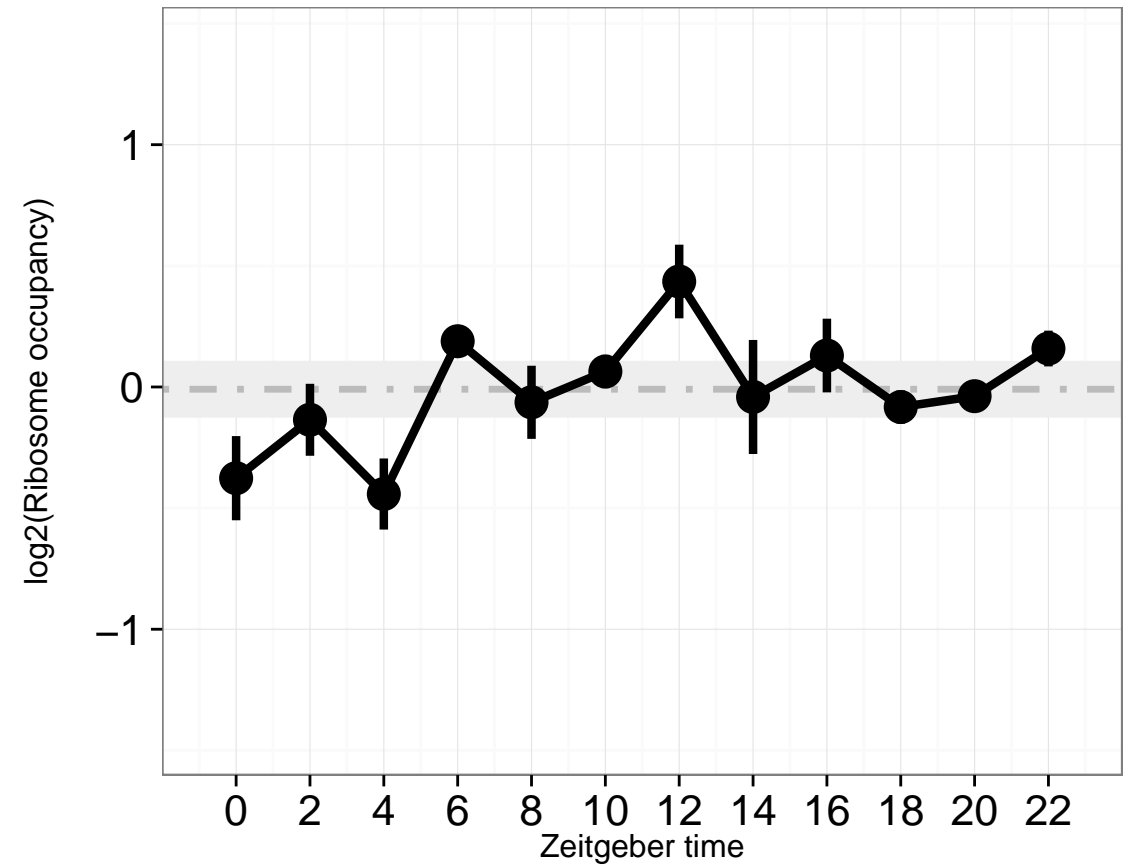

Supplement: Supplementary file 5929 [file 1]

## Bccip

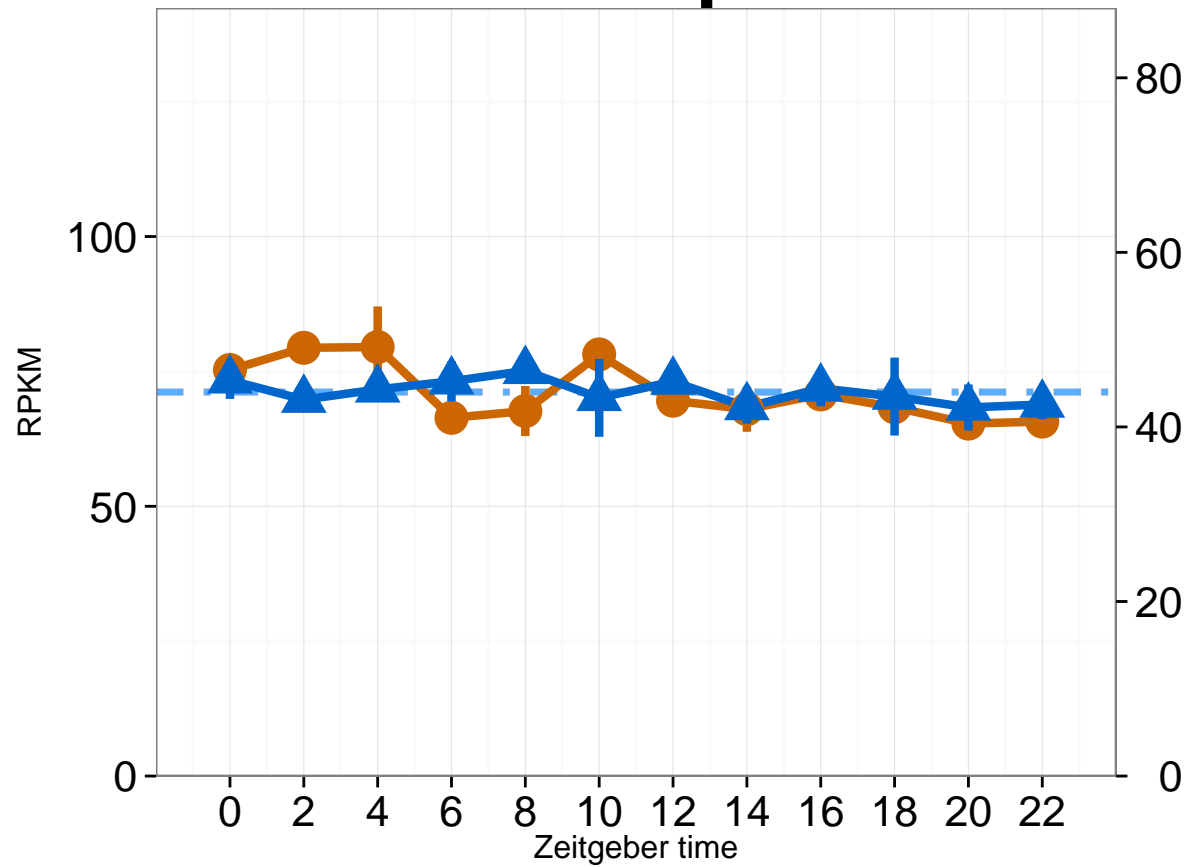

## Bccip

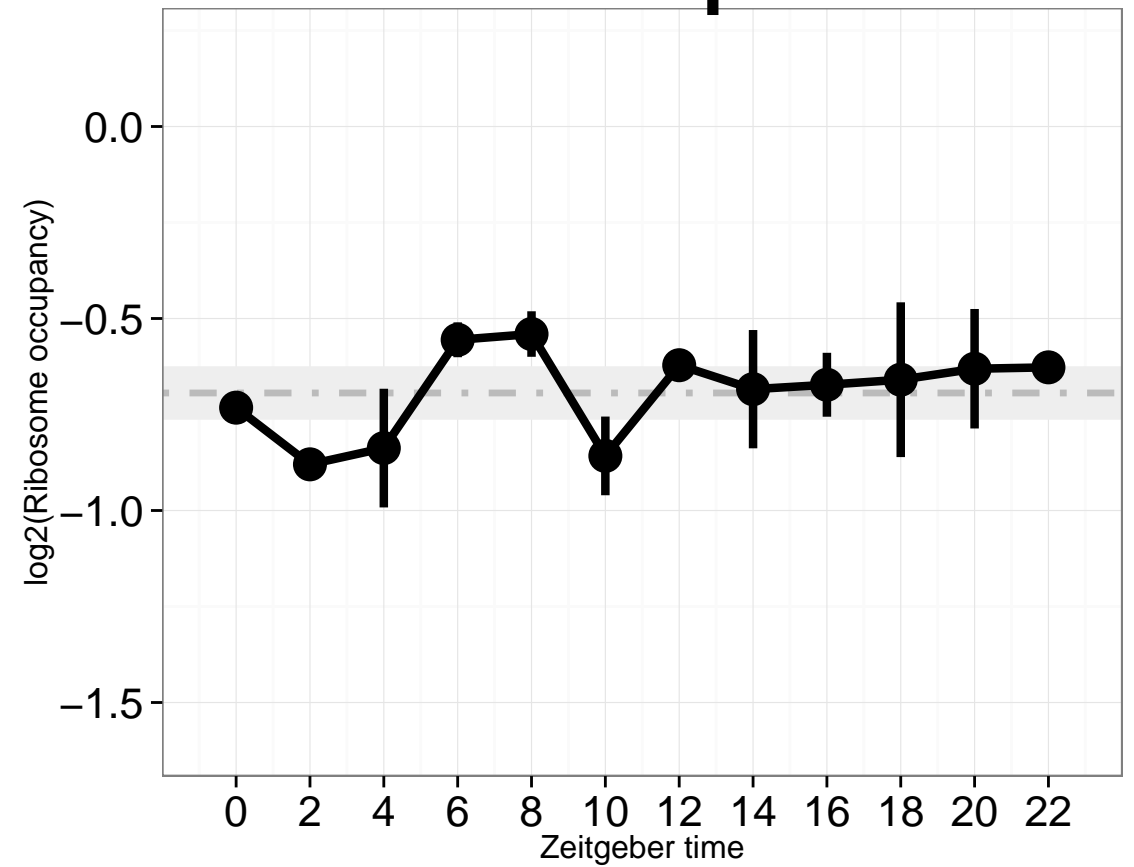

Supplement: Supplementary file 5930 [file 1]

# Pde1b

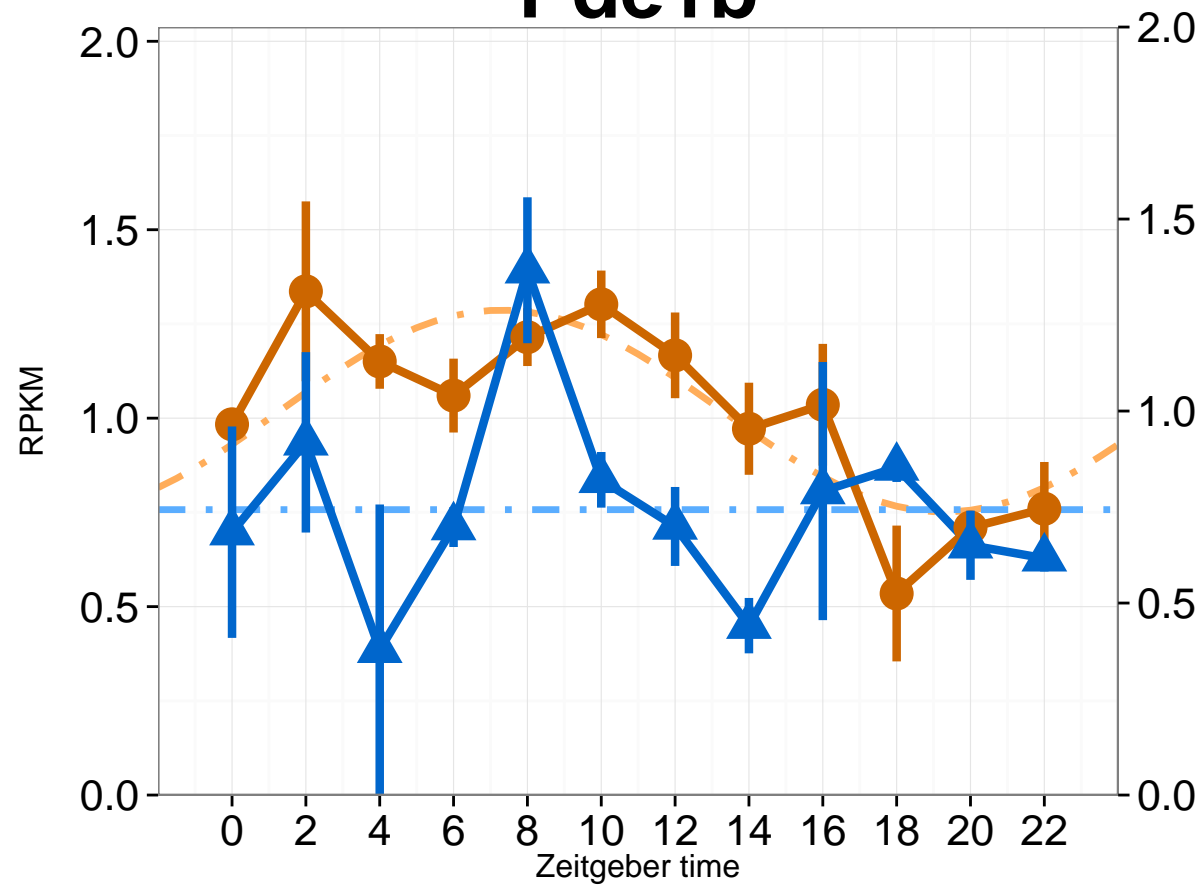

# Pde1b

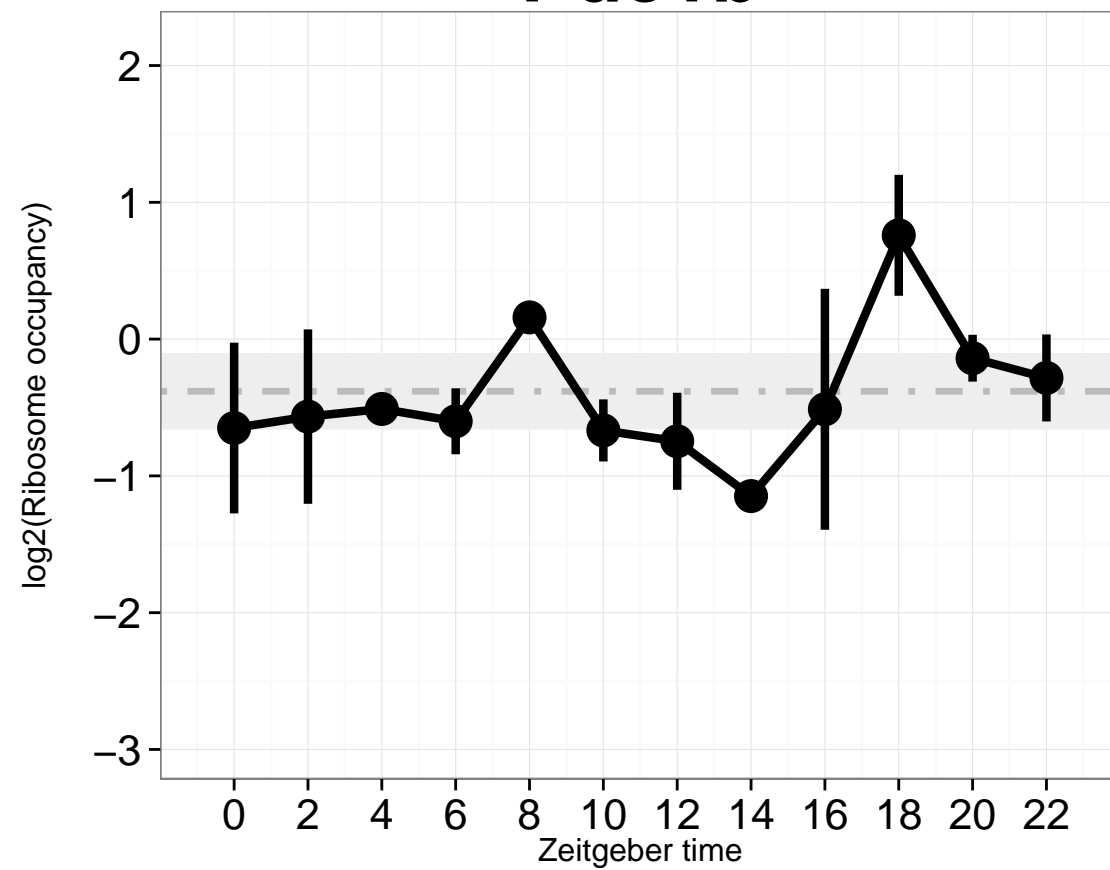

Supplement: Supplementary file 5931 [file 1]

## Zfand5

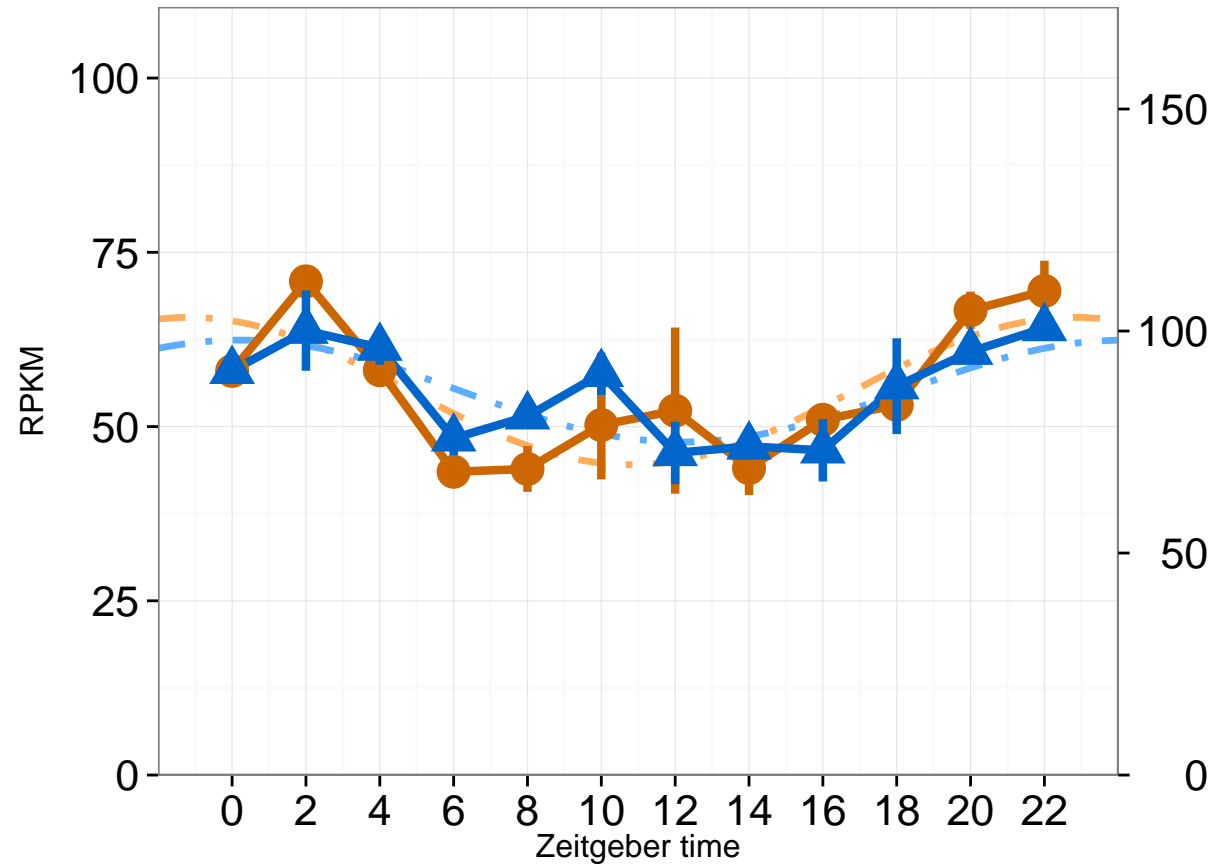

## Zfand5

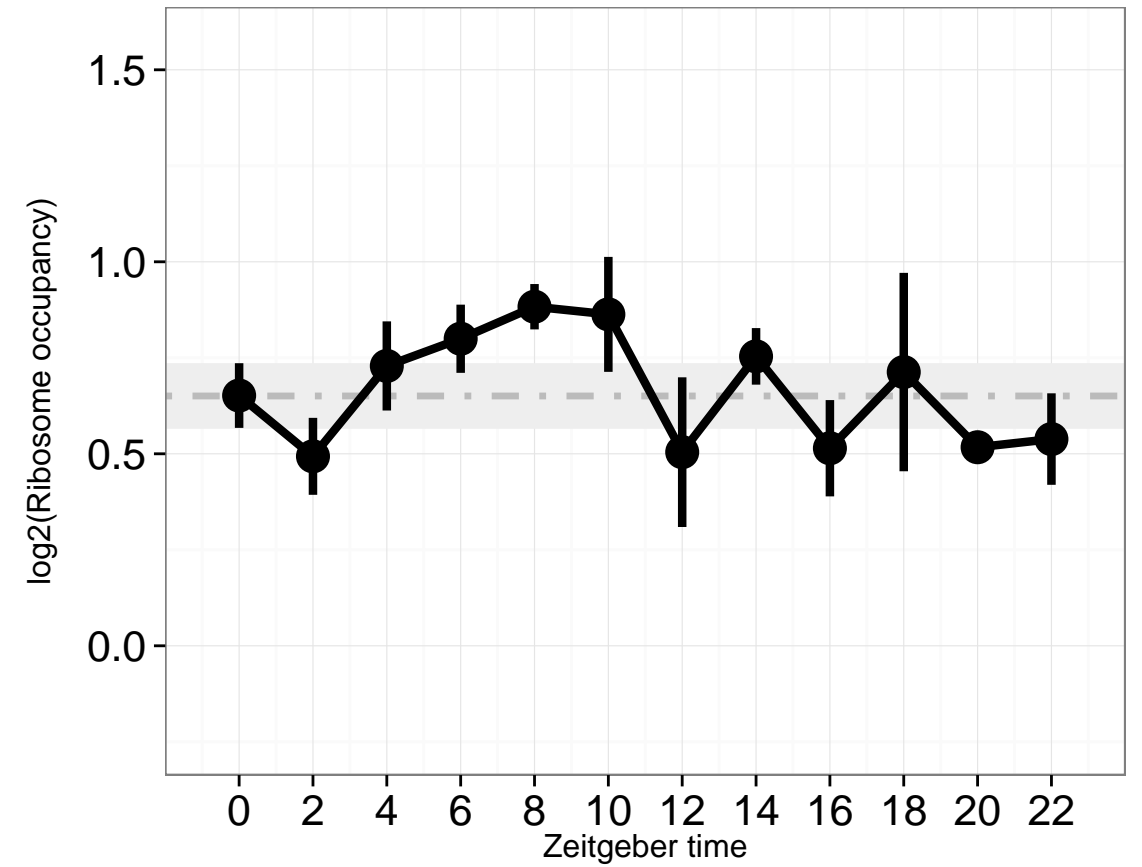

Supplement: Supplementary file 5932 [file 1]

## Tmem209

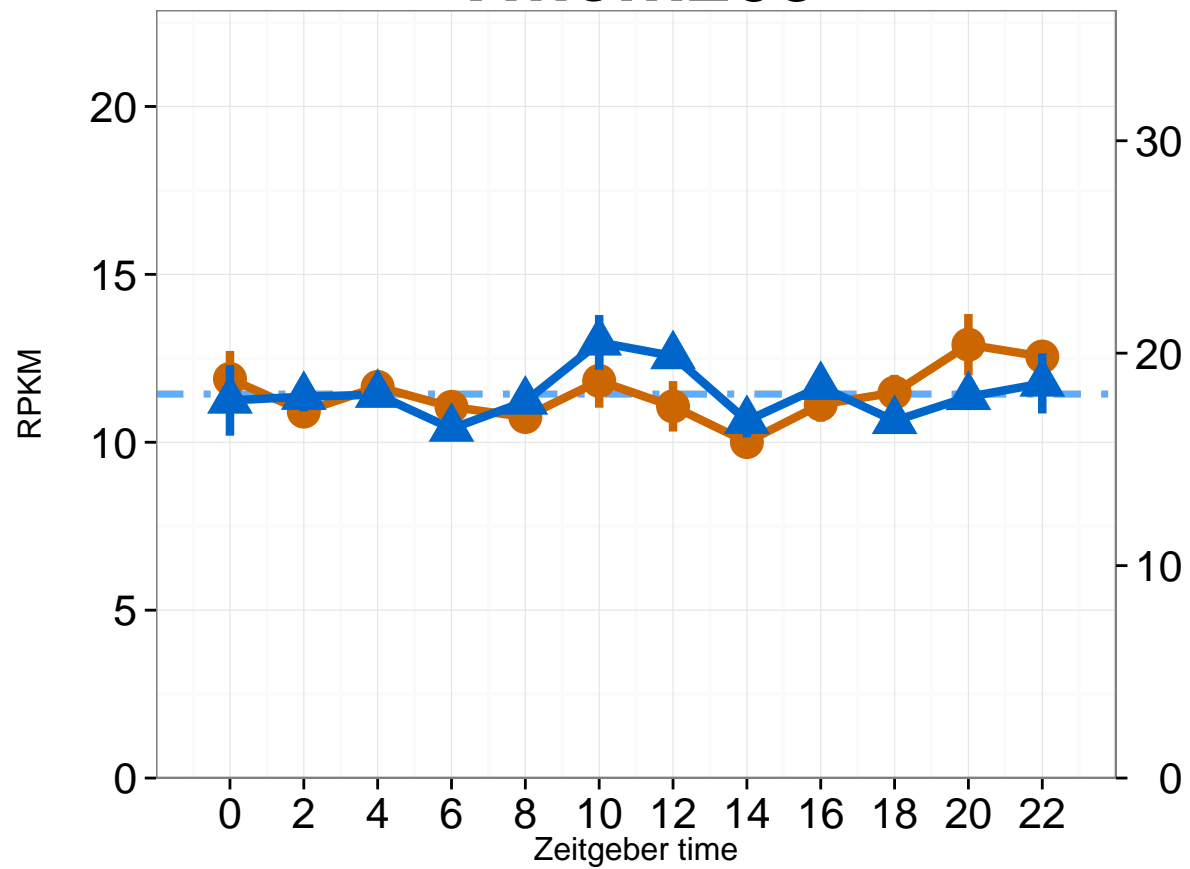

## Tmem209

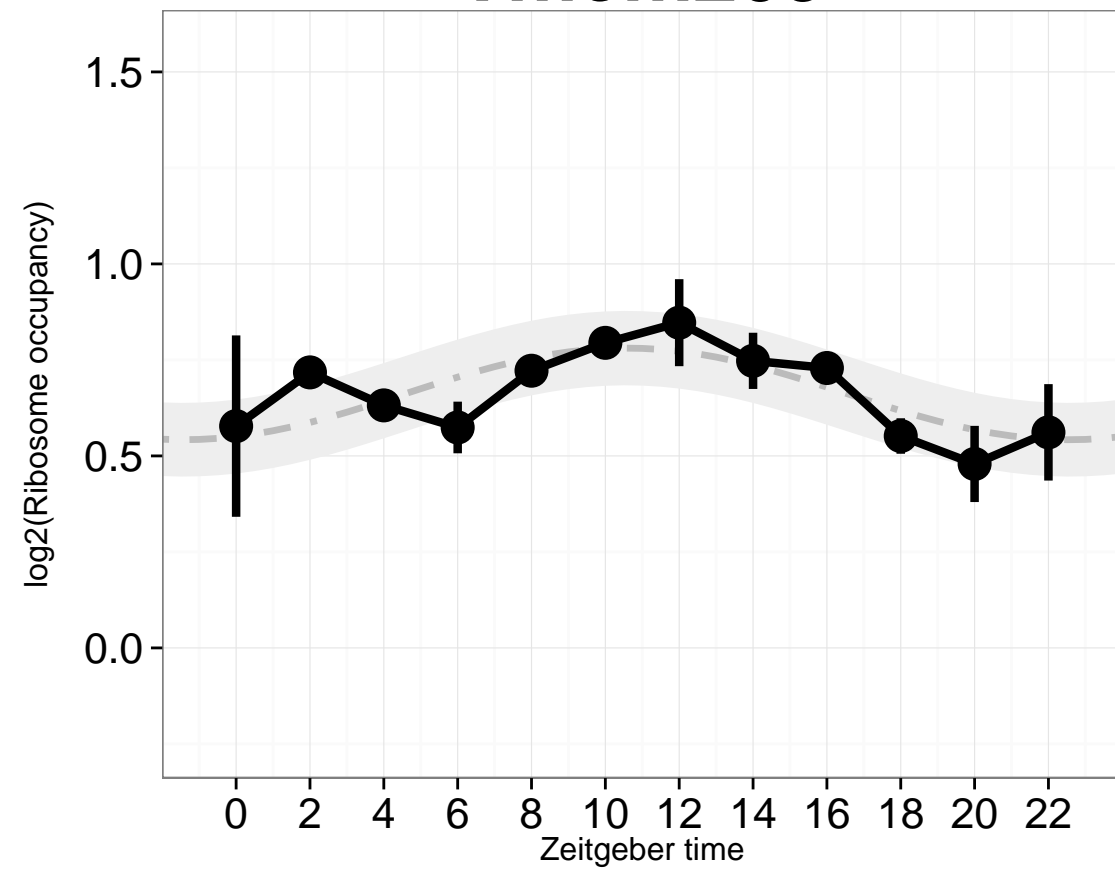

Supplement: Supplementary file 5933 [file 1]

# Lipg

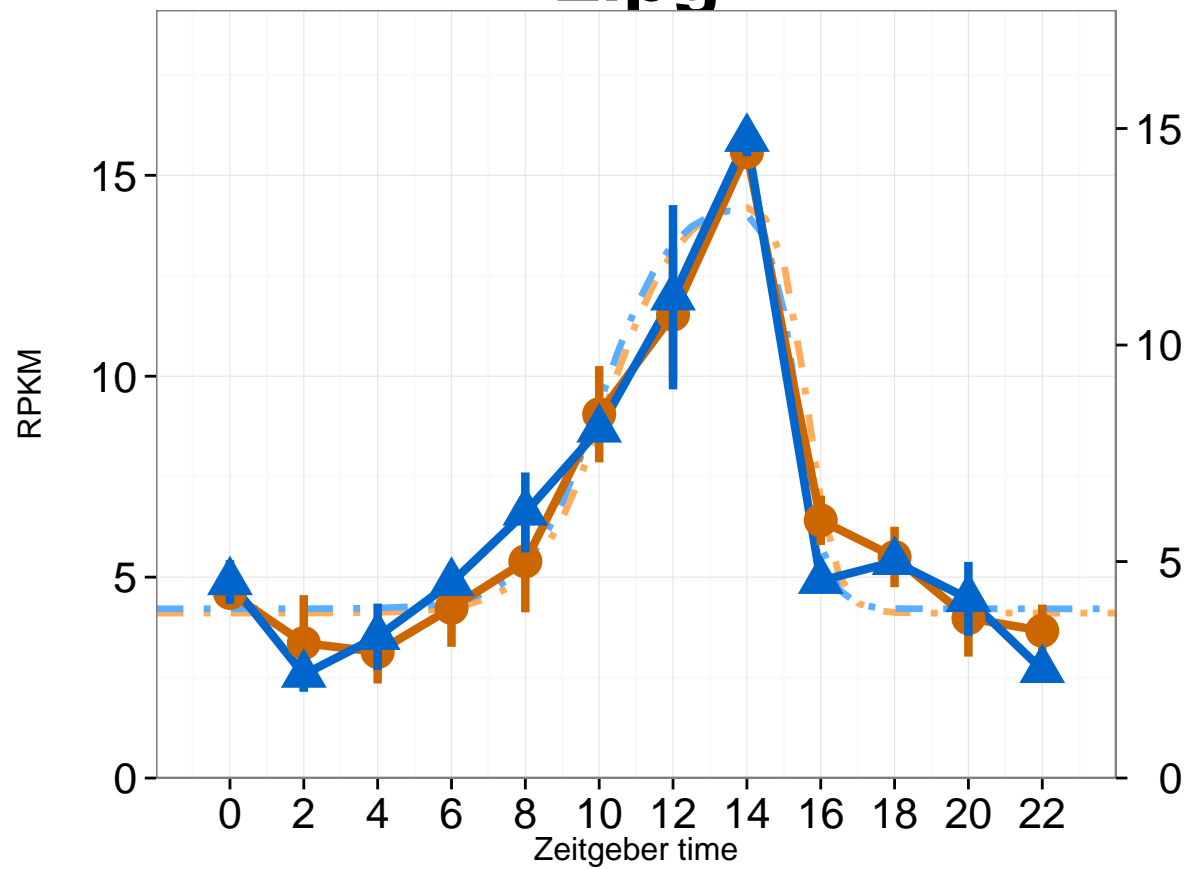

# Lipg

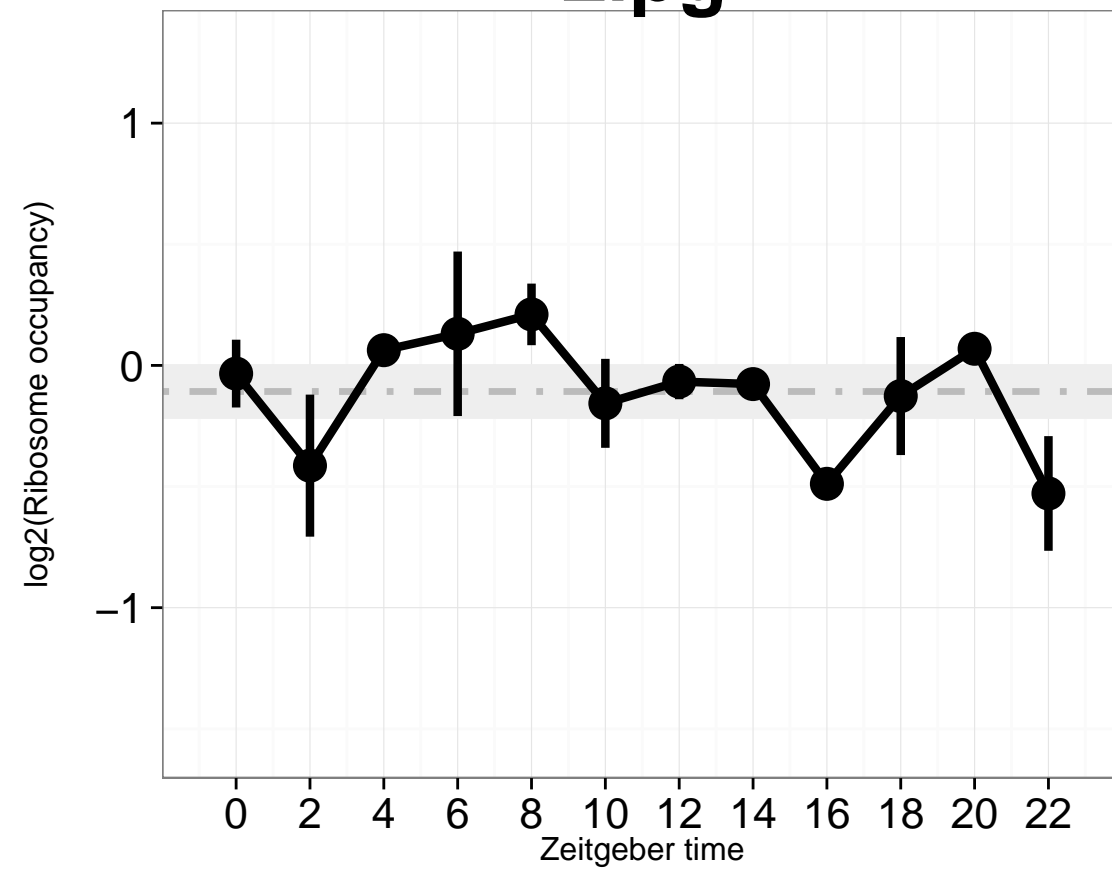

Supplement: Supplementary file 5934 [file 1]

# Tpra1

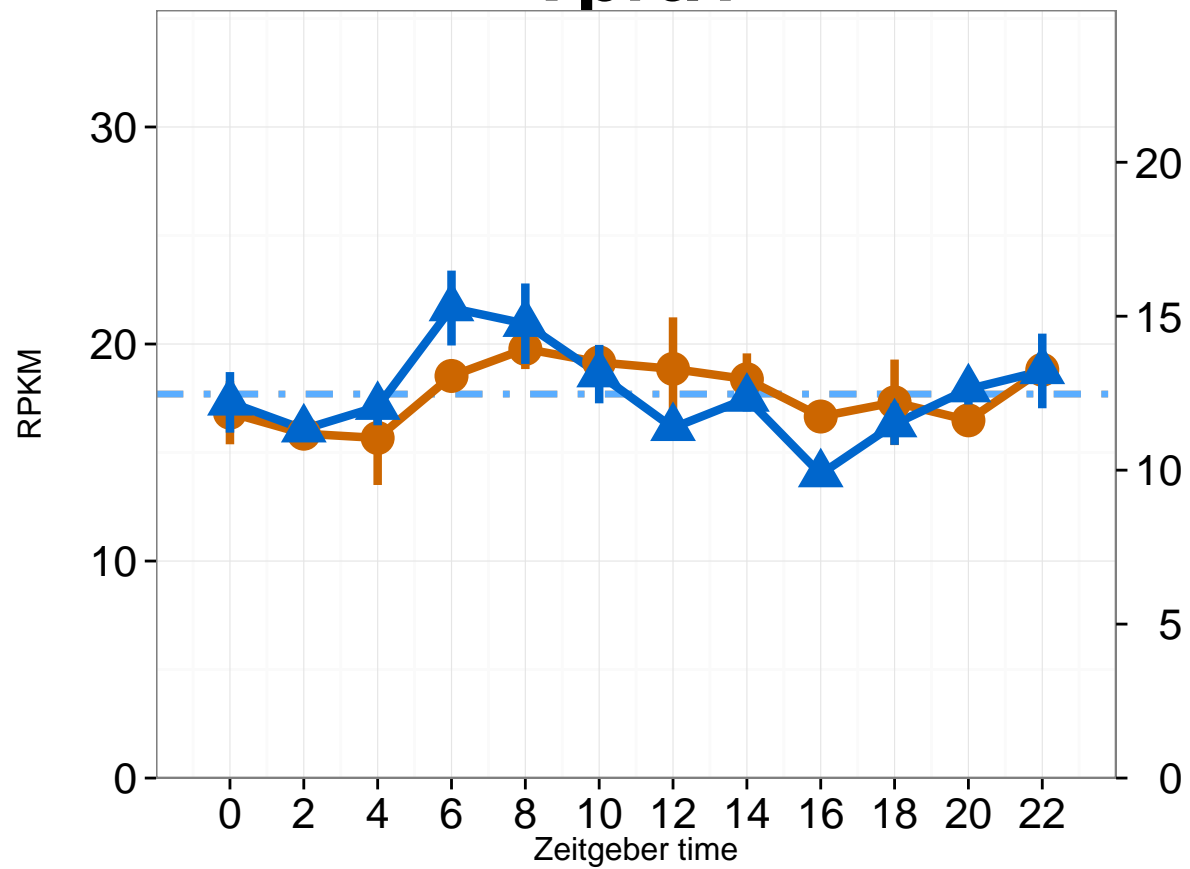

# Tpra1

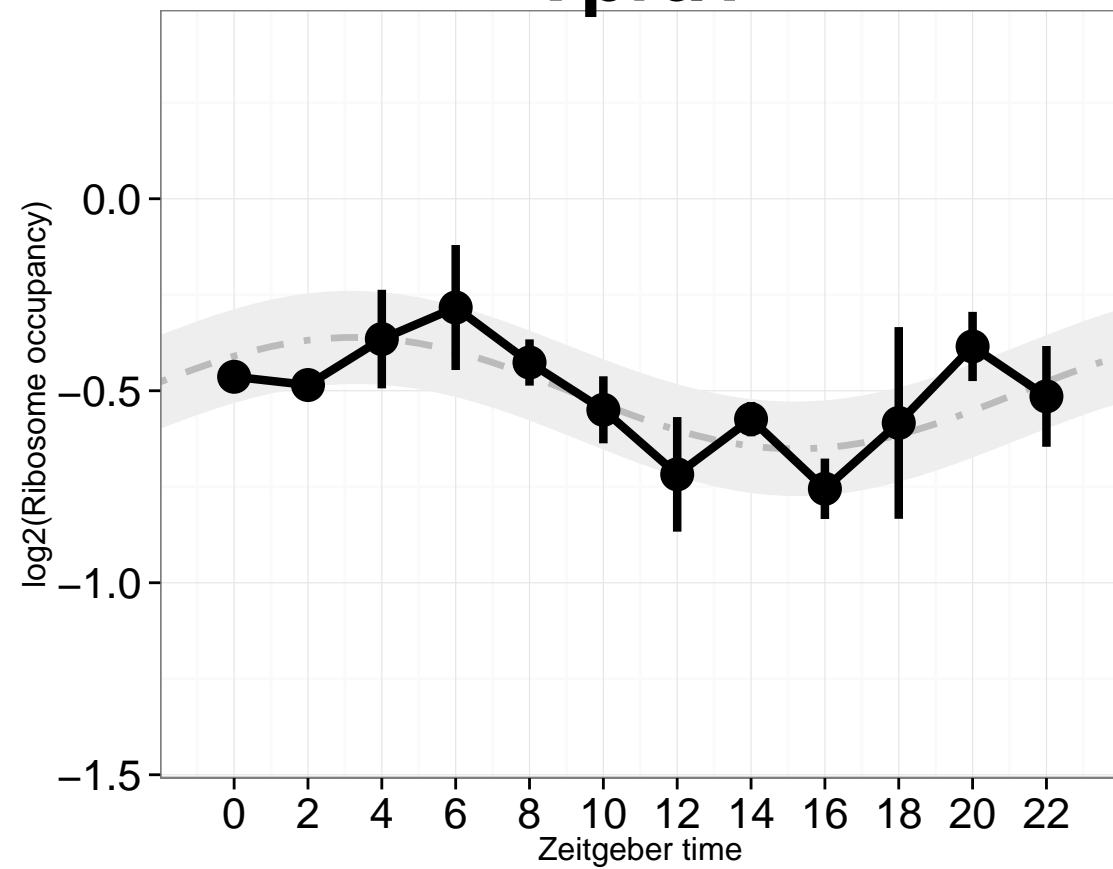

Supplement: Supplementary file 5935 [file 1]

## Chek2

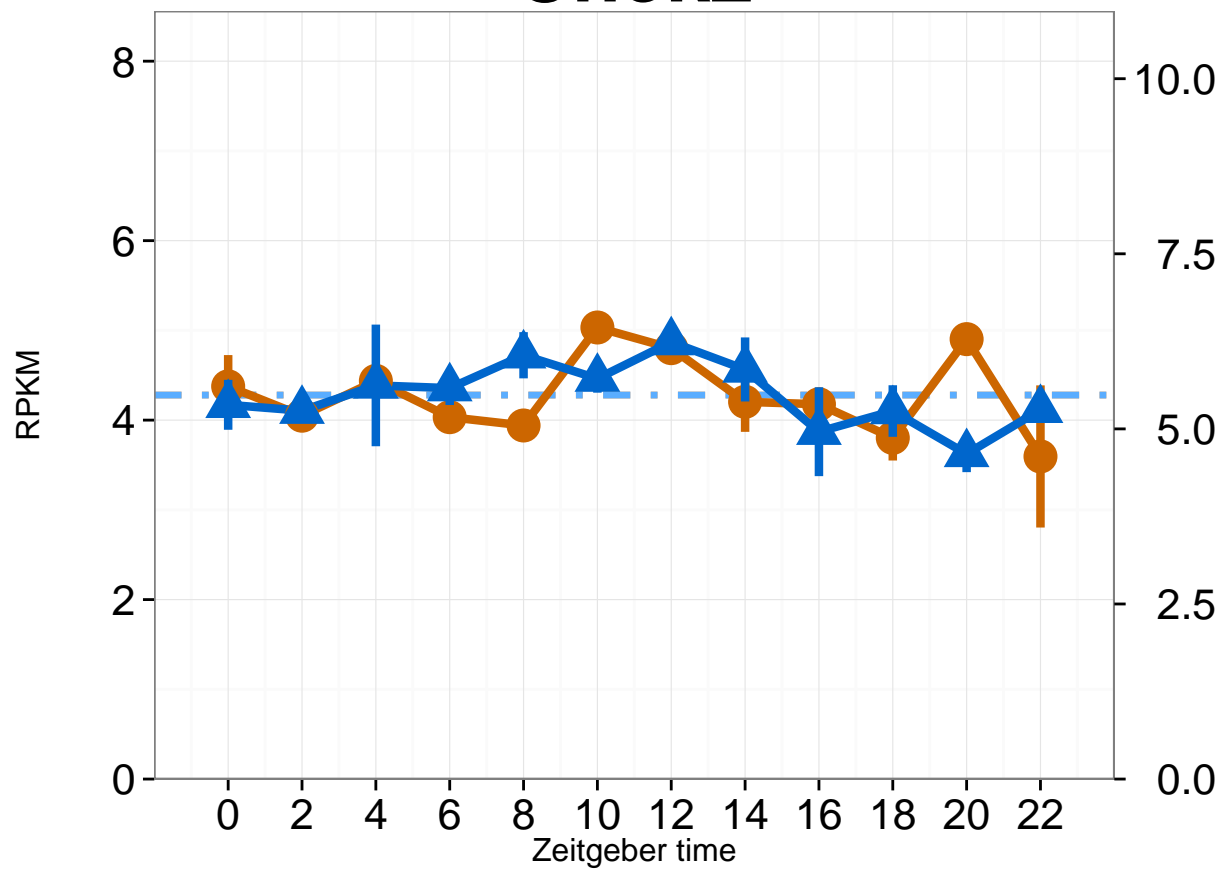

## Chek2

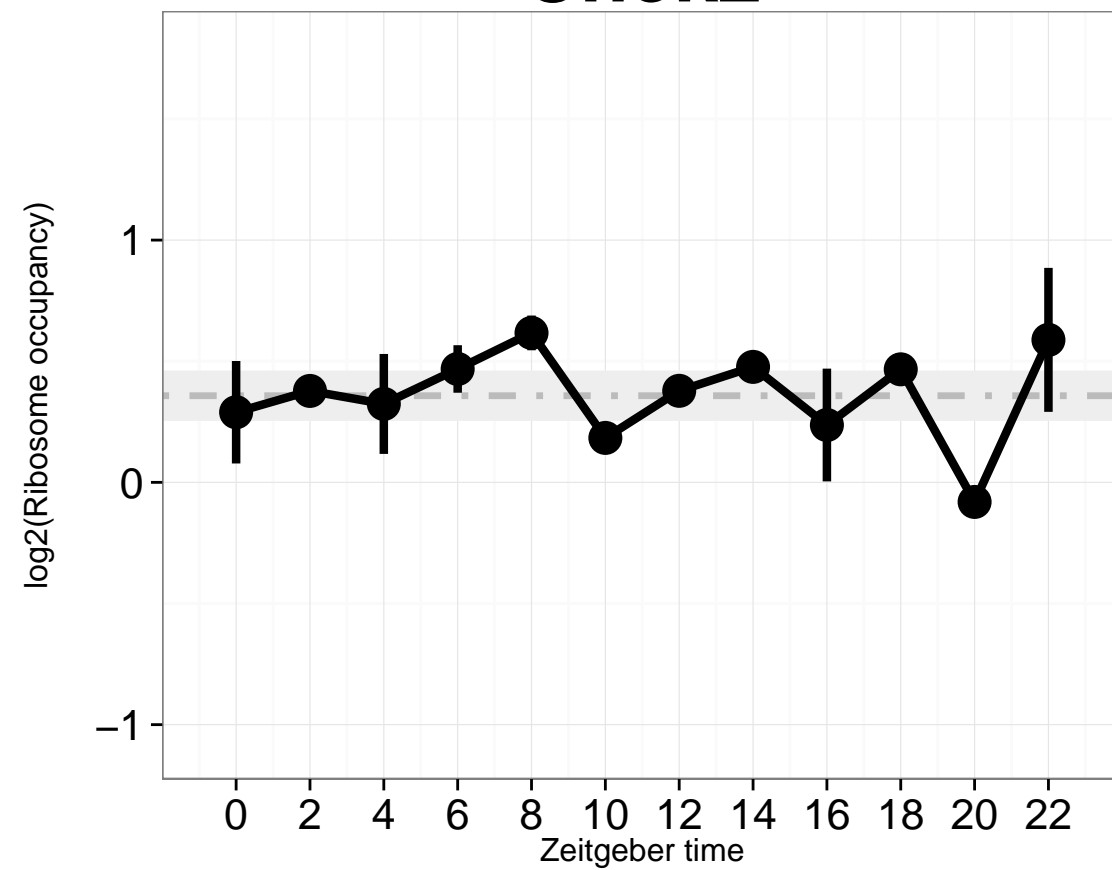

Supplement: Supplementary file 5936 [file 1]

## Rab9

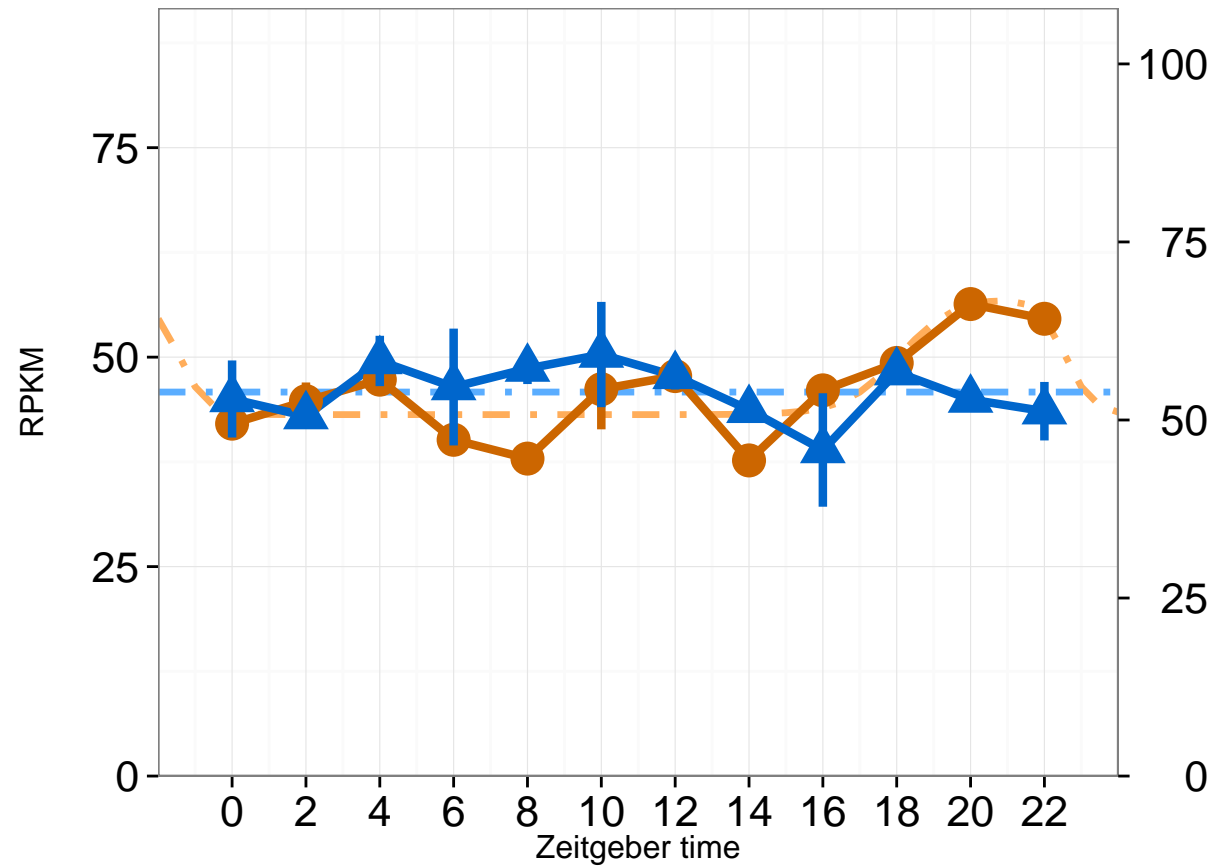

## Rab9

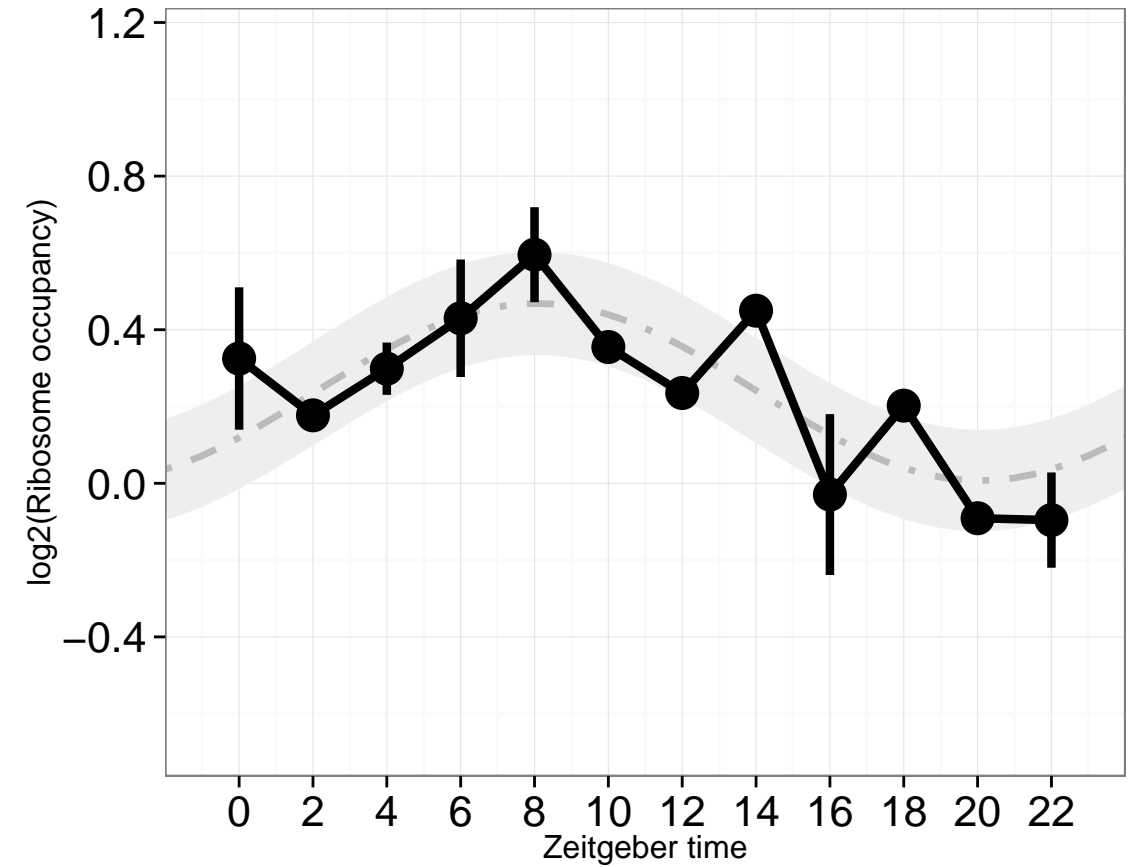

Supplement: Supplementary file 5937 [file 1]

# Mrpl35

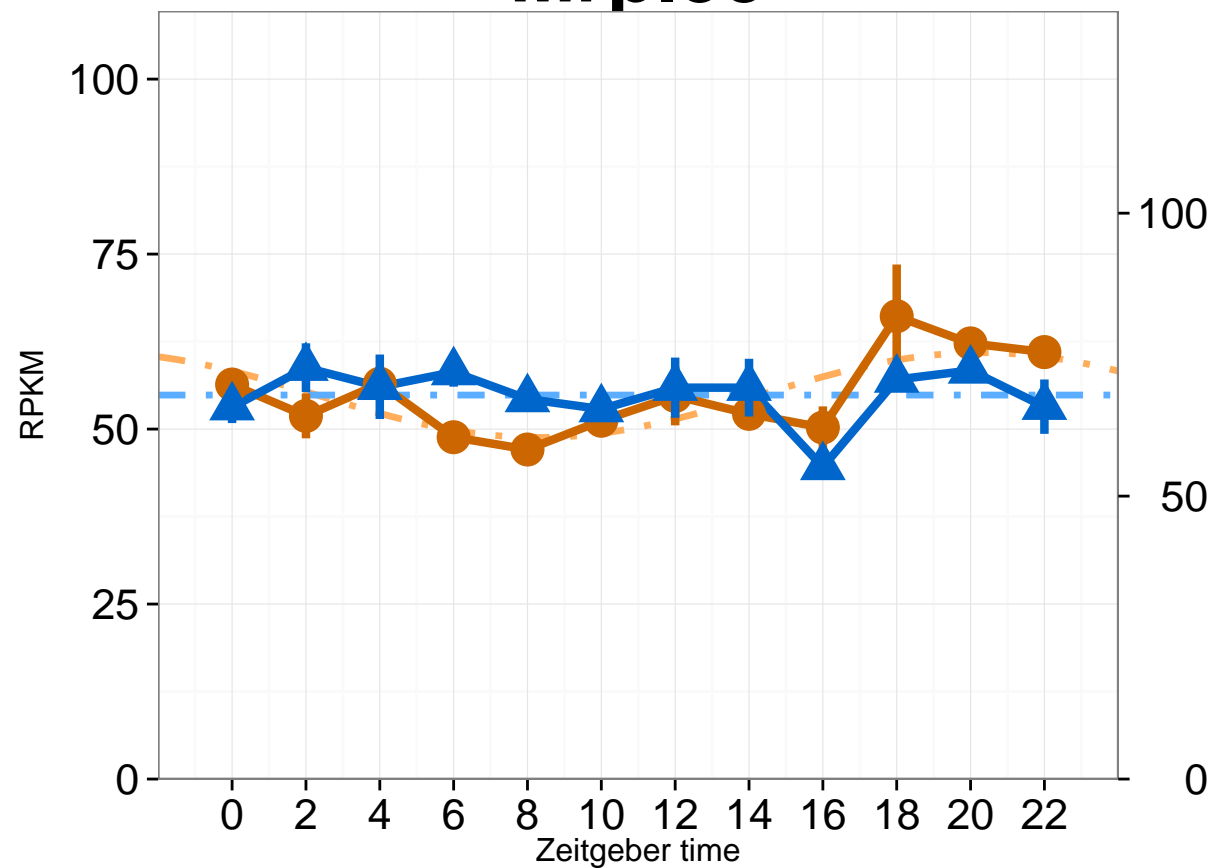

# Mrpl35

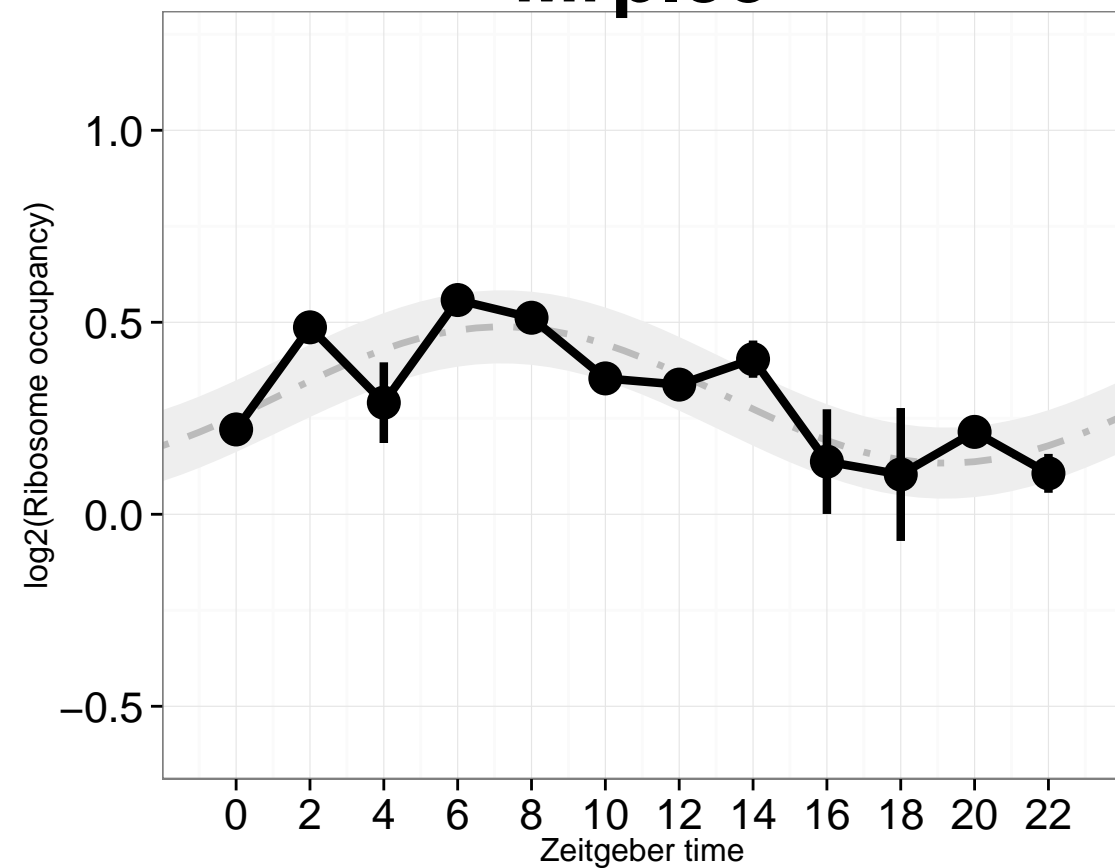

Supplement: Supplementary file 5938 [file 1]

## Ermp1

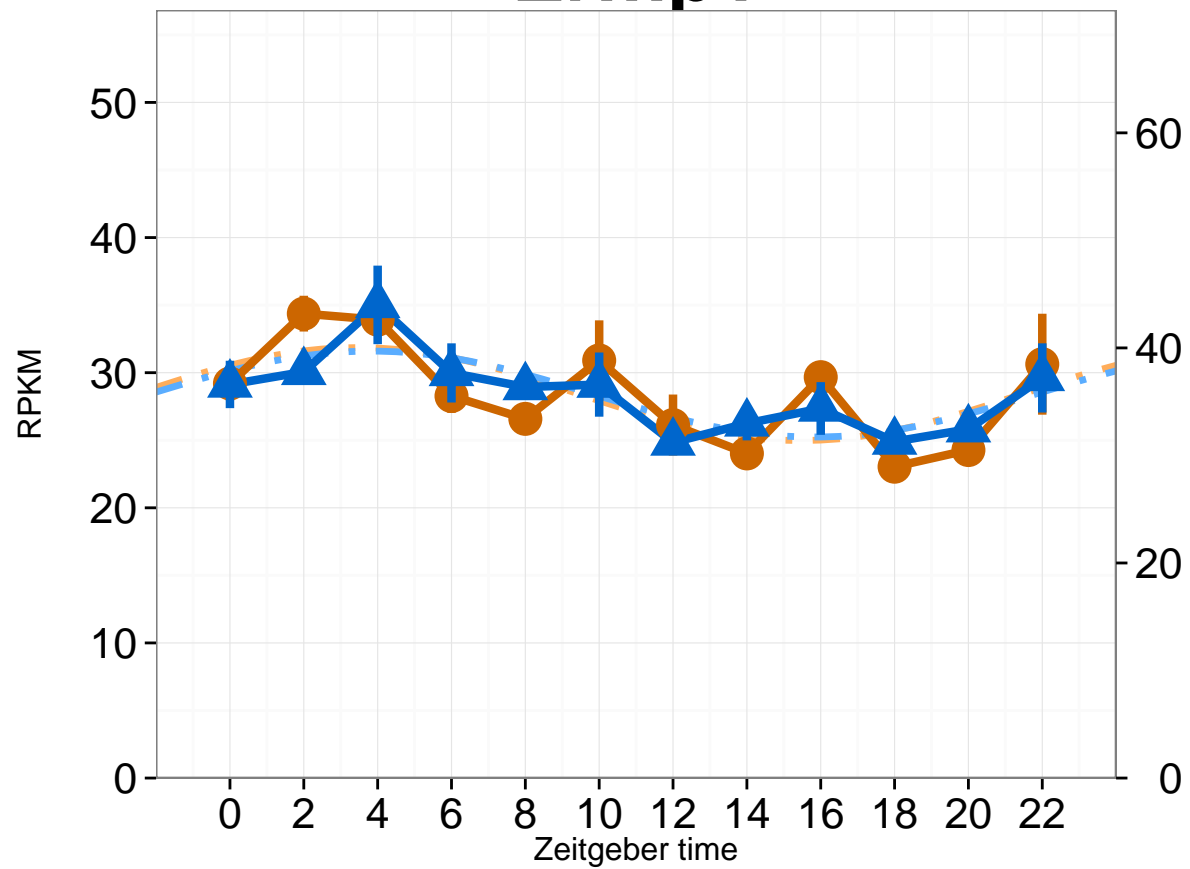

## Ermp1

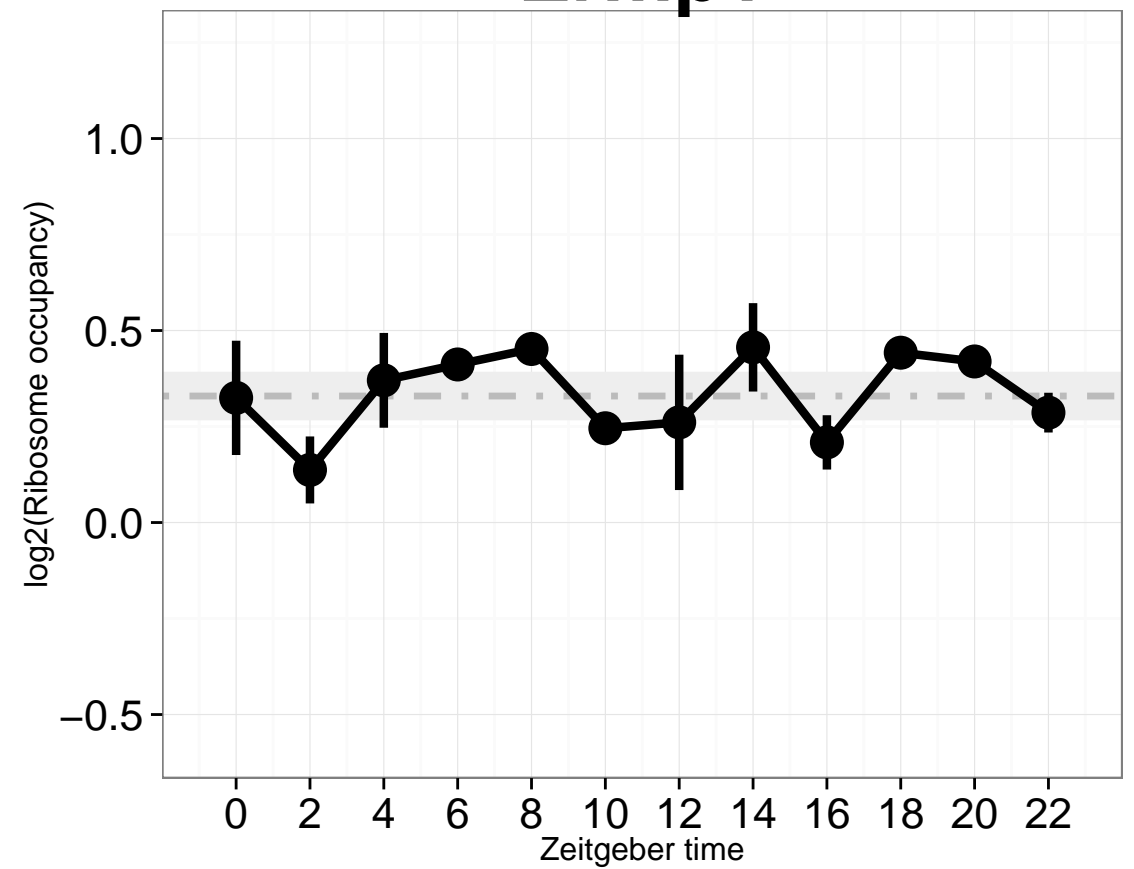

Supplement: Supplementary file 5939 [file 1]

# Zmym6

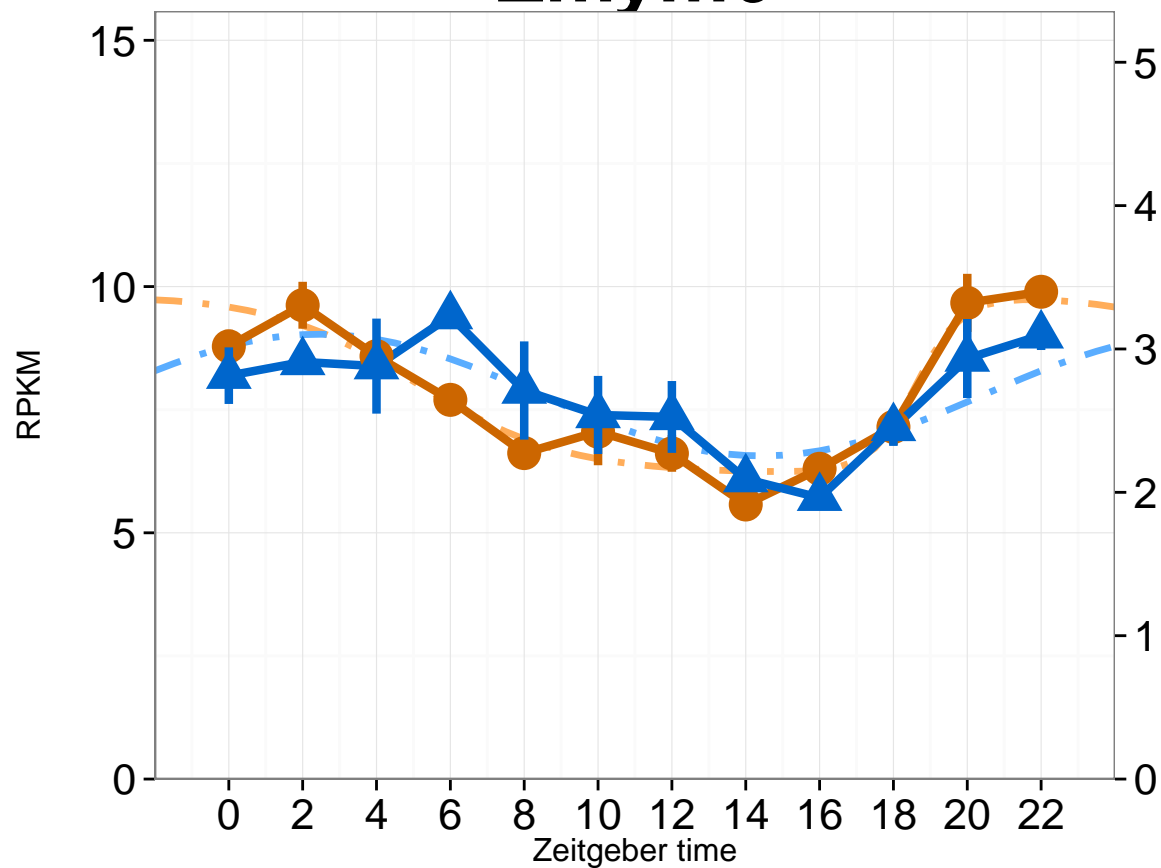

# Zmym6

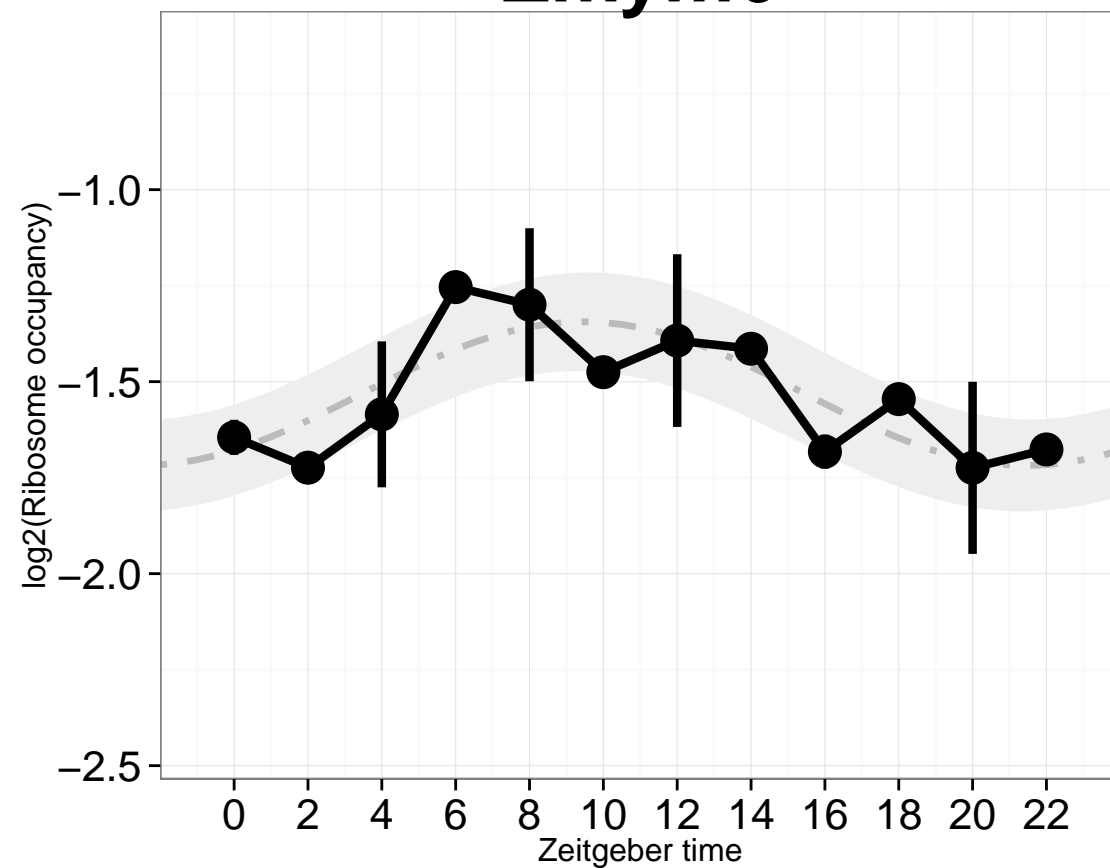

Supplement: Supplementary file 5940 [file 1]

# C4b

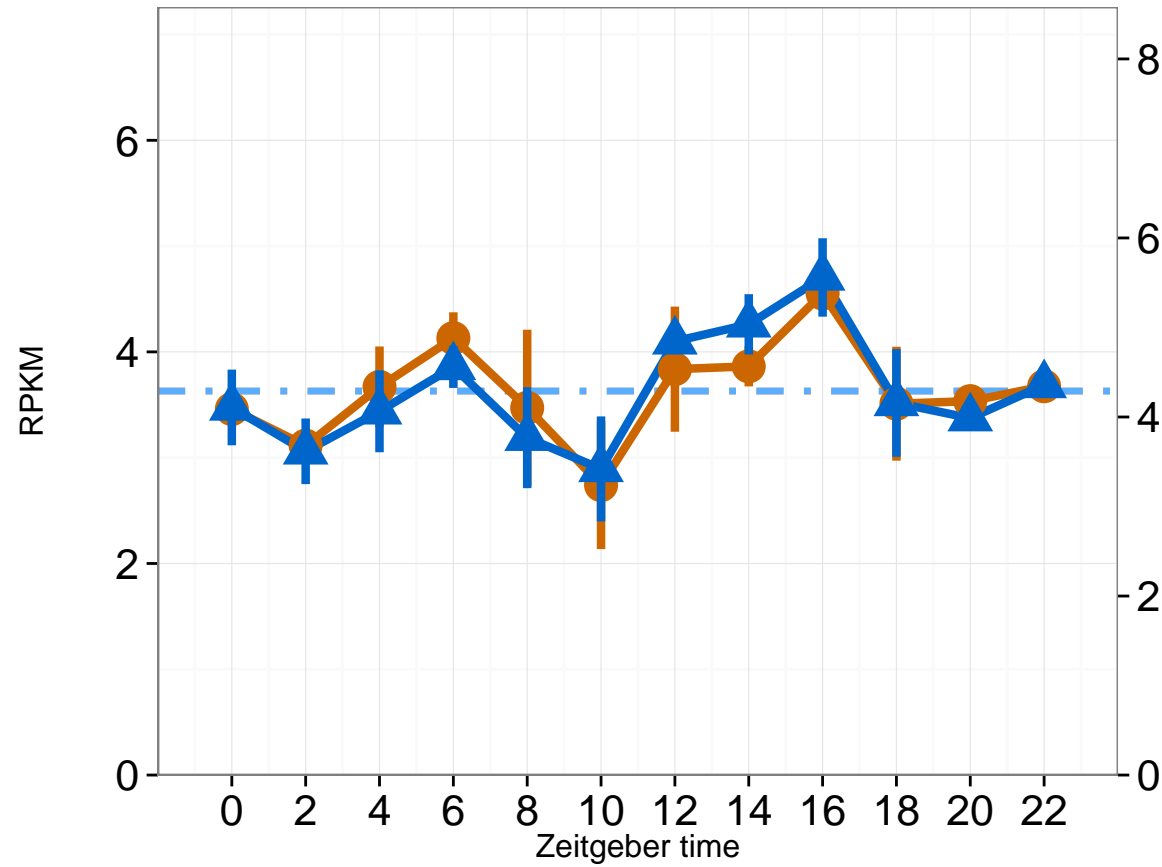

# C4b

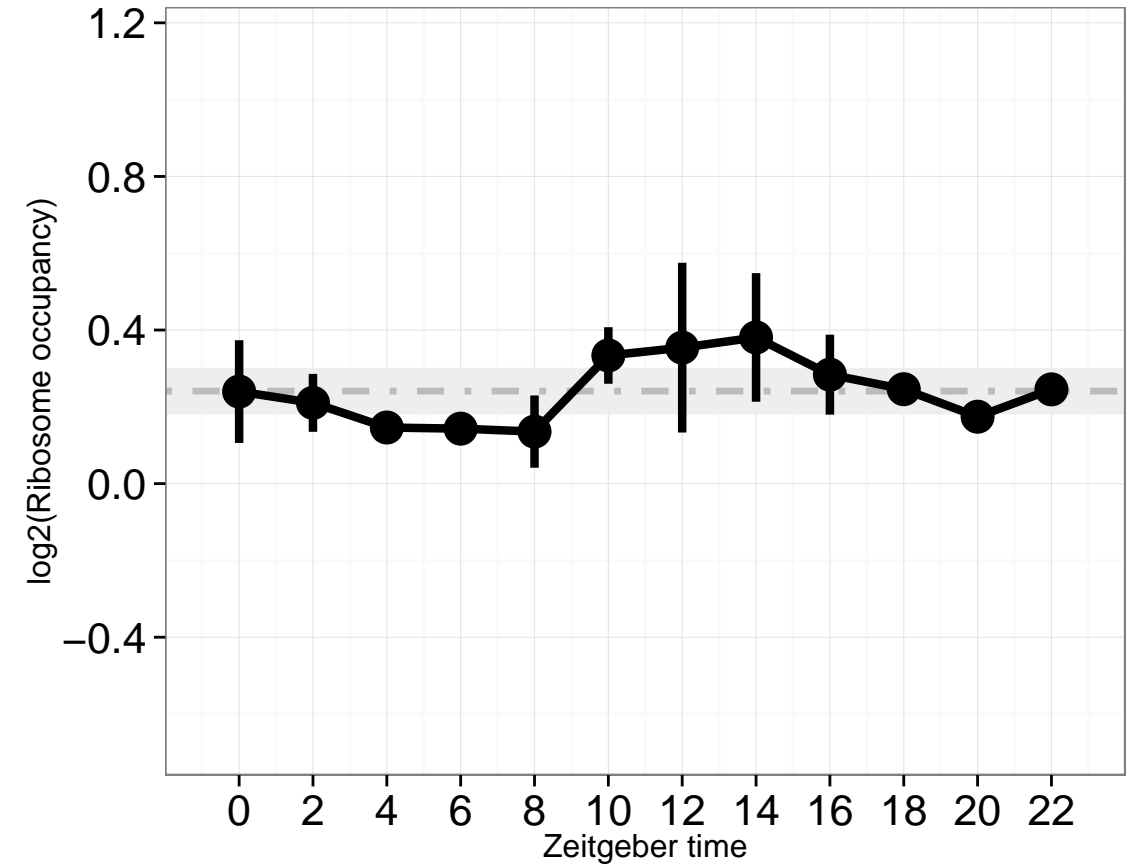

Supplement: Supplementary file 5941 [file 1]

# Syt9

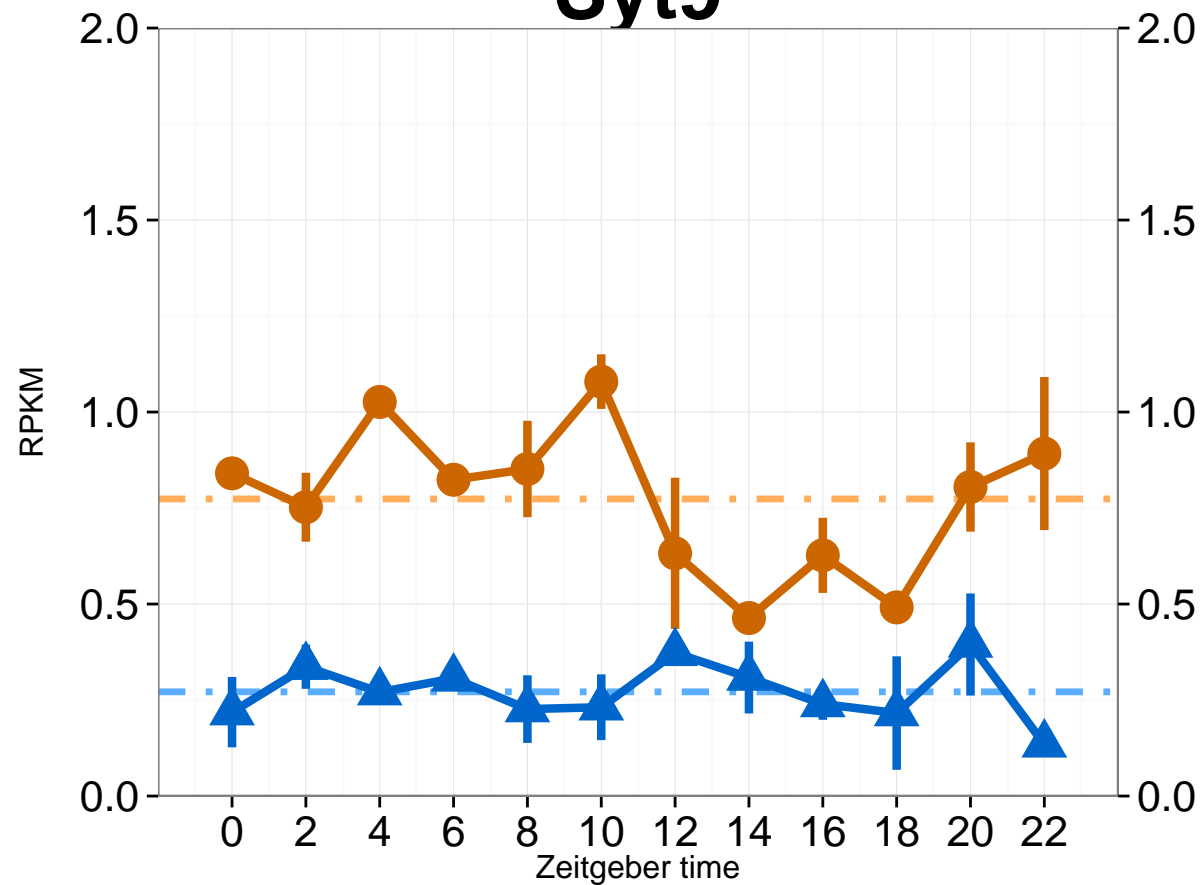

# Syt9

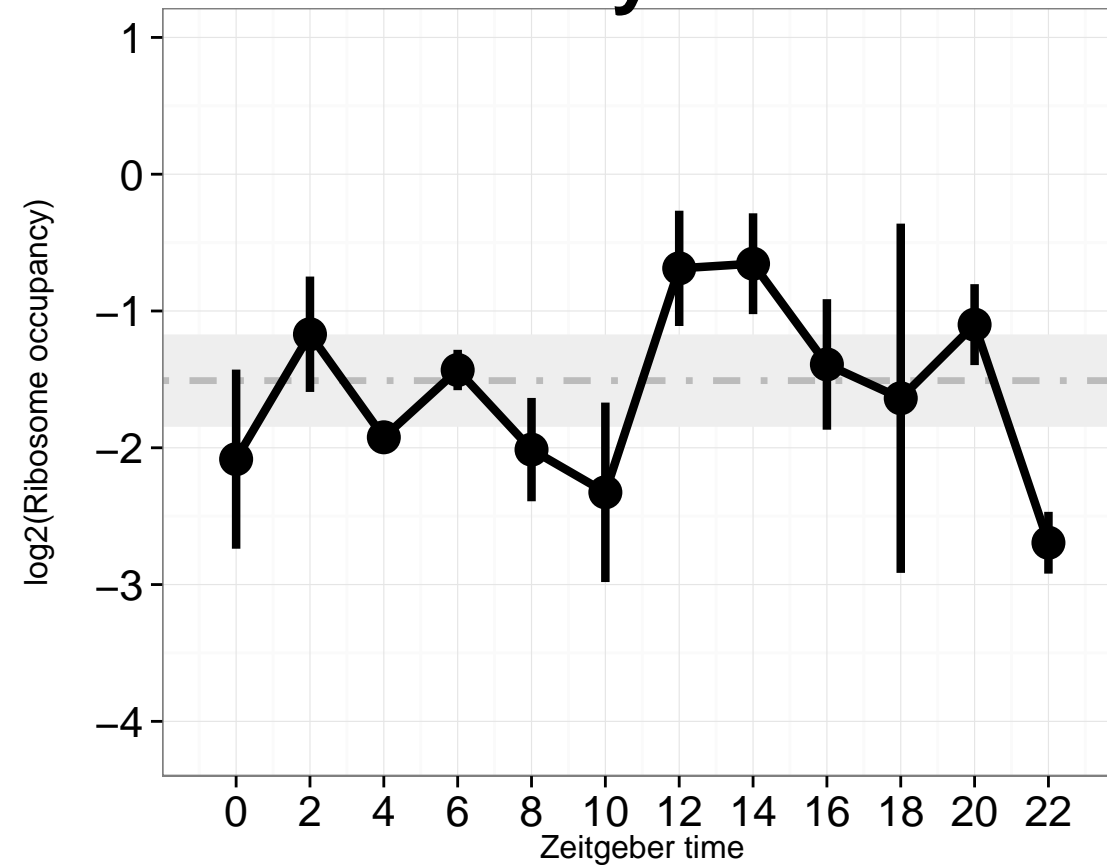

Supplement: Supplementary file 5942 [file 1]

# Atad1

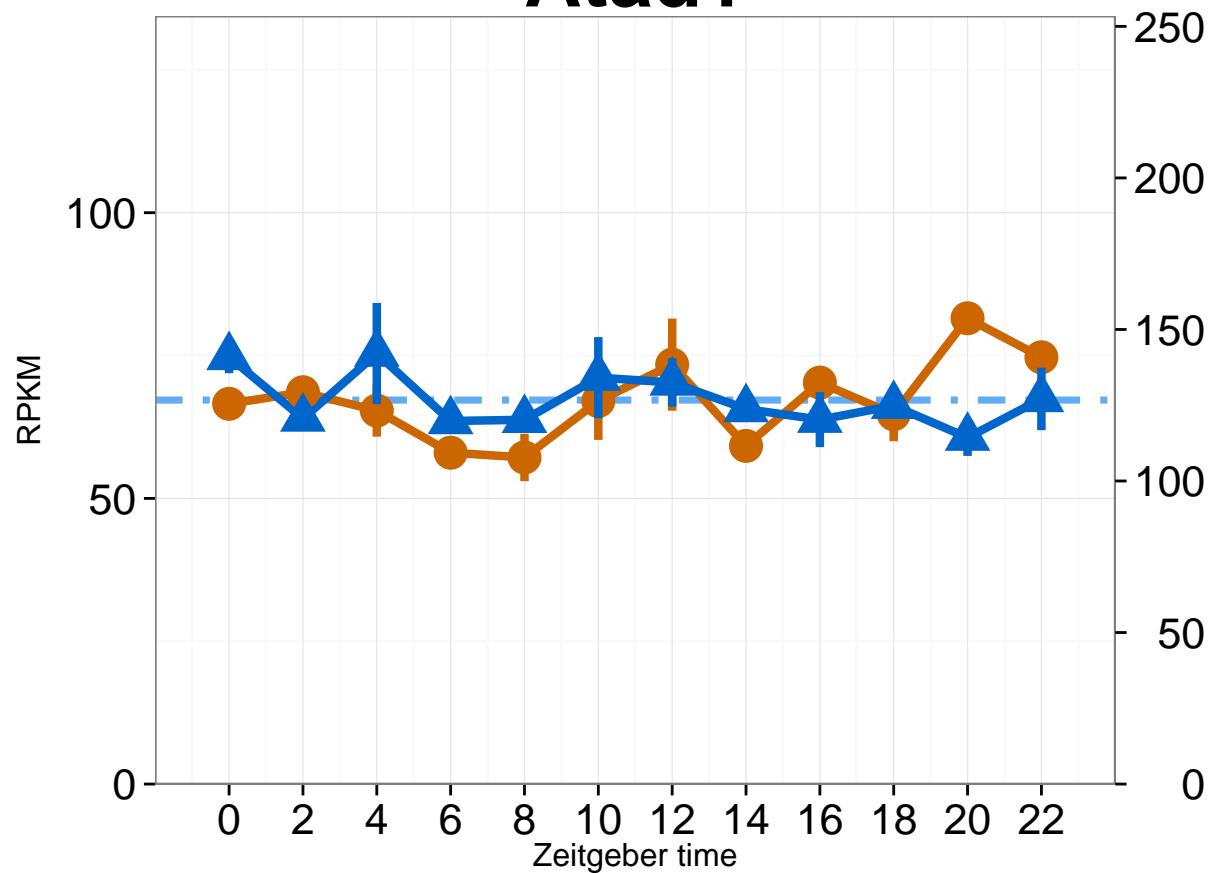

# Atad1

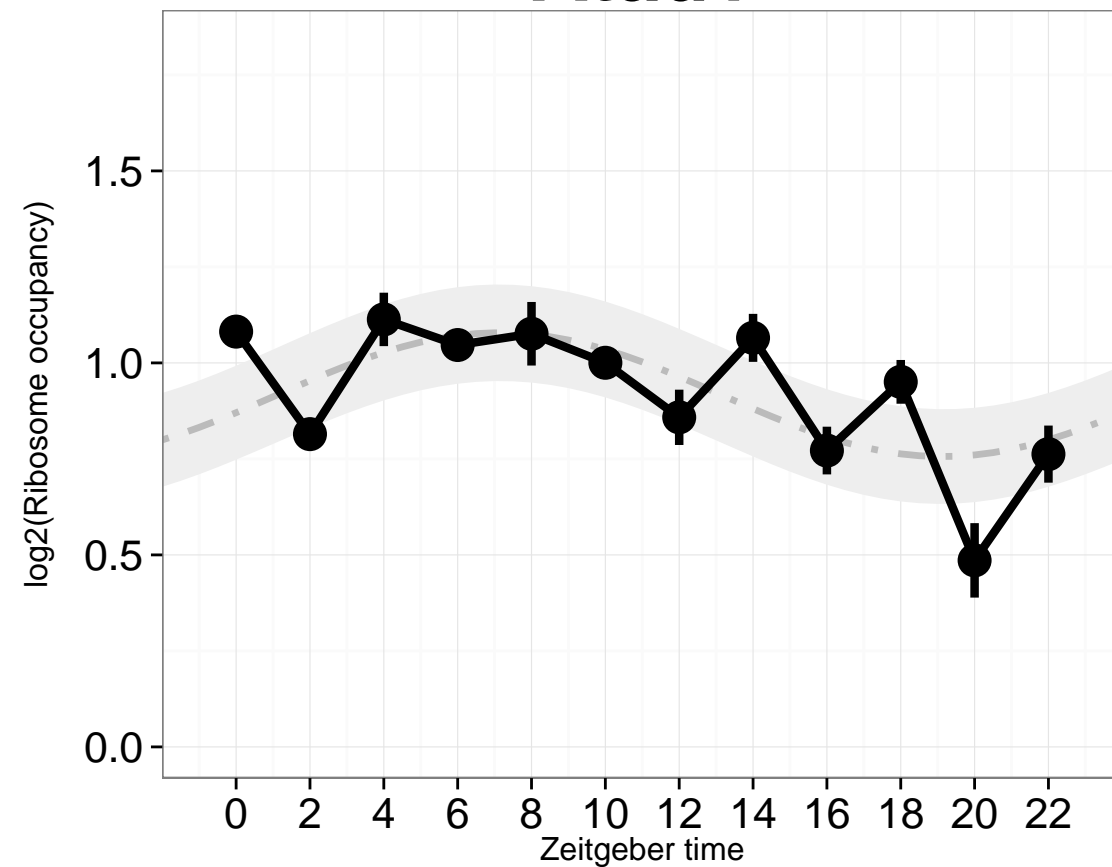

Supplement: Supplementary file 5943 [file 1]

# Gjc2

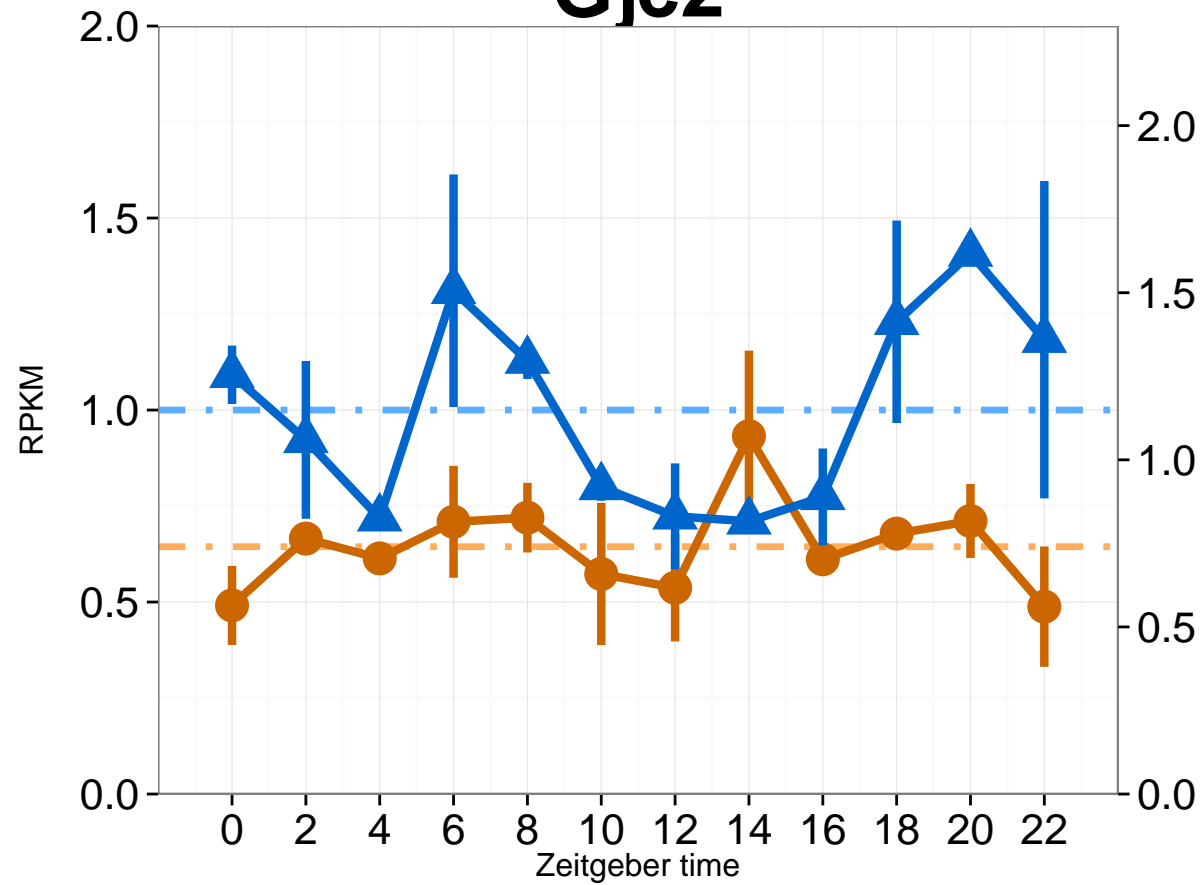

# Gjc2

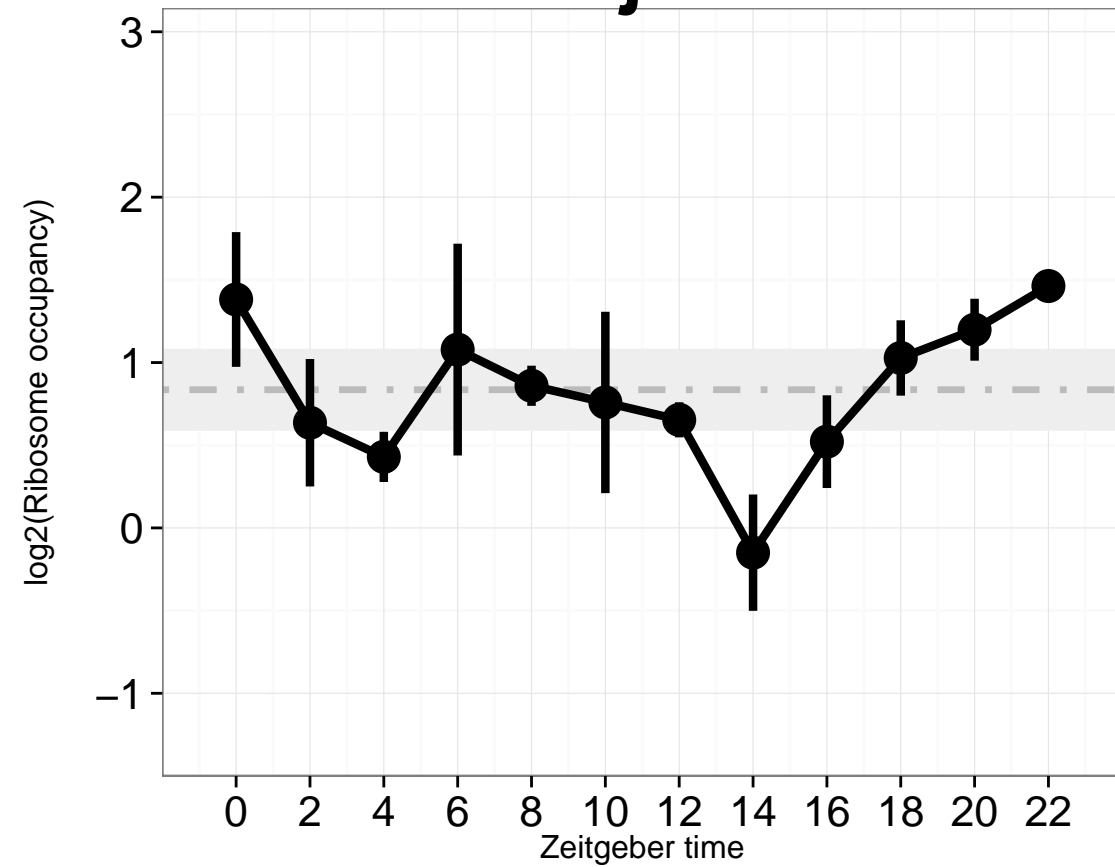

Supplement: Supplementary file 5944 [file 1]

# Wdr6

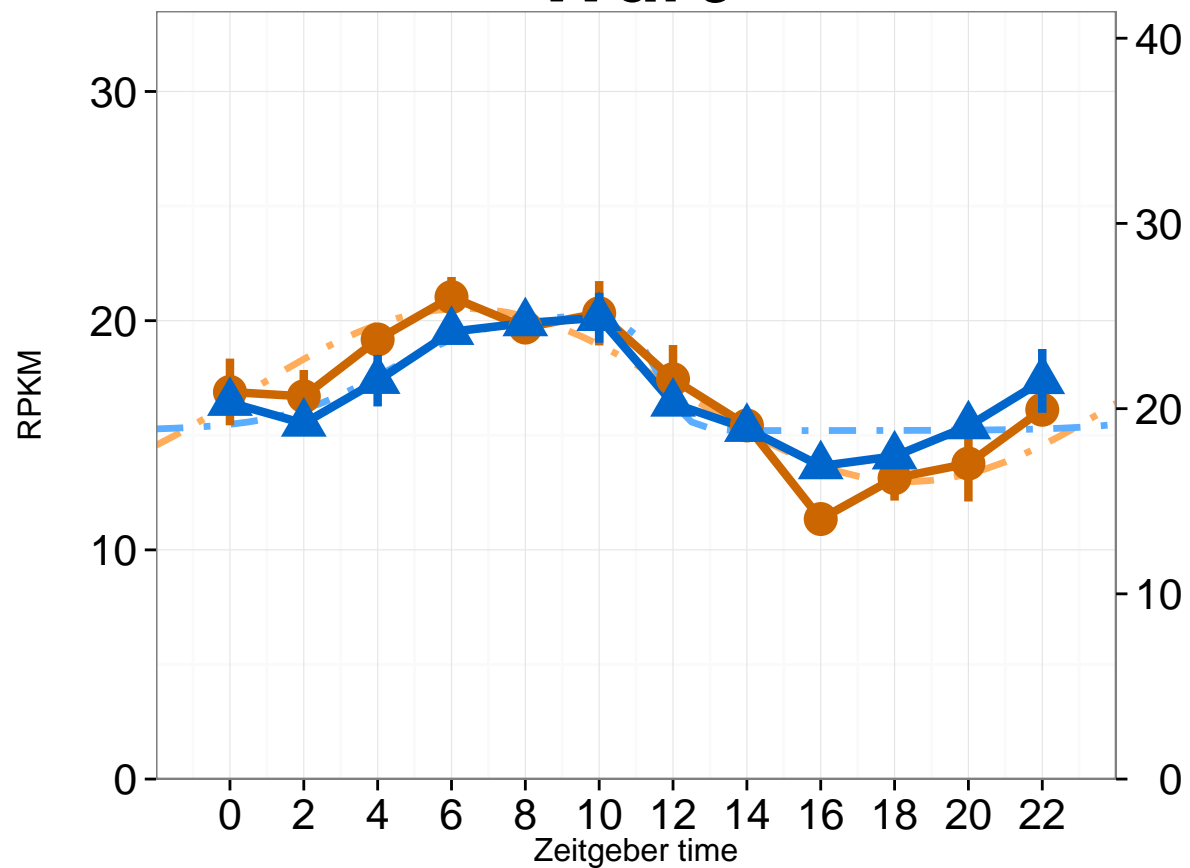

# Wdr6

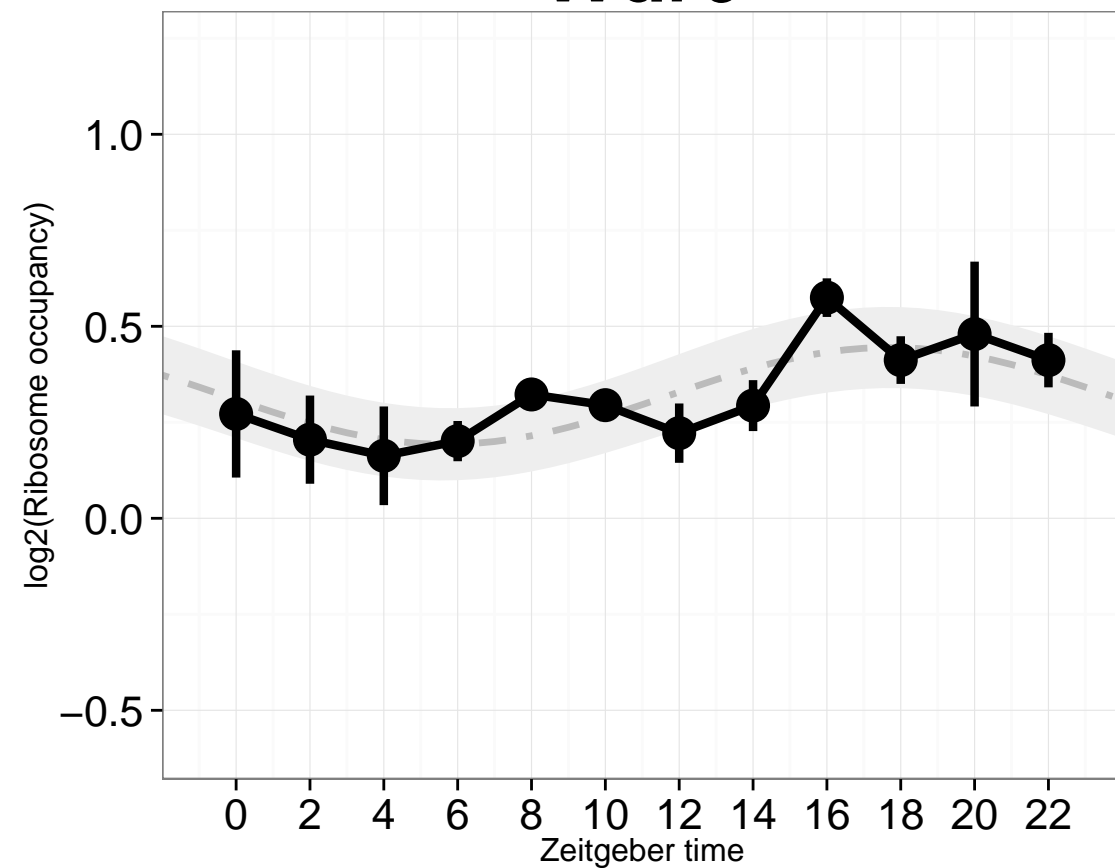

Supplement: Supplementary file 5945 [file 1]

## Arhgap10

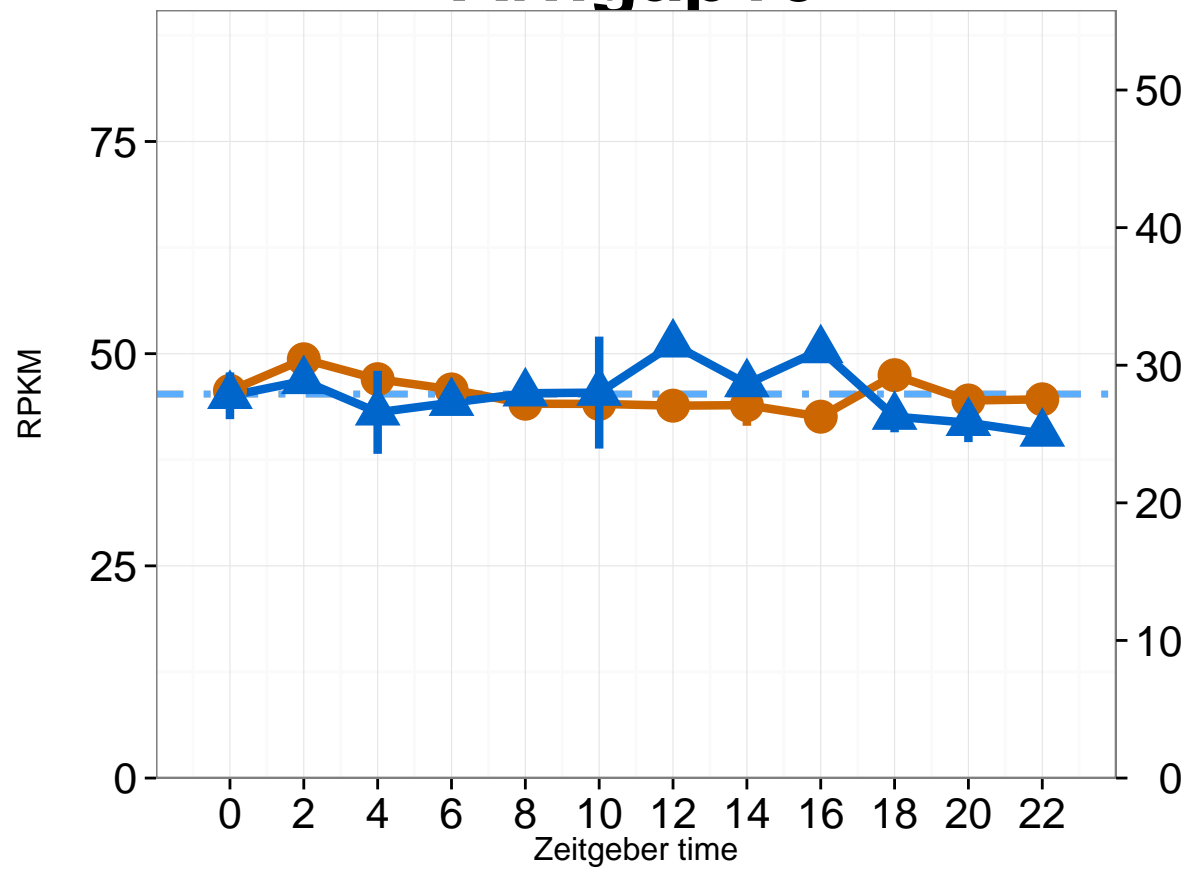

## Arhgap10

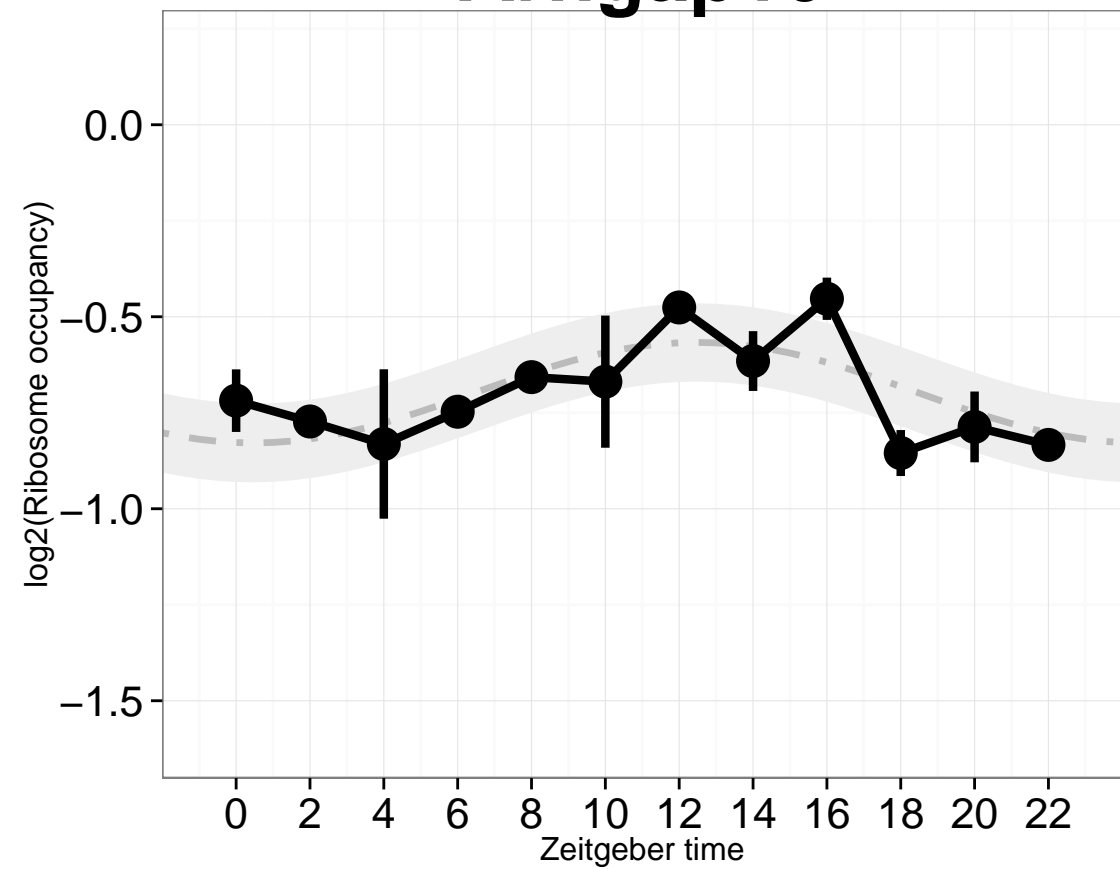

Supplement: Supplementary file 5946 [file 1]

# Gm17402

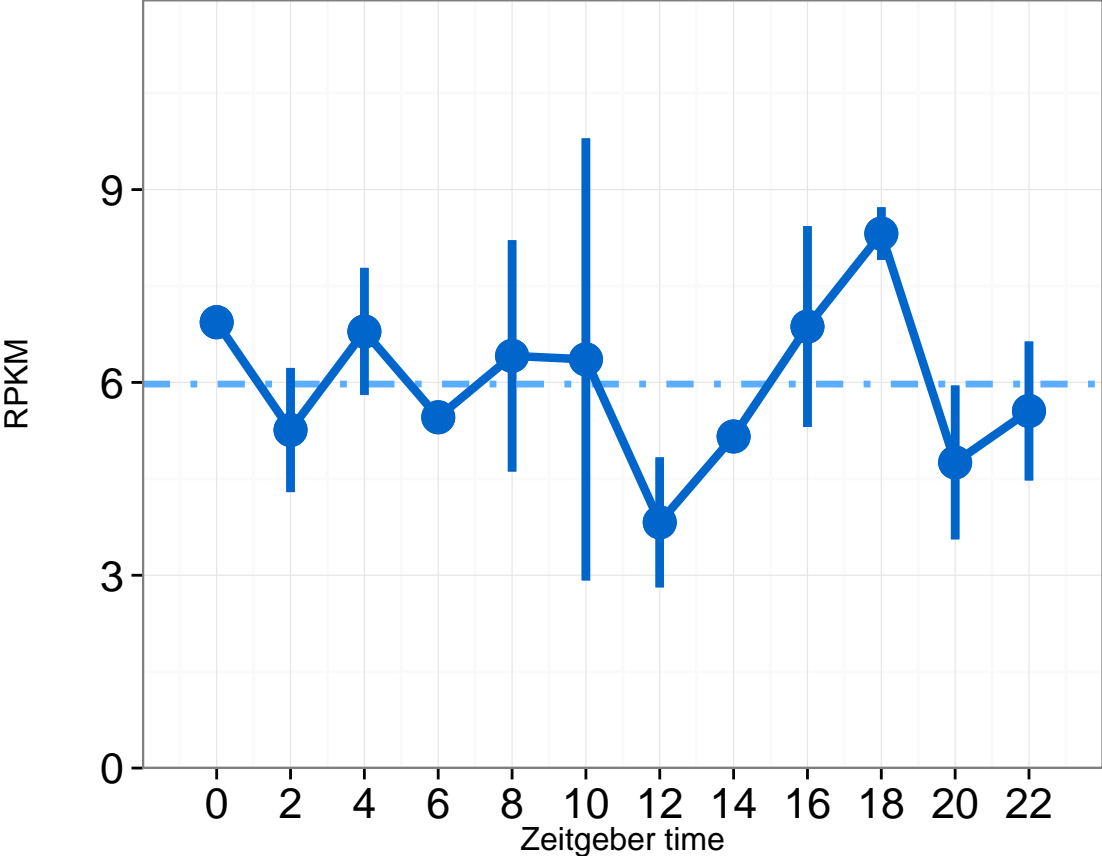

# Gm17402 log2(Ribosome occupanc

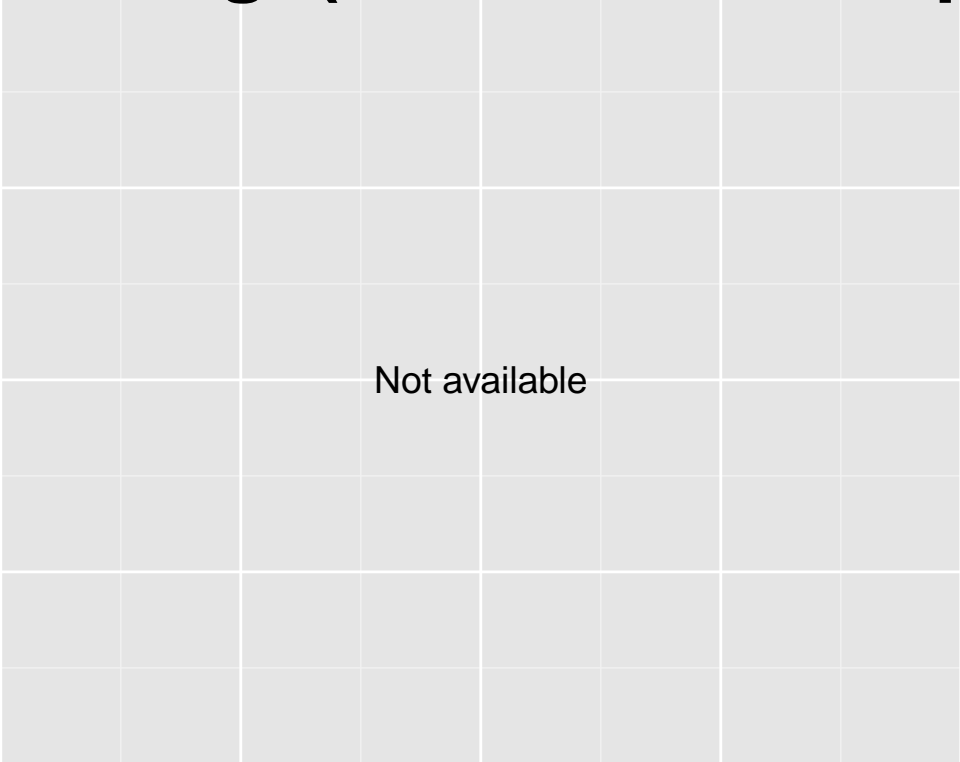

Supplement: Supplementary file 5947 [file 1]

# Gnb1l

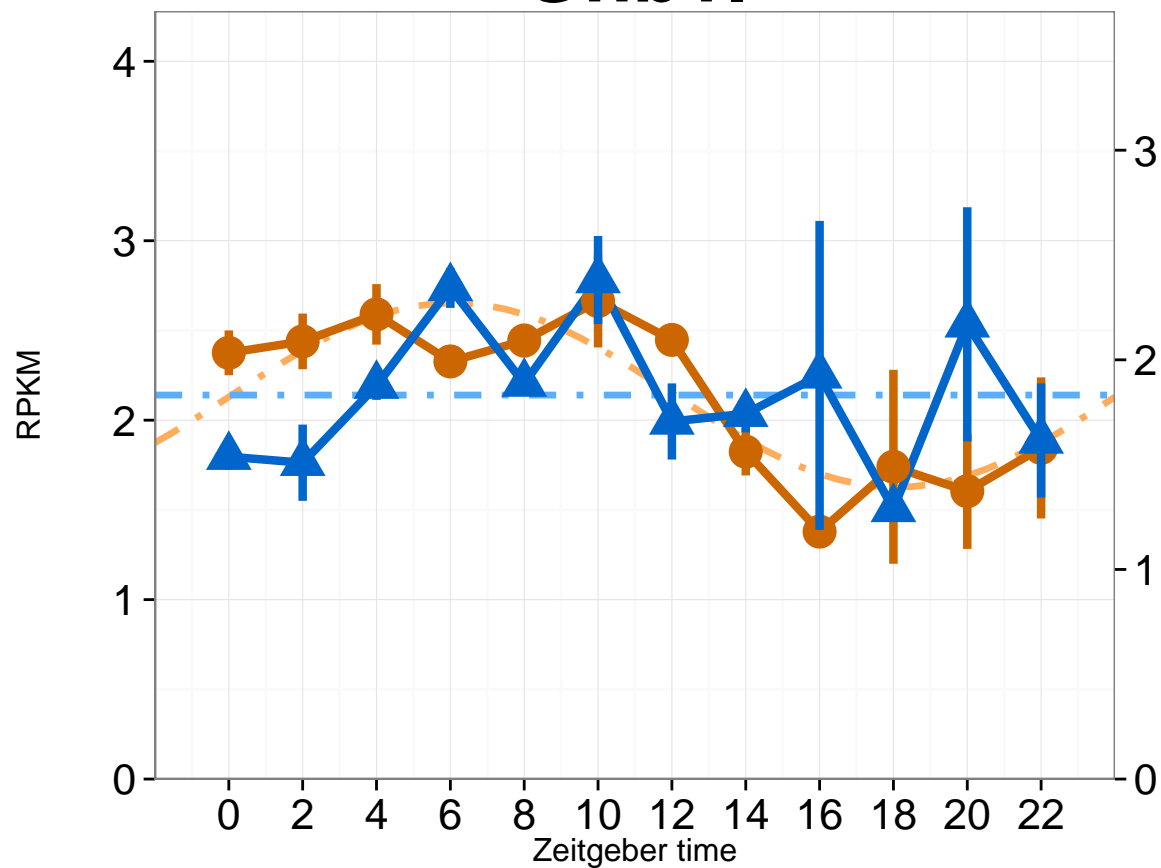

# Gnb1l

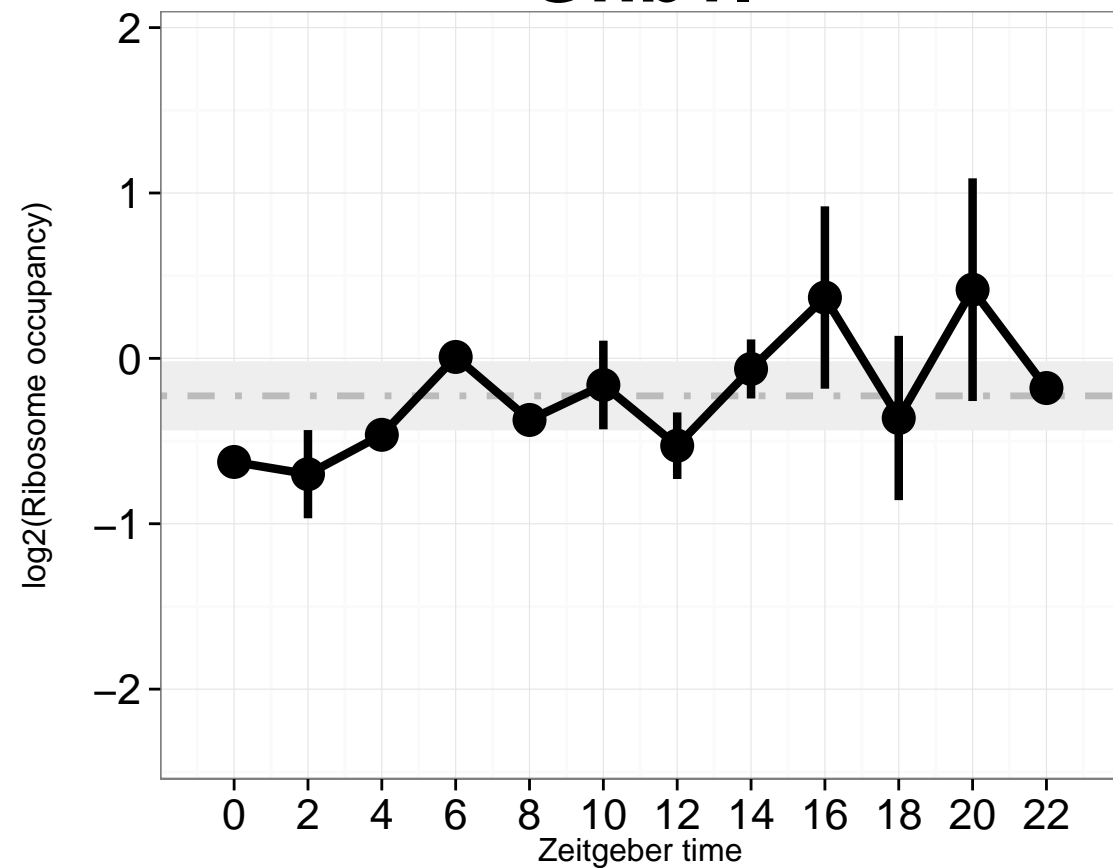

Supplement: Supplementary file 5948 [file 1]

# Rplp1

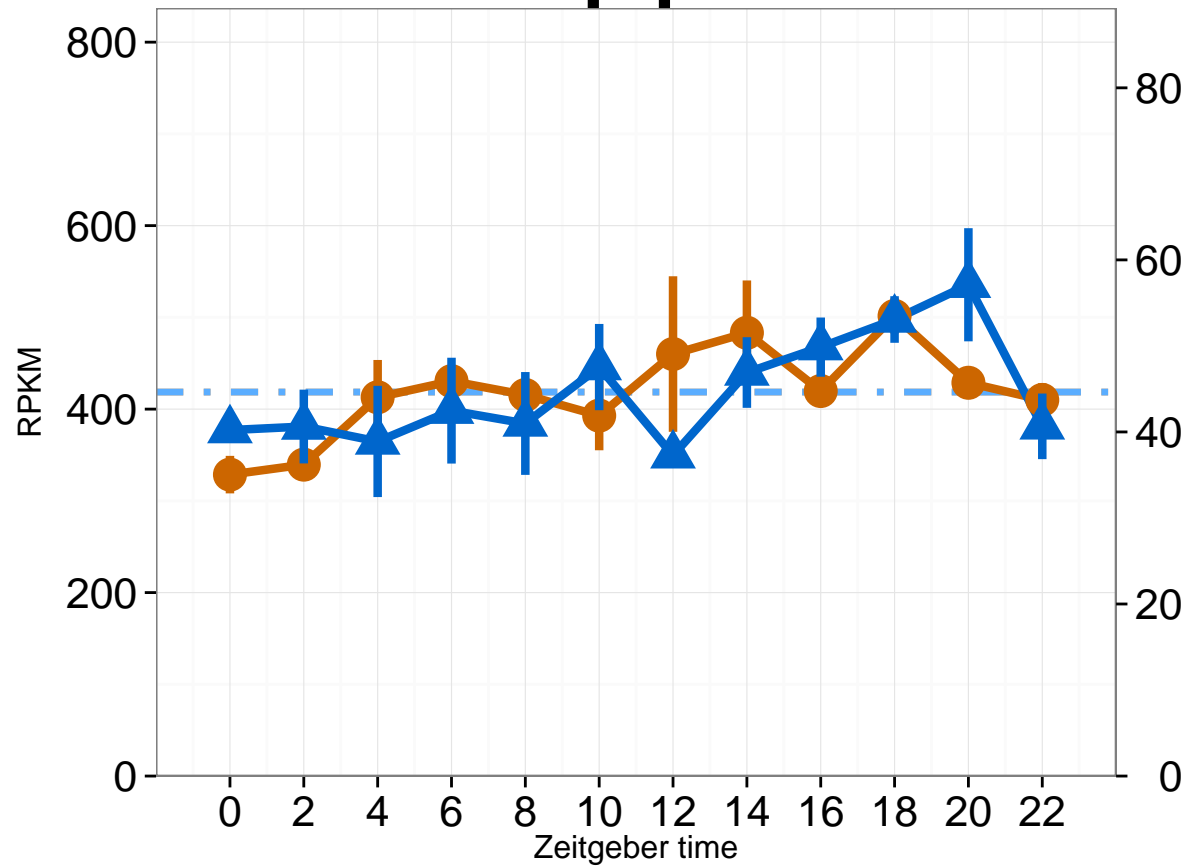

# Rplp1

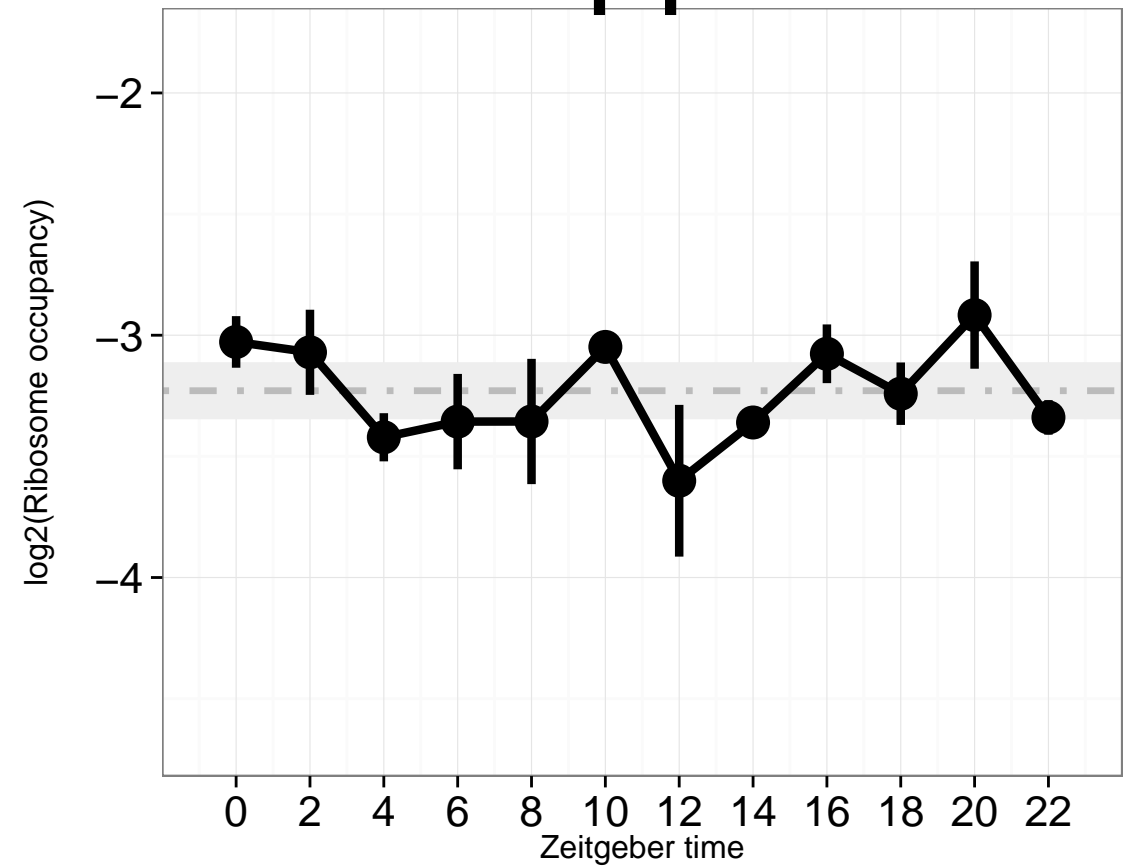

Supplement: Supplementary file 5949 [file 1]

## Tmem37

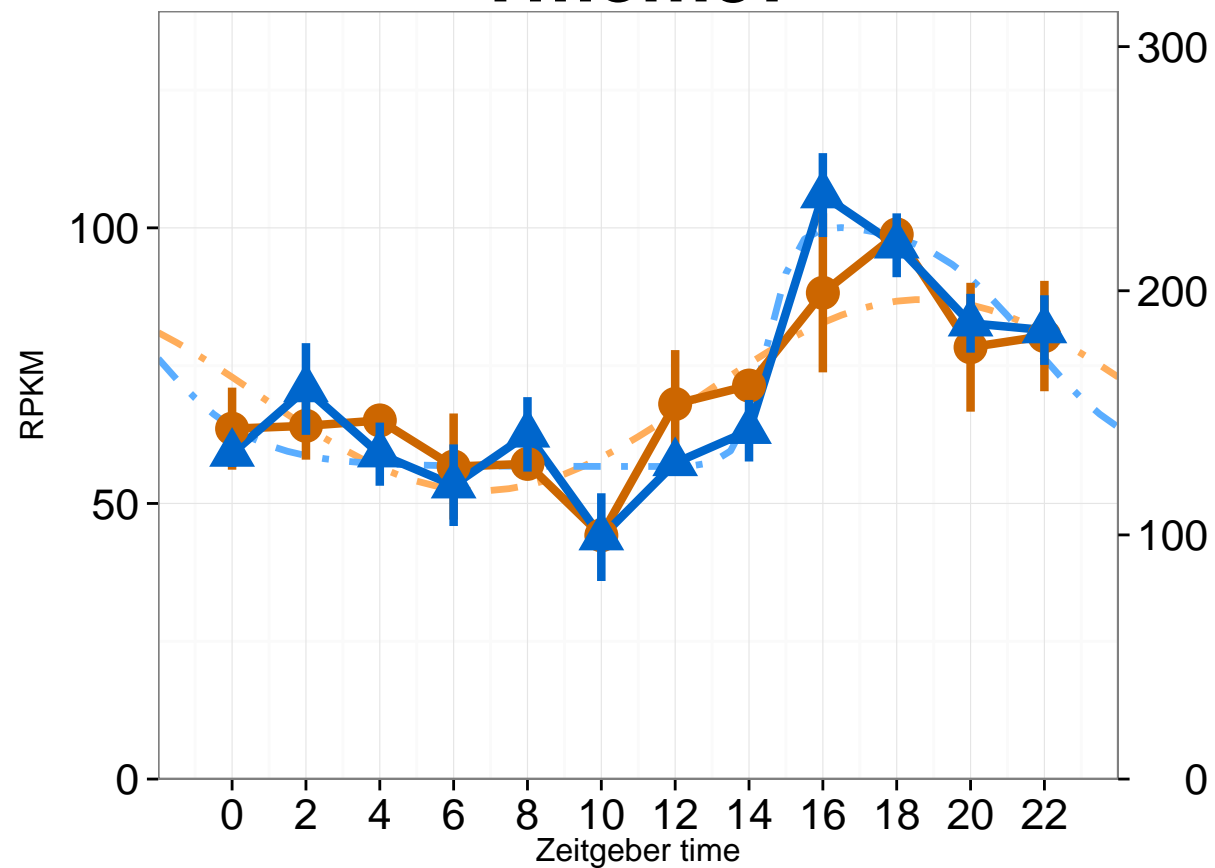

## Tmem37

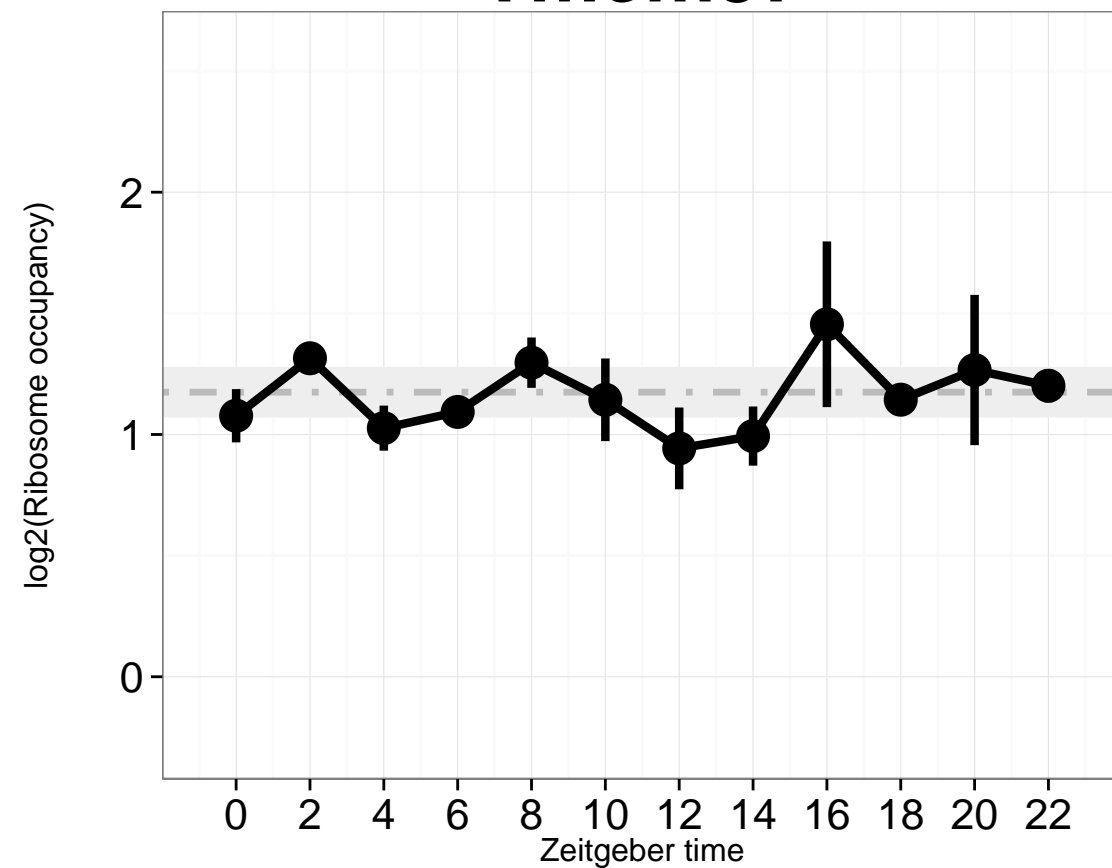

Supplement: Supplementary file 5950 [file 1]

# Sprr1a

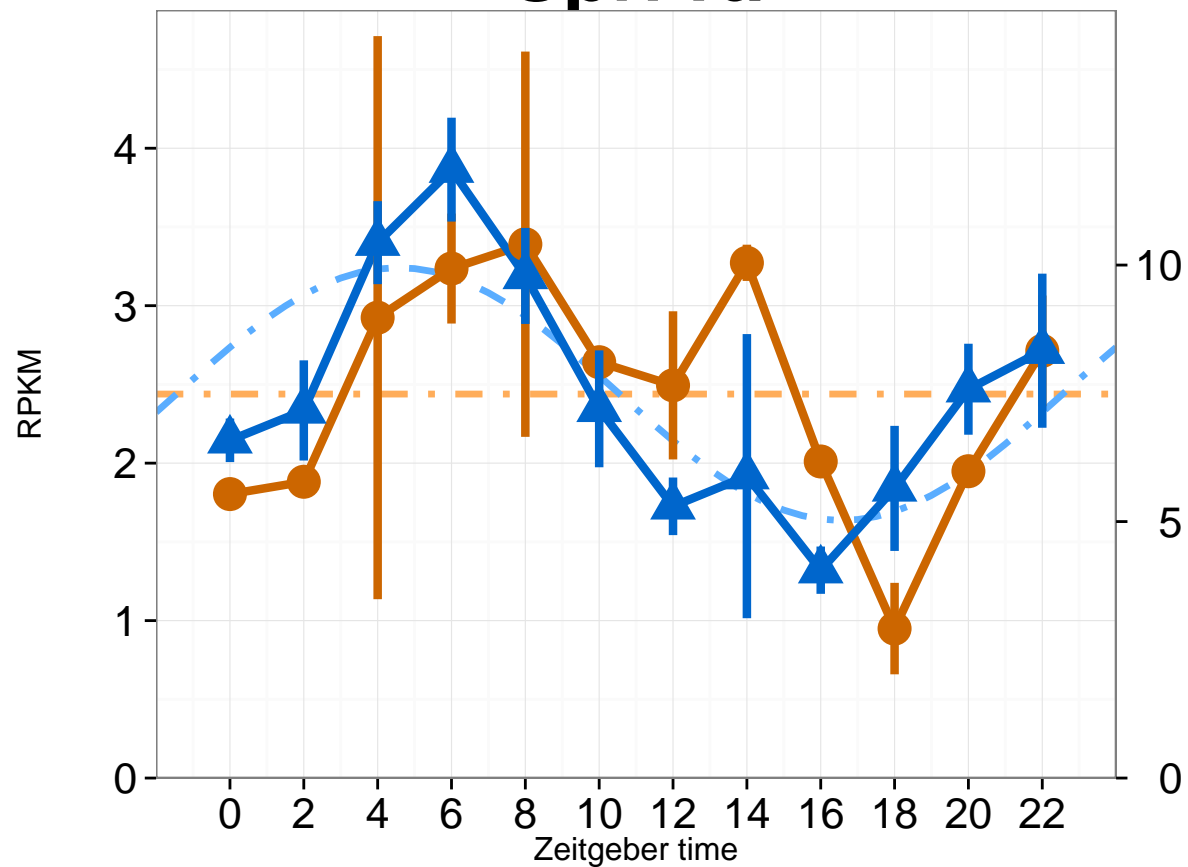

# Sprr1a

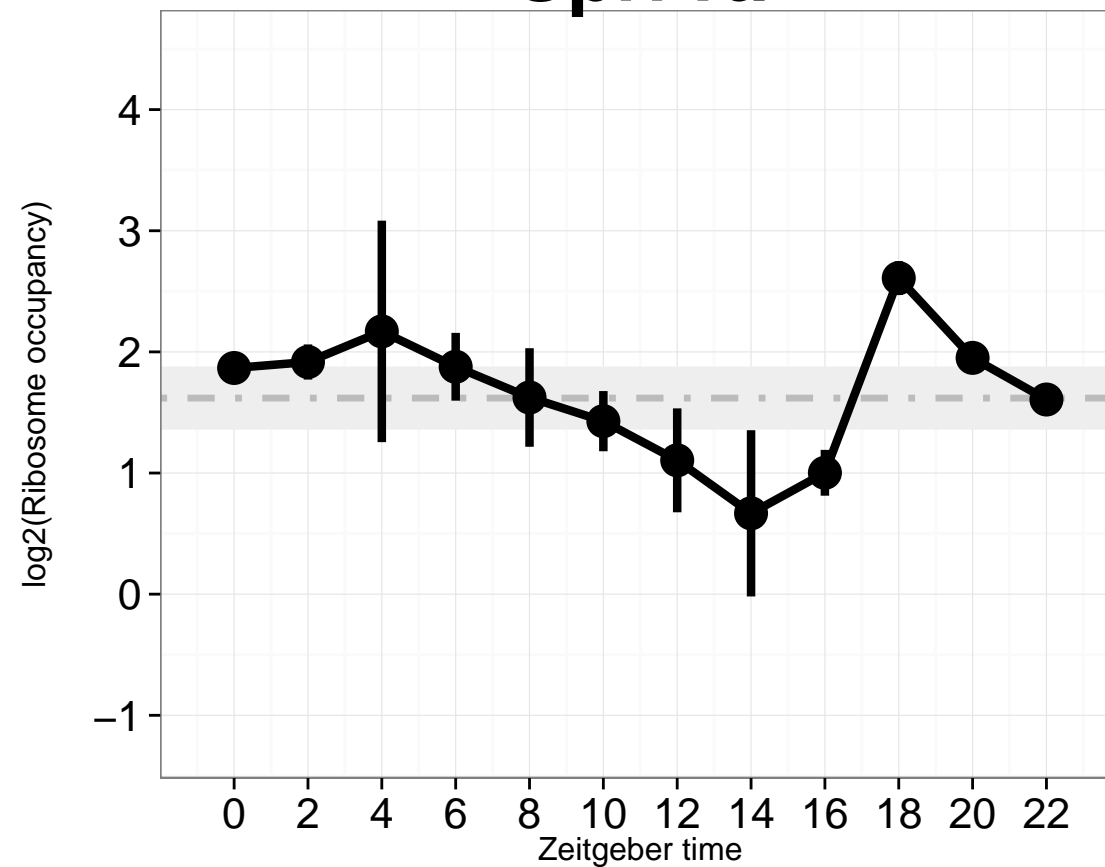

Supplement: Supplementary file 5951 [file 1]

# Vmac

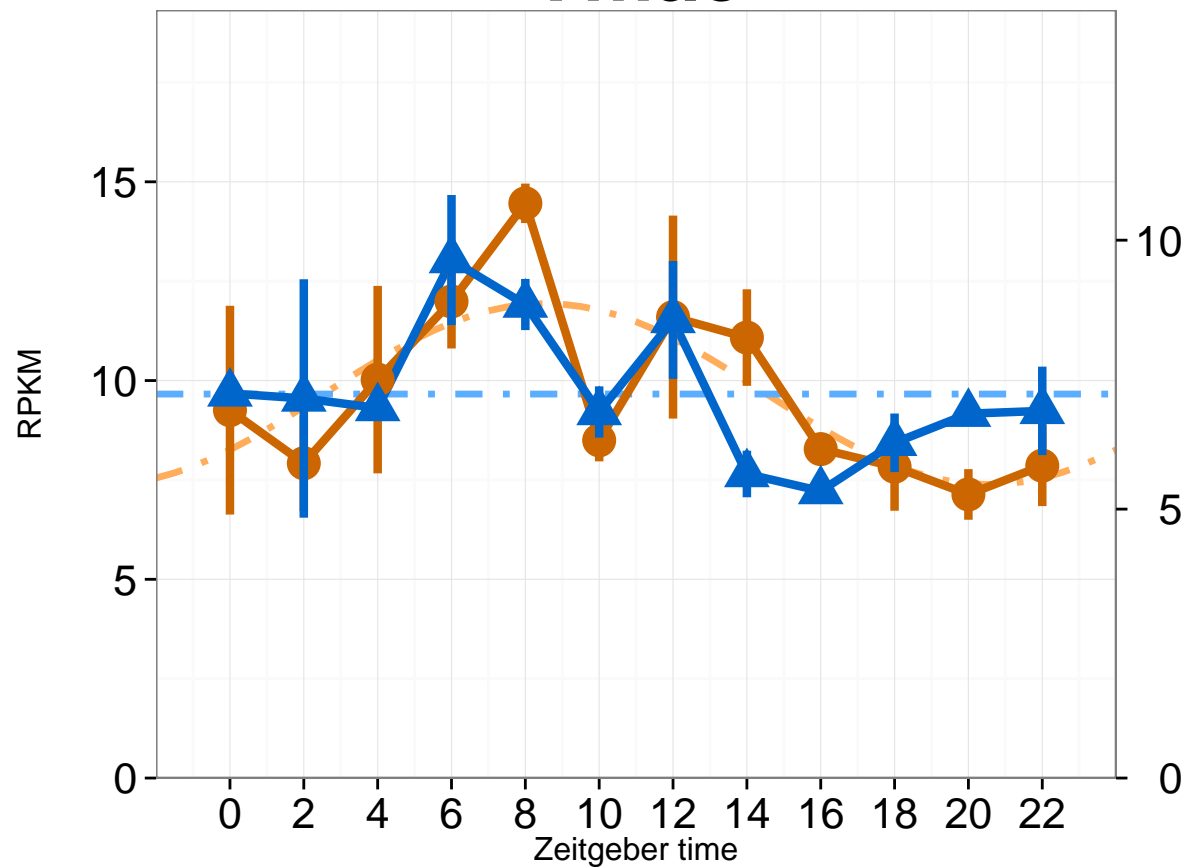

# Vmac

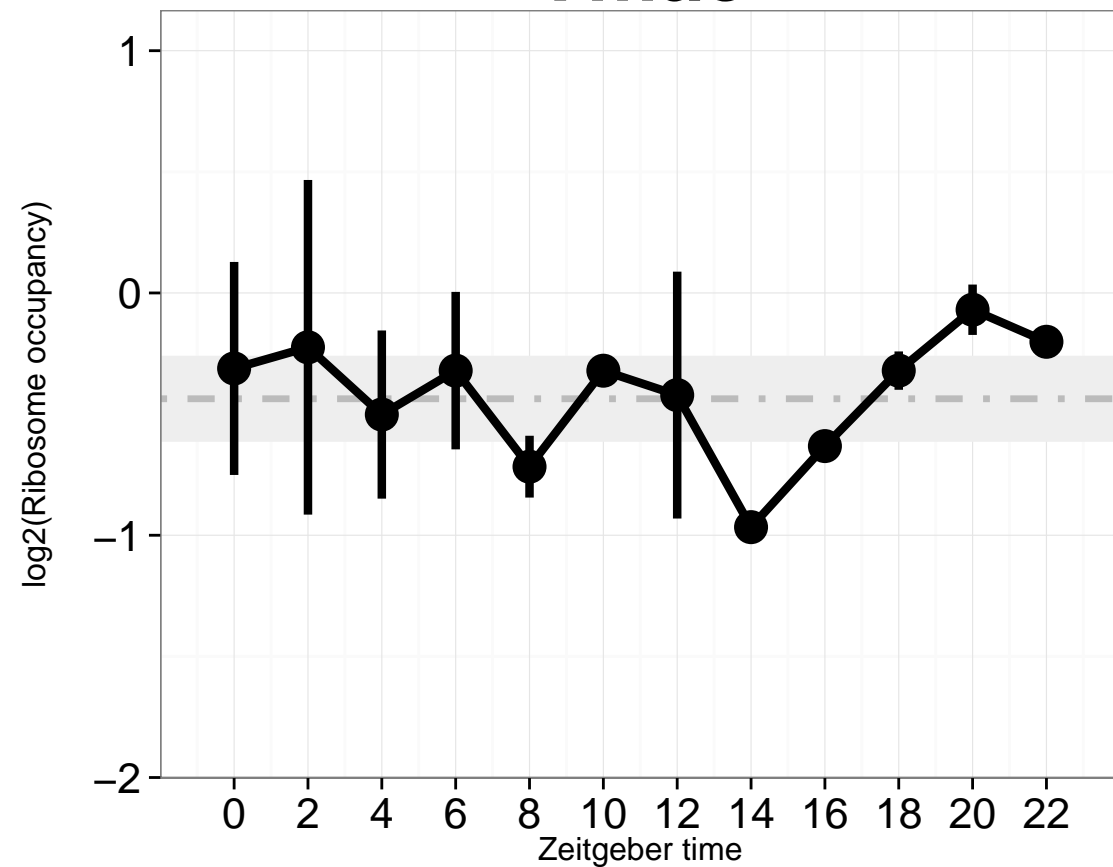

Supplement: Supplementary file 5952 [file 1]

# March8

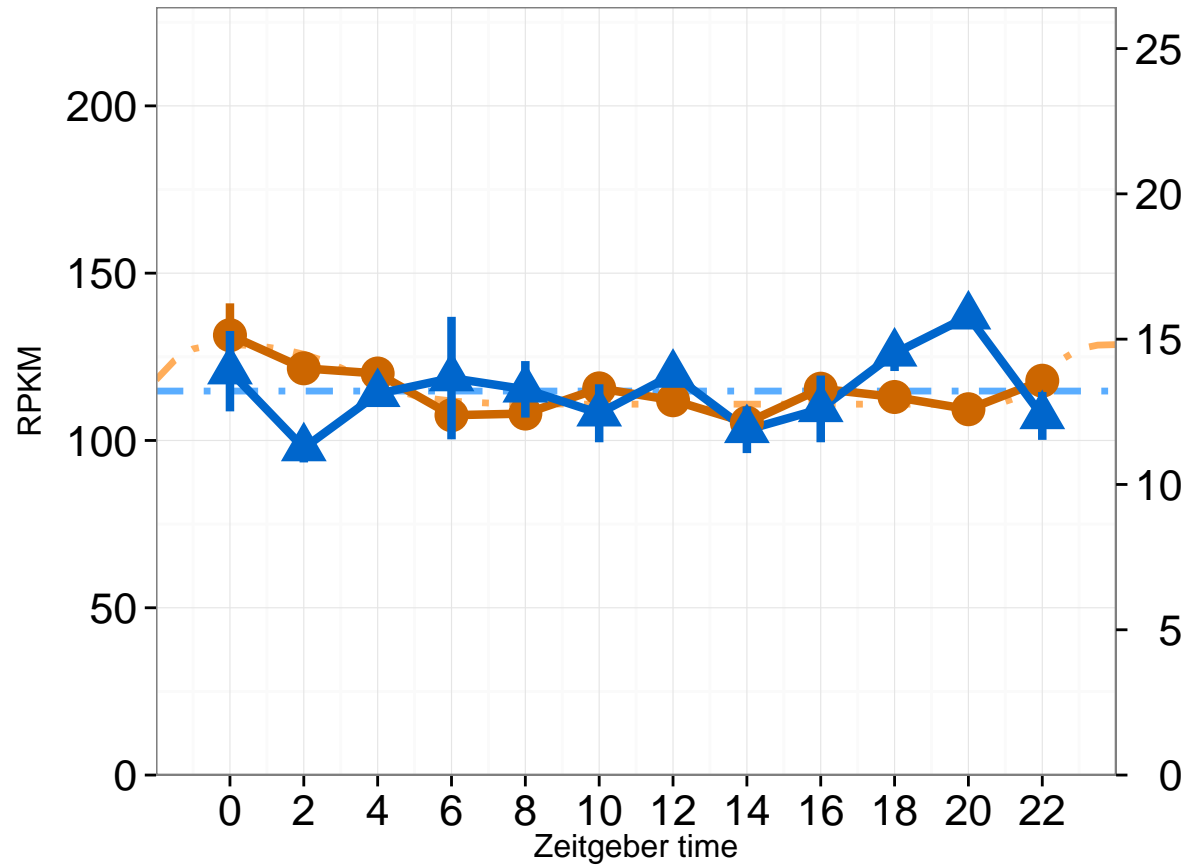

# March8

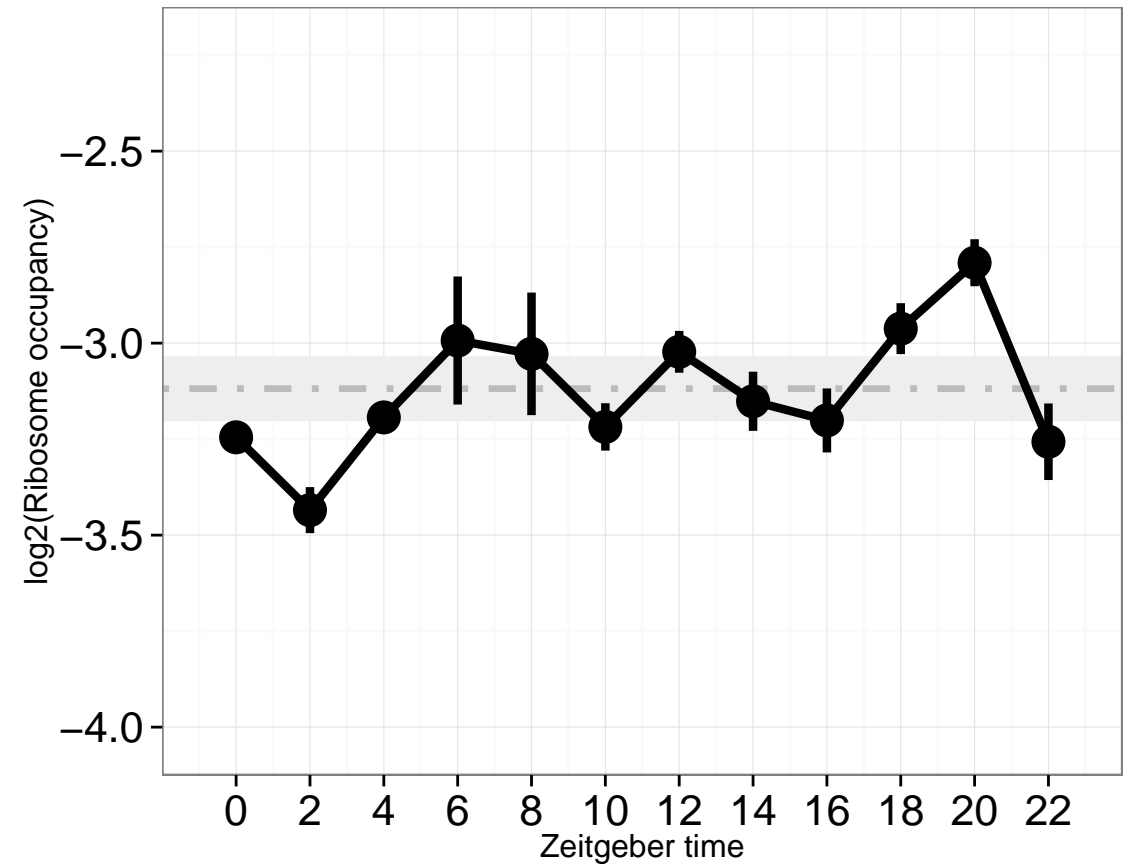

Supplement: Supplementary file 5953 [file 1]

# Slc16a3

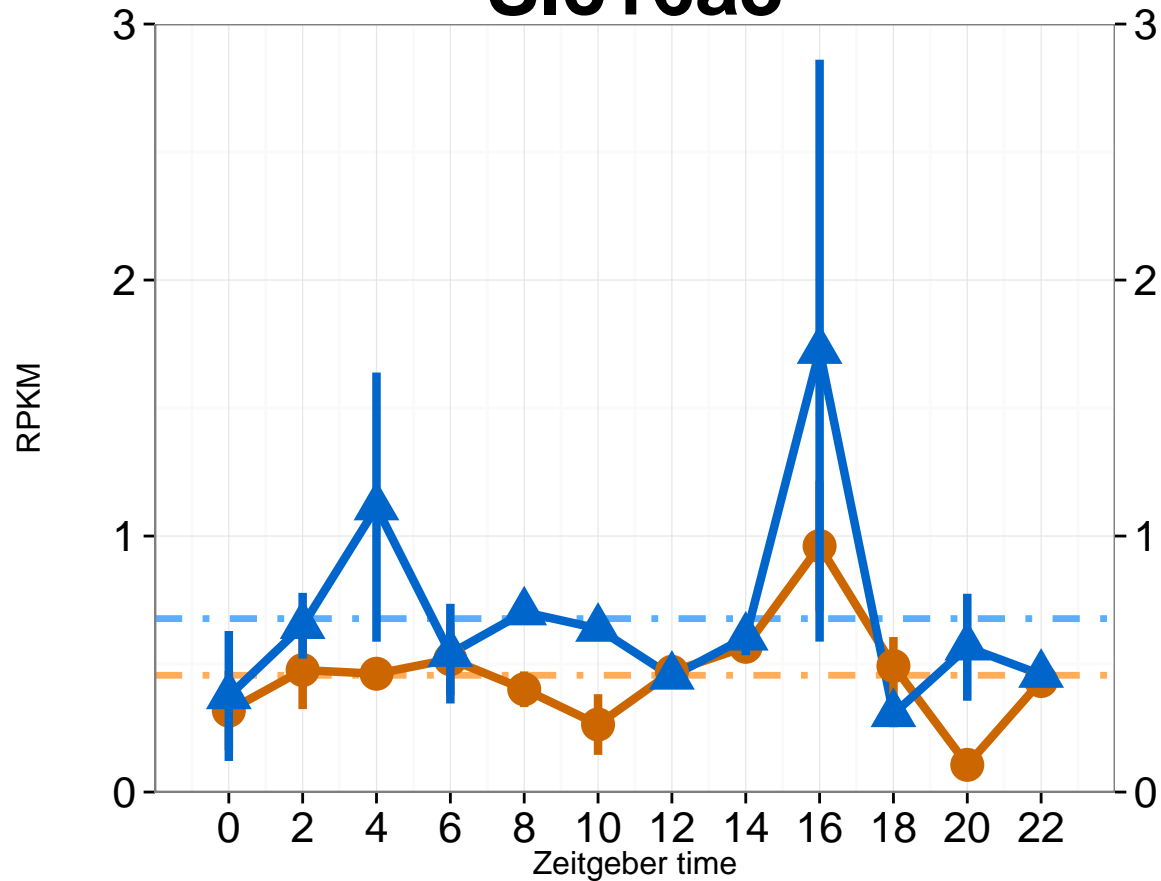

# Slc16a3

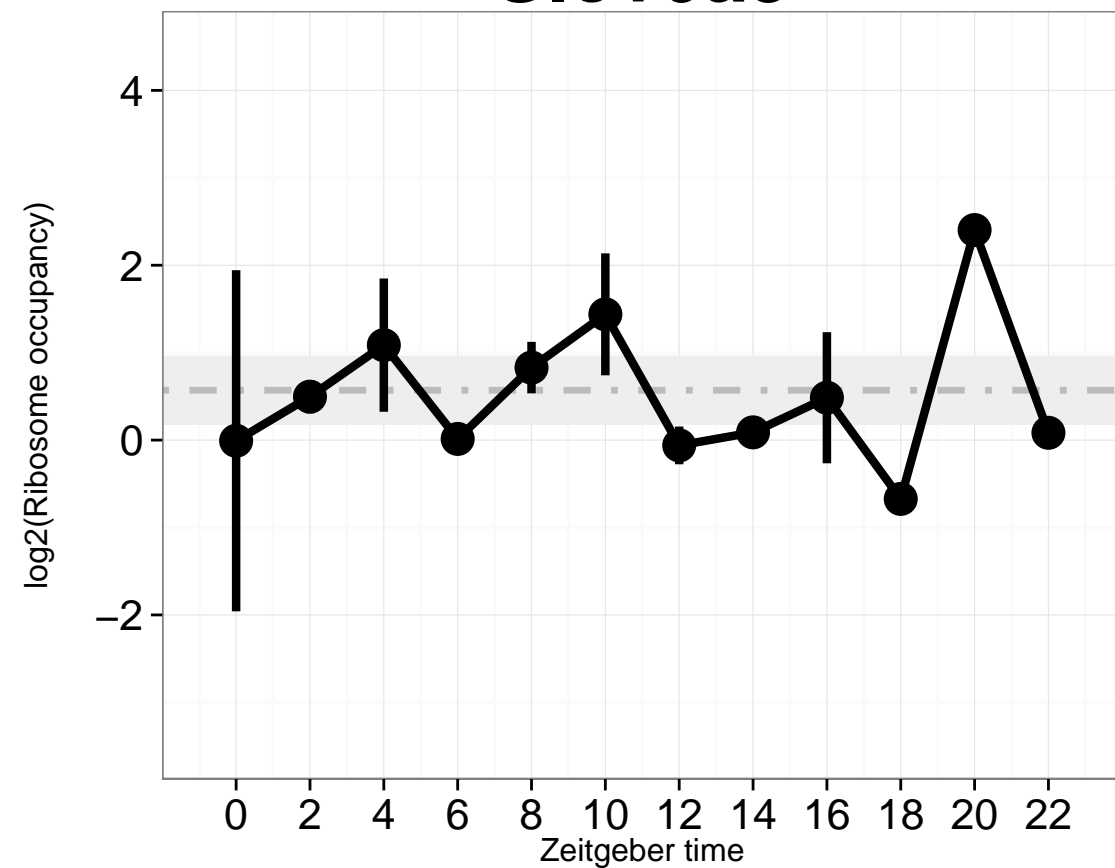

Supplement: Supplementary file 5954 [file 1]

# Top3b

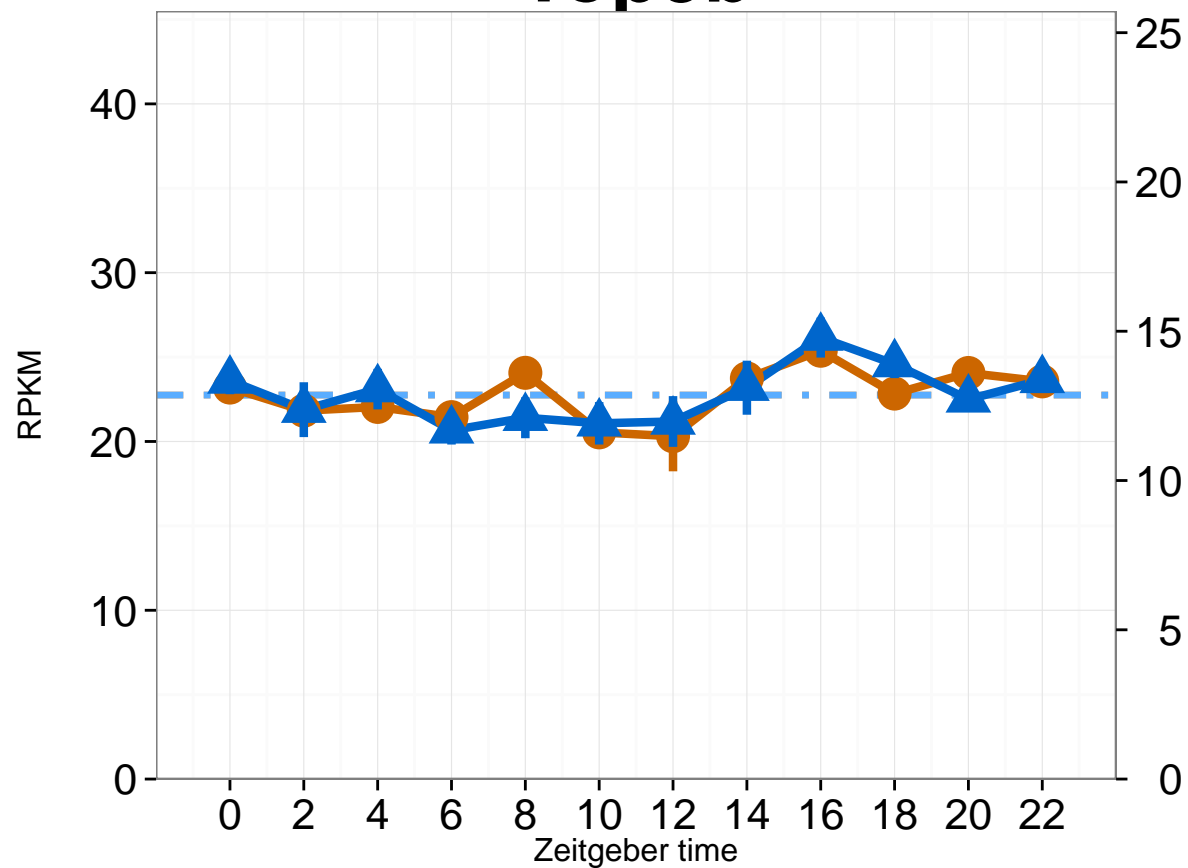

# Top3b

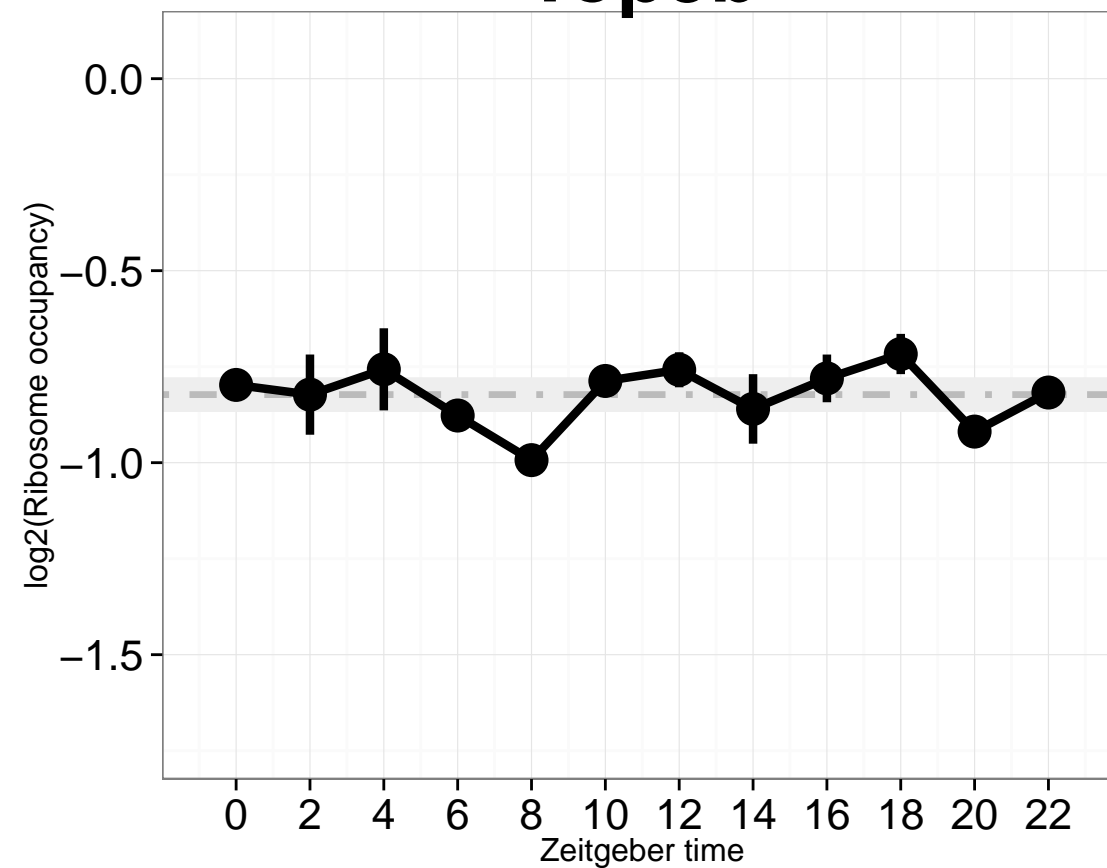

Supplement: Supplementary file 5955 [file 1]

## Taf8

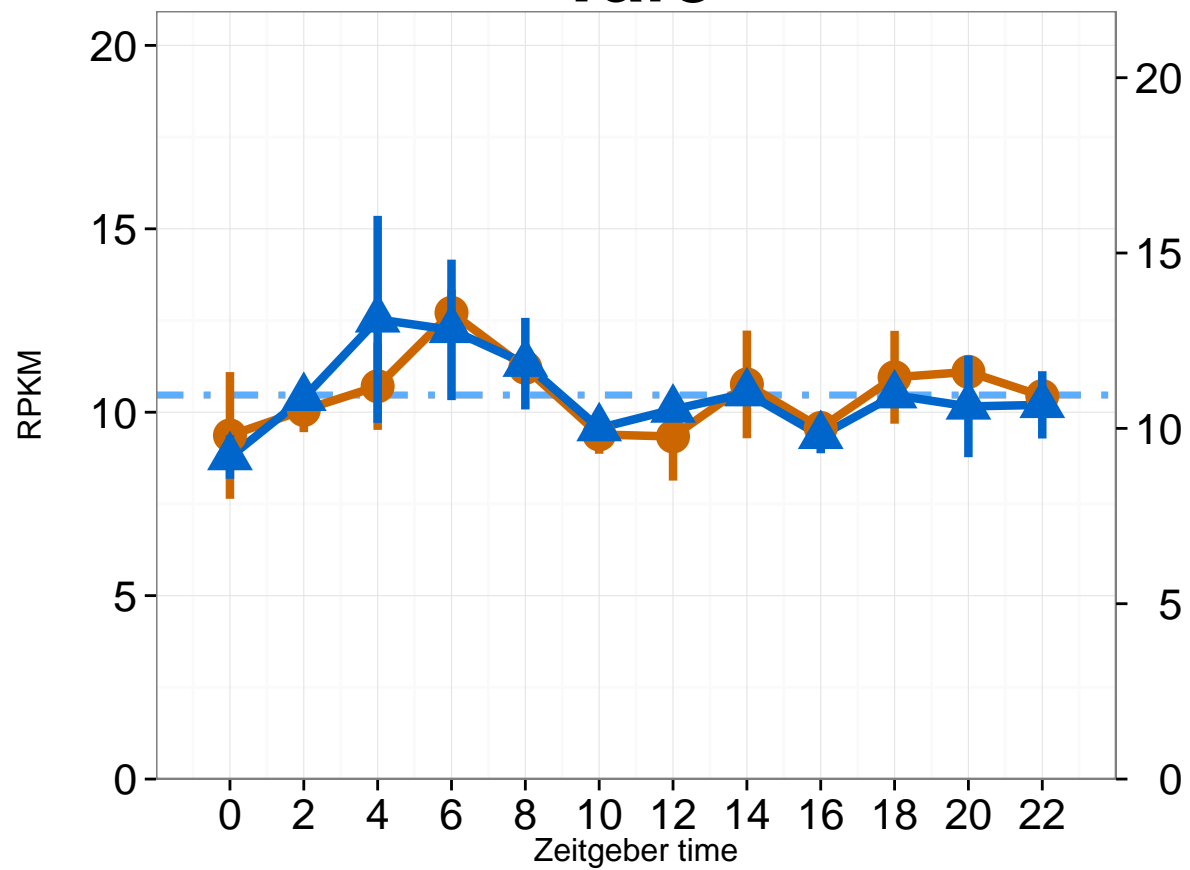

## Taf8

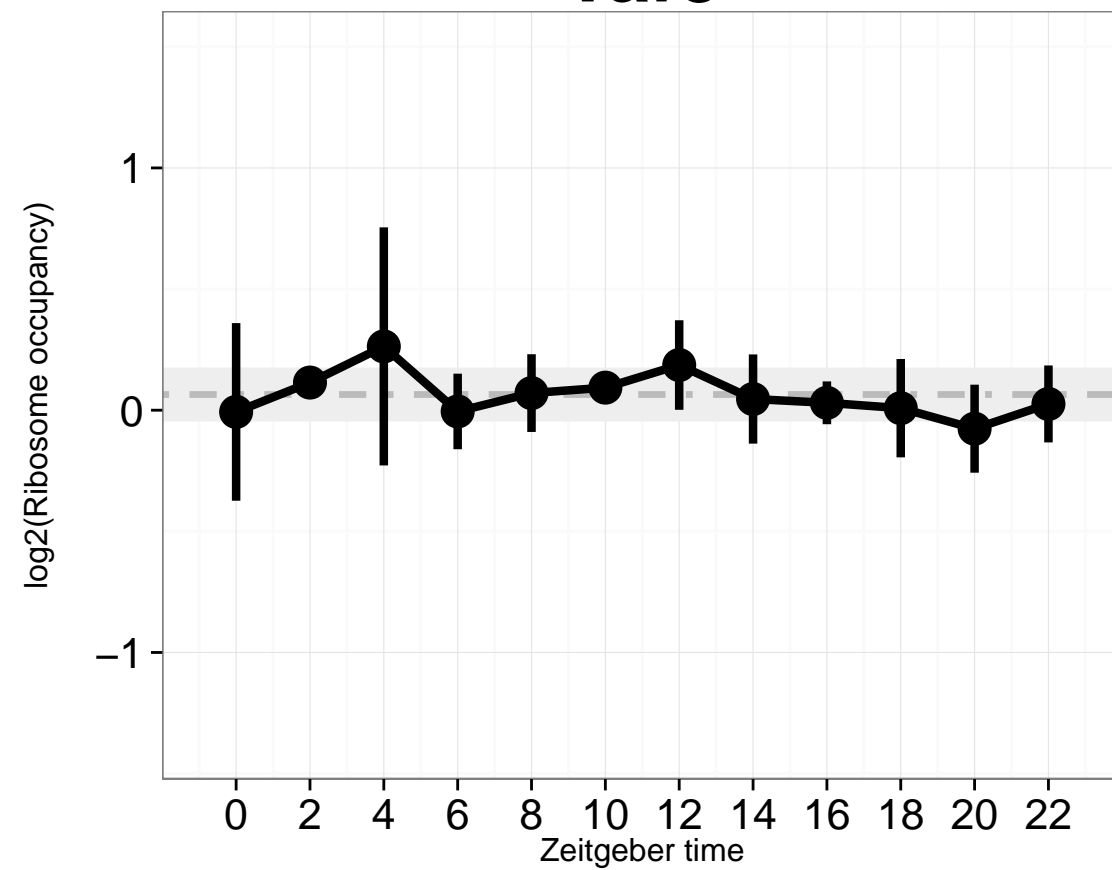

Supplement: Supplementary file 5956 [file 1]

## Cdca4

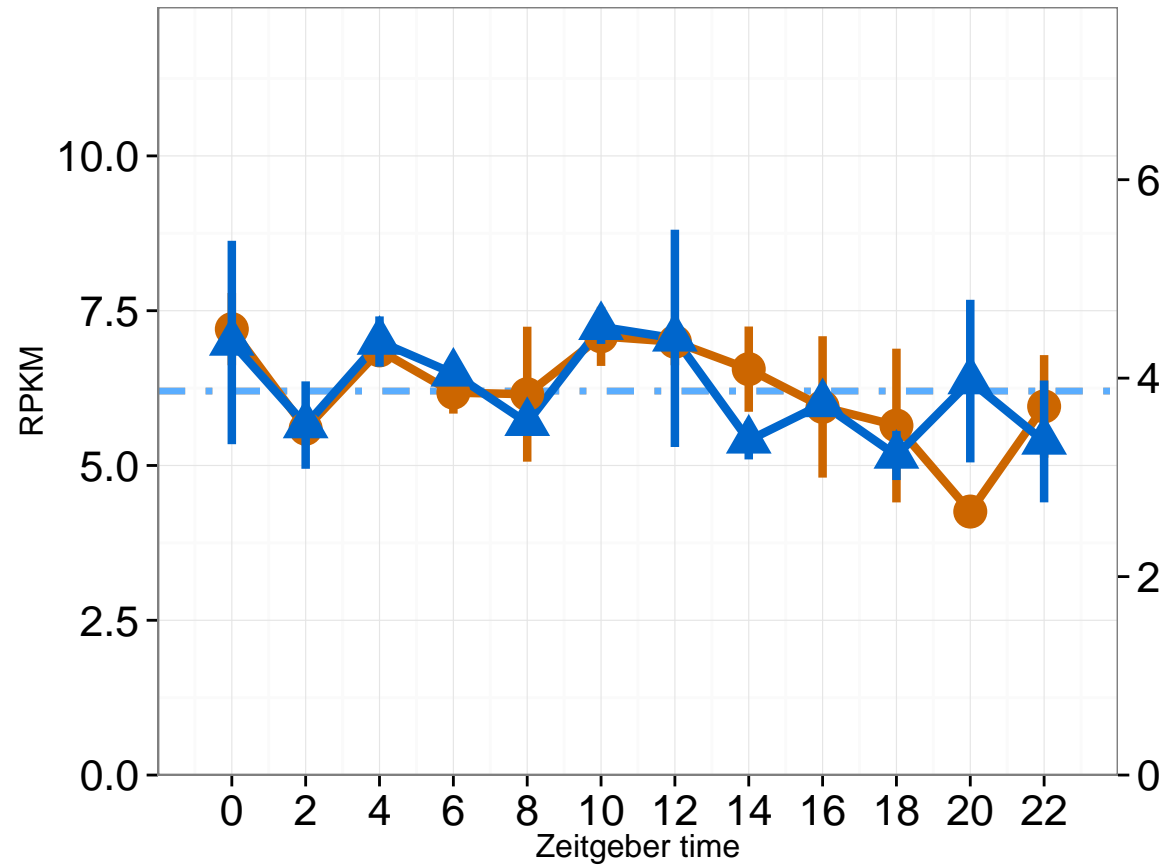

## Cdca4

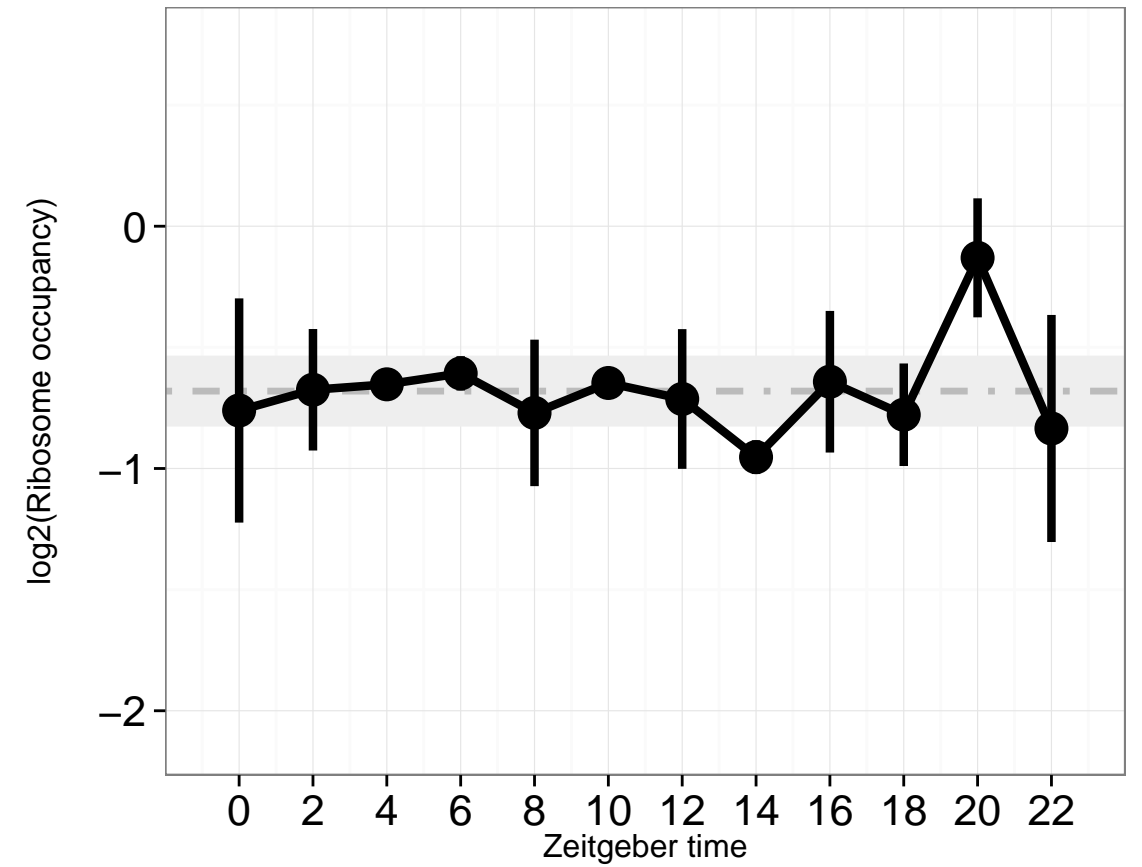

Supplement: Supplementary file 5957 [file 1]

# Ankrd6

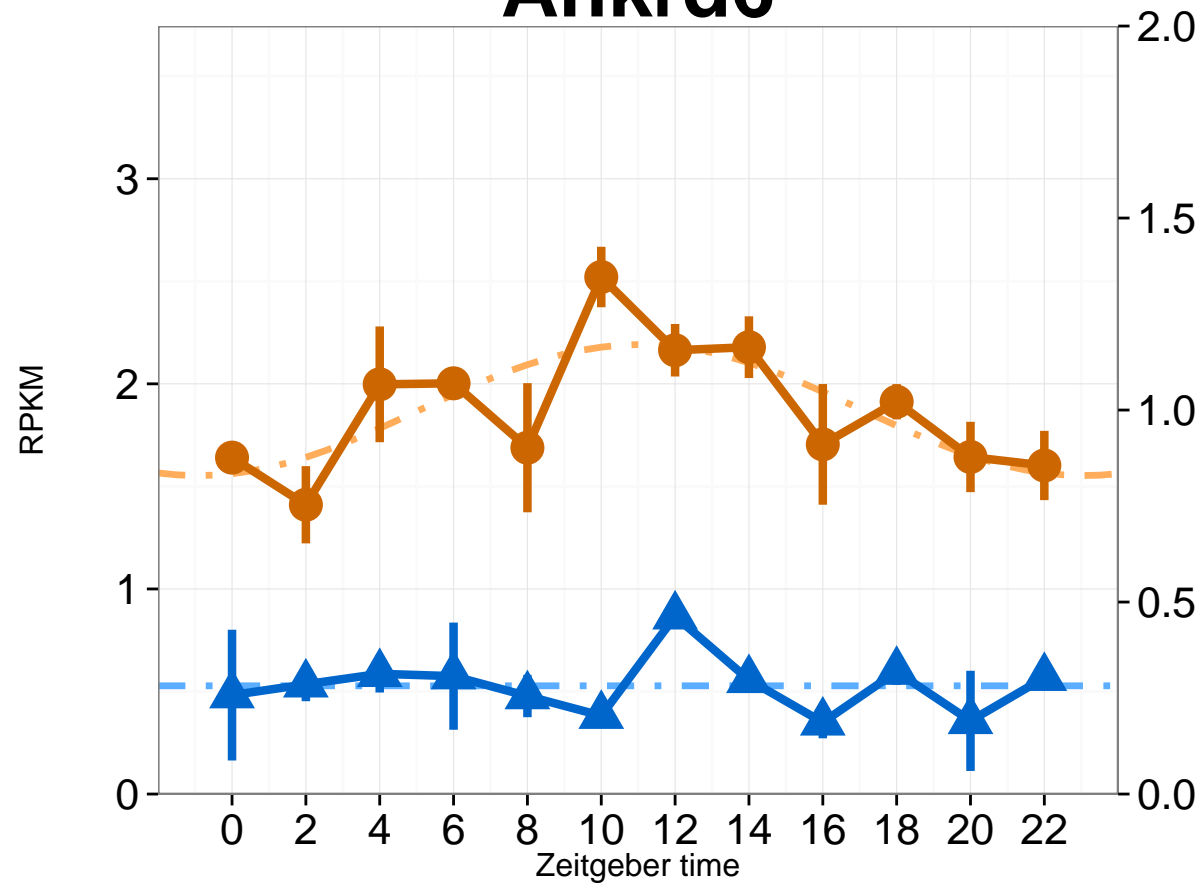

# Ankrd6

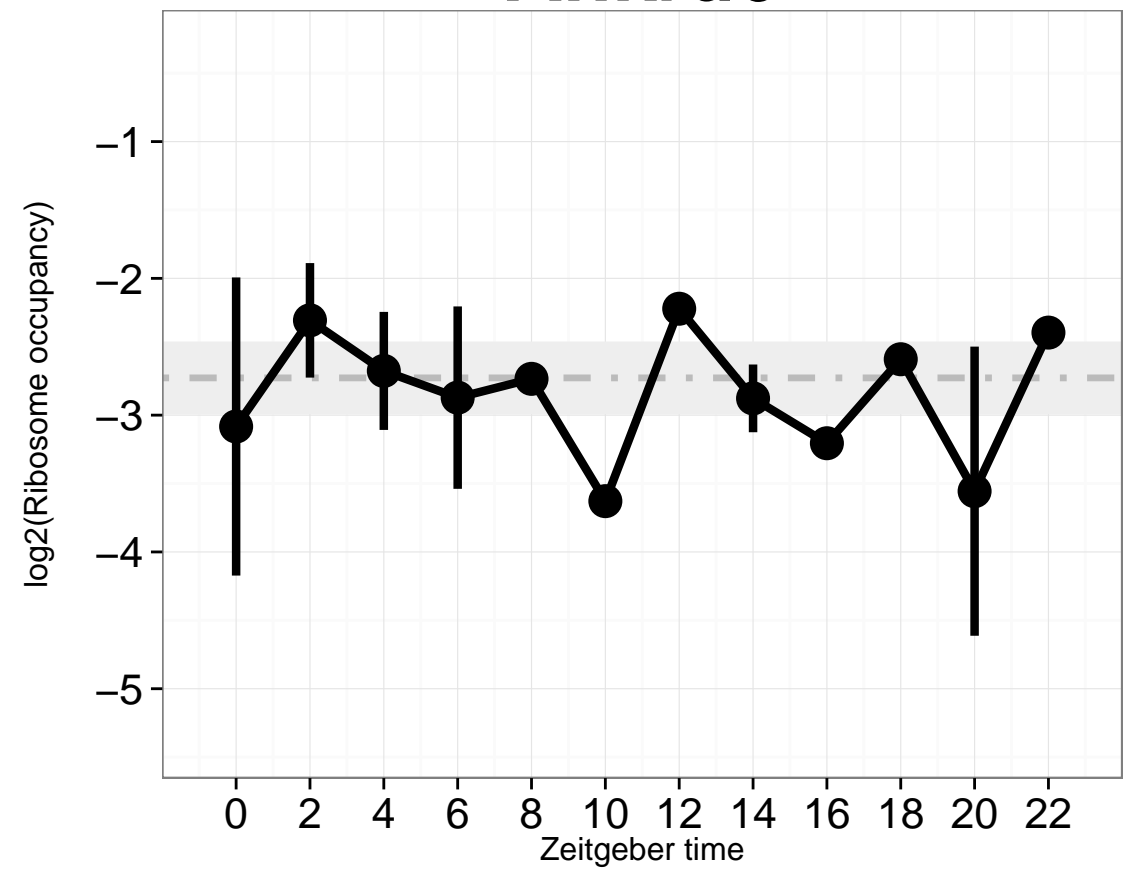

Supplement: Supplementary file 5958 [file 1]

# Rbbp6

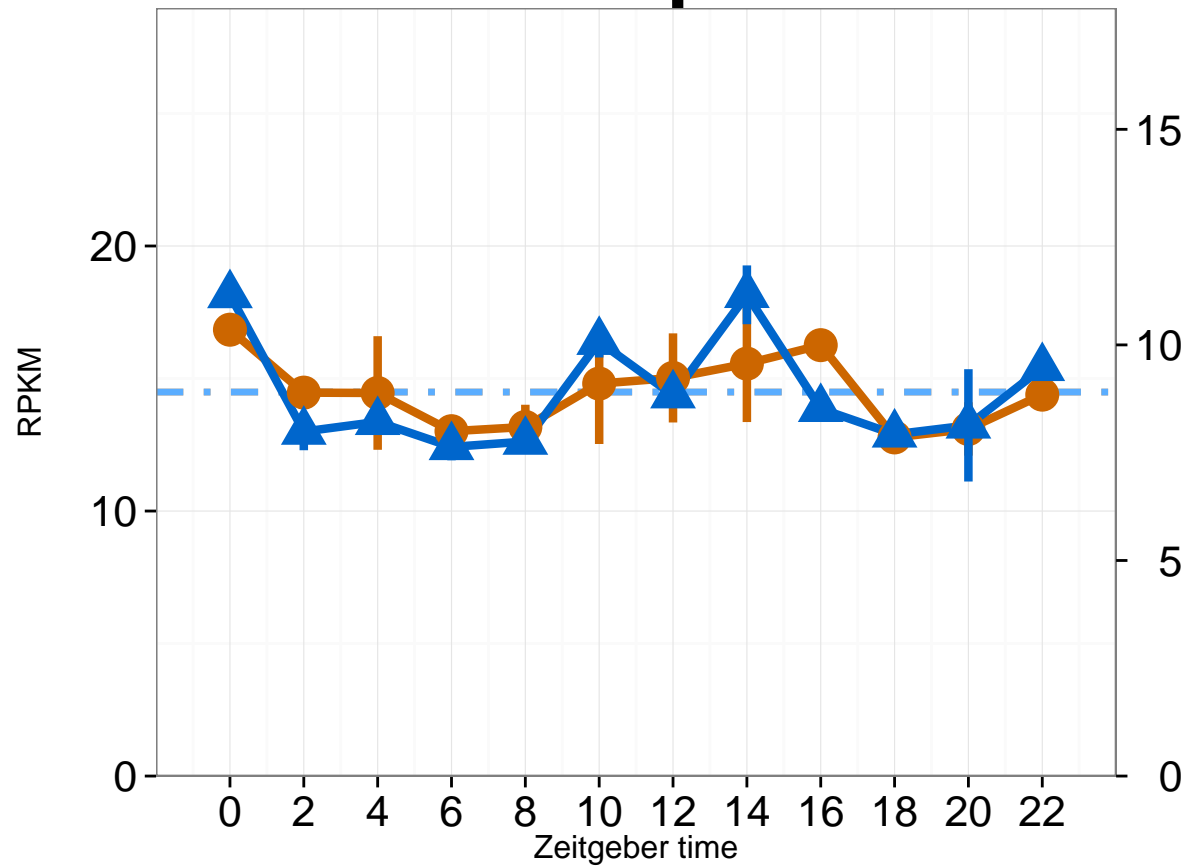

# Rbbp6

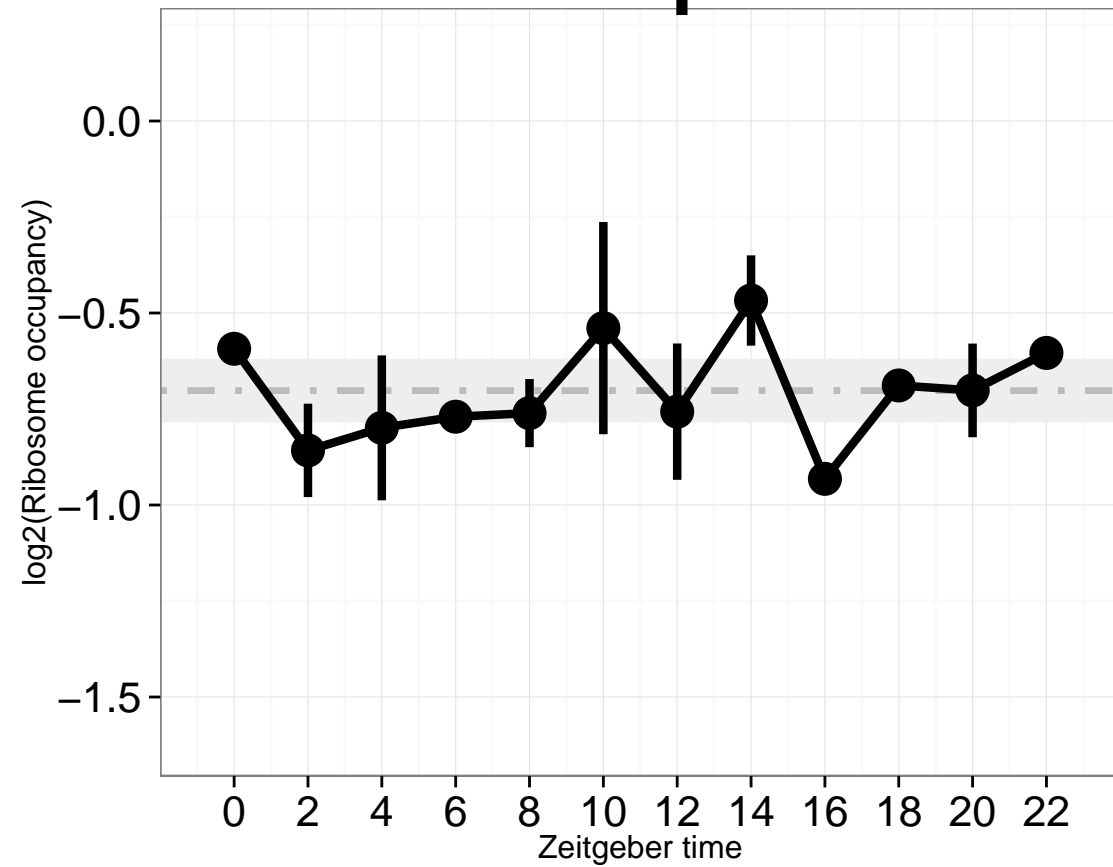

Supplement: Supplementary file 5959 [file 1]

## Pon2

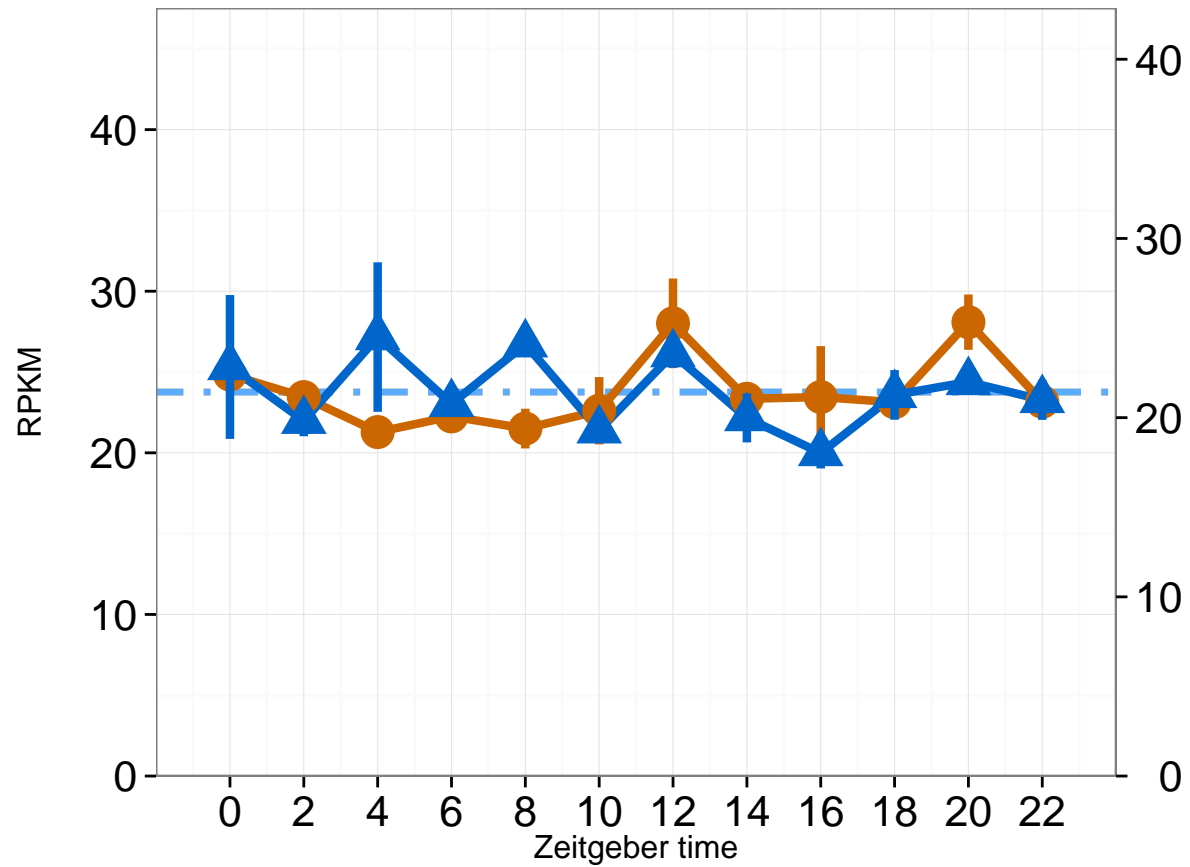

## Pon2

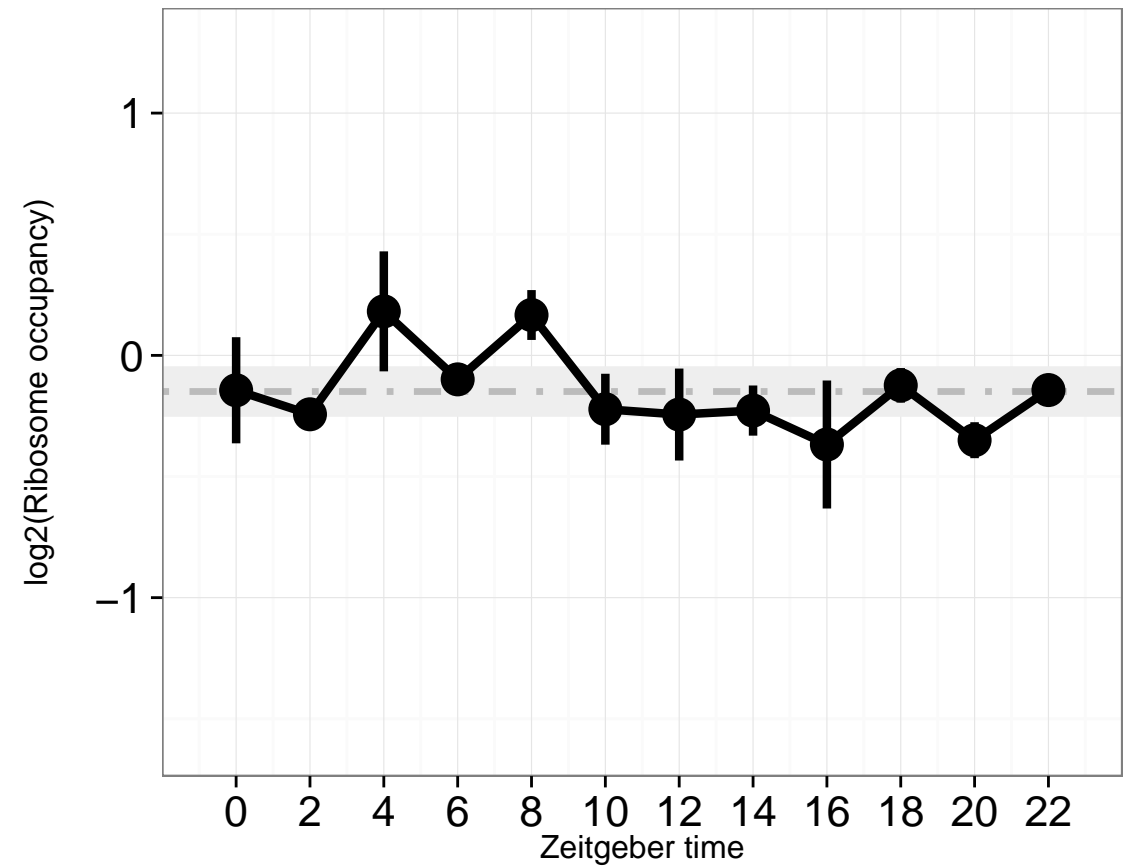

Supplement: Supplementary file 5960 [file 1]

# Pcbp3

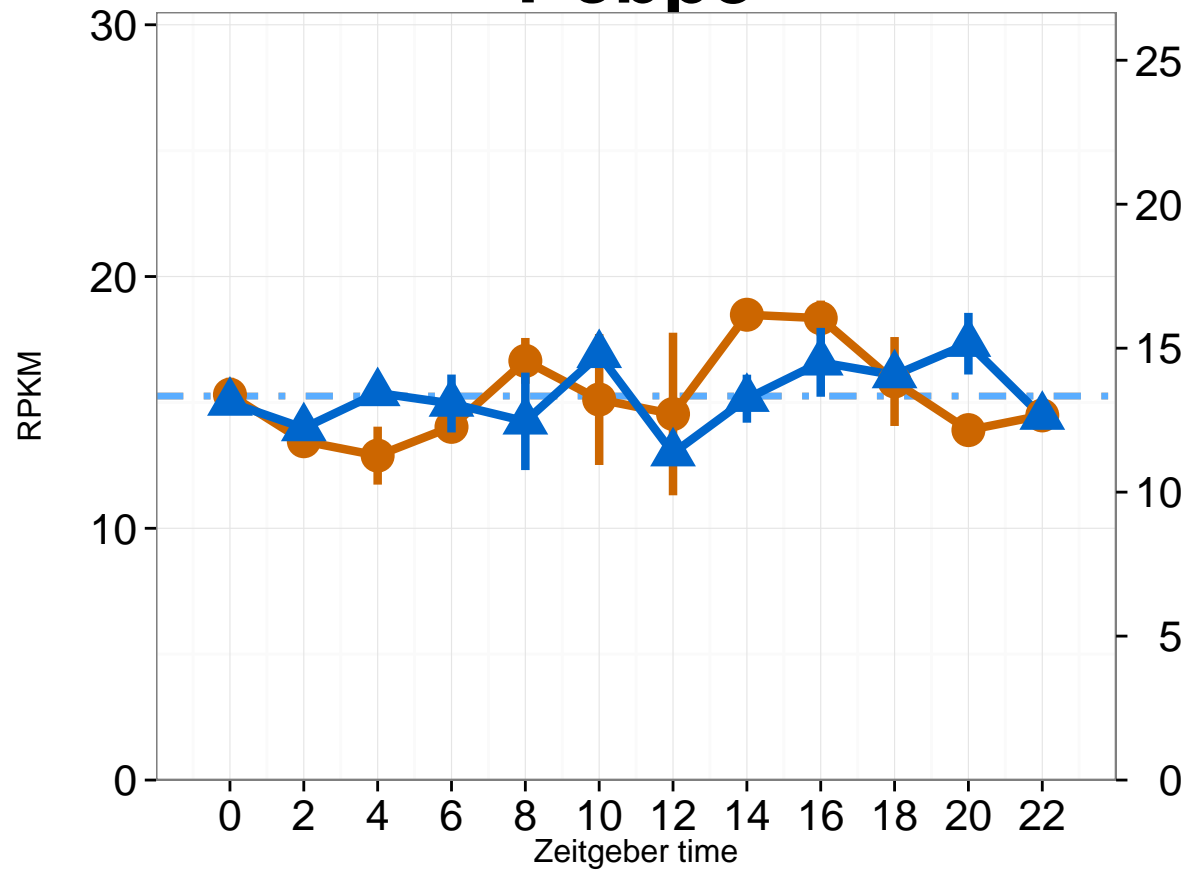

# Pcbp3

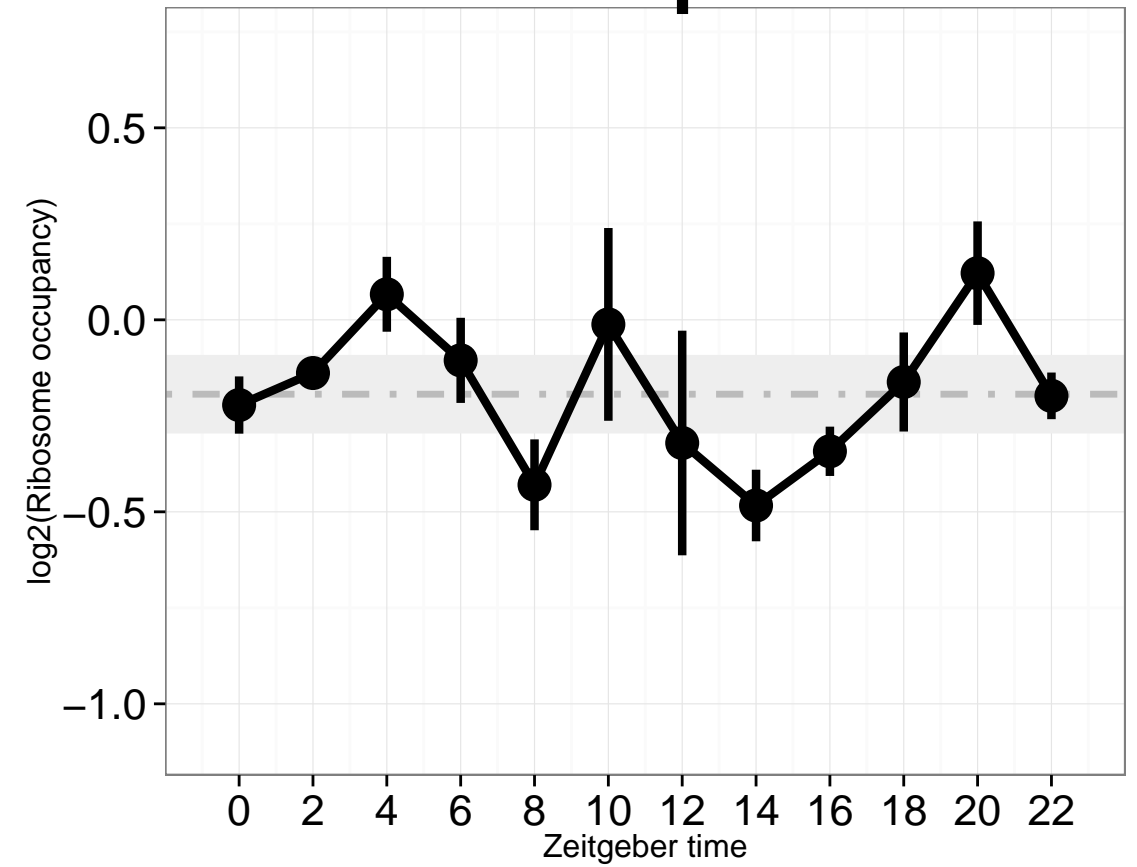

Supplement: Supplementary file 5961 [file 1]

# Efr3b

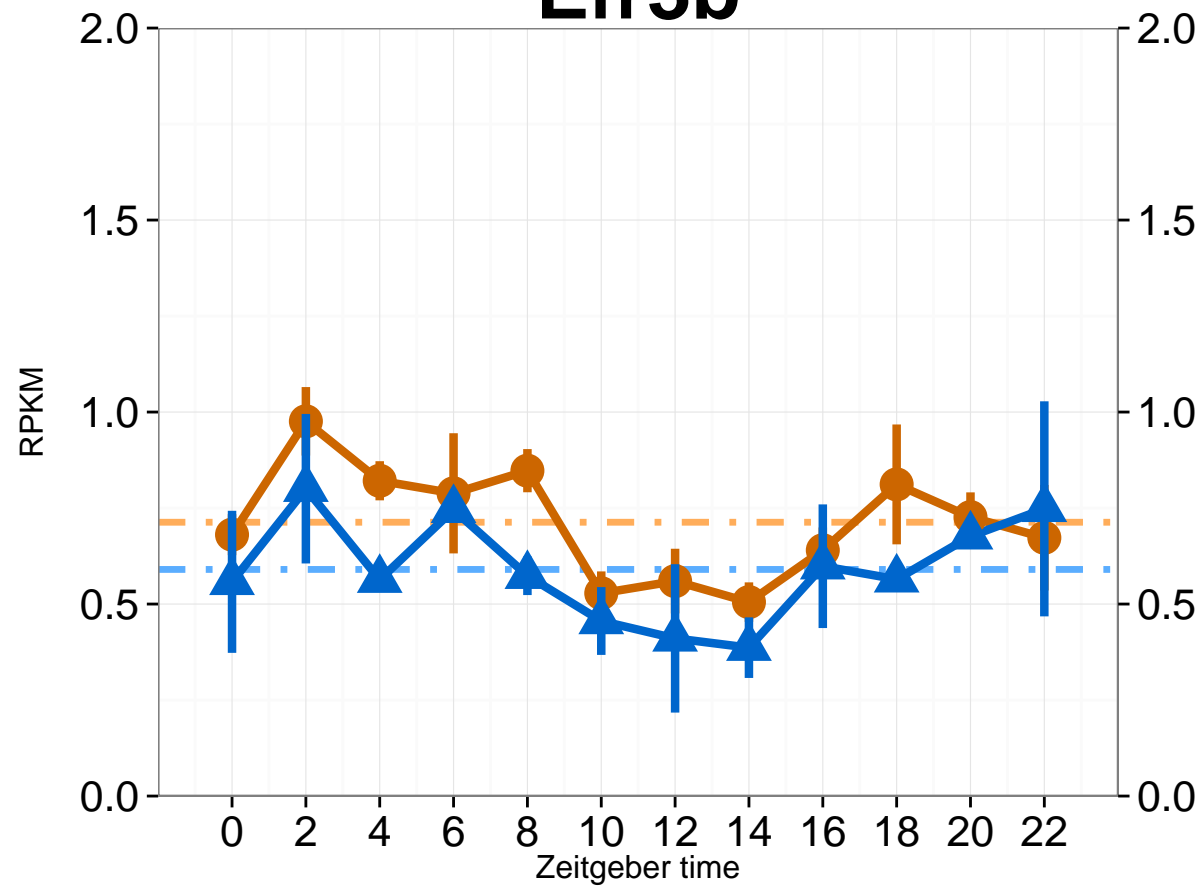

# Efr3b

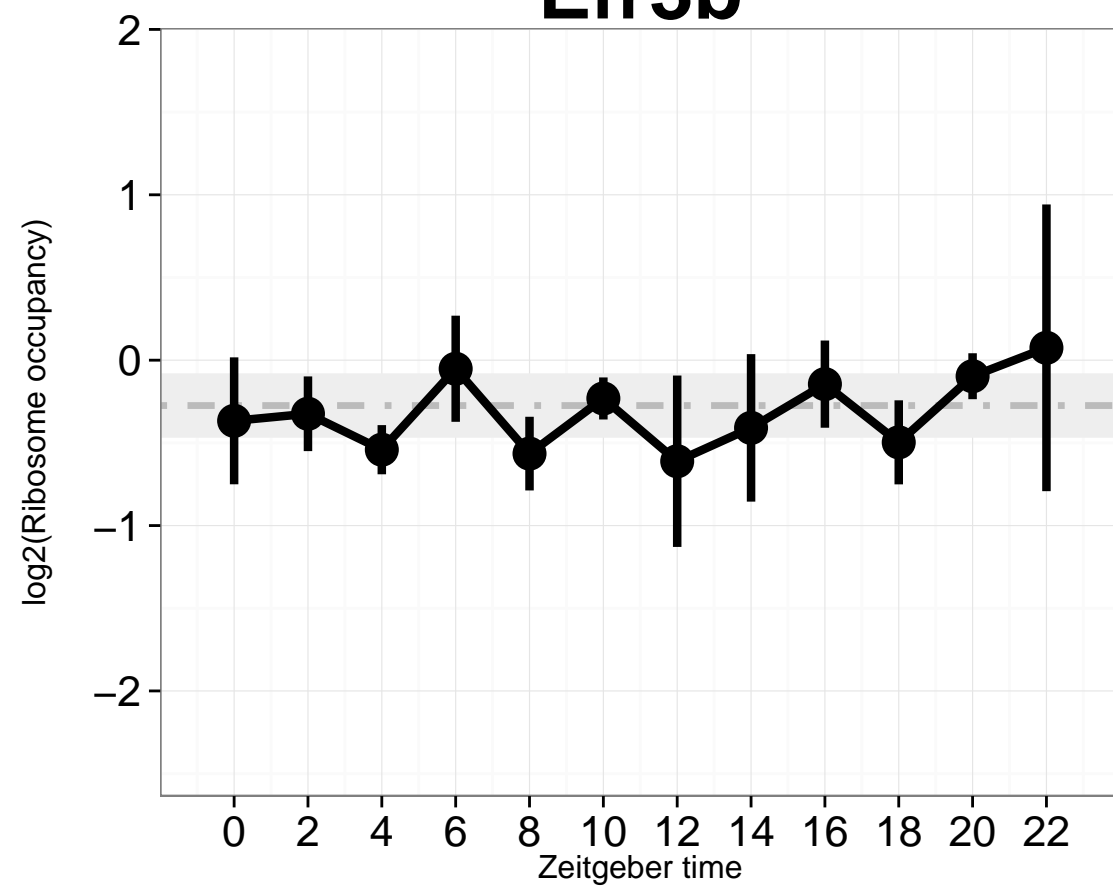

Supplement: Supplementary file 5962 [file 1]

## Keap1

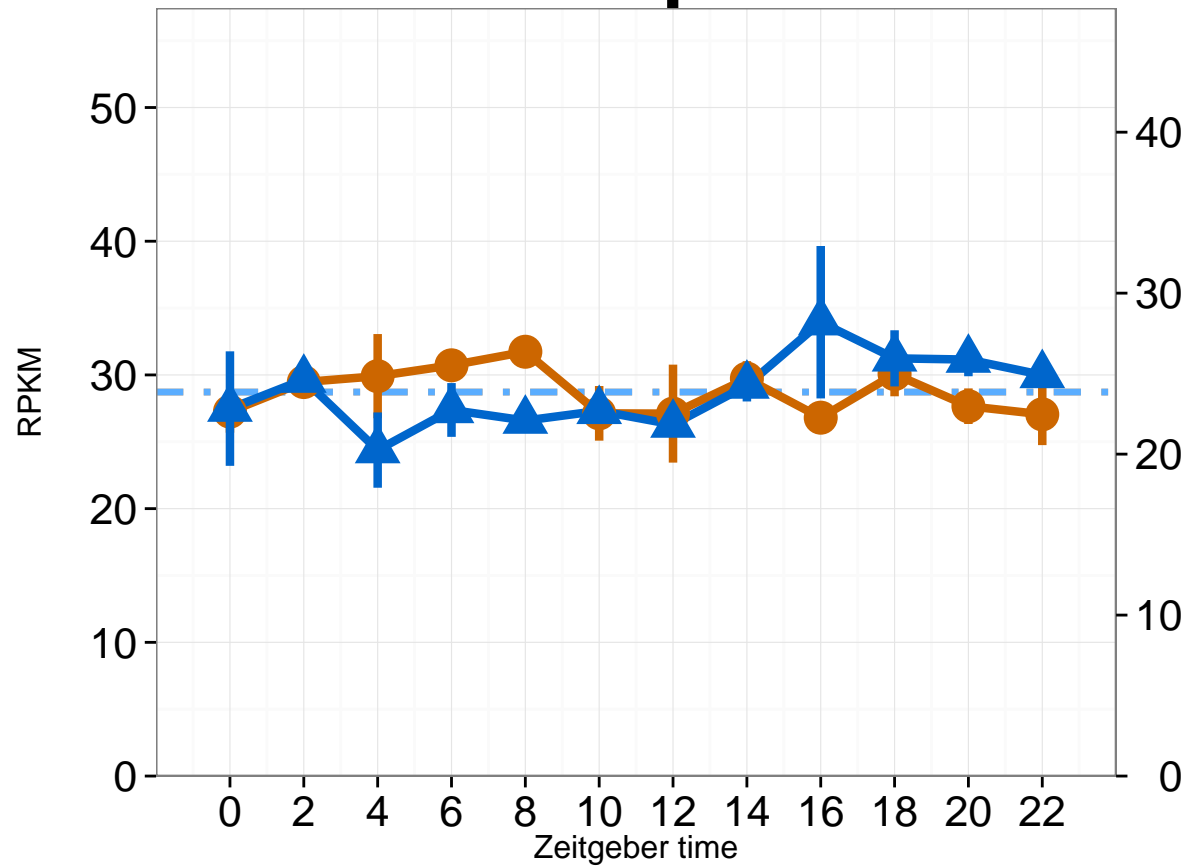

## Keap1

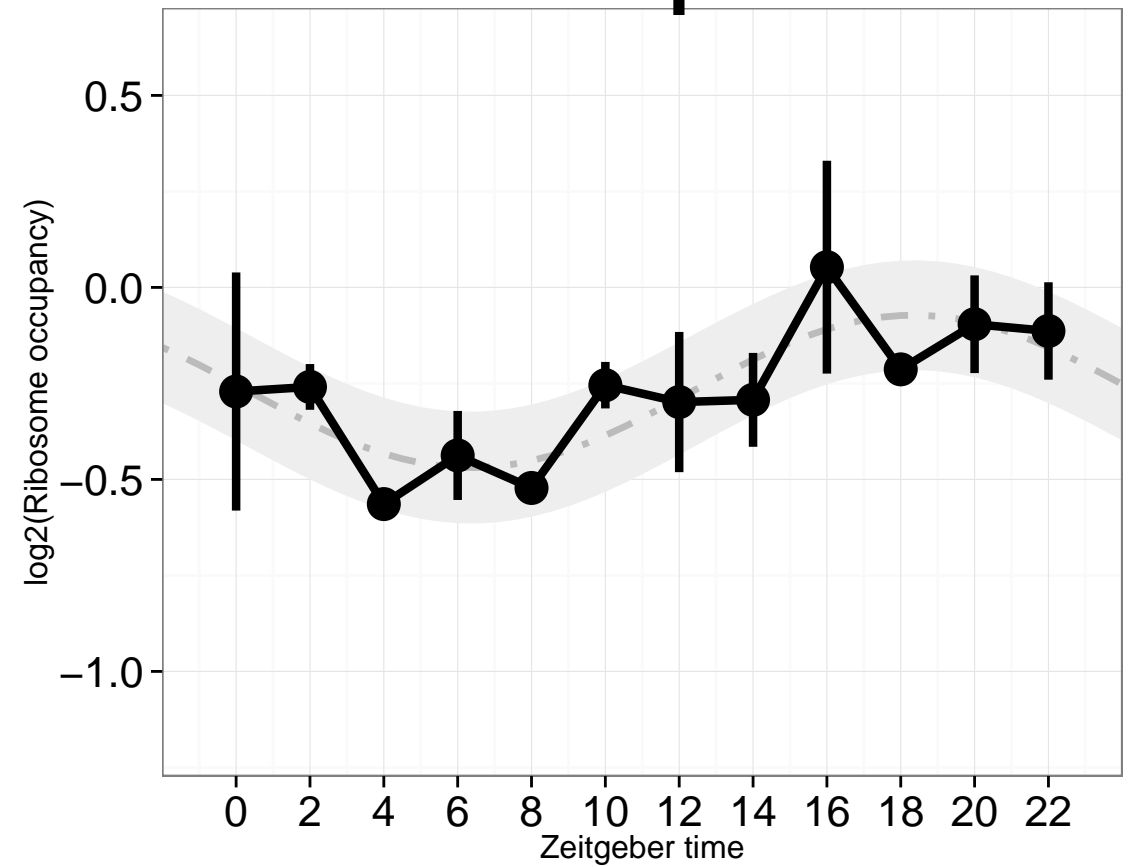

Supplement: Supplementary file 5963 [file 1]

## Tspo

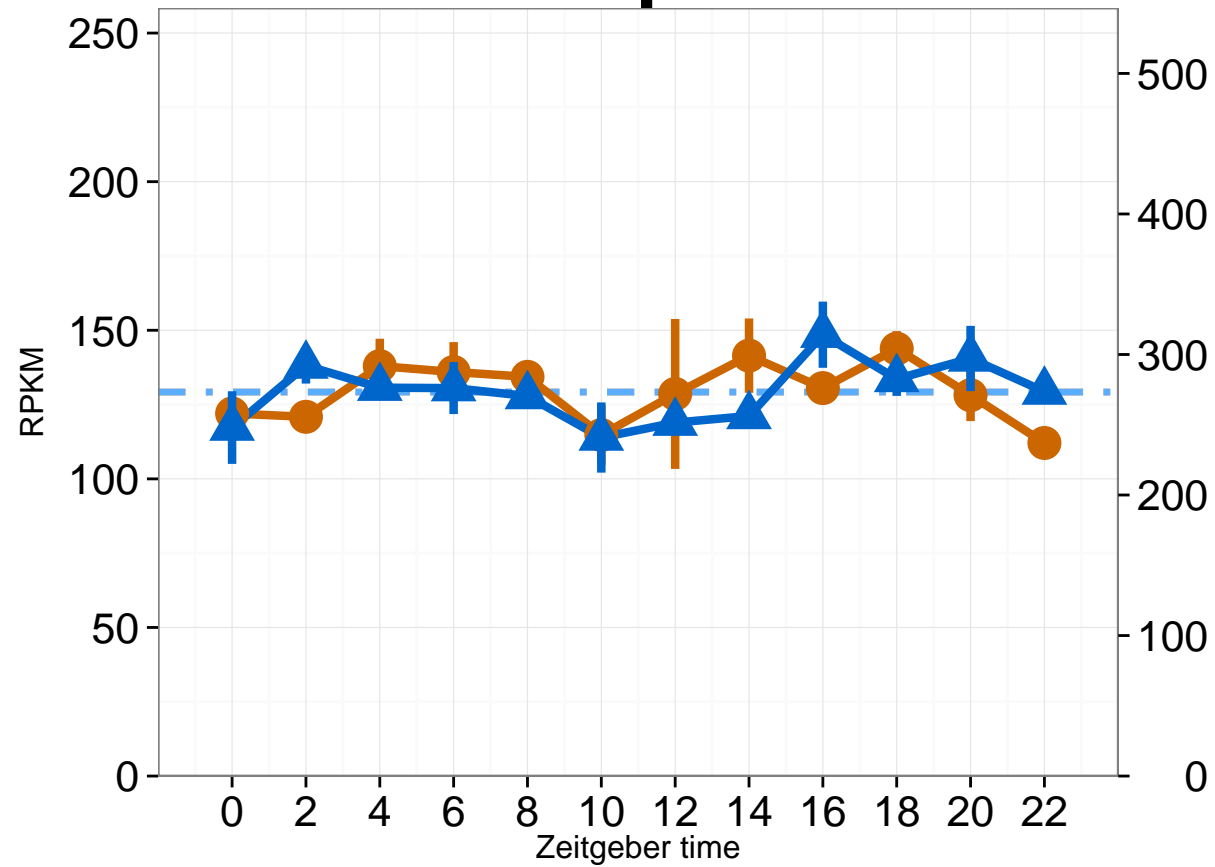

## Tspo

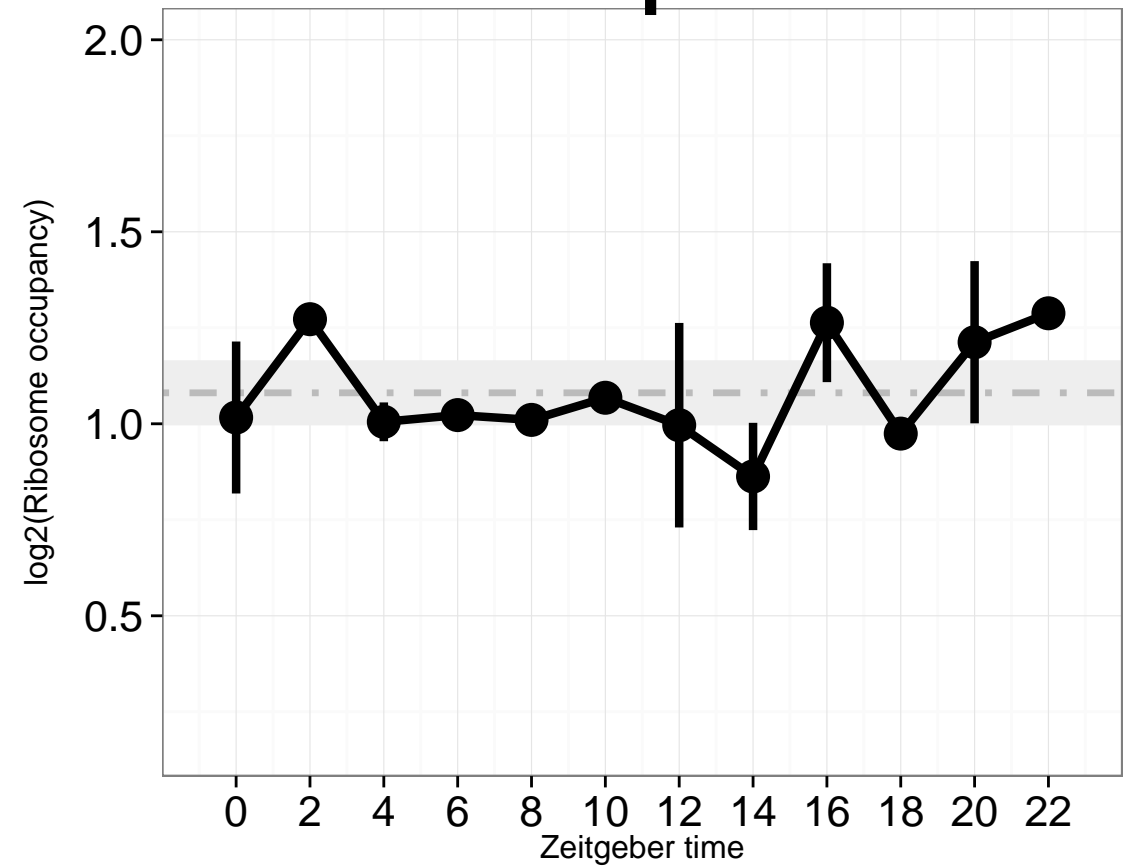

Supplement: Supplementary file 5964 [file 1]

## Pigq

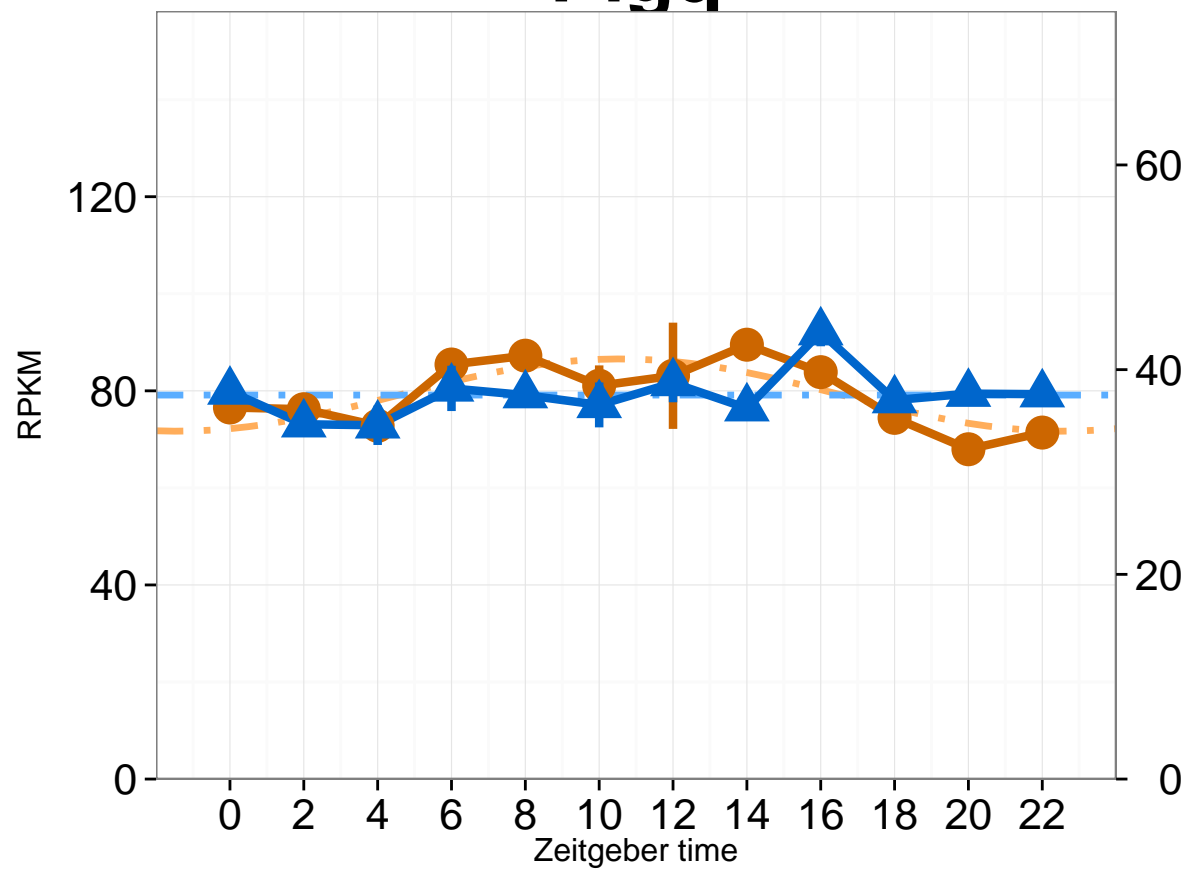

## Pigq

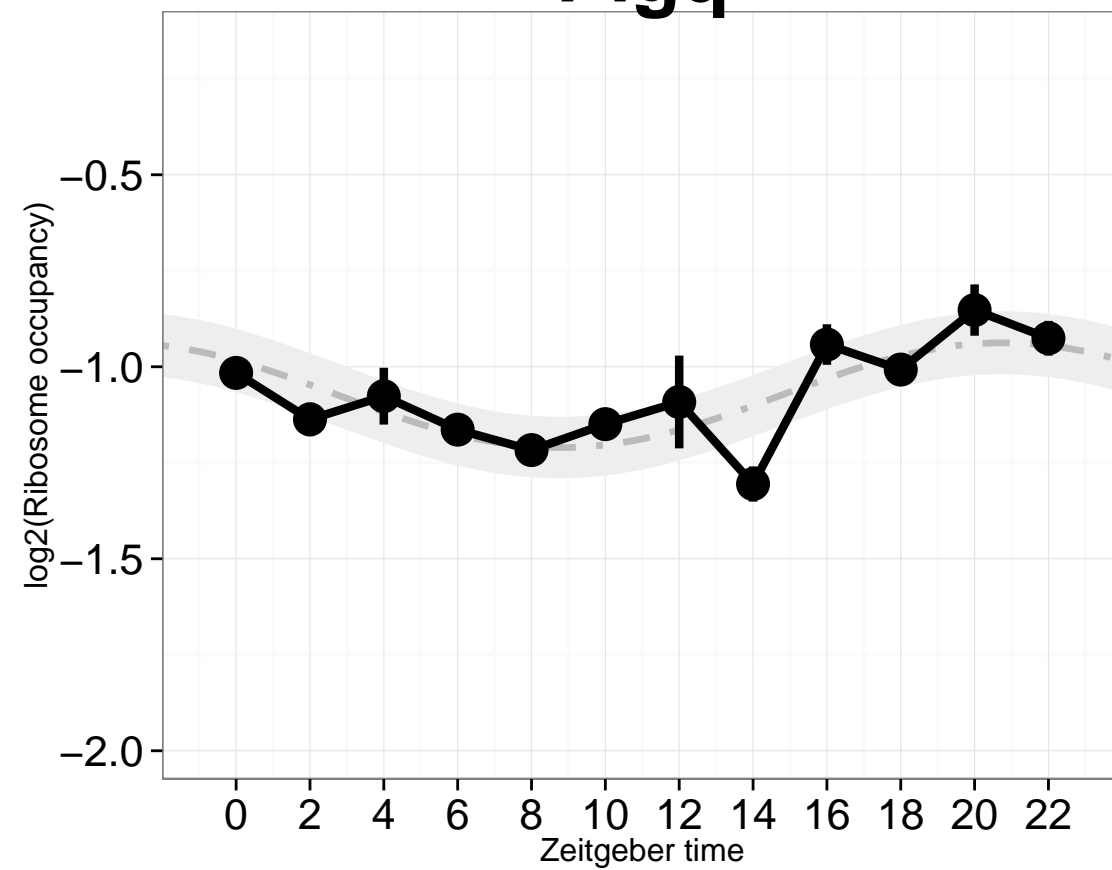

Supplement: Supplementary file 5965 [file 1]

## KIhI12

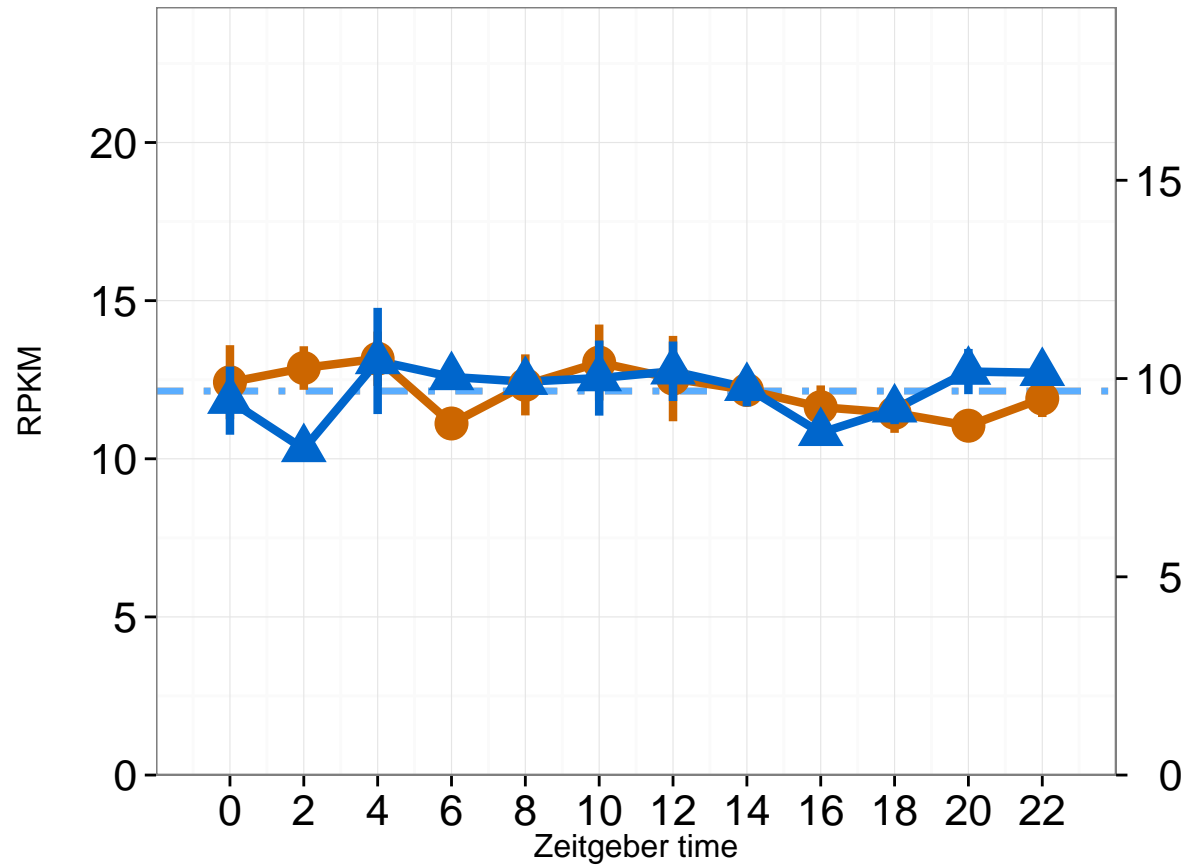

## KIhI12

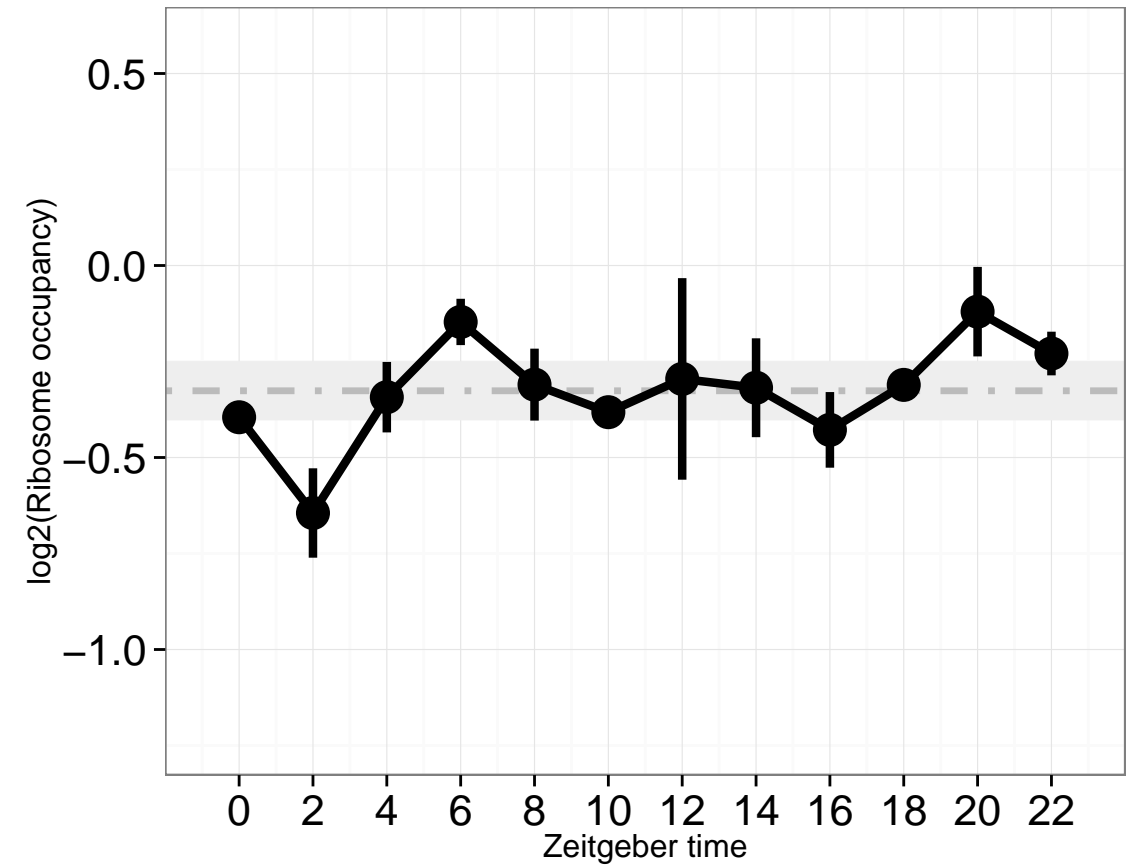

Supplement: Supplementary file 5966 [file 1]

# Inpp5k

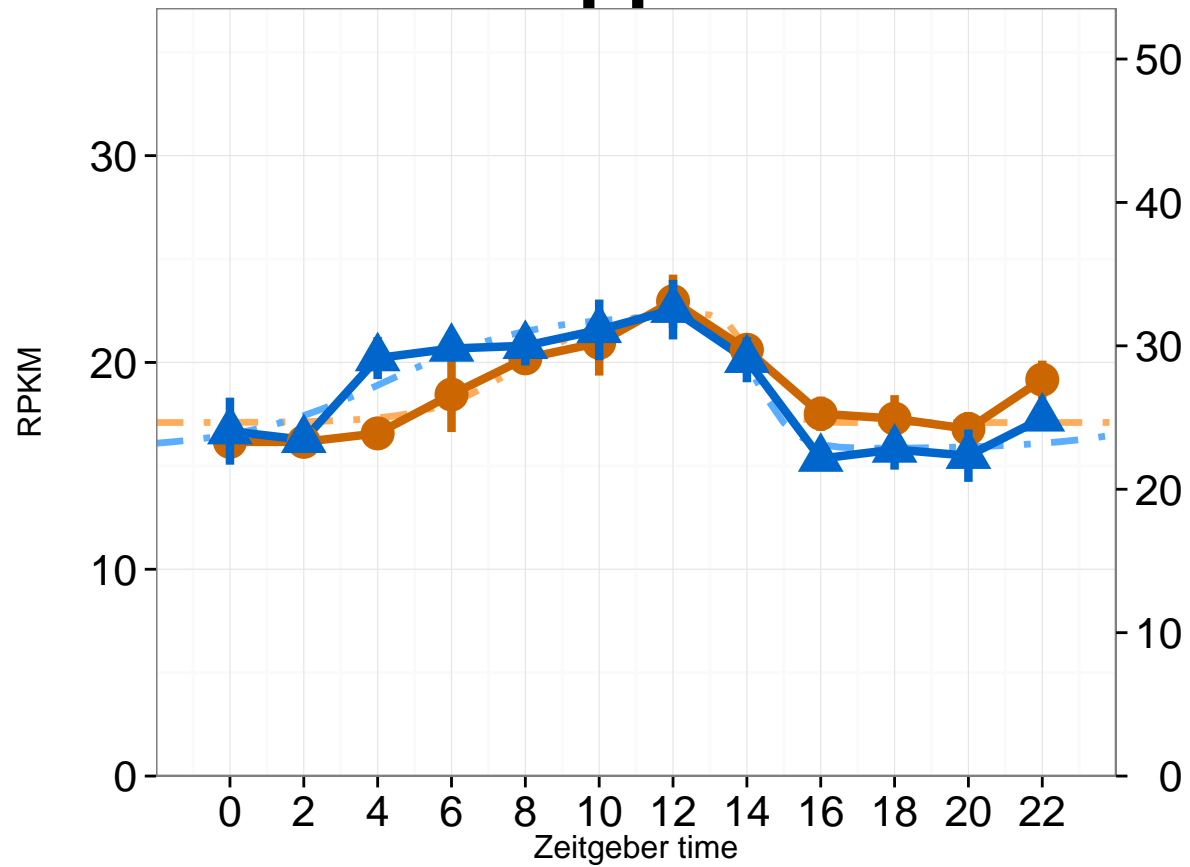

# Inpp5k

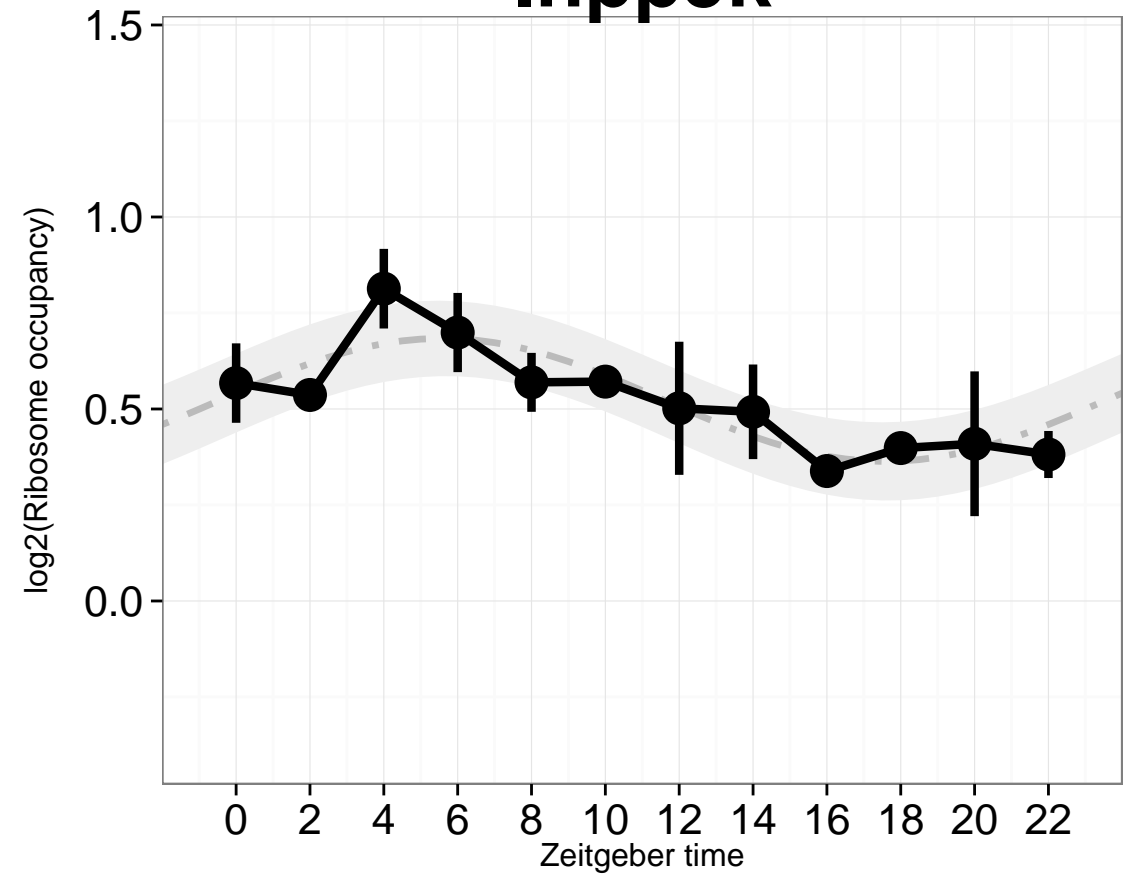

Supplement: Supplementary file 5967 [file 1]

## Scin

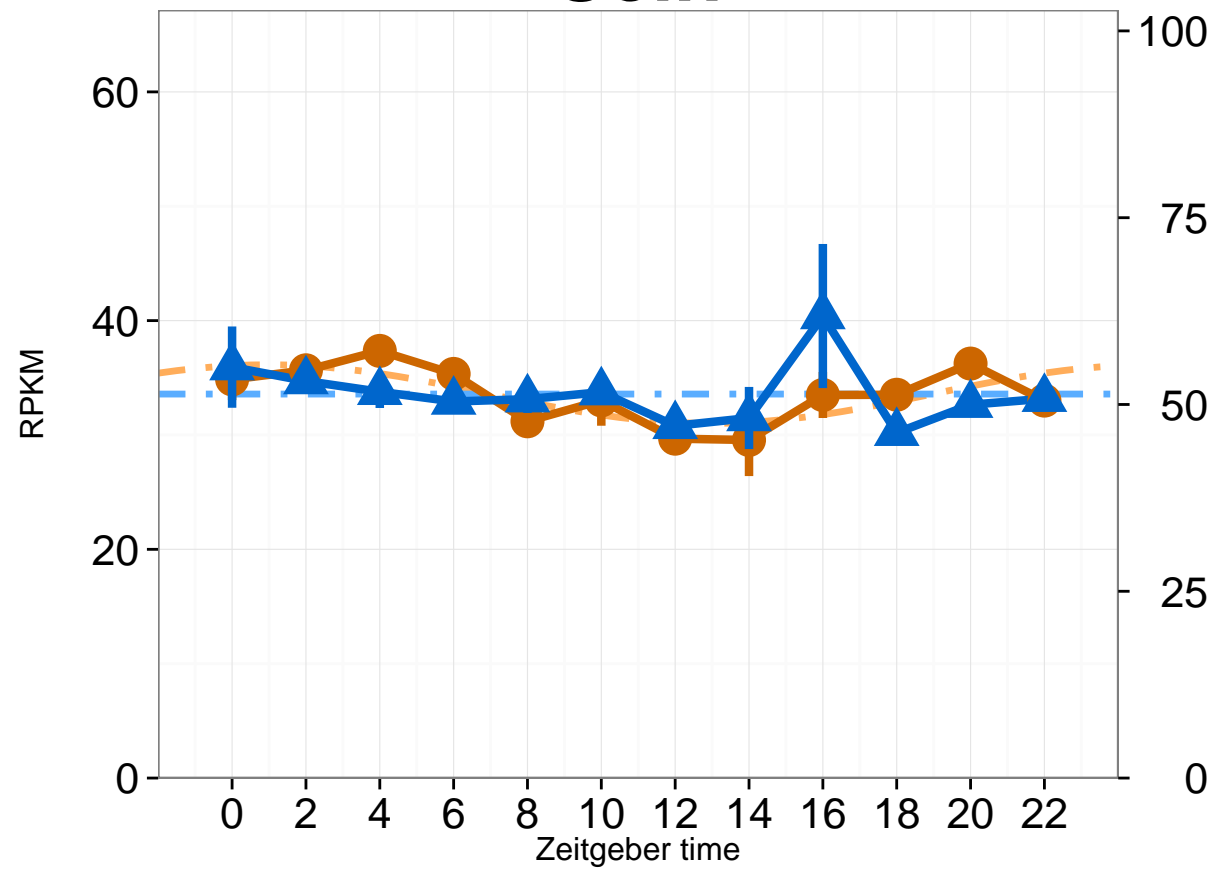

## Scin

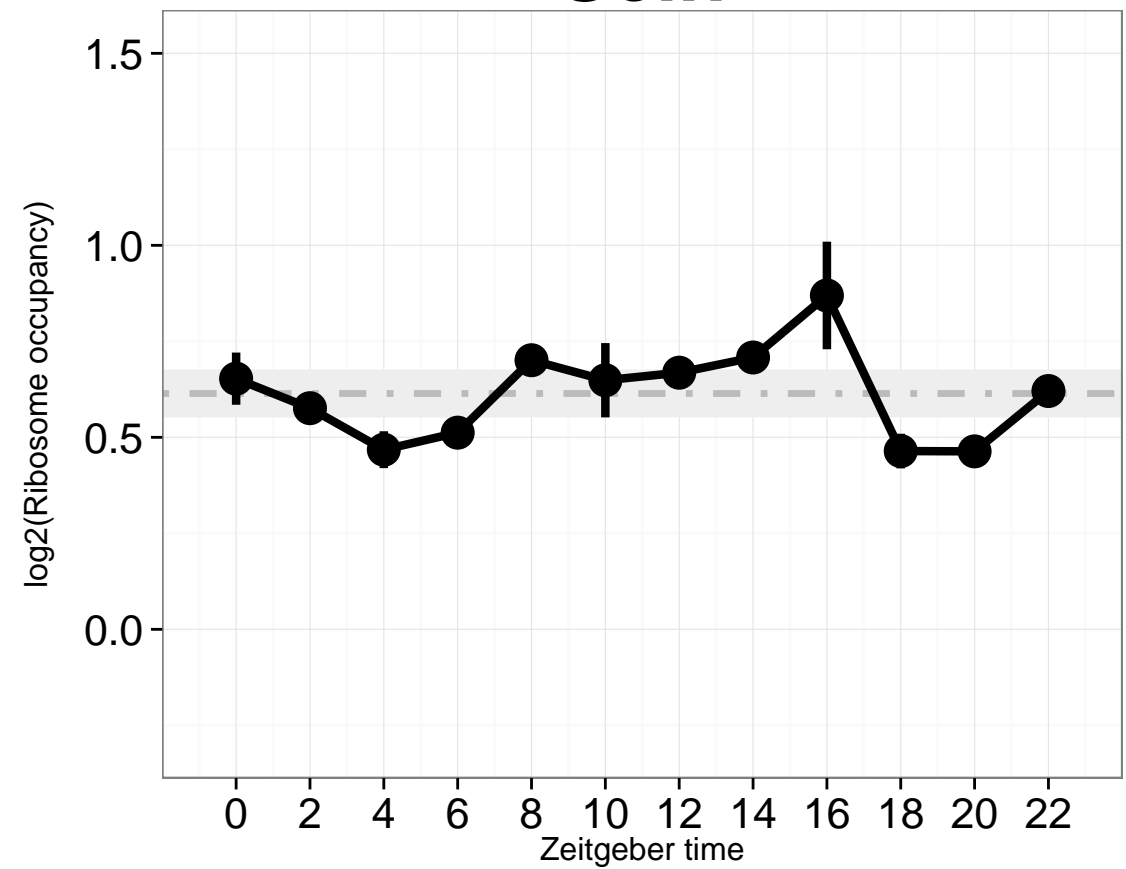

Supplement: Supplementary file 5968 [file 1]

# Dclre1a

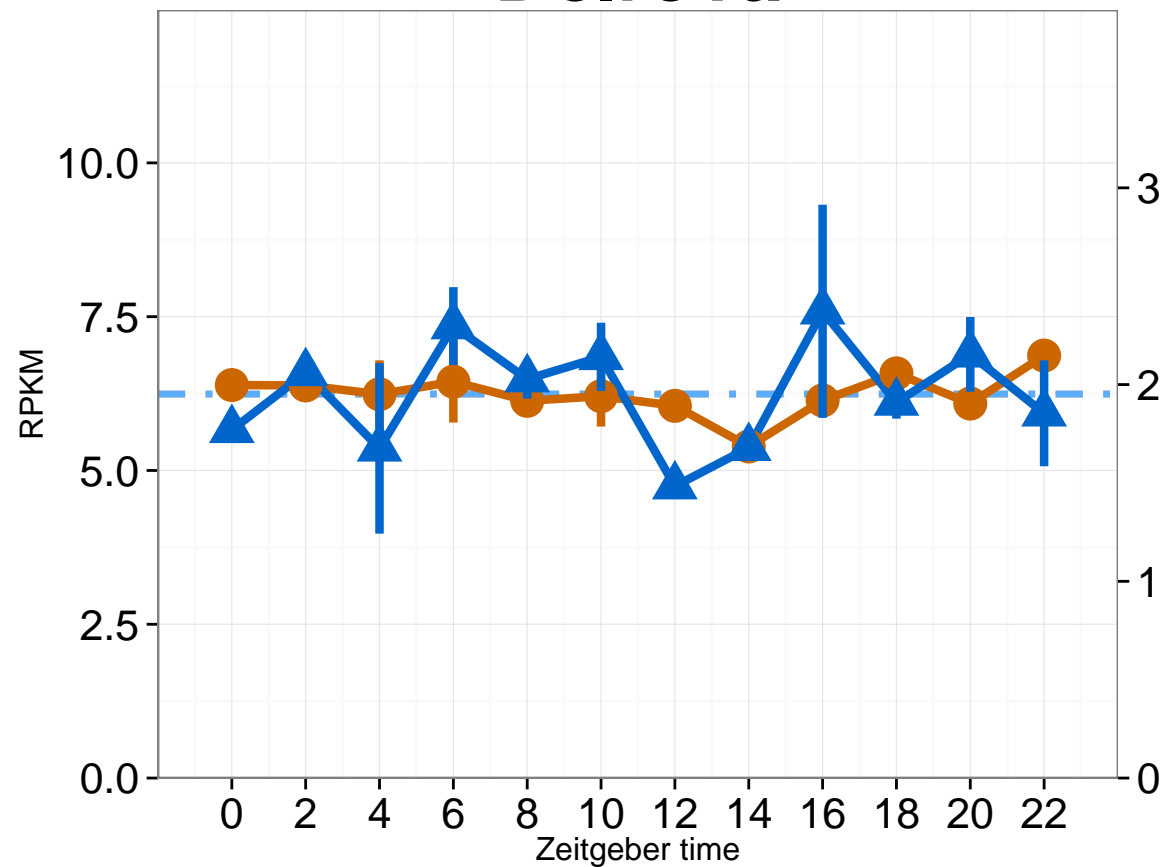

# Dclre1a

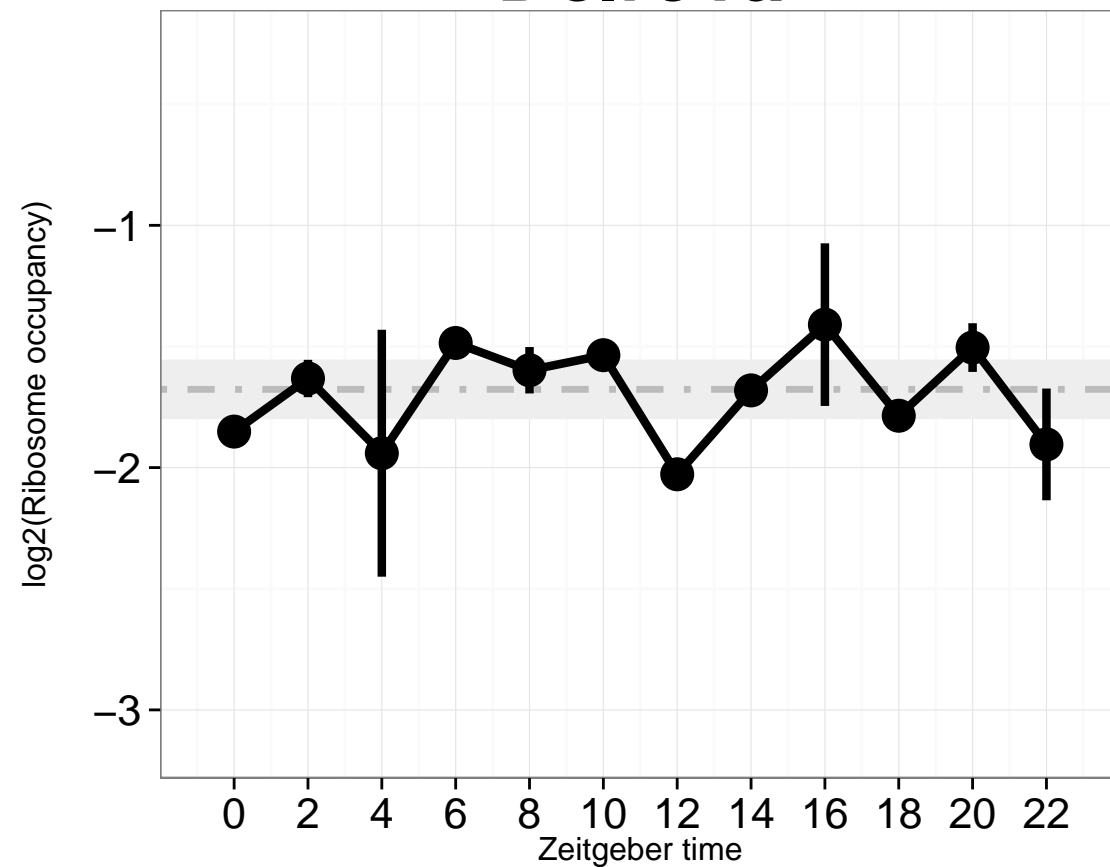

Supplement: Supplementary file 5969 [file 1]

# Fkbp7

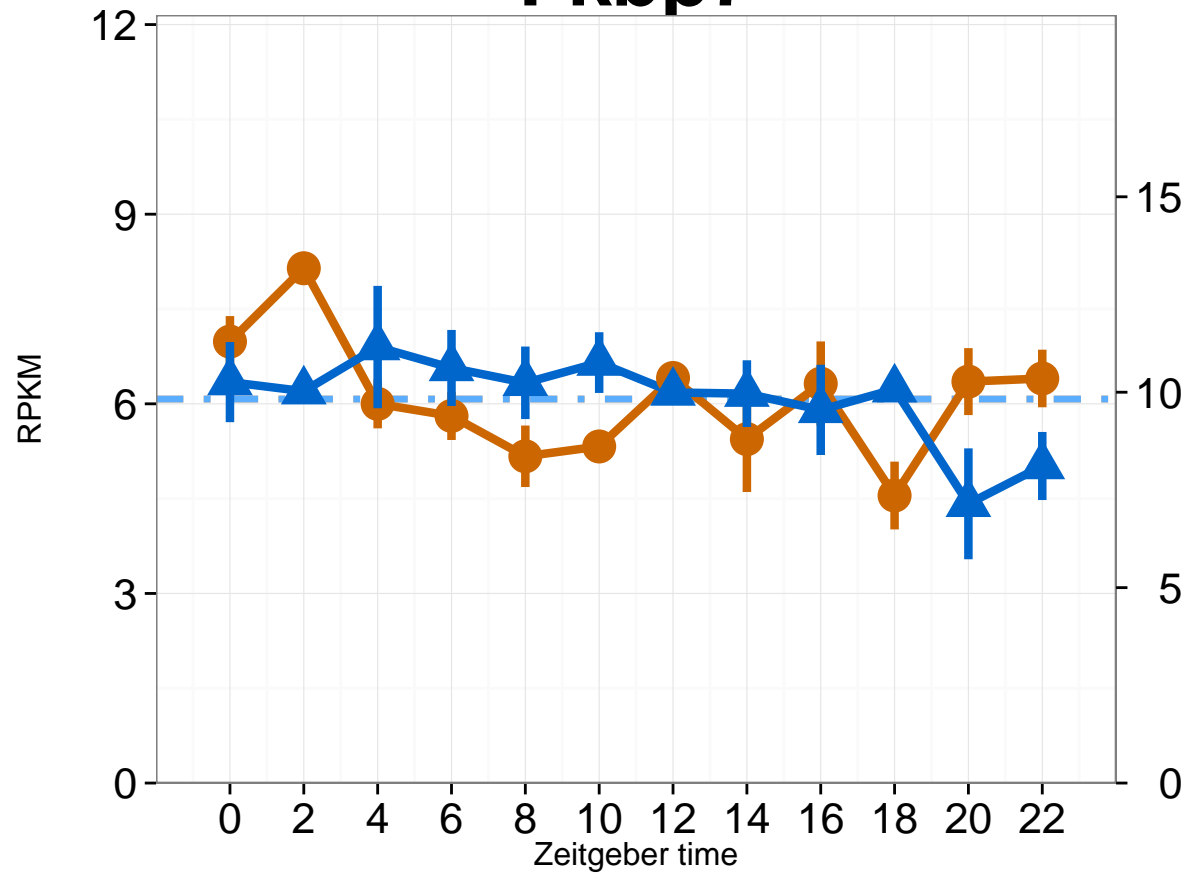

# Fkbp7

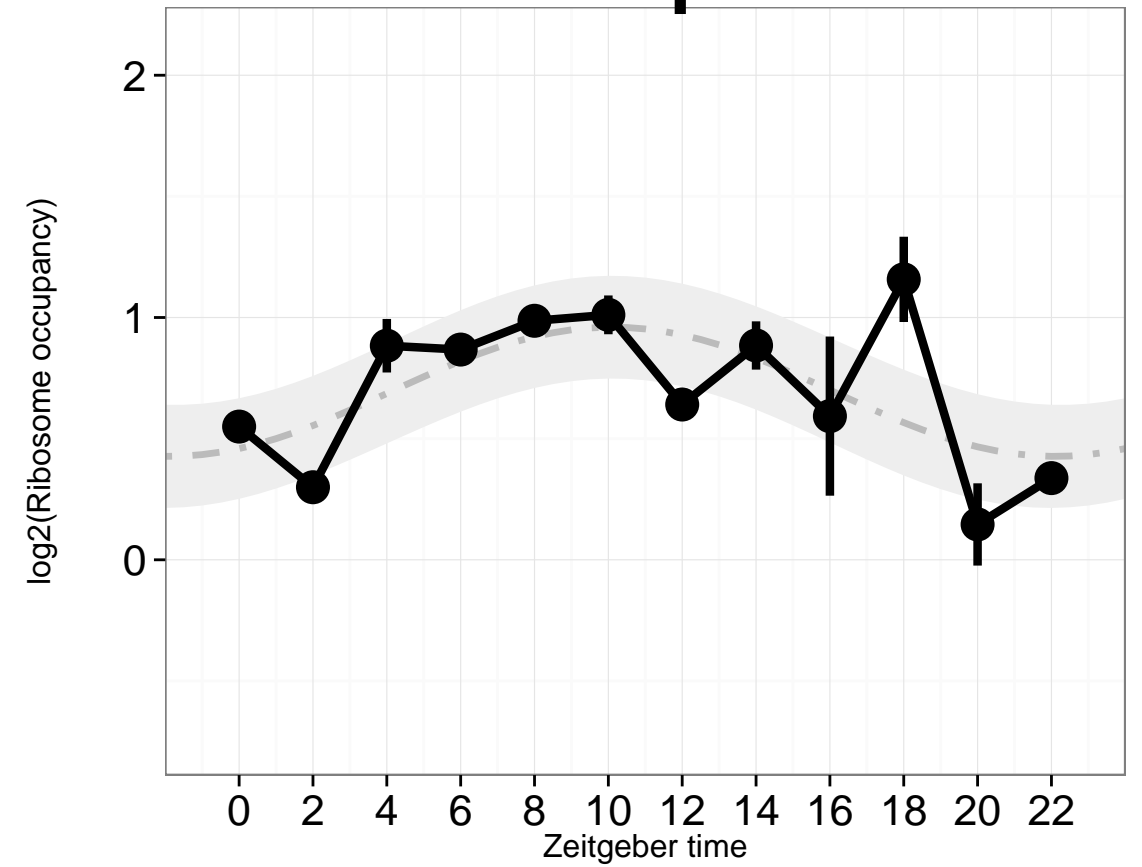

Supplement: Supplementary file 5970 [file 1]

## Neu3

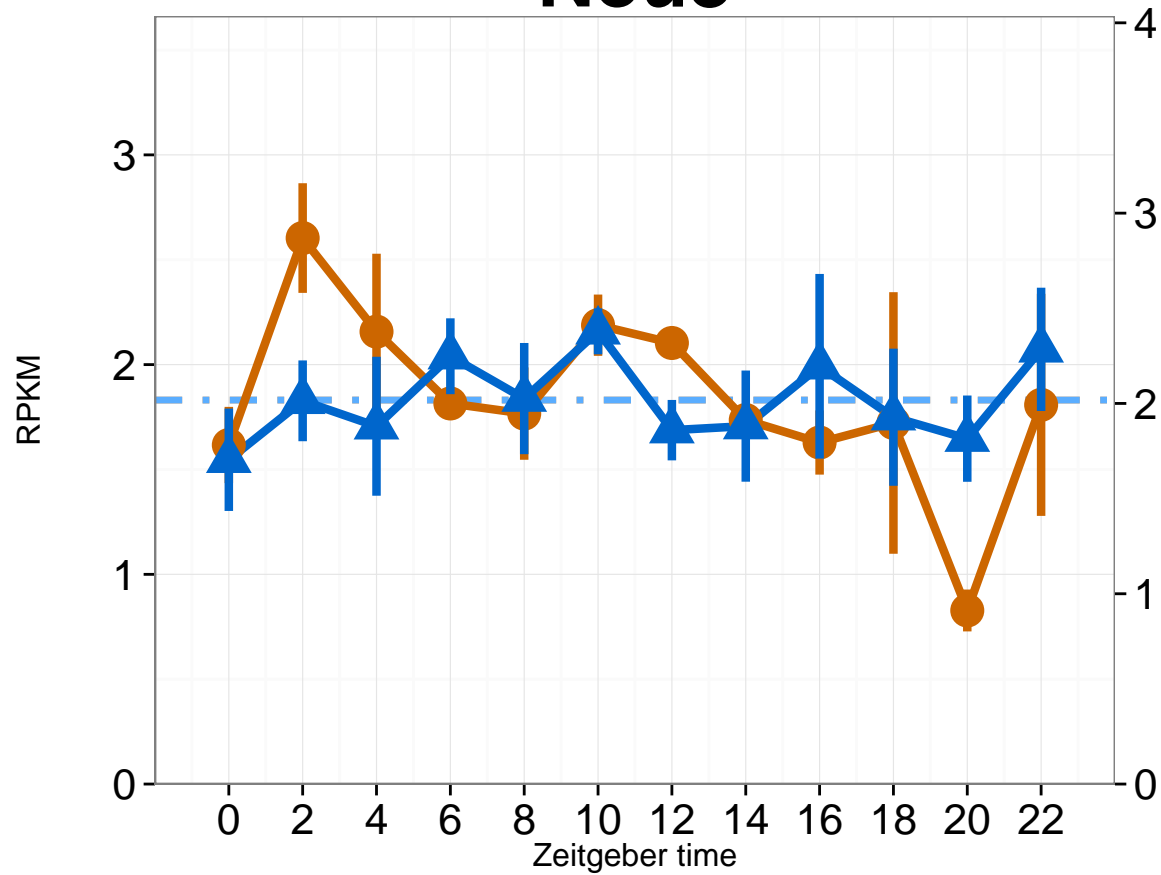

## Neu3

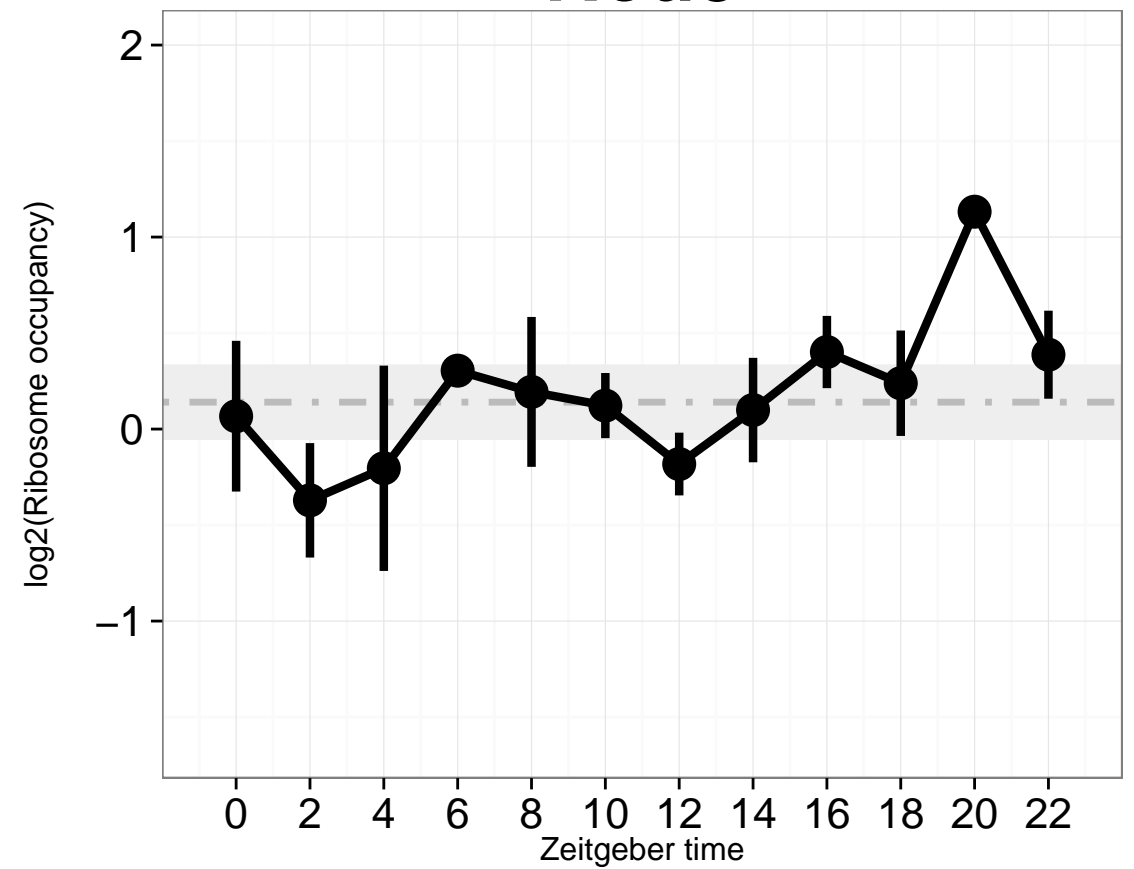

Supplement: Supplementary file 5971 [file 1]

# Mgat2

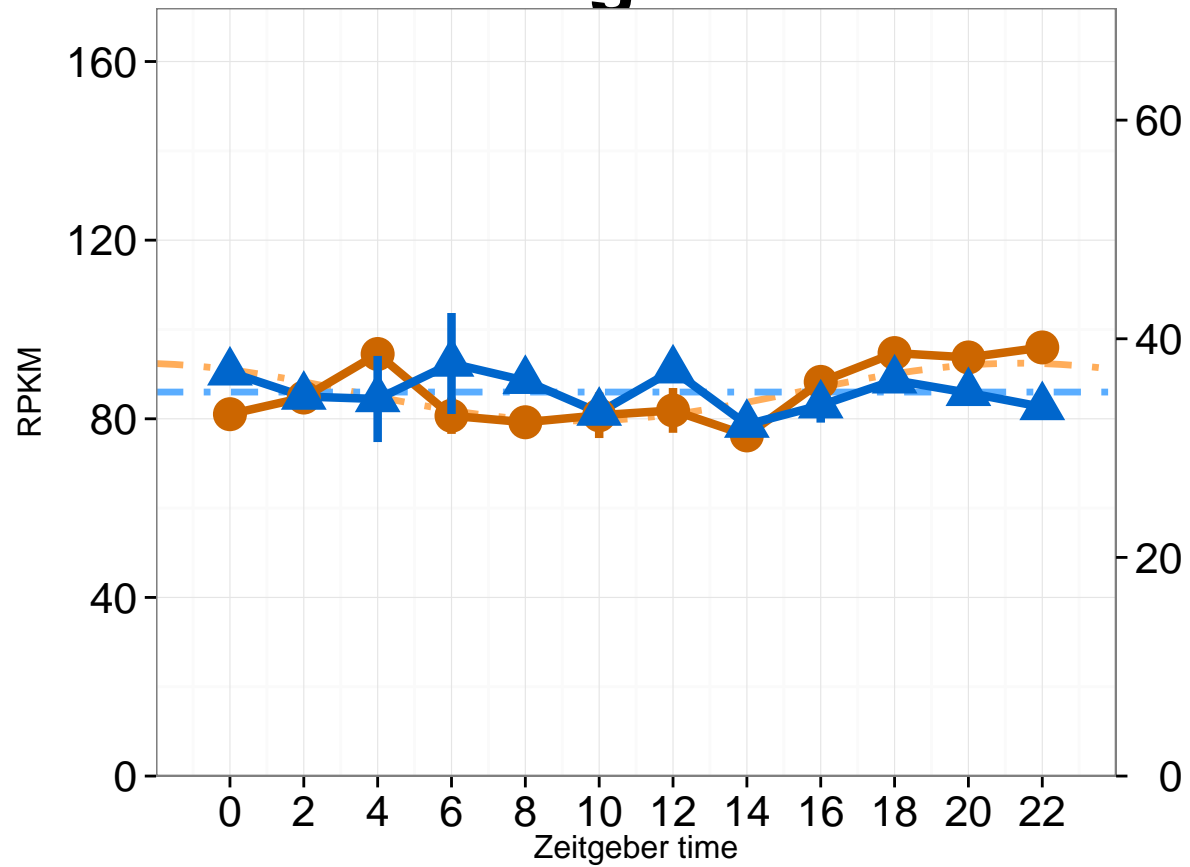

# Mgat2

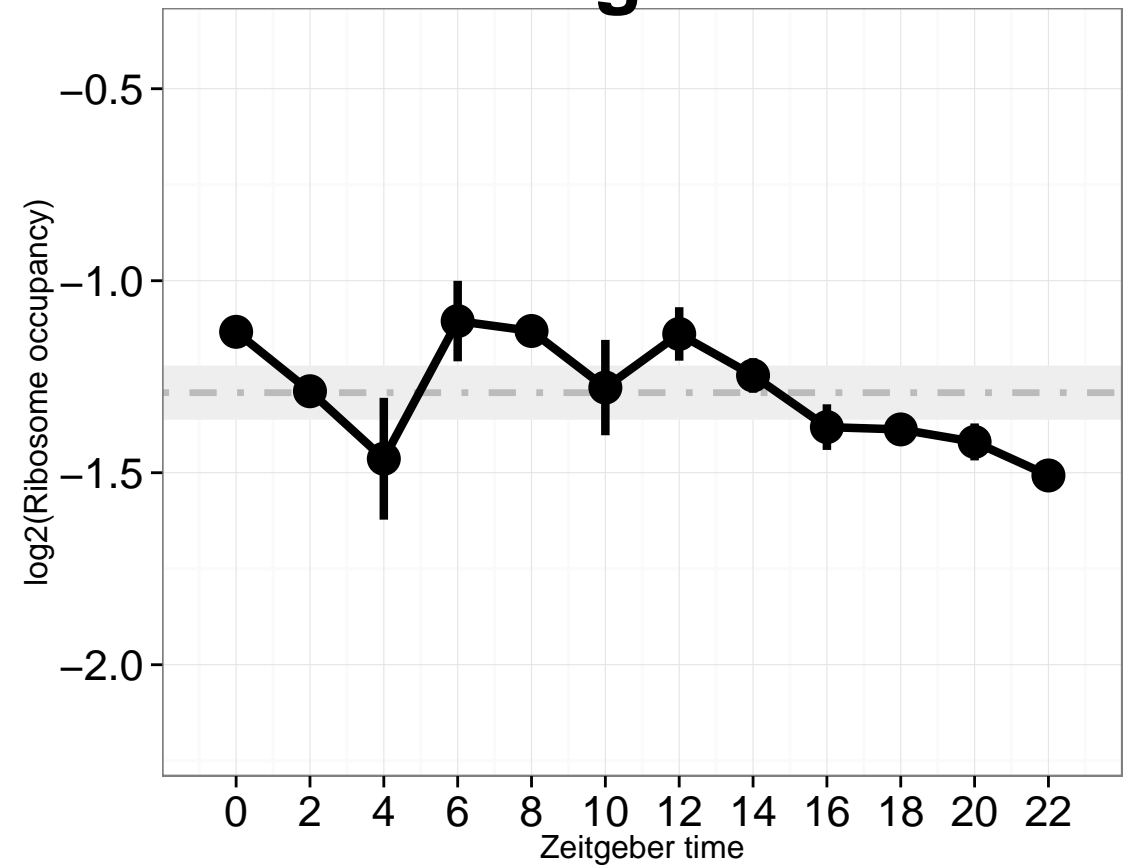

Supplement: Supplementary file 5972 [file 1]

## Ogfr

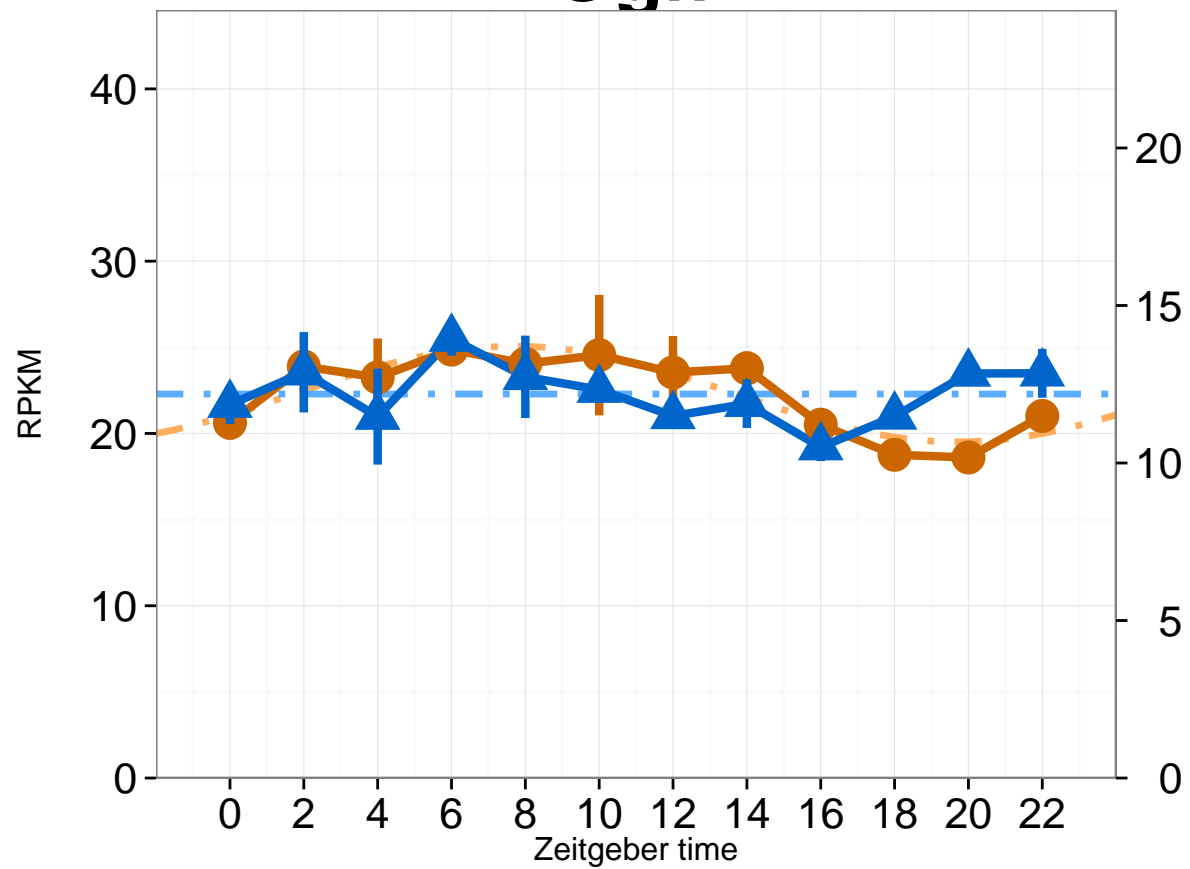

## Ogfr

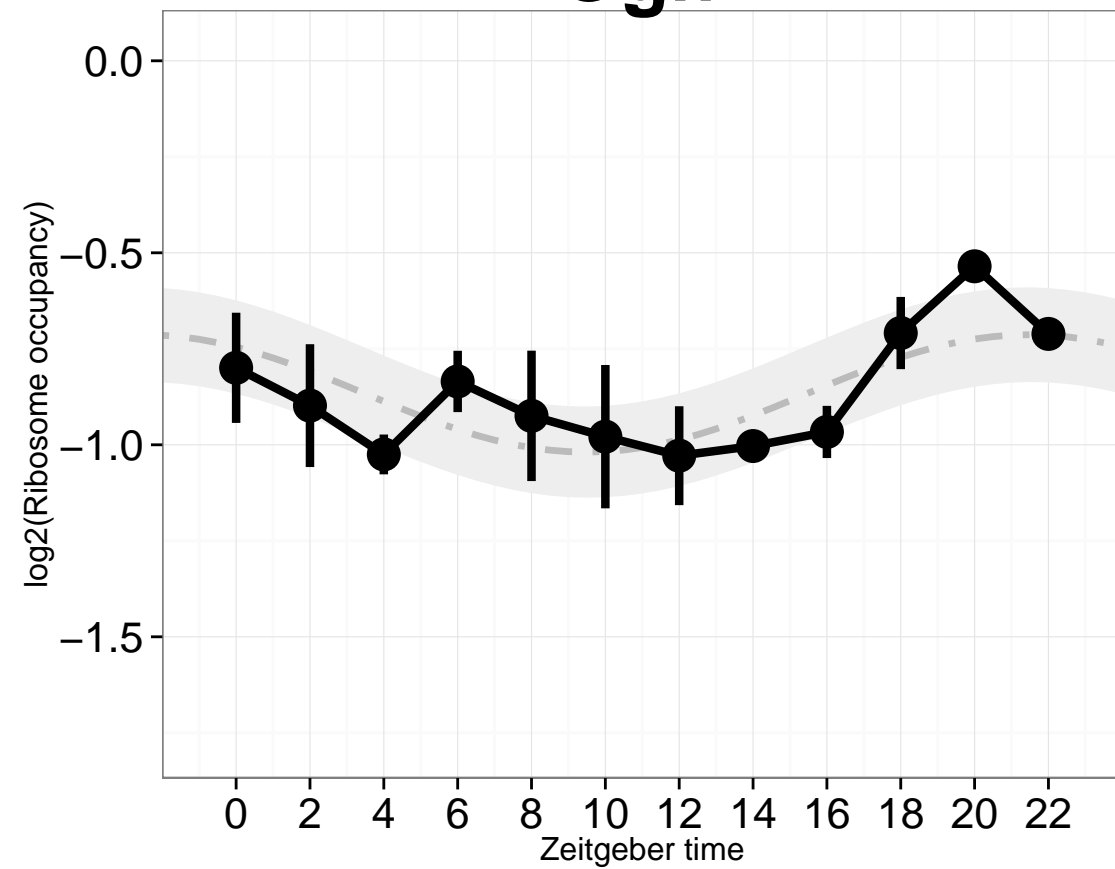

Supplement: Supplementary file 5973 [file 1]

## Sin3b

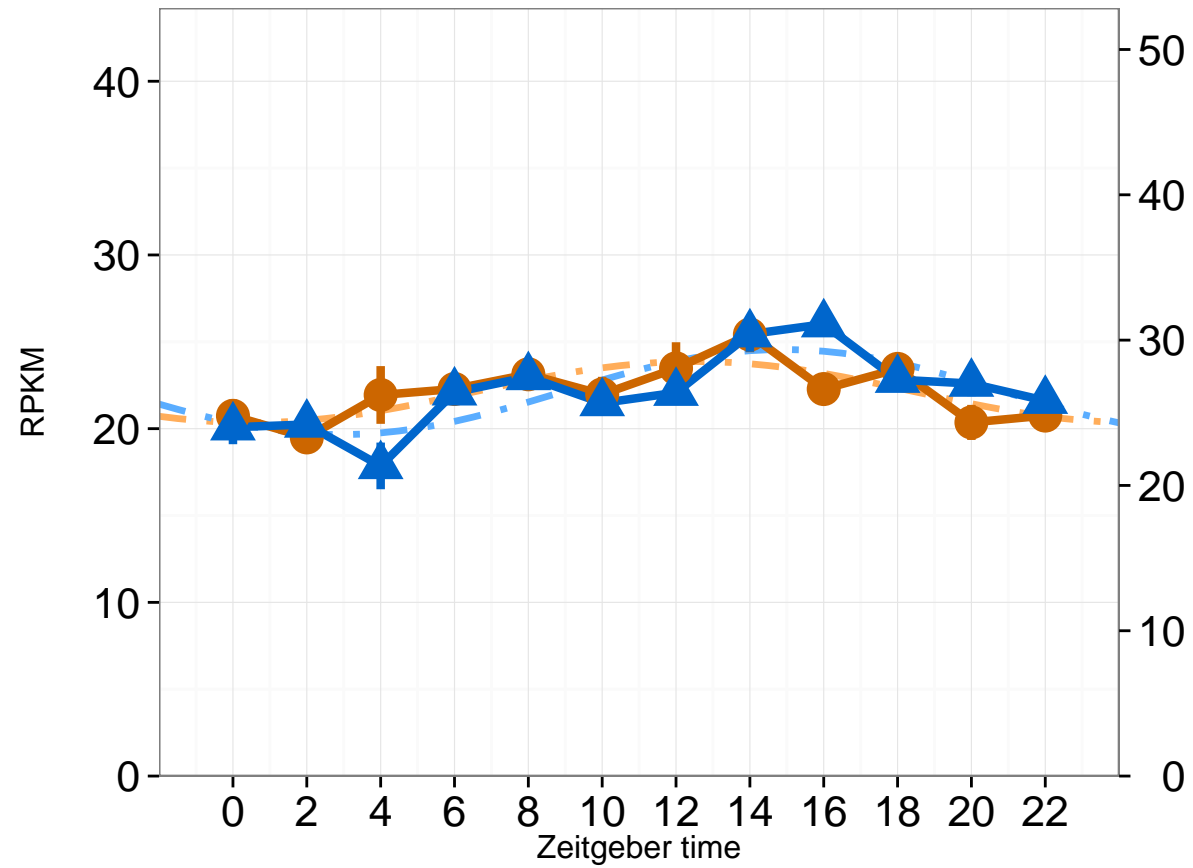

## Sin3b

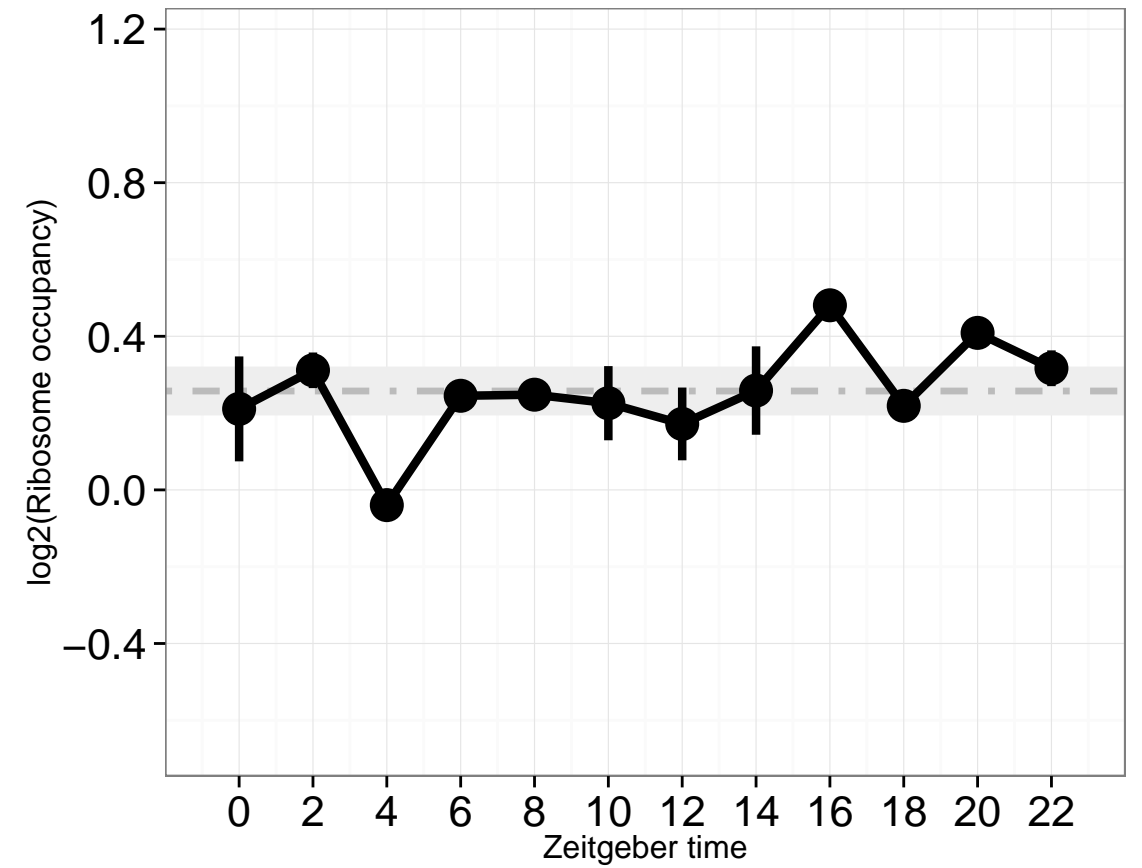

Supplement: Supplementary file 5974 [file 1]

## Gm5595

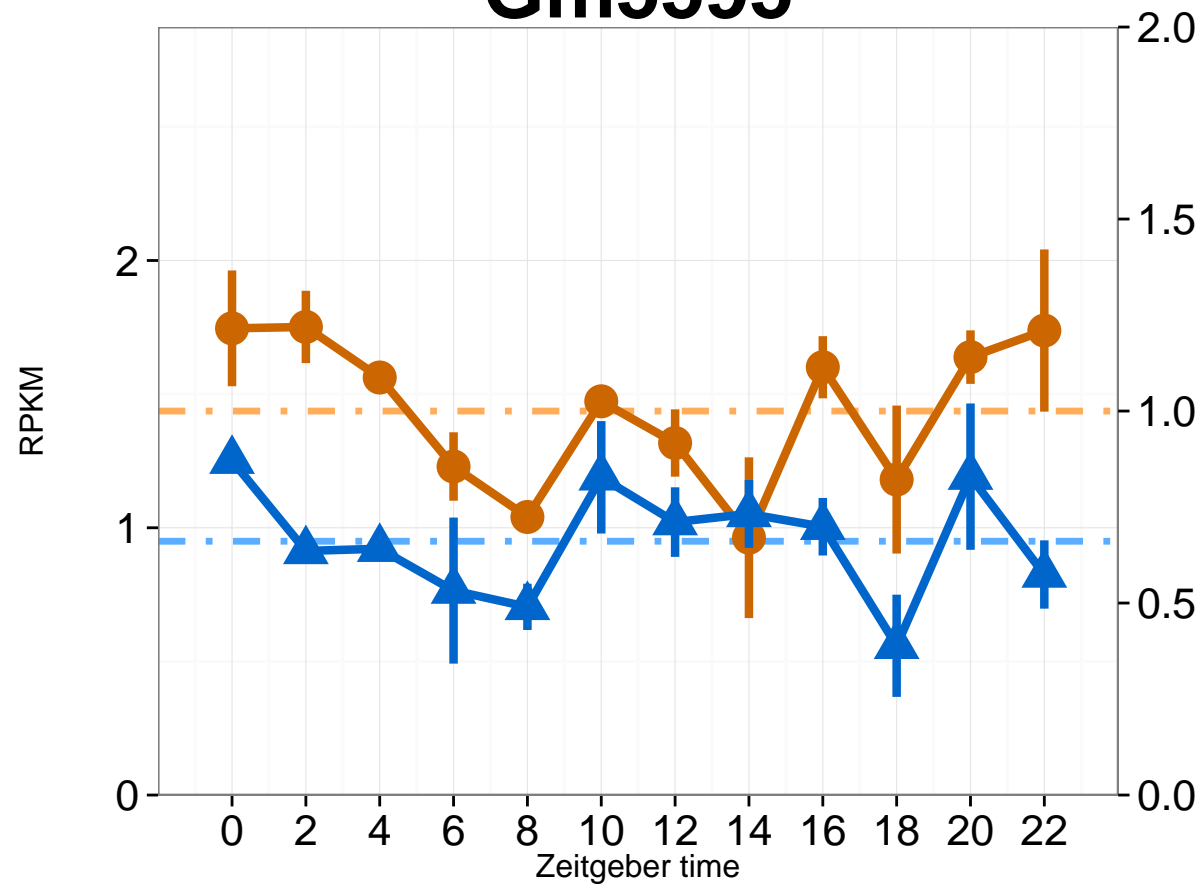

## Gm5595

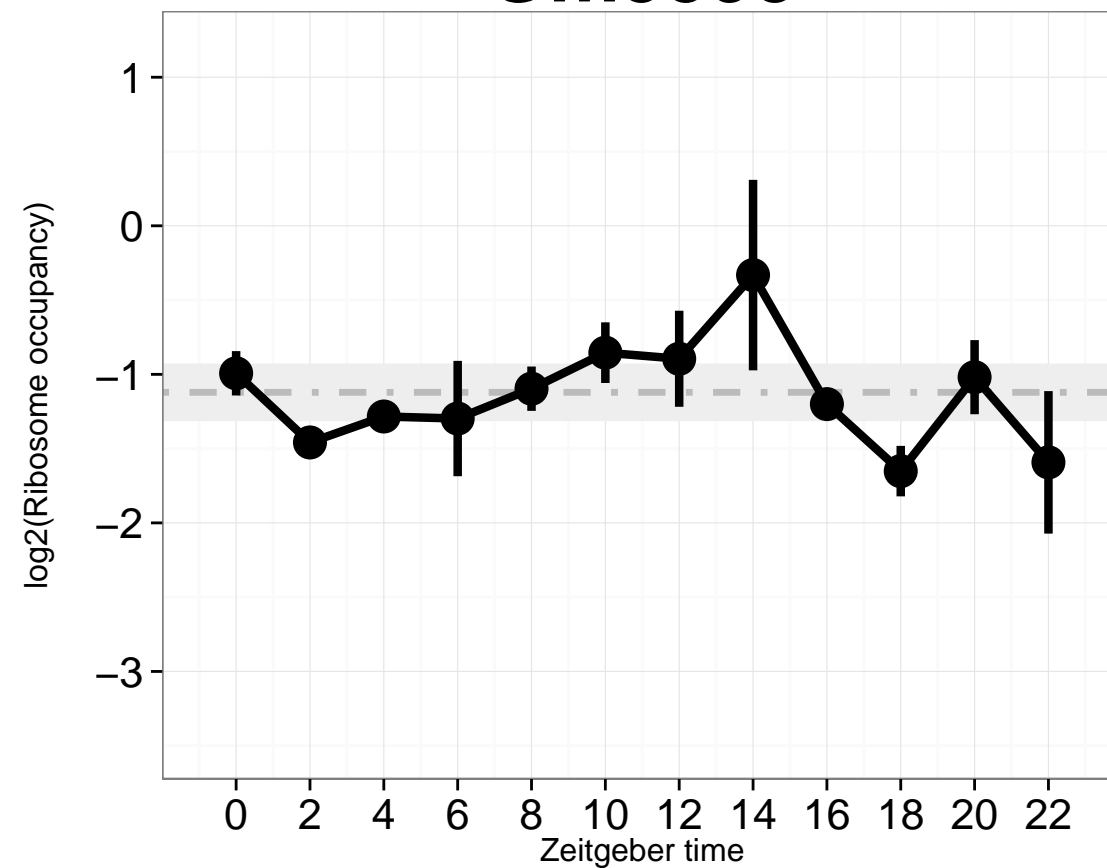

Supplement: Supplementary file 5975 [file 1]

## Shroom3

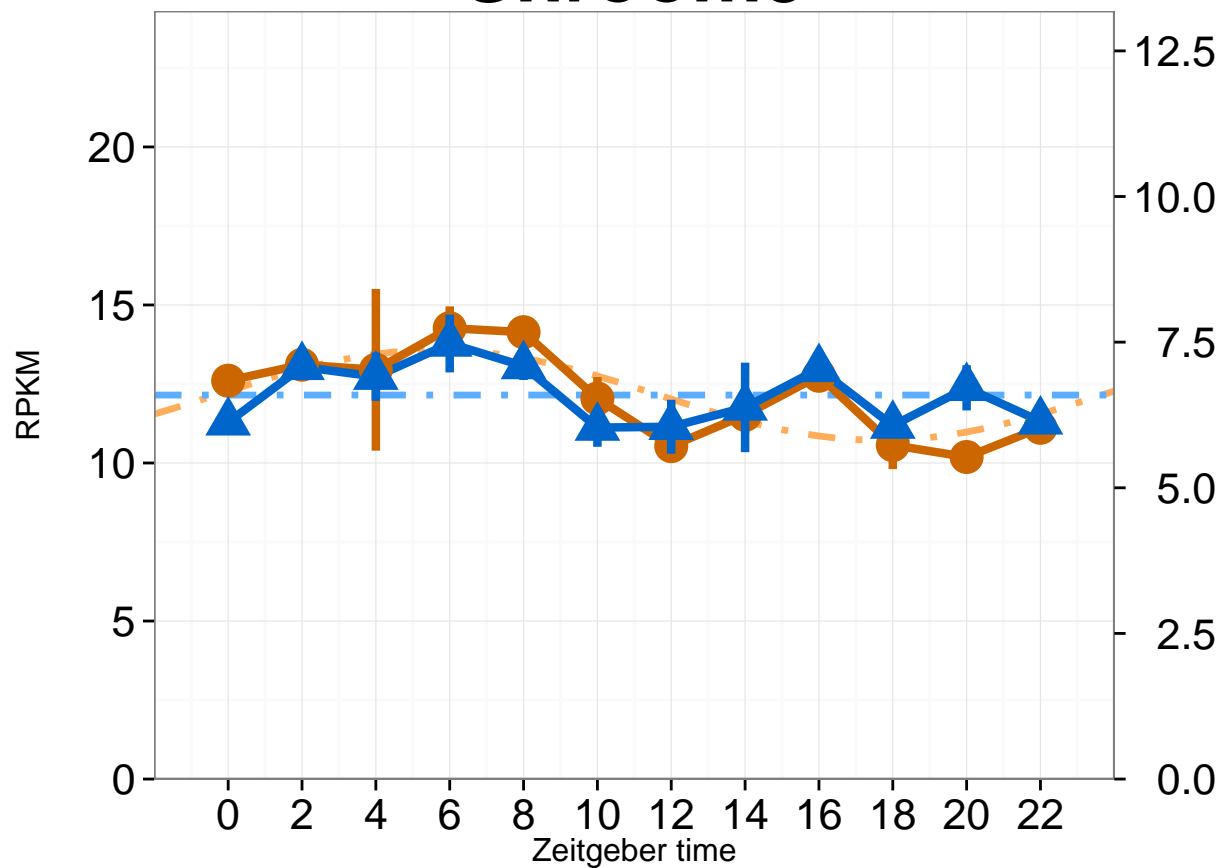

## Shroom3

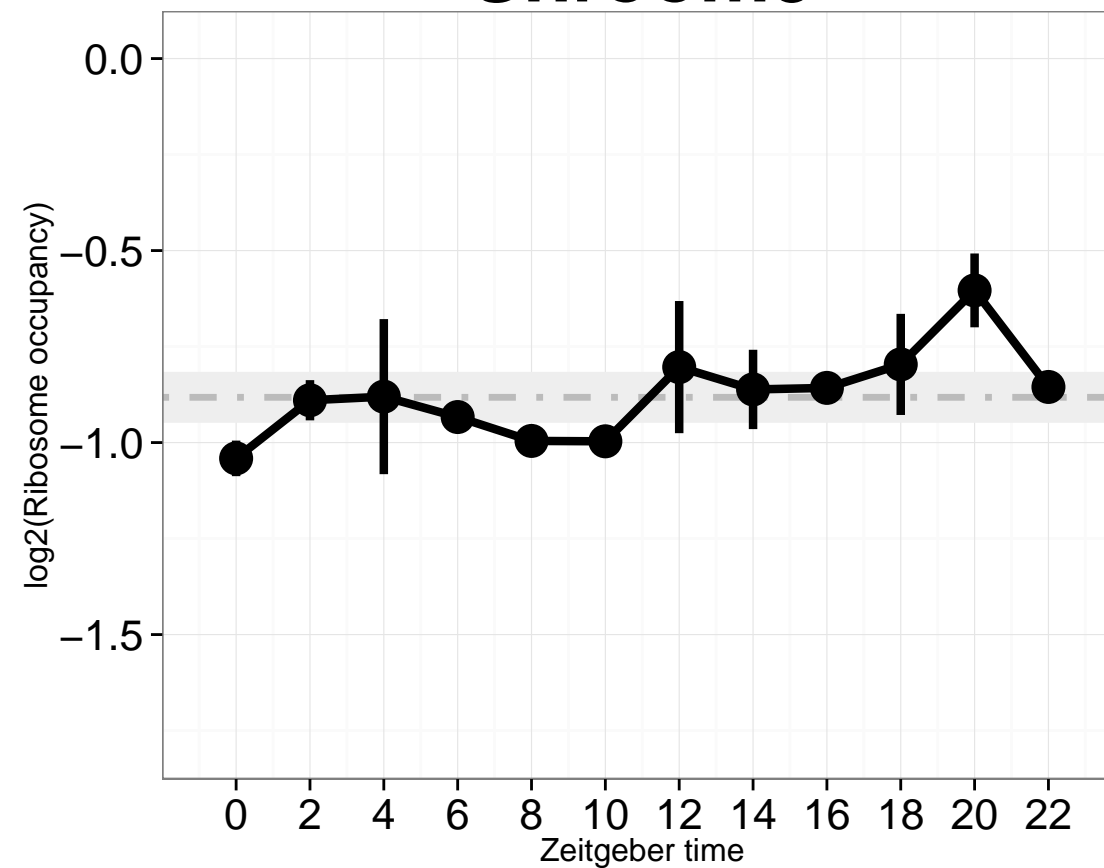

Supplement: Supplementary file 5976 [file 1]

# Lrrc14b

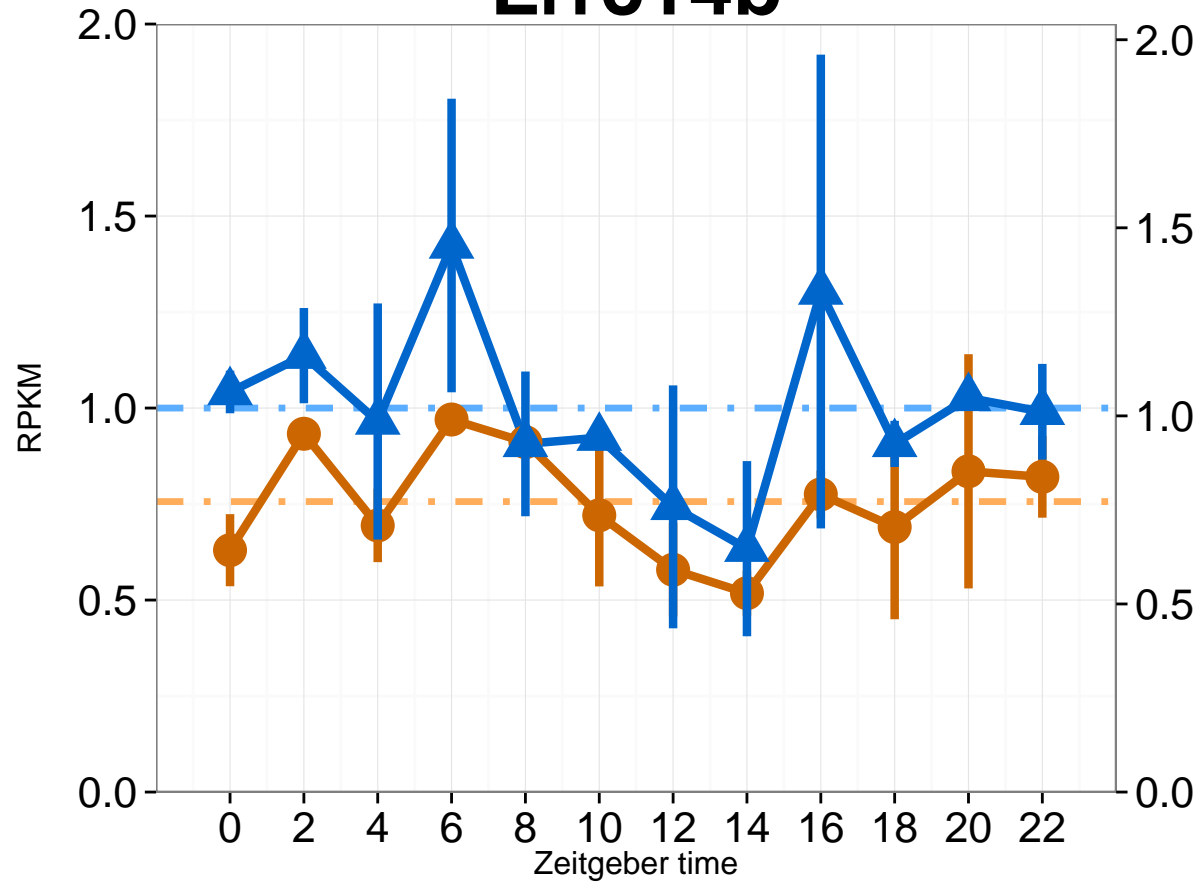

# Lrrc14b

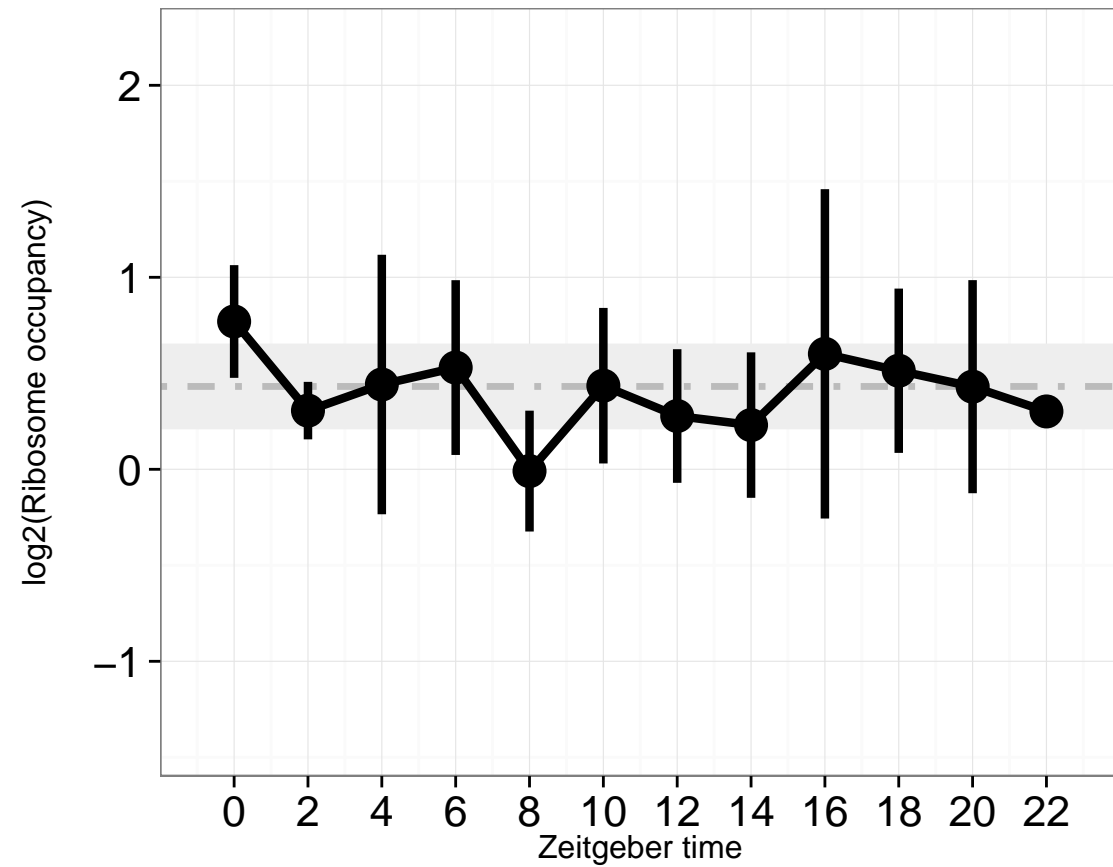

Supplement: Supplementary file 5977 [file 1]

## Cluh

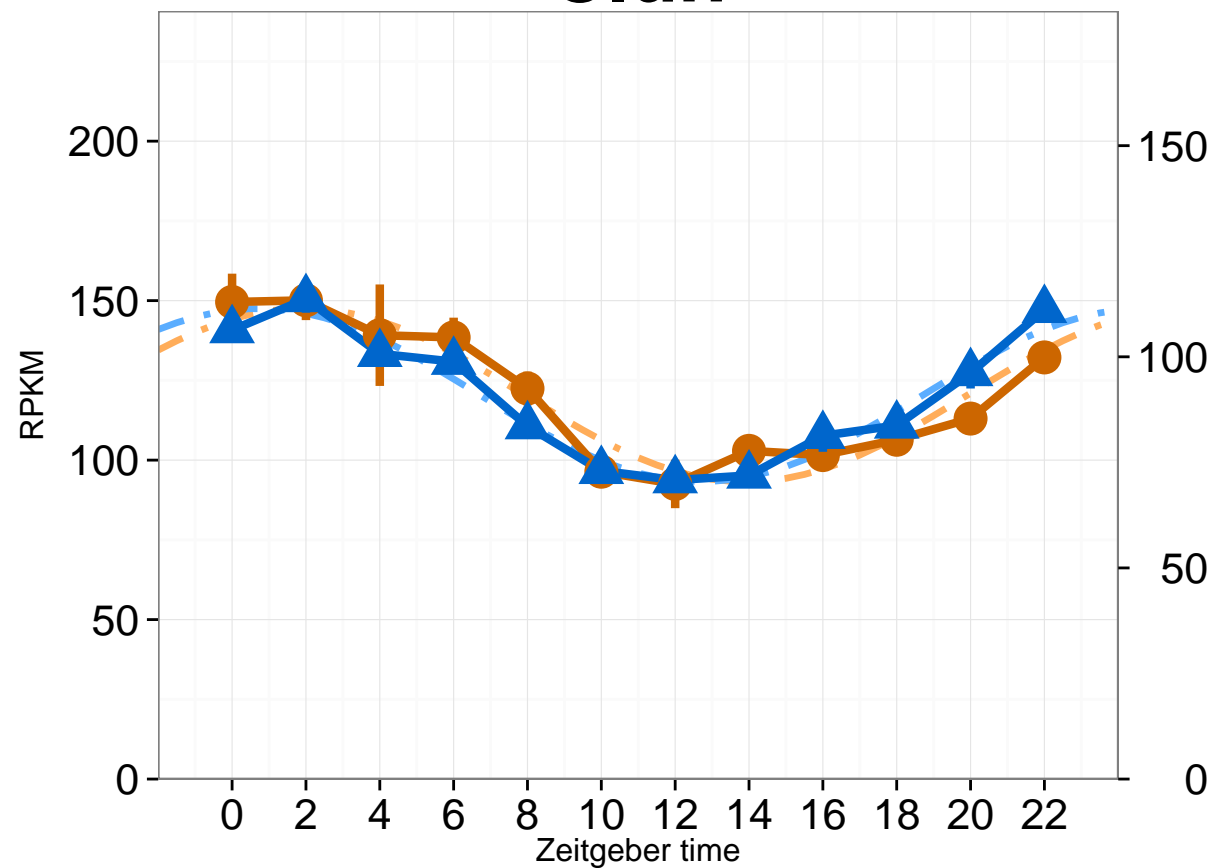

## Cluh

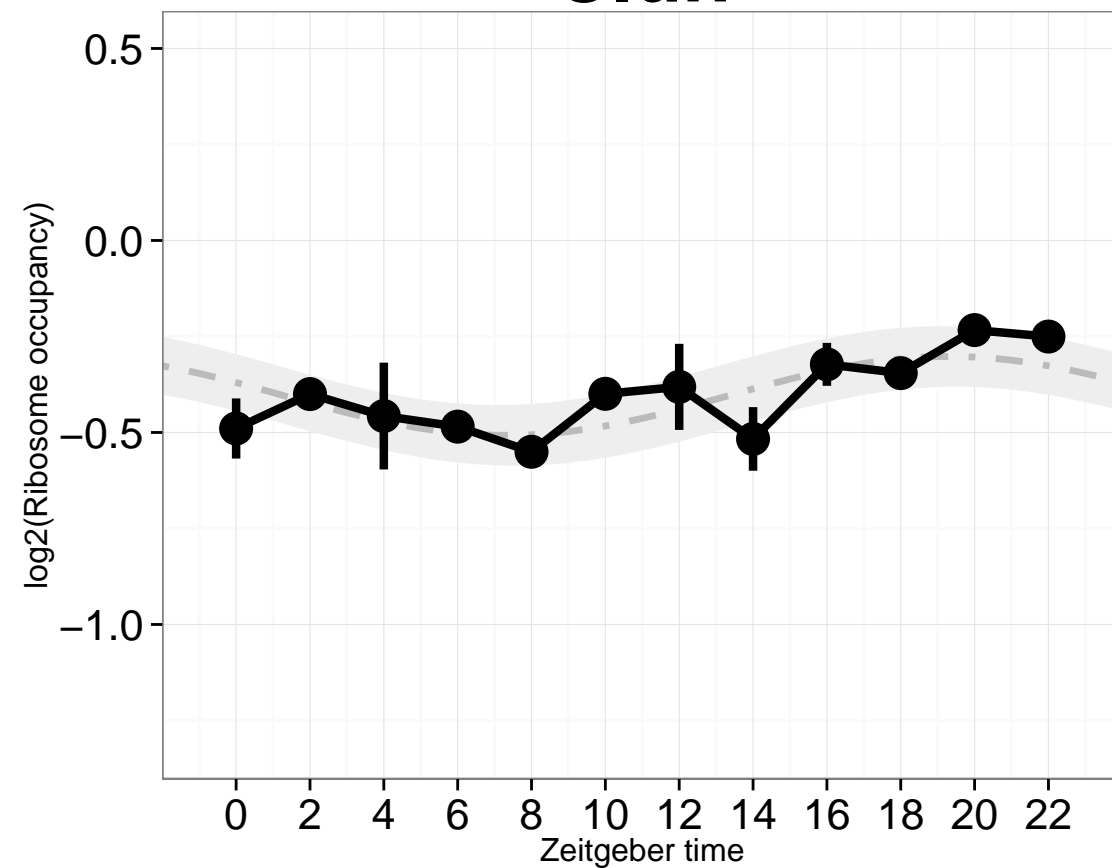

Supplement: Supplementary file 5978 [file 1]

Sep15

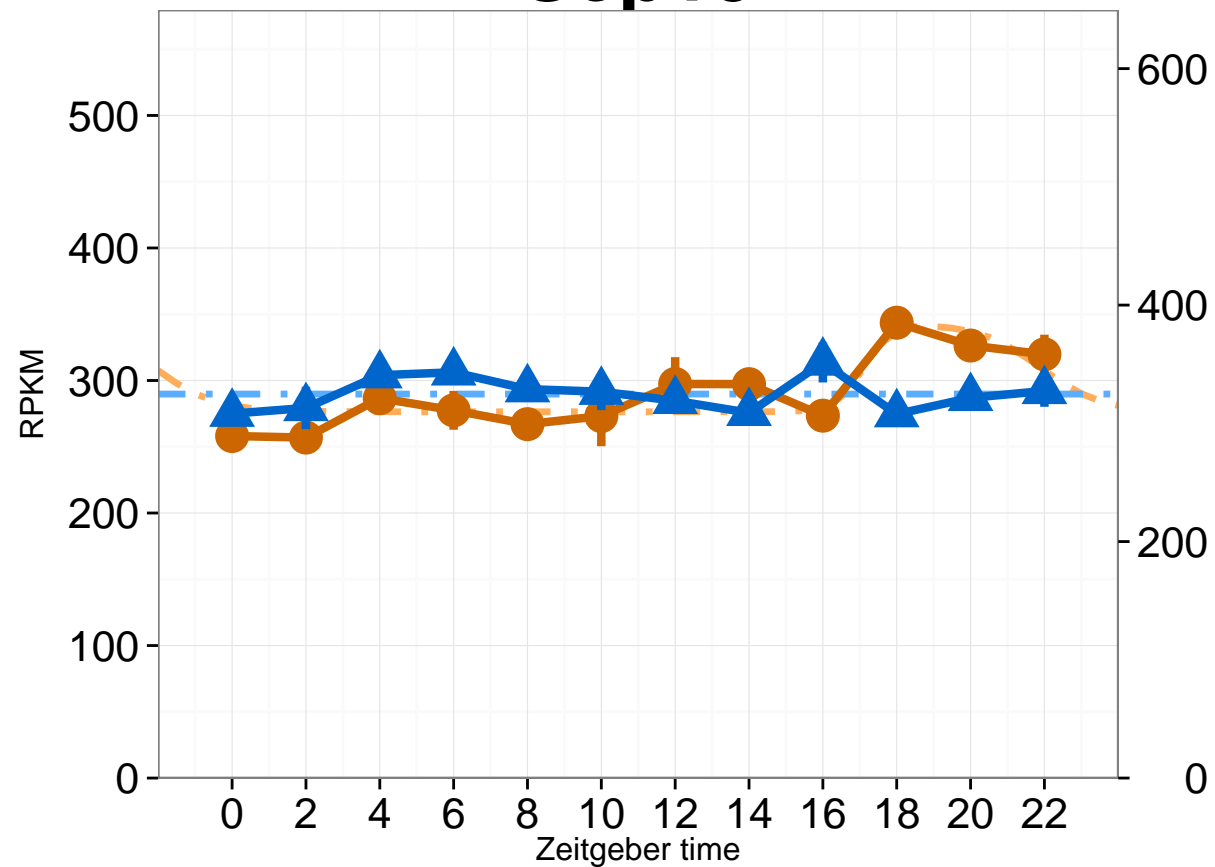

Sep15

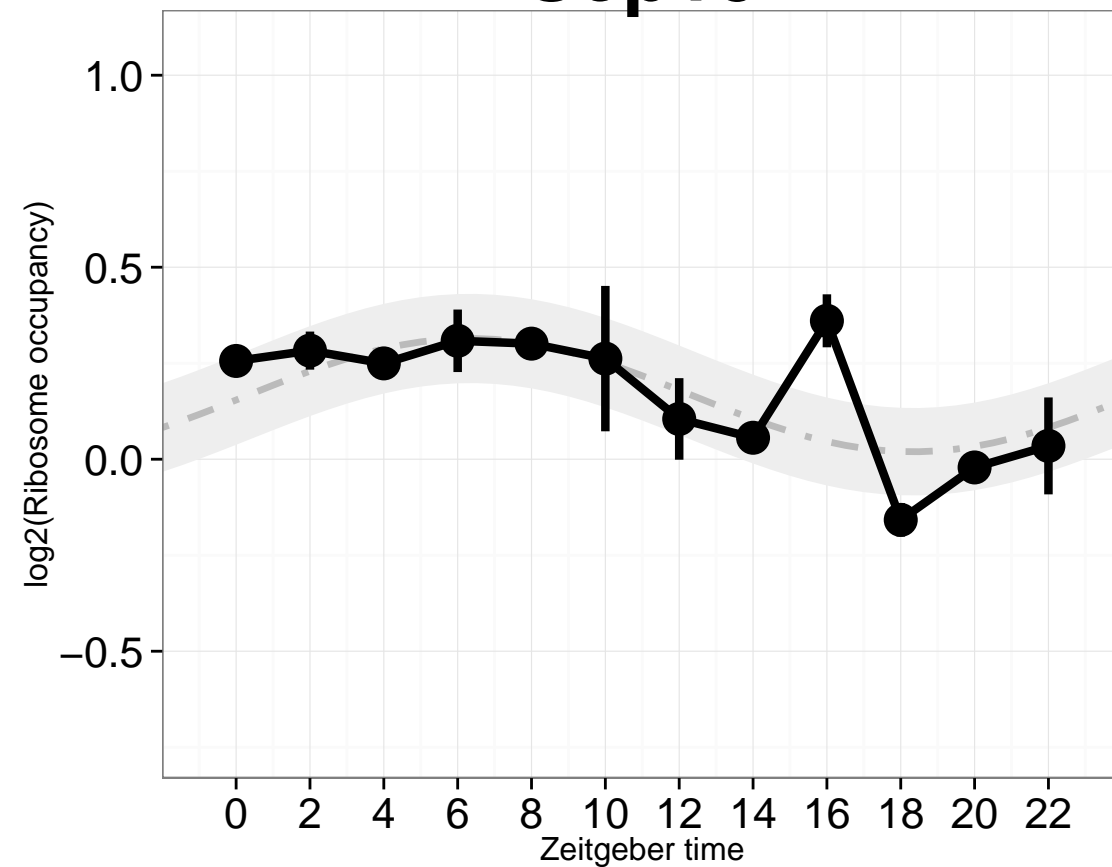

Supplement: Supplementary file 5979 [file 1]

## Dnmt1

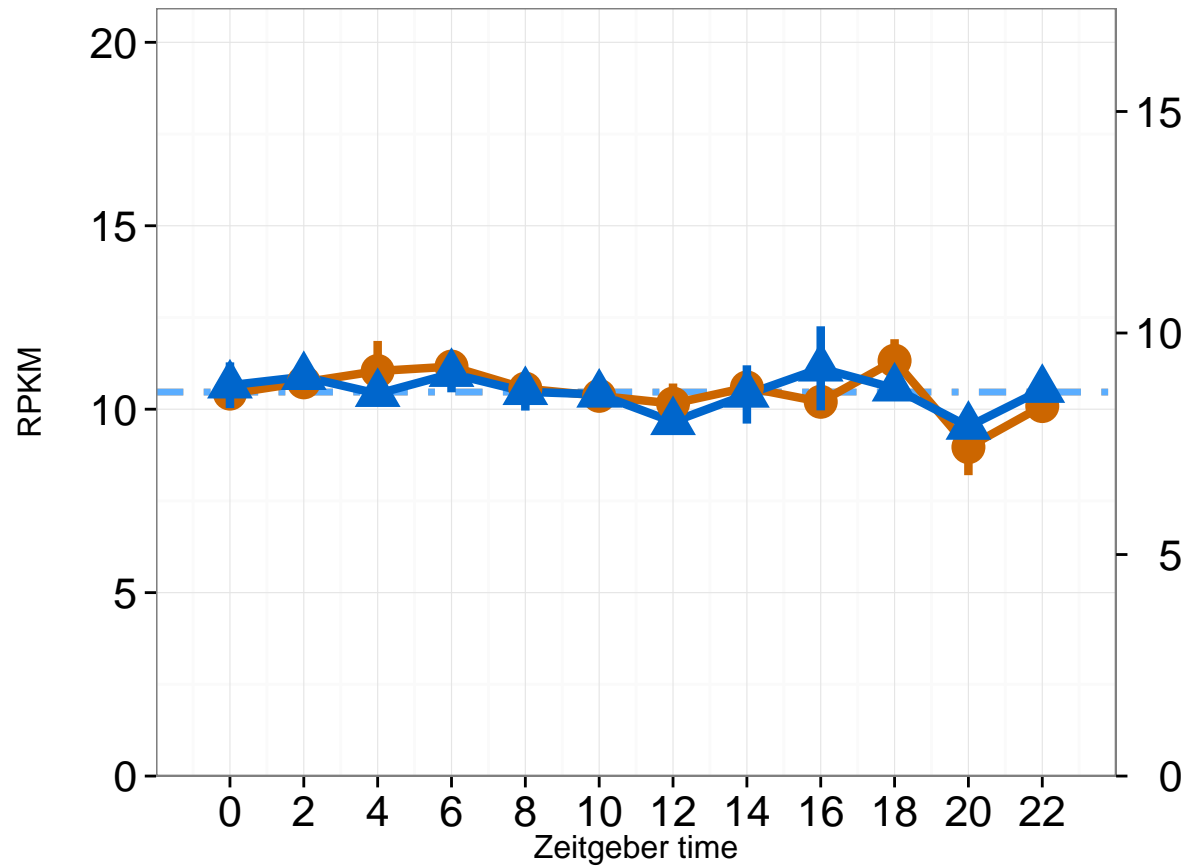

## Dnmt1

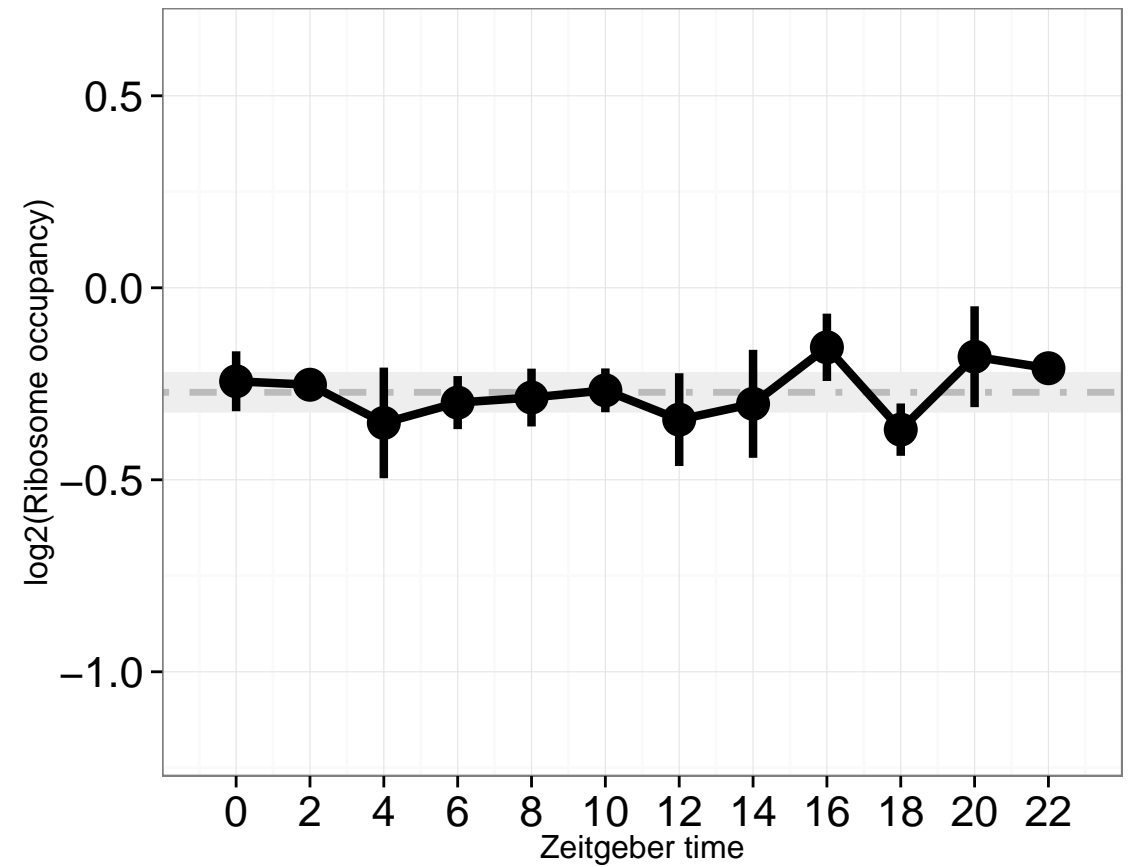

Supplement: Supplementary file 5980 [file 1]

# Tmem106a

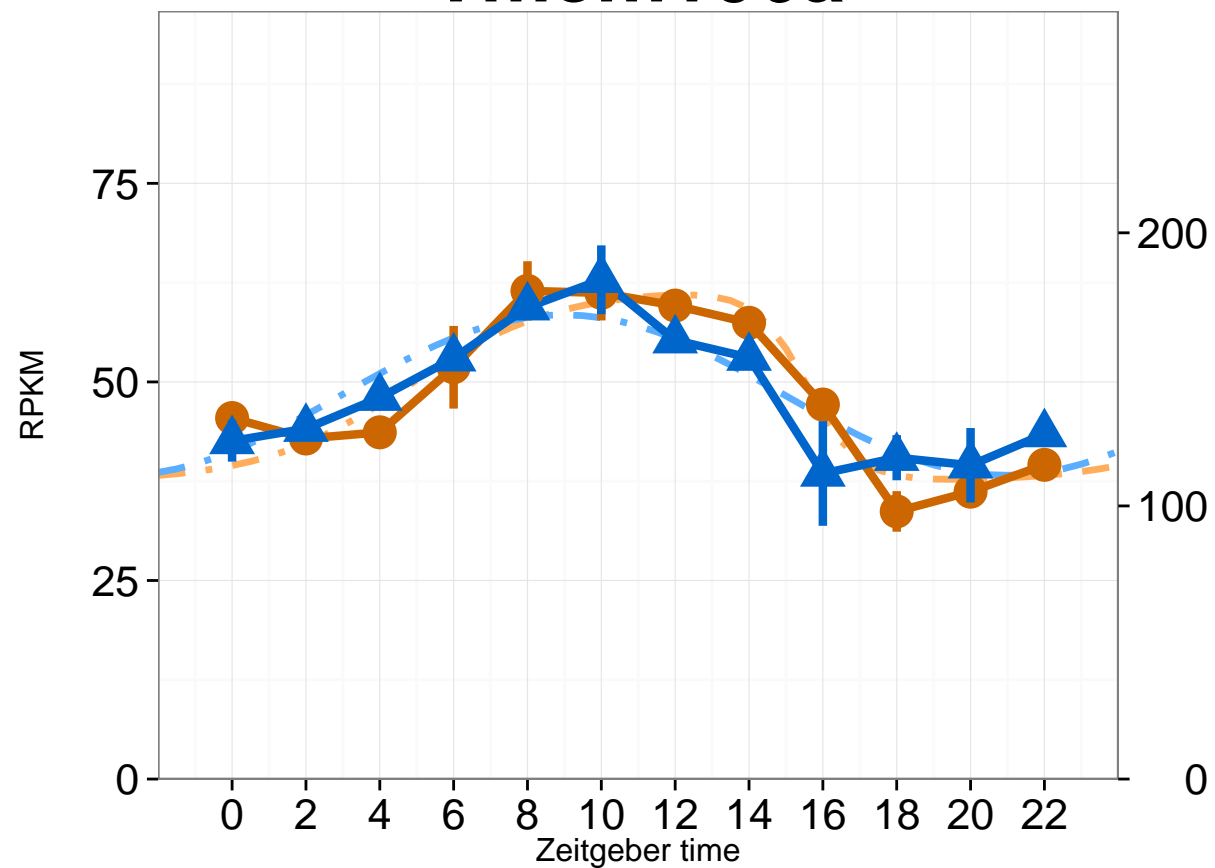

# Tmem106a

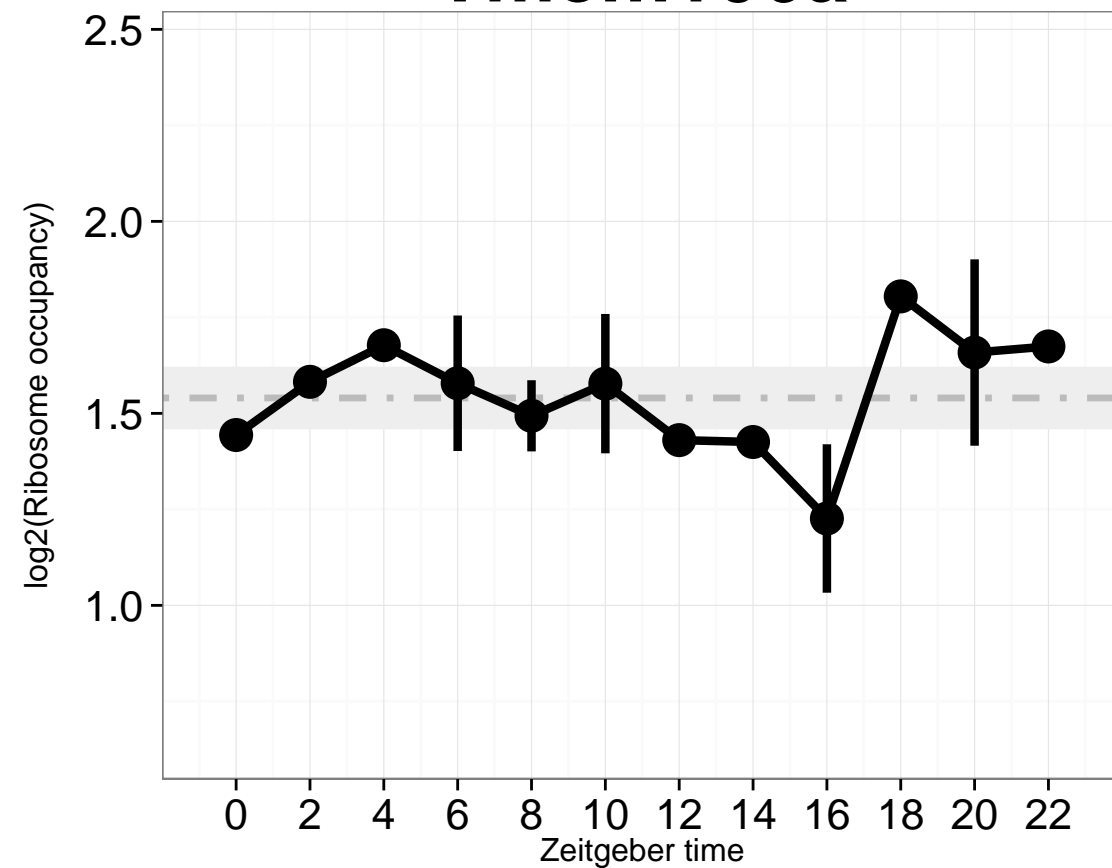

Supplement: Supplementary file 5981 [file 1]

## Trmu

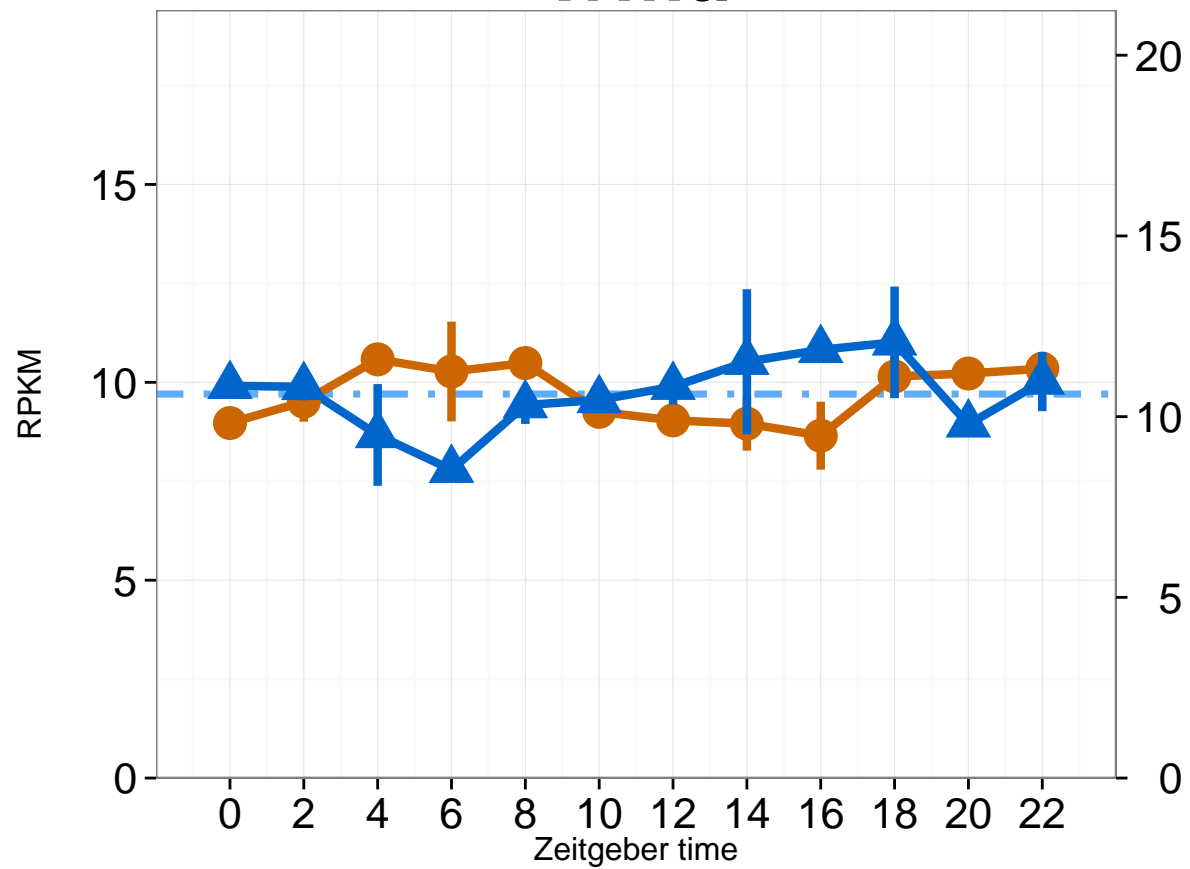

## Trmu

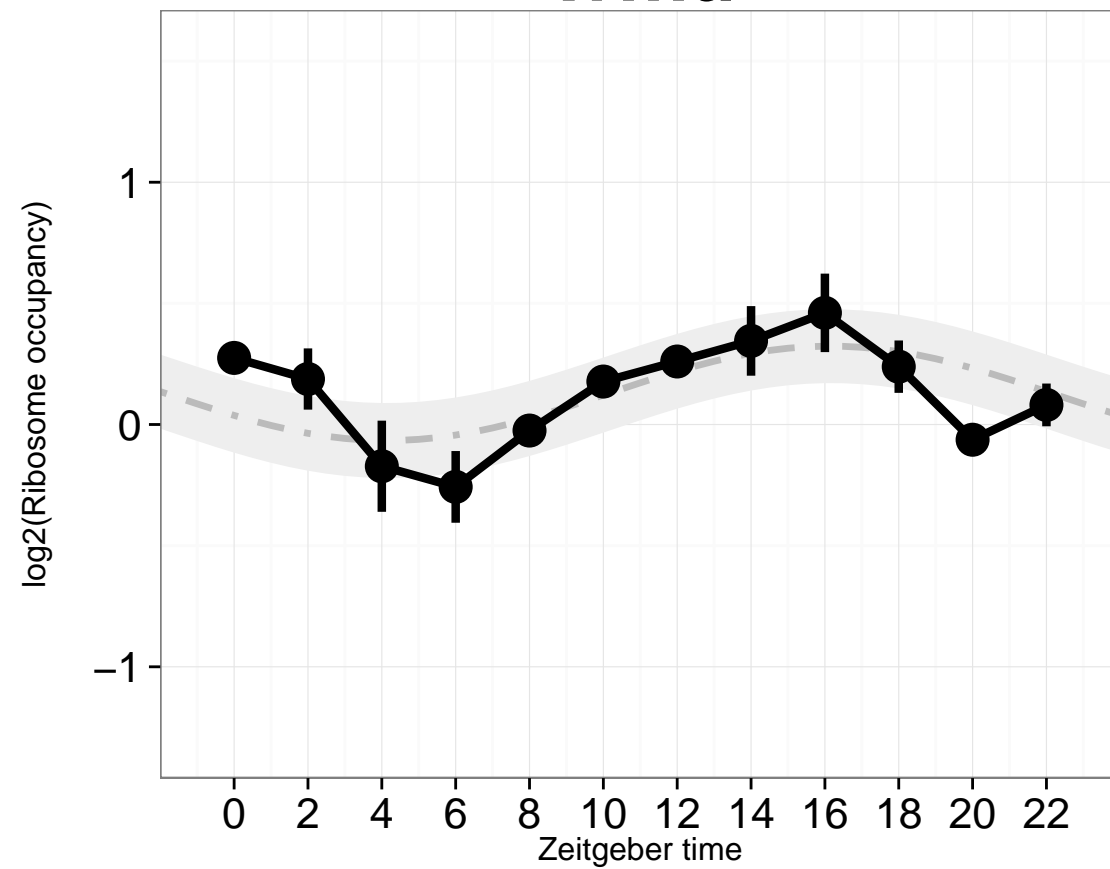

Supplement: Supplementary file 5982 [file 1]

# Tnn

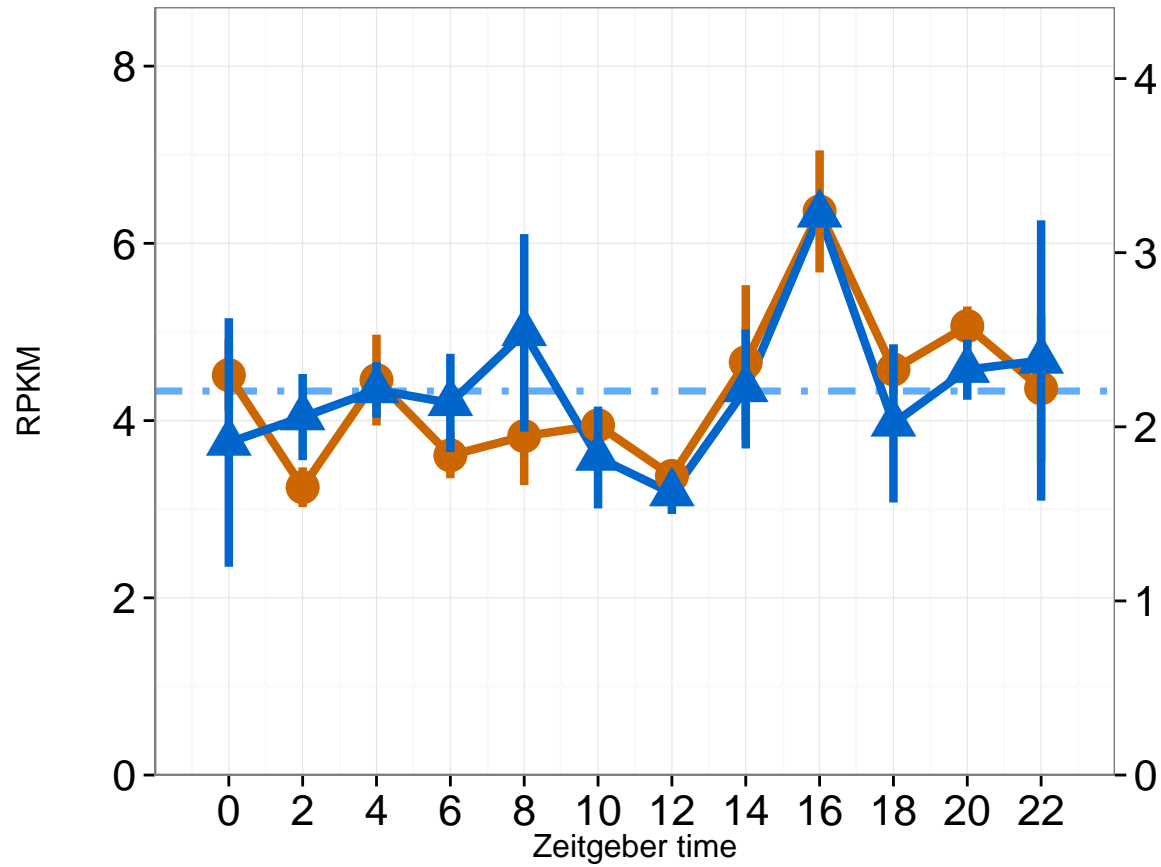

# Tnn

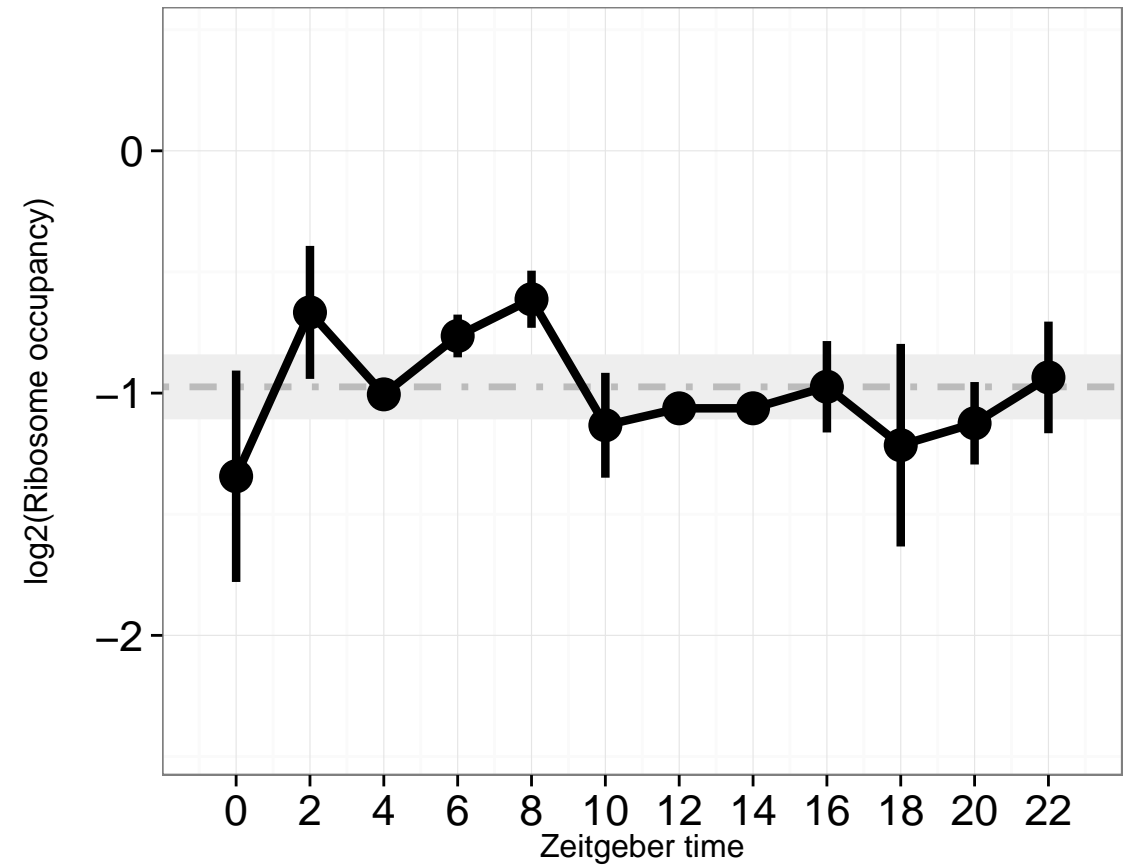

Supplement: Supplementary file 5983 [file 1]

## Lanc12

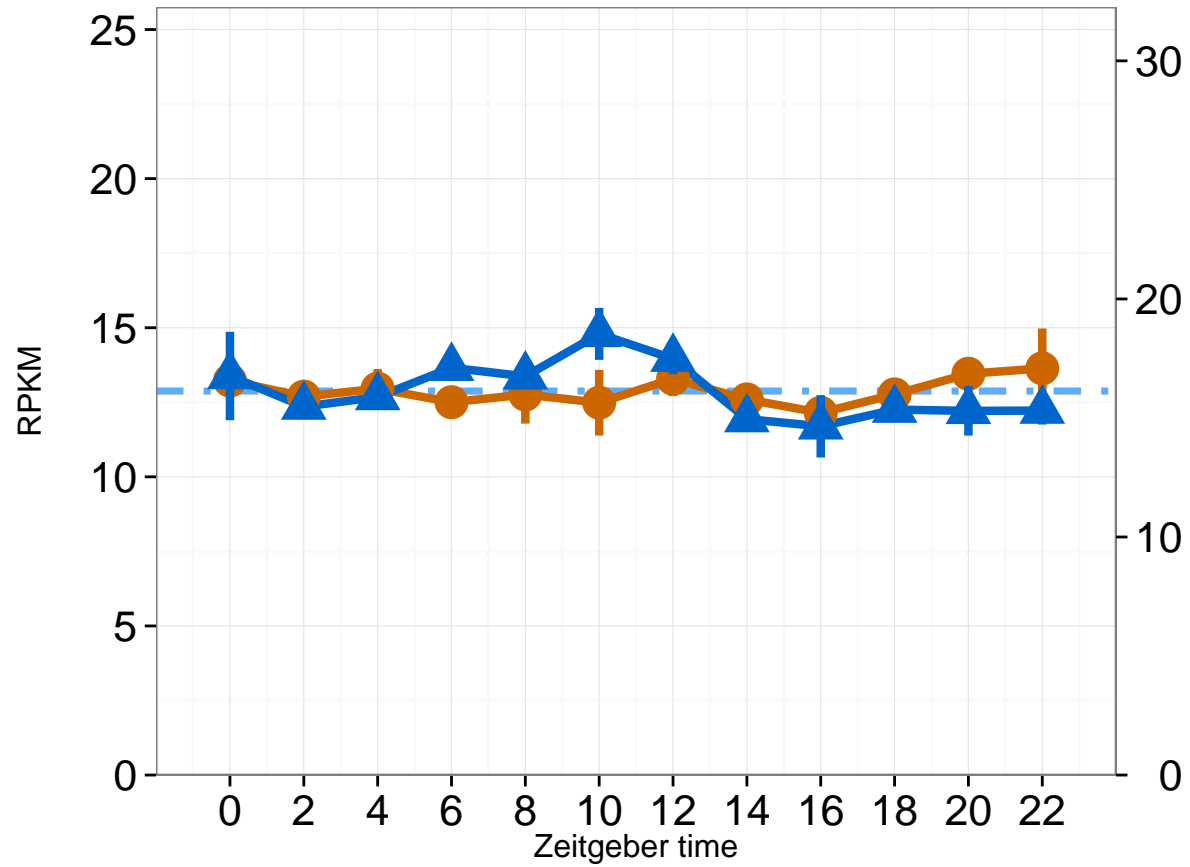

## Lanc12

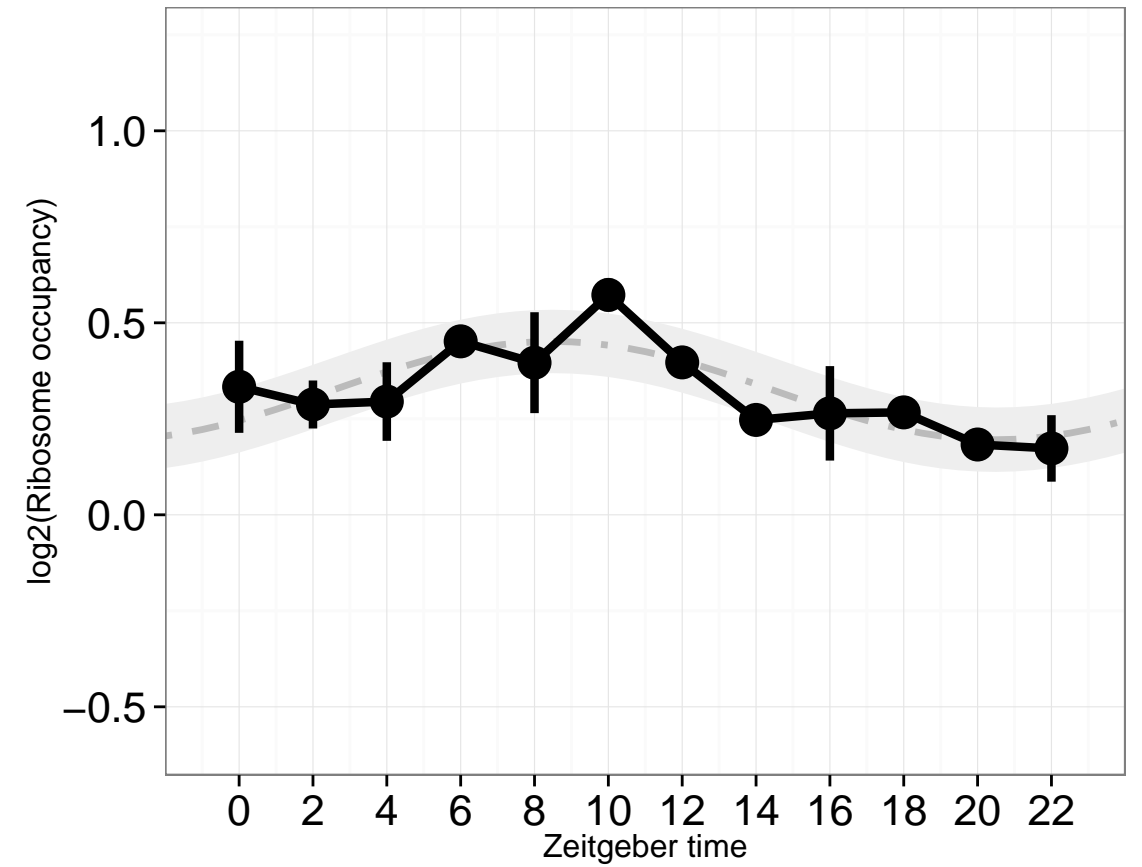

Supplement: Supplementary file 5984 [file 1]

## Anapc2

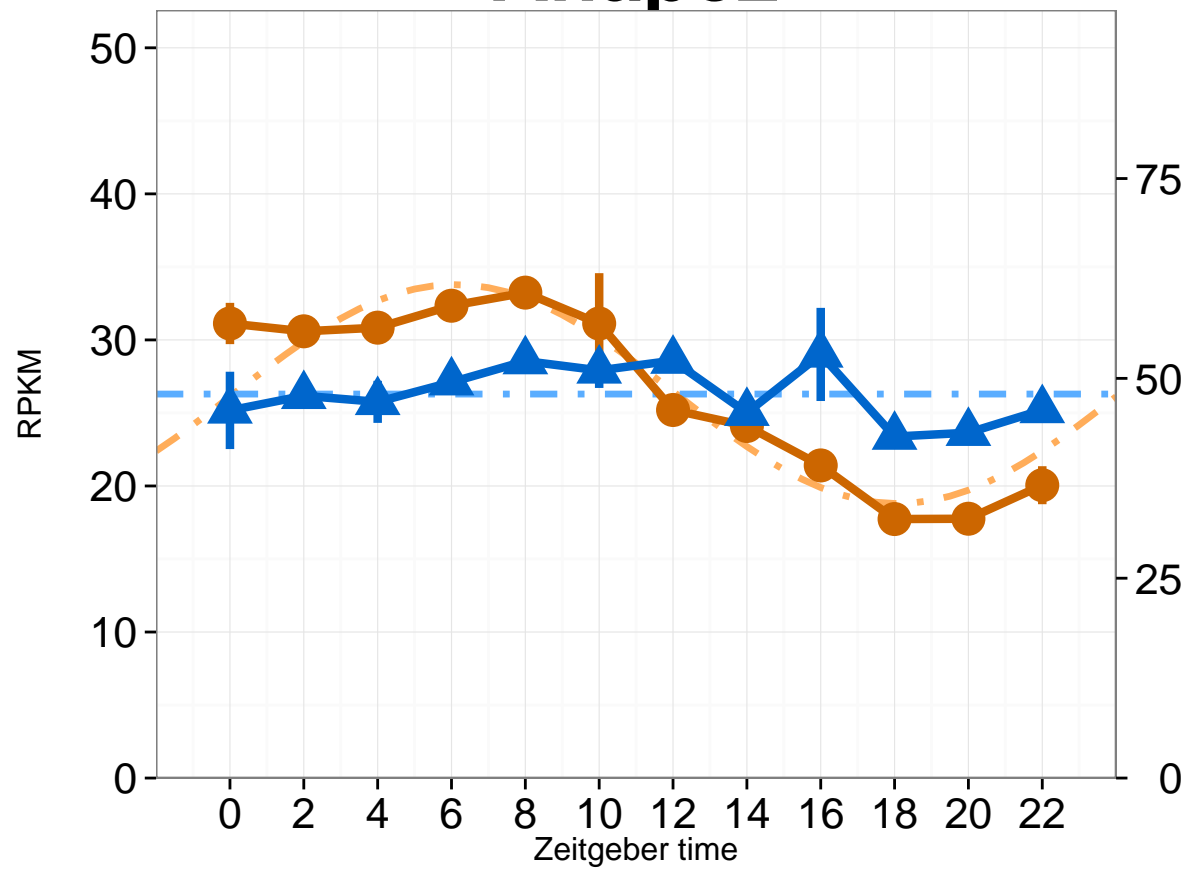

## Anapc2

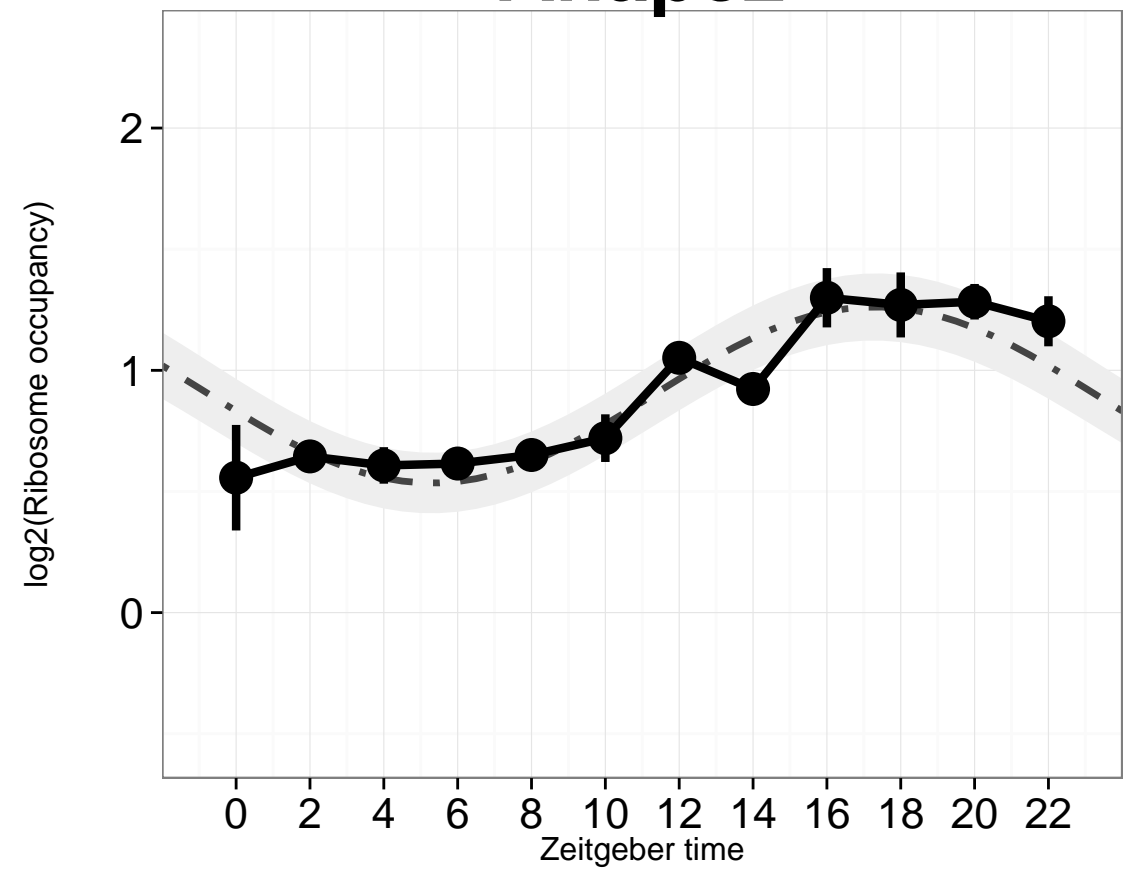

Supplement: Supplementary file 5985 [file 1]

## Galm

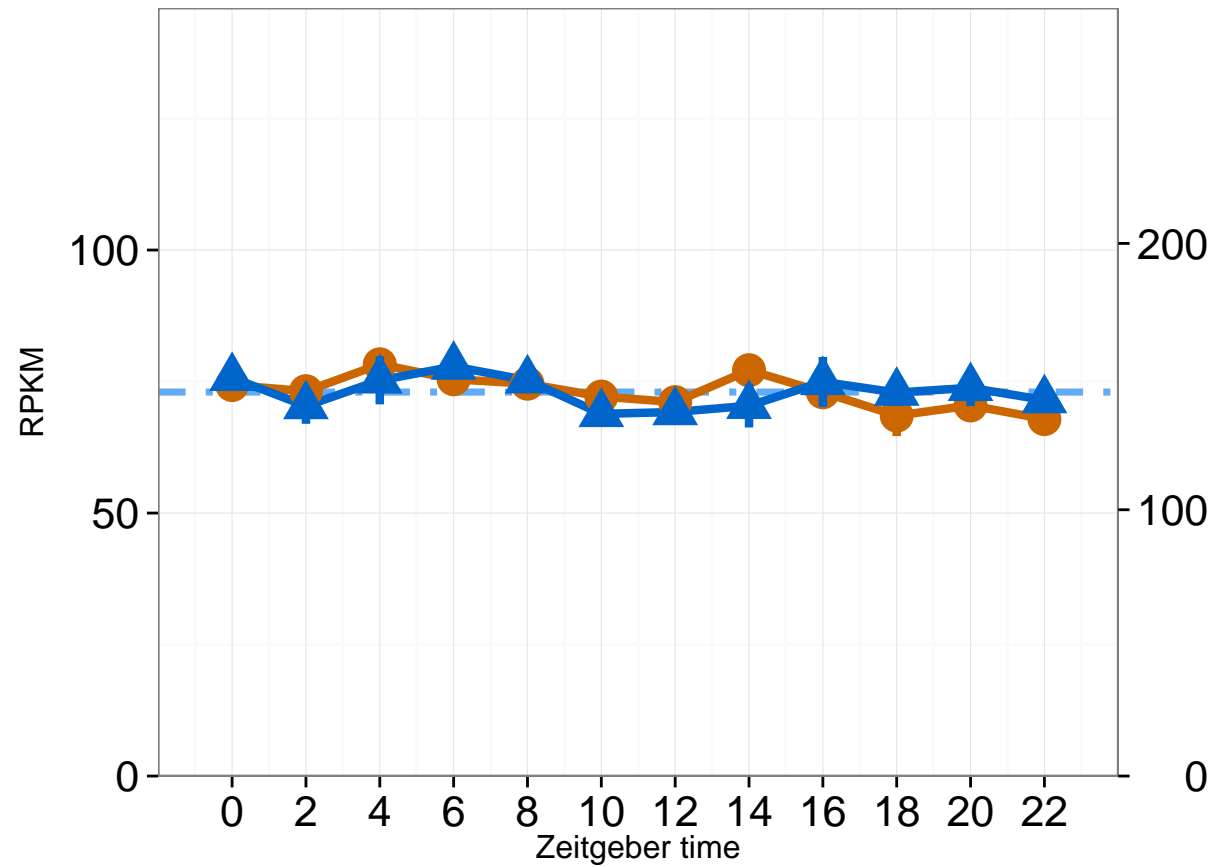

## Galm

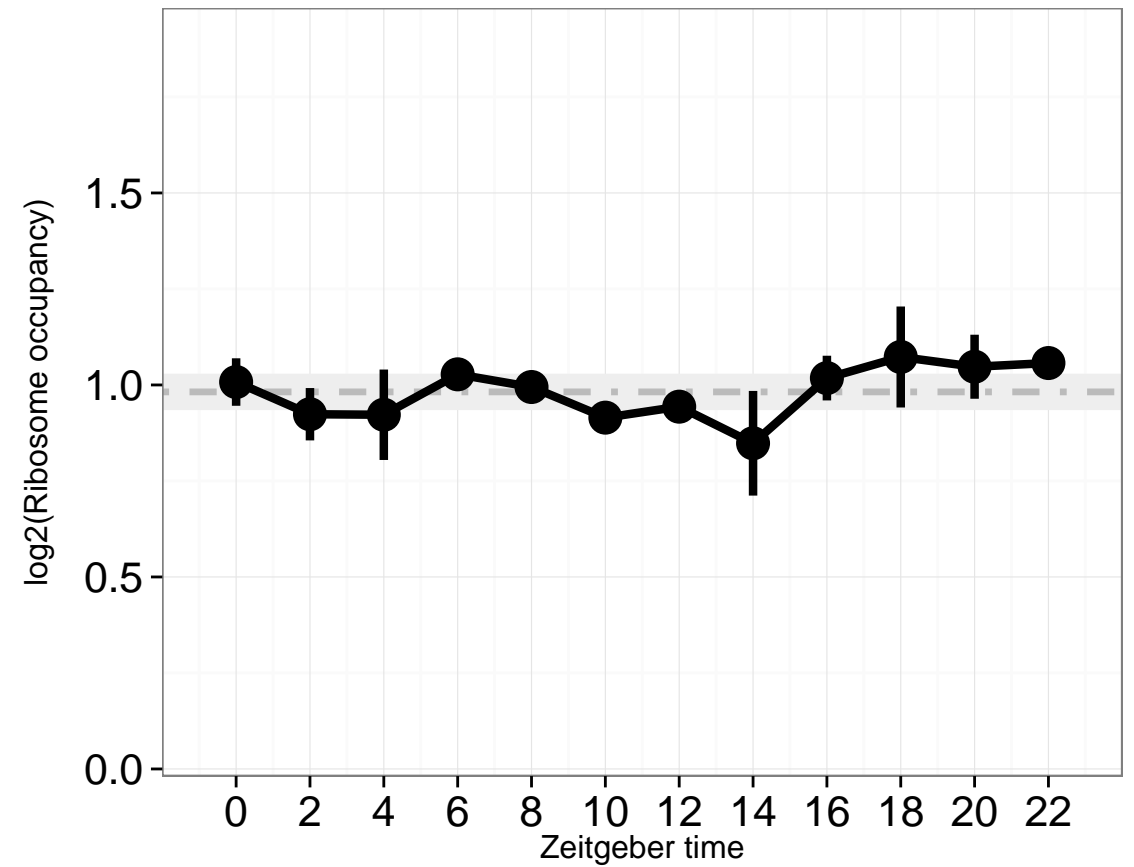

Supplement: Supplementary file 5986 [file 1]

# Lmx1b

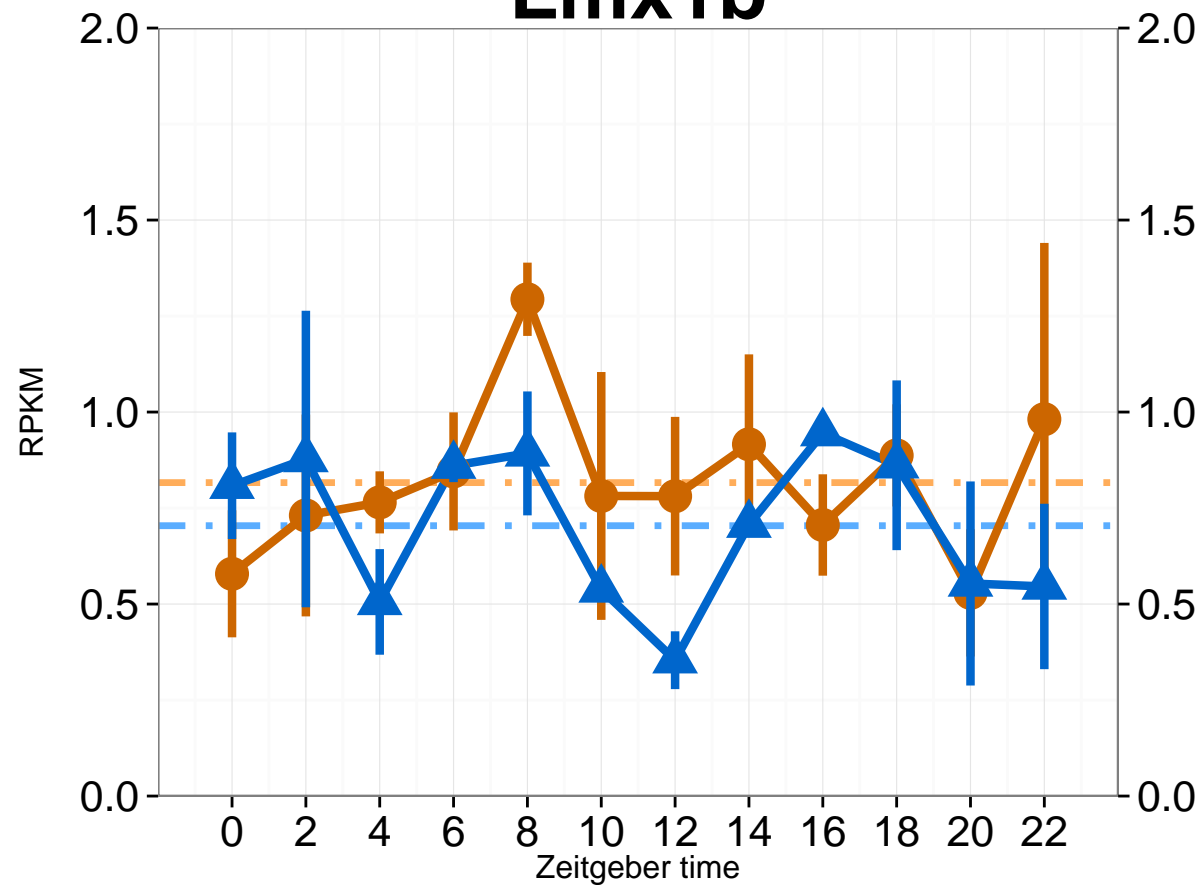

# Lmx1b

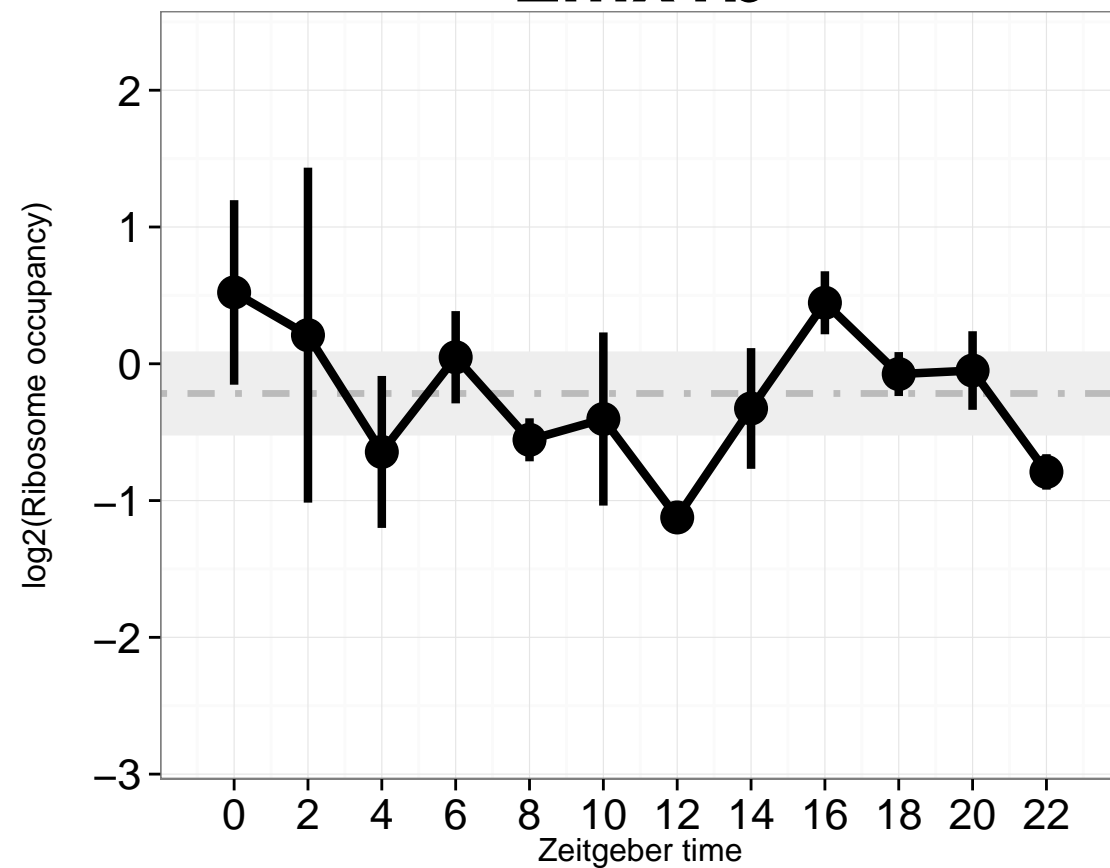

Supplement: Supplementary file 5987 [file 1]

# Gper1

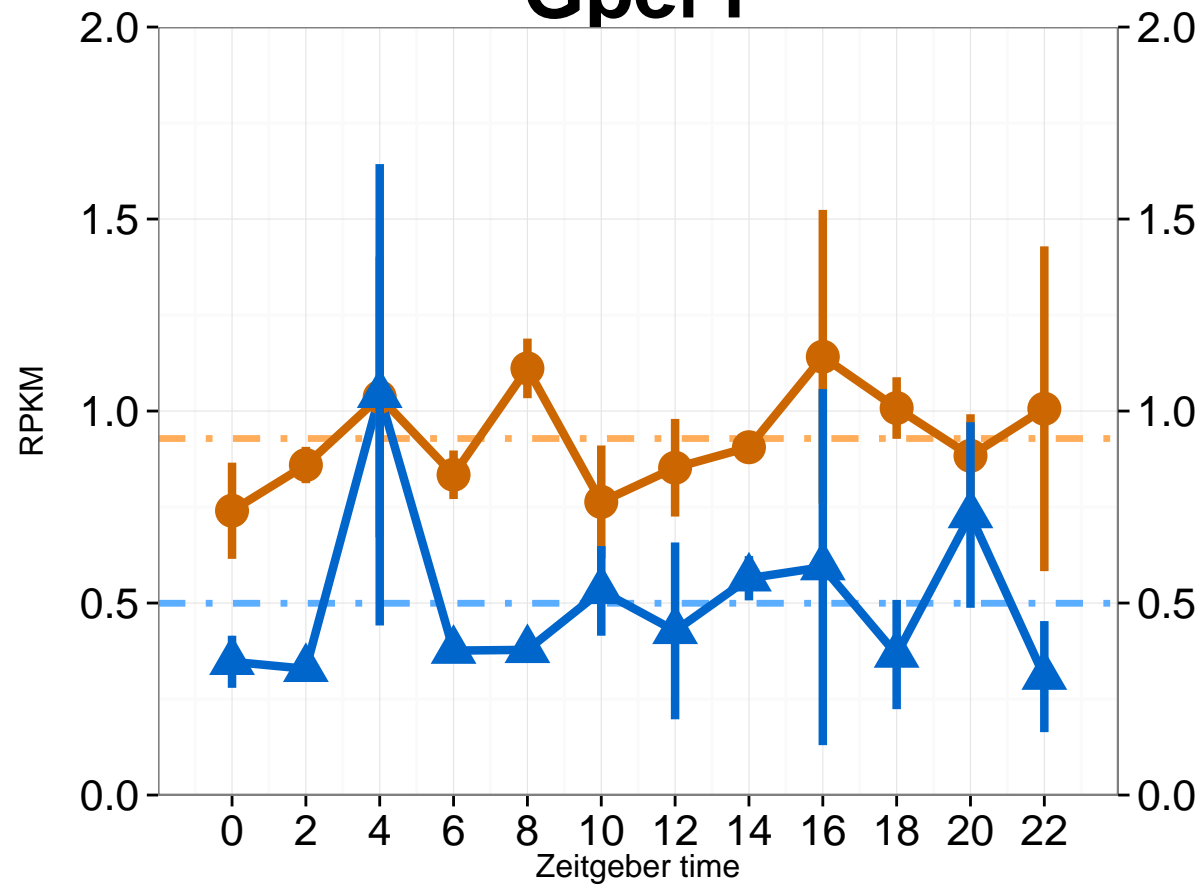

# Gper1

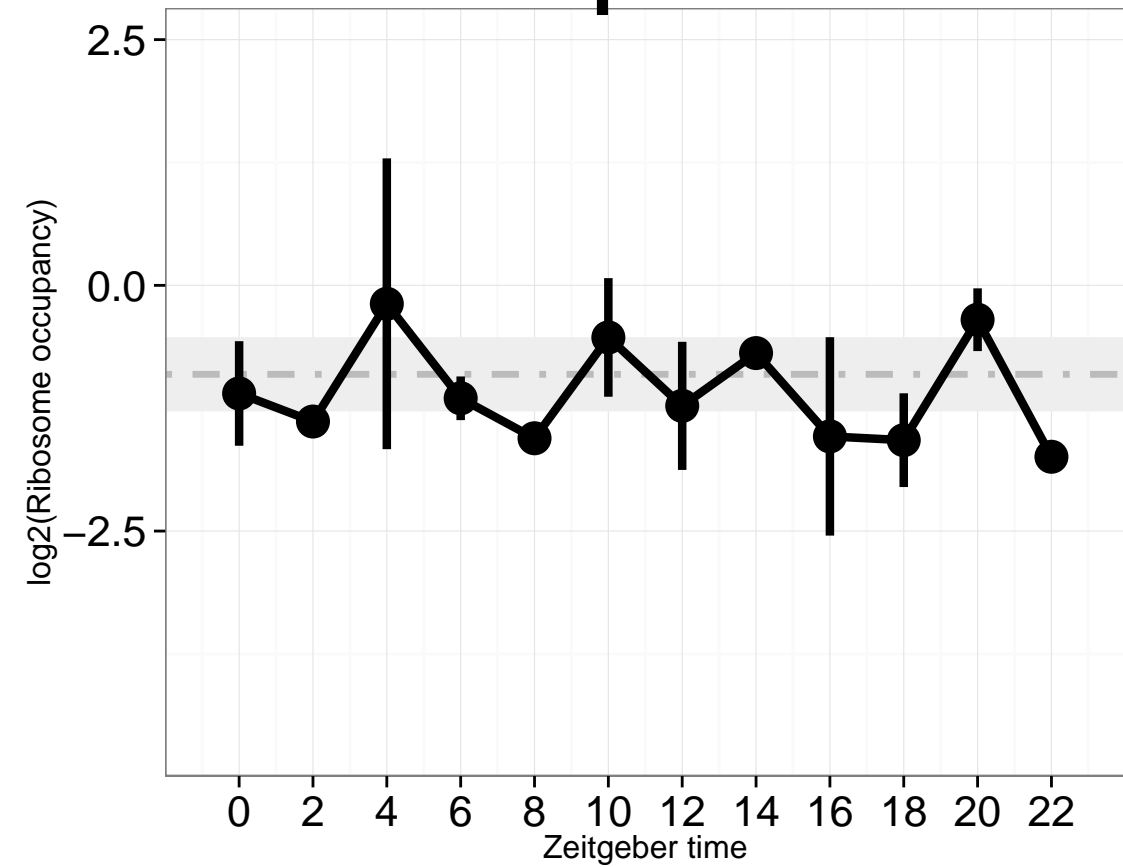

Supplement: Supplementary file 5988 [file 1]

## Apeh

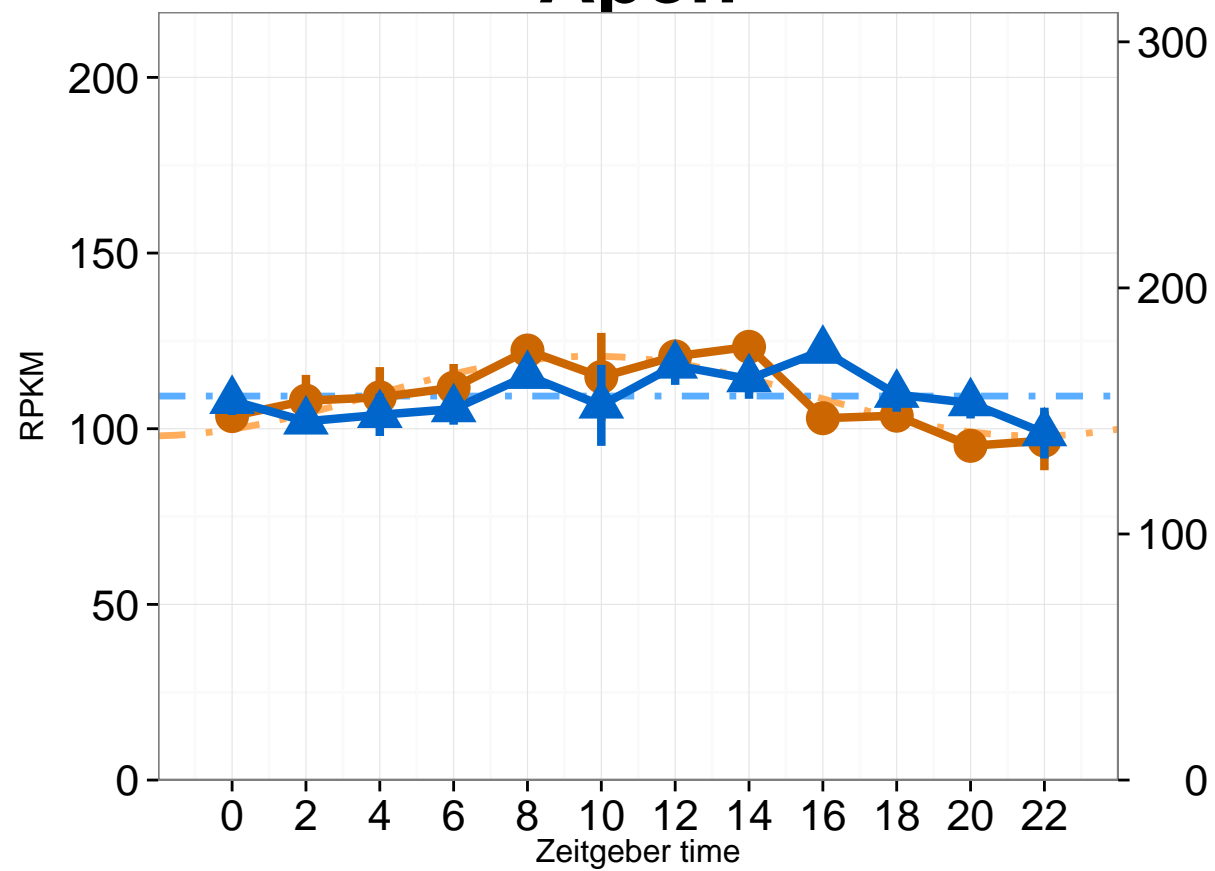

## Apeh

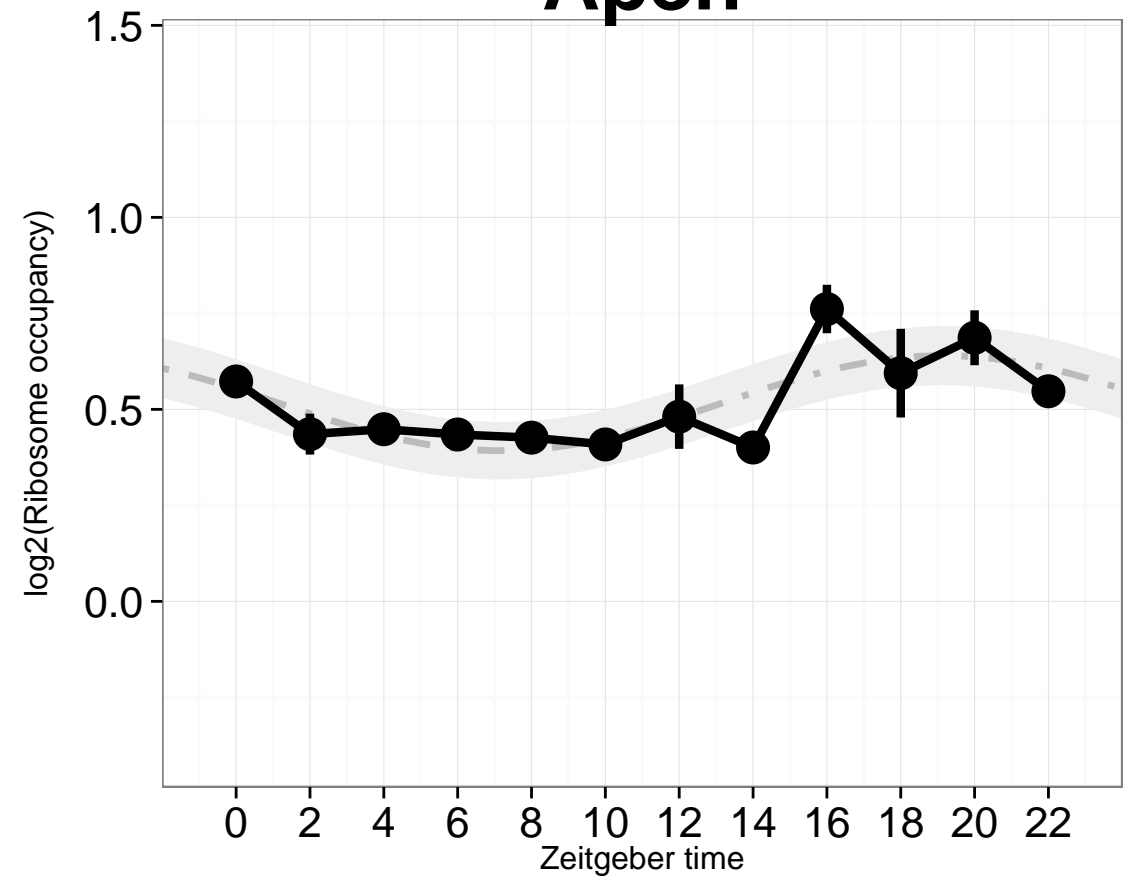

Supplement: Supplementary file 5989 [file 1]

## Akr1e1

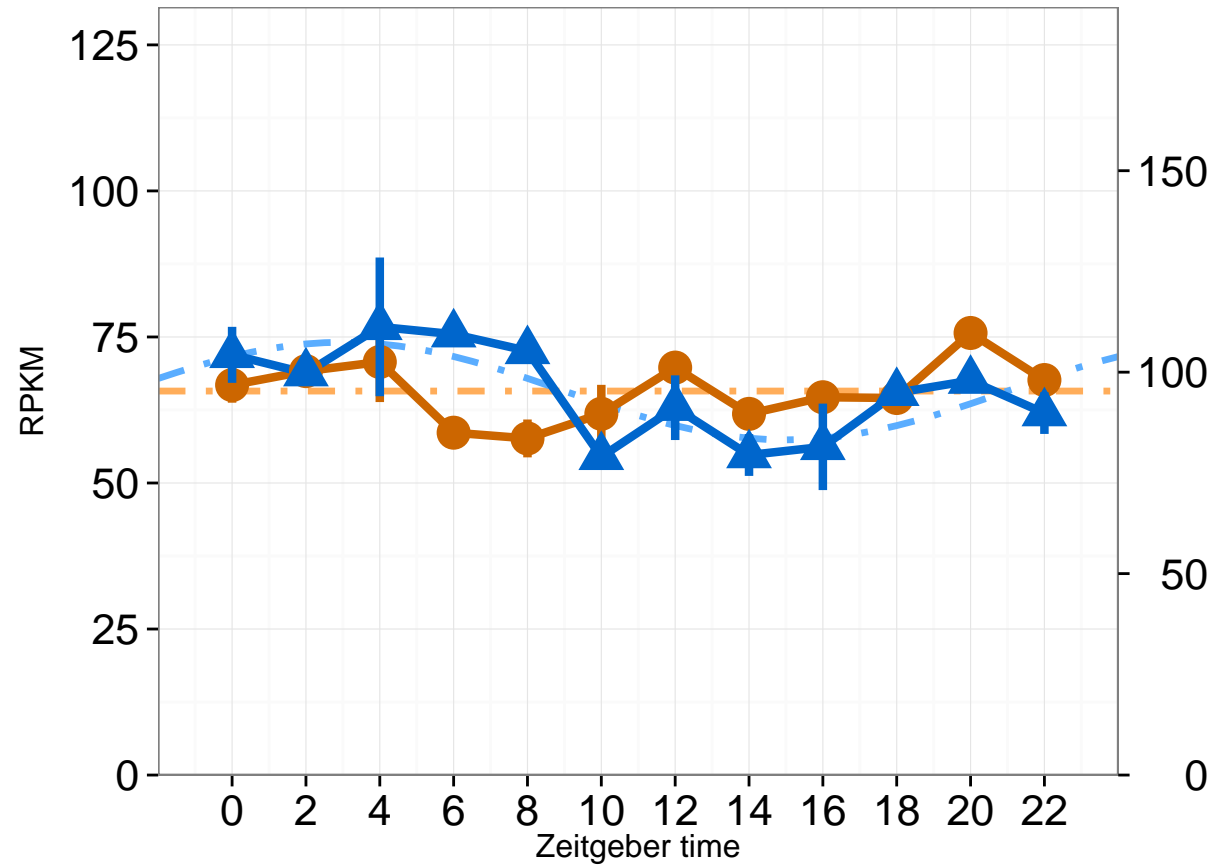

## Akr1e1

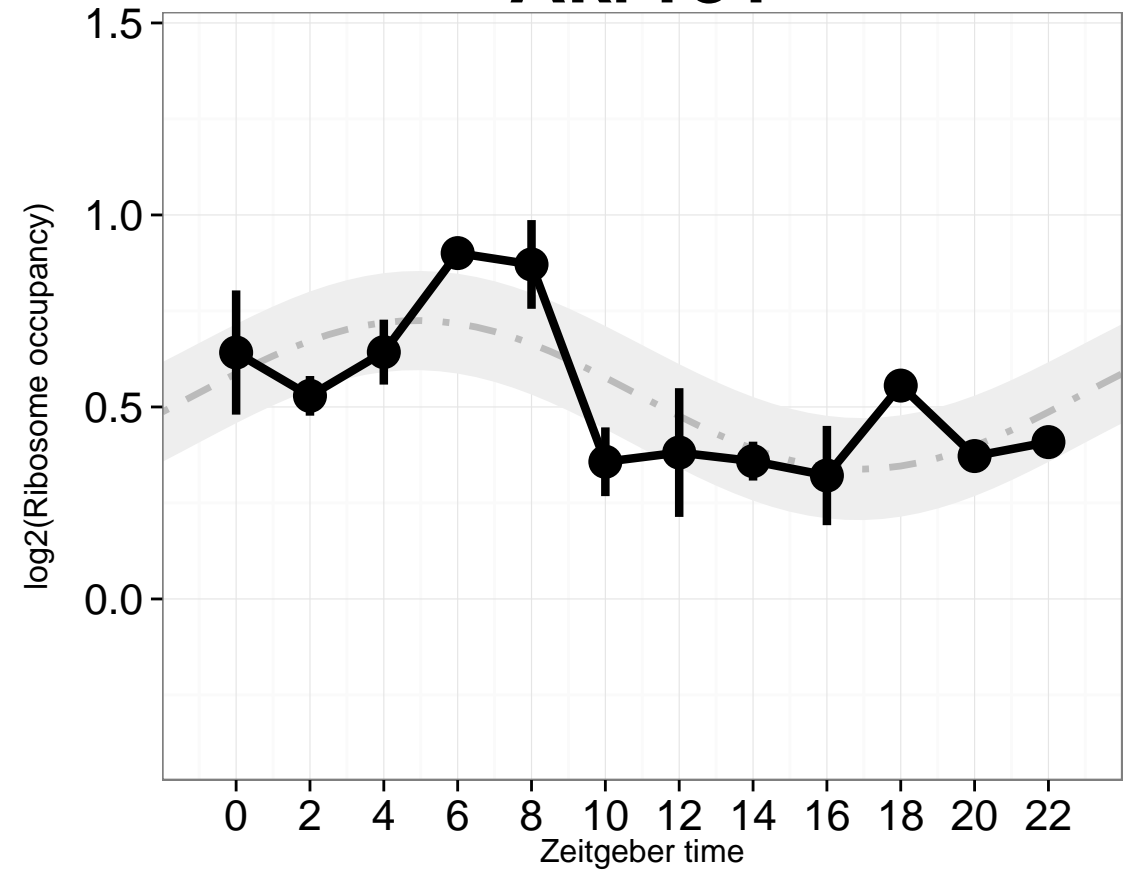

Supplement: Supplementary file 5990 [file 1]

# Adcy1

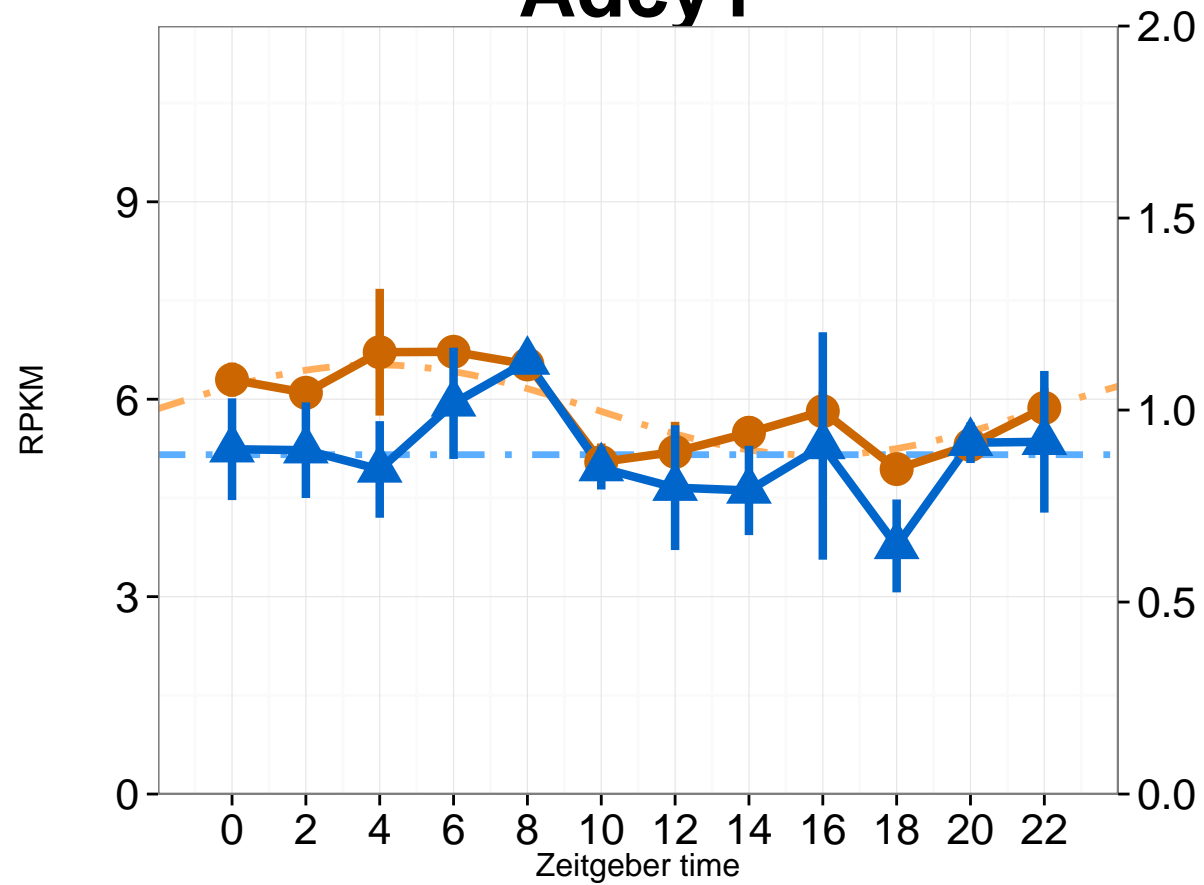

# Adcy1

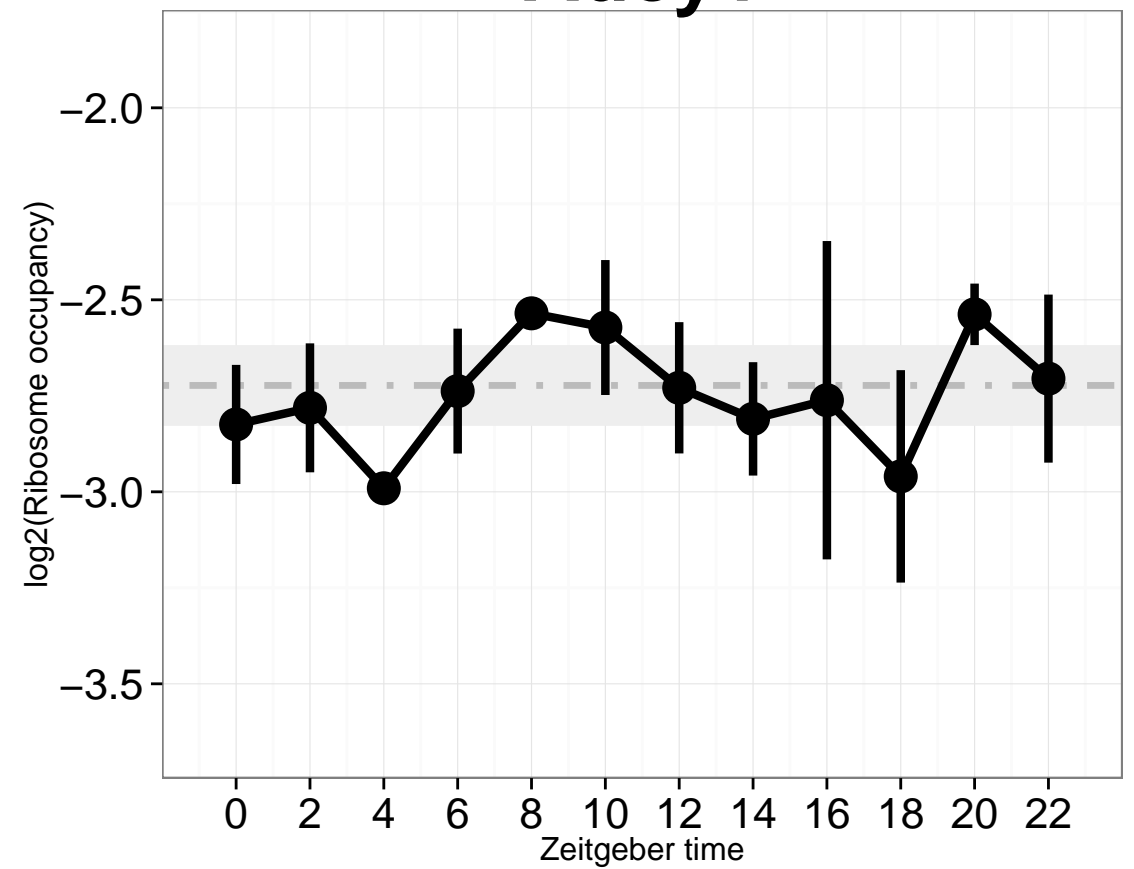

Supplement: Supplementary file 5991 [file 1]

# Supt7l

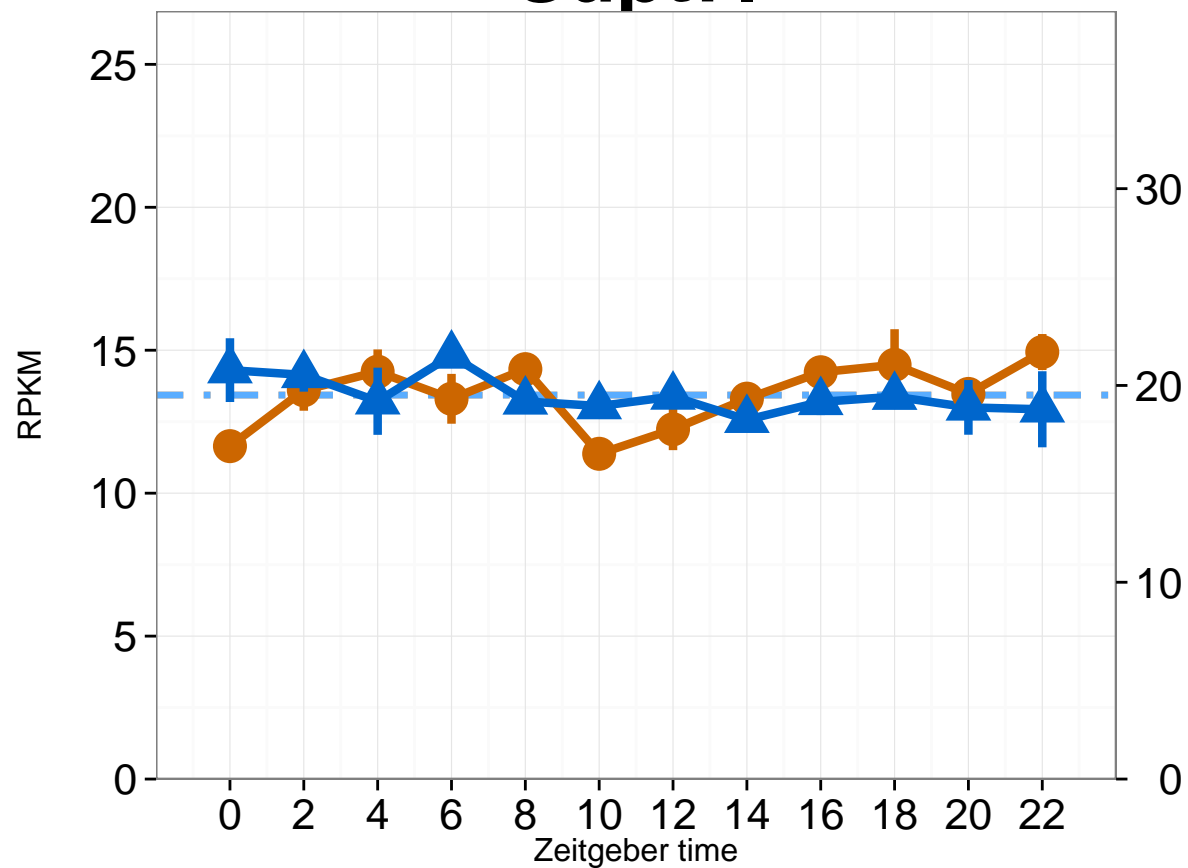

# Supt7l

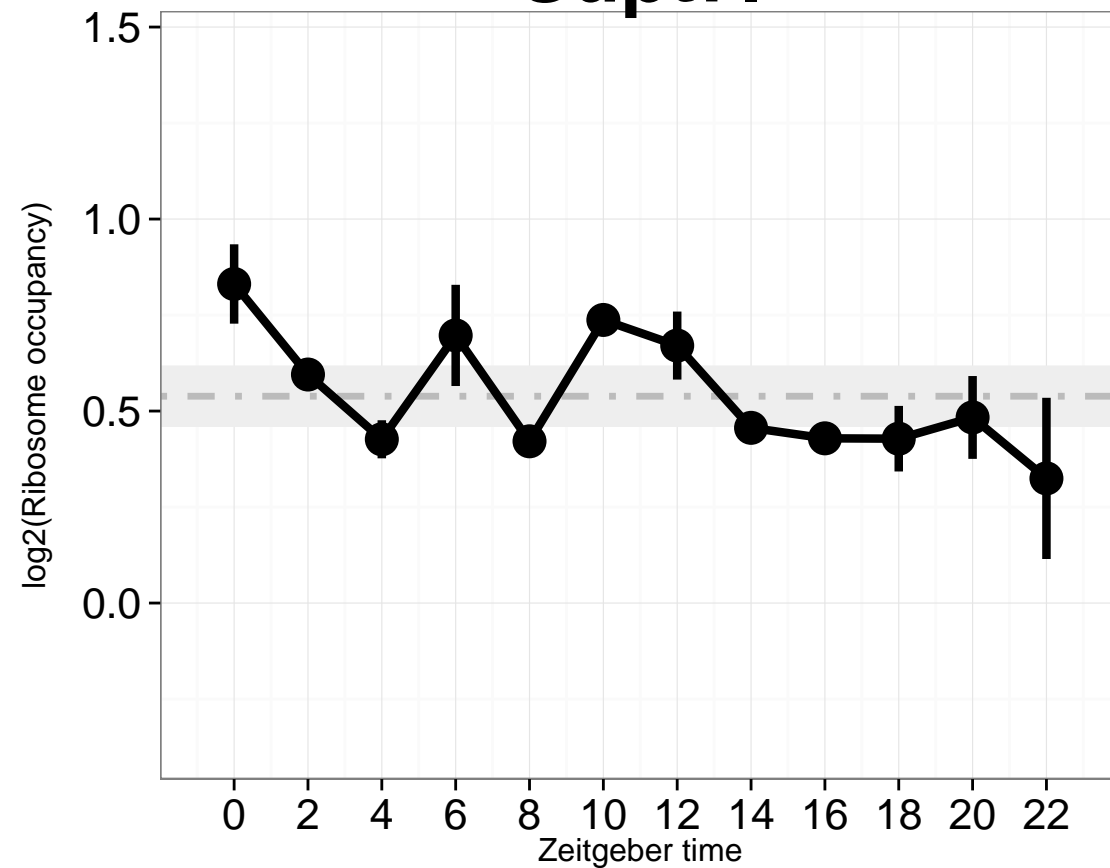

Supplement: Supplementary file 5992 [file 1]

## Snx29

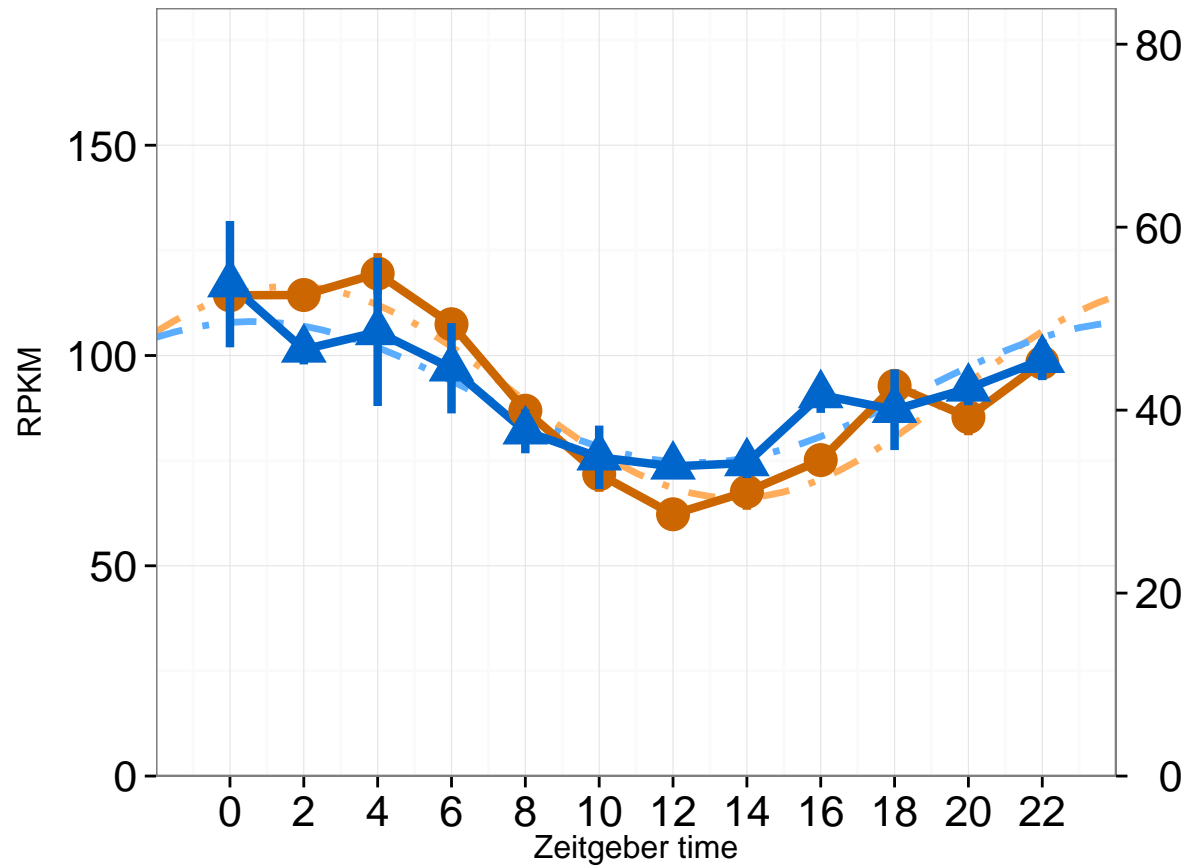

## Snx29

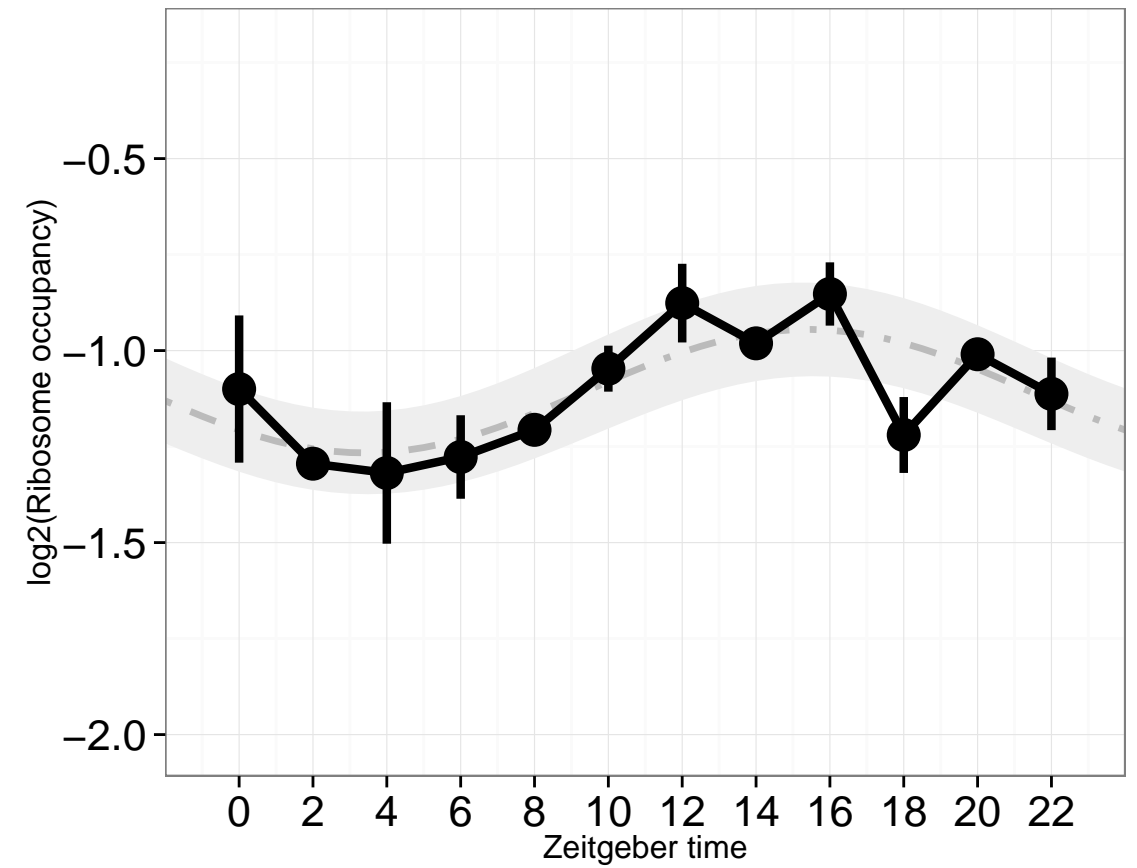

Supplement: Supplementary file 5993 [file 1]

## Zxdc

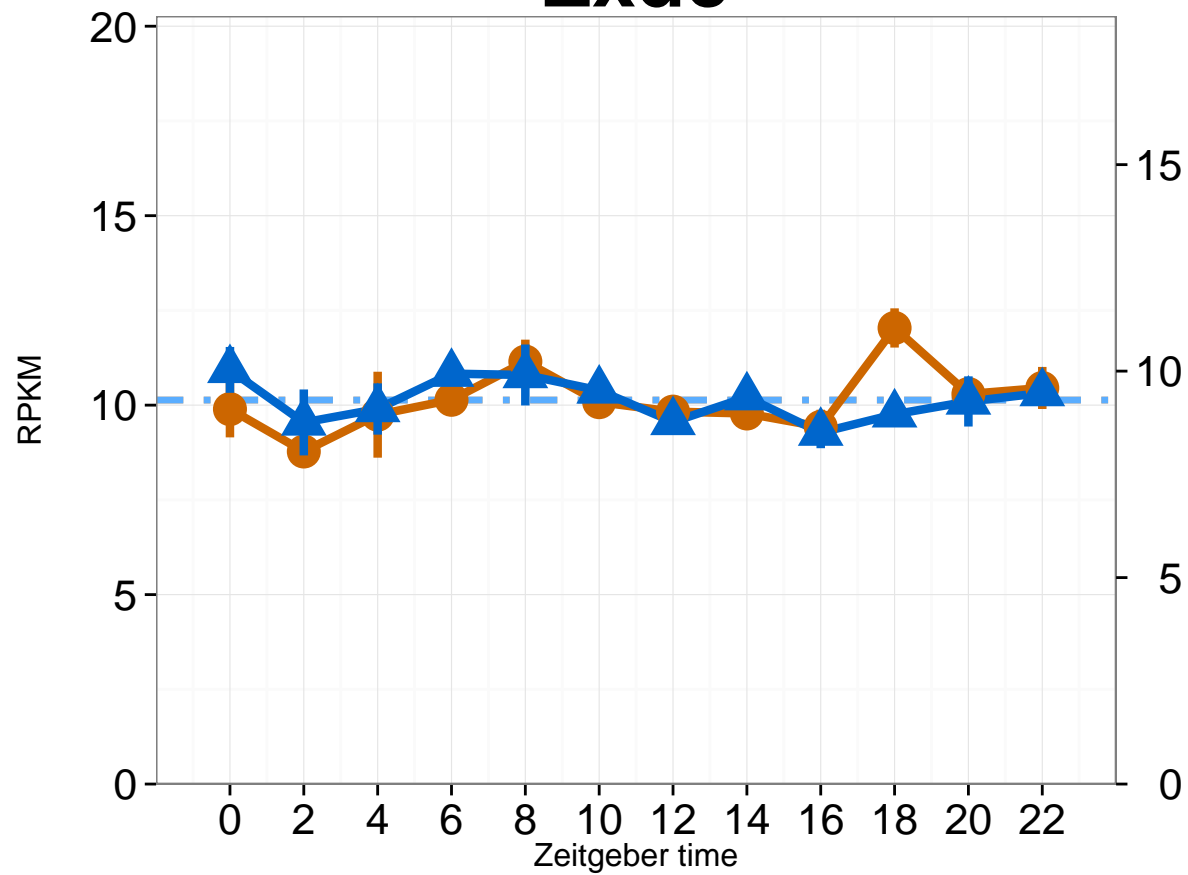

## Zxdc

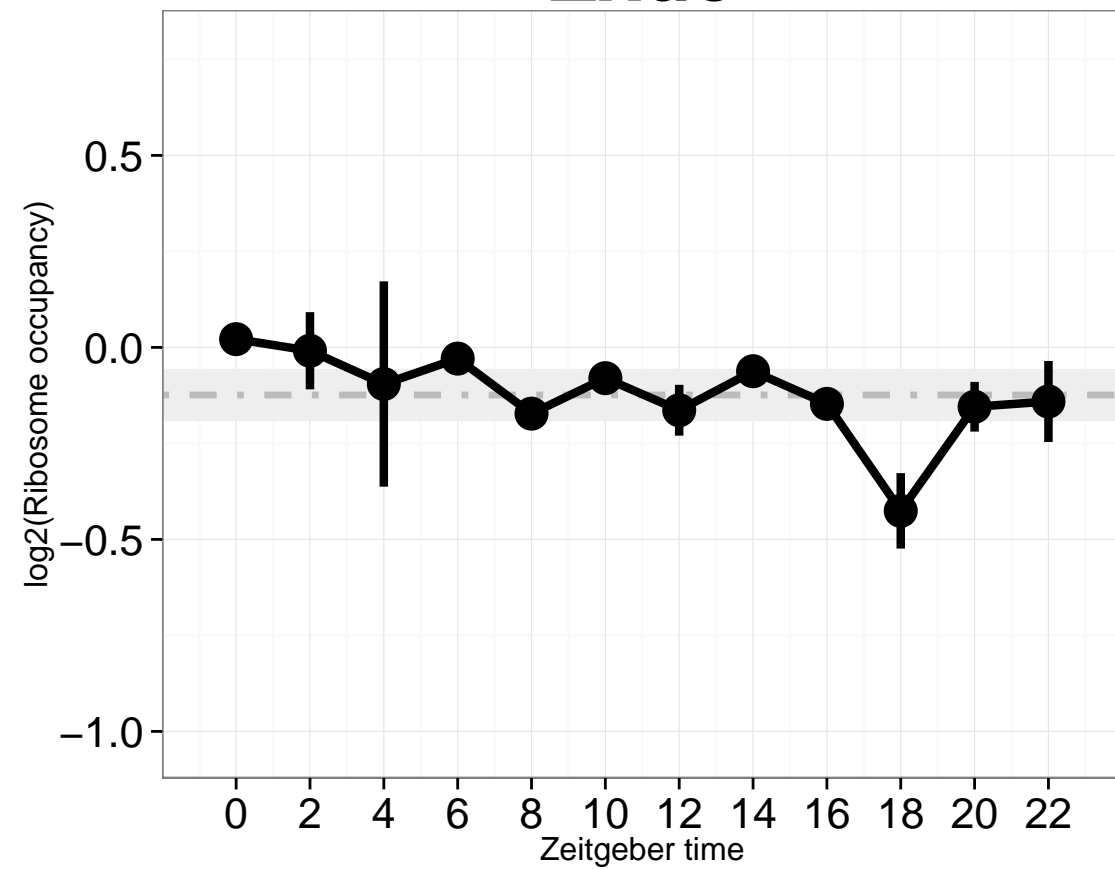

Supplement: Supplementary file 5994 [file 1]

# Zfp518b

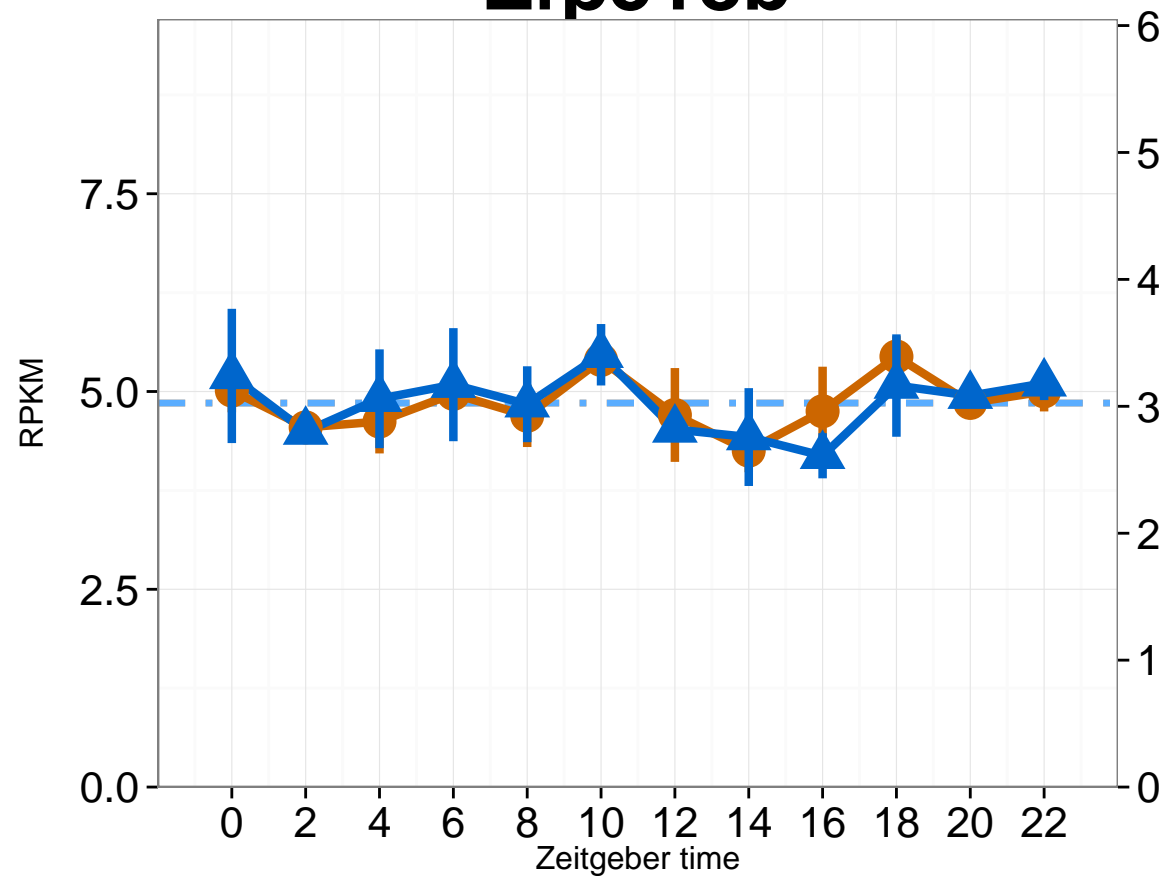

# Zfp518b

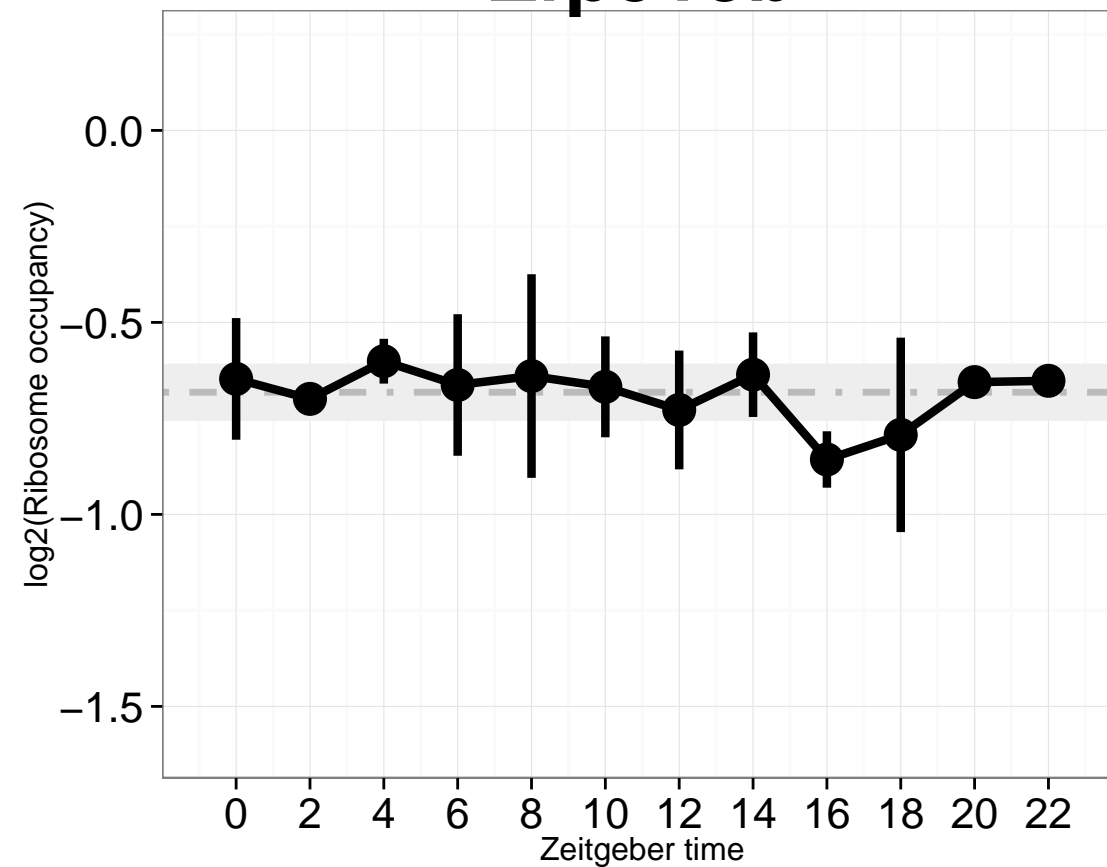

Supplement: Supplementary file 5995 [file 1]

## Ncoa7

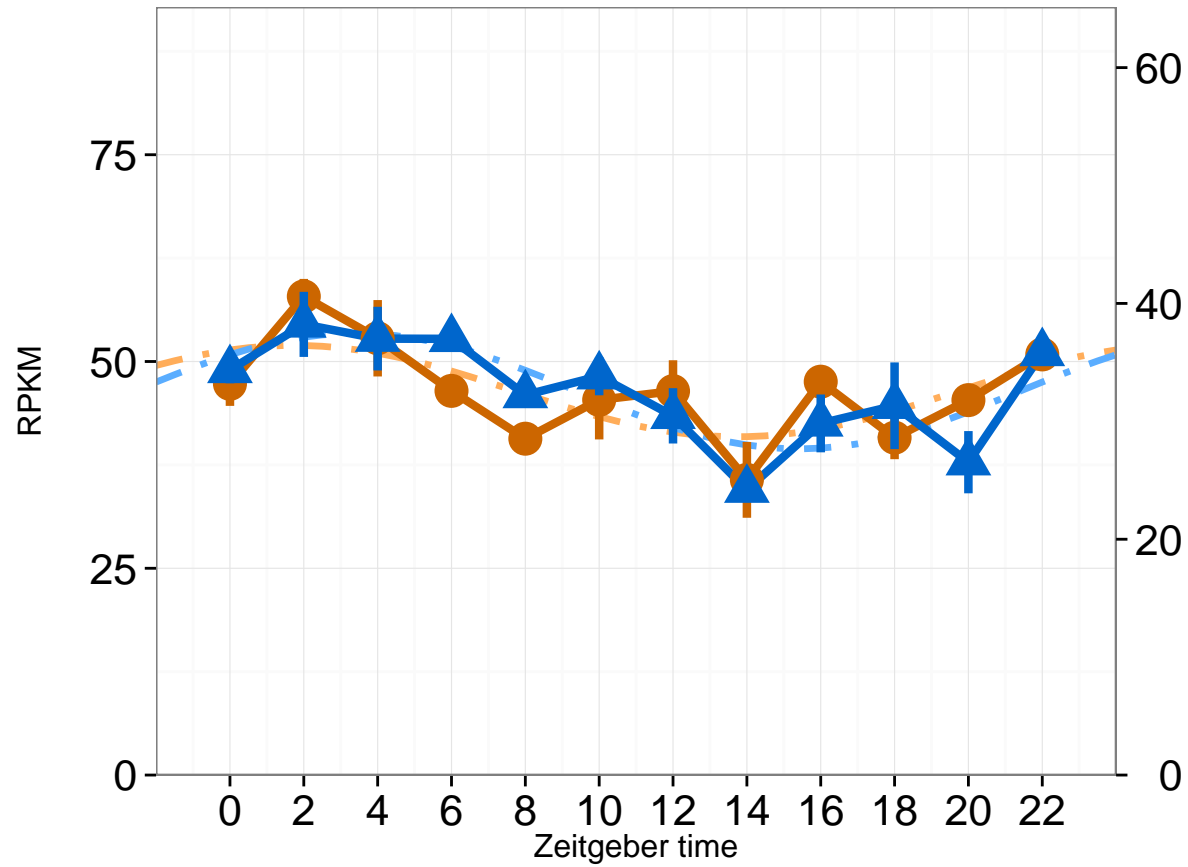

## Ncoa7

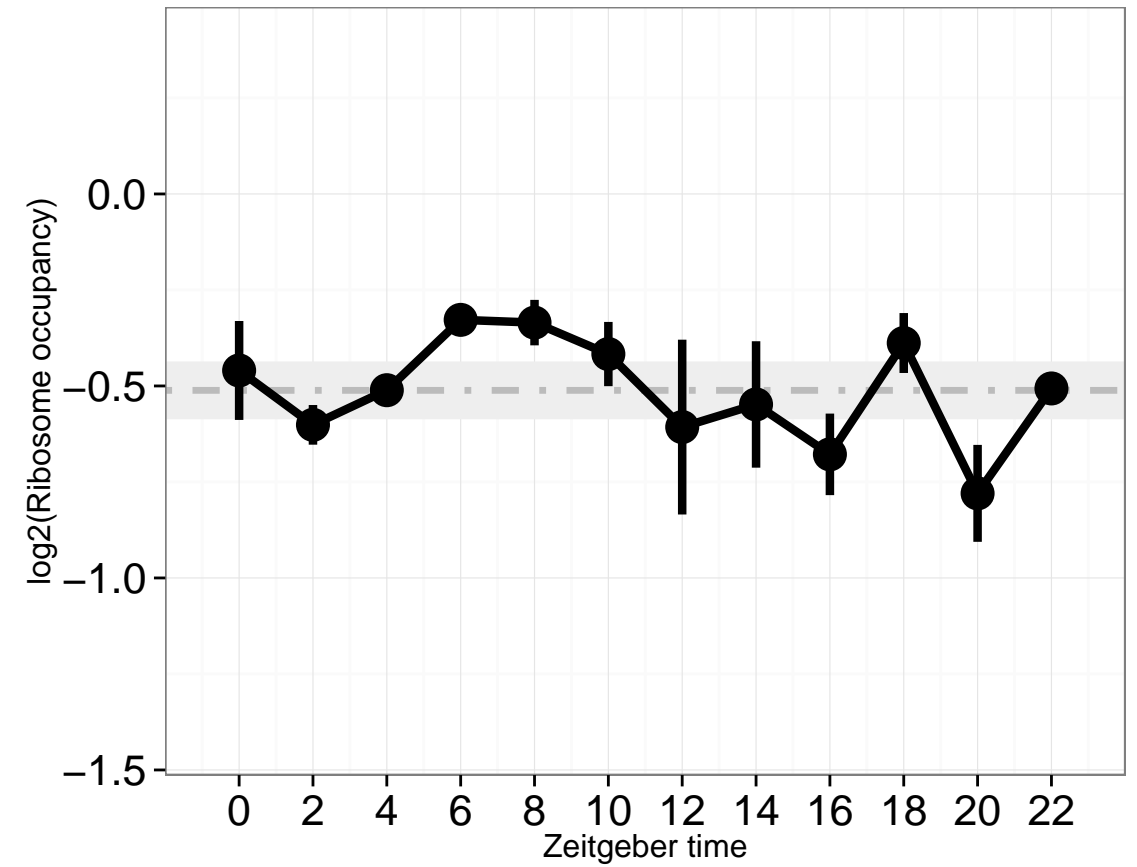

Supplement: Supplementary file 5996 [file 1]

## Slc25a25

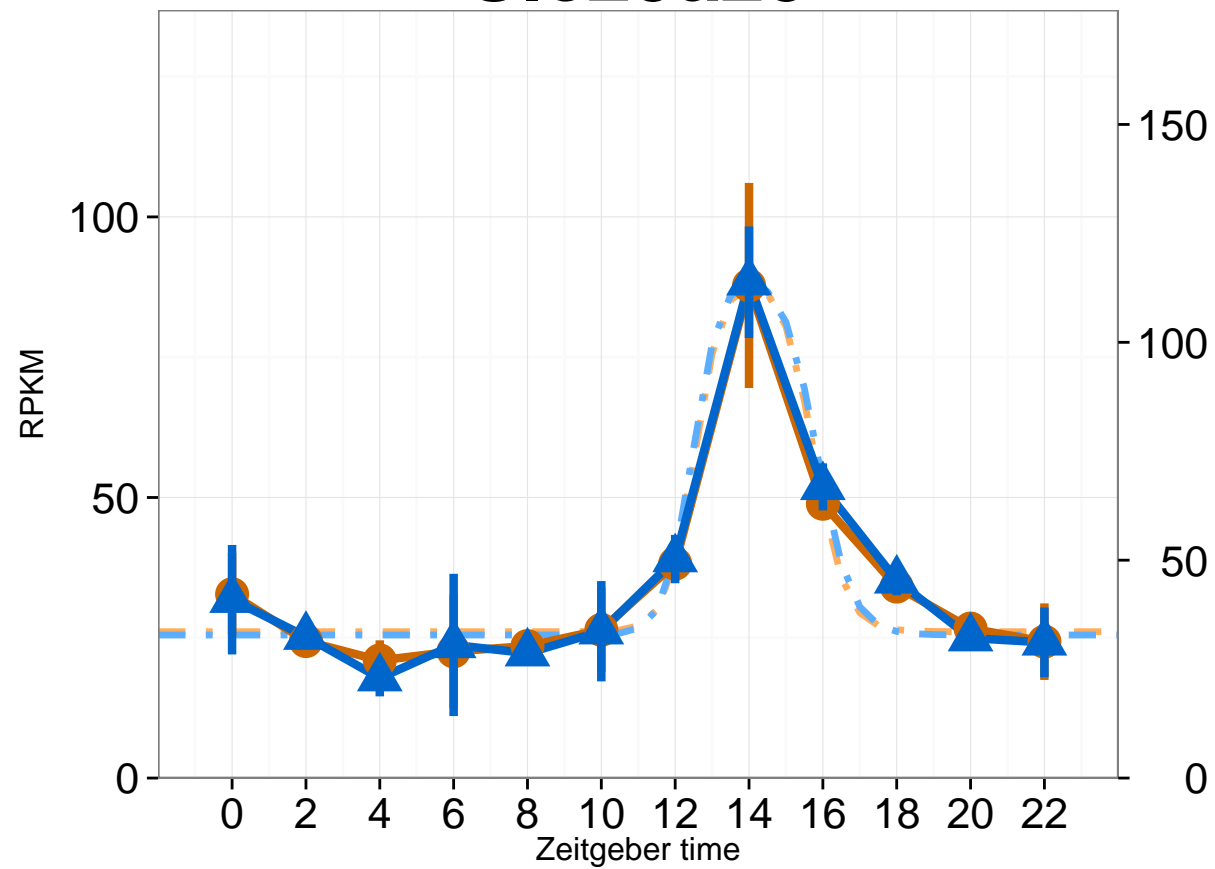

## Slc25a25

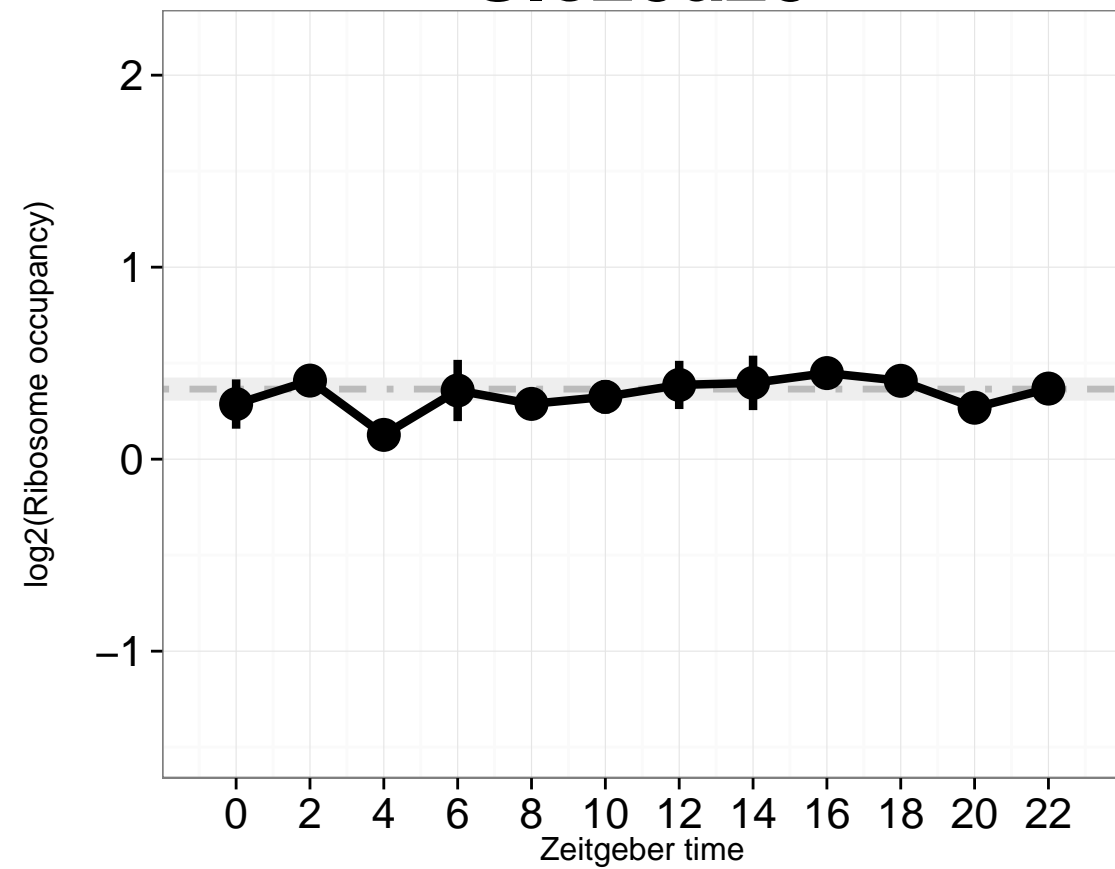

Supplement: Supplementary file 5997 [file 1]

## Ensa

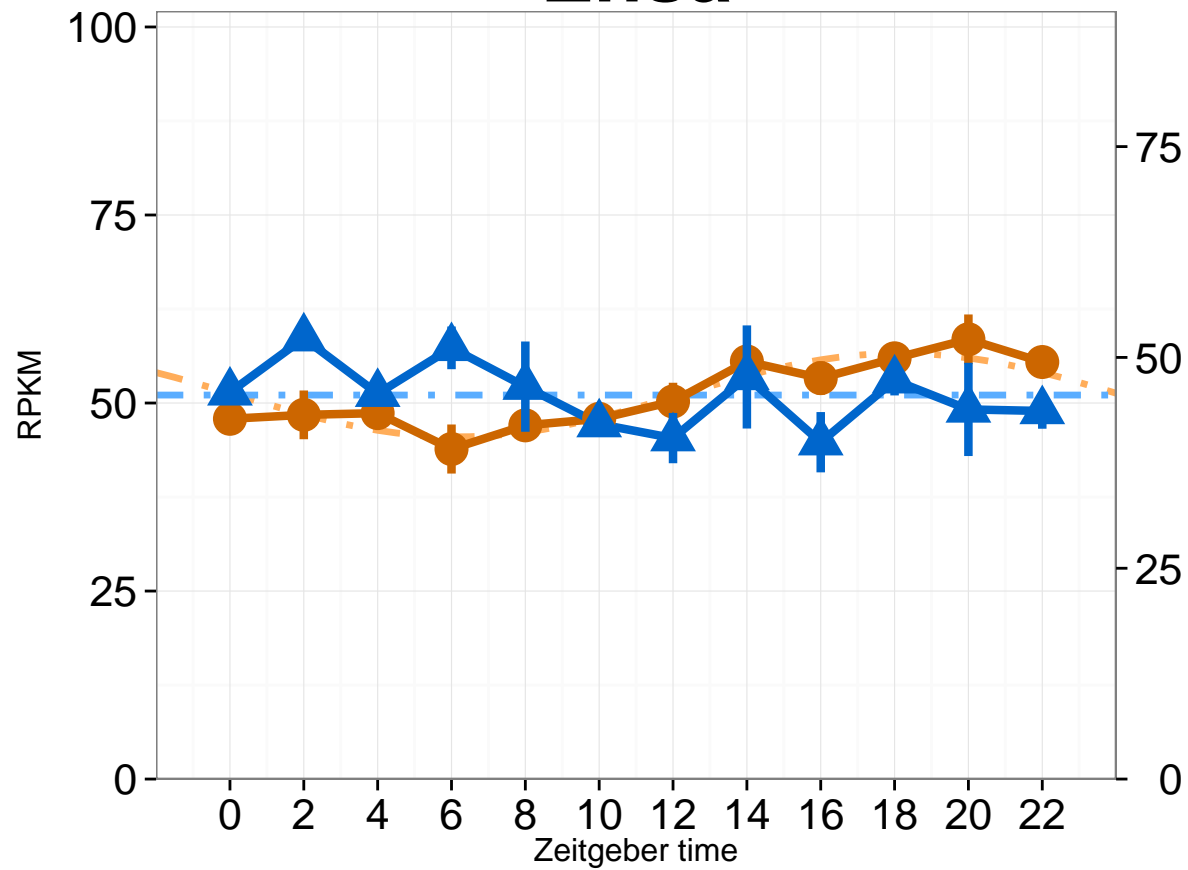

## Ensa

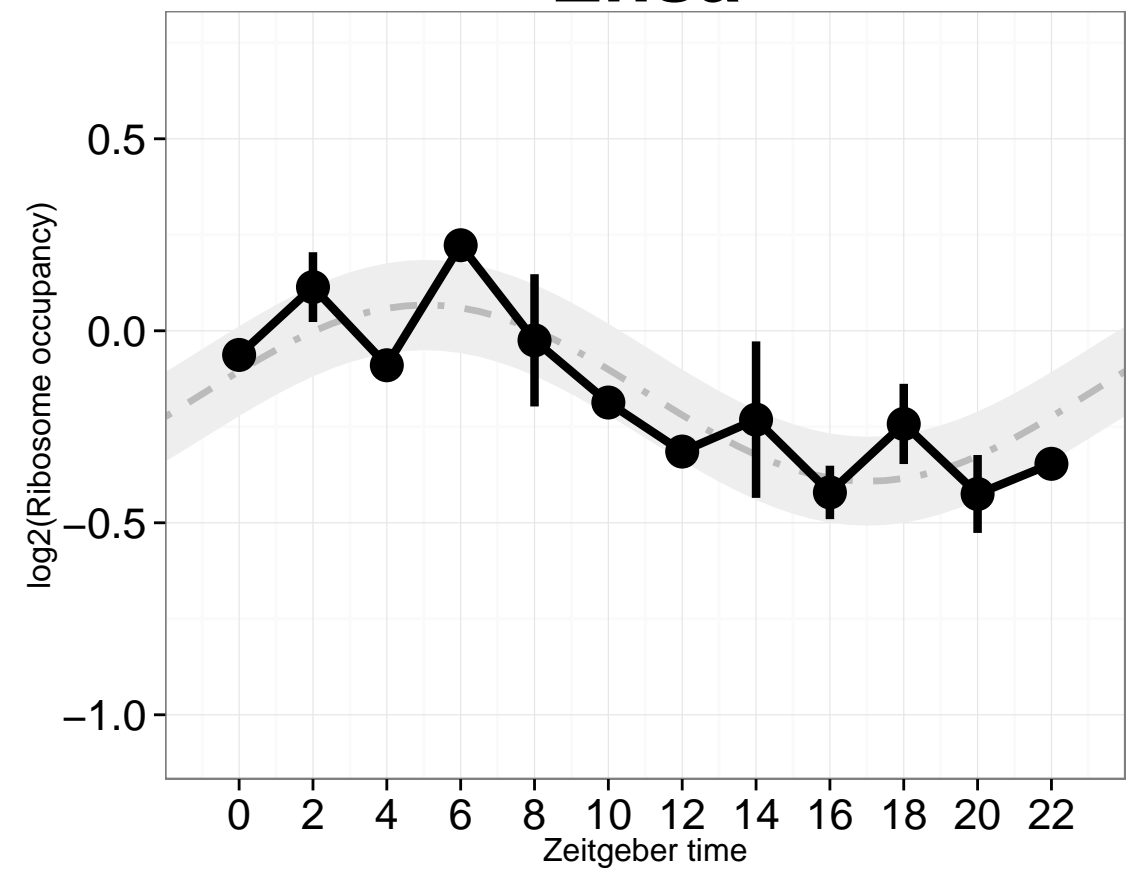

Supplement: Supplementary file 5998 [file 1]

## Cln8

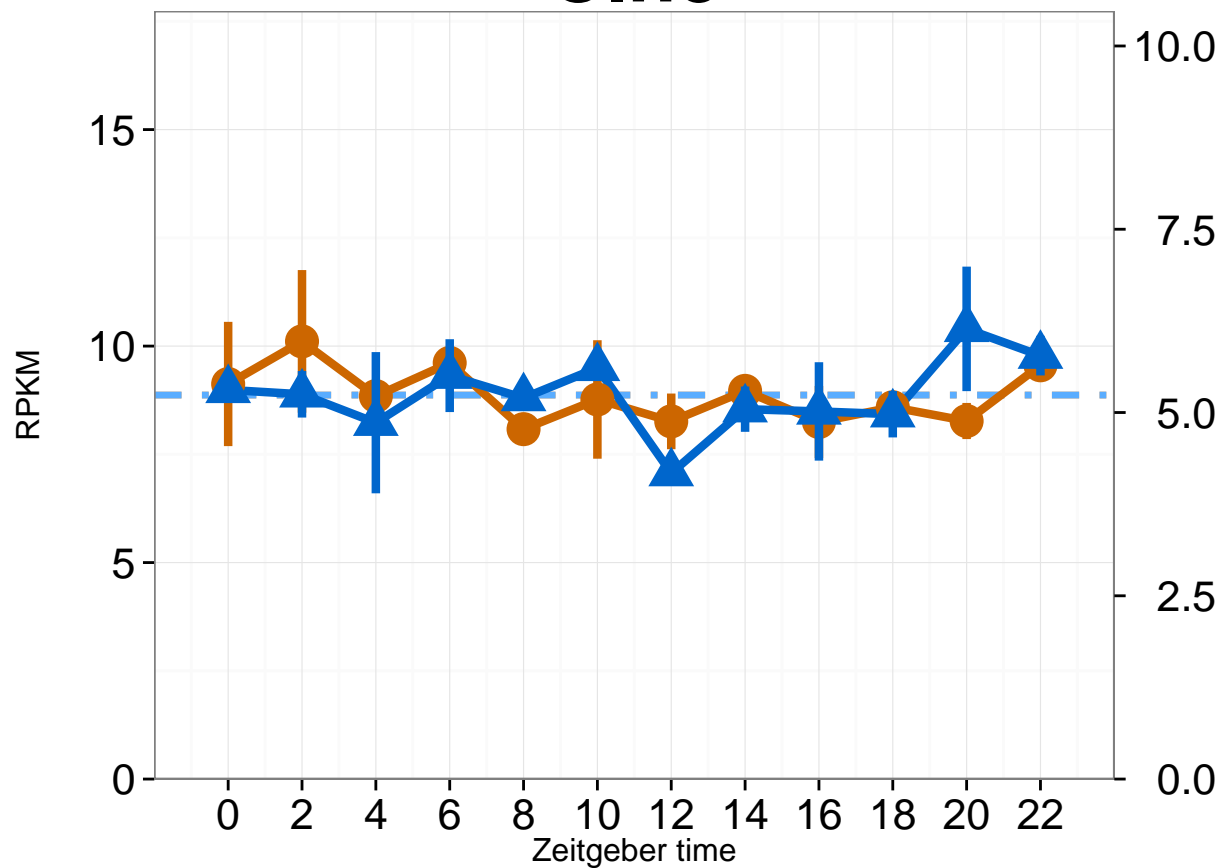

## Cln8

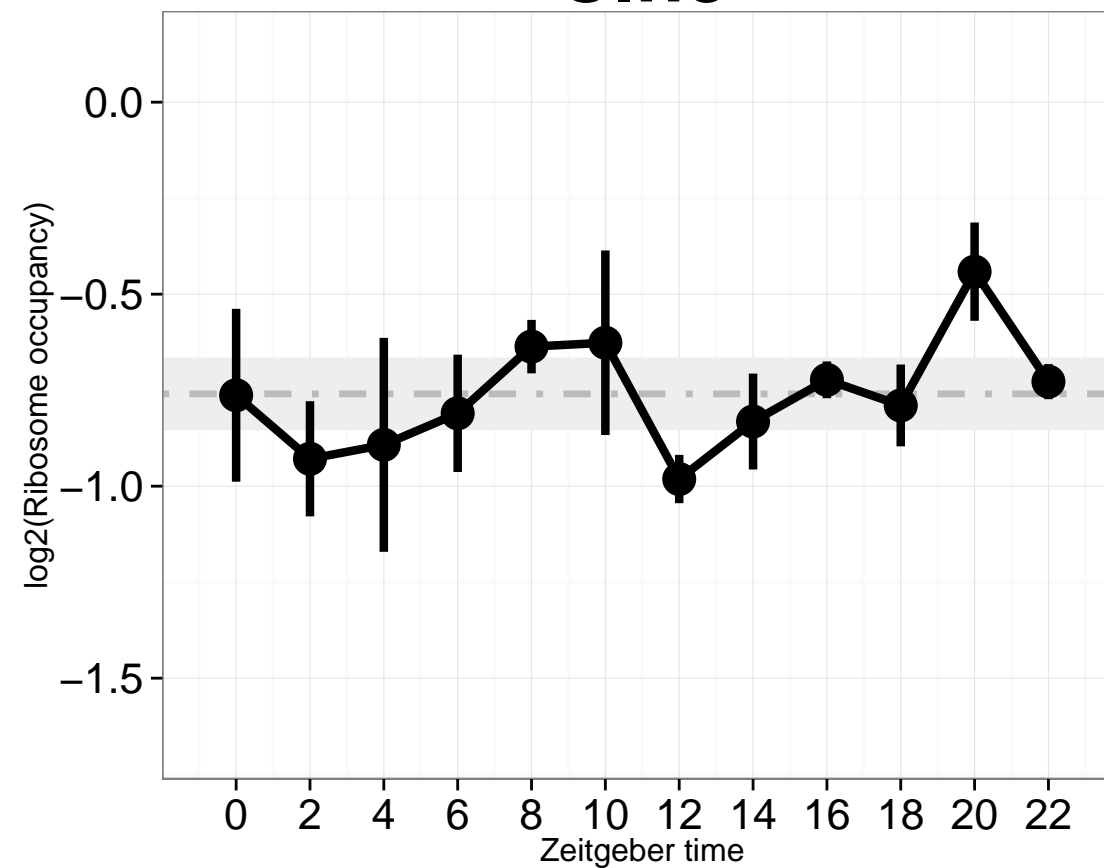

Supplement: Supplementary file 5999 [file 1]

# Ube2g1

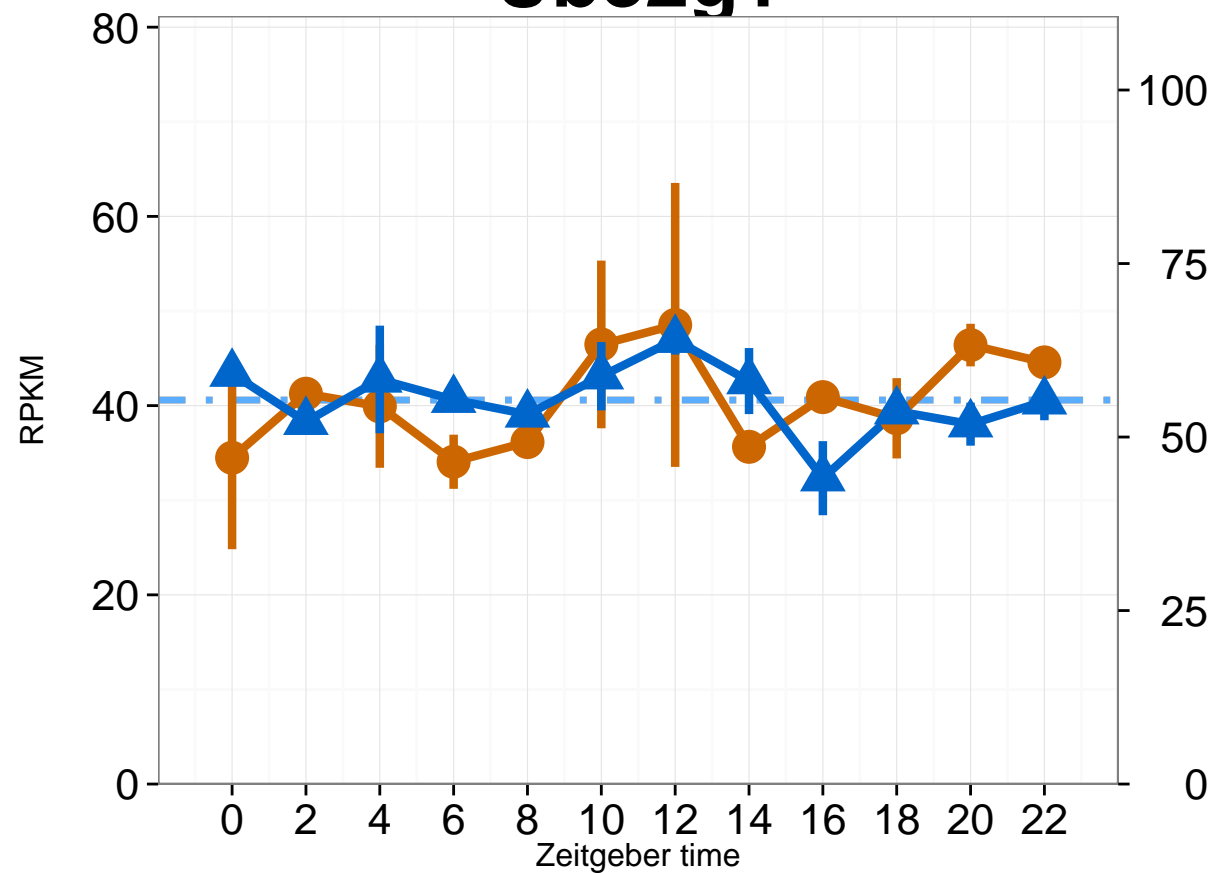

# Ube2g1

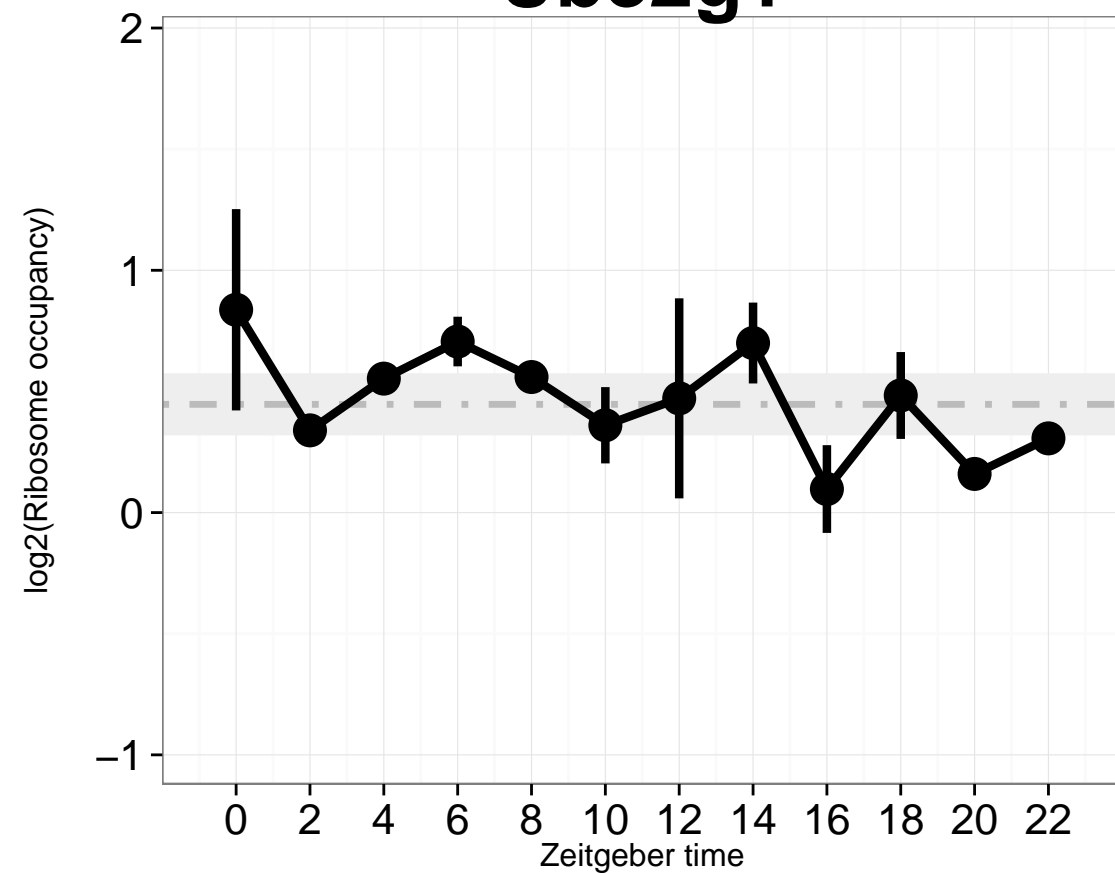

Supplement: Supplementary file 6000 [file 1]

# Ugt2a3

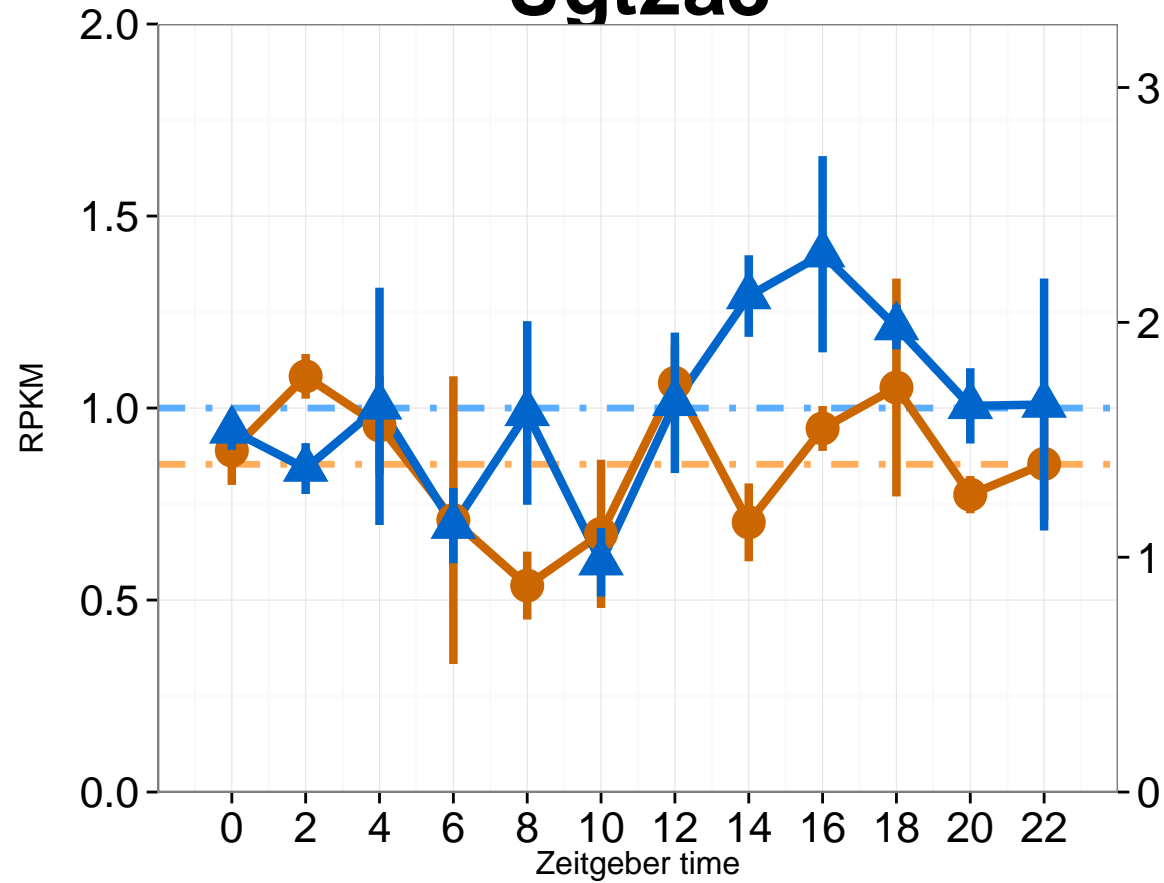

# Ugt2a3

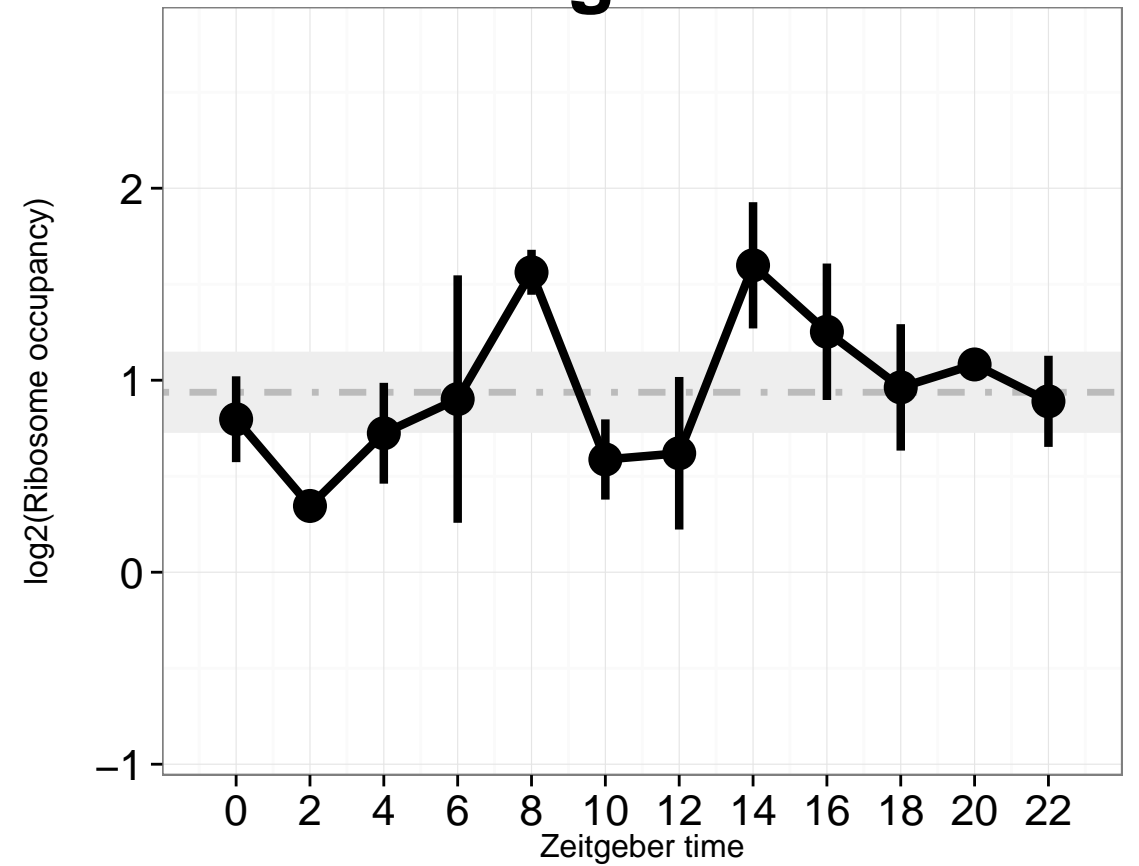

Supplement: Supplementary file 6001 [file 1]

# Nr1d1

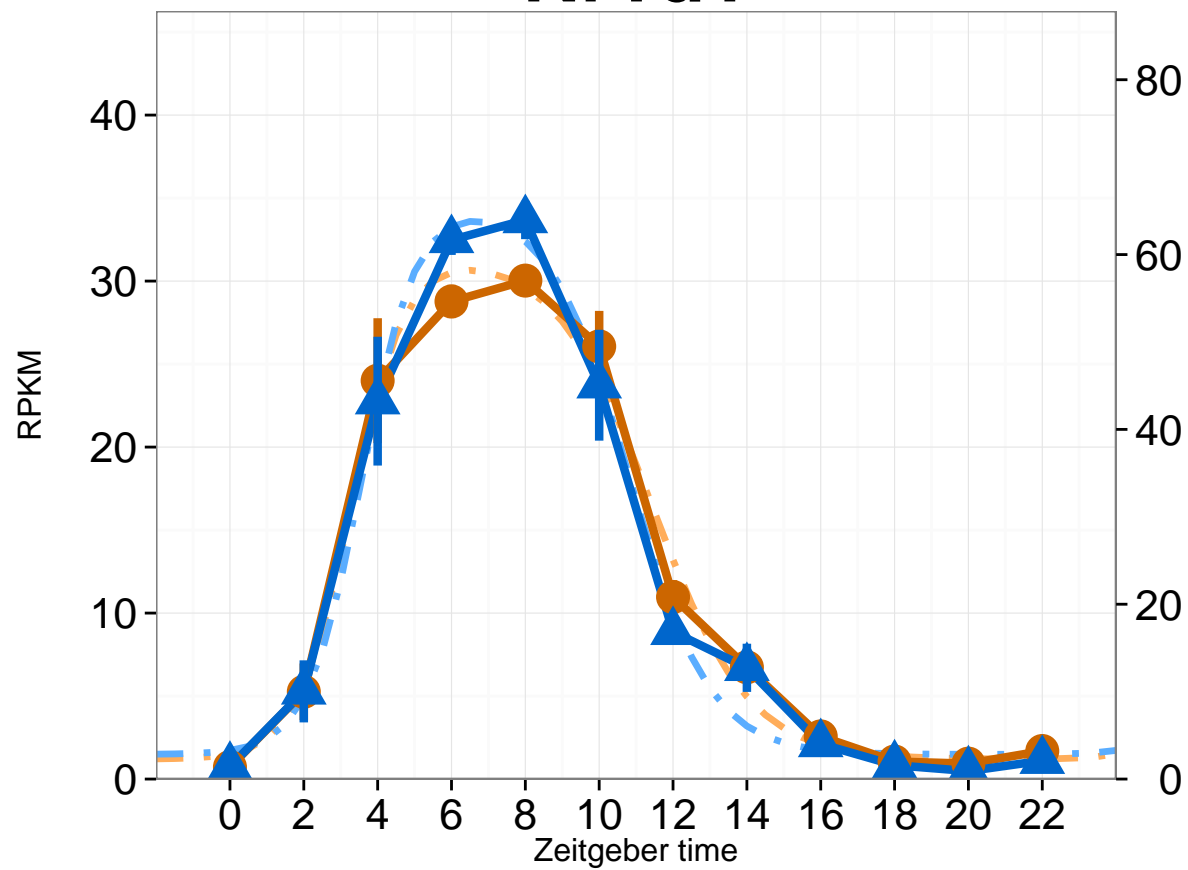

# Nr1d1

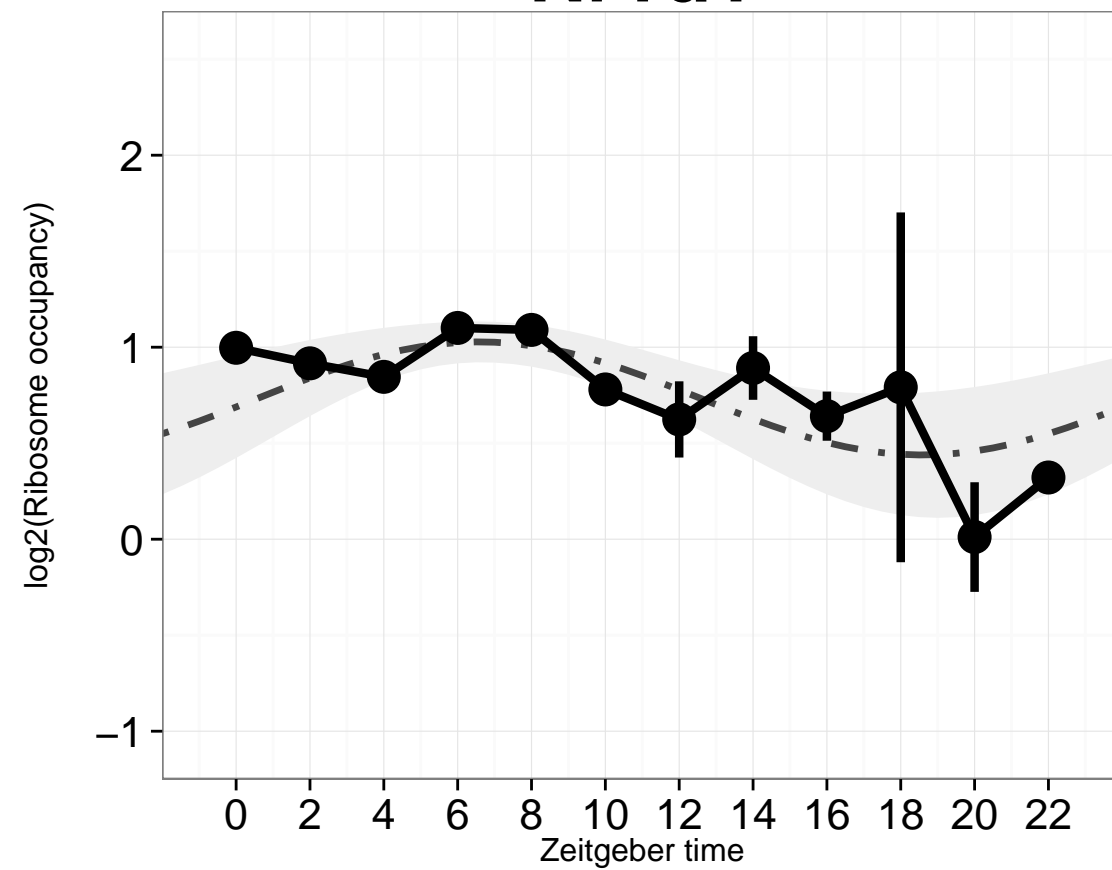

Supplement: Supplementary file 6002 [file 1]

# Mrps18c

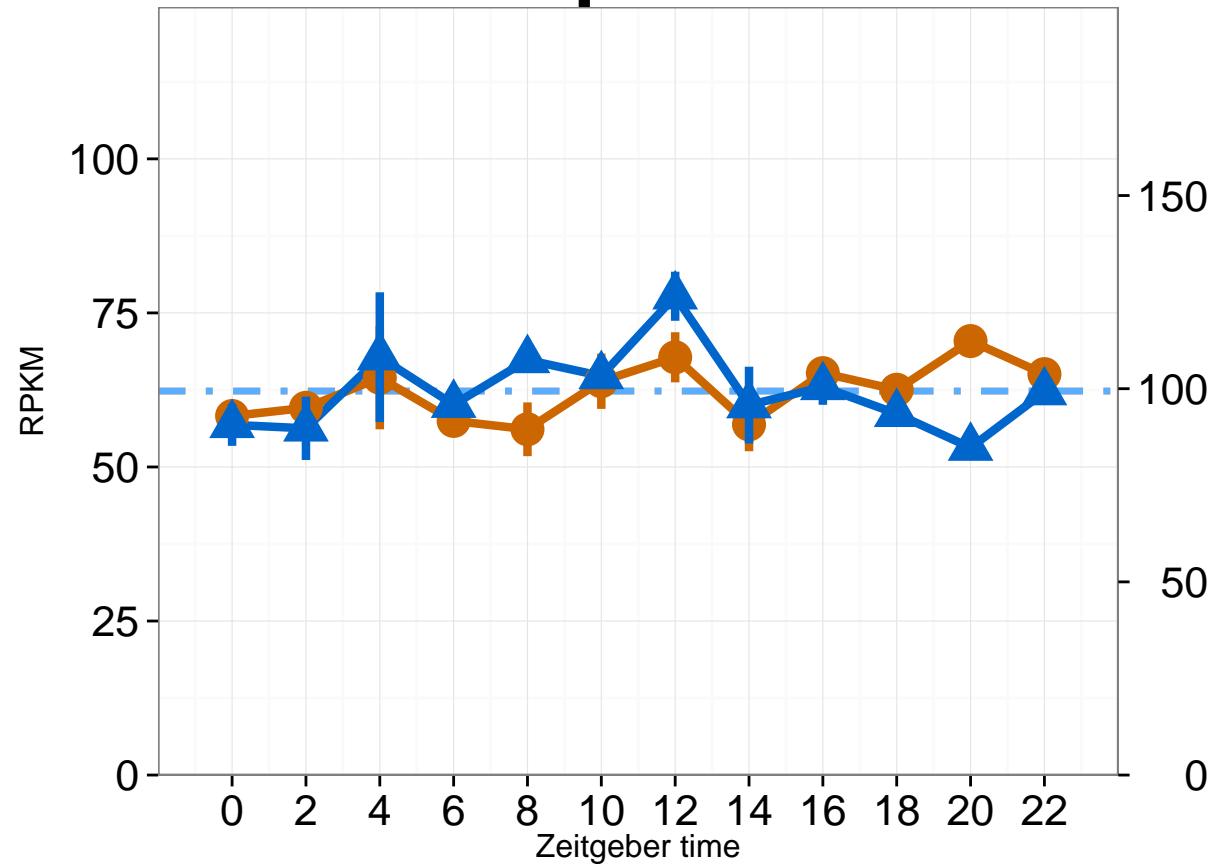

# Mrps18c

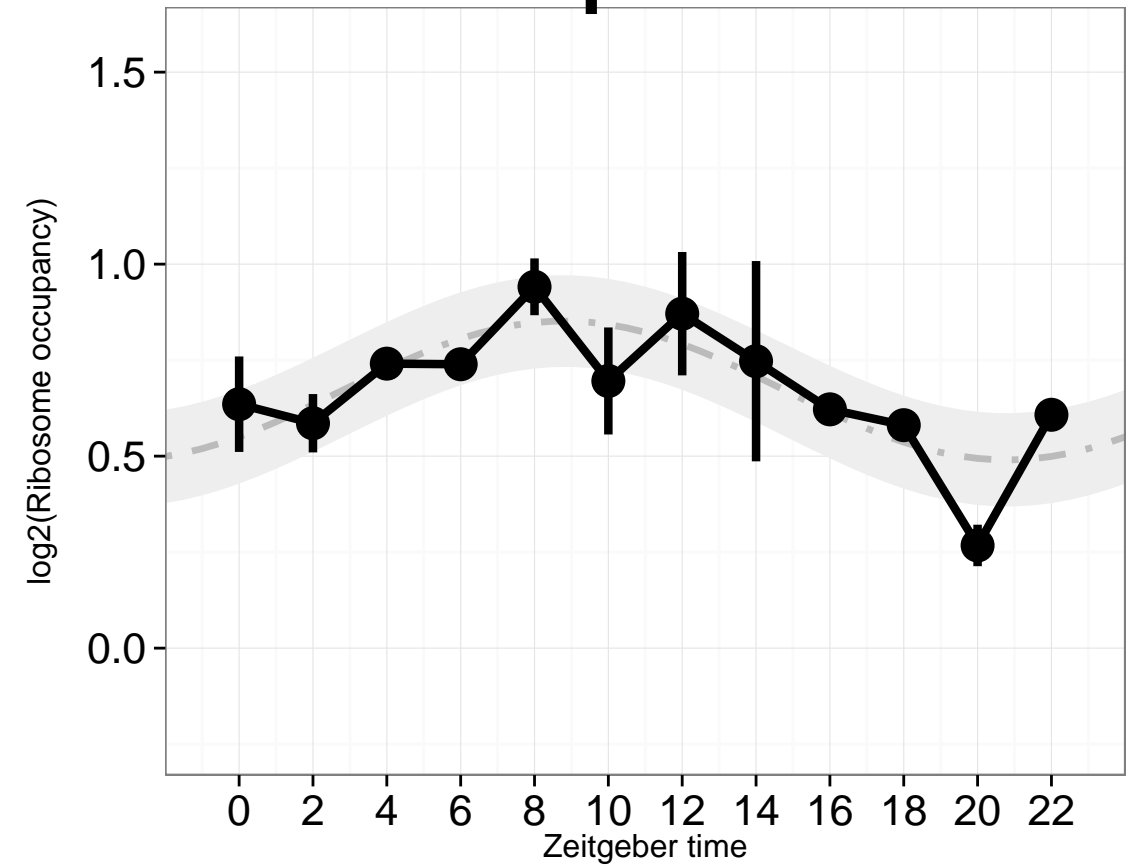

Supplement: Supplementary file 6003 [file 1]

# Zfp263

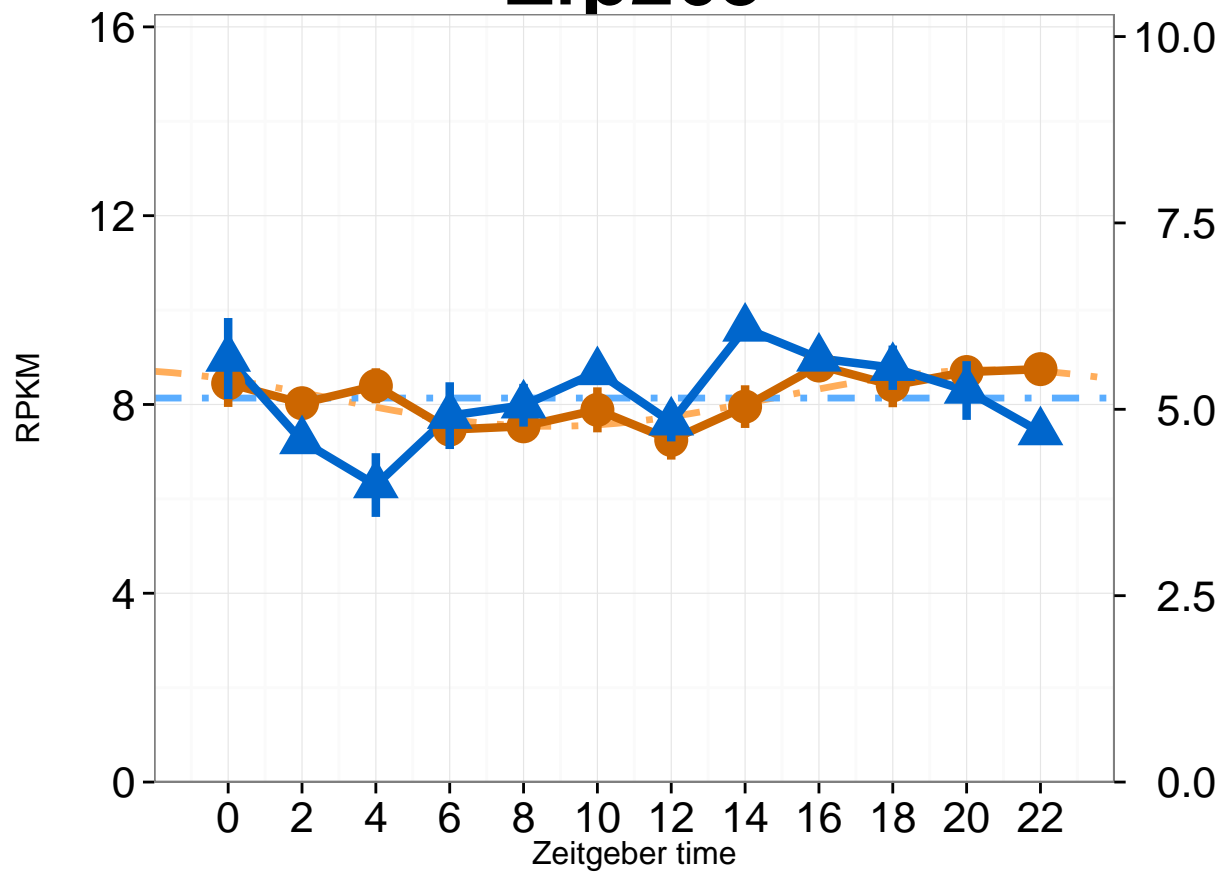

# Zfp263

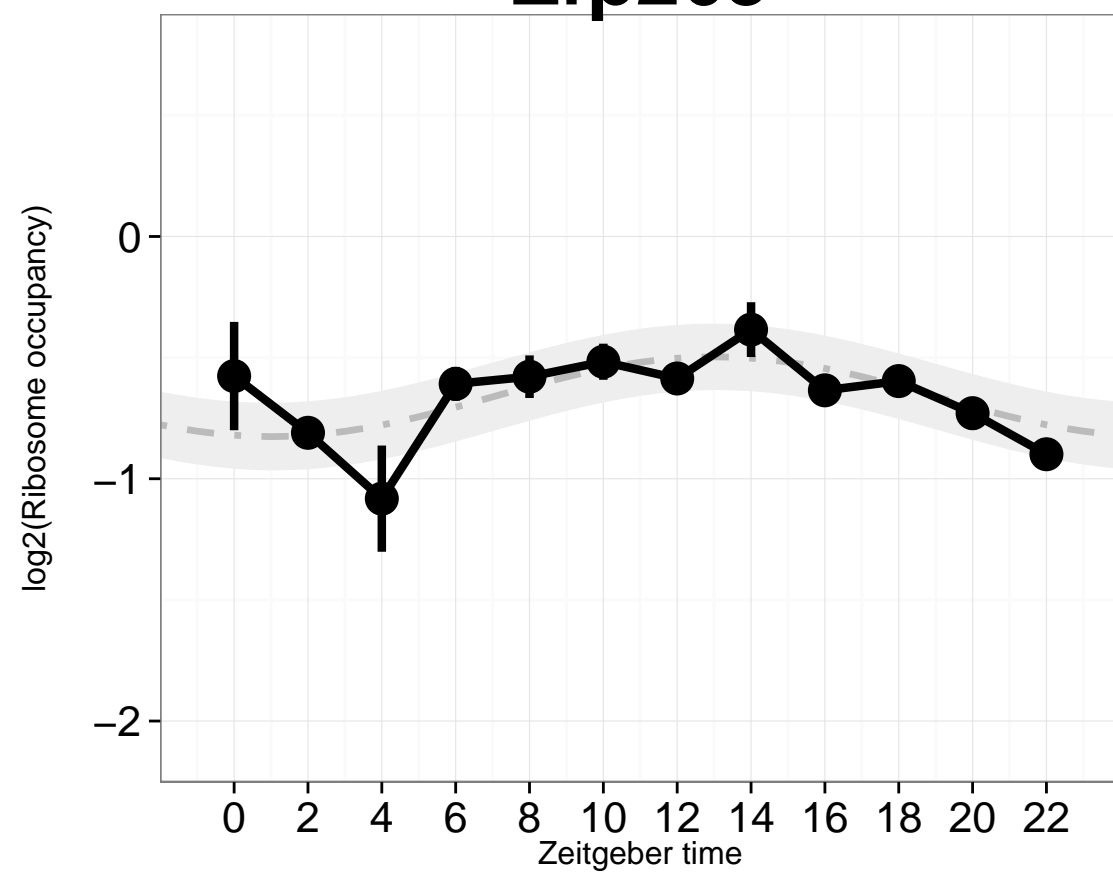

Supplement: Supplementary file 6004 [file 1]

## Amotl1

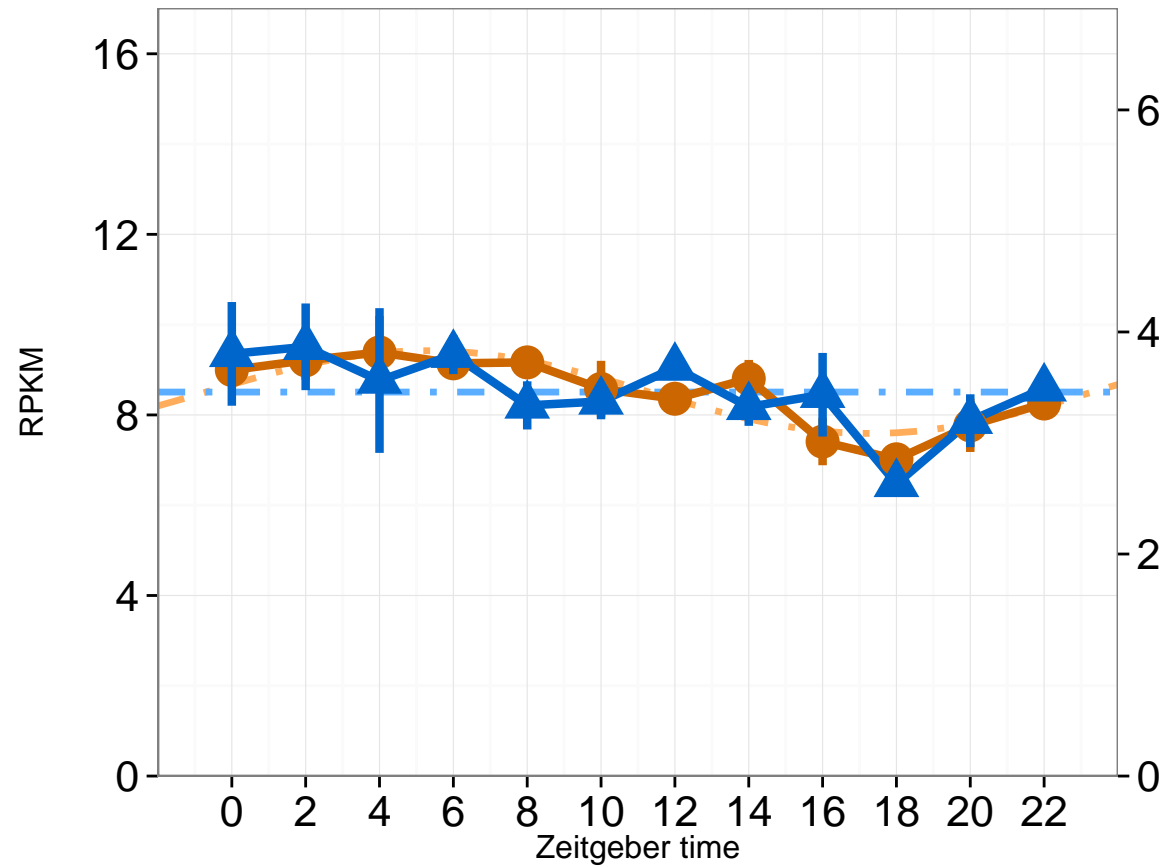

## Amotl1

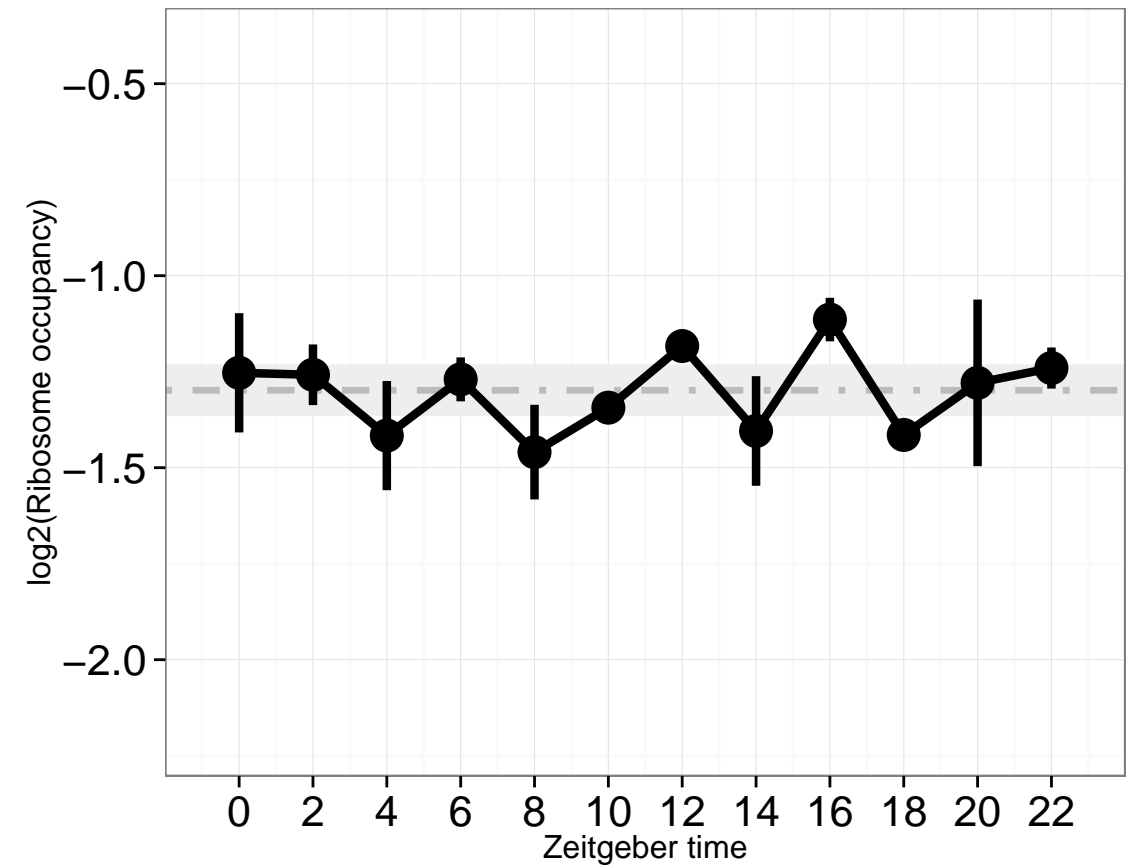

Supplement: Supplementary file 6005 [file 1]

**Figf**

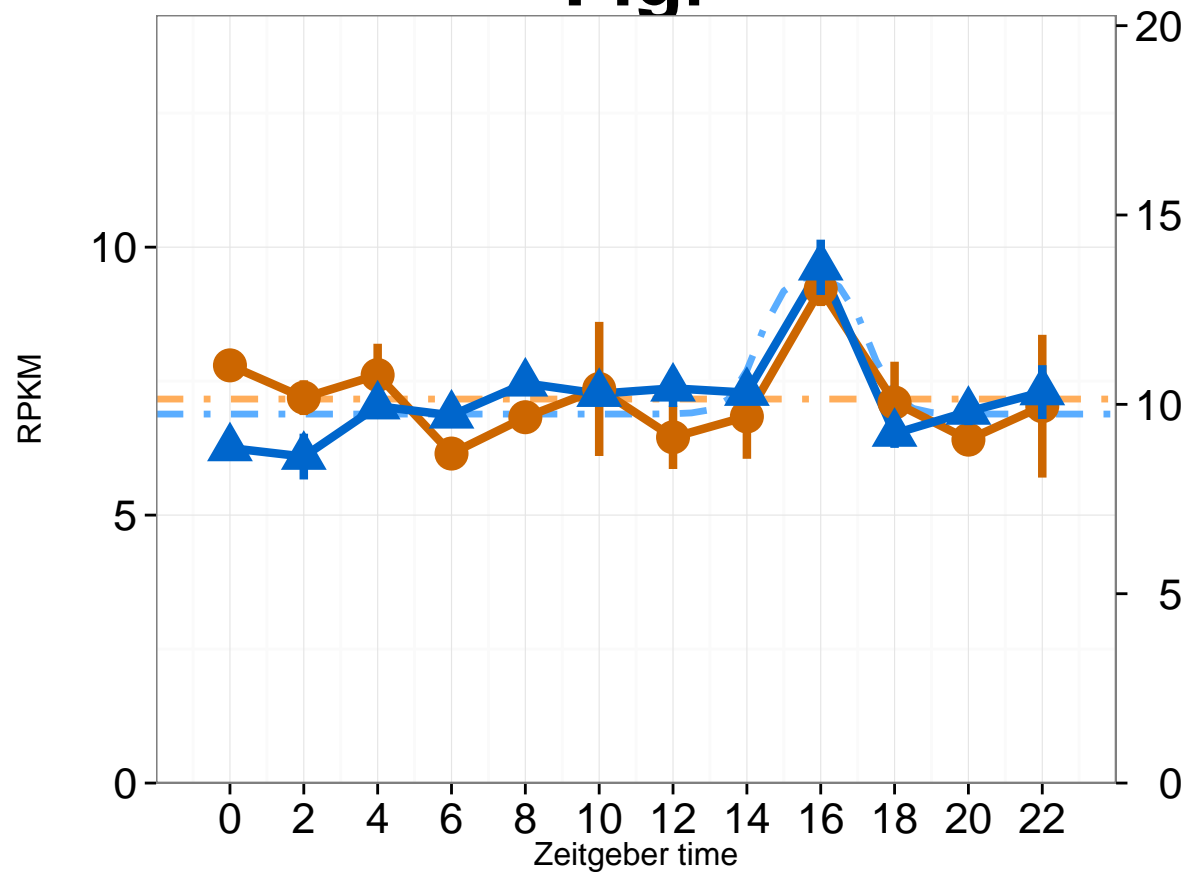

**Figf**

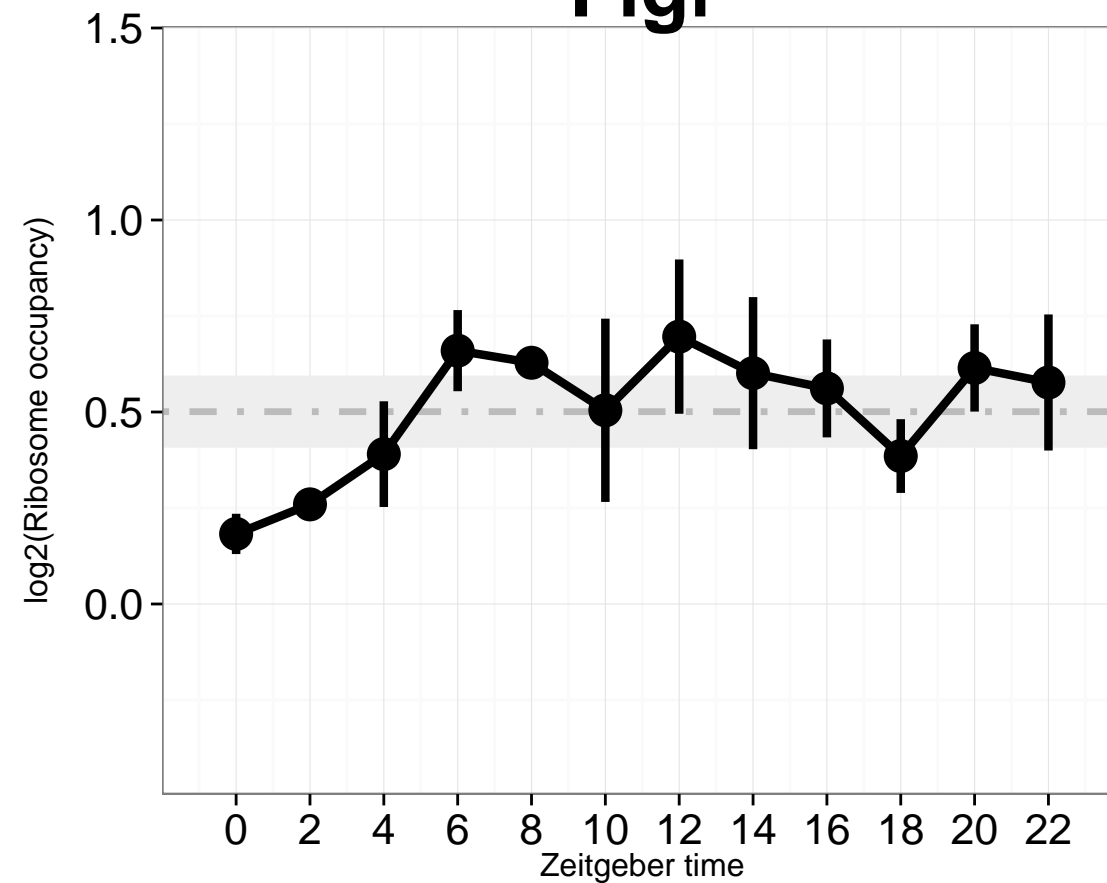

Supplement: Supplementary file 6006 [file 1]

# Snapc1

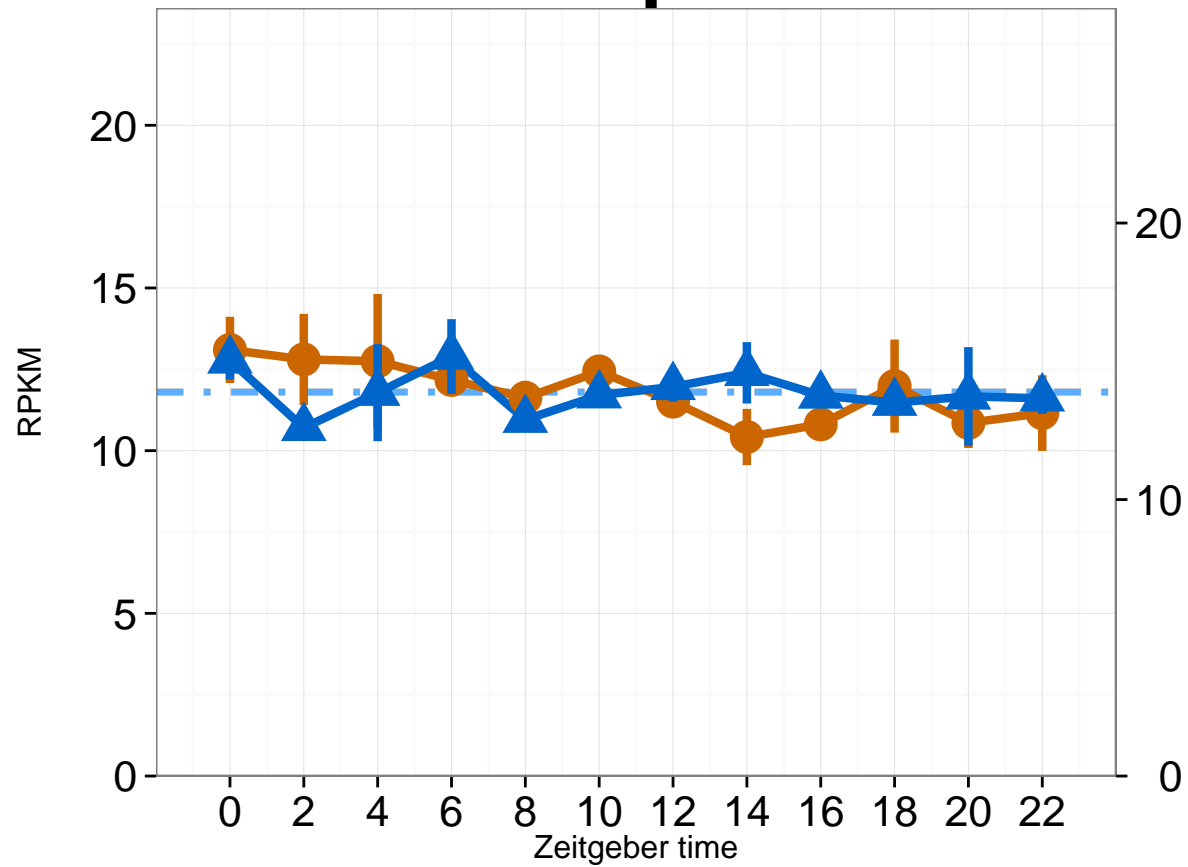

# Snapc1

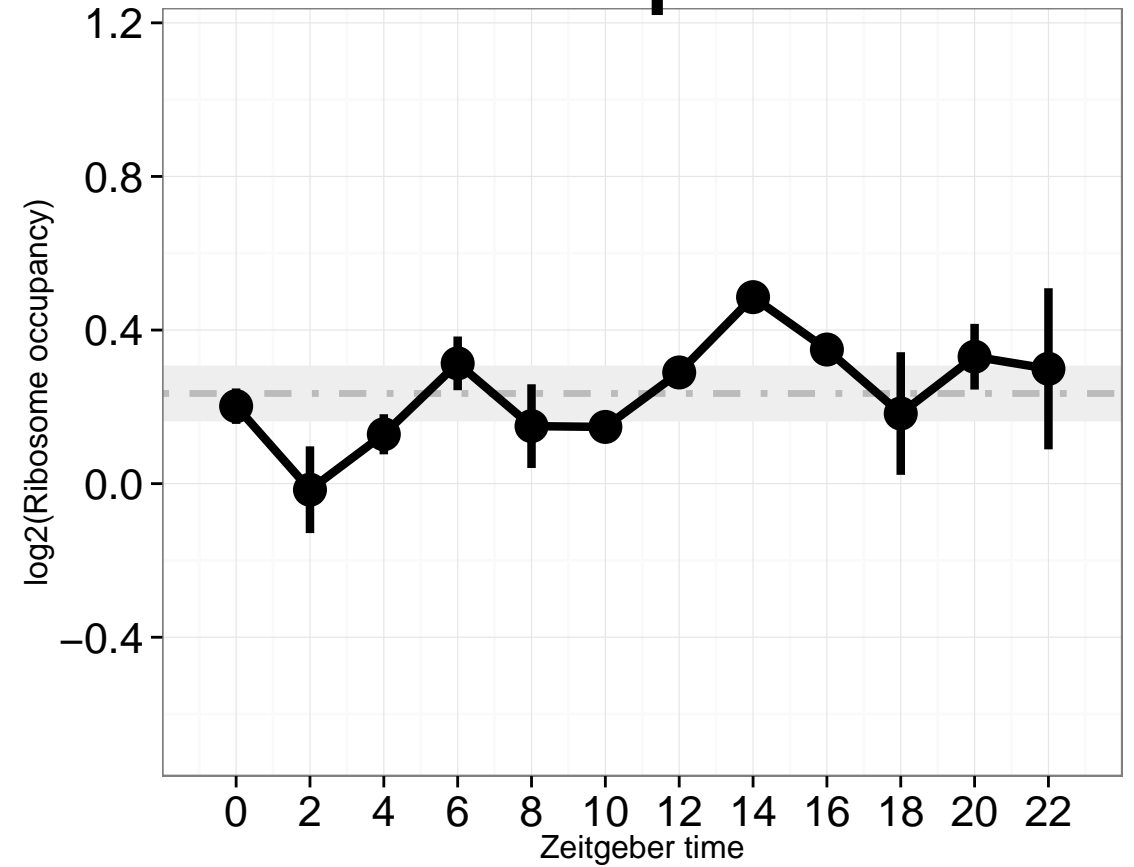

Supplement: Supplementary file 6007 [file 1]

# Tnfrsf26

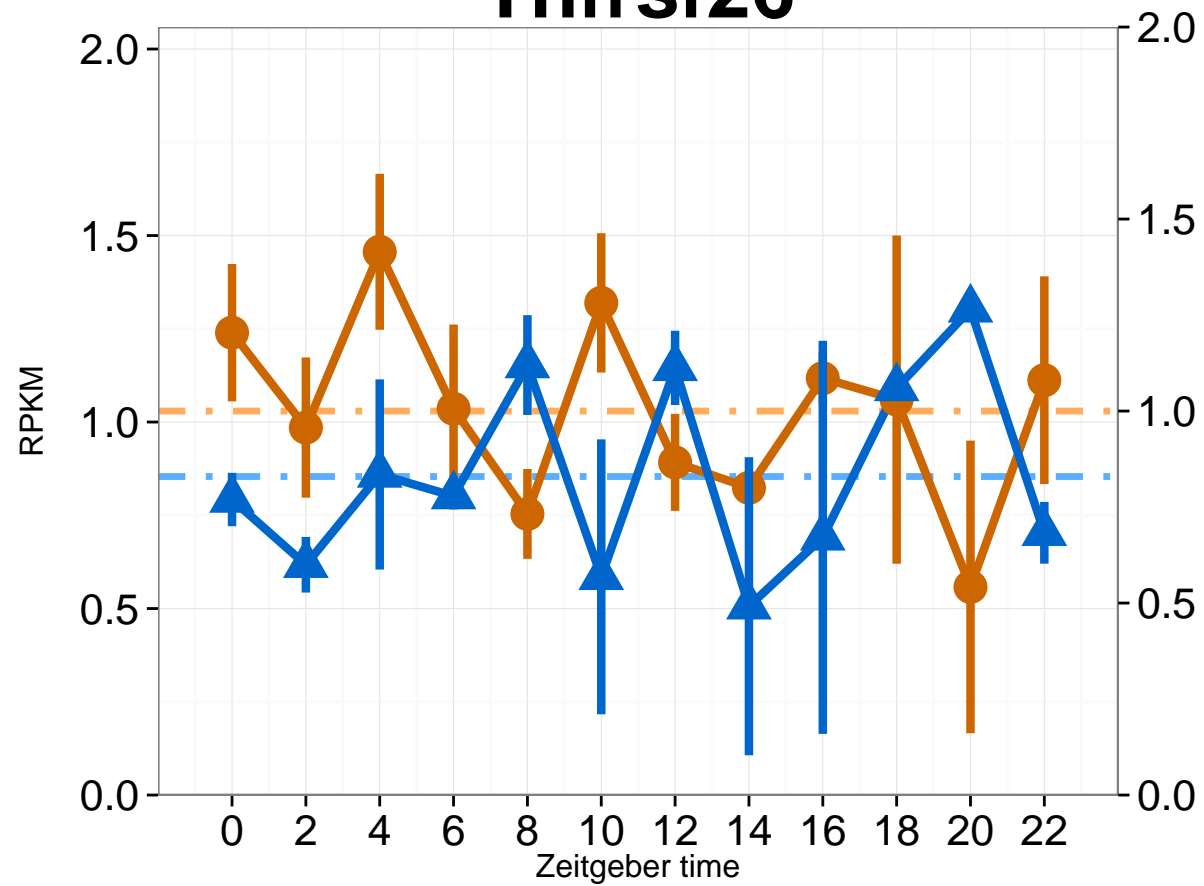

# Tnfrsf26

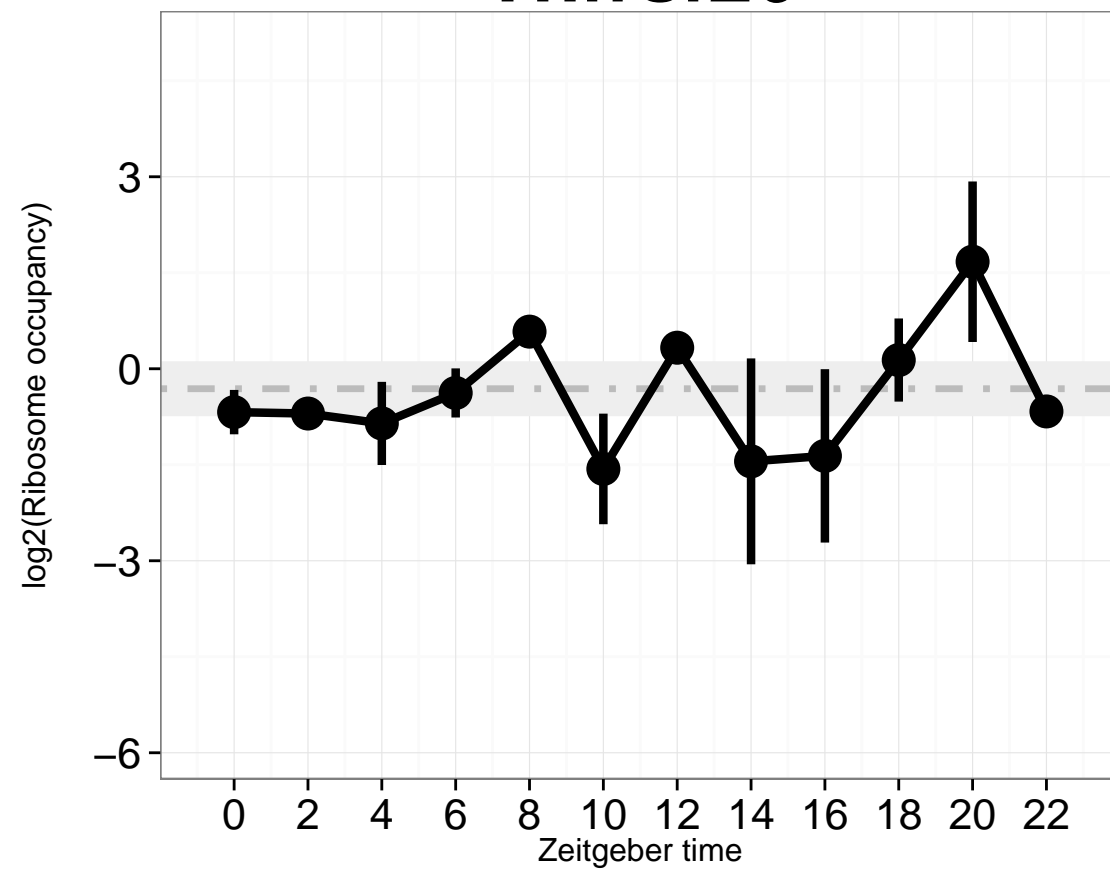

Supplement: Supplementary file 6008 [file 1]

# C1qtnf3

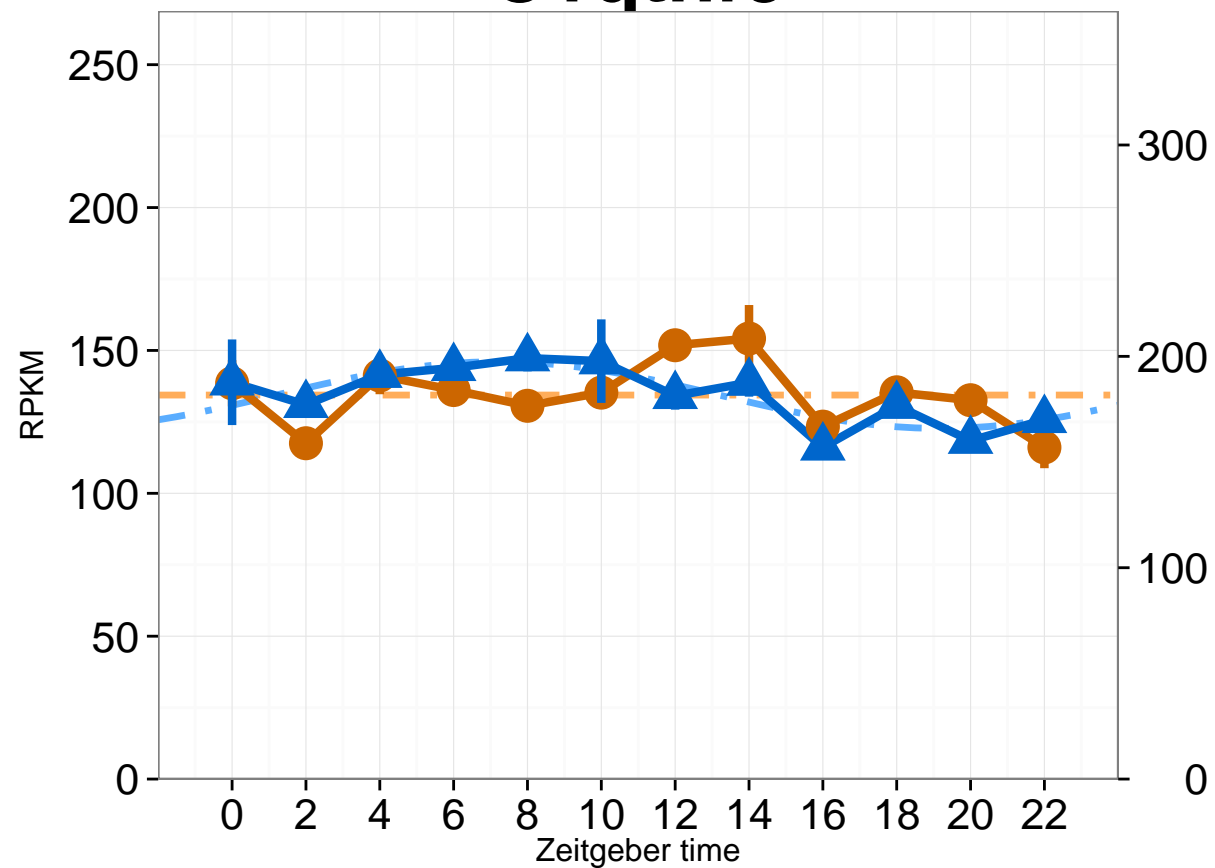

# C1qtnf3

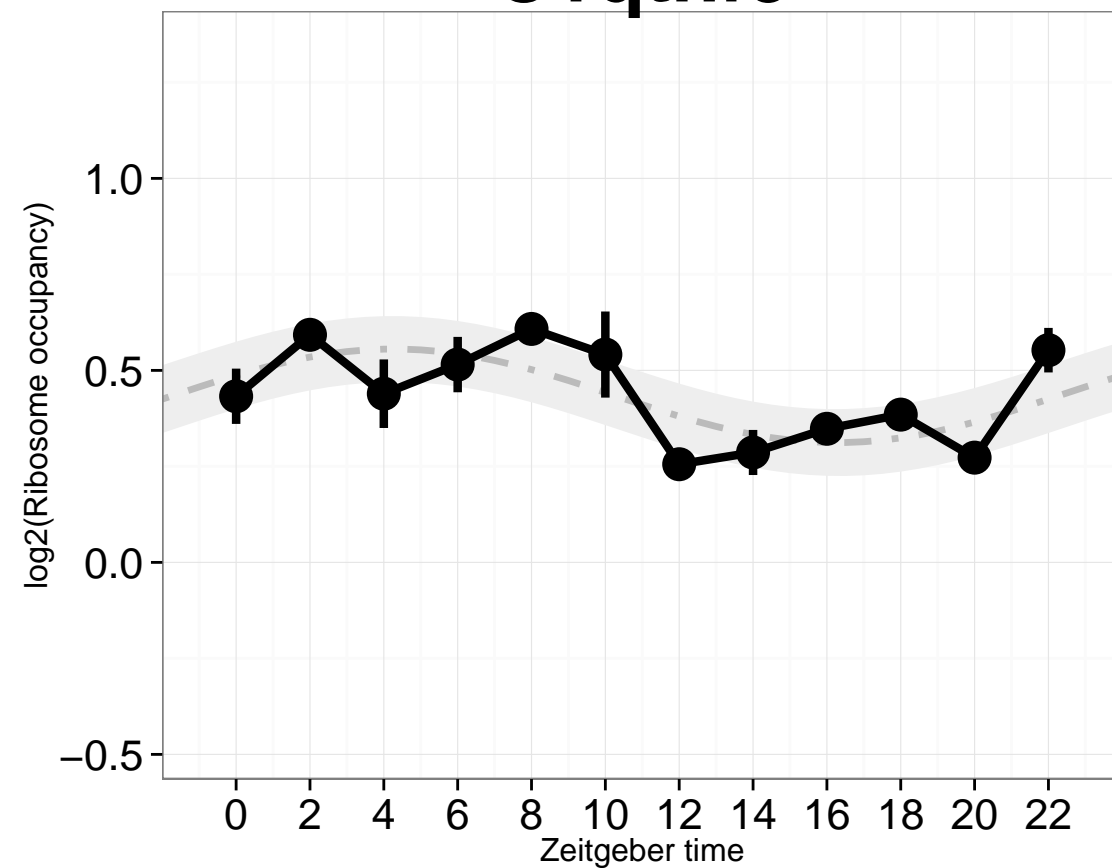

Supplement: Supplementary file 6009 [file 1]

# Larp6

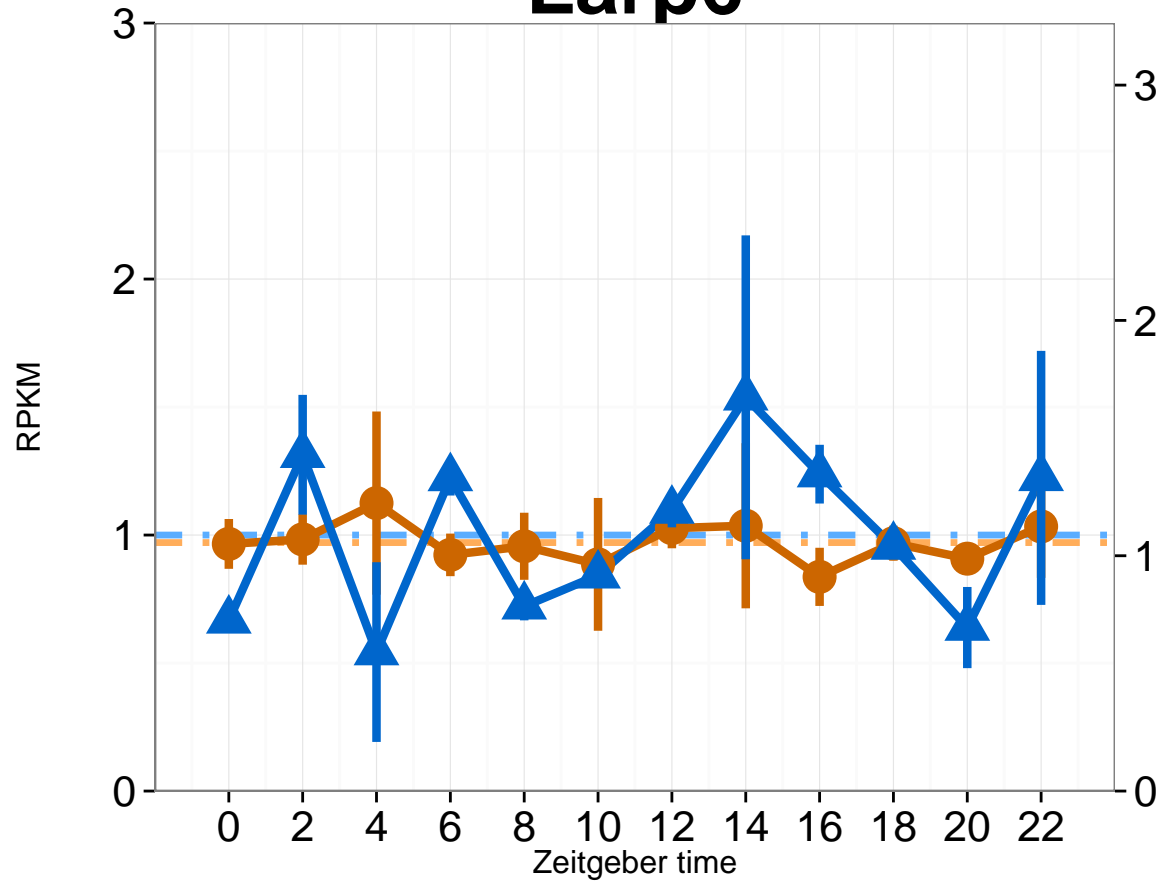

# Larp6

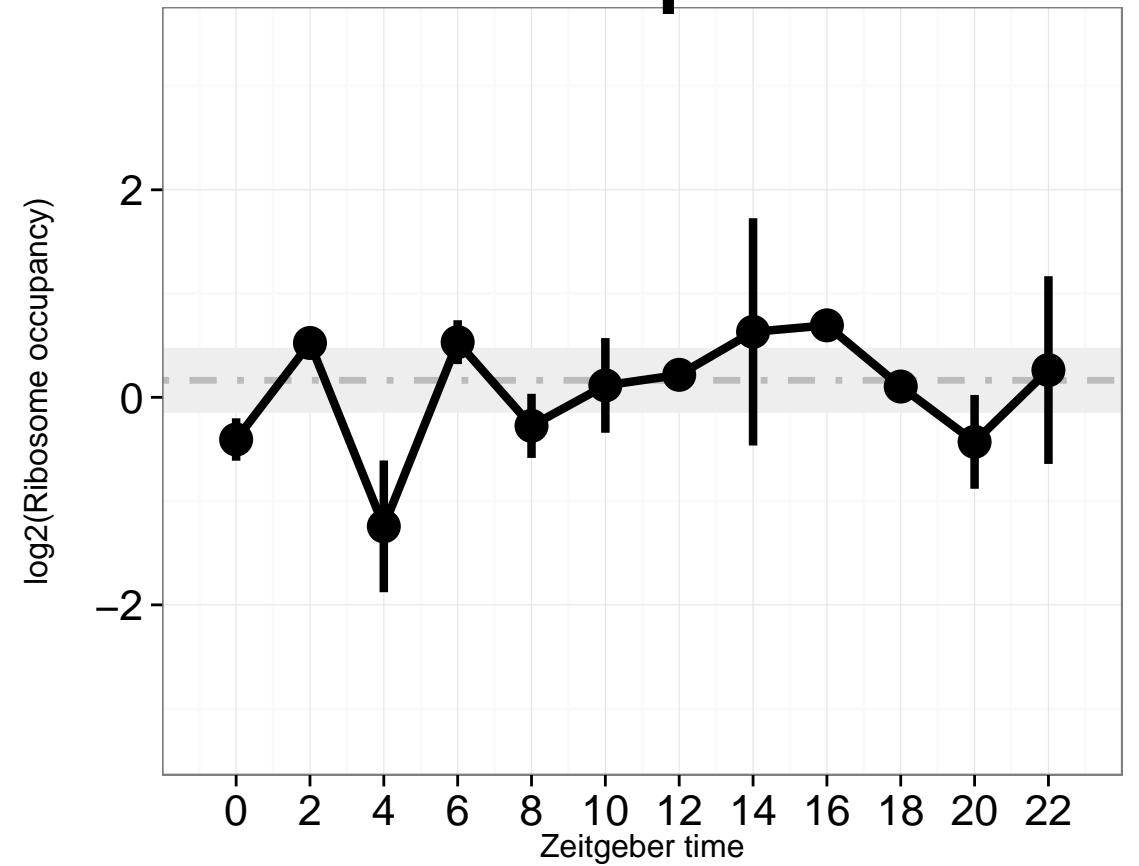

Supplement: Supplementary file 6010 [file 1]

## Grn

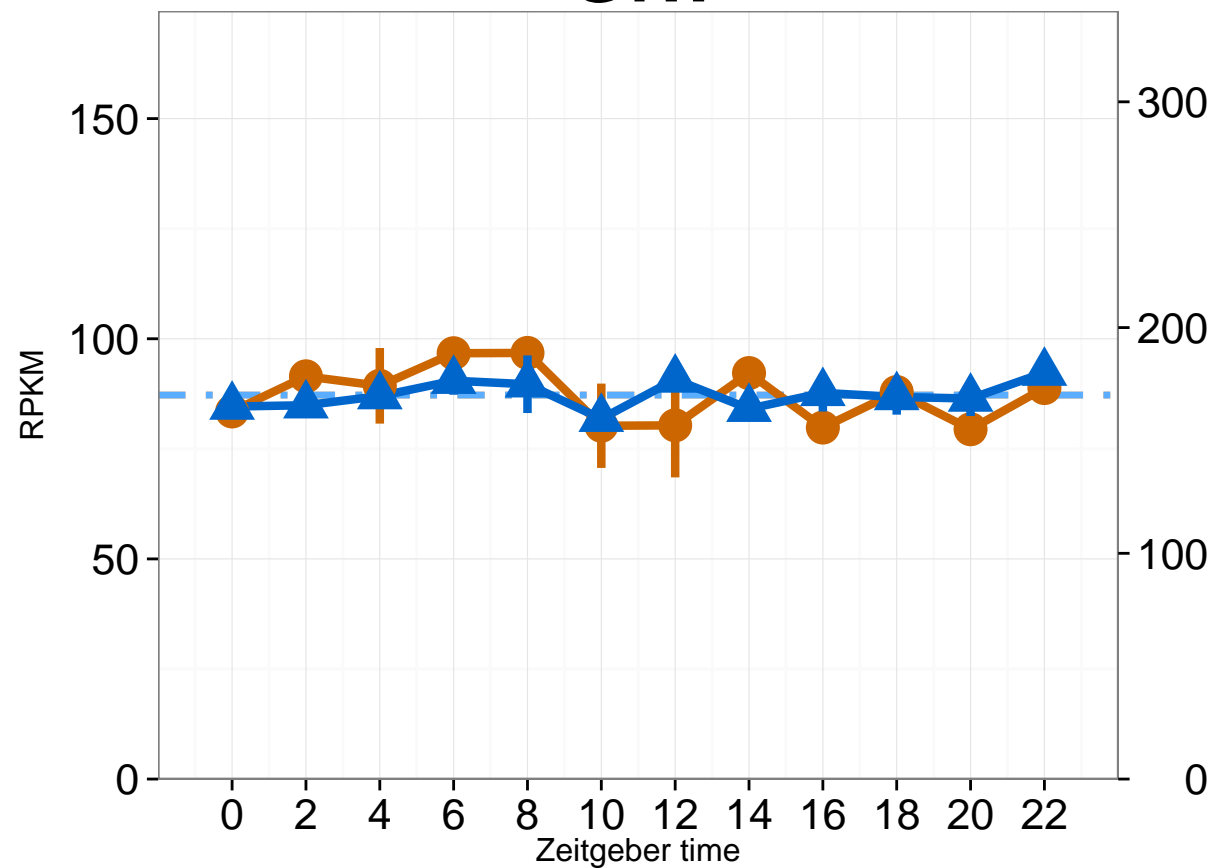

## Grn

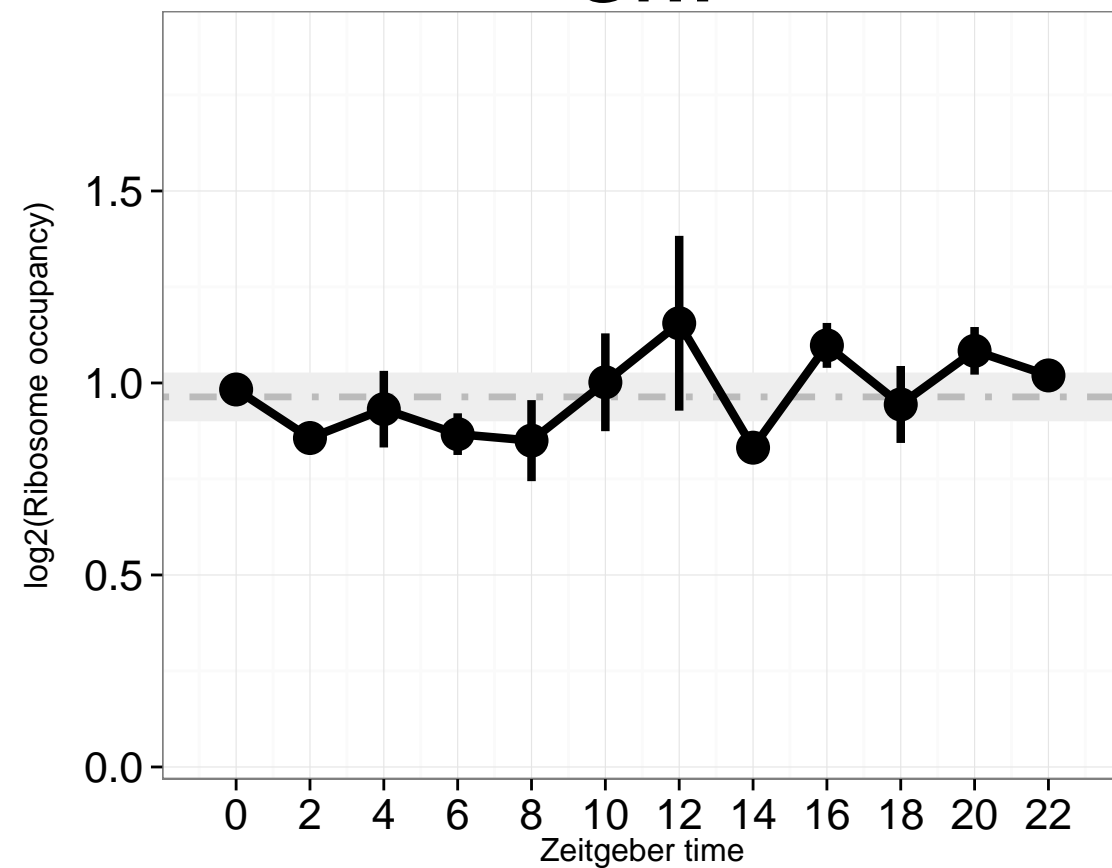

Supplement: Supplementary file 6011 [file 1]

## Pard3

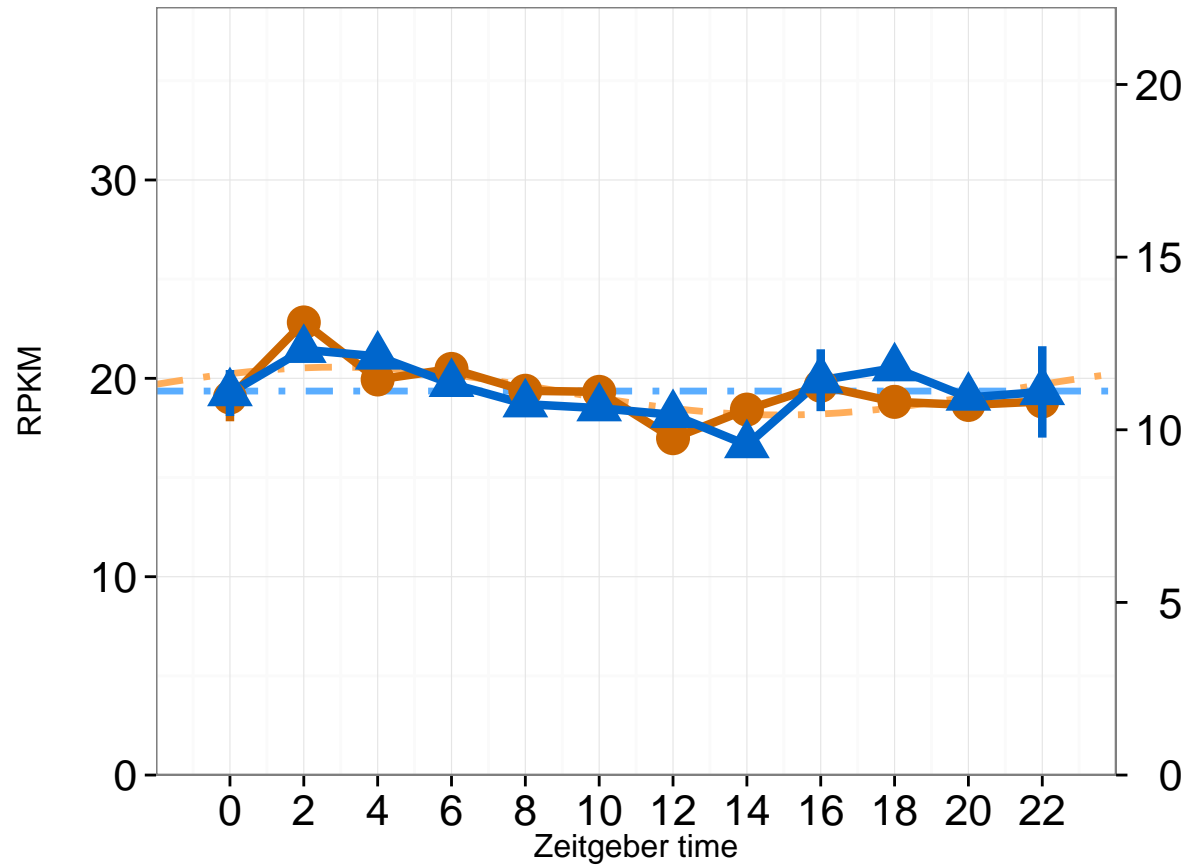

## Pard3

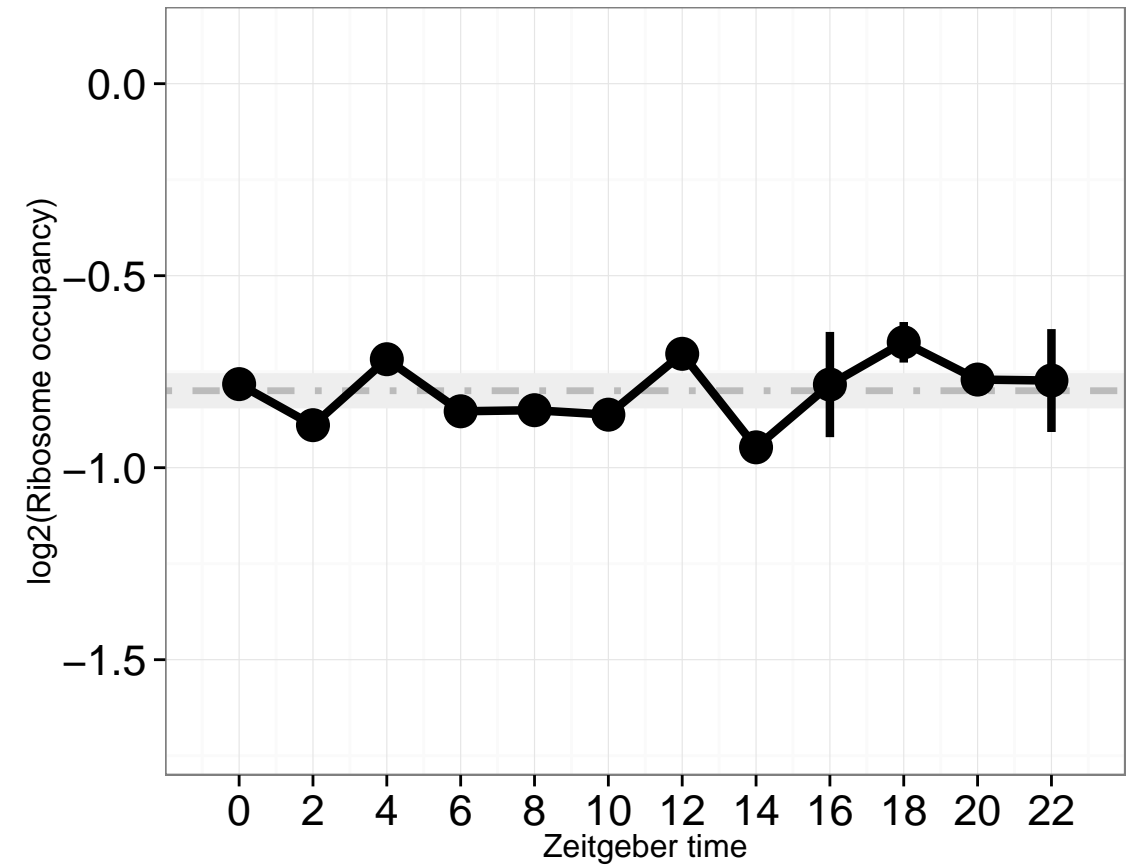

Supplement: Supplementary file 6012 [file 1]

# Nr1d2

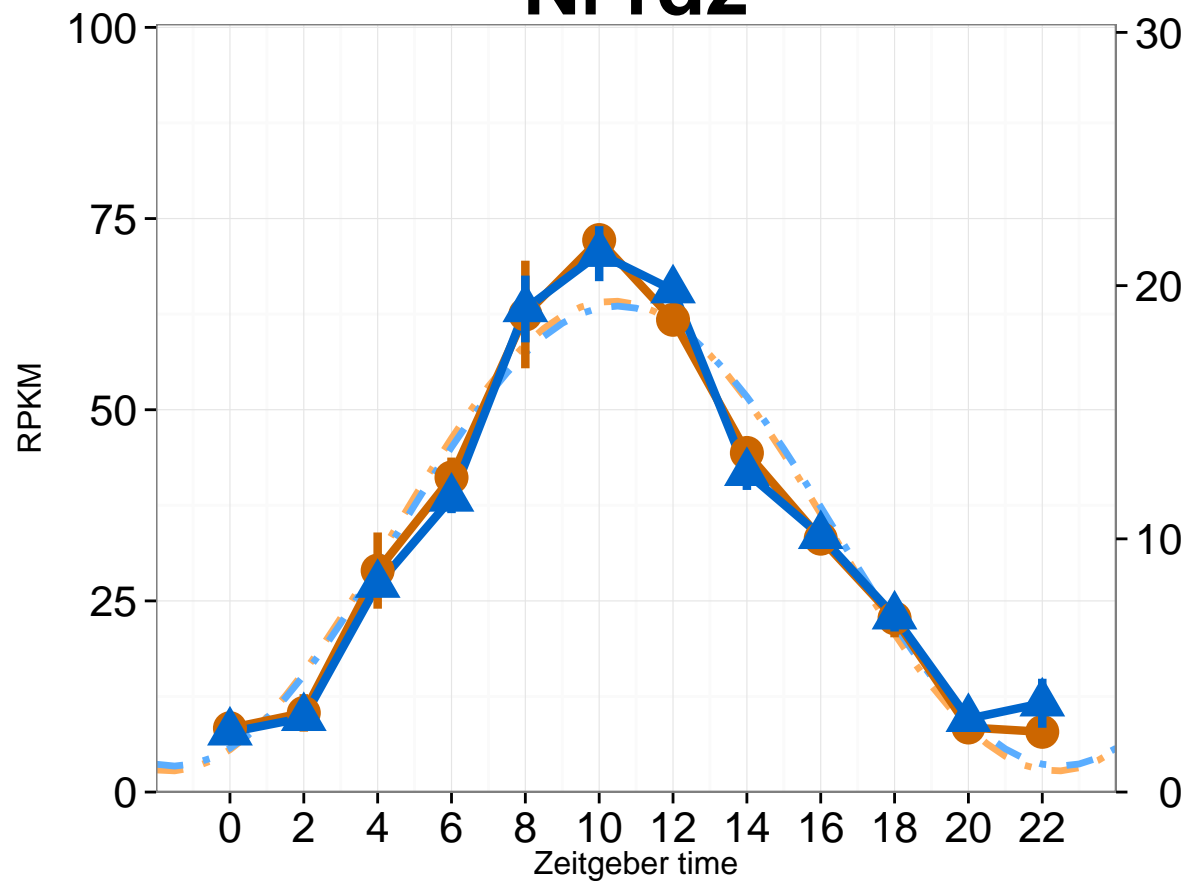

# Nr1d2

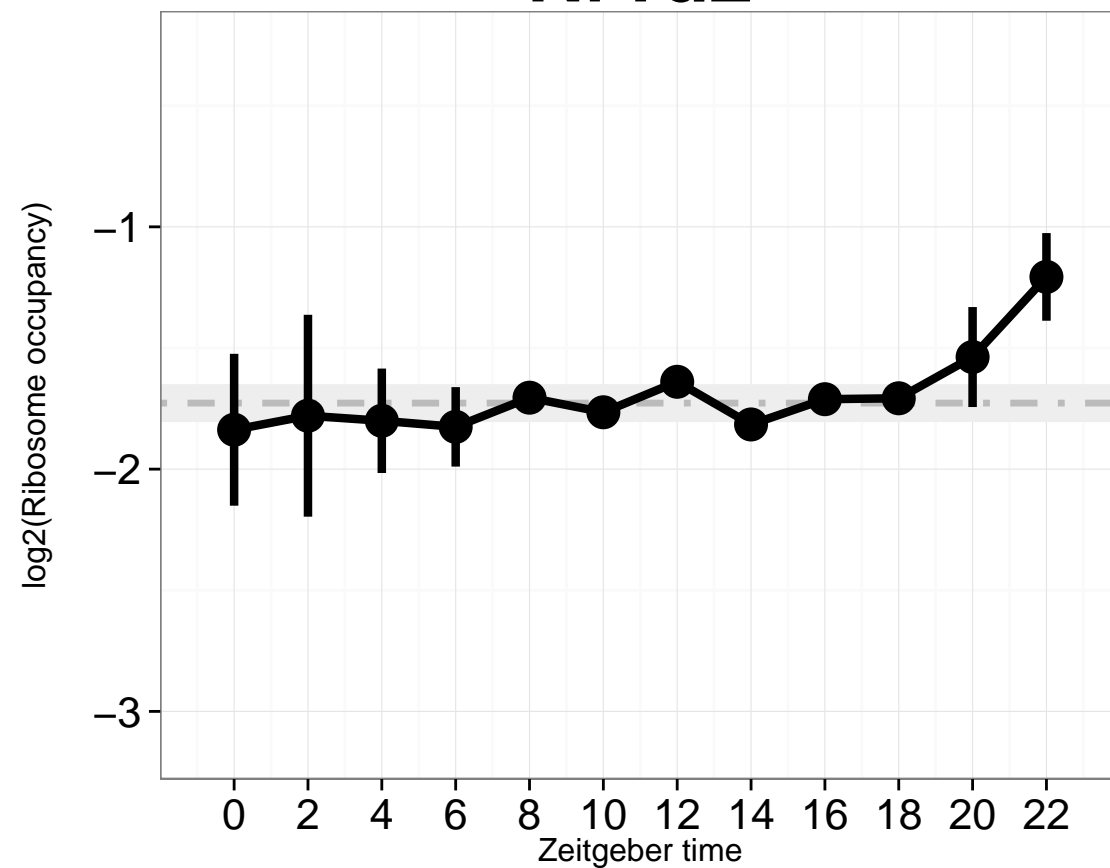

Supplement: Supplementary file 6013 [file 1]

# Zfp54

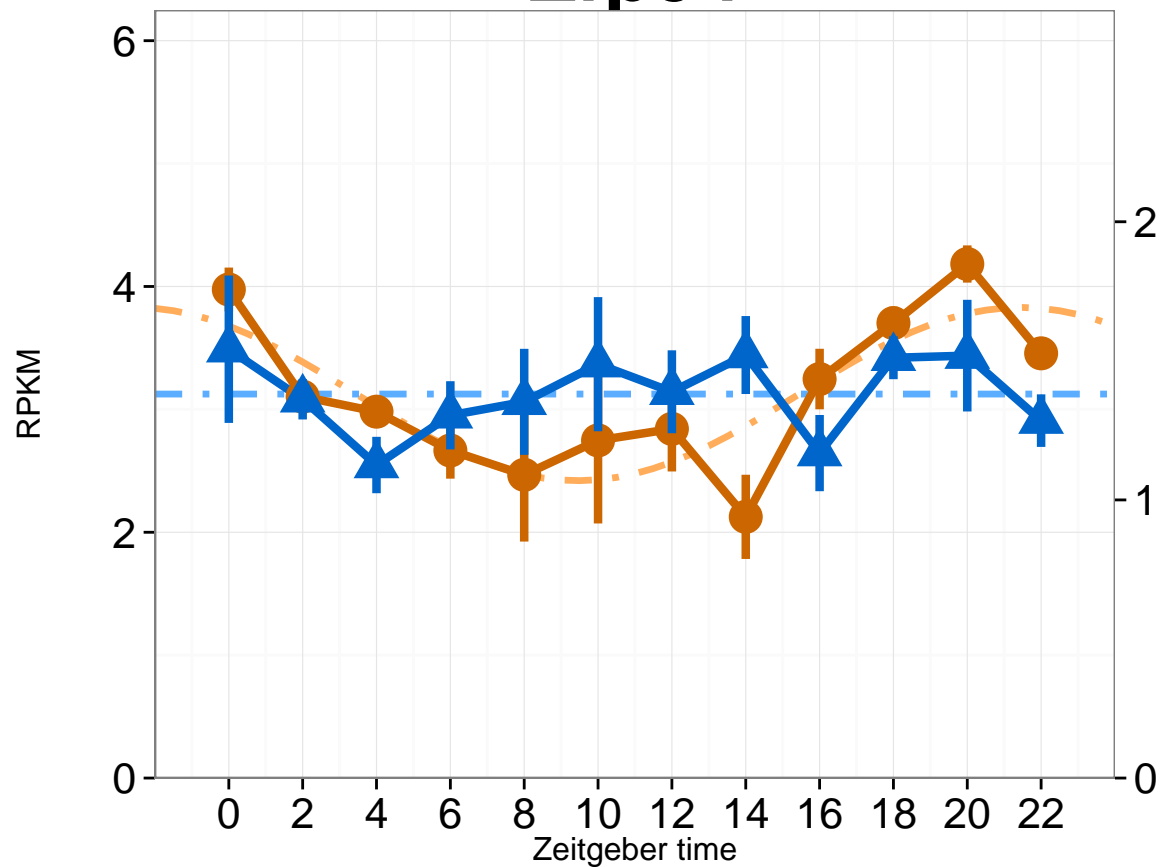

# Zfp54

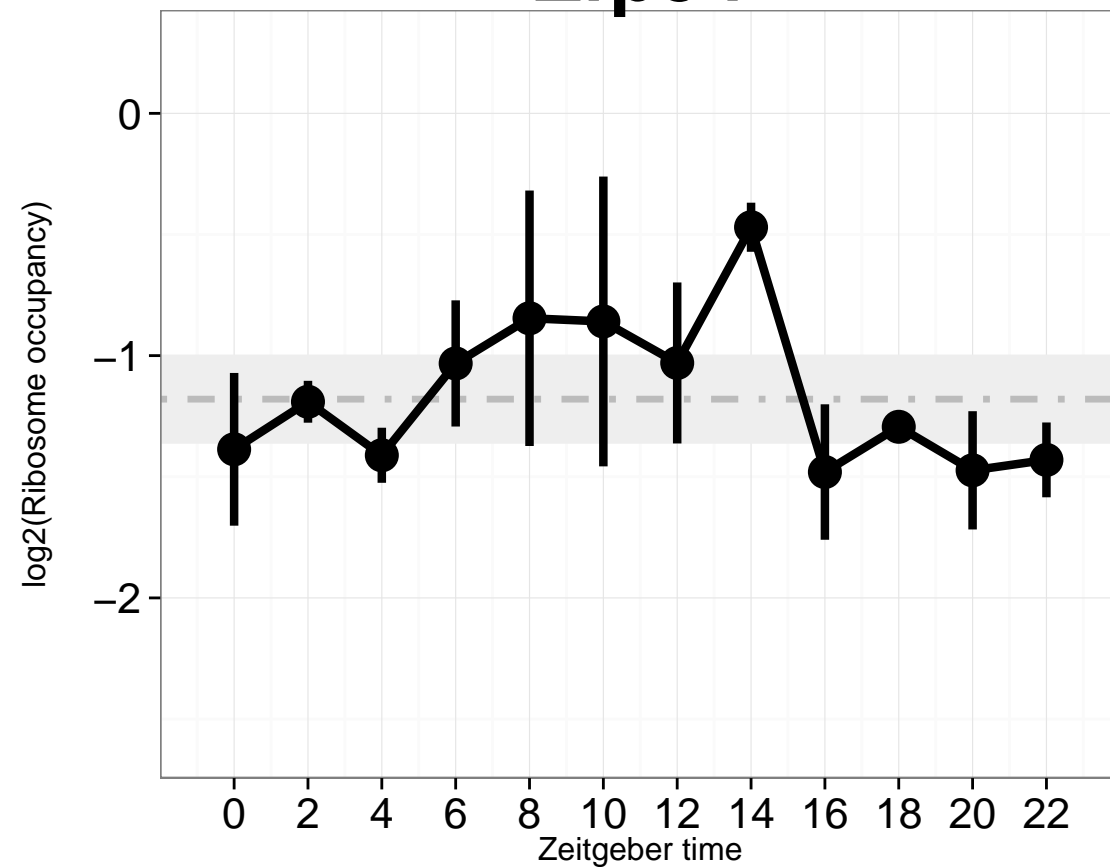

Supplement: Supplementary file 6014 [file 1]

## Gm17509

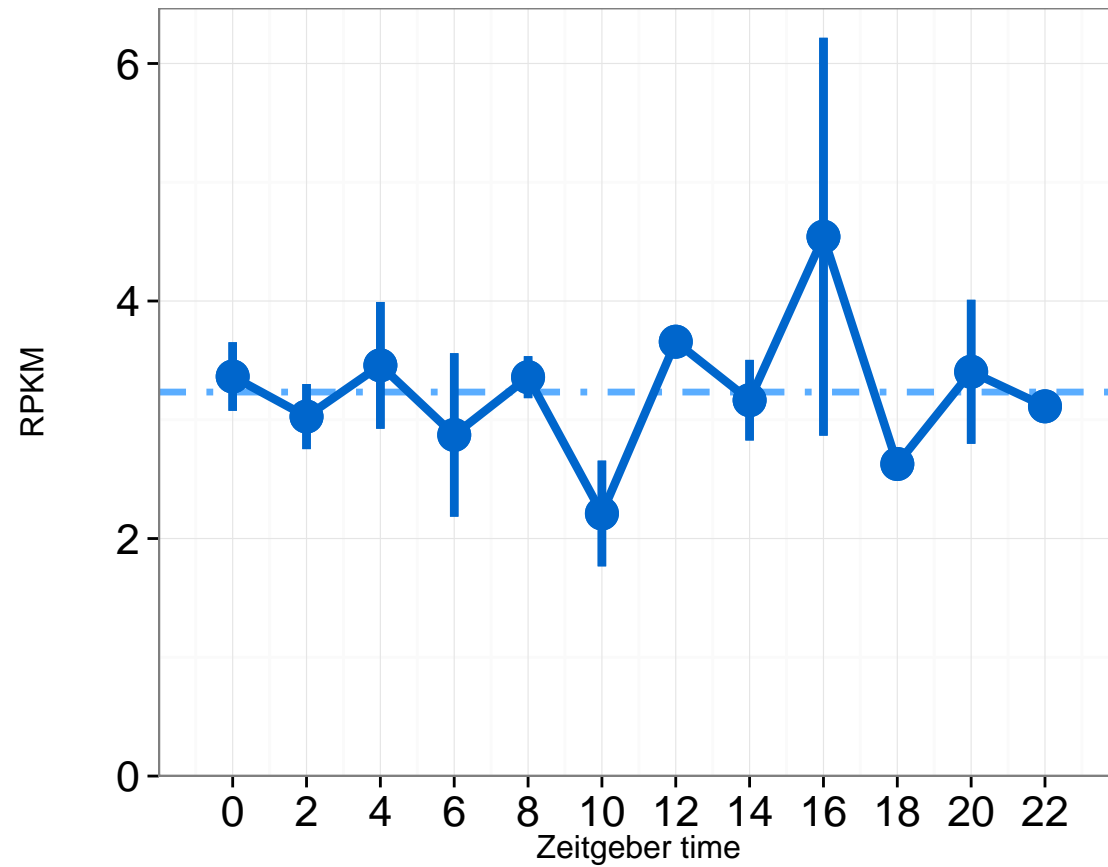

## Gm17509 log2(Ribosome occupanc

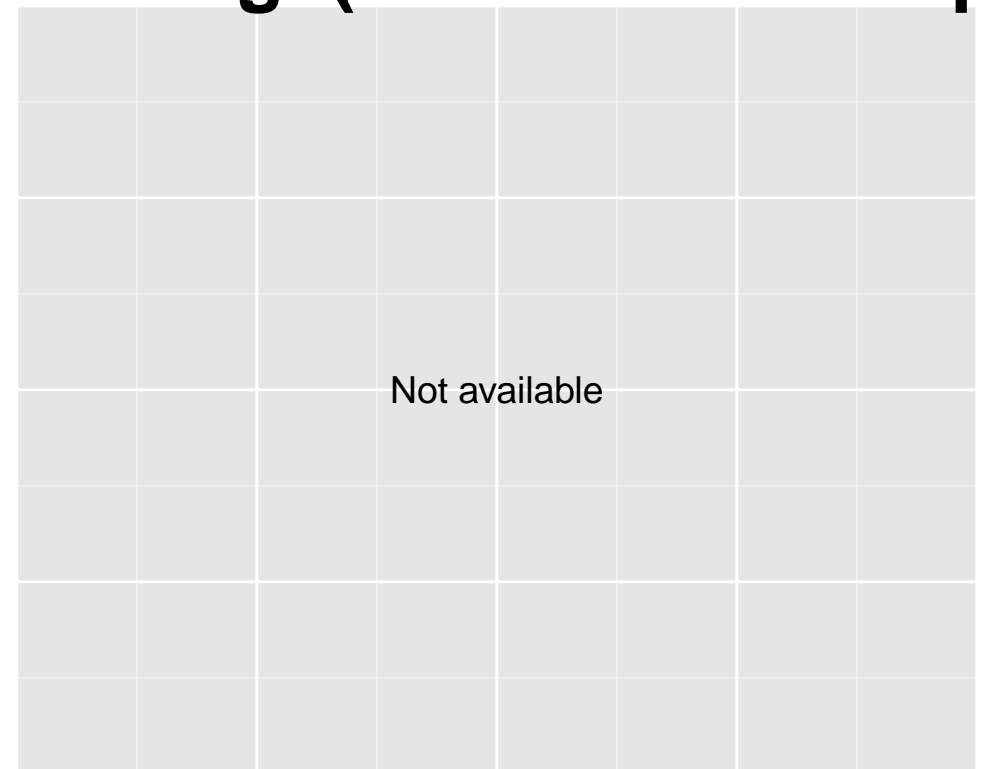

Supplement: Supplementary file 6015 [file 1]

# Scn4b

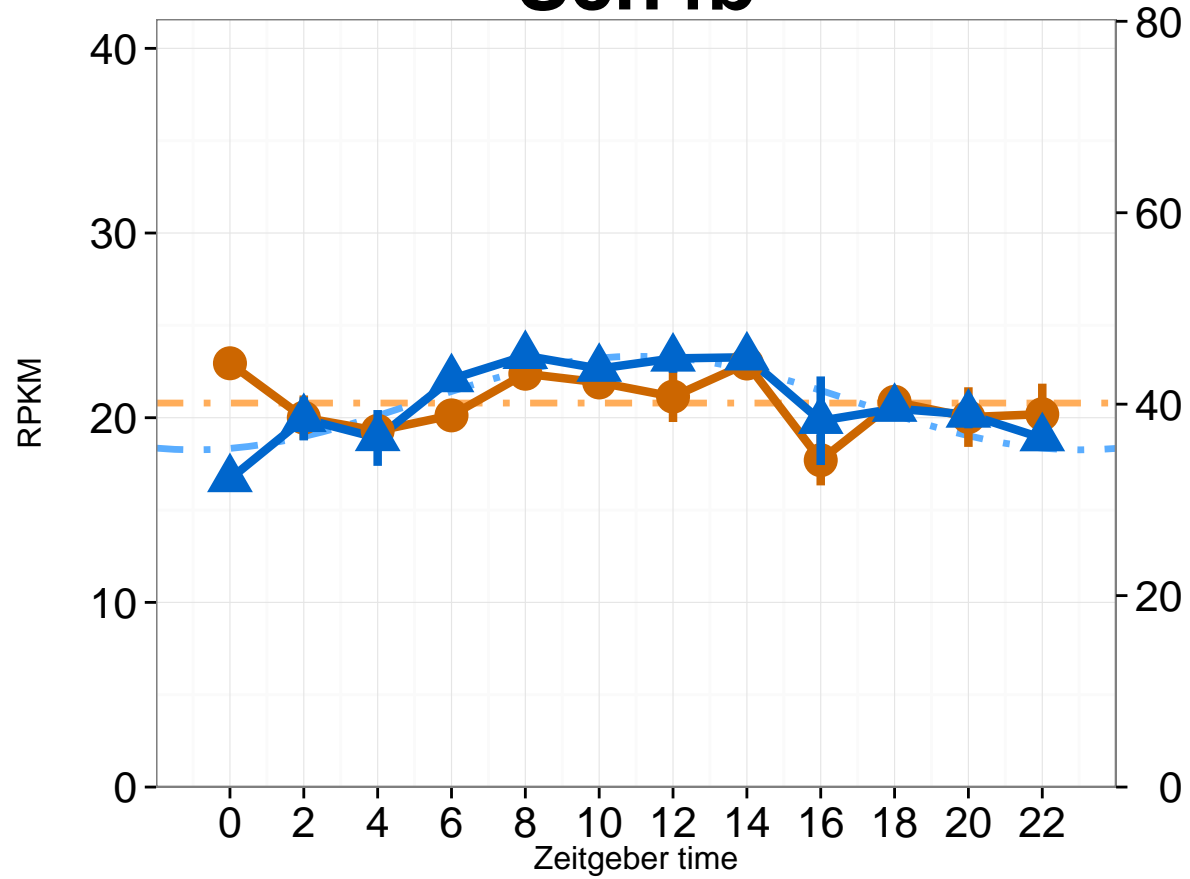

# Scn4b

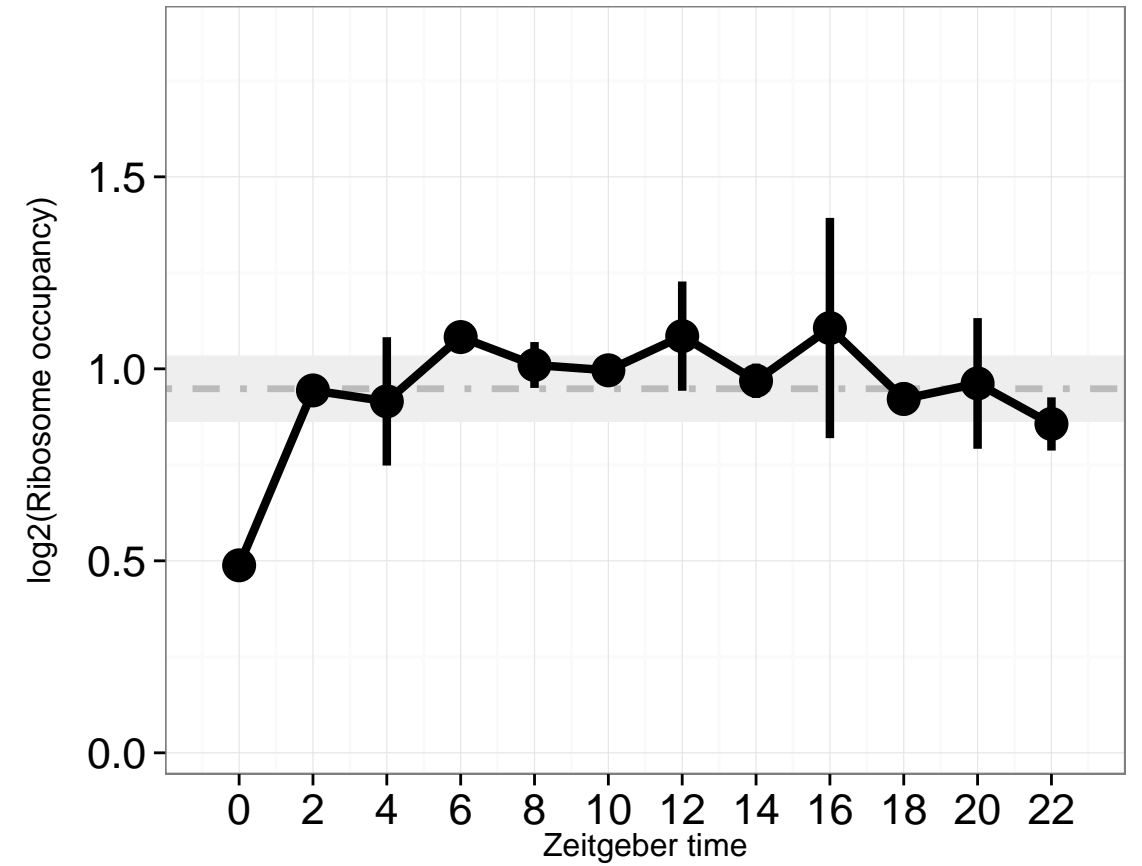

Supplement: Supplementary file 6016 [file 1]

## Cux1

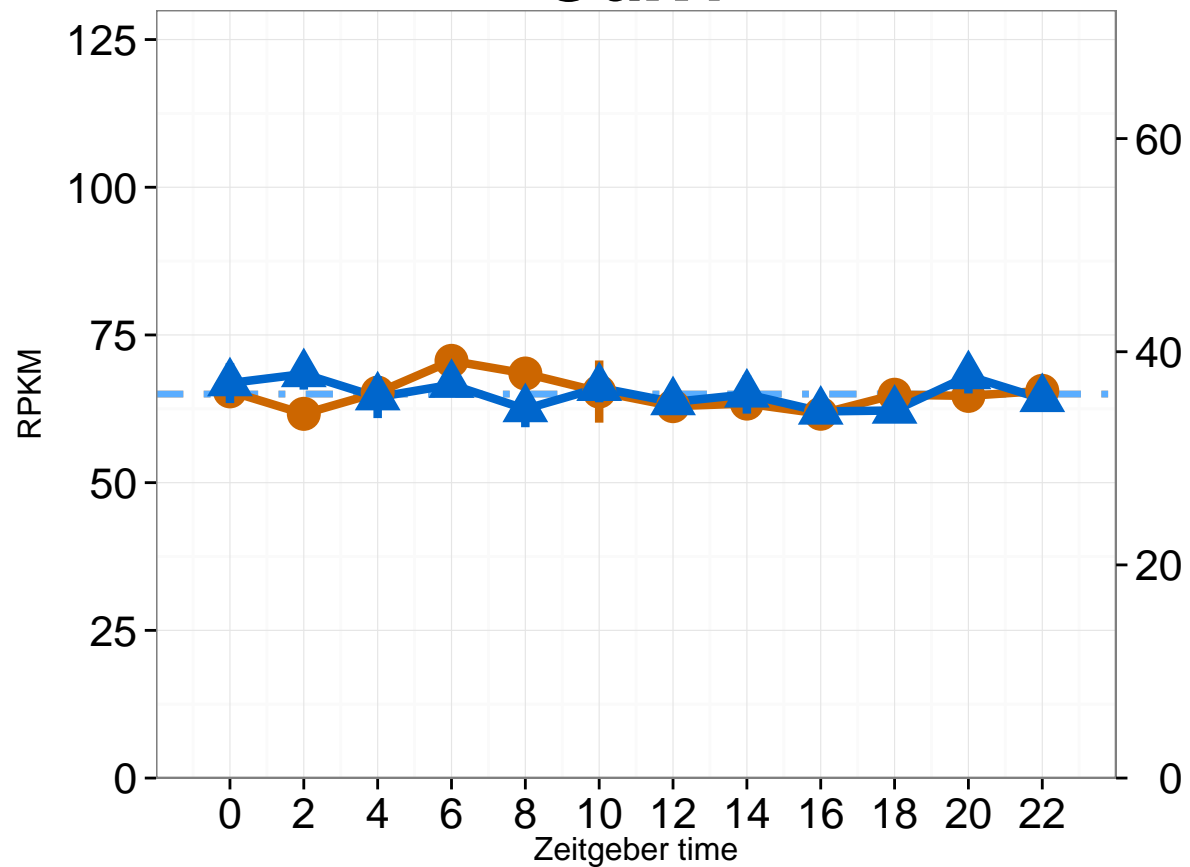

## Cux1

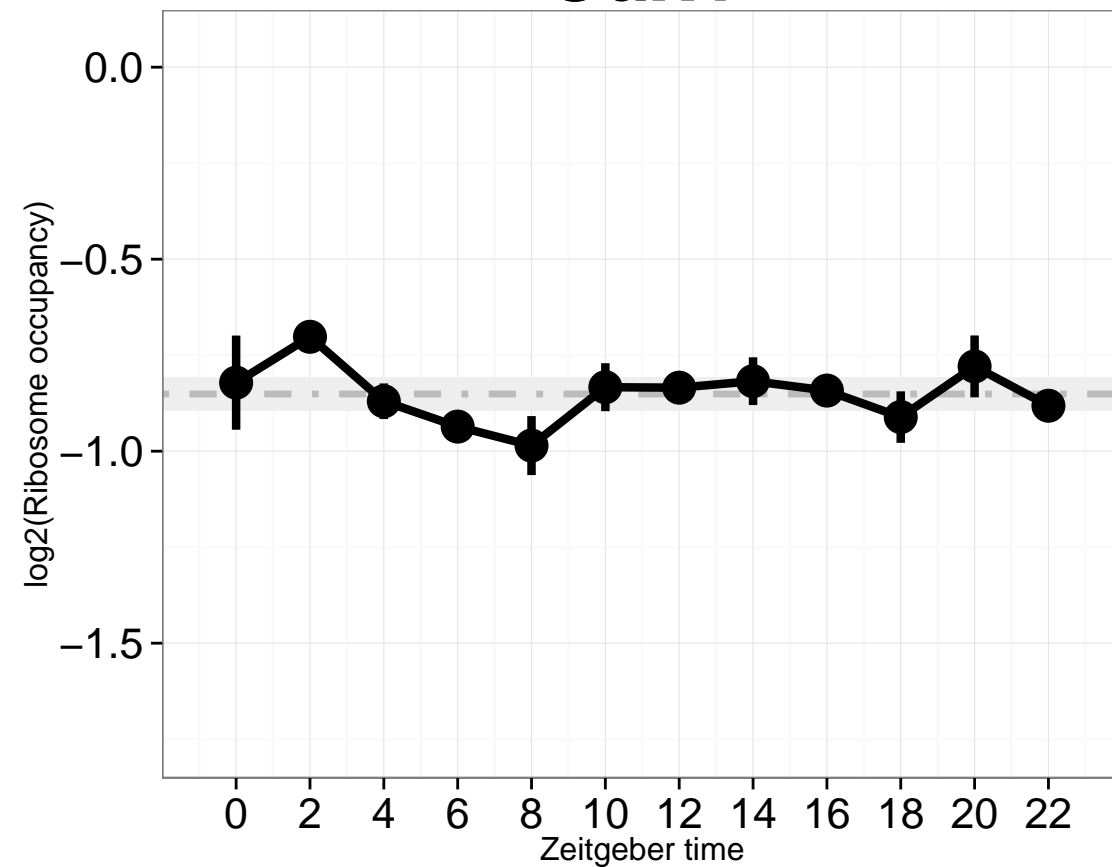

Supplement: Supplementary file 6017 [file 1]

## Gm12166

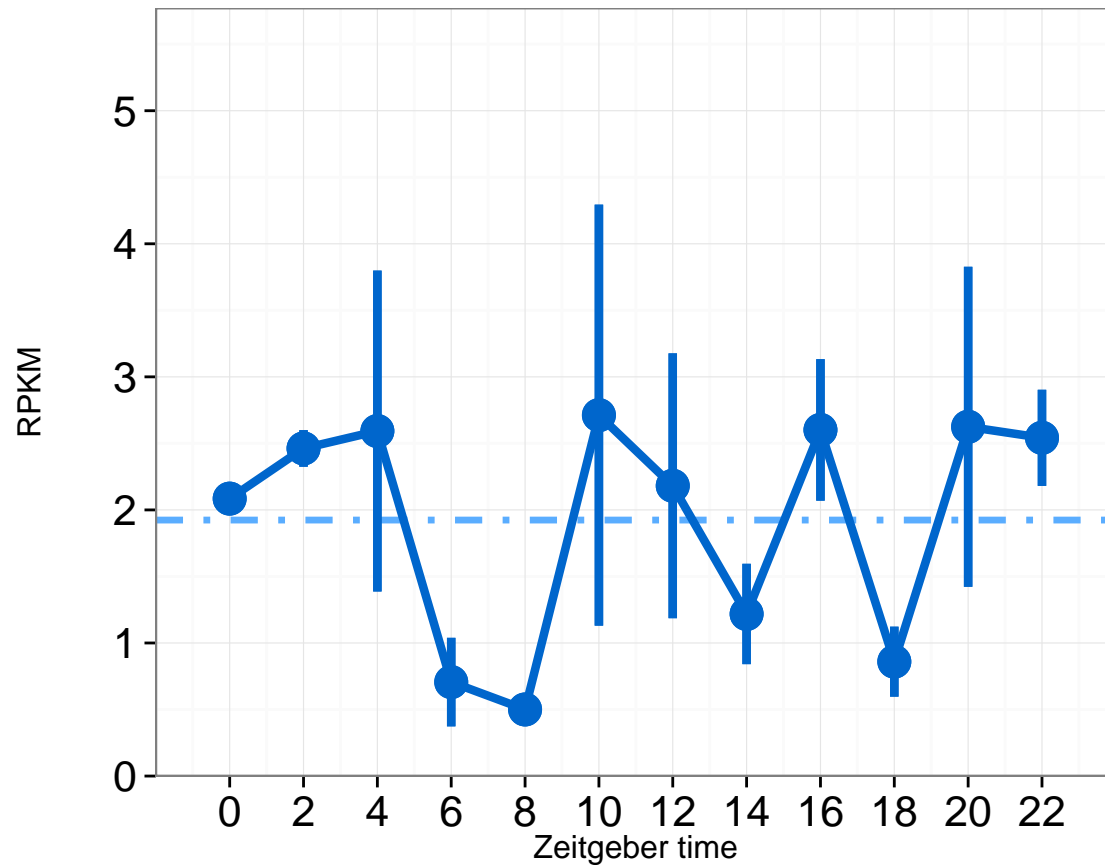

## Gm12166 log2(Ribosome occupanc



Supplement: Supplementary file 6018 [file 1]

# Cmtm6

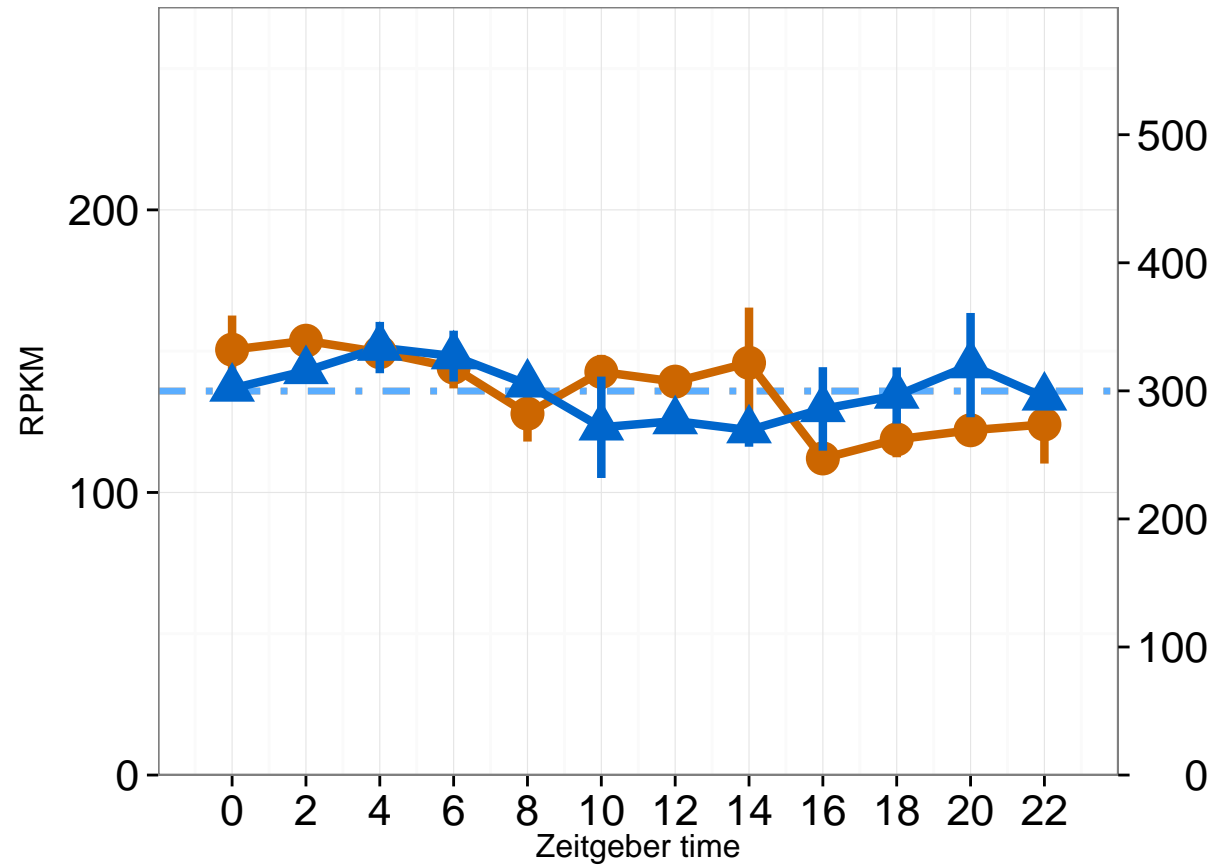

# Cmtm6

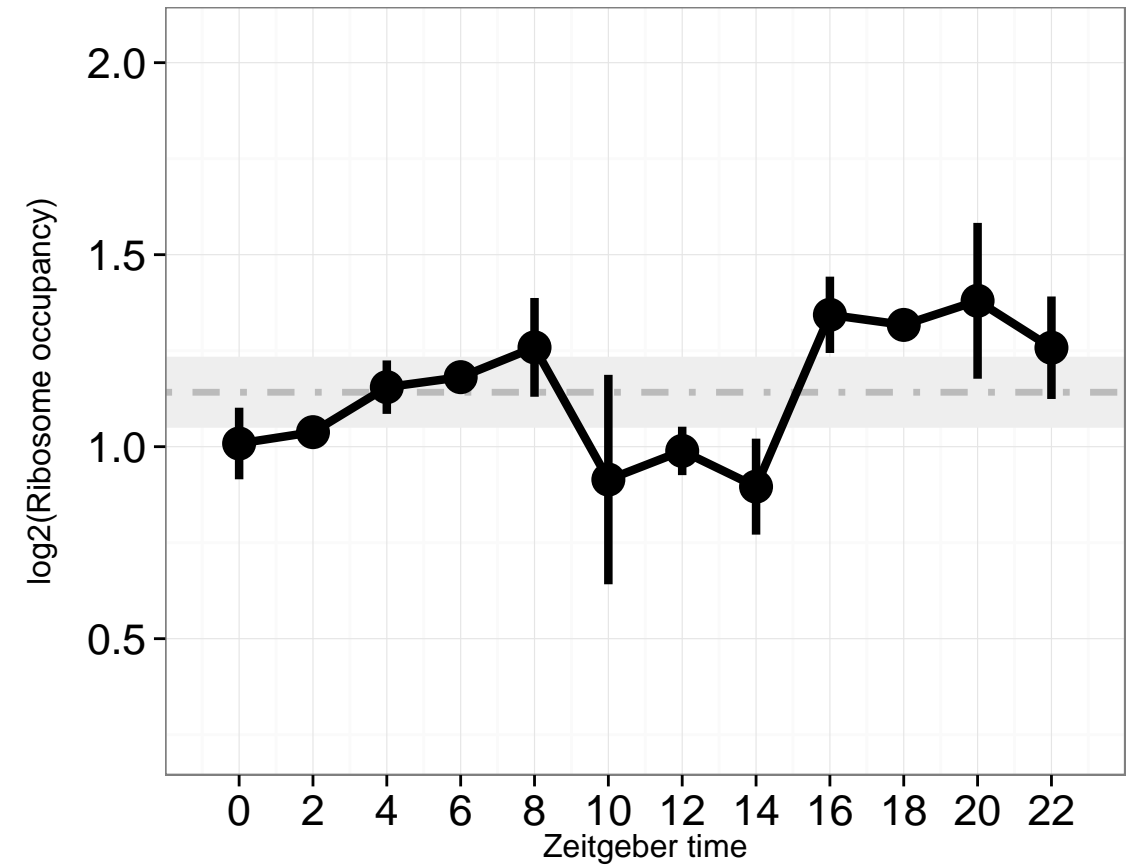

Supplement: Supplementary file 6019 [file 1]

## Cldn25

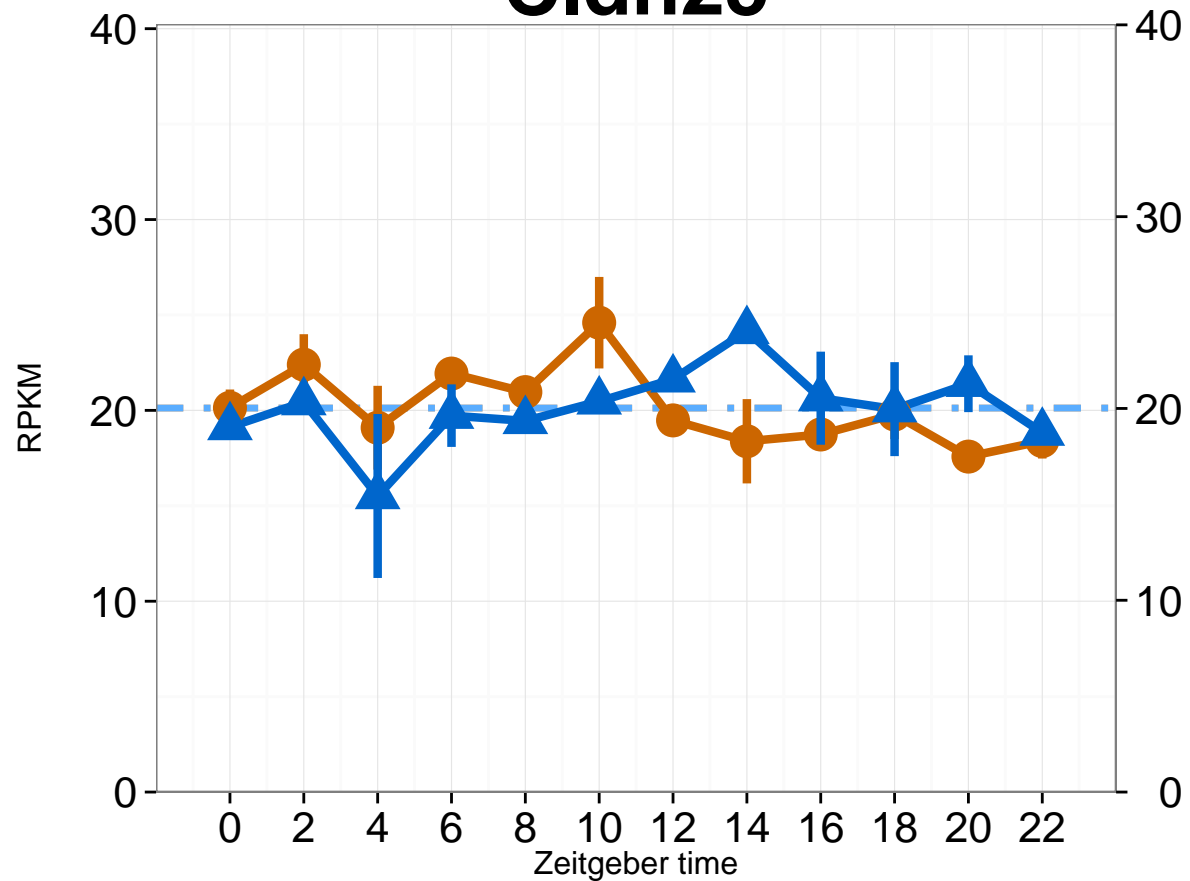

## Cldn25

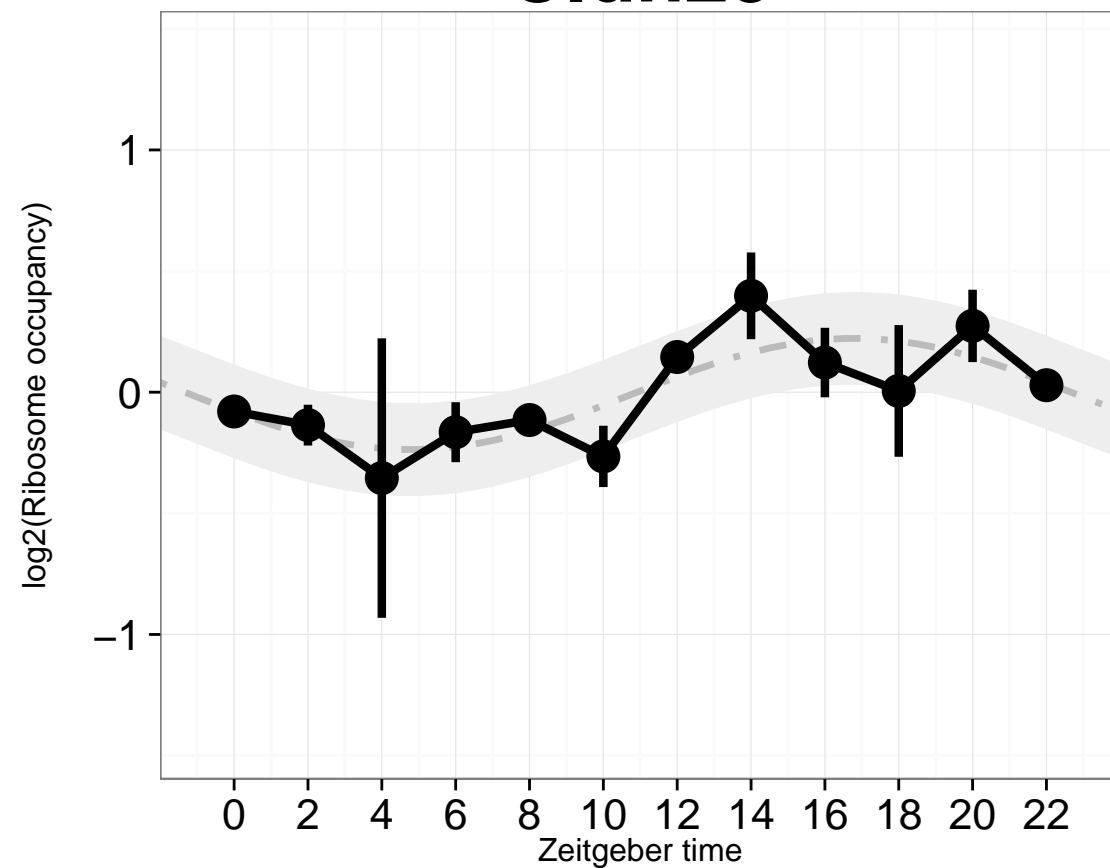

Supplement: Supplementary file 6020 [file 1]

# St6galnac4

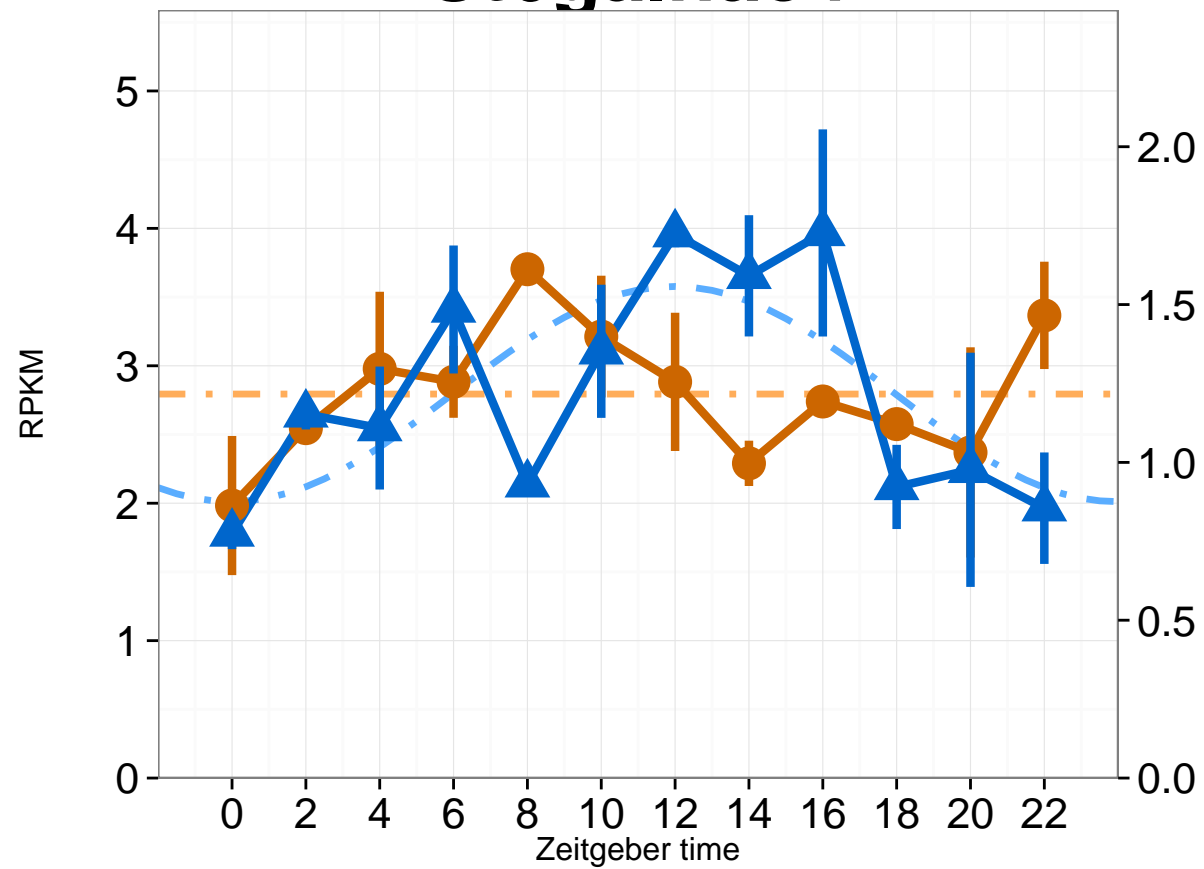

# St6galnac4

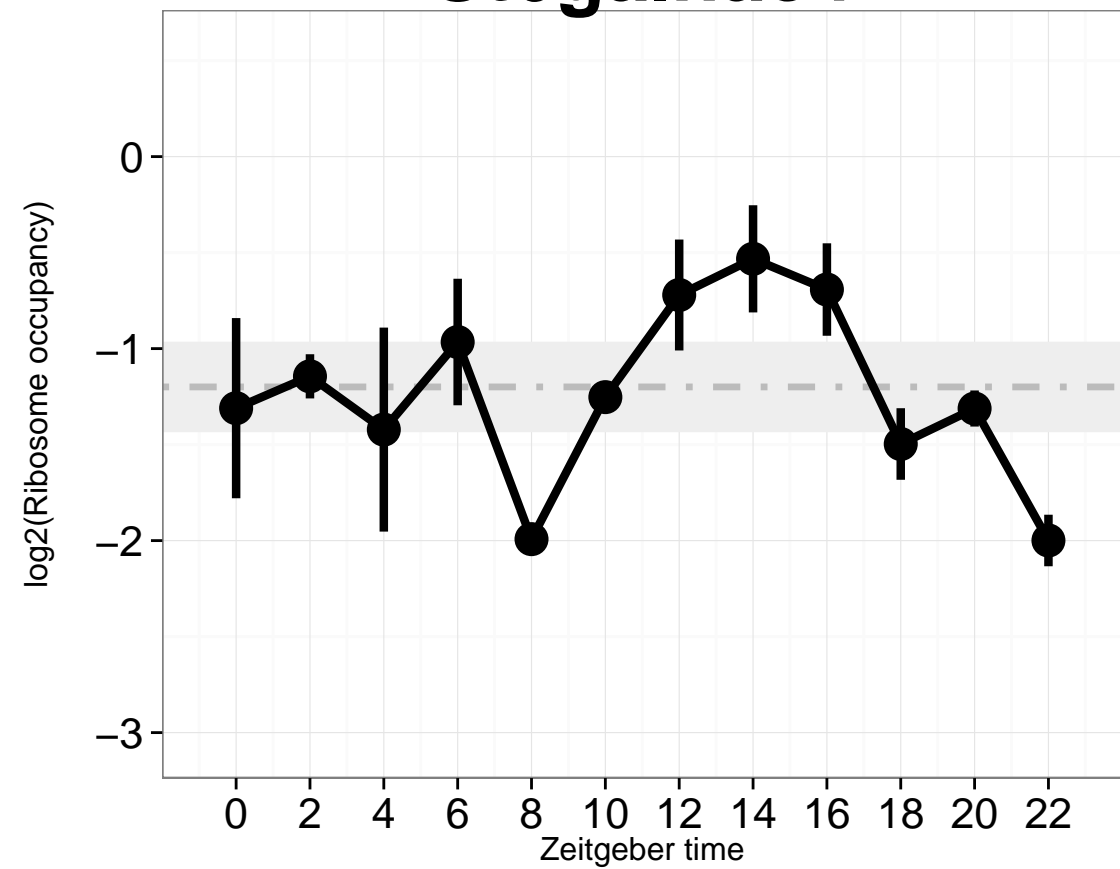

Supplement: Supplementary file 6021 [file 1]

## AI661453

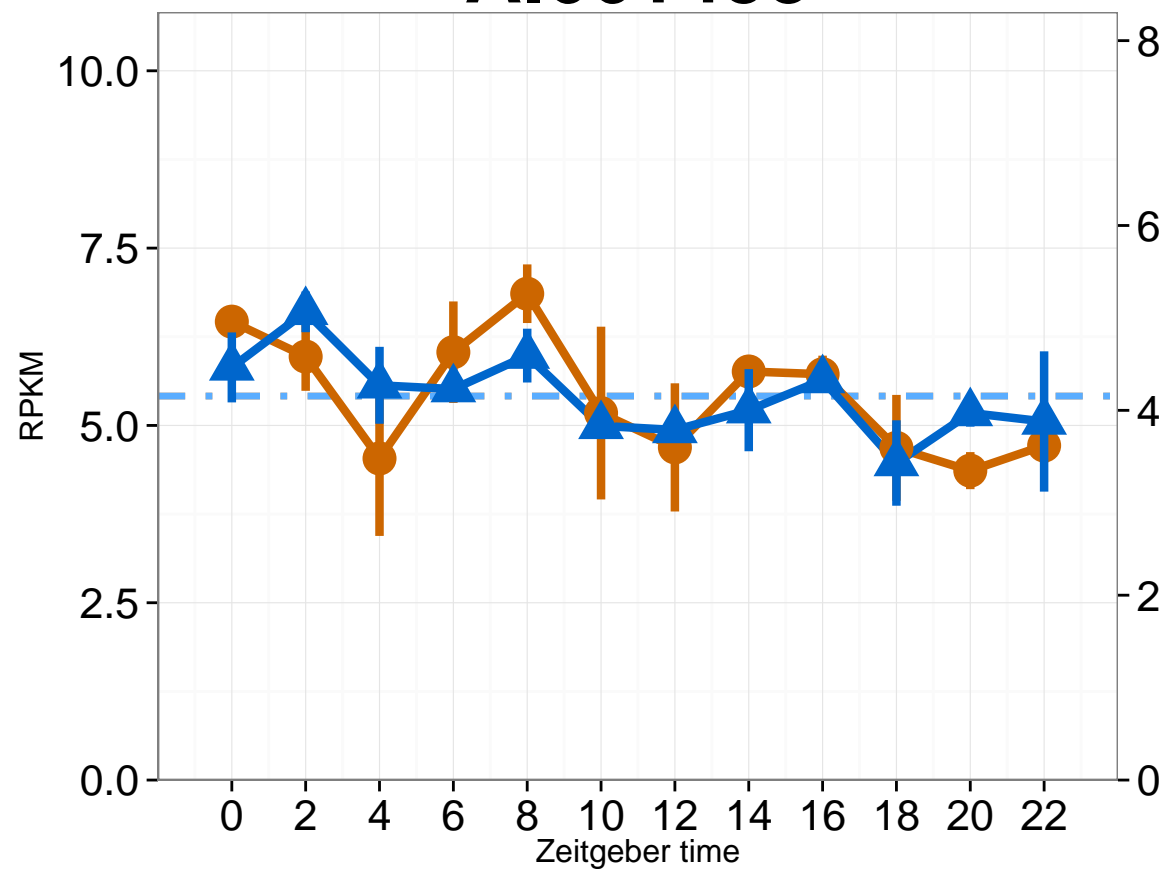

## AI661453

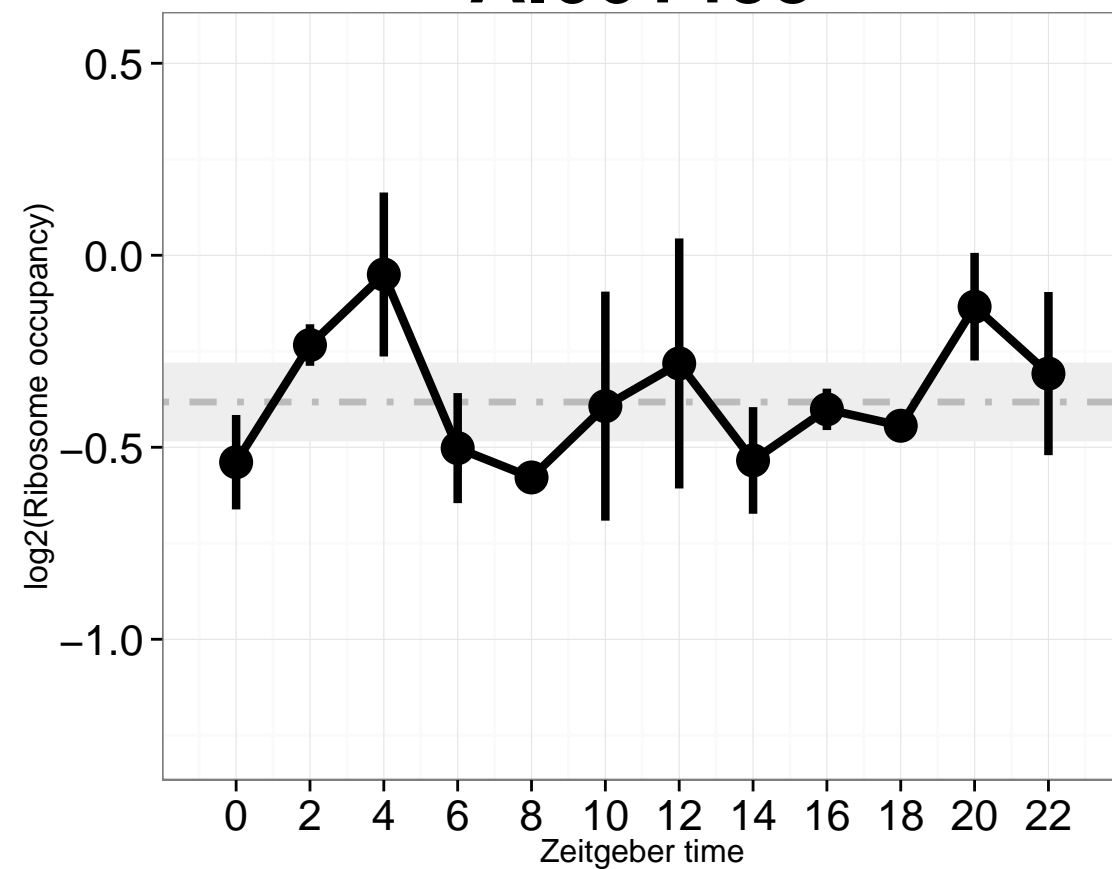

Supplement: Supplementary file 6022 [file 1]
