# Supplementary material (part 61 of 133)
Source: publisher figshare collection journal article supplement (https://springernature.figshare.com/articles/dataset/_/4903193)

# Fam118a

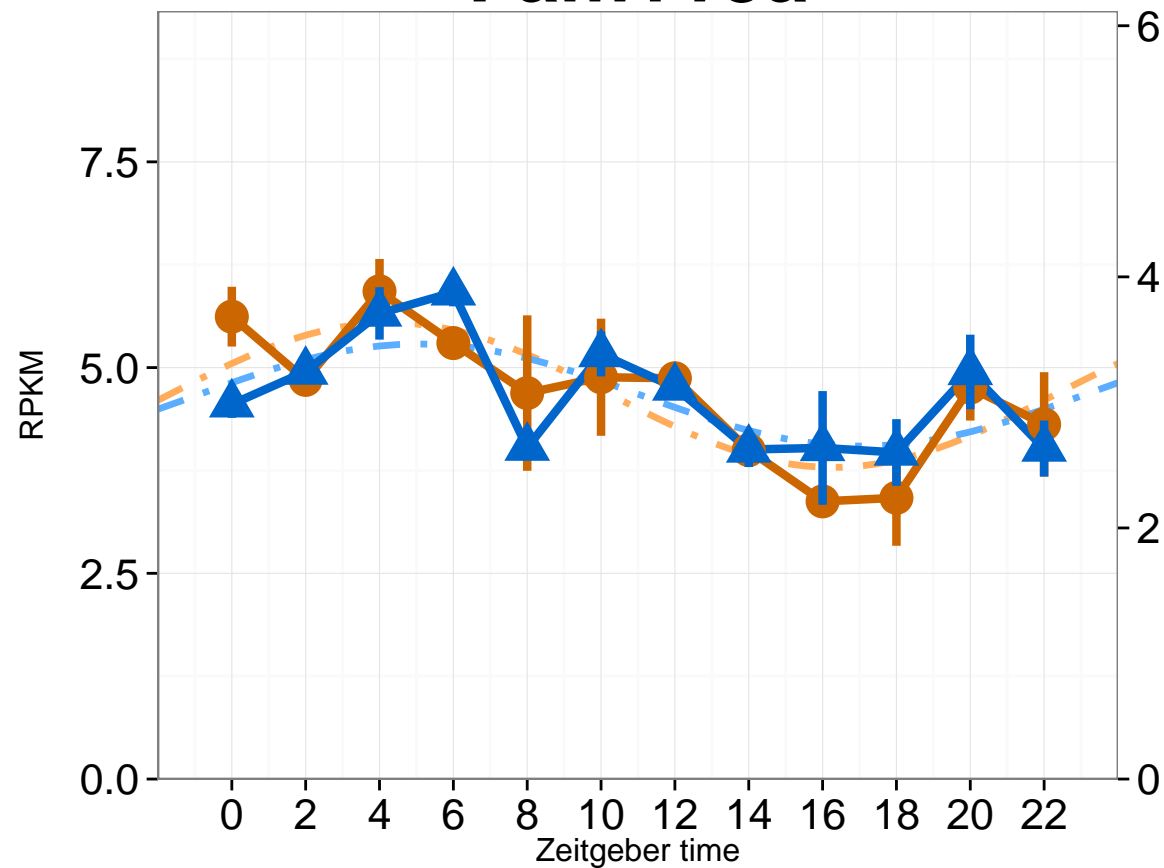

# Fam118a

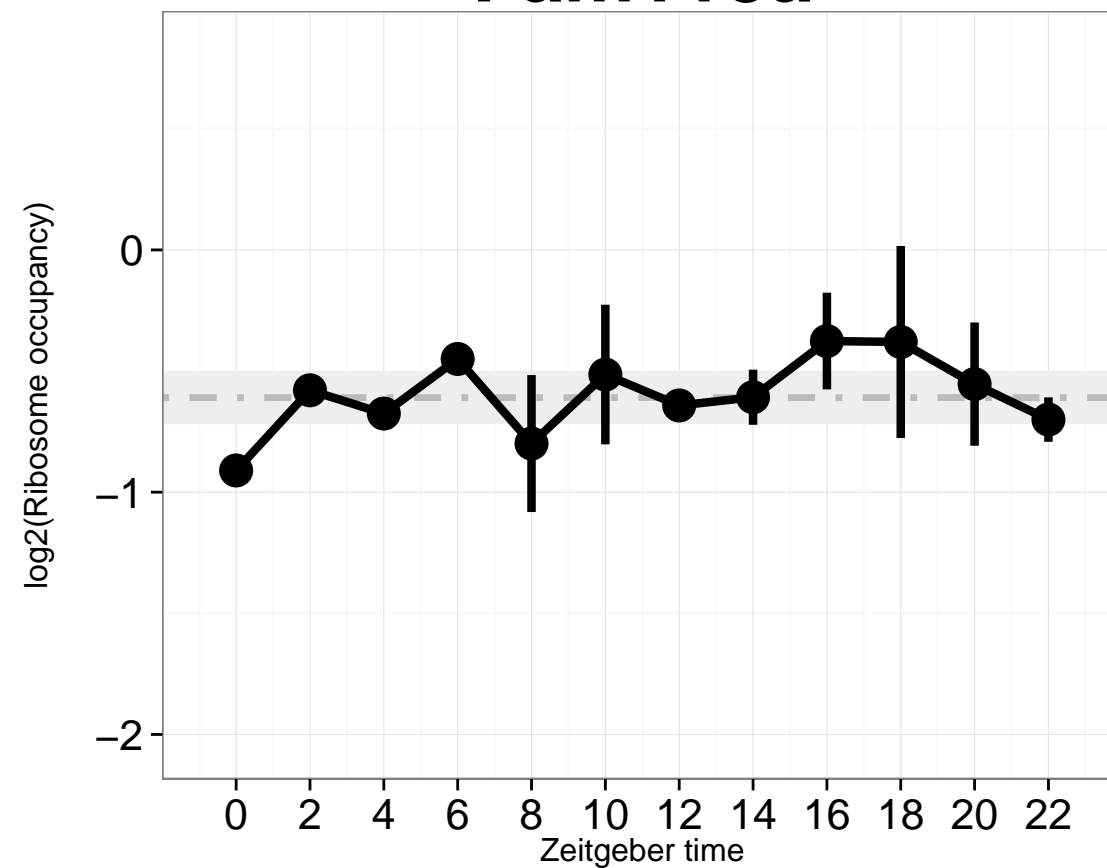

Supplement: Supplementary file 6023 [file 1]

## Osgepl1

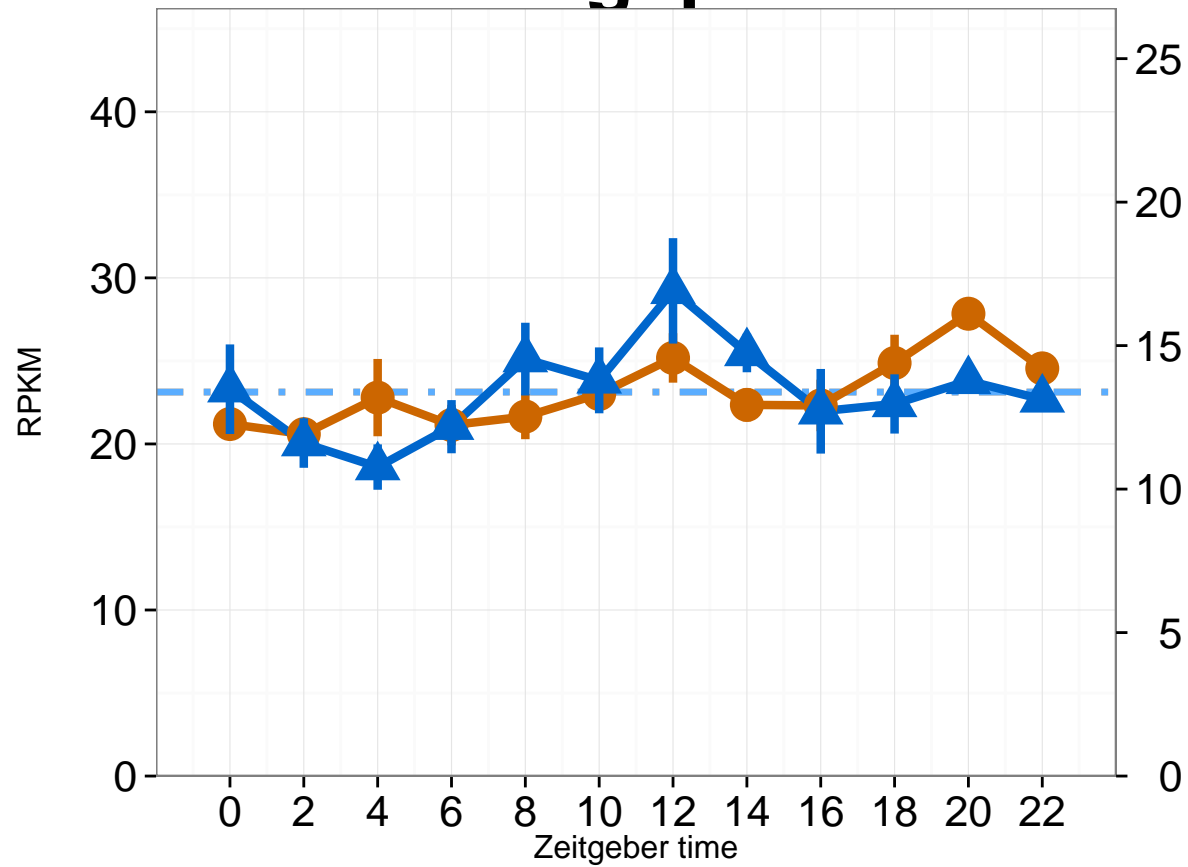

## Osgepl1

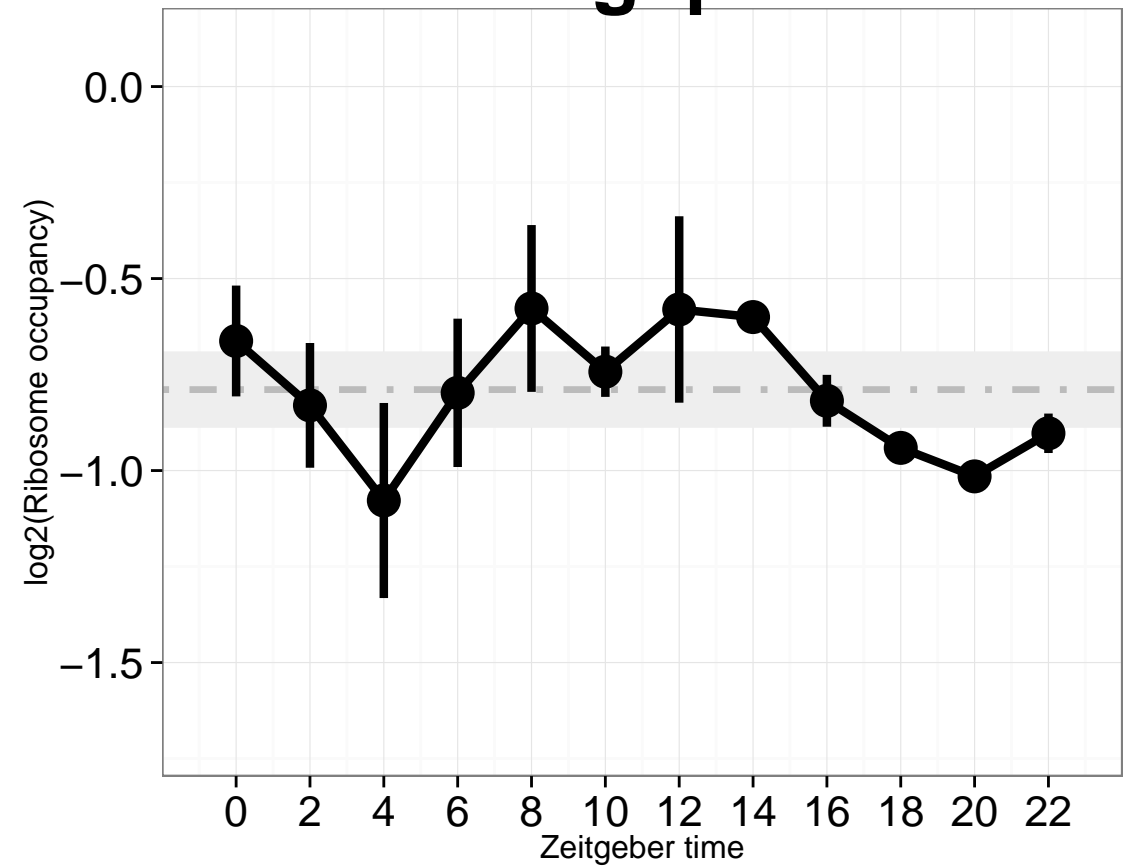

Supplement: Supplementary file 6024 [file 1]

## Gigyf1

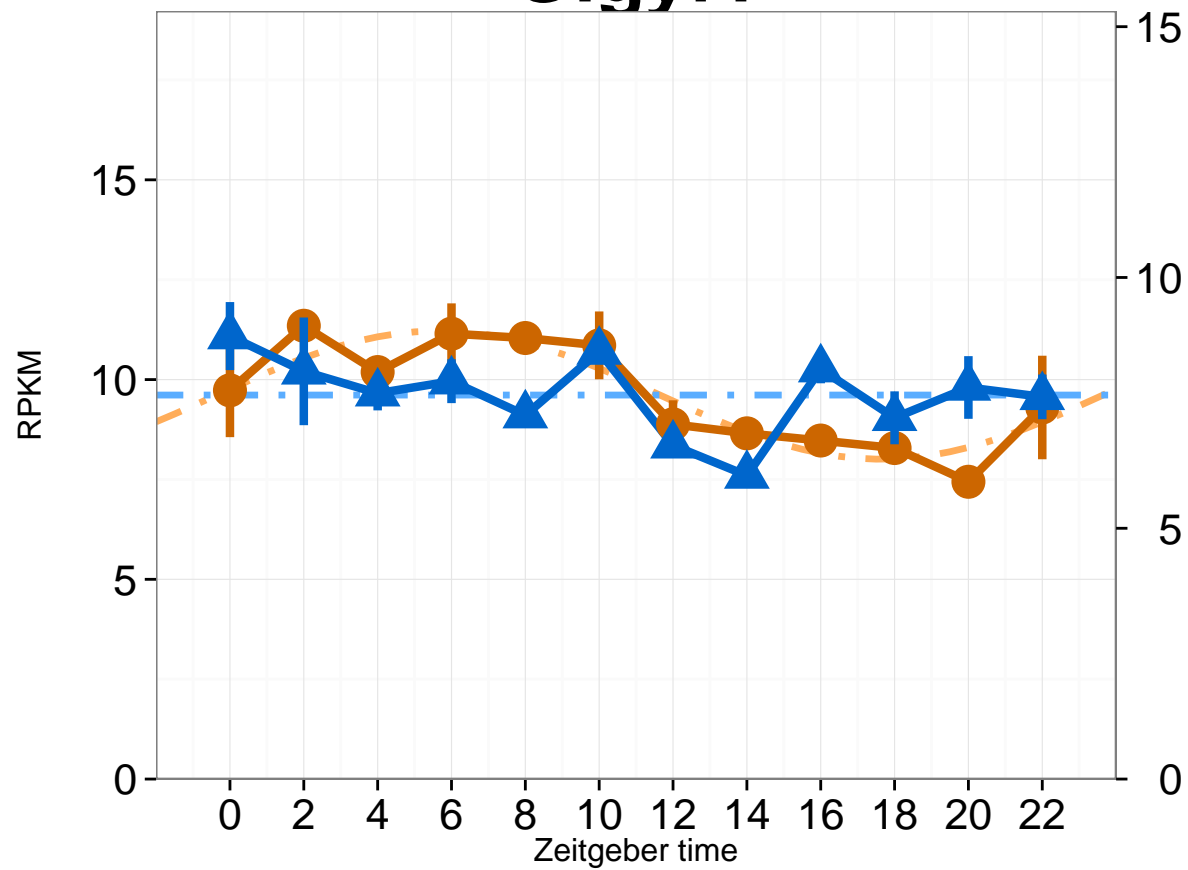

## Gigyf1

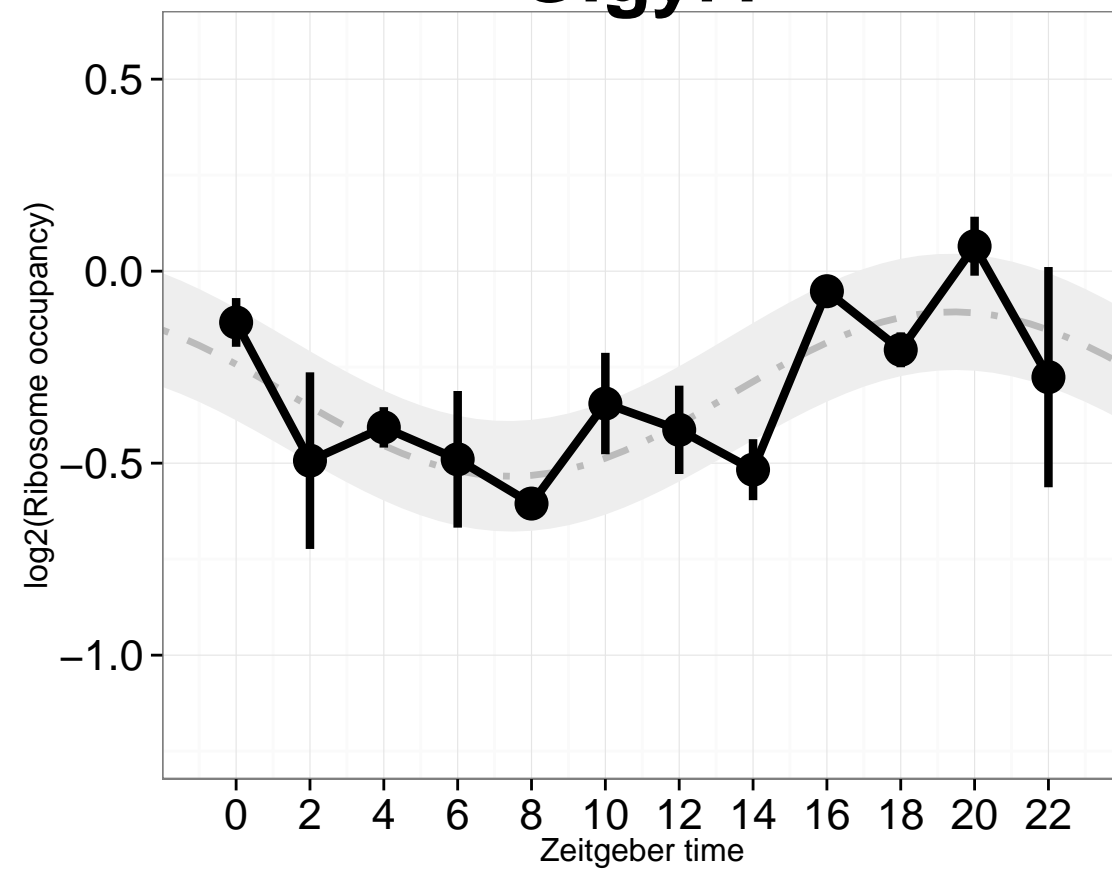

Supplement: Supplementary file 6025 [file 1]

## Gemin5

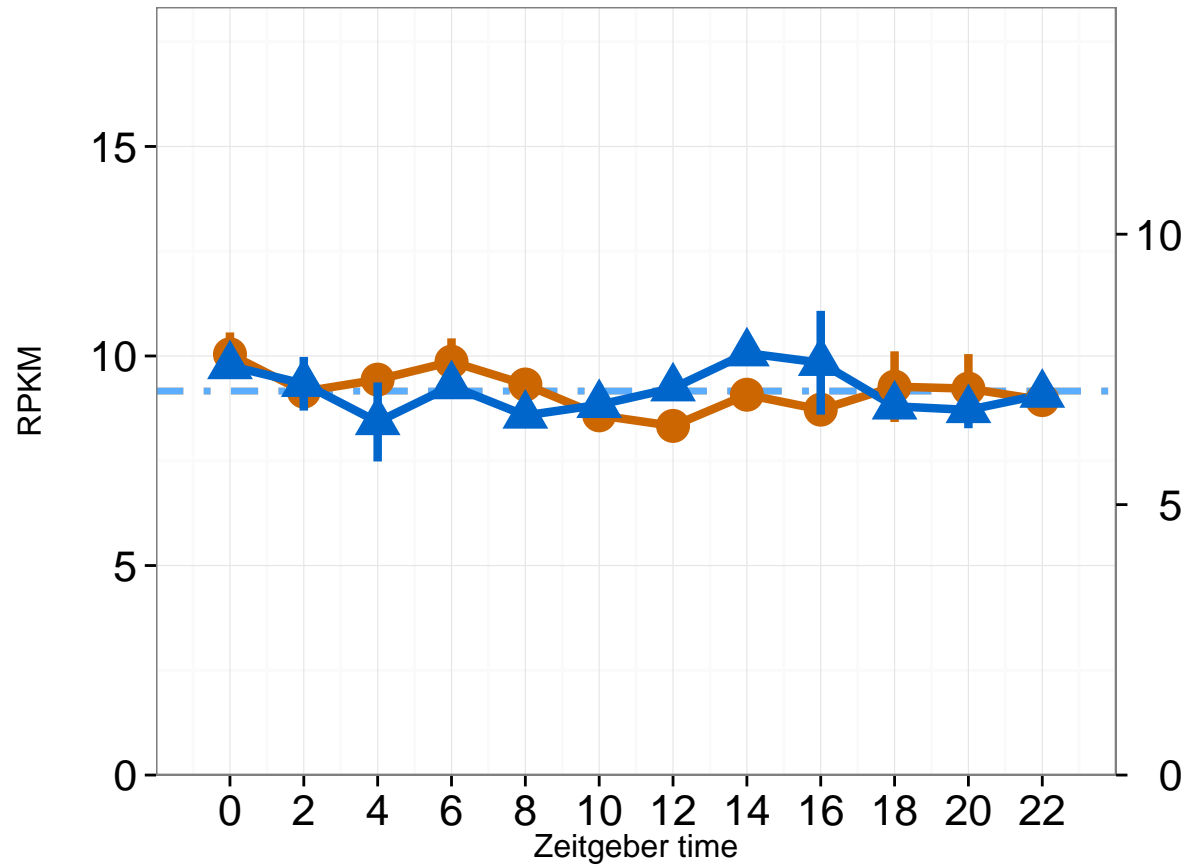

## Gemin5

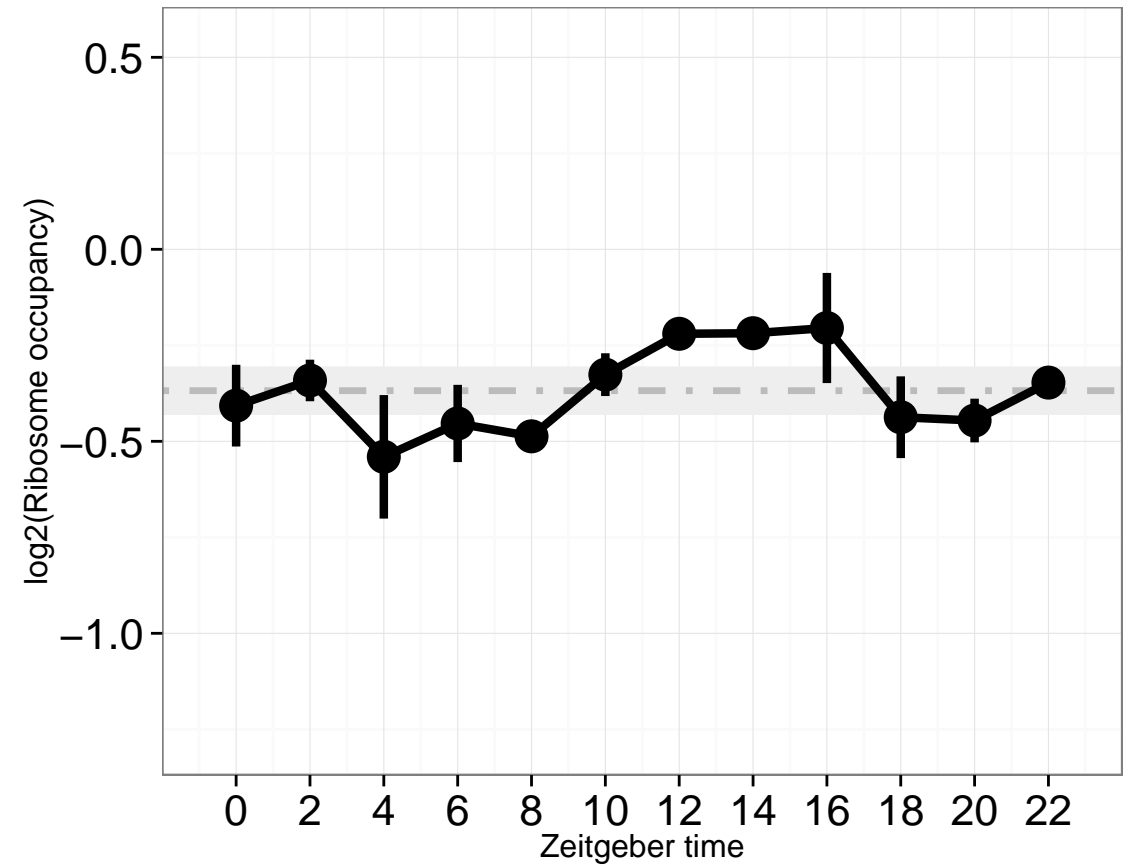

Supplement: Supplementary file 6026 [file 1]

## Fndc5

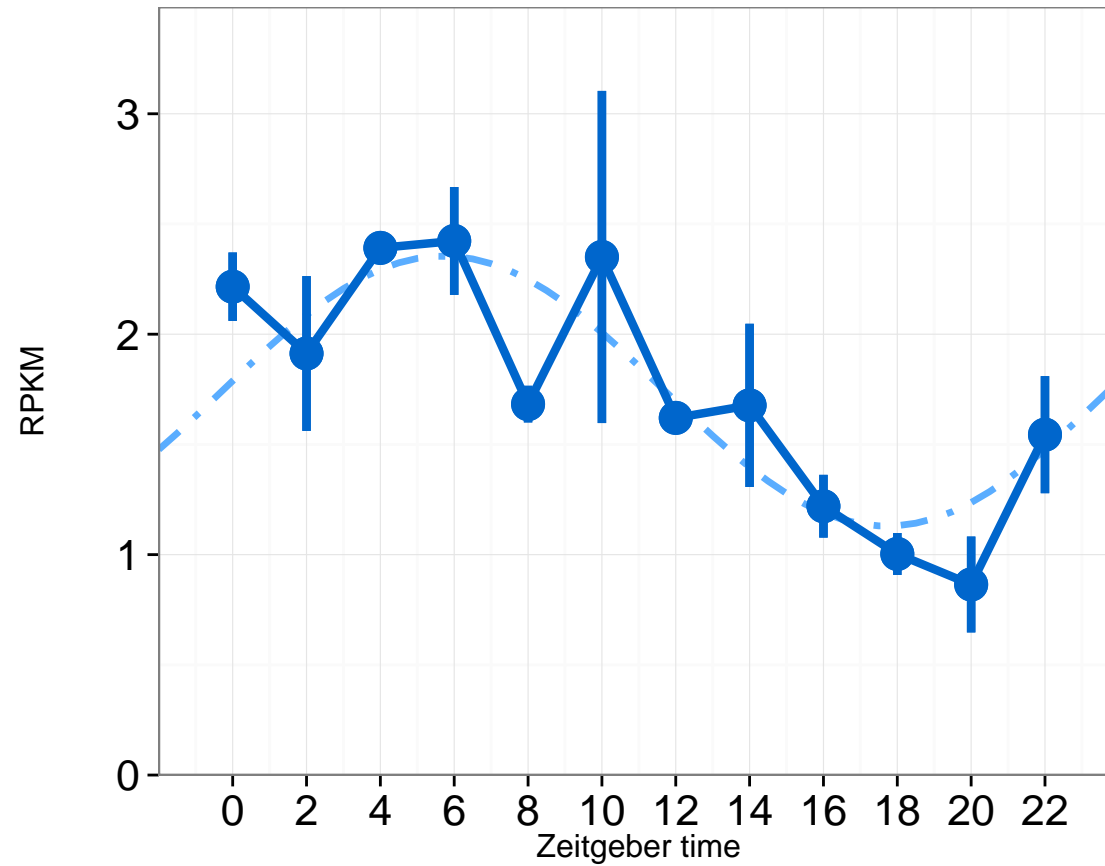

## Fndc5 log2(Ribosome occupancy

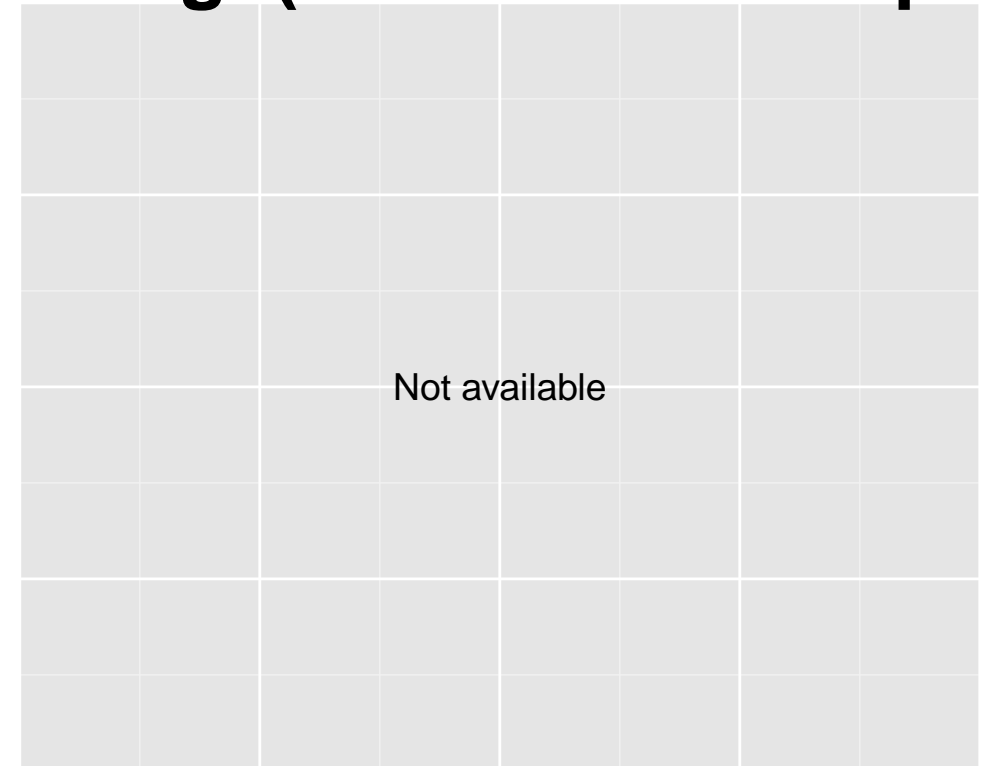

Supplement: Supplementary file 6027 [file 1]

## Tnfsf10

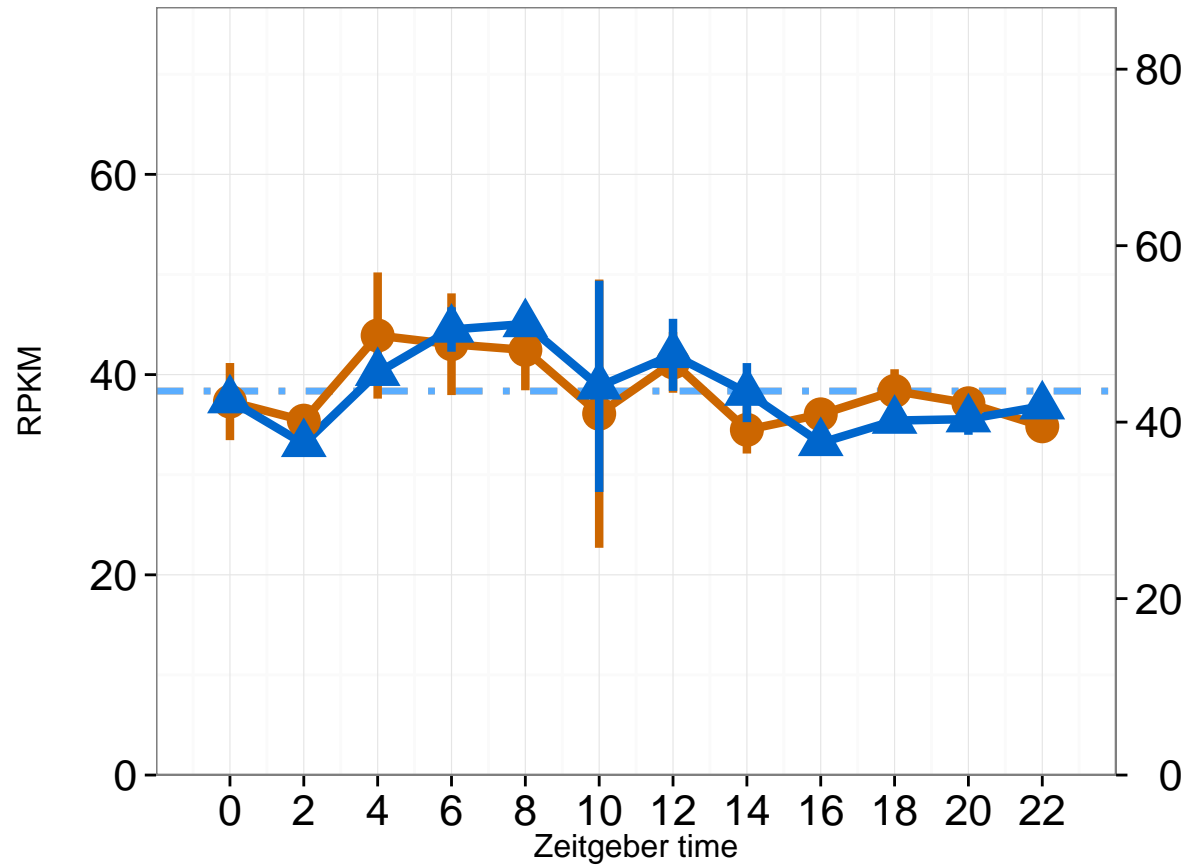

## Tnfsf10

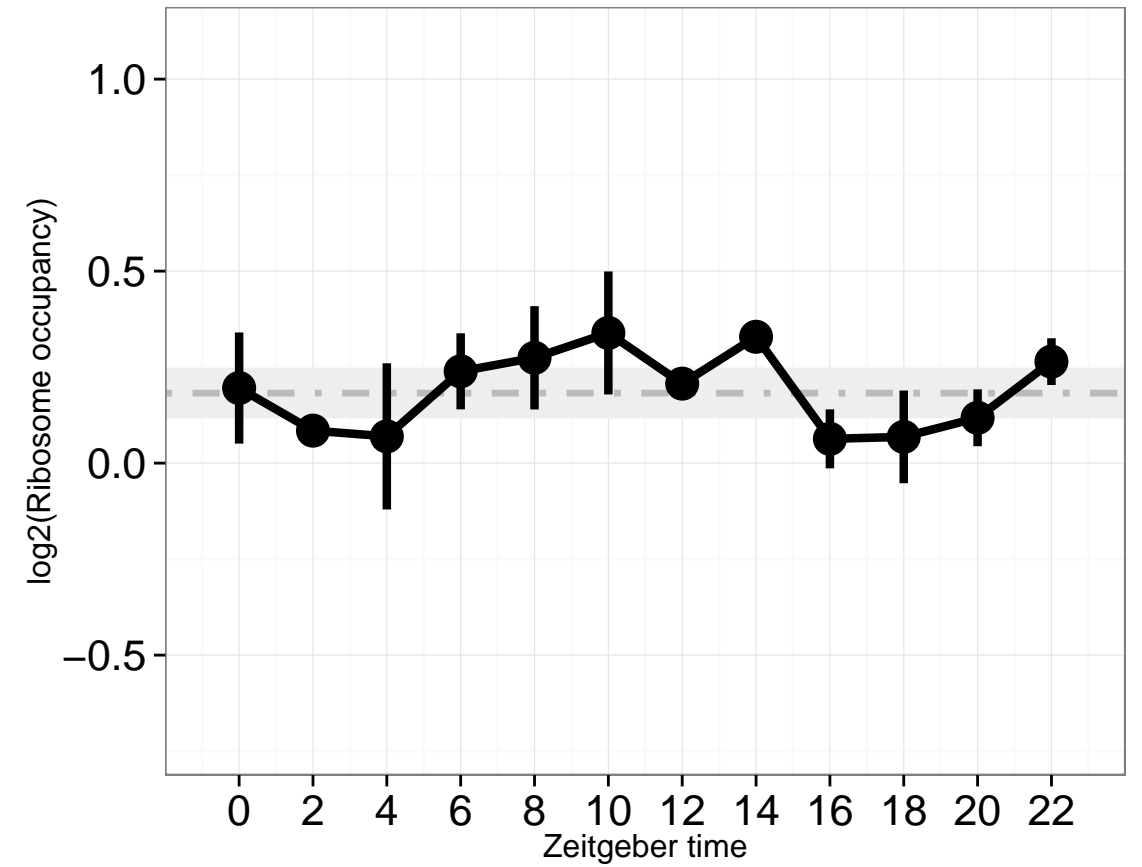

Supplement: Supplementary file 6028 [file 1]

## Arl5b

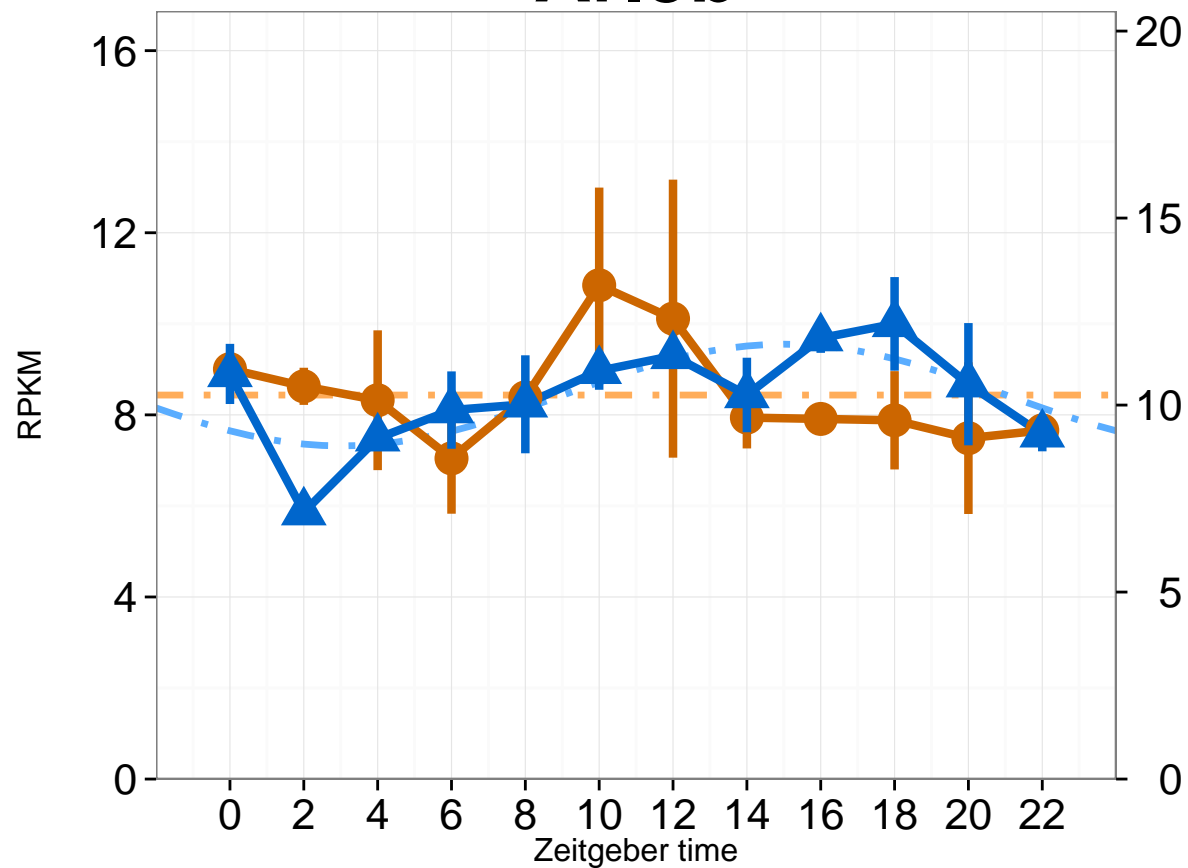

## Arl5b

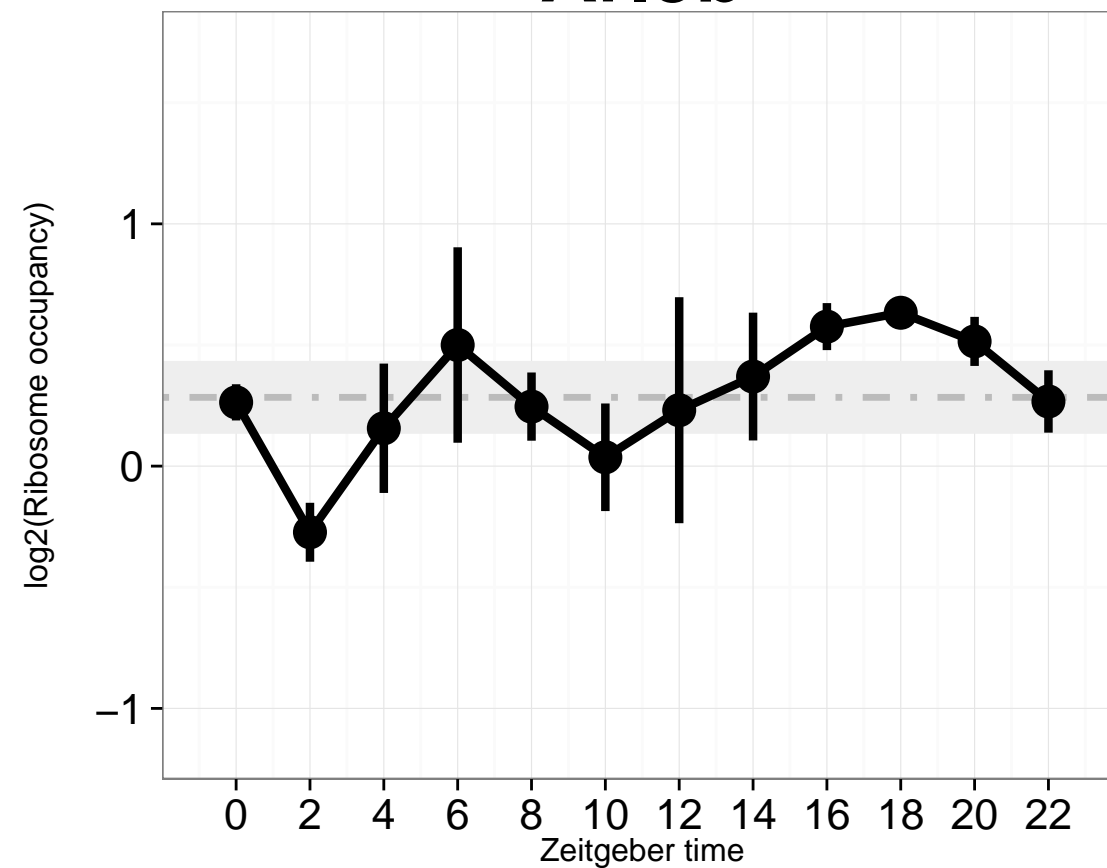

Supplement: Supplementary file 6029 [file 1]

# Hip1

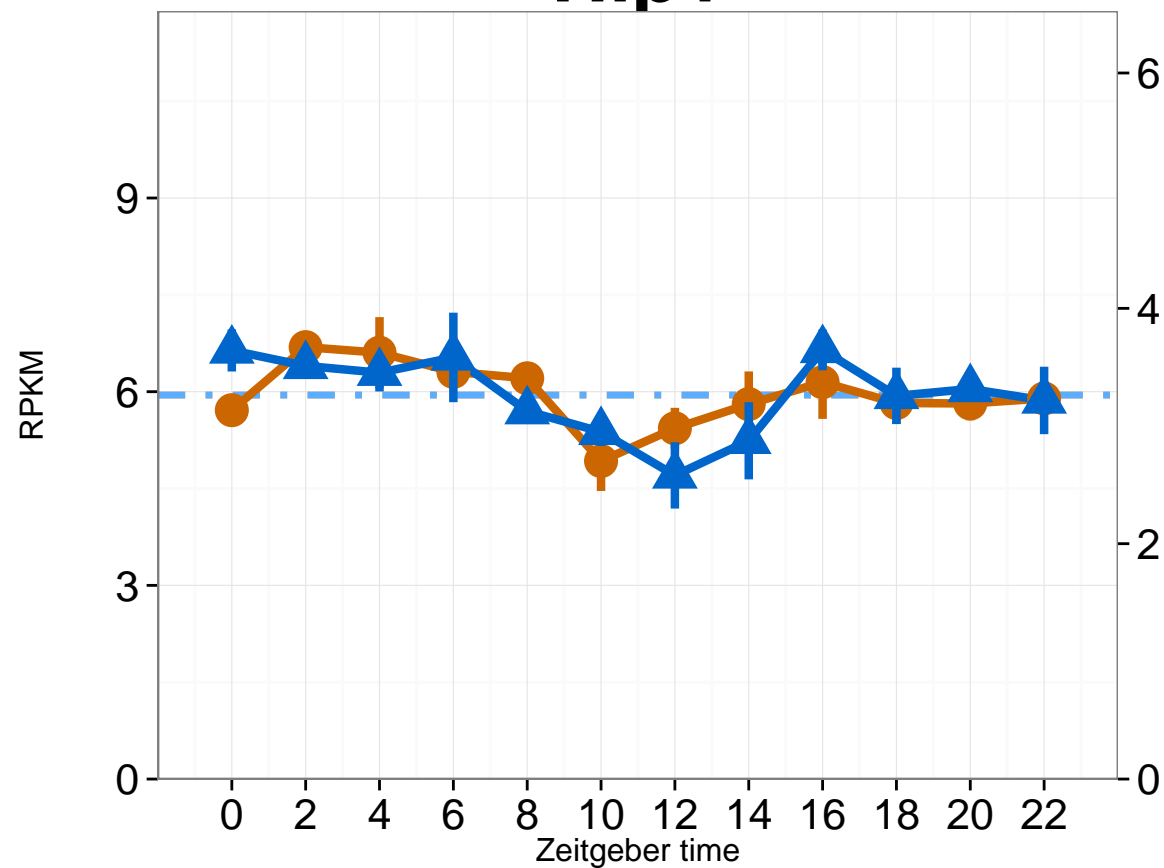

# Hip1

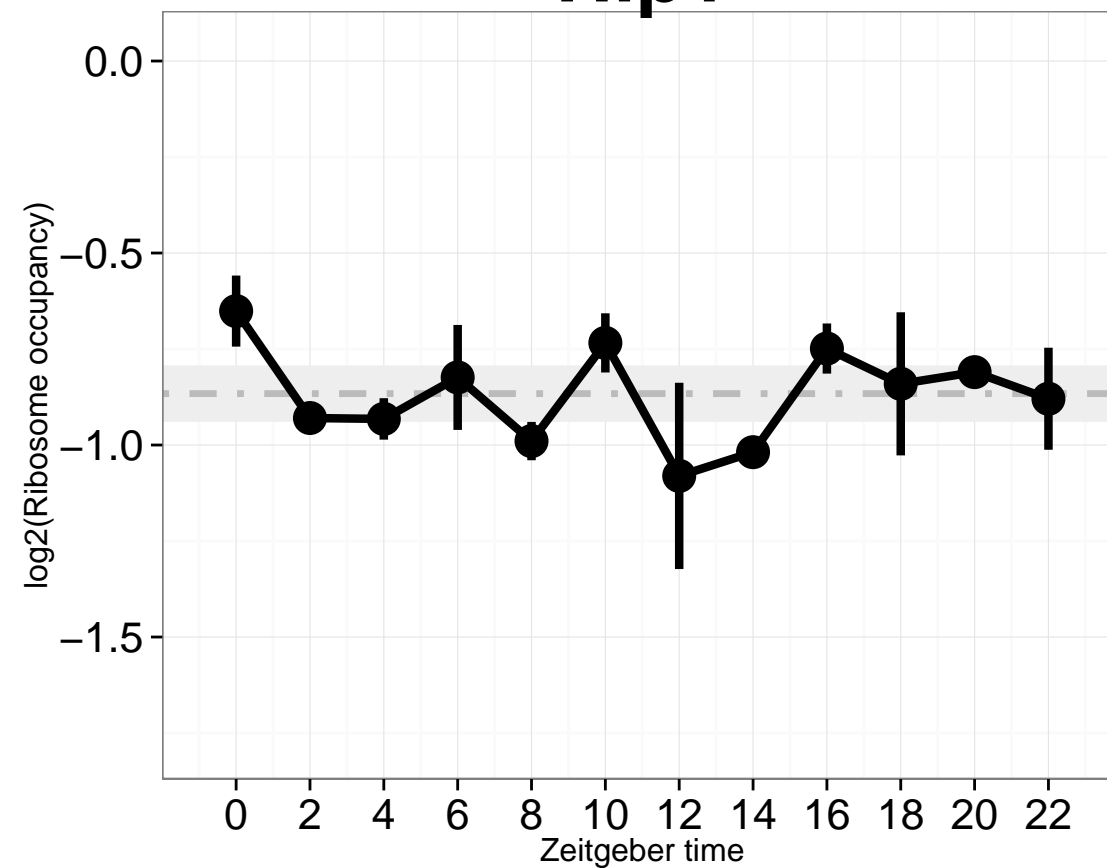

Supplement: Supplementary file 6030 [file 1]

# Mn1

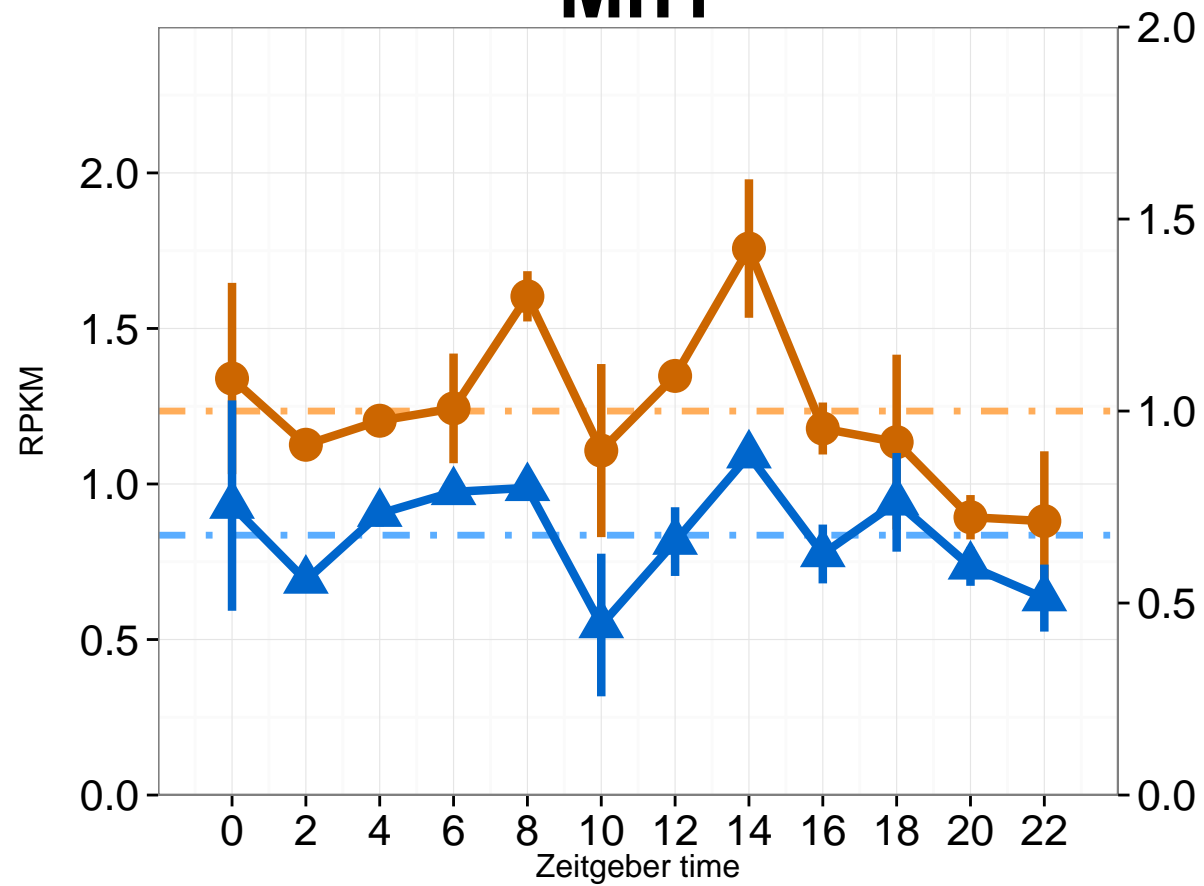

# Mn1

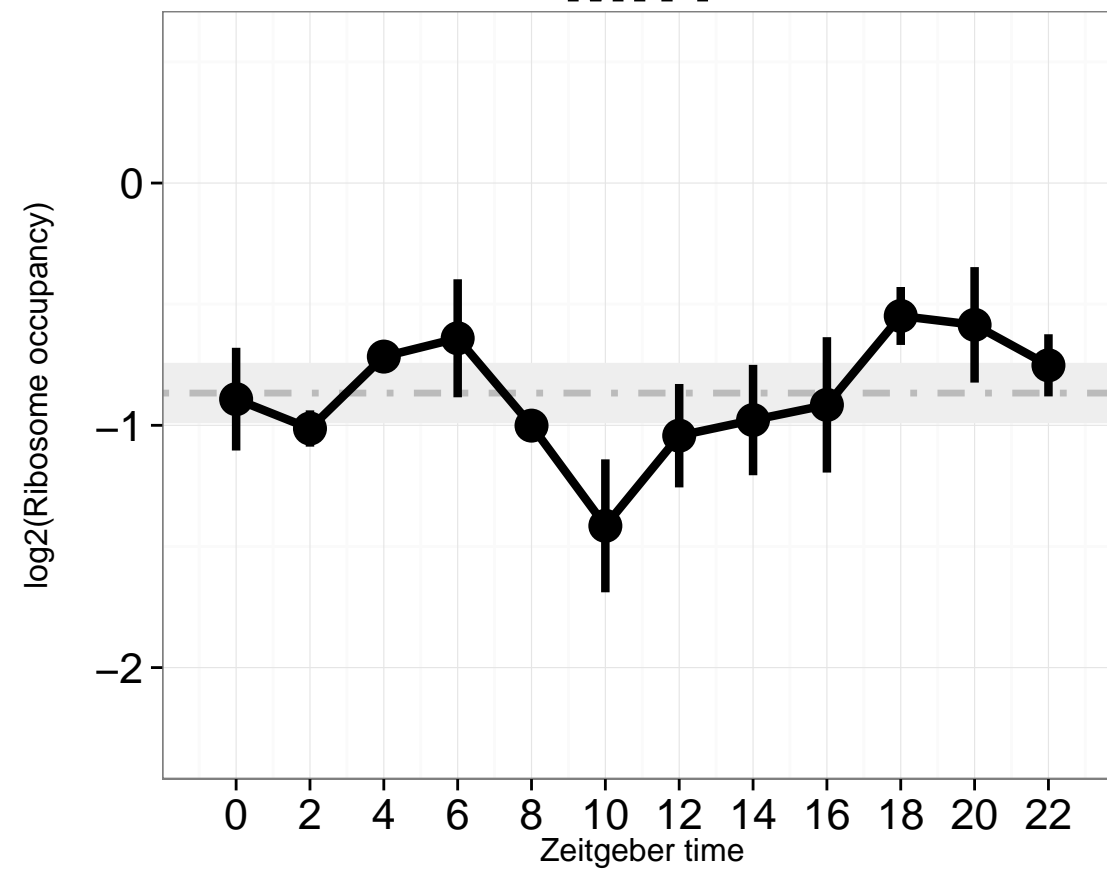

Supplement: Supplementary file 6031 [file 1]

## Pik3r3

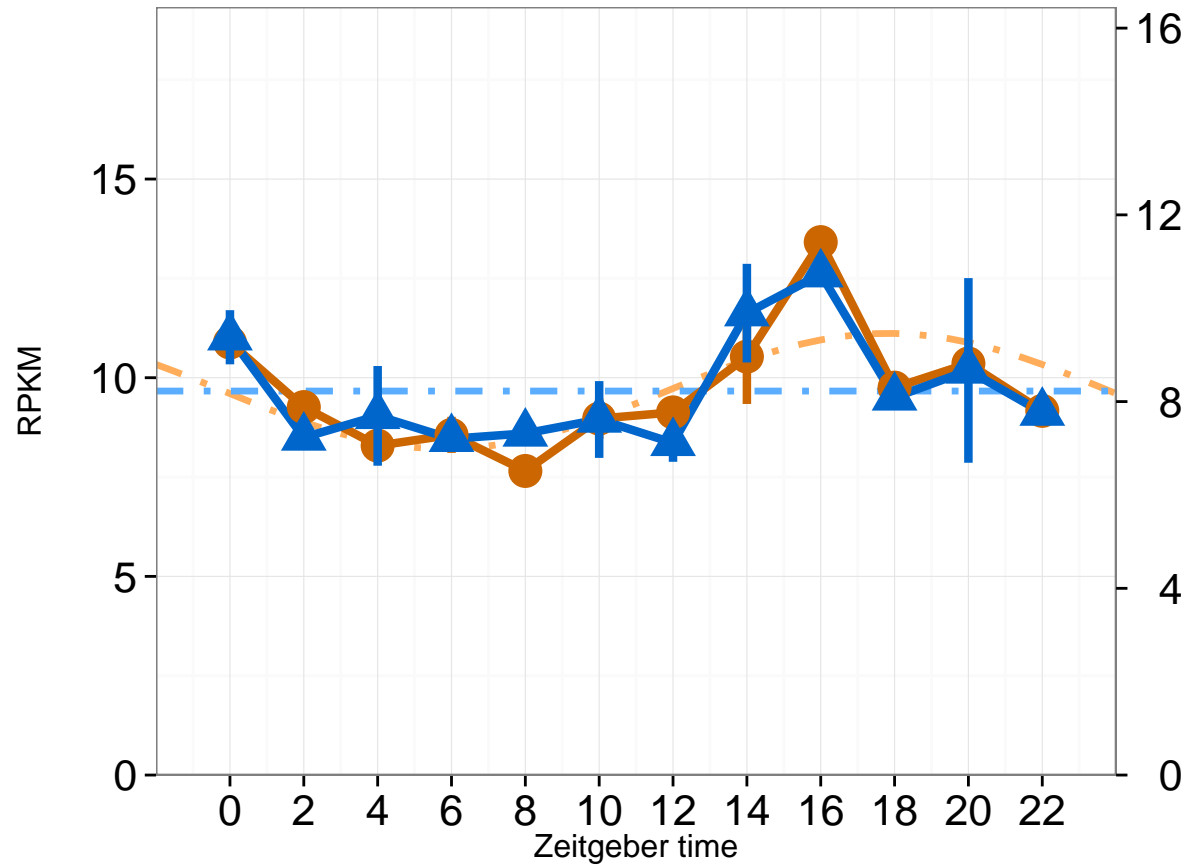

## Pik3r3

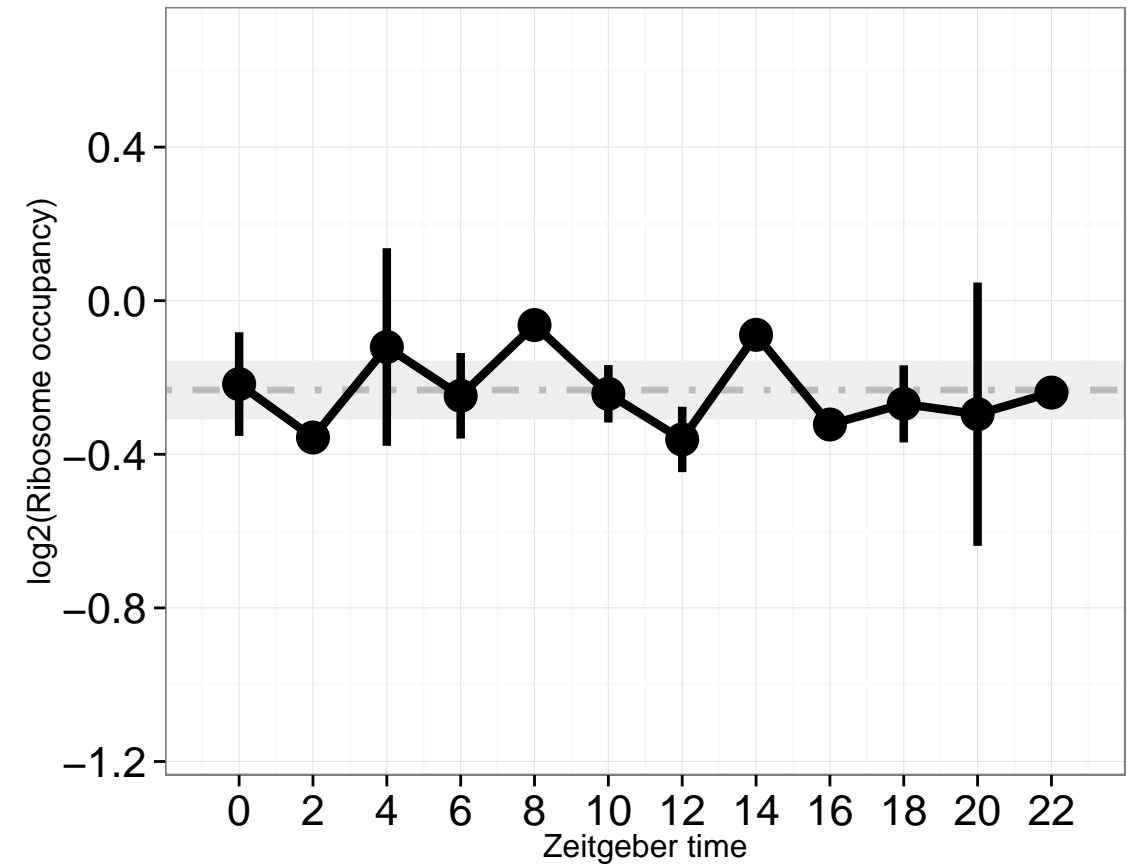

Supplement: Supplementary file 6032 [file 1]

## Slc22a13

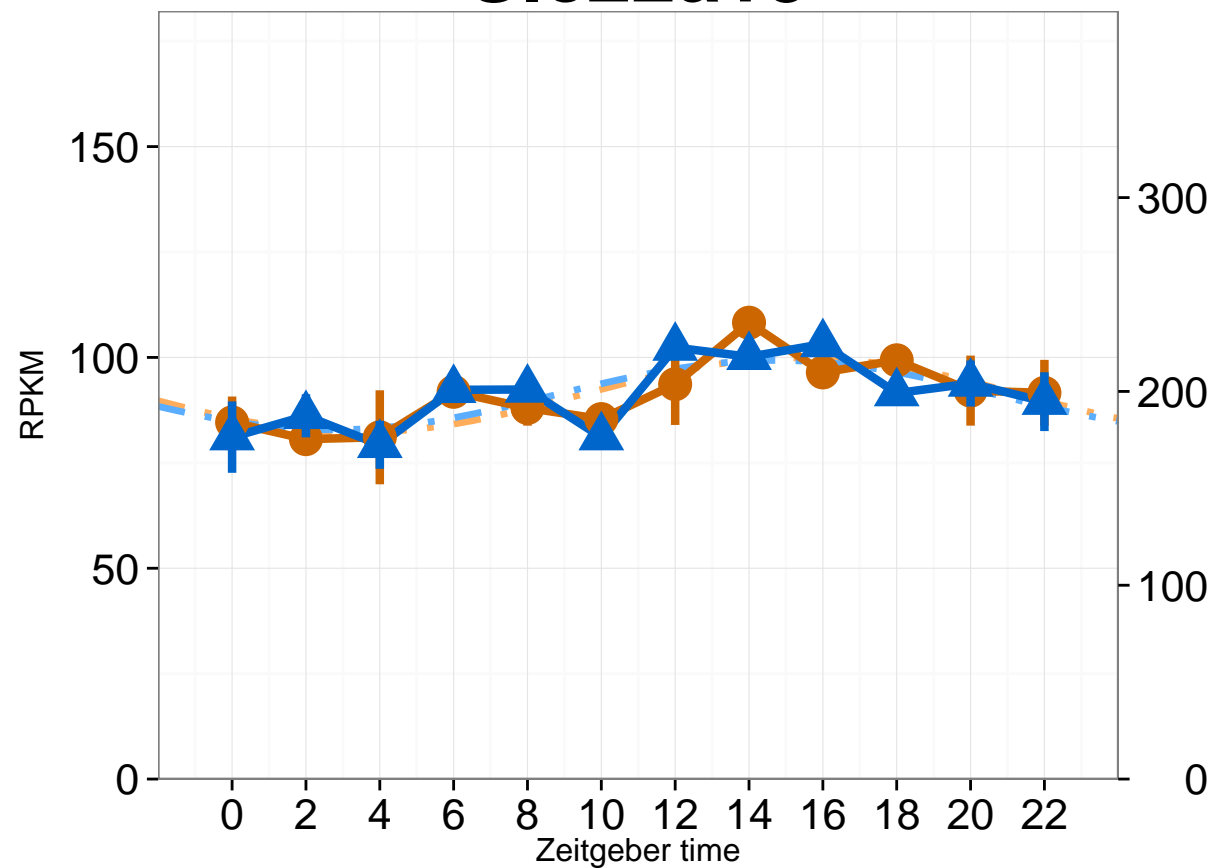

## Slc22a13

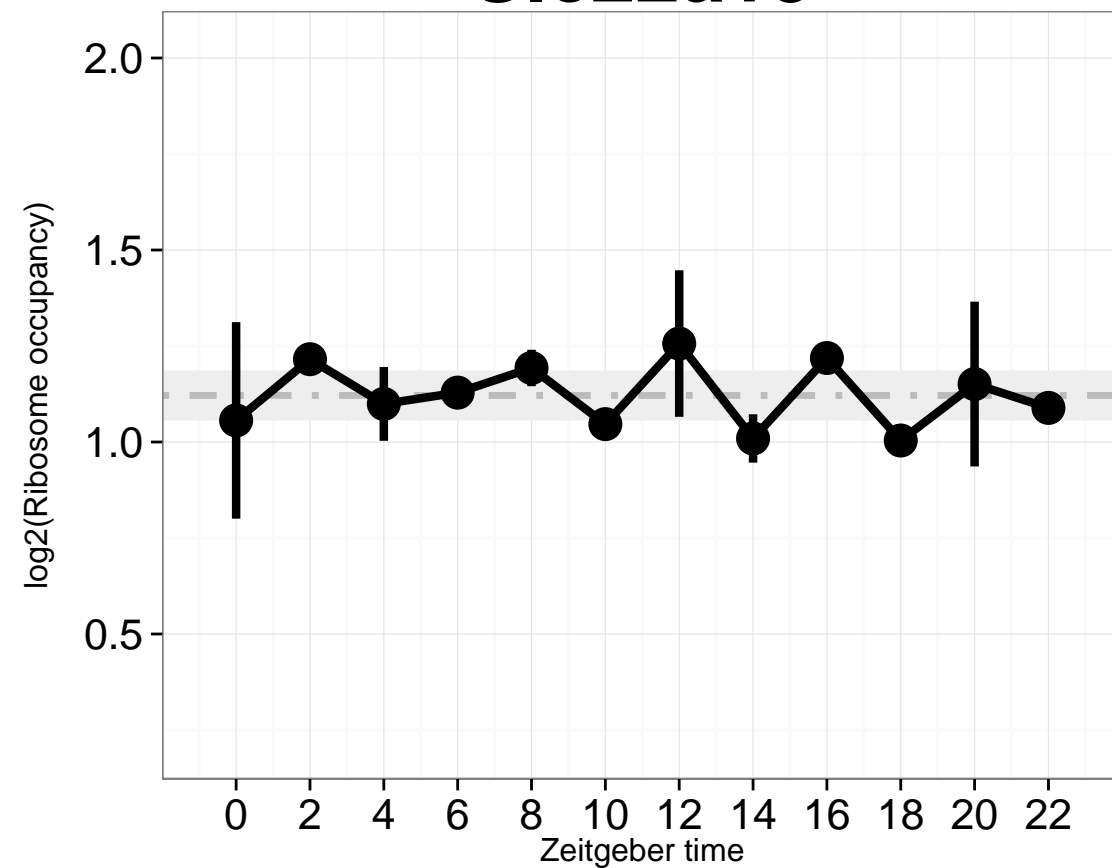

Supplement: Supplementary file 6033 [file 1]

# Cpsf4

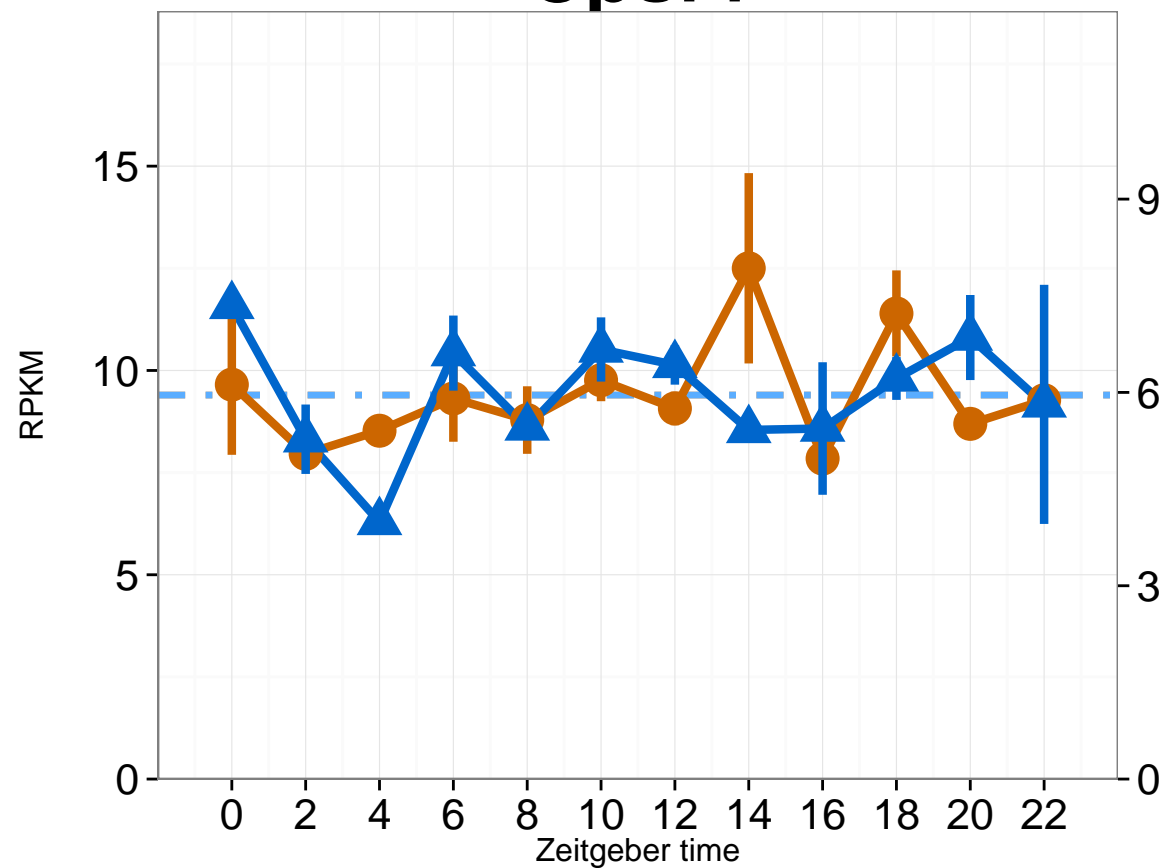

# Cpsf4

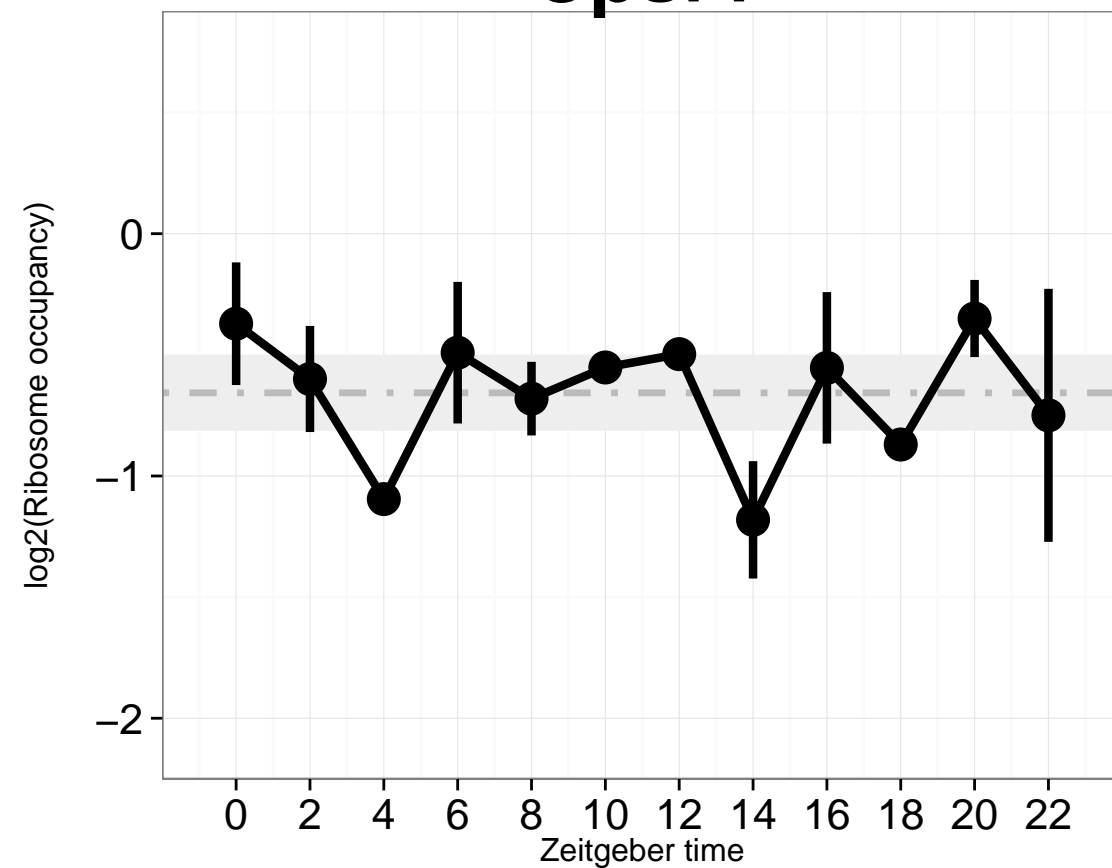

Supplement: Supplementary file 6034 [file 1]

## Diap3

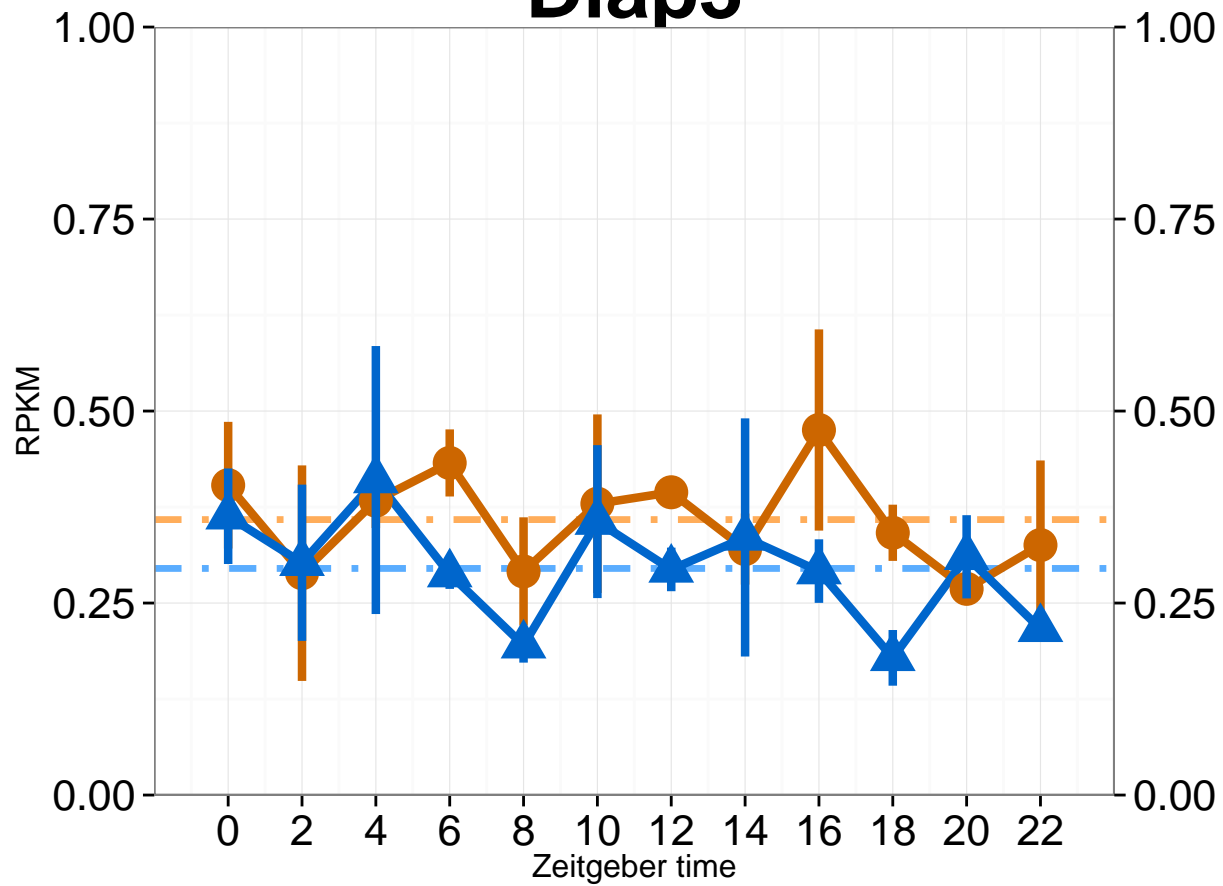

## Diap3

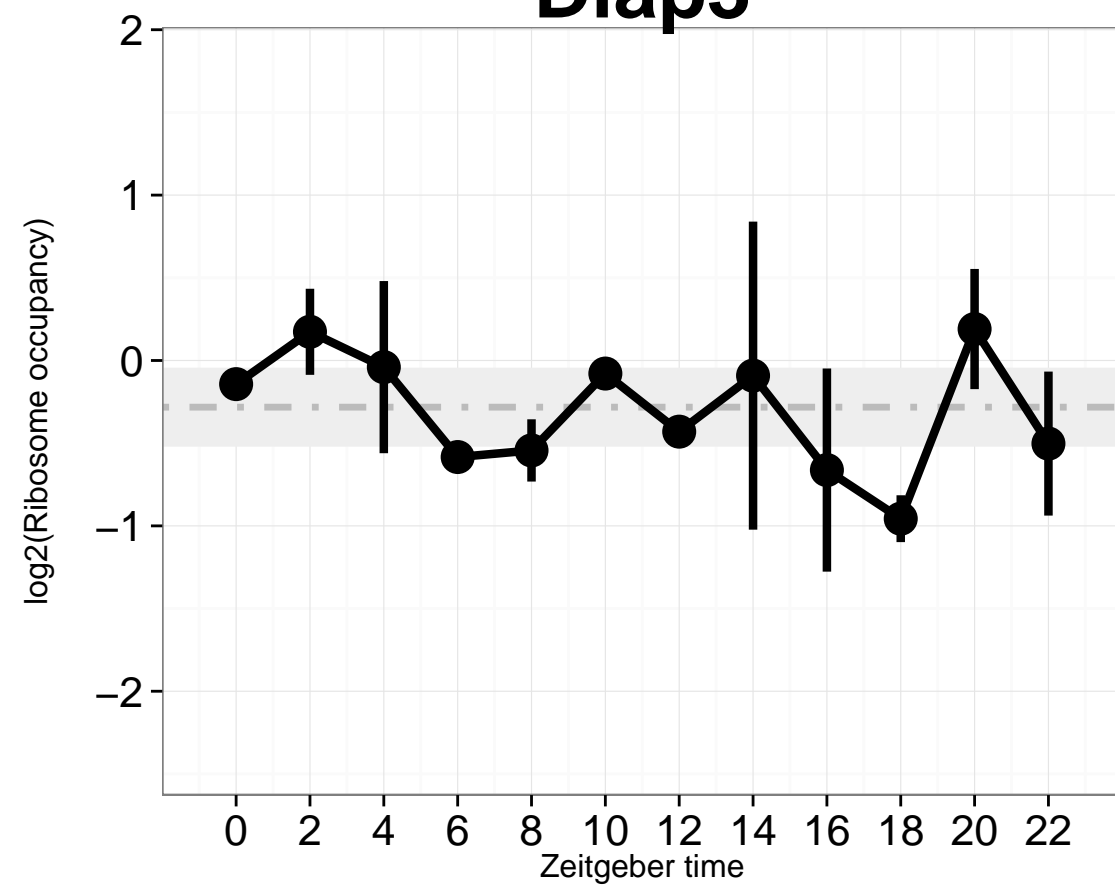

Supplement: Supplementary file 6035 [file 1]

## Slfn5

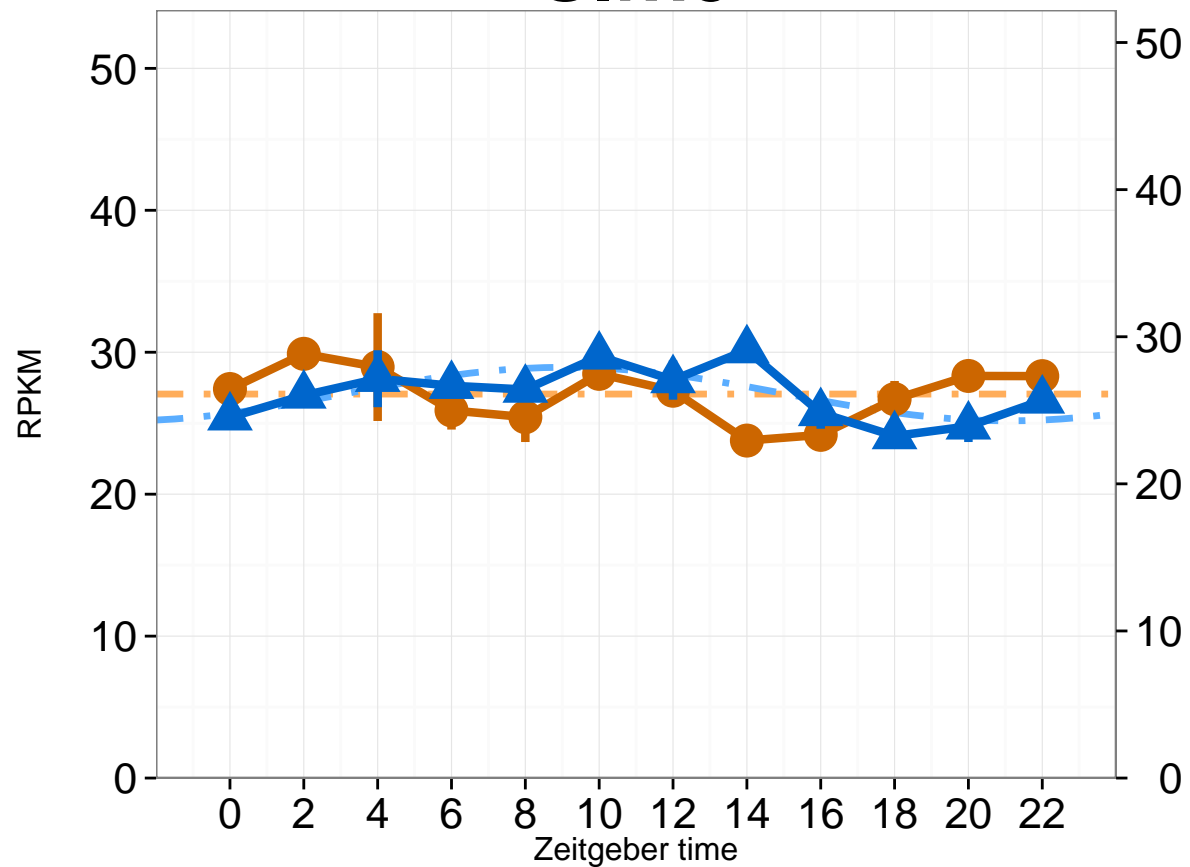

## Slfn5

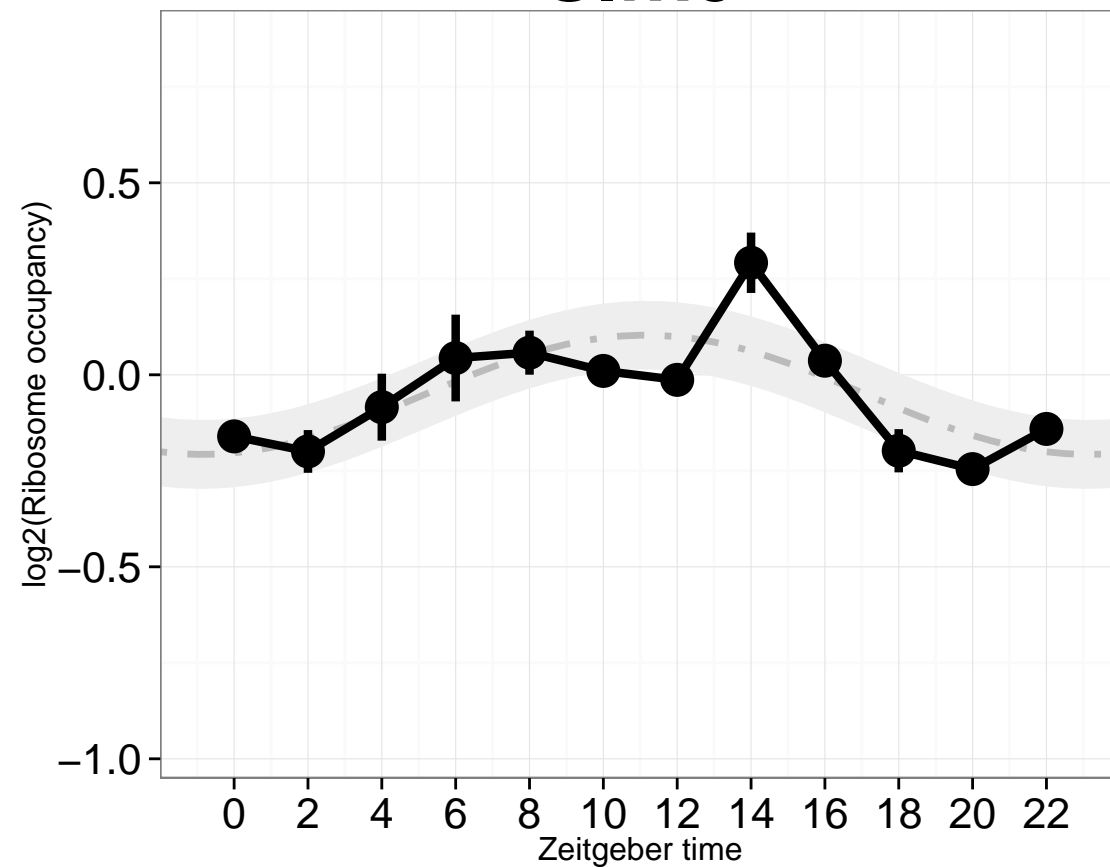

Supplement: Supplementary file 6036 [file 1]

## Pdha1

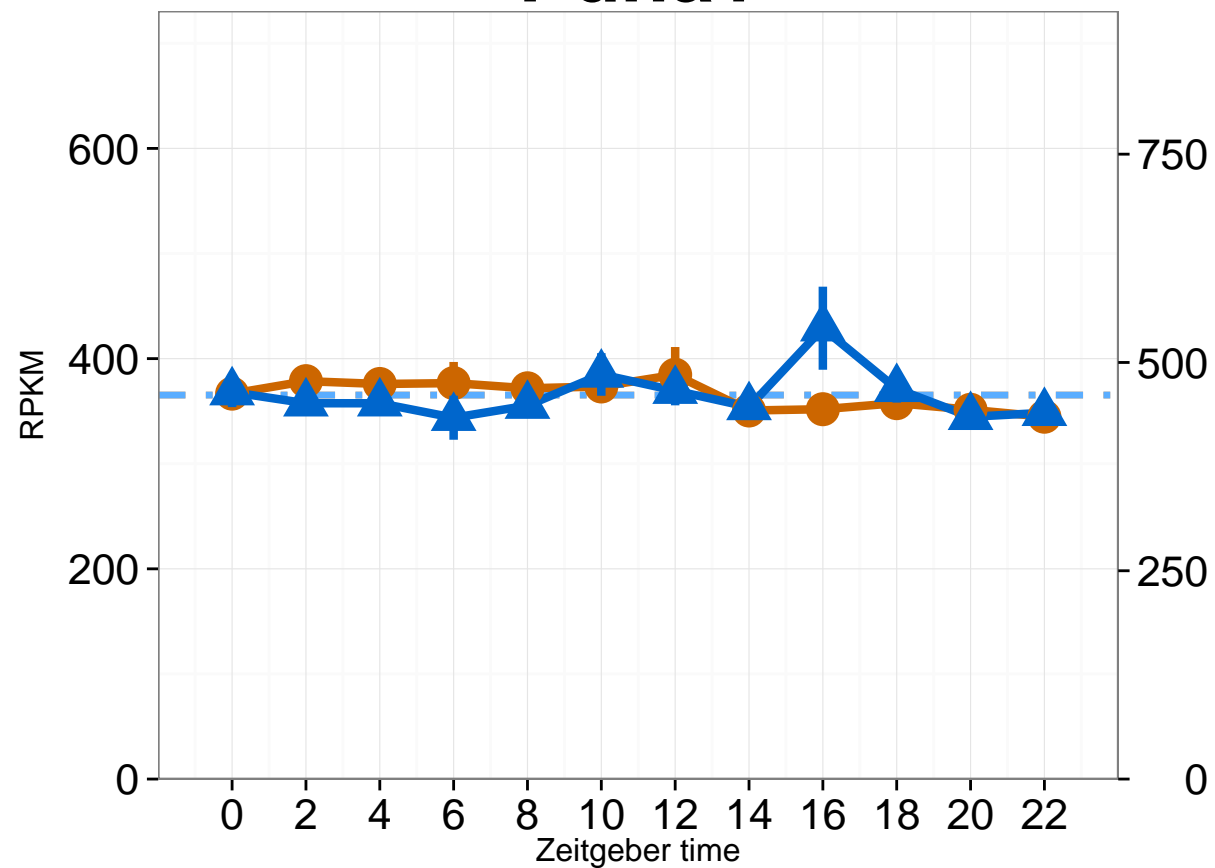

## Pdha1

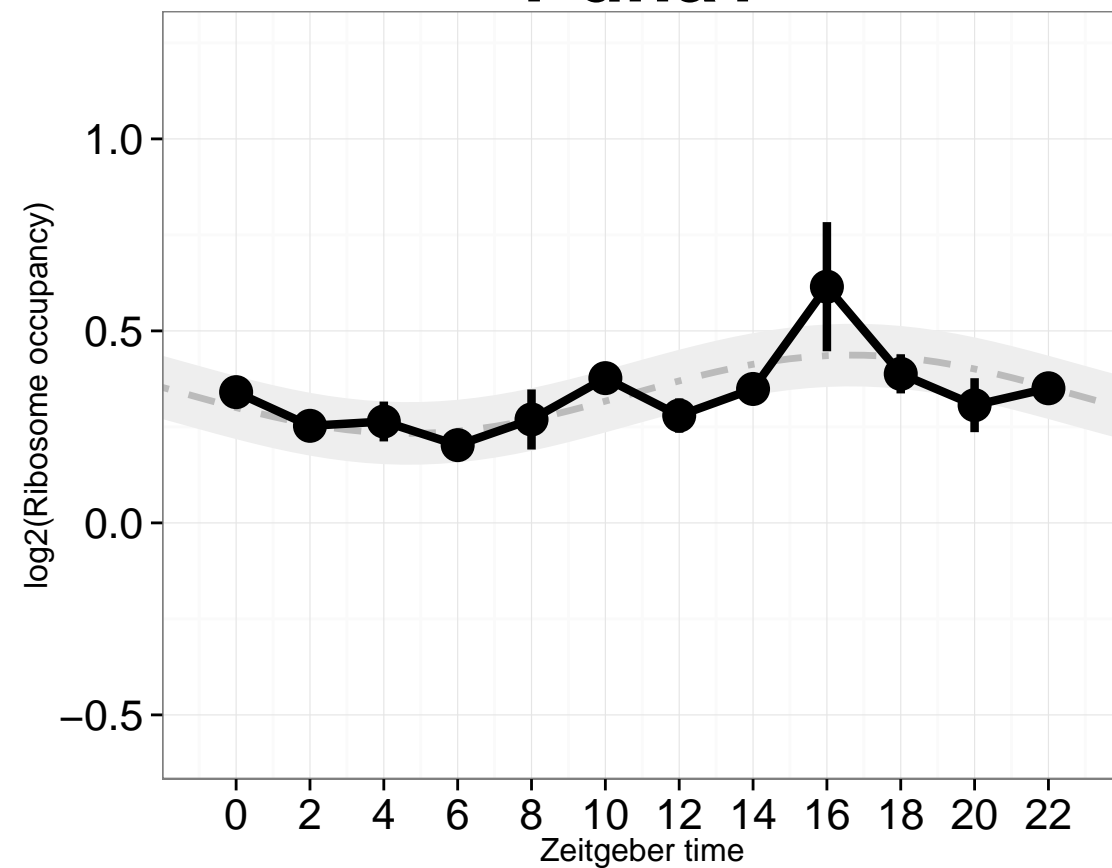

Supplement: Supplementary file 6037 [file 1]

## ARVCF

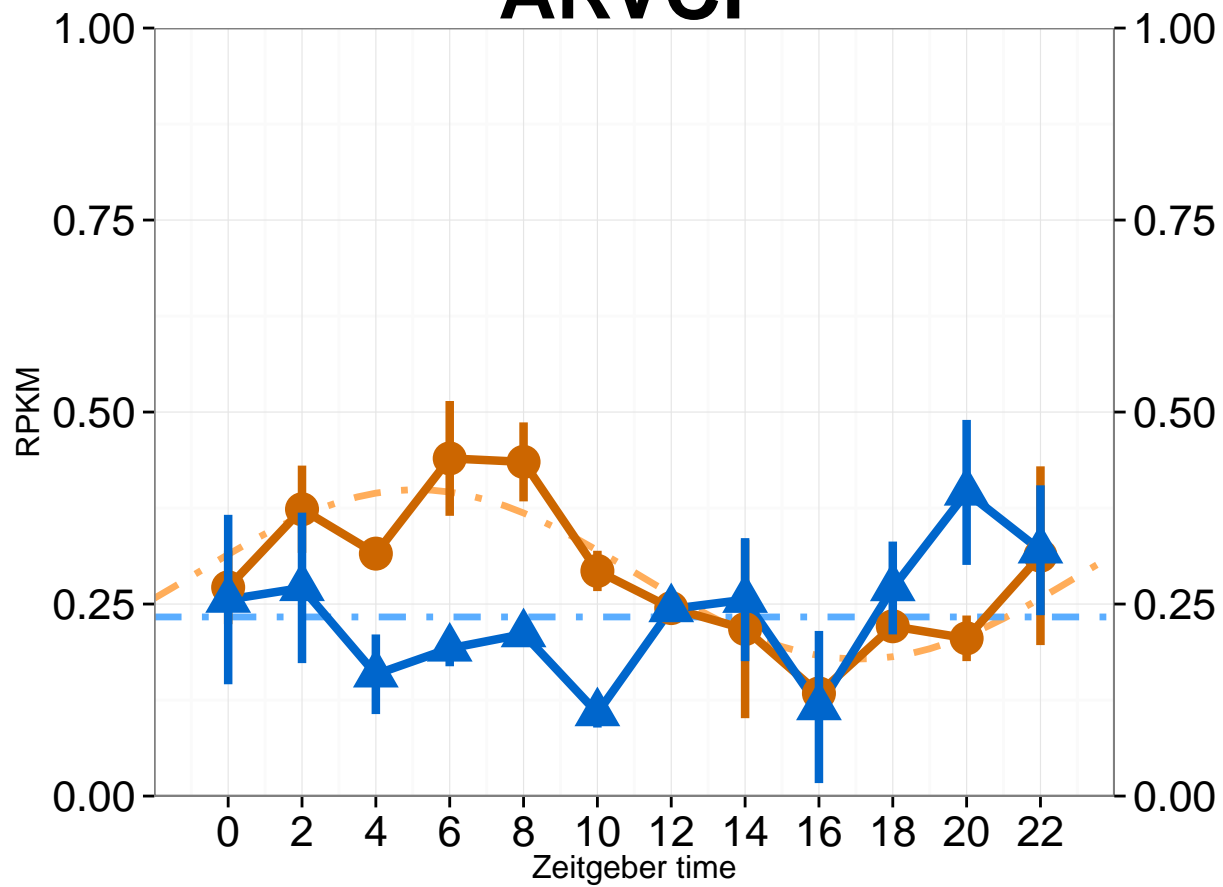

## ARVCF

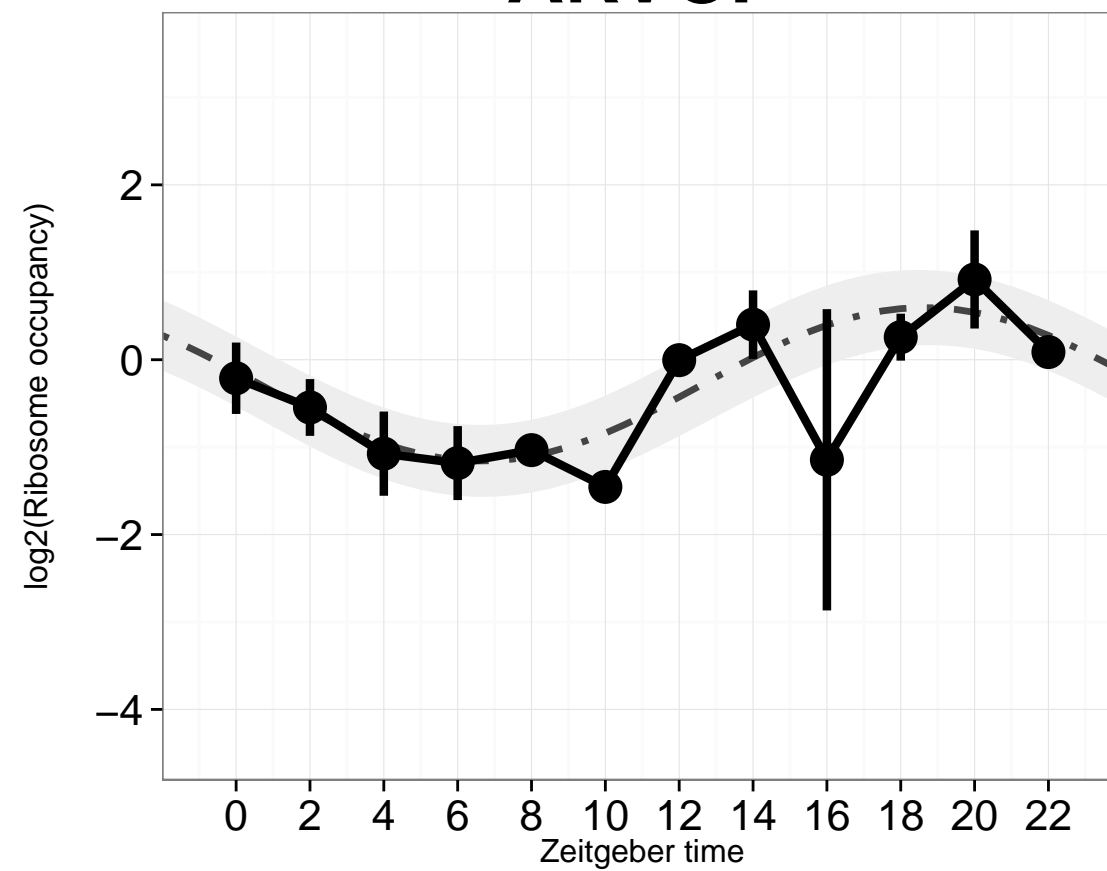

Supplement: Supplementary file 6038 [file 1]

## Thoc3

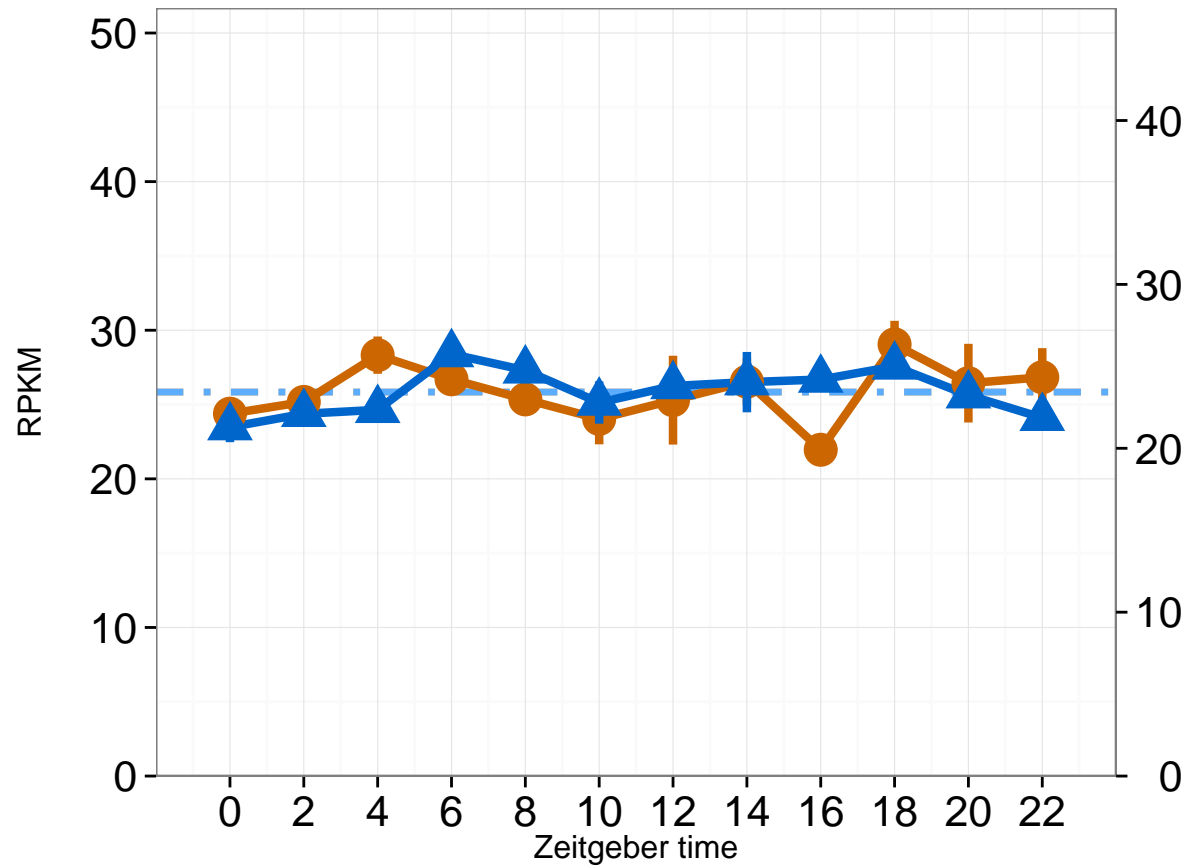

## Thoc3

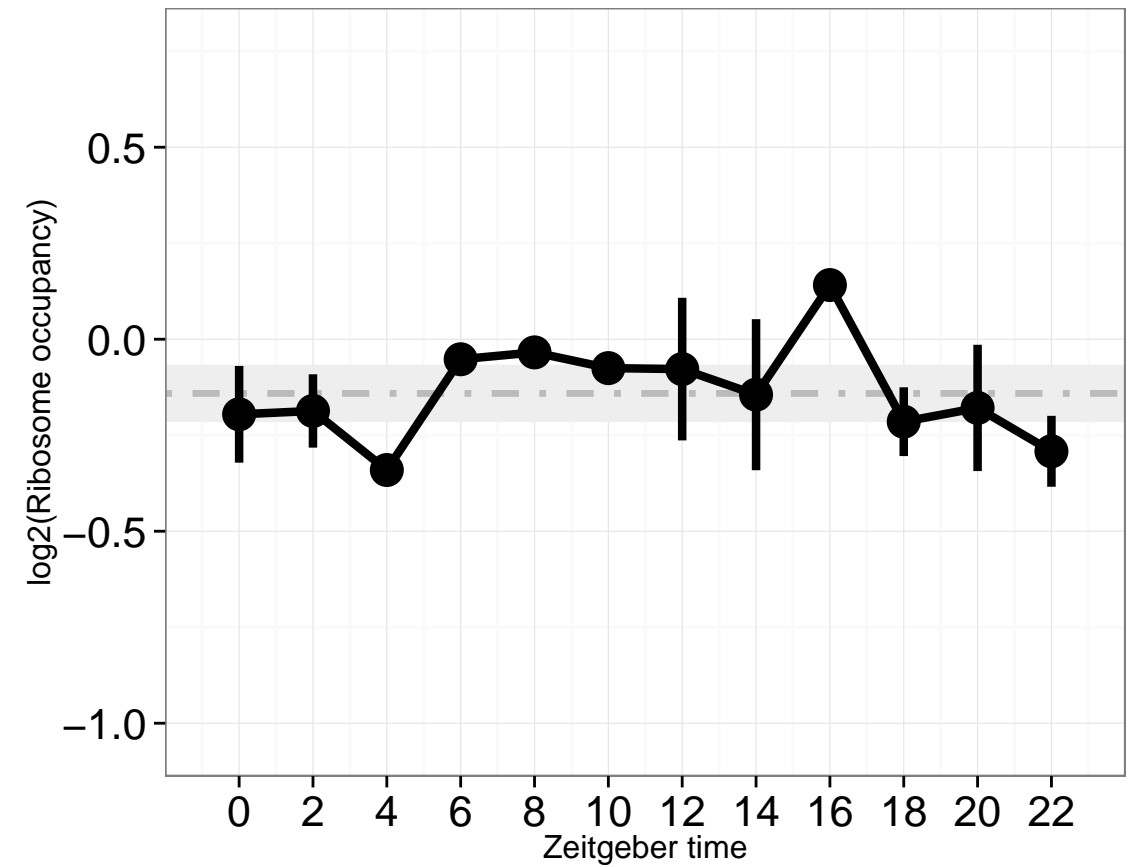

Supplement: Supplementary file 6039 [file 1]

## Uck2

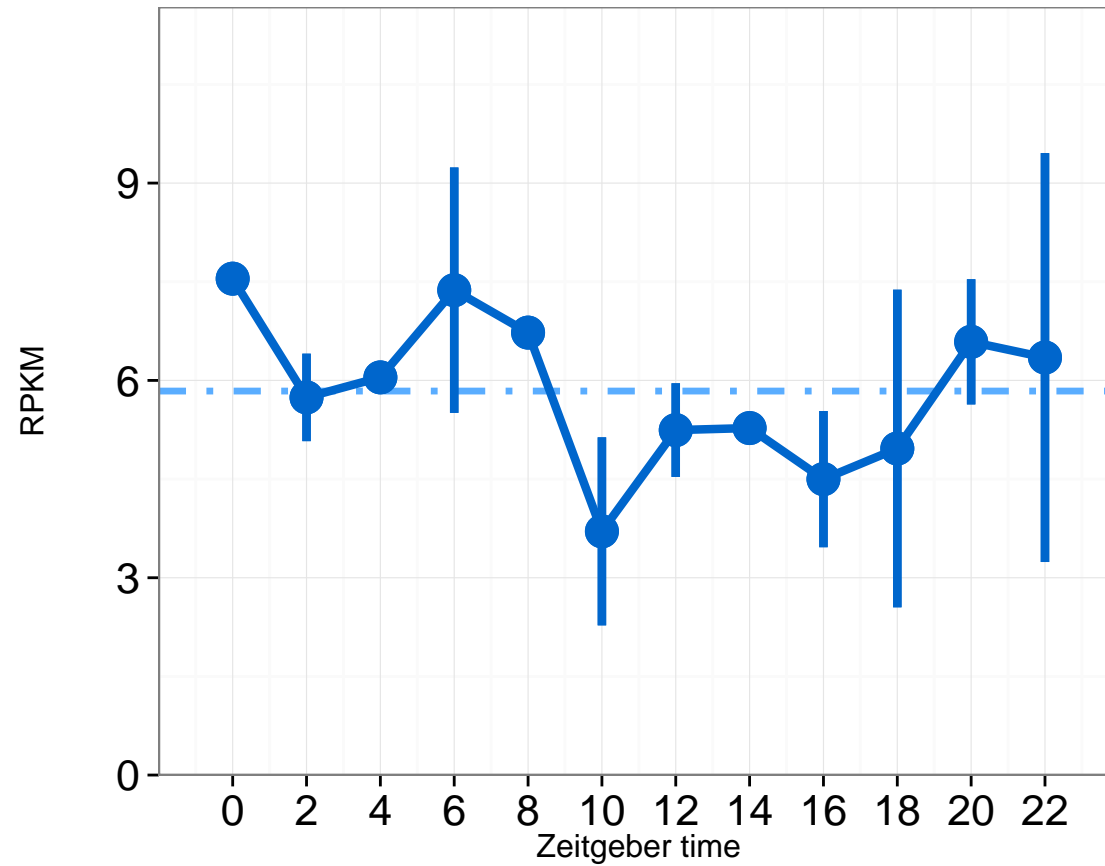

## Uck2 log2(Ribosome occupancy)

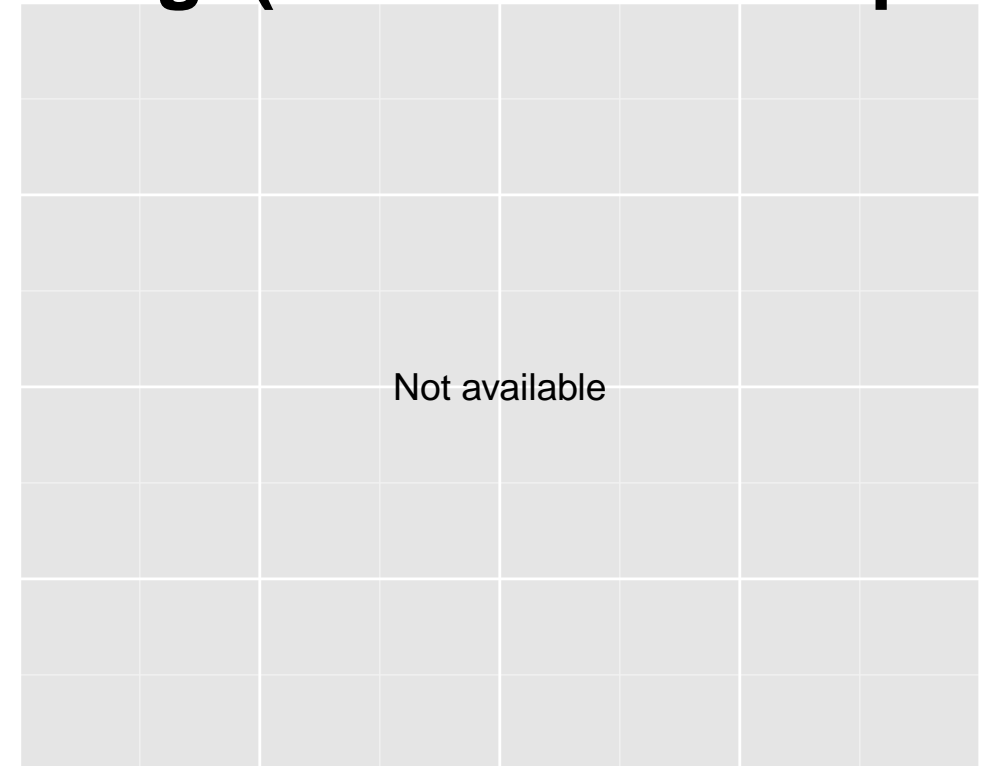

Supplement: Supplementary file 6040 [file 1]

# Clip3

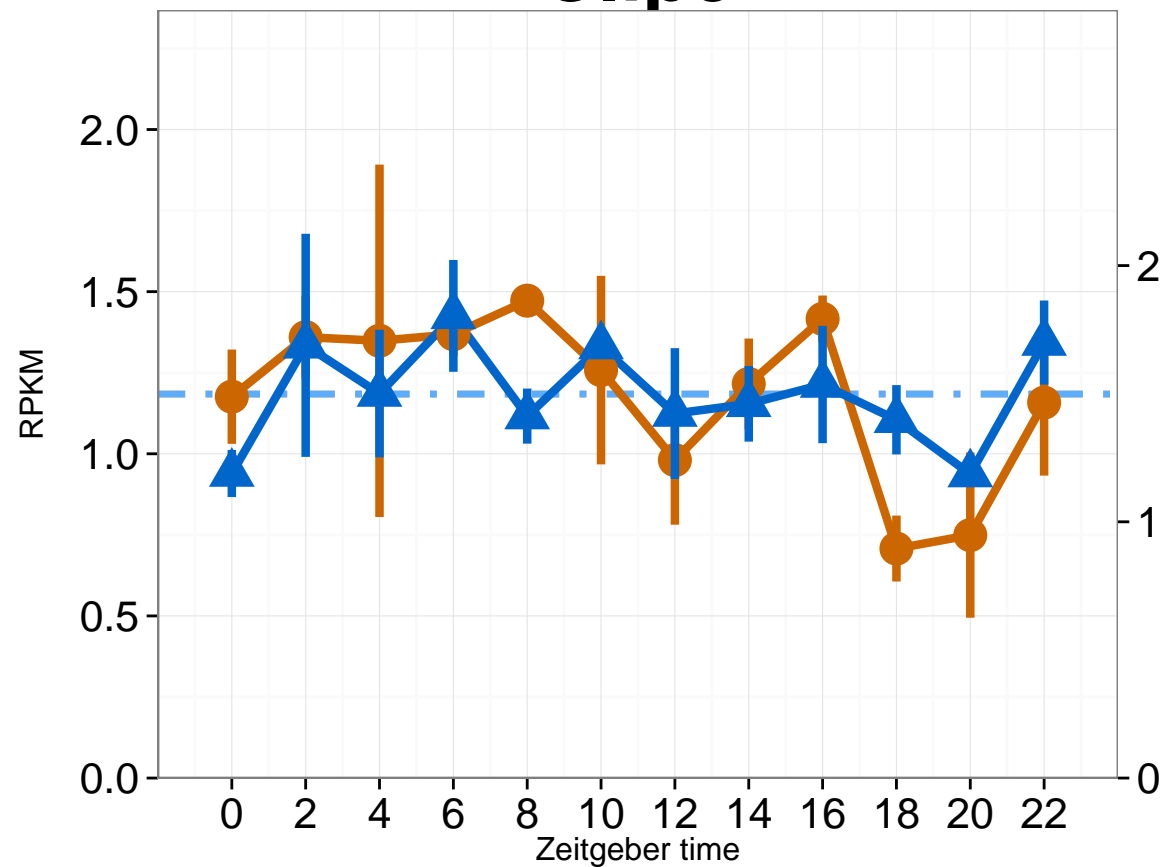

# Clip3

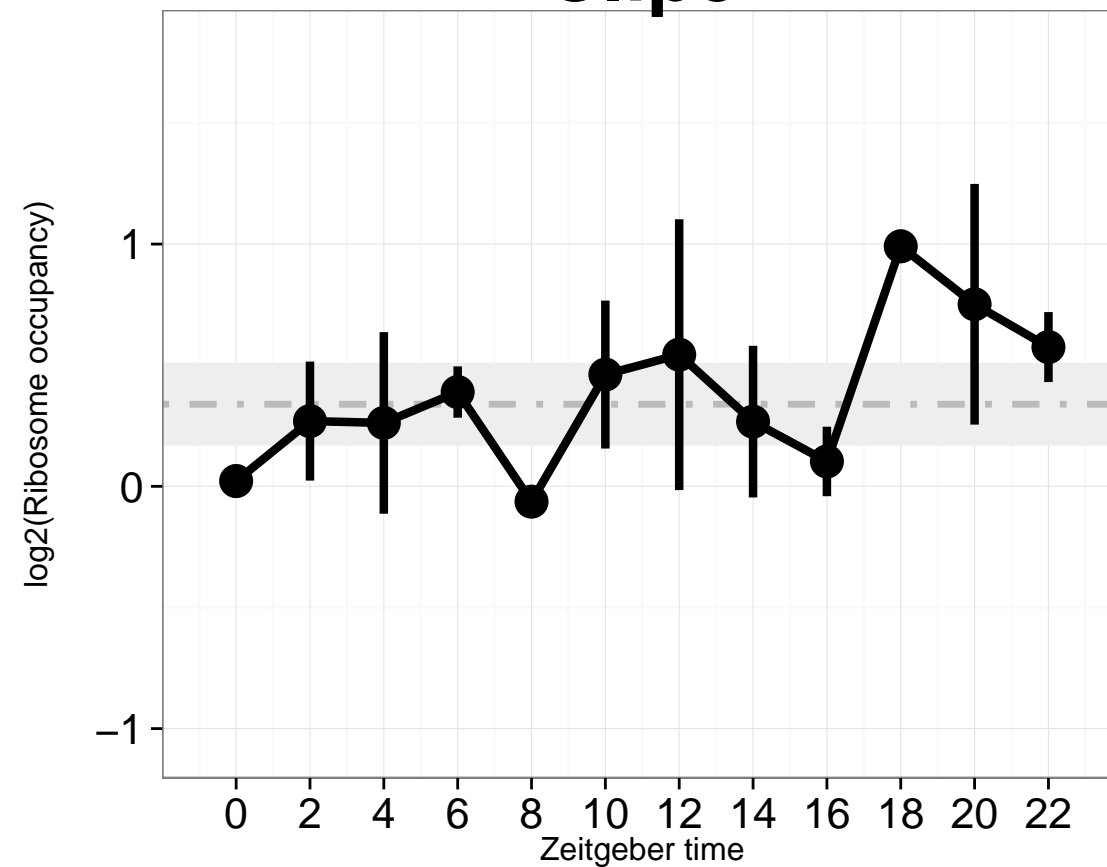

Supplement: Supplementary file 6041 [file 1]

## Puf60

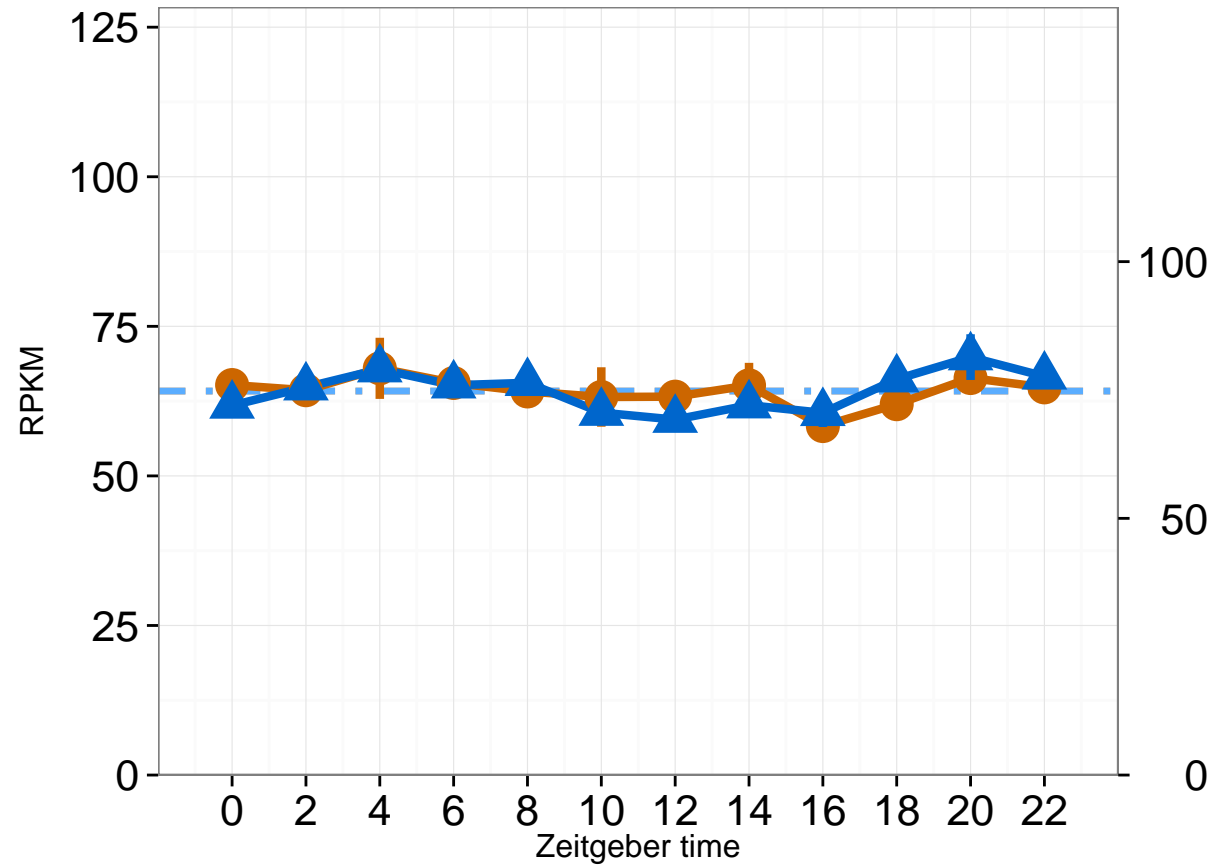

## Puf60

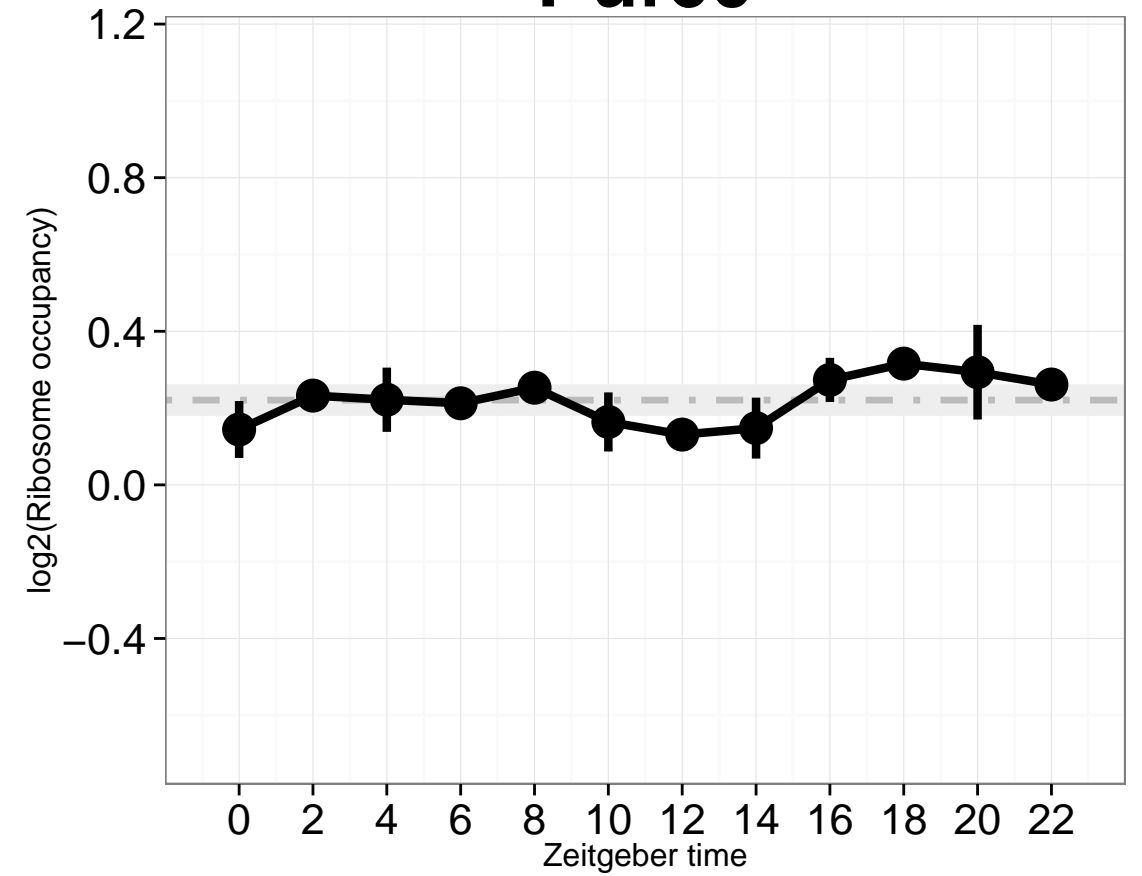

Supplement: Supplementary file 6042 [file 1]

## Tnfsf15

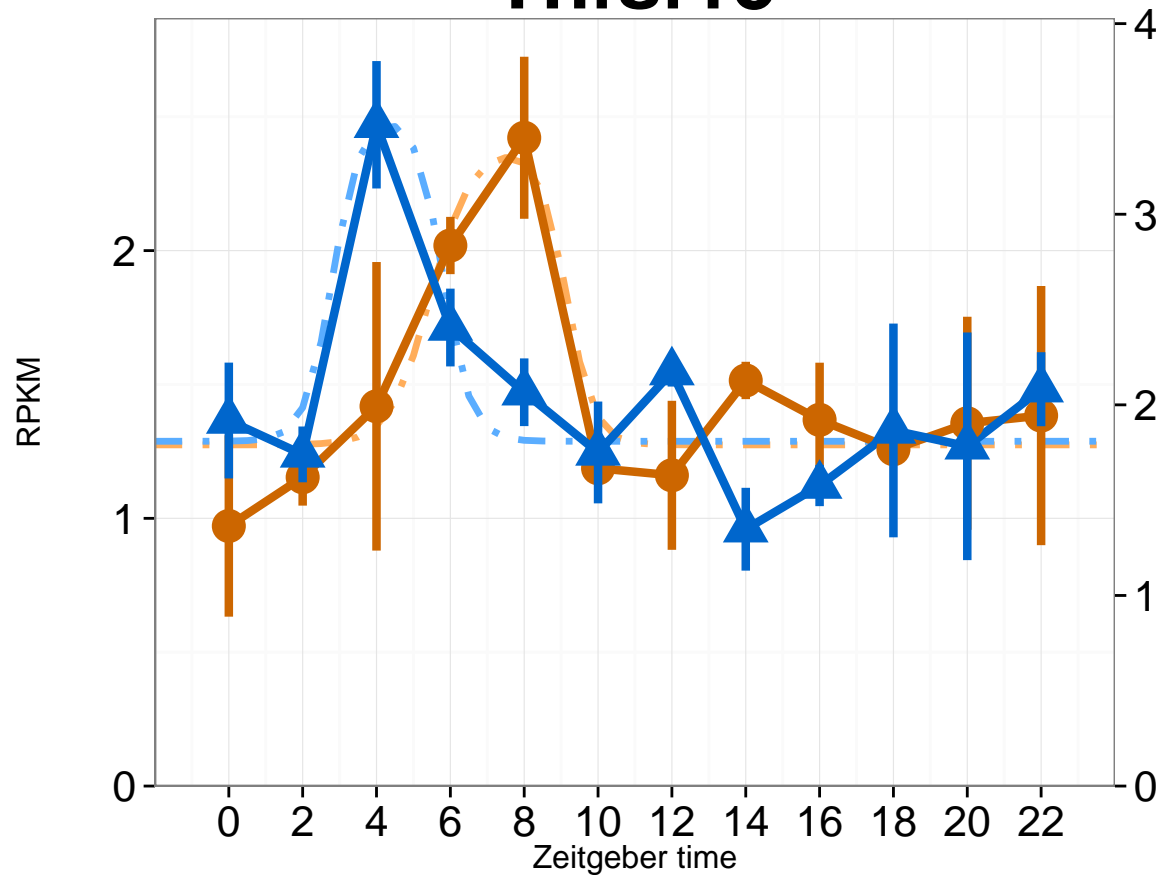

## Tnfsf15

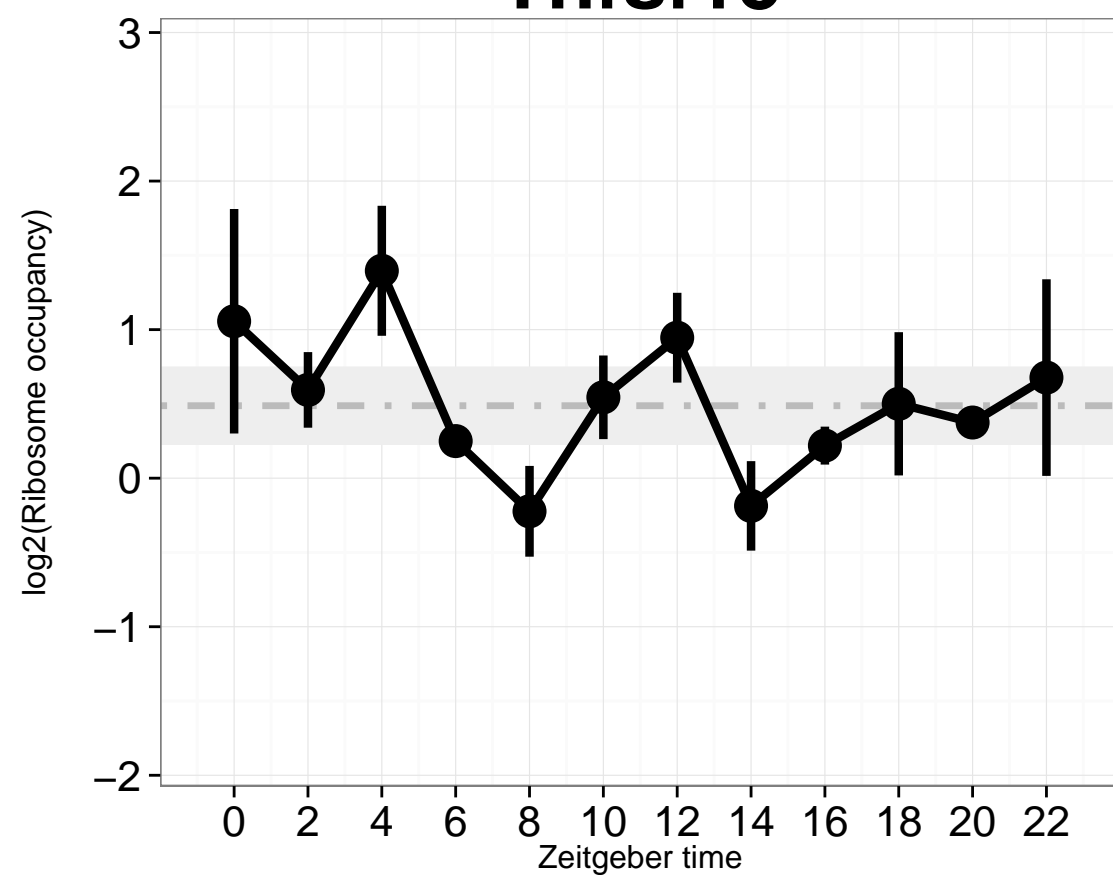

Supplement: Supplementary file 6043 [file 1]

## Mcu

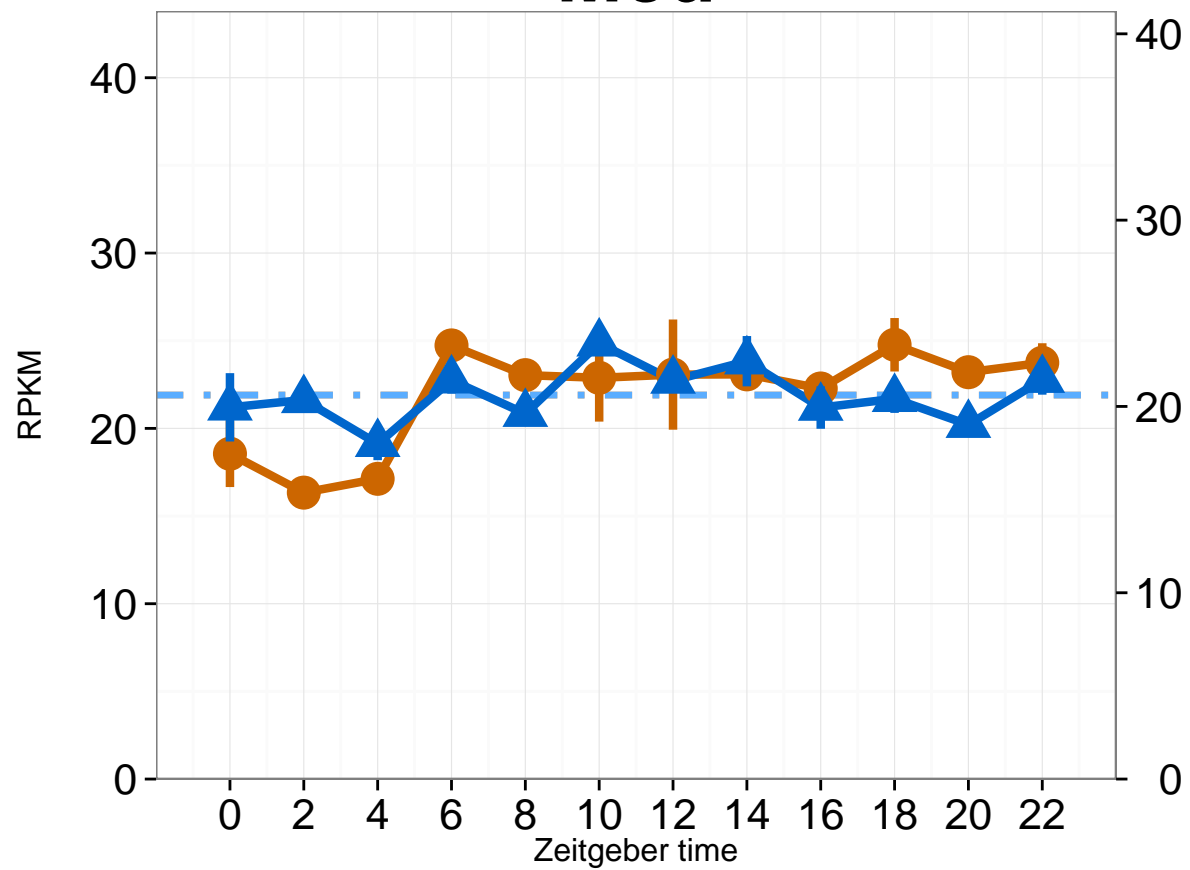

## Mcu

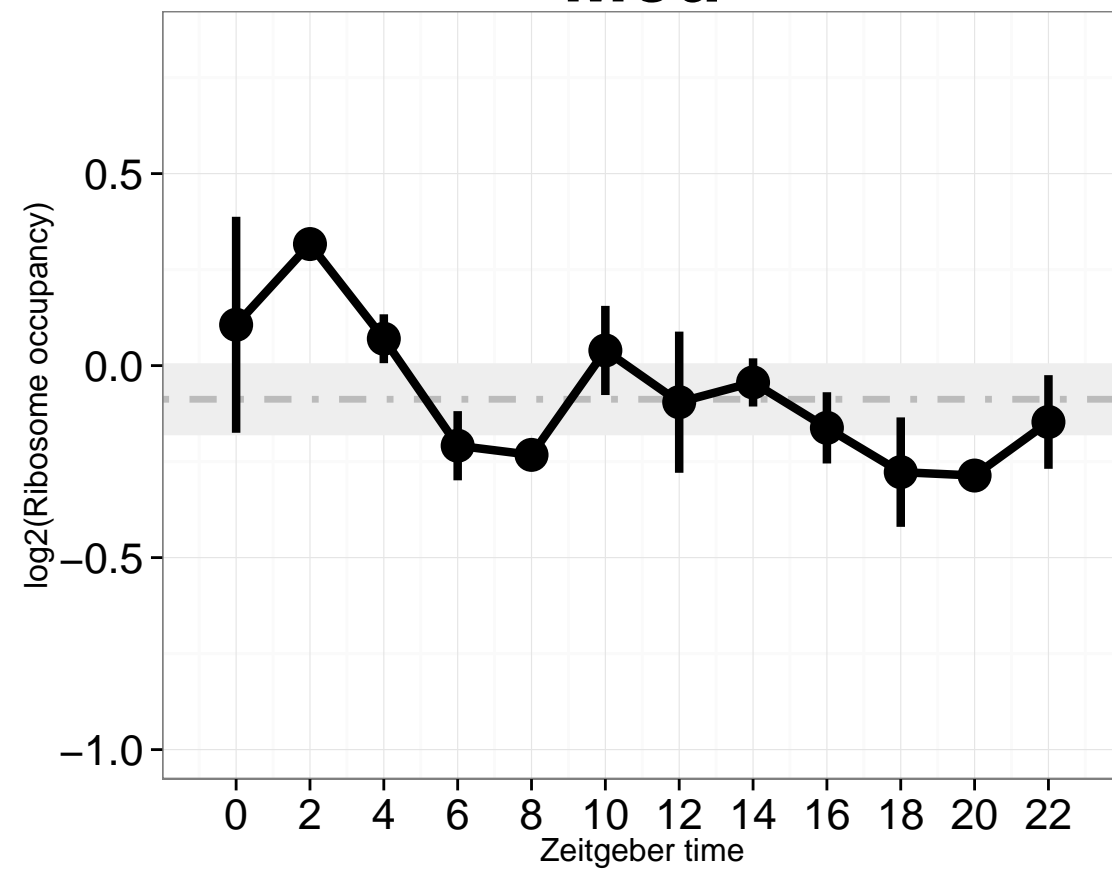

Supplement: Supplementary file 6044 [file 1]

## Poldip3

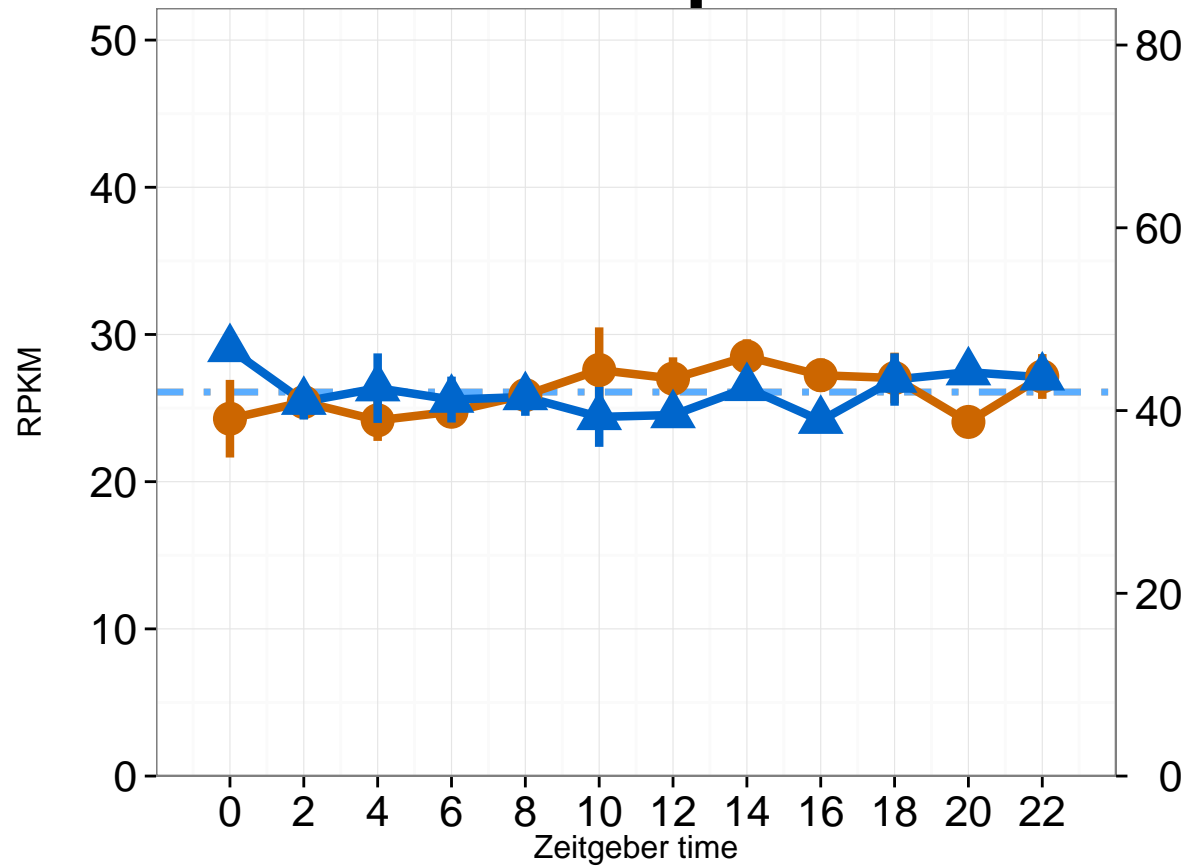

## Poldip3

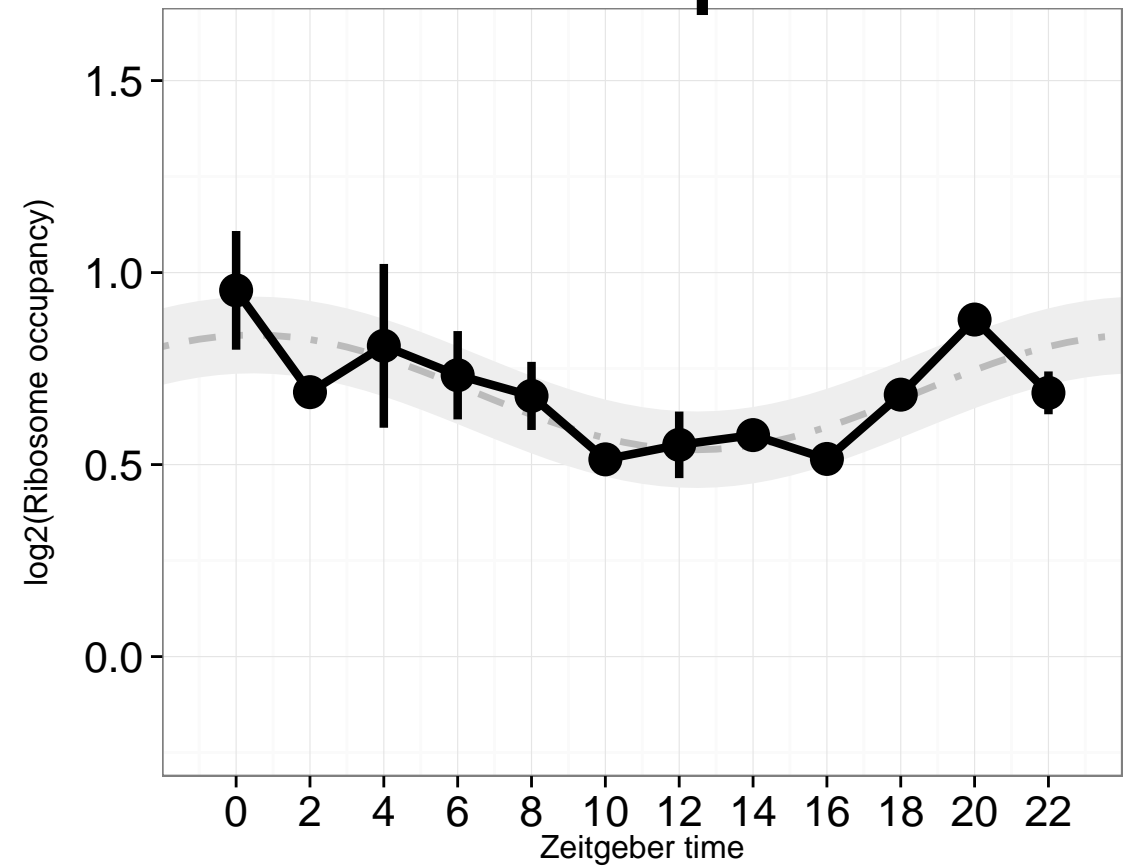

Supplement: Supplementary file 6045 [file 1]

# H2-Q6

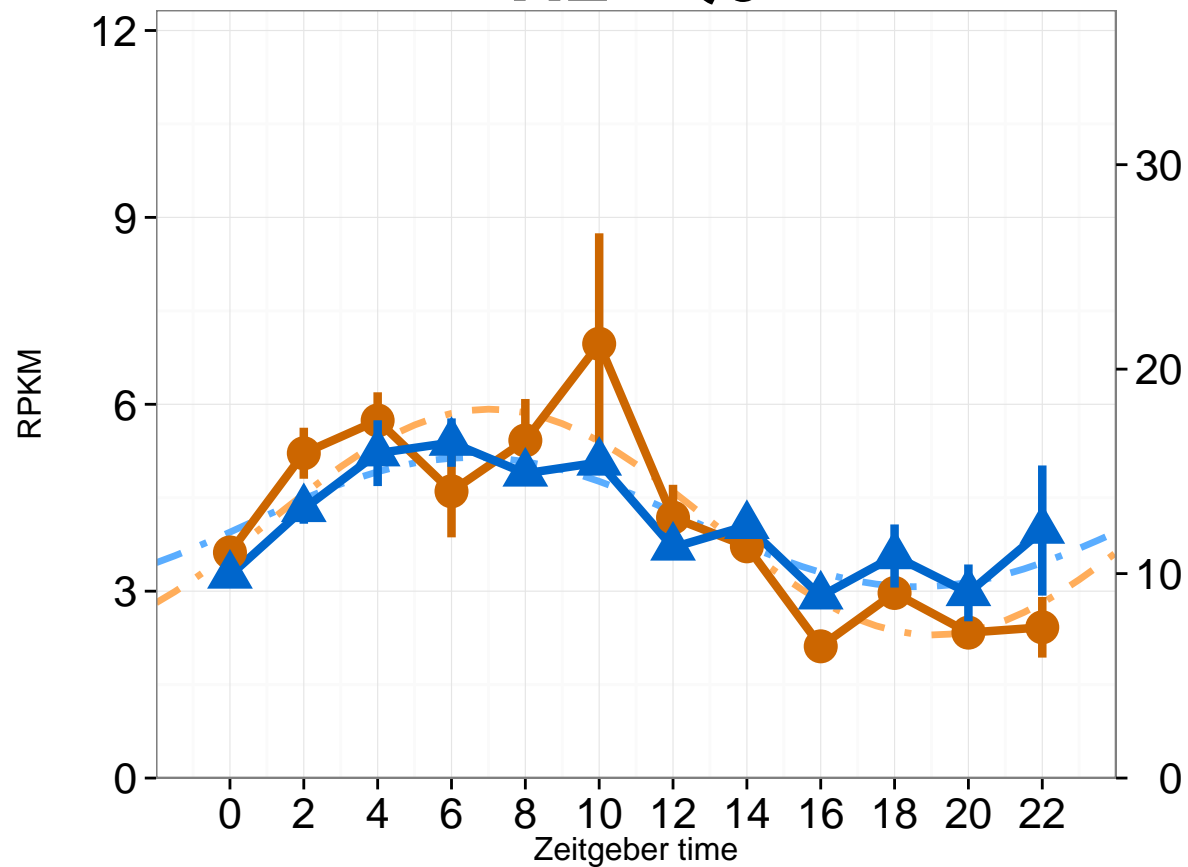

# H2-Q6

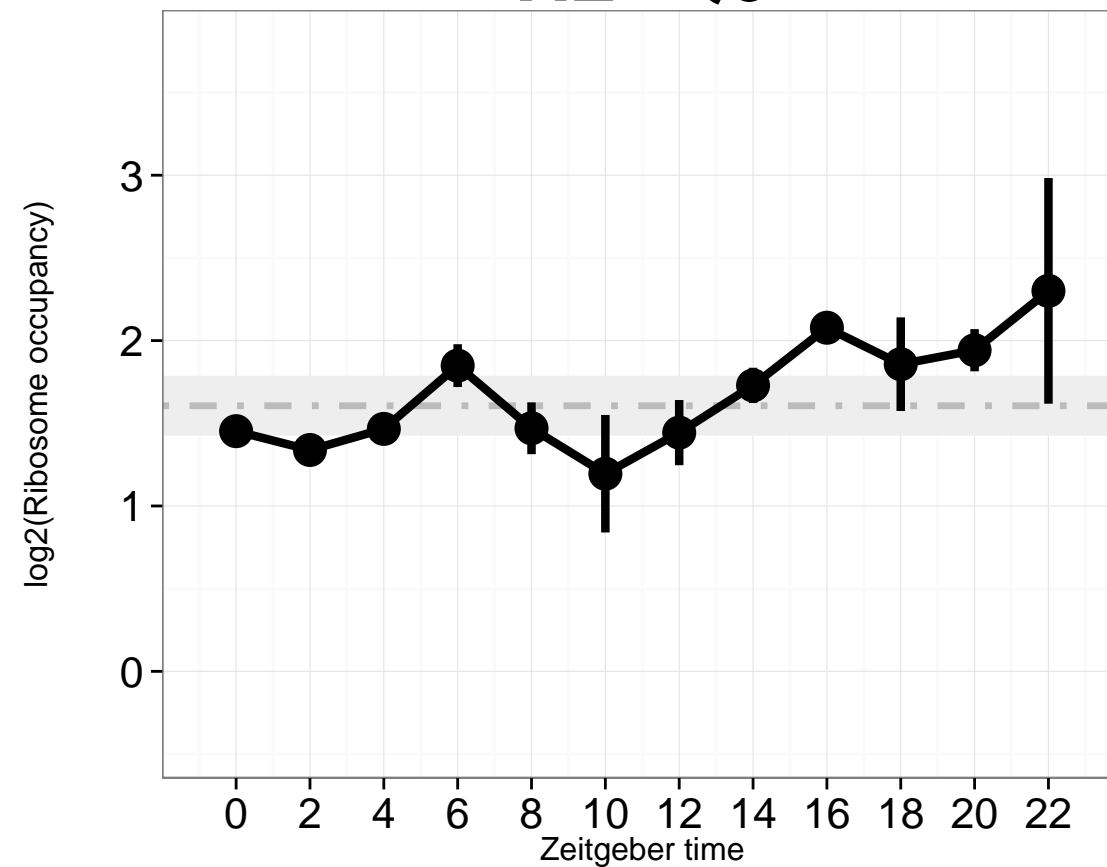

Supplement: Supplementary file 6046 [file 1]

# Capn6

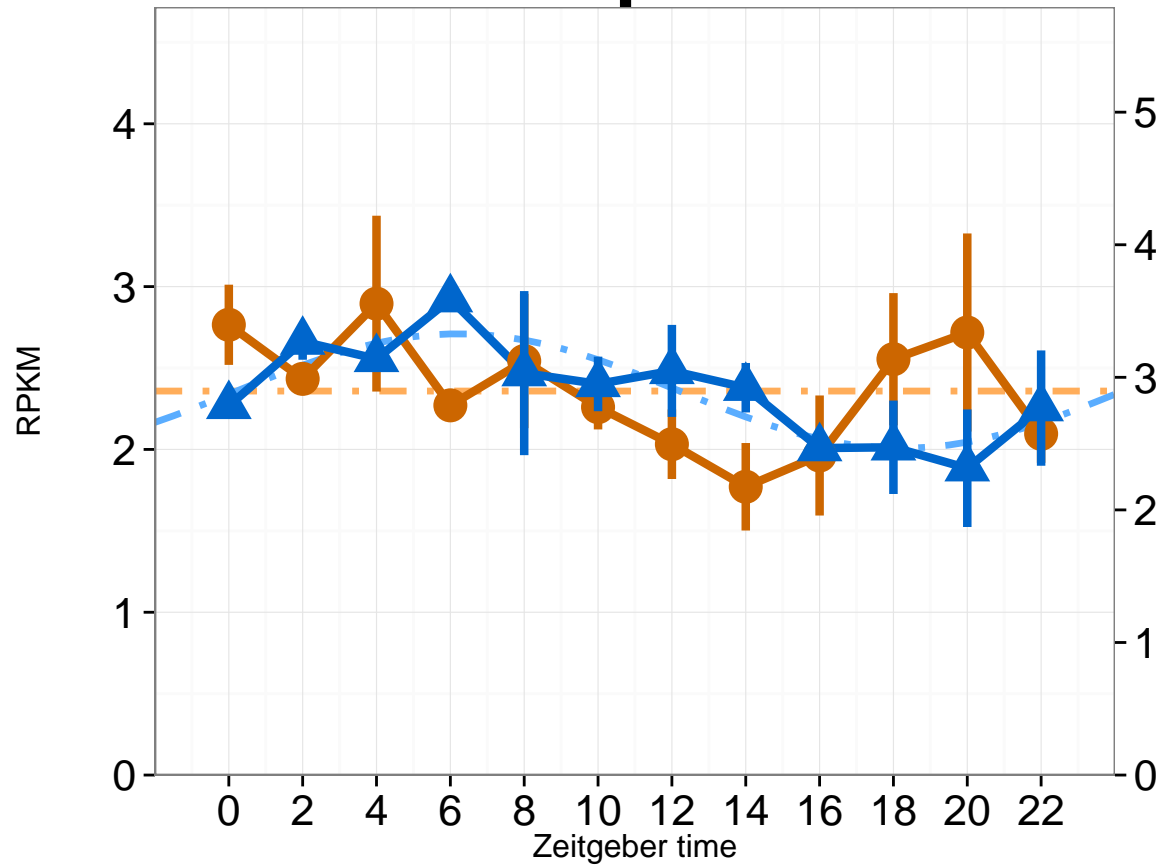

# Capn6

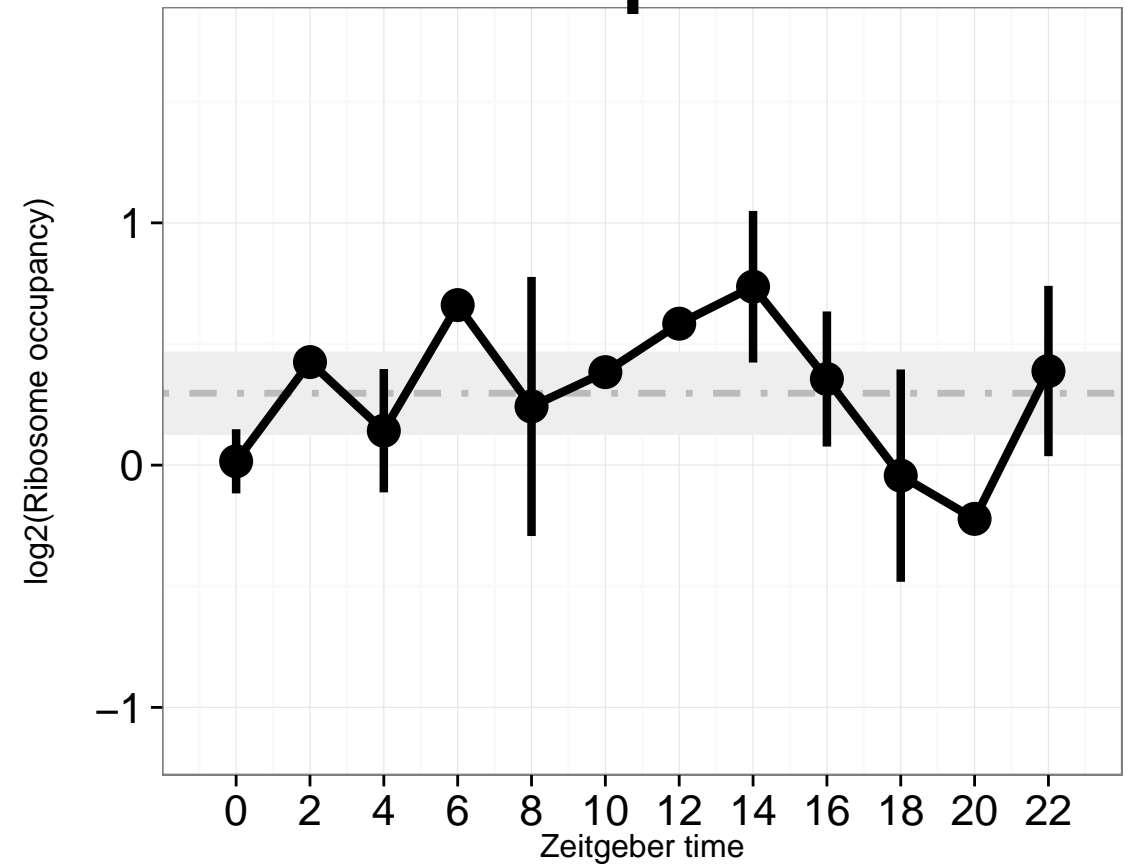

Supplement: Supplementary file 6047 [file 1]

## Slfn2

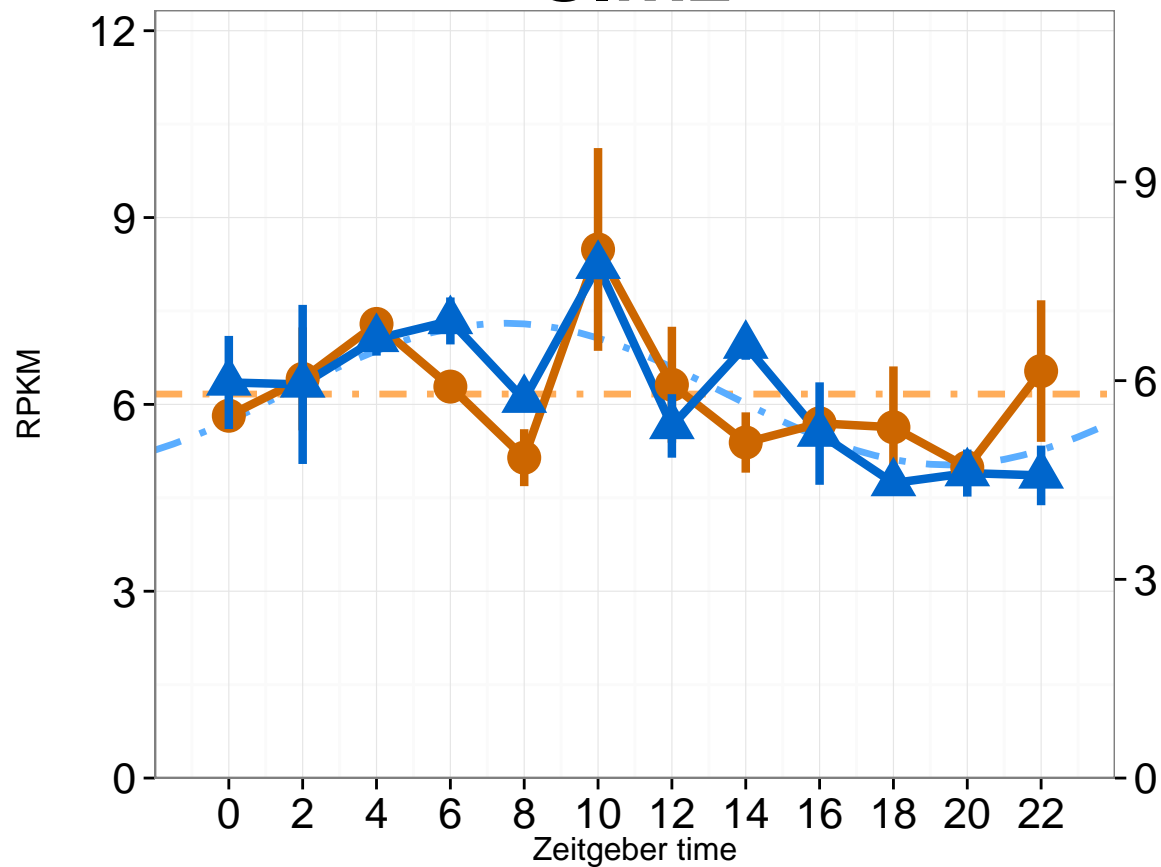

## Slfn2

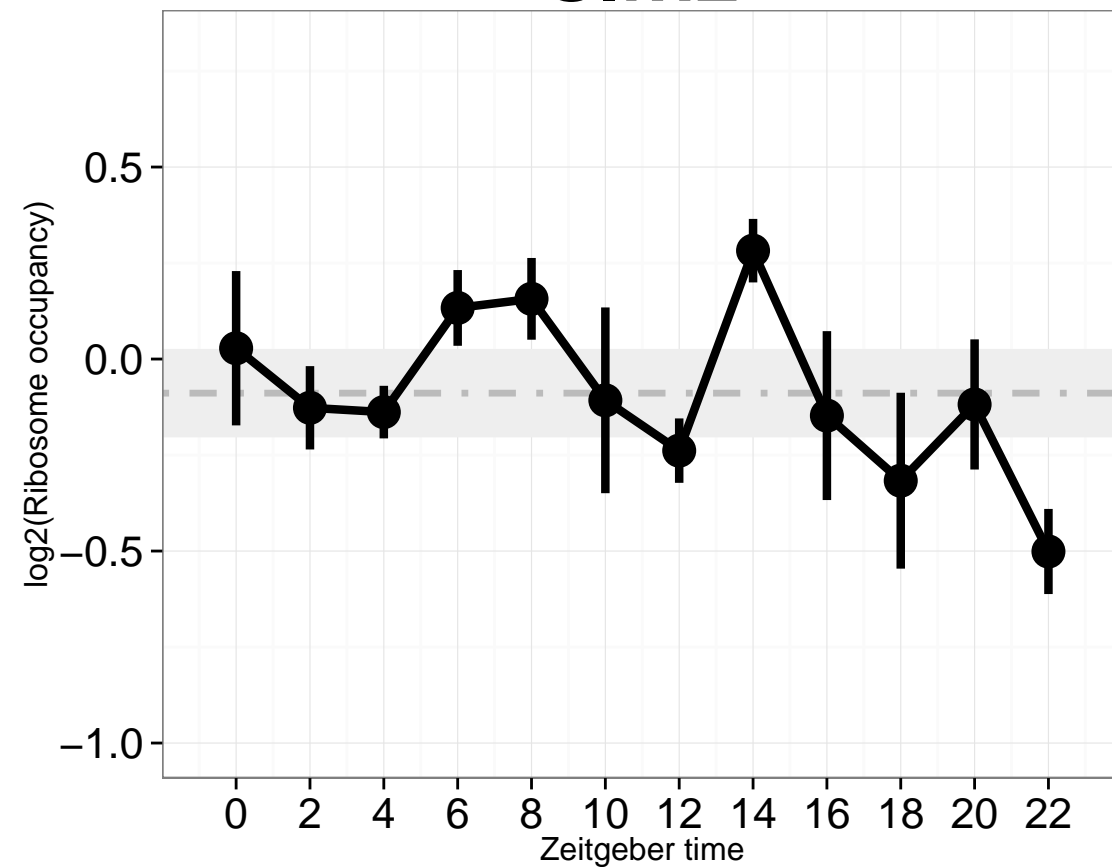

Supplement: Supplementary file 6048 [file 1]

## Rasd1

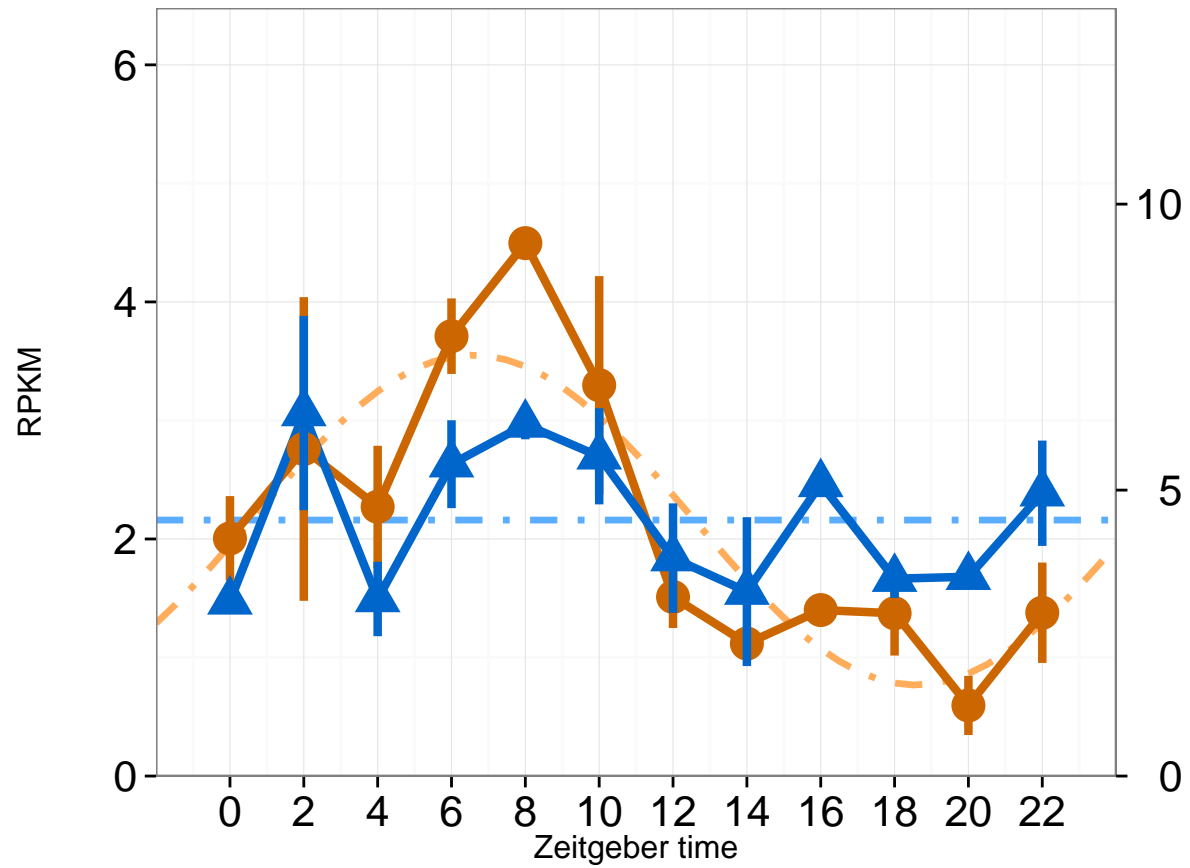

## Rasd1

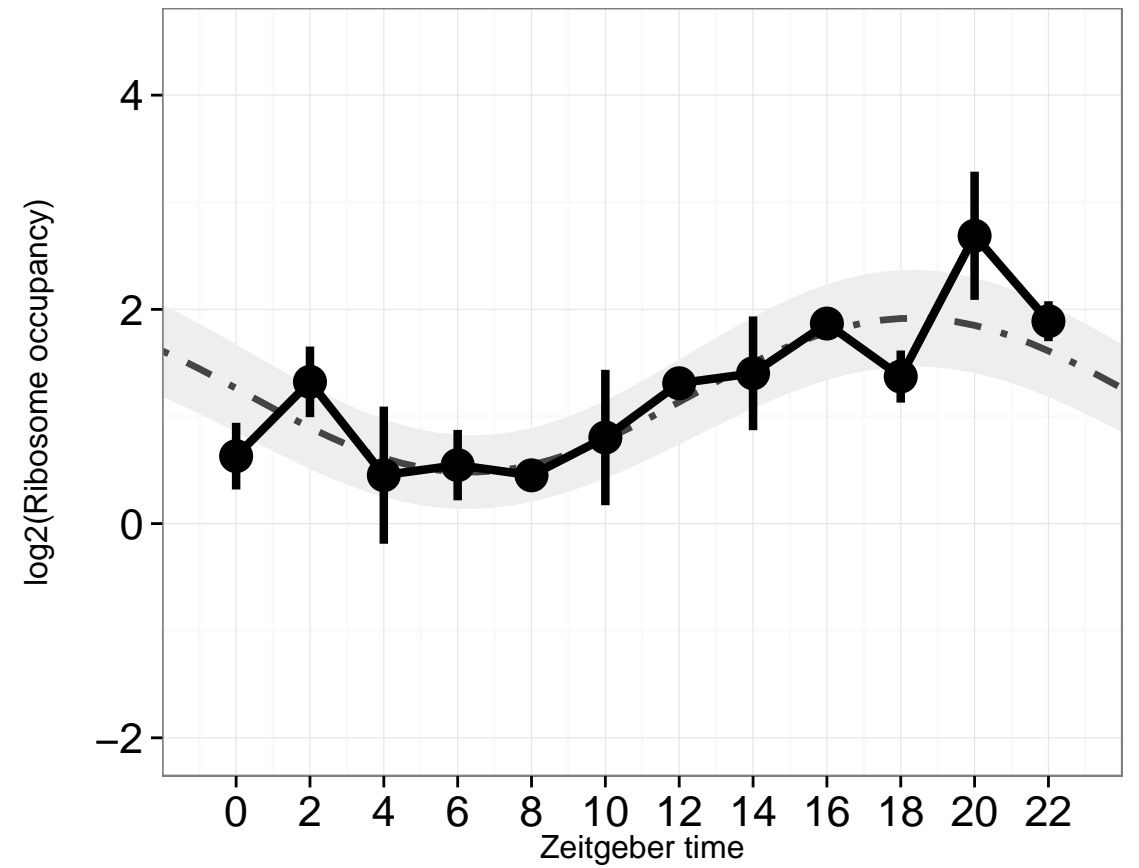

Supplement: Supplementary file 6049 [file 1]

## Tmx2

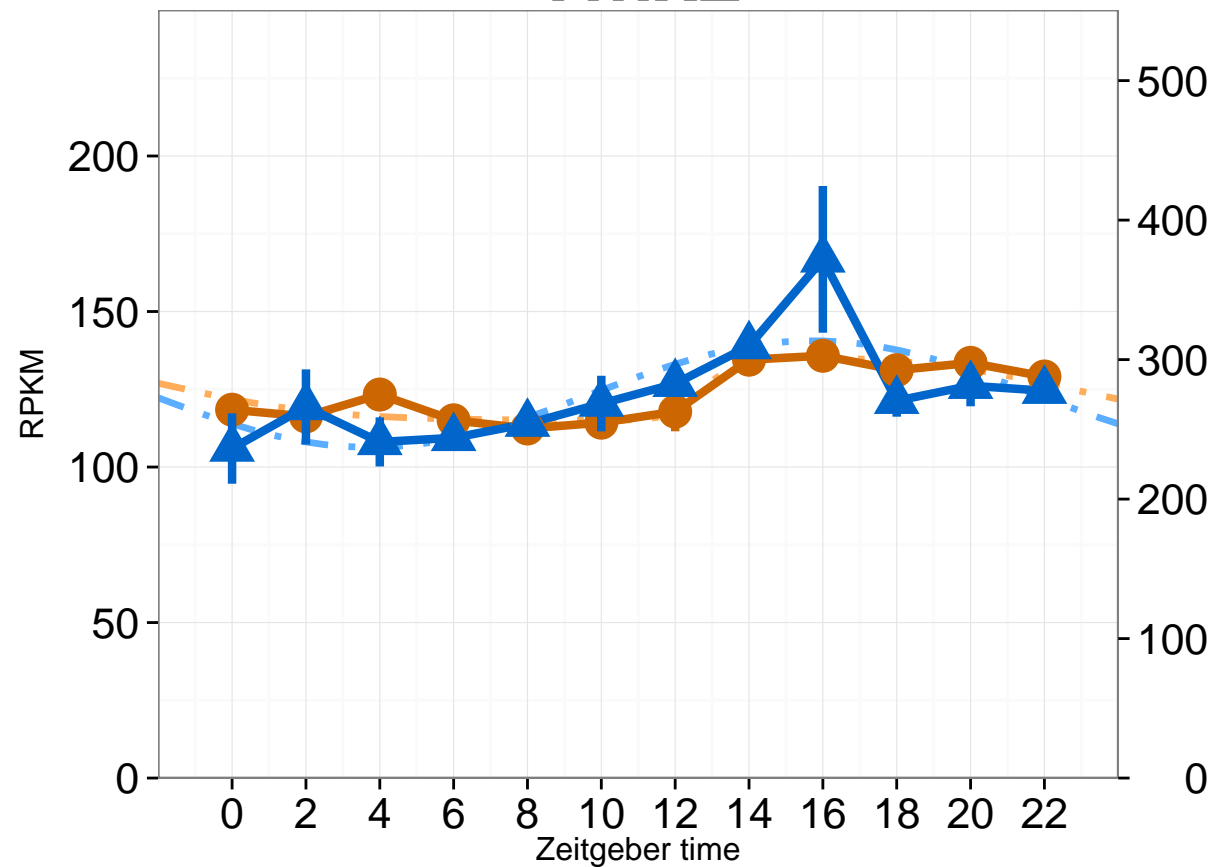

## Tmx2

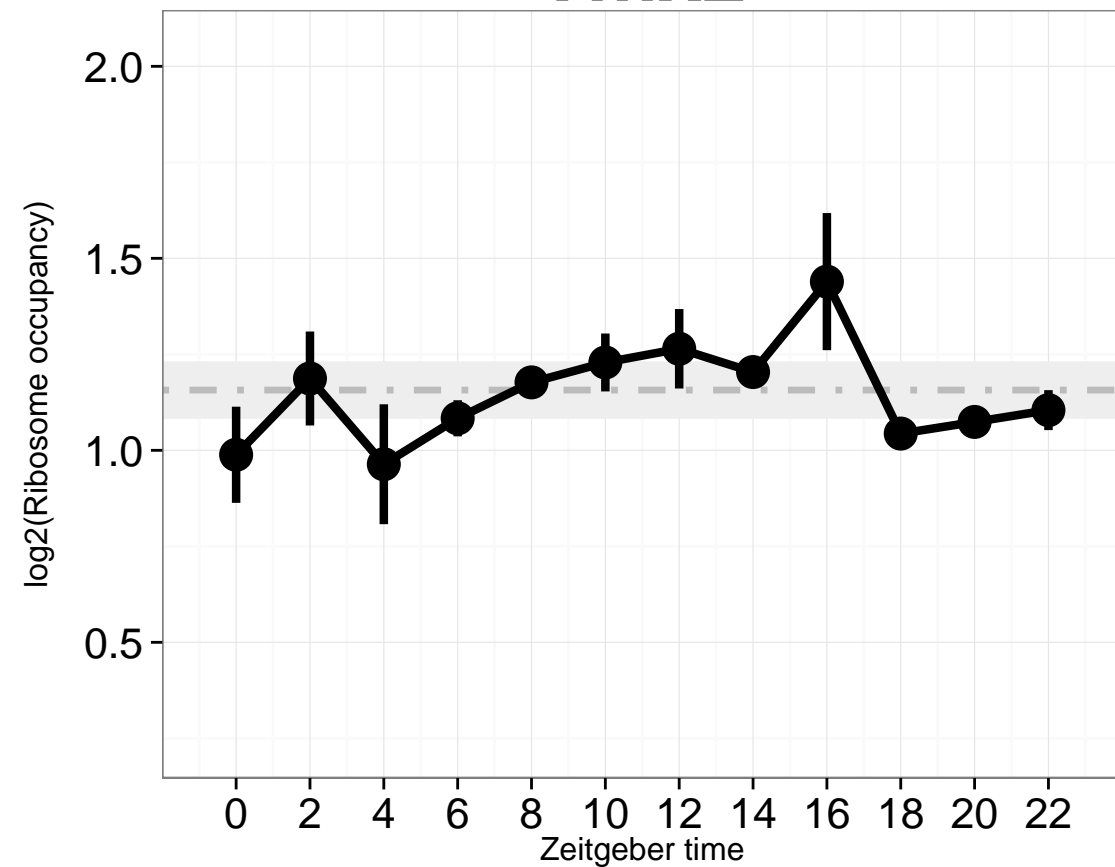

Supplement: Supplementary file 6050 [file 1]

## 6430550D23Rik

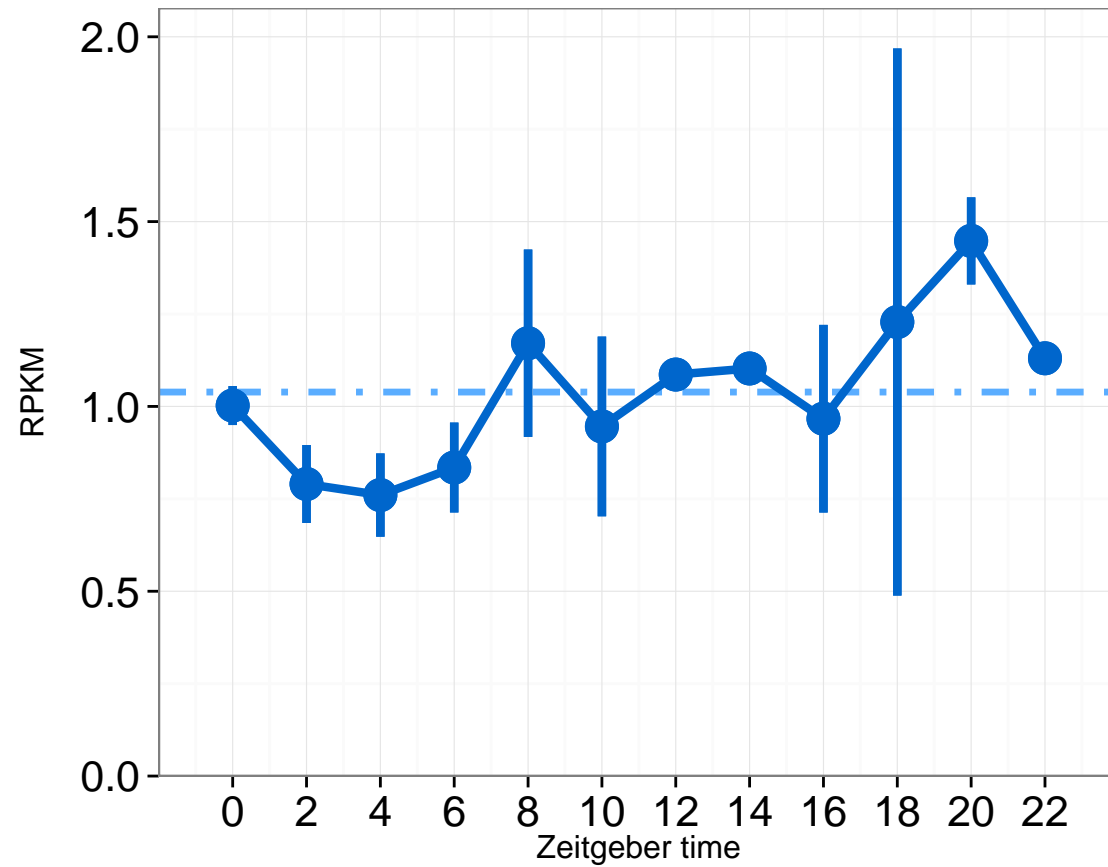

## 6430550D23Rik log<sub>2</sub>(Ribosome occup

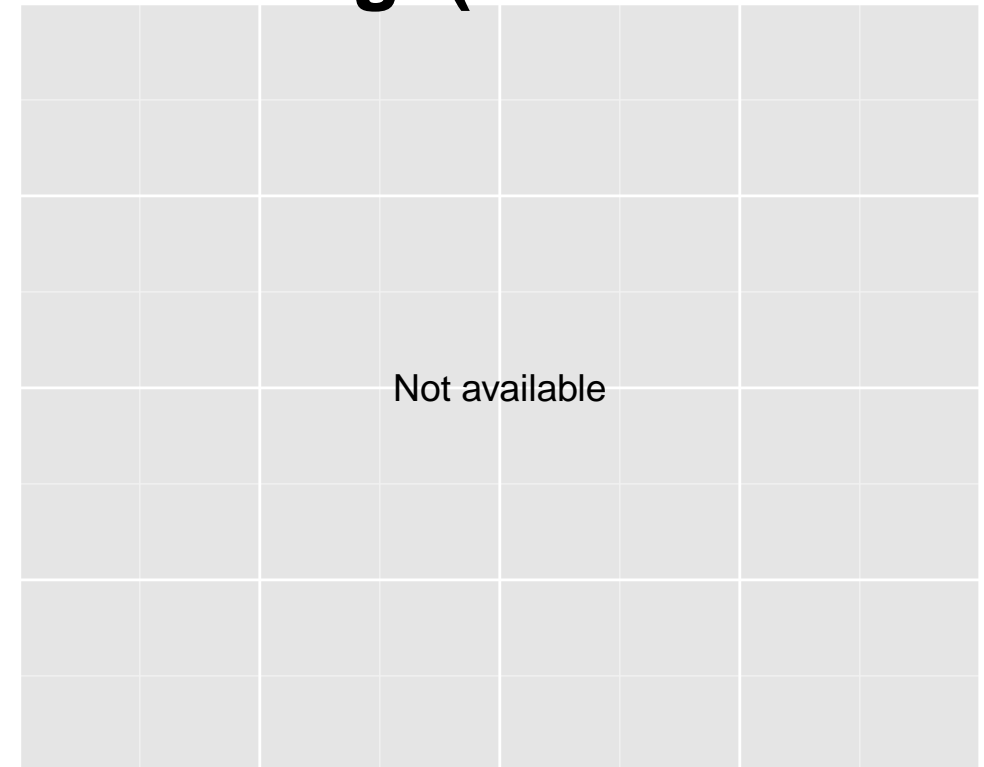

Supplement: Supplementary file 6051 [file 1]

## Gin1

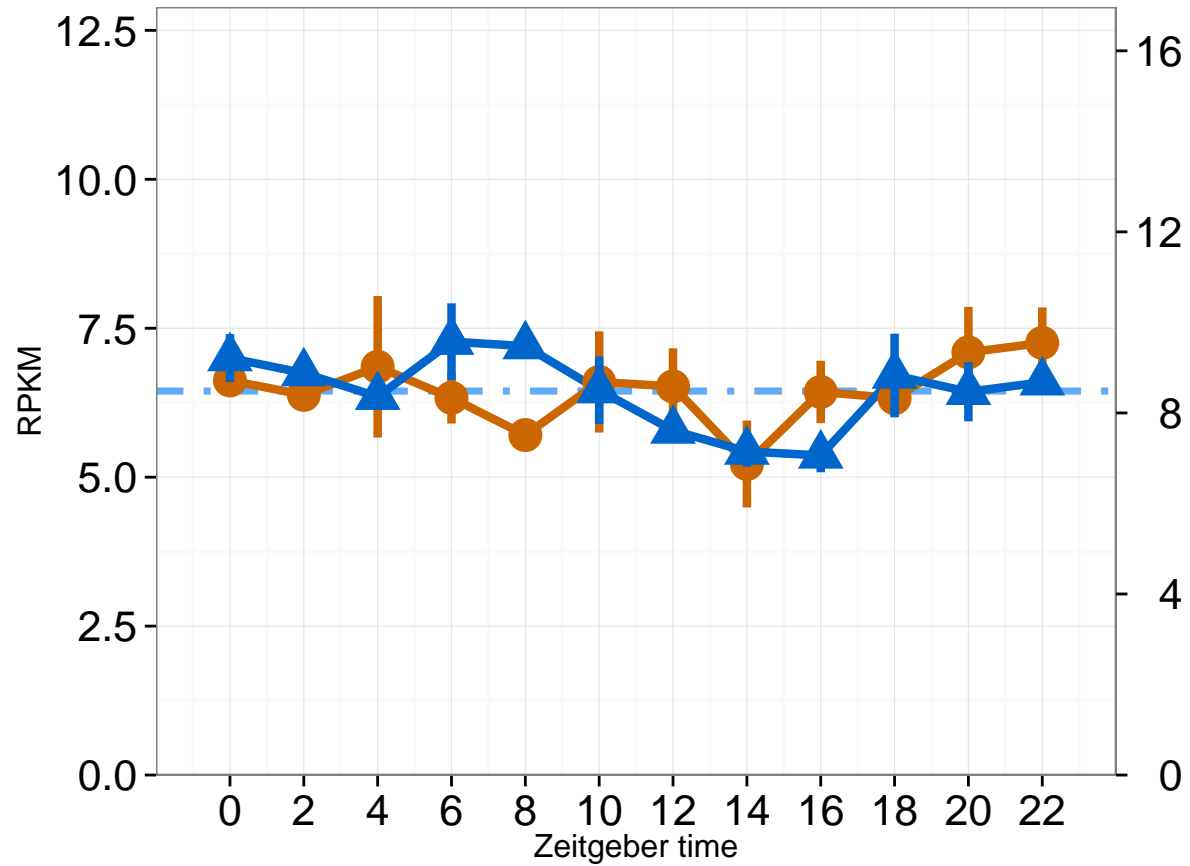

## Gin1

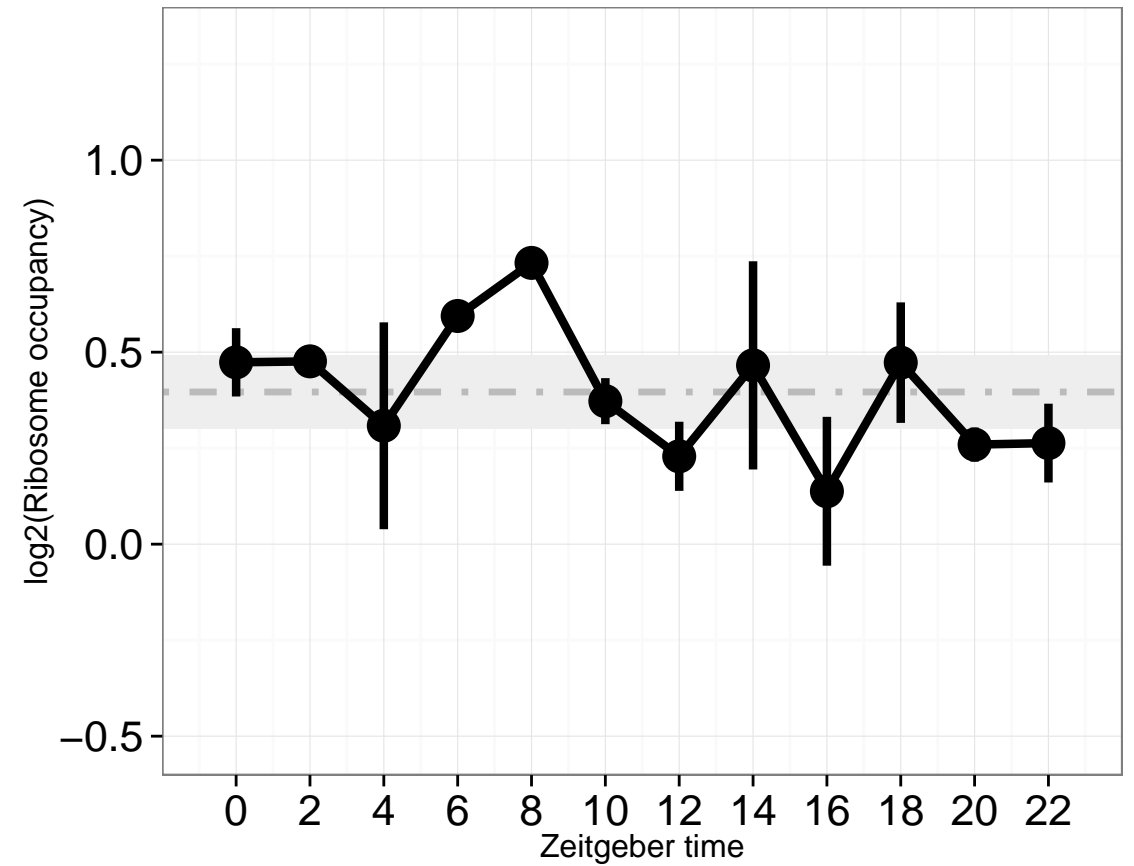

Supplement: Supplementary file 6052 [file 1]

# Flot2

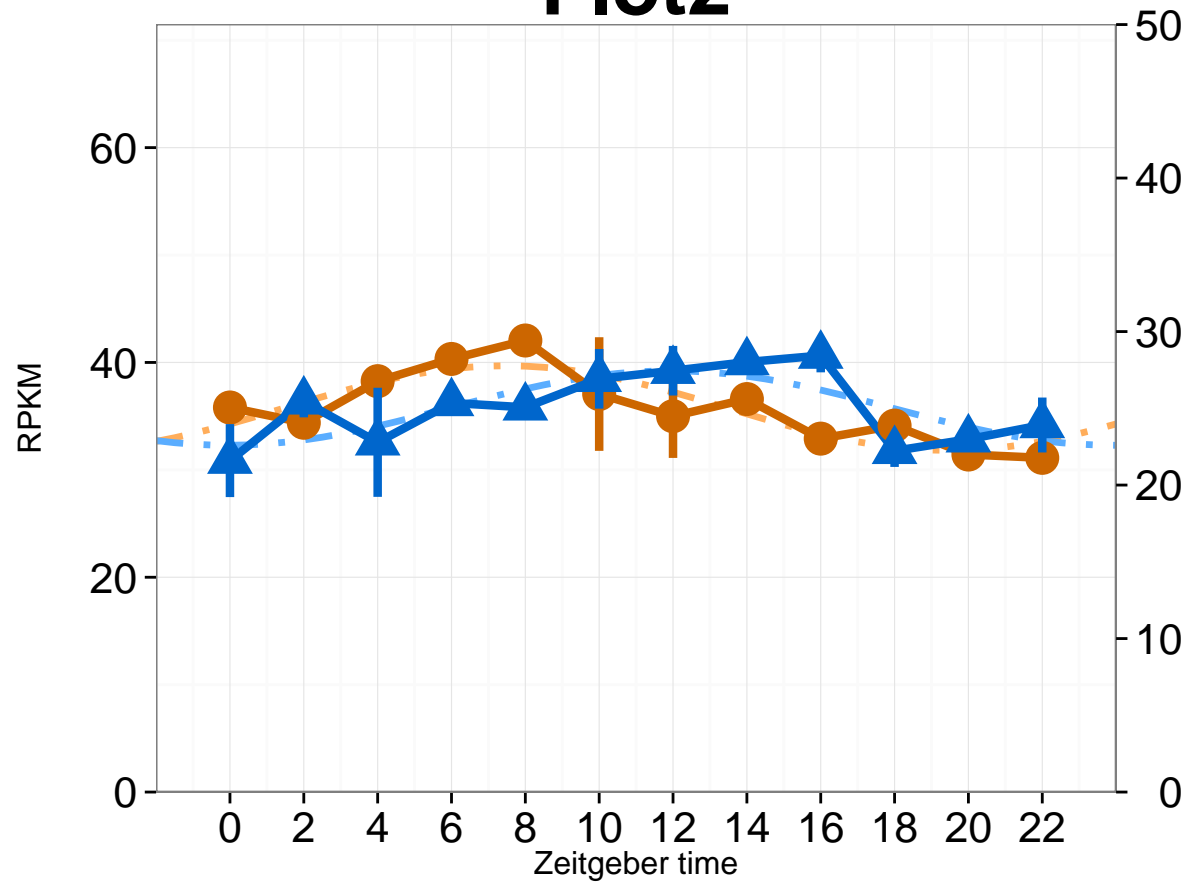

# Flot2

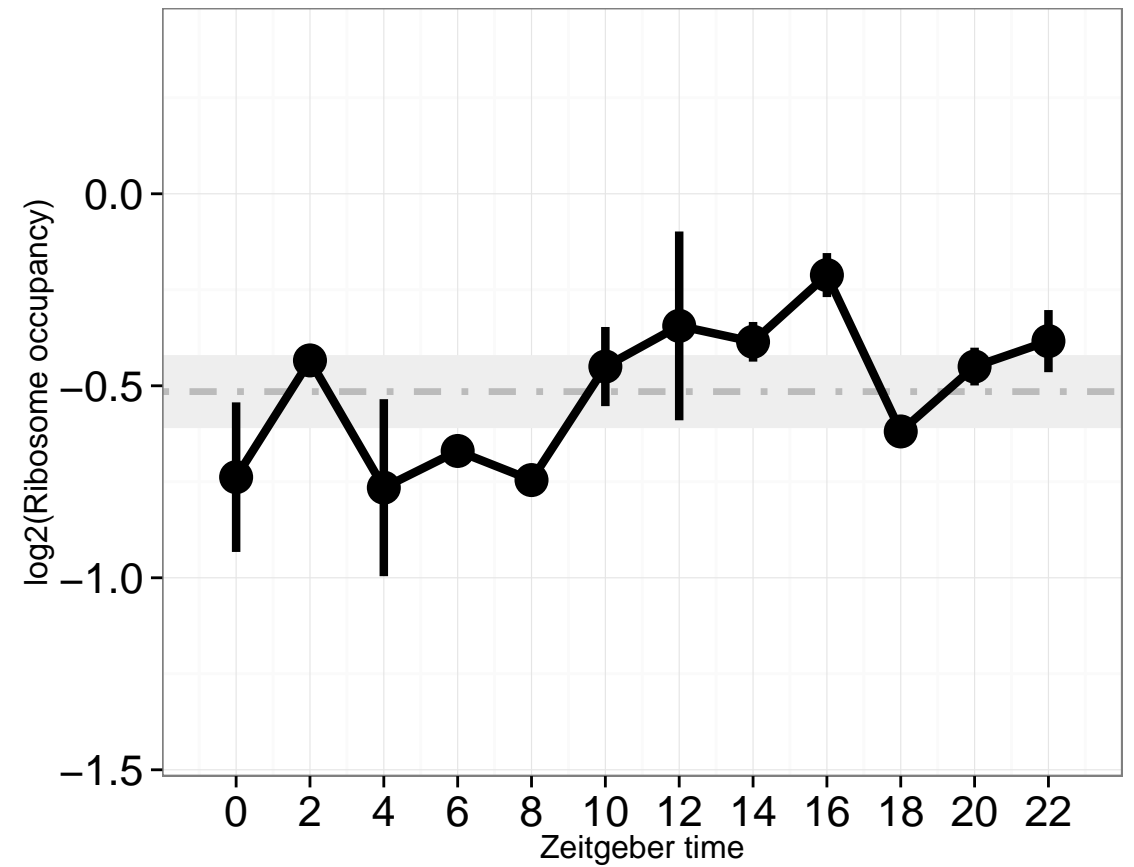

Supplement: Supplementary file 6053 [file 1]

## Sos1

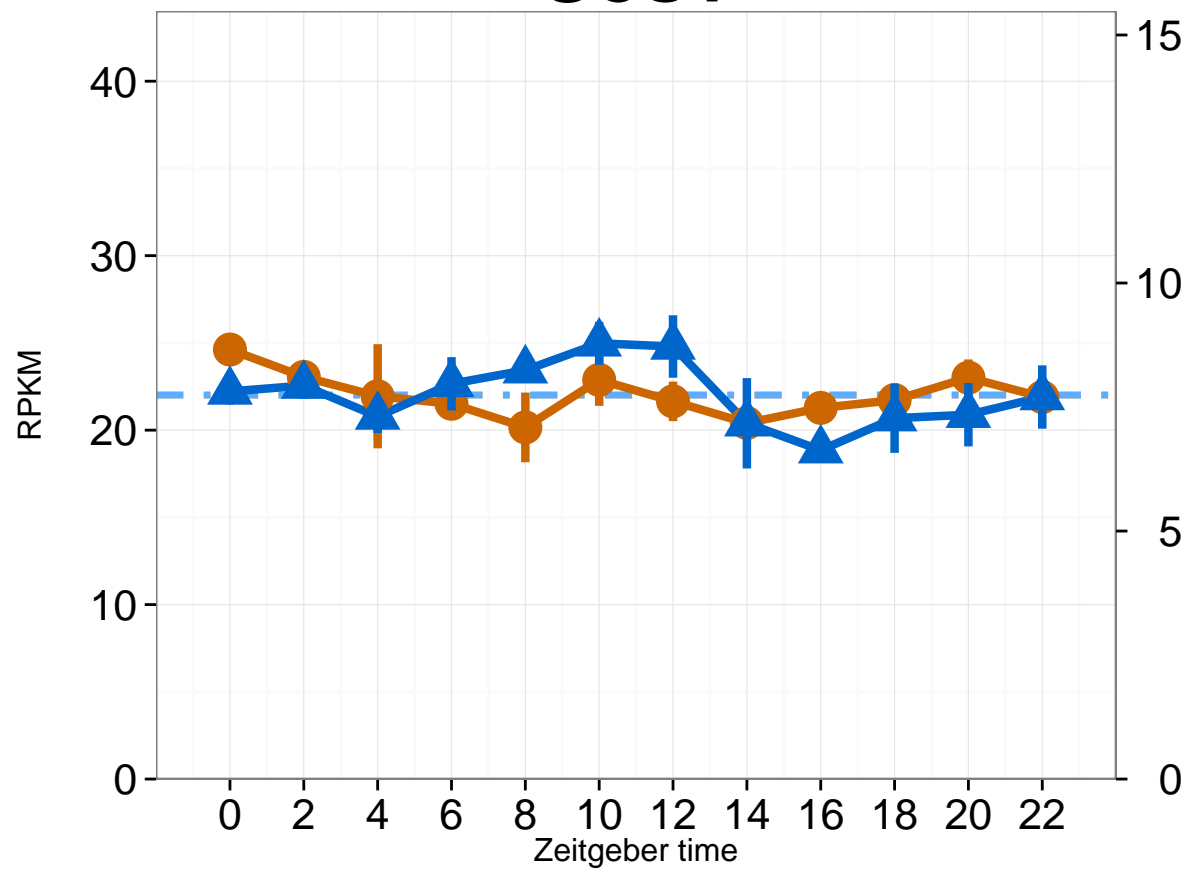

## Sos1

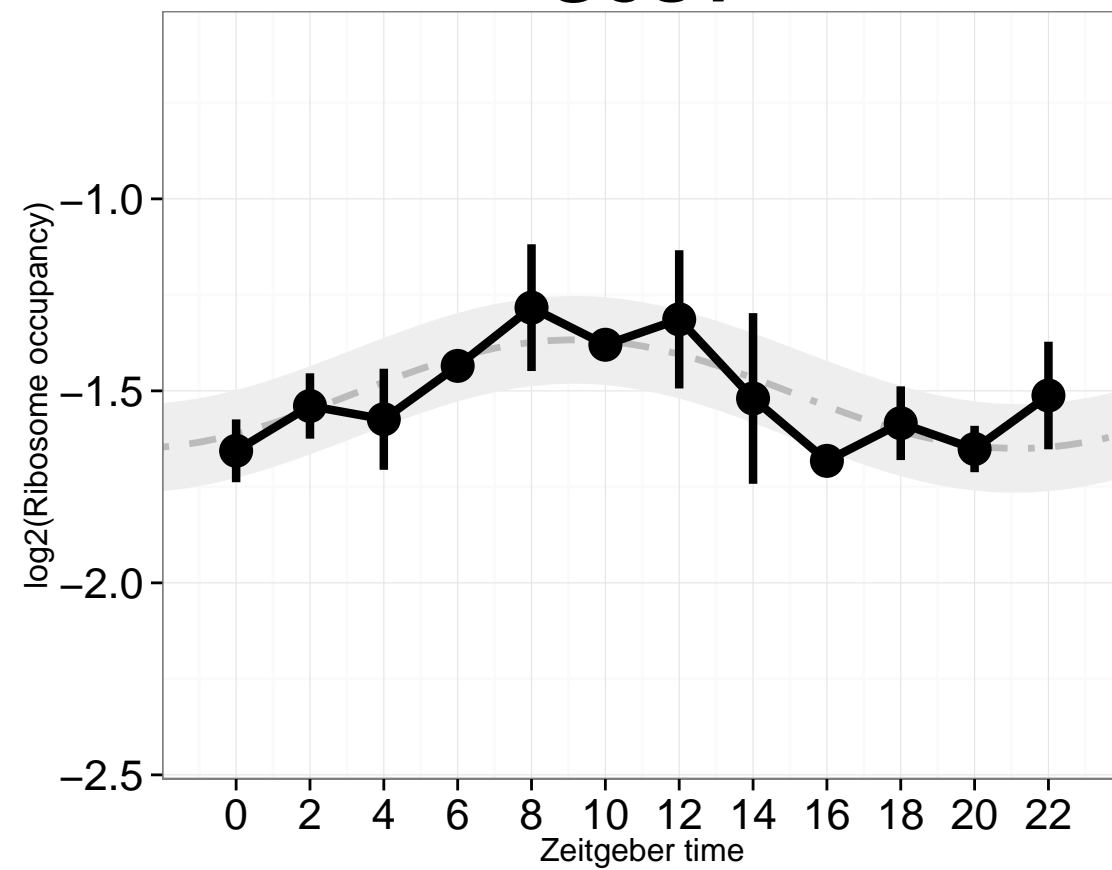

Supplement: Supplementary file 6054 [file 1]

## Papola

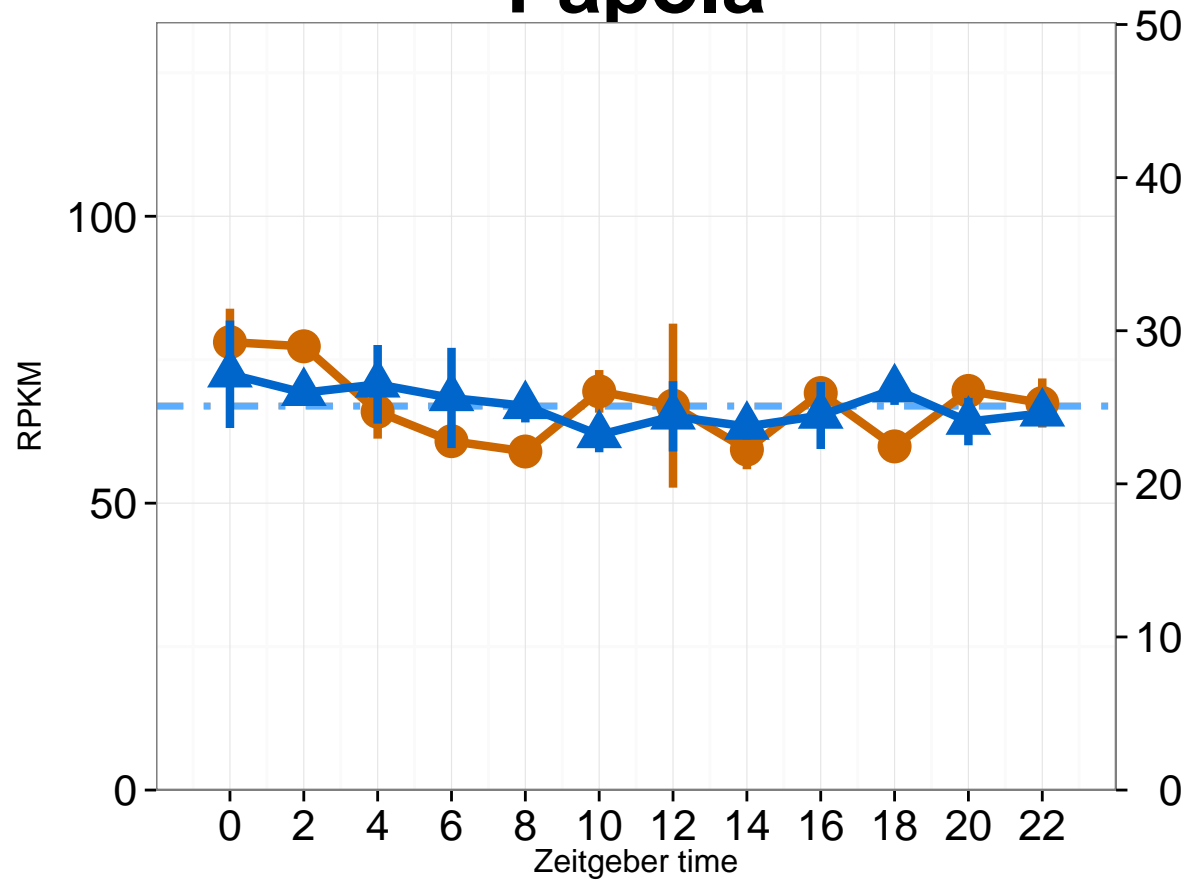

## Papola

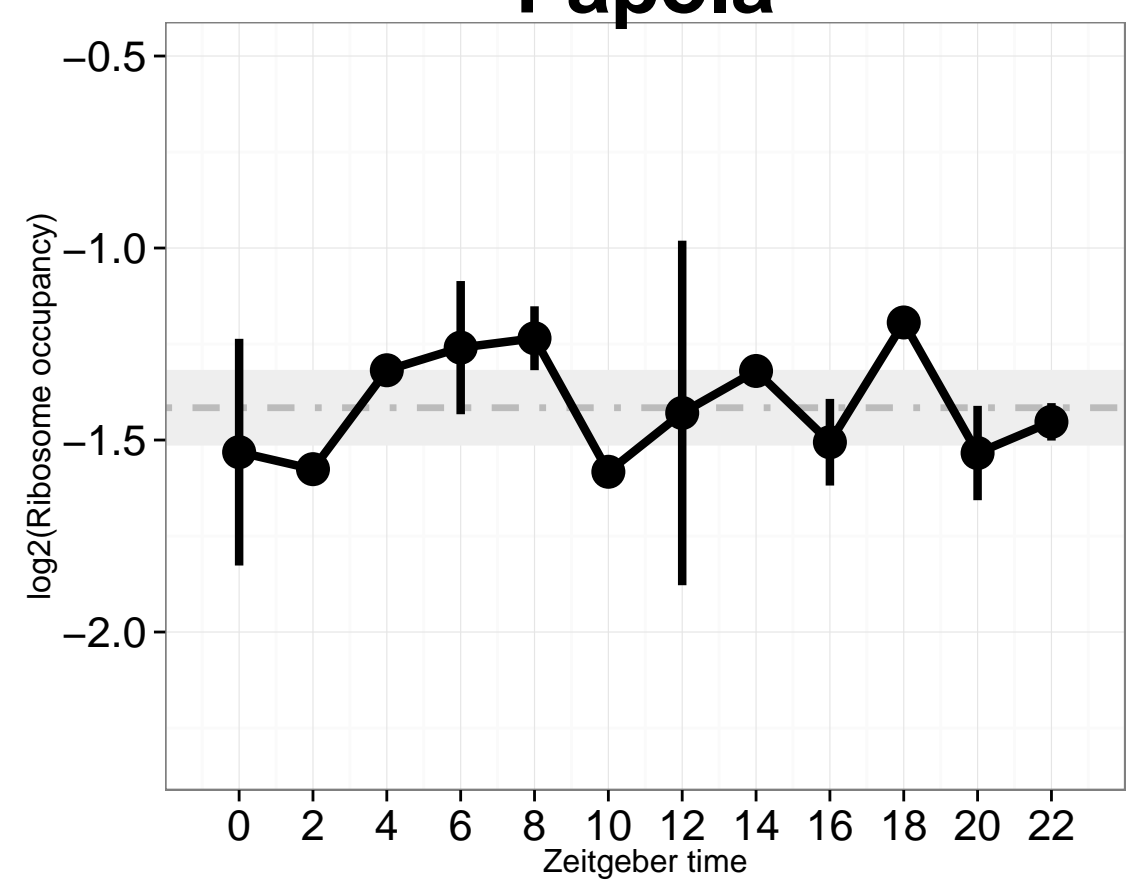

Supplement: Supplementary file 6055 [file 1]

## Ogfod1

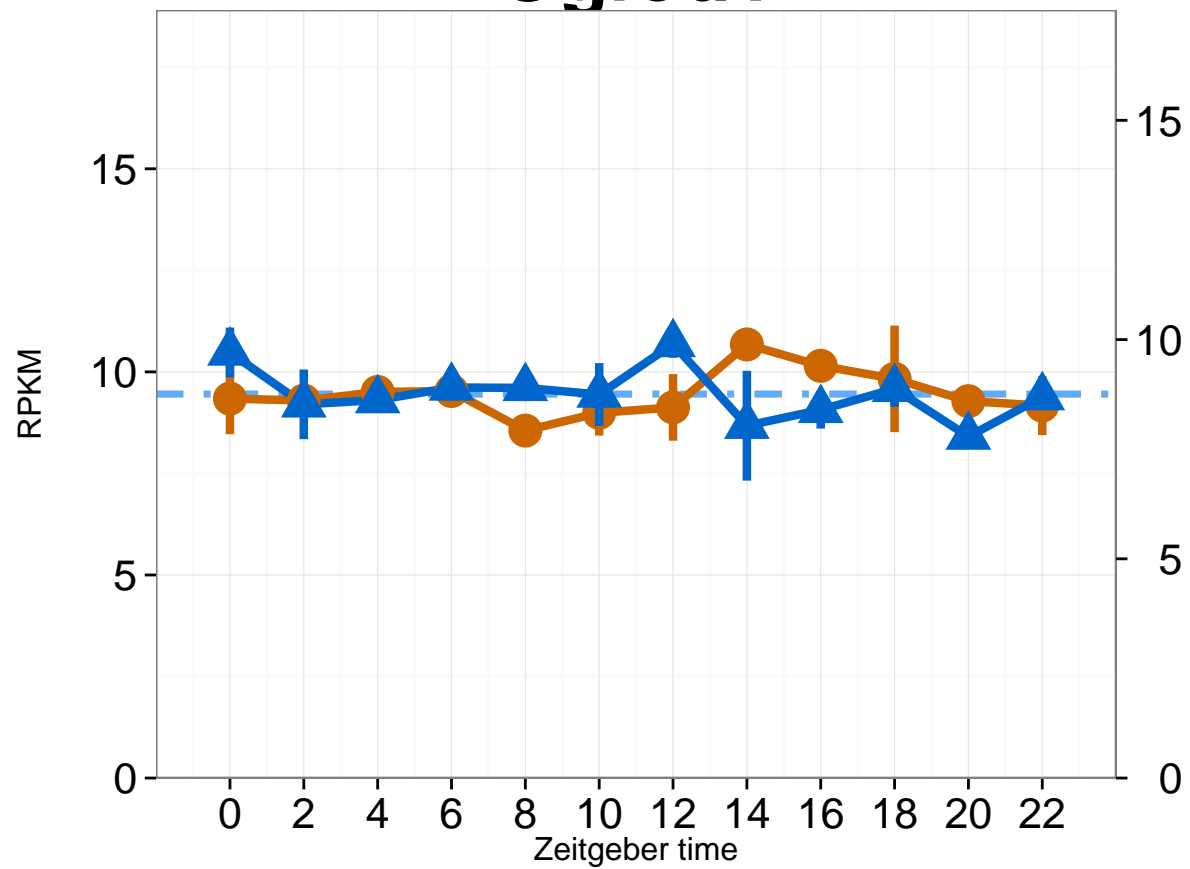

## Ogfod1

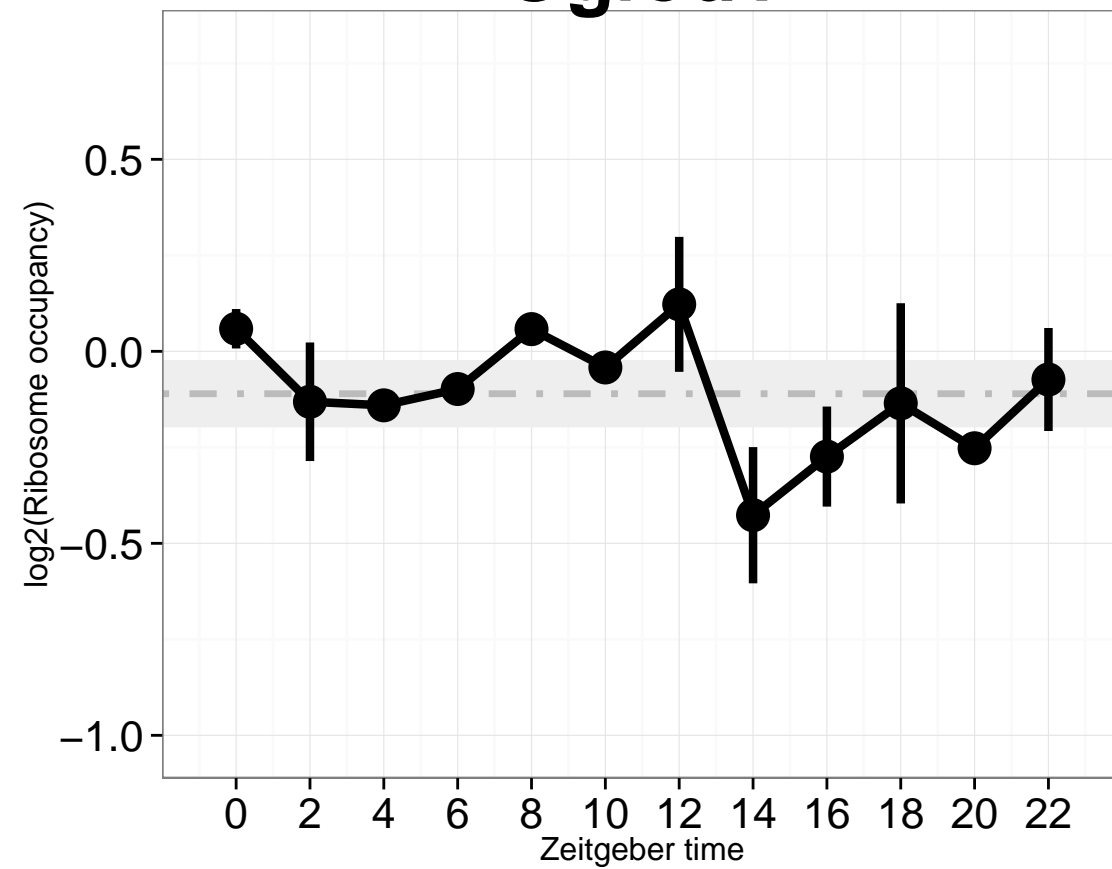

Supplement: Supplementary file 6056 [file 1]

# Rpl9

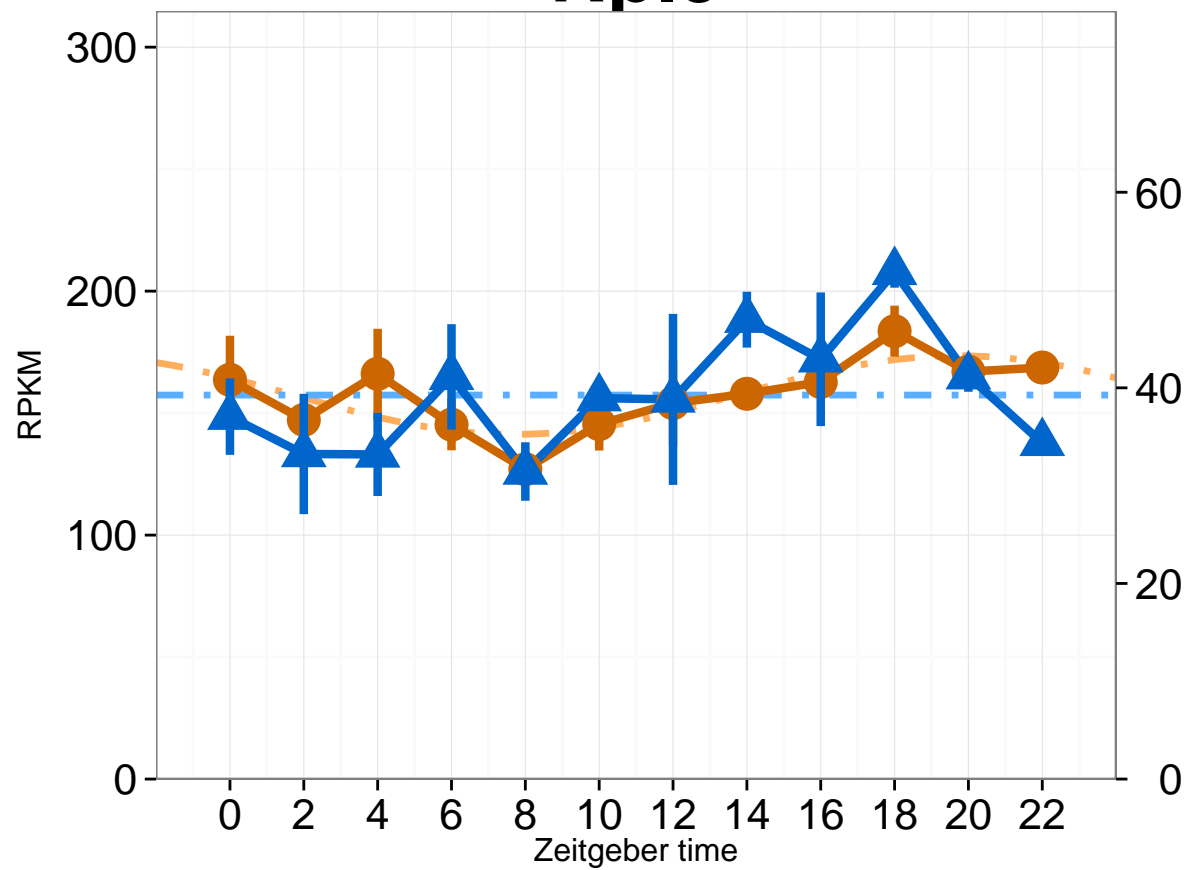

# Rpl9

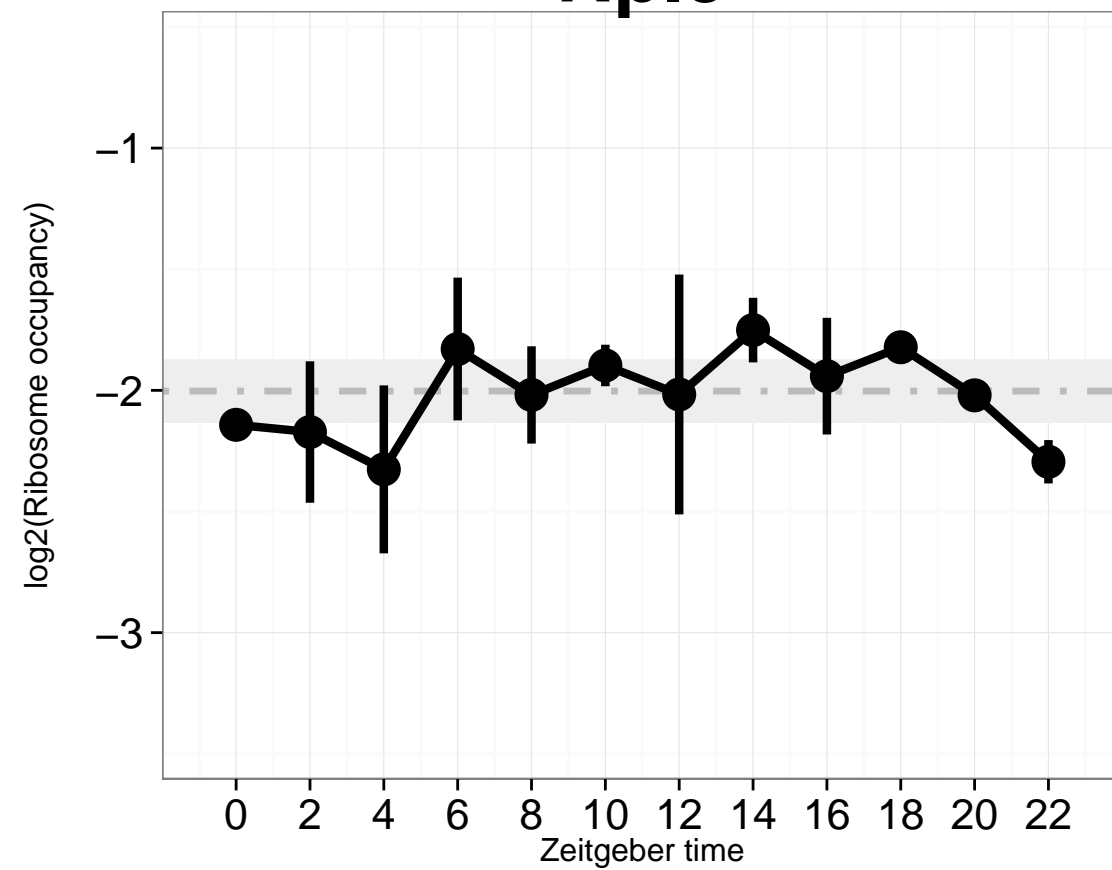

Supplement: Supplementary file 6057 [file 1]

# Ptpn12

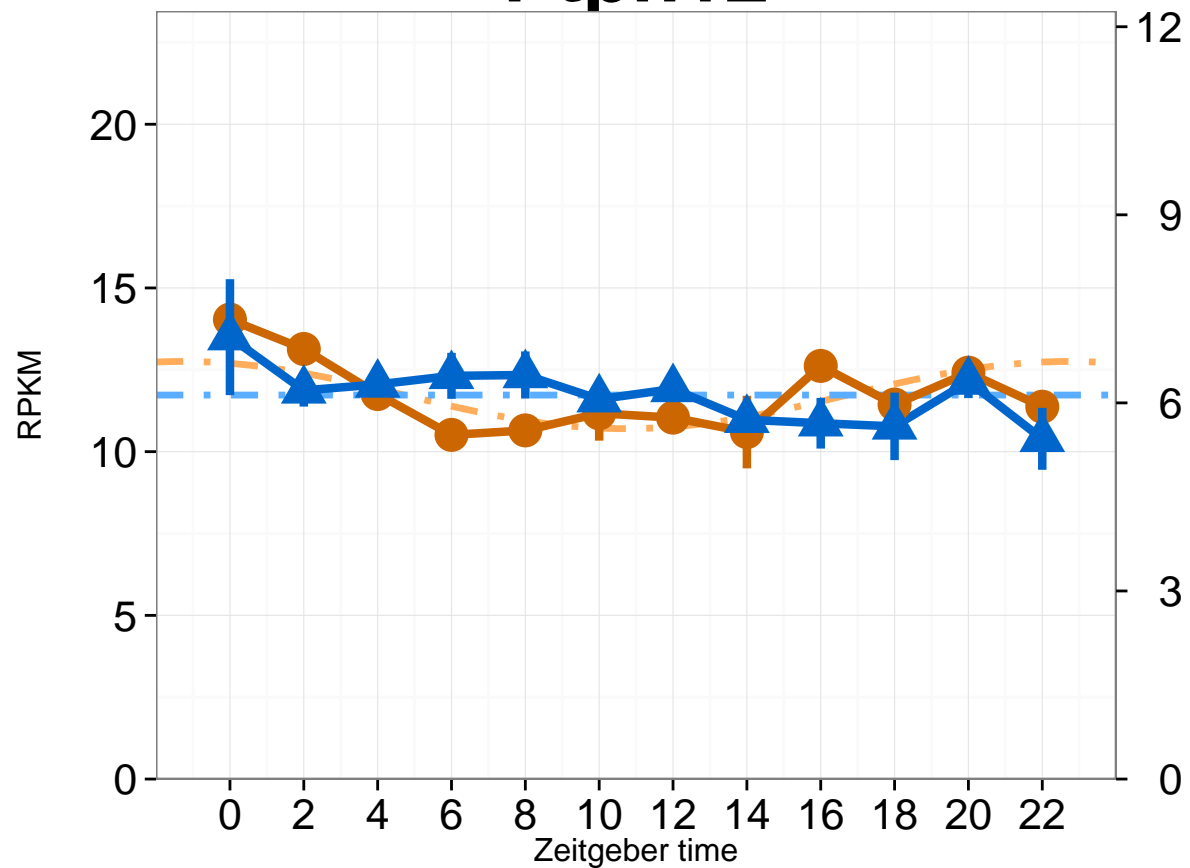

# Ptpn12

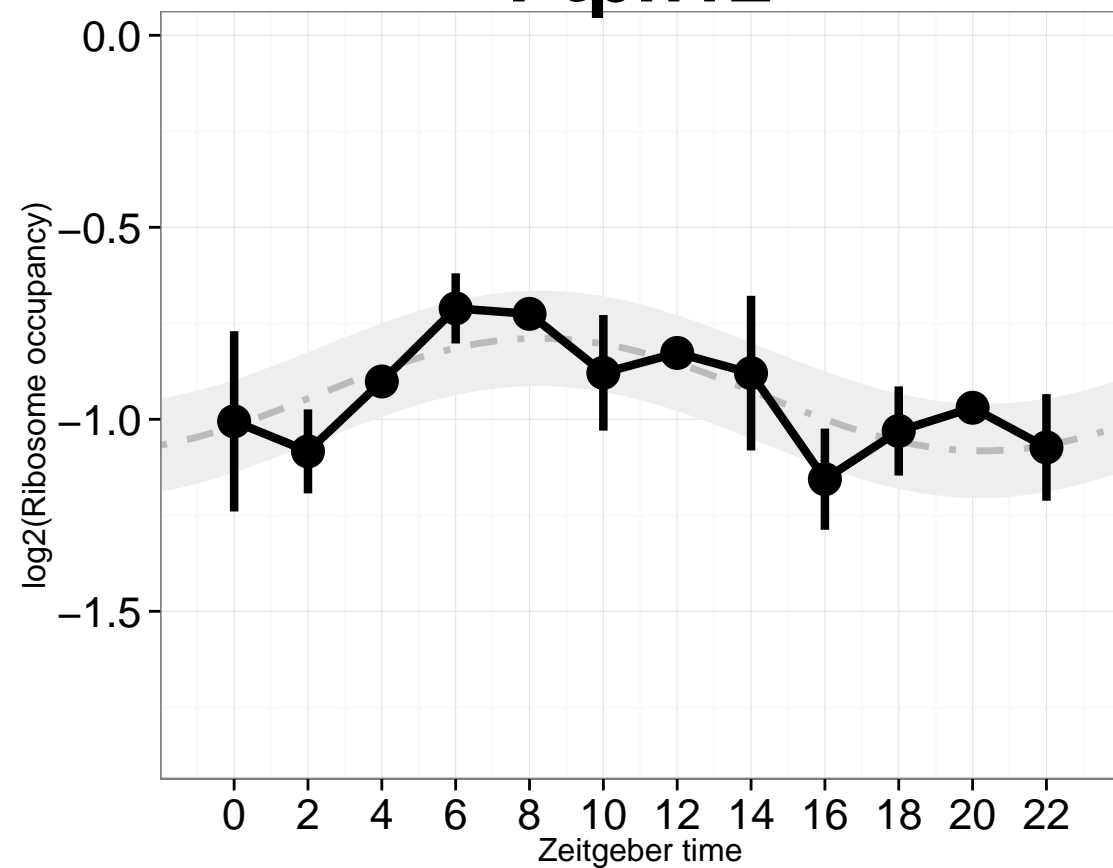

Supplement: Supplementary file 6058 [file 1]

## Zswim8

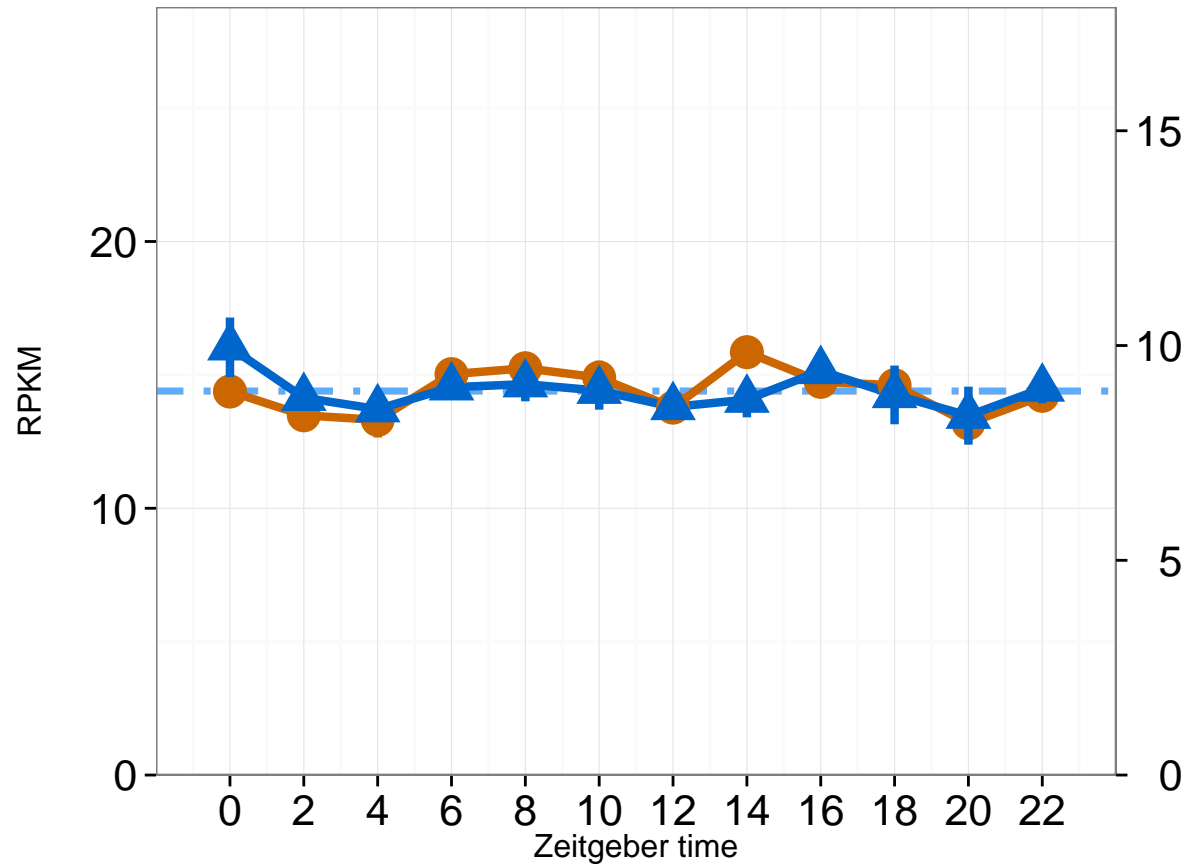

## Zswim8

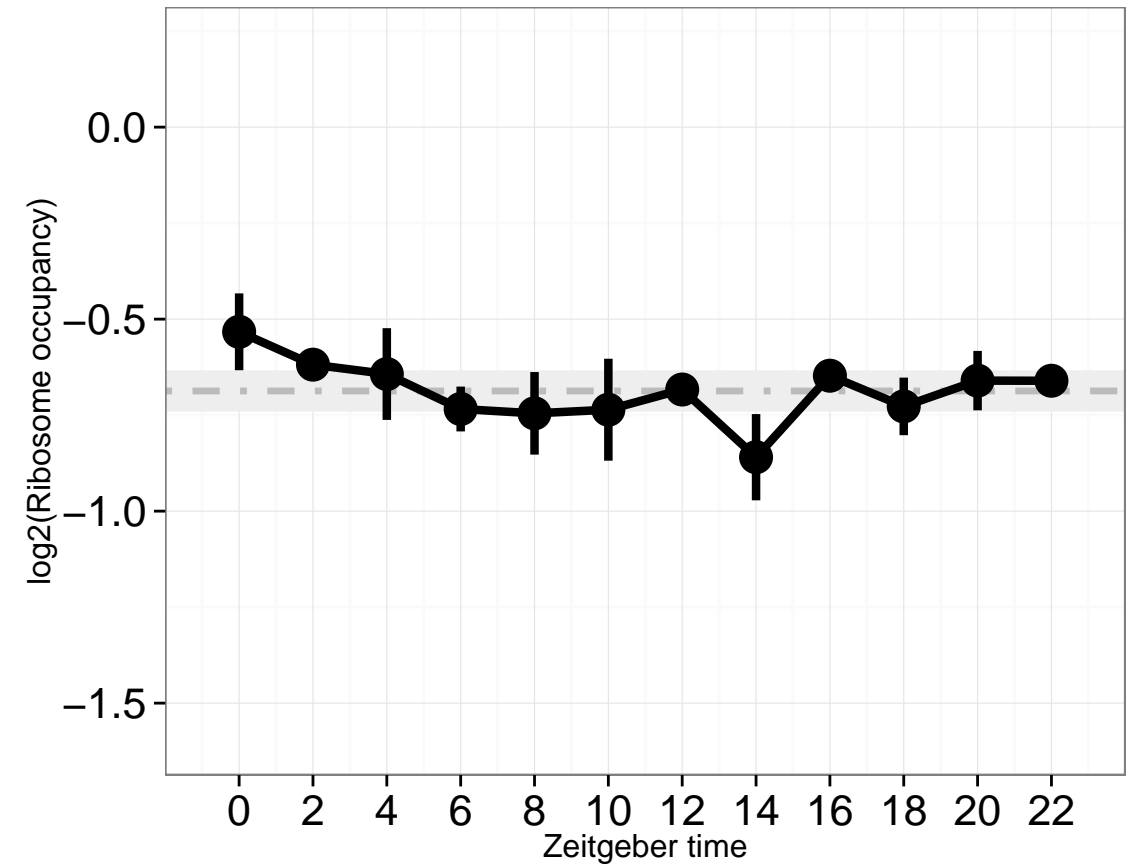

Supplement: Supplementary file 6059 [file 1]

## Neil2

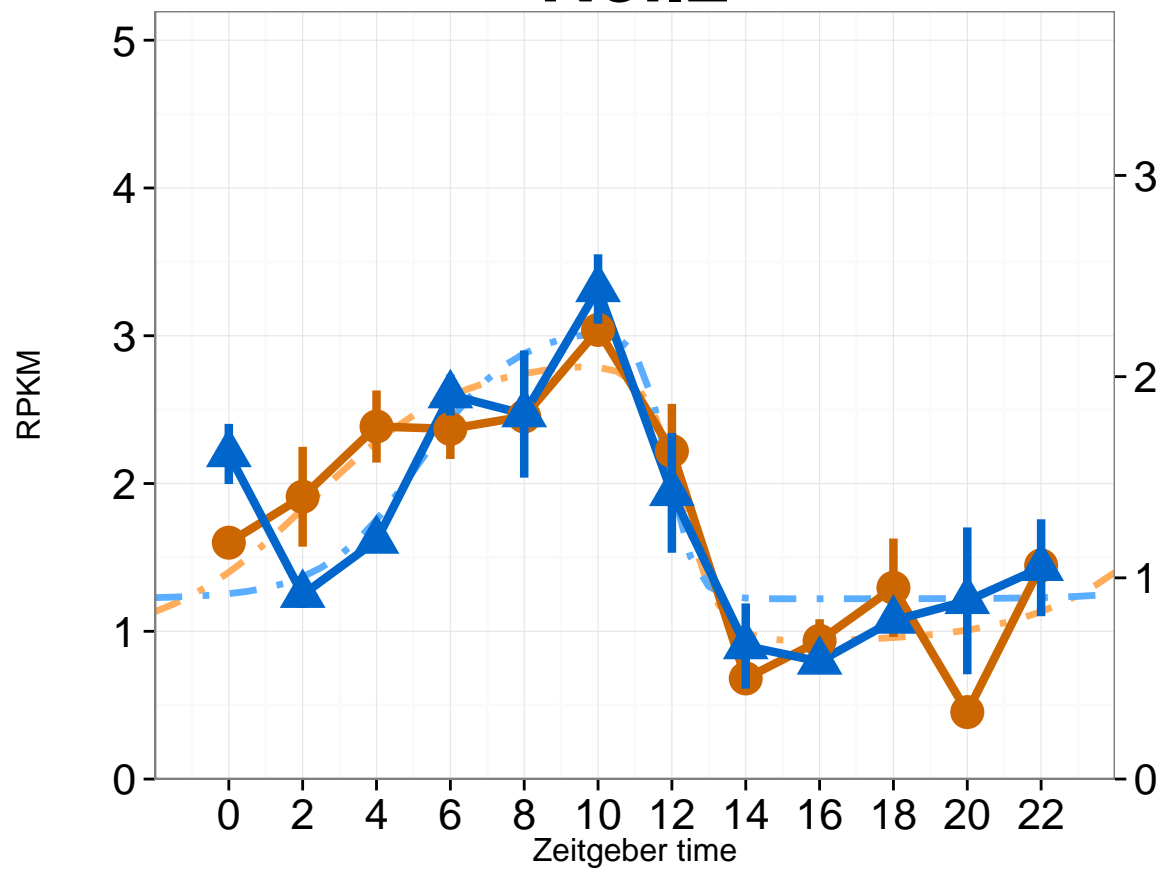

## Neil2

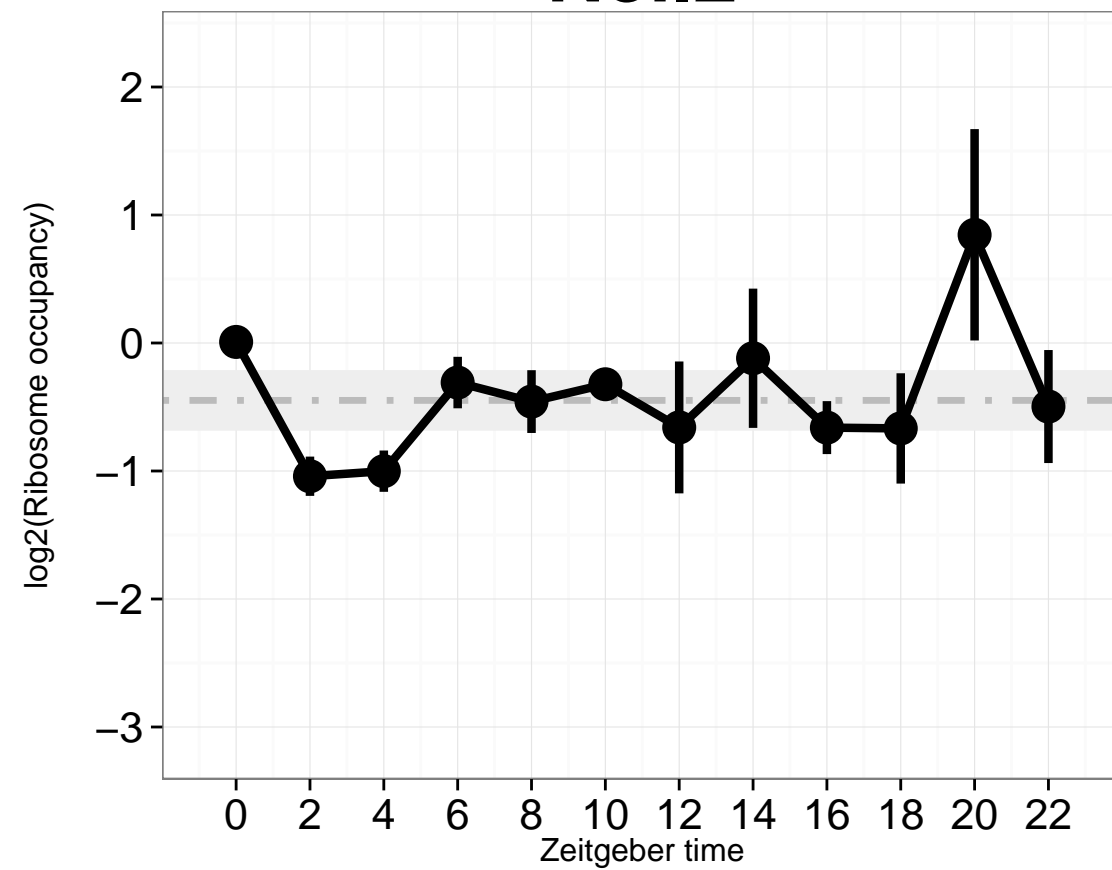

Supplement: Supplementary file 6060 [file 1]

# Dact1

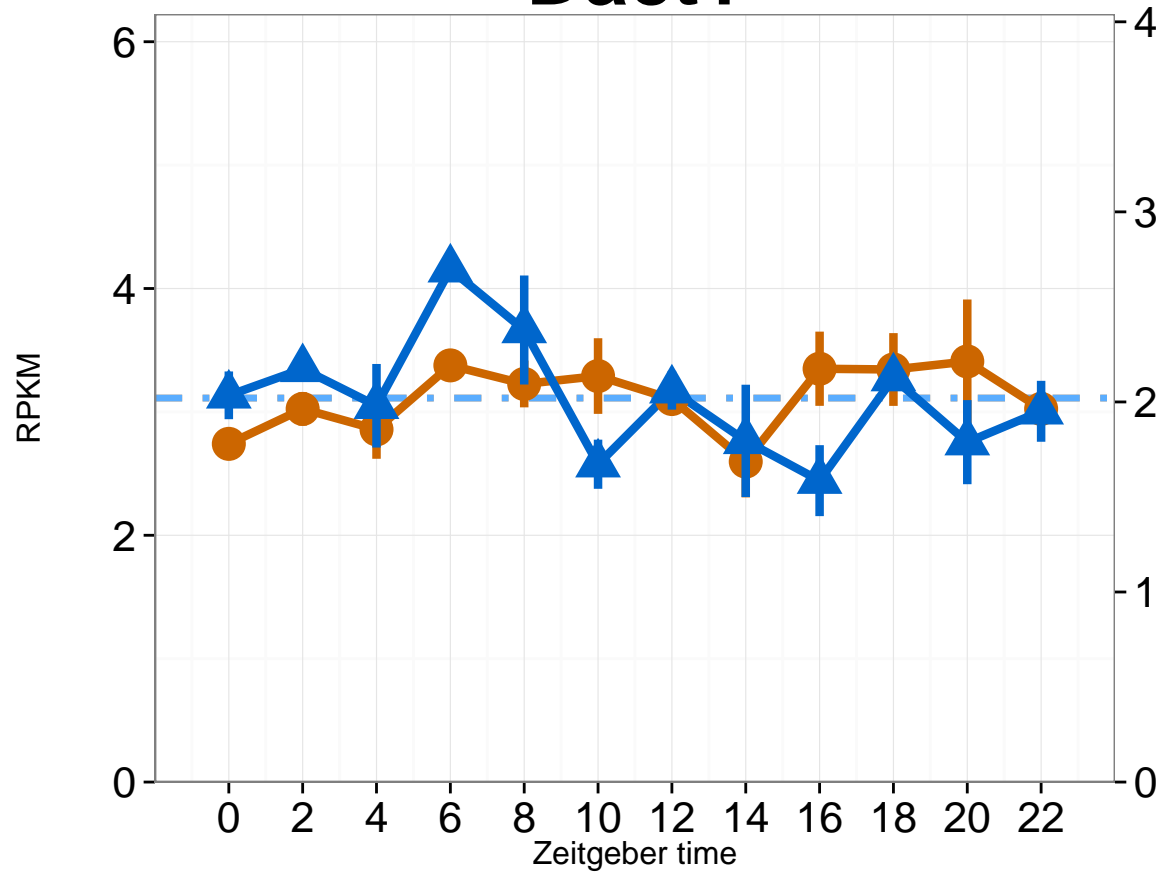

# Dact1

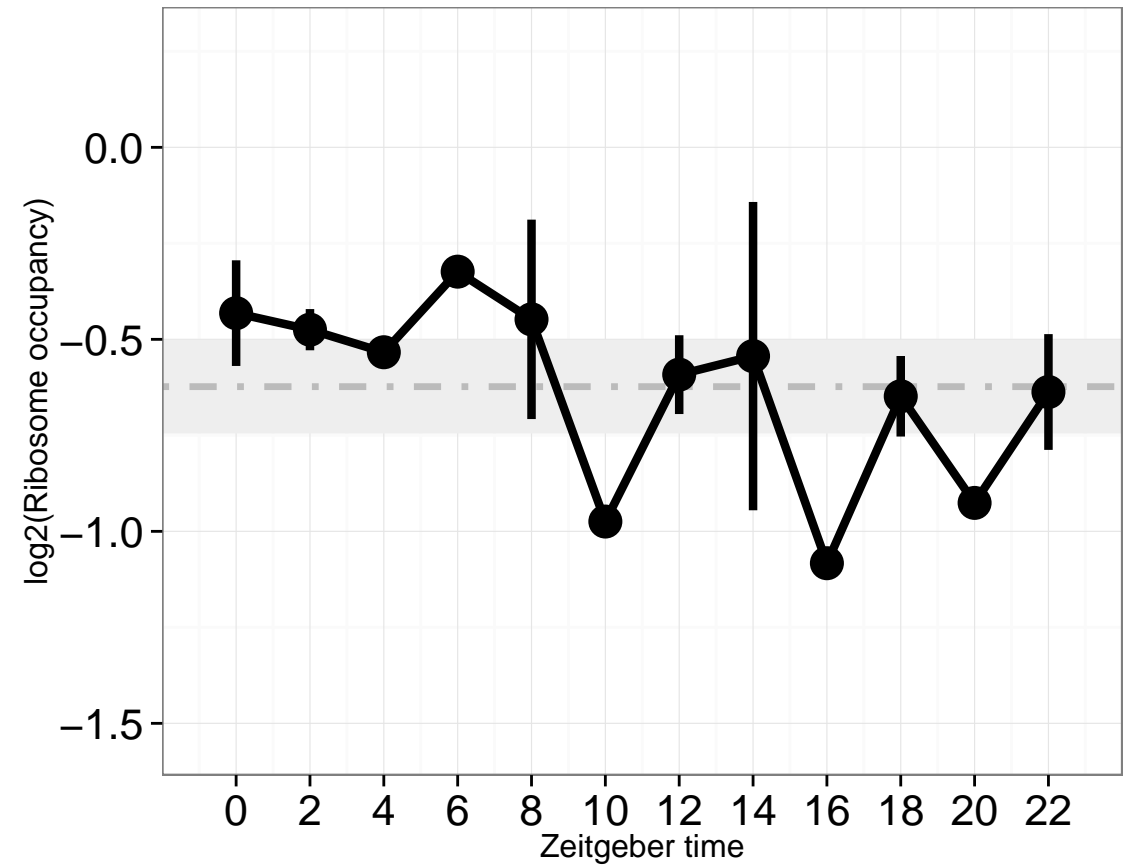

Supplement: Supplementary file 6061 [file 1]

# Tfb2m

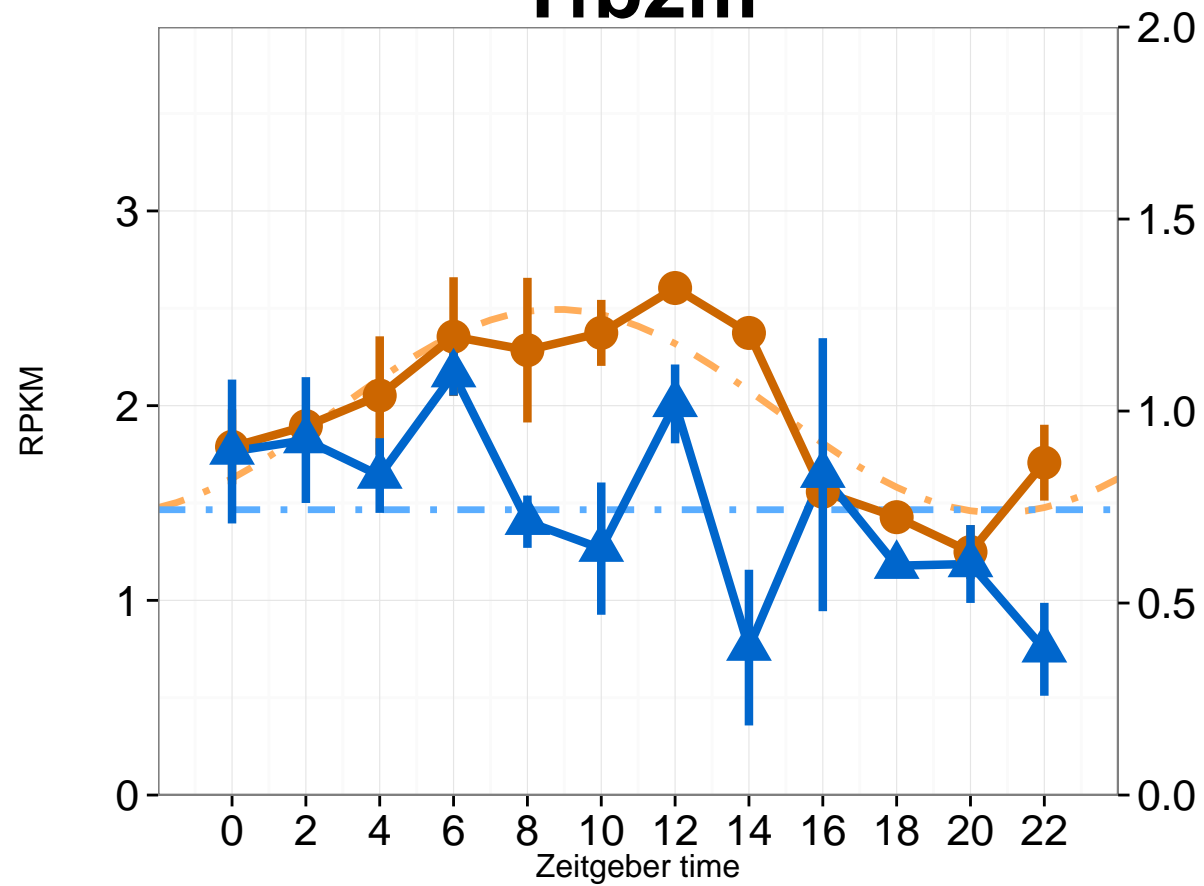

# Tfb2m

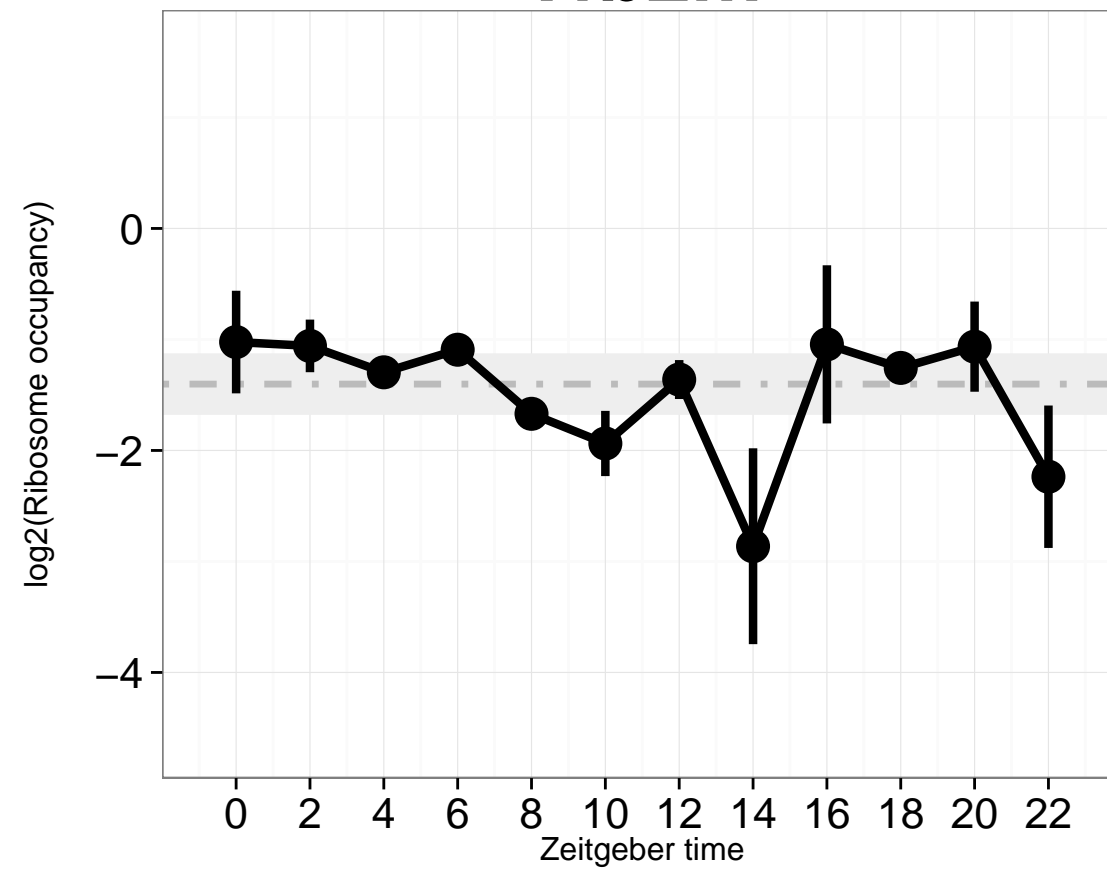

Supplement: Supplementary file 6062 [file 1]

## Aars2

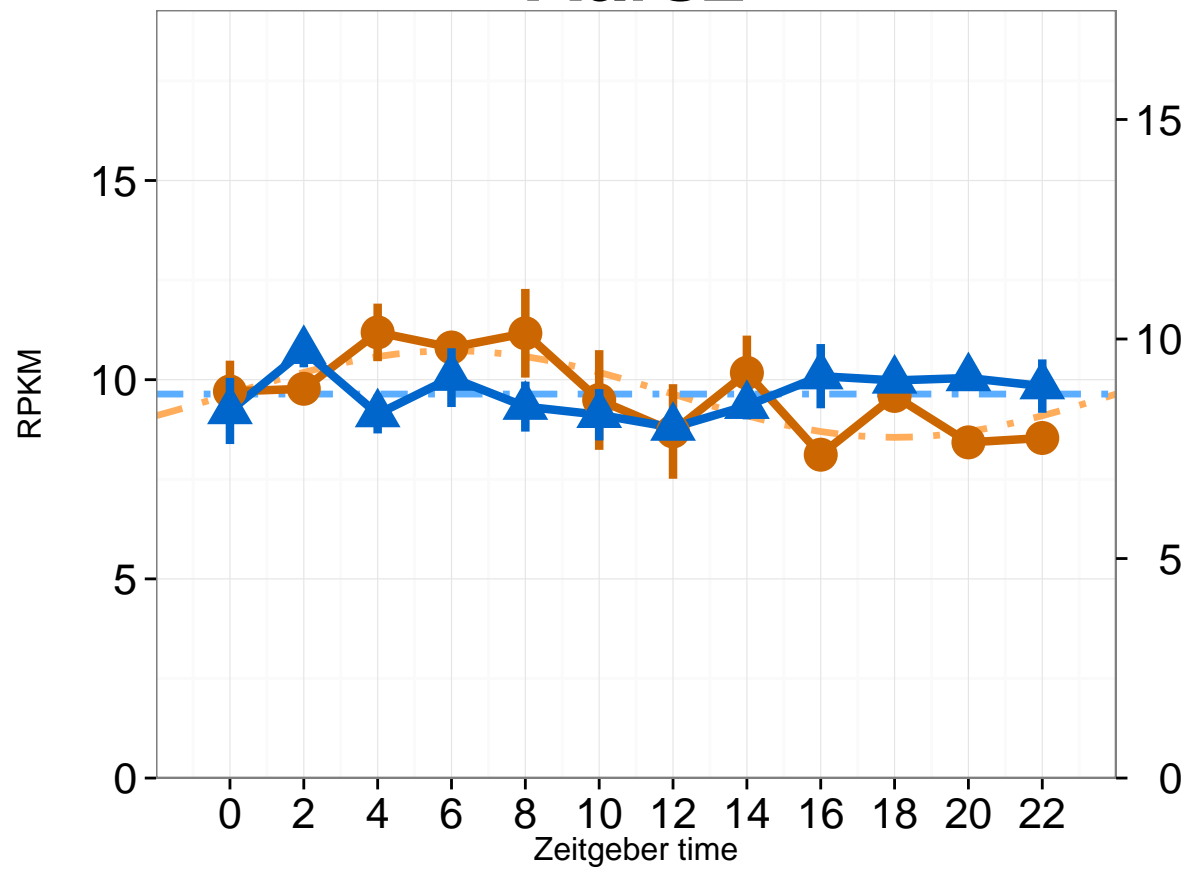

## Aars2

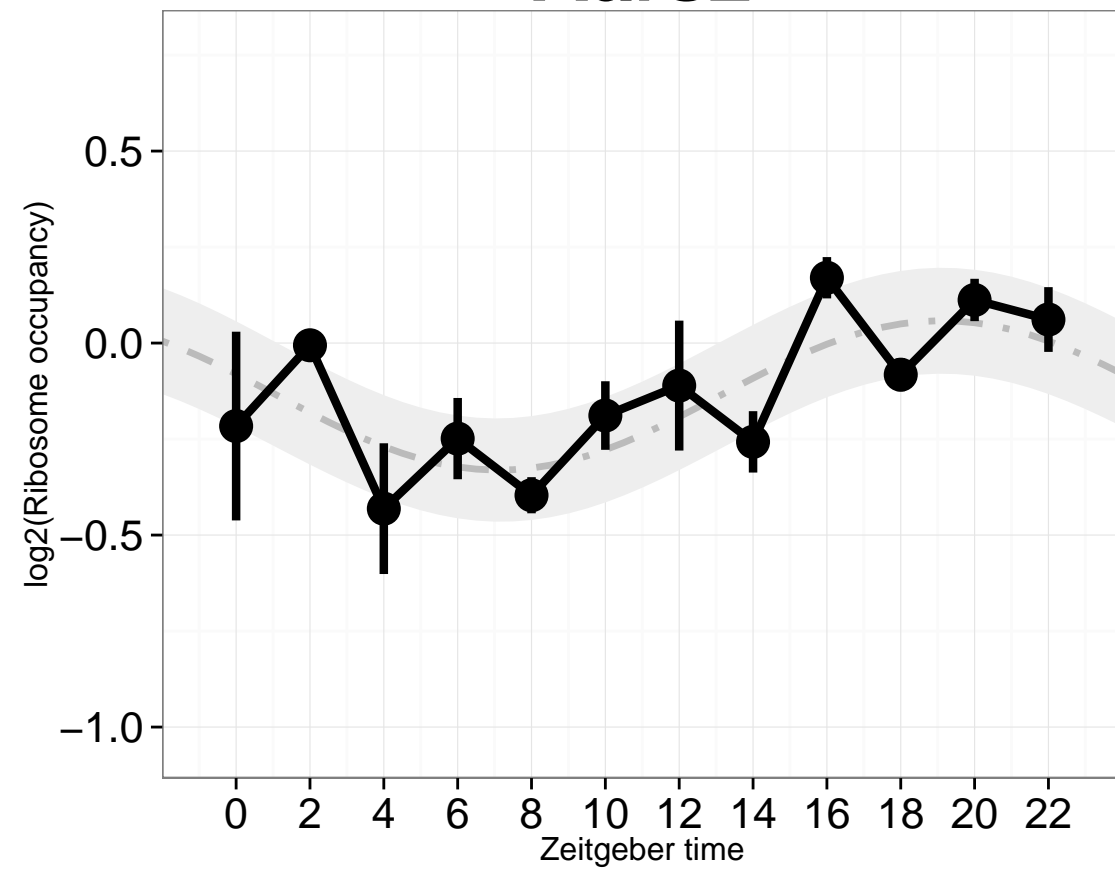

Supplement: Supplementary file 6063 [file 1]

## Fbln5

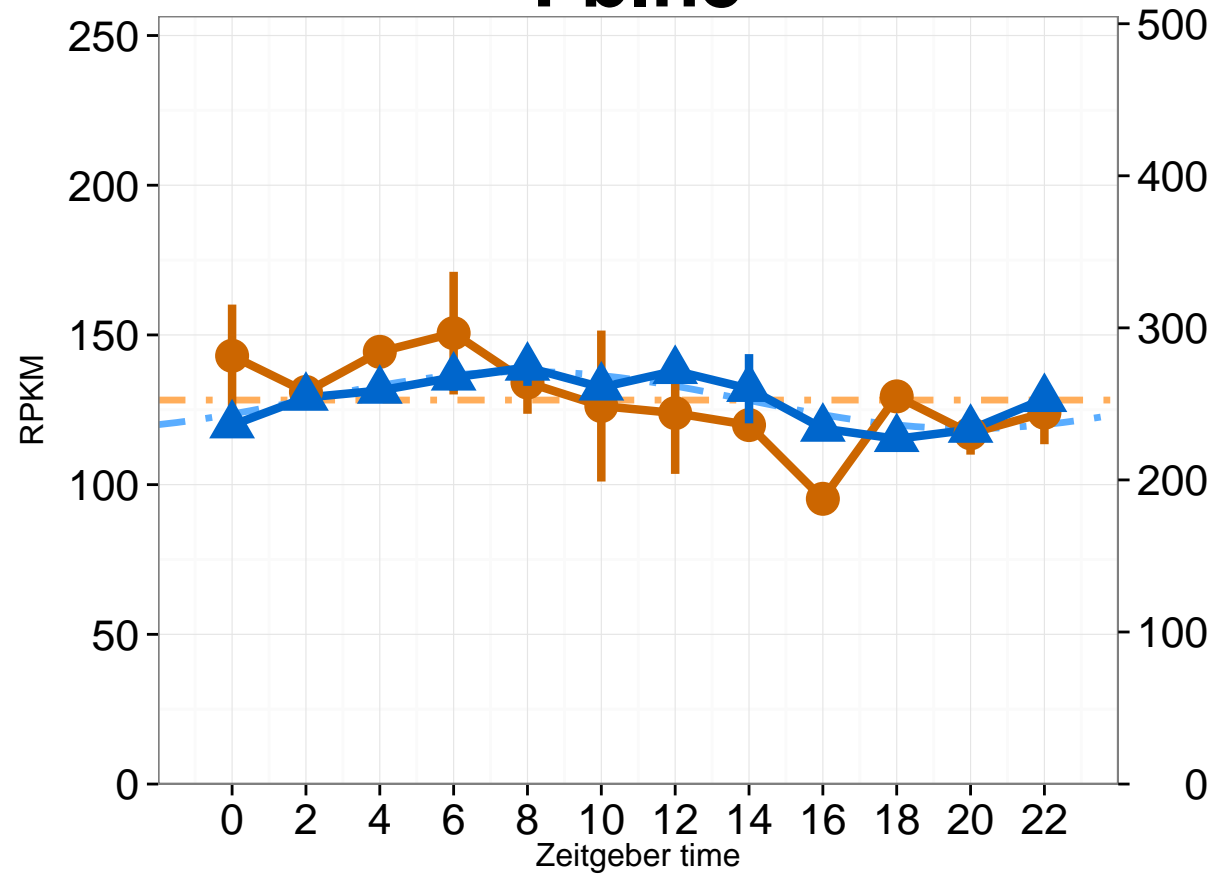

## Fbln5

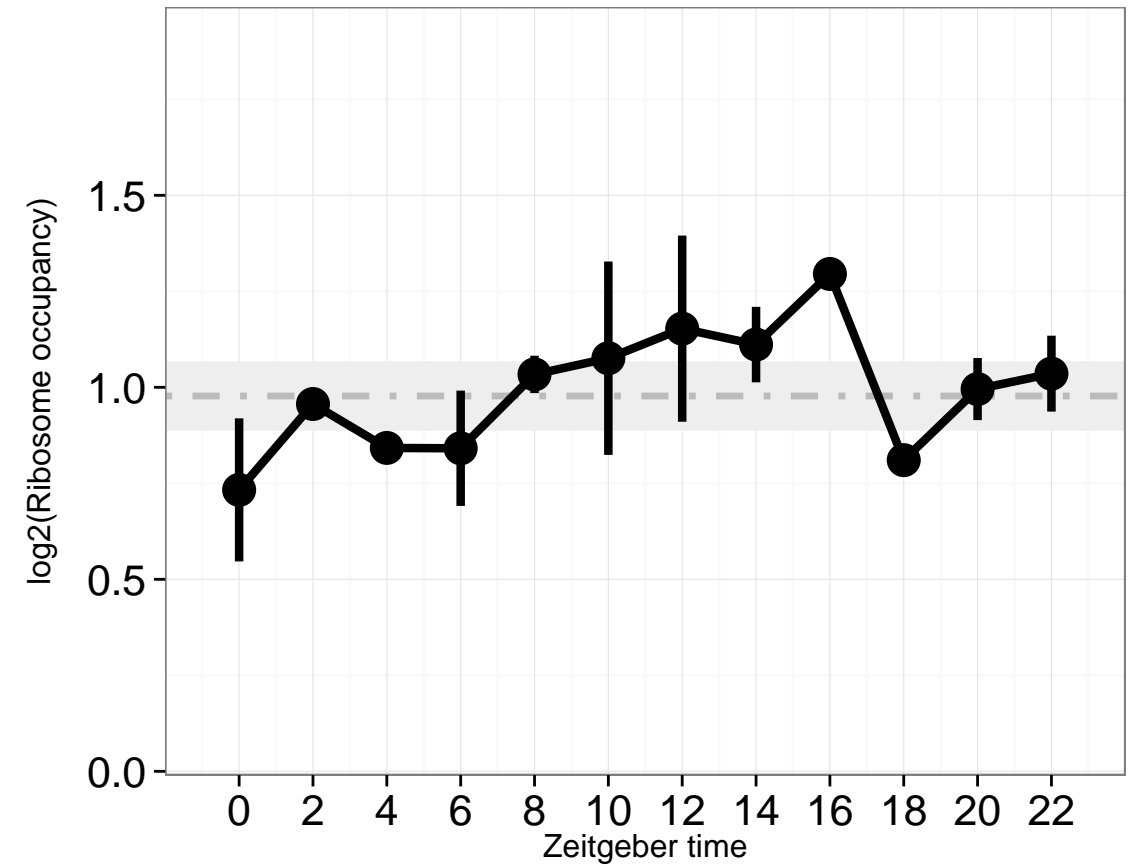

Supplement: Supplementary file 6064 [file 1]

# Ndufa11

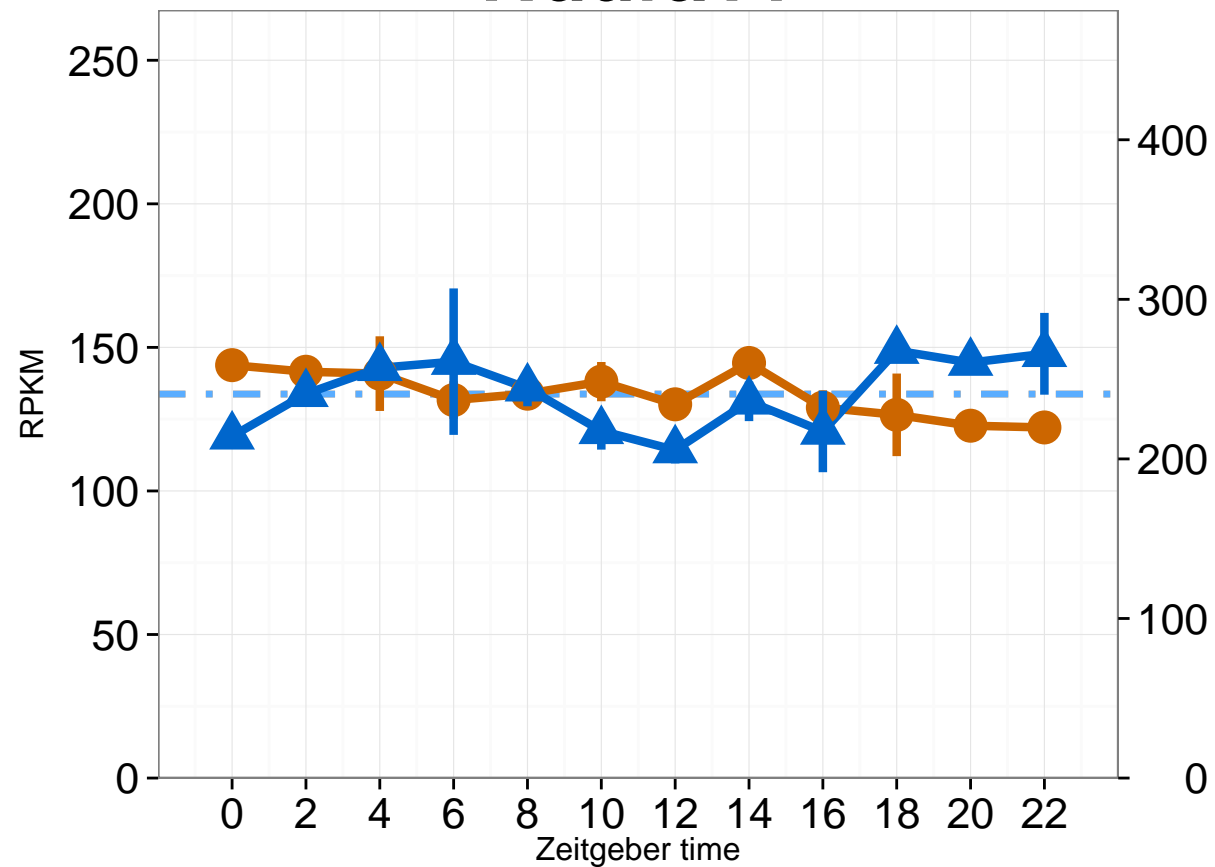

# Ndufa11

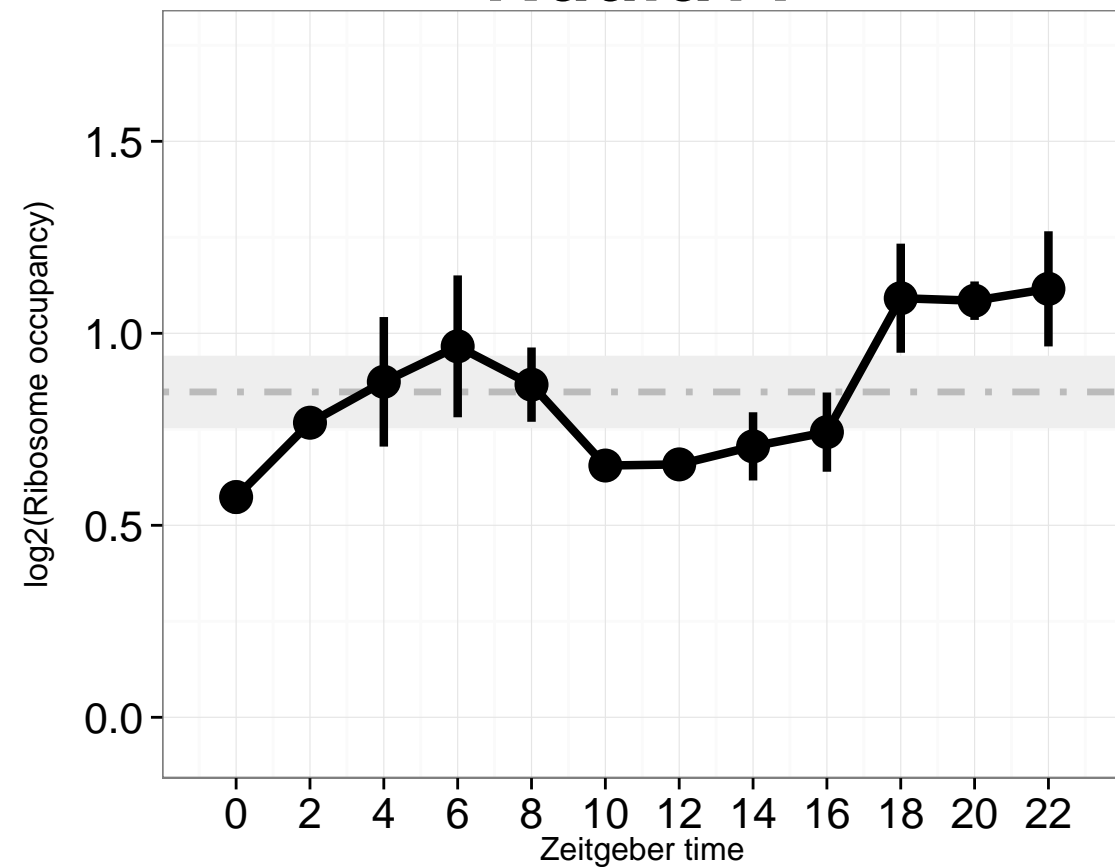

Supplement: Supplementary file 6065 [file 1]

# Zfp687

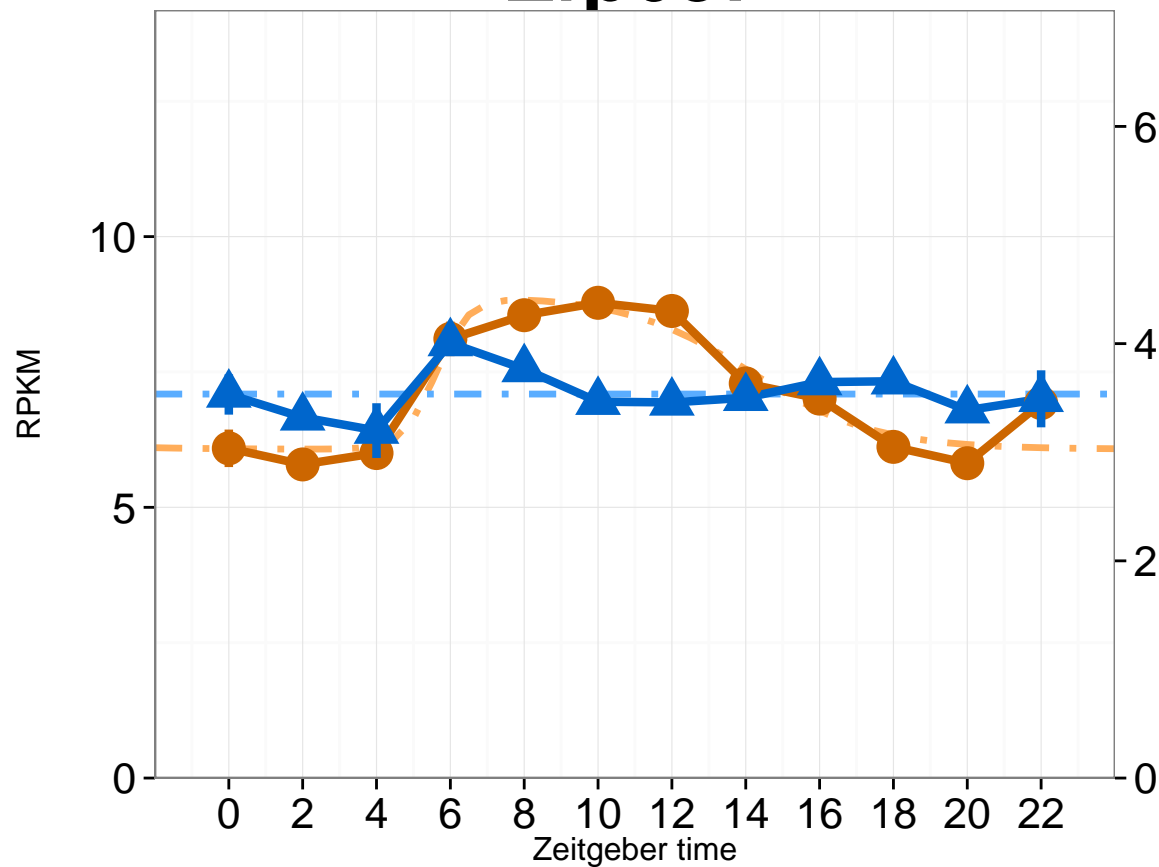

# Zfp687

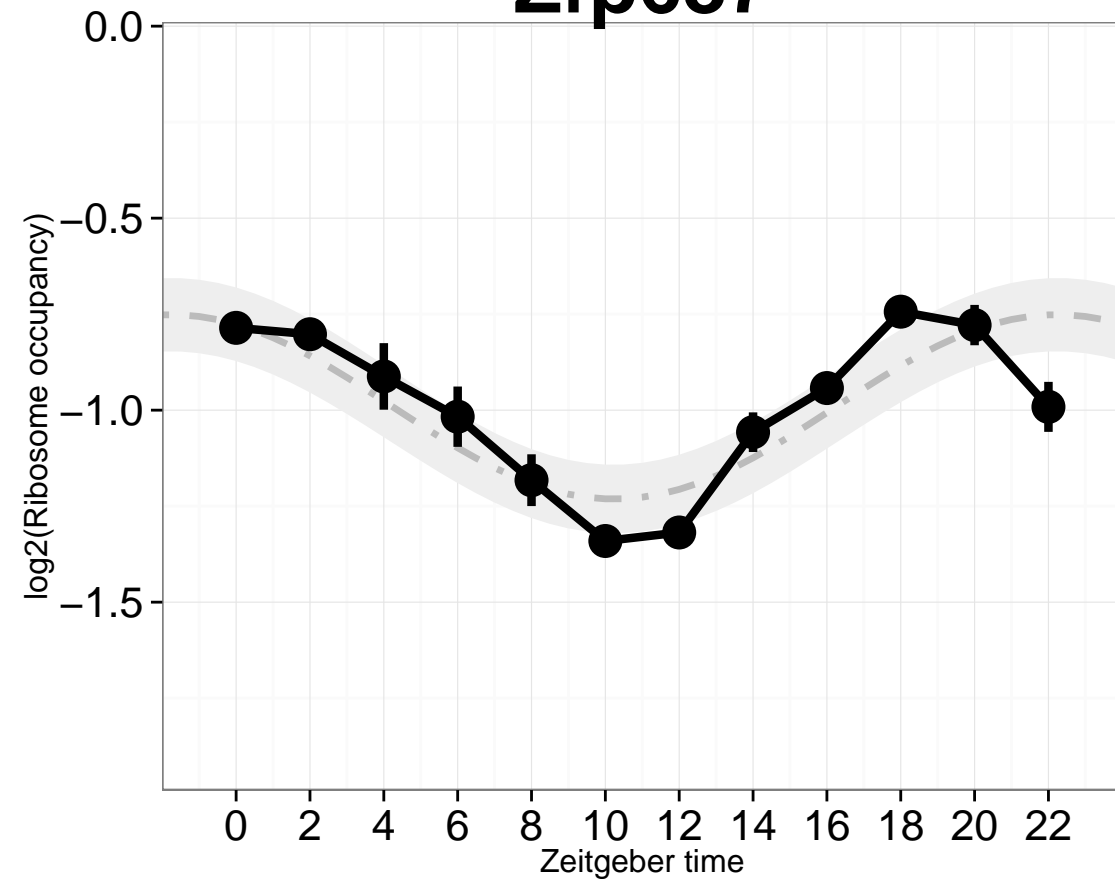

Supplement: Supplementary file 6066 [file 1]

# Hat1

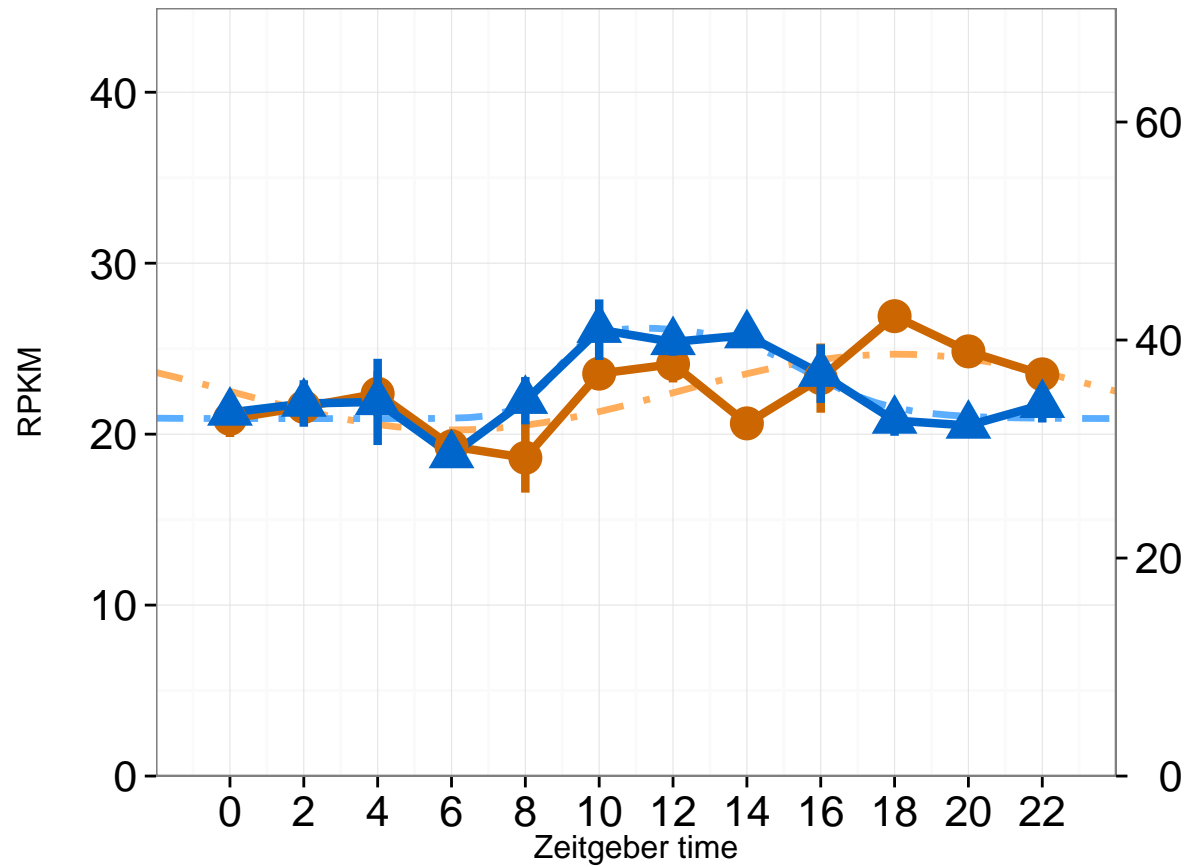

# Hat1

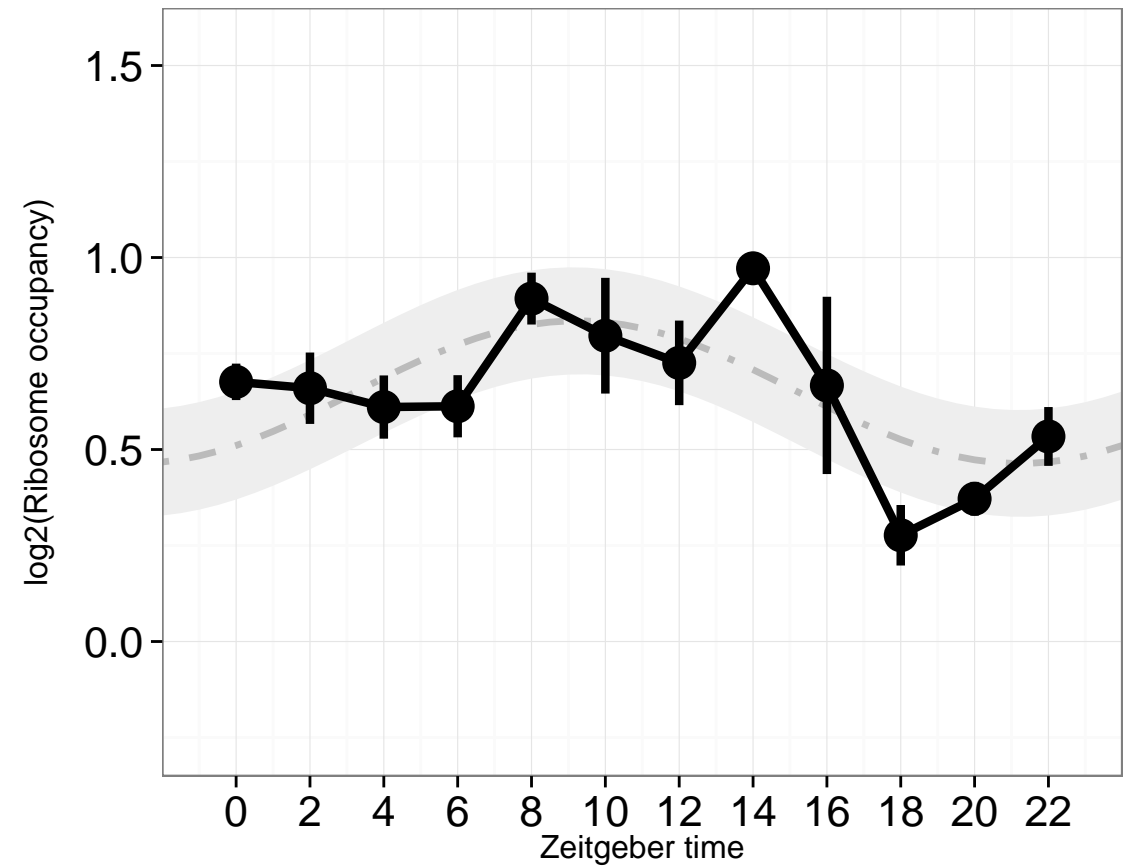

Supplement: Supplementary file 6067 [file 1]

## Kidins220

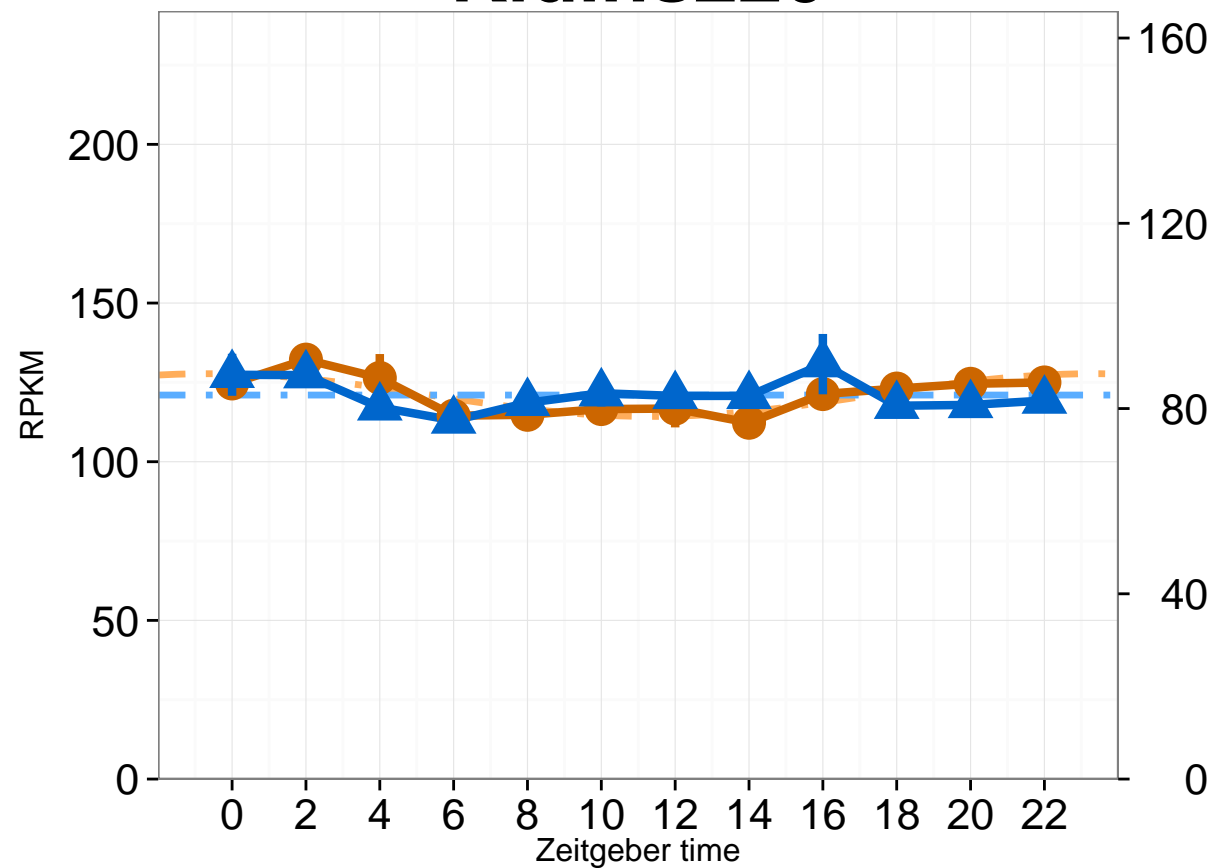

## Kidins220

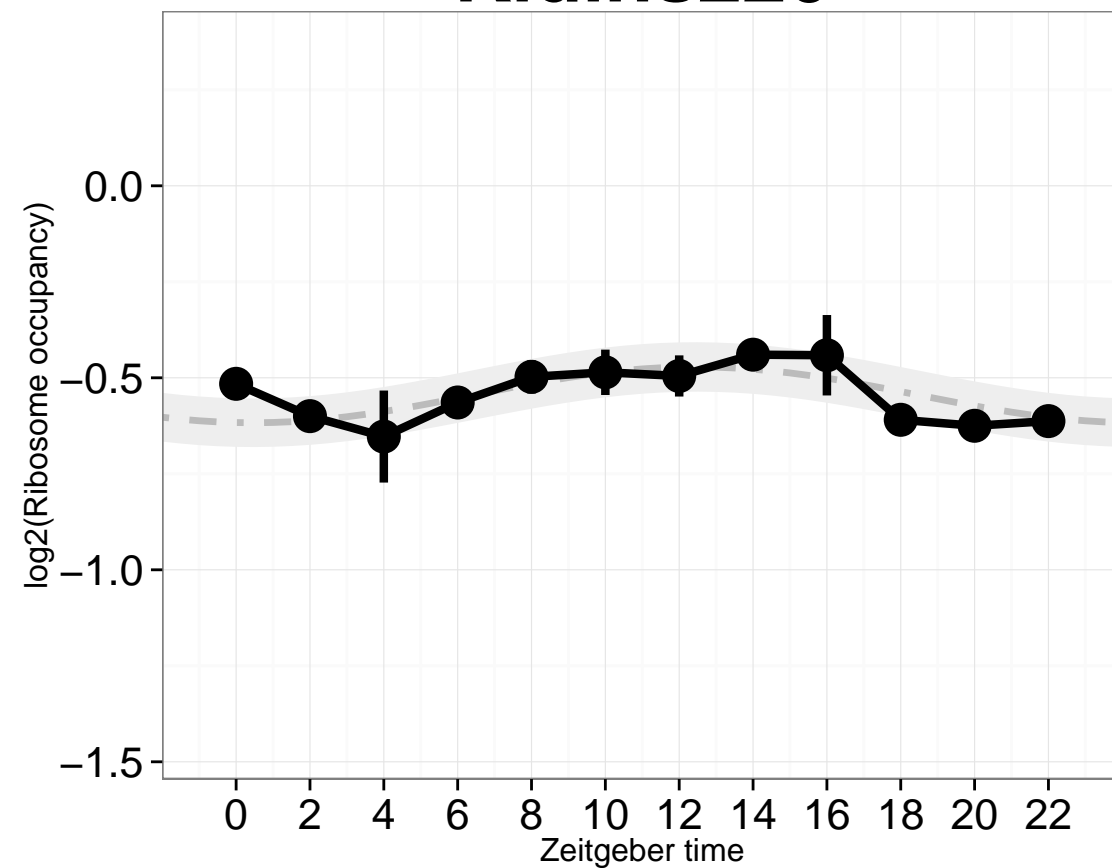

Supplement: Supplementary file 6068 [file 1]

## Xab2

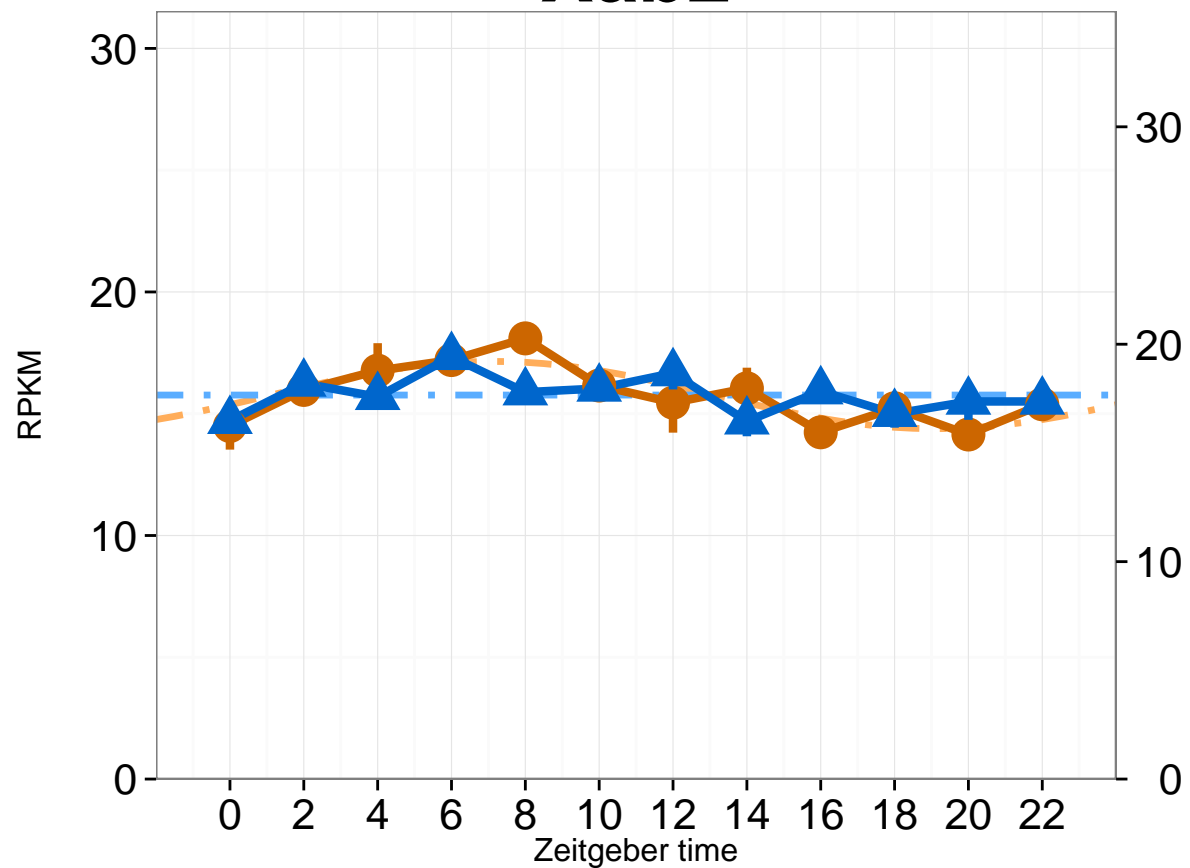

## Xab2

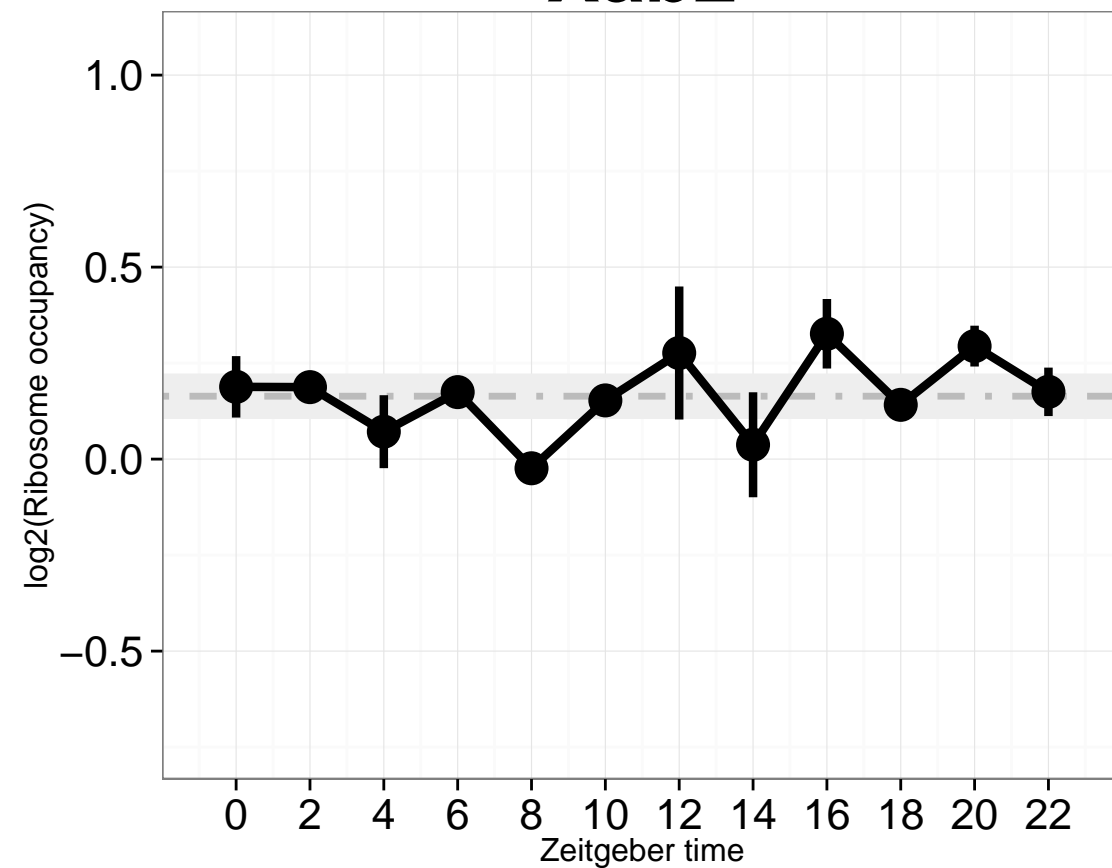

Supplement: Supplementary file 6069 [file 1]

## Snx14

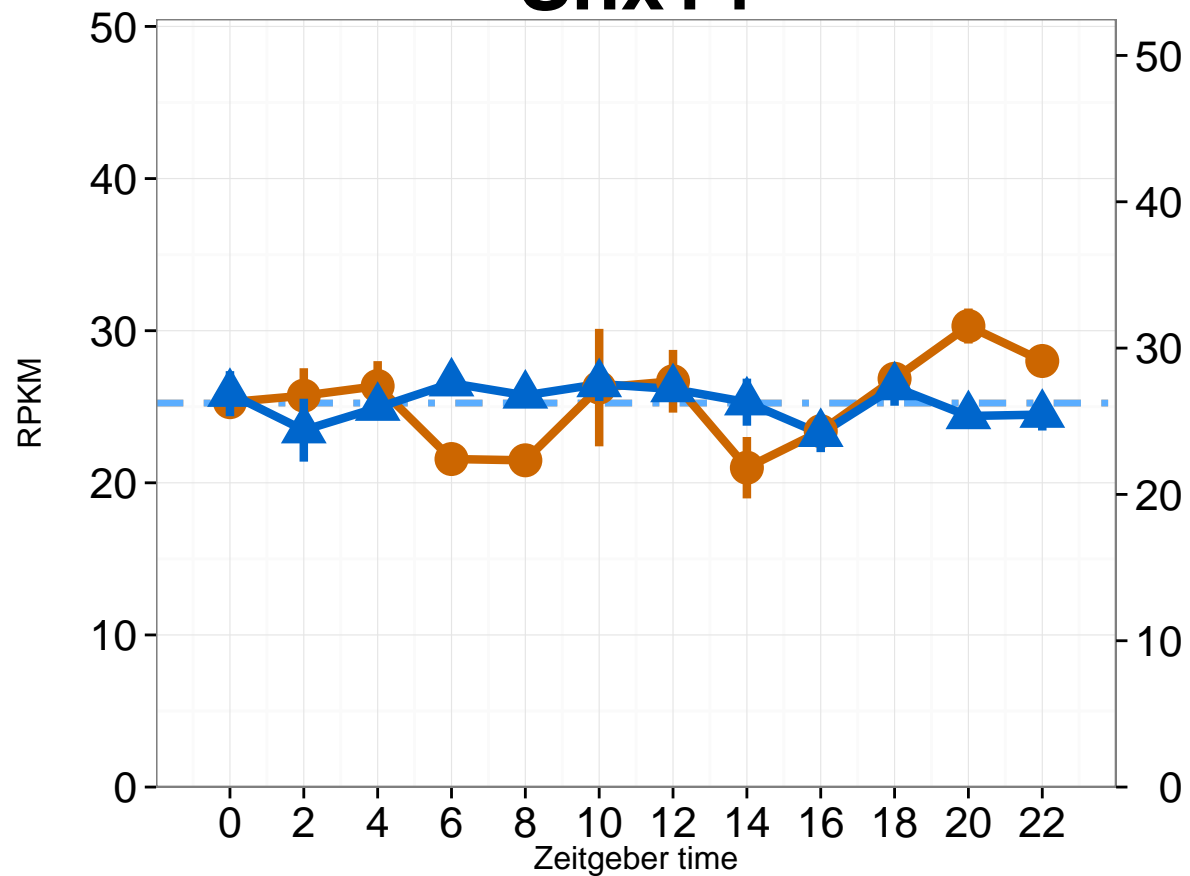

## Snx14

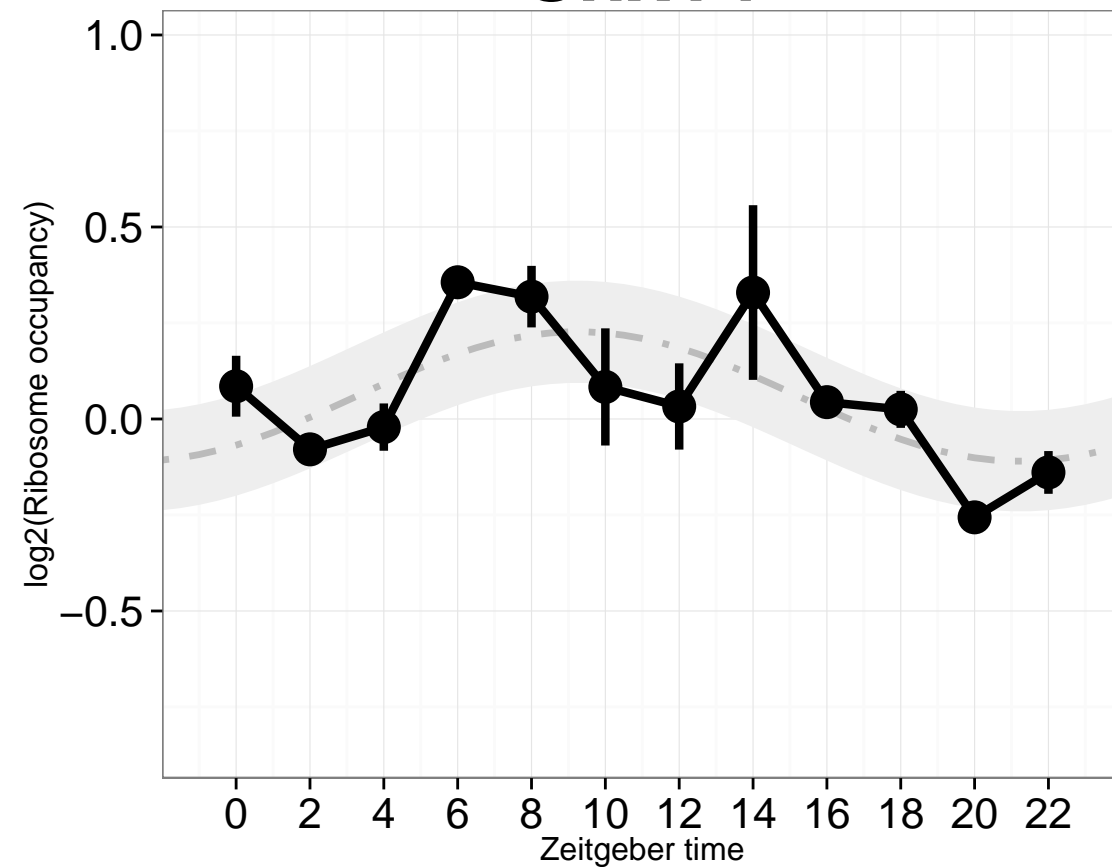

Supplement: Supplementary file 6070 [file 1]

# Zfp59

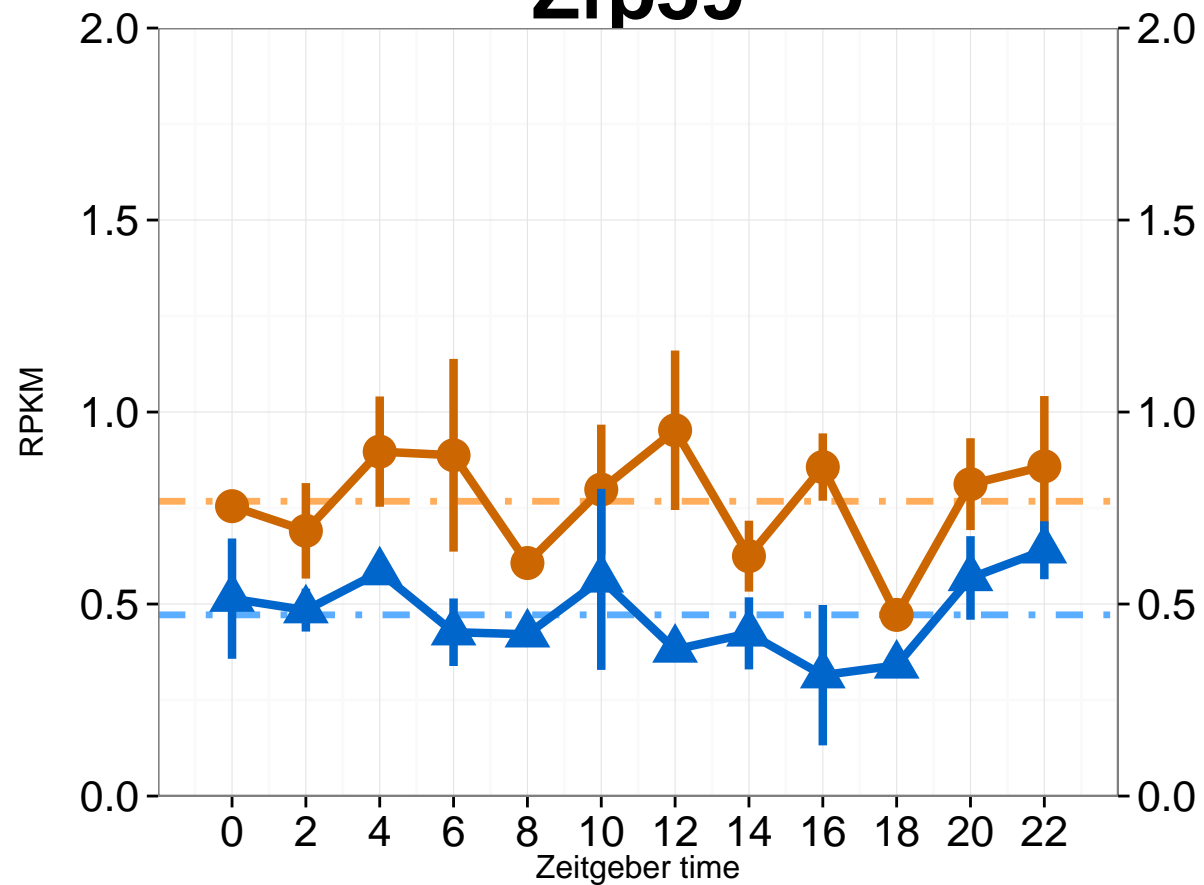

# Zfp59

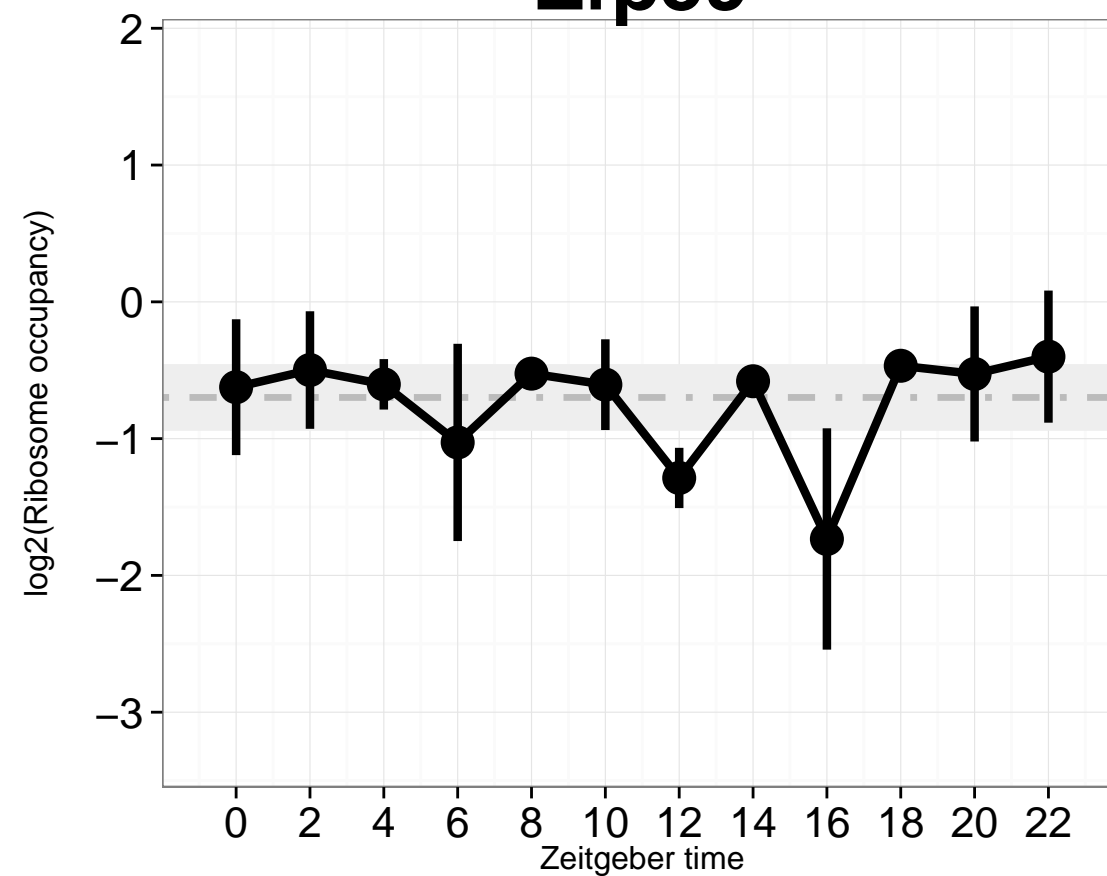

Supplement: Supplementary file 6071 [file 1]

# Fancg

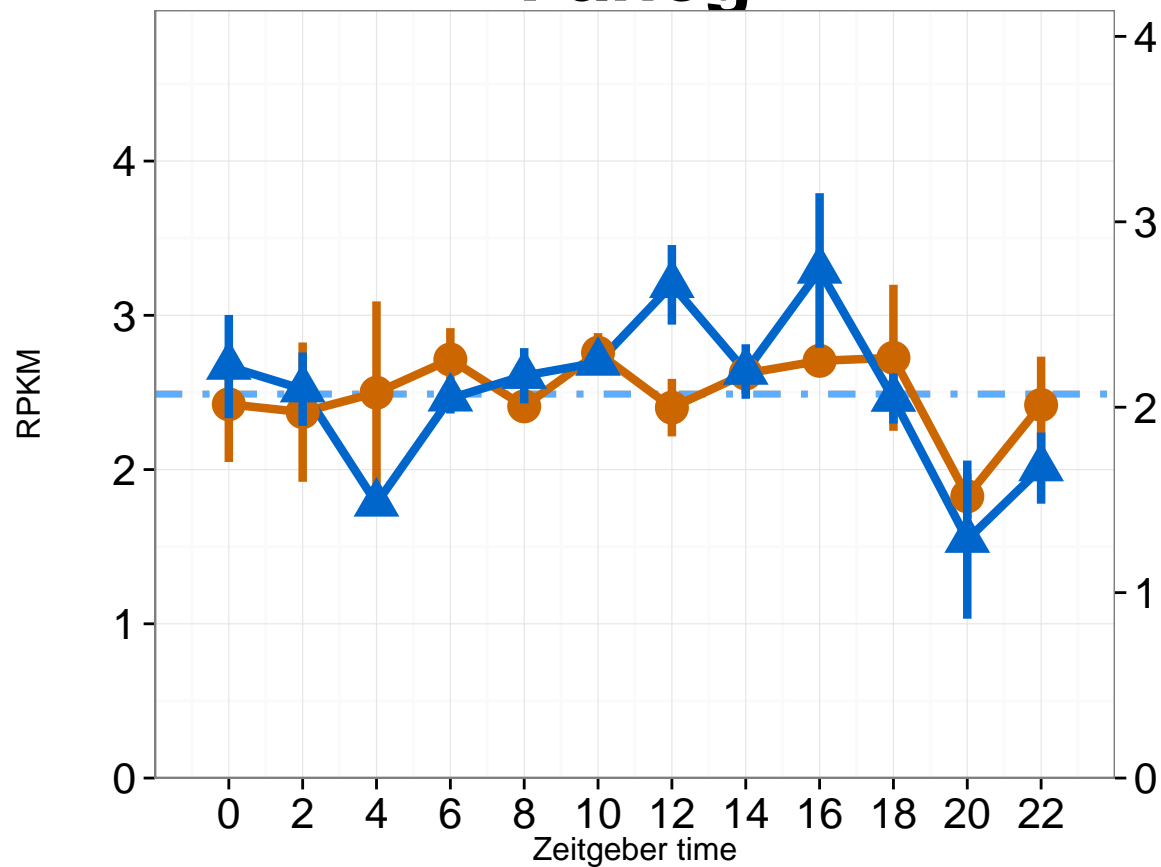

# Fancg

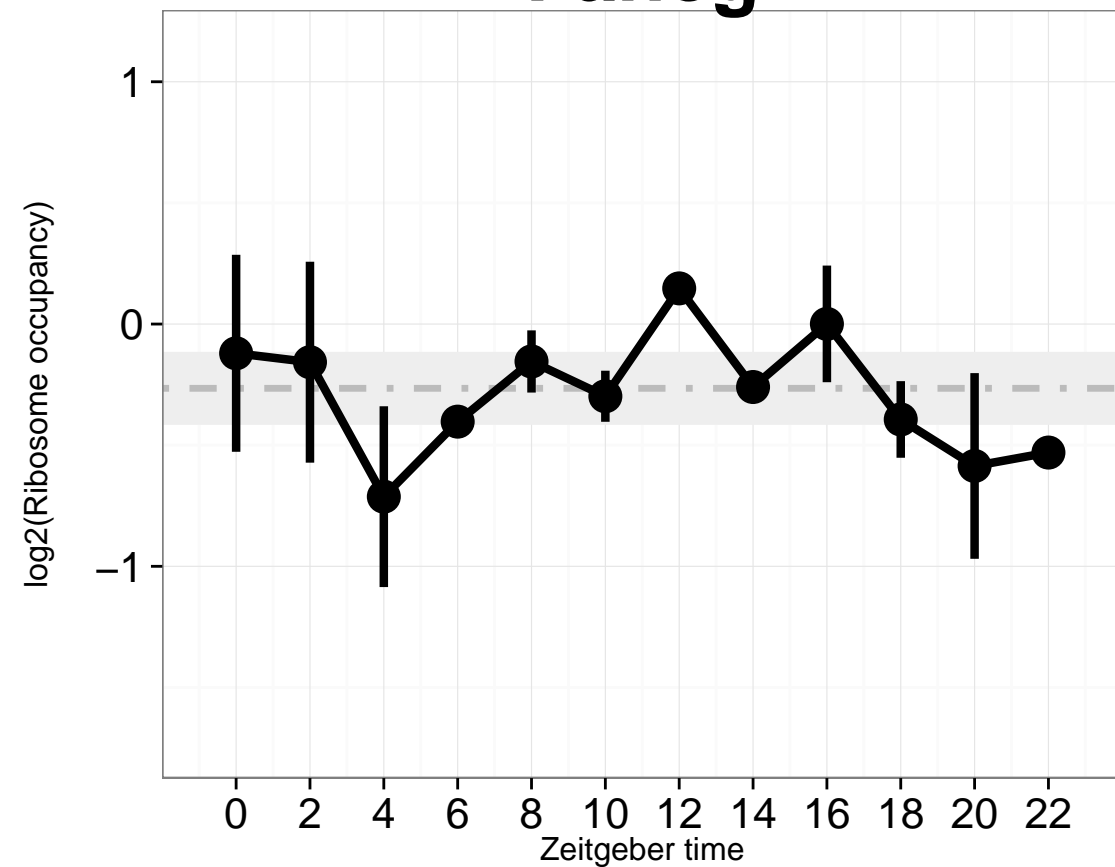

Supplement: Supplementary file 6072 [file 1]

## Gphn

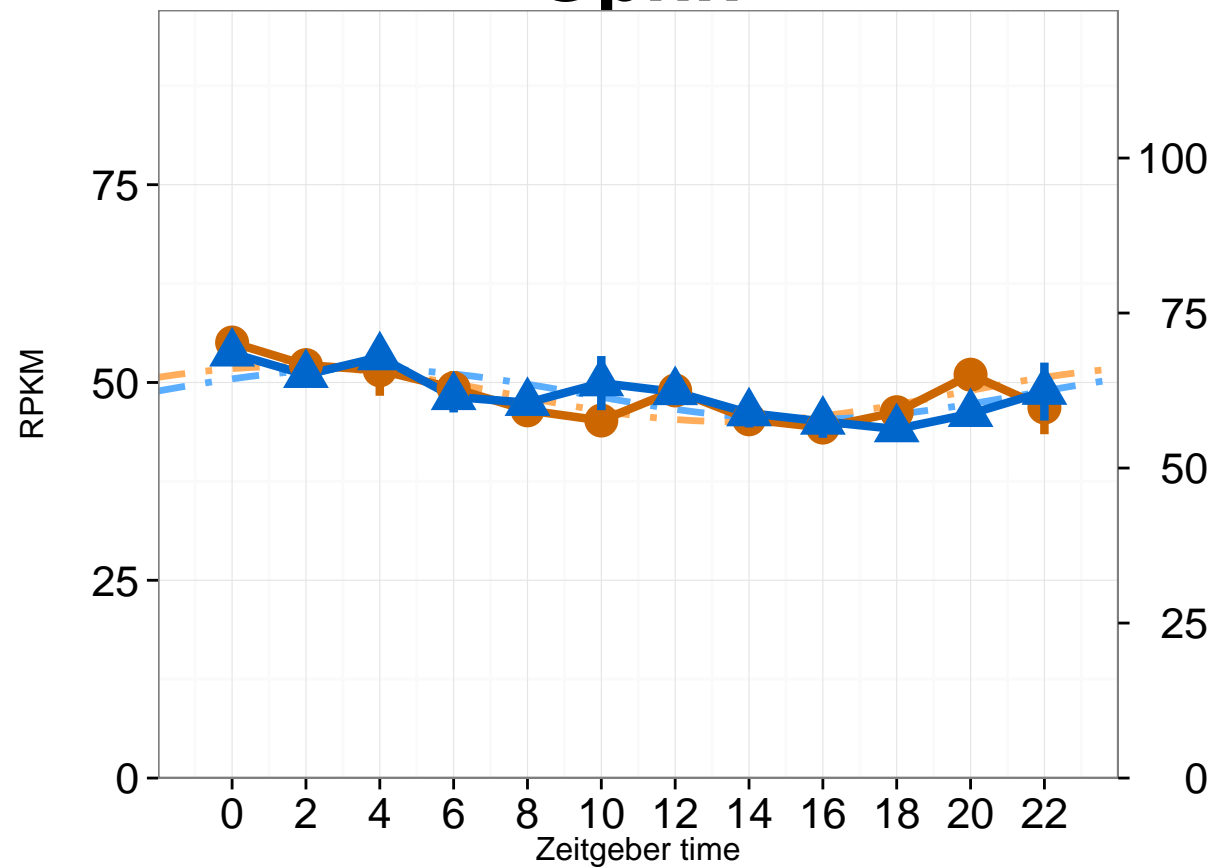

## Gphn

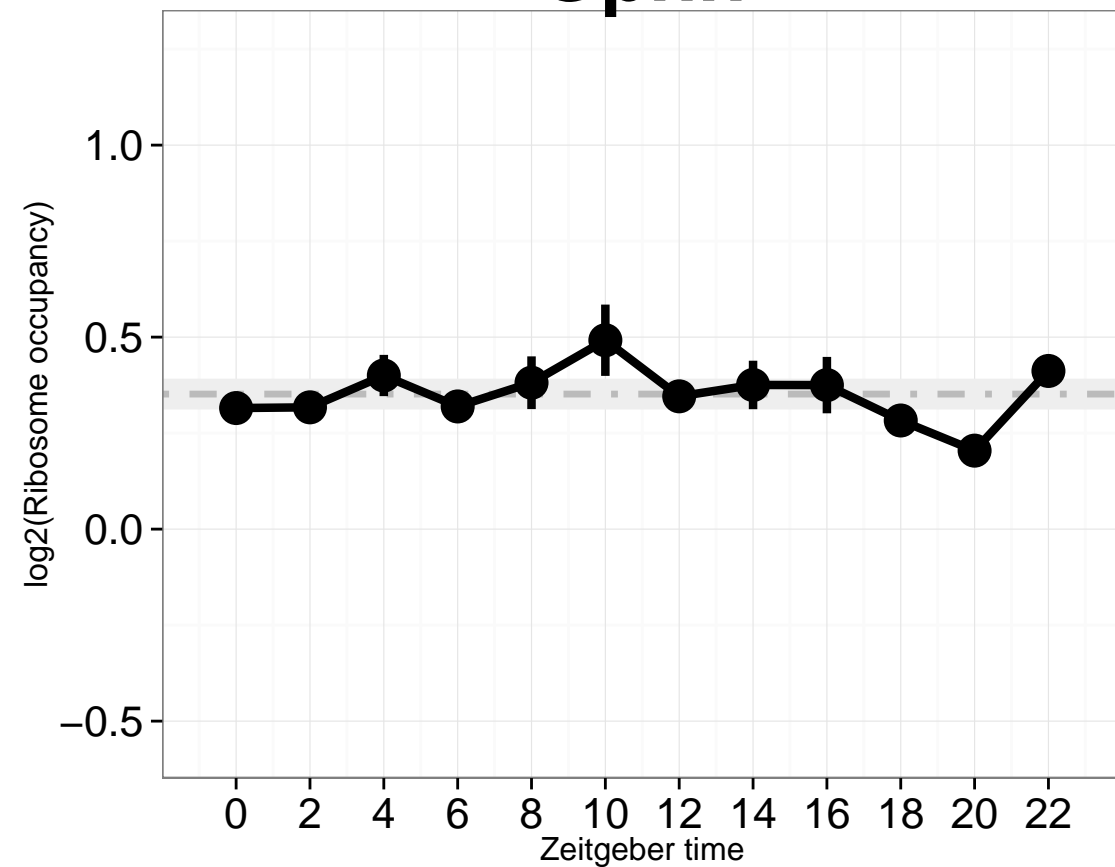

Supplement: Supplementary file 6073 [file 1]

# Ugt2b38

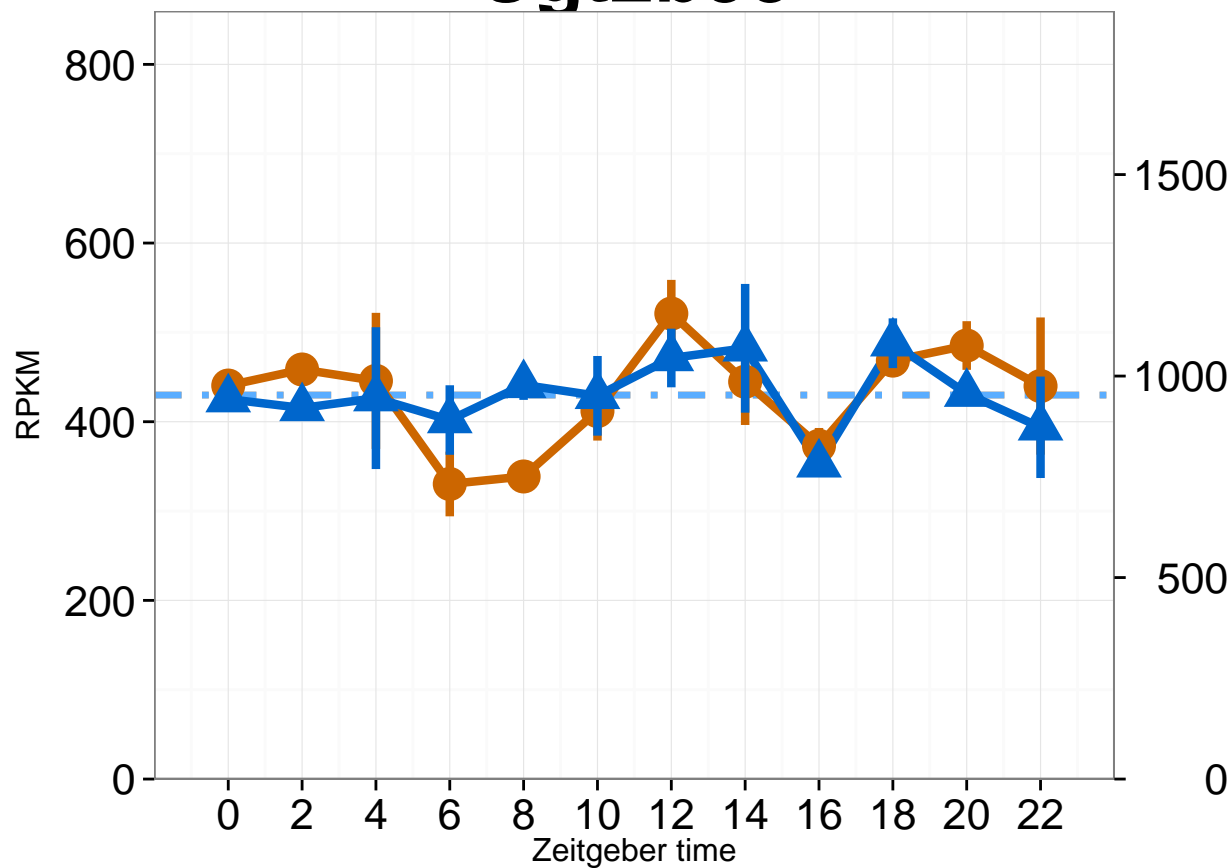

# Ugt2b38

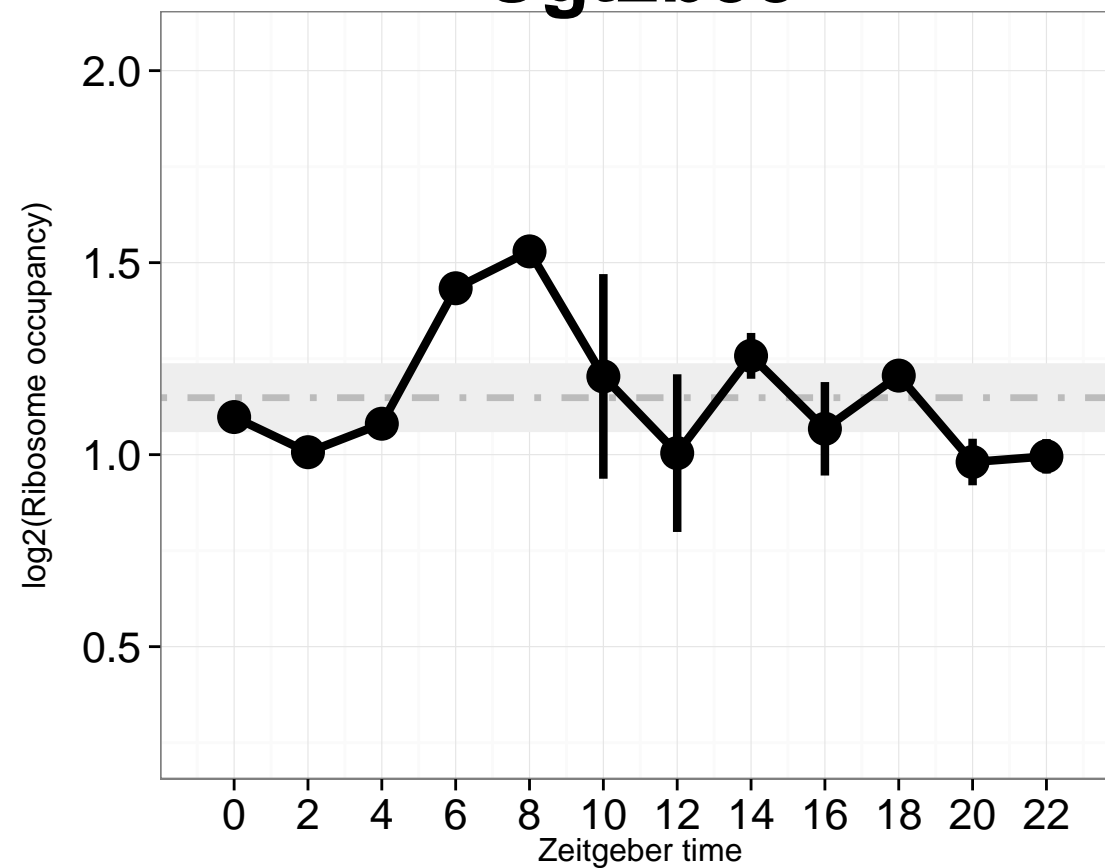

Supplement: Supplementary file 6074 [file 1]

## Pgrmc2

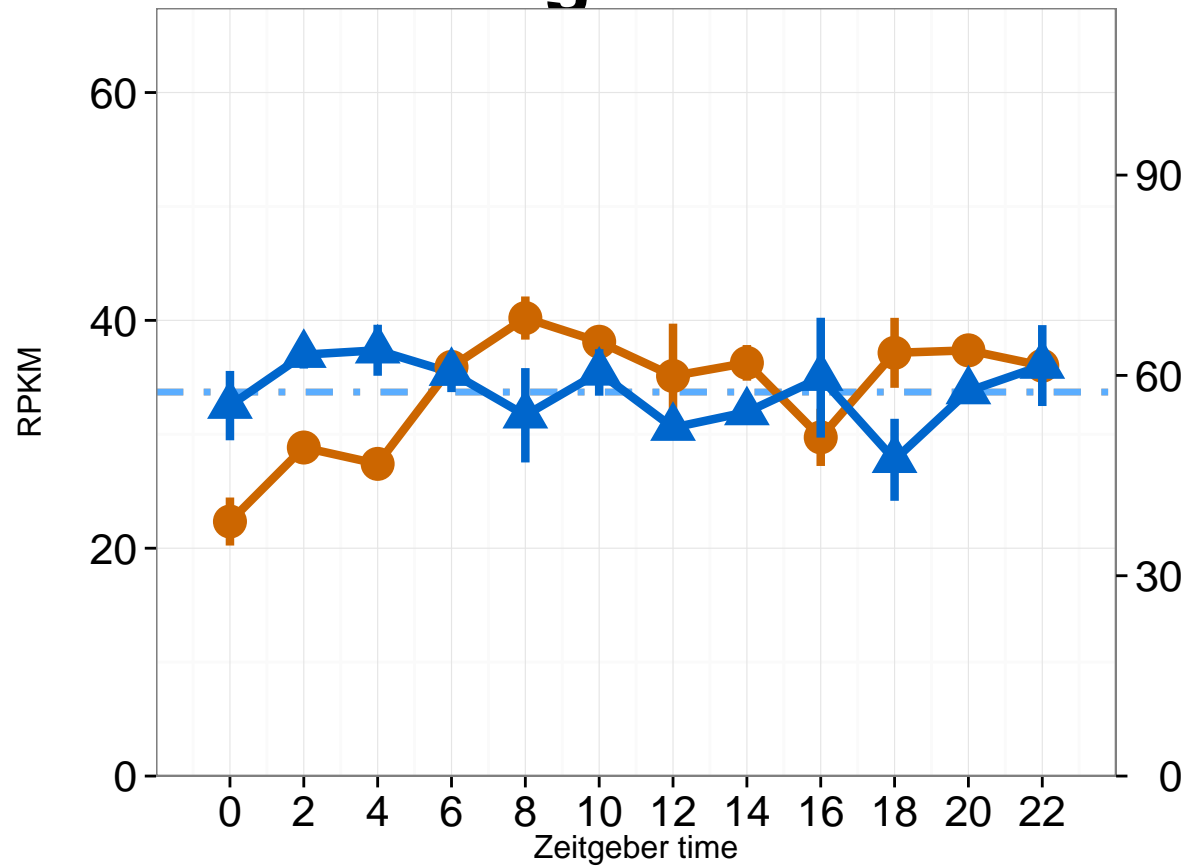

## Pgrmc2

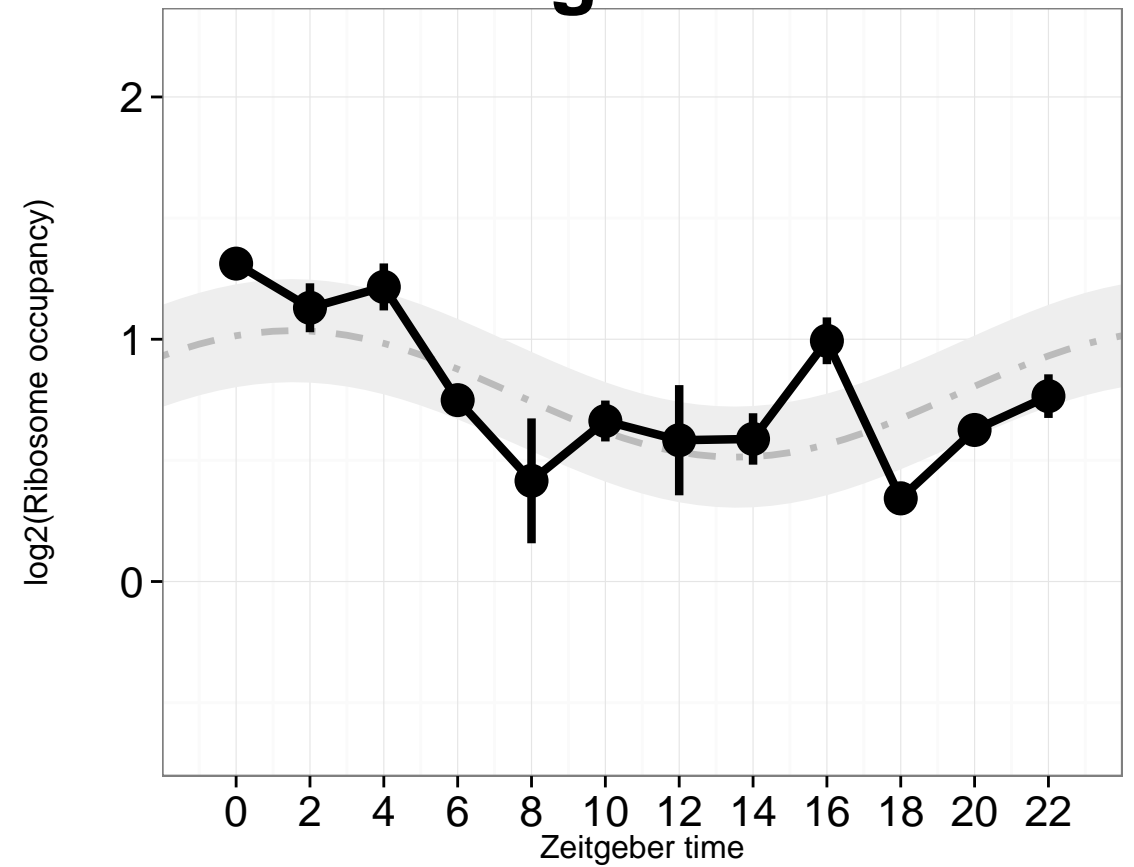

Supplement: Supplementary file 6075 [file 1]

## Dph6

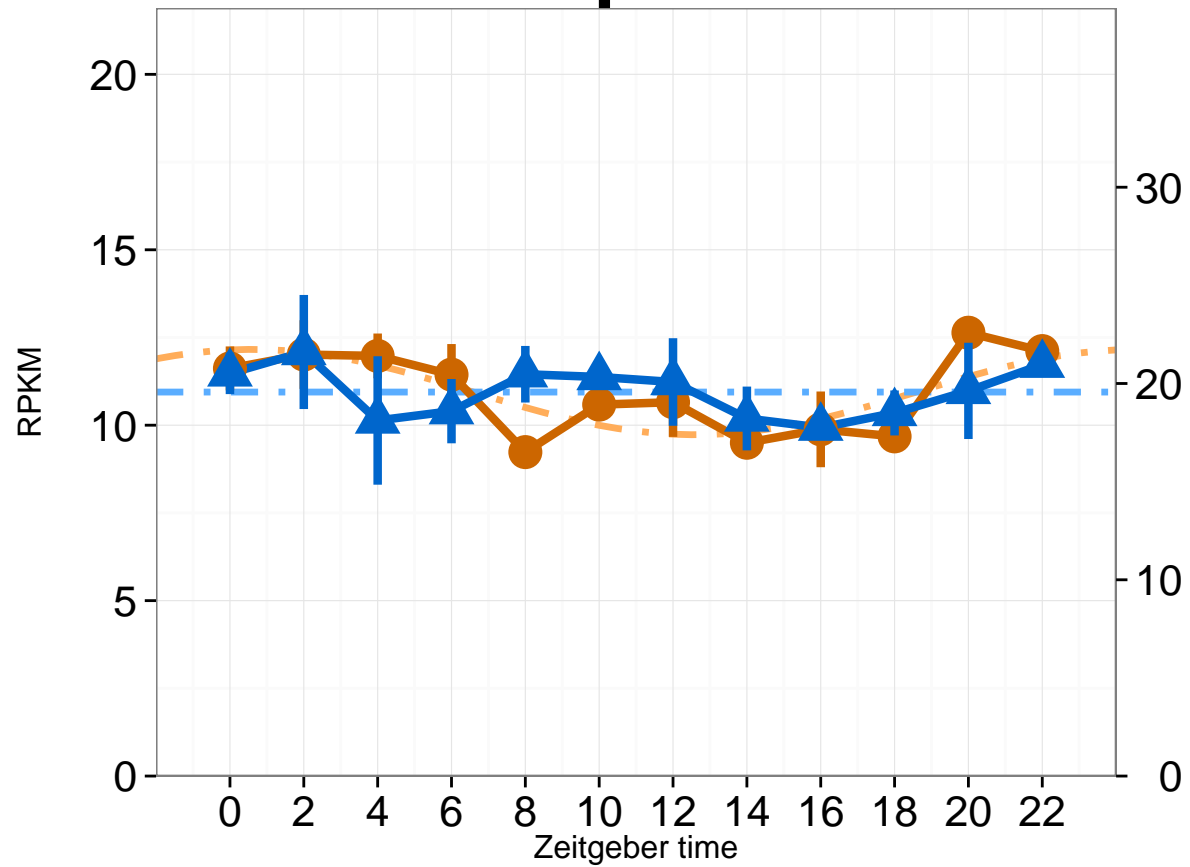

## Dph6

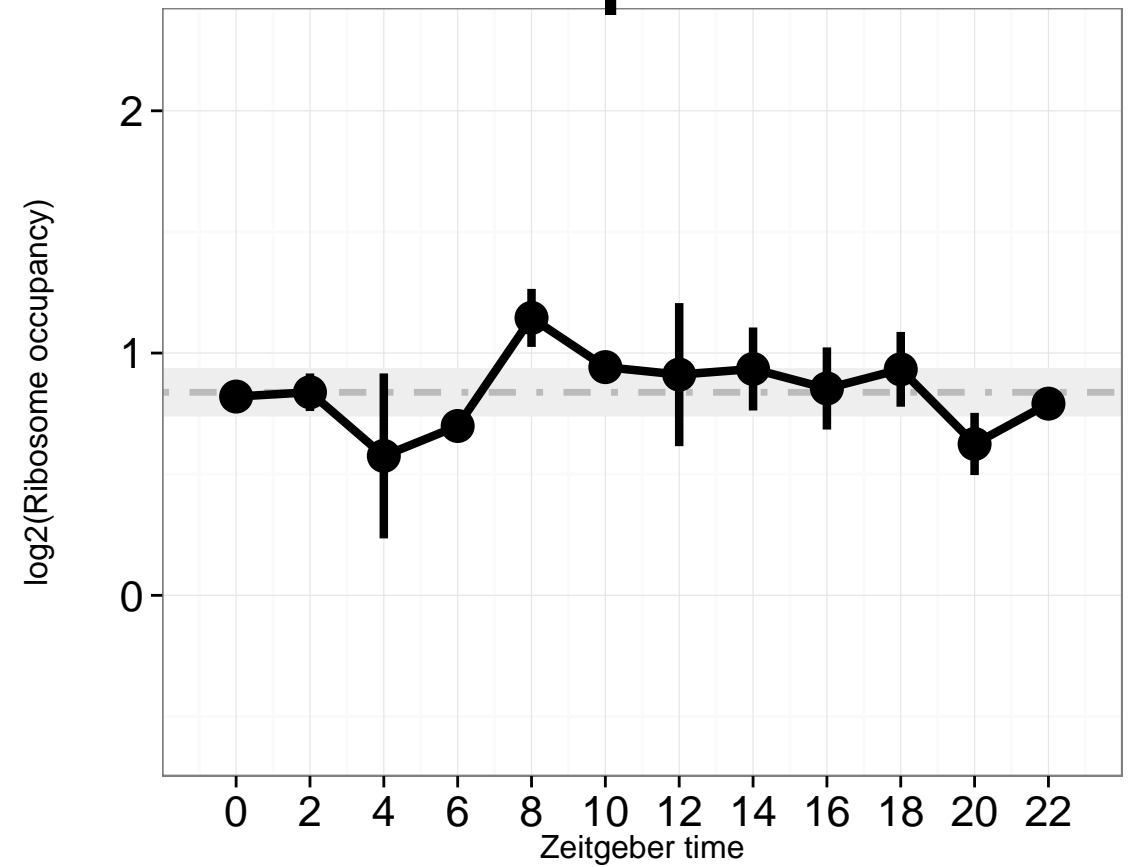

Supplement: Supplementary file 6076 [file 1]

# Ptpn1

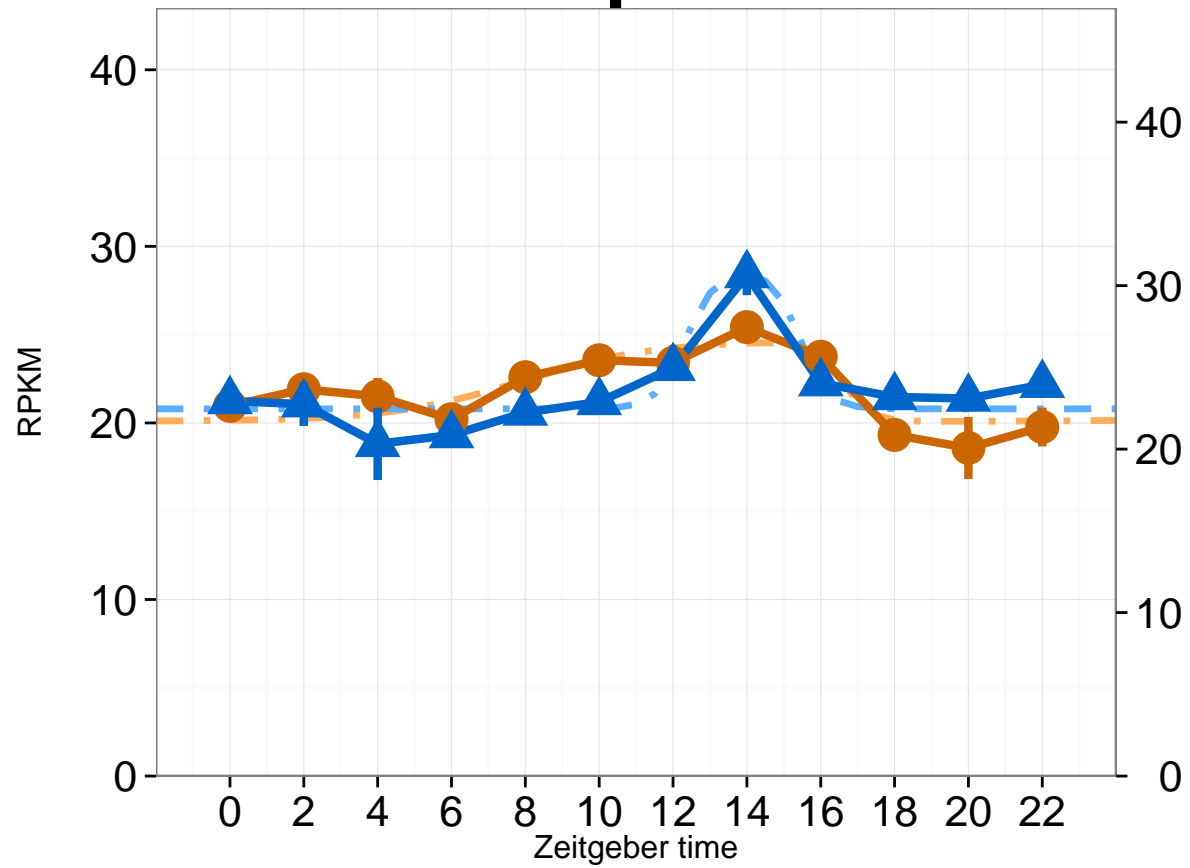

# Ptpn1

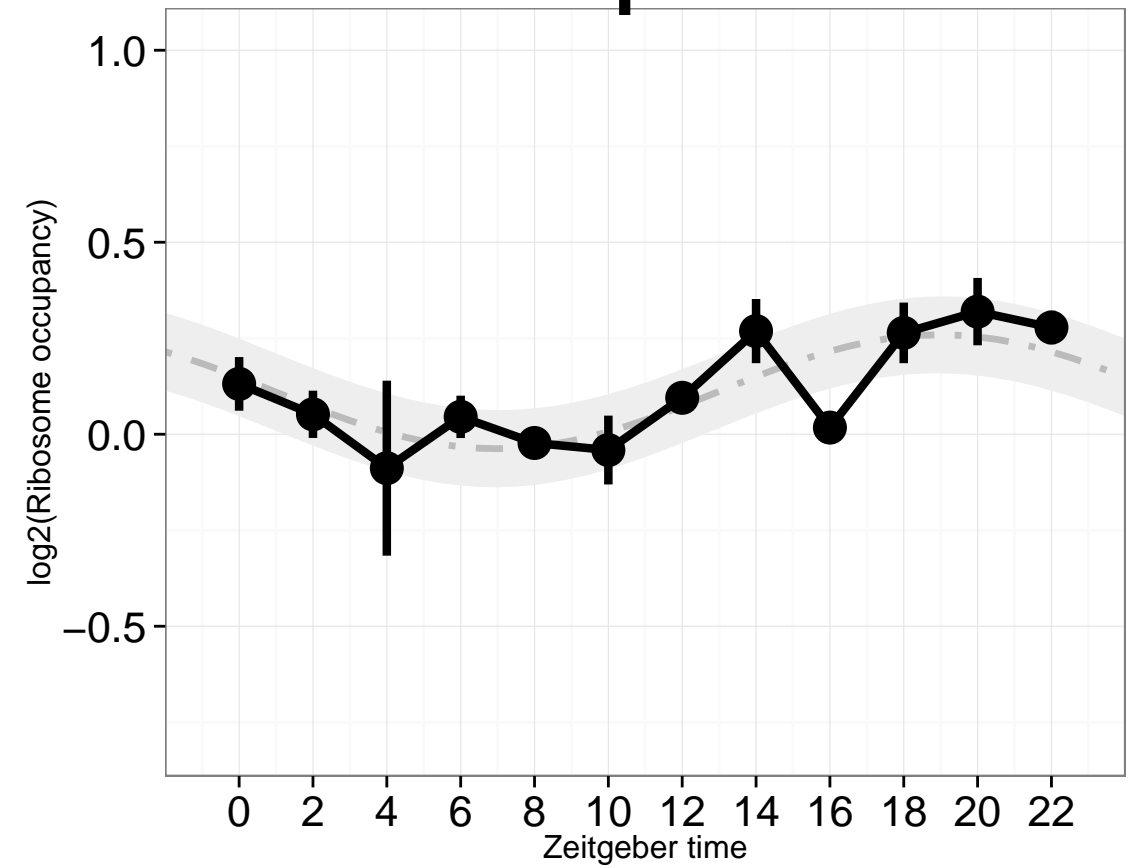

Supplement: Supplementary file 6077 [file 1]

# Hs3st6

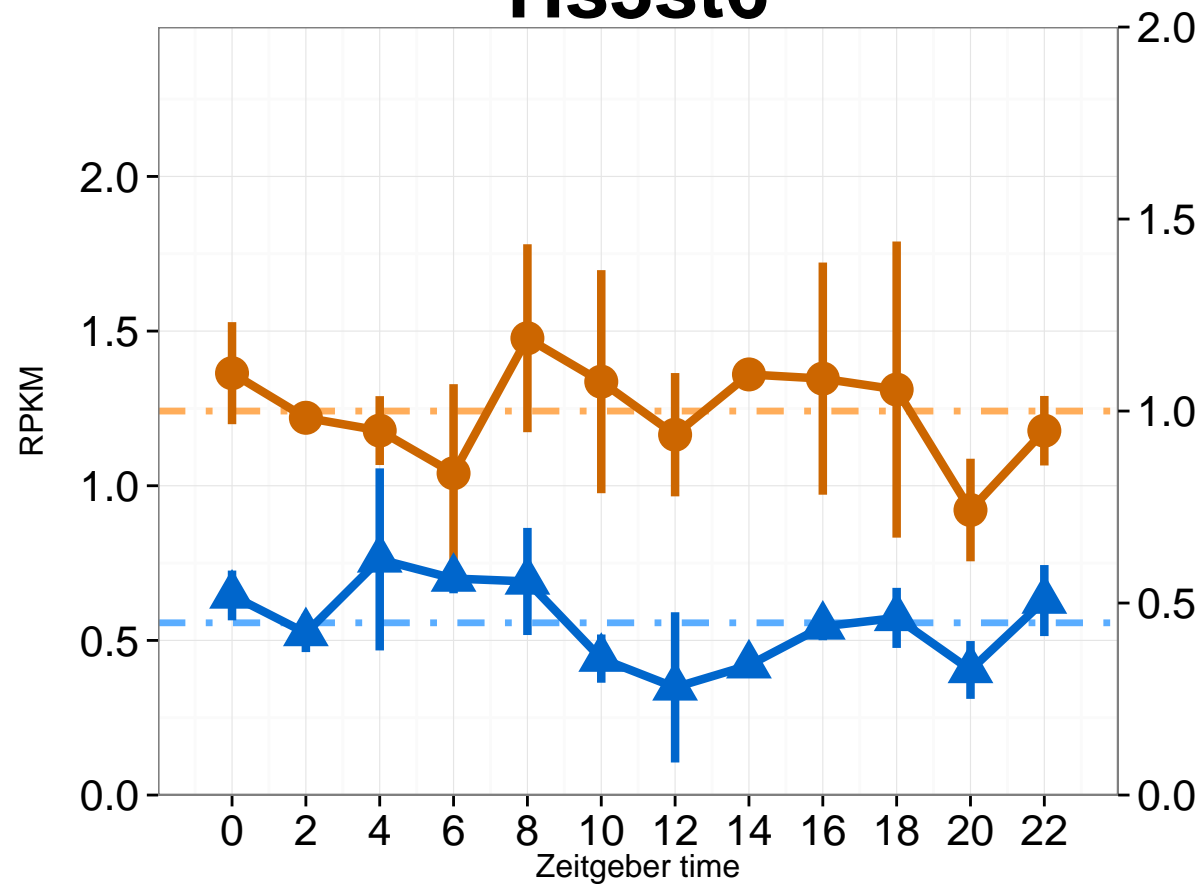

# Hs3st6

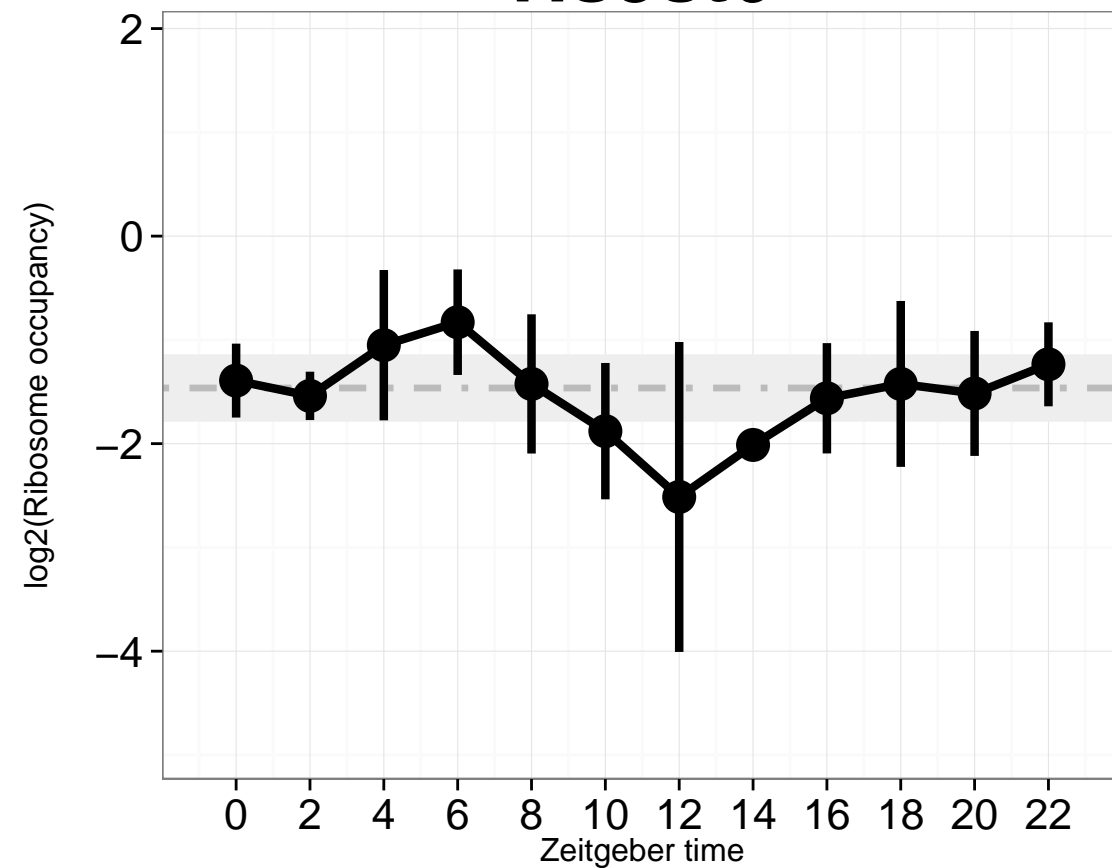

Supplement: Supplementary file 6078 [file 1]

# Sfrp1

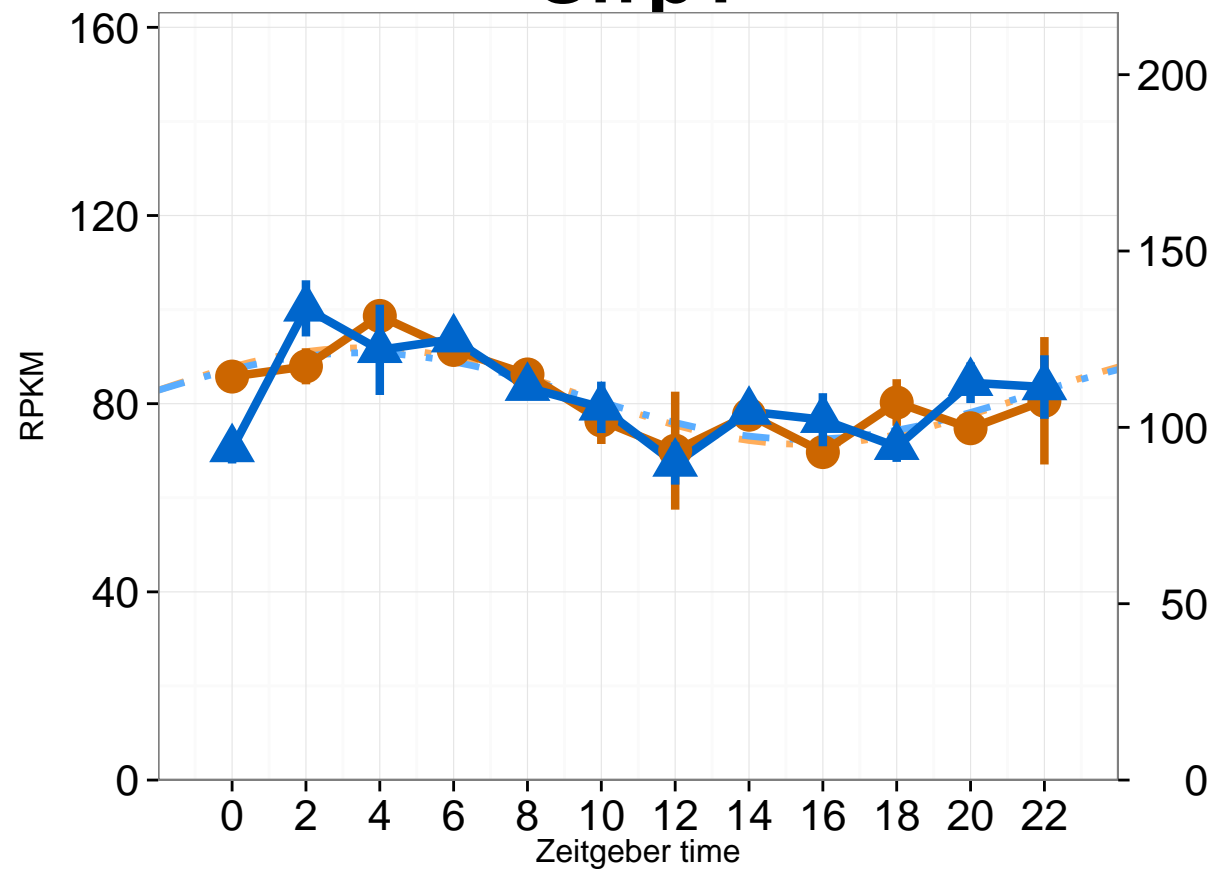

# Sfrp1

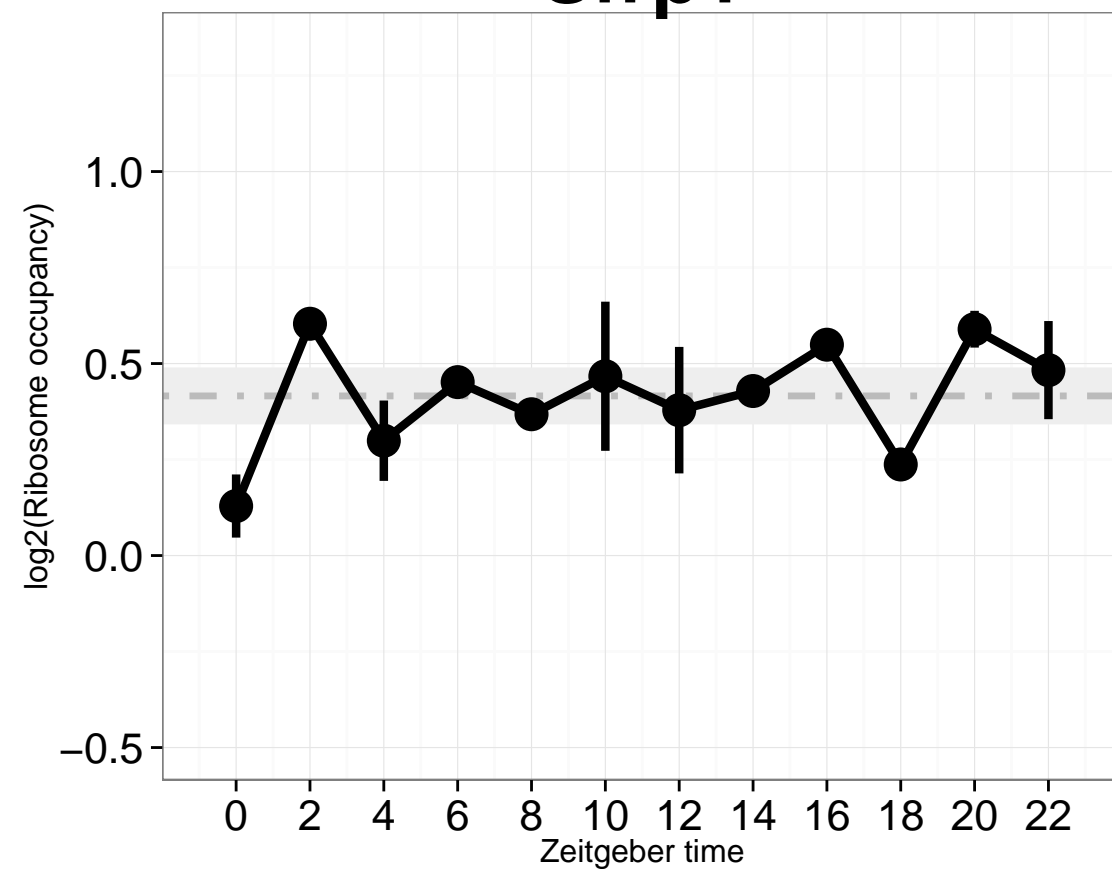

Supplement: Supplementary file 6079 [file 1]

## B3gat2

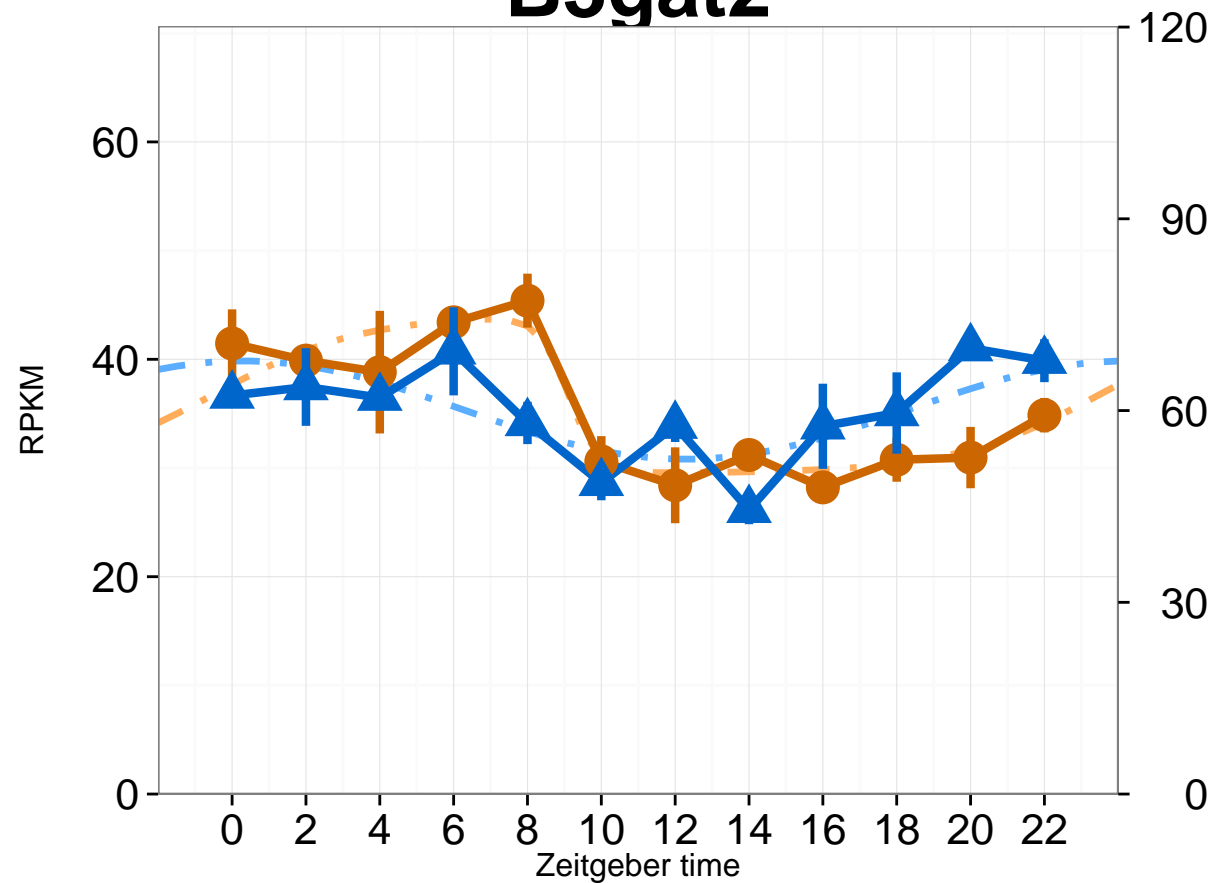

## B3gat2

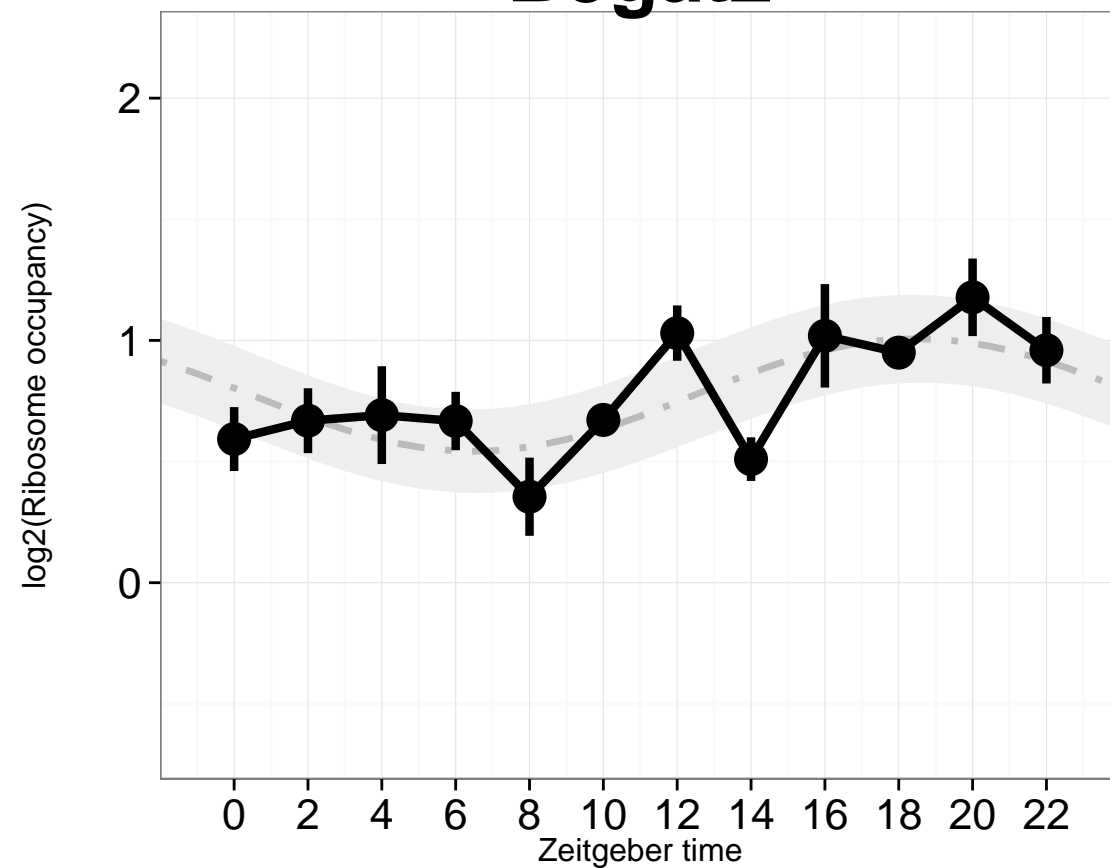

Supplement: Supplementary file 6080 [file 1]

## Eif4a1

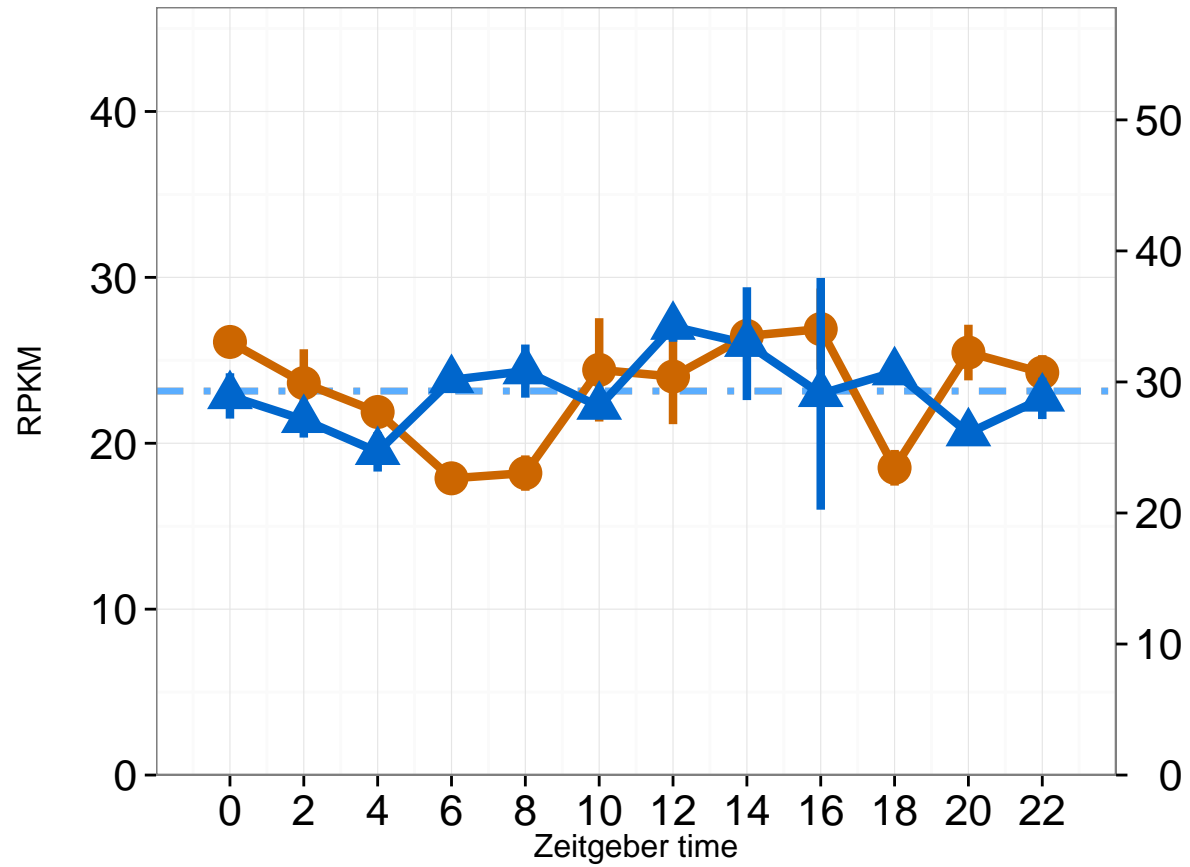

## Eif4a1

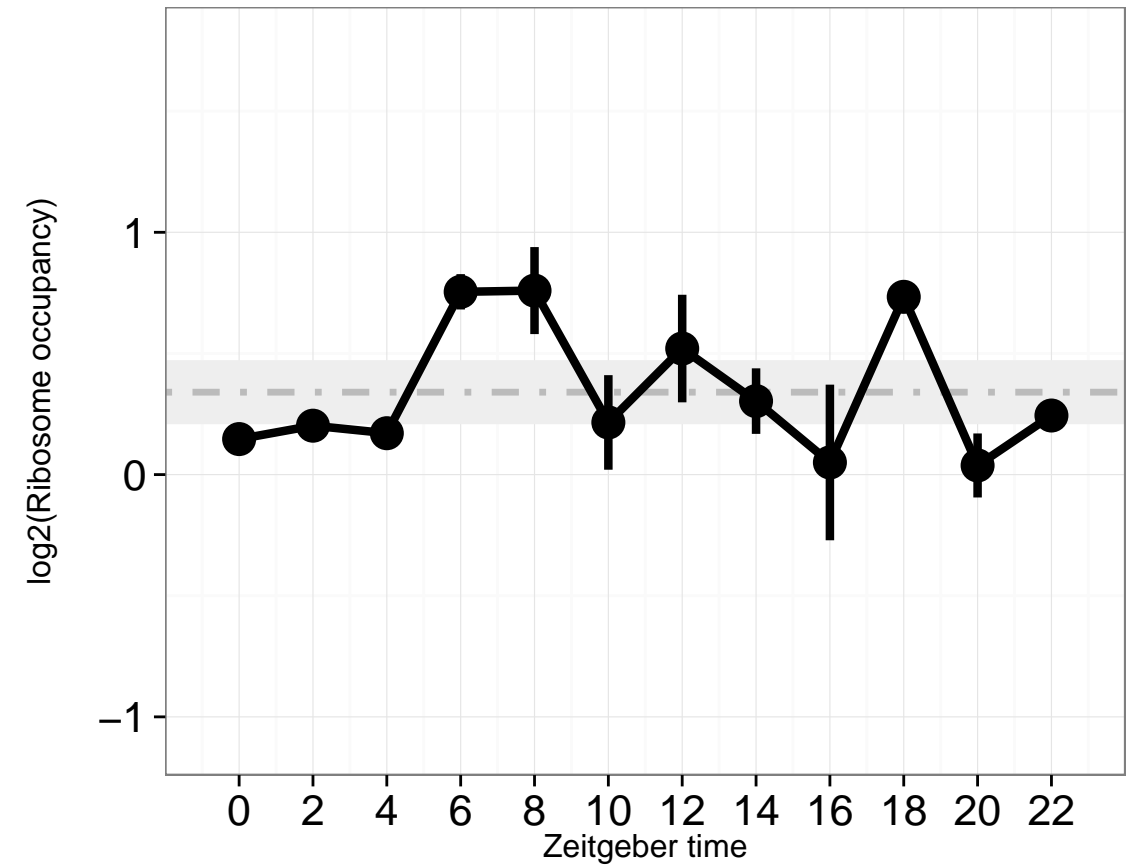

Supplement: Supplementary file 6081 [file 1]

## Rpsa

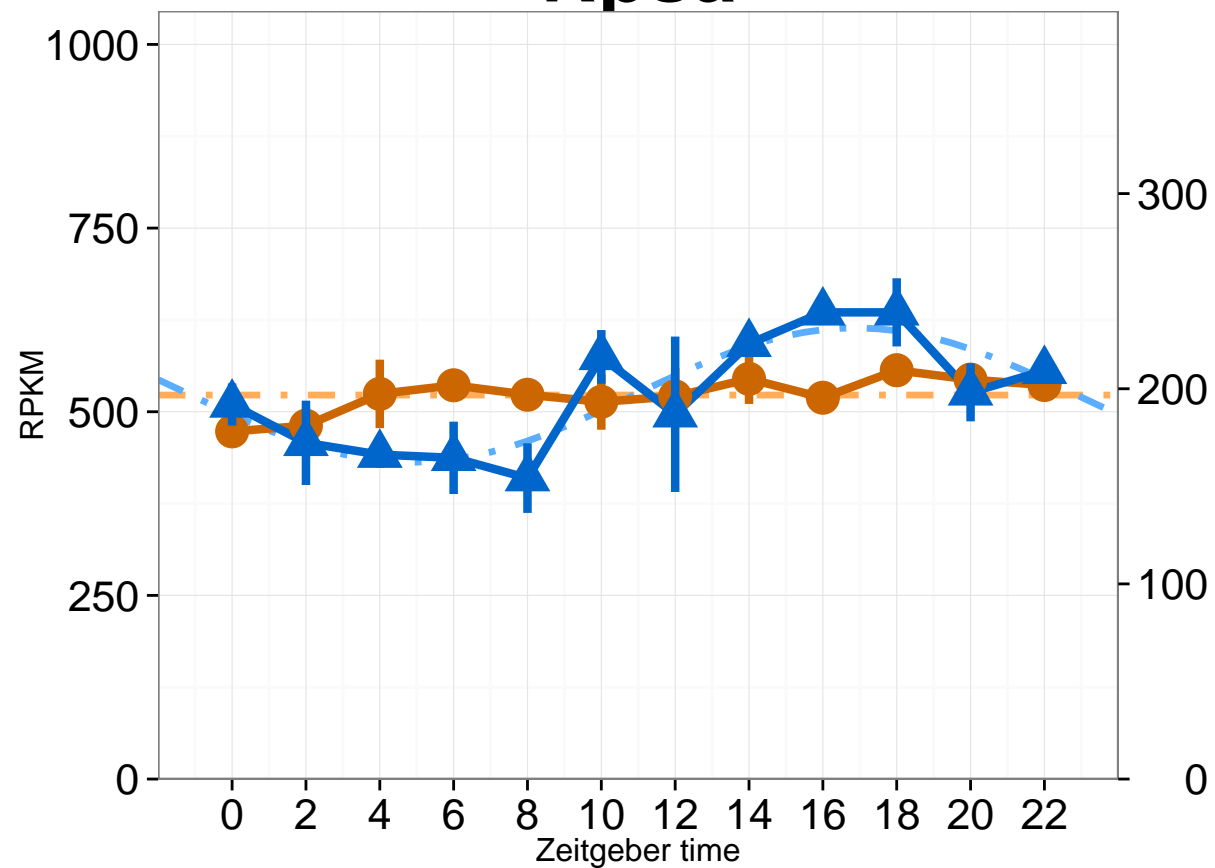

## Rpsa

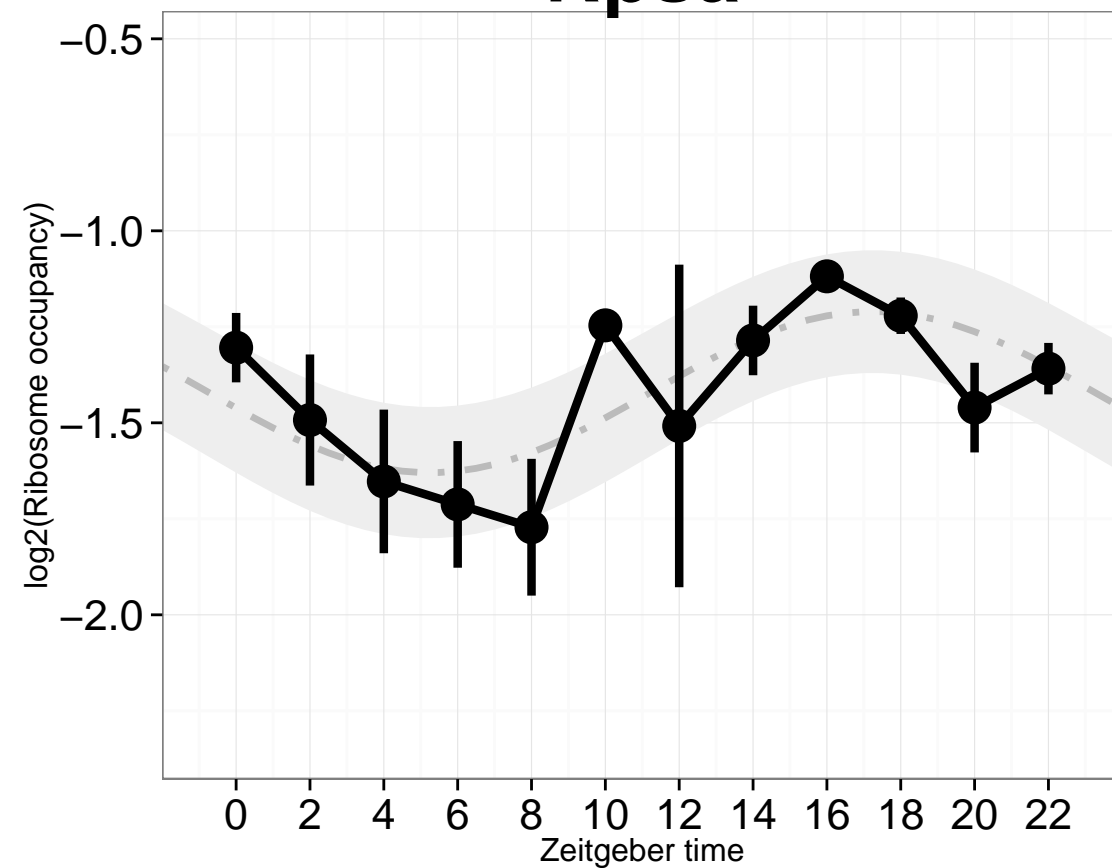

Supplement: Supplementary file 6082 [file 1]

# Klh17

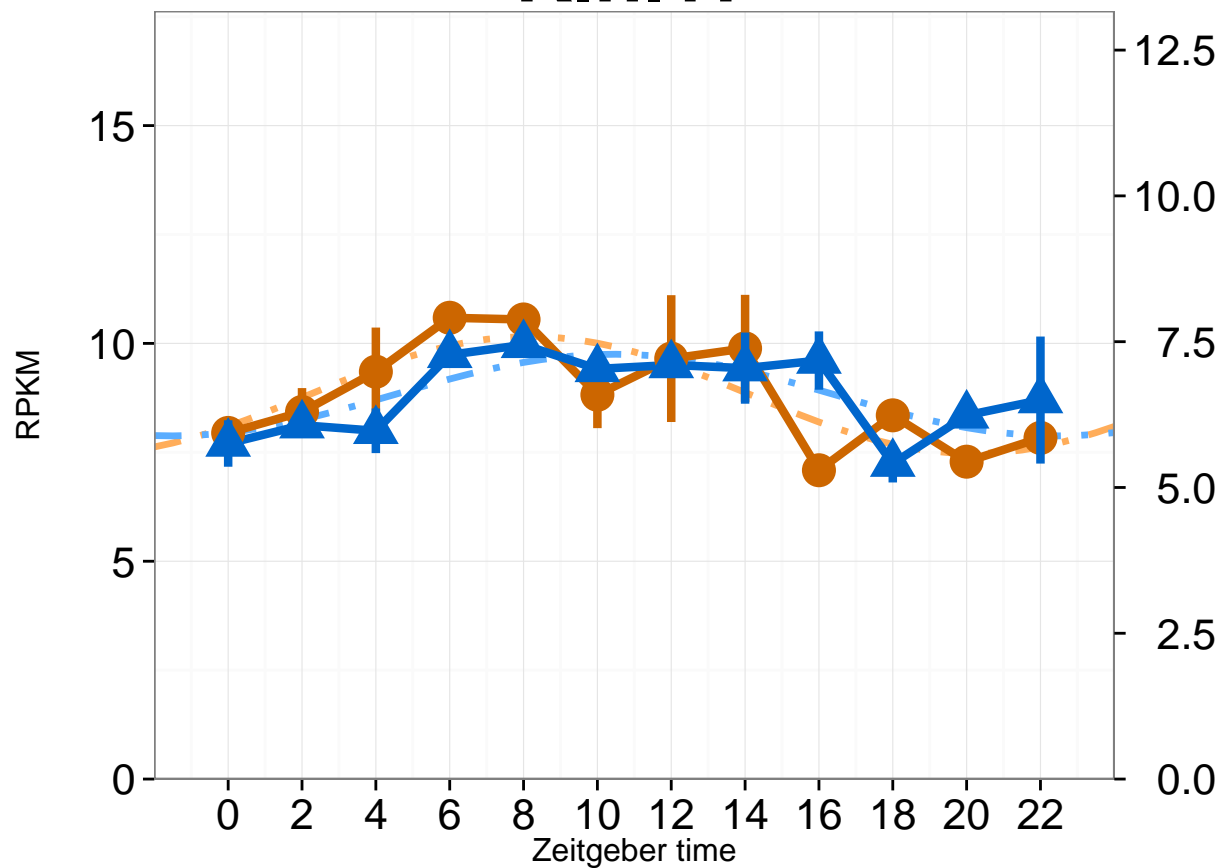

# Klh17

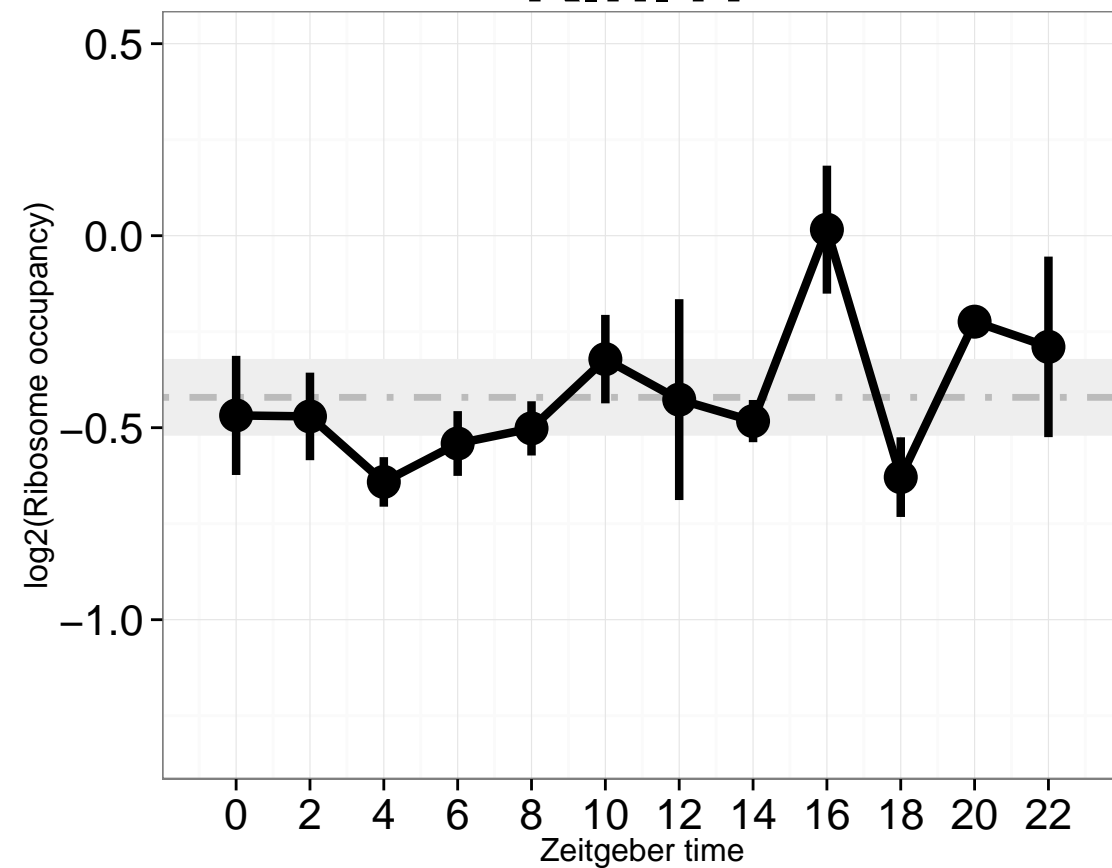

Supplement: Supplementary file 6083 [file 1]

## Lcp1

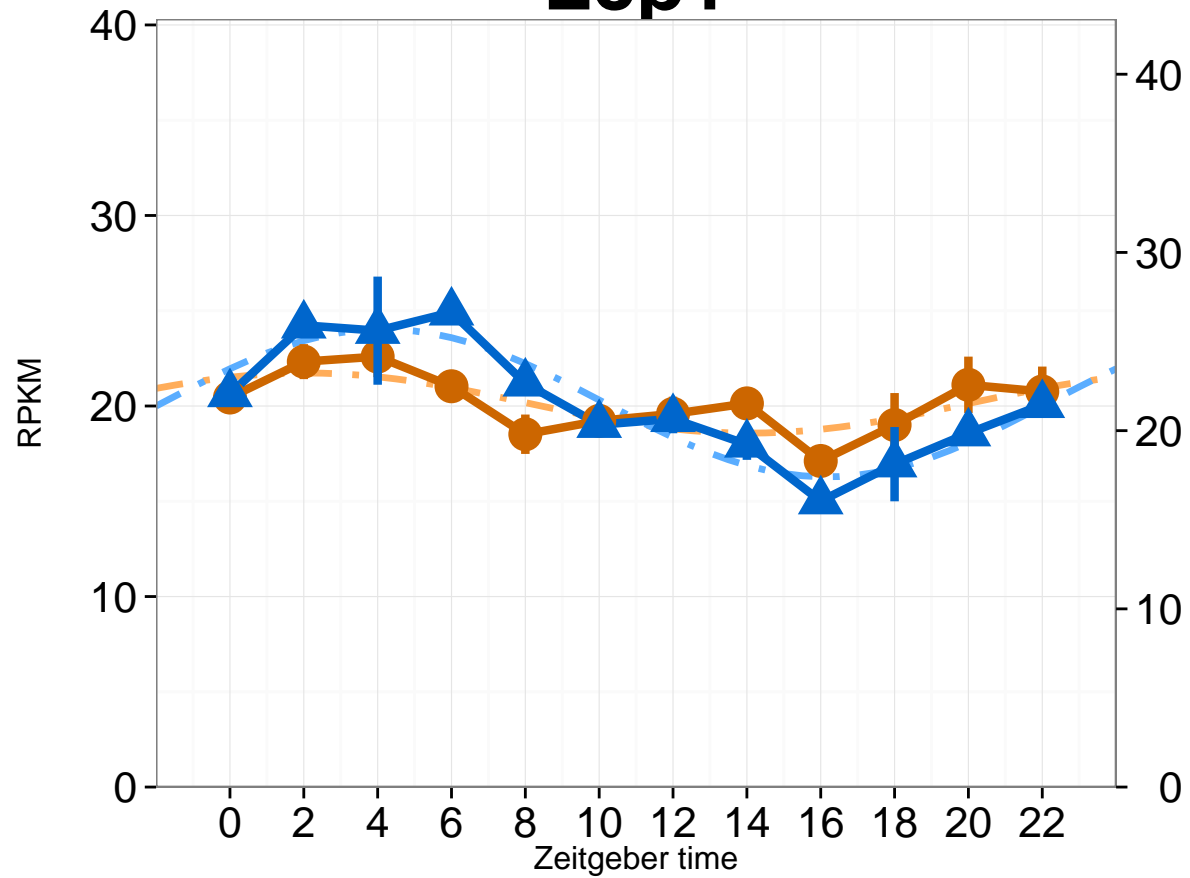

## Lcp1

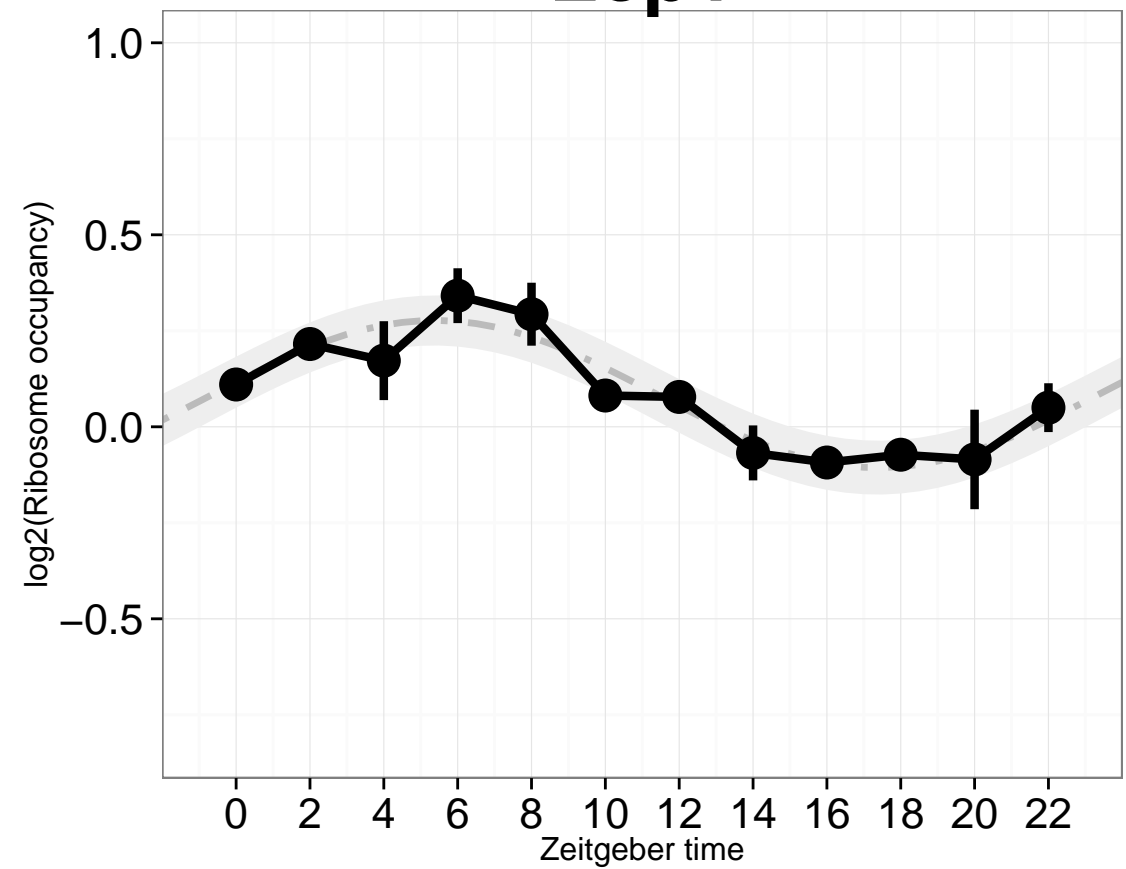

Supplement: Supplementary file 6084 [file 1]

## Slc37a3

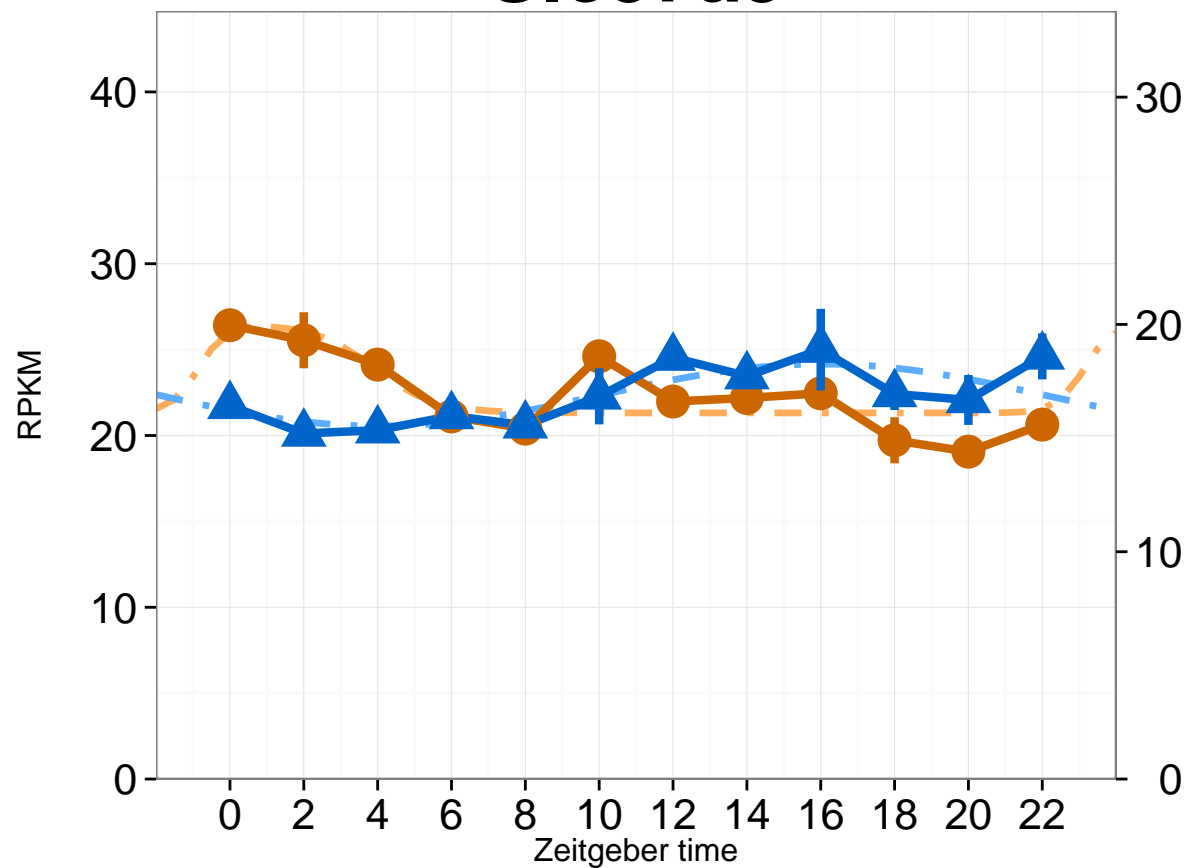

## Slc37a3

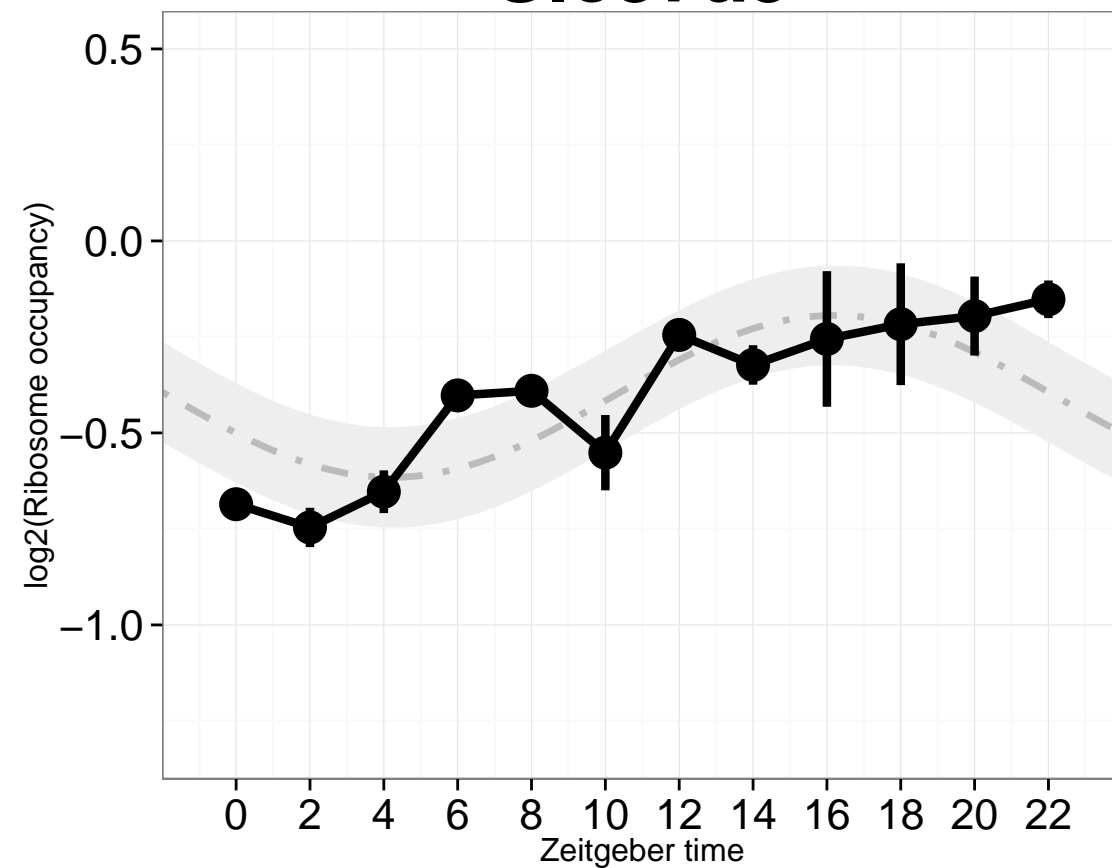

Supplement: Supplementary file 6085 [file 1]

## Uba52

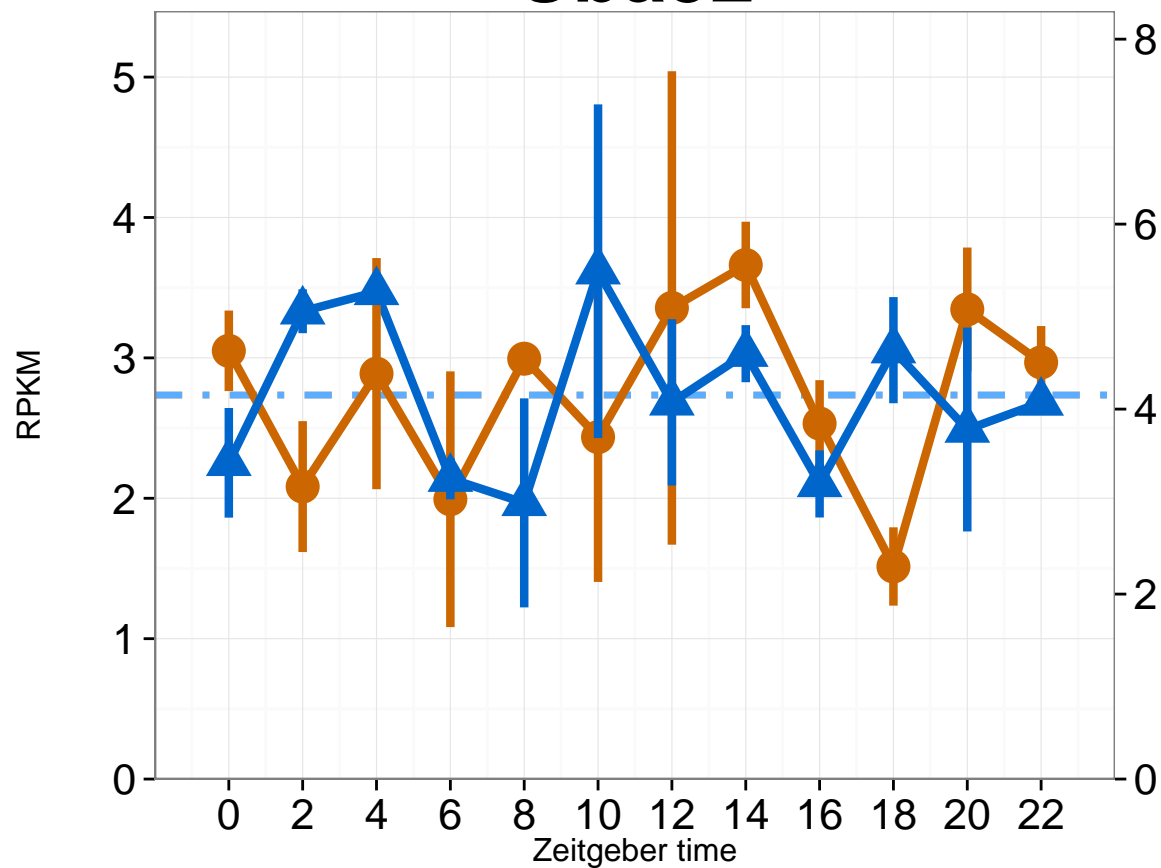

## Uba52

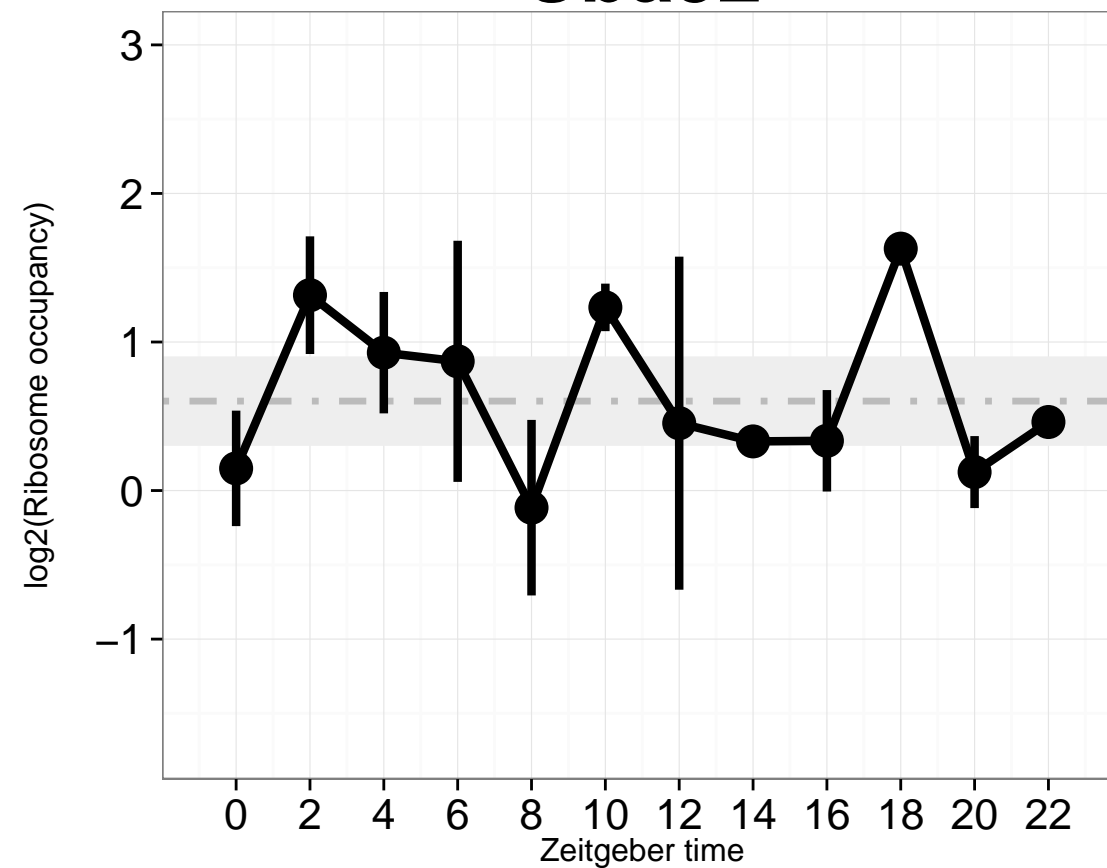

Supplement: Supplementary file 6086 [file 1]

# Pfkfb1

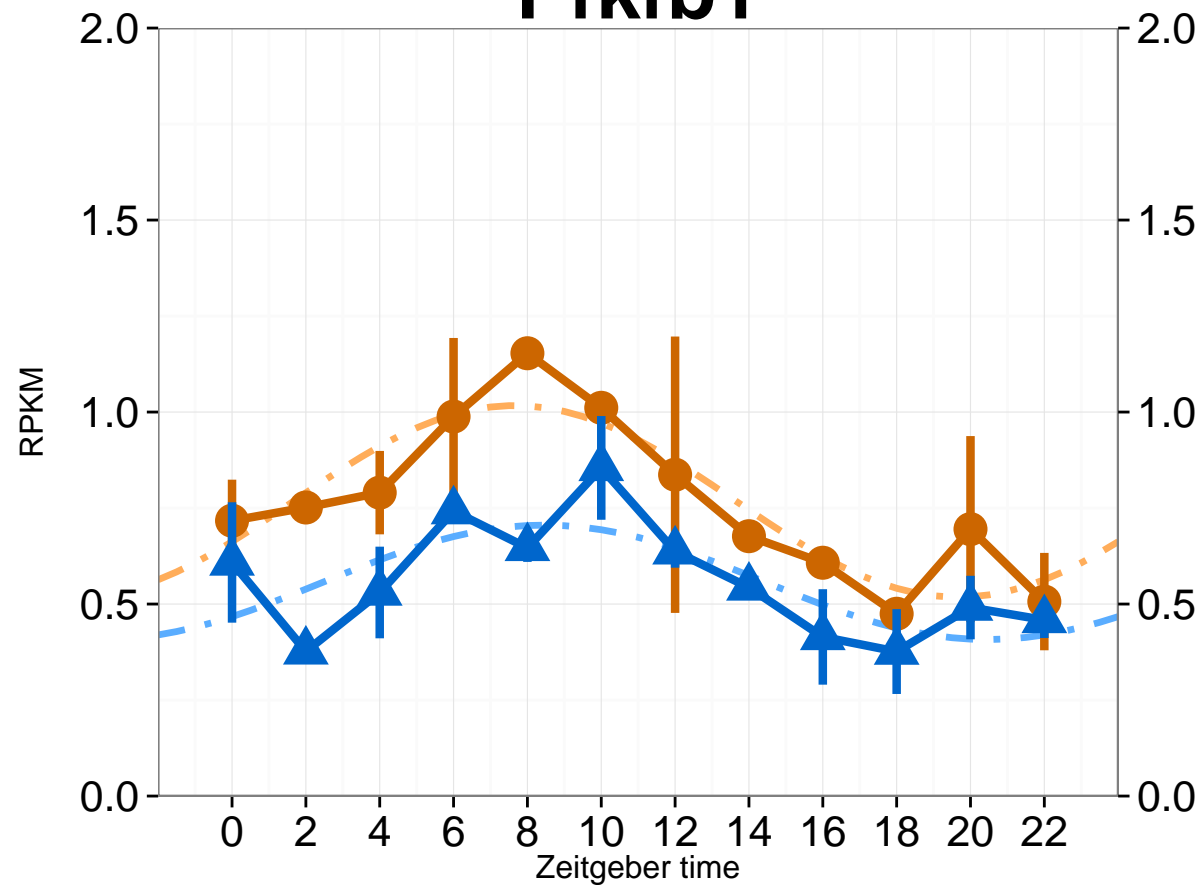

# Pfkfb1

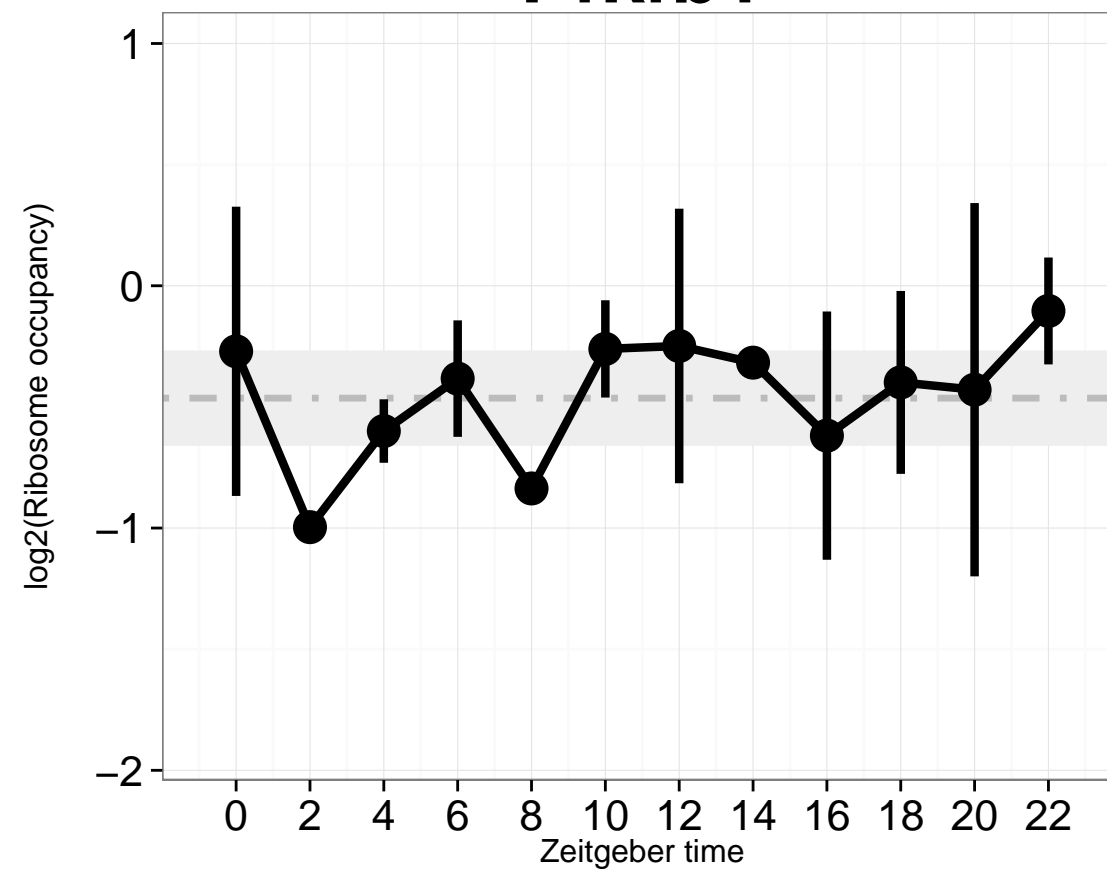

Supplement: Supplementary file 6087 [file 1]

# Nt5e

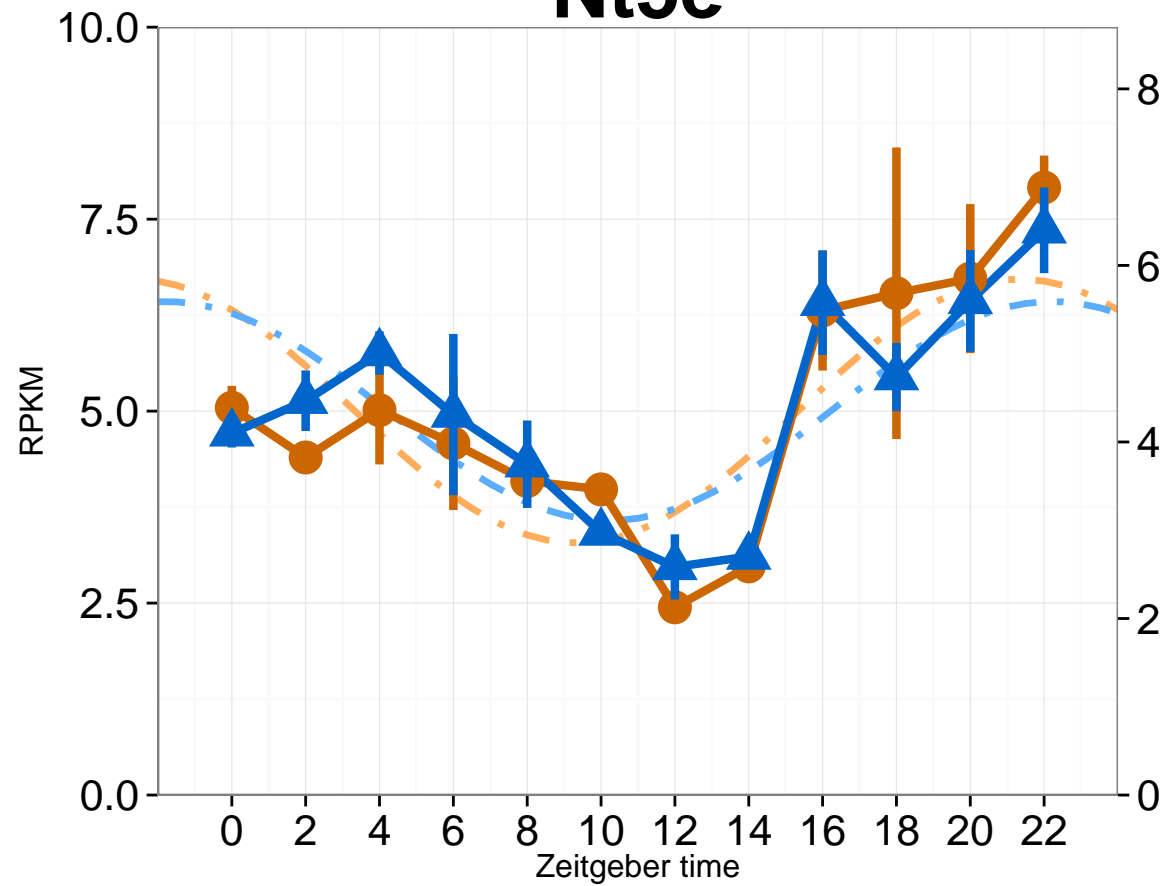

# Nt5e

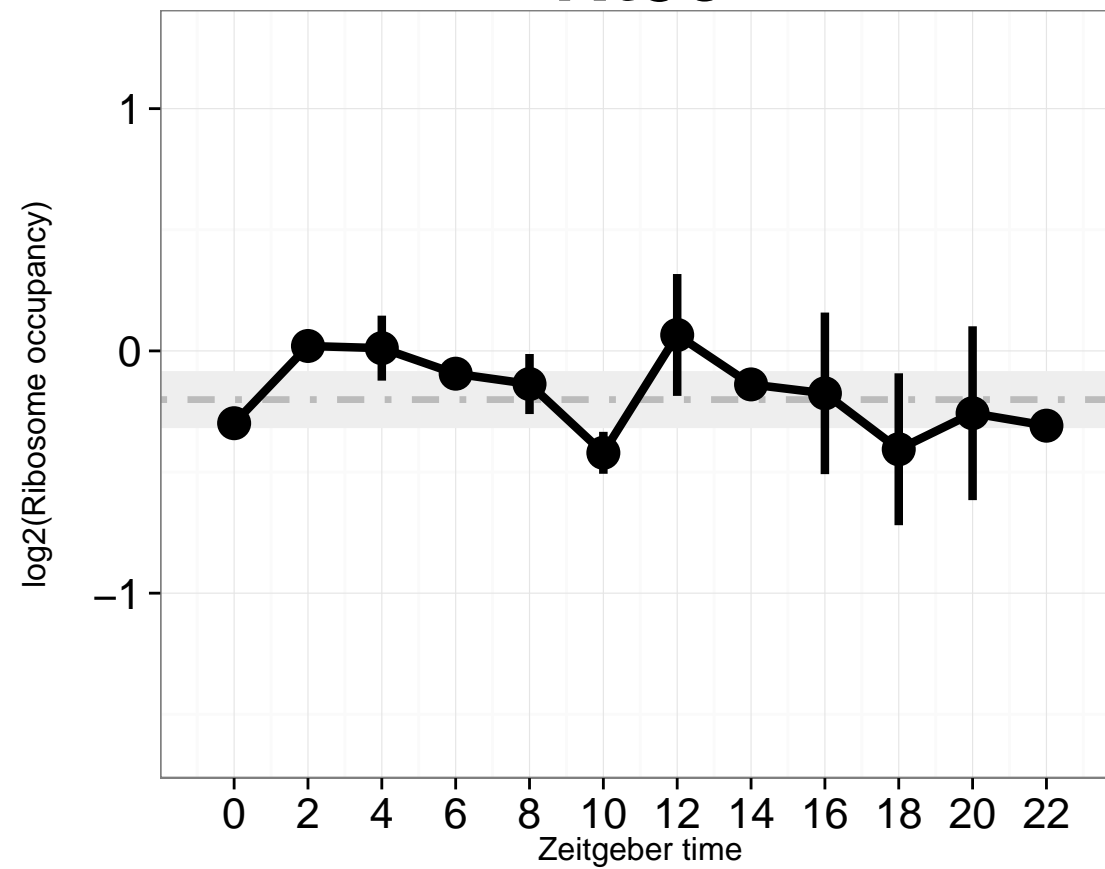

Supplement: Supplementary file 6088 [file 1]

## Mettl2

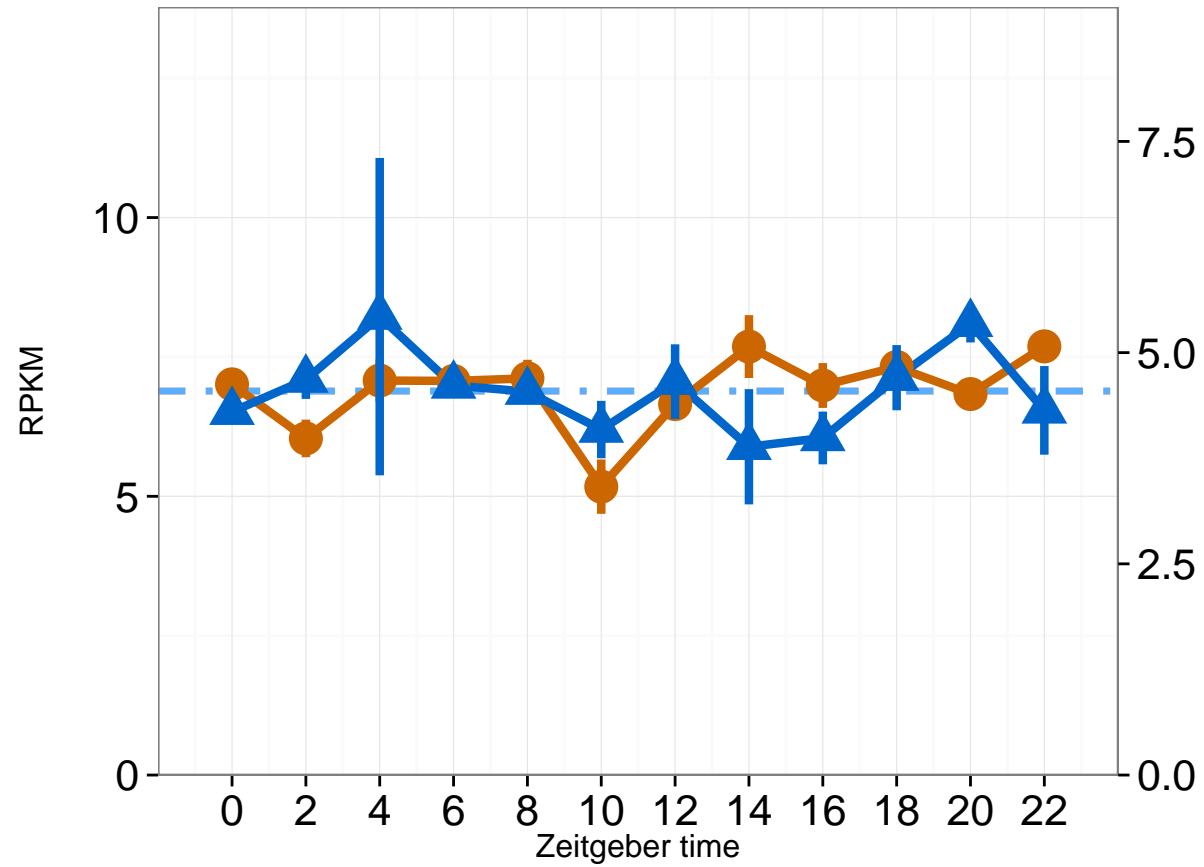

## Mettl2

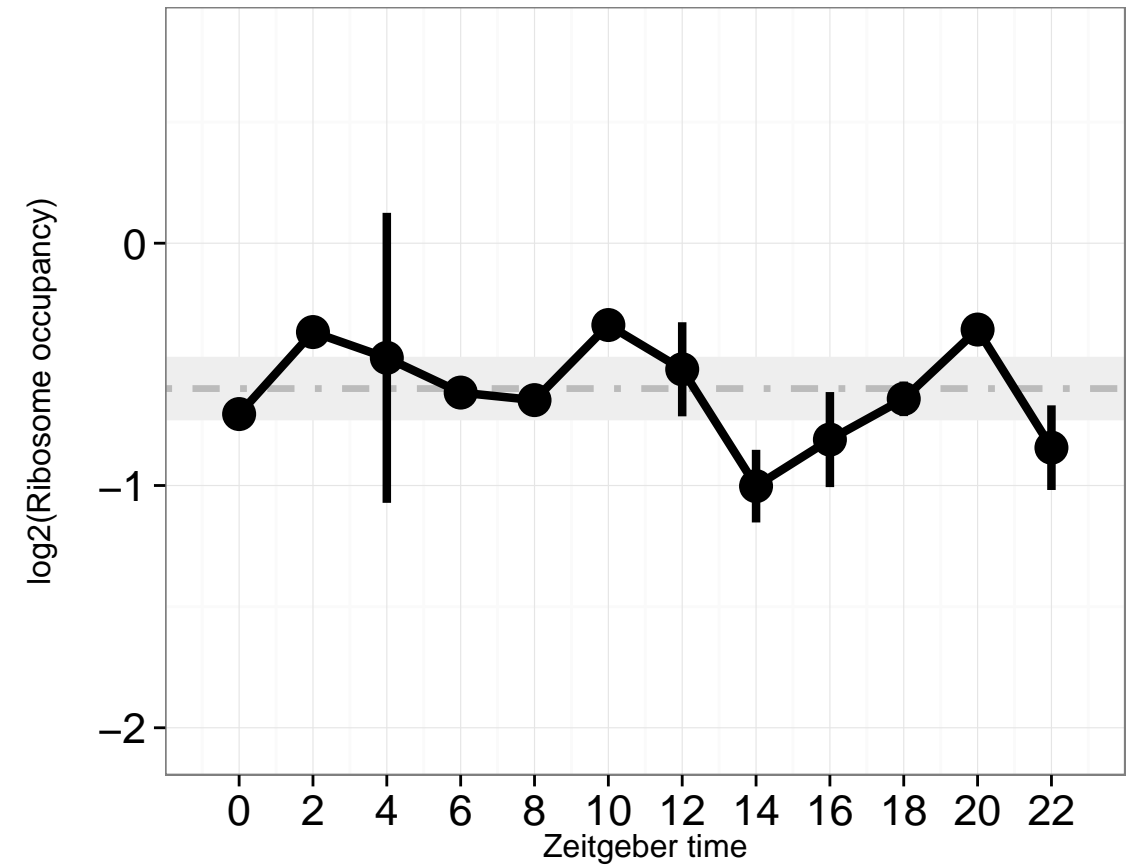

Supplement: Supplementary file 6089 [file 1]

# Slc44a1

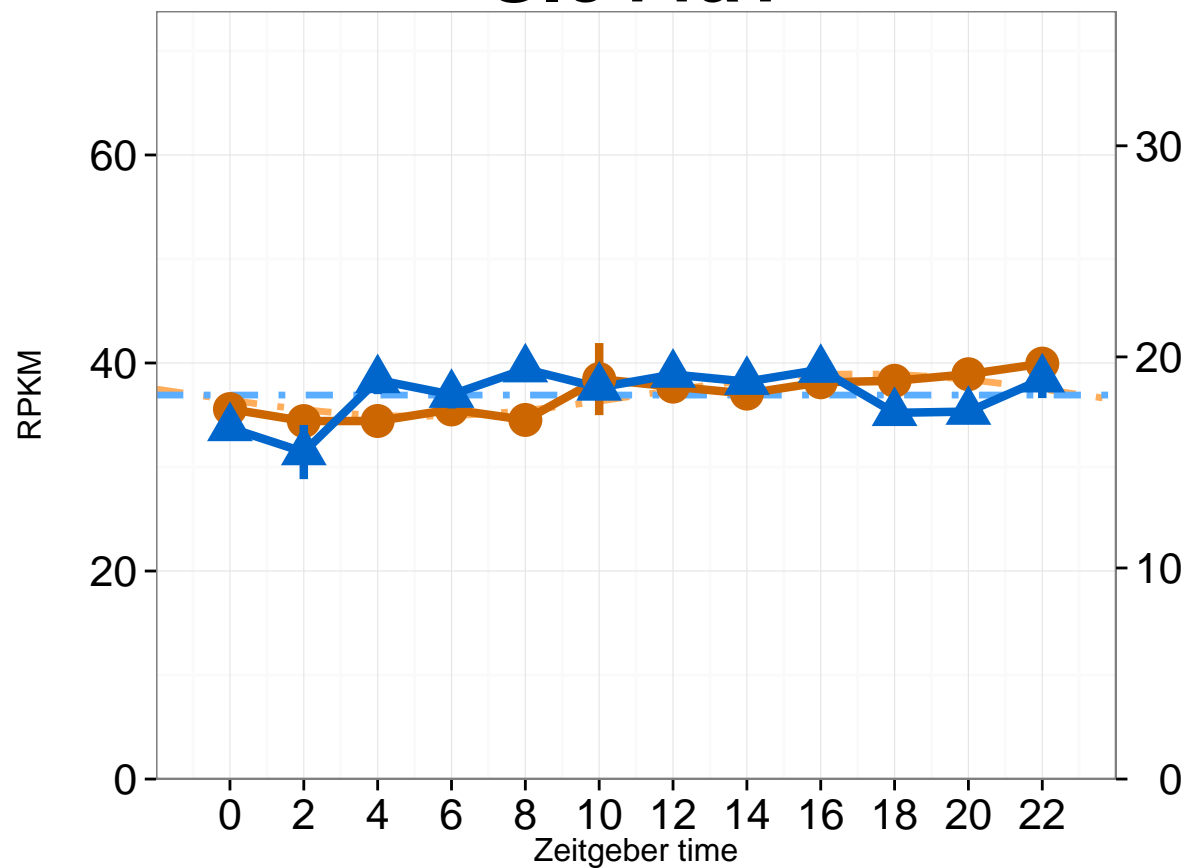

# Slc44a1

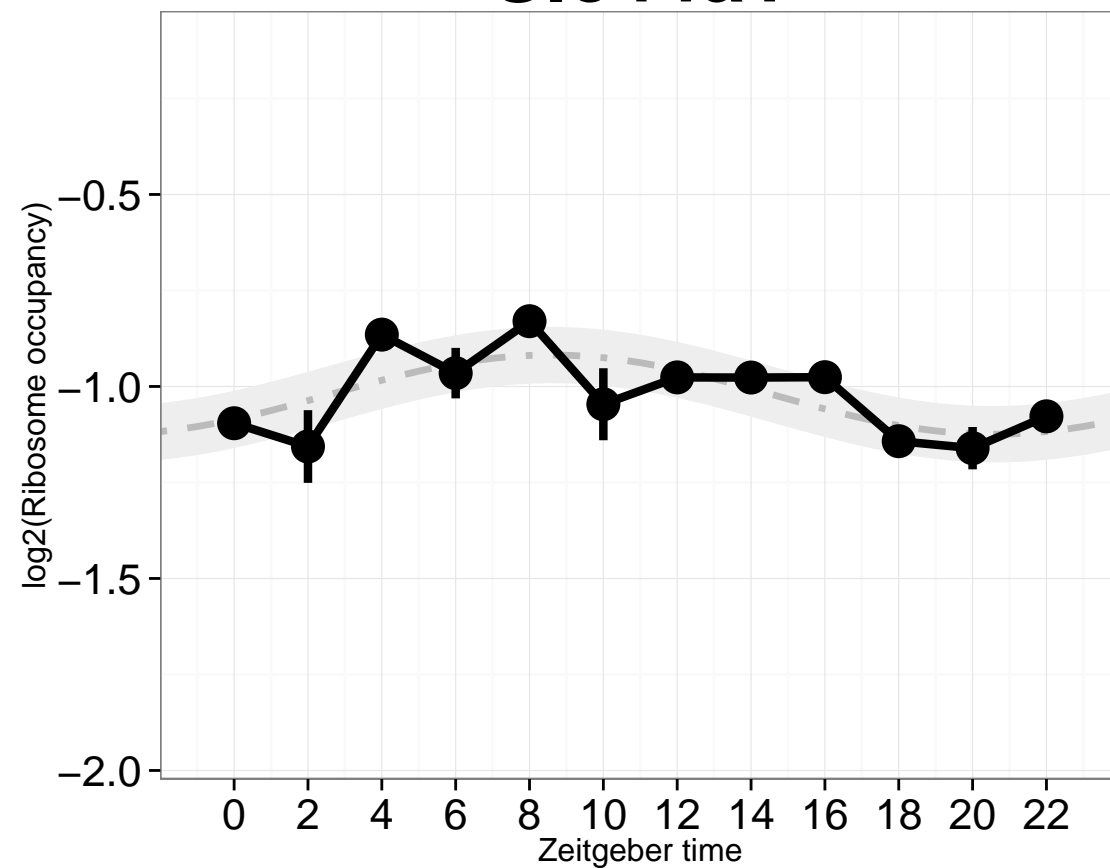

Supplement: Supplementary file 6090 [file 1]

## Dna2

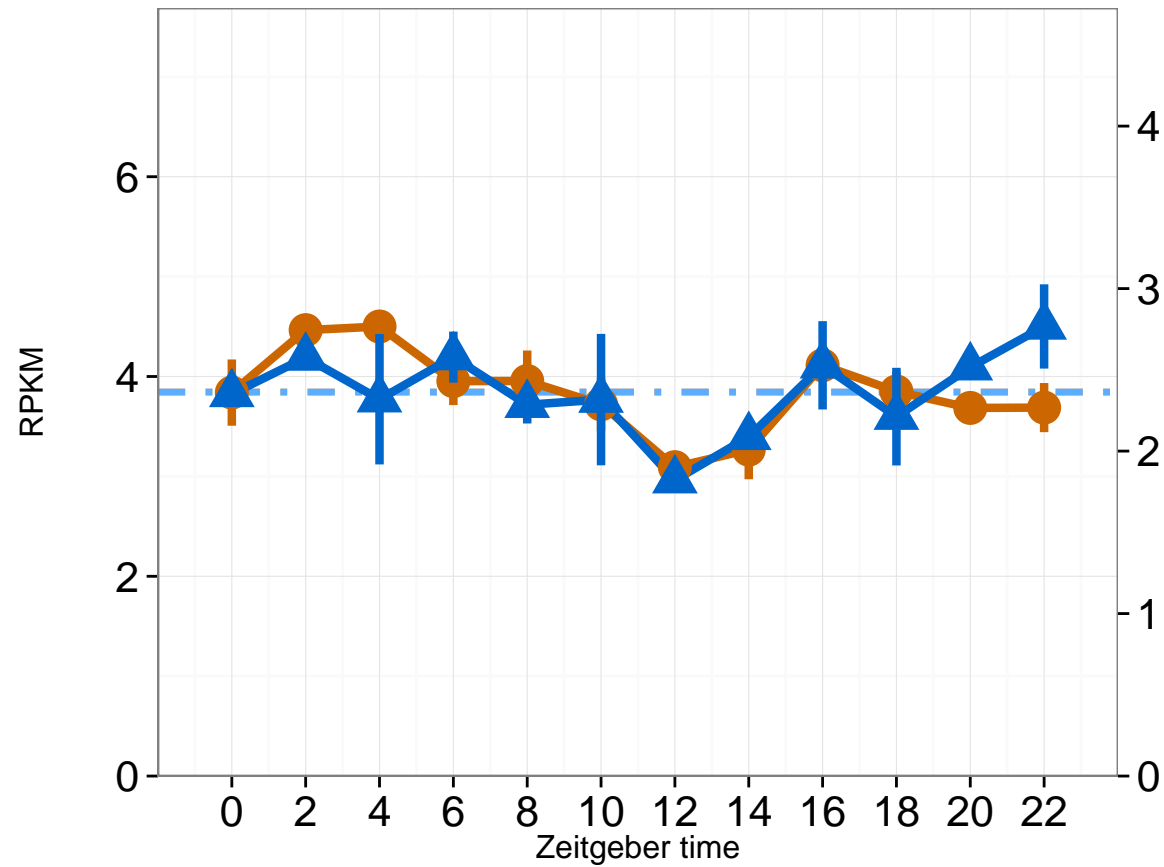

## Dna2

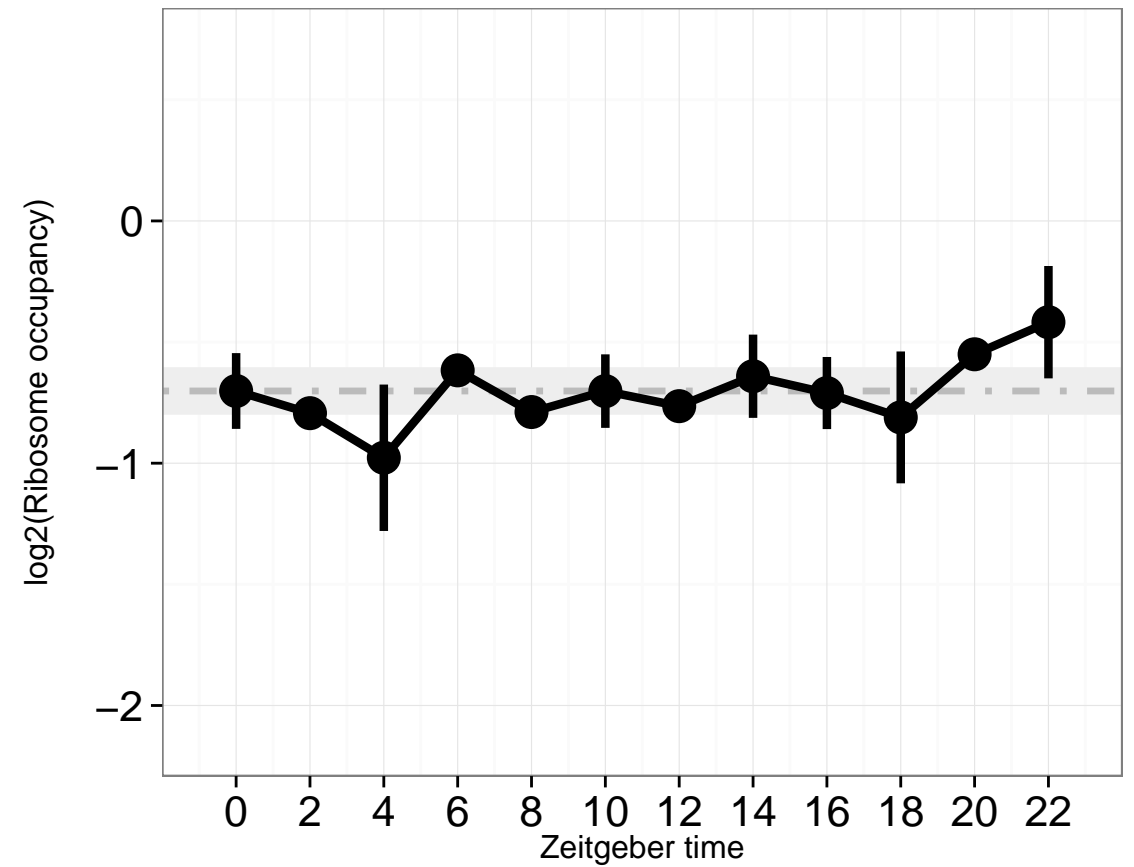

Supplement: Supplementary file 6091 [file 1]

# Dnajc2

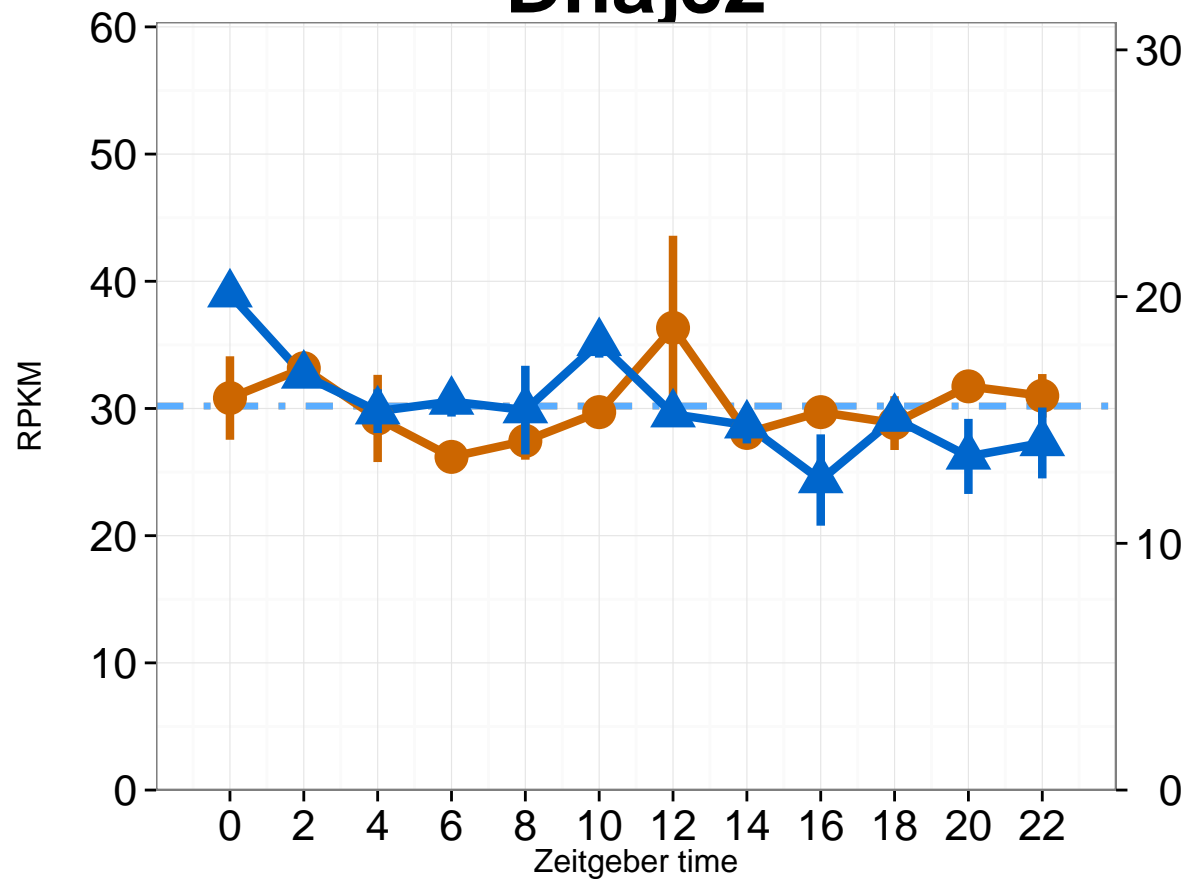

# Dnajc2

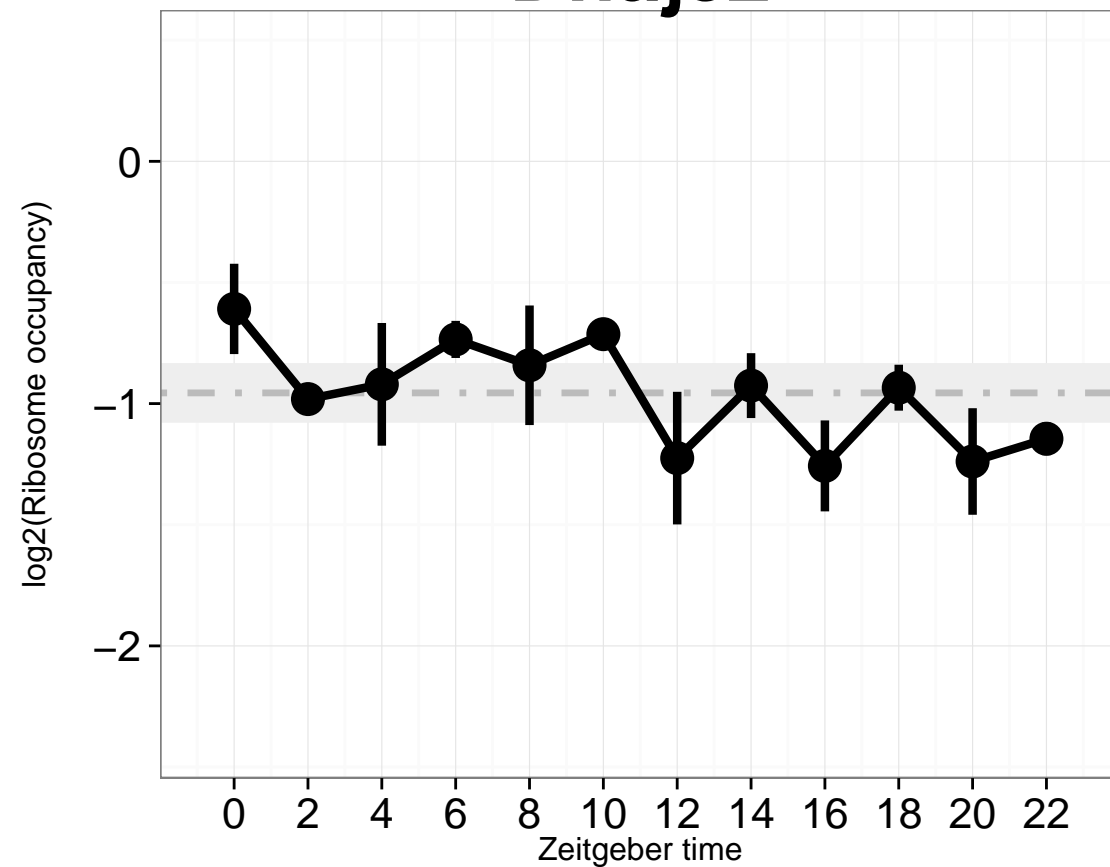

Supplement: Supplementary file 6092 [file 1]

## Eid2

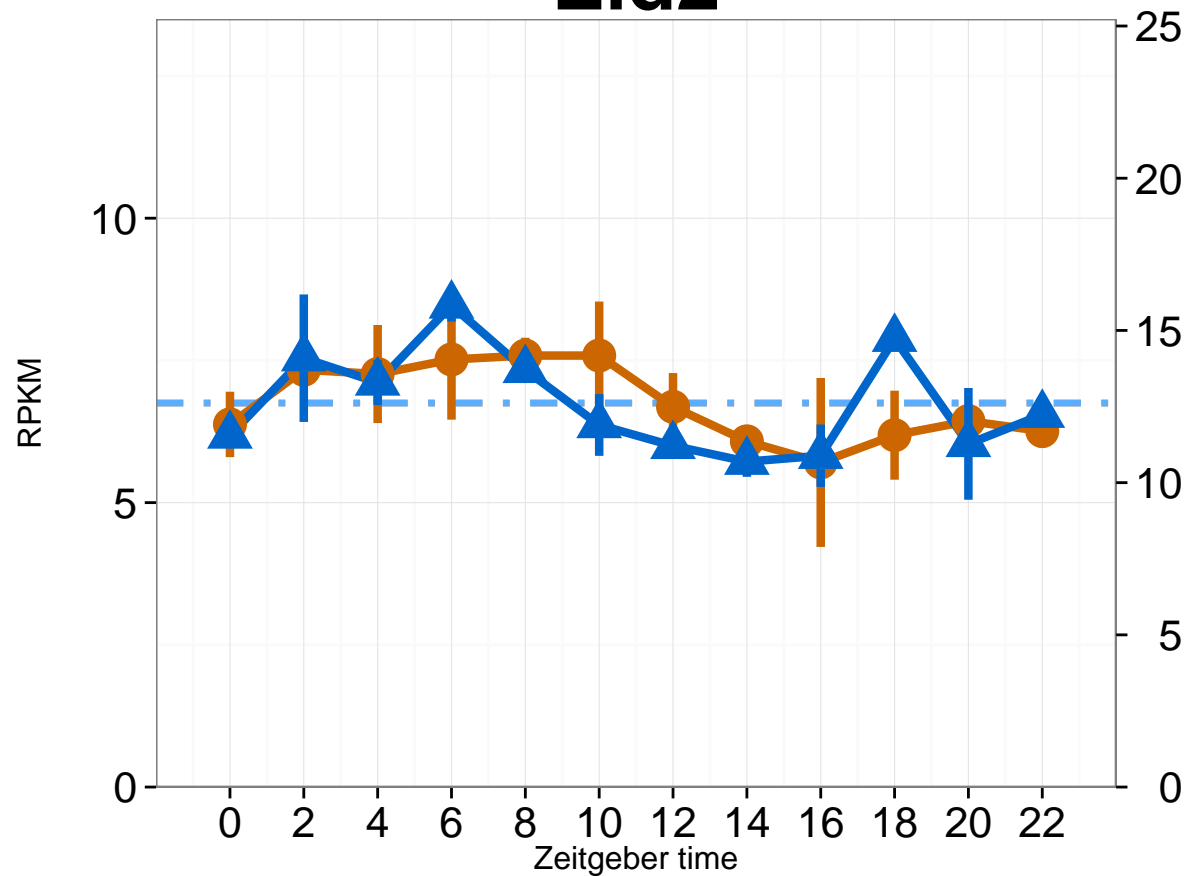

## Eid2

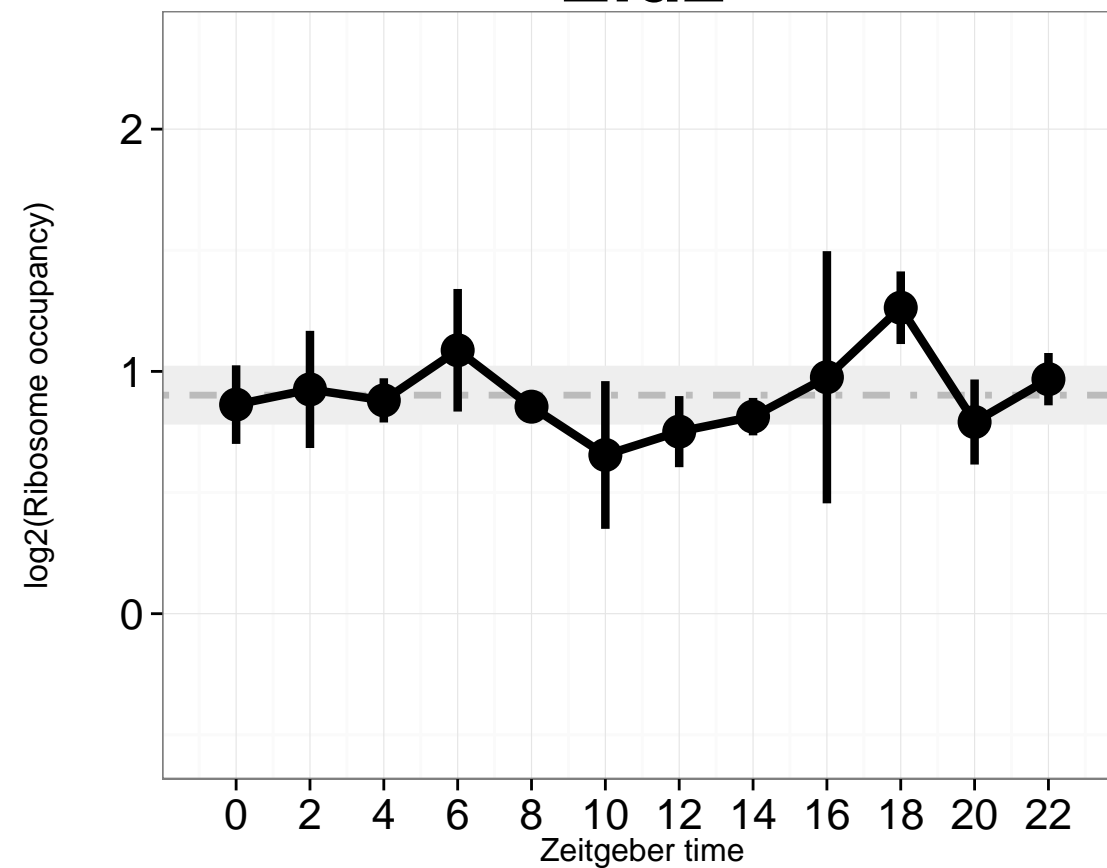

Supplement: Supplementary file 6093 [file 1]

# Cd8a TR

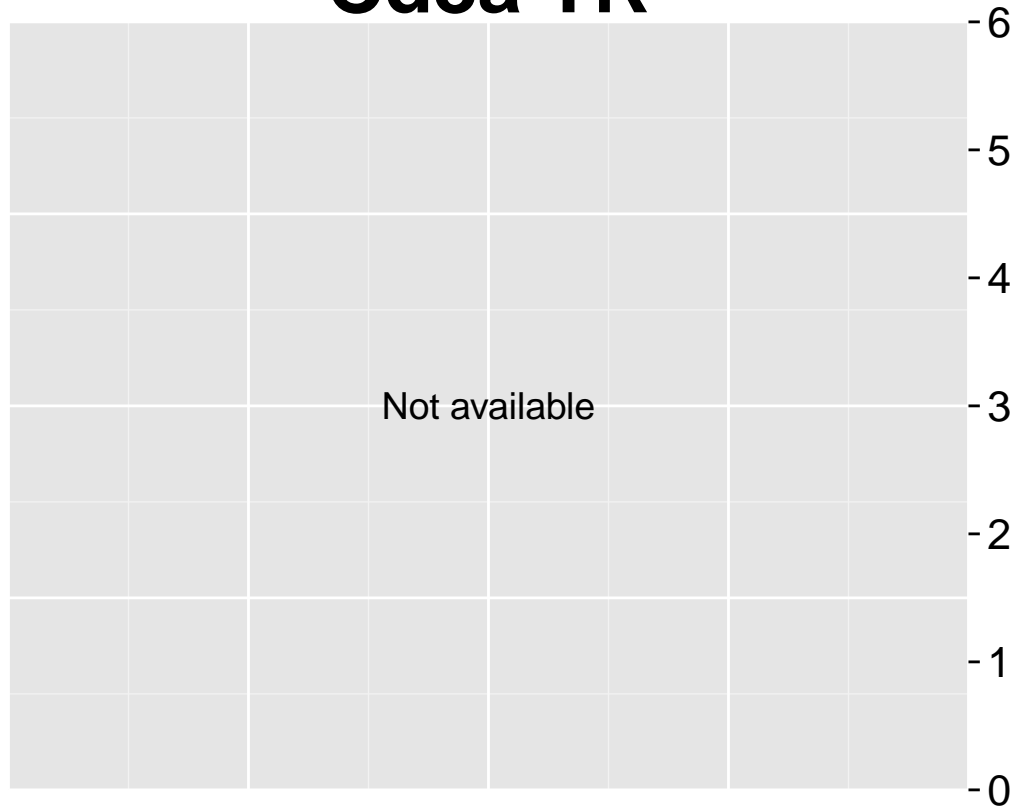

## Cd8a log2(Ribosome occupancy)

Supplement: Supplementary file 6094 [file 1]

## Zfp595

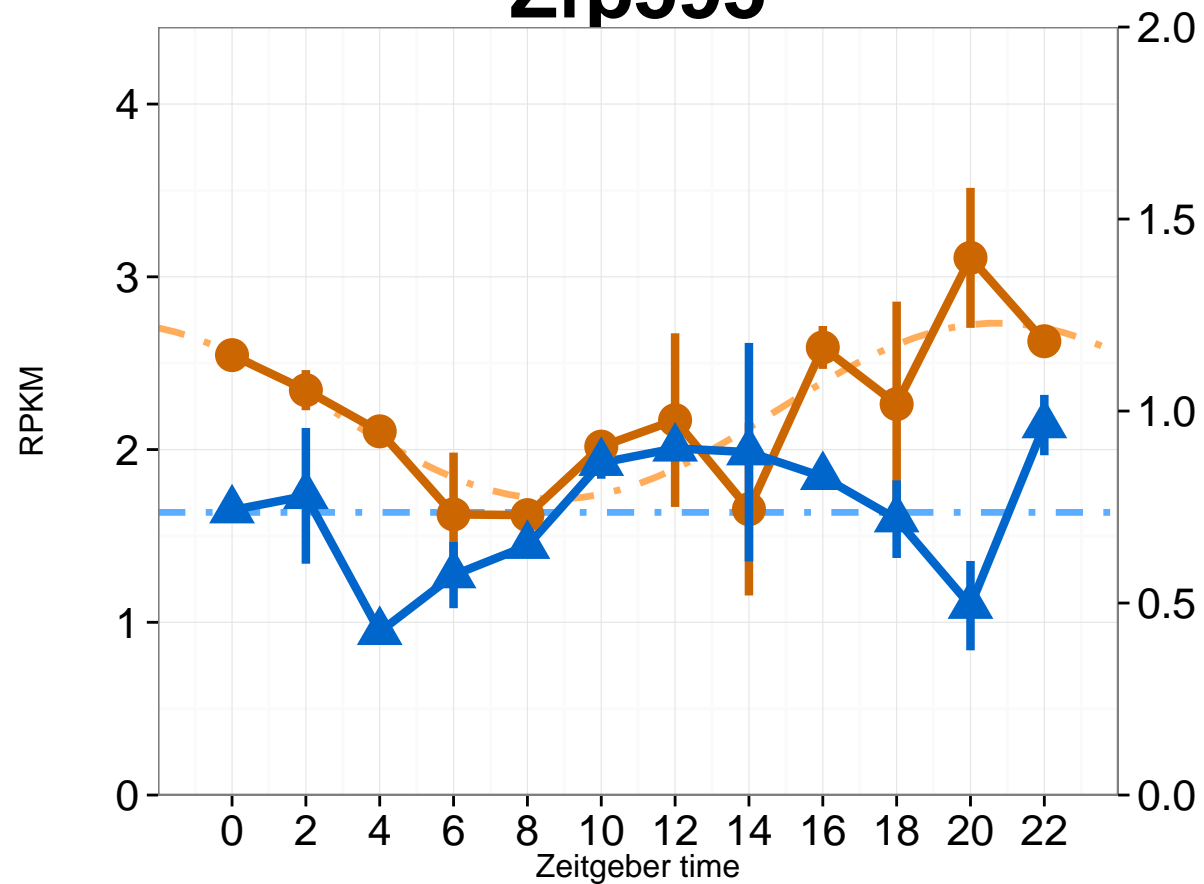

## Zfp595

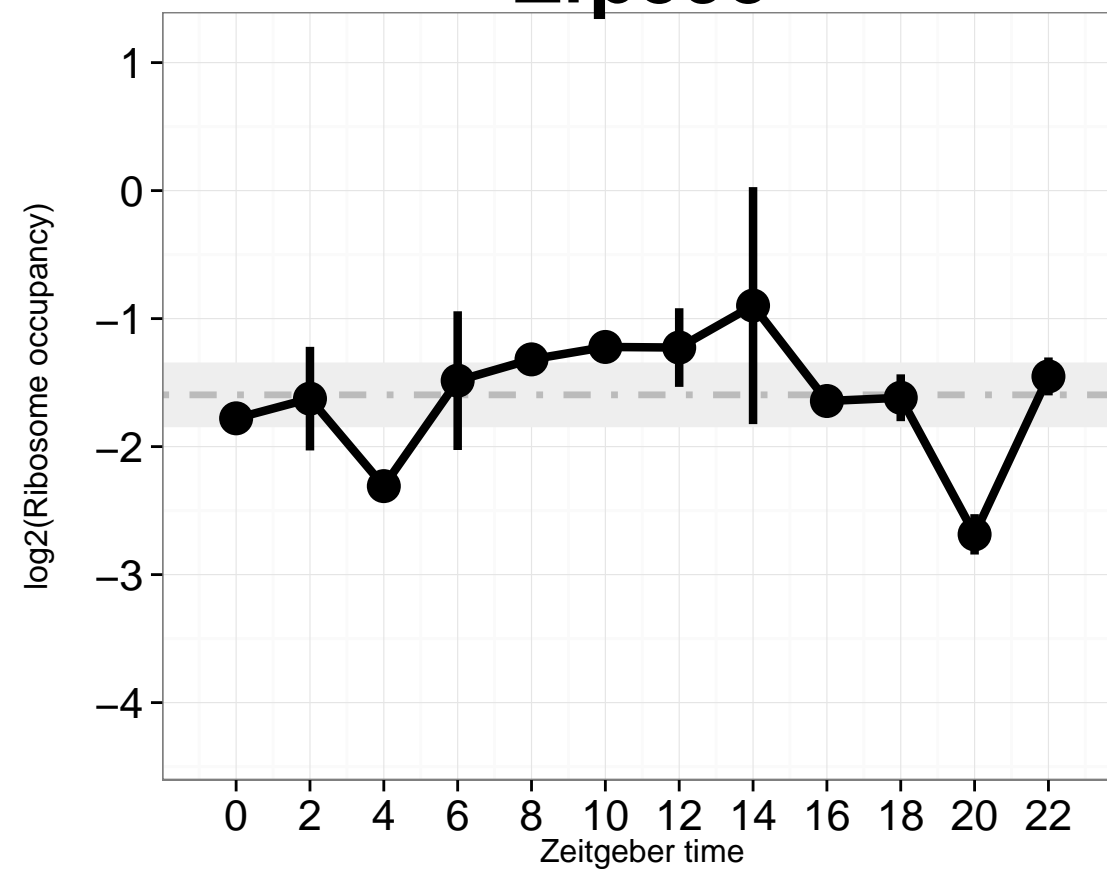

Supplement: Supplementary file 6095 [file 1]

## Spryd4

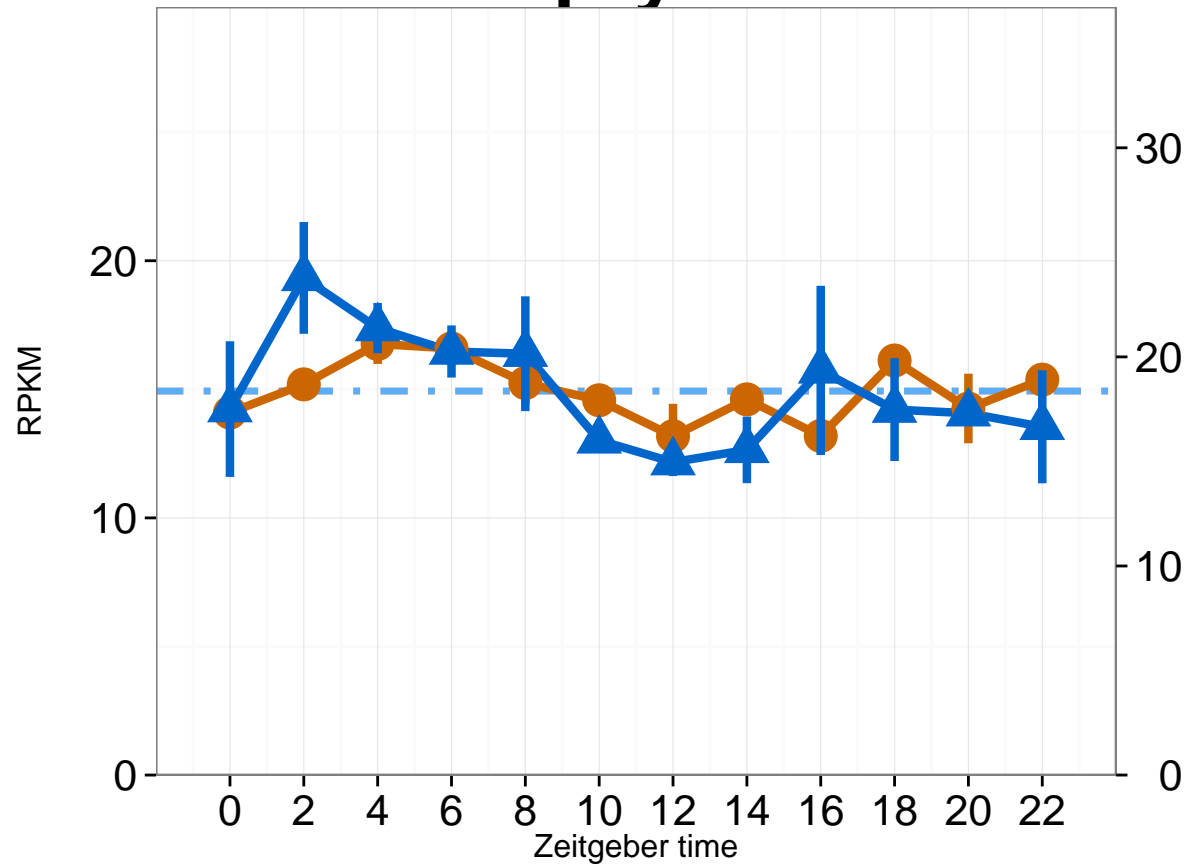

## Spryd4

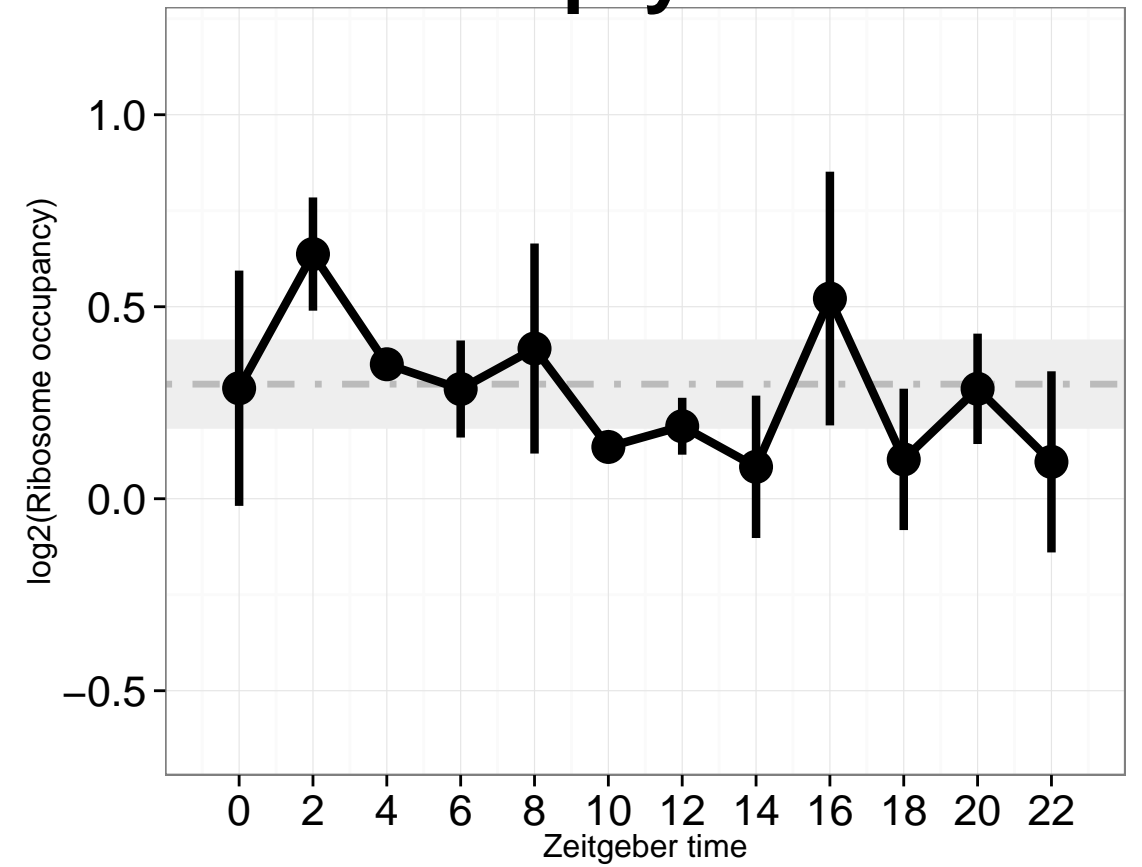

Supplement: Supplementary file 6096 [file 1]

# Tsen54

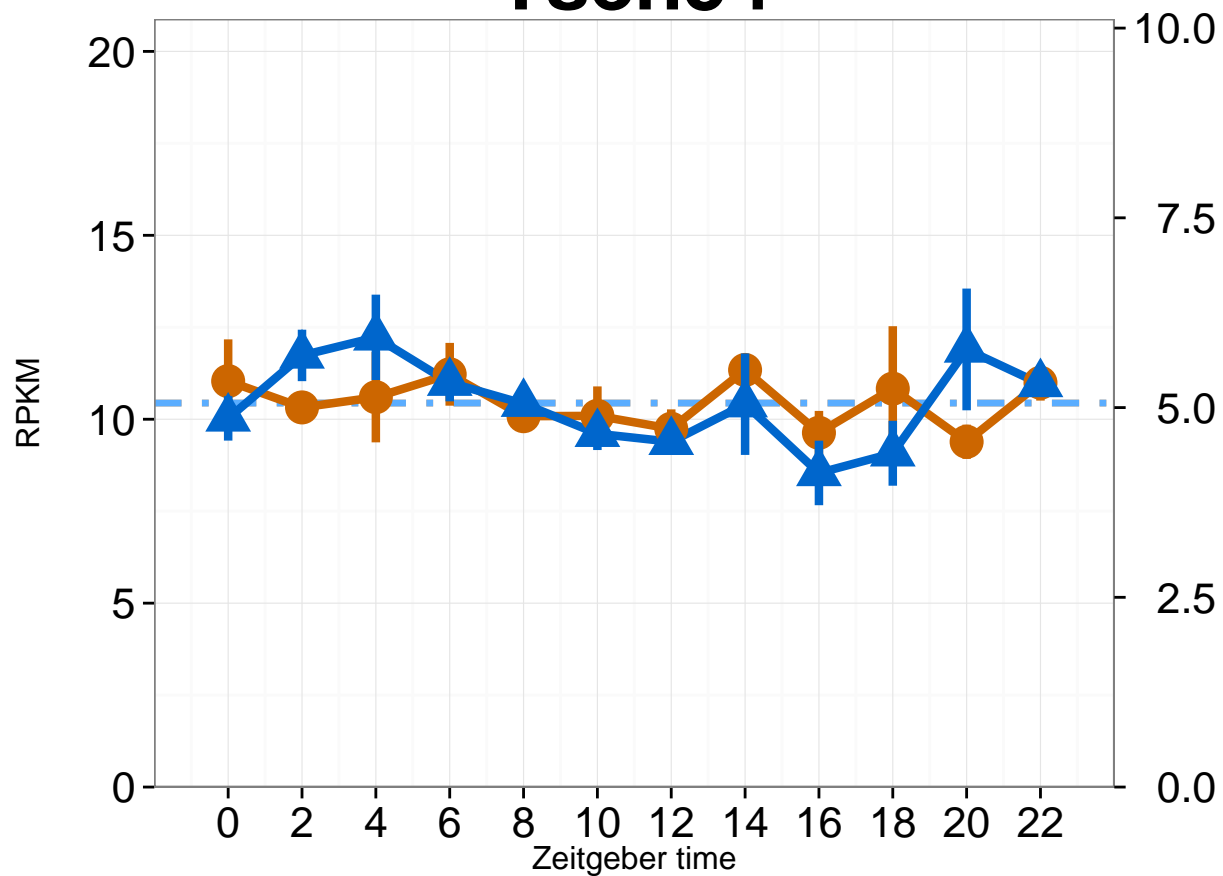

# Tsen54

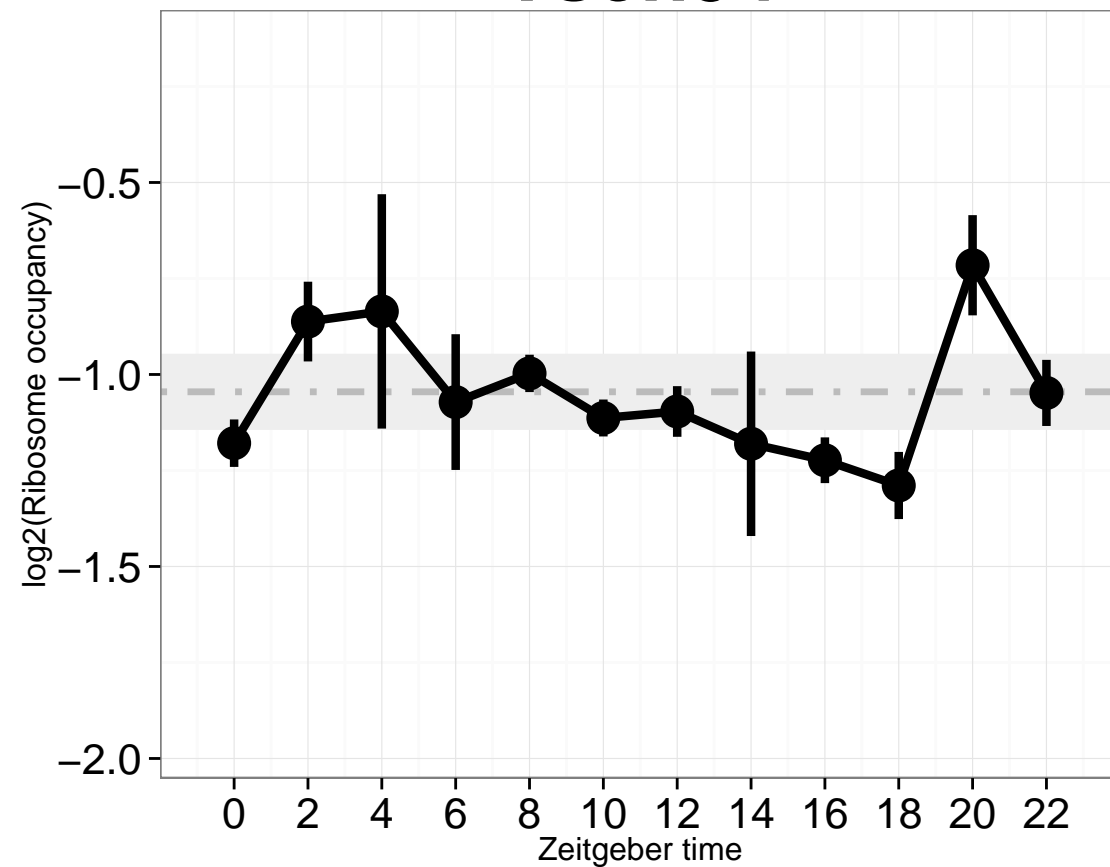

Supplement: Supplementary file 6097 [file 1]

# Wdr12

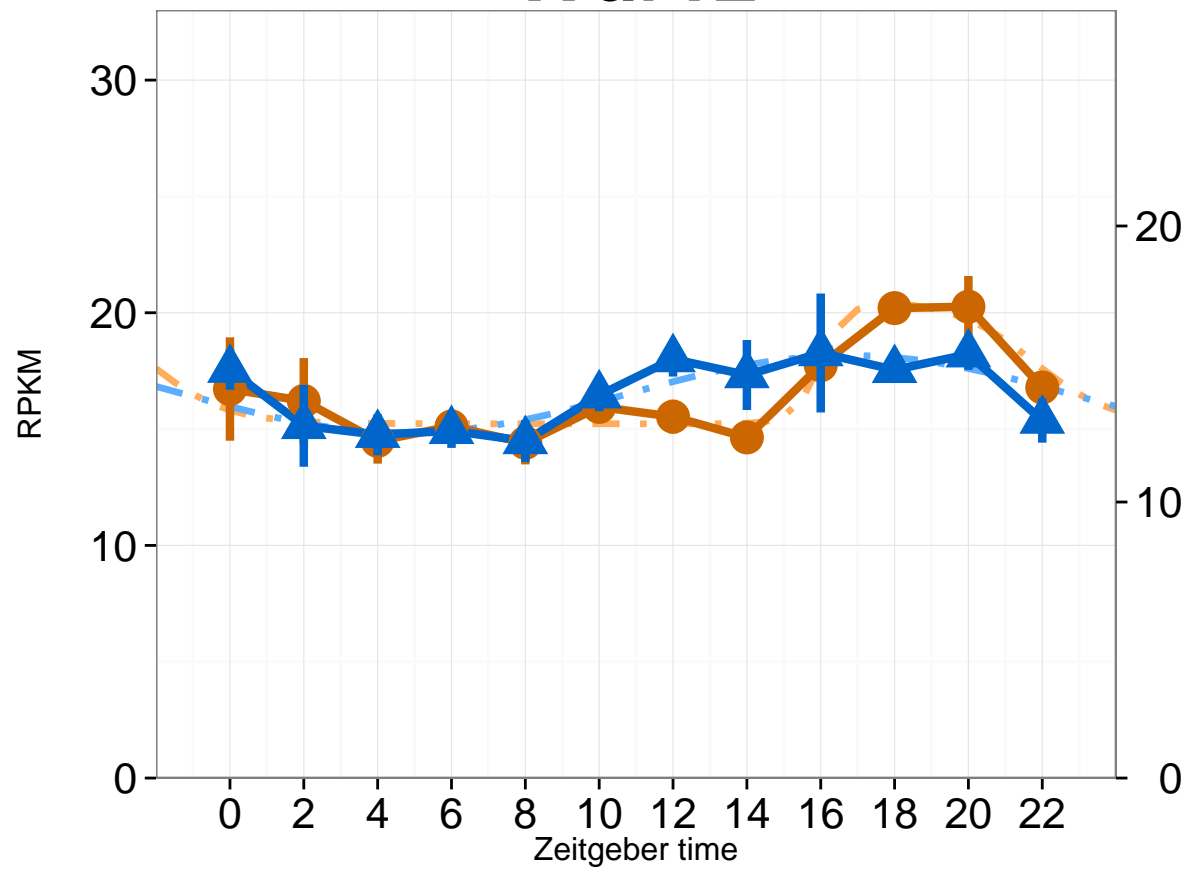

# Wdr12

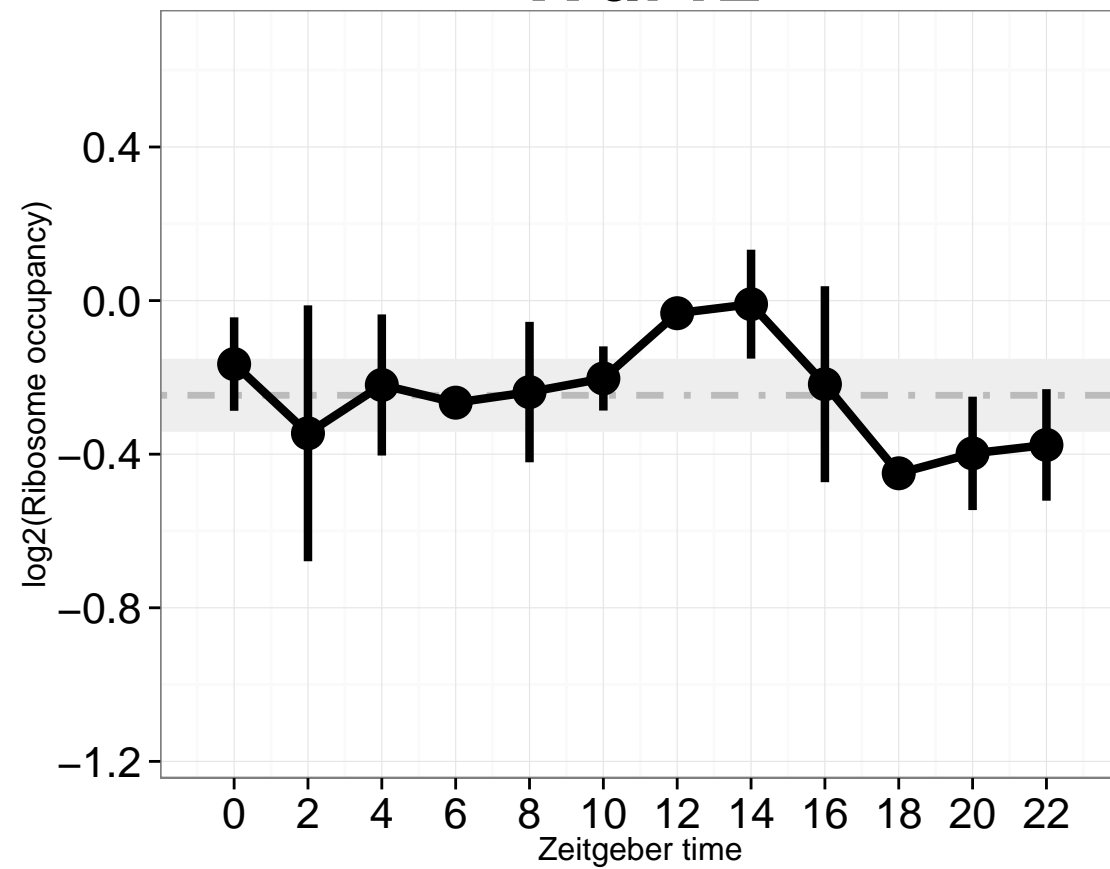

Supplement: Supplementary file 6098 [file 1]

# Trappc10

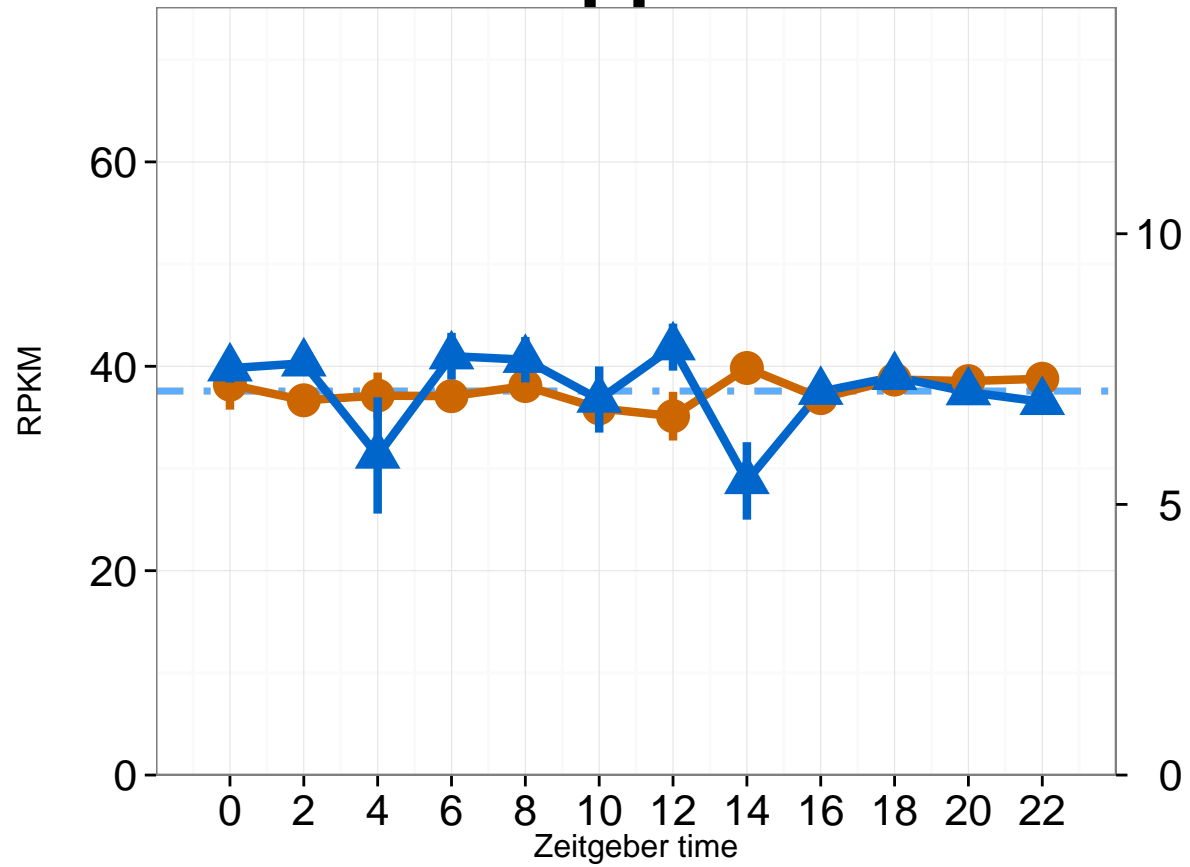

# Trappc10

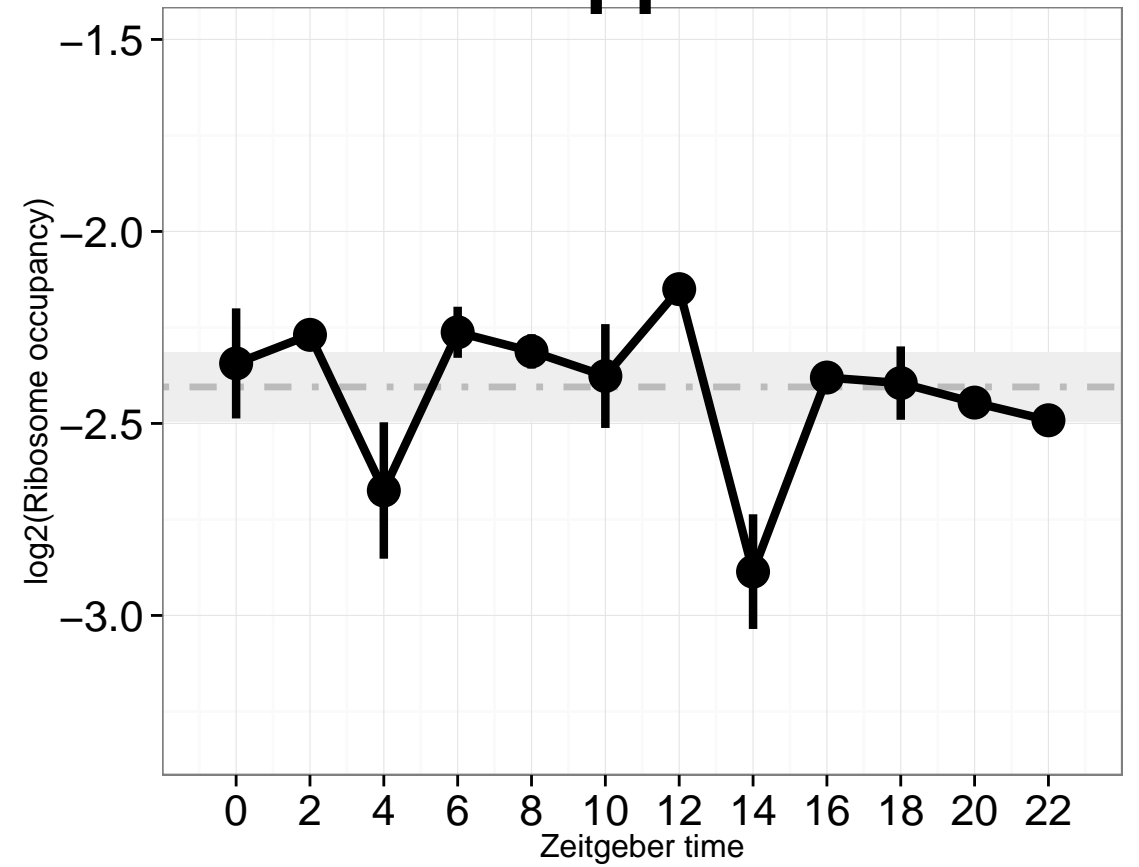

Supplement: Supplementary file 6099 [file 1]

## Mas1

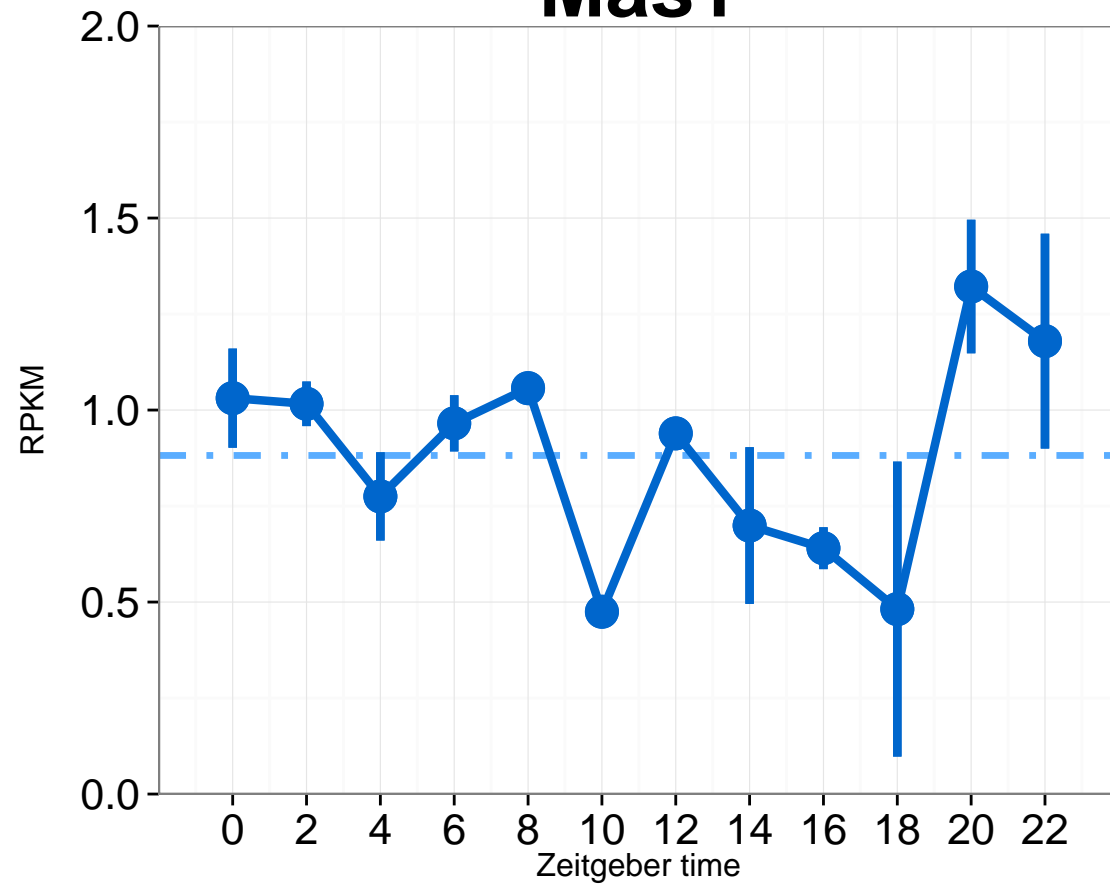

## Mas1 log<sub>2</sub>(Ribosome occupancy)

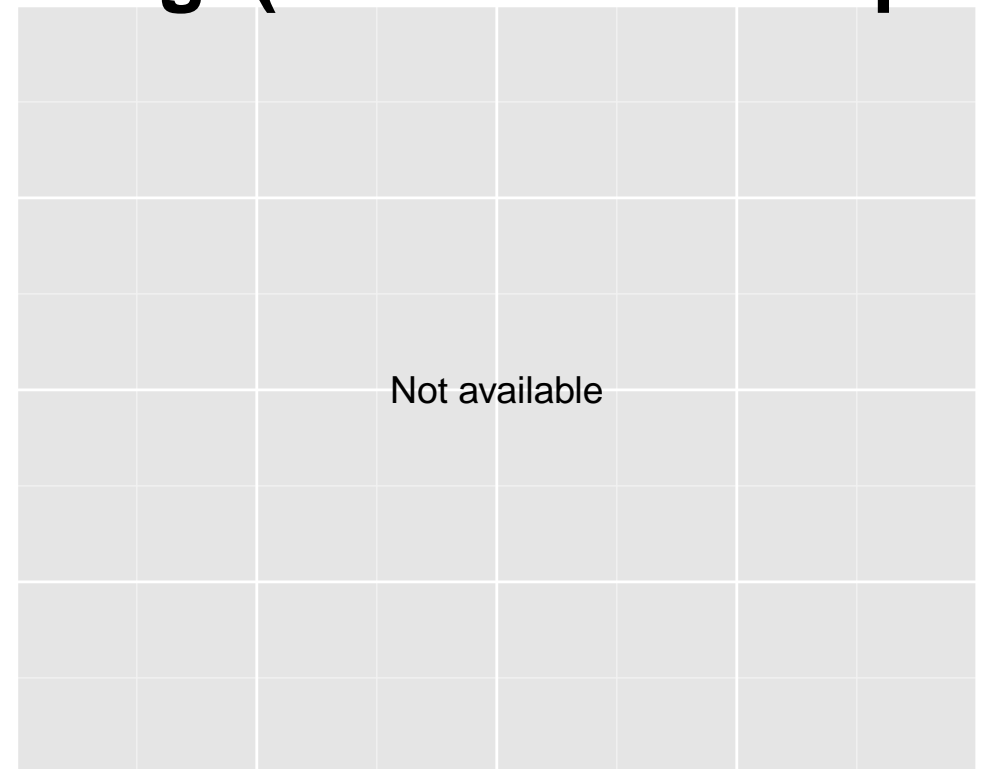

Supplement: Supplementary file 6100 [file 1]

# Prom1

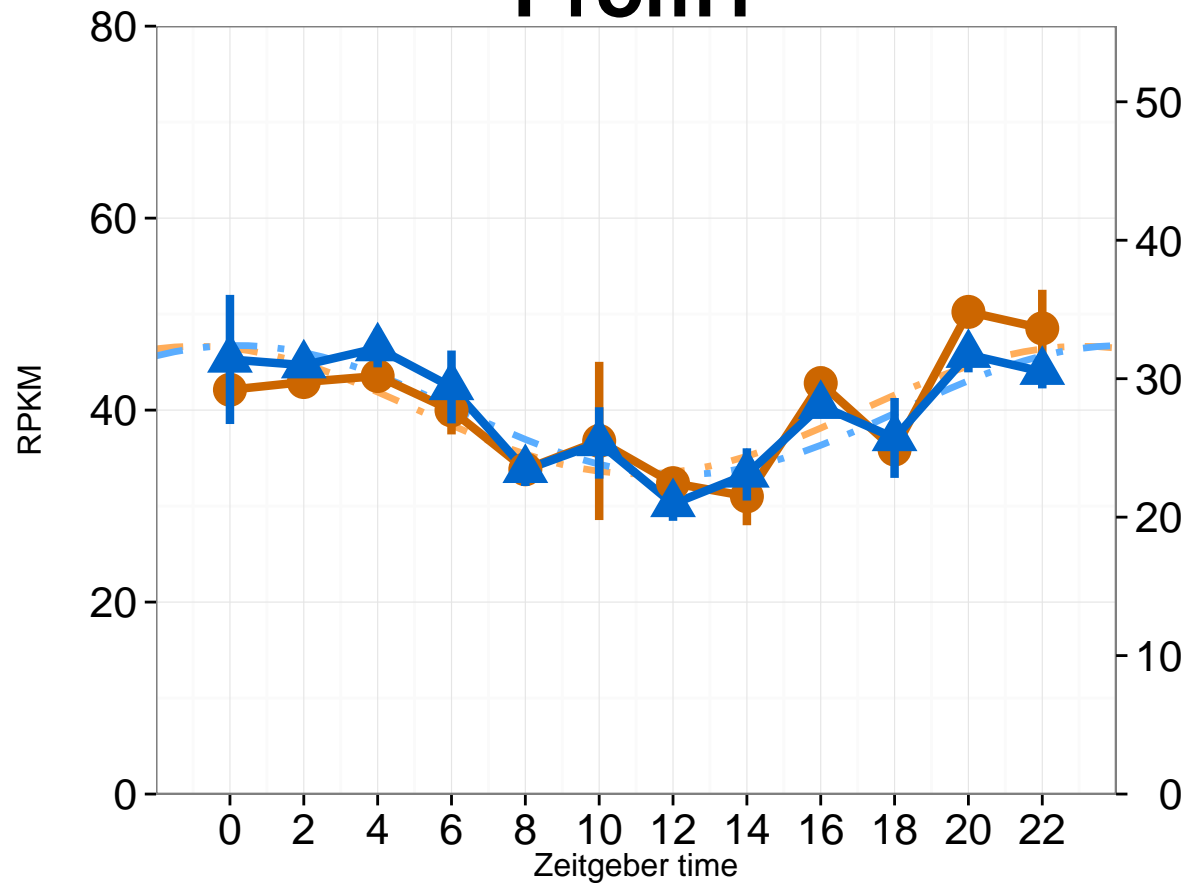

# Prom1

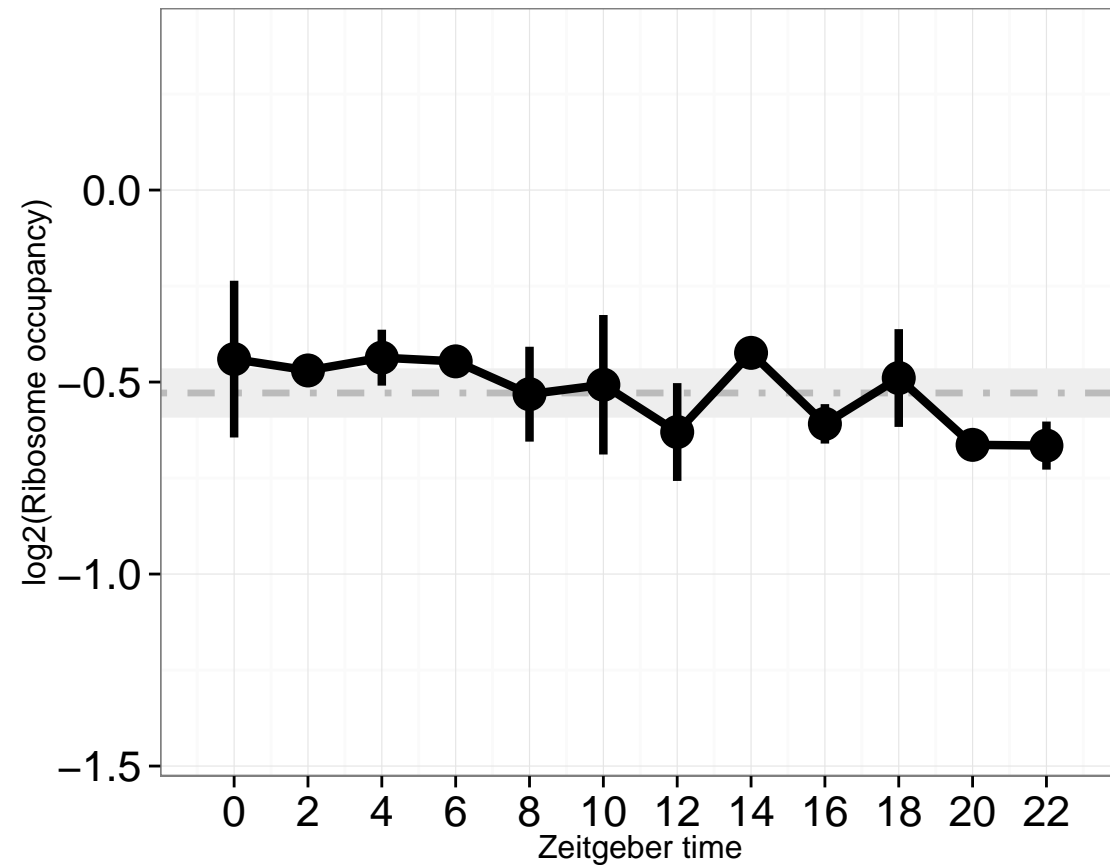

Supplement: Supplementary file 6101 [file 1]

# Atxn7l2

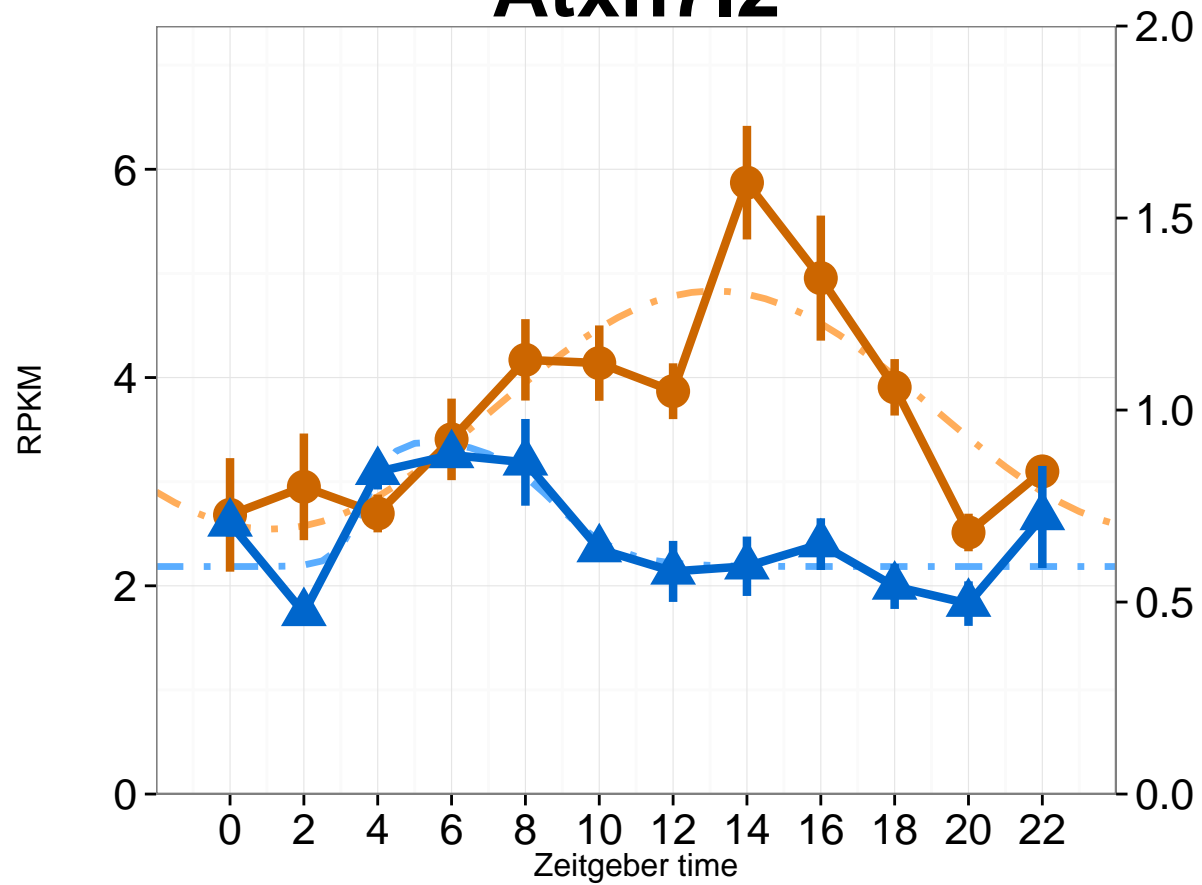

# Atxn7l2

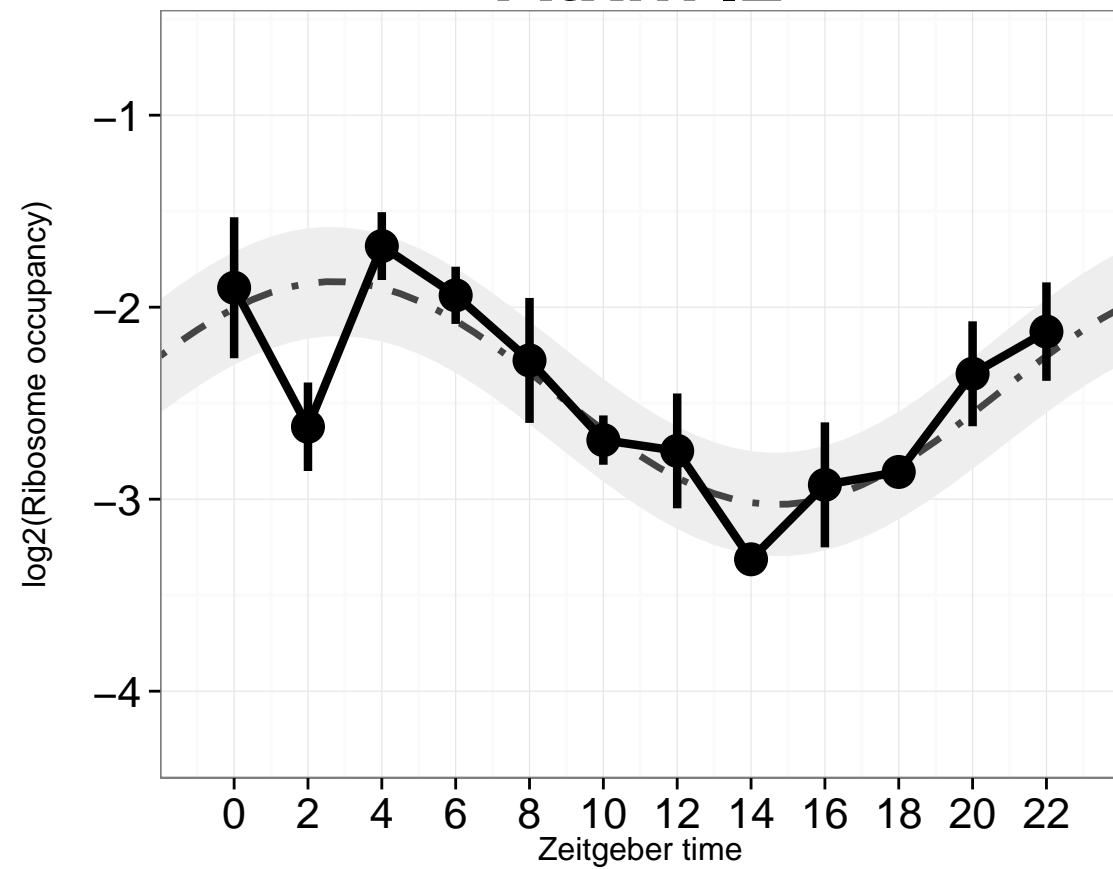

Supplement: Supplementary file 6102 [file 1]

# Arhgef37

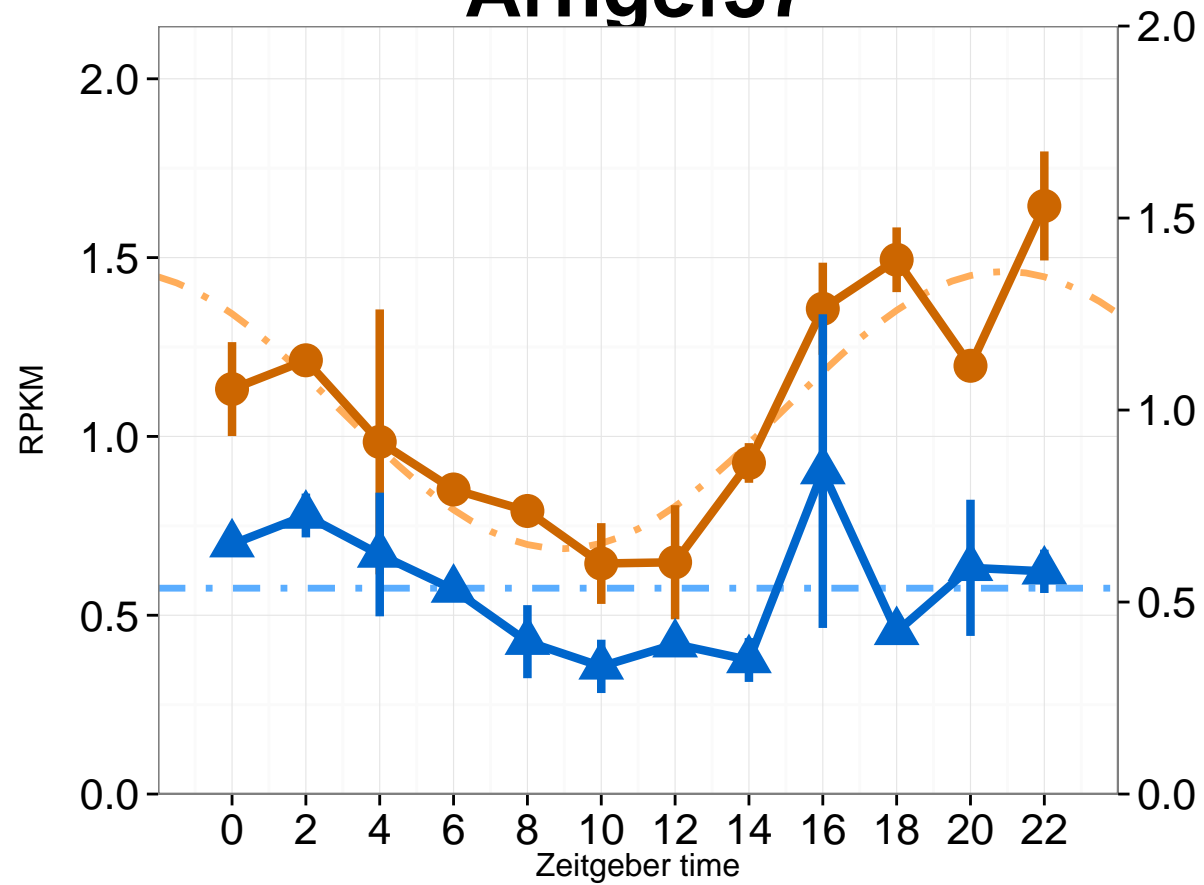

# Arhgef37

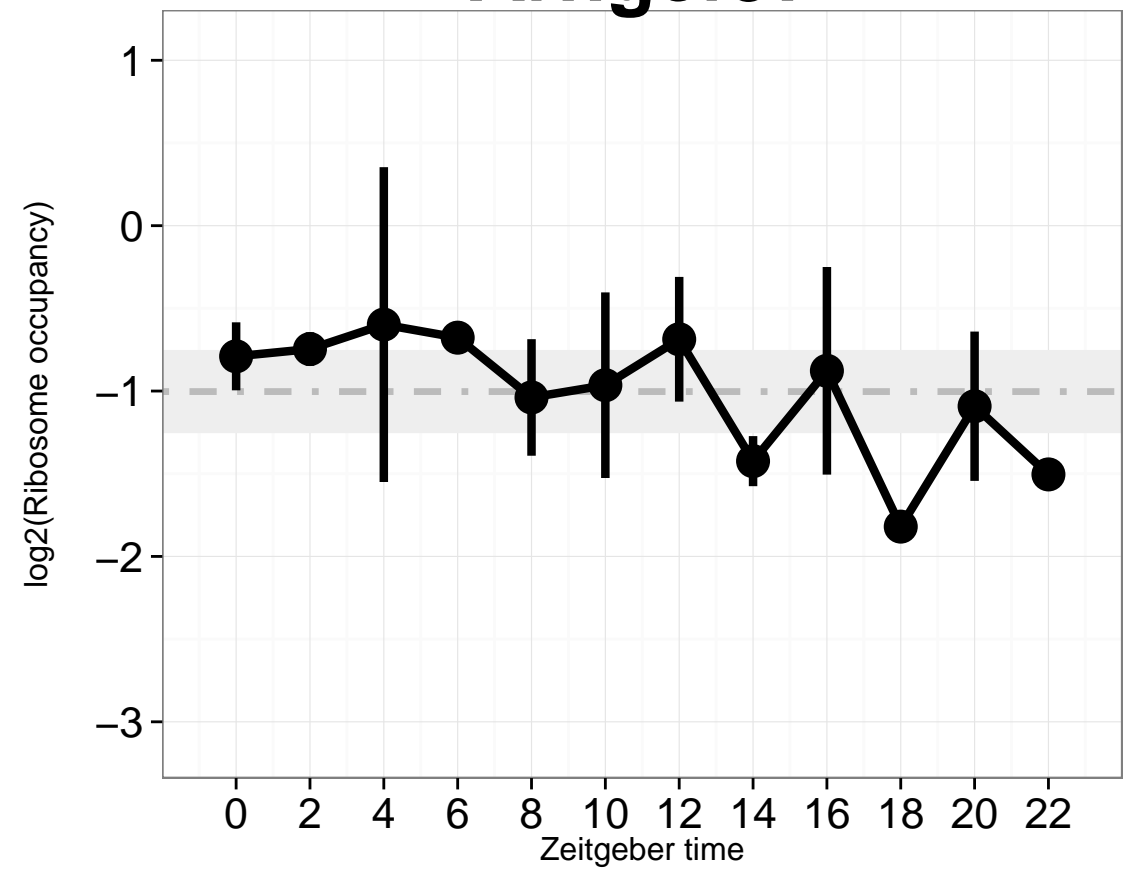

Supplement: Supplementary file 6103 [file 1]

## Lman1

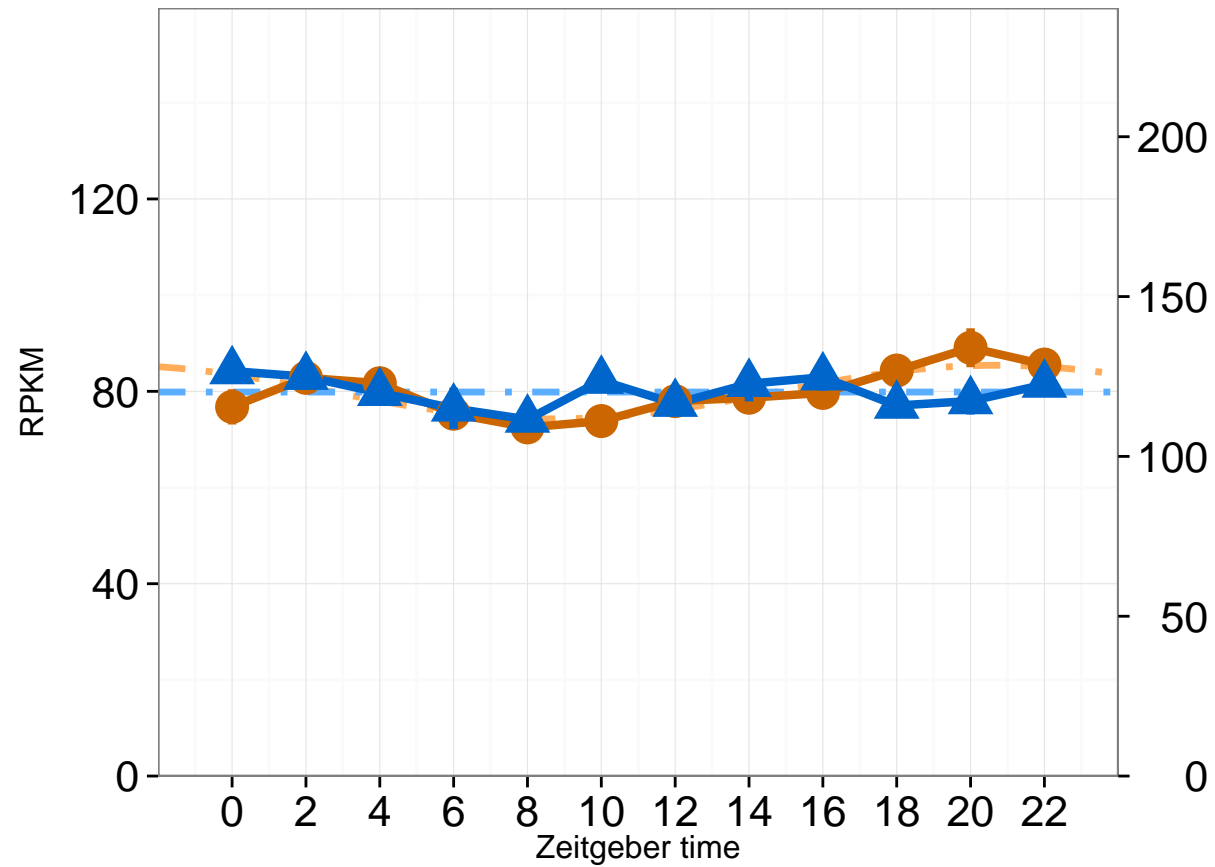

## Lman1

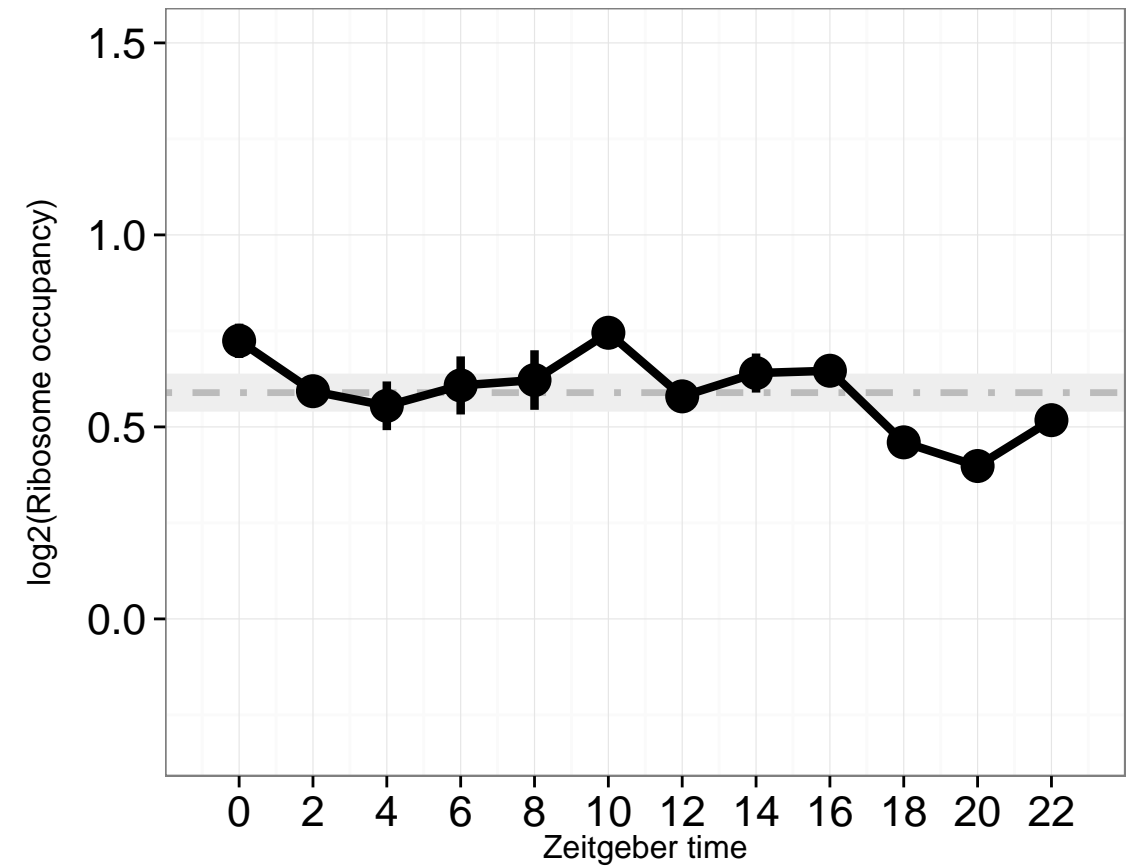

Supplement: Supplementary file 6104 [file 1]

# Flot1

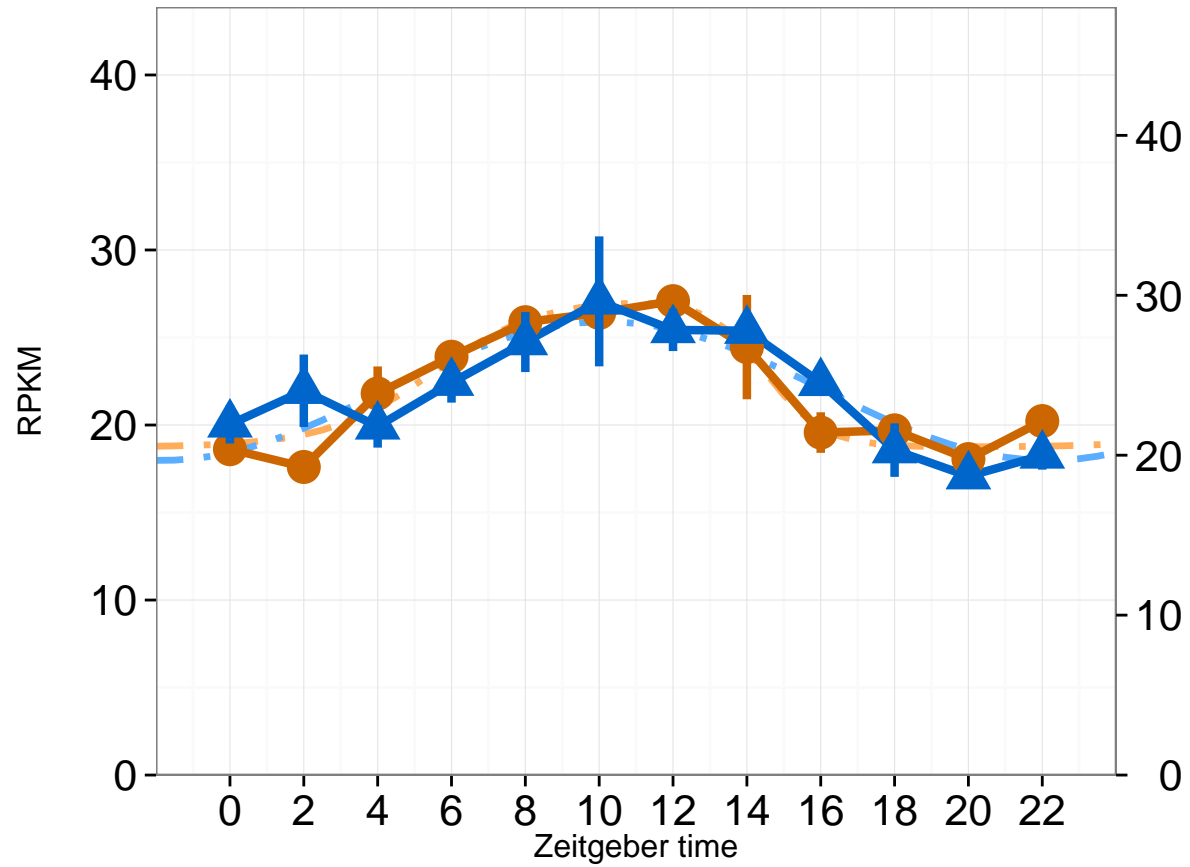

# Flot1

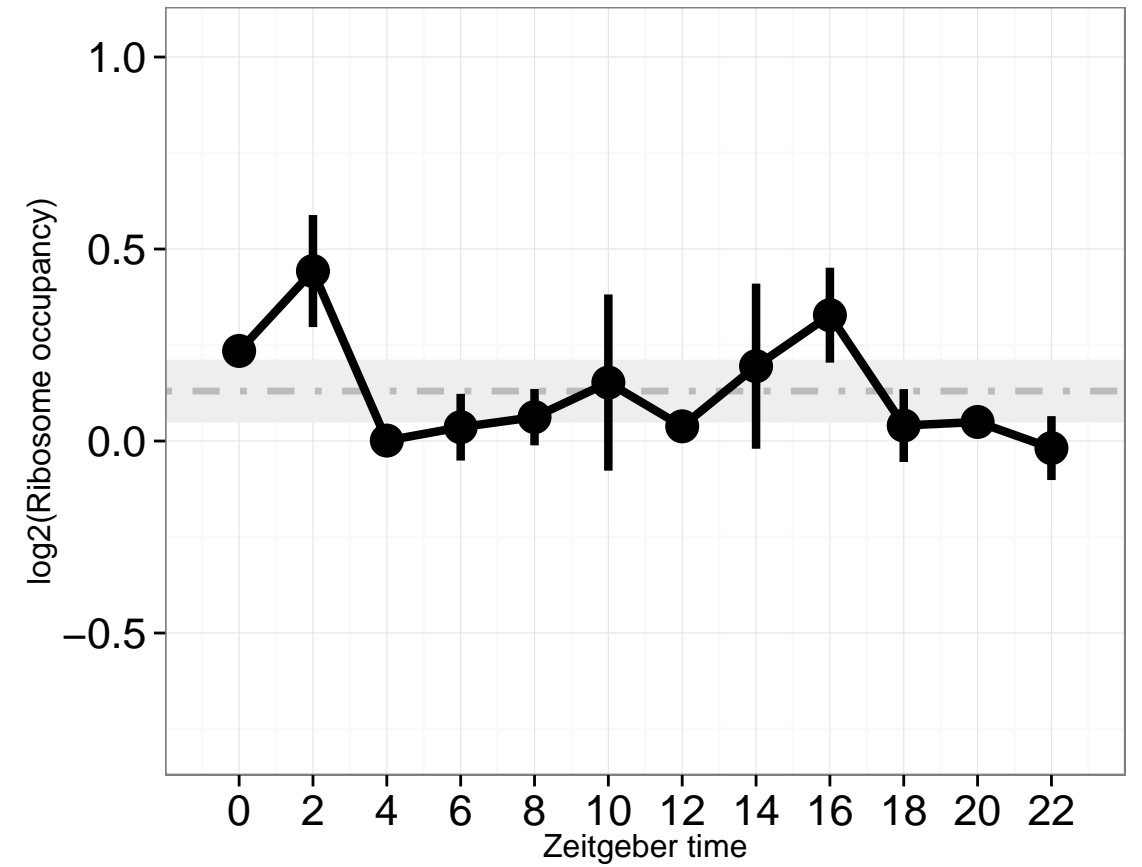

Supplement: Supplementary file 6105 [file 1]

## Mphosph10

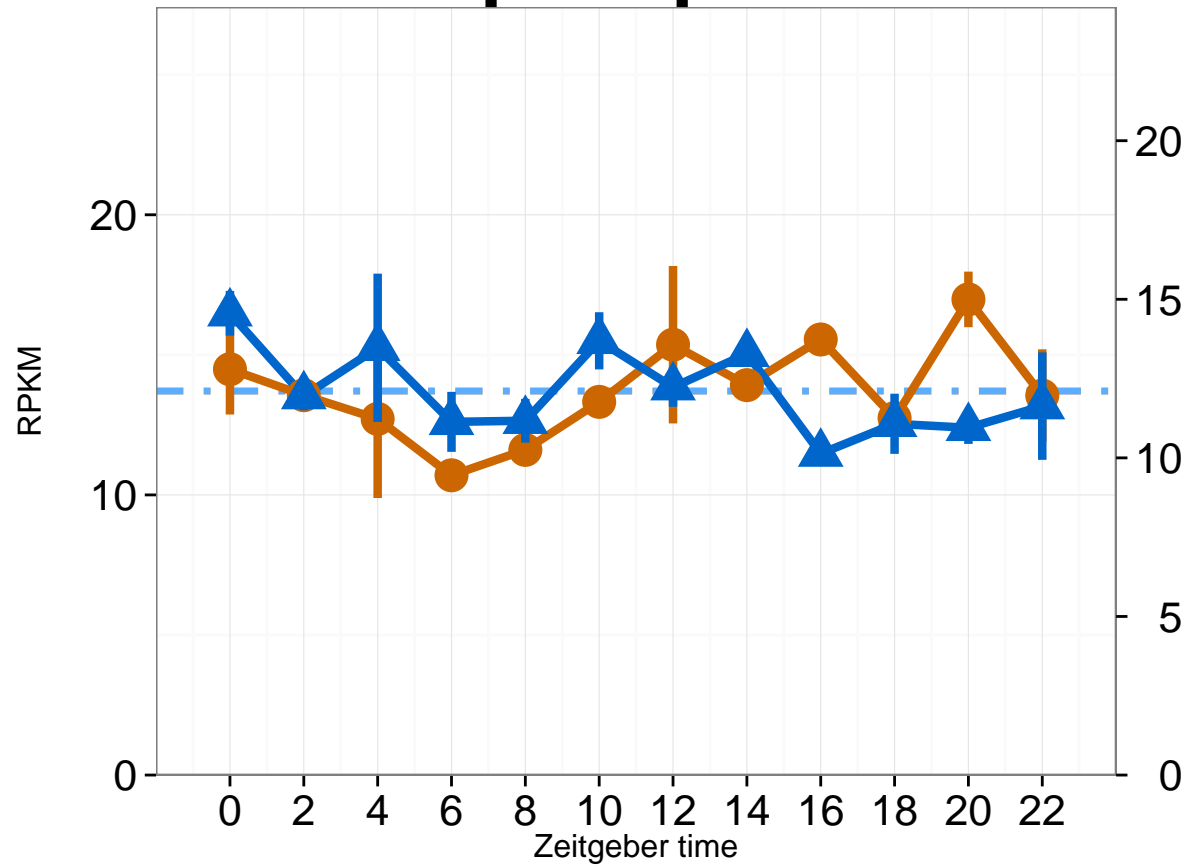

## Mphosph10

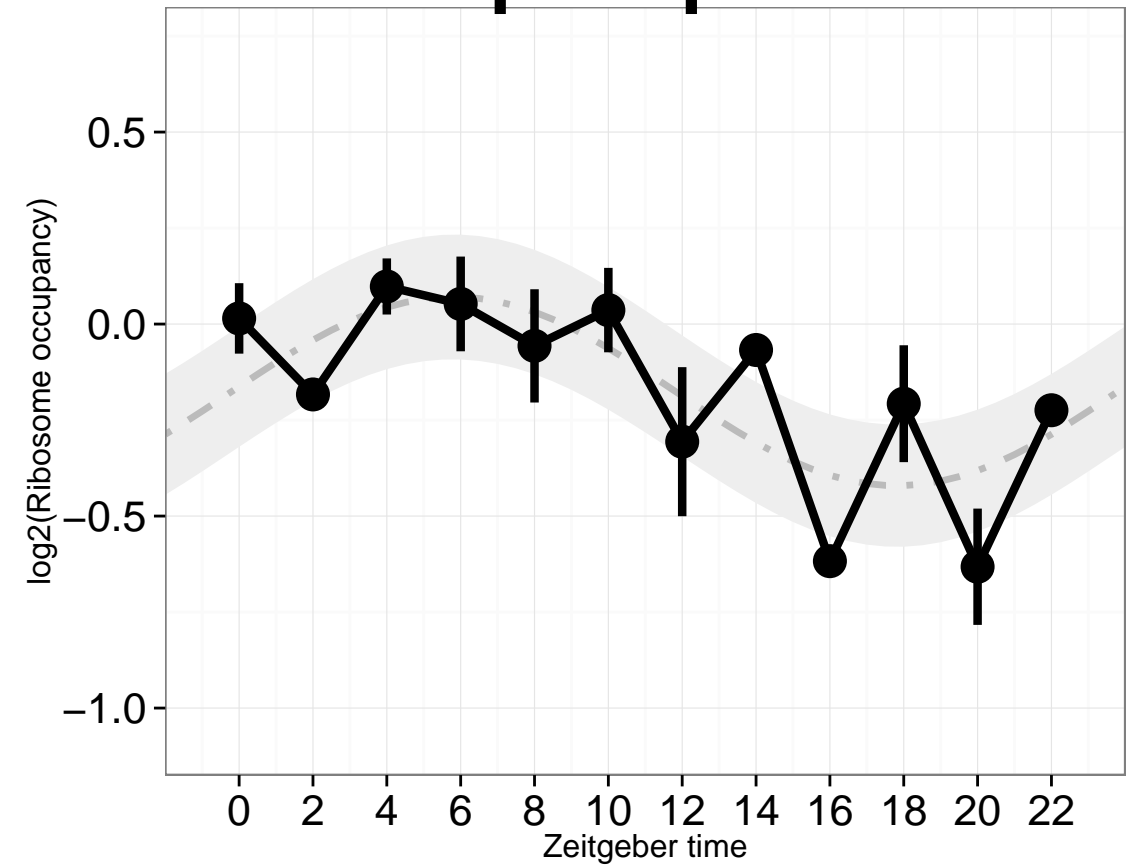

Supplement: Supplementary file 6106 [file 1]

# Tmem179b

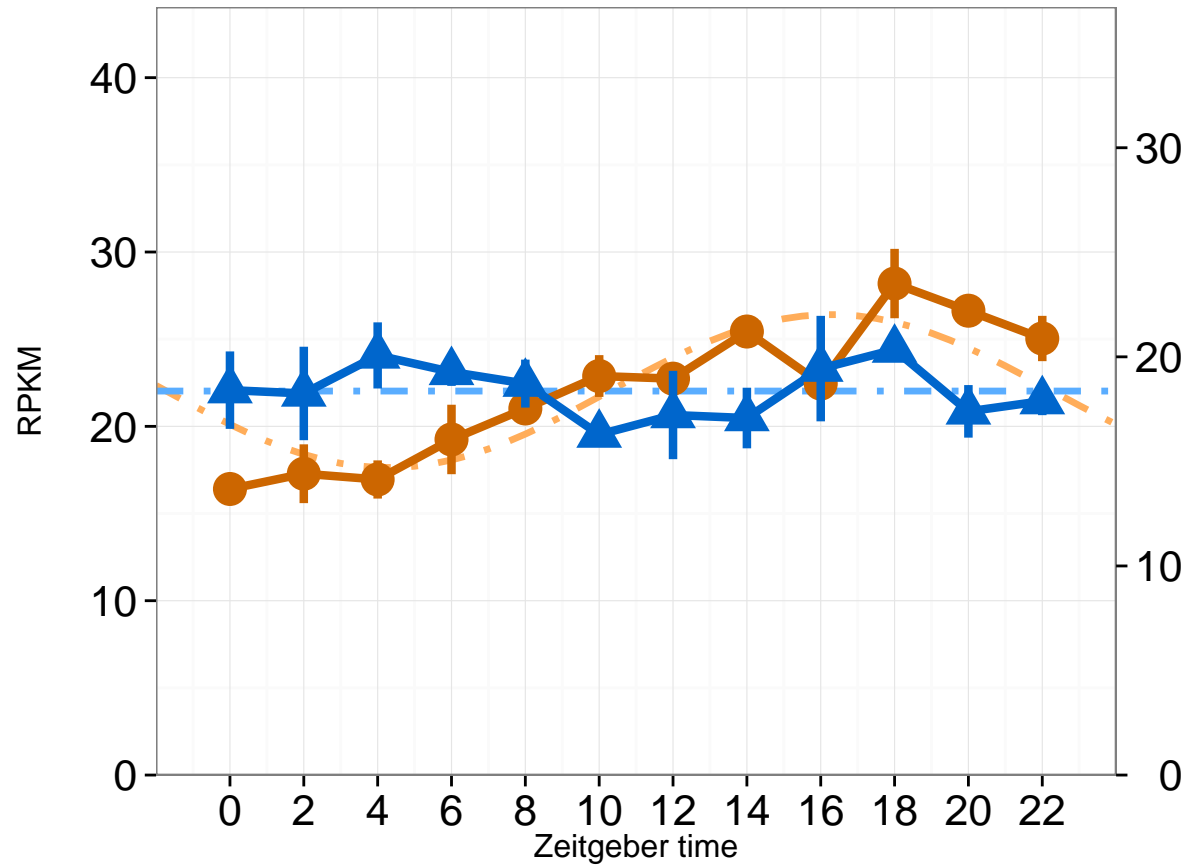

# Tmem179b

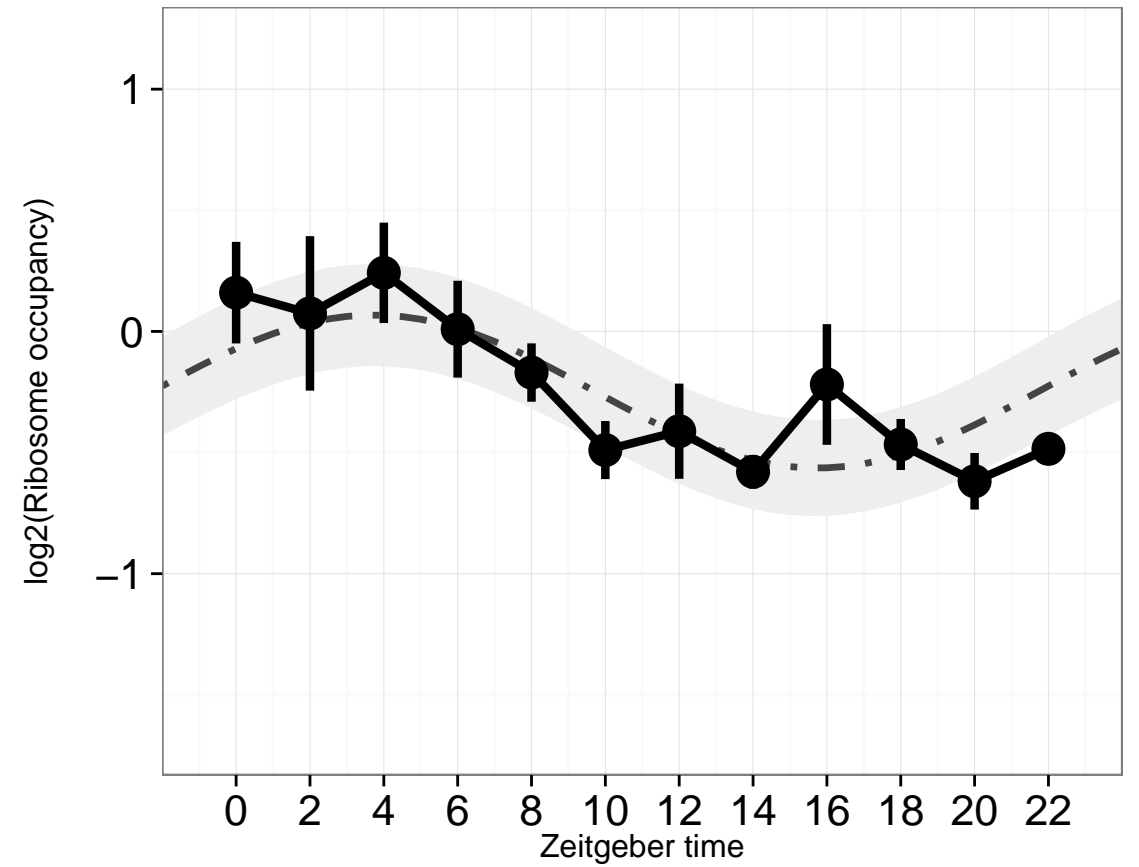

Supplement: Supplementary file 6107 [file 1]

# Pof1b

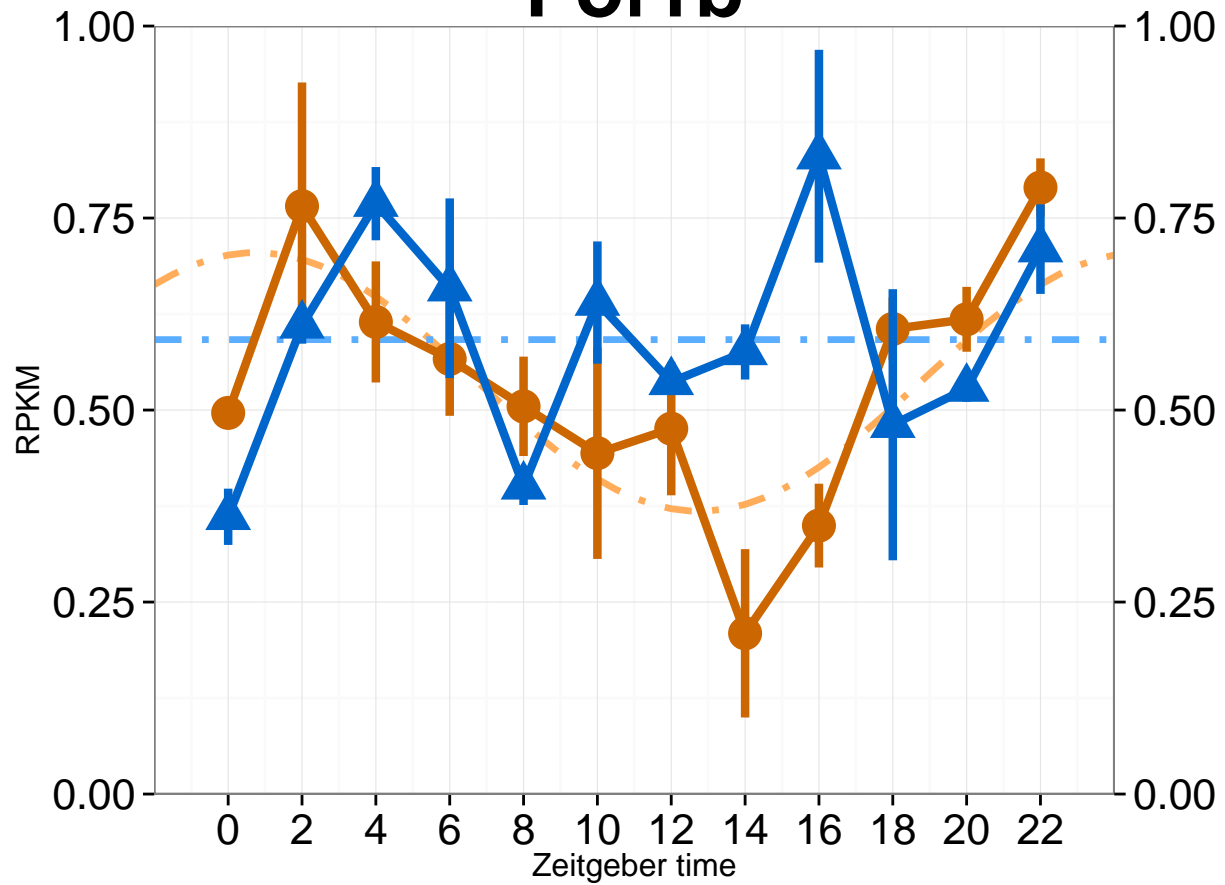

# Pof1b

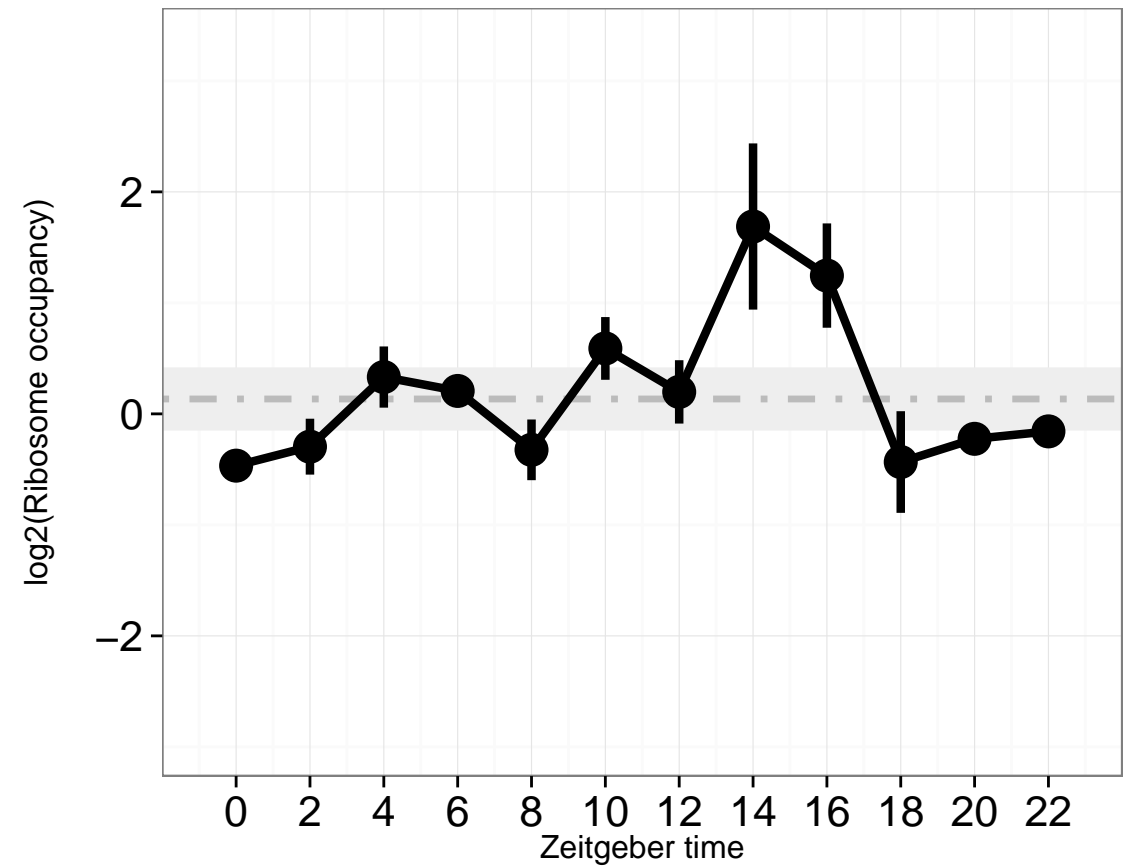

Supplement: Supplementary file 6108 [file 1]

# Lrp5

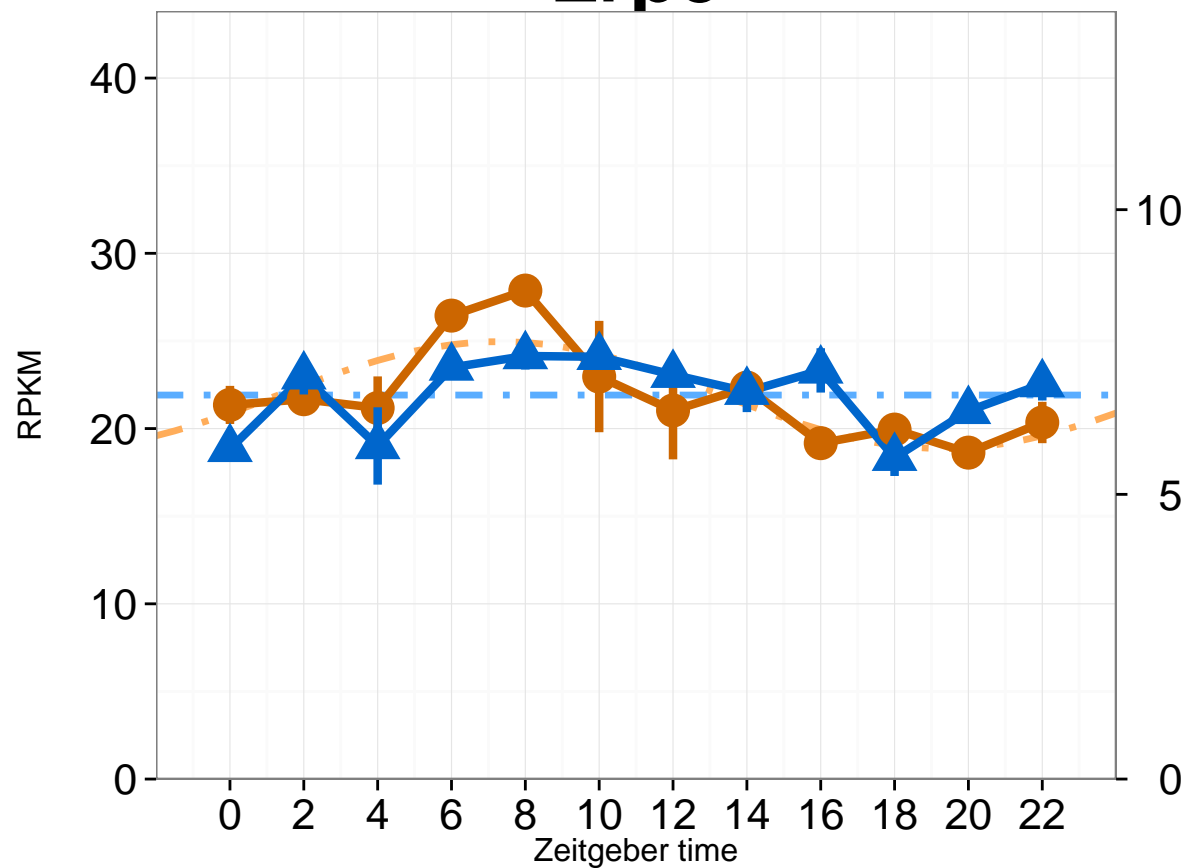

# Lrp5

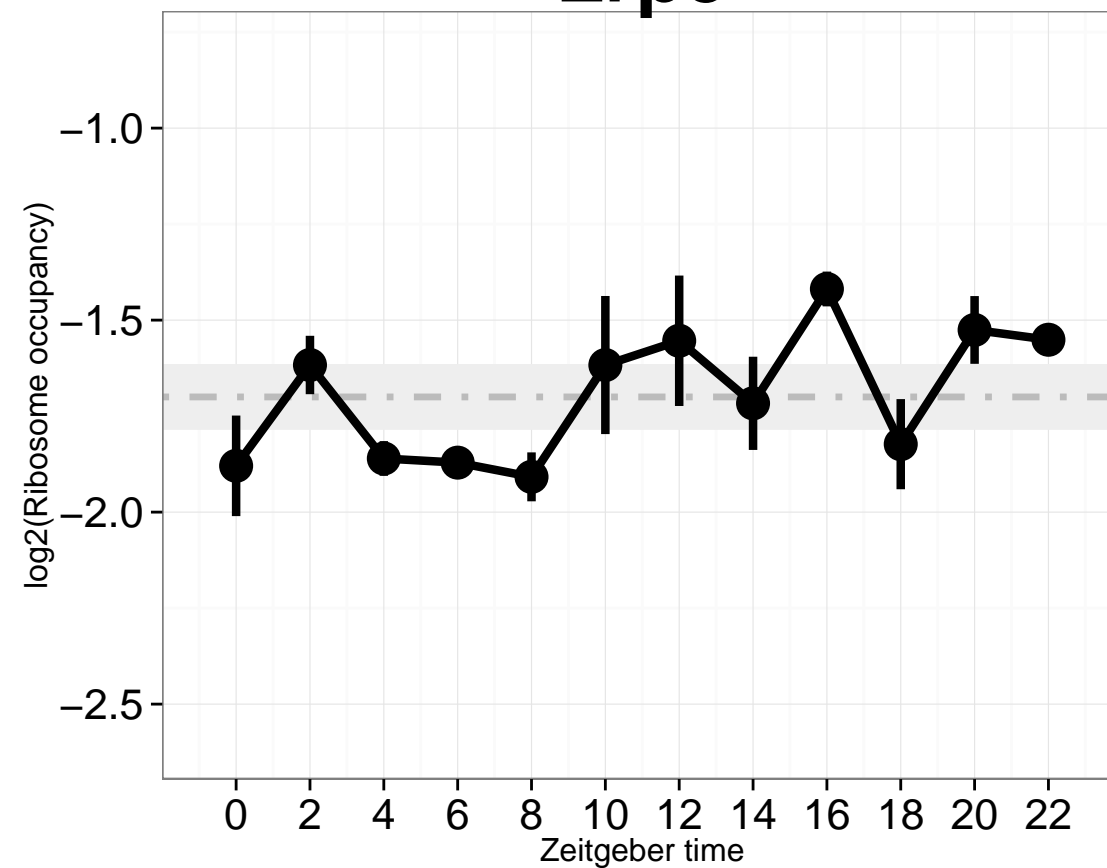

Supplement: Supplementary file 6109 [file 1]

## Cryaa

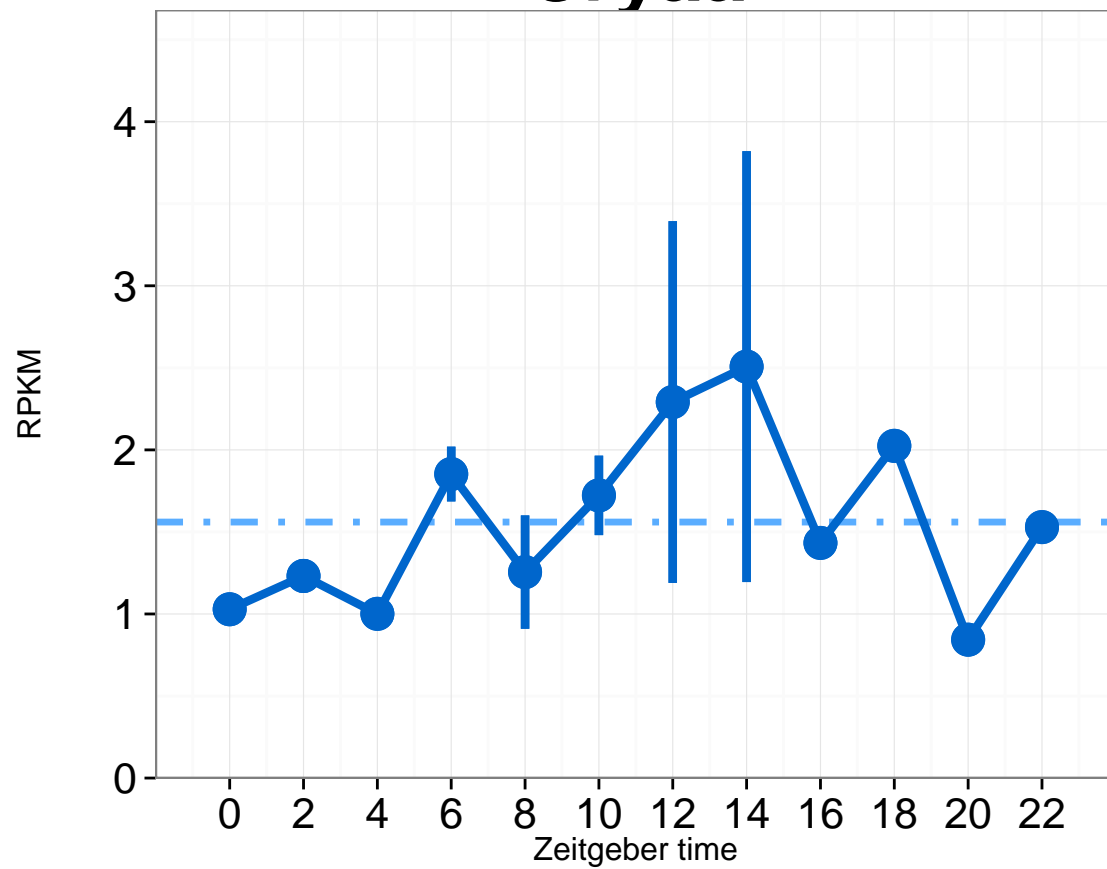

## Cryaa log2(Ribosome occupancy

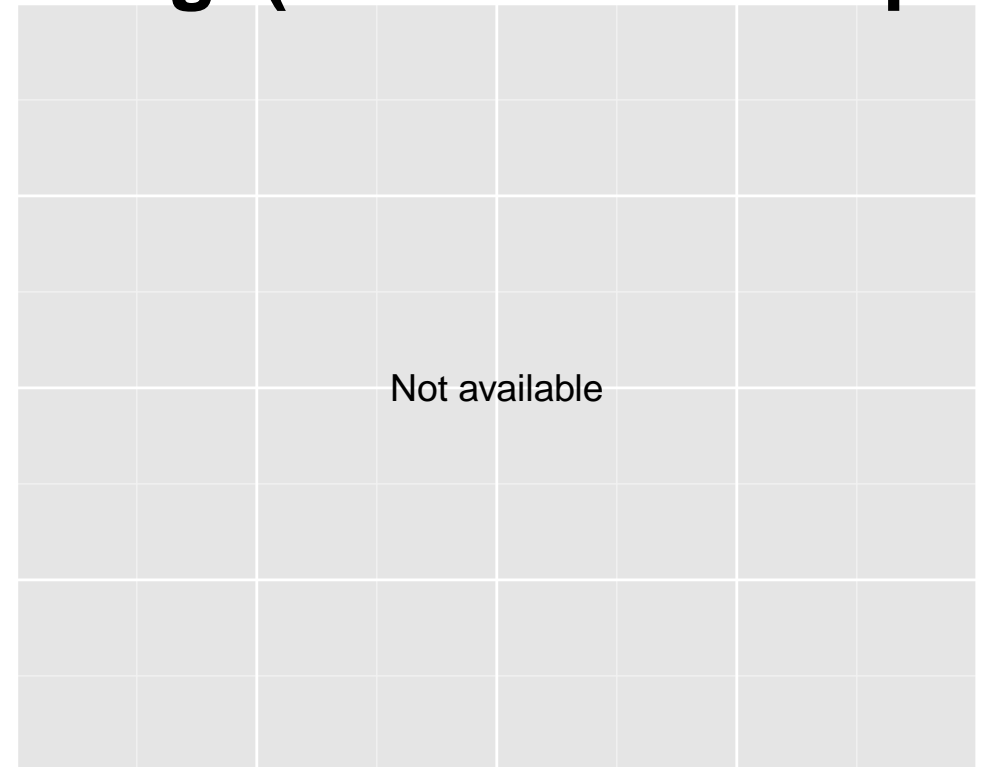

Supplement: Supplementary file 6110 [file 1]

## Larp4

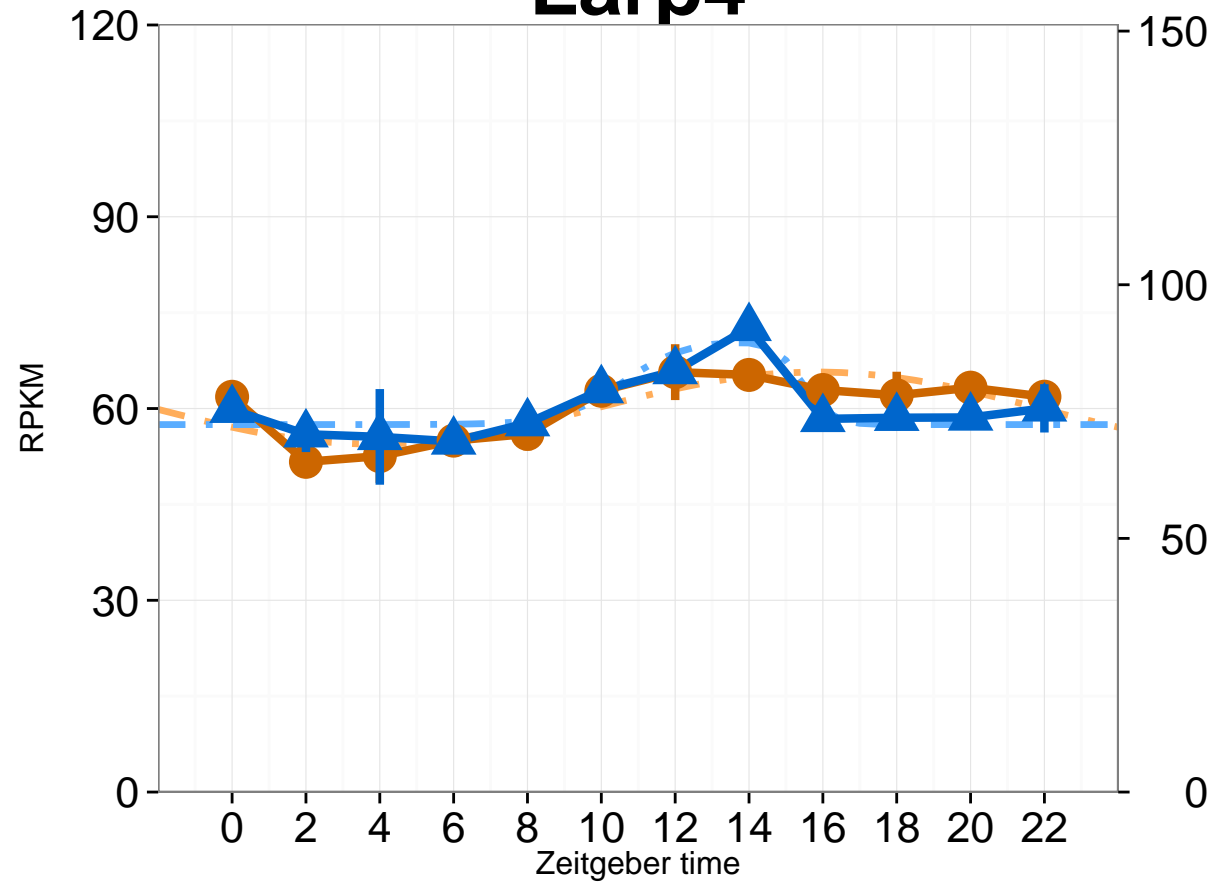

## Larp4

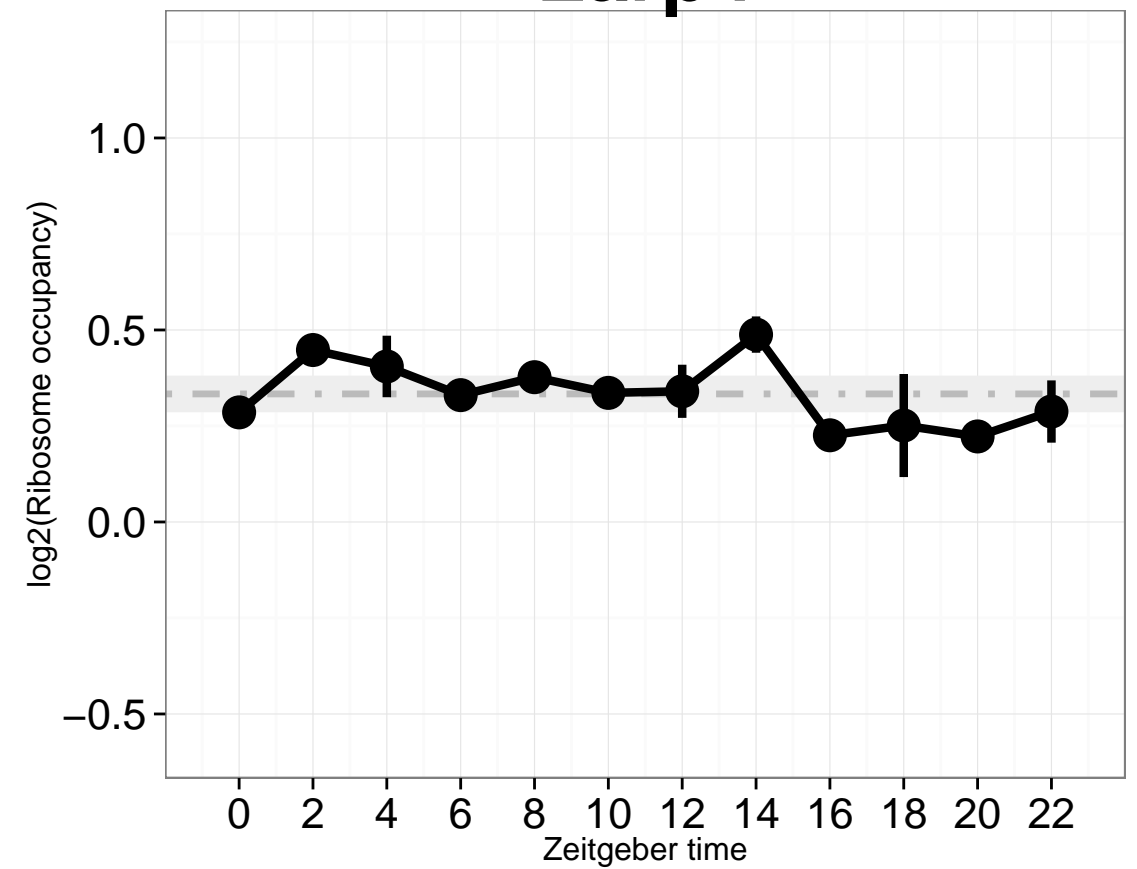

Supplement: Supplementary file 6111 [file 1]

## Zkscan6

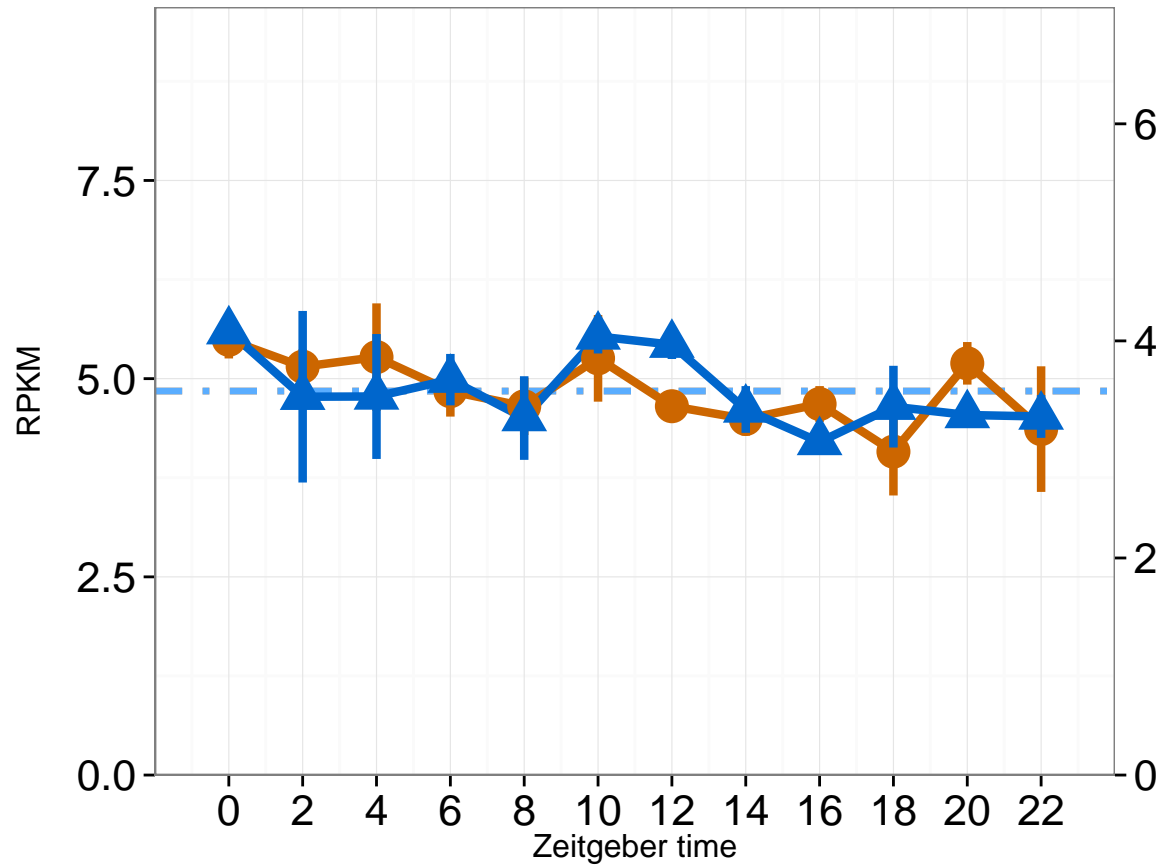

## Zkscan6

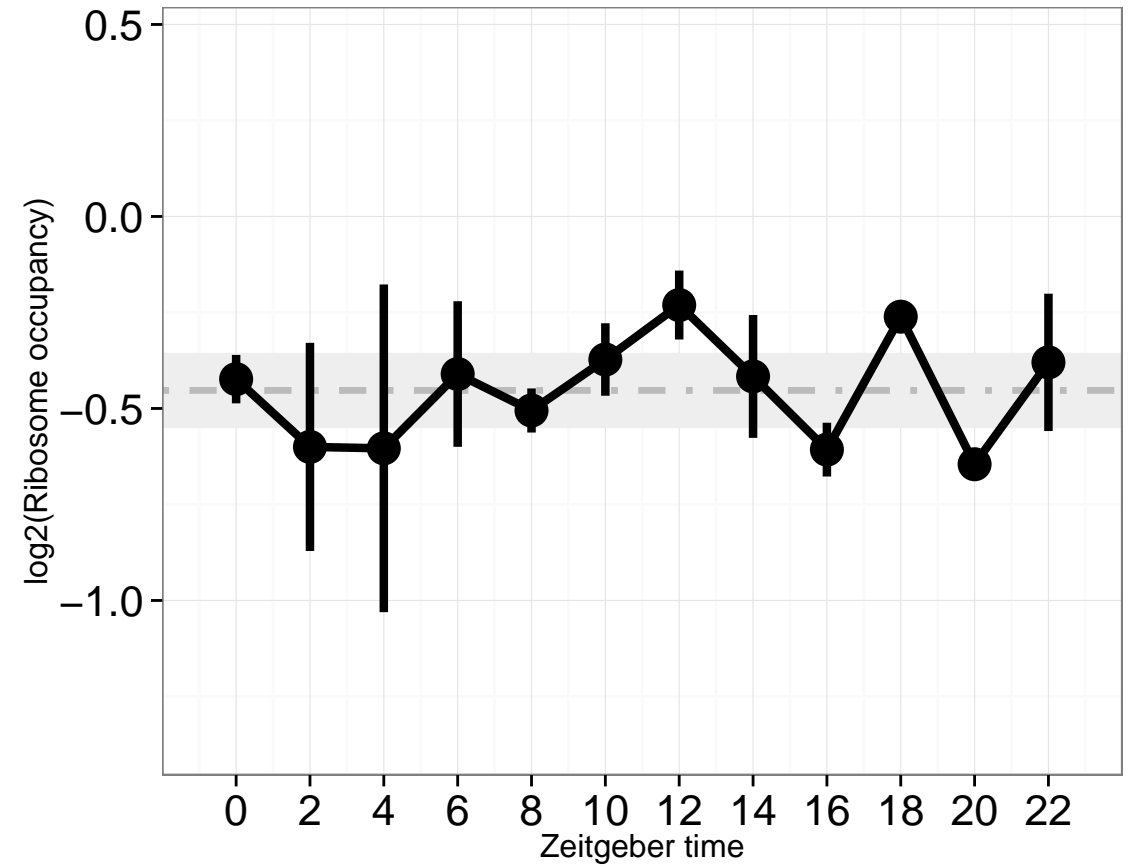

Supplement: Supplementary file 6112 [file 1]

# Actl6a

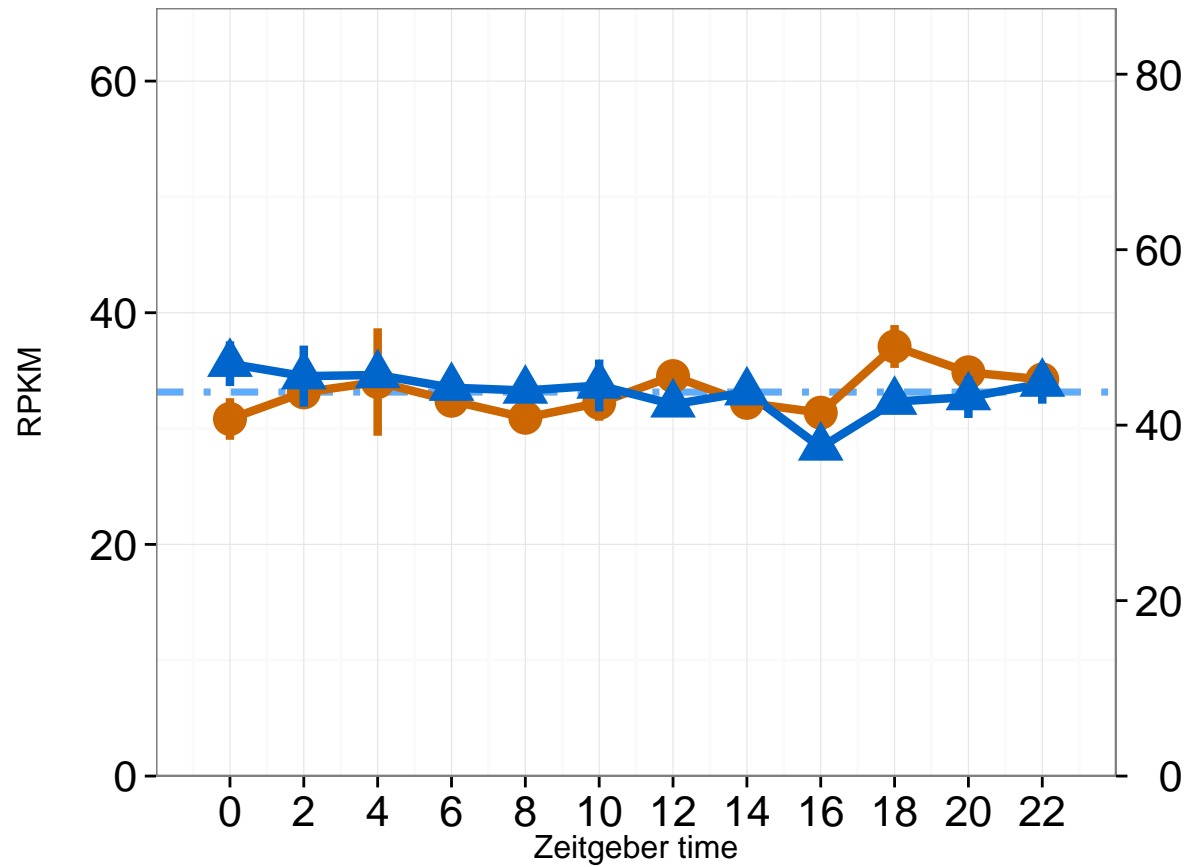

# Actl6a

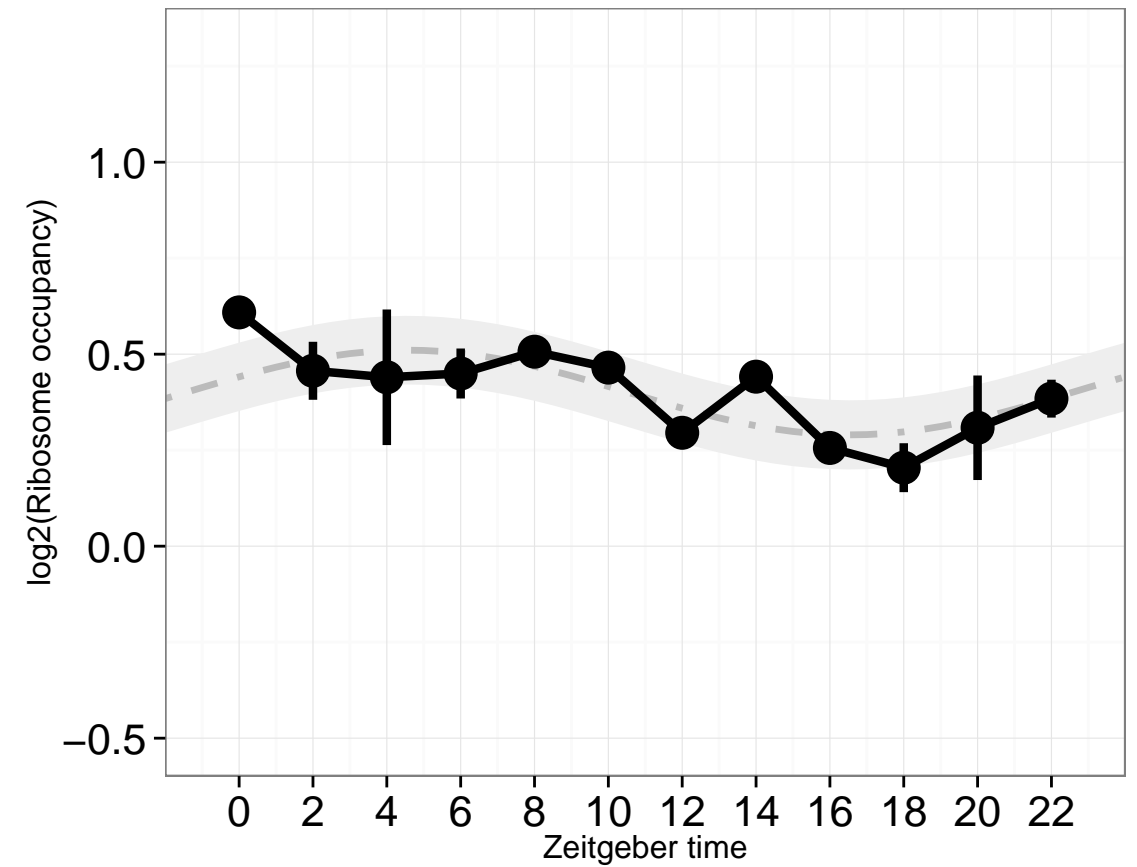

Supplement: Supplementary file 6113 [file 1]

# Idh3a

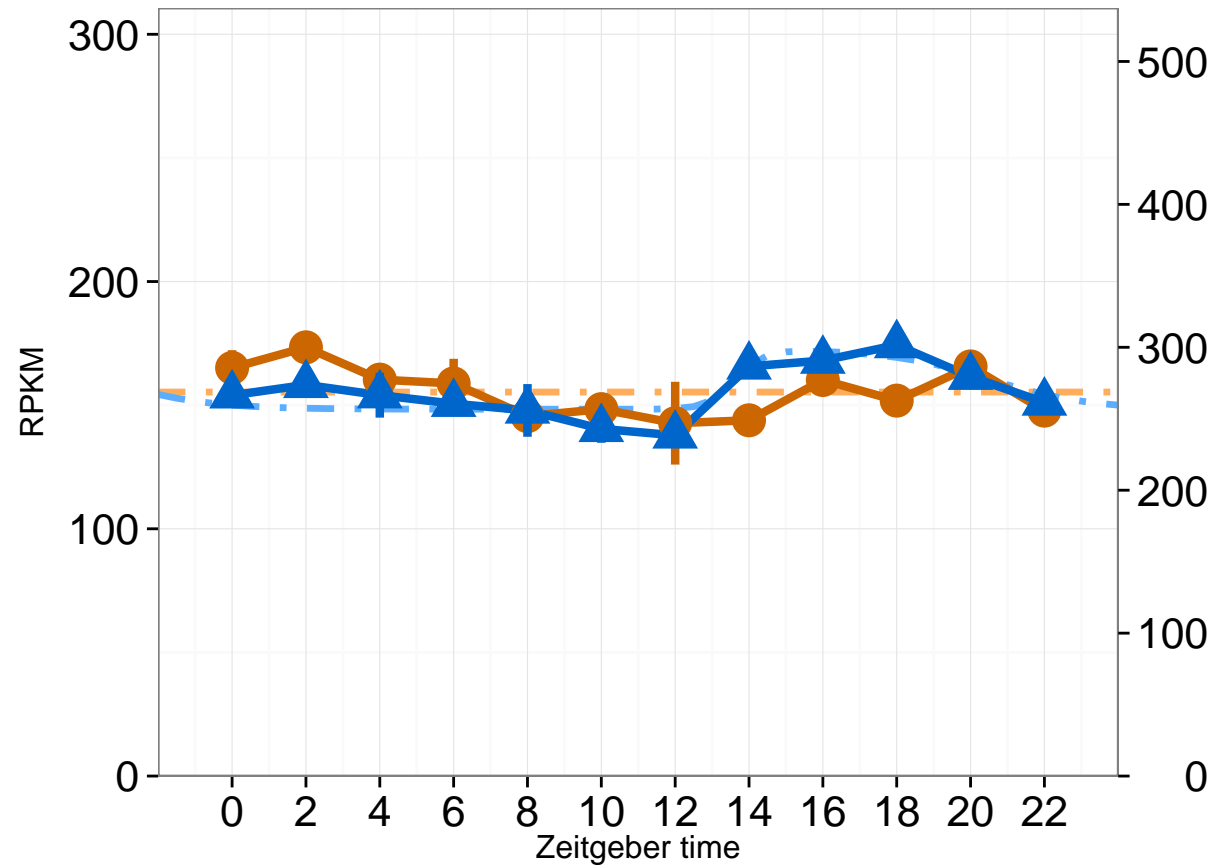

# Idh3a

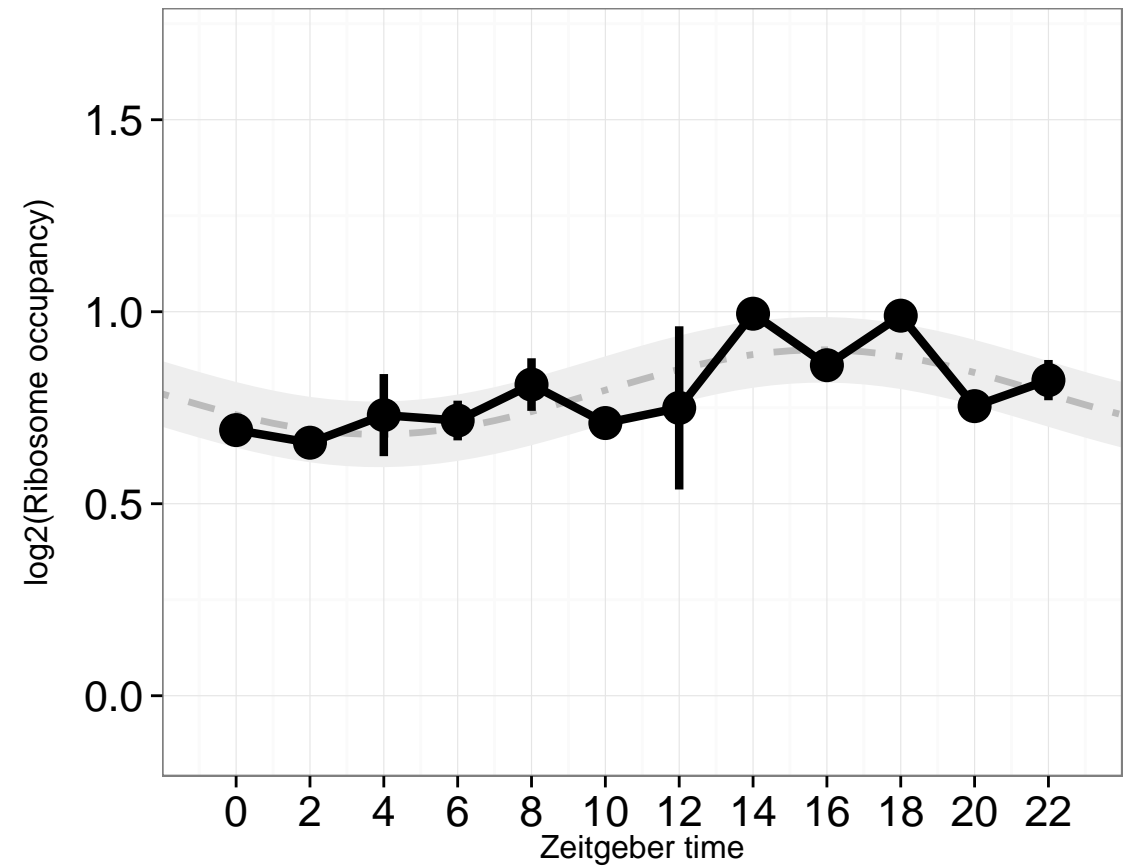

Supplement: Supplementary file 6114 [file 1]

## Slc17a5

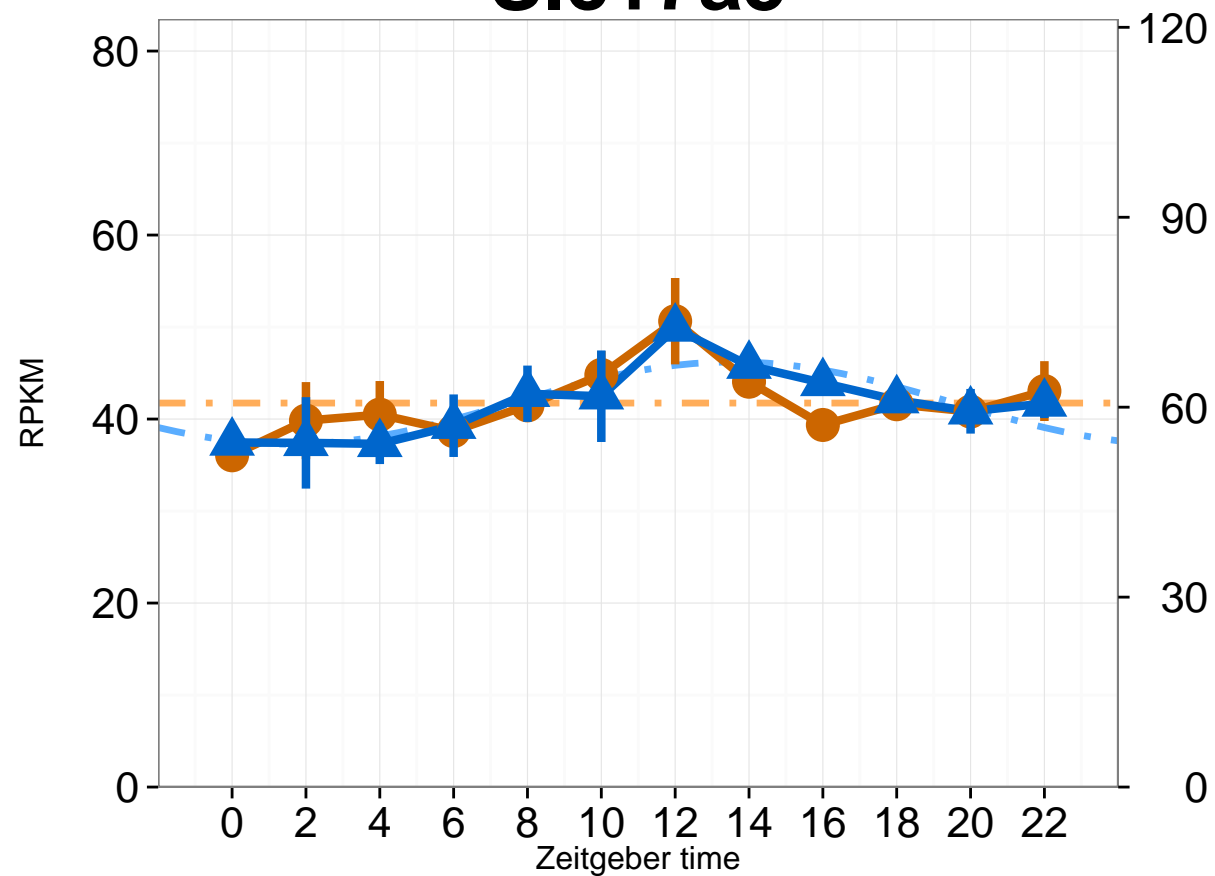

## Slc17a5

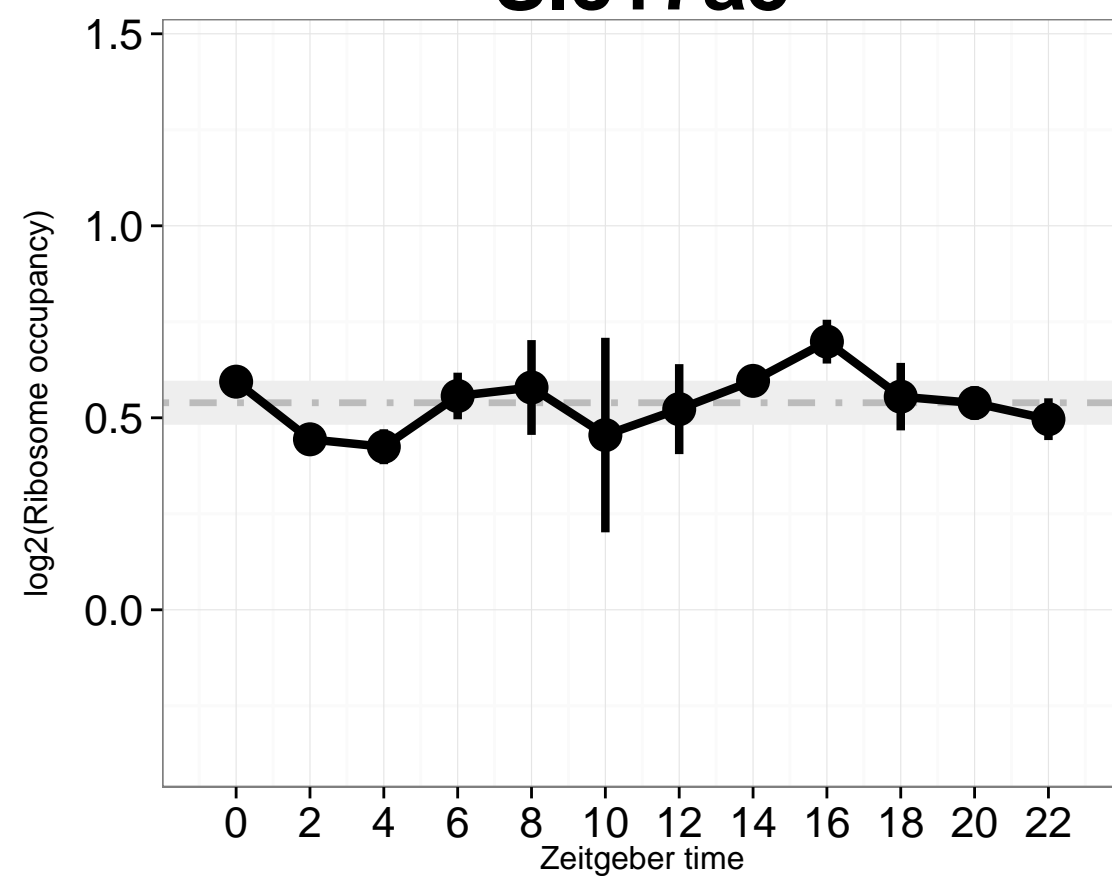

Supplement: Supplementary file 6115 [file 1]

## Slc25a13

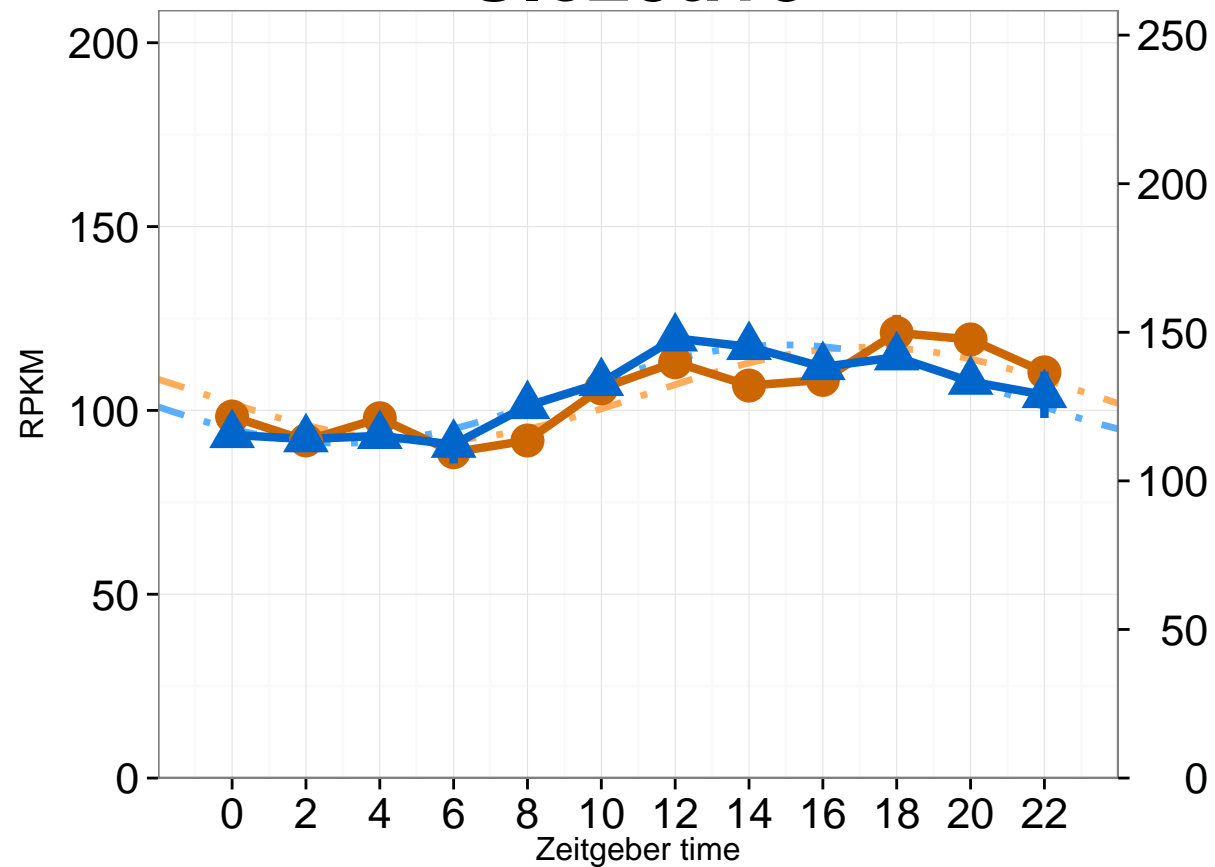

## Slc25a13

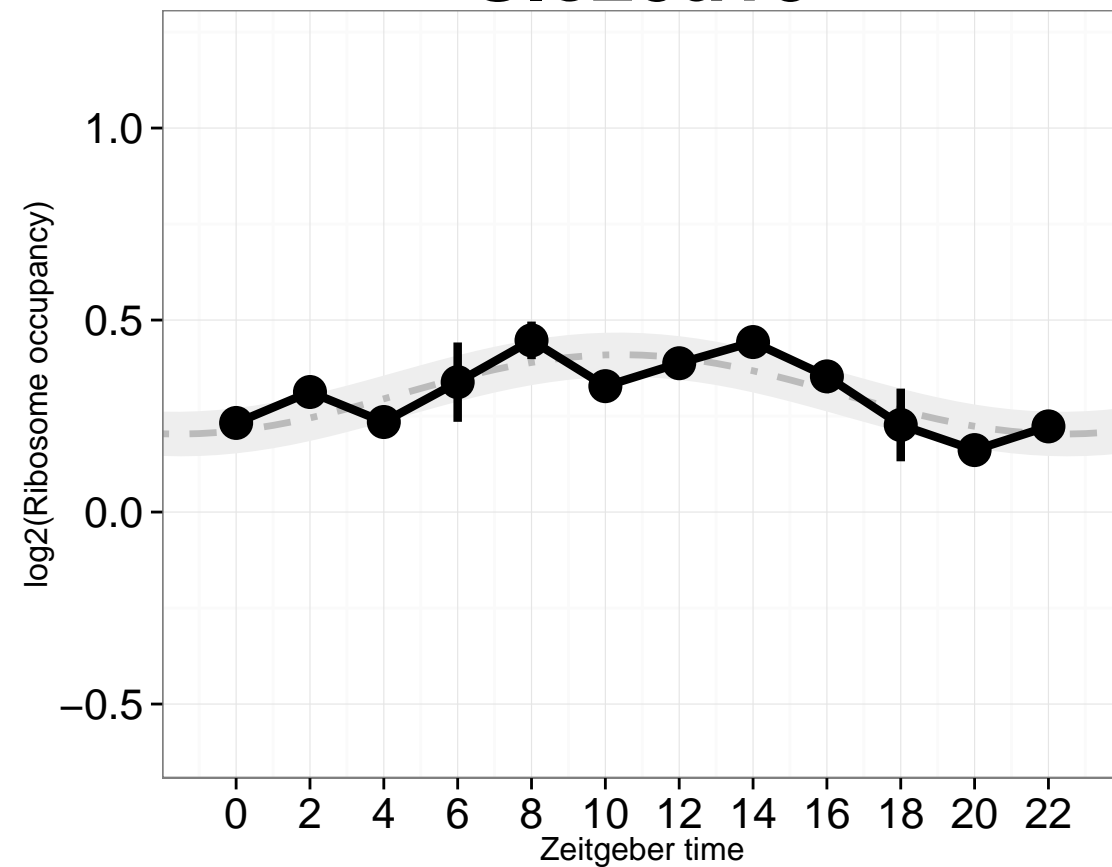

Supplement: Supplementary file 6116 [file 1]

## Gm4787

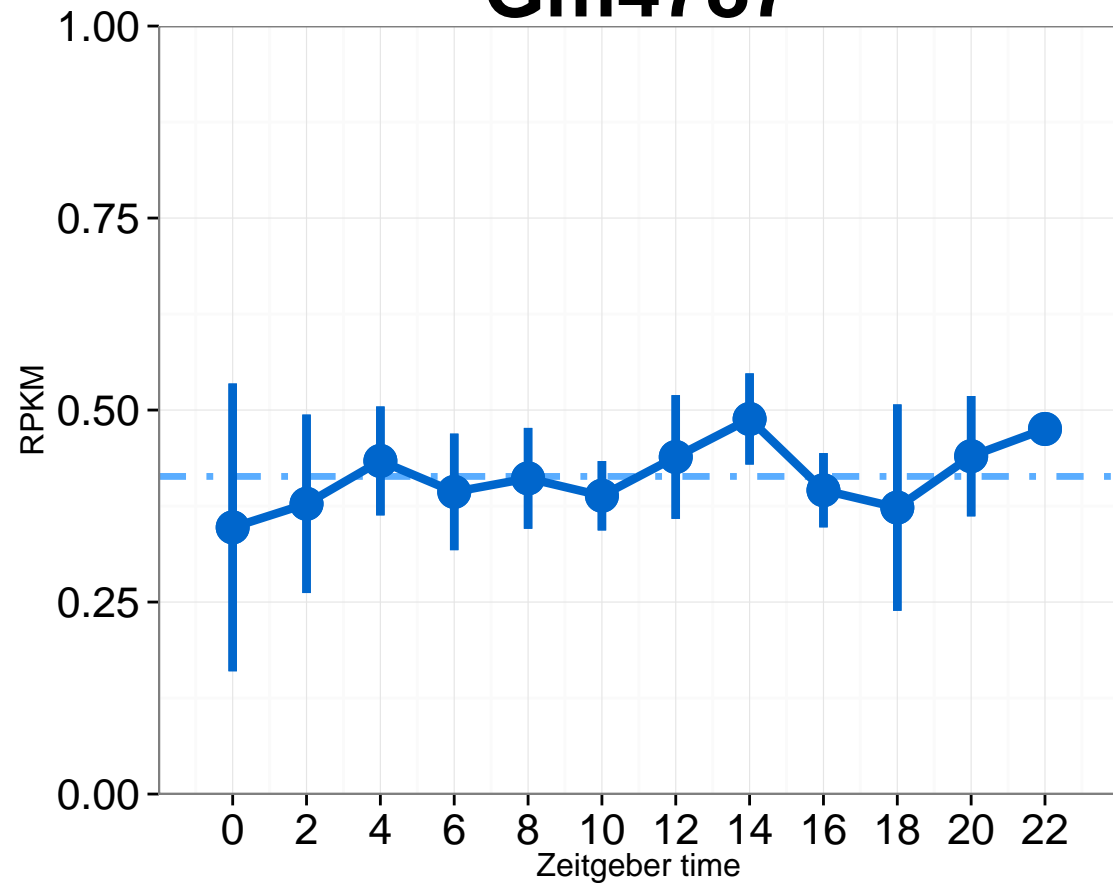

## Gm4787 log2(Ribosome occupanc

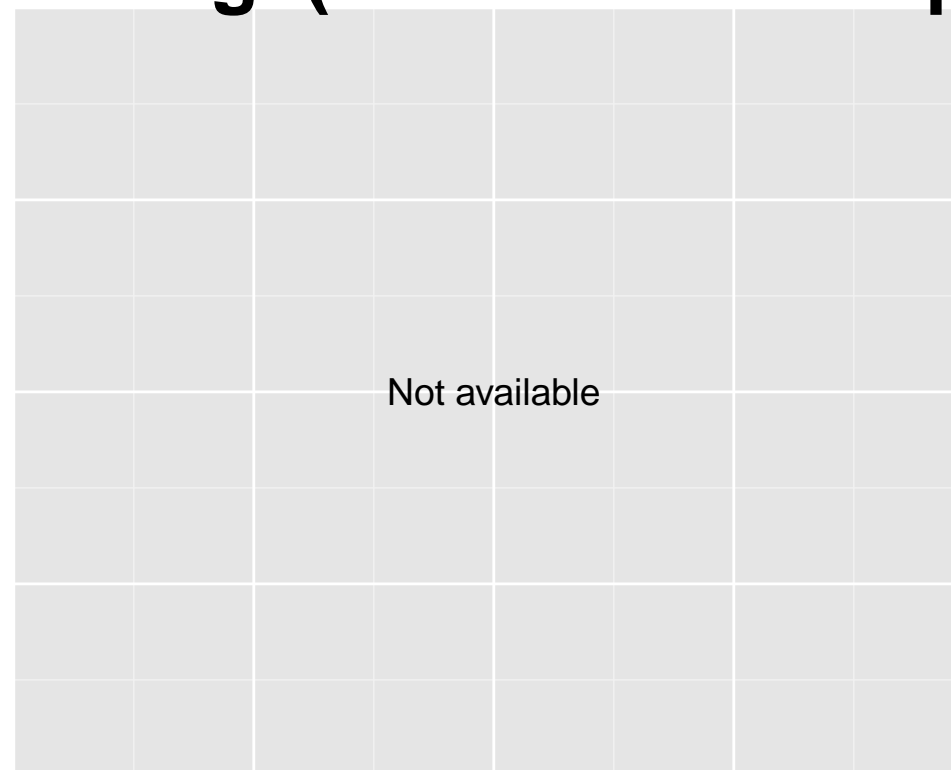

Supplement: Supplementary file 6117 [file 1]

# Tma7

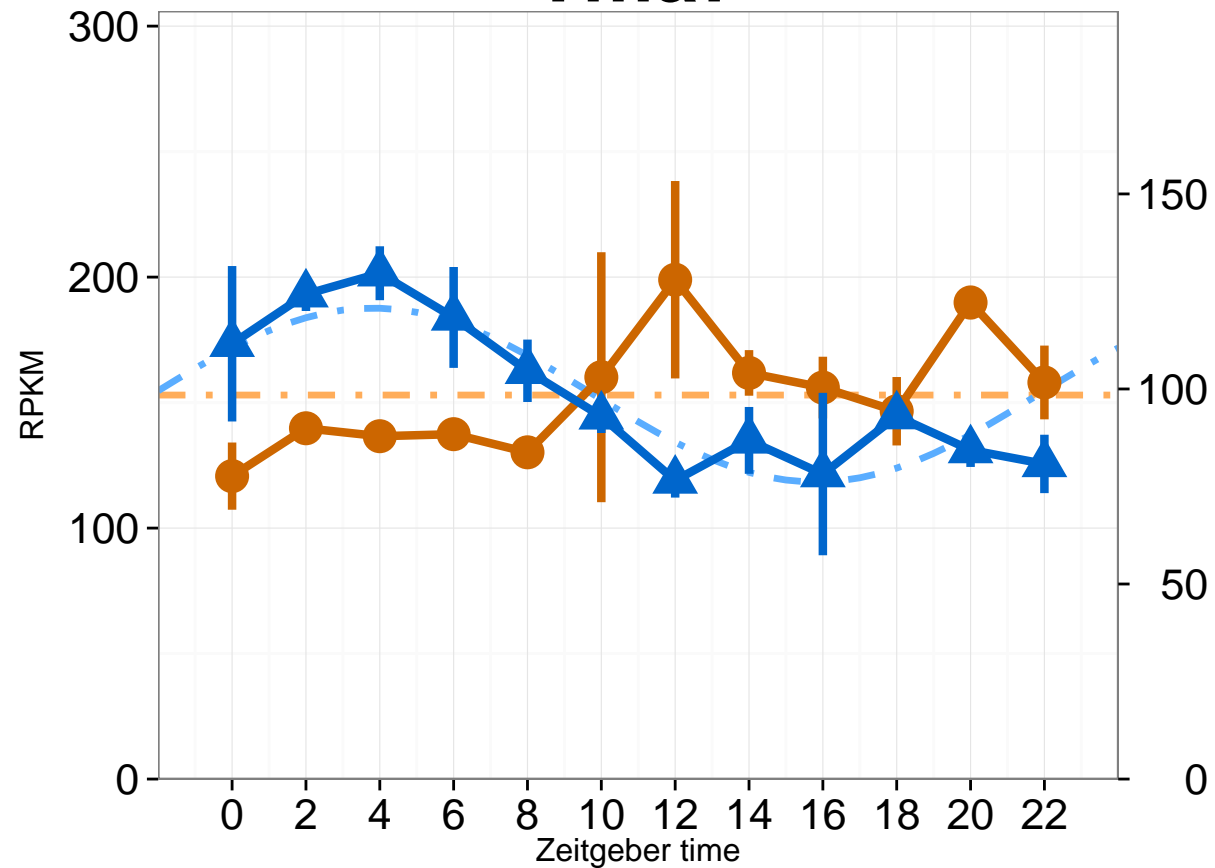

# Tma7

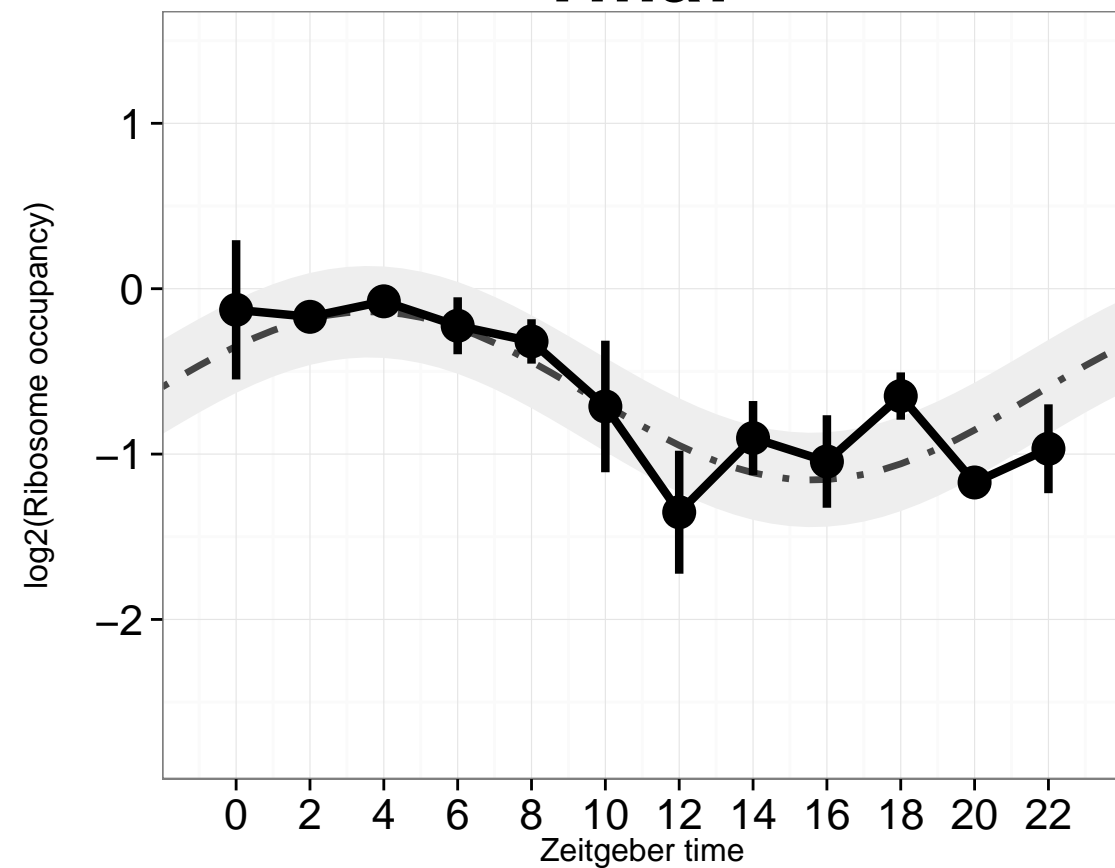

Supplement: Supplementary file 6118 [file 1]

## Ppie

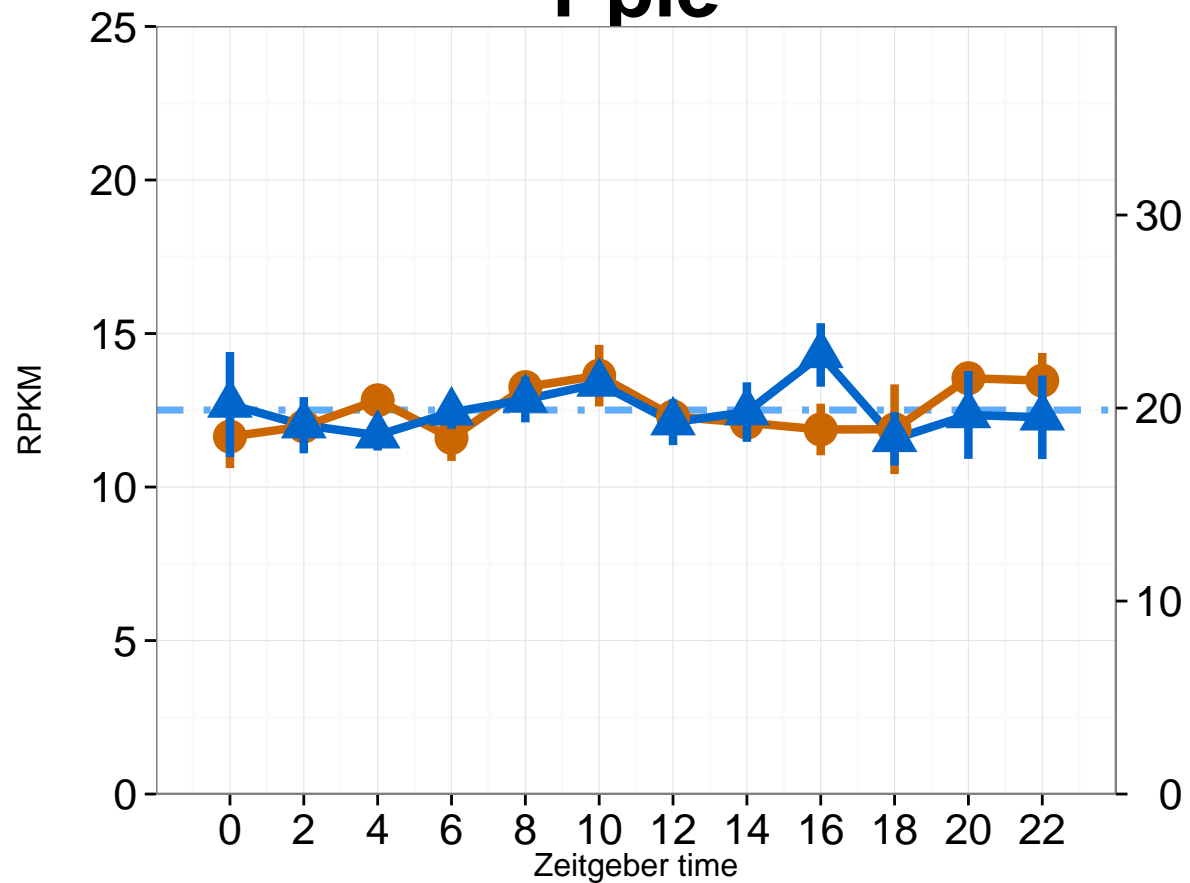

## Ppie

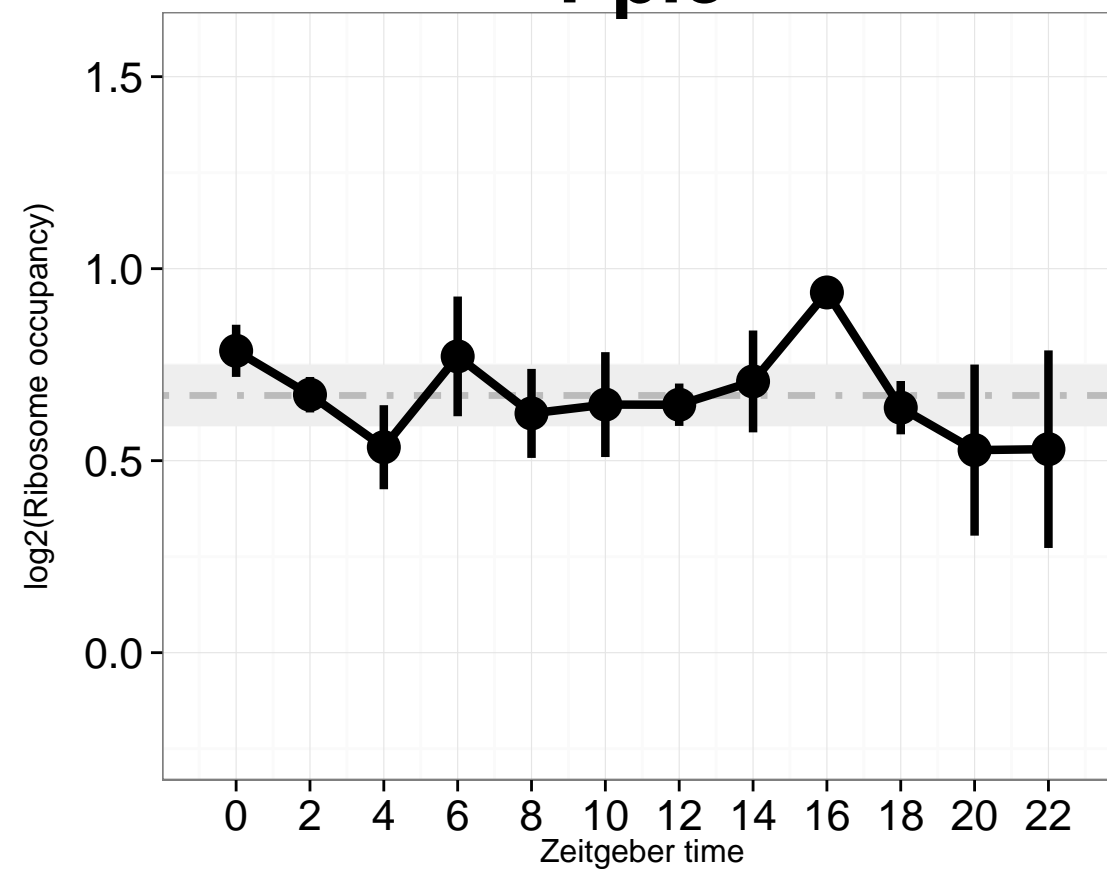

Supplement: Supplementary file 6119 [file 1]

## Aurka

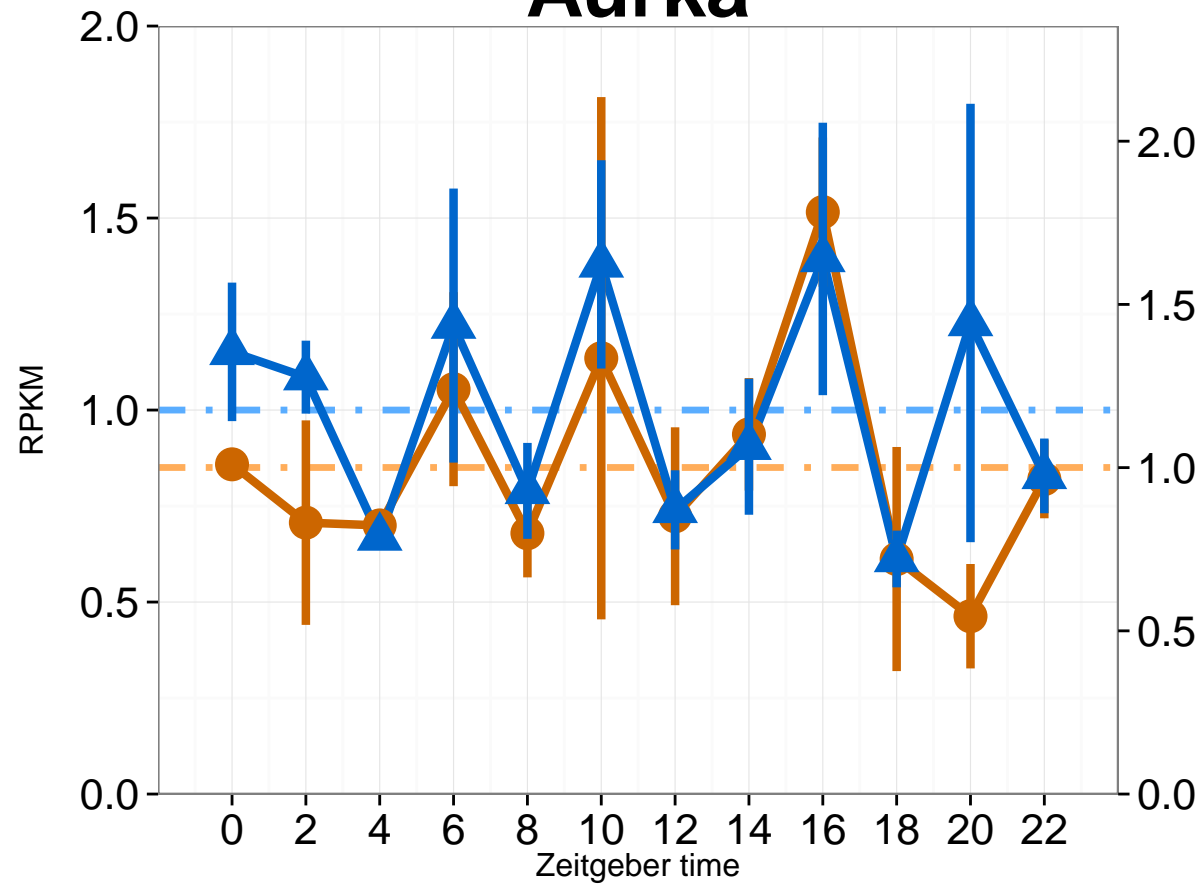

## Aurka

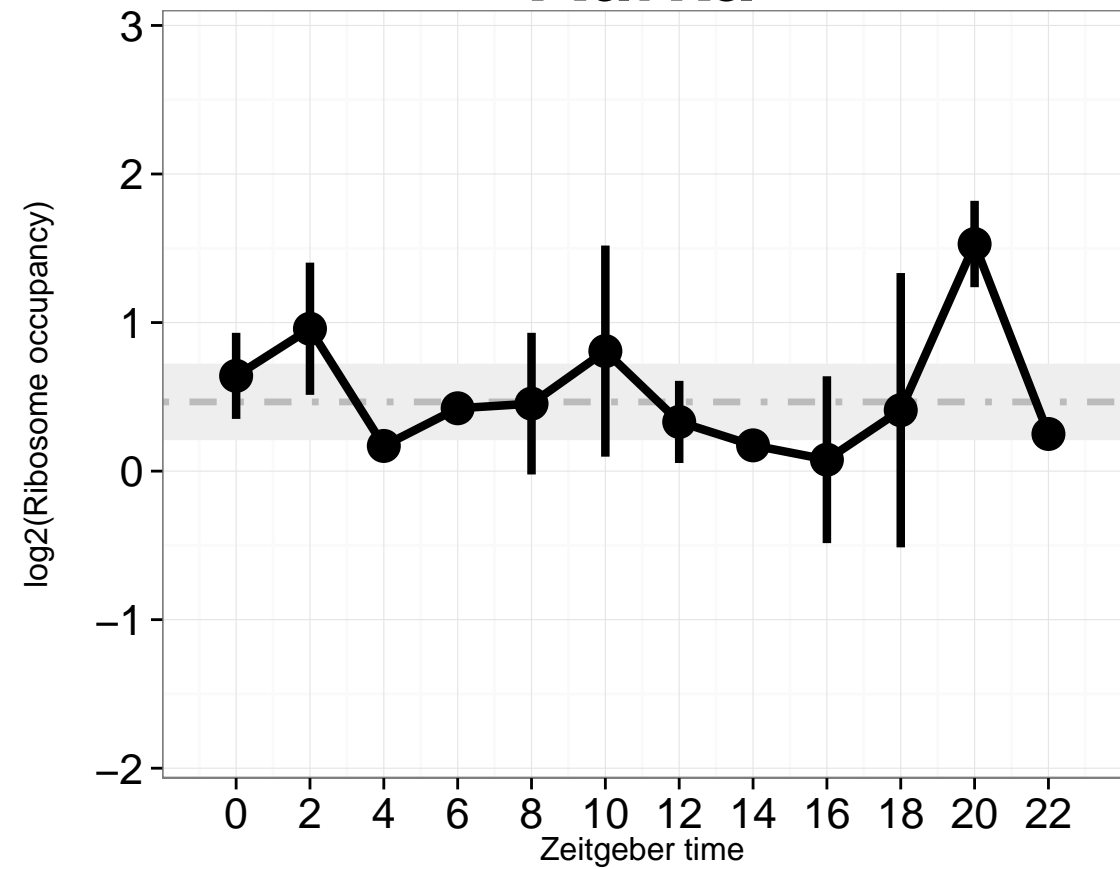

Supplement: Supplementary file 6120 [file 1]

# 9230110C19Rik

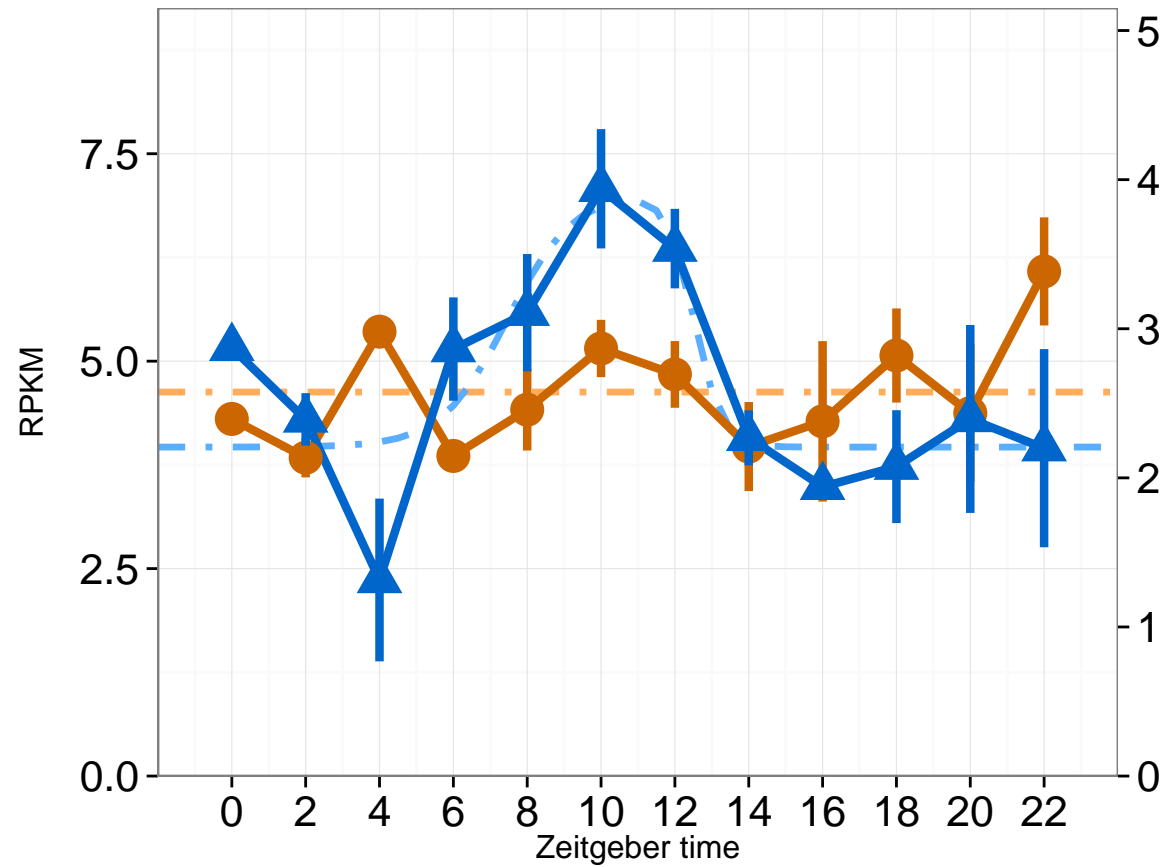

# 9230110C19Rik

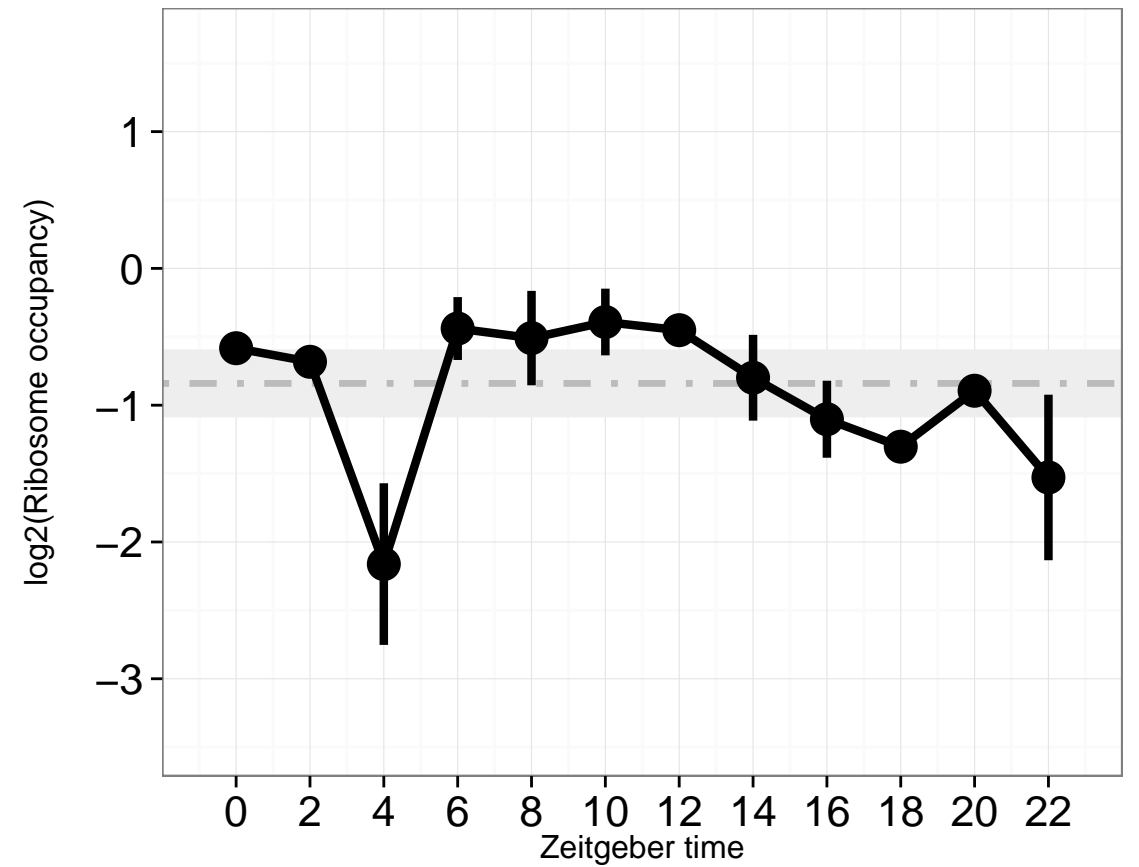

Supplement: Supplementary file 6121 [file 1]

## Unc50

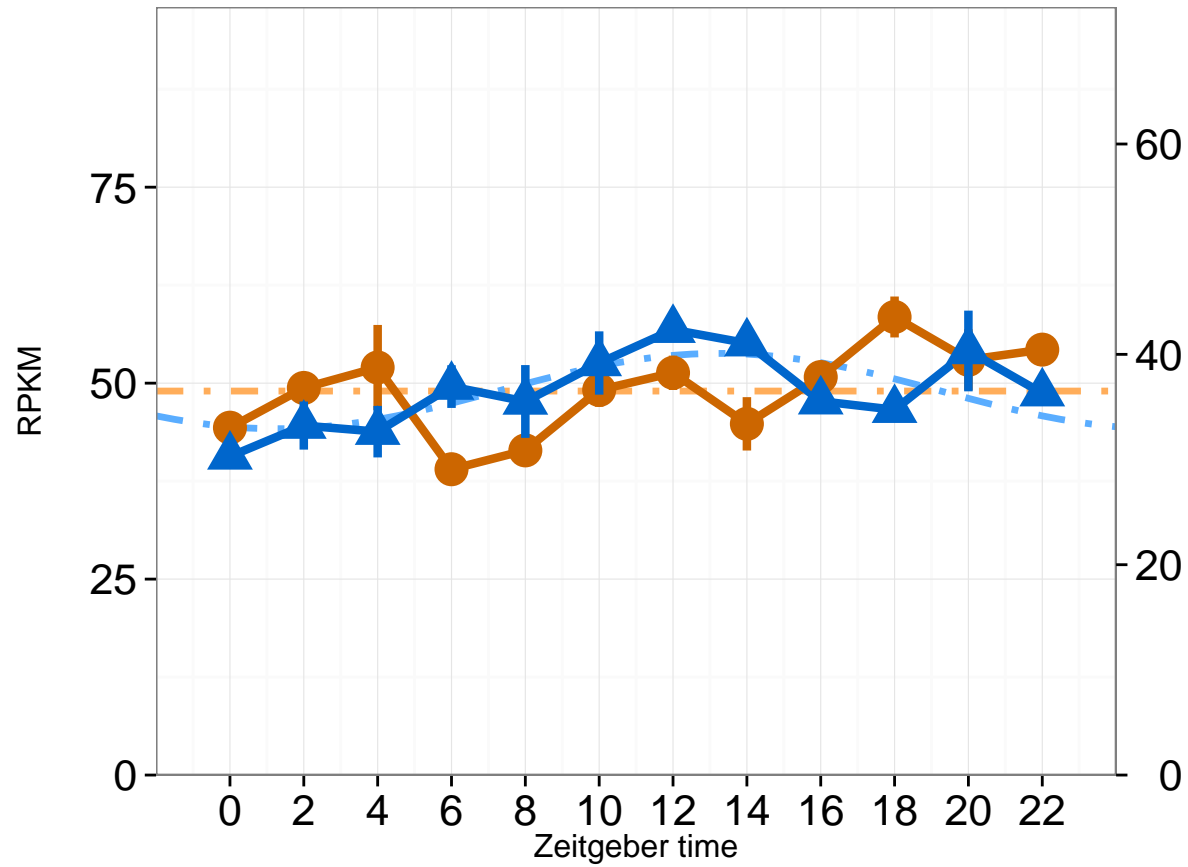

## Unc50

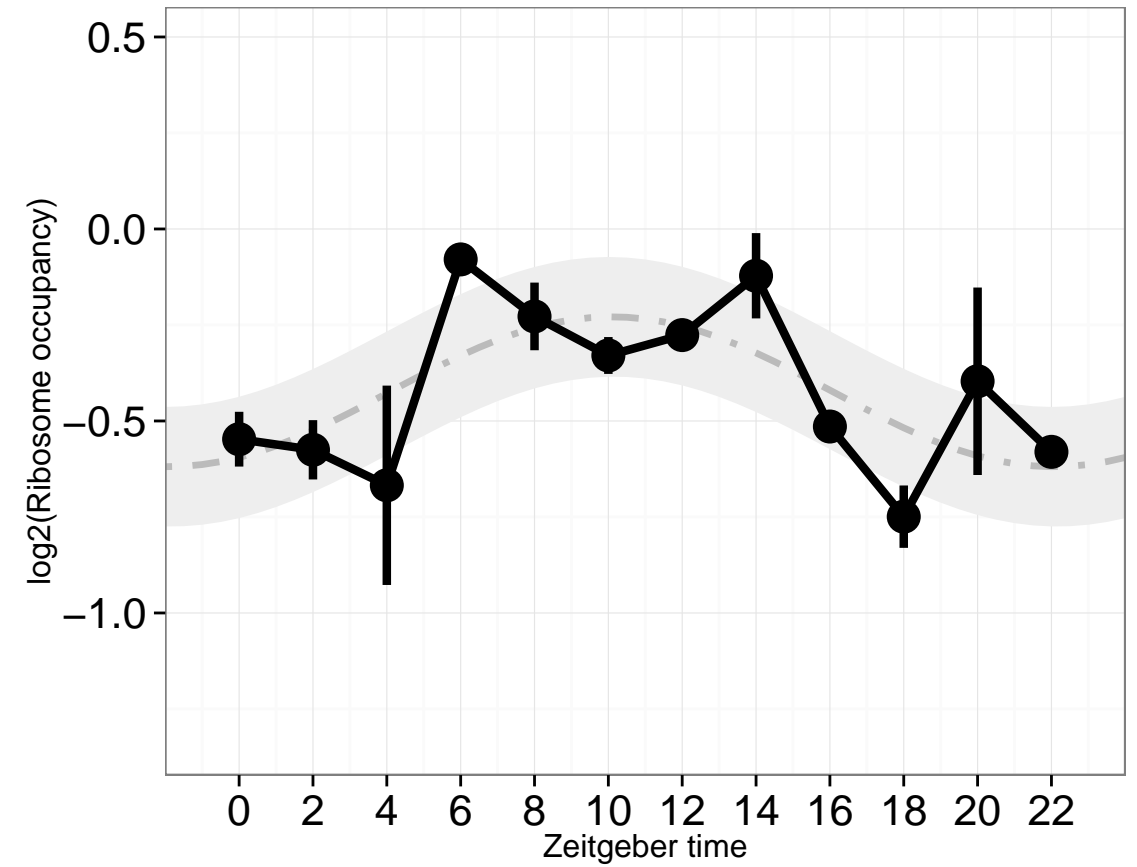

Supplement: Supplementary file 6122 [file 1]
