# Supplementary material (part 62 of 133)
Source: publisher figshare collection journal article supplement (https://springernature.figshare.com/articles/dataset/_/4903193)

**Gm11175 TR**

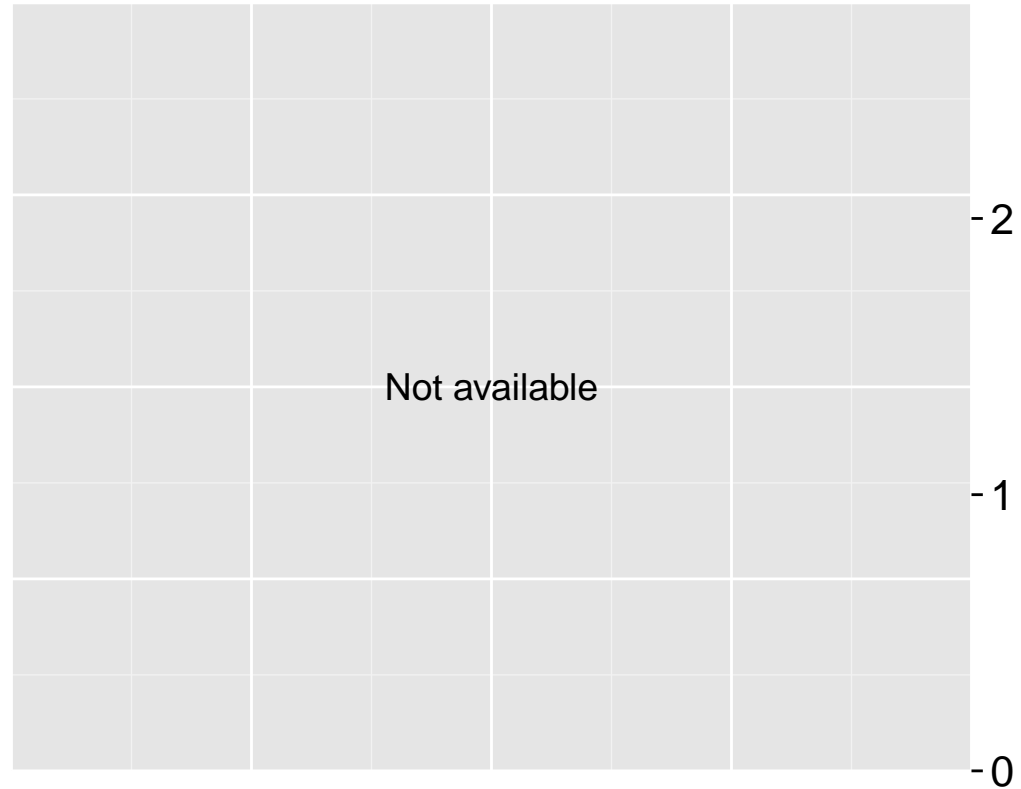

**Gm11175 log2(Ribosome occupancy)**

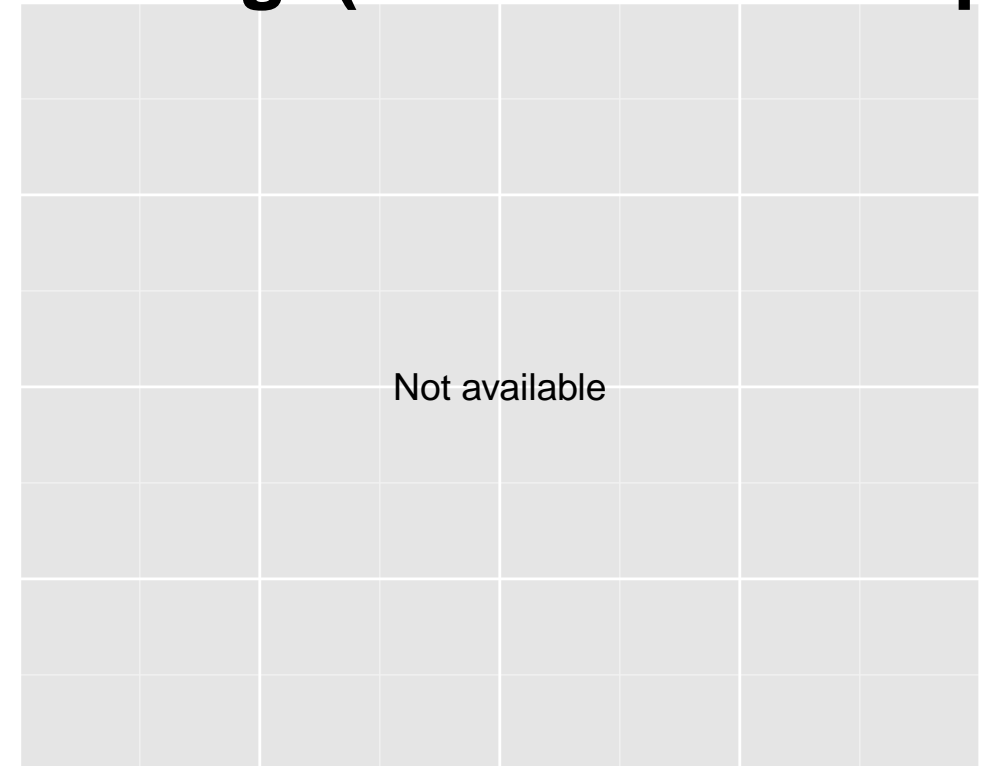

Supplement: Supplementary file 6123 [file 1]

# 1300002K09Rik

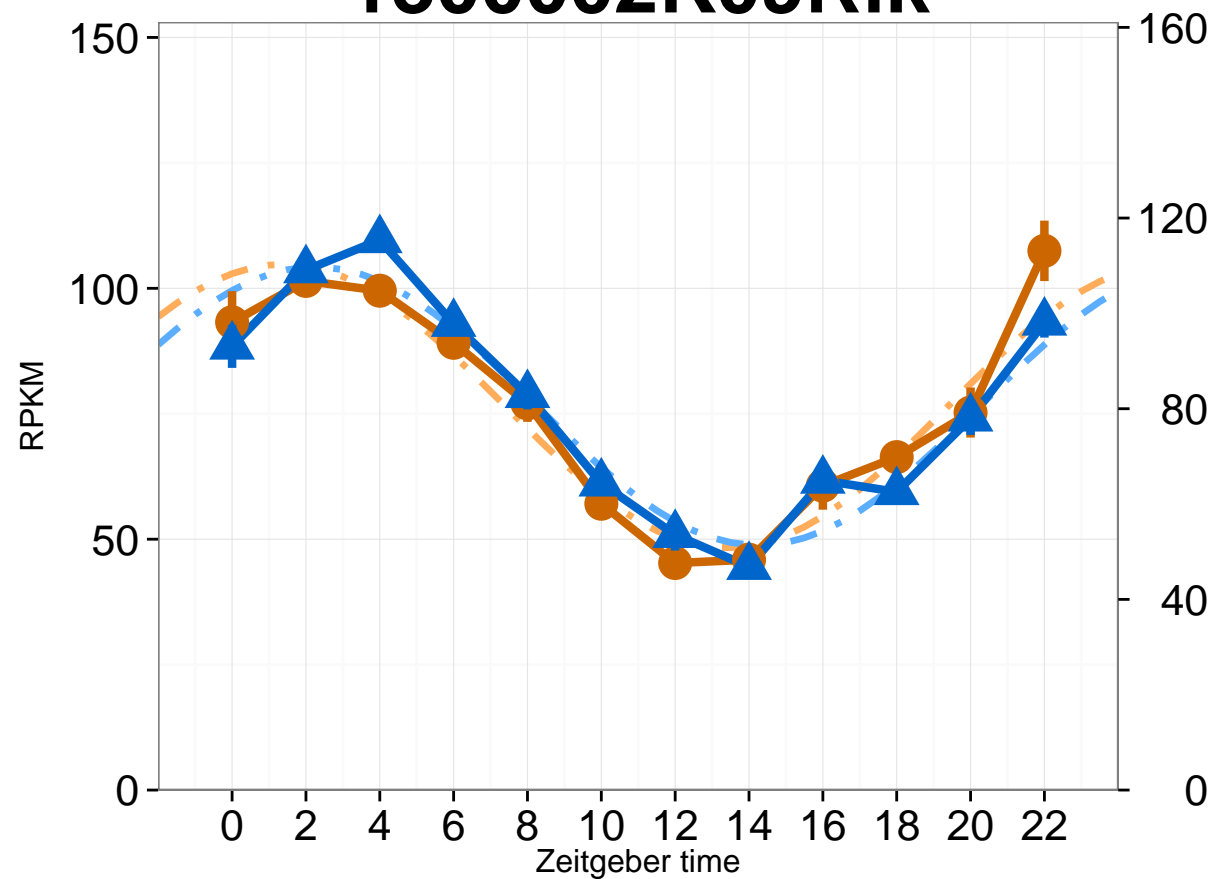

# 1300002K09Rik

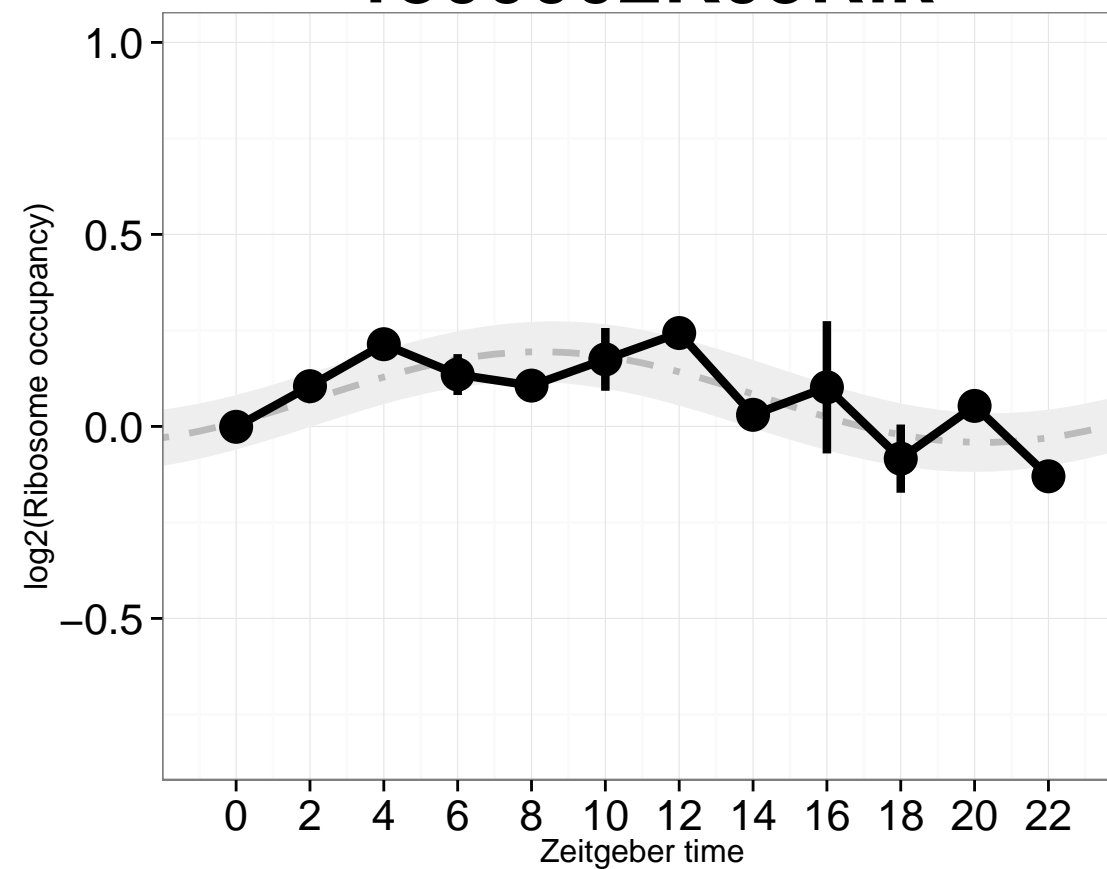

Supplement: Supplementary file 6124 [file 1]

**Elavl3 TR**

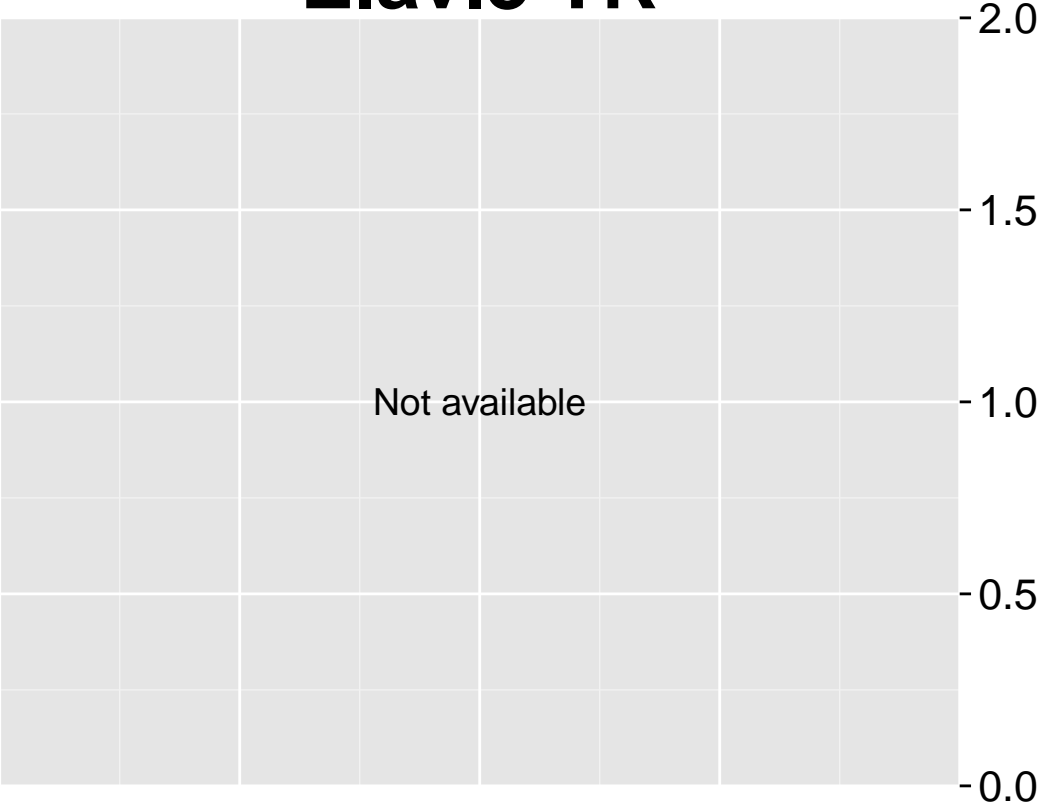

**Elavl3 log2(Ribosome occupancy**

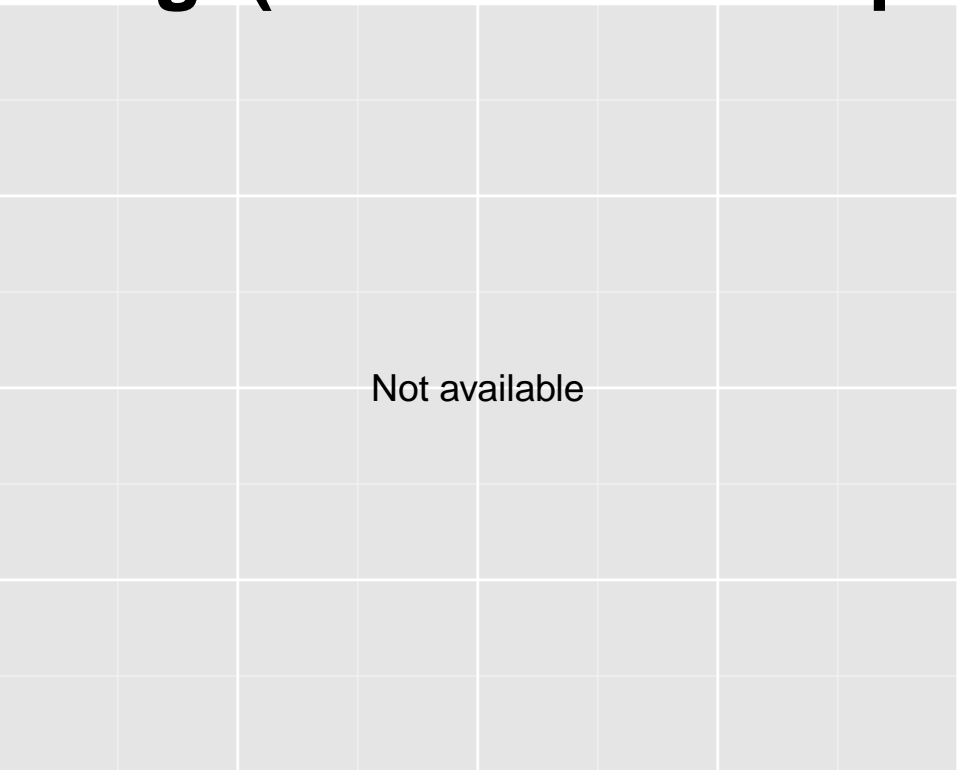

Supplement: Supplementary file 6125 [file 1]

## ReIn

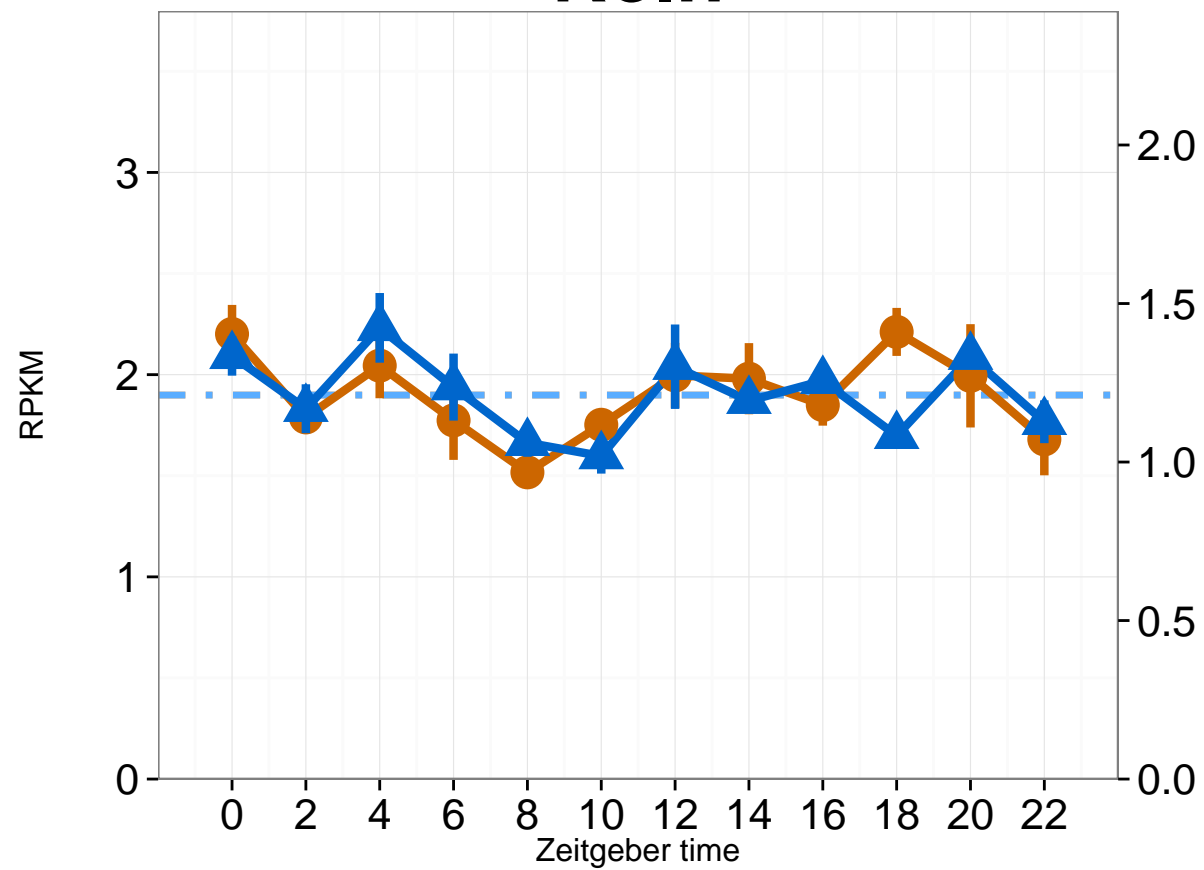

## ReIn

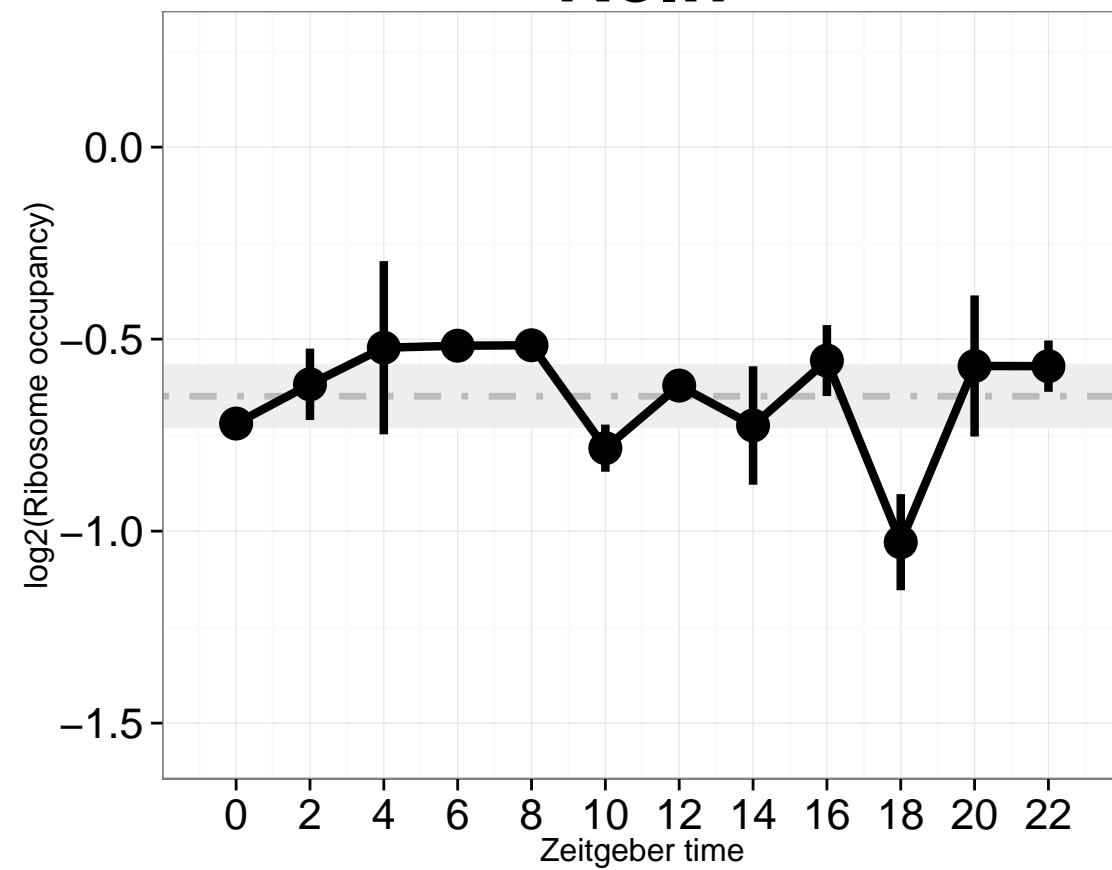

Supplement: Supplementary file 6126 [file 1]

# Gpm6b

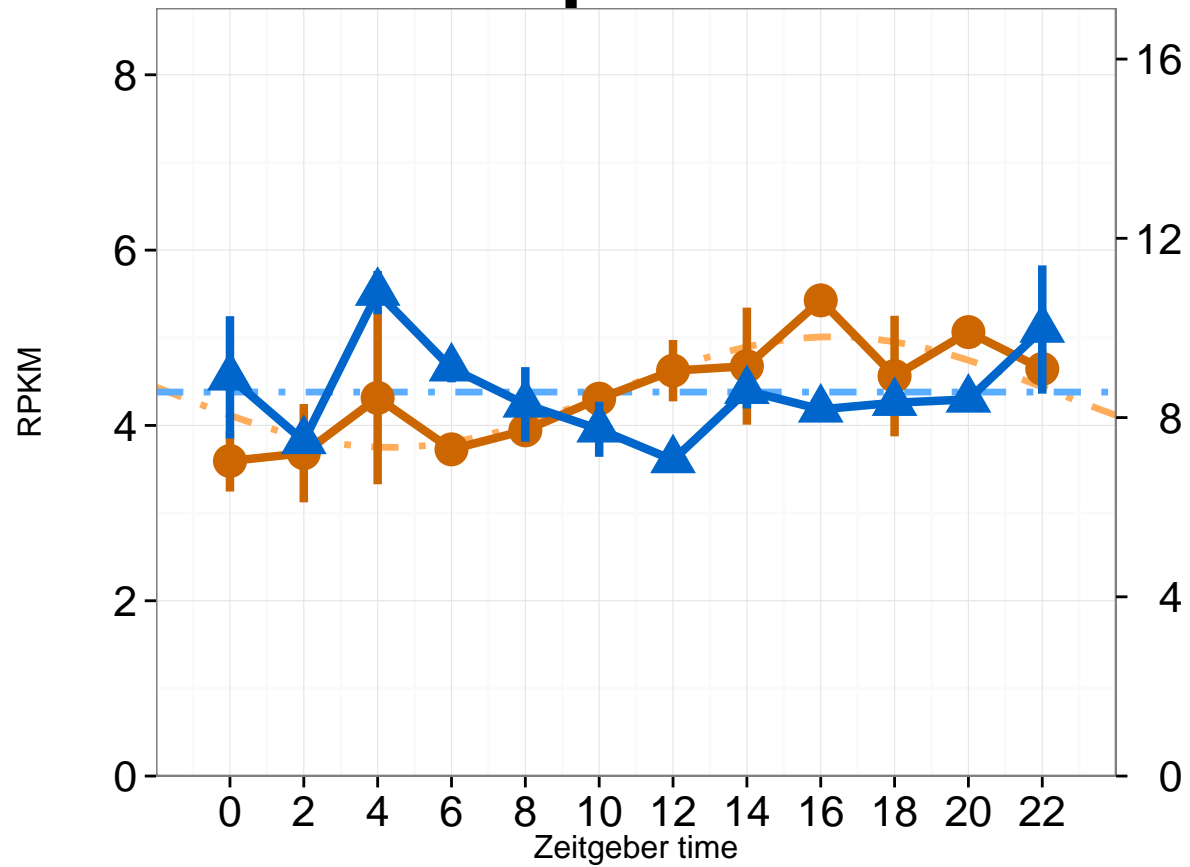

# Gpm6b

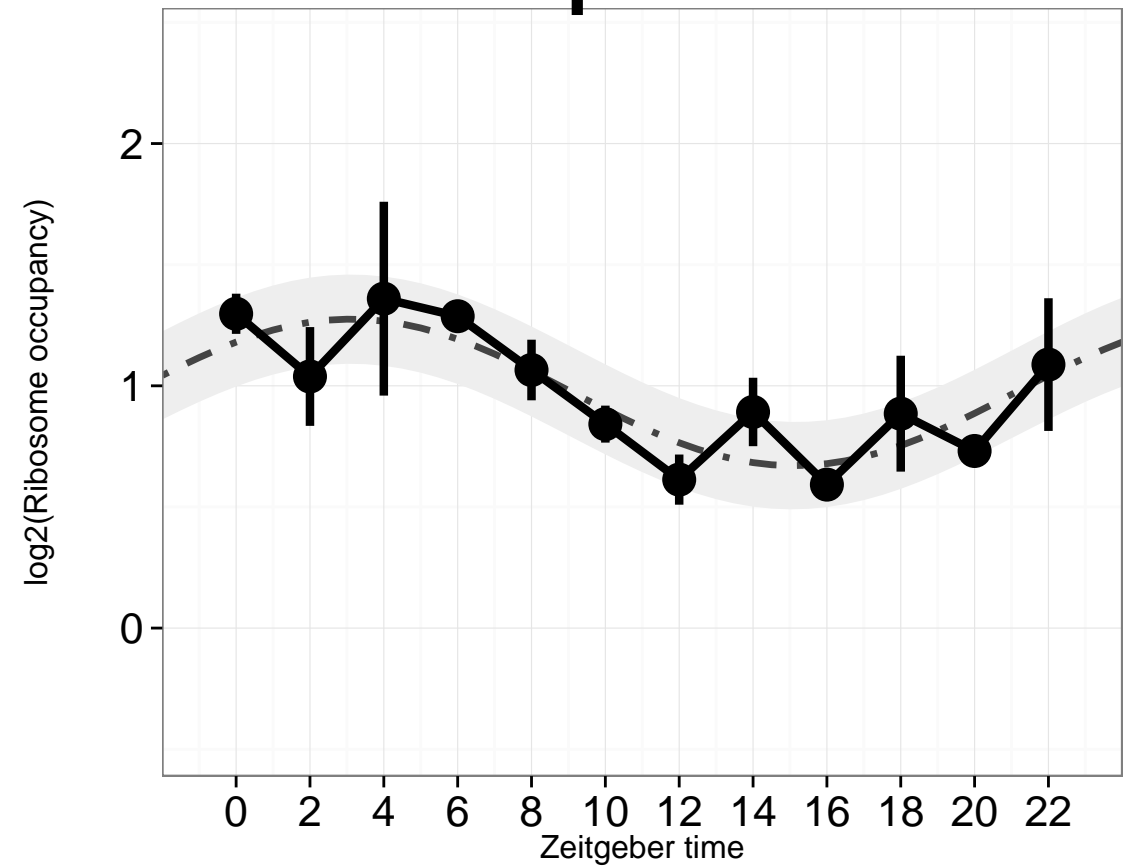

Supplement: Supplementary file 6127 [file 1]

# Trim16

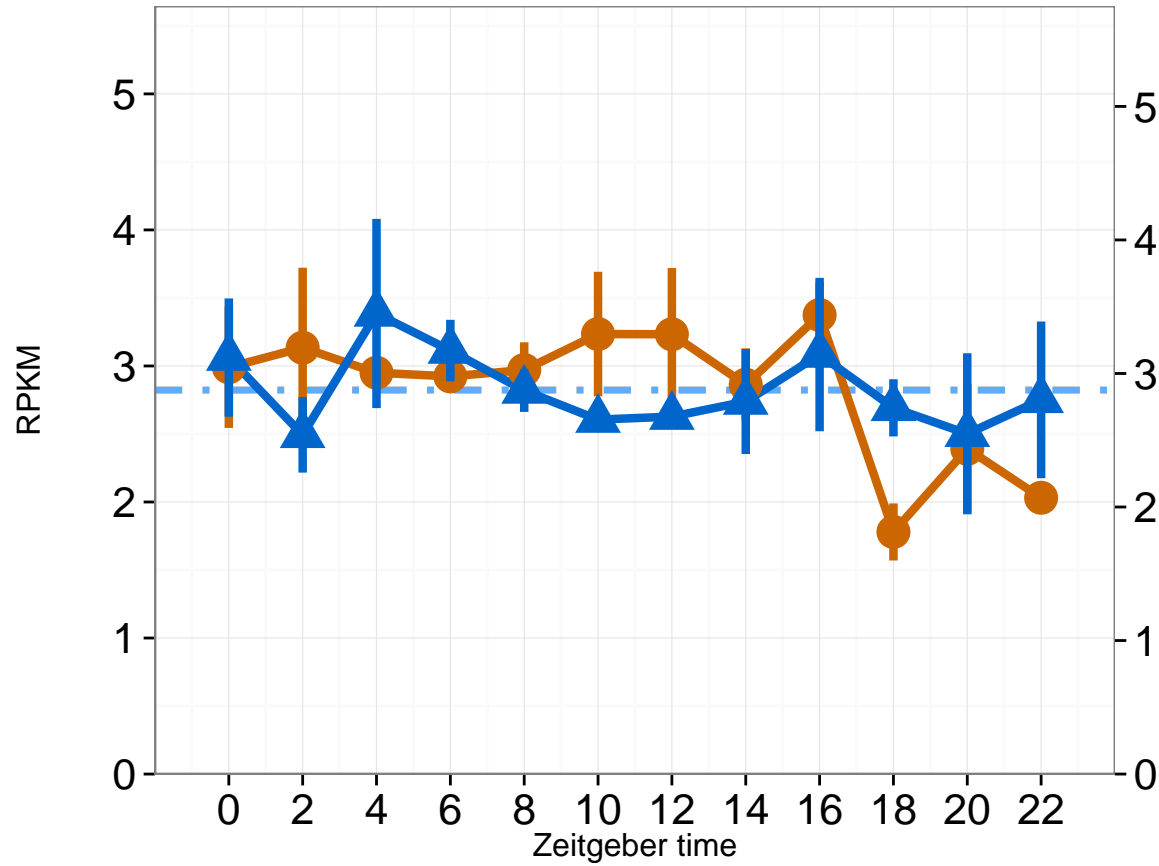

# Trim16

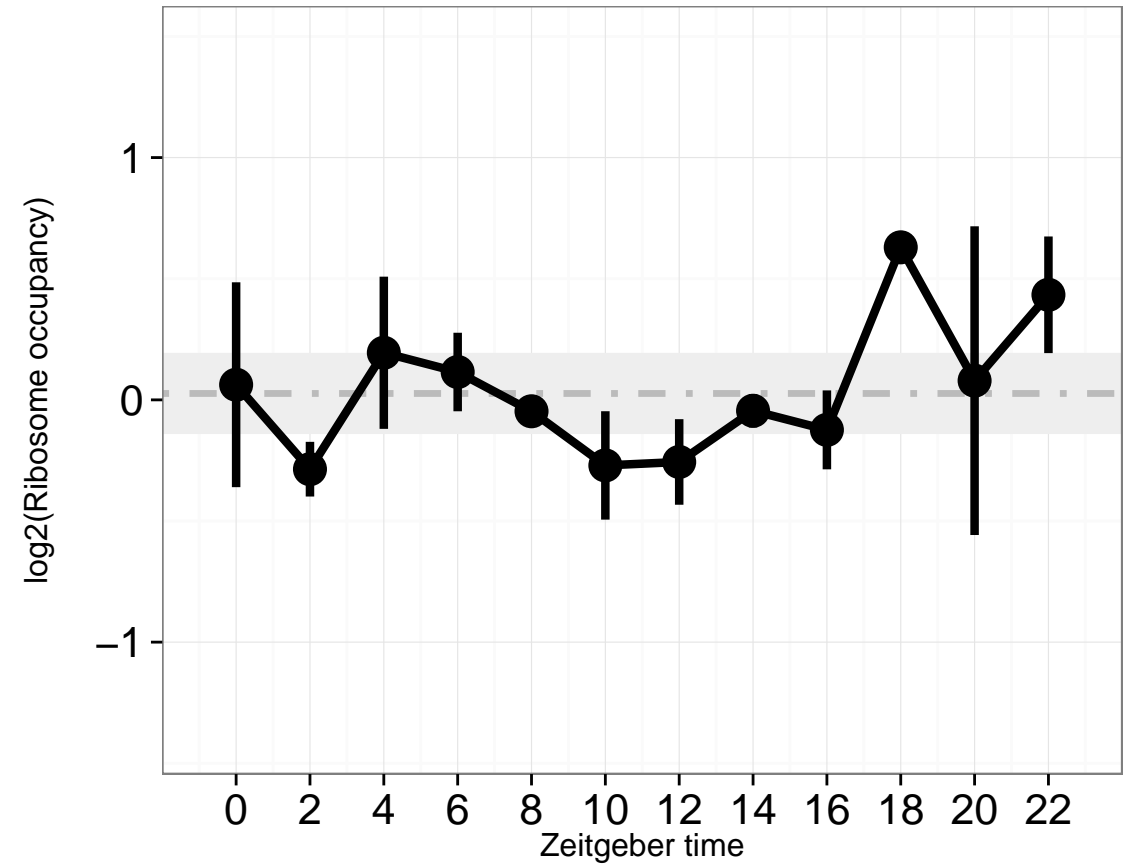

Supplement: Supplementary file 6128 [file 1]

## Ralgds

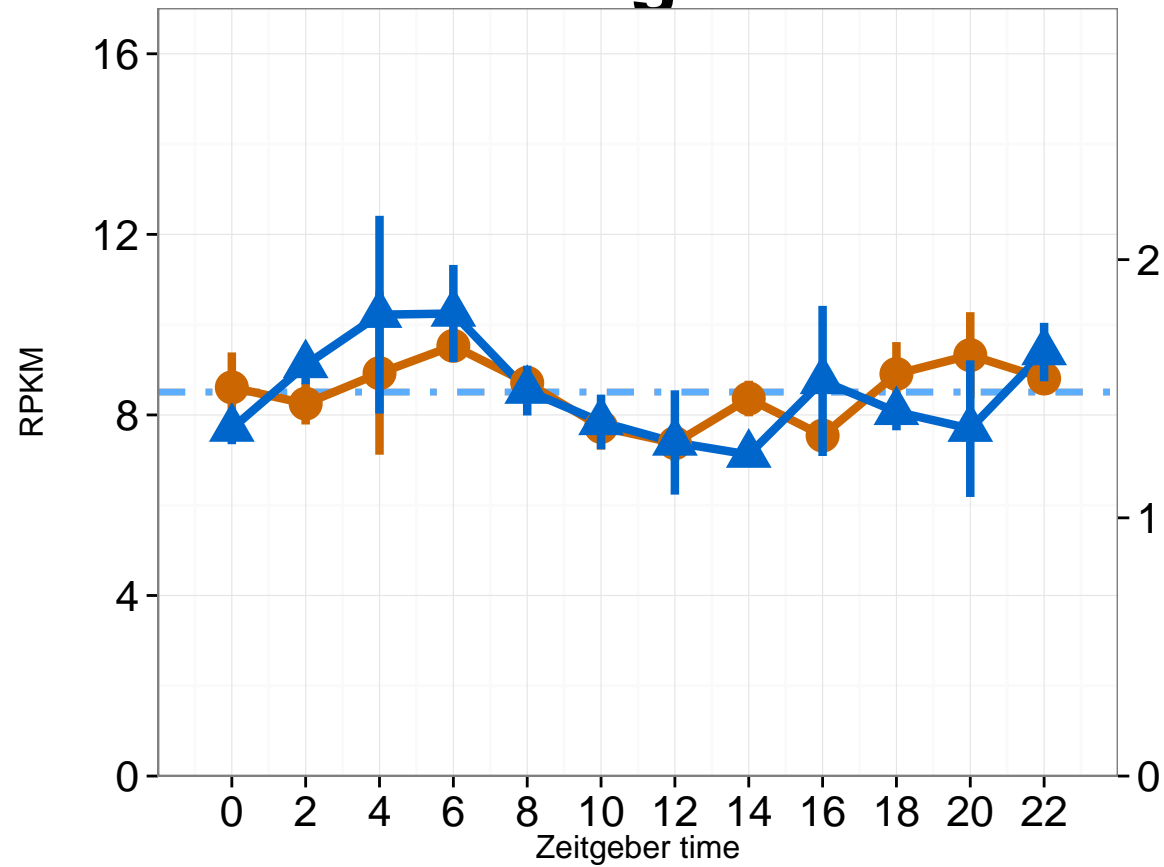

## Ralgds

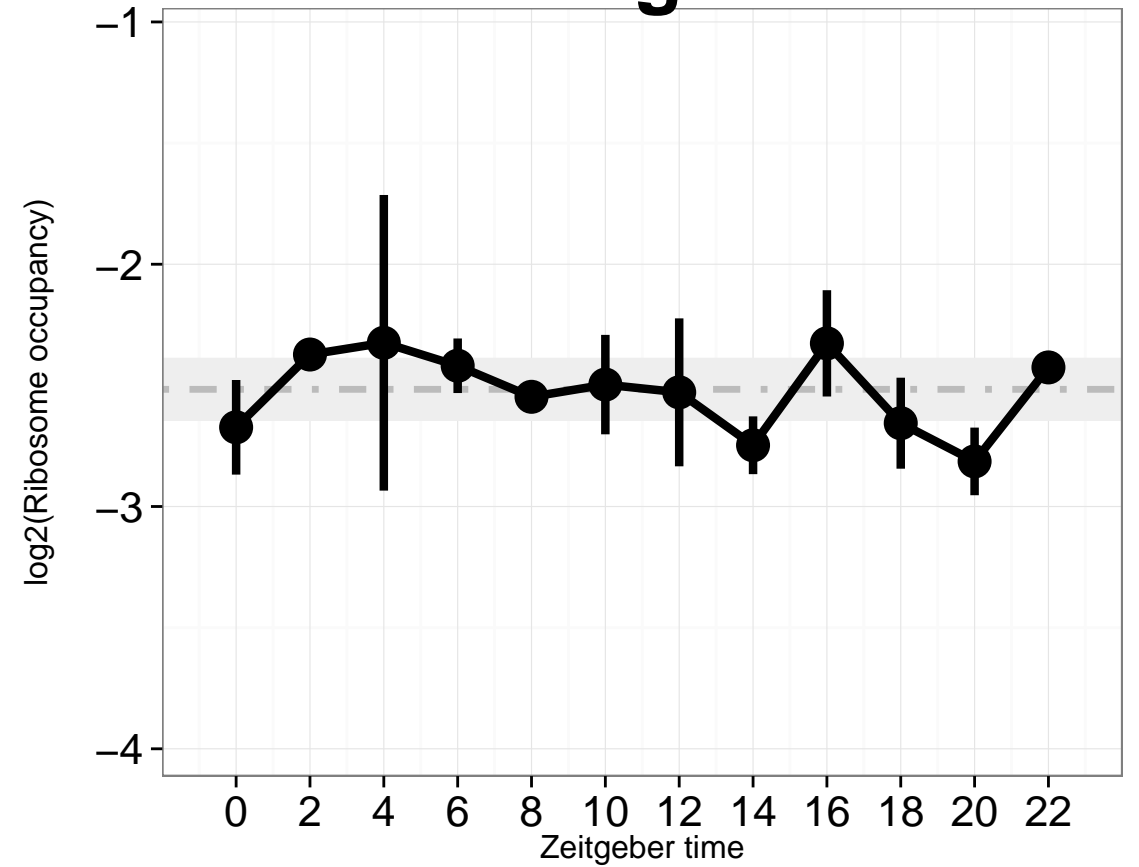

Supplement: Supplementary file 6129 [file 1]

# Sumf1

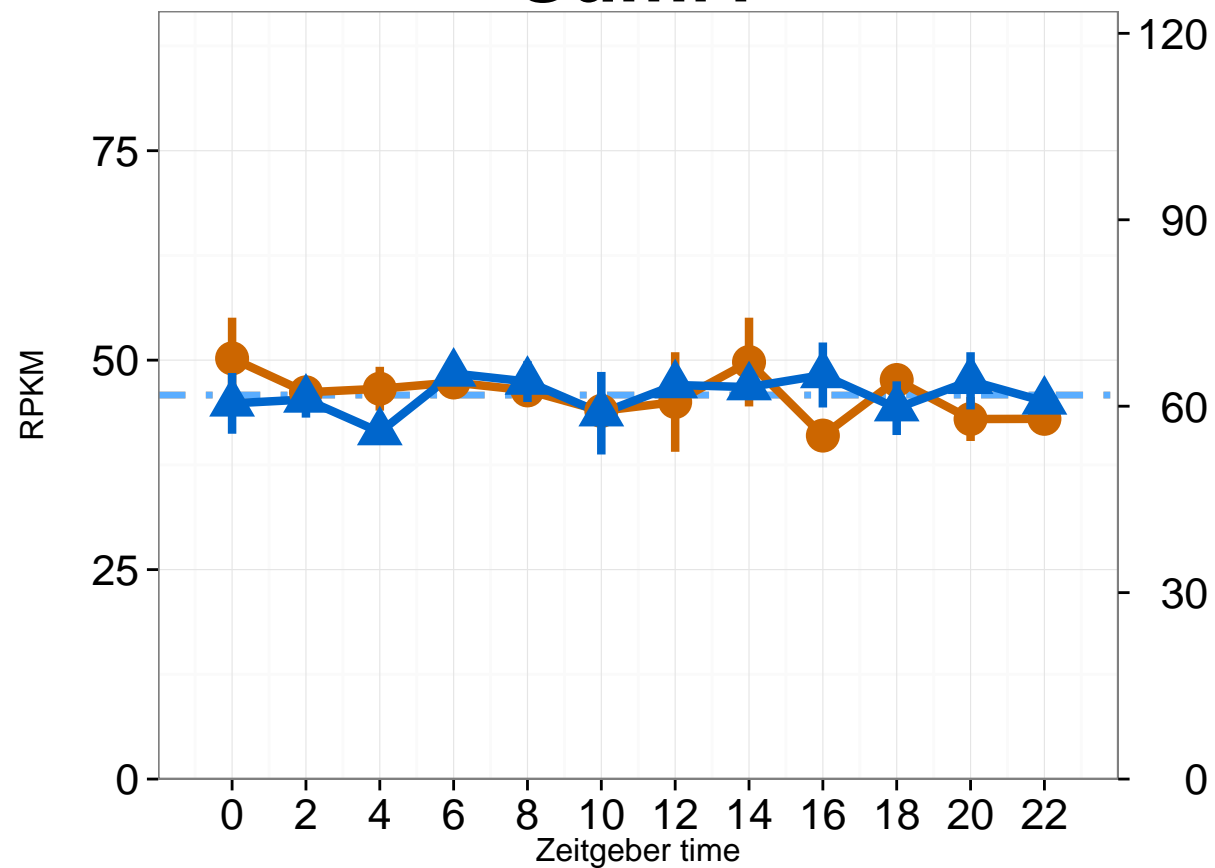

# Sumf1

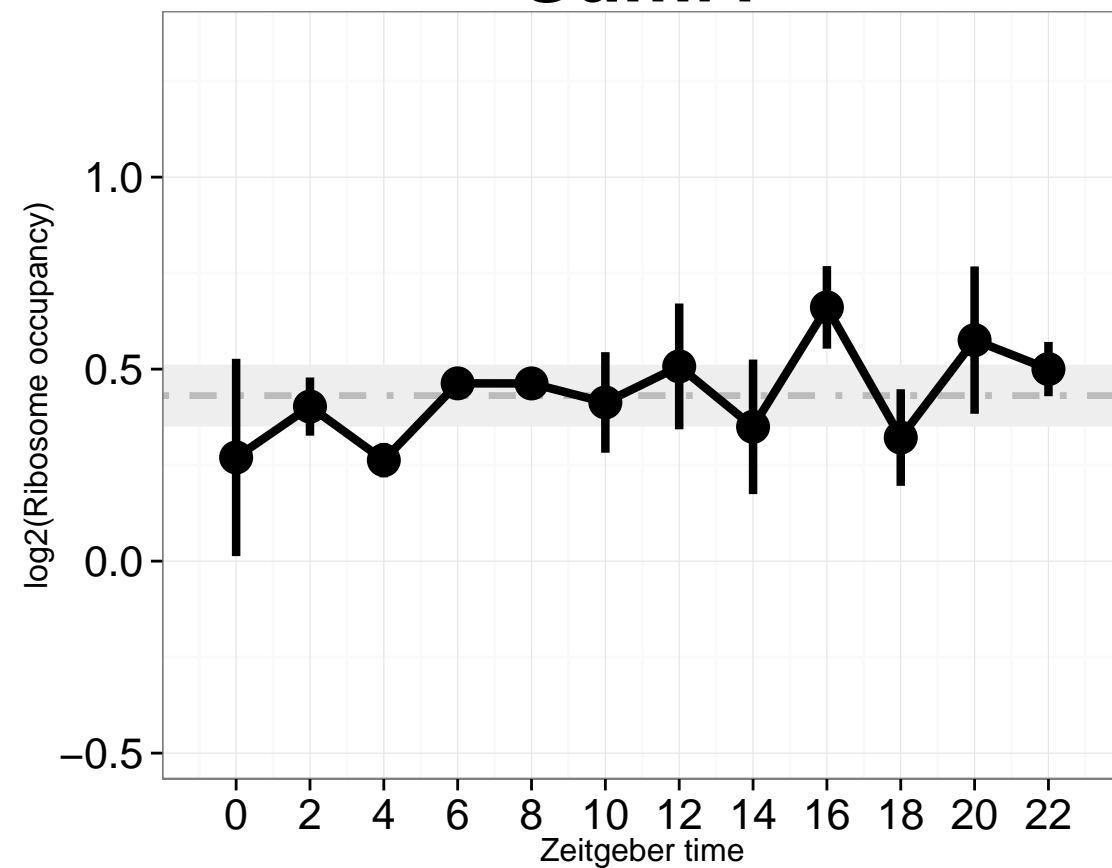

Supplement: Supplementary file 6130 [file 1]

## Mmrn2

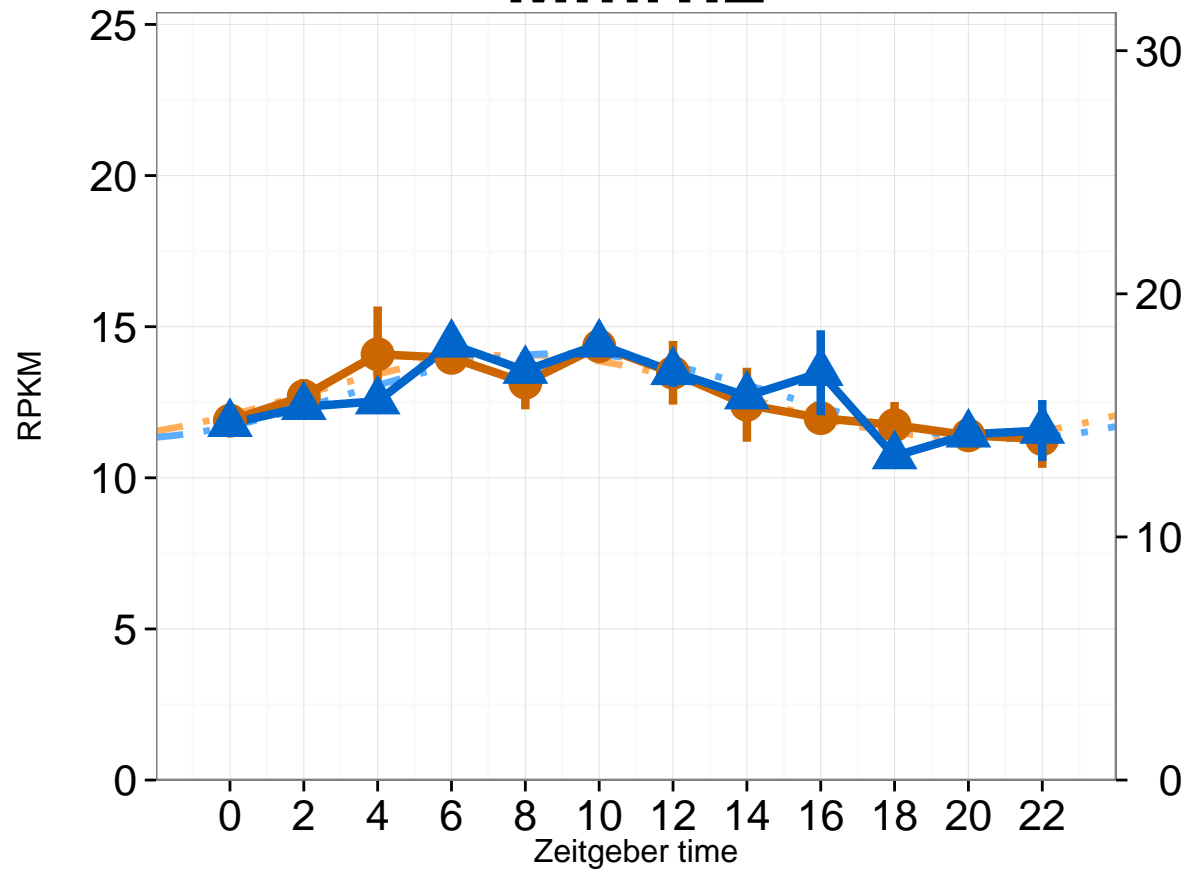

## Mmrn2

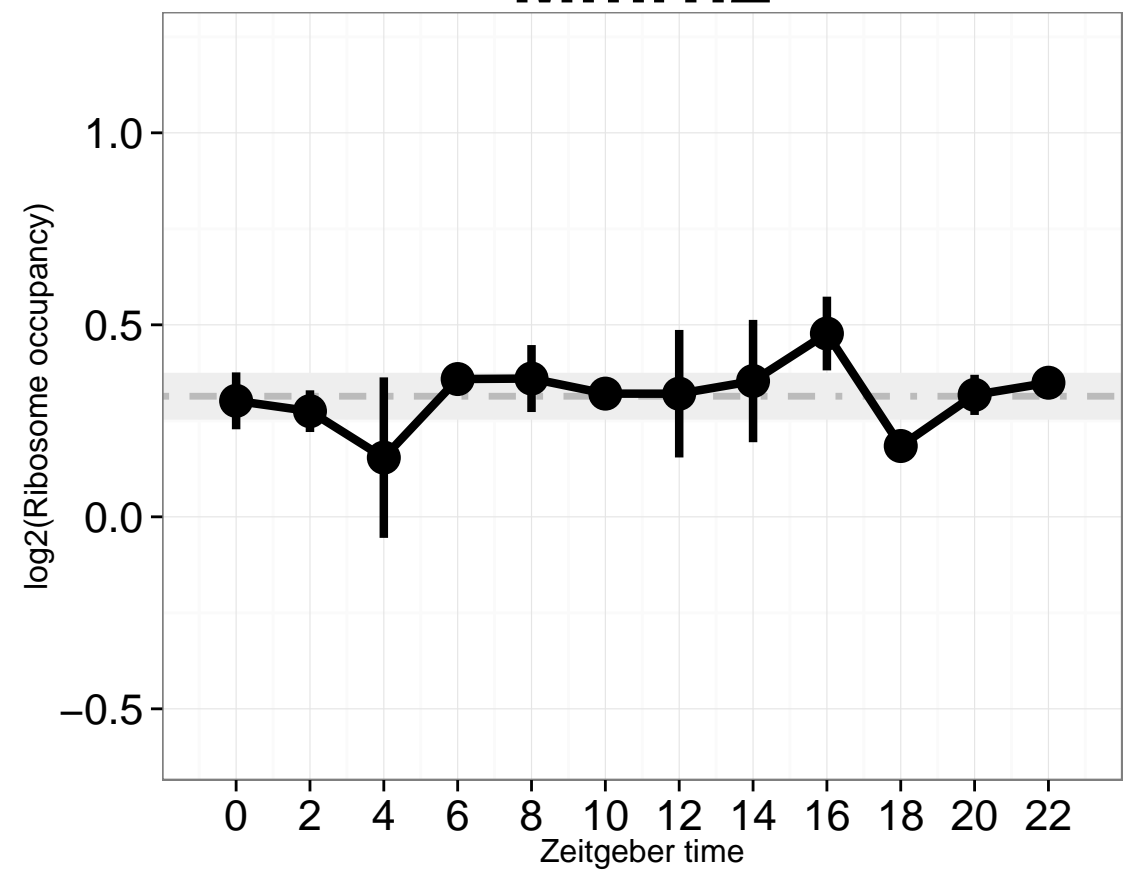

Supplement: Supplementary file 6131 [file 1]

## Ces1d

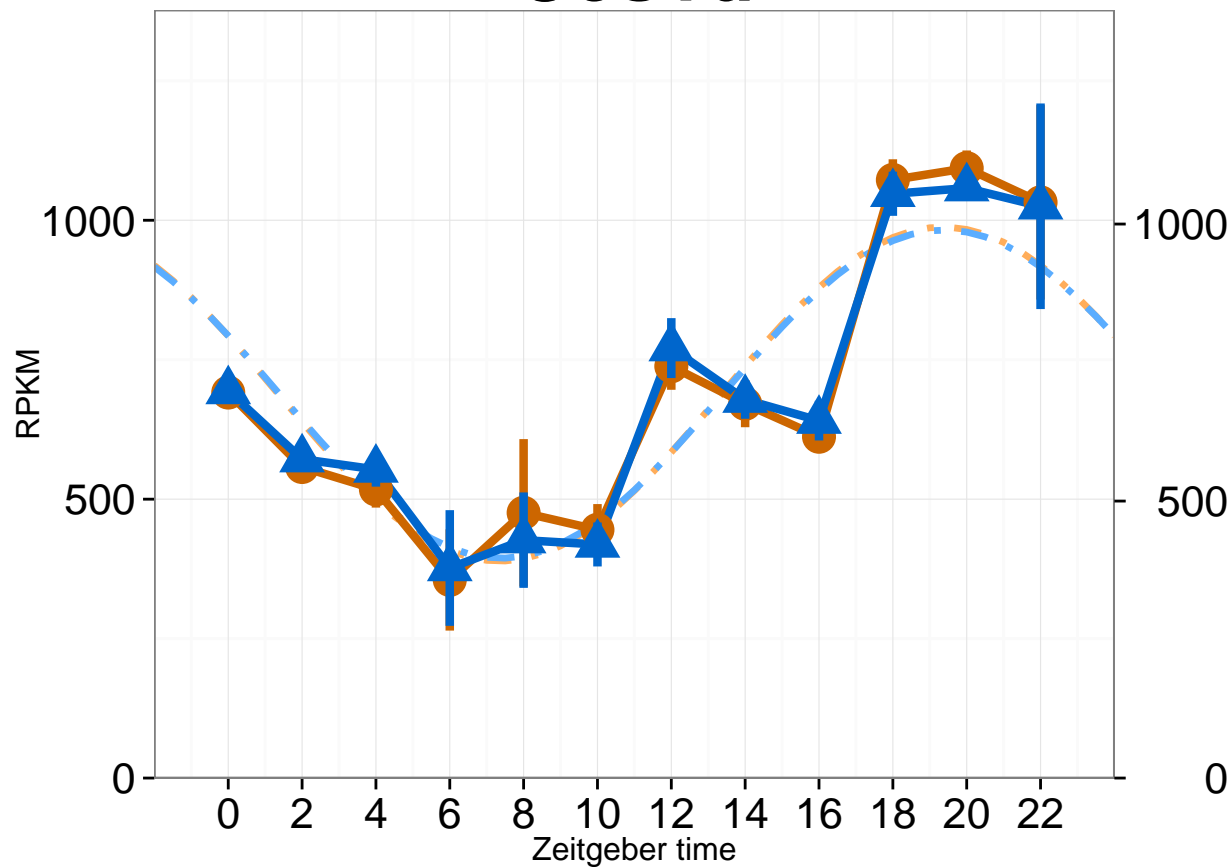

## Ces1d

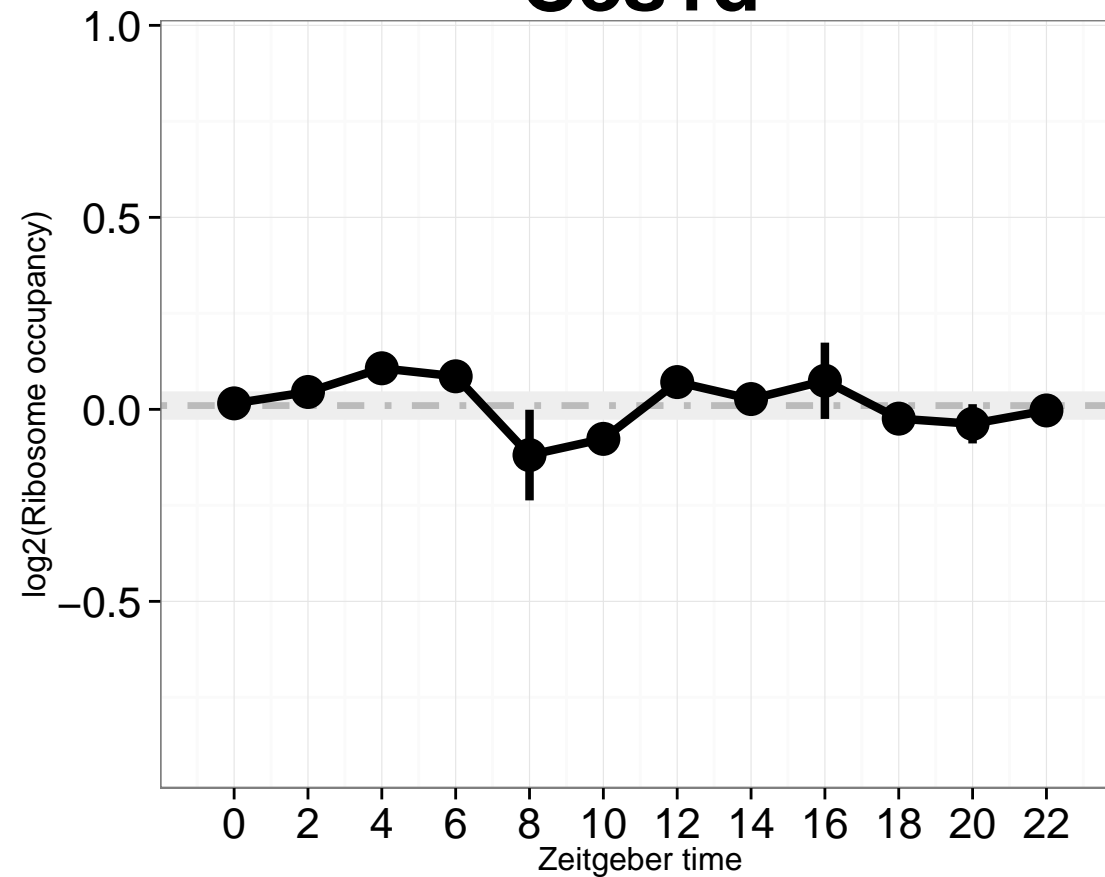

Supplement: Supplementary file 6132 [file 1]

# Fam222b

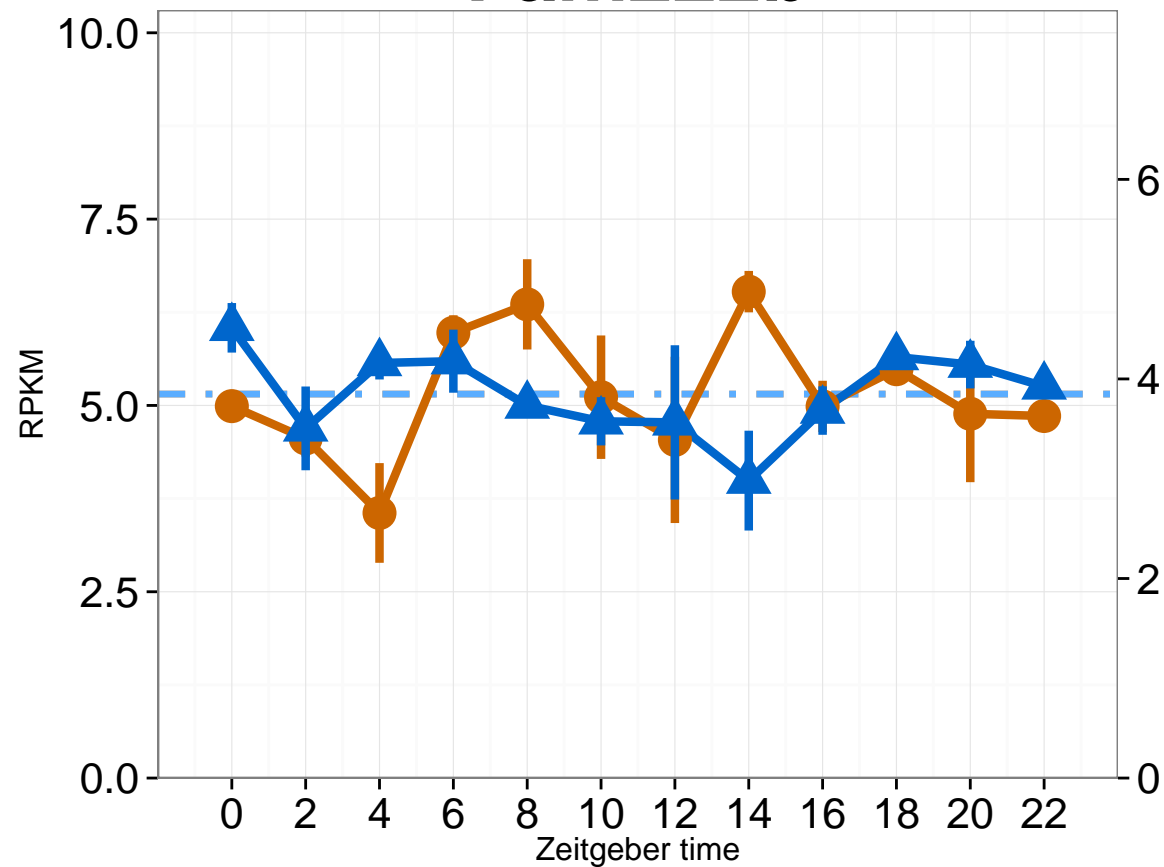

# Fam222b

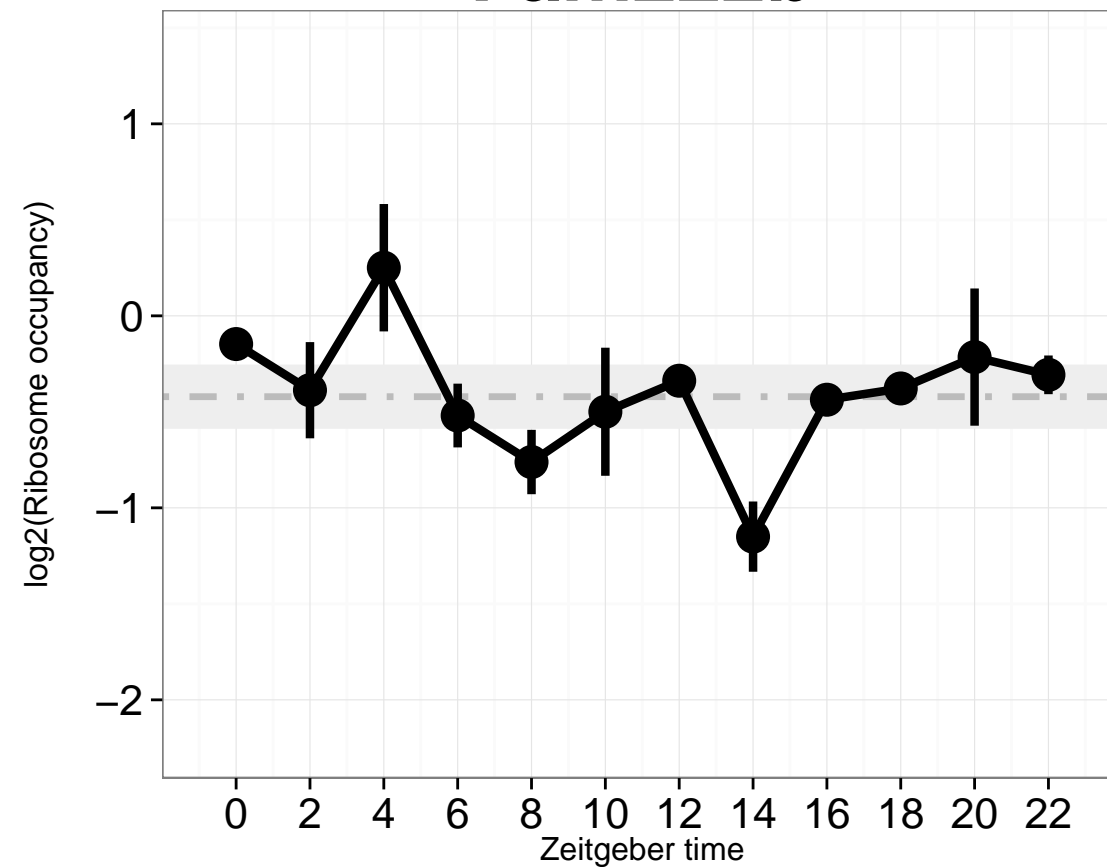

Supplement: Supplementary file 6133 [file 1]

# Fndc3b

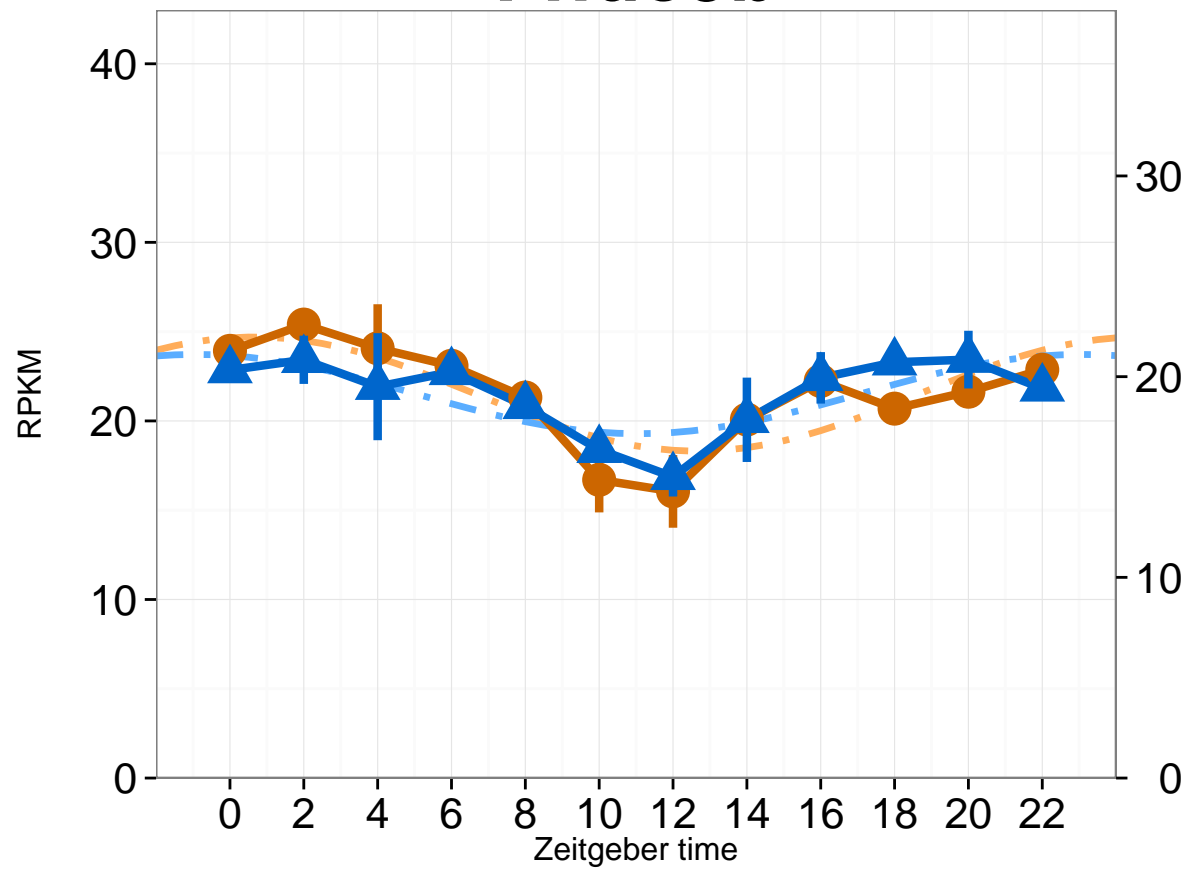

# Fndc3b

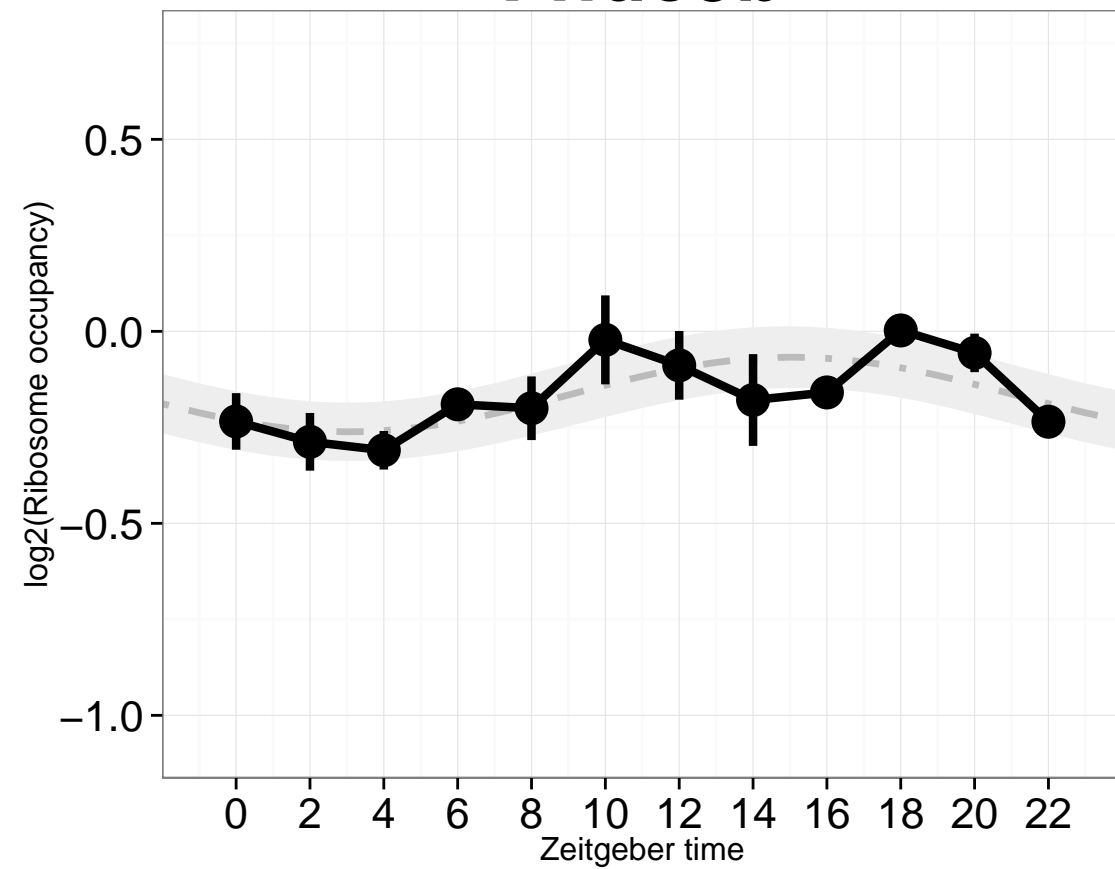

Supplement: Supplementary file 6134 [file 1]

## Ppfibp1

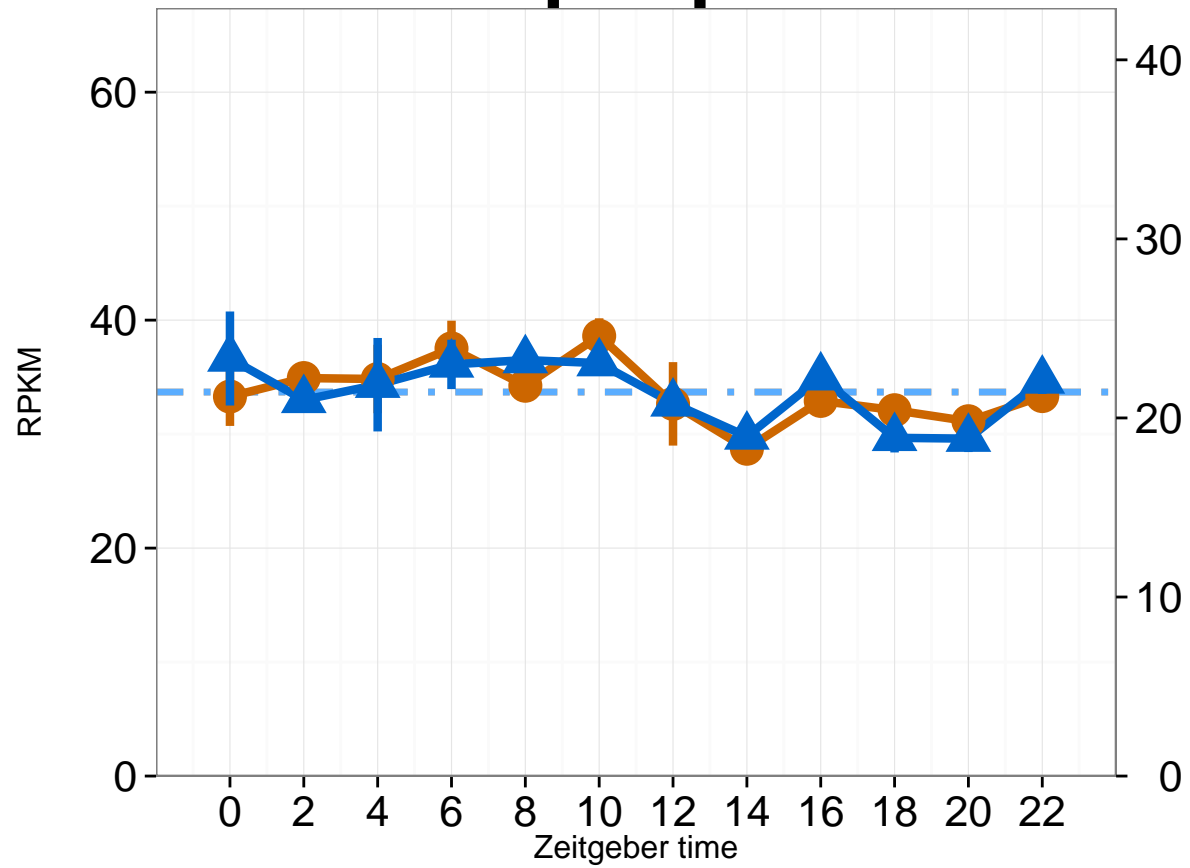

## Ppfibp1

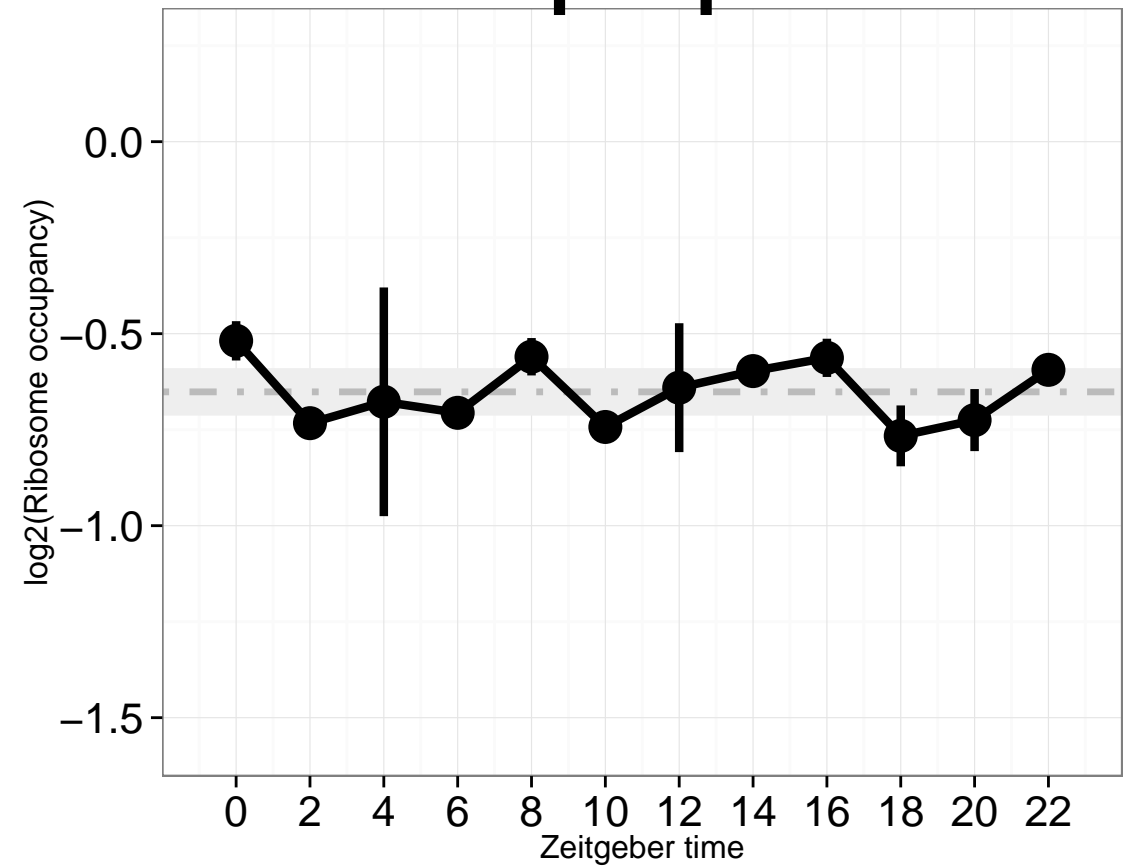

Supplement: Supplementary file 6135 [file 1]

# Acyp2

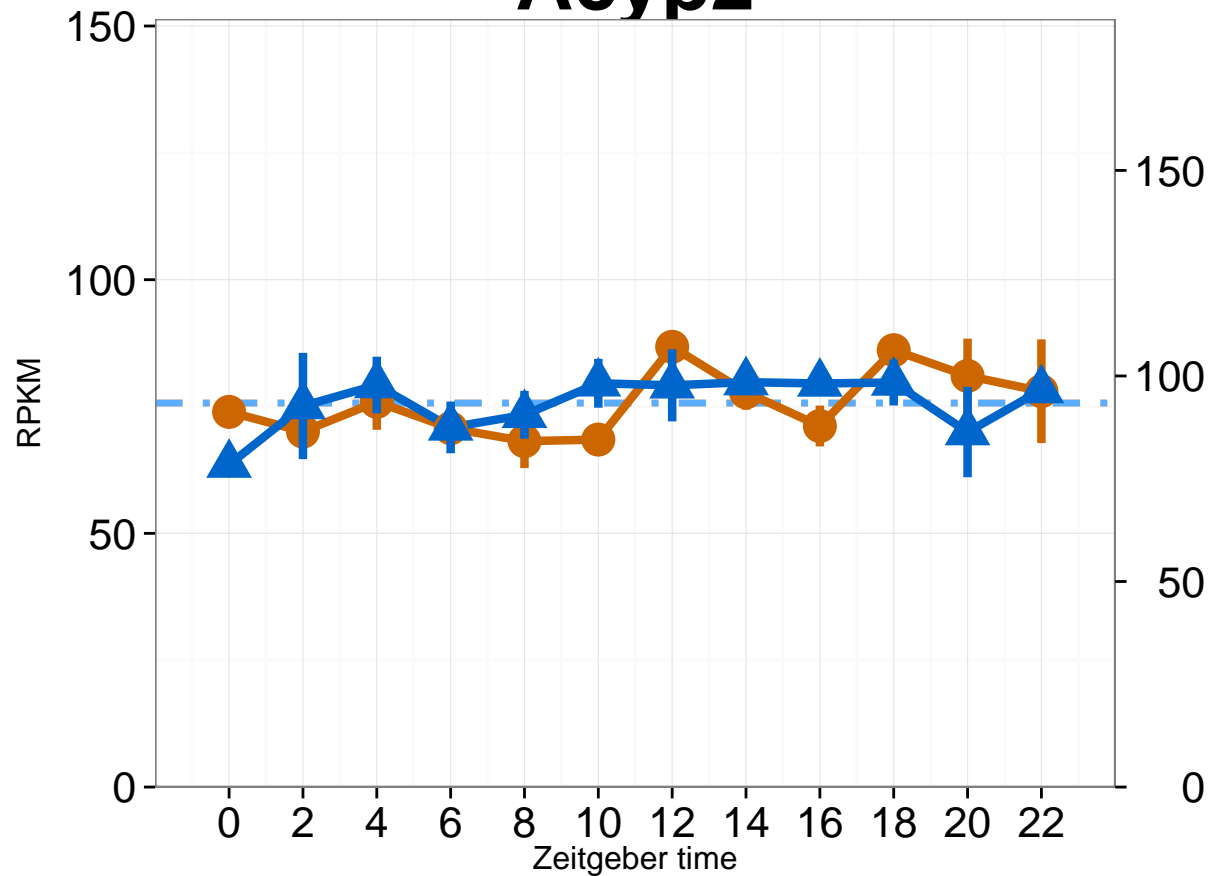

# Acyp2

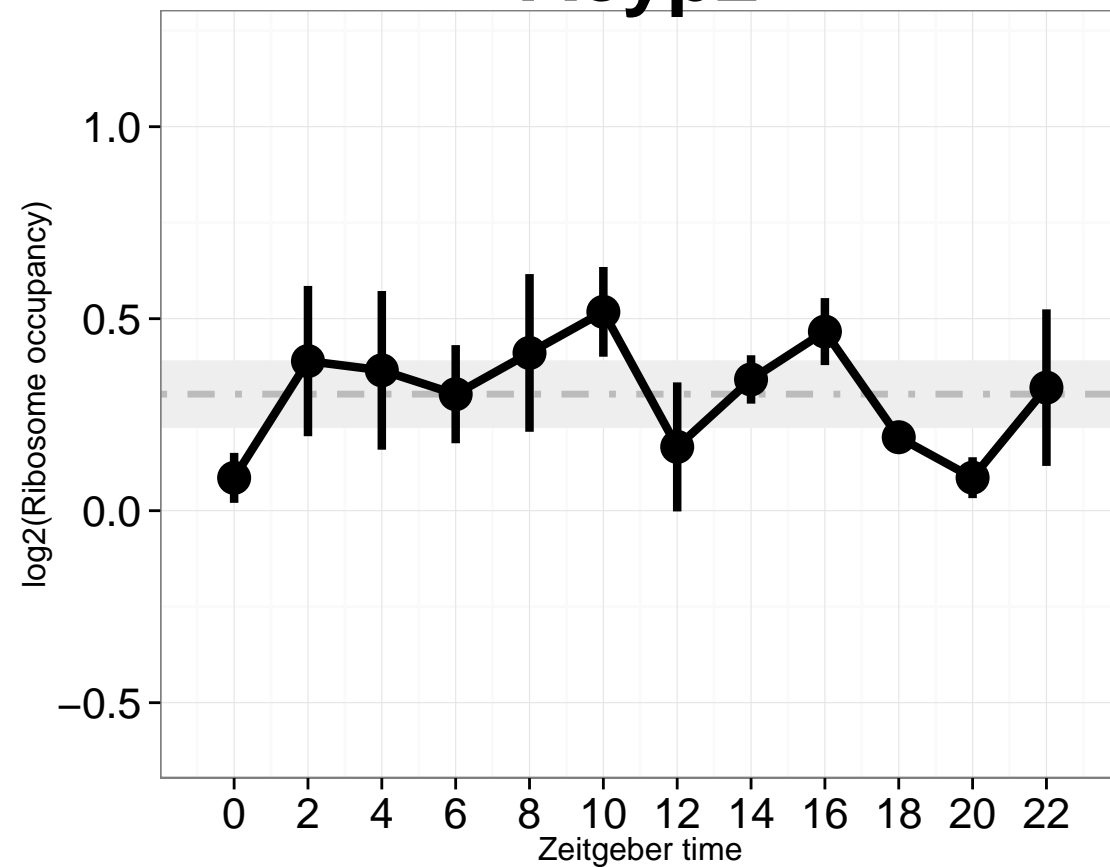

Supplement: Supplementary file 6136 [file 1]

# Fitm1

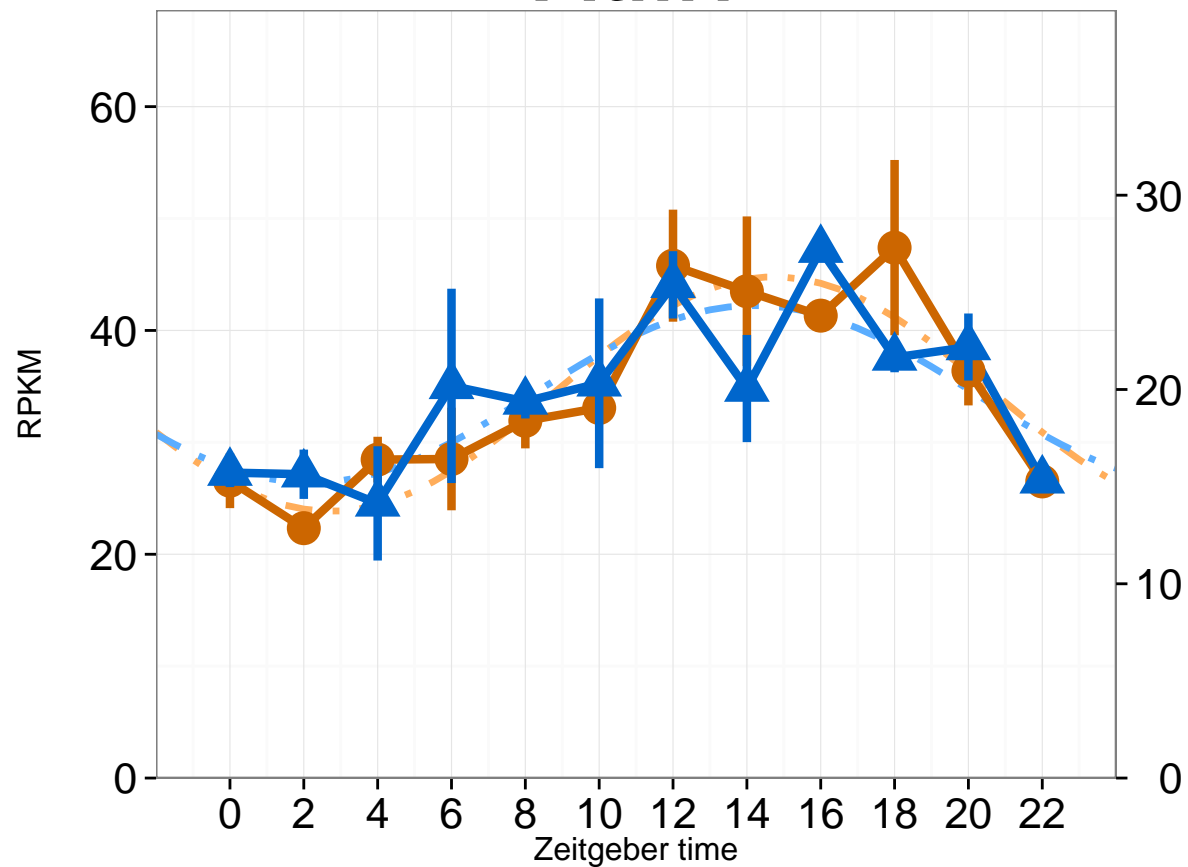

# Fitm1

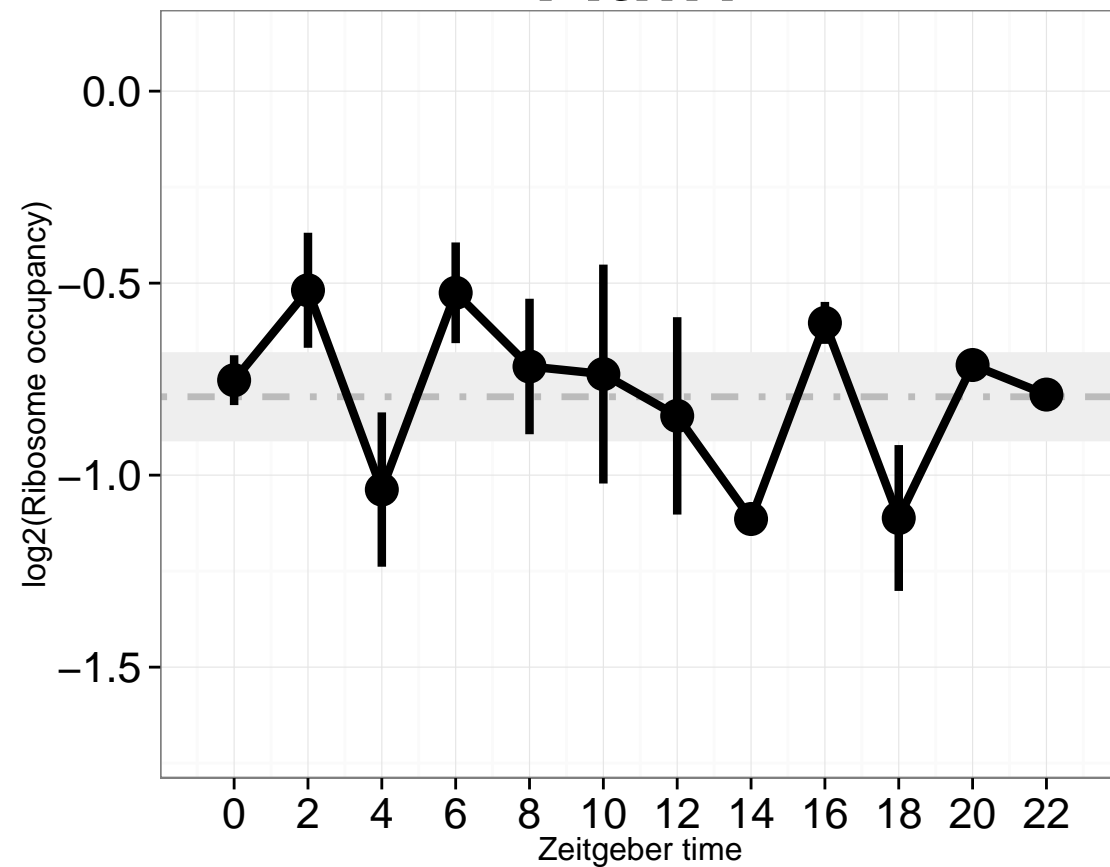

Supplement: Supplementary file 6137 [file 1]

## Thra

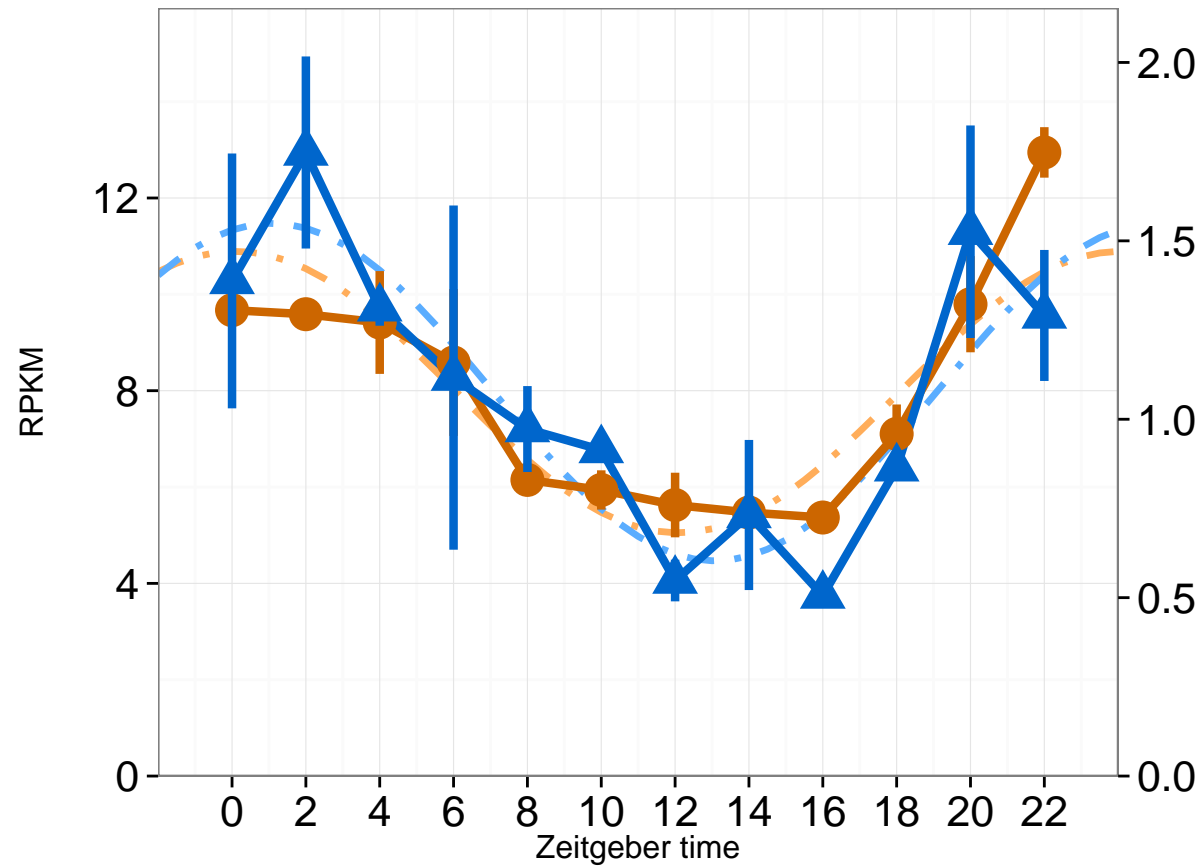

## Thra

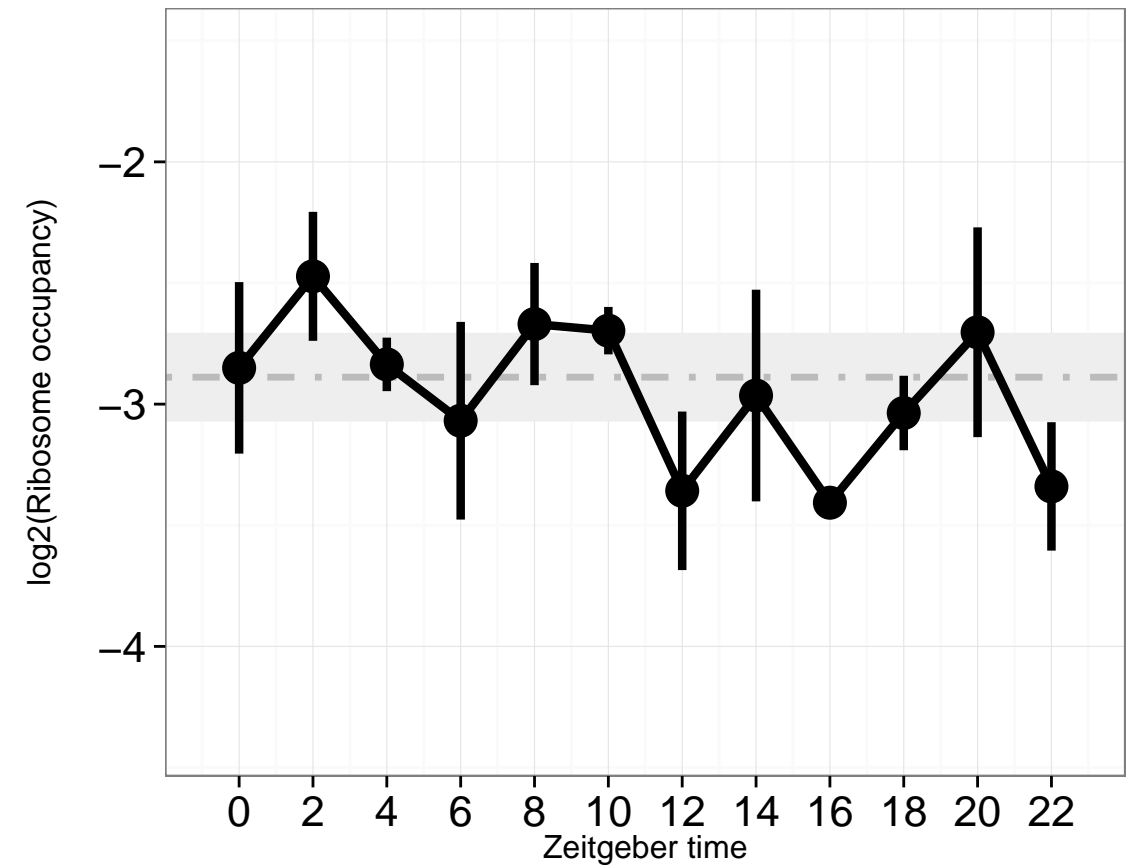

Supplement: Supplementary file 6138 [file 1]

## Camk1

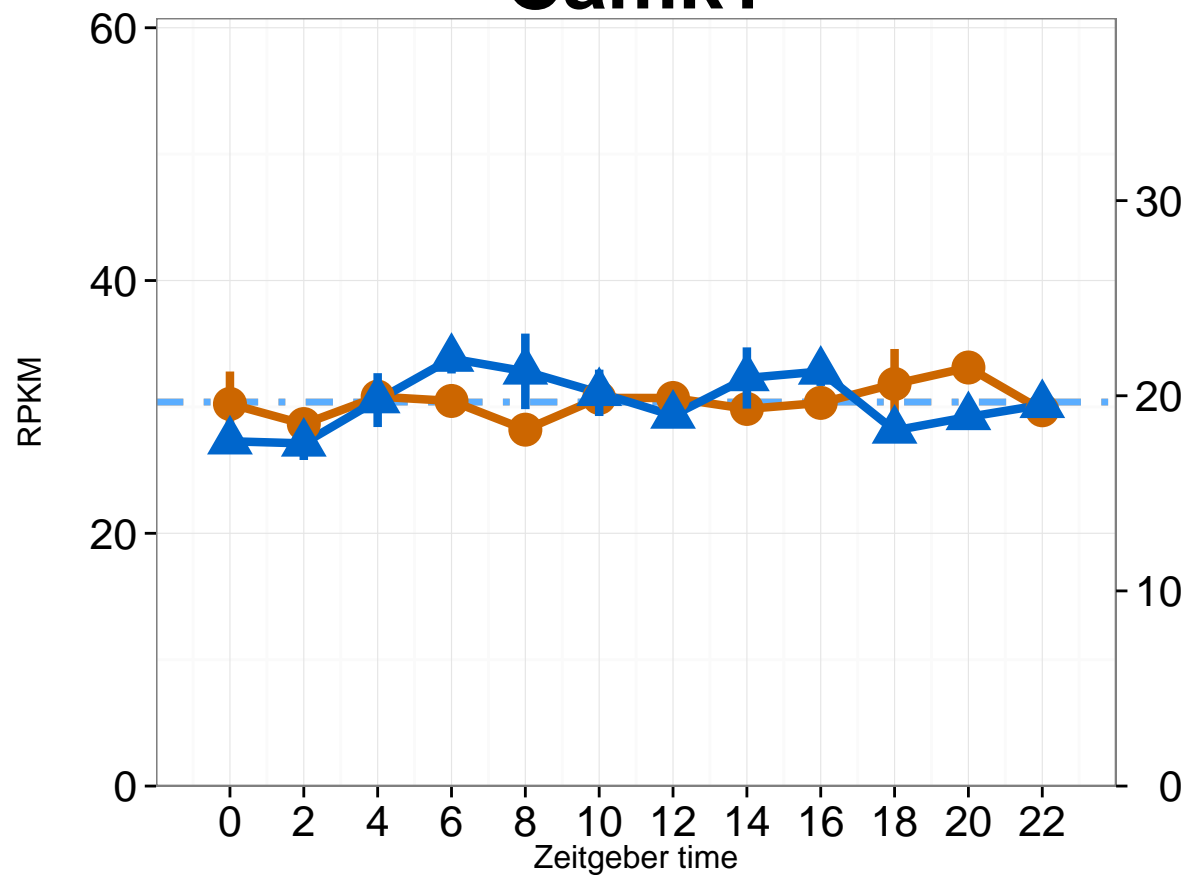

## Camk1

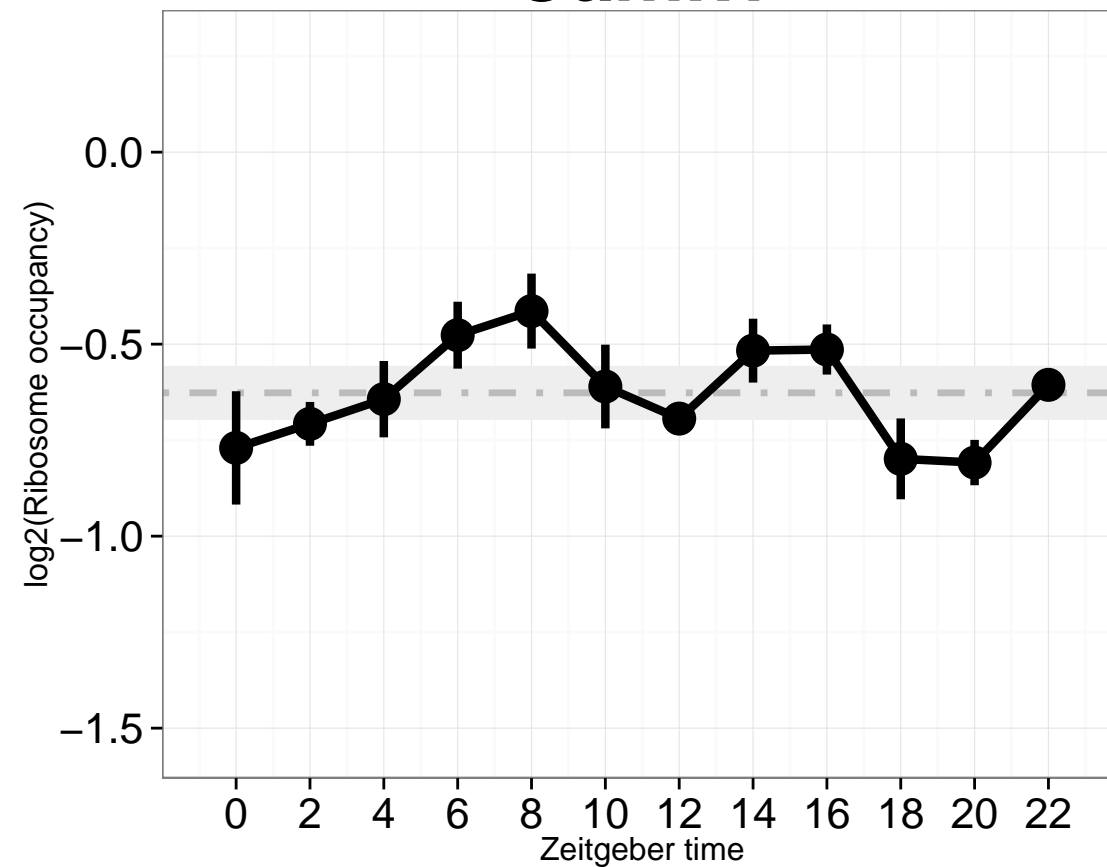

Supplement: Supplementary file 6139 [file 1]

## Cmip

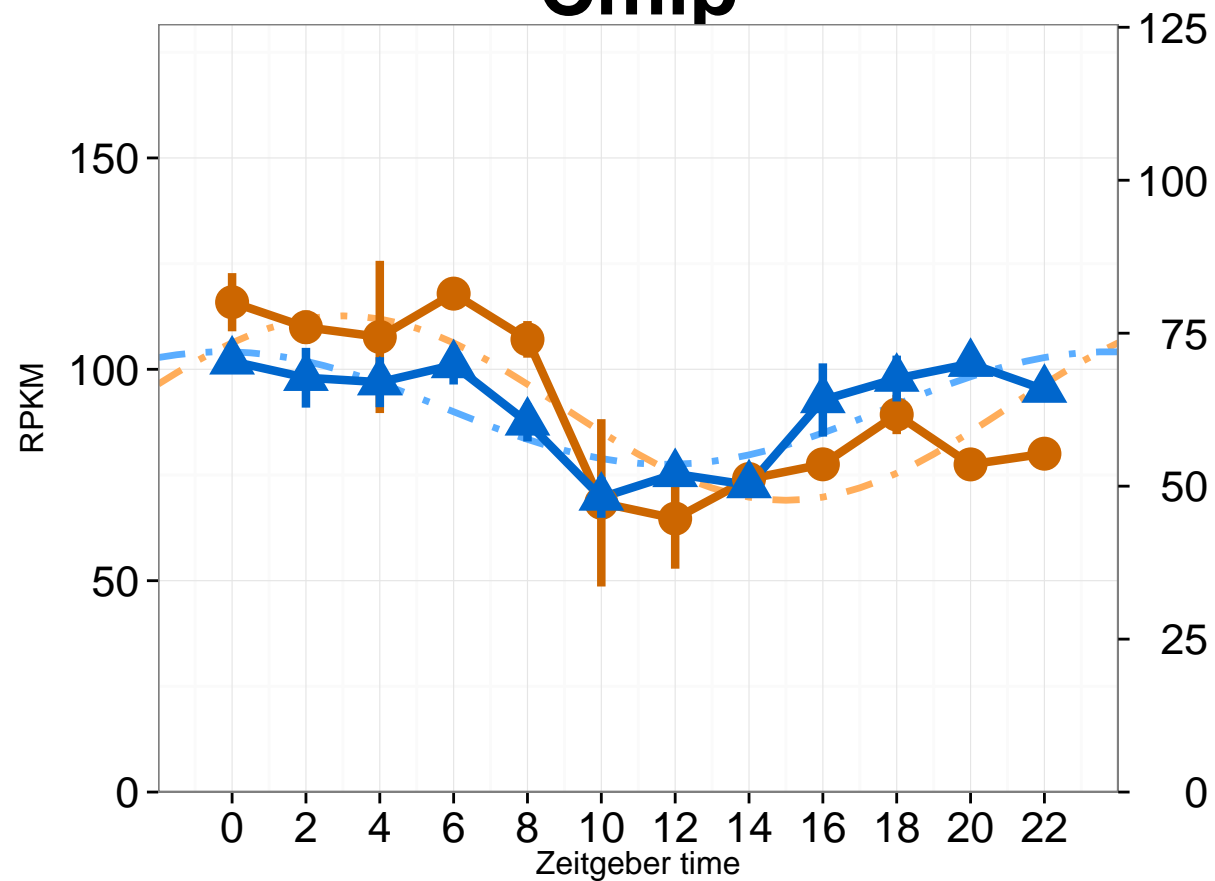

## Cmip

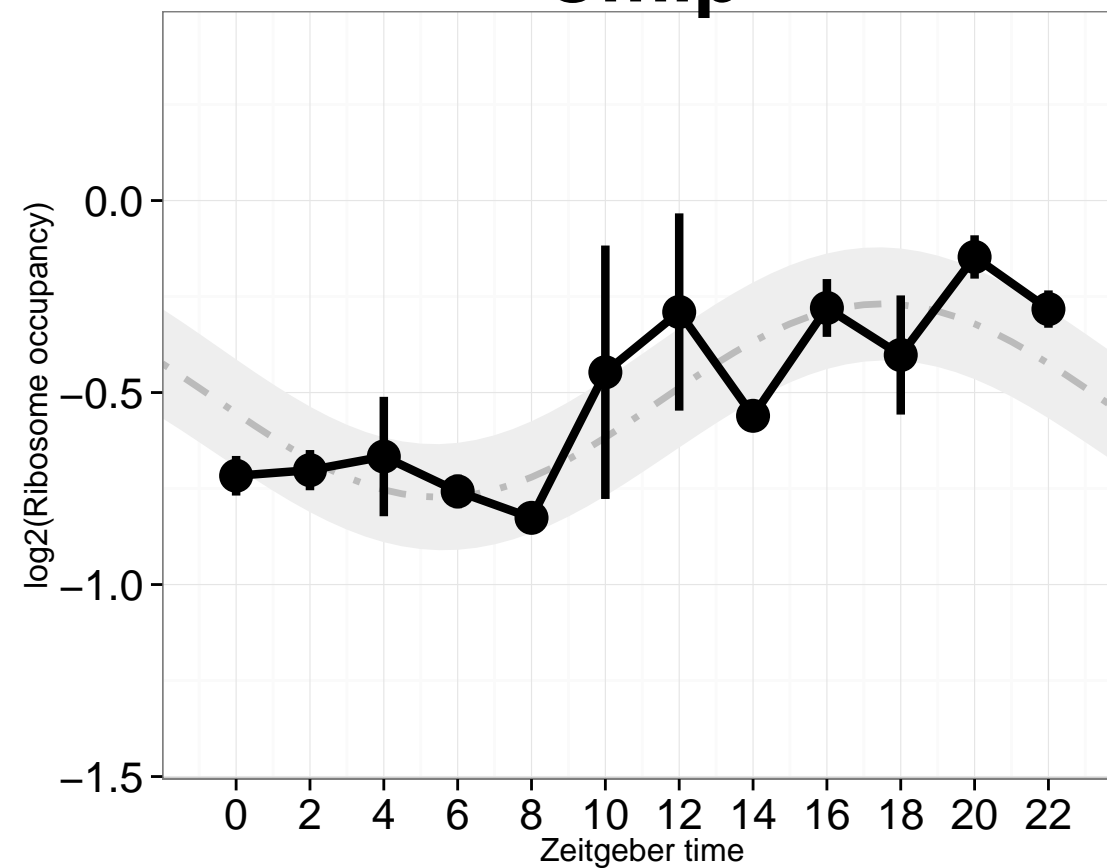

Supplement: Supplementary file 6140 [file 1]

# Scaf4

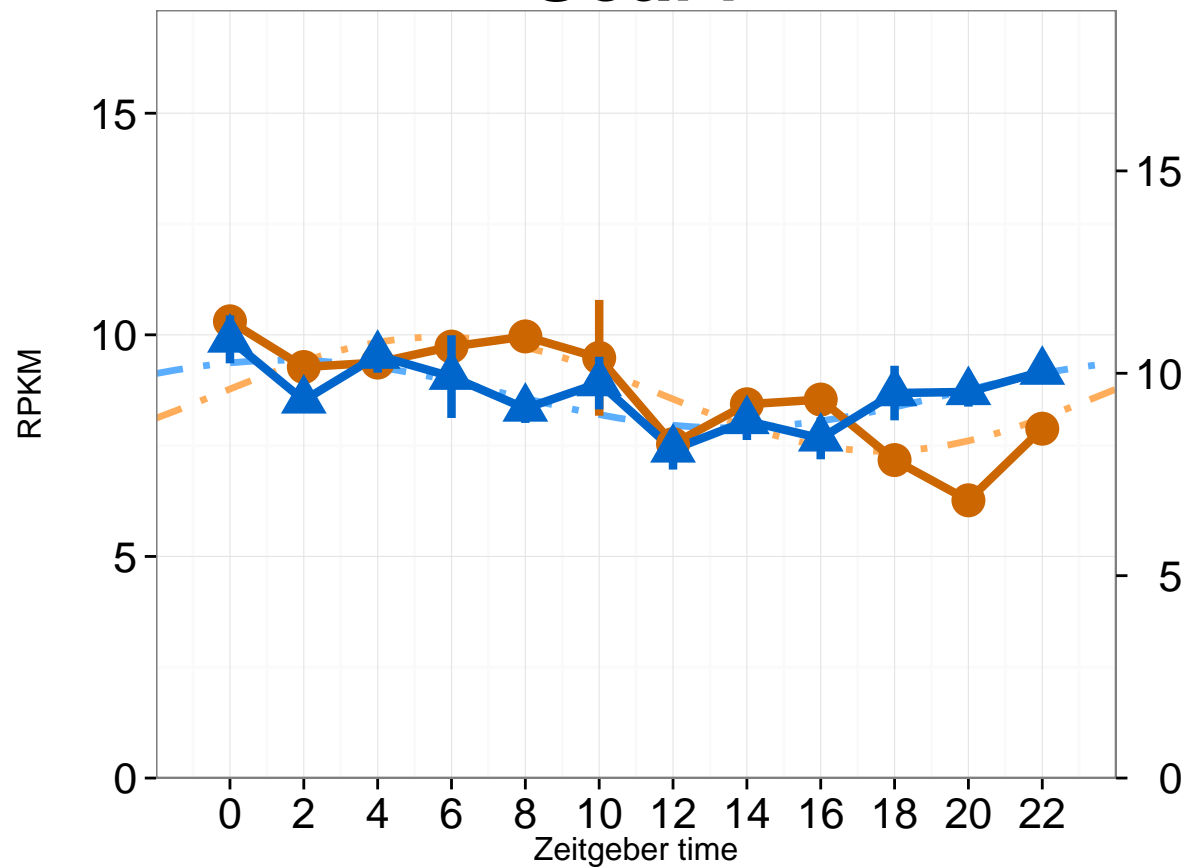

# Scaf4

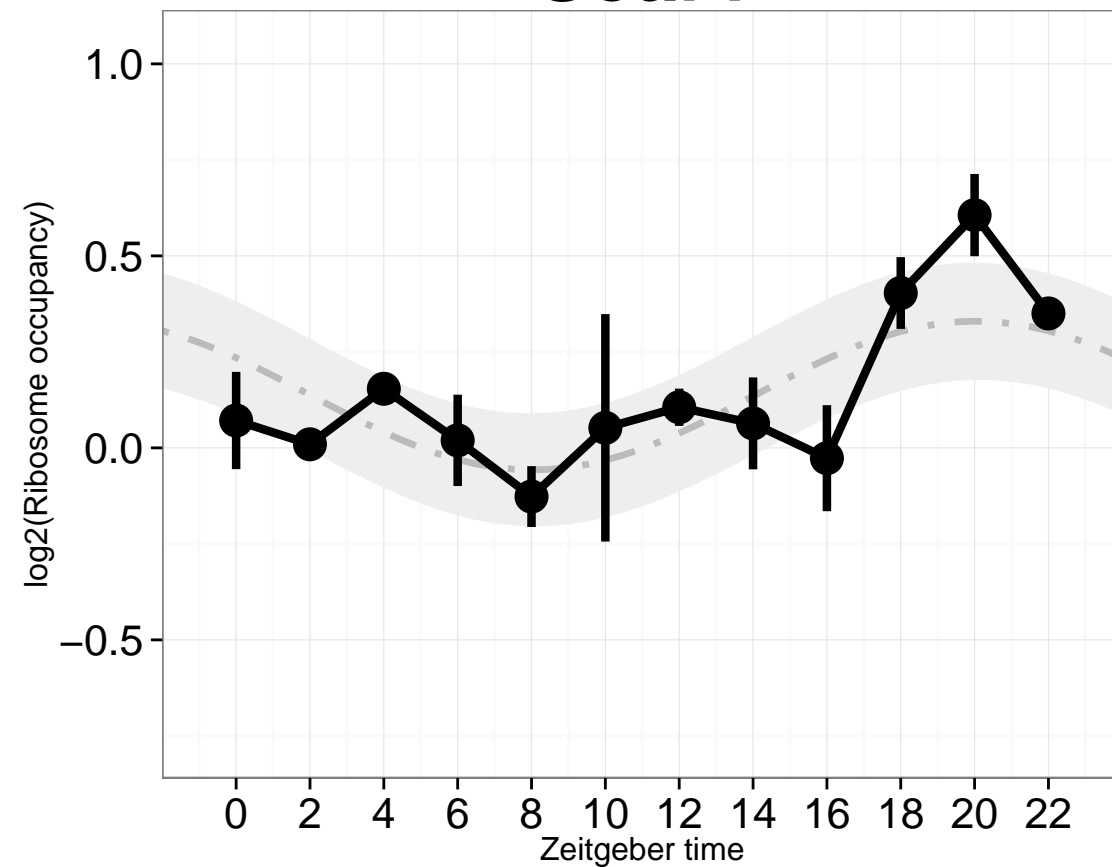

Supplement: Supplementary file 6141 [file 1]

## Slc7a7

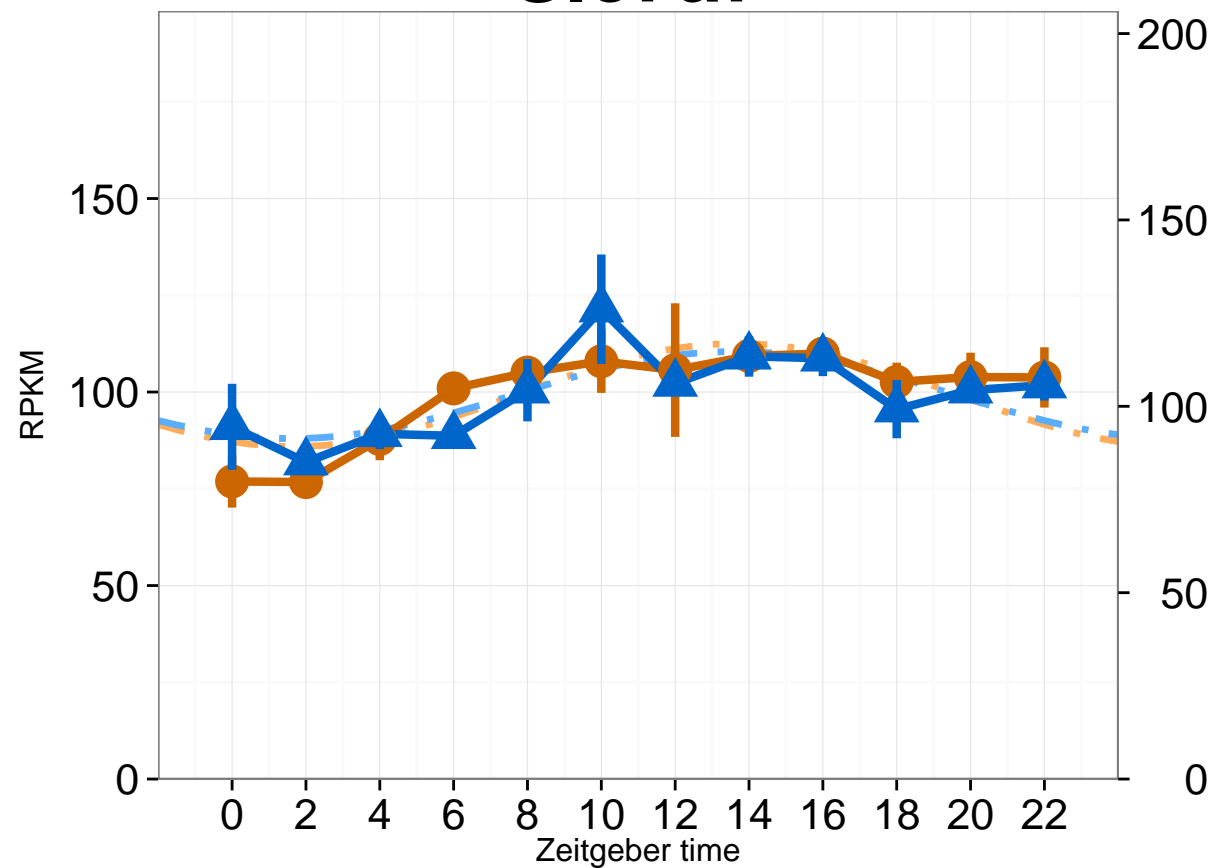

## Slc7a7

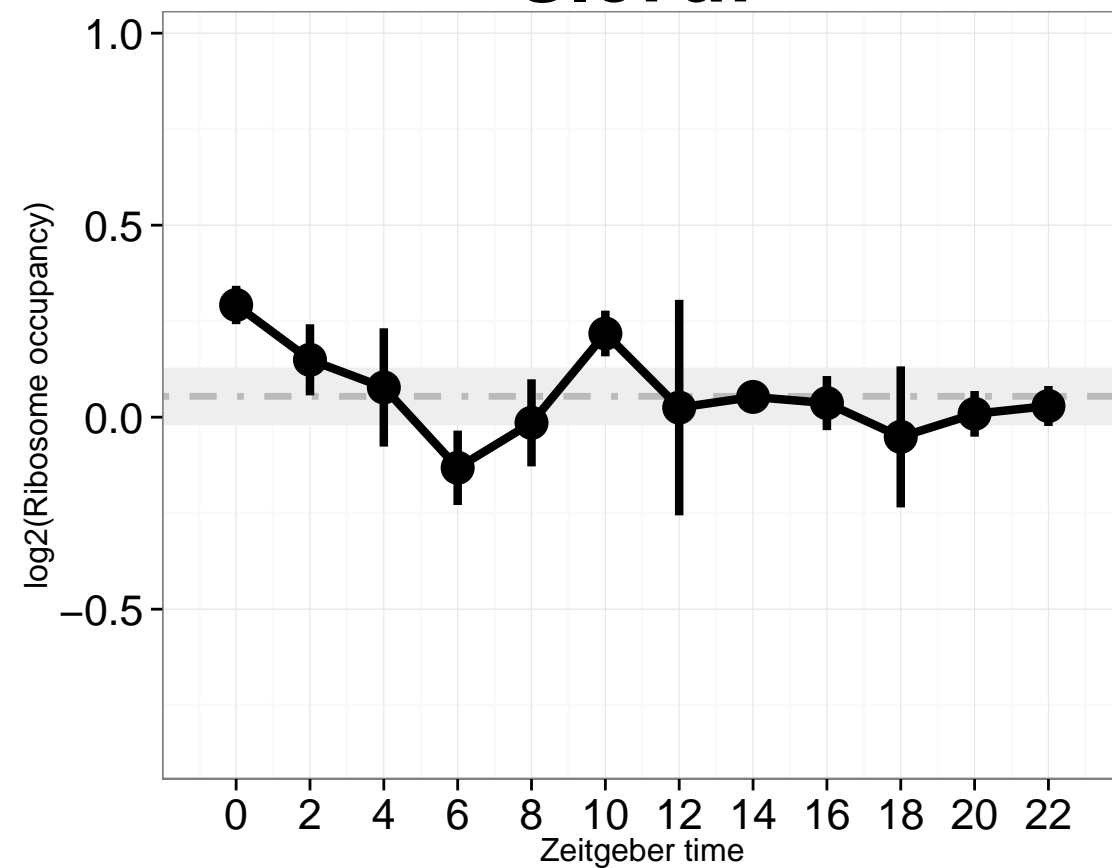

Supplement: Supplementary file 6142 [file 1]

# Metap2

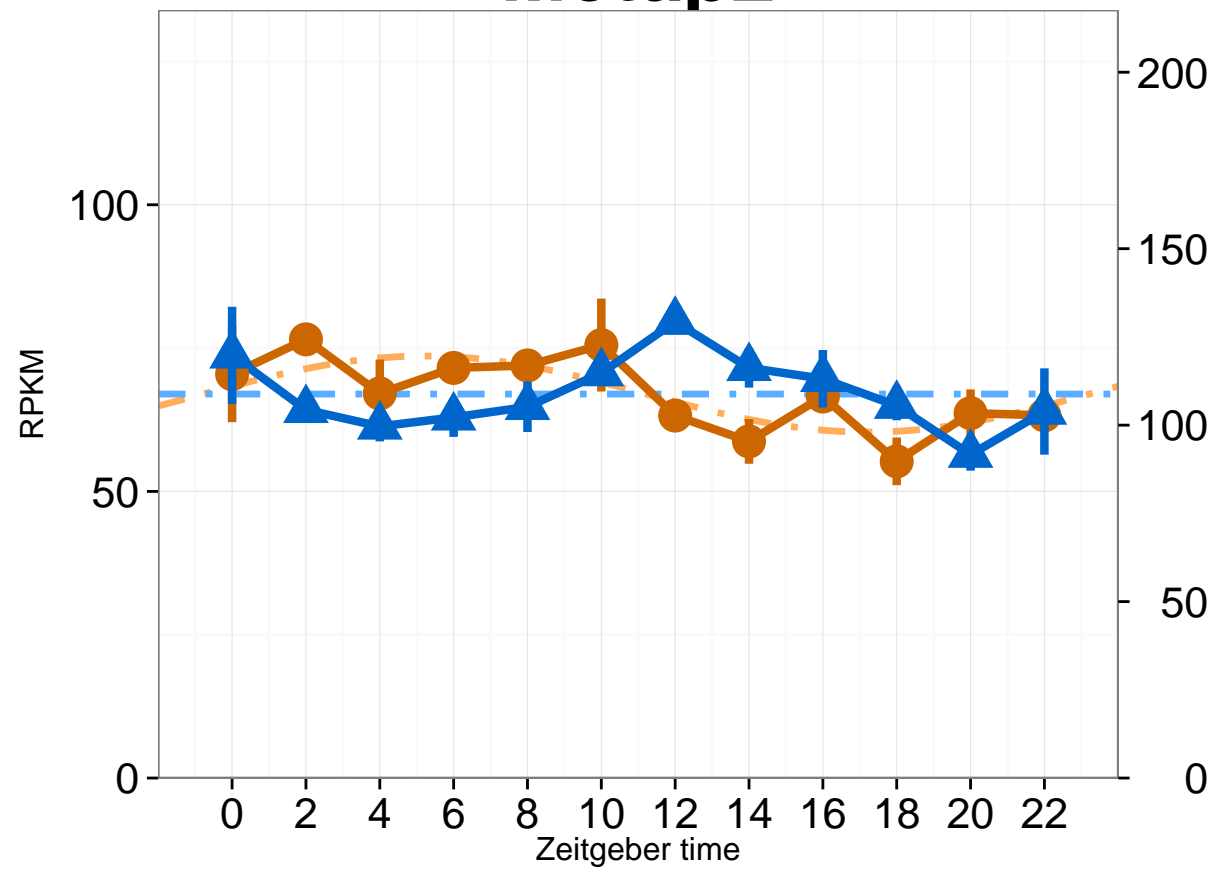

# Metap2

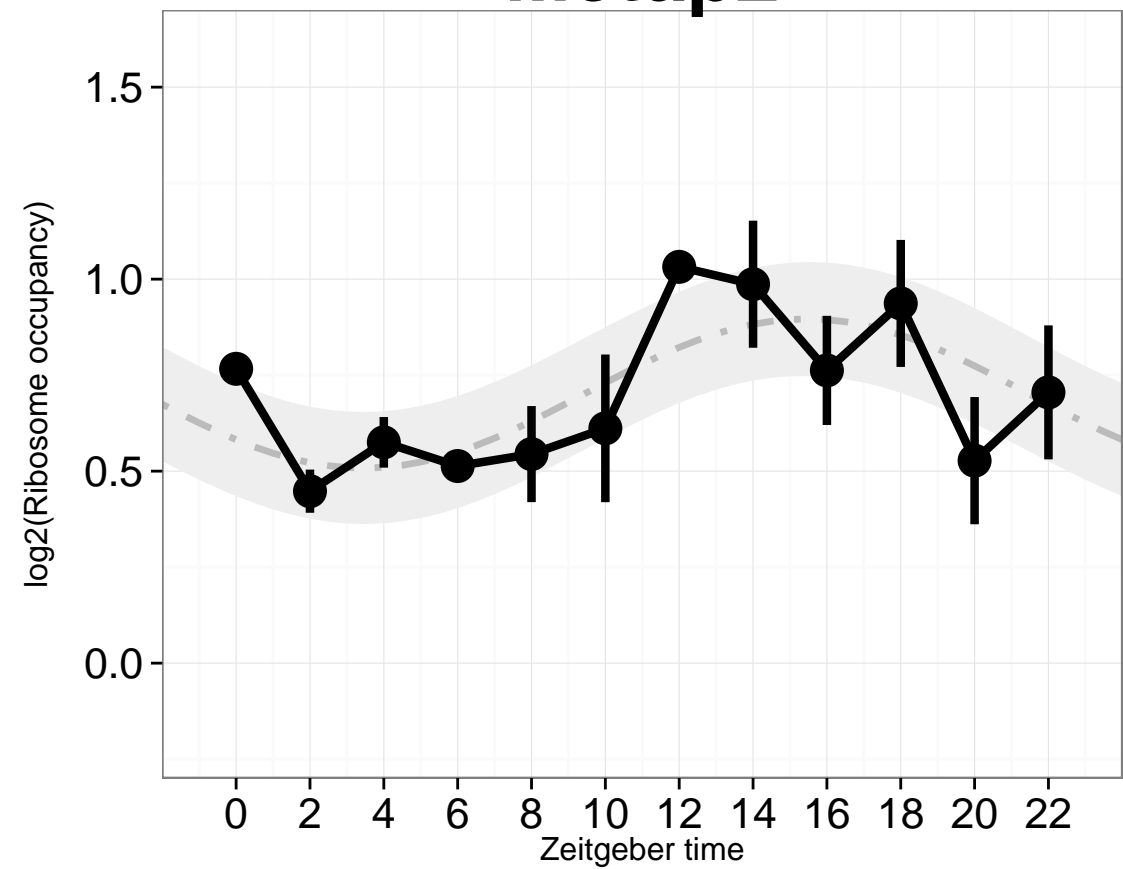

Supplement: Supplementary file 6143 [file 1]

# Taf10

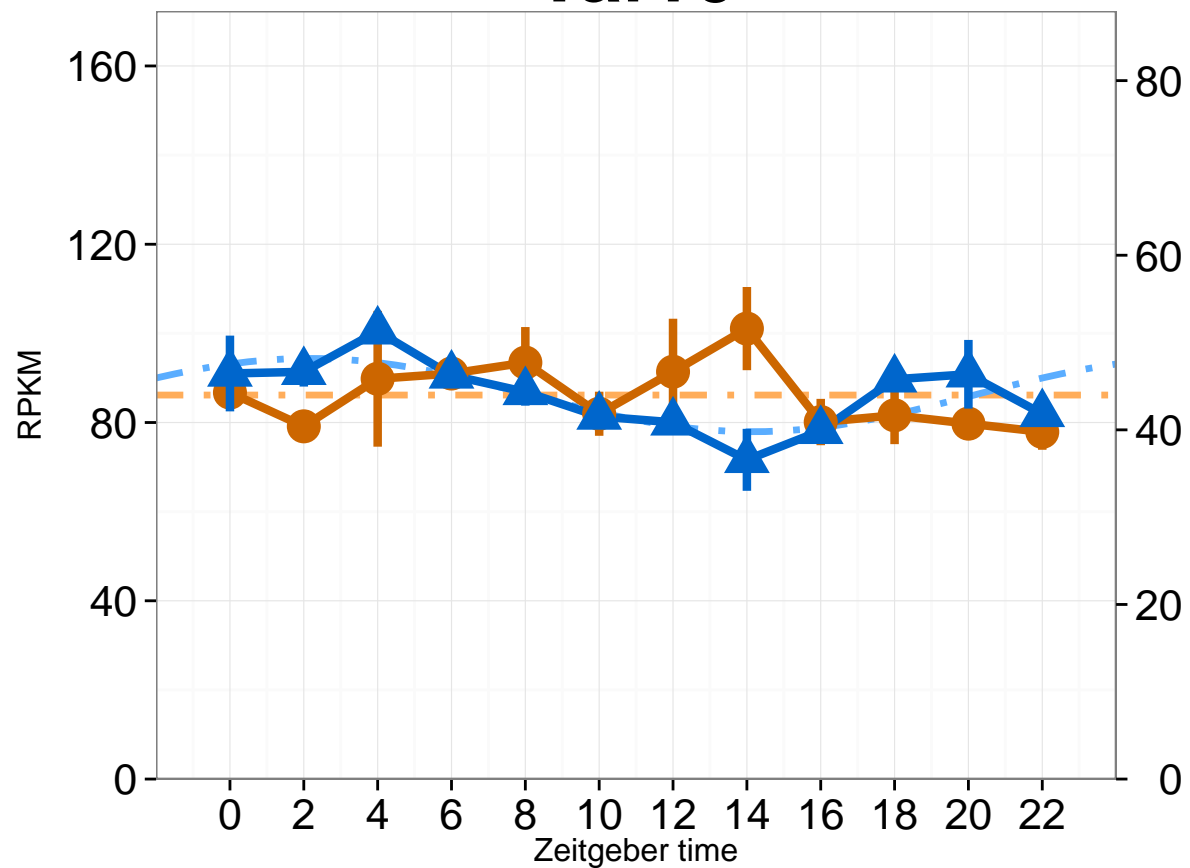

# Taf10

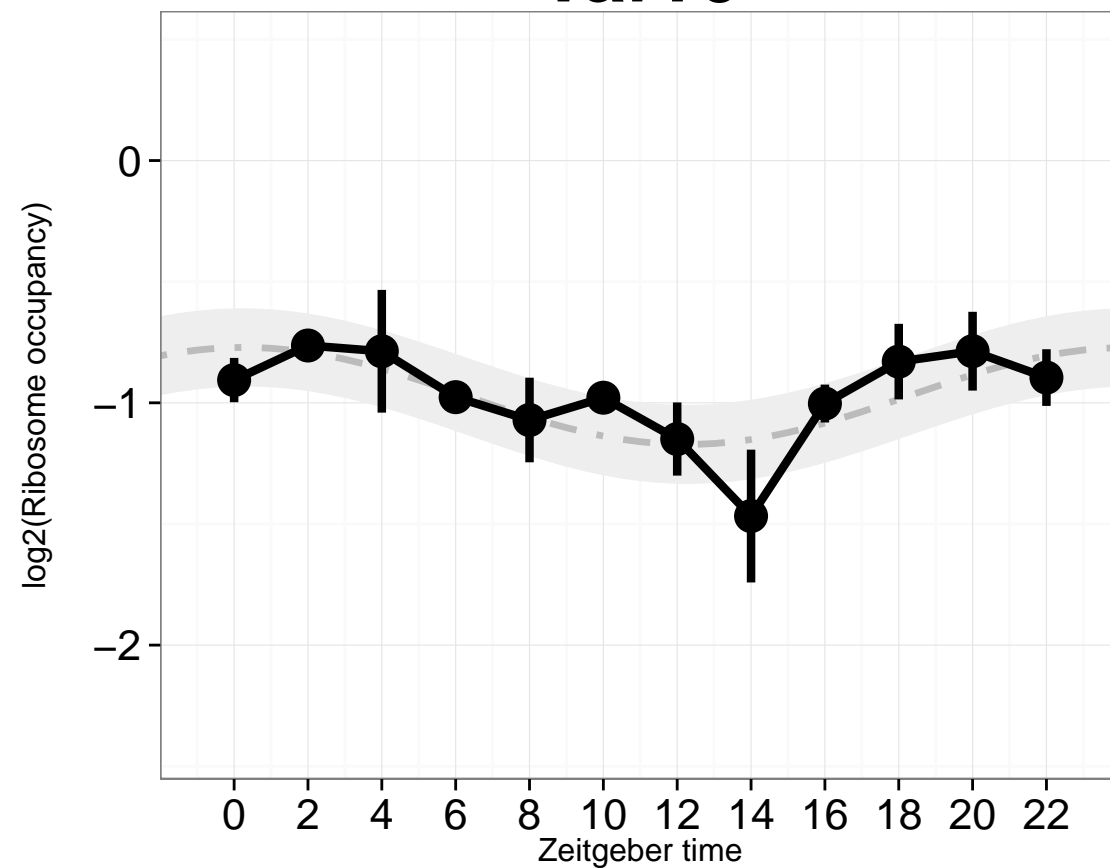

Supplement: Supplementary file 6144 [file 1]

# 1810032O08Rik

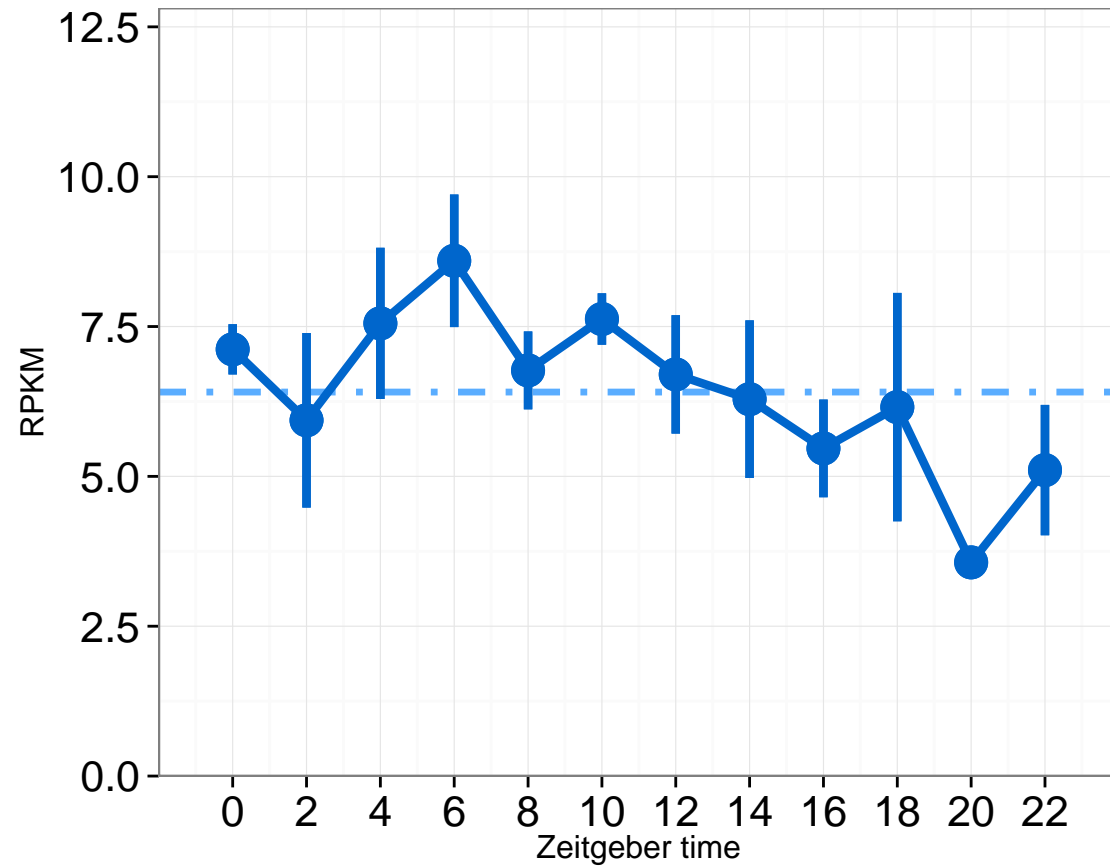

# 1810032O08Rik log2(Ribosome occup

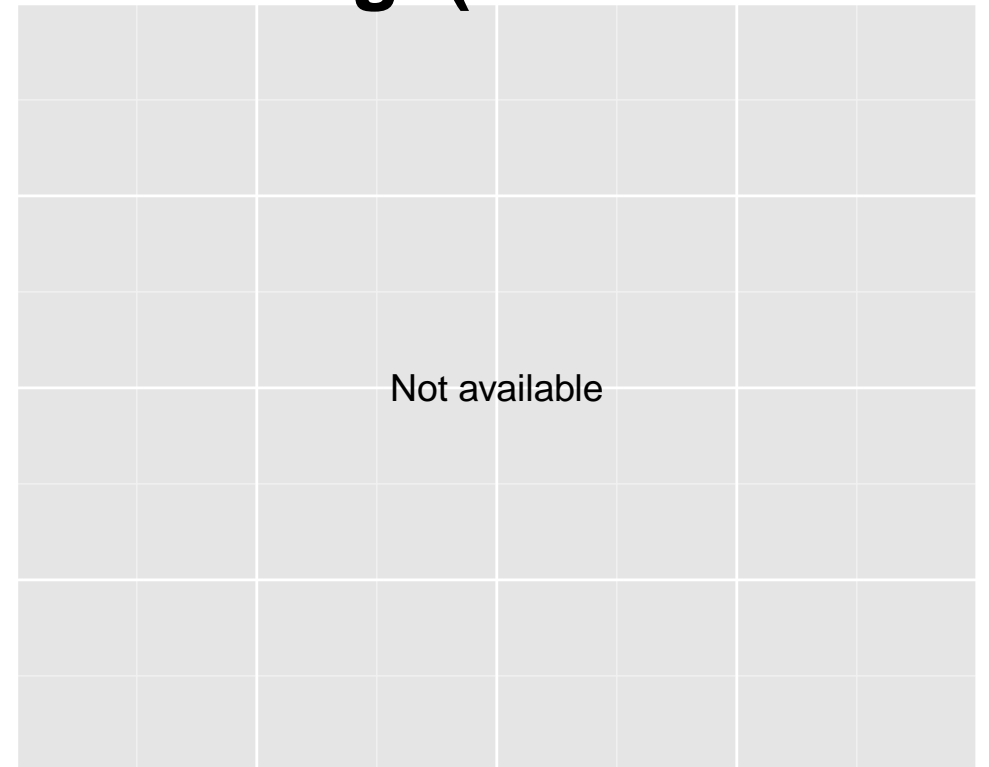

Supplement: Supplementary file 6145 [file 1]

# Nrbp2

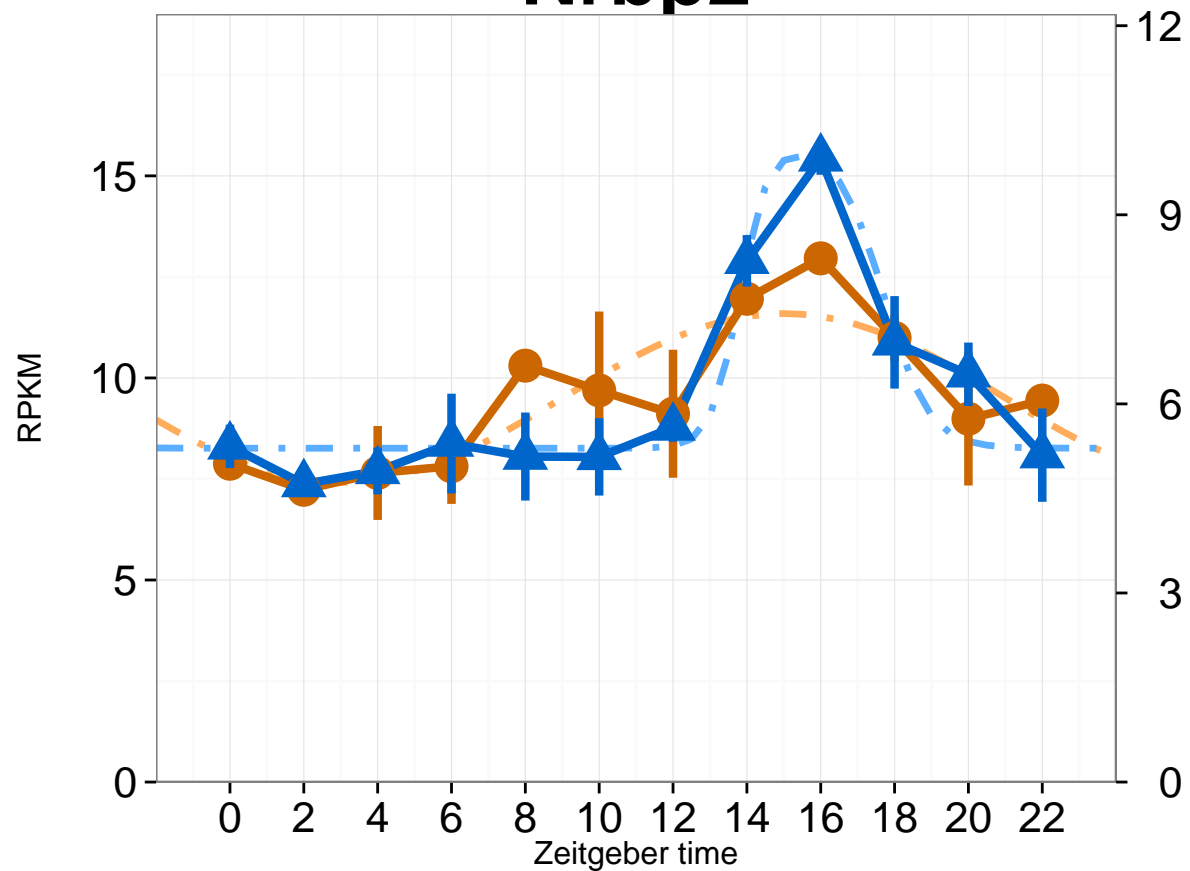

# Nrbp2

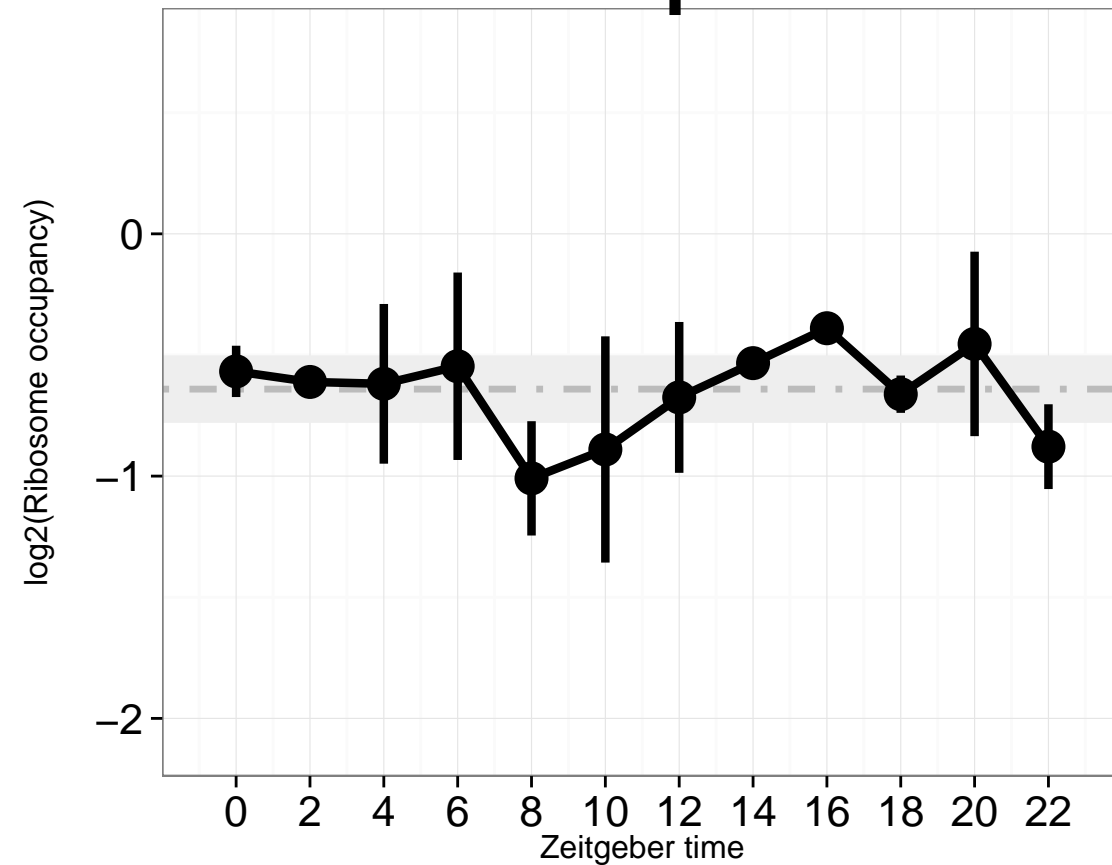

Supplement: Supplementary file 6146 [file 1]

## Sgpp2

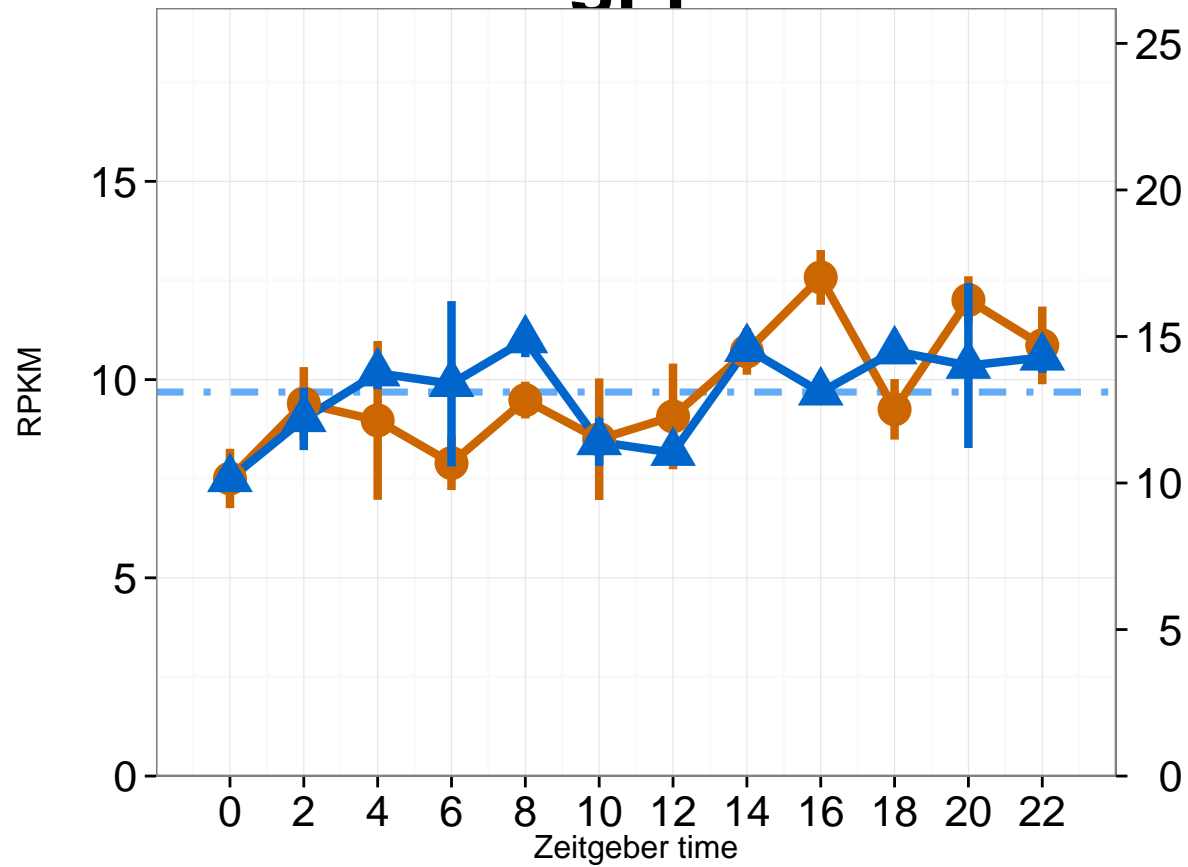

## Sgpp2

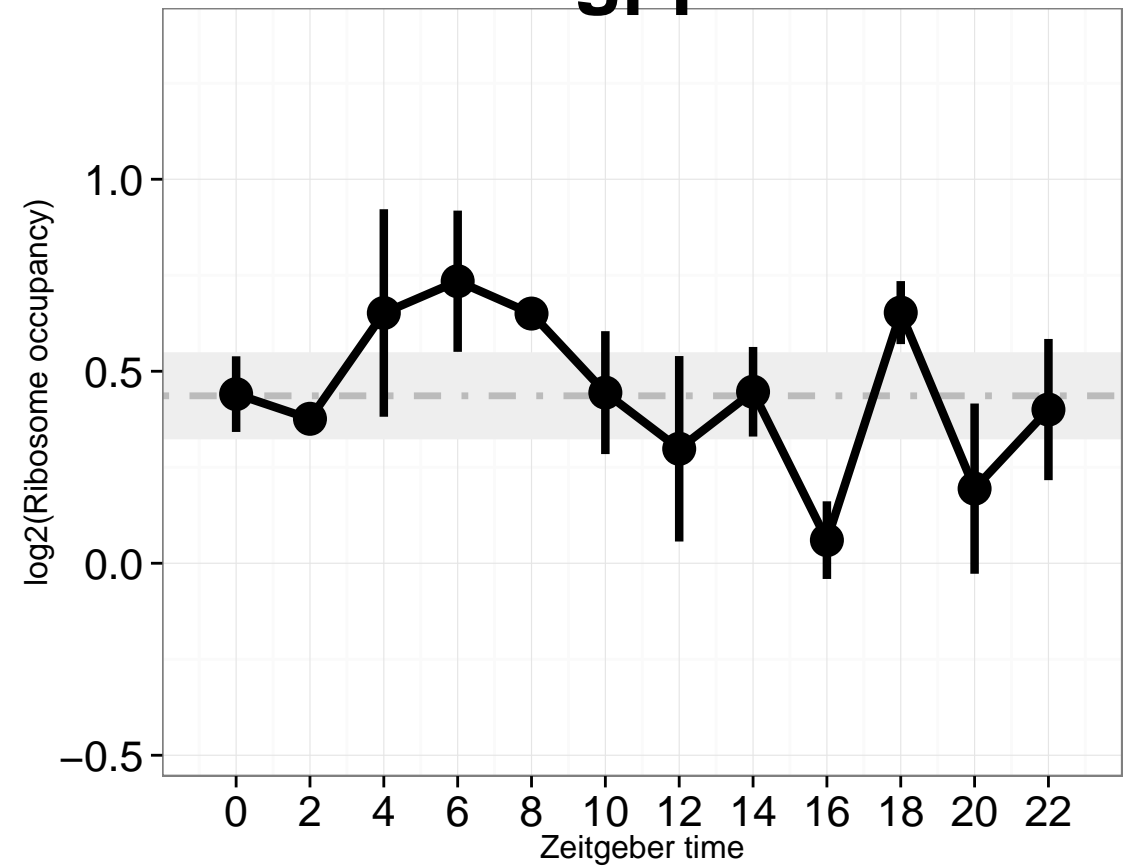

Supplement: Supplementary file 6147 [file 1]

## Slc6a4

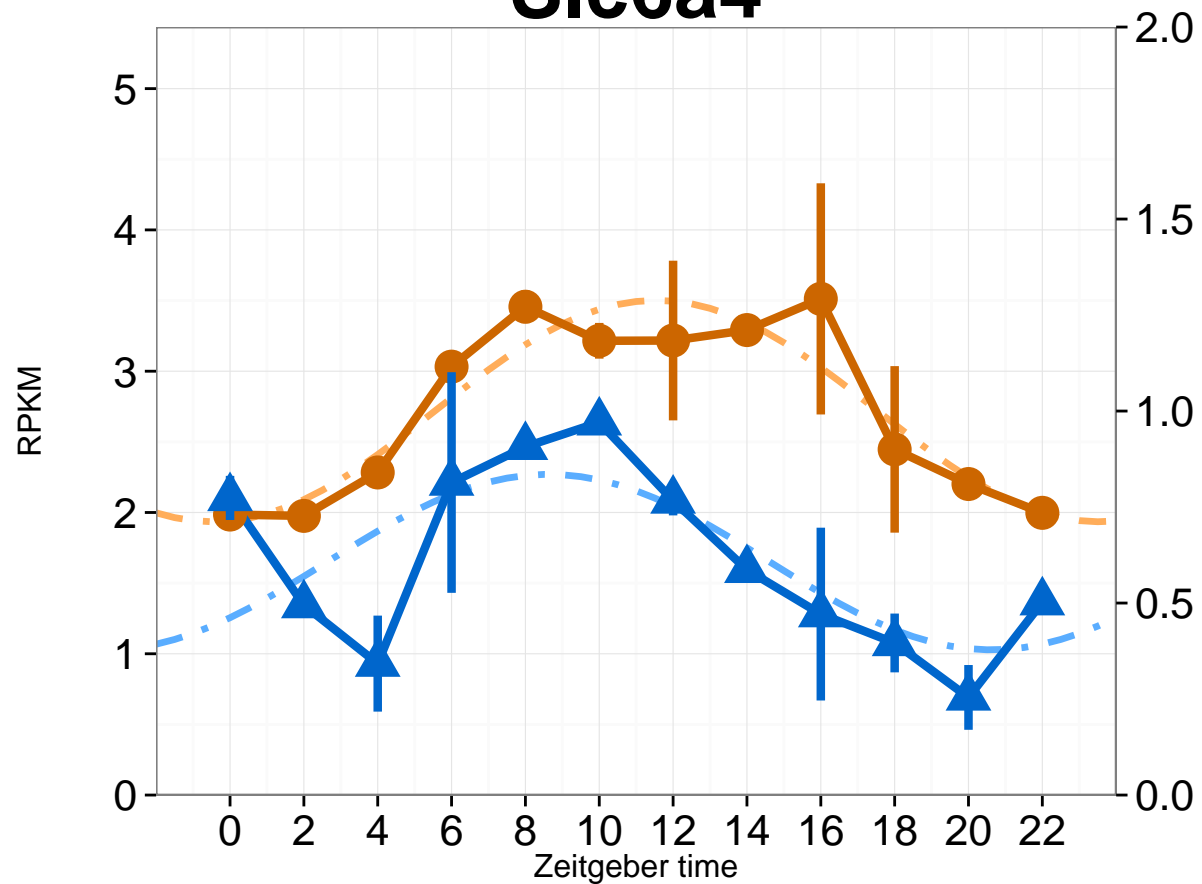

## Slc6a4

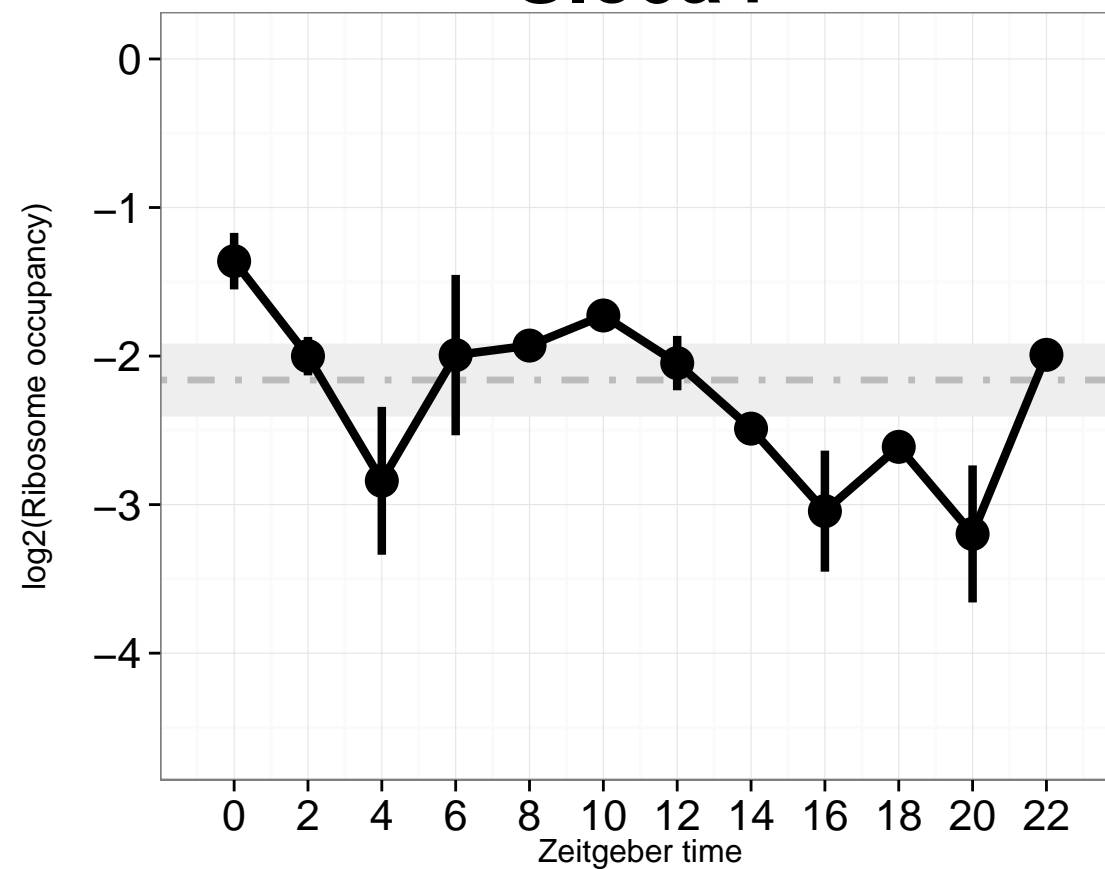

Supplement: Supplementary file 6148 [file 1]

# Sh3pxd2b

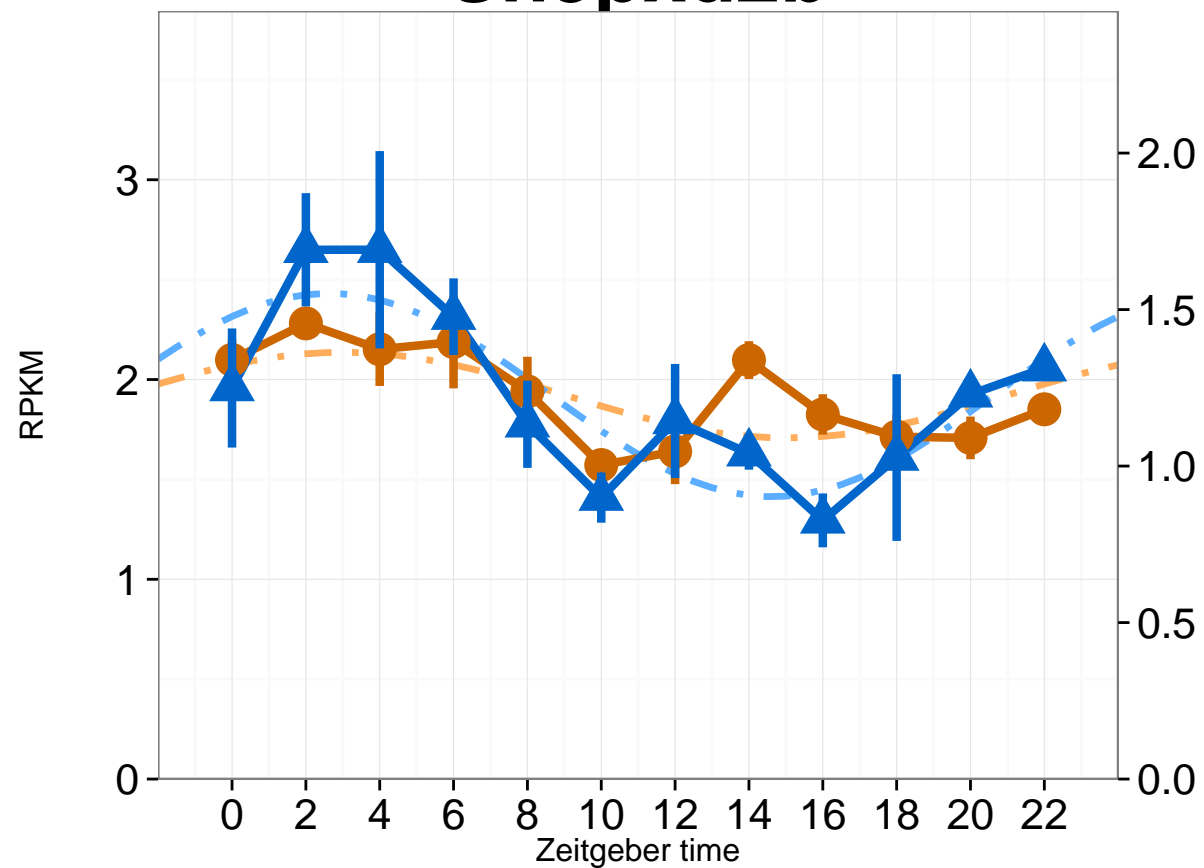

# Sh3pxd2b

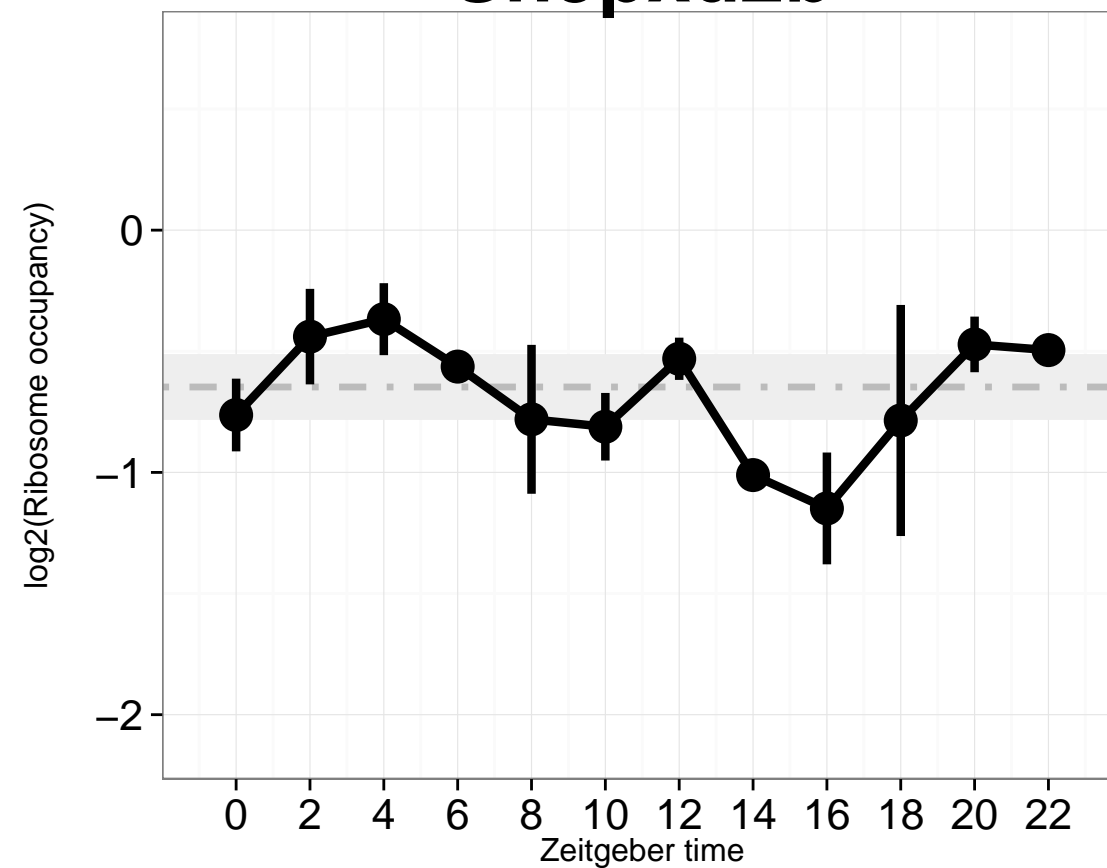

Supplement: Supplementary file 6149 [file 1]

## Btg1

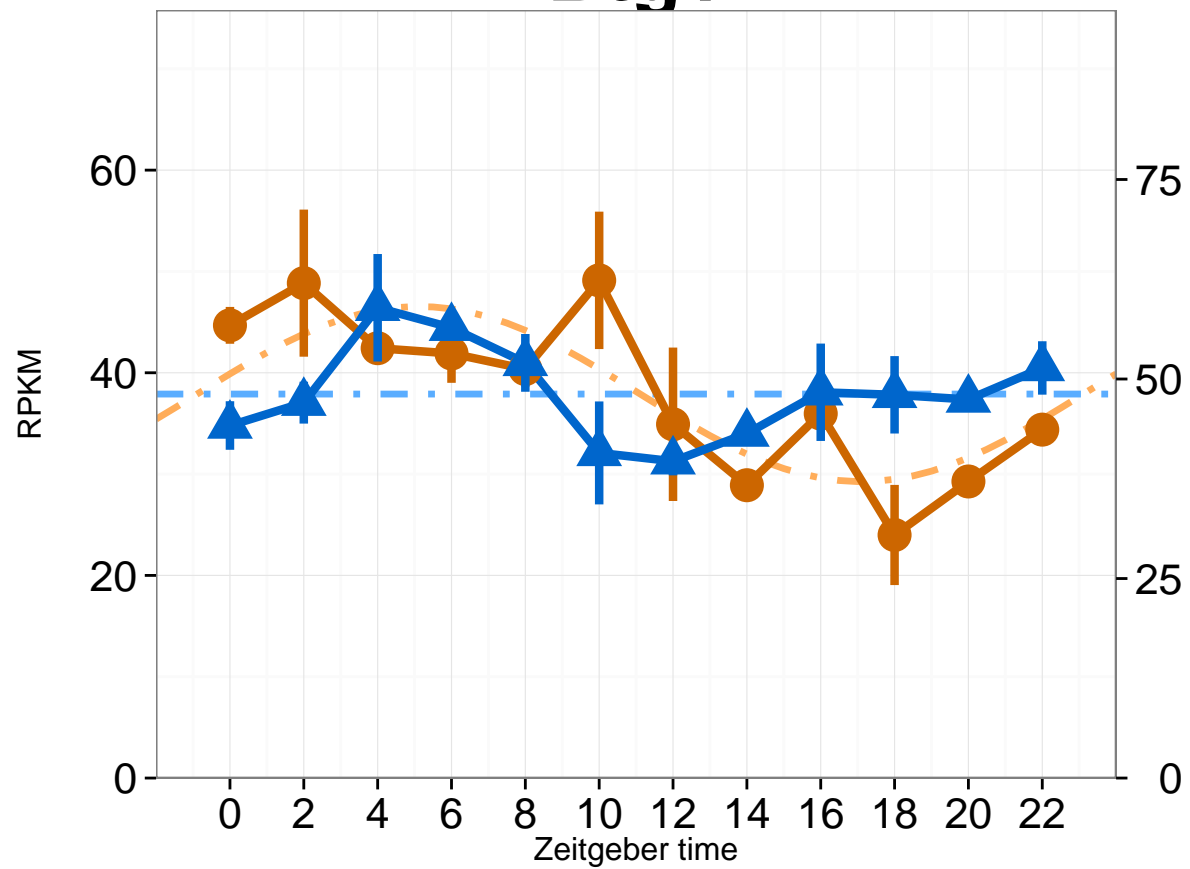

## Btg1

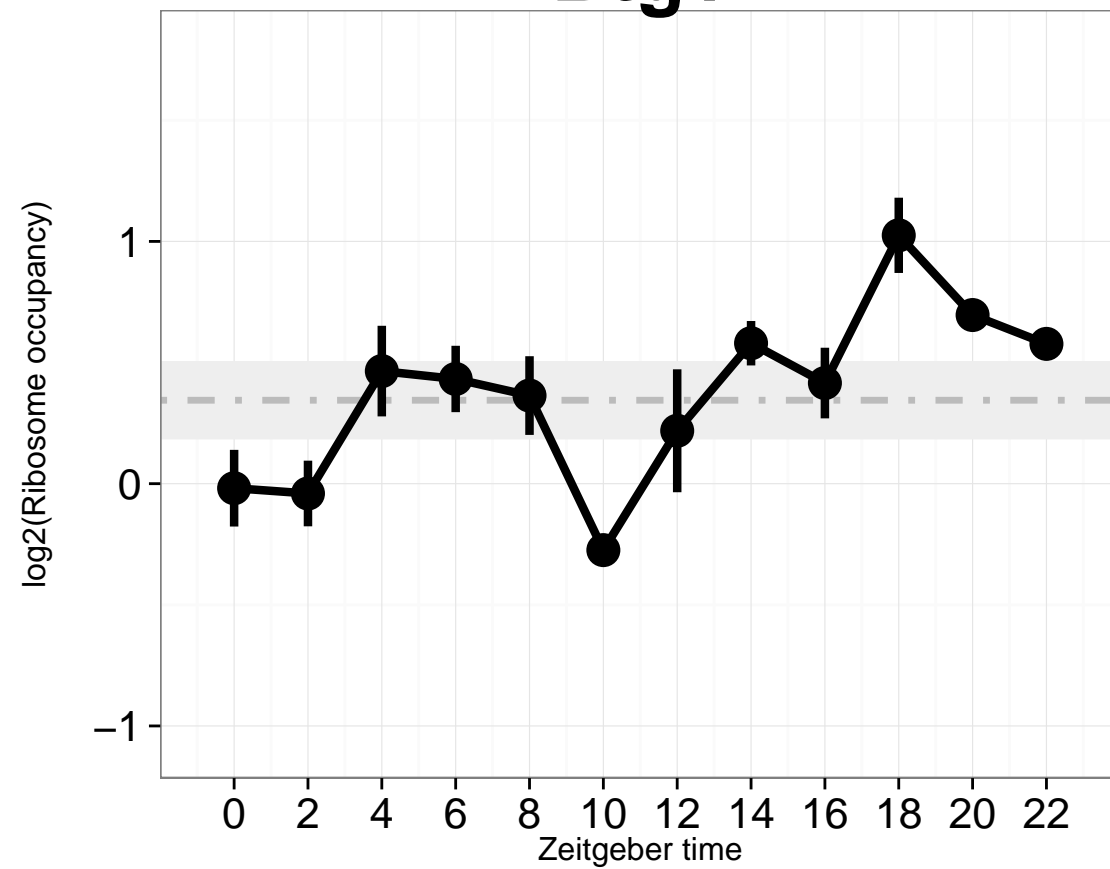

Supplement: Supplementary file 6150 [file 1]

## Ddx58

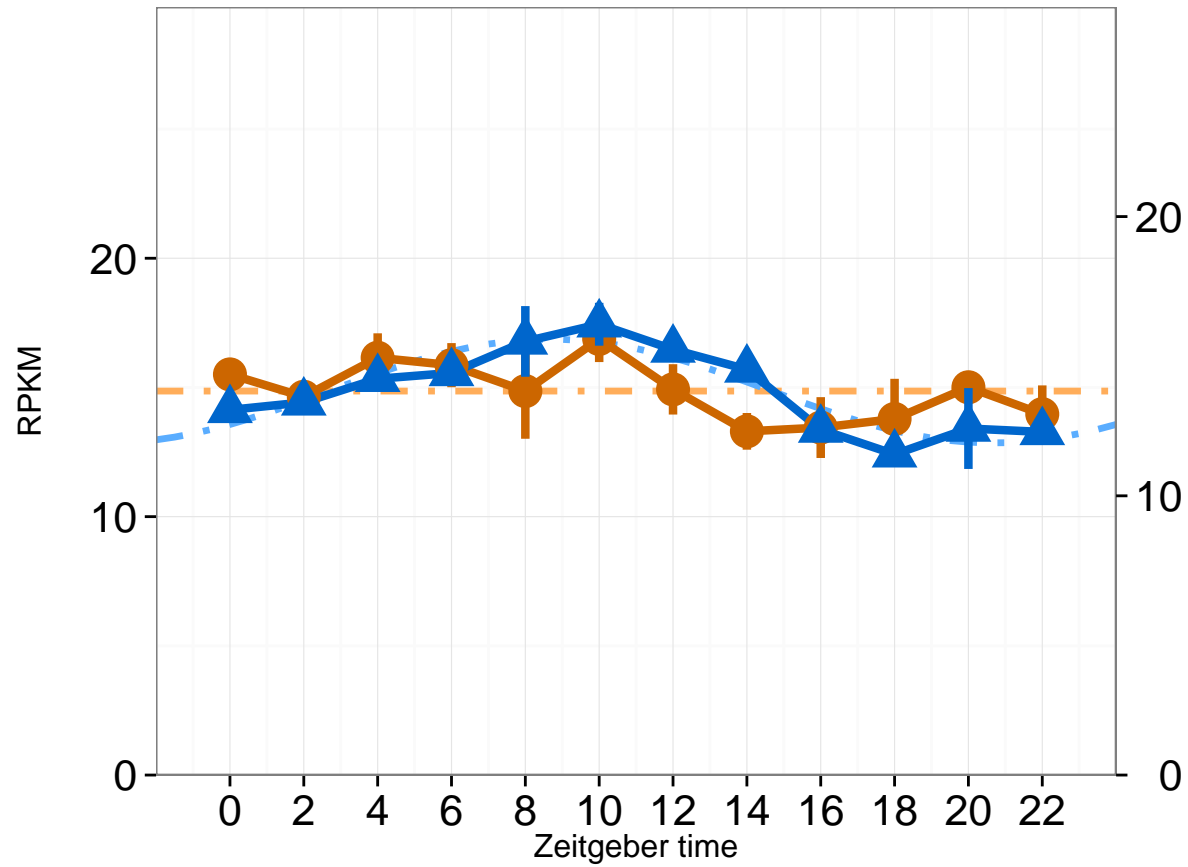

## Ddx58

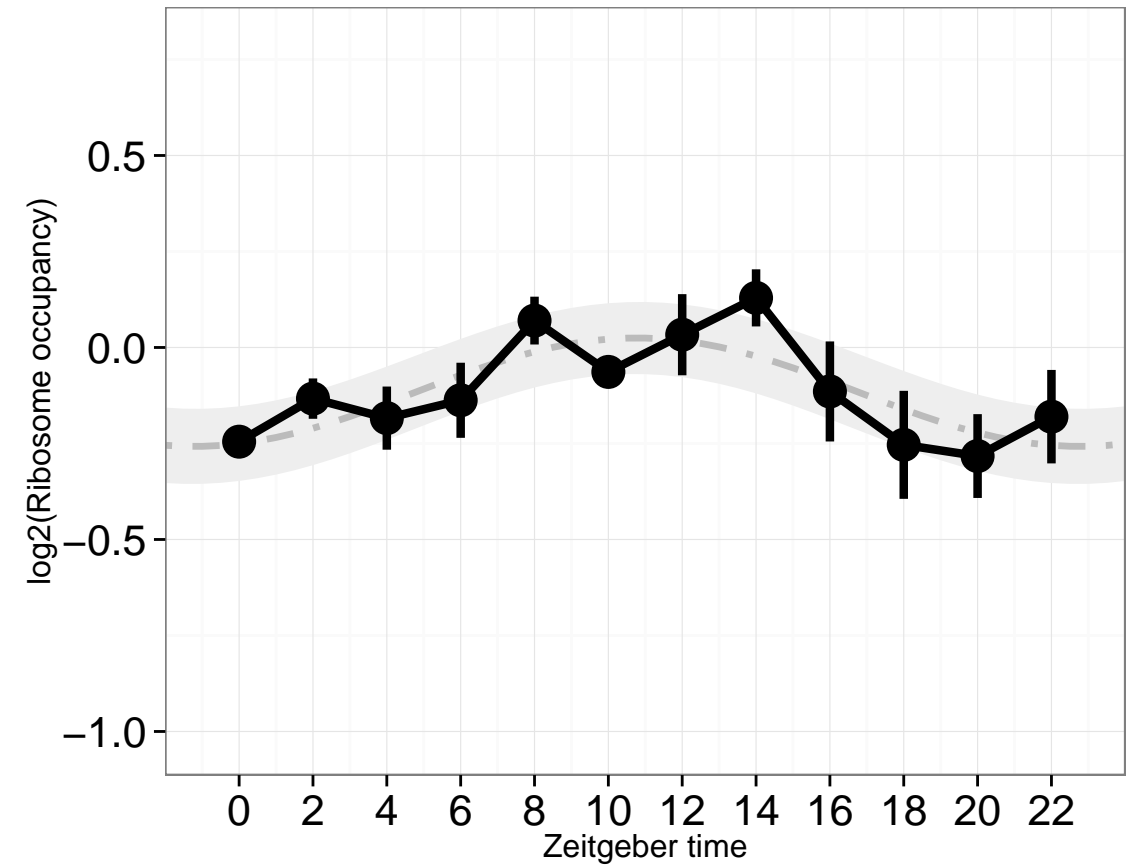

Supplement: Supplementary file 6151 [file 1]

# Prss53

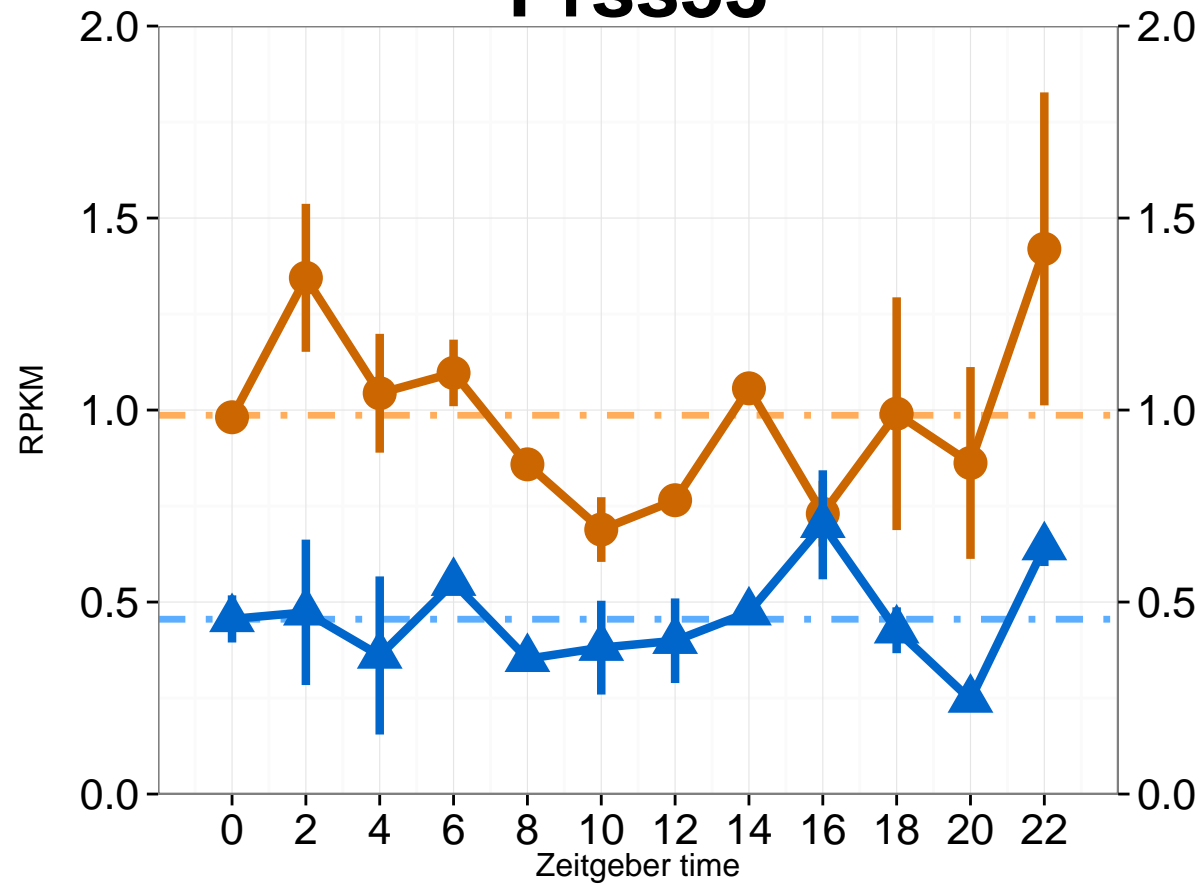

# Prss53

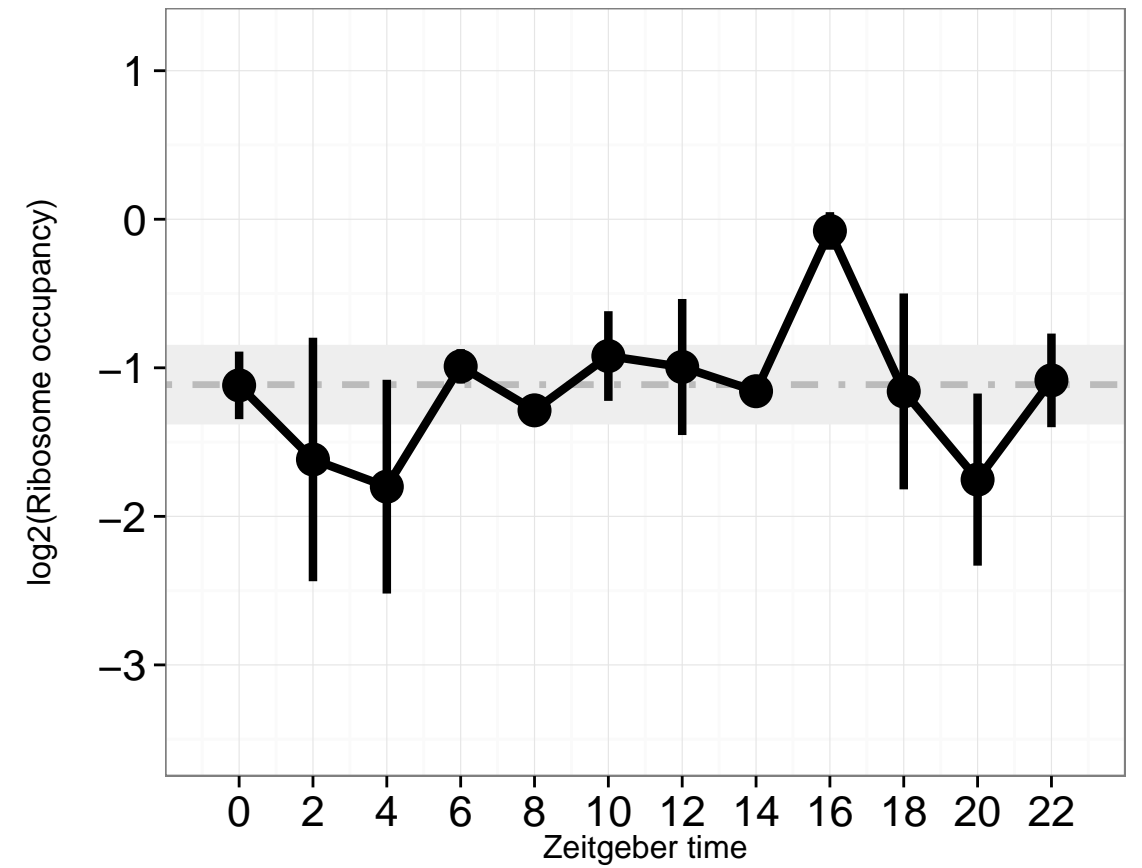

Supplement: Supplementary file 6152 [file 1]

# Slc30a2

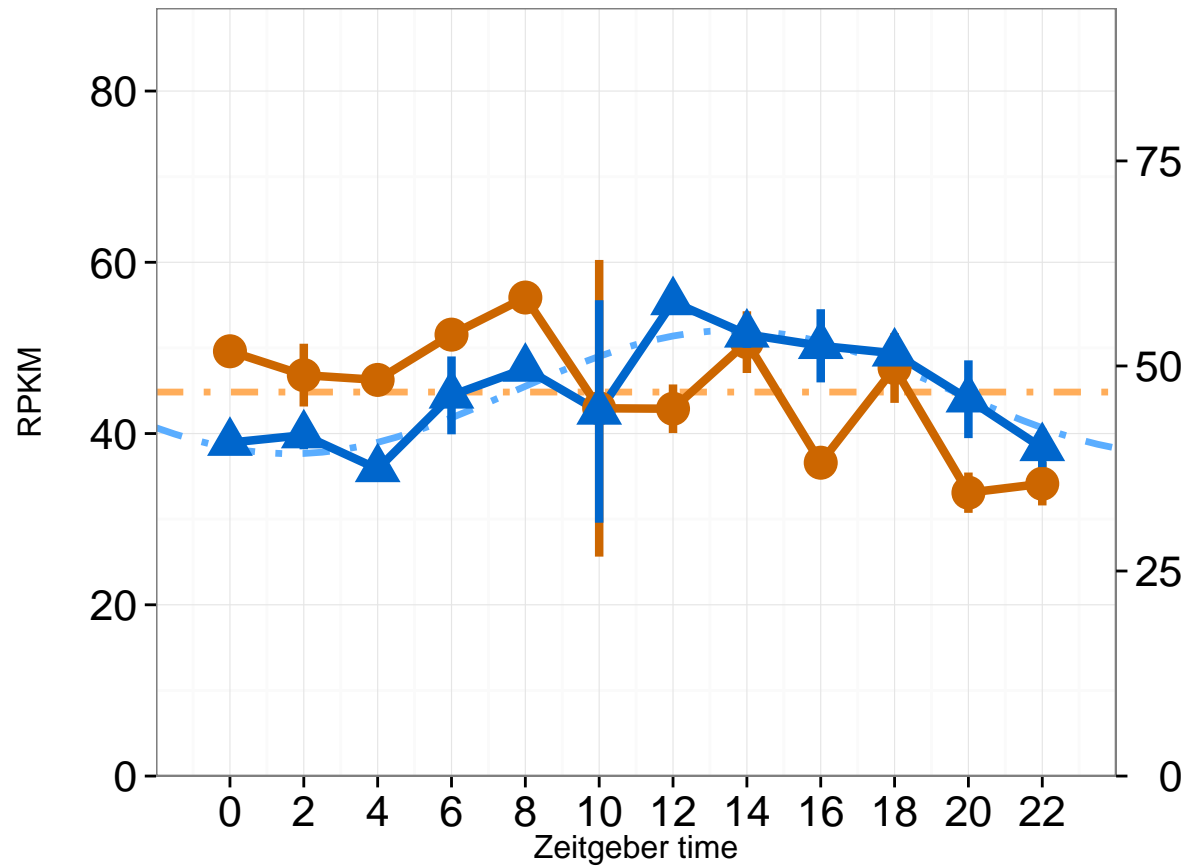

# Slc30a2

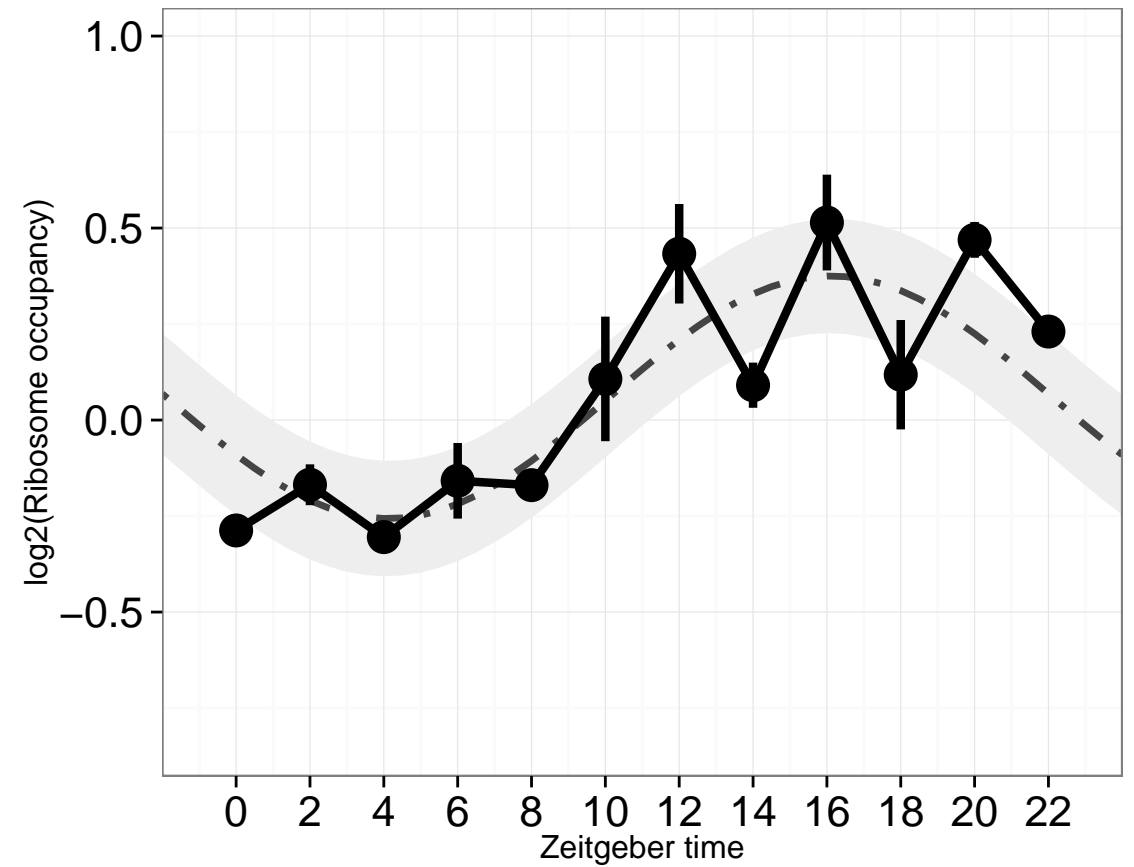

Supplement: Supplementary file 6153 [file 1]

## 4931428F04Rik

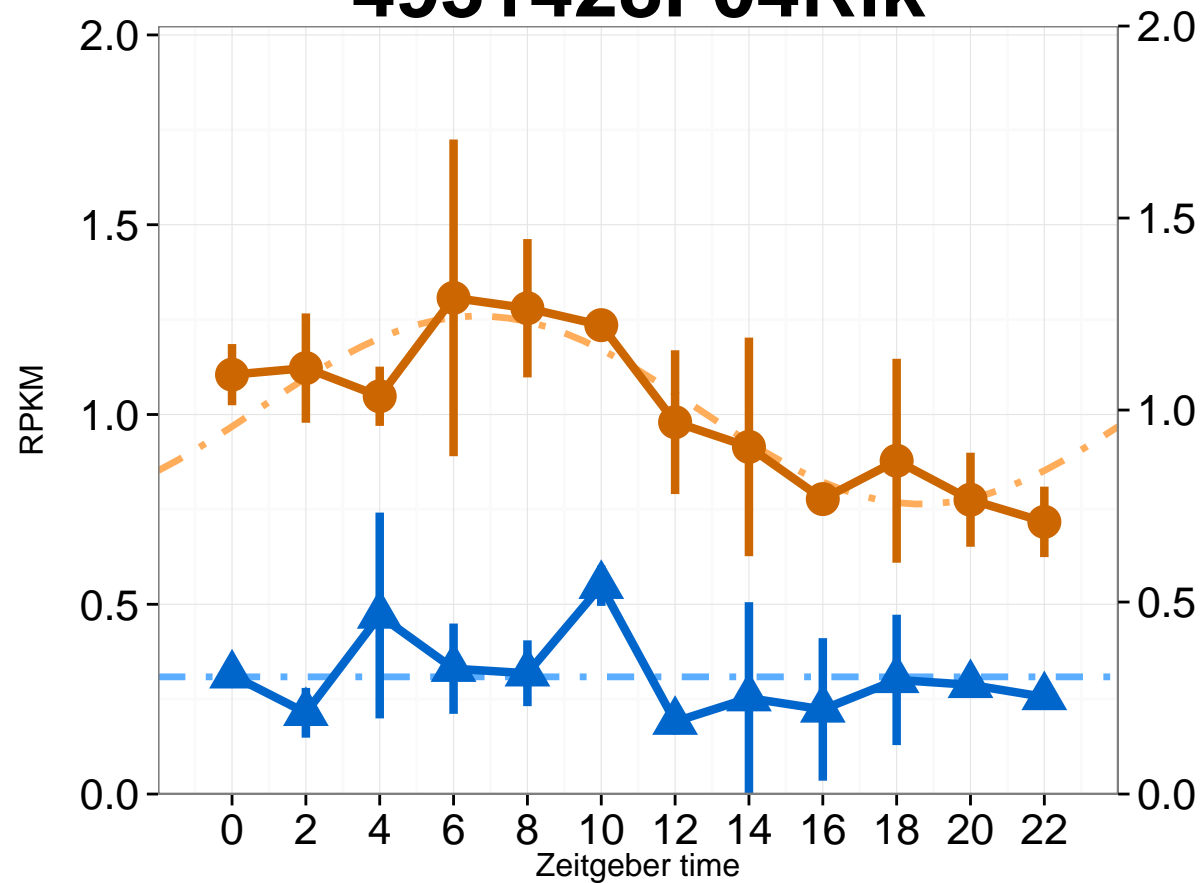

## 4931428F04Rik

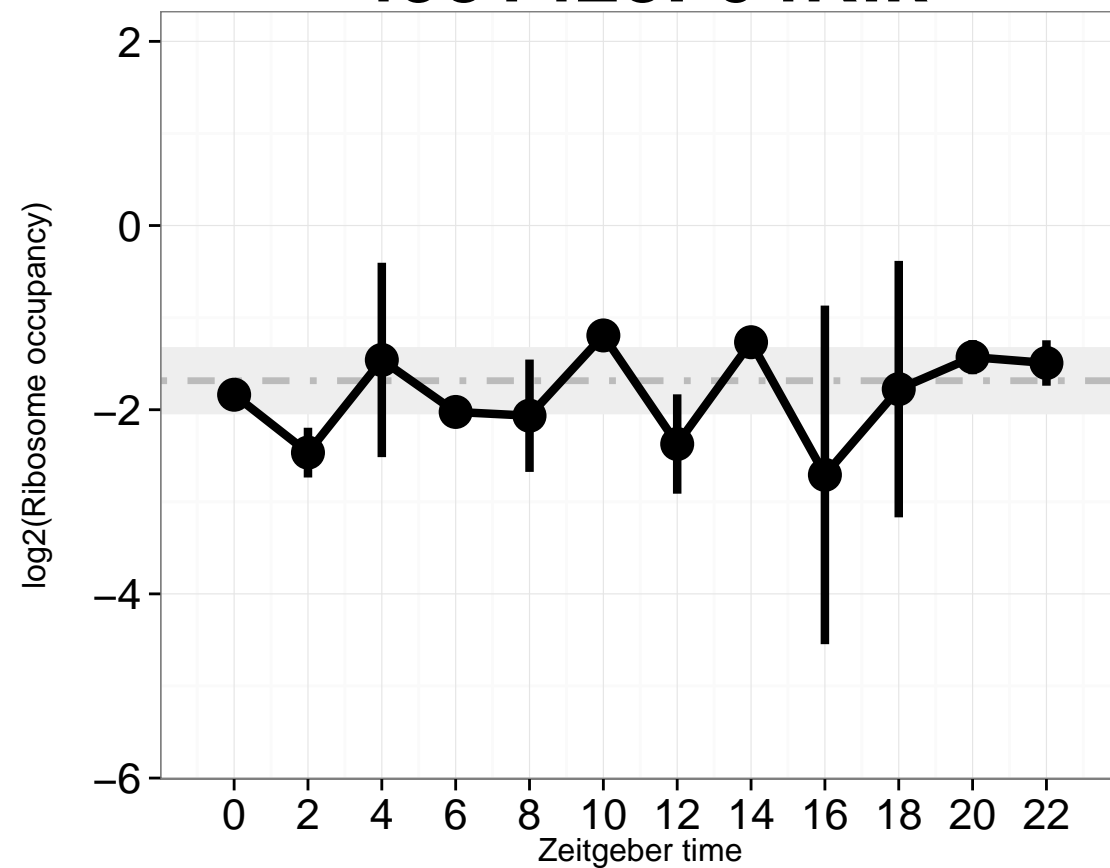

Supplement: Supplementary file 6154 [file 1]

# 2310057M21Rik

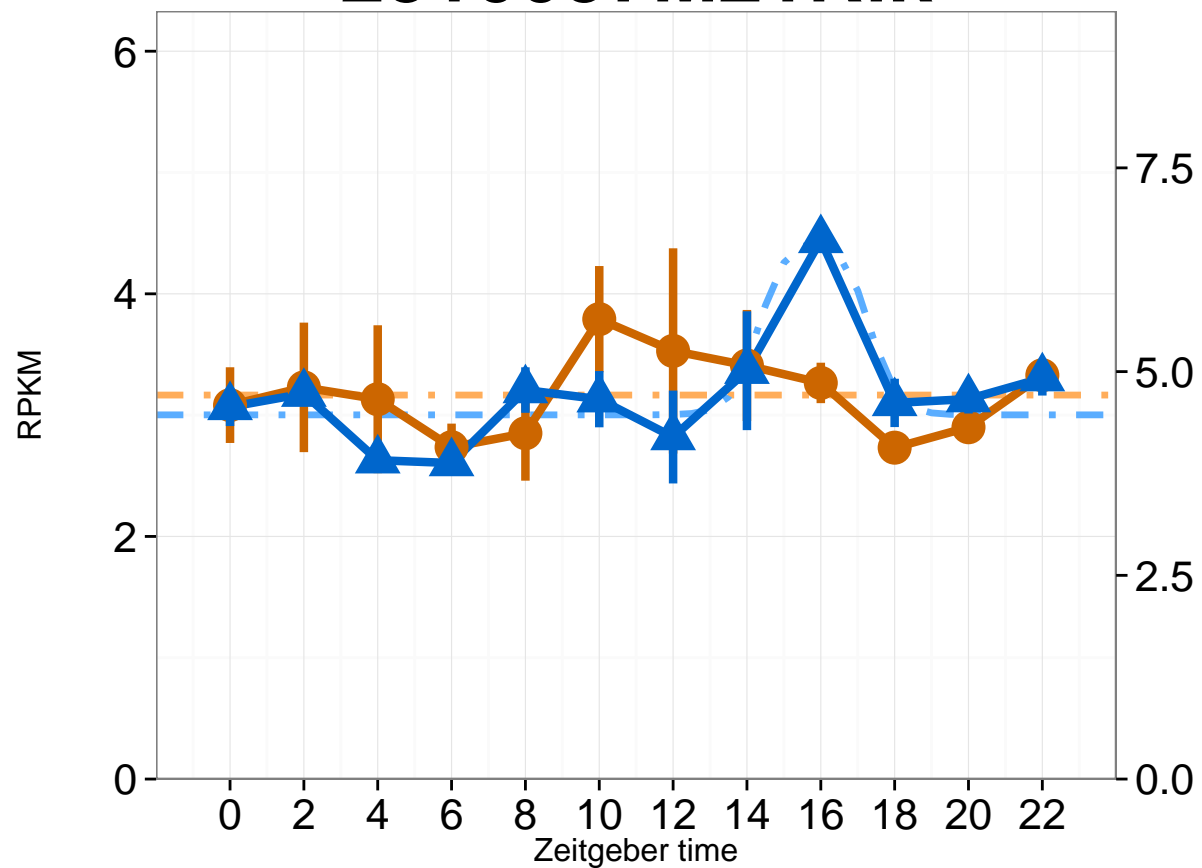

# 2310057M21Rik

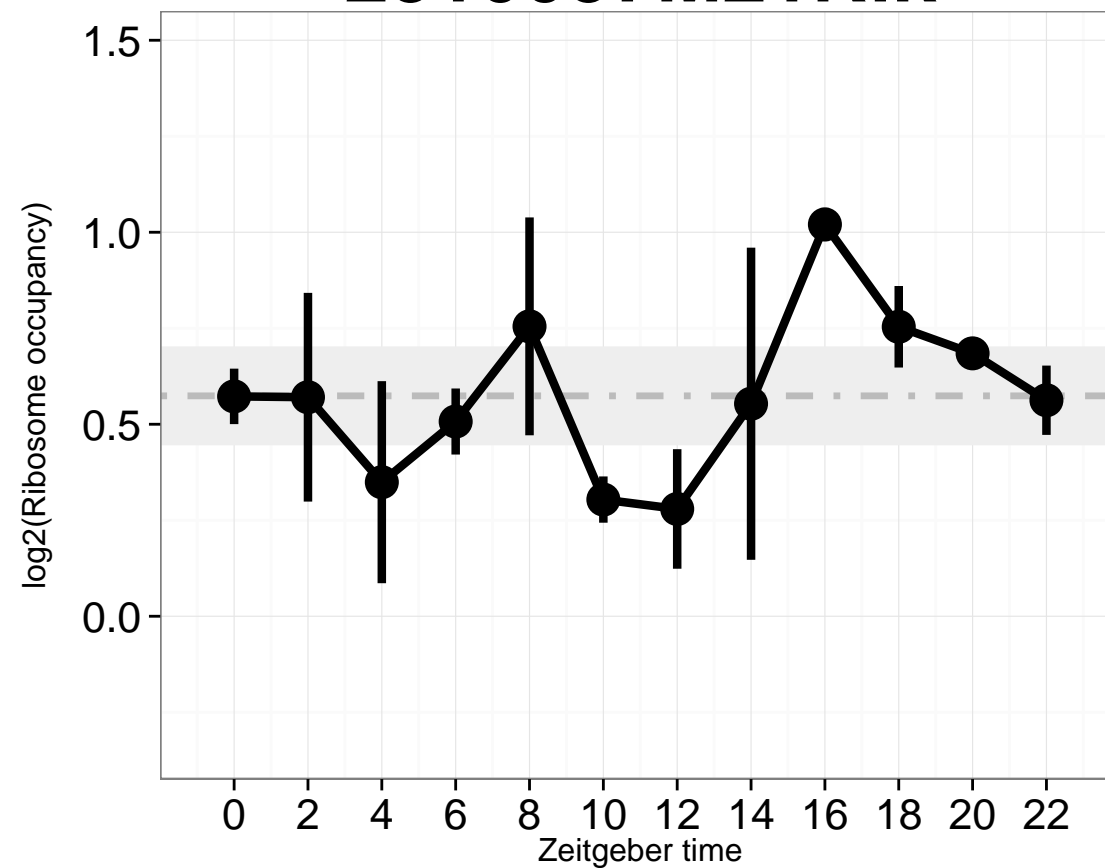

Supplement: Supplementary file 6155 [file 1]

## Rybp

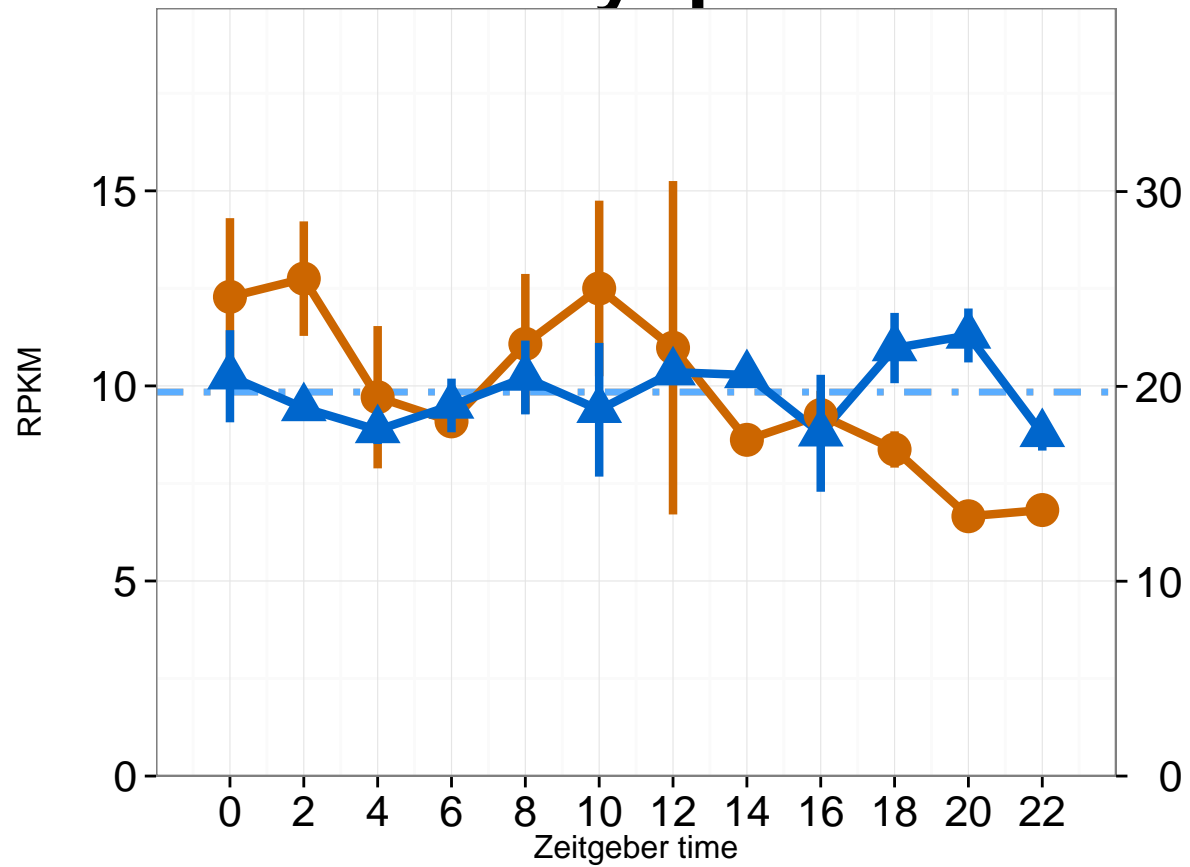

## Rybp

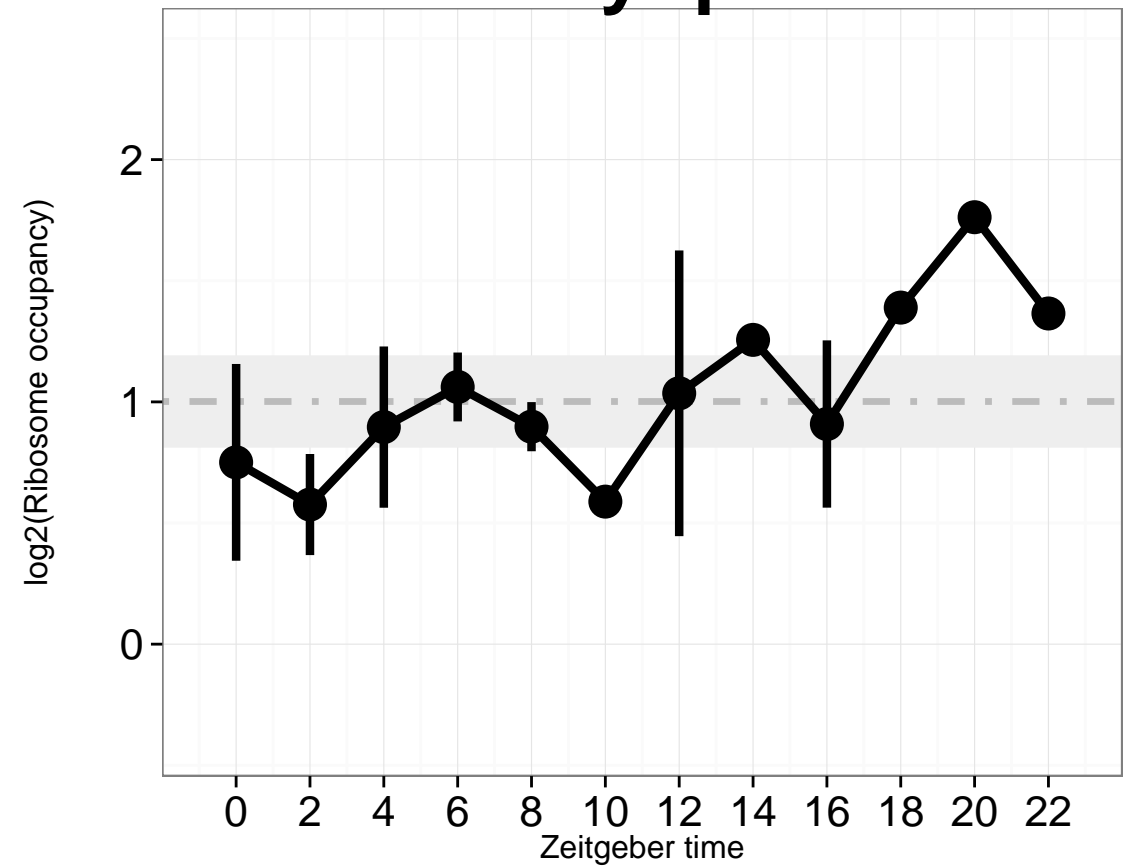

Supplement: Supplementary file 6156 [file 1]

# Guca2a

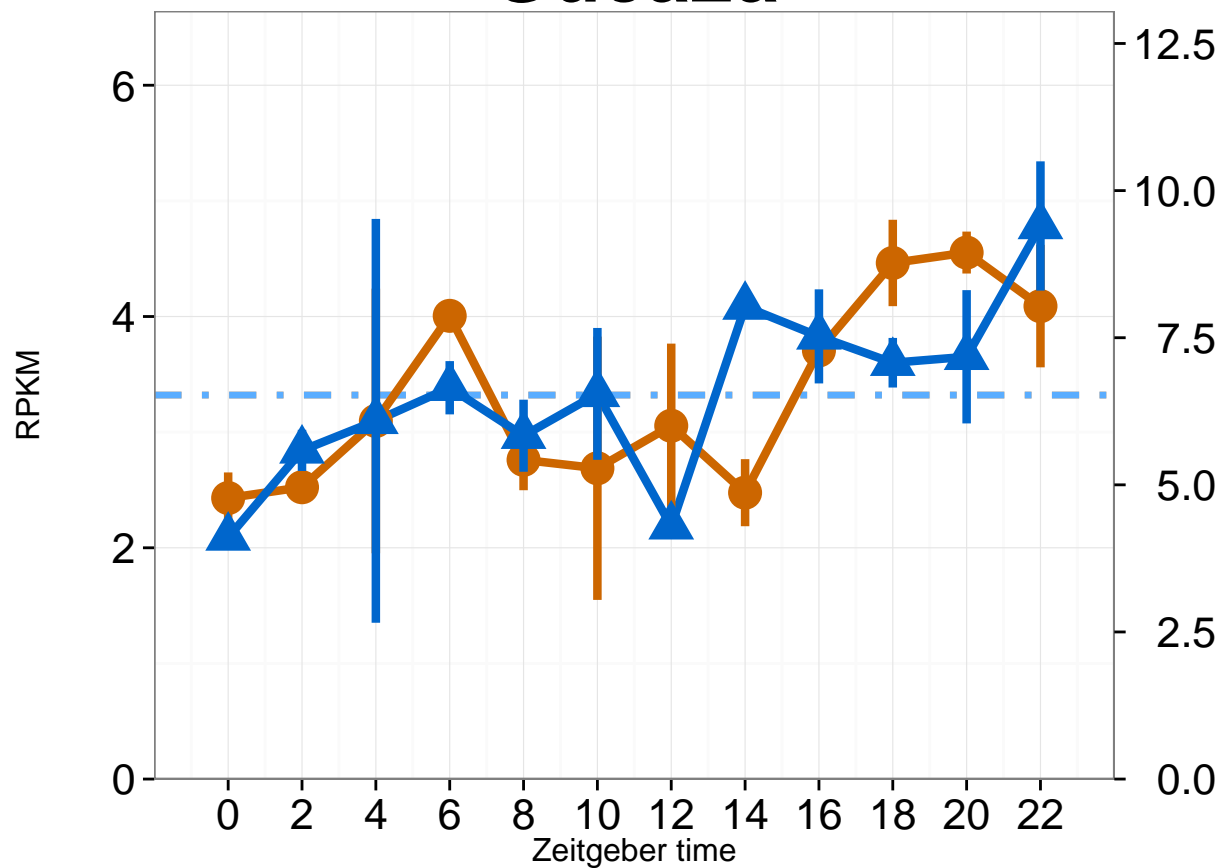

# Guca2a

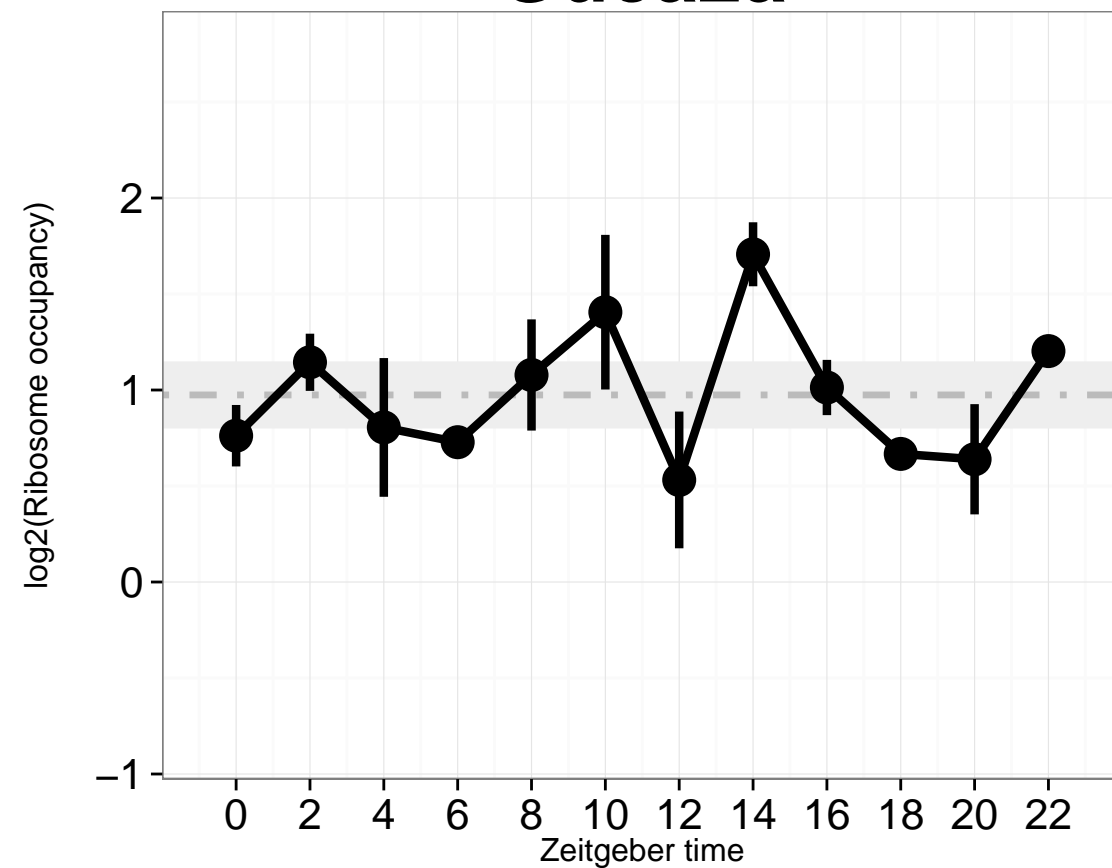

Supplement: Supplementary file 6157 [file 1]

# Fcgr3

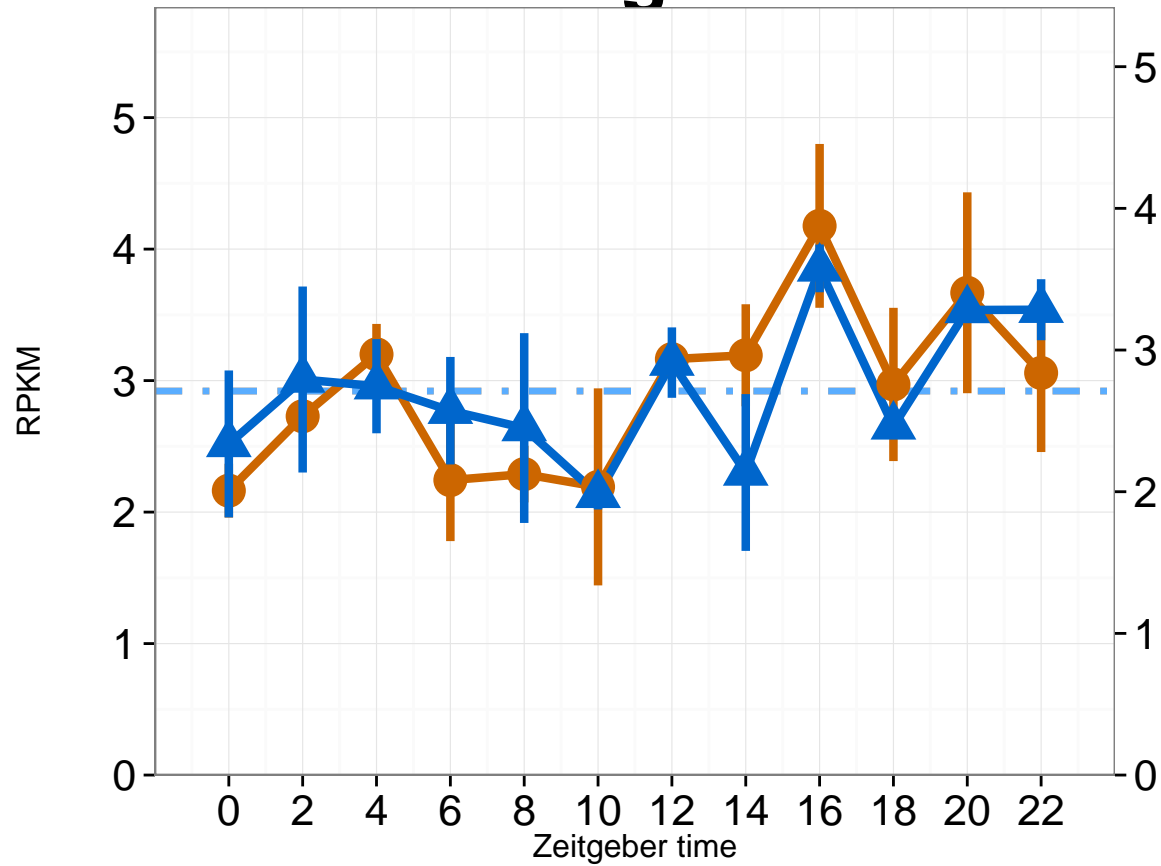

# Fcgr3

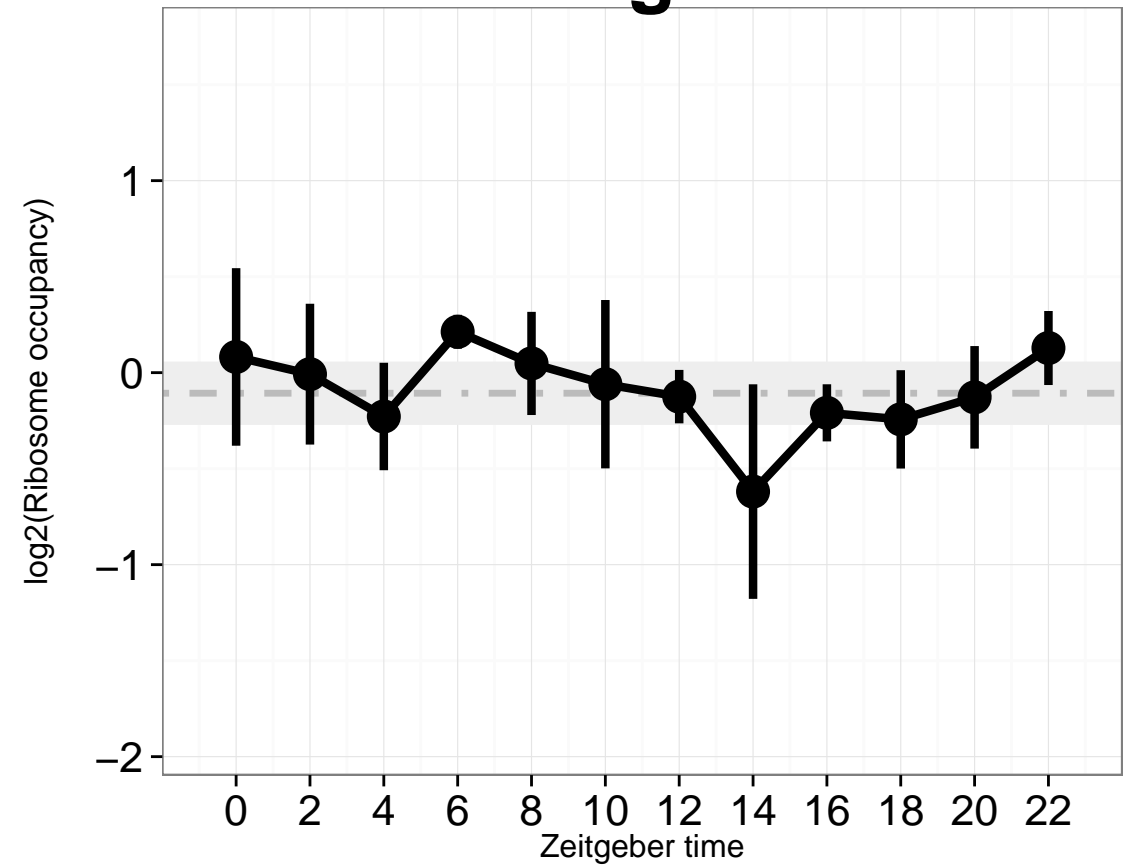

Supplement: Supplementary file 6158 [file 1]

# Slc38a7

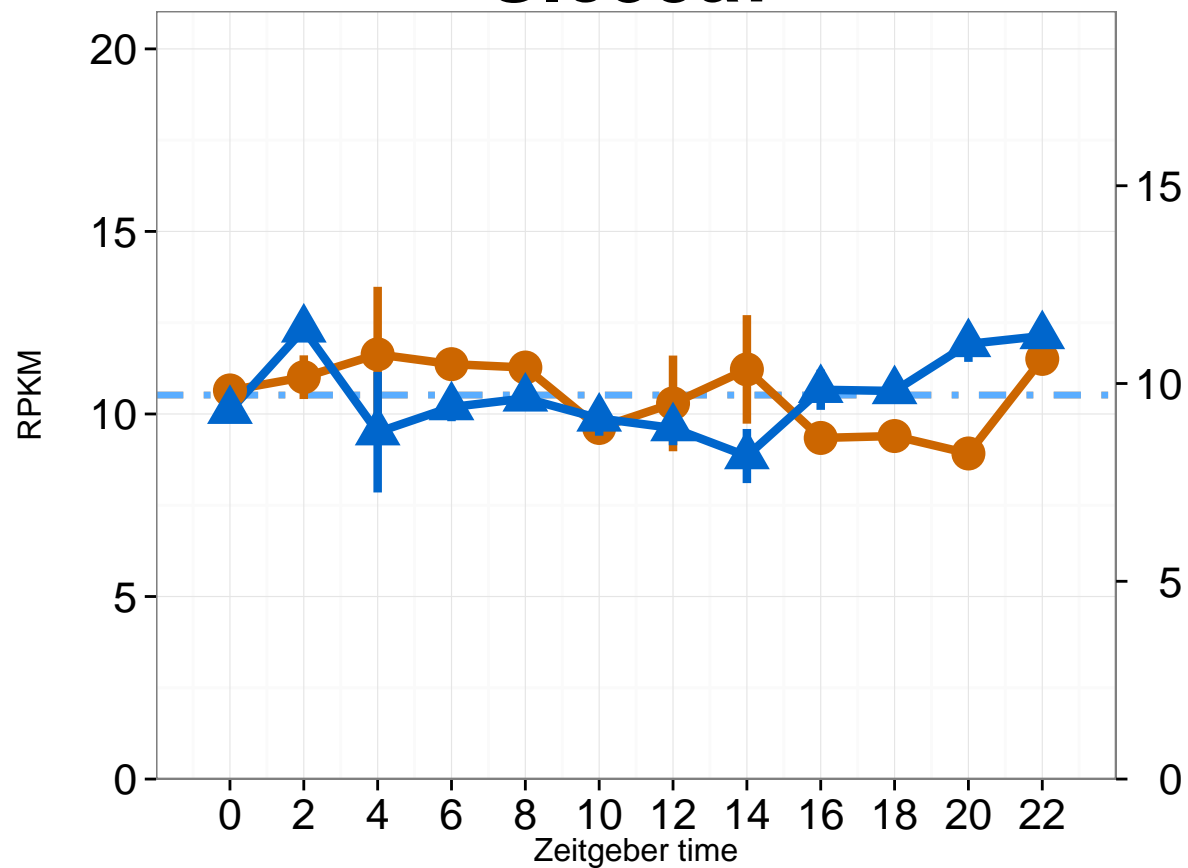

# Slc38a7

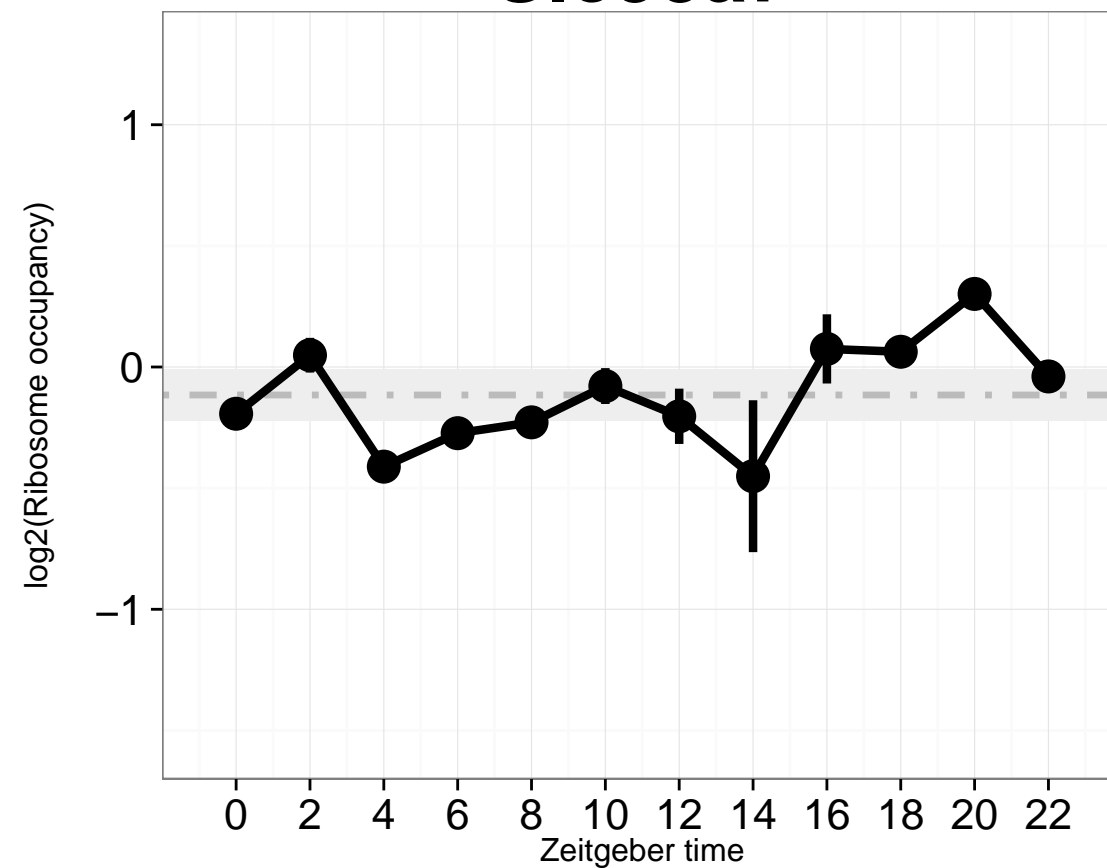

Supplement: Supplementary file 6159 [file 1]

## Cadm1

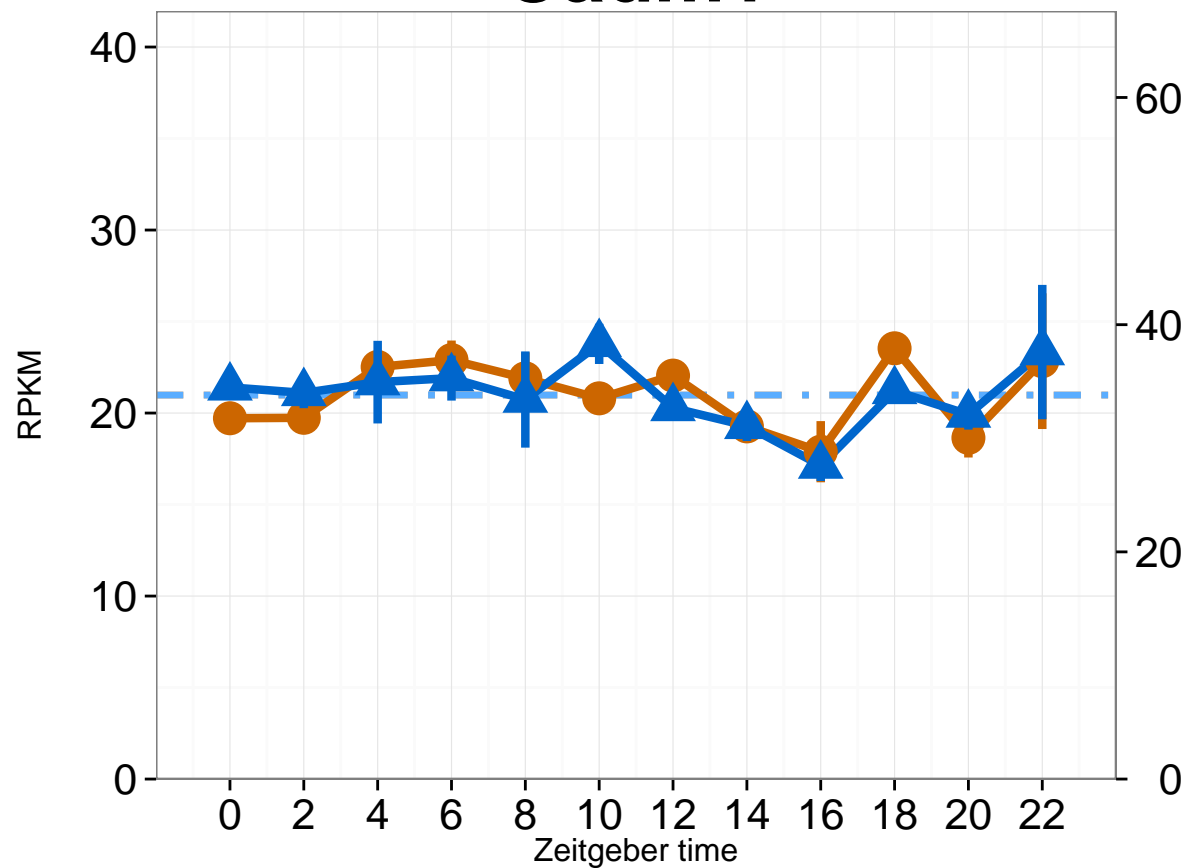

## Cadm1

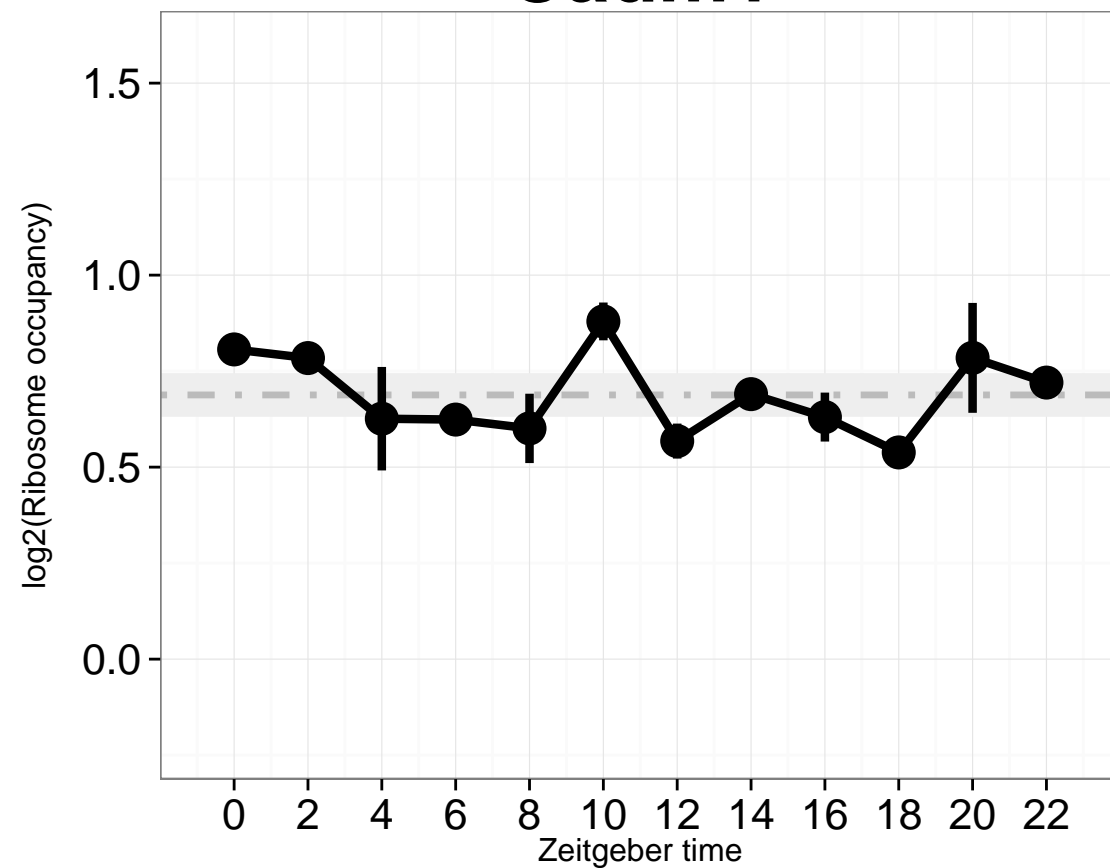

Supplement: Supplementary file 6160 [file 1]

## Cxcr4

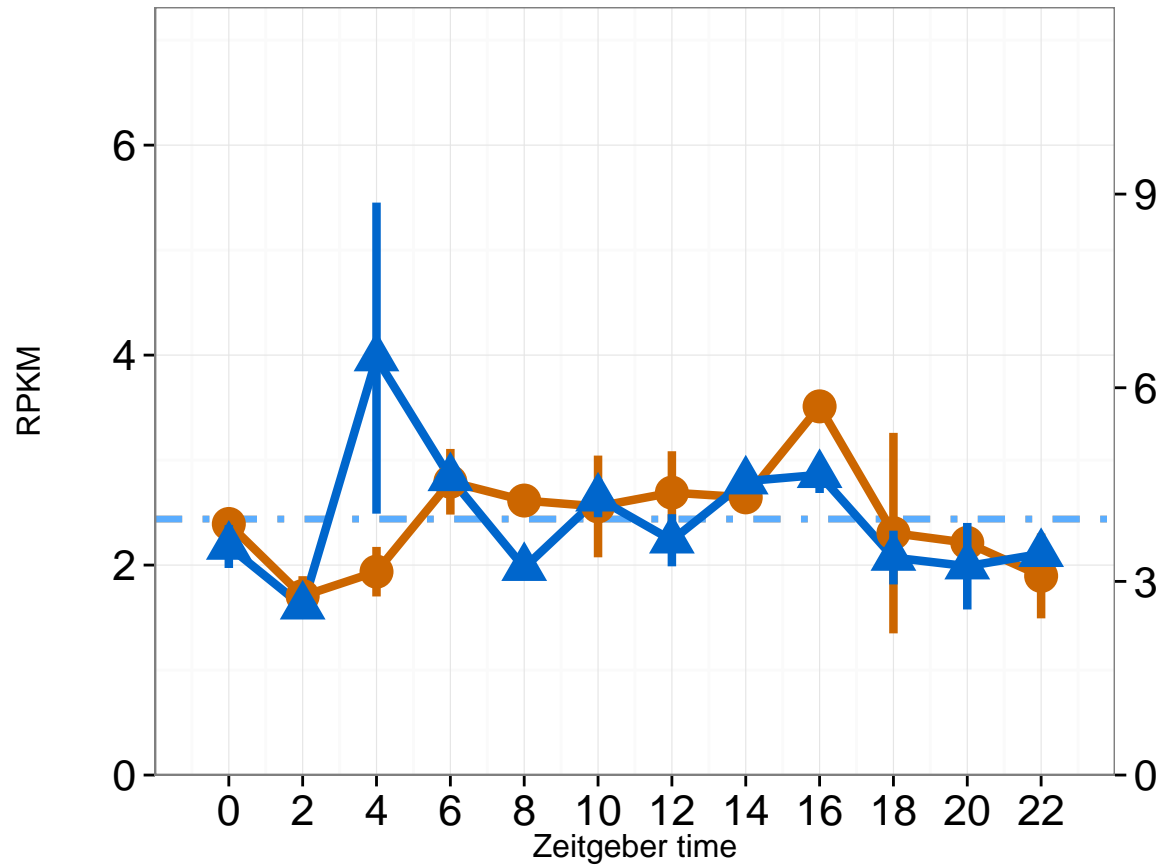

## Cxcr4

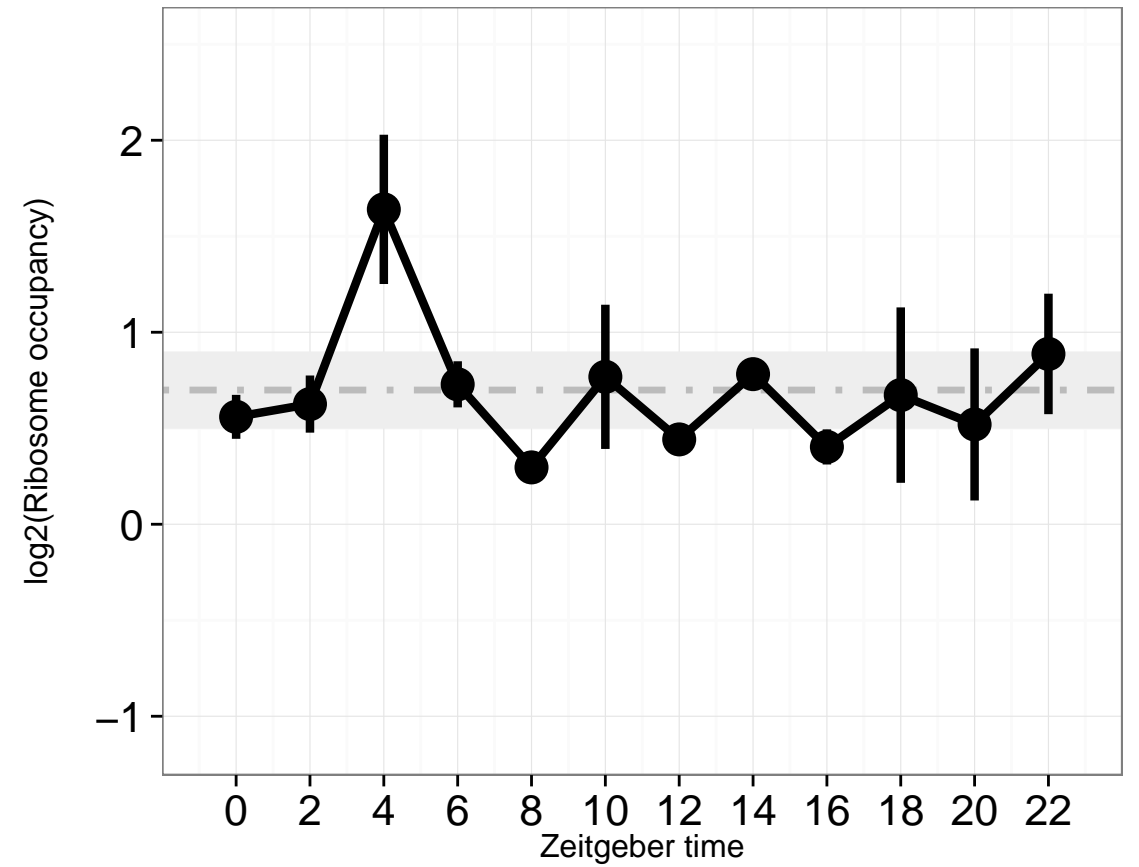

Supplement: Supplementary file 6161 [file 1]

## Sdk2

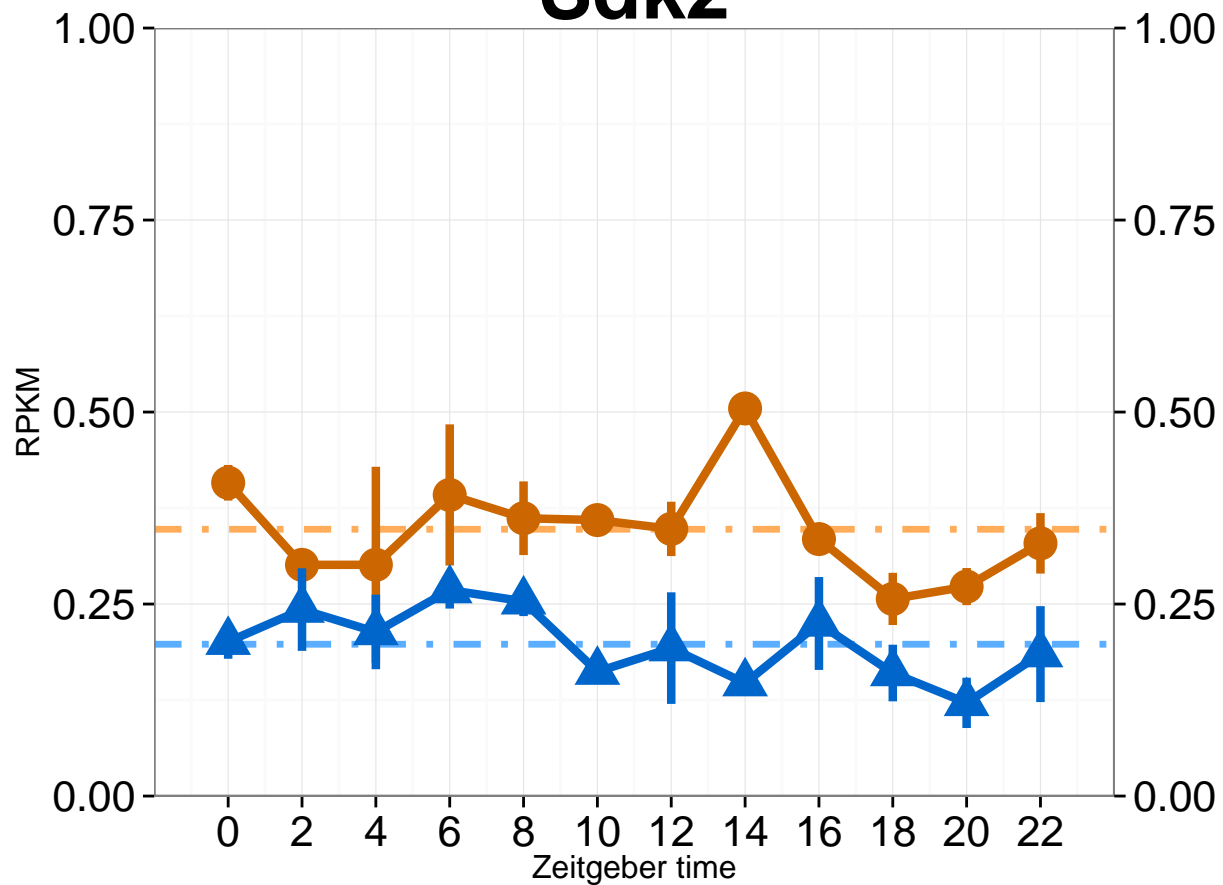

## Sdk2

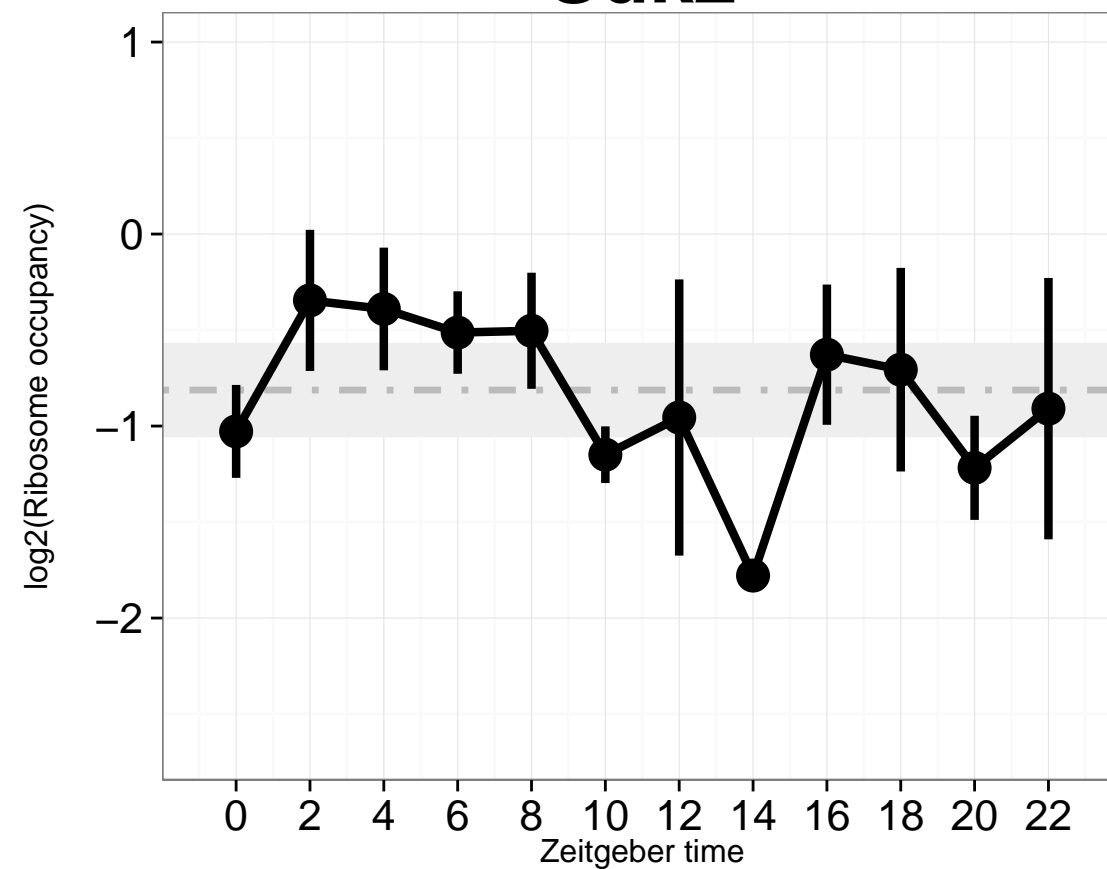

Supplement: Supplementary file 6162 [file 1]

**Ip6k3 TR**

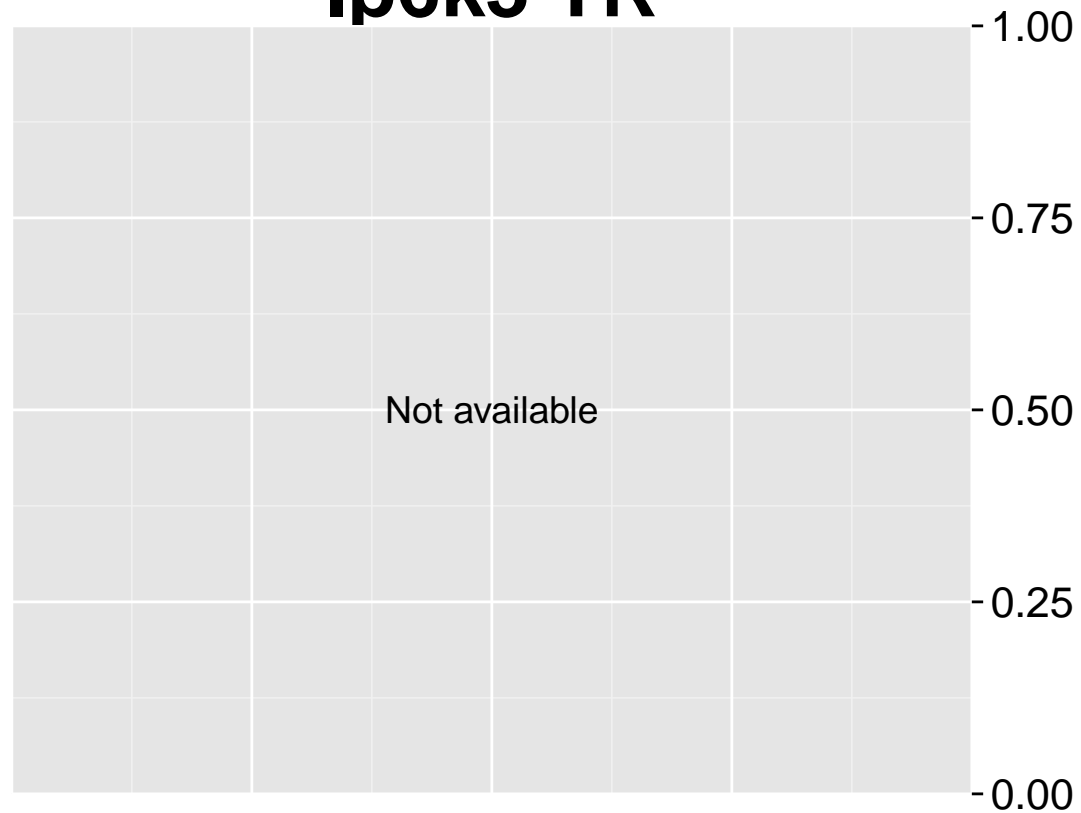

**Ip6k3 log2(Ribosome occupancy)**

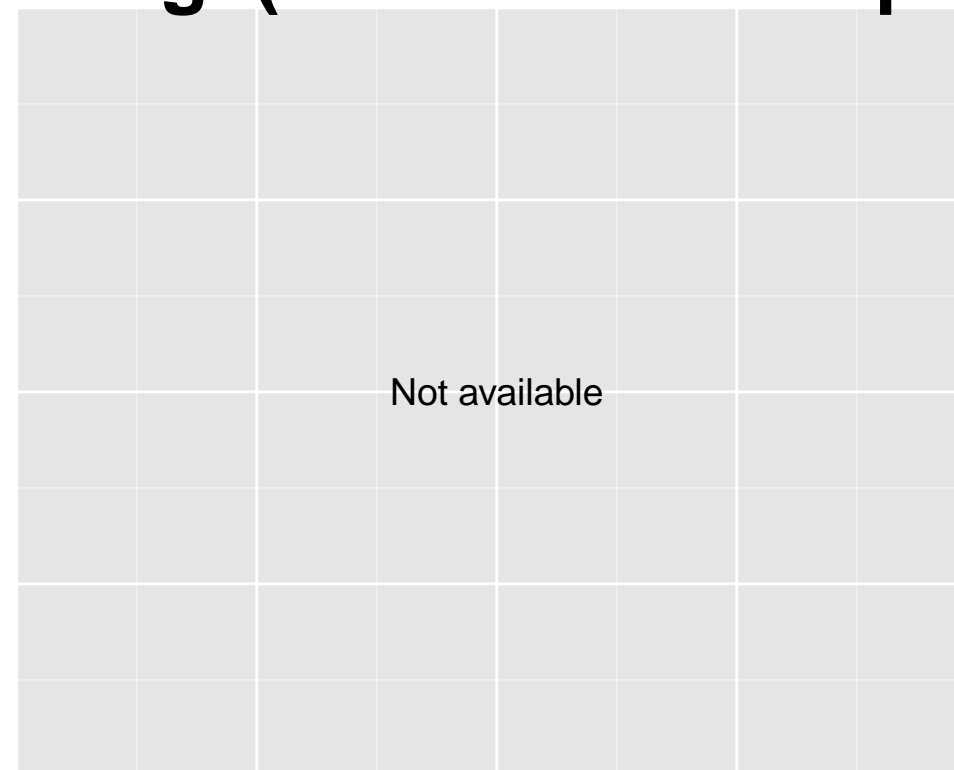

Supplement: Supplementary file 6163 [file 1]

# Gnb1

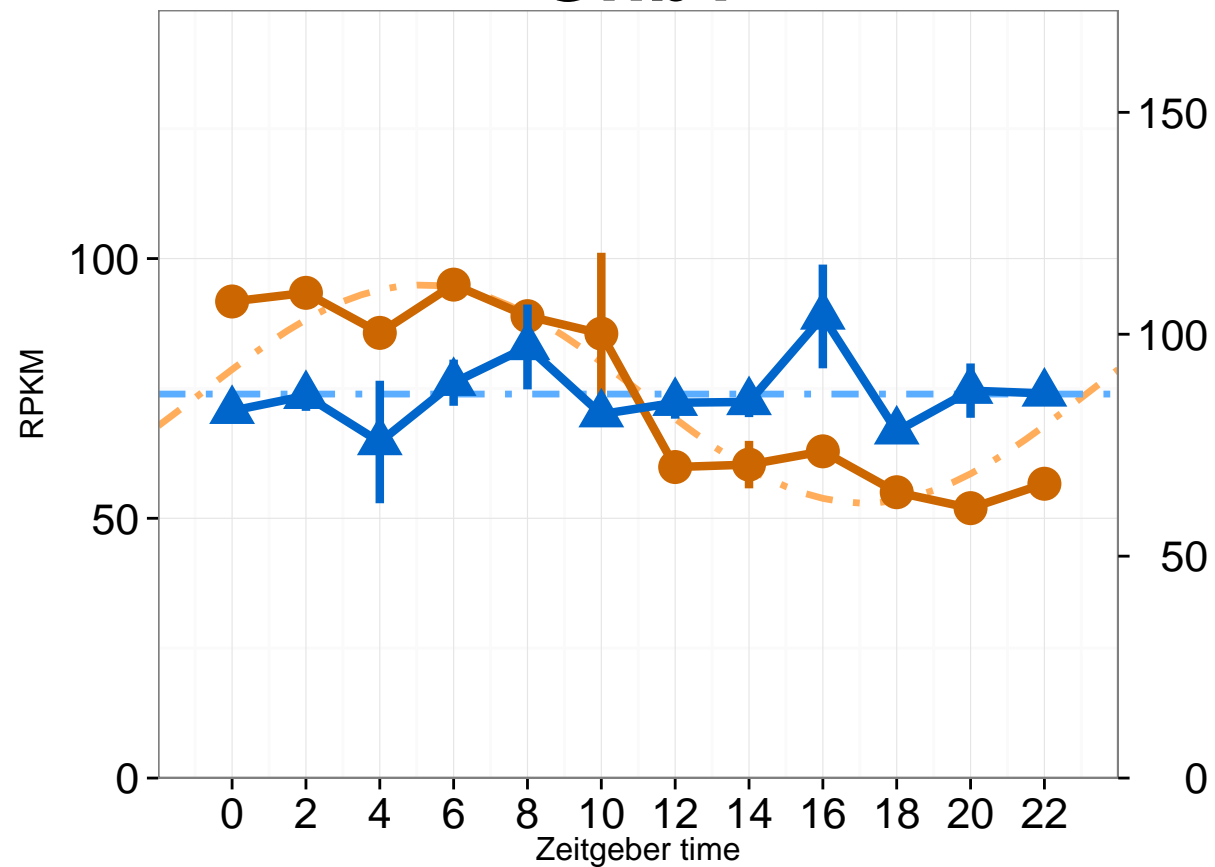

# Gnb1

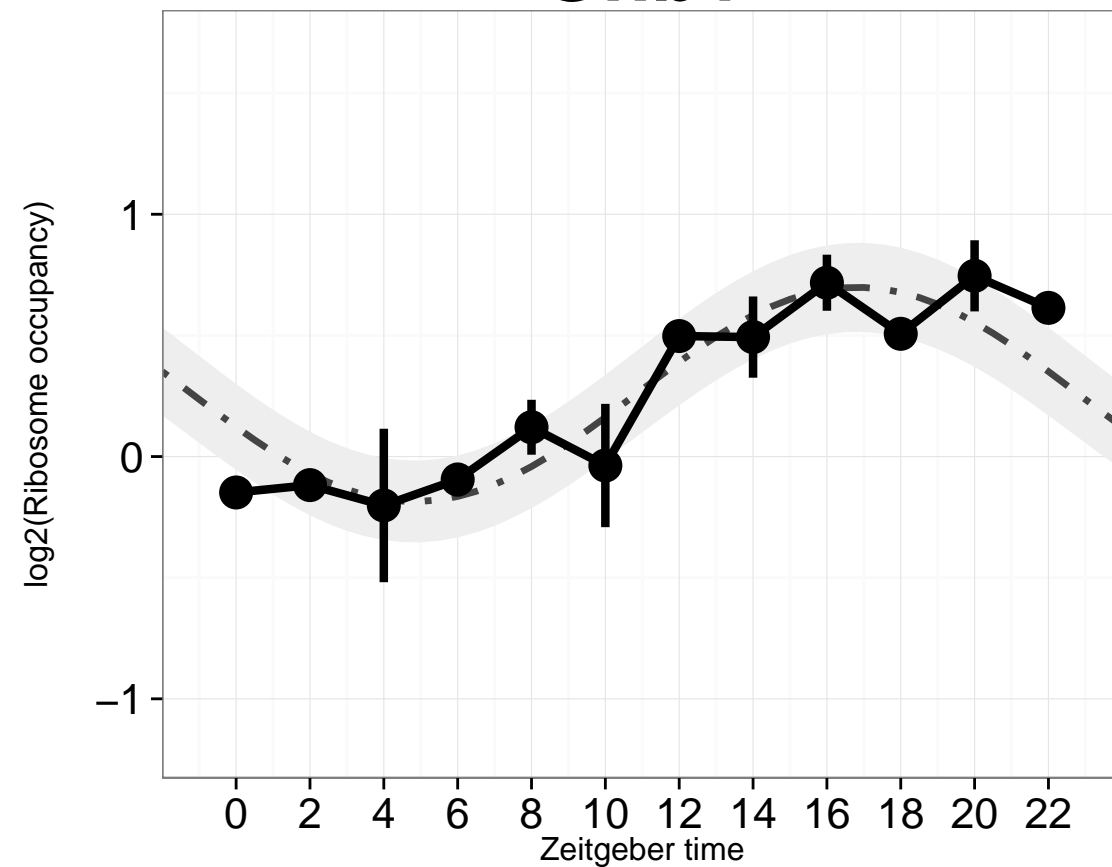

Supplement: Supplementary file 6164 [file 1]

## Pomp

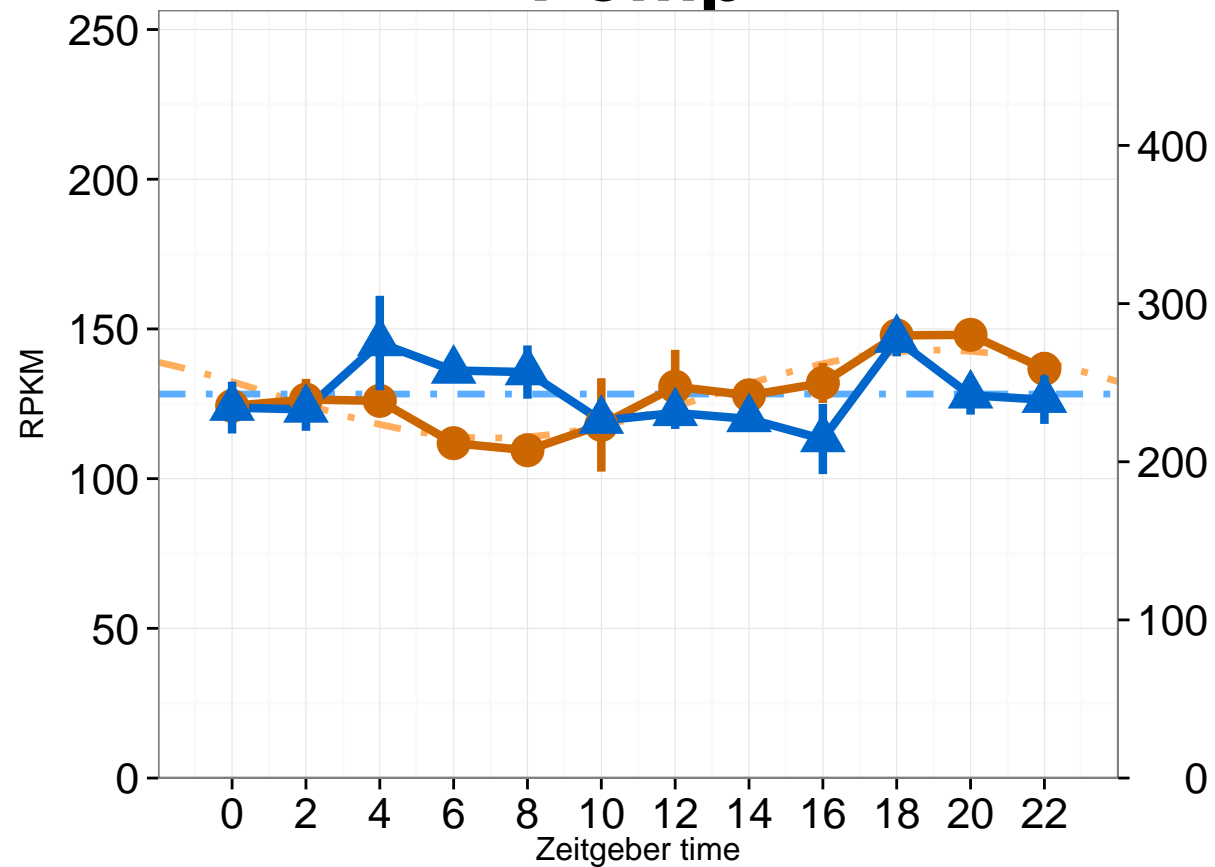

## Pomp

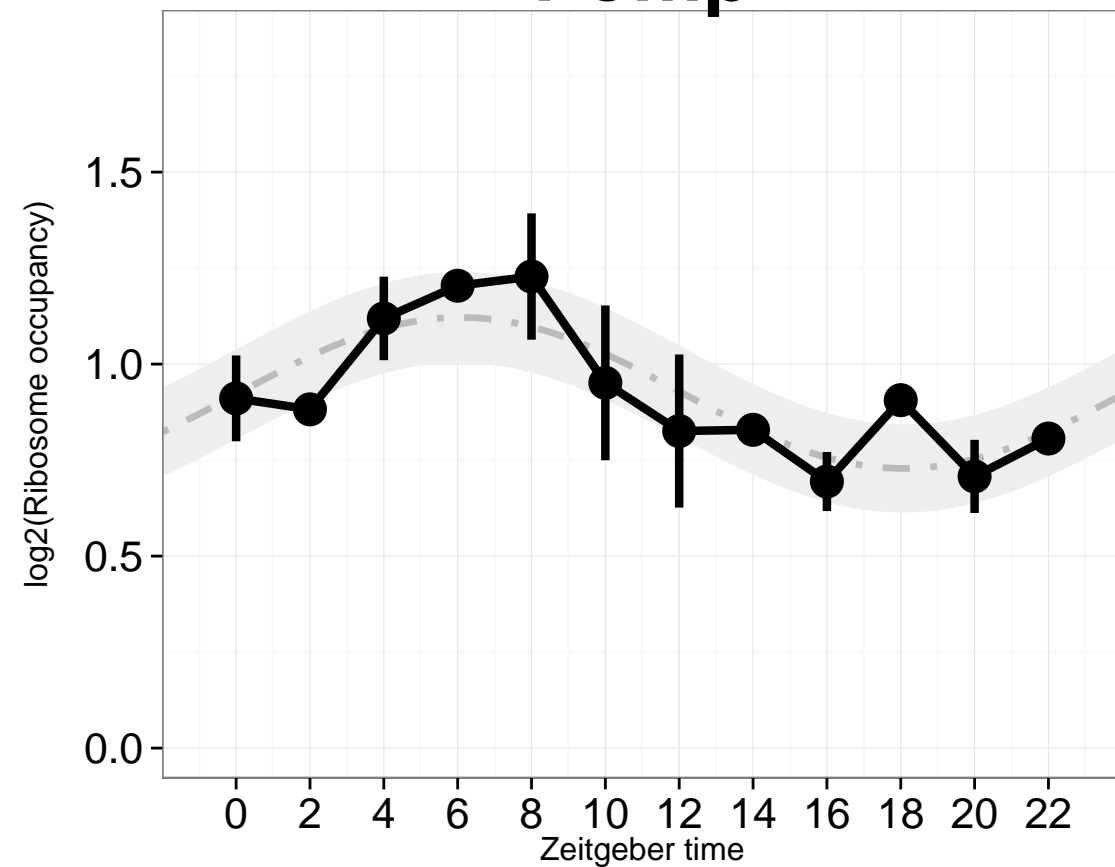

Supplement: Supplementary file 6165 [file 1]

# Sort1

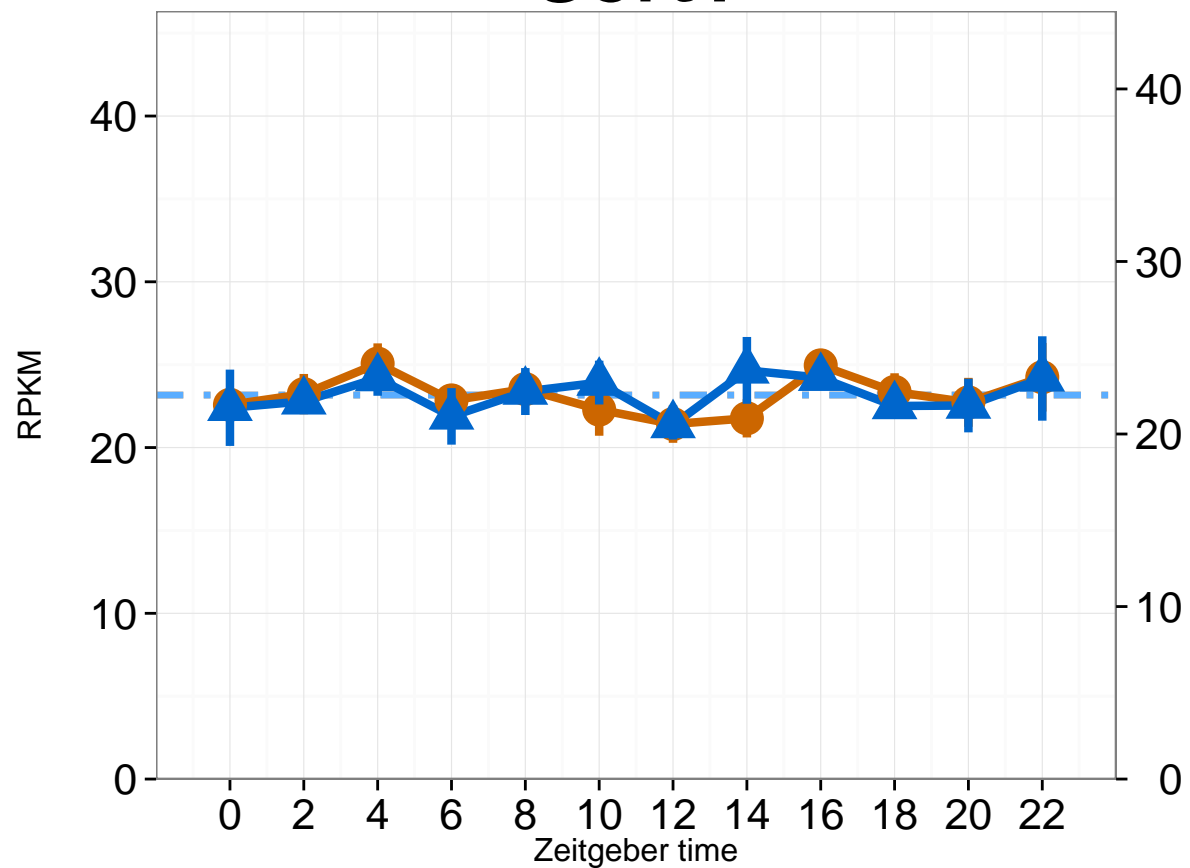

# Sort1

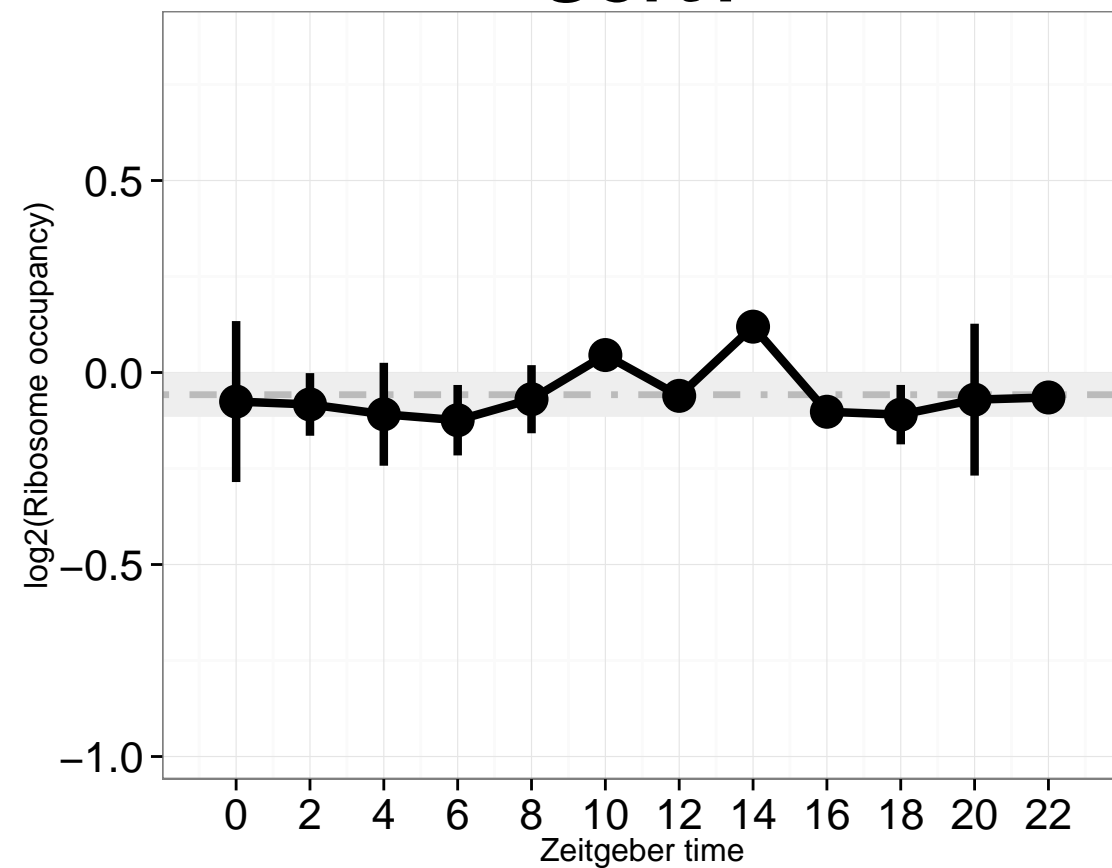

Supplement: Supplementary file 6166 [file 1]

## Rps17

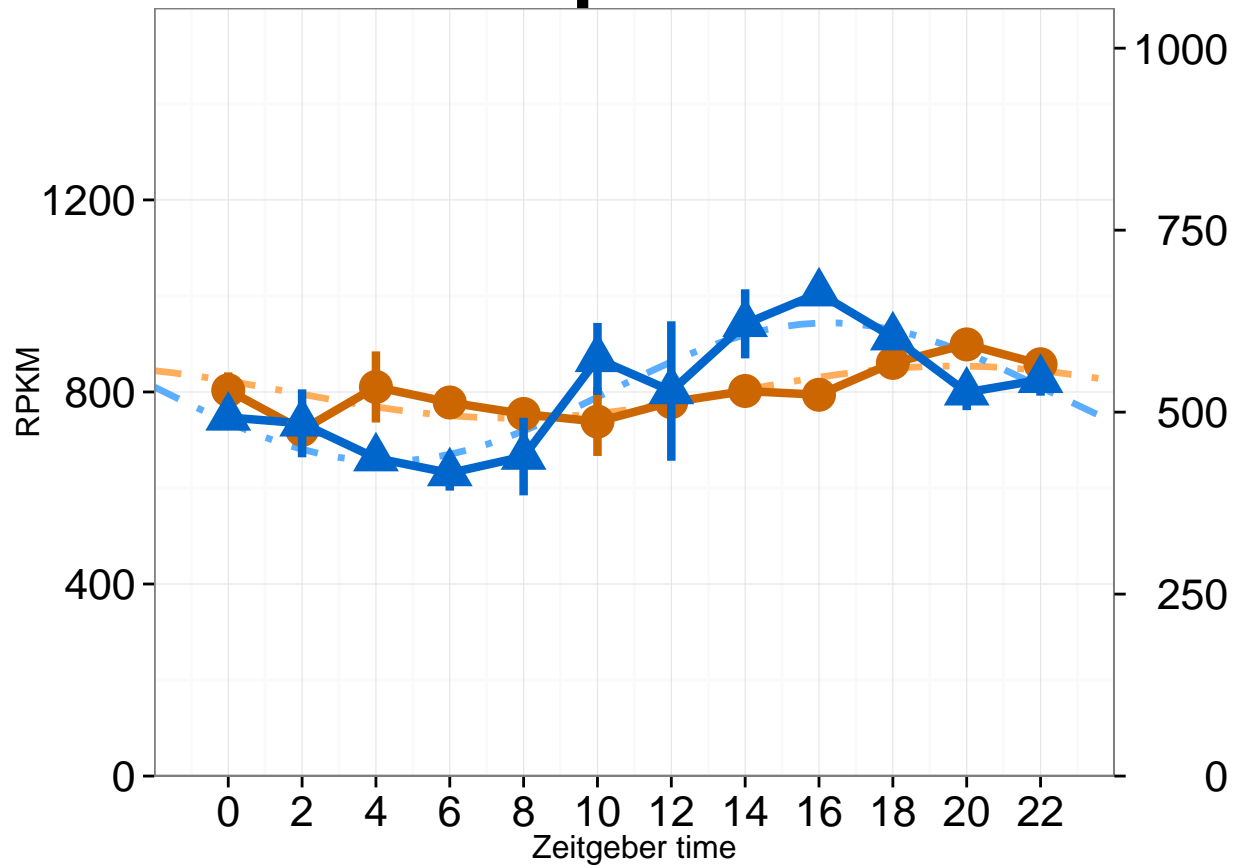

## Rps17

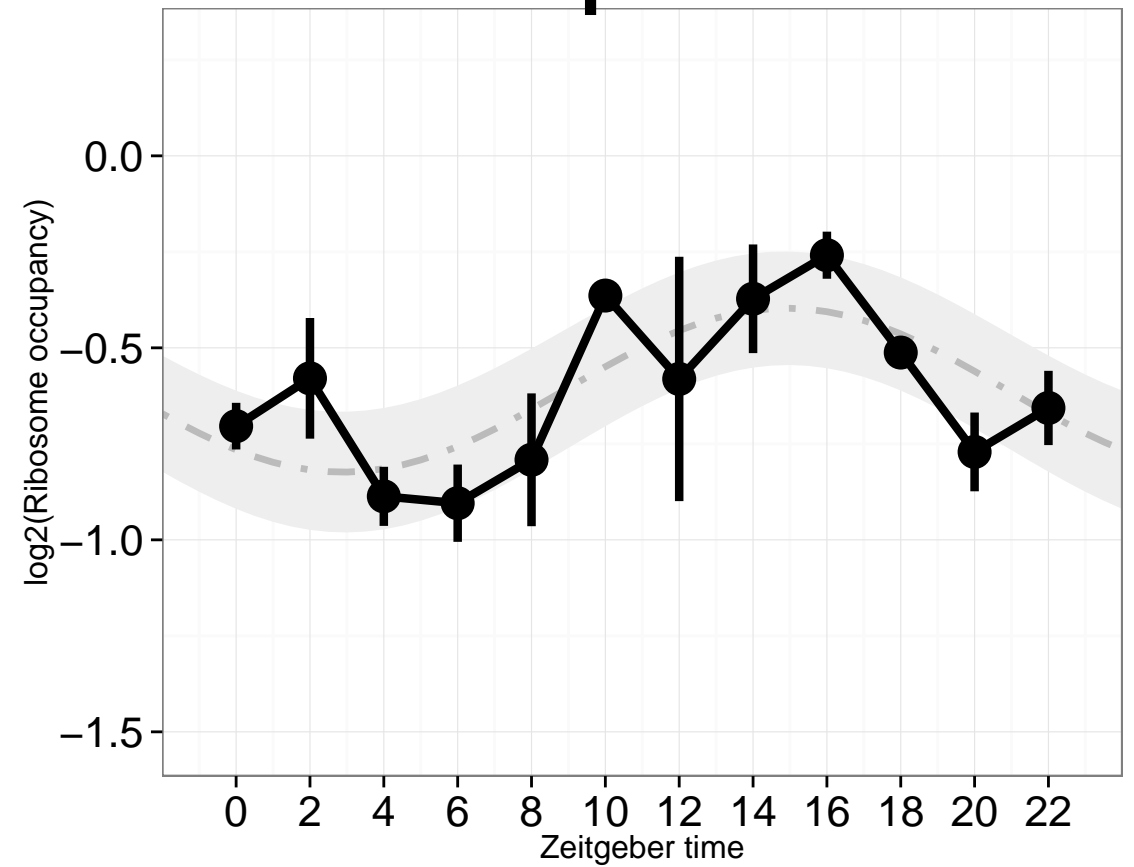

Supplement: Supplementary file 6167 [file 1]

# Ckap2

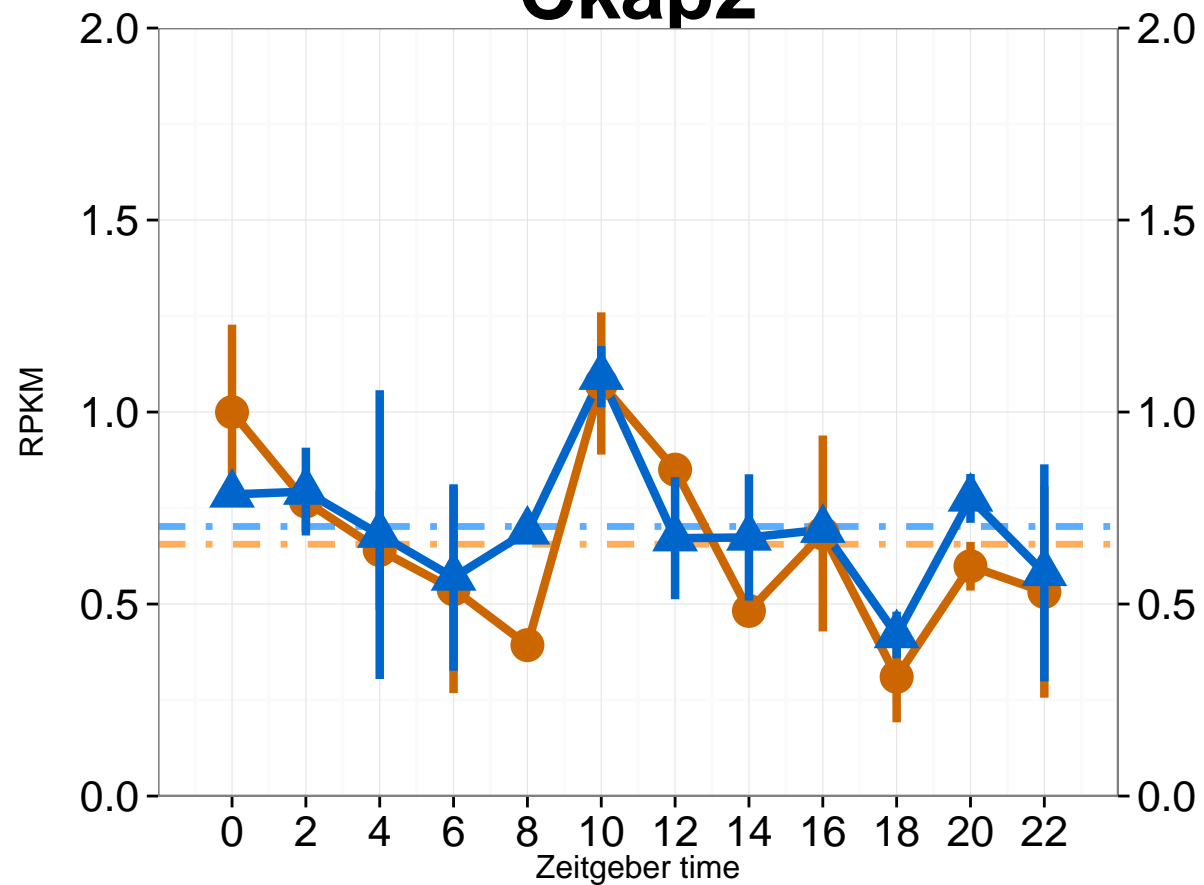

# Ckap2

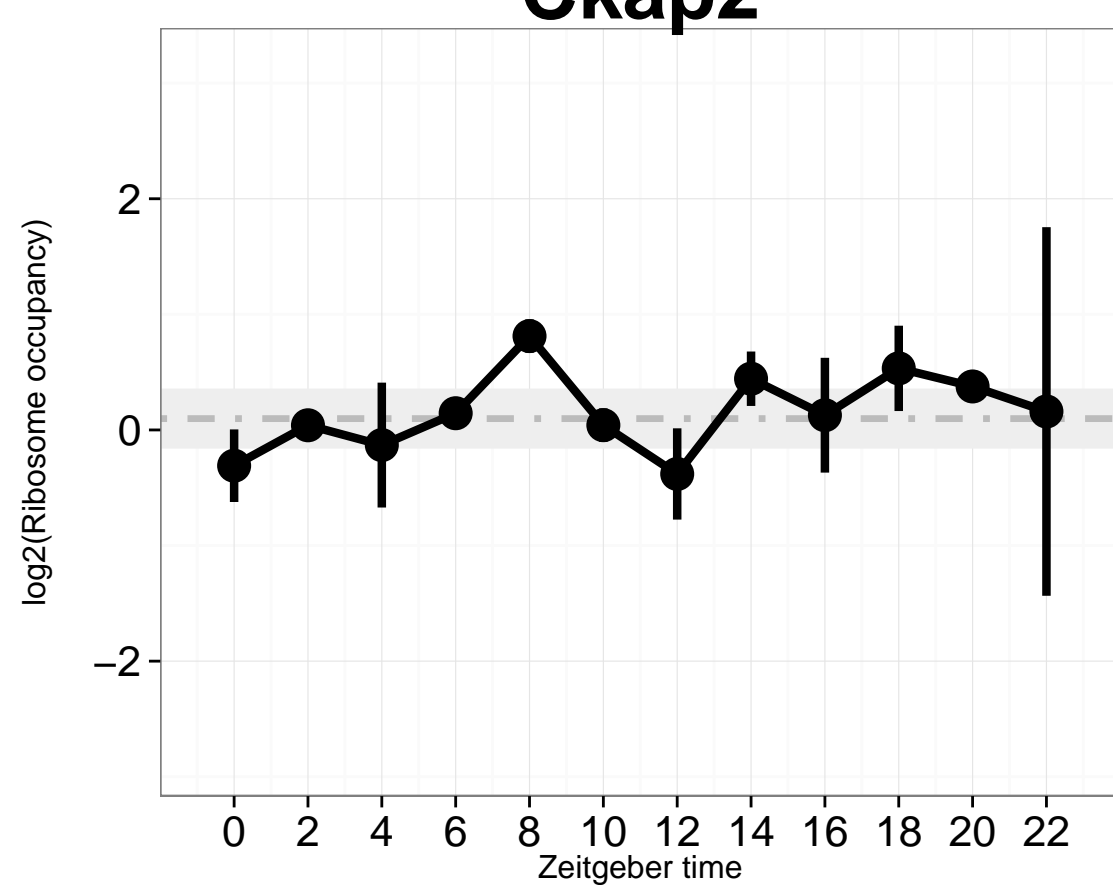

Supplement: Supplementary file 6168 [file 1]

## Klhl21

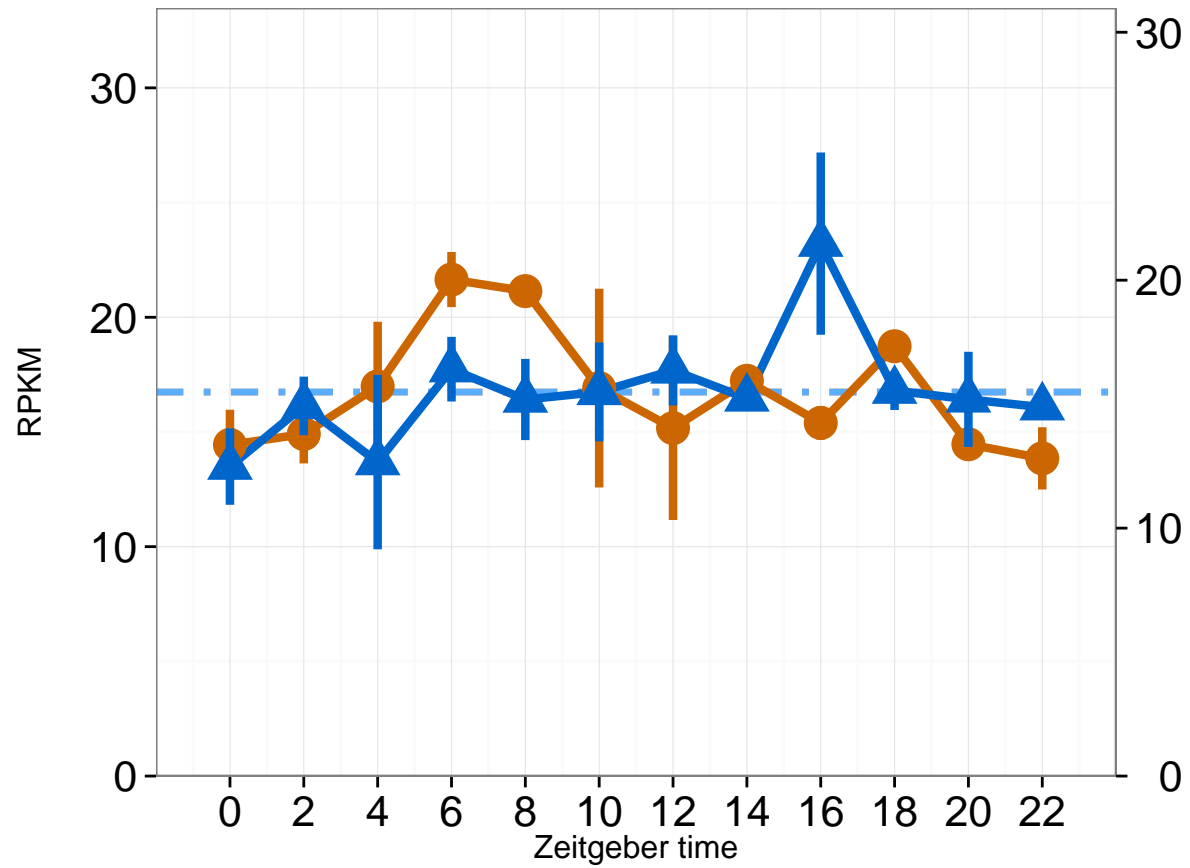

## Klhl21

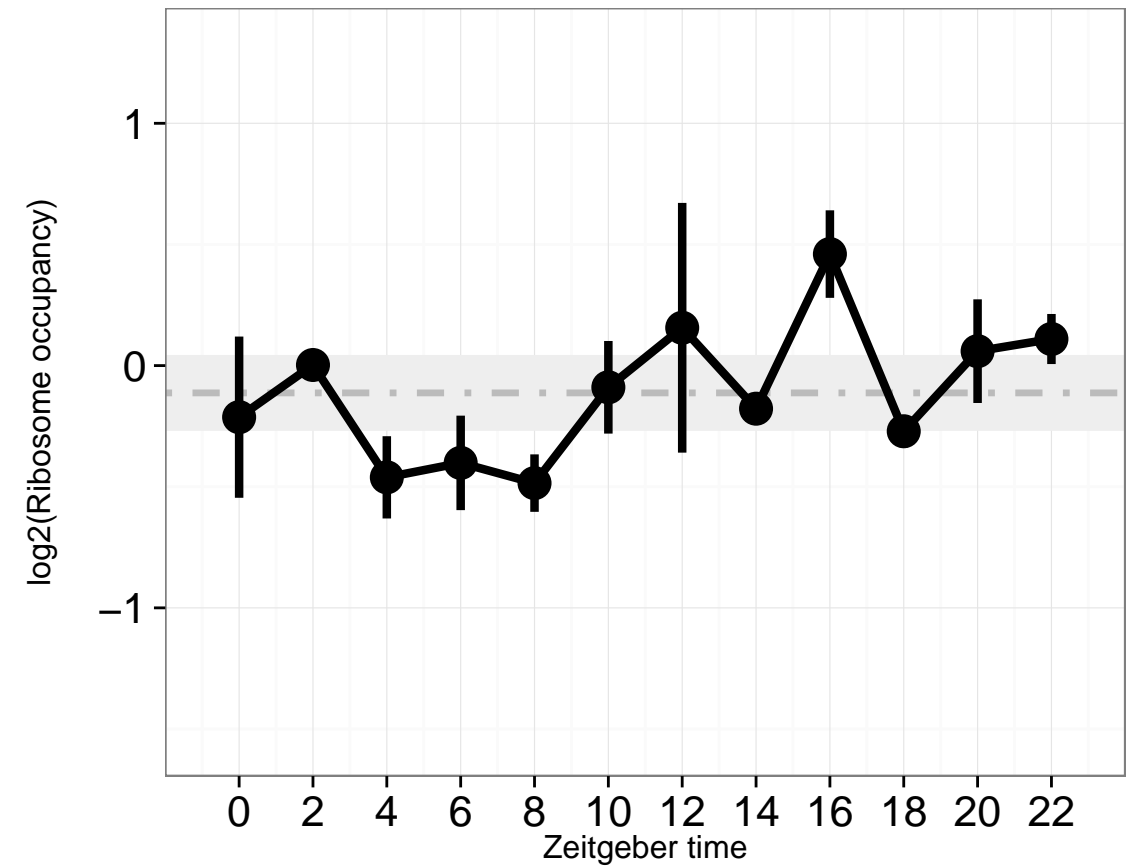

Supplement: Supplementary file 6169 [file 1]

## MyI12b

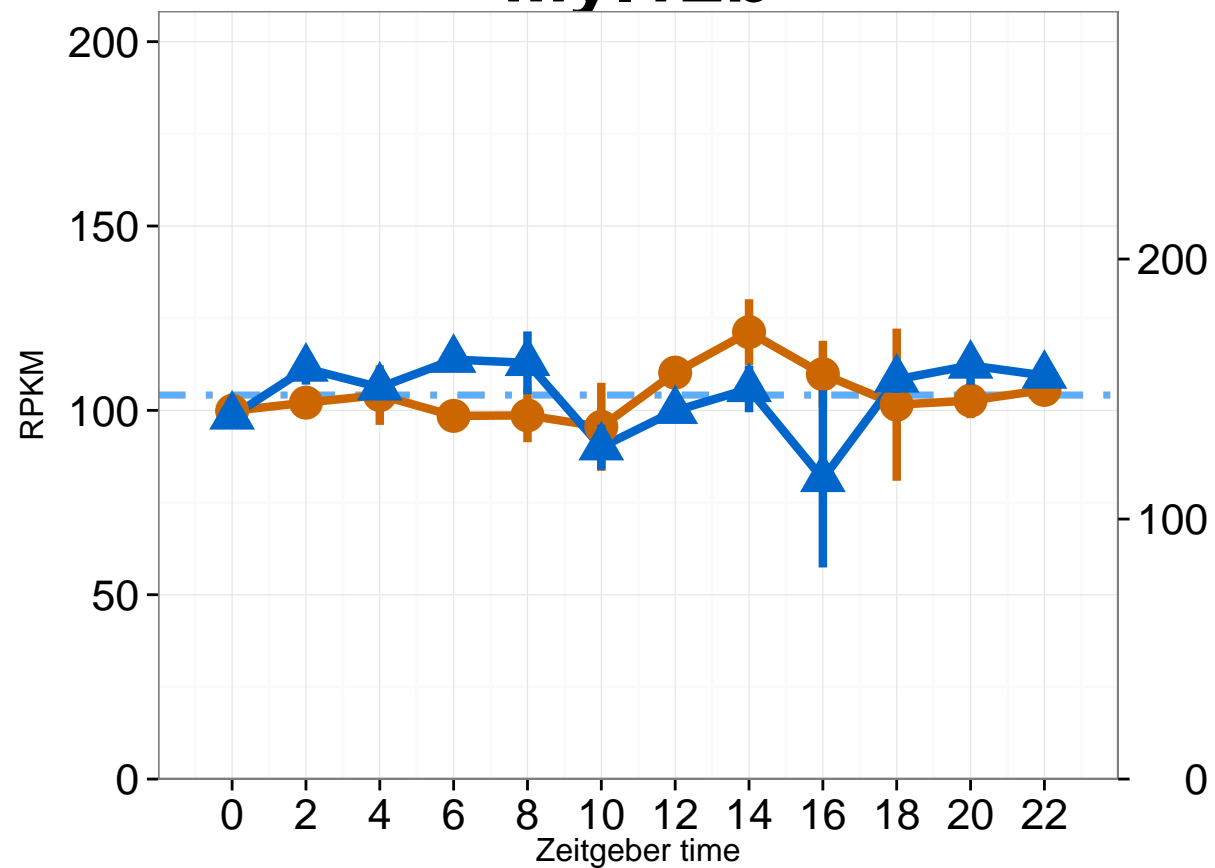

## MyI12b

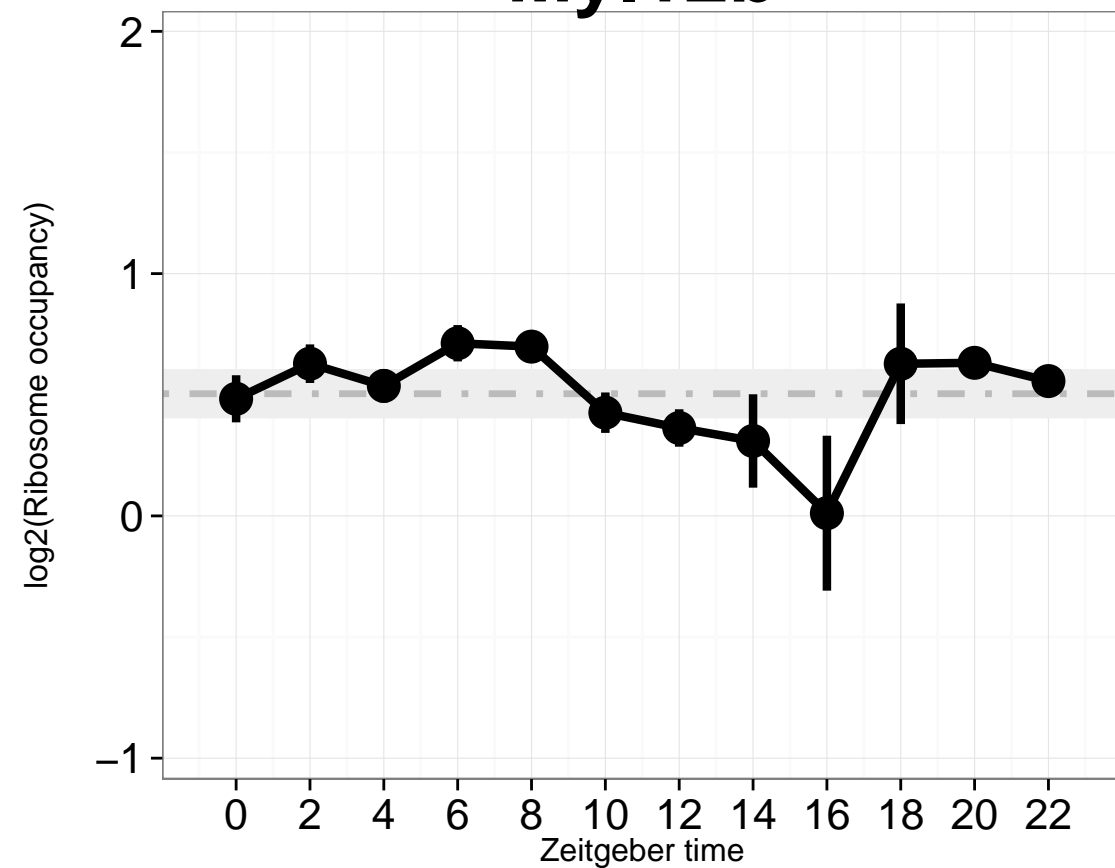

Supplement: Supplementary file 6170 [file 1]

## Ltbp1

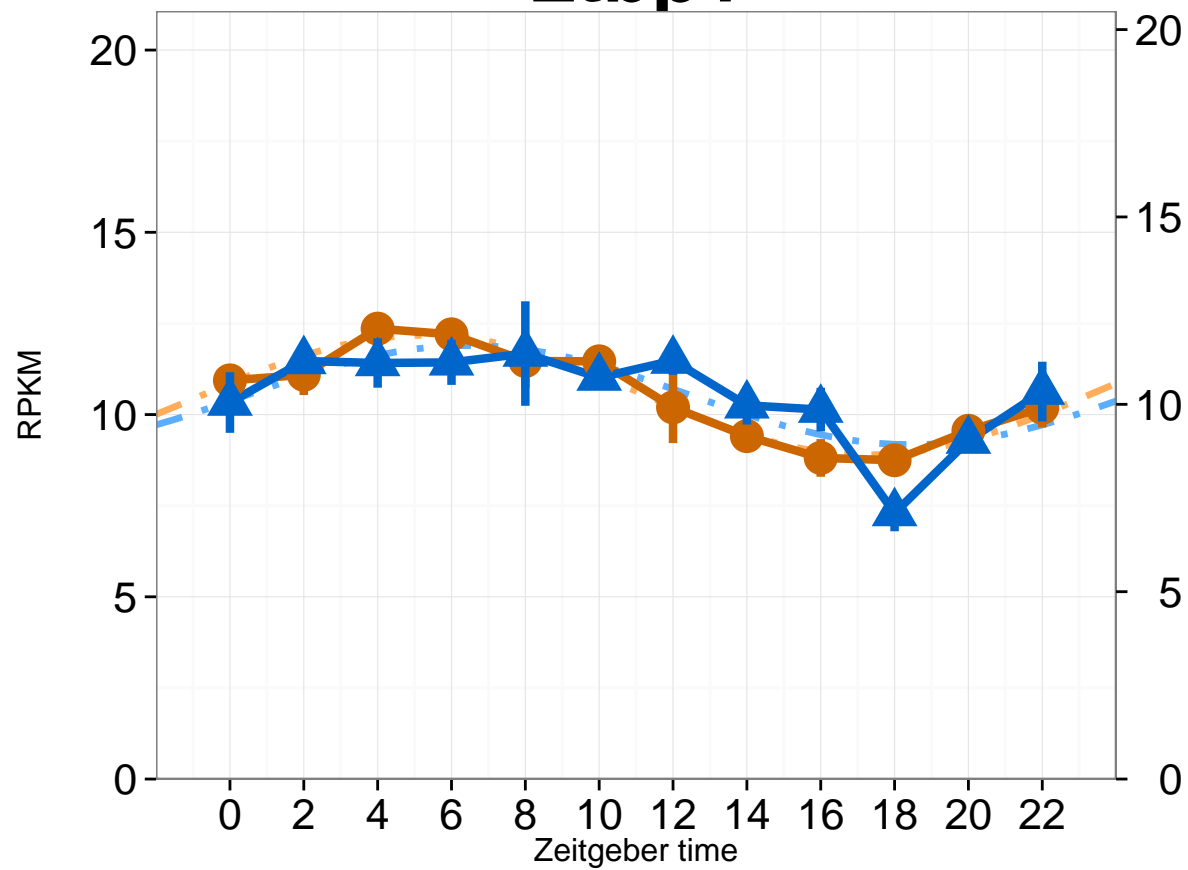

## Ltbp1

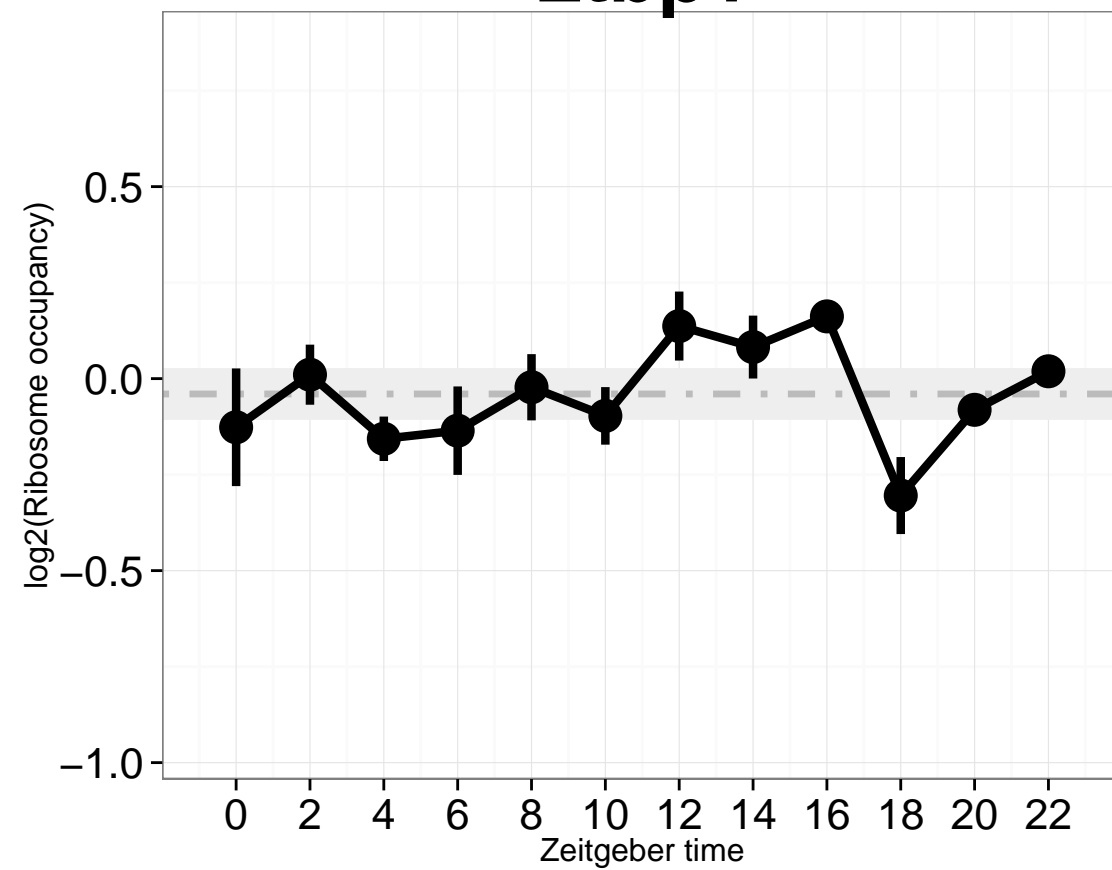

Supplement: Supplementary file 6171 [file 1]

# Gpr89

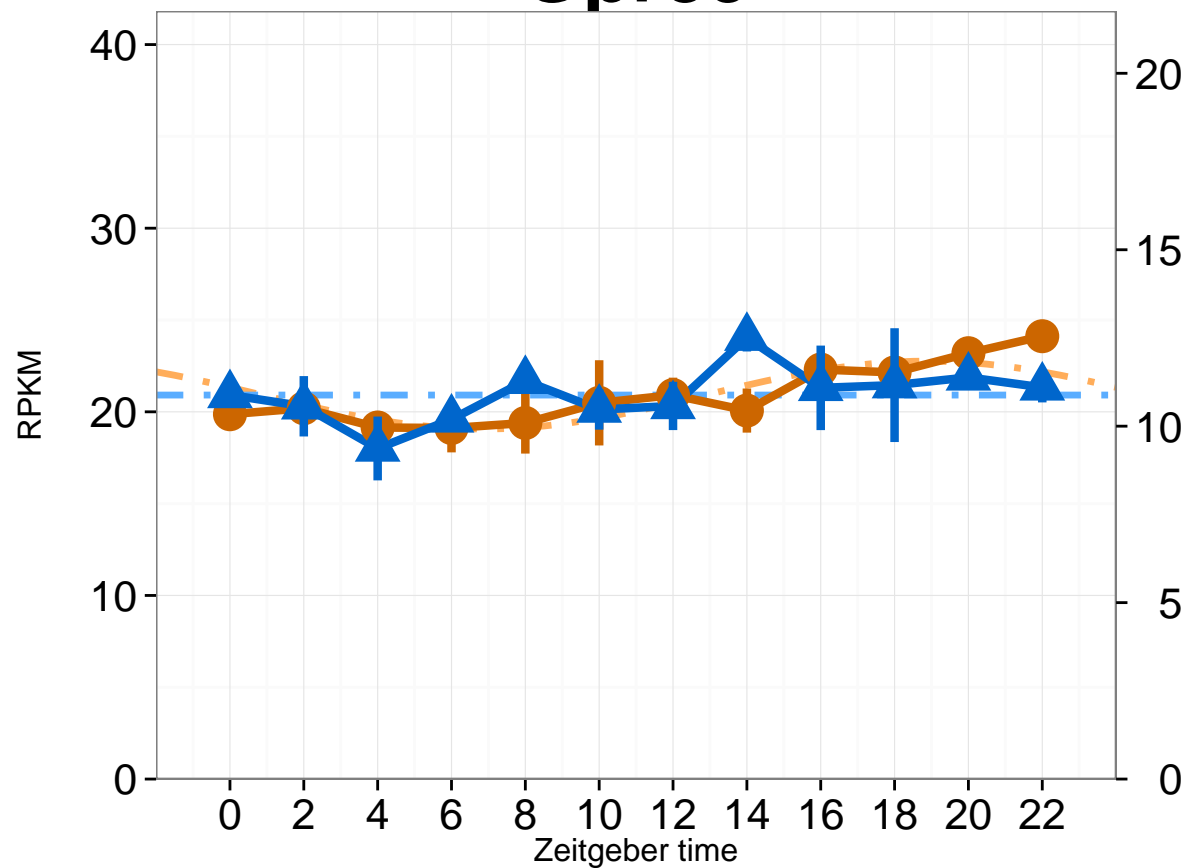

# Gpr89

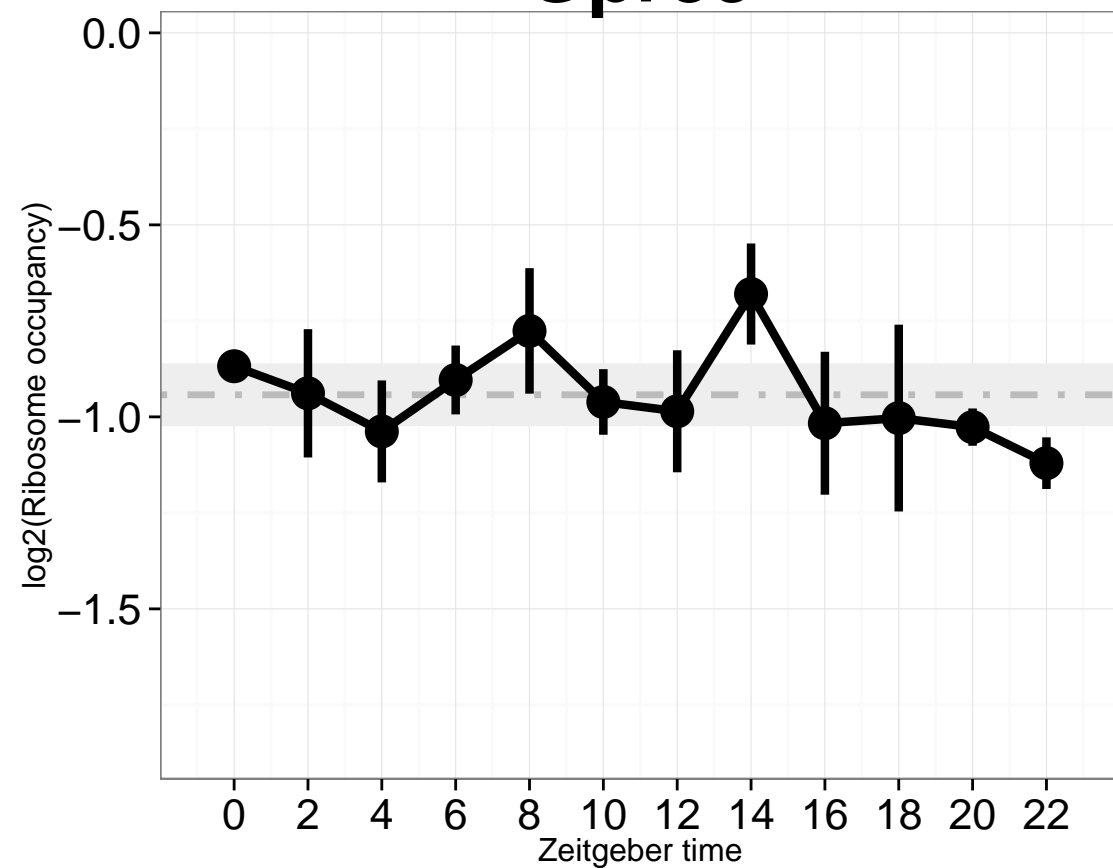

Supplement: Supplementary file 6172 [file 1]

## Apc

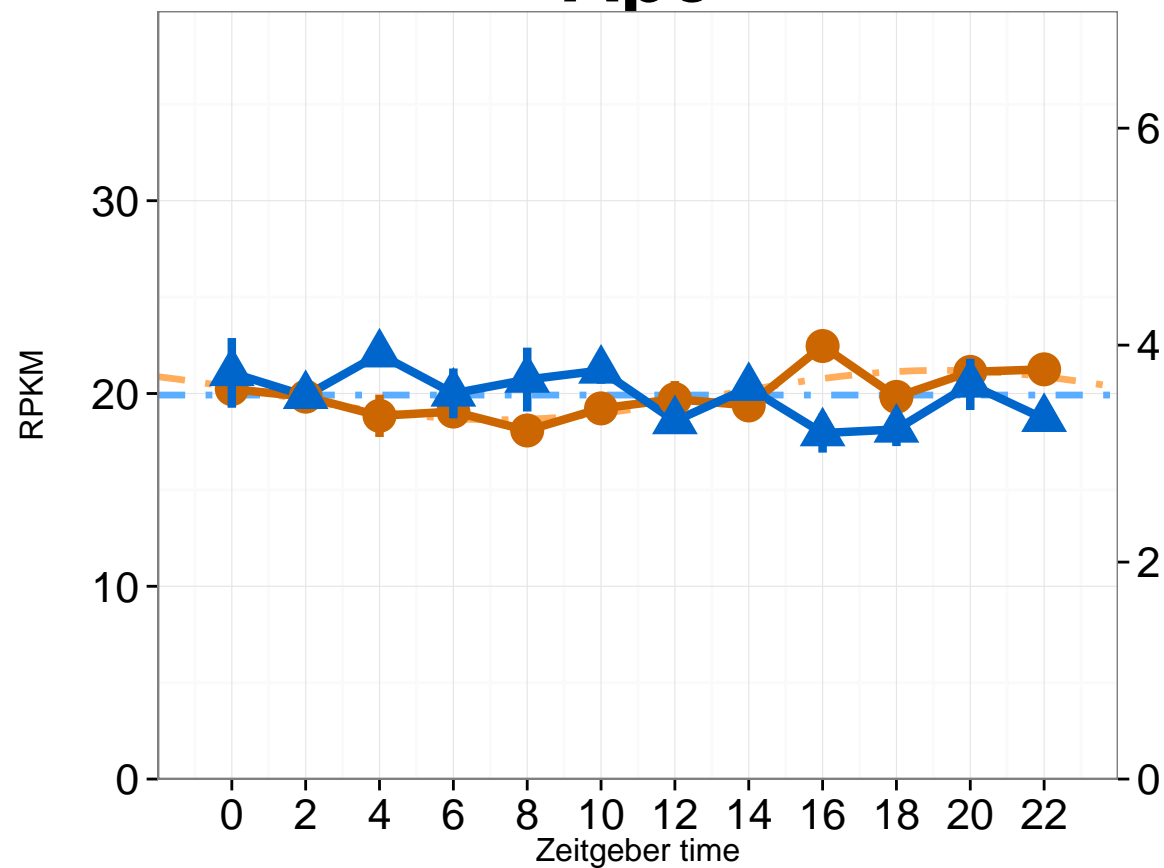

## Apc

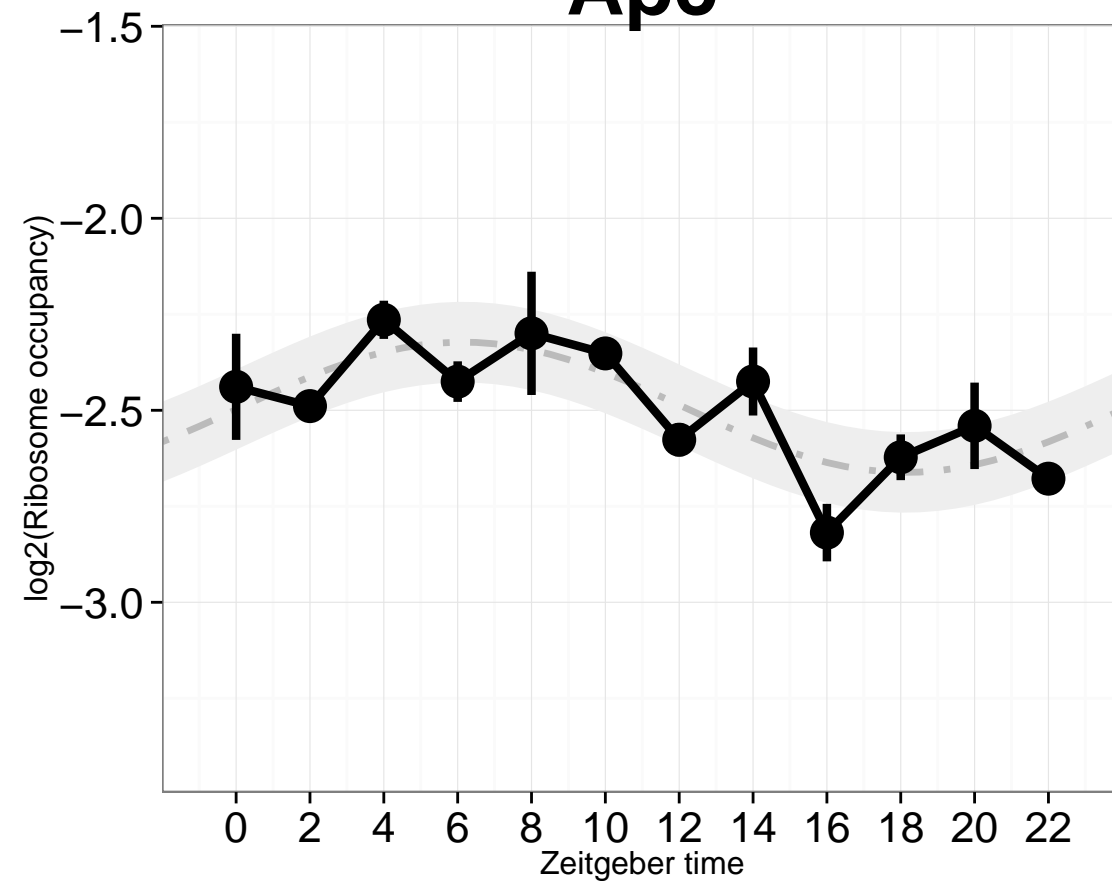

Supplement: Supplementary file 6173 [file 1]

## Pfkp

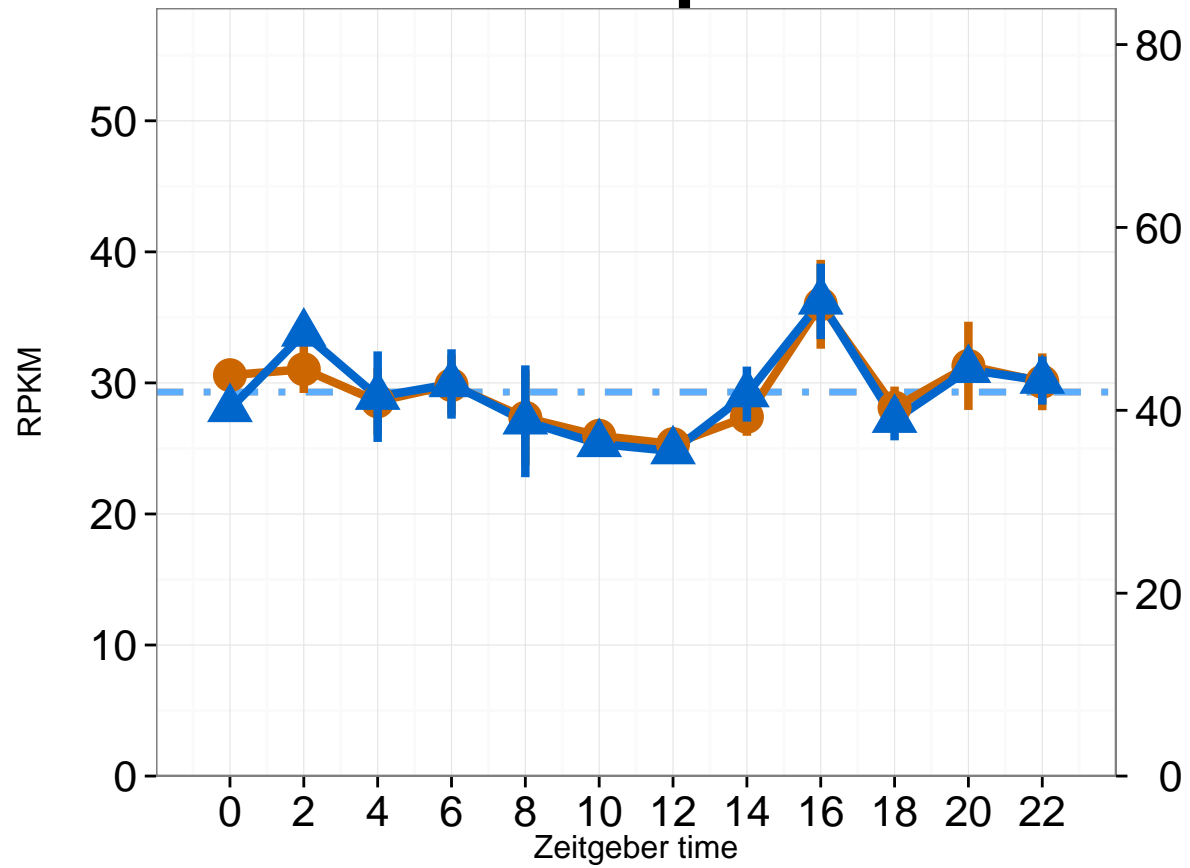

## Pfkp

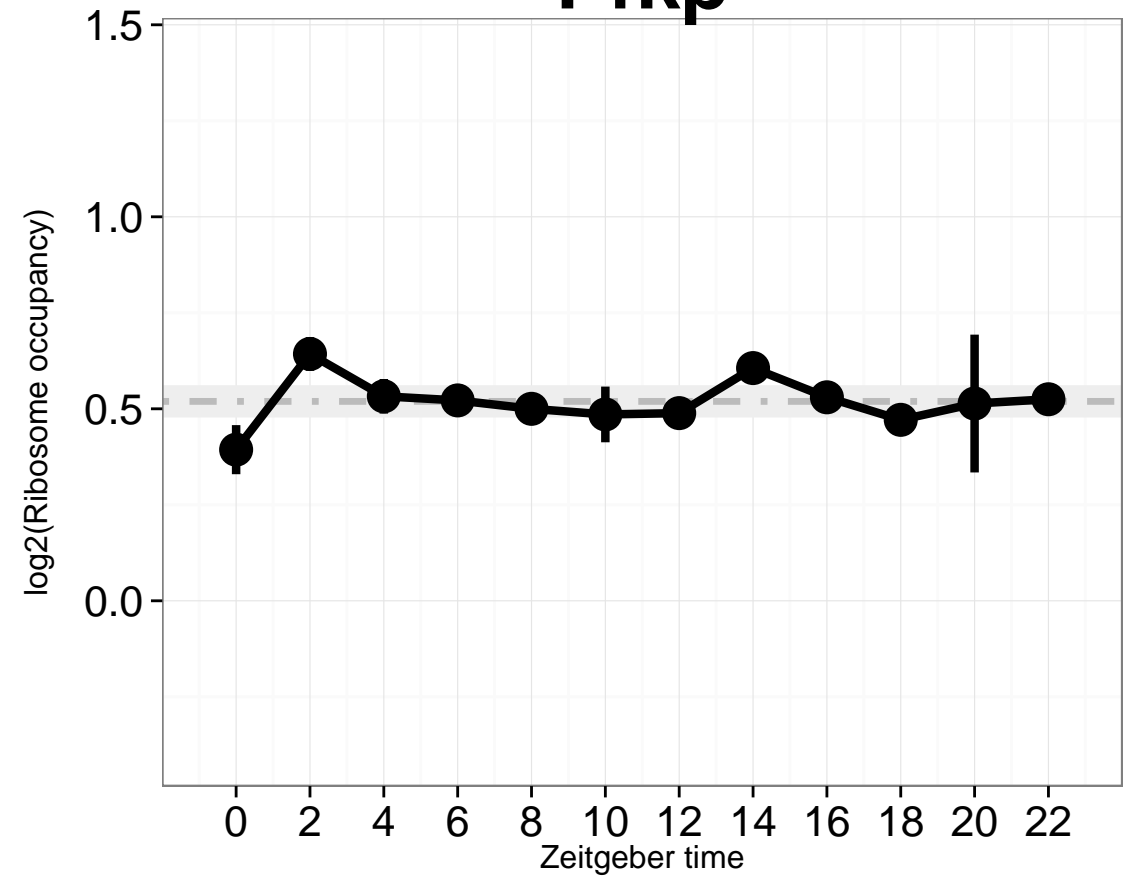

Supplement: Supplementary file 6174 [file 1]

## NoI7

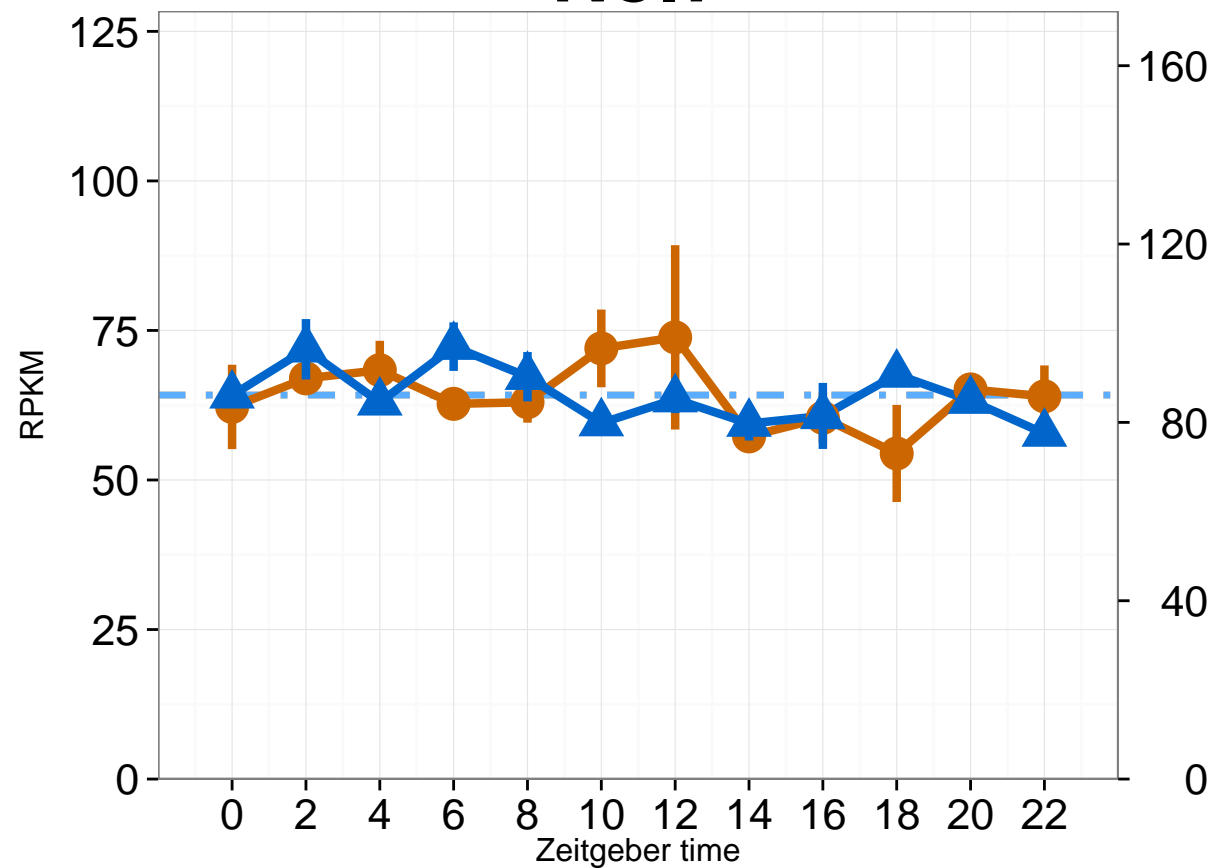

## NoI7

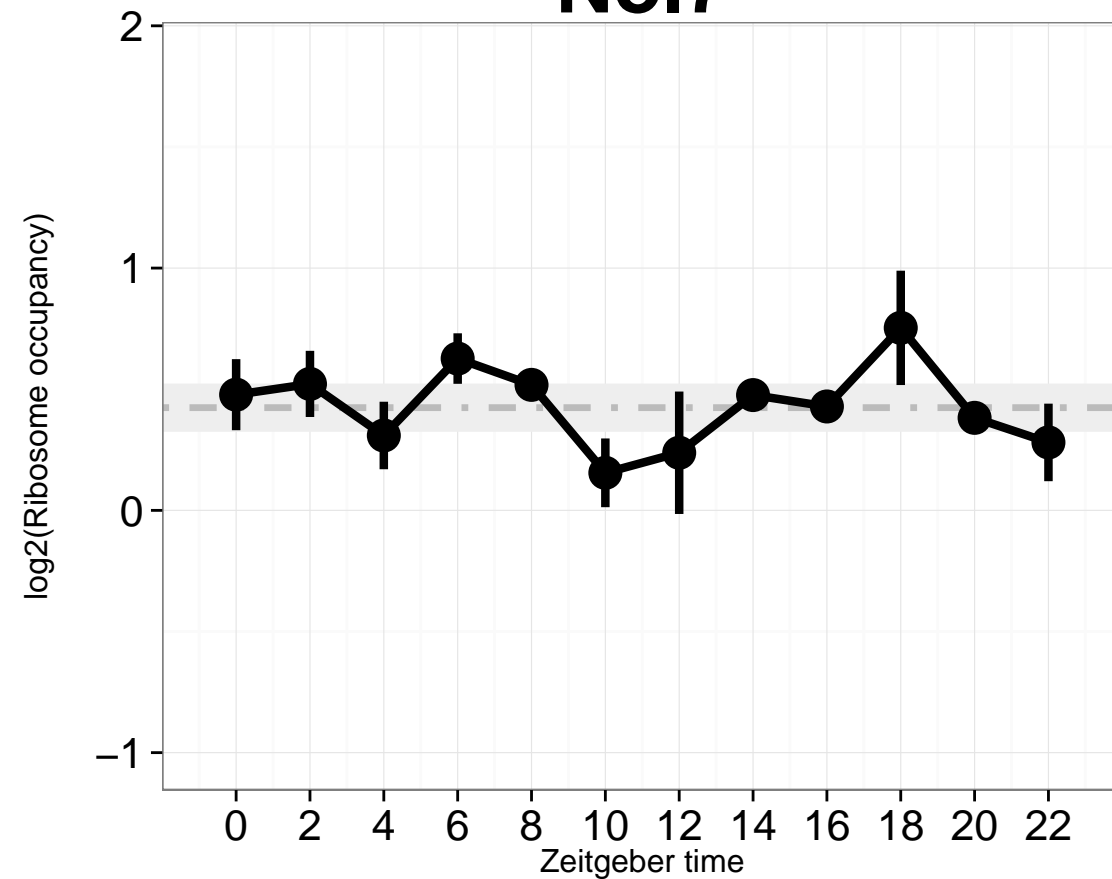

Supplement: Supplementary file 6175 [file 1]

# Acot13

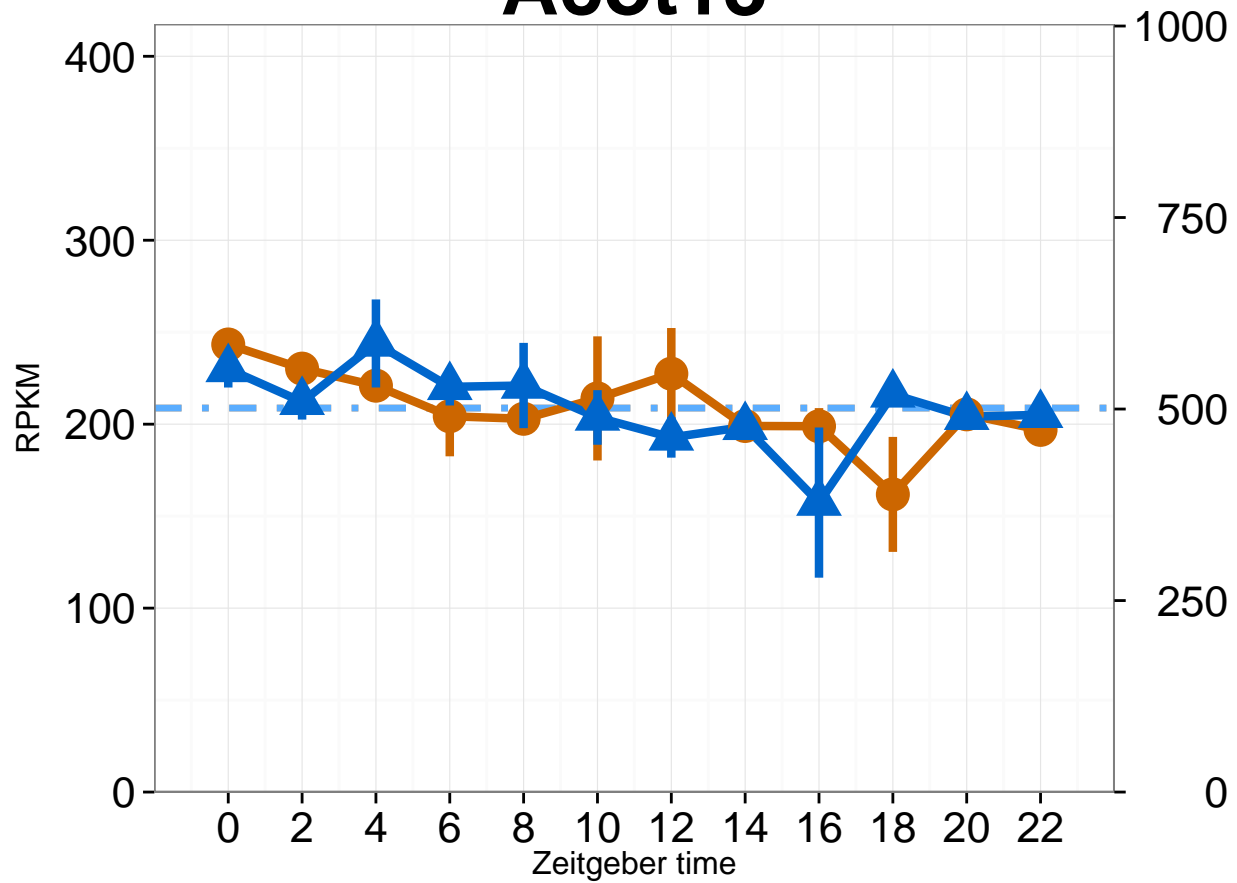

# Acot13

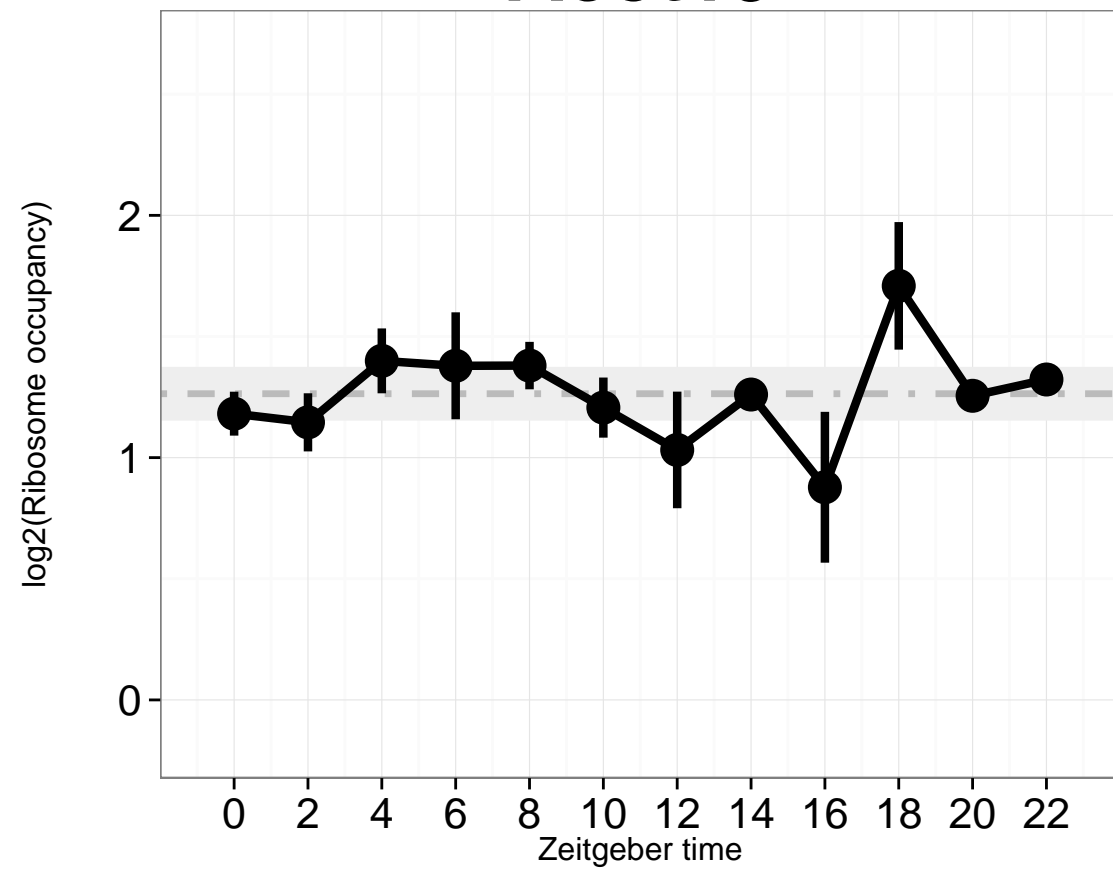

Supplement: Supplementary file 6176 [file 1]

# Slc39a5

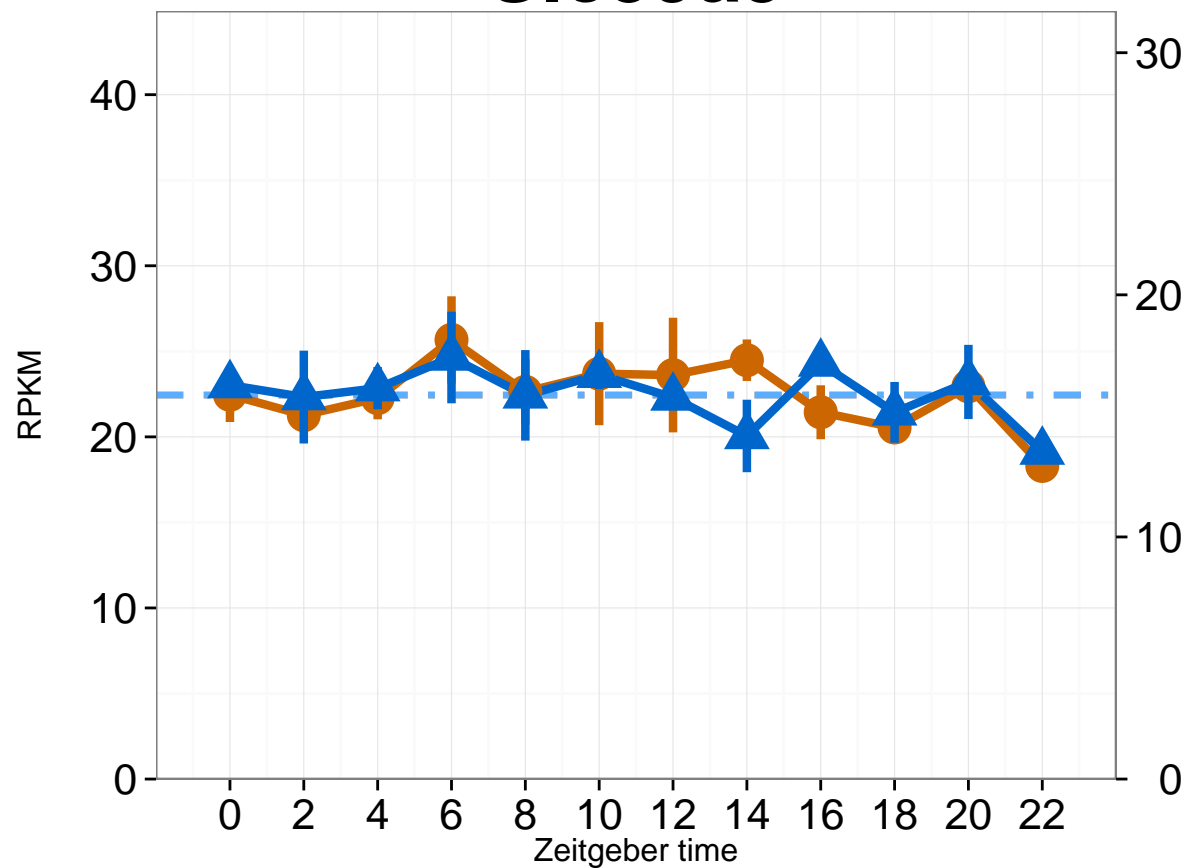

# Slc39a5

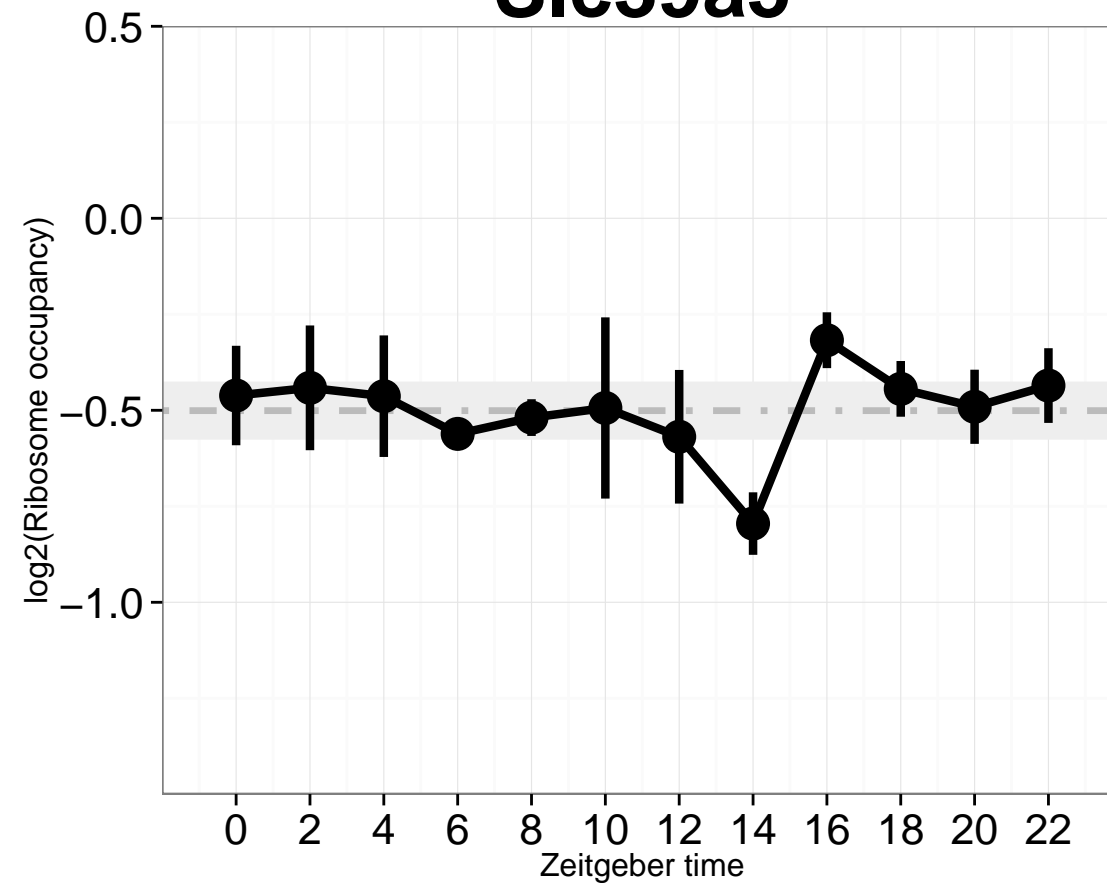

Supplement: Supplementary file 6177 [file 1]

# Pik3cg

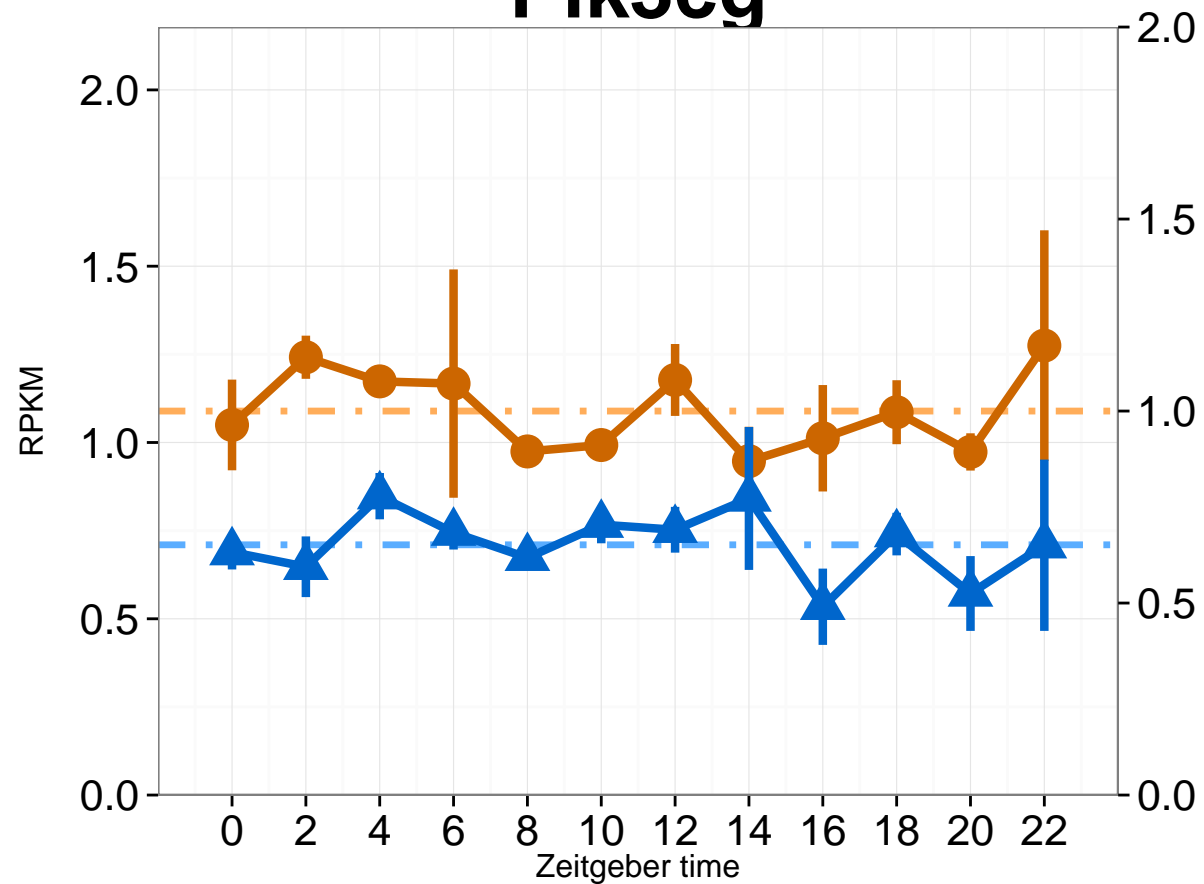

# Pik3cg

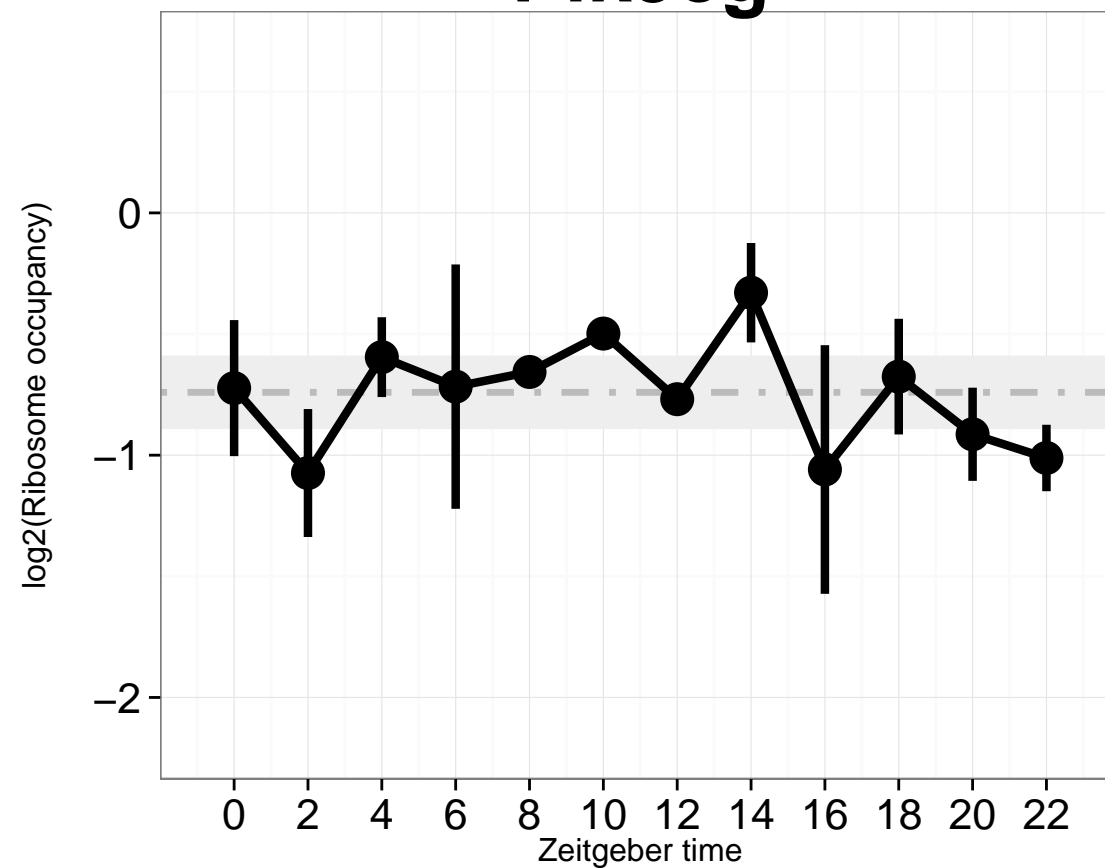

Supplement: Supplementary file 6178 [file 1]

## Ppfia4

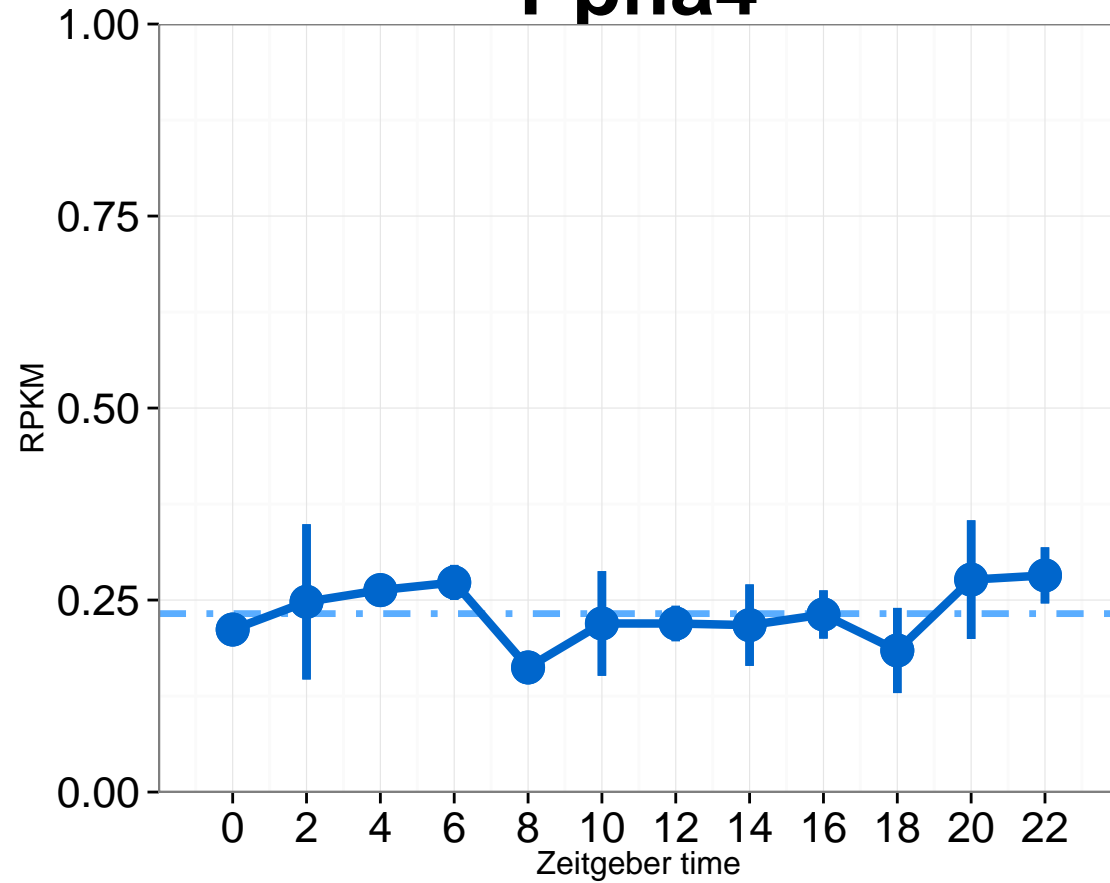

## Ppfia4 log2(Ribosome occupancy

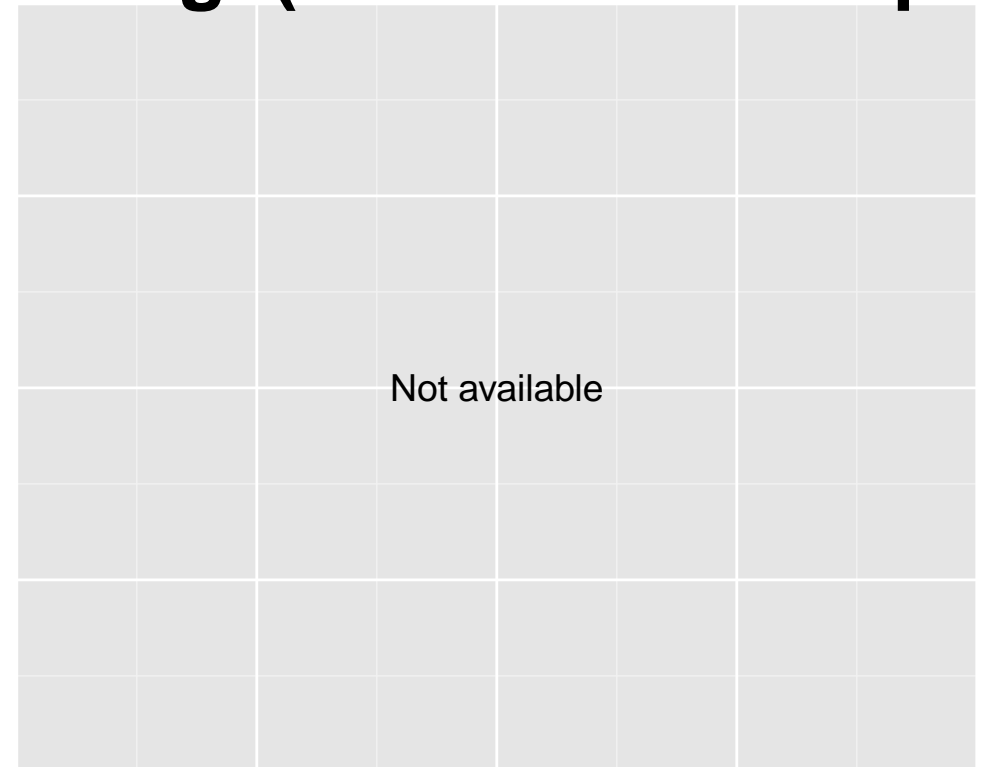

Supplement: Supplementary file 6179 [file 1]

# Crtc3

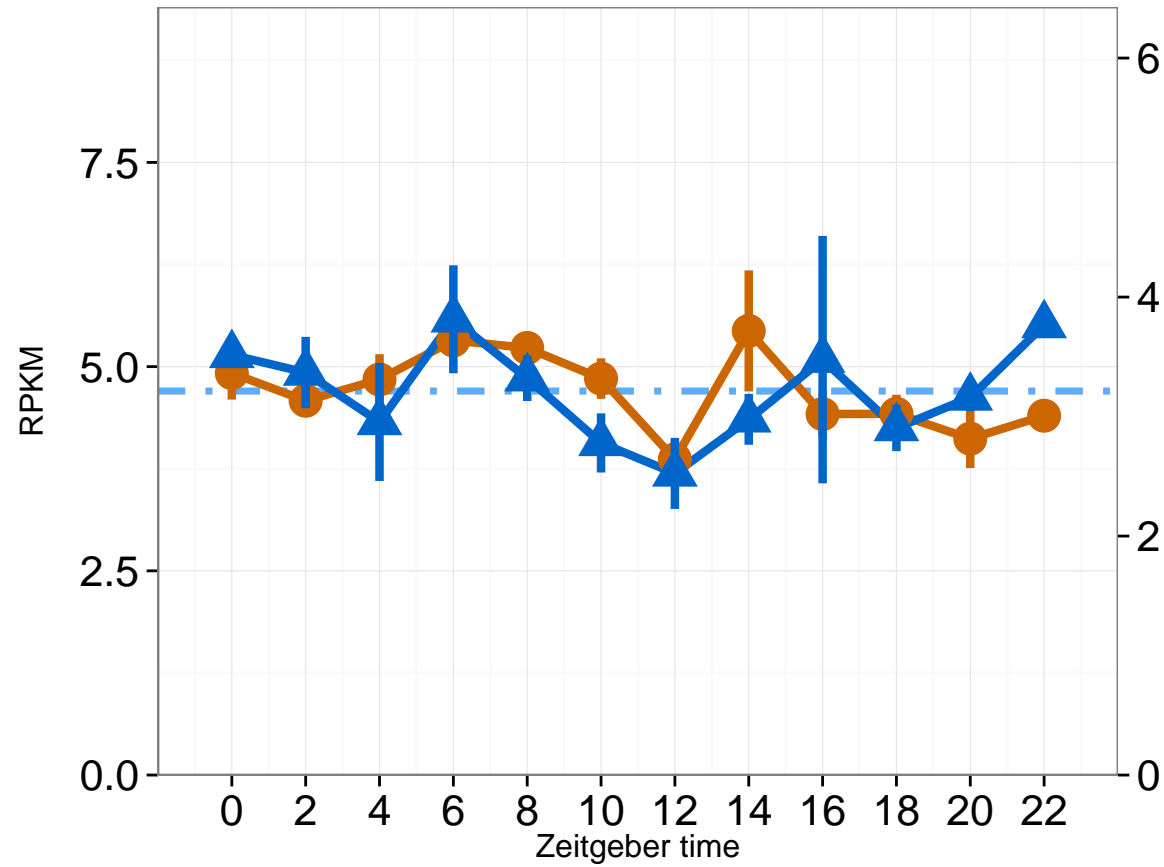

# Crtc3

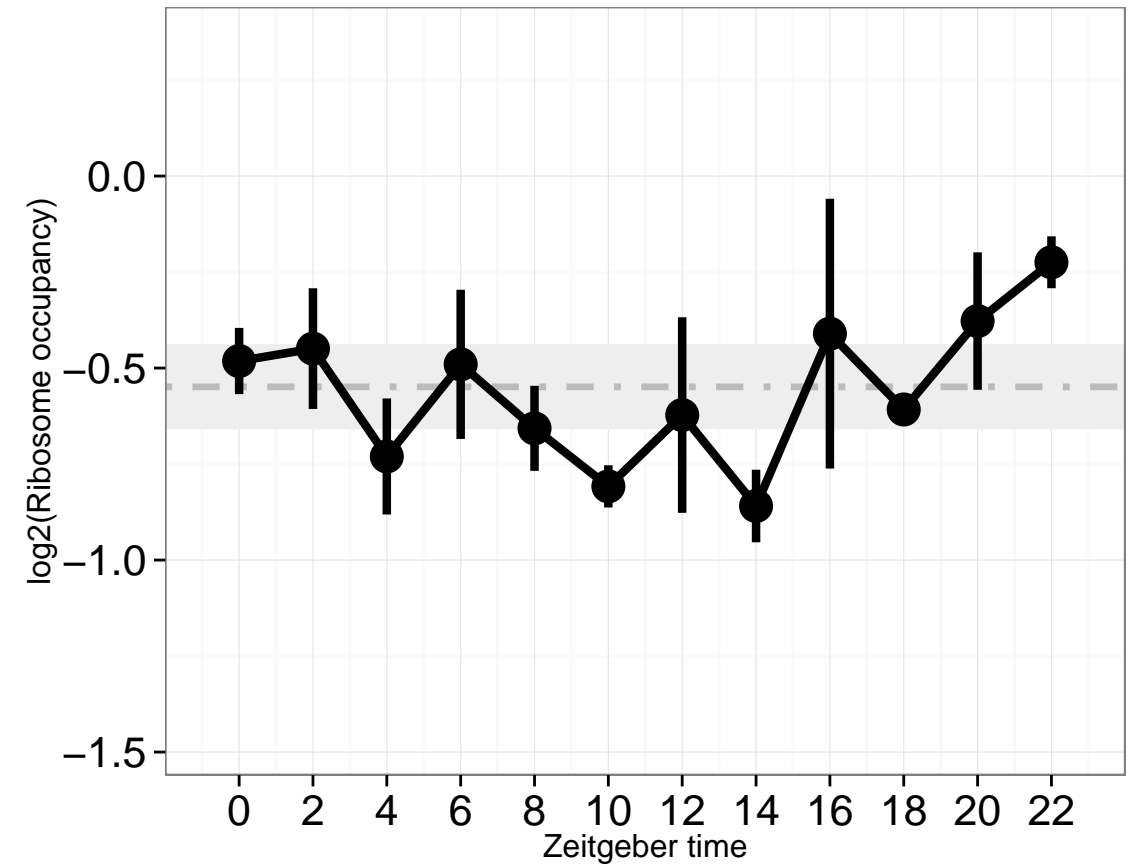

Supplement: Supplementary file 6180 [file 1]

## Aplnr

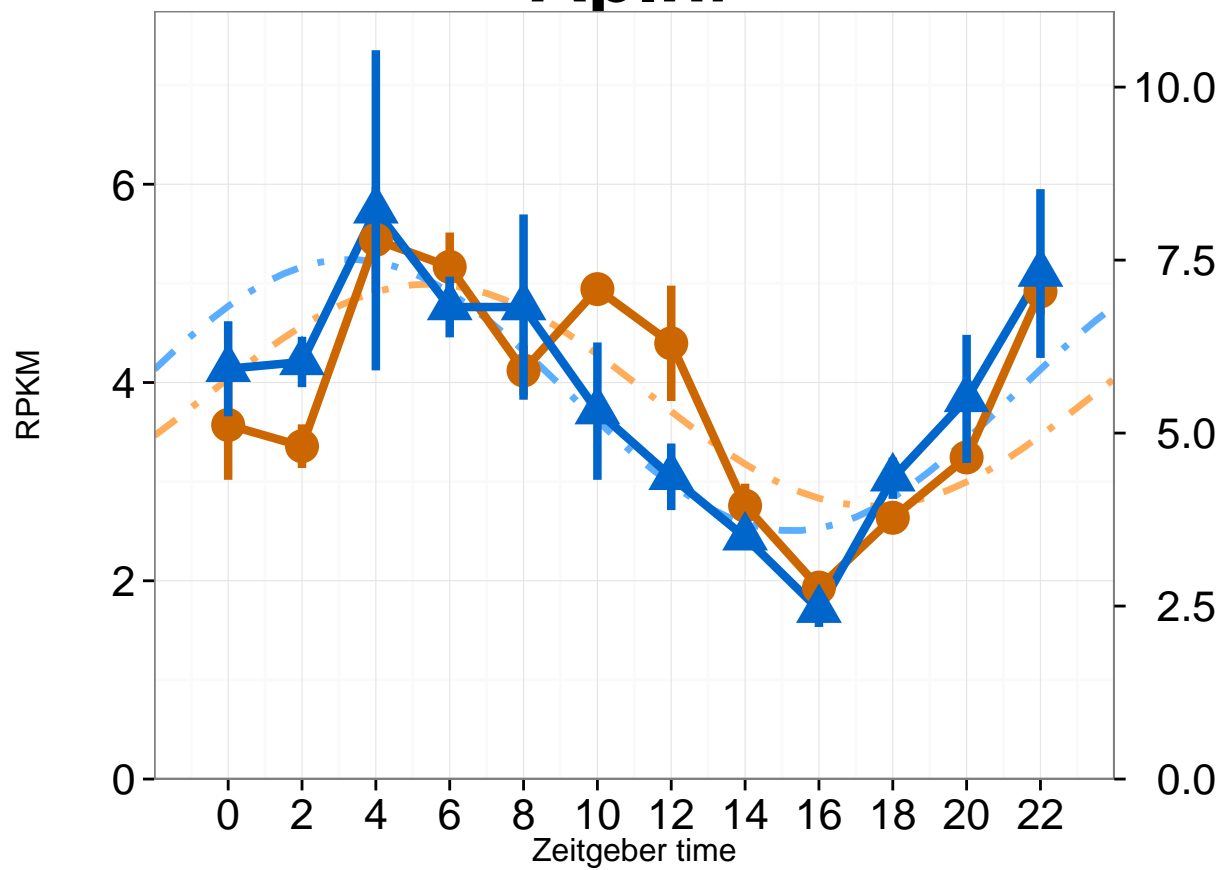

## Aplnr

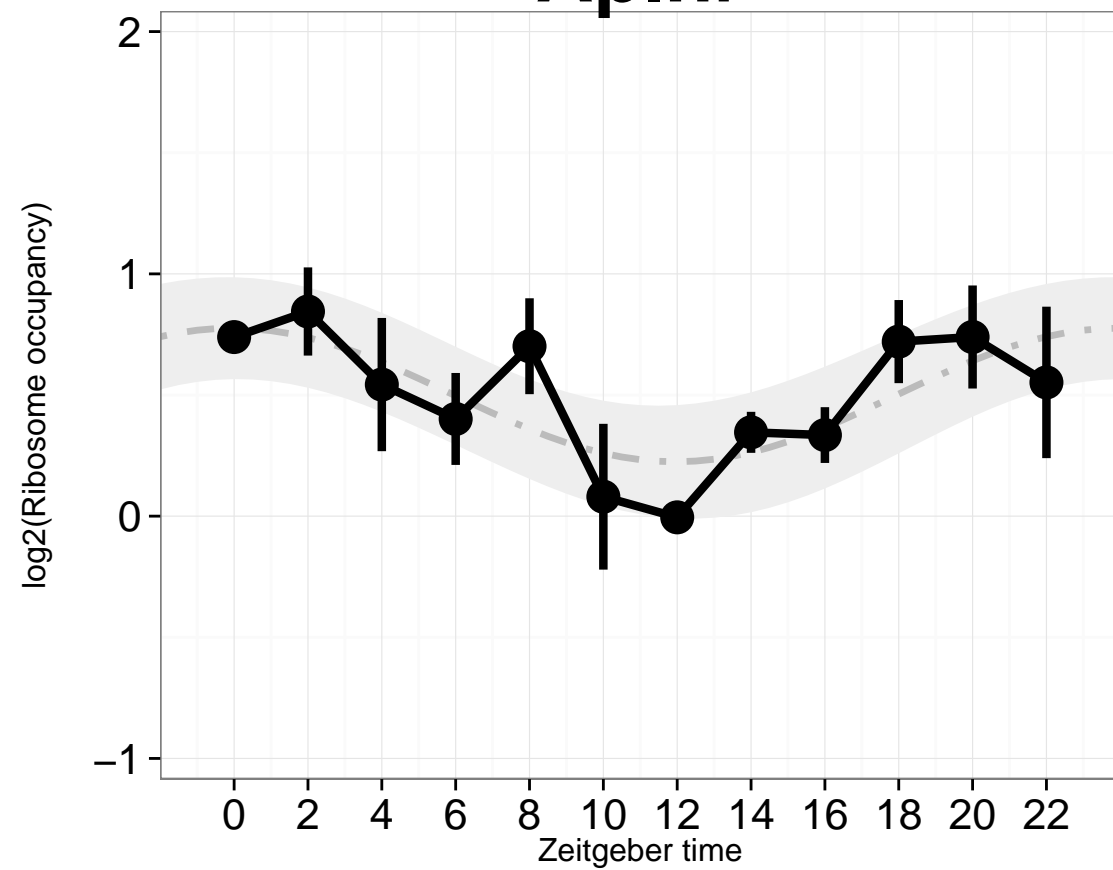

Supplement: Supplementary file 6181 [file 1]

## Gfm2

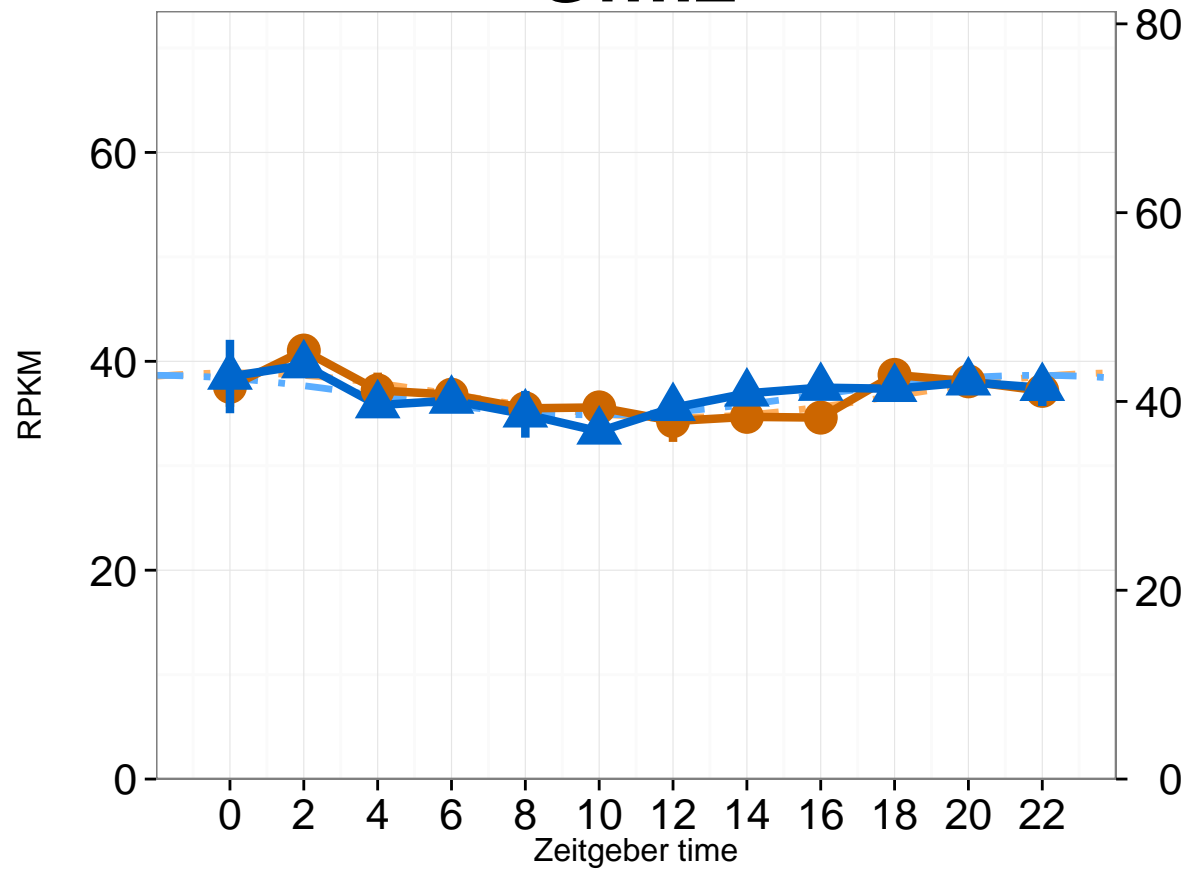

## Gfm2

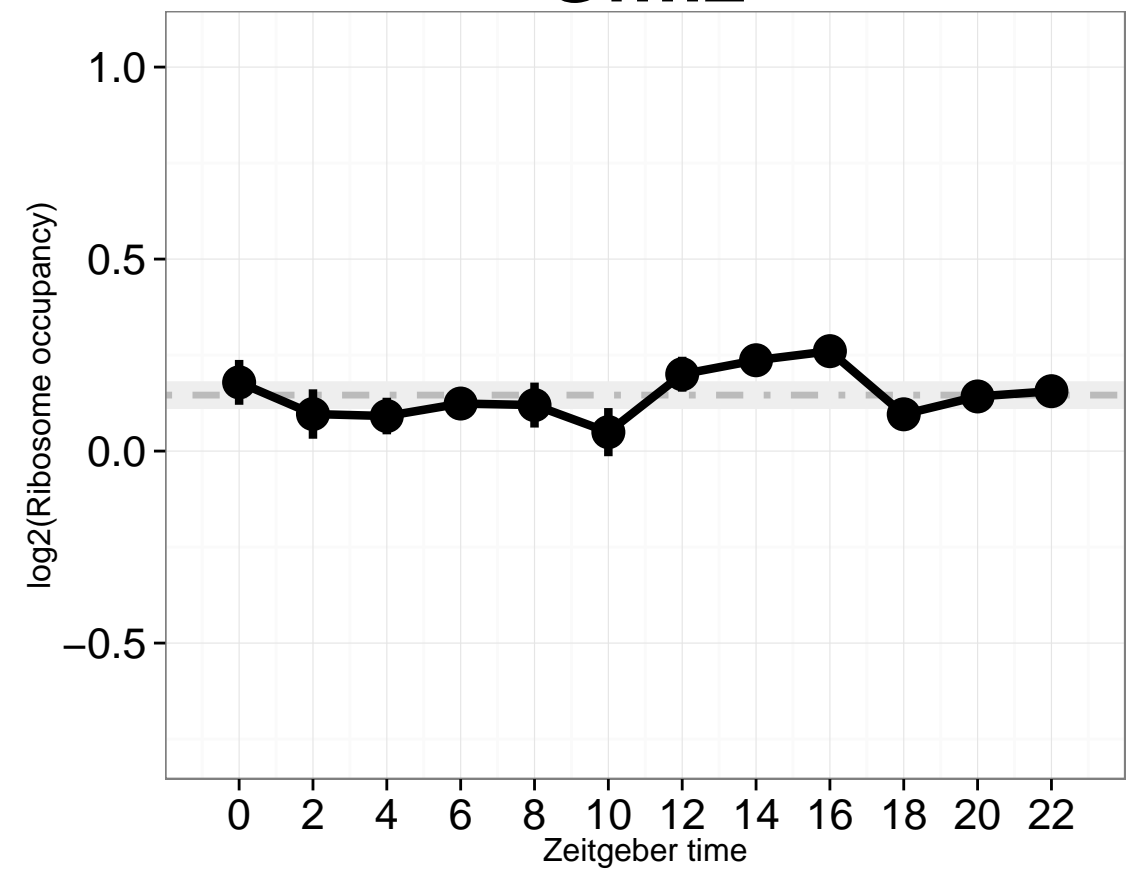

Supplement: Supplementary file 6182 [file 1]

## Notch4

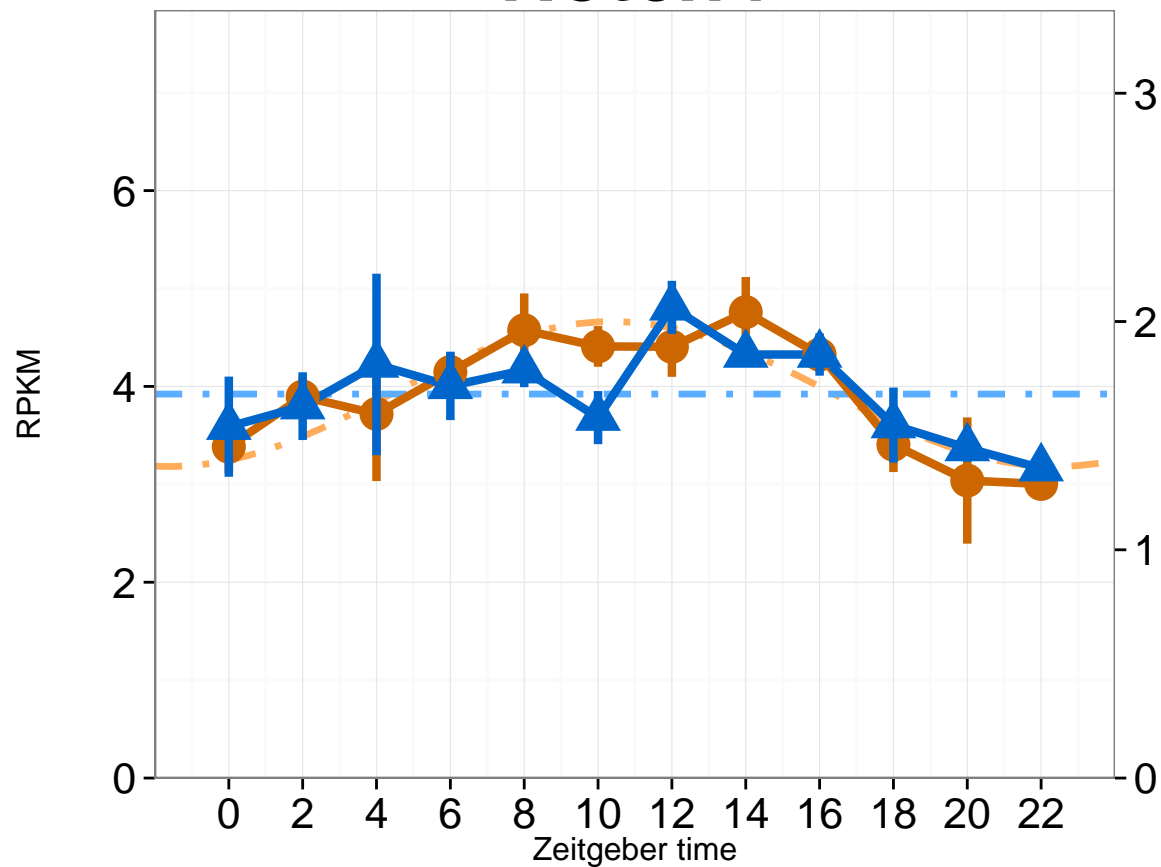

## Notch4

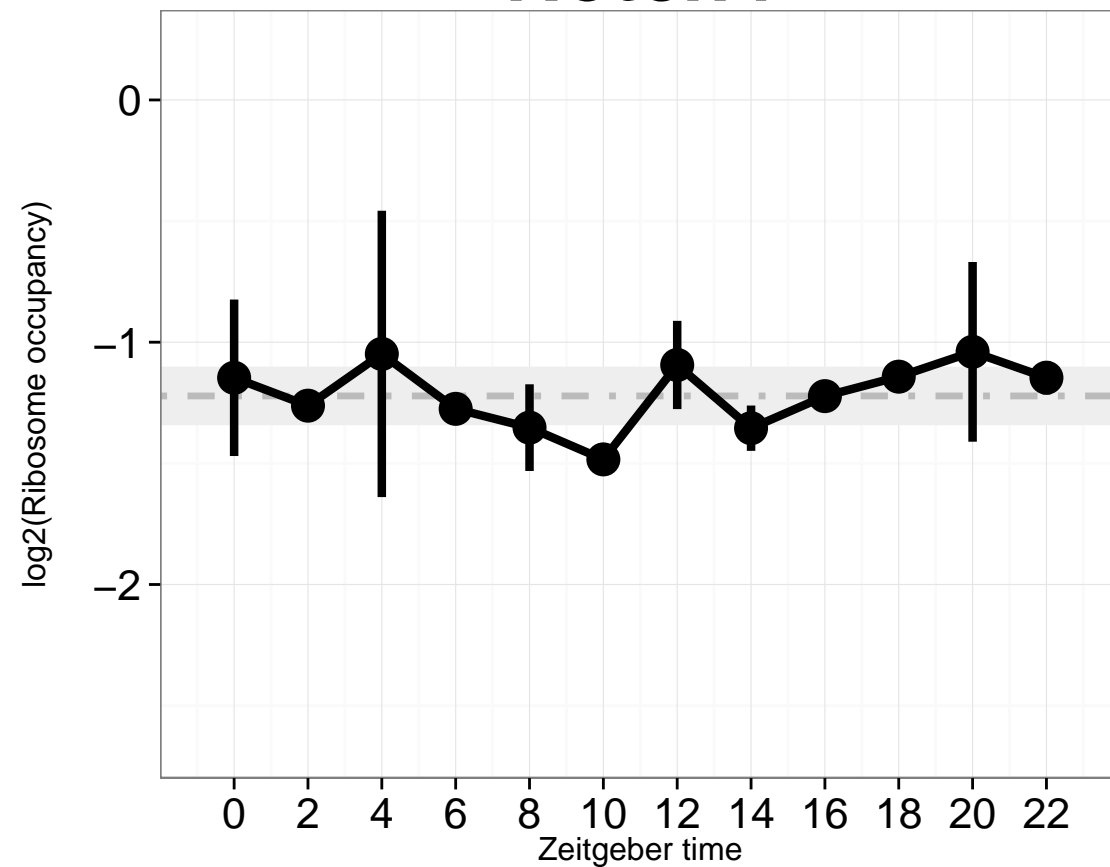

Supplement: Supplementary file 6183 [file 1]

## Fam45a

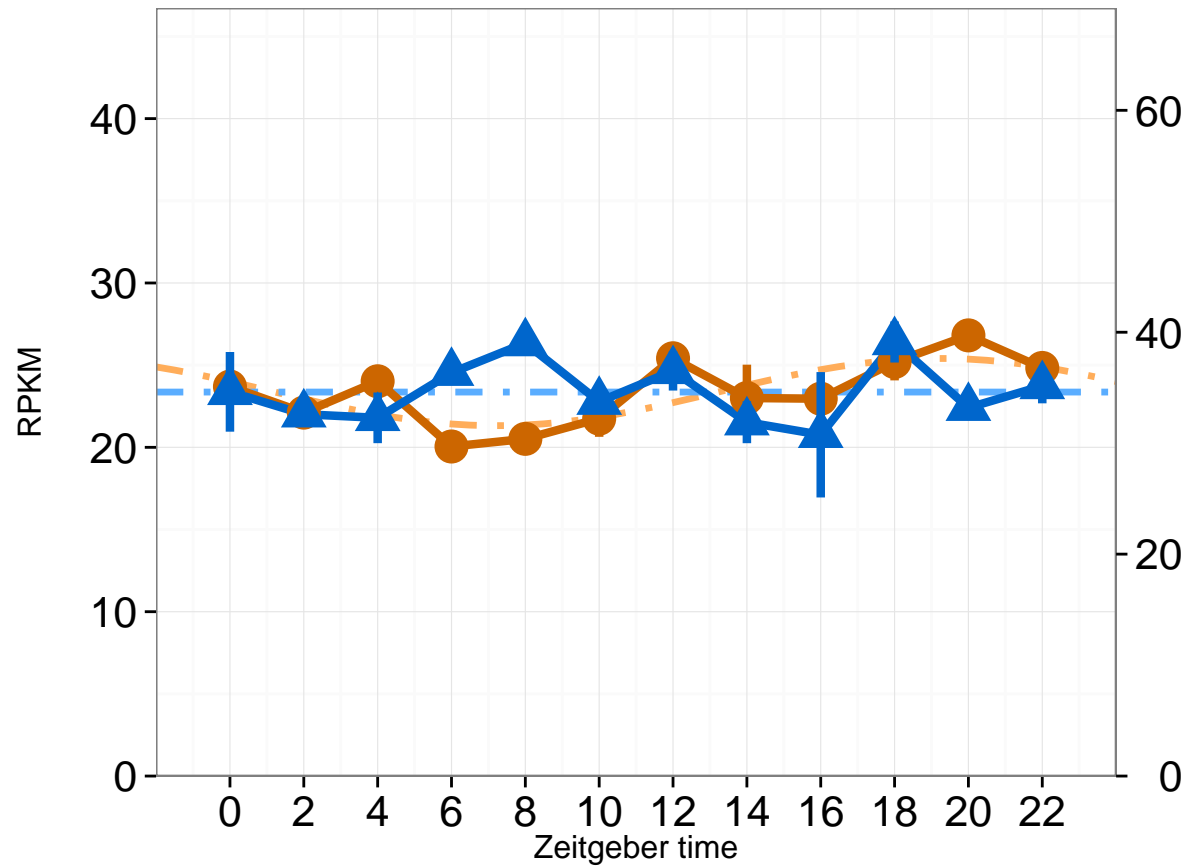

## Fam45a

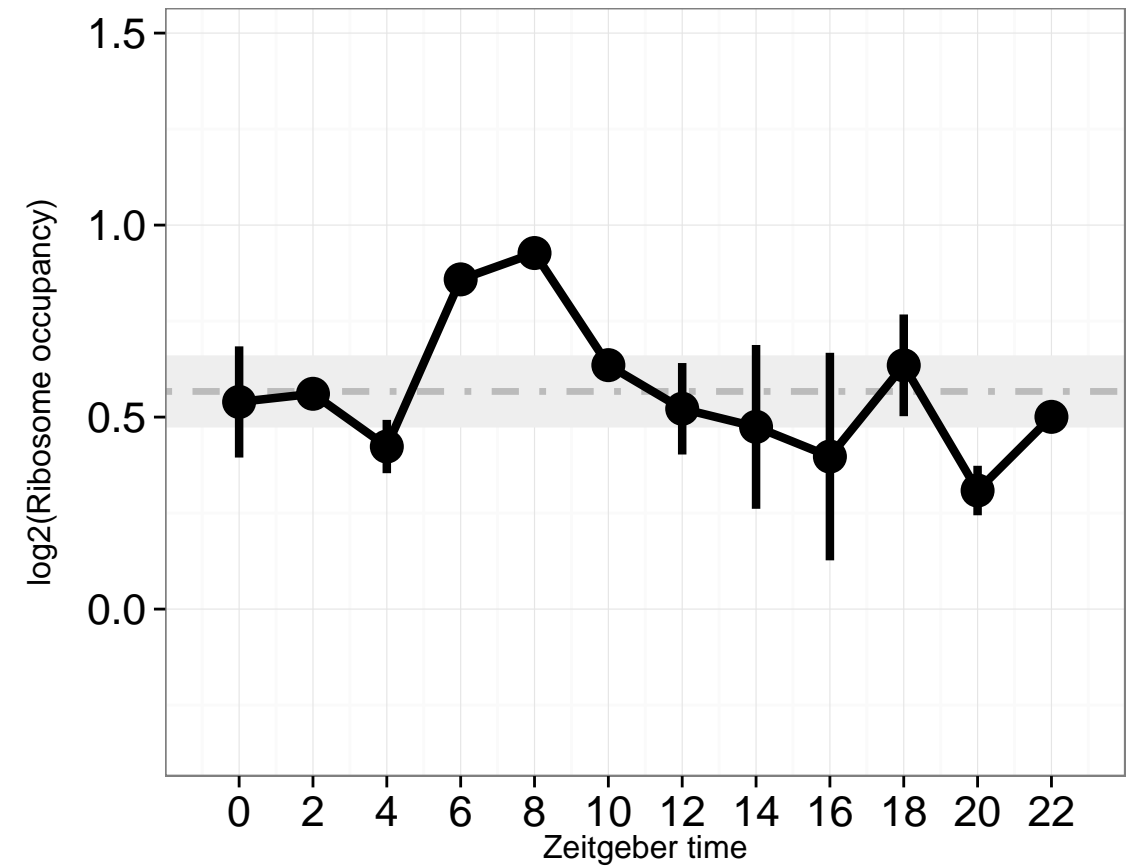

Supplement: Supplementary file 6184 [file 1]

# Yes1

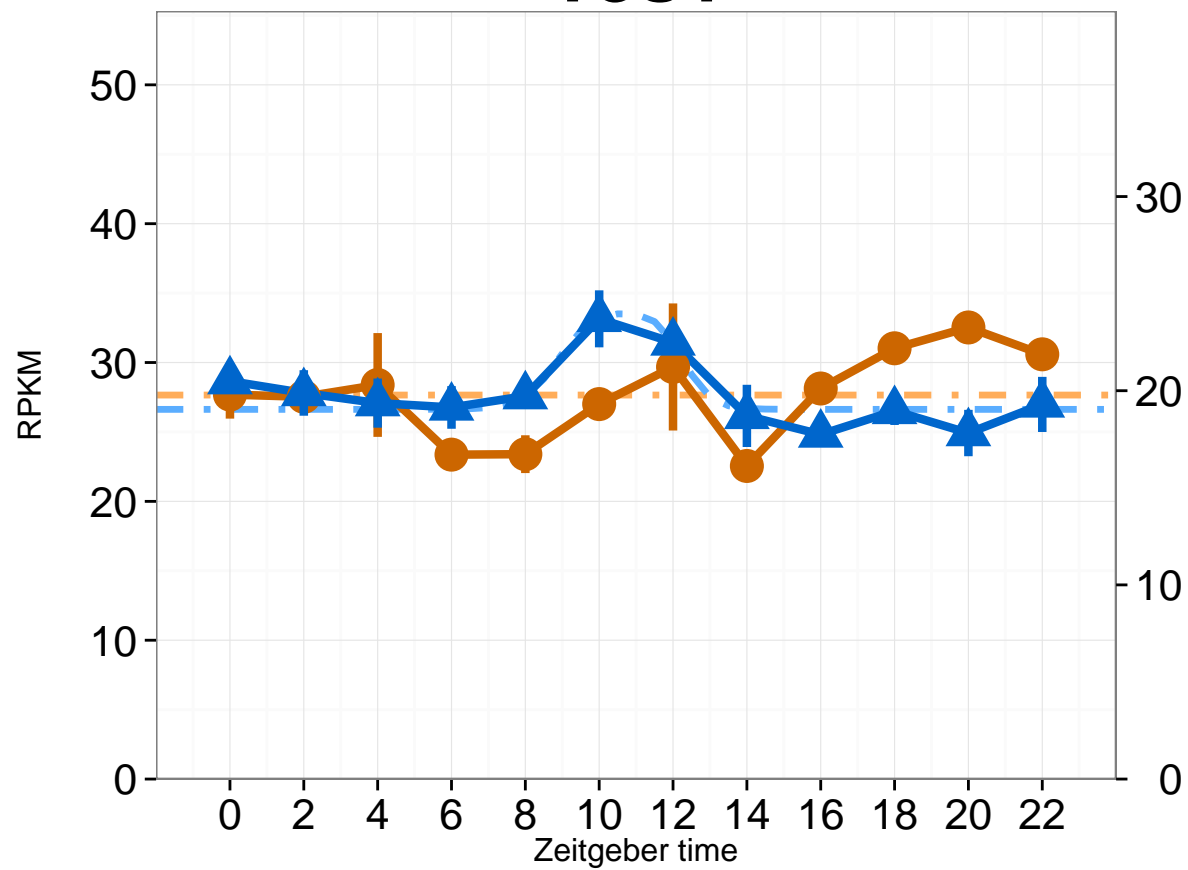

# Yes1

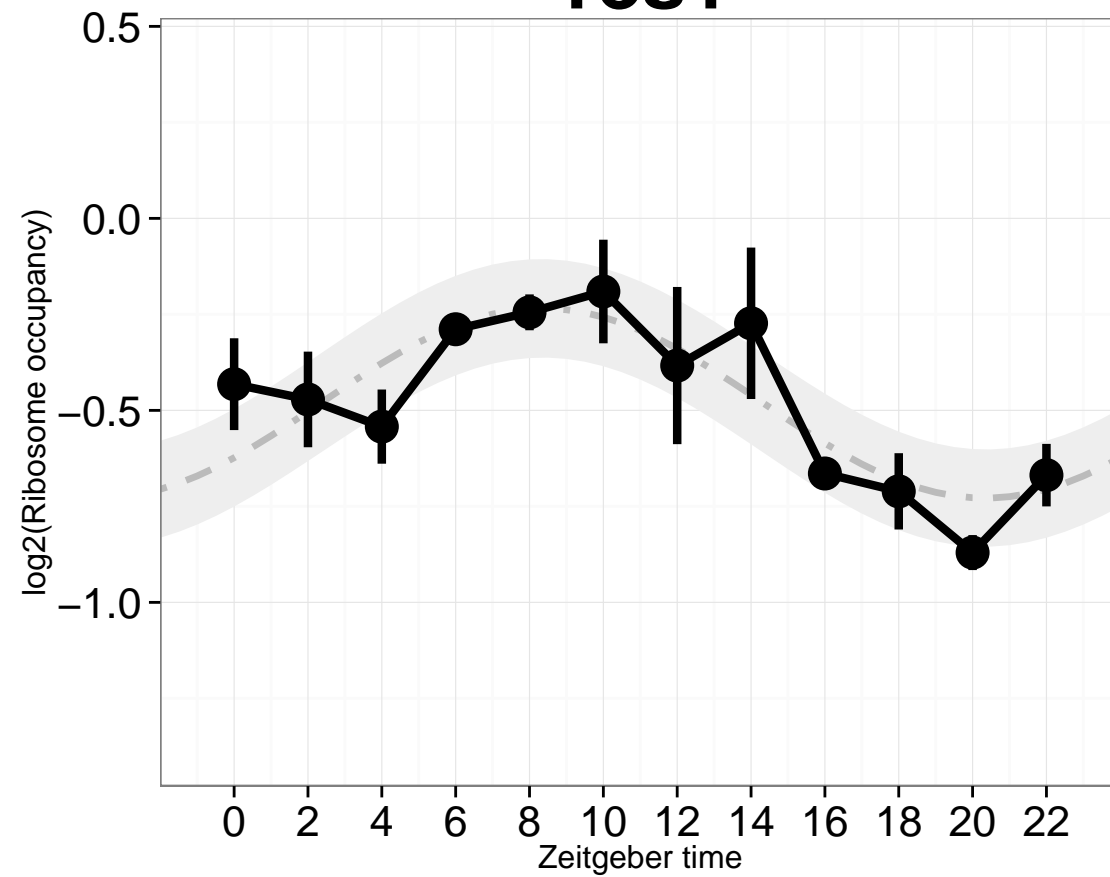

Supplement: Supplementary file 6185 [file 1]

## Scap

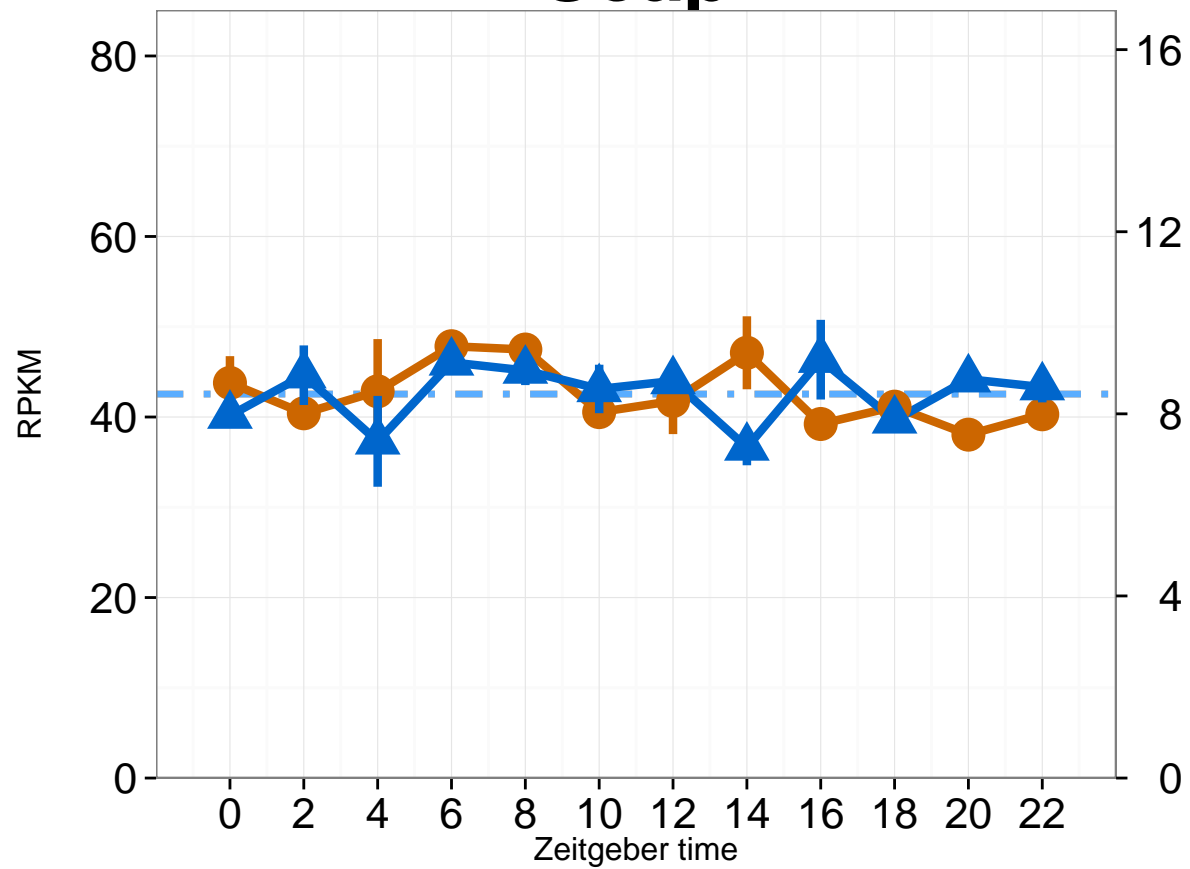

## Scap

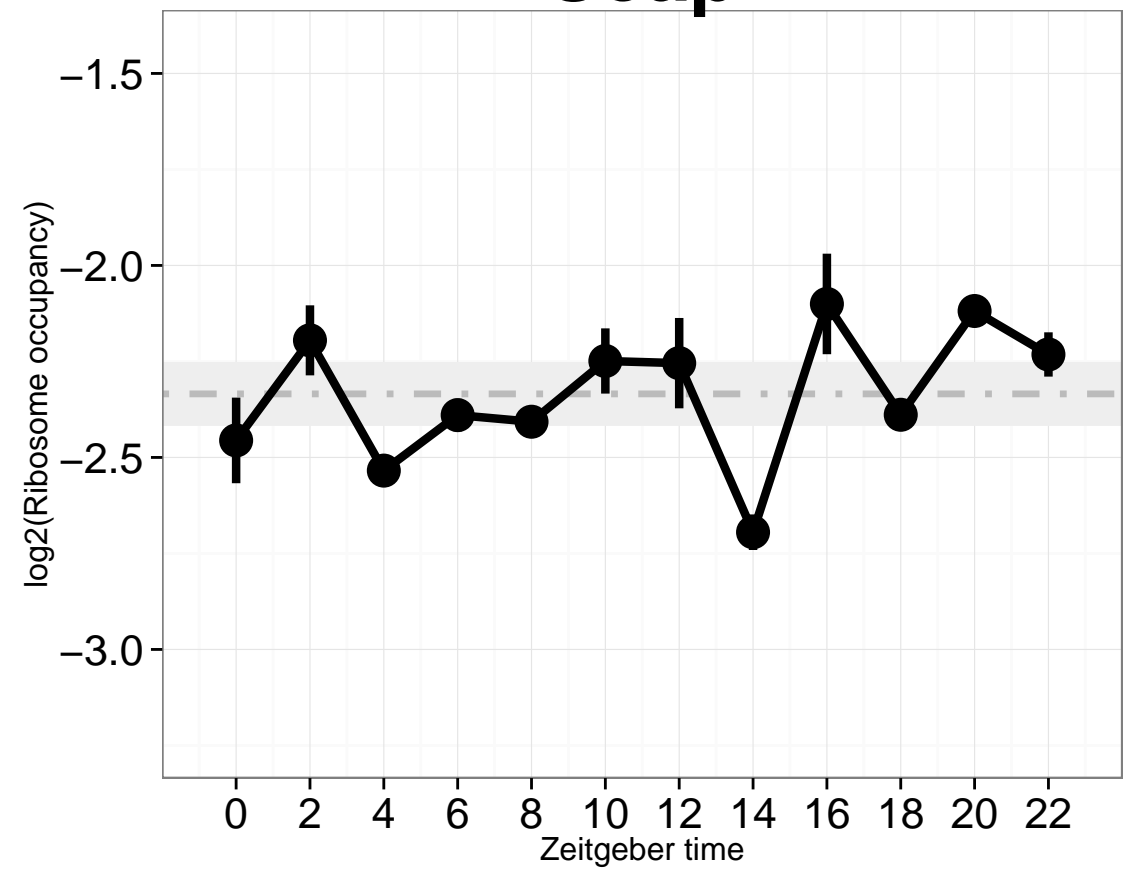

Supplement: Supplementary file 6186 [file 1]

## Spidr

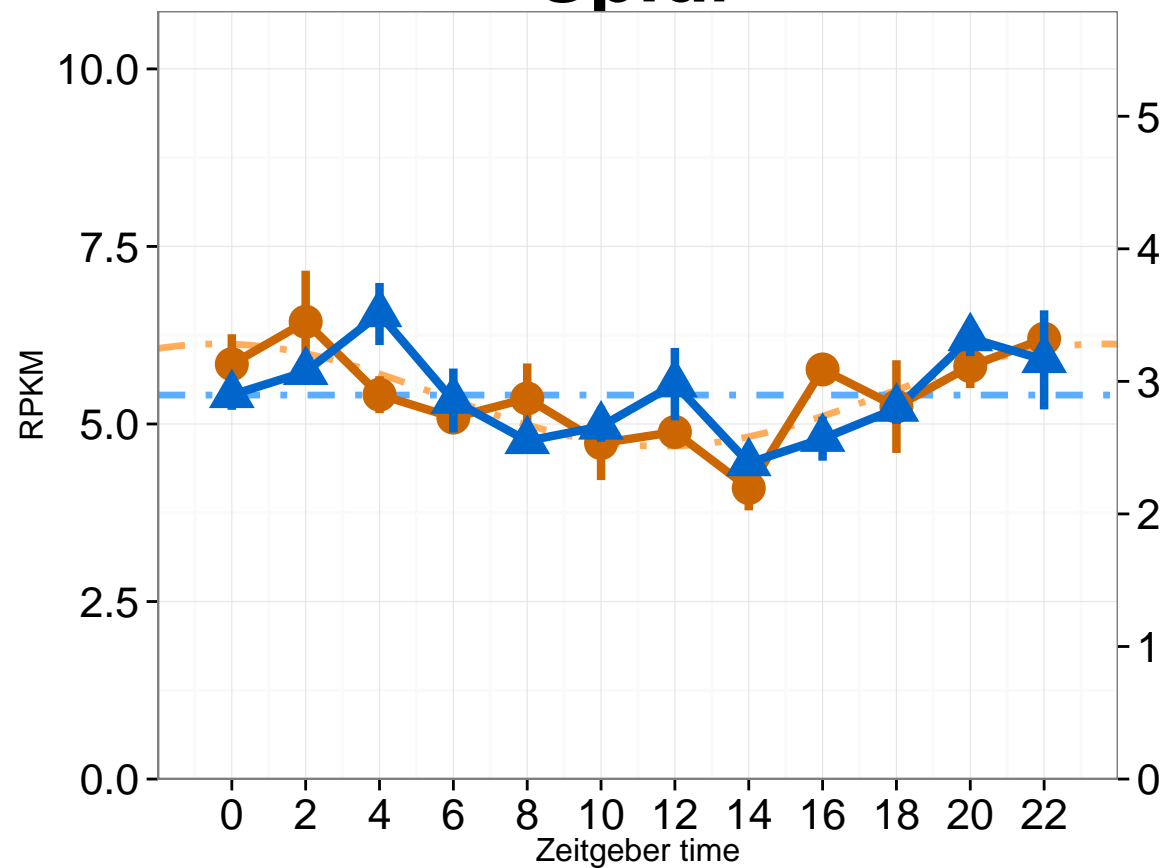

## Spidr

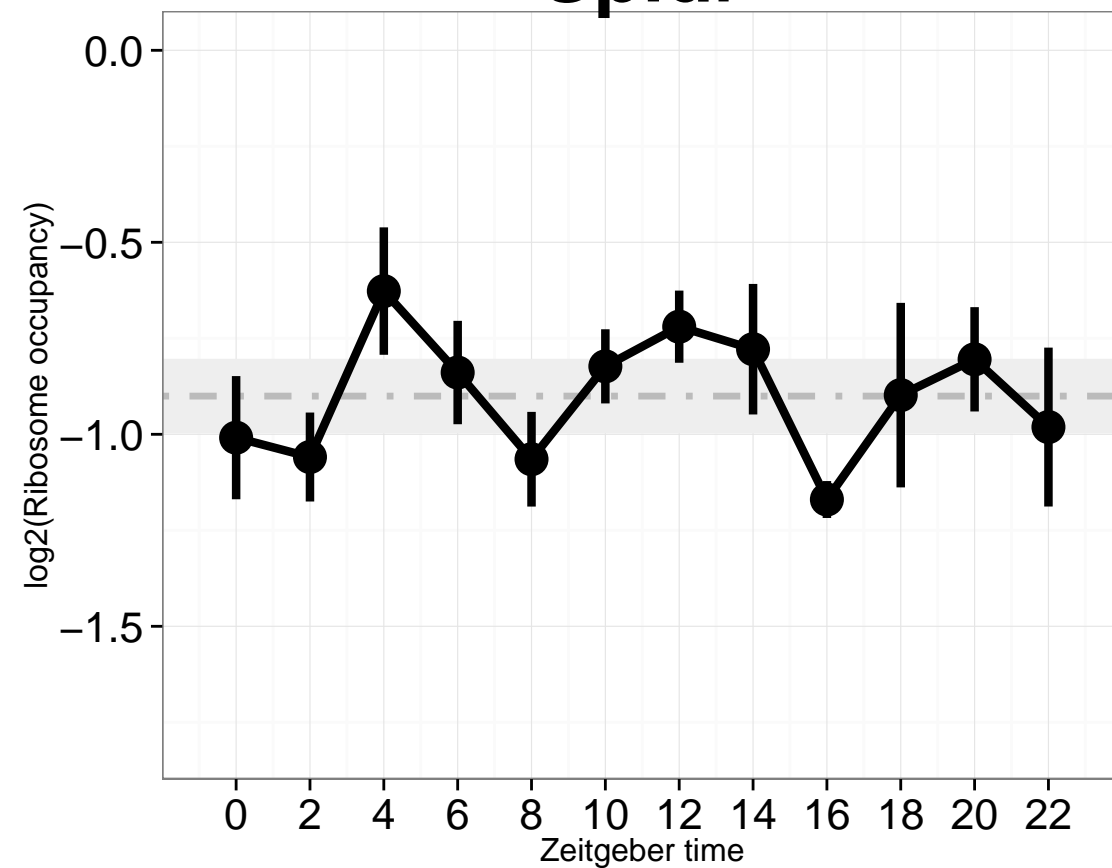

Supplement: Supplementary file 6187 [file 1]

## Arvcf

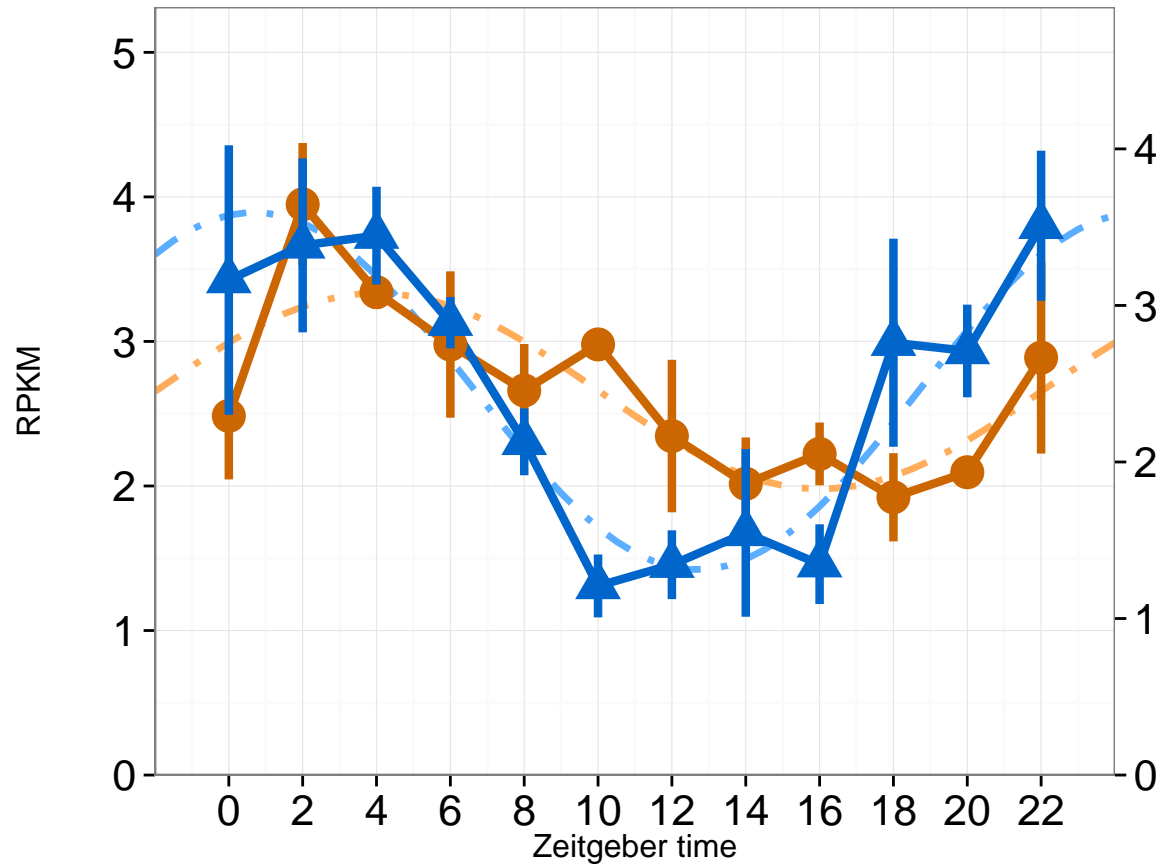

## Arvcf

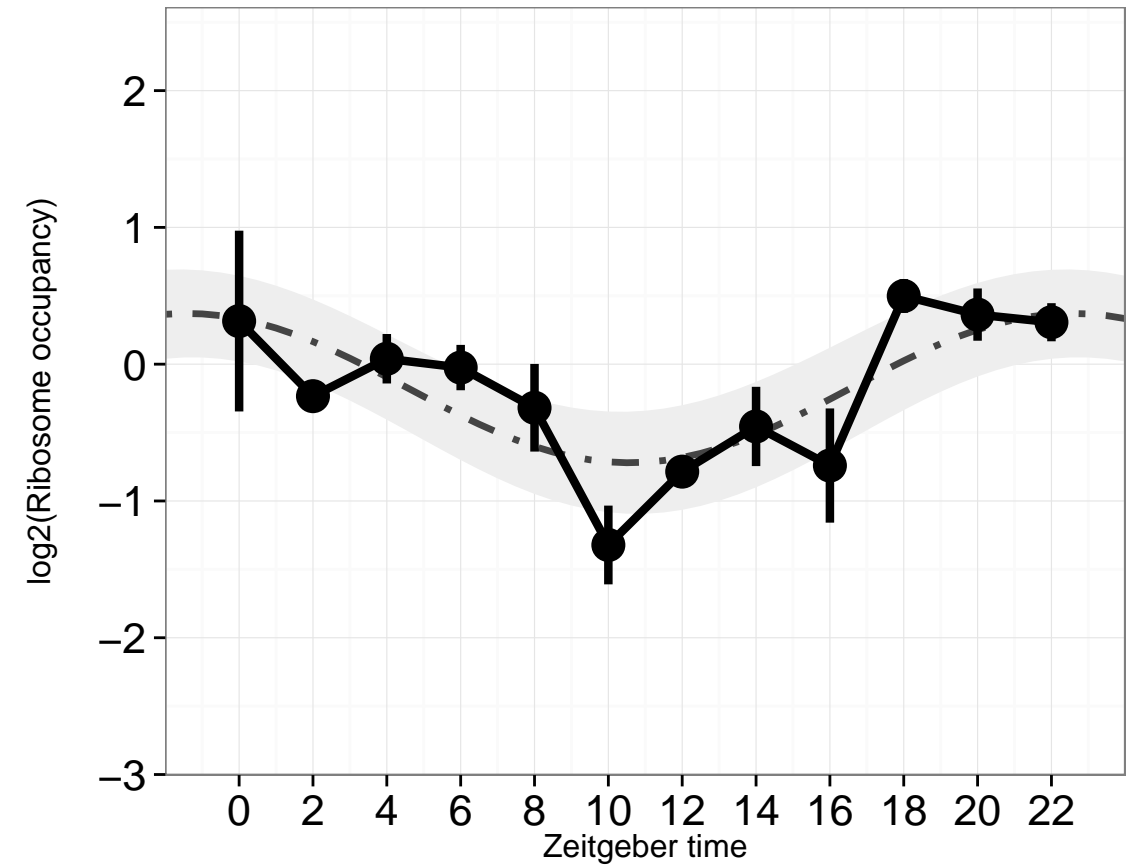

Supplement: Supplementary file 6188 [file 1]

# Grk5

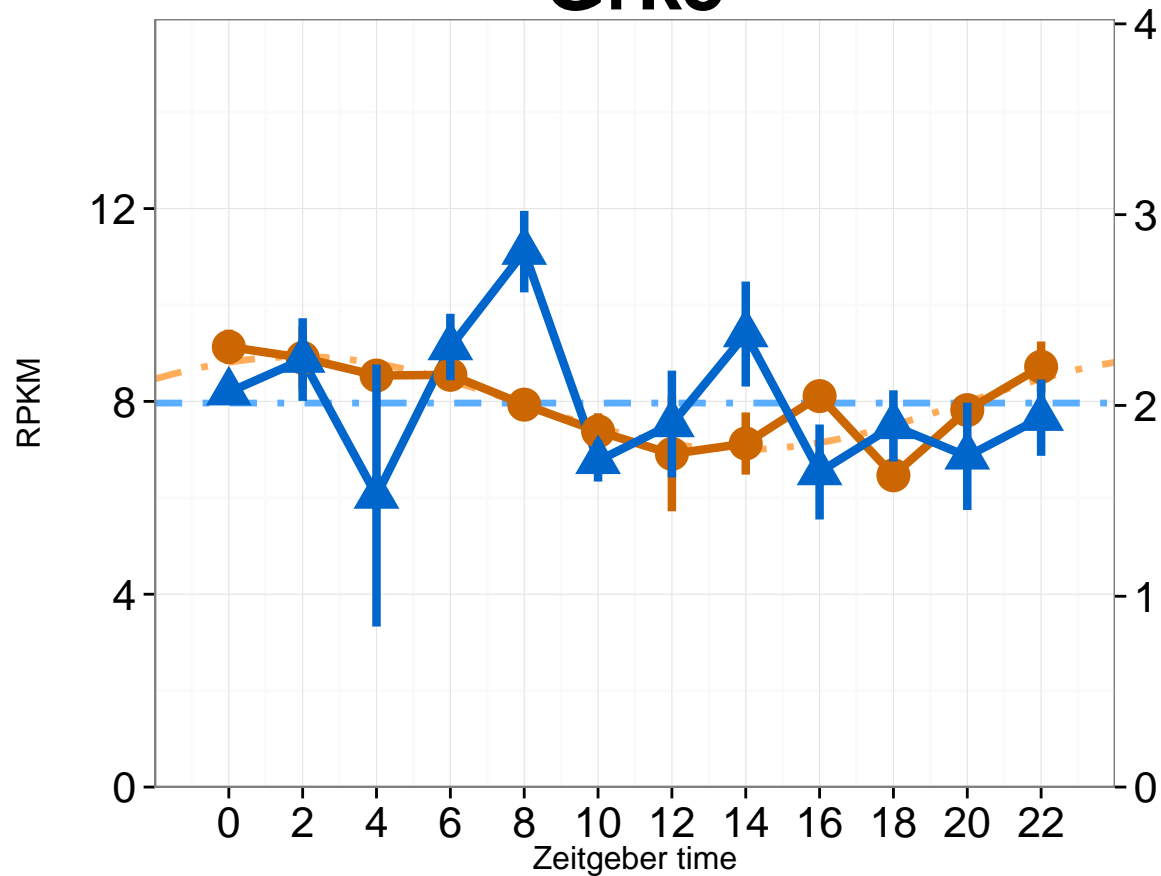

# Grk5

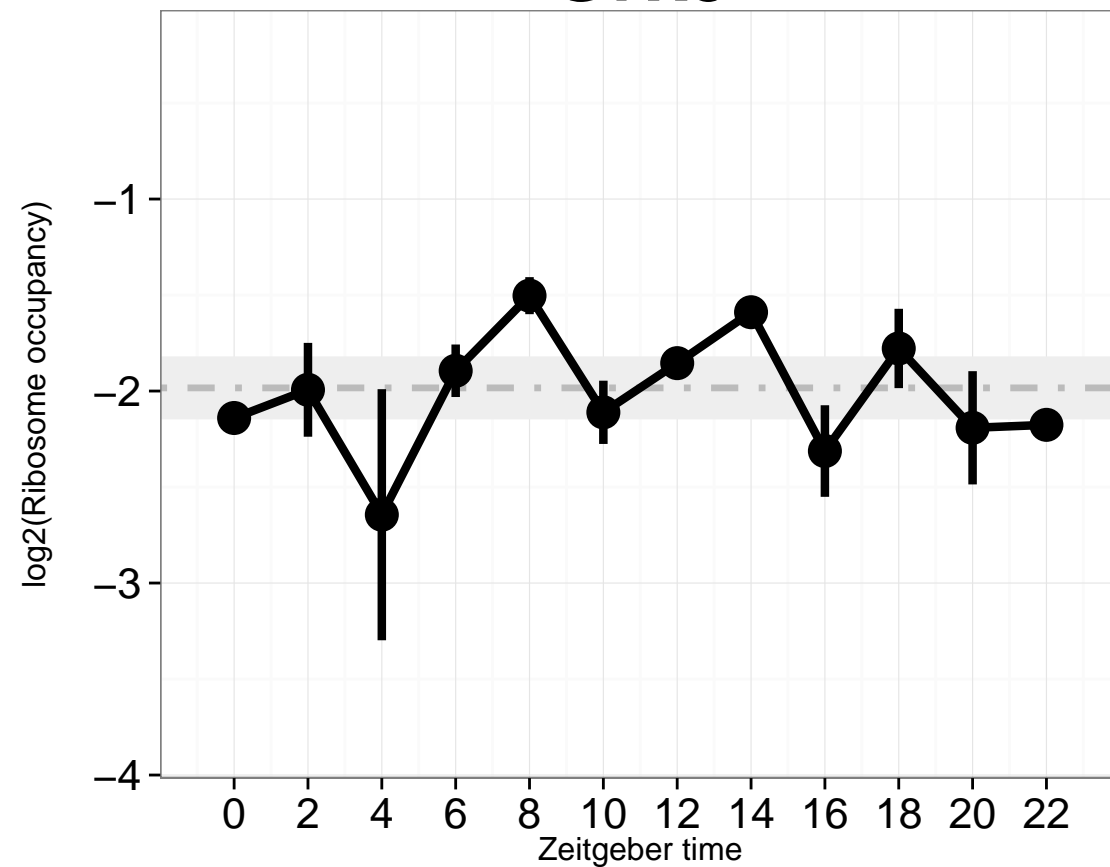

Supplement: Supplementary file 6189 [file 1]

## Sfpq

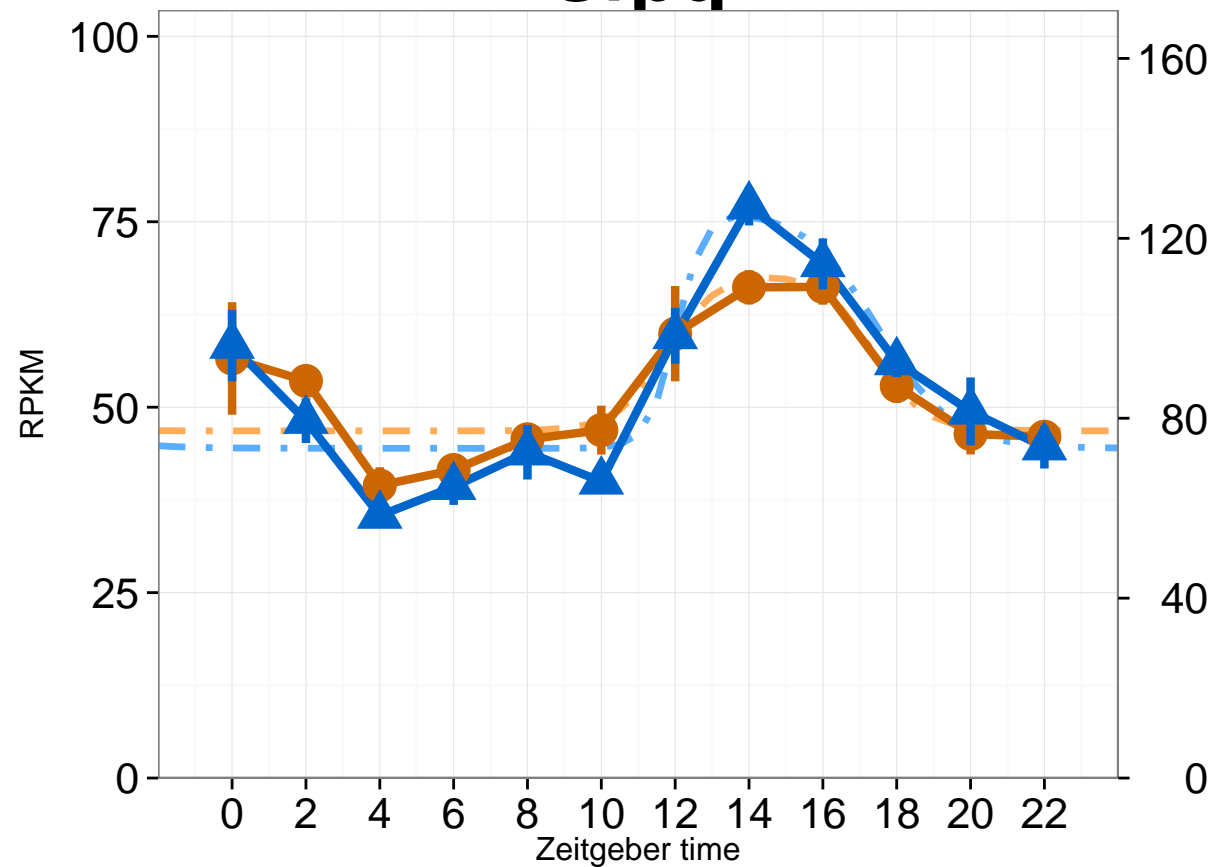

## Sfpq

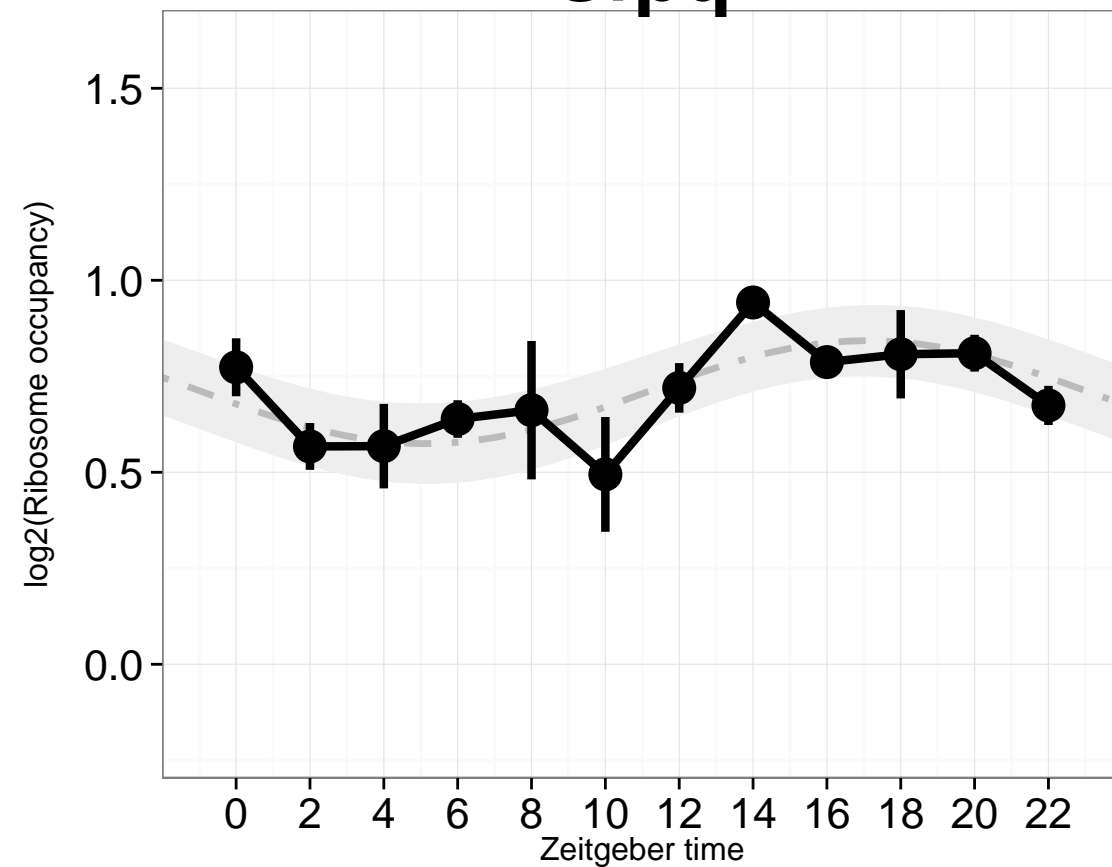

Supplement: Supplementary file 6190 [file 1]

# Fancc

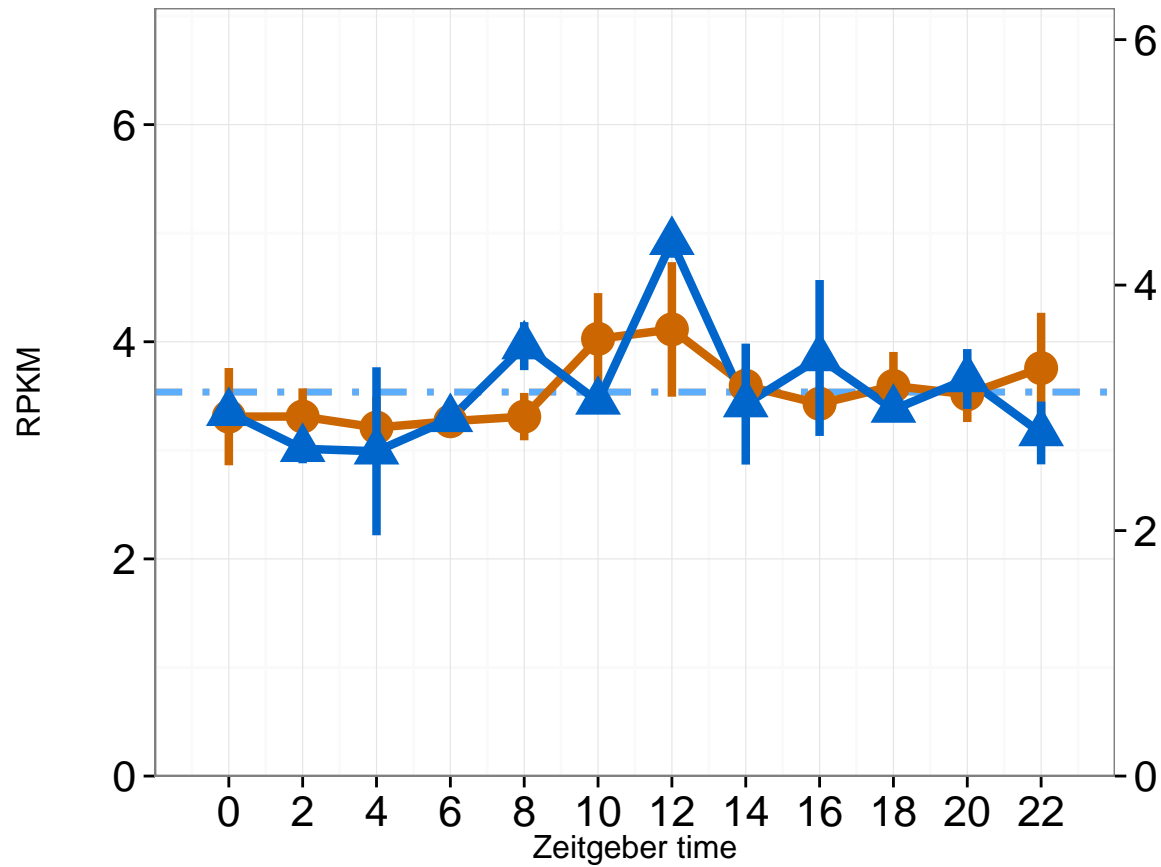

# Fancc

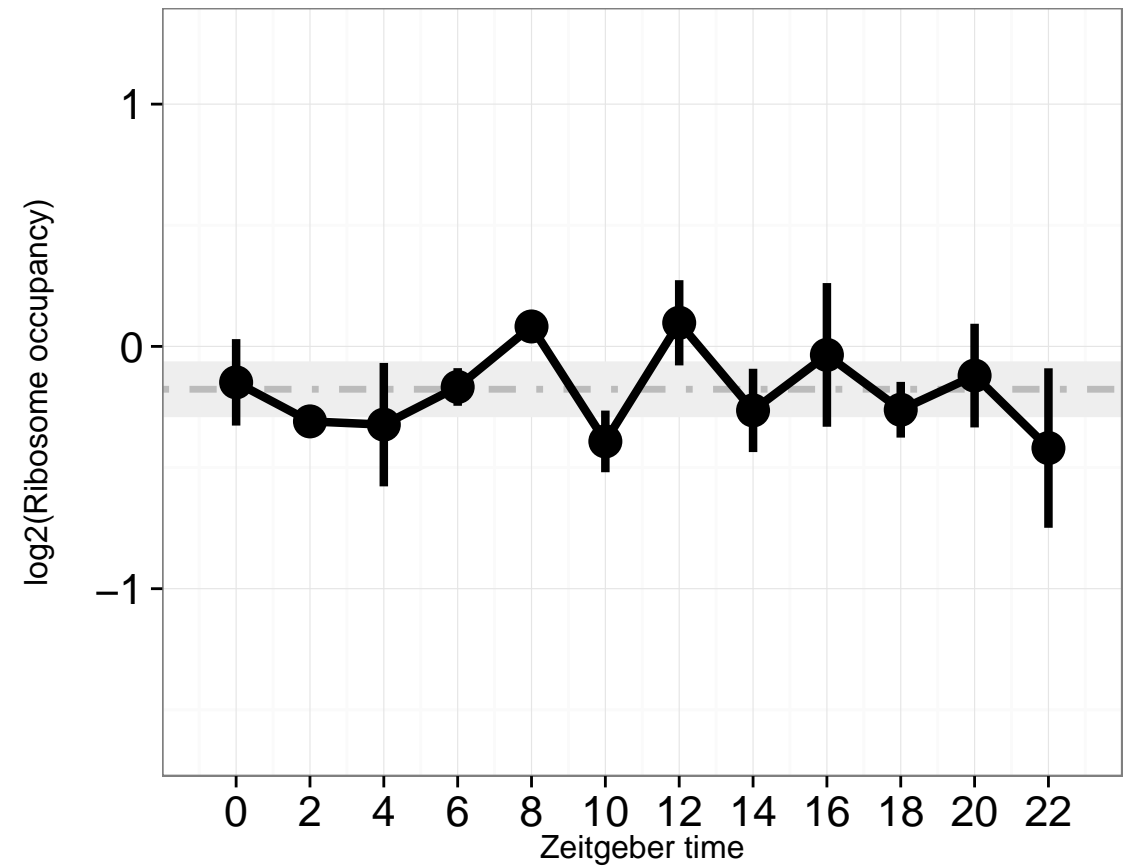

Supplement: Supplementary file 6191 [file 1]

# Vopp1

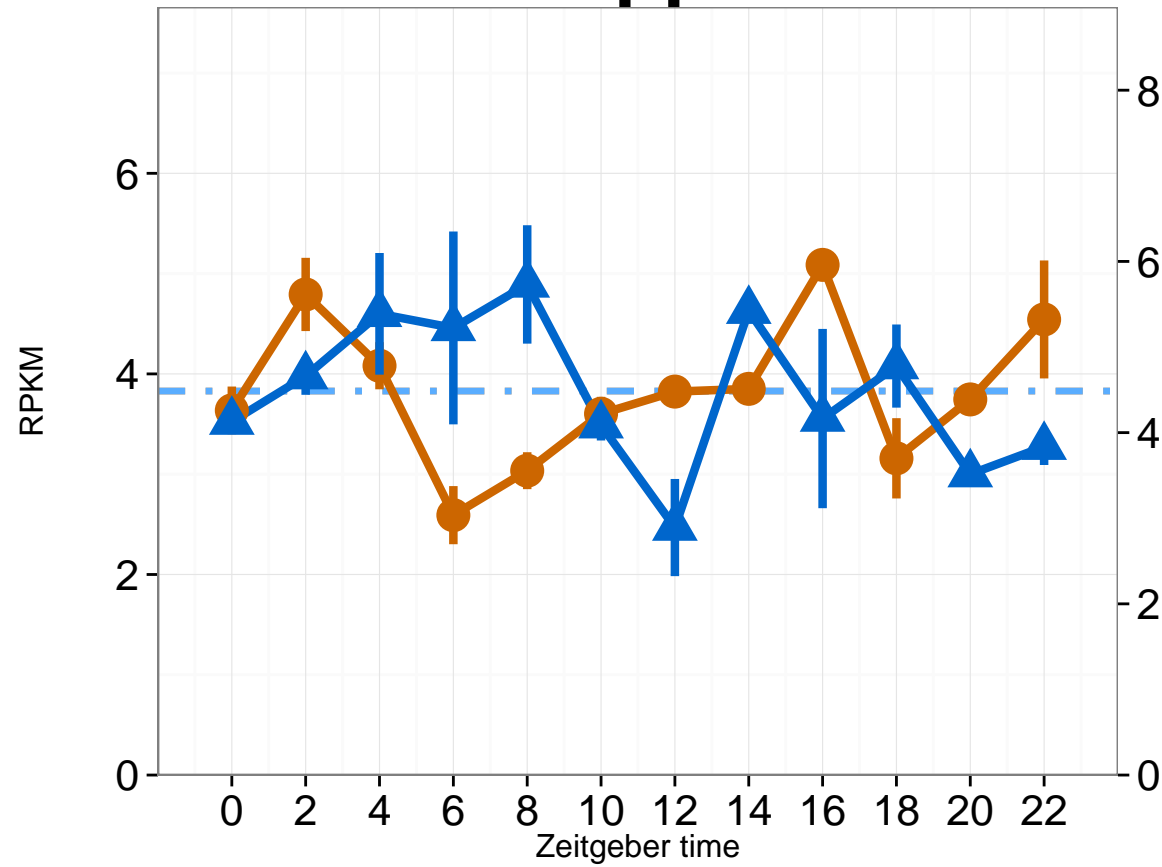

# Vopp1

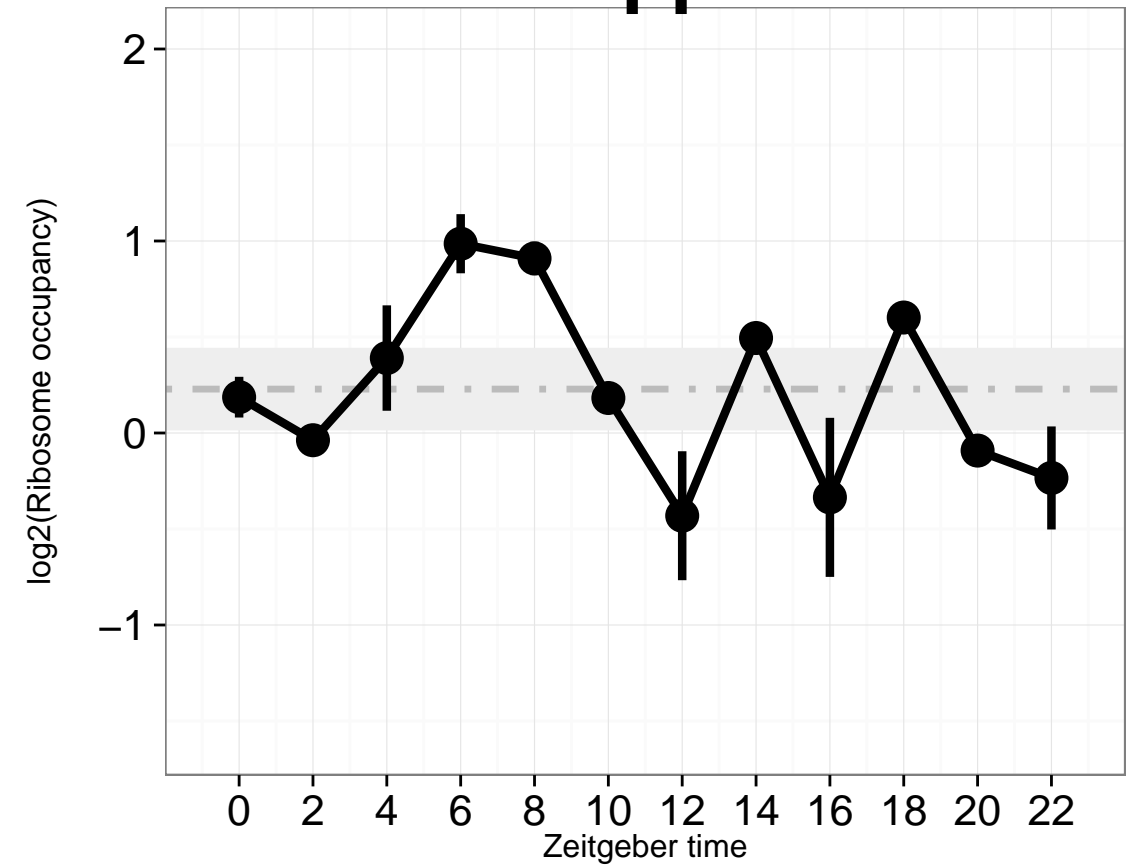

Supplement: Supplementary file 6192 [file 1]

## Tomm5

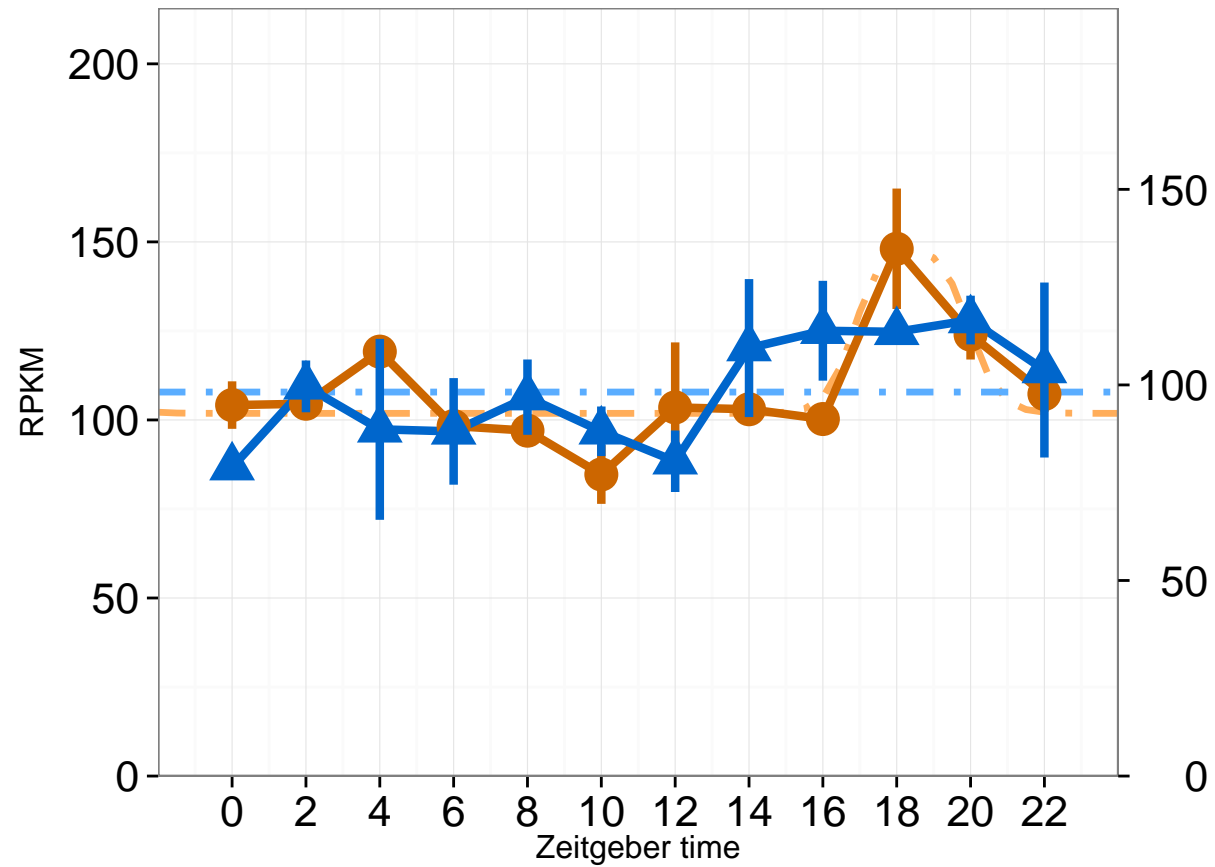

## Tomm5

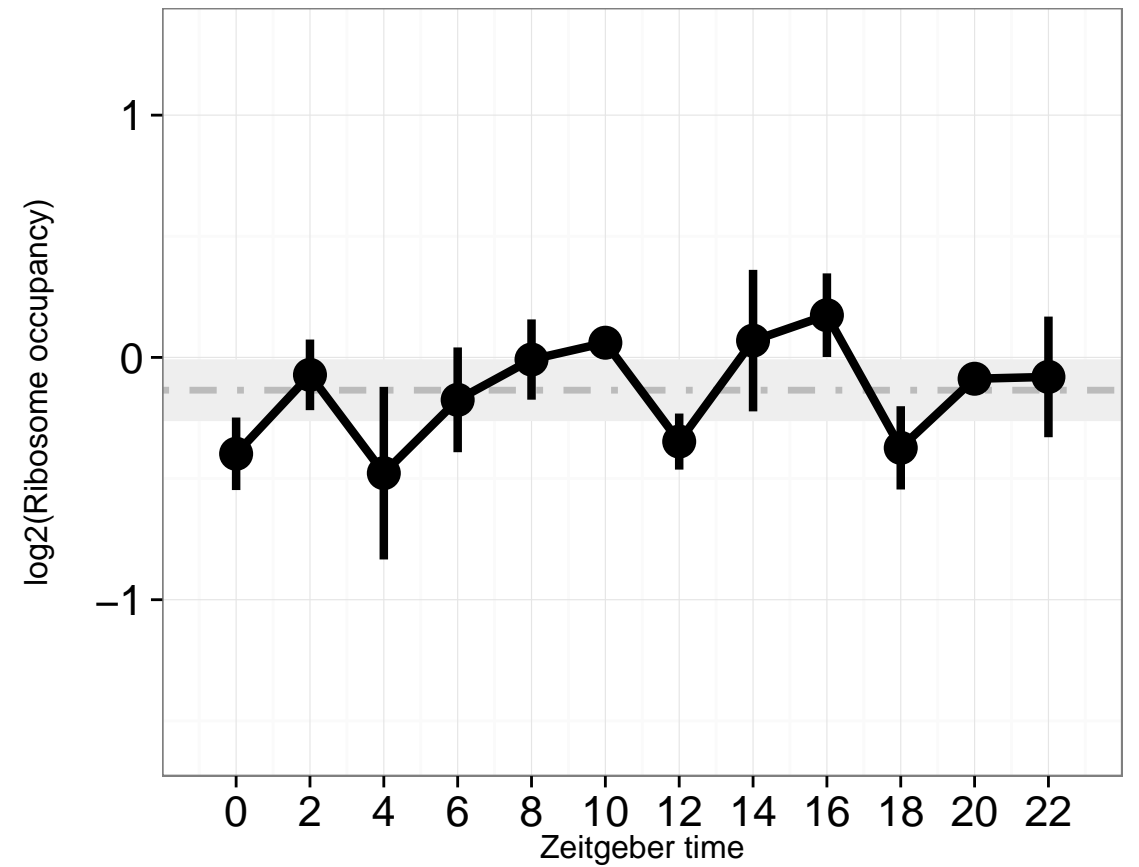

Supplement: Supplementary file 6193 [file 1]

# AU021092

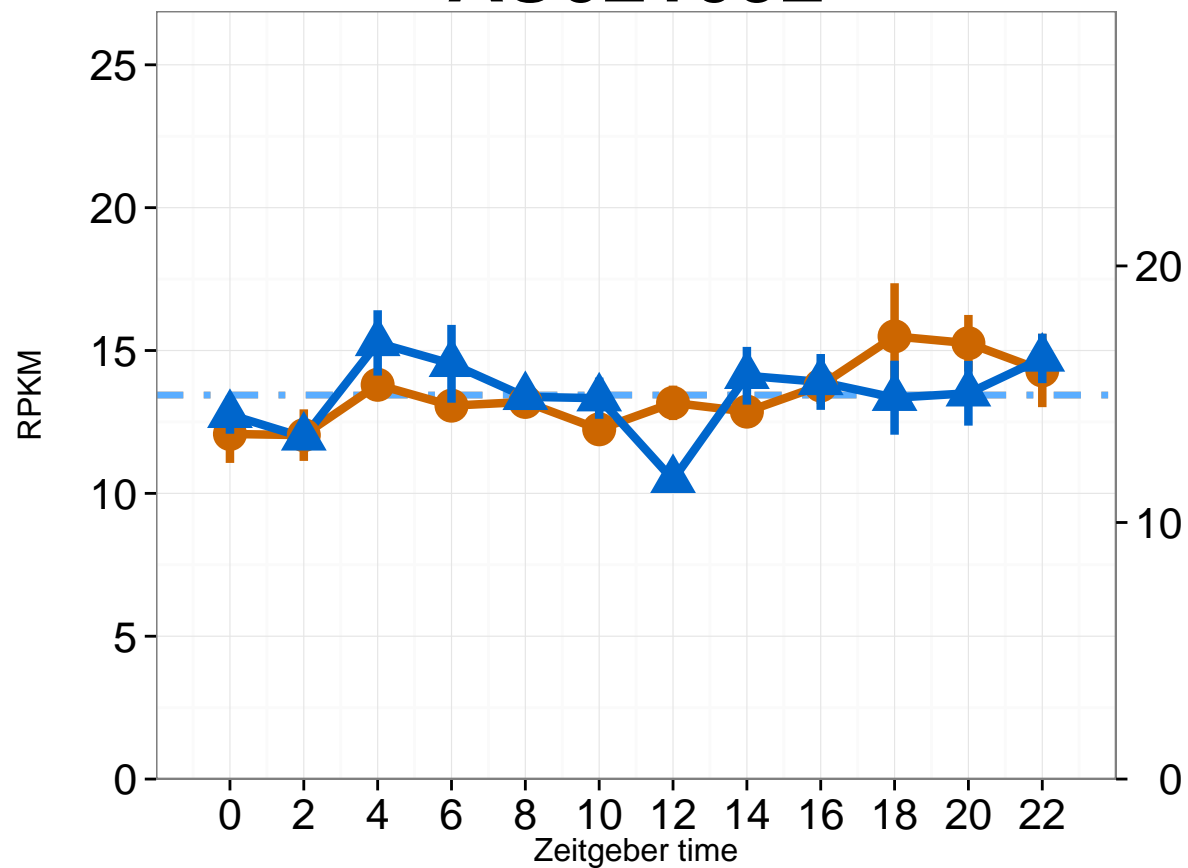

# AU021092

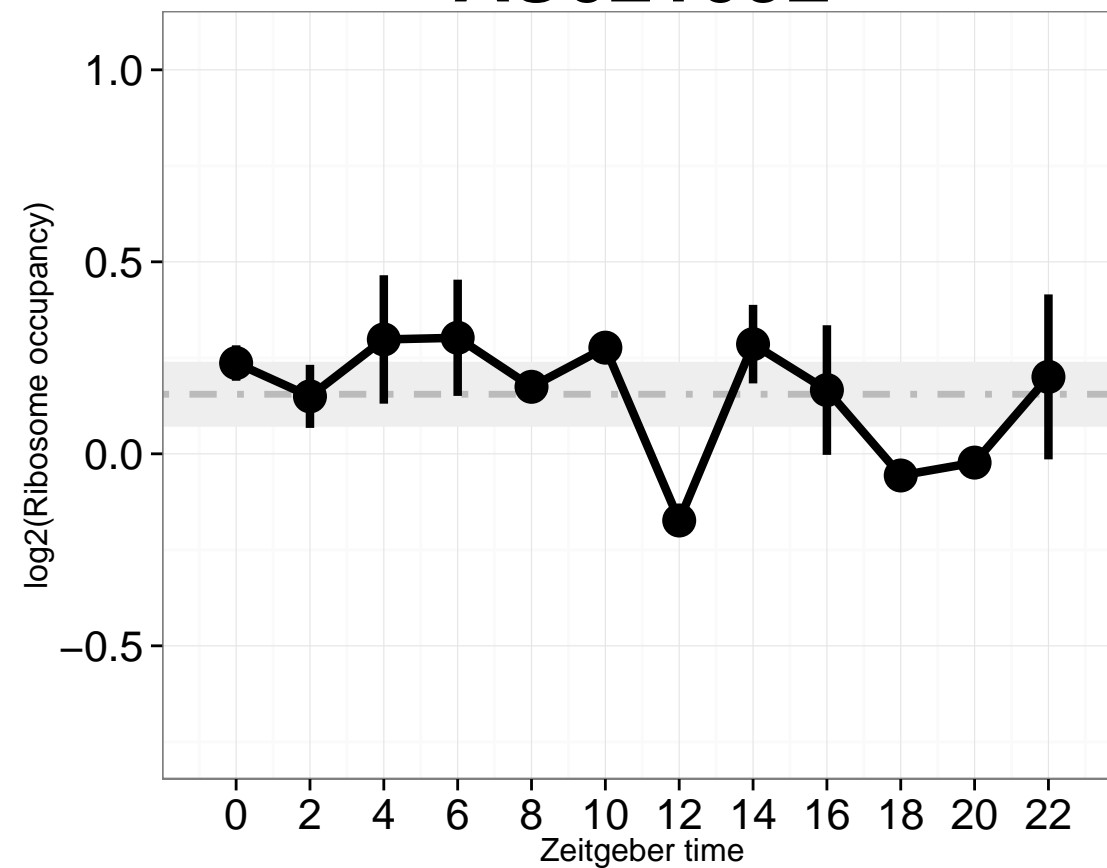

Supplement: Supplementary file 6194 [file 1]

**Fam13c**

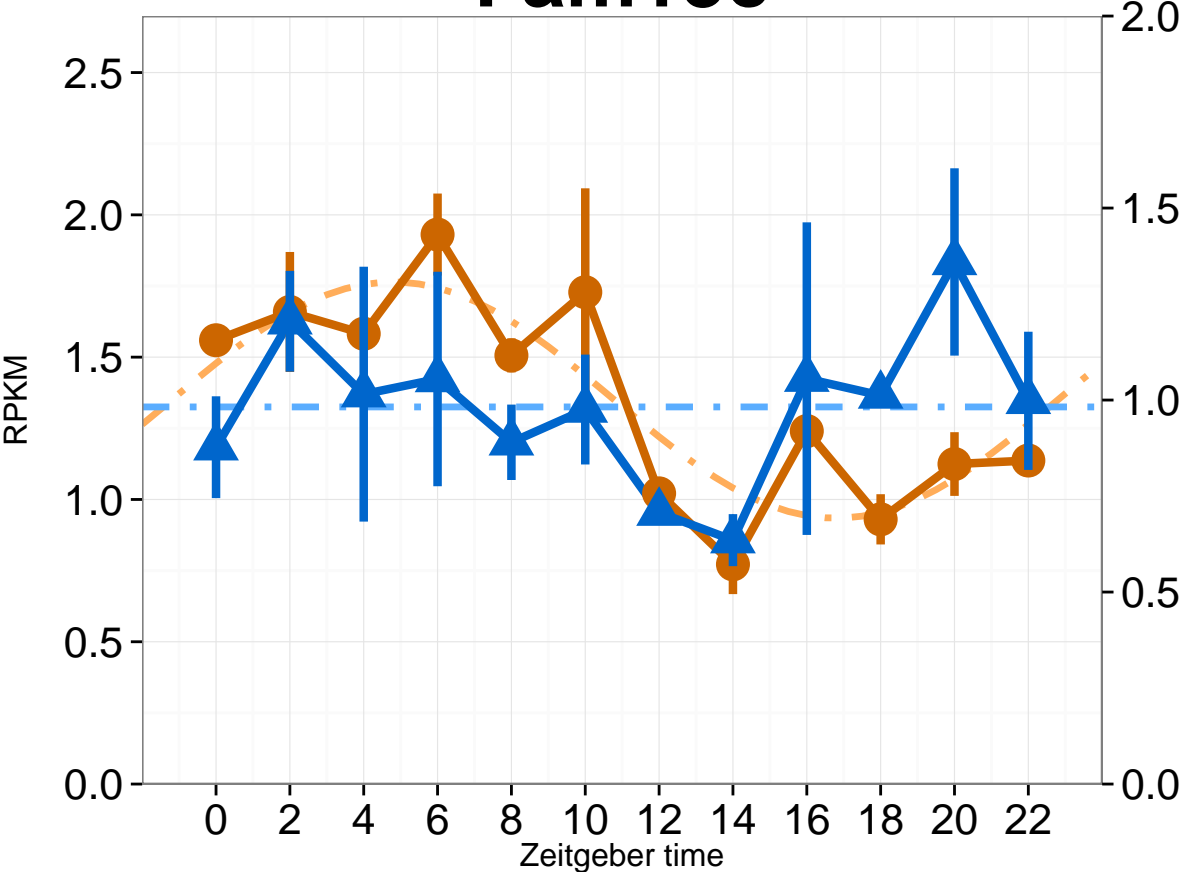

**Fam13c**

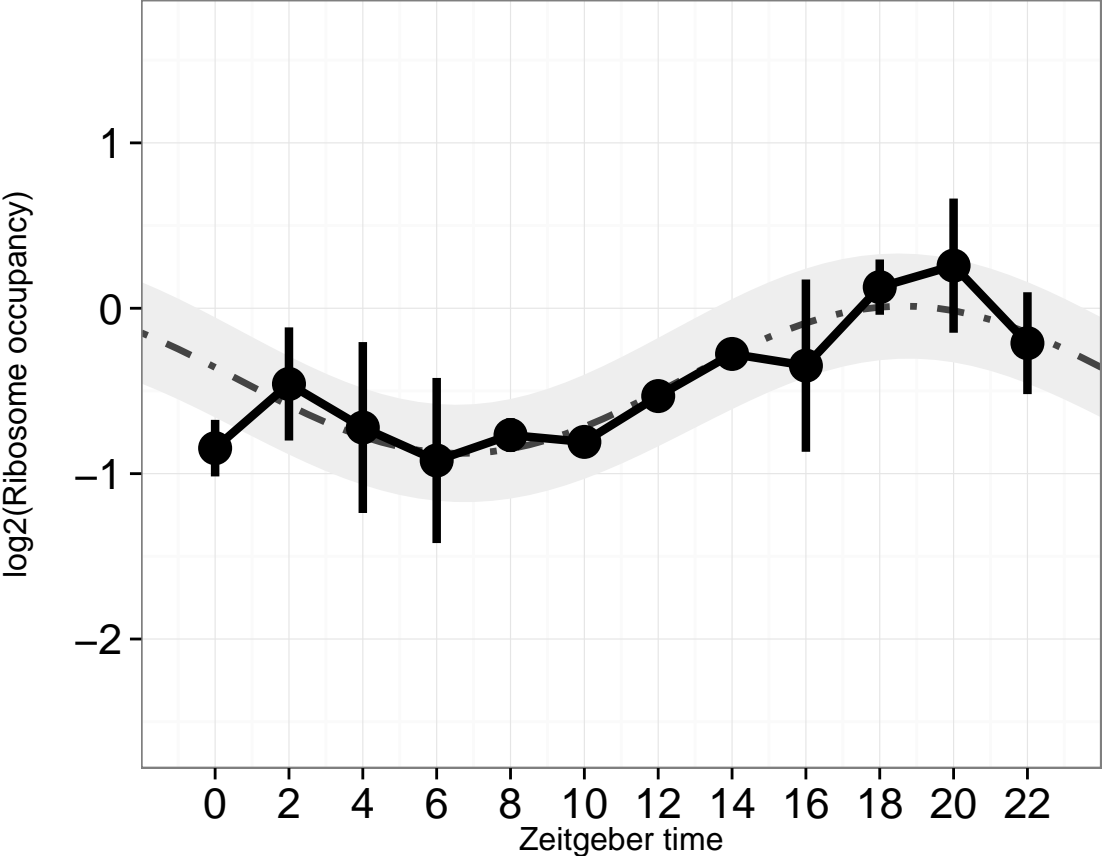

Supplement: Supplementary file 6195 [file 1]

## Atoh8

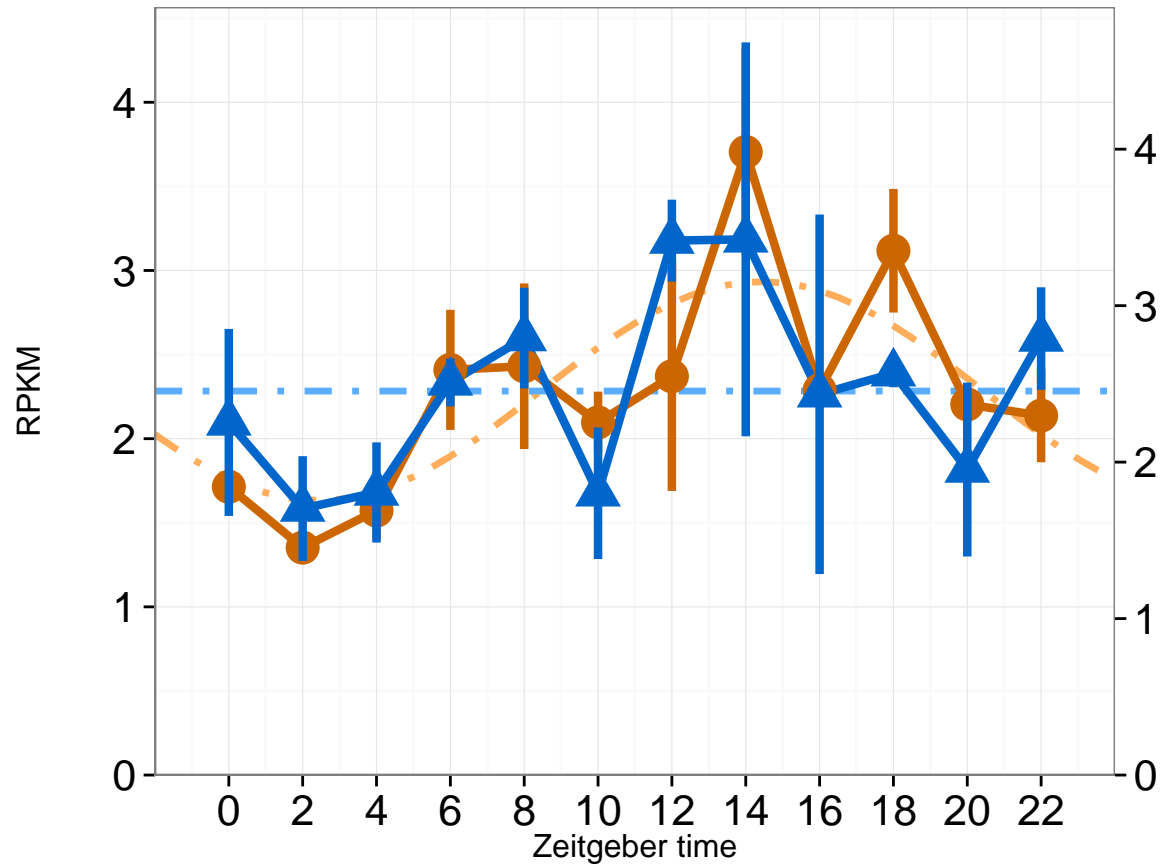

## Atoh8

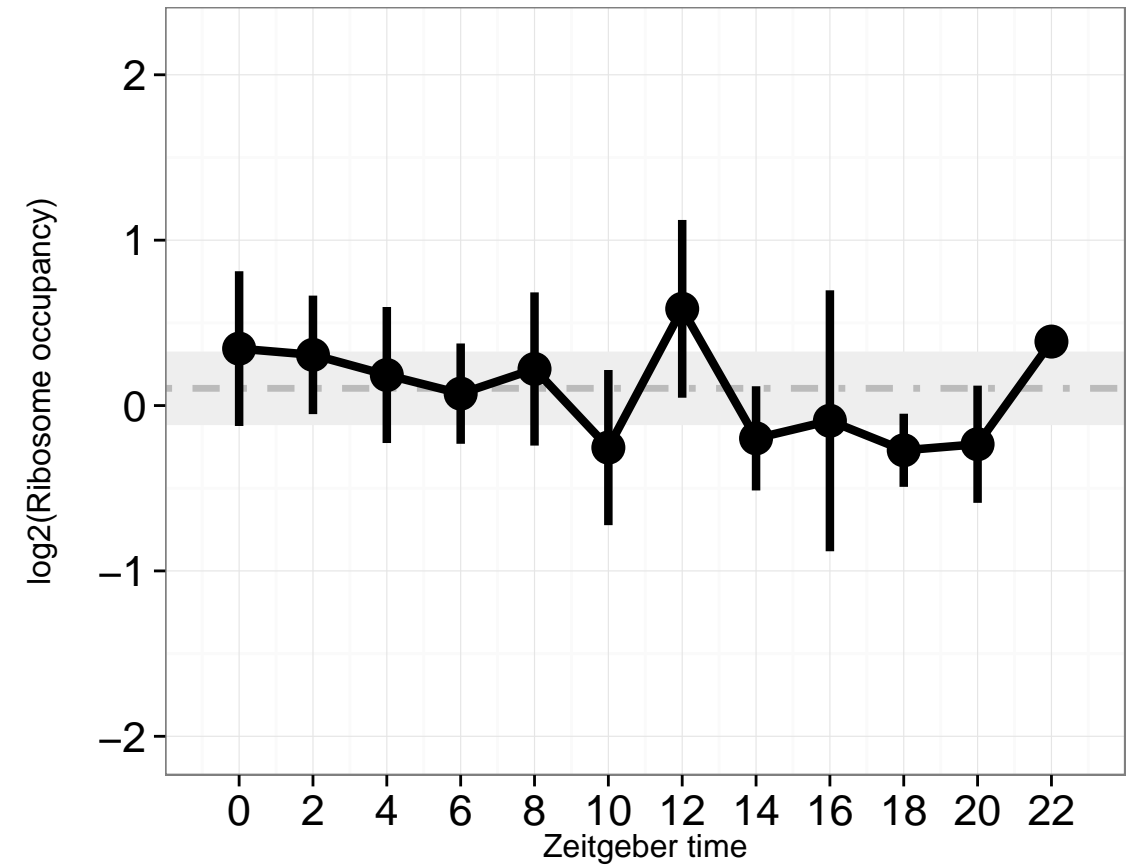

Supplement: Supplementary file 6196 [file 1]

## Maz

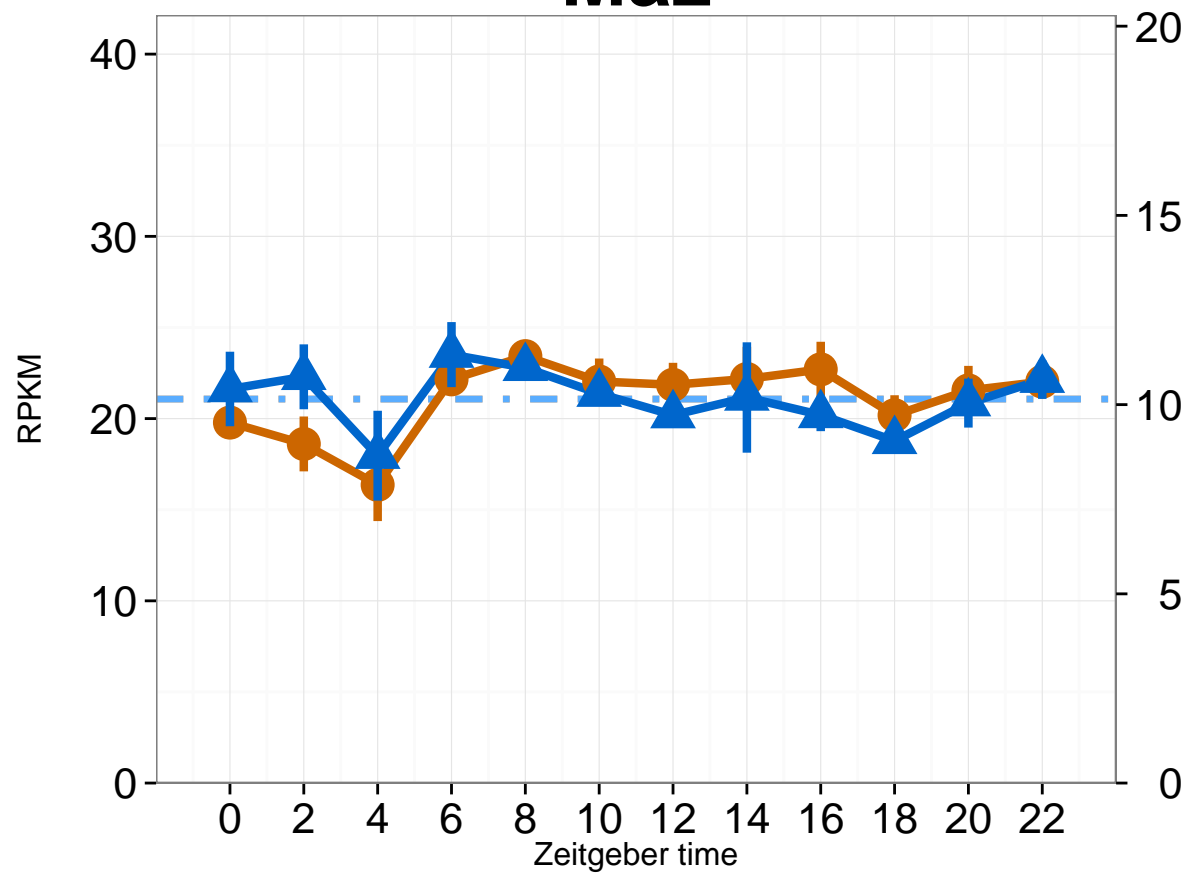

## Maz

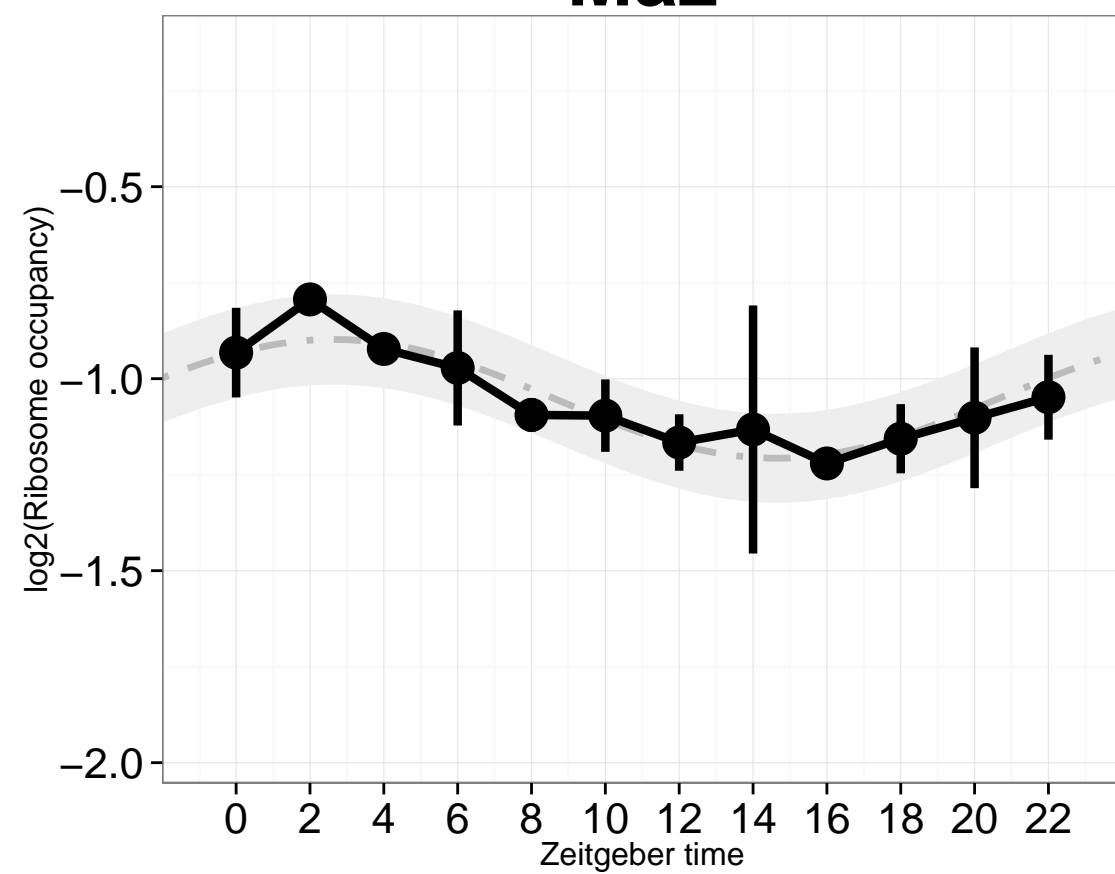

Supplement: Supplementary file 6197 [file 1]

## Zscan30

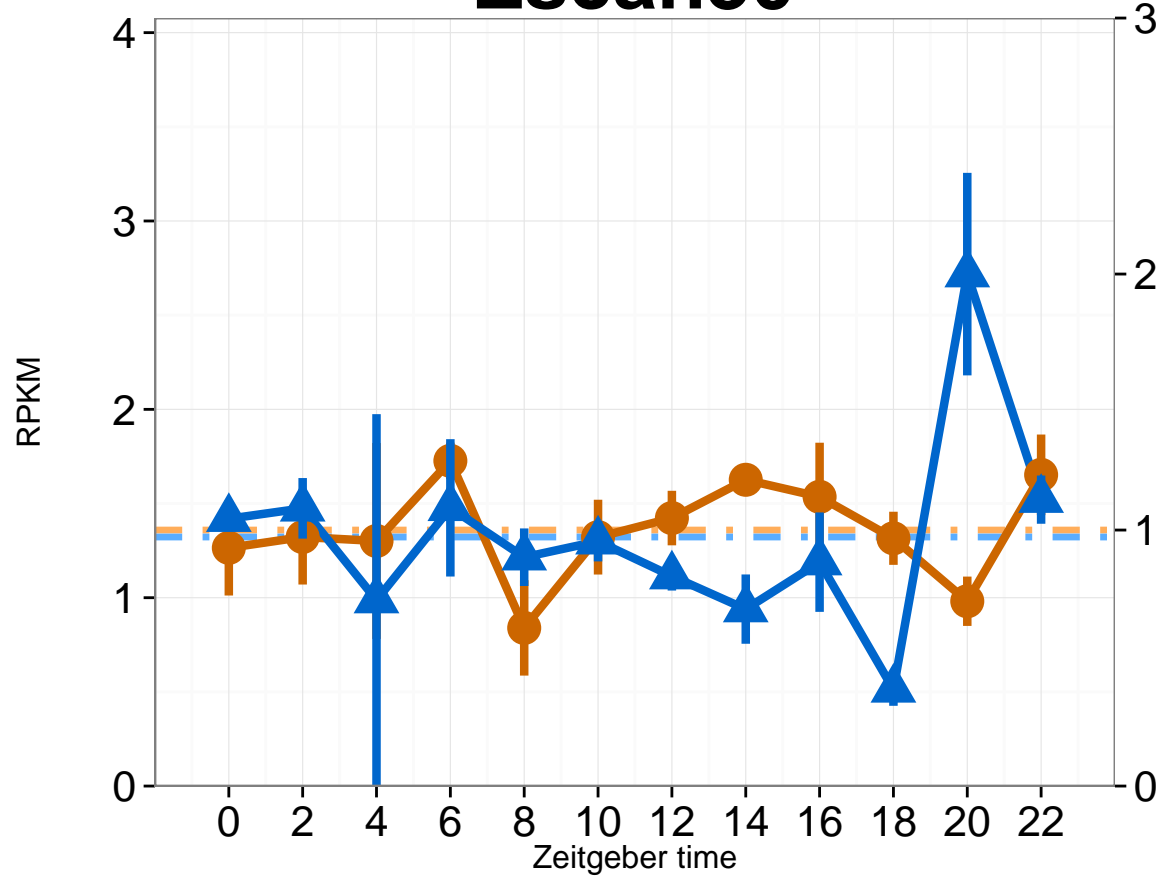

## Zscan30

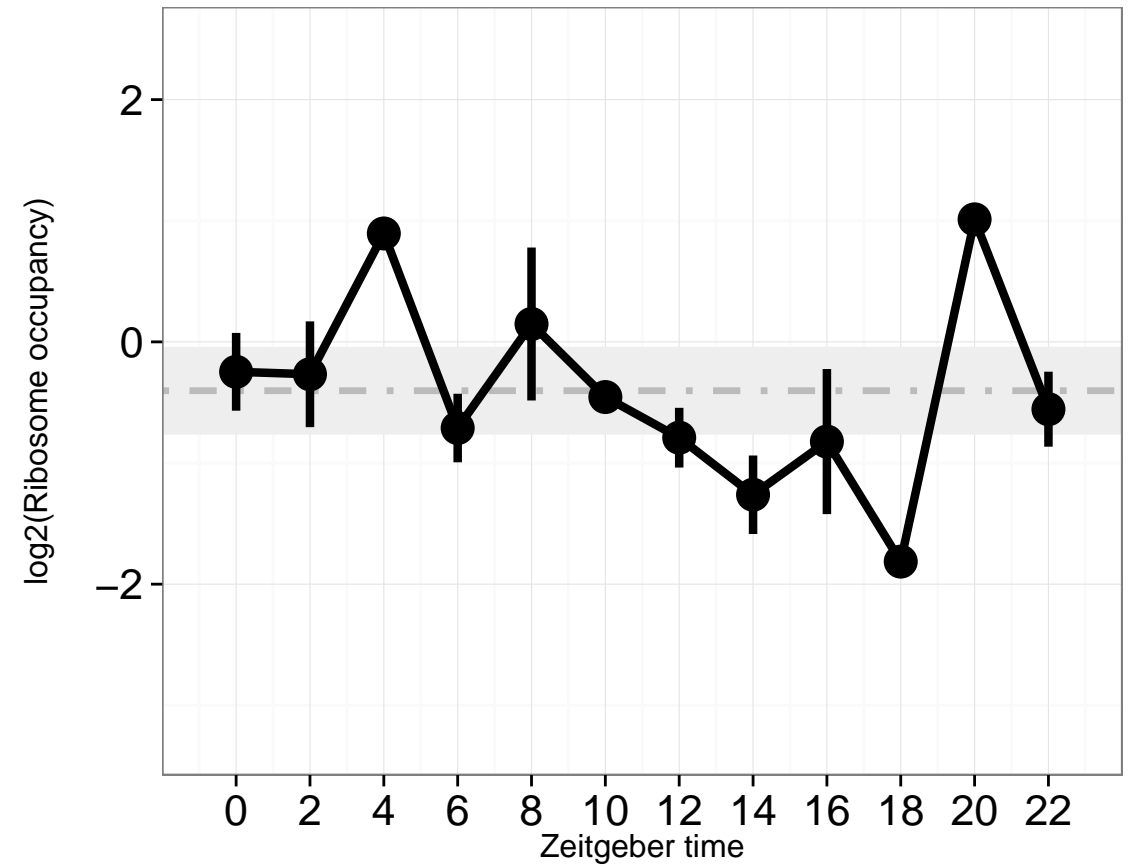

Supplement: Supplementary file 6198 [file 1]

# Col3a1

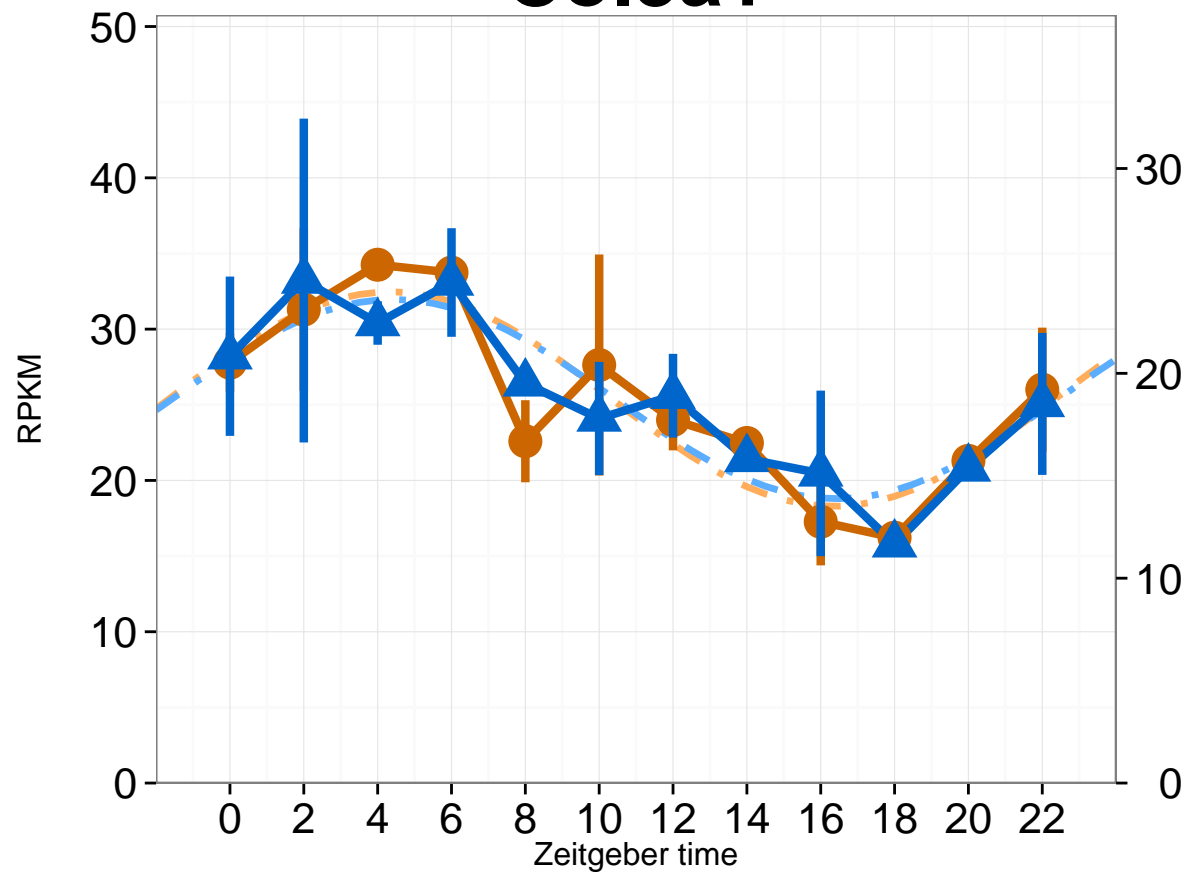

# Col3a1

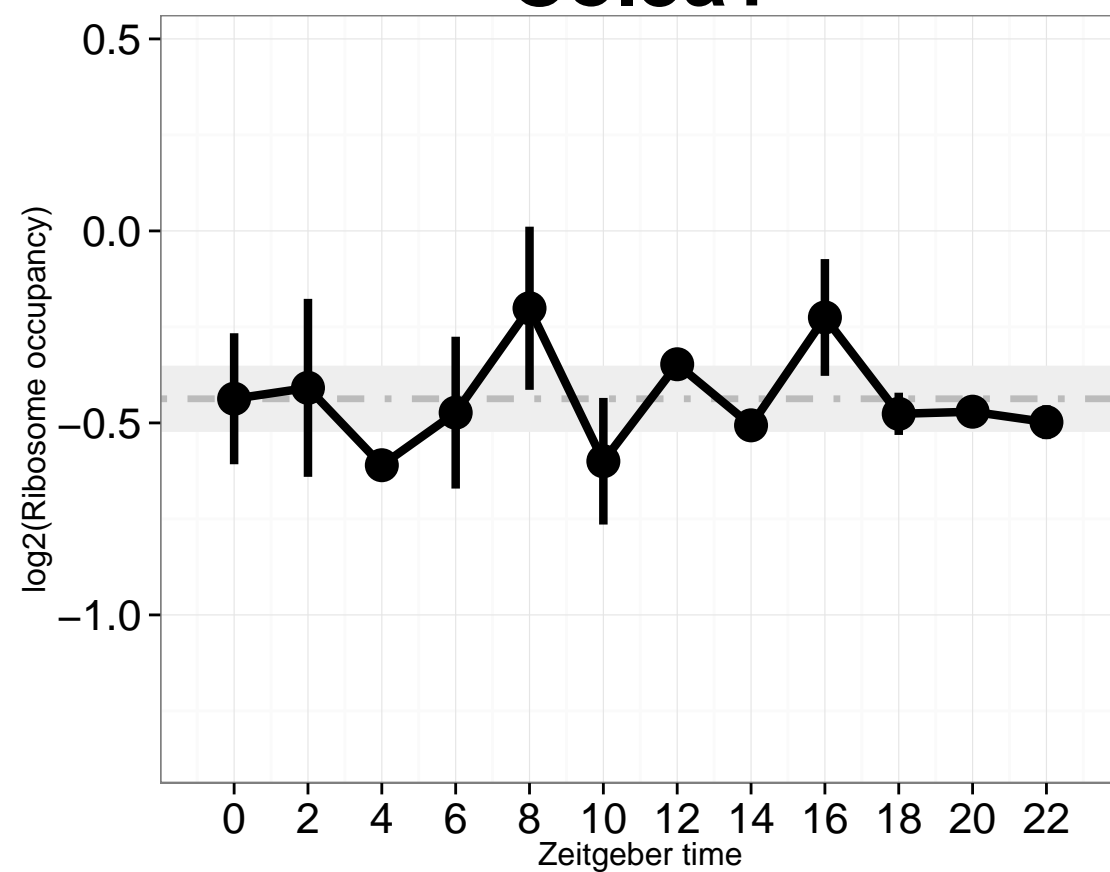

Supplement: Supplementary file 6199 [file 1]

# Gtf2h2

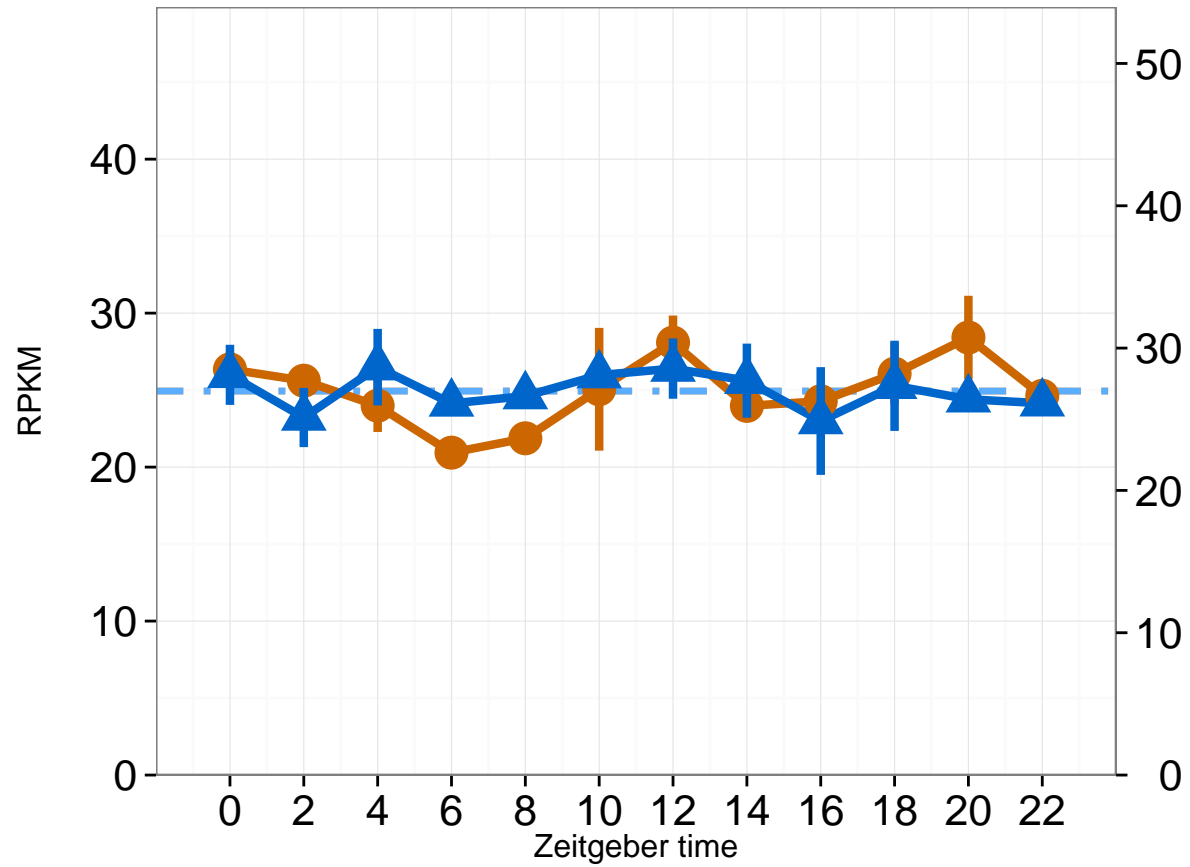

# Gtf2h2

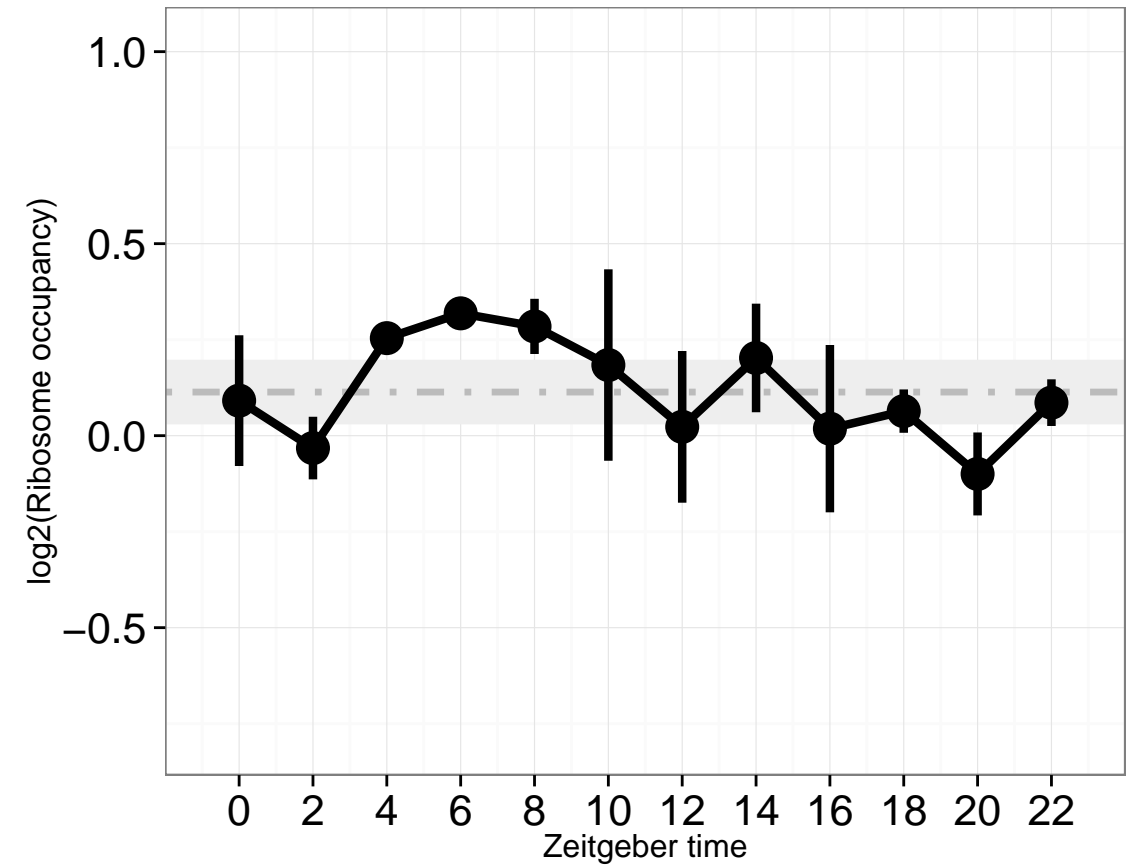

Supplement: Supplementary file 6200 [file 1]

# Lcmt1

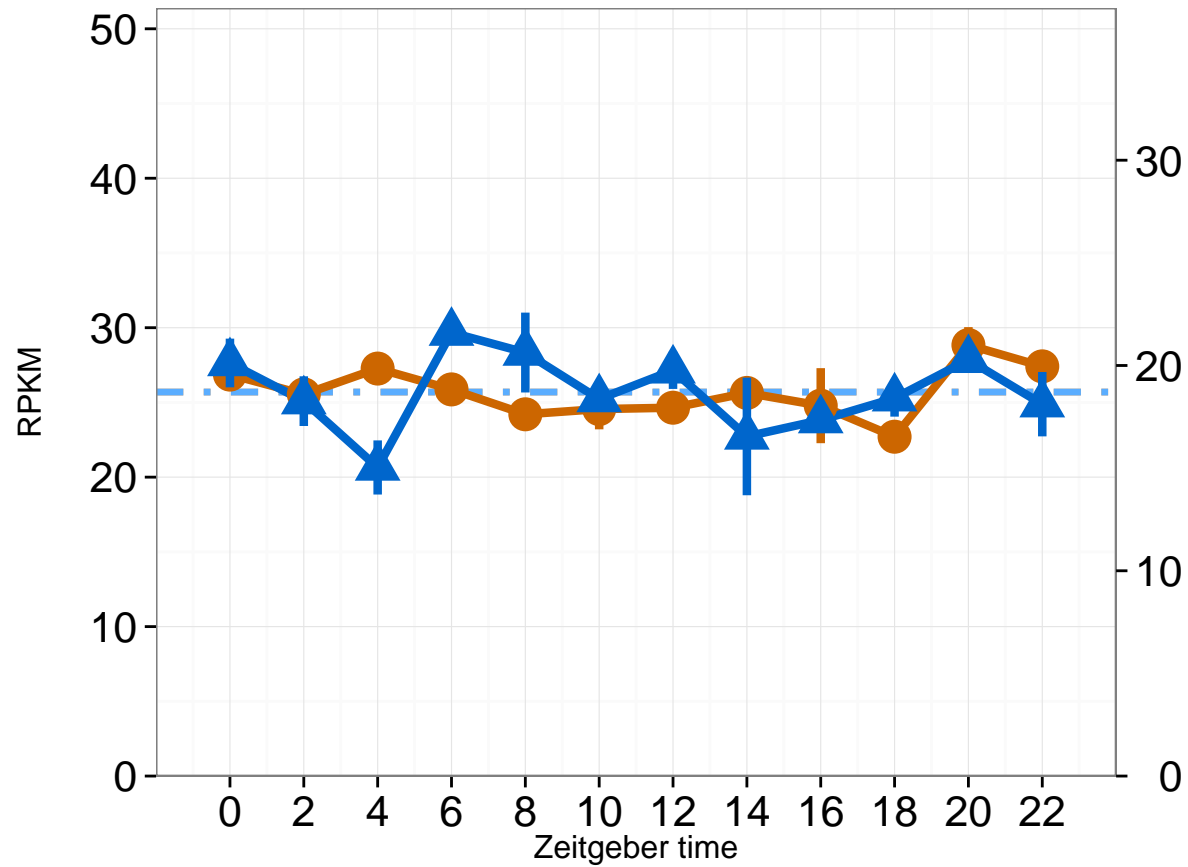

# Lcmt1

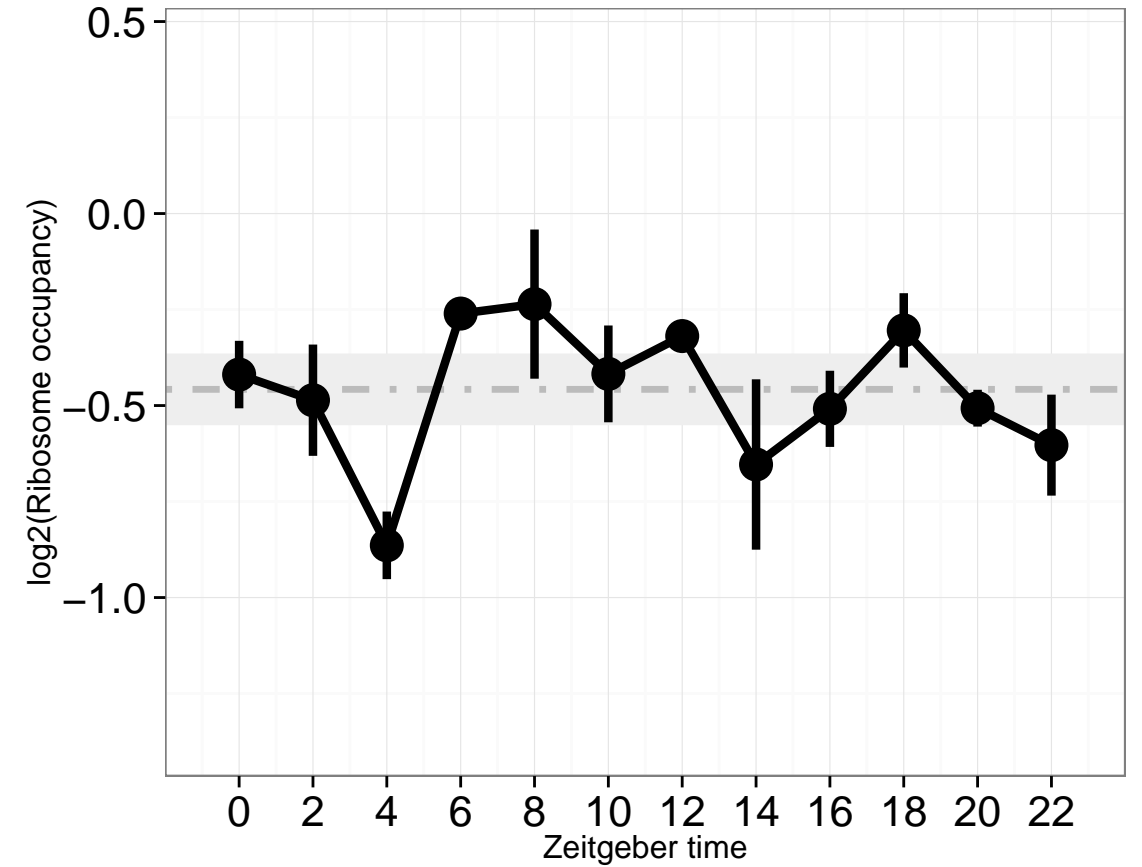

Supplement: Supplementary file 6201 [file 1]

# Zfp236

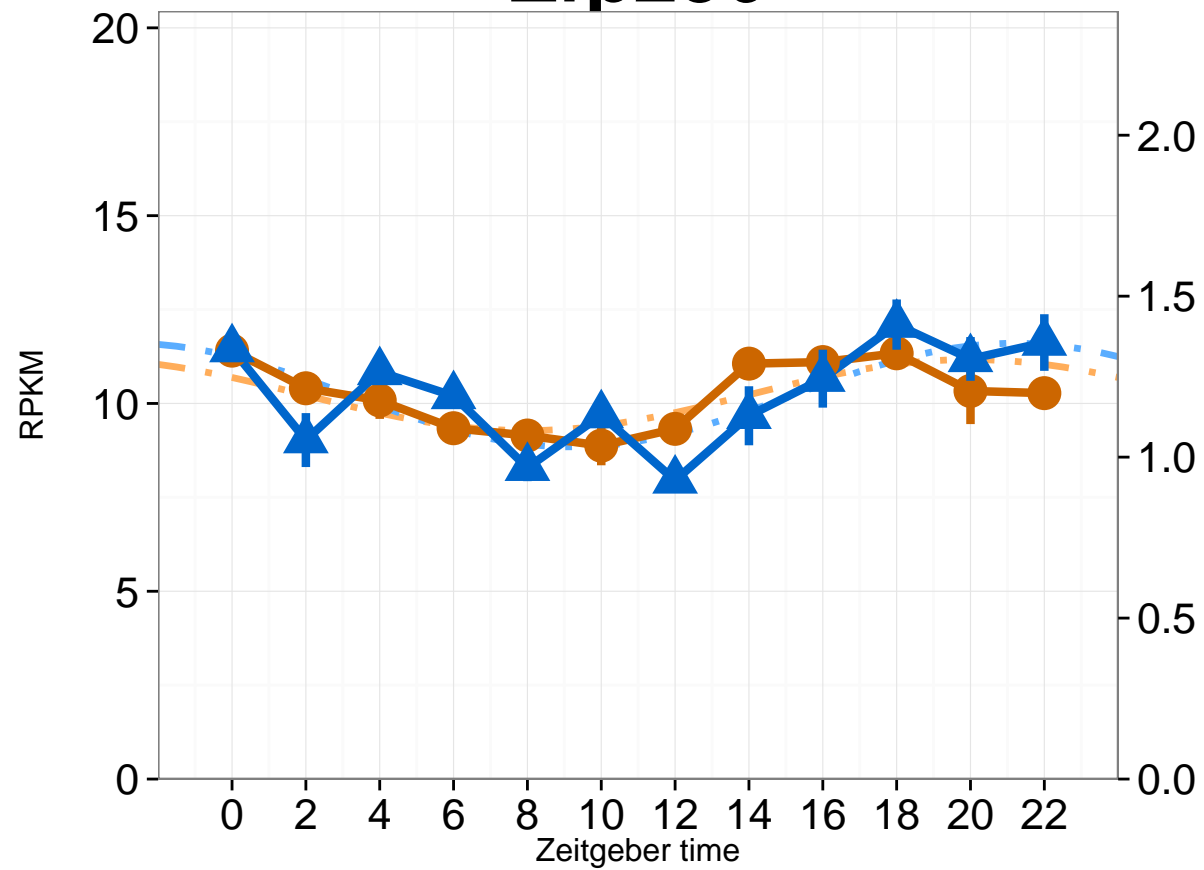

# Zfp236

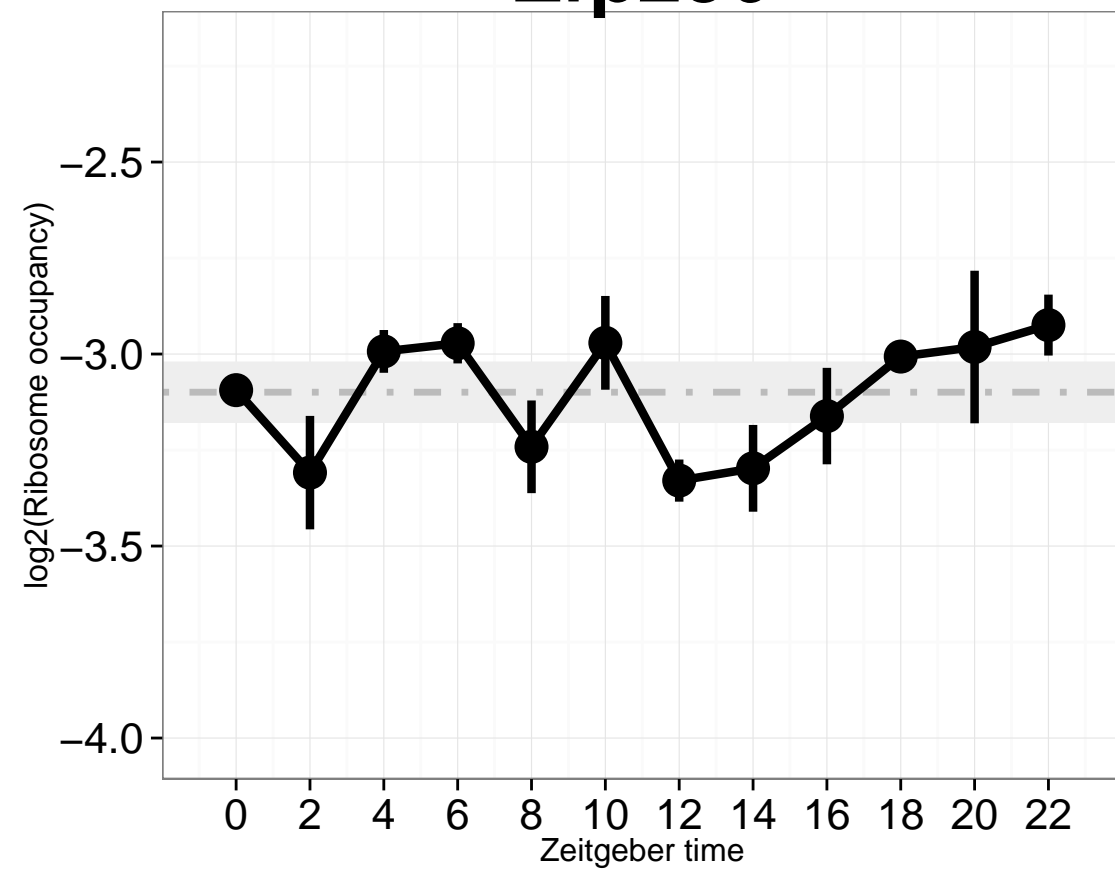

Supplement: Supplementary file 6202 [file 1]

## Bik

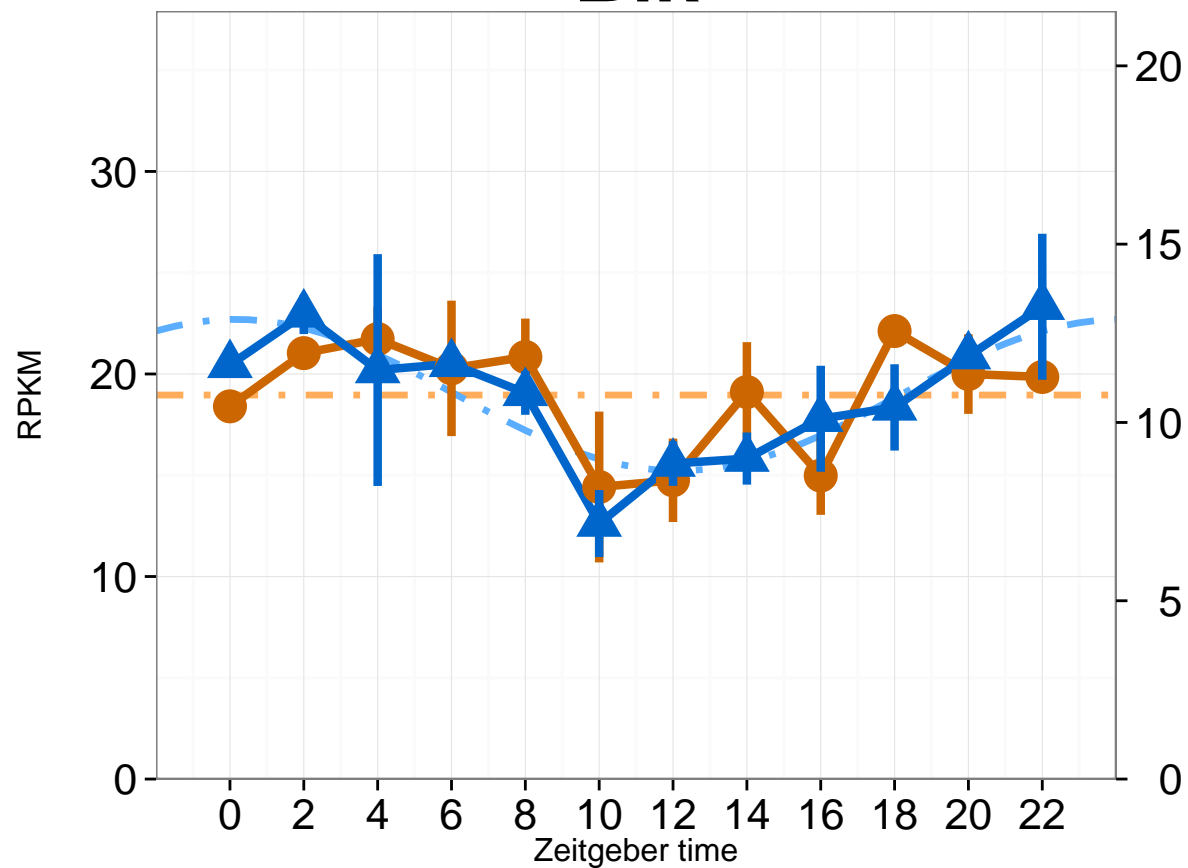

## Bik

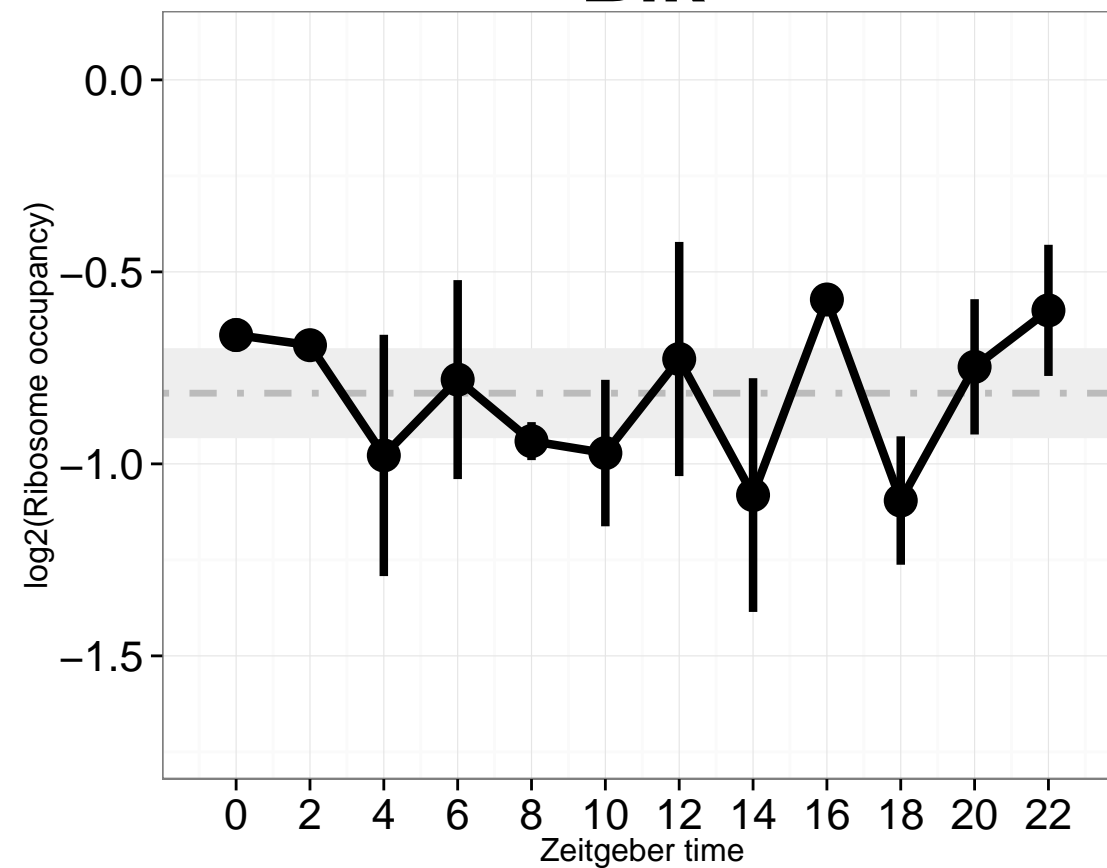

Supplement: Supplementary file 6203 [file 1]

## Ptbp3

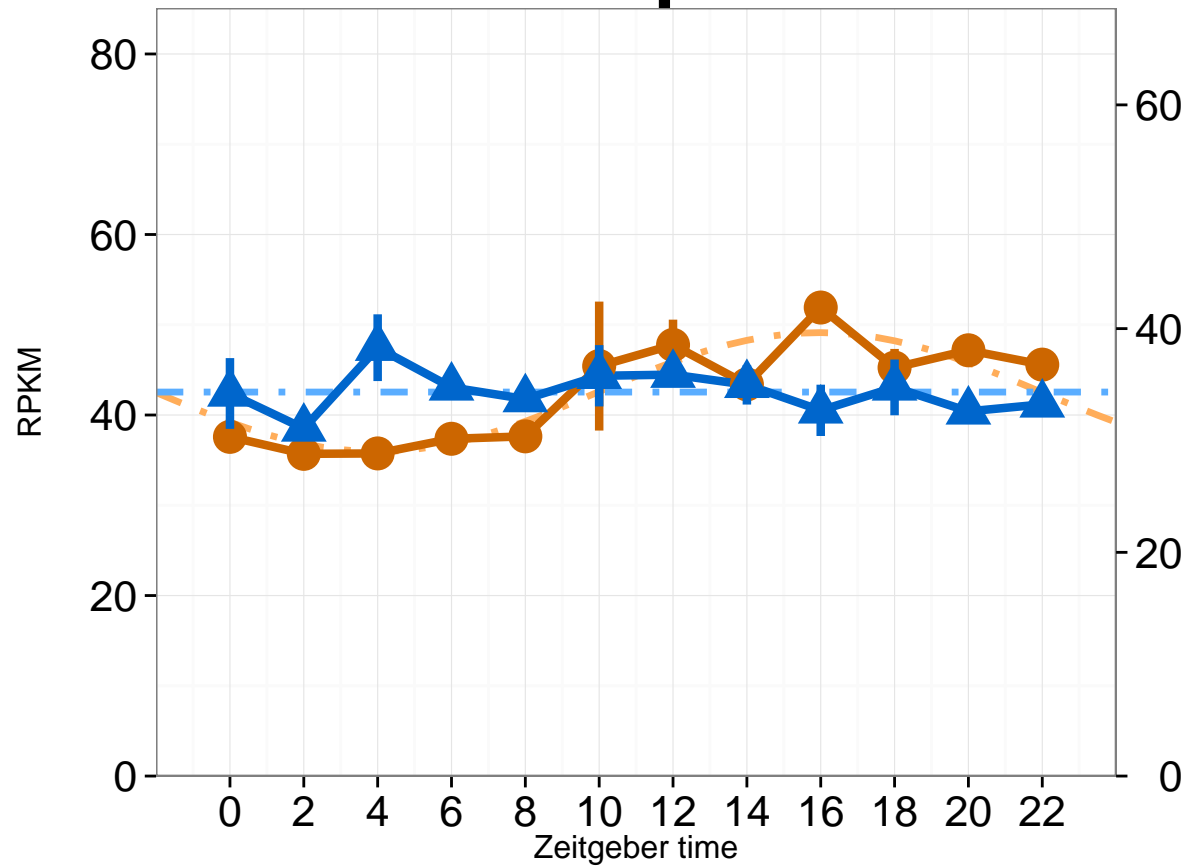

## Ptbp3

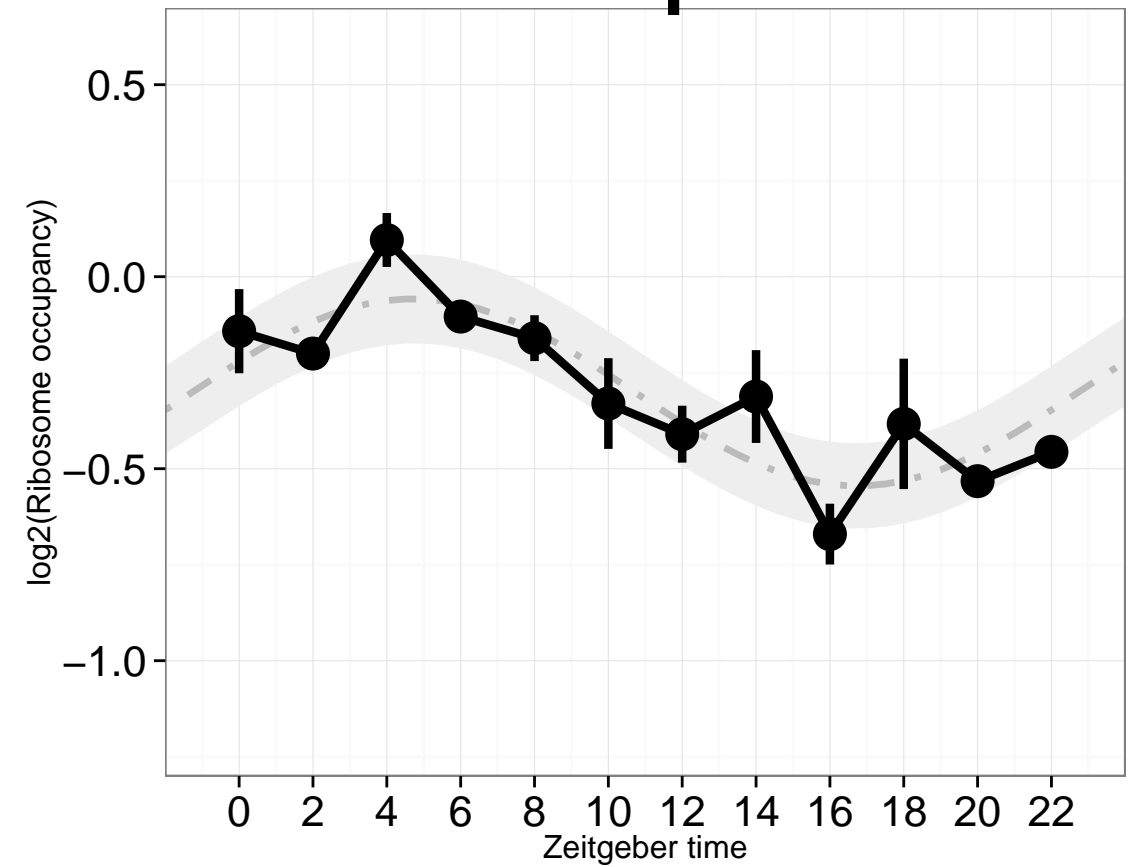

Supplement: Supplementary file 6204 [file 1]

# Maob

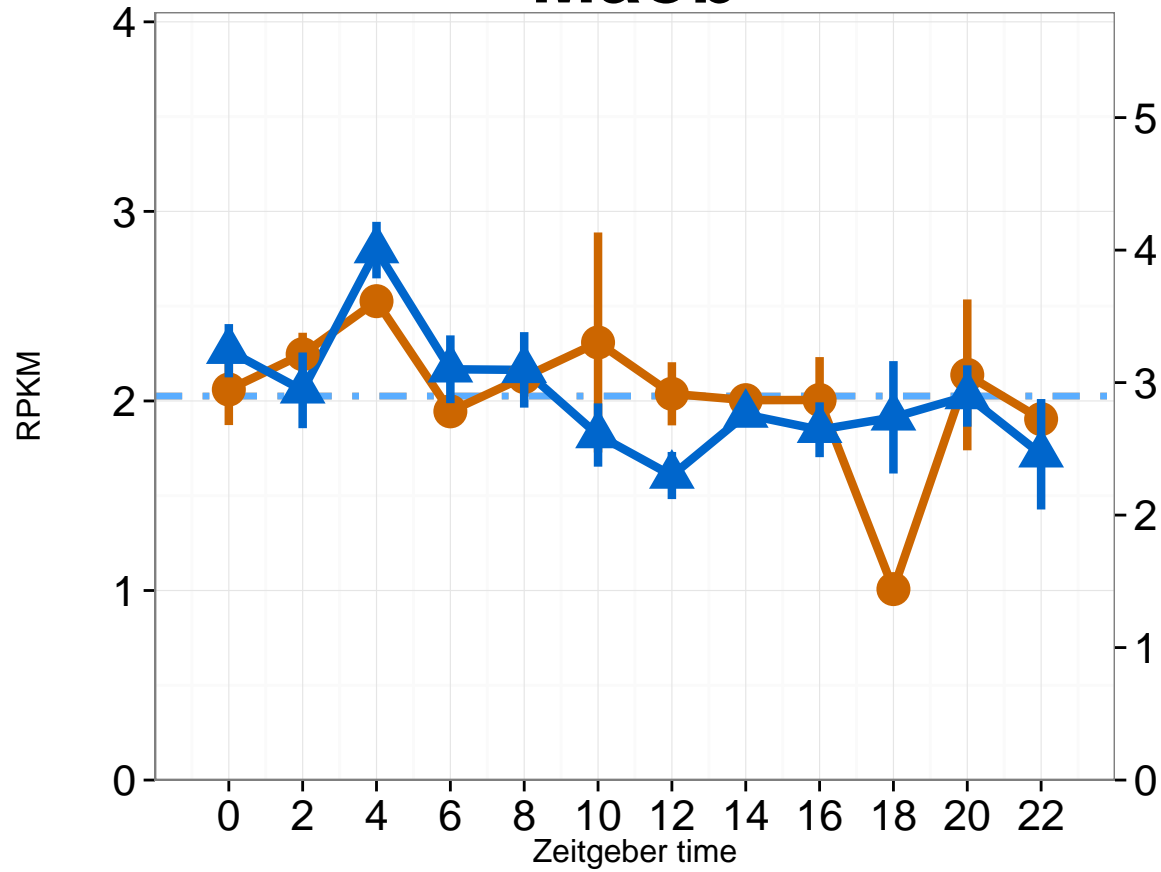

# Maob

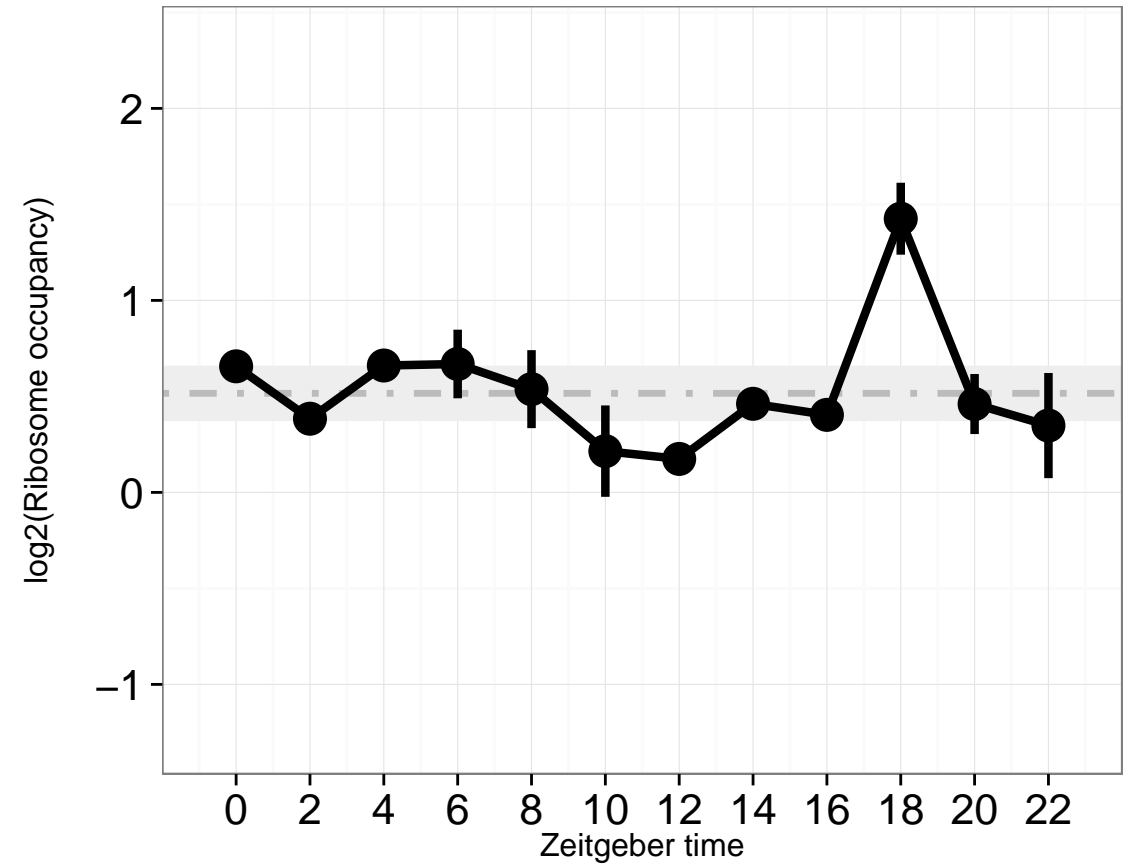

Supplement: Supplementary file 6205 [file 1]

# Zc3h7a

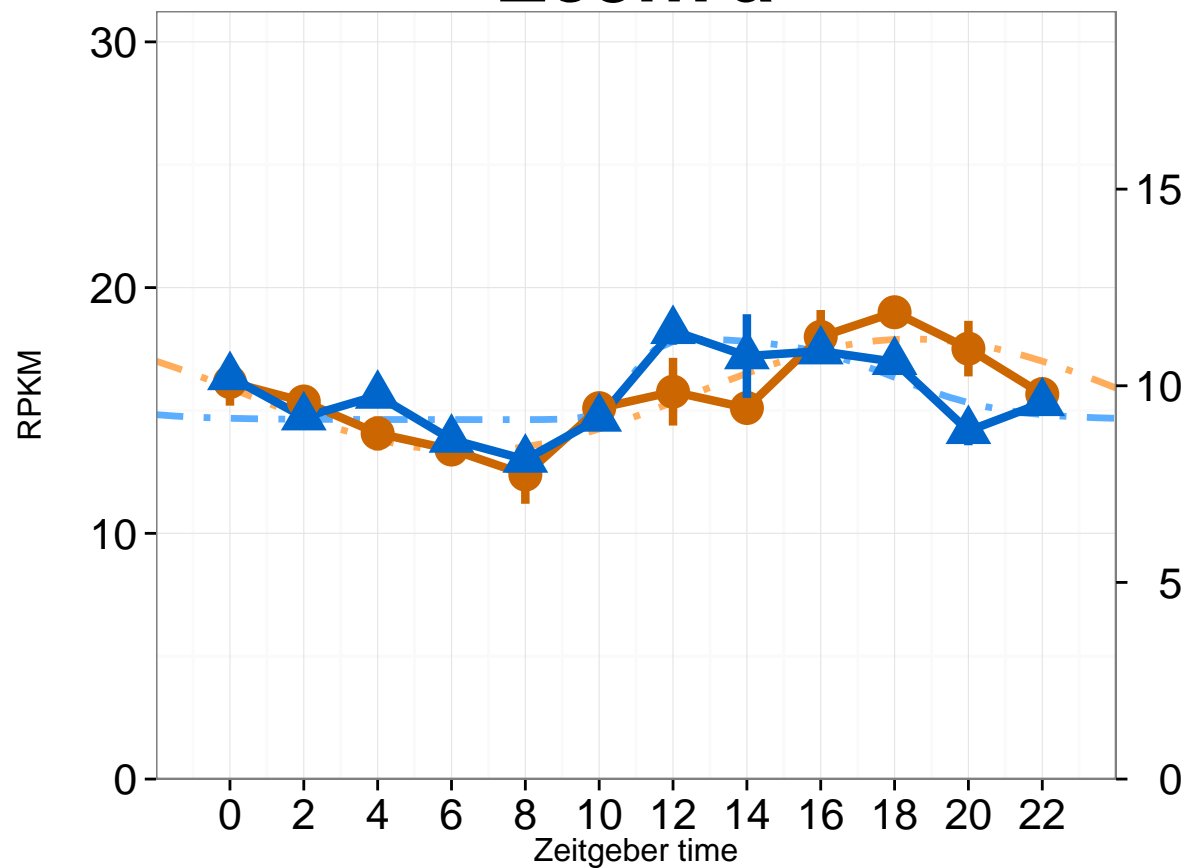

# Zc3h7a

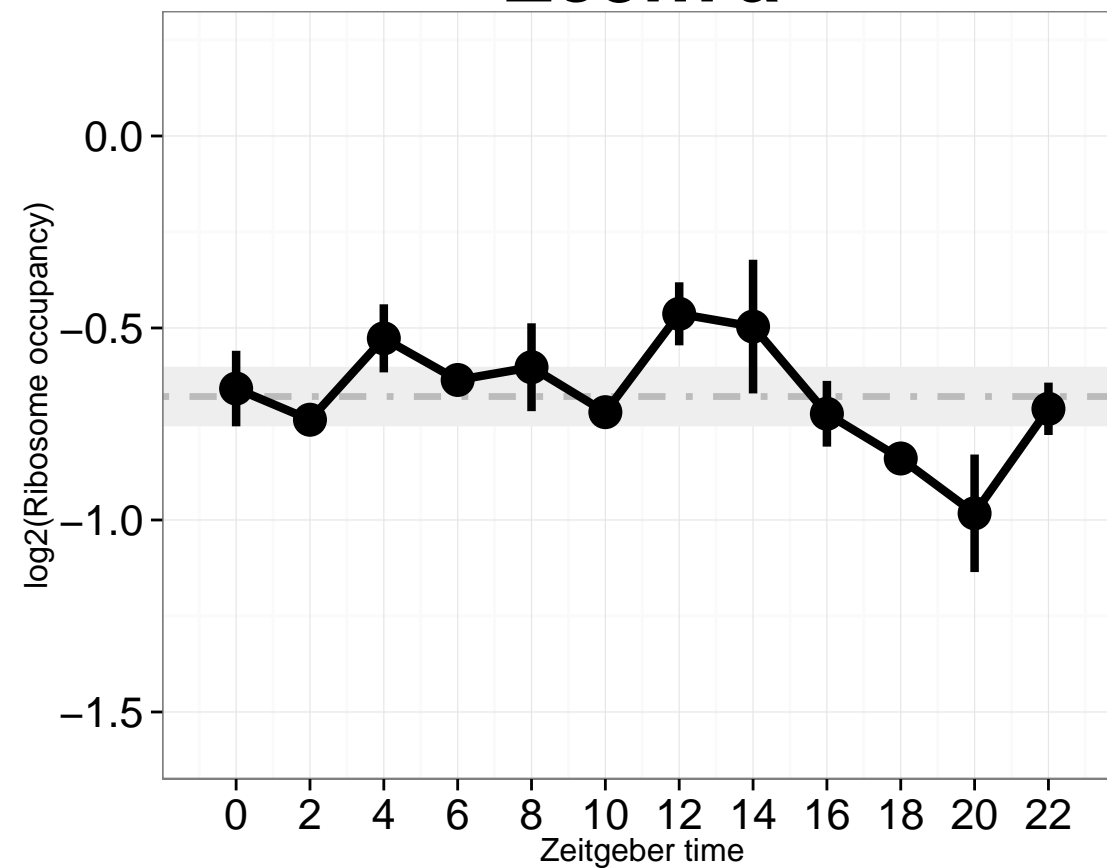

Supplement: Supplementary file 6206 [file 1]

## Slc25a51

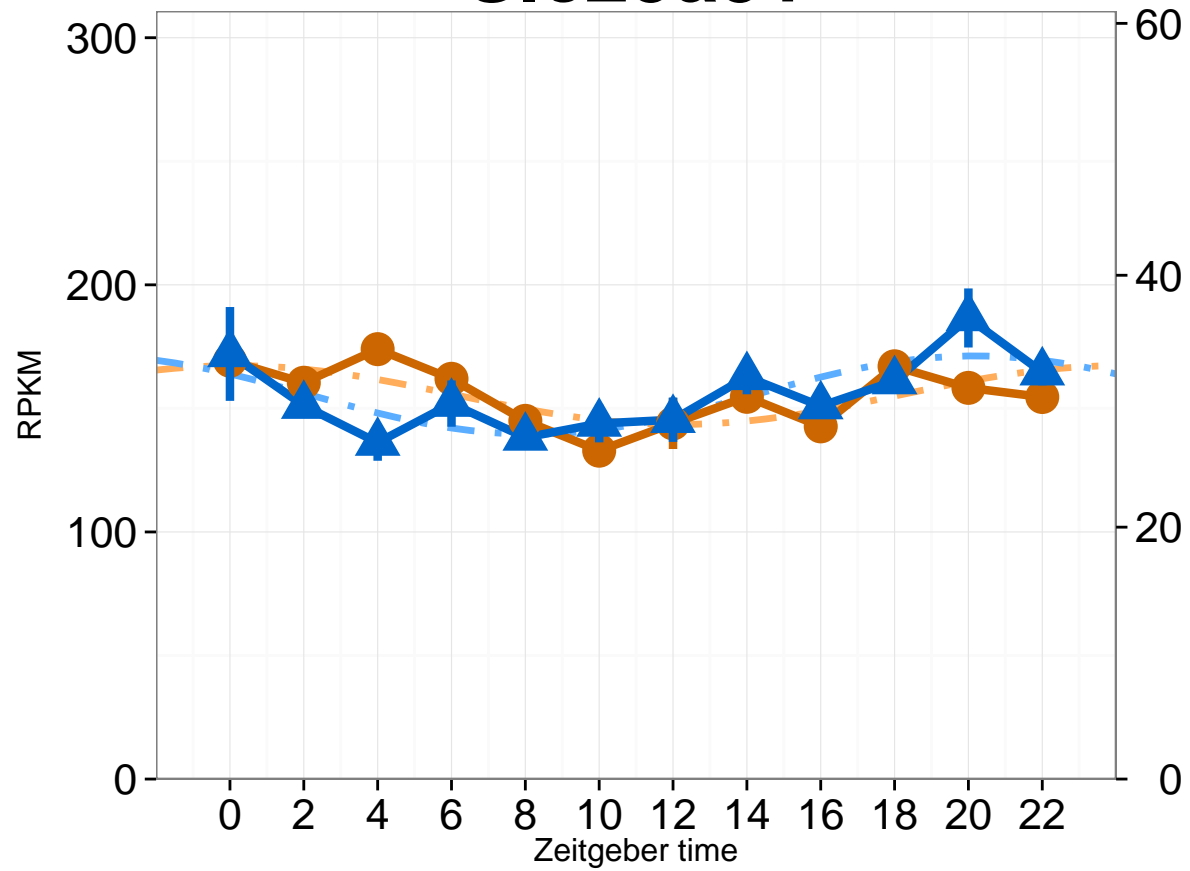

## Slc25a51

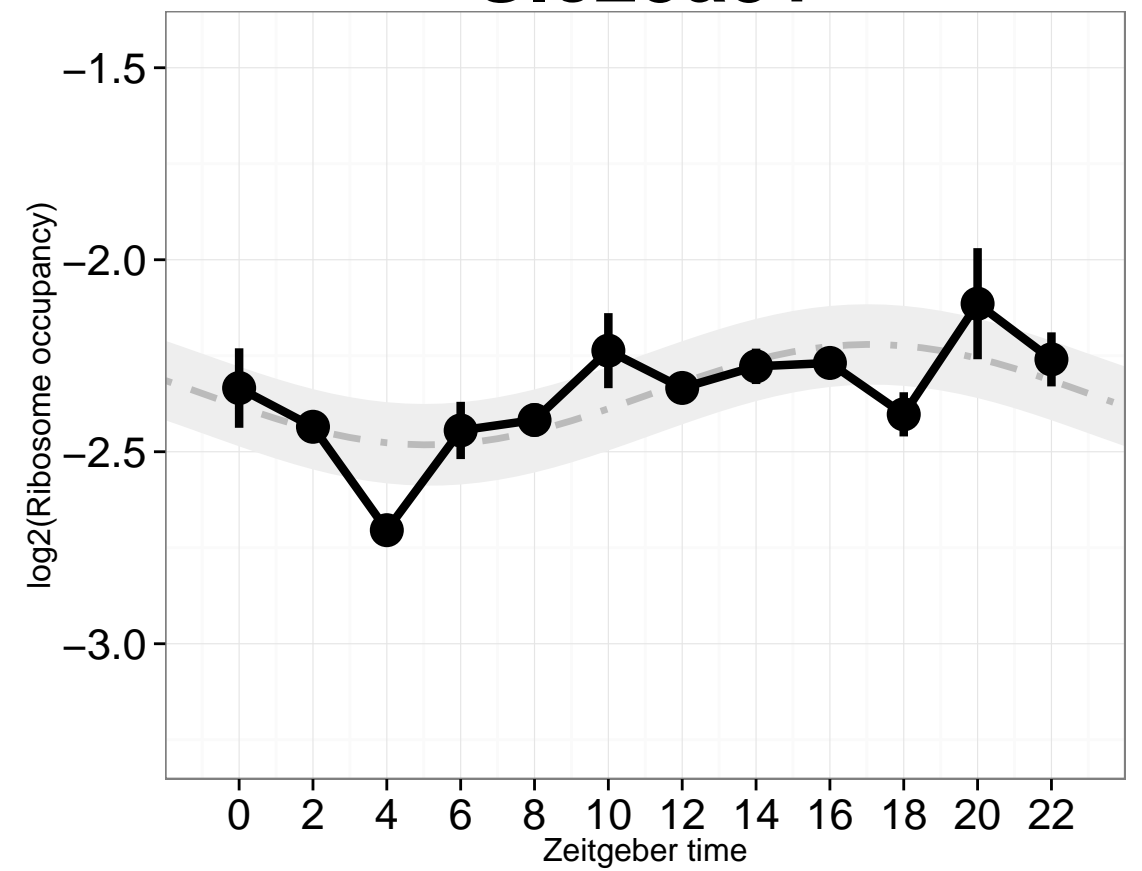

Supplement: Supplementary file 6207 [file 1]

# Gpx7

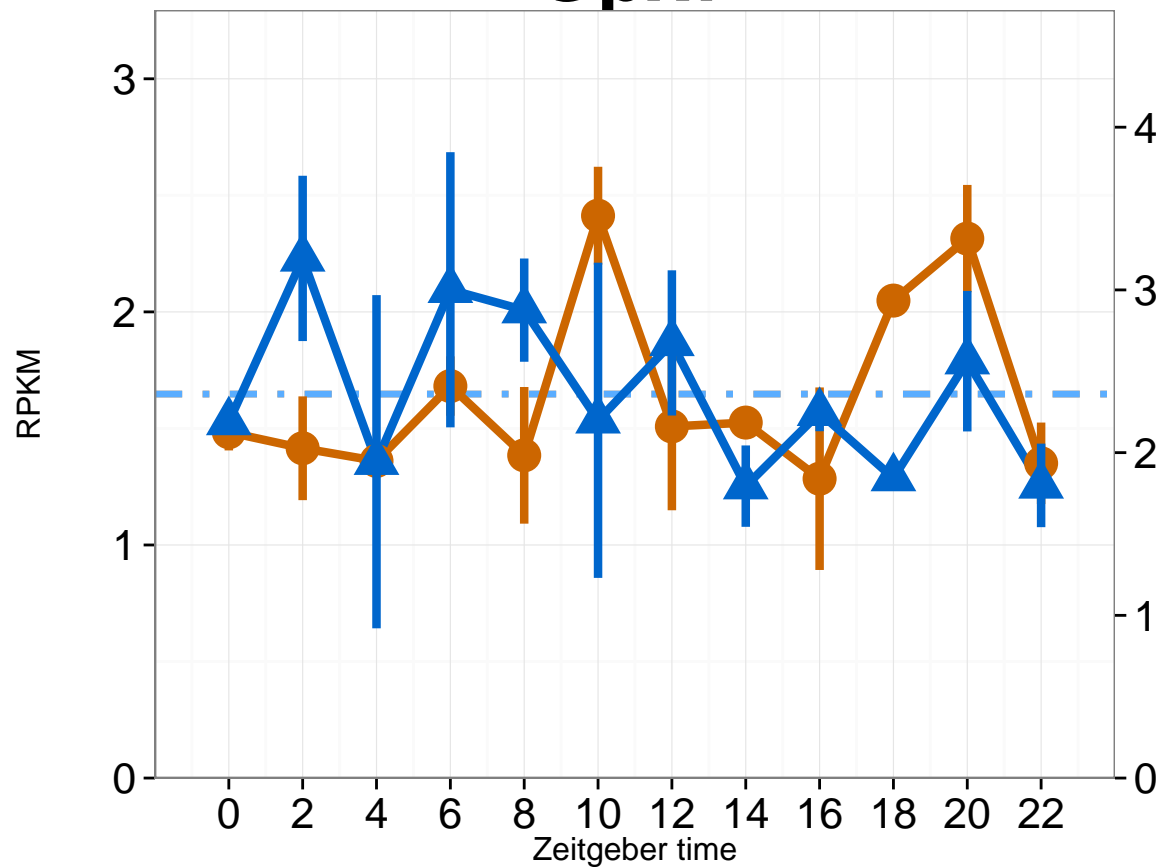

# Gpx7

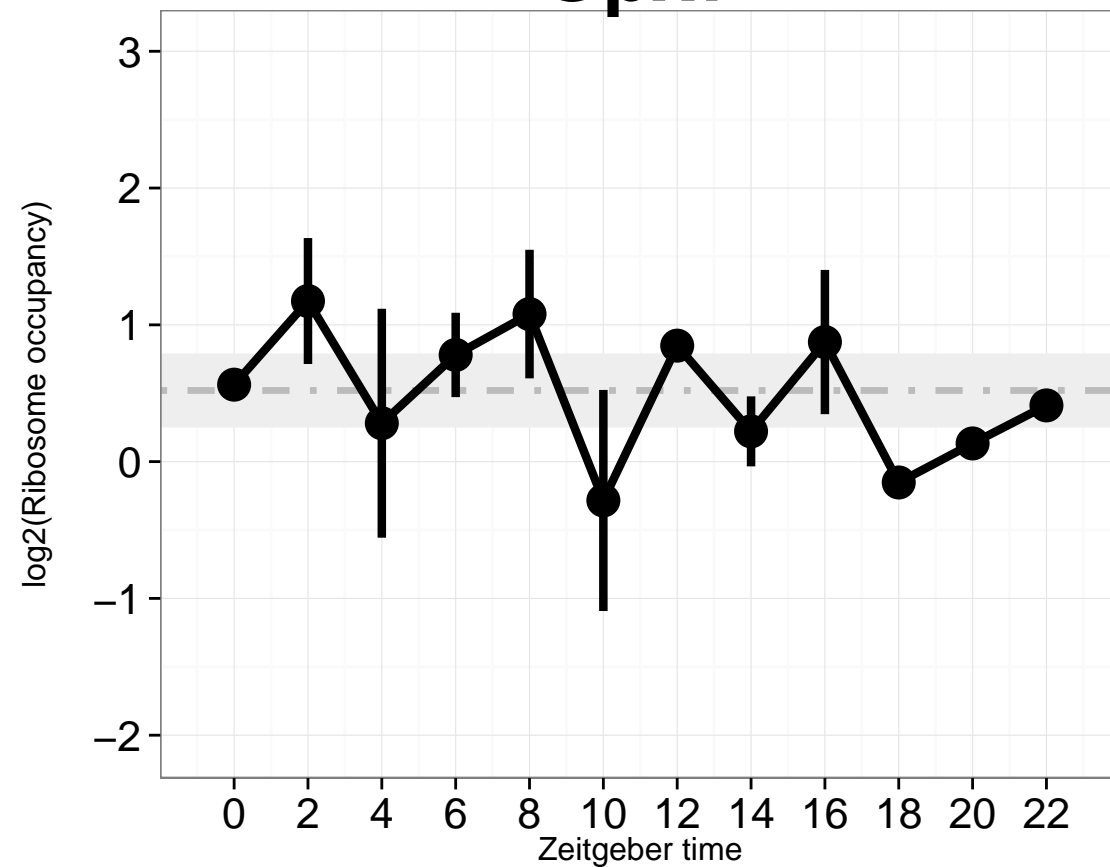

Supplement: Supplementary file 6208 [file 1]

## Etfa

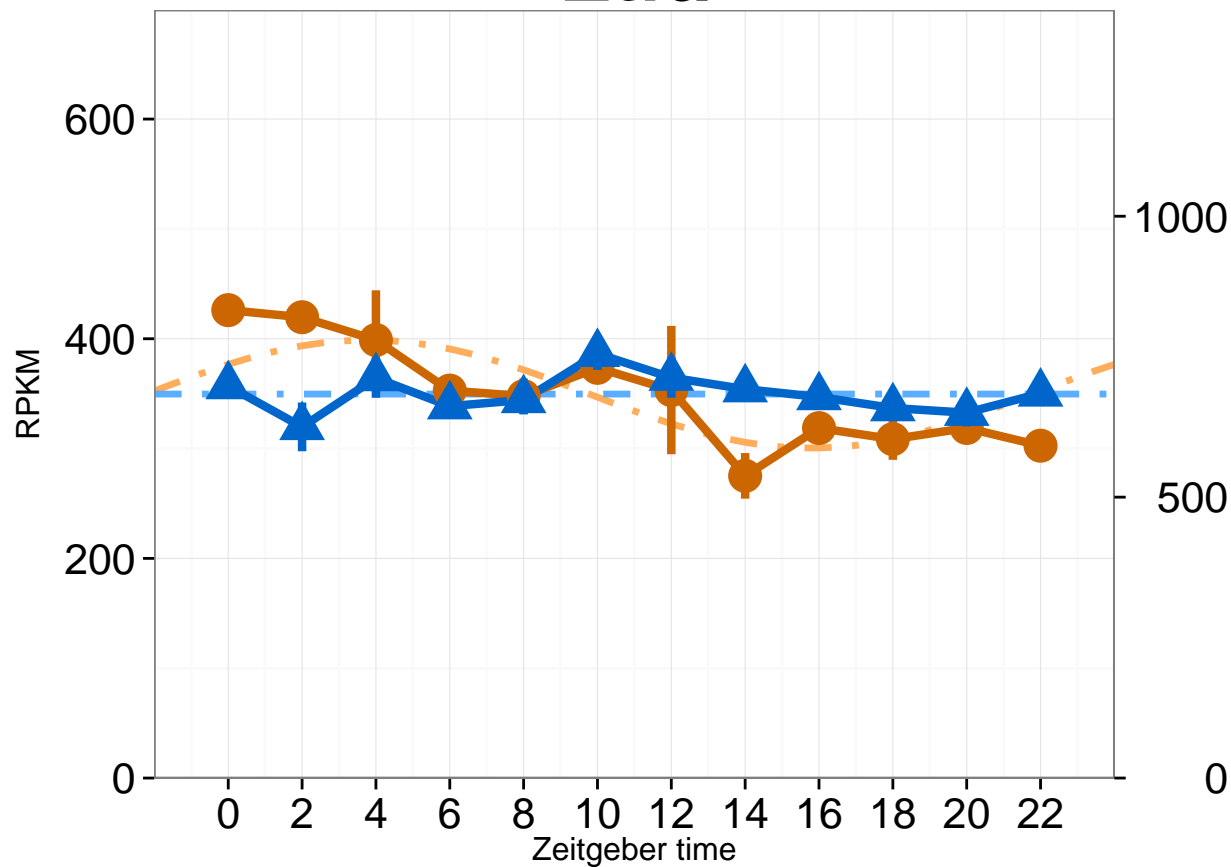

## Etfa

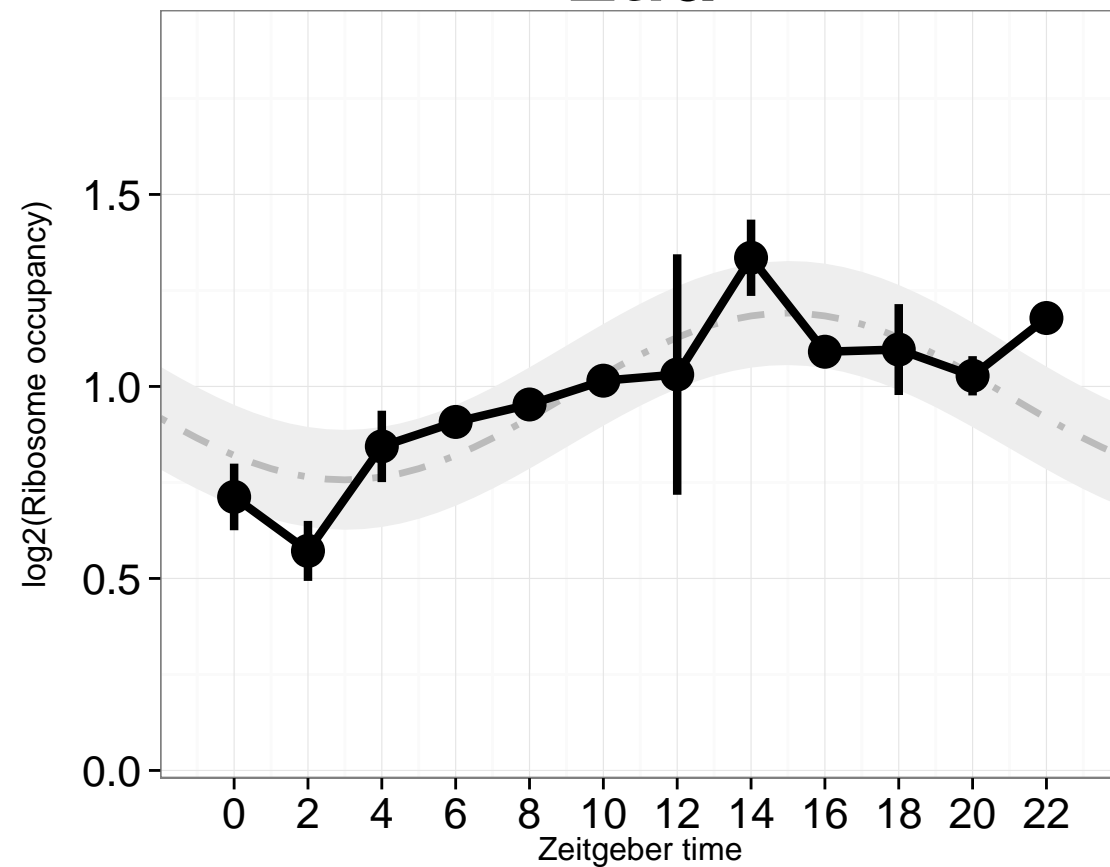

Supplement: Supplementary file 6209 [file 1]

## Herc3

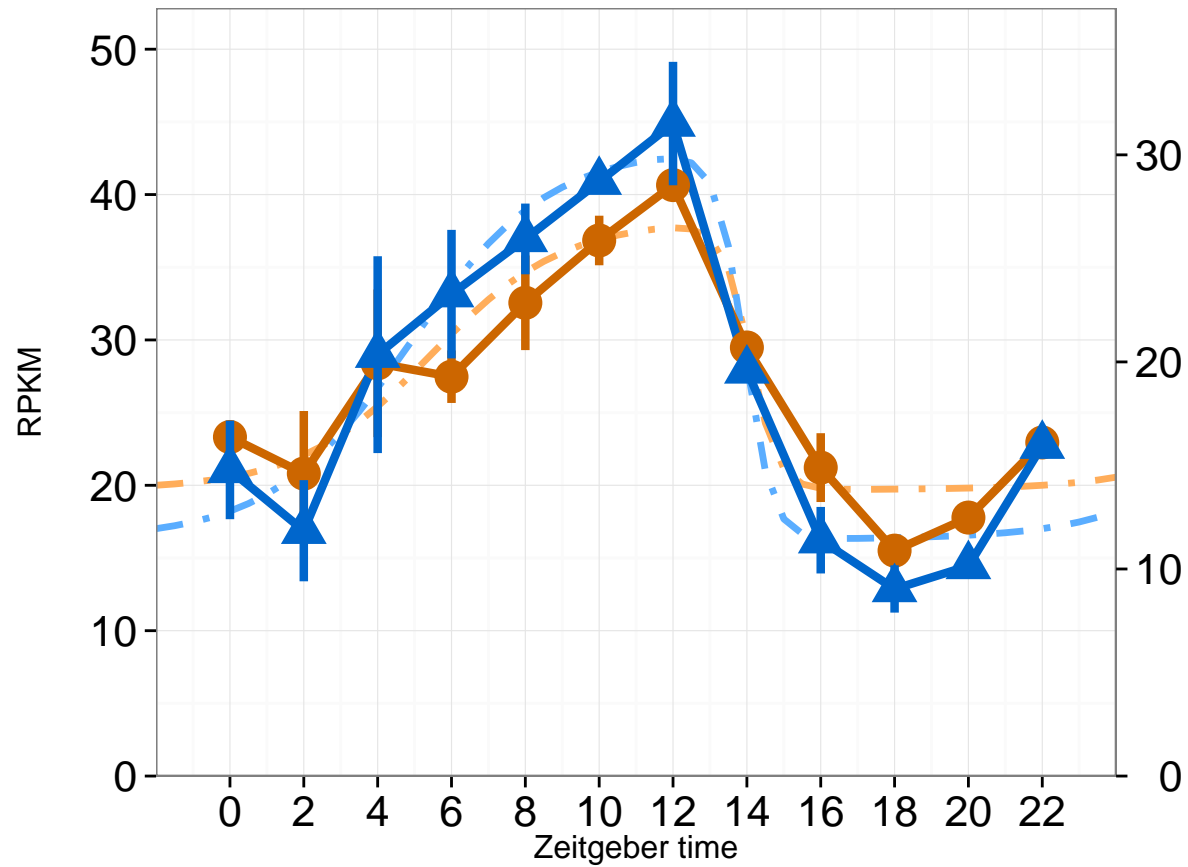

## Herc3

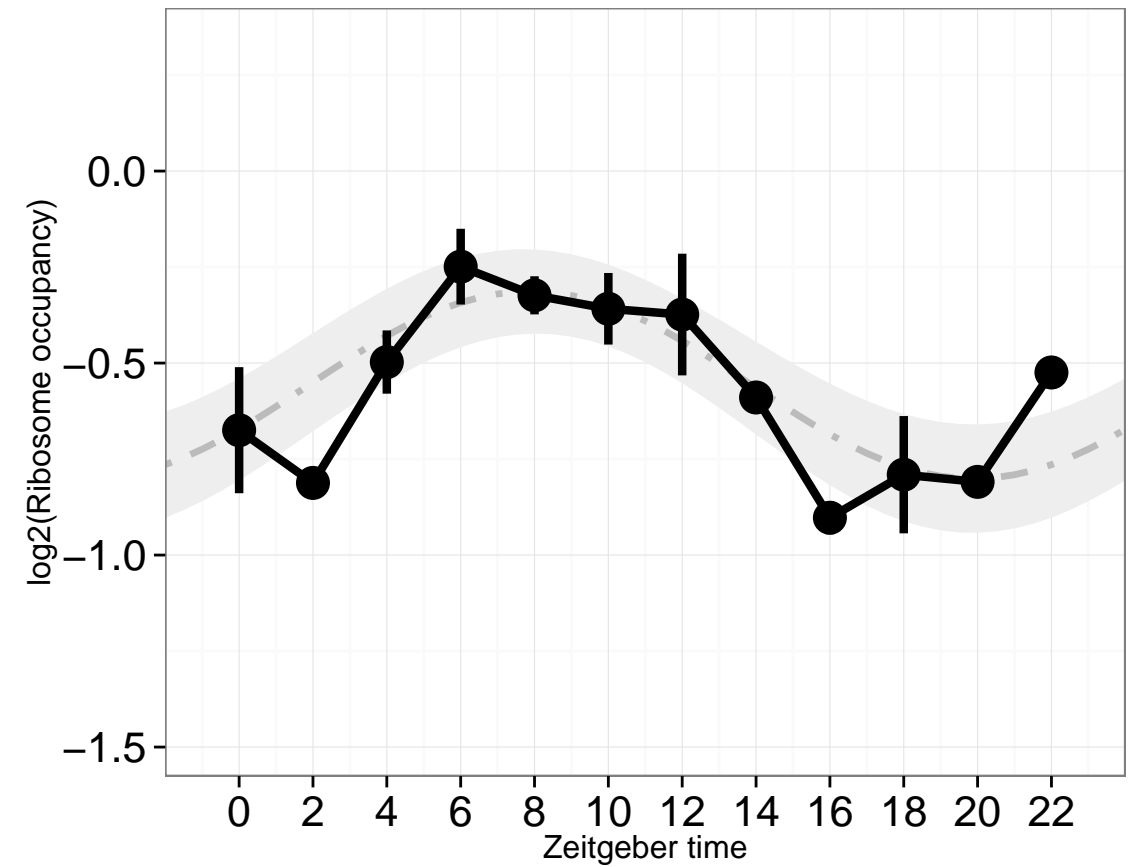

Supplement: Supplementary file 6210 [file 1]

# Gm5141

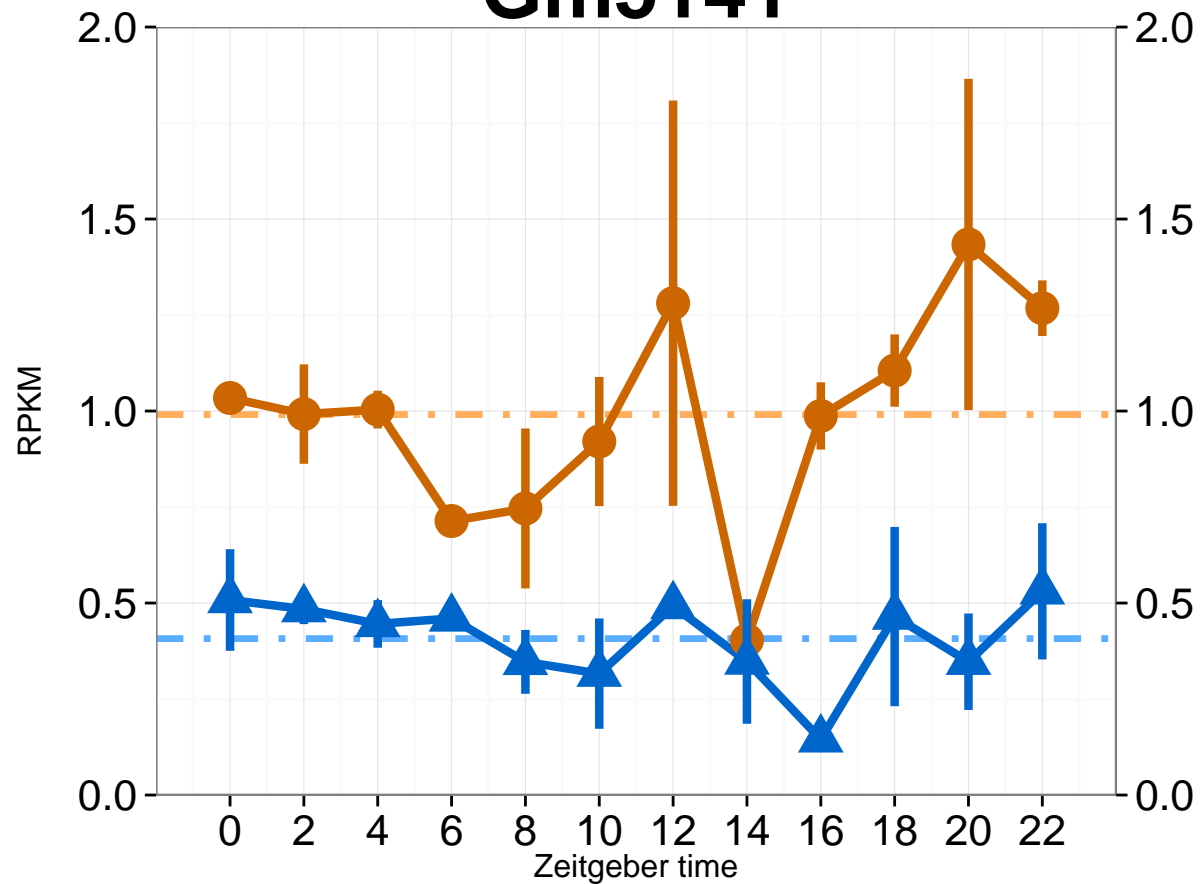

# Gm5141

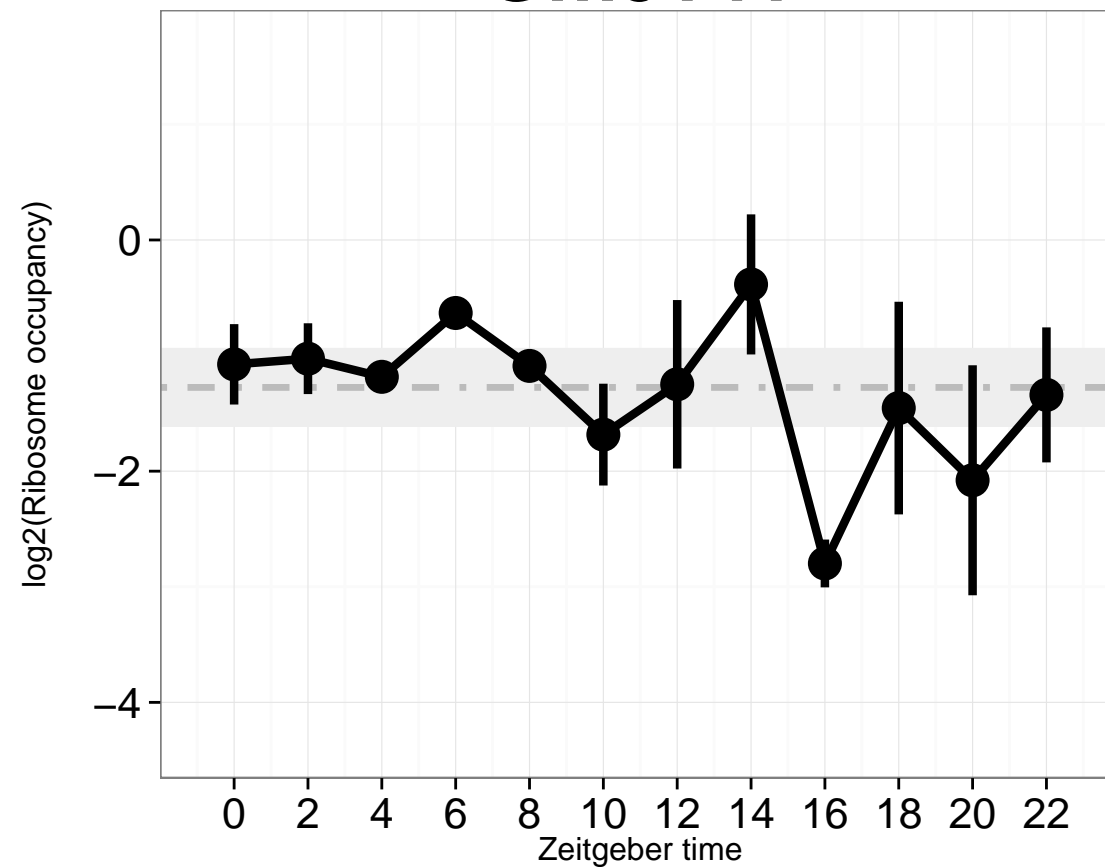

Supplement: Supplementary file 6211 [file 1]

## Nudcd3

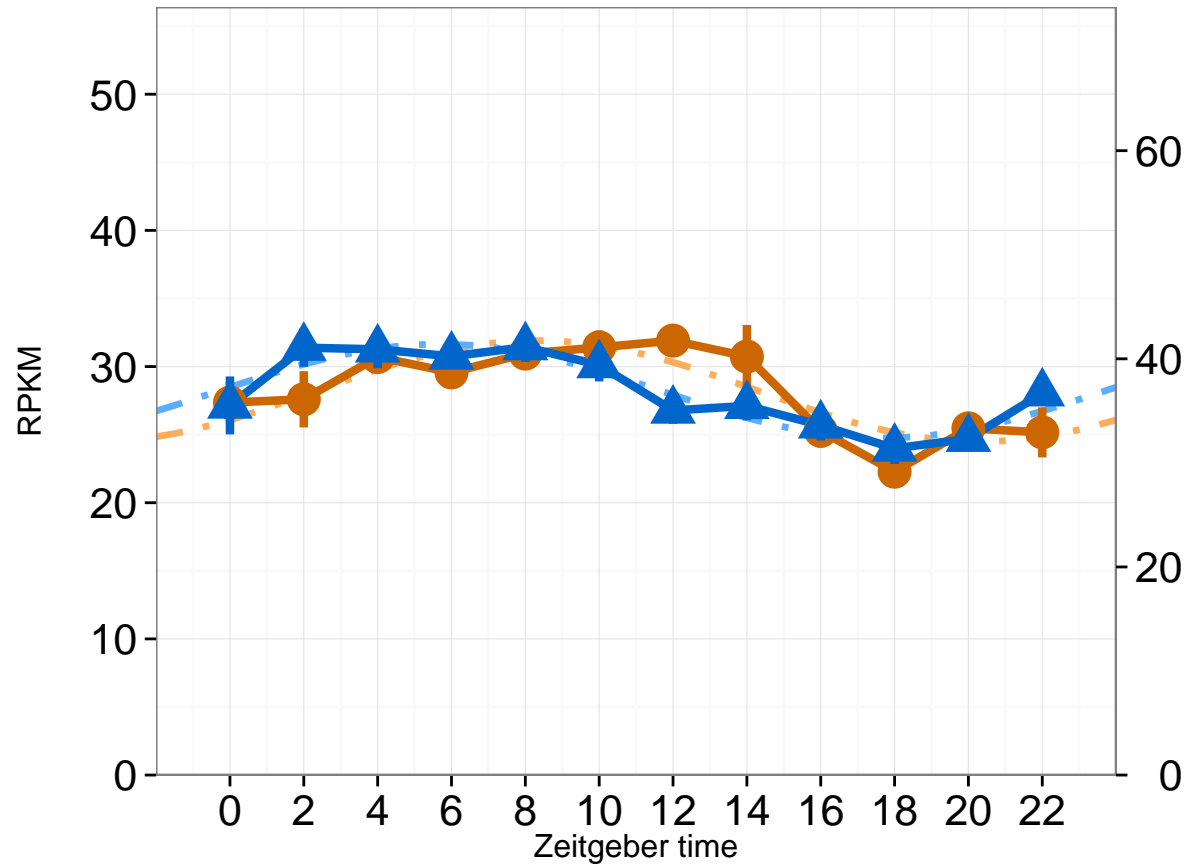

## Nudcd3

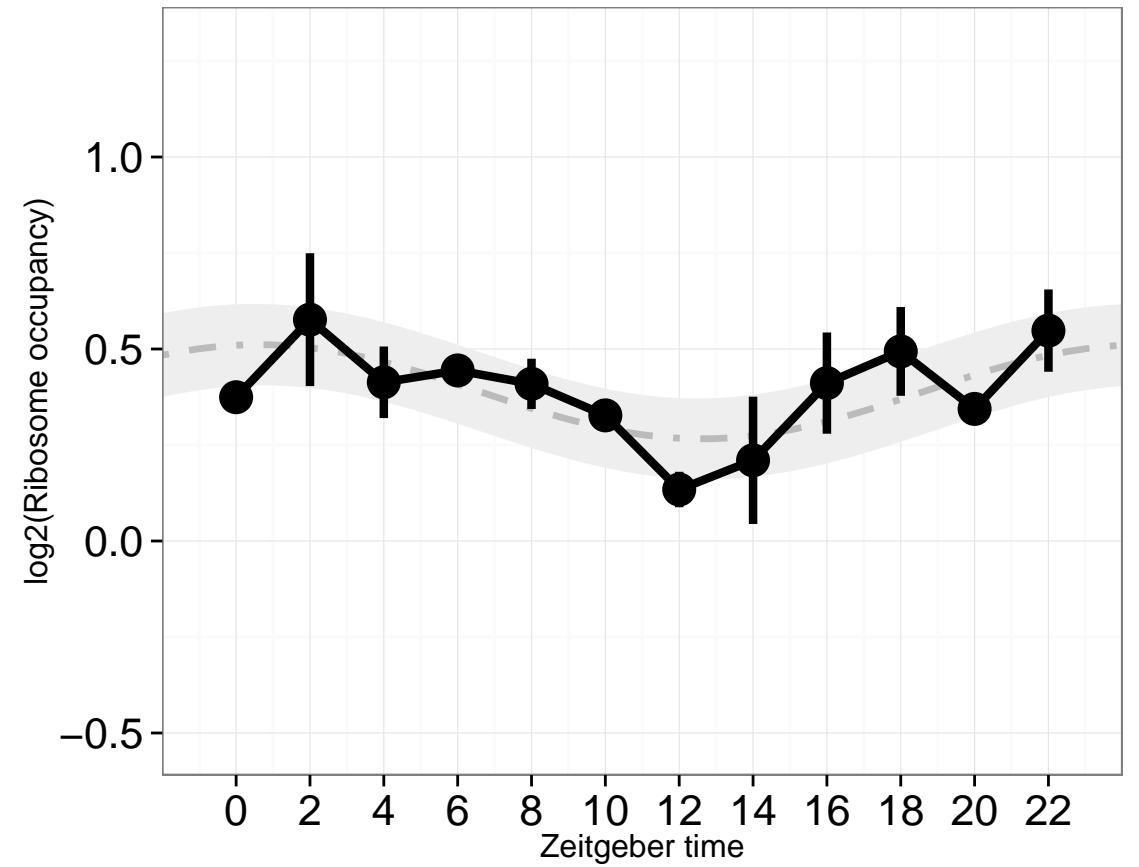

Supplement: Supplementary file 6212 [file 1]

## Nsdhl

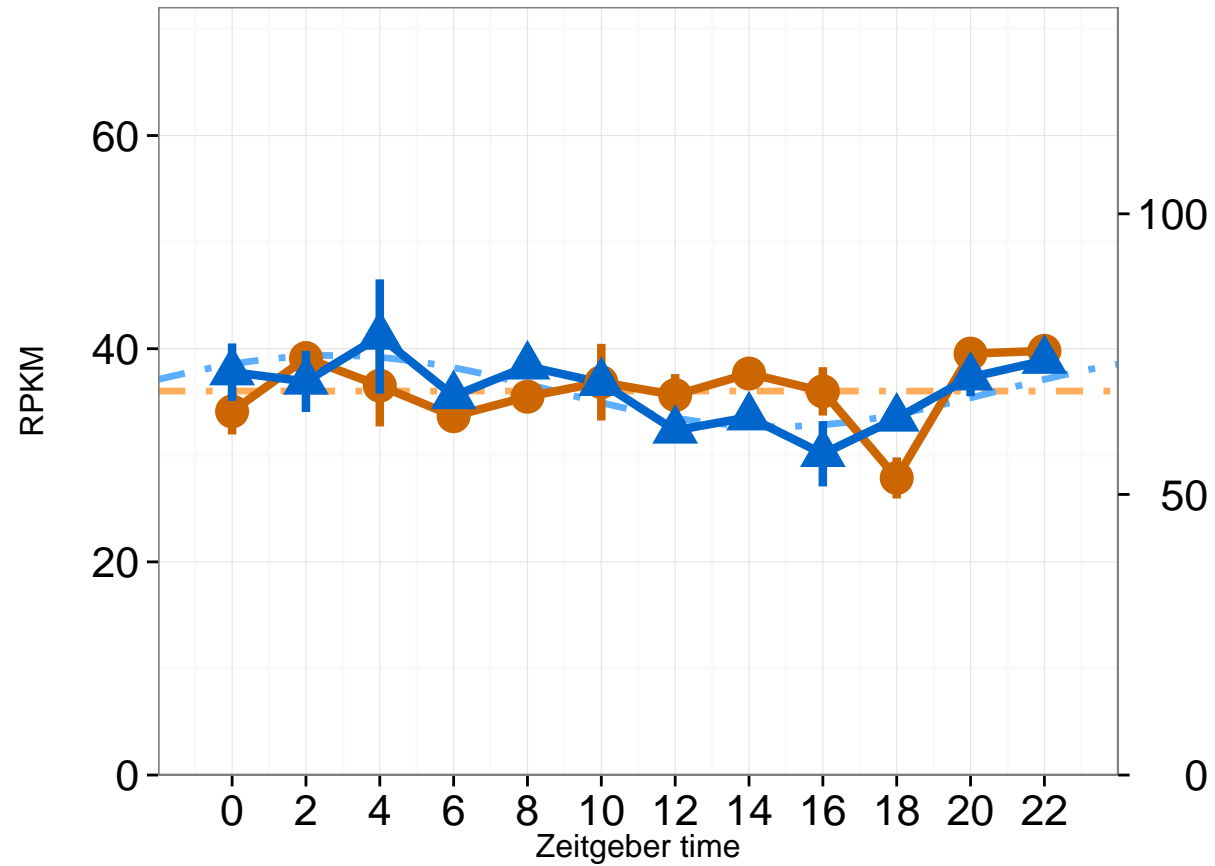

## Nsdhl

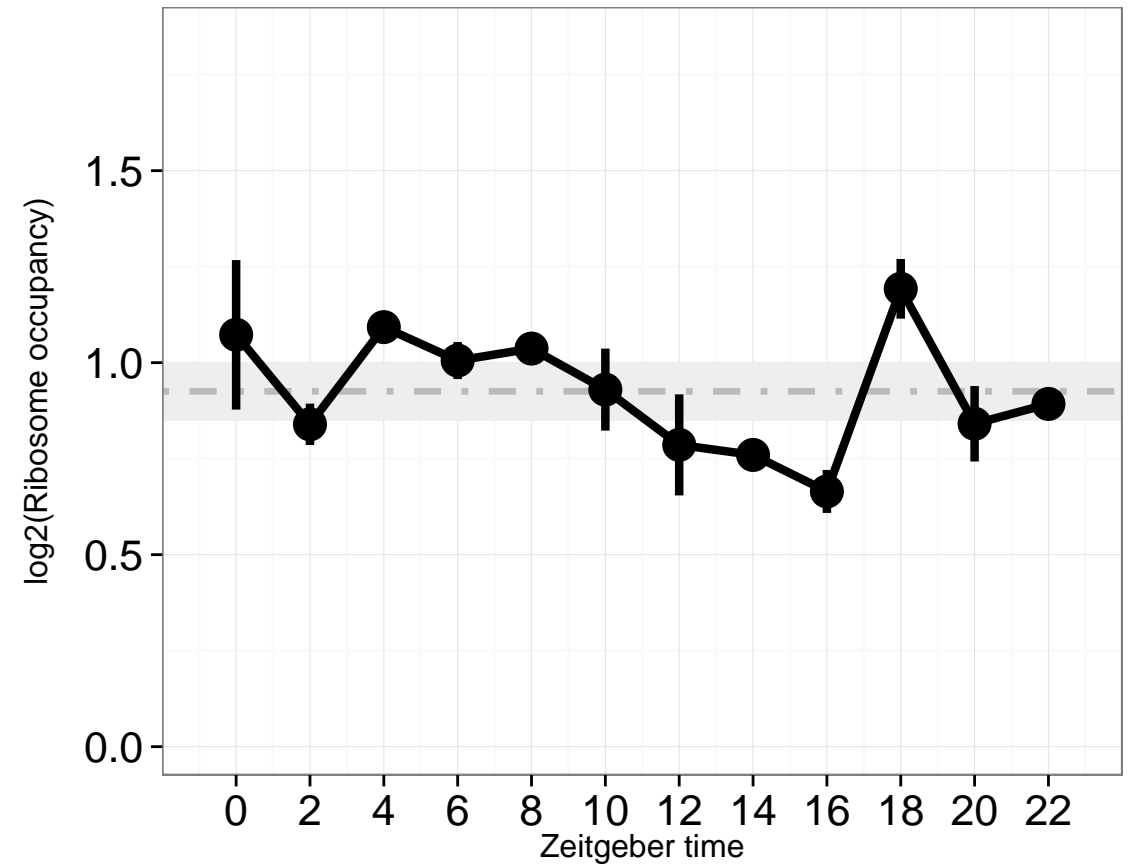

Supplement: Supplementary file 6213 [file 1]

# Pacs2

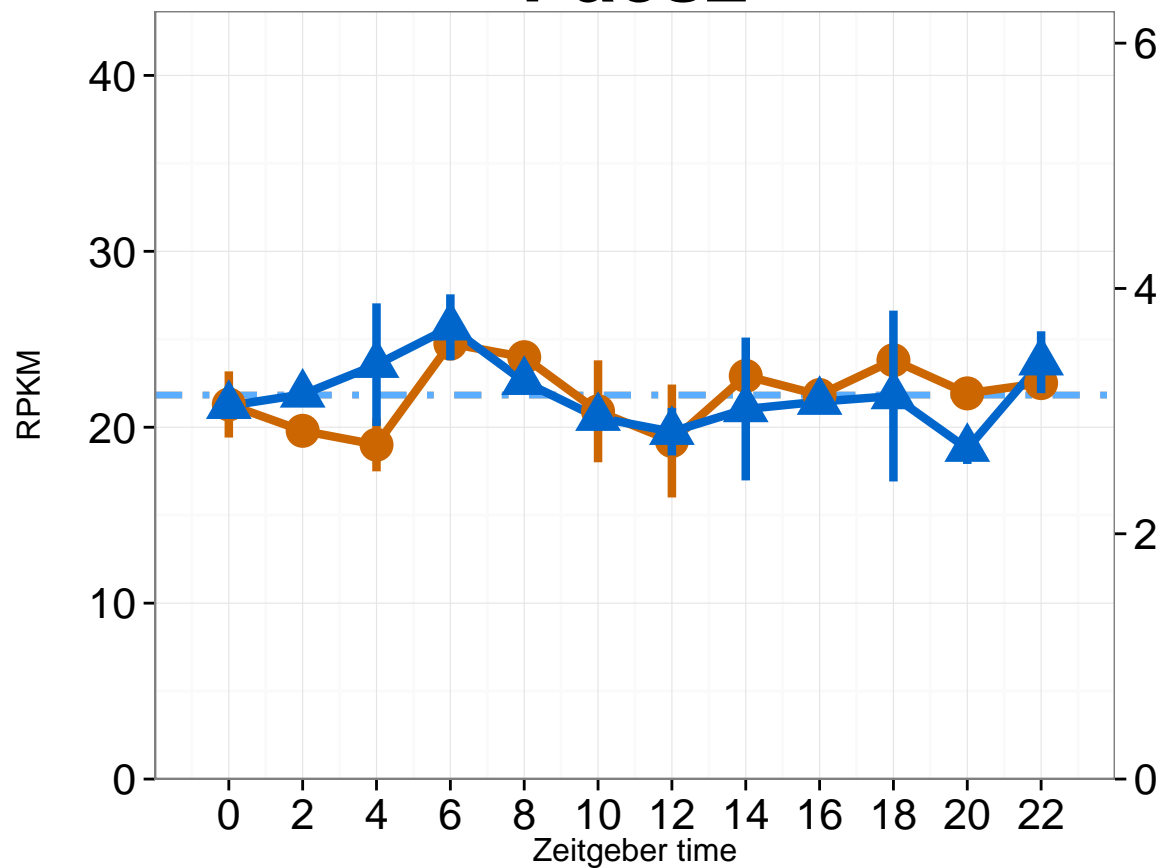

# Pacs2

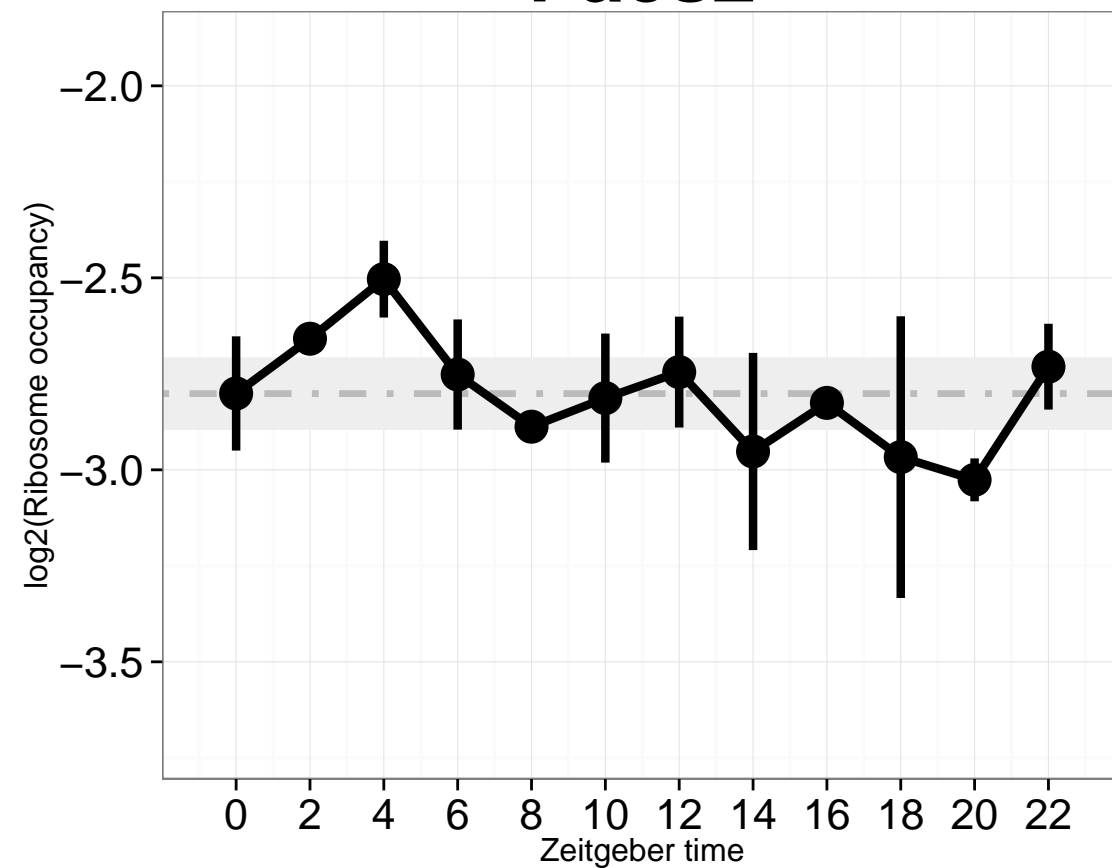

Supplement: Supplementary file 6214 [file 1]

## Aldoa

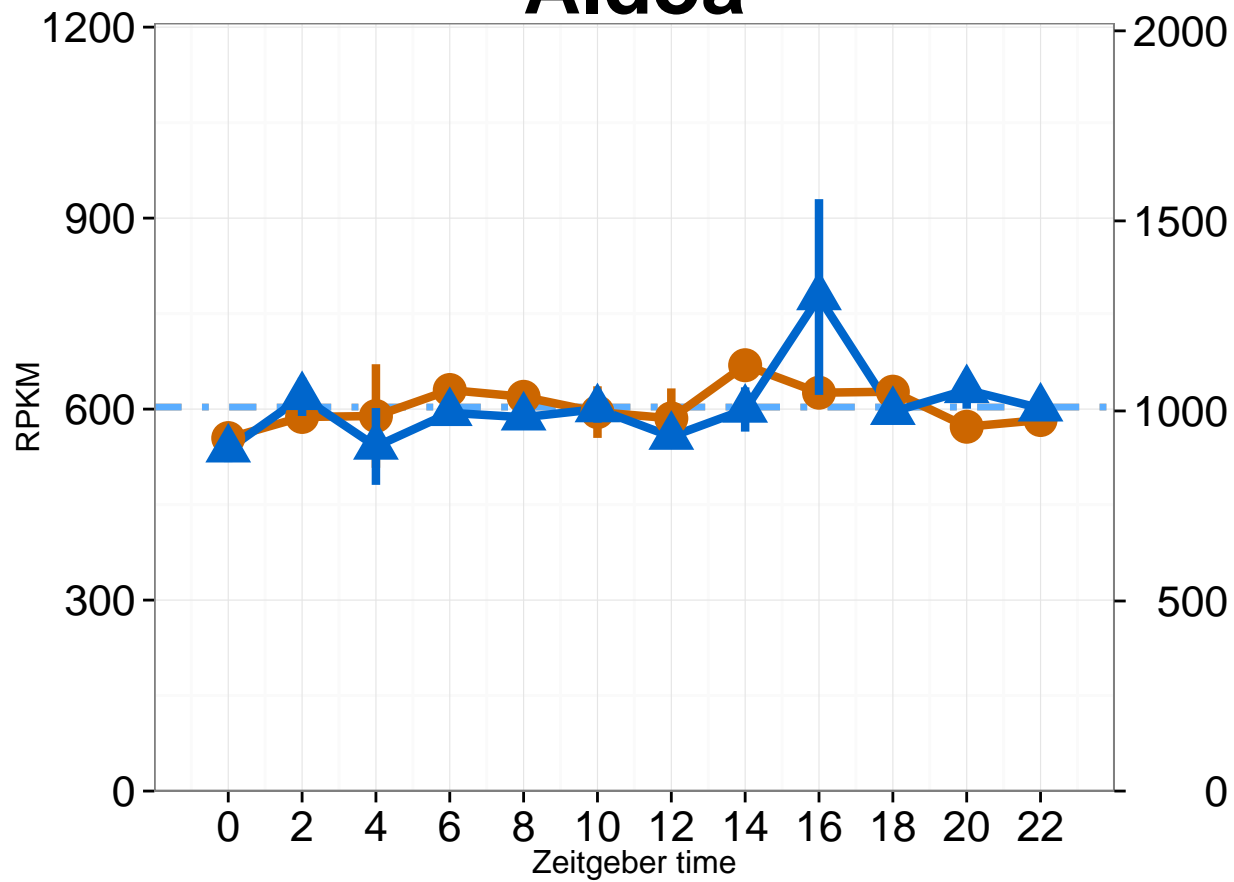

## Aldoa

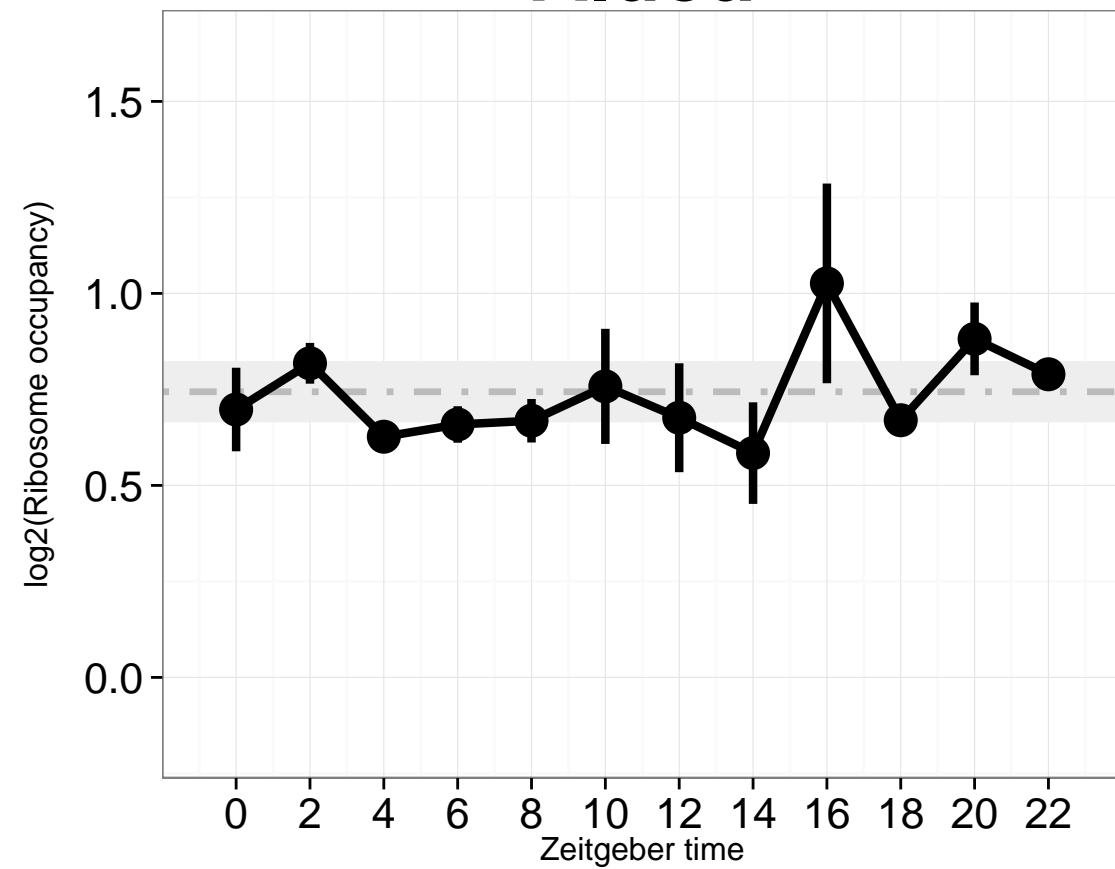

Supplement: Supplementary file 6215 [file 1]

## lfih1

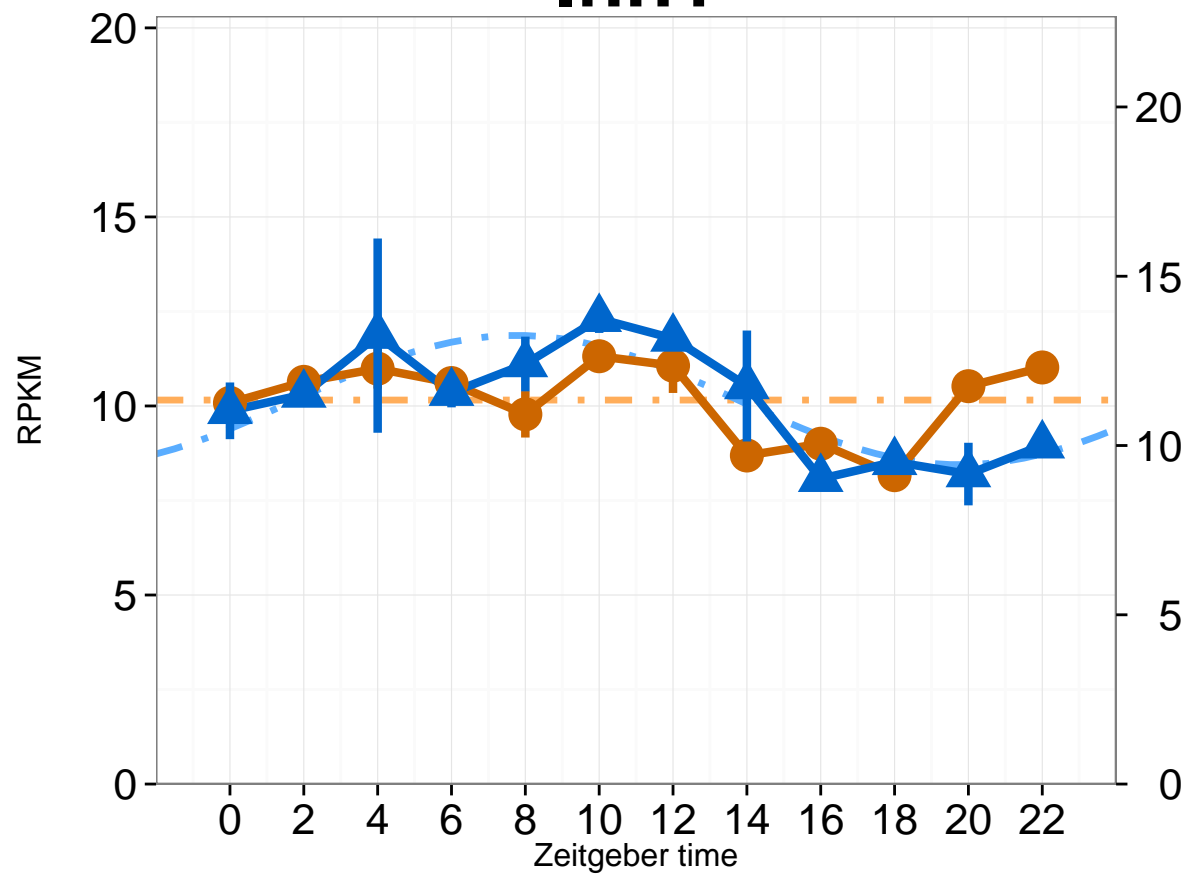

## lfih1

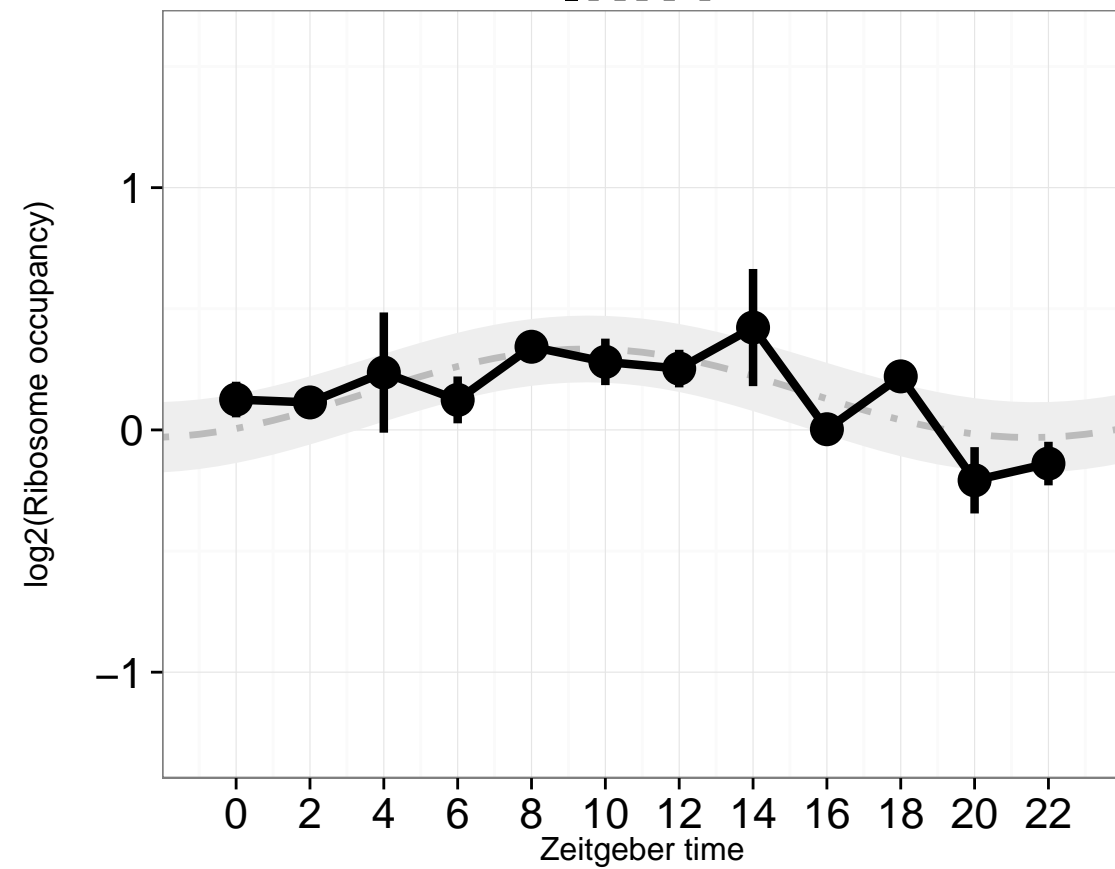

Supplement: Supplementary file 6216 [file 1]

# Abcb7

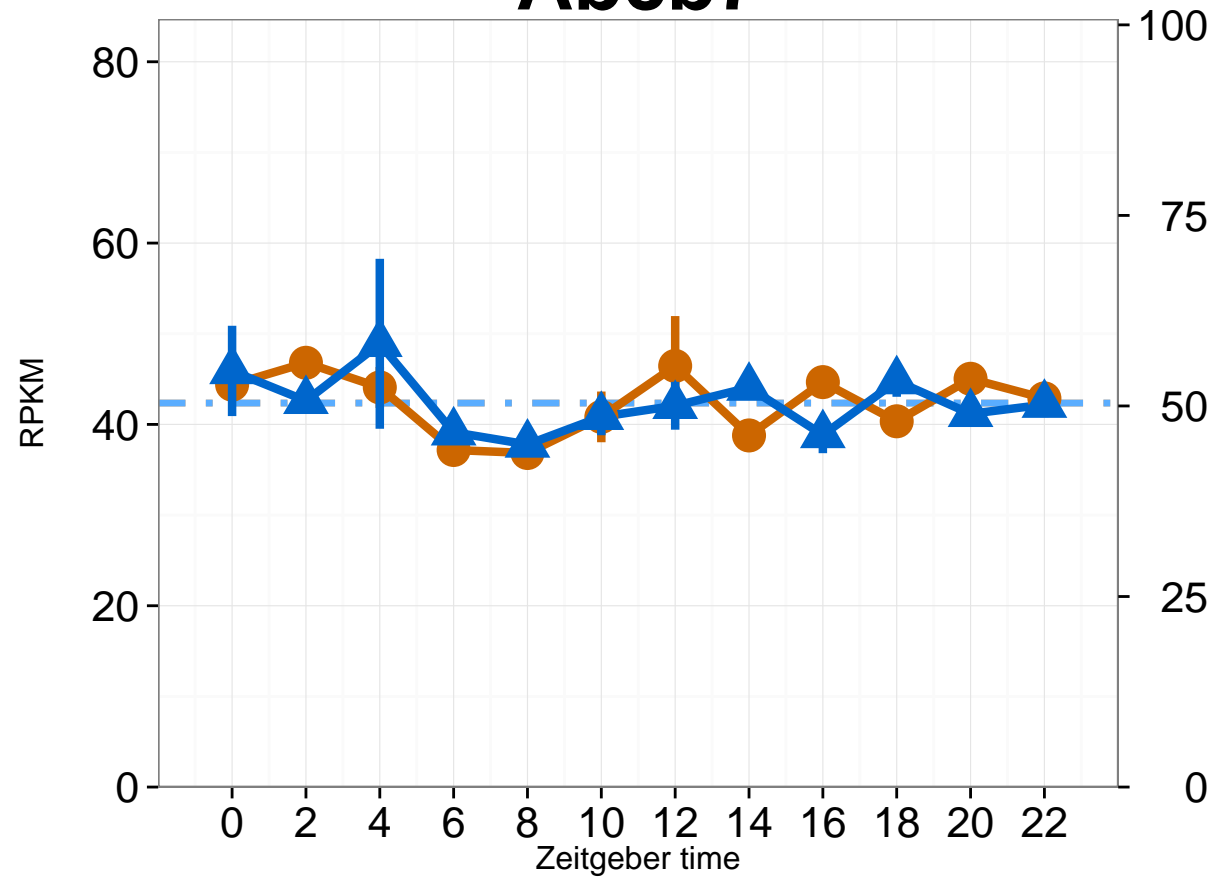

# Abcb7

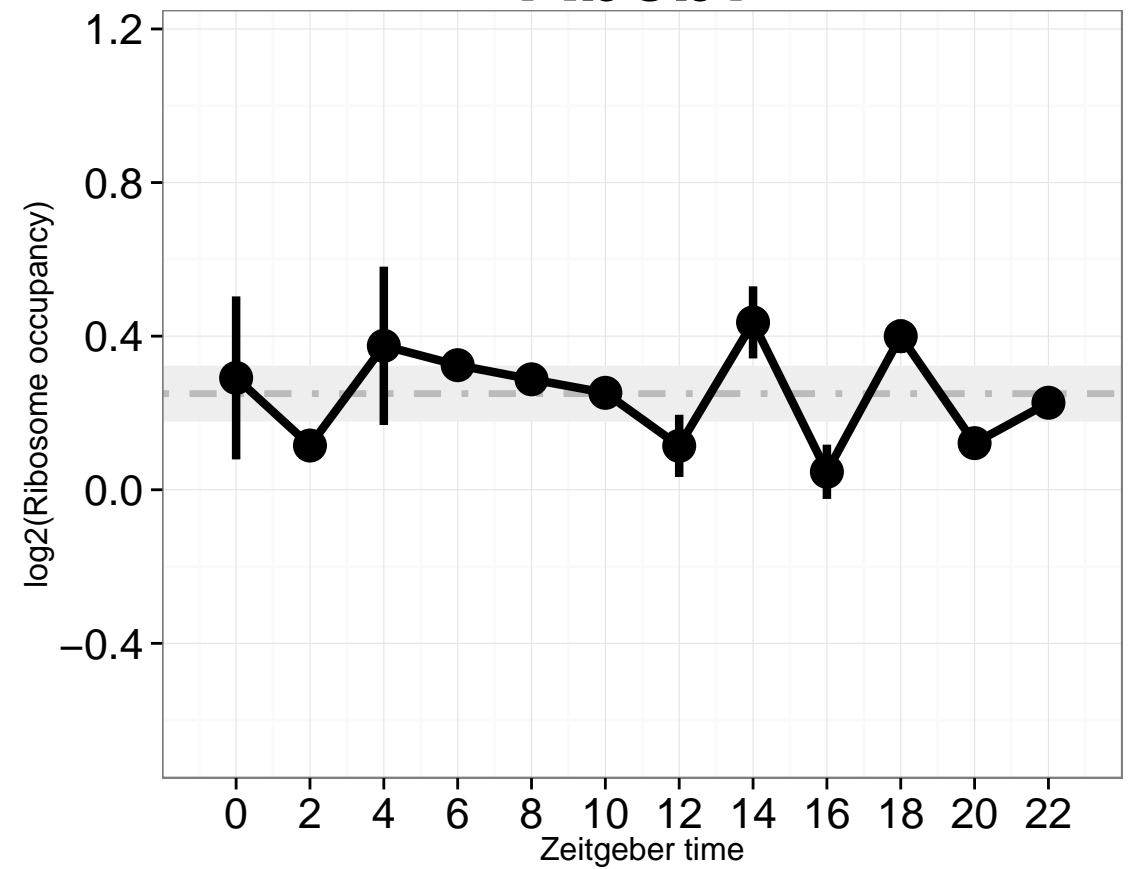

Supplement: Supplementary file 6217 [file 1]

## Zc3h14

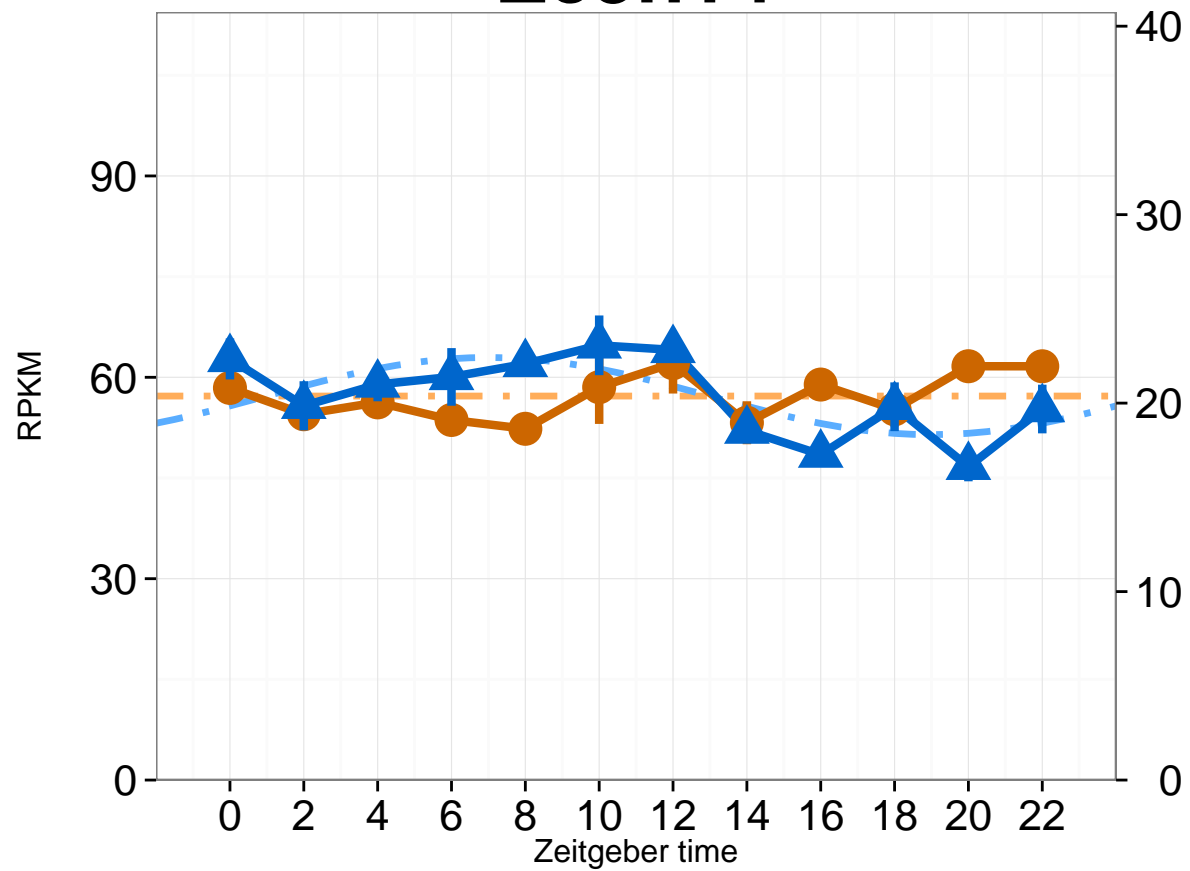

## Zc3h14

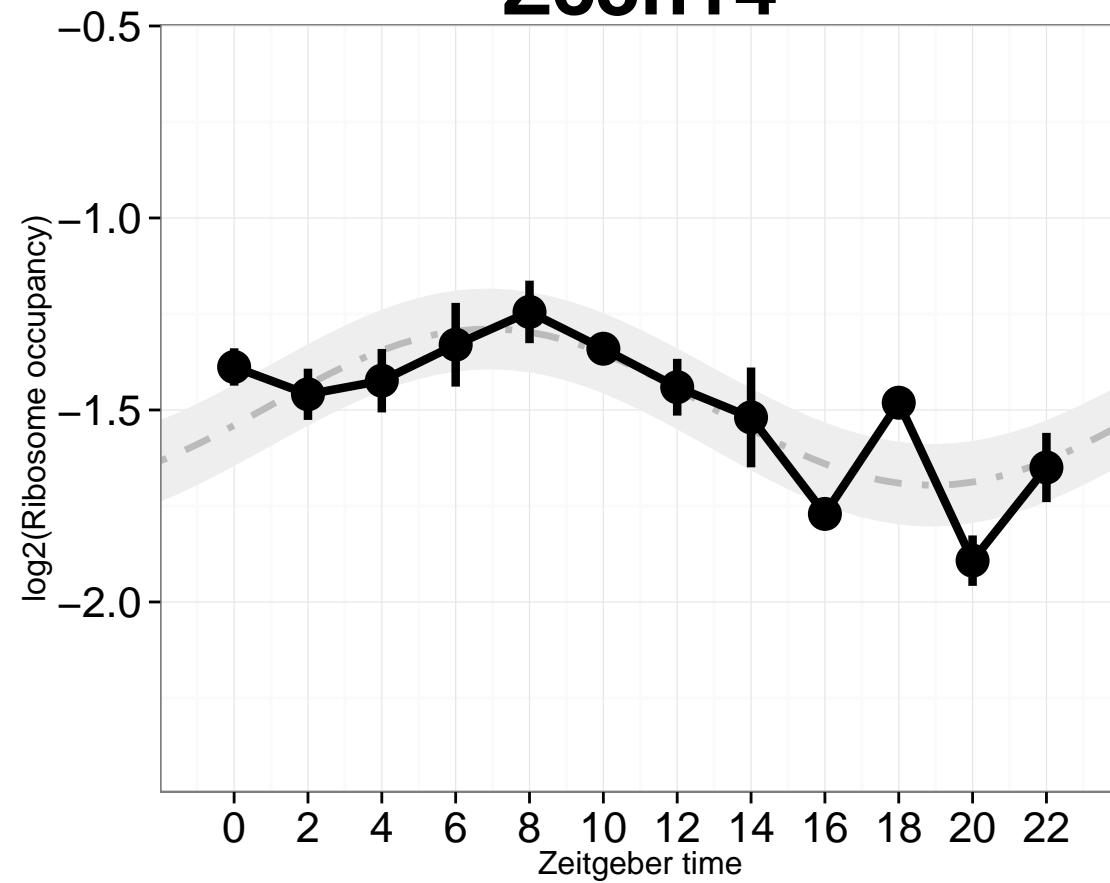

Supplement: Supplementary file 6218 [file 1]

# Pkig

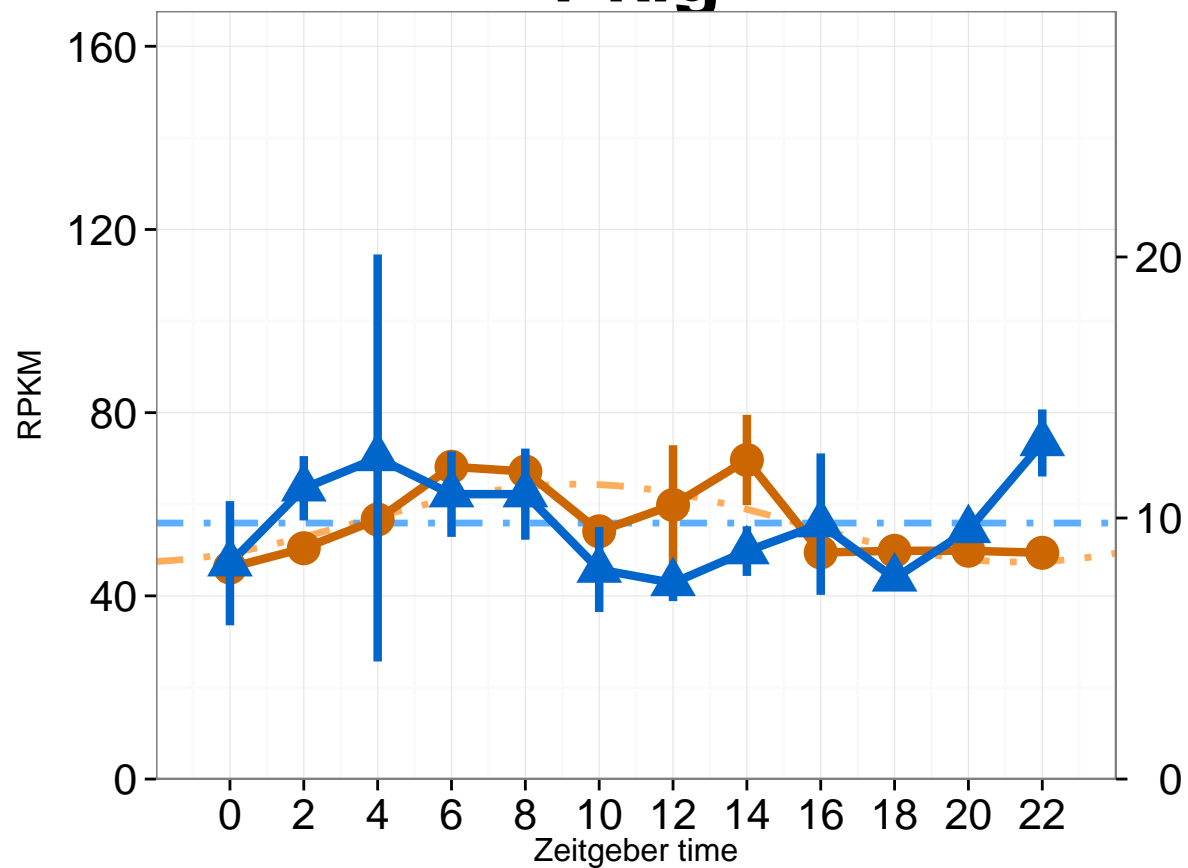

# Pkig

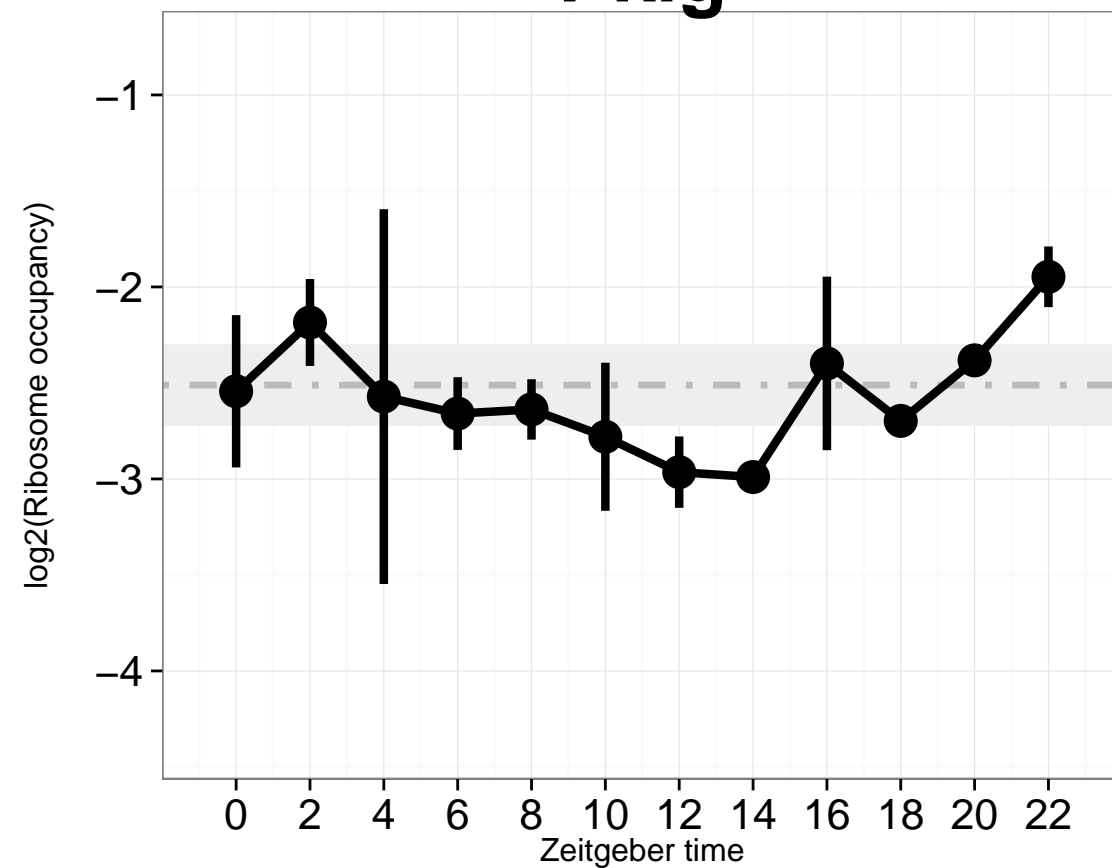

Supplement: Supplementary file 6219 [file 1]

## Ccndbp1

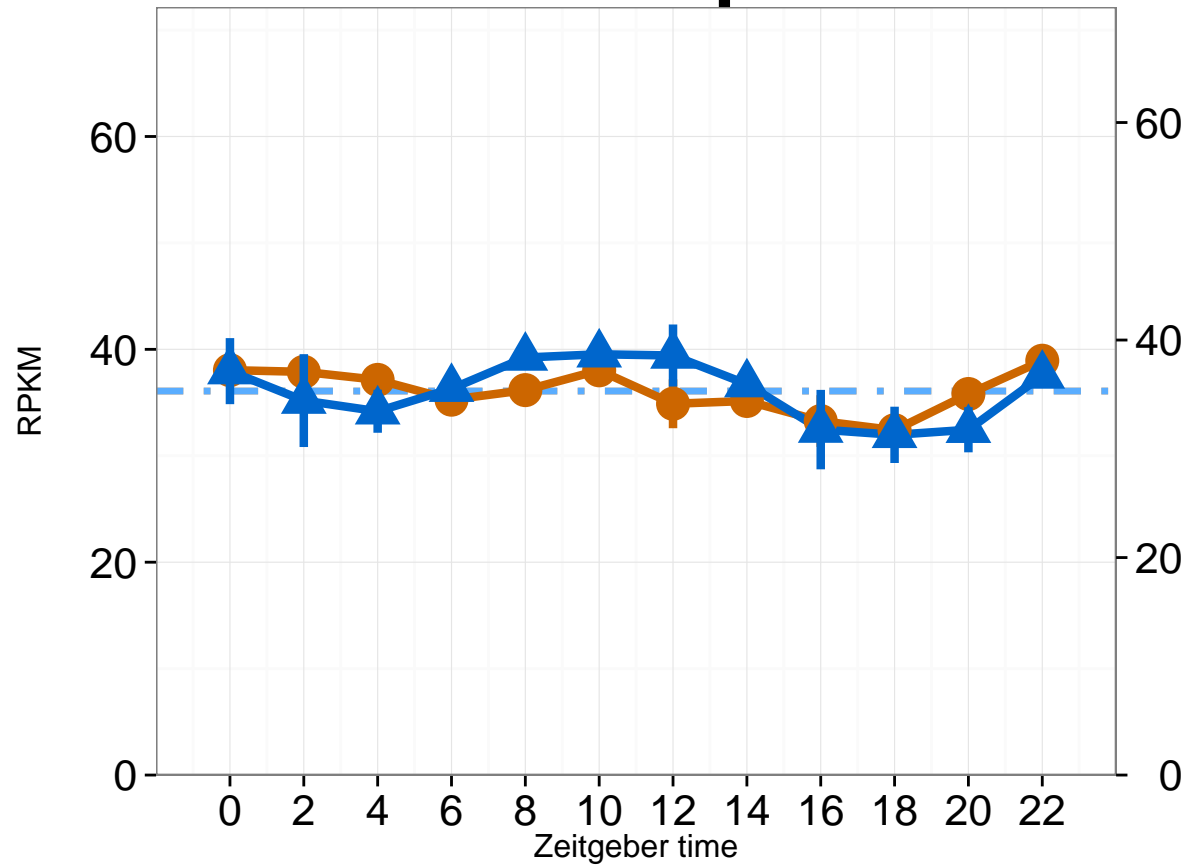

## Ccndbp1

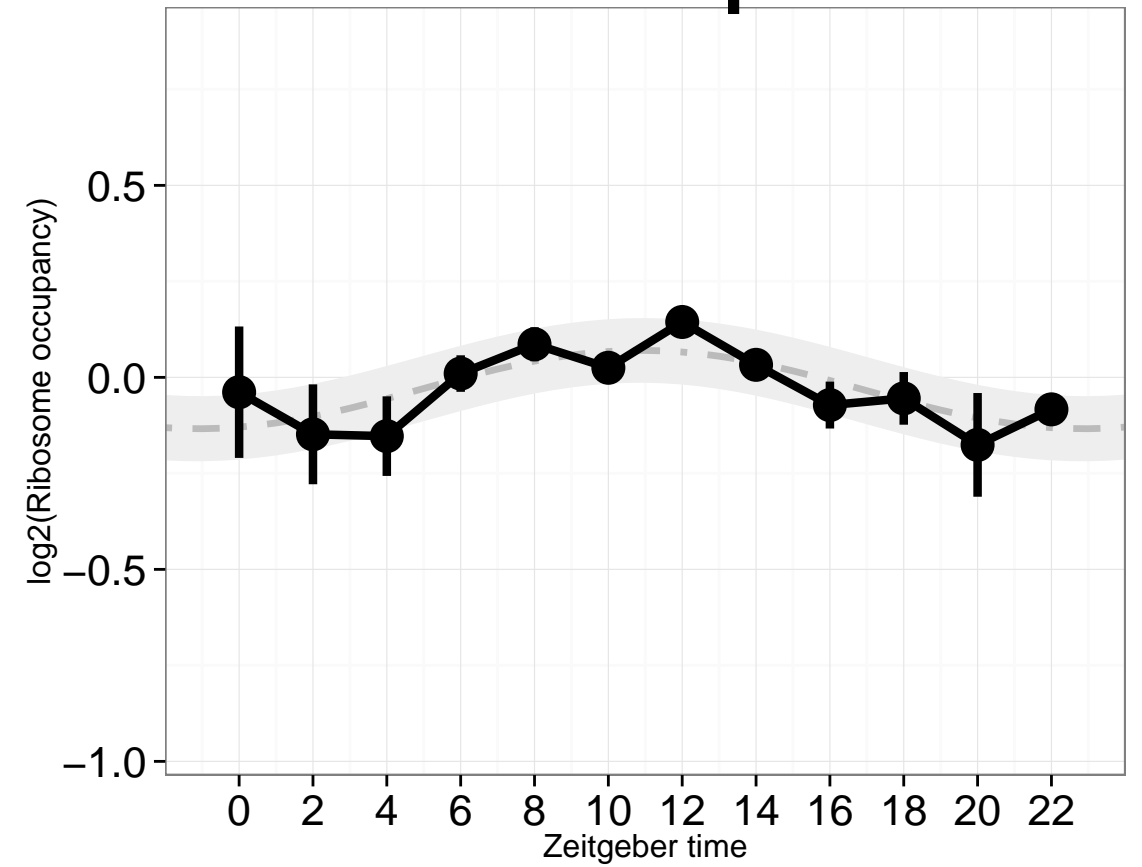

Supplement: Supplementary file 6220 [file 1]

# Hps1

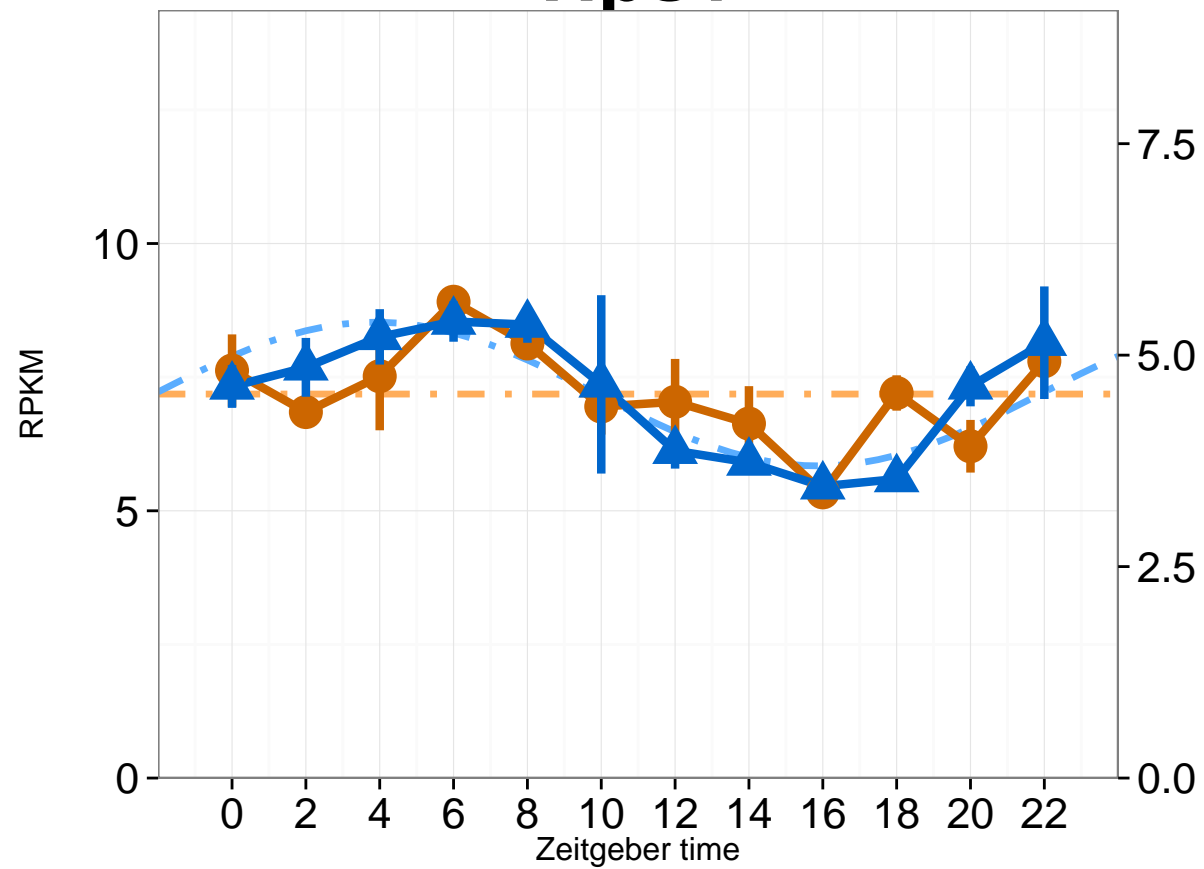

# Hps1

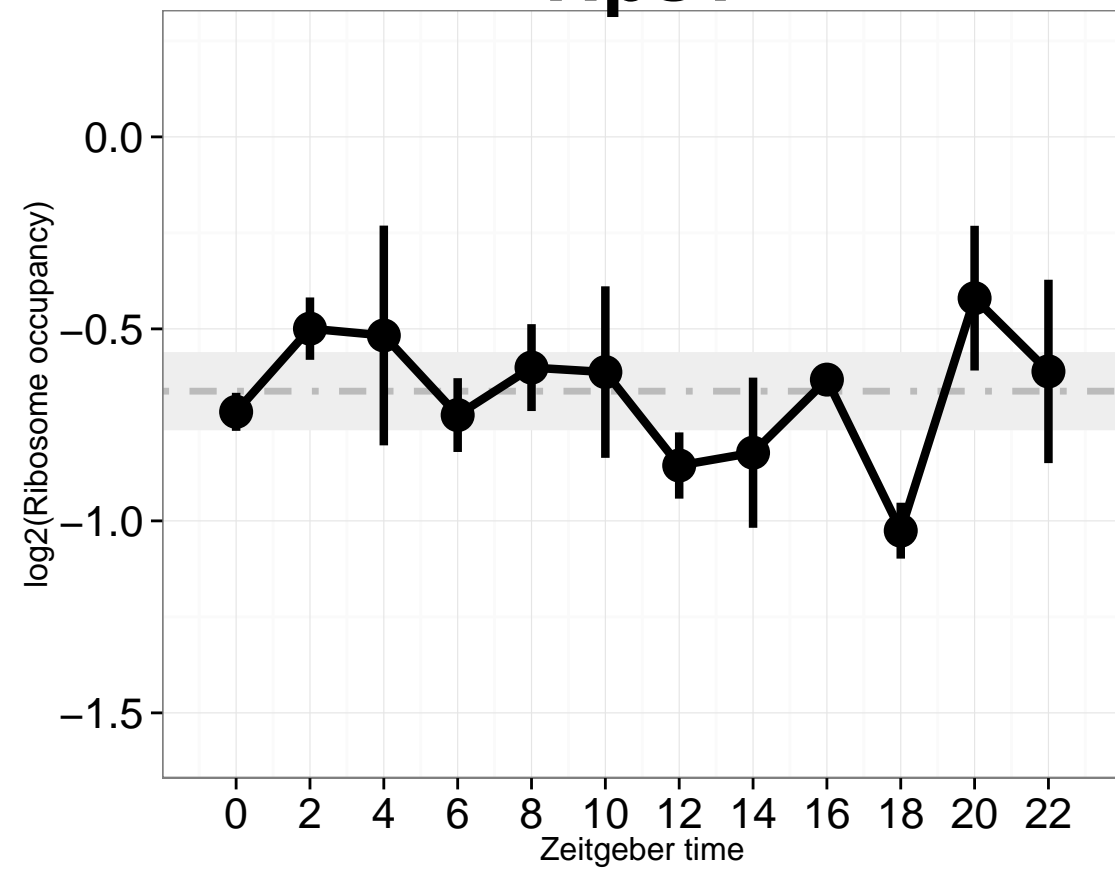

Supplement: Supplementary file 6221 [file 1]

## Mvp

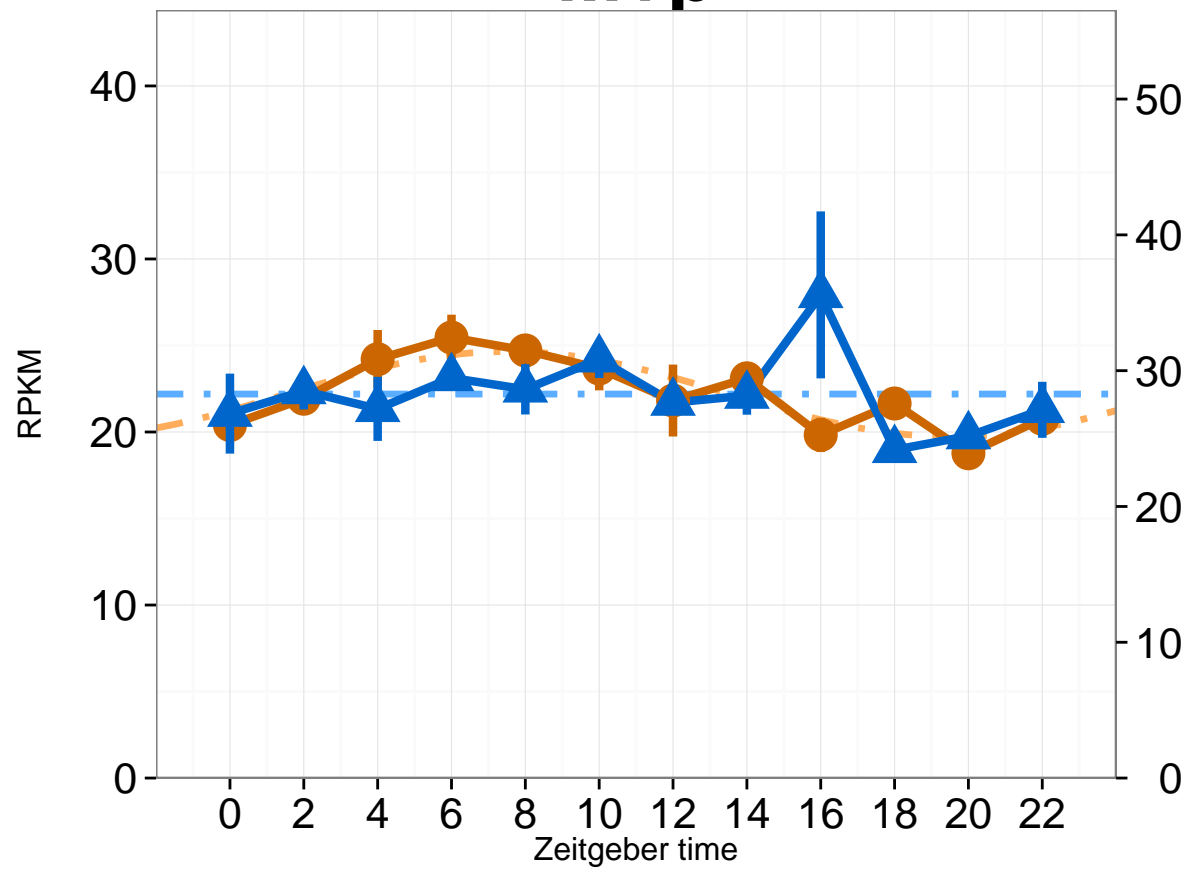

## Mvp

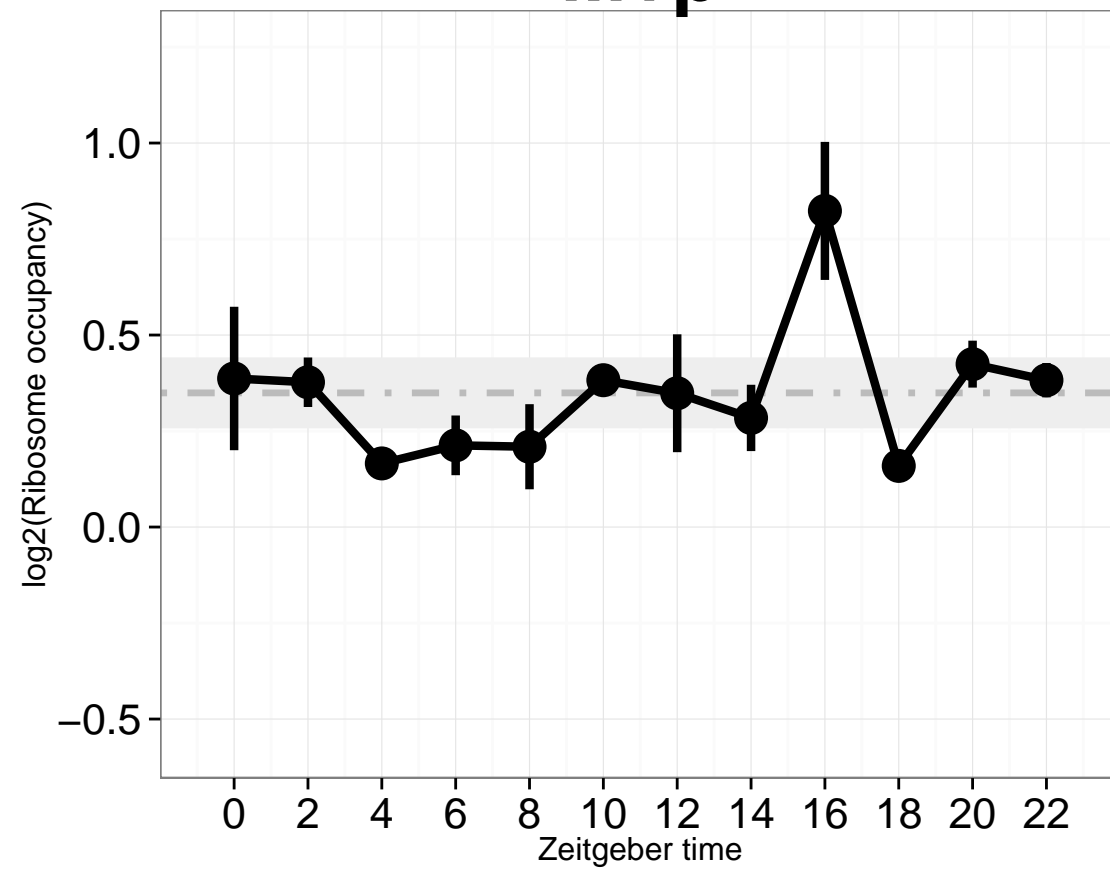

Supplement: Supplementary file 6222 [file 1]
