# Supplementary material (part 63 of 133)
Source: publisher figshare collection journal article supplement (https://springernature.figshare.com/articles/dataset/_/4903193)

## Txndc15

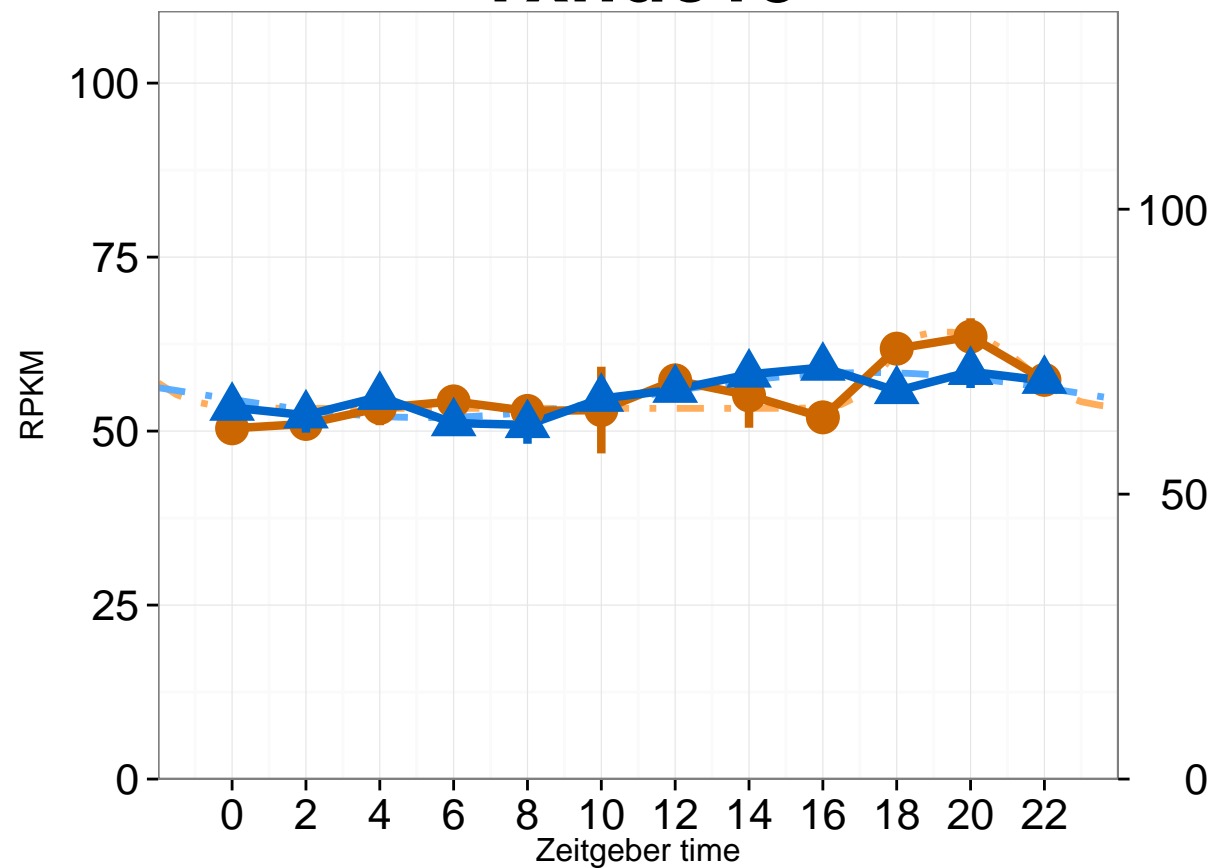

## Txndc15

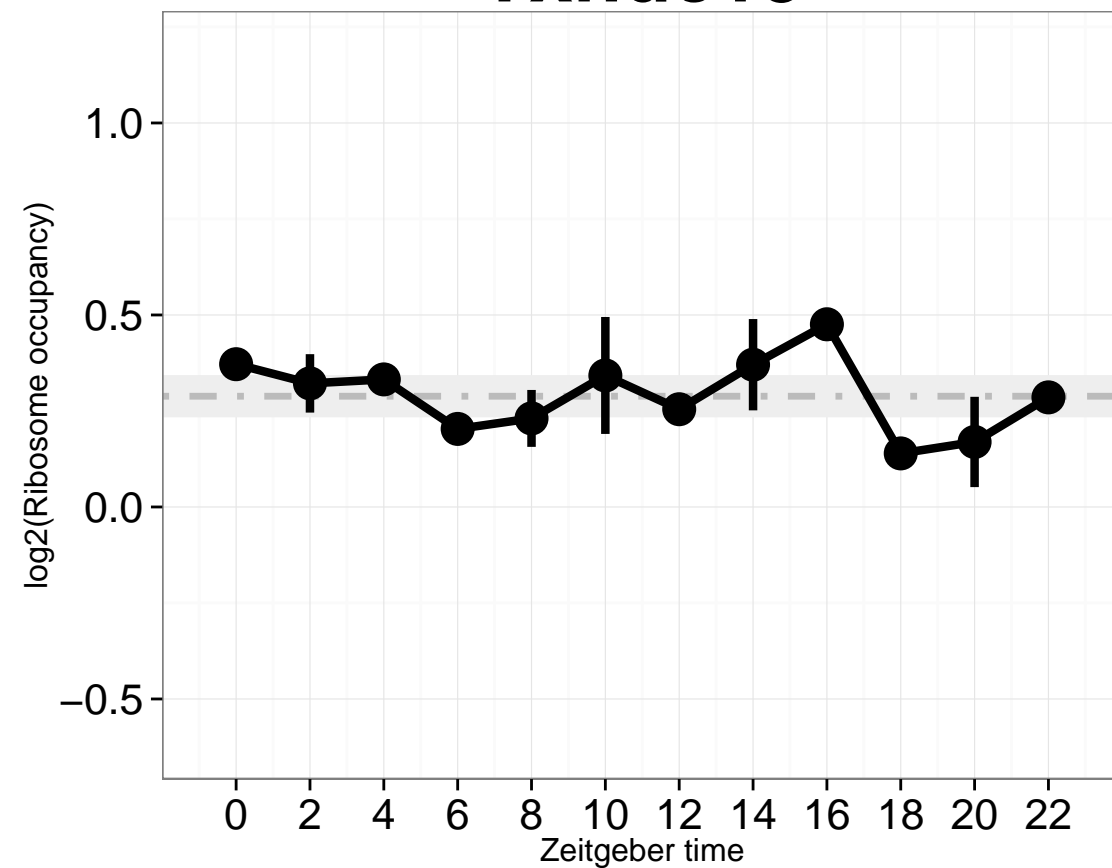

Supplement: Supplementary file 6223 [file 1]

## Hint3

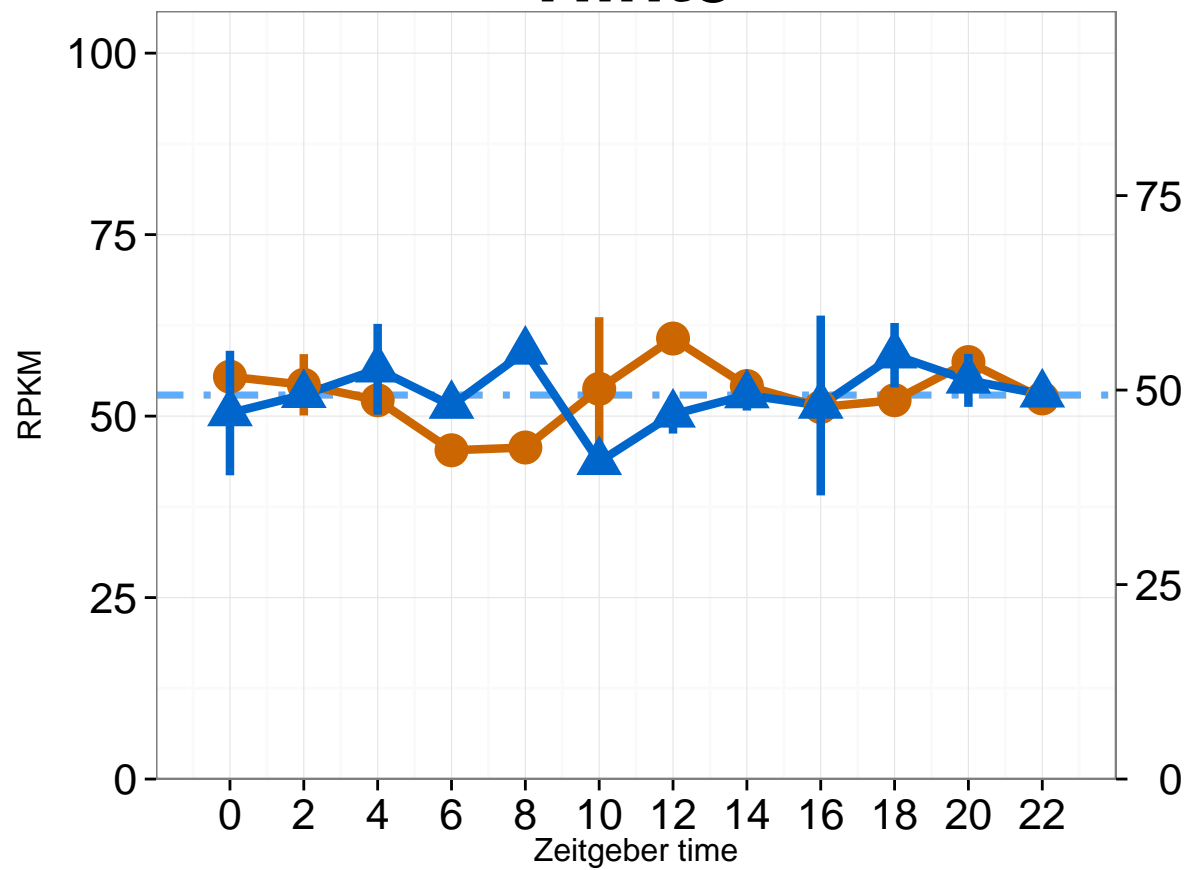

## Hint3

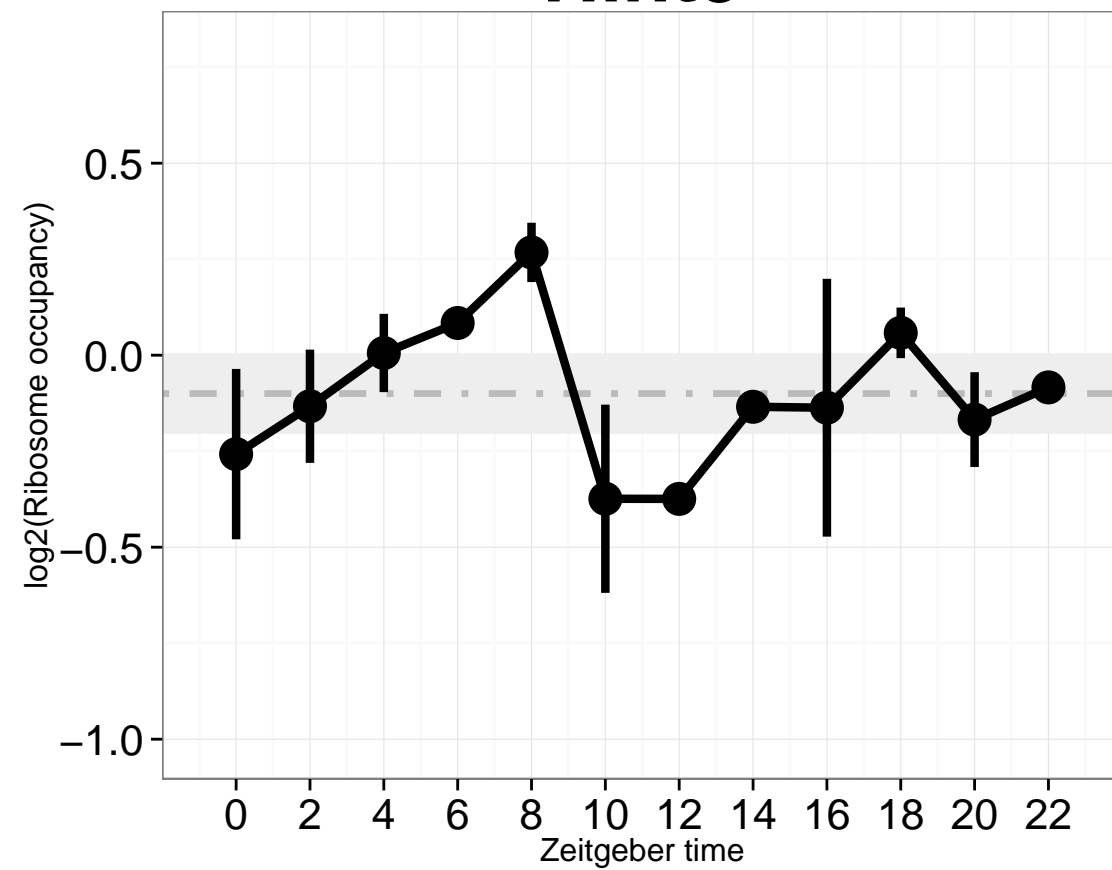

Supplement: Supplementary file 6224 [file 1]

# Fndc1

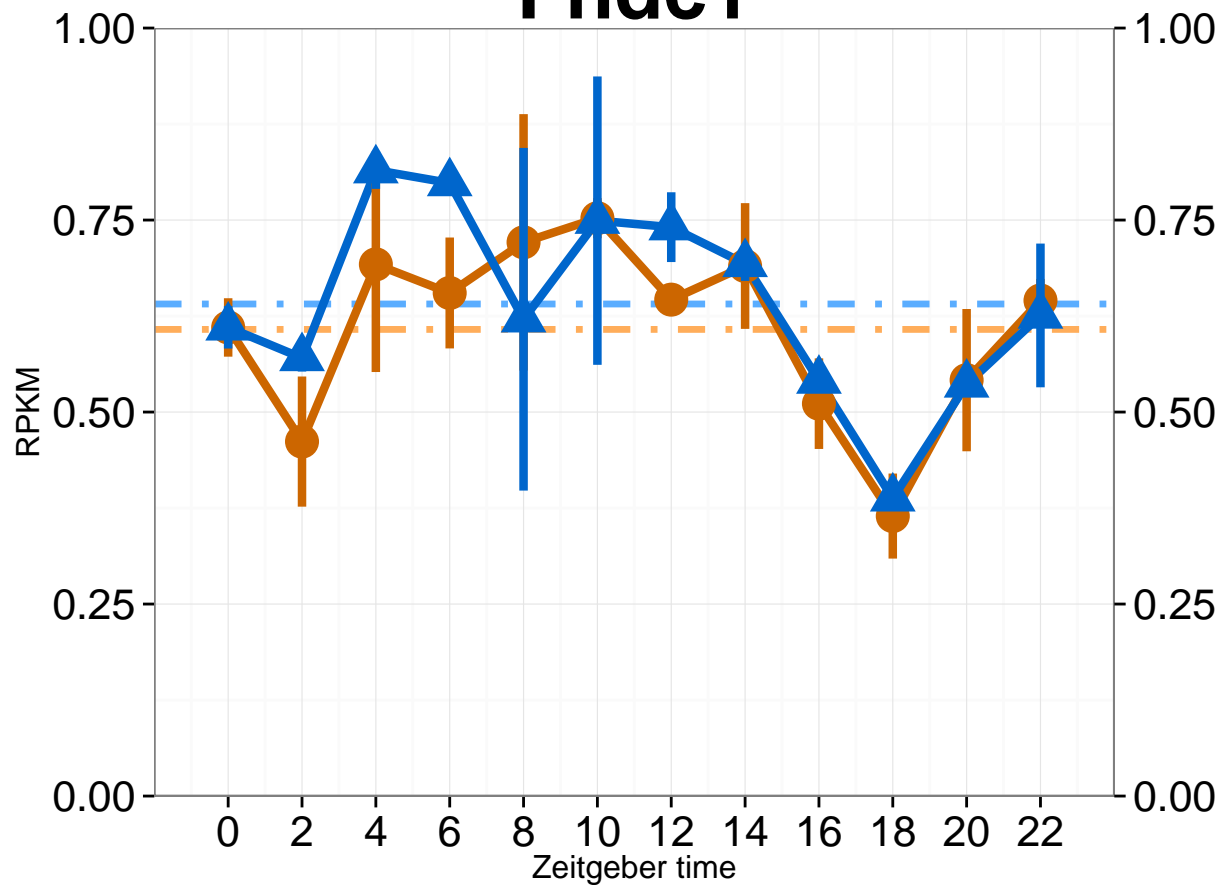

# Fndc1

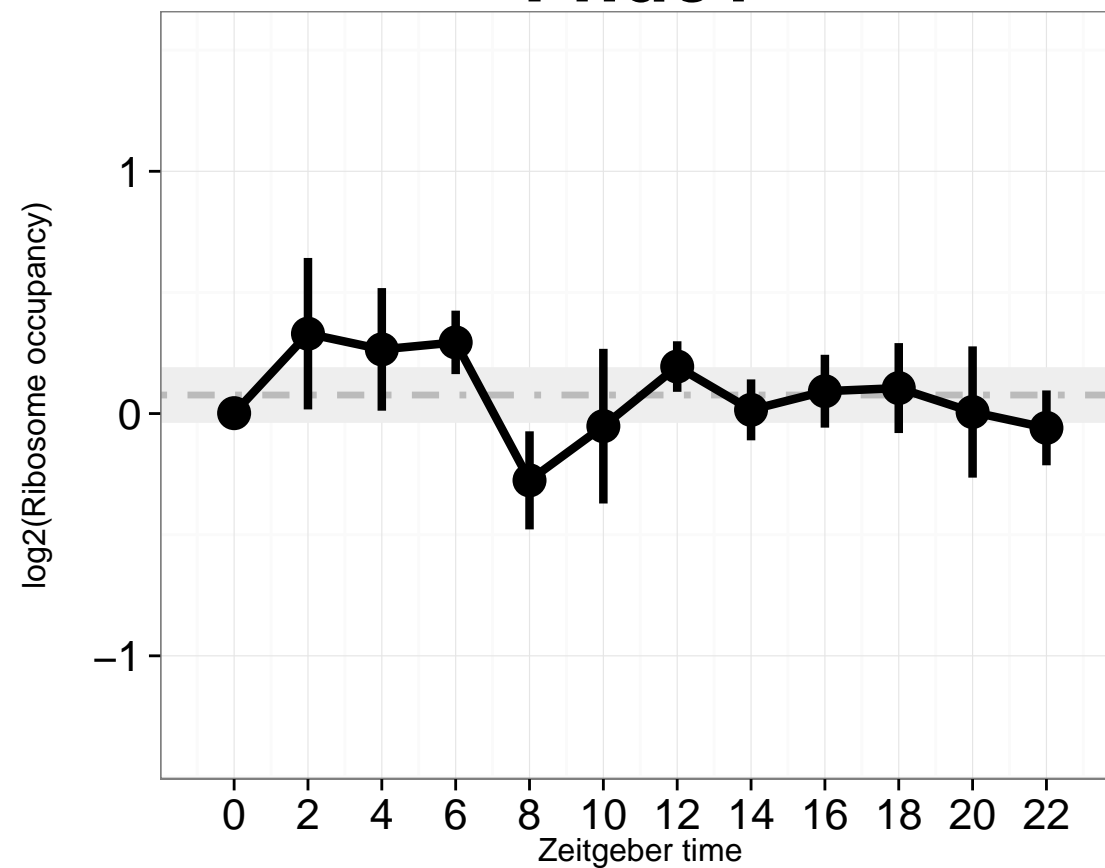

Supplement: Supplementary file 6225 [file 1]

# Atp5g1

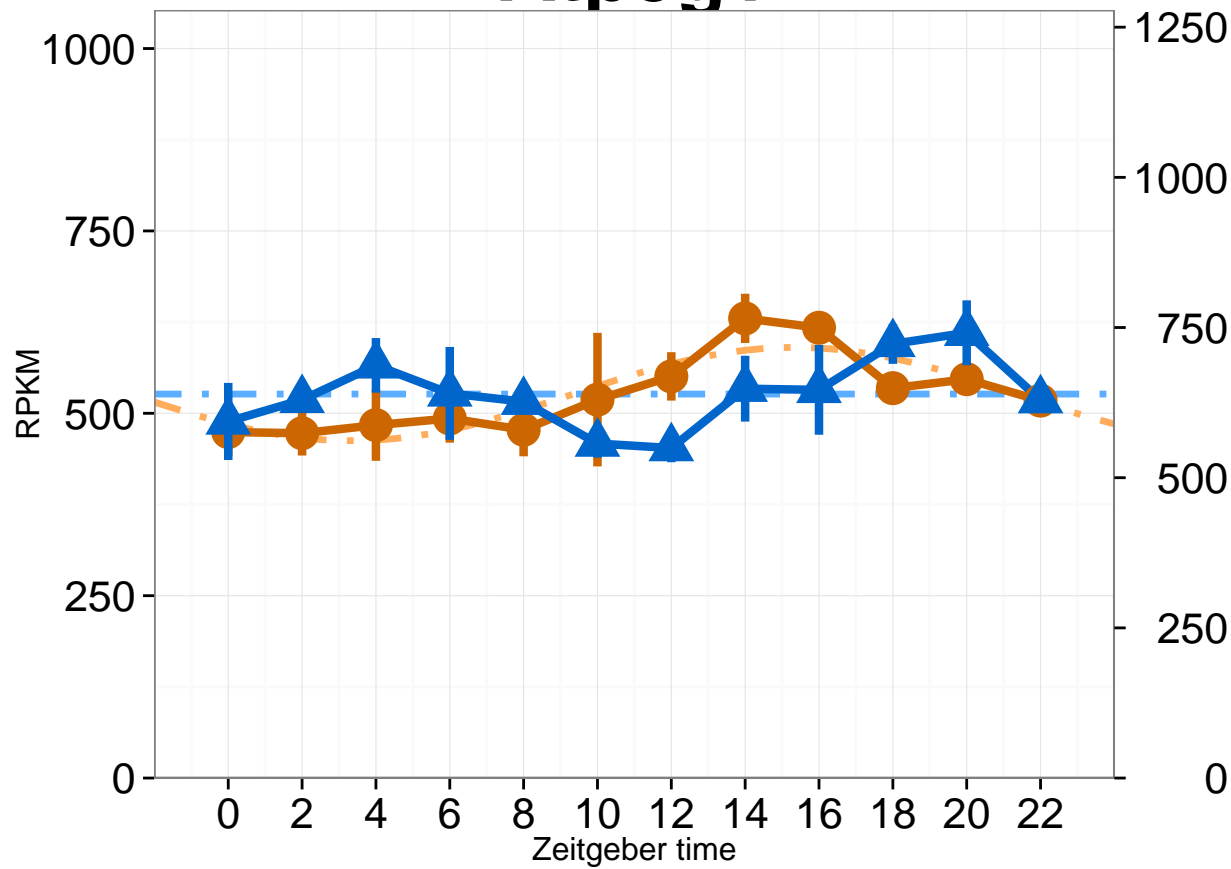

# Atp5g1

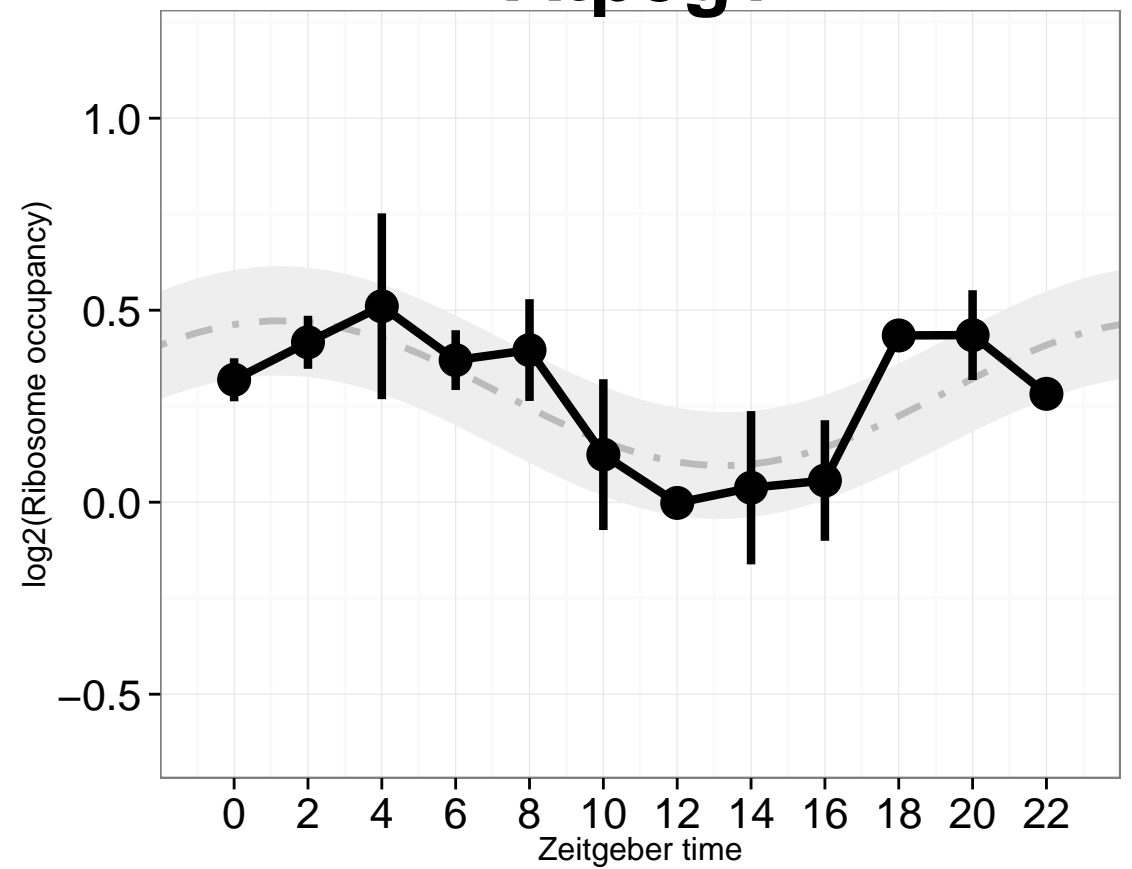

Supplement: Supplementary file 6226 [file 1]

## Pvr

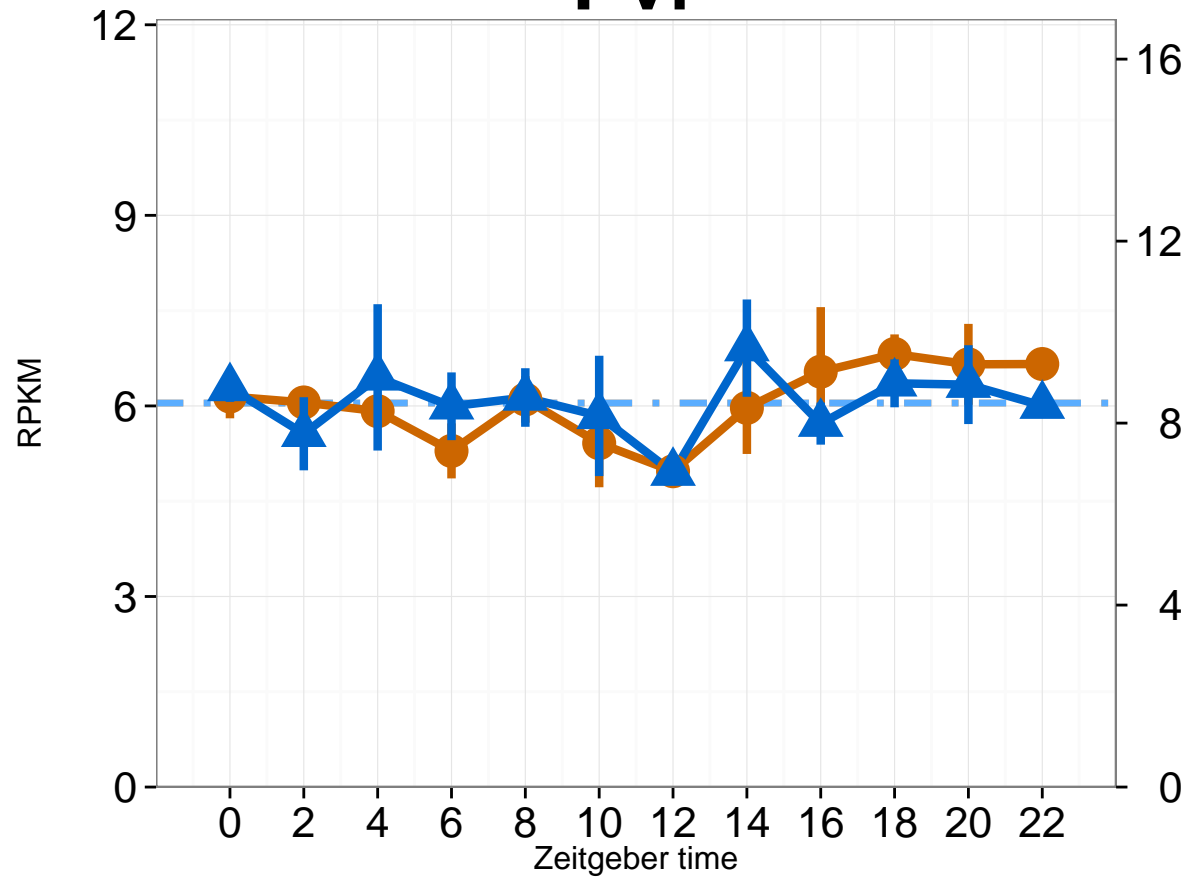

## Pvr

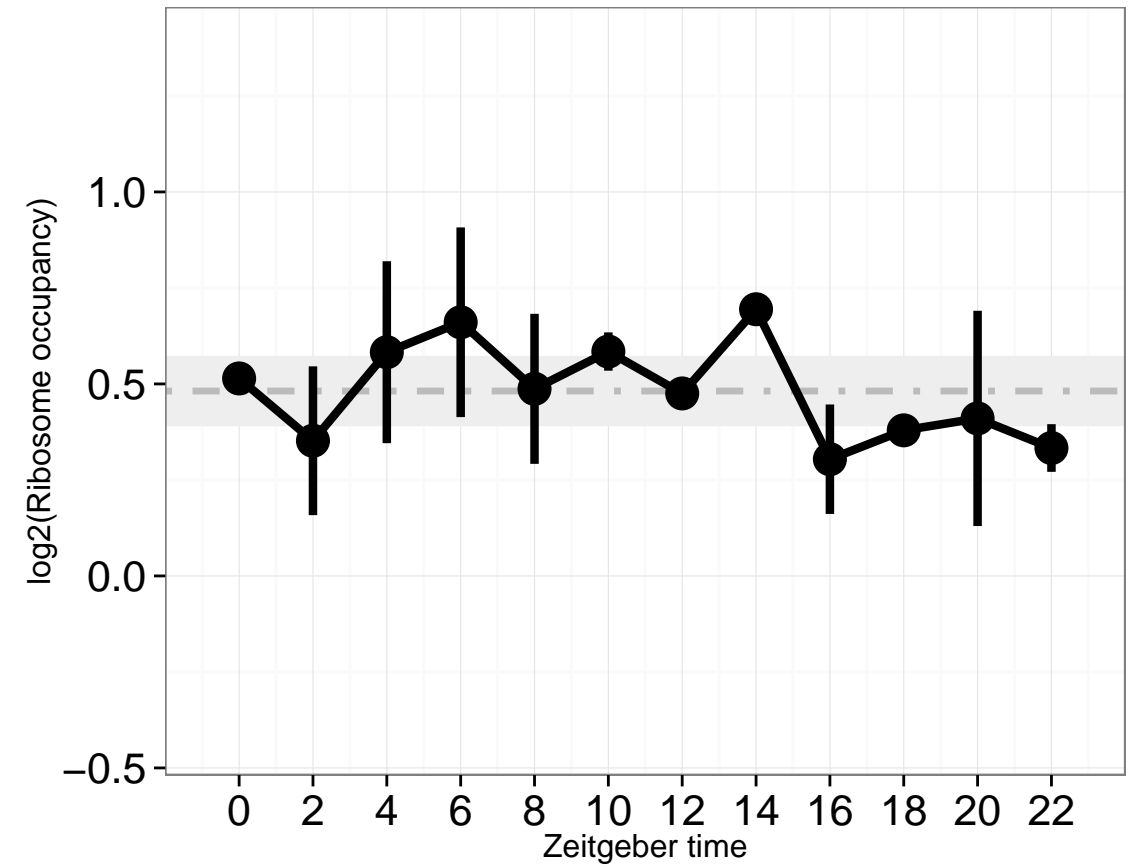

Supplement: Supplementary file 6227 [file 1]

# Plekhg6

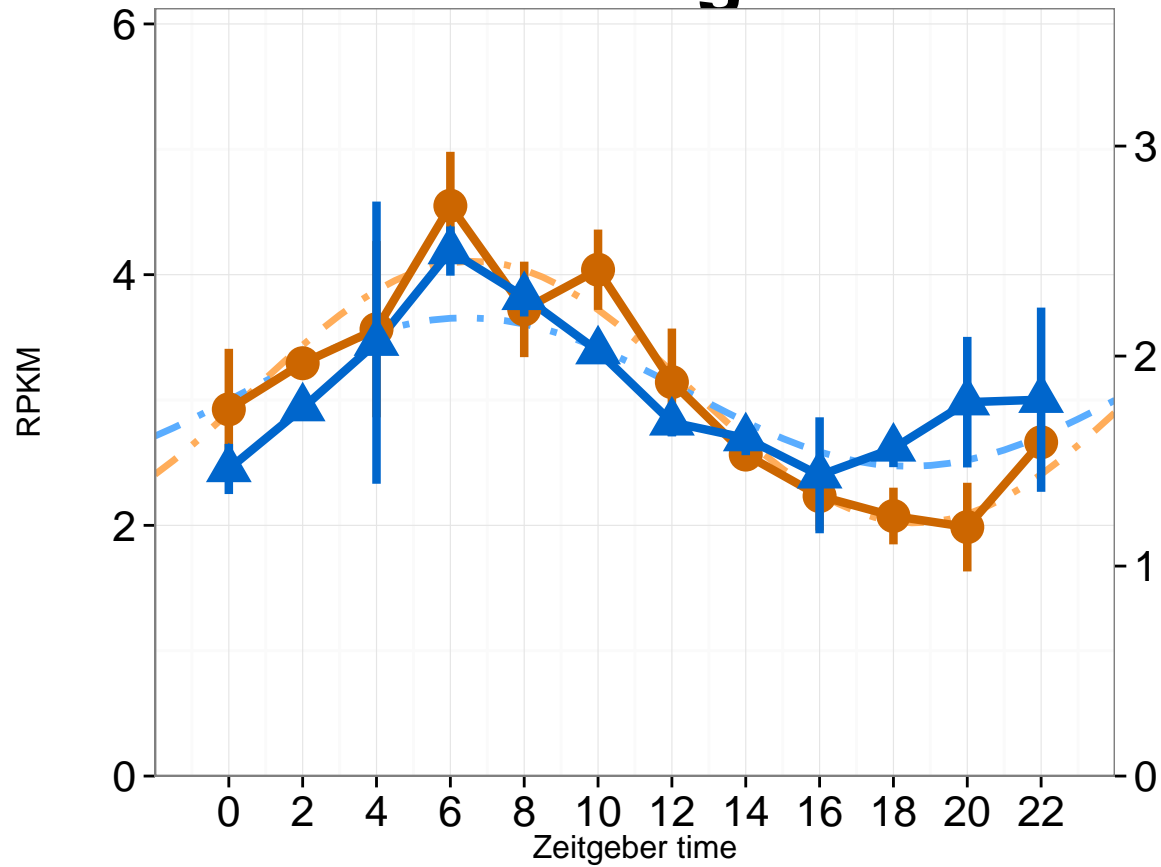

# Plekhg6

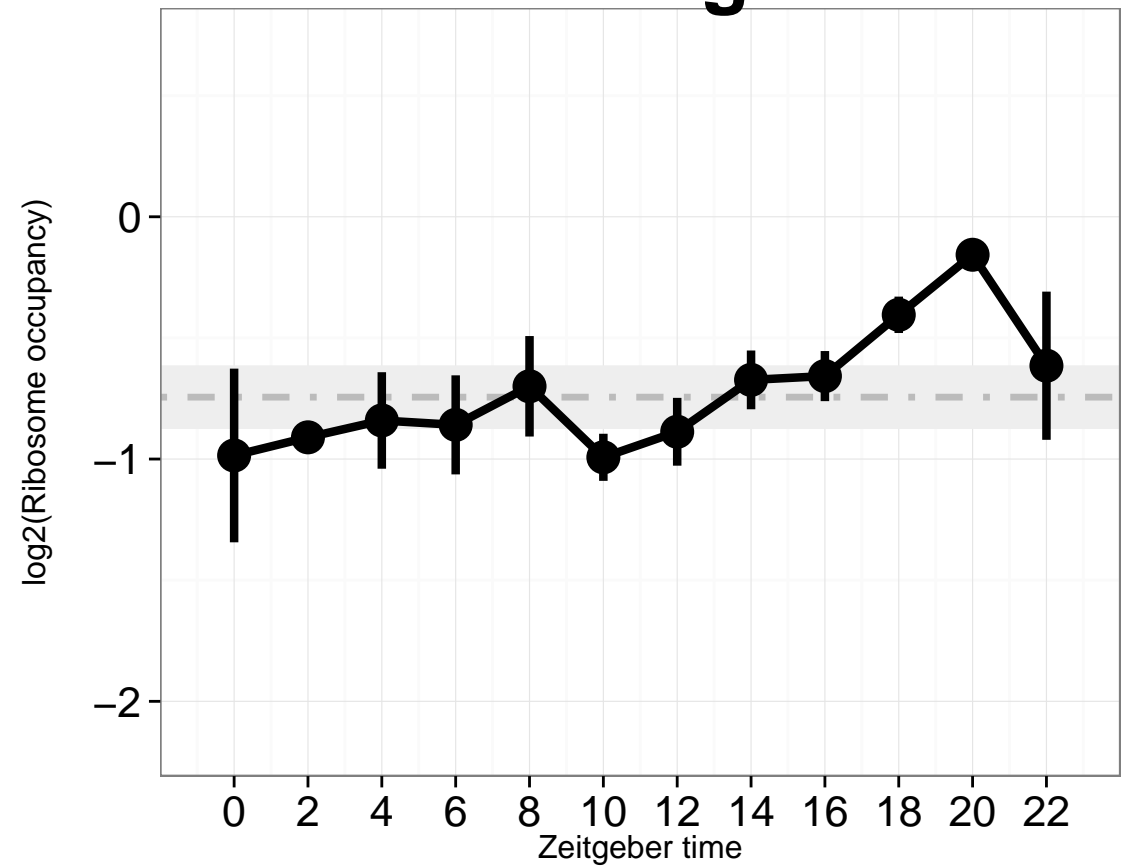

Supplement: Supplementary file 6228 [file 1]

## Cldn12

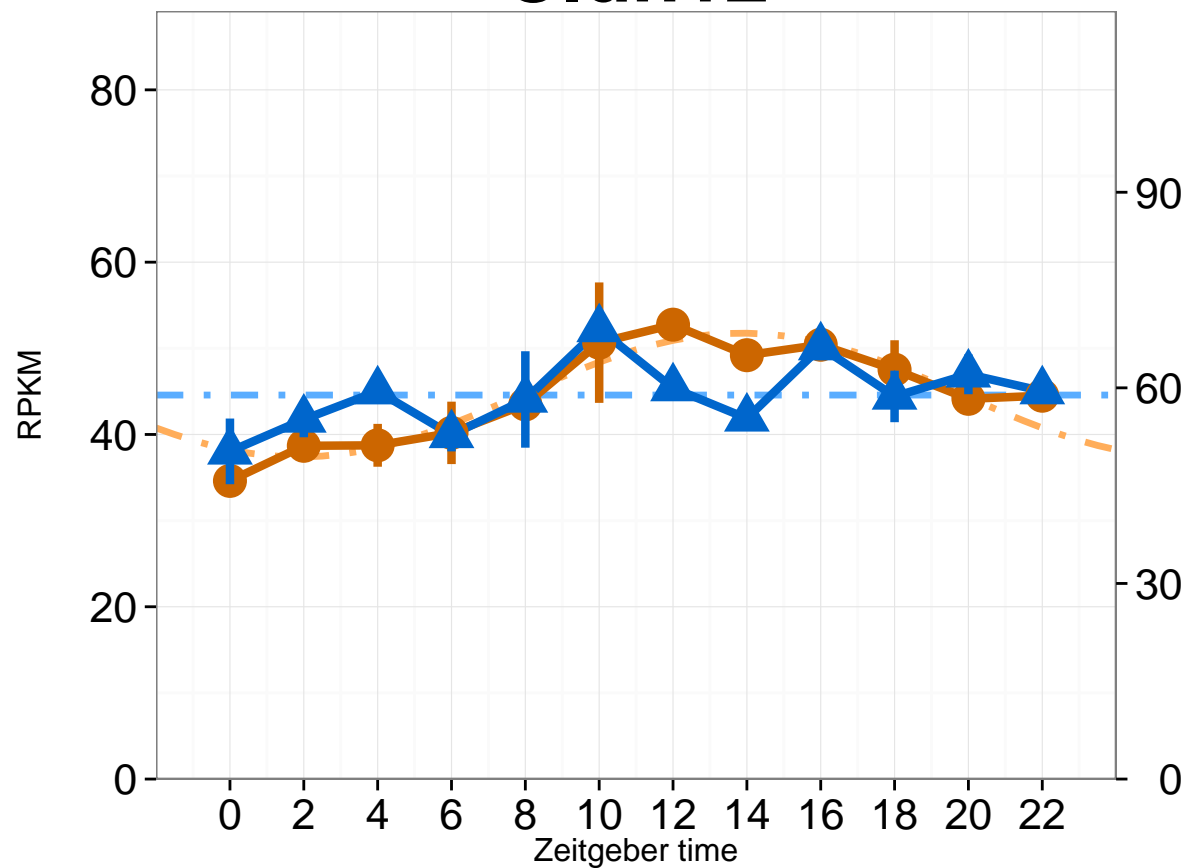

## Cldn12

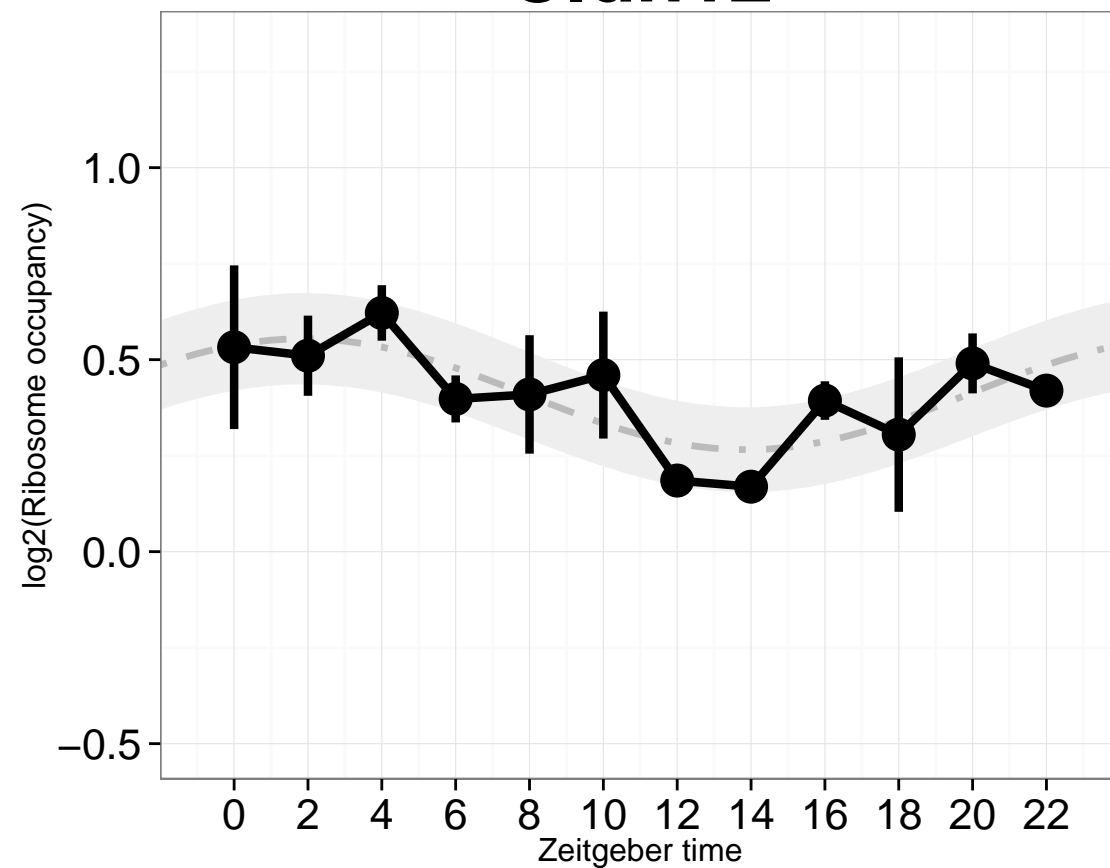

Supplement: Supplementary file 6229 [file 1]

## Esyt1

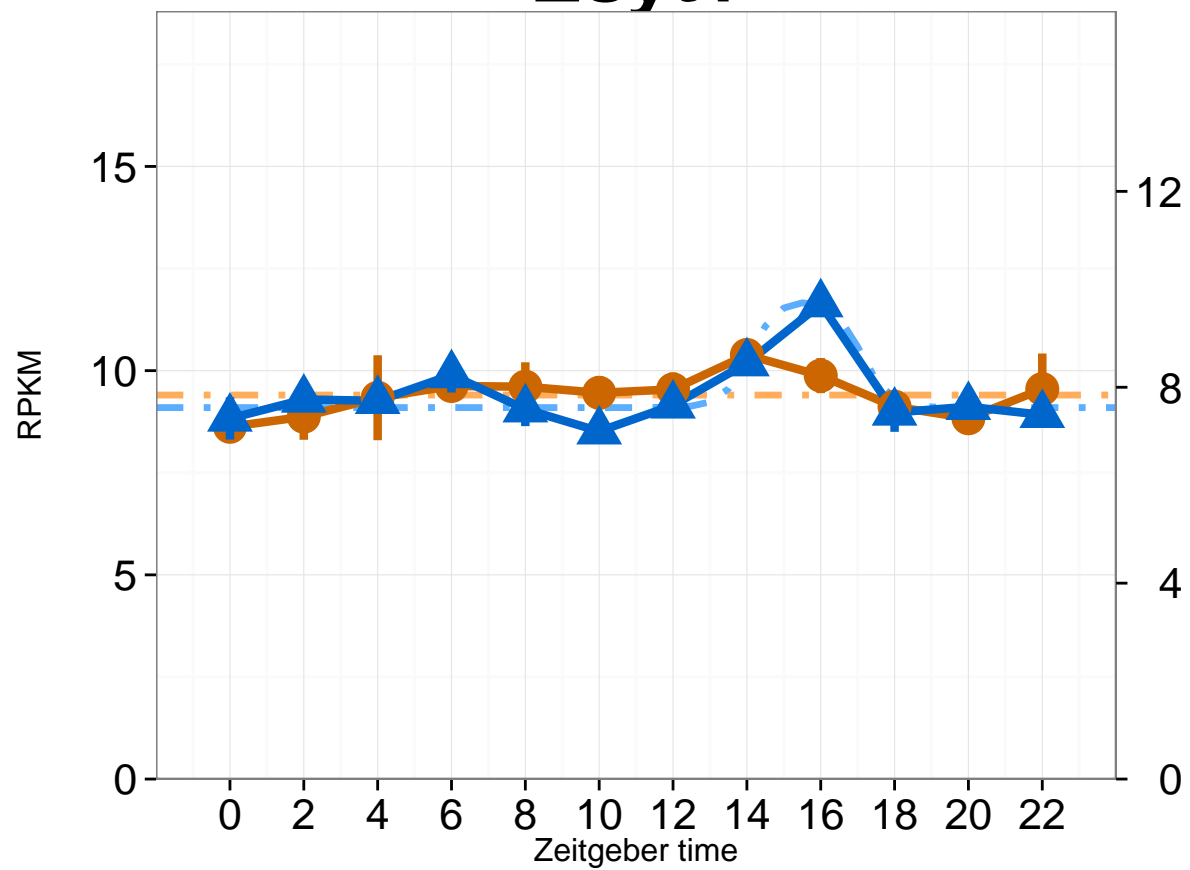

## Esyt1

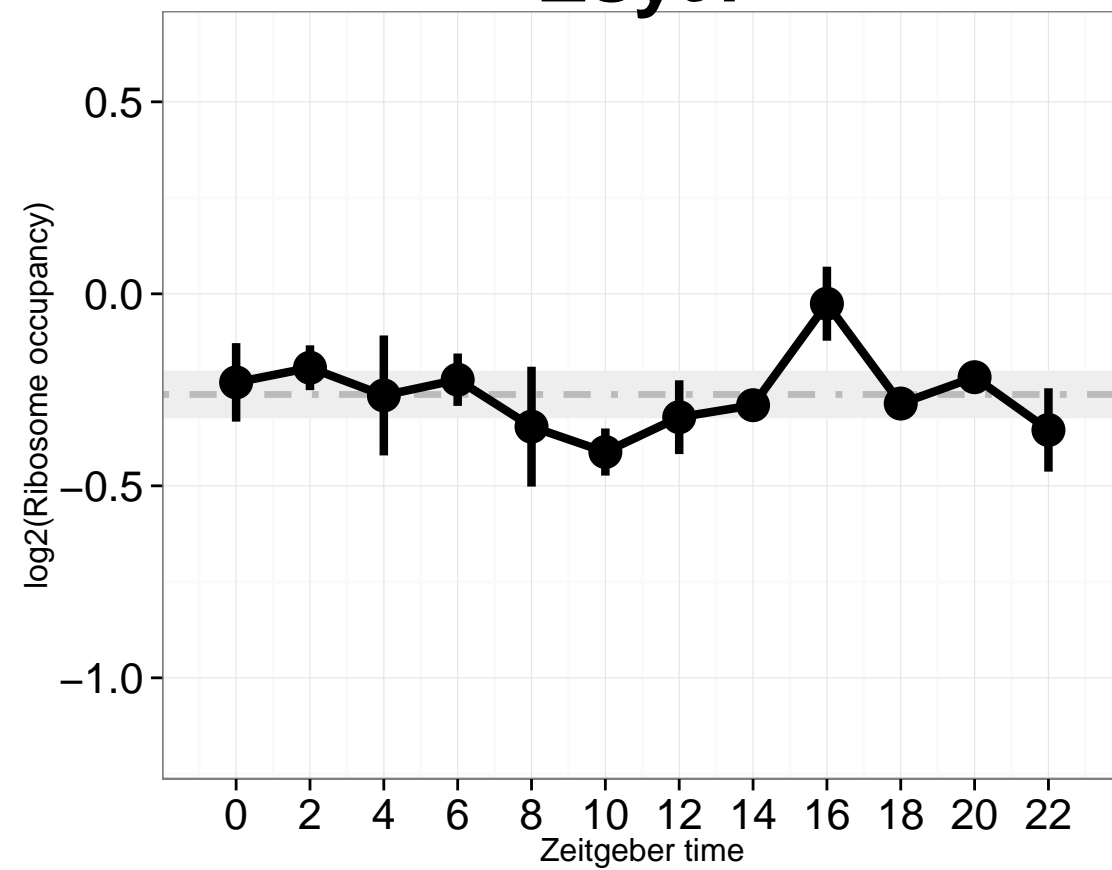

Supplement: Supplementary file 6230 [file 1]

# Shfm1

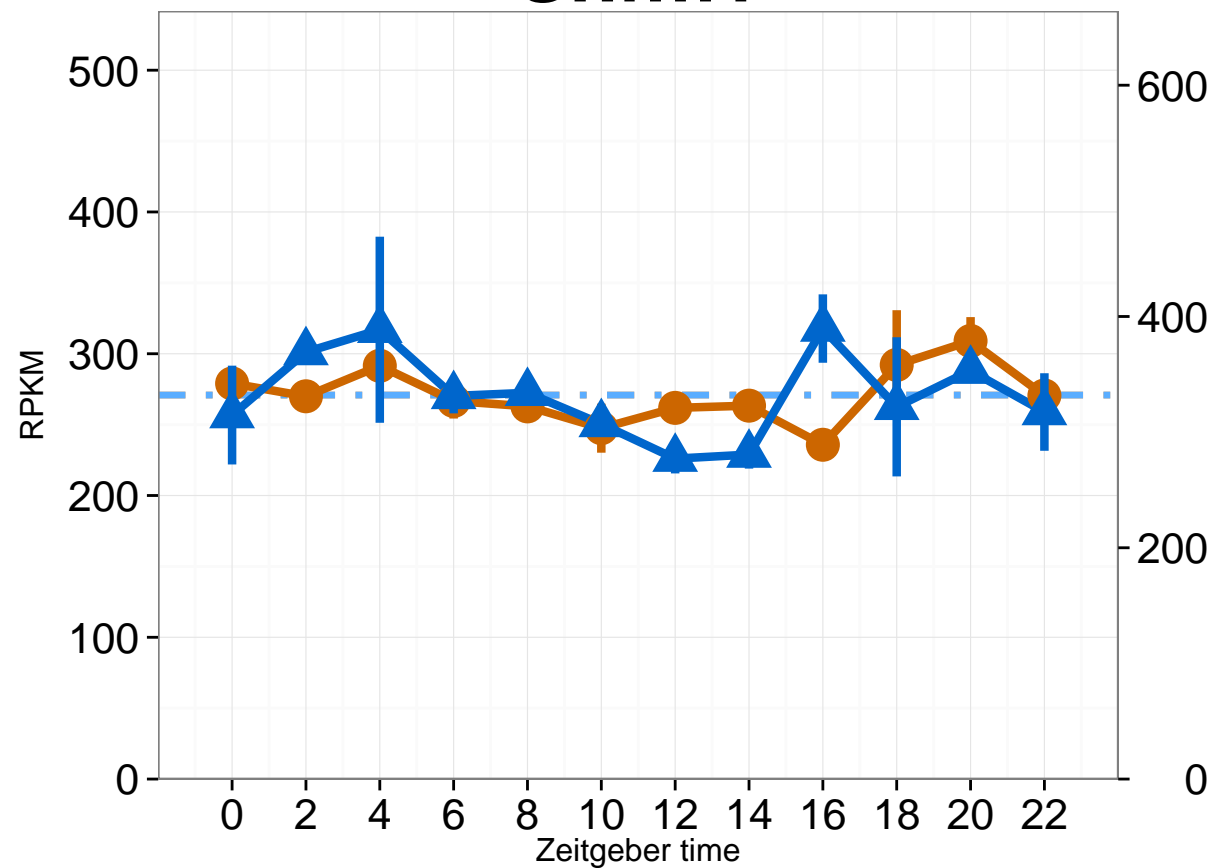

# Shfm1

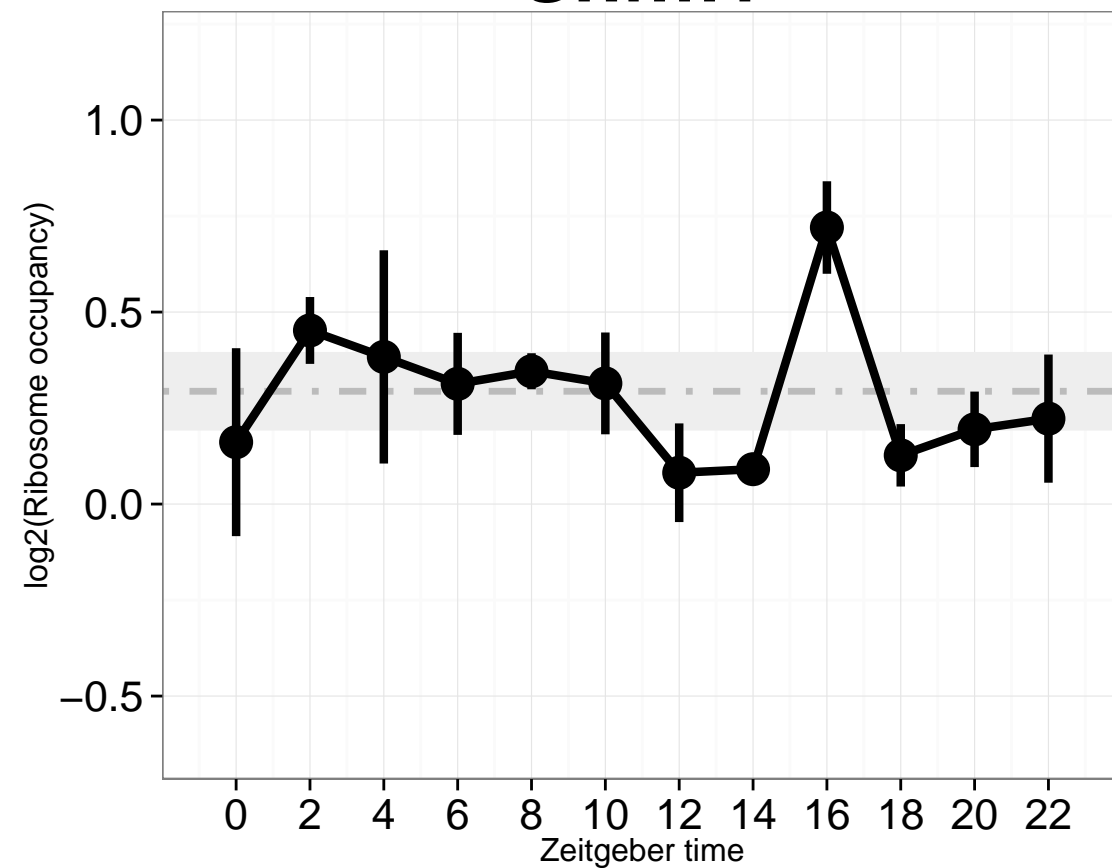

Supplement: Supplementary file 6231 [file 1]

# Kcng1

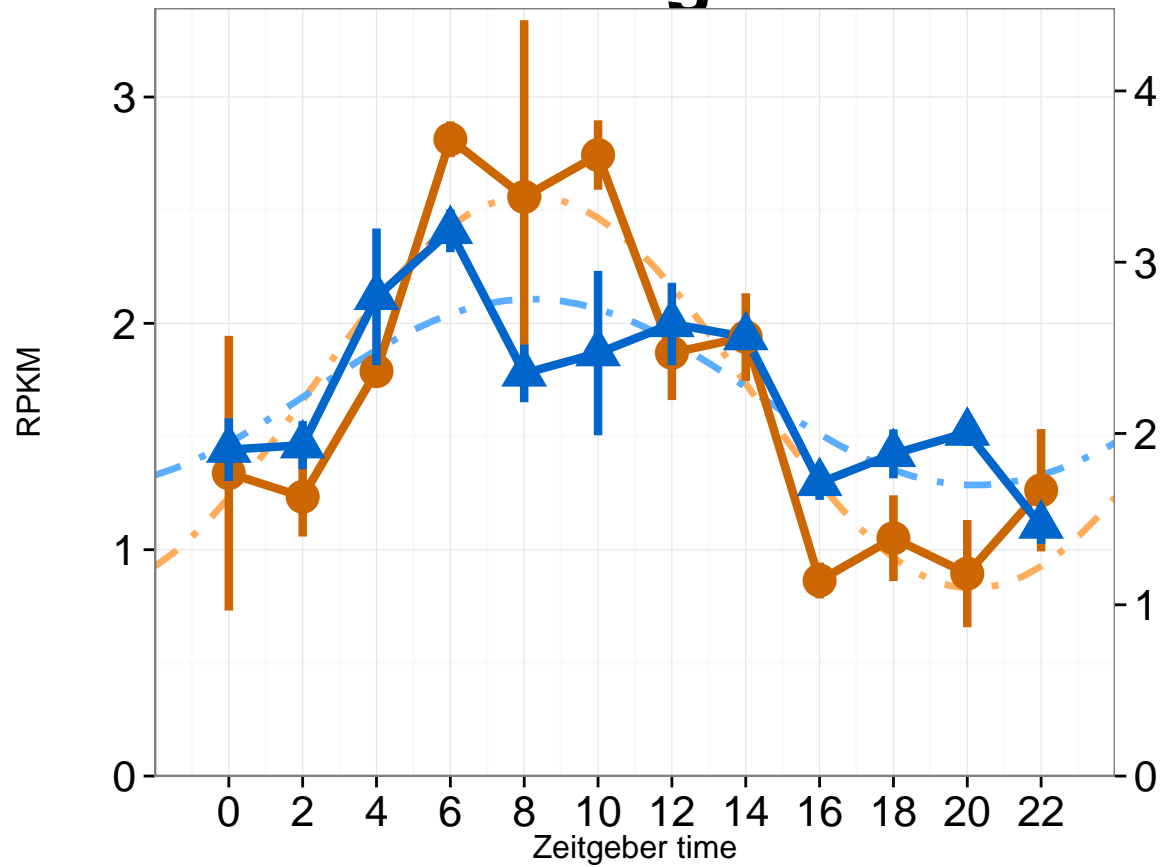

# Kcng1

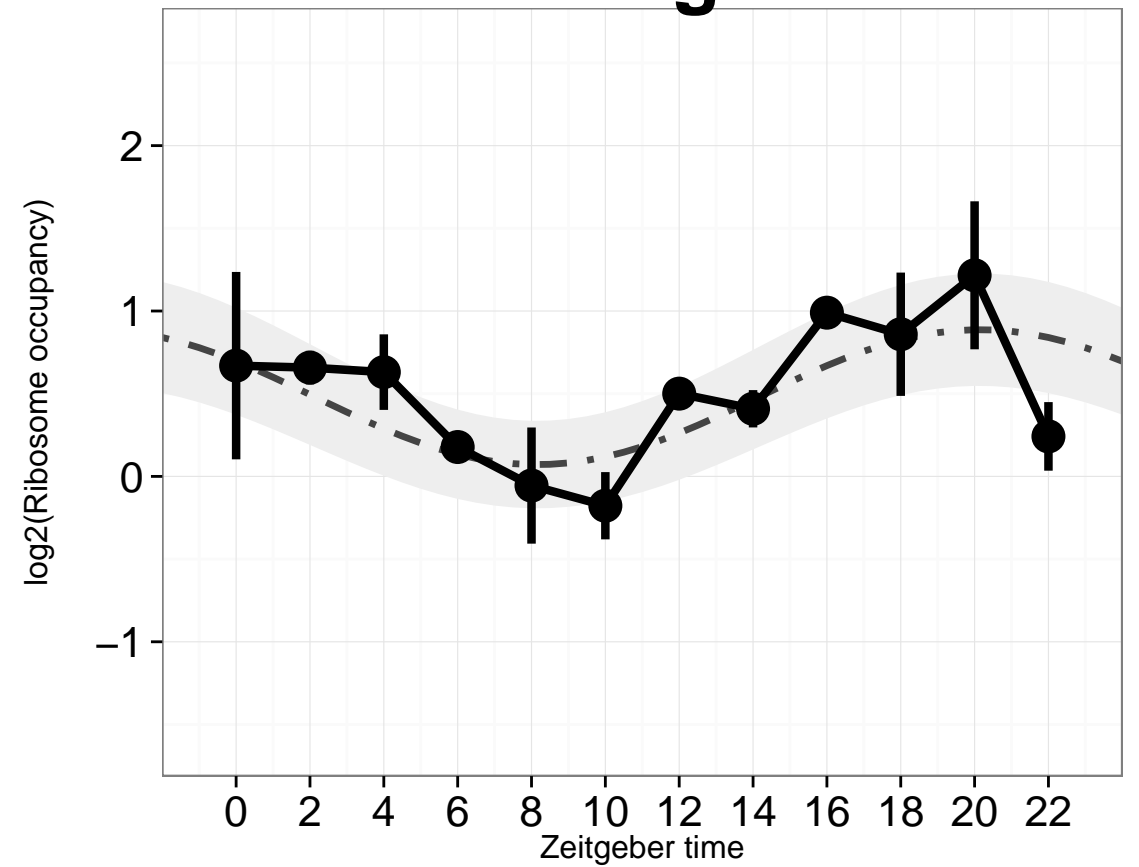

Supplement: Supplementary file 6232 [file 1]

## Mdm1

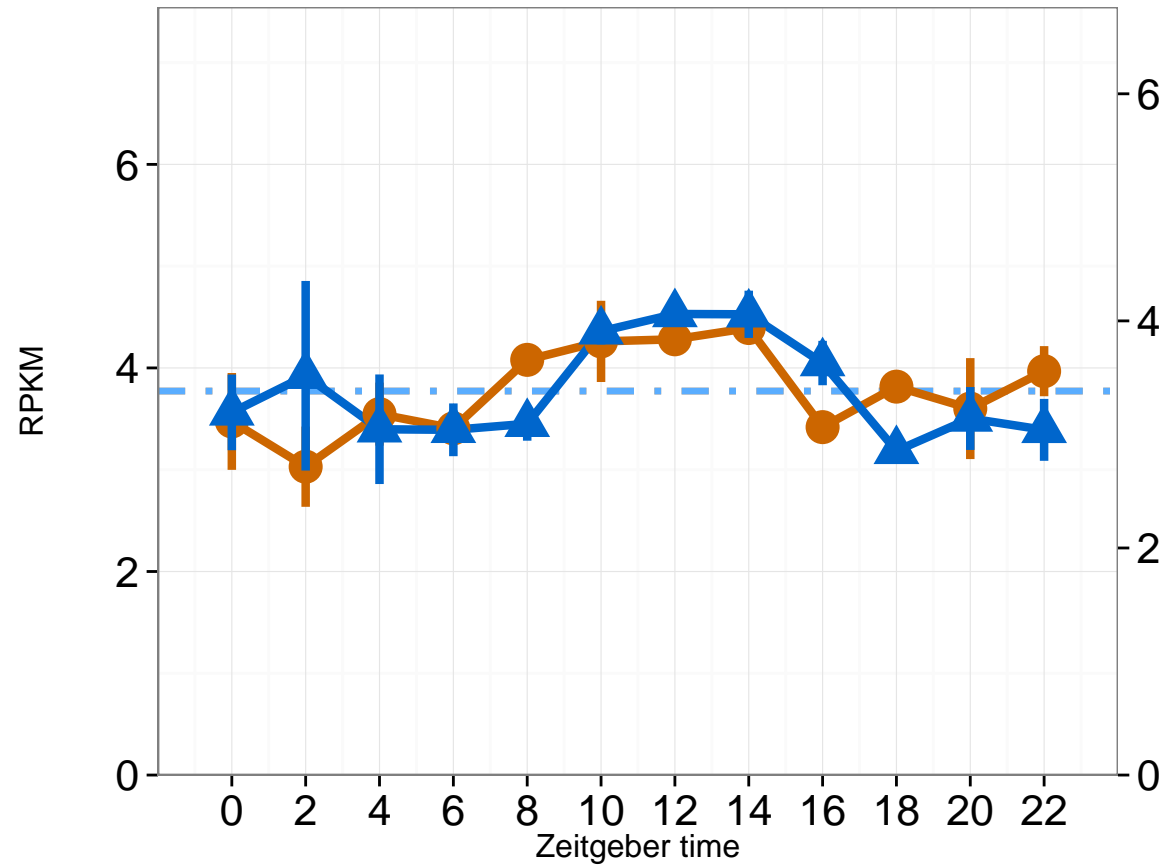

## Mdm1

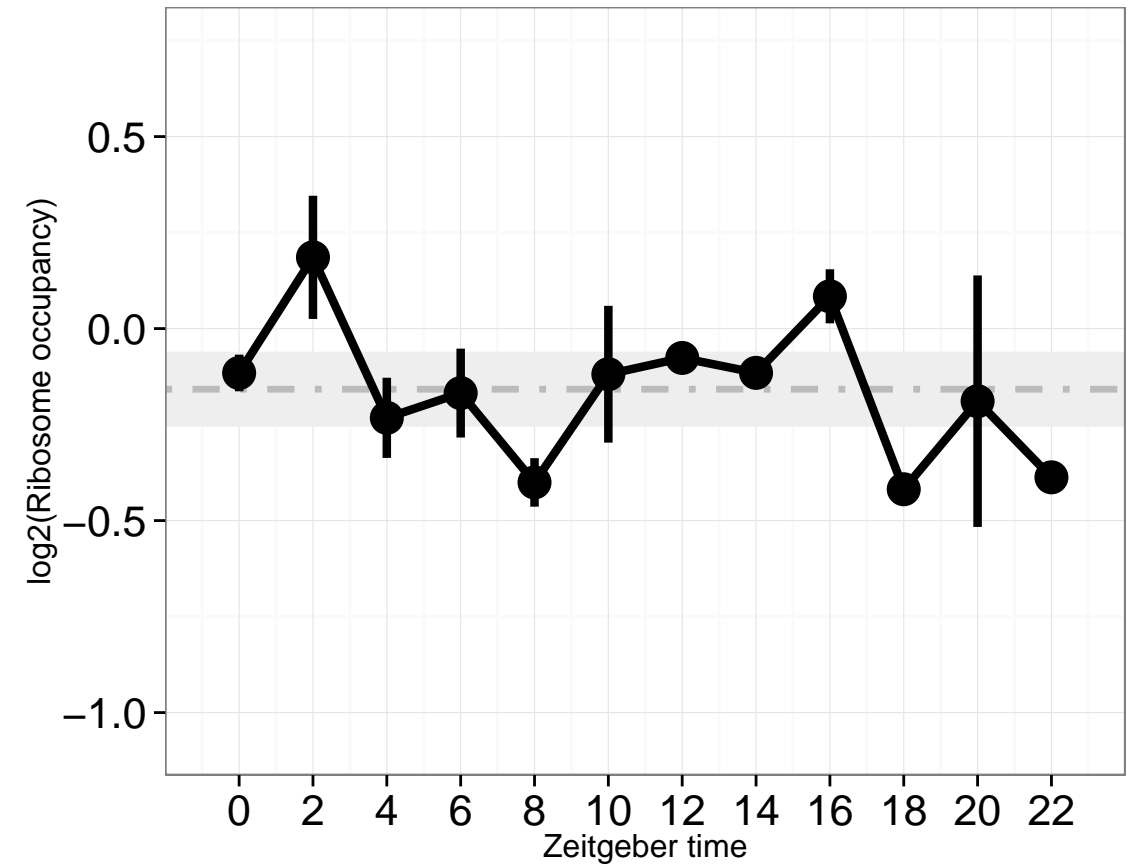

Supplement: Supplementary file 6233 [file 1]

## Ddhd1

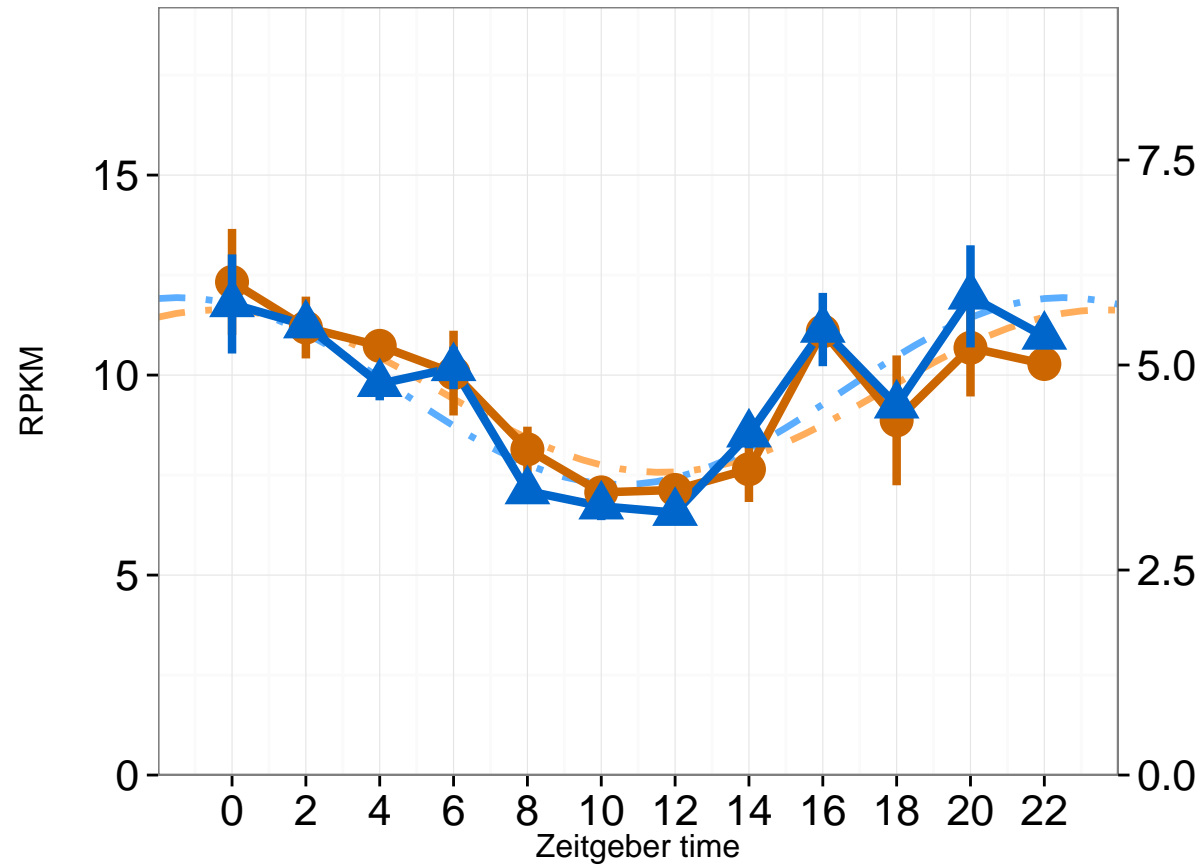

## Ddhd1

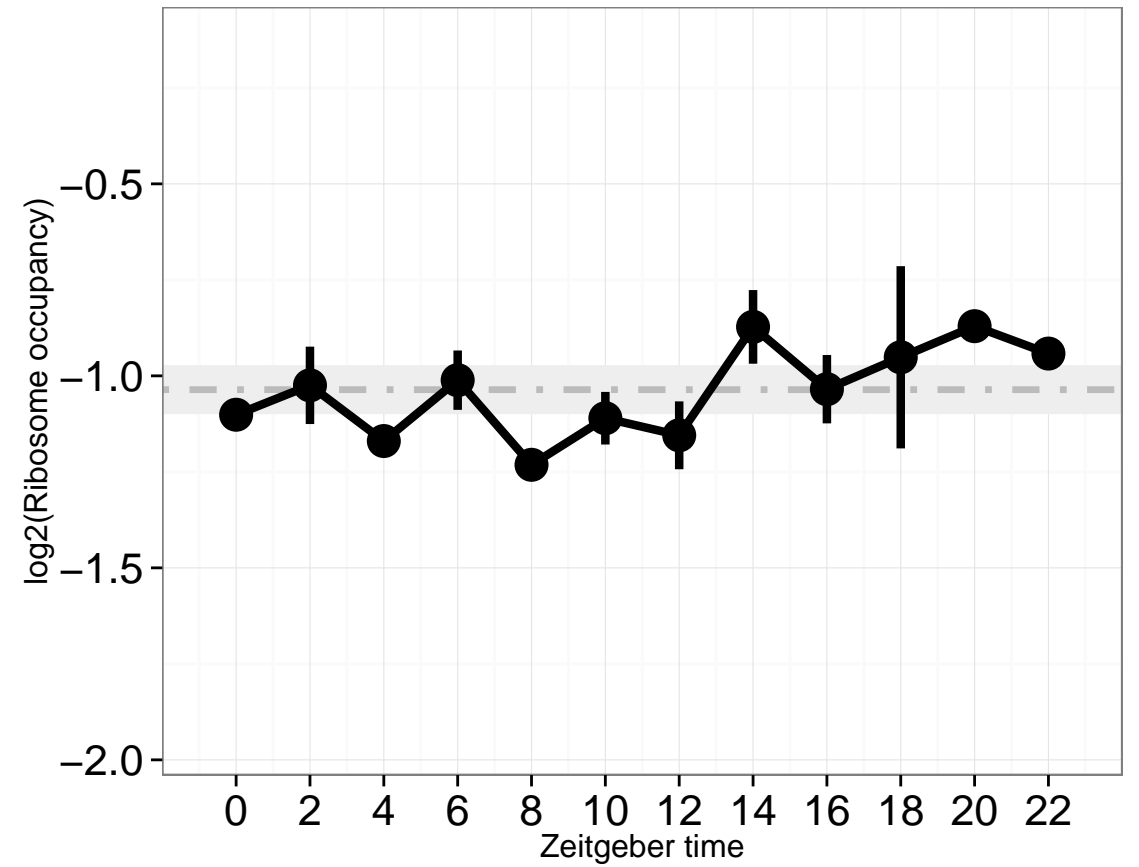

Supplement: Supplementary file 6234 [file 1]

# Apex2

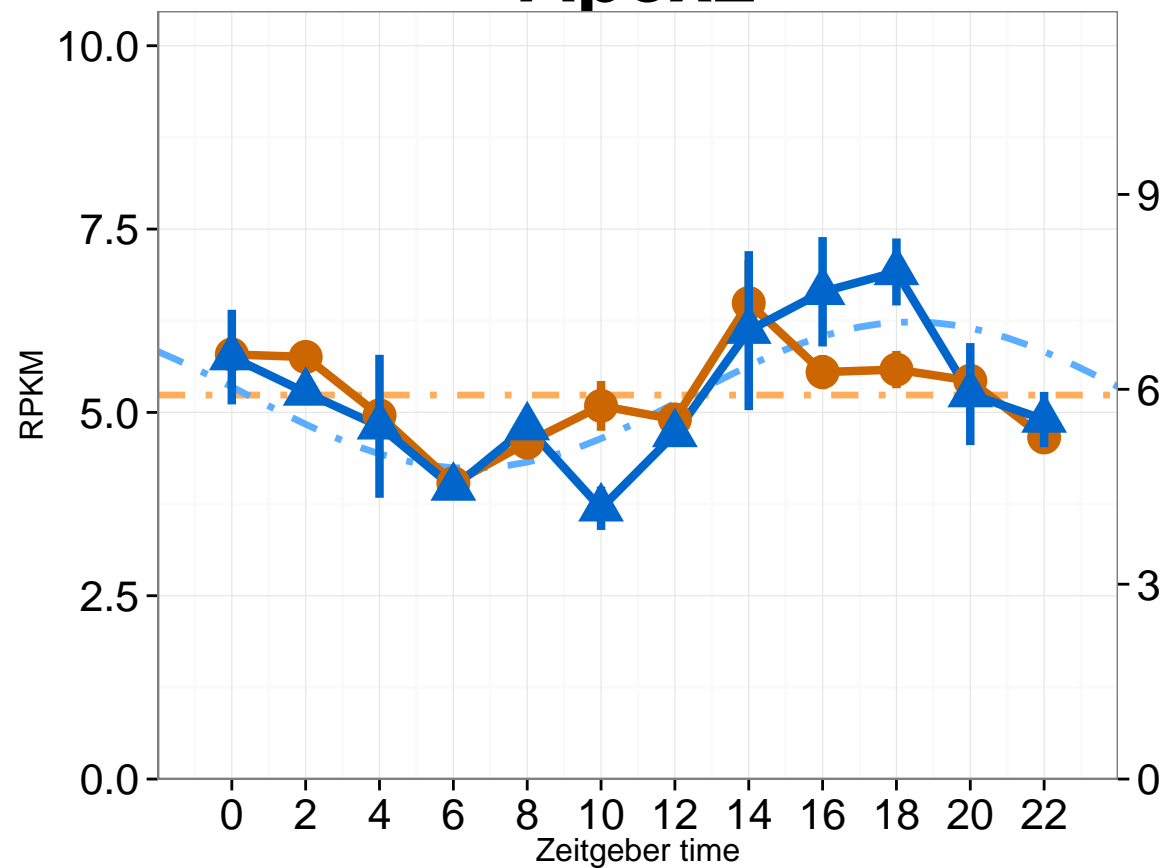

# Apex2

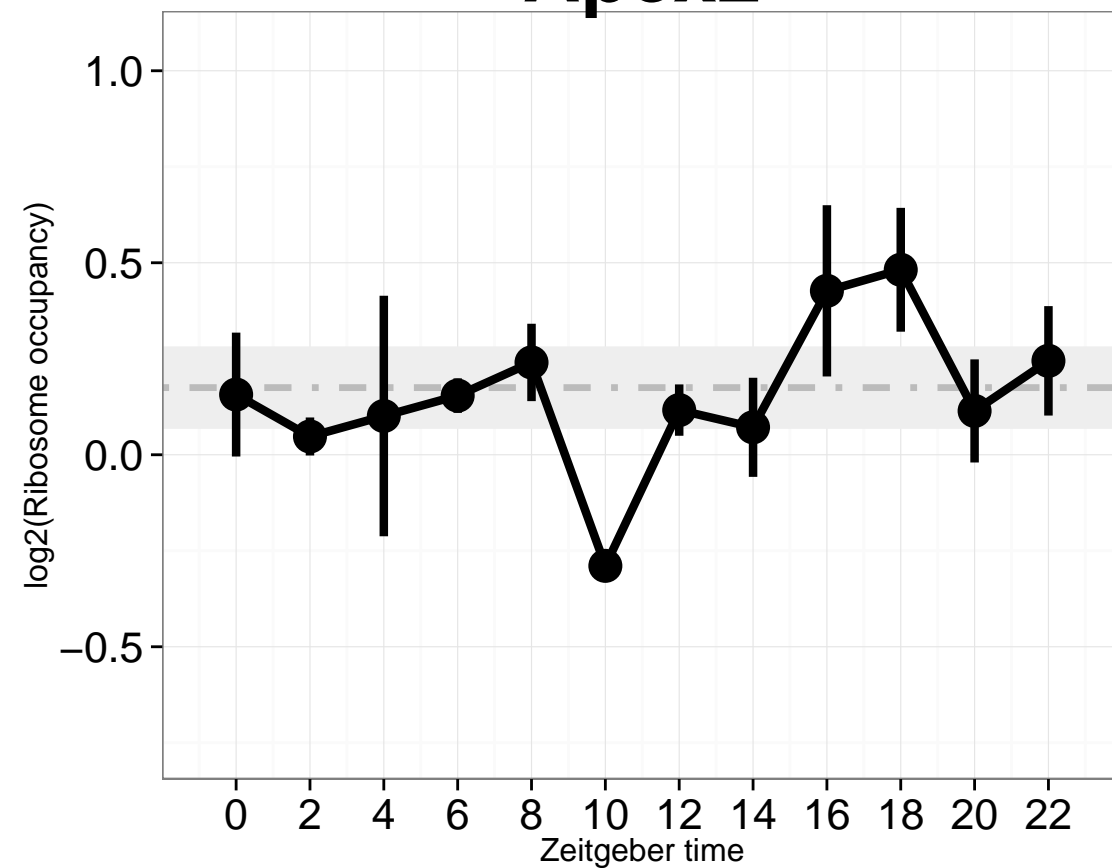

Supplement: Supplementary file 6235 [file 1]

## Fbxl4

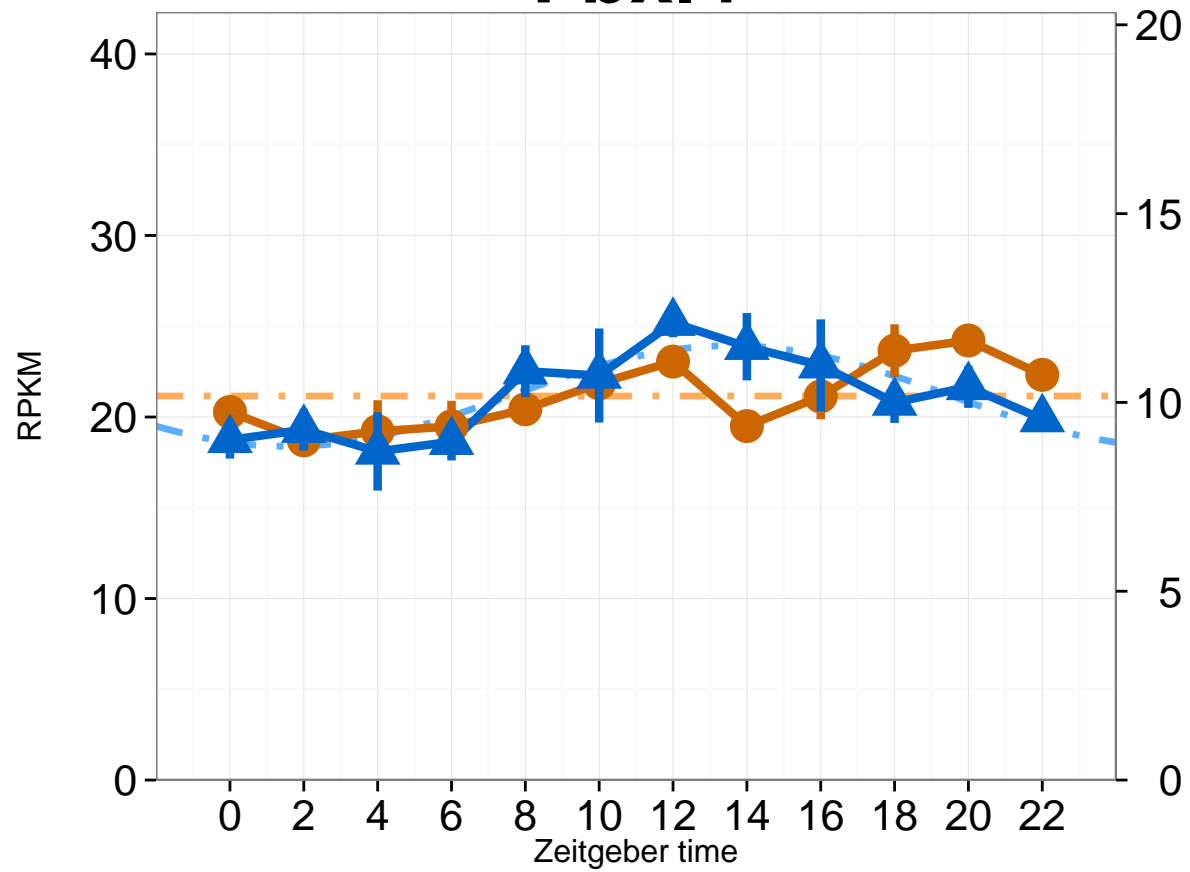

## Fbxl4

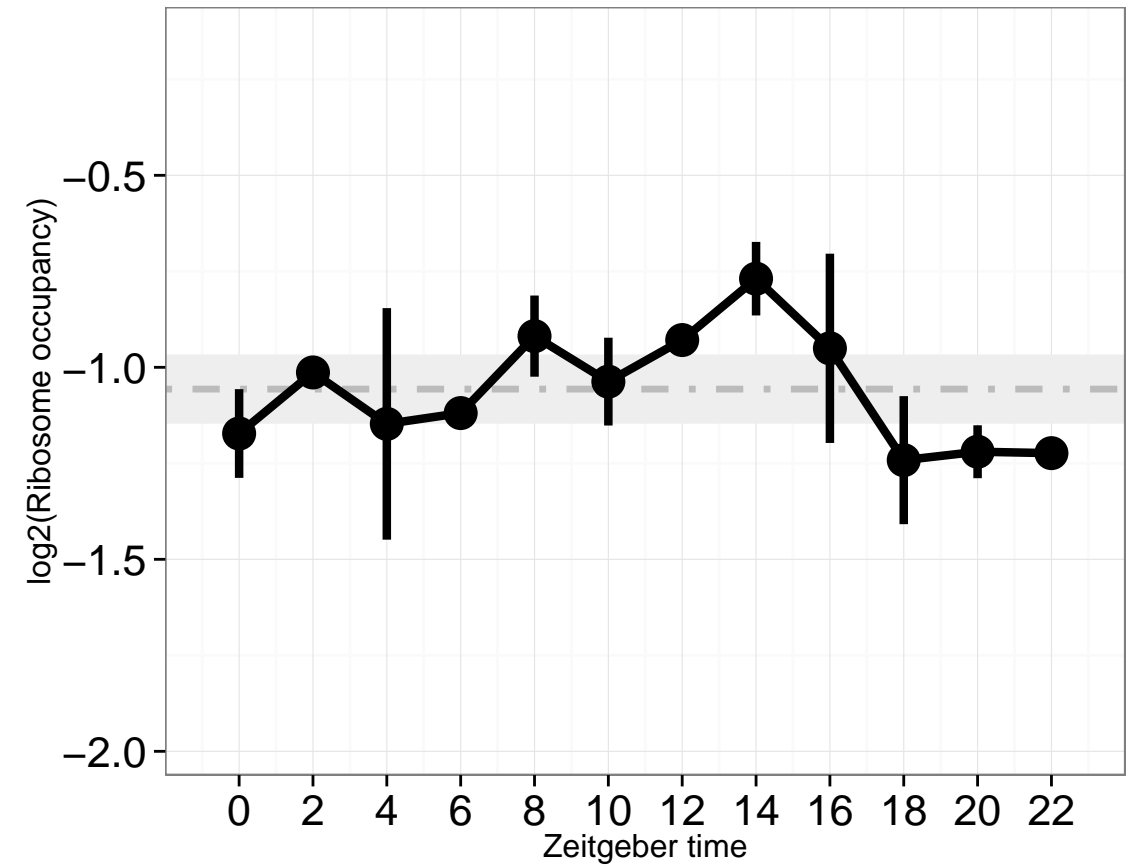

Supplement: Supplementary file 6236 [file 1]

# Dnajb6

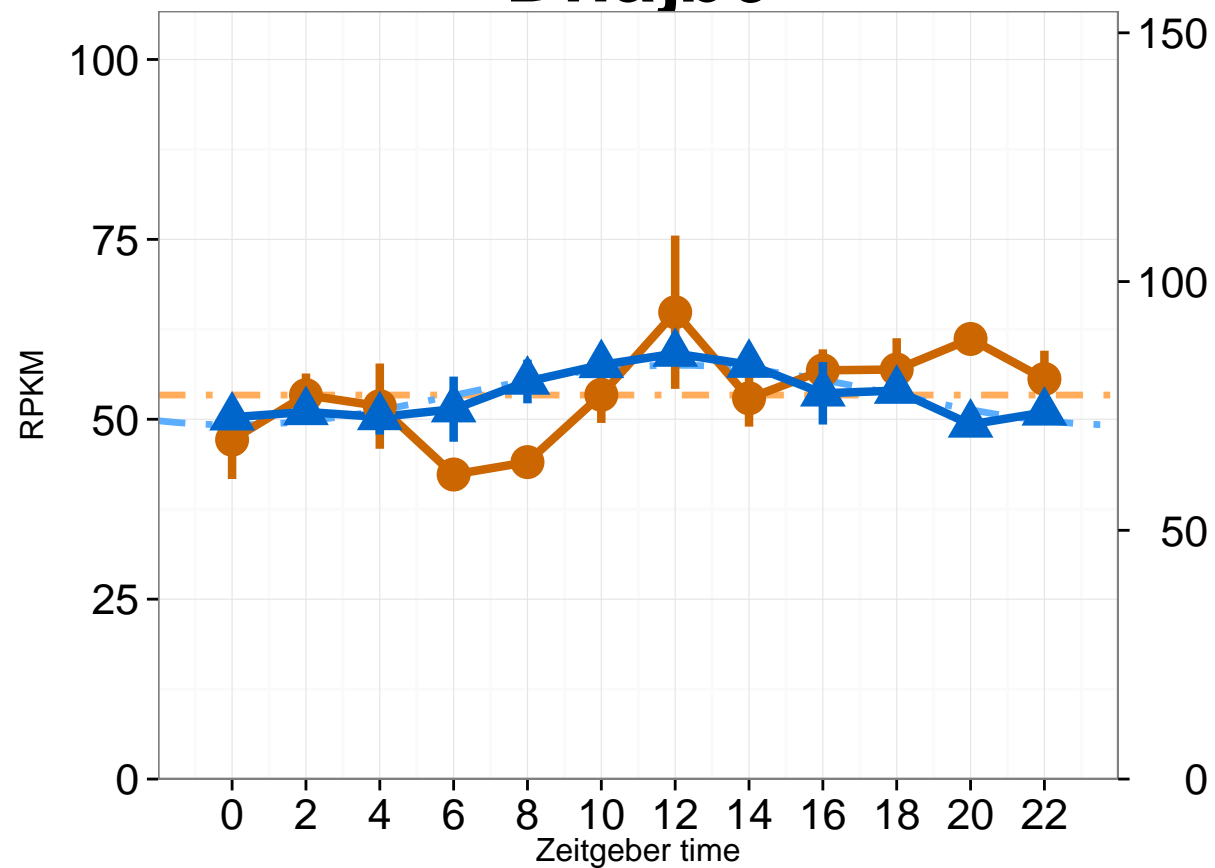

# Dnajb6

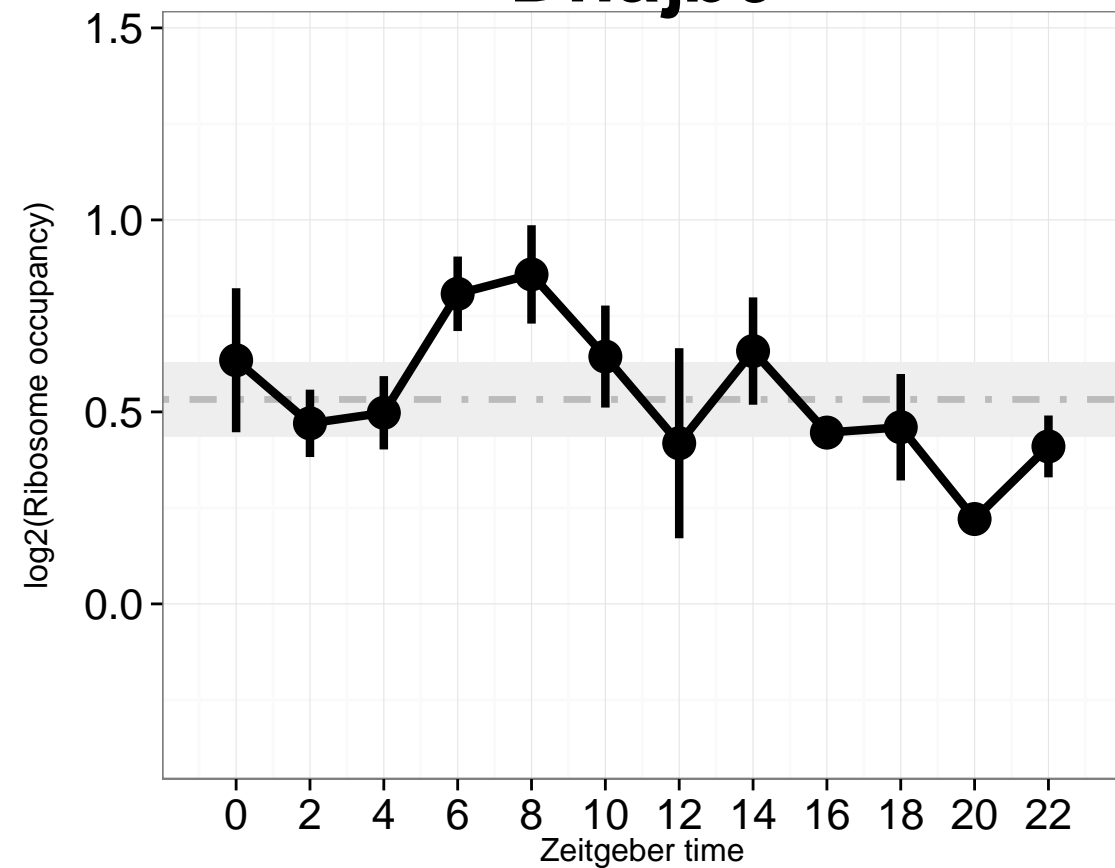

Supplement: Supplementary file 6237 [file 1]

# Kpnb1

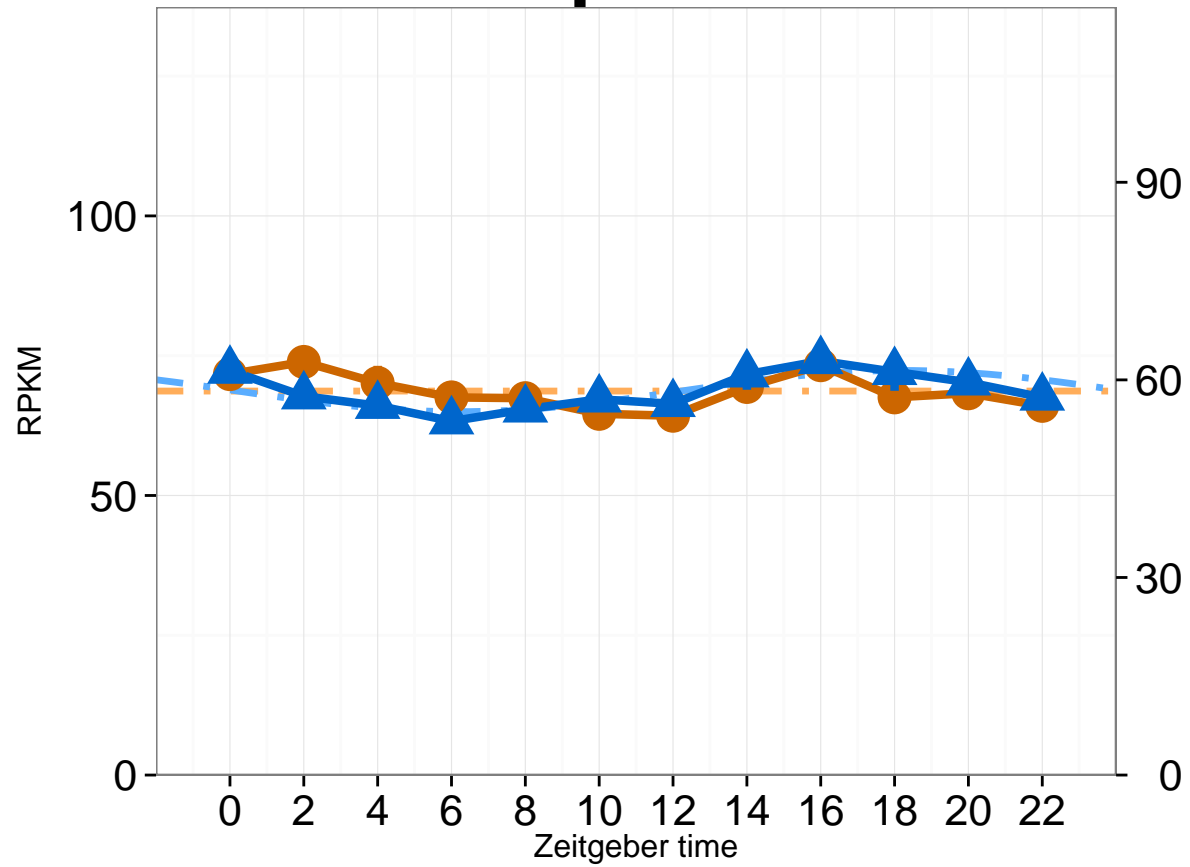

# Kpnb1

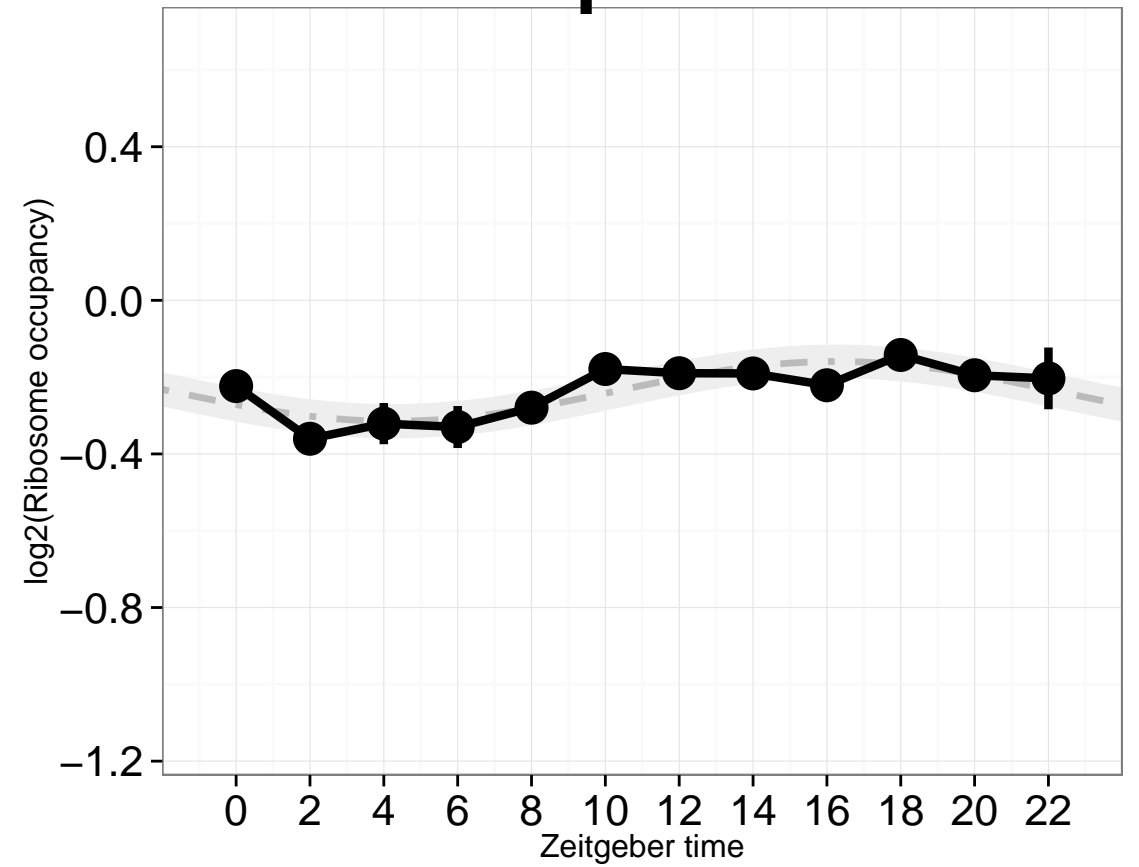

Supplement: Supplementary file 6238 [file 1]

# Lacc1

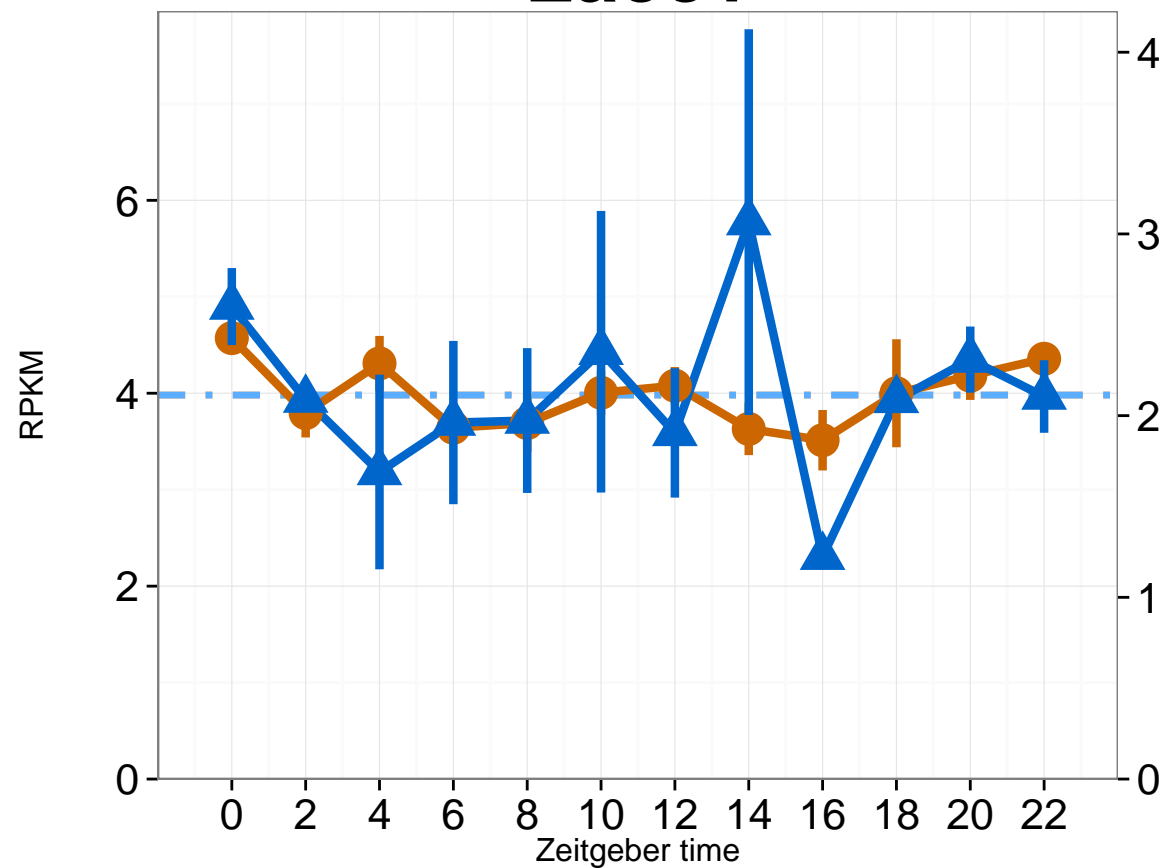

# Lacc1

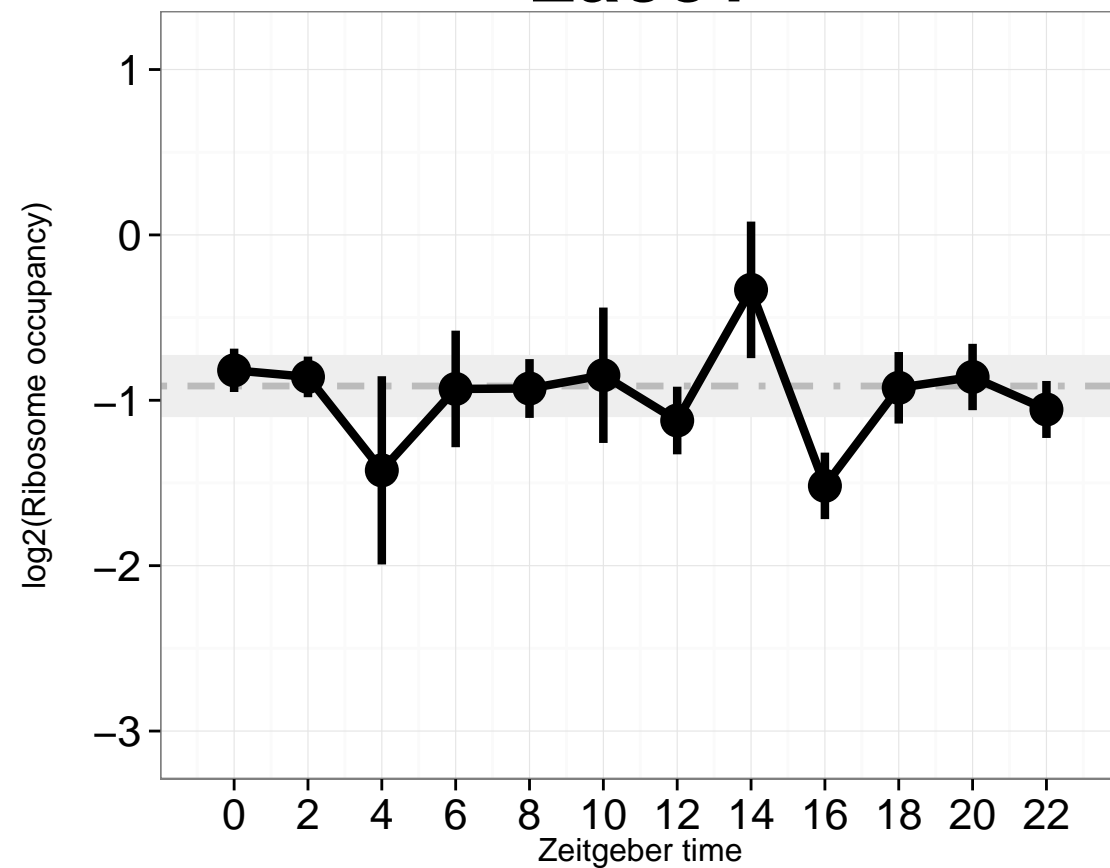

Supplement: Supplementary file 6239 [file 1]

# March7

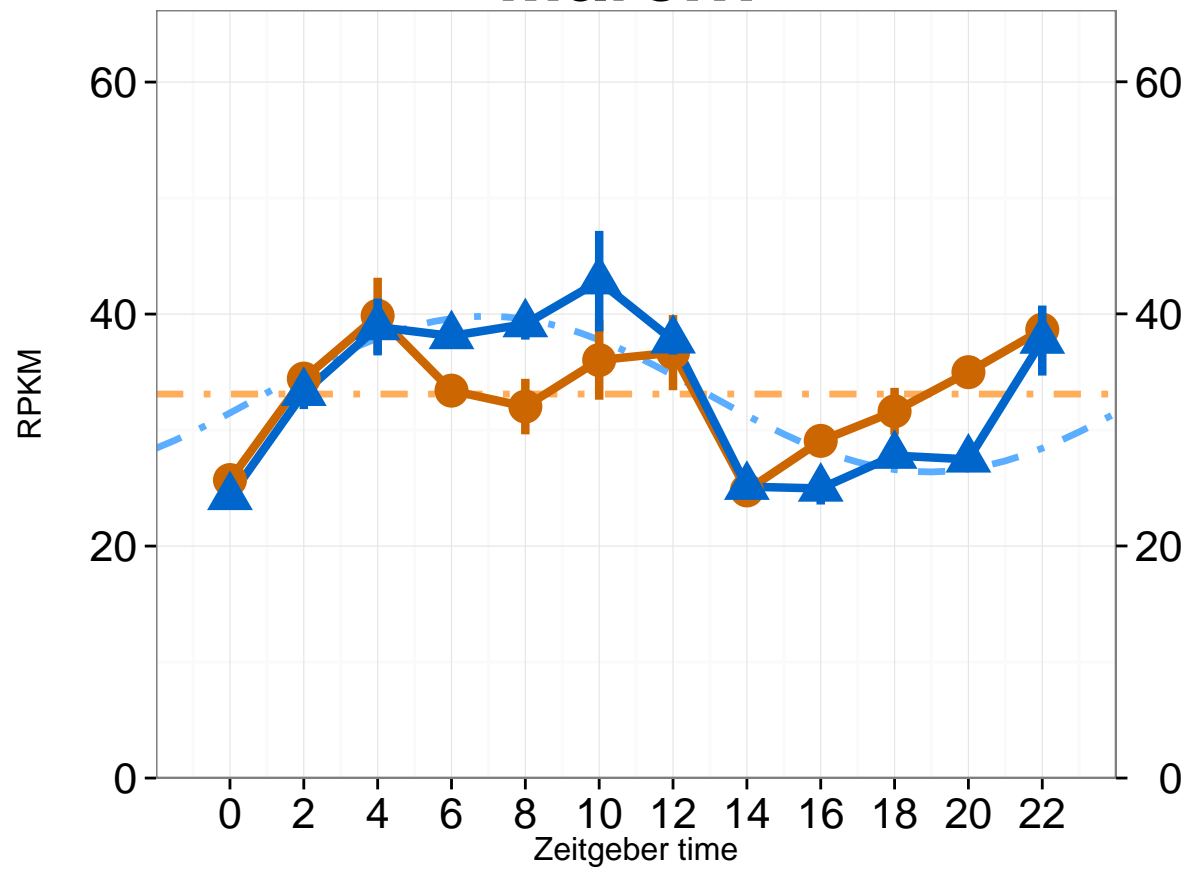

# March7

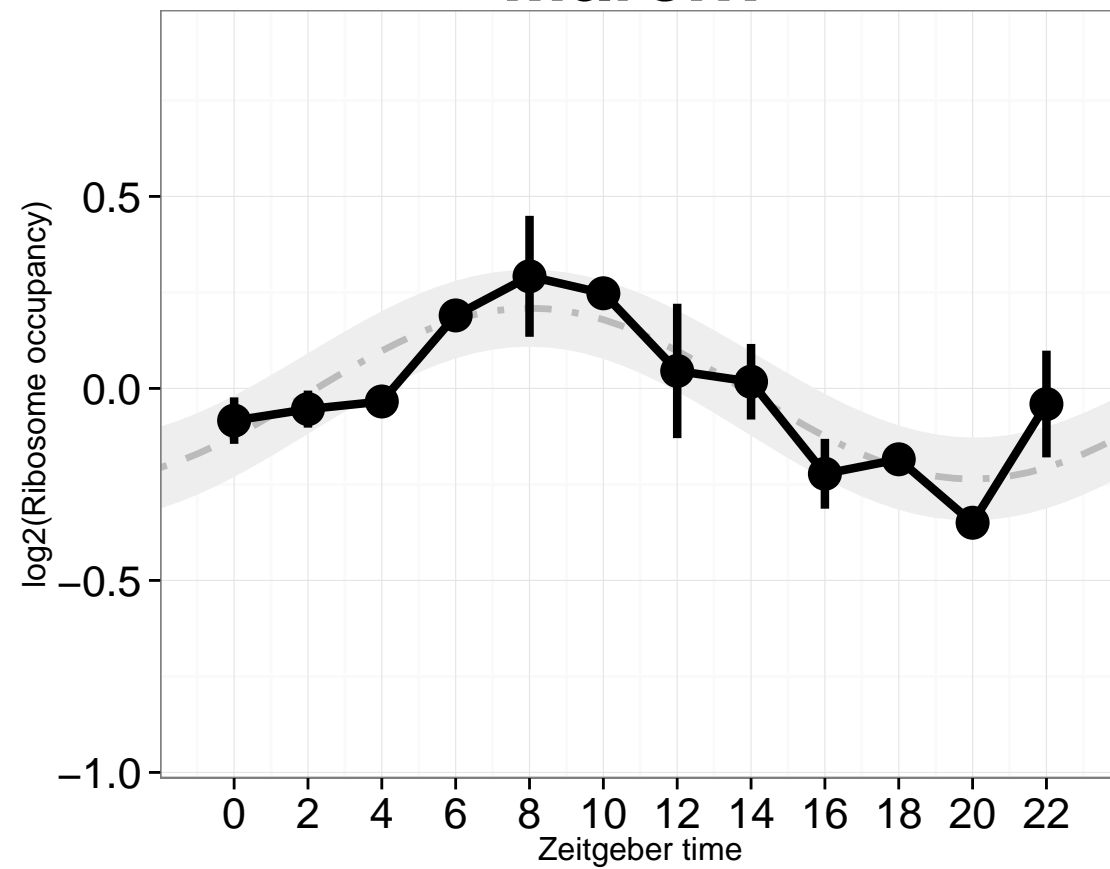

Supplement: Supplementary file 6240 [file 1]

## Aste1

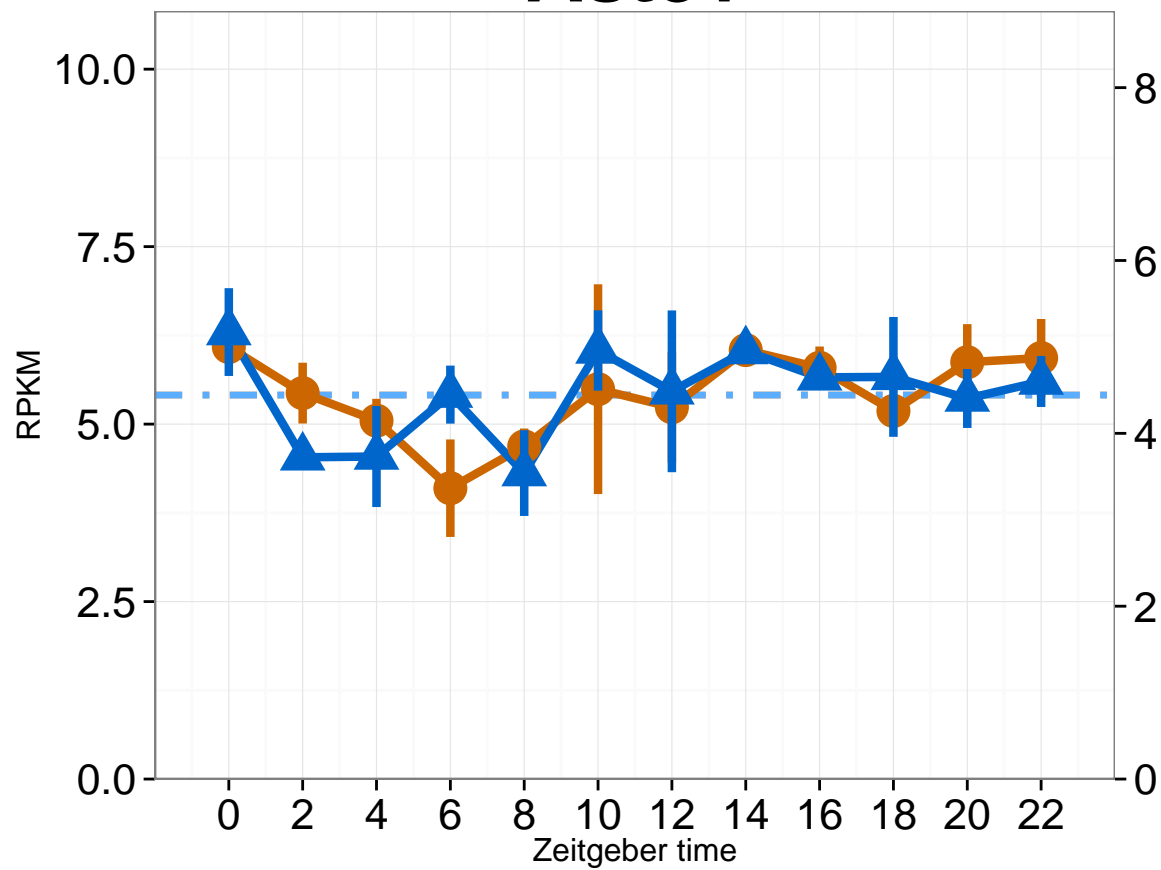

## Aste1

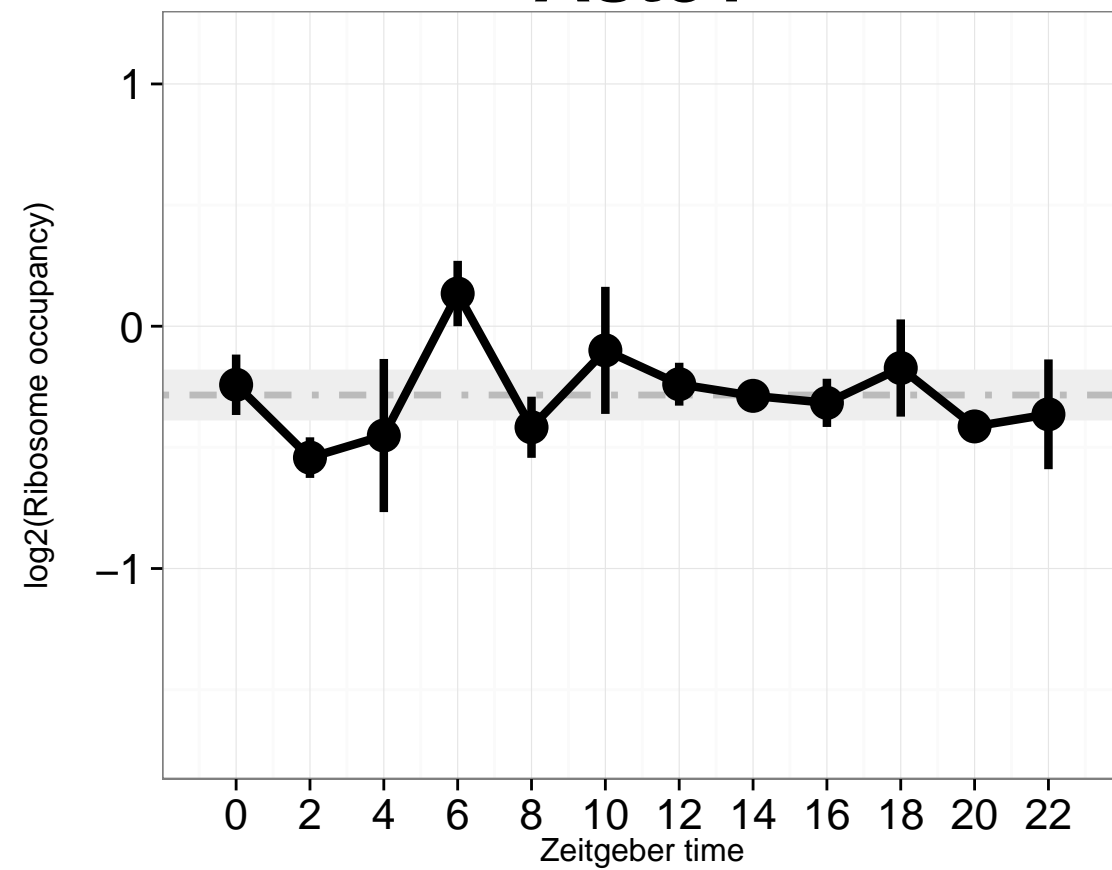

Supplement: Supplementary file 6241 [file 1]

## Smim5

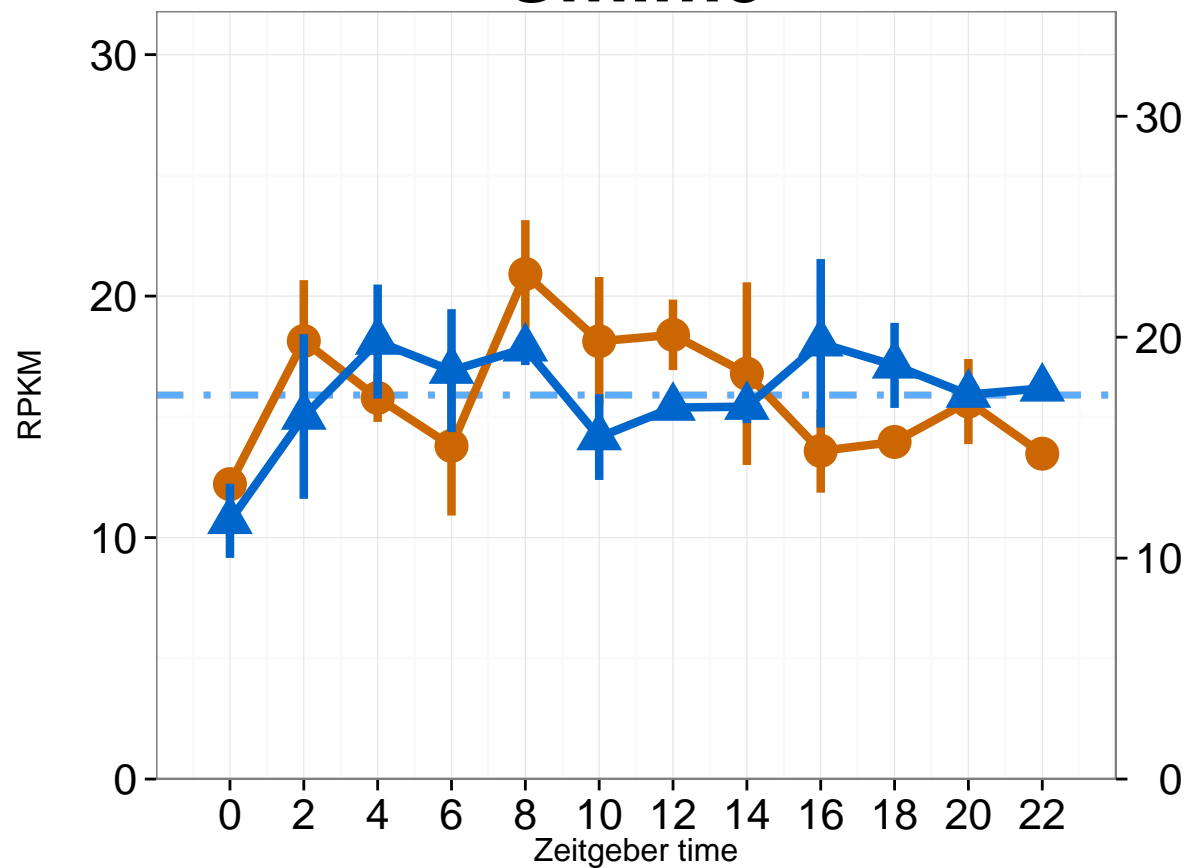

## Smim5

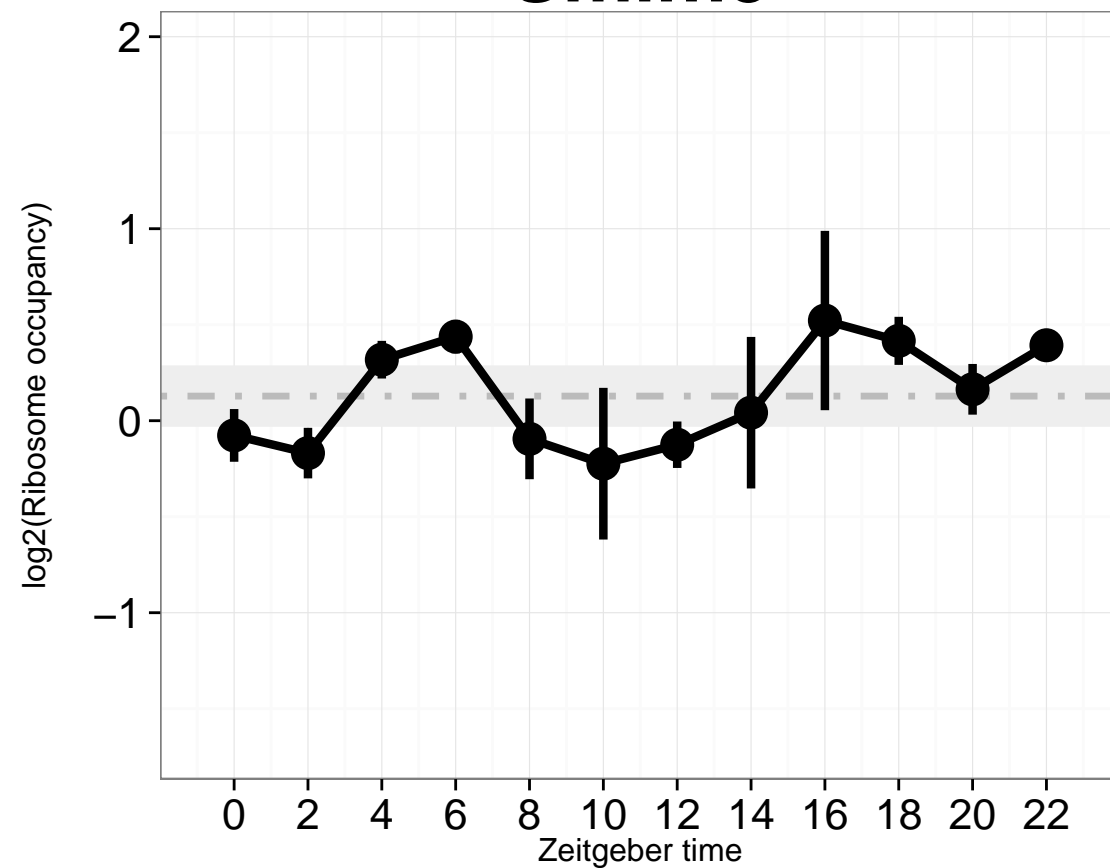

Supplement: Supplementary file 6242 [file 1]

## Prkcdbp

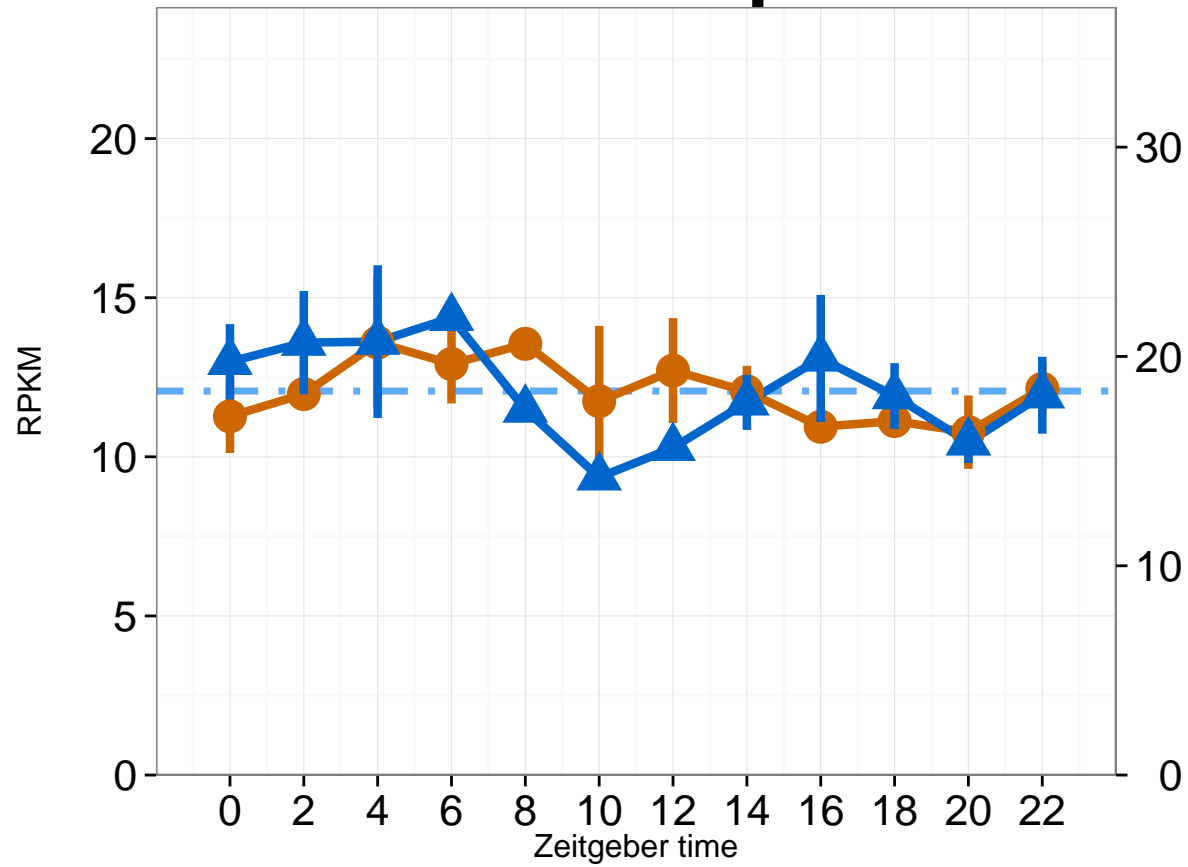

## Prkcdbp

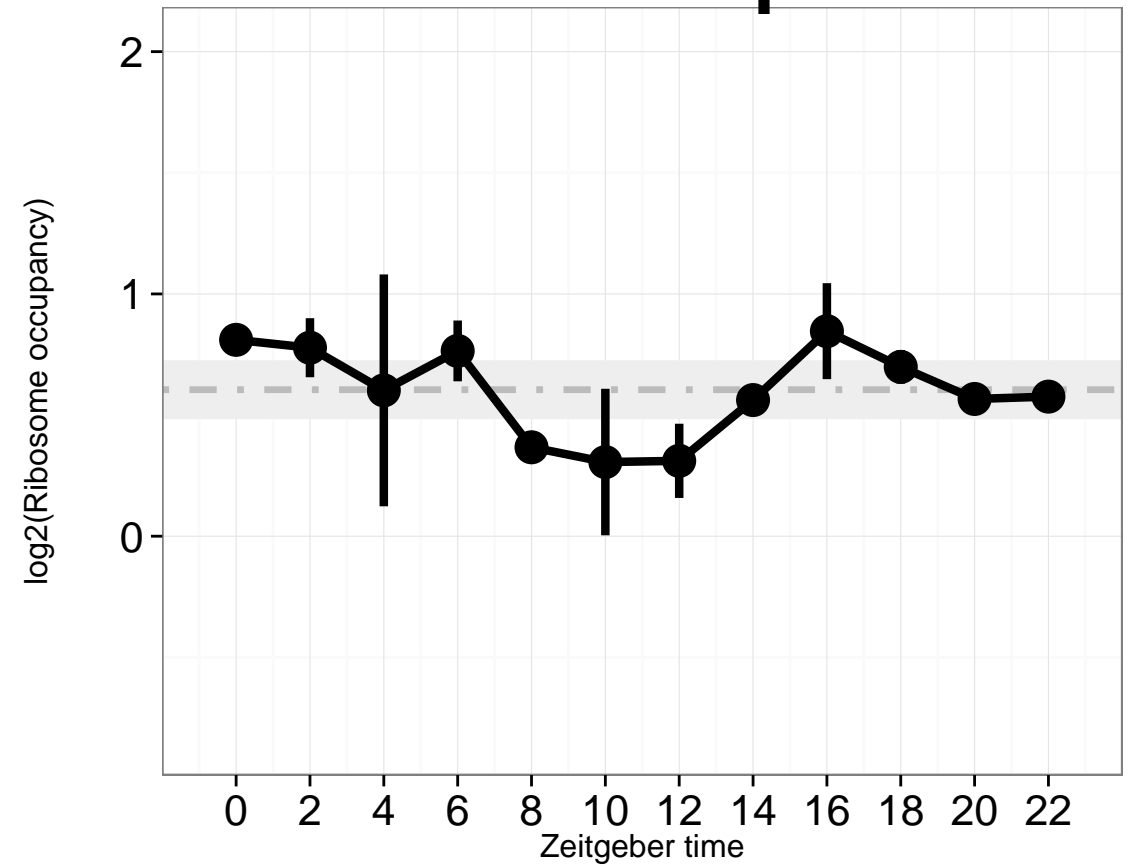

Supplement: Supplementary file 6243 [file 1]

# Paqr3

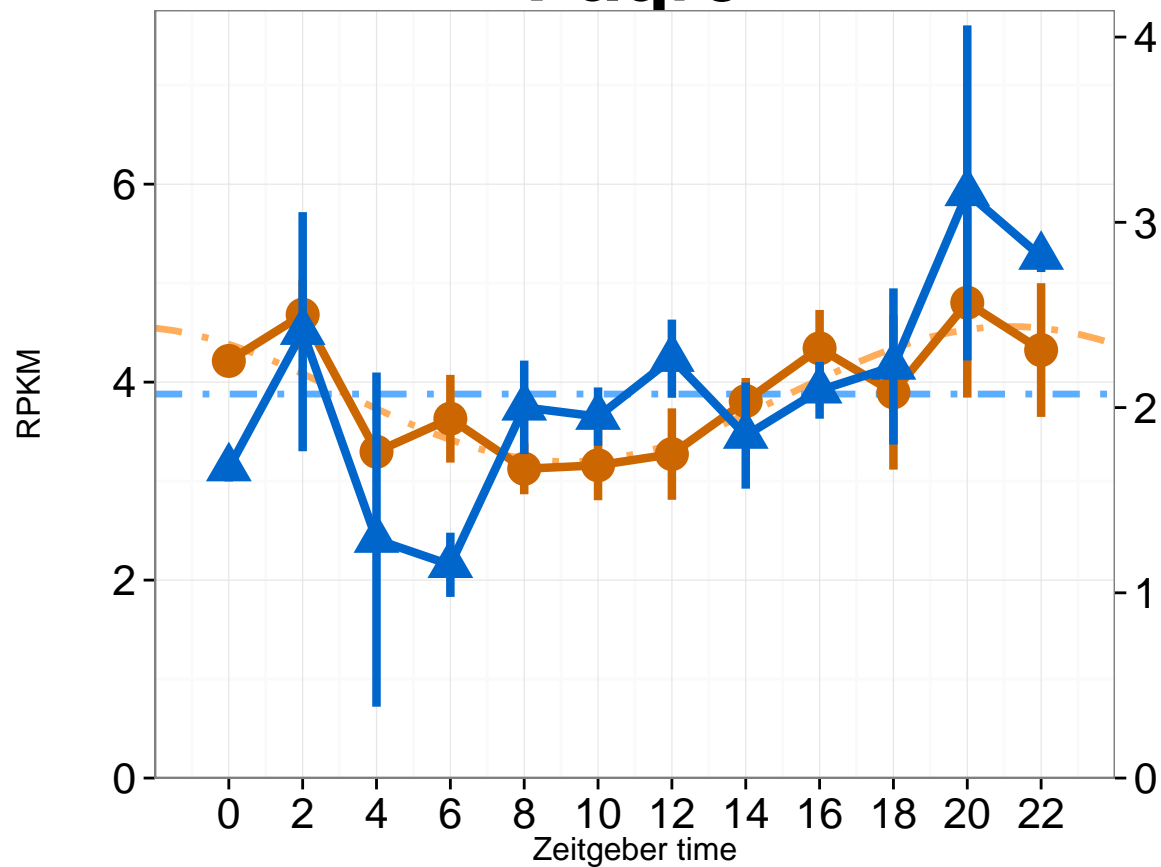

# Paqr3

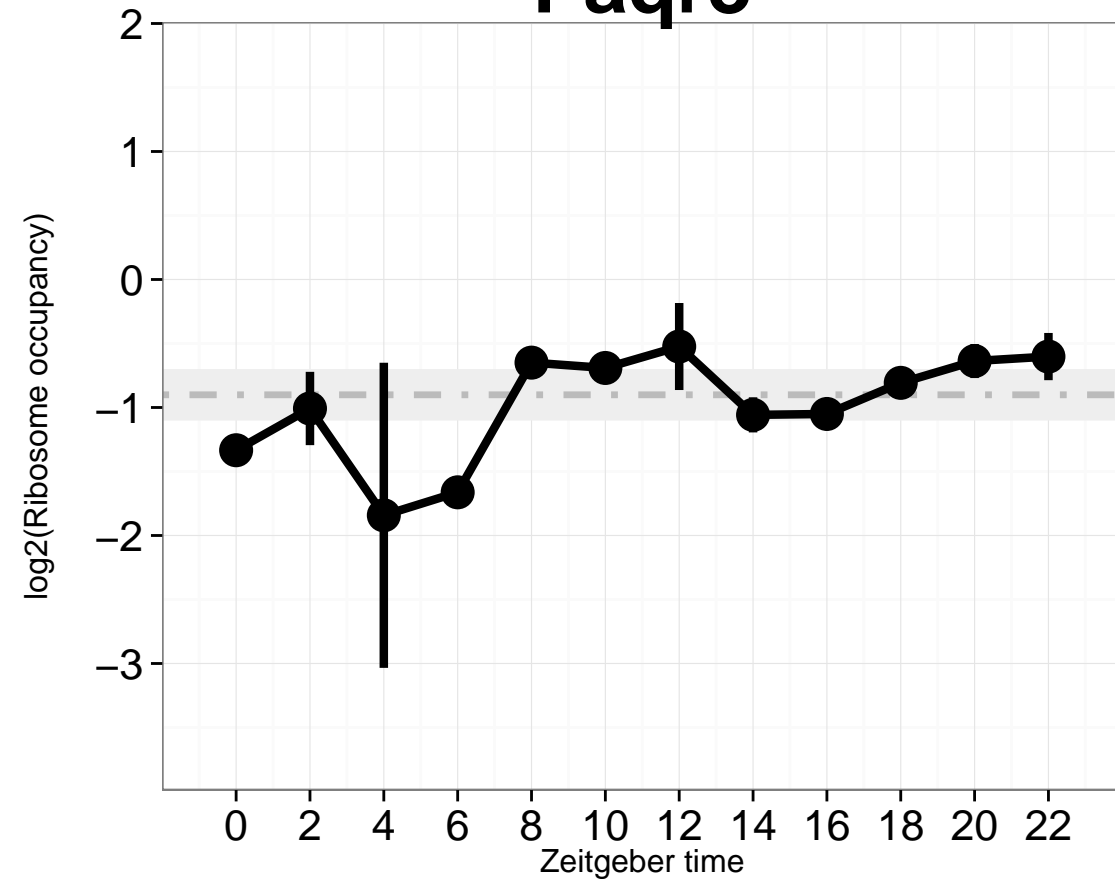

Supplement: Supplementary file 6244 [file 1]

# Mfsd1

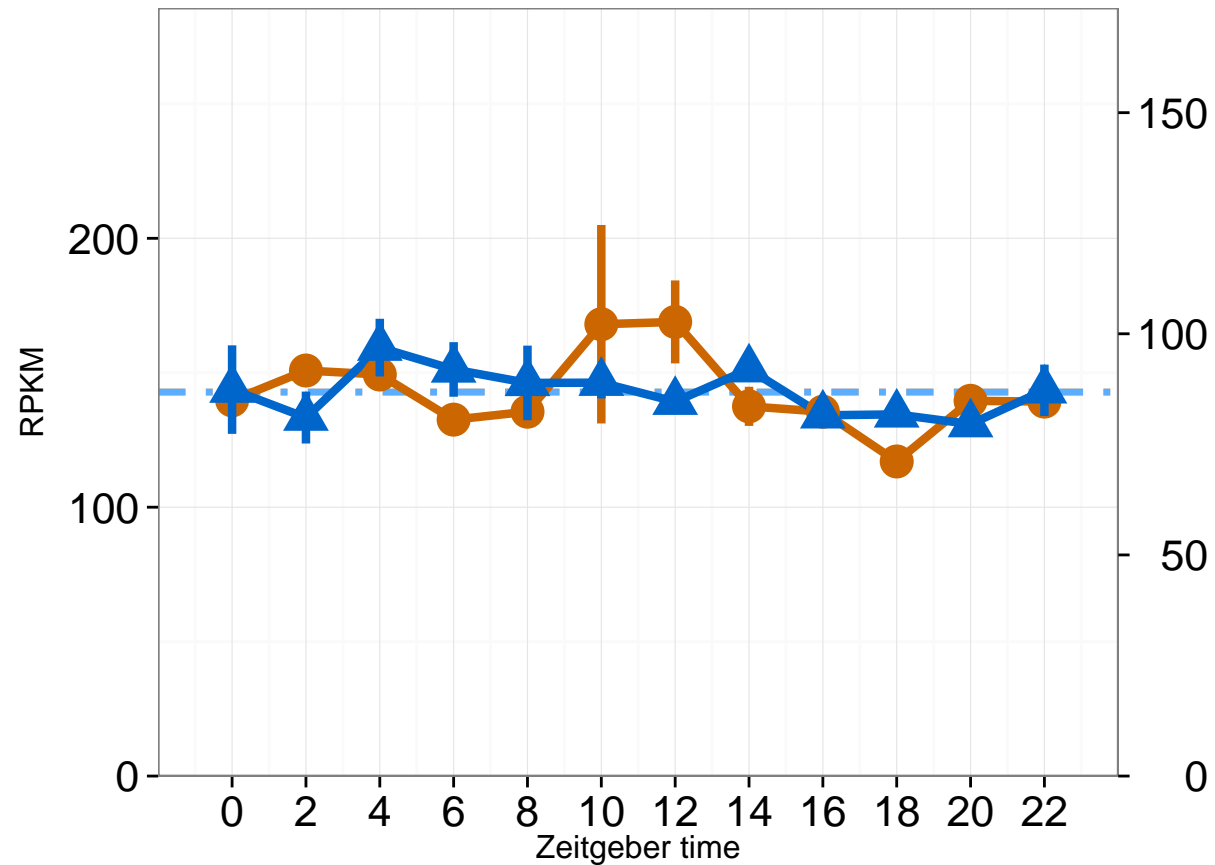

# Mfsd1

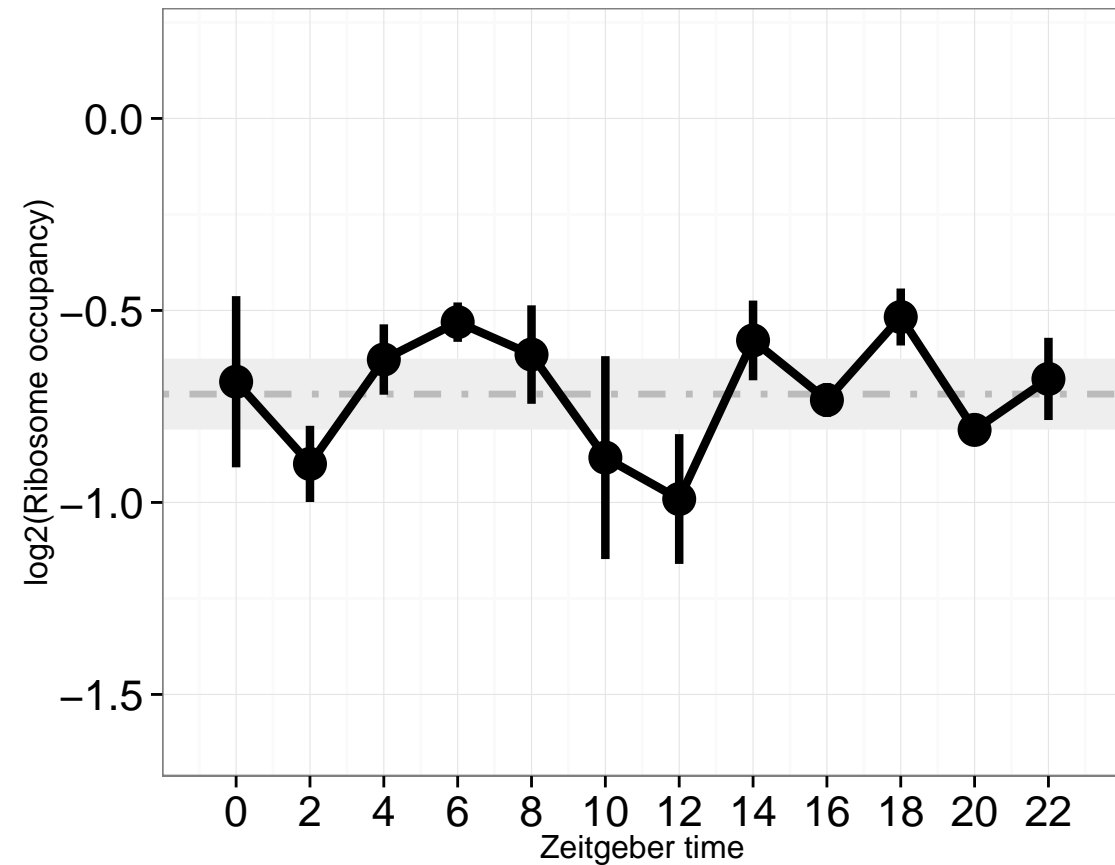

Supplement: Supplementary file 6245 [file 1]

## Camta2

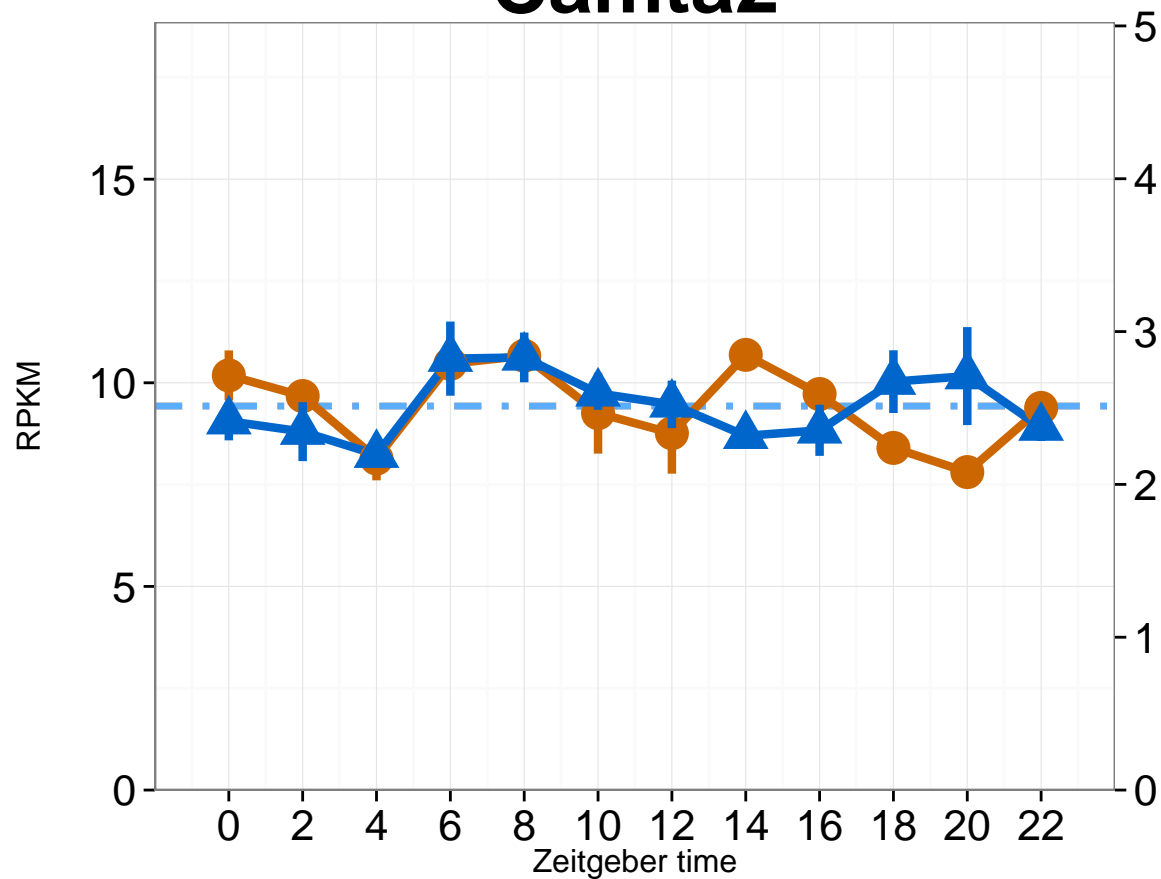

## Camta2

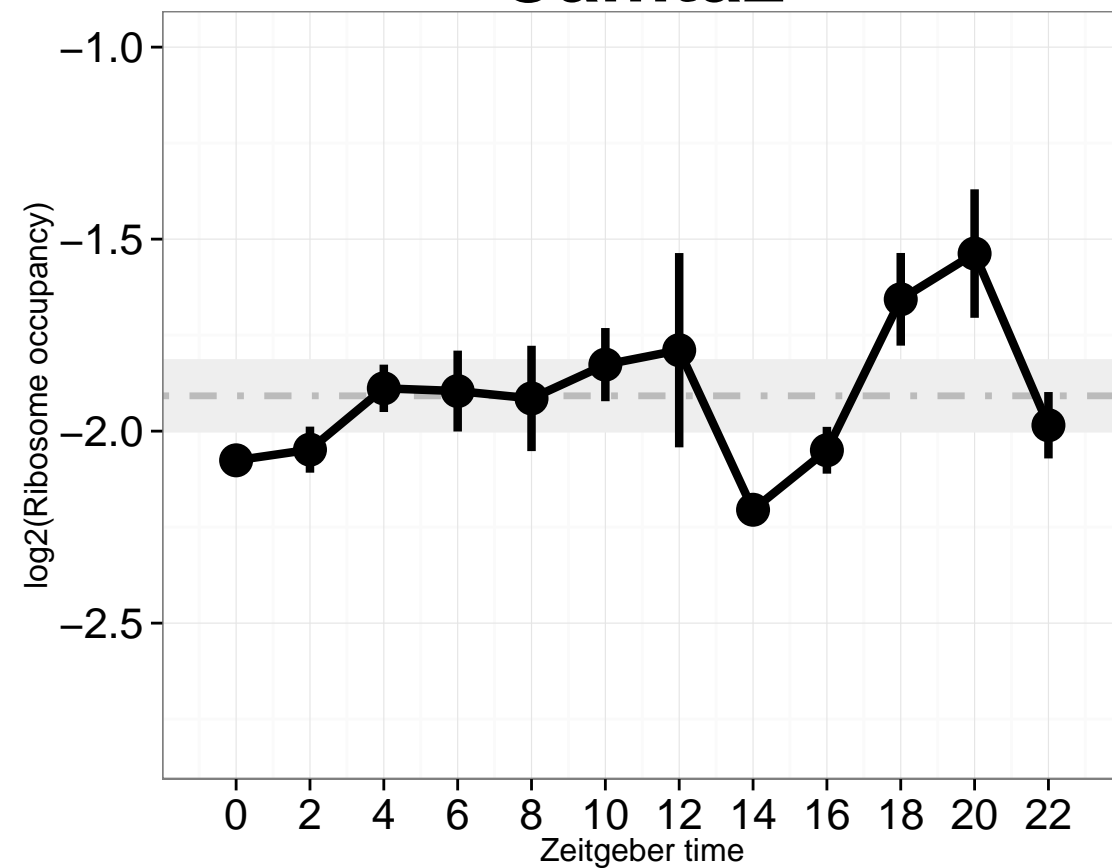

Supplement: Supplementary file 6246 [file 1]

# Ms4a4b

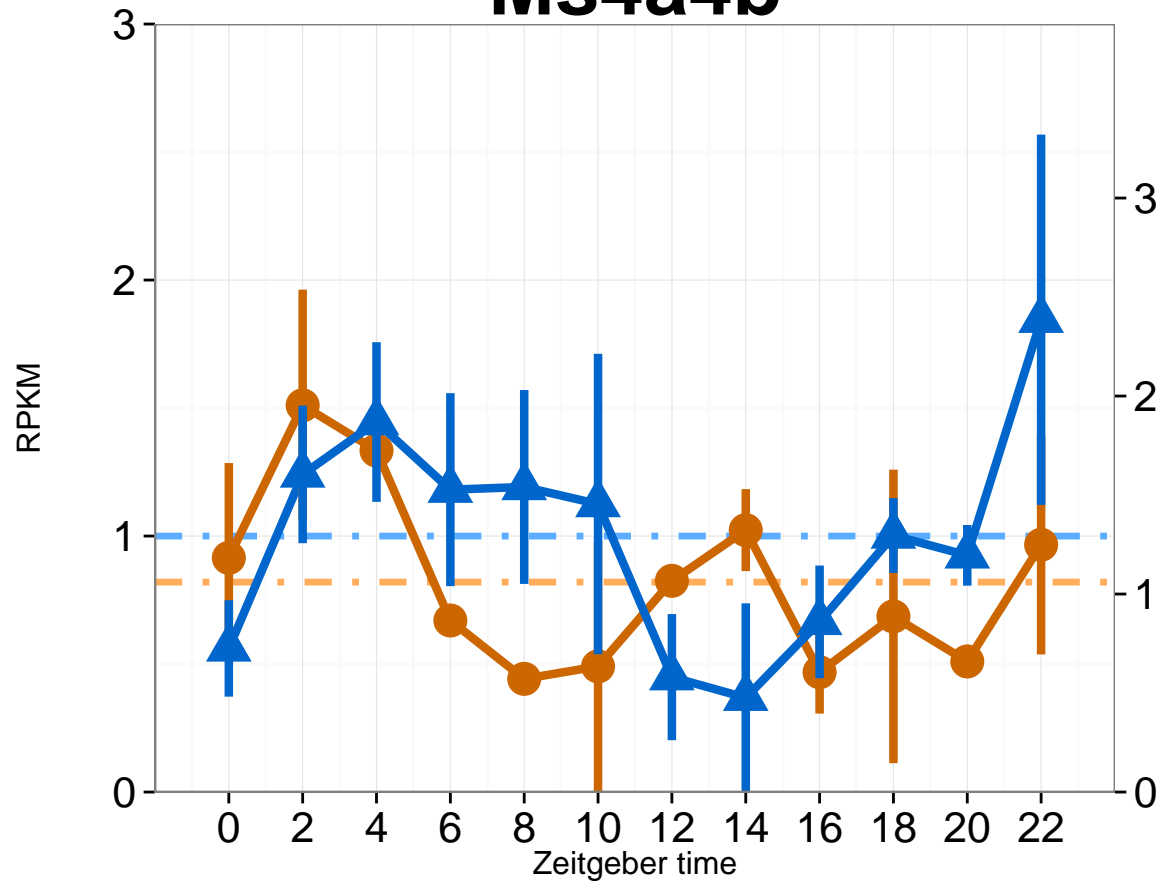

# Ms4a4b

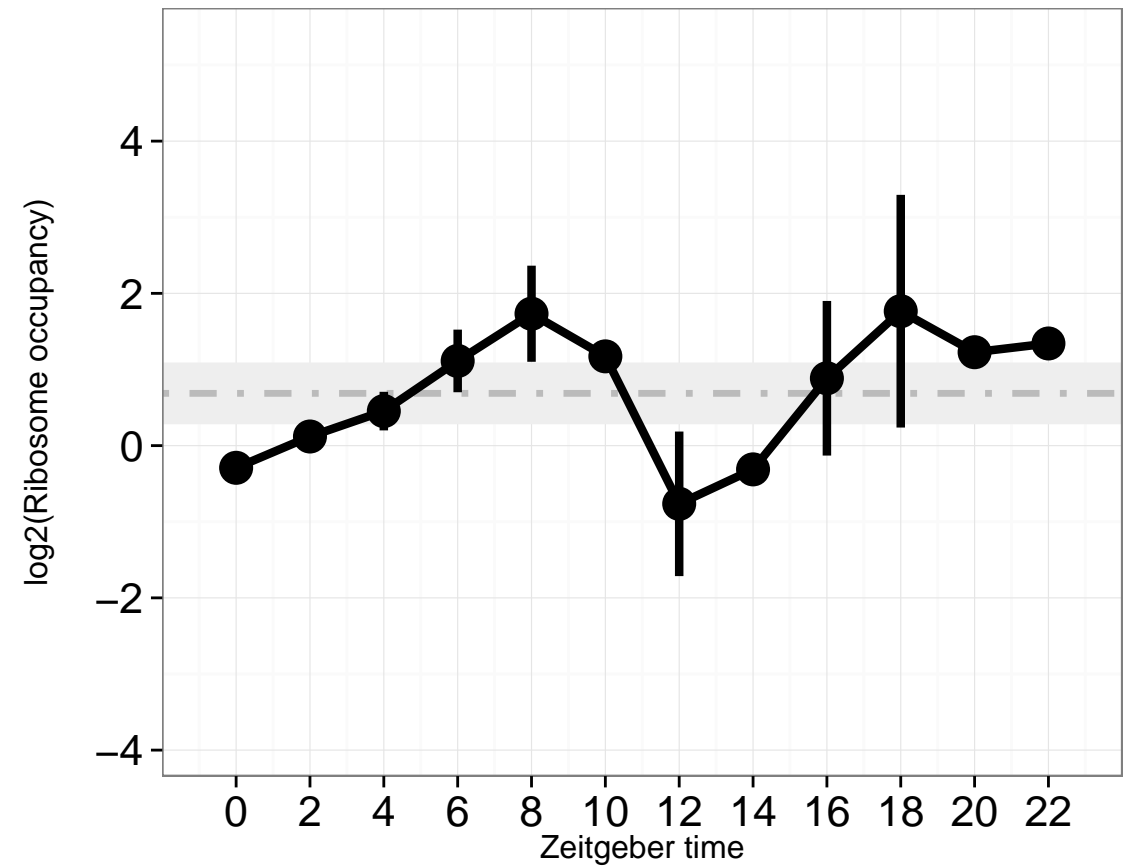

Supplement: Supplementary file 6247 [file 1]

## Apof TR

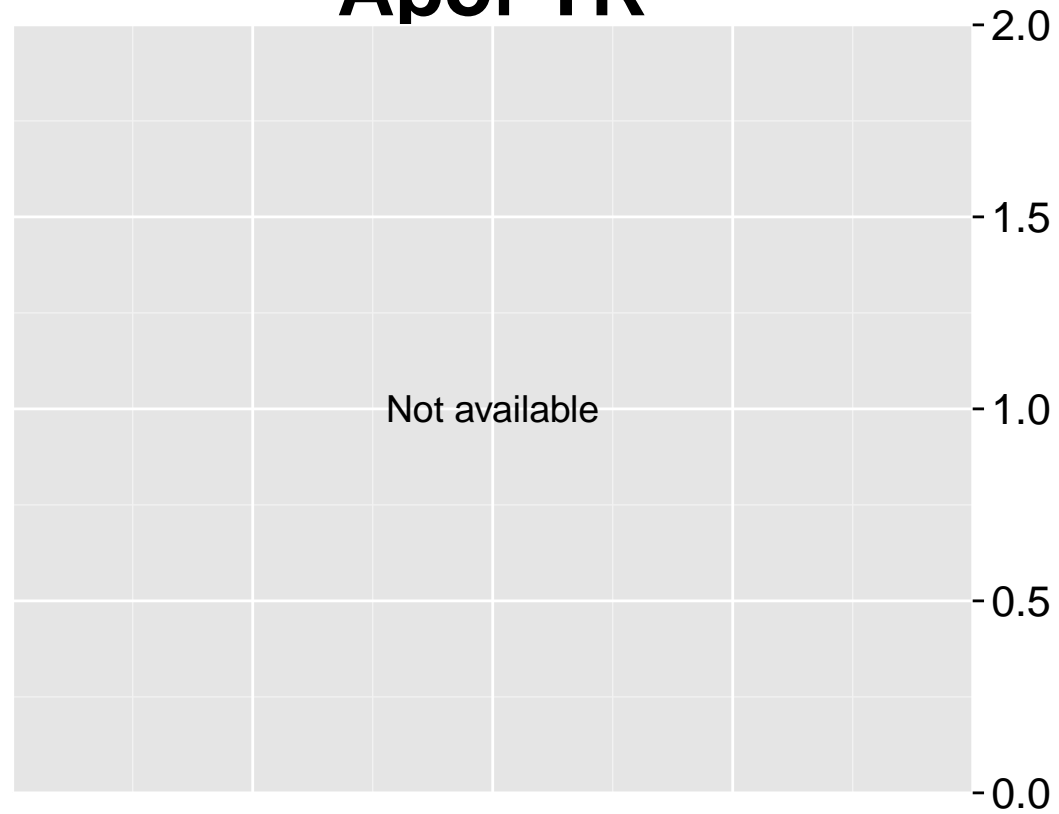

## Apof log2(Ribosome occupancy)

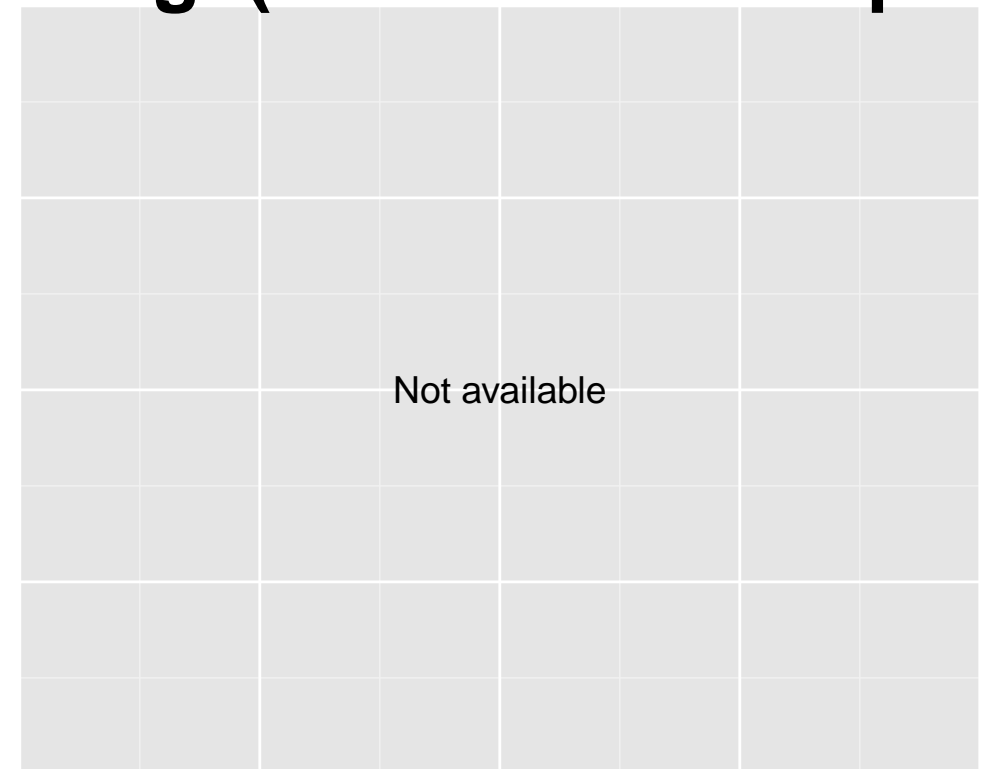

Supplement: Supplementary file 6248 [file 1]

## 4930579K19Rik

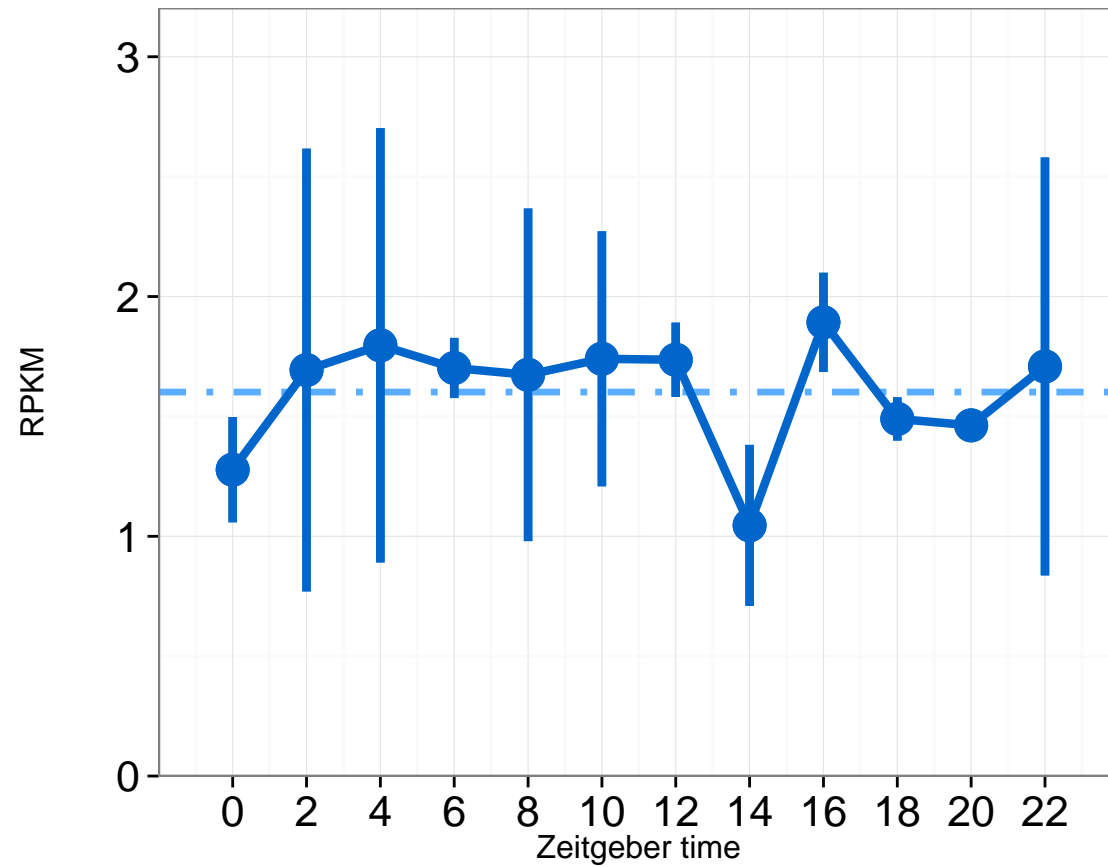

## 4930579K19Rik log2(Ribosome occup

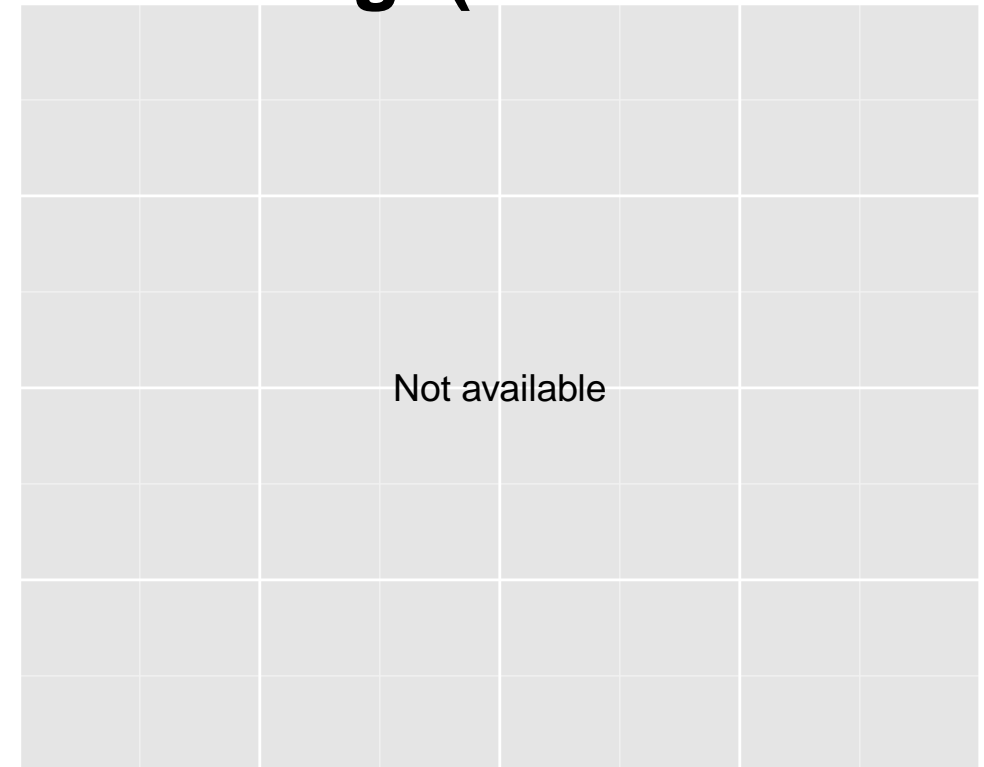

Supplement: Supplementary file 6249 [file 1]

# Zfp703

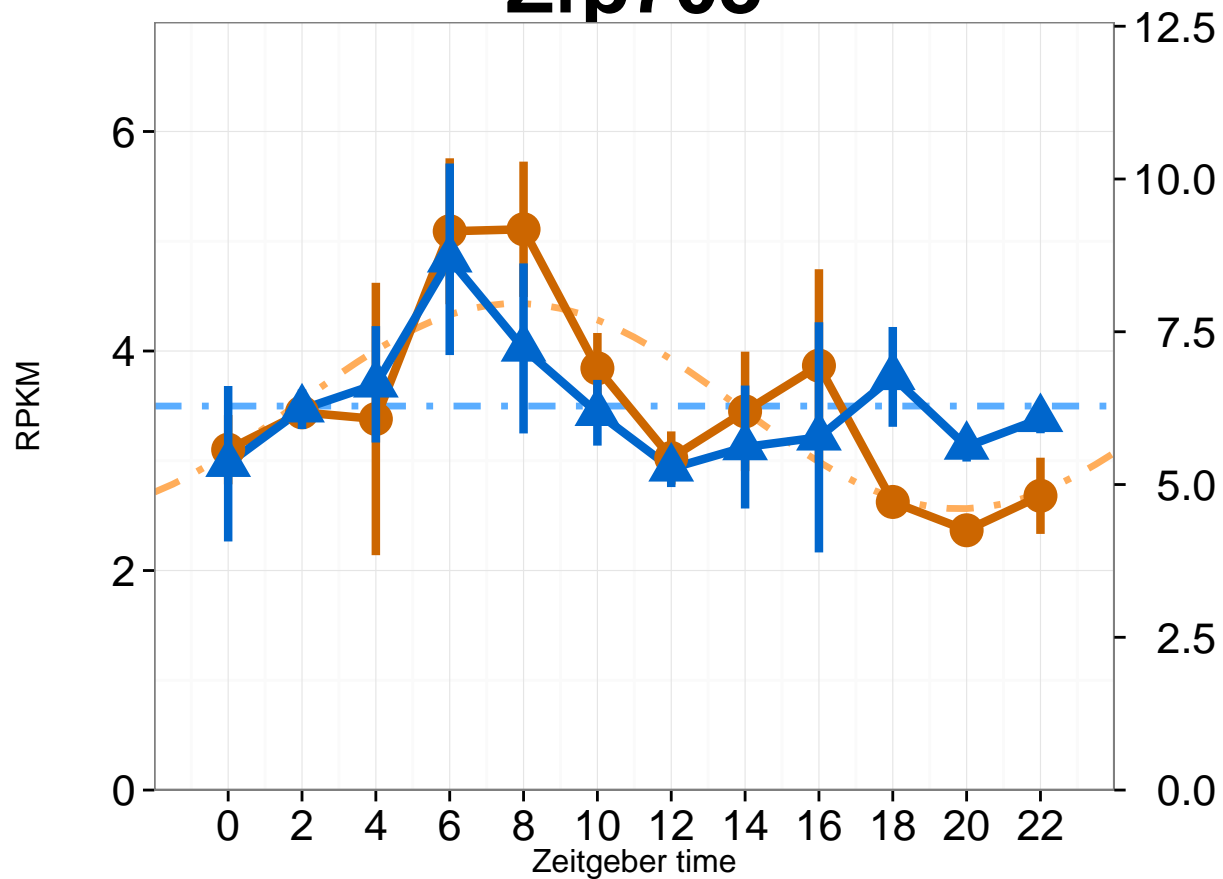

# Zfp703

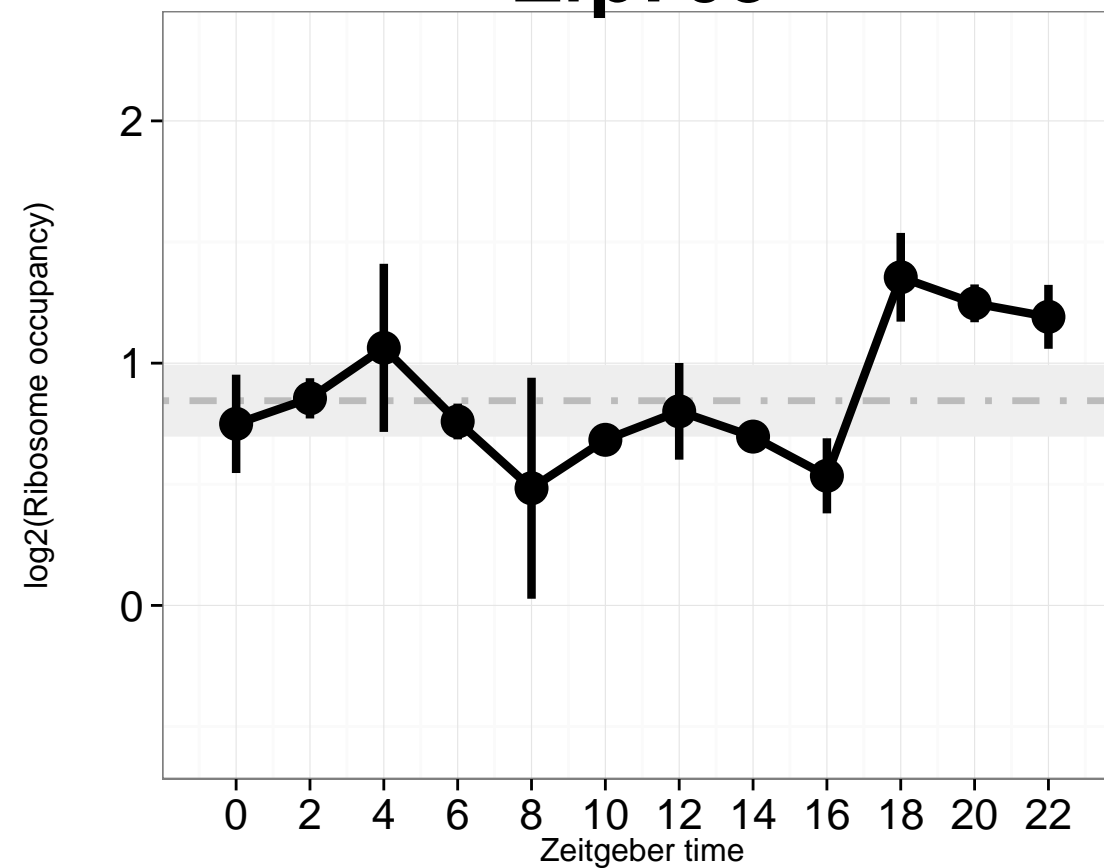

Supplement: Supplementary file 6250 [file 1]

## Mark3

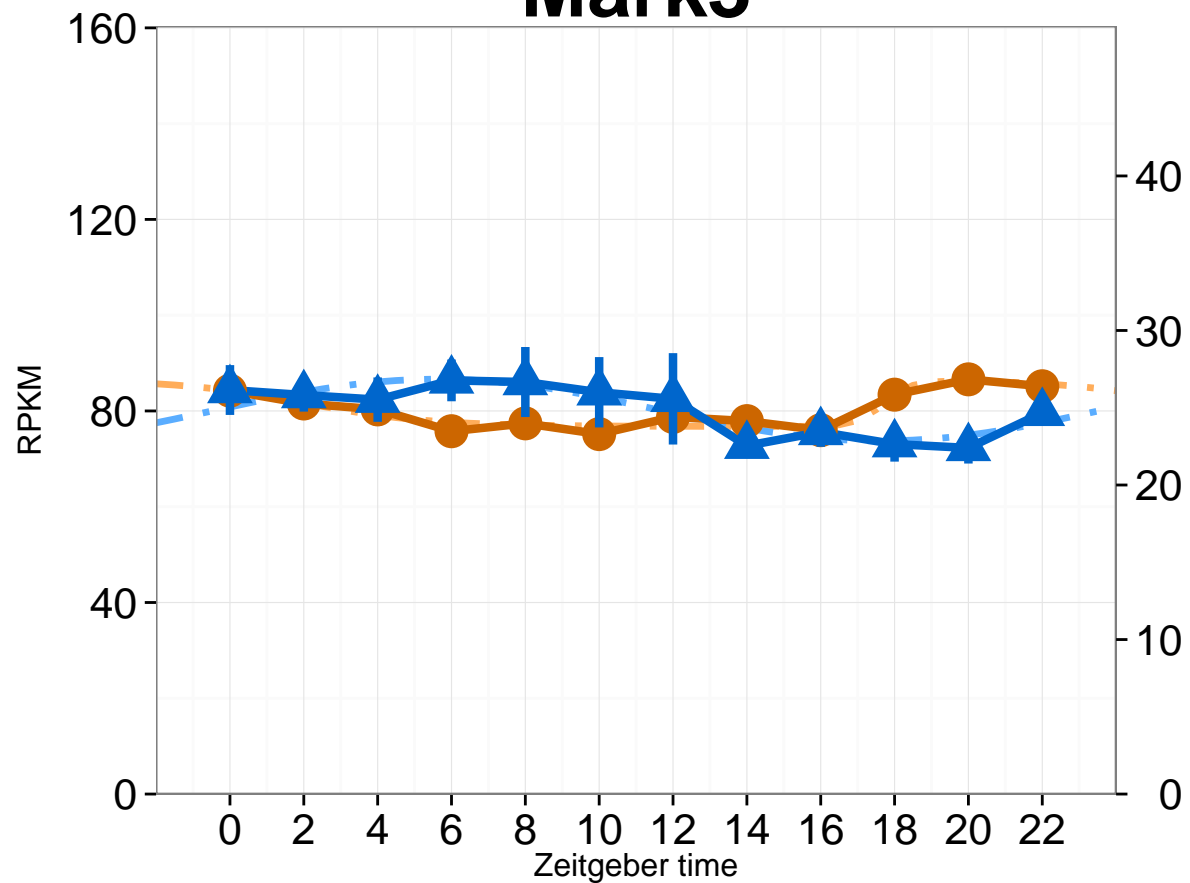

## Mark3

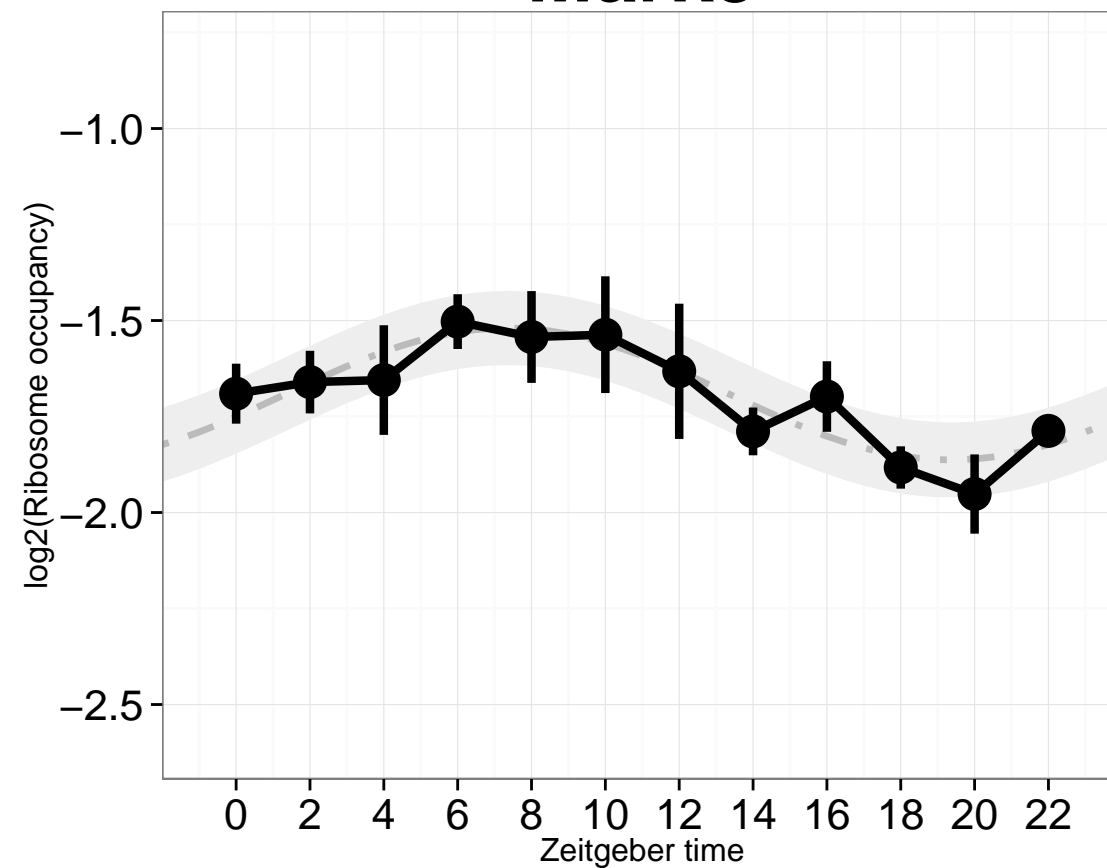

Supplement: Supplementary file 6251 [file 1]

## Ppif

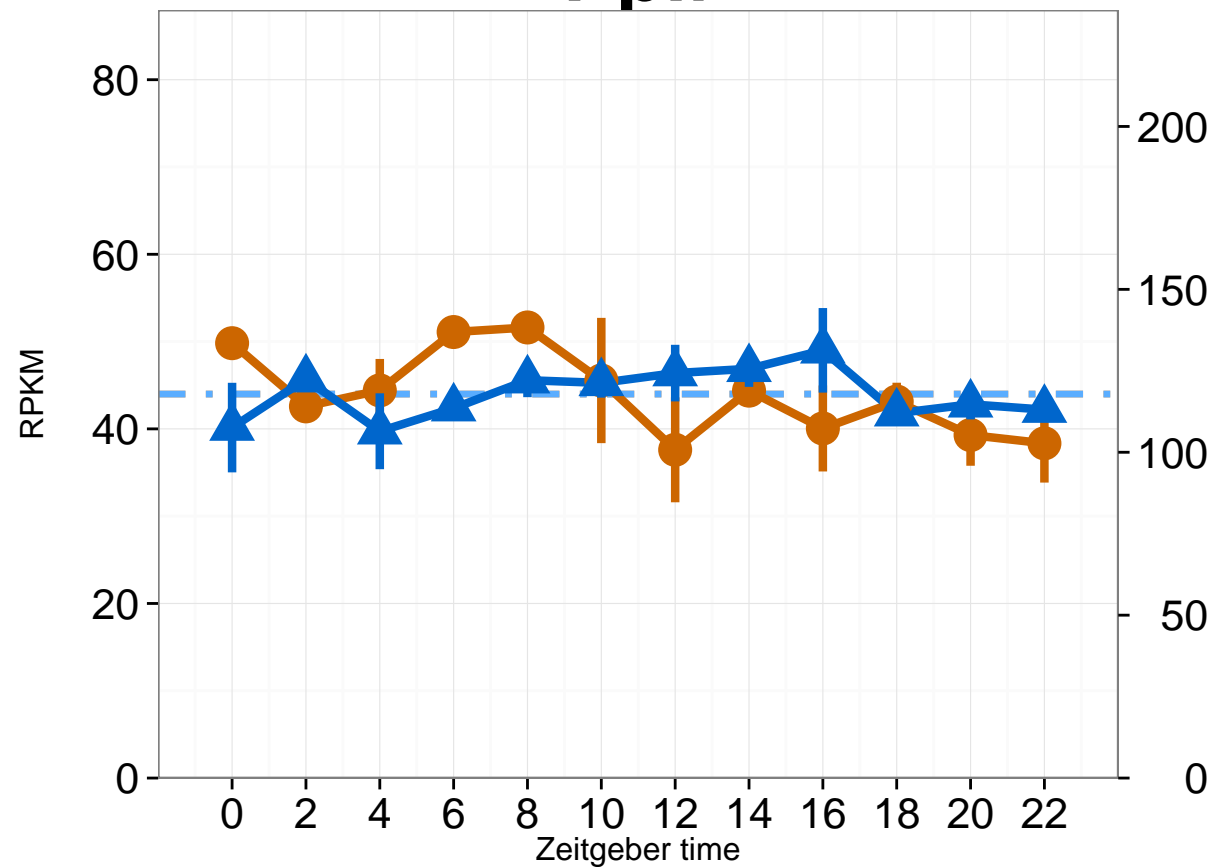

## Ppif

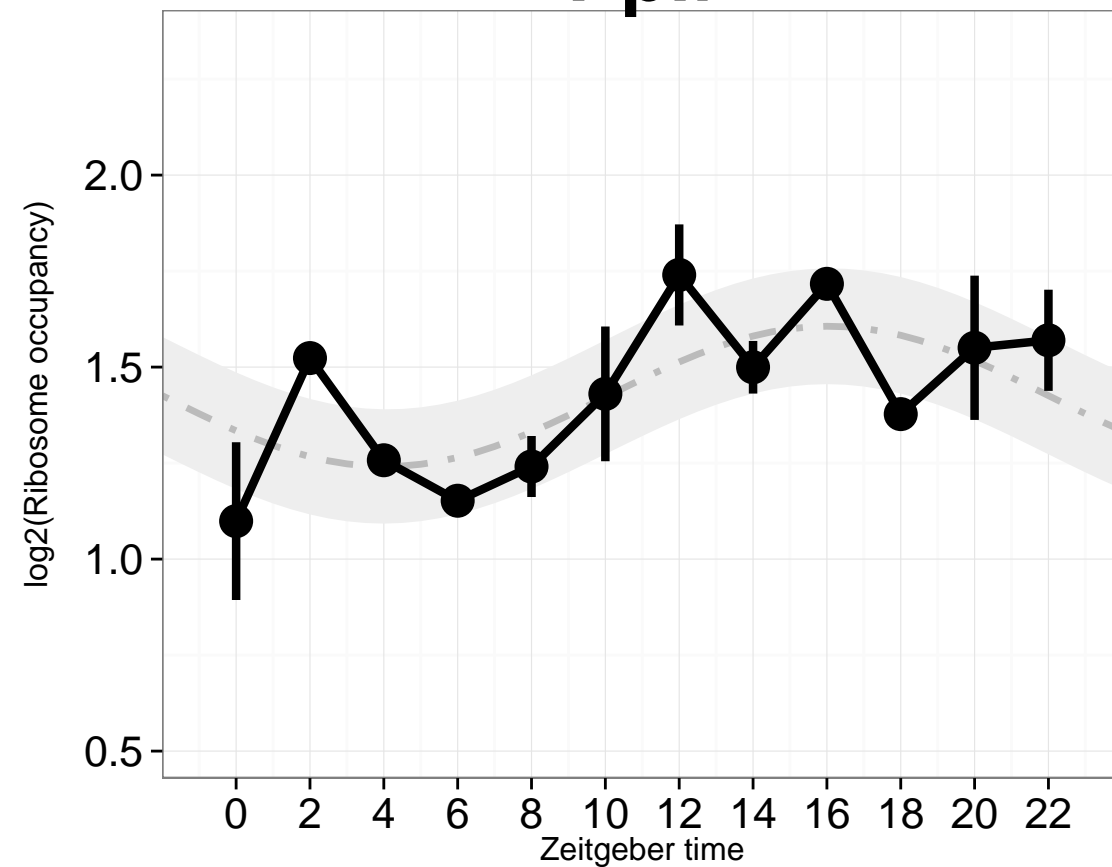

Supplement: Supplementary file 6252 [file 1]

## Gpr161

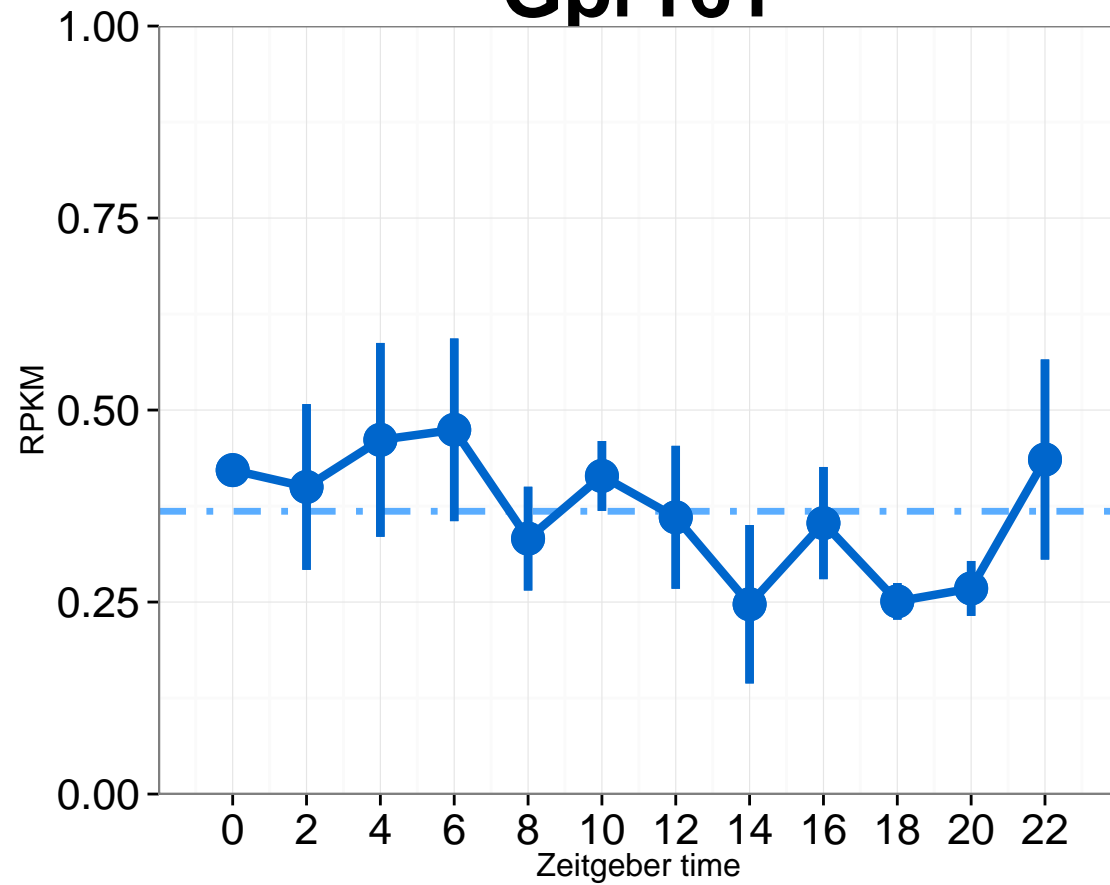

## Gpr161 log2(Ribosome occupancy)

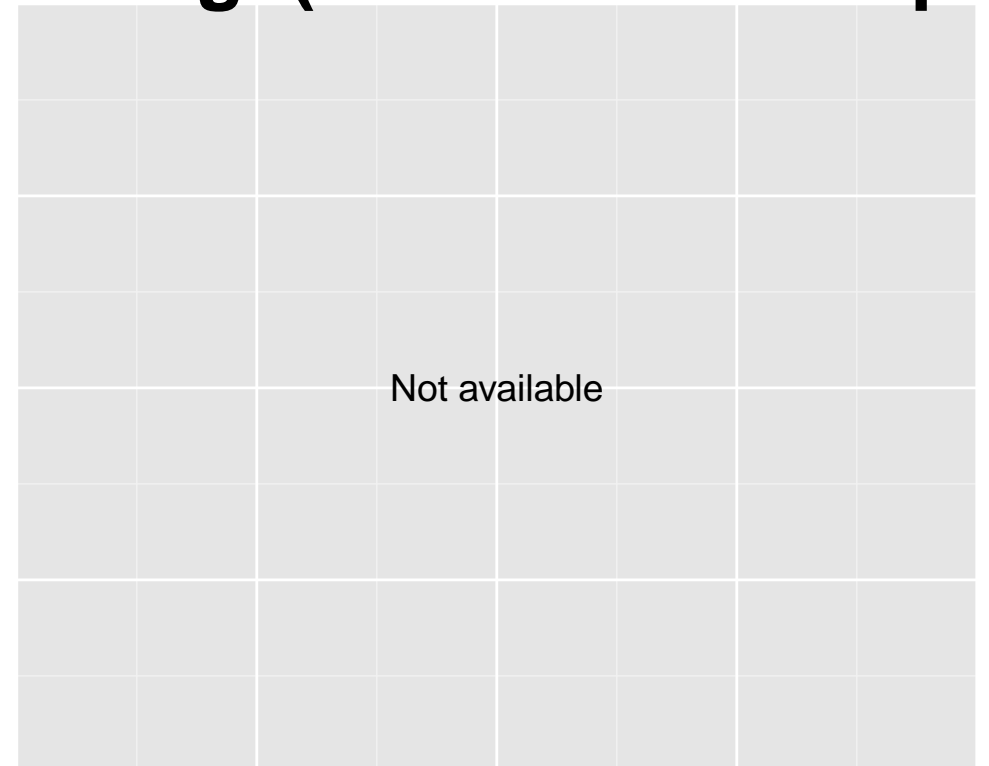

Supplement: Supplementary file 6253 [file 1]

## Mtmr10

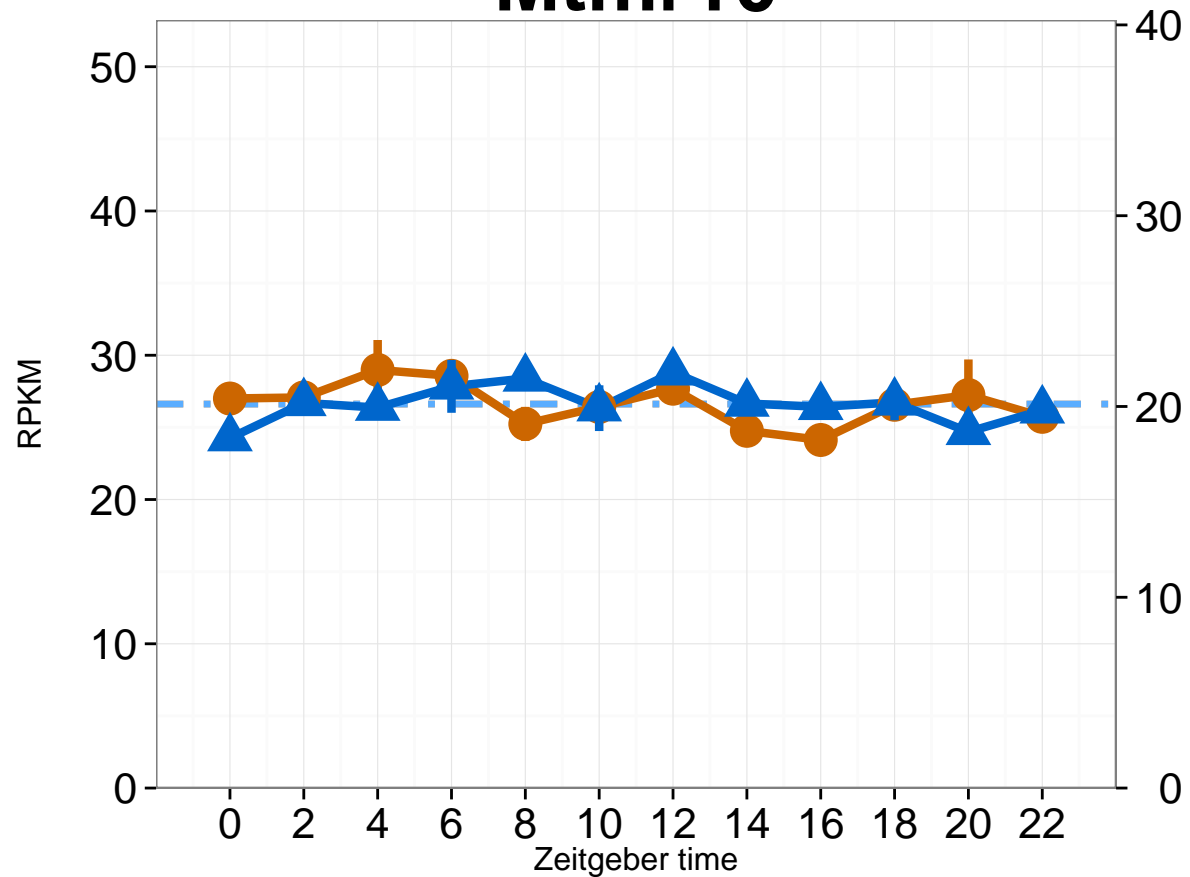

## Mtmr10

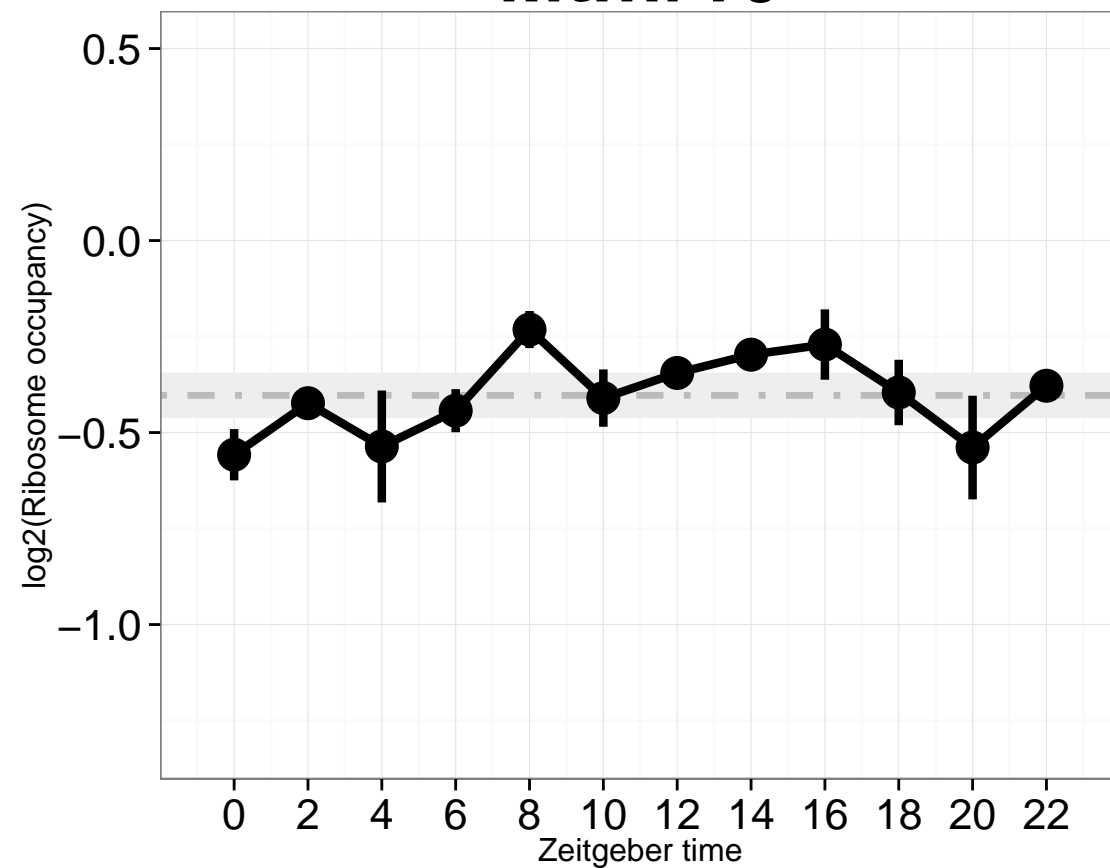

Supplement: Supplementary file 6254 [file 1]

## Ifnlr1

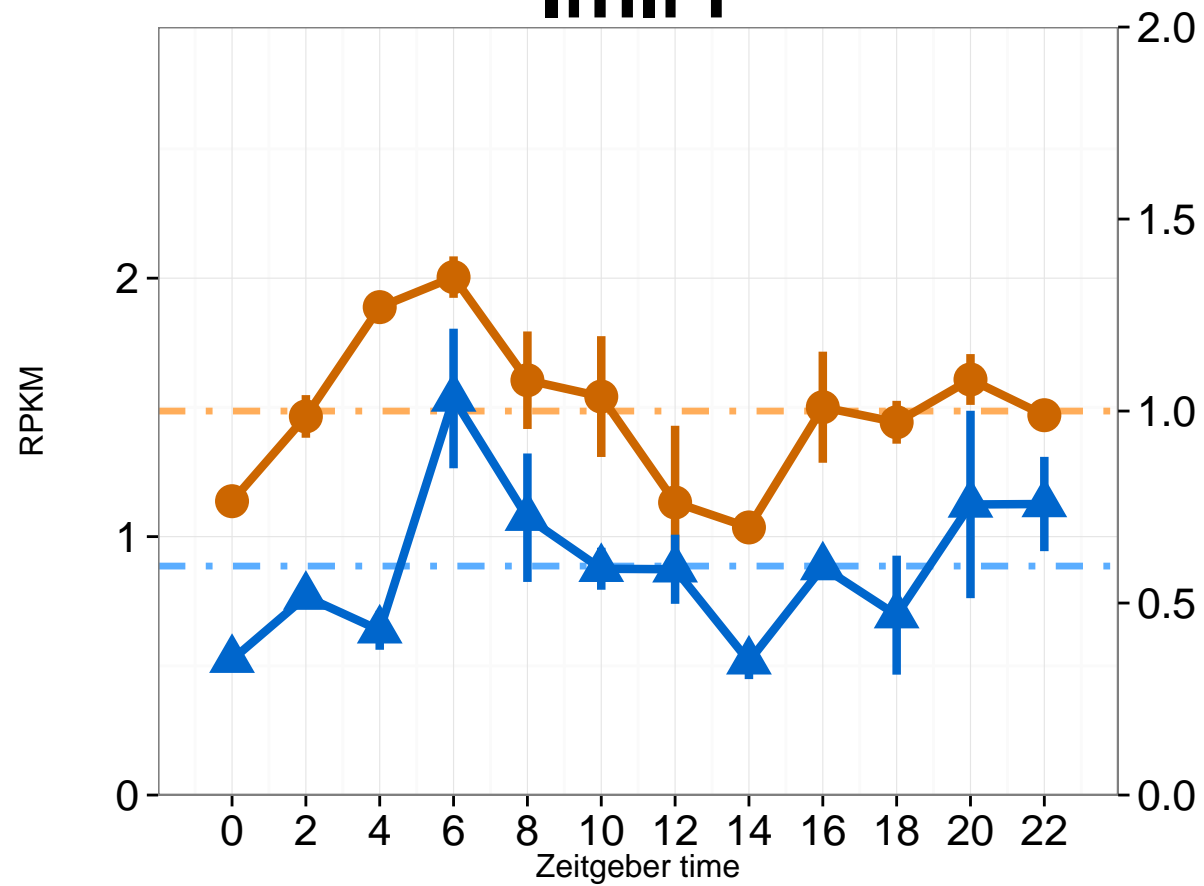

## Ifnlr1

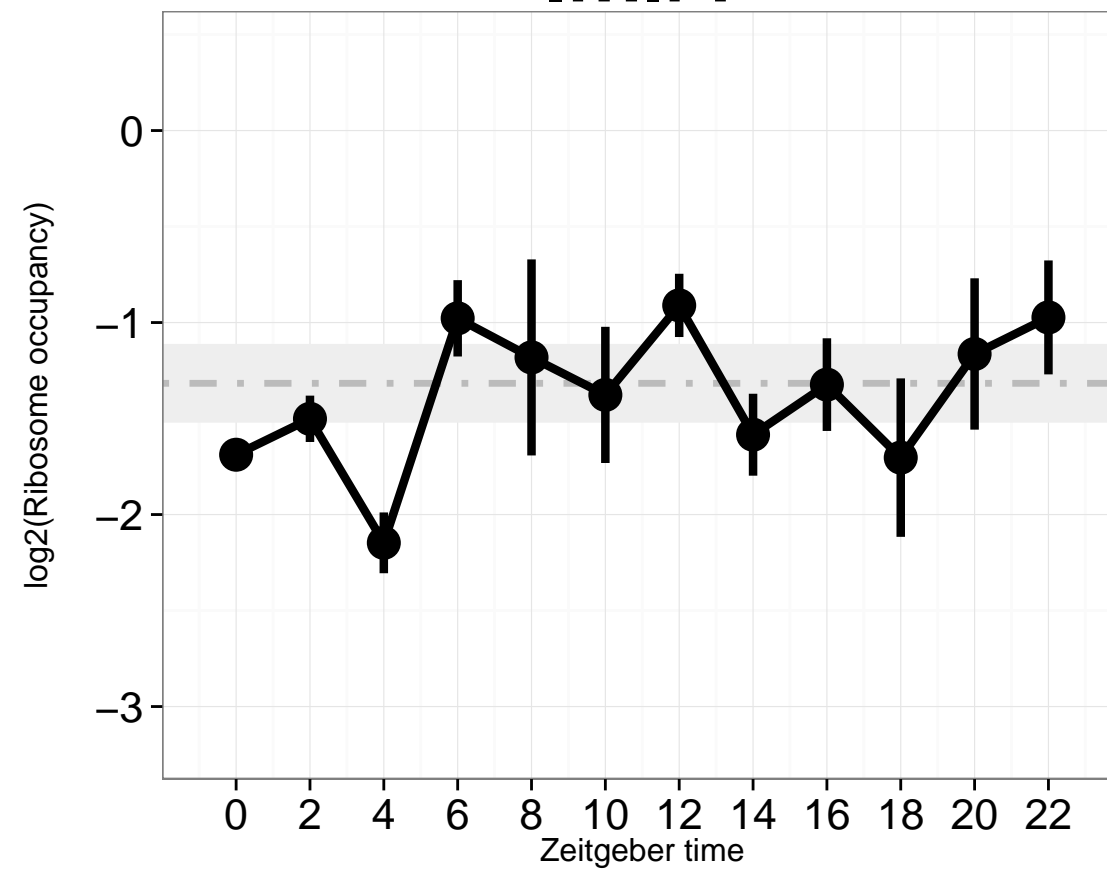

Supplement: Supplementary file 6255 [file 1]

## Ube3c

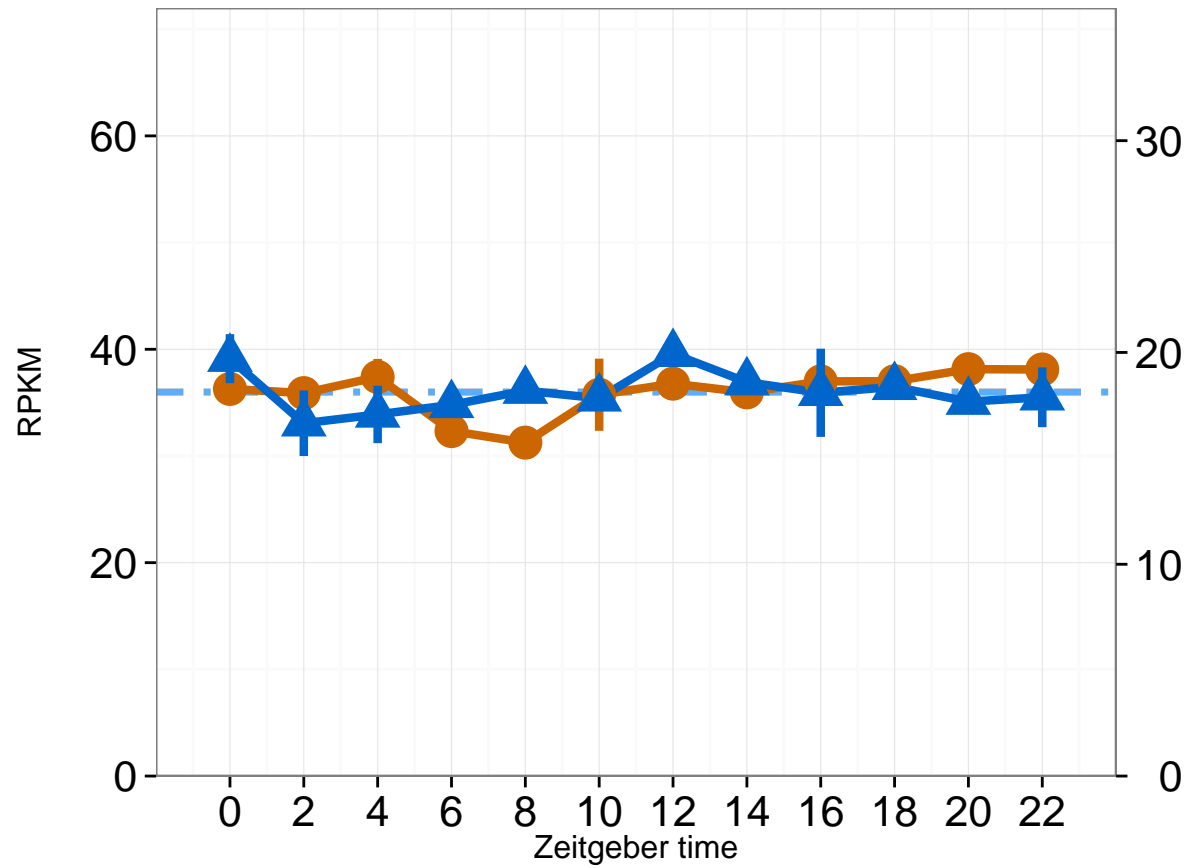

## Ube3c

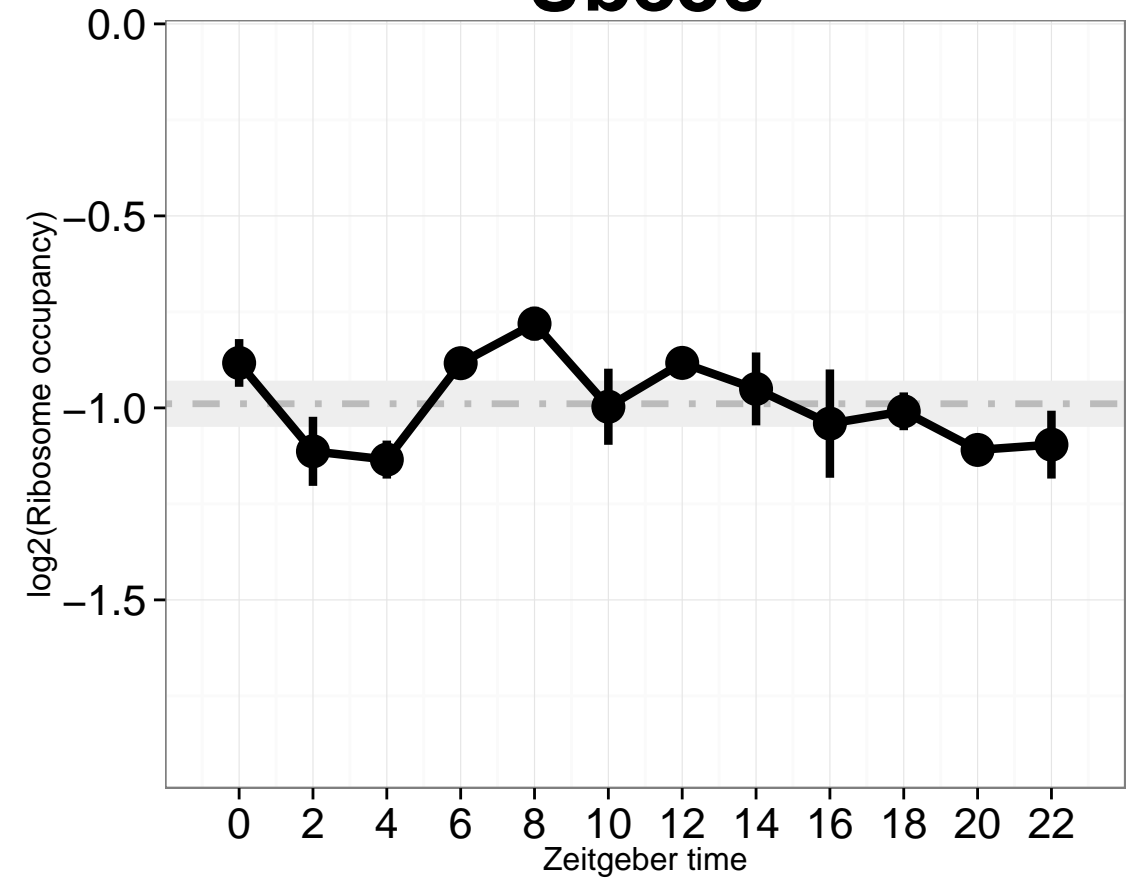

Supplement: Supplementary file 6256 [file 1]

# Alg6

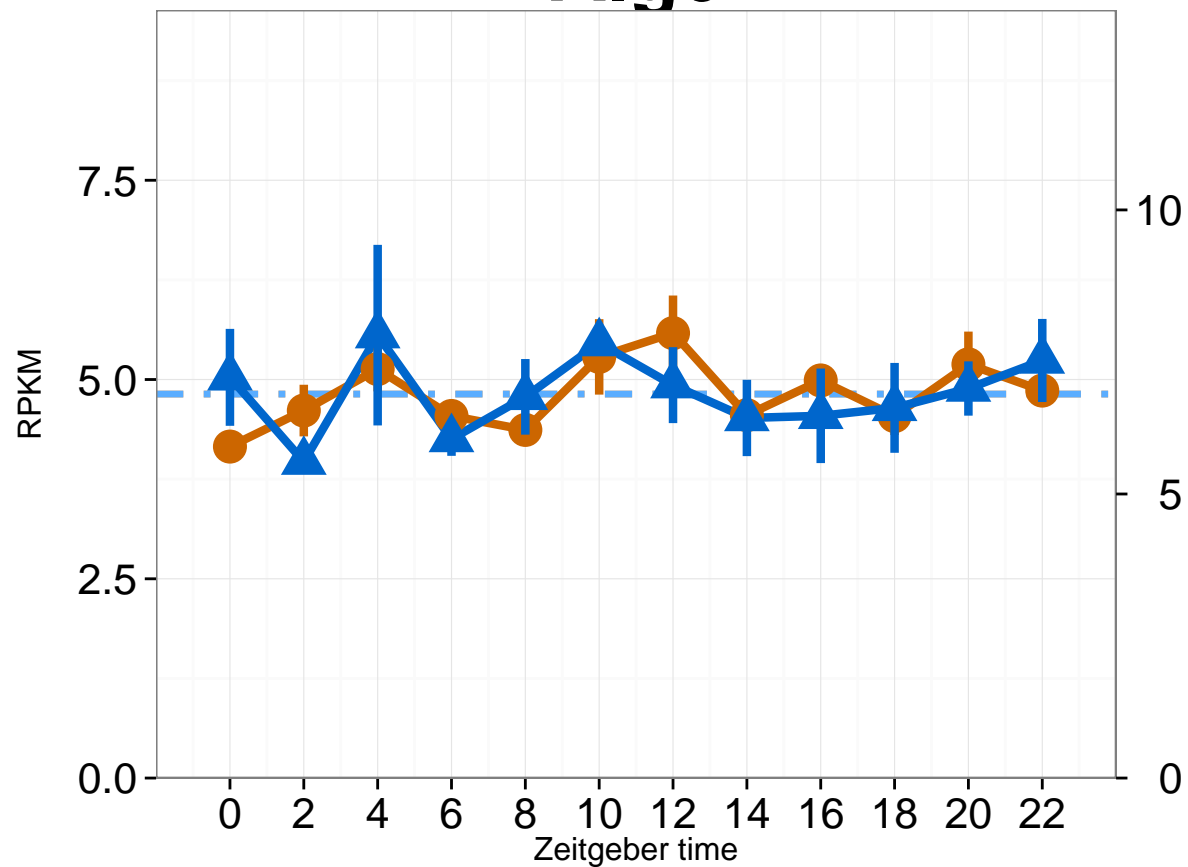

# Alg6

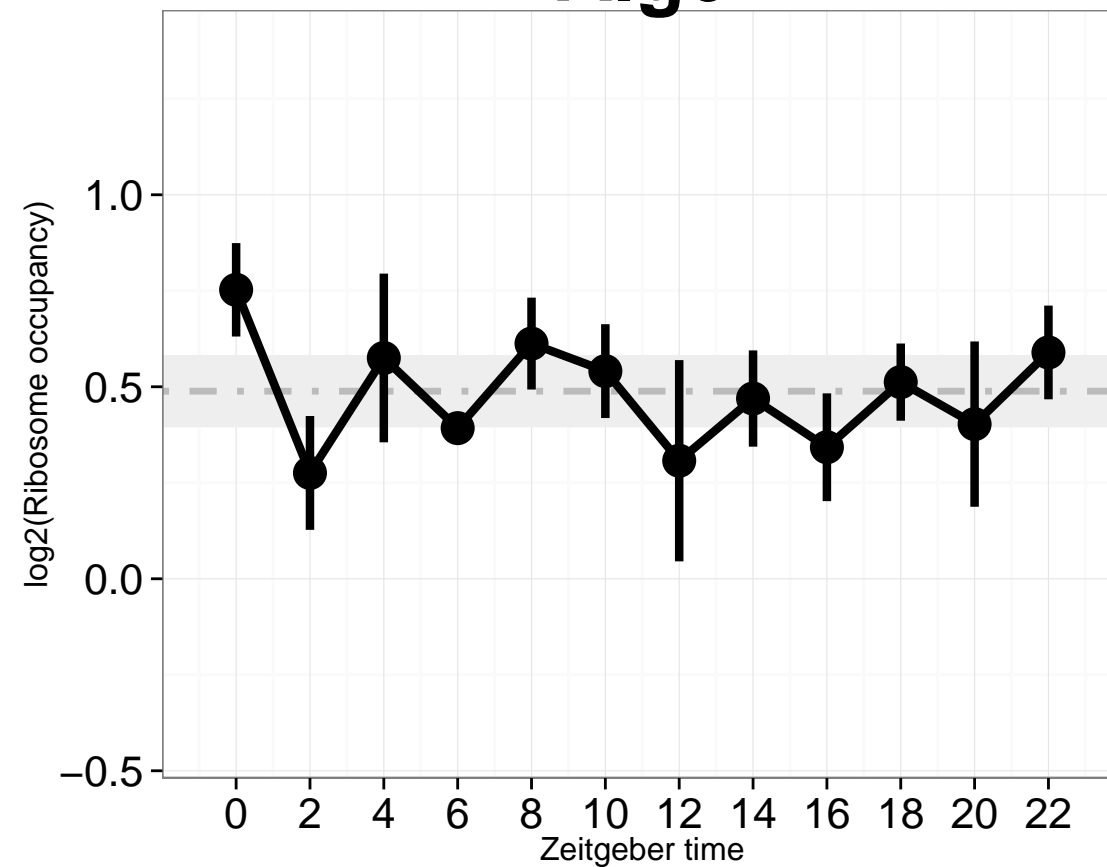

Supplement: Supplementary file 6257 [file 1]

## NvI

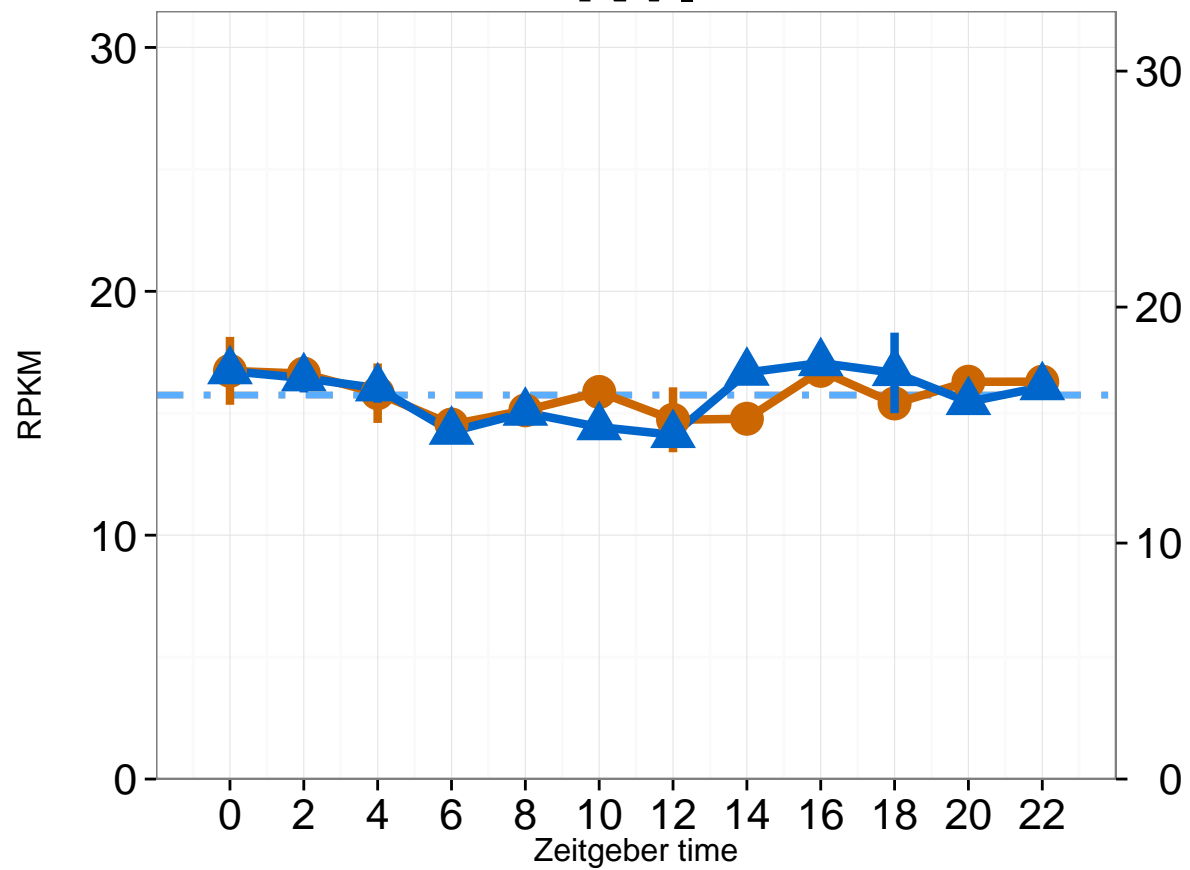

## NvI

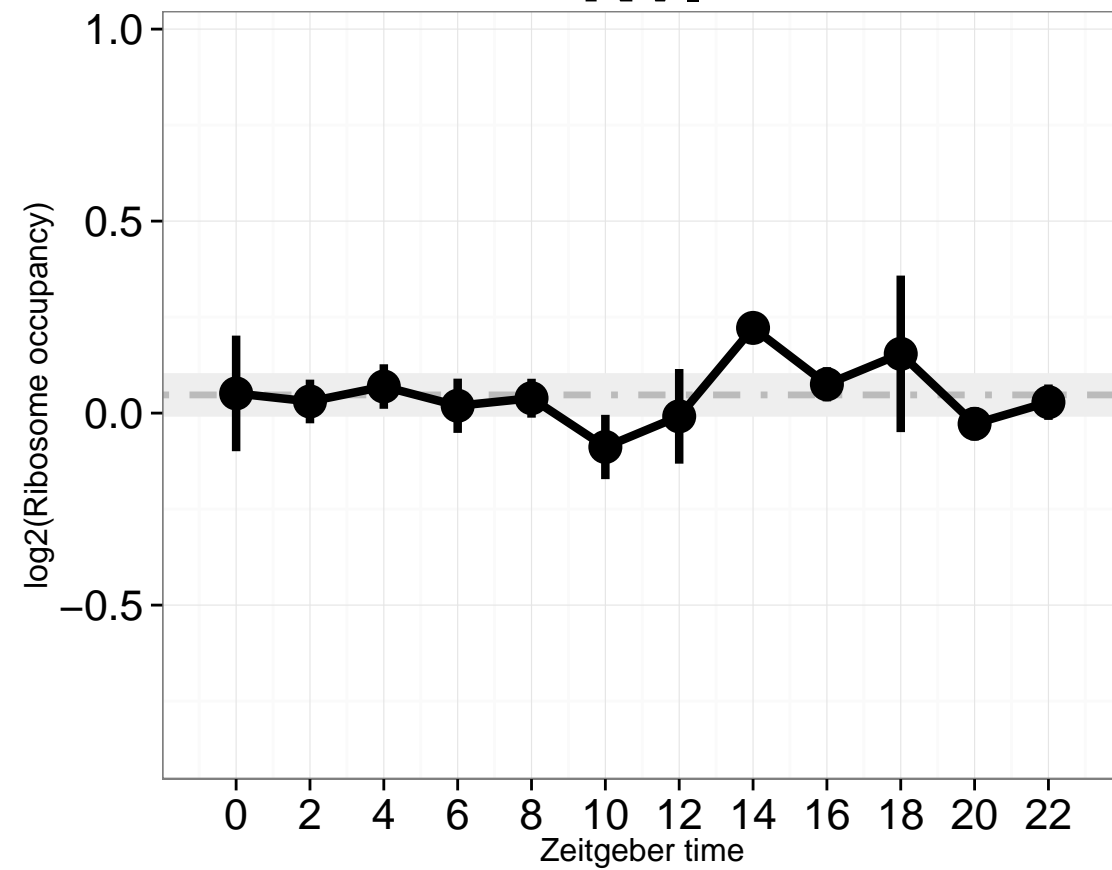

Supplement: Supplementary file 6258 [file 1]

## Dek

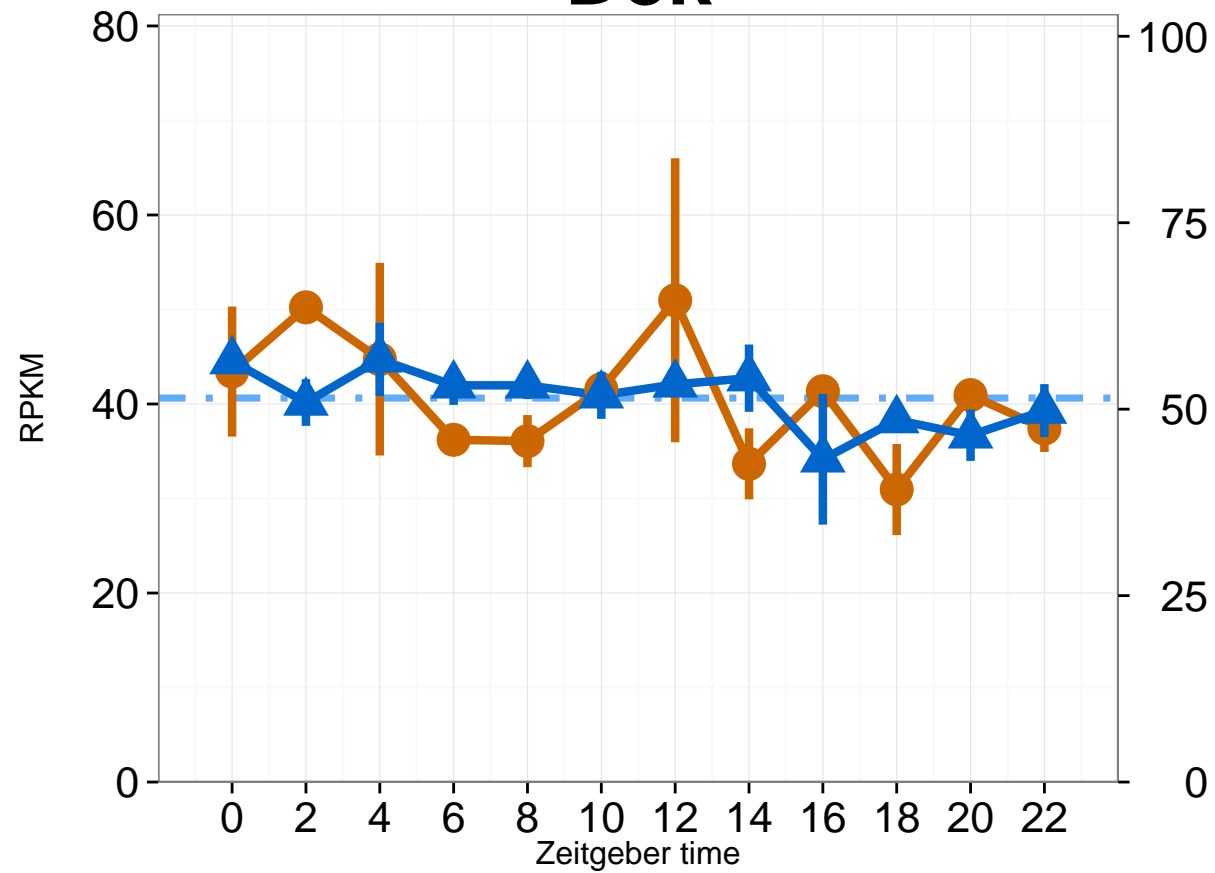

## Dek

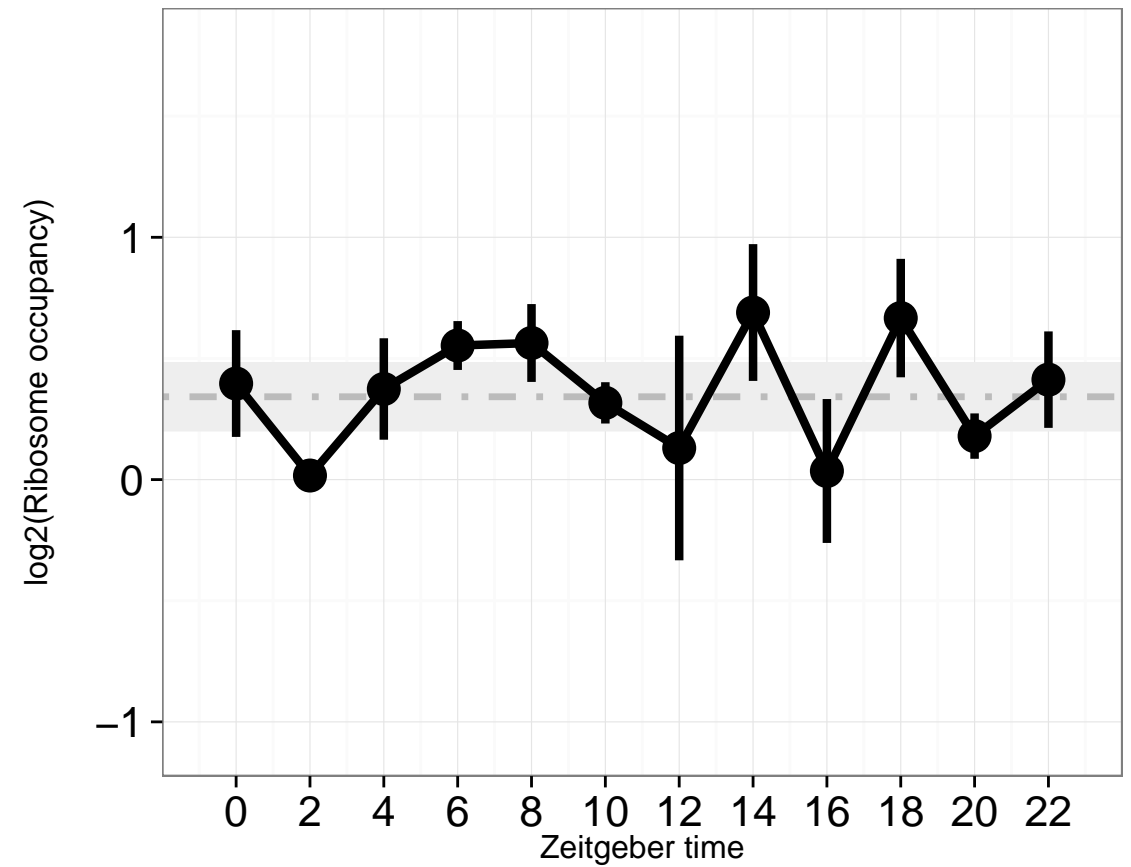

Supplement: Supplementary file 6259 [file 1]

# Fam114a2

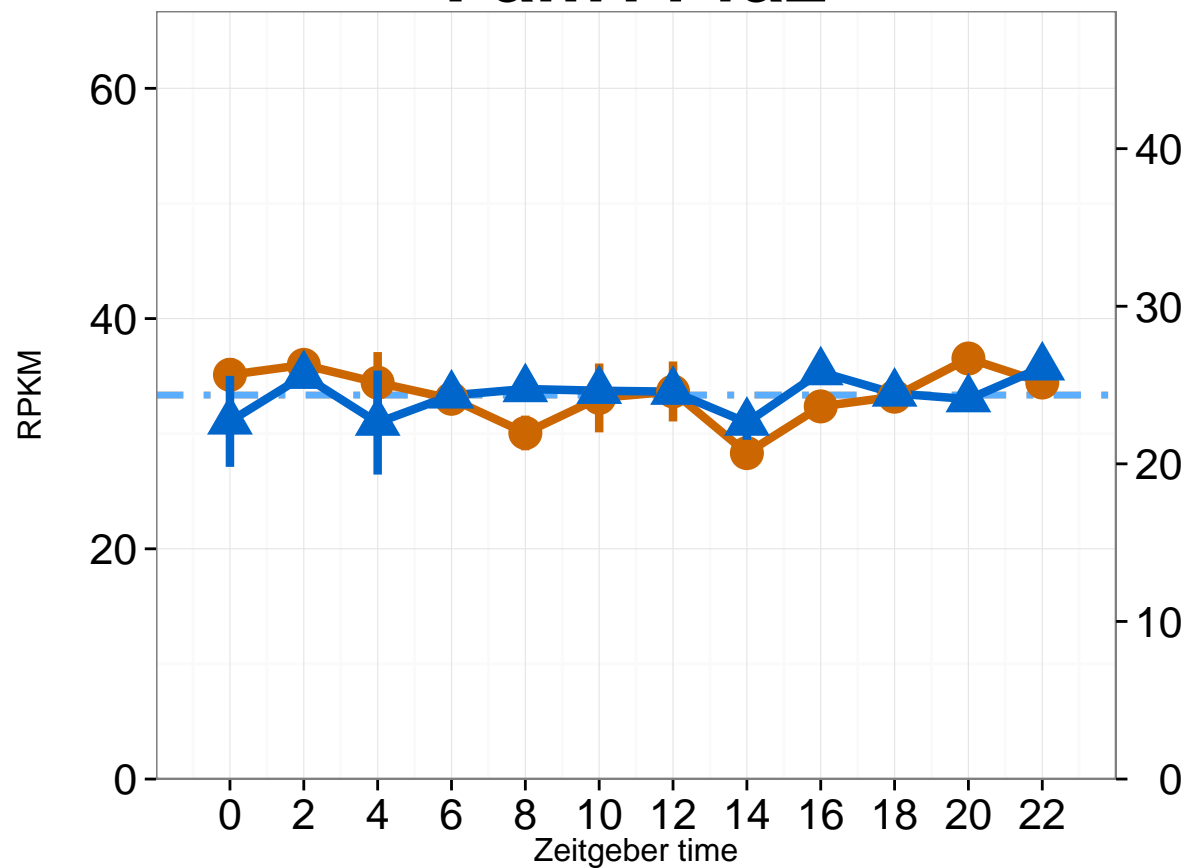

# Fam114a2

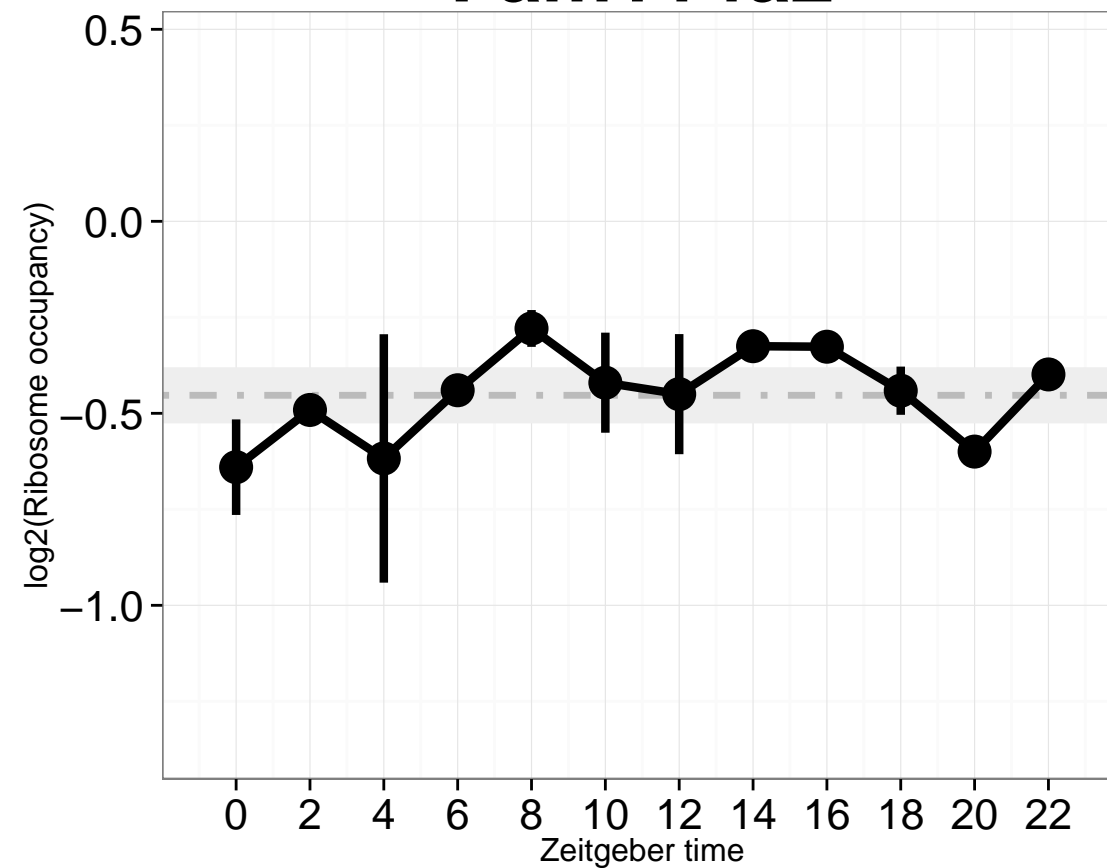

Supplement: Supplementary file 6260 [file 1]

## Xrn1

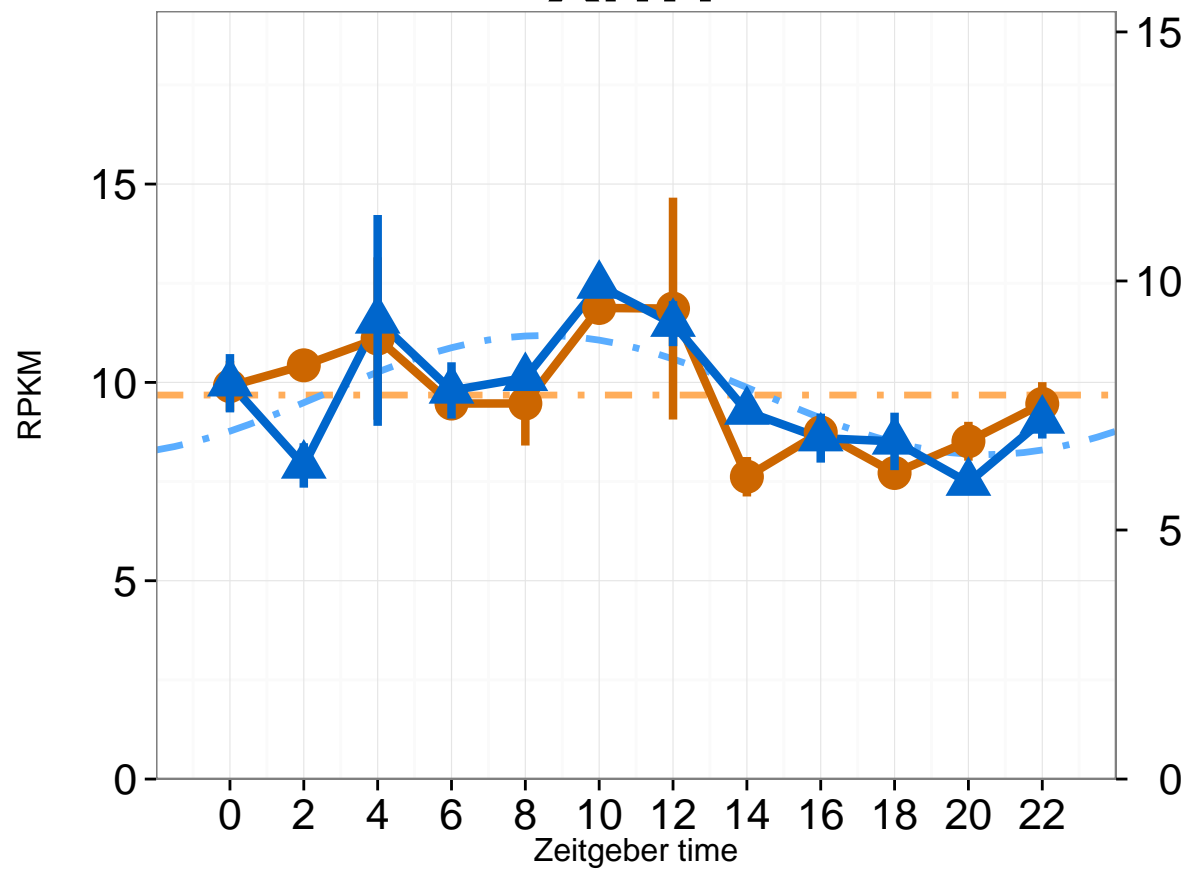

## Xrn1

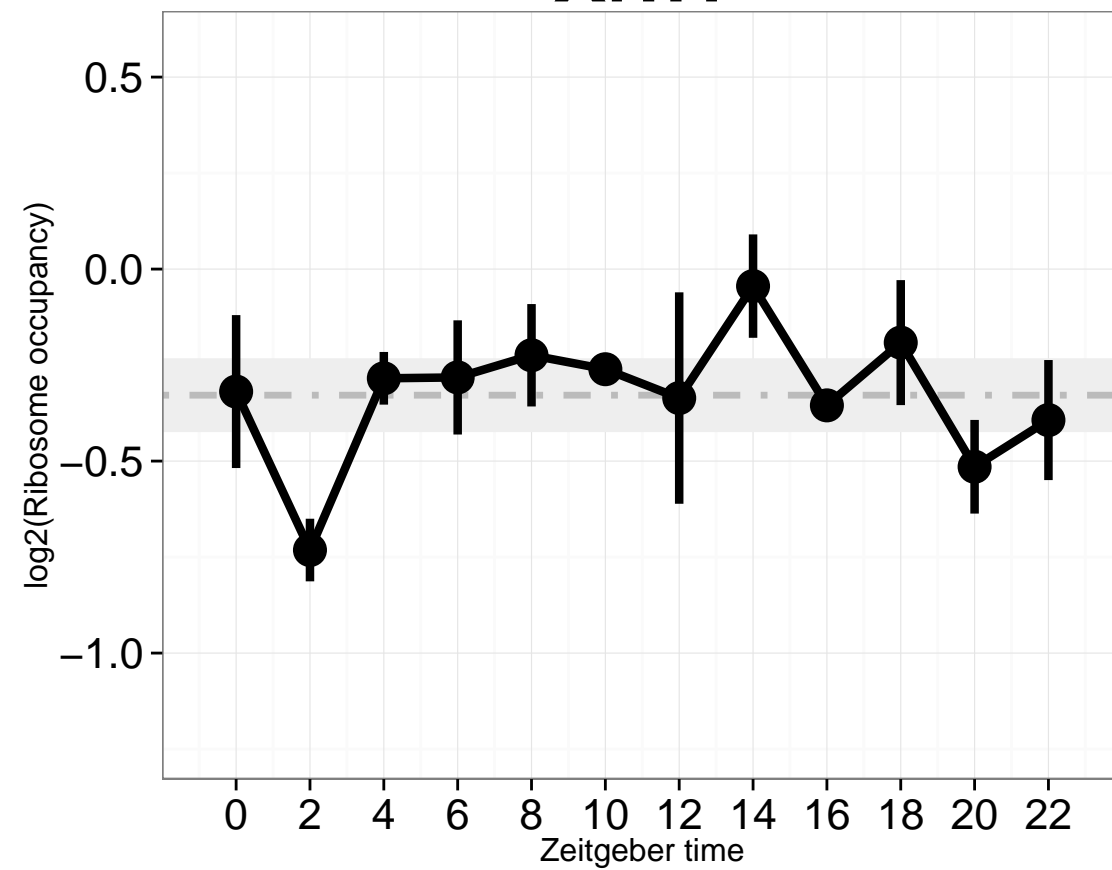

Supplement: Supplementary file 6261 [file 1]

## Cnnm2

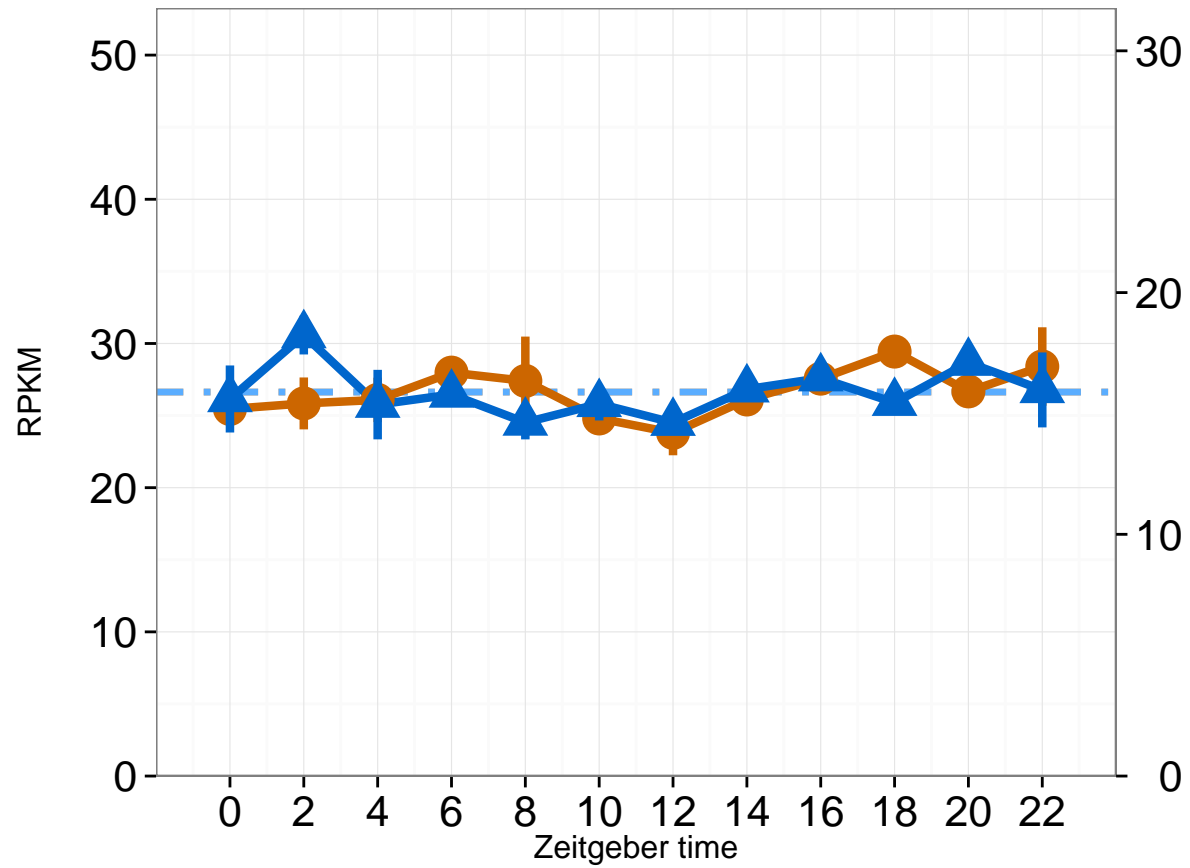

## Cnnm2

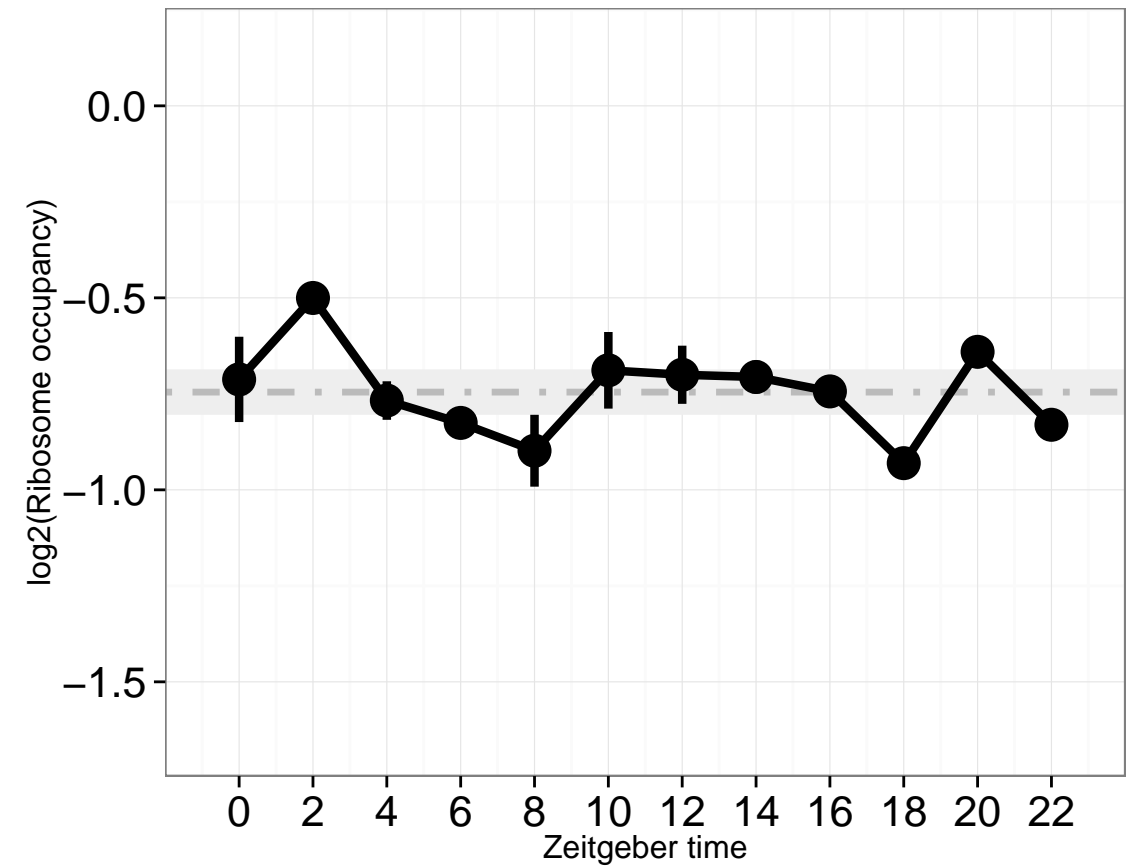

Supplement: Supplementary file 6262 [file 1]

# Arrdc3

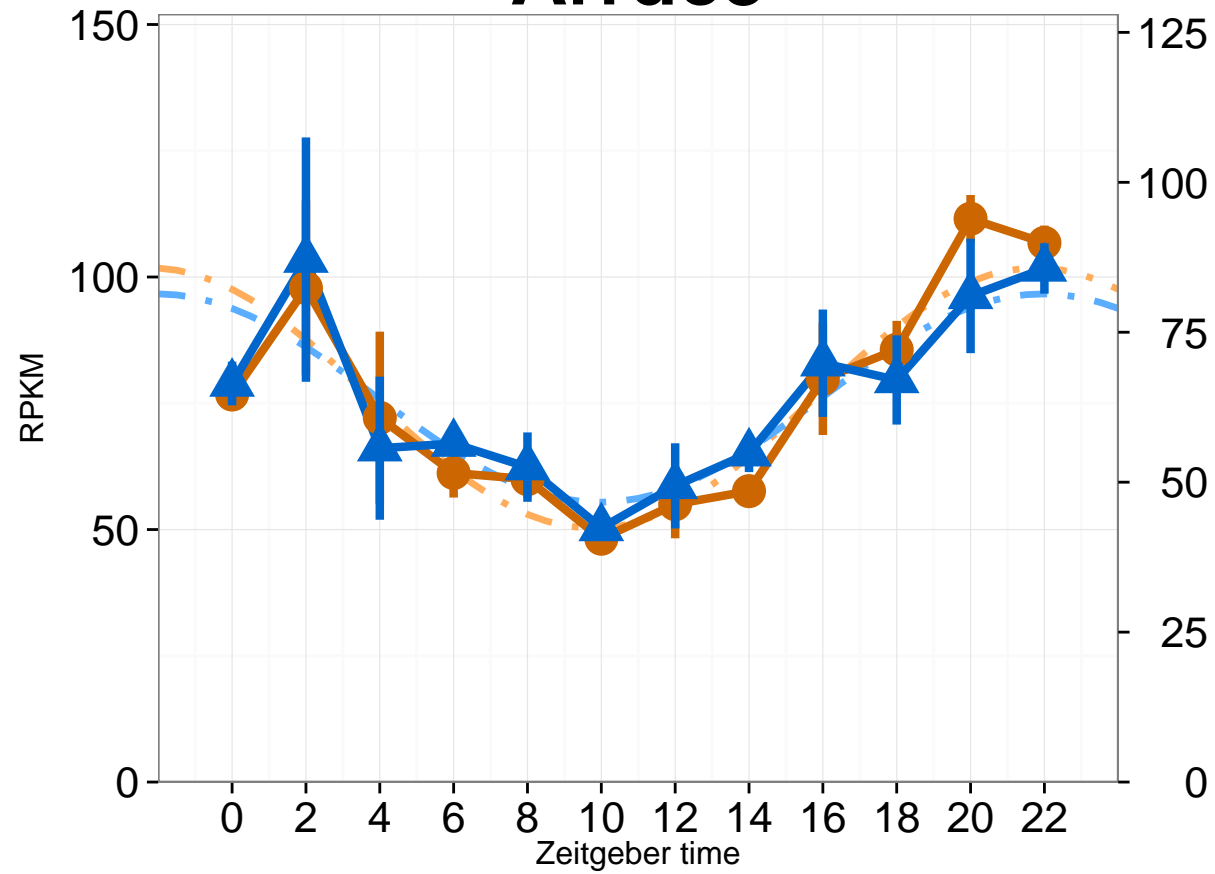

# Arrdc3

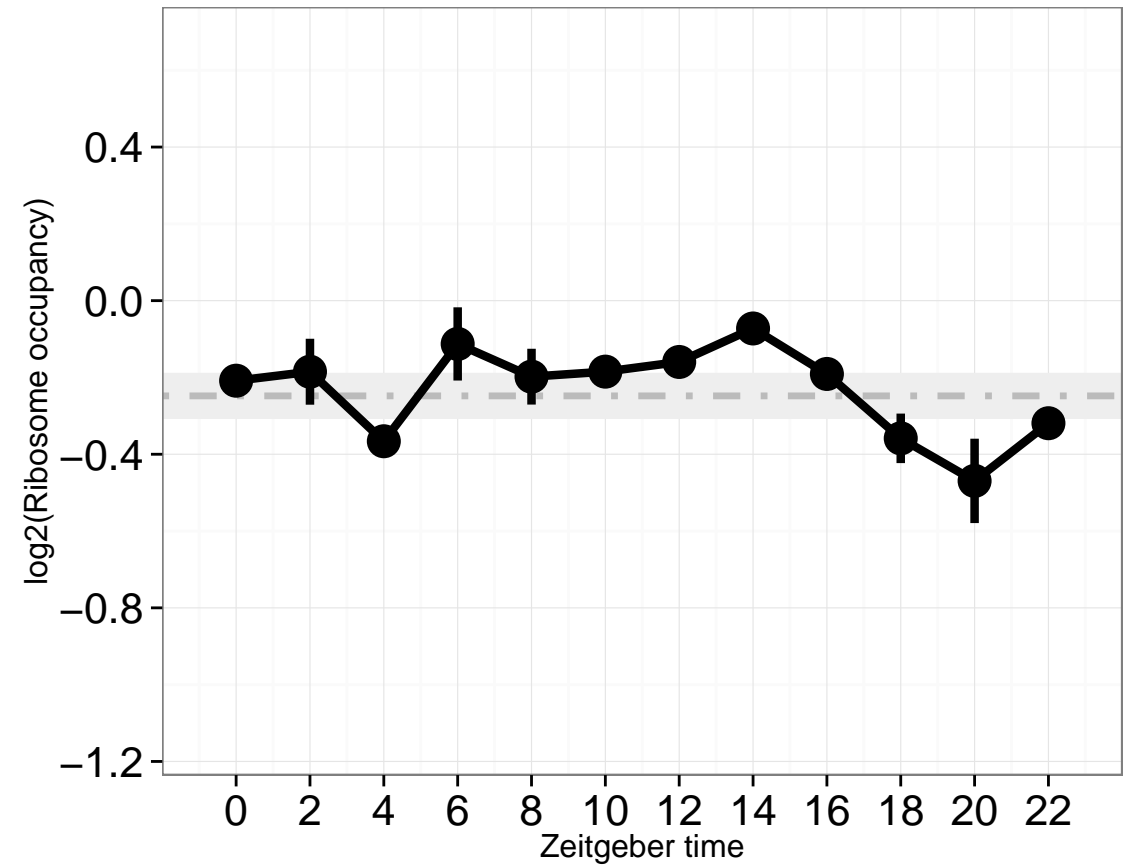

Supplement: Supplementary file 6263 [file 1]

## Xkr9

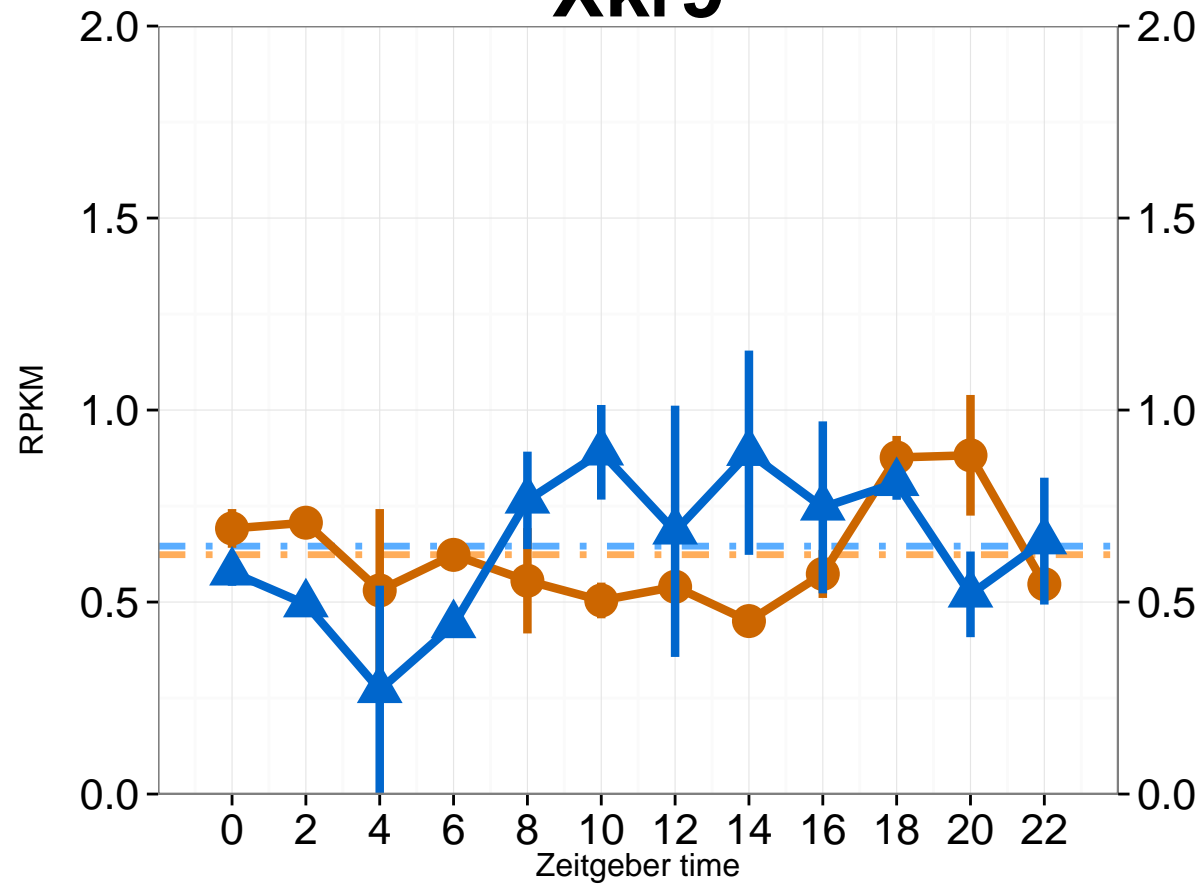

## Xkr9

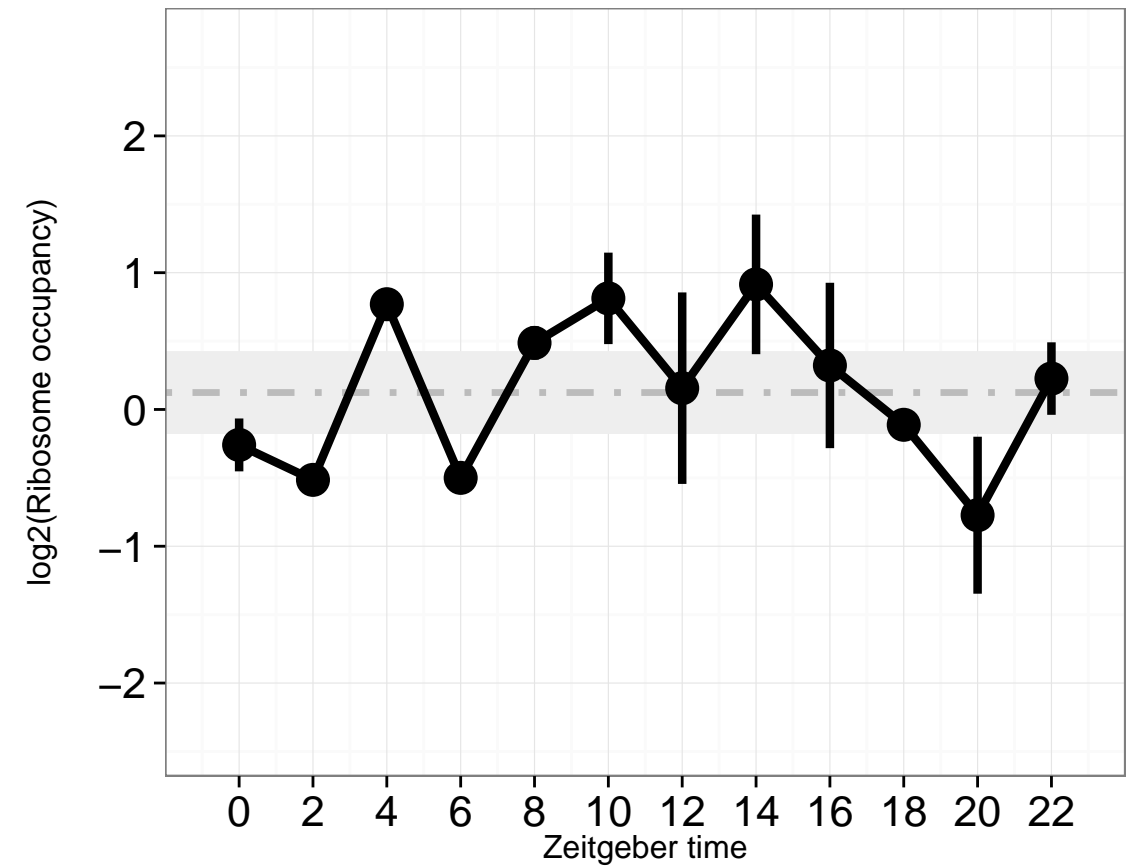

Supplement: Supplementary file 6264 [file 1]

## Dlgap4

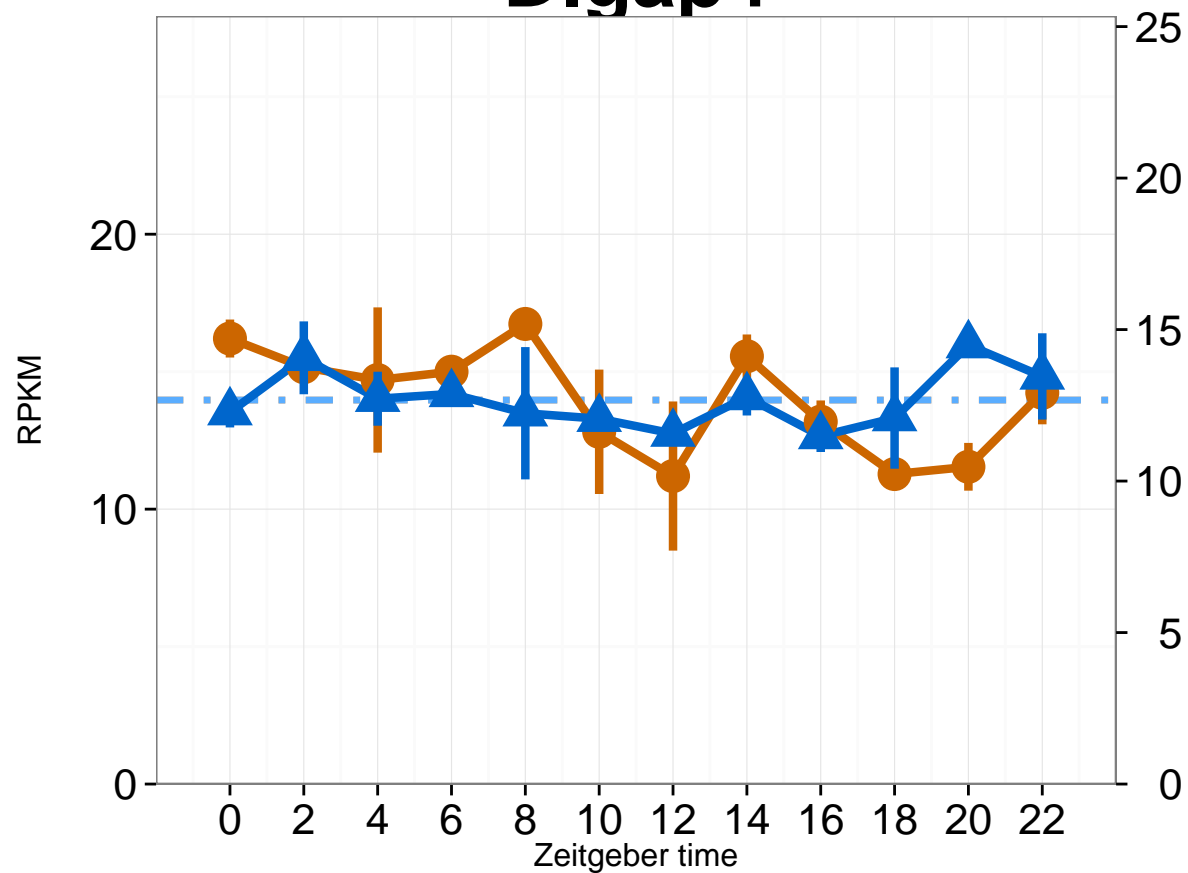

## Dlgap4

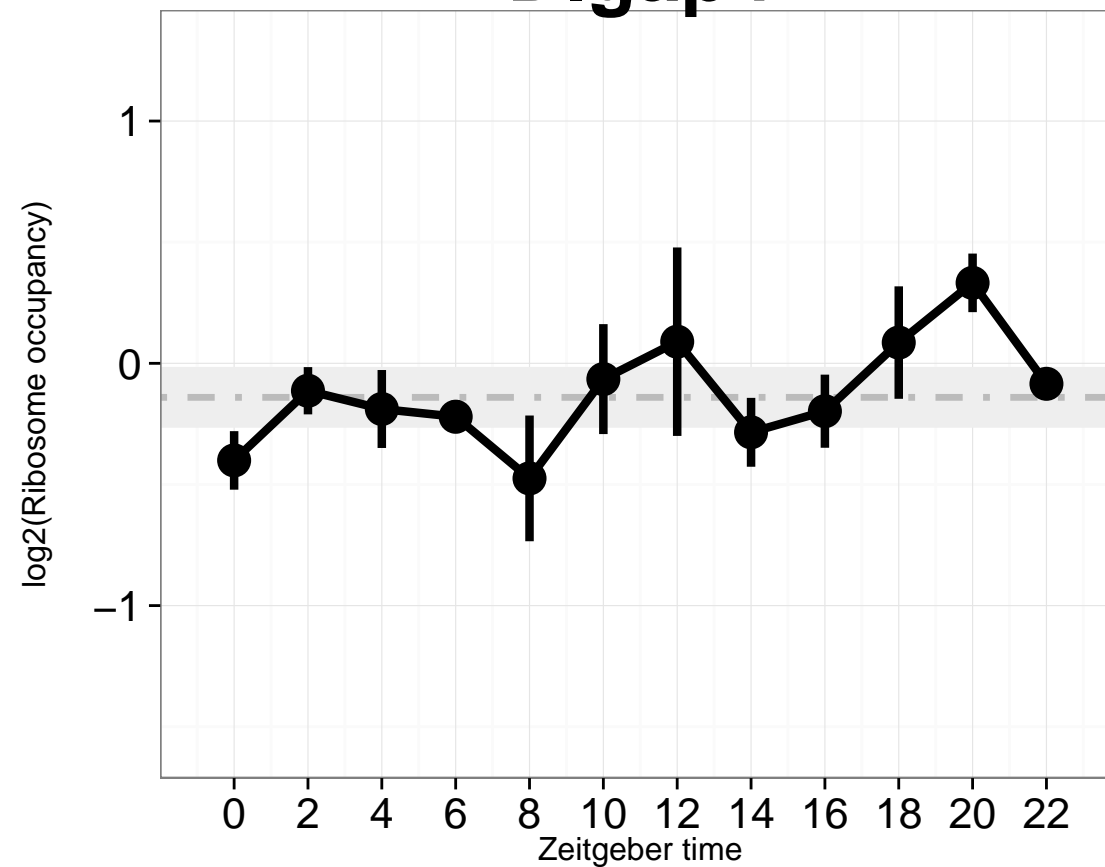

Supplement: Supplementary file 6265 [file 1]

## Rin3

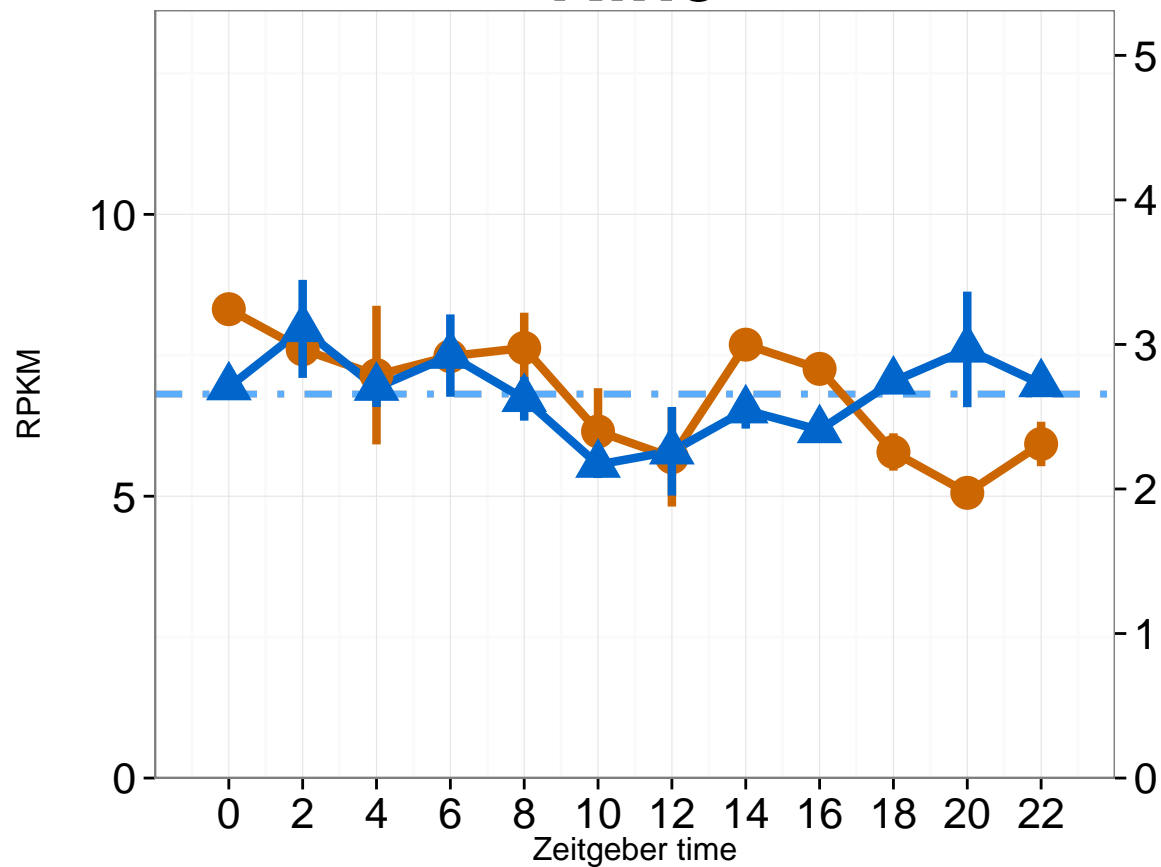

## Rin3

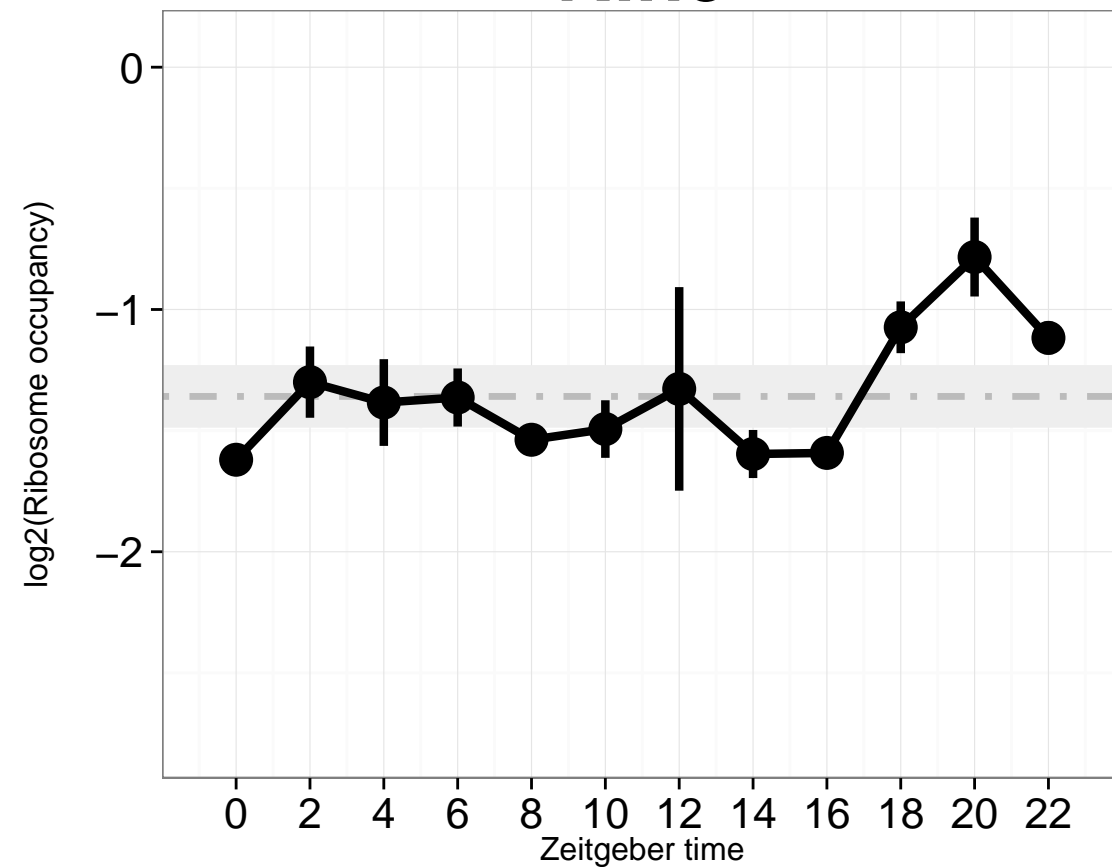

Supplement: Supplementary file 6266 [file 1]

## Bora

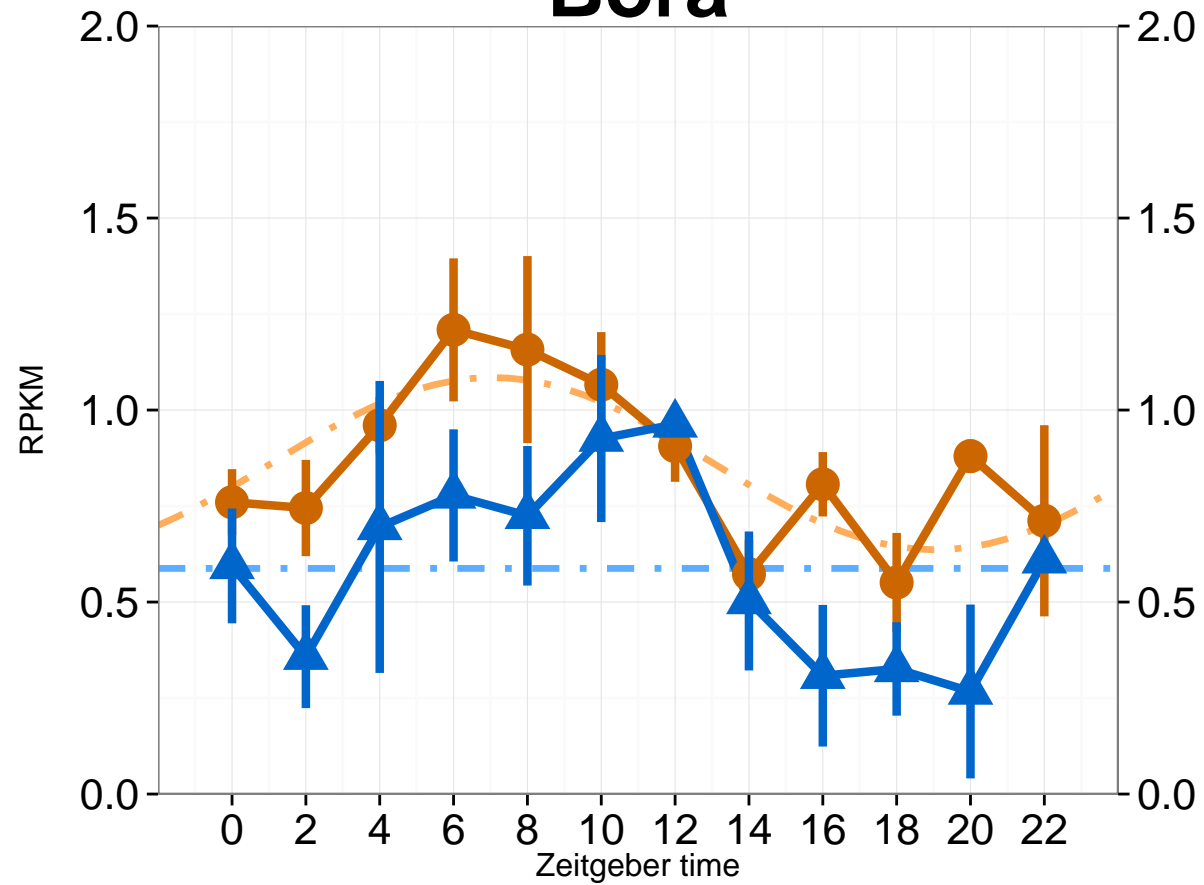

## Bora

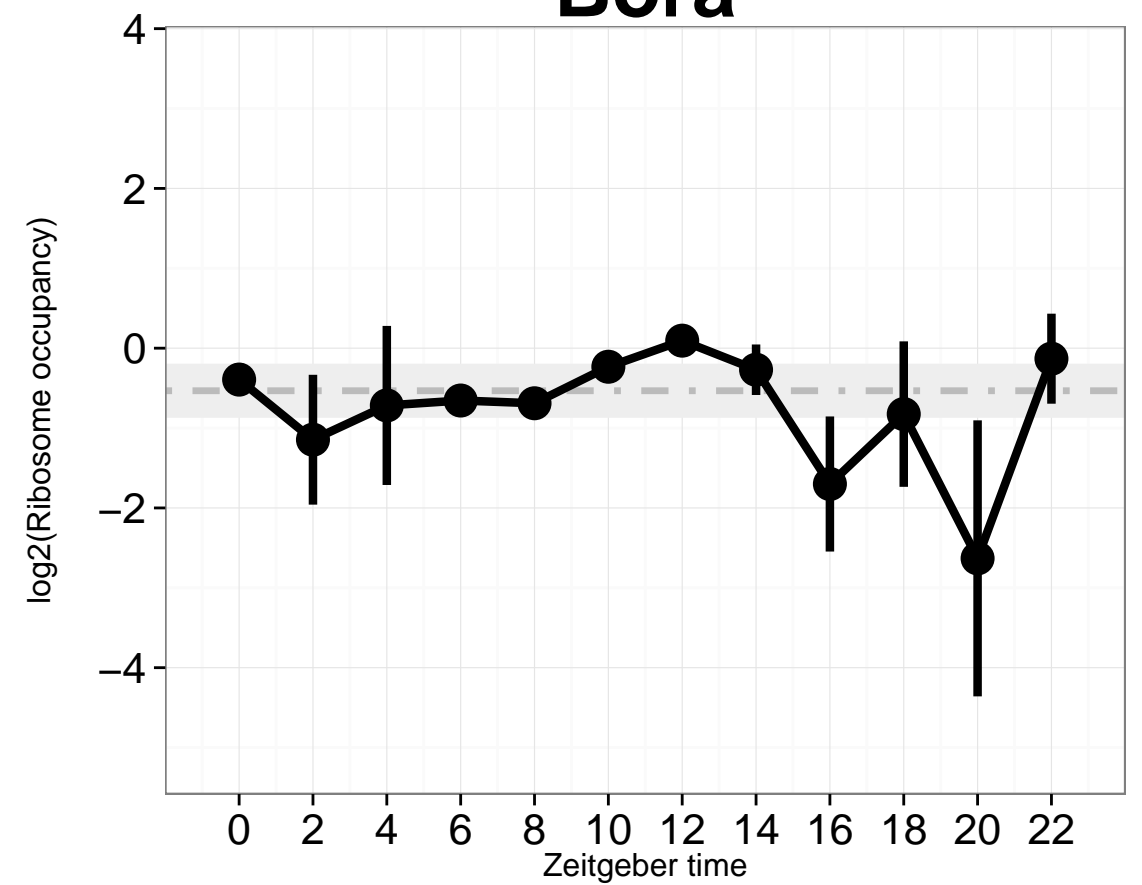

Supplement: Supplementary file 6267 [file 1]

# Dnajc10

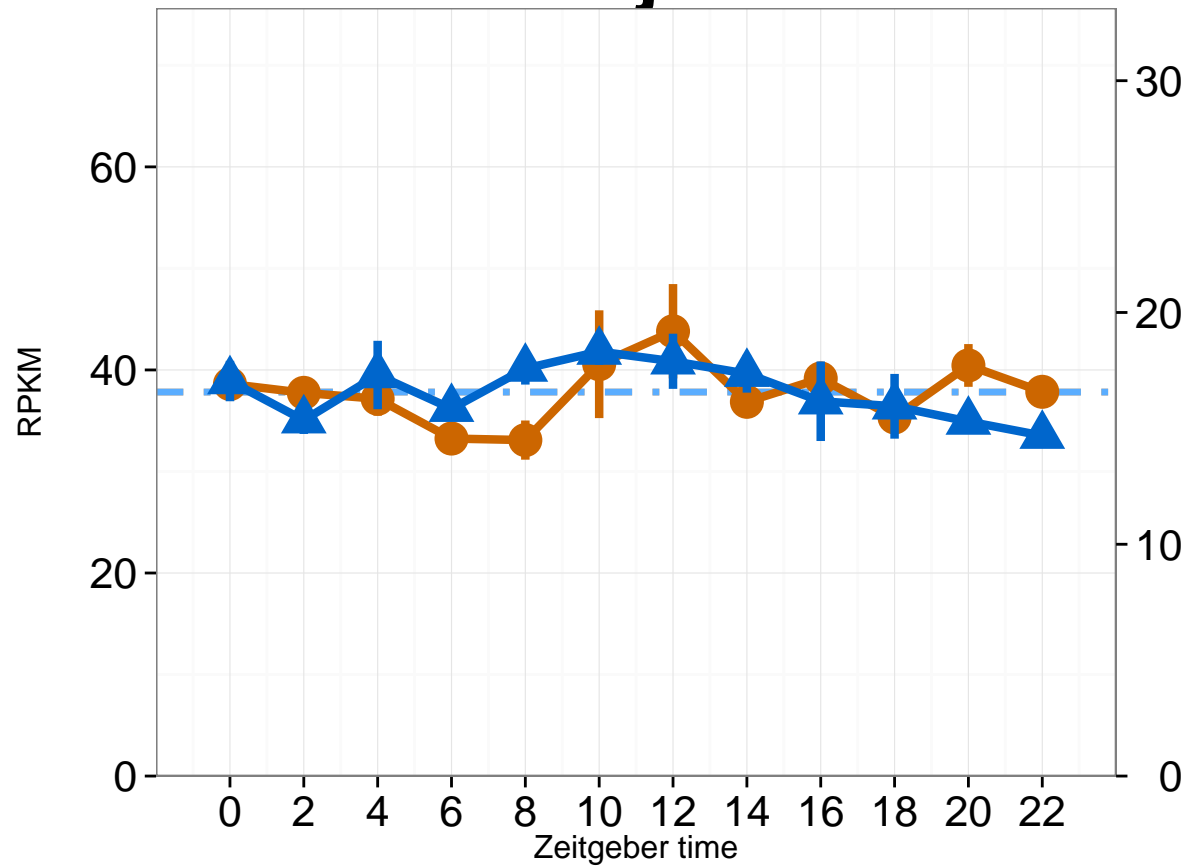

# Dnajc10

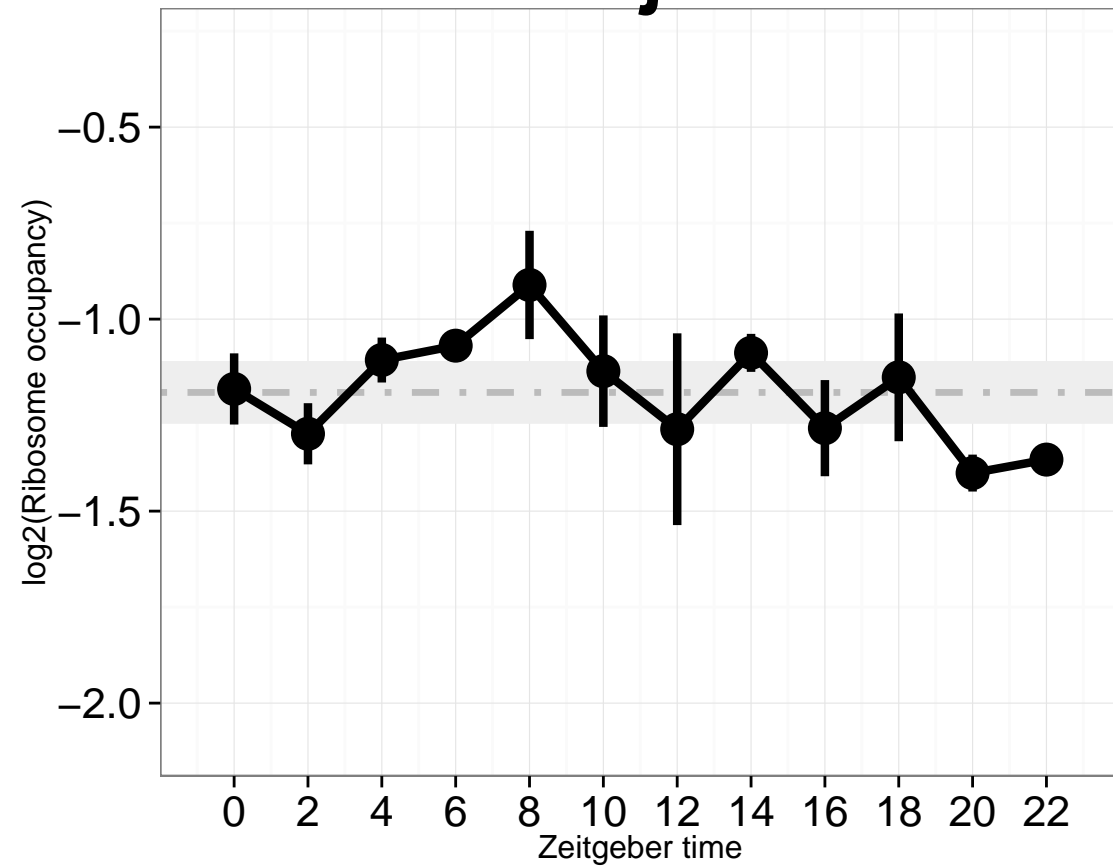

Supplement: Supplementary file 6268 [file 1]

# Fgl1

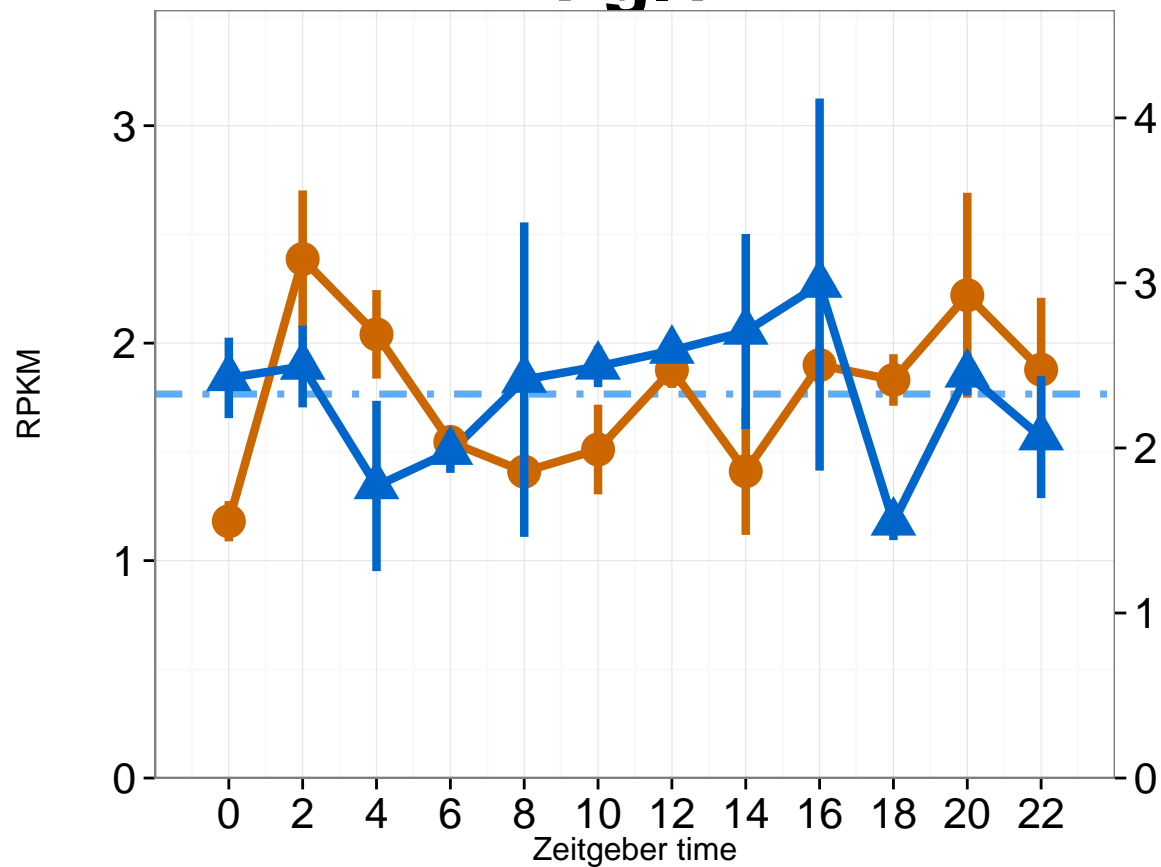

# Fgl1

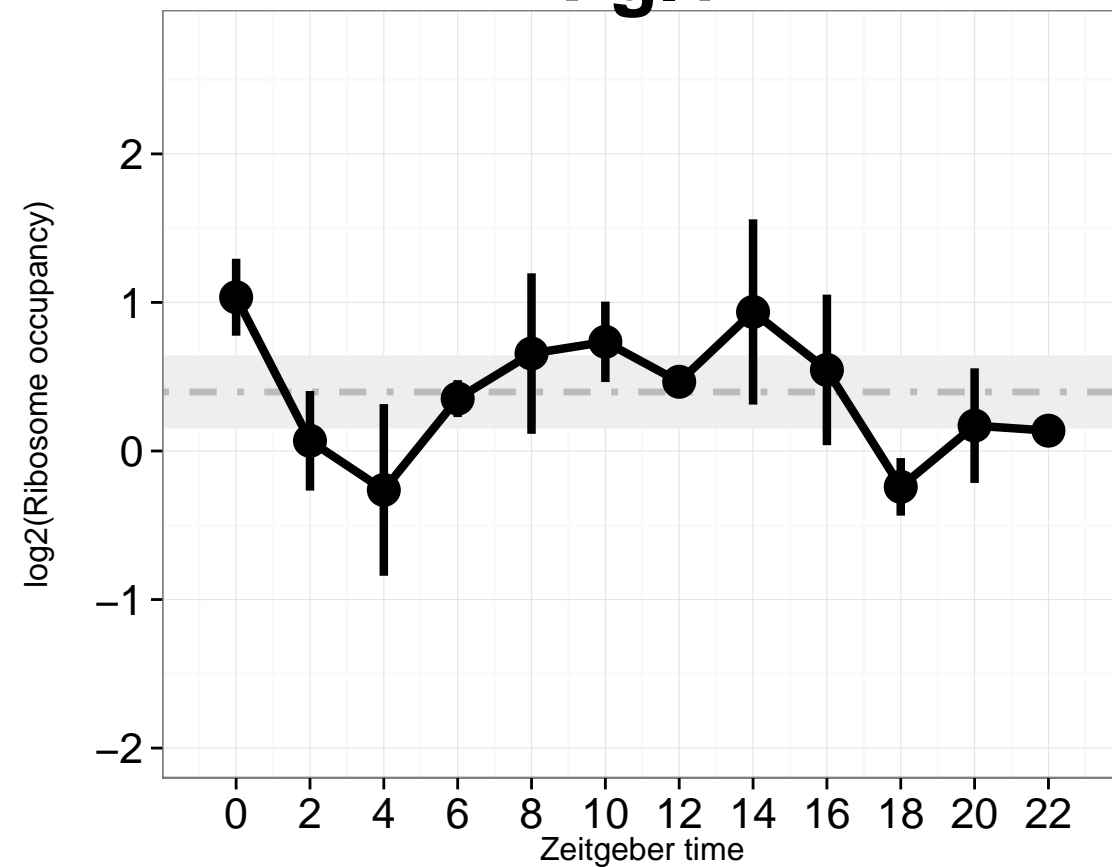

Supplement: Supplementary file 6269 [file 1]

# Bzw1

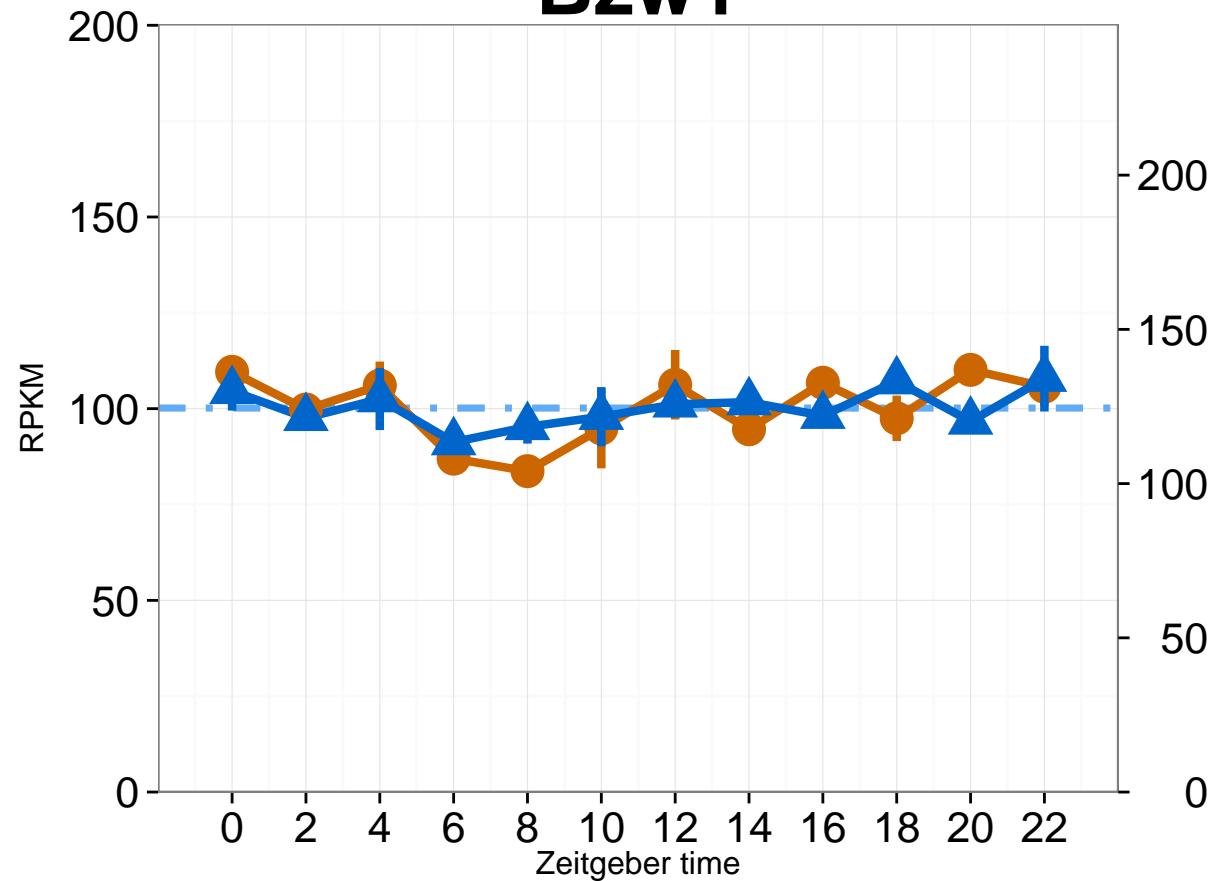

# Bzw1

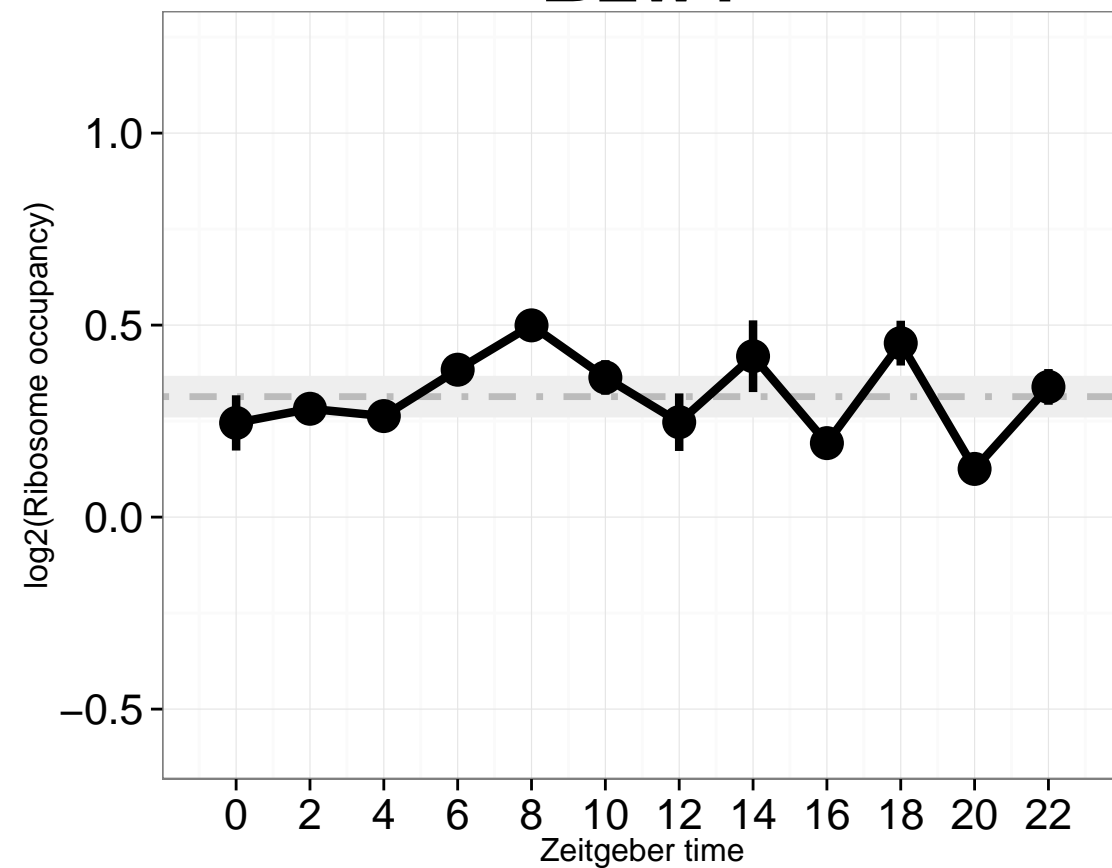

Supplement: Supplementary file 6270 [file 1]

# Wdr16

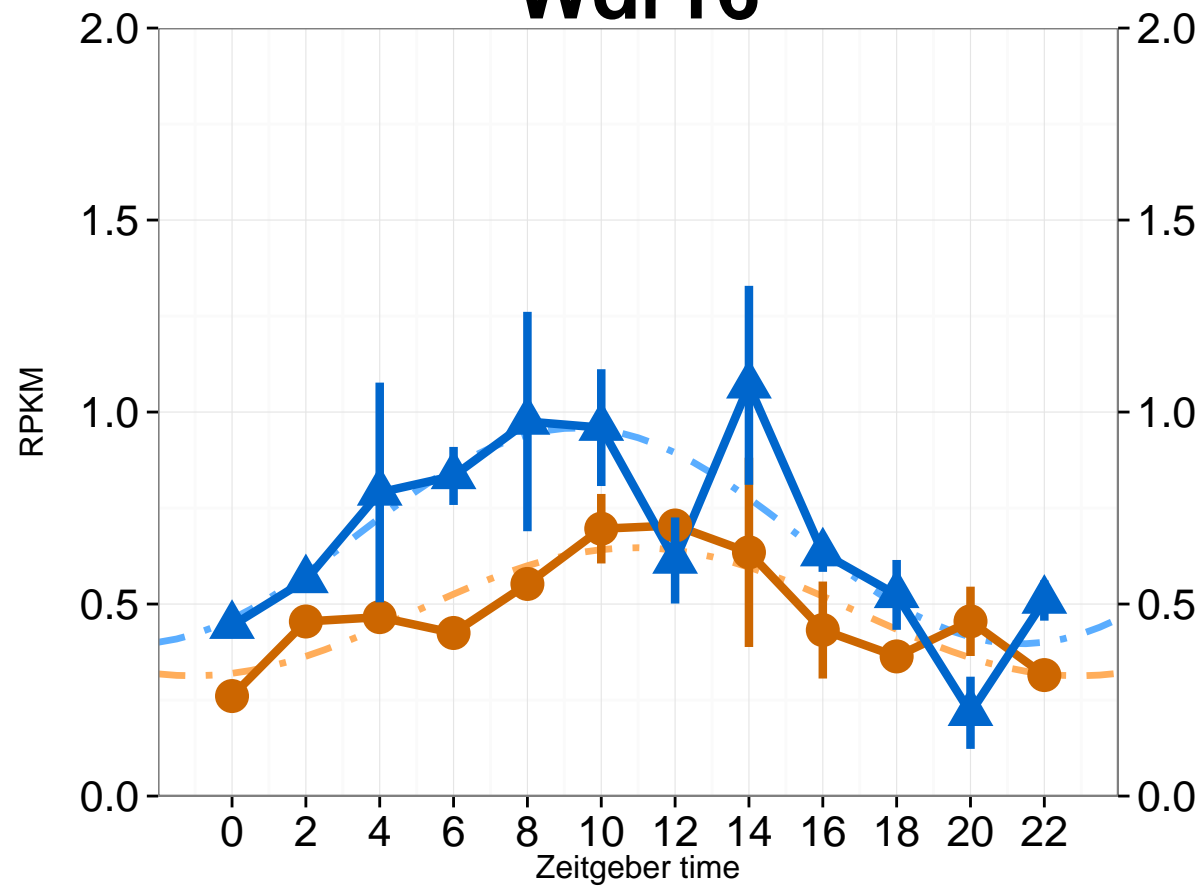

# Wdr16

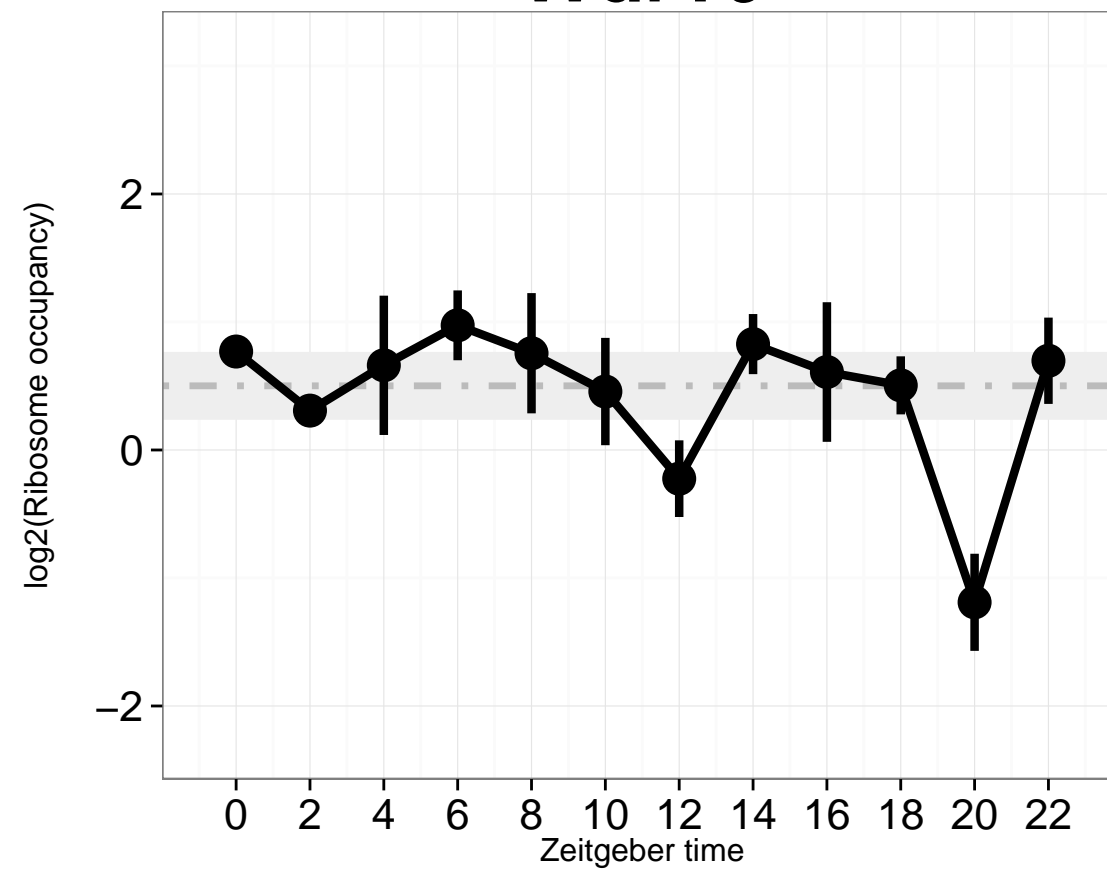

Supplement: Supplementary file 6271 [file 1]

## Ranbp3l

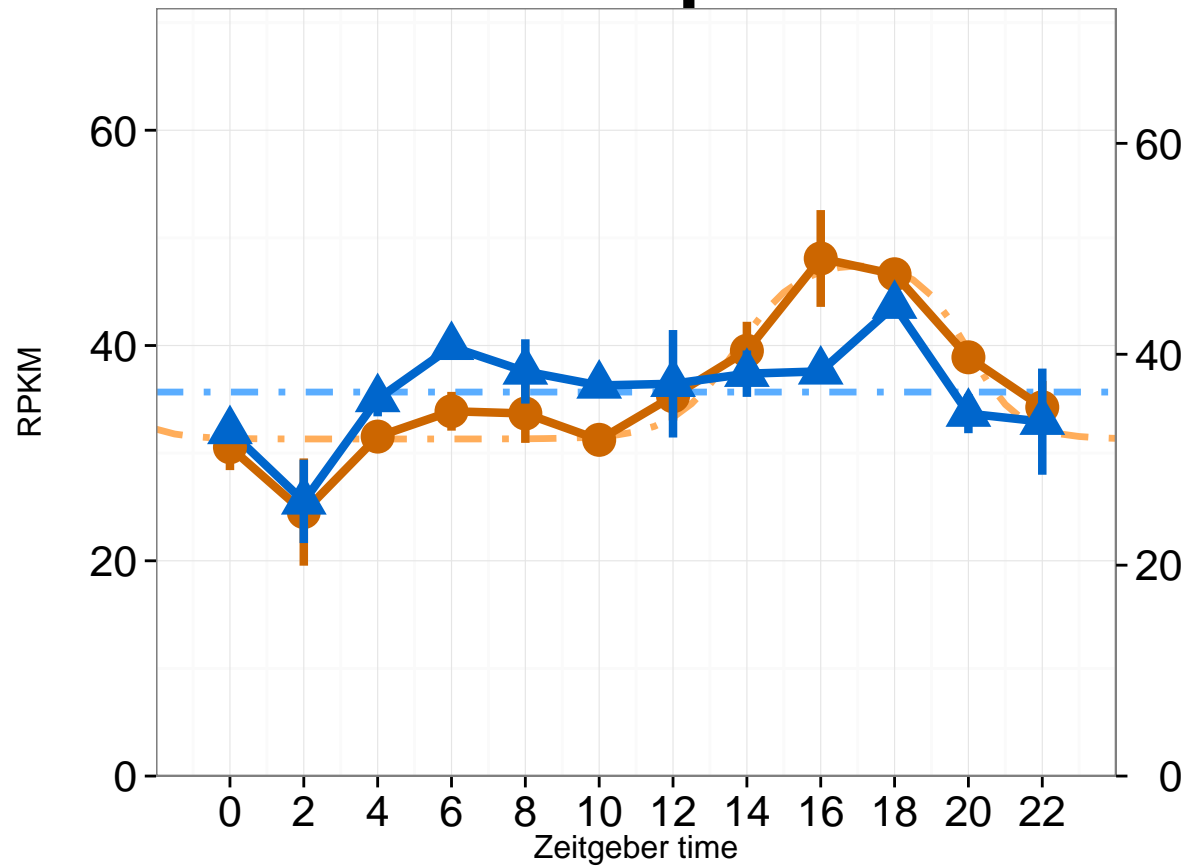

## Ranbp3l

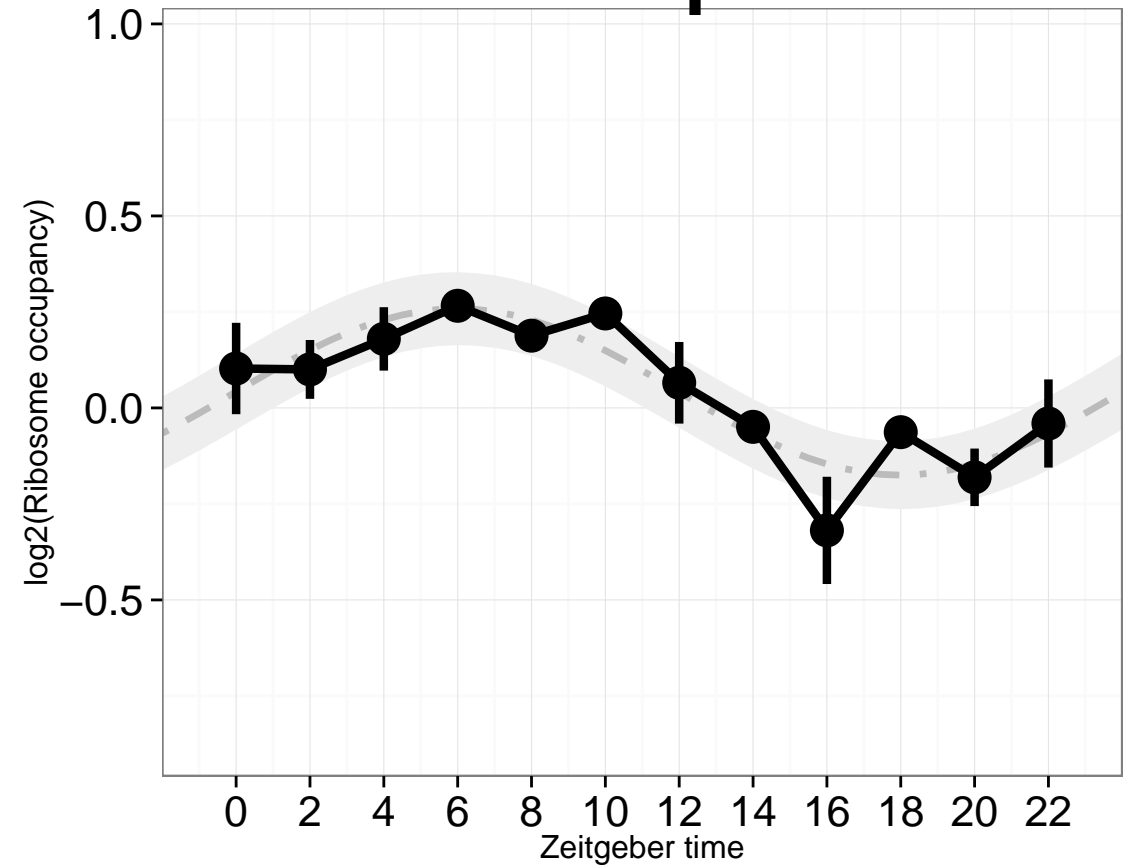

Supplement: Supplementary file 6272 [file 1]

## Ostc

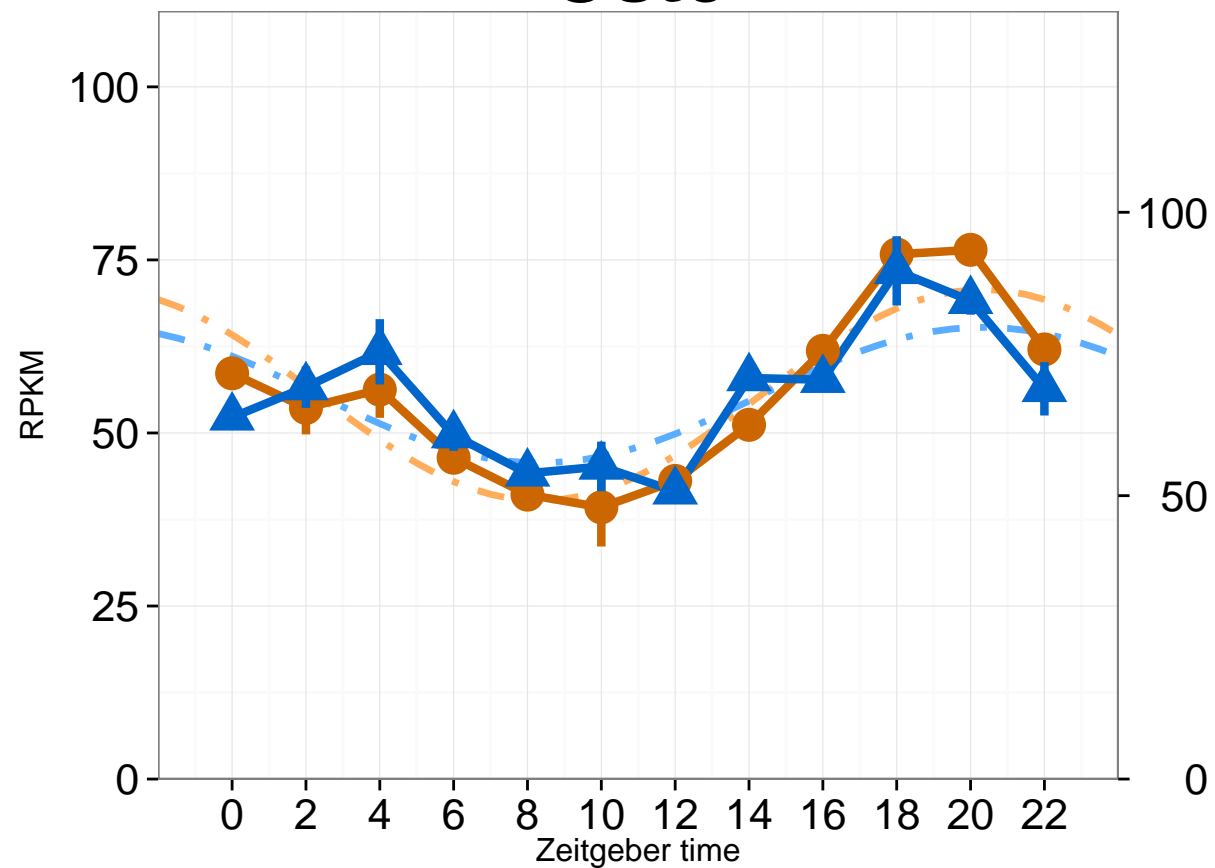

## Ostc

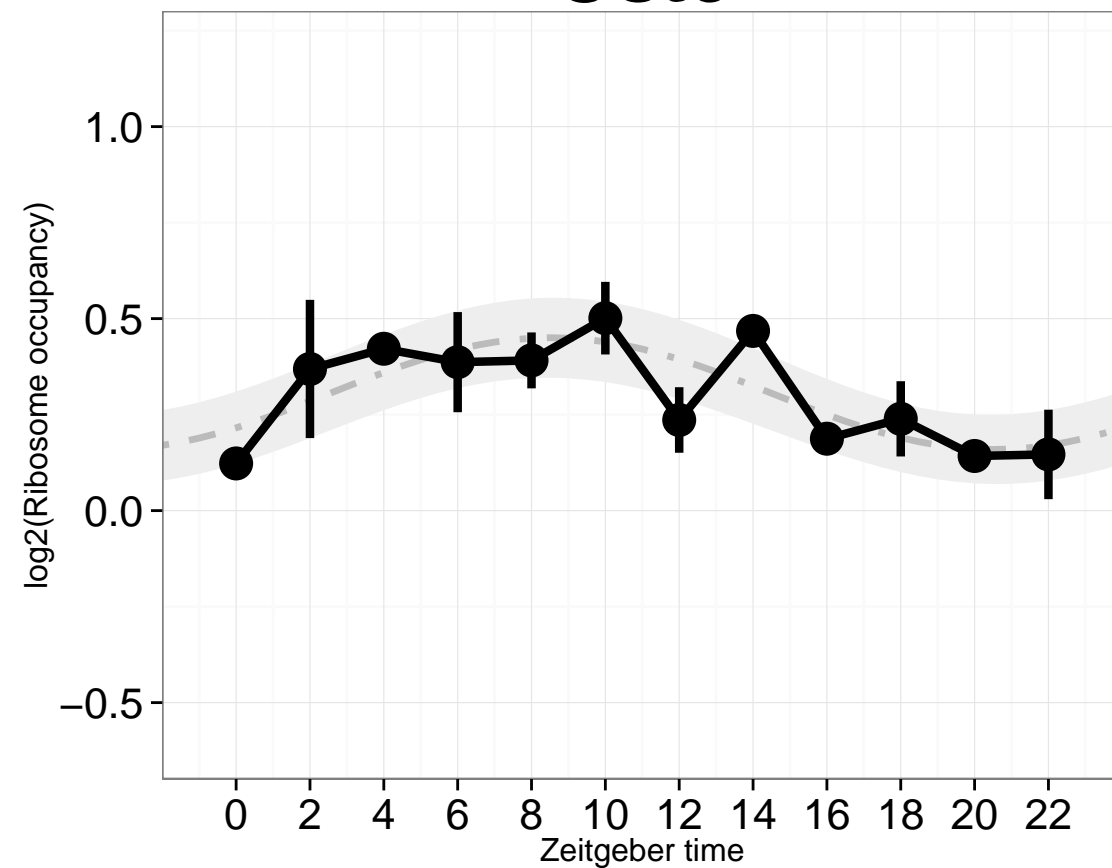

Supplement: Supplementary file 6273 [file 1]

# Mtfr1l

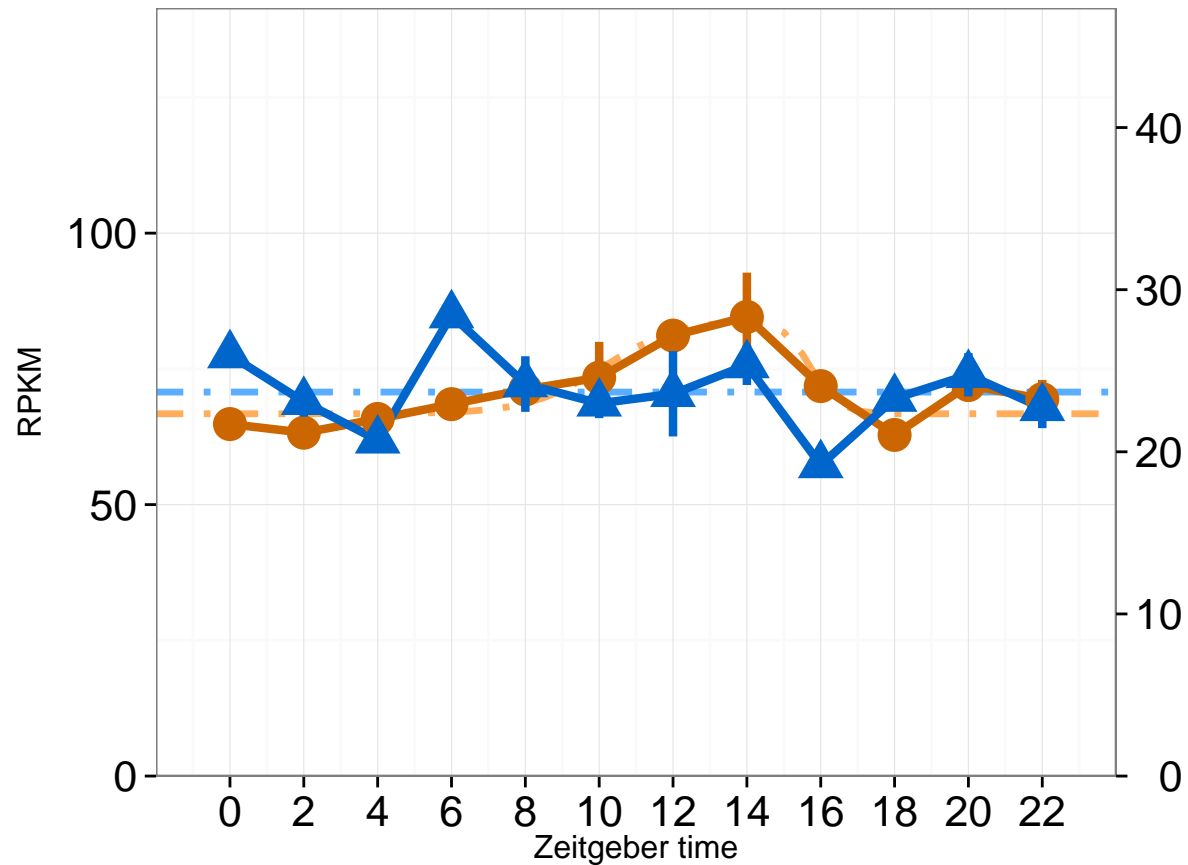

# Mtfr1l

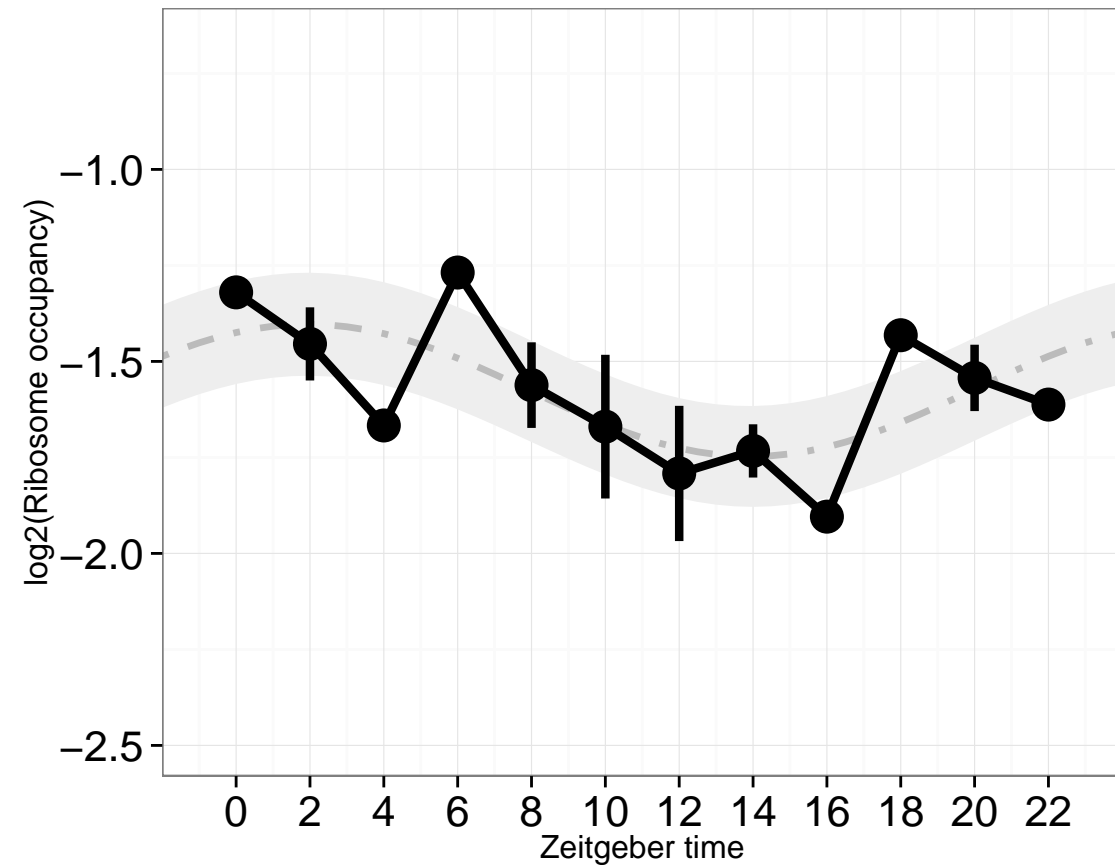

Supplement: Supplementary file 6274 [file 1]

## BC035947

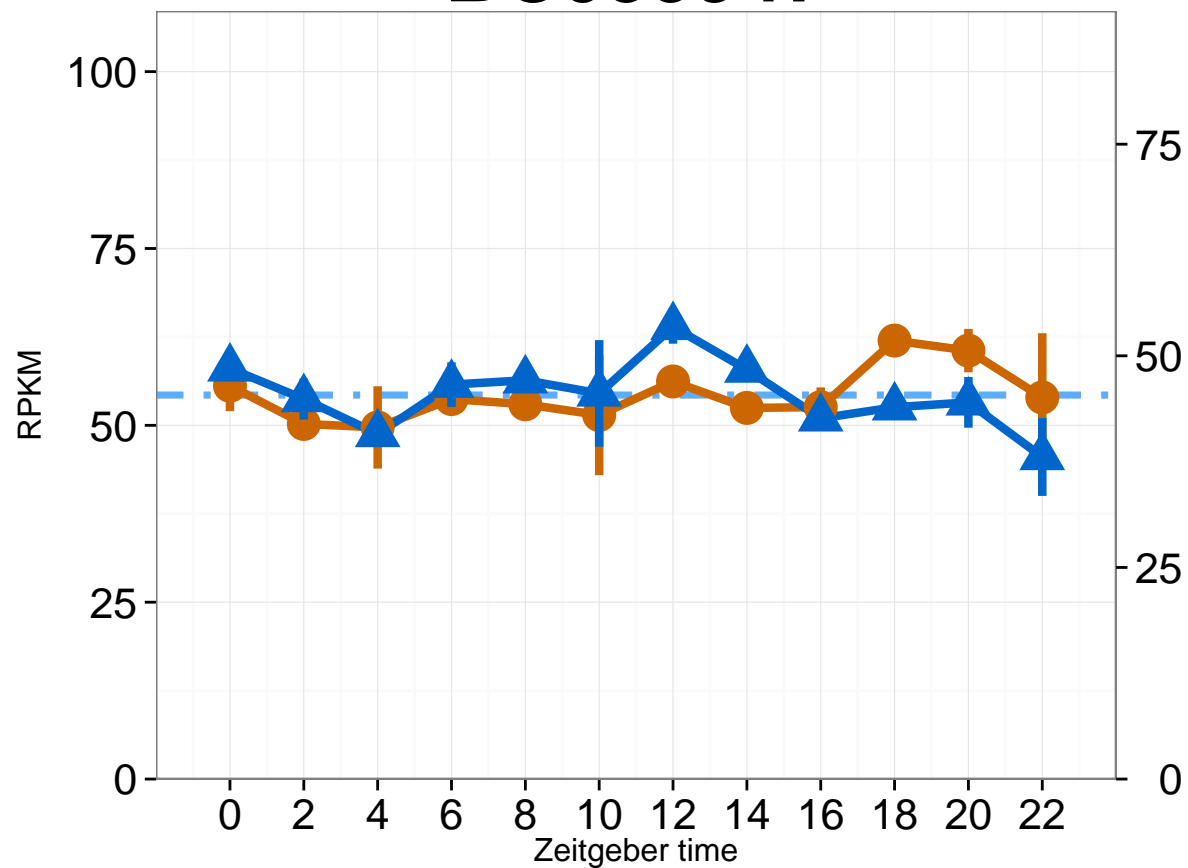

## BC035947

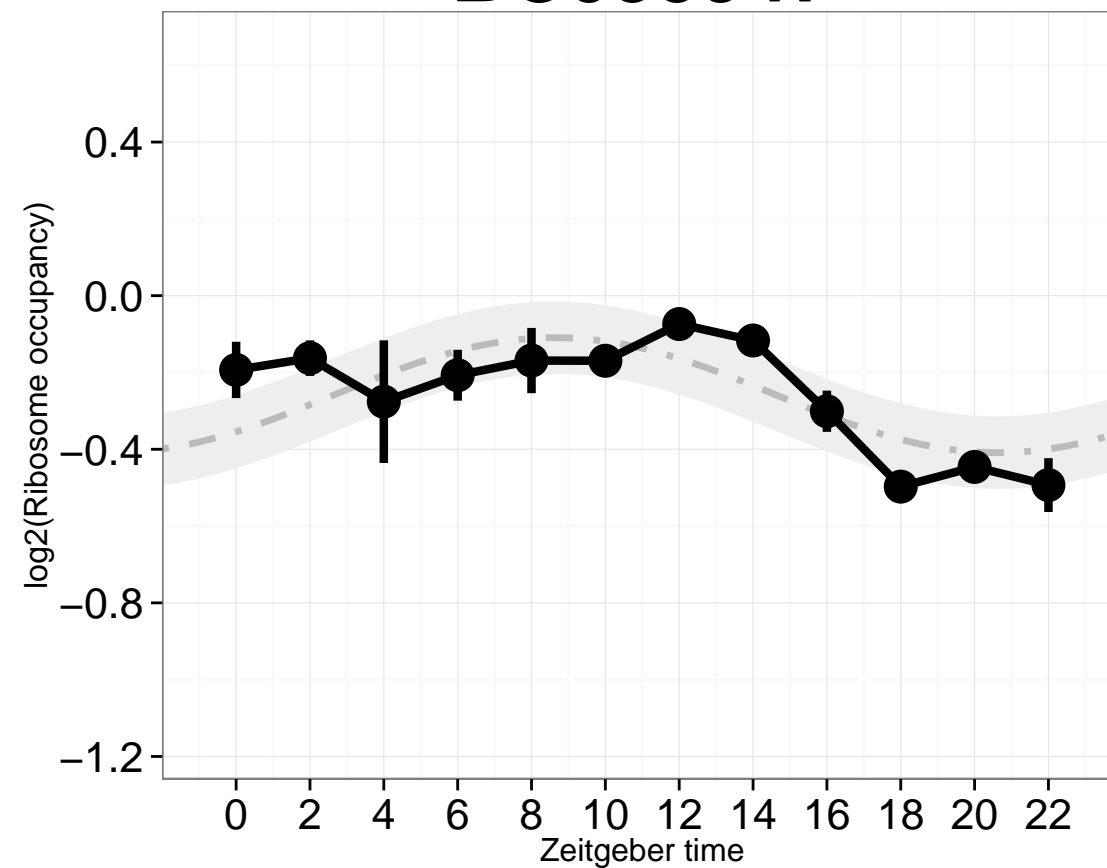

Supplement: Supplementary file 6275 [file 1]

# Gm2382

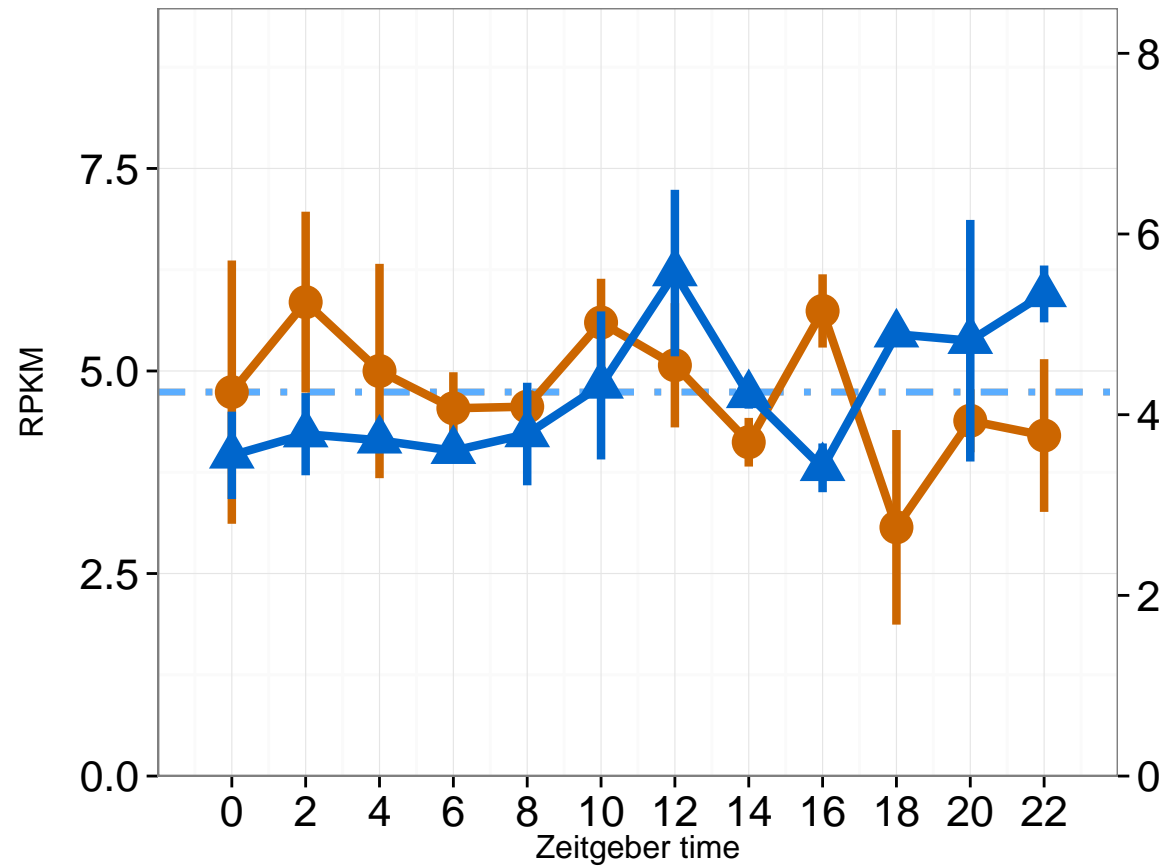

# Gm2382

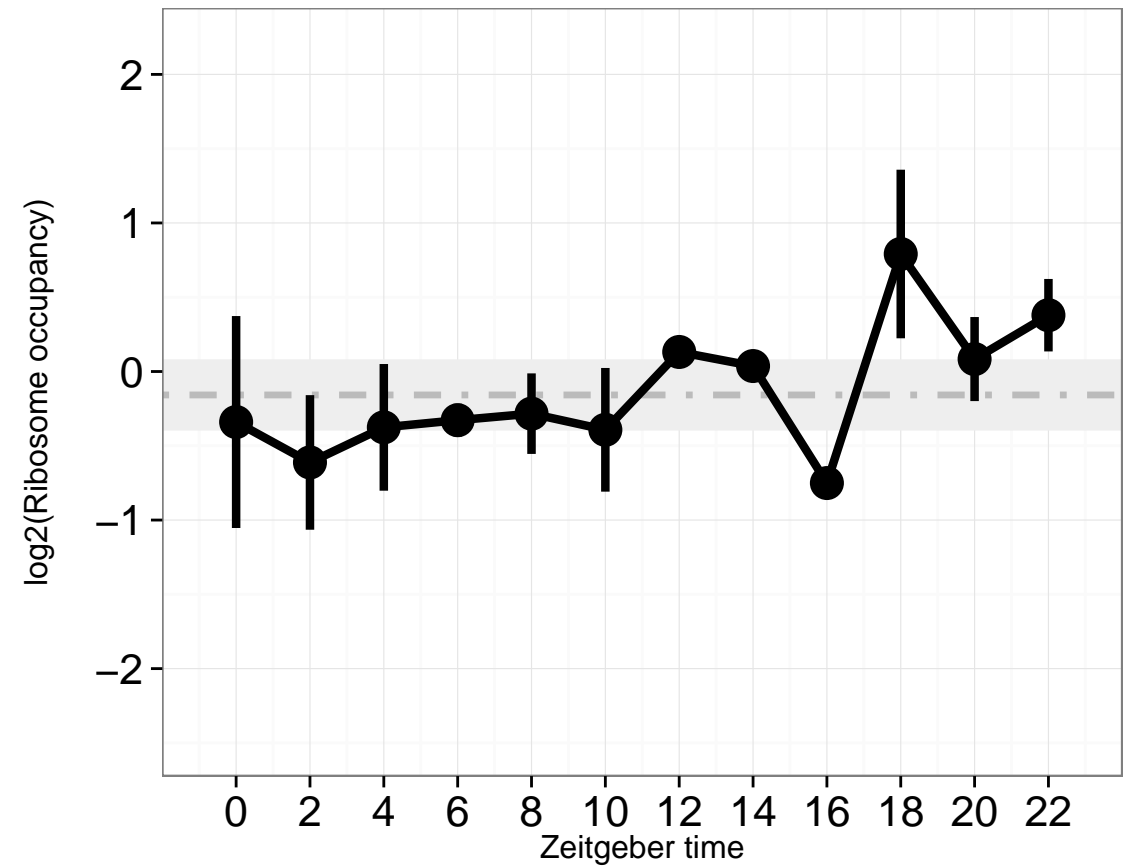

Supplement: Supplementary file 6276 [file 1]

## Klk1b5

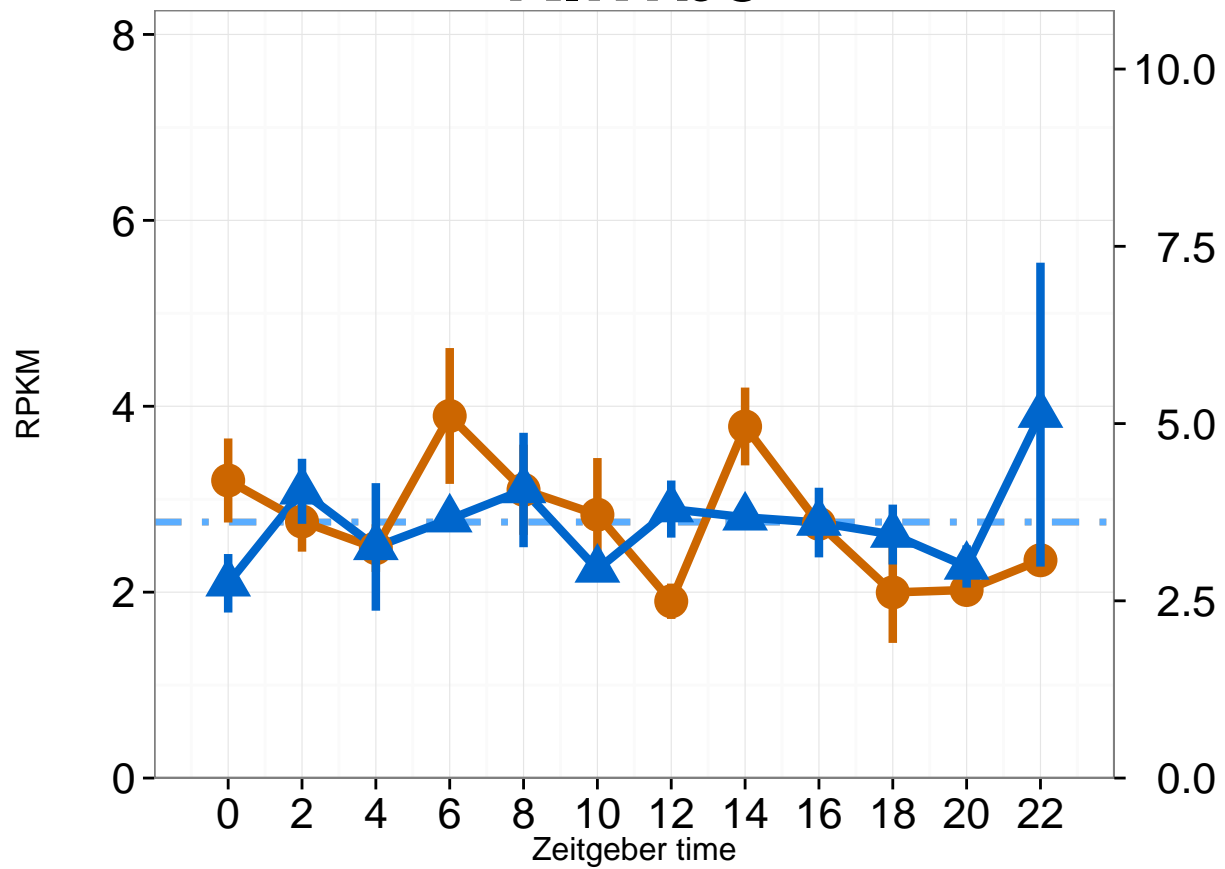

## Klk1b5

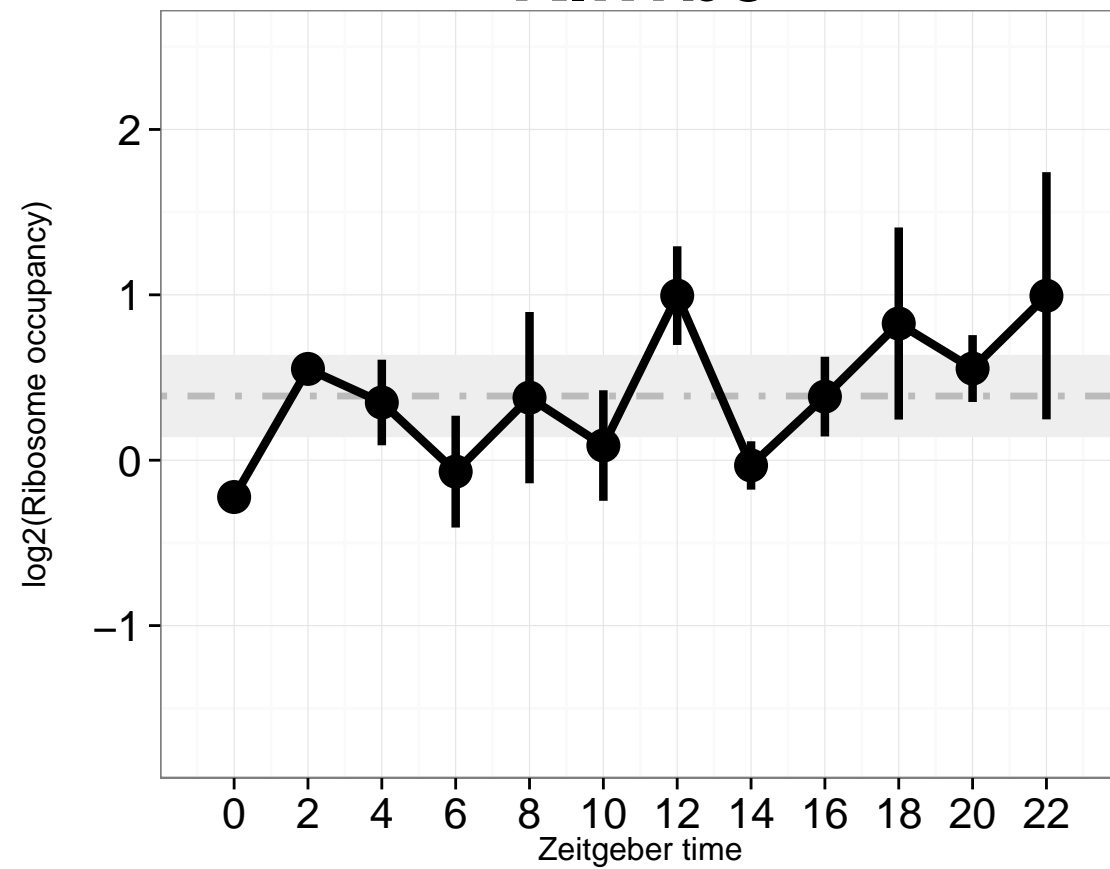

Supplement: Supplementary file 6277 [file 1]

# Morf4l2

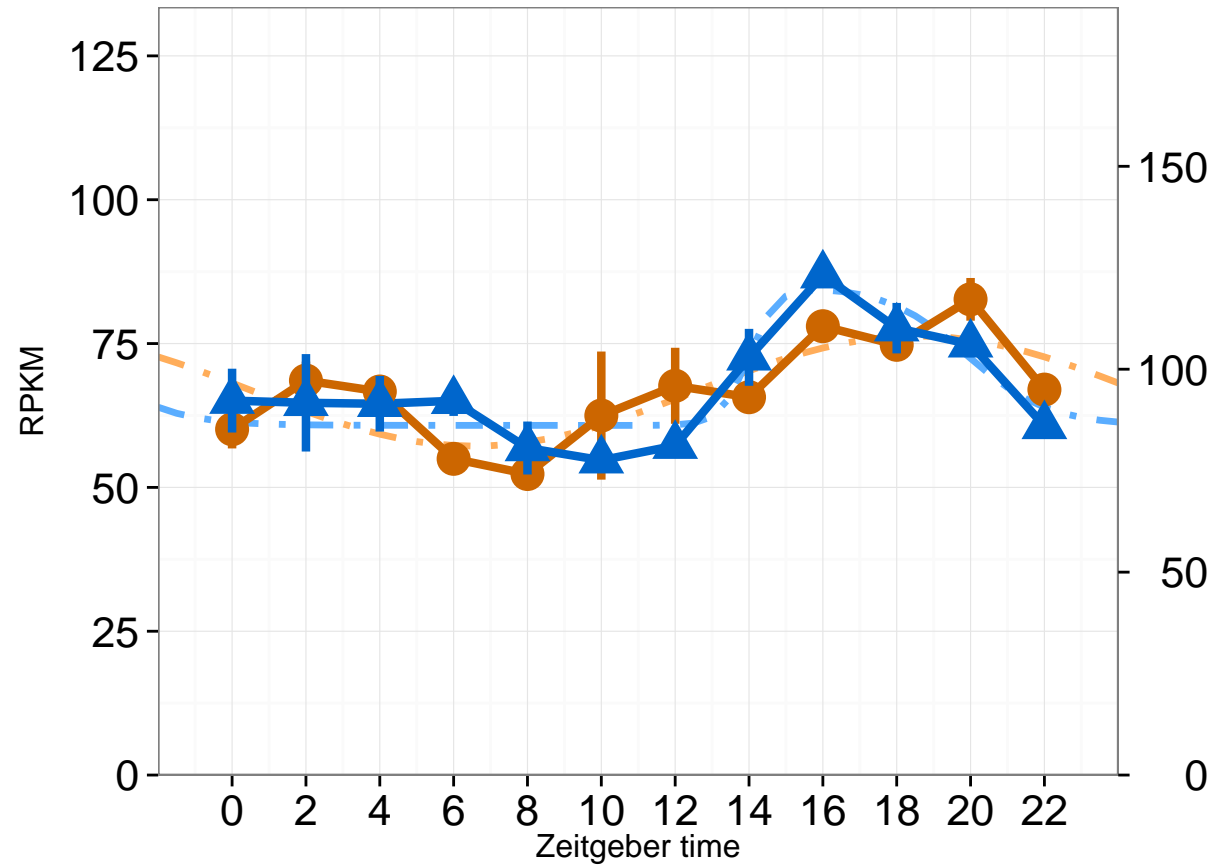

# Morf4l2

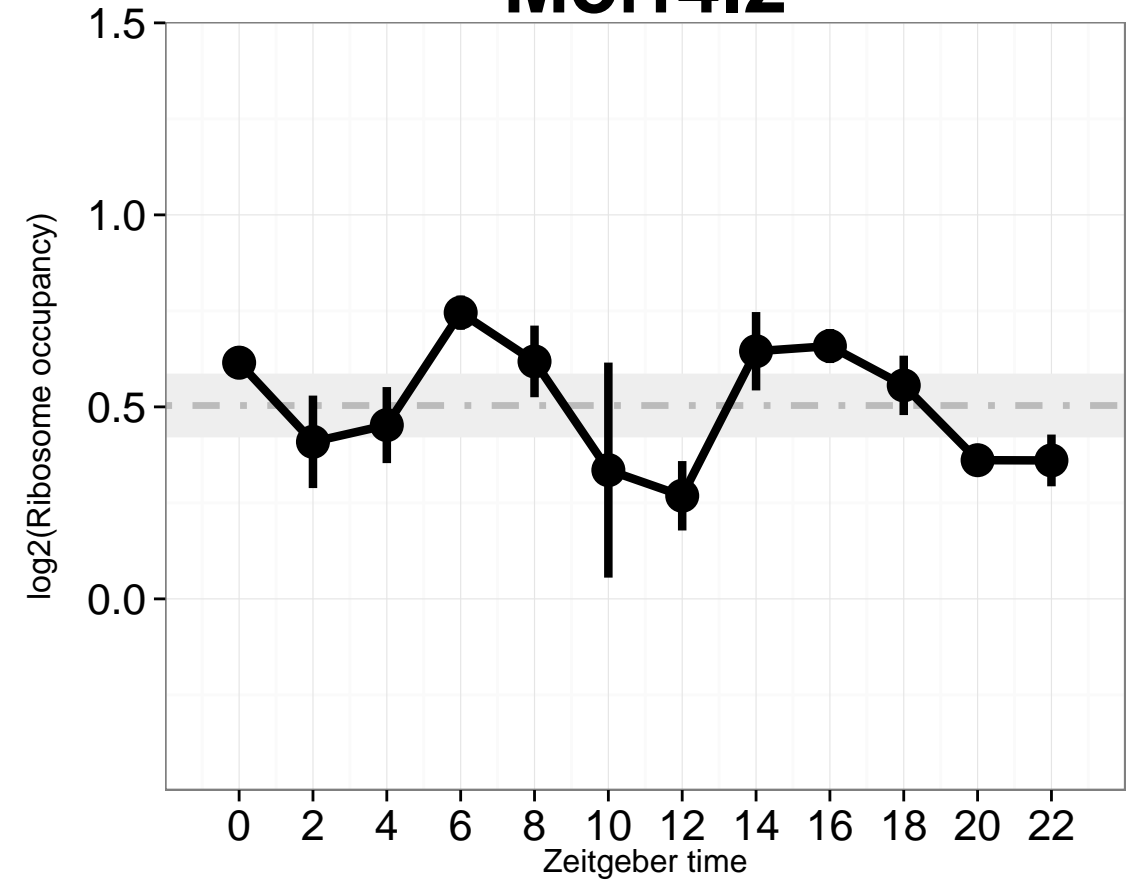

Supplement: Supplementary file 6278 [file 1]

## Slc26a4

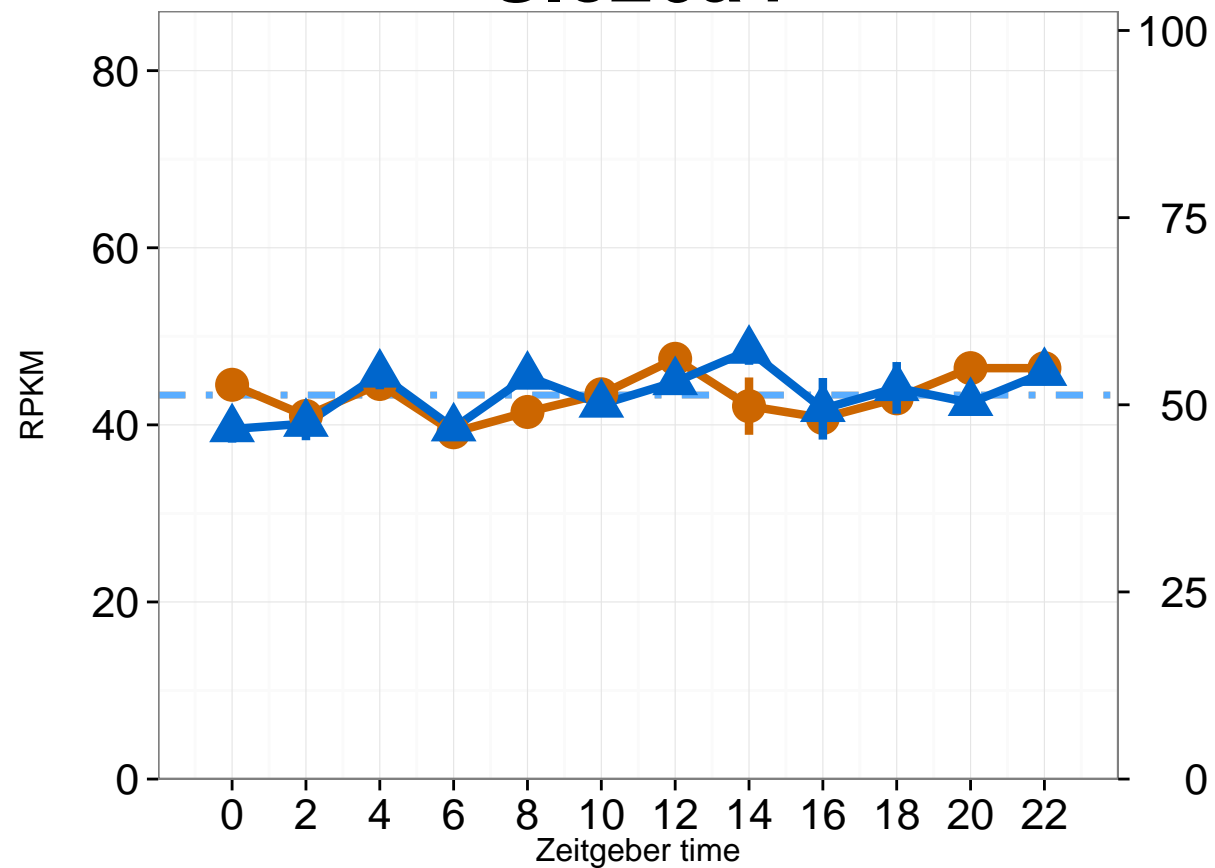

## Slc26a4

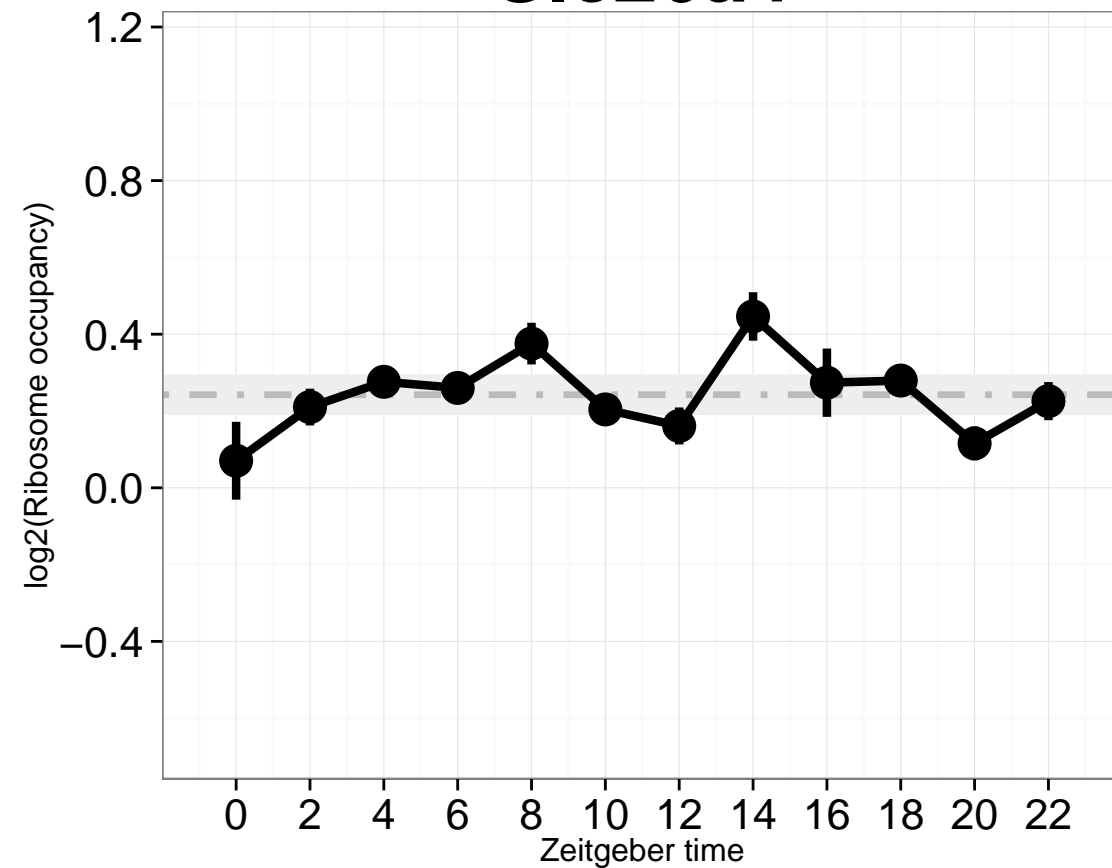

Supplement: Supplementary file 6279 [file 1]

# Rpl8

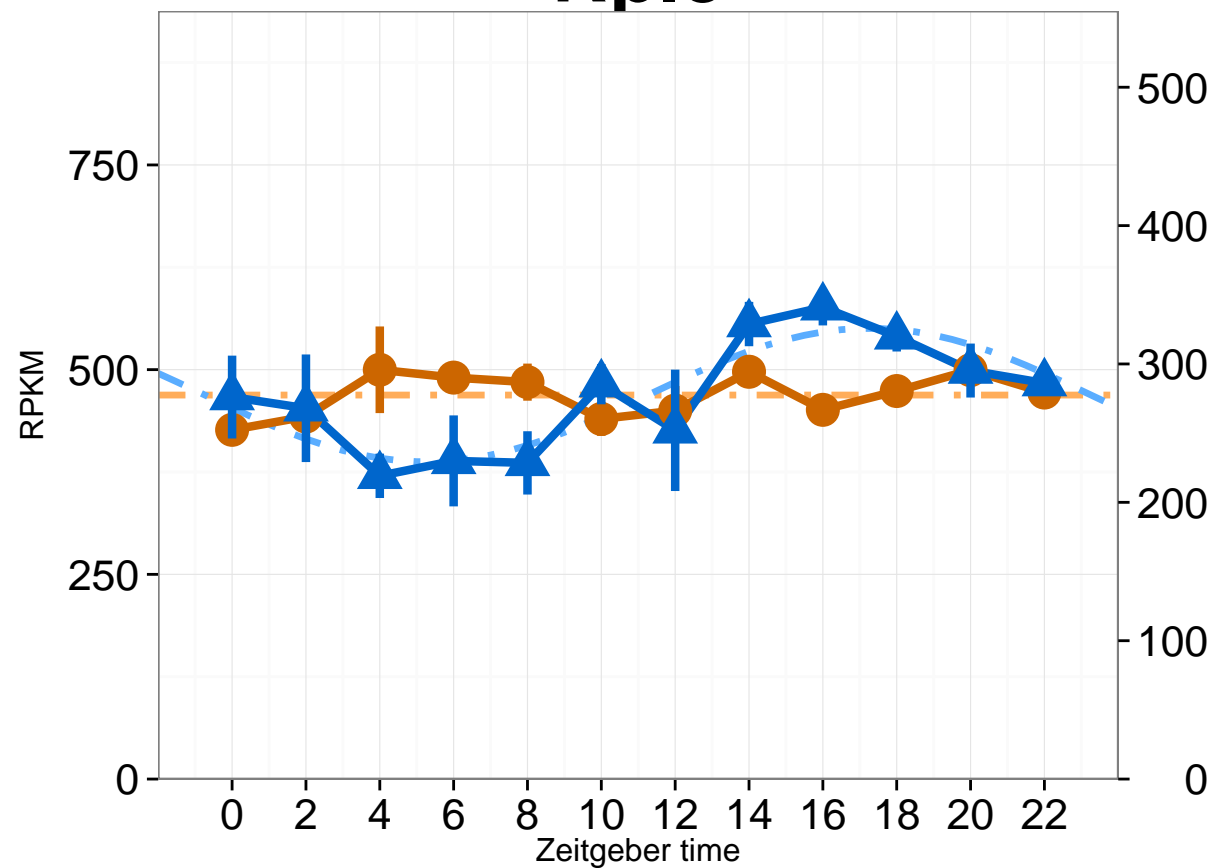

# Rpl8

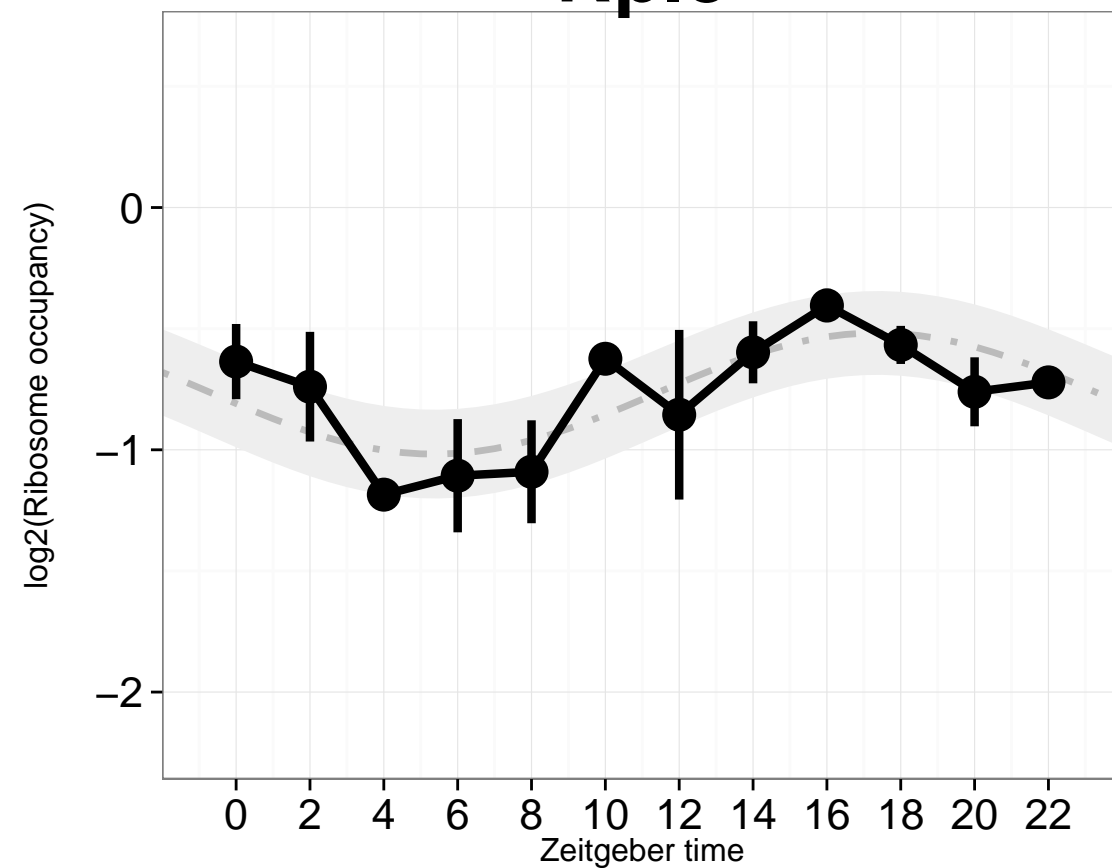

Supplement: Supplementary file 6280 [file 1]

## Acly

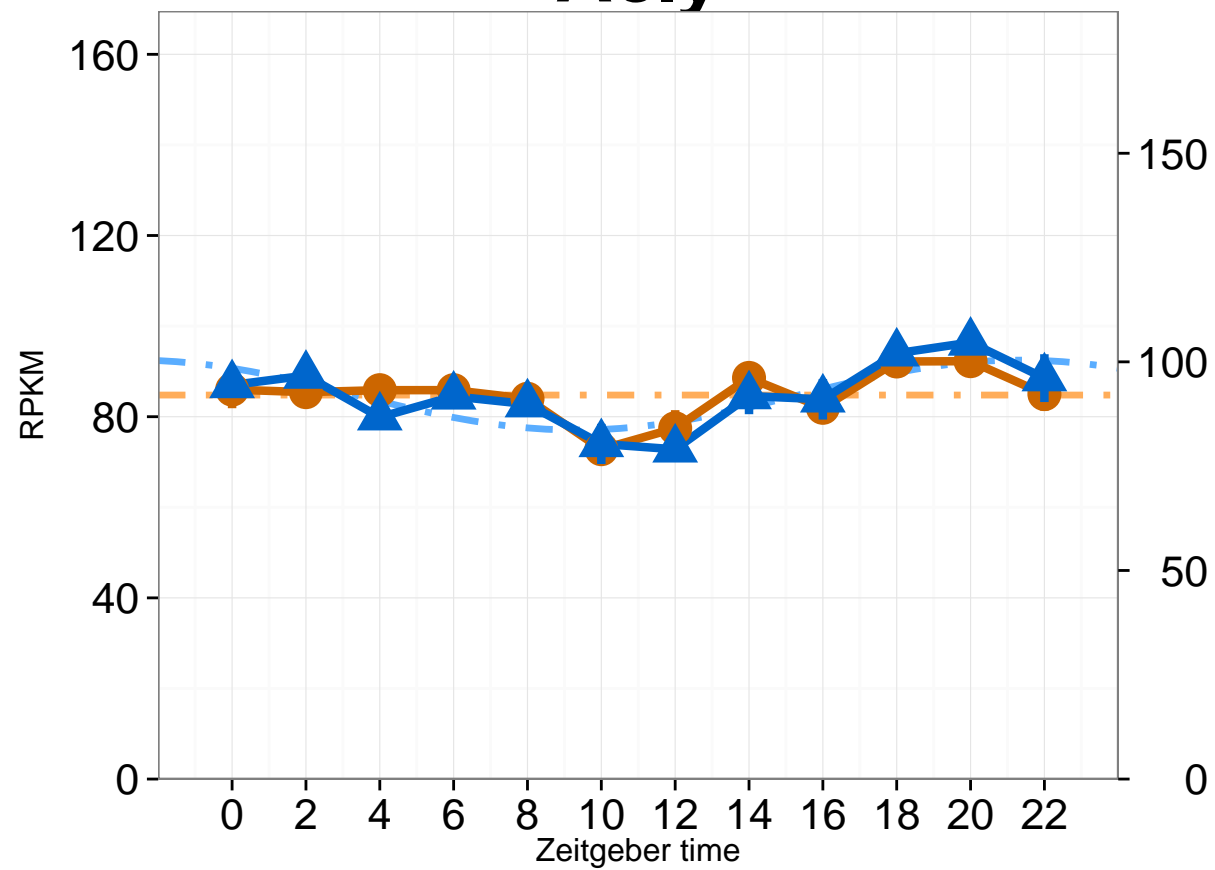

## Acly

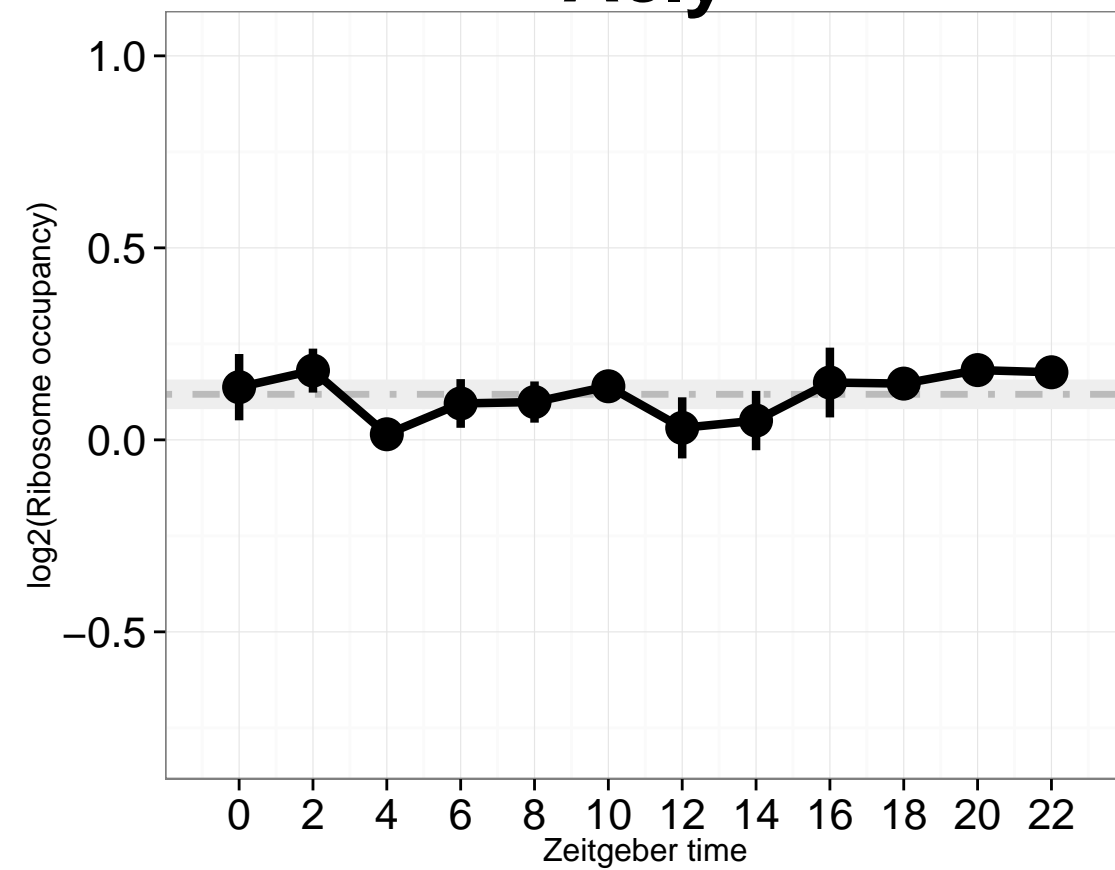

Supplement: Supplementary file 6281 [file 1]

## Hivep2

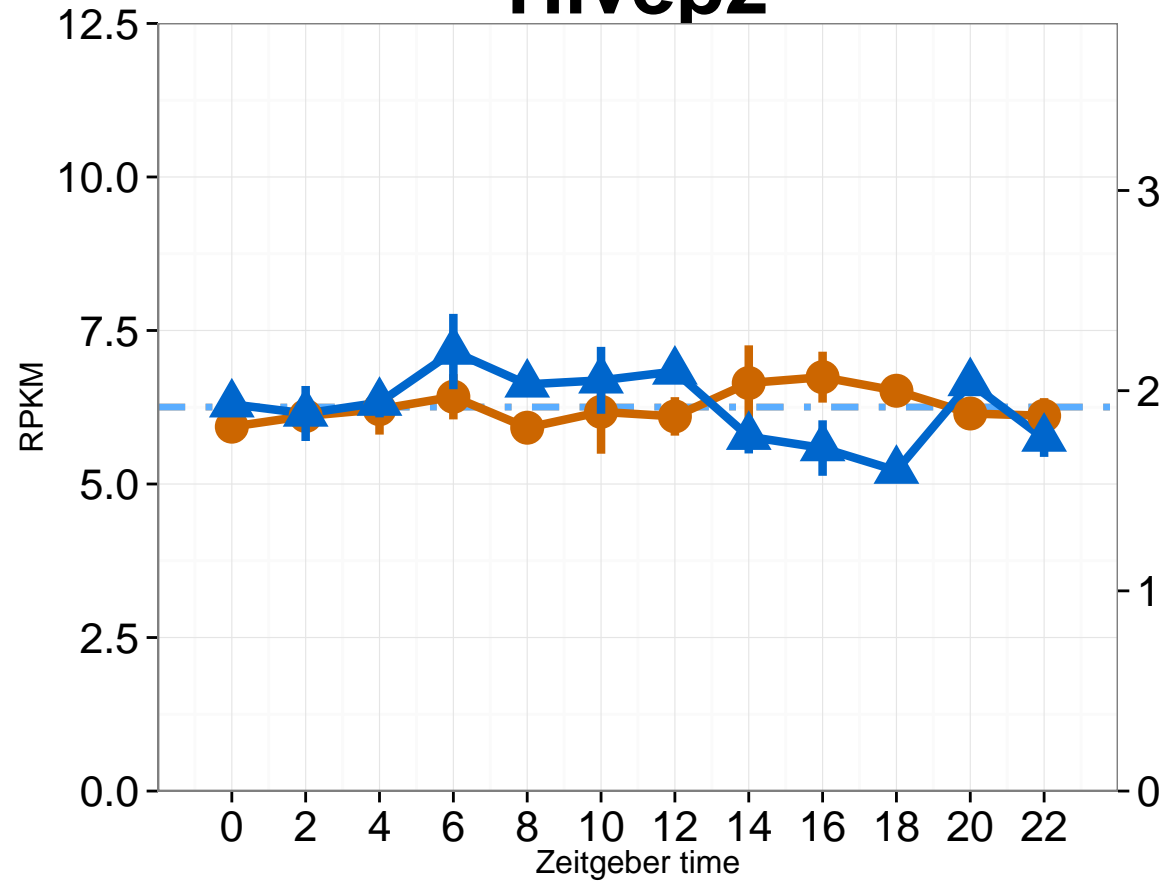

## Hivep2

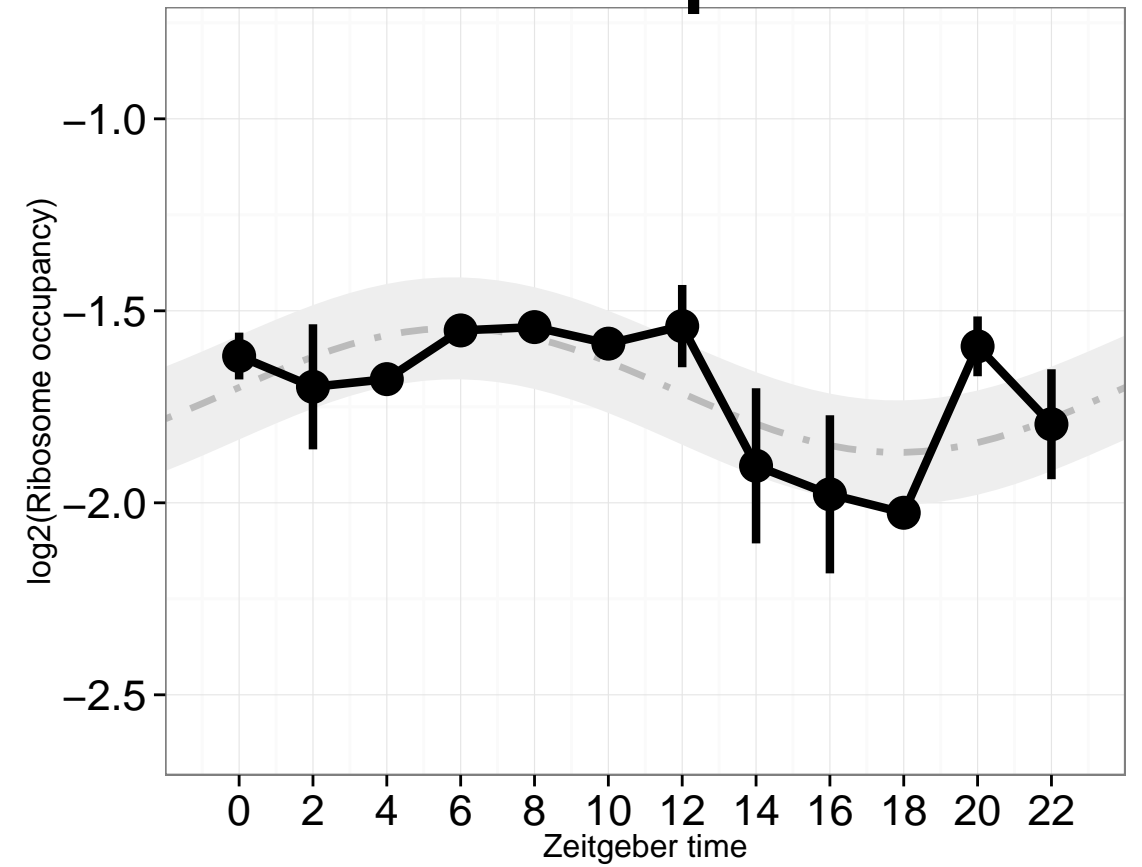

Supplement: Supplementary file 6282 [file 1]

# Polr2g

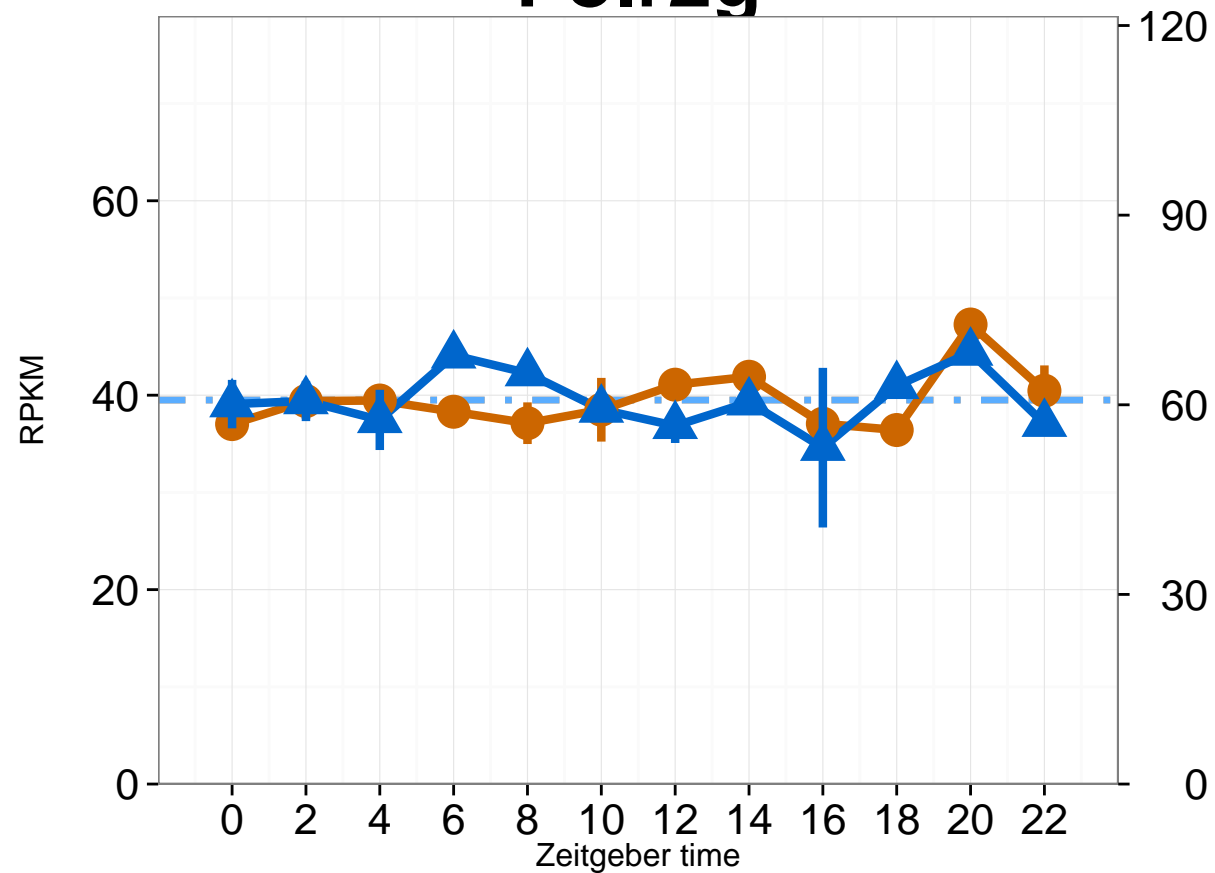

# Polr2g

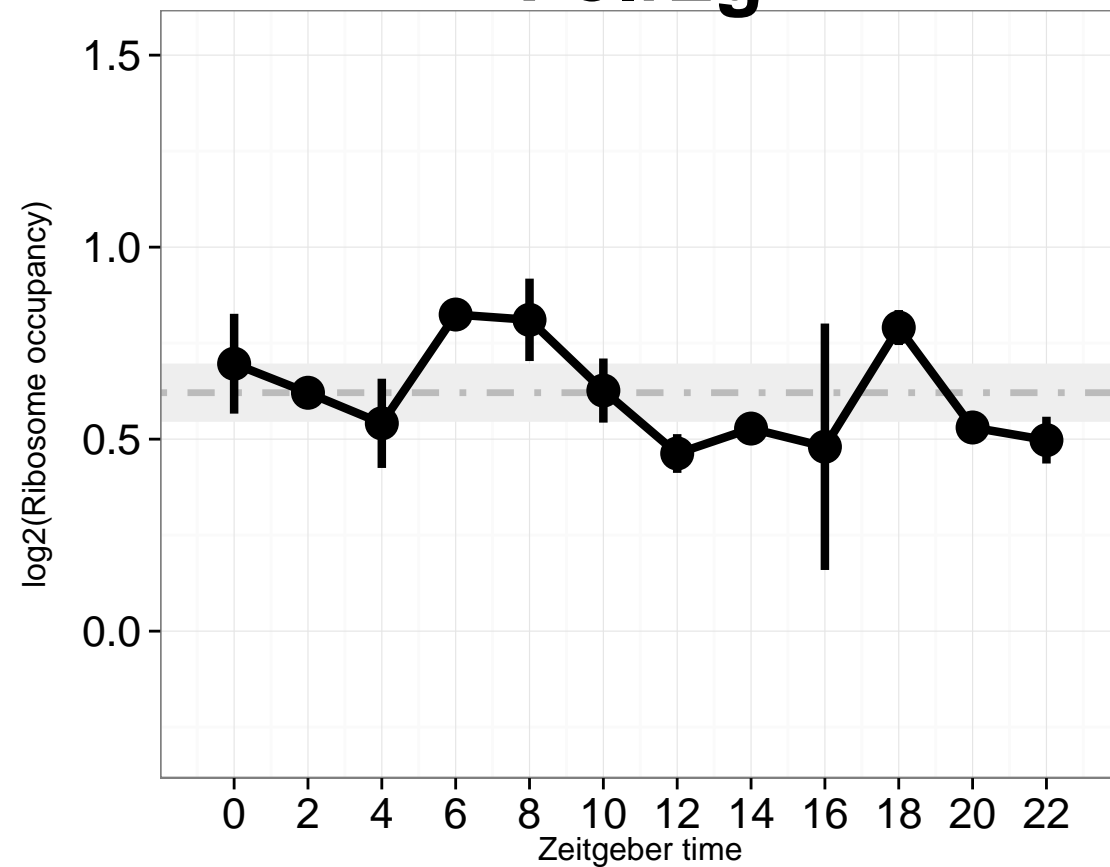

Supplement: Supplementary file 6283 [file 1]

## Cd4

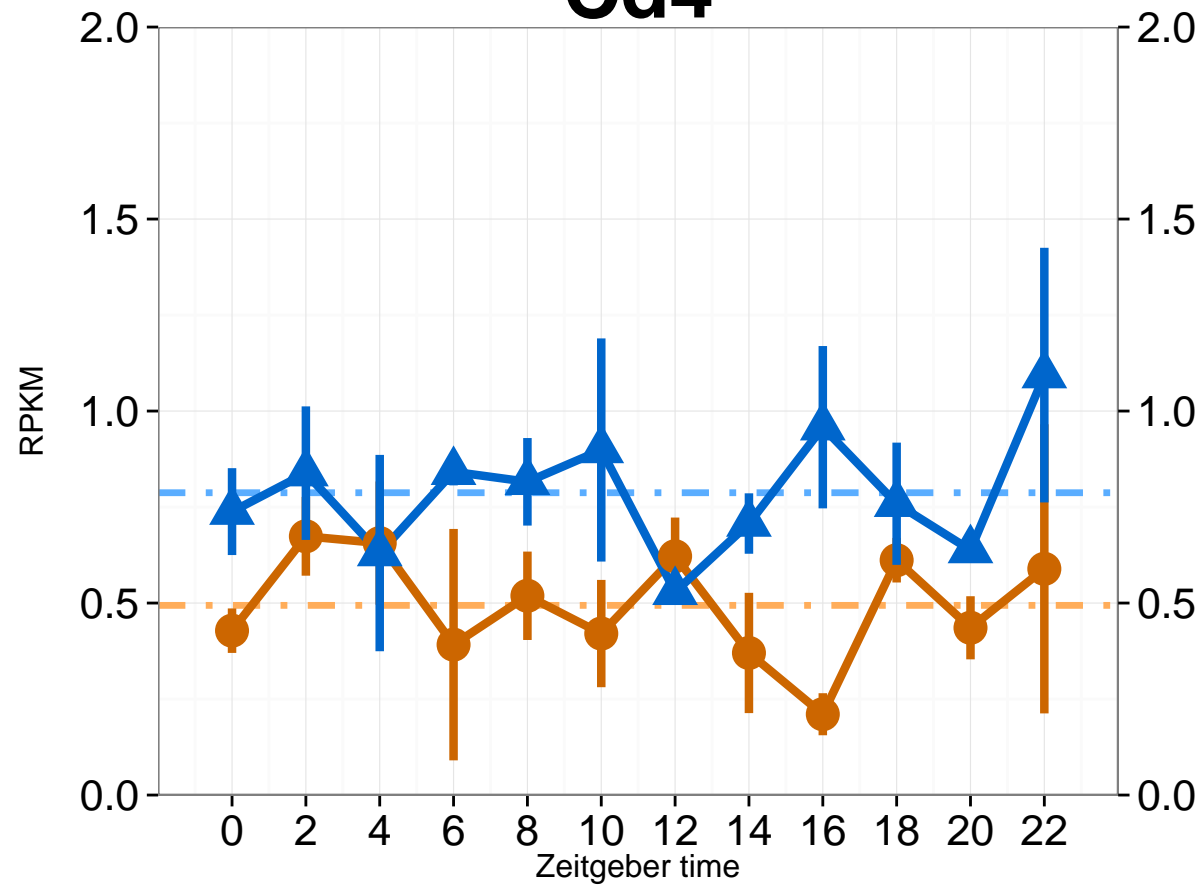

## Cd4

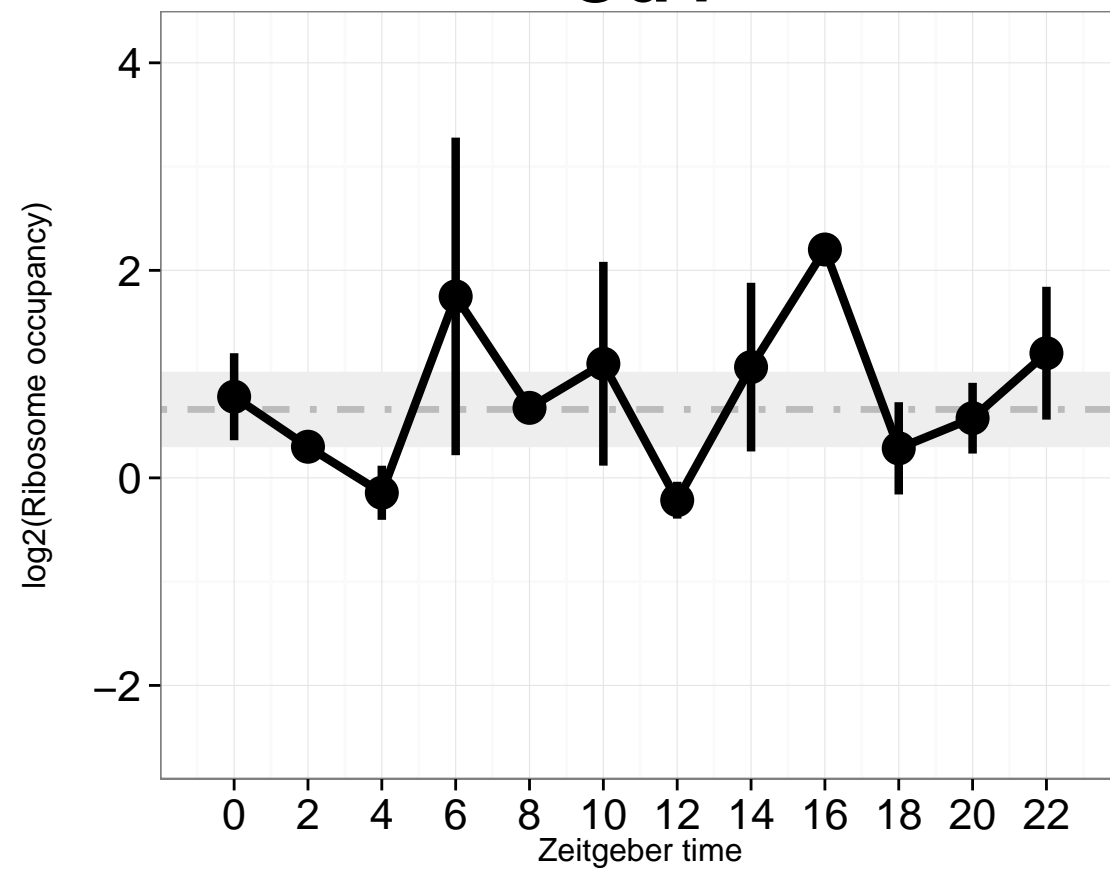

Supplement: Supplementary file 6284 [file 1]

# Ankrd13a

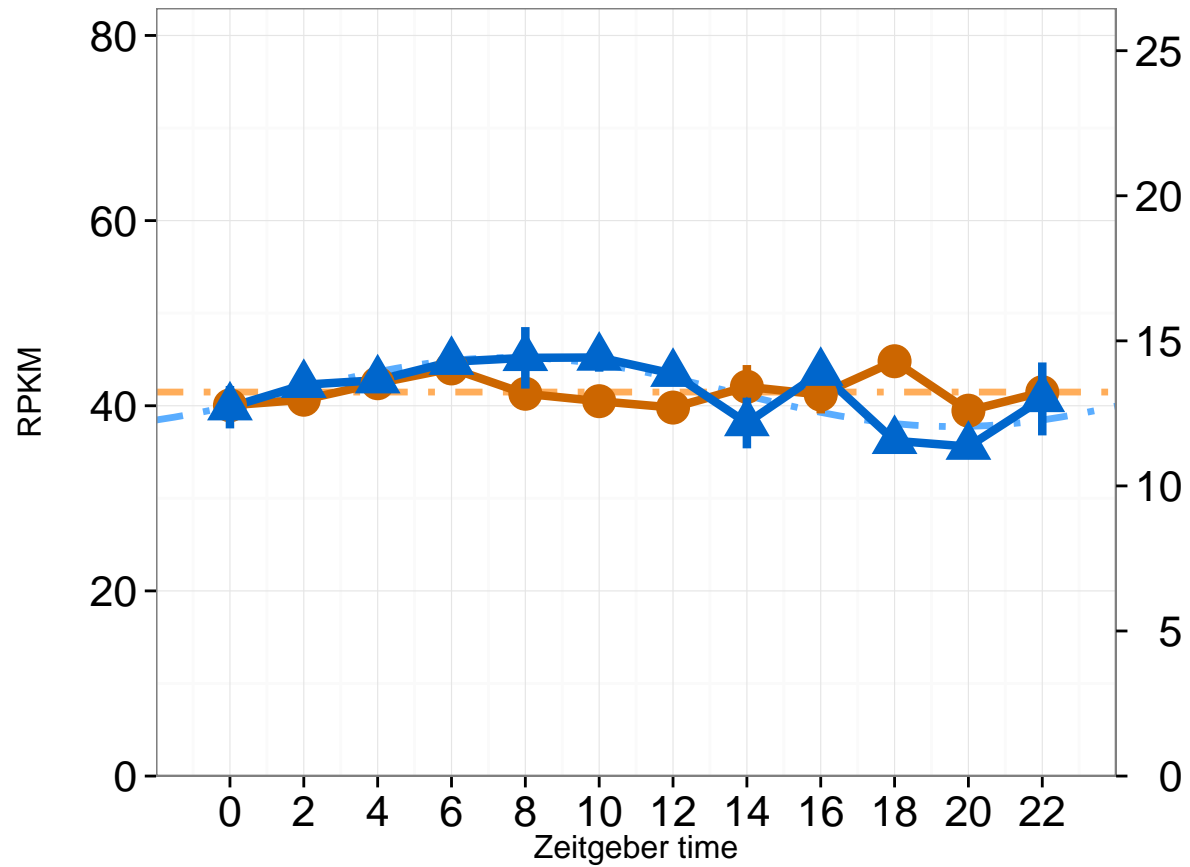

# Ankrd13a

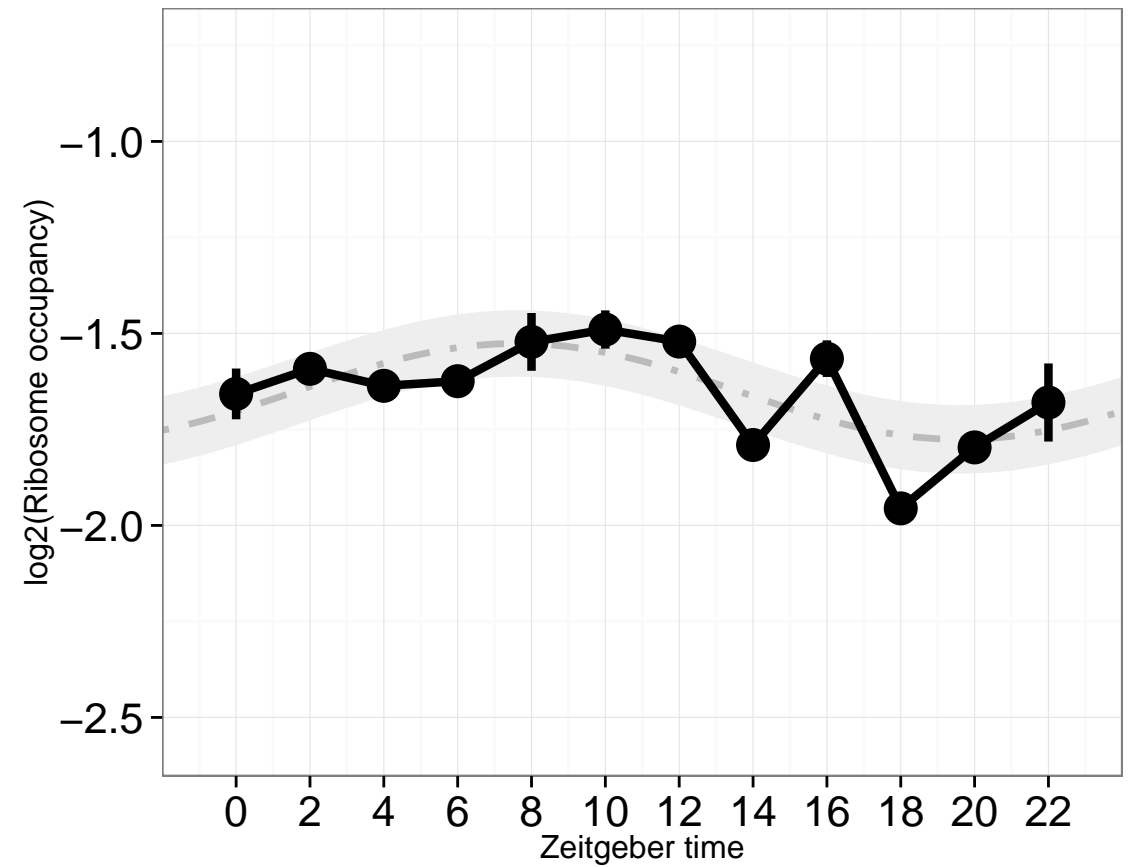

Supplement: Supplementary file 6285 [file 1]

# Pfn2

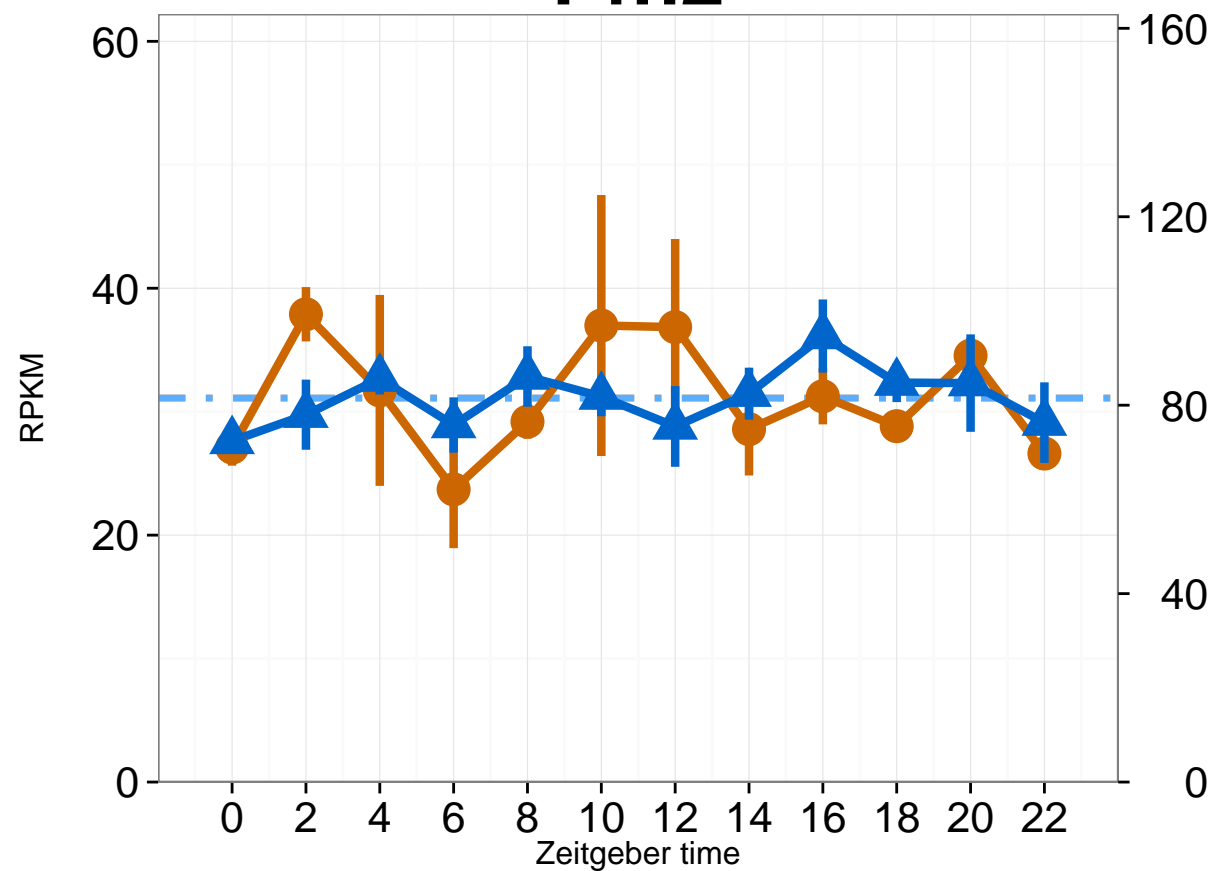

# Pfn2

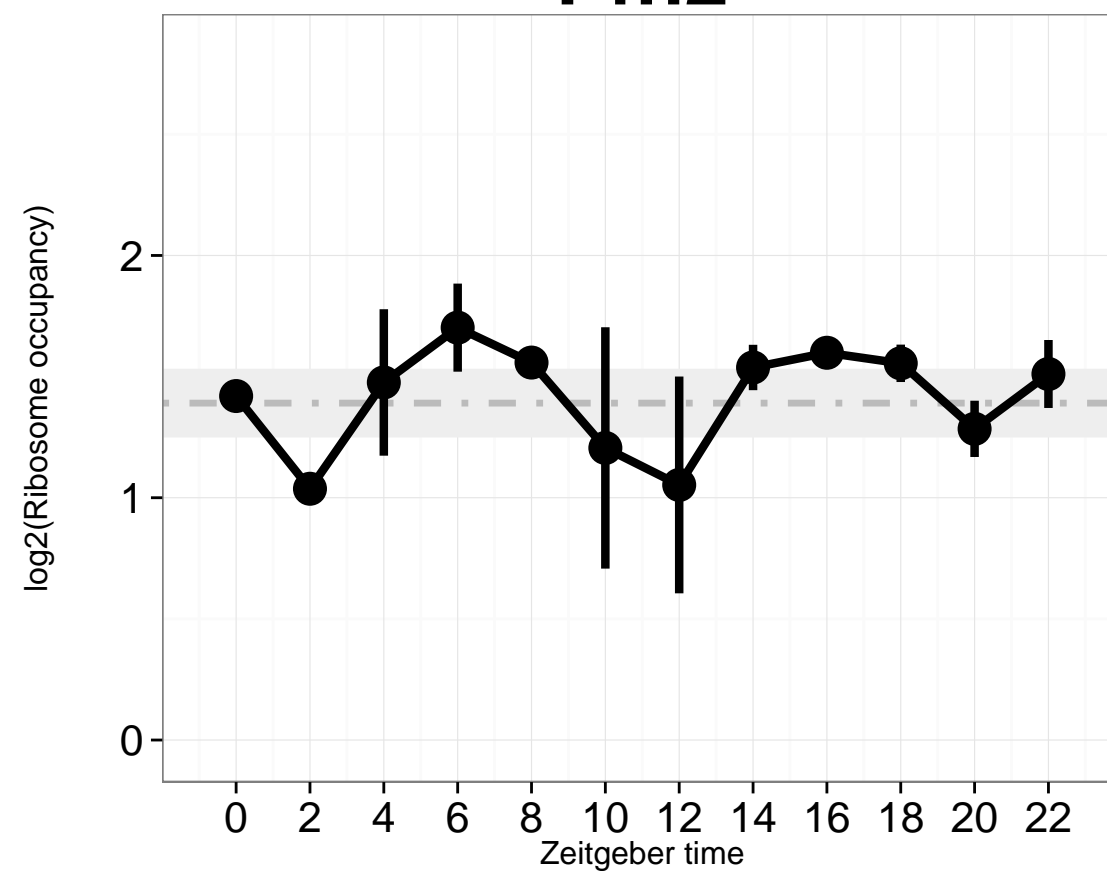

Supplement: Supplementary file 6286 [file 1]

## Elp4

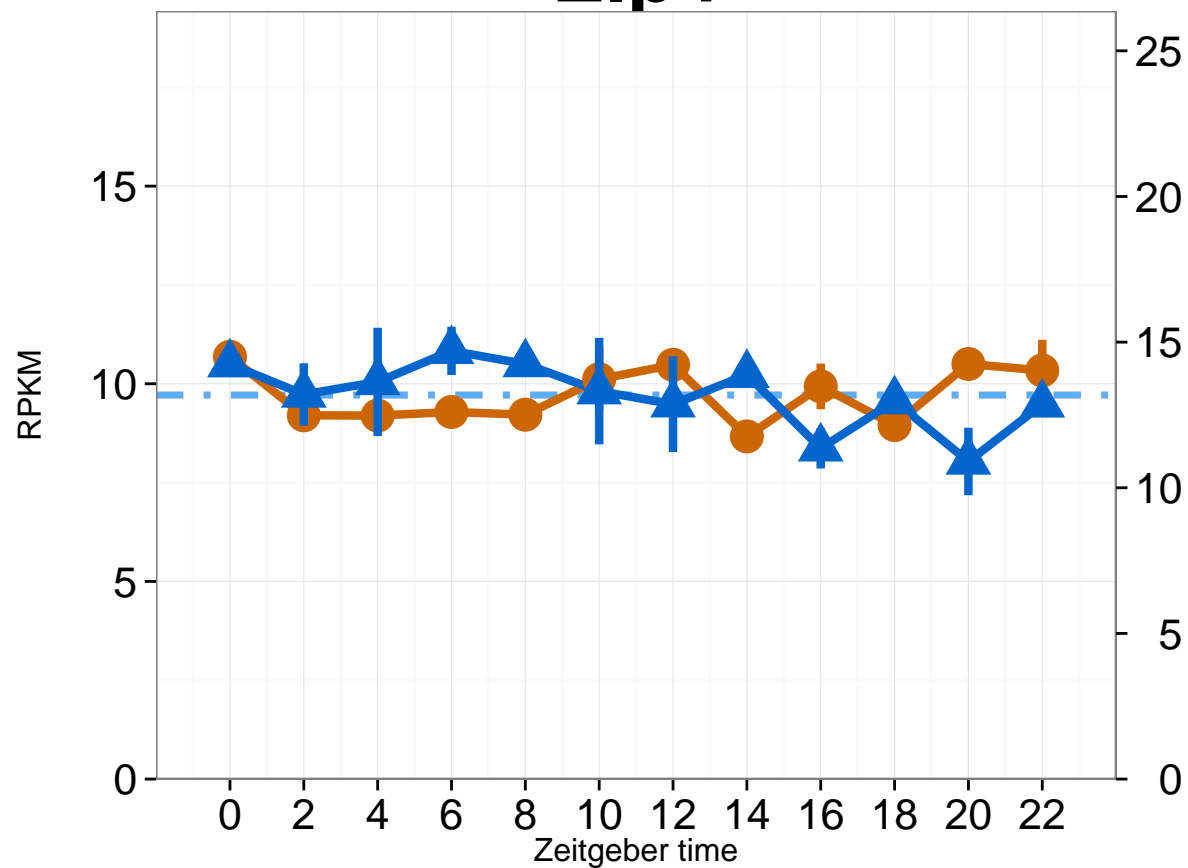

## Elp4

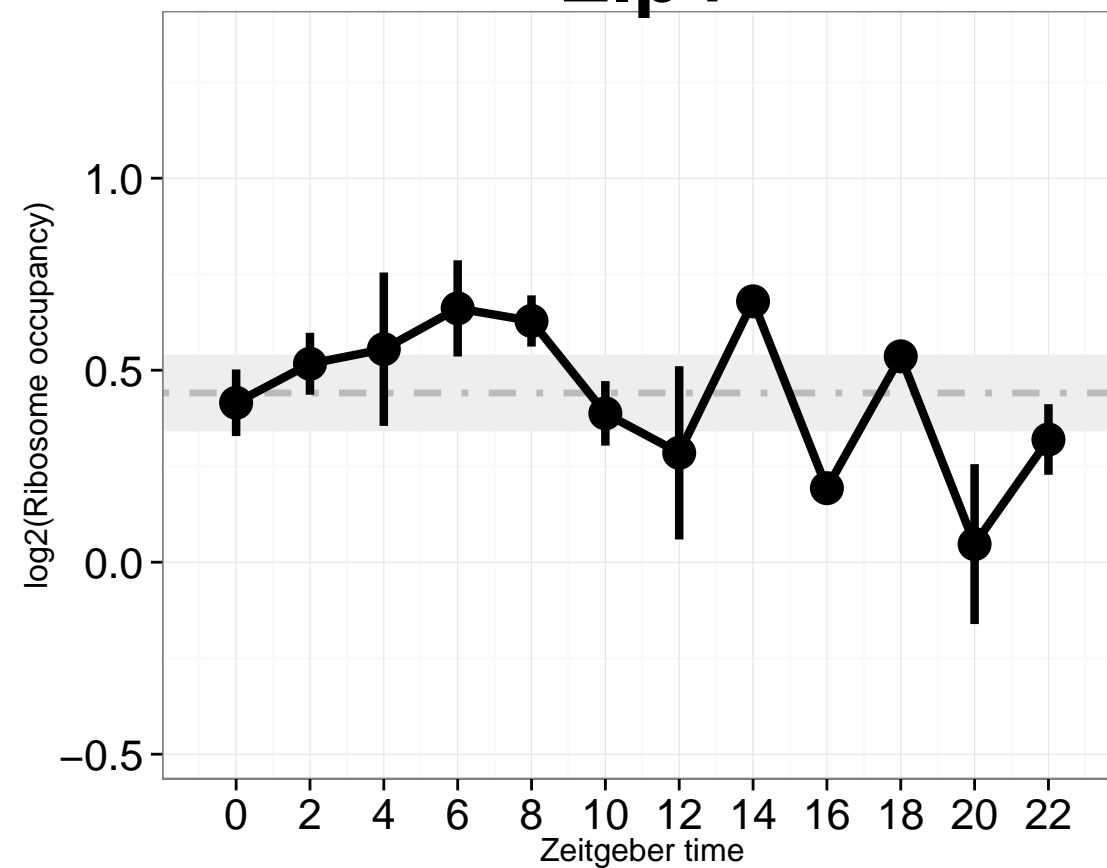

Supplement: Supplementary file 6287 [file 1]

## Fgl2

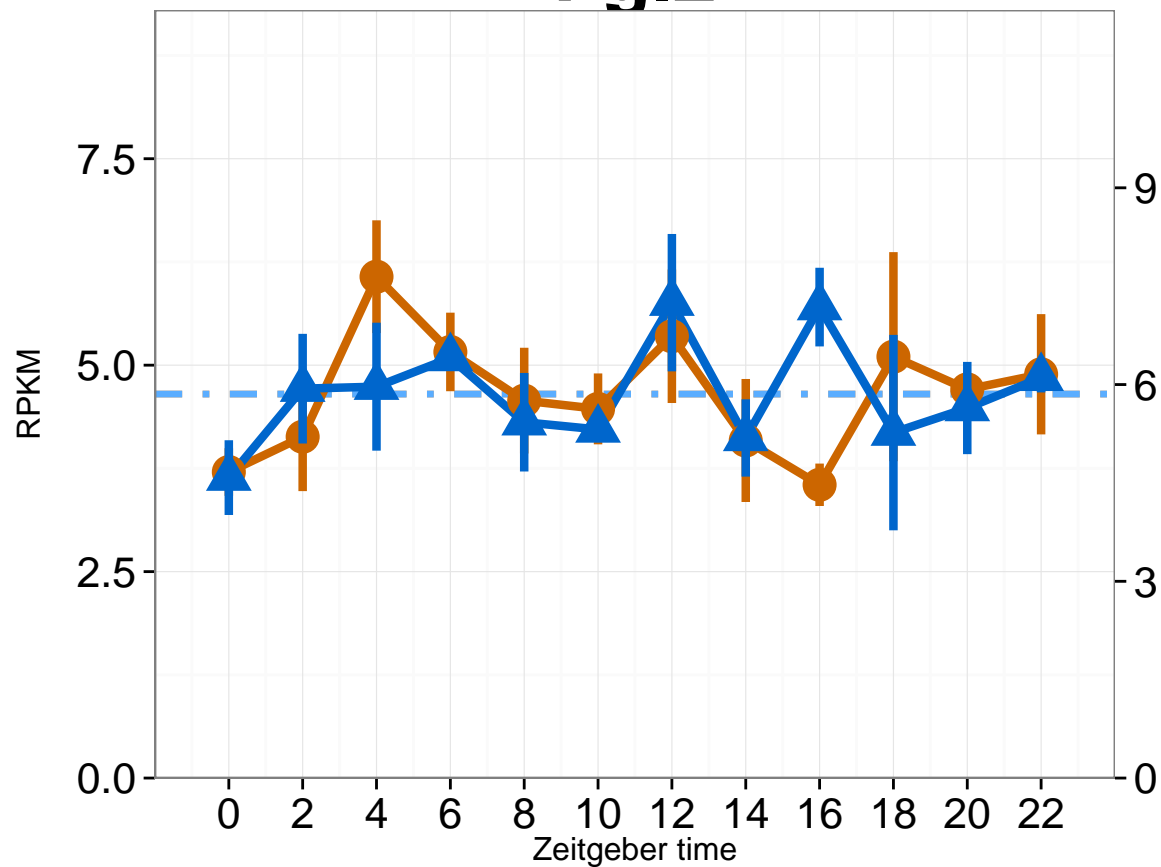

## Fgl2

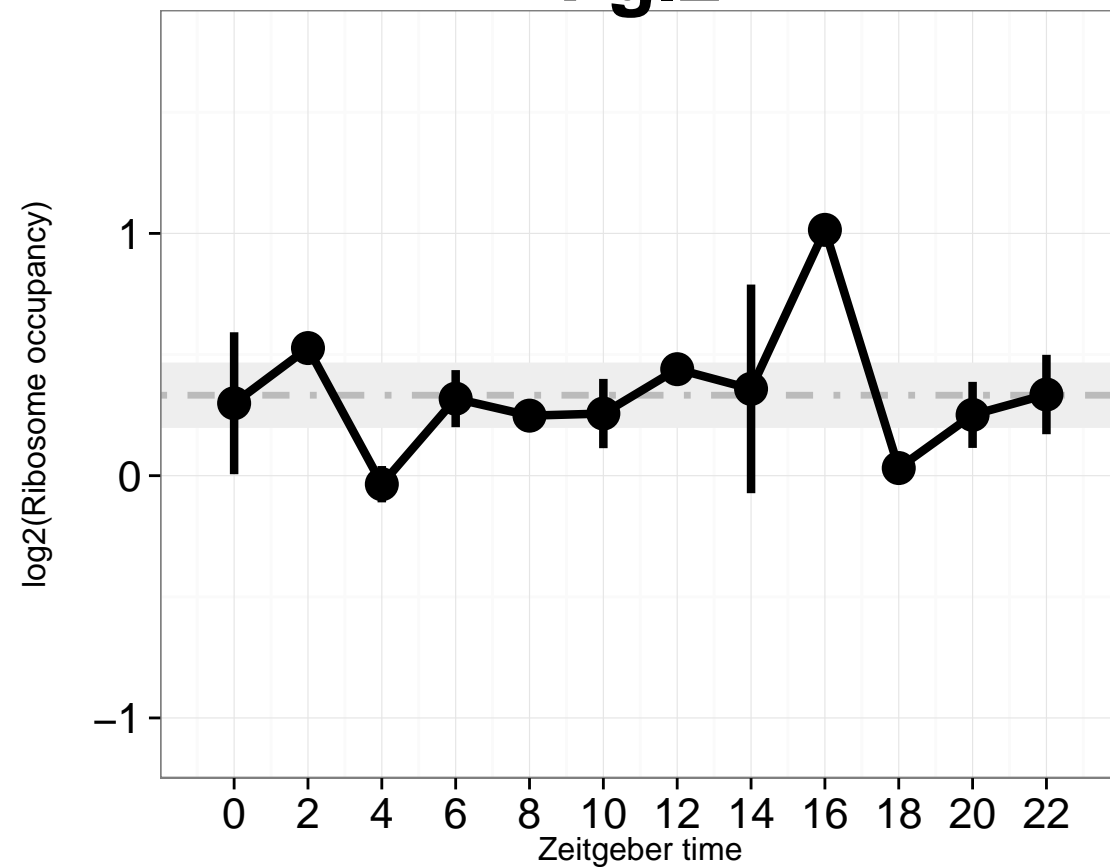

Supplement: Supplementary file 6288 [file 1]

## Anpep

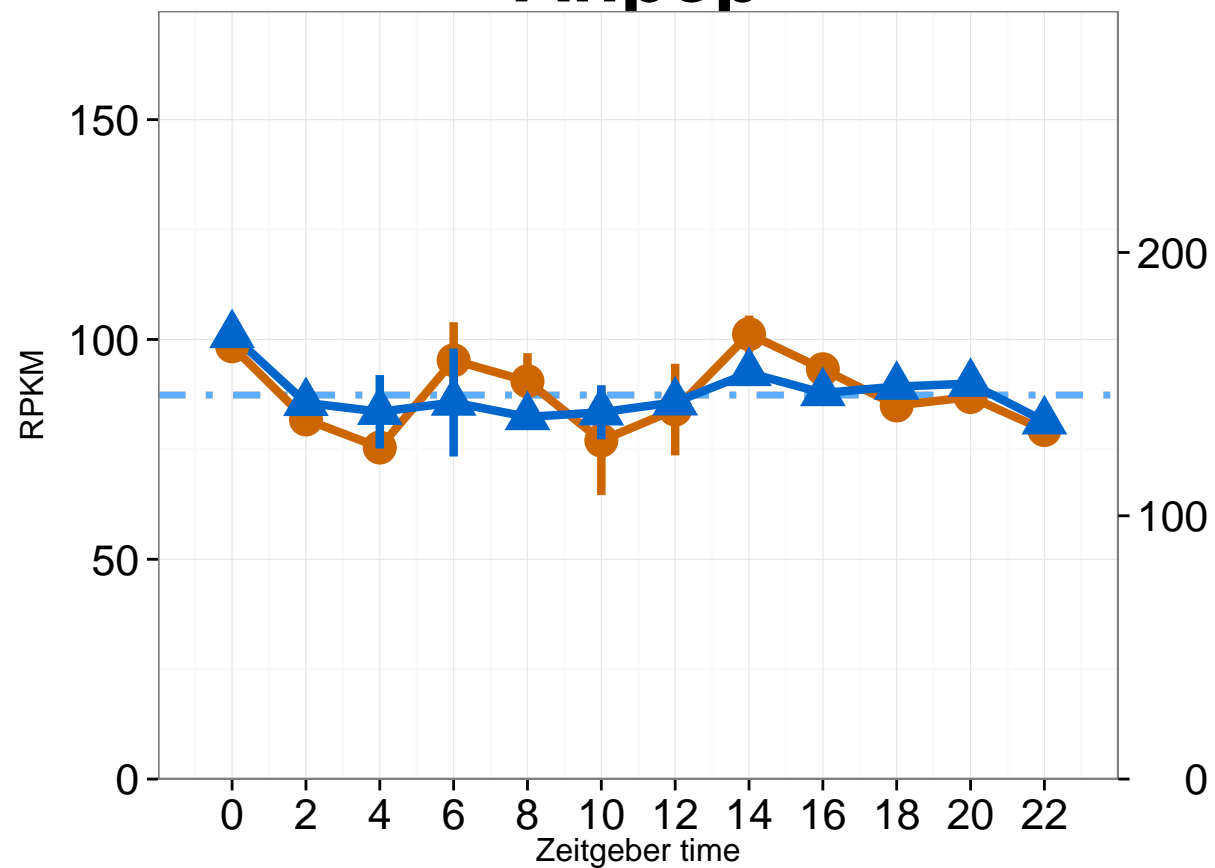

## Anpep

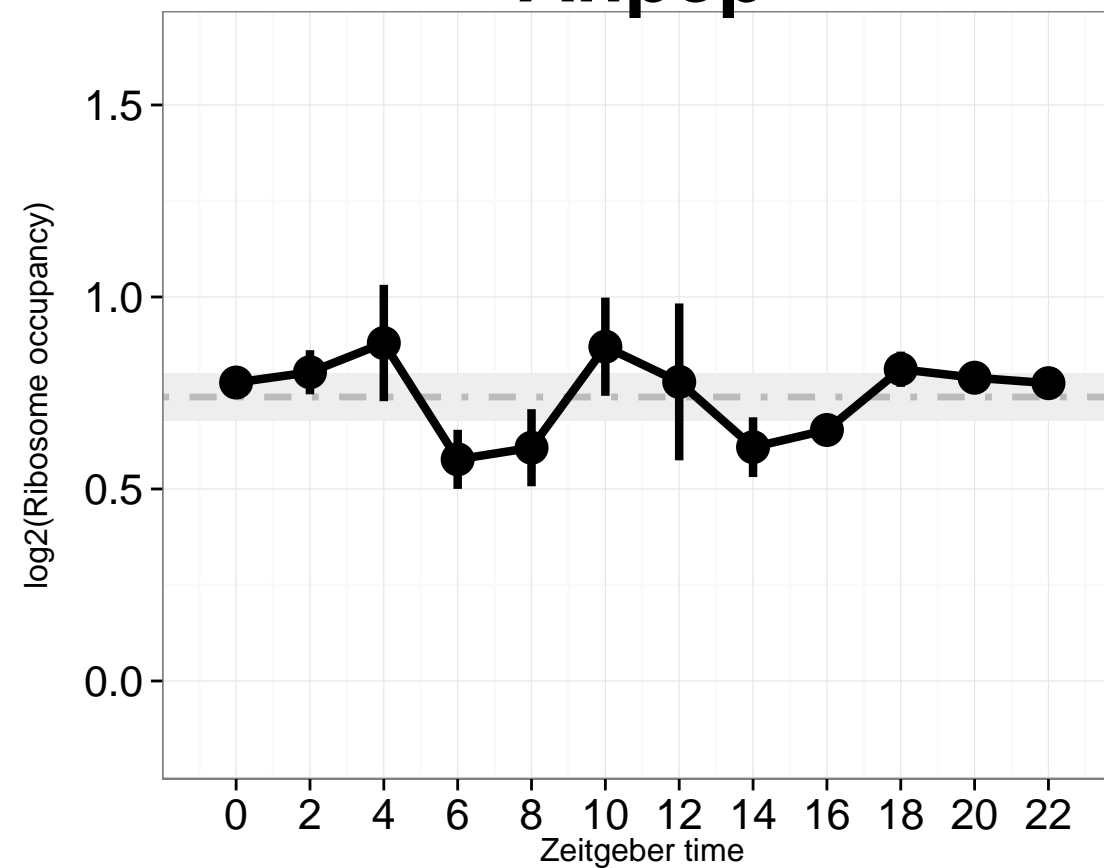

Supplement: Supplementary file 6289 [file 1]

## Plekhm1

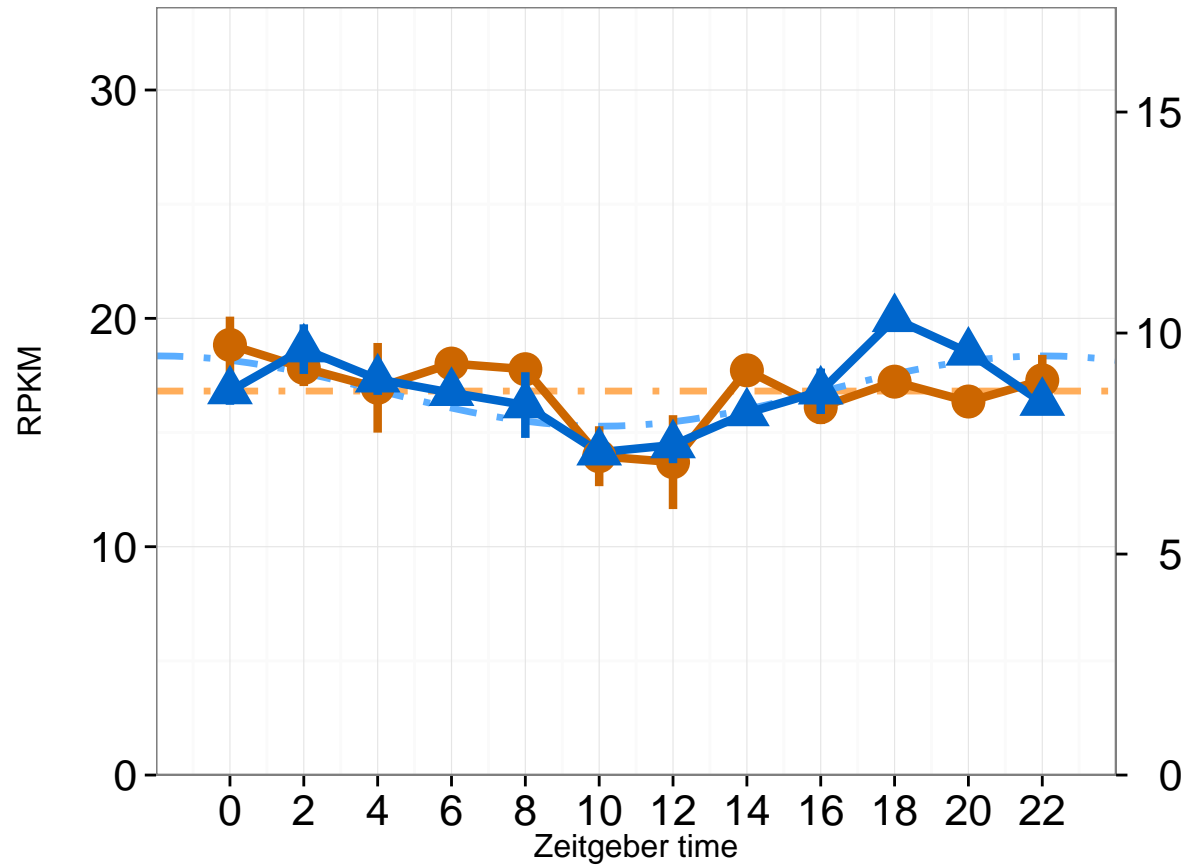

## Plekhm1

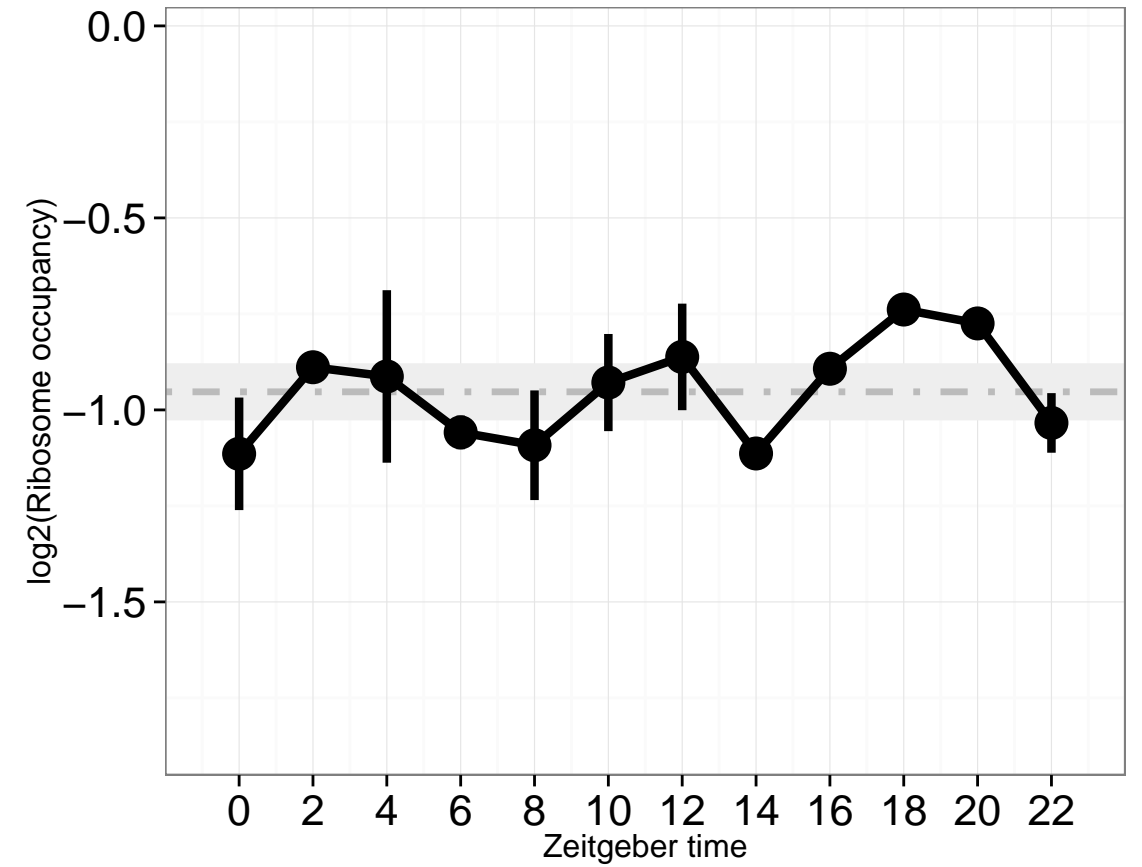

Supplement: Supplementary file 6290 [file 1]

## Gpn2

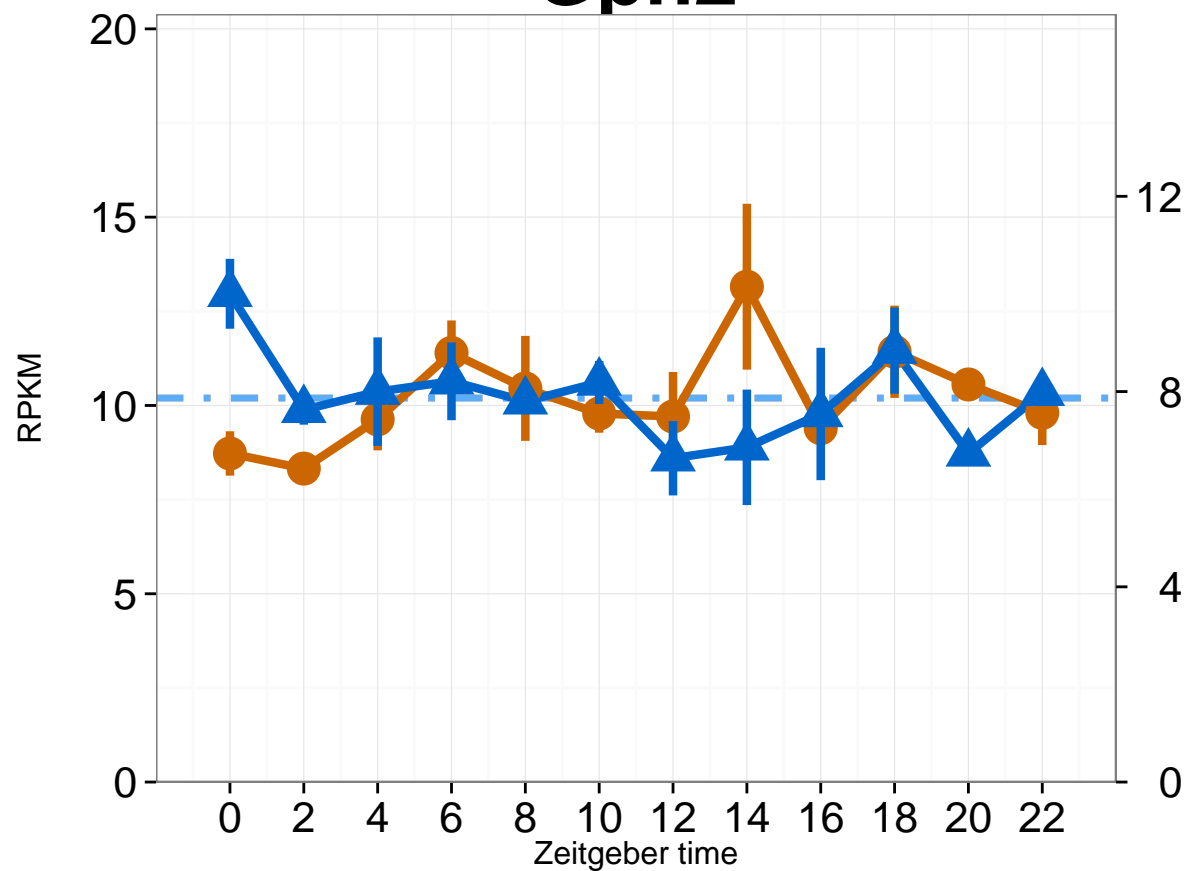

## Gpn2

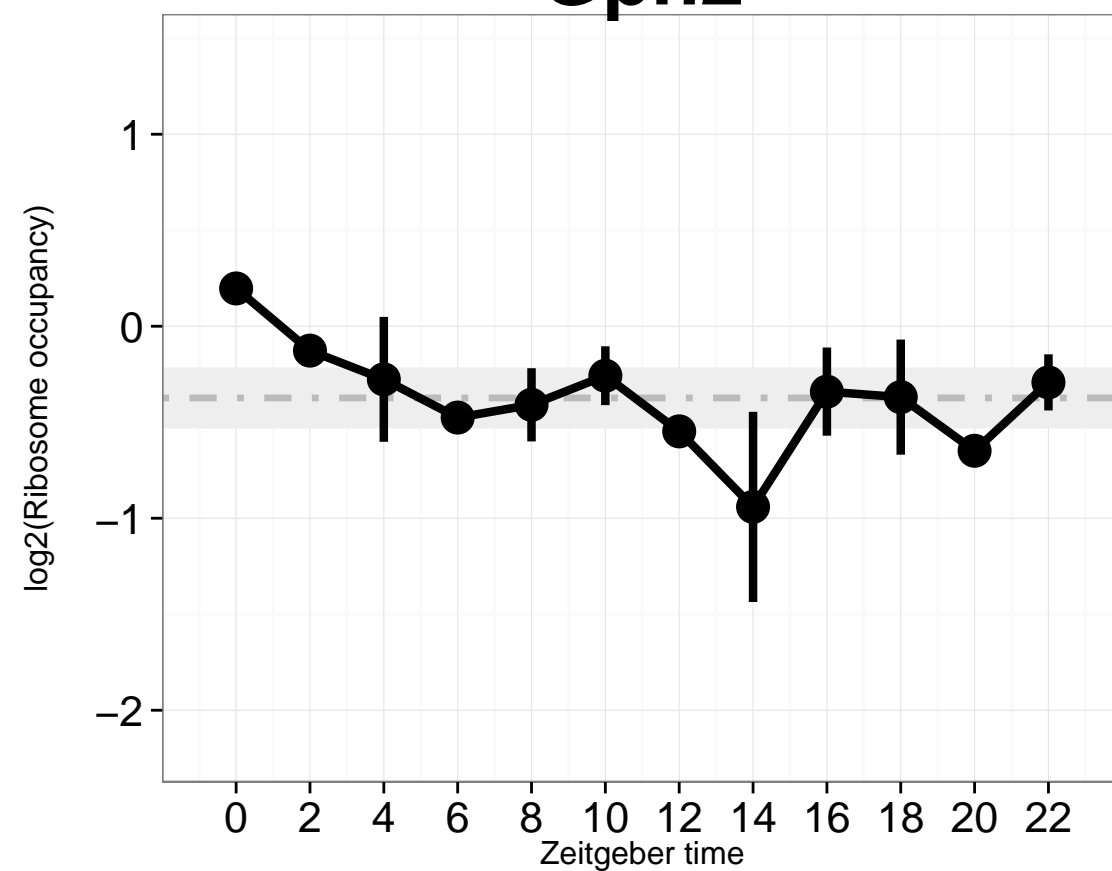

Supplement: Supplementary file 6291 [file 1]

# Ecm2

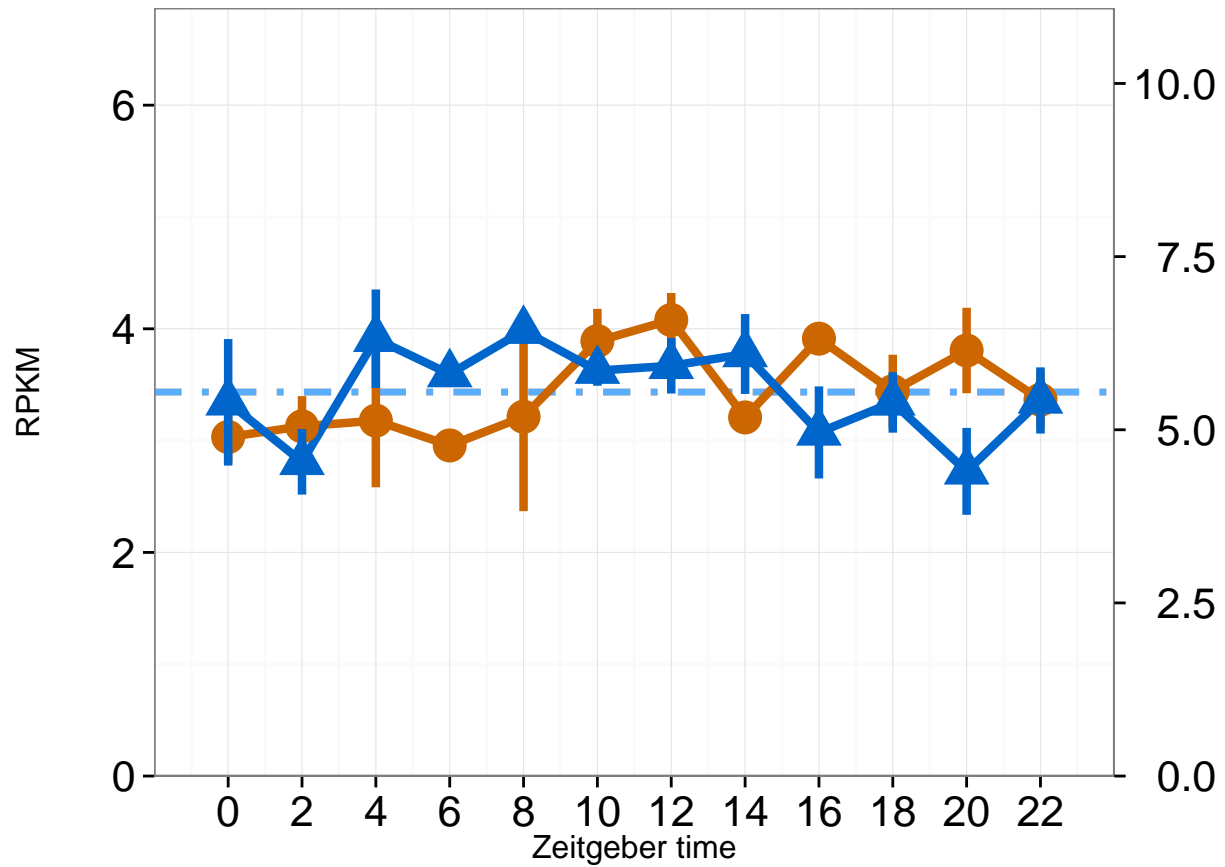

# Ecm2

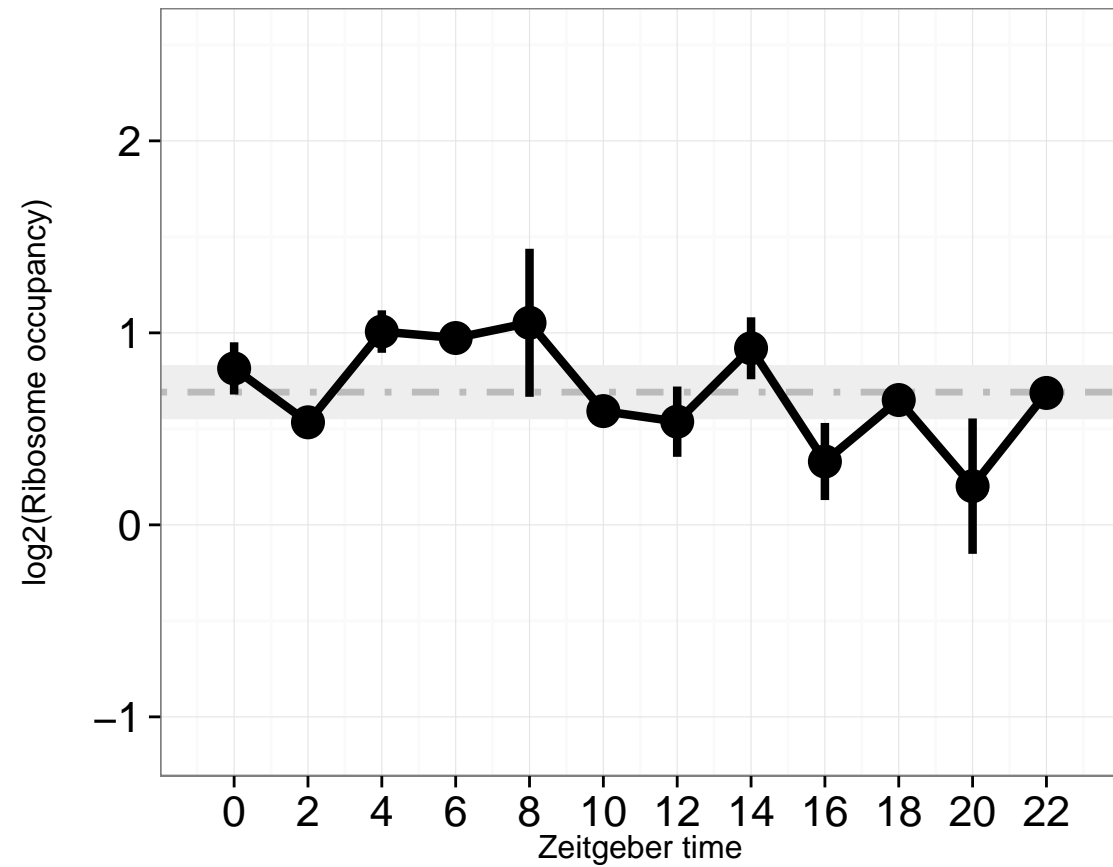

Supplement: Supplementary file 6292 [file 1]

# Tuba1a

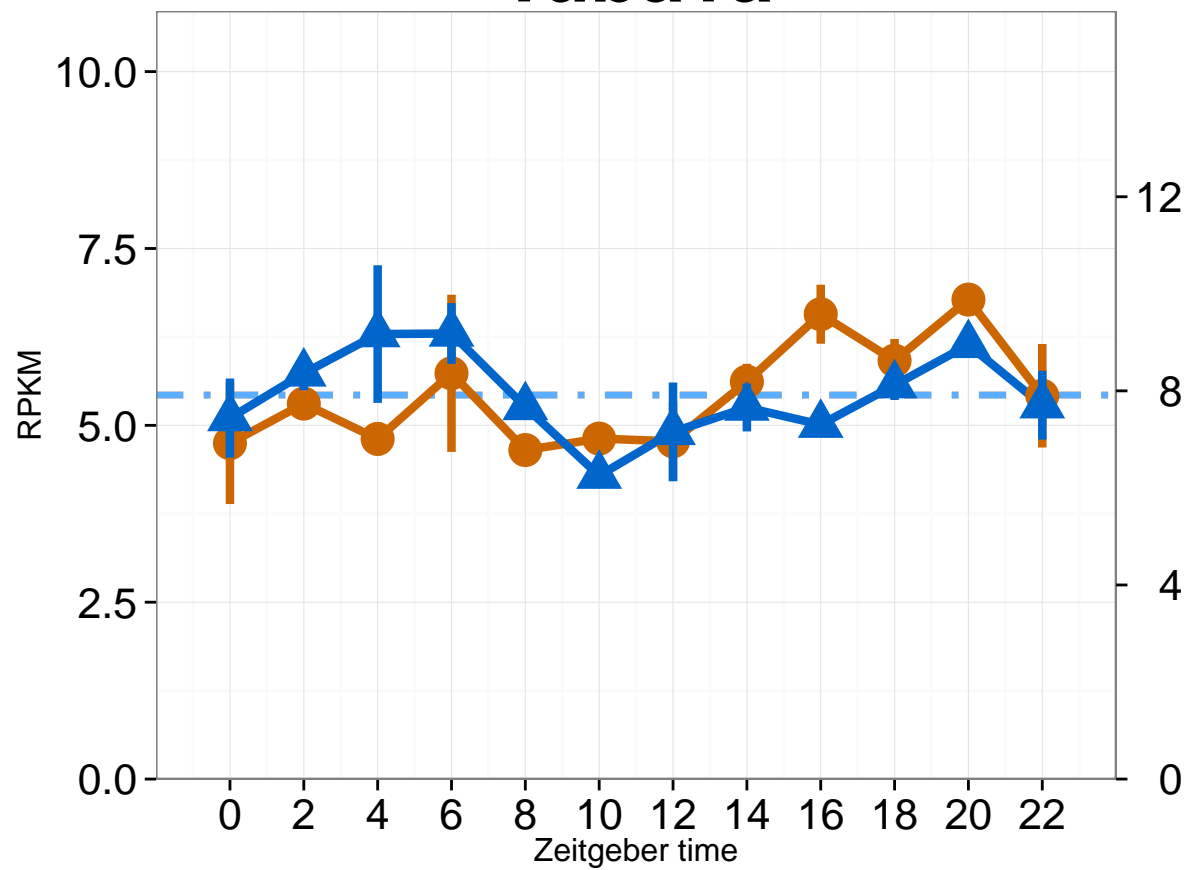

# Tuba1a

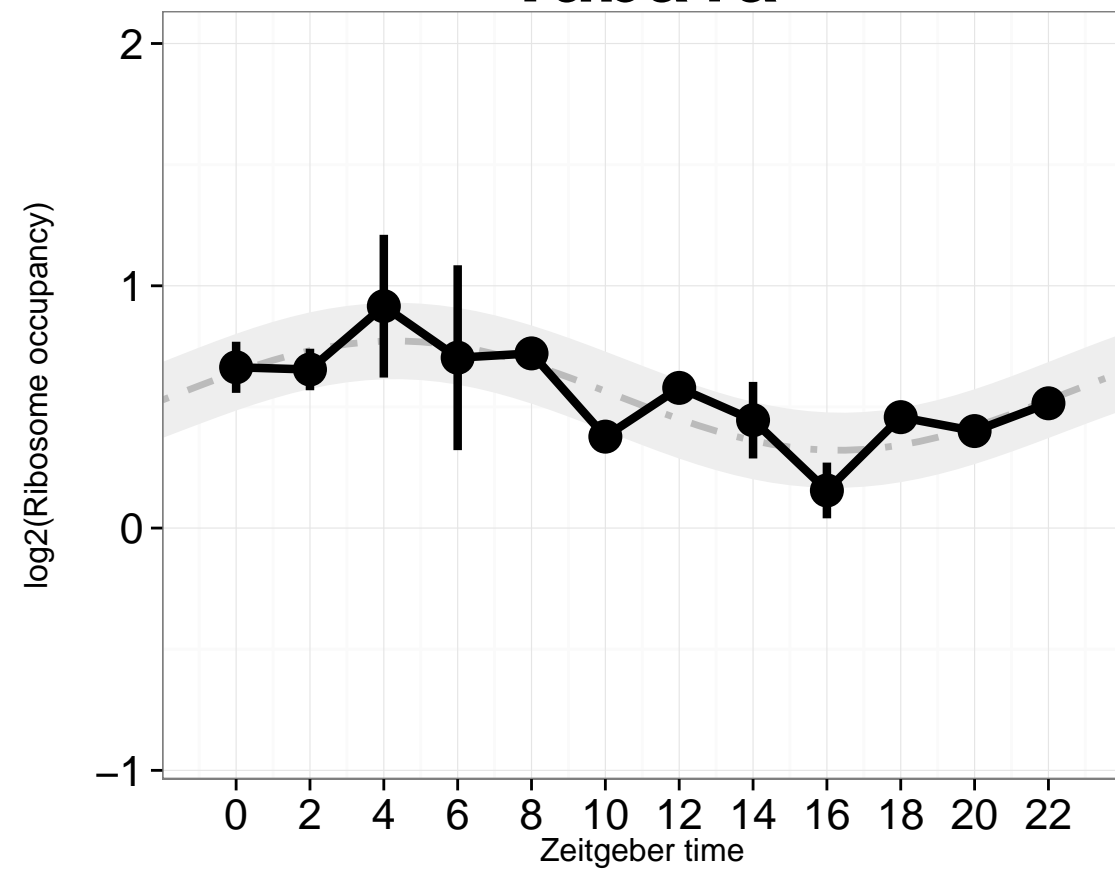

Supplement: Supplementary file 6293 [file 1]

## Ap4s1

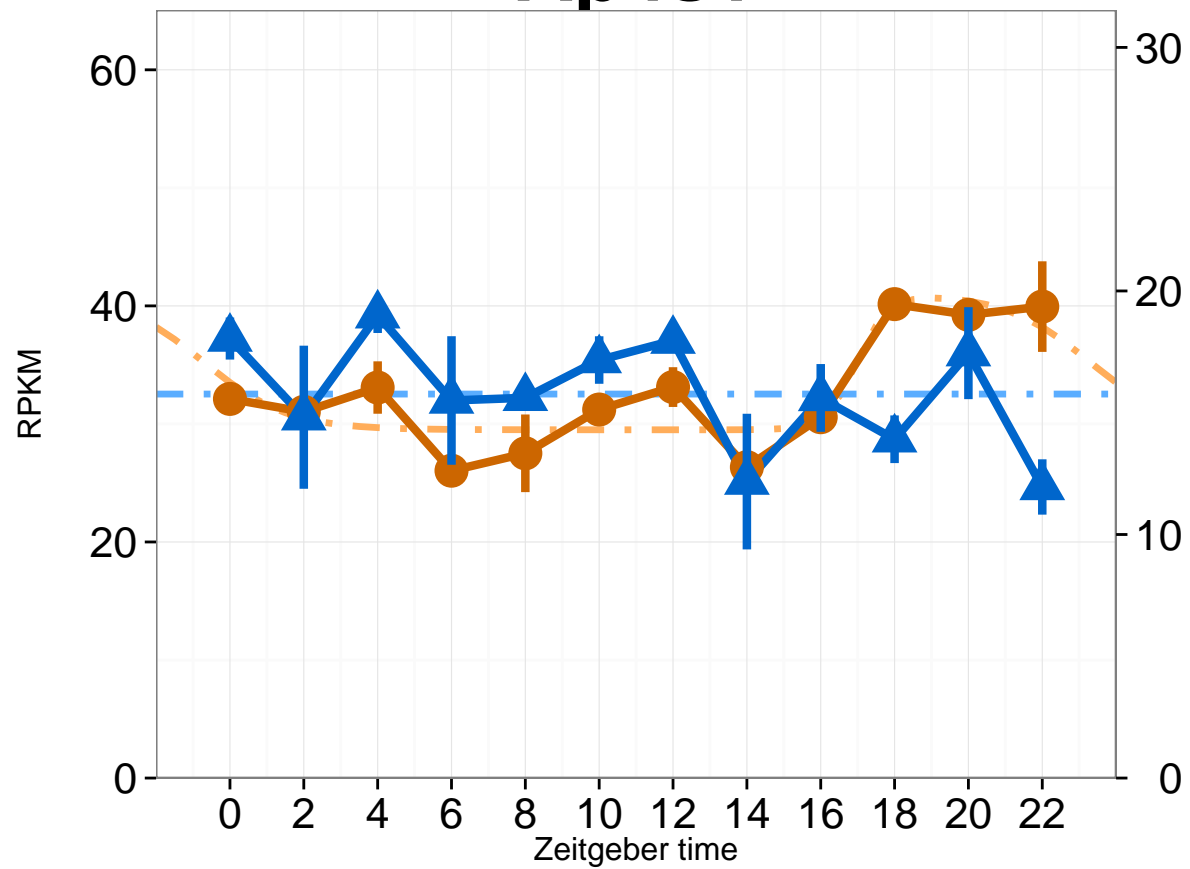

## Ap4s1

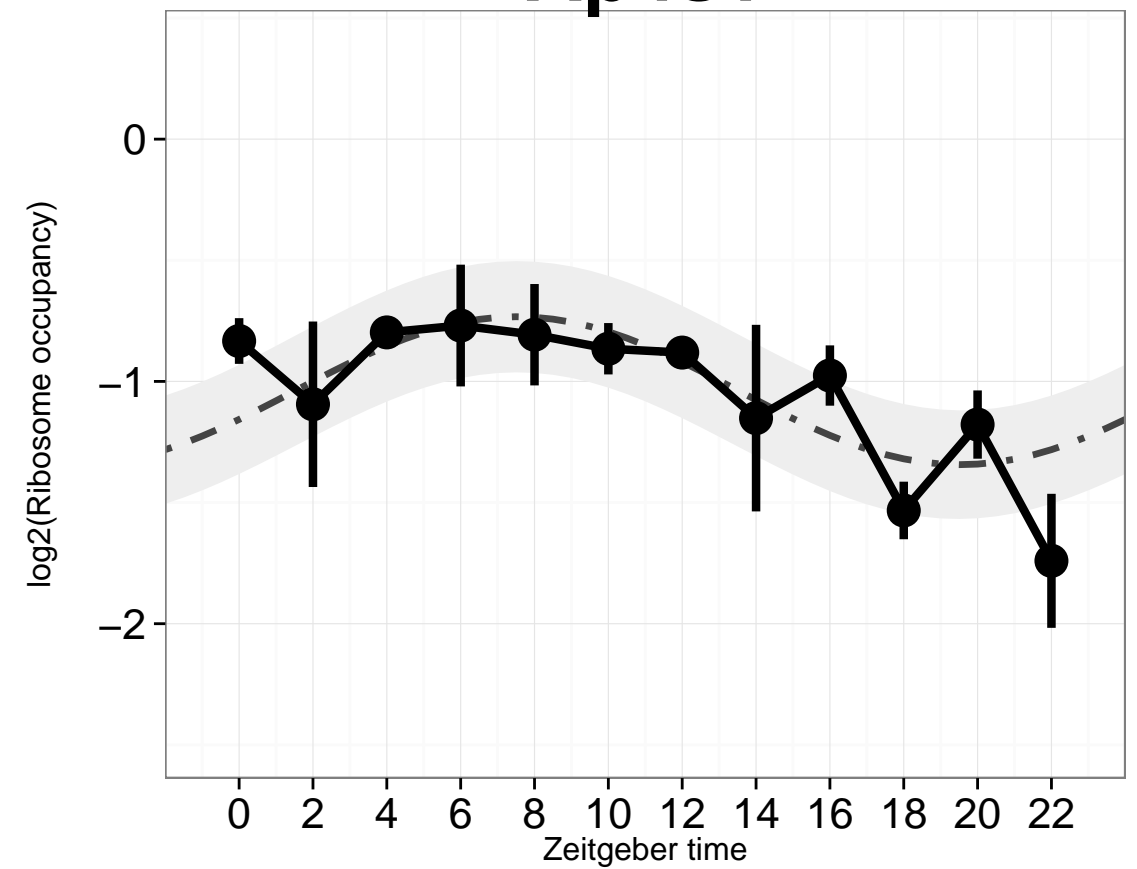

Supplement: Supplementary file 6294 [file 1]

# Ints10

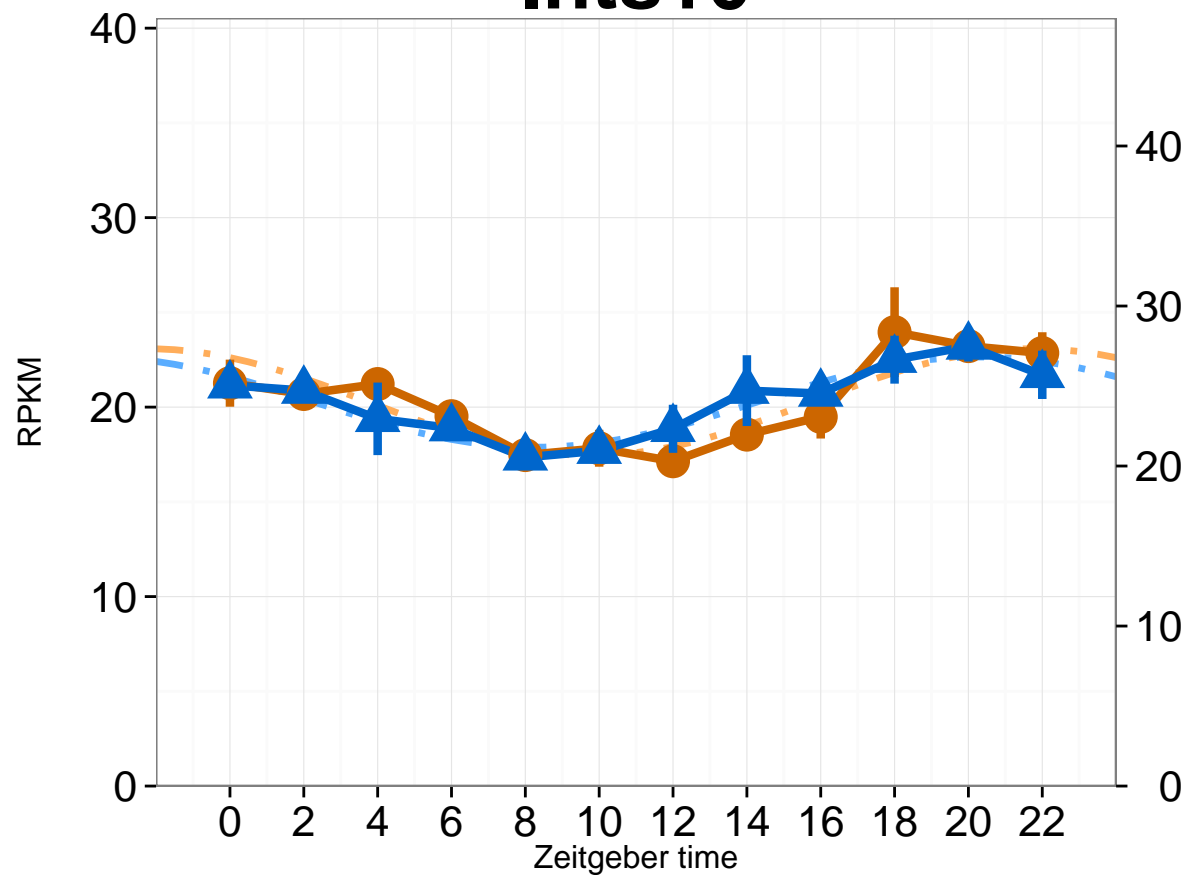

# Ints10

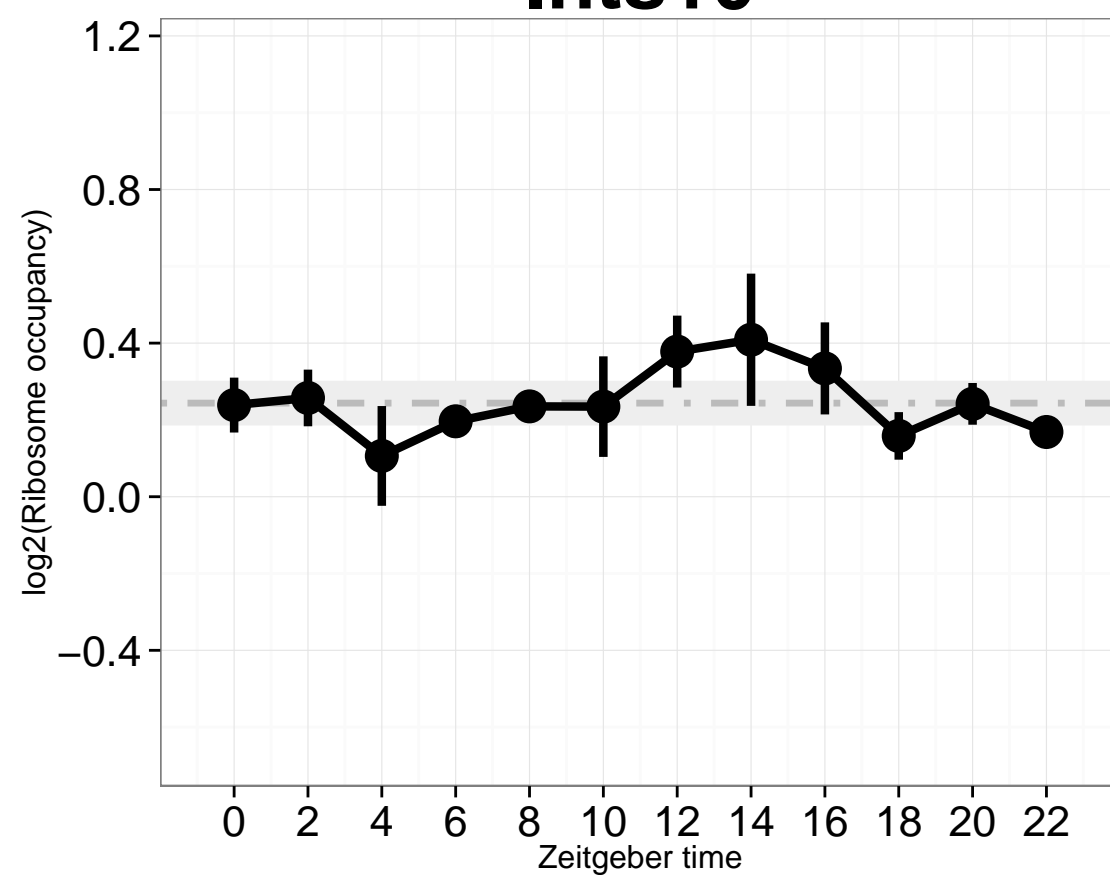

Supplement: Supplementary file 6295 [file 1]

## PphIn1

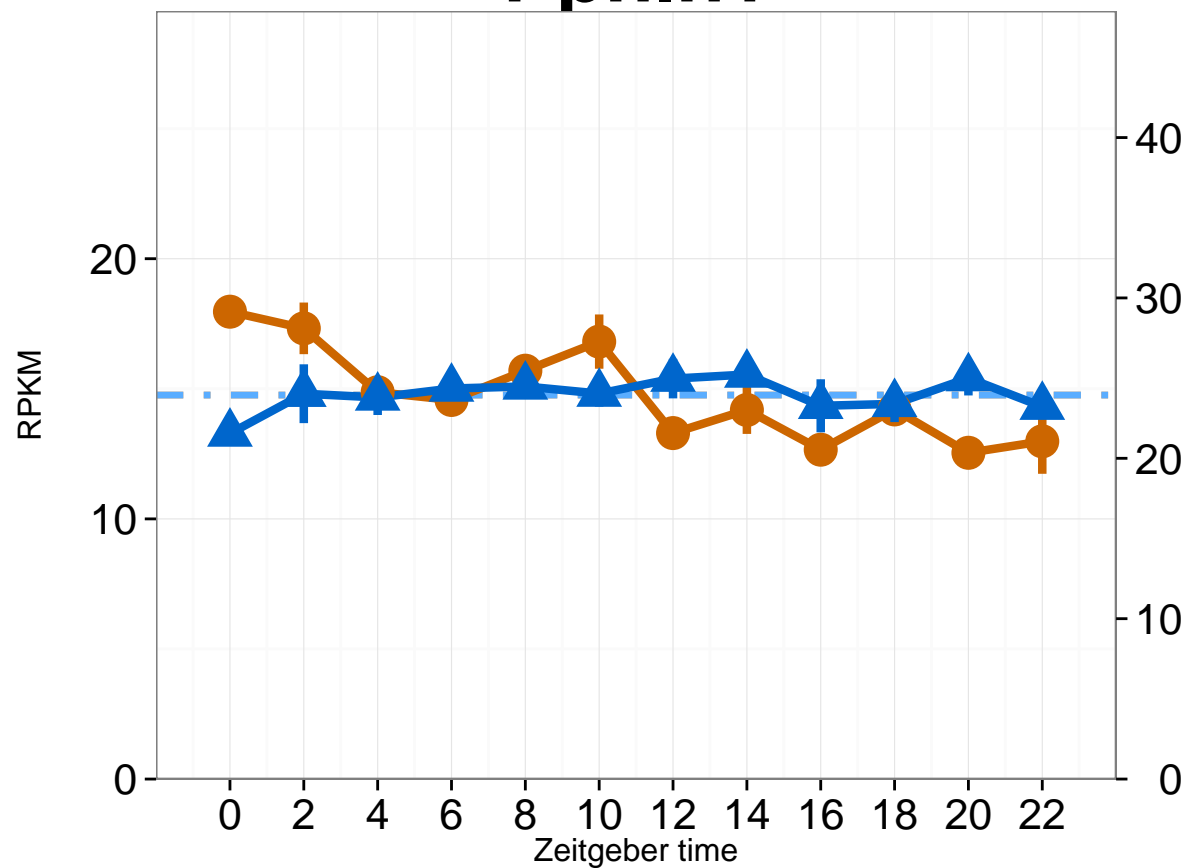

## PphIn1

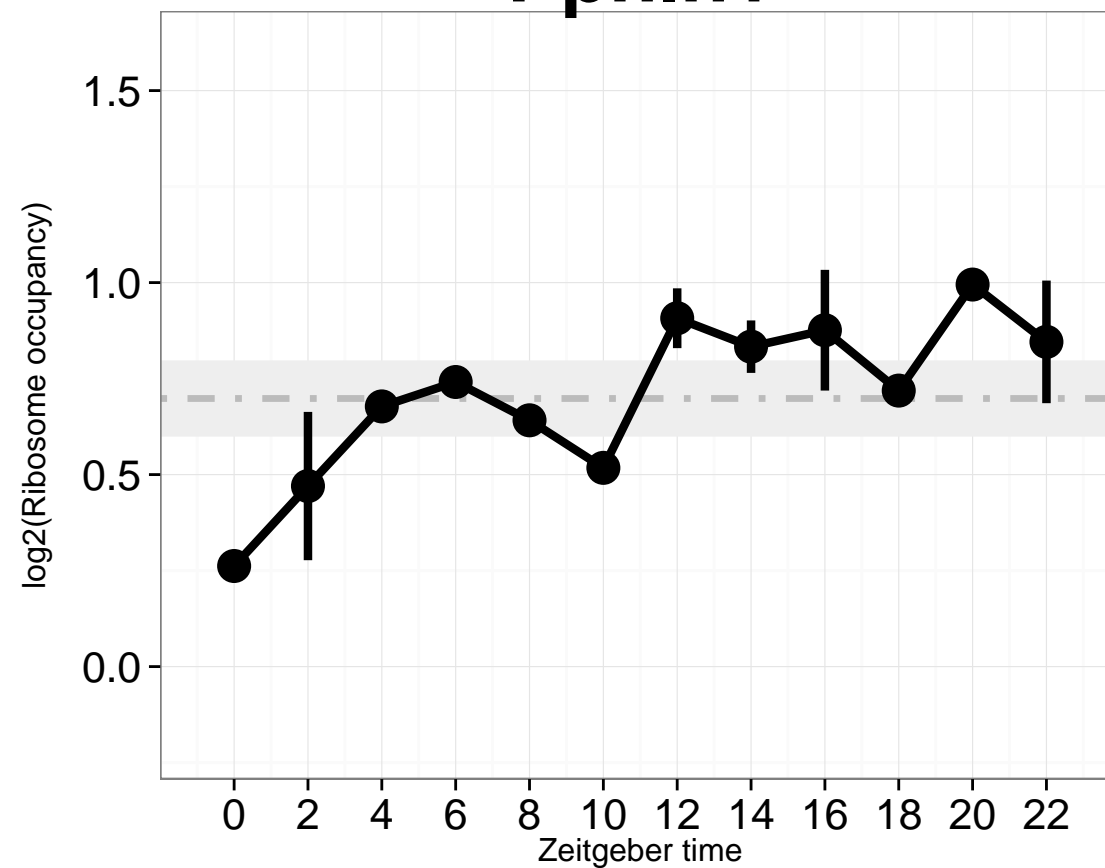

Supplement: Supplementary file 6296 [file 1]

# Hs3st1

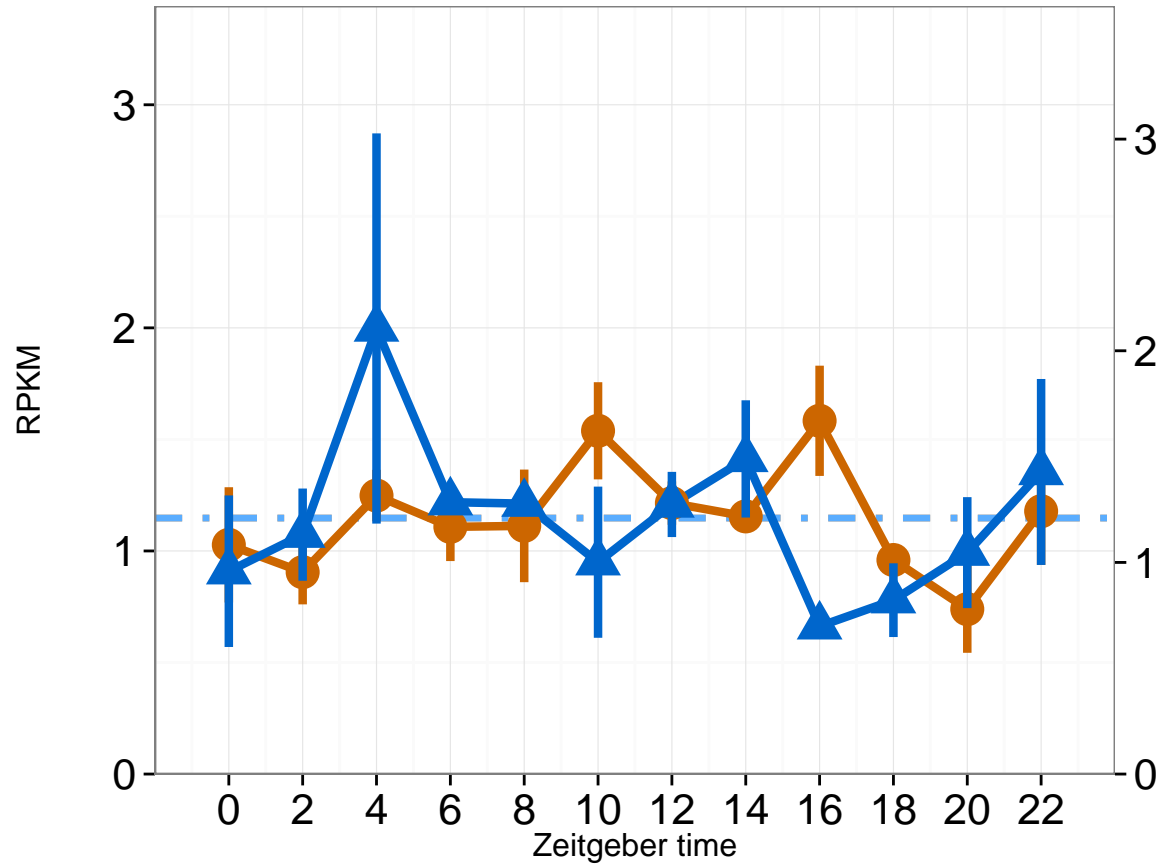

# Hs3st1

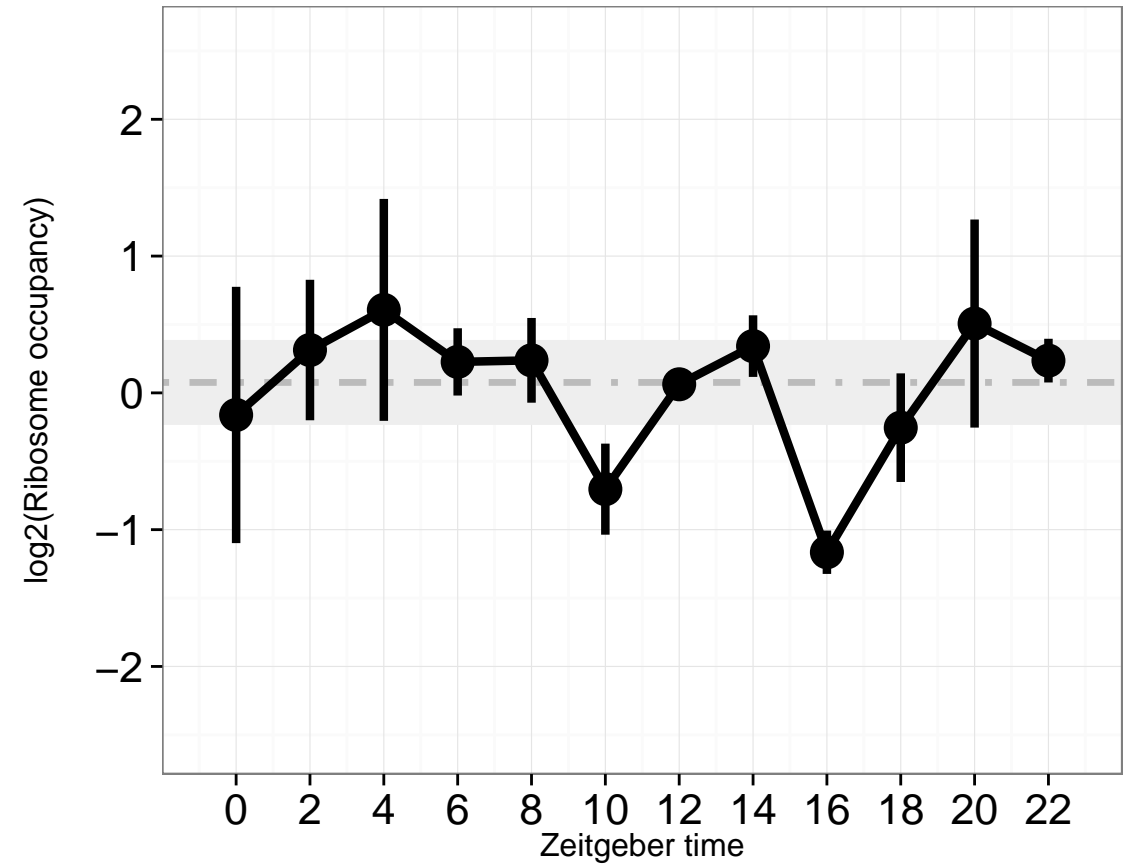

Supplement: Supplementary file 6297 [file 1]

# Fem1b

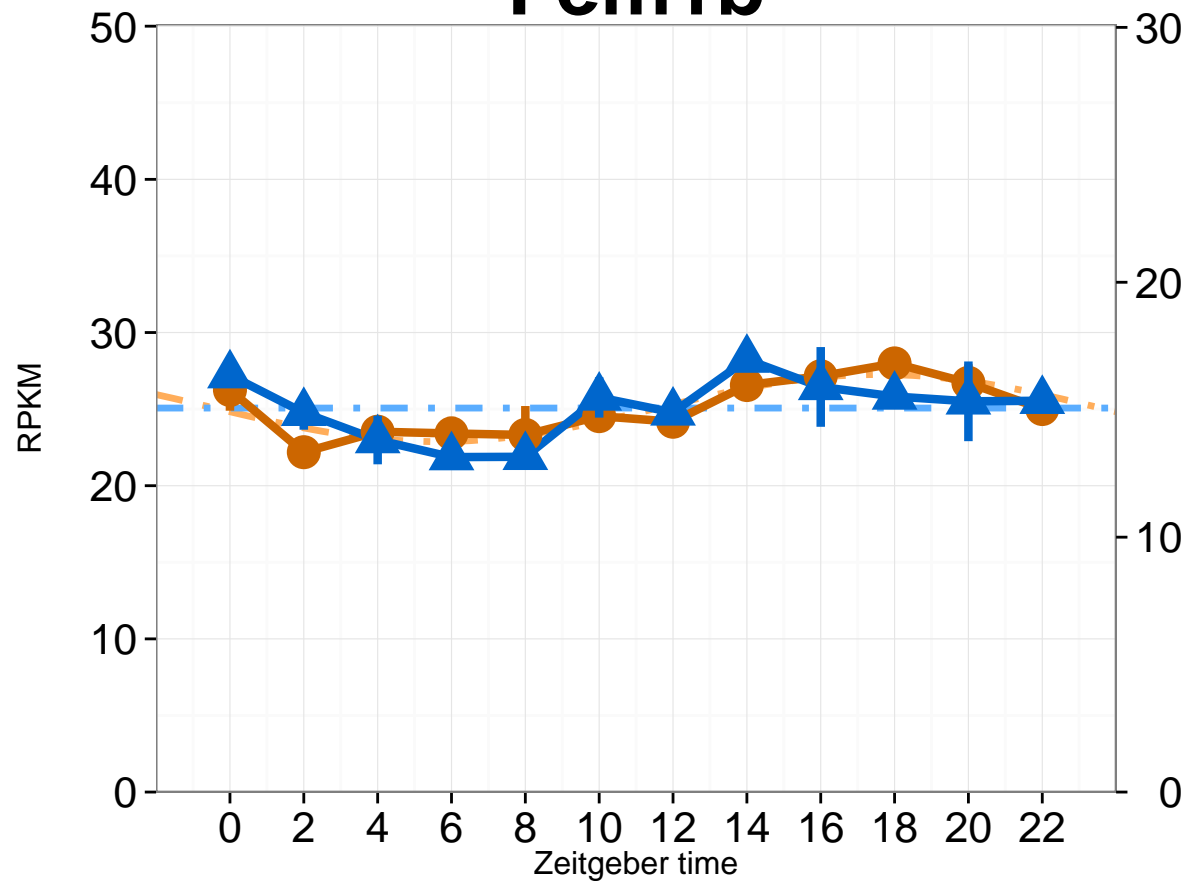

# Fem1b

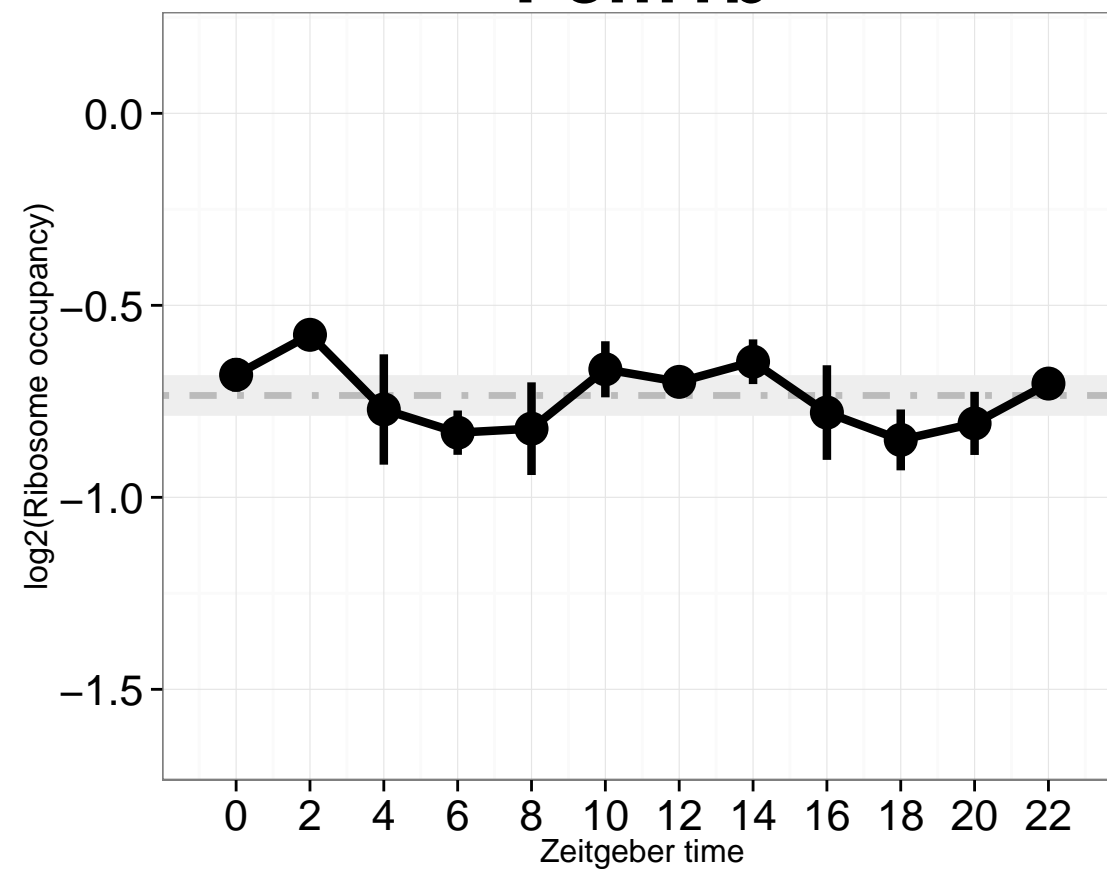

Supplement: Supplementary file 6298 [file 1]

# Calb1

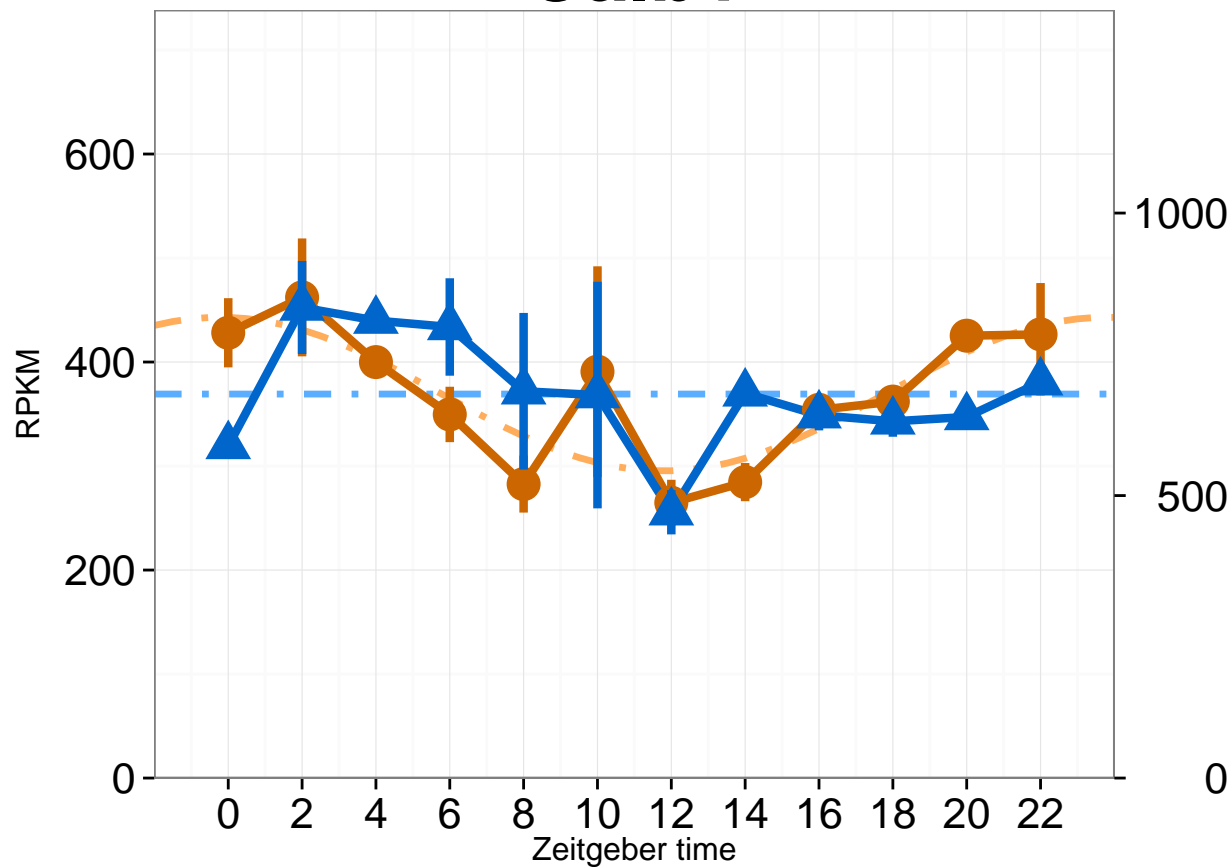

# Calb1

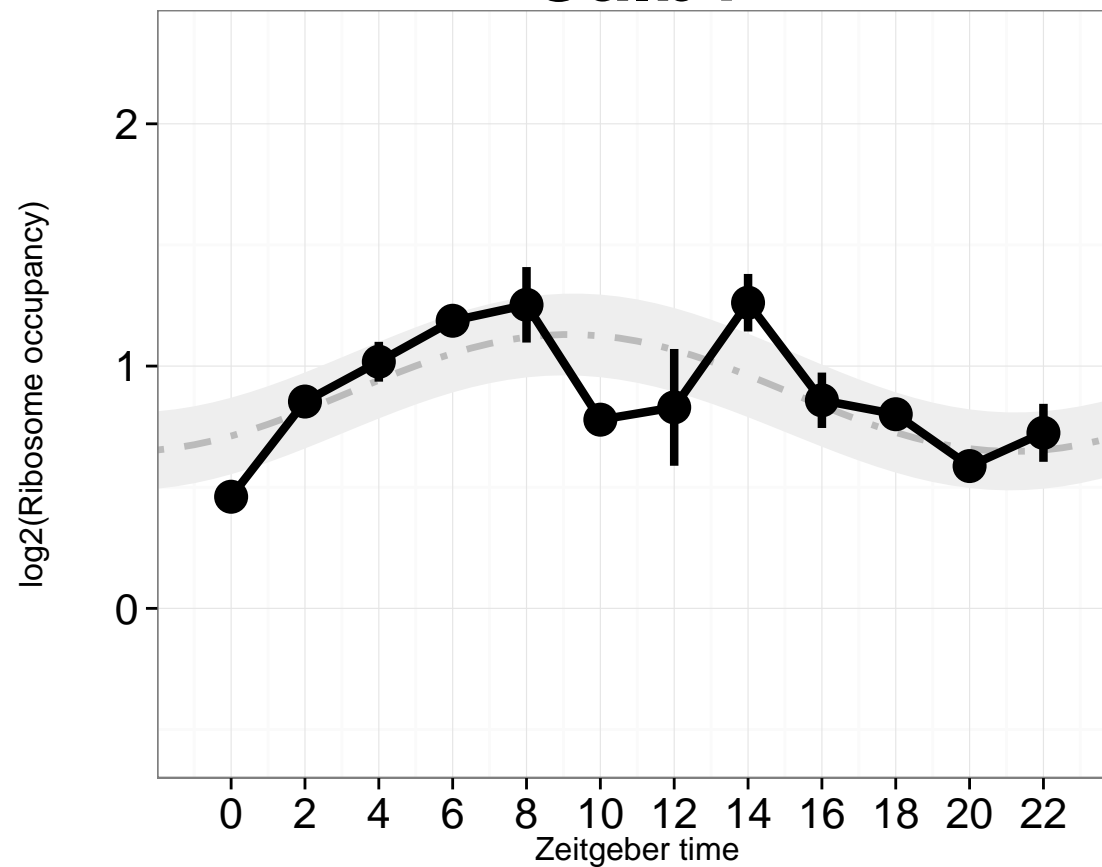

Supplement: Supplementary file 6299 [file 1]

# Rfc1

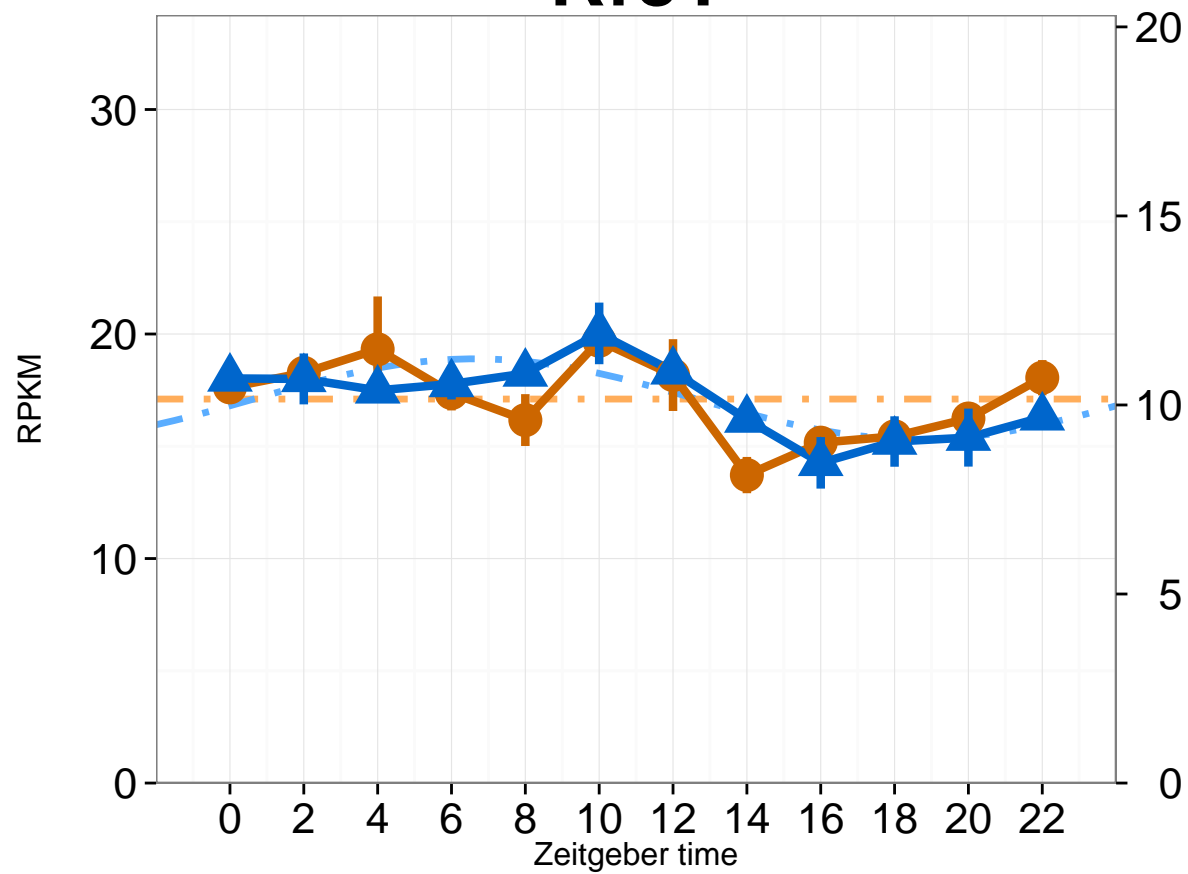

# Rfc1

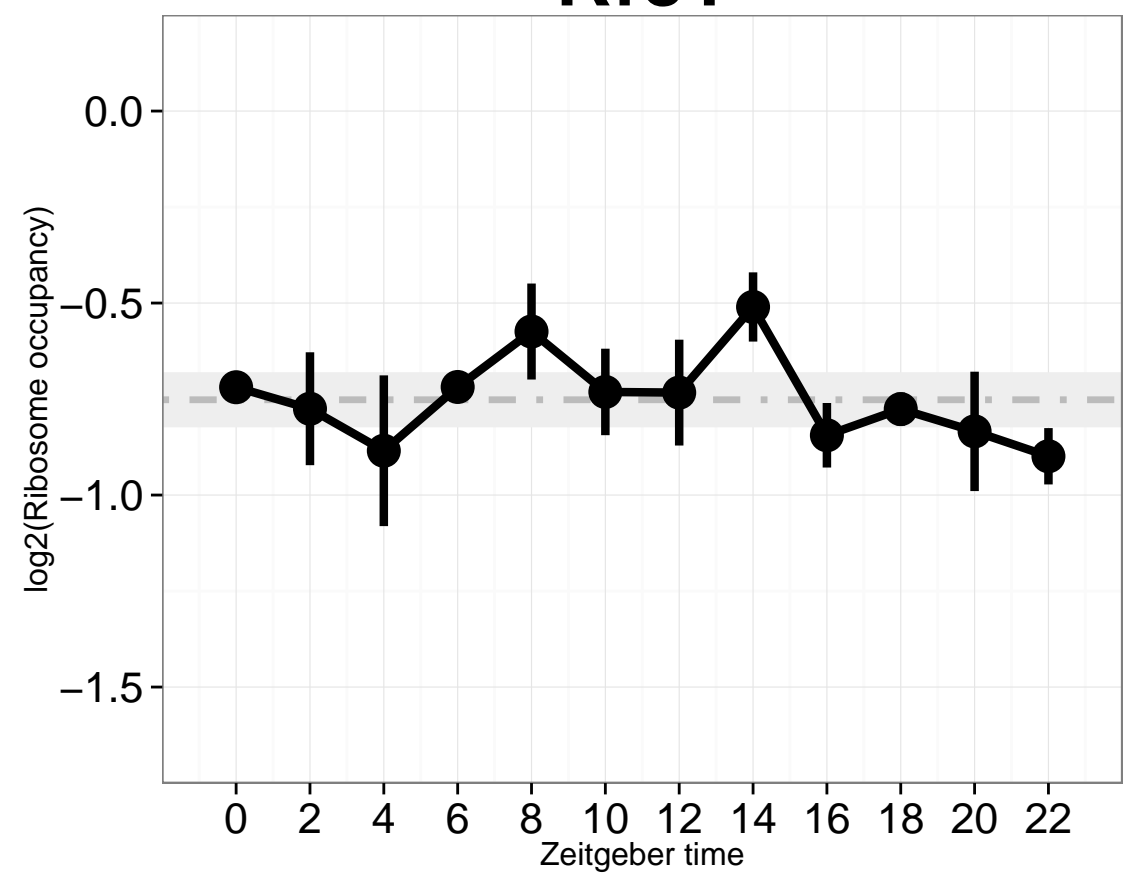

Supplement: Supplementary file 6300 [file 1]

## Eps8l2

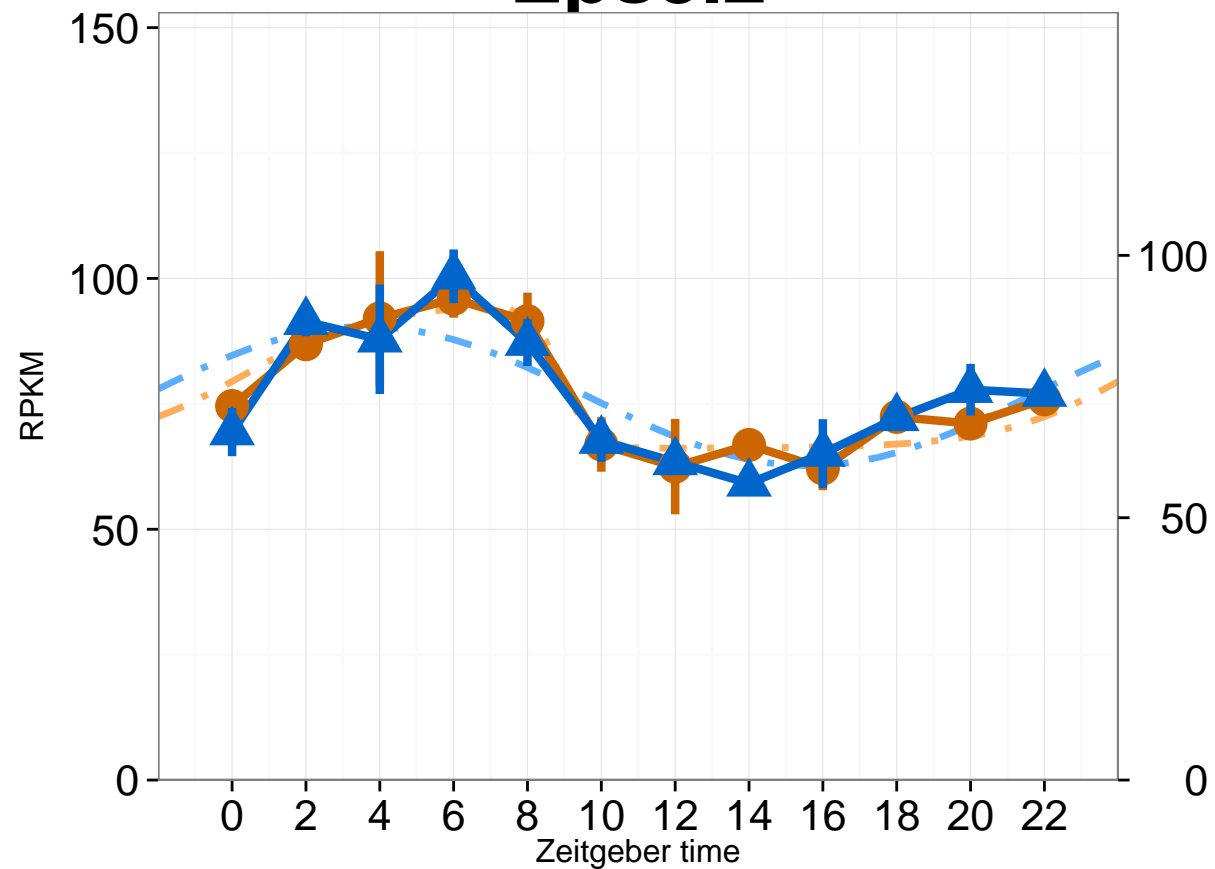

## Eps8l2

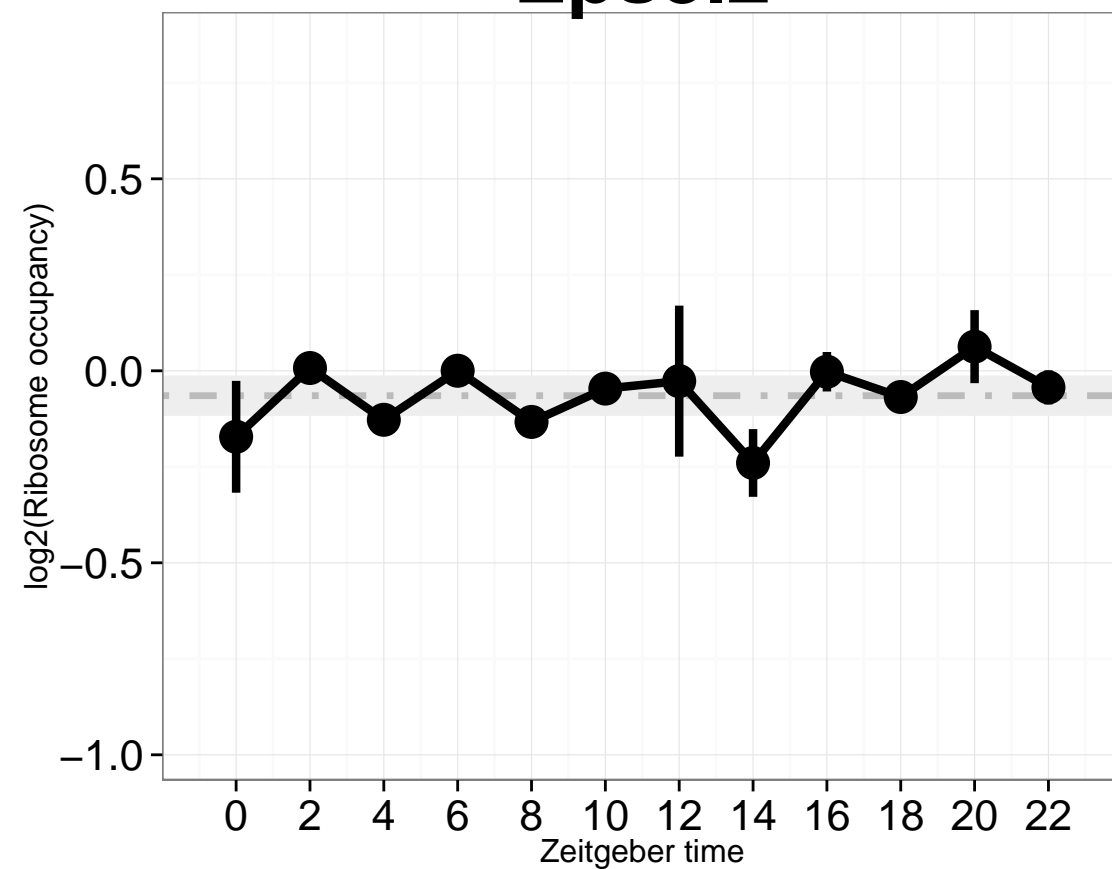

Supplement: Supplementary file 6301 [file 1]

## Twf2

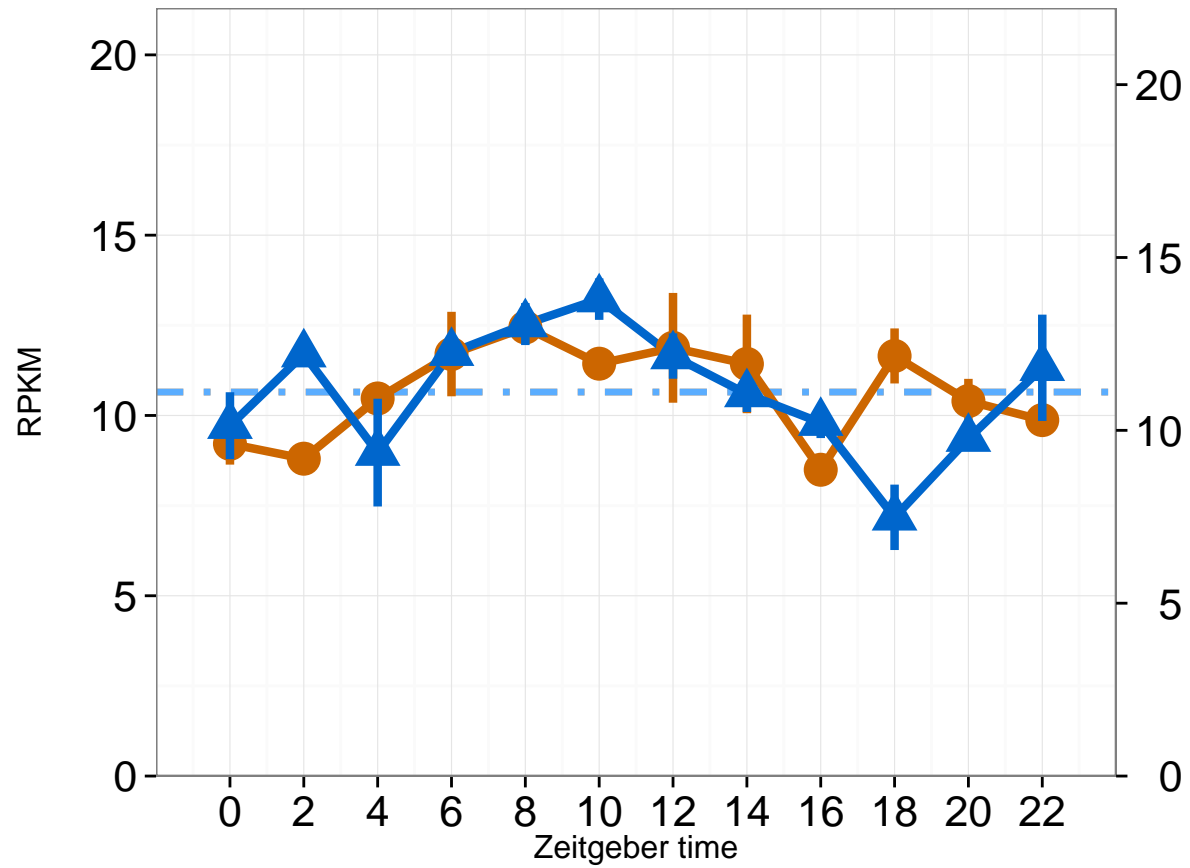

## Twf2

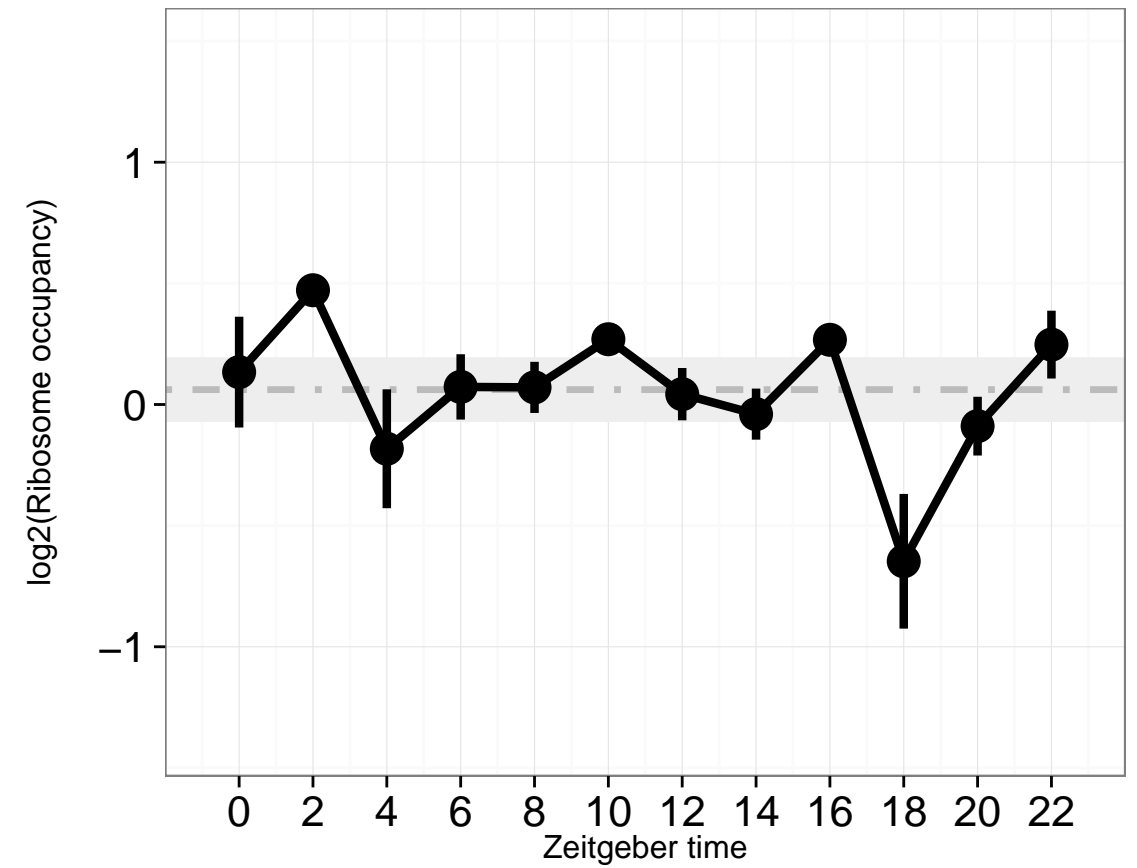

Supplement: Supplementary file 6302 [file 1]

## Nabp2

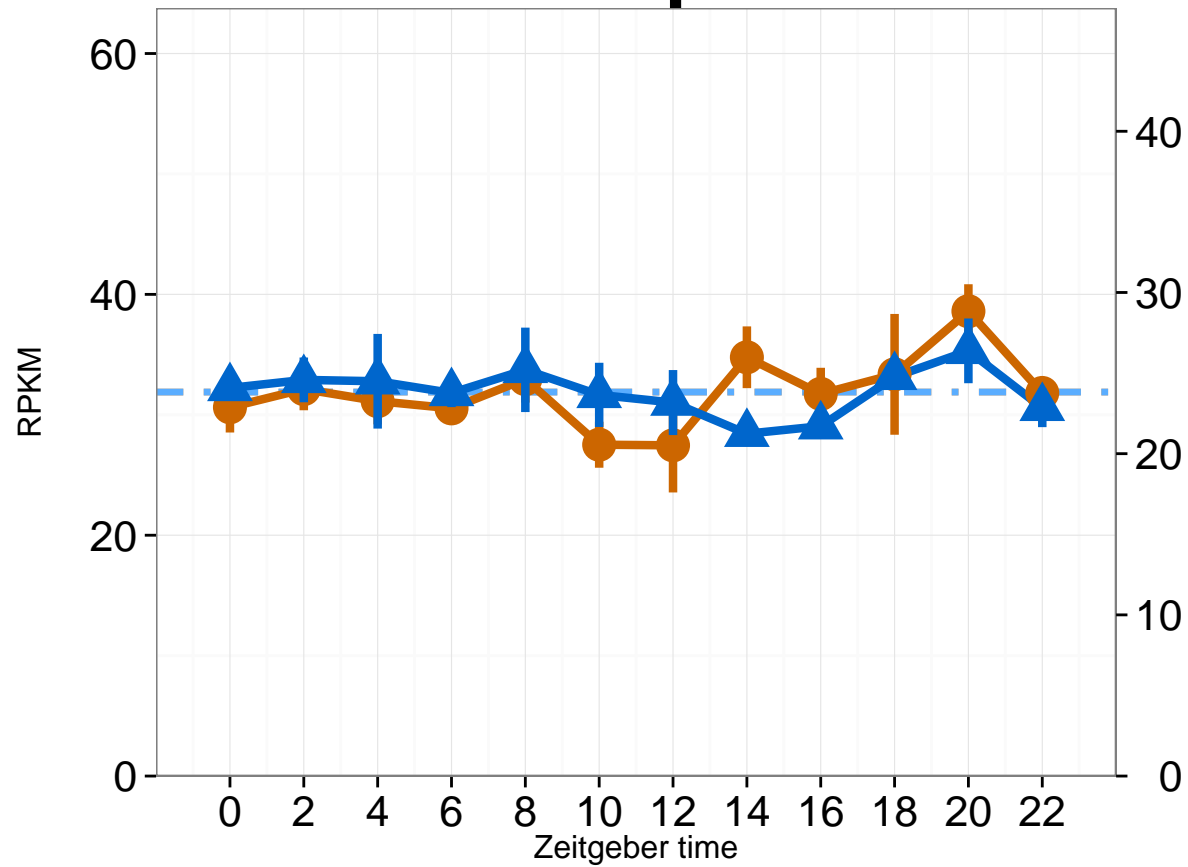

## Nabp2

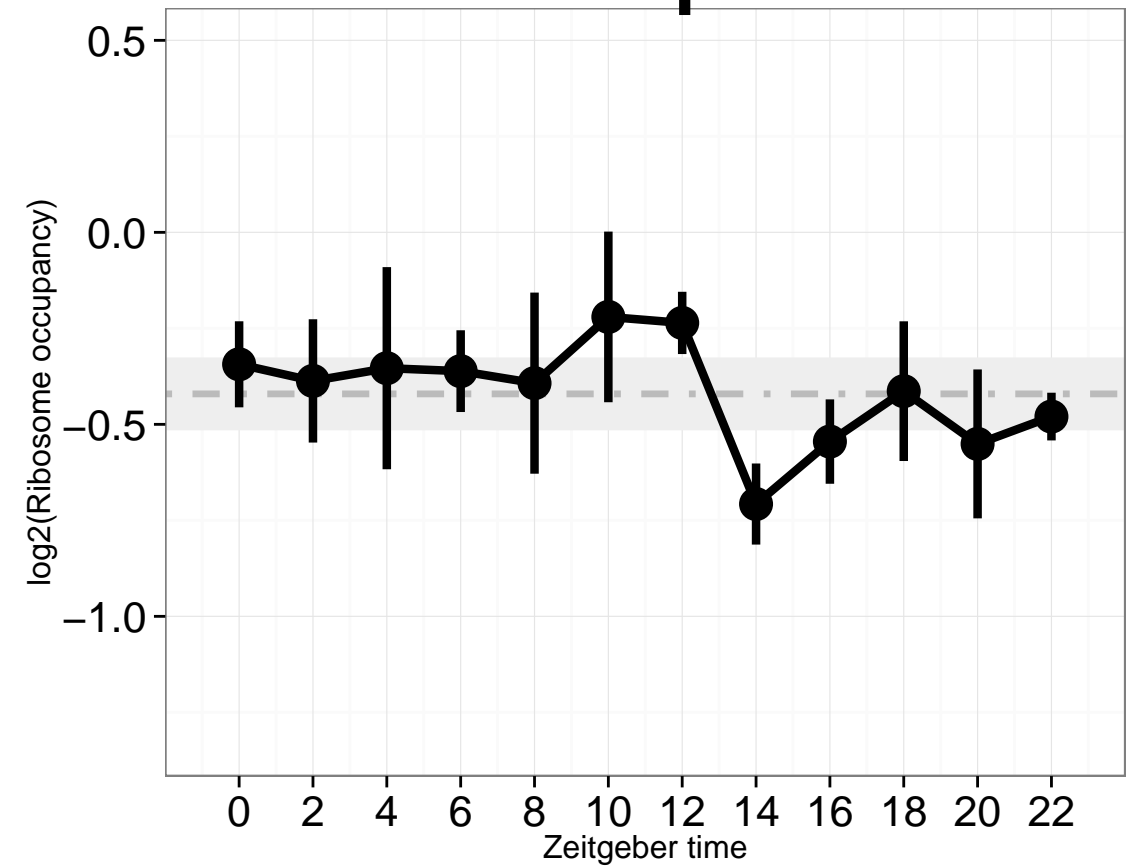

Supplement: Supplementary file 6303 [file 1]

**Rasgef1a TR**

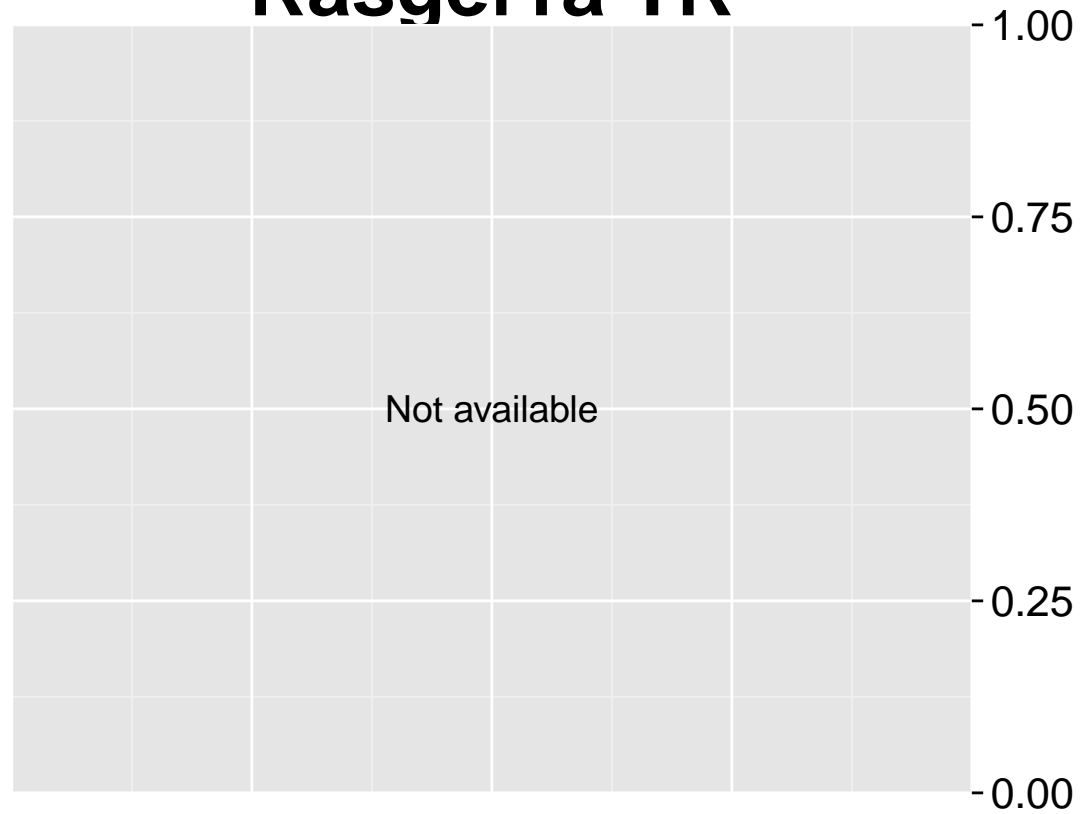

**Rasgef1a log2(Ribosome occupanc**

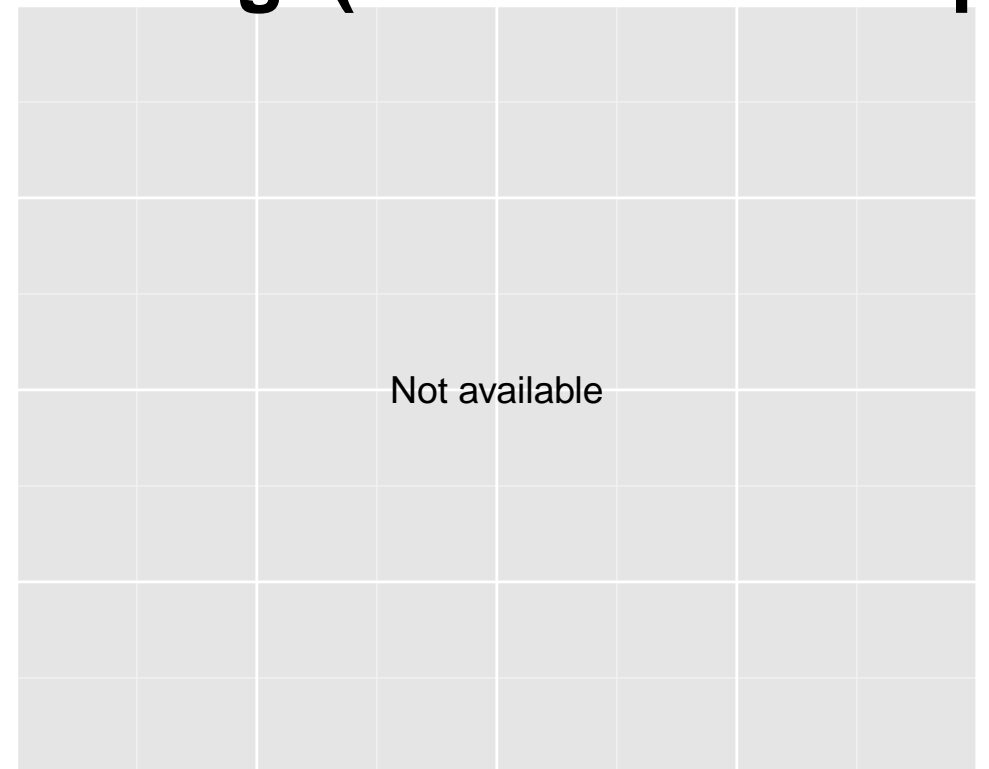

Supplement: Supplementary file 6304 [file 1]

## Tgfbr2

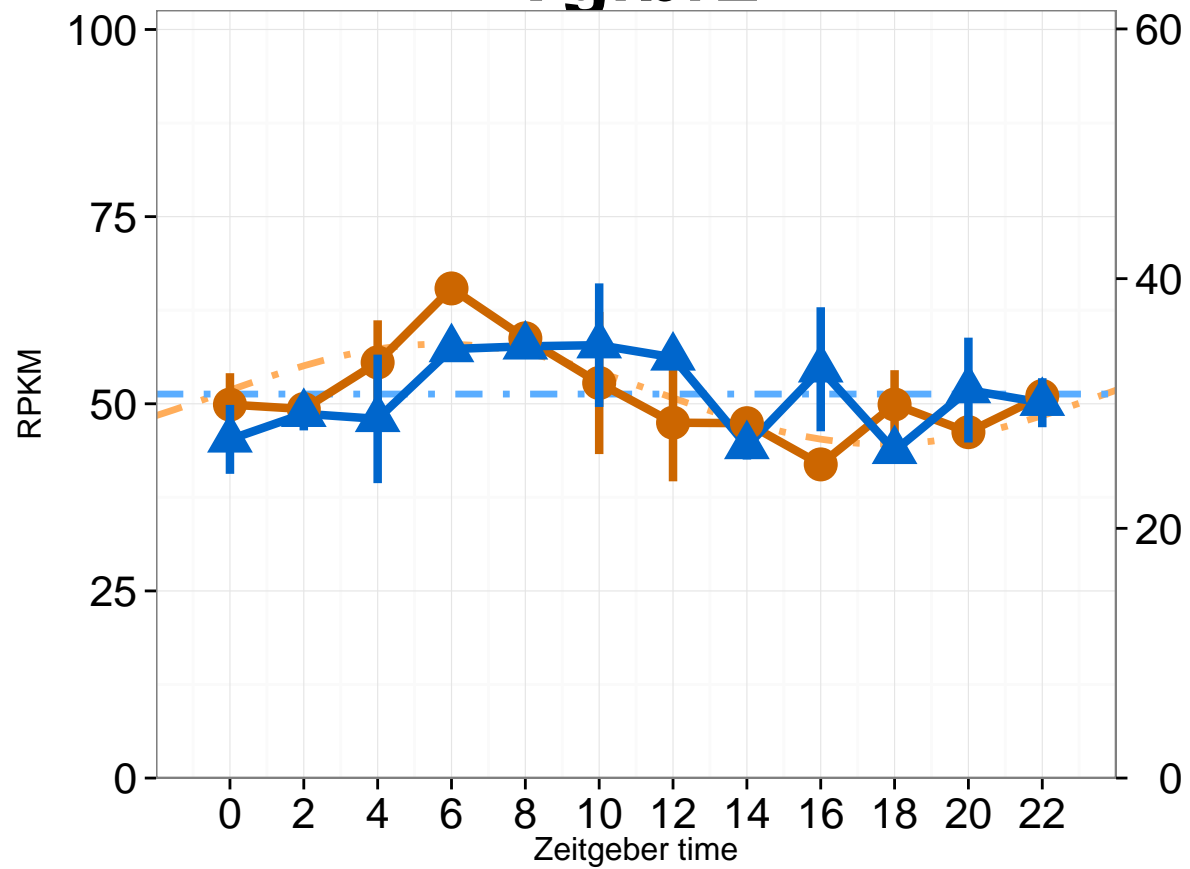

## Tgfbr2

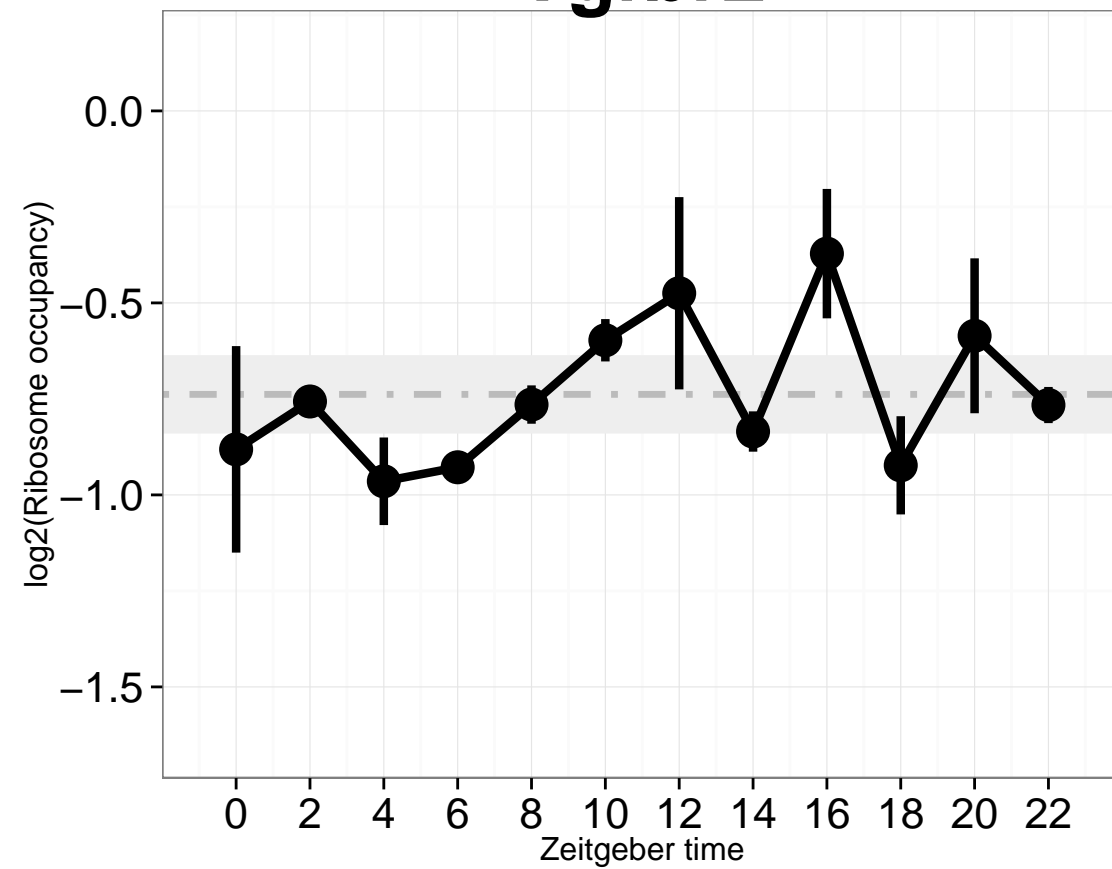

Supplement: Supplementary file 6305 [file 1]

## Ephb2

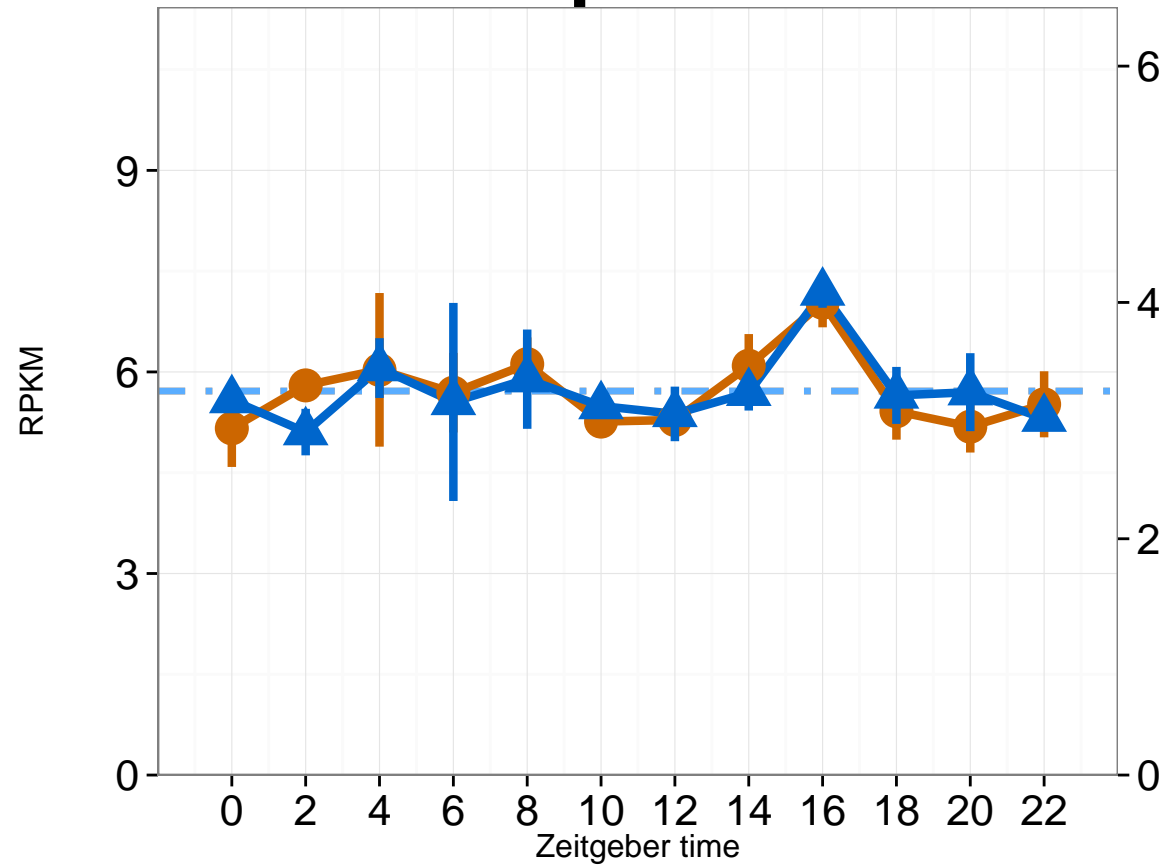

## Ephb2

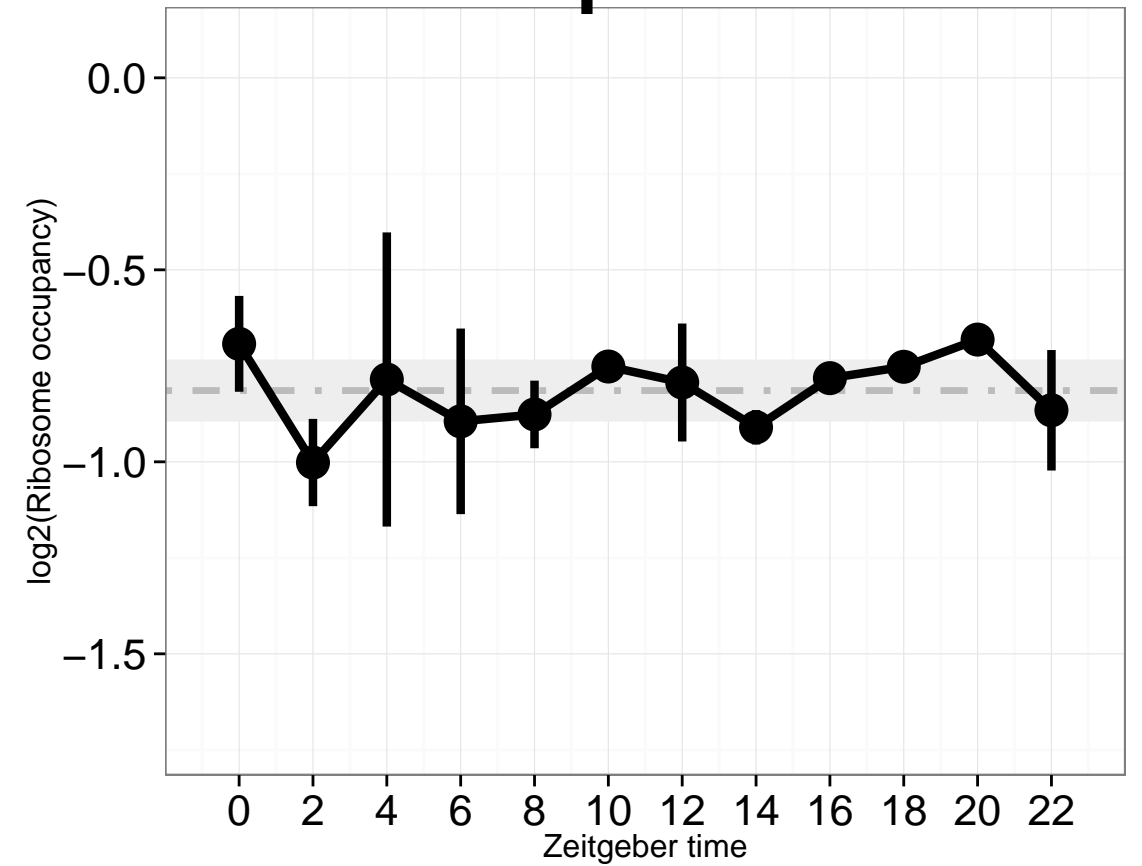

Supplement: Supplementary file 6306 [file 1]

## Klf4

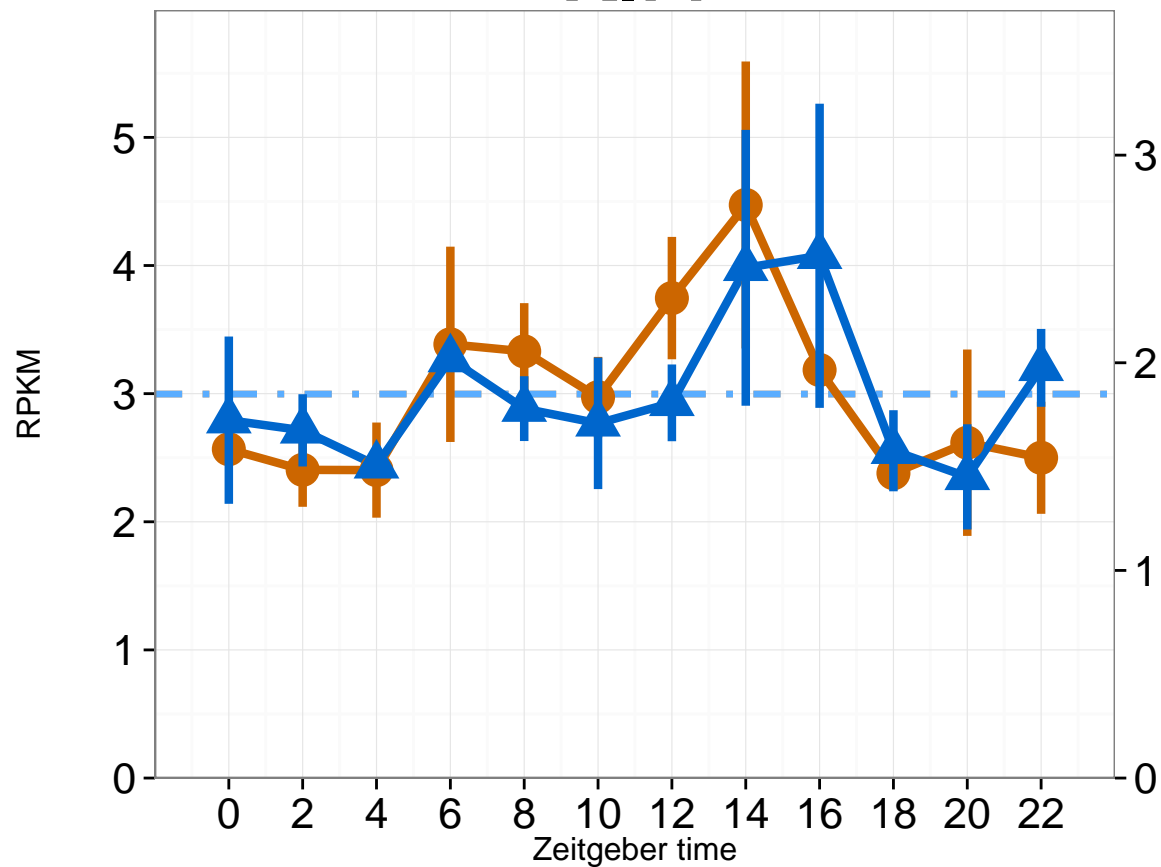

## Klf4

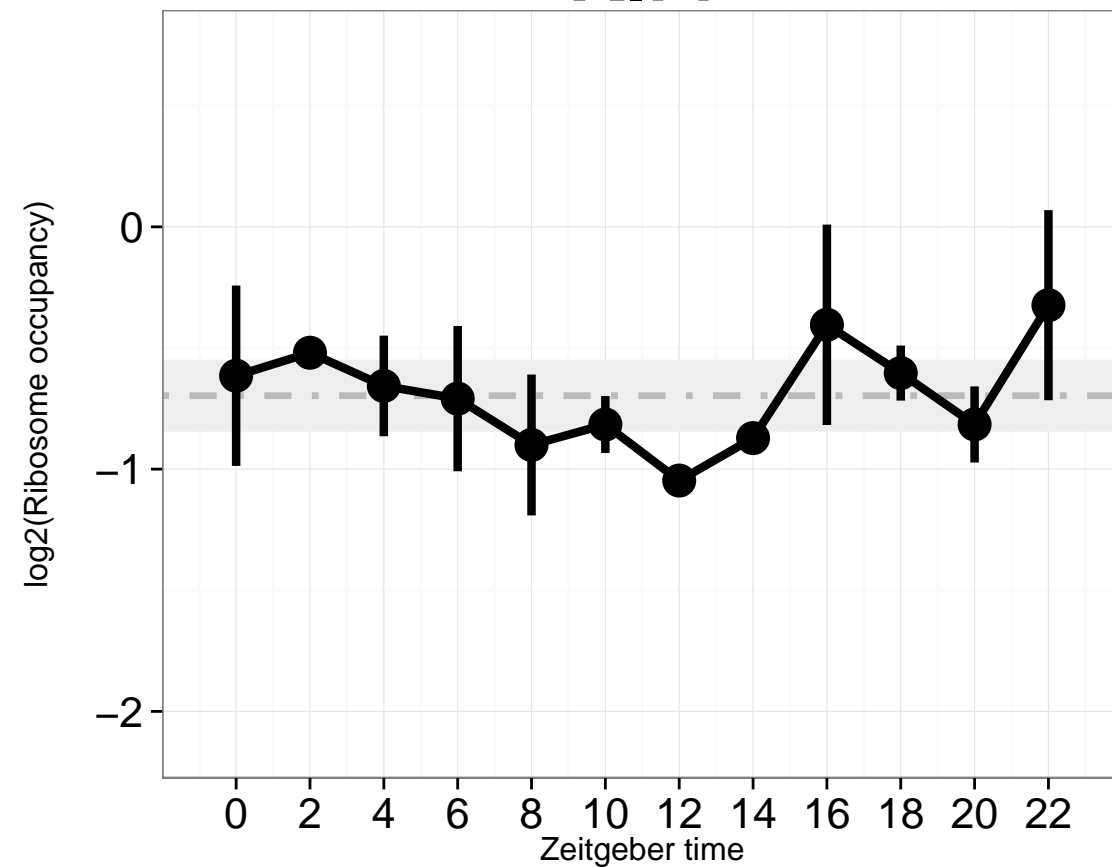

Supplement: Supplementary file 6307 [file 1]

## Rce1

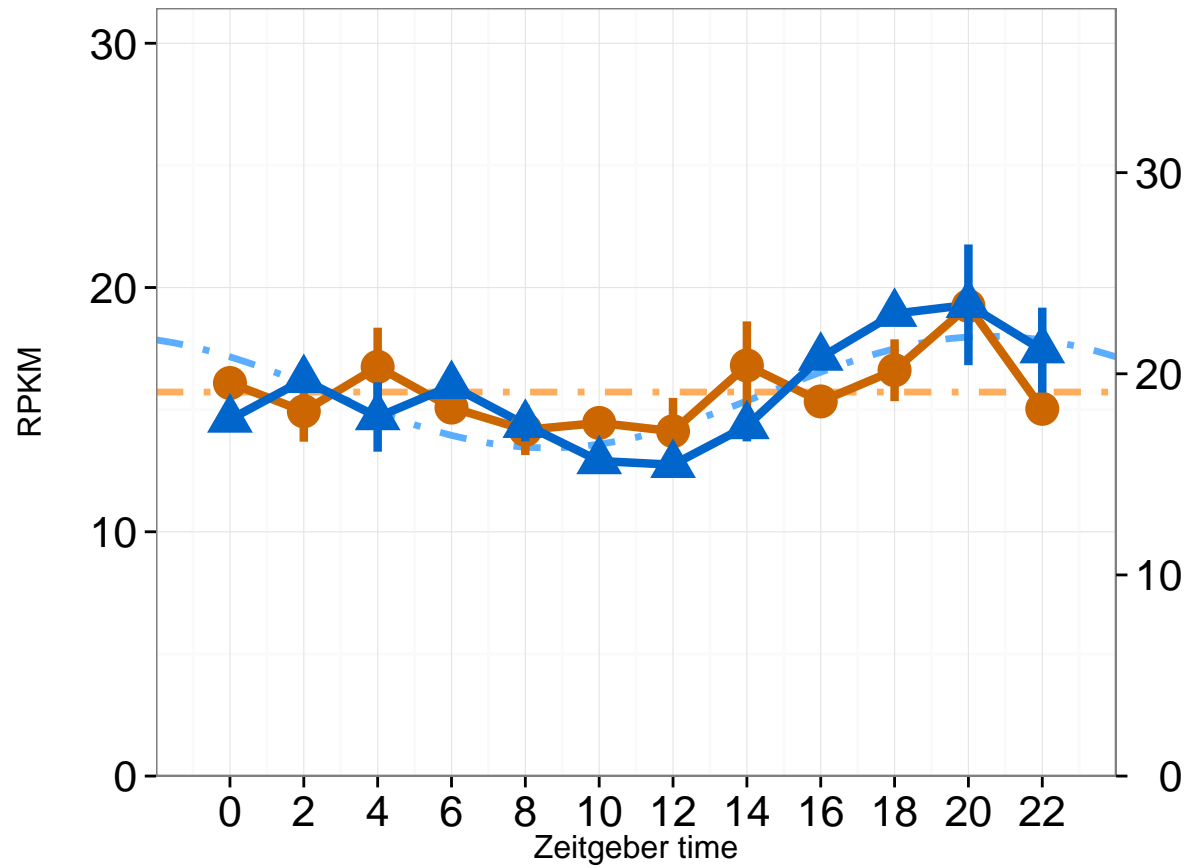

## Rce1

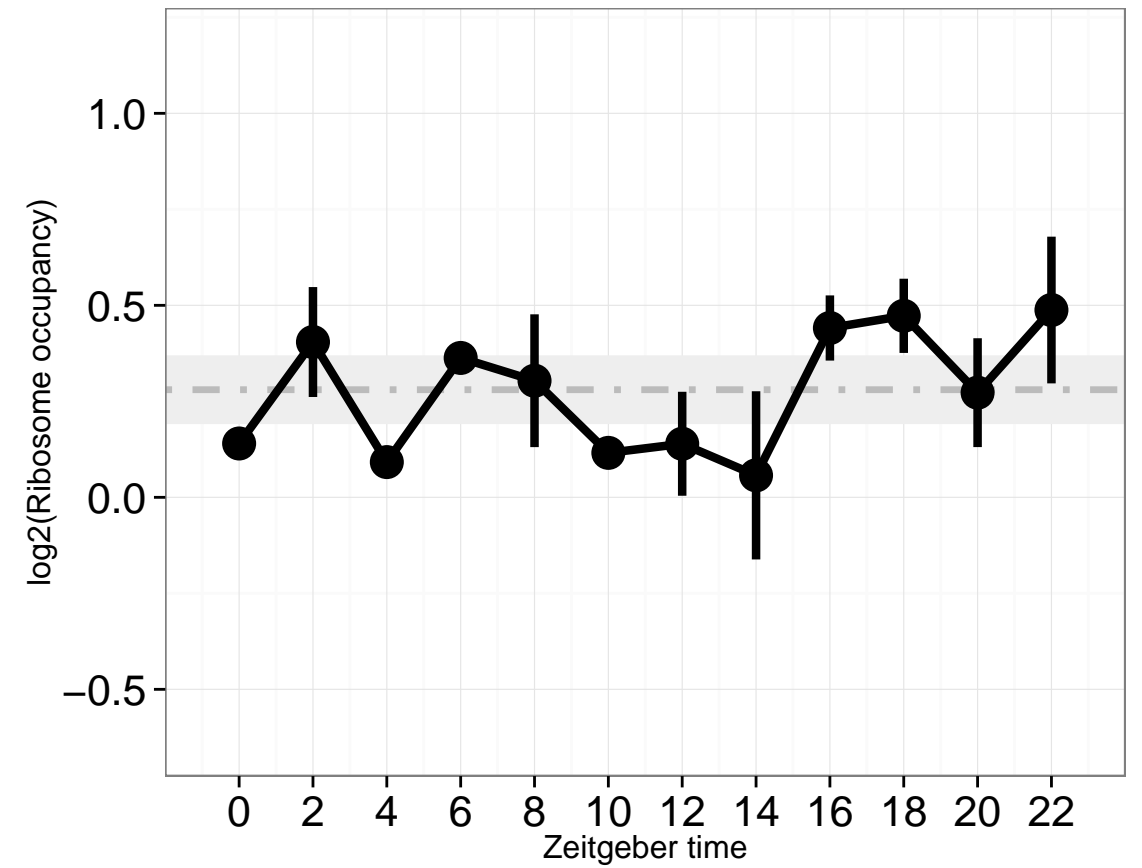

Supplement: Supplementary file 6308 [file 1]

## Pqbp1

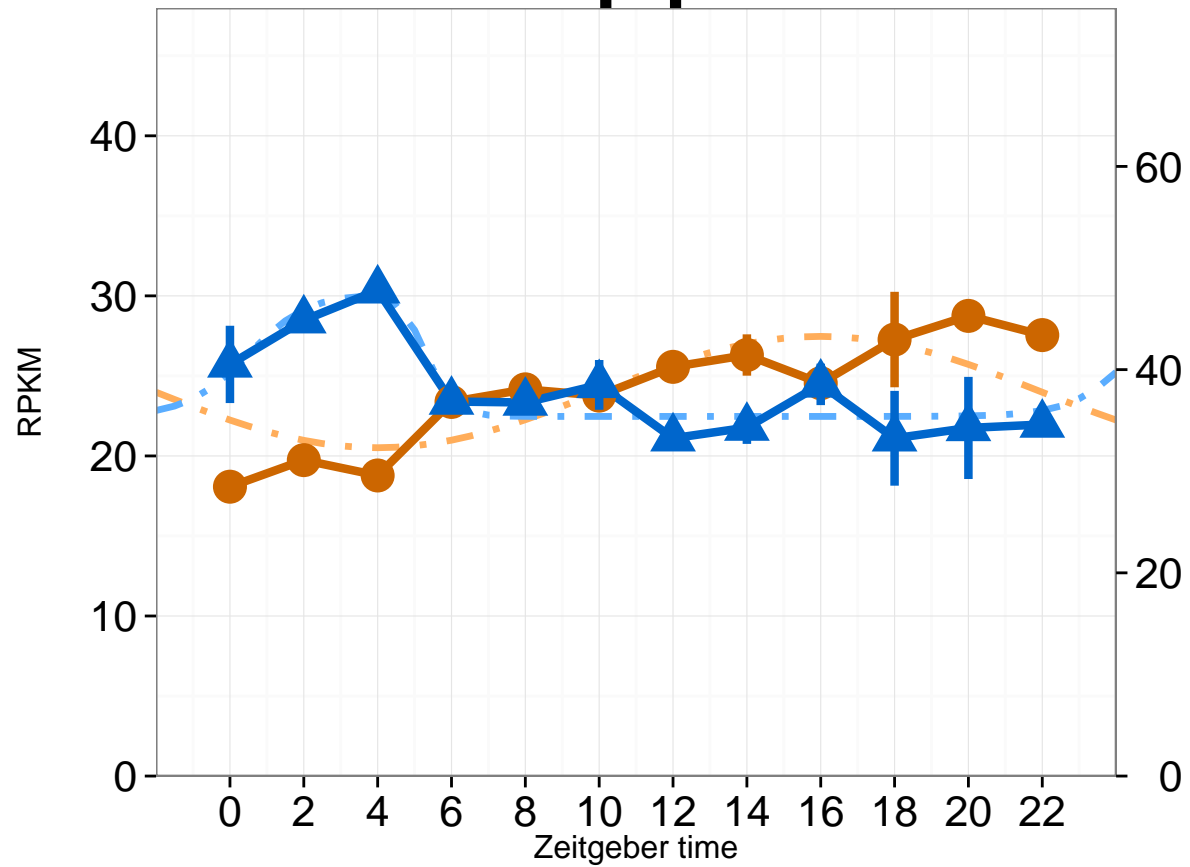

## Pqbp1

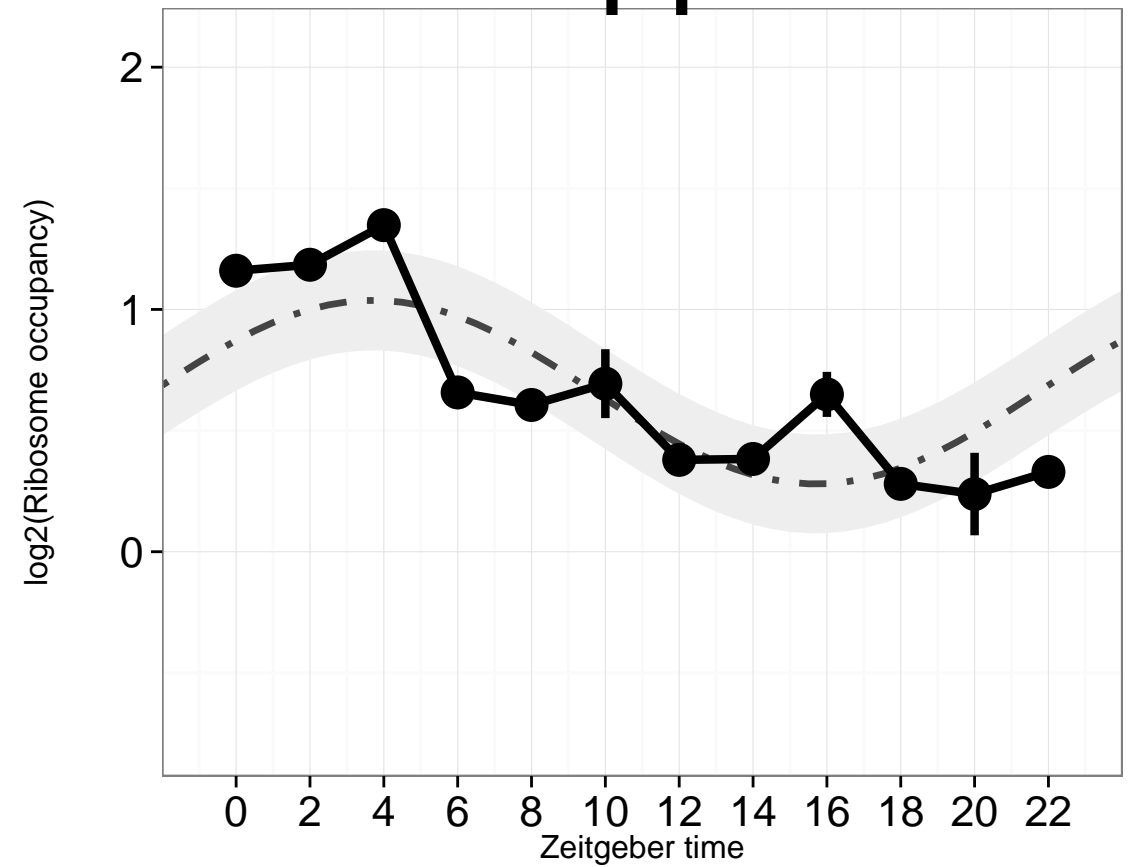

Supplement: Supplementary file 6309 [file 1]

# Traf6

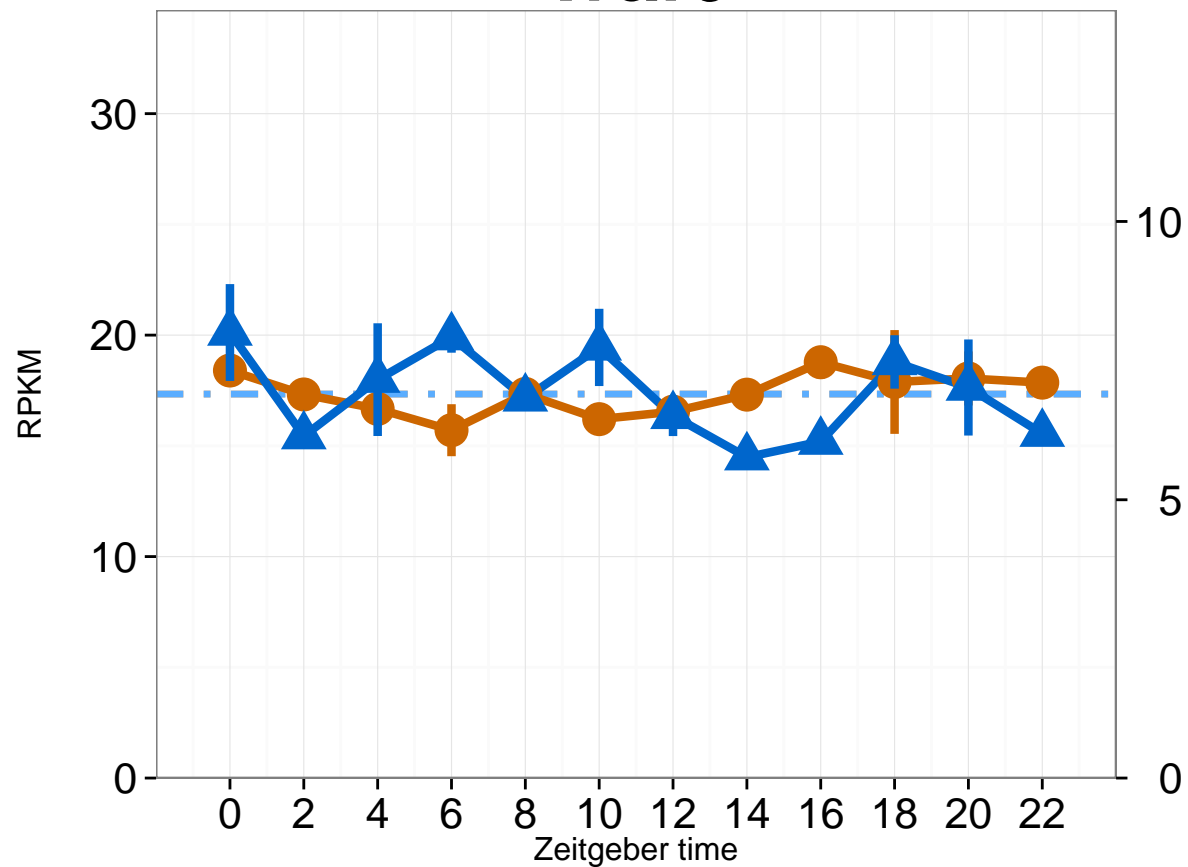

# Traf6

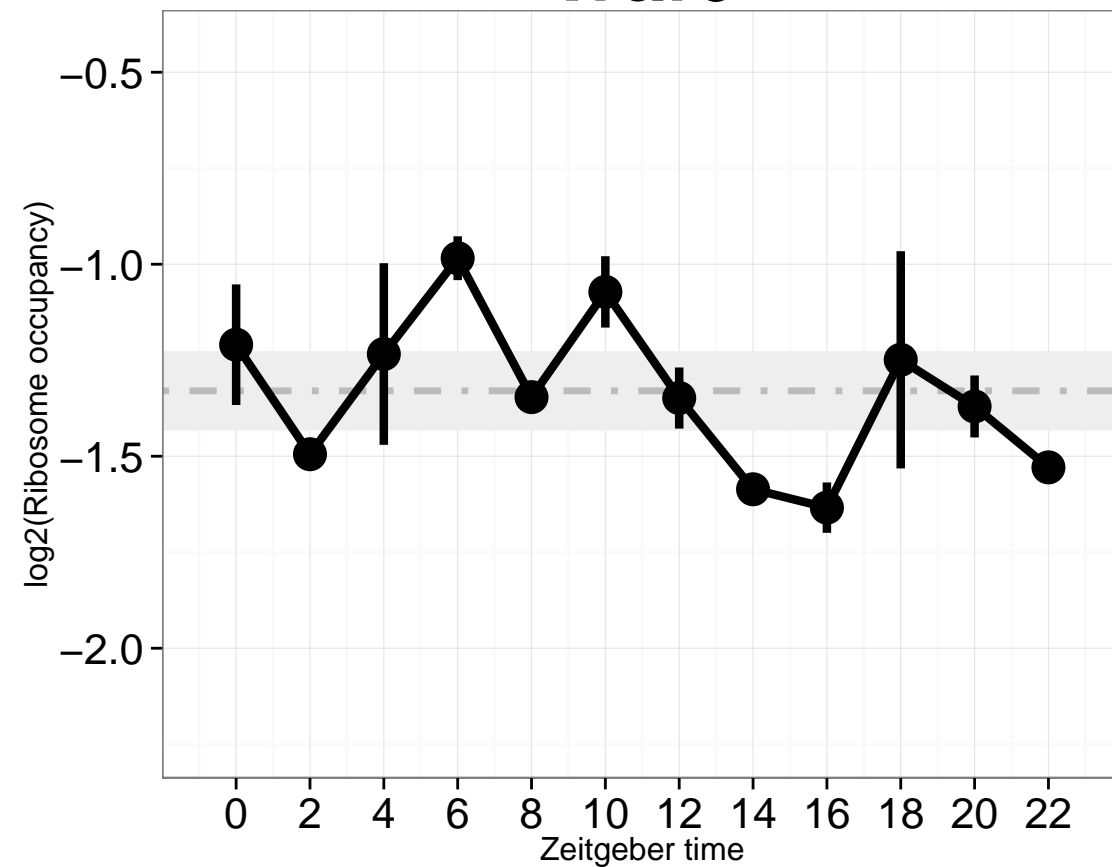

Supplement: Supplementary file 6310 [file 1]

# Fbxl19

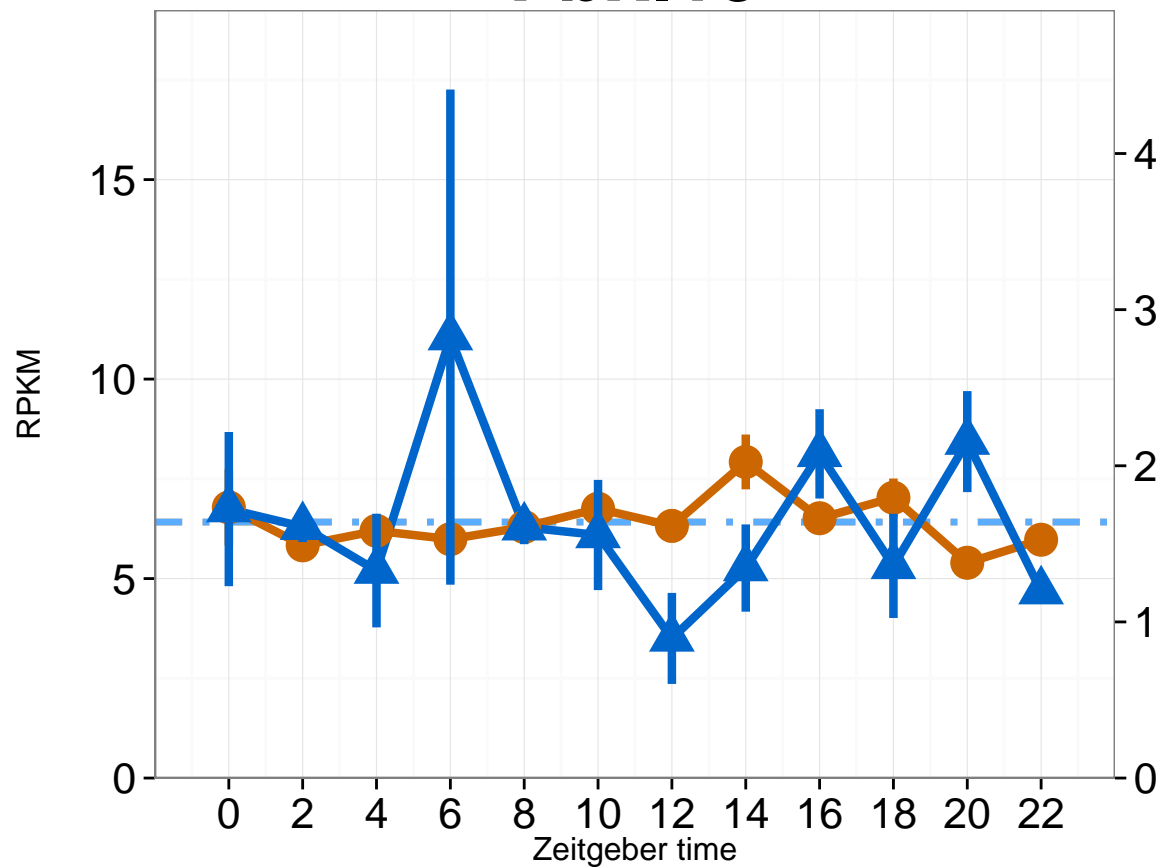

# Fbxl19

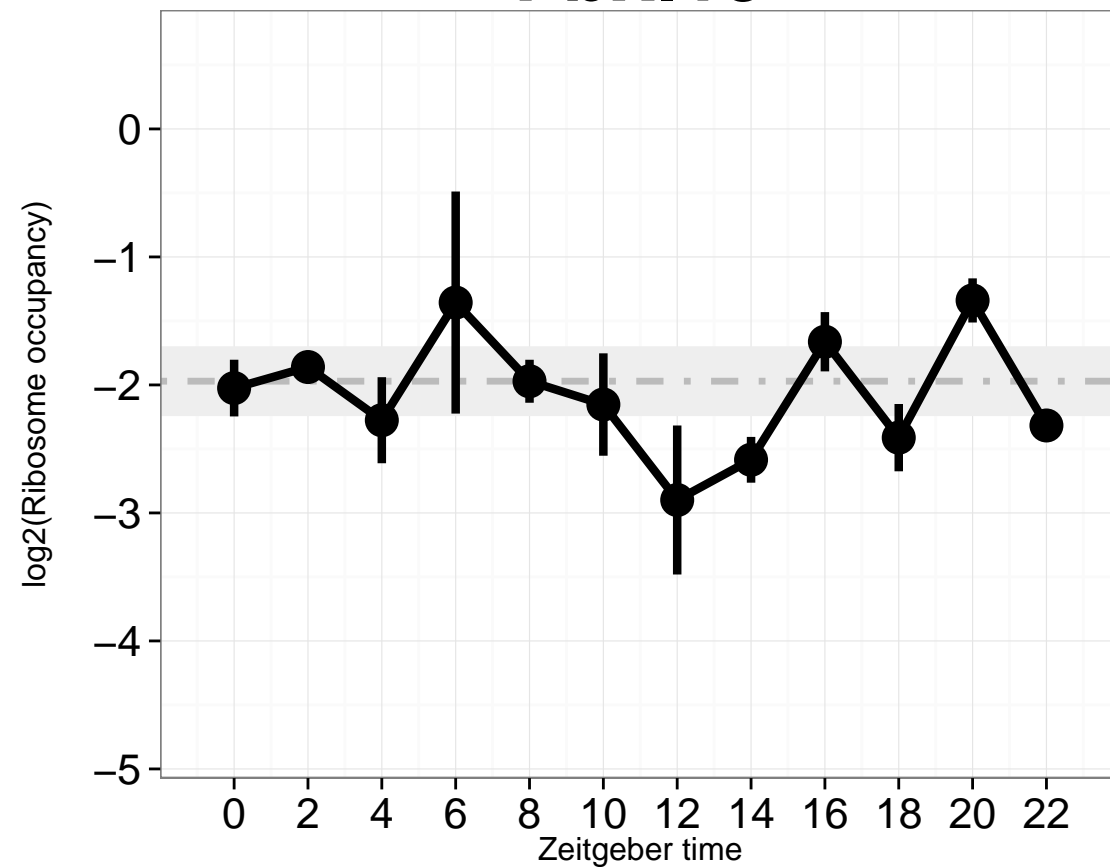

Supplement: Supplementary file 6311 [file 1]

# Zmat3

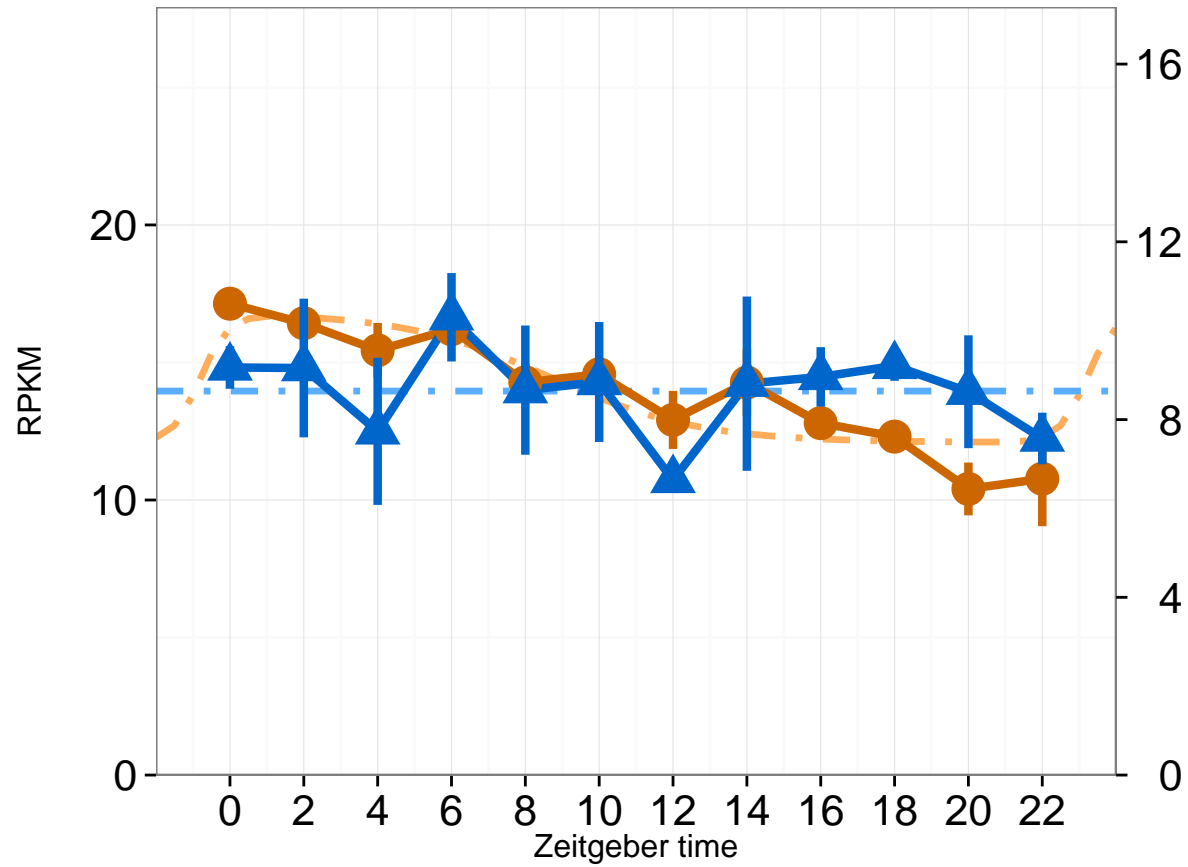

# Zmat3

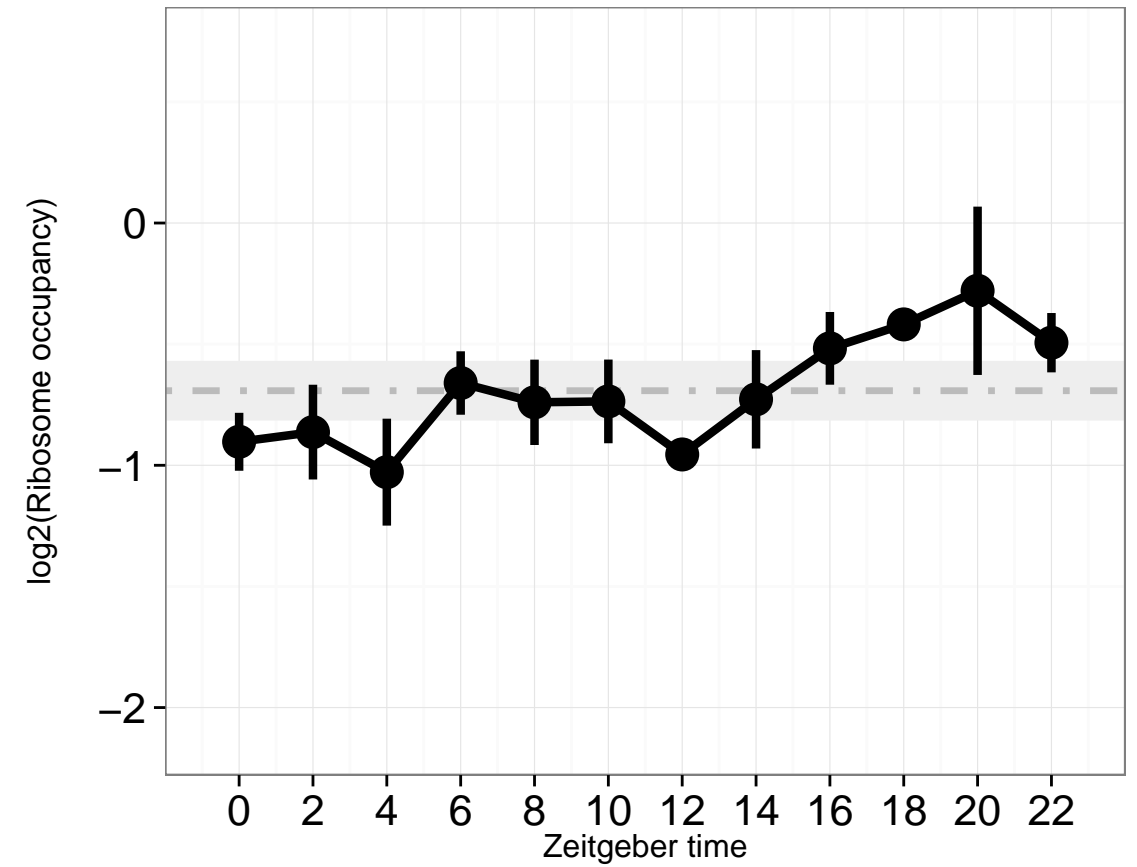

Supplement: Supplementary file 6312 [file 1]

## Gsdmd

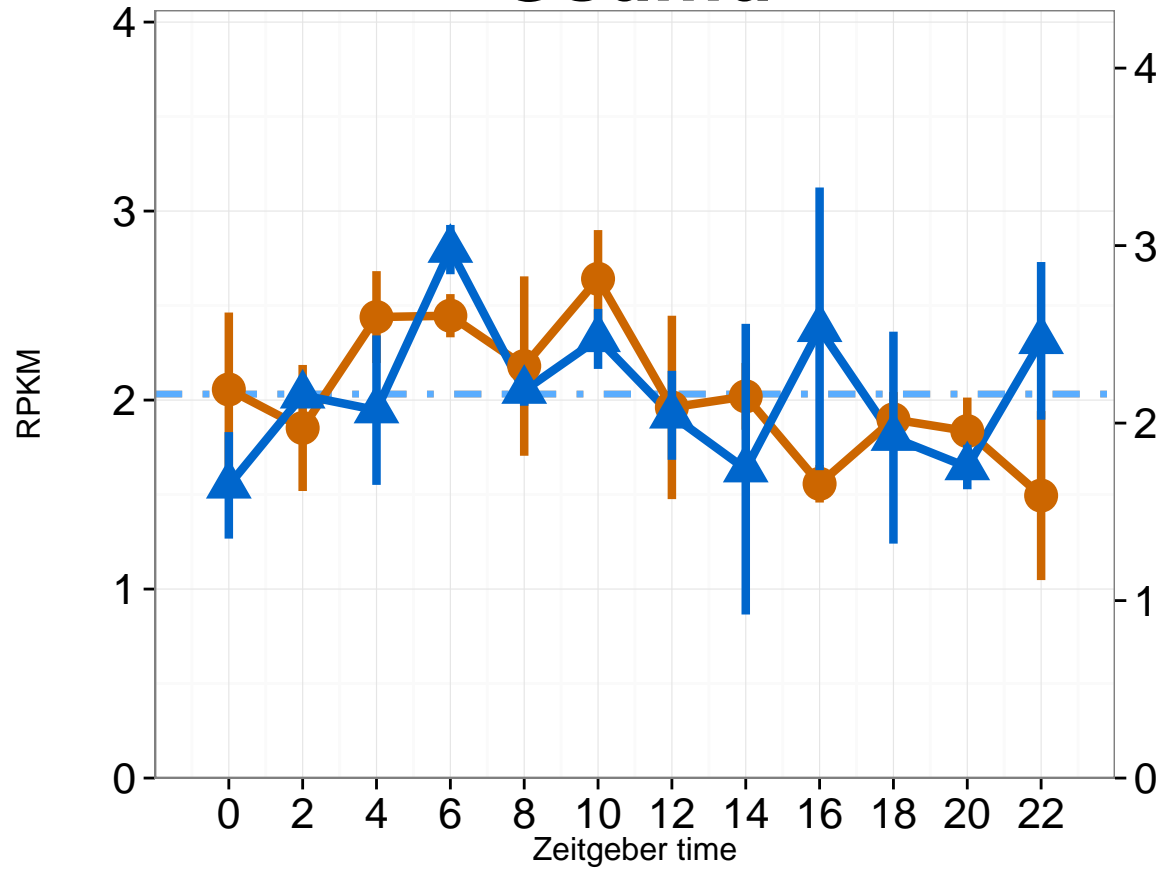

## Gsdmd

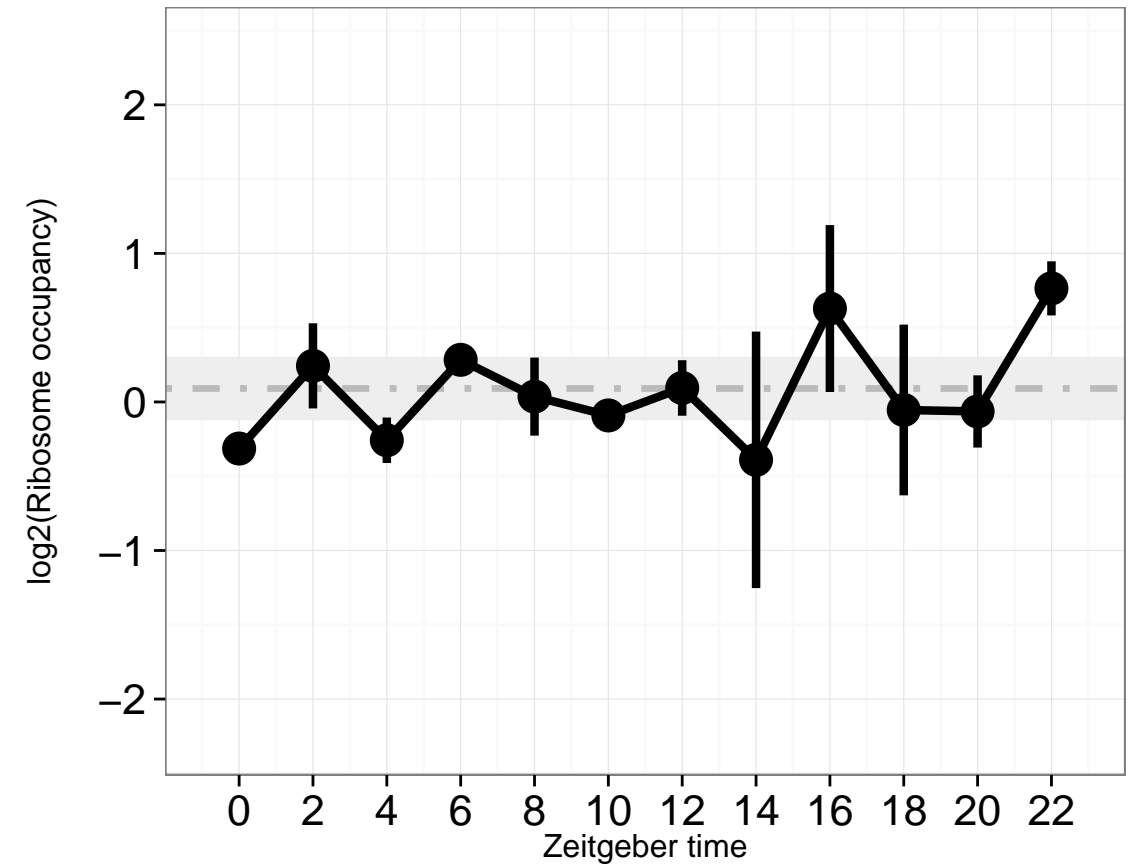

Supplement: Supplementary file 6313 [file 1]

## Mvk

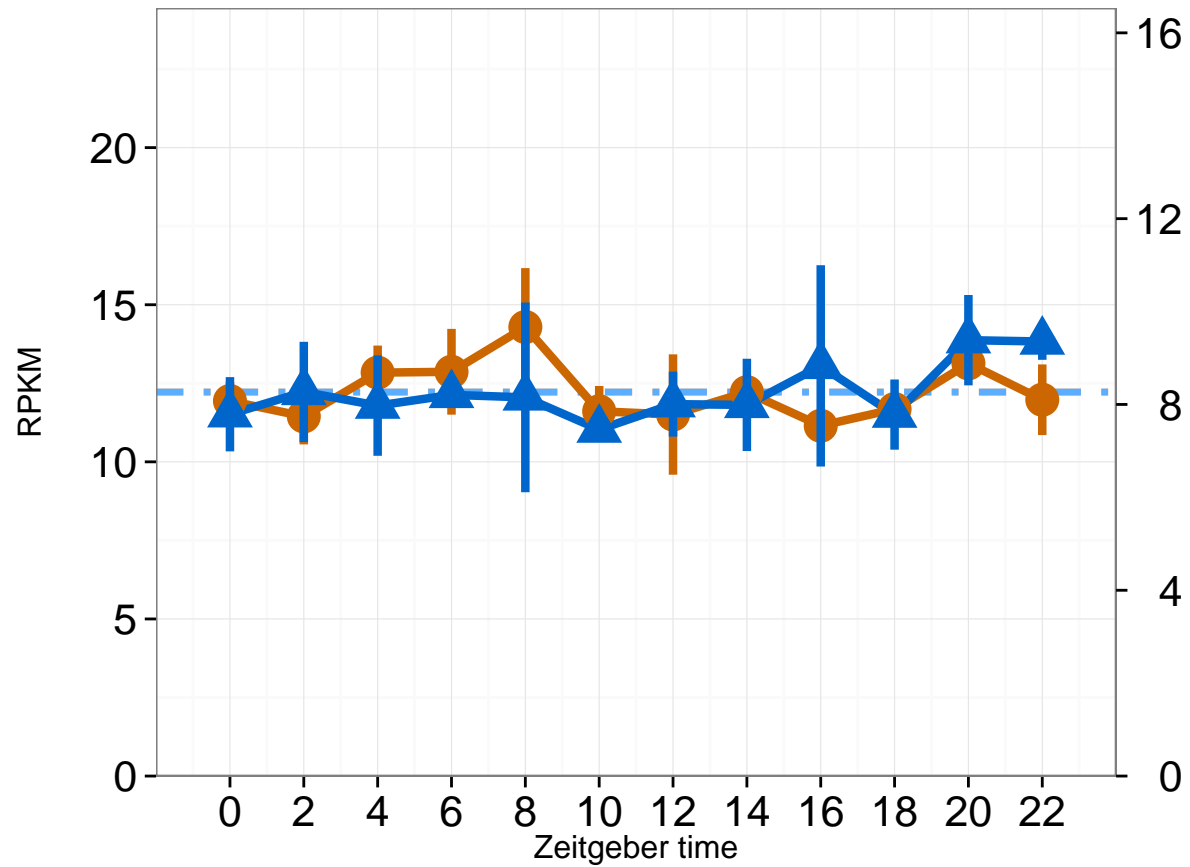

## Mvk

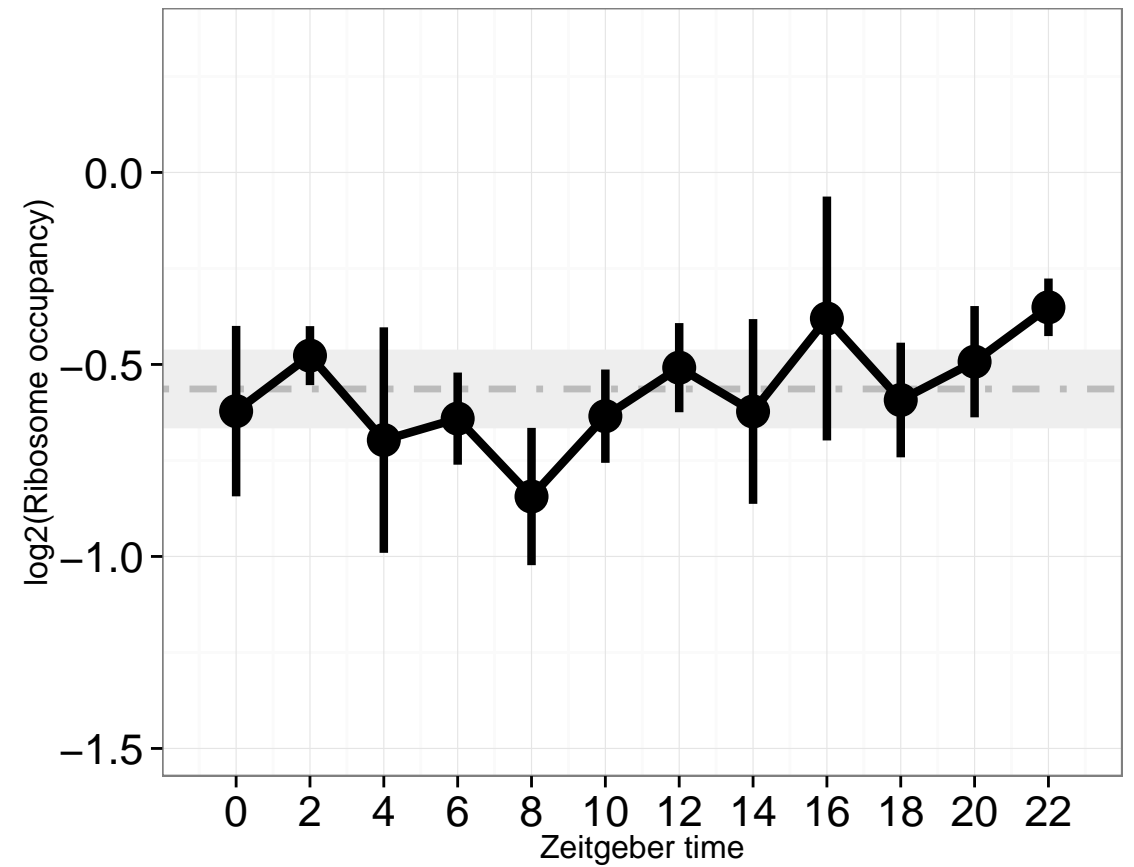

Supplement: Supplementary file 6314 [file 1]

## Ykt6

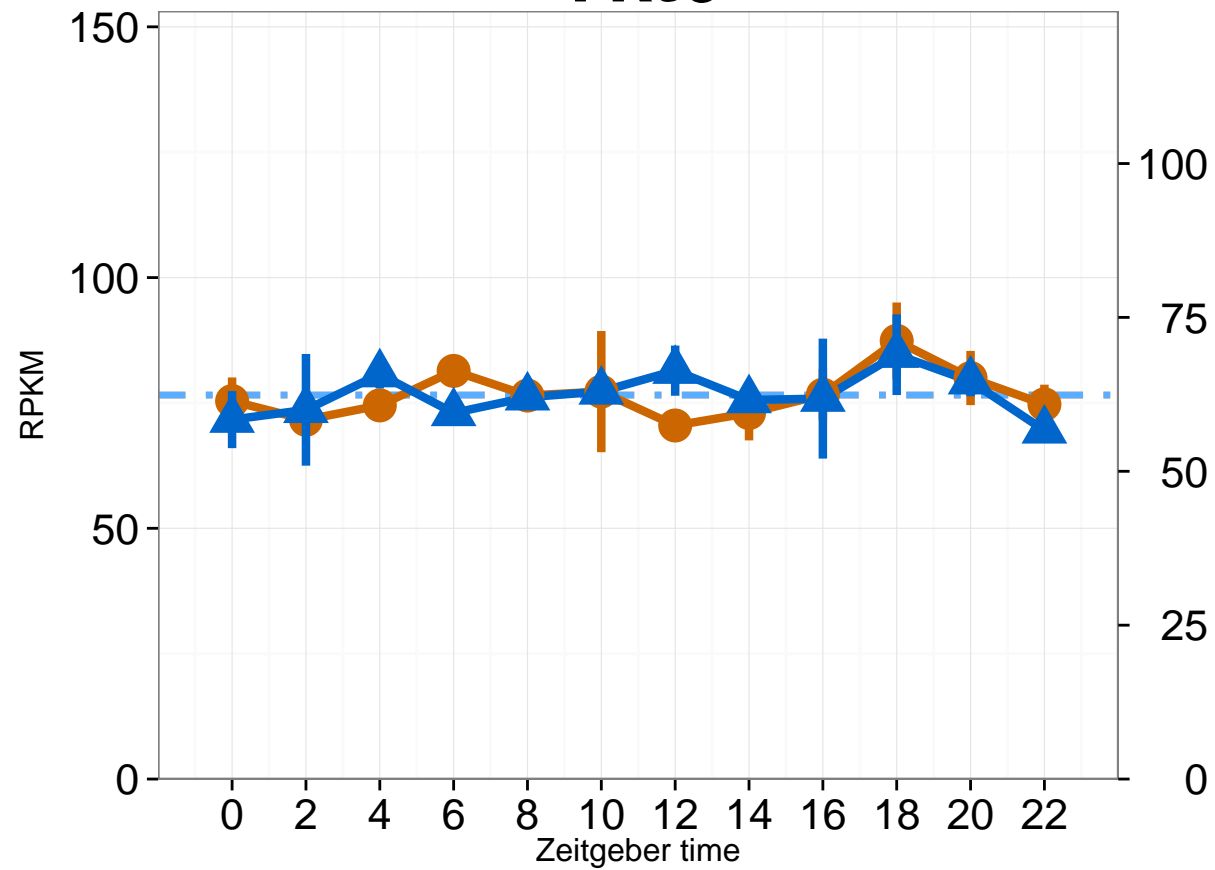

## Ykt6

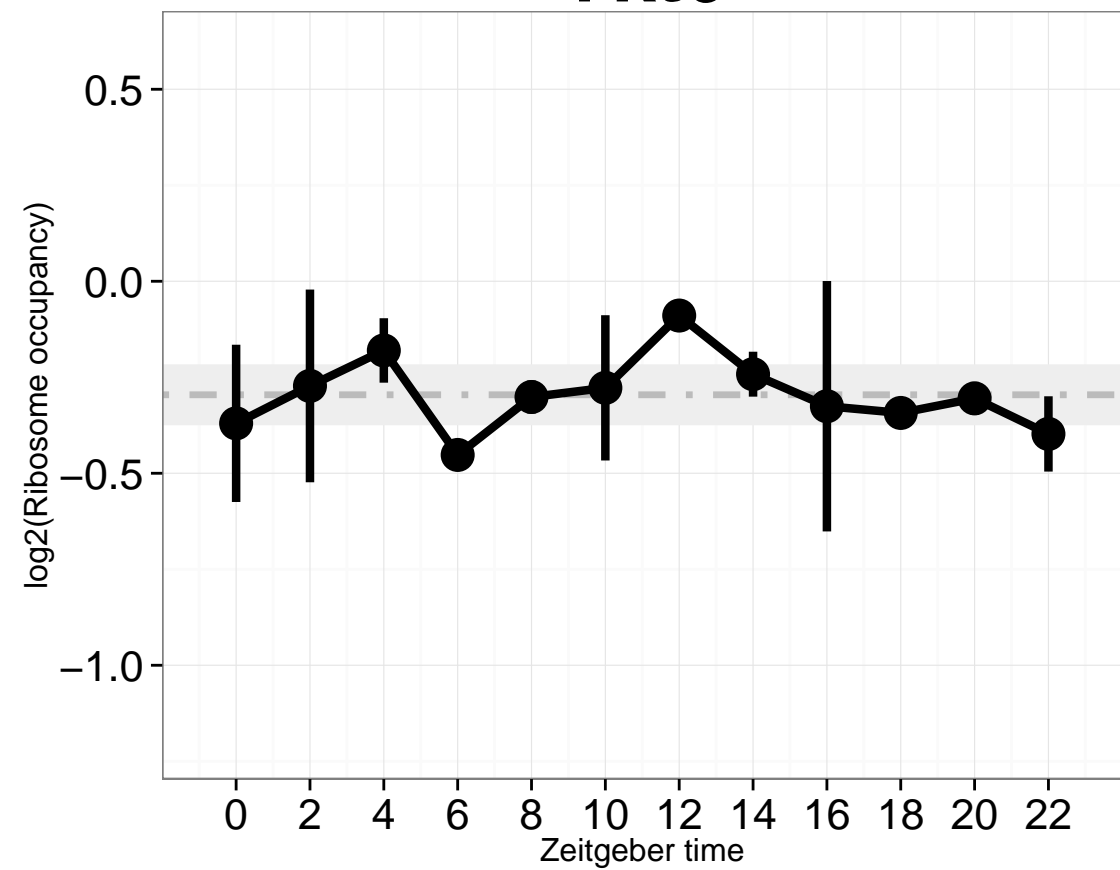

Supplement: Supplementary file 6315 [file 1]

## Folr2

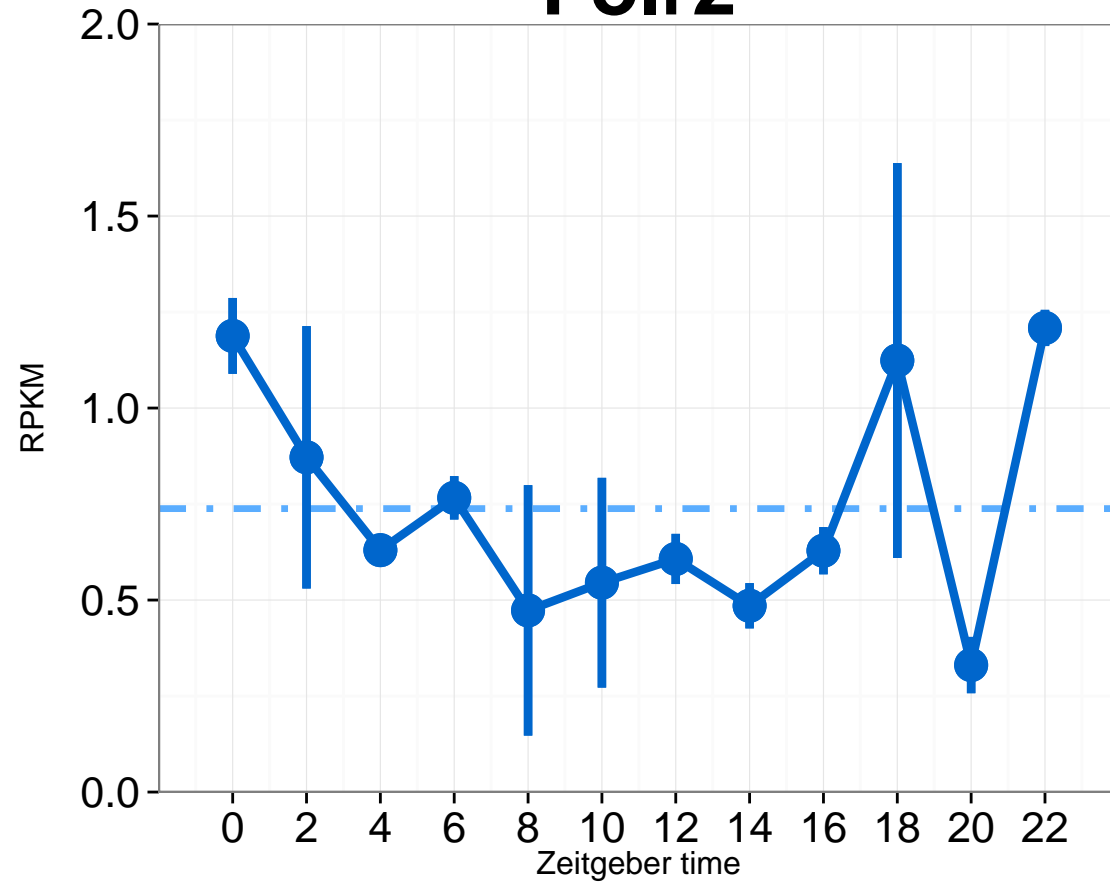

## Folr2 log2(Ribosome occupancy)

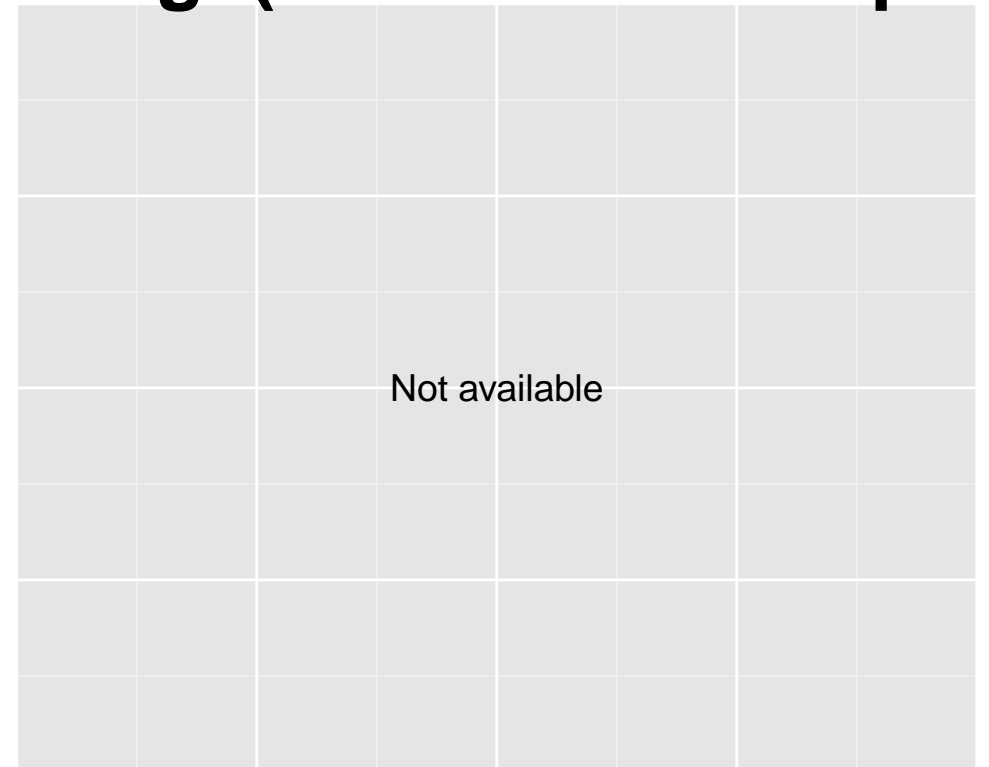

Supplement: Supplementary file 6316 [file 1]

# Mov10

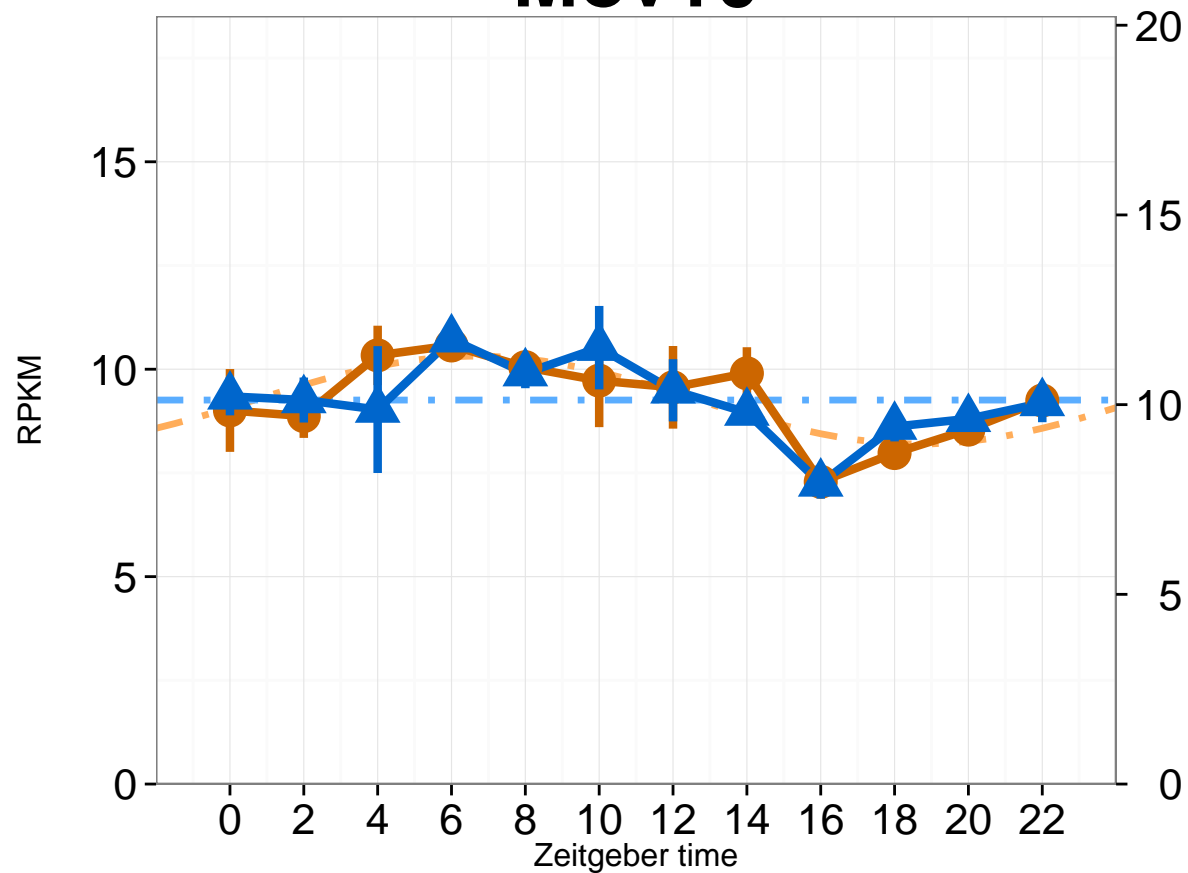

# Mov10

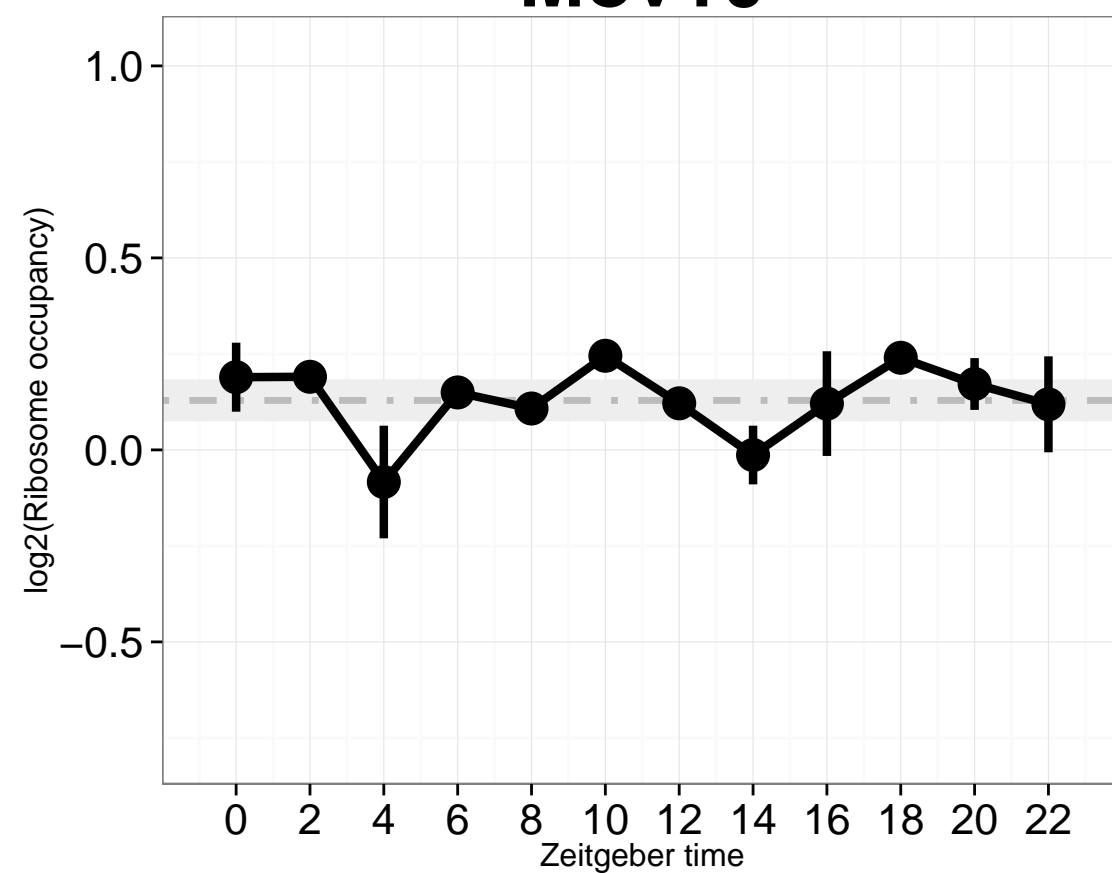

Supplement: Supplementary file 6317 [file 1]

# B3galnt2

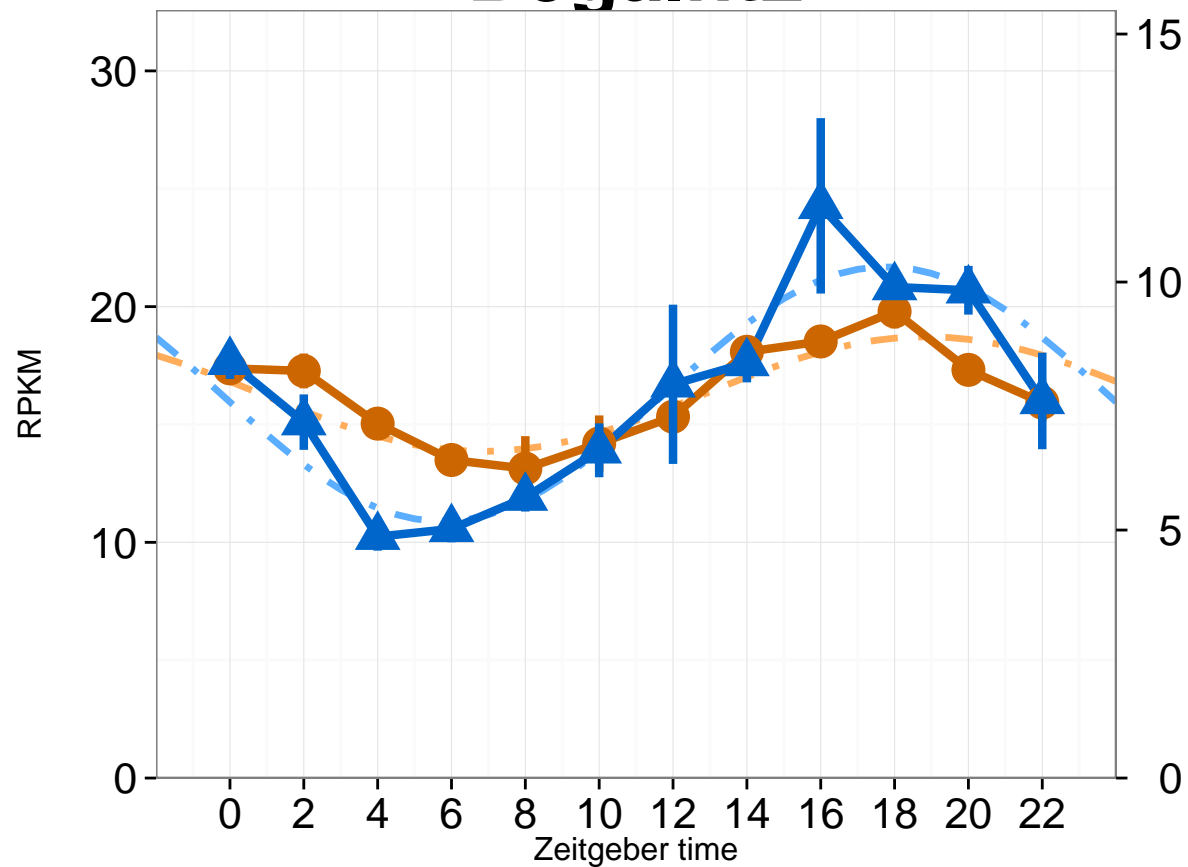

# B3galnt2

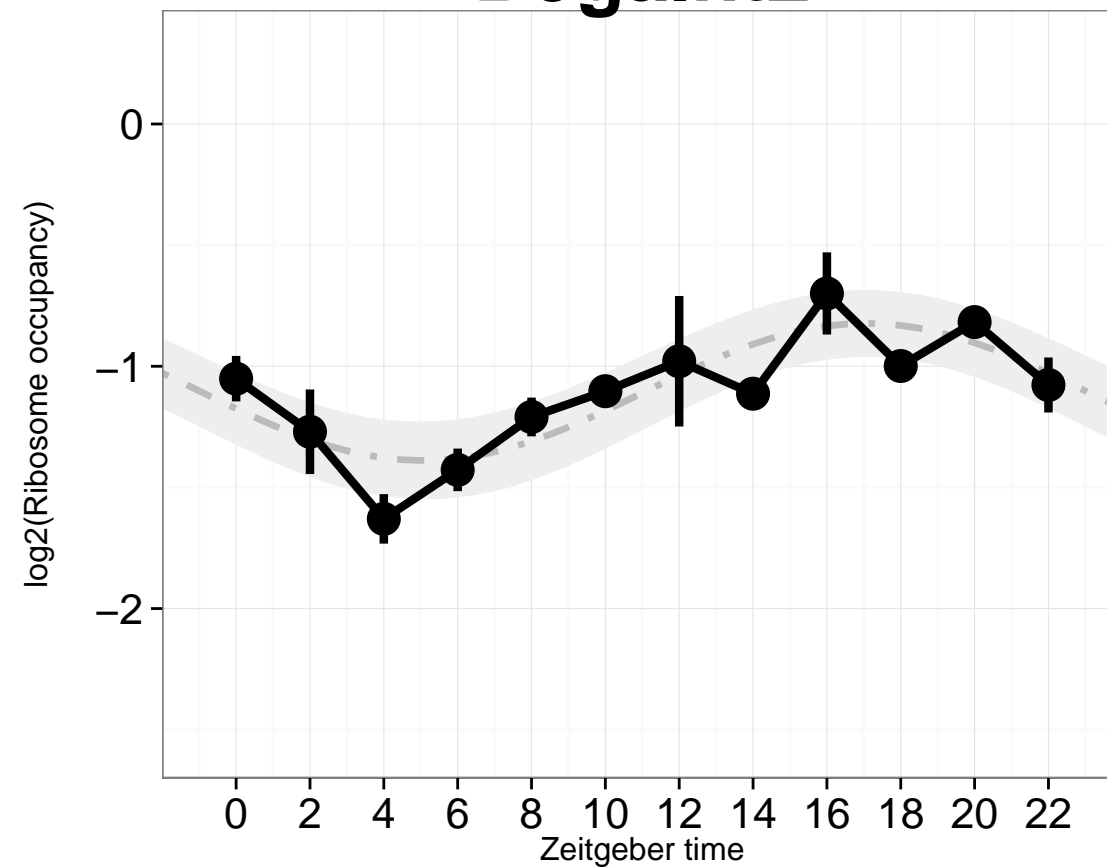

Supplement: Supplementary file 6318 [file 1]

# Slc37a2

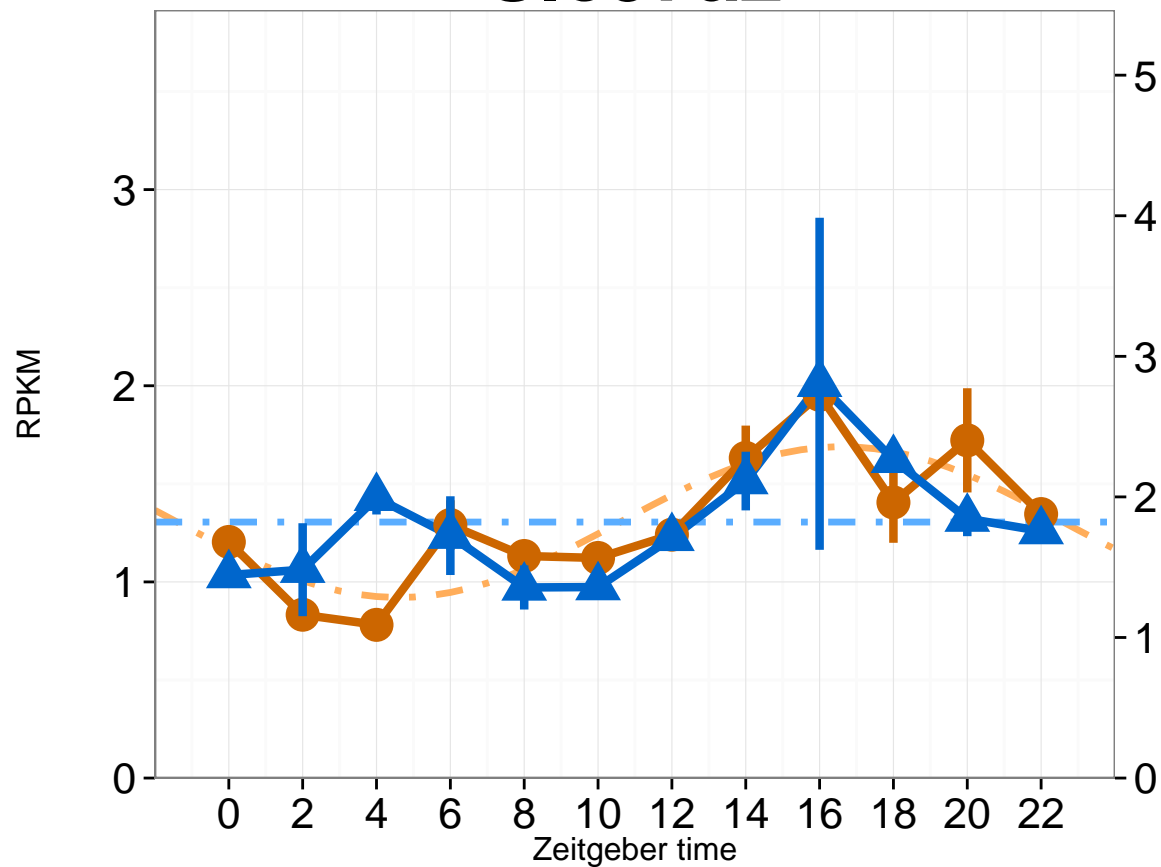

# Slc37a2

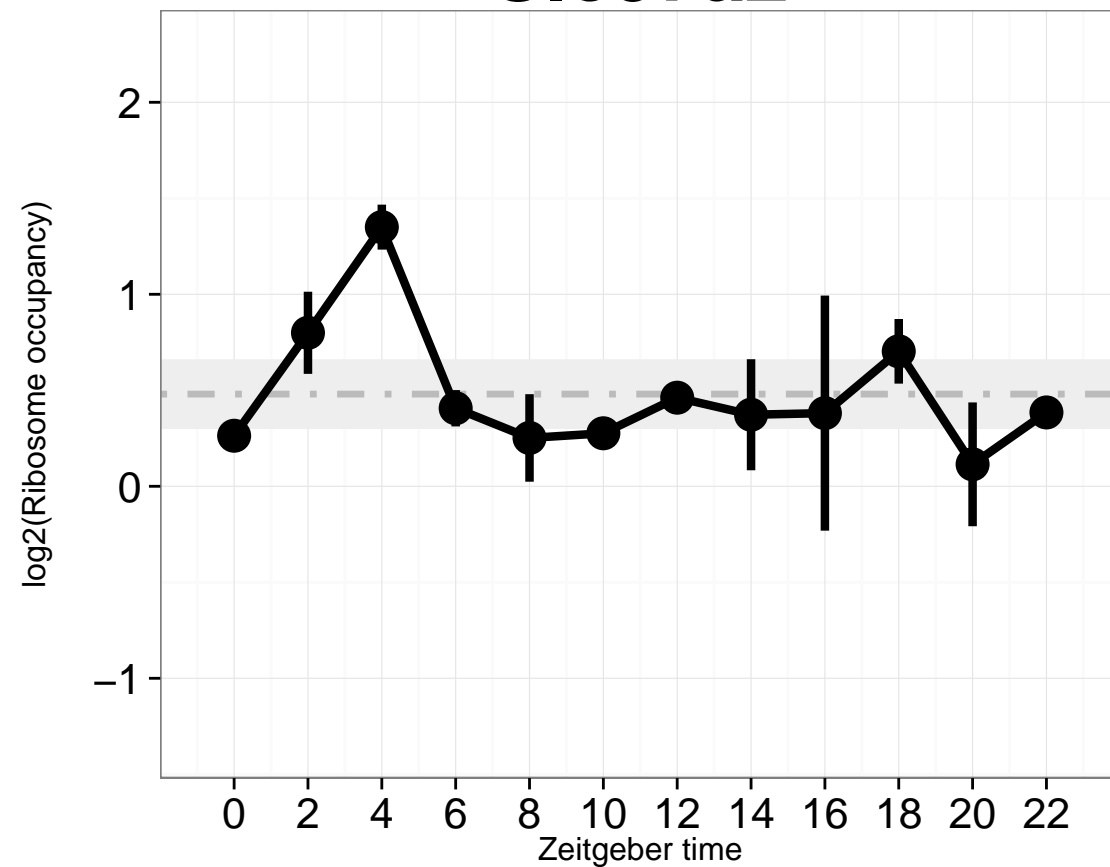

Supplement: Supplementary file 6319 [file 1]

## Gm9905

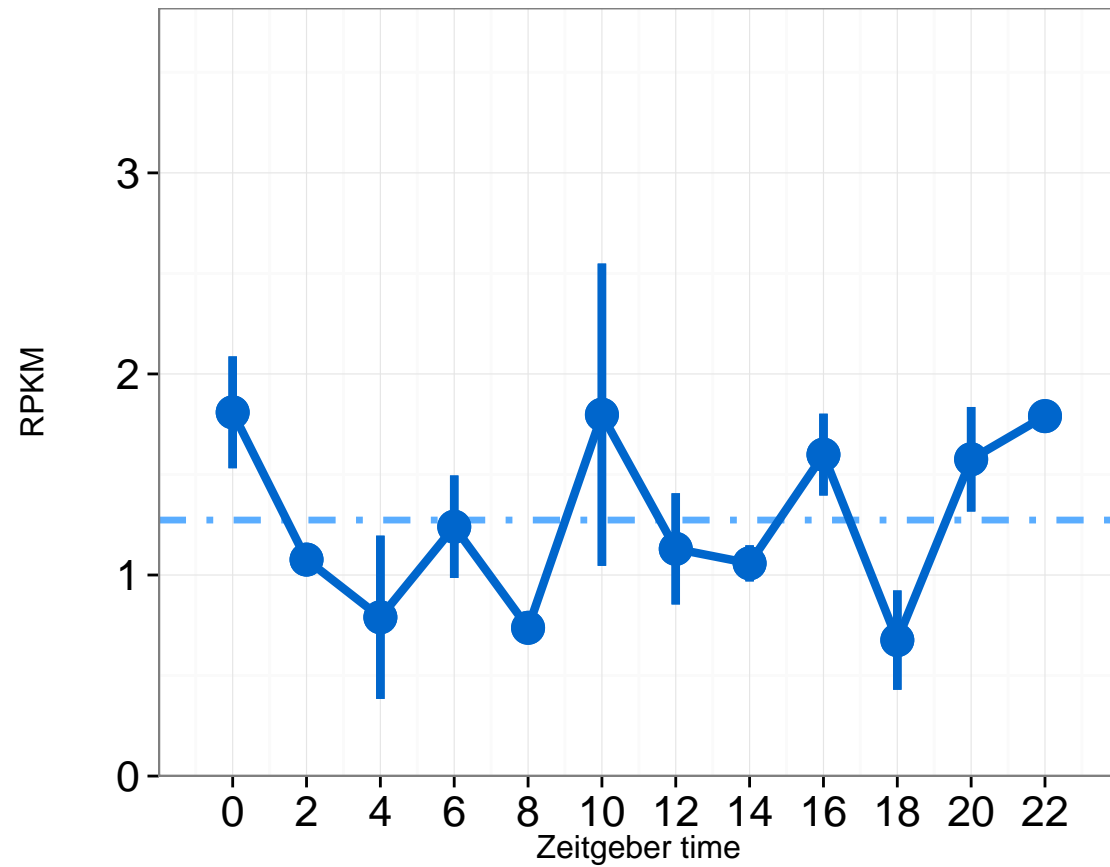

## Gm9905 log2(Ribosome occupanc

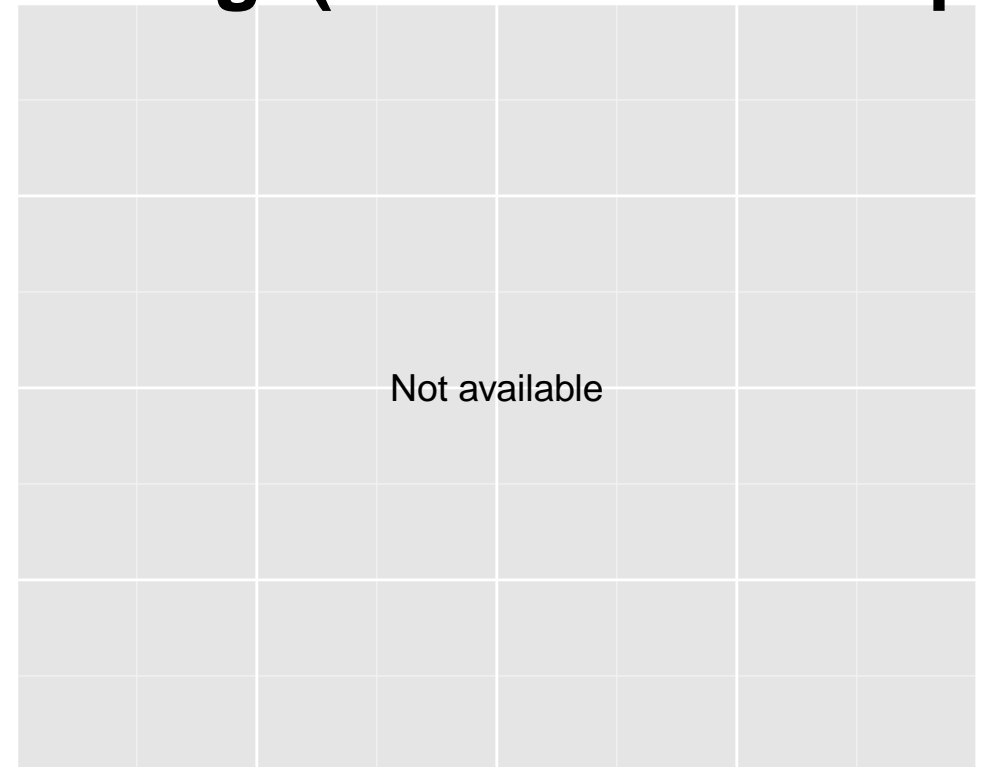

Supplement: Supplementary file 6320 [file 1]

# Zfp951

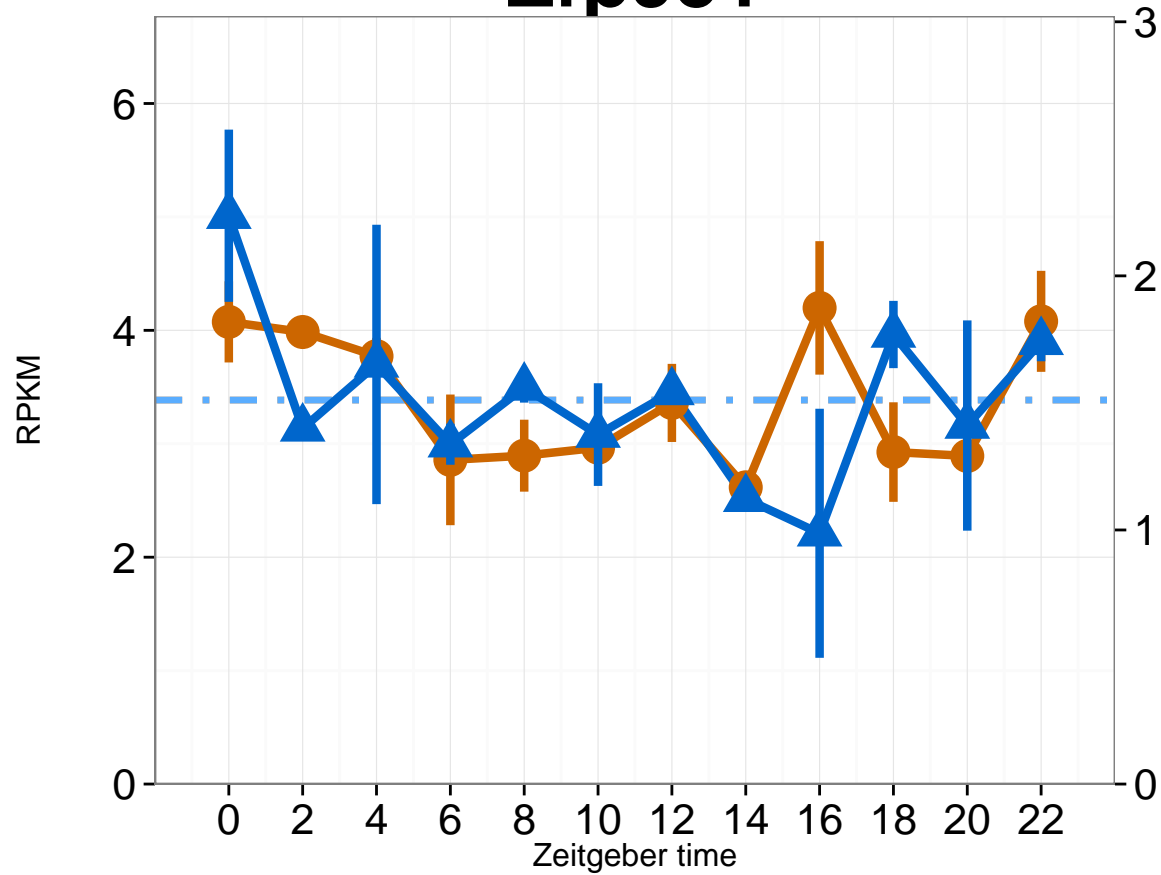

# Zfp951

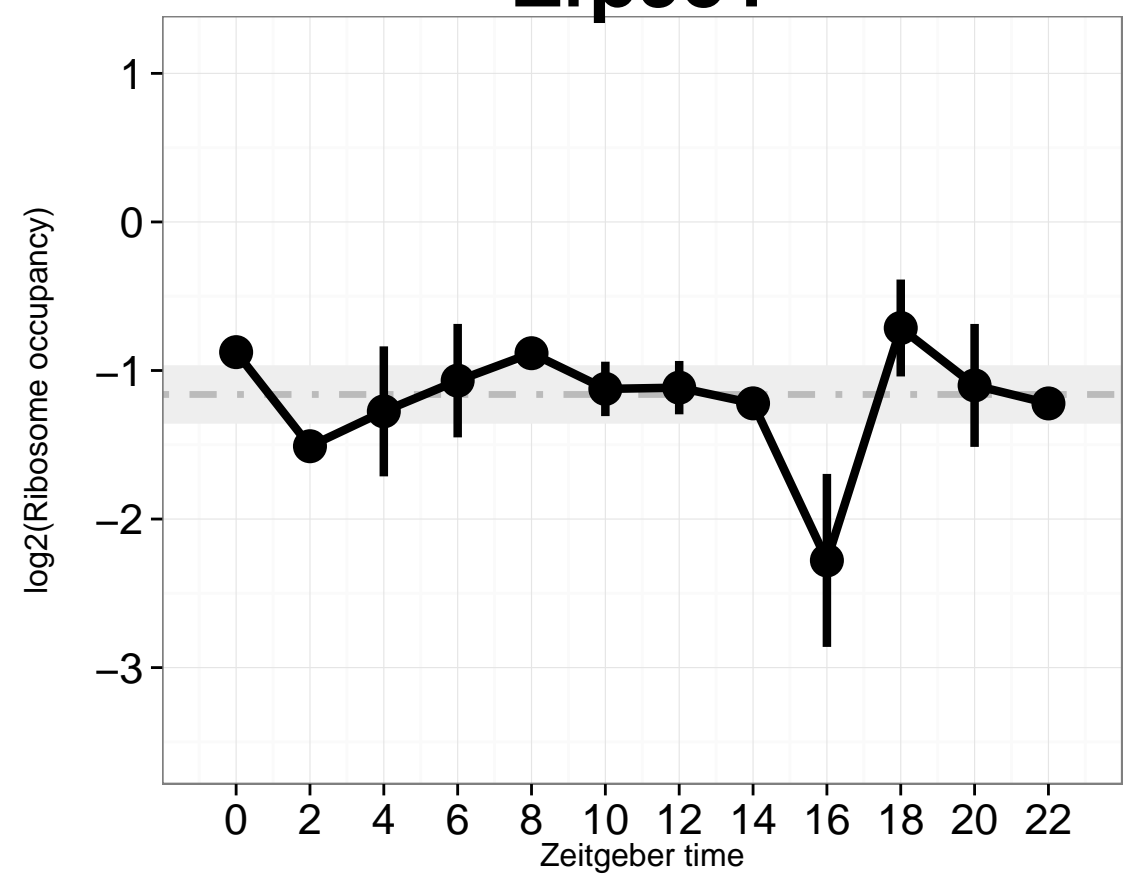

Supplement: Supplementary file 6321 [file 1]

## Rpn2

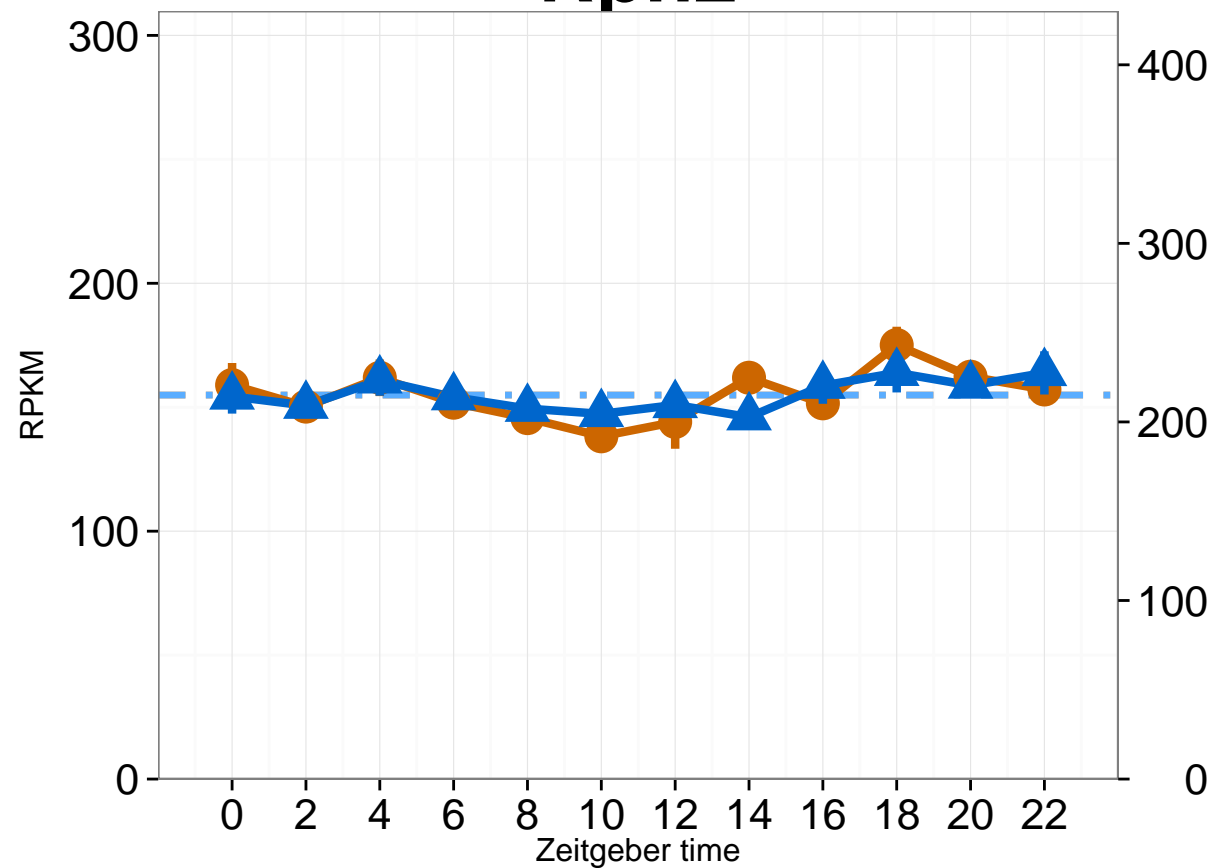

## Rpn2

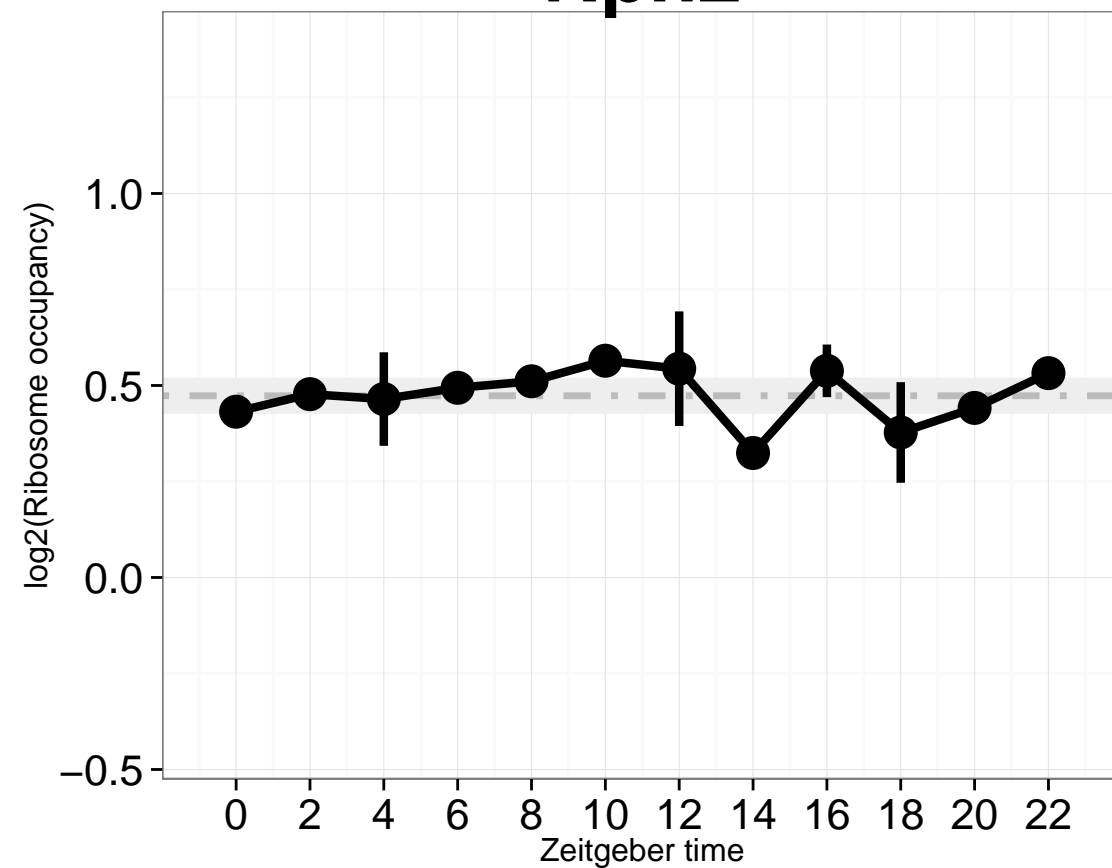

Supplement: Supplementary file 6322 [file 1]
