# Supplementary material (part 64 of 133)
Source: publisher figshare collection journal article supplement (https://springernature.figshare.com/articles/dataset/_/4903193)

## Kars

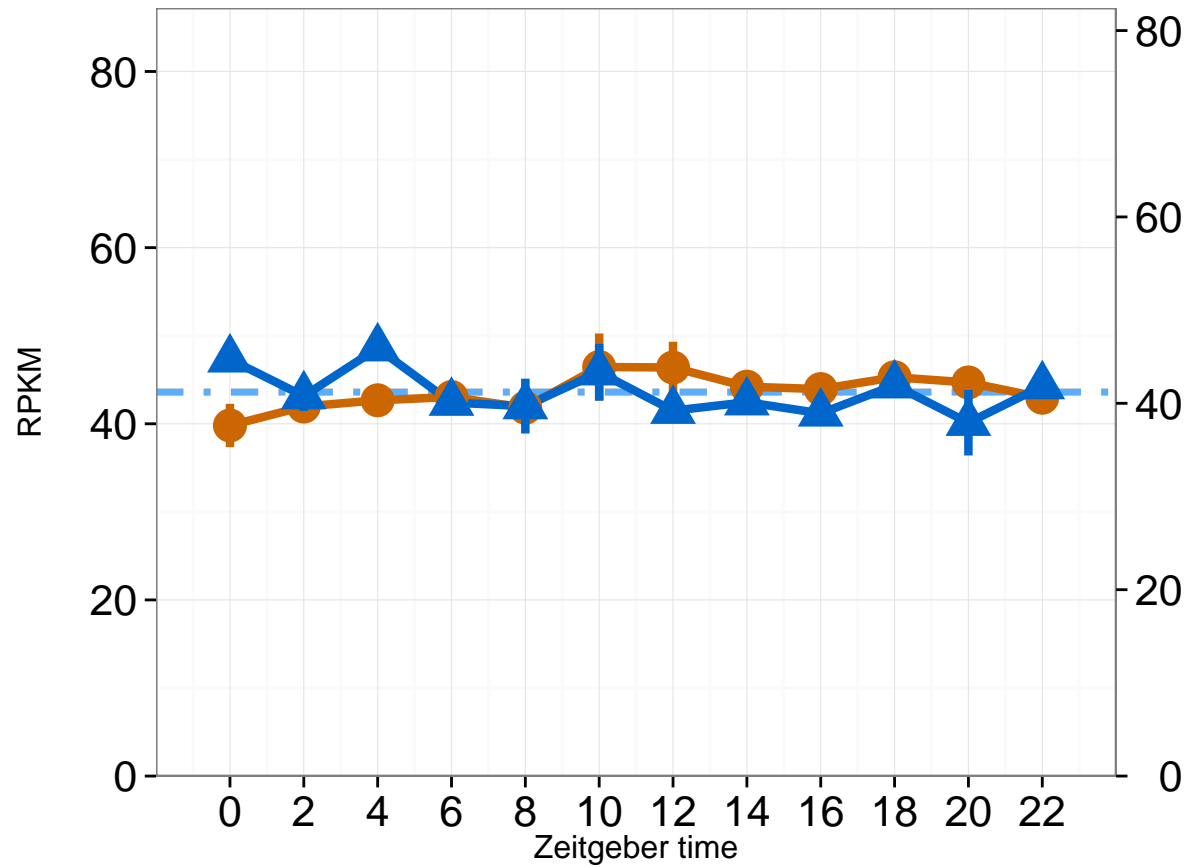

## Kars

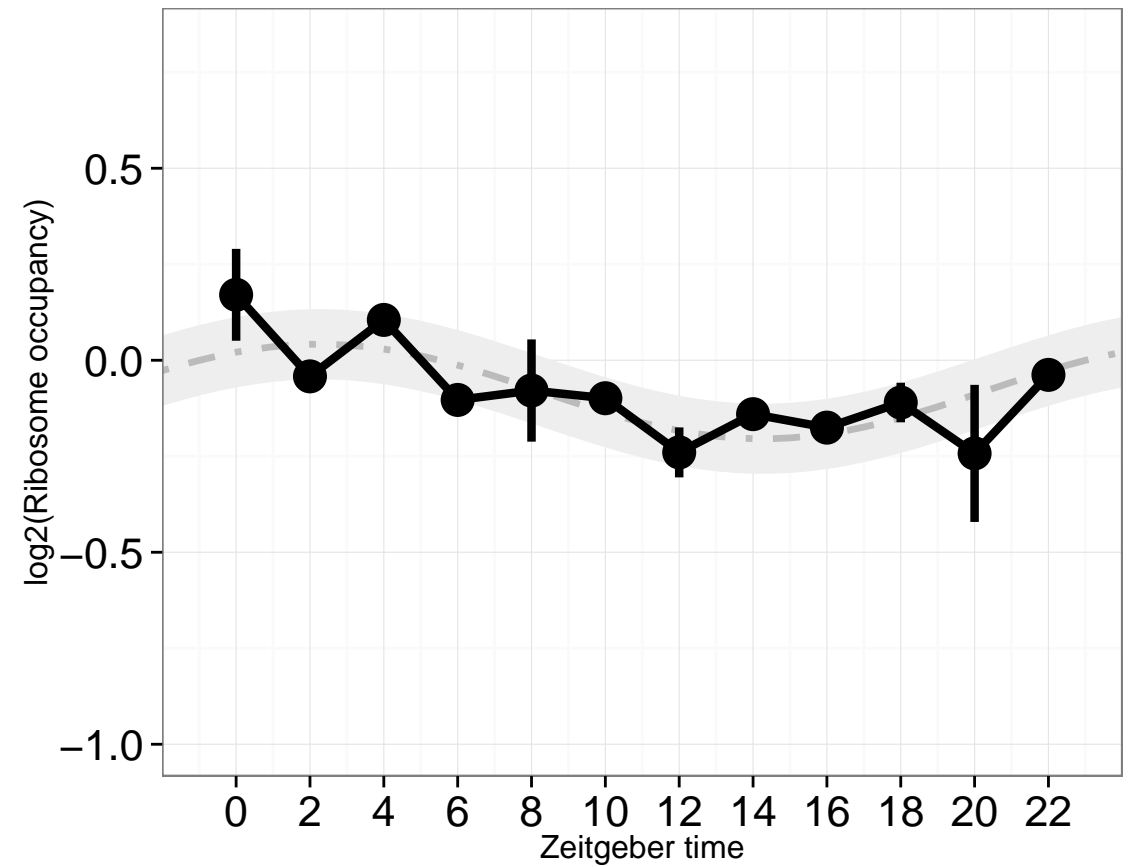

Supplement: Supplementary file 6323 [file 1]

## Vnn1

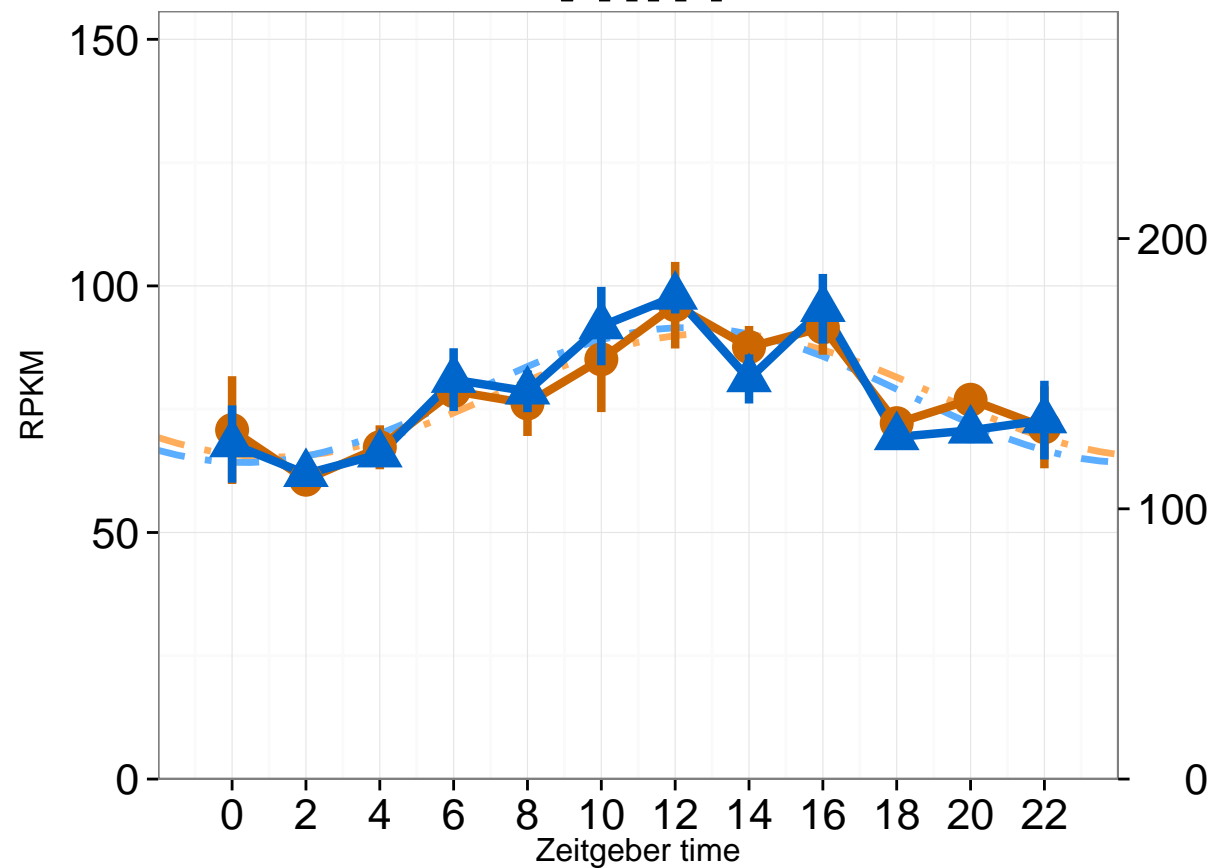

## Vnn1

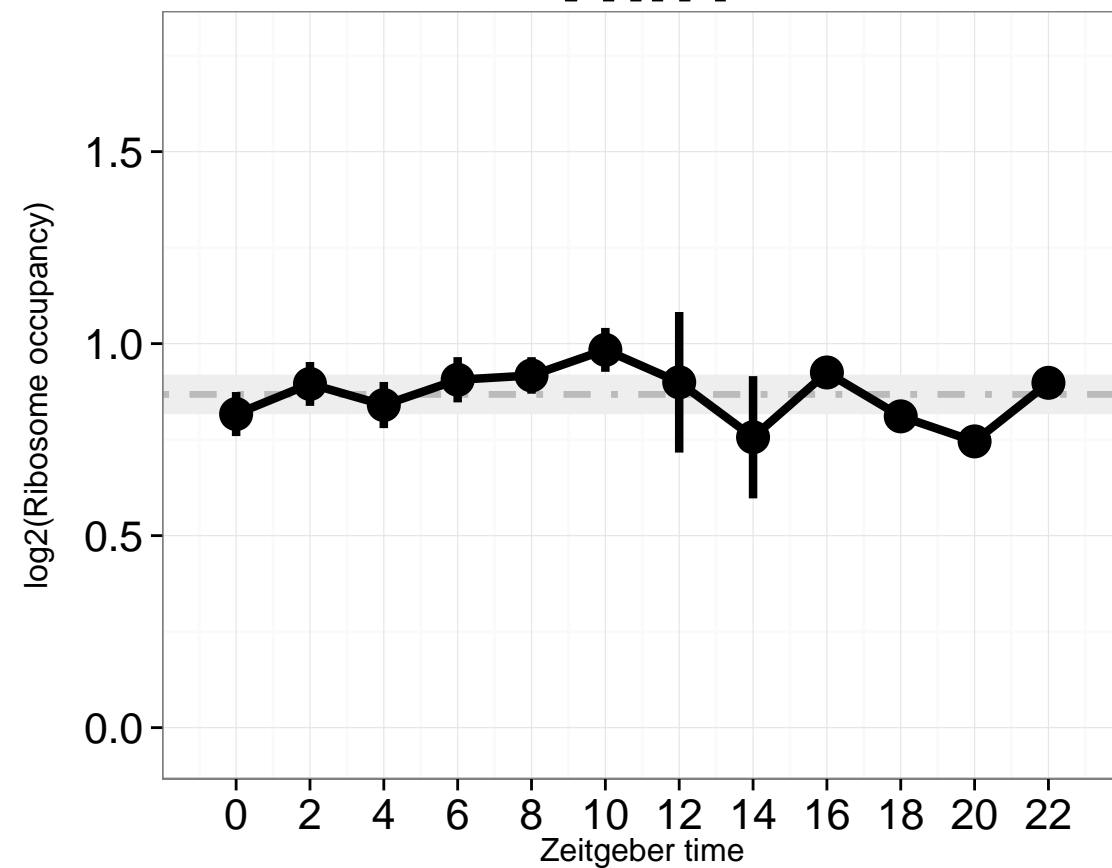

Supplement: Supplementary file 6324 [file 1]

# Fxn

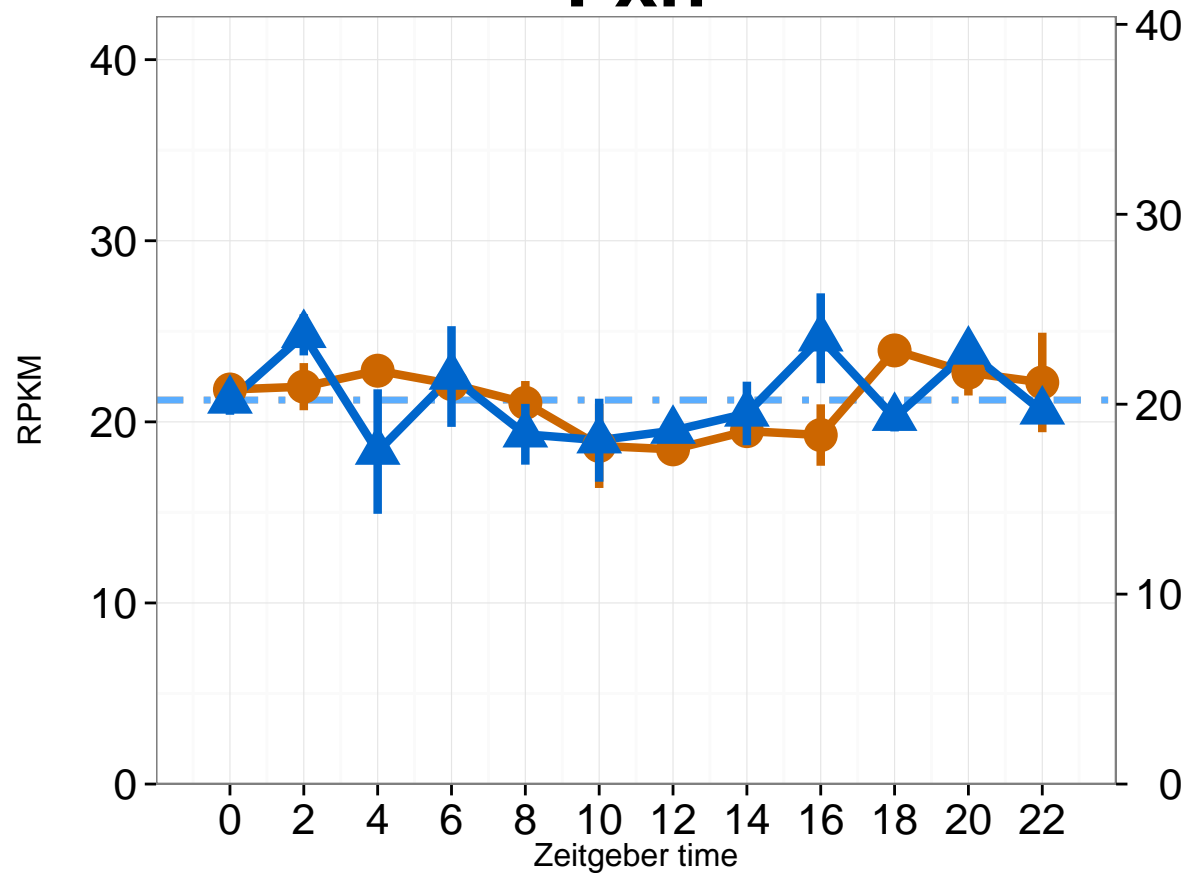

# Fxn

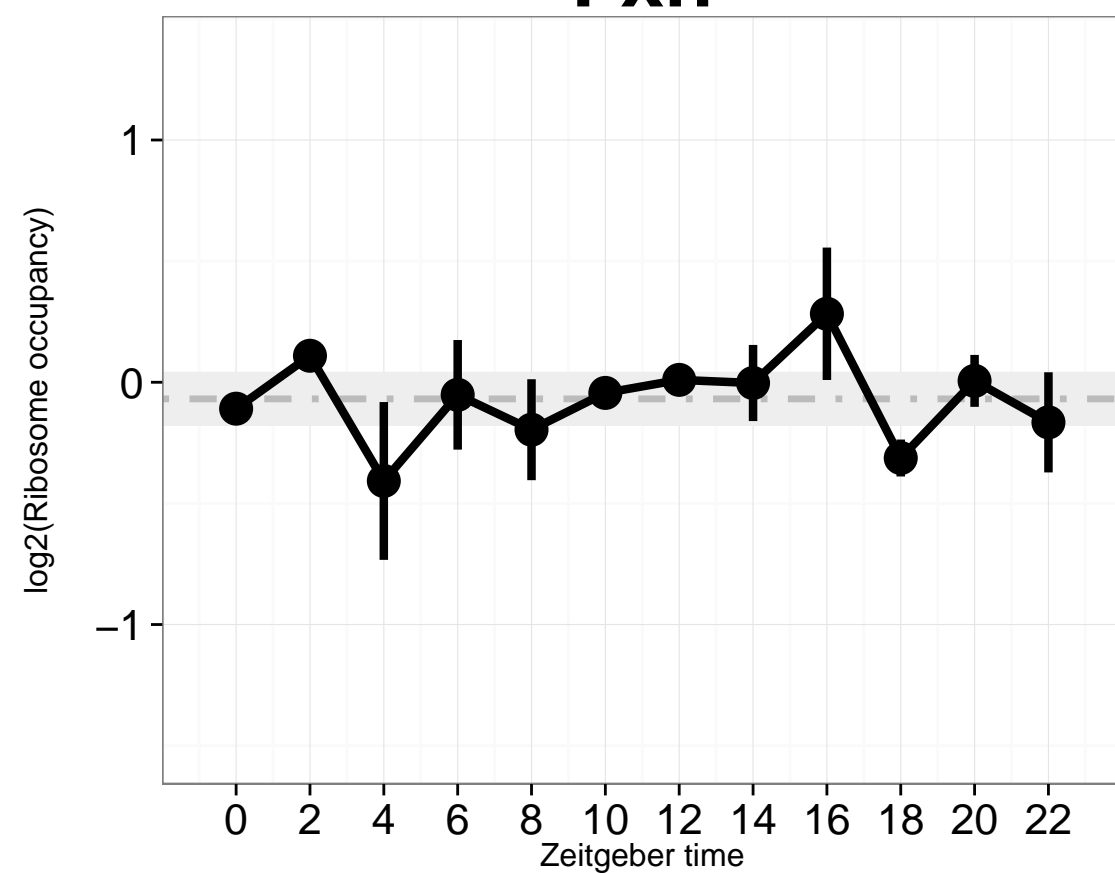

Supplement: Supplementary file 6325 [file 1]

## Msh3

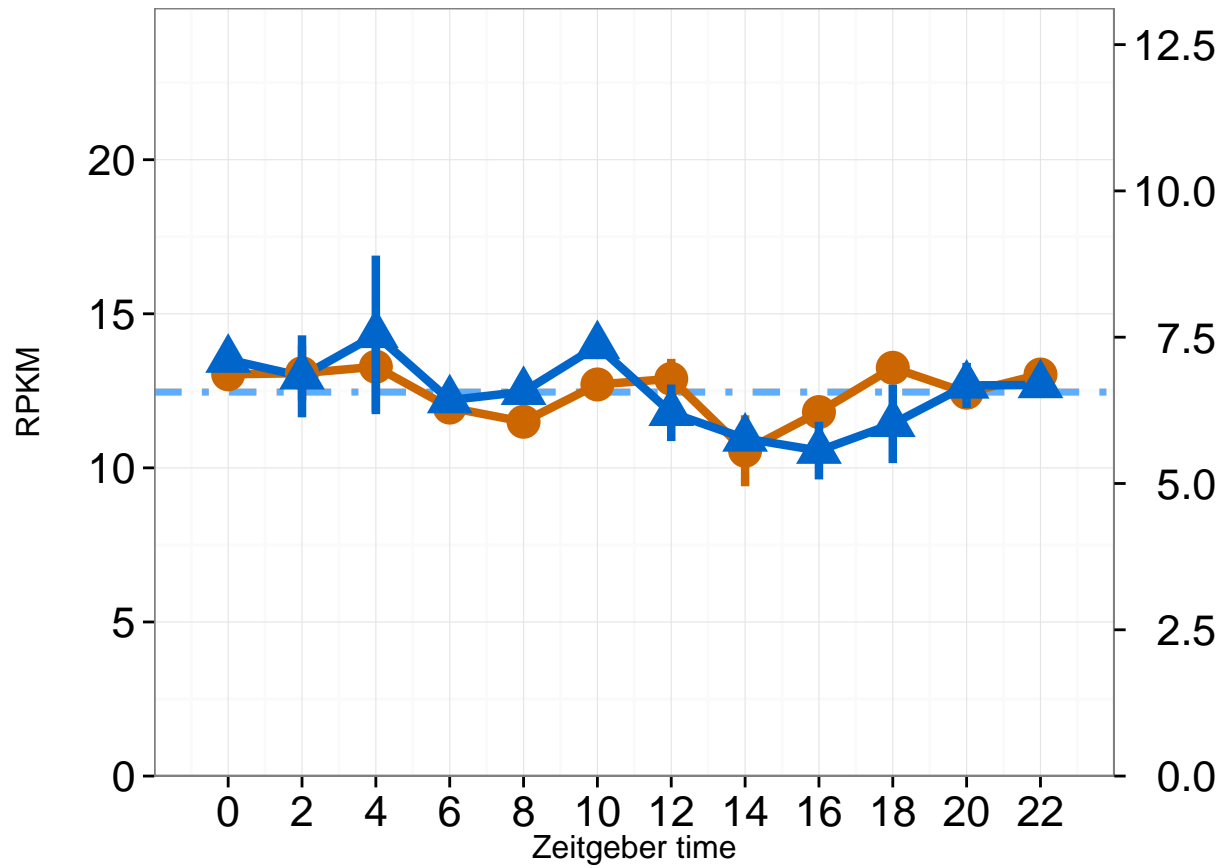

## Msh3

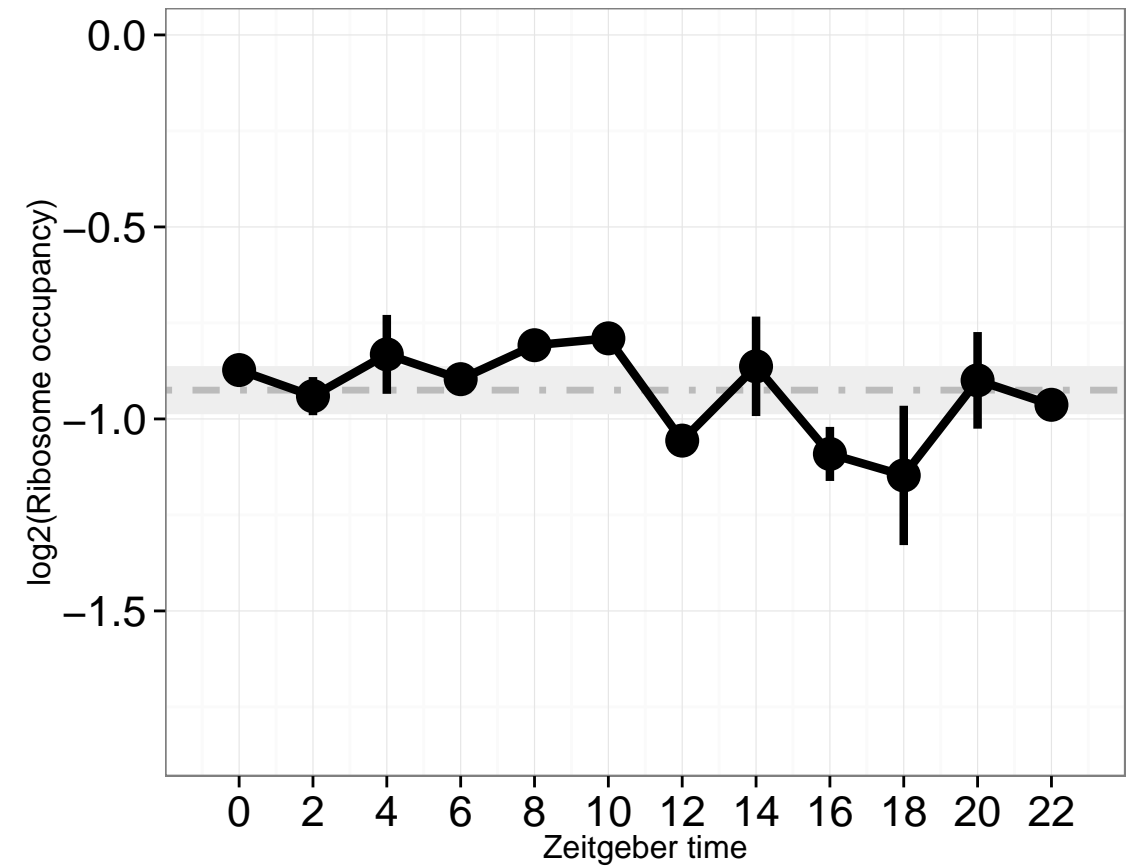

Supplement: Supplementary file 6326 [file 1]

## Inf2

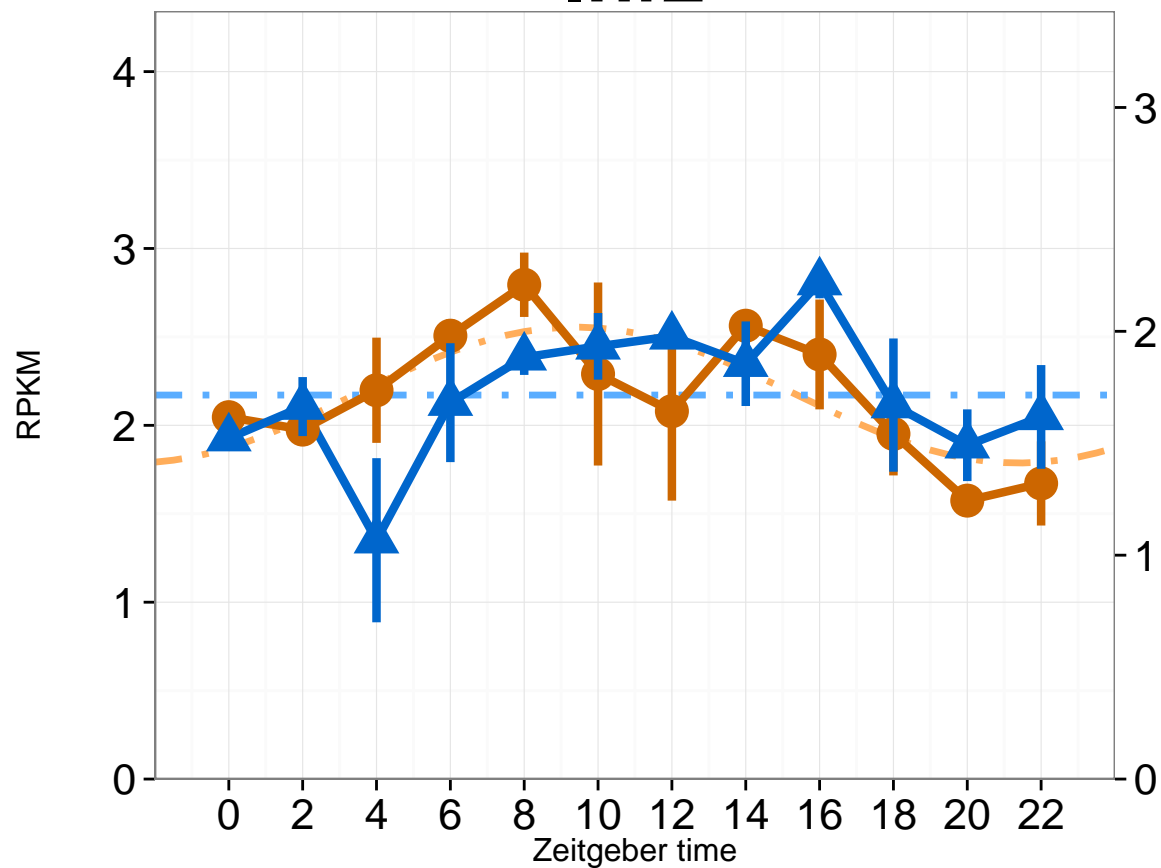

## Inf2

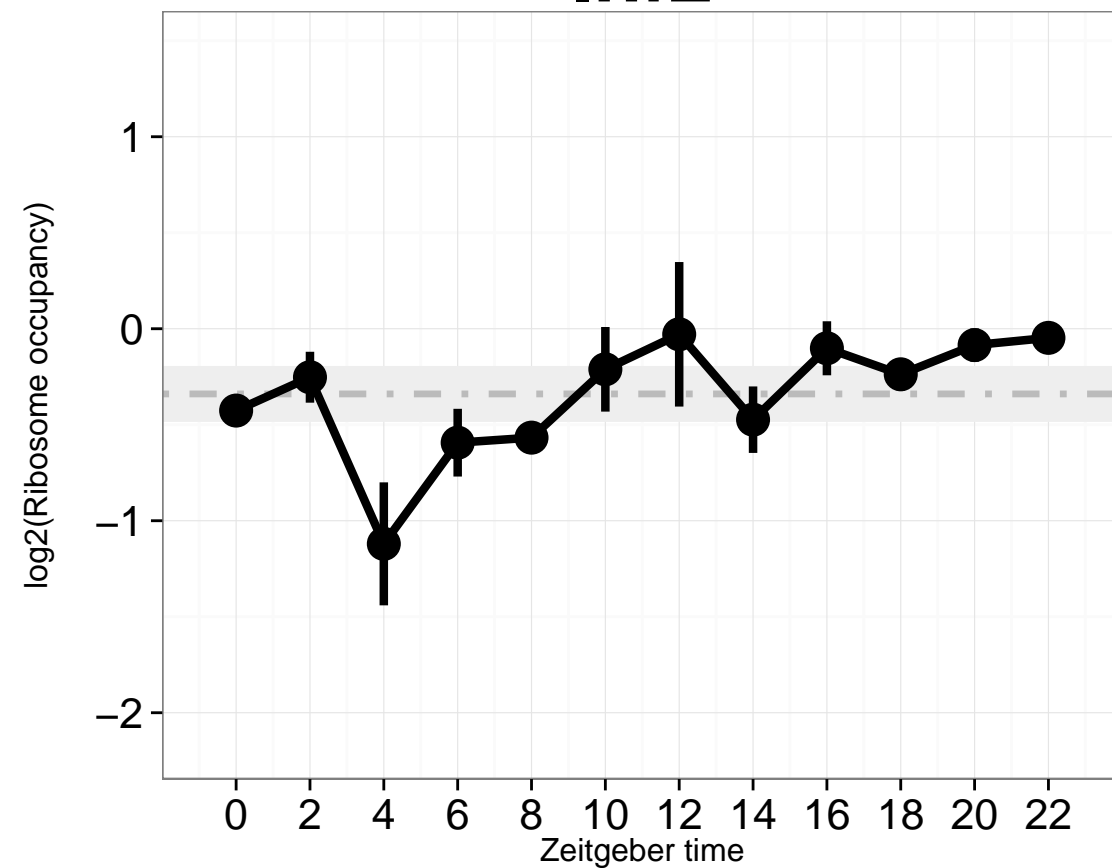

Supplement: Supplementary file 6327 [file 1]

## Nkd1

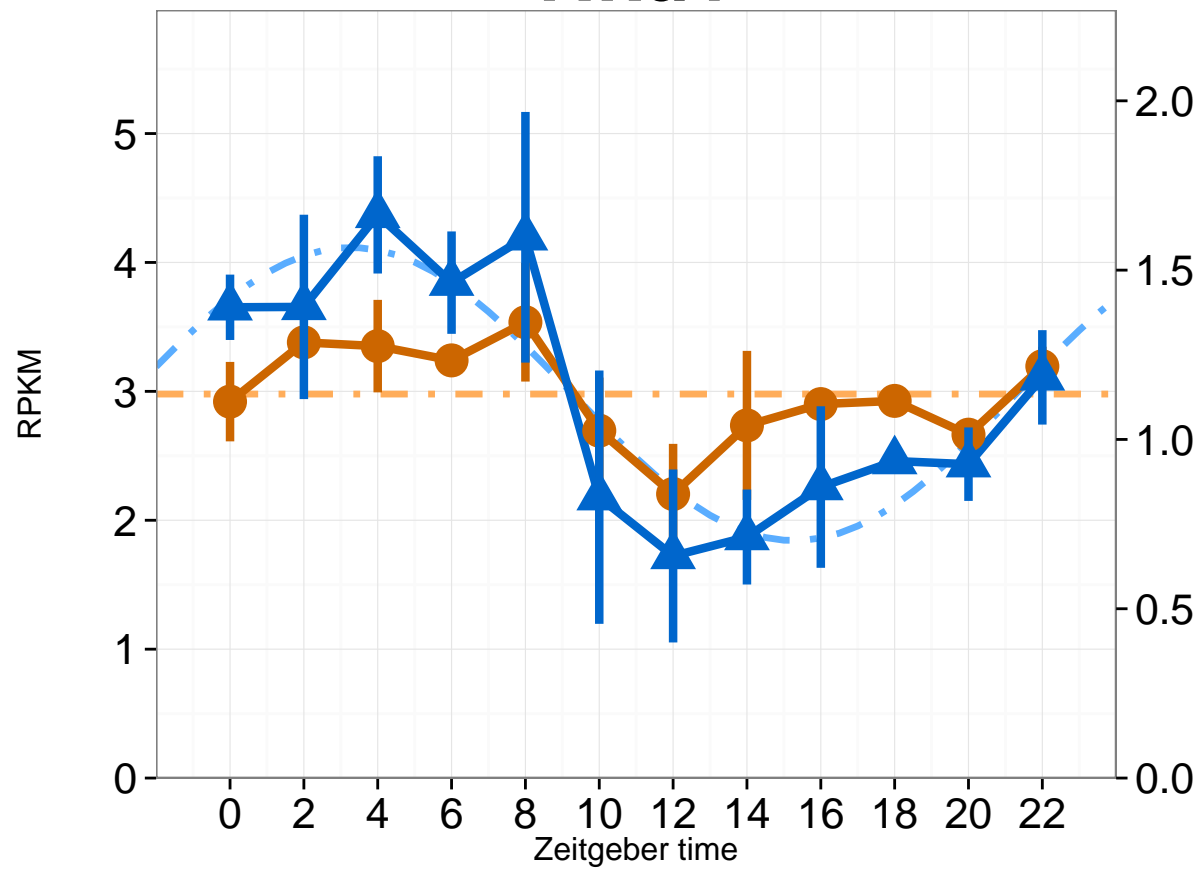

## Nkd1

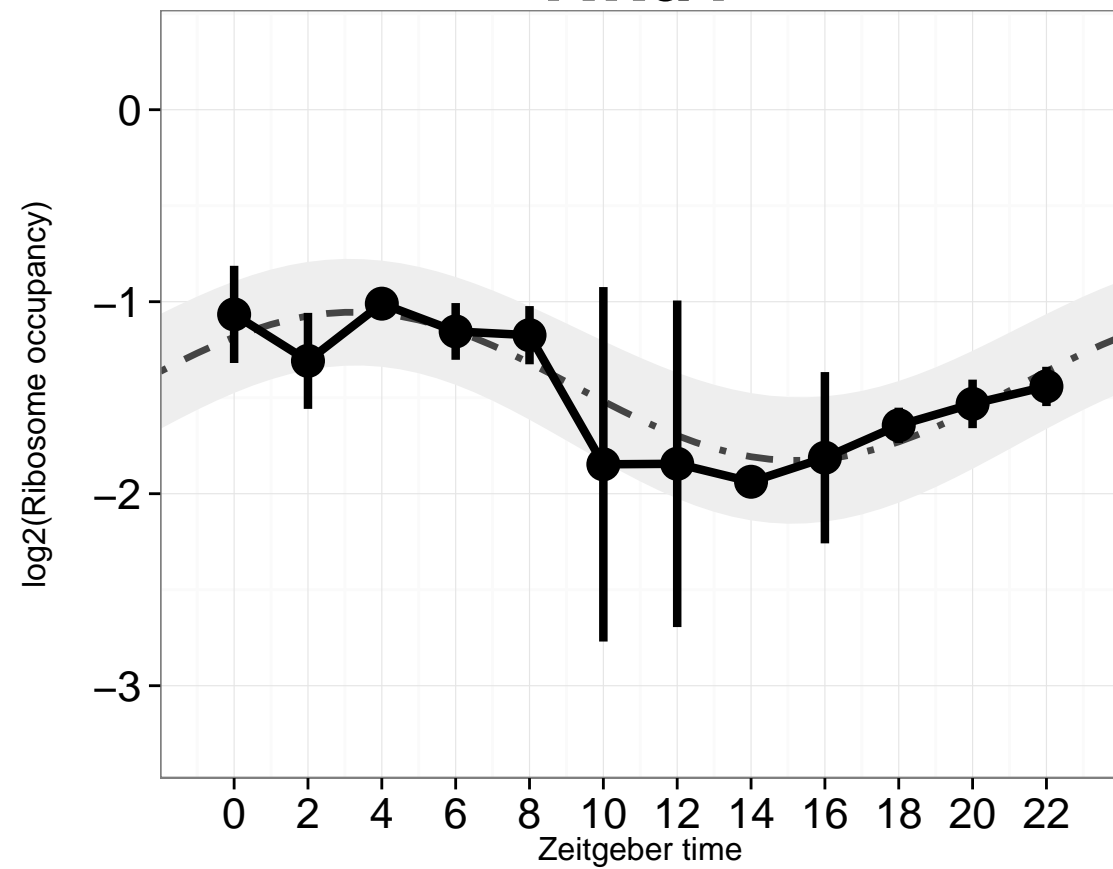

Supplement: Supplementary file 6328 [file 1]

## Adrbk1

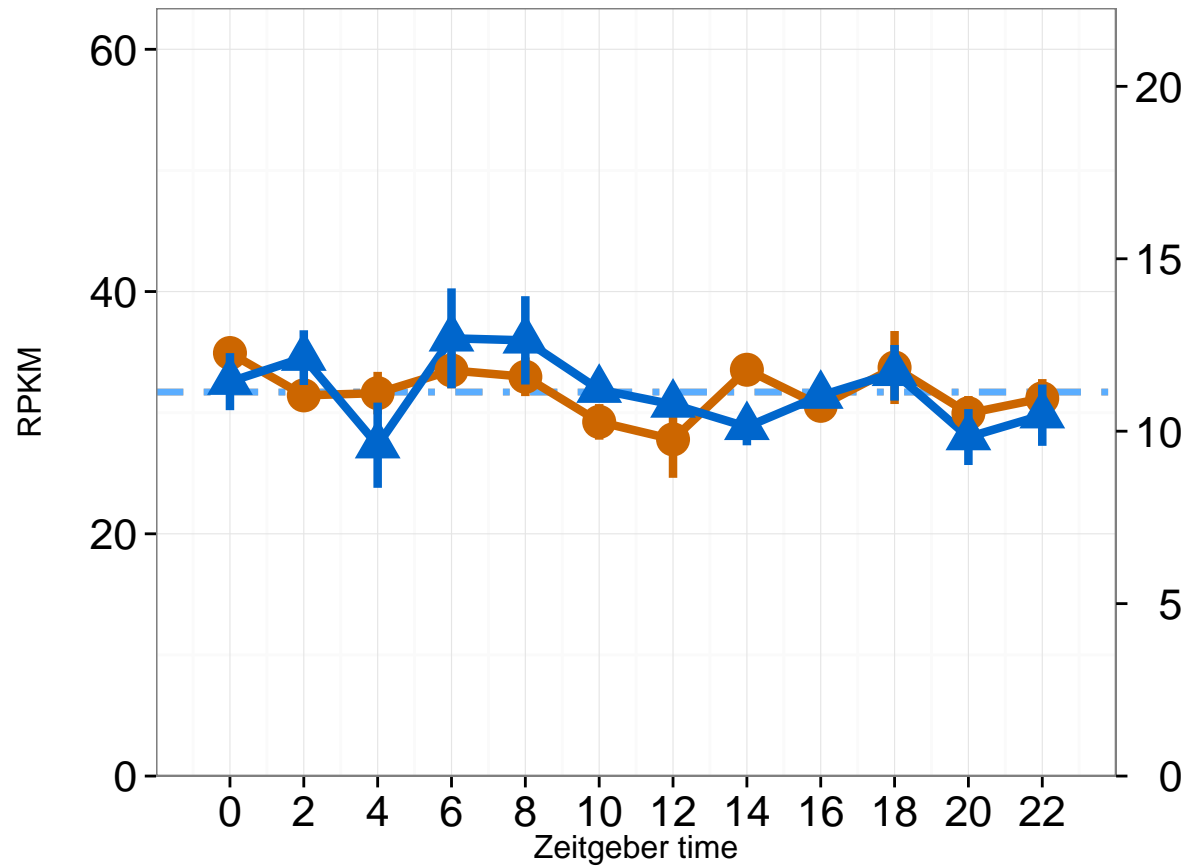

## Adrbk1

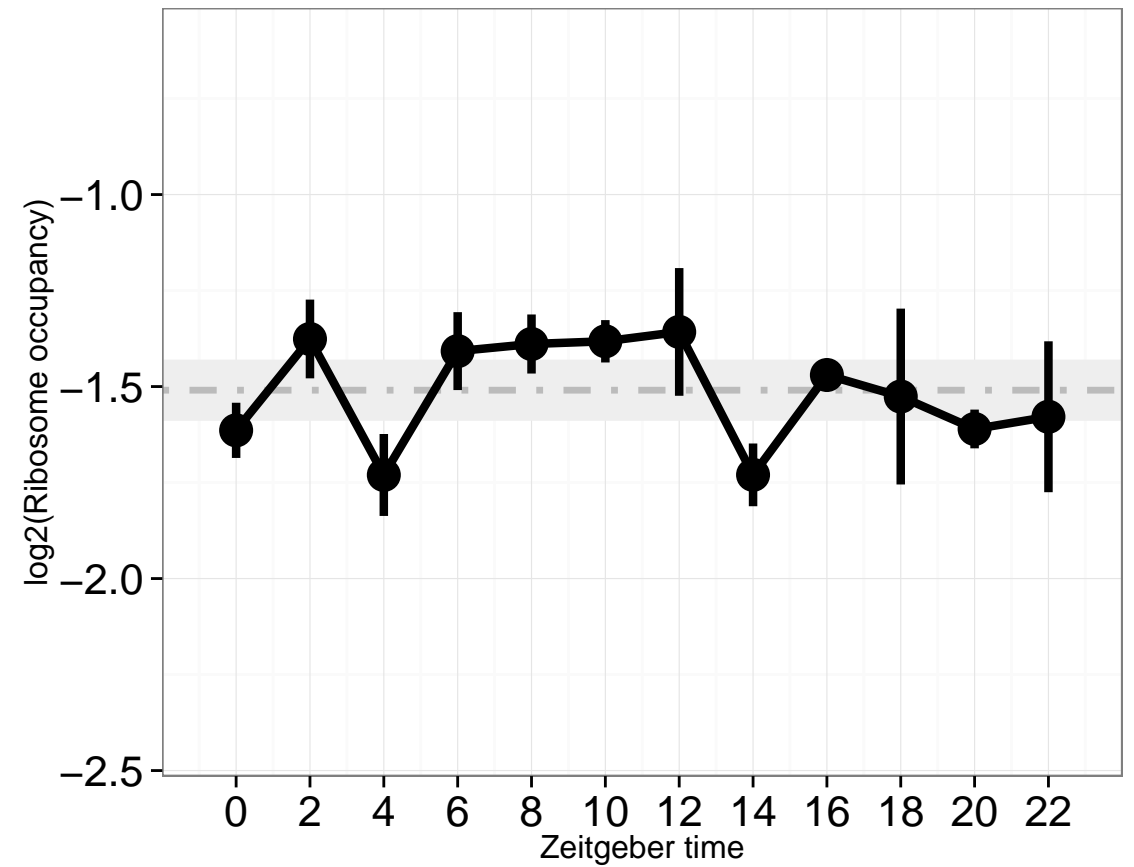

Supplement: Supplementary file 6329 [file 1]

## Cnst

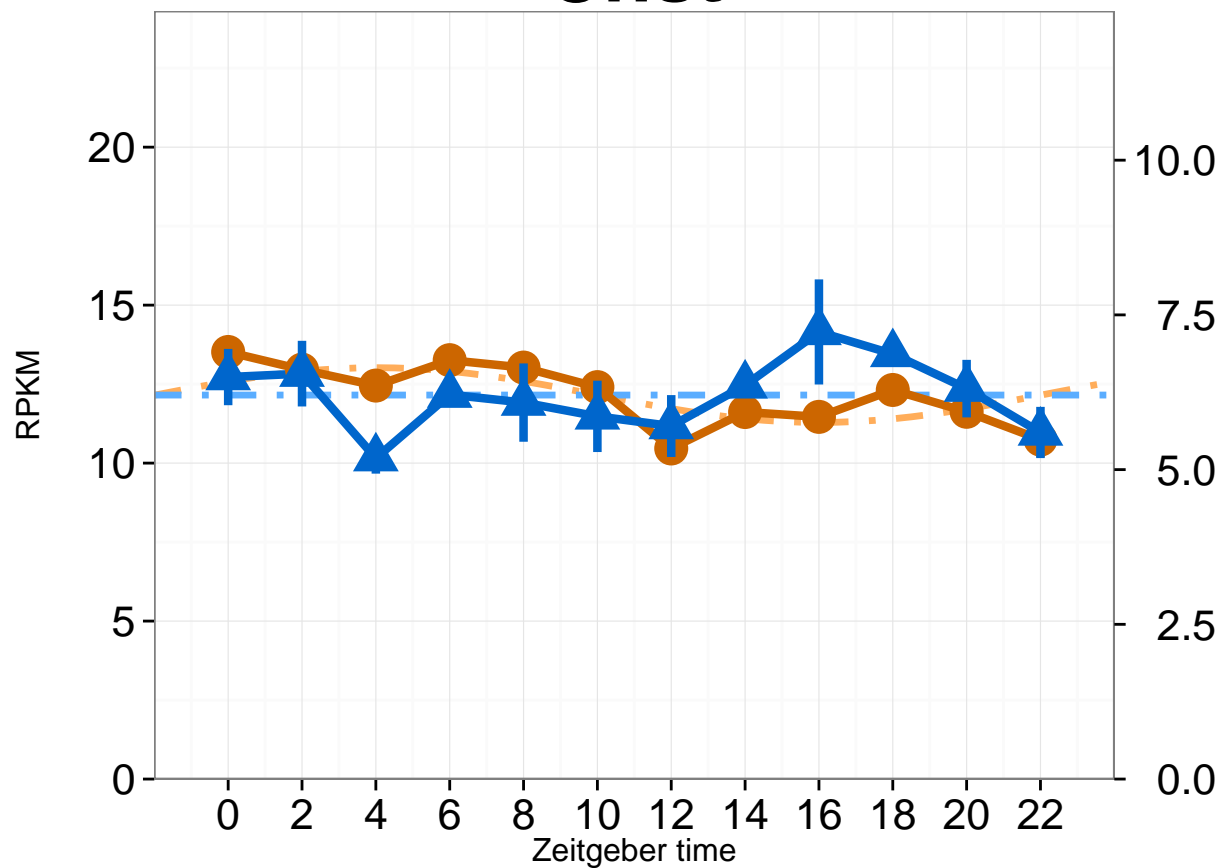

## Cnst

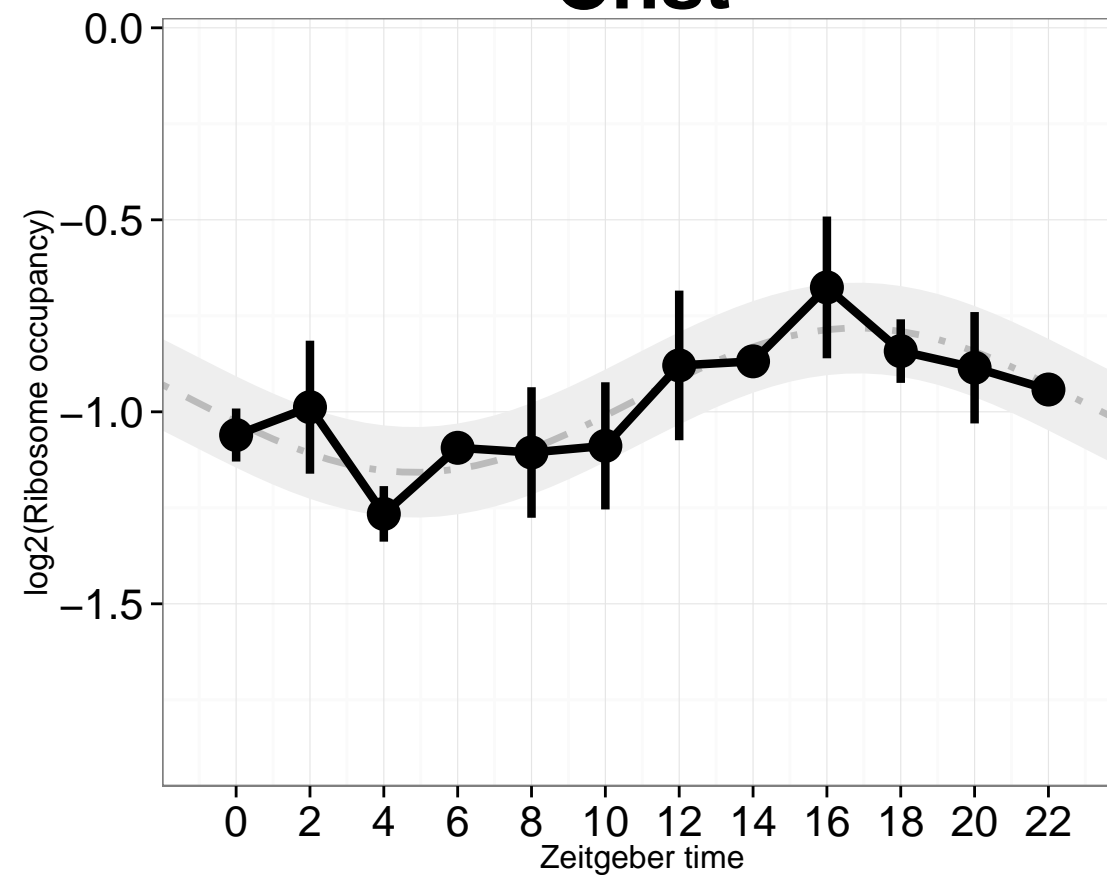

Supplement: Supplementary file 6330 [file 1]

## Ovol2

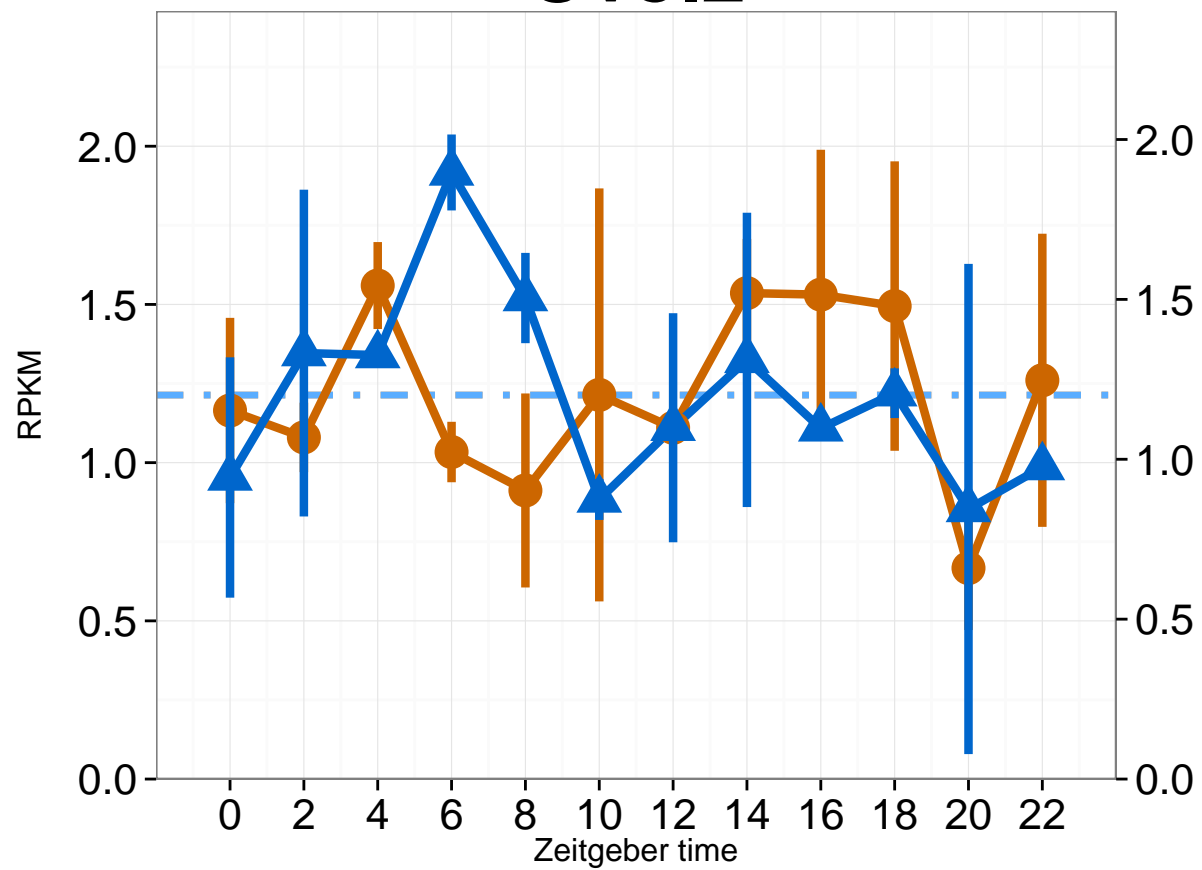

## Ovol2

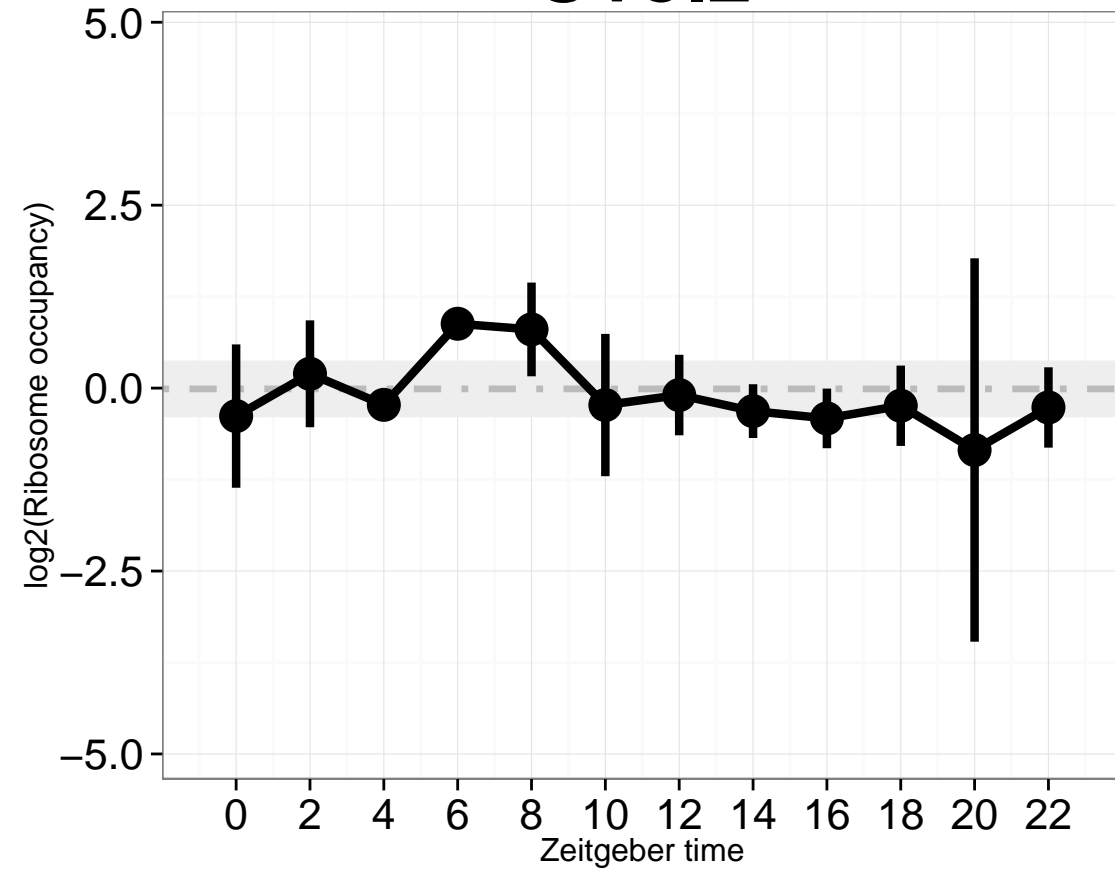

Supplement: Supplementary file 6331 [file 1]

## Slc4a11

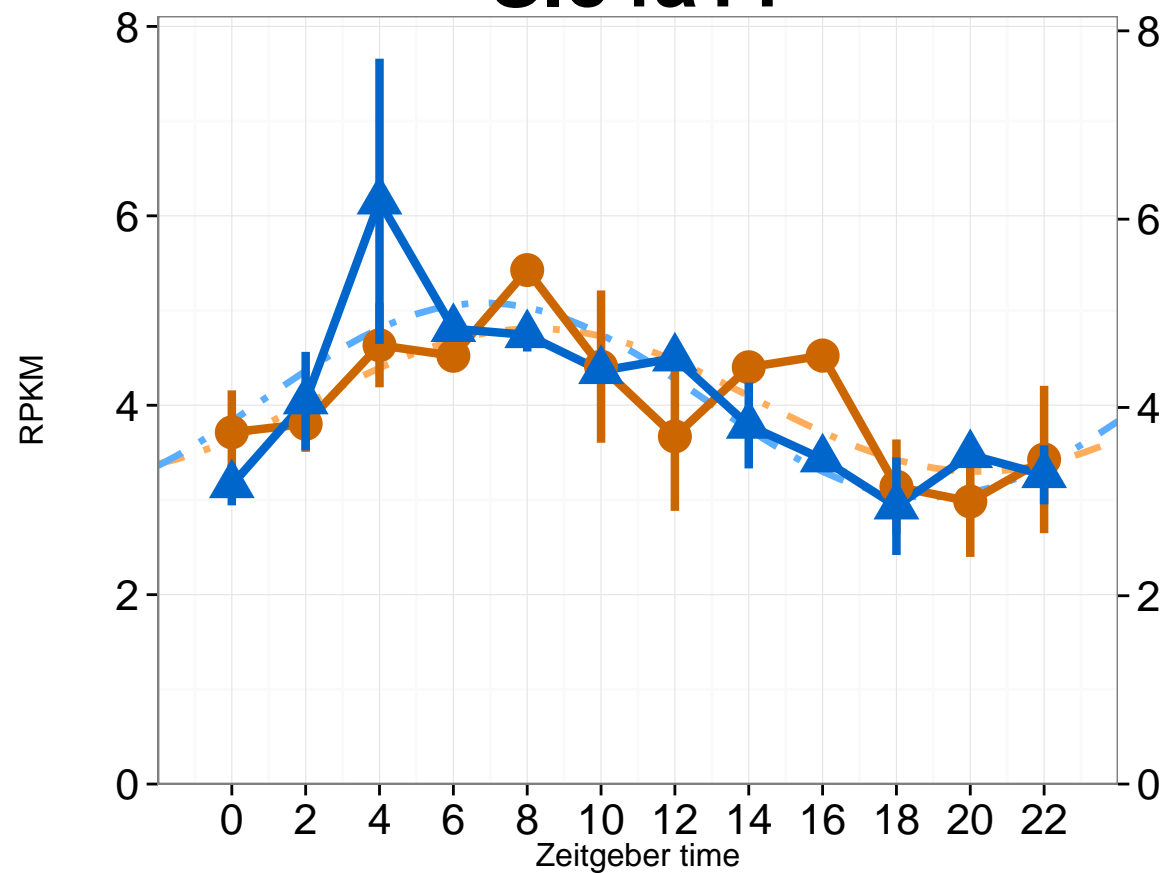

## Slc4a11

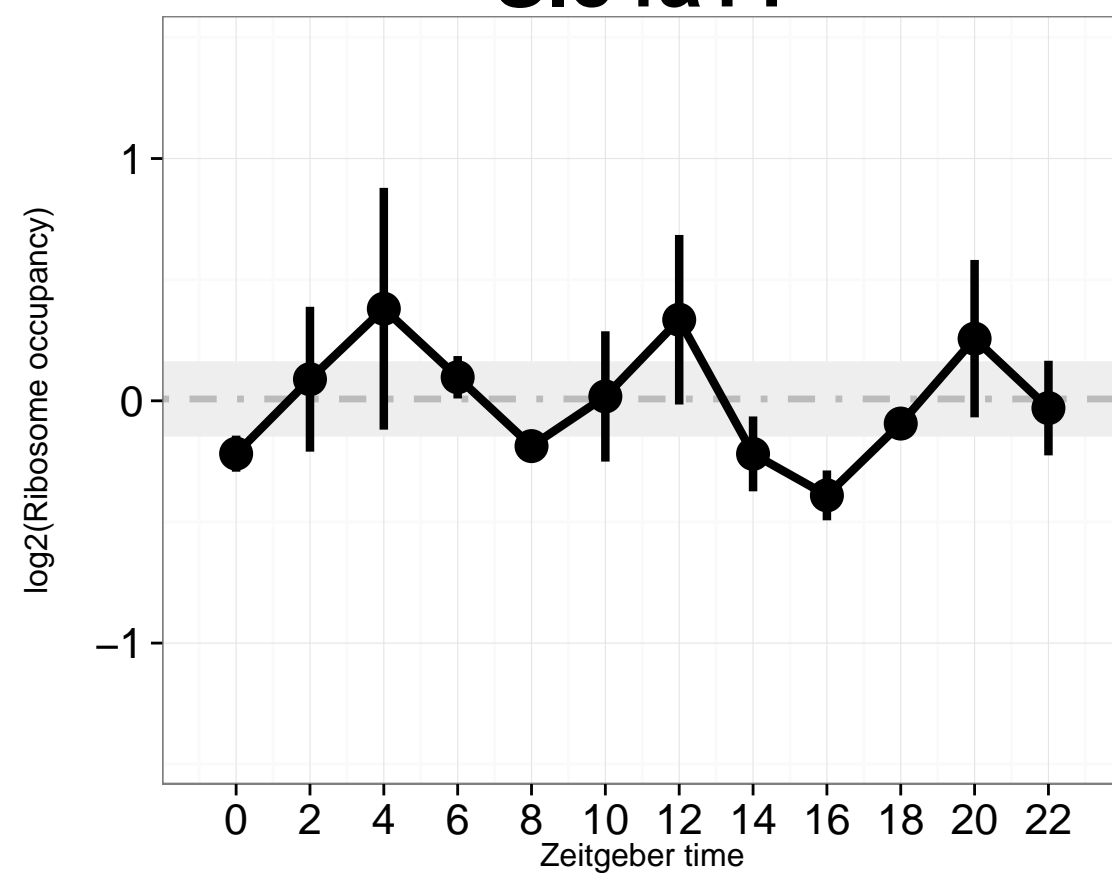

Supplement: Supplementary file 6332 [file 1]

# Tmem39b

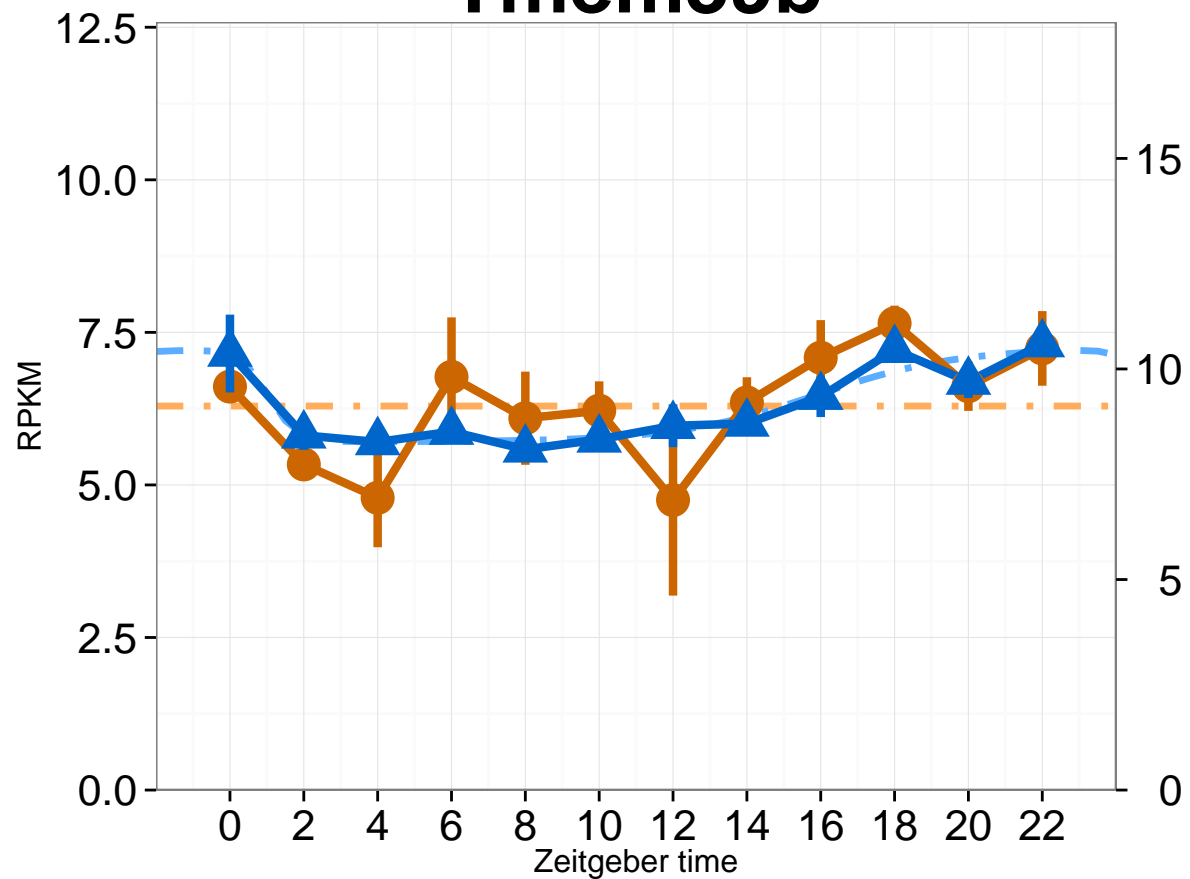

# Tmem39b

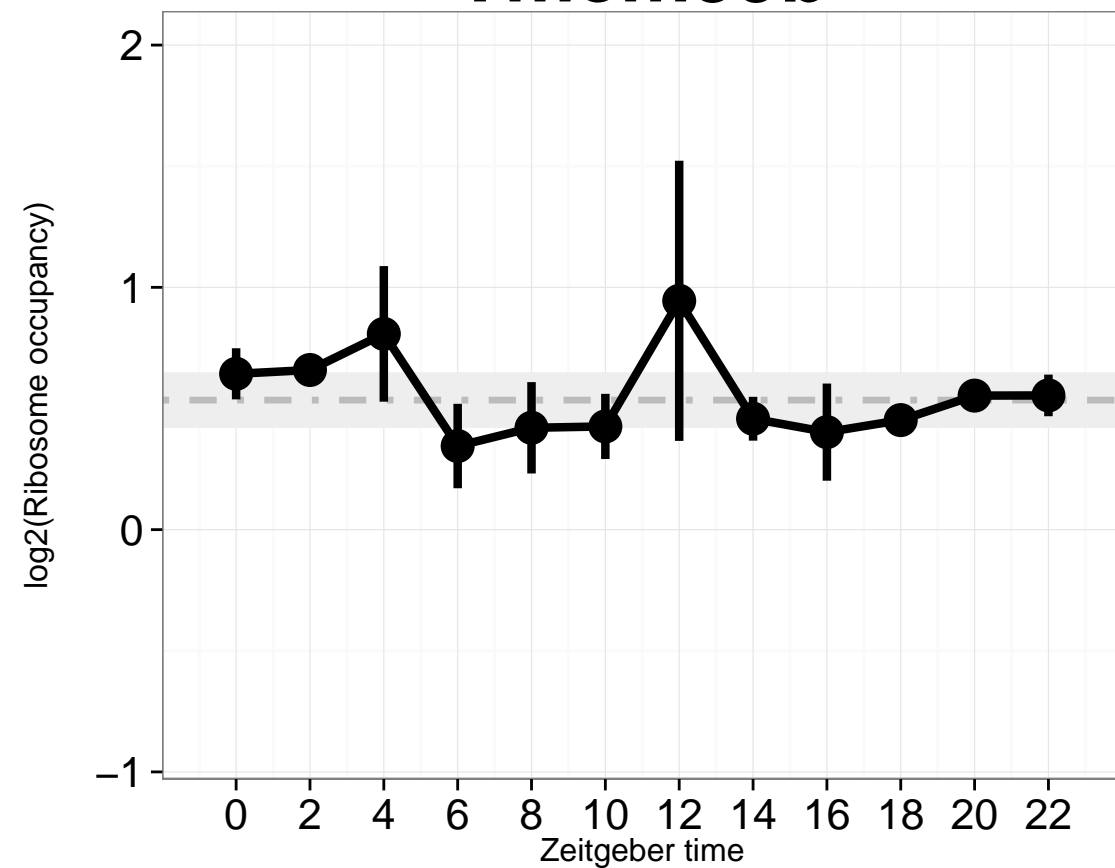

Supplement: Supplementary file 6333 [file 1]

## A930039A15Rik

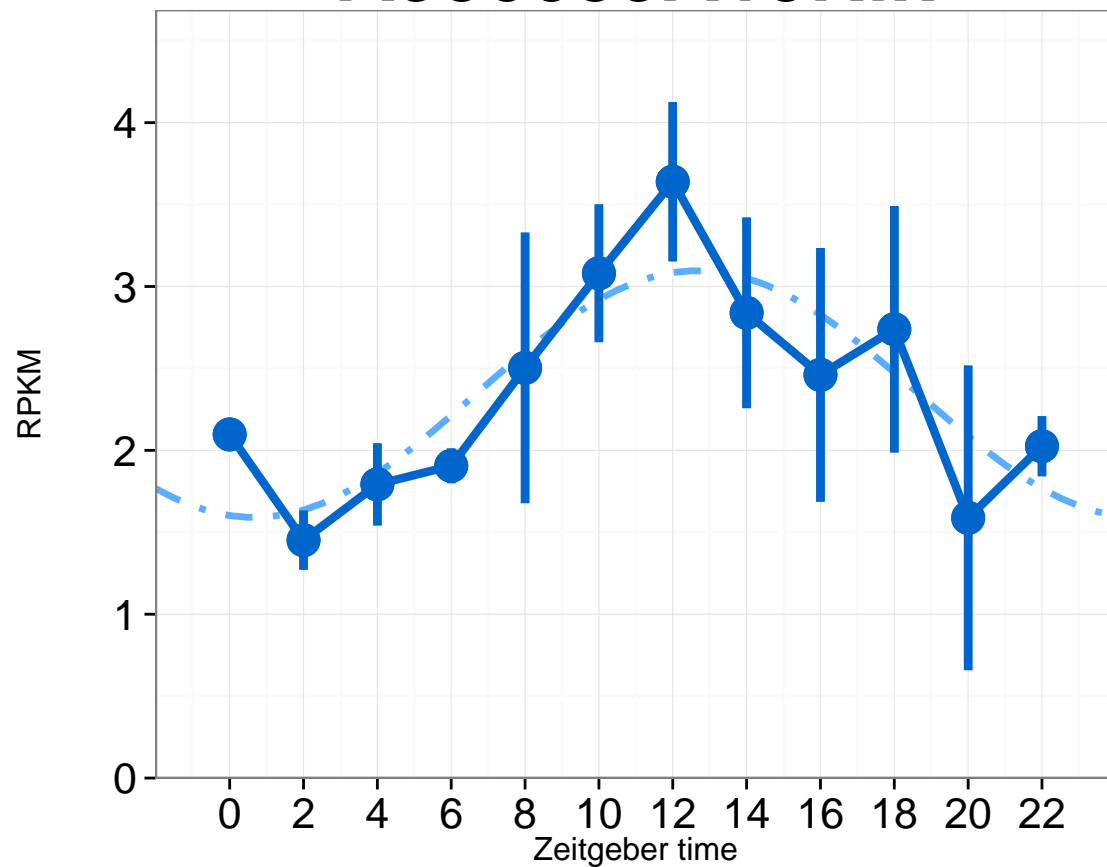

## A930039A15Rik log2(Ribosome occup

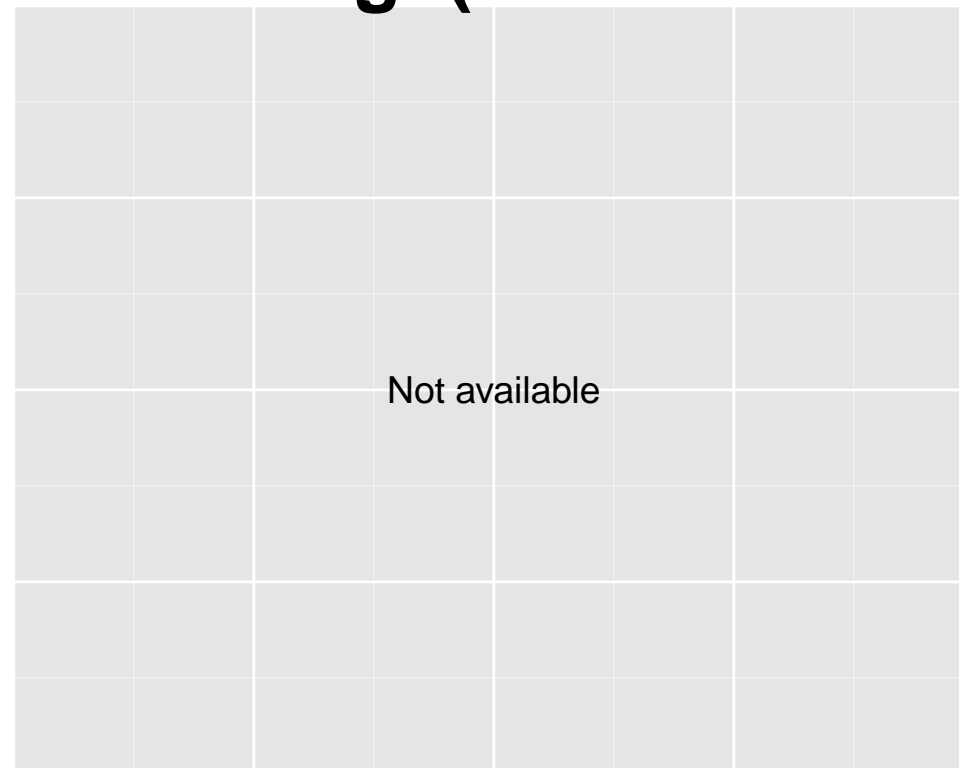

Supplement: Supplementary file 6334 [file 1]

# Tssc1

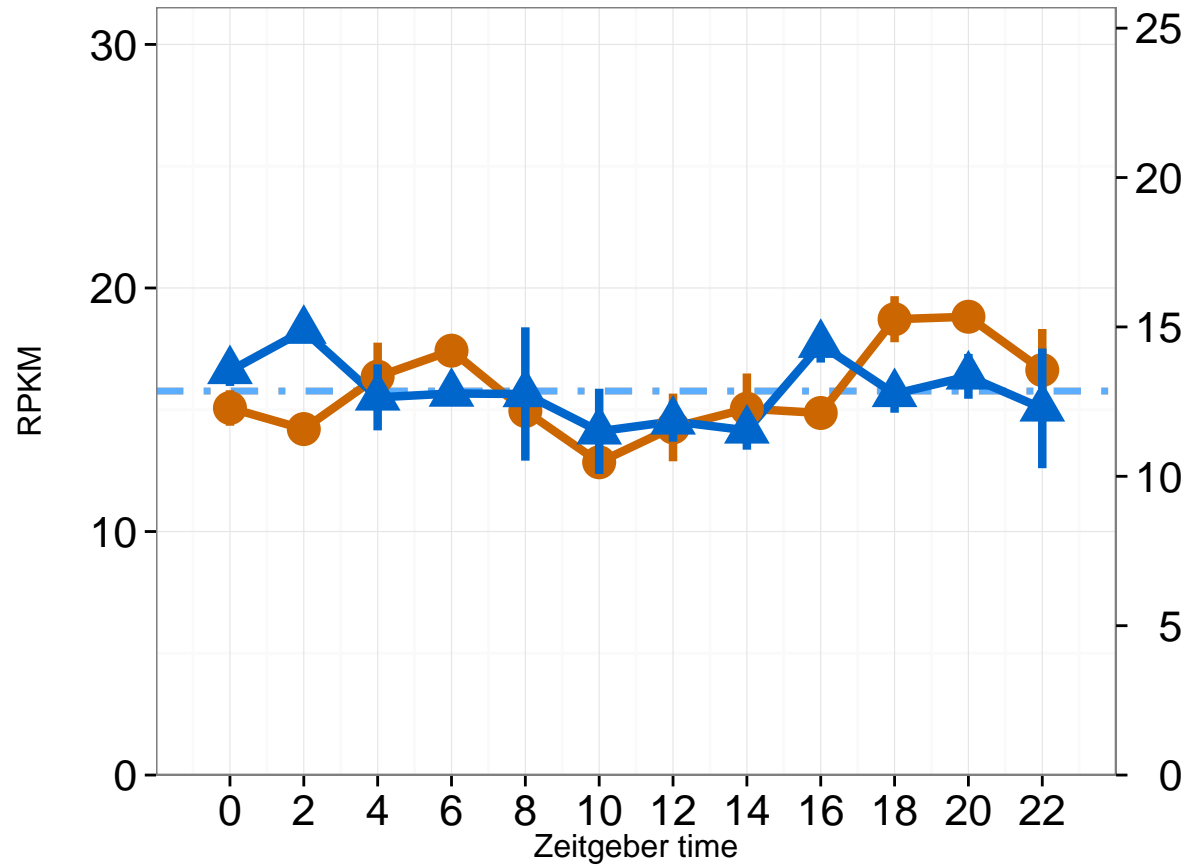

# Tssc1

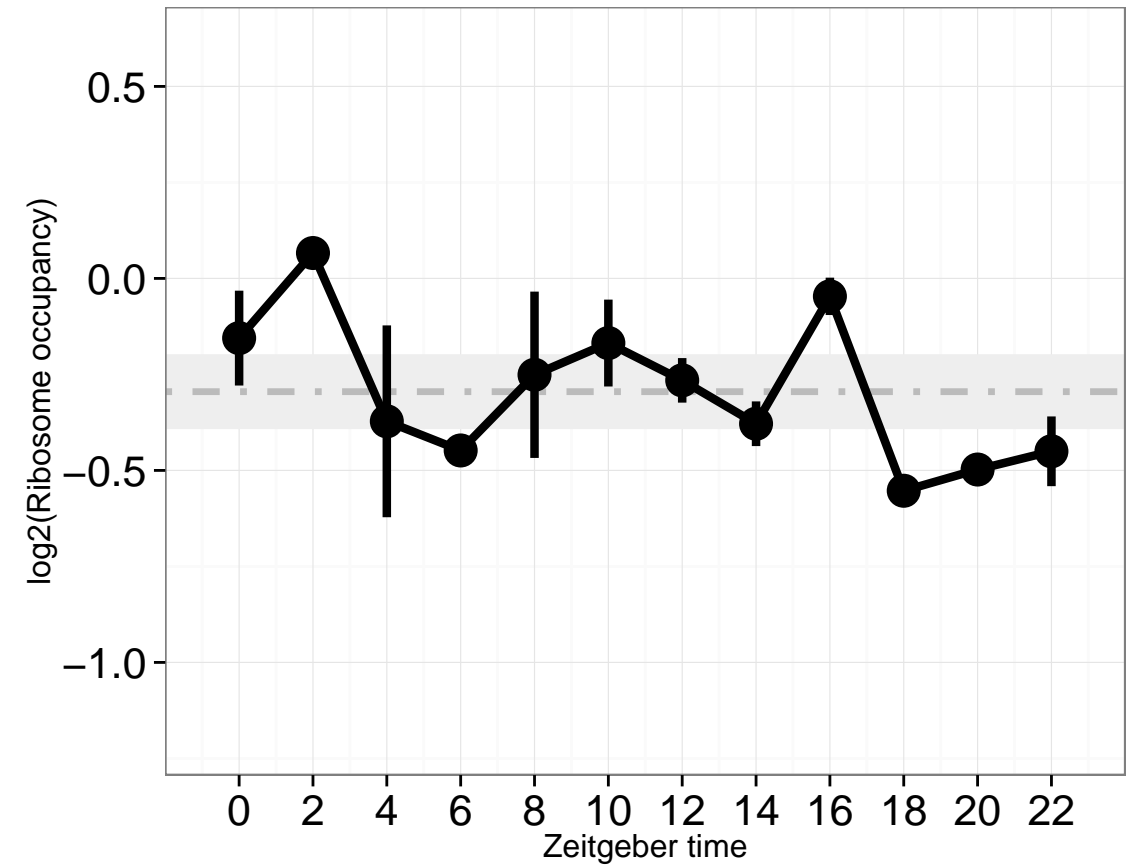

Supplement: Supplementary file 6335 [file 1]

# Helz

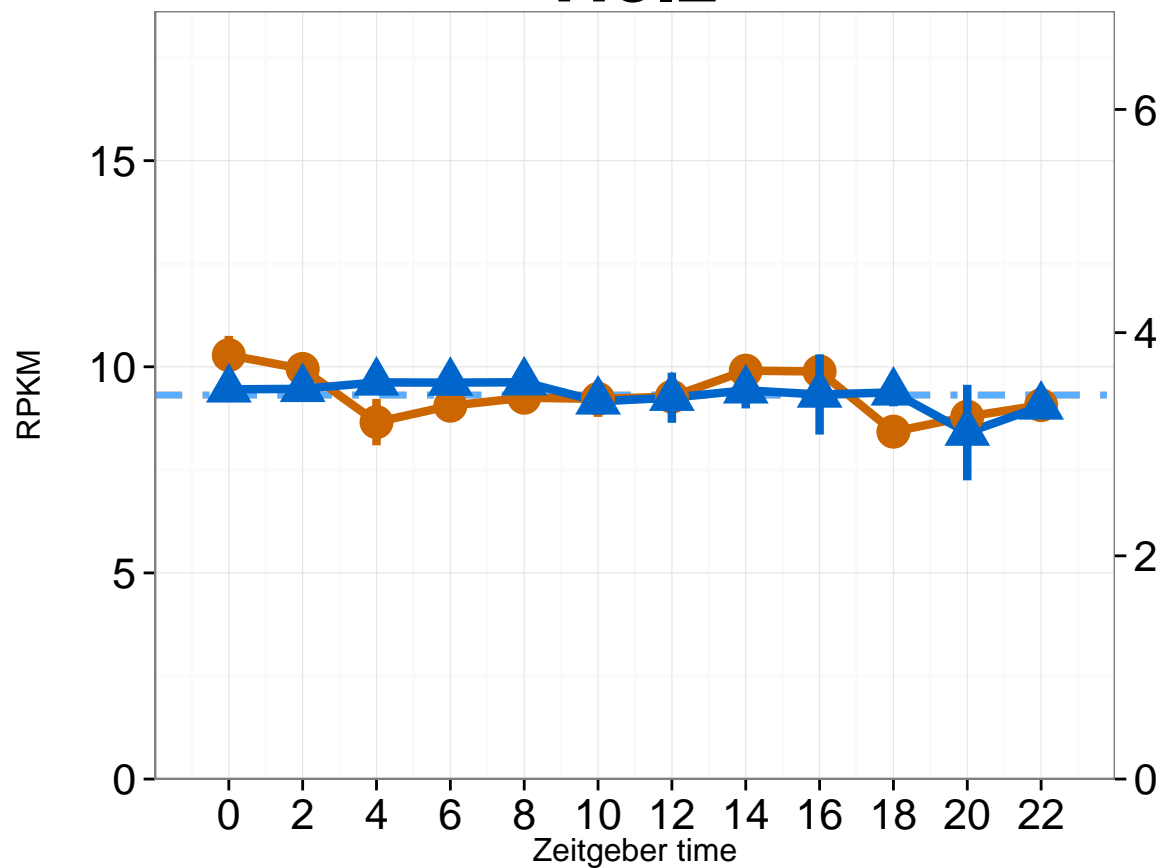

# Helz

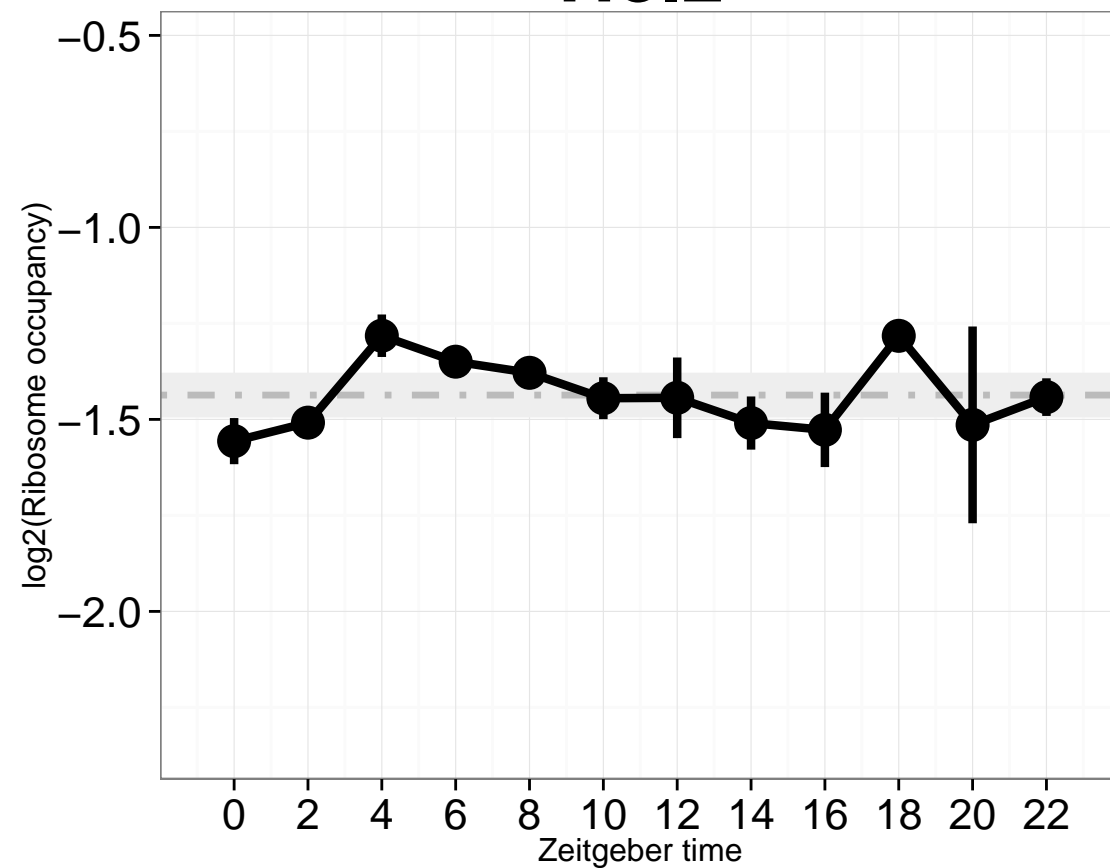

Supplement: Supplementary file 6336 [file 1]

# Soga1

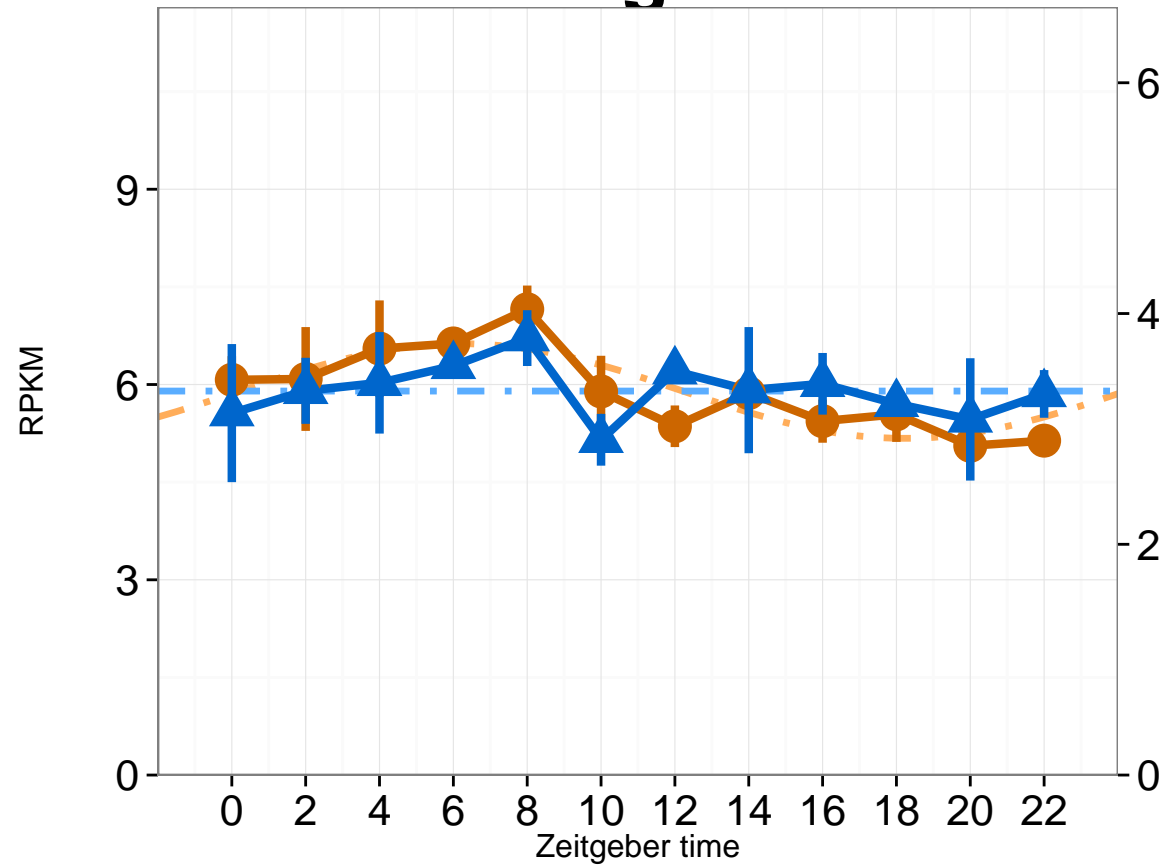

# Soga1

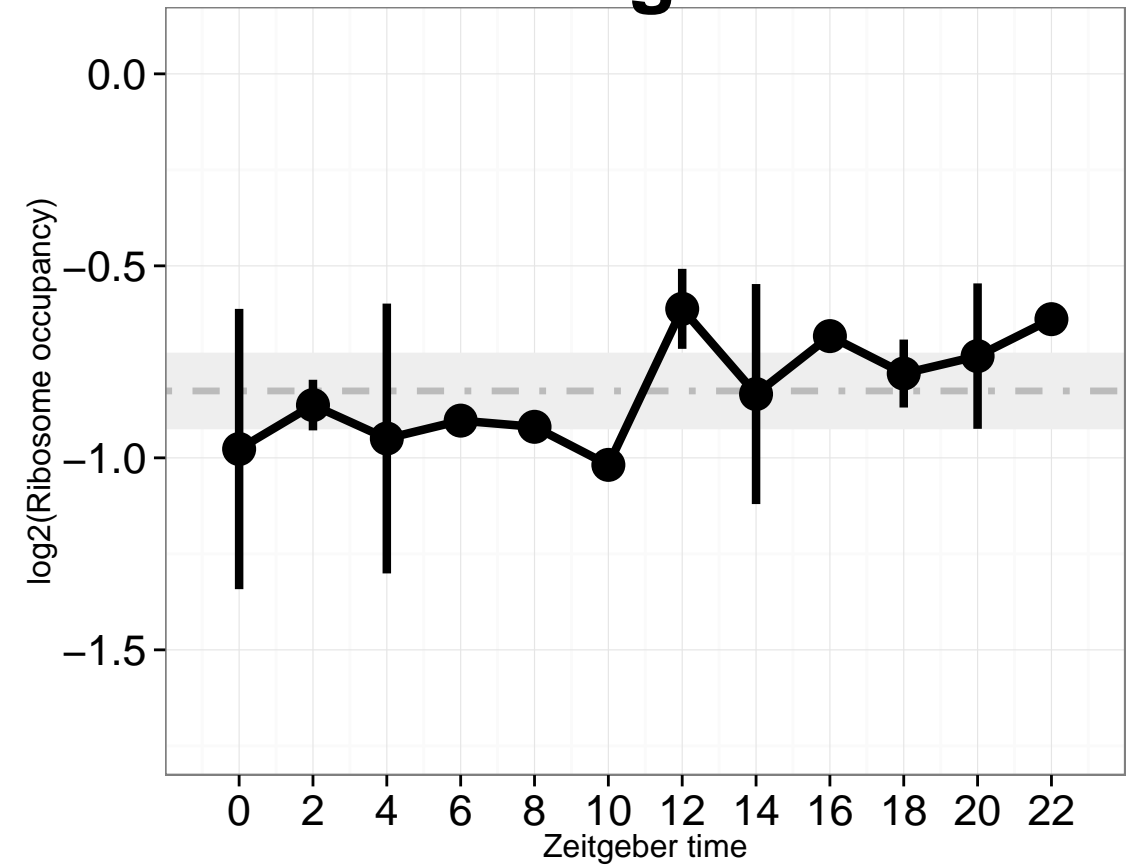

Supplement: Supplementary file 6337 [file 1]

# Pdzk1ip1

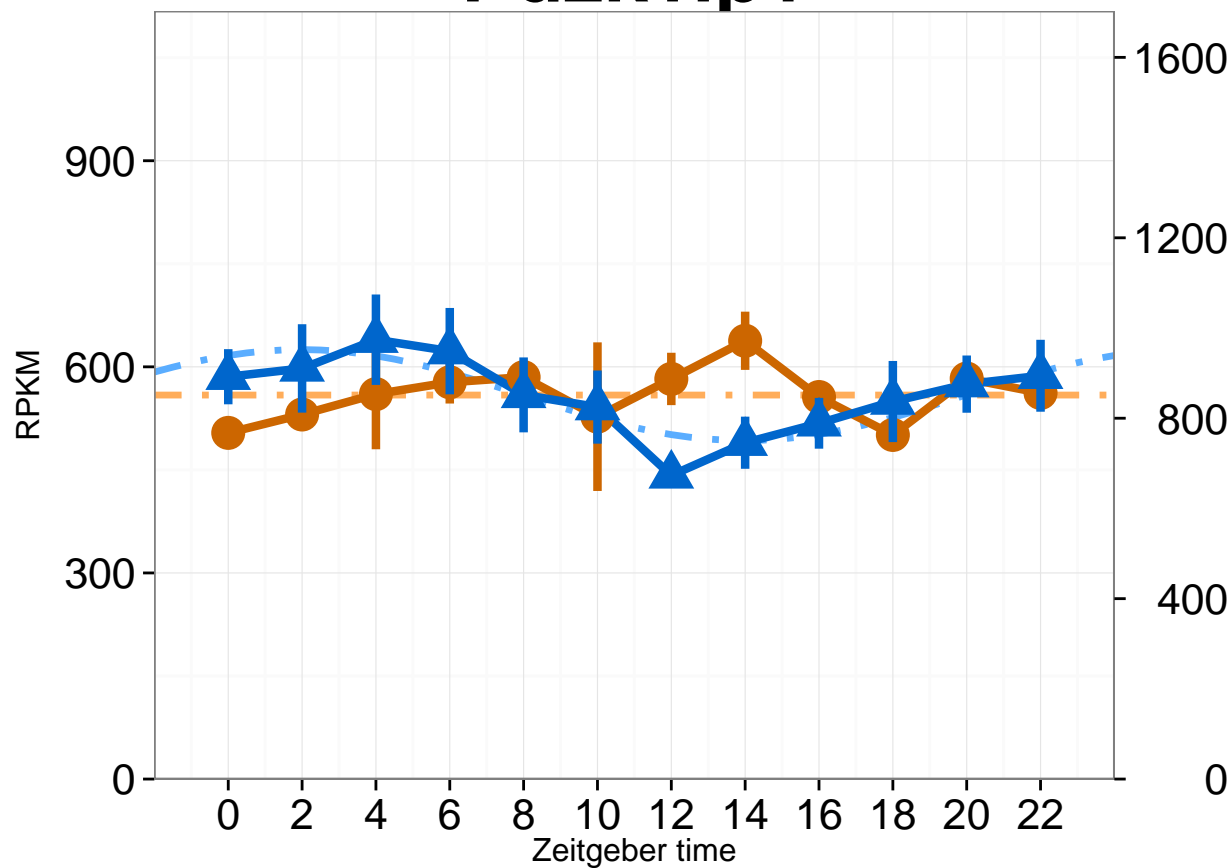

# Pdzk1ip1

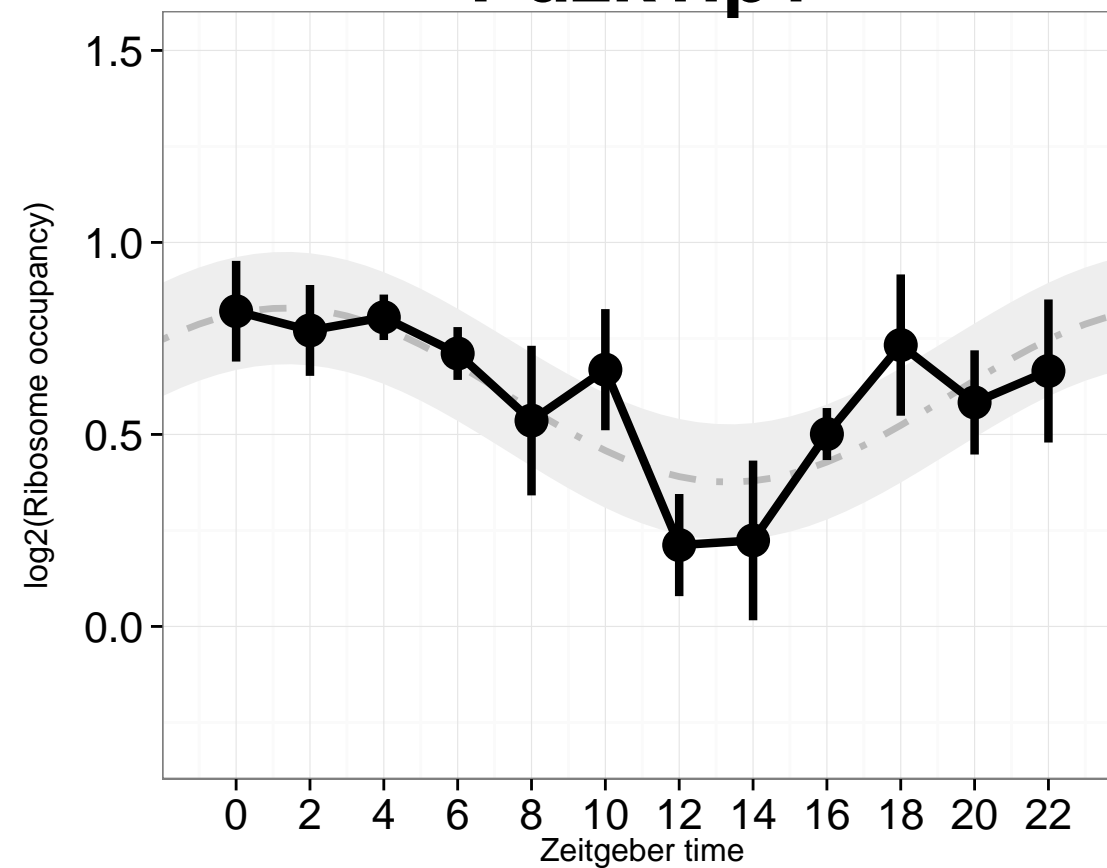

Supplement: Supplementary file 6338 [file 1]

## Tfg

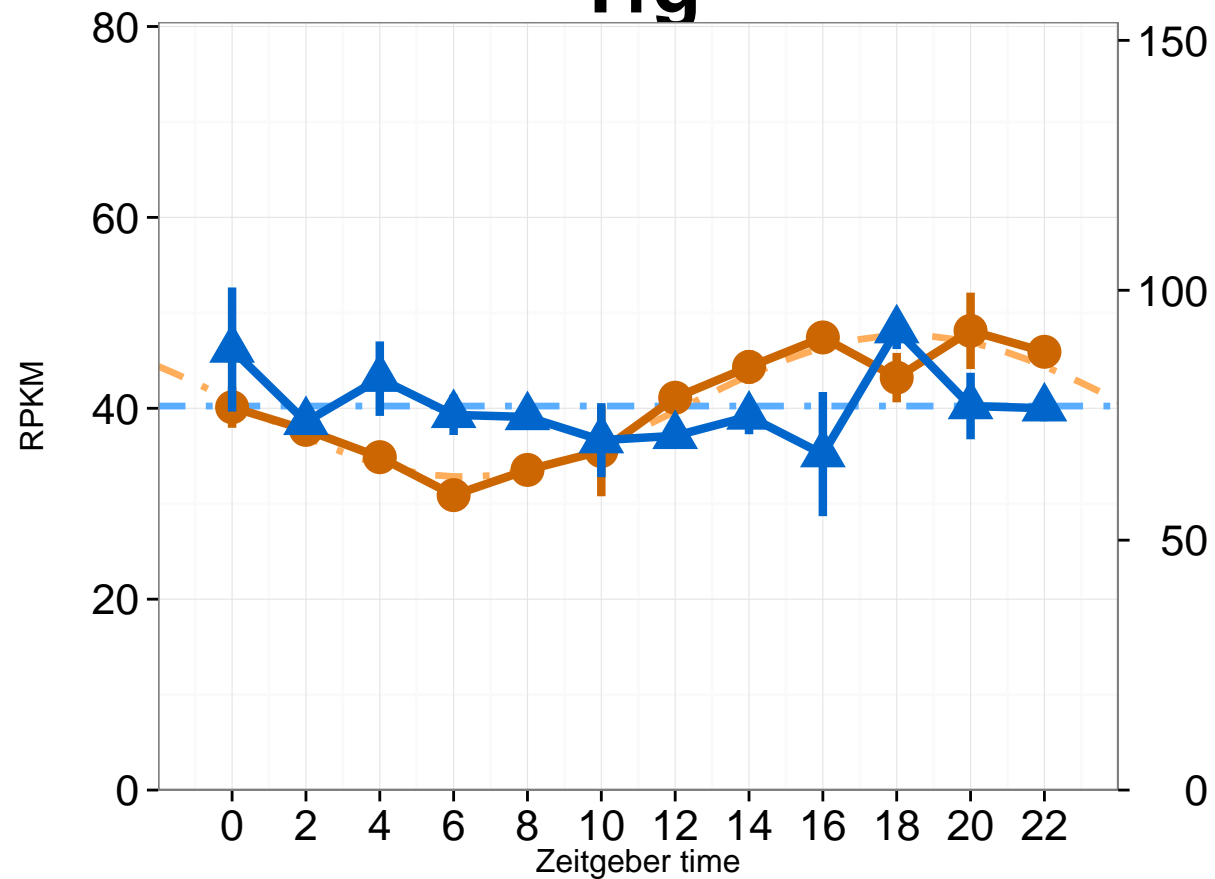

## Tfg

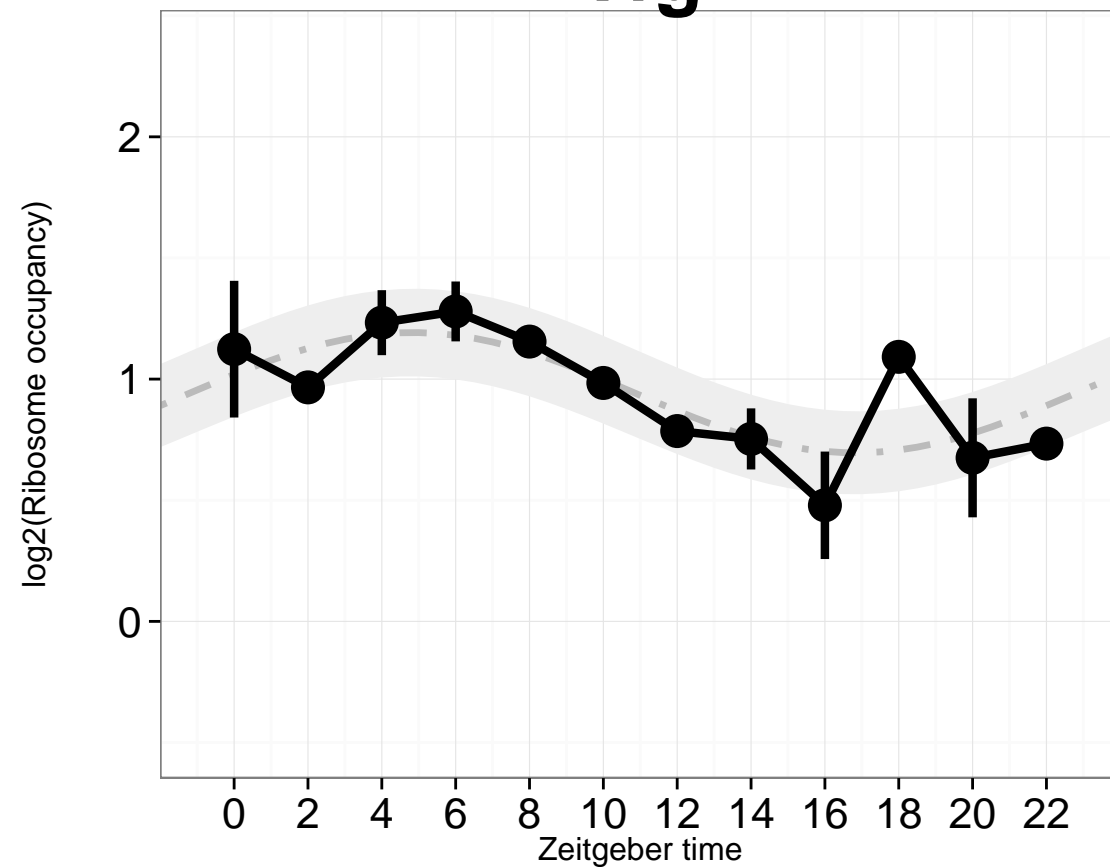

Supplement: Supplementary file 6339 [file 1]

# Cwf19l1

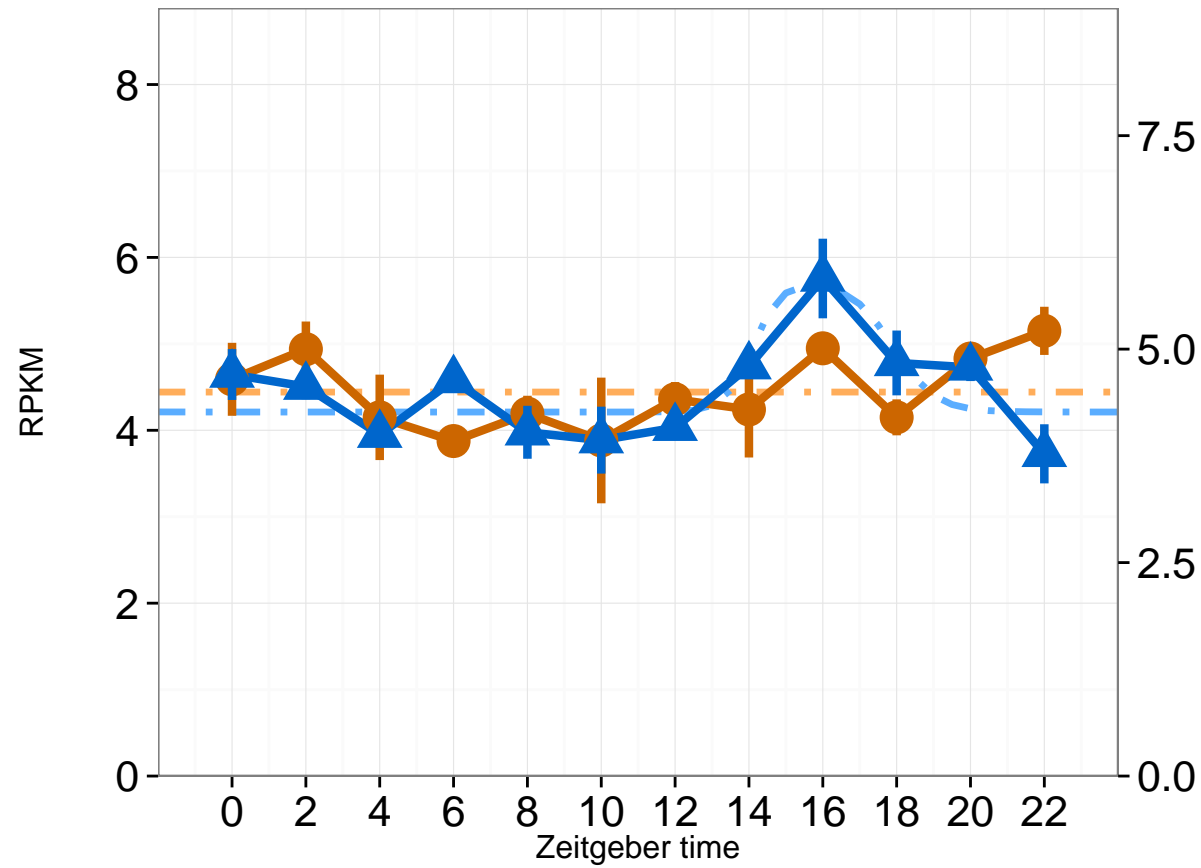

# Cwf19l1

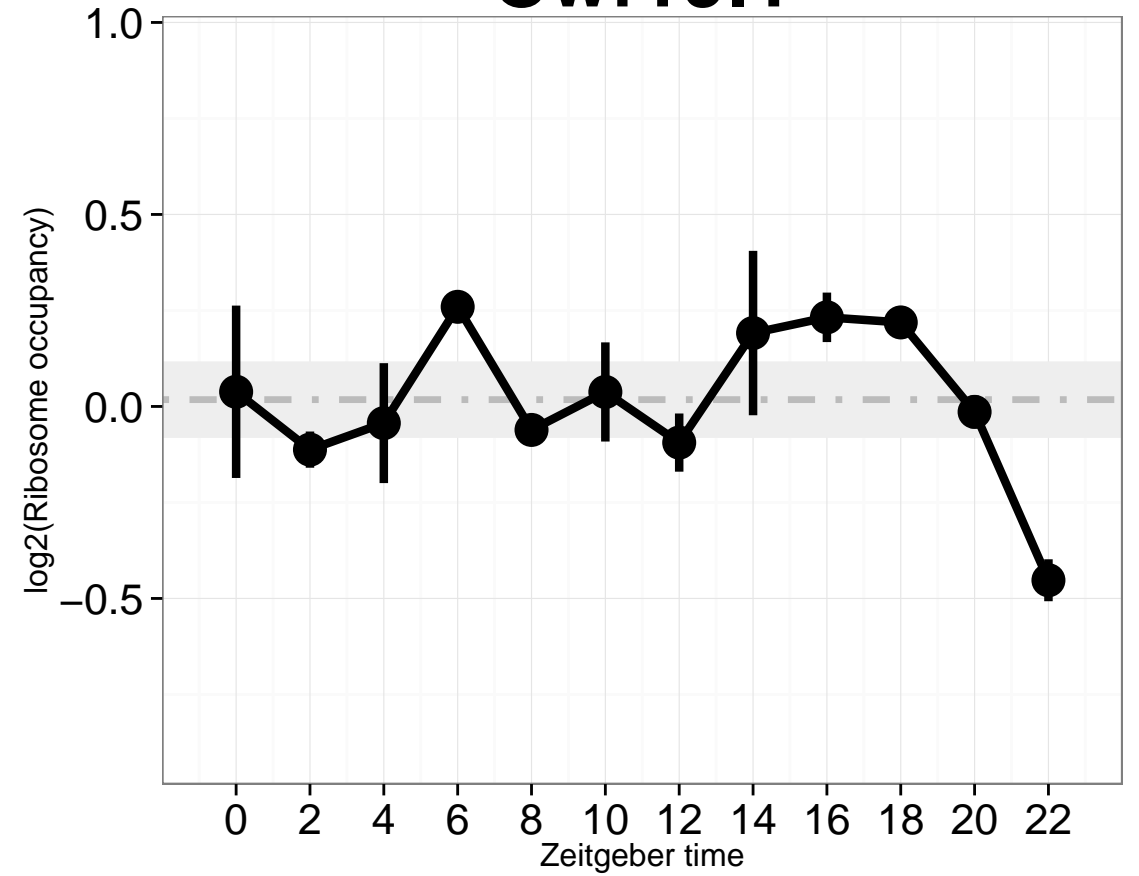

Supplement: Supplementary file 6340 [file 1]

# Ppp1r16a

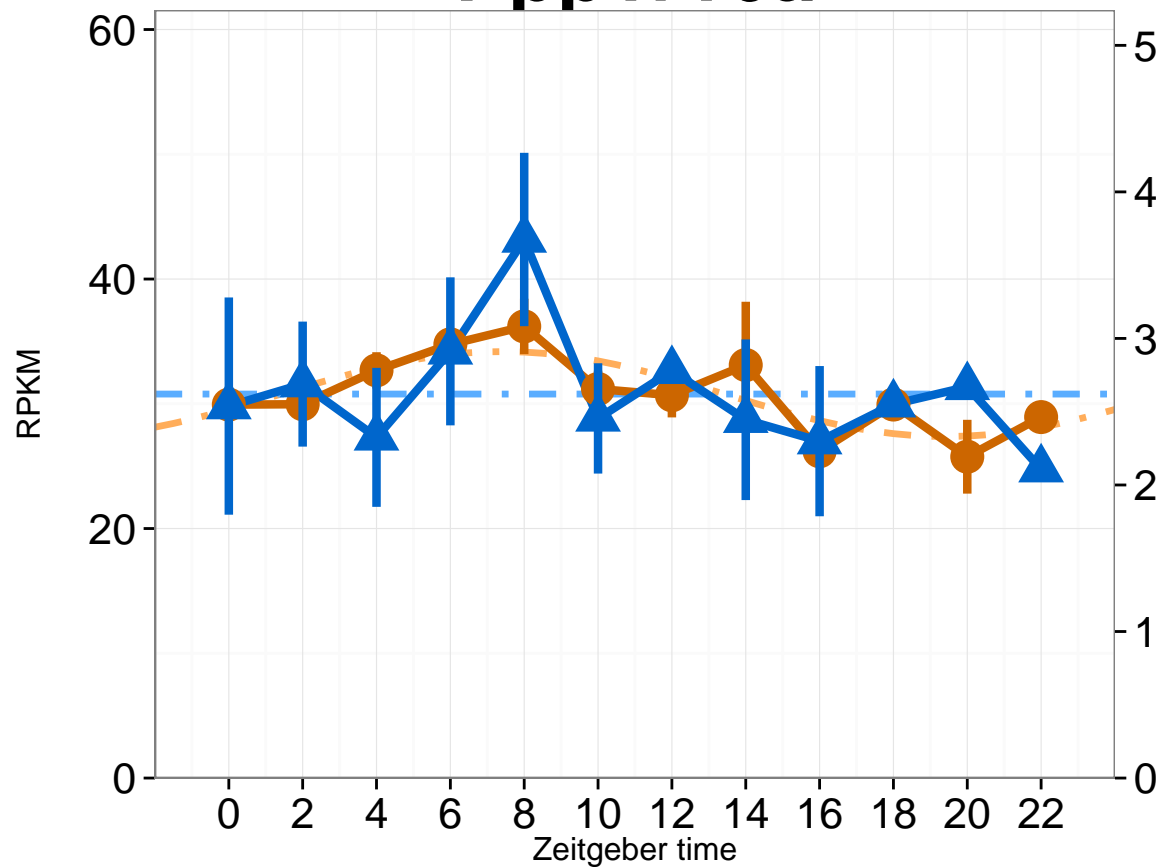

# Ppp1r16a

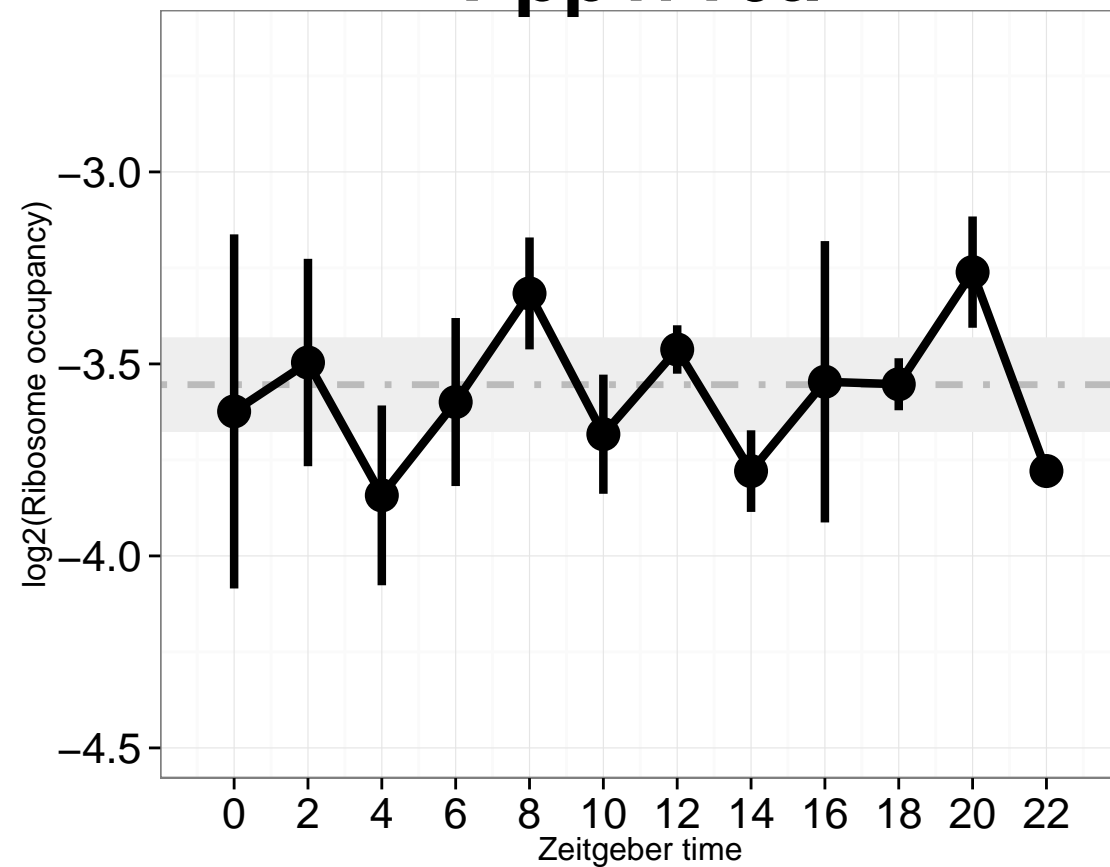

Supplement: Supplementary file 6341 [file 1]

## Por

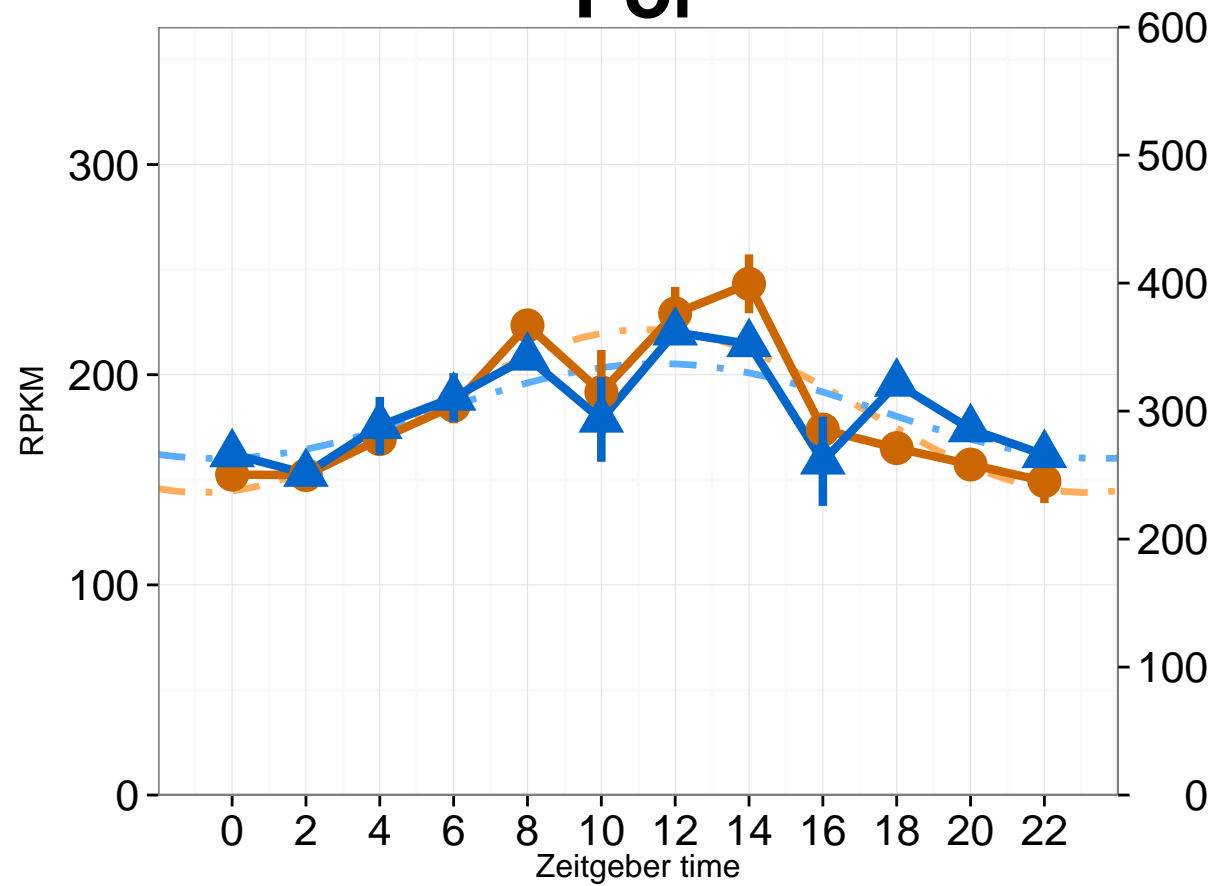

## Por

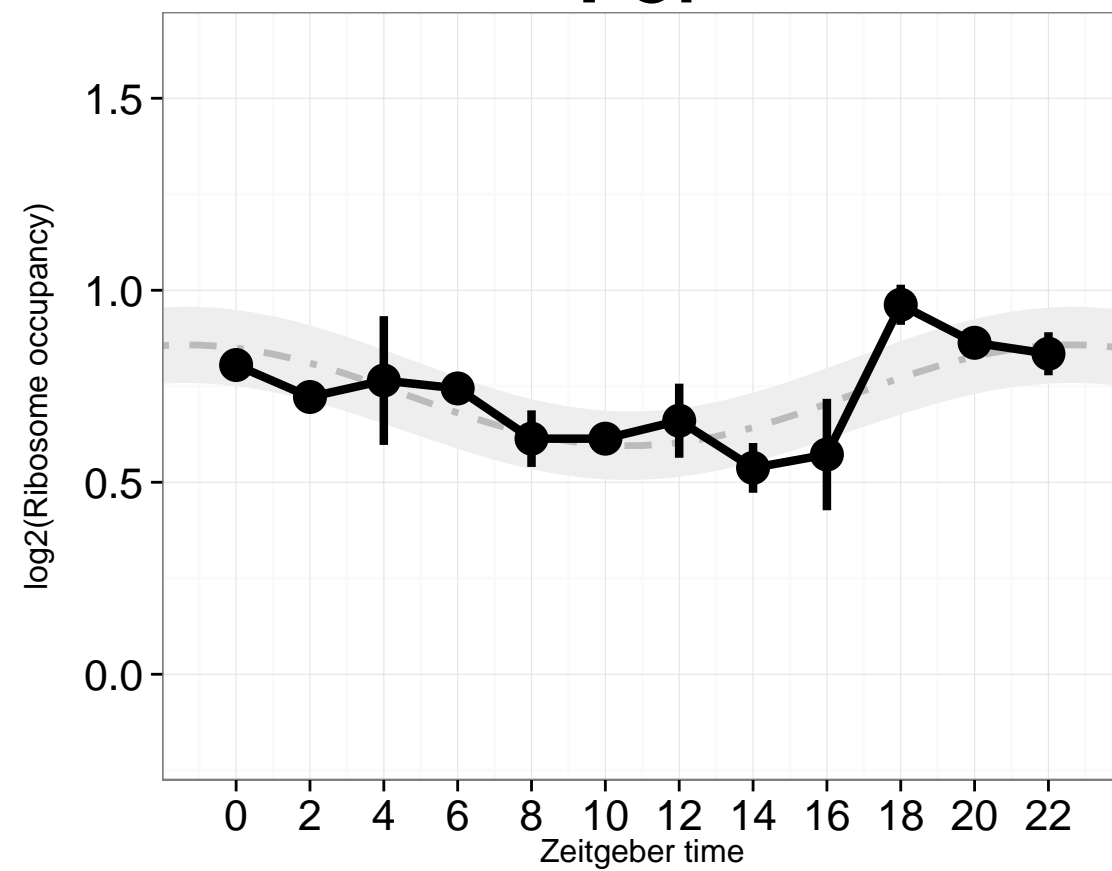

Supplement: Supplementary file 6342 [file 1]

# Nudt5

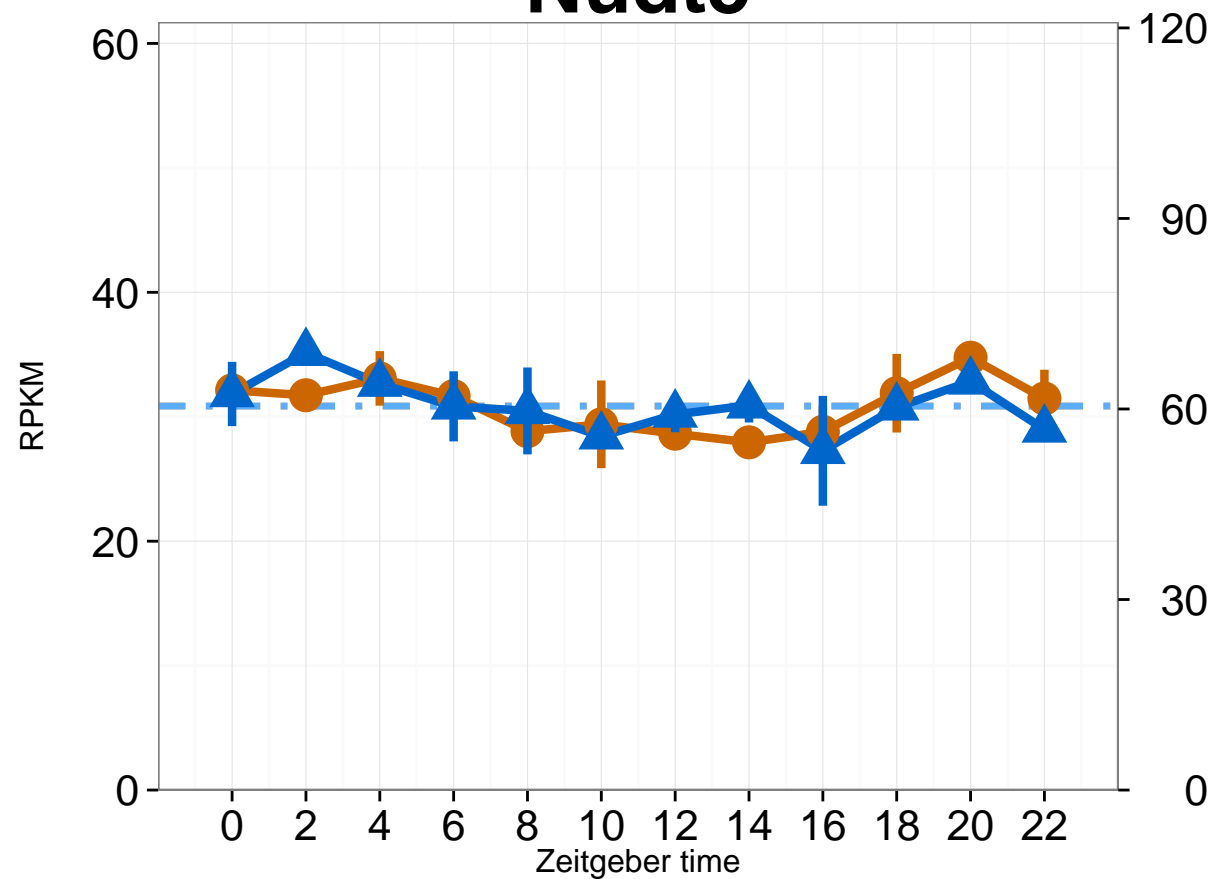

# Nudt5

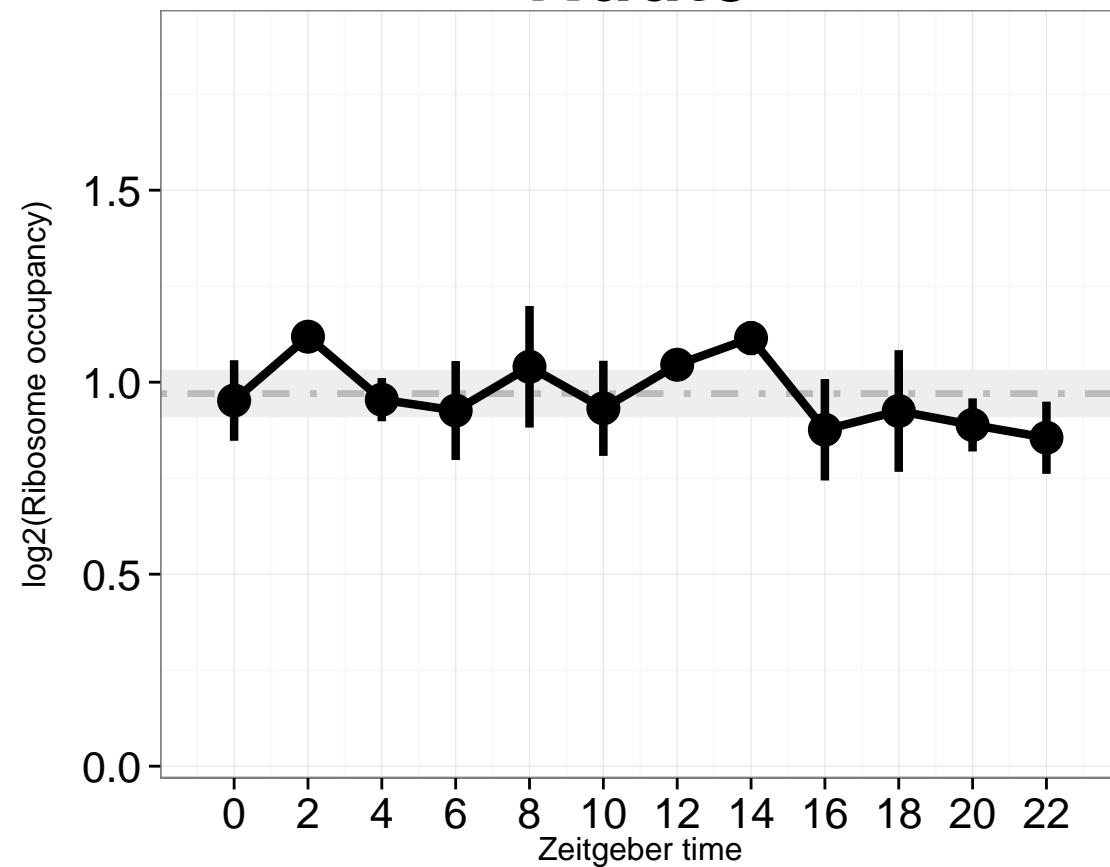

Supplement: Supplementary file 6343 [file 1]

# Gpld1

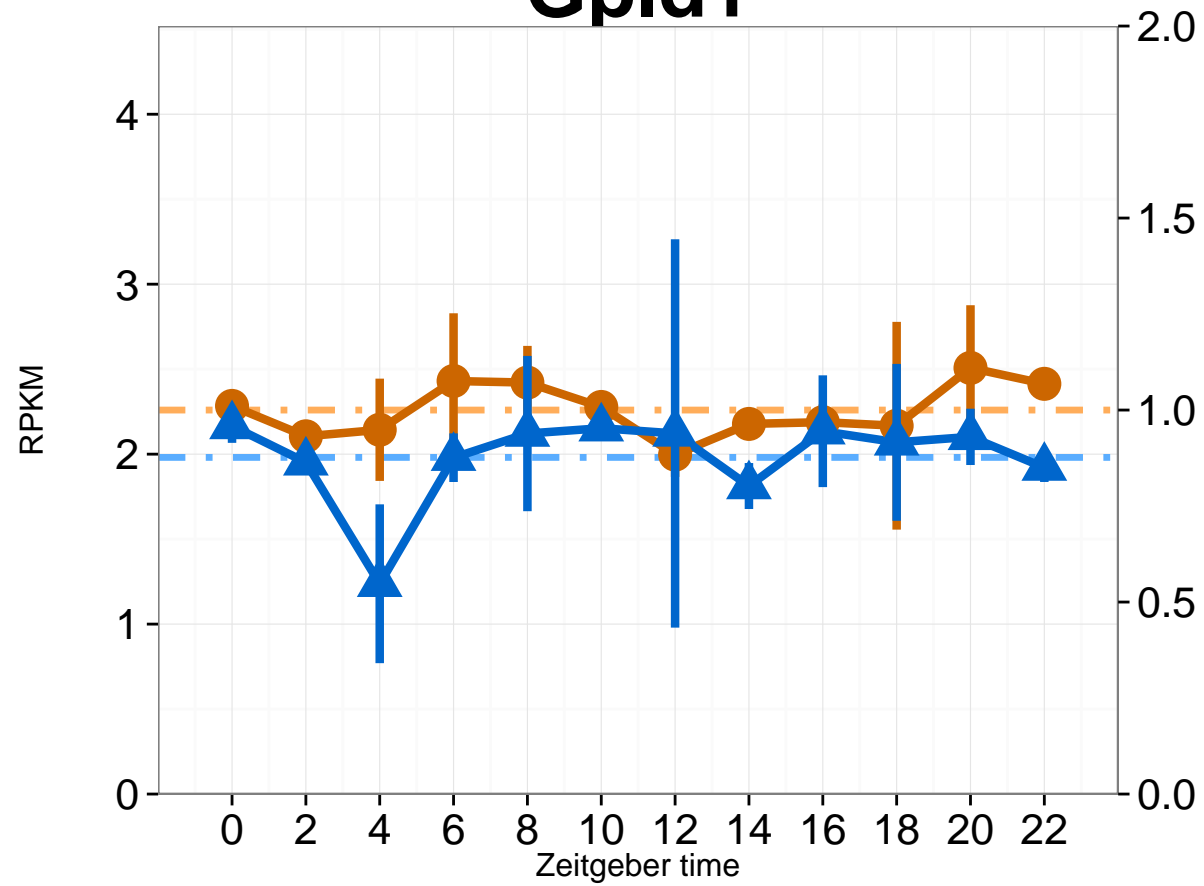

# Gpld1

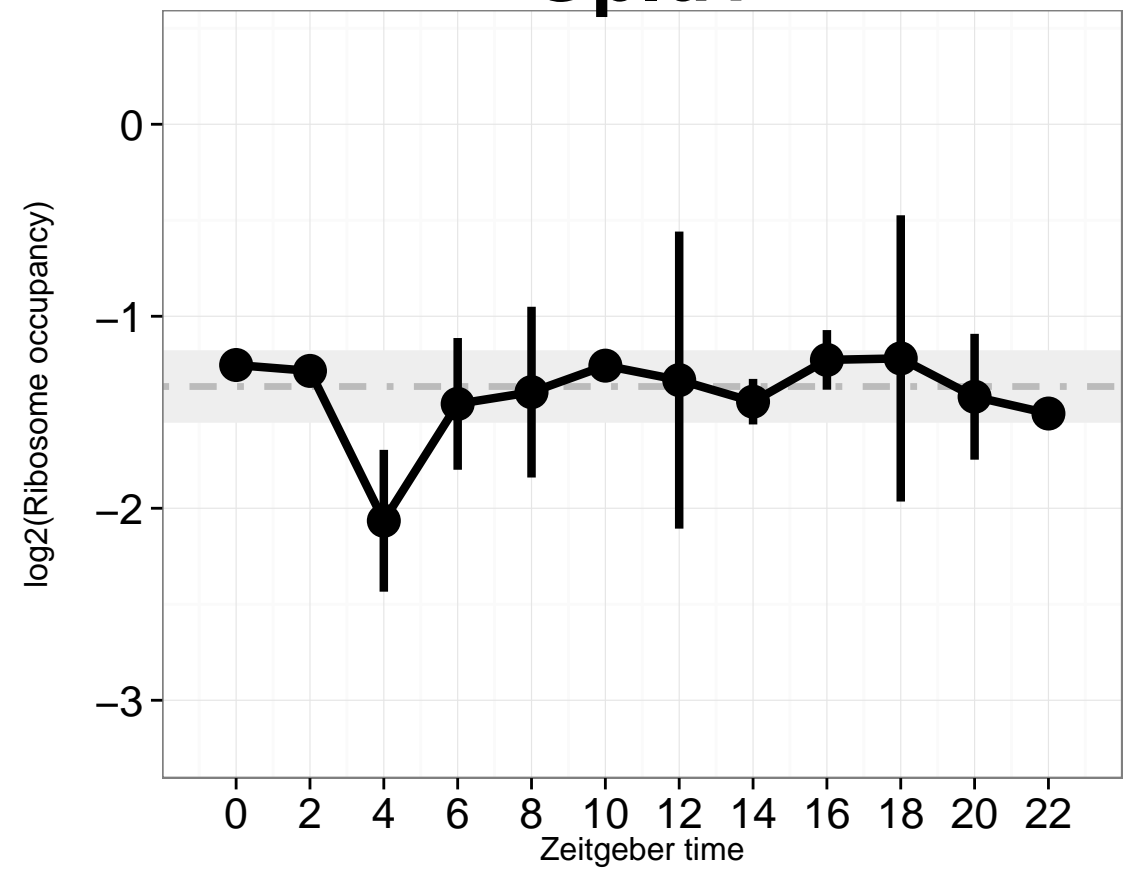

Supplement: Supplementary file 6344 [file 1]

## Ppil6

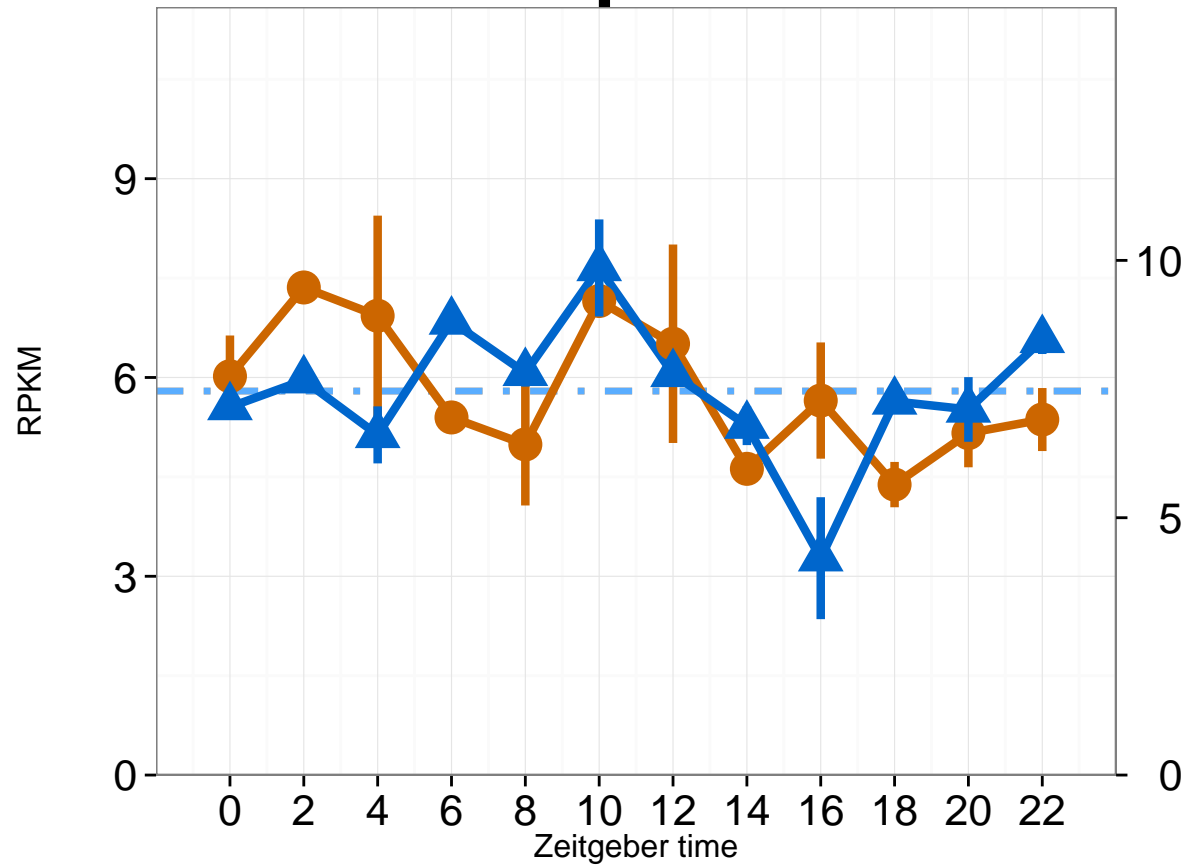

## Ppil6

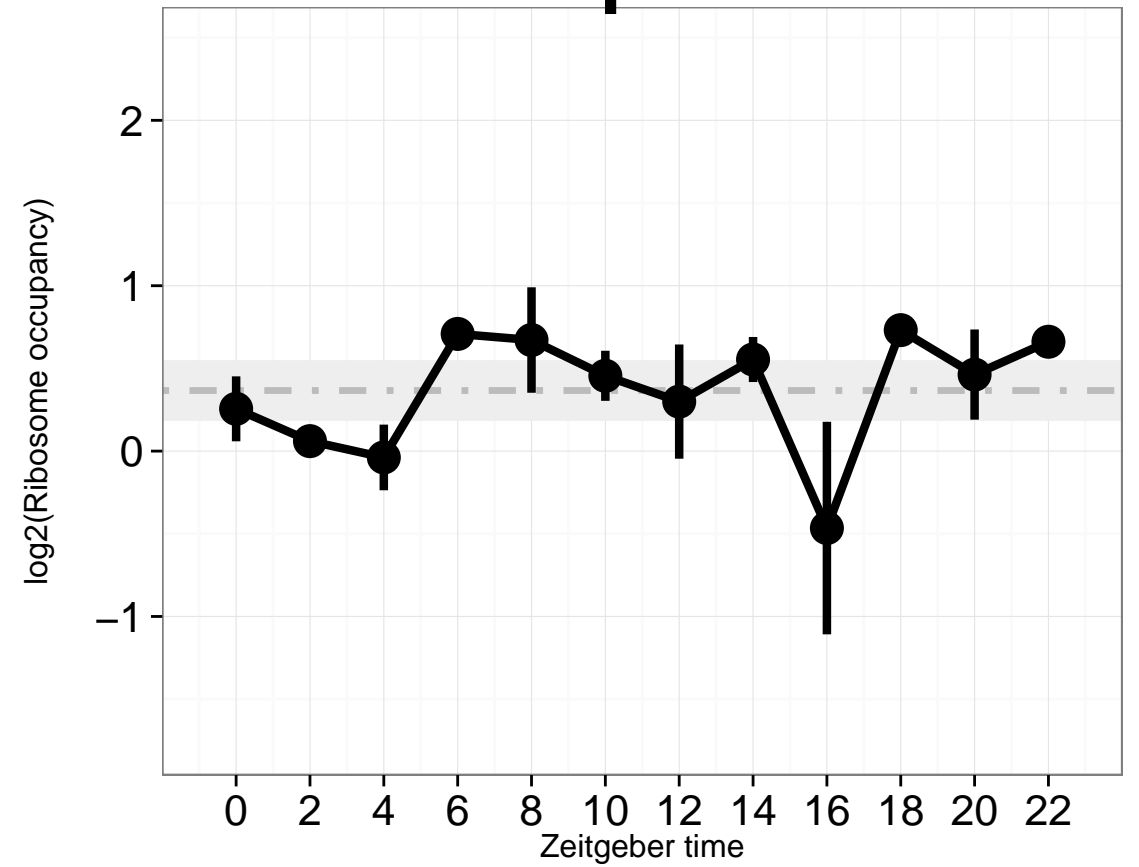

Supplement: Supplementary file 6345 [file 1]

# Atp8b5

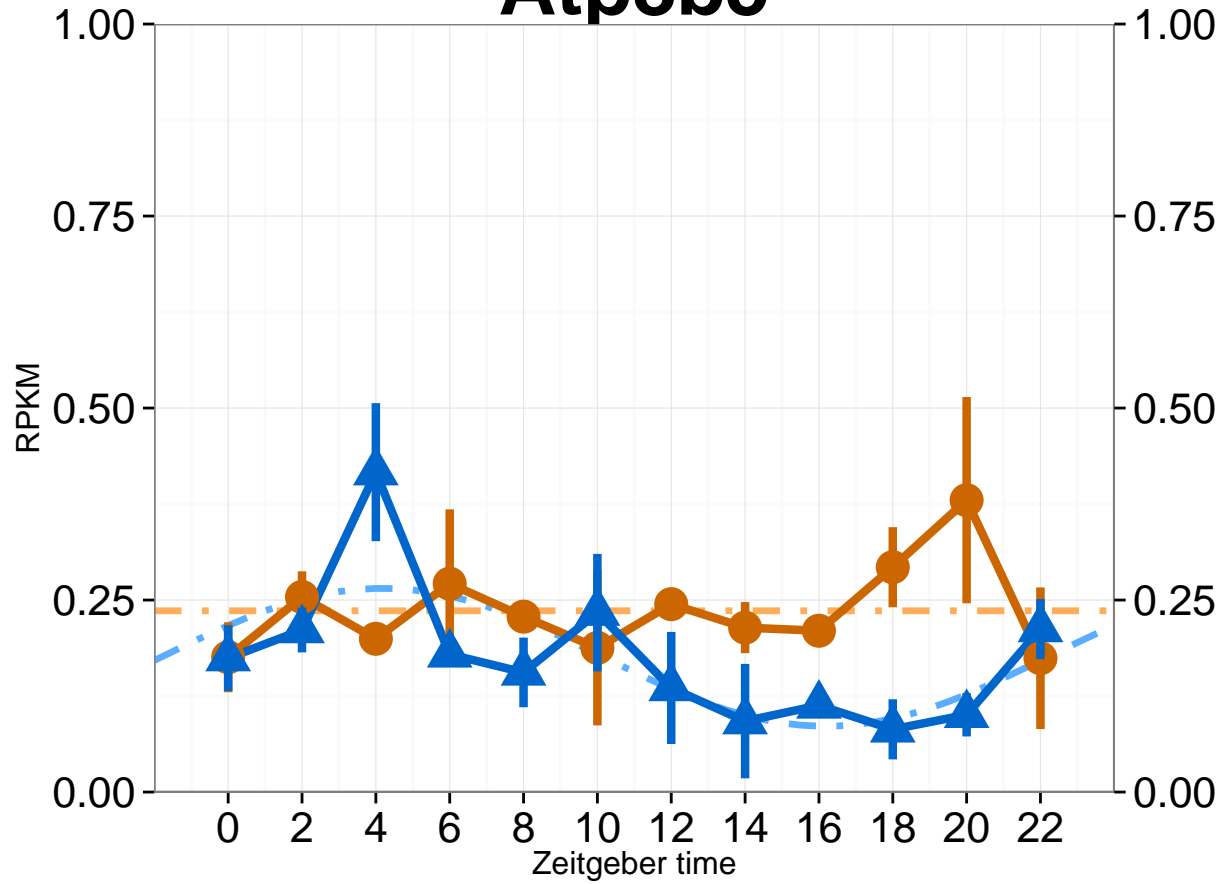

# Atp8b5

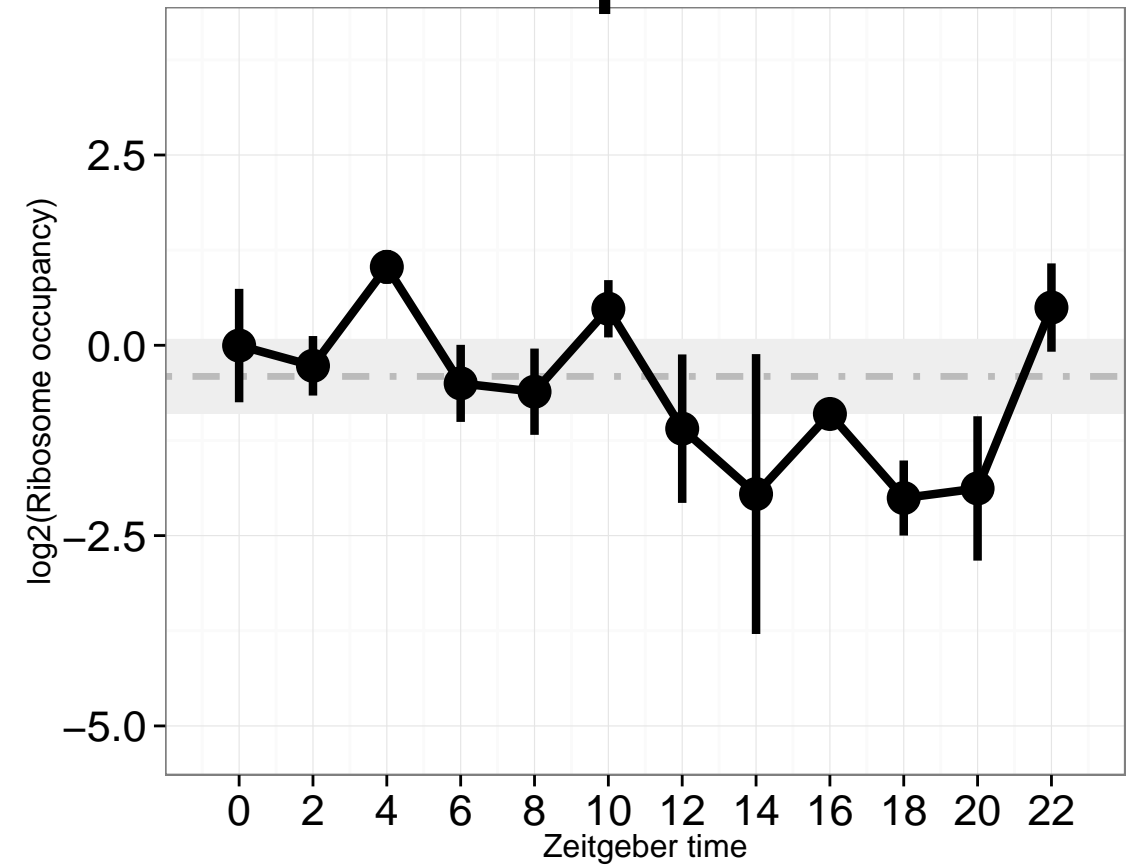

Supplement: Supplementary file 6346 [file 1]

## Ska2

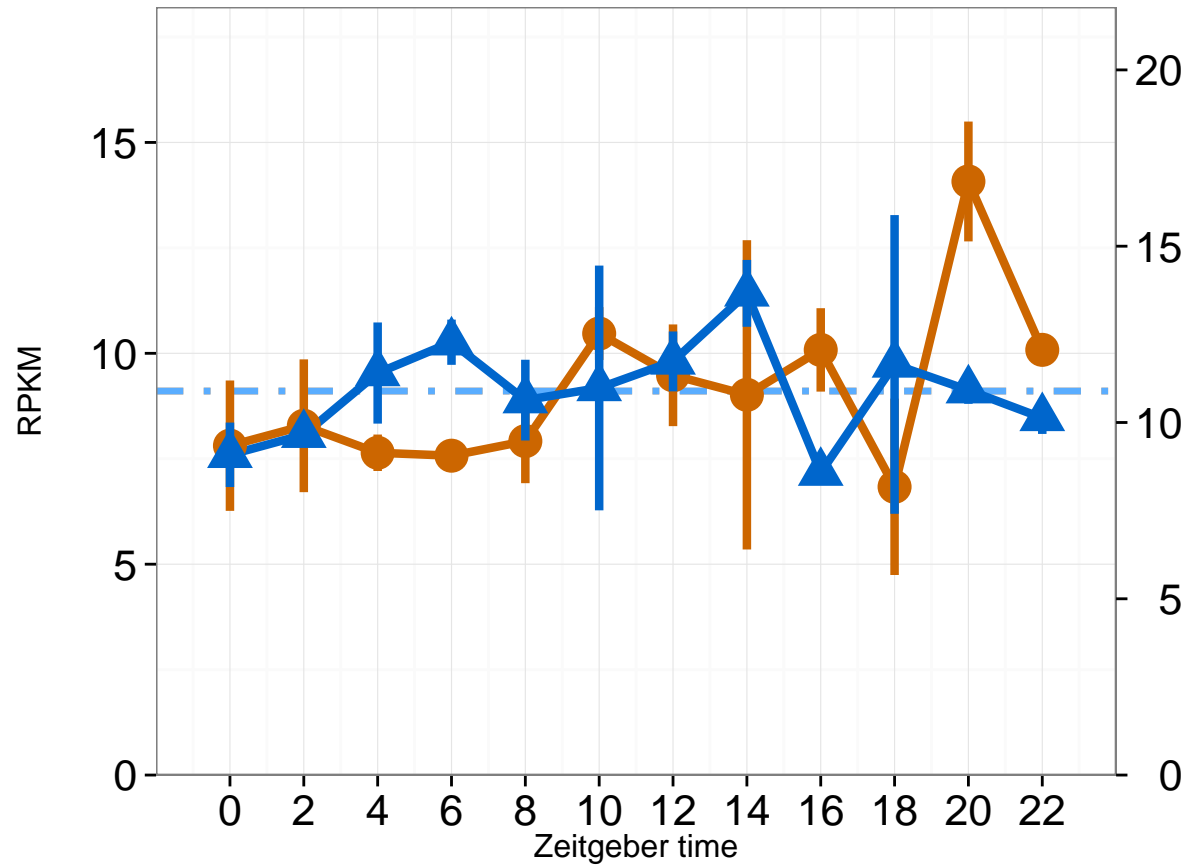

## Ska2

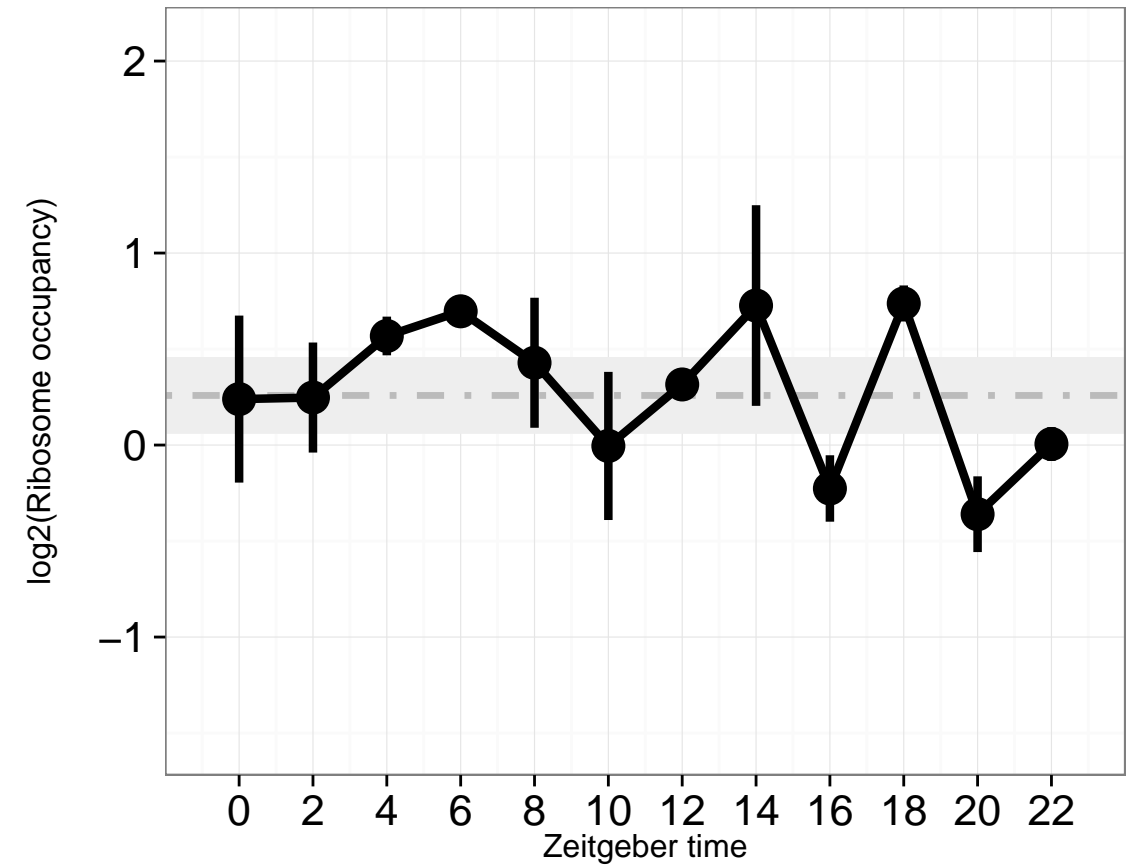

Supplement: Supplementary file 6347 [file 1]

# Atp8a2

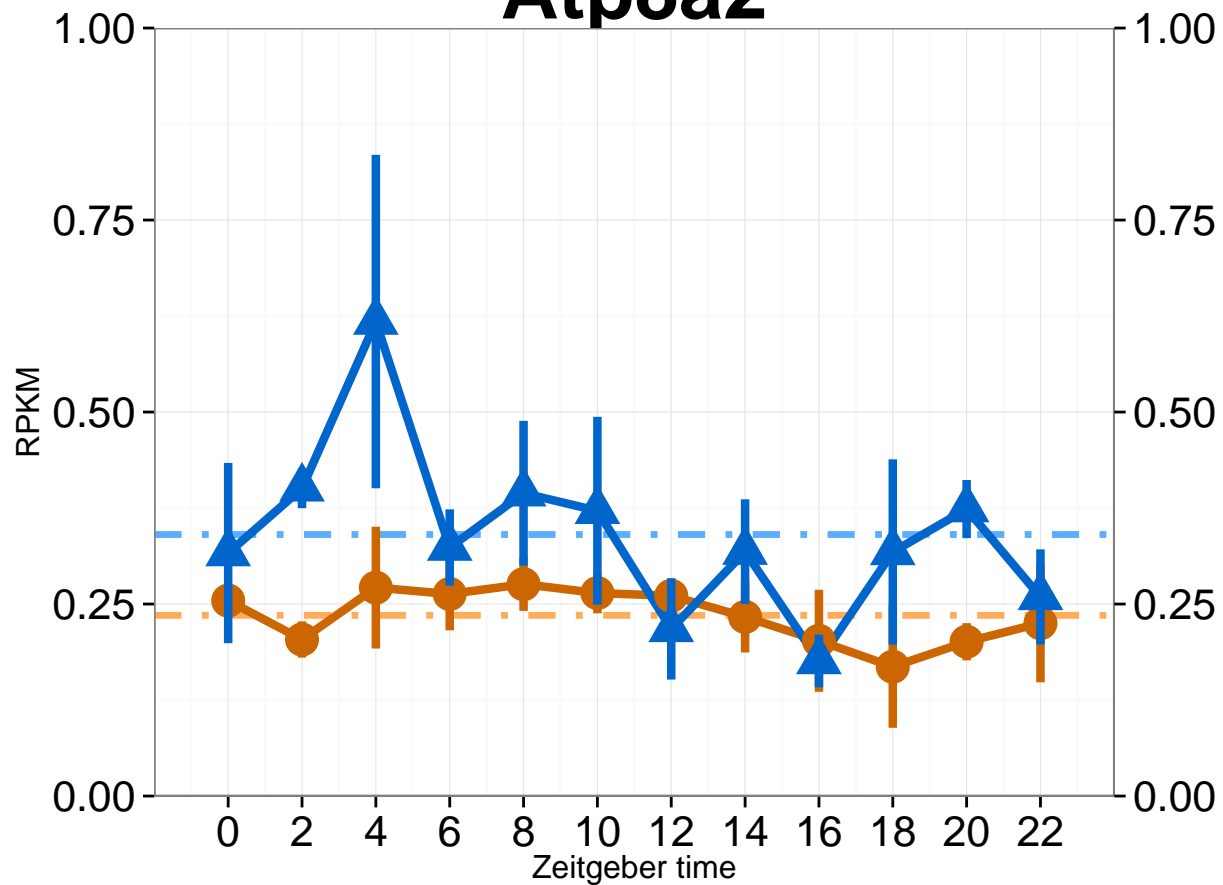

# Atp8a2

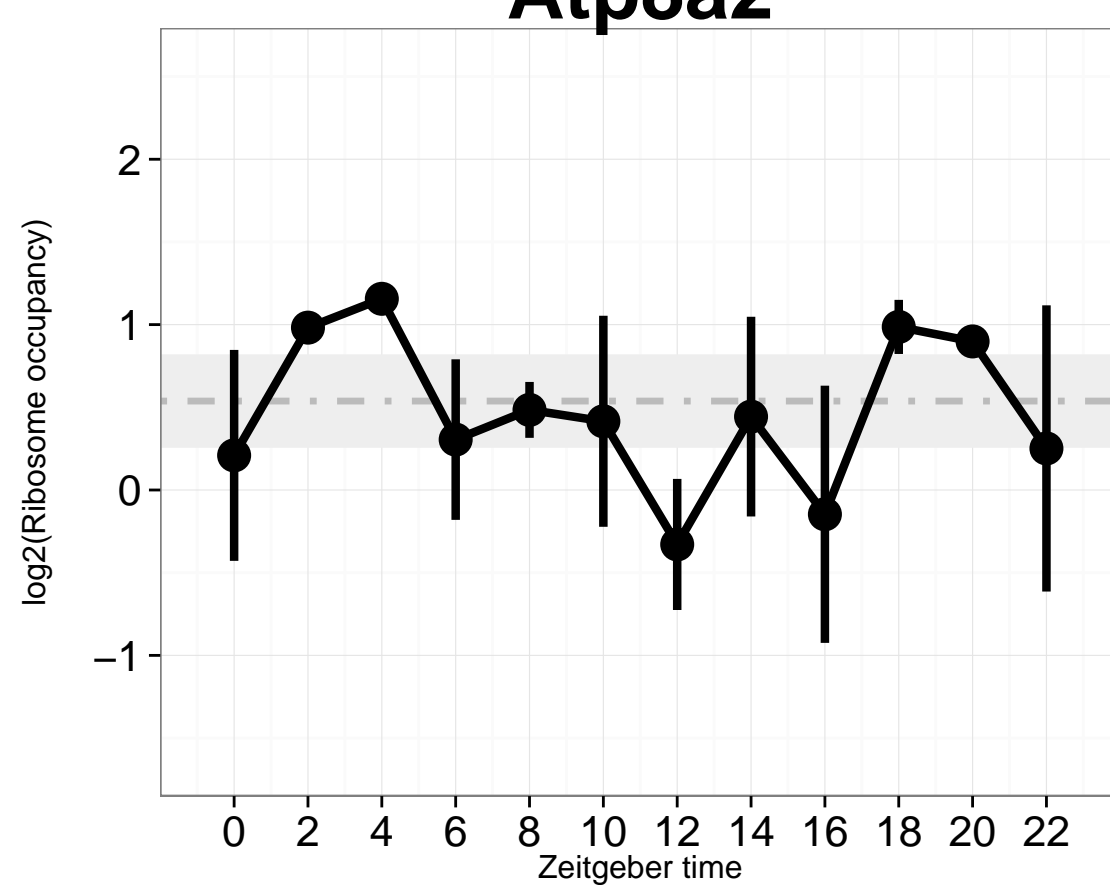

Supplement: Supplementary file 6348 [file 1]

## Wdr91

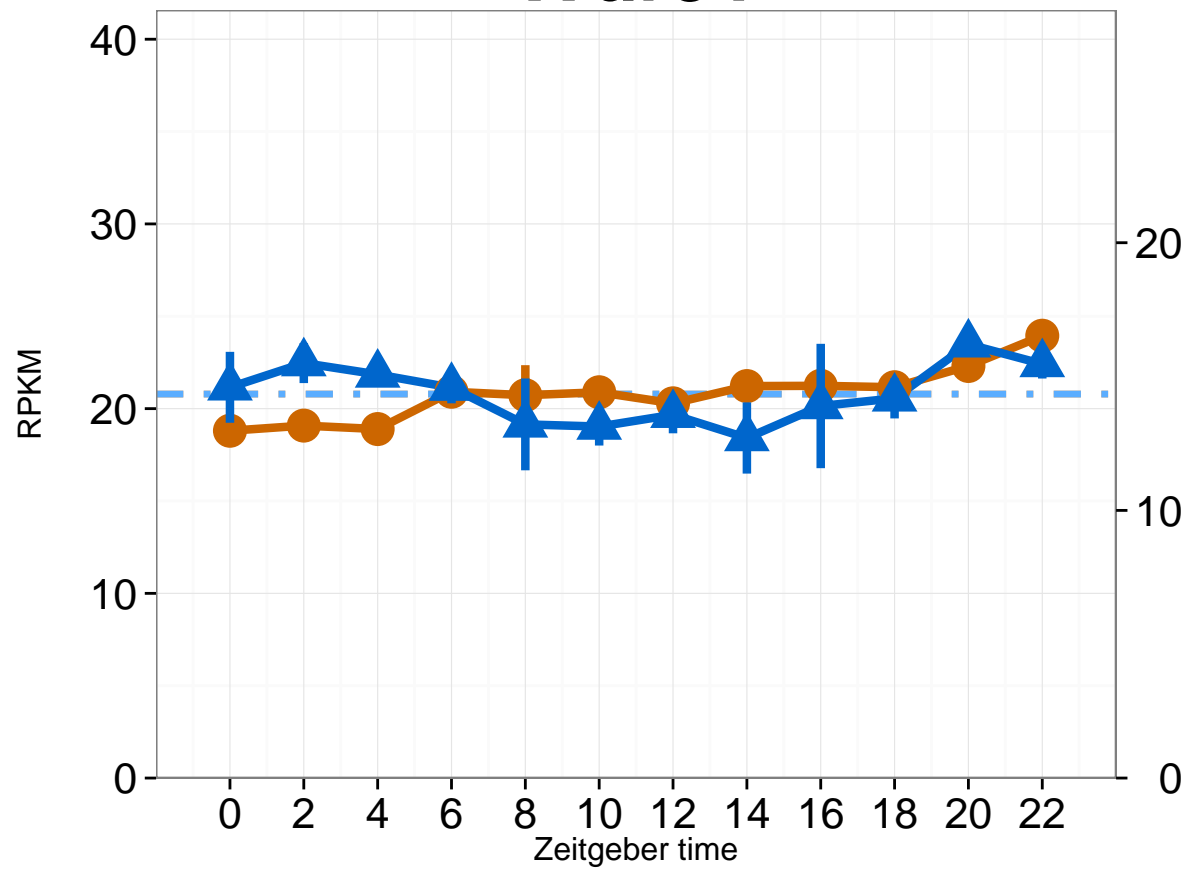

## Wdr91

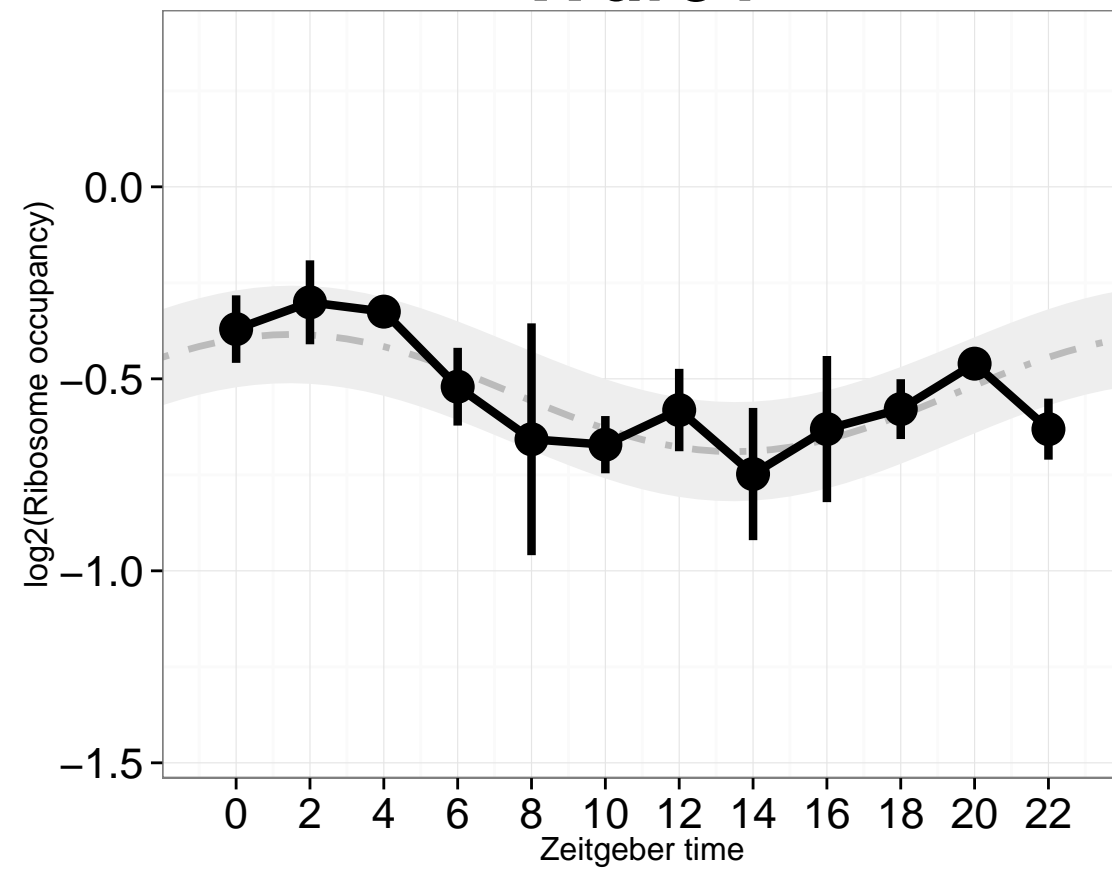

Supplement: Supplementary file 6349 [file 1]

## Unk

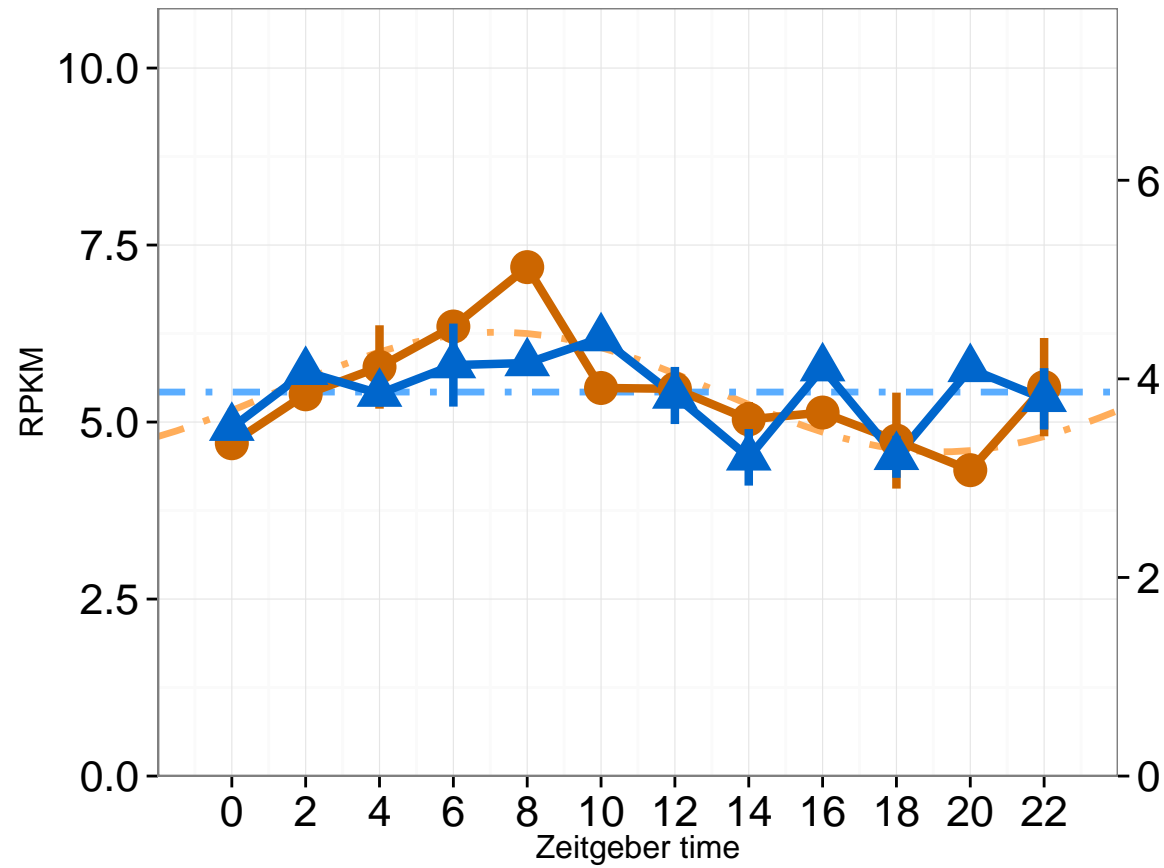

## Unk

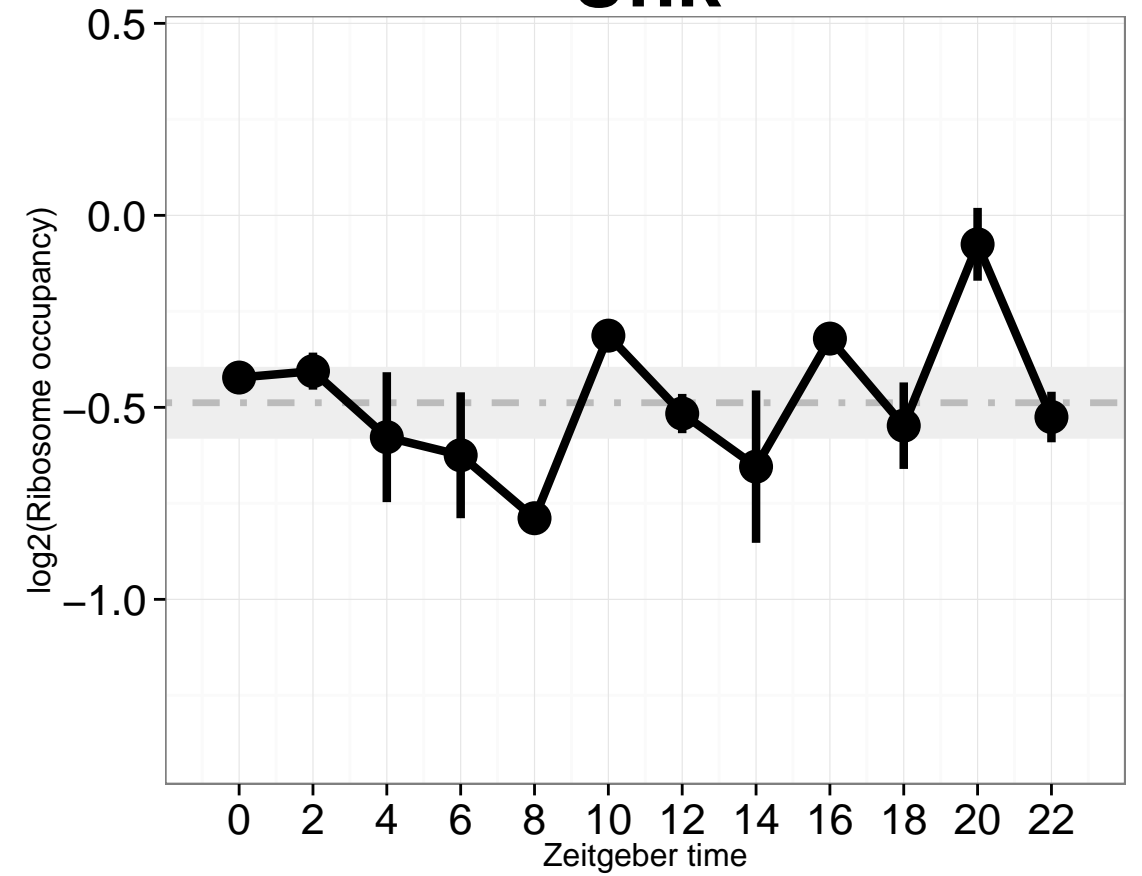

Supplement: Supplementary file 6350 [file 1]

# Ppt2

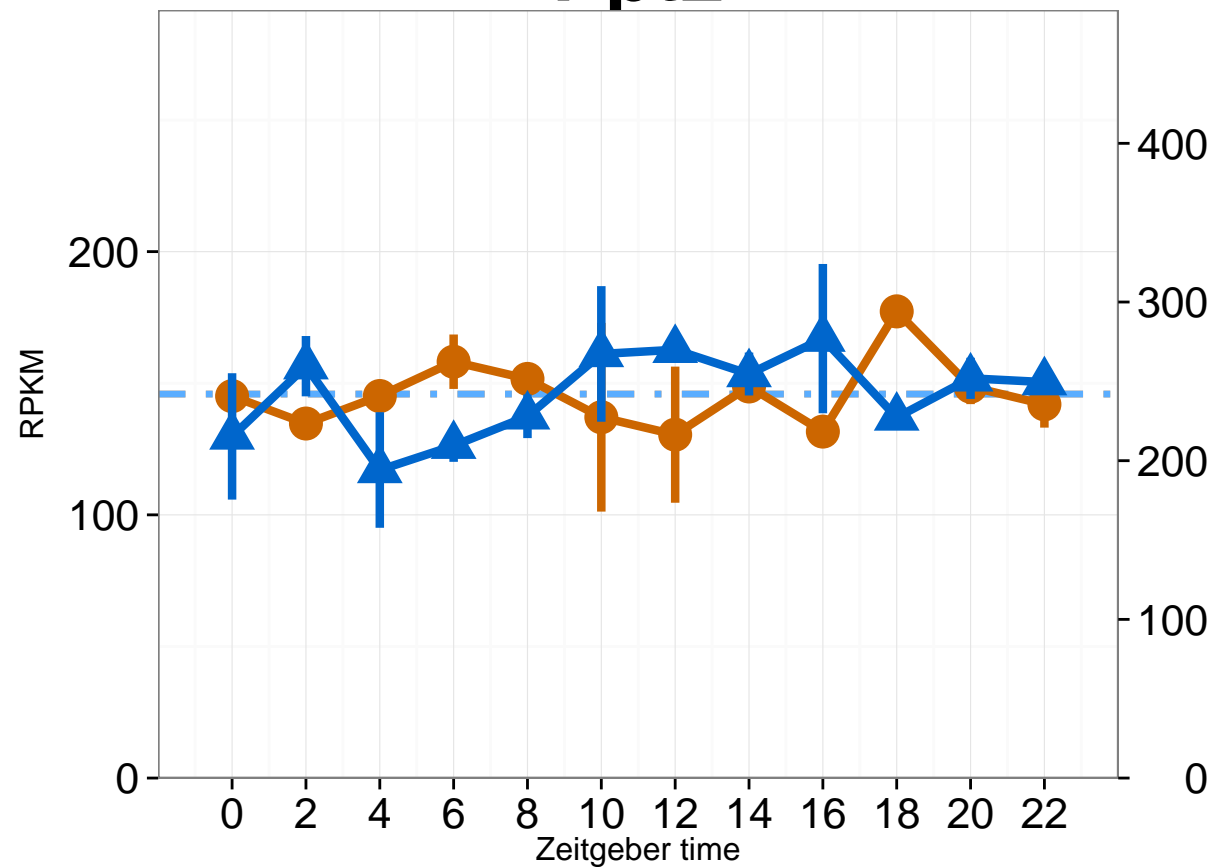

# Ppt2

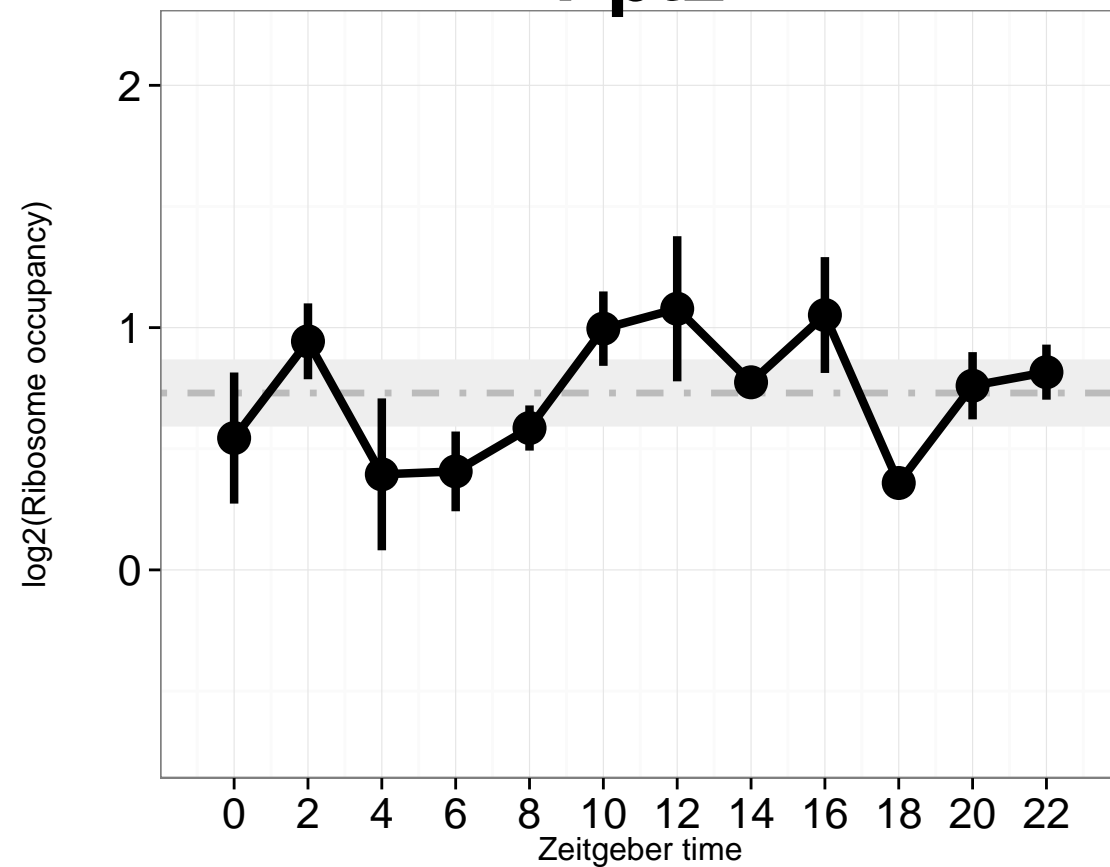

Supplement: Supplementary file 6351 [file 1]

# Ugt3a1

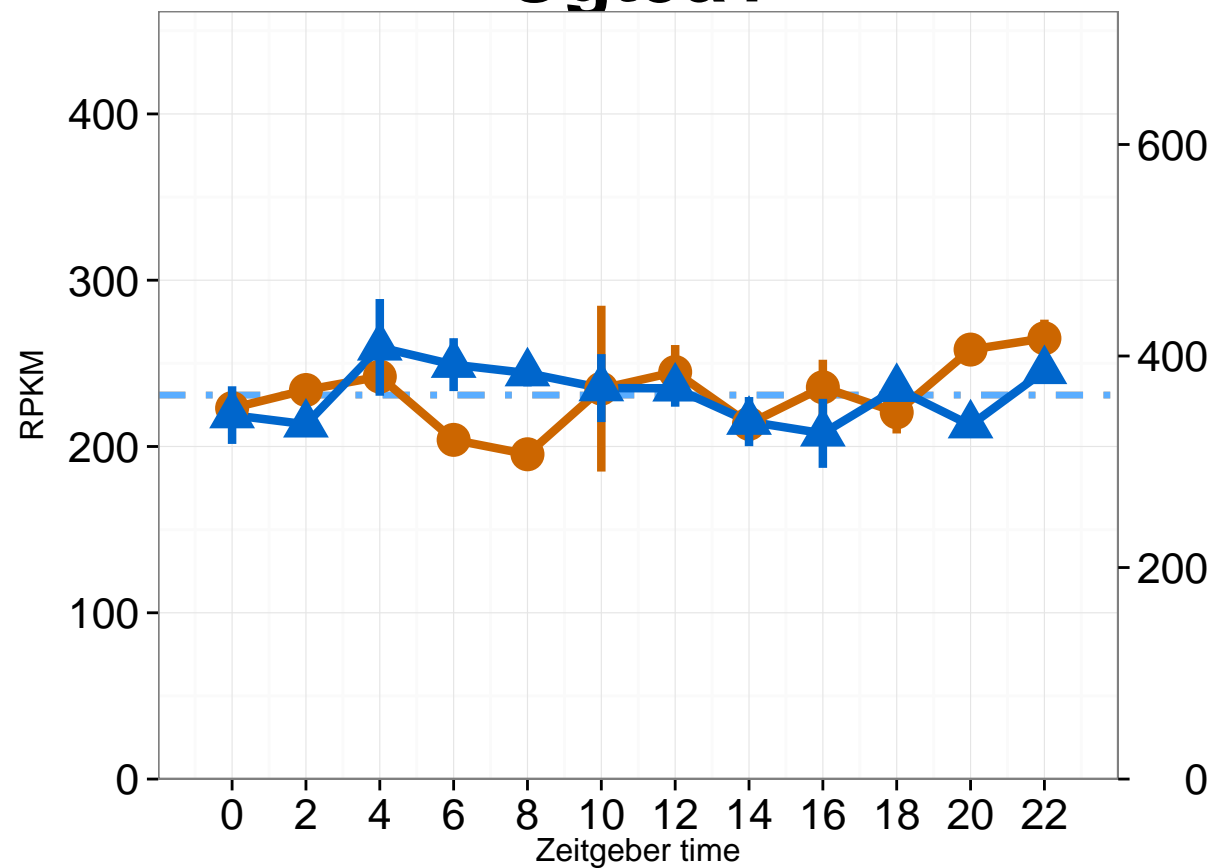

# Ugt3a1

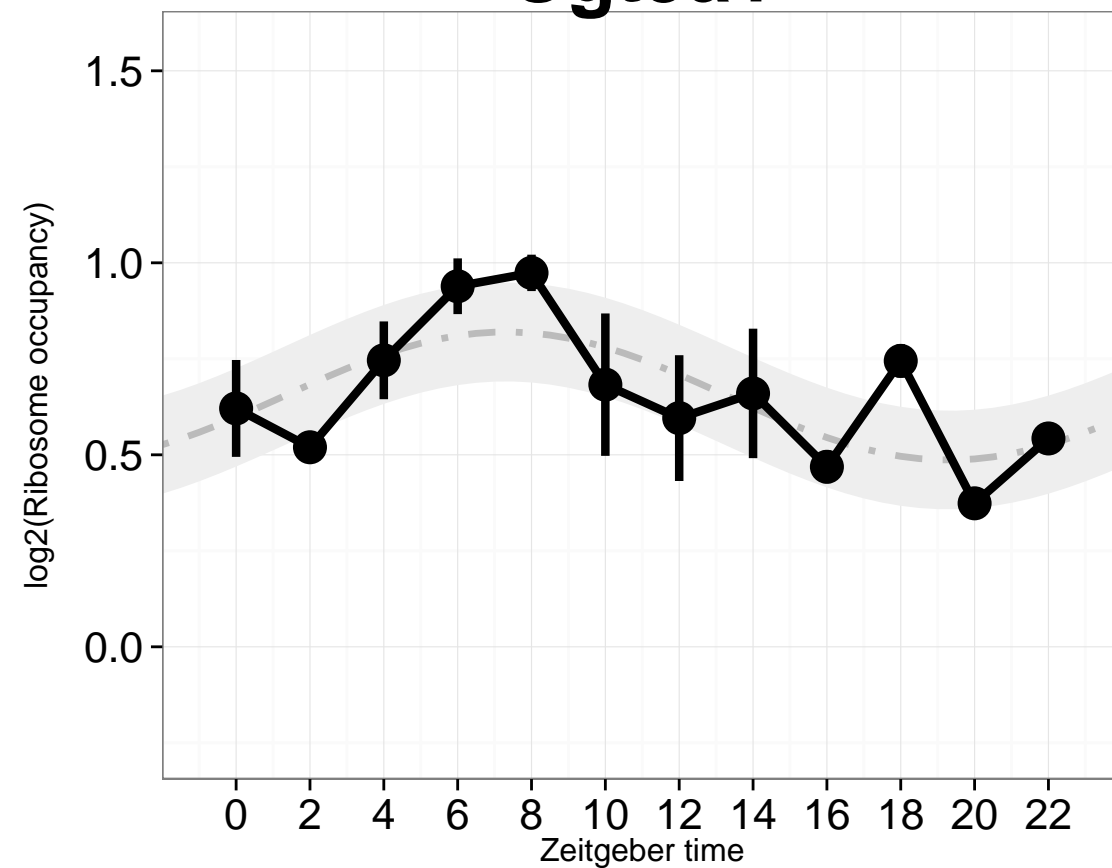

Supplement: Supplementary file 6352 [file 1]

# N6amt1

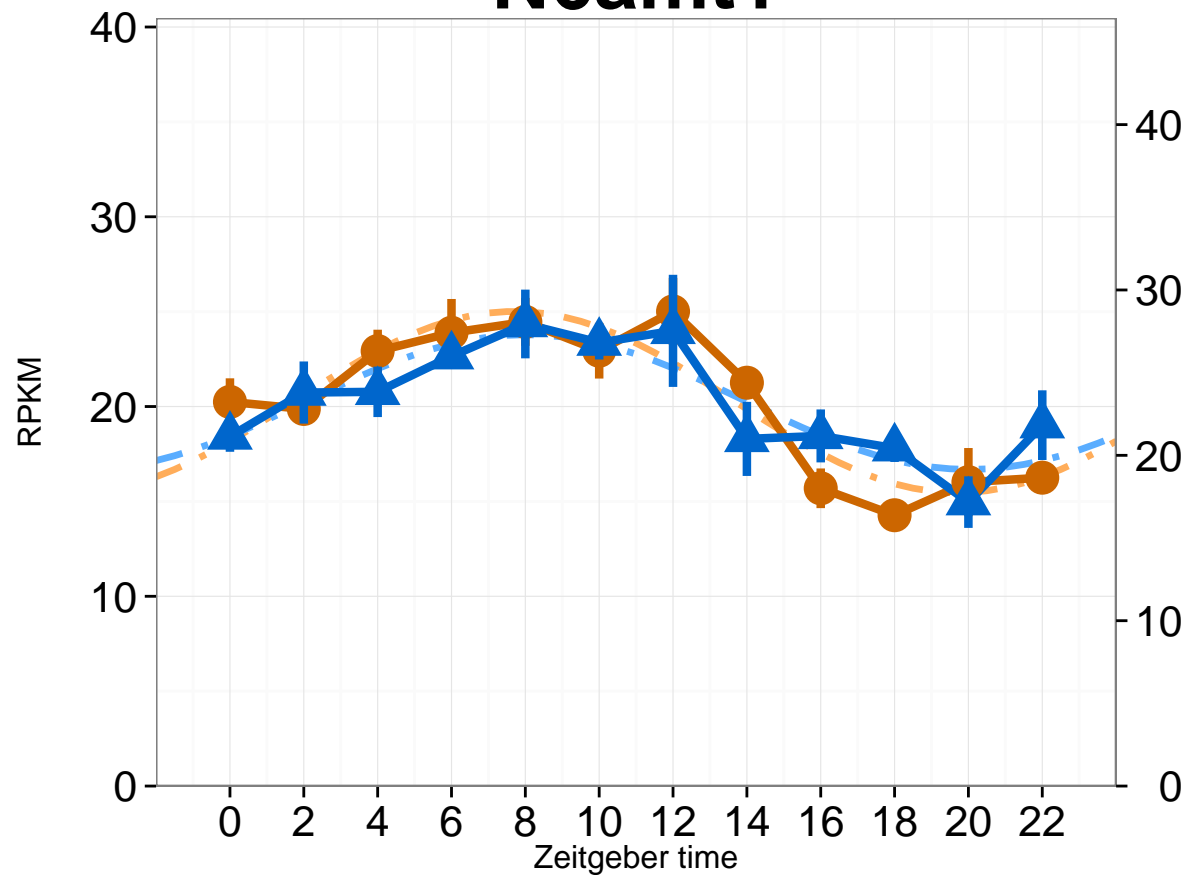

# N6amt1

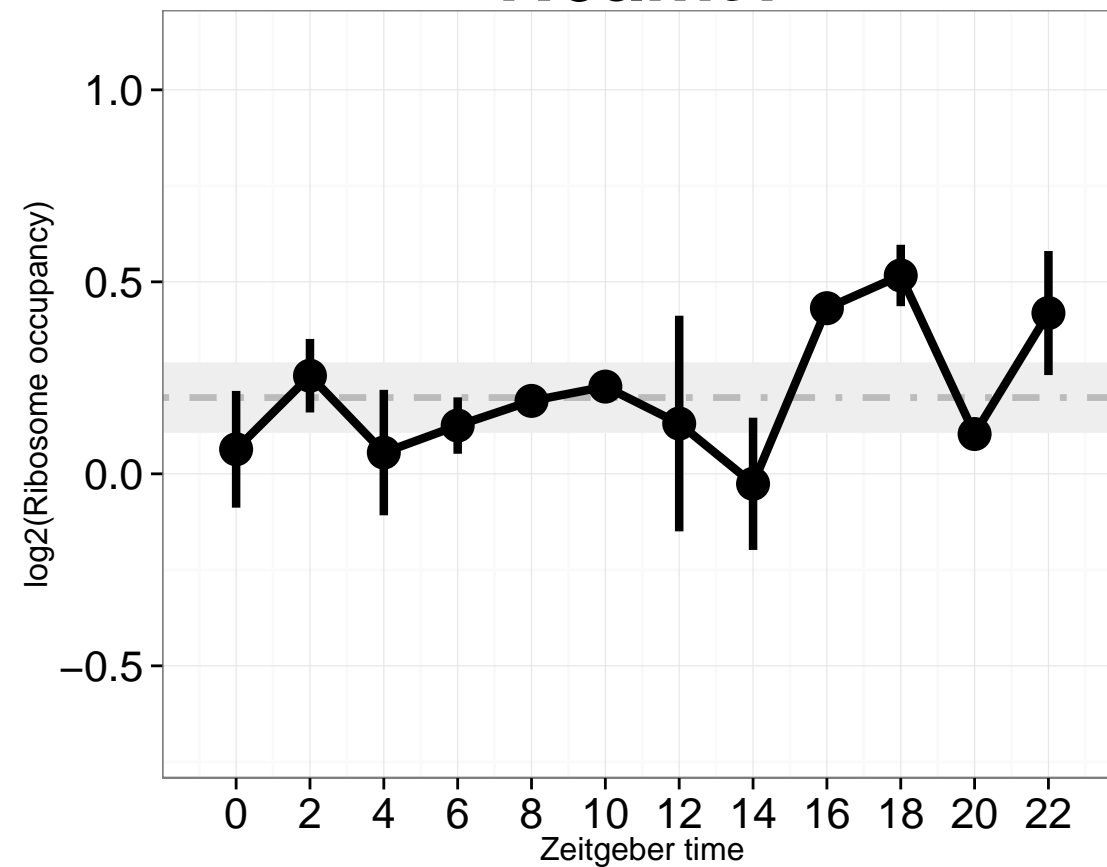

Supplement: Supplementary file 6353 [file 1]

# Ggta1

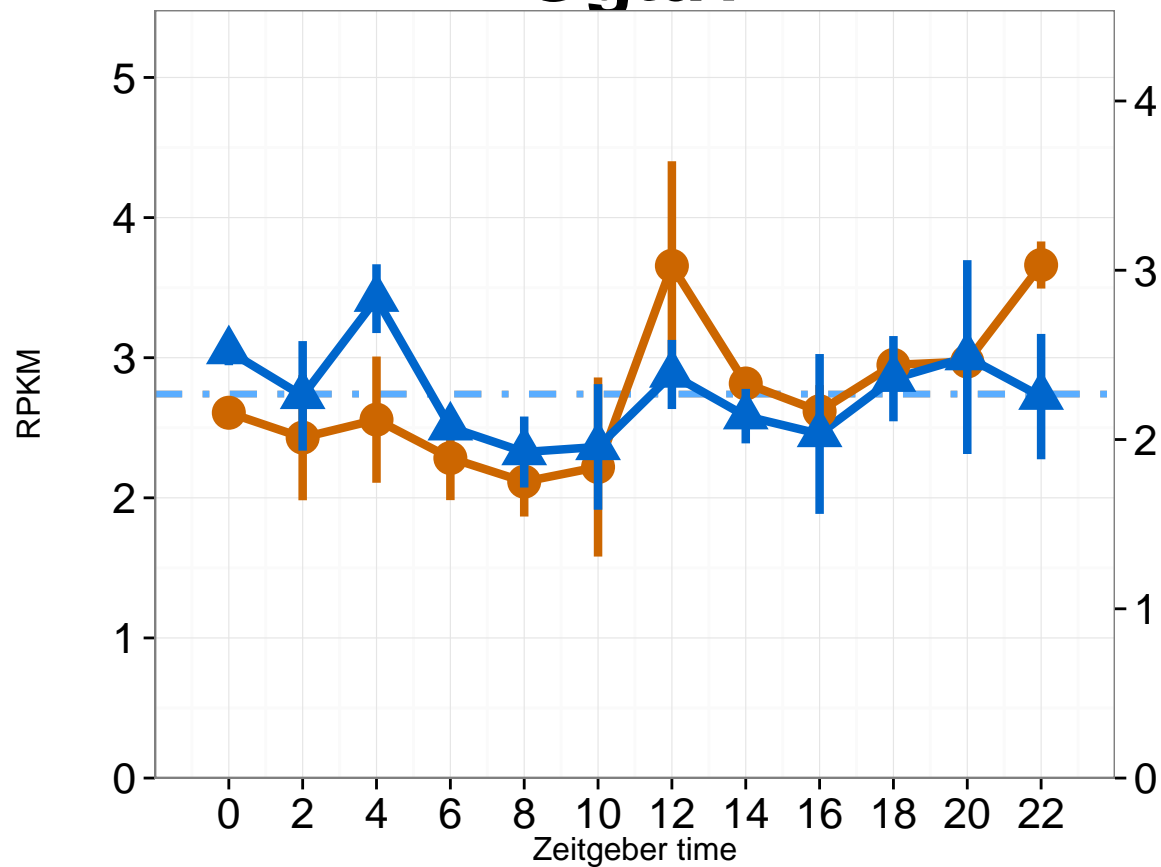

# Ggta1

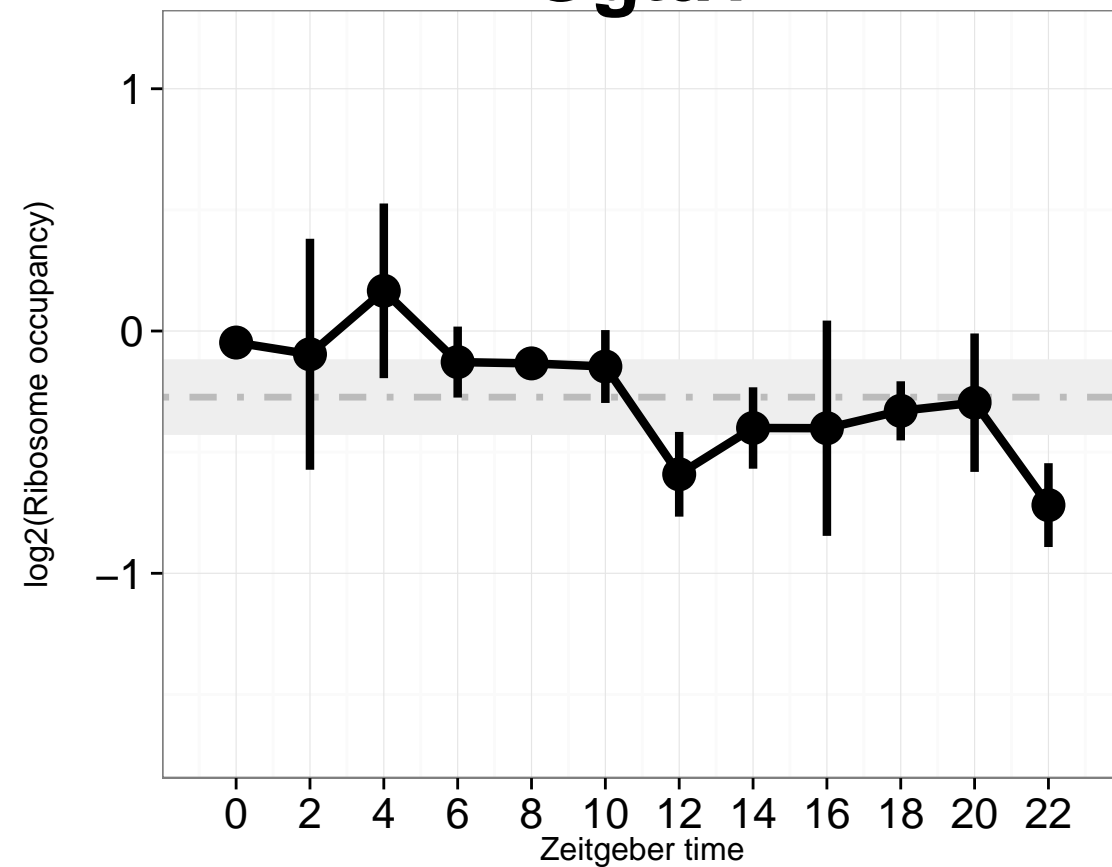

Supplement: Supplementary file 6354 [file 1]

## Noc2l

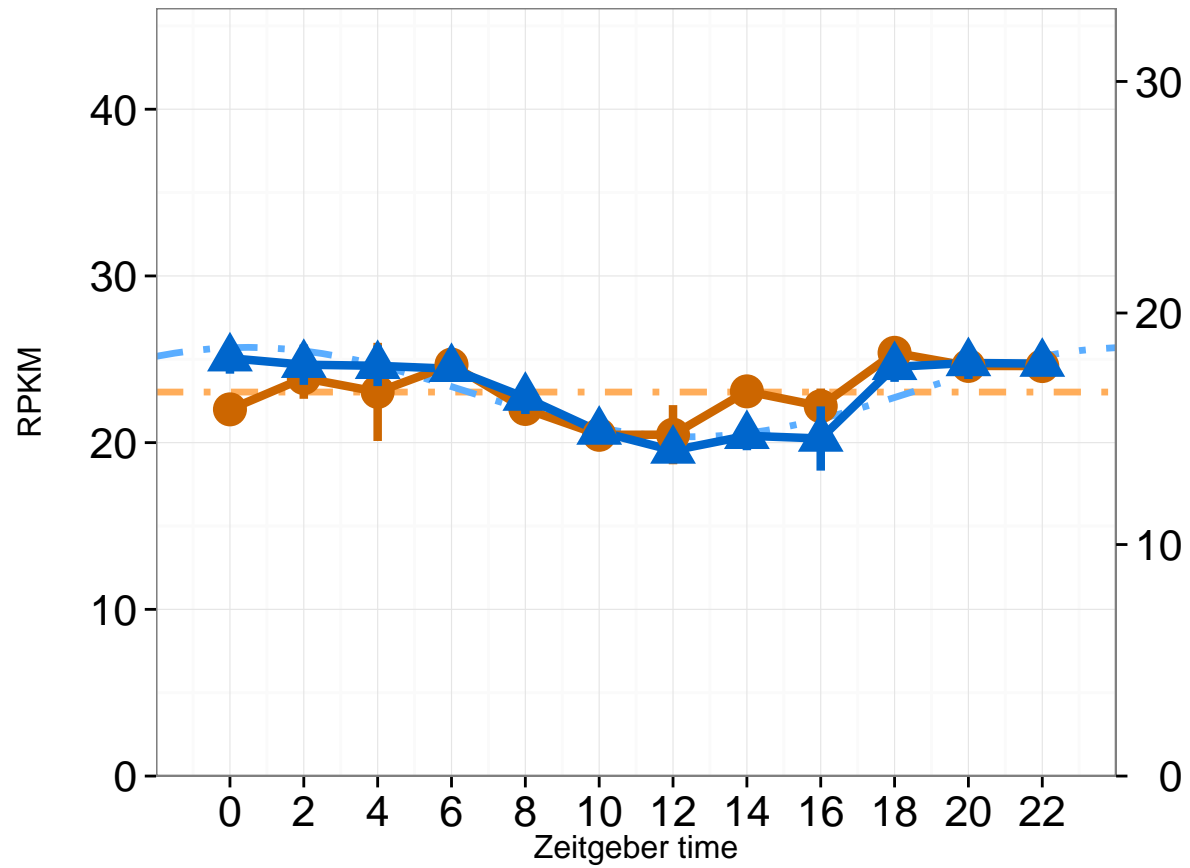

## Noc2l

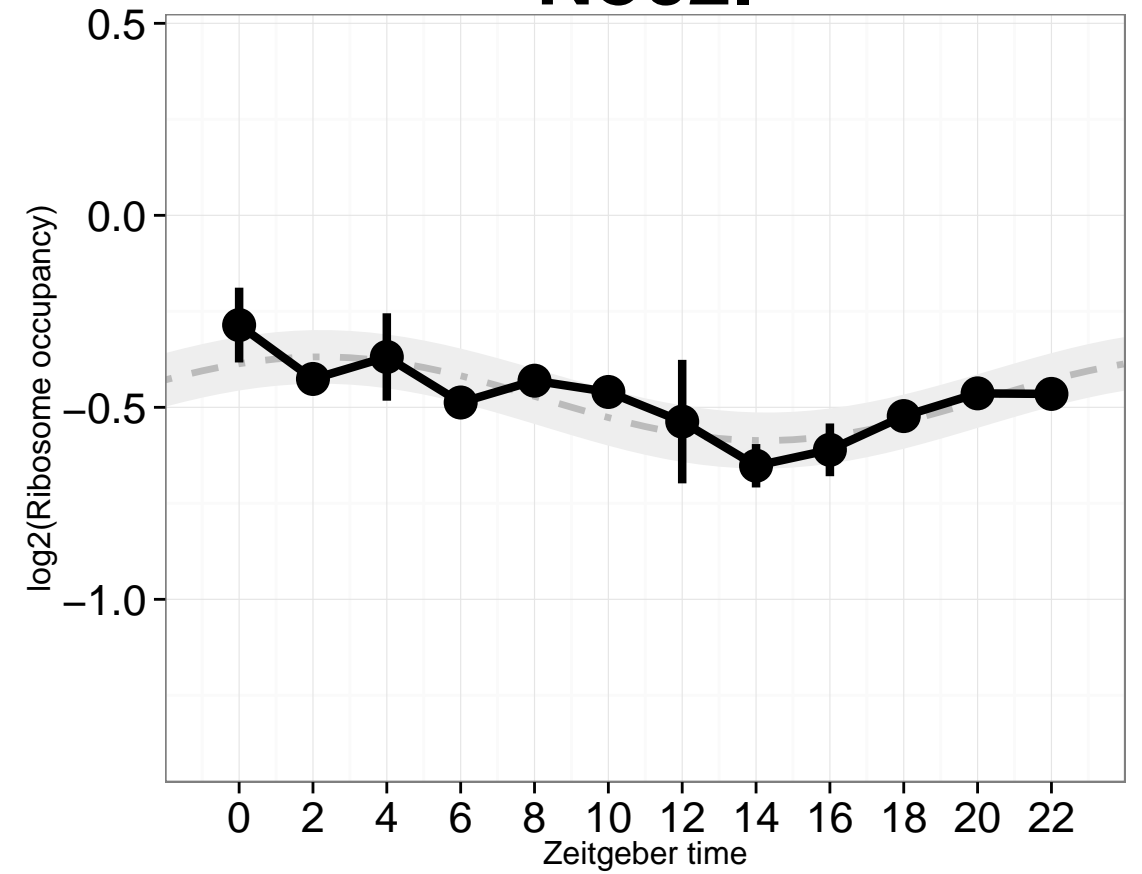

Supplement: Supplementary file 6355 [file 1]

# Recql5

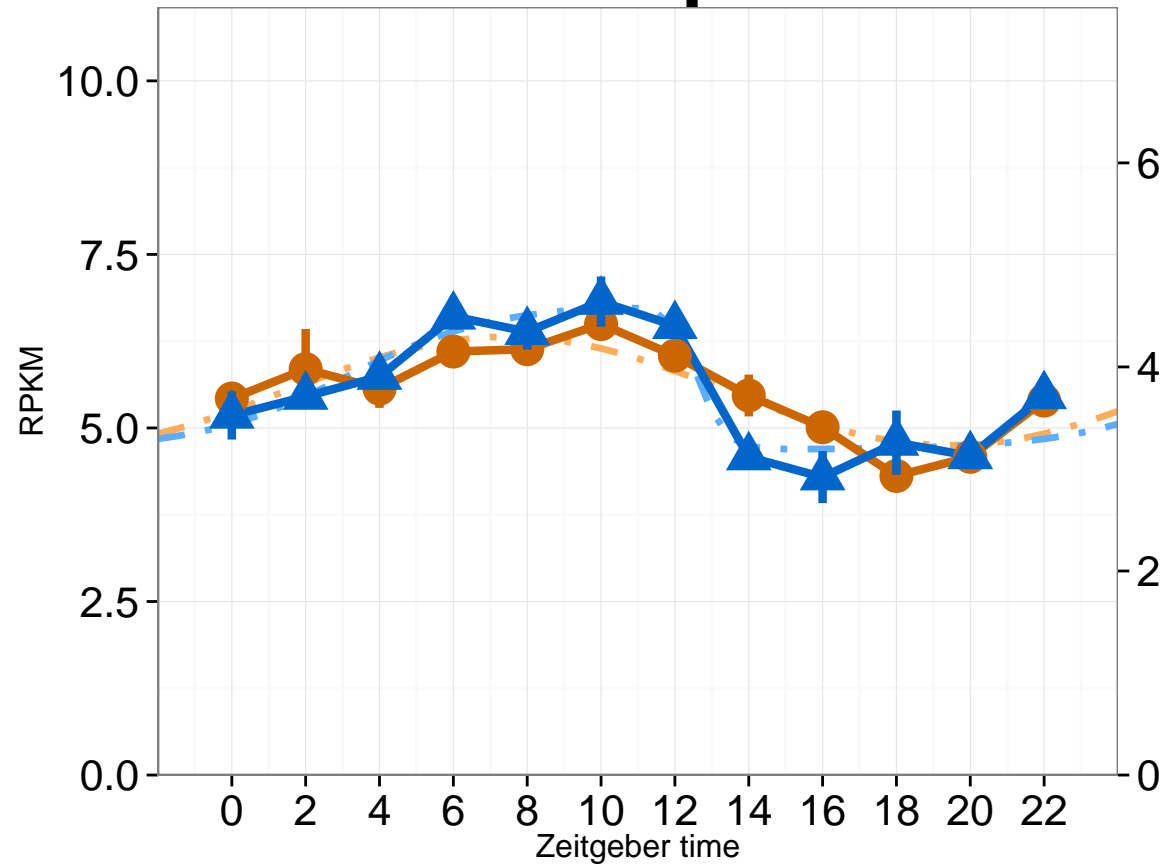

# Recql5

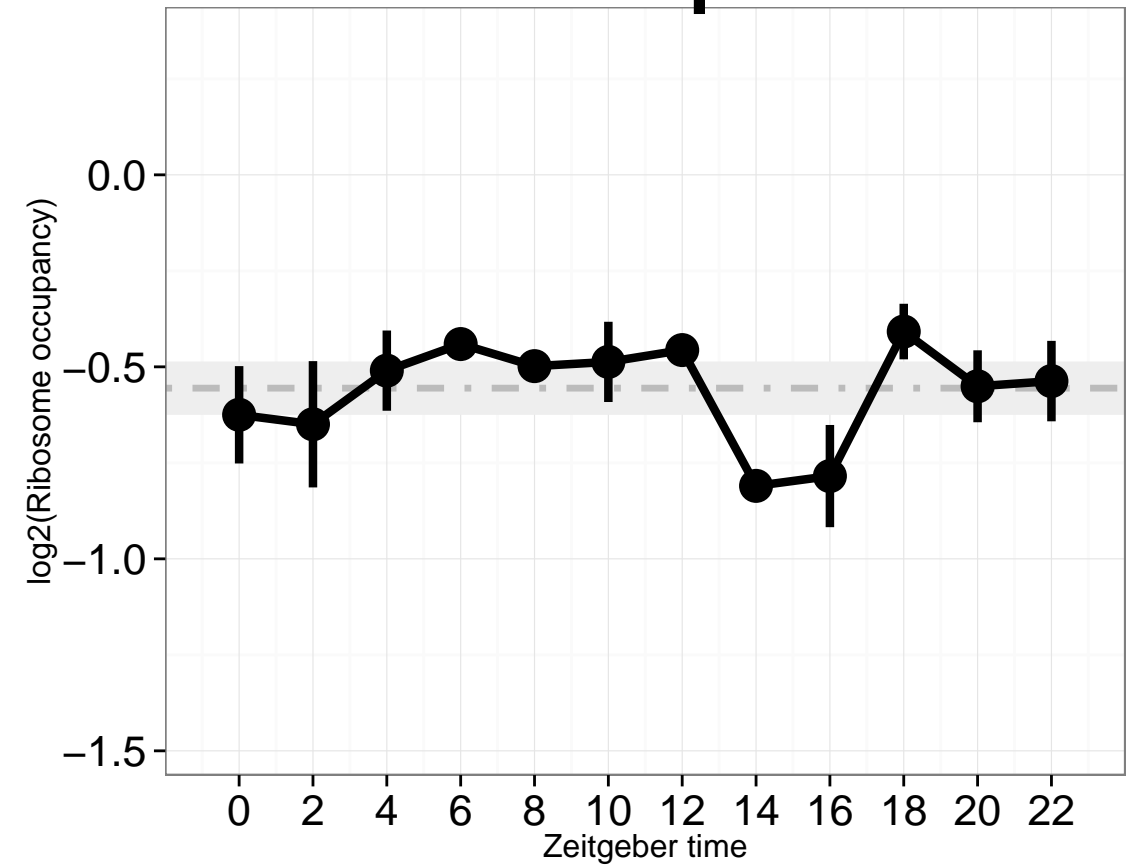

Supplement: Supplementary file 6356 [file 1]

# Agtpbp1

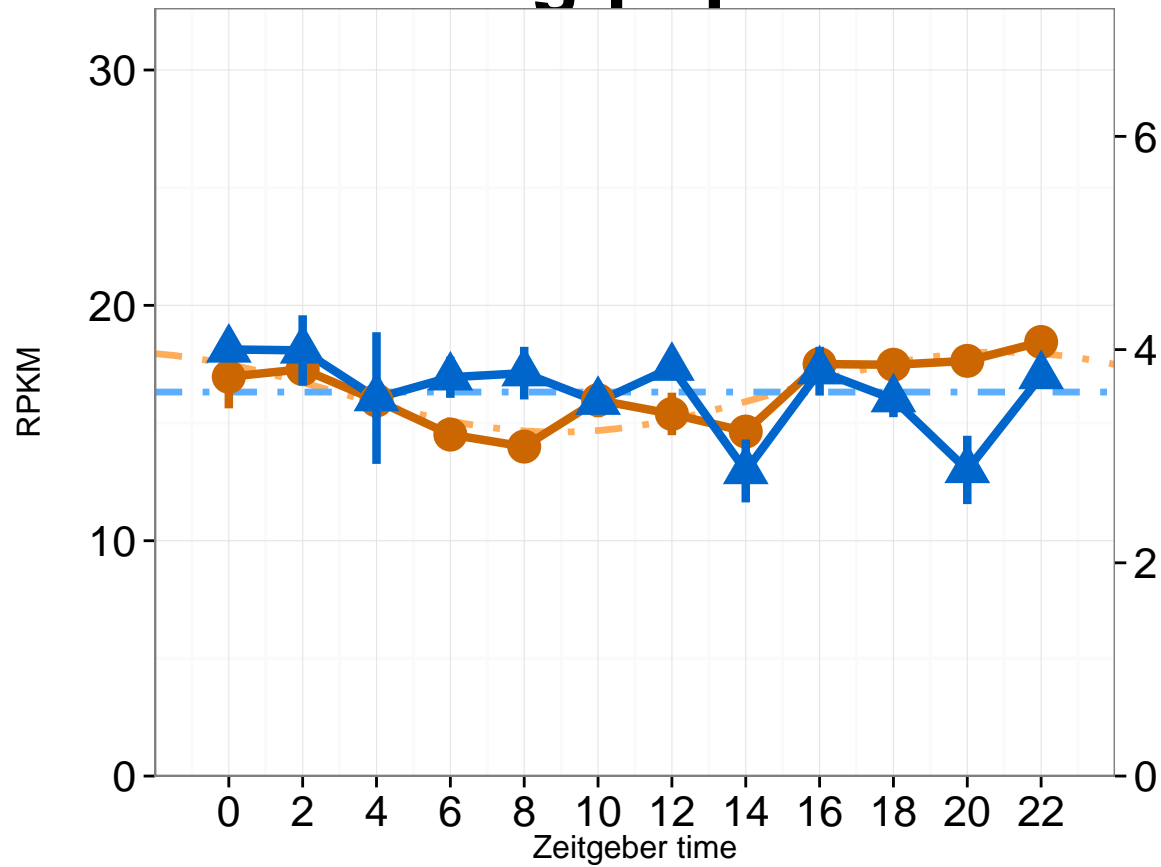

# Agtpbp1

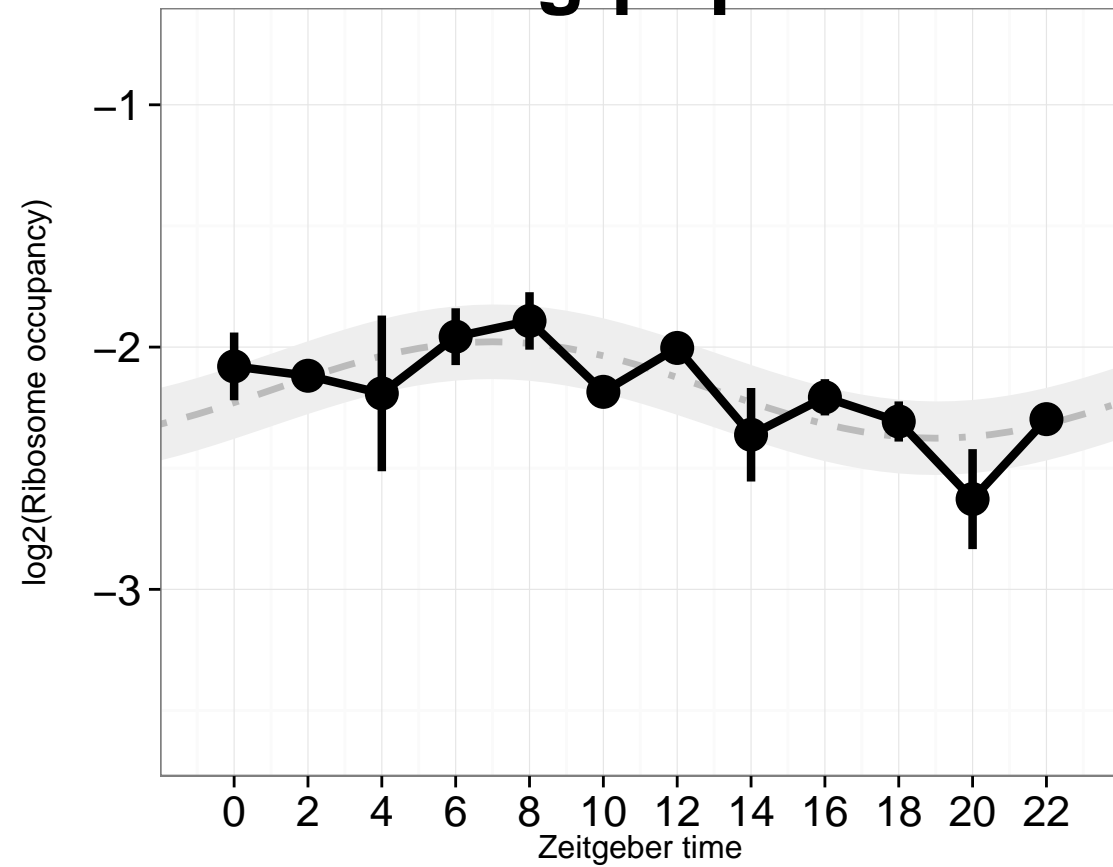

Supplement: Supplementary file 6357 [file 1]

## A130051J06Rik

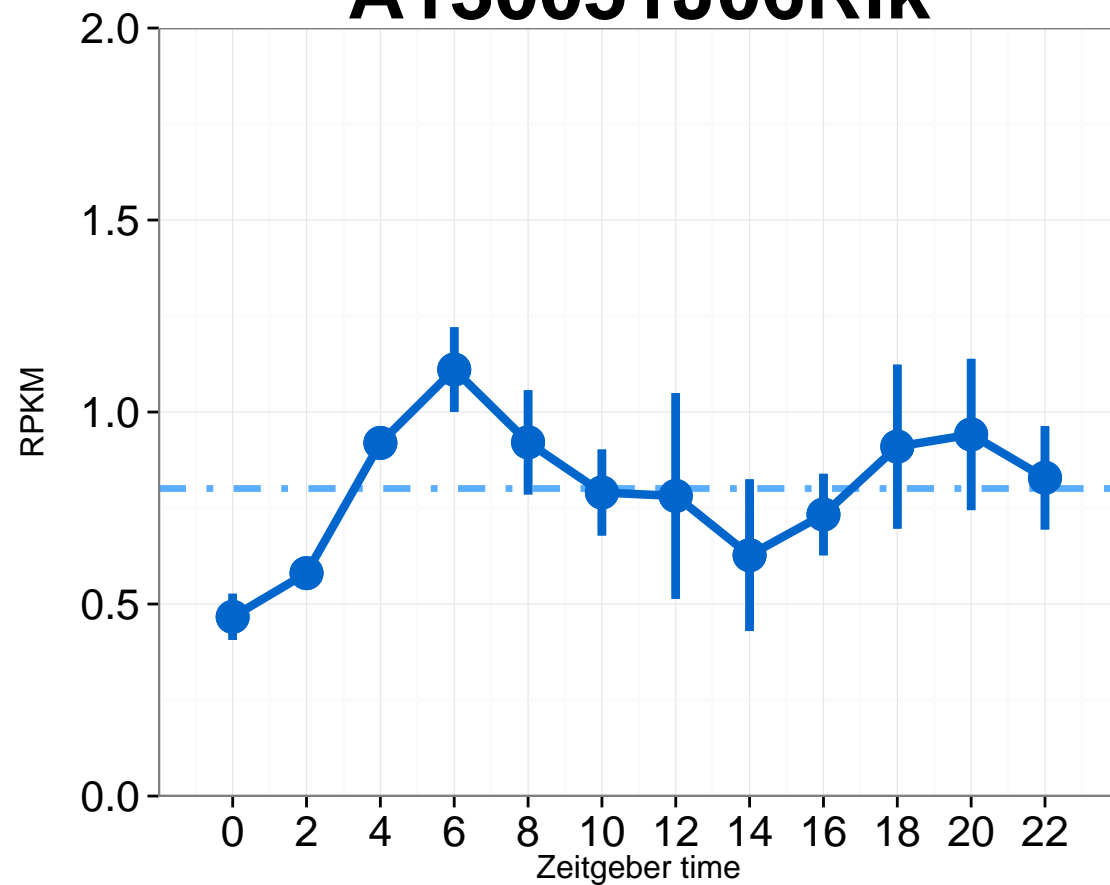

## A130051J06Rik log<sub>2</sub>(Ribosome occup

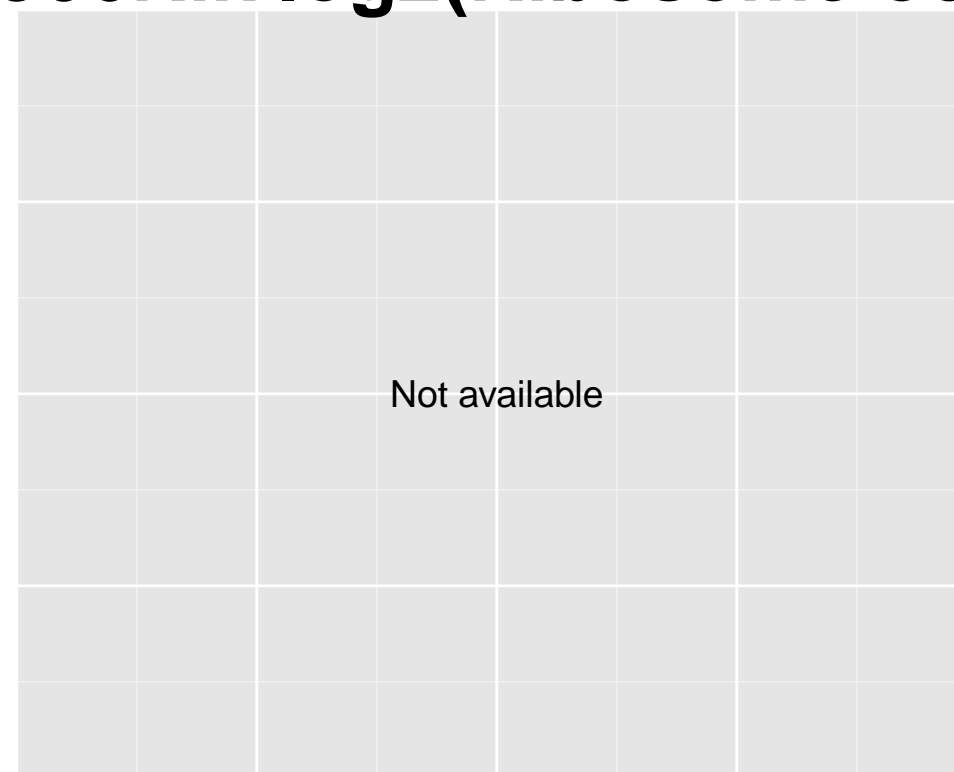

Supplement: Supplementary file 6358 [file 1]

# Itm2b

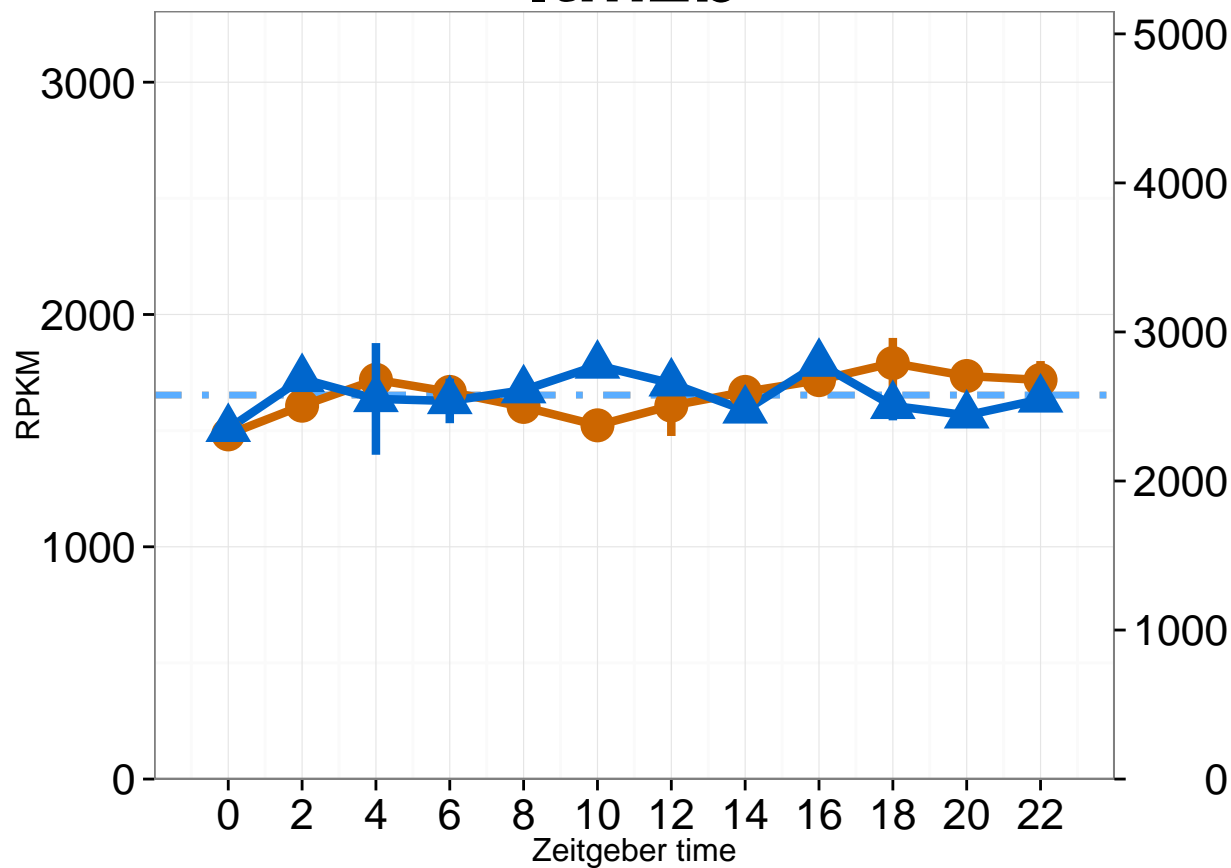

# Itm2b

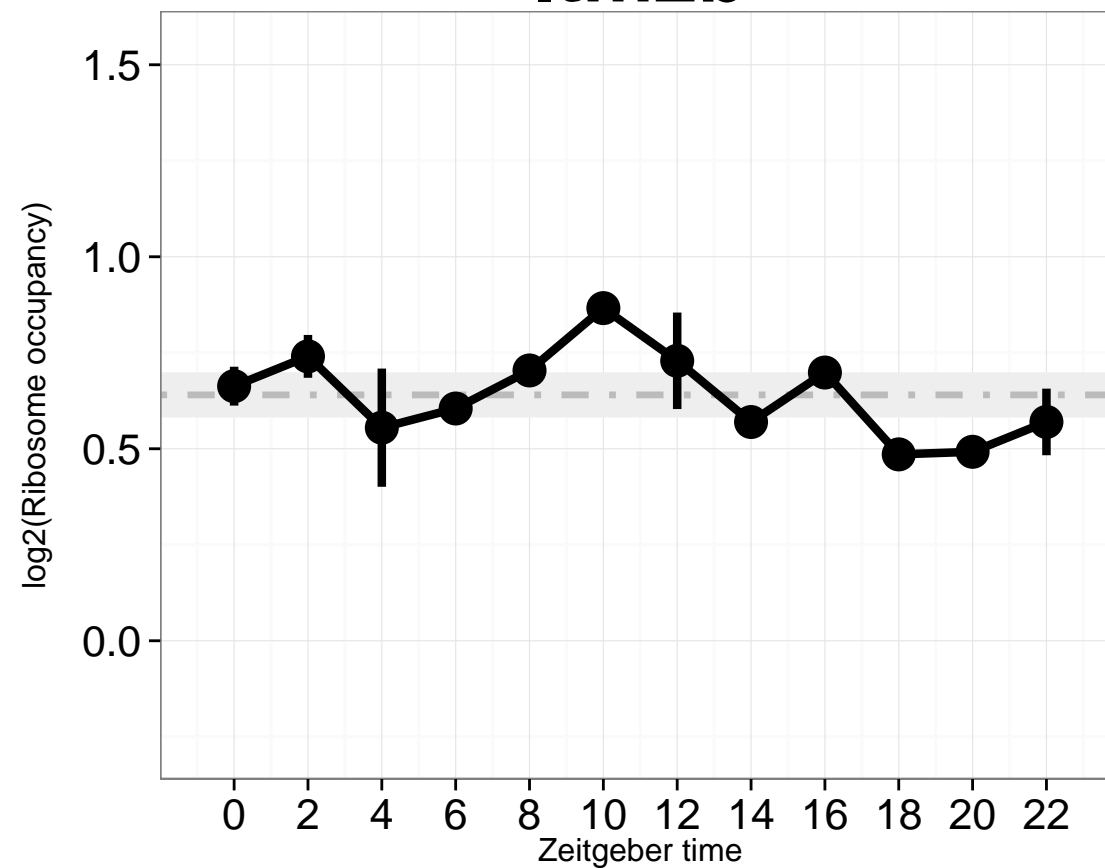

Supplement: Supplementary file 6359 [file 1]

# Tmf1

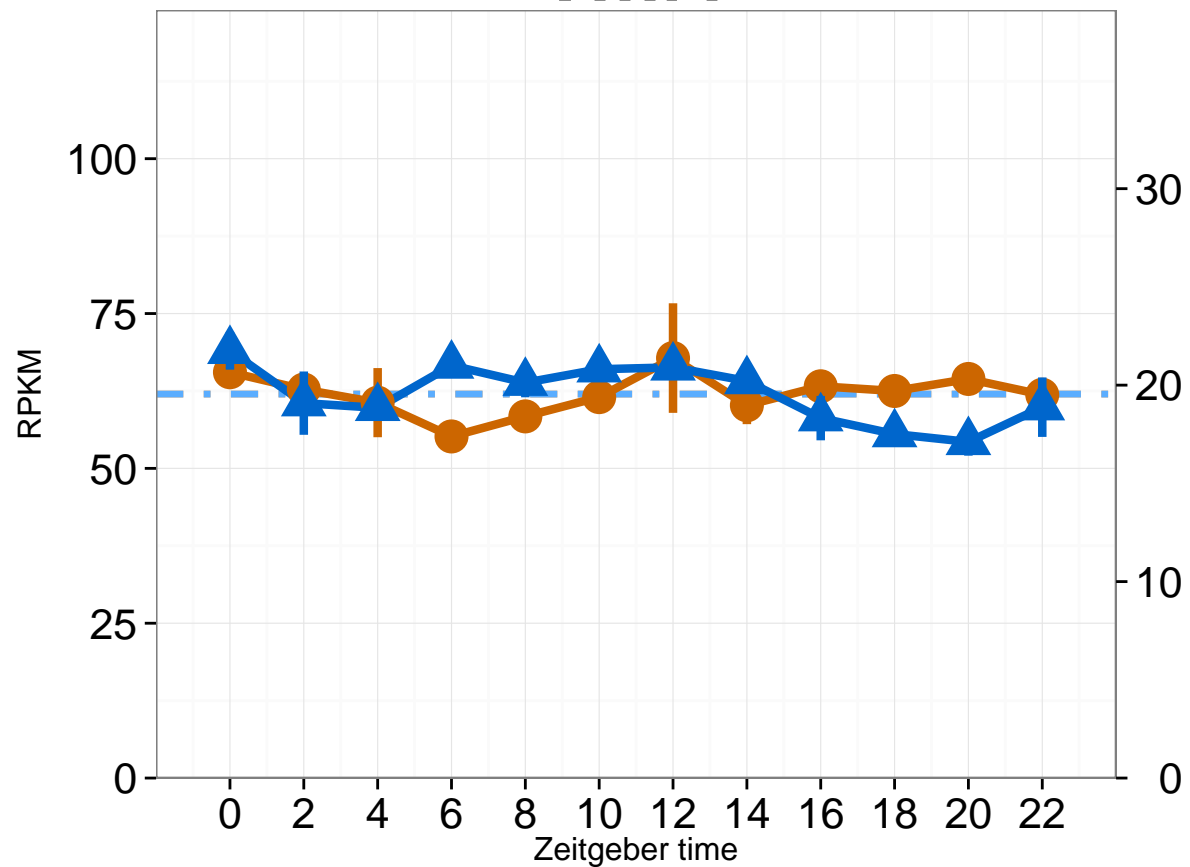

# Tmf1

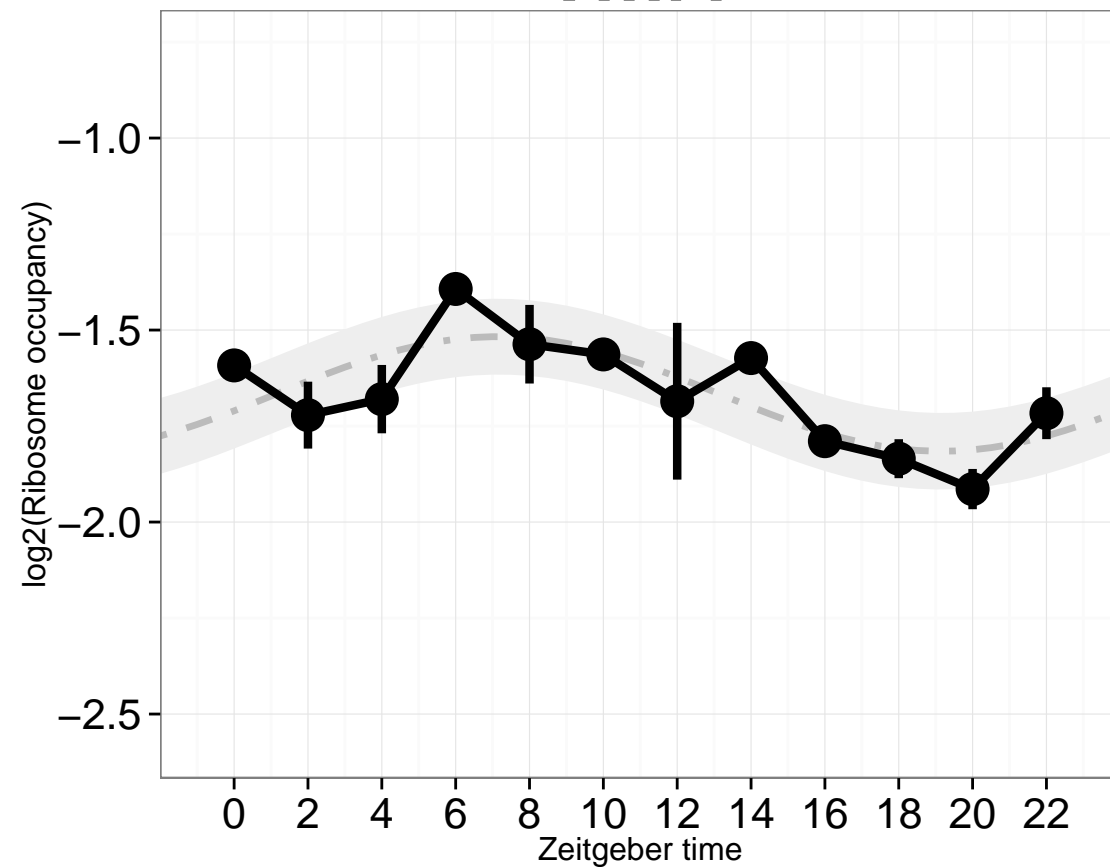

Supplement: Supplementary file 6360 [file 1]

# Nup107

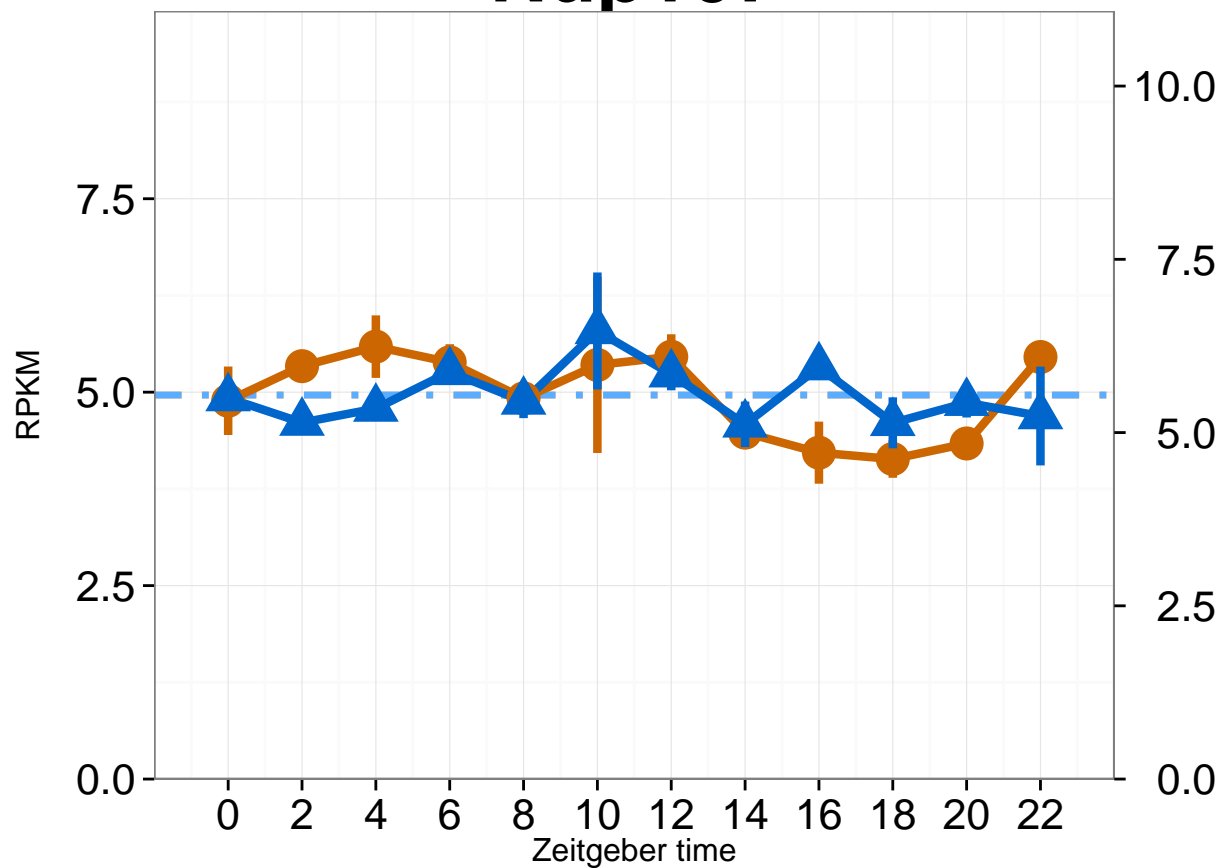

# Nup107

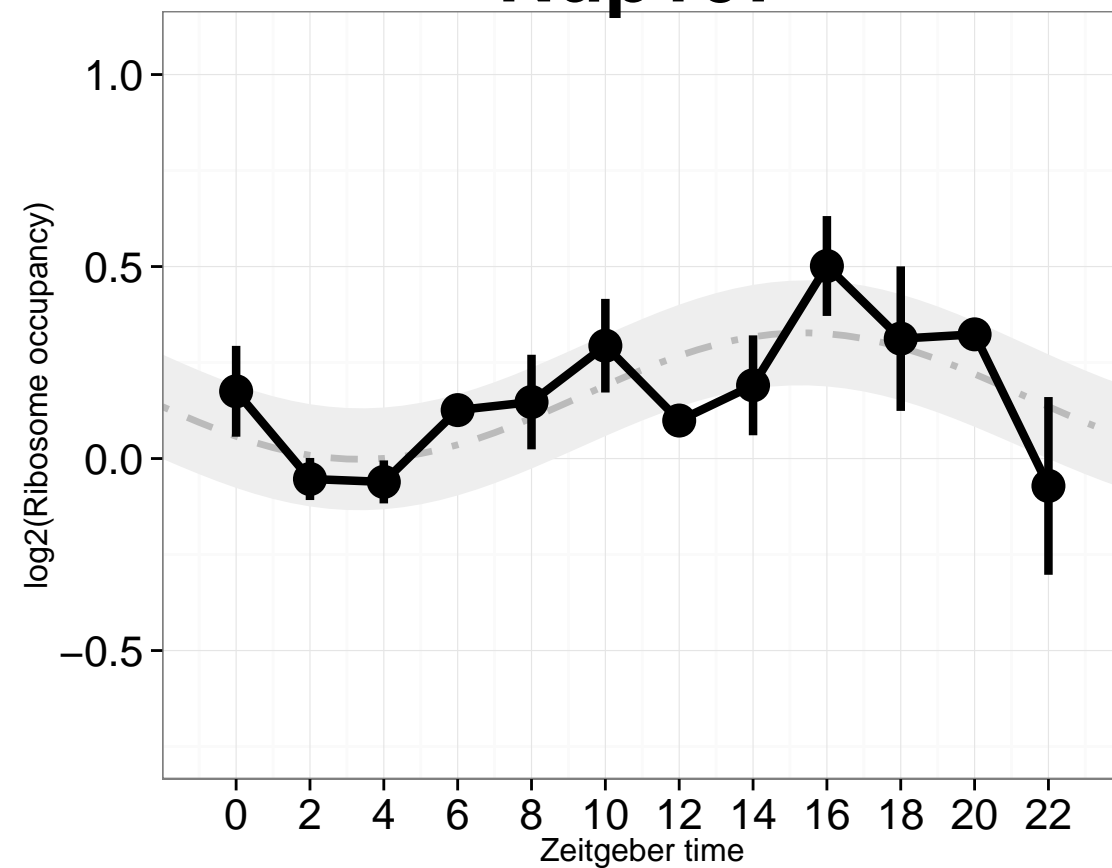

Supplement: Supplementary file 6361 [file 1]

## Slc39a10

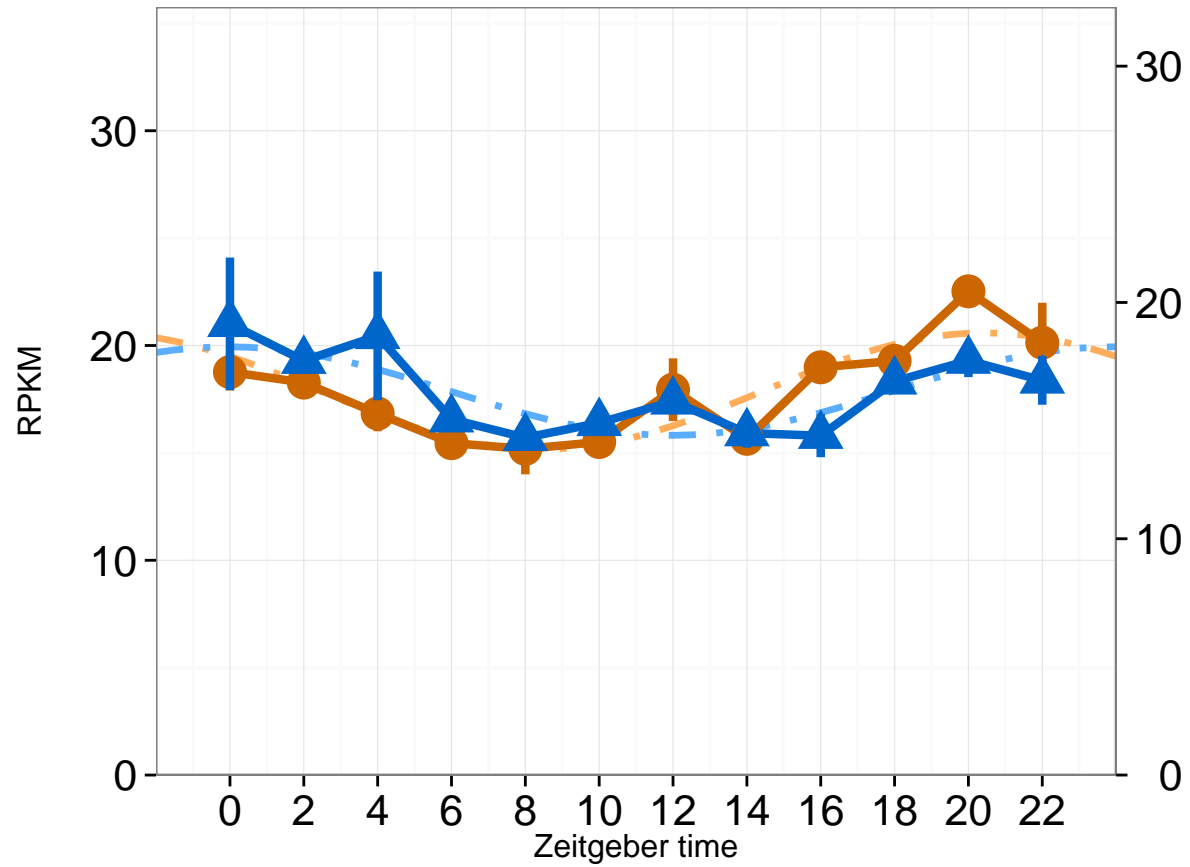

## Slc39a10

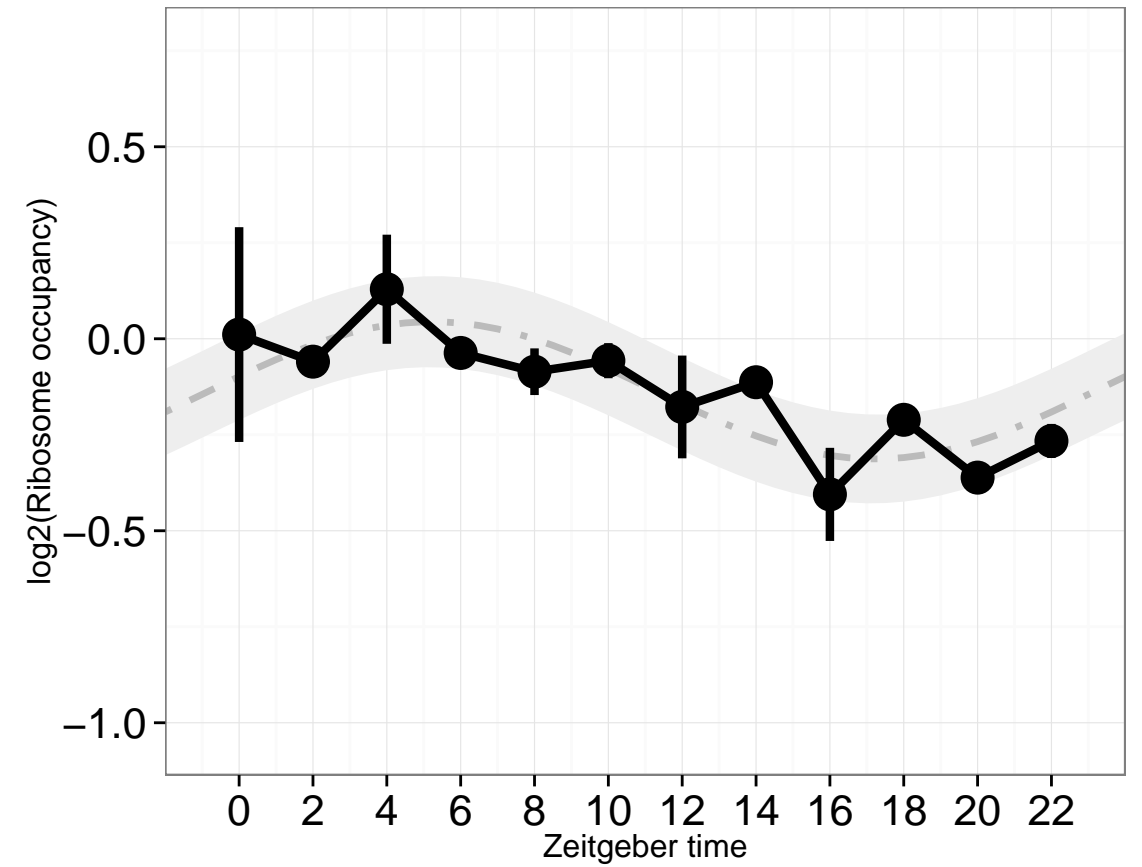

Supplement: Supplementary file 6362 [file 1]

## Mtfmt

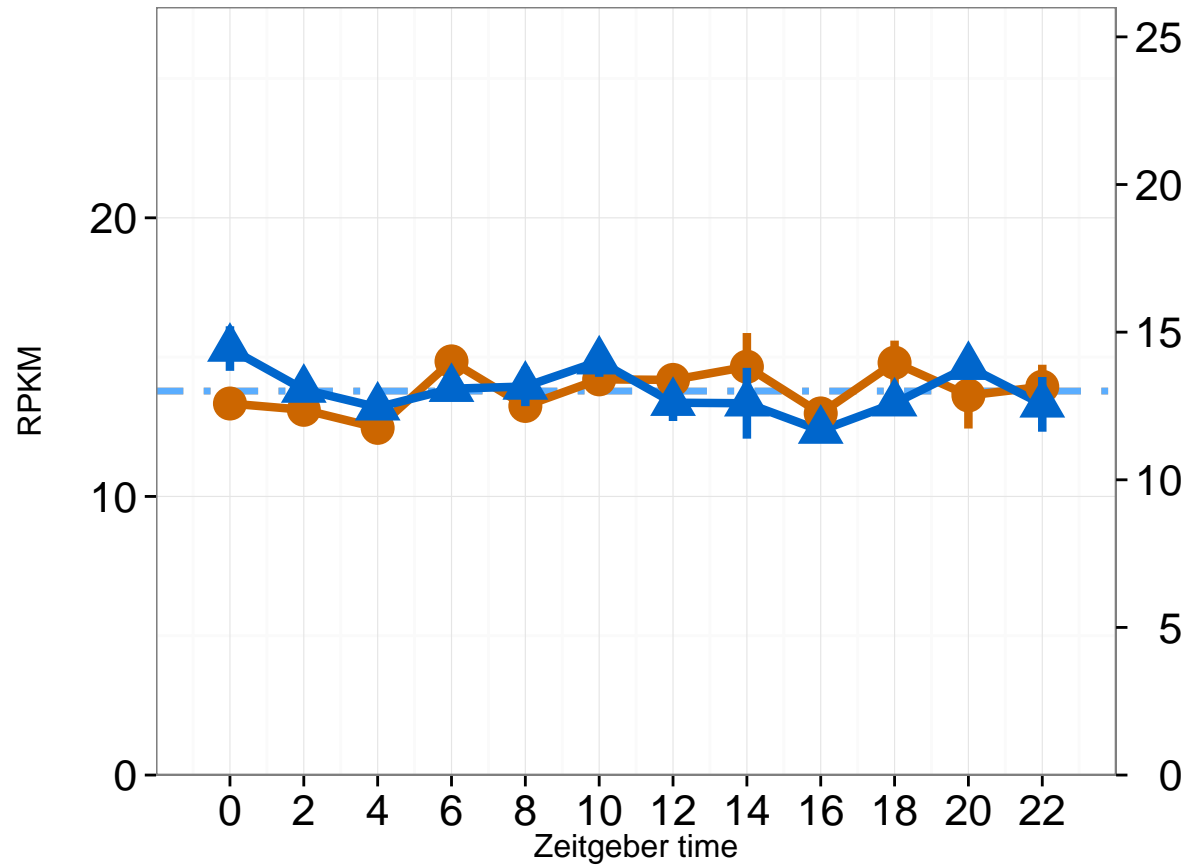

## Mtfmt

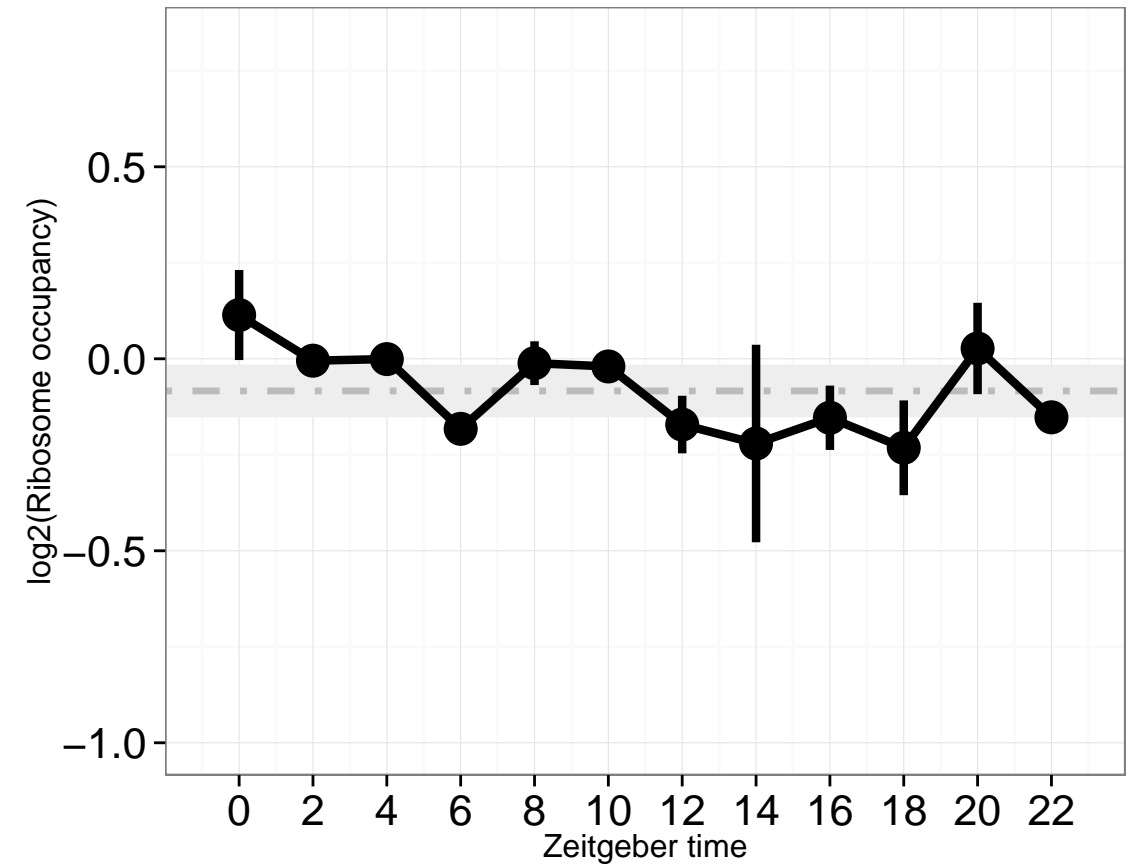

Supplement: Supplementary file 6363 [file 1]

## Sncg

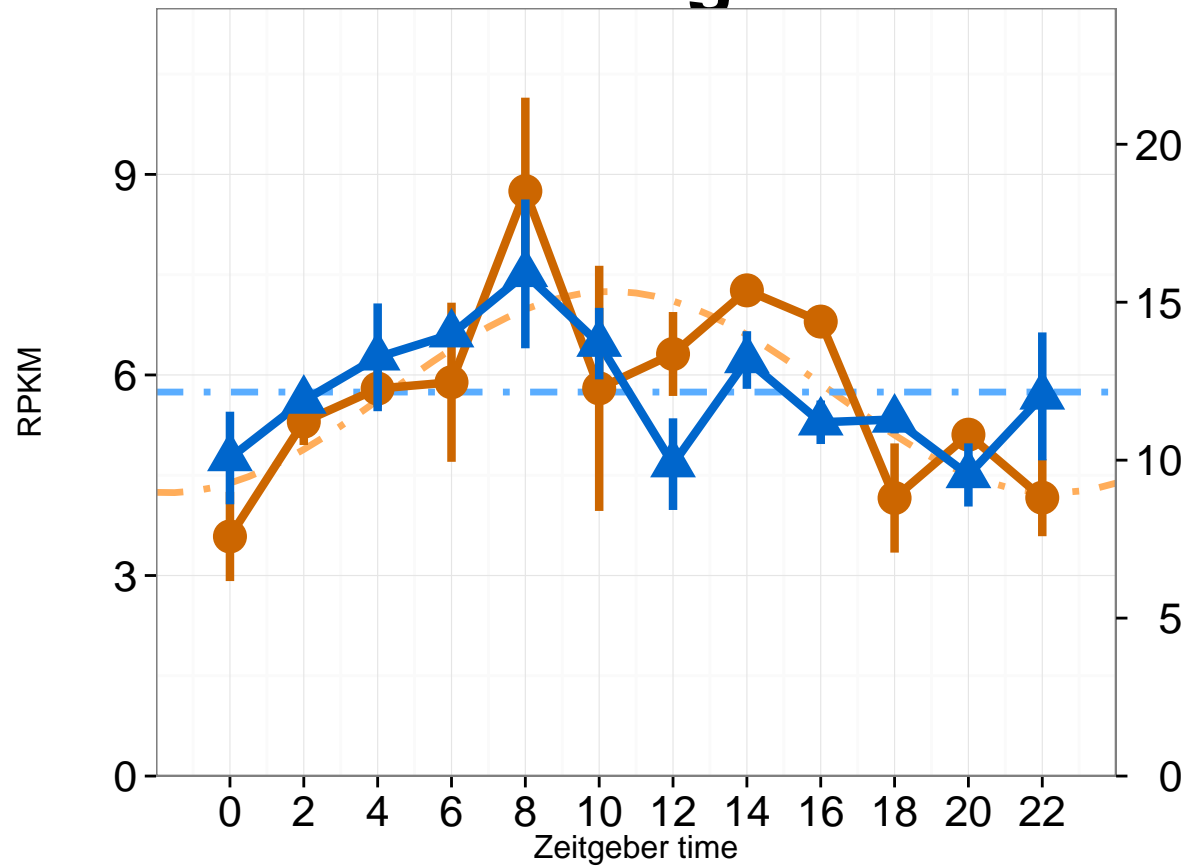

## Sncg

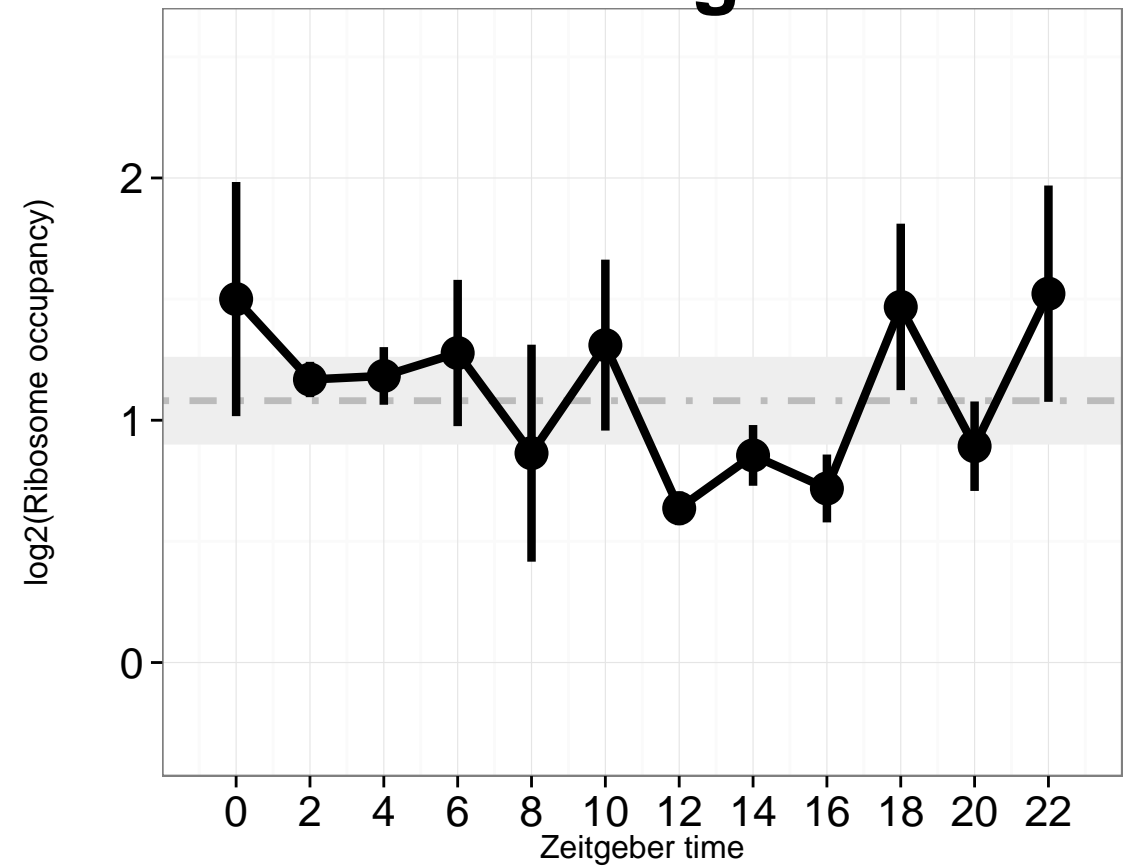

Supplement: Supplementary file 6364 [file 1]

## Slc35e2

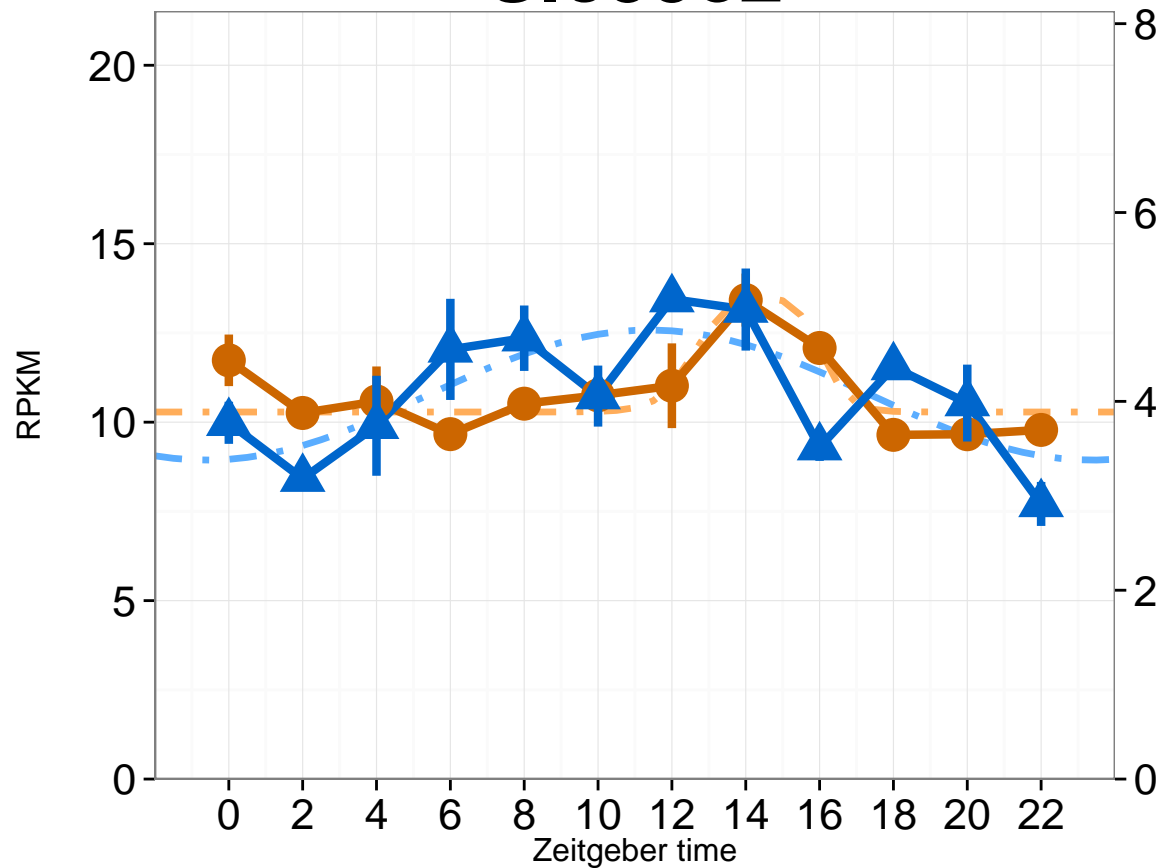

## Slc35e2

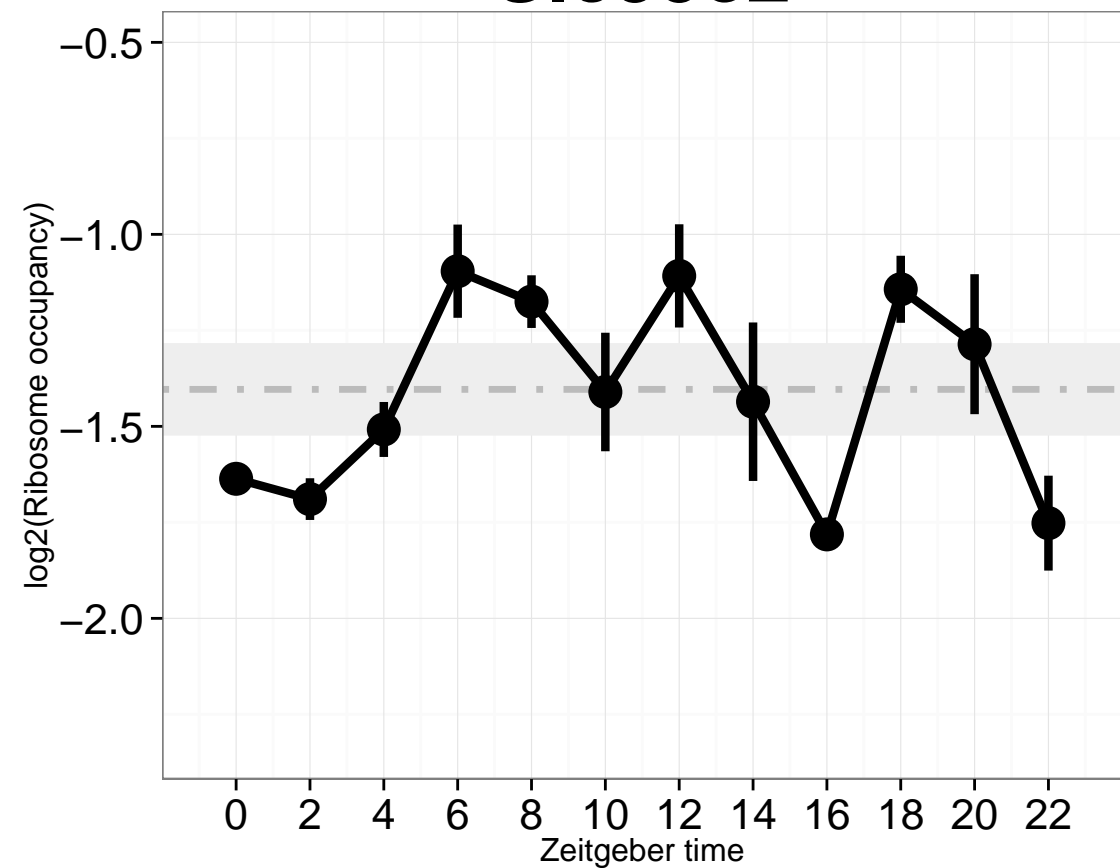

Supplement: Supplementary file 6365 [file 1]

## Ankhd1

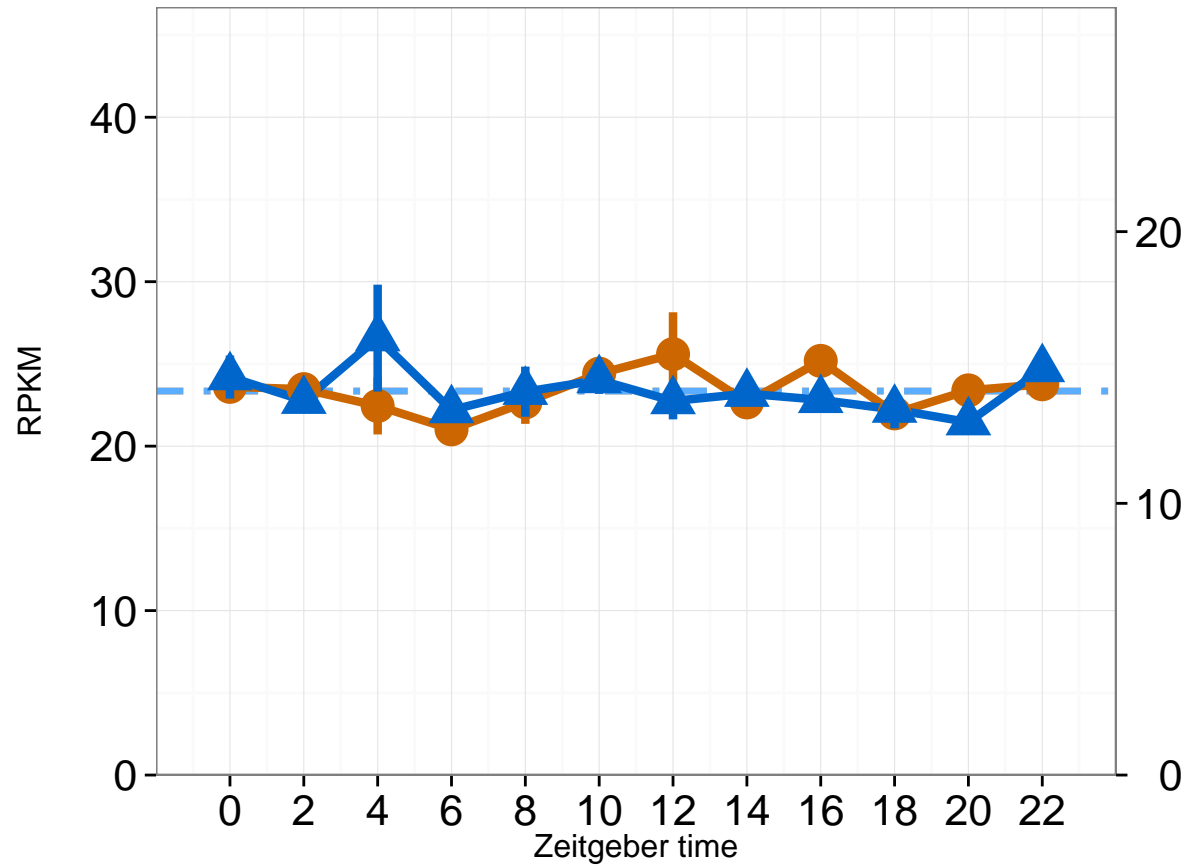

## Ankhd1

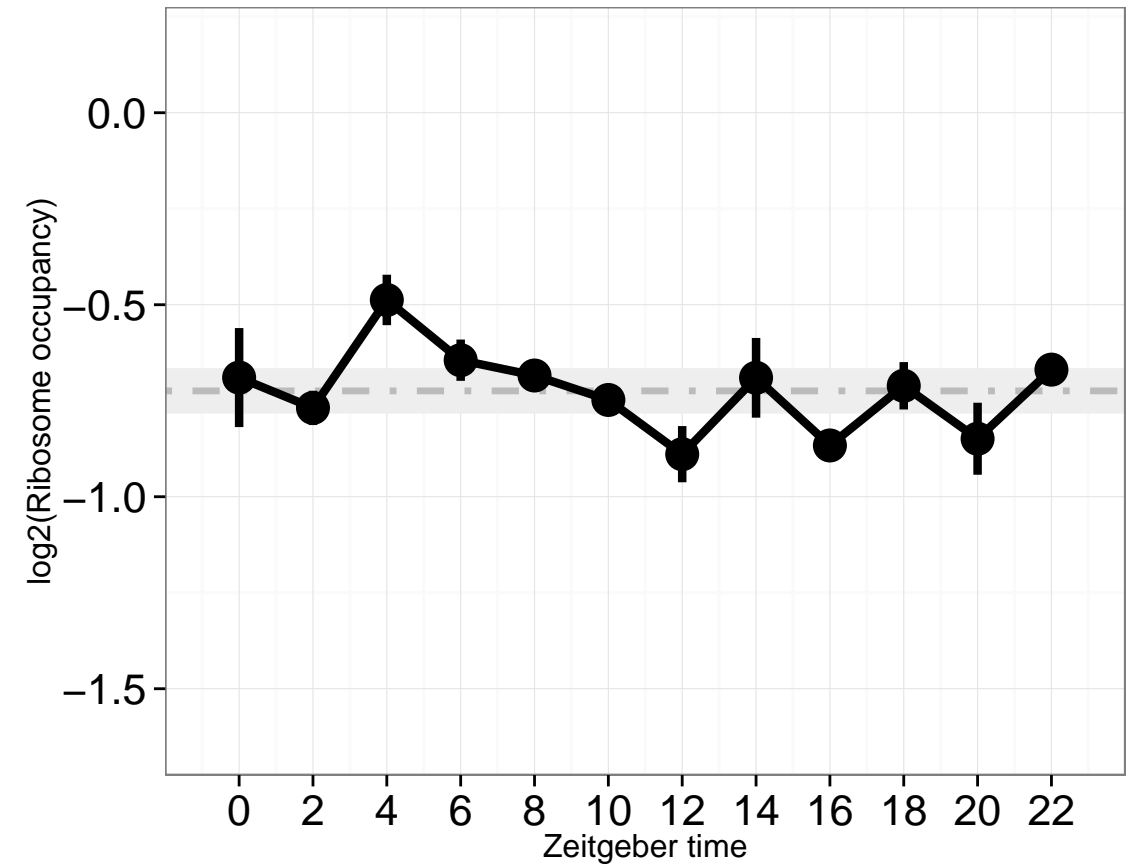

Supplement: Supplementary file 6366 [file 1]

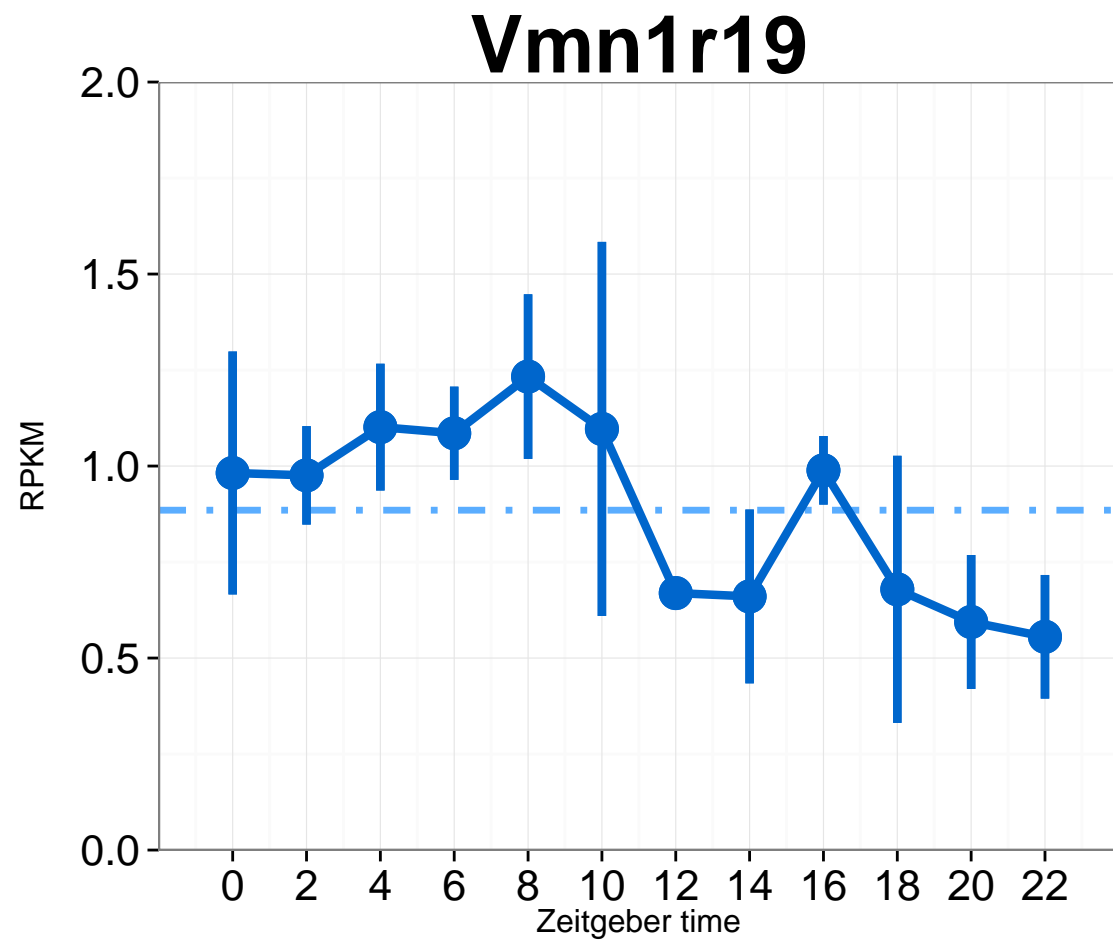

### Vmn1r19 log2(Ribosome occupanc

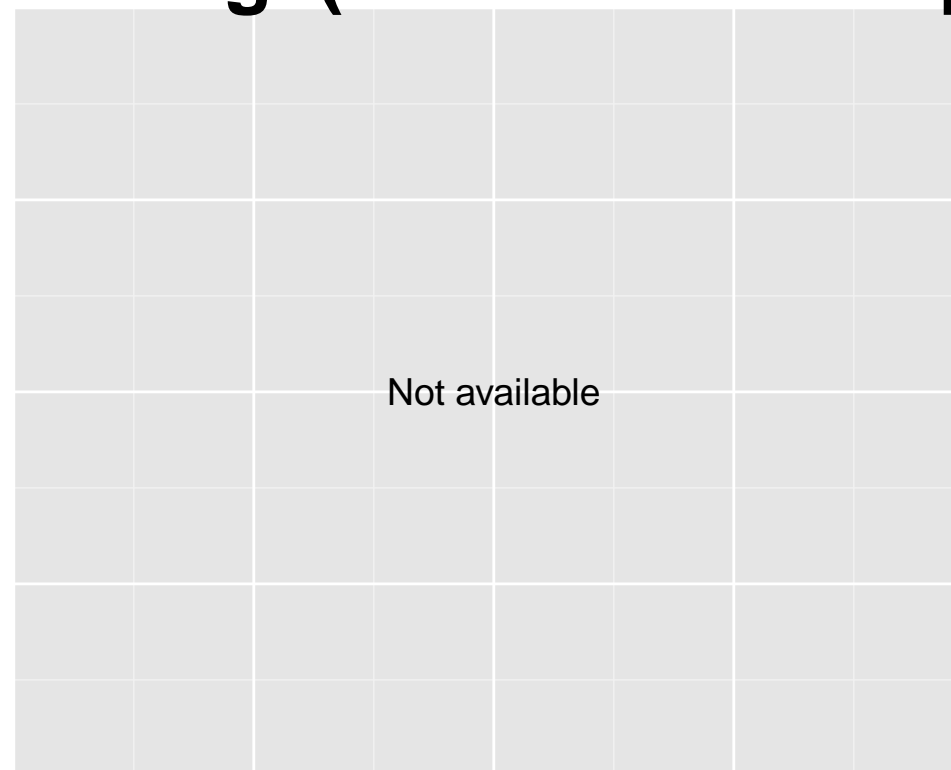

Supplement: Supplementary file 6367 [file 1]

# Cenpc1

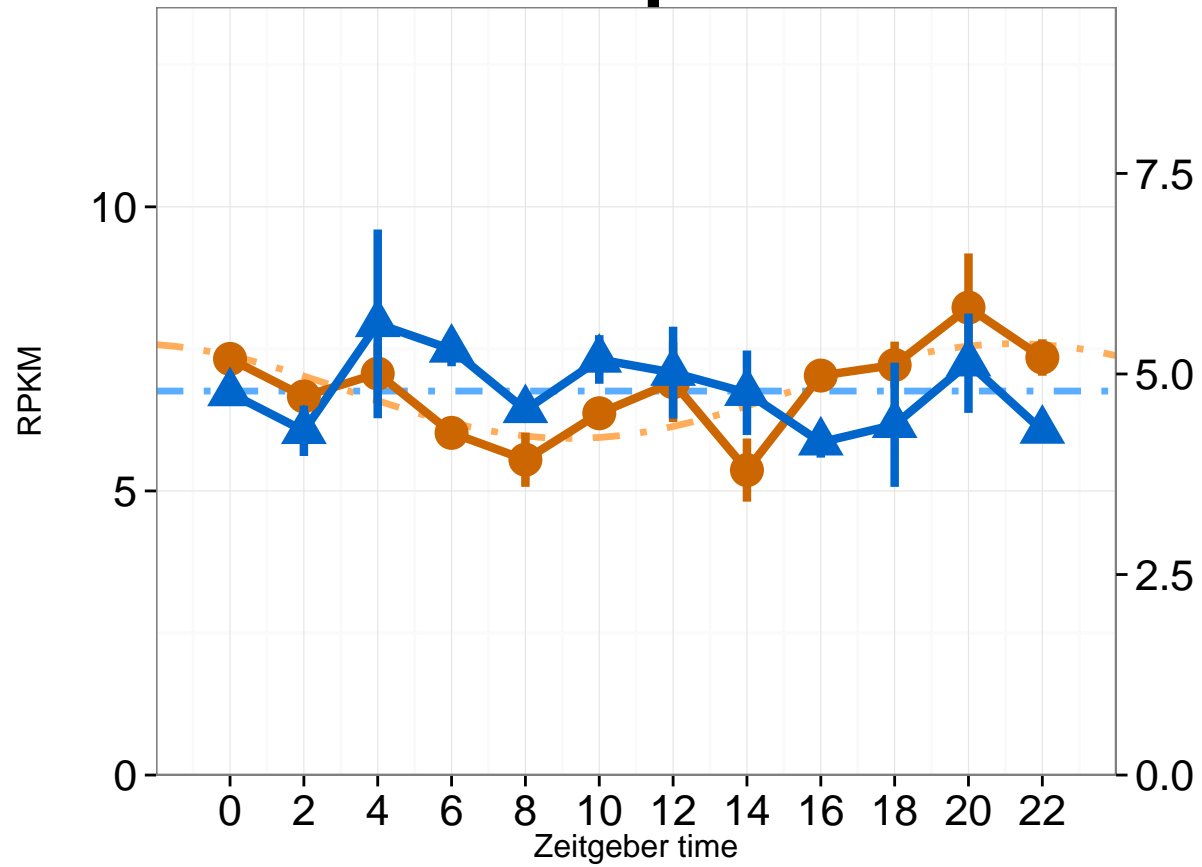

# Cenpc1

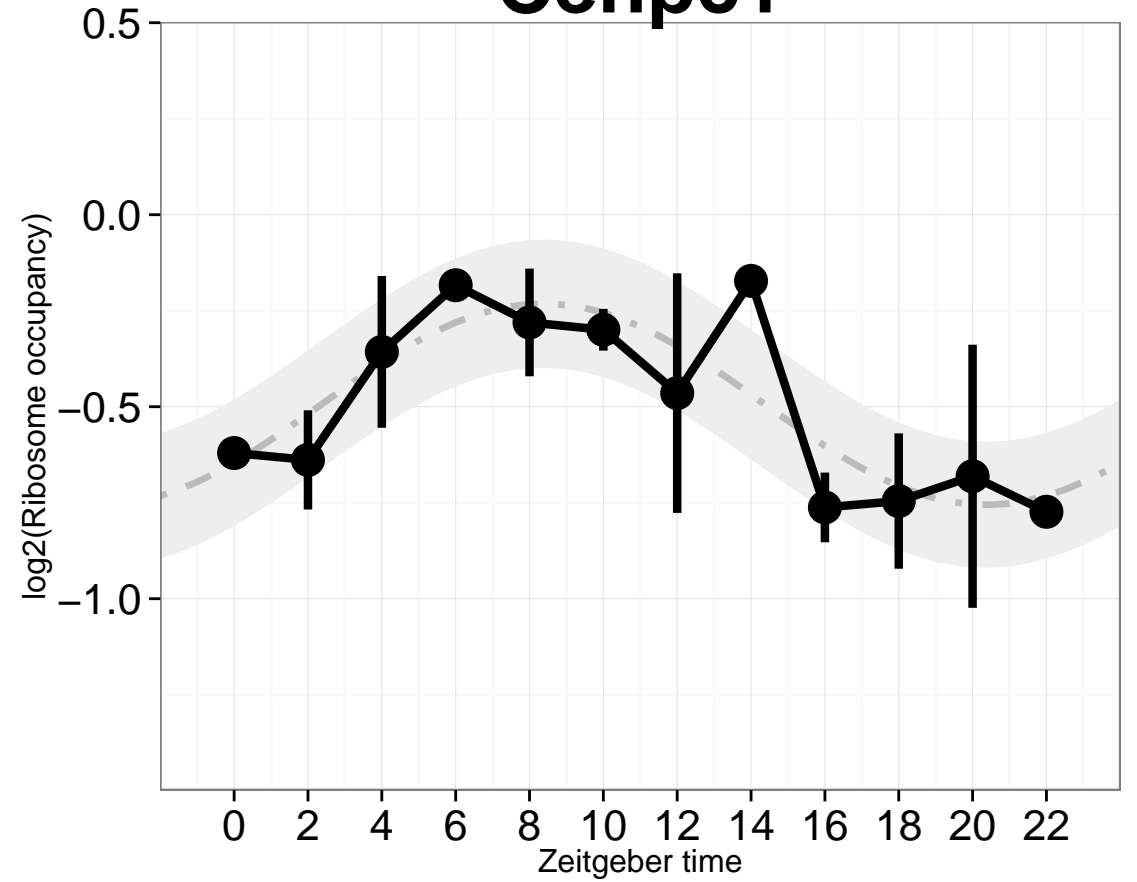

Supplement: Supplementary file 6368 [file 1]

# Srbd1

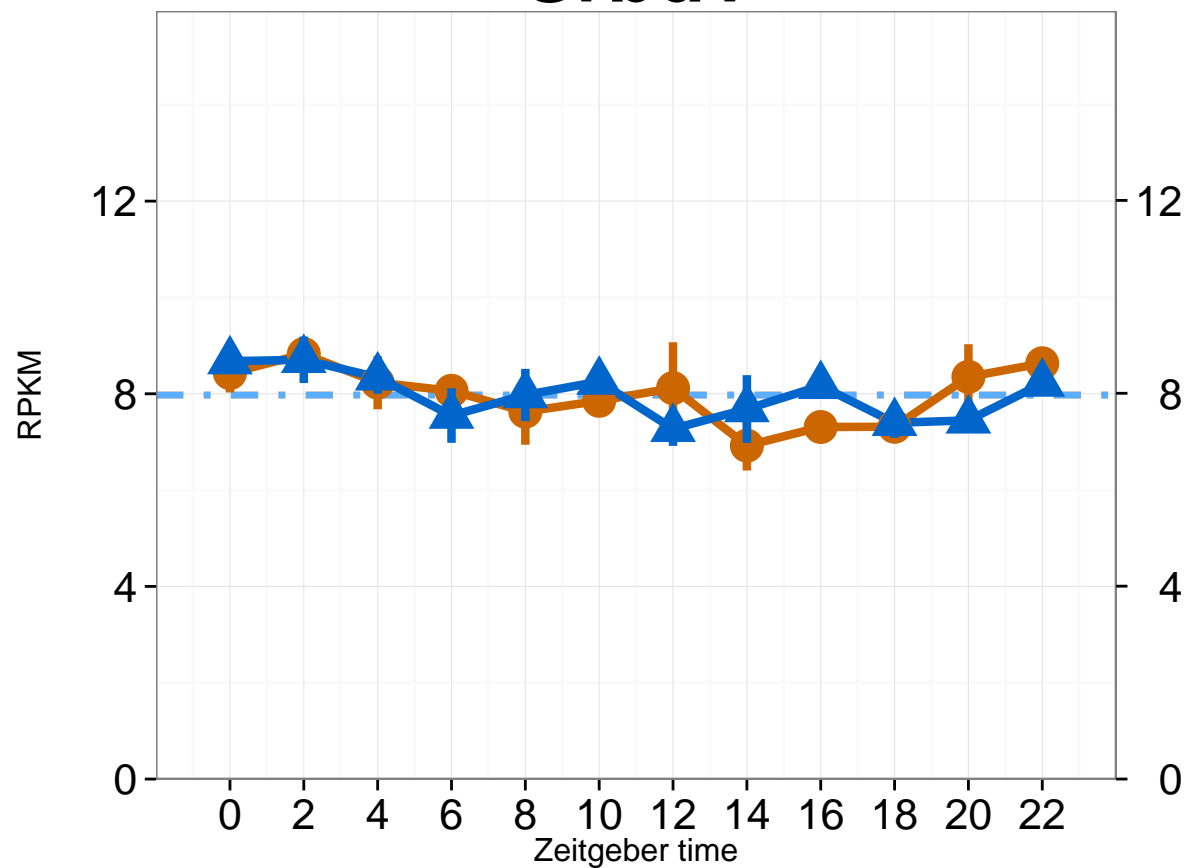

# Srbd1

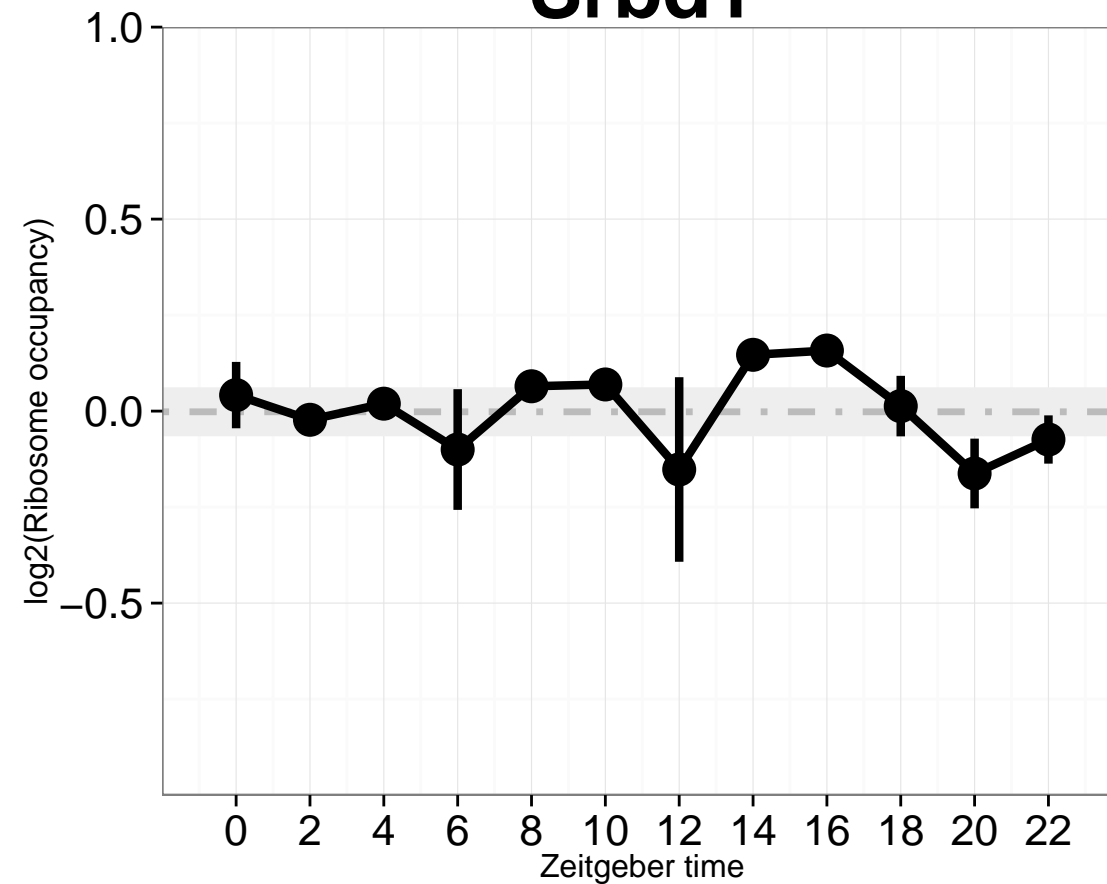

Supplement: Supplementary file 6369 [file 1]

## Thbd

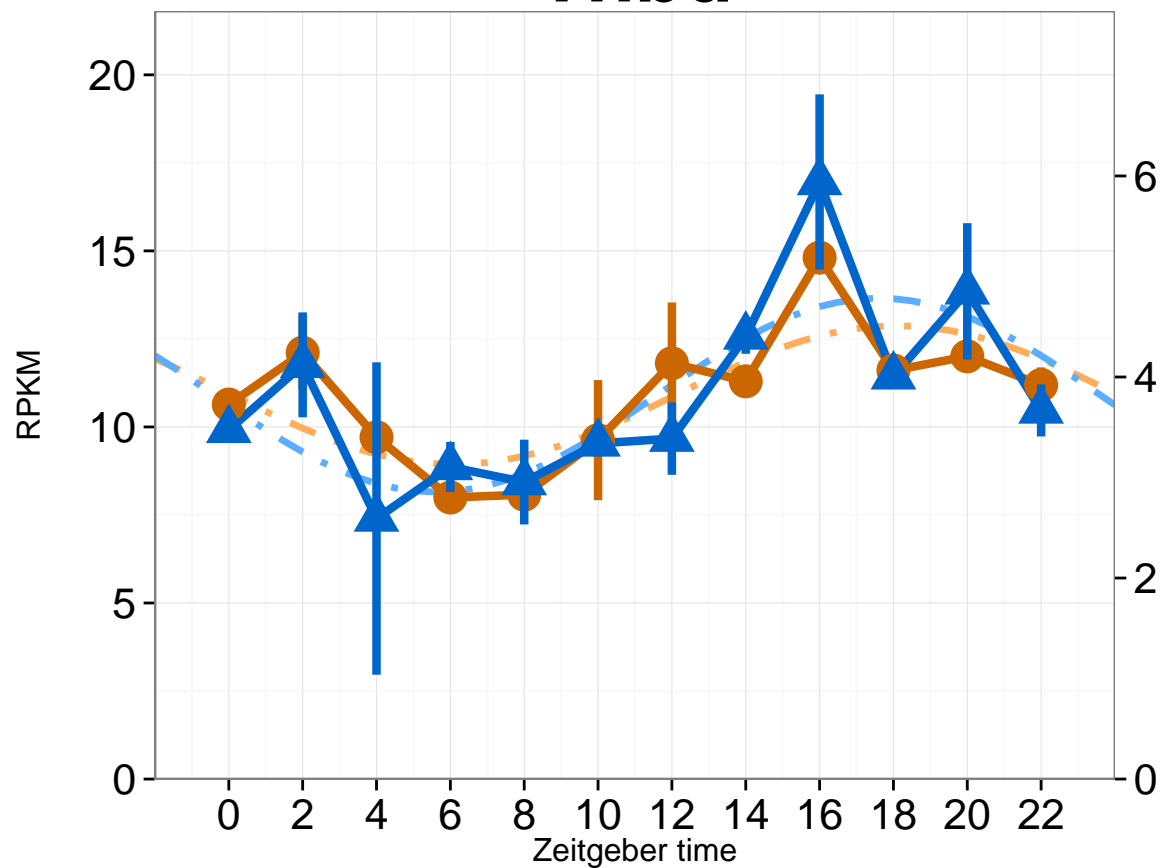

## Thbd

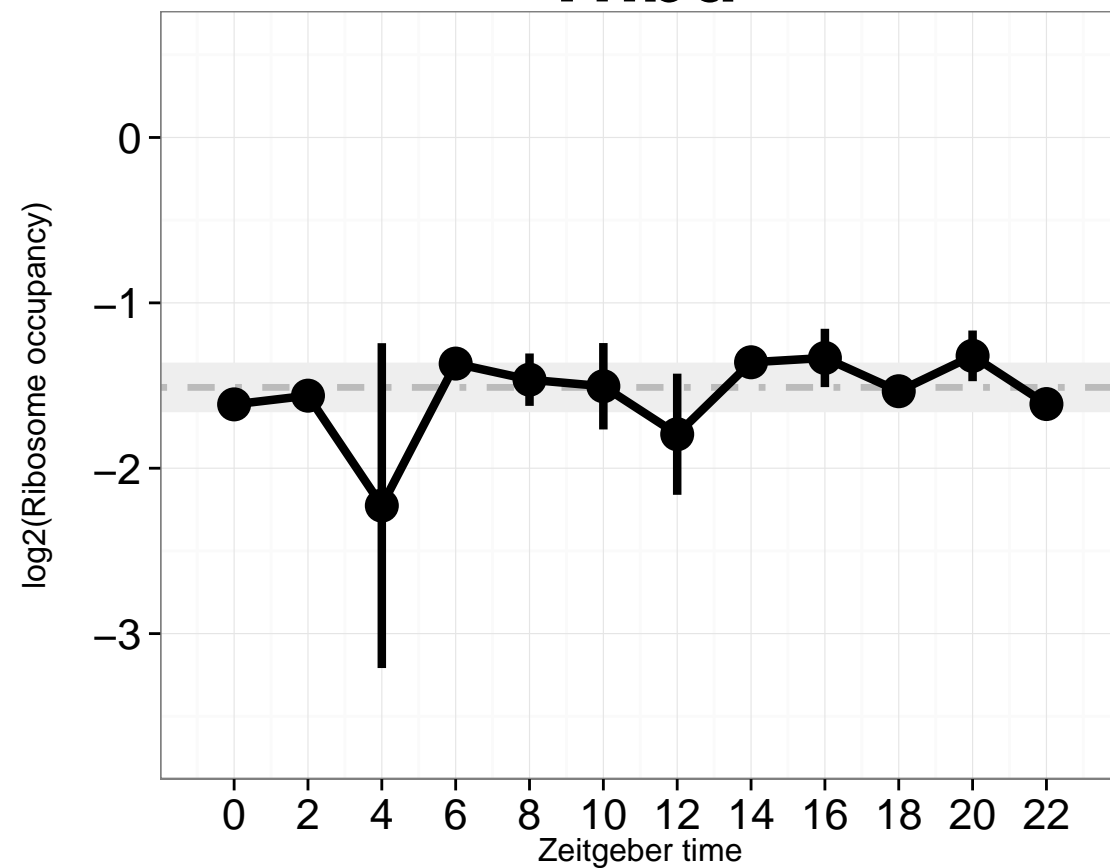

Supplement: Supplementary file 6370 [file 1]

AA415398

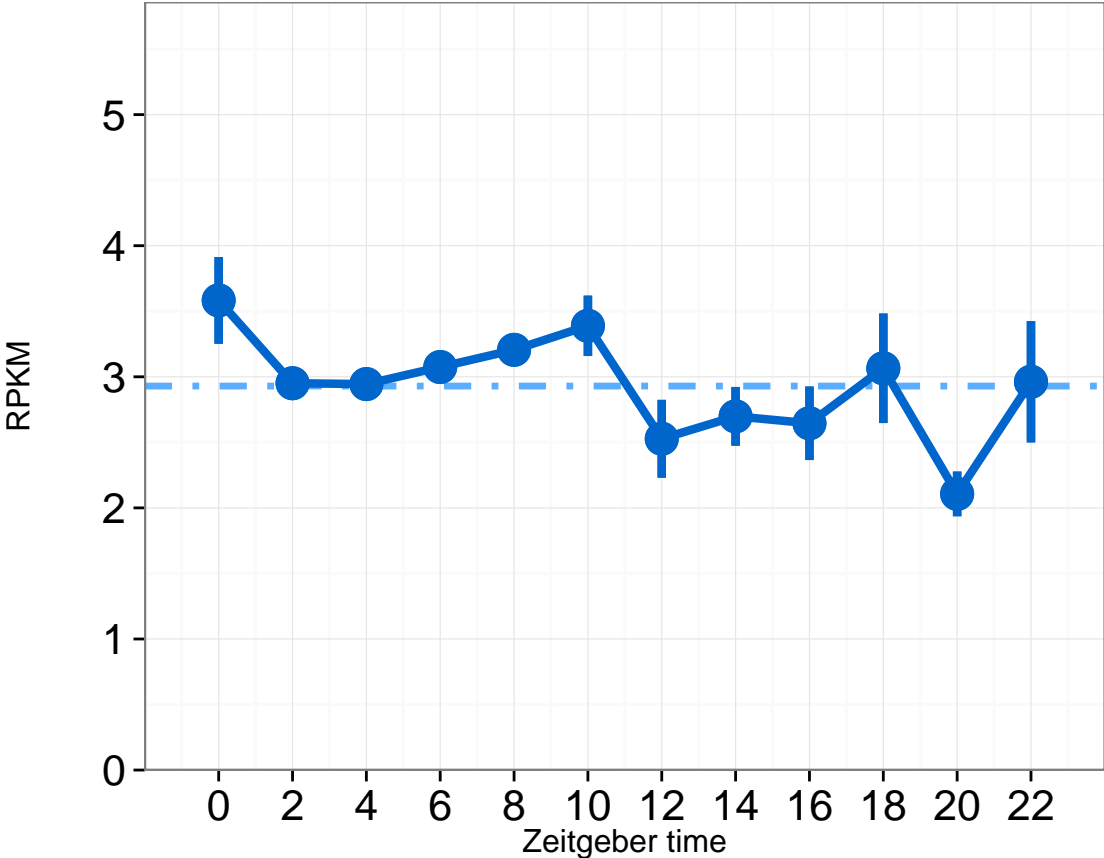

AA415398 log2(Ribosome occupancy)

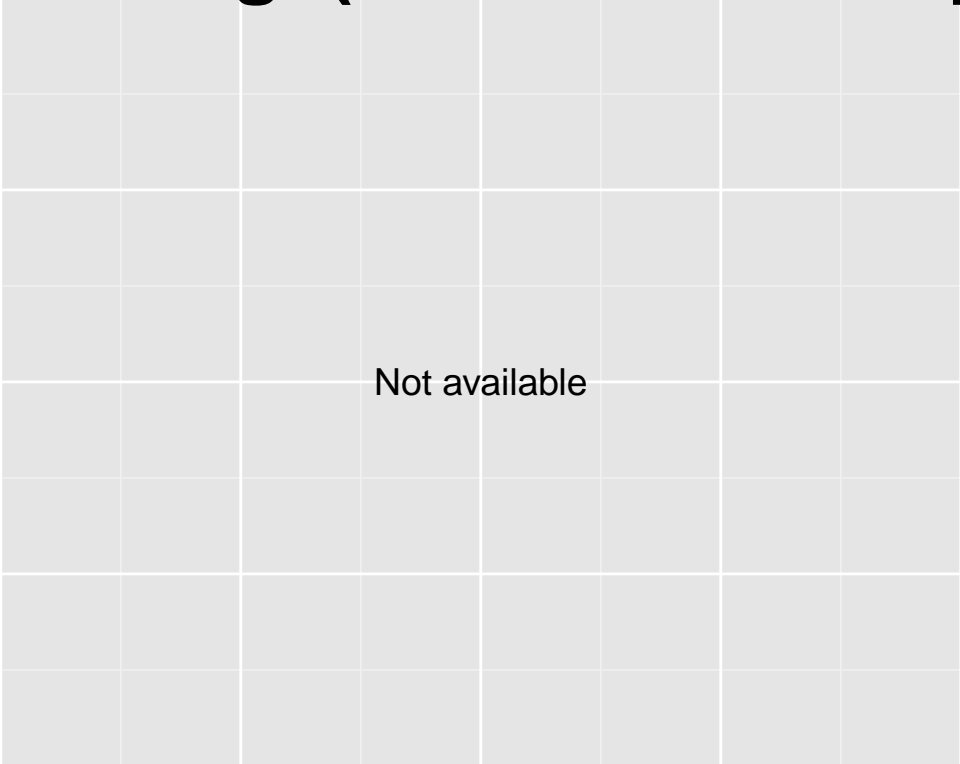

Supplement: Supplementary file 6371 [file 1]

# Cyp2d26

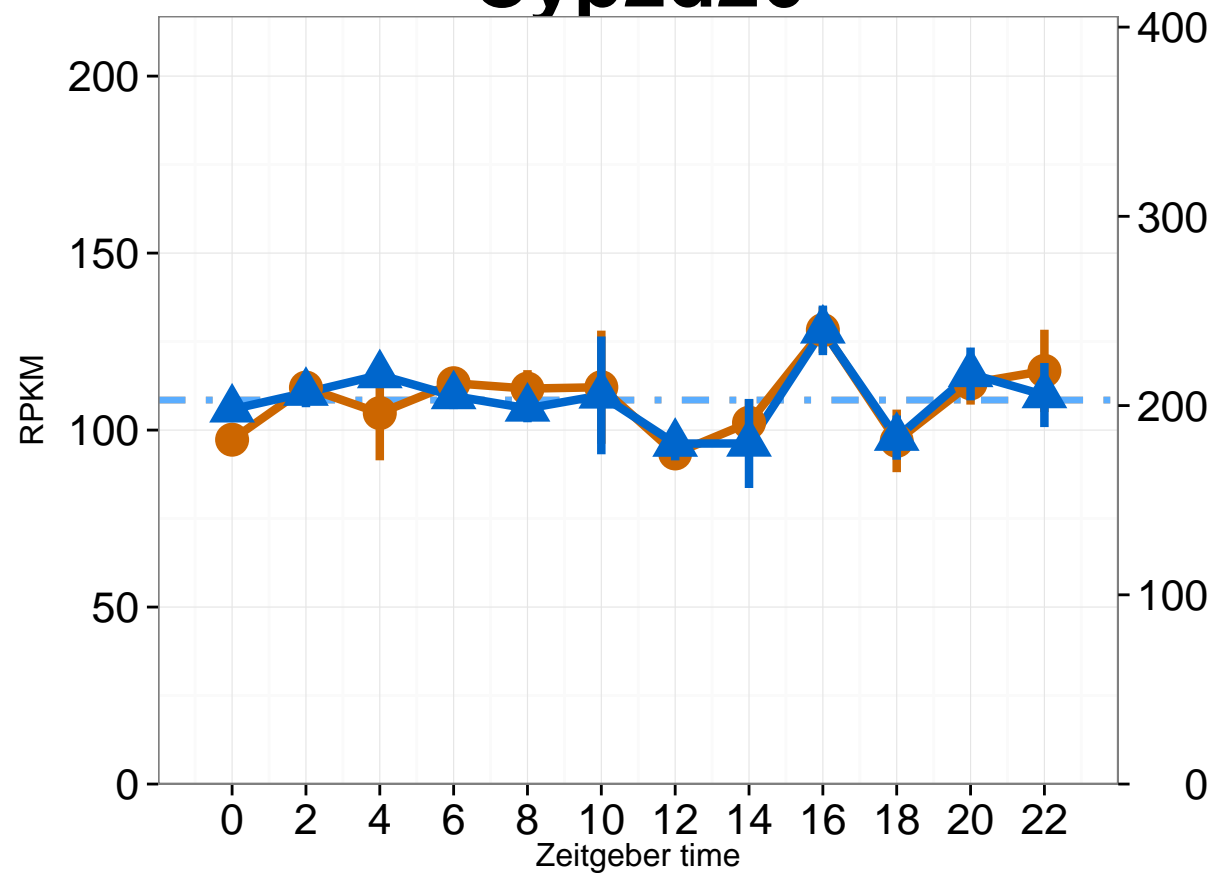

# Cyp2d26

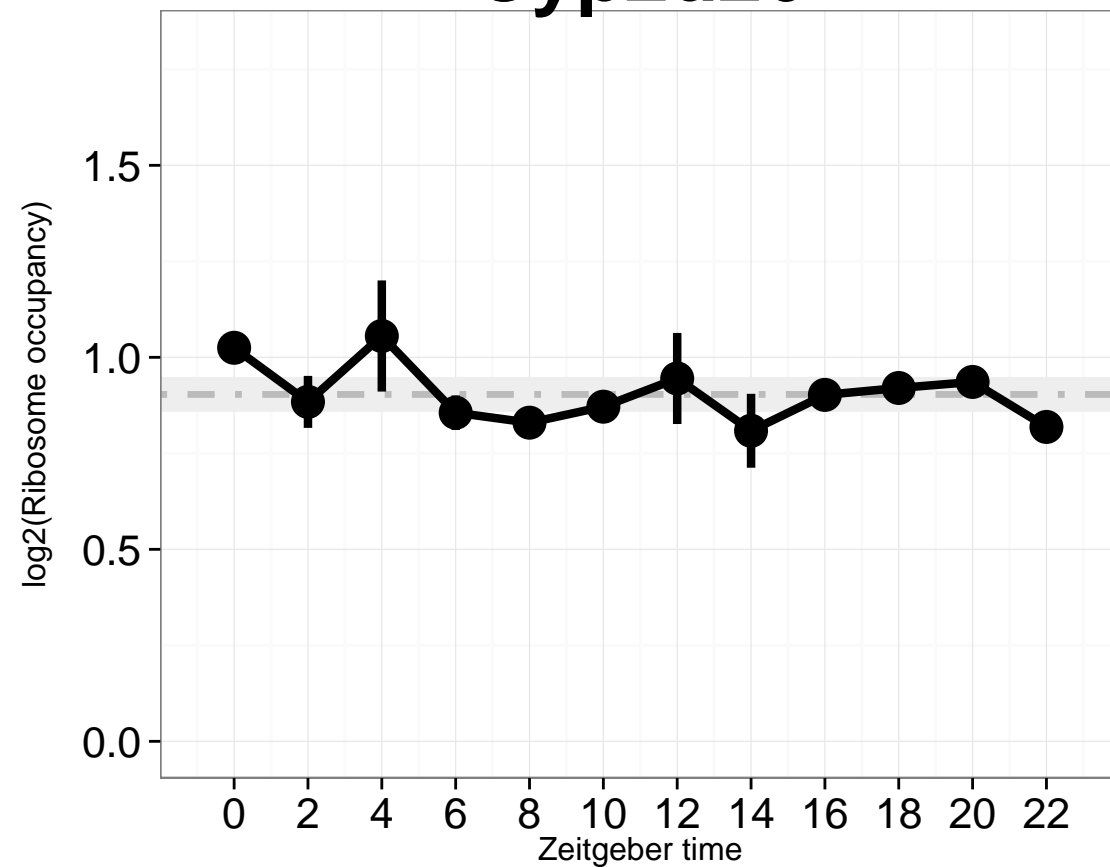

Supplement: Supplementary file 6372 [file 1]

## Nfu1

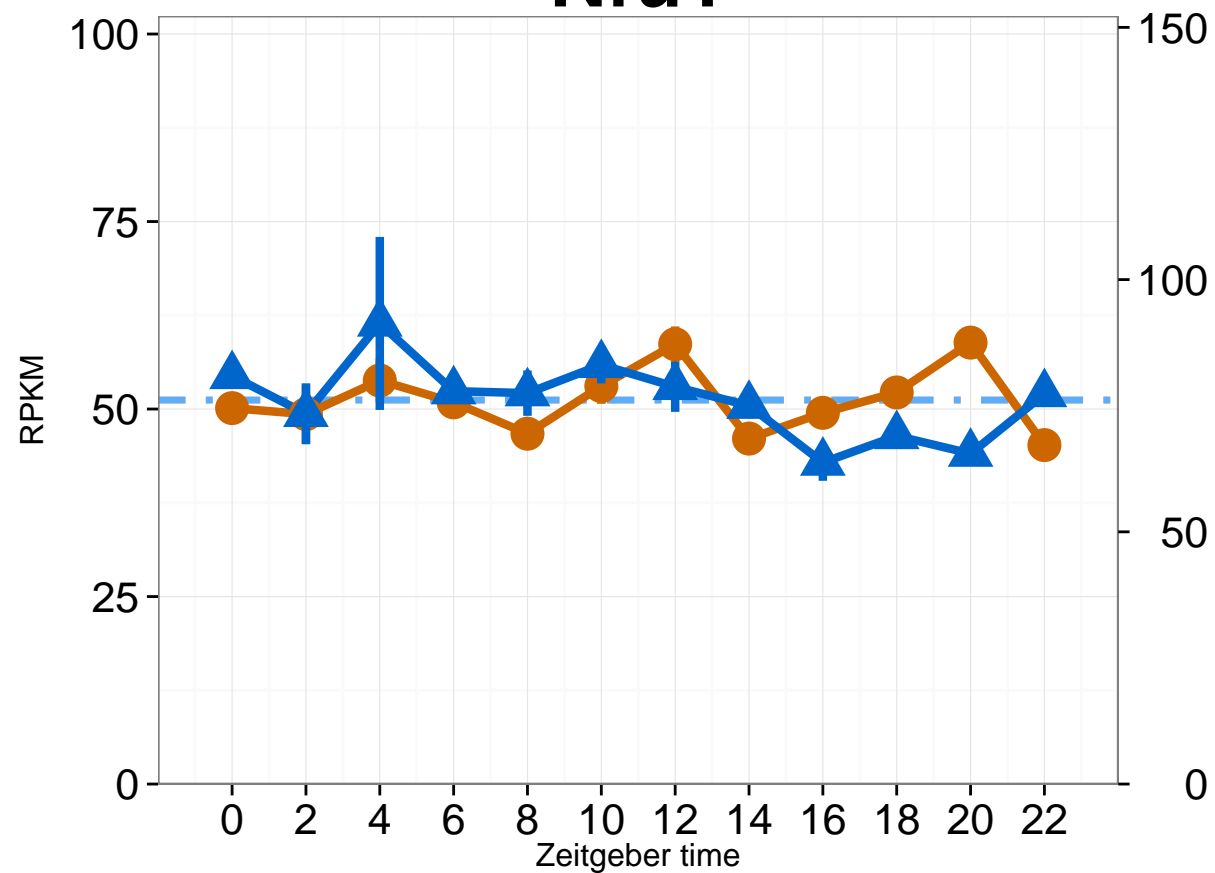

## Nfu1

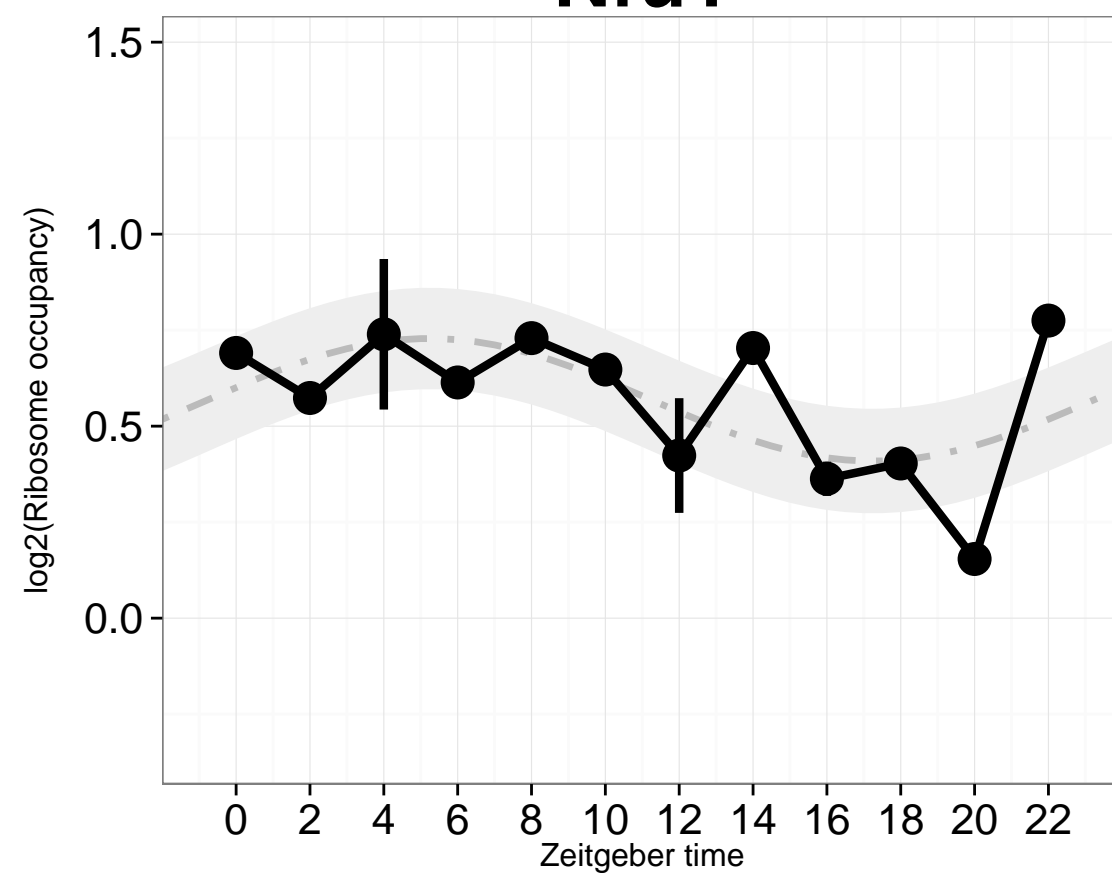

Supplement: Supplementary file 6373 [file 1]

## Pld2

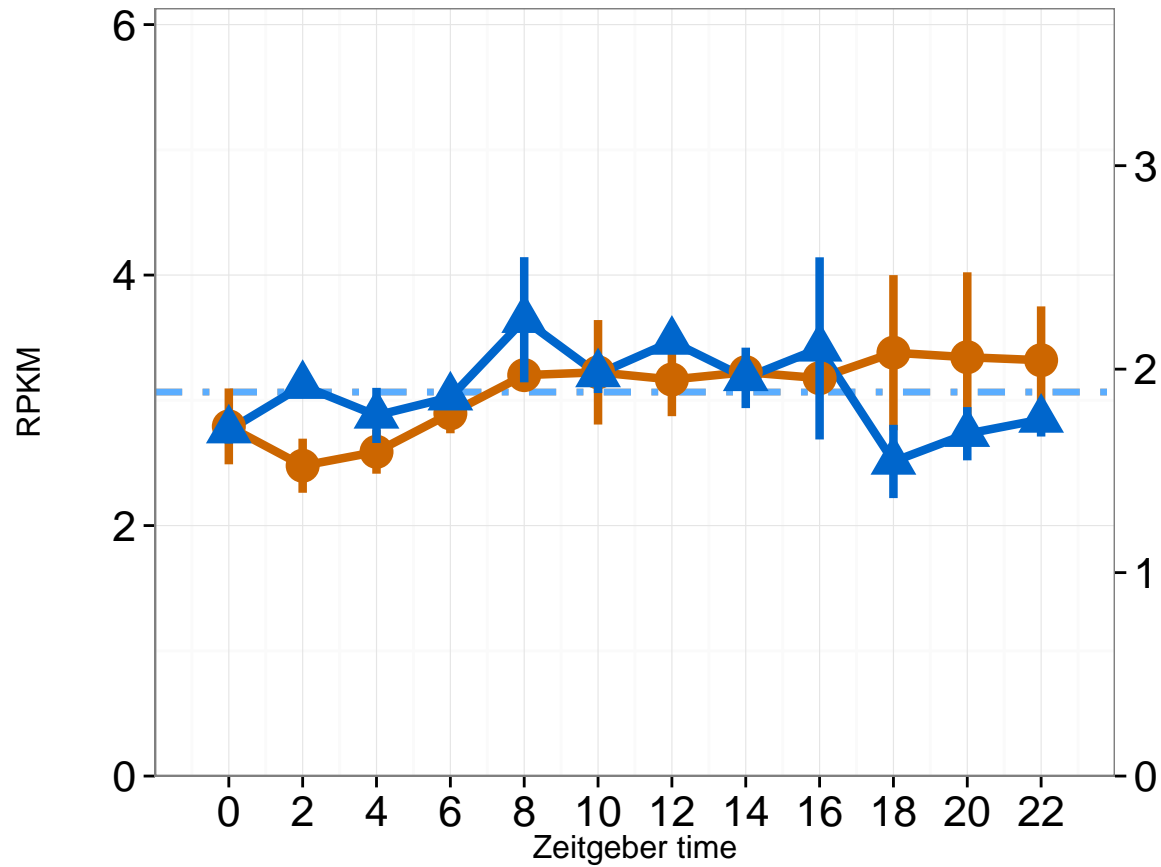

## Pld2

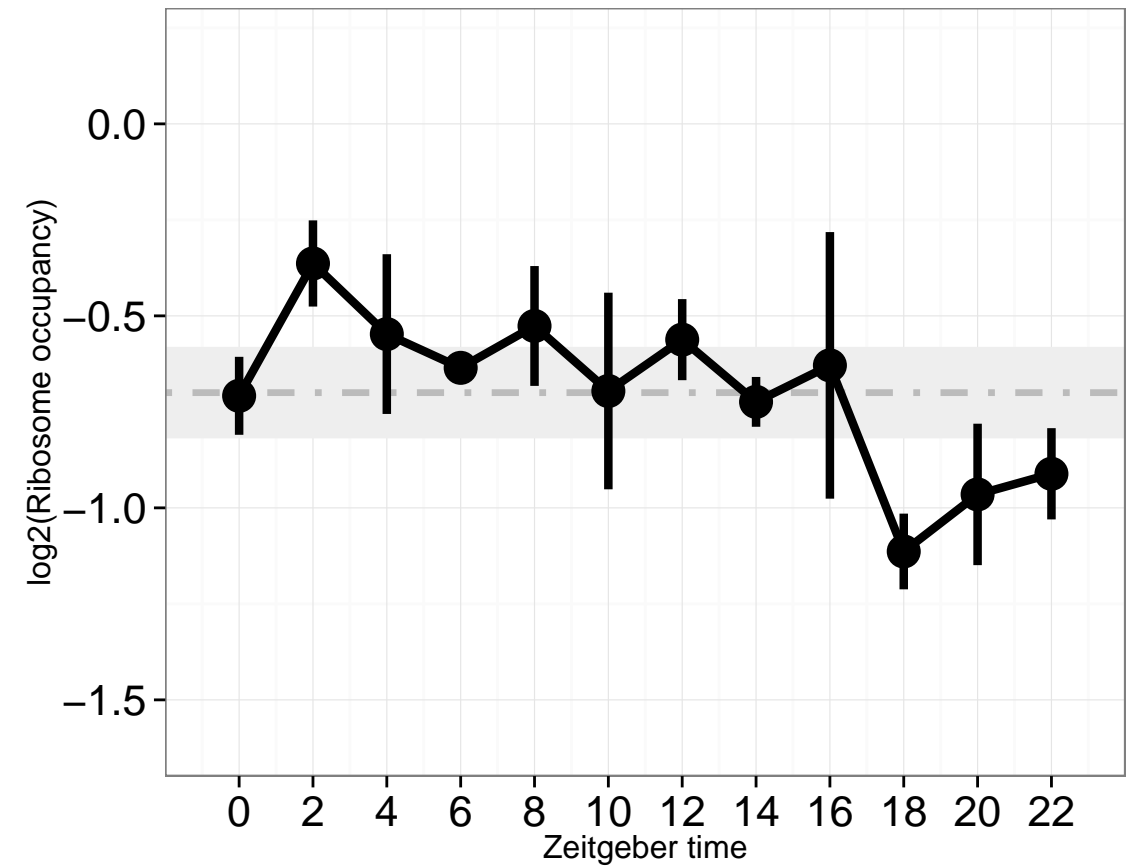

Supplement: Supplementary file 6374 [file 1]

## Ppox

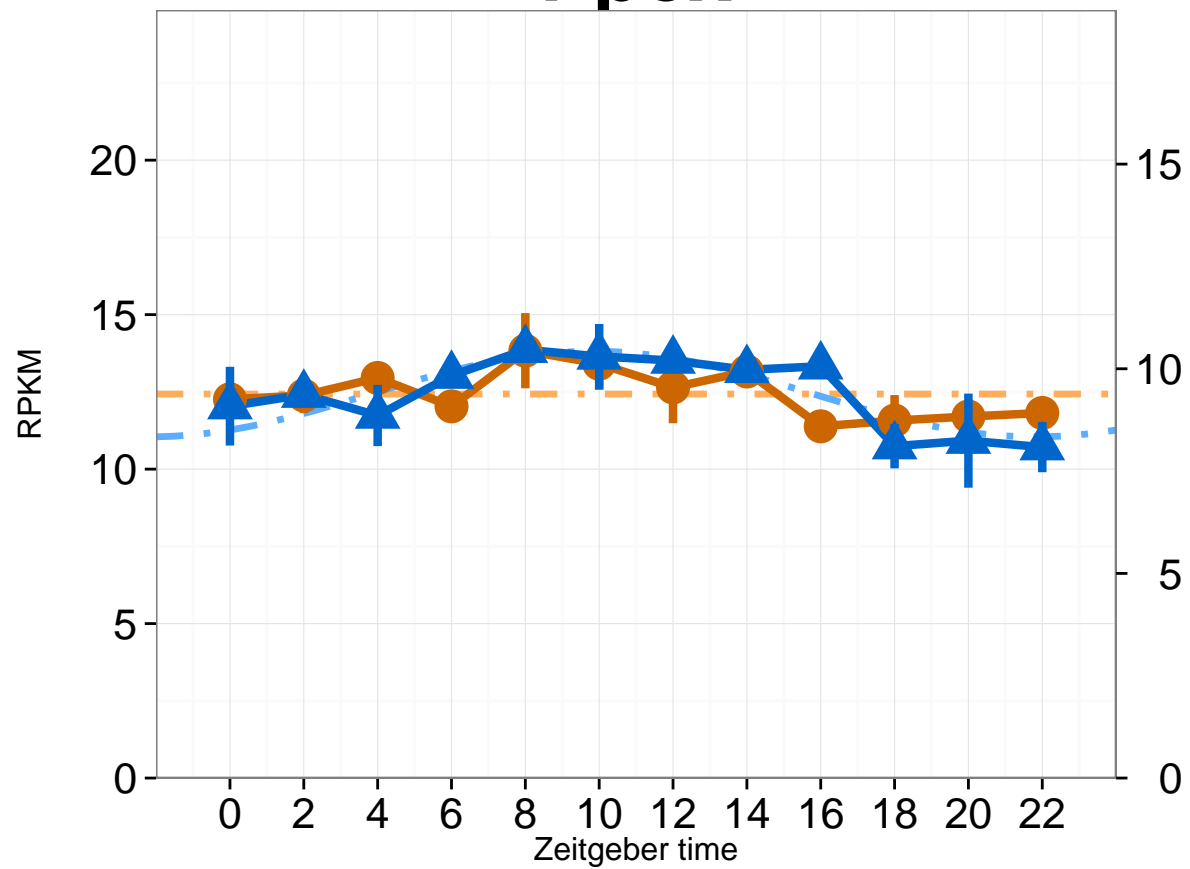

## Ppox

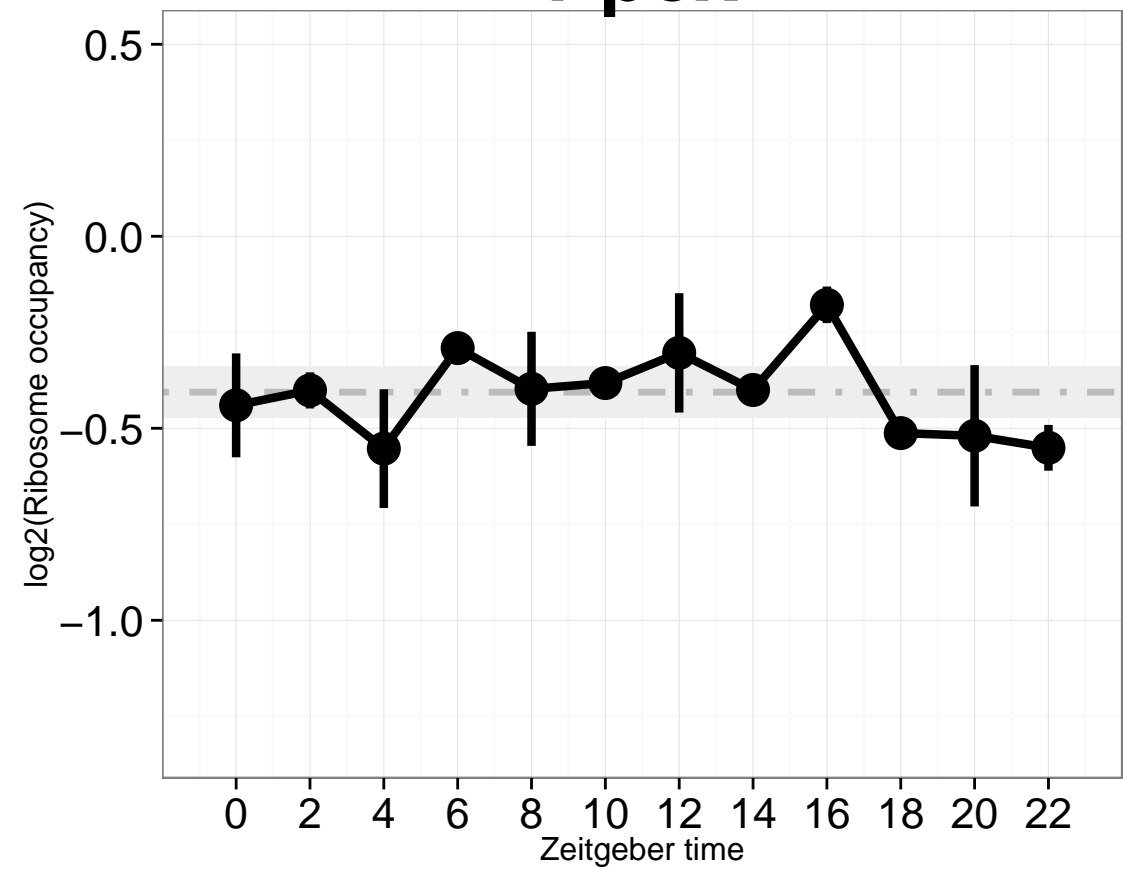

Supplement: Supplementary file 6375 [file 1]

# Spag6

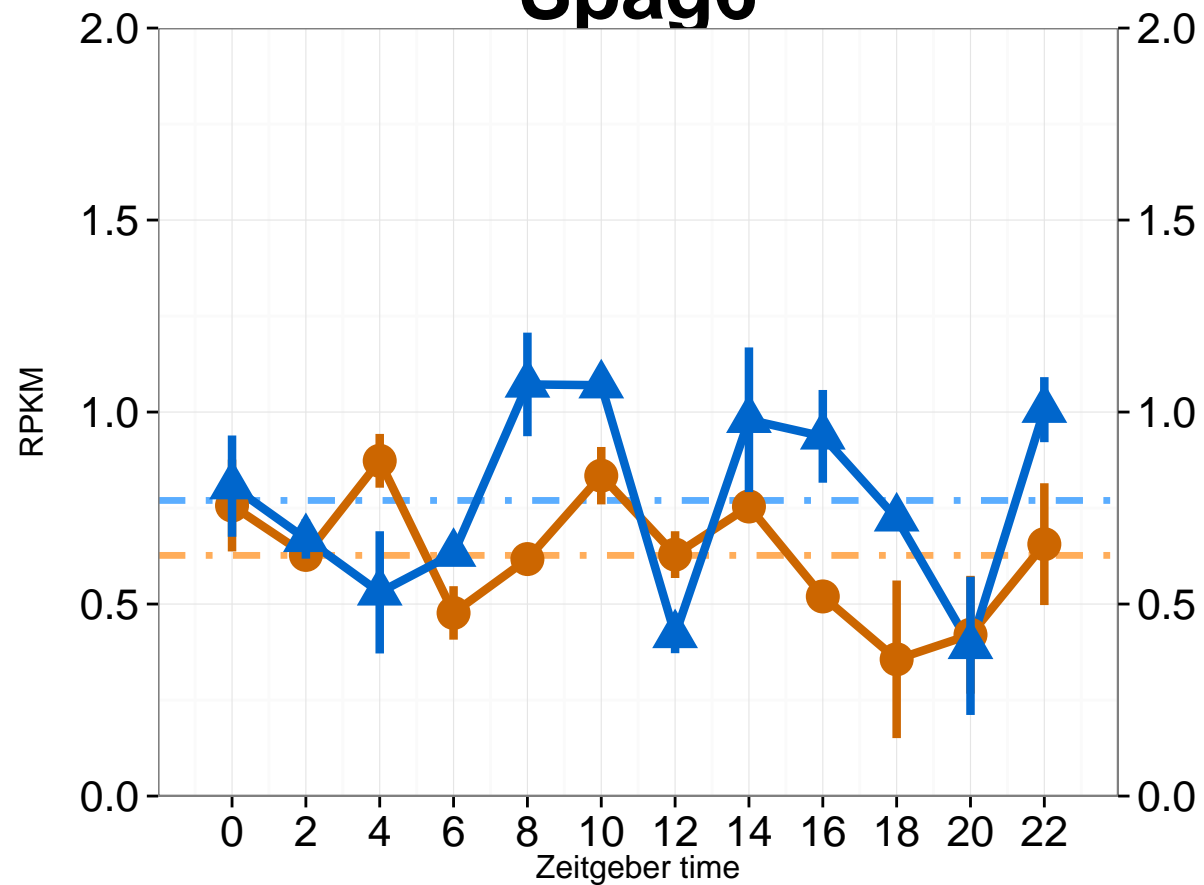

# Spag6

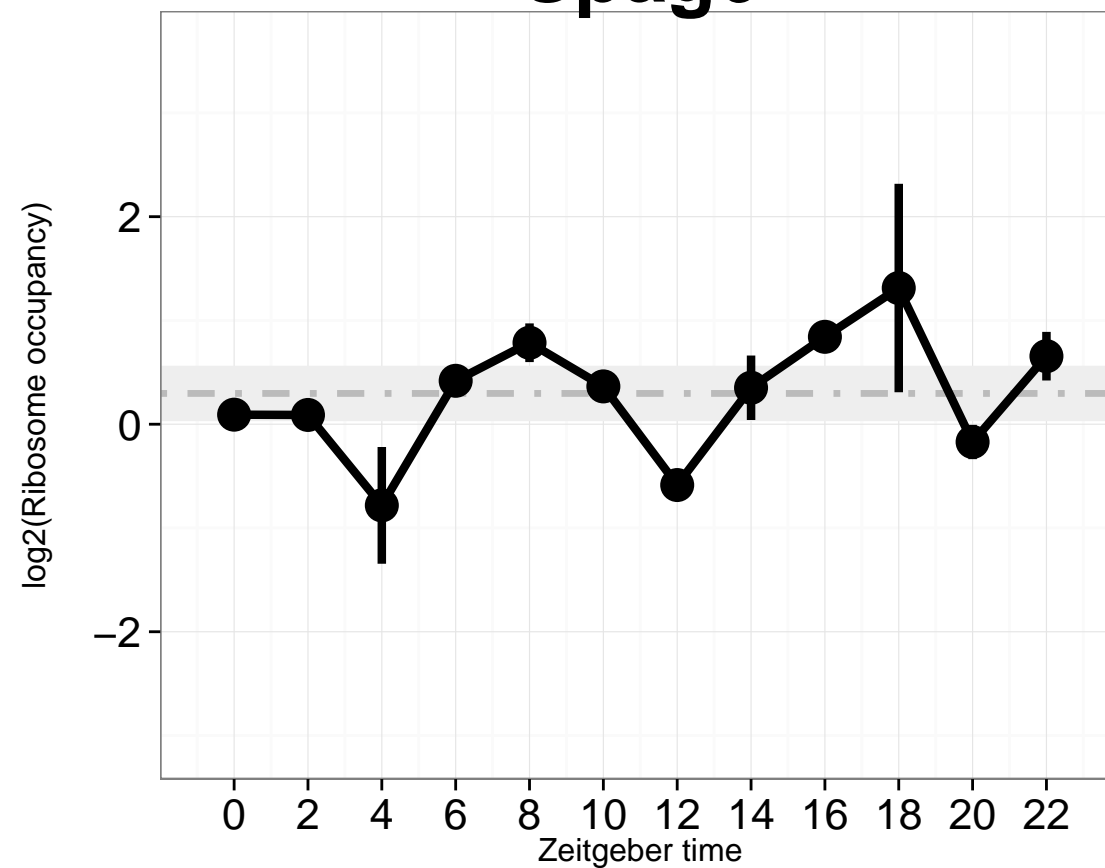

Supplement: Supplementary file 6376 [file 1]

## Smarca4

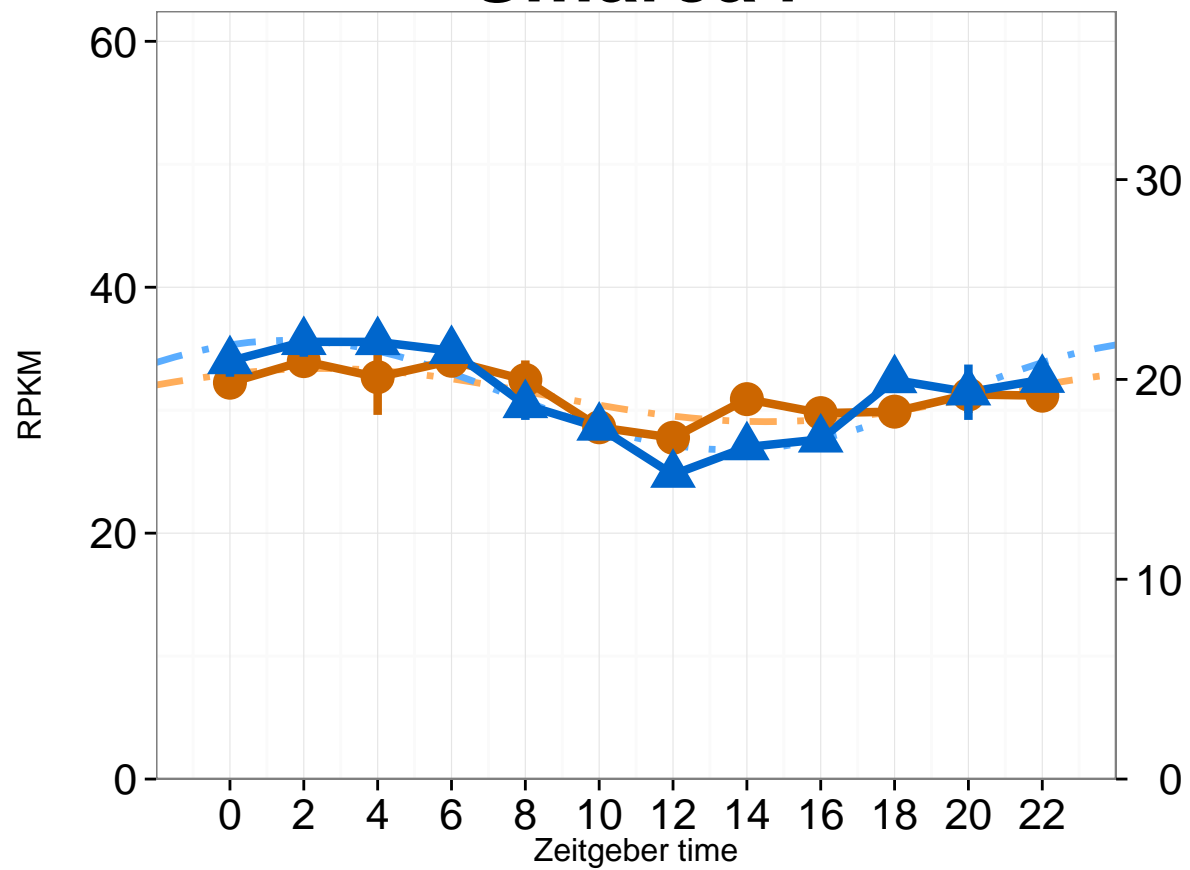

## Smarca4

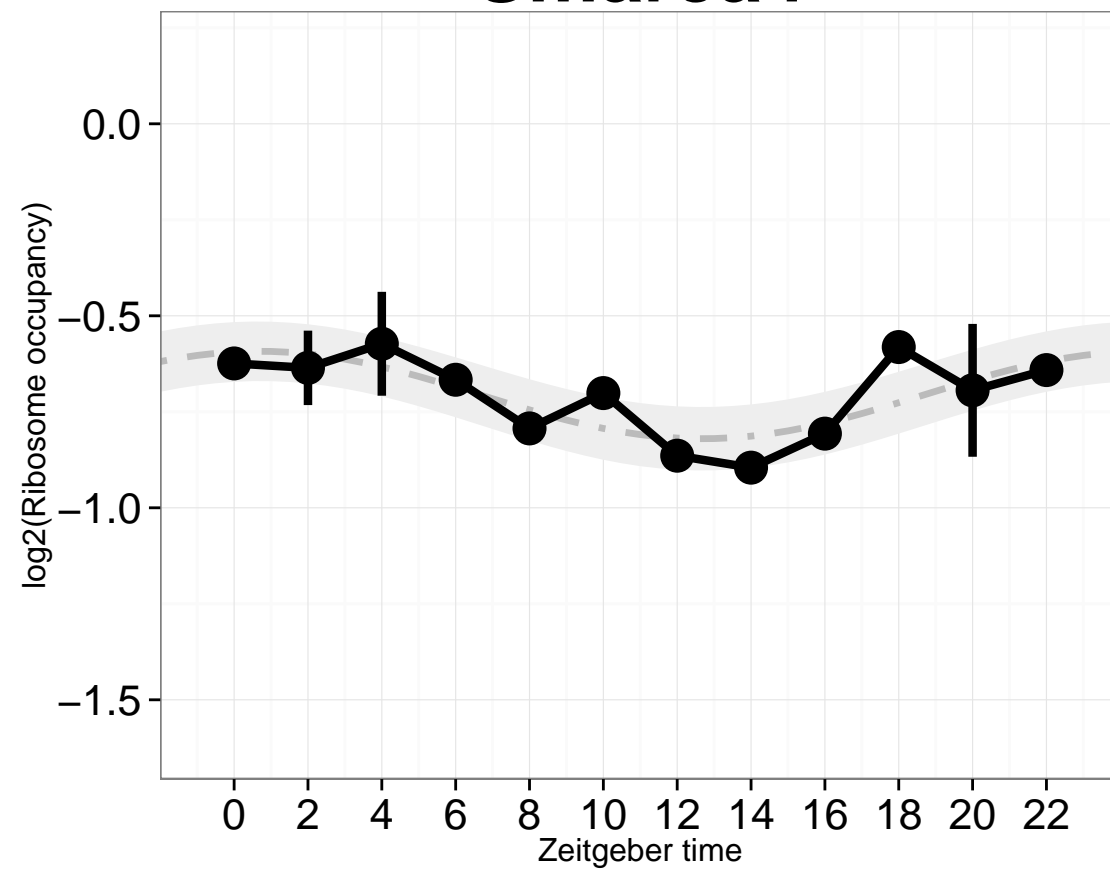

Supplement: Supplementary file 6377 [file 1]

# Tspan18

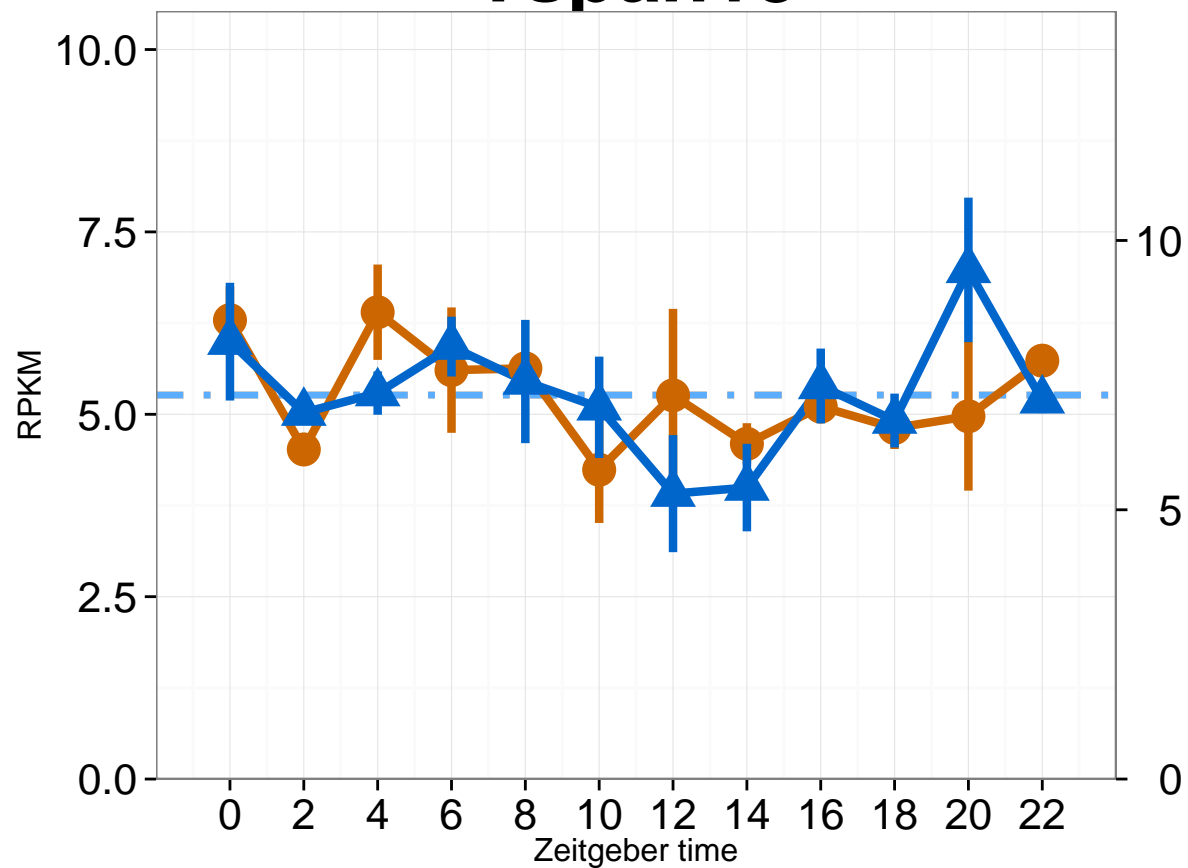

# Tspan18

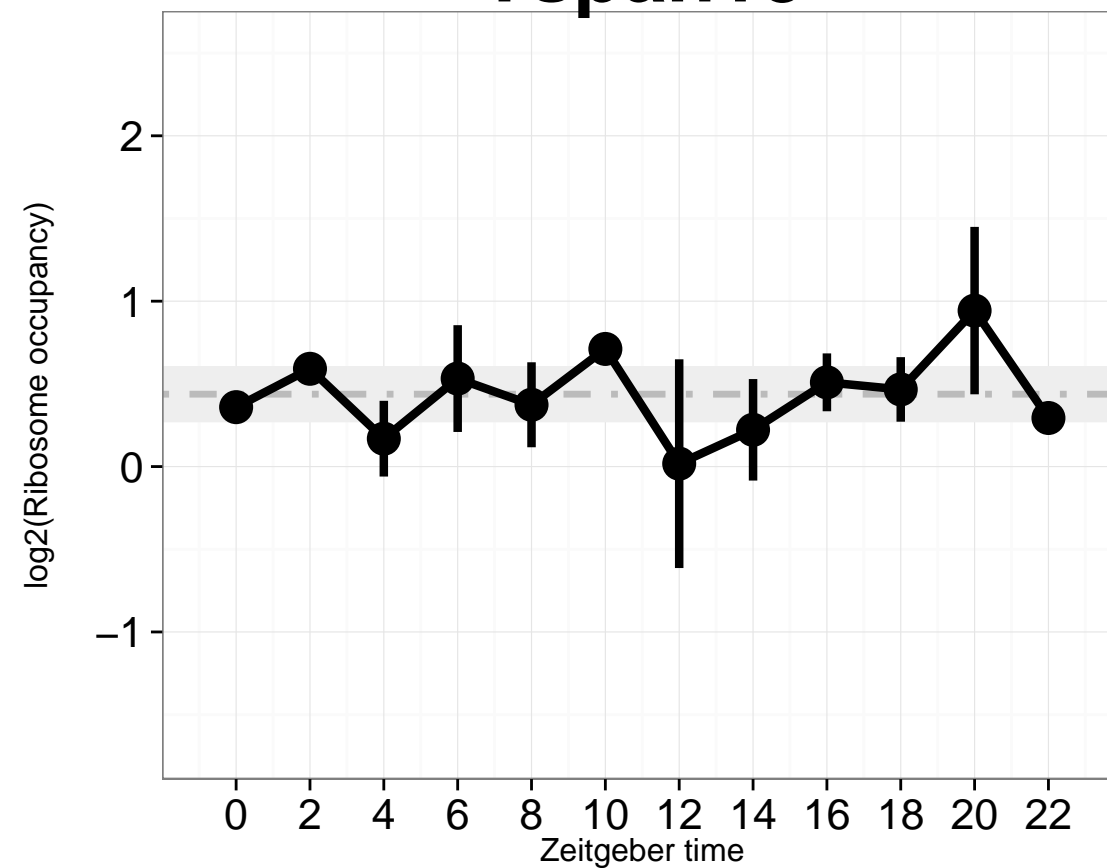

Supplement: Supplementary file 6378 [file 1]

## Dclk1 TR

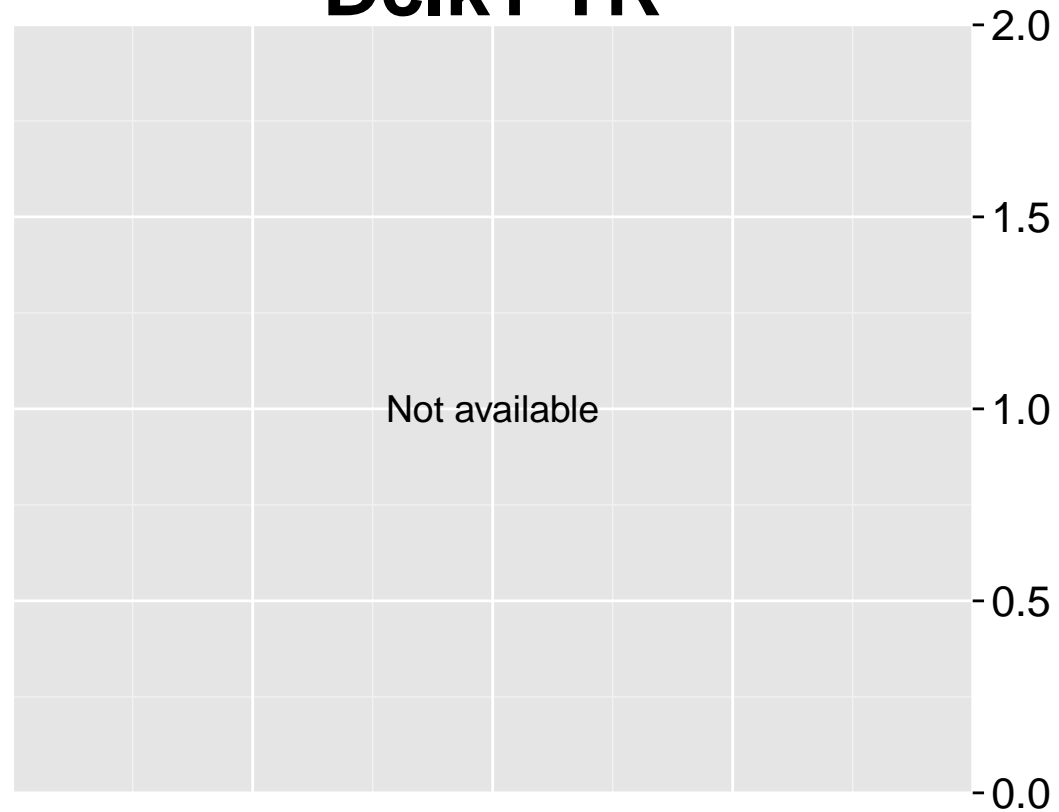

## Dclk1 log2(Ribosome occupancy)

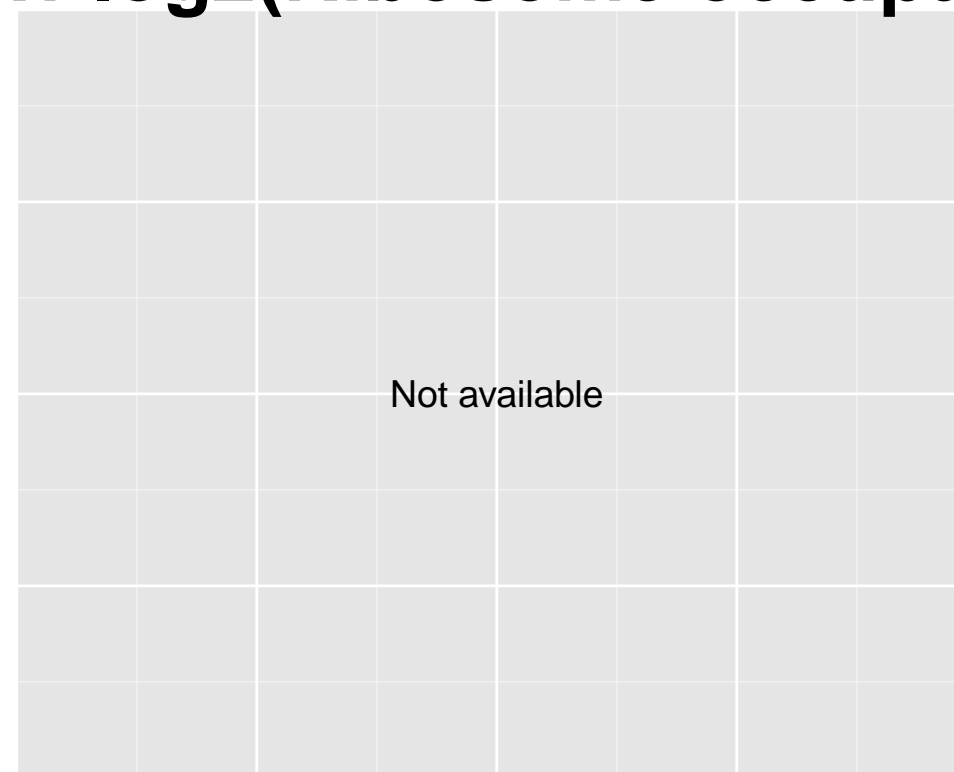

Supplement: Supplementary file 6379 [file 1]

## Bloc1s6

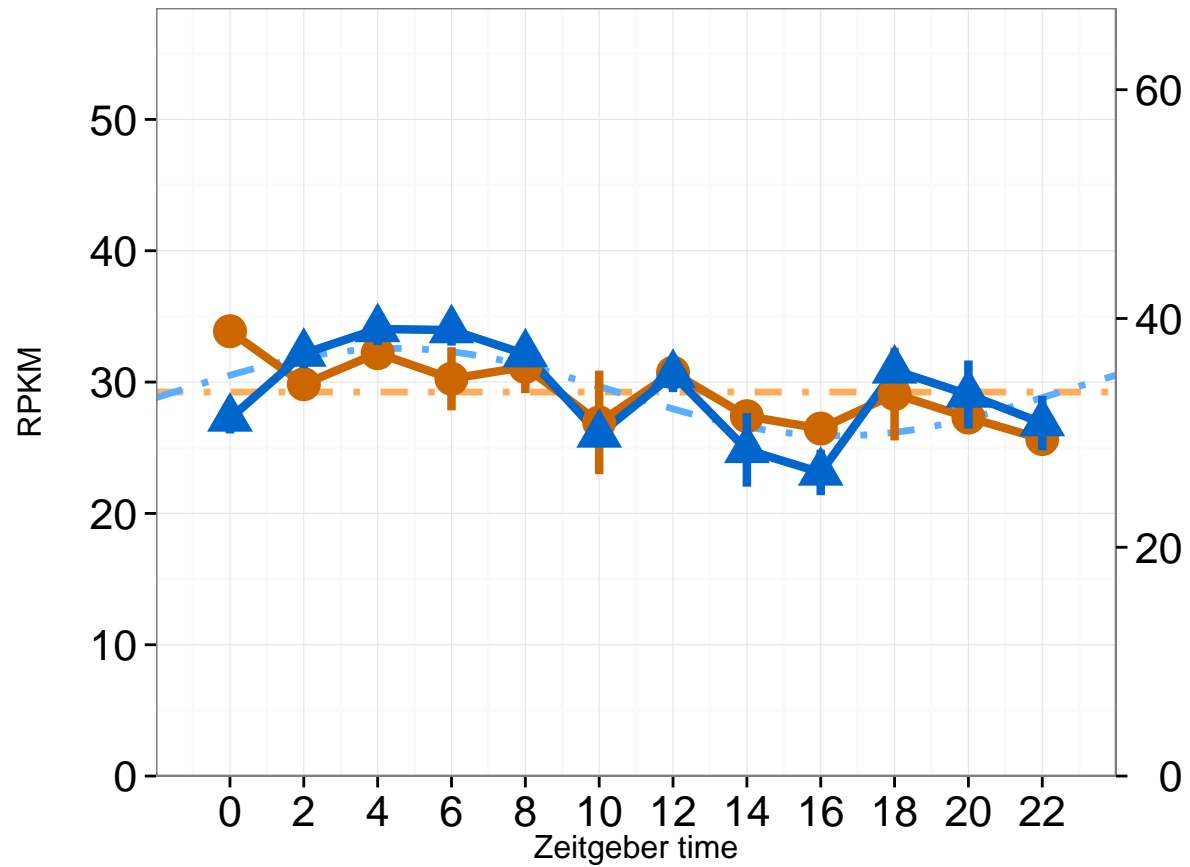

## Bloc1s6

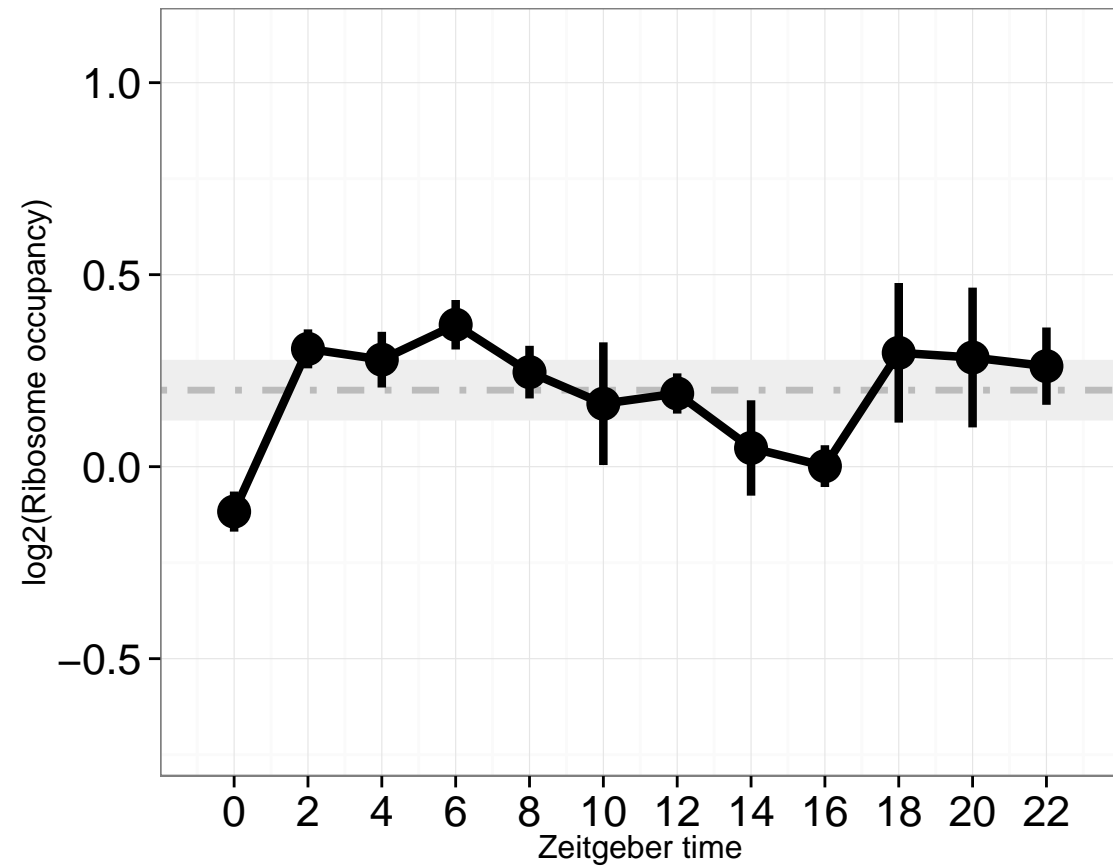

Supplement: Supplementary file 6380 [file 1]

# Hsd17b14

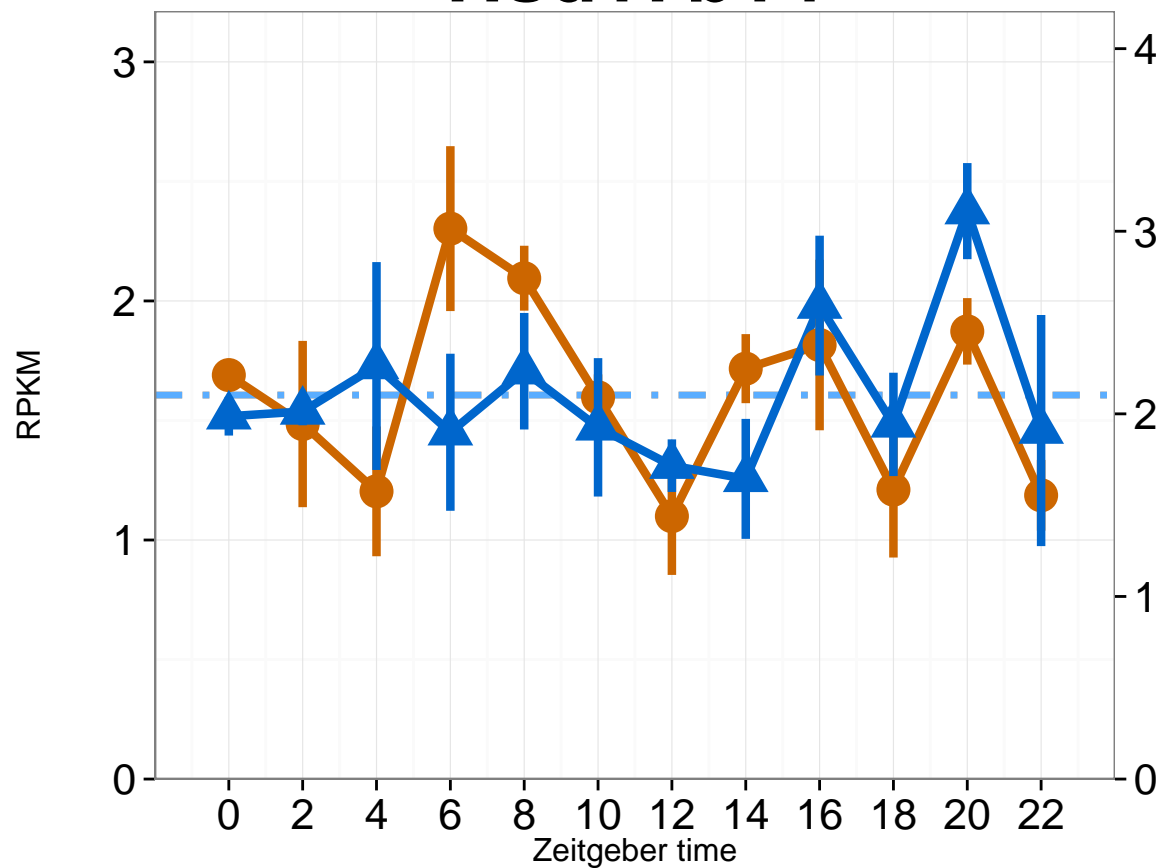

# Hsd17b14

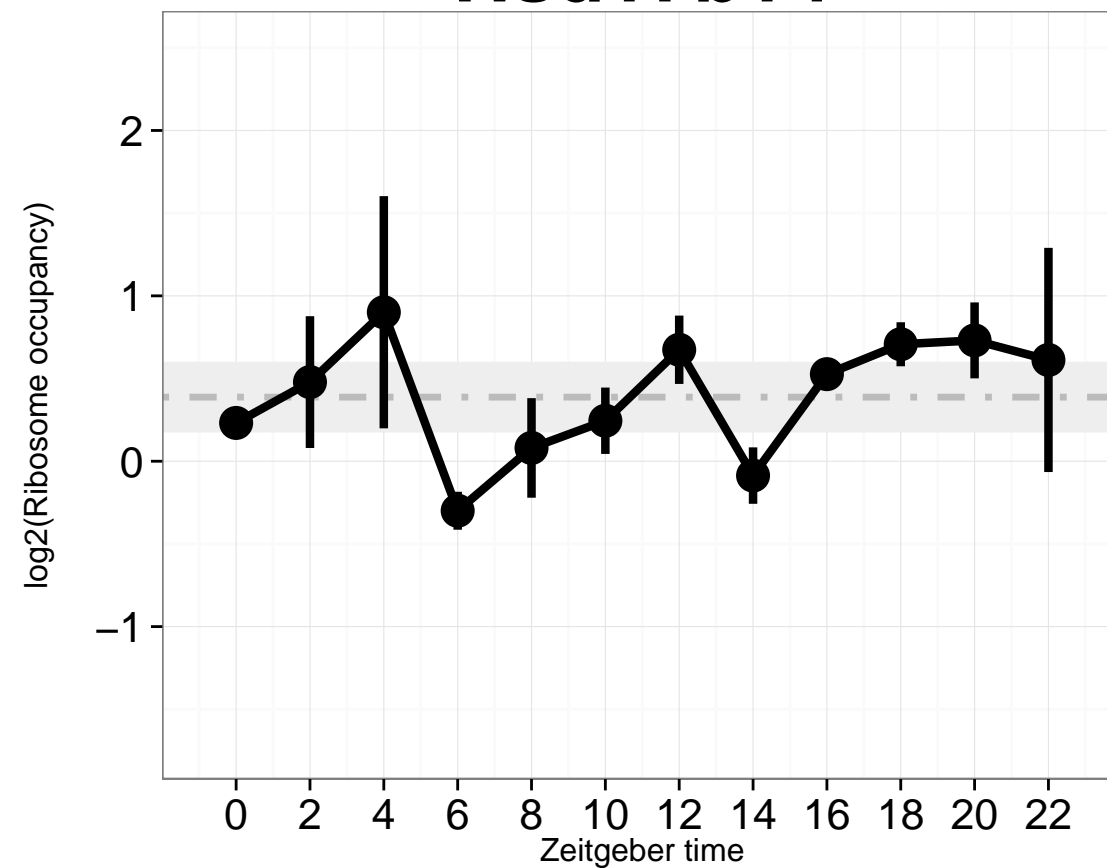

Supplement: Supplementary file 6381 [file 1]

## Slc22a8

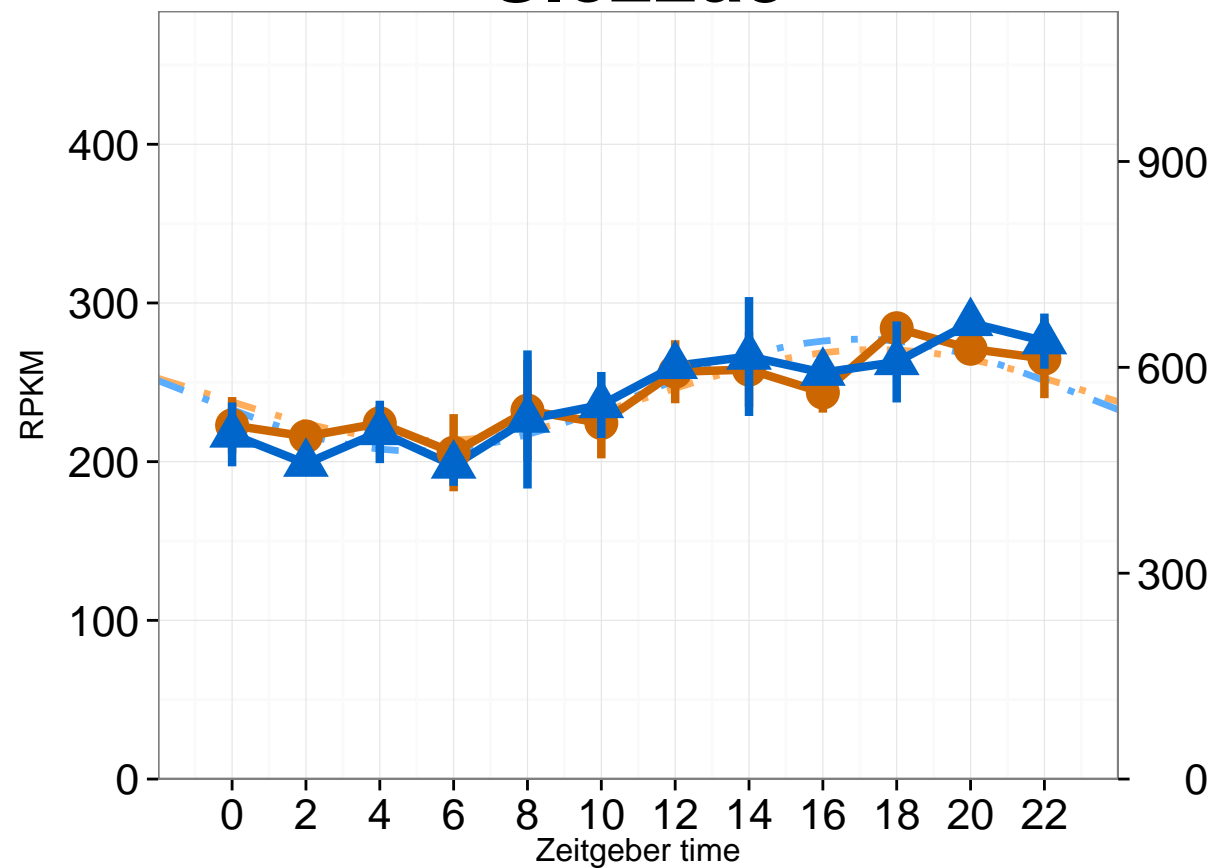

## Slc22a8

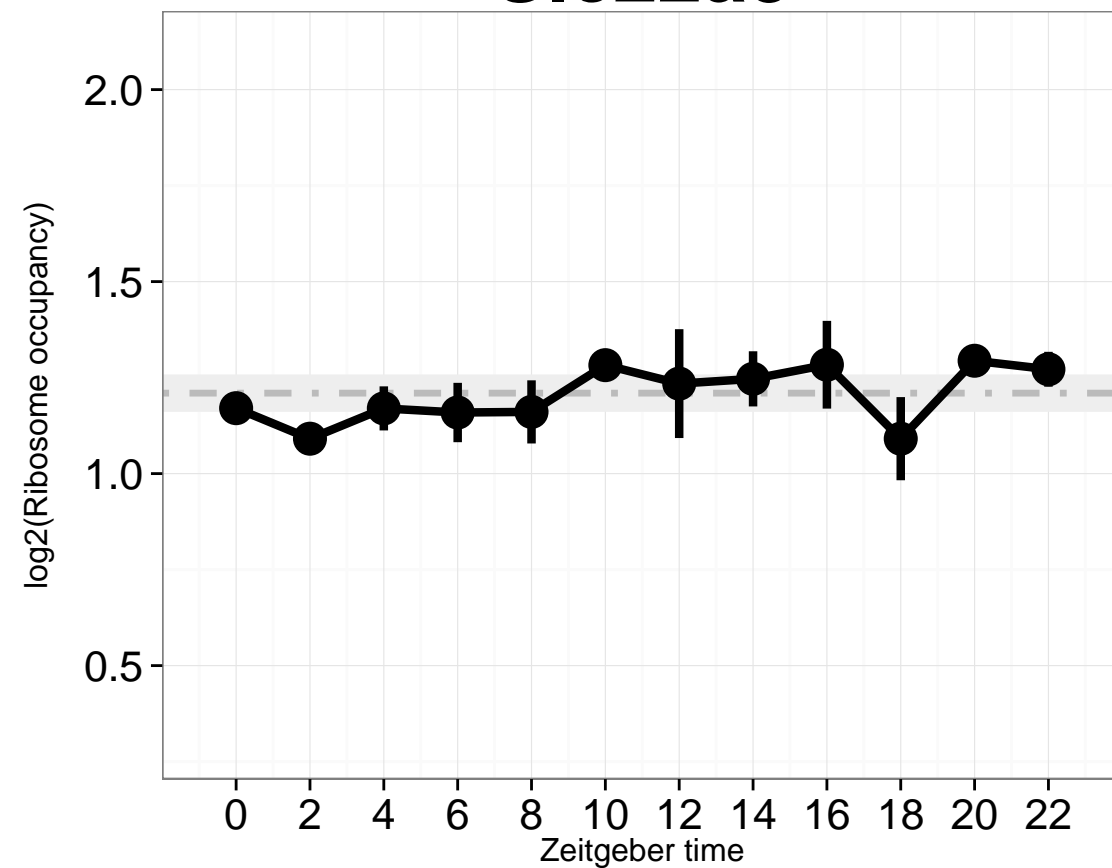

Supplement: Supplementary file 6382 [file 1]

## Esrp1

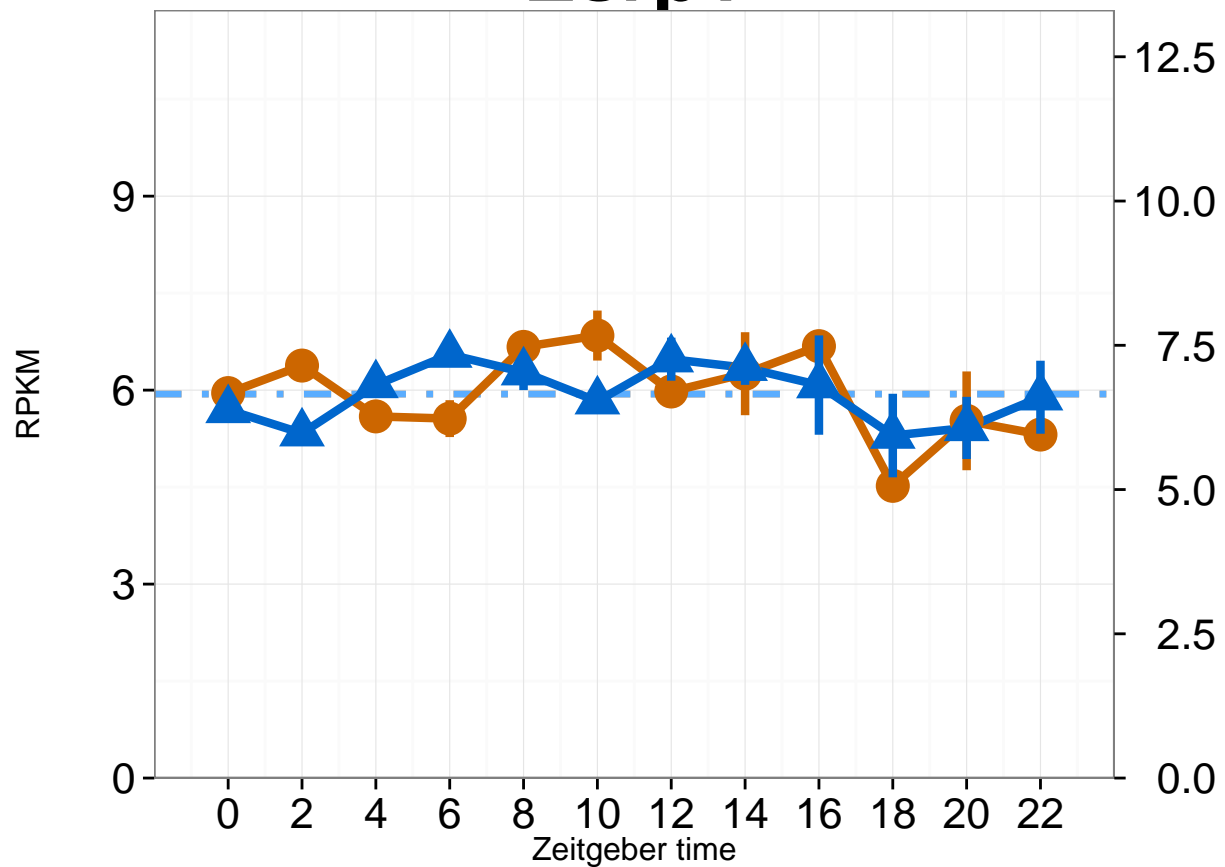

## Esrp1

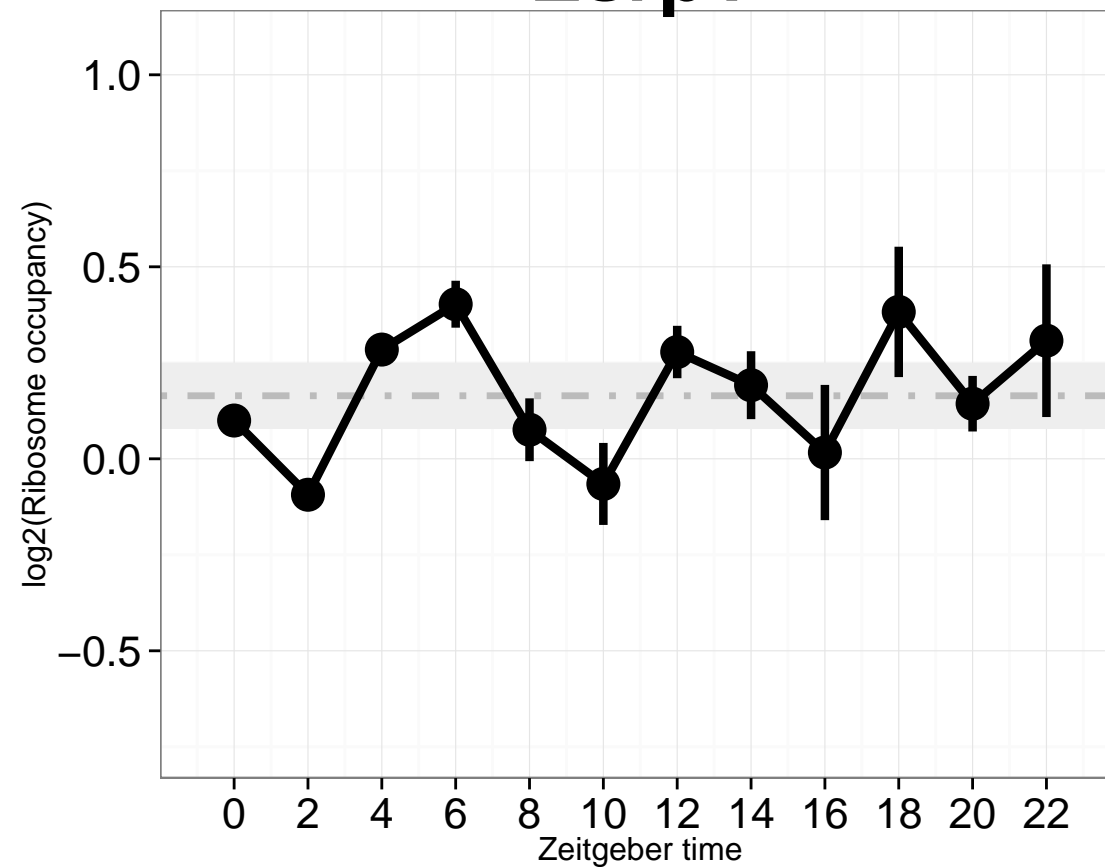

Supplement: Supplementary file 6383 [file 1]

## Trio

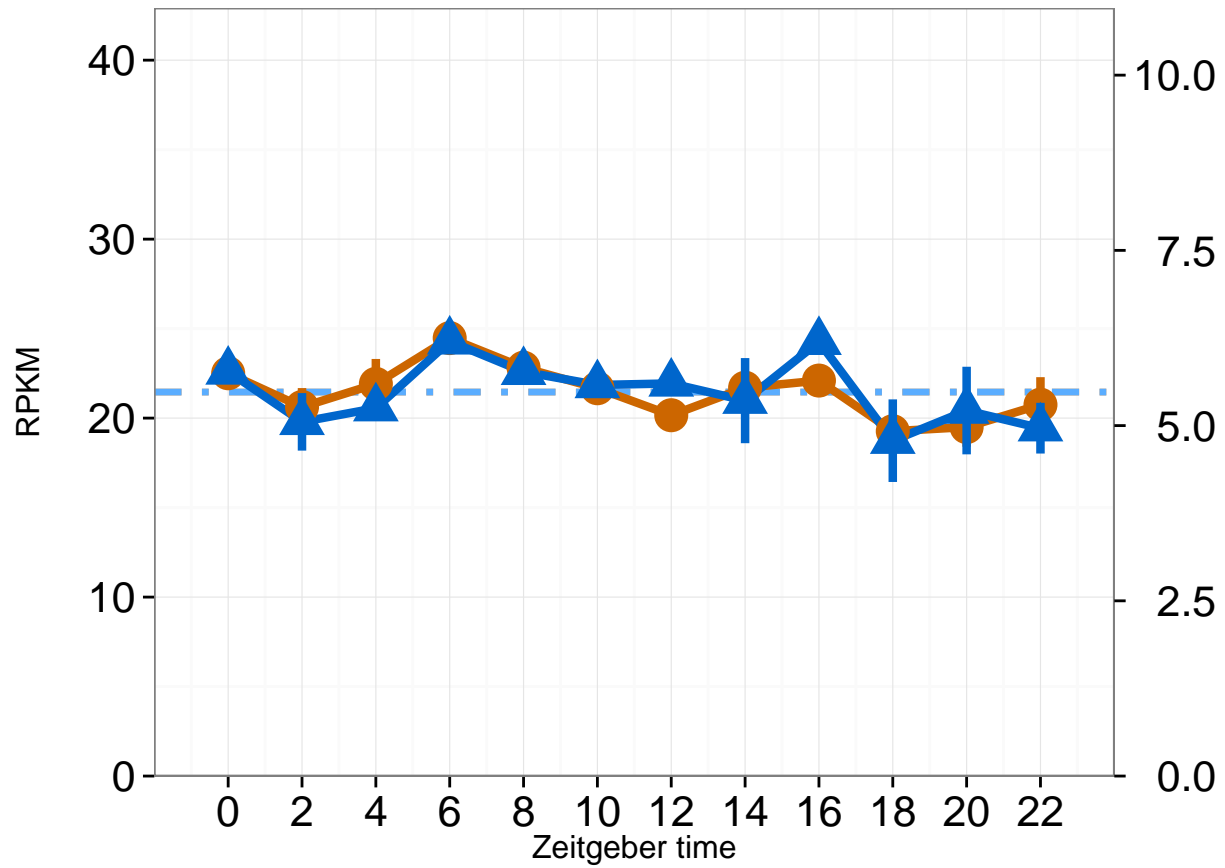

## Trio

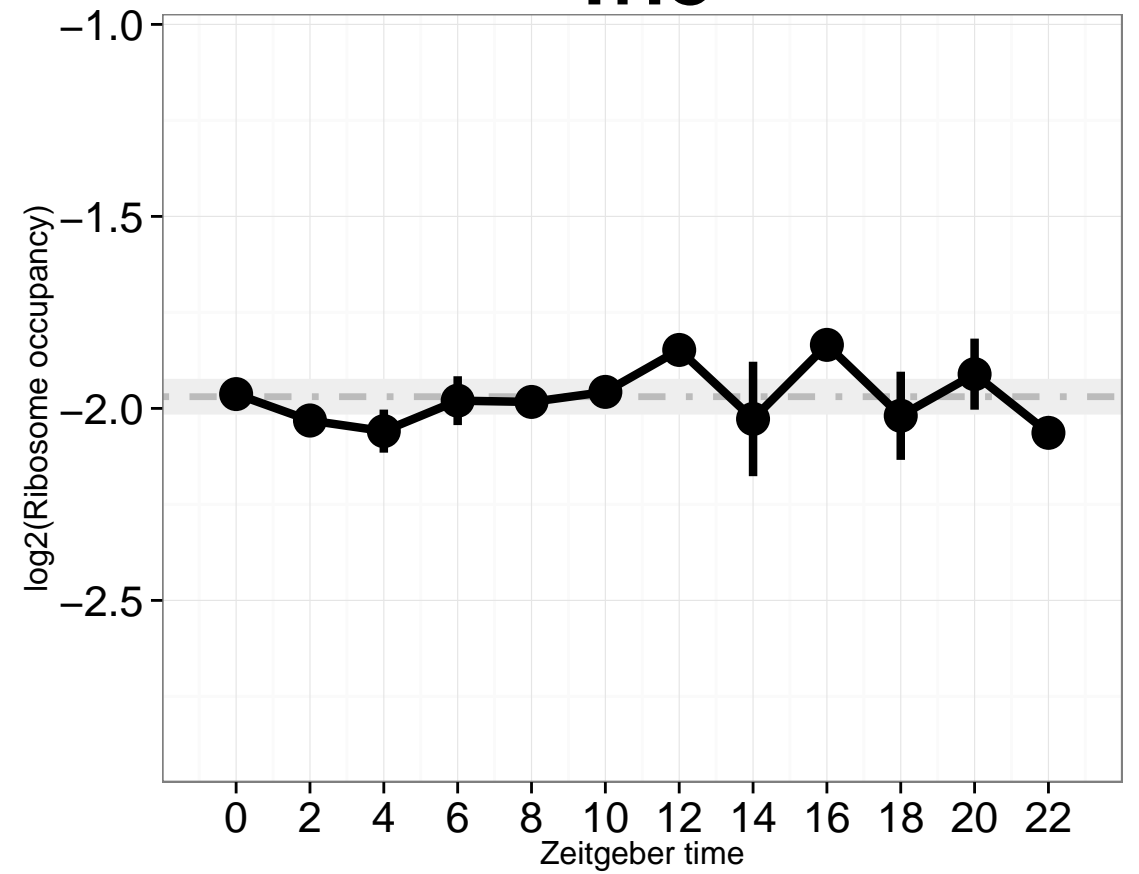

Supplement: Supplementary file 6384 [file 1]

# Rgl1

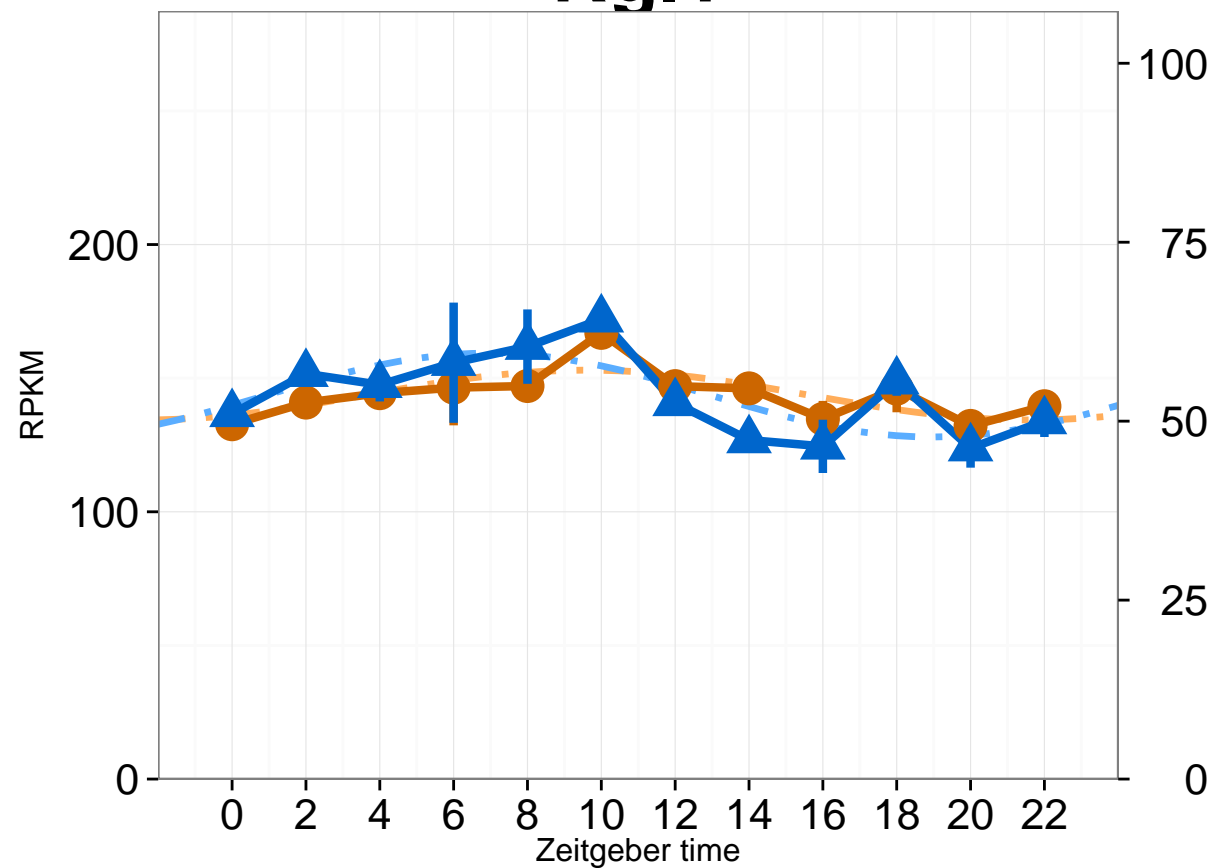

# Rgl1

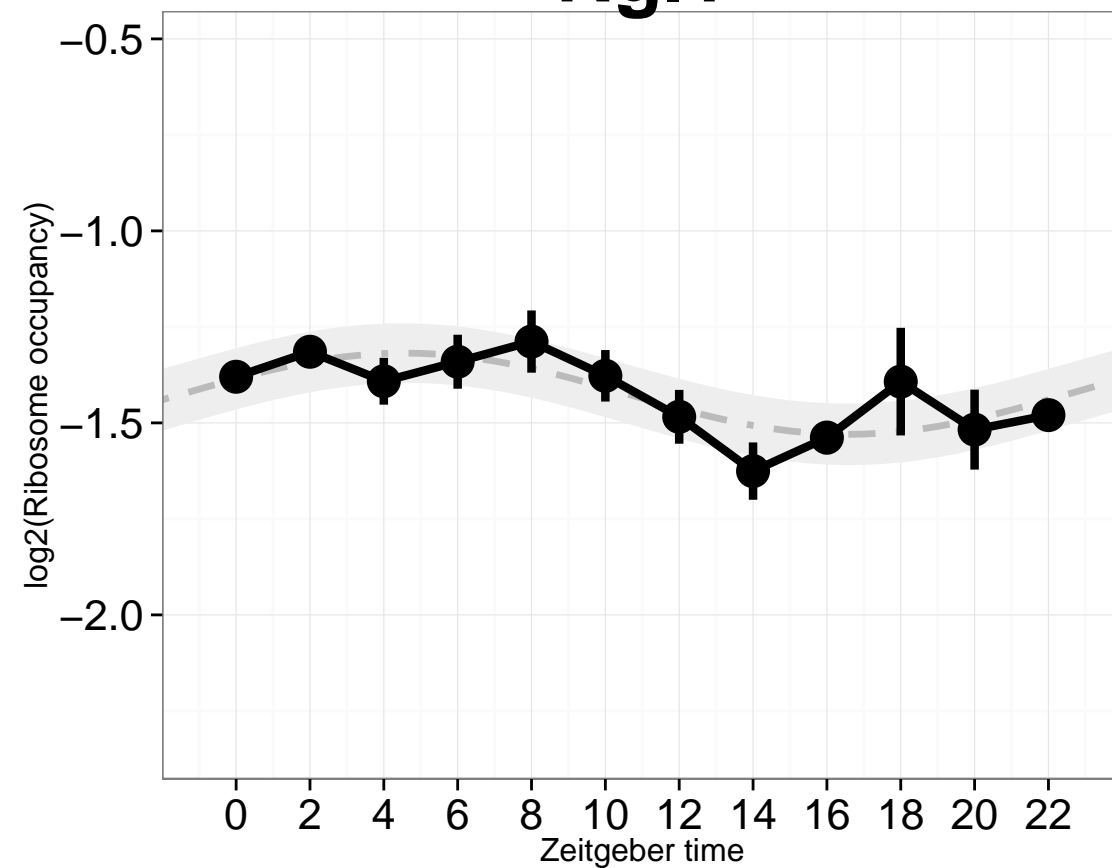

Supplement: Supplementary file 6385 [file 1]

# Dennd1b

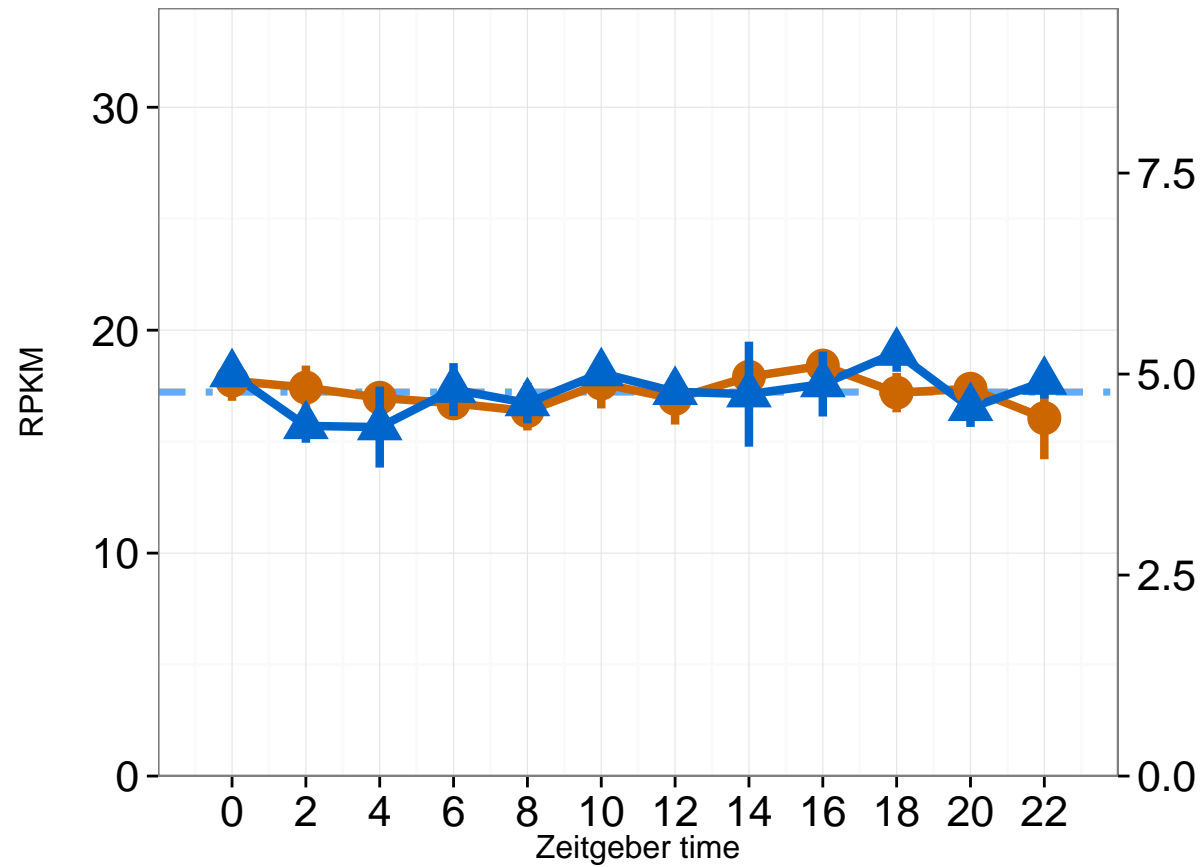

# Dennd1b

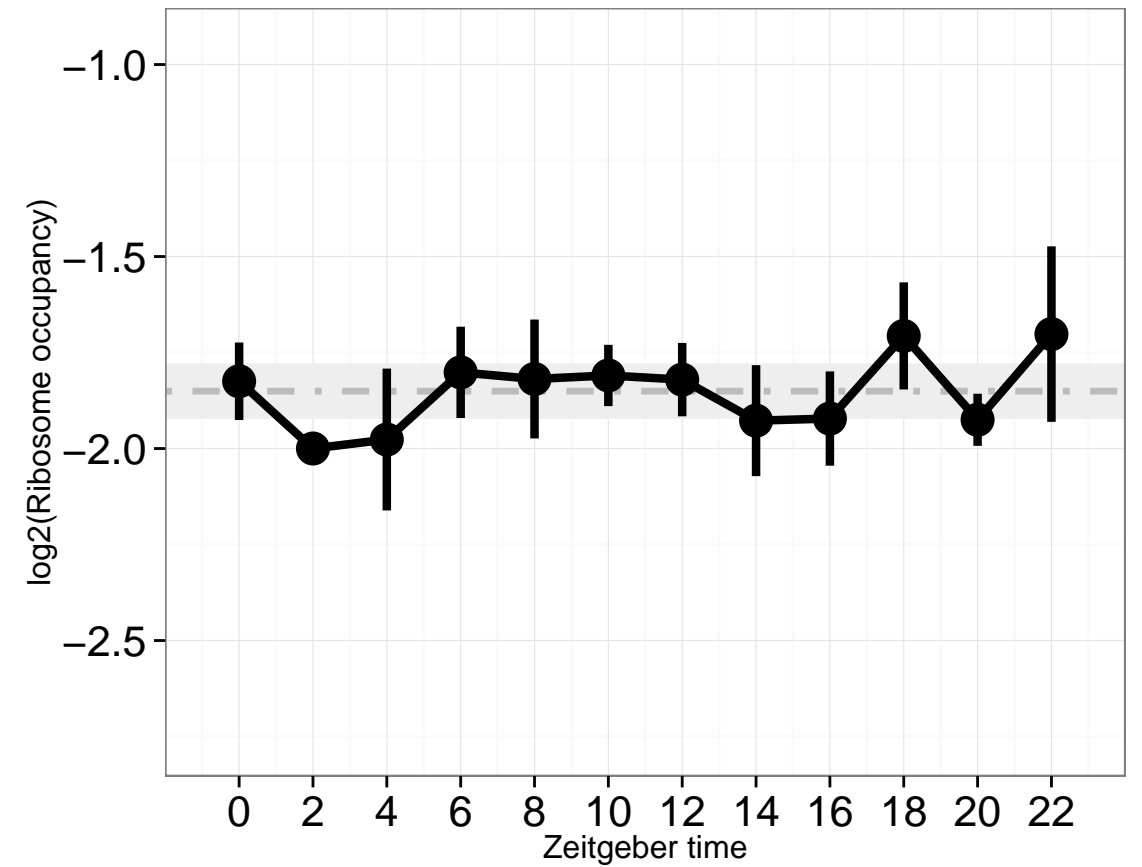

Supplement: Supplementary file 6386 [file 1]

# Zfp428

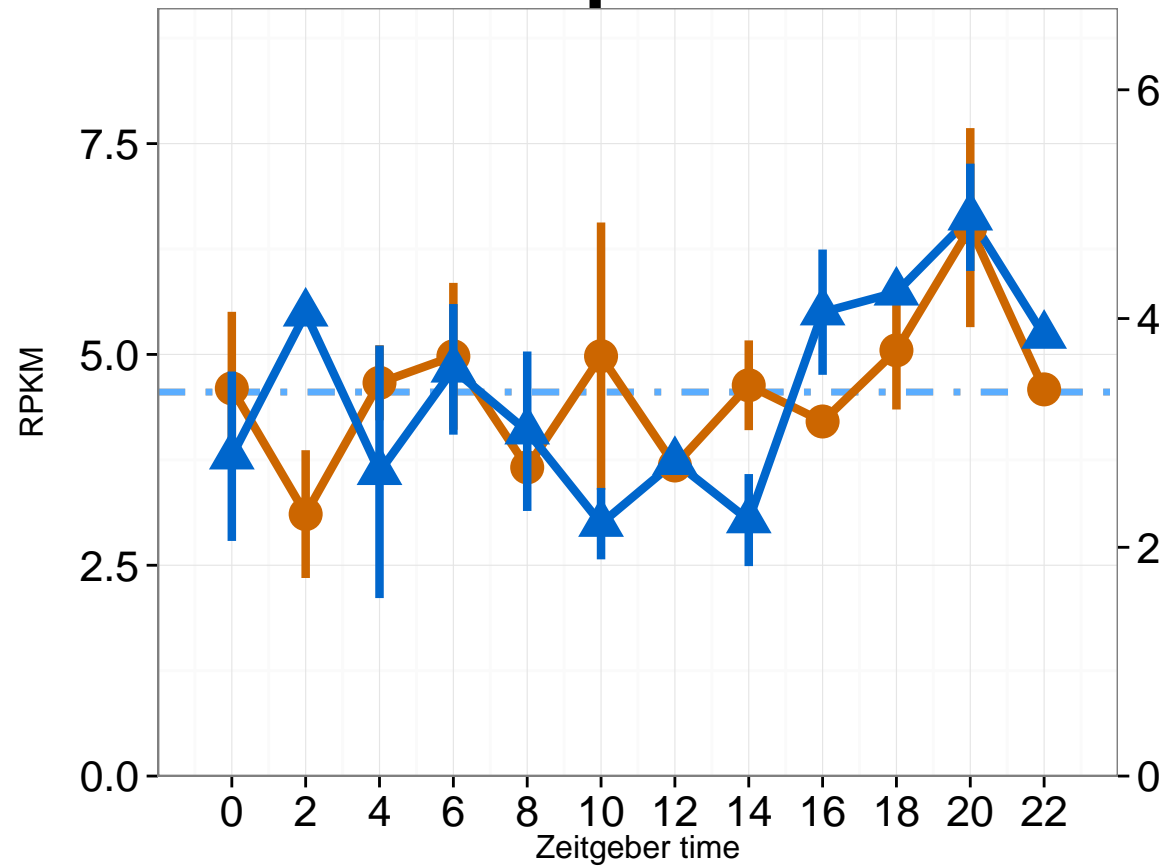

# Zfp428

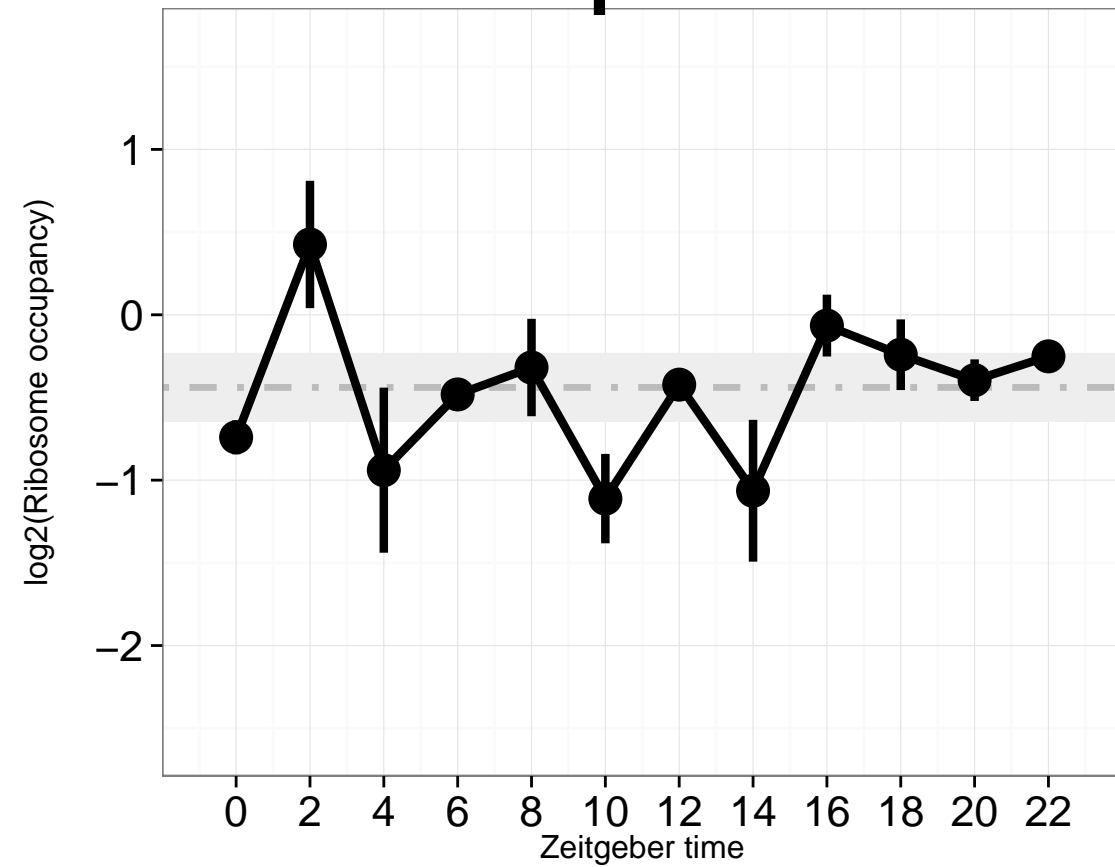

Supplement: Supplementary file 6387 [file 1]

# Wars2

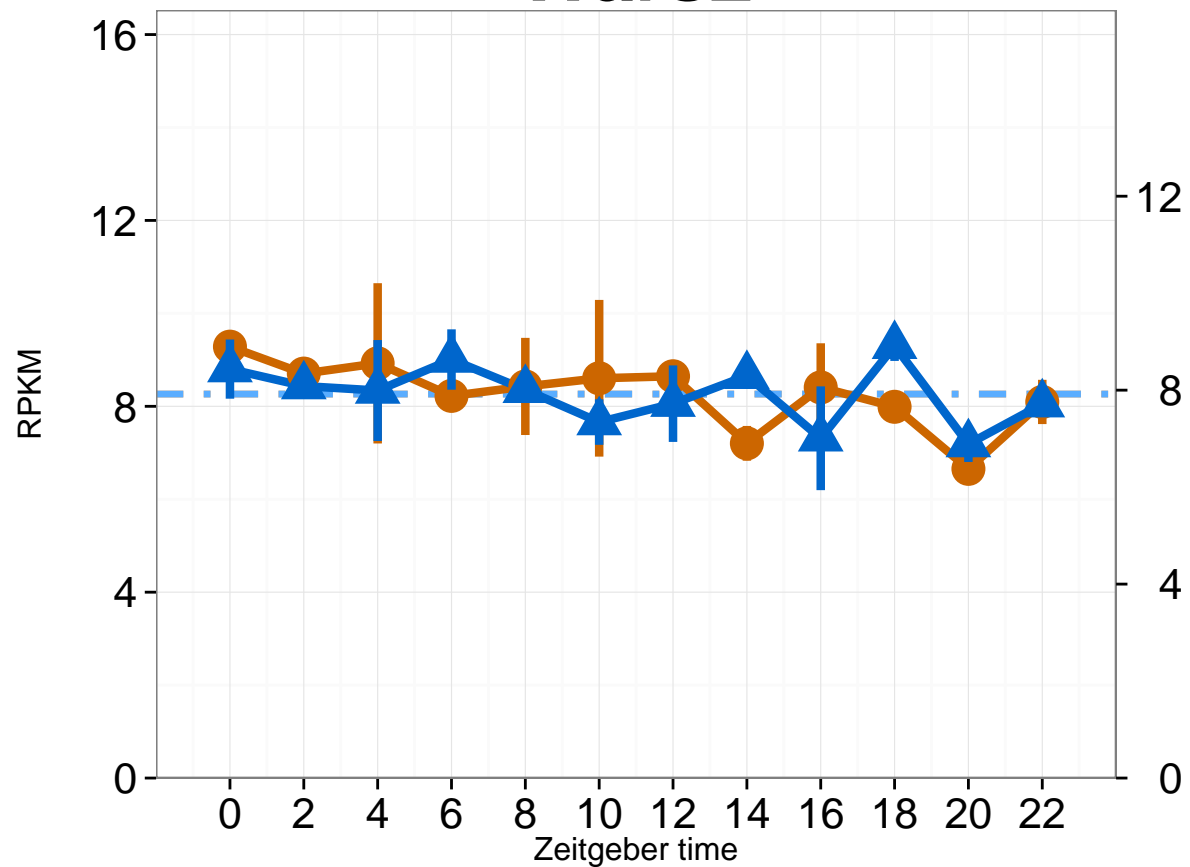

# Wars2

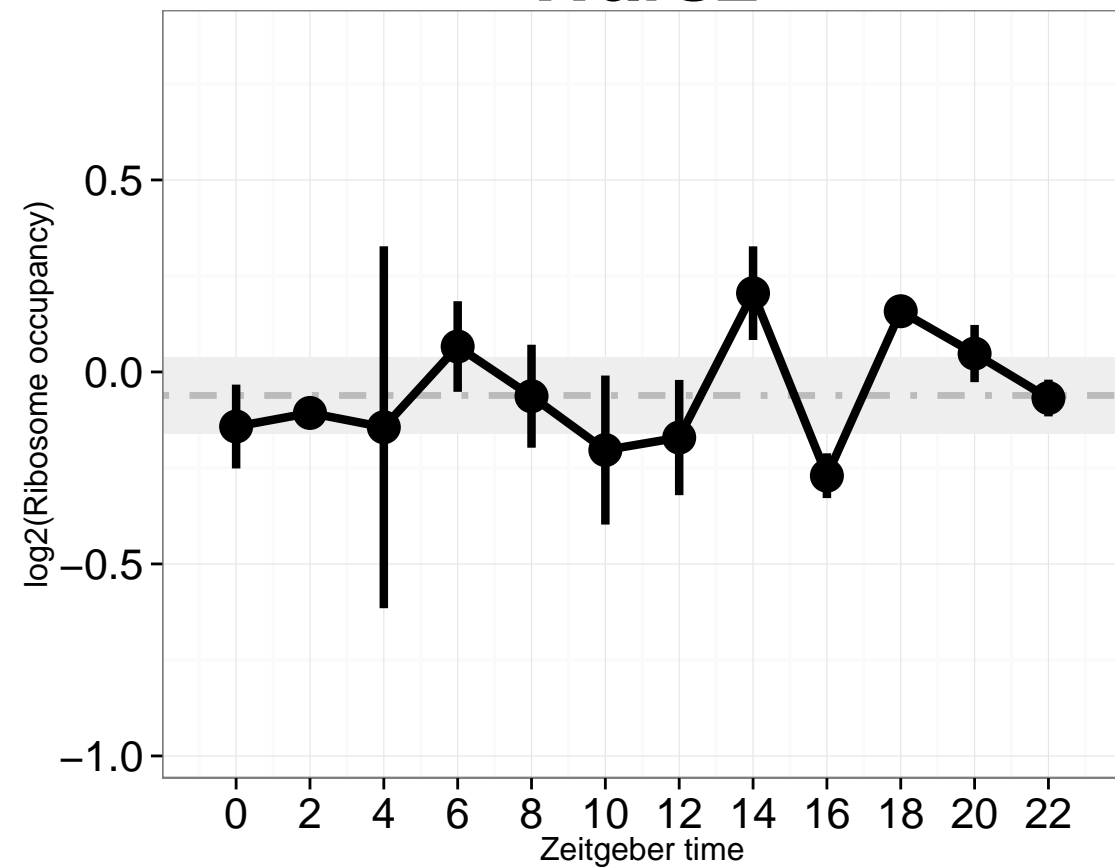

Supplement: Supplementary file 6388 [file 1]

## Hcn2

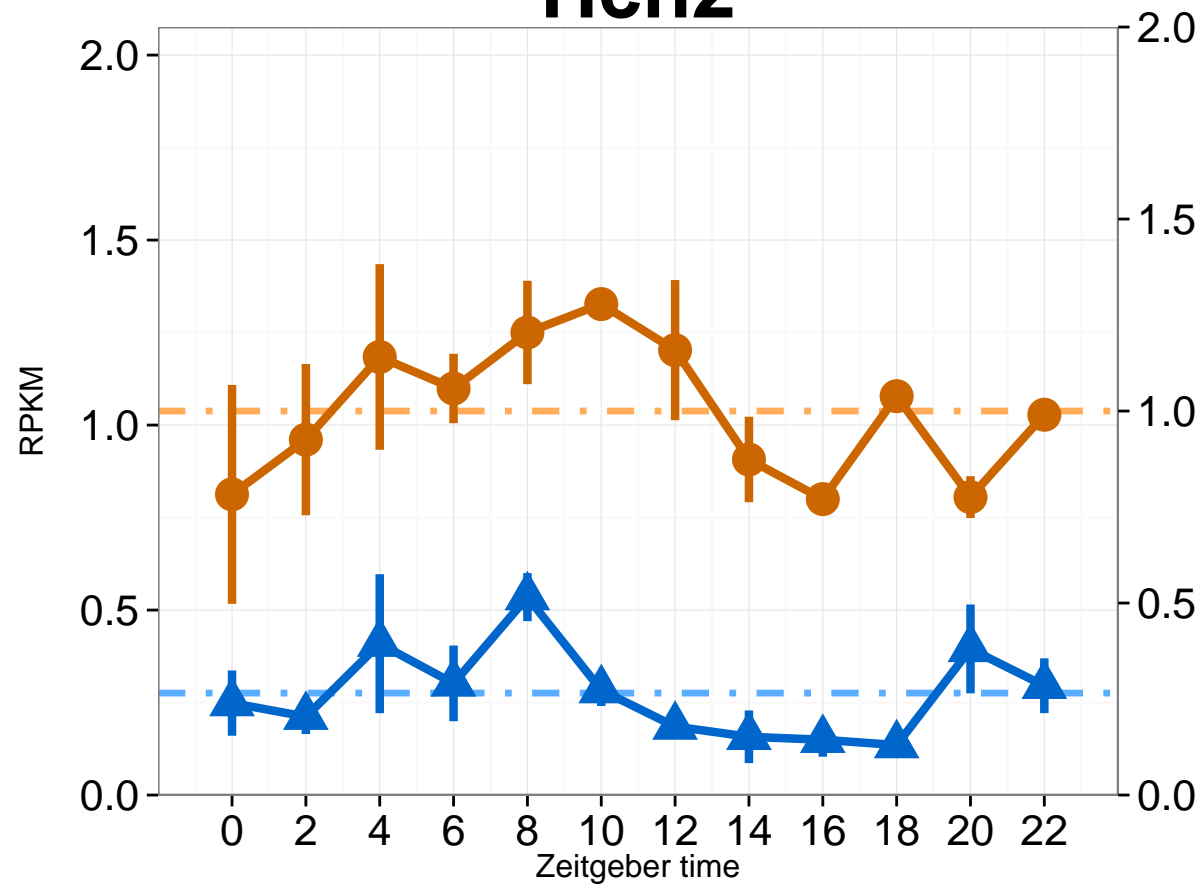

## Hcn2

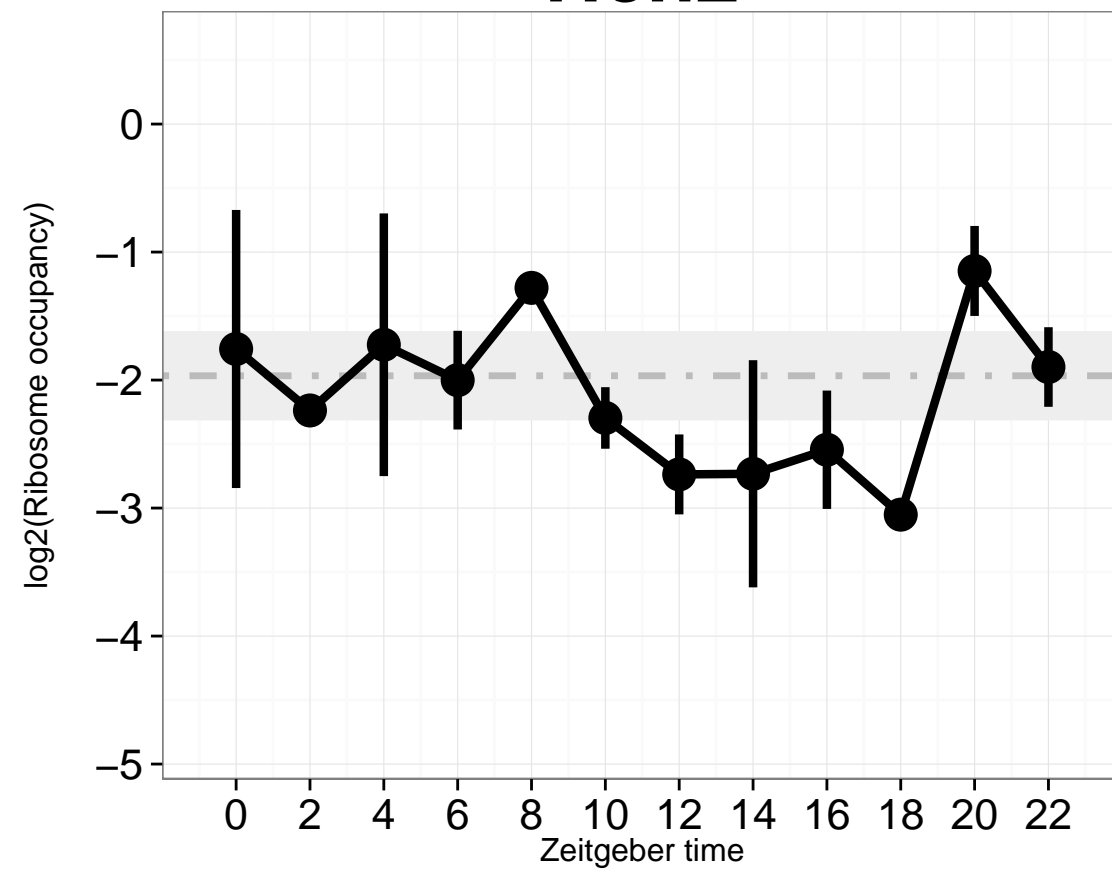

Supplement: Supplementary file 6389 [file 1]

## RbmX2

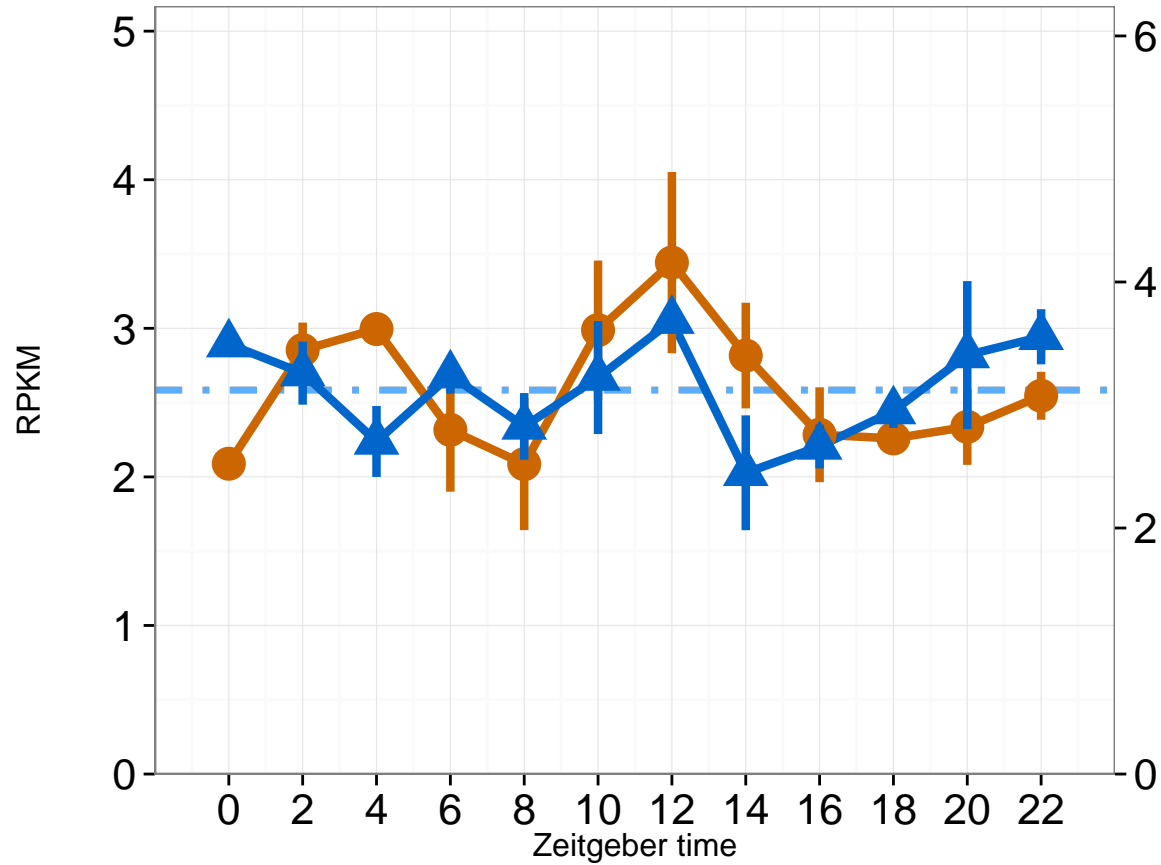

## RbmX2

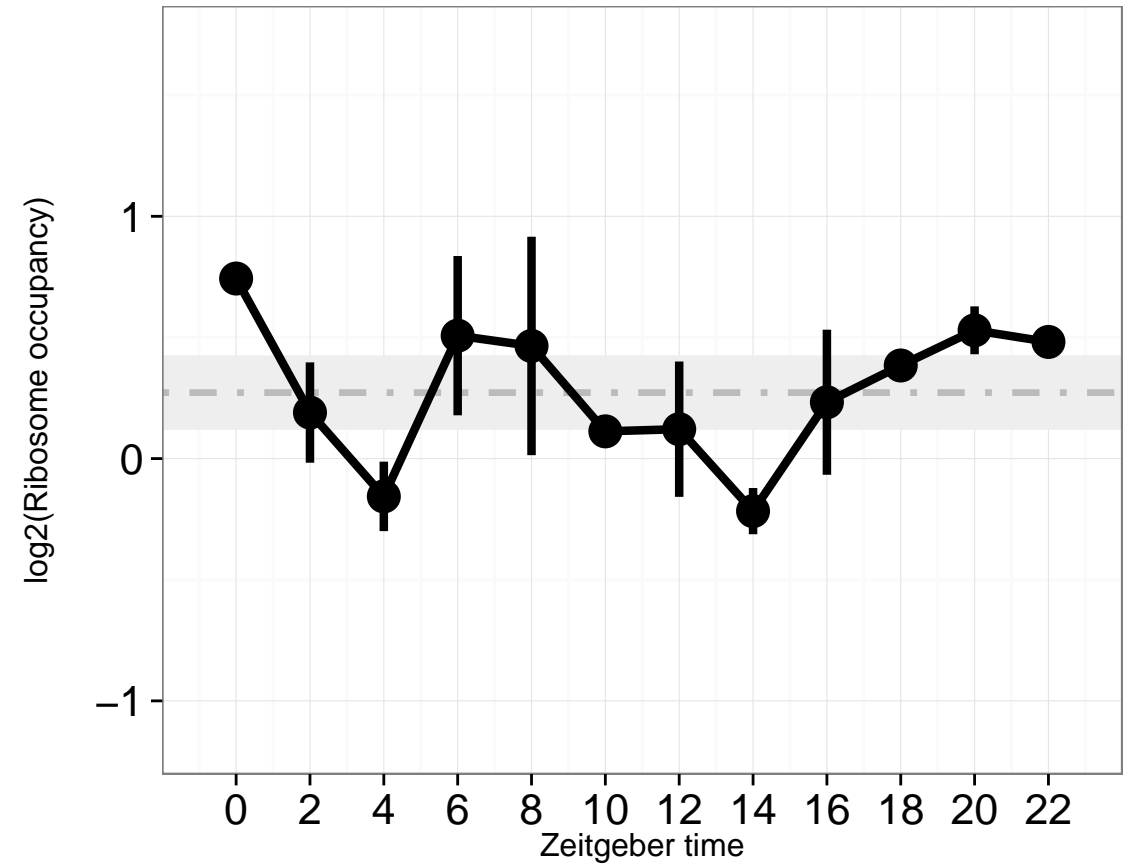

Supplement: Supplementary file 6390 [file 1]

## Ampd2

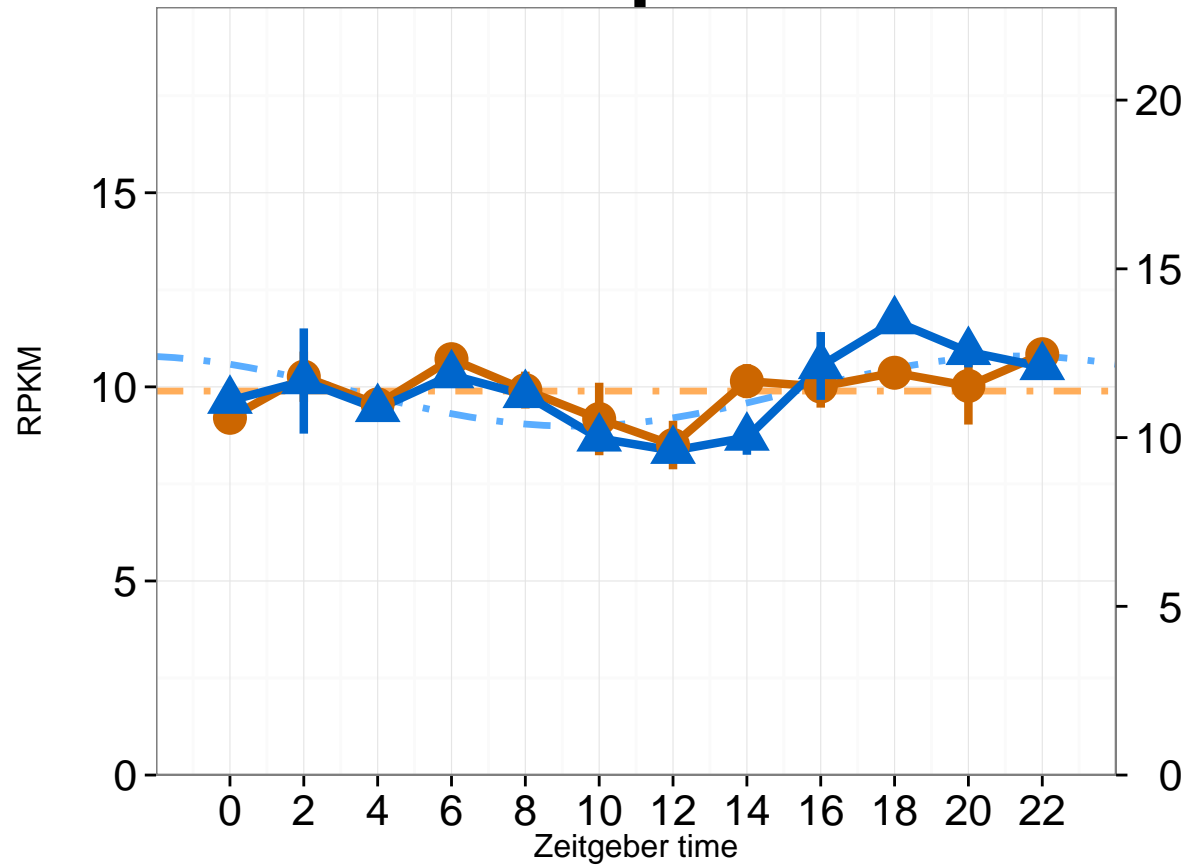

## Ampd2

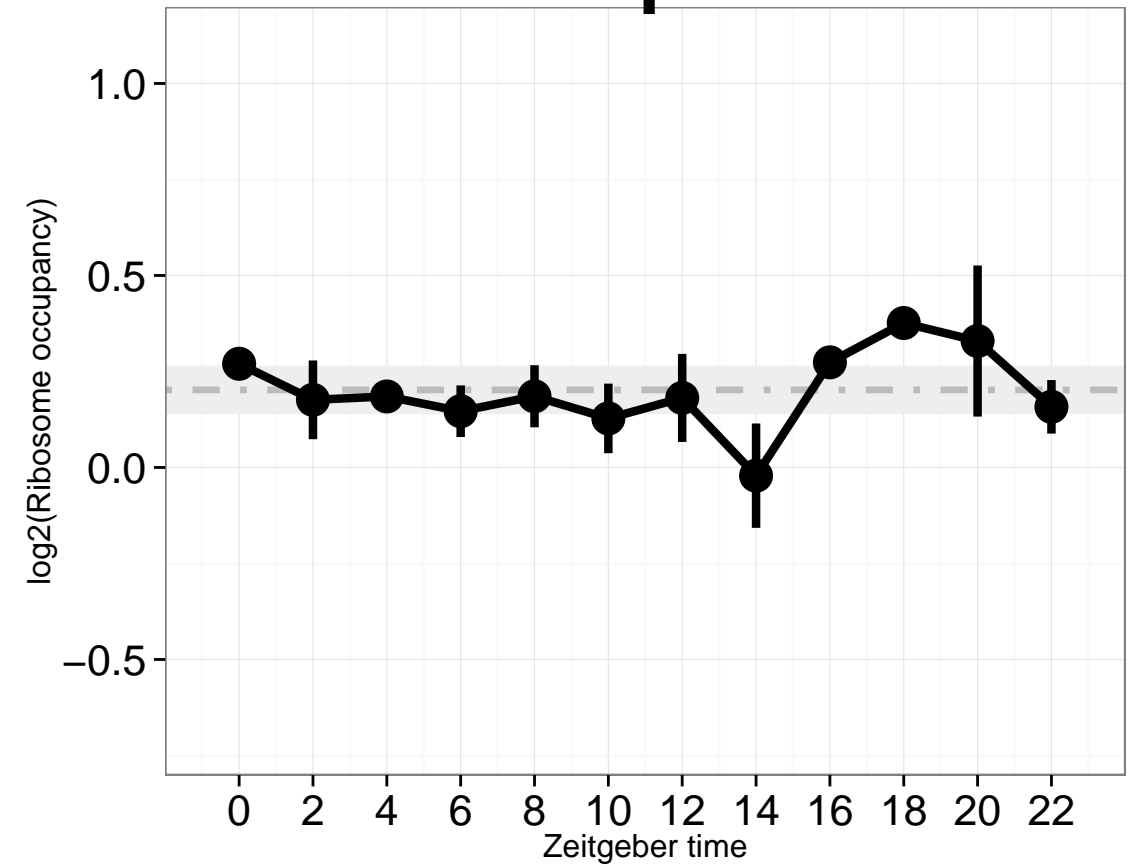

Supplement: Supplementary file 6391 [file 1]

# Tmem35

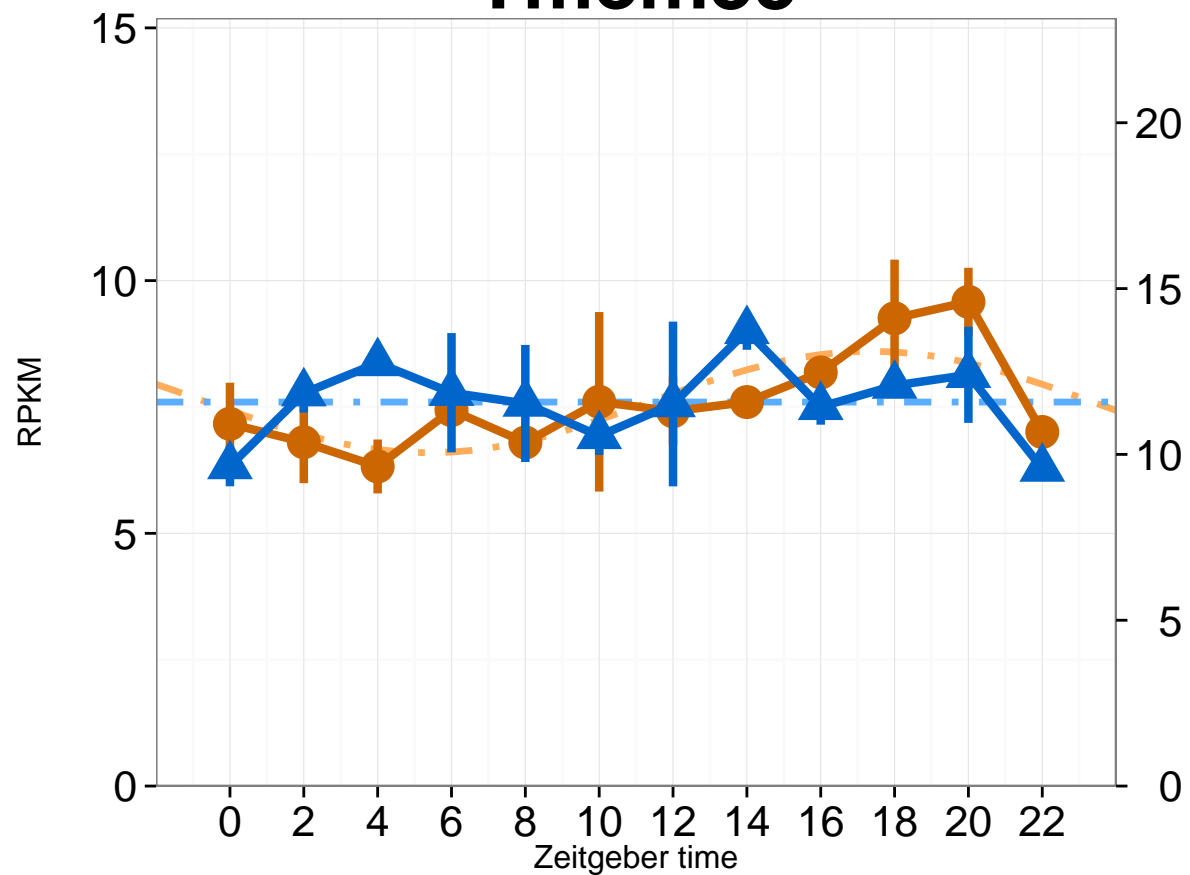

# Tmem35

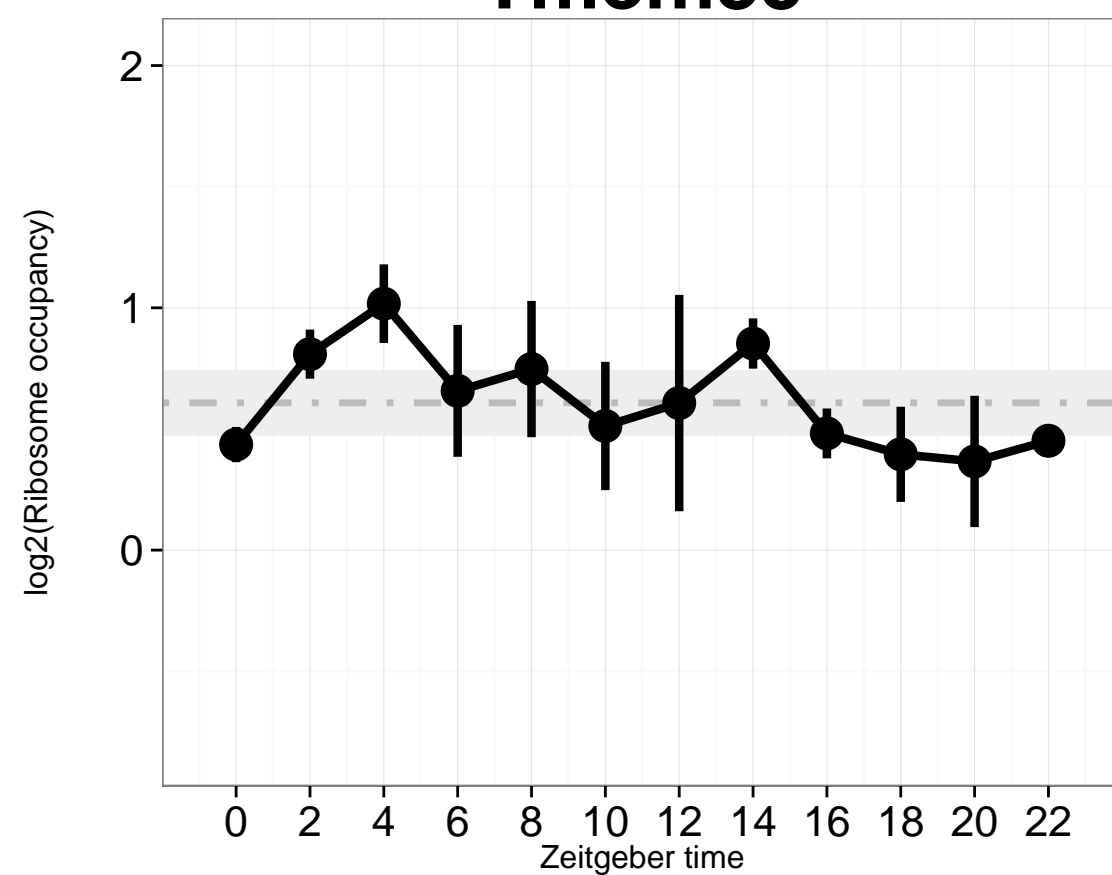

Supplement: Supplementary file 6392 [file 1]

# Cc2d1a

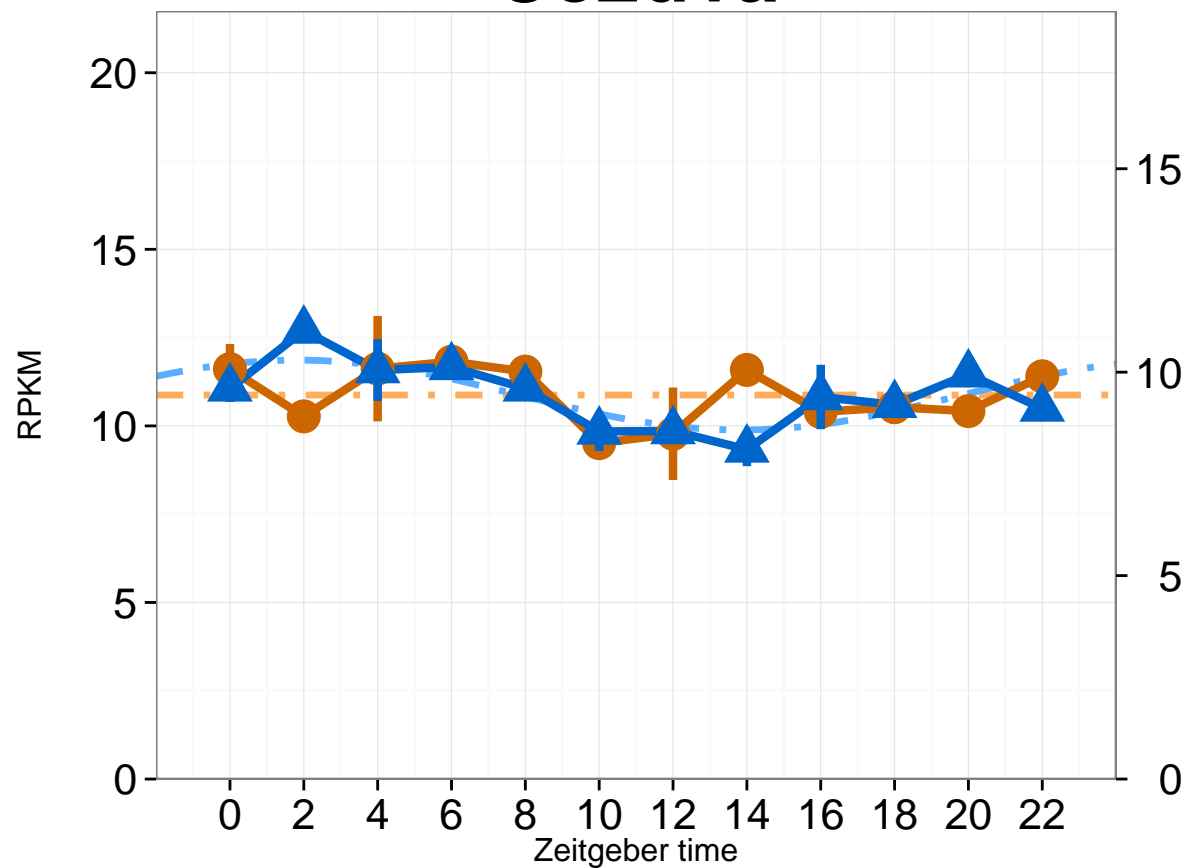

# Cc2d1a

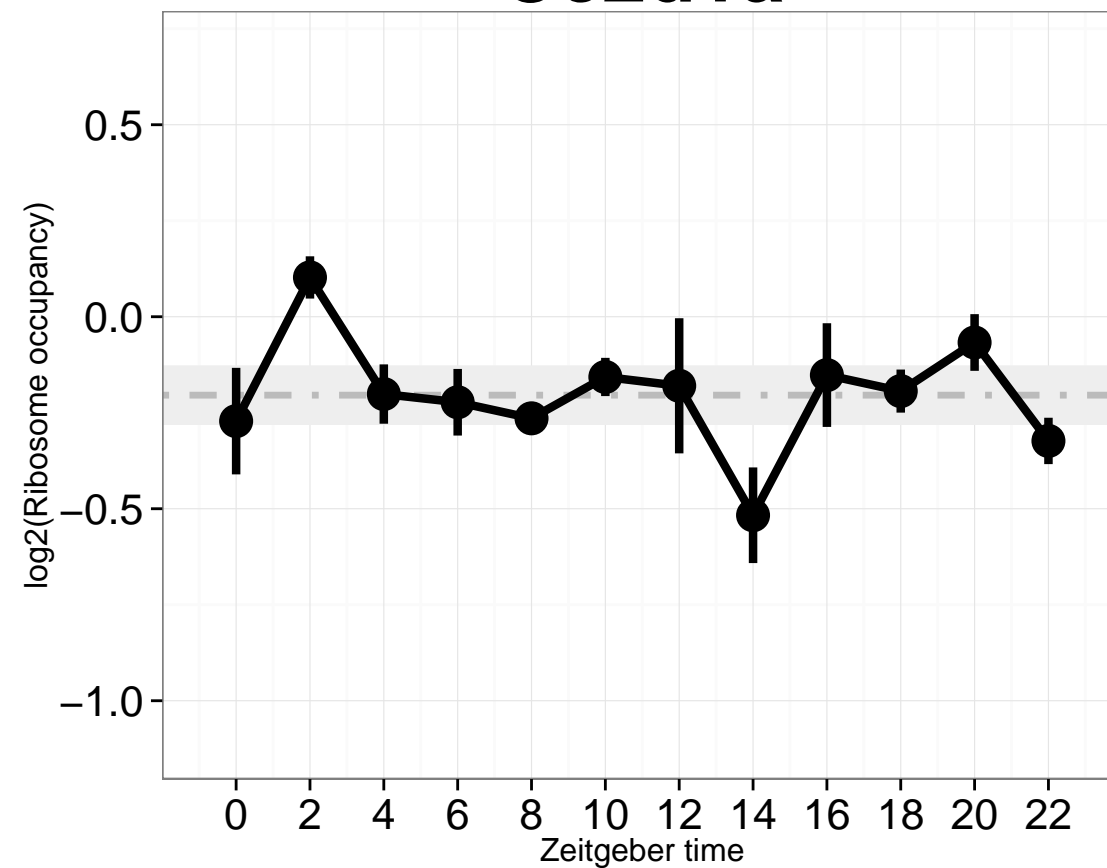

Supplement: Supplementary file 6393 [file 1]

# Sertad4

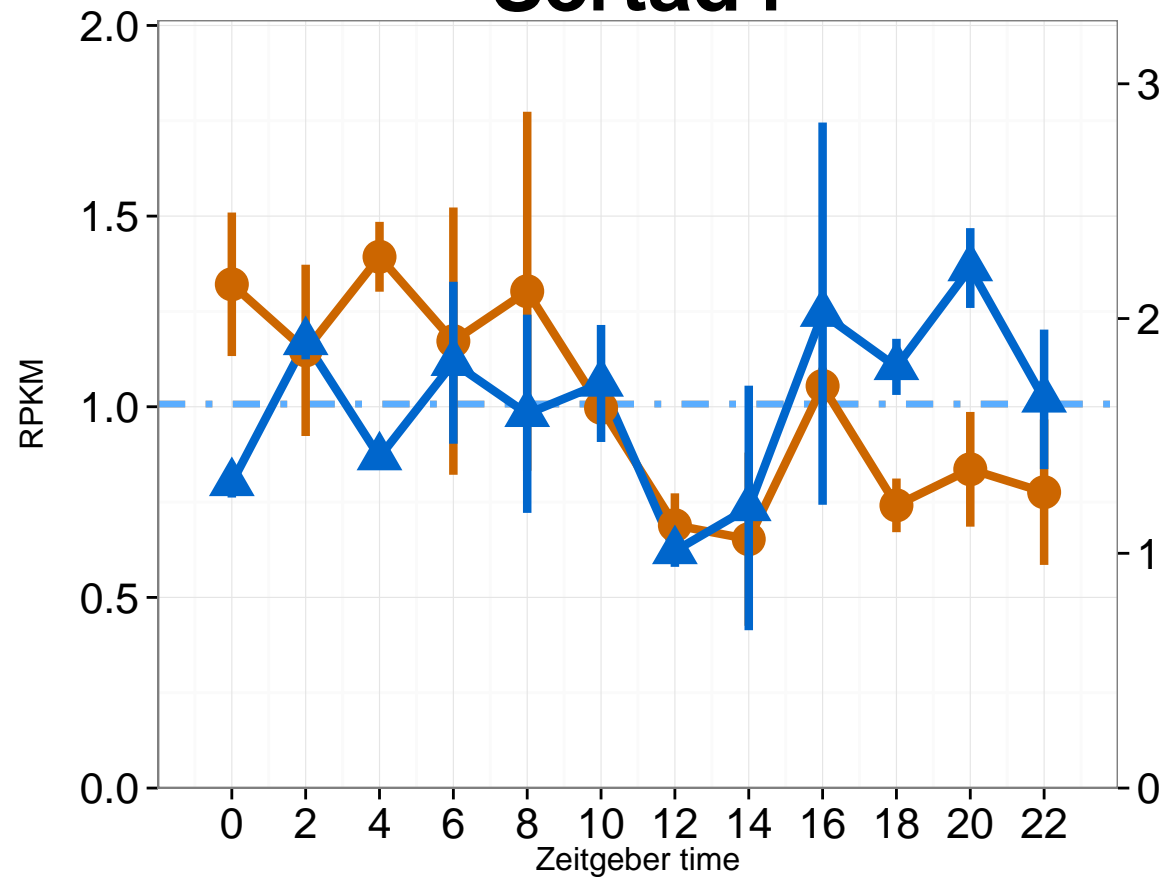

# Sertad4

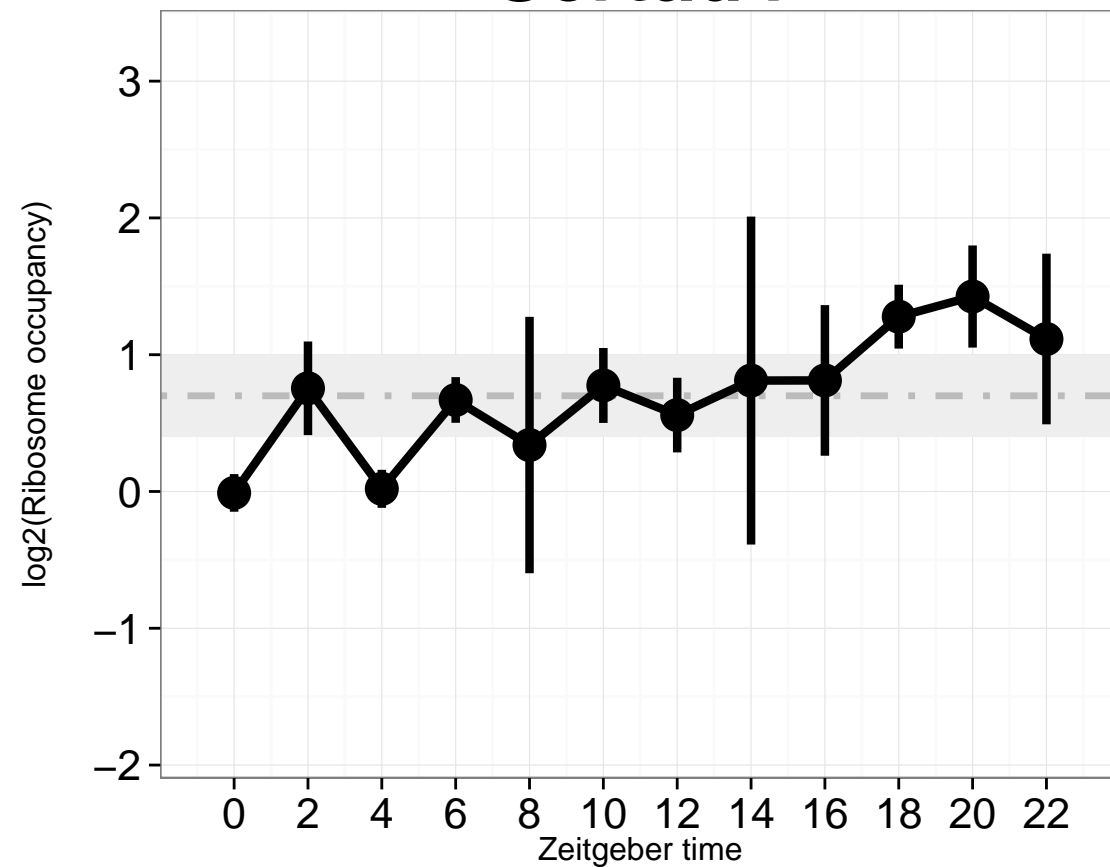

Supplement: Supplementary file 6394 [file 1]

# Cpped1

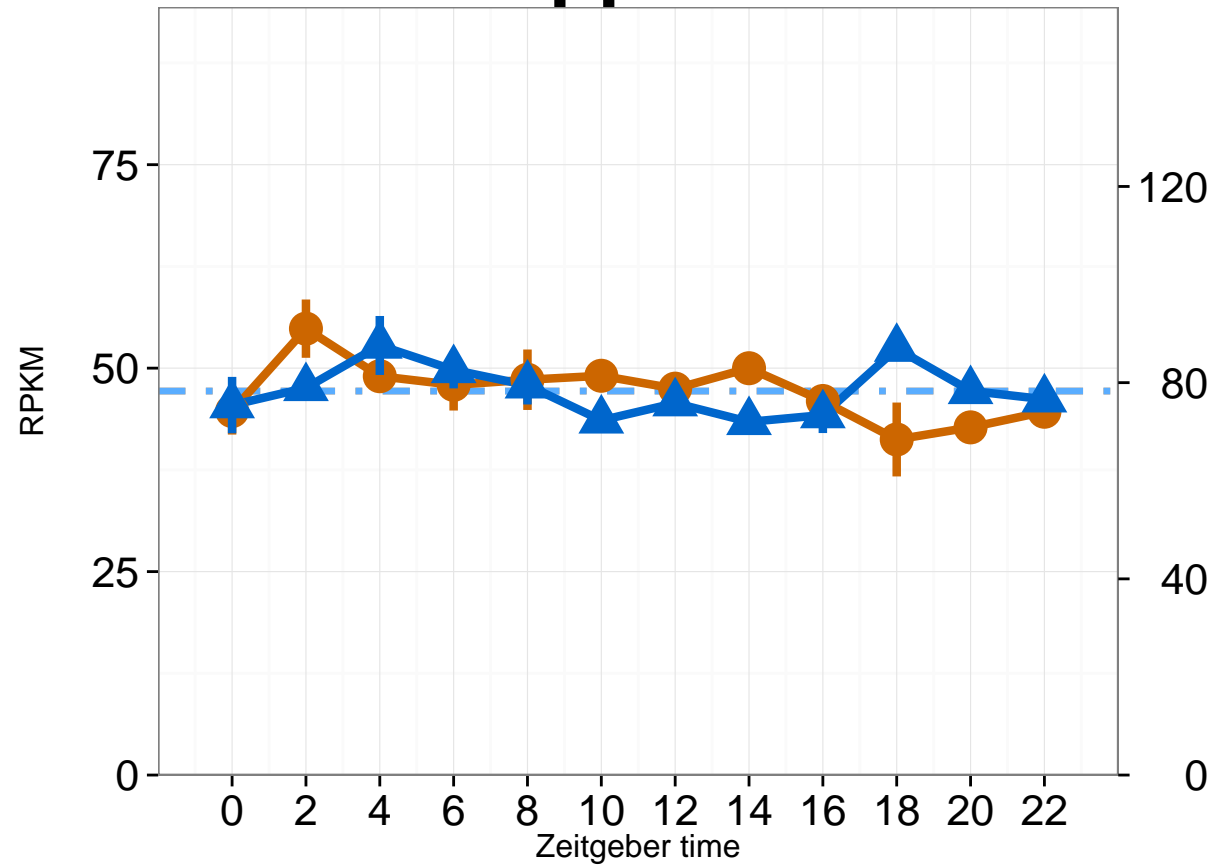

# Cpped1

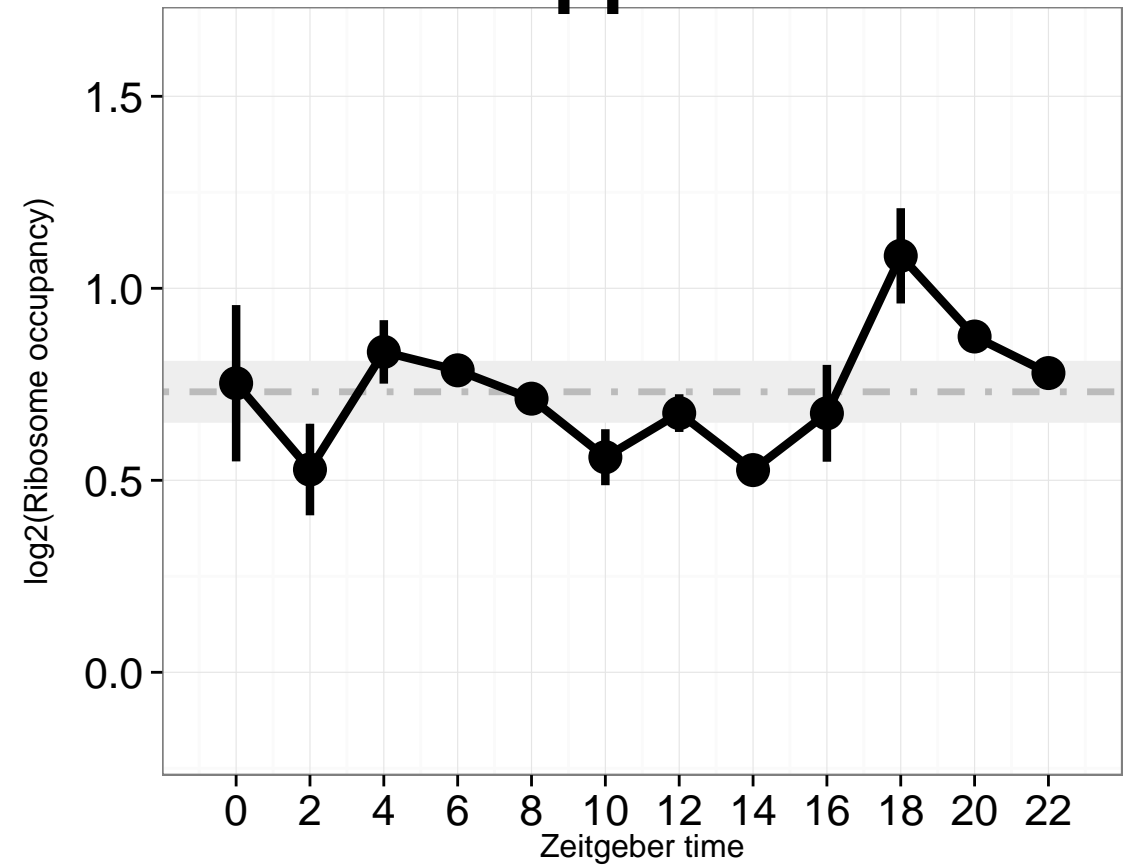

Supplement: Supplementary file 6395 [file 1]

## Smpd2

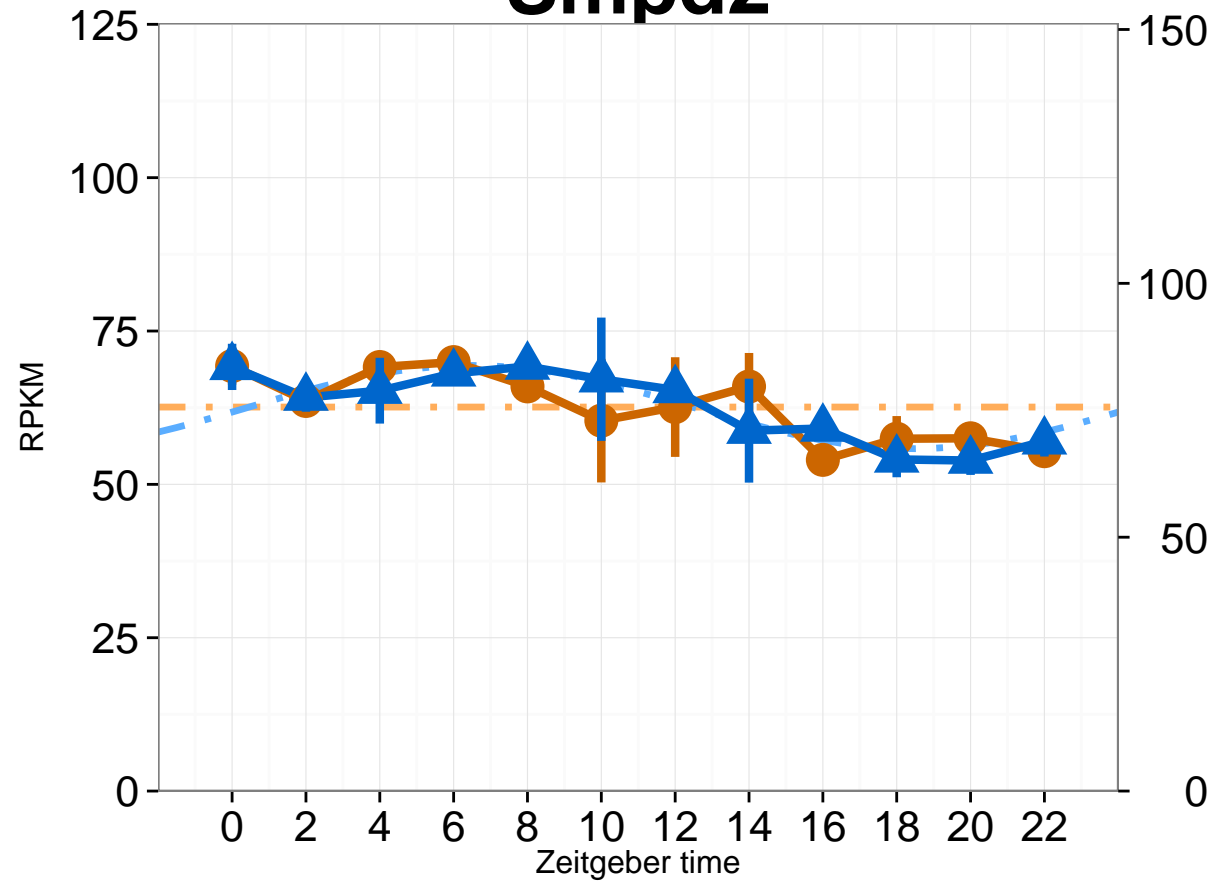

## Smpd2

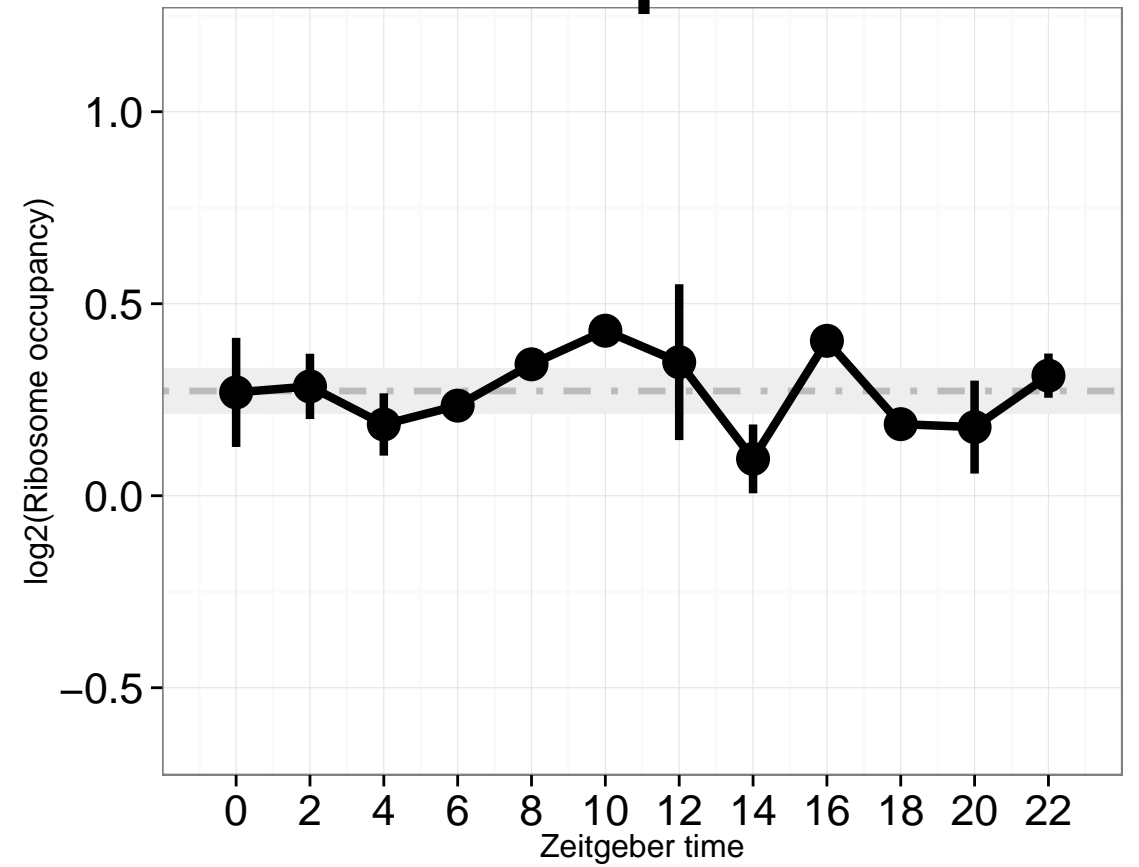

Supplement: Supplementary file 6396 [file 1]

## Dffb

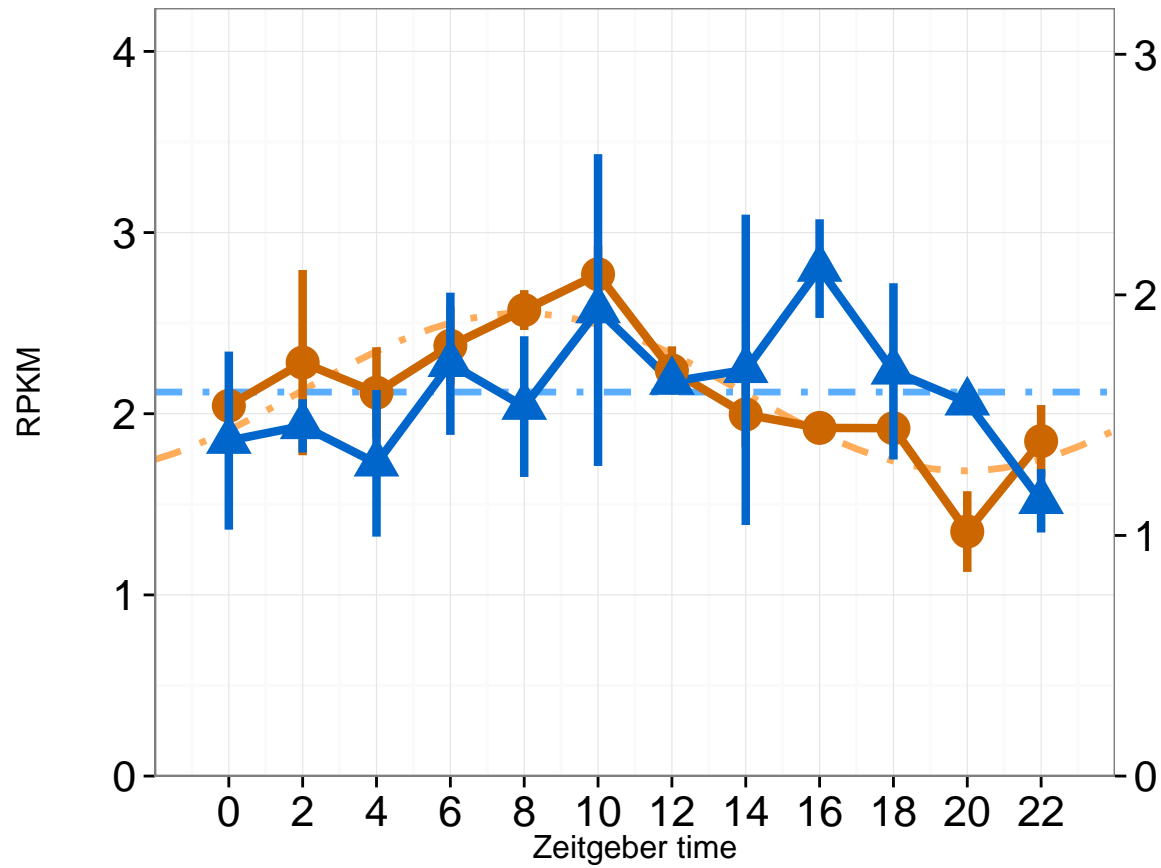

## Dffb

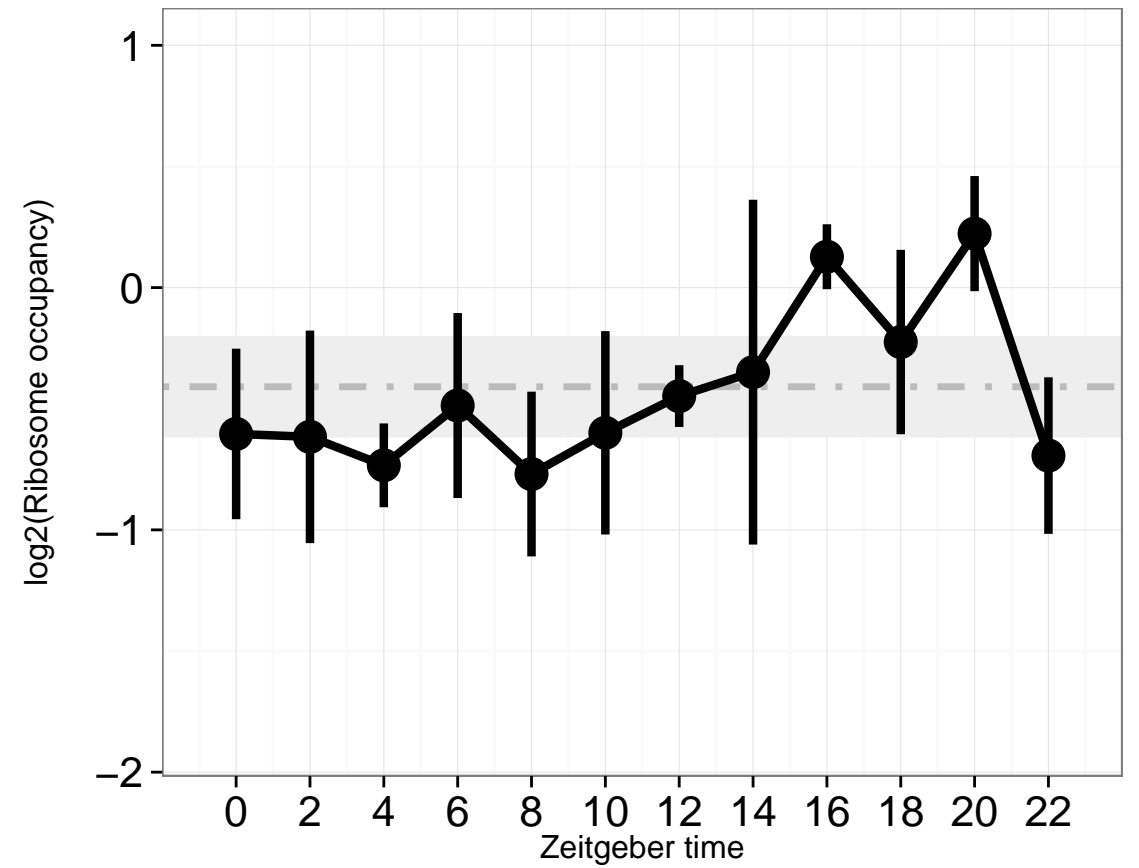

Supplement: Supplementary file 6397 [file 1]

## Slc12a7

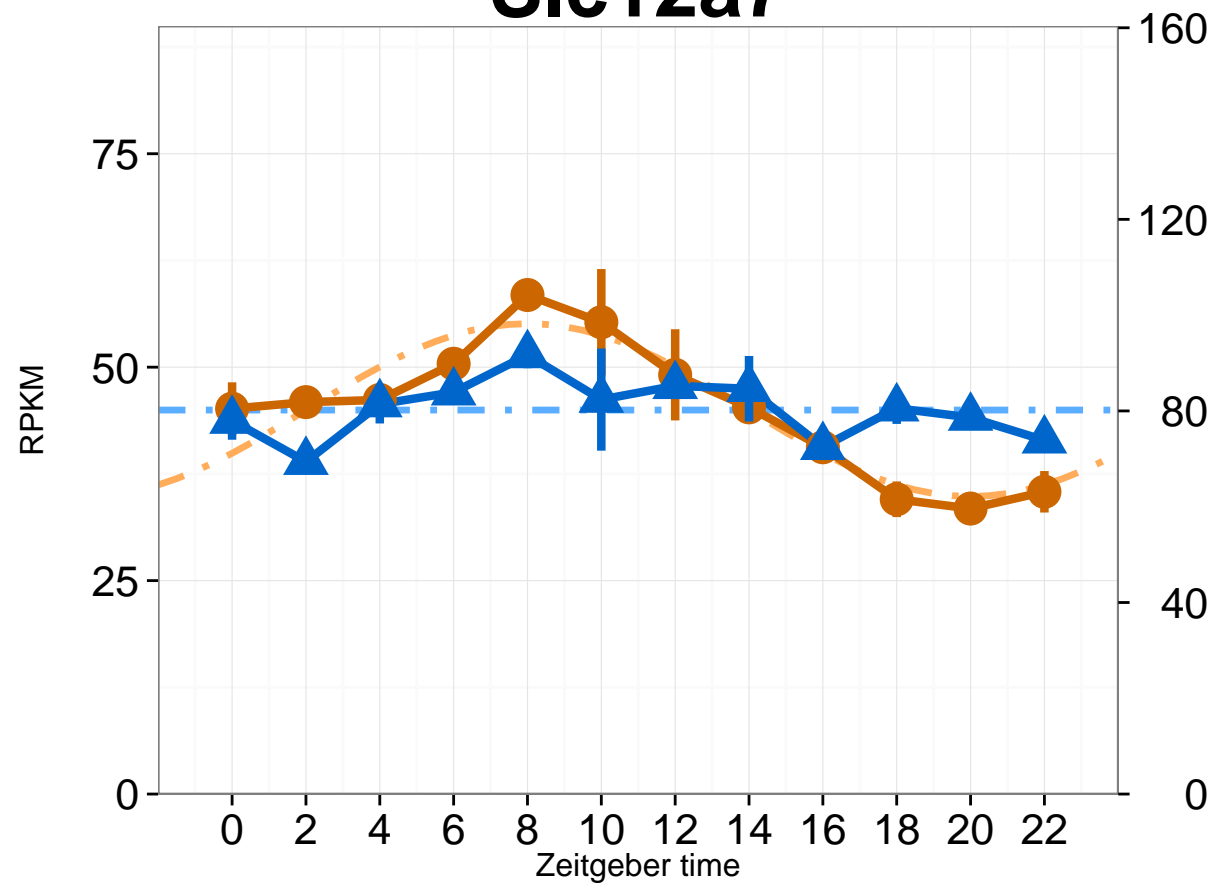

## Slc12a7

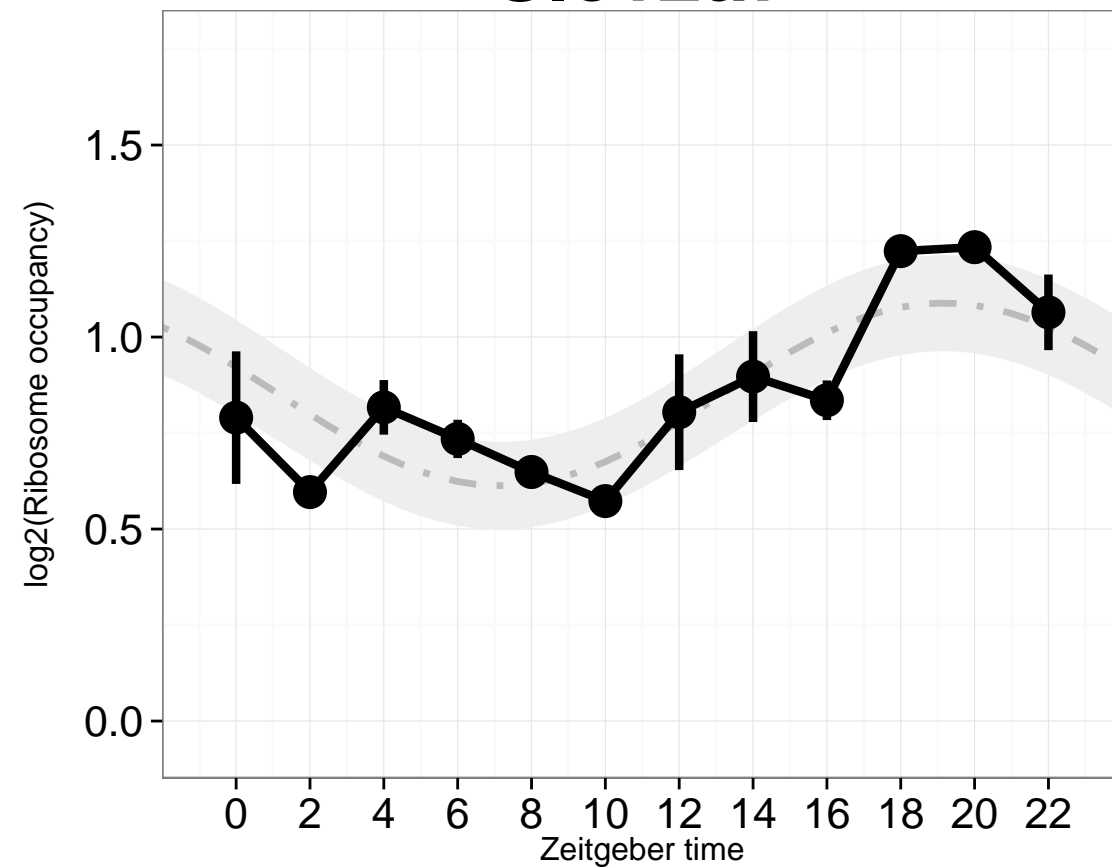

Supplement: Supplementary file 6398 [file 1]

# Syt3

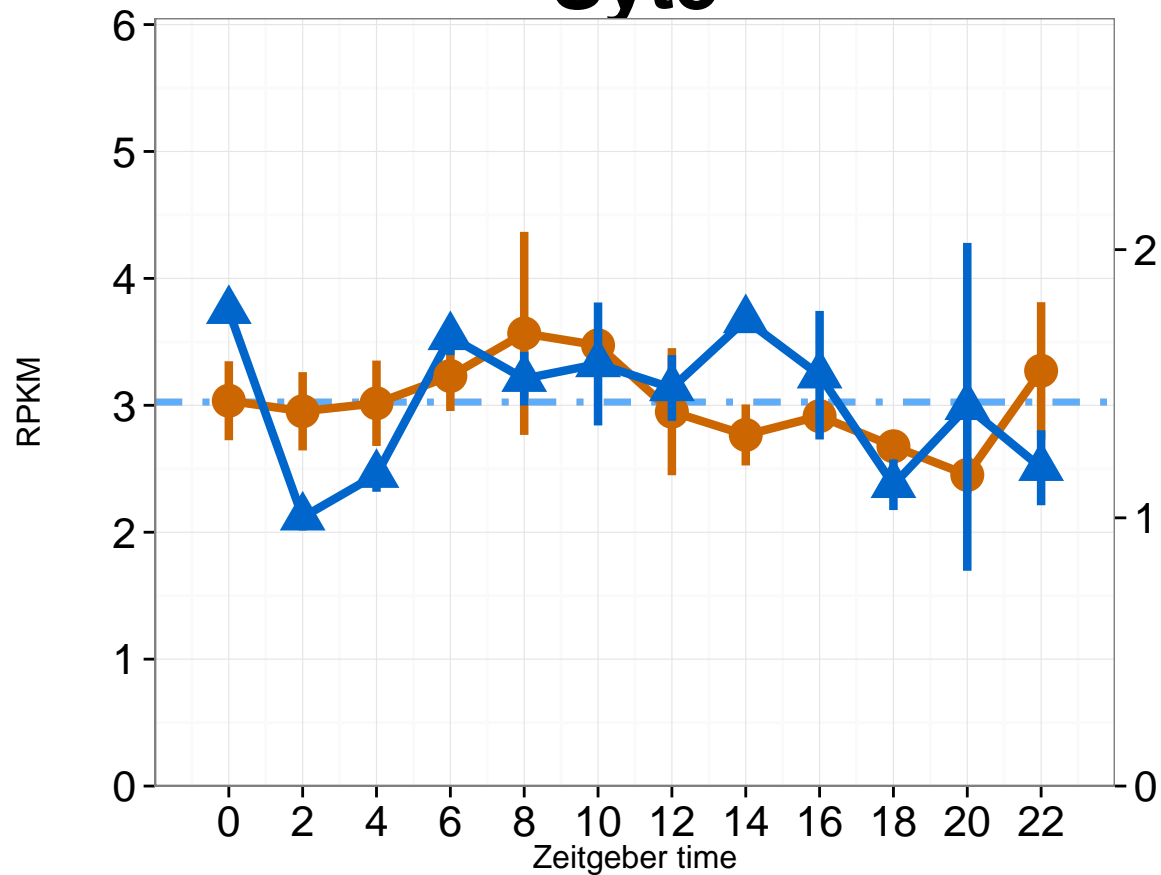

# Syt3

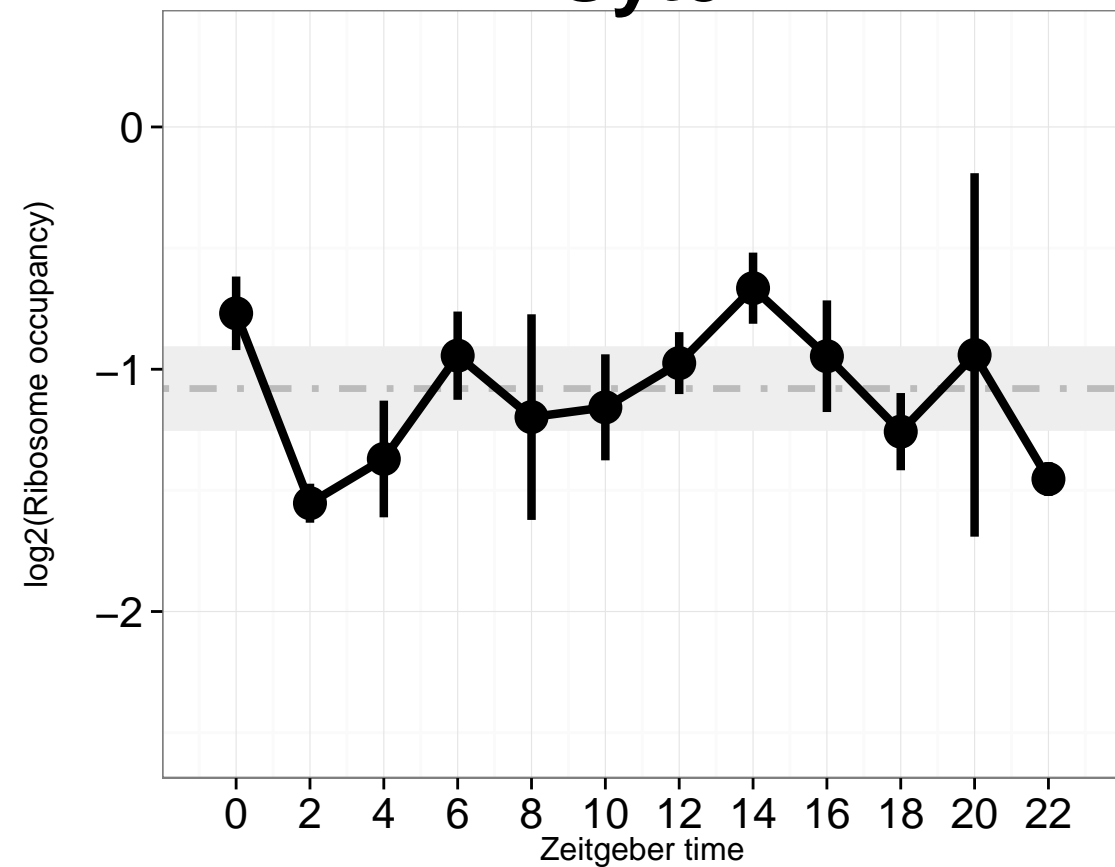

Supplement: Supplementary file 6399 [file 1]

# Tmem241

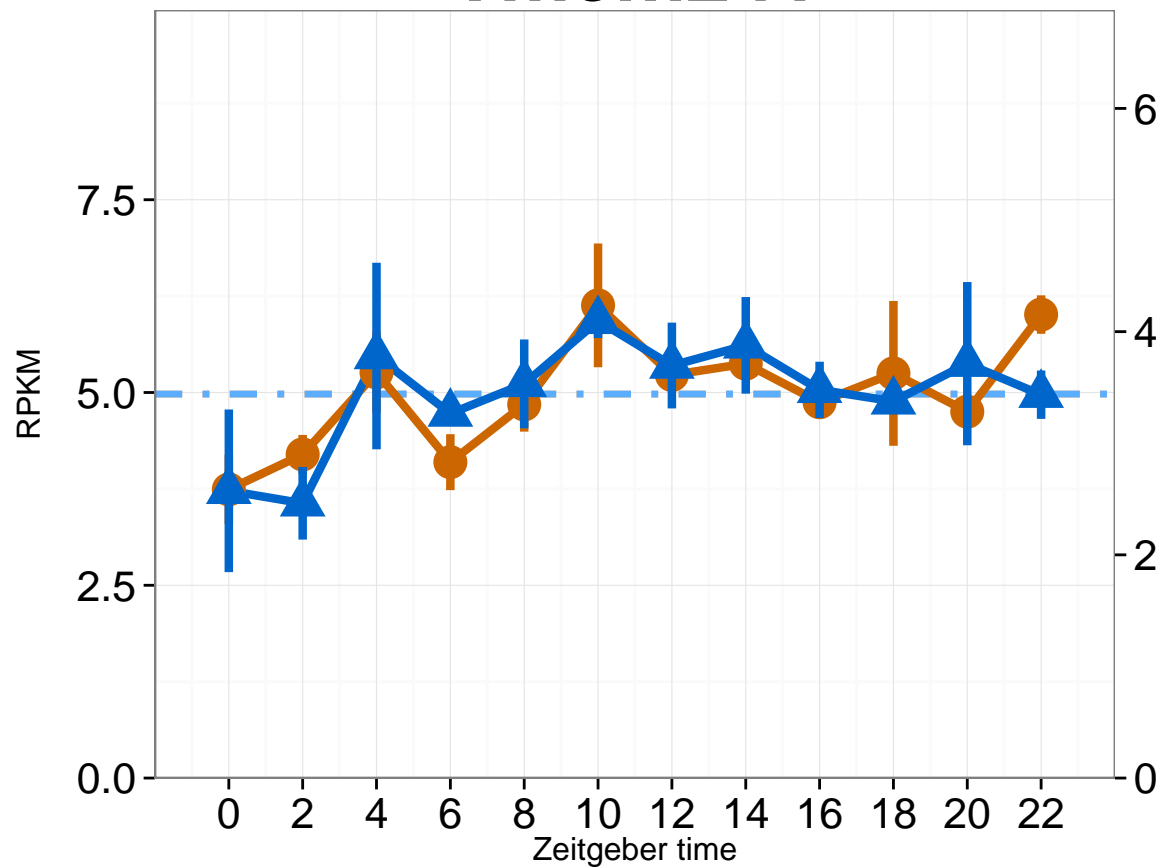

# Tmem241

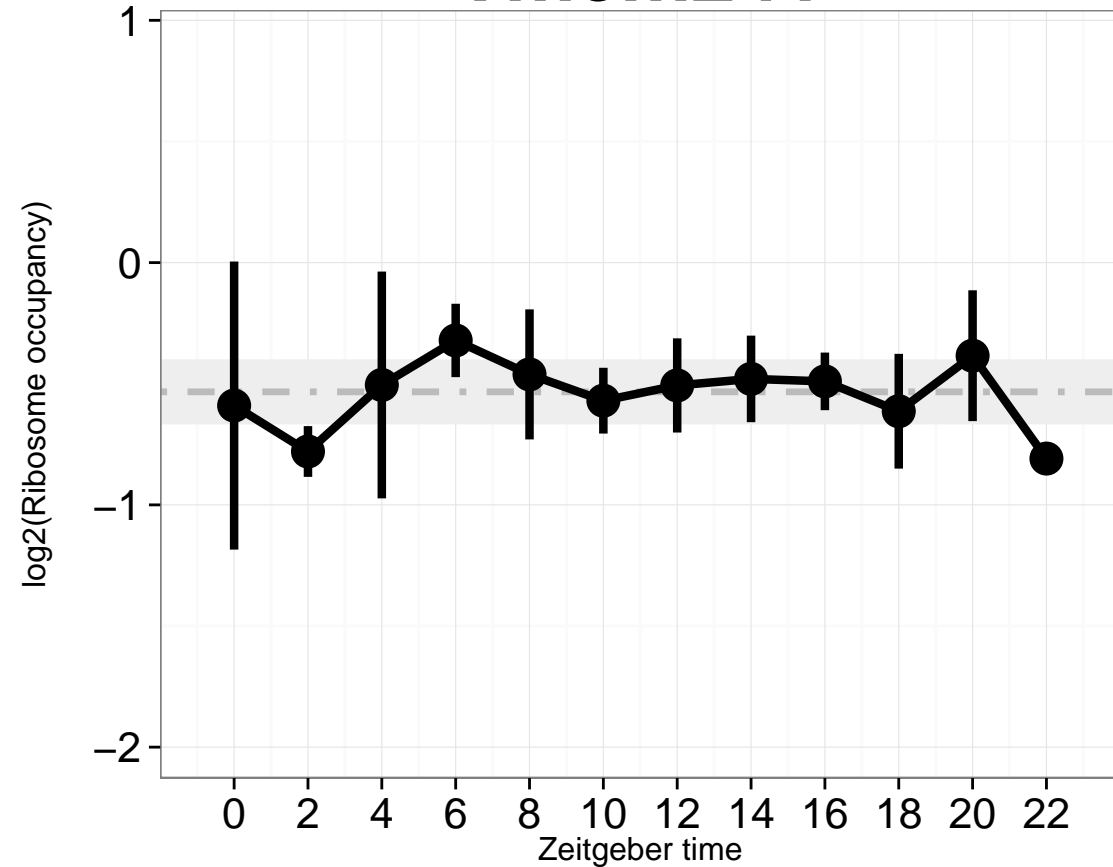

Supplement: Supplementary file 6400 [file 1]

# 1700037H04Rik

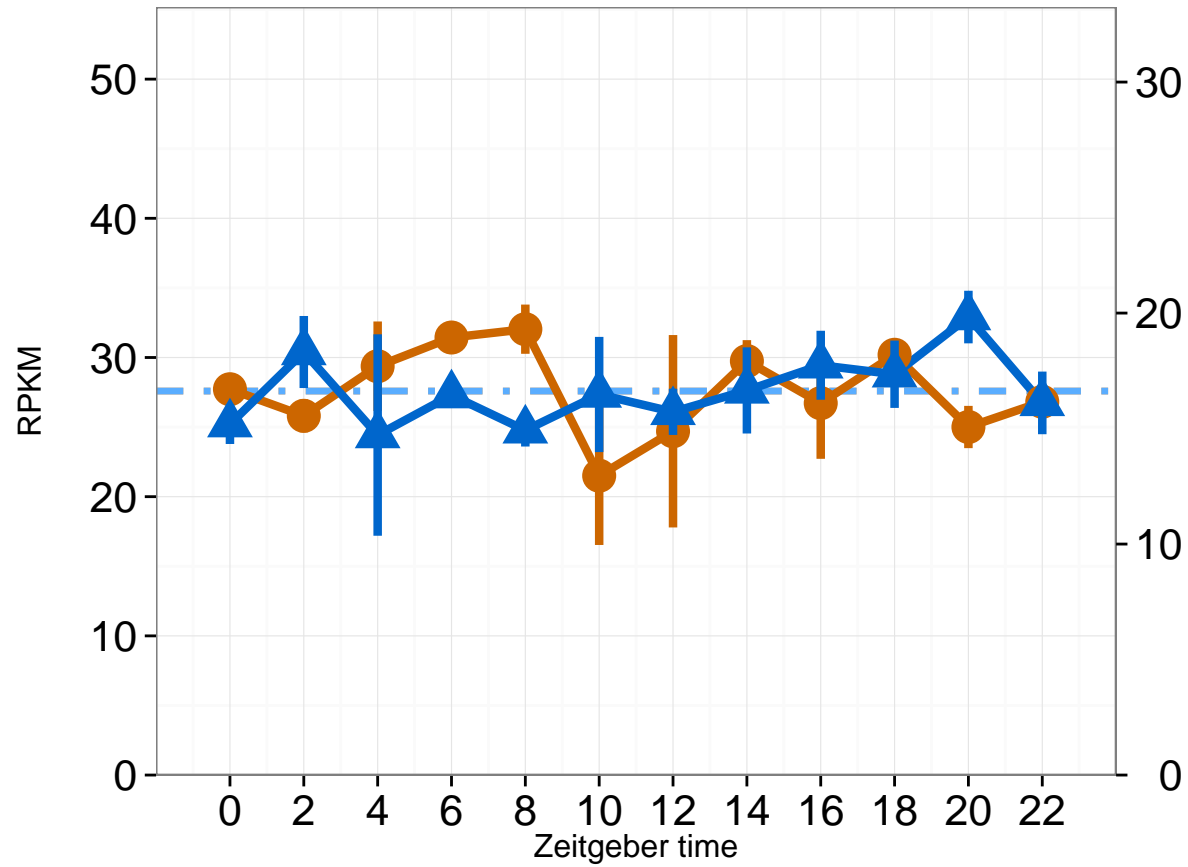

# 1700037H04Rik

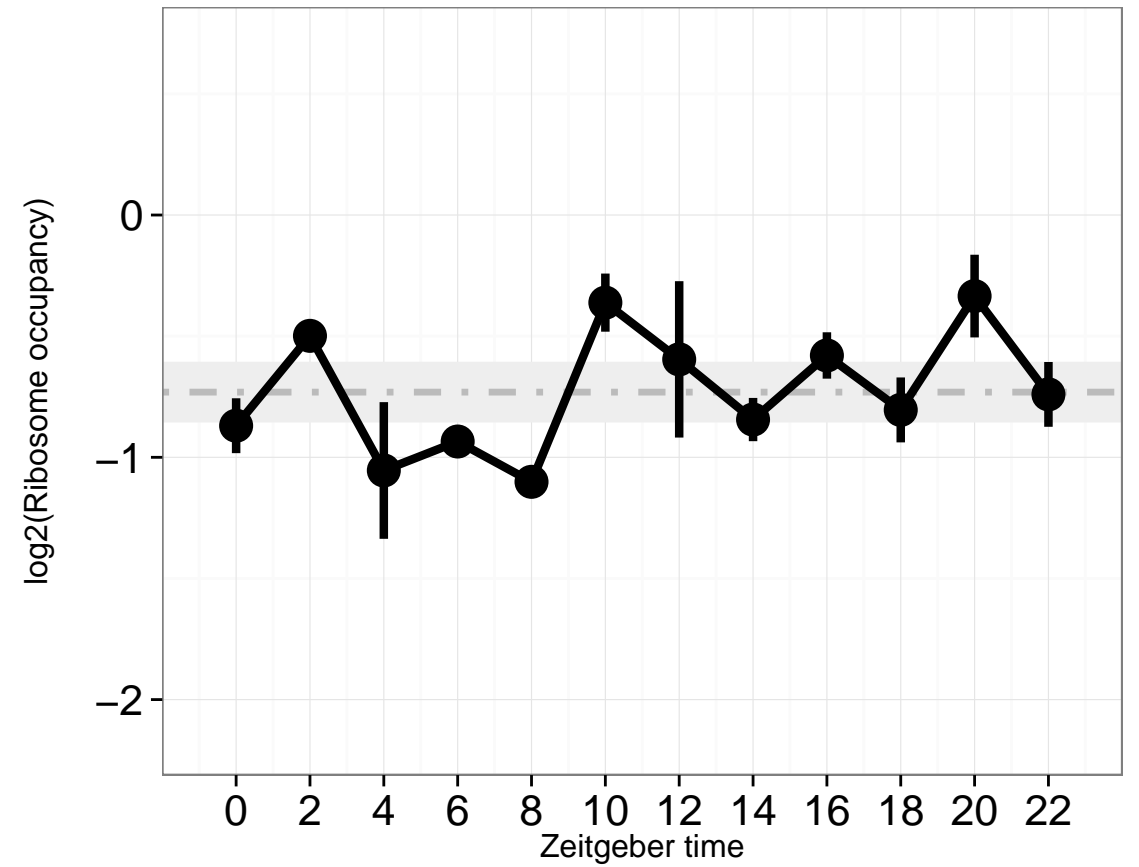

Supplement: Supplementary file 6401 [file 1]

# Arpc1b

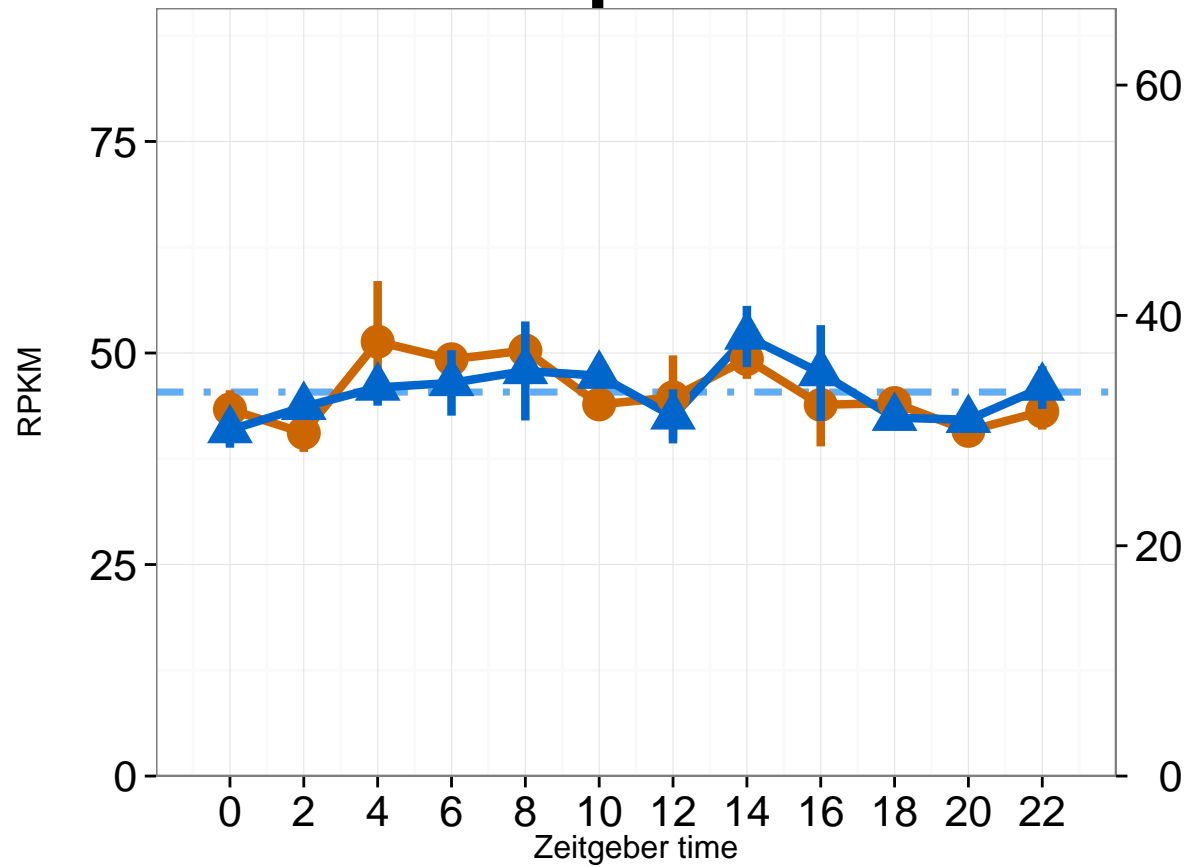

# Arpc1b

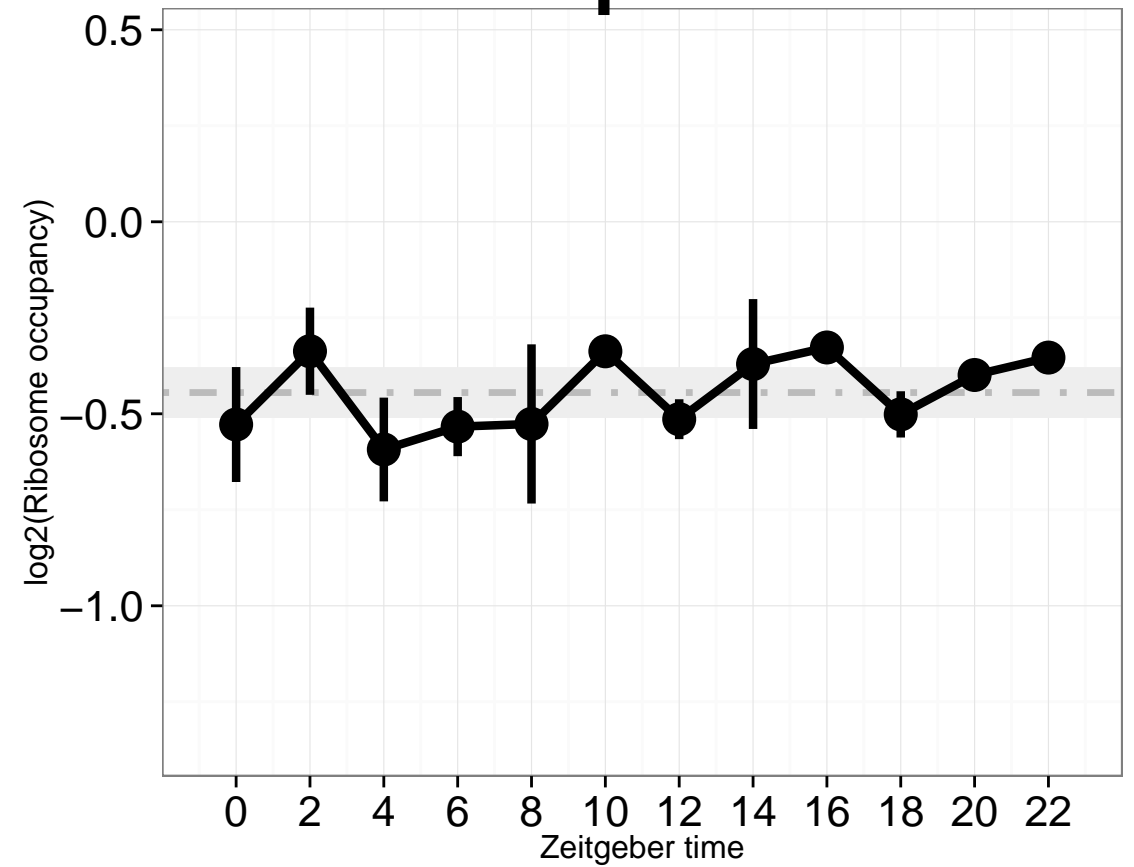

Supplement: Supplementary file 6402 [file 1]

## Ocrl

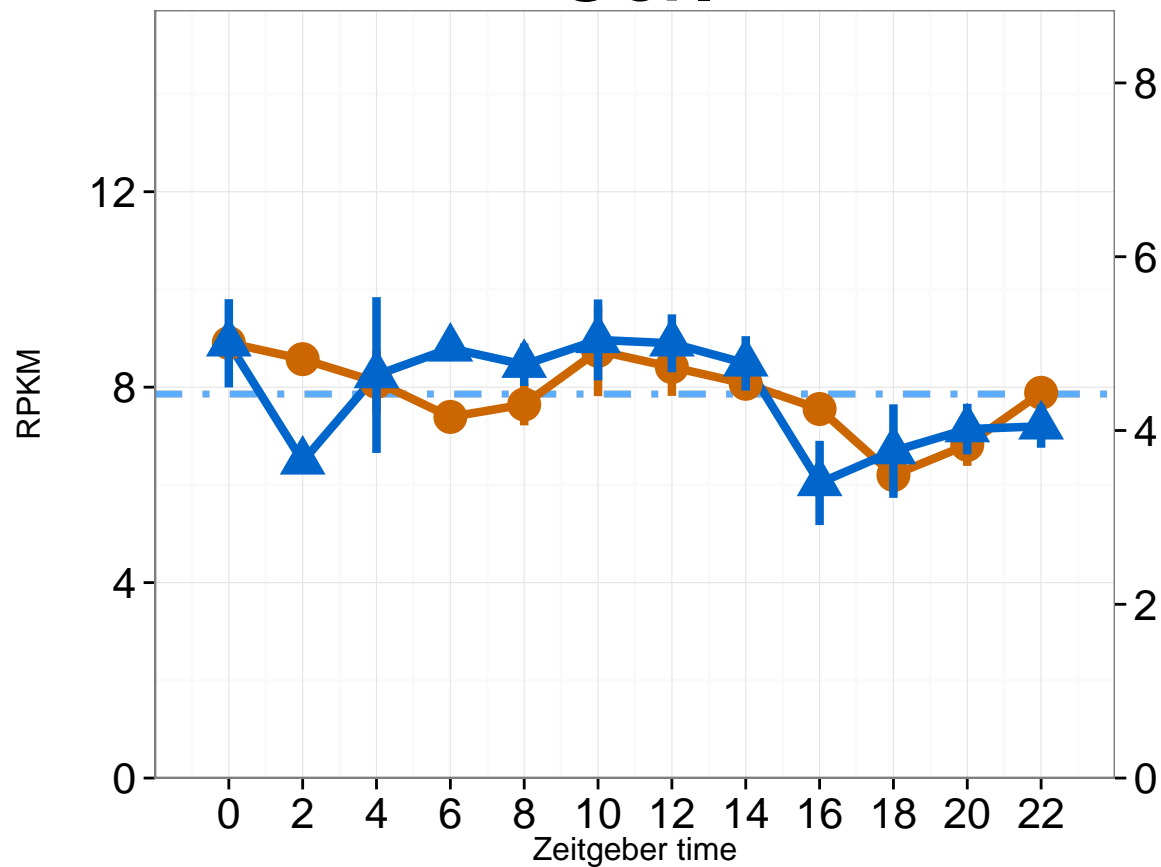

## Ocrl

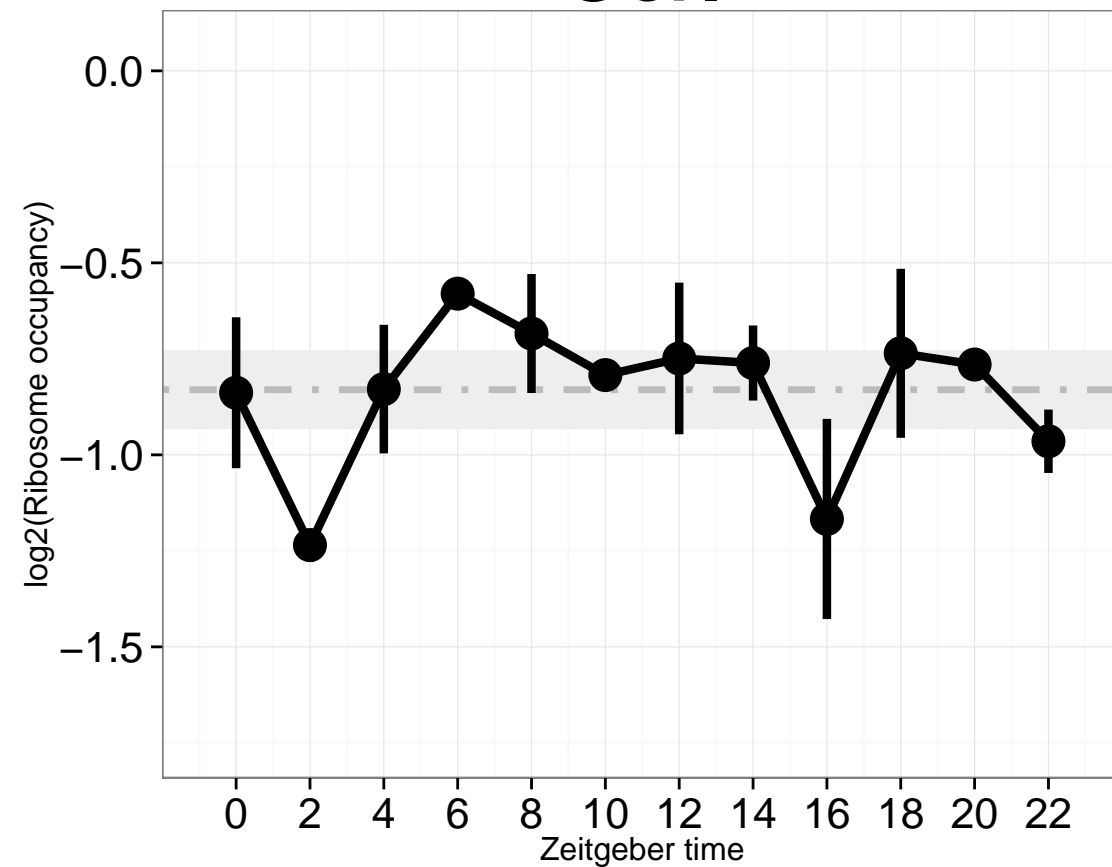

Supplement: Supplementary file 6403 [file 1]

## Zscan29

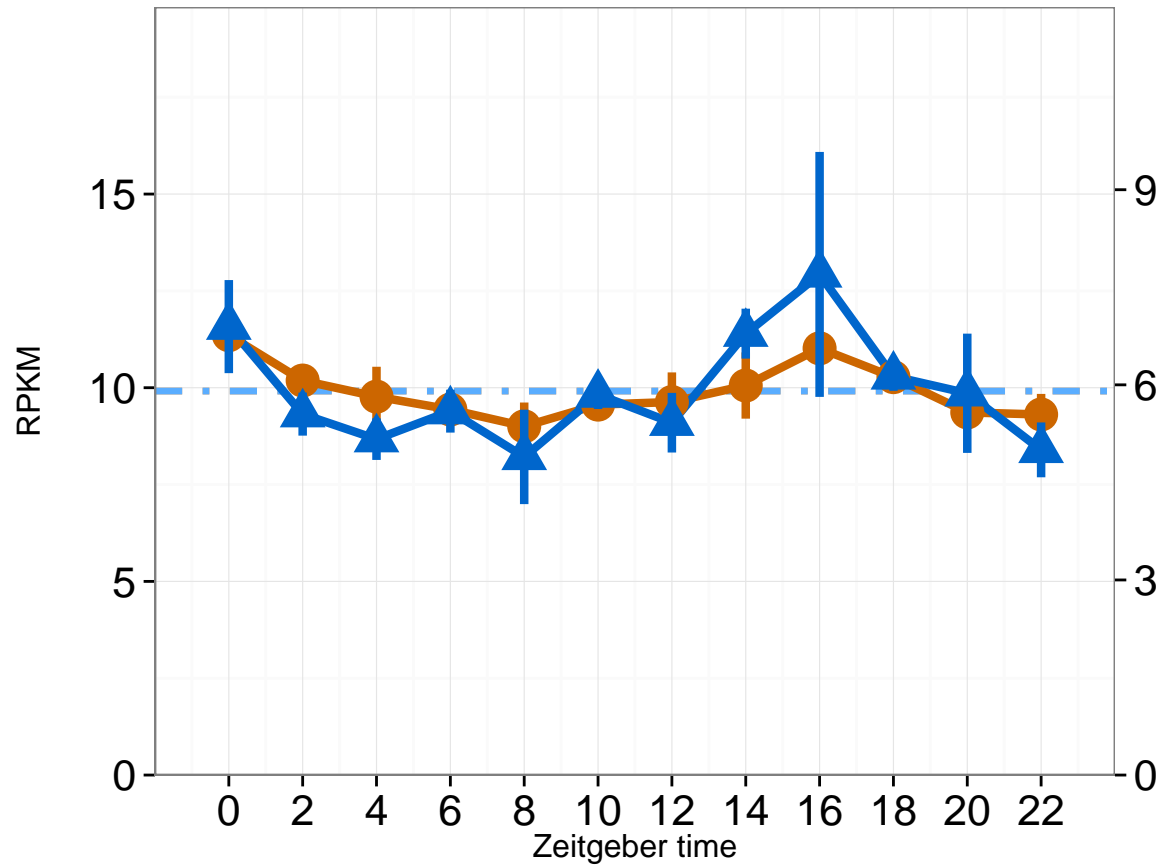

## Zscan29

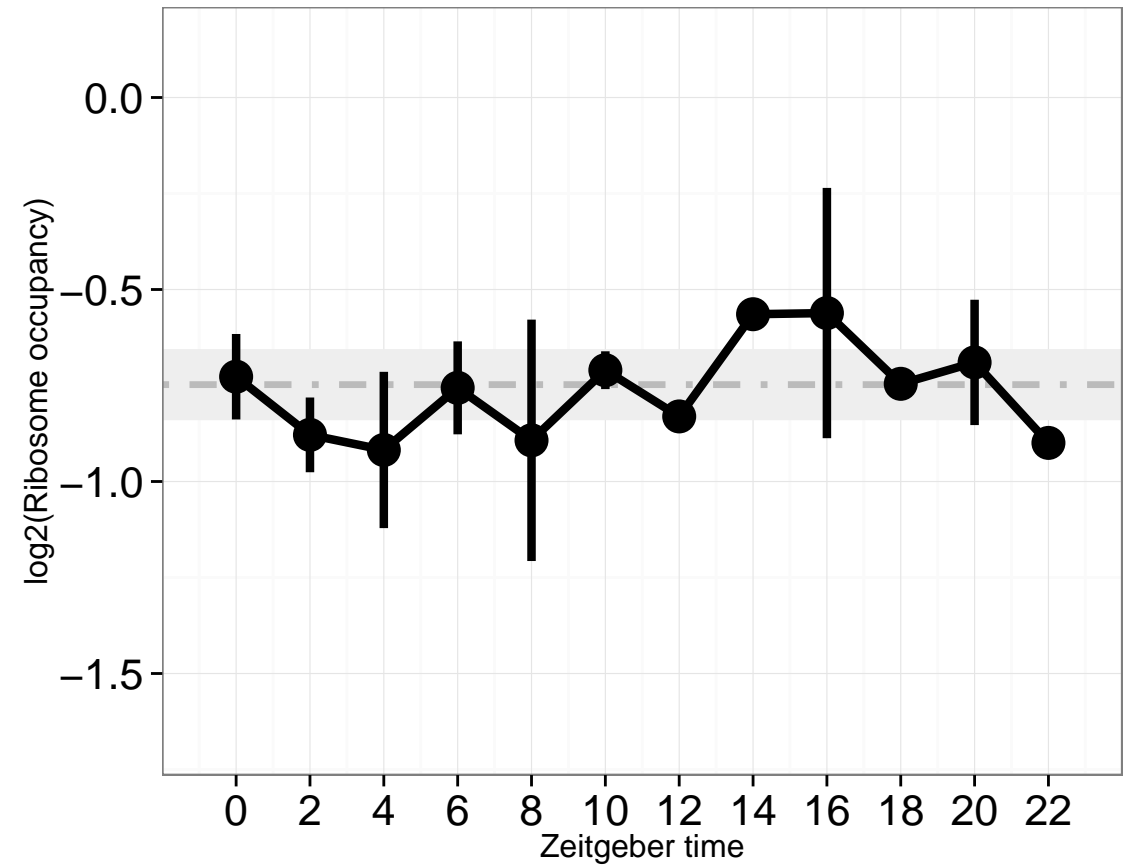

Supplement: Supplementary file 6404 [file 1]

# Rbm33

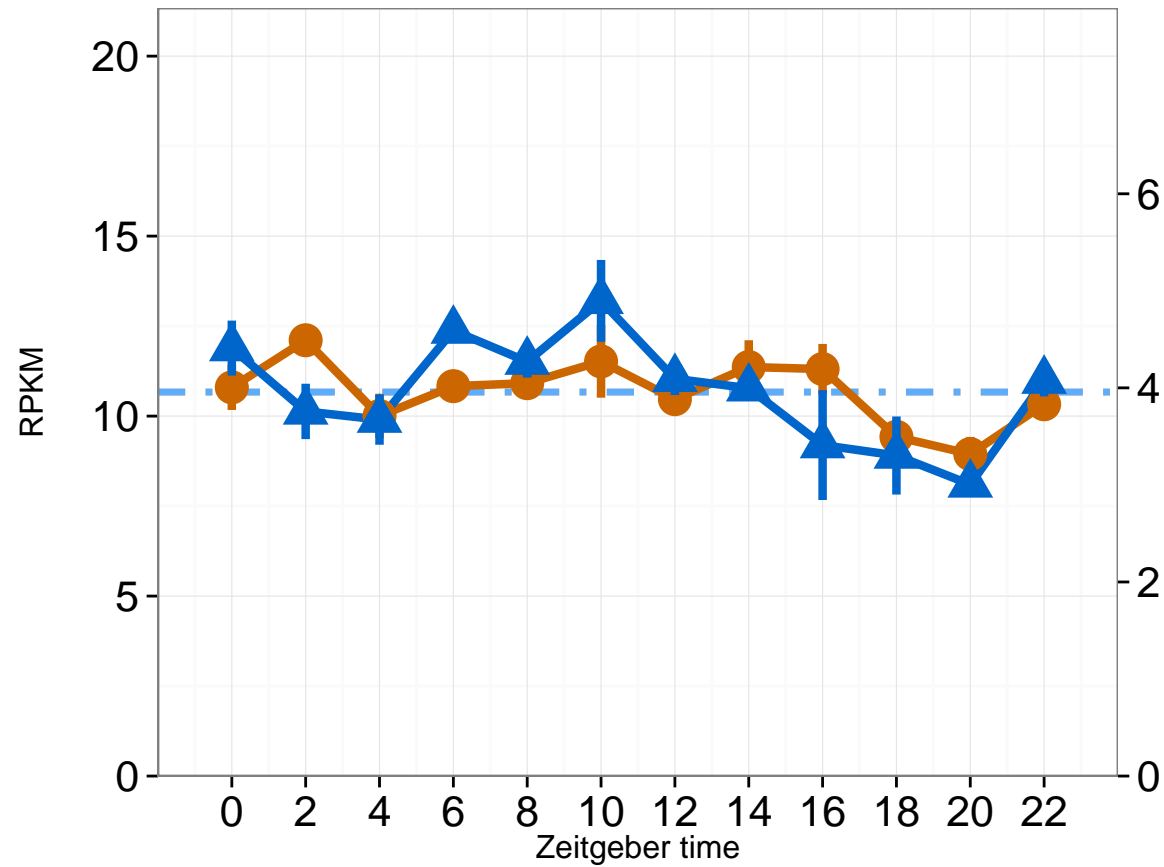

# Rbm33

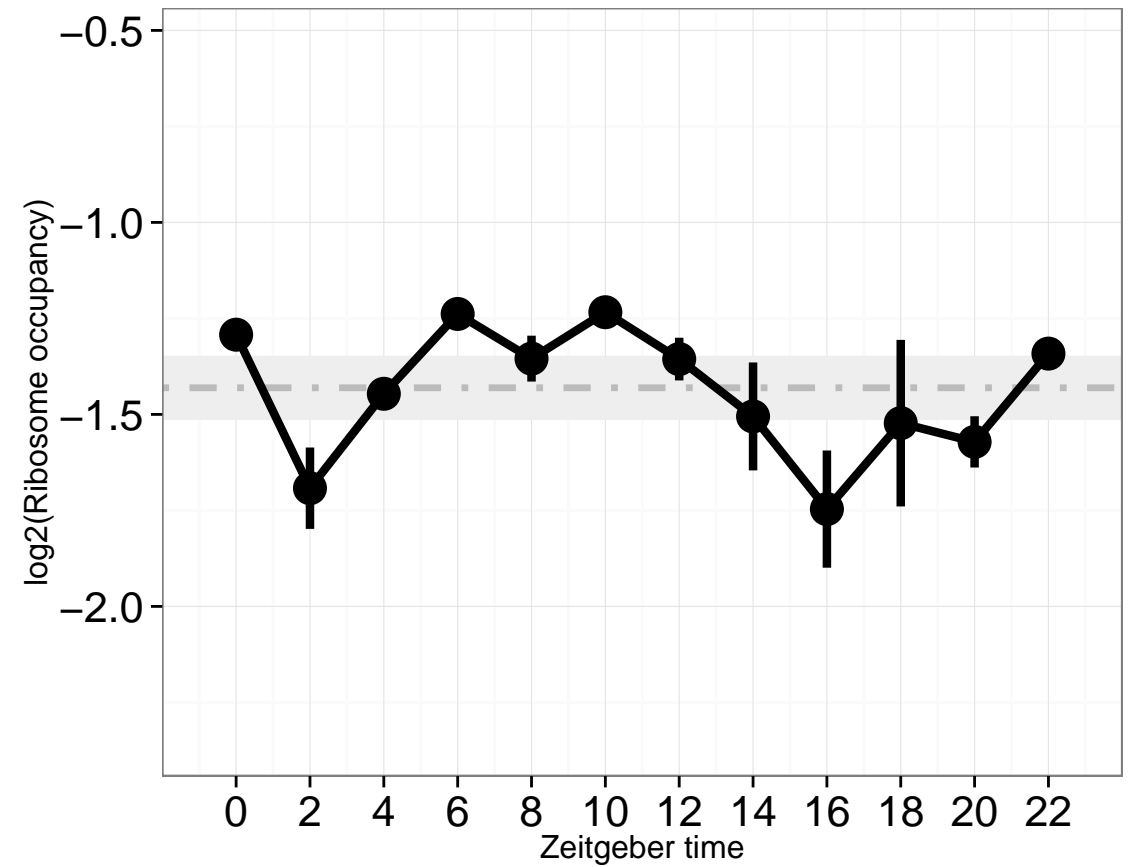

Supplement: Supplementary file 6405 [file 1]

# Msrb1

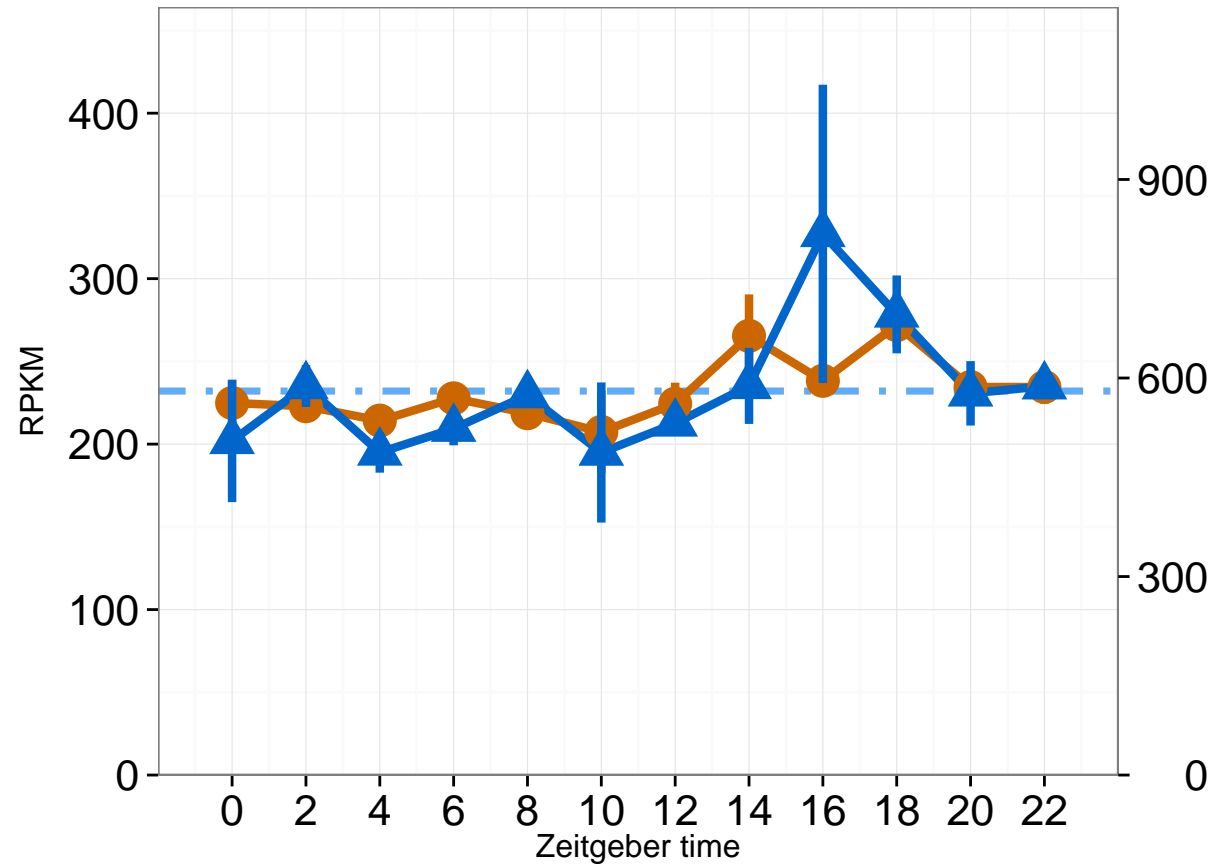

# Msrb1

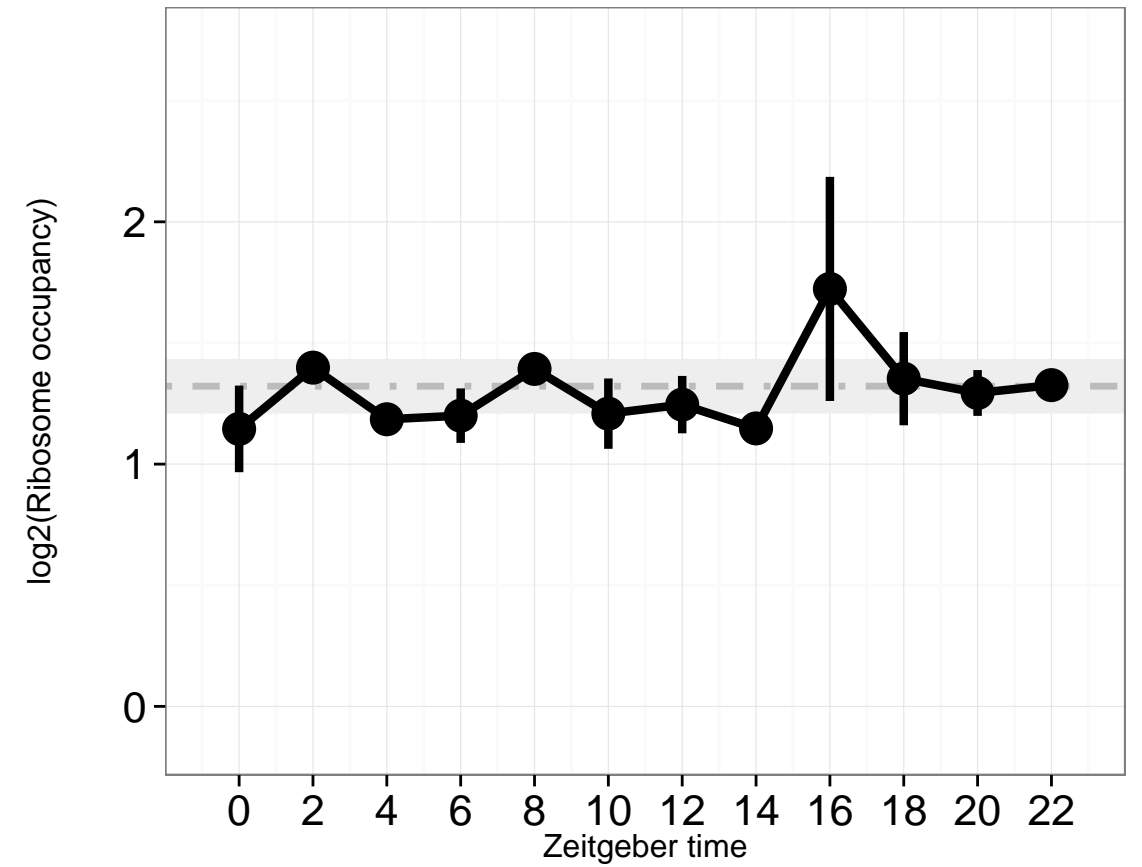

Supplement: Supplementary file 6406 [file 1]

## Espn

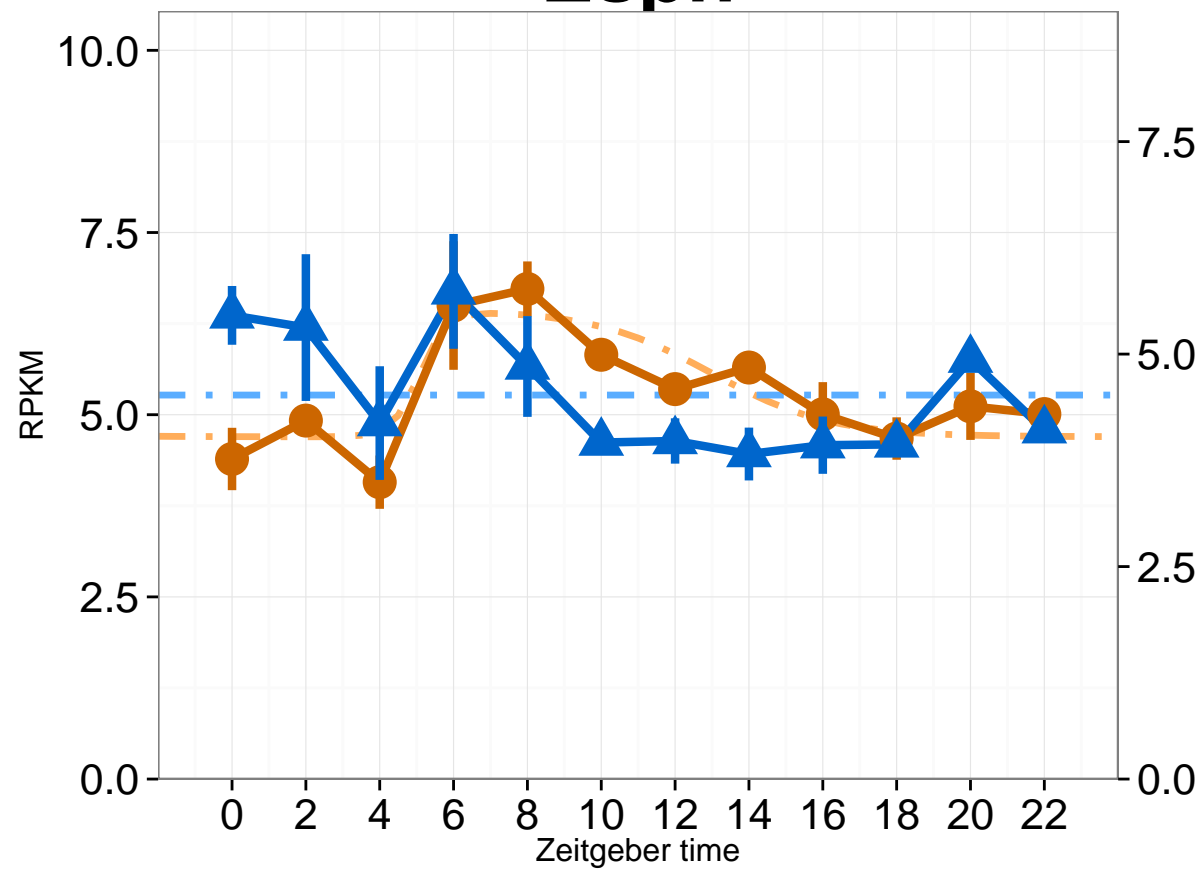

## Espn

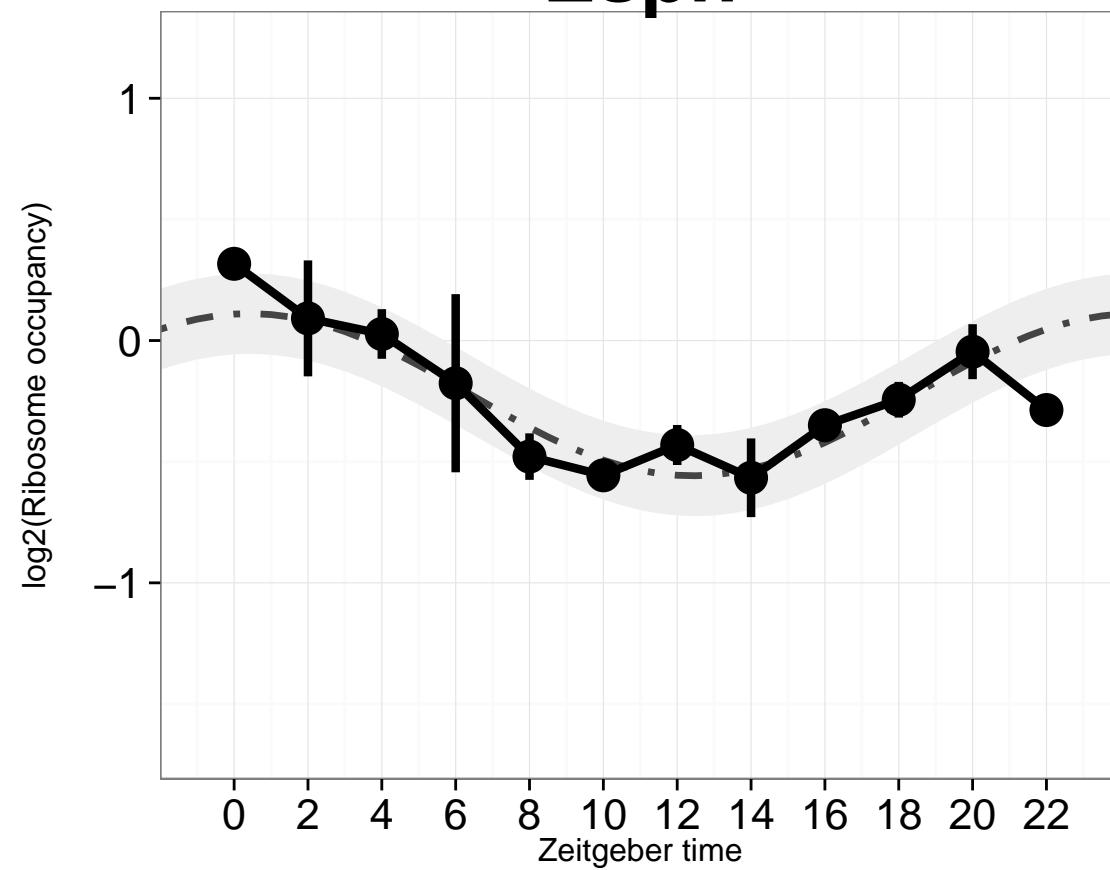

Supplement: Supplementary file 6407 [file 1]

# Akr1c12

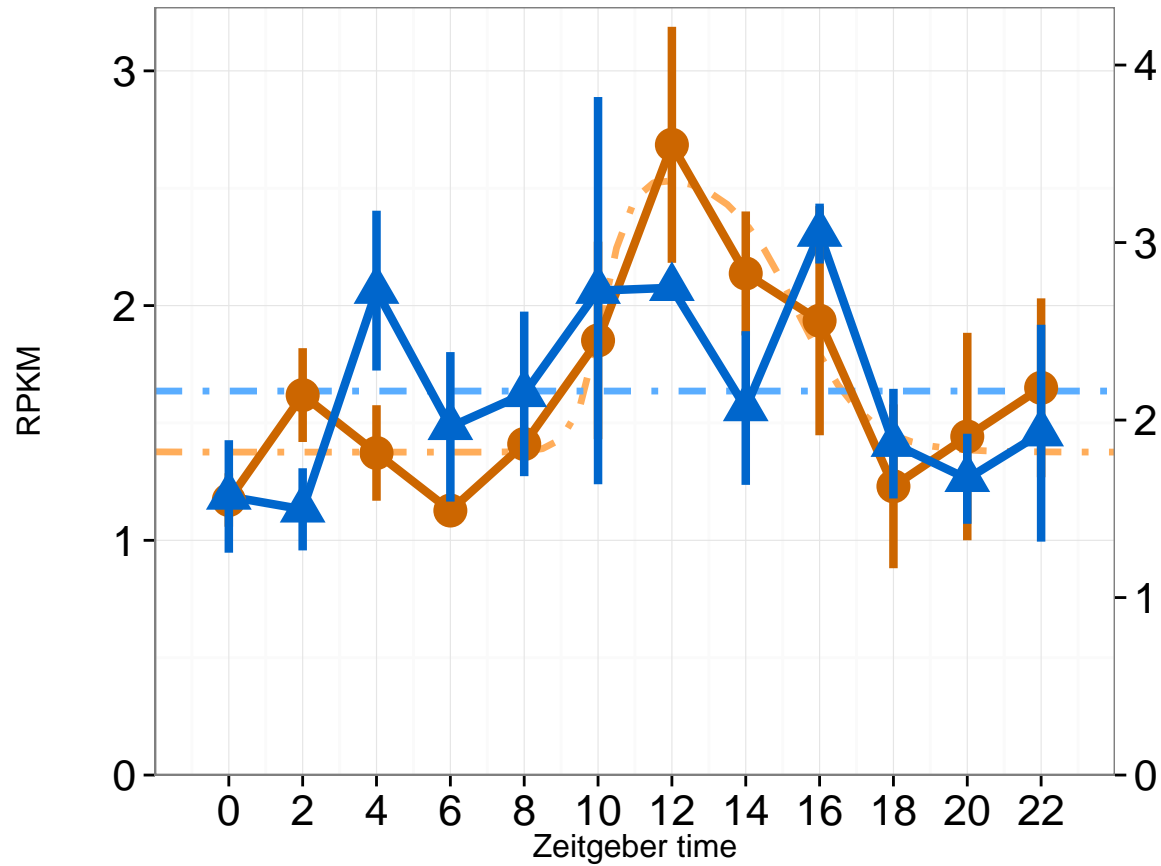

# Akr1c12

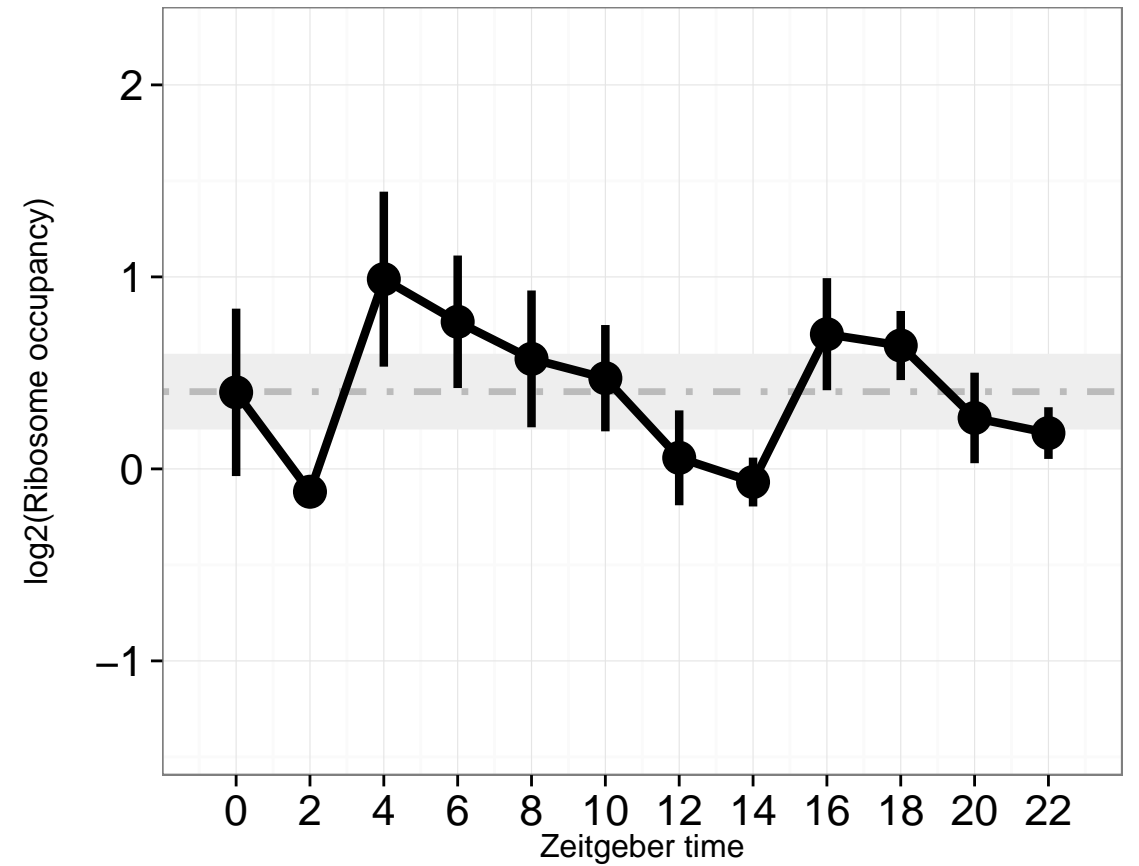

Supplement: Supplementary file 6408 [file 1]

## Slc25a27

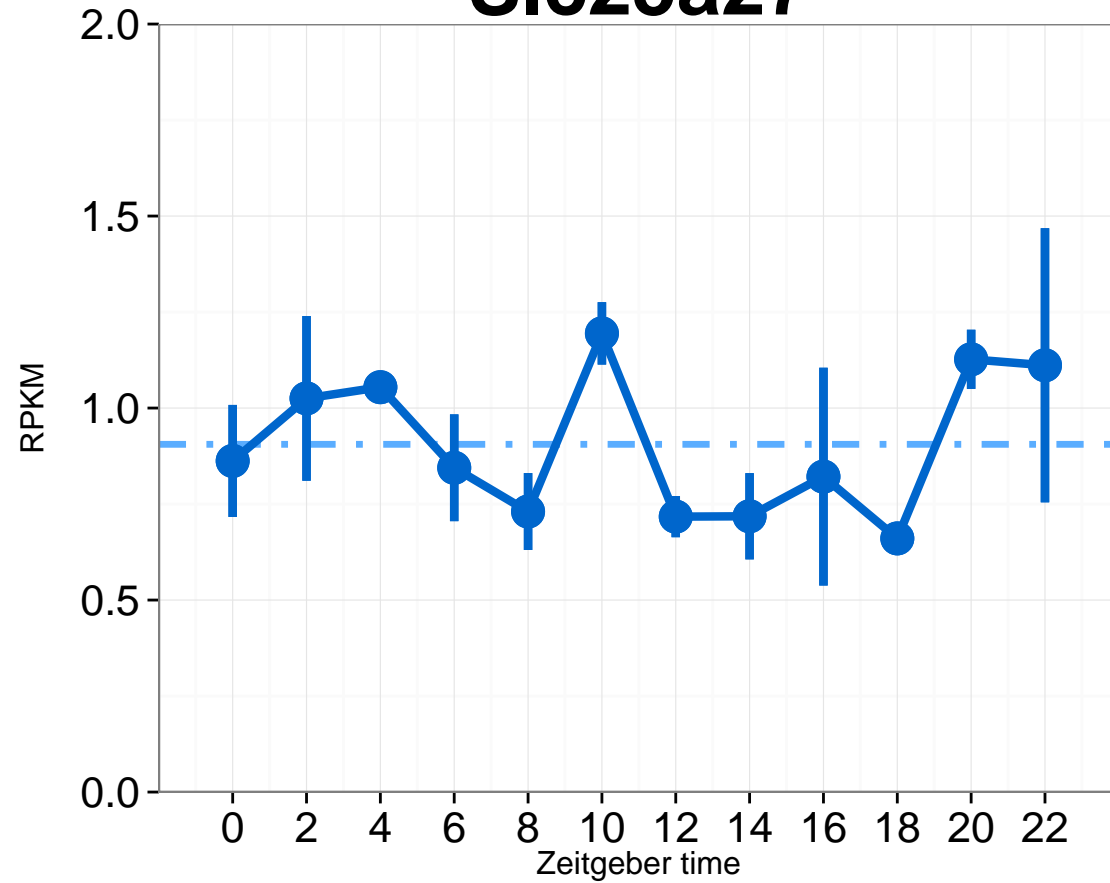

## Slc25a27 log2(Ribosome occupanc

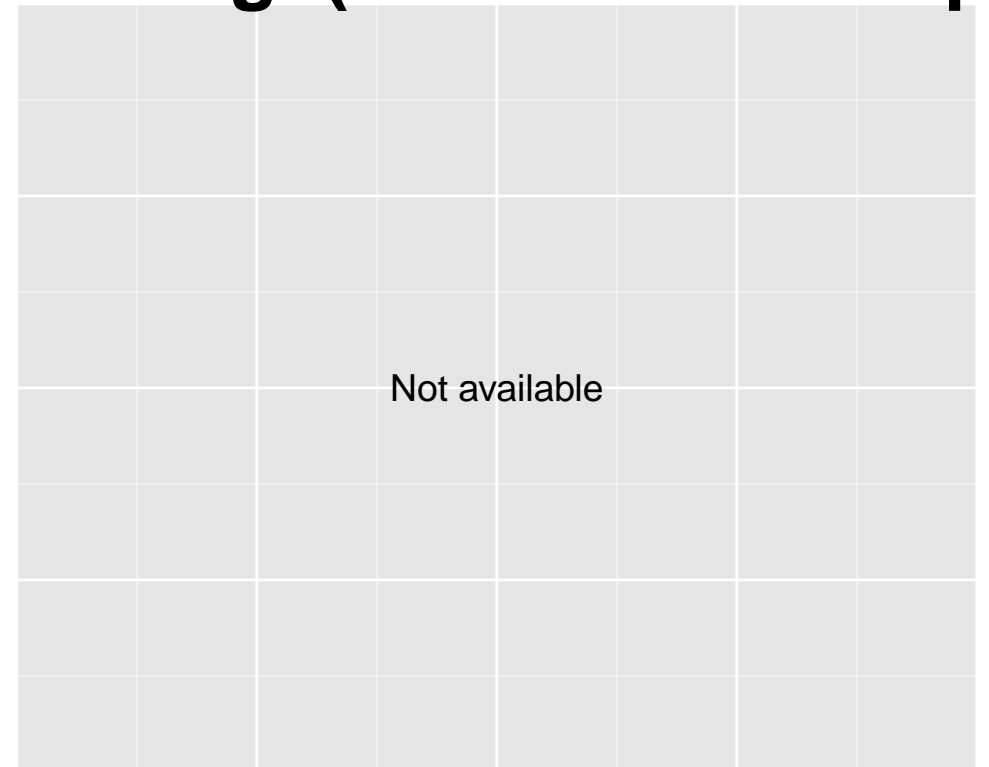

Supplement: Supplementary file 6409 [file 1]

# Tmem30a

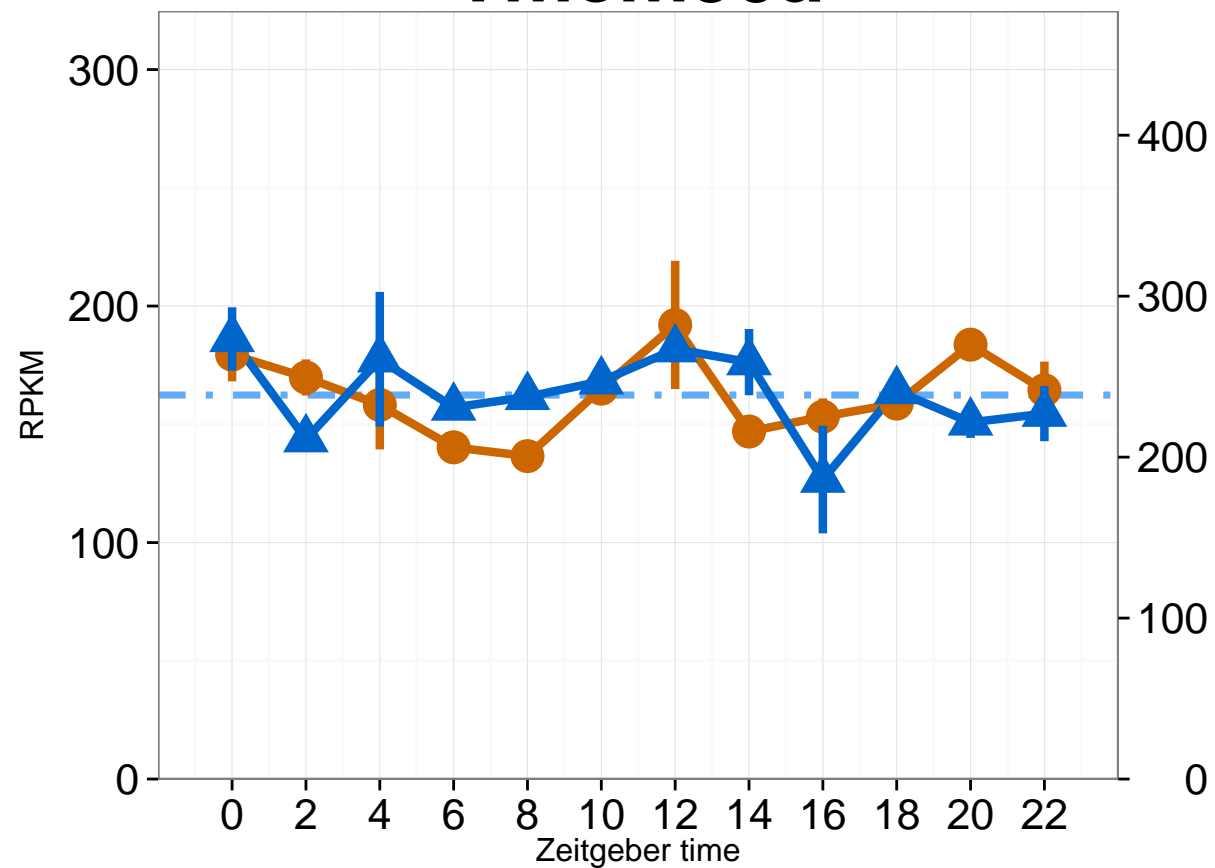

# Tmem30a

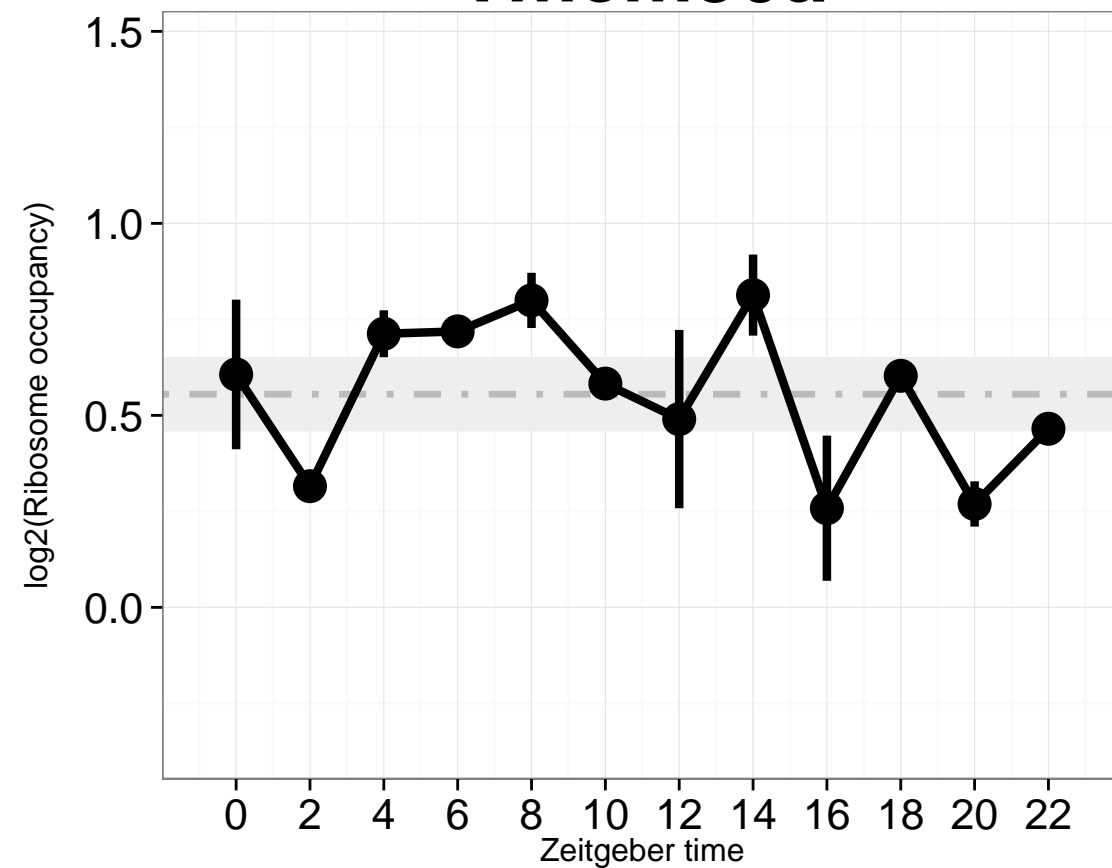

Supplement: Supplementary file 6410 [file 1]

## Nprl3

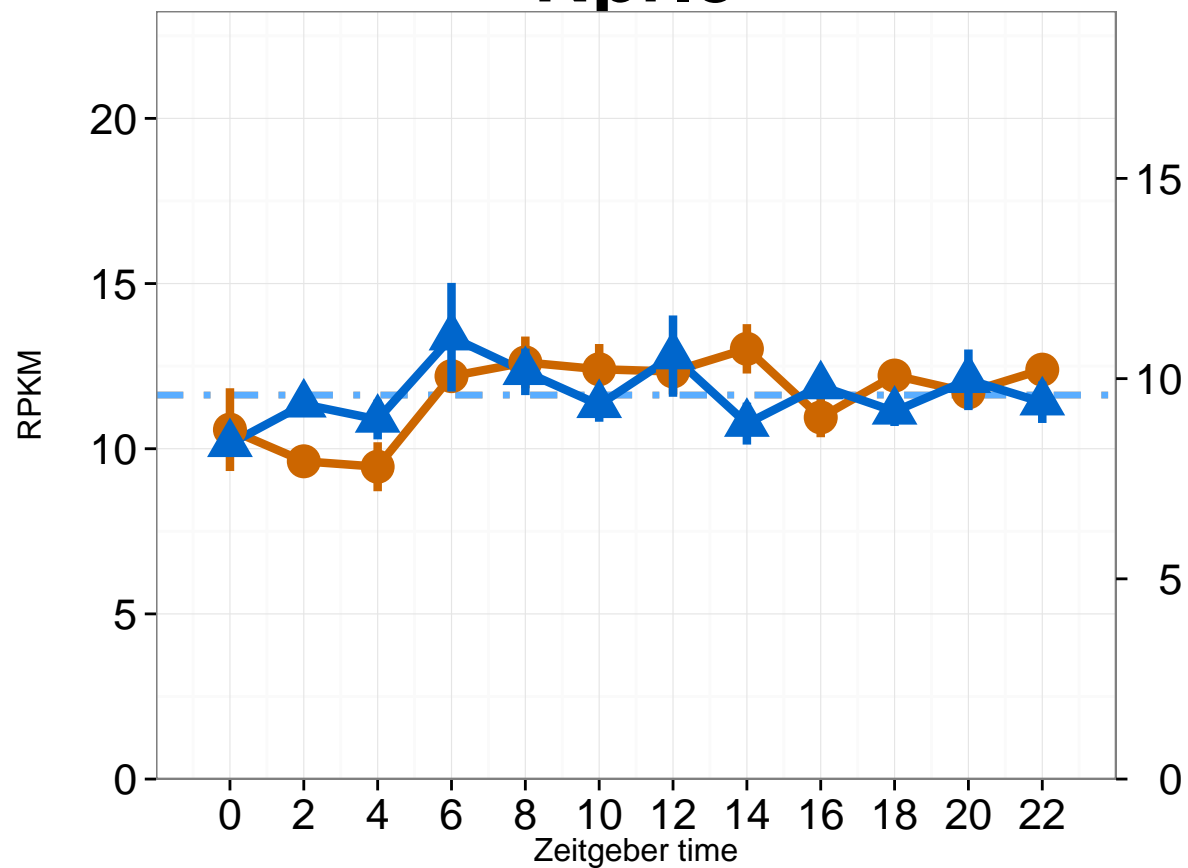

## Nprl3

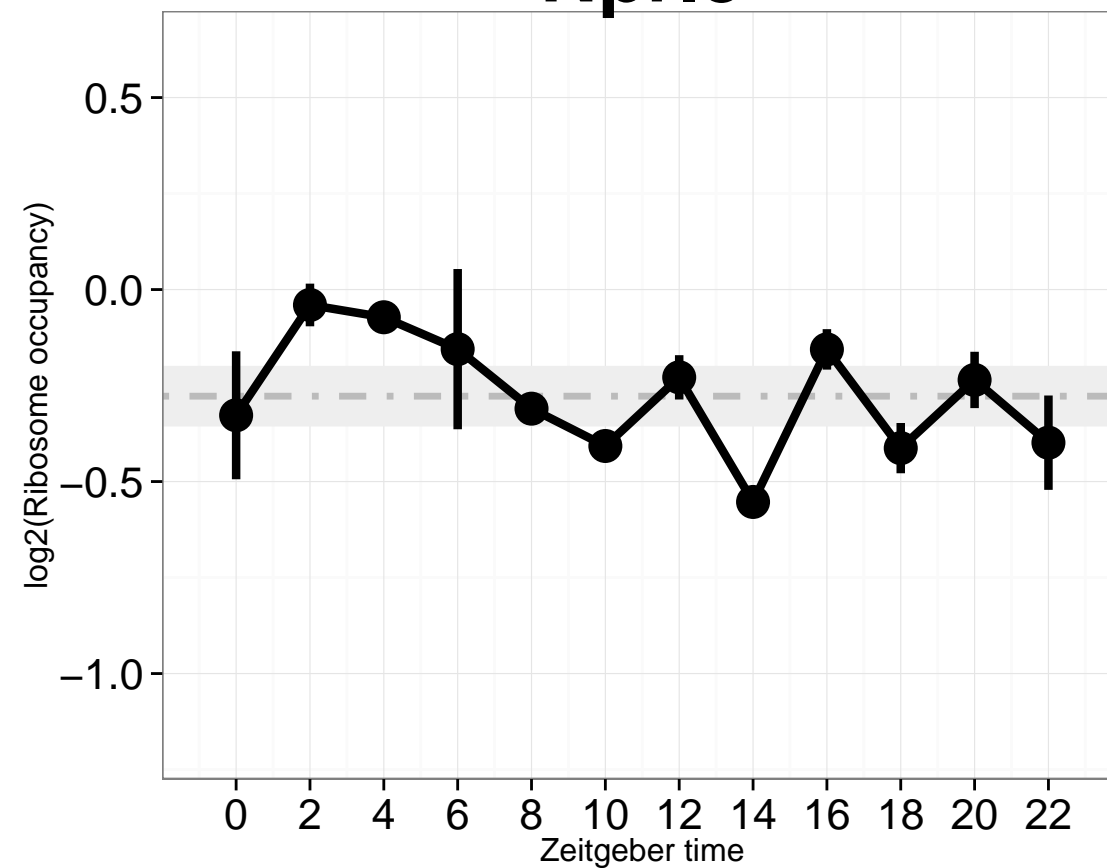

Supplement: Supplementary file 6411 [file 1]

## Rab23

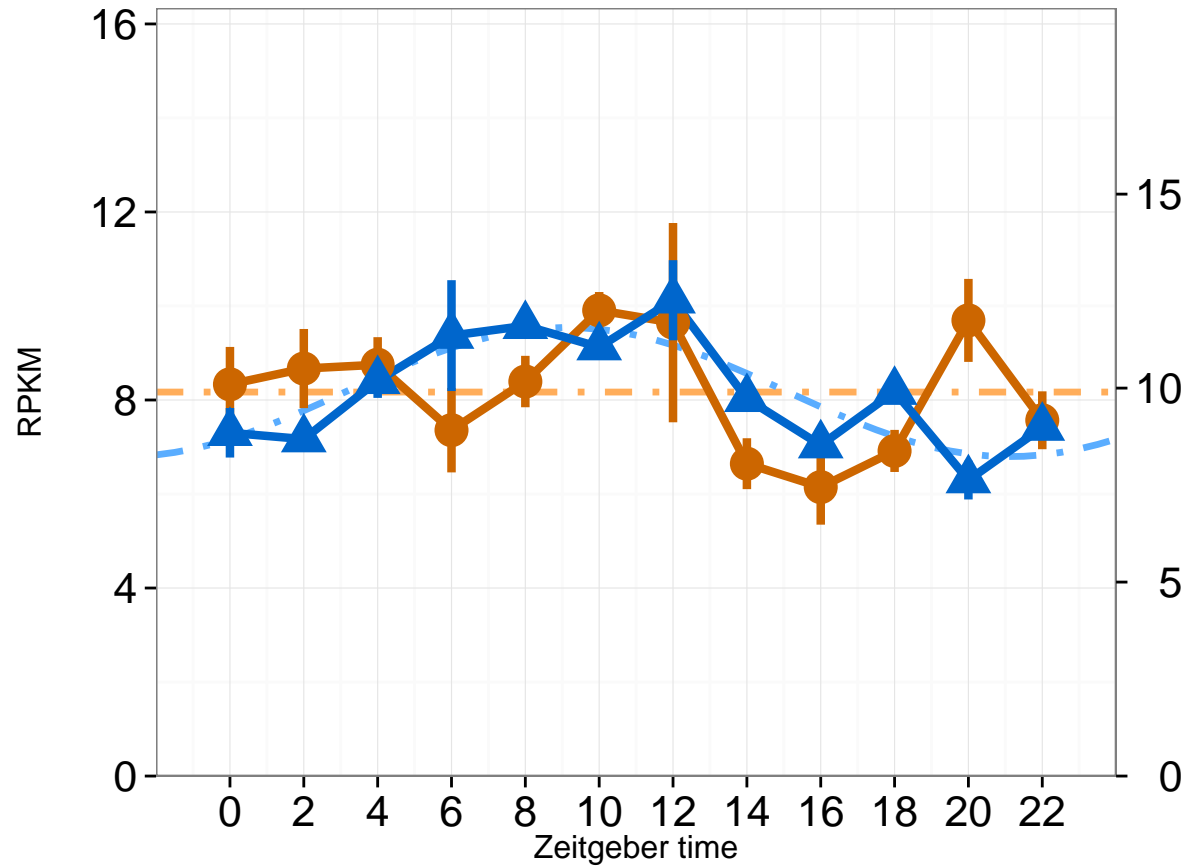

## Rab23

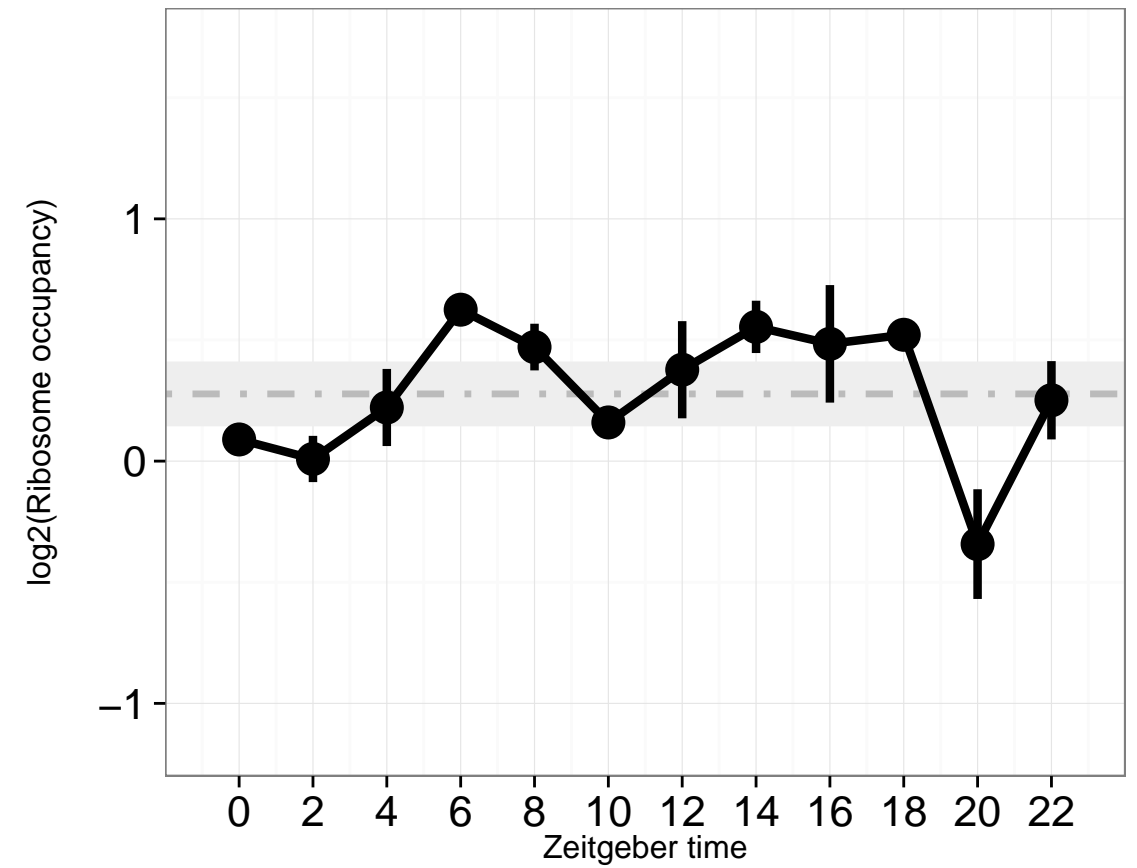

Supplement: Supplementary file 6412 [file 1]

# 5730507C01Rik

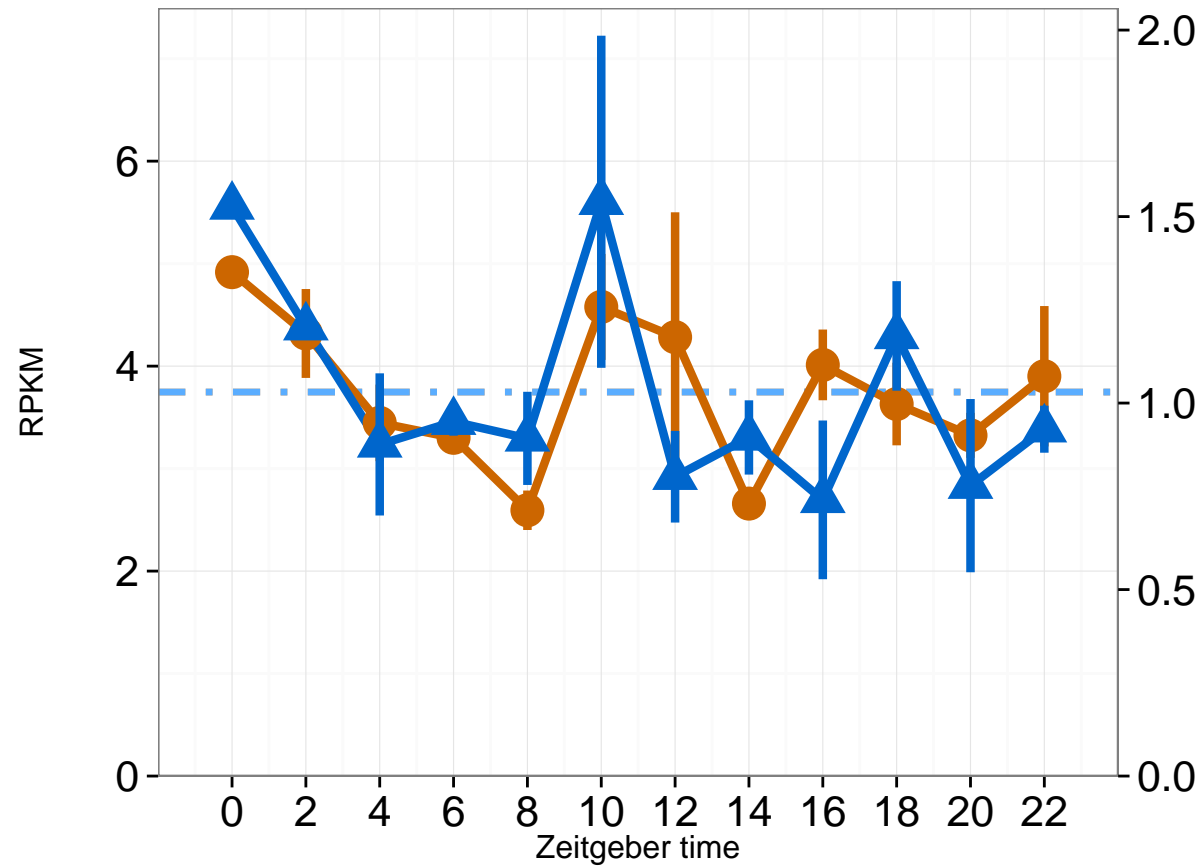

# 5730507C01Rik

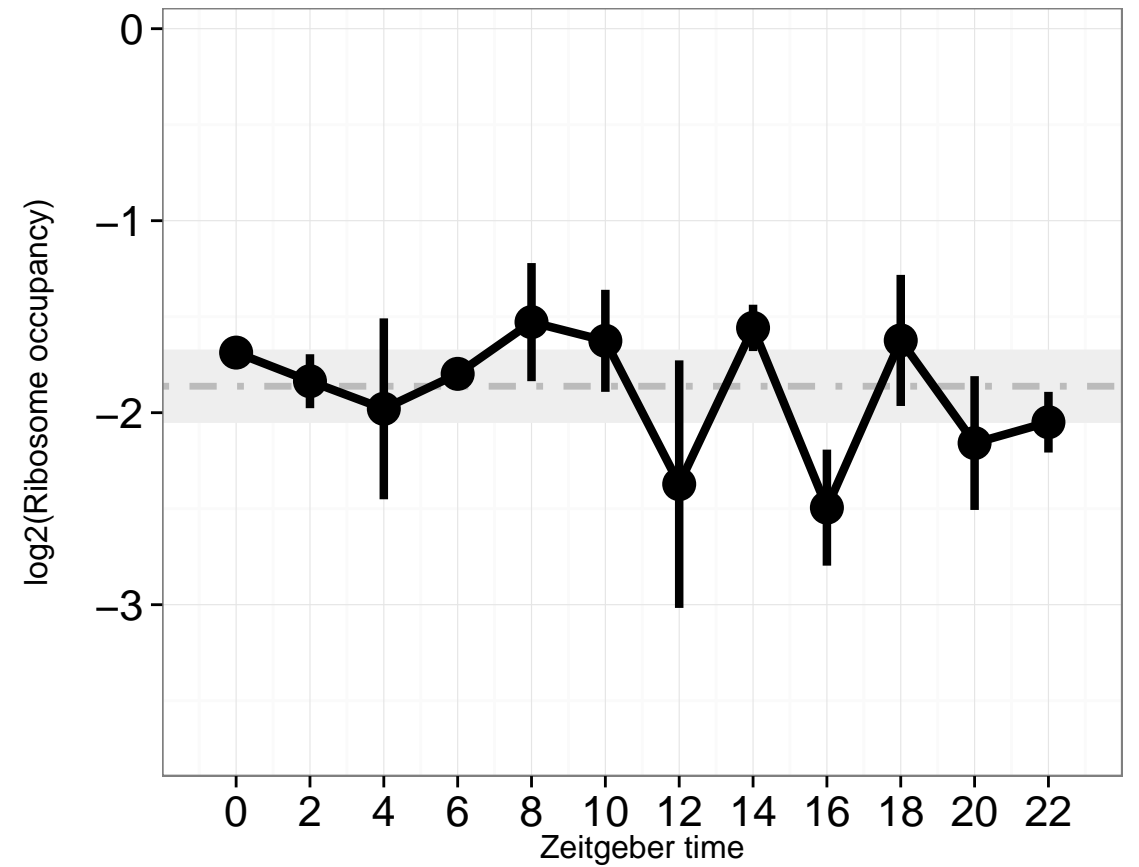

Supplement: Supplementary file 6413 [file 1]

## Pak1

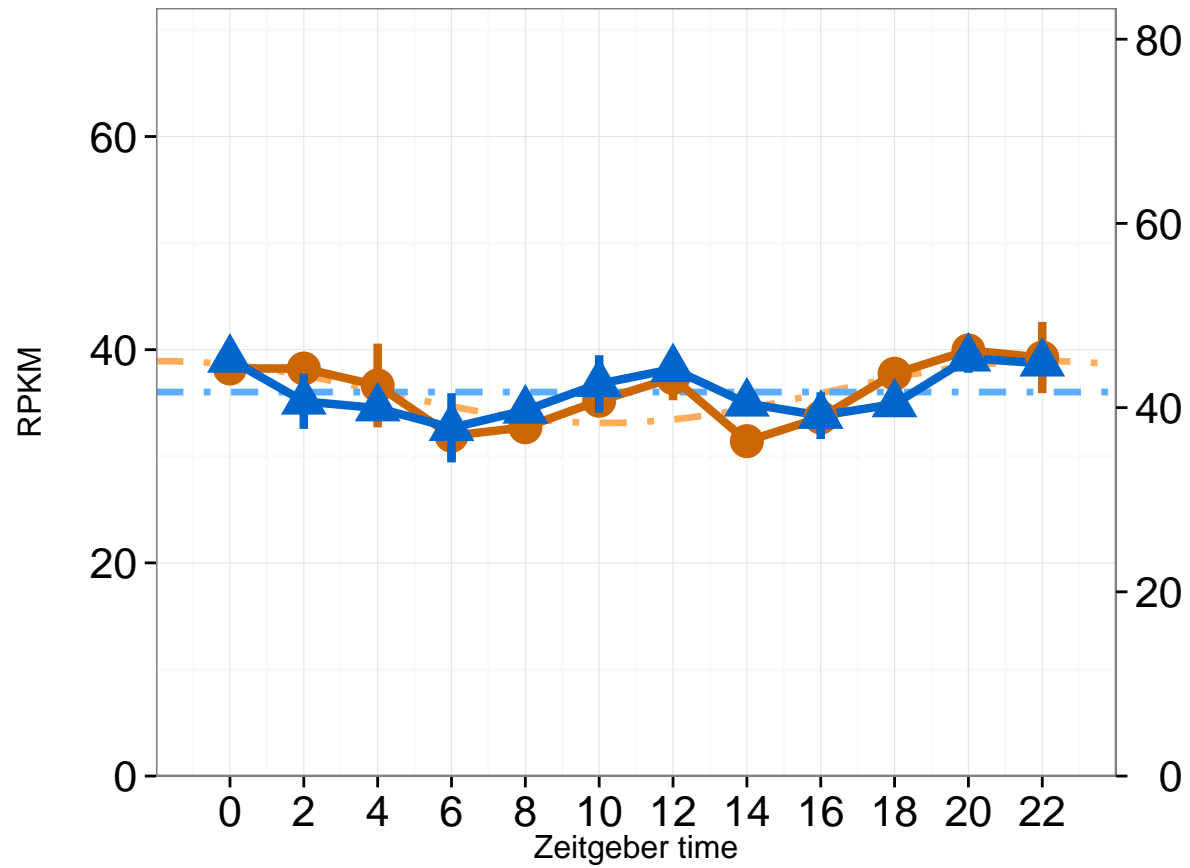

## Pak1

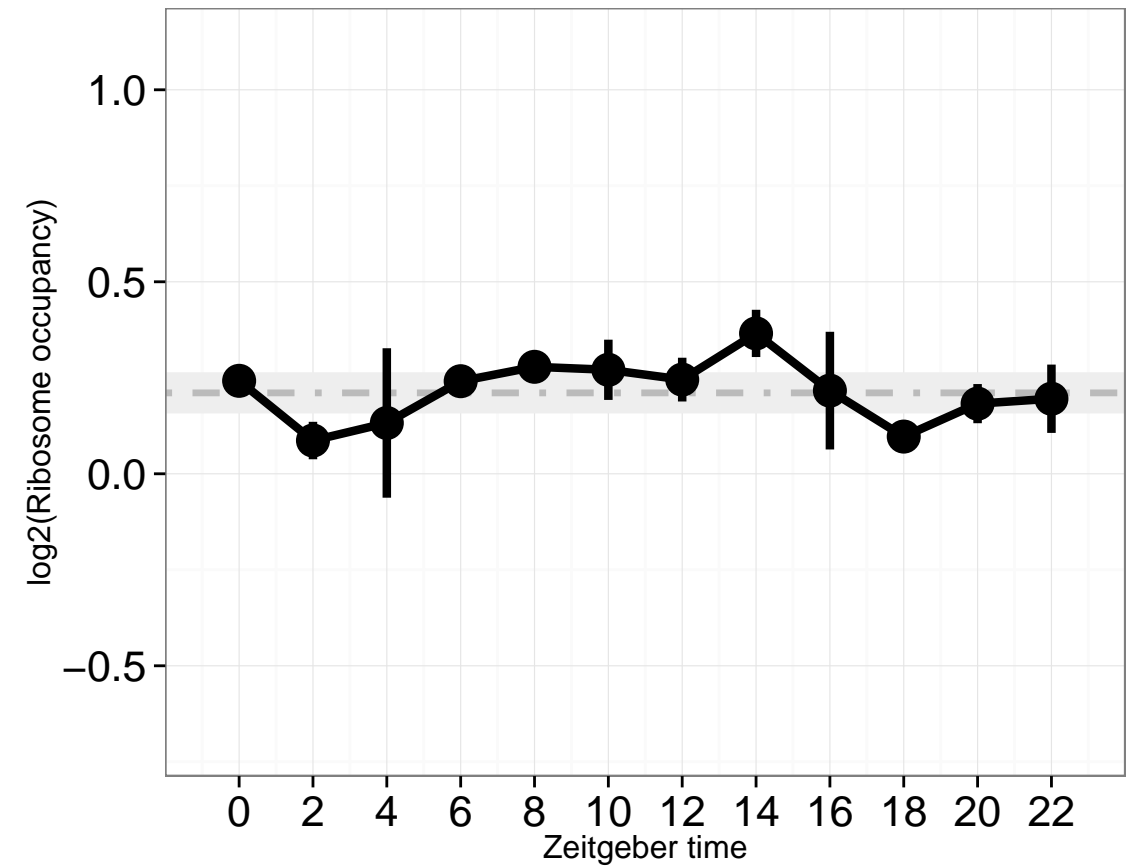

Supplement: Supplementary file 6414 [file 1]

# Itga7

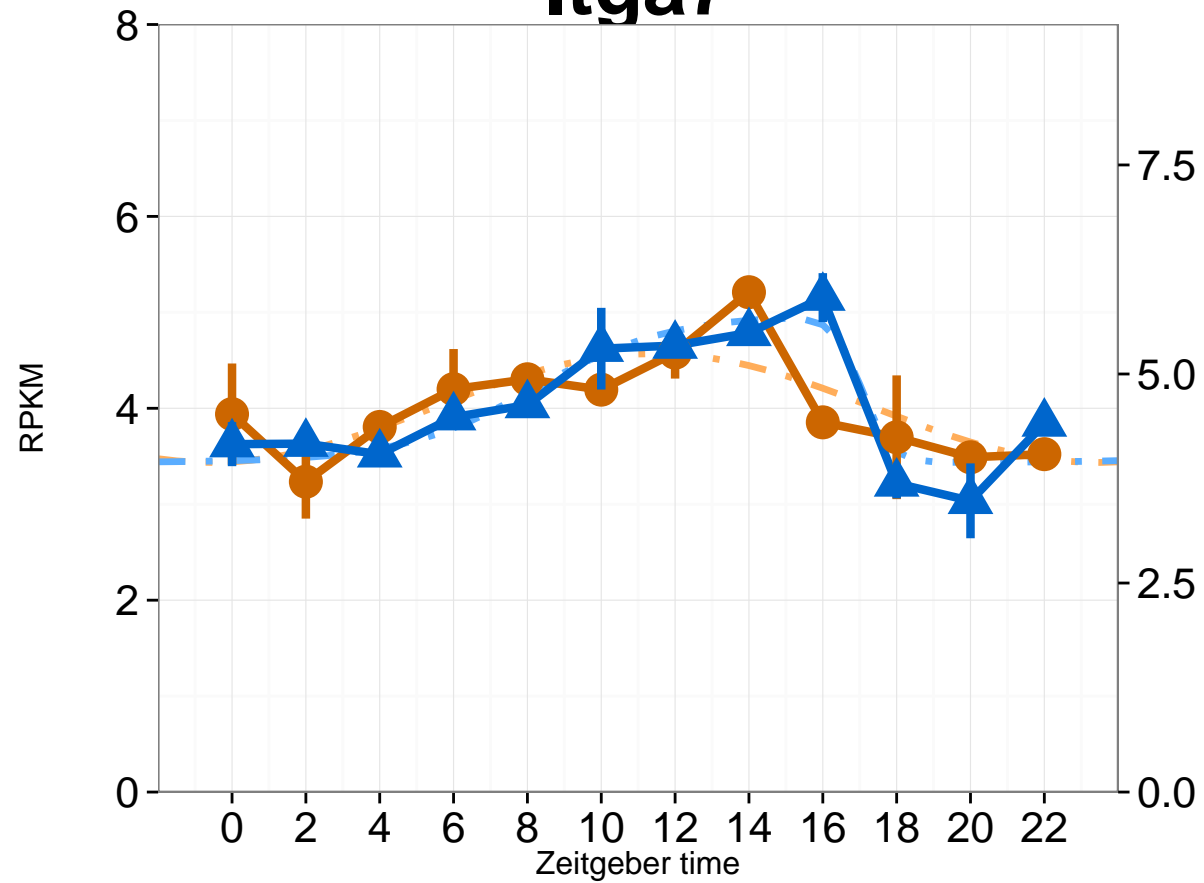

# Itga7

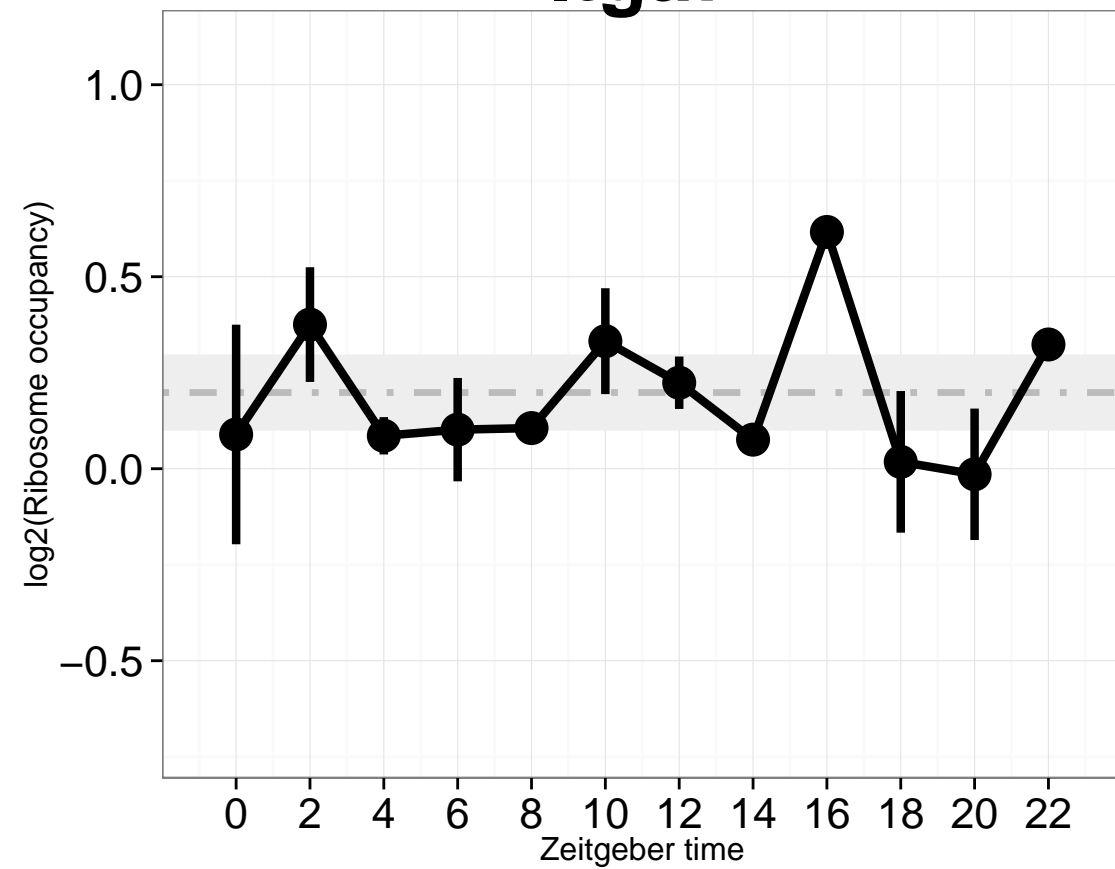

Supplement: Supplementary file 6415 [file 1]

**Ifngr1**

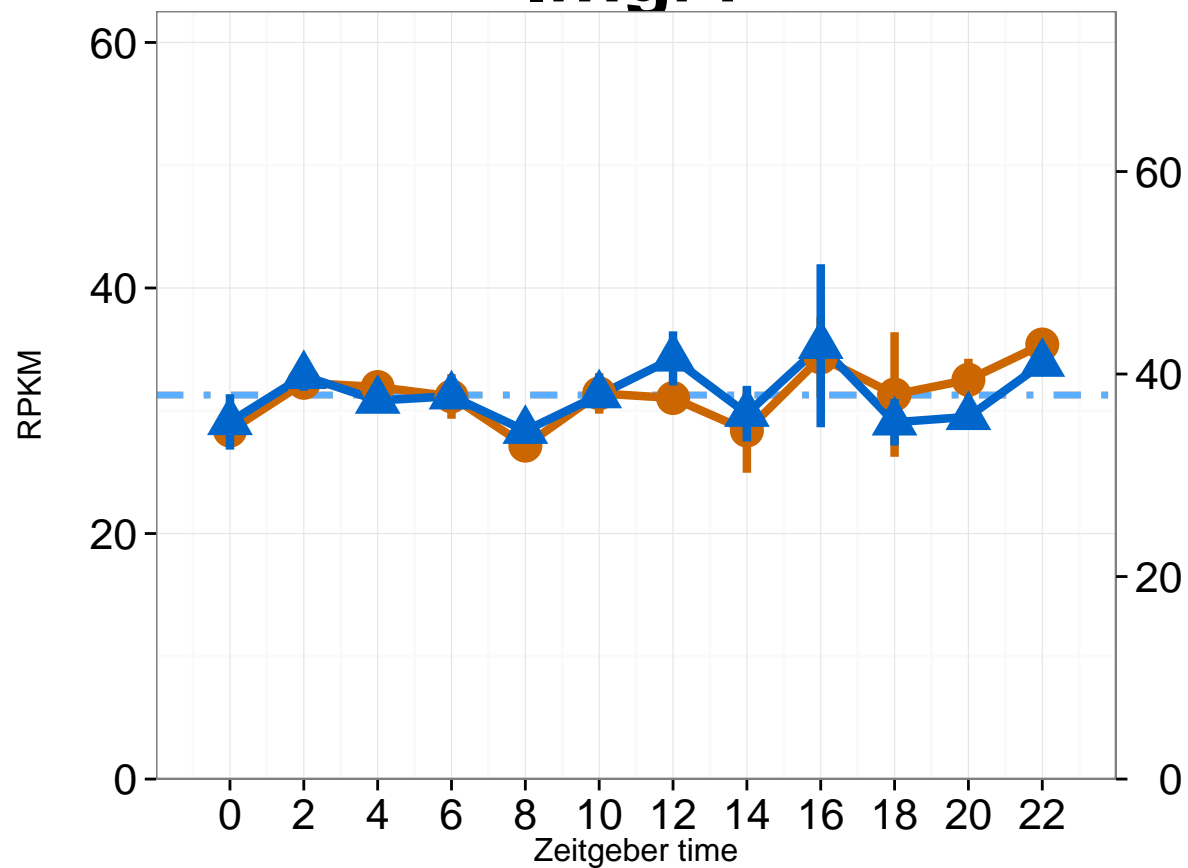

**Ifngr1**

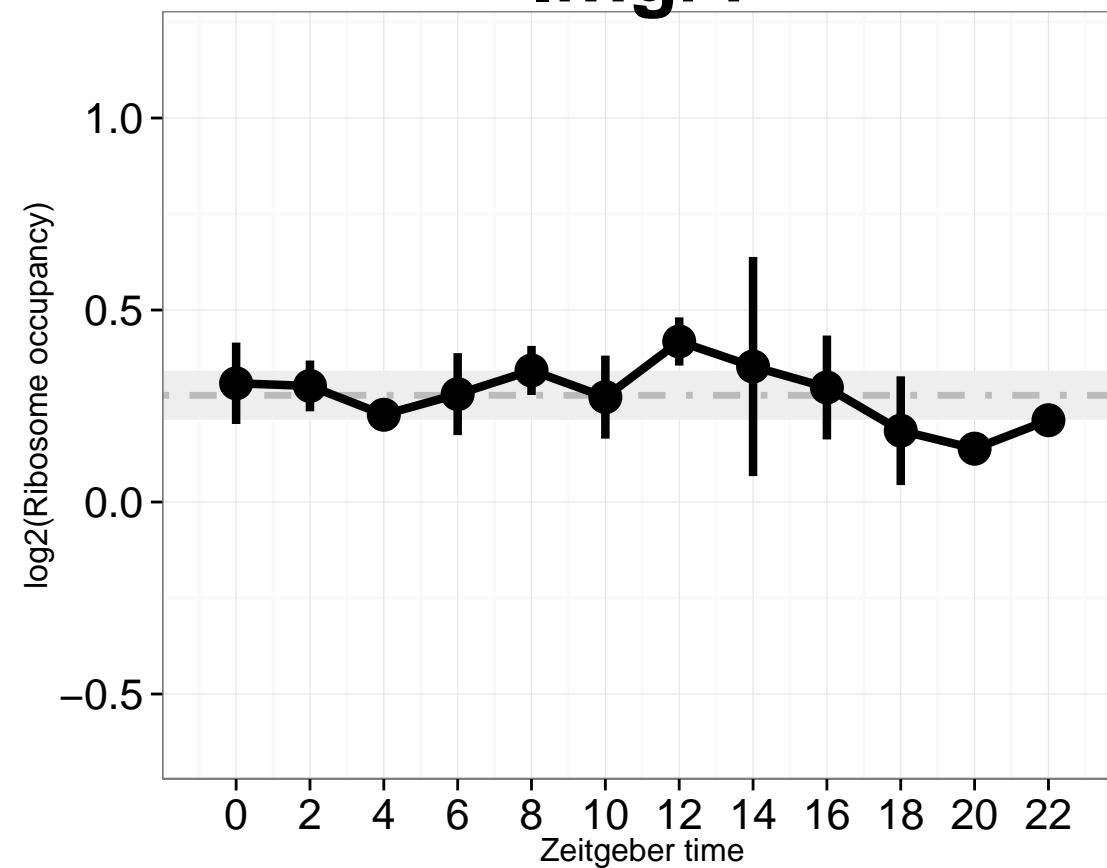

Supplement: Supplementary file 6416 [file 1]

# Ugt3a2

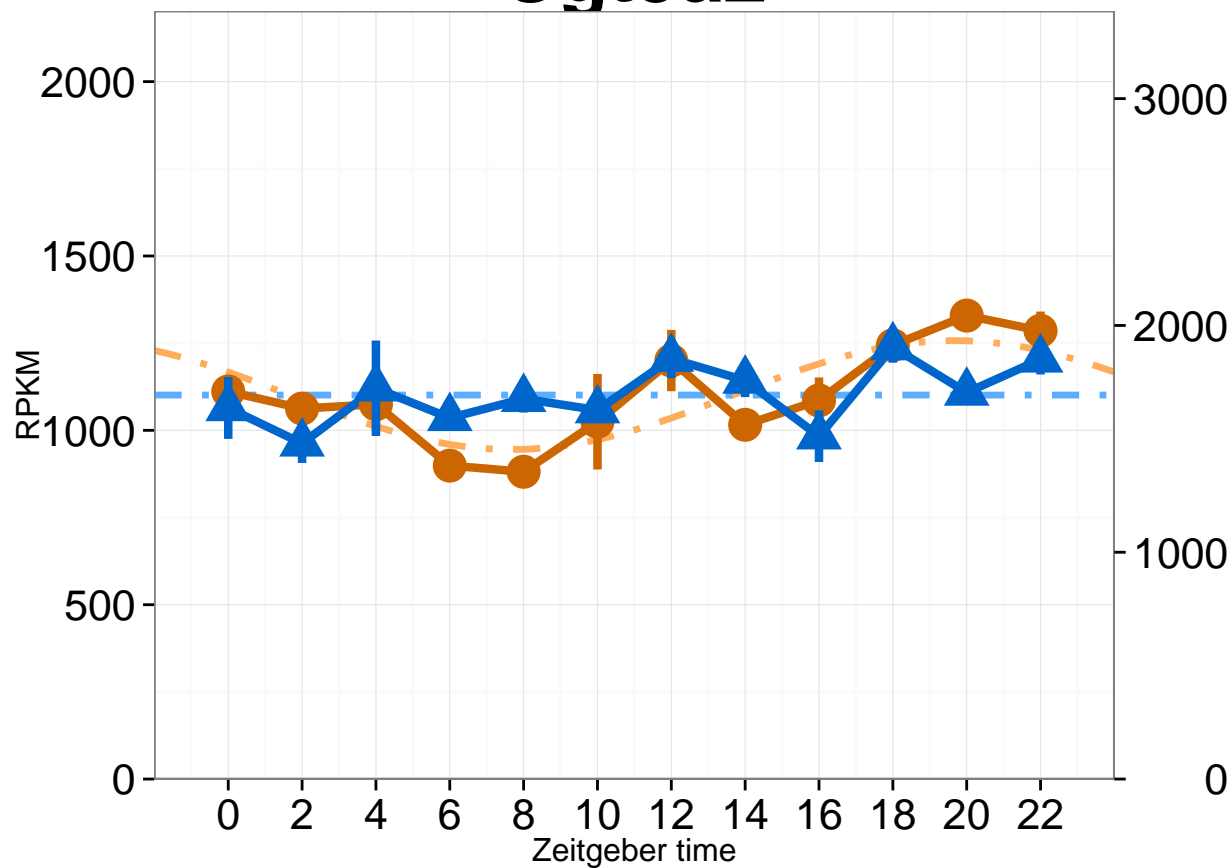

# Ugt3a2

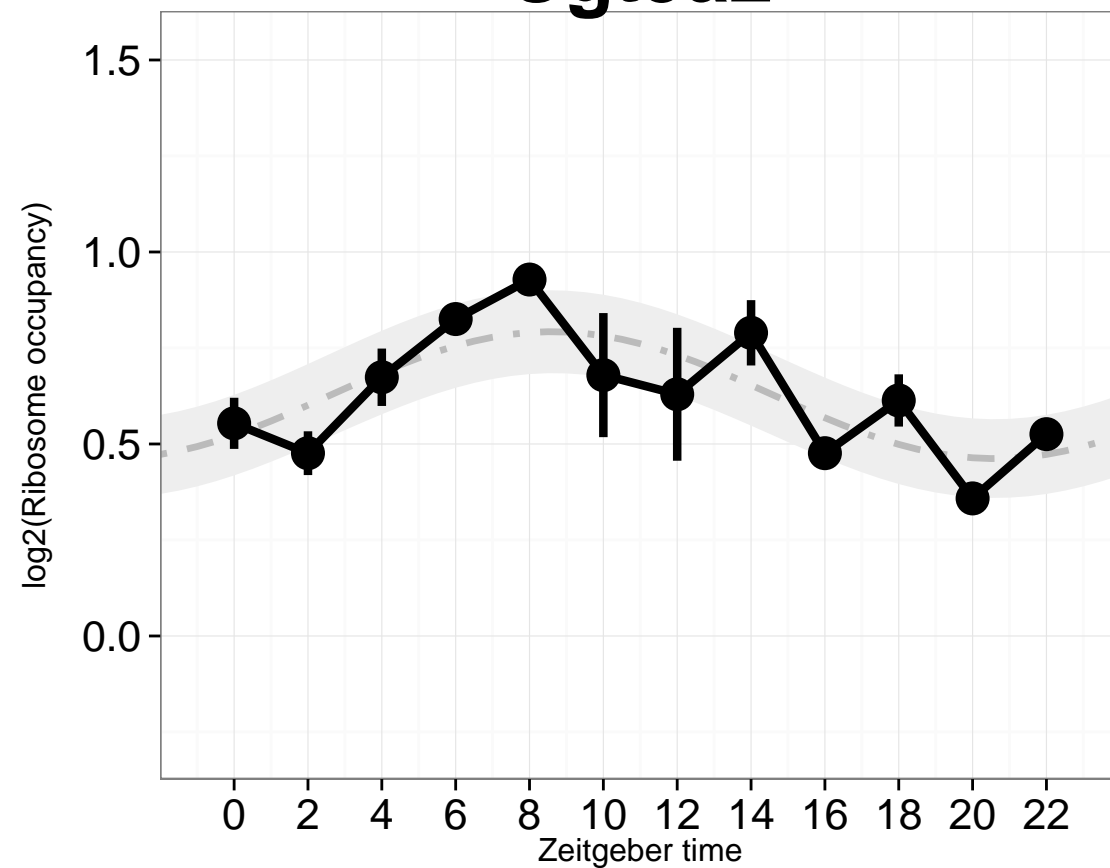

Supplement: Supplementary file 6417 [file 1]

# Serpina1d

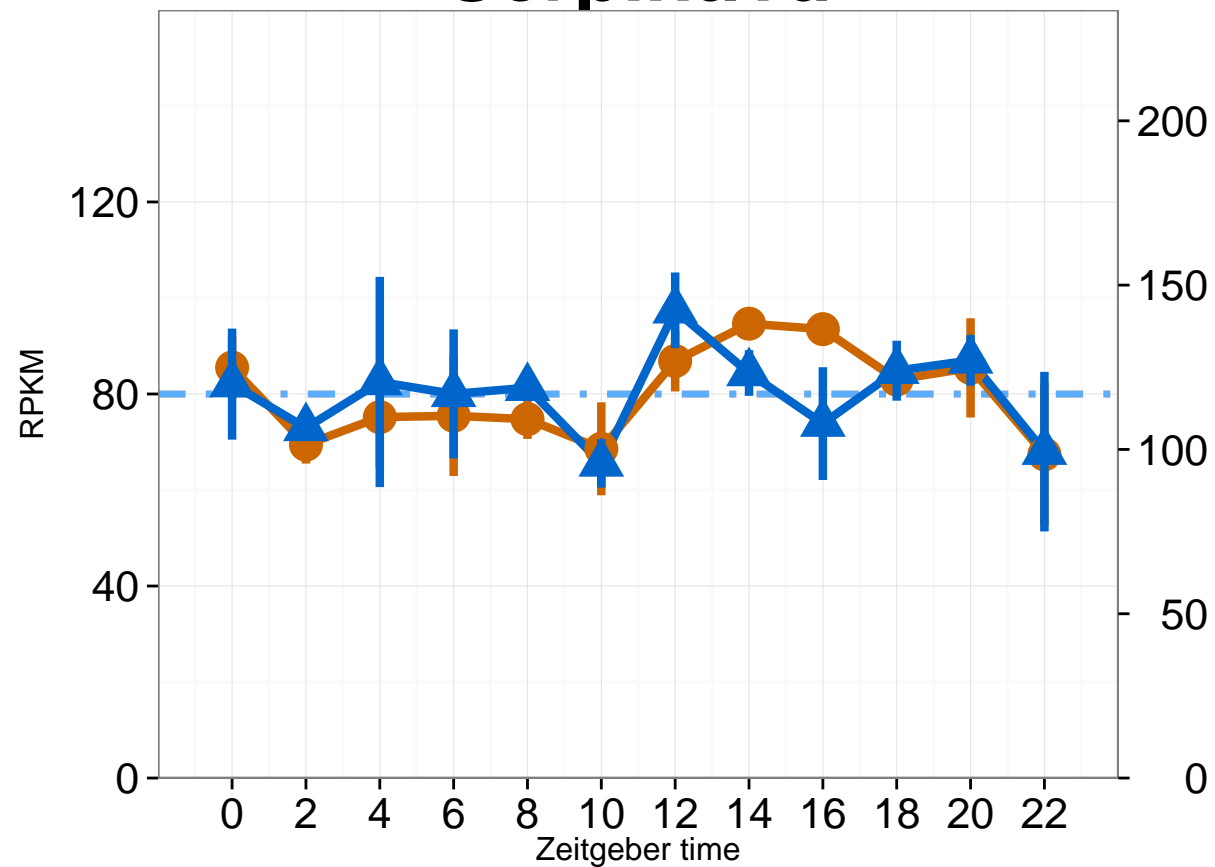

# Serpina1d

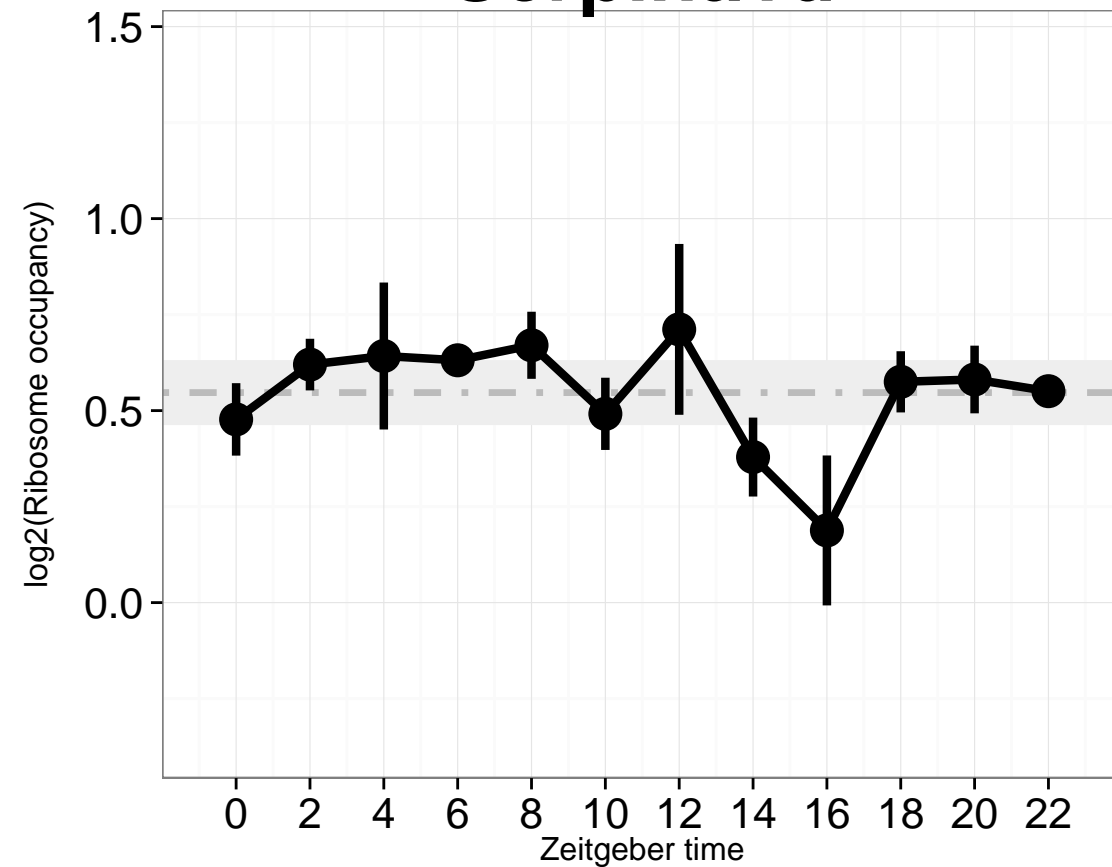

Supplement: Supplementary file 6418 [file 1]

## Mndal

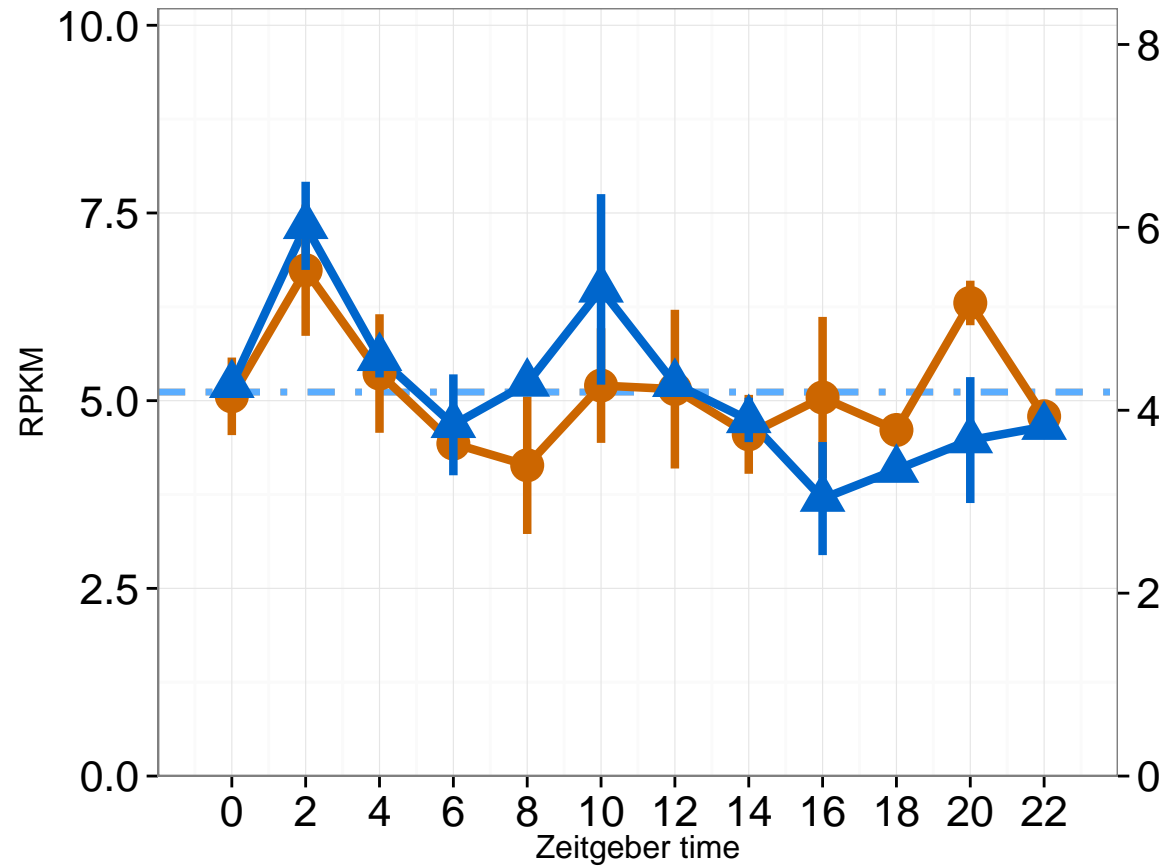

## Mndal

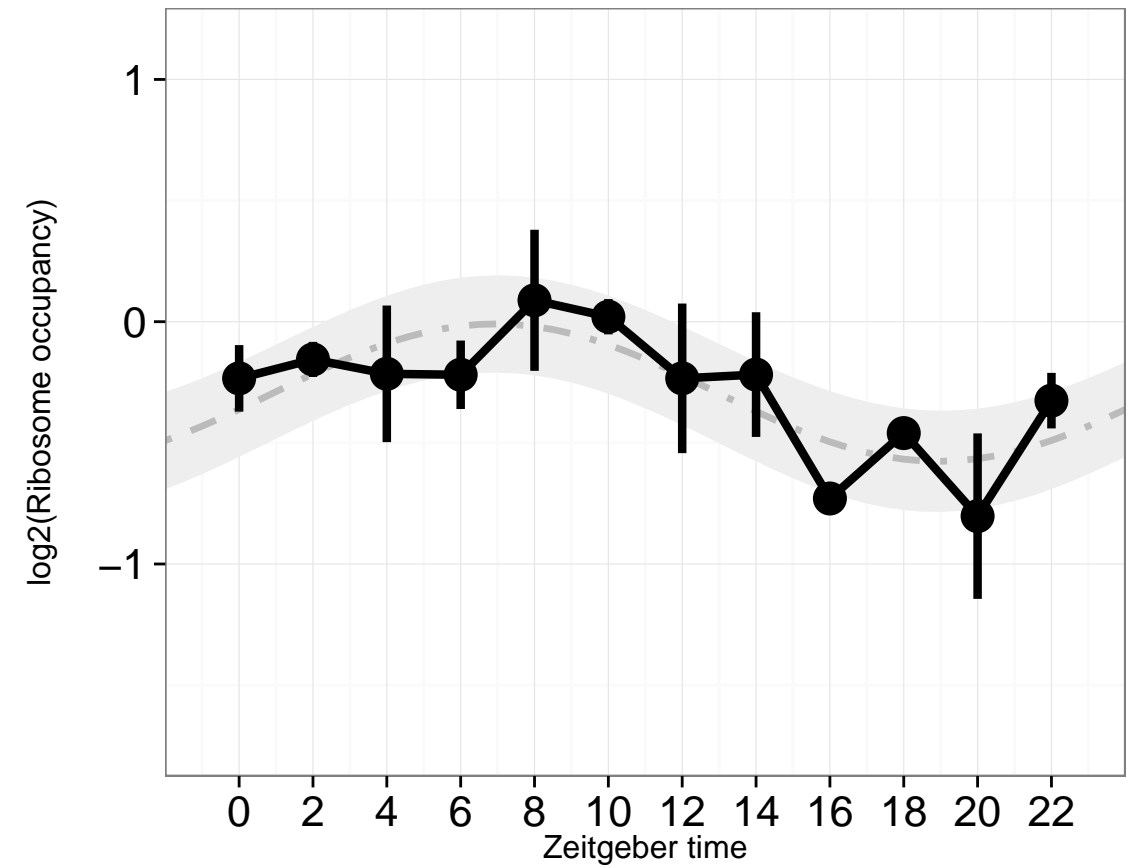

Supplement: Supplementary file 6419 [file 1]

## Slit2

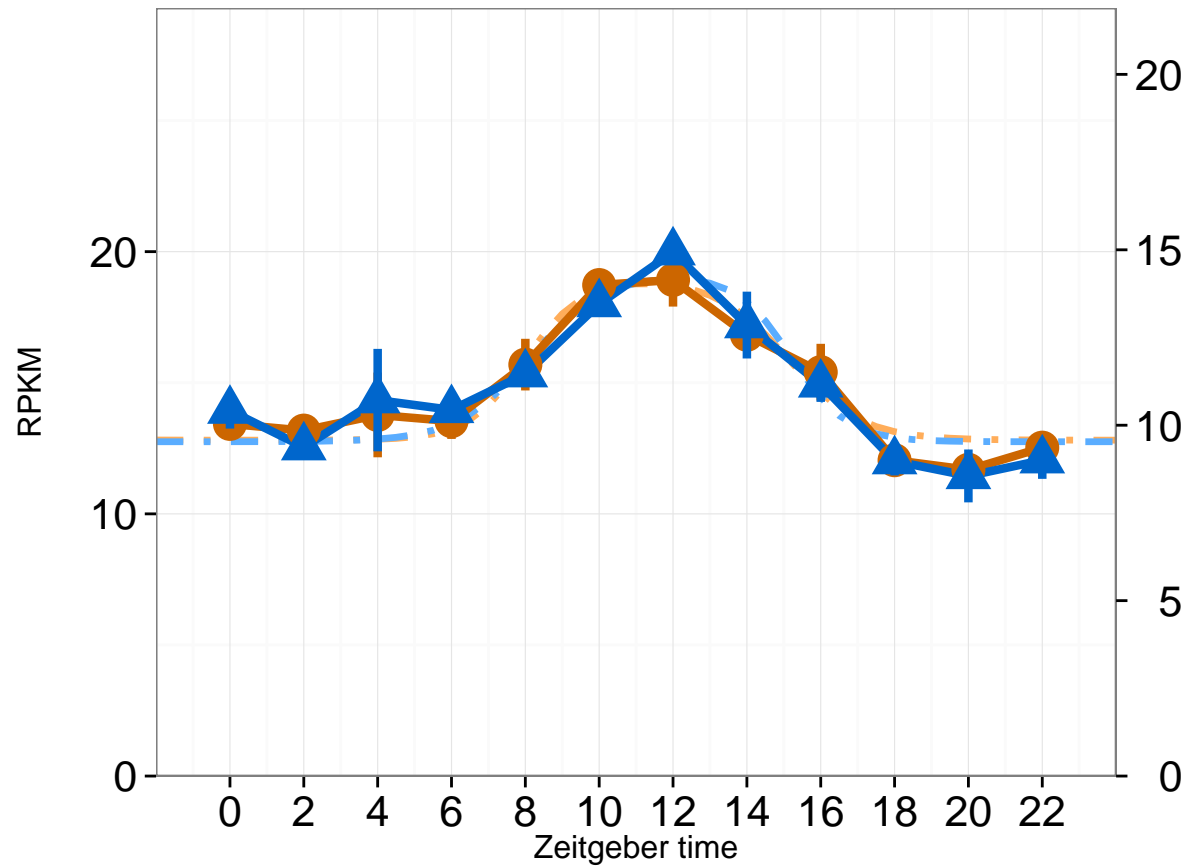

## Slit2

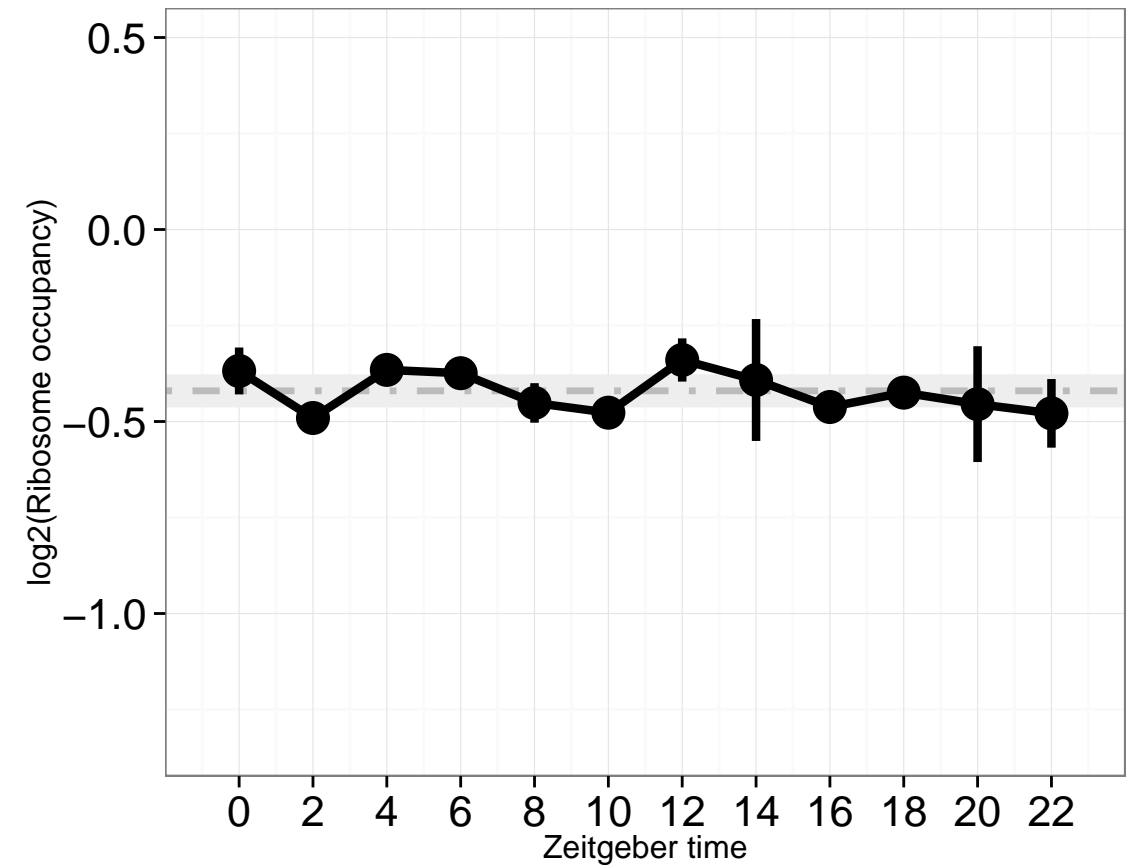

Supplement: Supplementary file 6420 [file 1]

## Lilra5

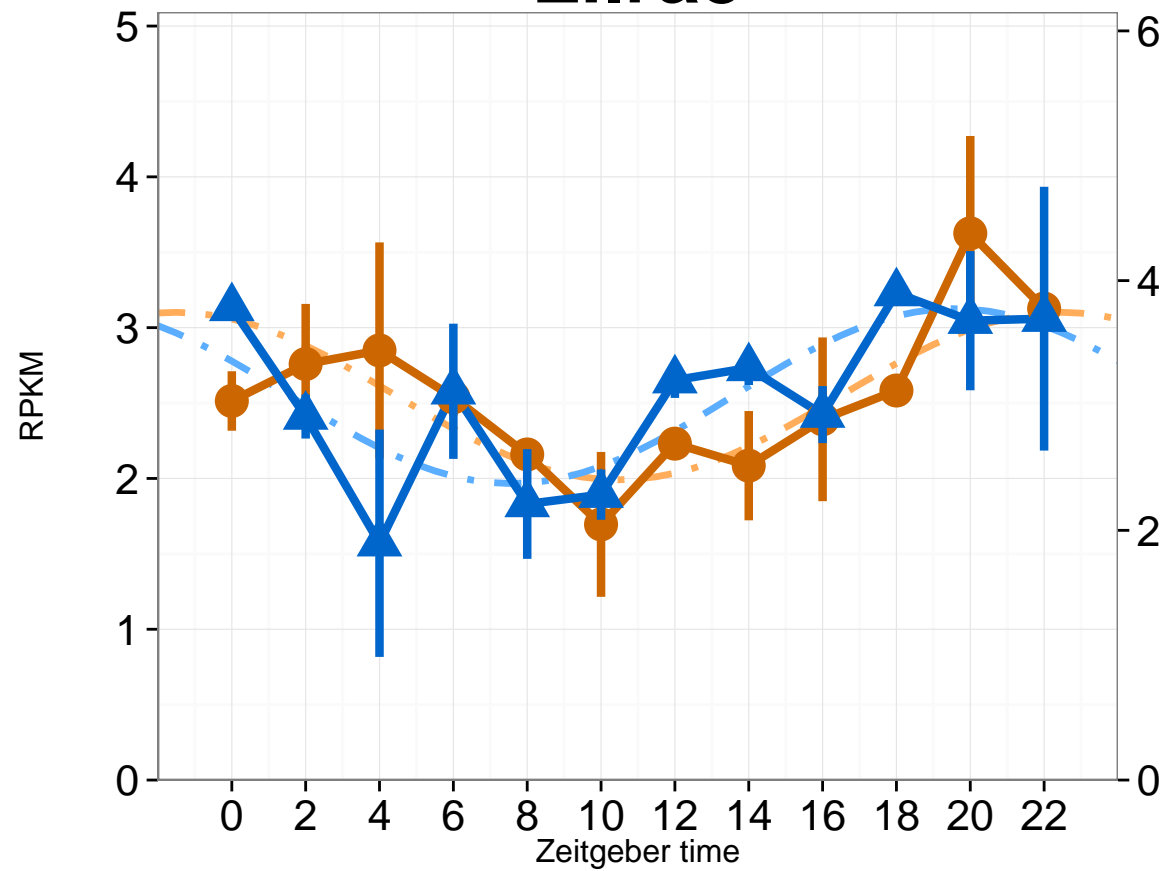

## Lilra5

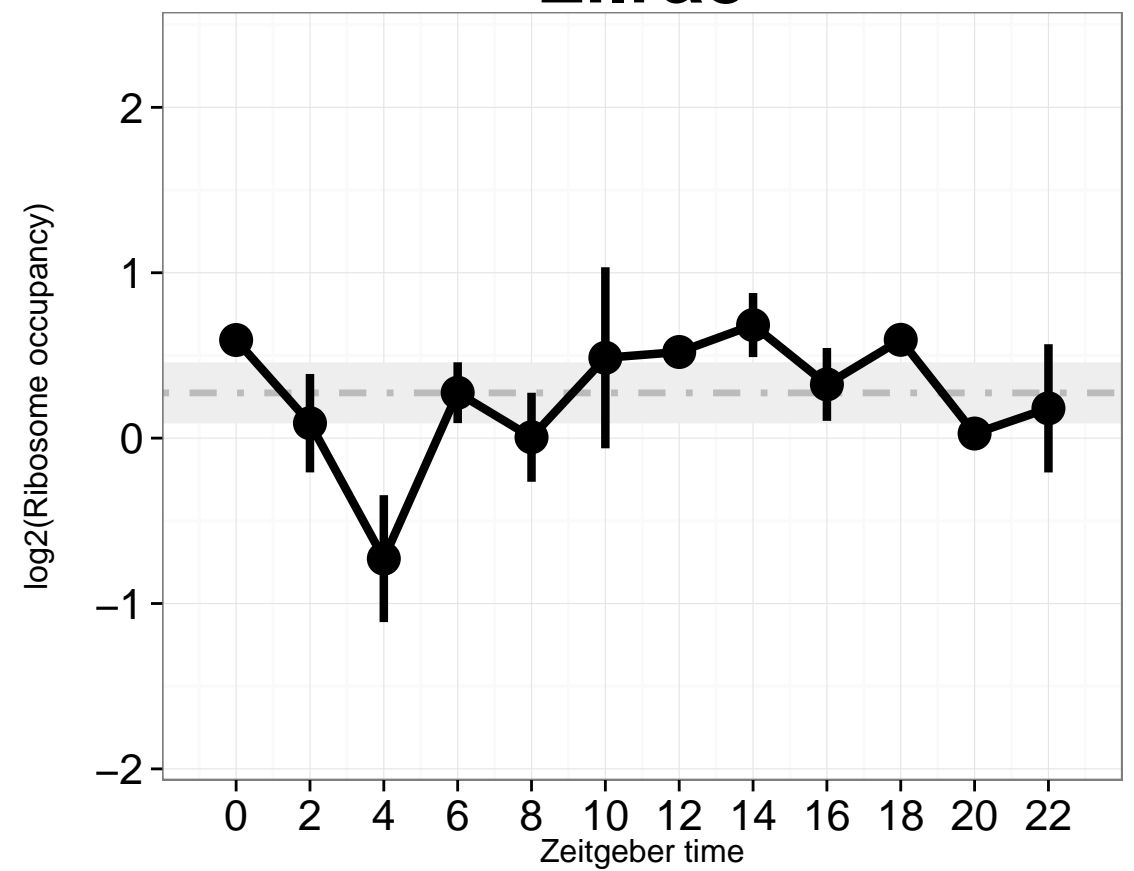

Supplement: Supplementary file 6421 [file 1]

## Timm44

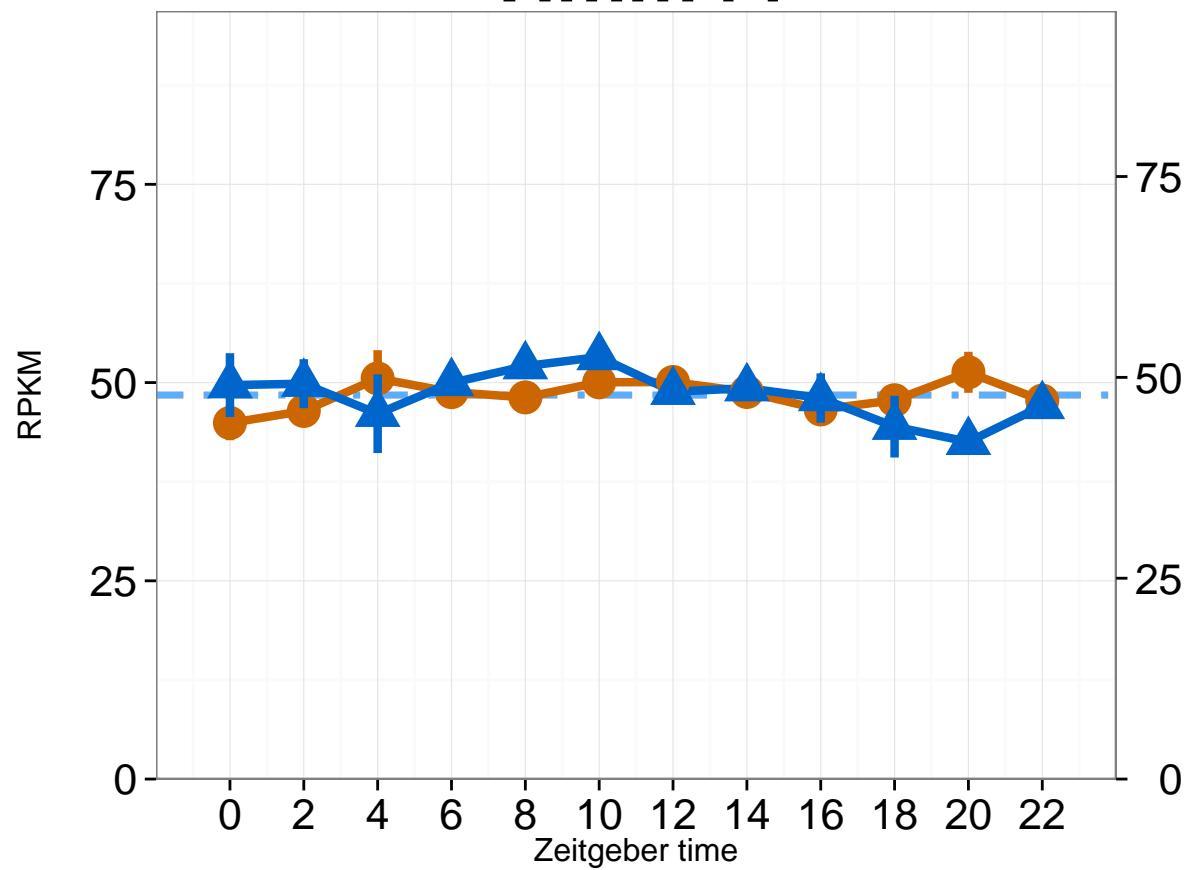

## Timm44

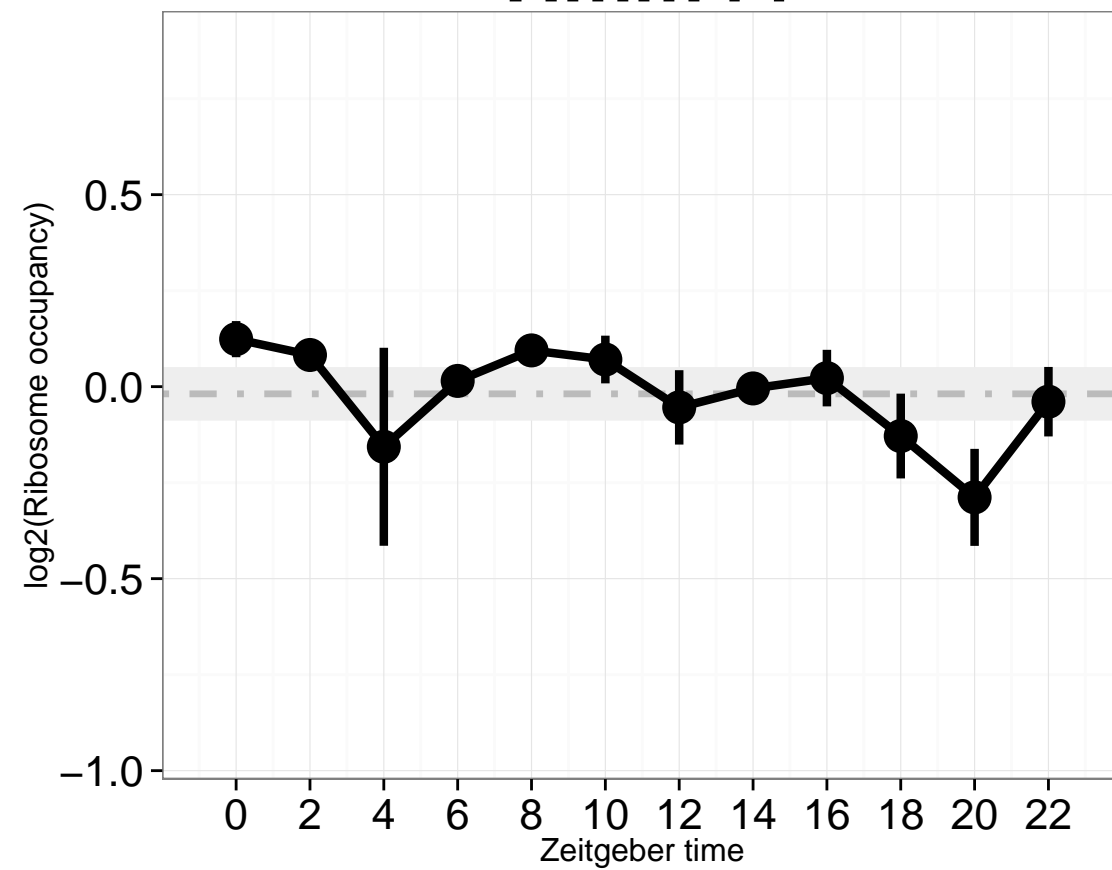

Supplement: Supplementary file 6422 [file 1]
