# Supplementary material (part 65 of 133)
Source: publisher figshare collection journal article supplement (https://springernature.figshare.com/articles/dataset/_/4903193)

## Hykk

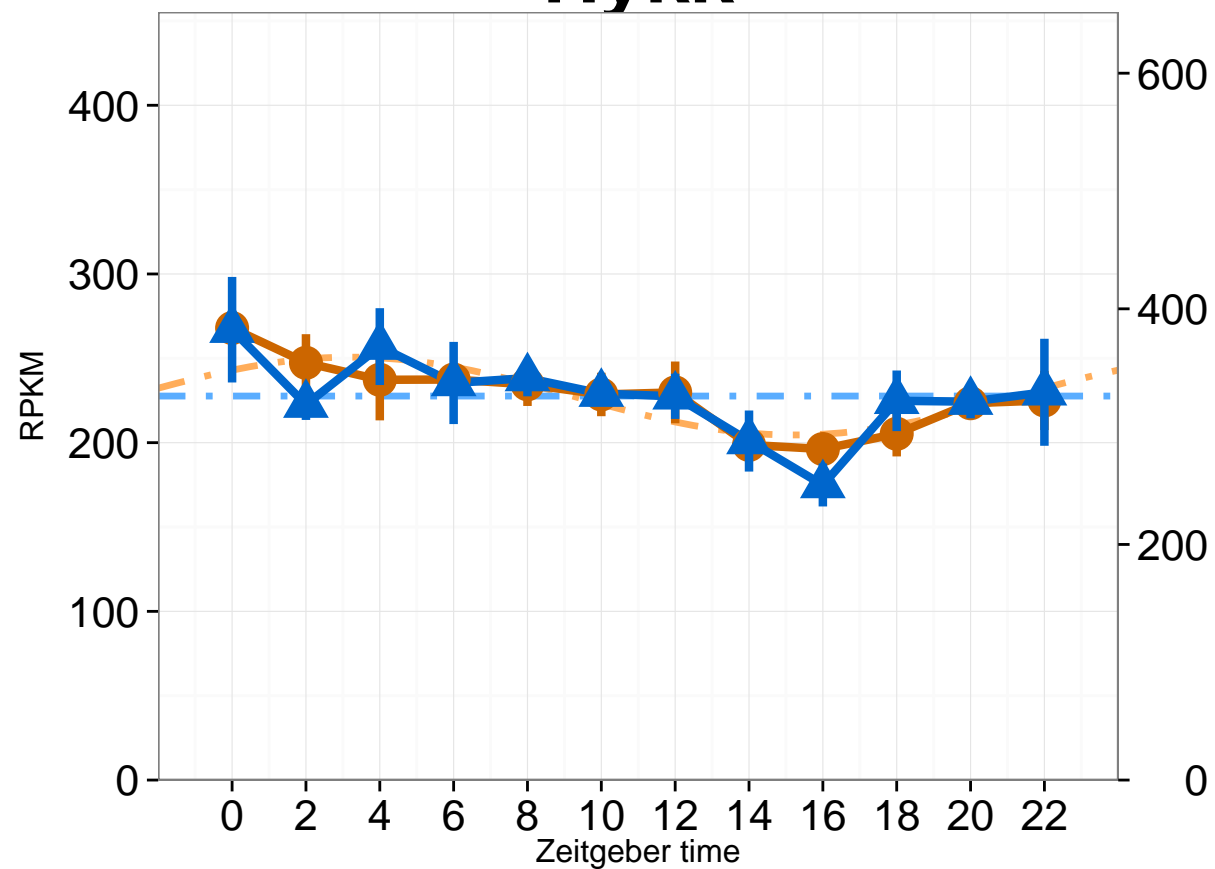

## Hykk

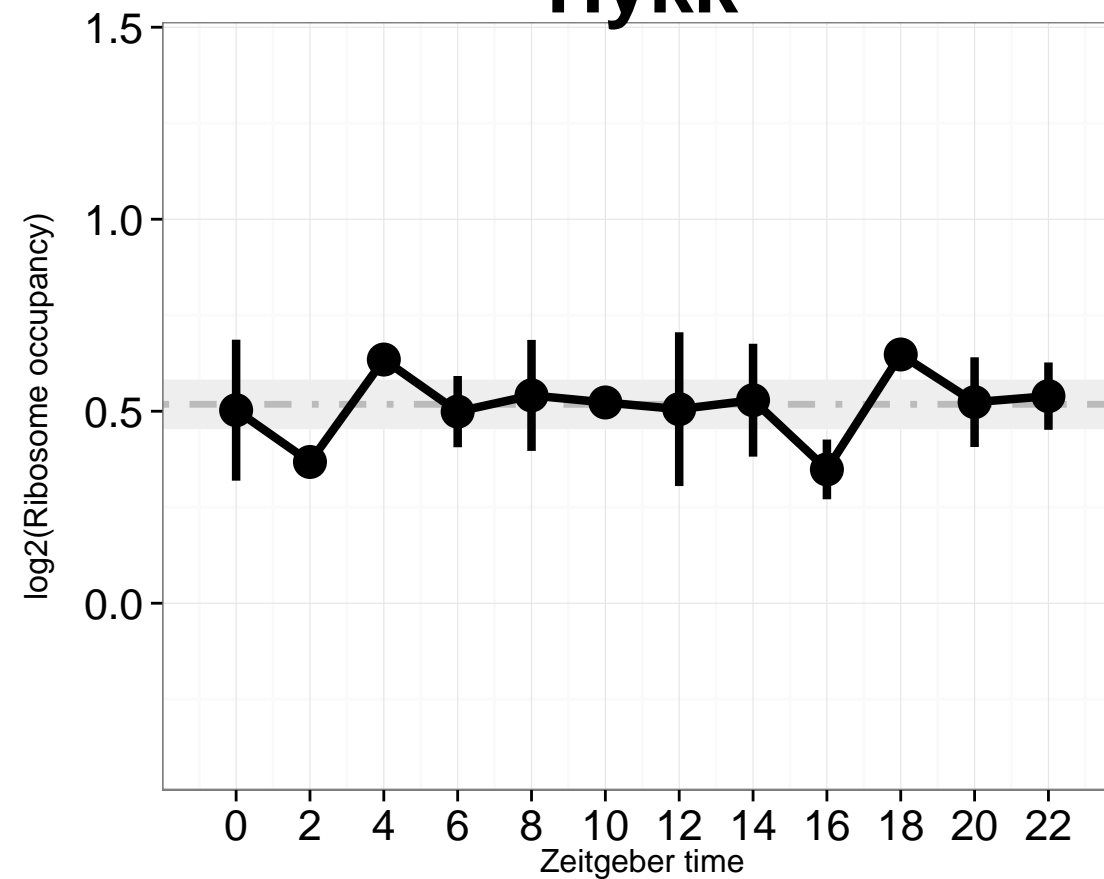

Supplement: Supplementary file 6423 [file 1]

## Nfil3

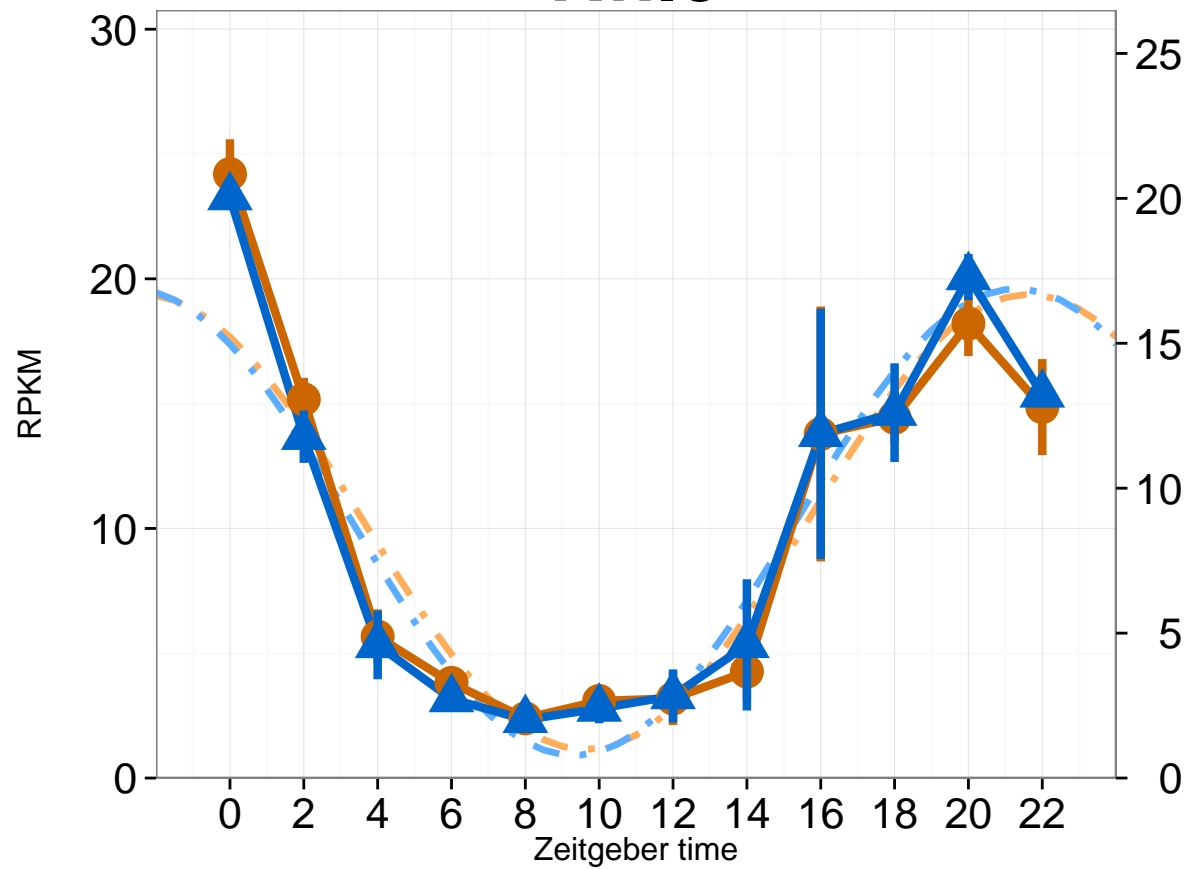

## Nfil3

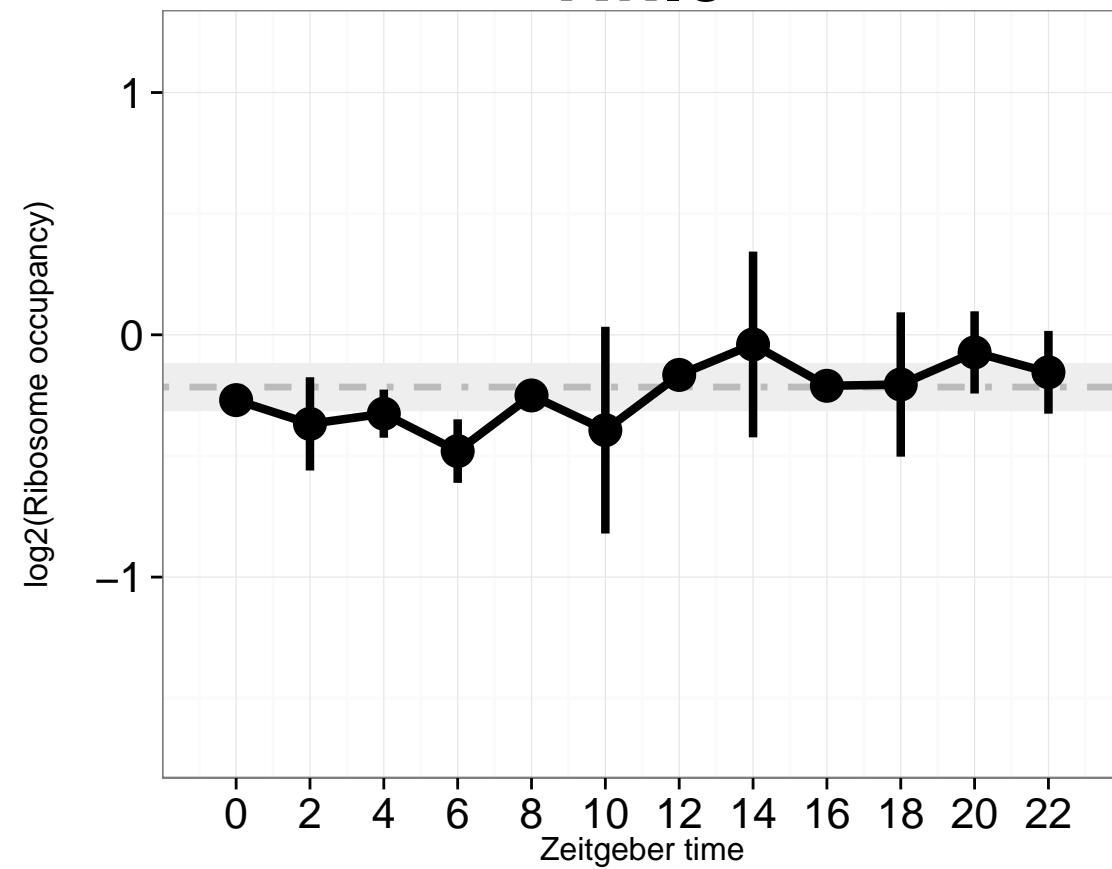

Supplement: Supplementary file 6424 [file 1]

# Serpinh1

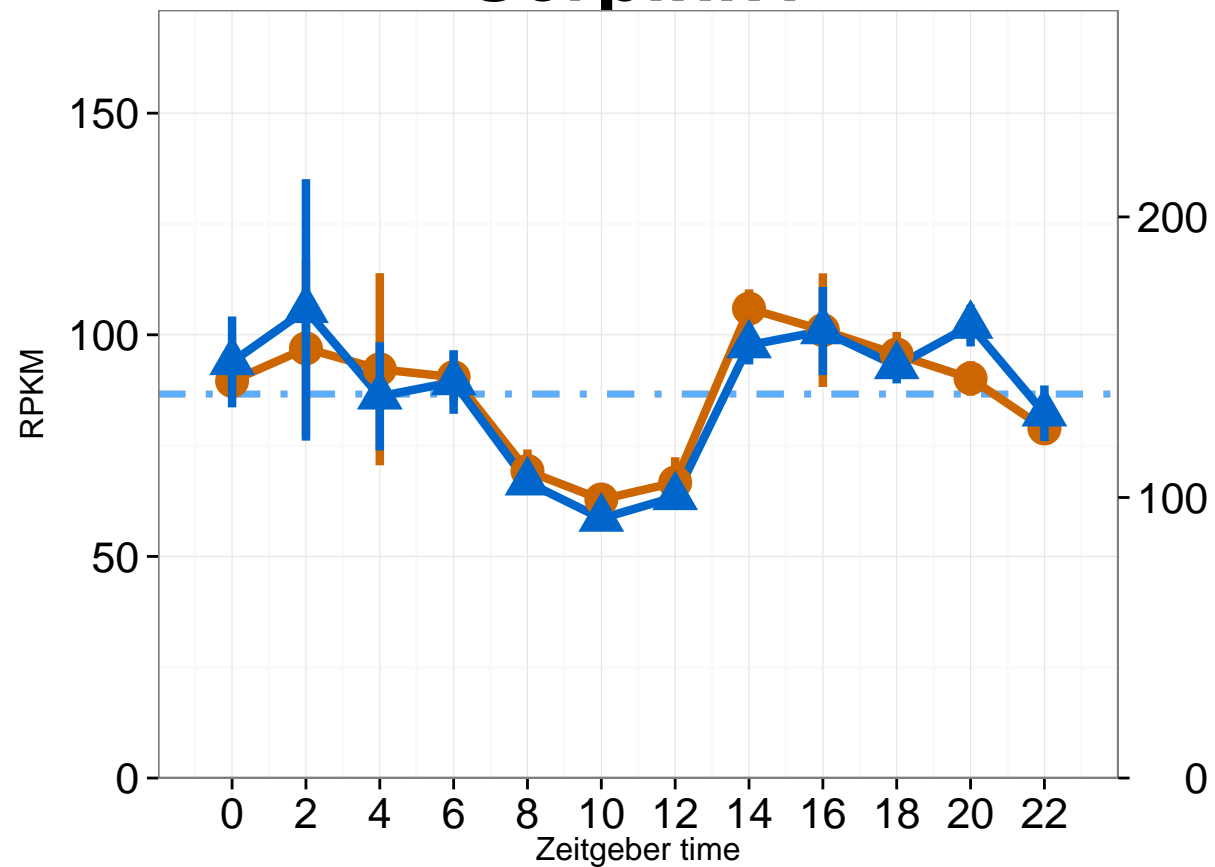

# Serpinh1

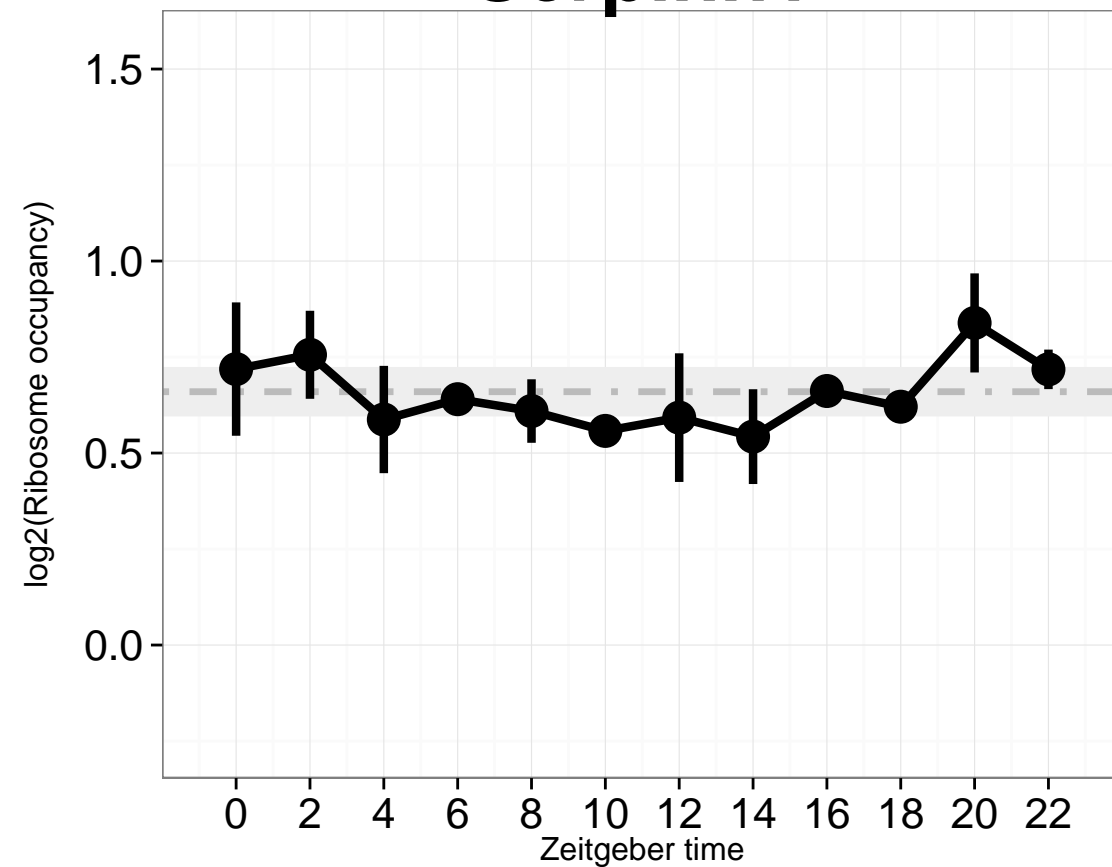

Supplement: Supplementary file 6425 [file 1]

# Abca7

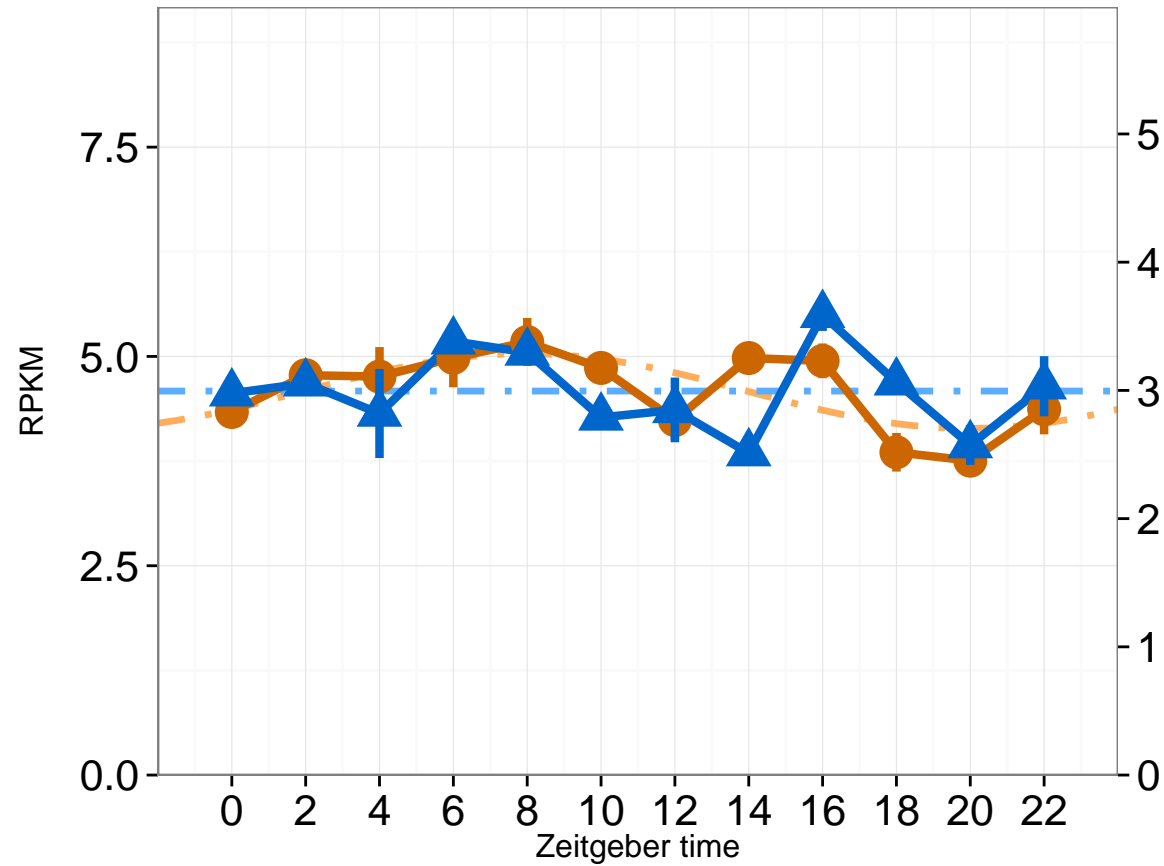

# Abca7

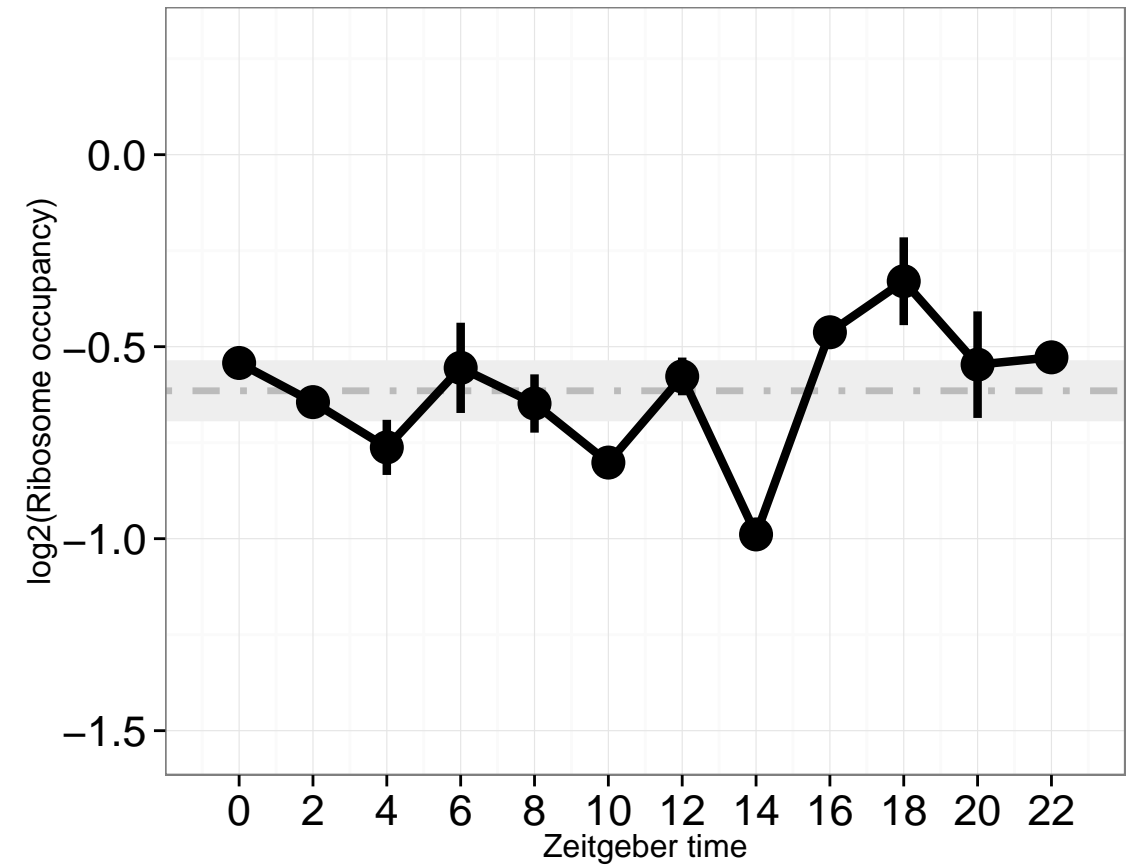

Supplement: Supplementary file 6426 [file 1]

## Ciz1

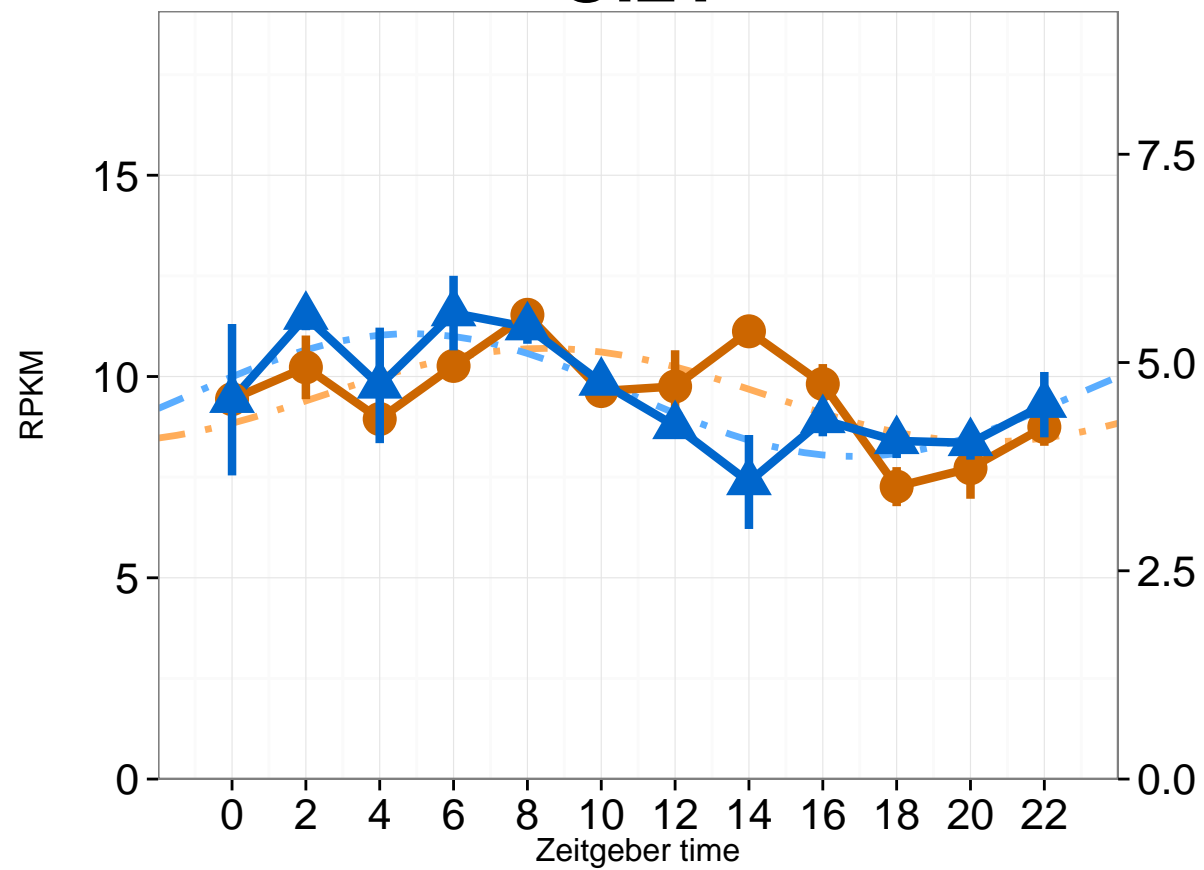

## Ciz1

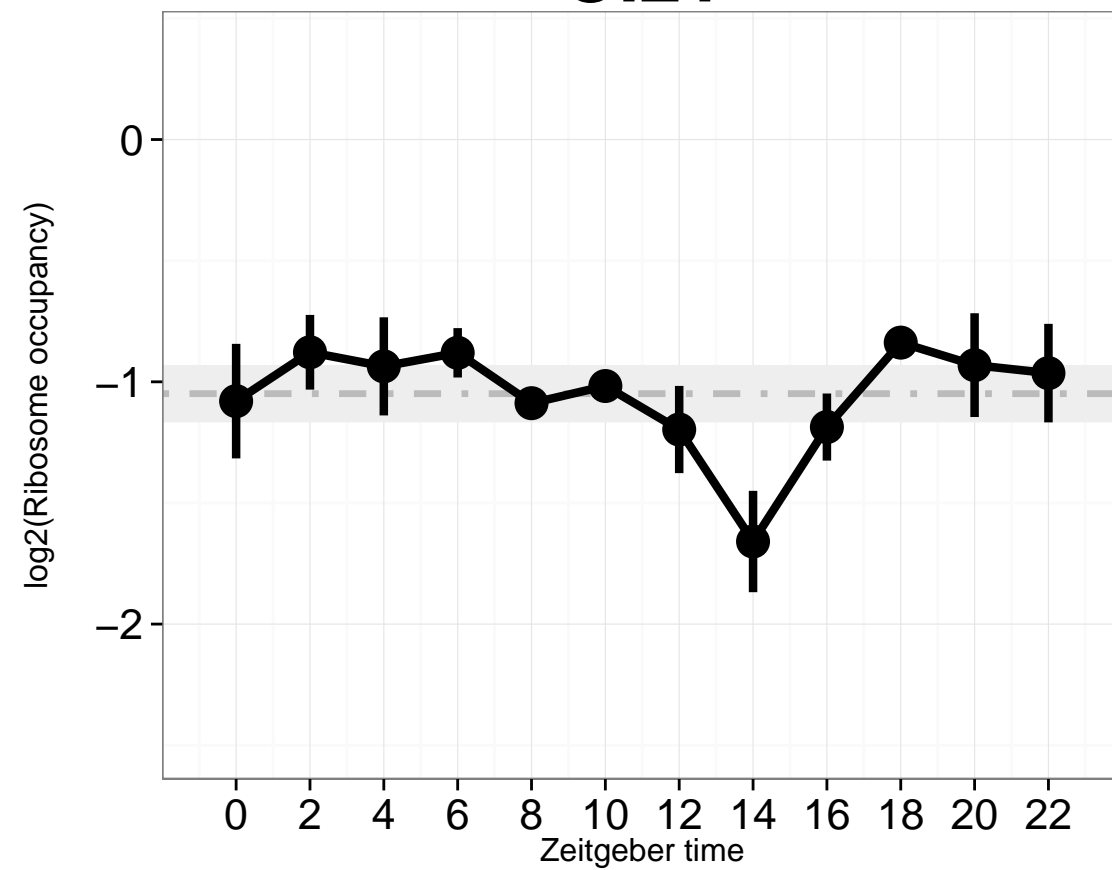

Supplement: Supplementary file 6427 [file 1]

## Nek4

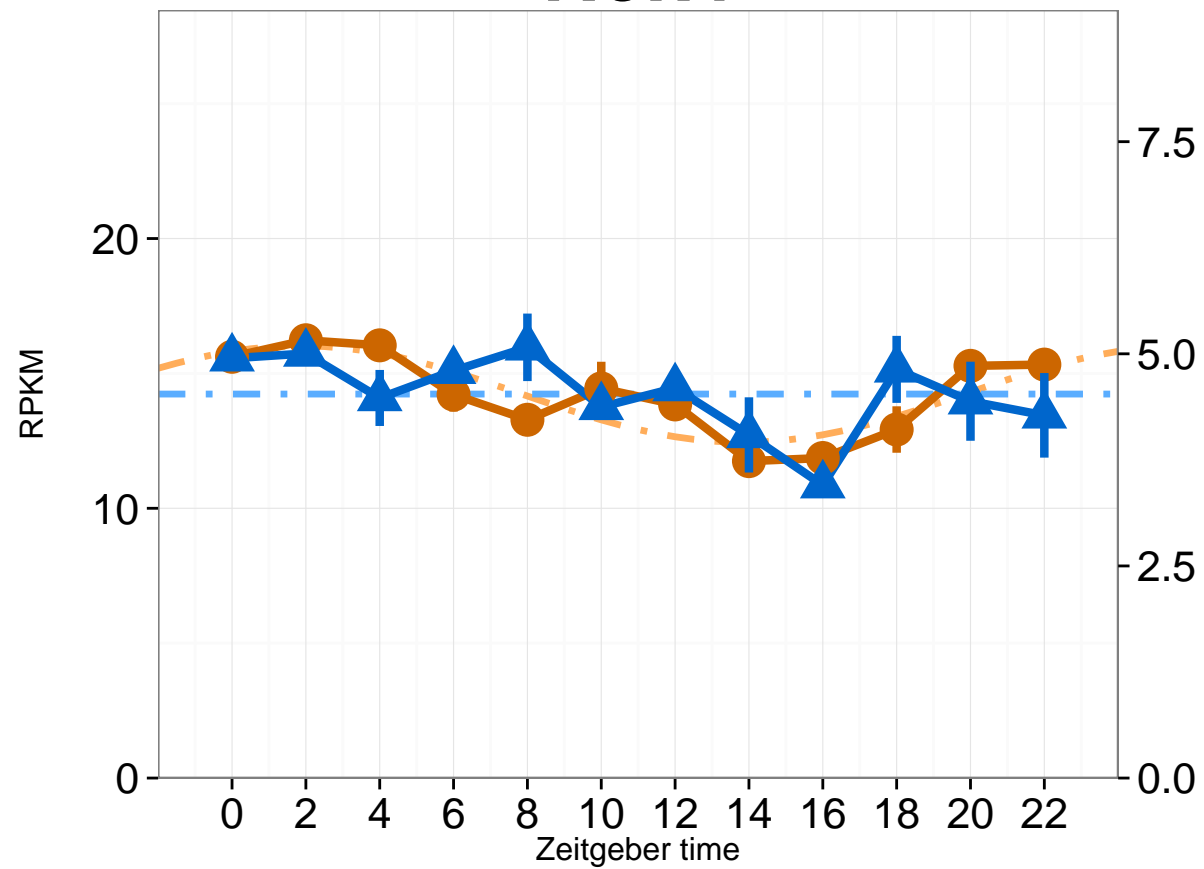

## Nek4

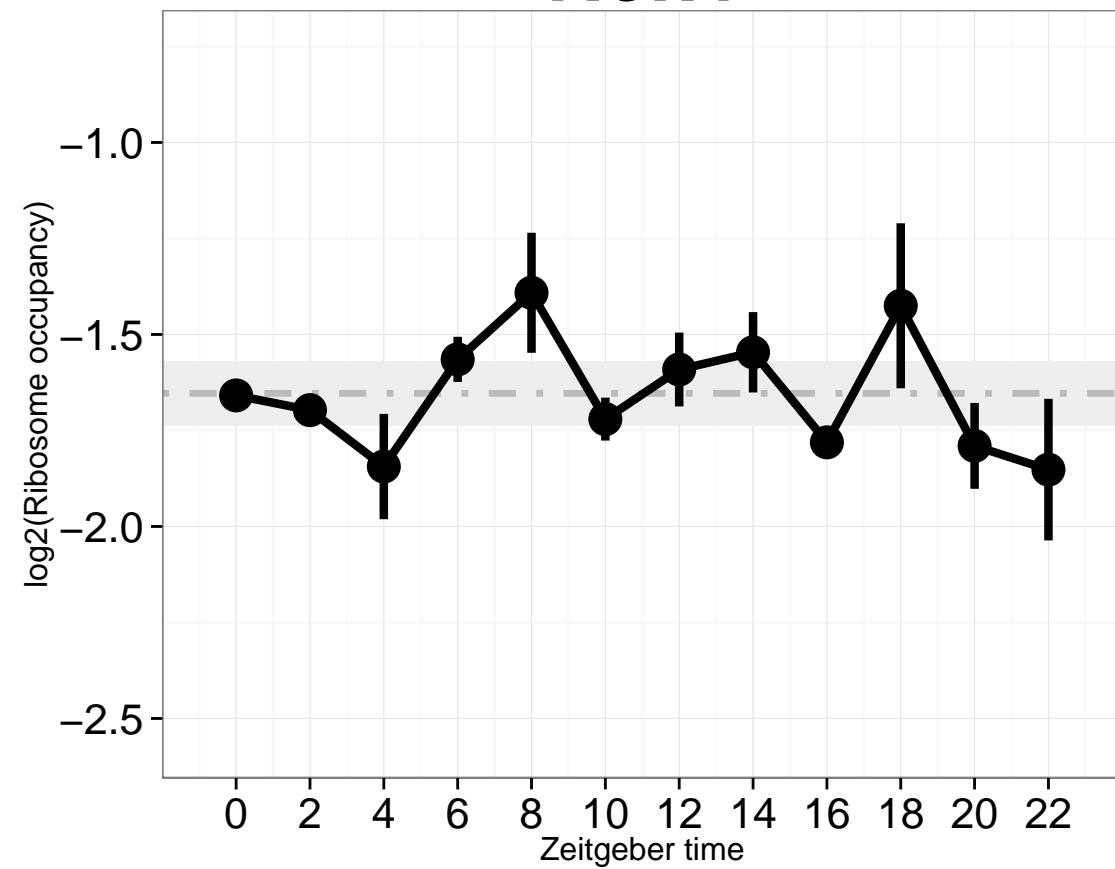

Supplement: Supplementary file 6428 [file 1]

# Sim1

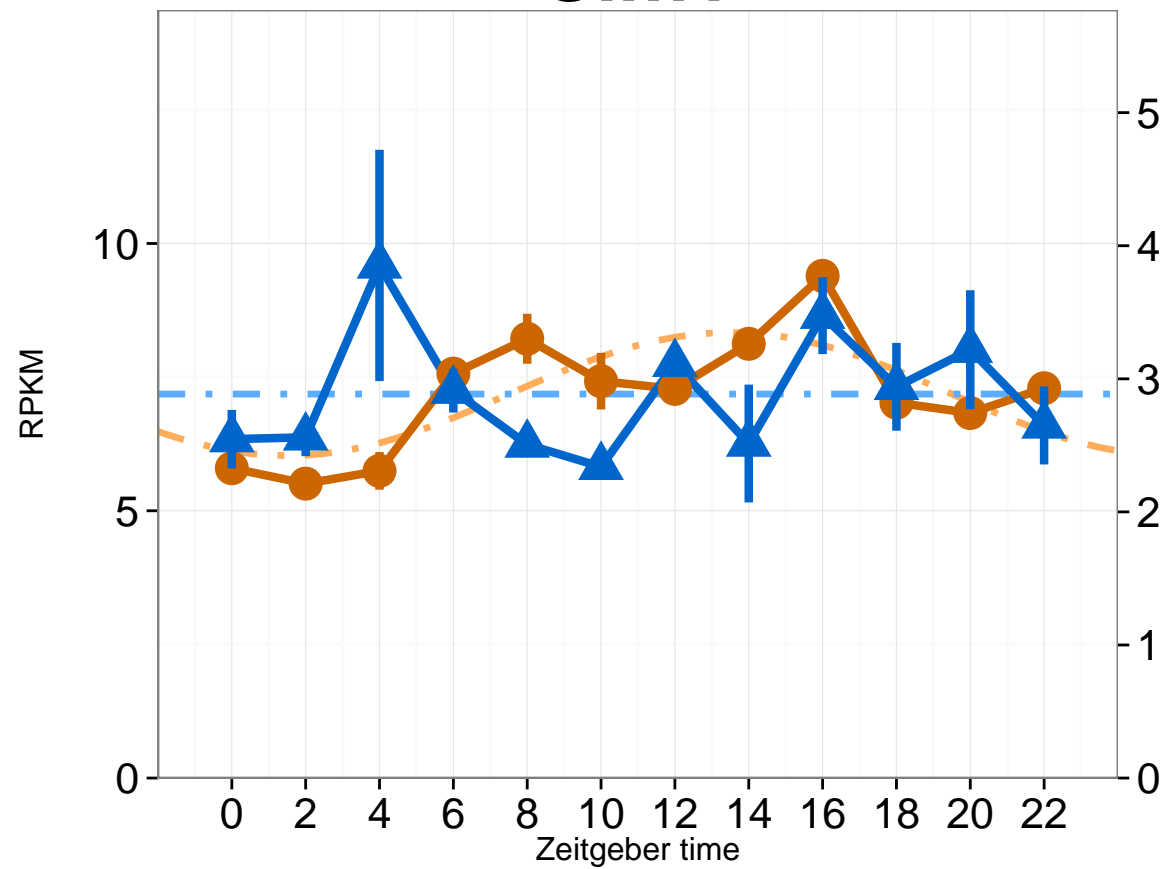

# Sim1

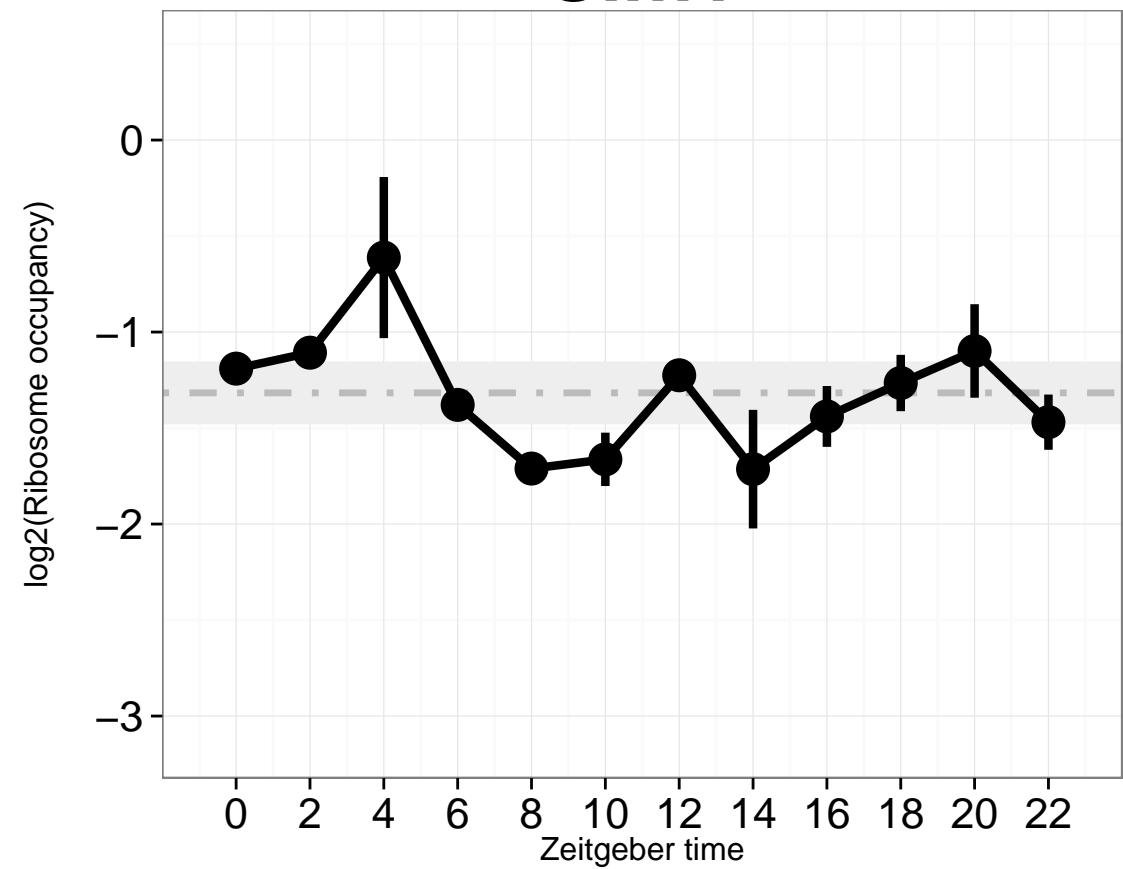

Supplement: Supplementary file 6429 [file 1]

# Atp11a

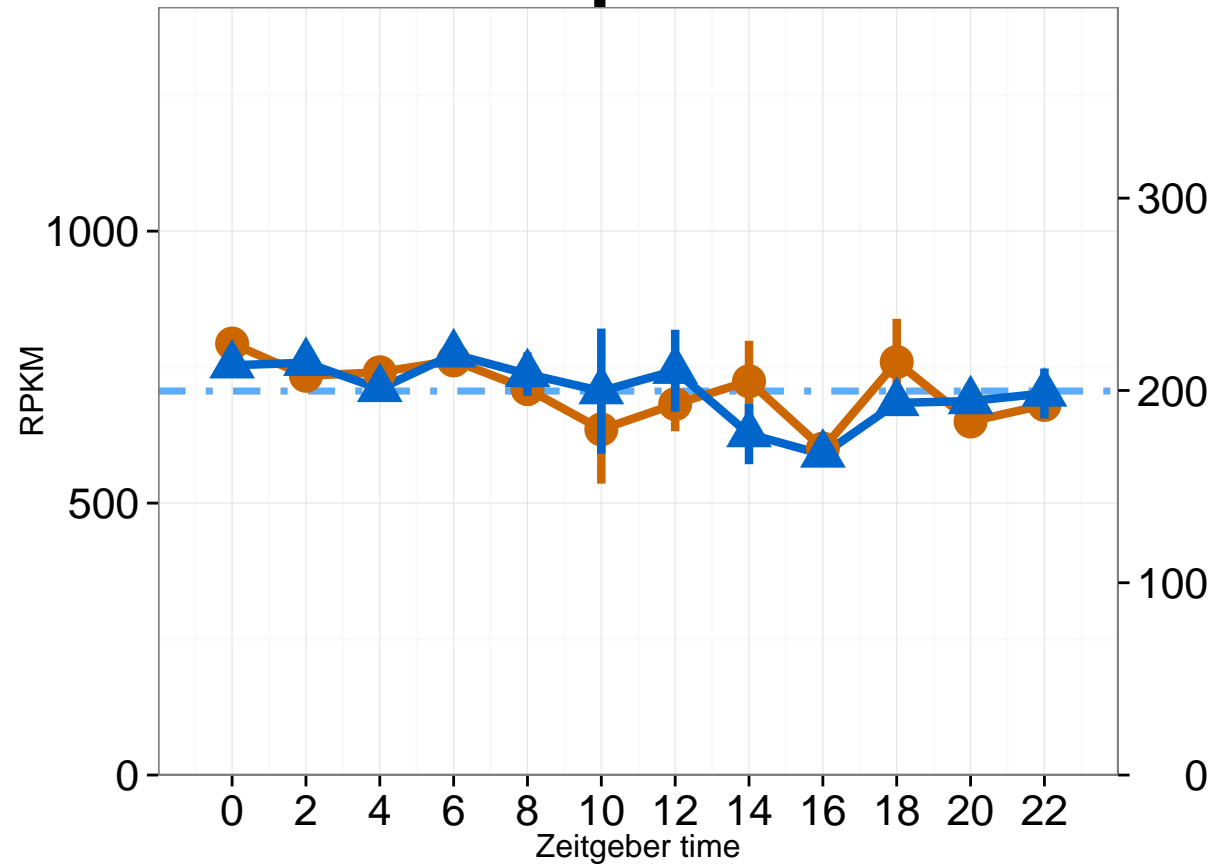

# Atp11a

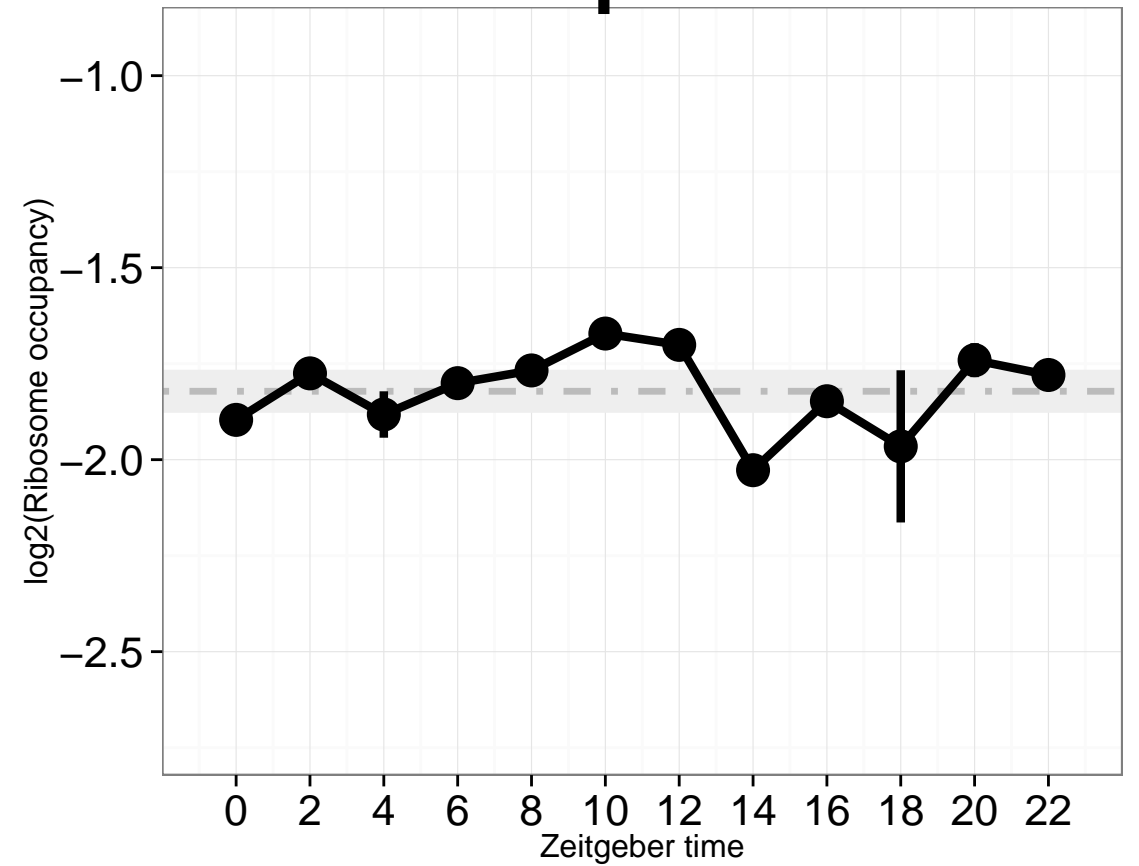

Supplement: Supplementary file 6430 [file 1]

# Zfp385b

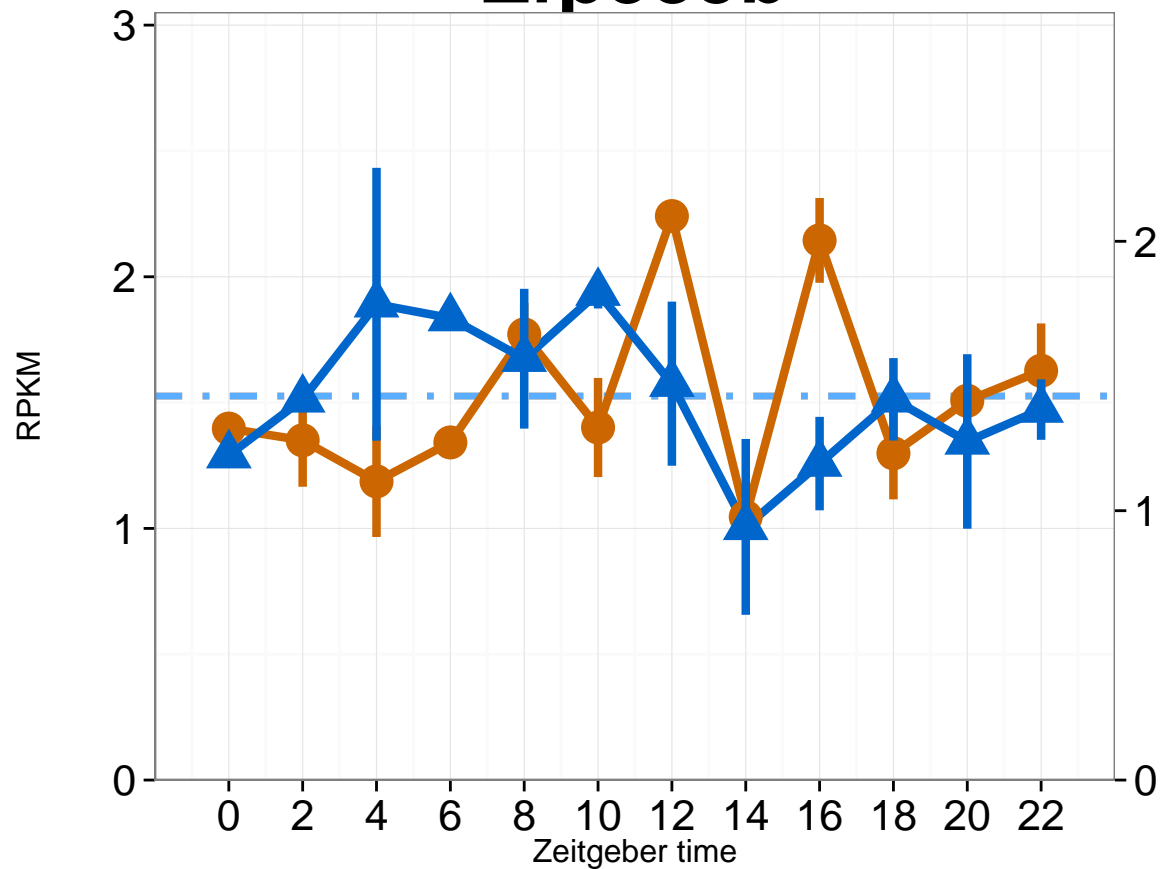

# Zfp385b

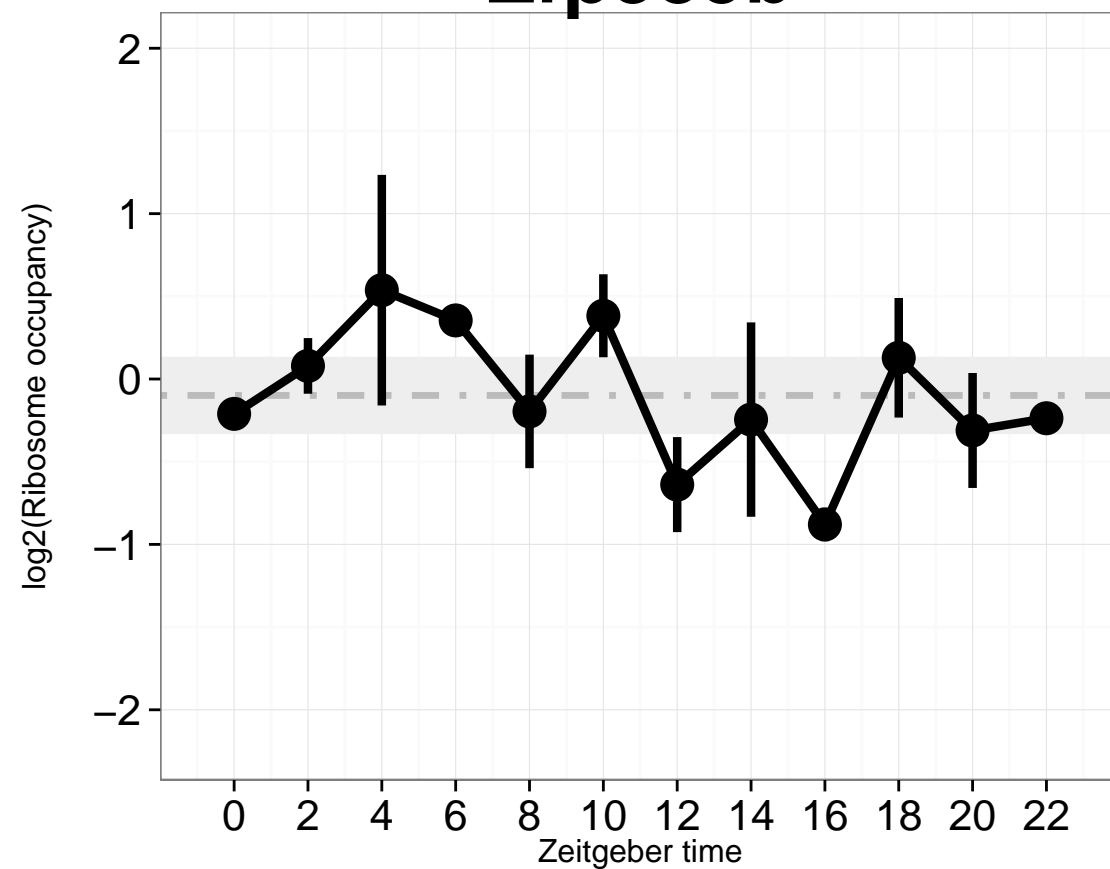

Supplement: Supplementary file 6431 [file 1]

# Hadha

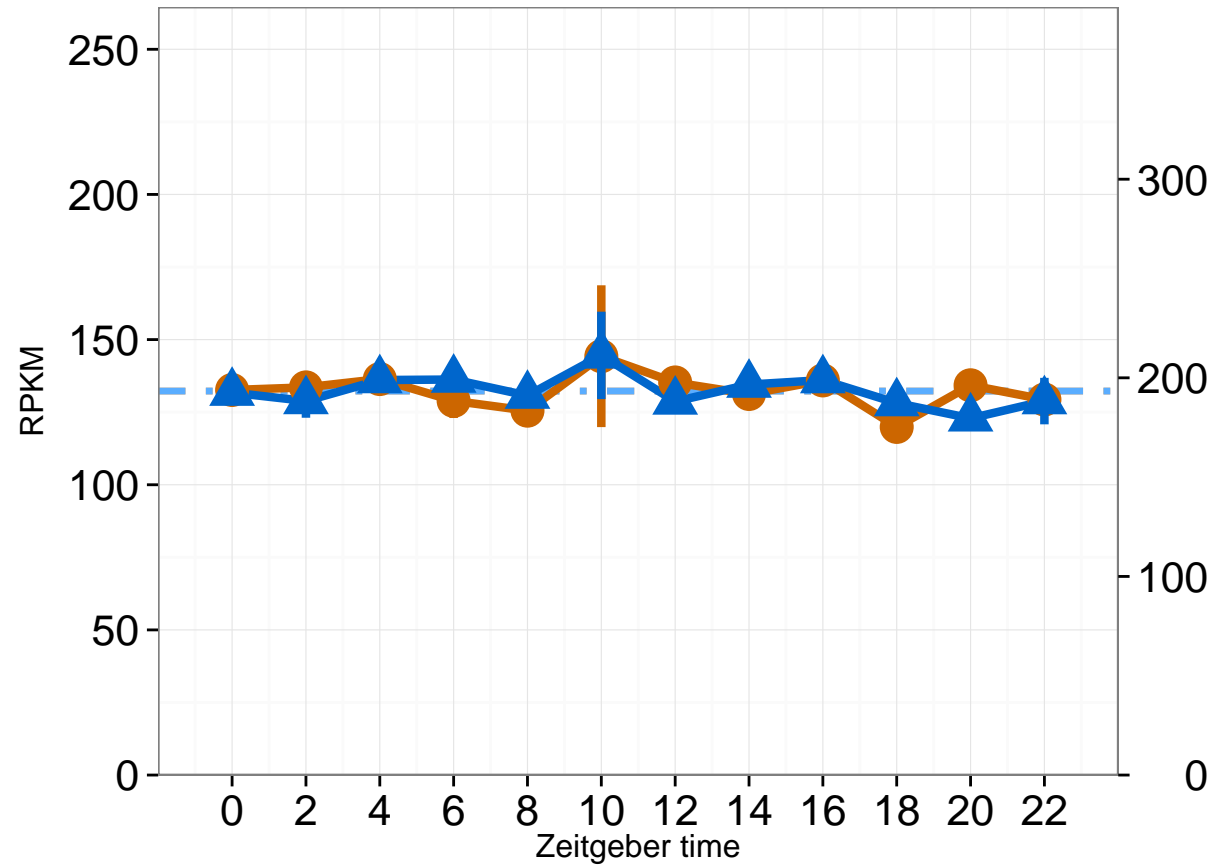

# Hadha

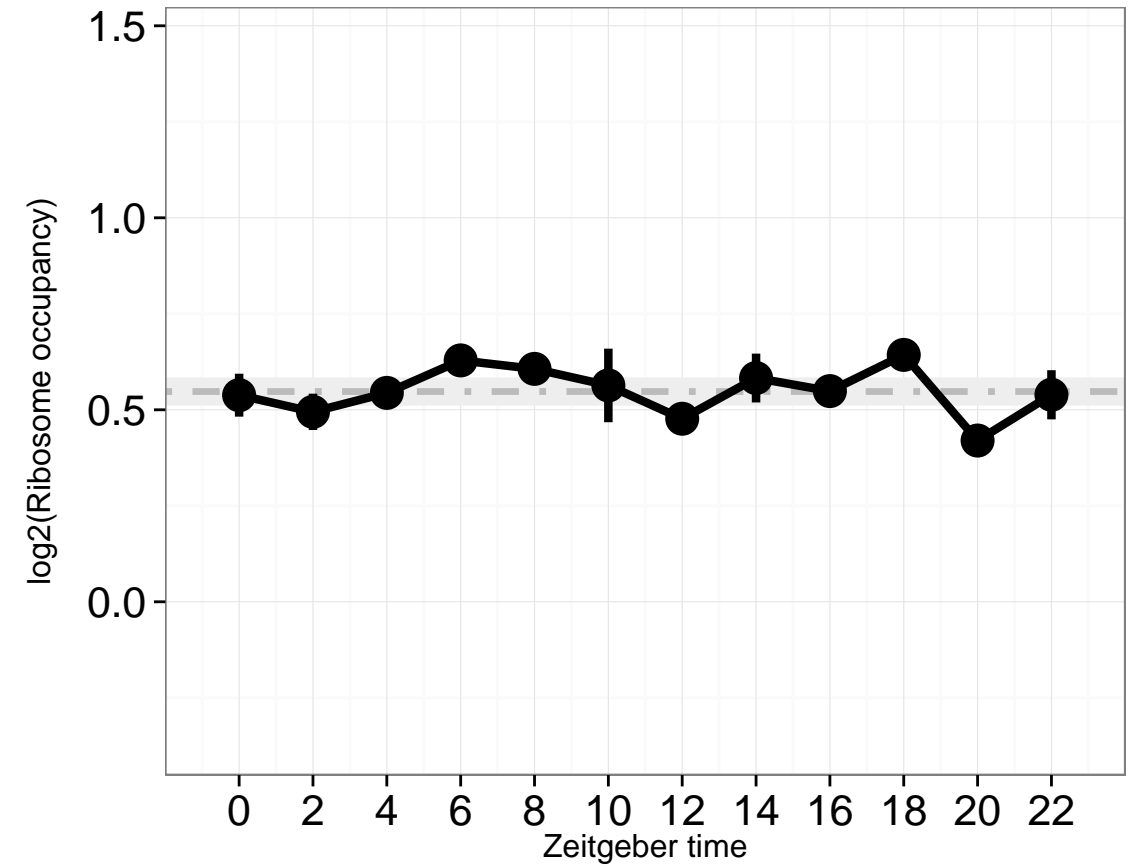

Supplement: Supplementary file 6432 [file 1]

# Frmd6

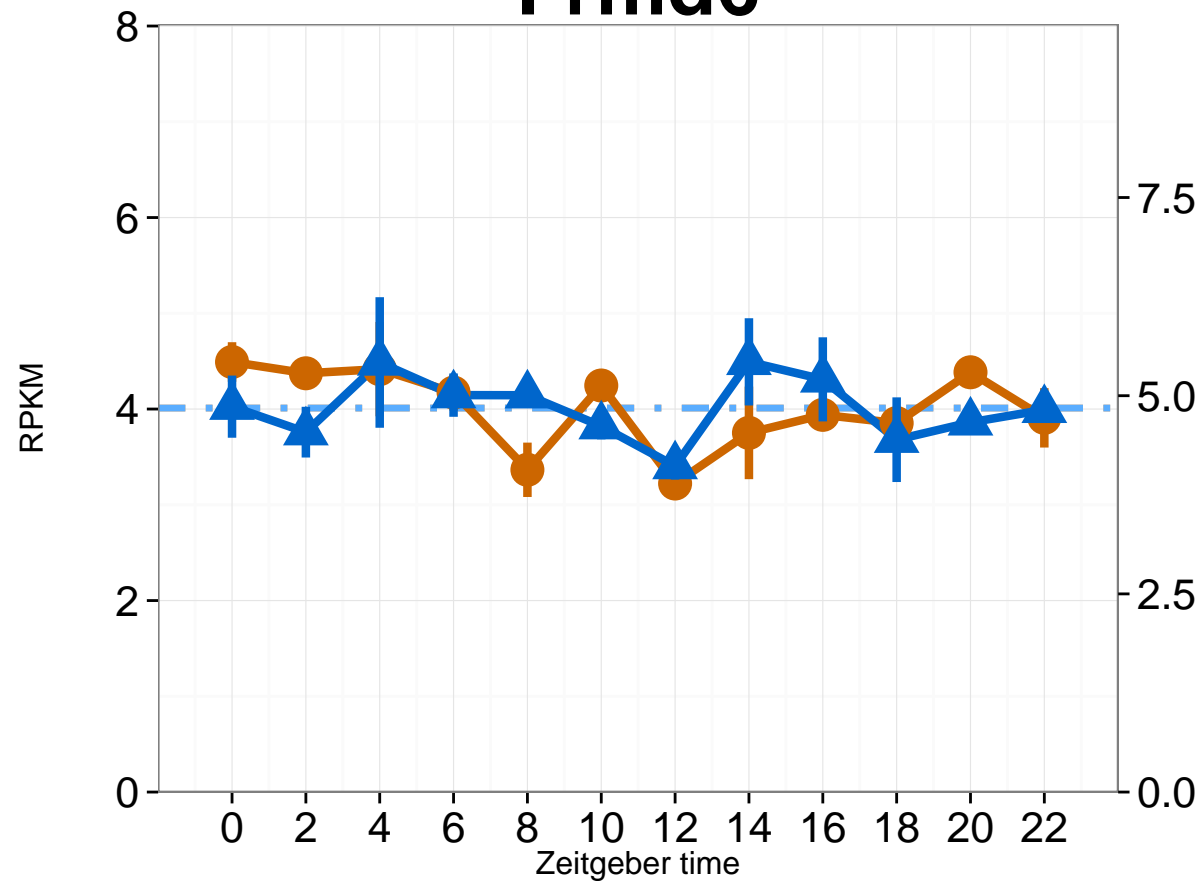

# Frmd6

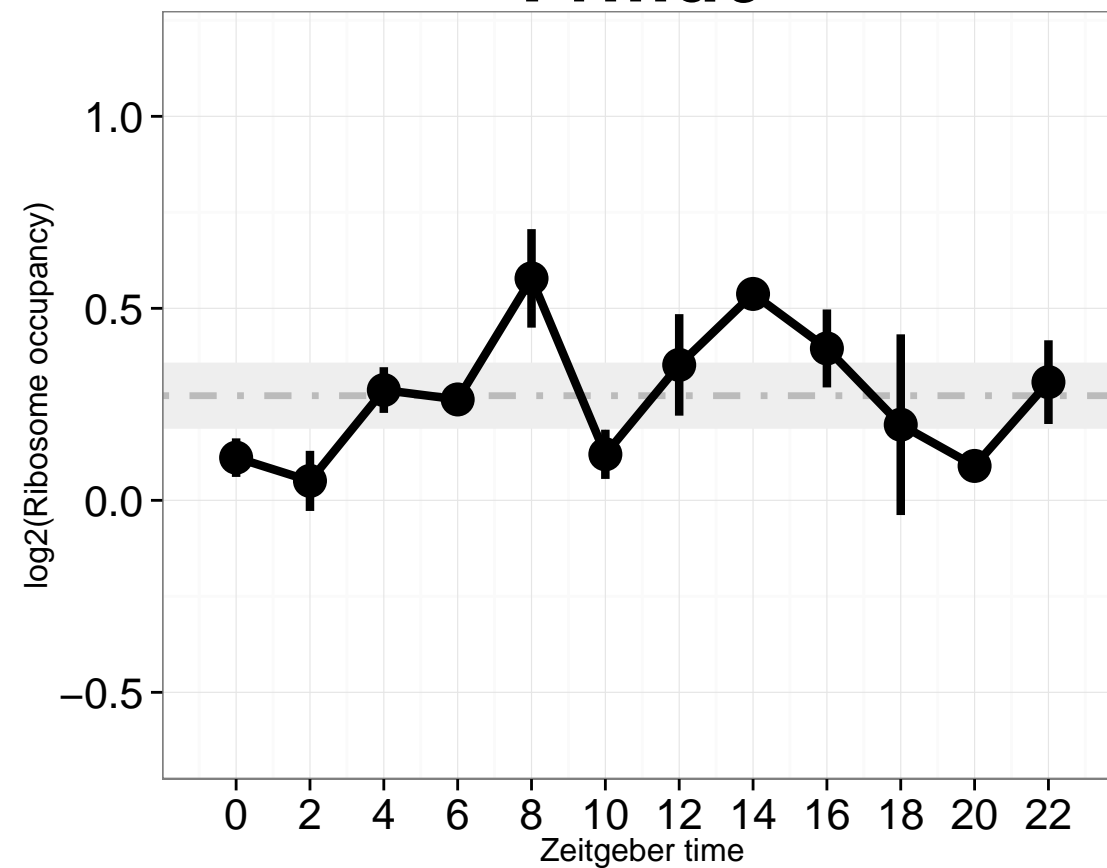

Supplement: Supplementary file 6433 [file 1]

# Rwdd2a TR

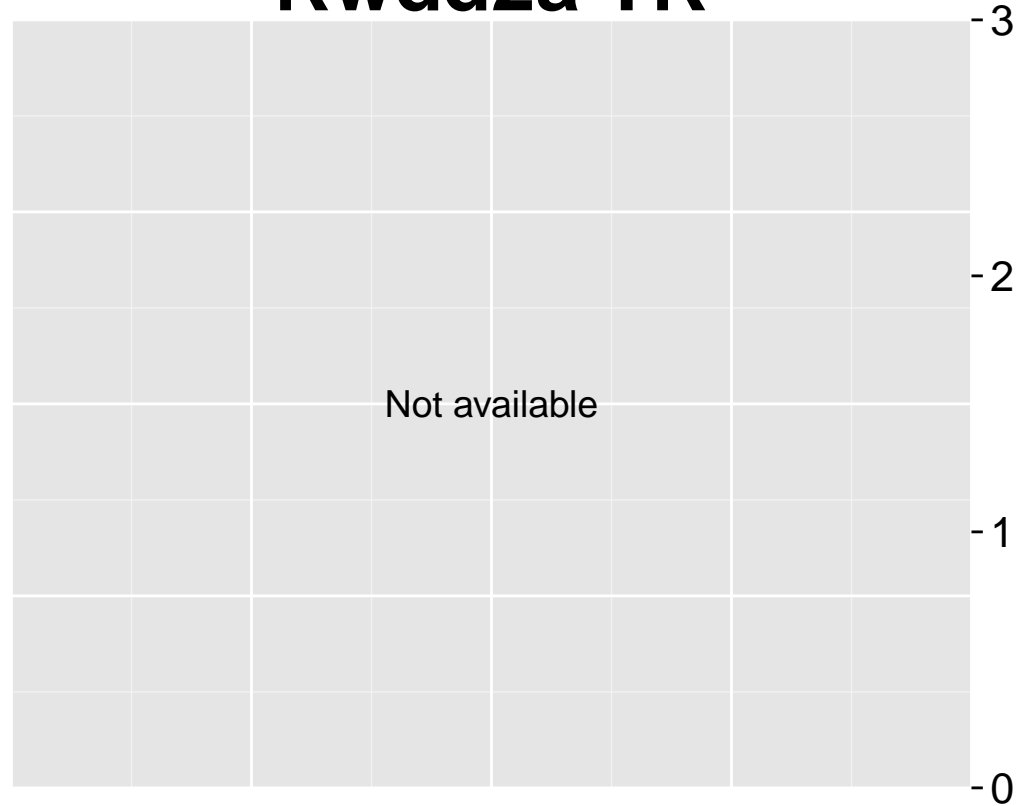

# Rwdd2a log2(Ribosome occupanc

Supplement: Supplementary file 6434 [file 1]

# Htr1b

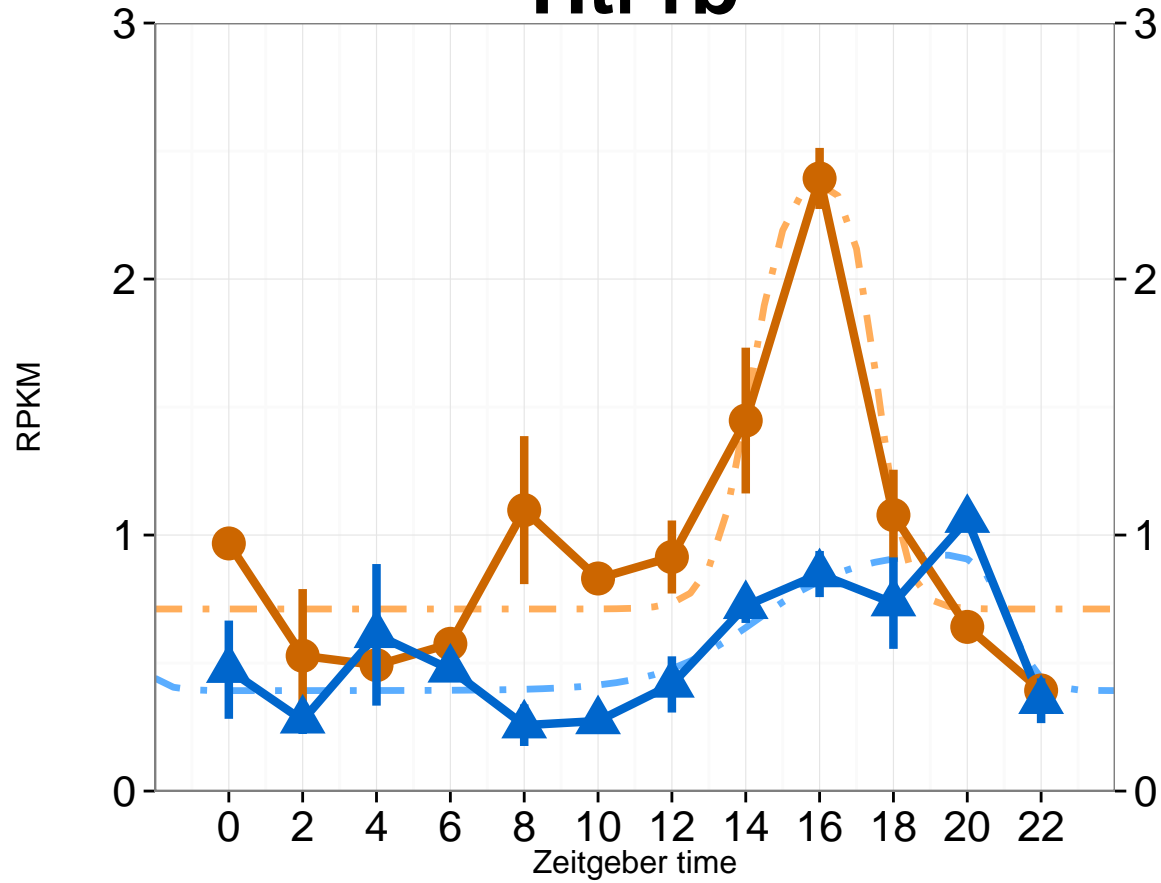

# Htr1b

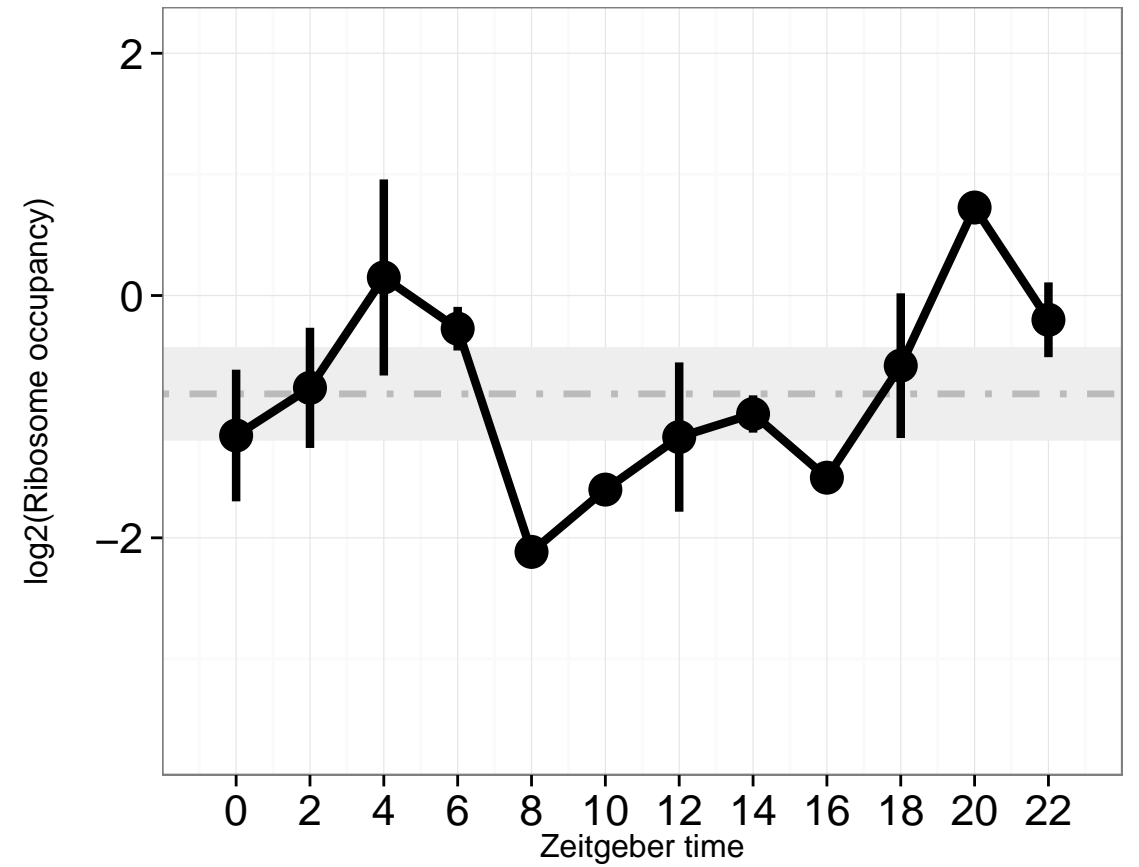

Supplement: Supplementary file 6435 [file 1]

**Rdh1 TR**

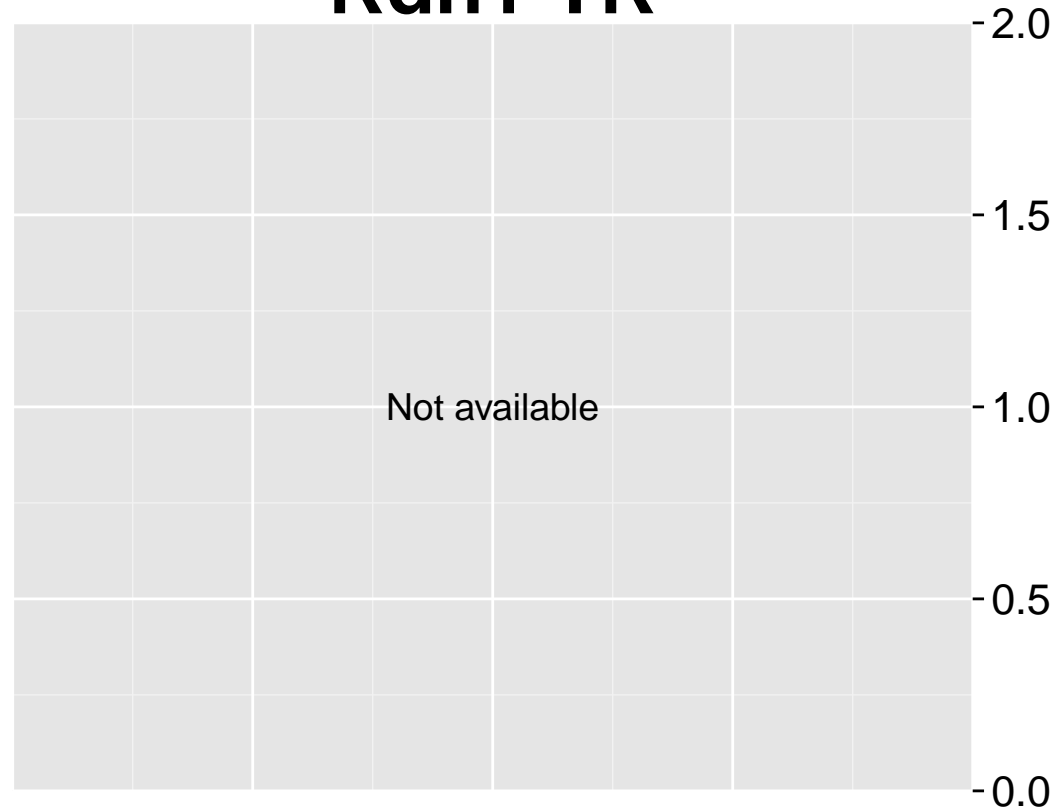

**Rdh1 log2(Ribosome occupancy)**

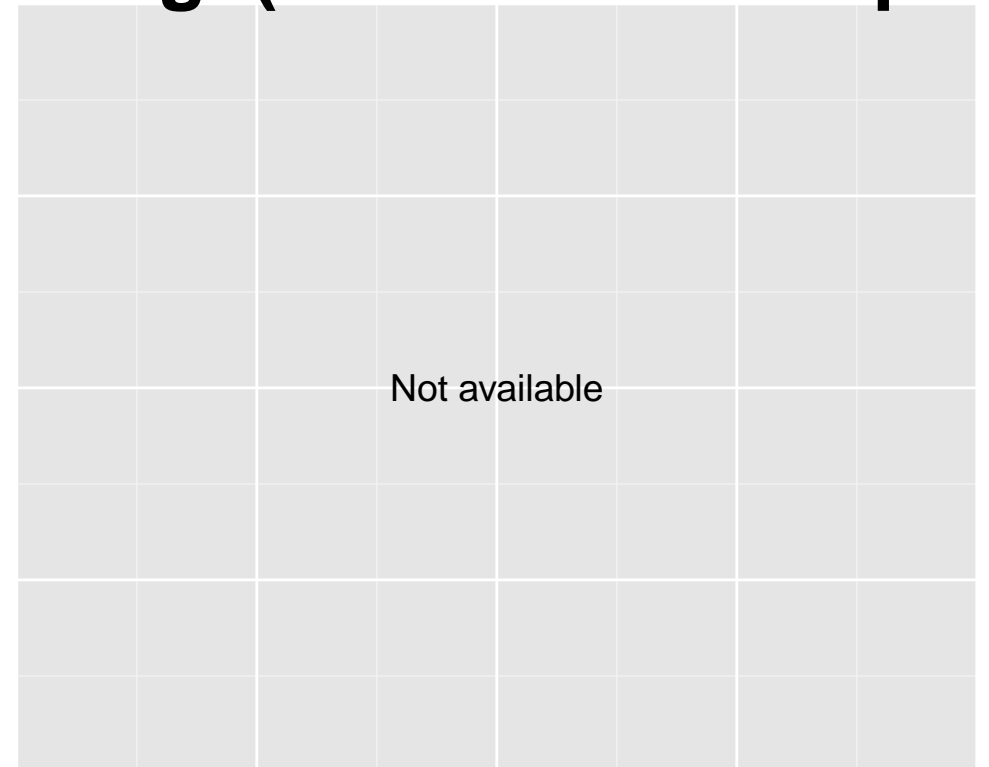

Supplement: Supplementary file 6436 [file 1]

## Mgl2

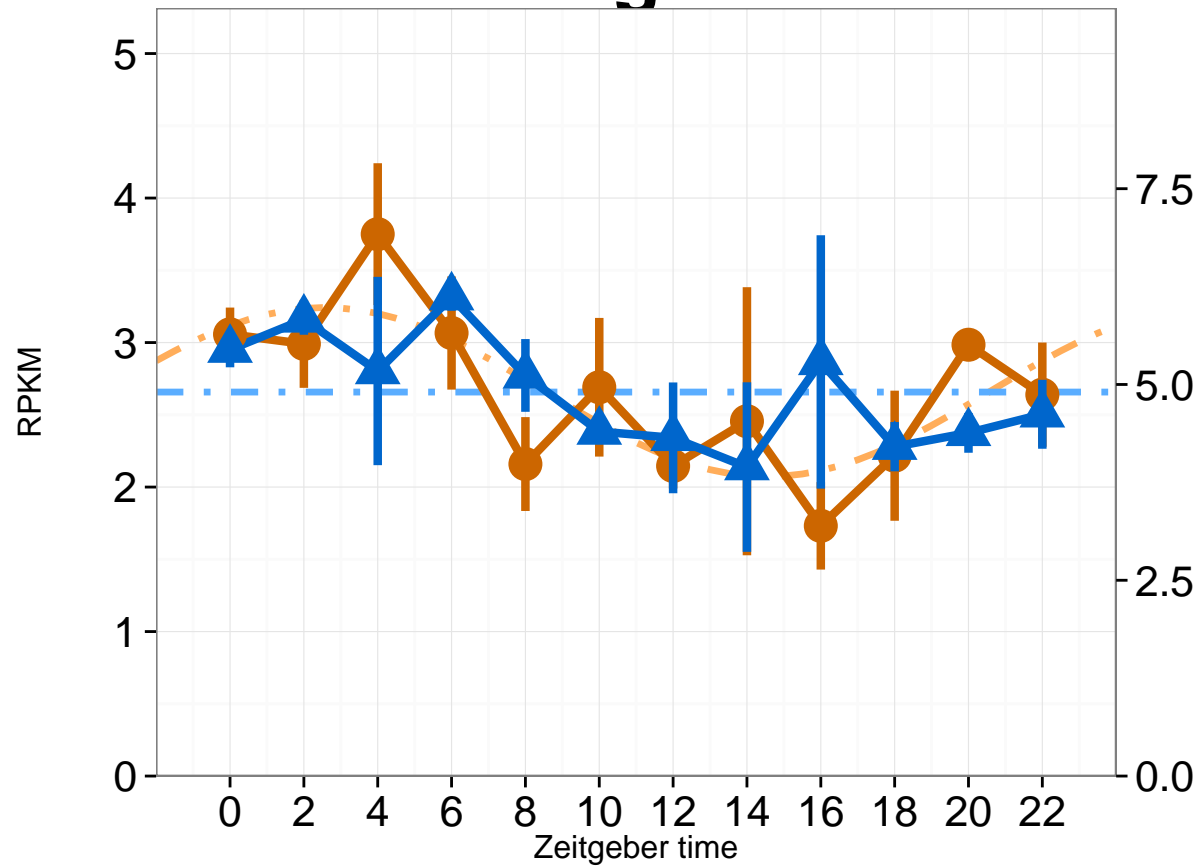

## Mgl2

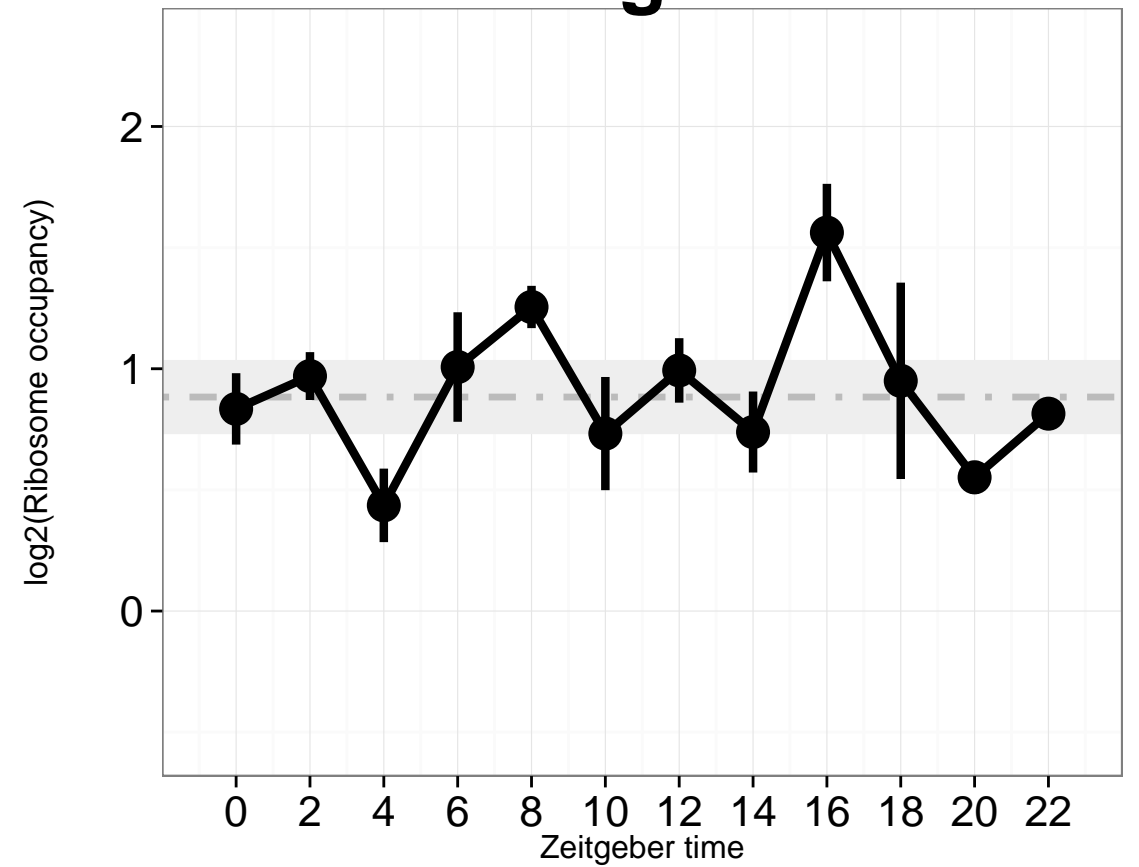

Supplement: Supplementary file 6437 [file 1]

# Zfp623

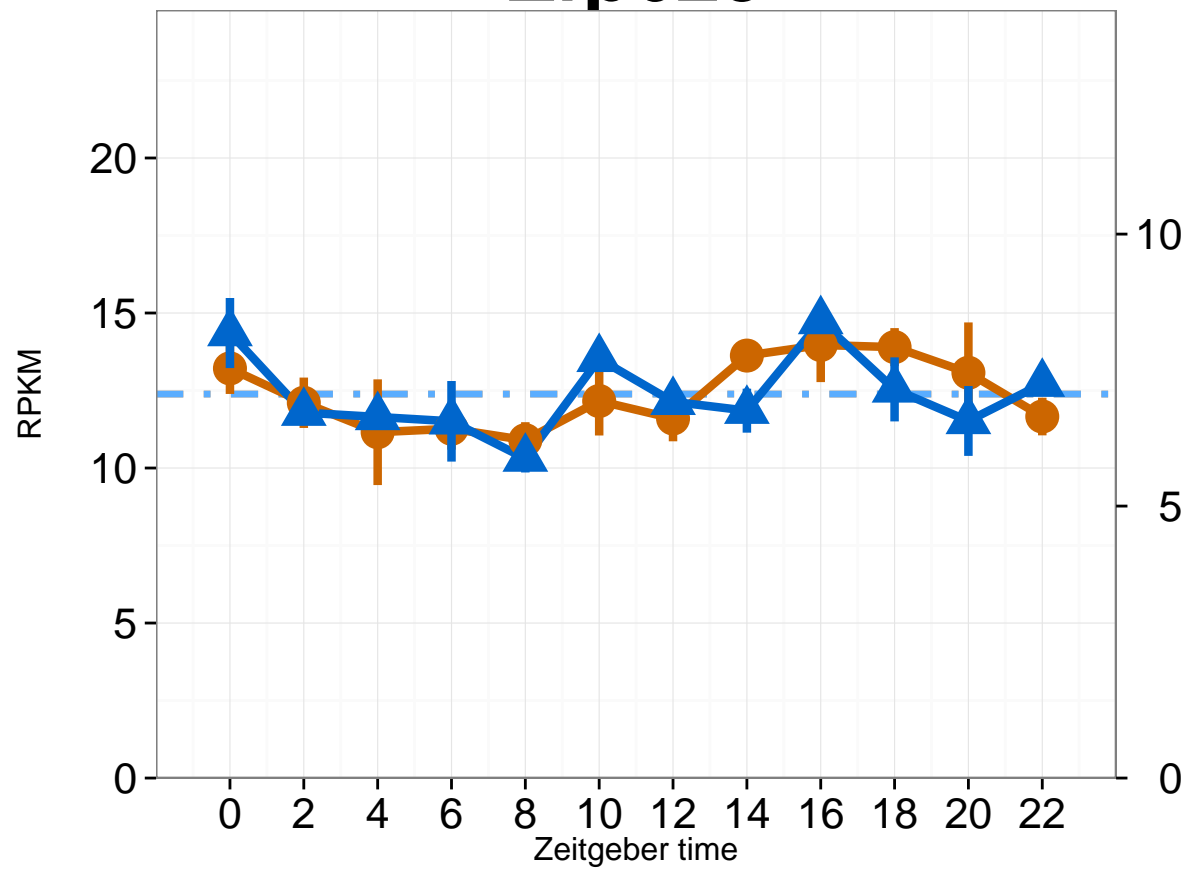

# Zfp623

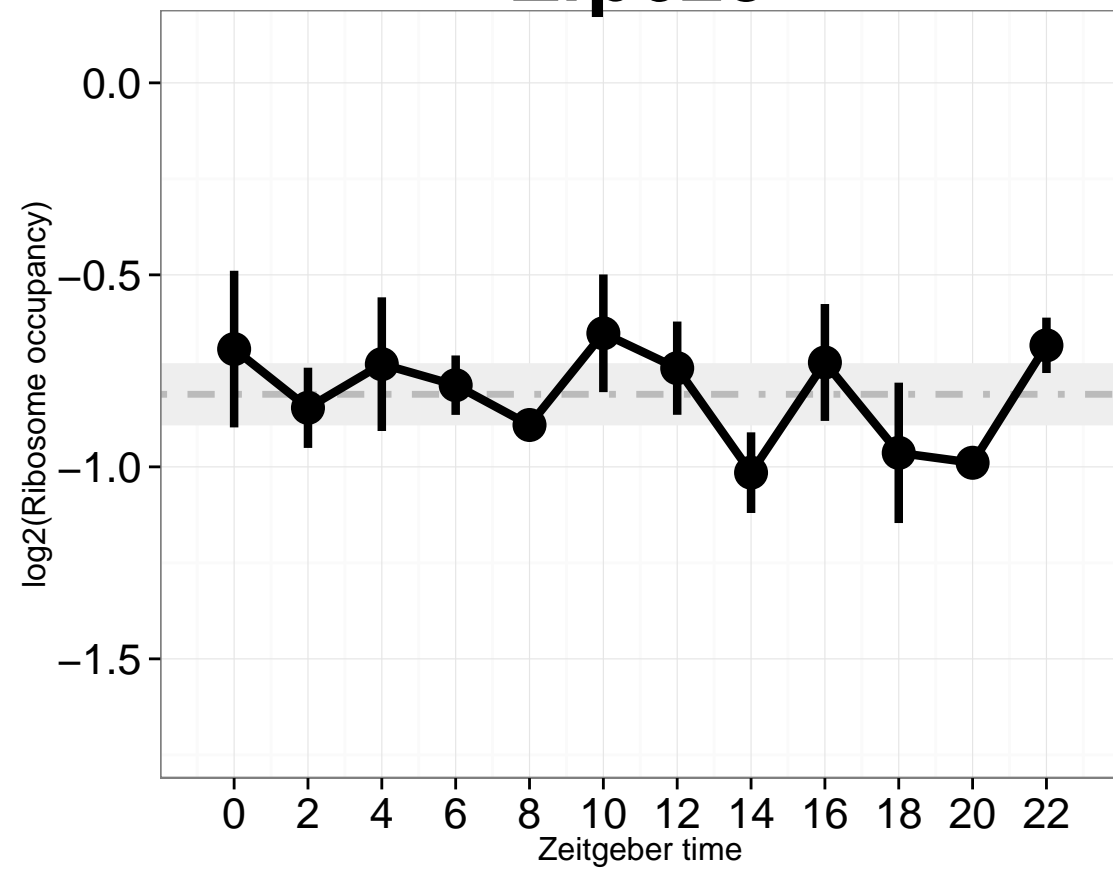

Supplement: Supplementary file 6438 [file 1]

## Slc25a33

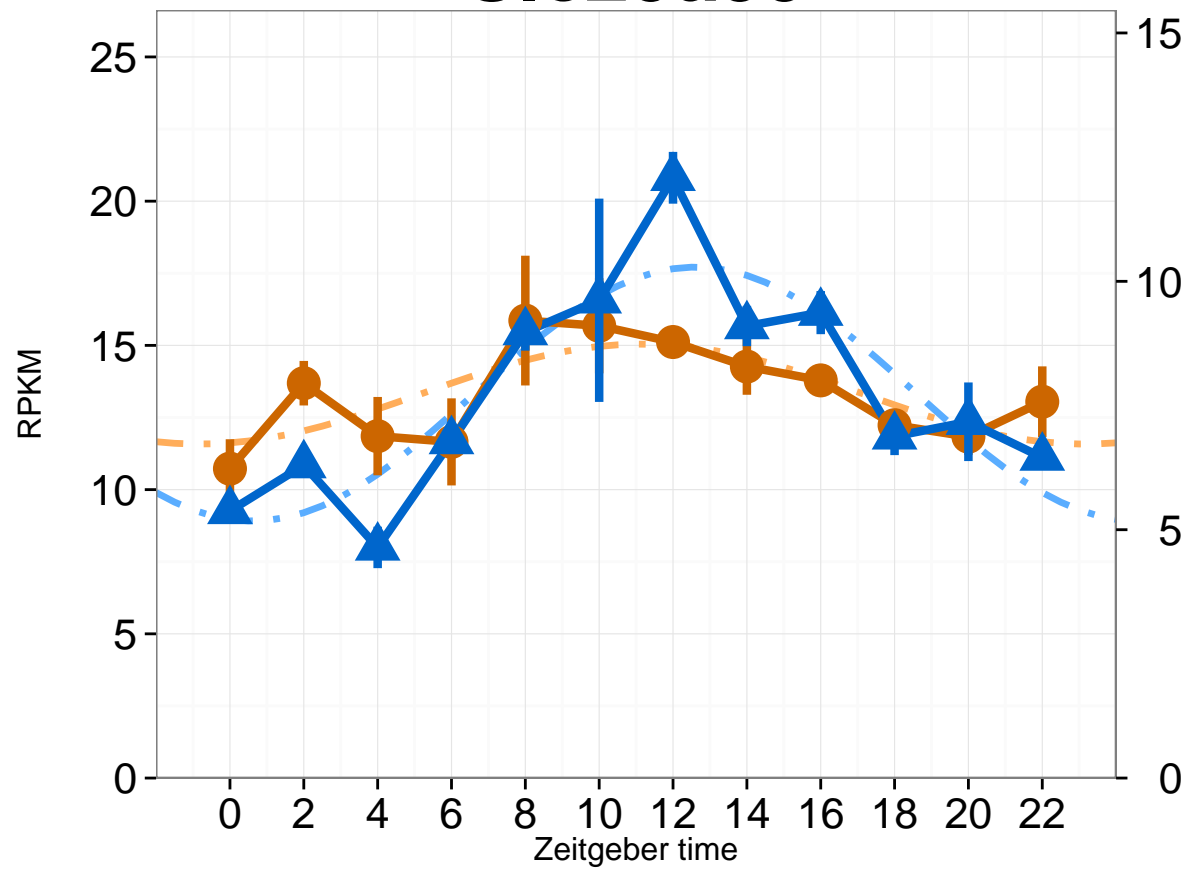

## Slc25a33

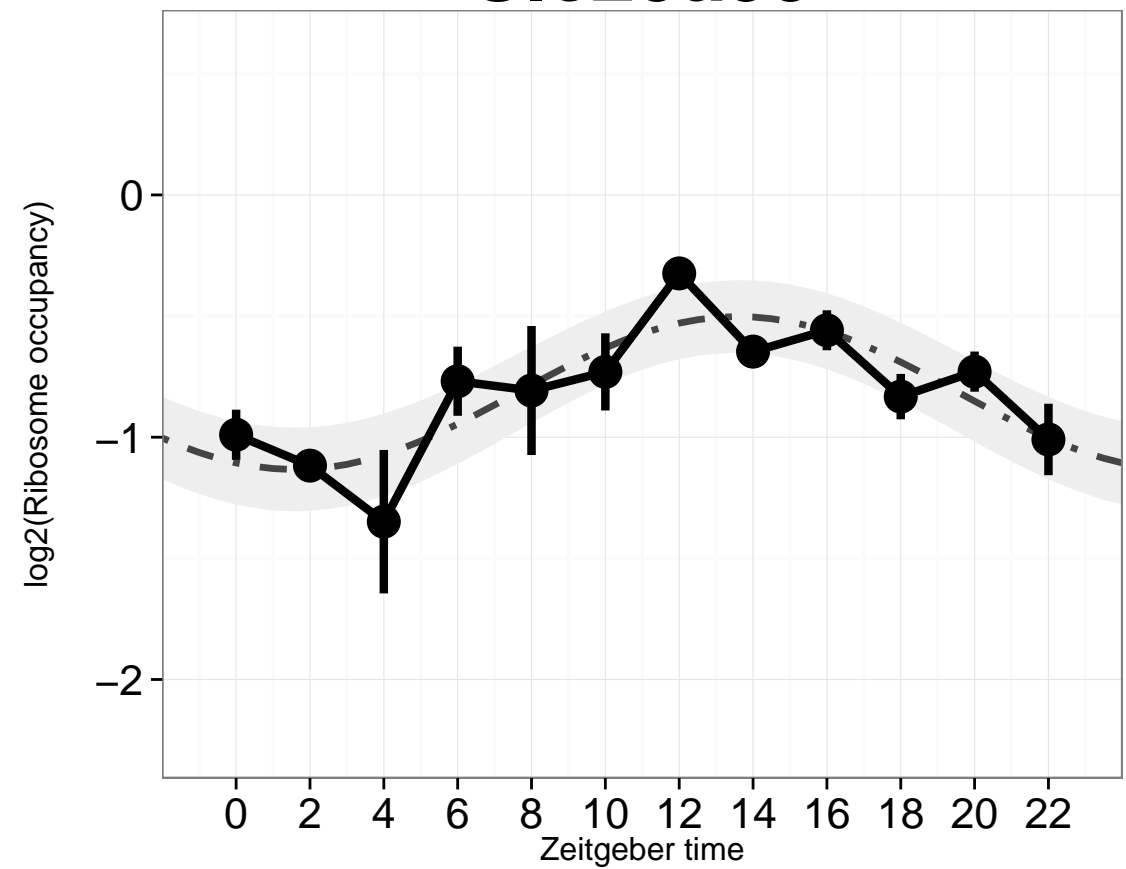

Supplement: Supplementary file 6439 [file 1]

# Fam53c

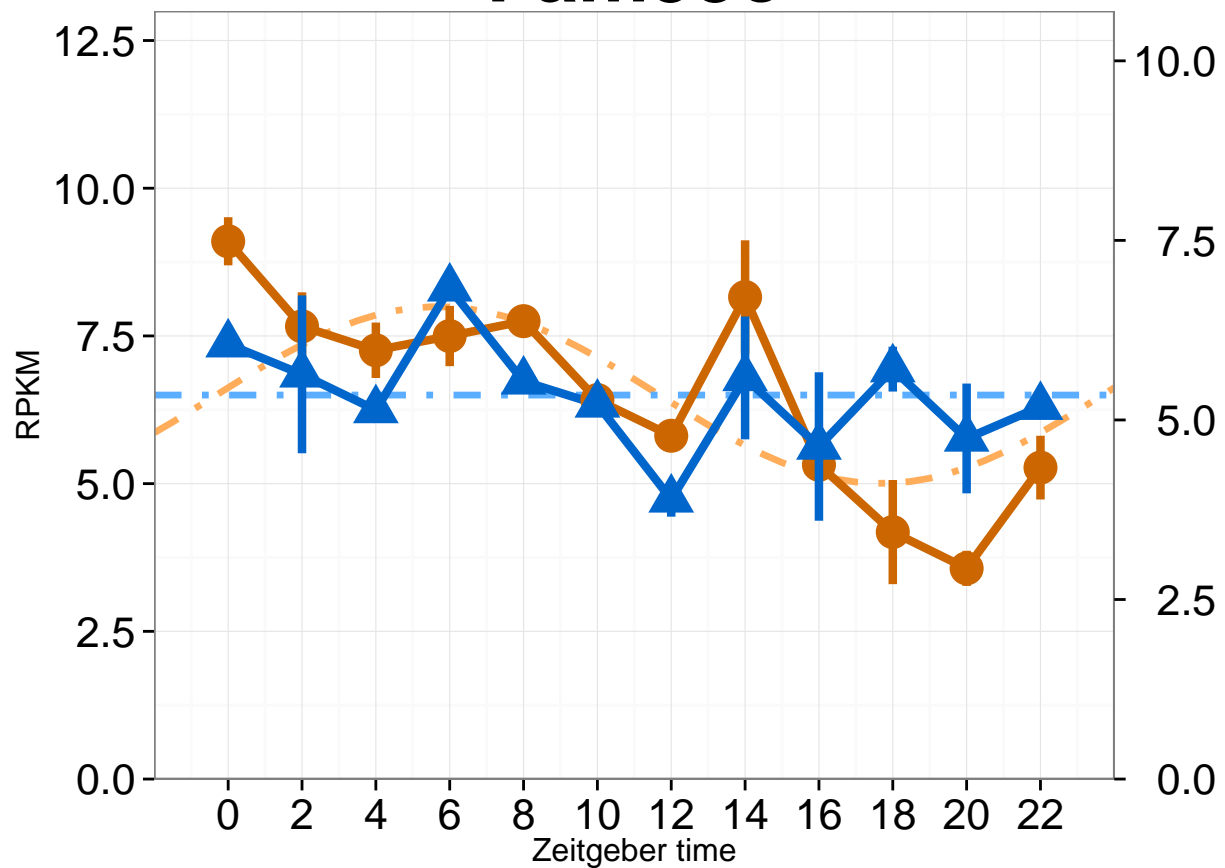

# Fam53c

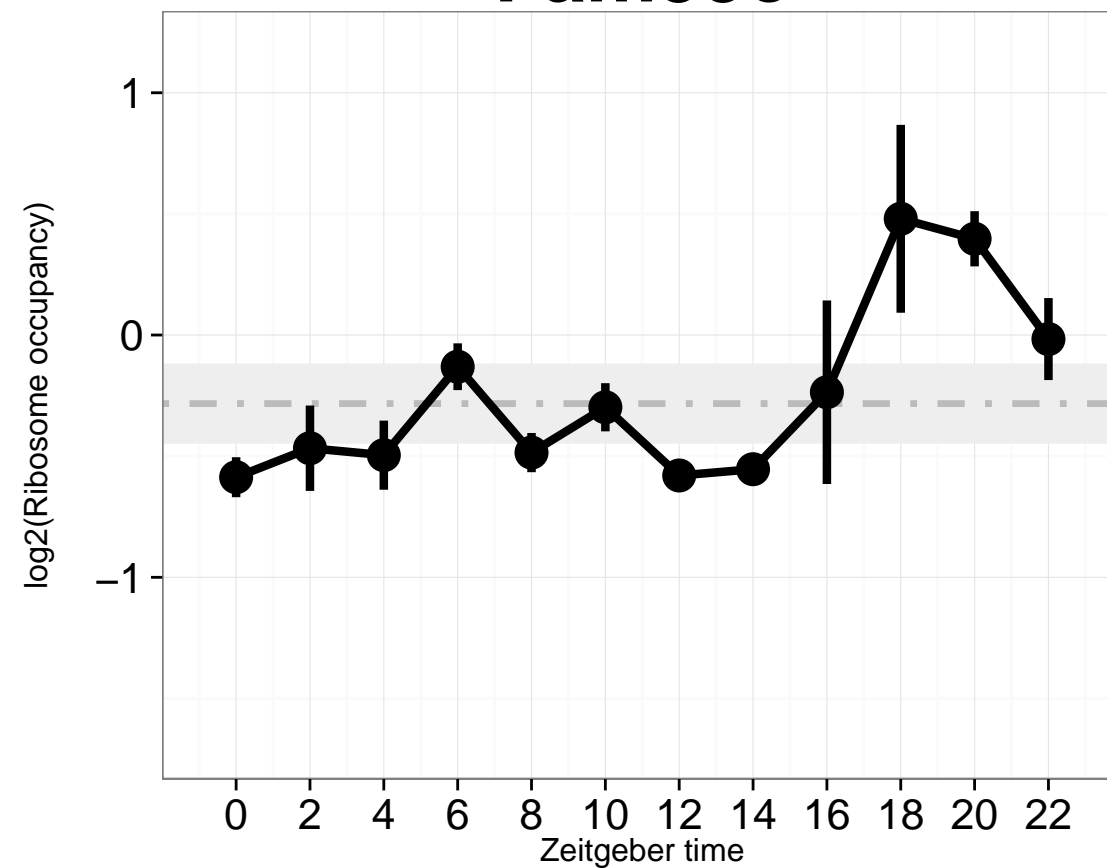

Supplement: Supplementary file 6440 [file 1]

# Tmem120b

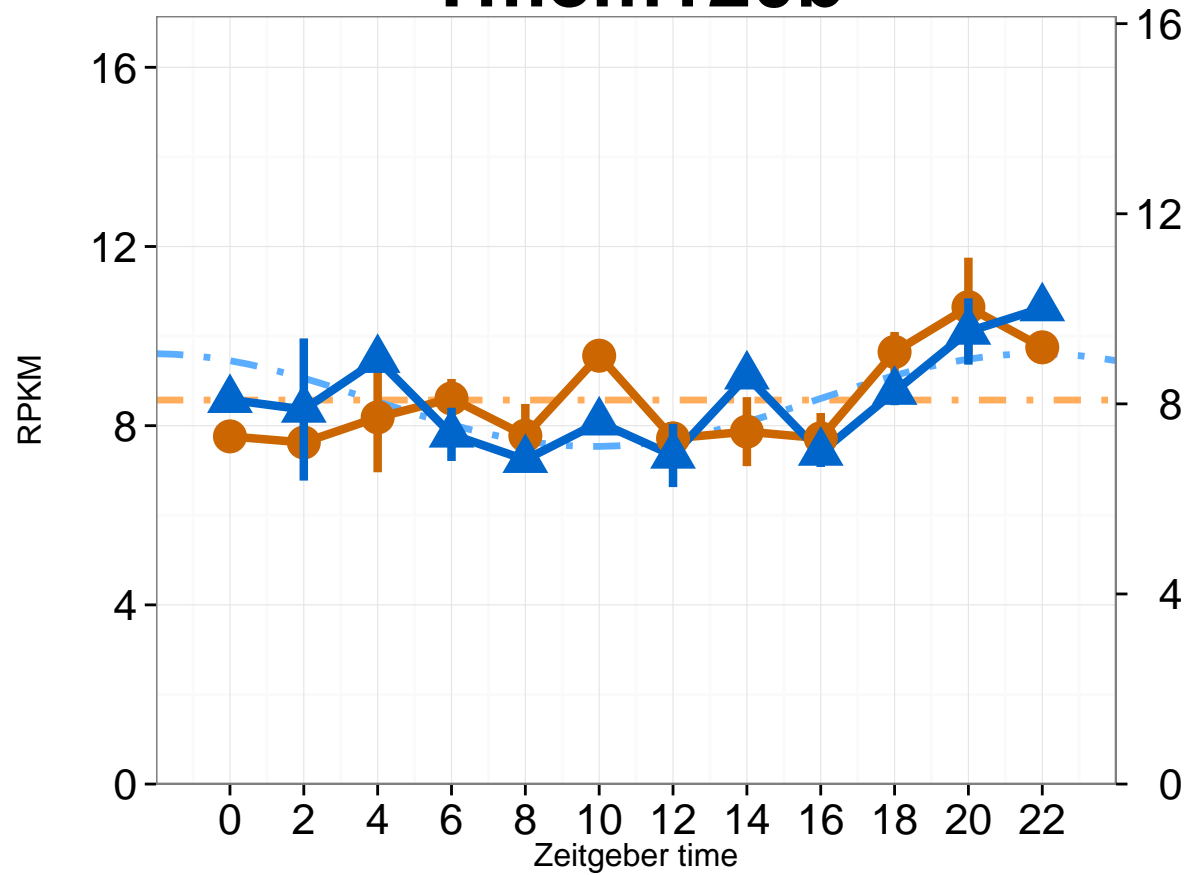

# Tmem120b

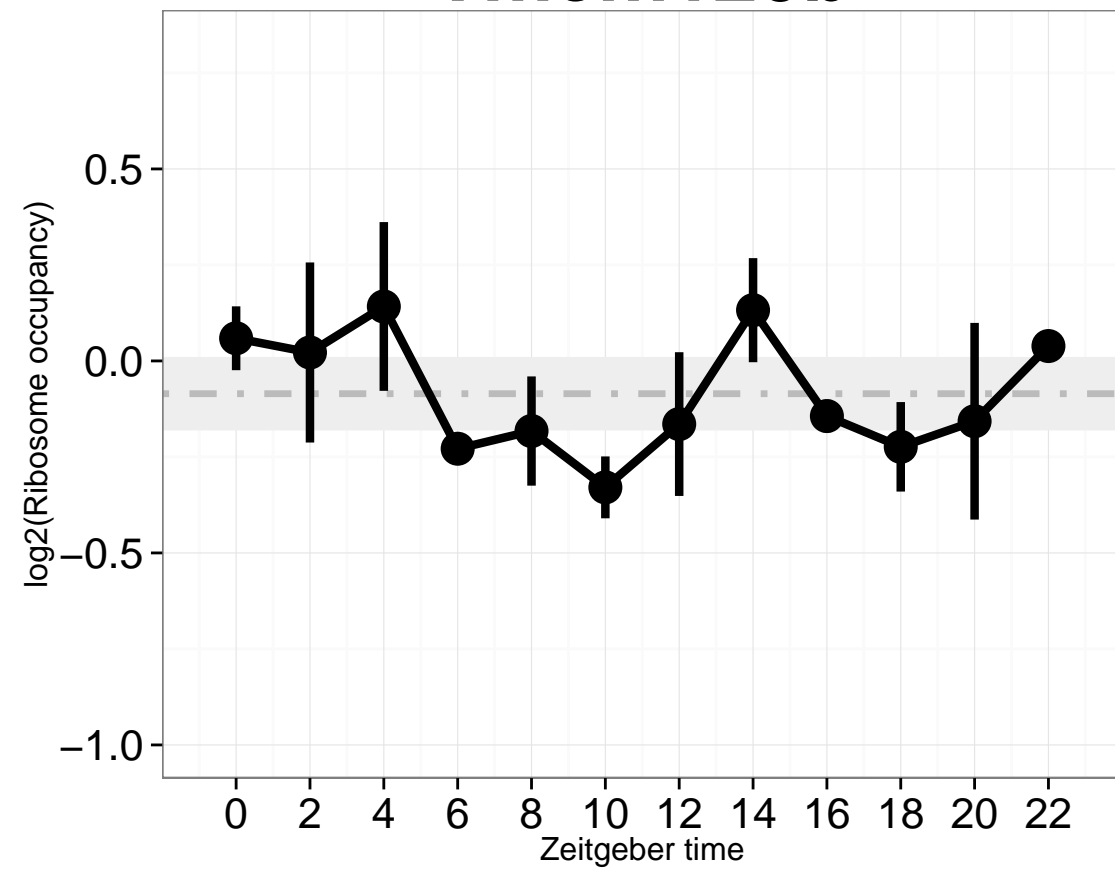

Supplement: Supplementary file 6441 [file 1]

# Mbtd1

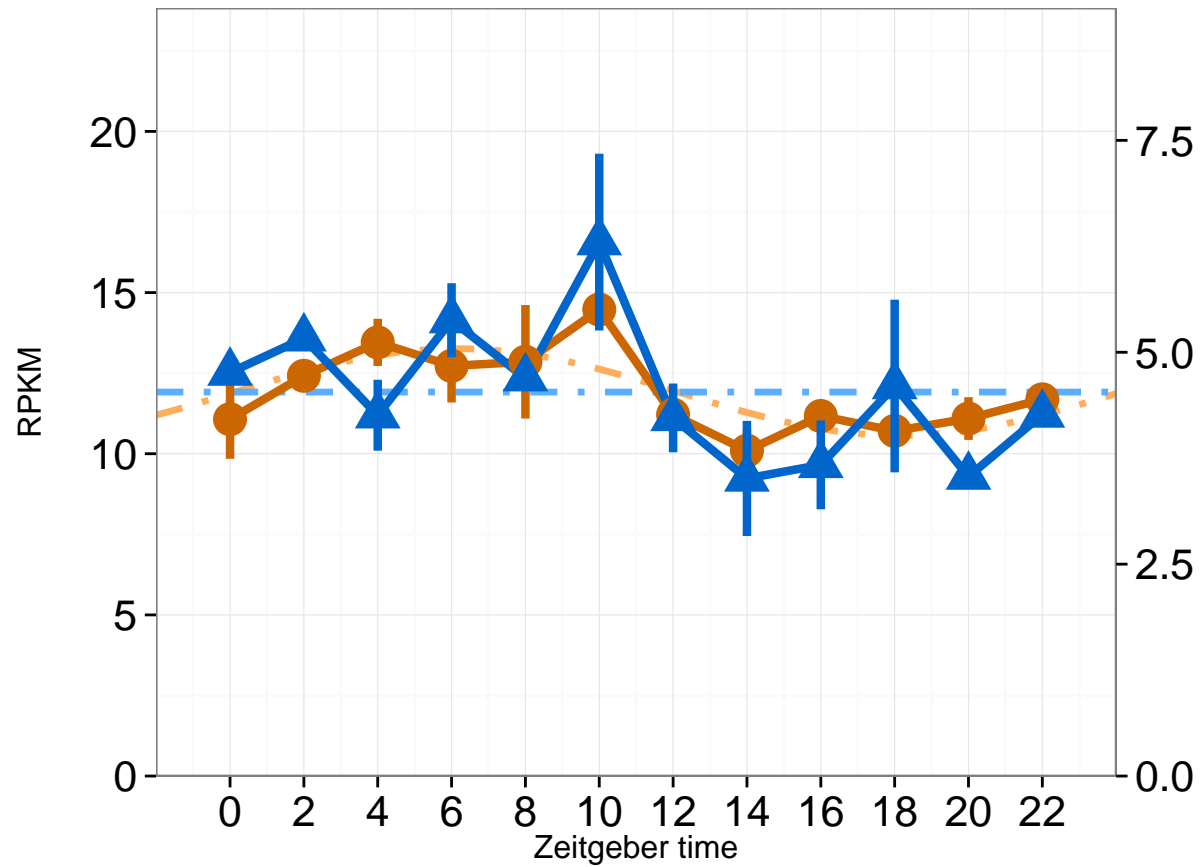

# Mbtd1

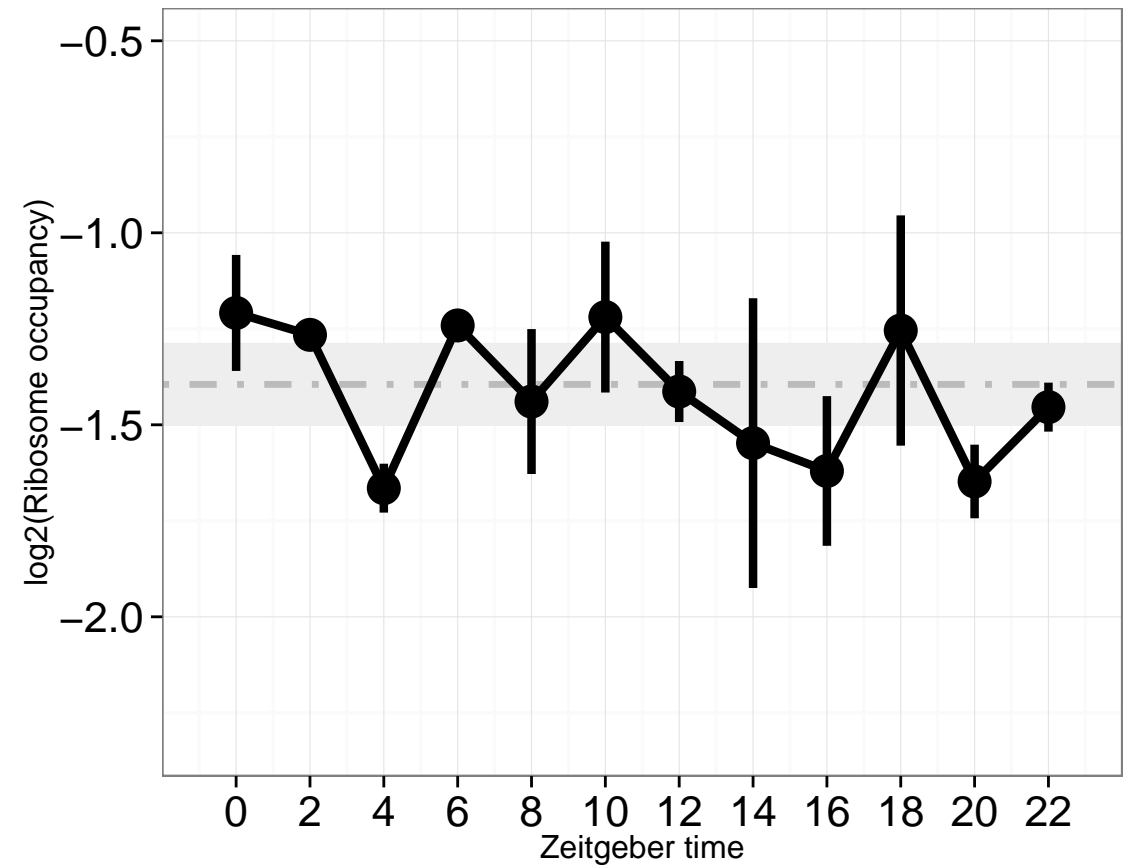

Supplement: Supplementary file 6442 [file 1]

# Trim27

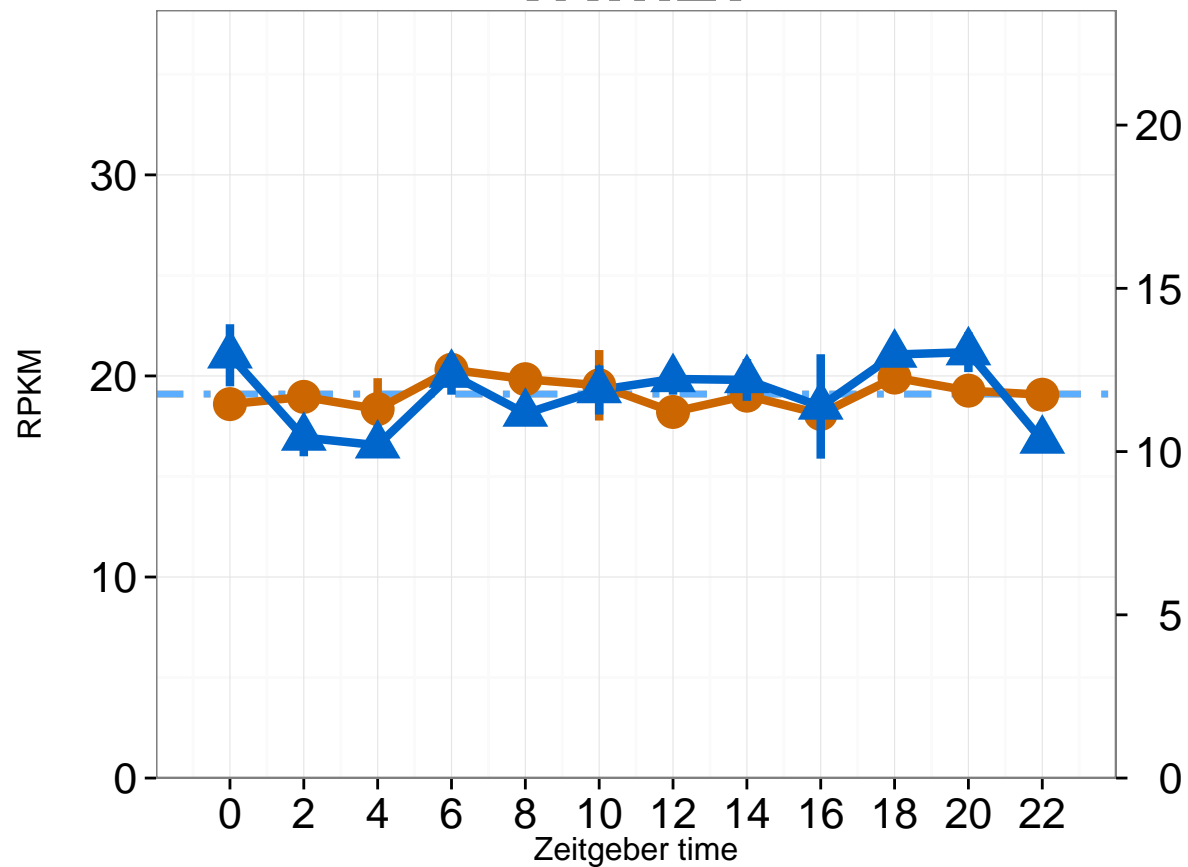

# Trim27

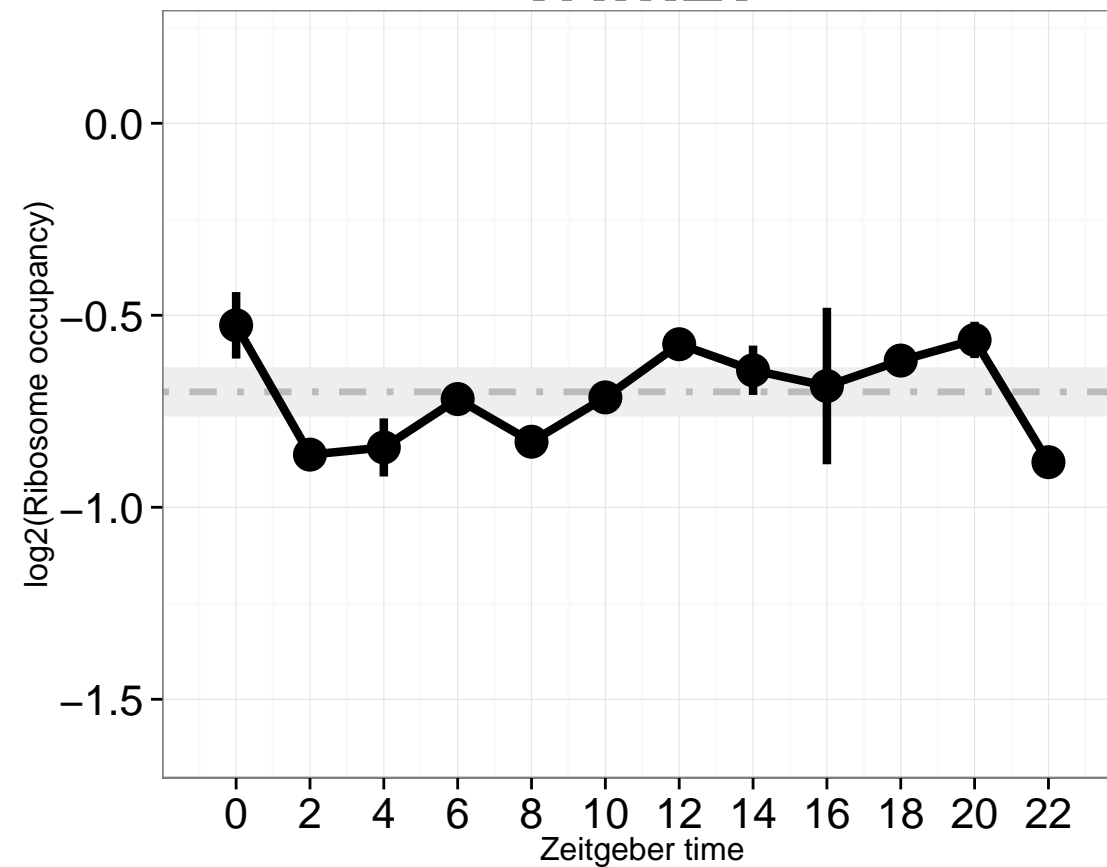

Supplement: Supplementary file 6443 [file 1]

# Rpl35a

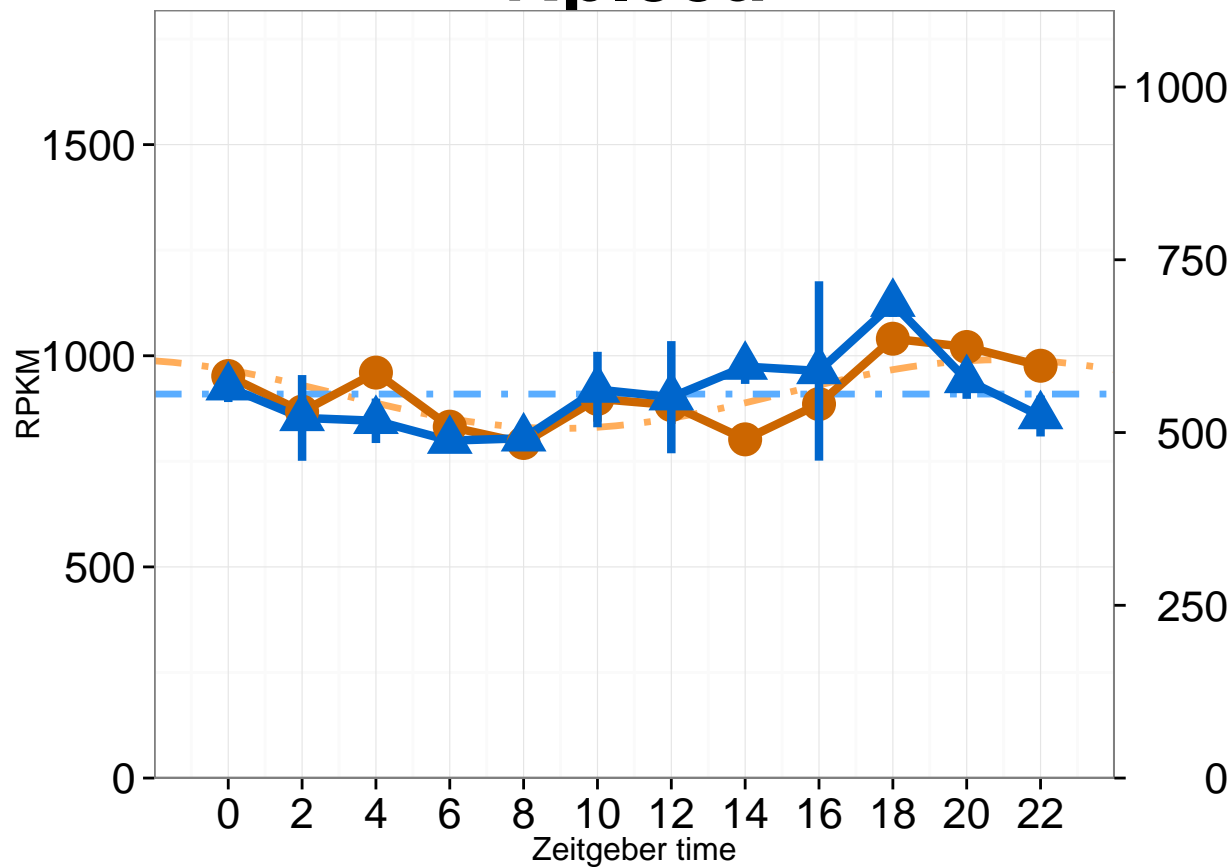

# Rpl35a

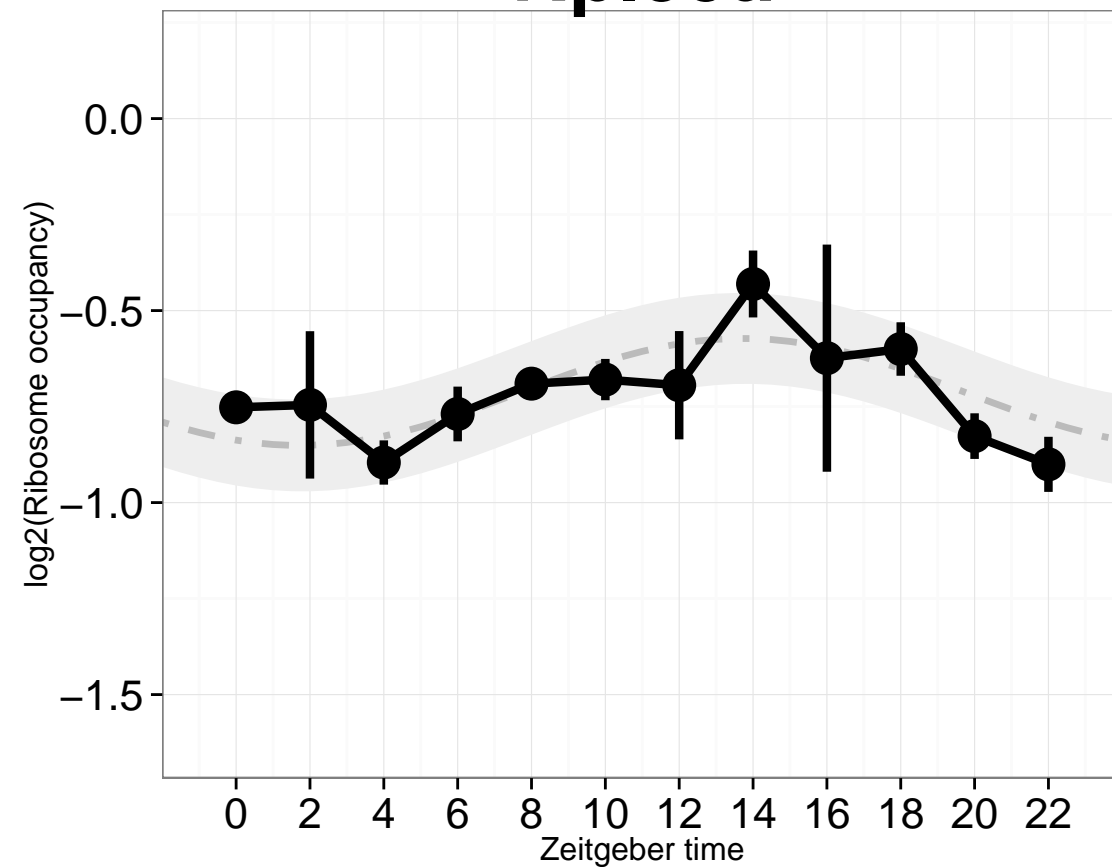

Supplement: Supplementary file 6444 [file 1]

## Dnajb12

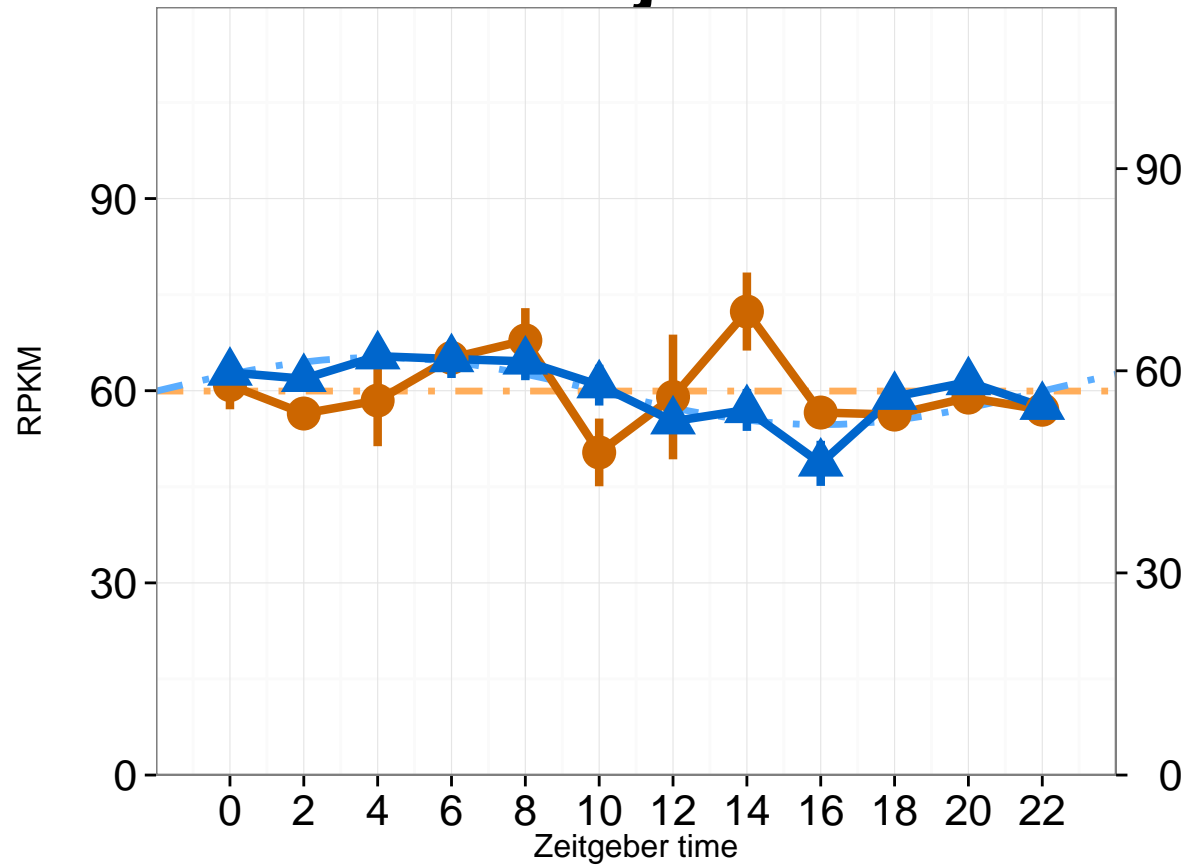

## Dnajb12

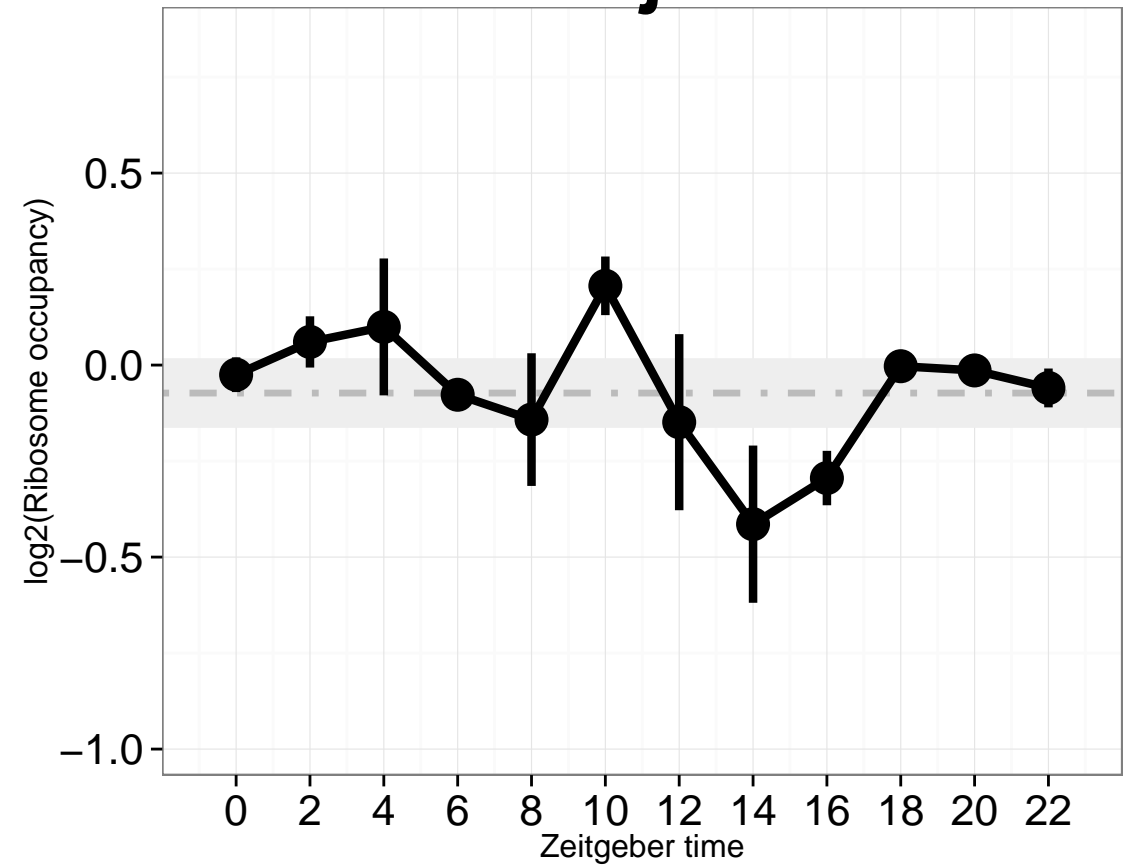

Supplement: Supplementary file 6445 [file 1]

# Clca1

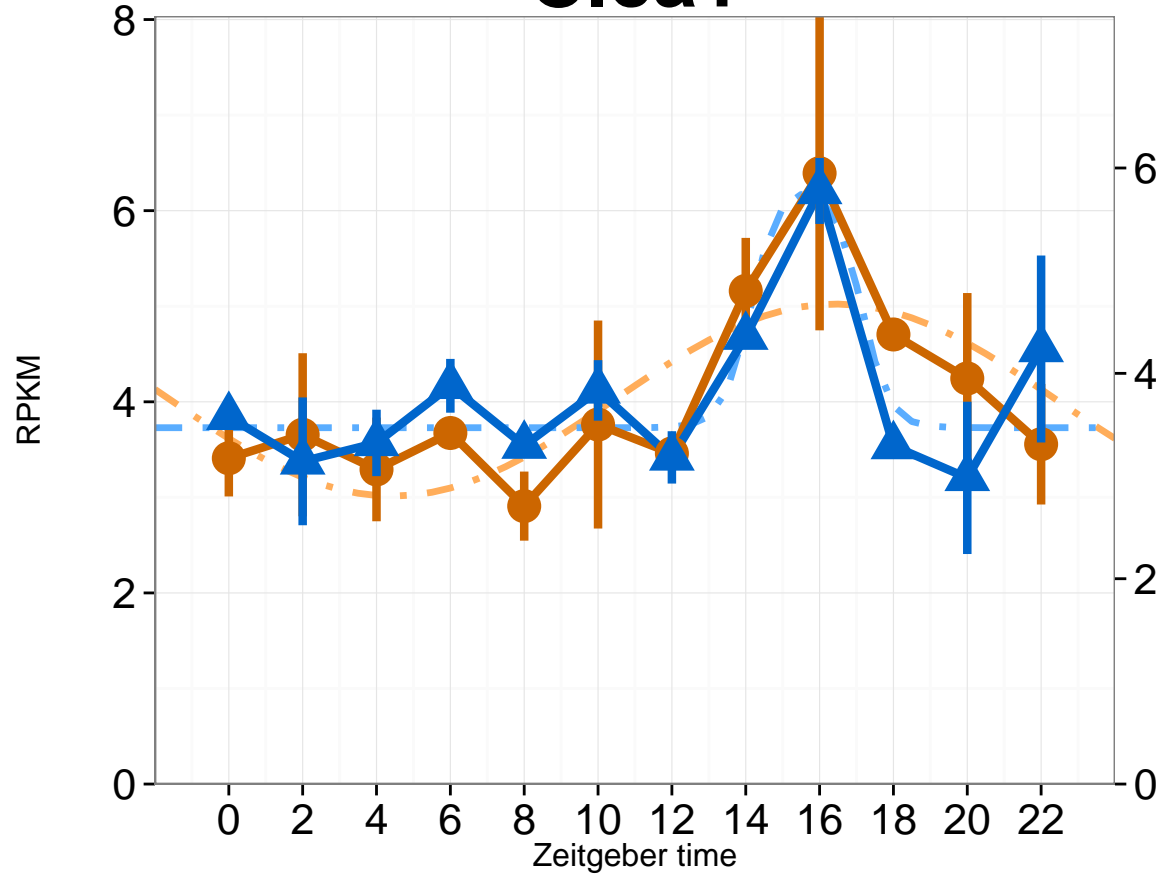

# Clca1

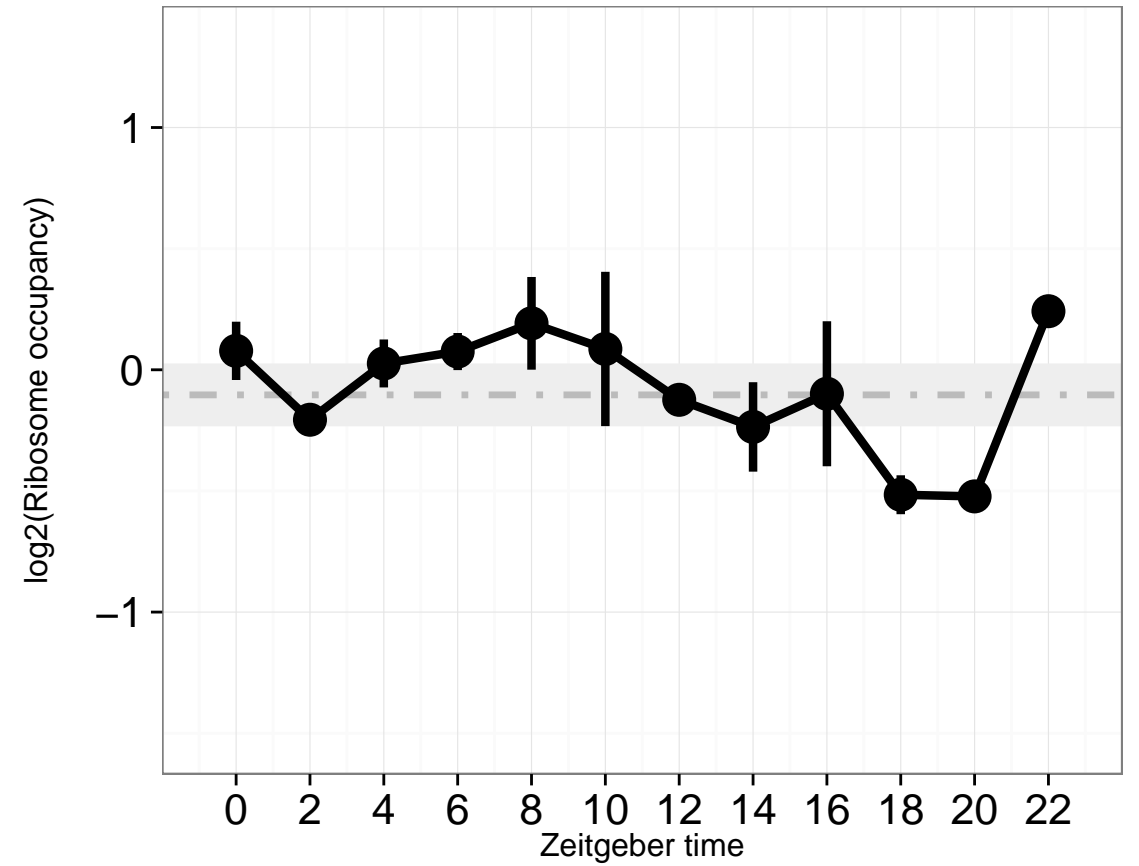

Supplement: Supplementary file 6446 [file 1]

## Abraci

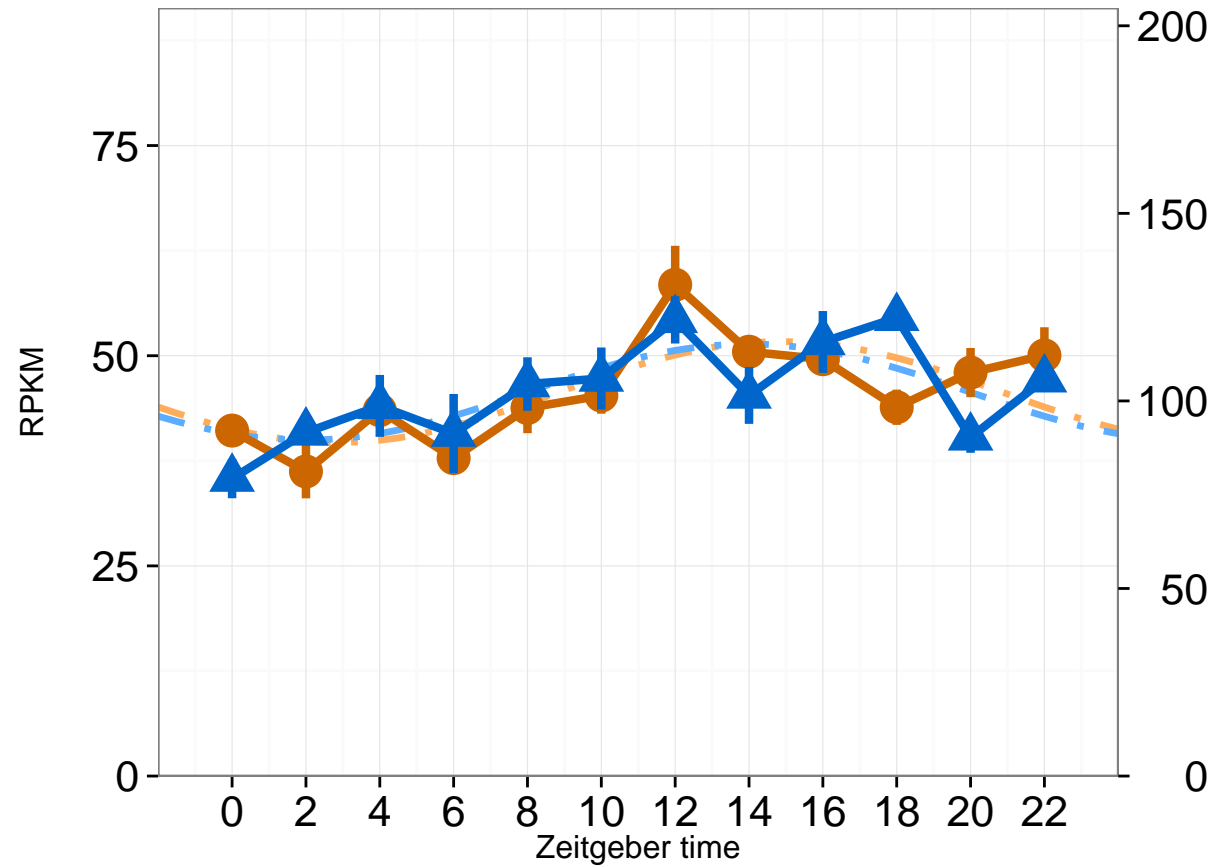

## Abraci

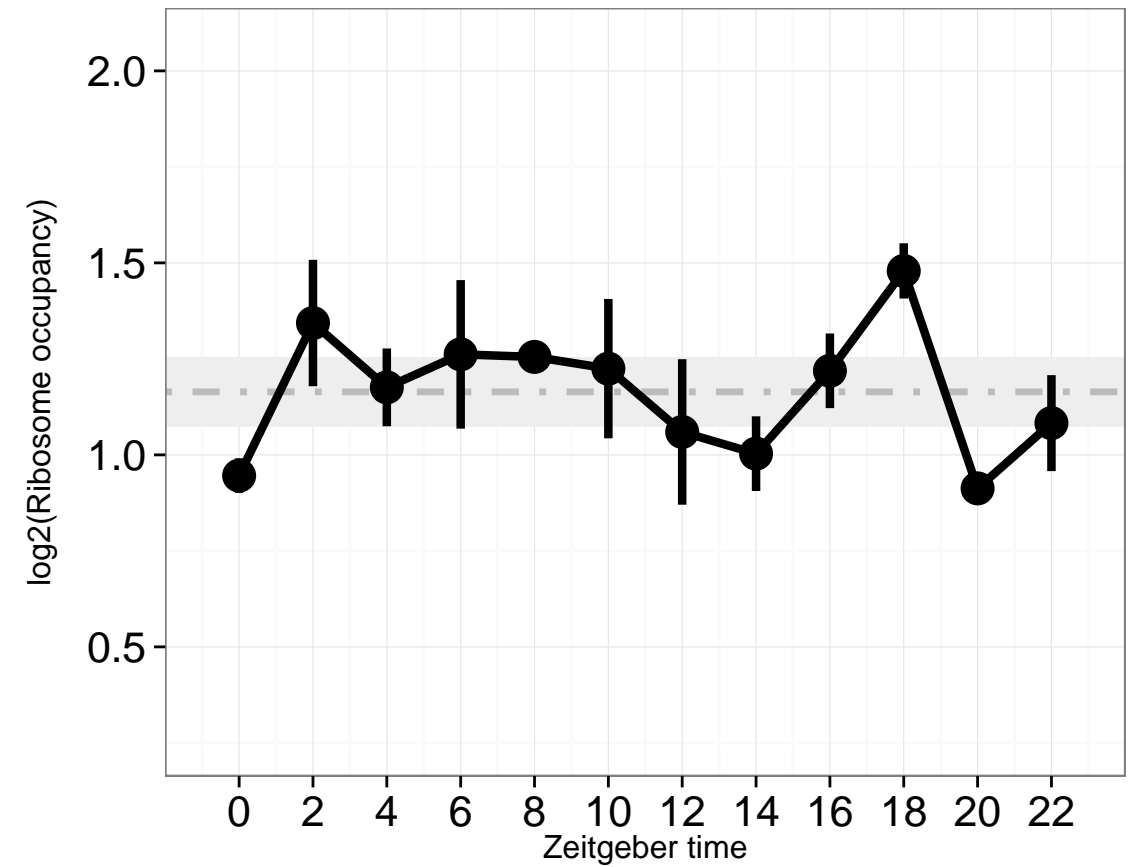

Supplement: Supplementary file 6447 [file 1]

## Bri3bp

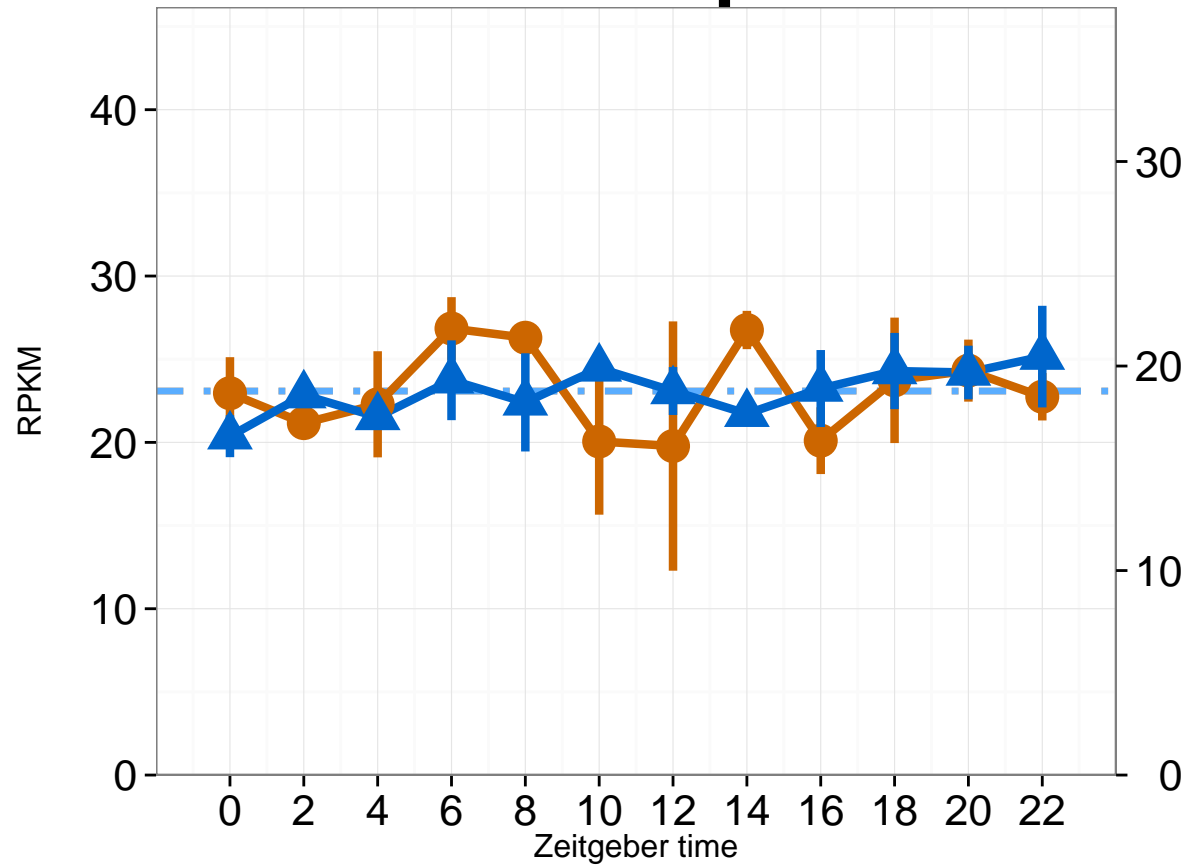

## Bri3bp

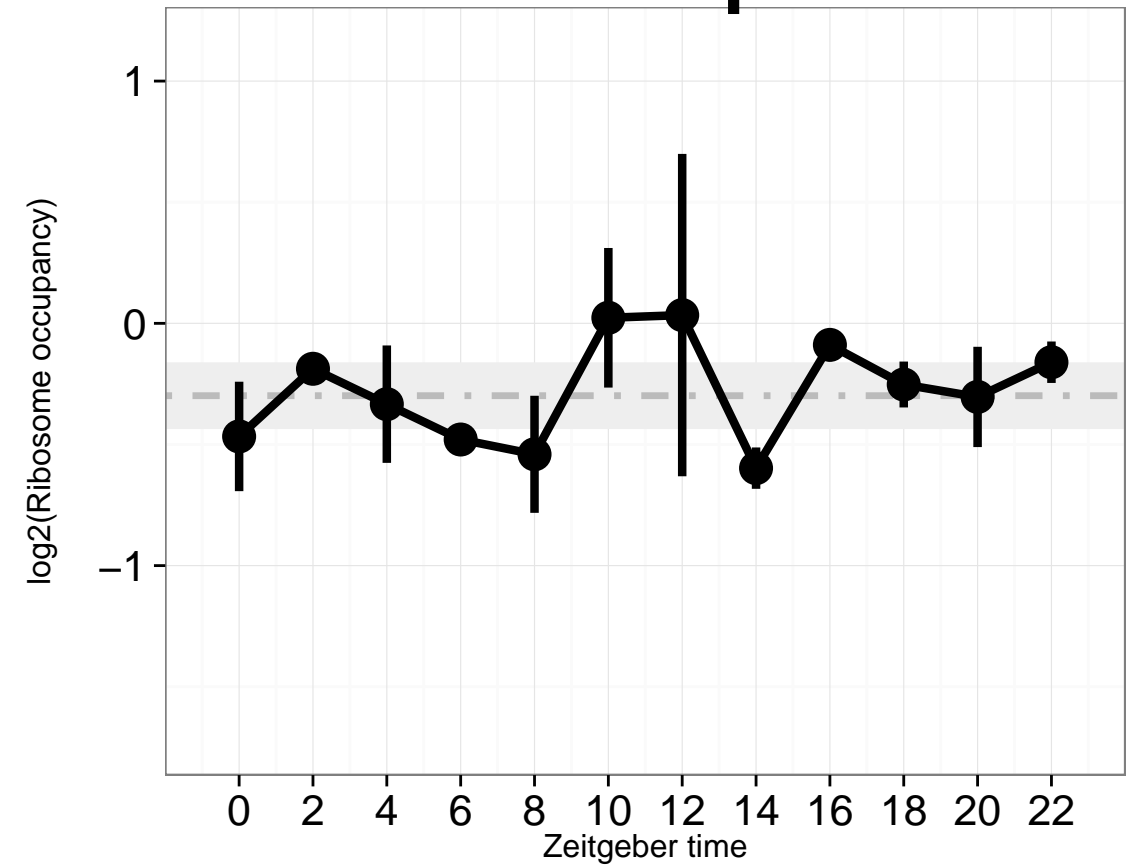

Supplement: Supplementary file 6448 [file 1]

## Nphp3

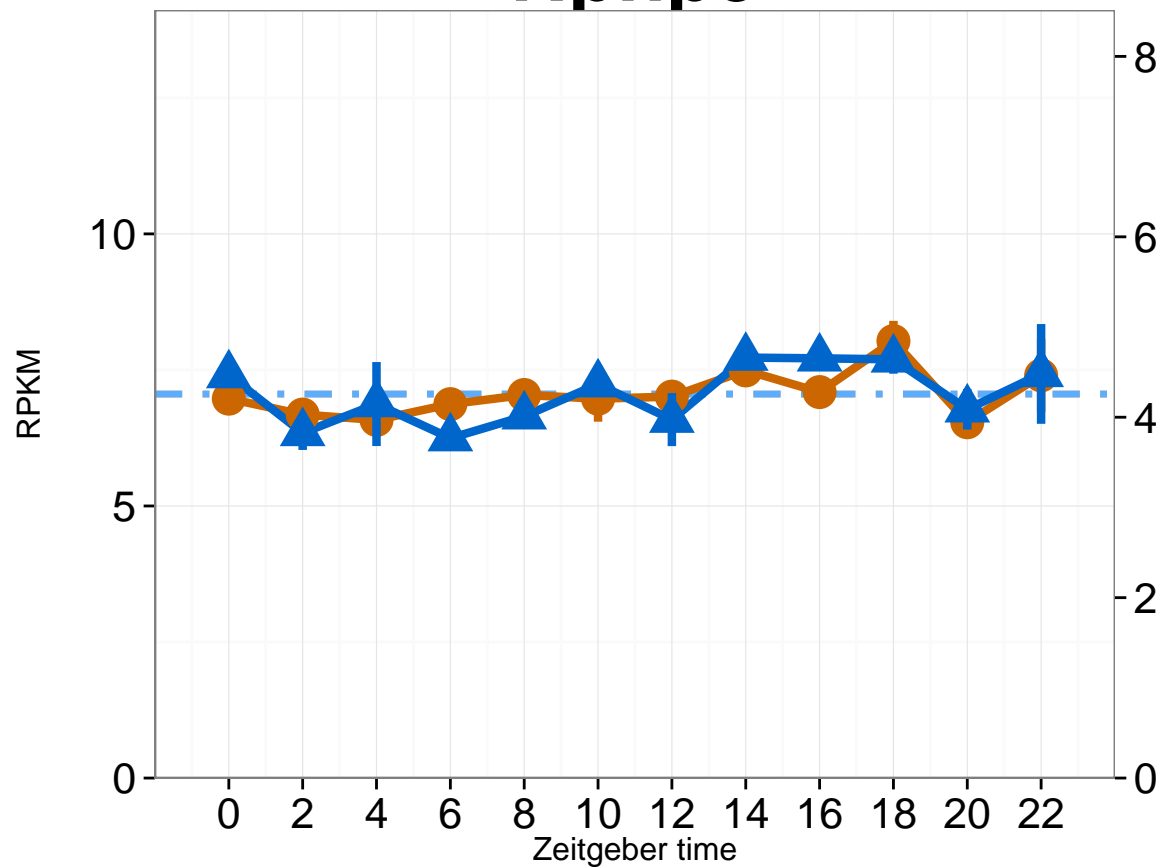

## Nphp3

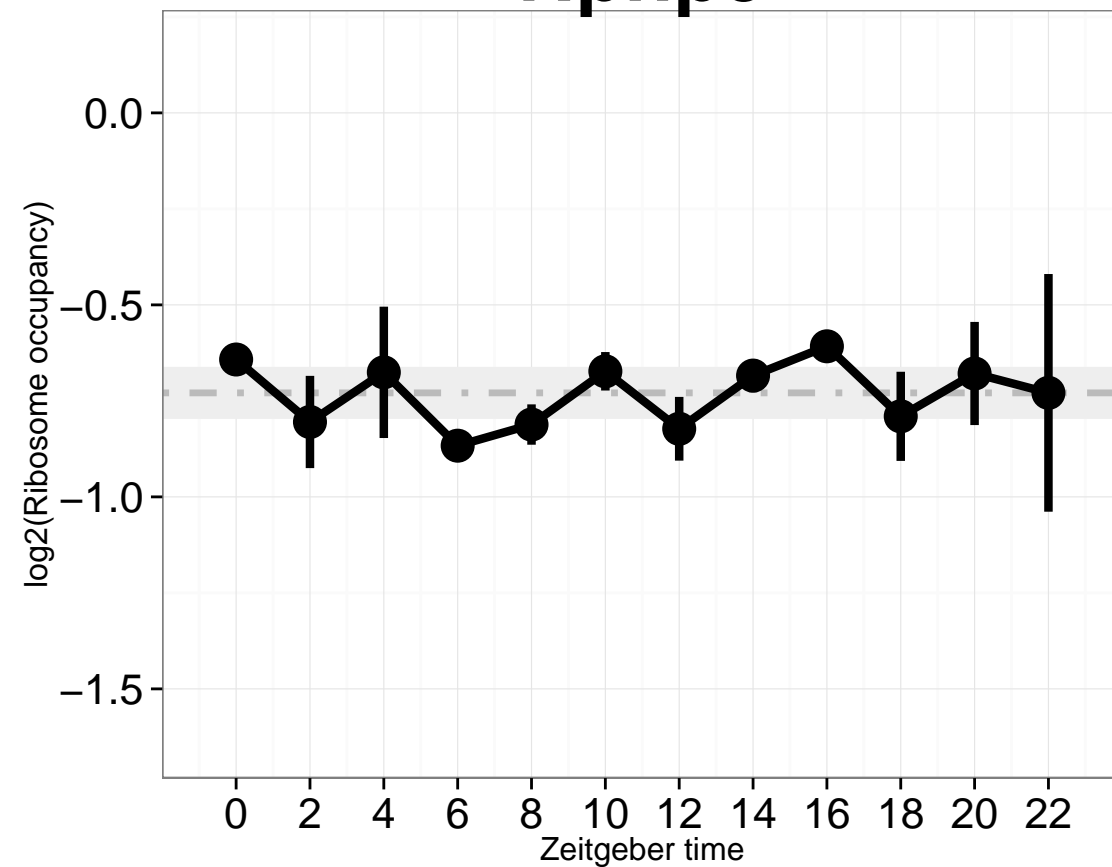

Supplement: Supplementary file 6449 [file 1]

Pcolce2

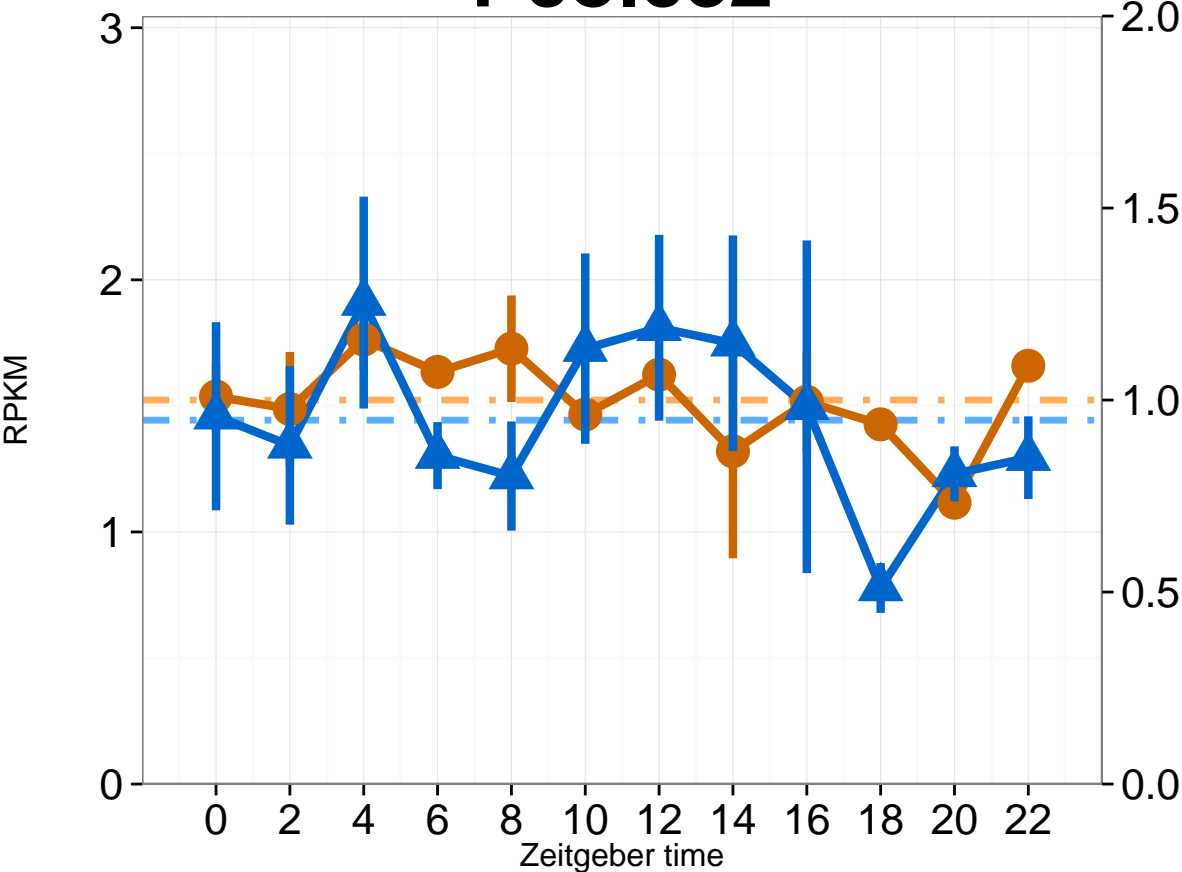

Pcolce2

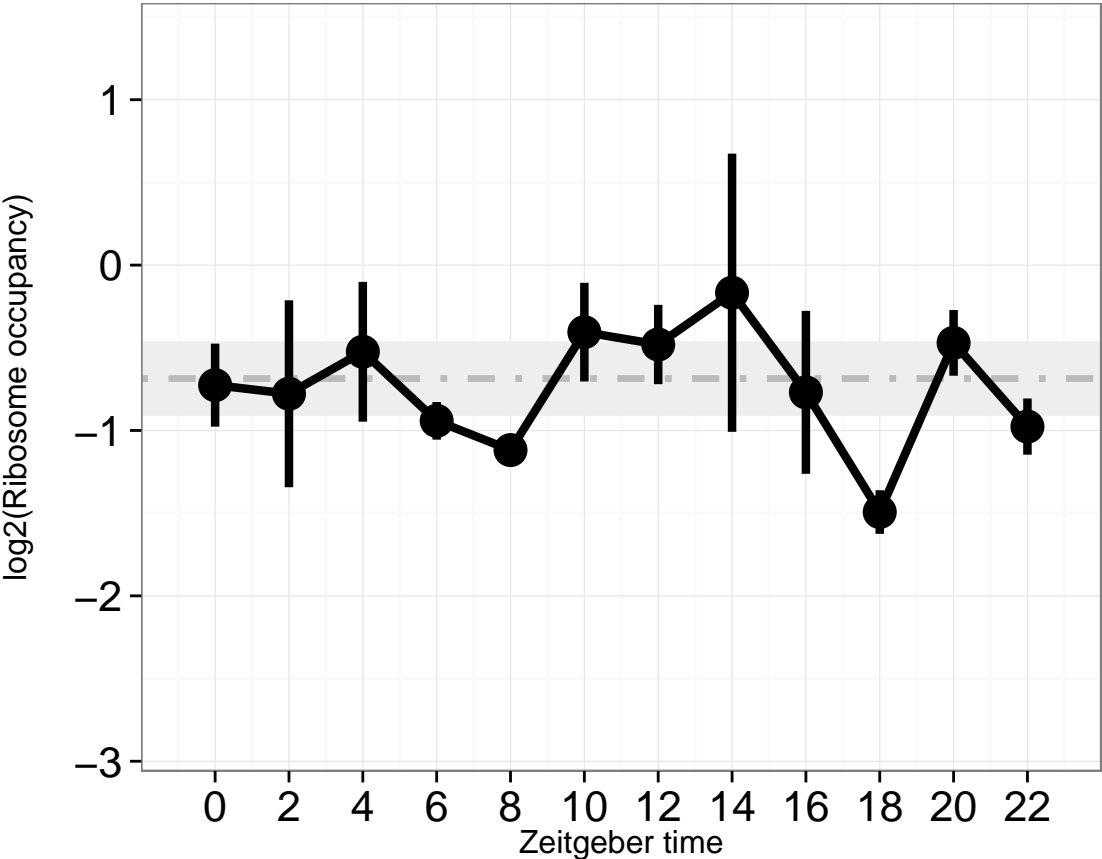

Supplement: Supplementary file 6450 [file 1]

# Lag3

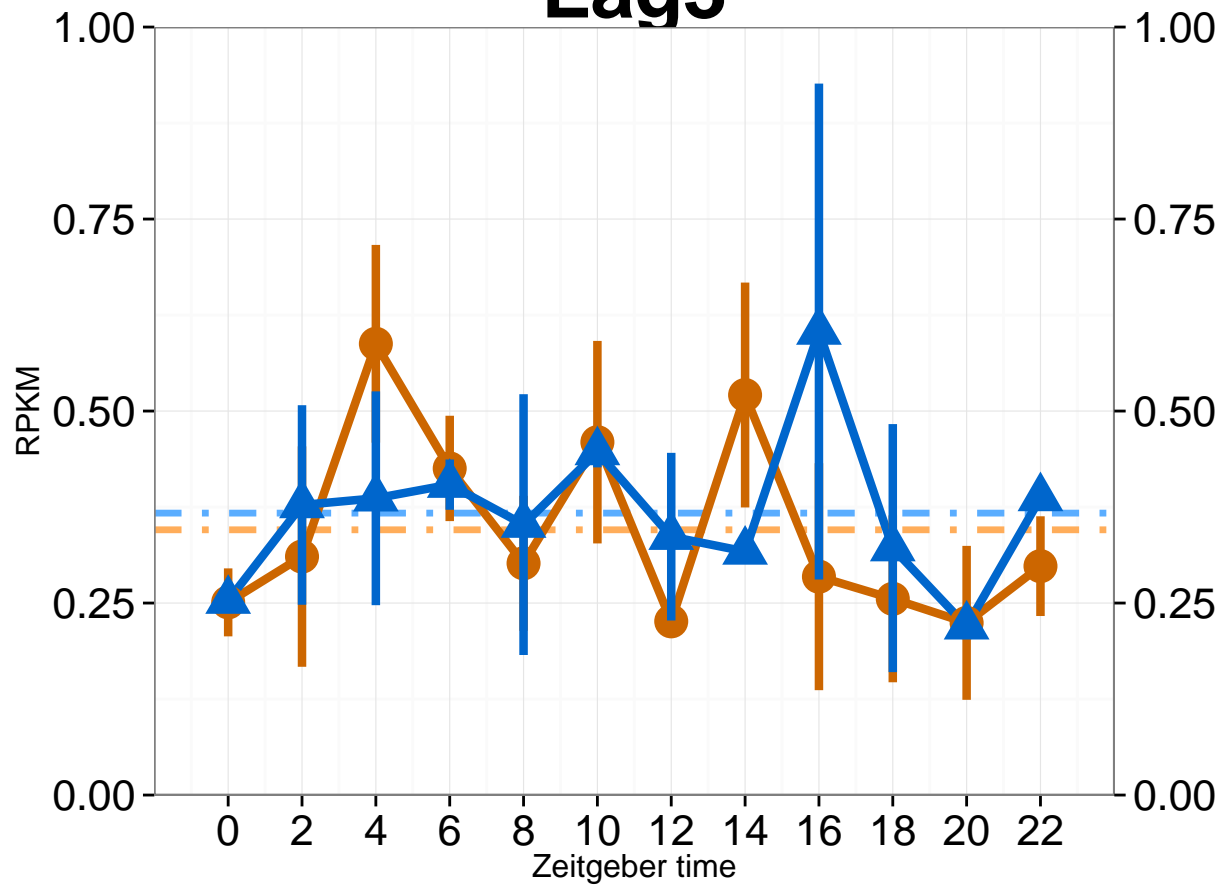

# Lag3

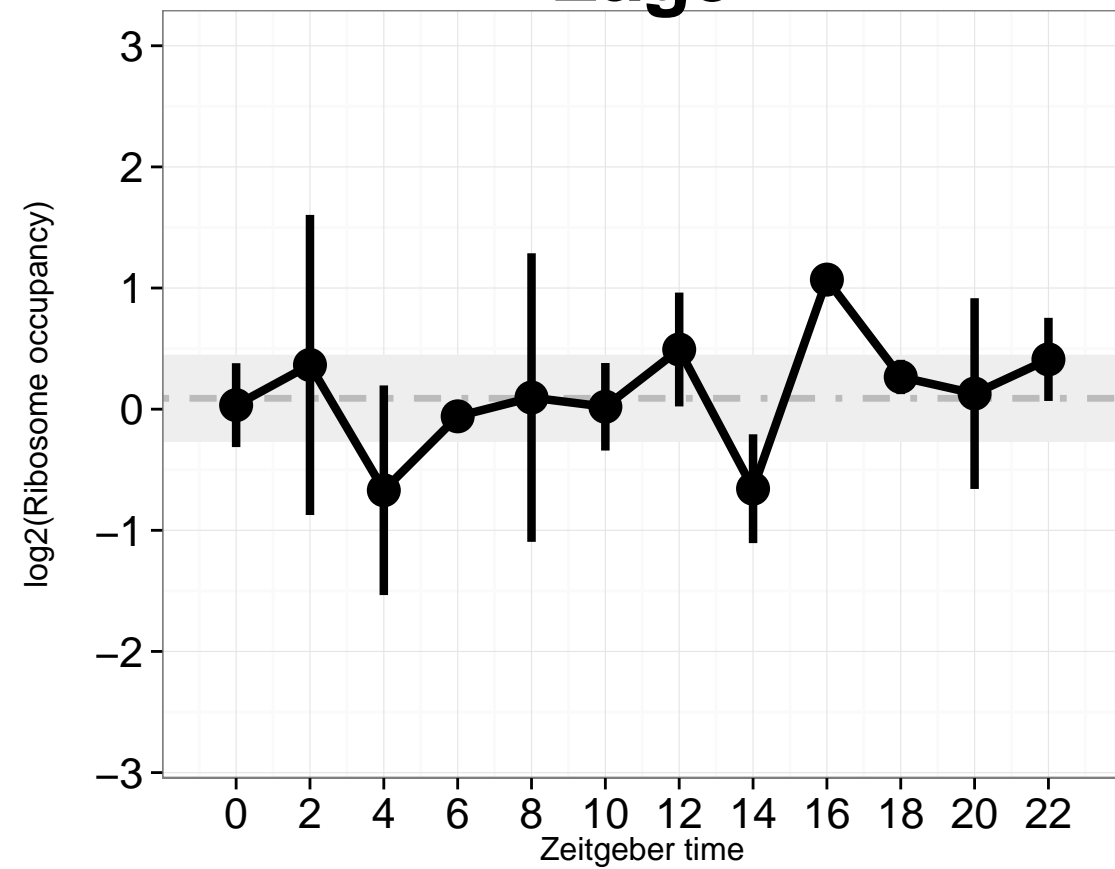

Supplement: Supplementary file 6451 [file 1]

# Hoxa7

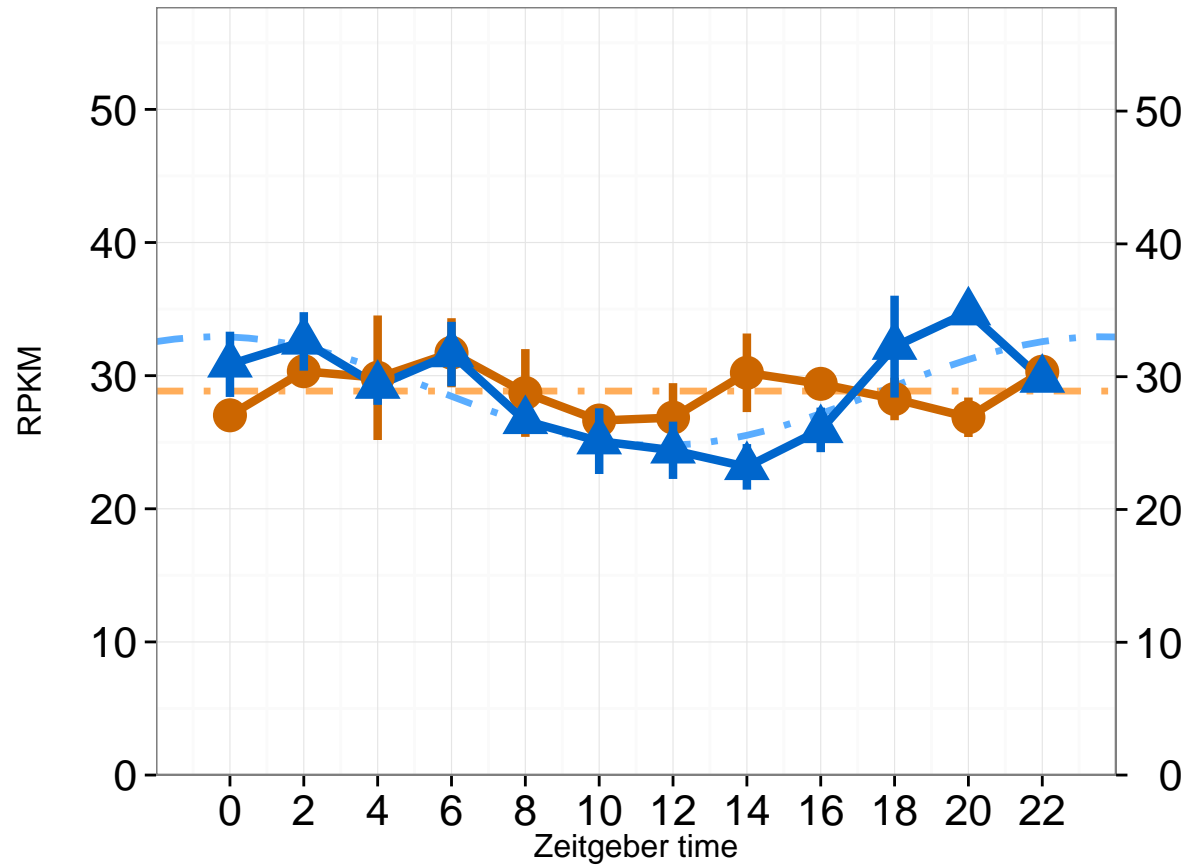

# Hoxa7

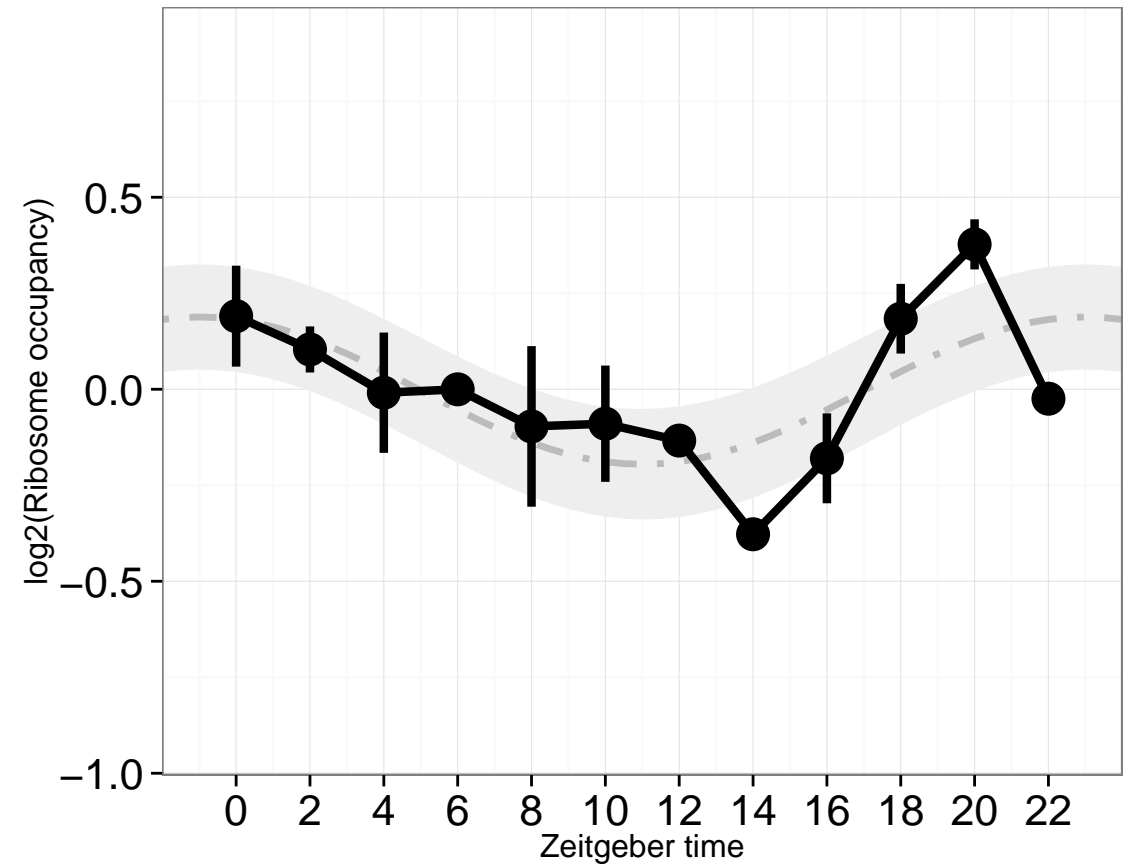

Supplement: Supplementary file 6452 [file 1]

# Itga3

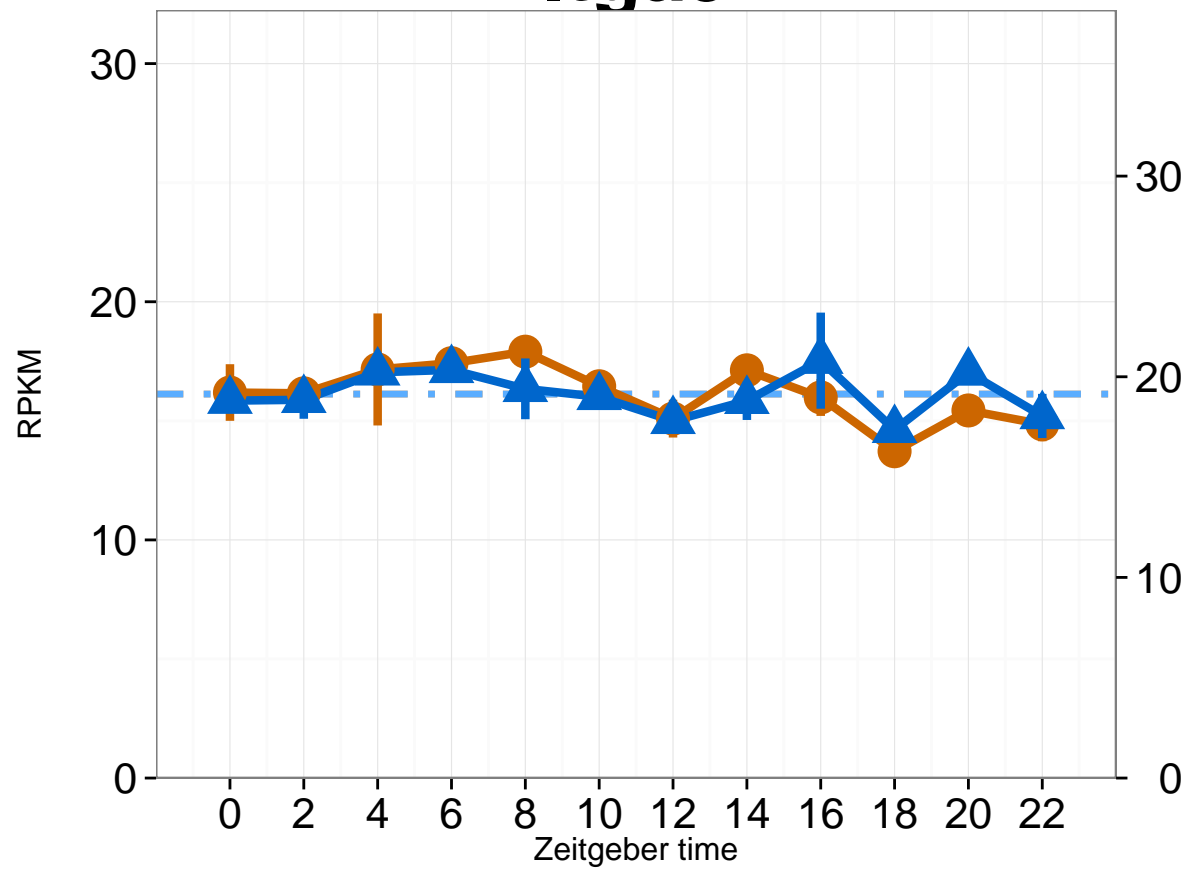

# Itga3

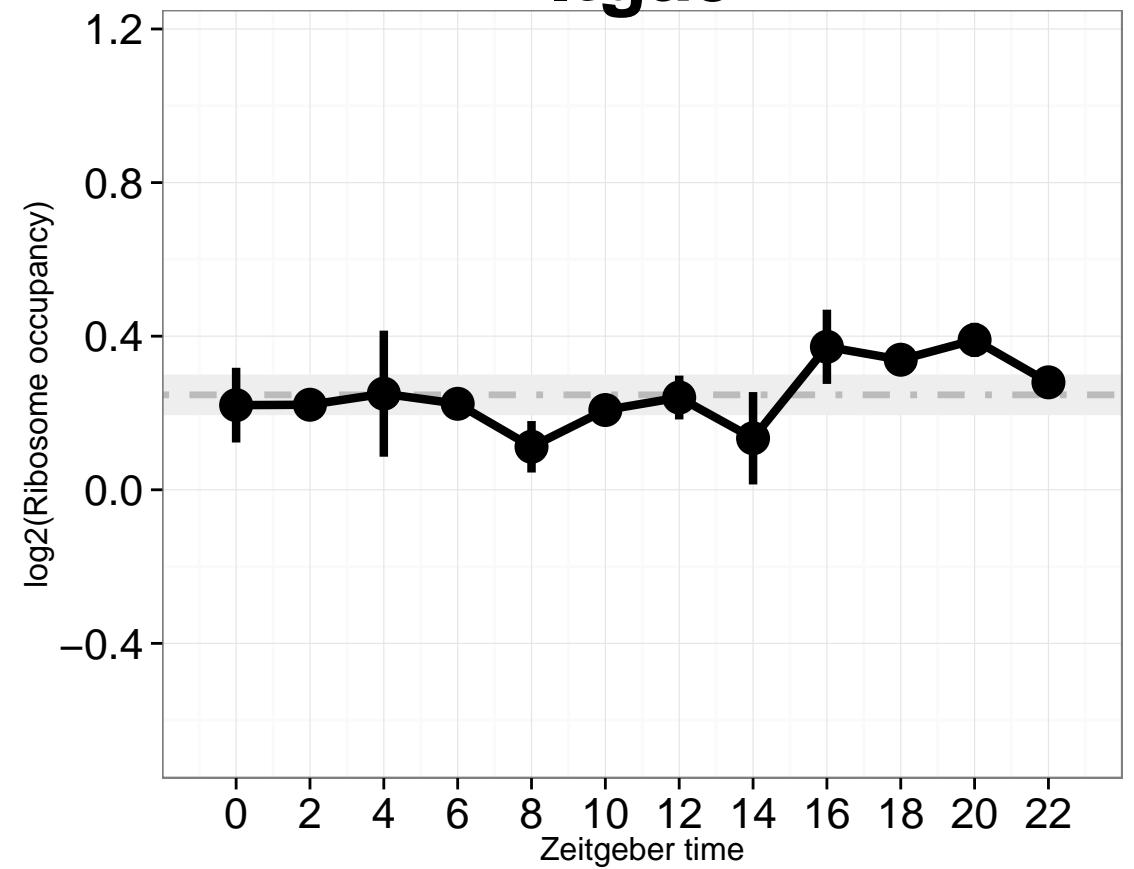

Supplement: Supplementary file 6453 [file 1]

## Mybl2

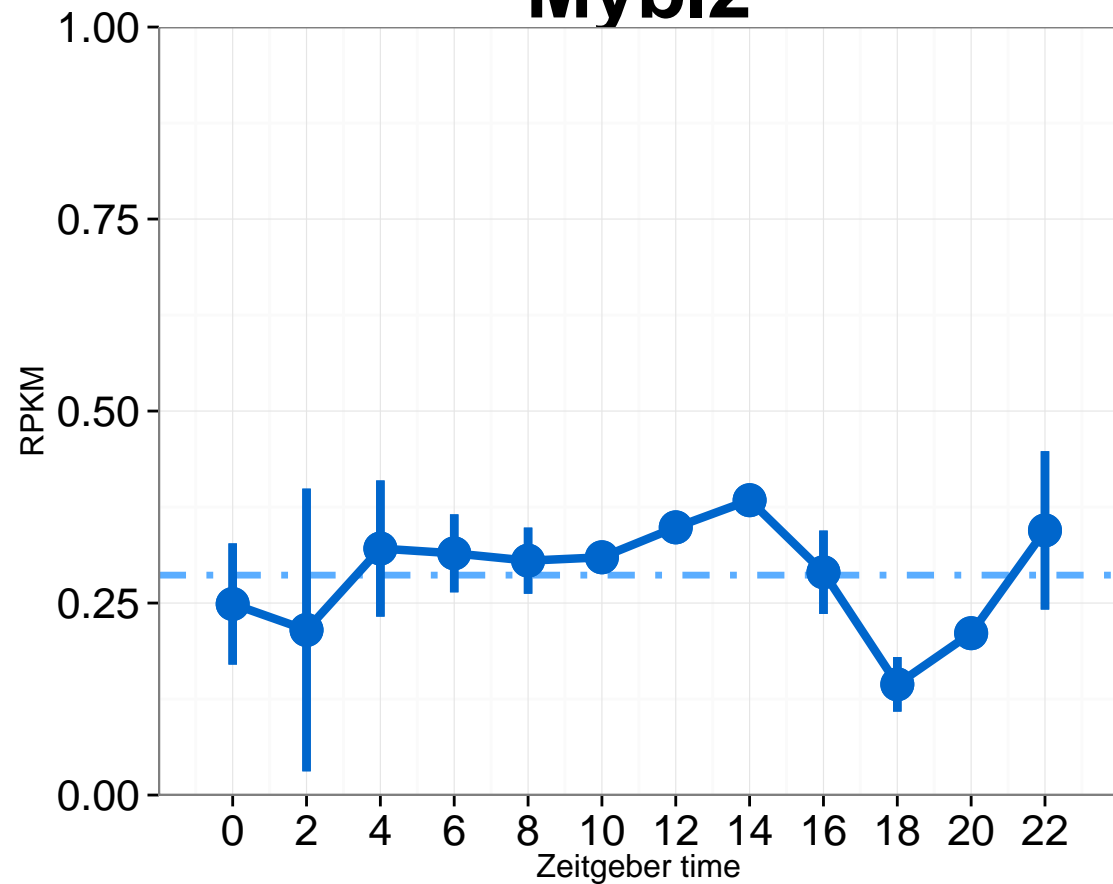

## Mybl2 log2(Ribosome occupancy

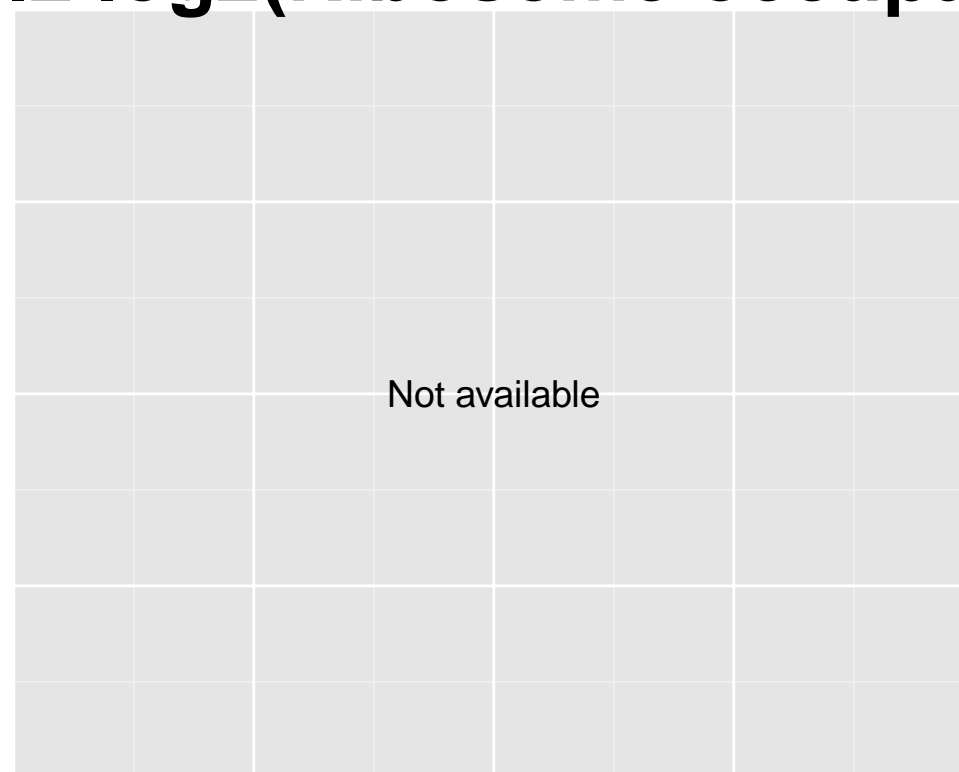

Supplement: Supplementary file 6454 [file 1]

## Mfsd11

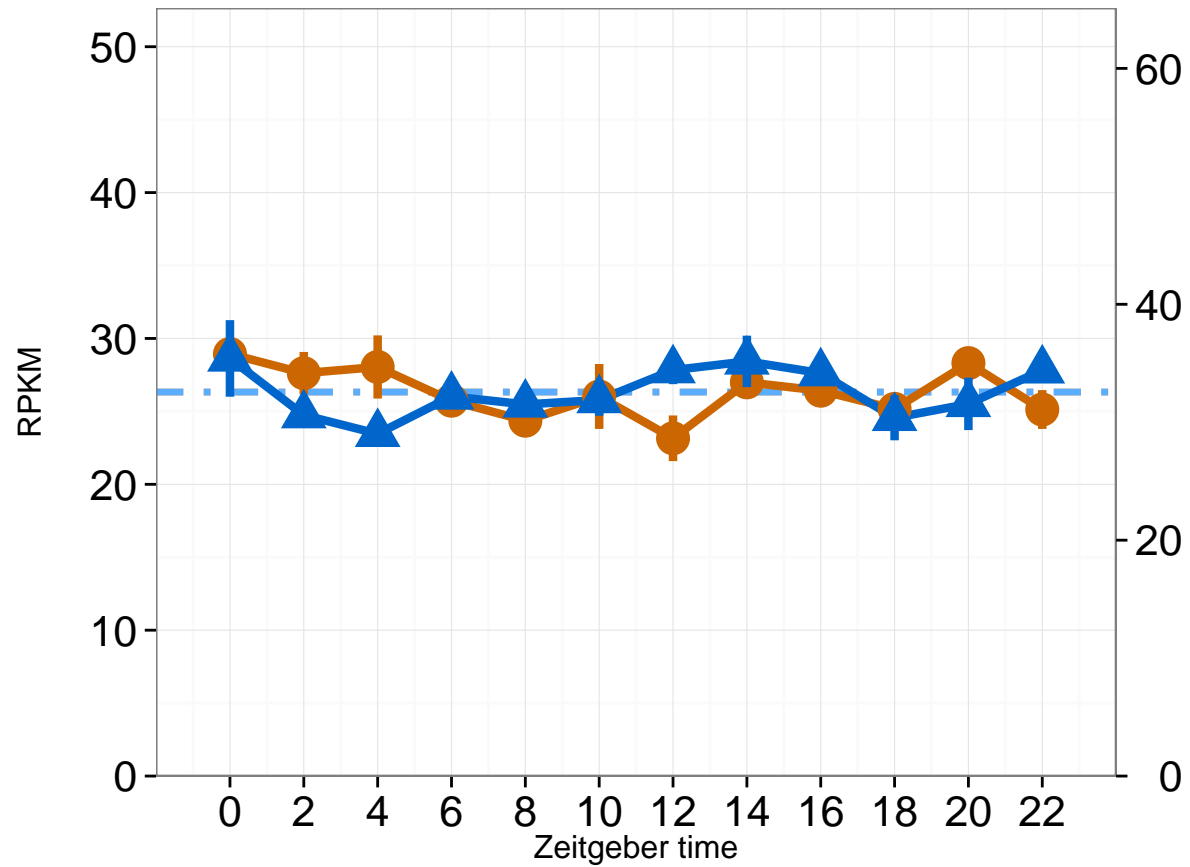

## Mfsd11

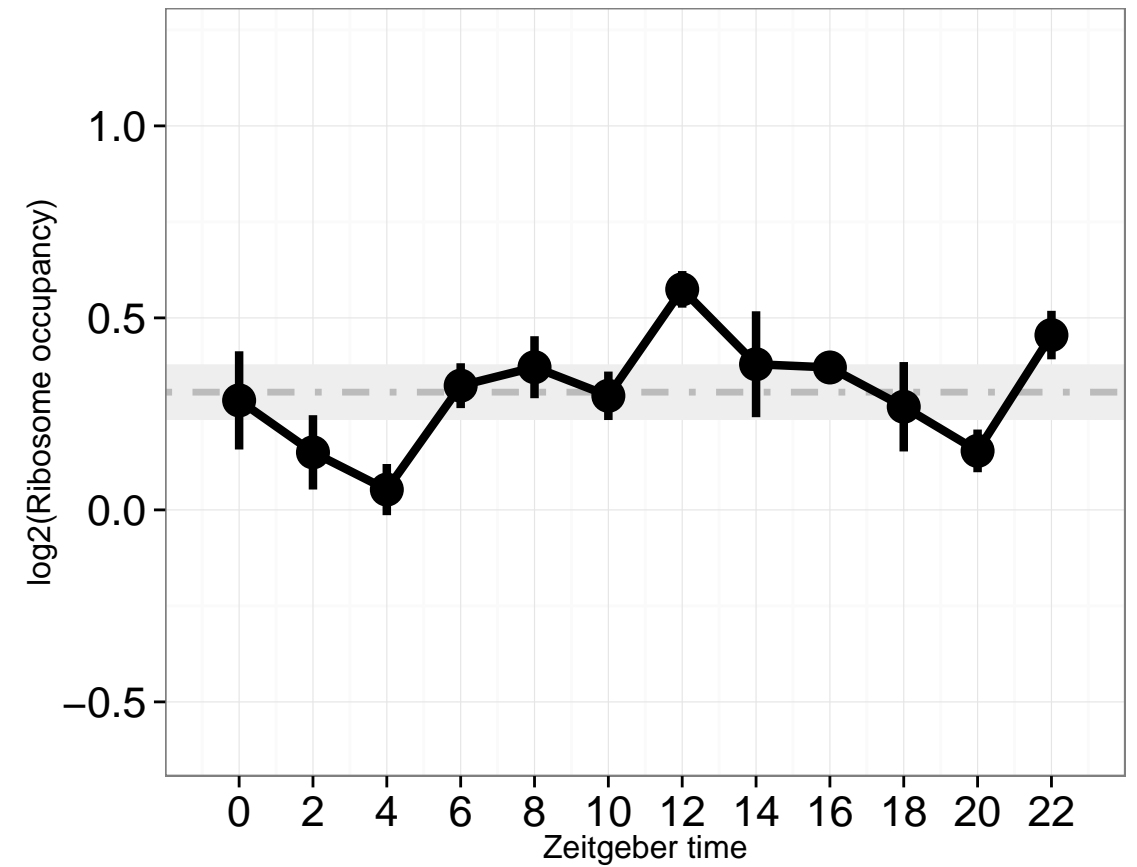

Supplement: Supplementary file 6455 [file 1]

## Gm10417

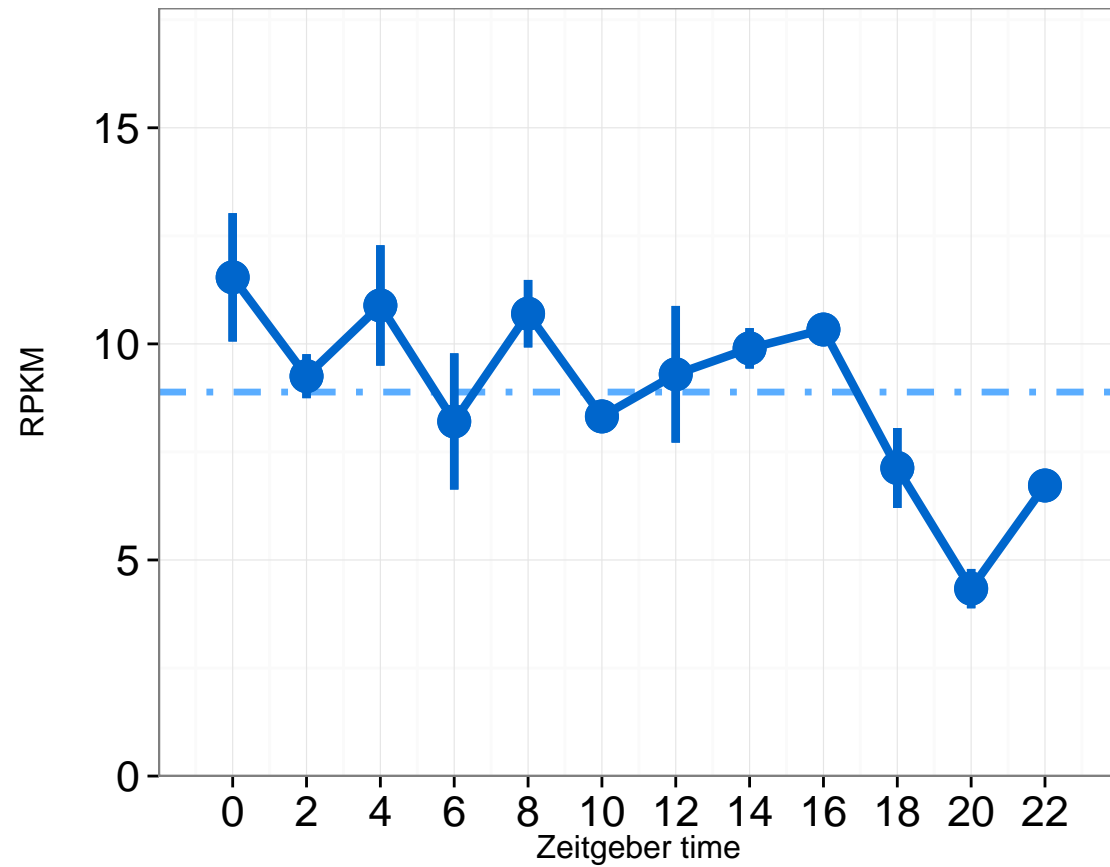

## Gm10417 log2(Ribosome occupanc

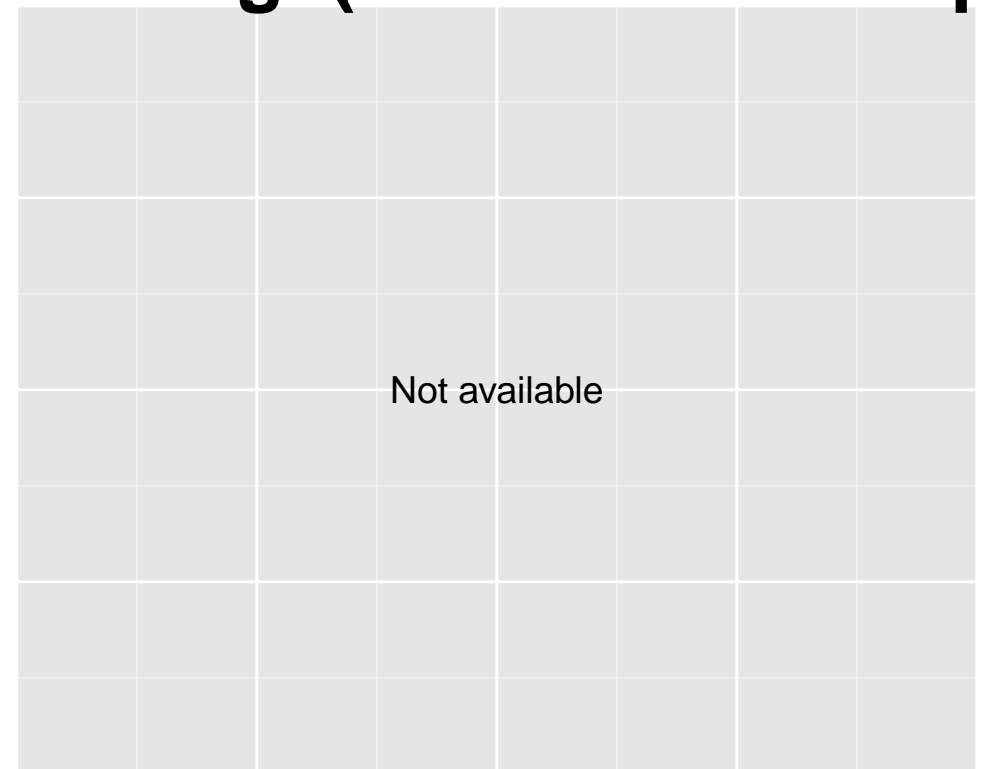

Supplement: Supplementary file 6456 [file 1]

## Diap1

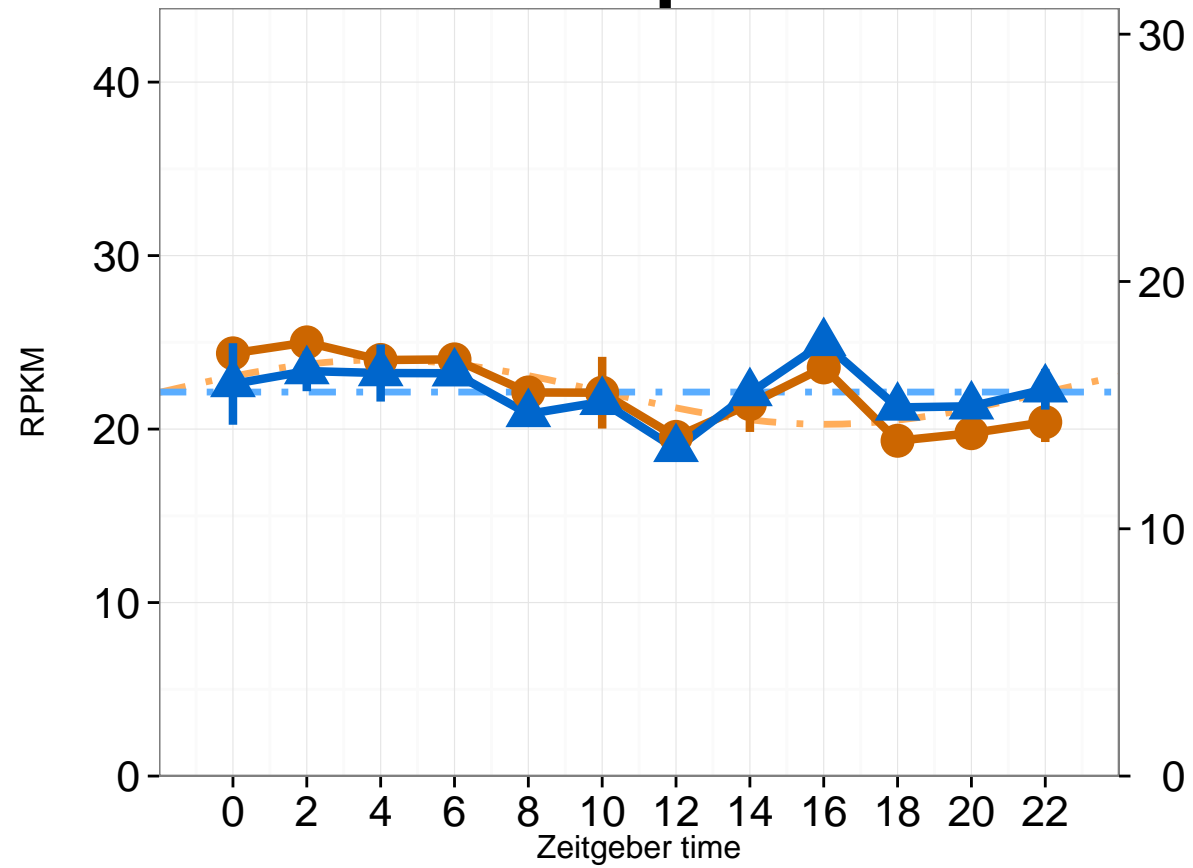

## Diap1

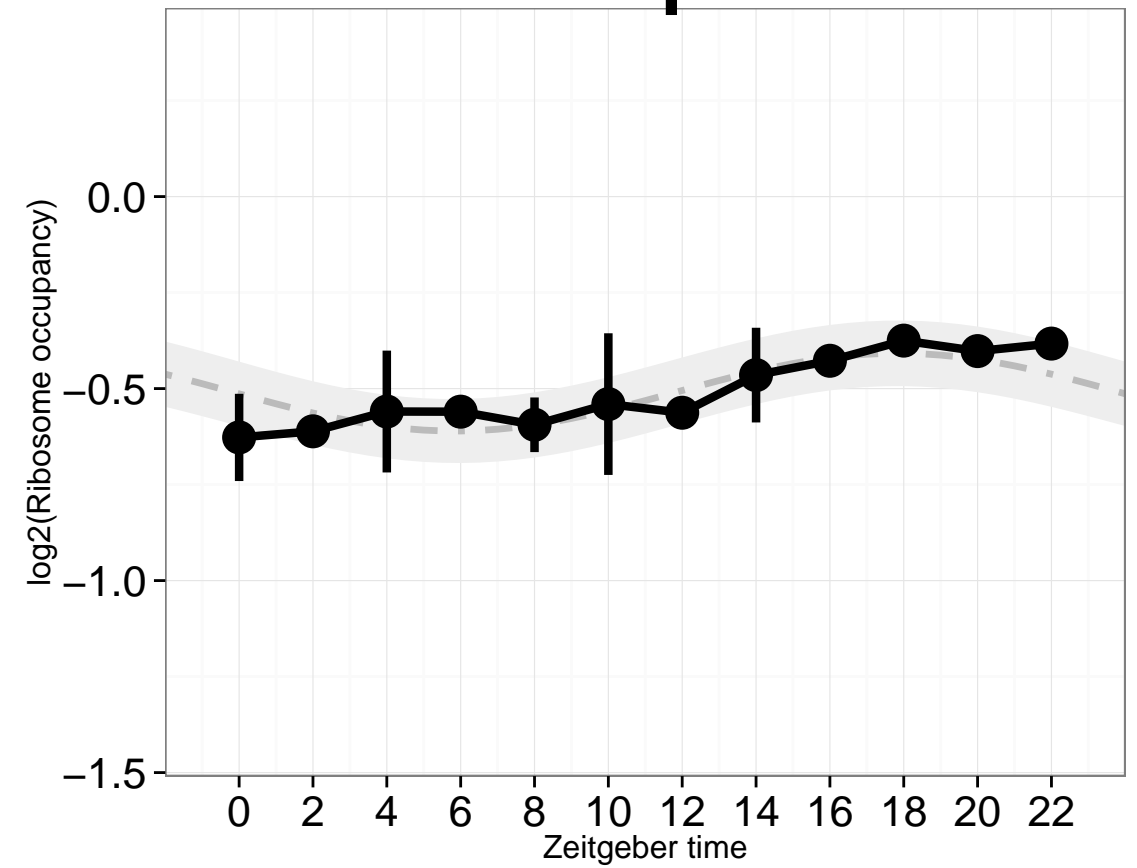

Supplement: Supplementary file 6457 [file 1]

## Edem2

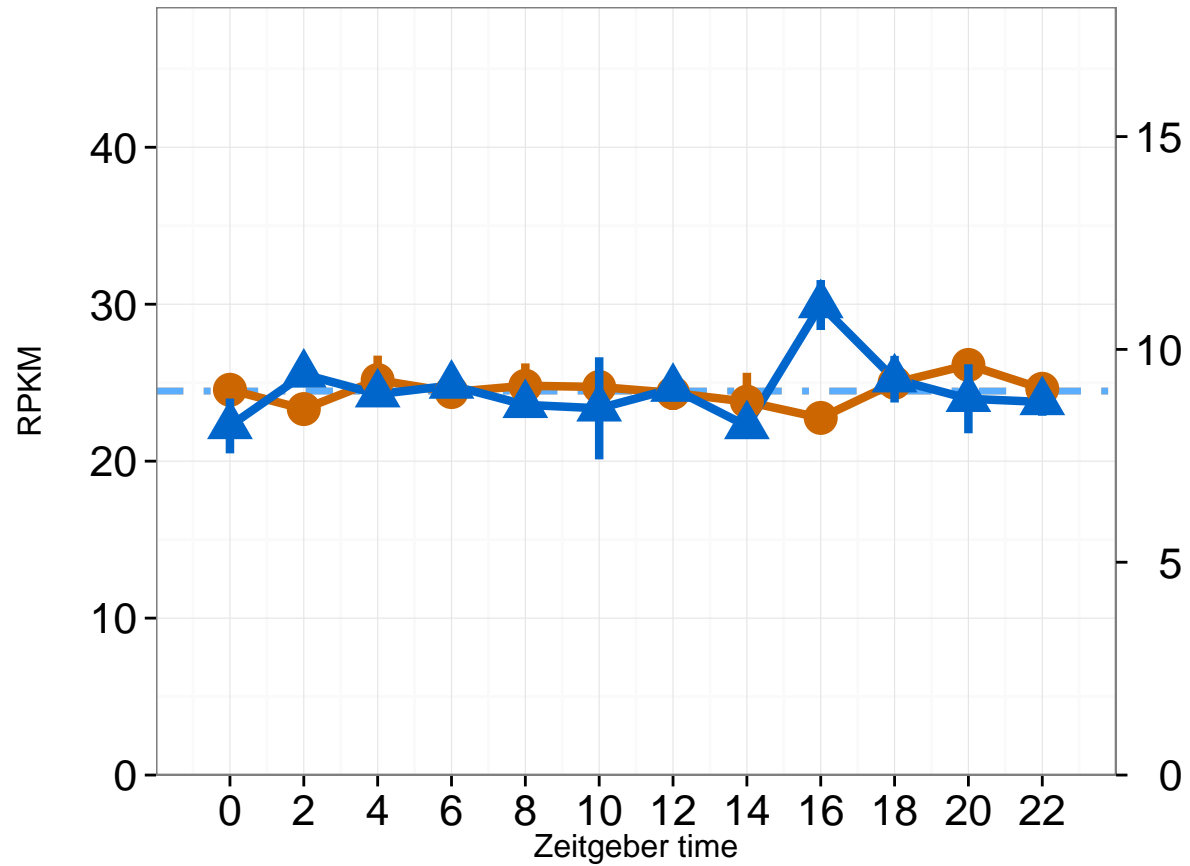

## Edem2

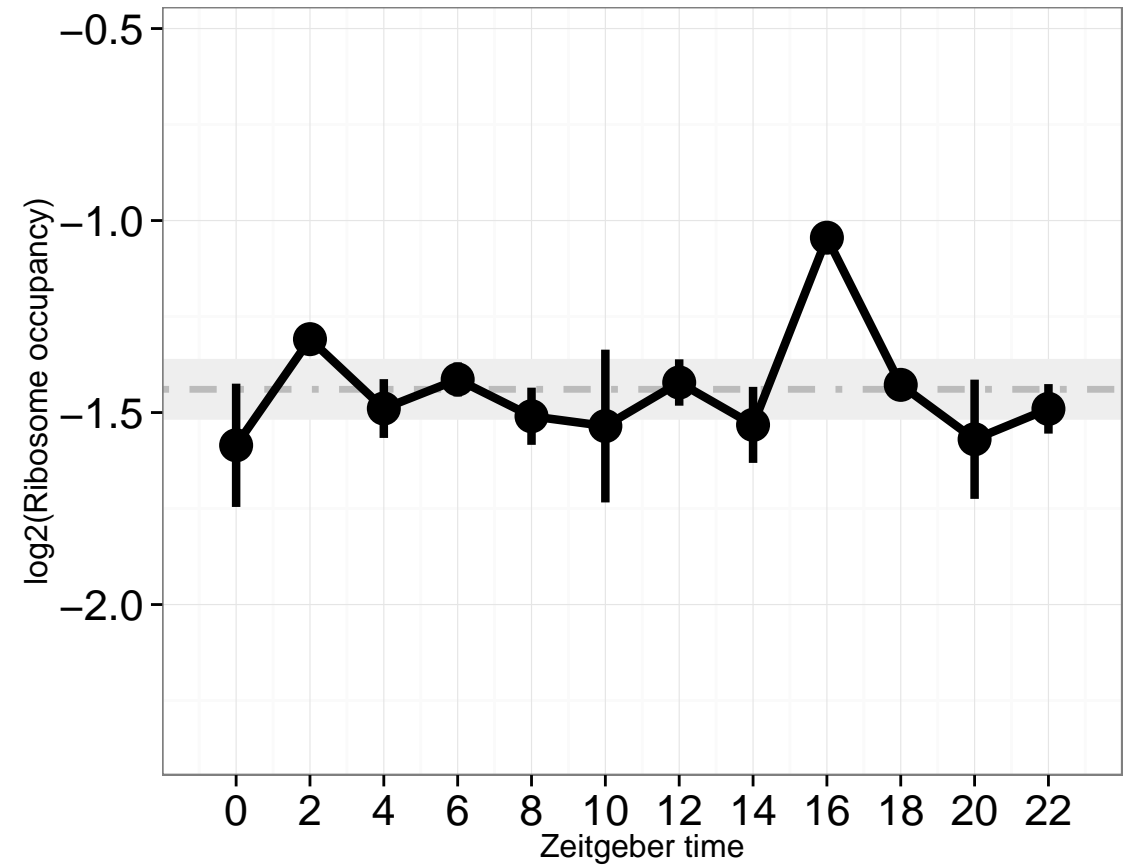

Supplement: Supplementary file 6458 [file 1]

## Nos2

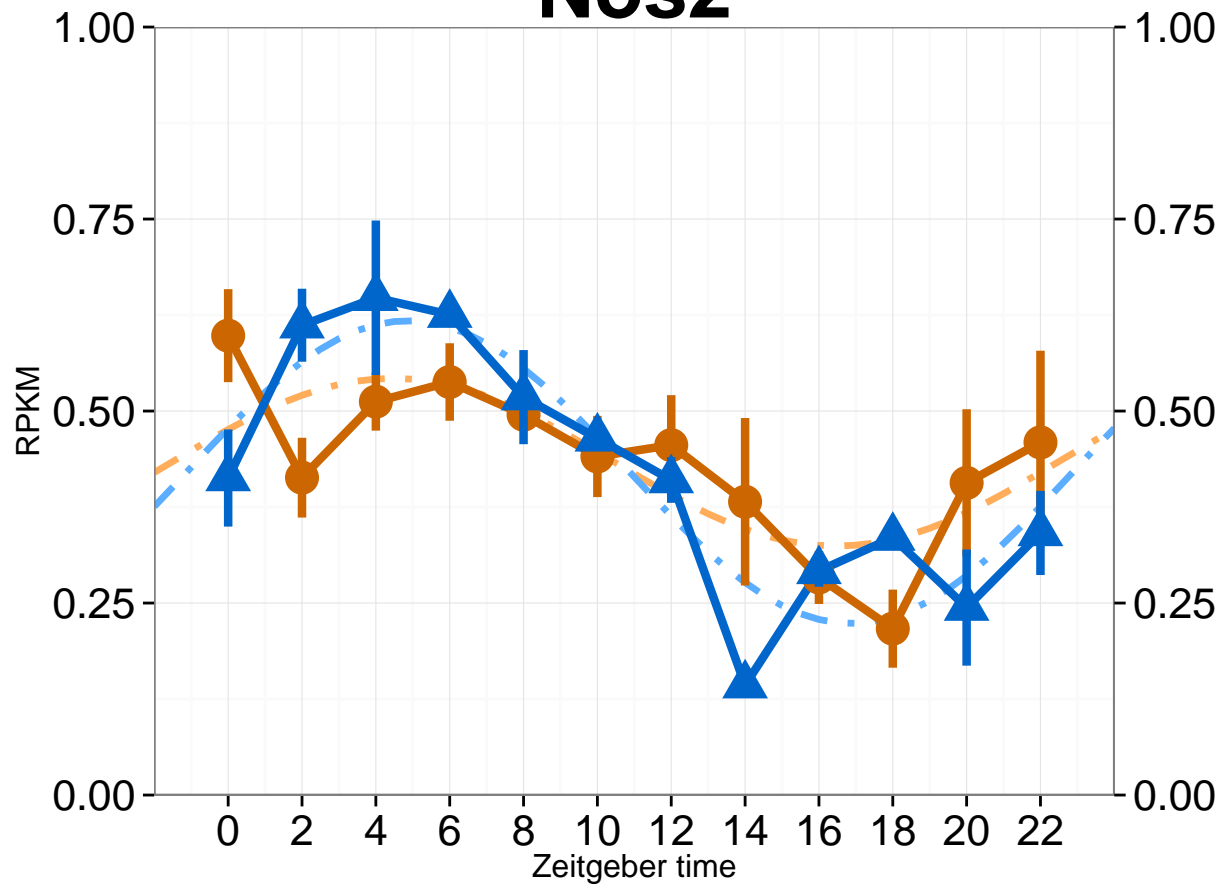

## Nos2

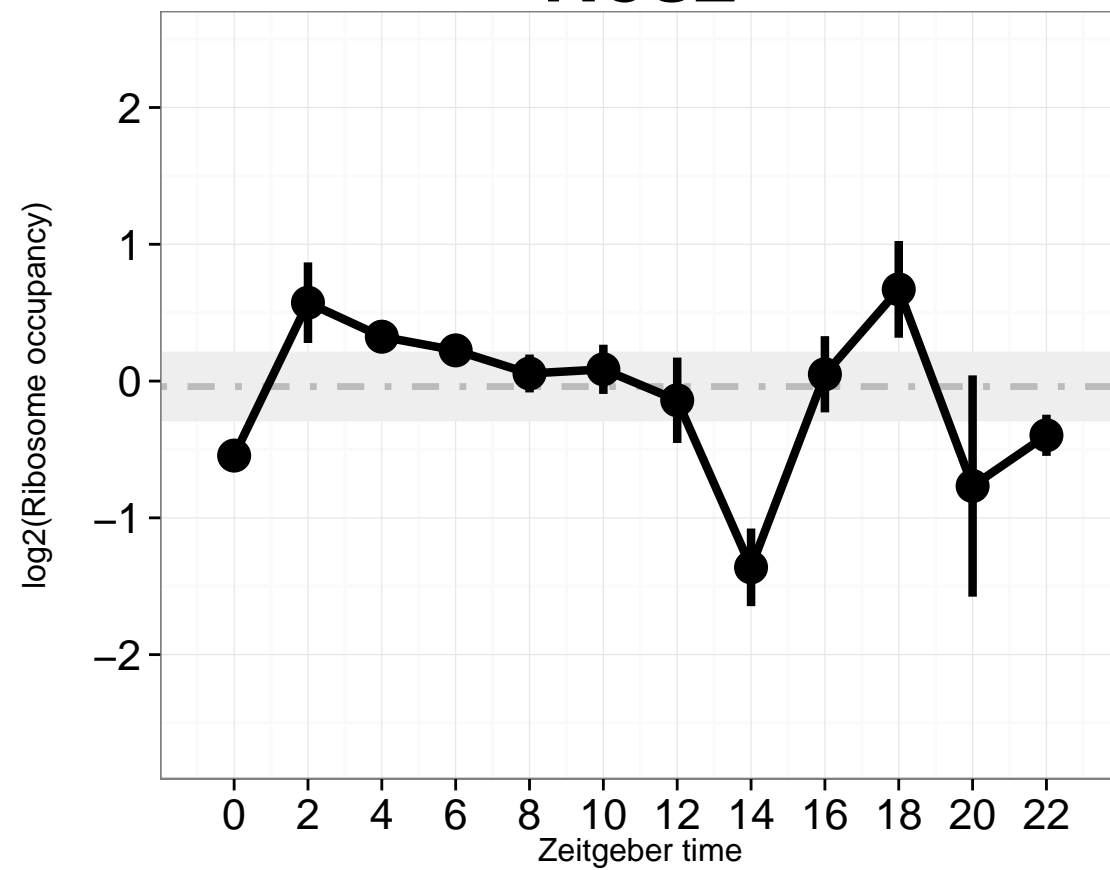

Supplement: Supplementary file 6459 [file 1]

## Riok1

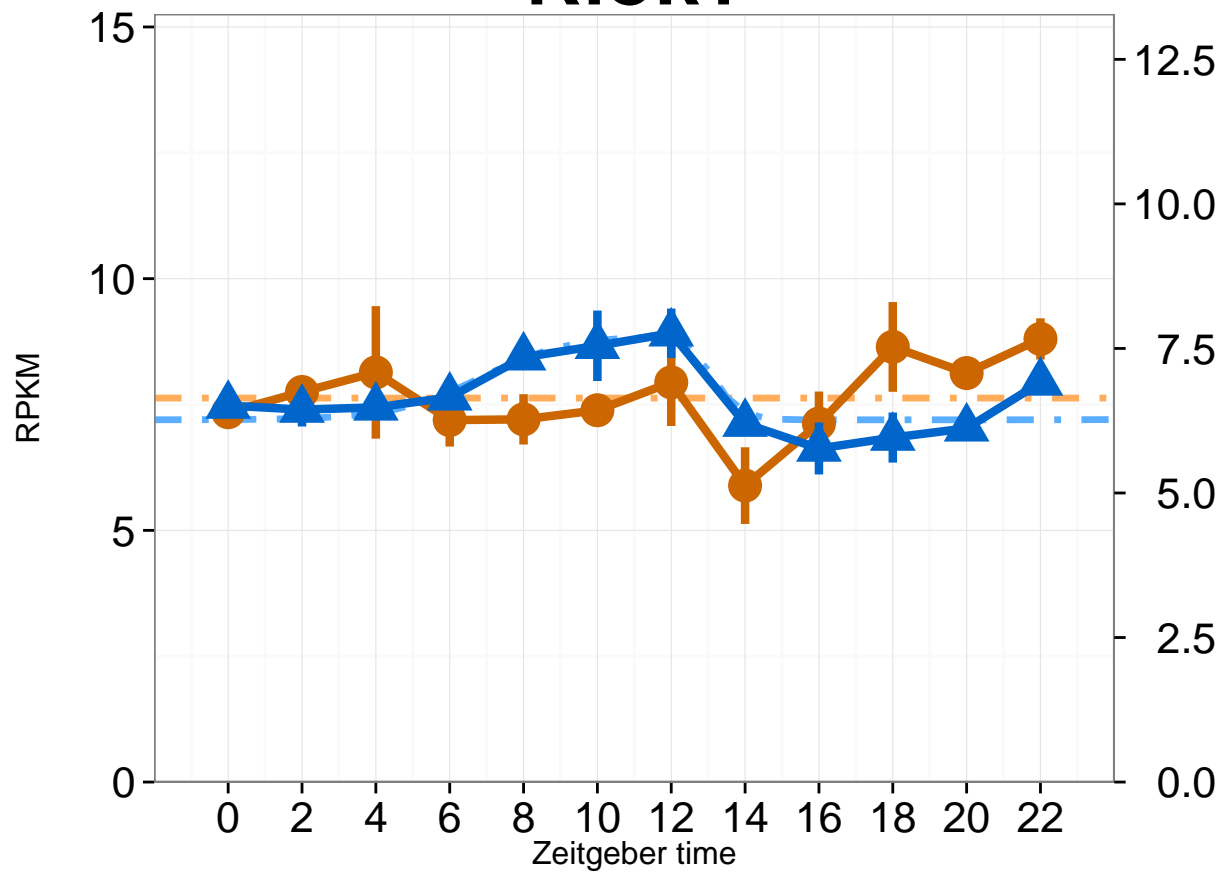

## Riok1

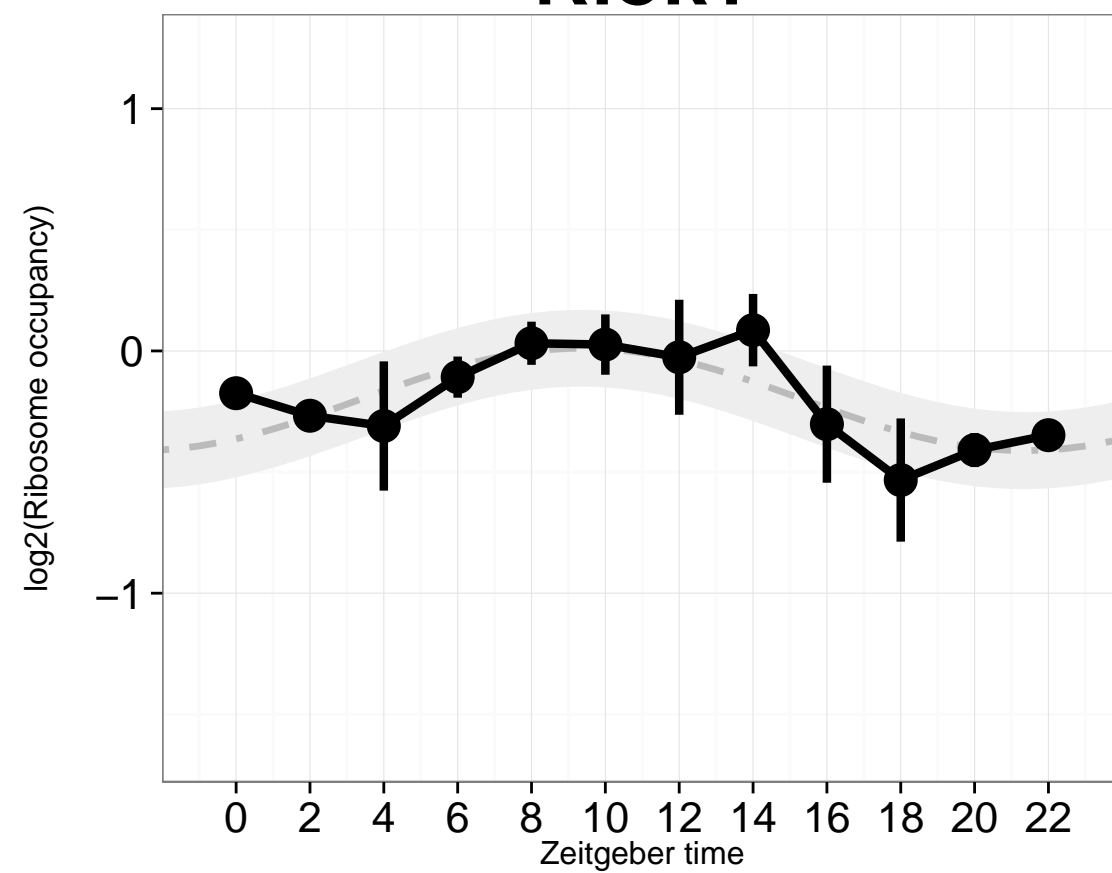

Supplement: Supplementary file 6460 [file 1]

## Ambra1

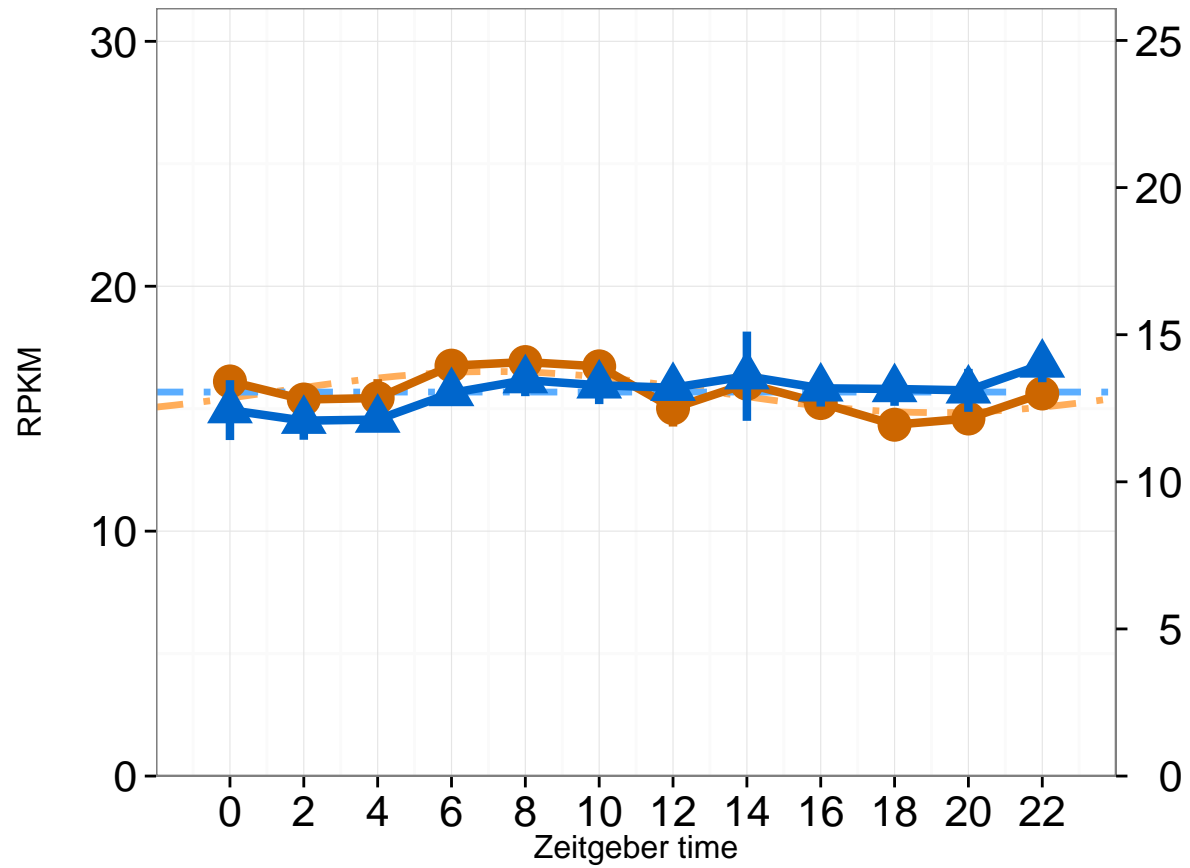

## Ambra1

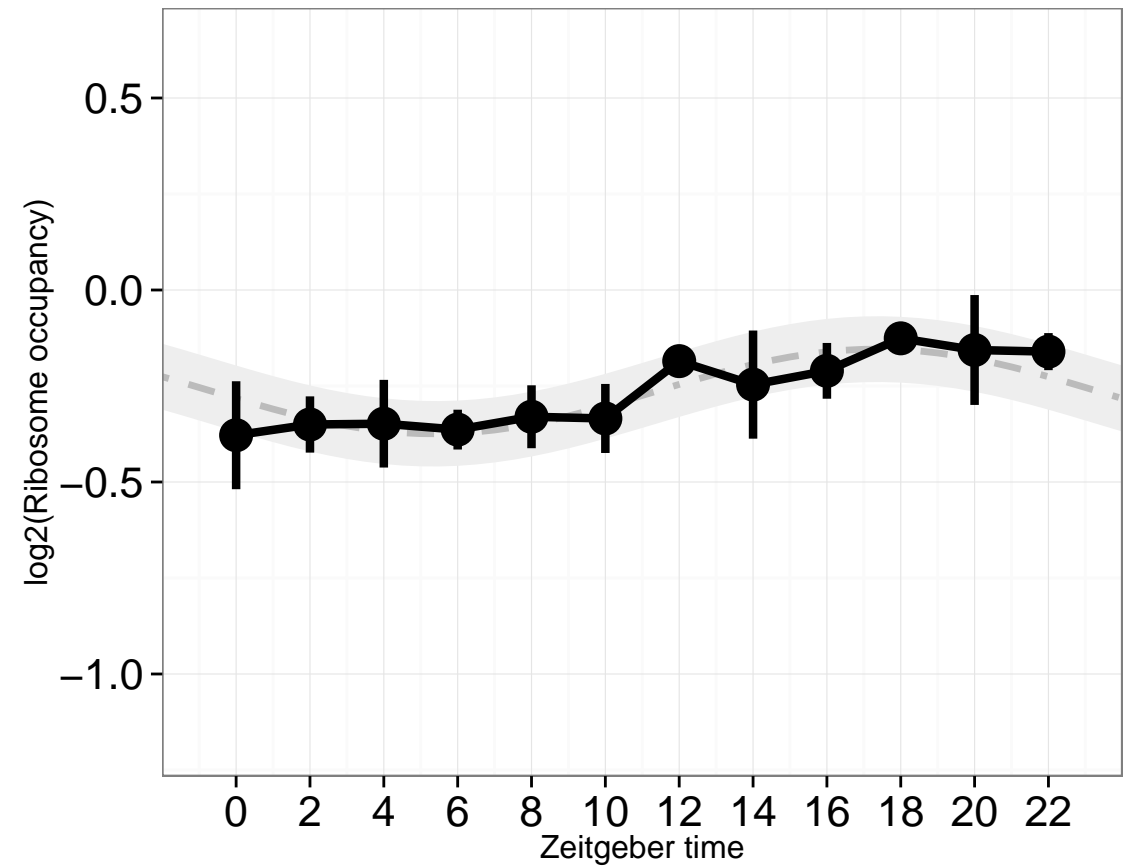

Supplement: Supplementary file 6461 [file 1]

# Tbc1d8

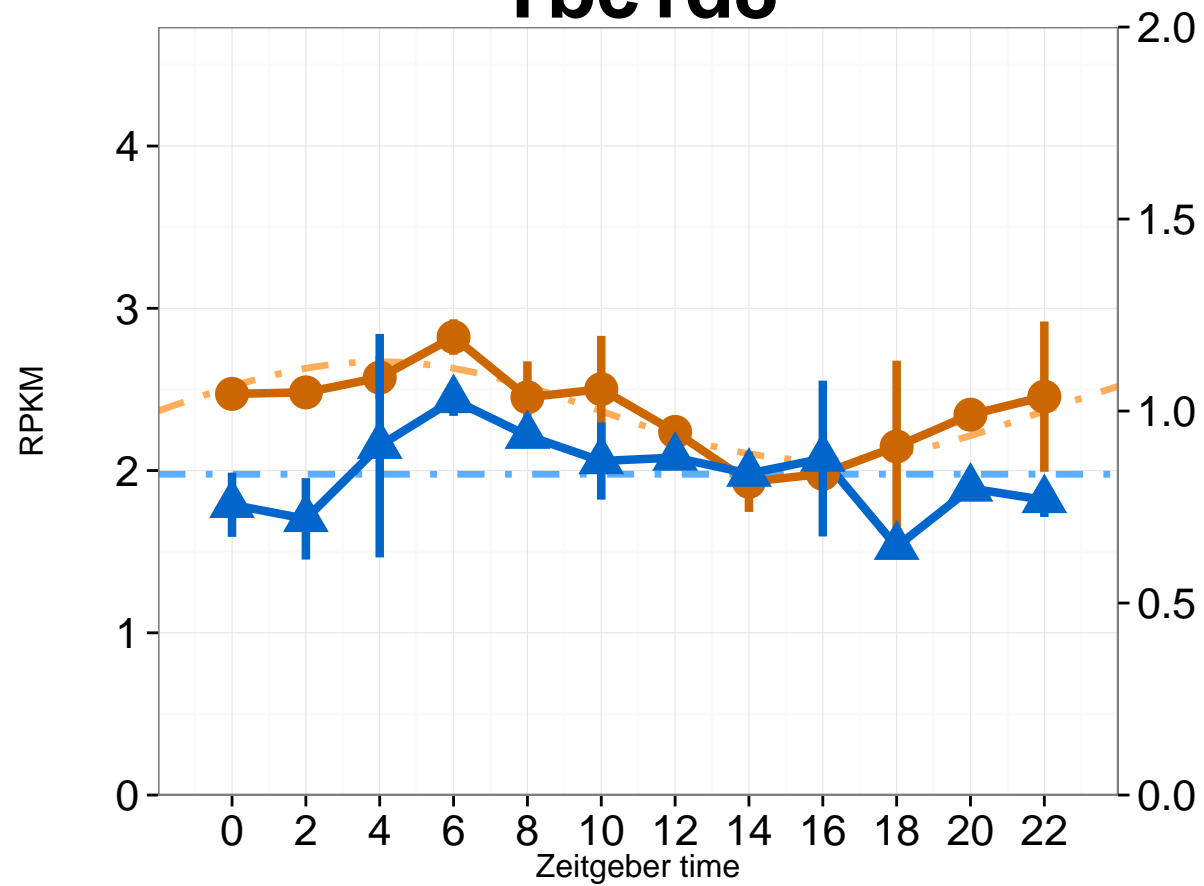

# Tbc1d8

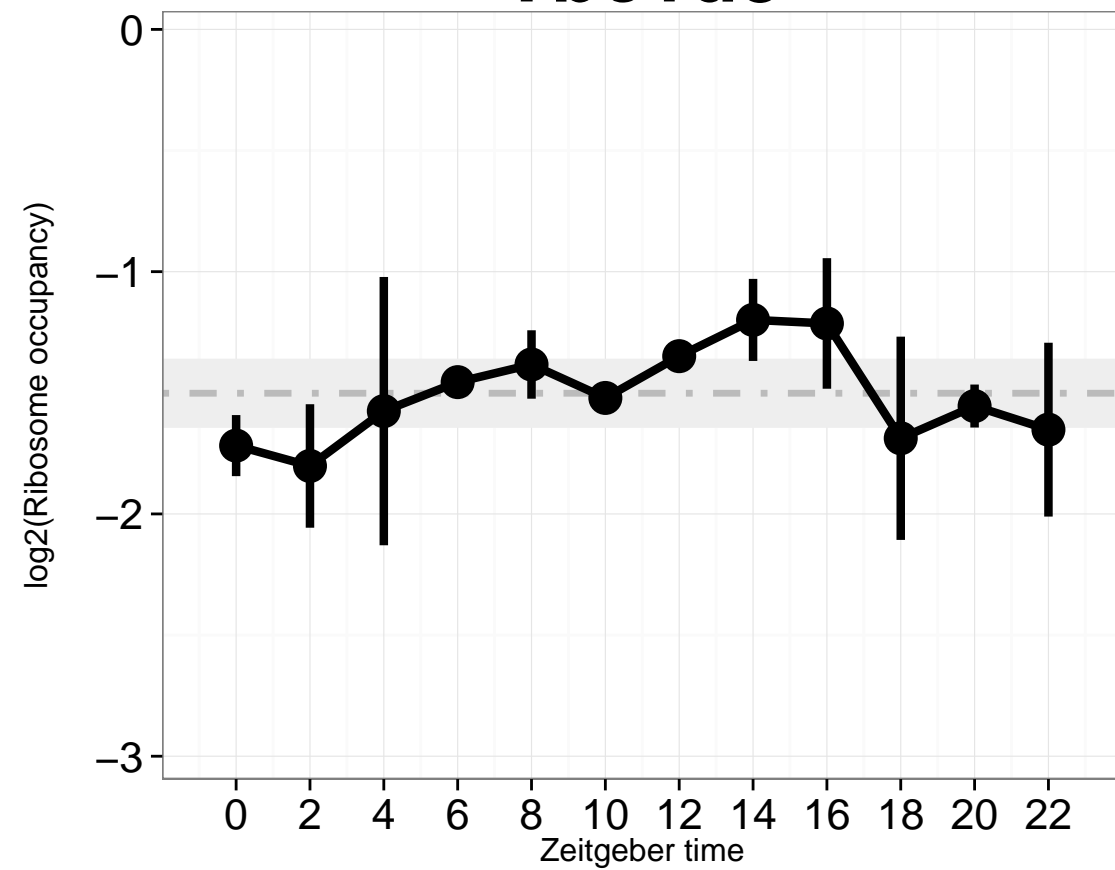

Supplement: Supplementary file 6462 [file 1]

## Ulk4

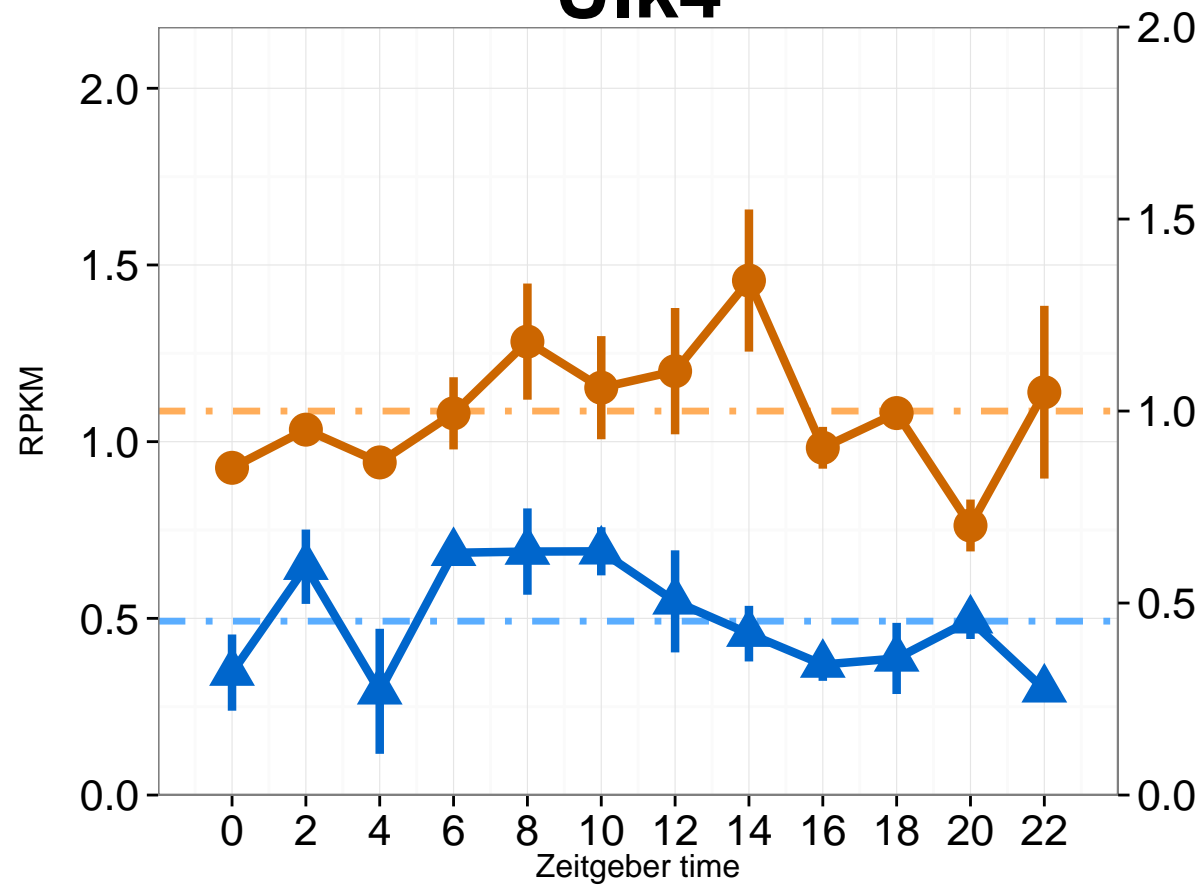

## Ulk4

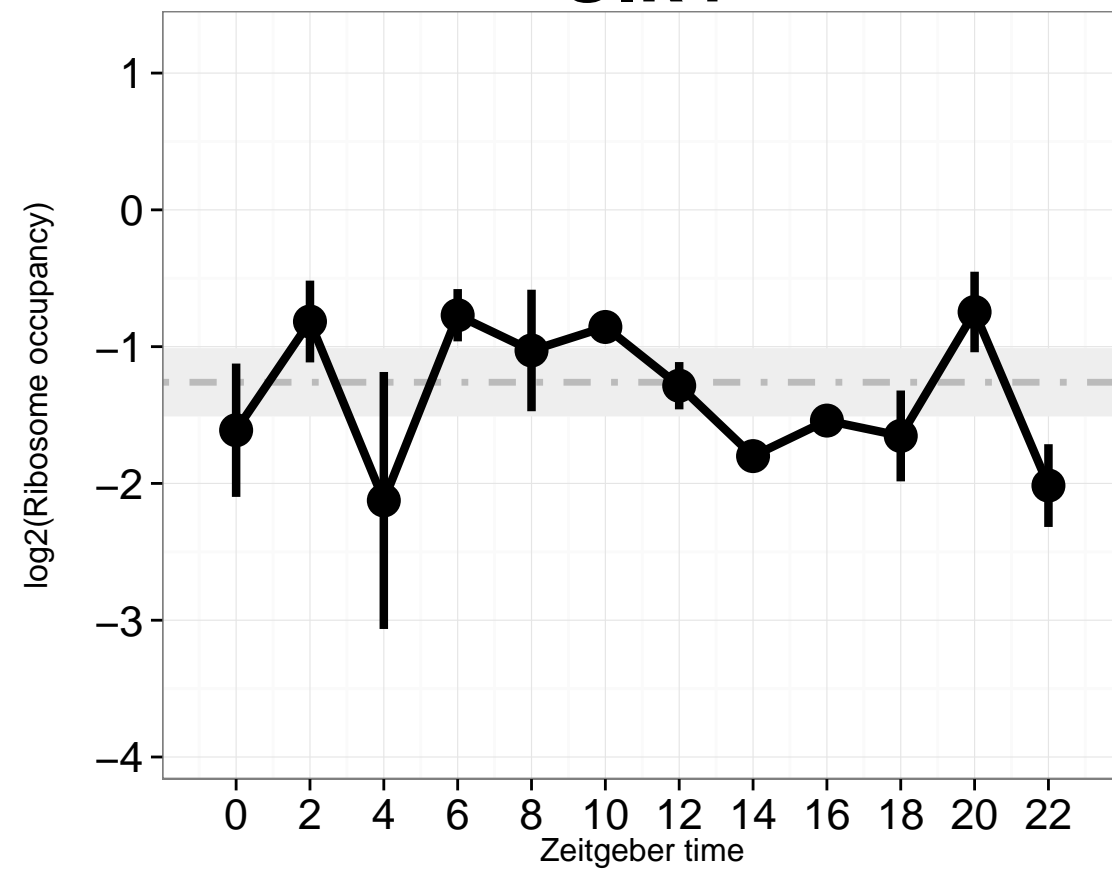

Supplement: Supplementary file 6463 [file 1]

## Frat2

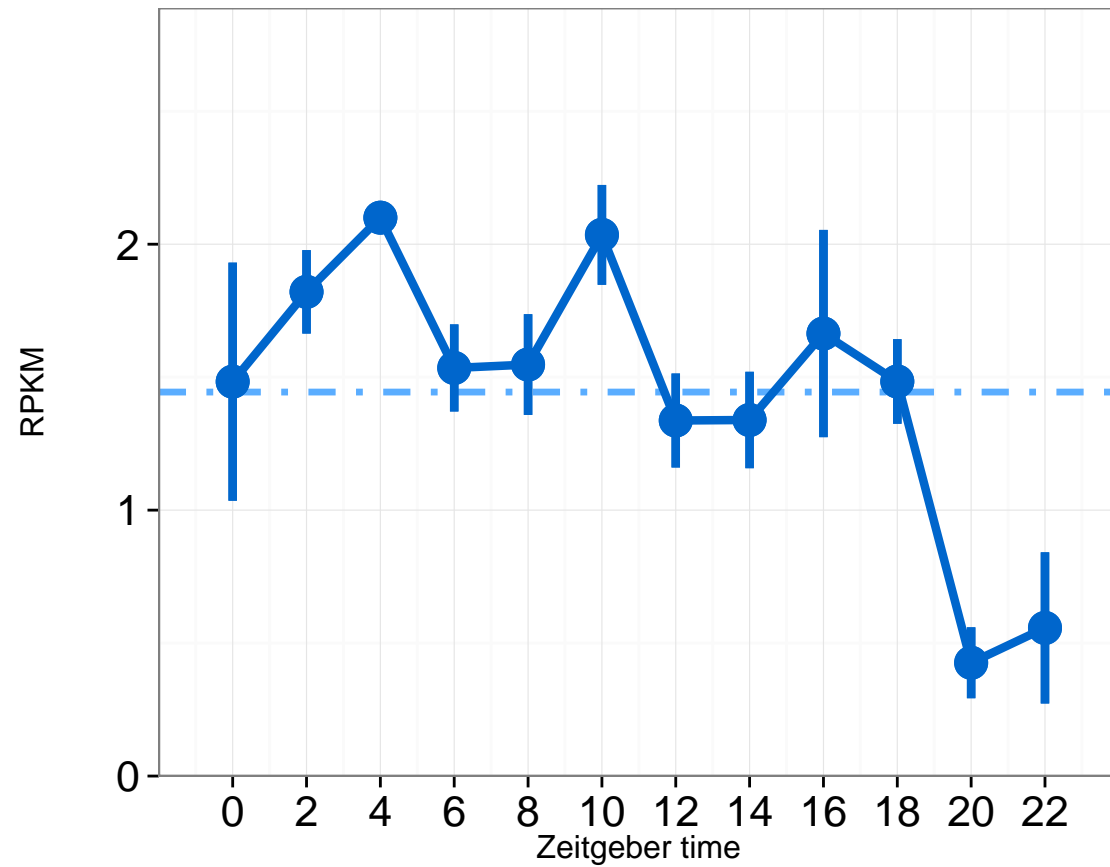

## Frat2 log2(Ribosome occupancy)

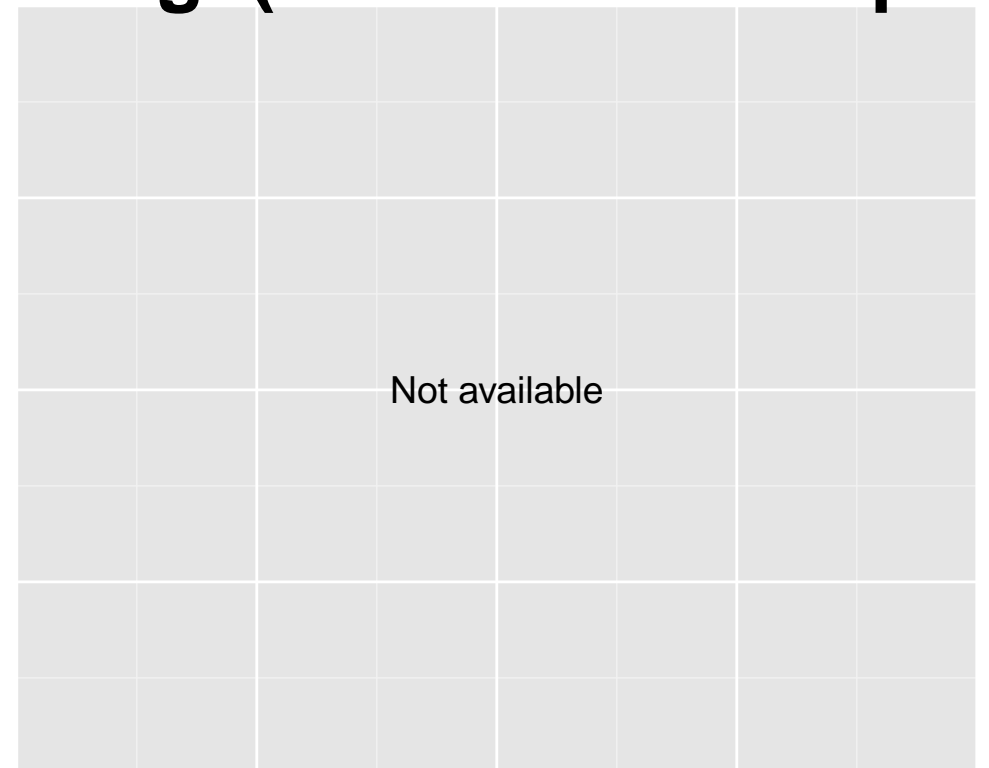

Supplement: Supplementary file 6464 [file 1]

## Gins3

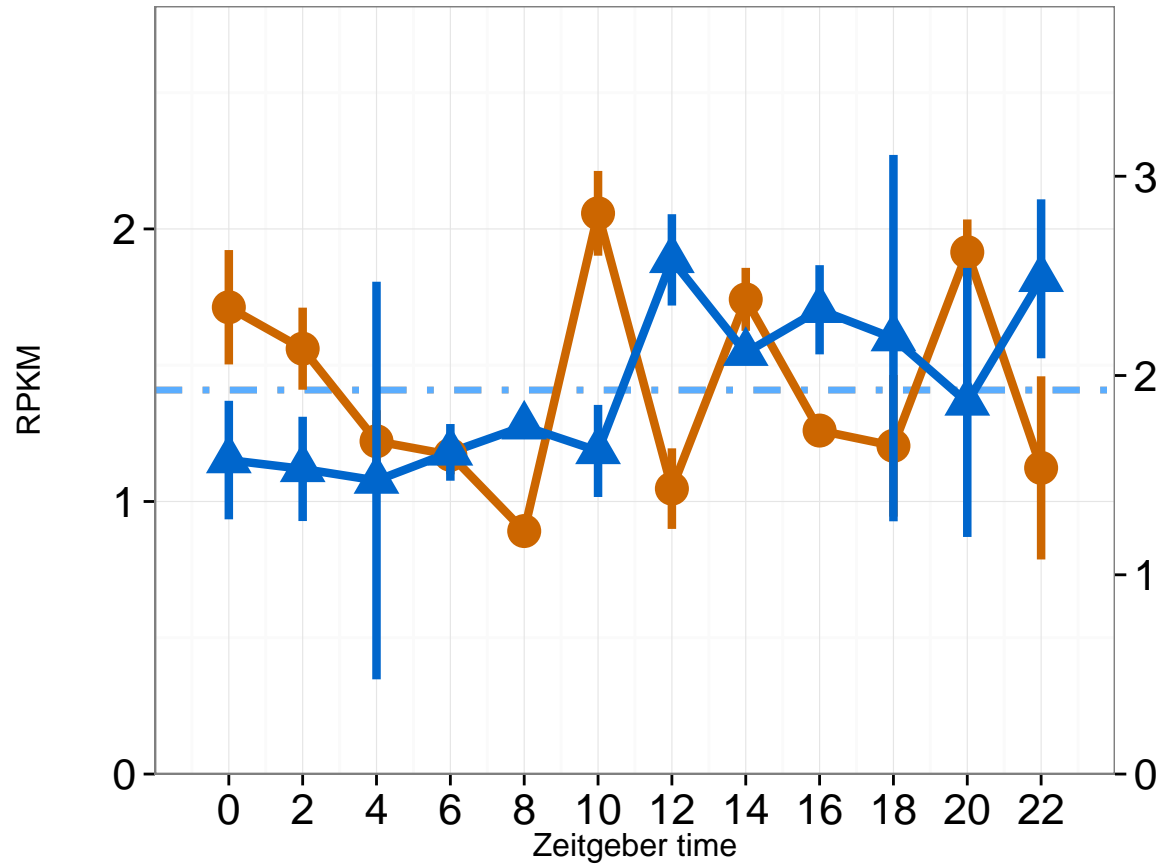

## Gins3

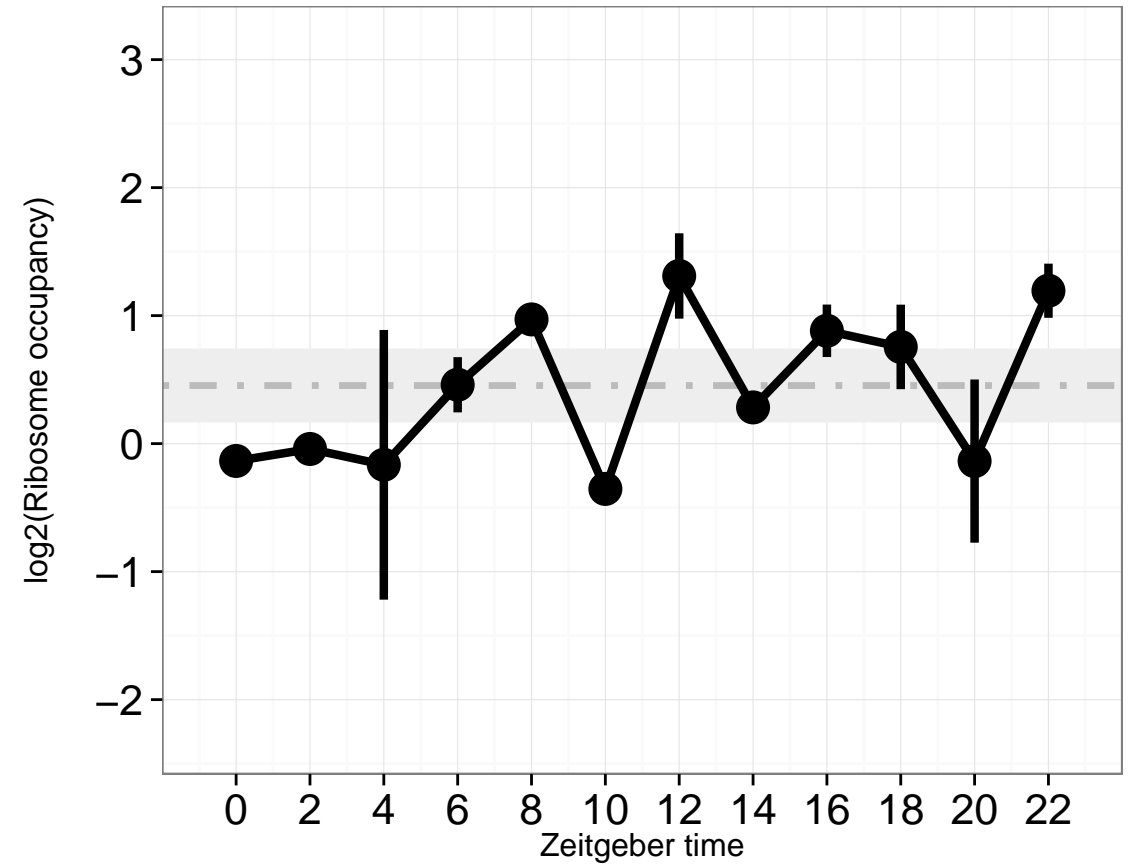

Supplement: Supplementary file 6465 [file 1]

## Ythdc1

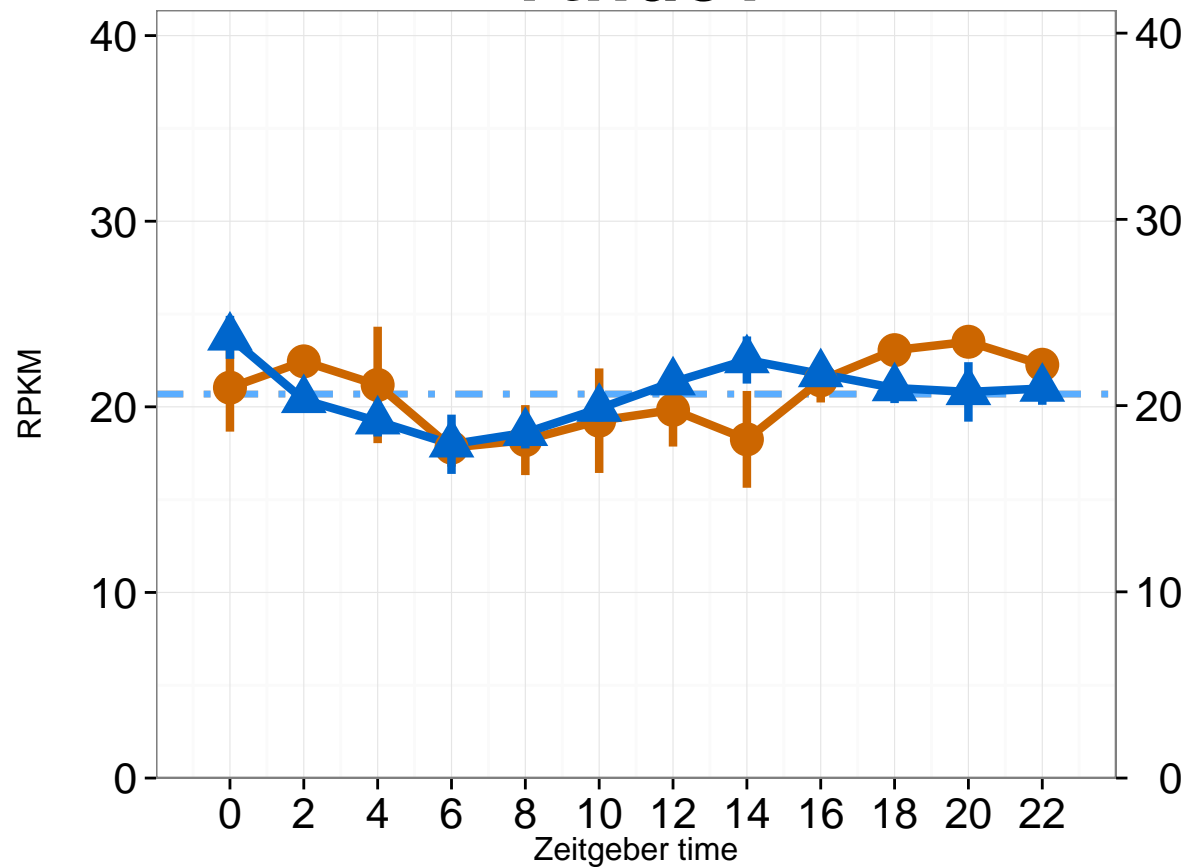

## Ythdc1

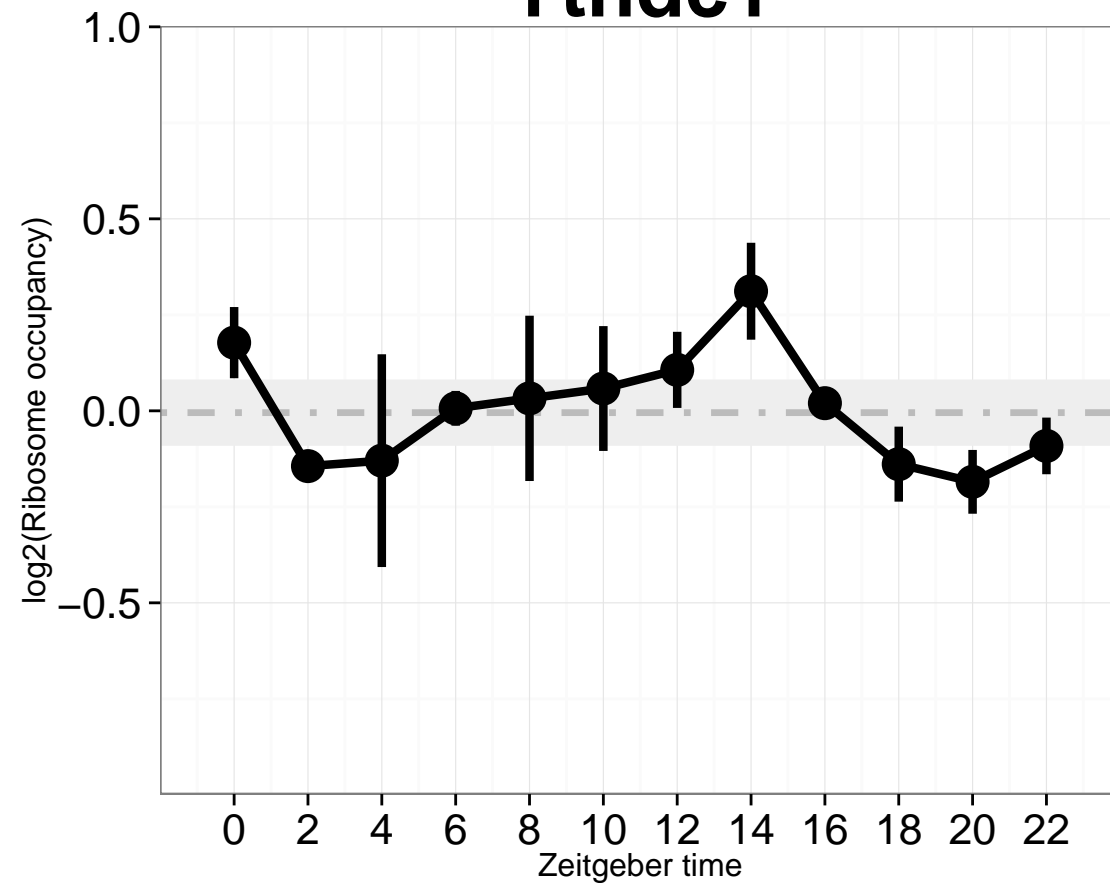

Supplement: Supplementary file 6466 [file 1]

# Chic1

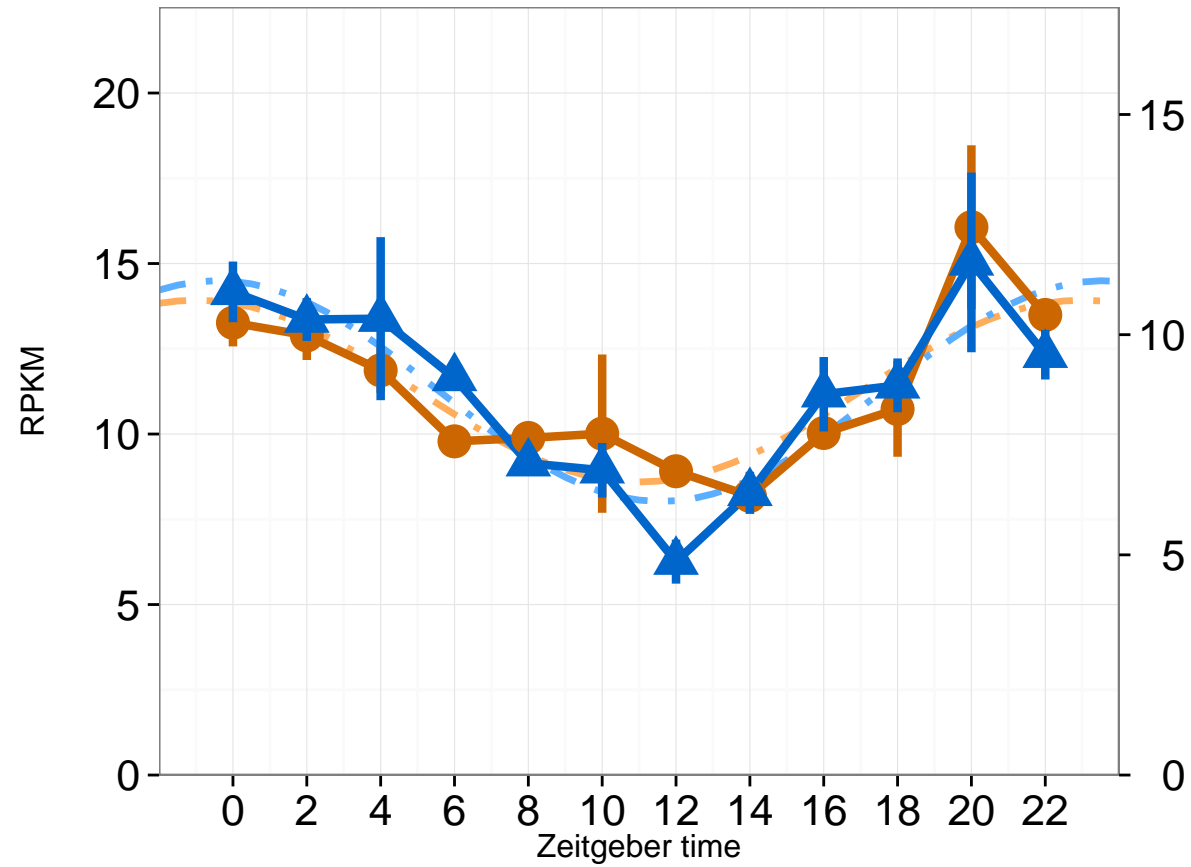

# Chic1

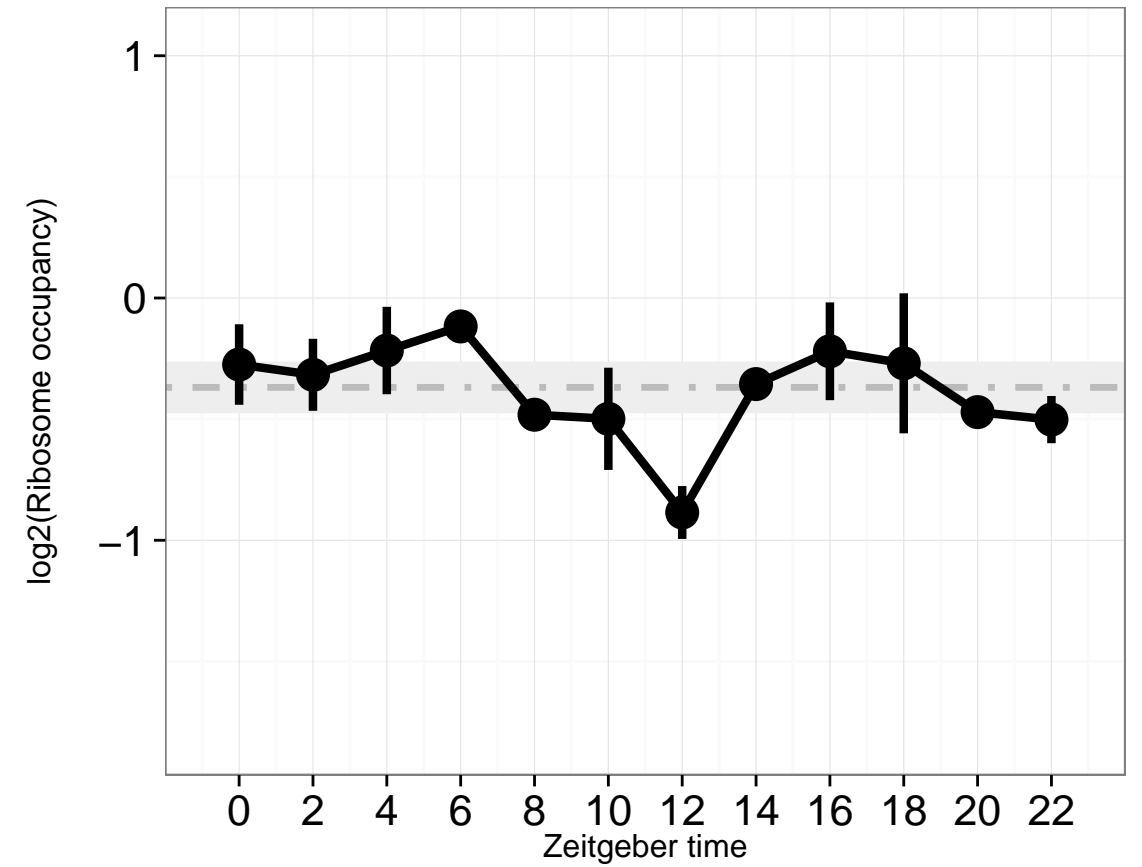

Supplement: Supplementary file 6467 [file 1]

## Acaa2

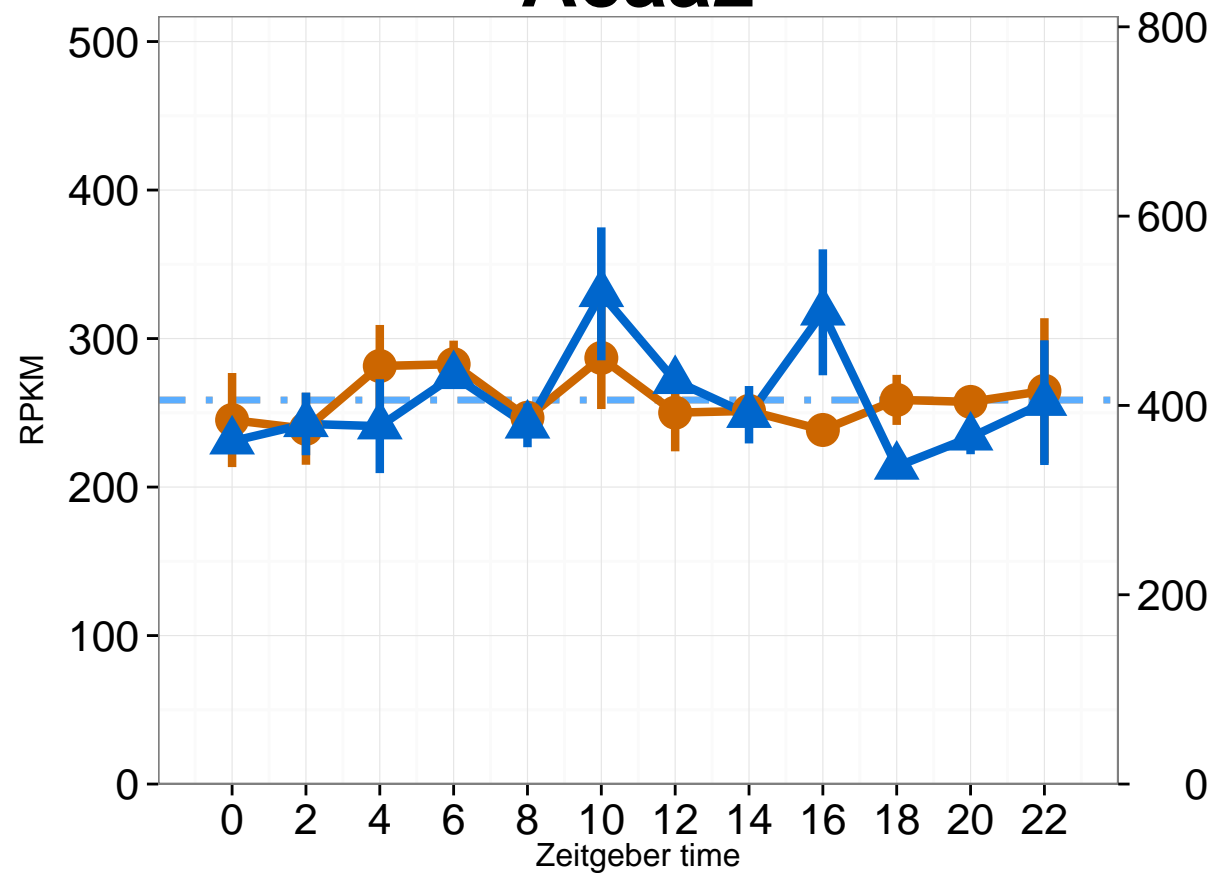

## Acaa2

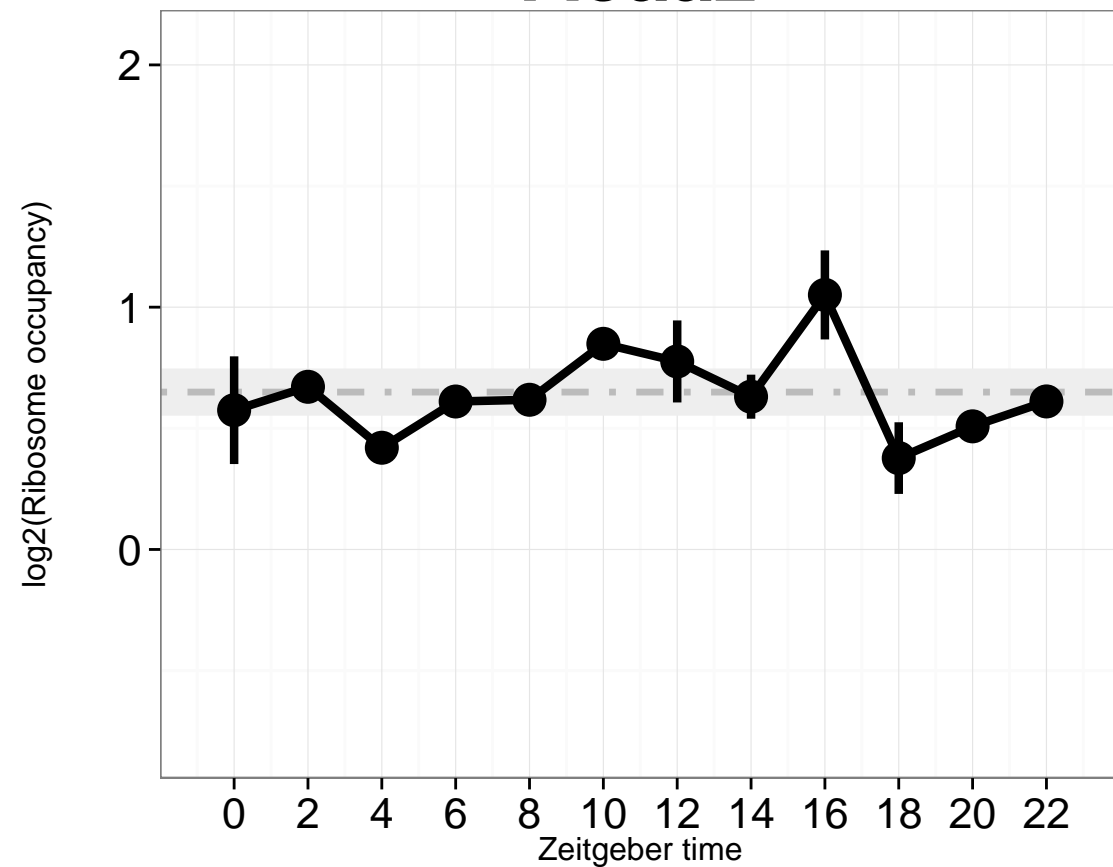

Supplement: Supplementary file 6468 [file 1]

# Dctn4

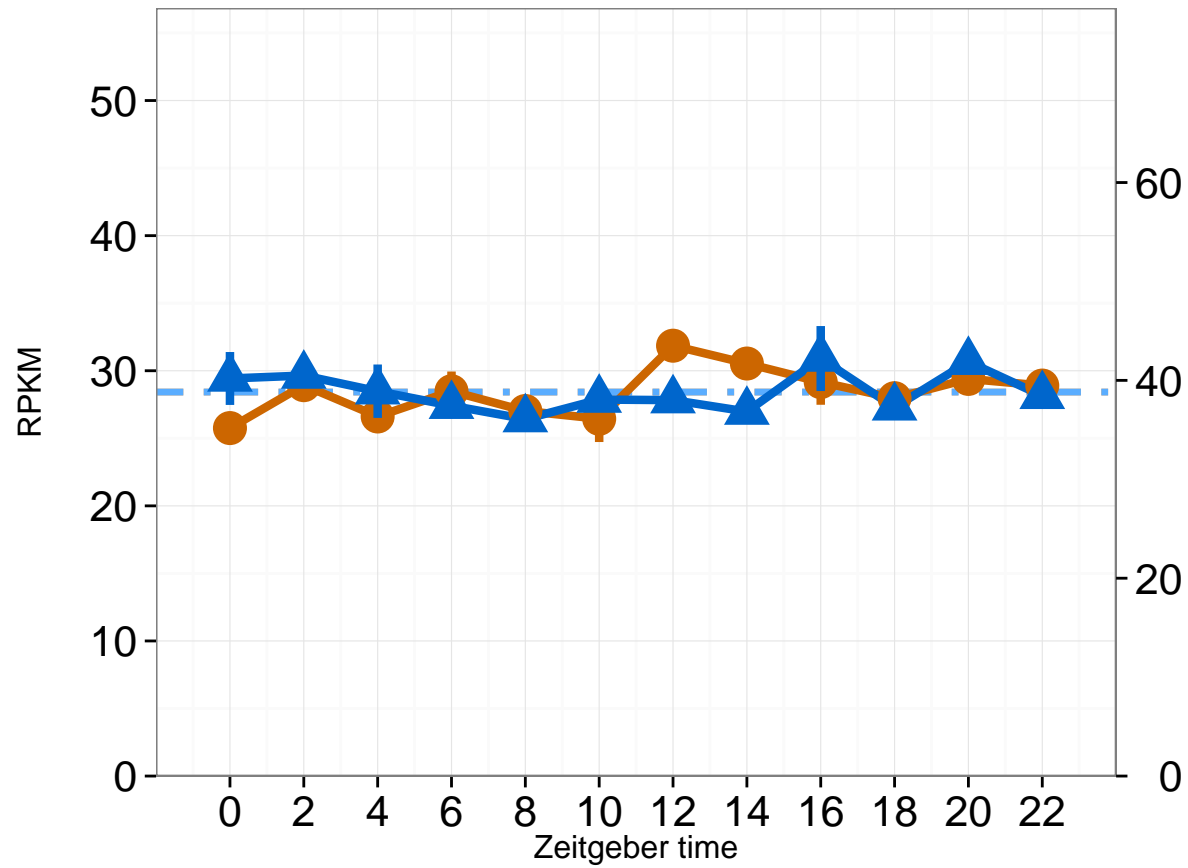

# Dctn4

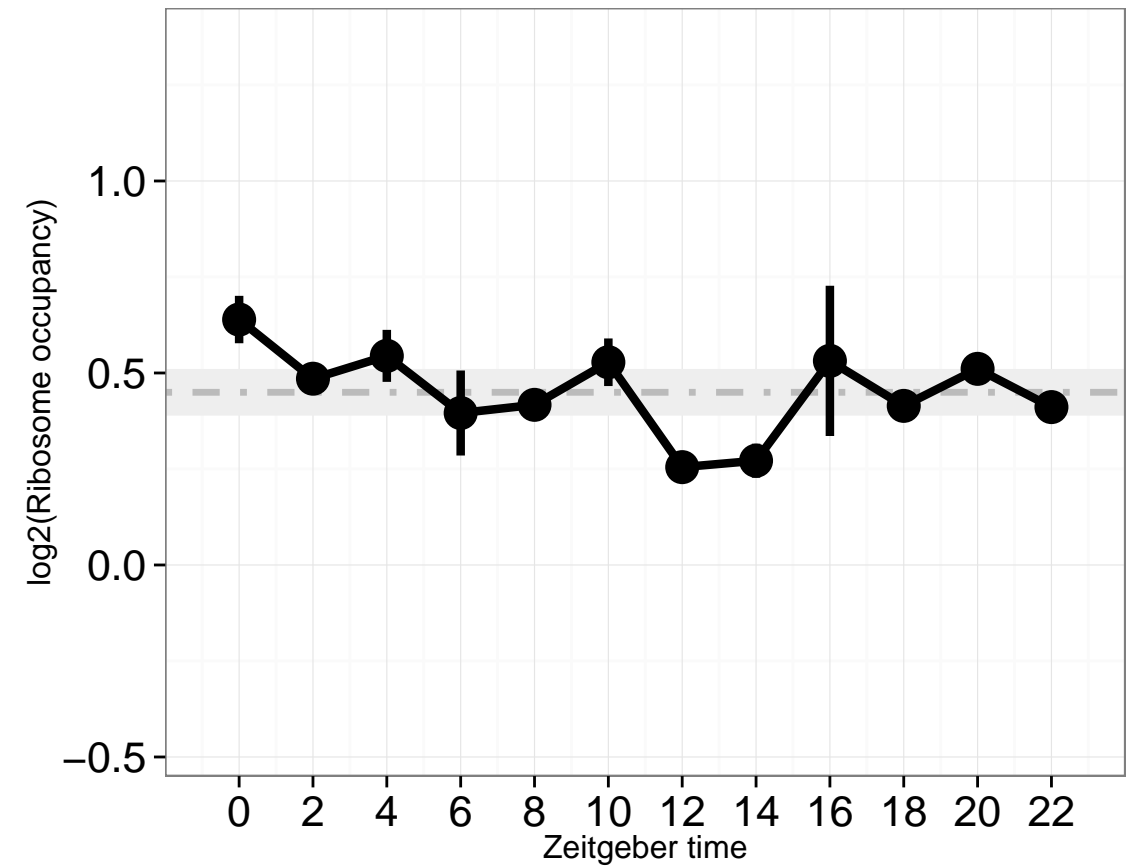

Supplement: Supplementary file 6469 [file 1]

## Ikbkg

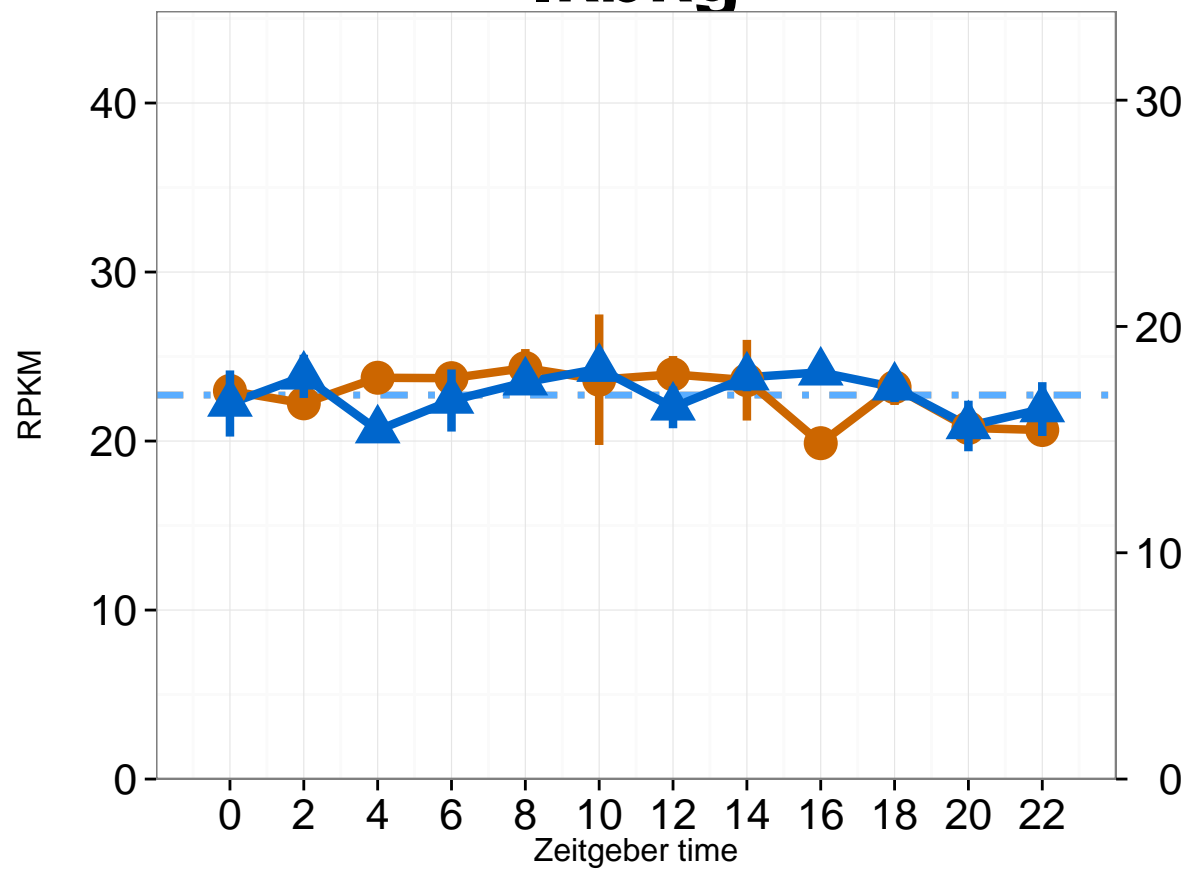

## Ikbkg

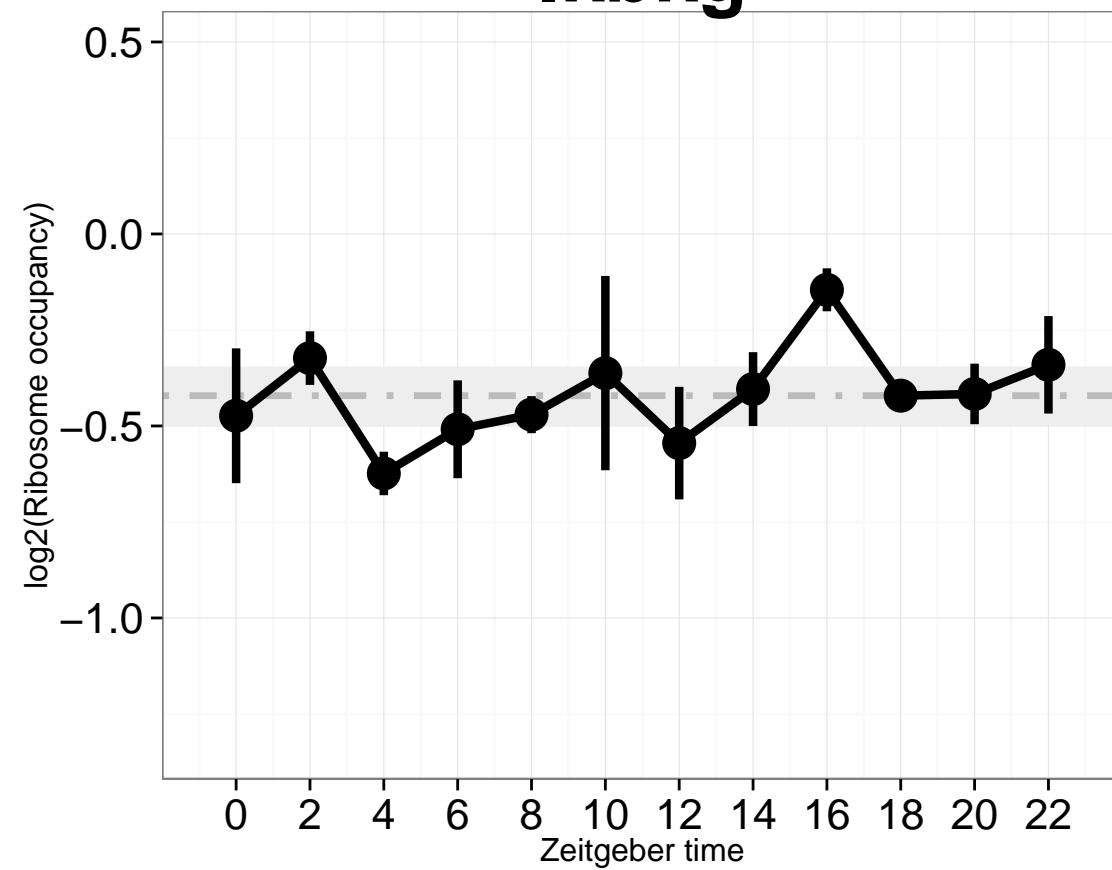

Supplement: Supplementary file 6470 [file 1]

# Rbm18

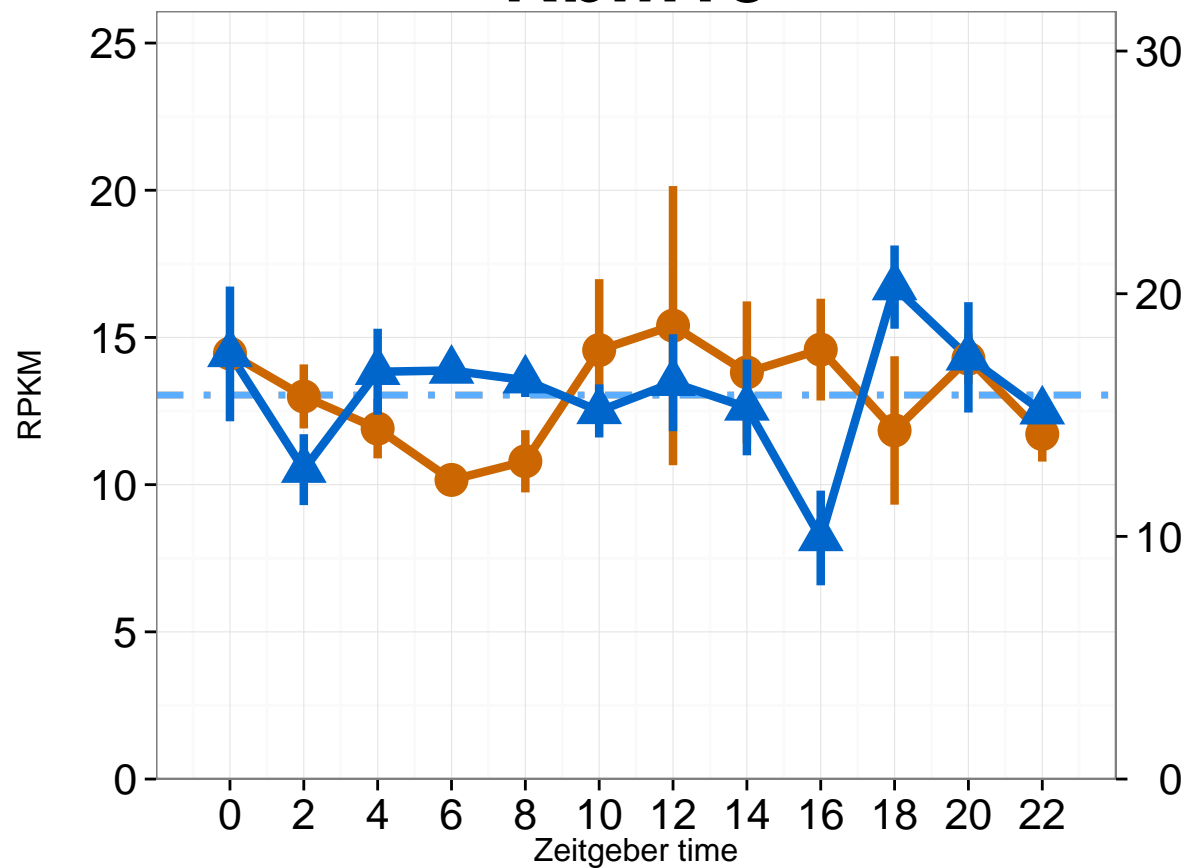

# Rbm18

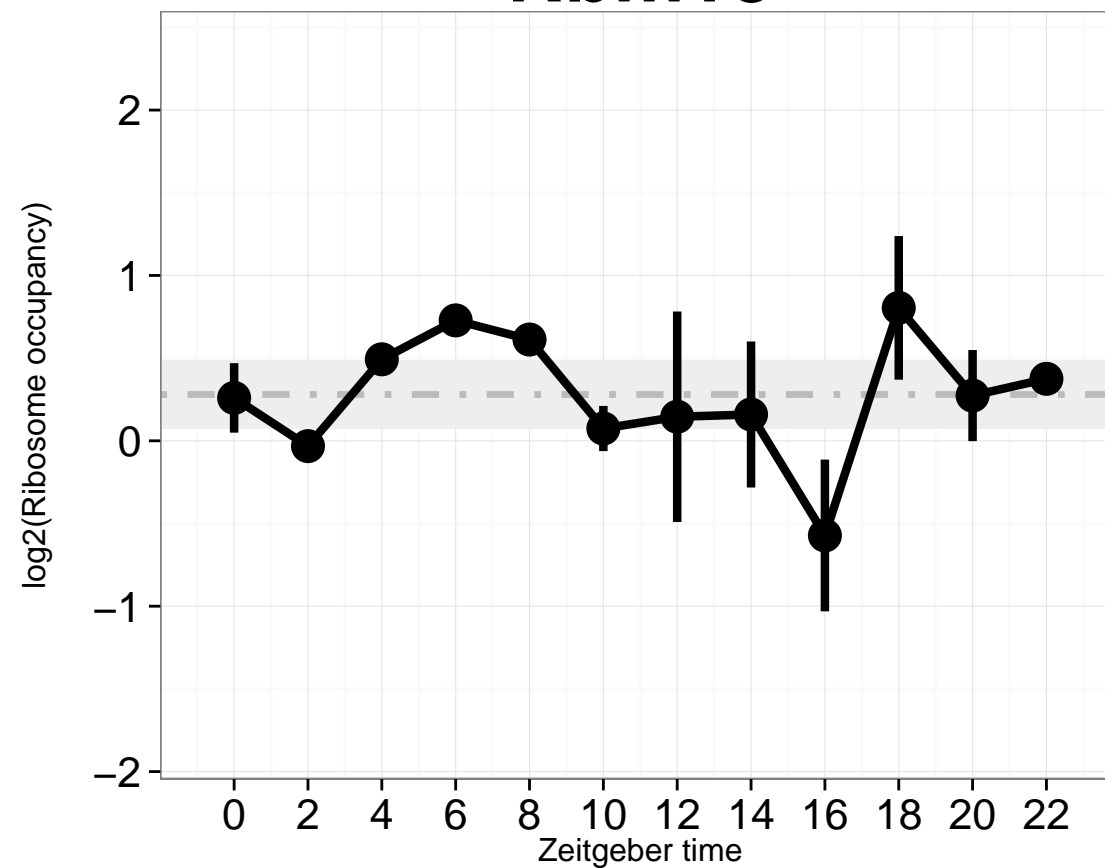

Supplement: Supplementary file 6471 [file 1]

## Ddx18

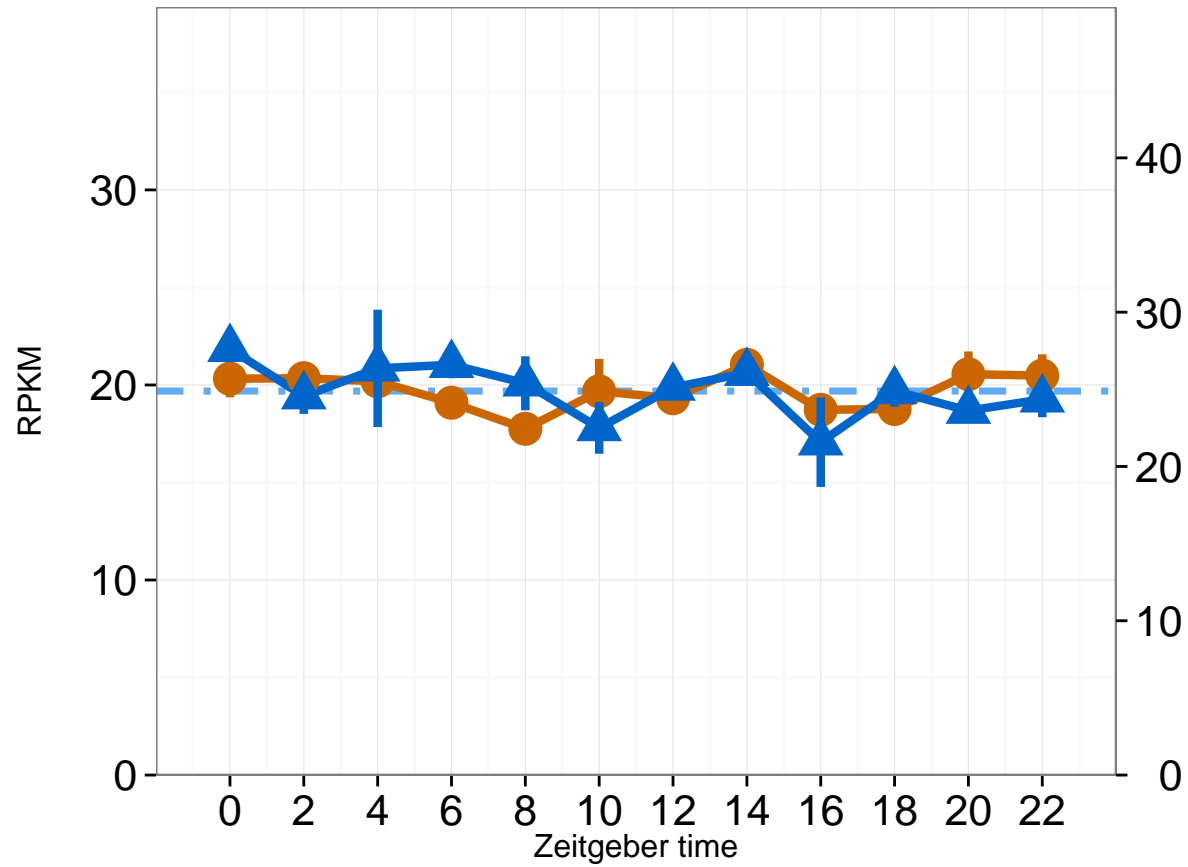

## Ddx18

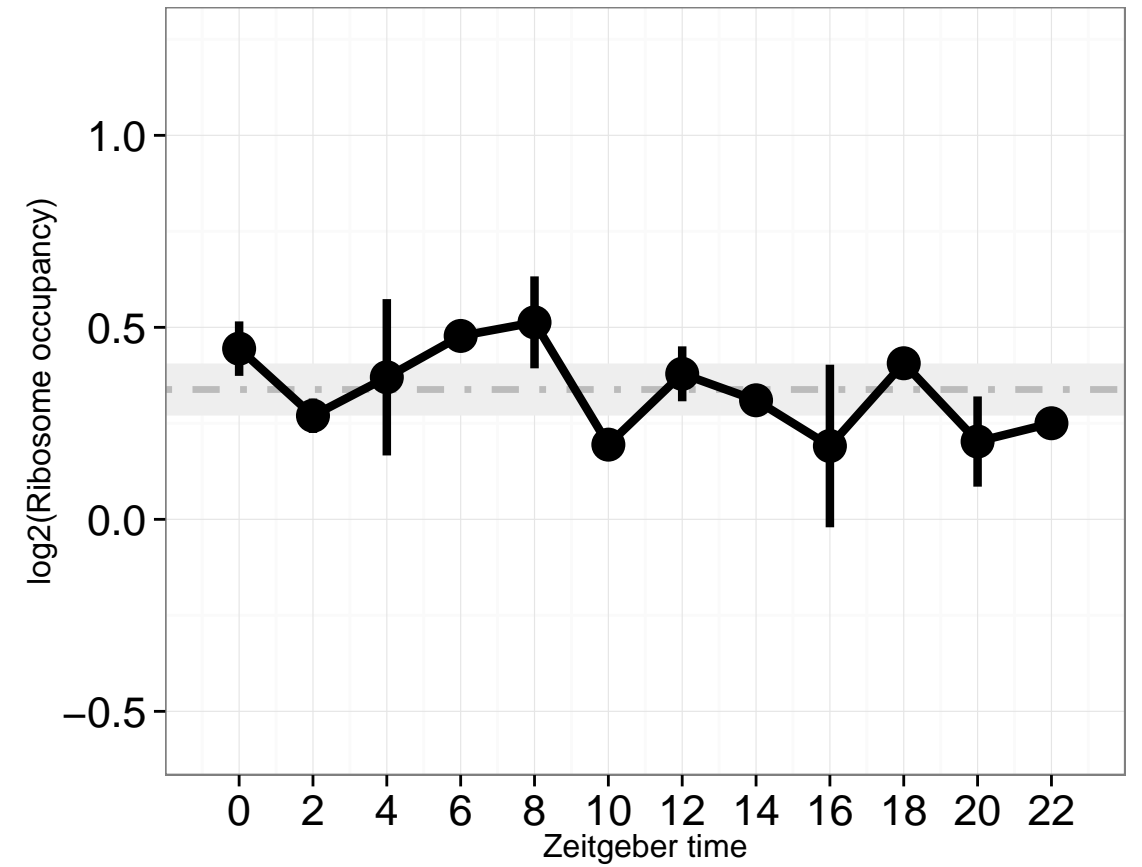

Supplement: Supplementary file 6472 [file 1]

# Rusc1

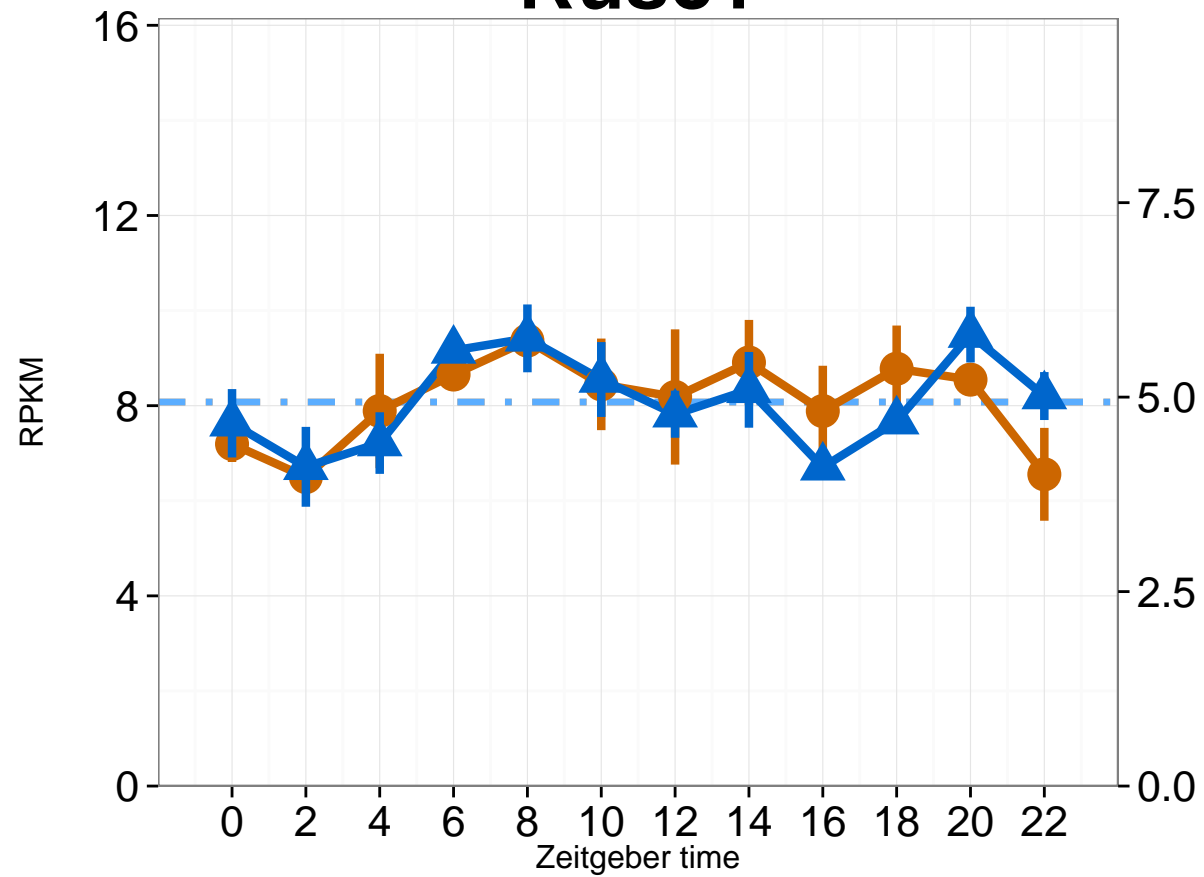

# Rusc1

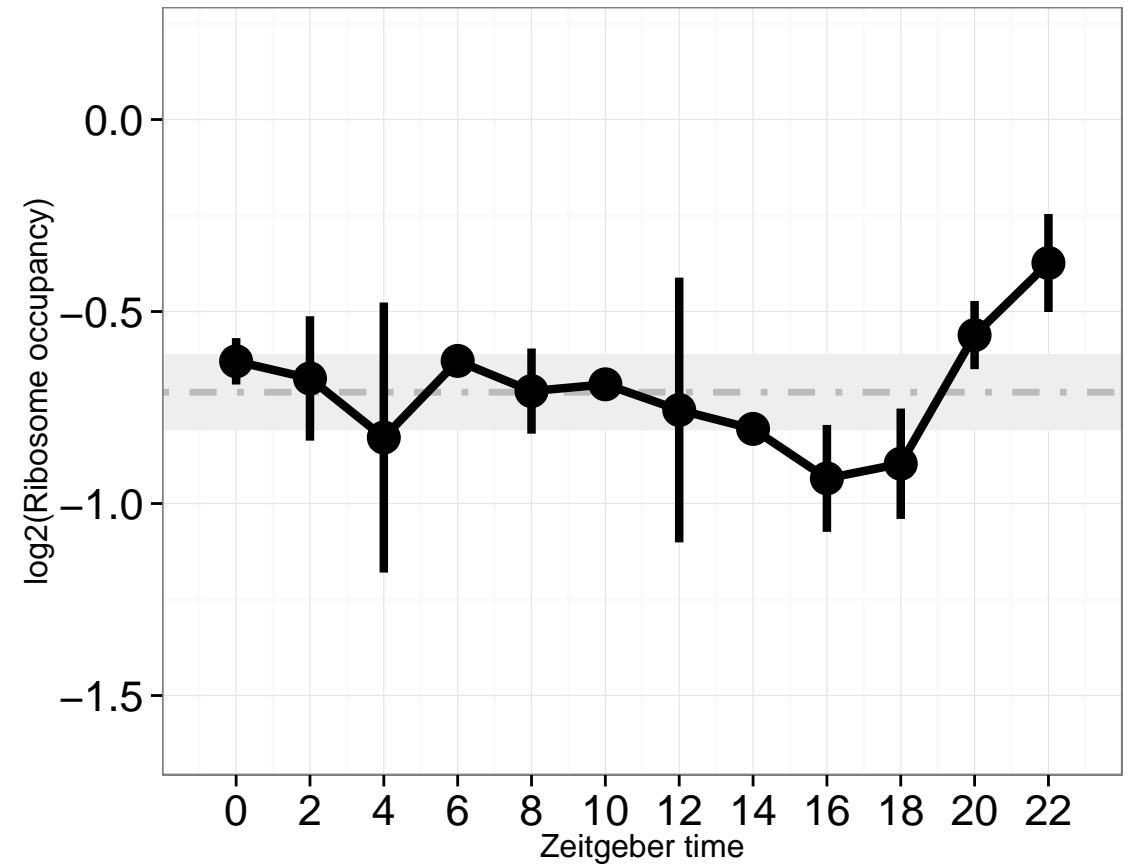

Supplement: Supplementary file 6473 [file 1]

## Nxph4

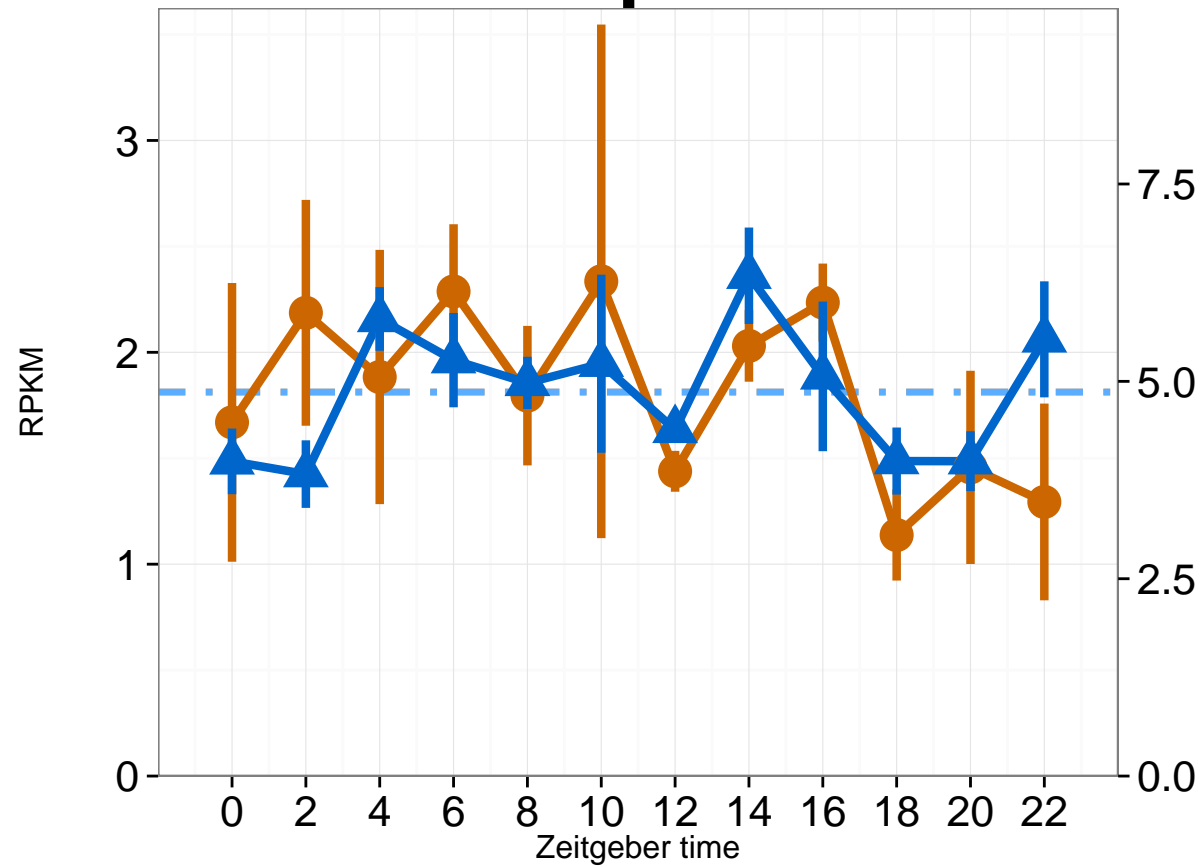

## Nxph4

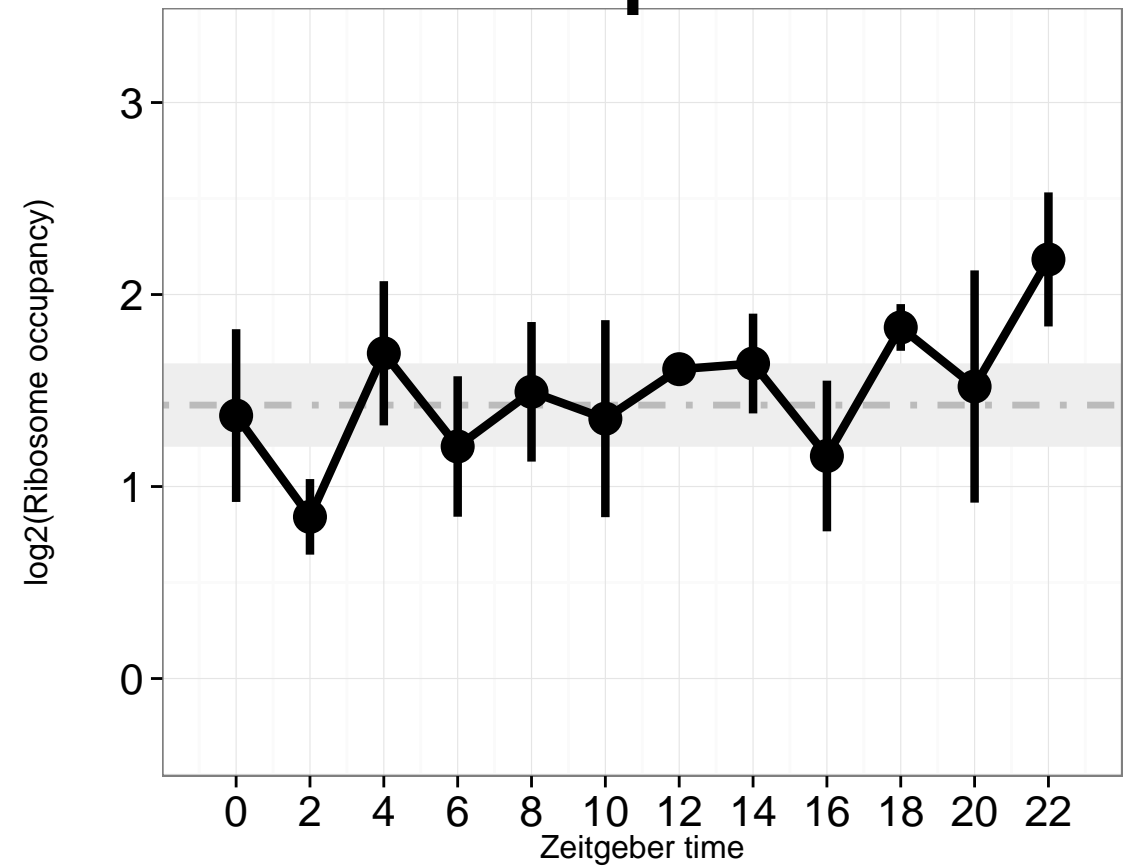

Supplement: Supplementary file 6474 [file 1]

## Tmtc3

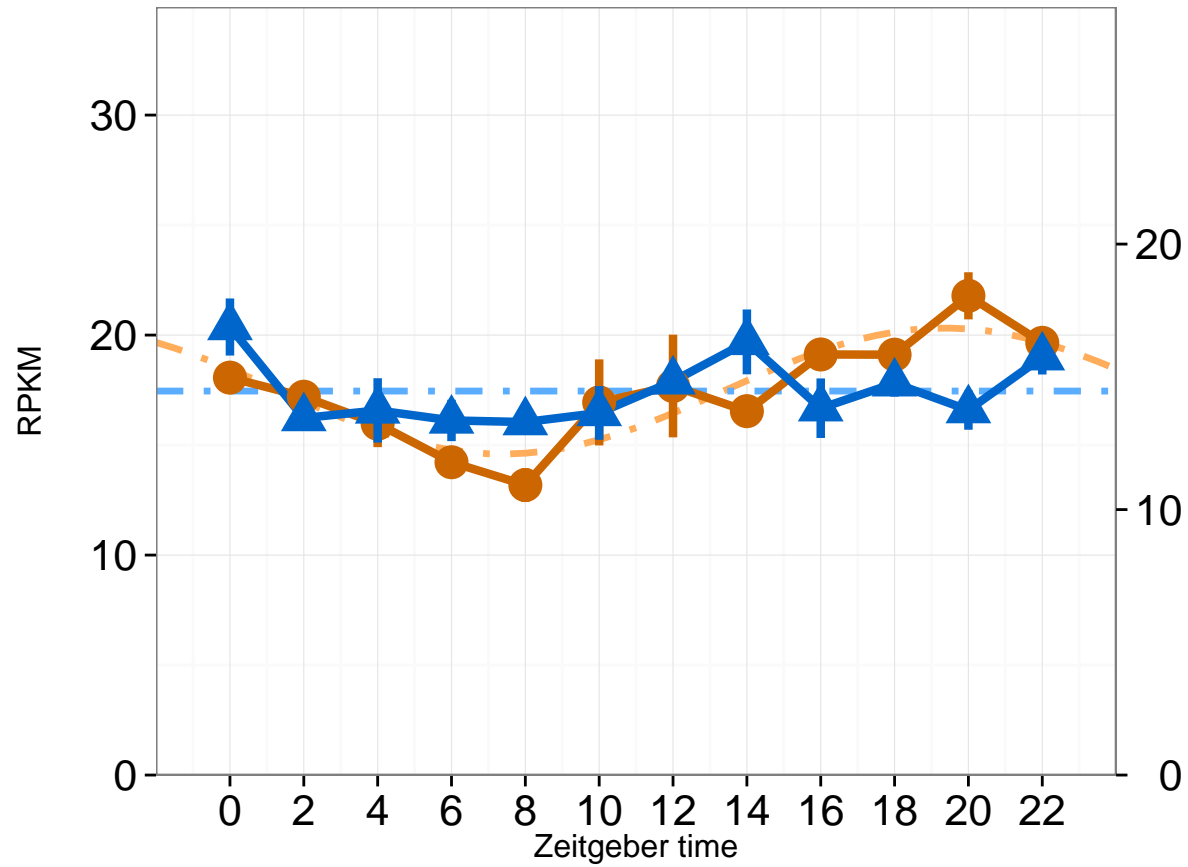

## Tmtc3

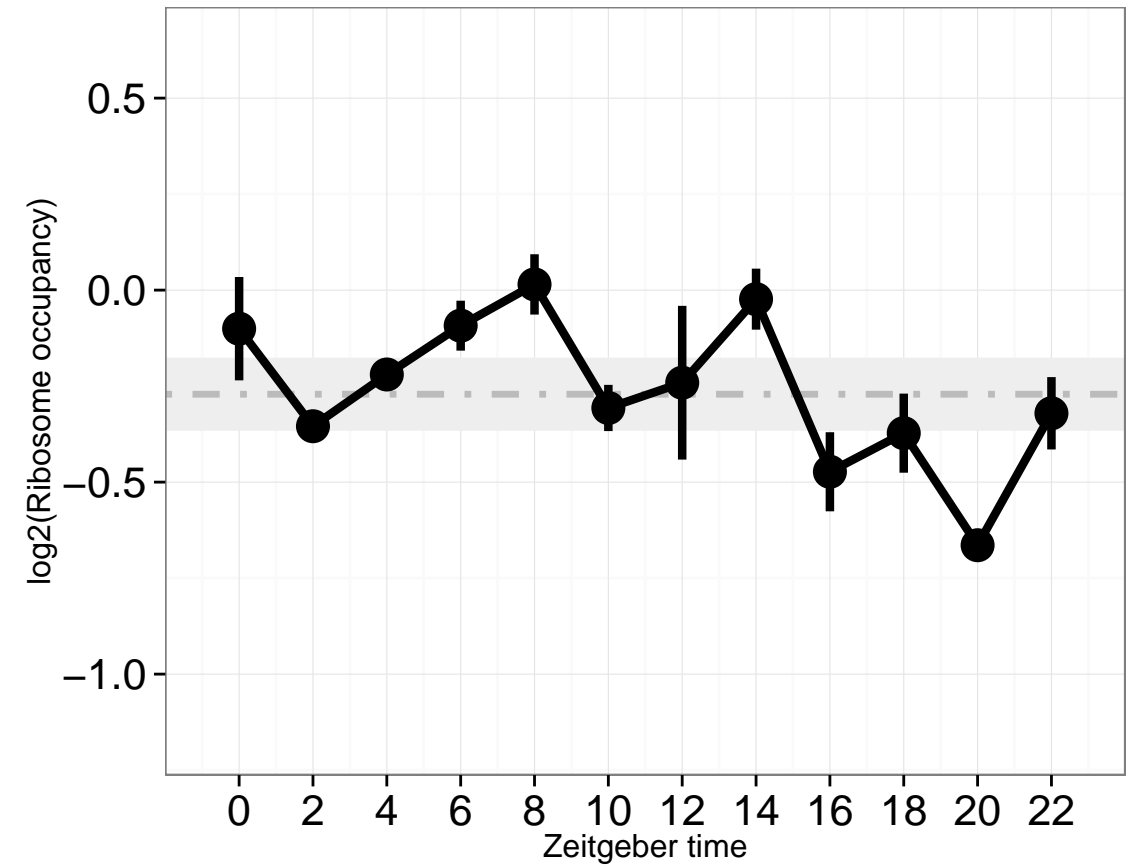

Supplement: Supplementary file 6475 [file 1]

## 2410016O06Rik

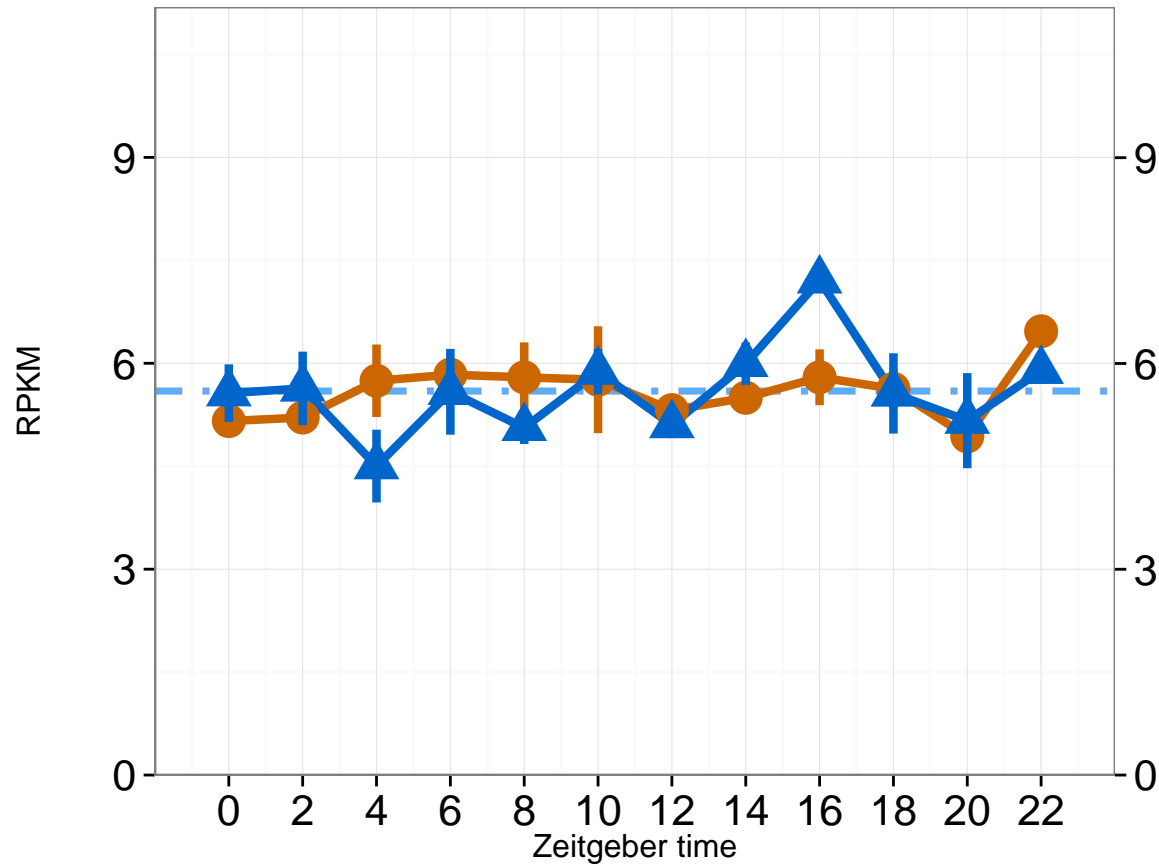

## 2410016O06Rik

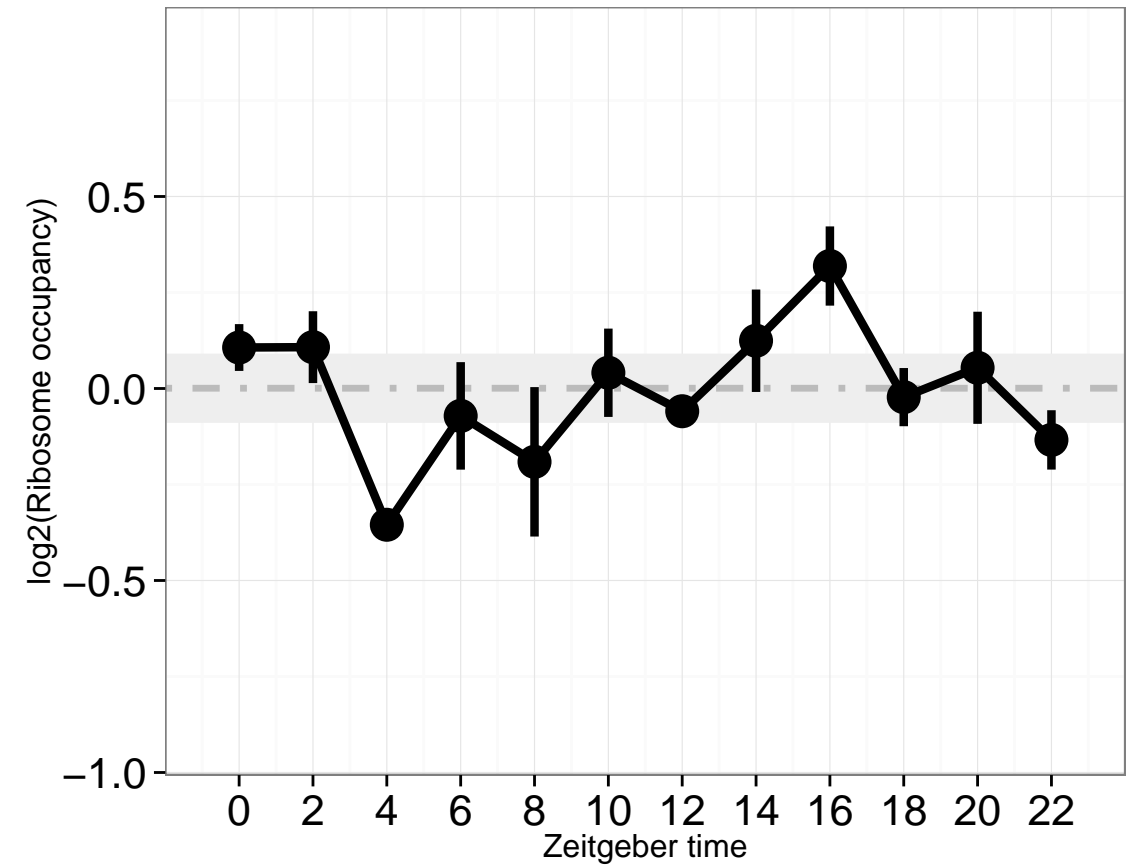

Supplement: Supplementary file 6476 [file 1]

## Eltd1

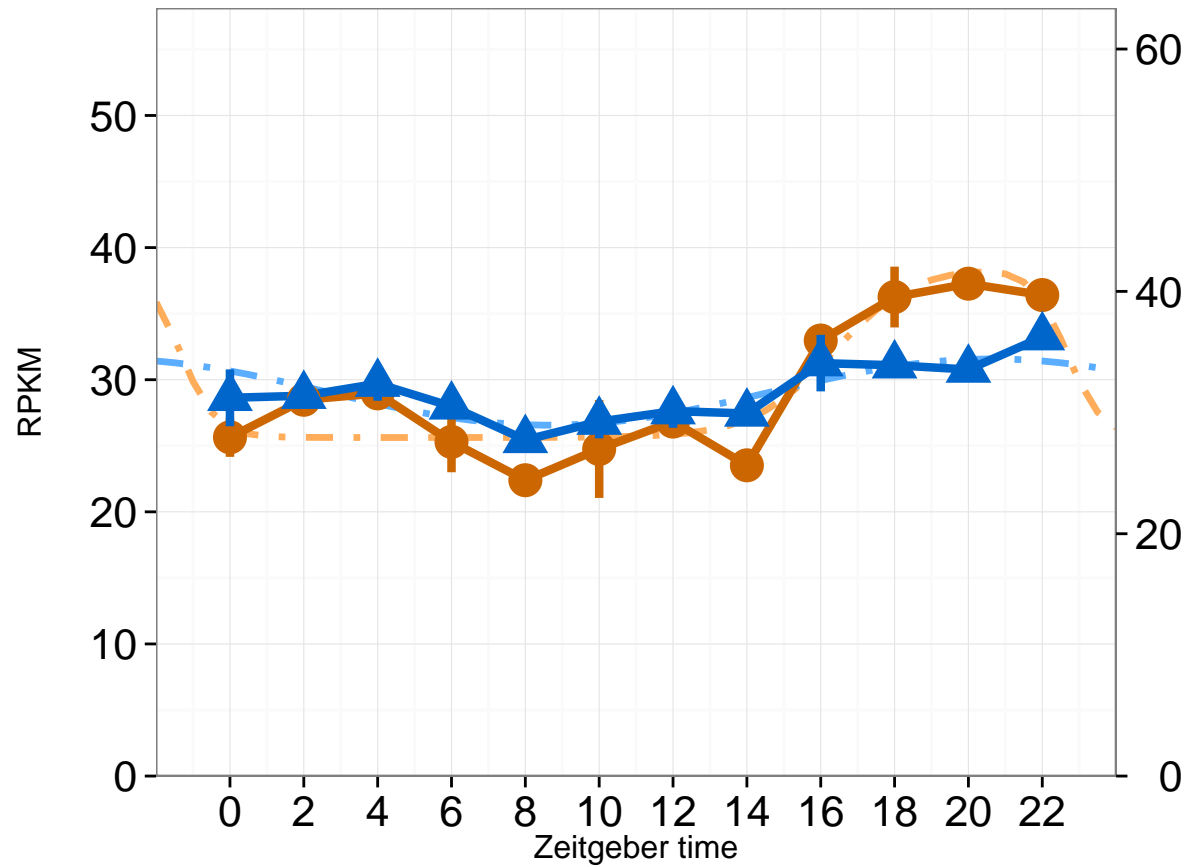

## Eltd1

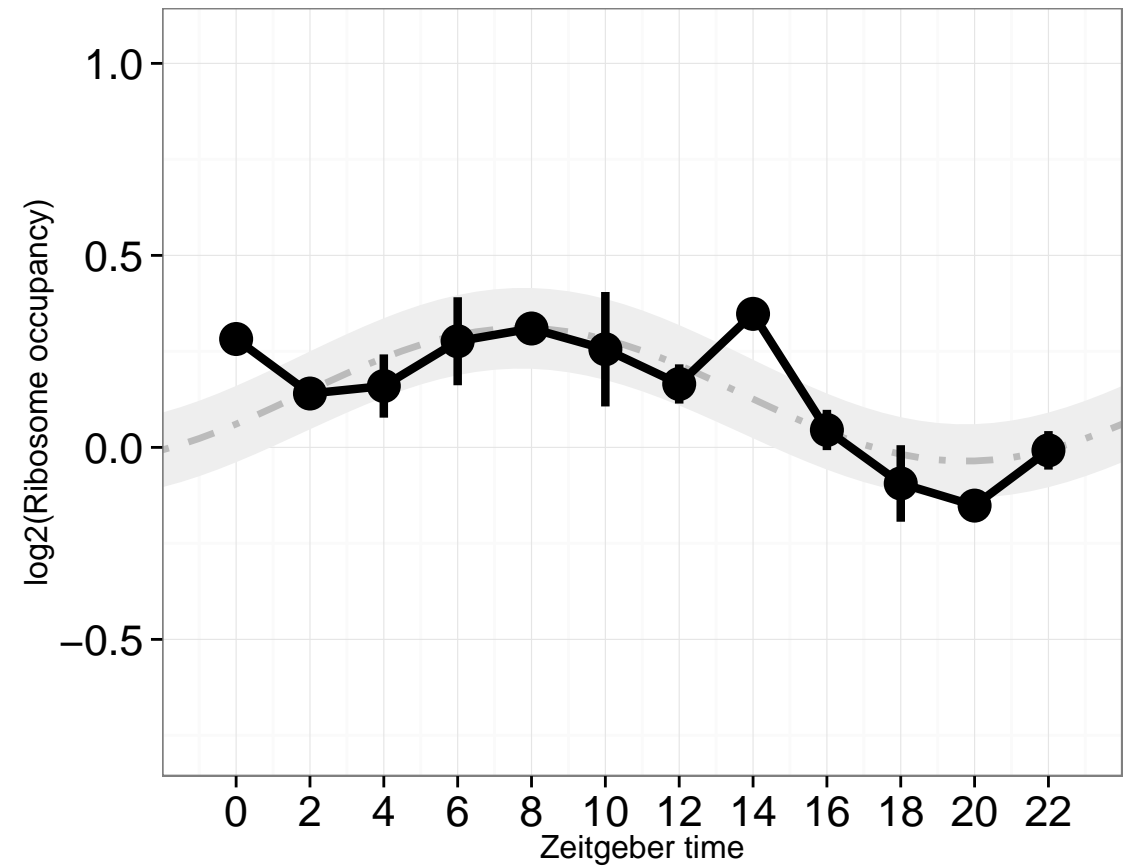

Supplement: Supplementary file 6477 [file 1]

## Mettl4

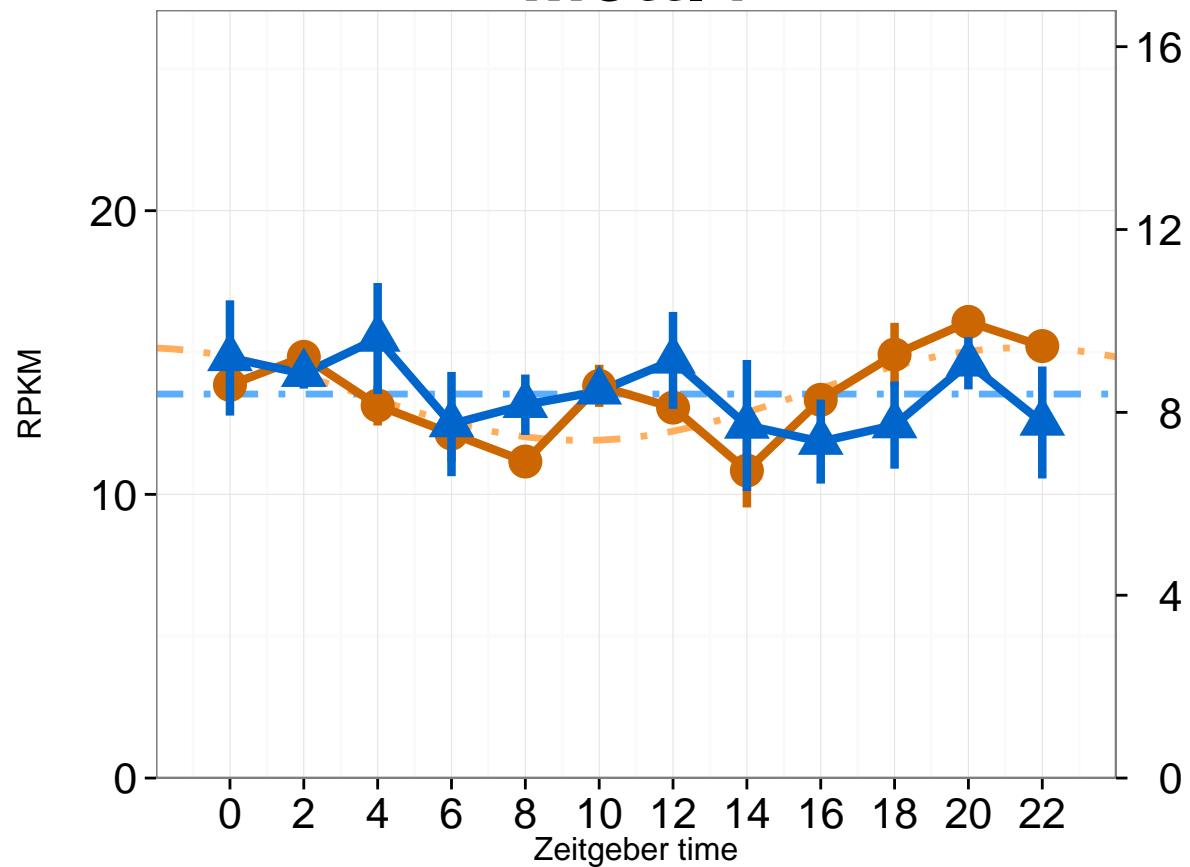

## Mettl4

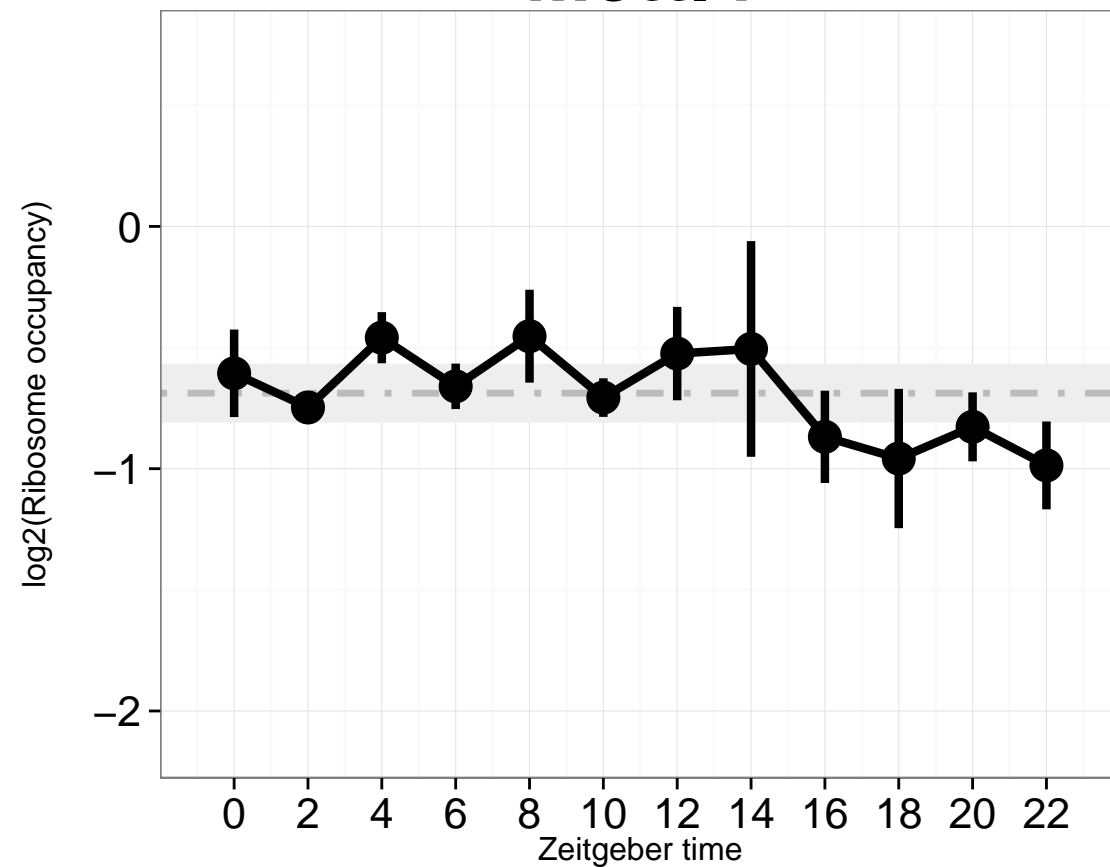

Supplement: Supplementary file 6478 [file 1]

## Paxbp1

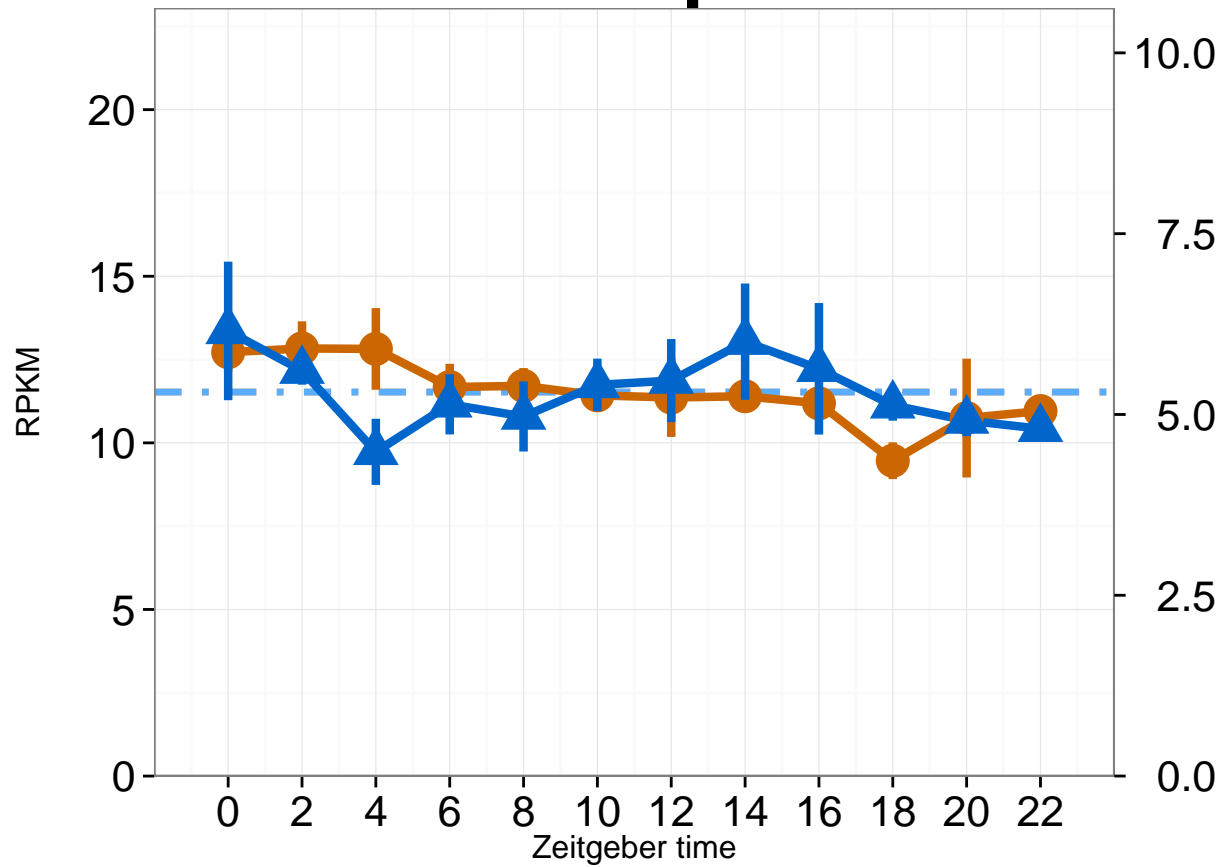

## Paxbp1

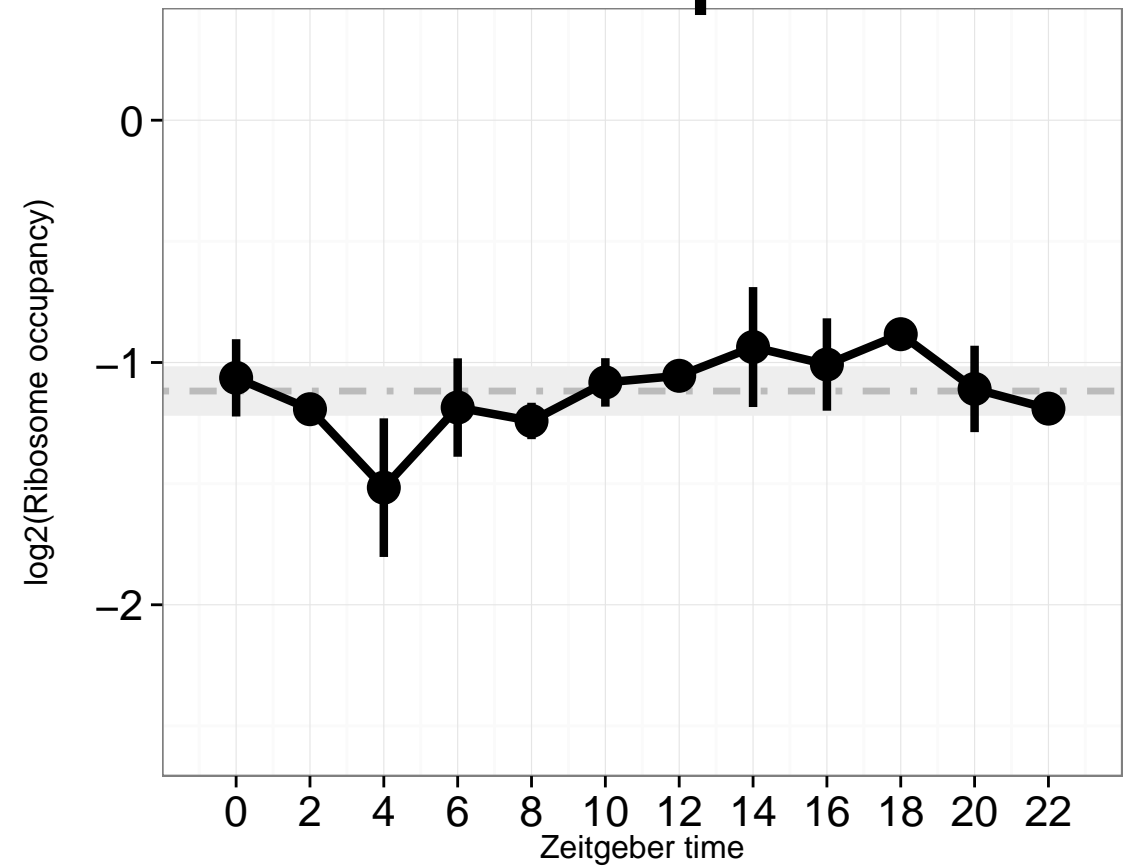

Supplement: Supplementary file 6479 [file 1]

## Phlda3

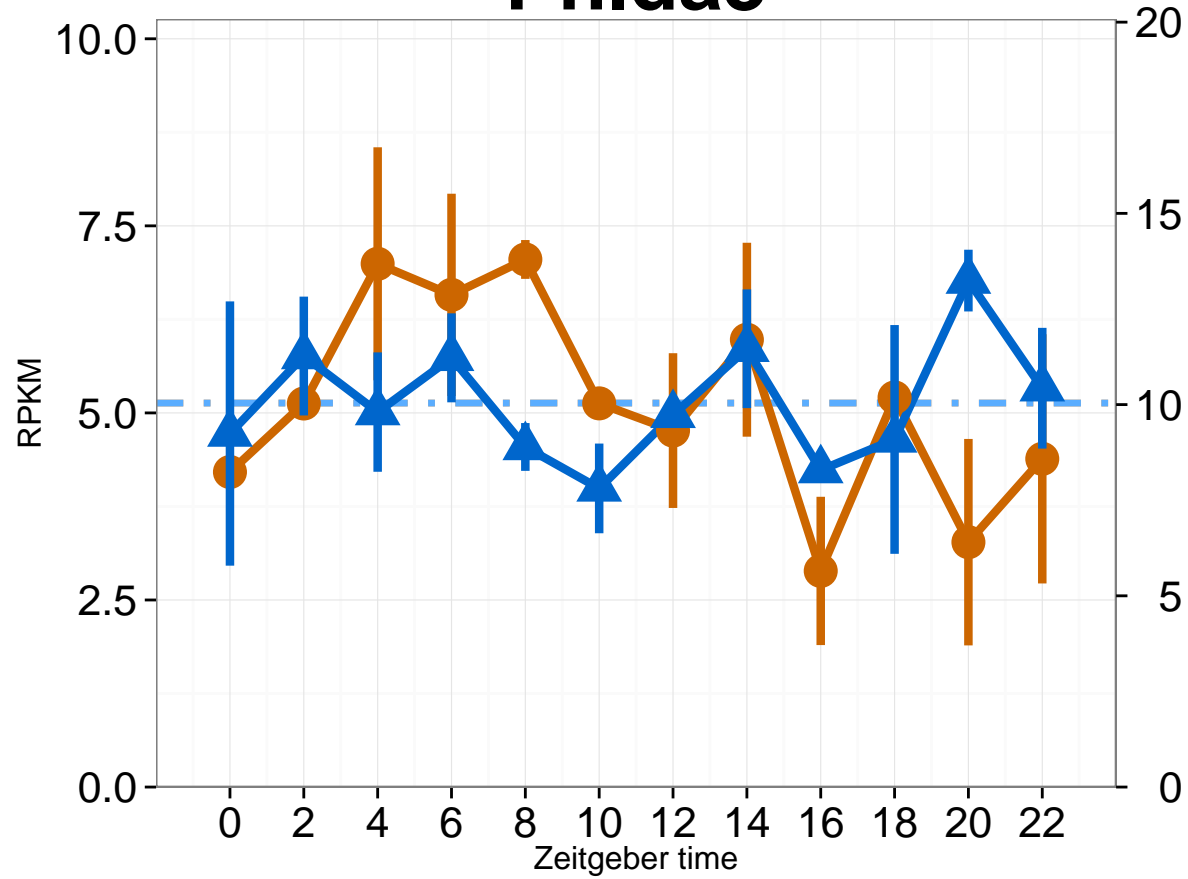

## Phlda3

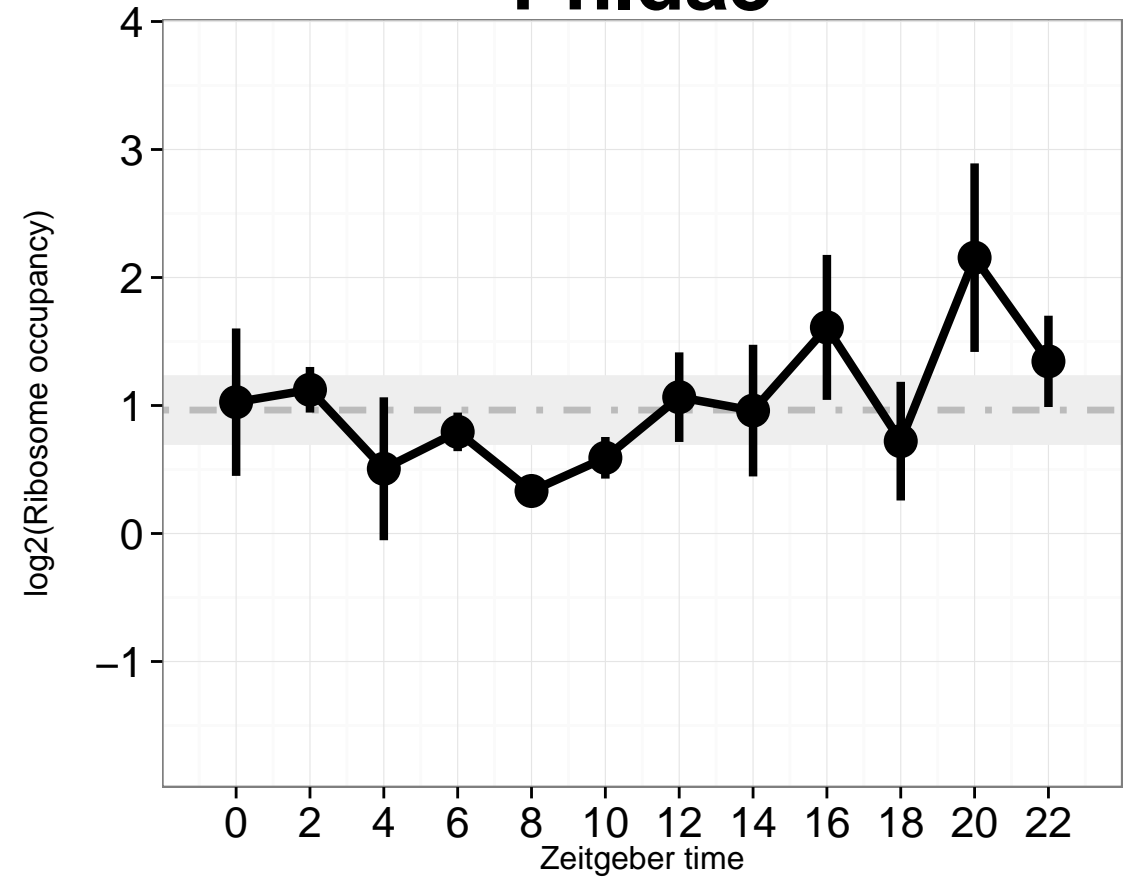

Supplement: Supplementary file 6480 [file 1]

## Hnrnpul2

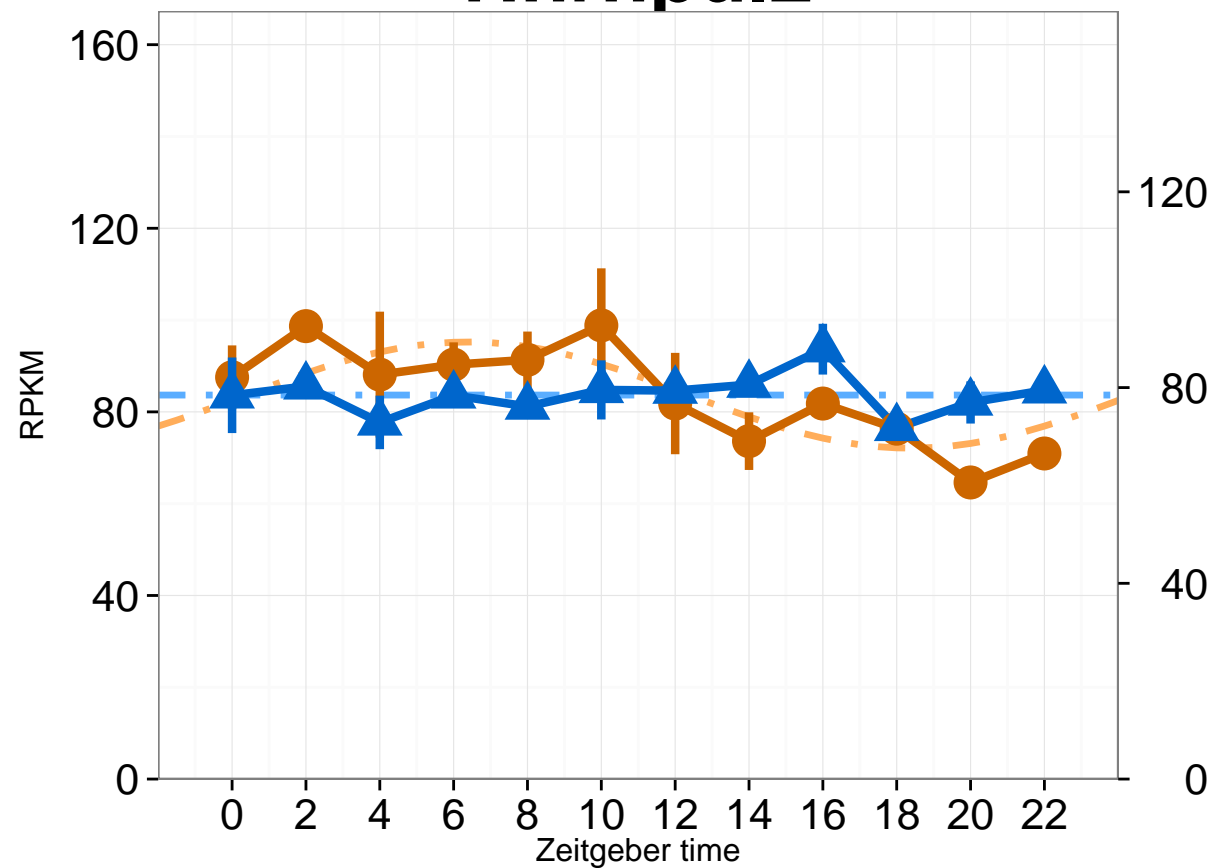

## Hnrnpul2

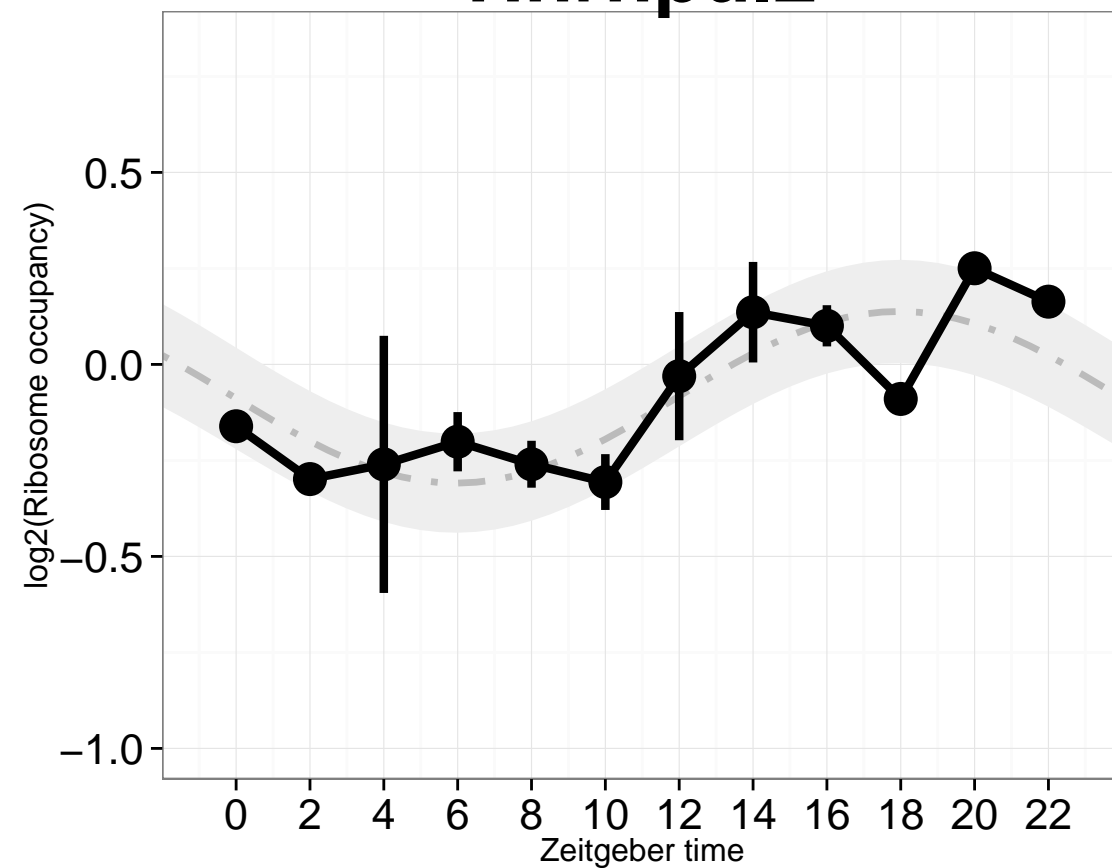

Supplement: Supplementary file 6481 [file 1]

## Cd93

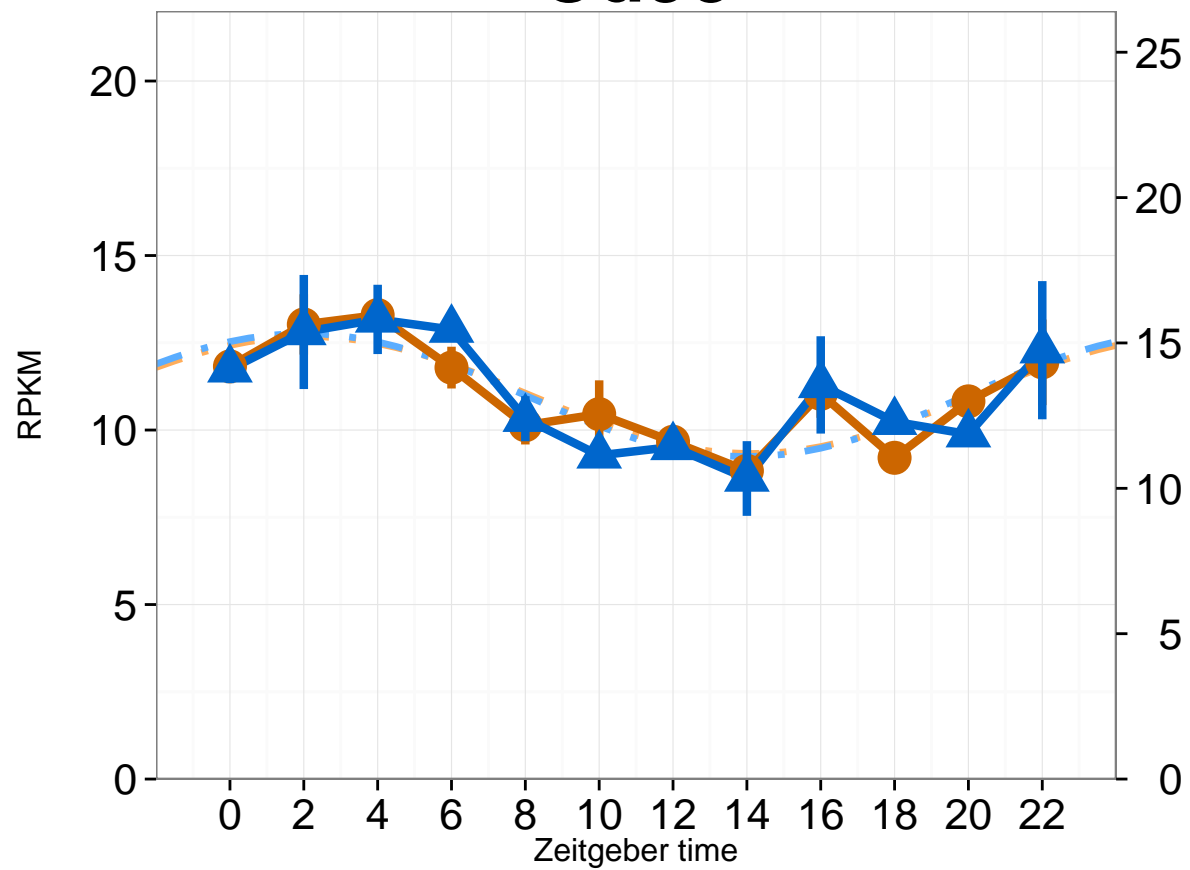

## Cd93

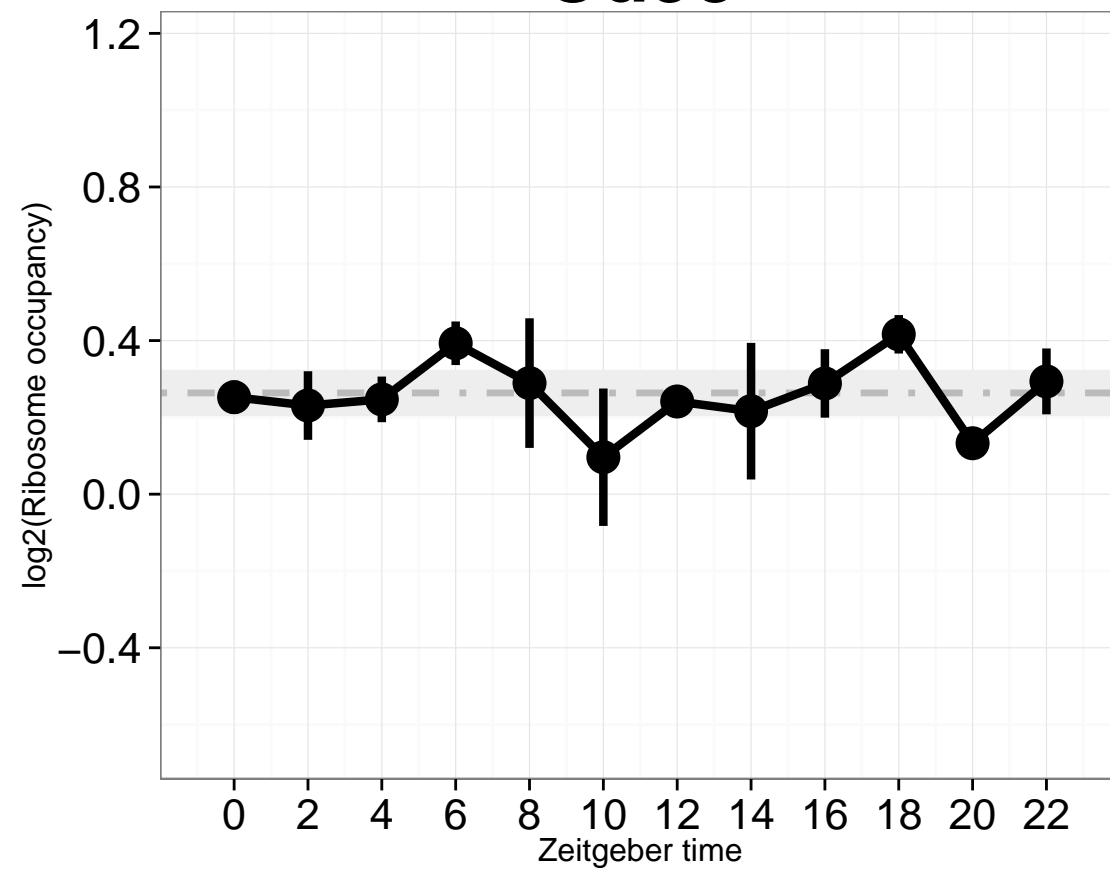

Supplement: Supplementary file 6482 [file 1]

## Pacrgl

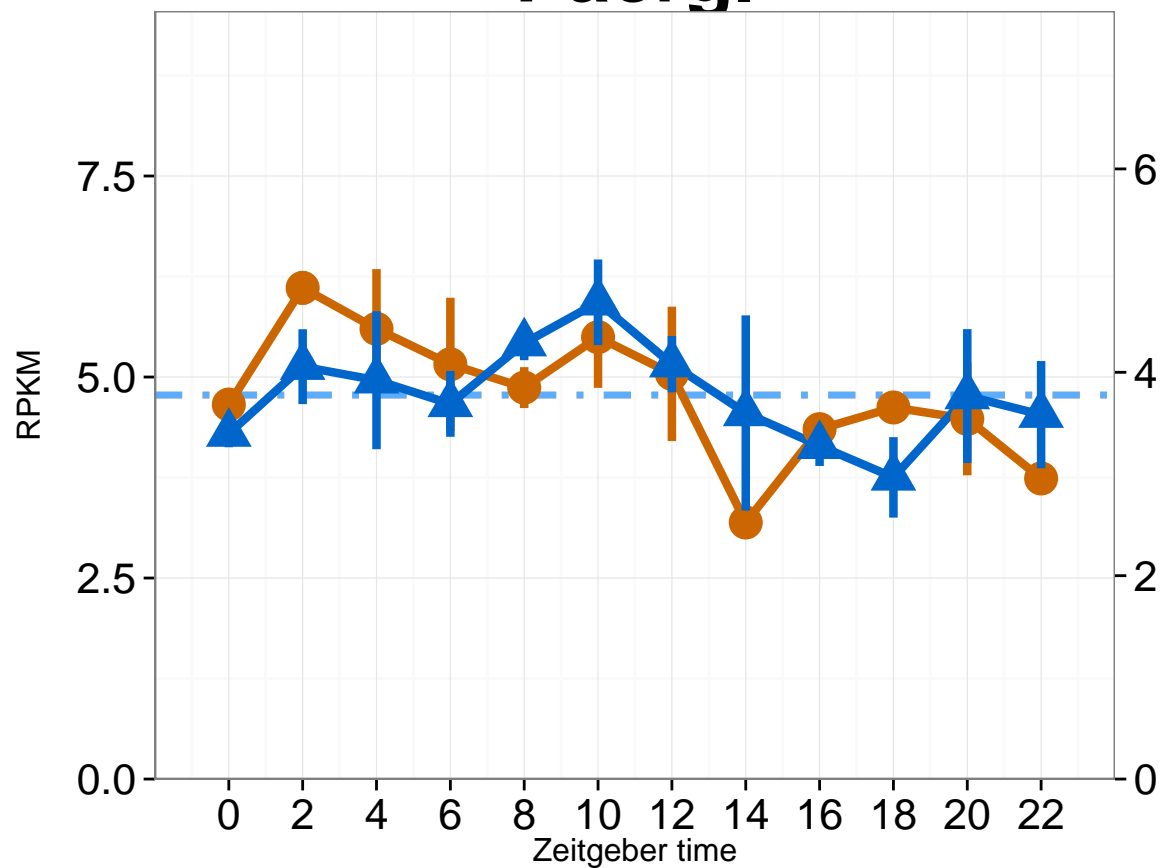

## Pacrgl

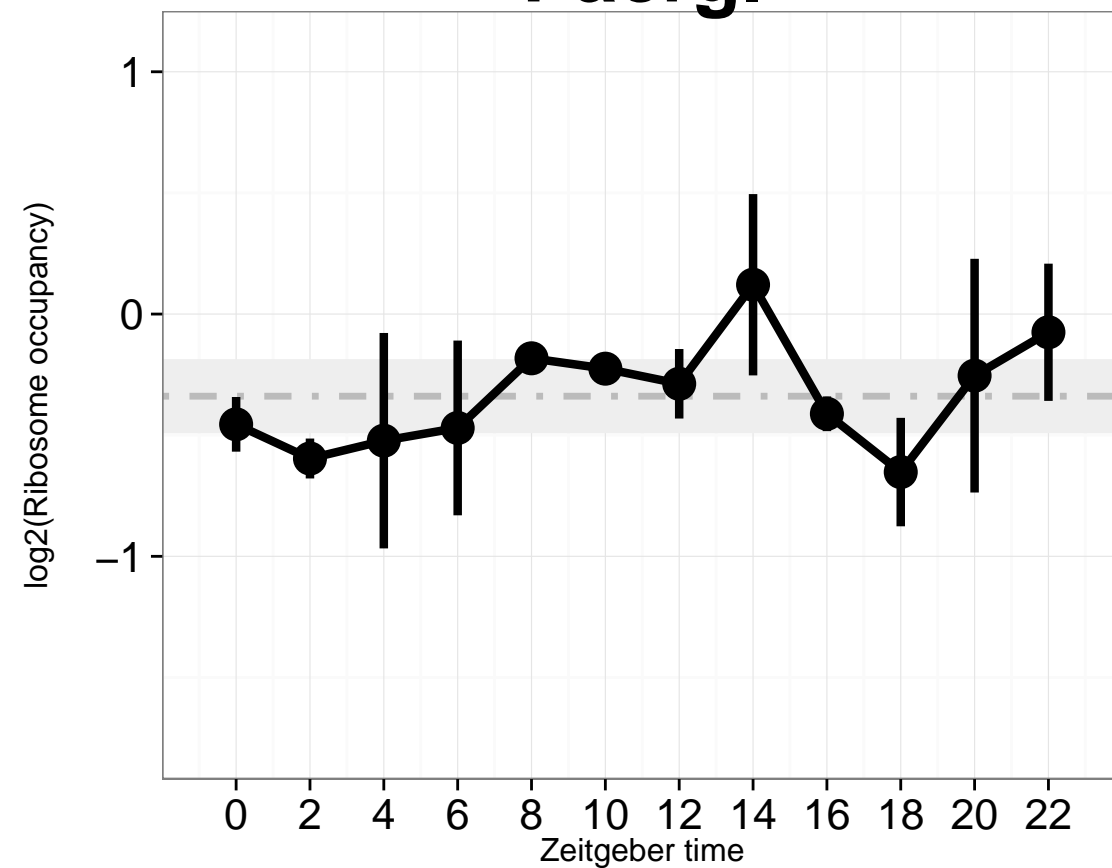

Supplement: Supplementary file 6483 [file 1]

## Klf11

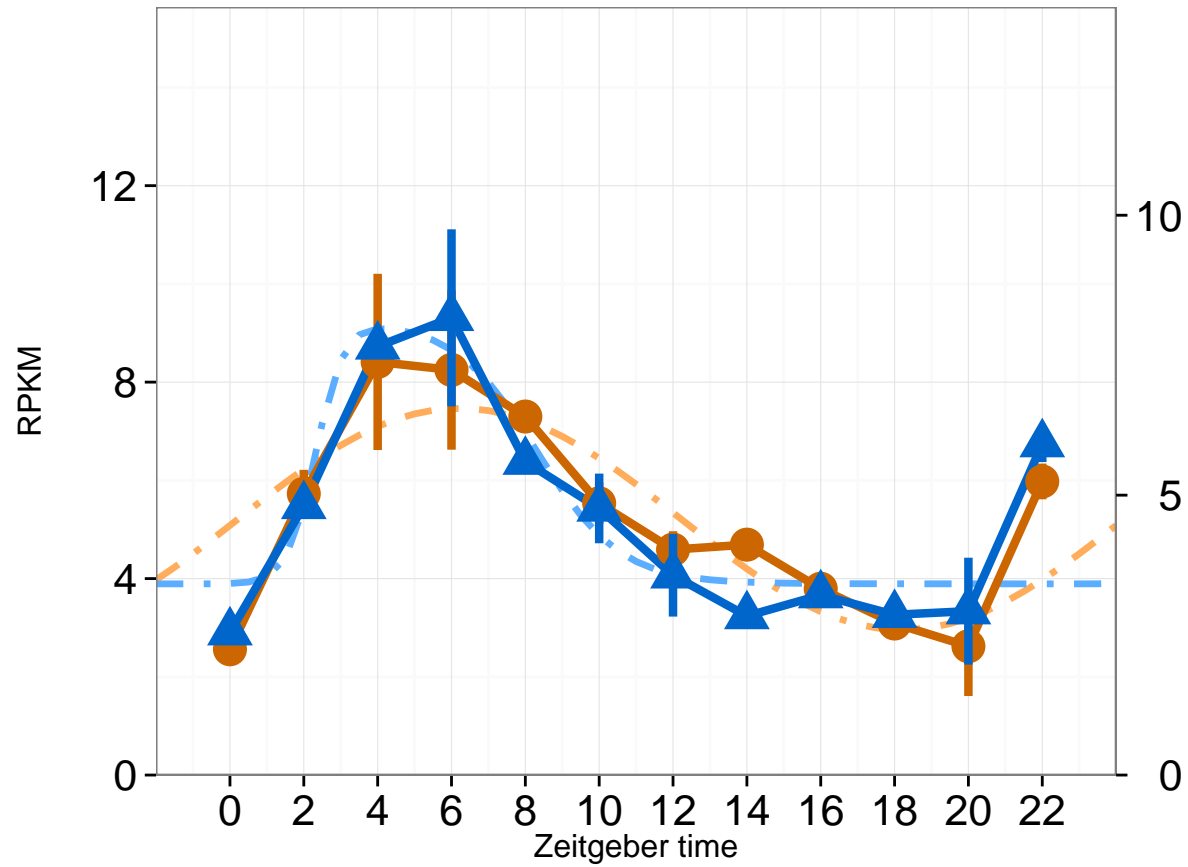

## Klf11

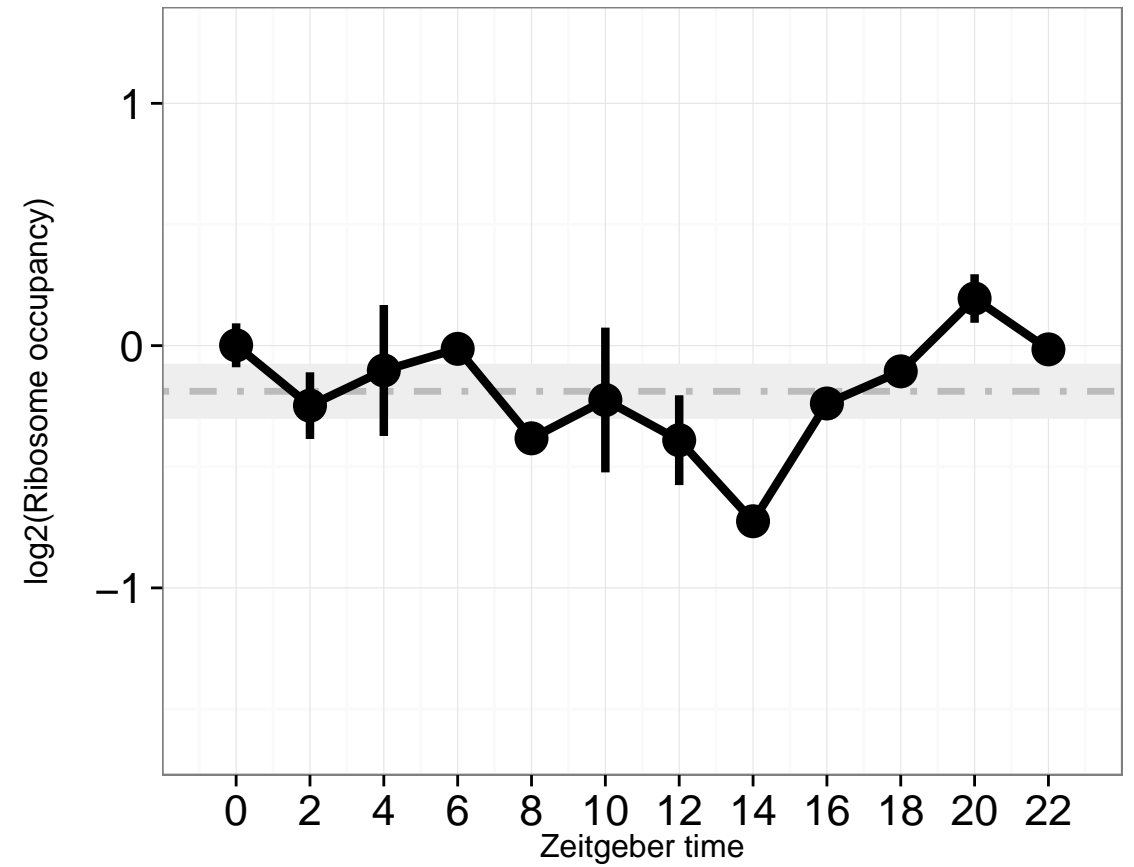

Supplement: Supplementary file 6484 [file 1]

# Lin54

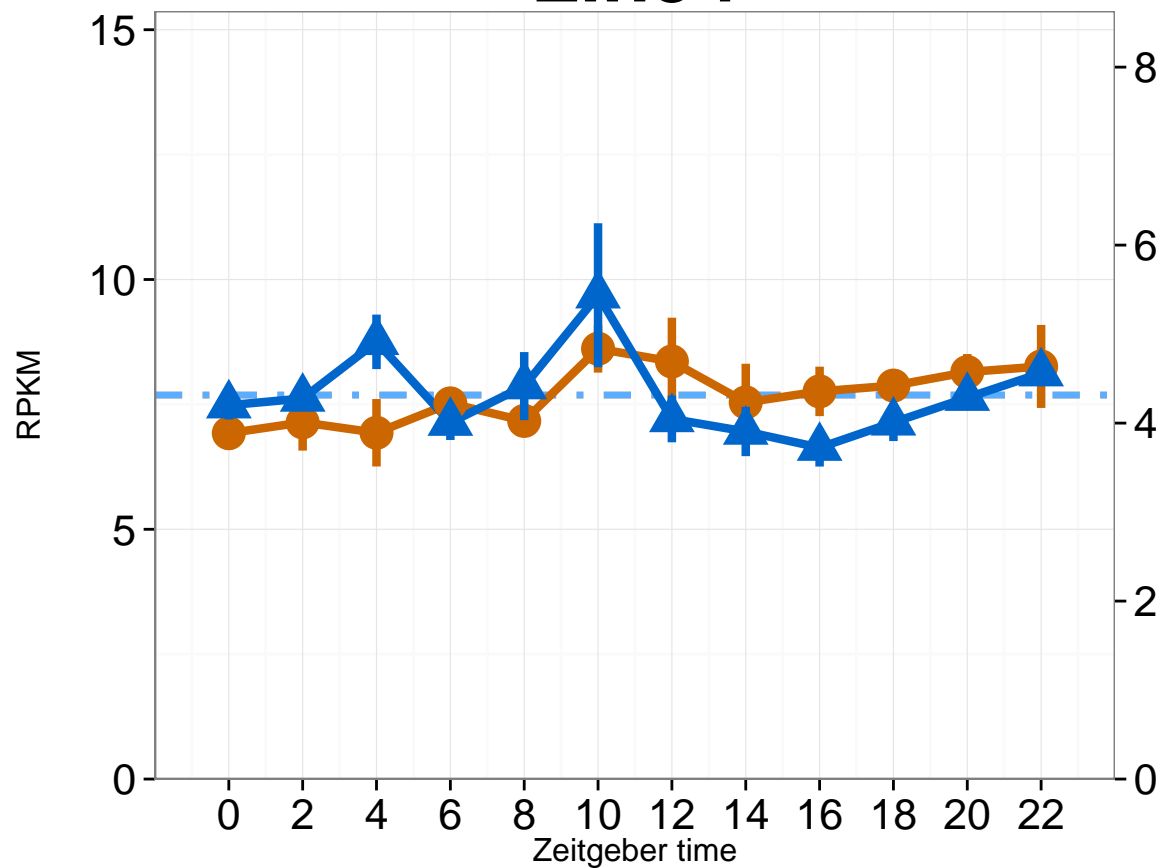

# Lin54

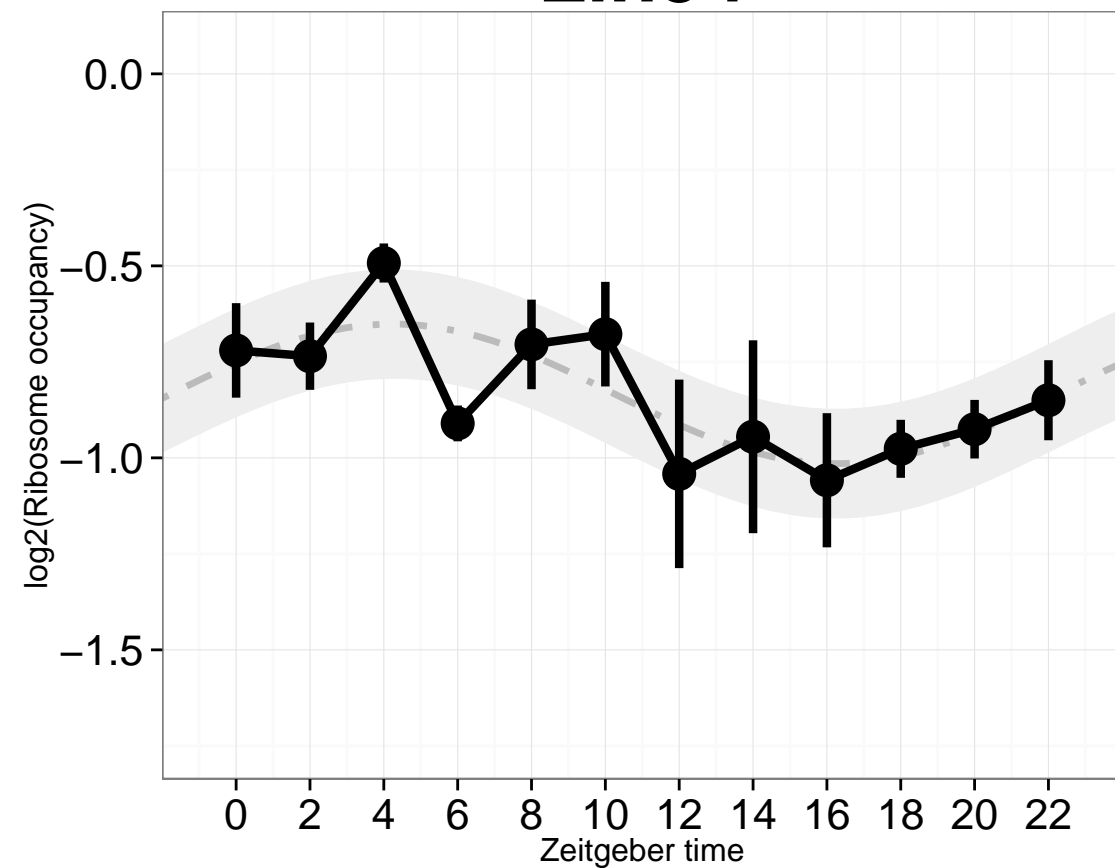

Supplement: Supplementary file 6485 [file 1]

## Hexim2

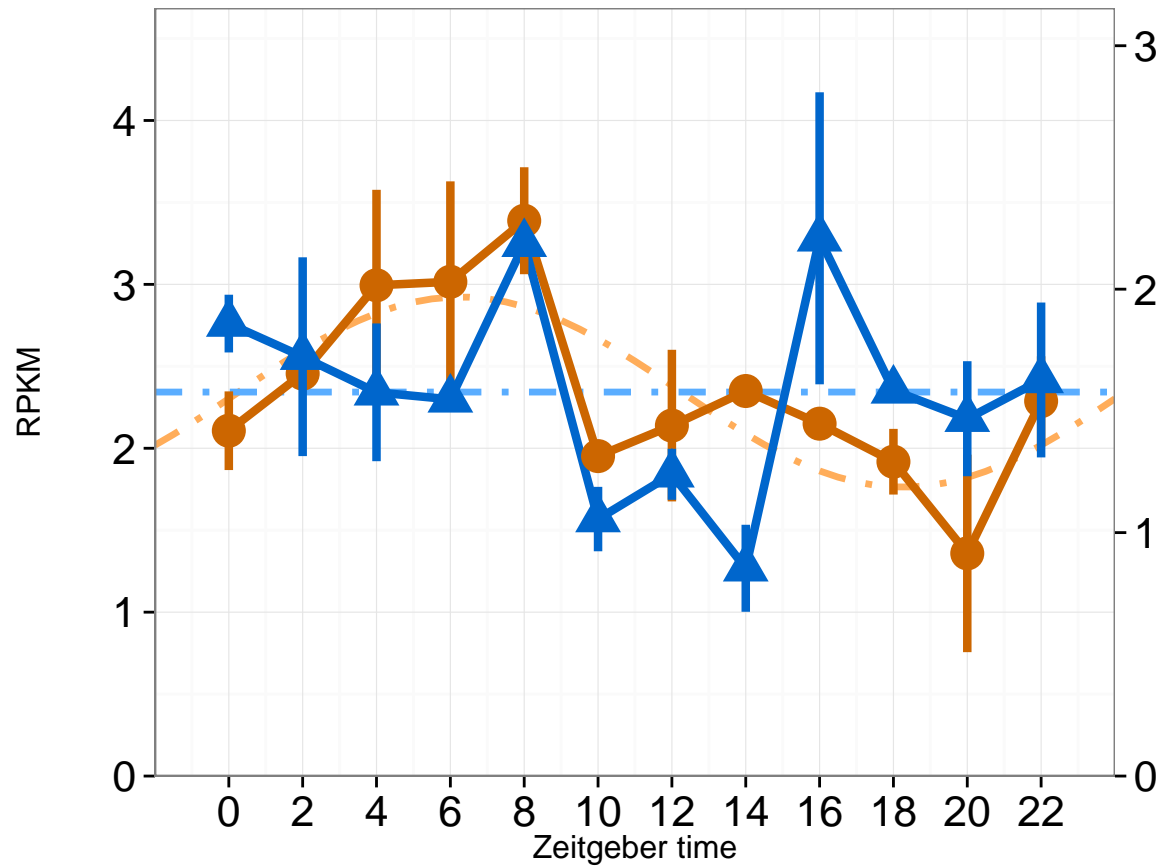

## Hexim2

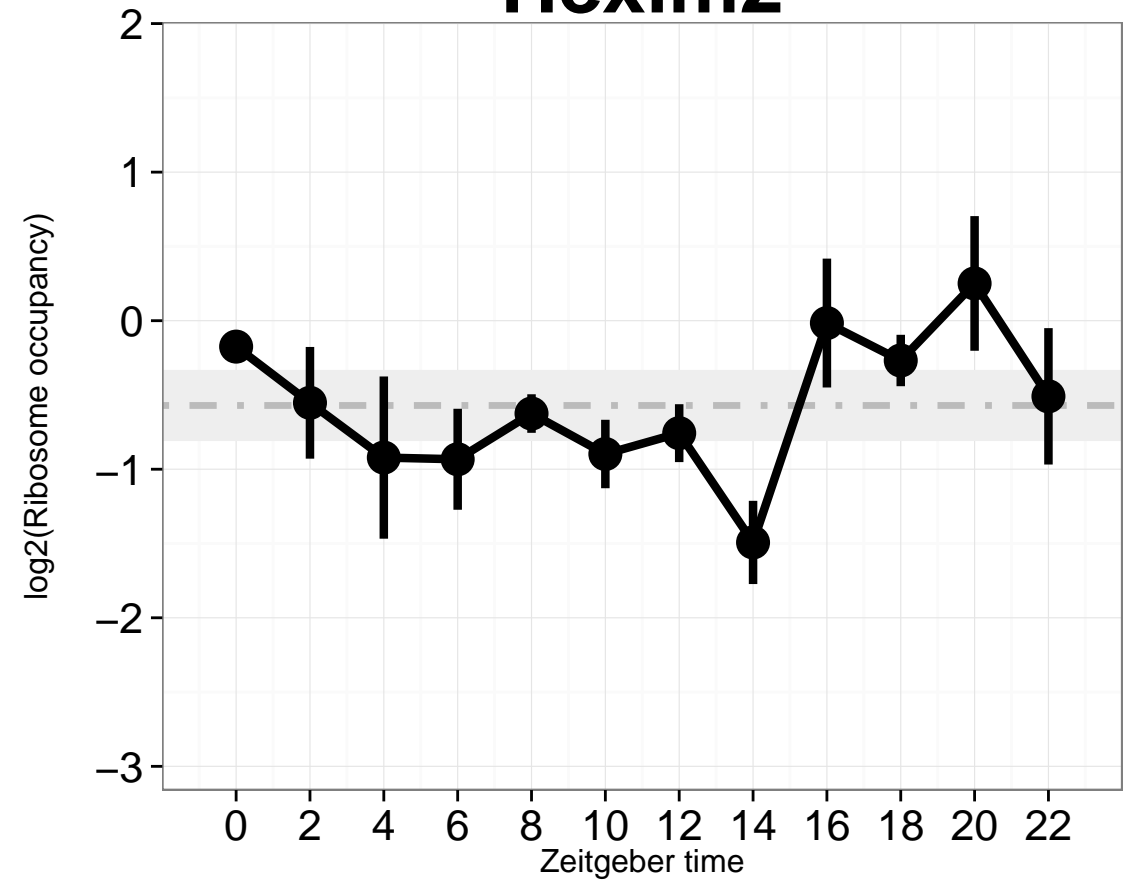

Supplement: Supplementary file 6486 [file 1]

## Pex26

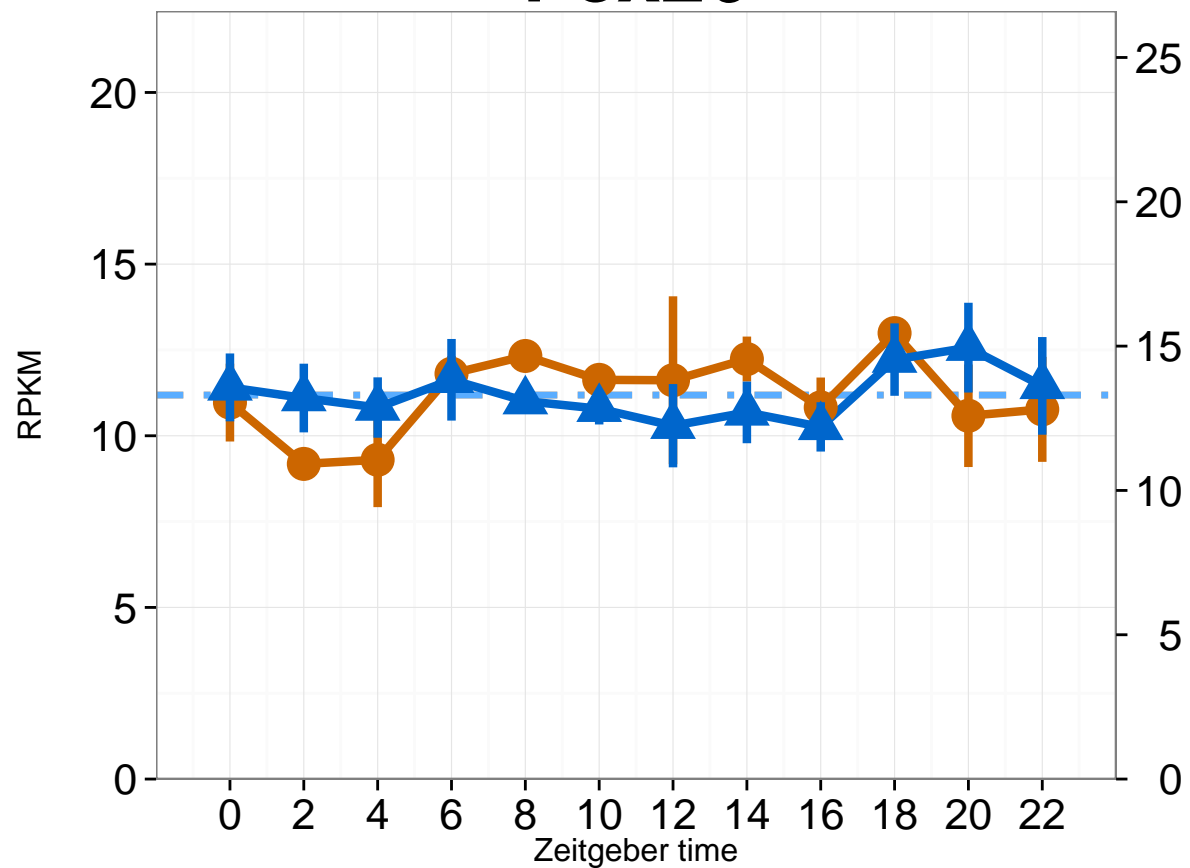

## Pex26

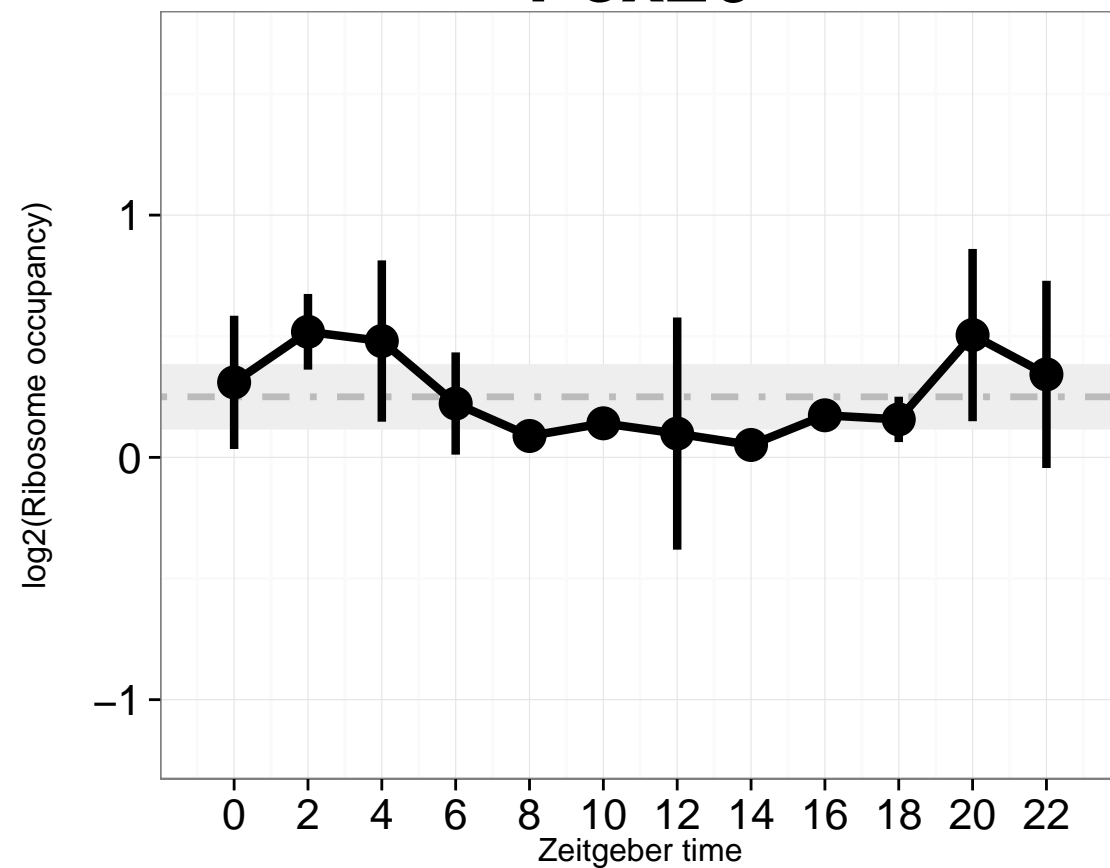

Supplement: Supplementary file 6487 [file 1]

# P4htm

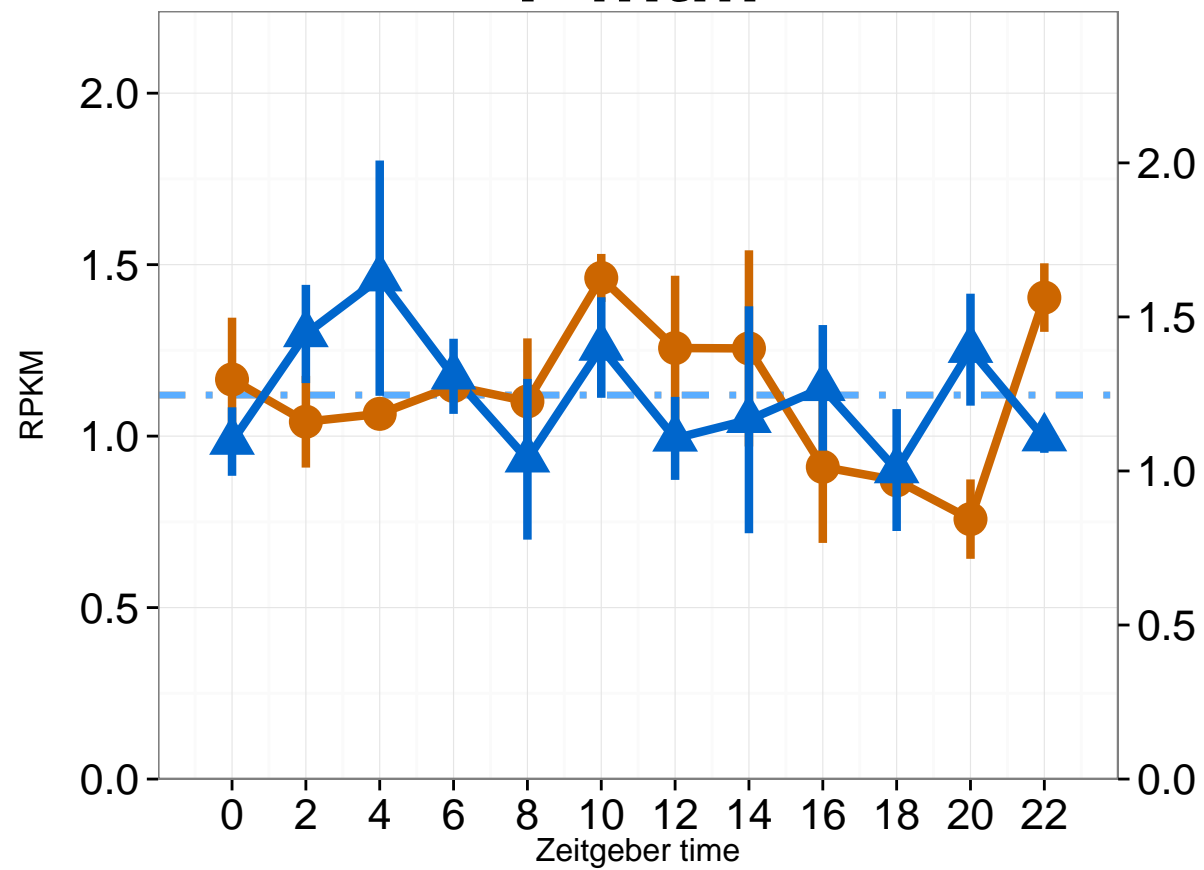

# P4htm

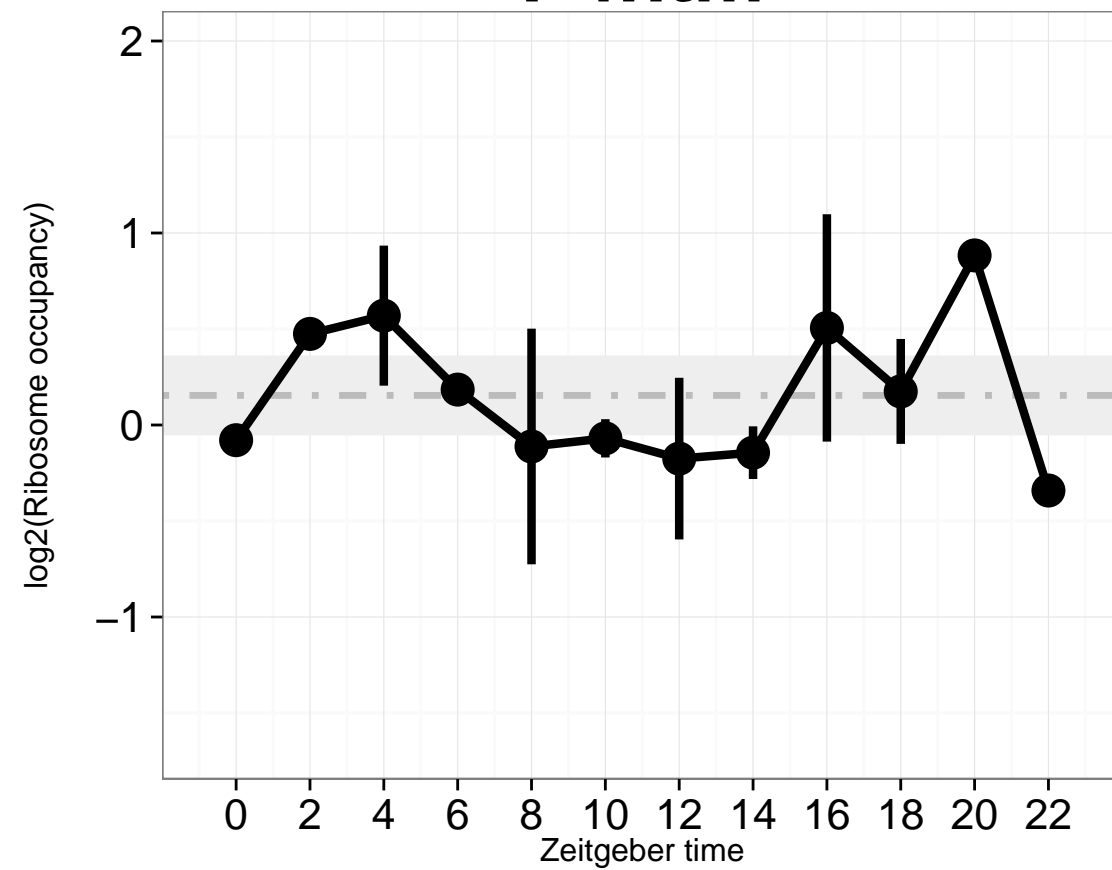

Supplement: Supplementary file 6488 [file 1]

## Fbxo30

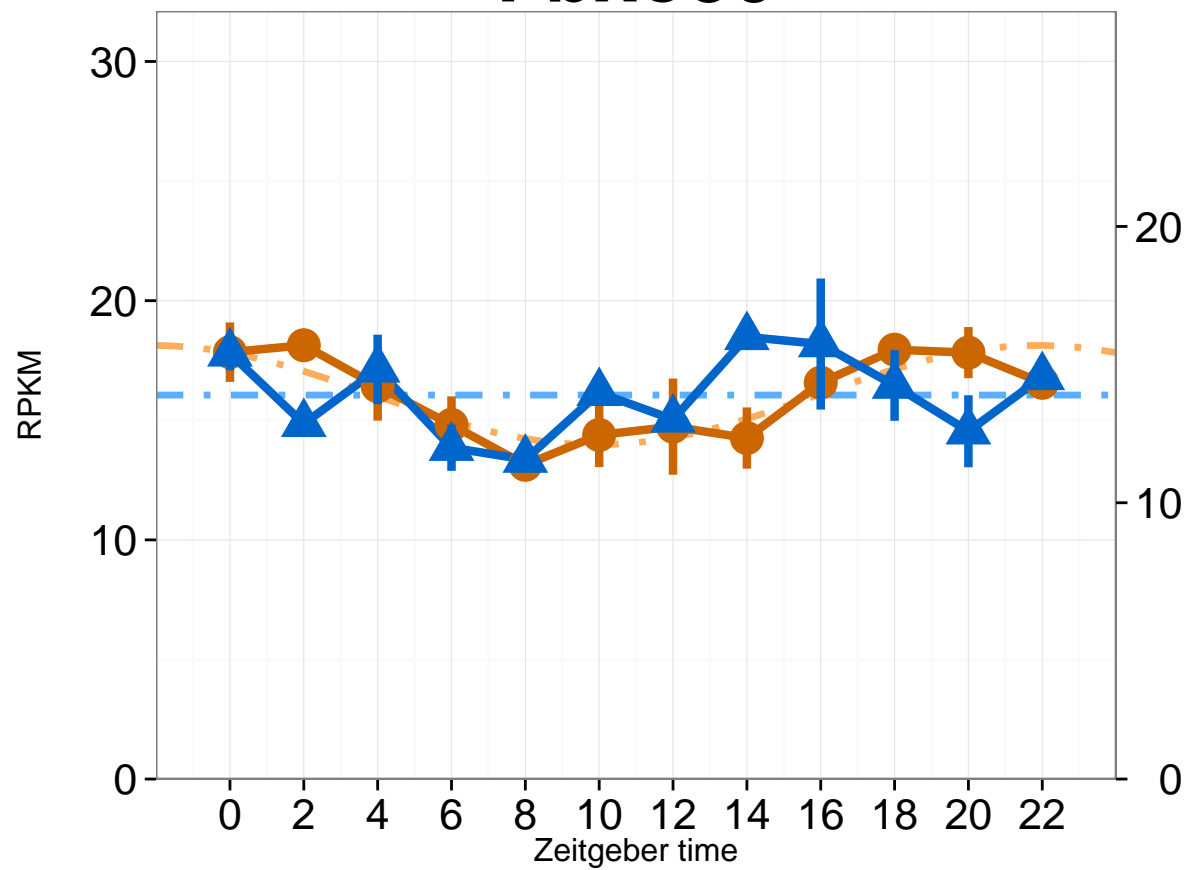

## Fbxo30

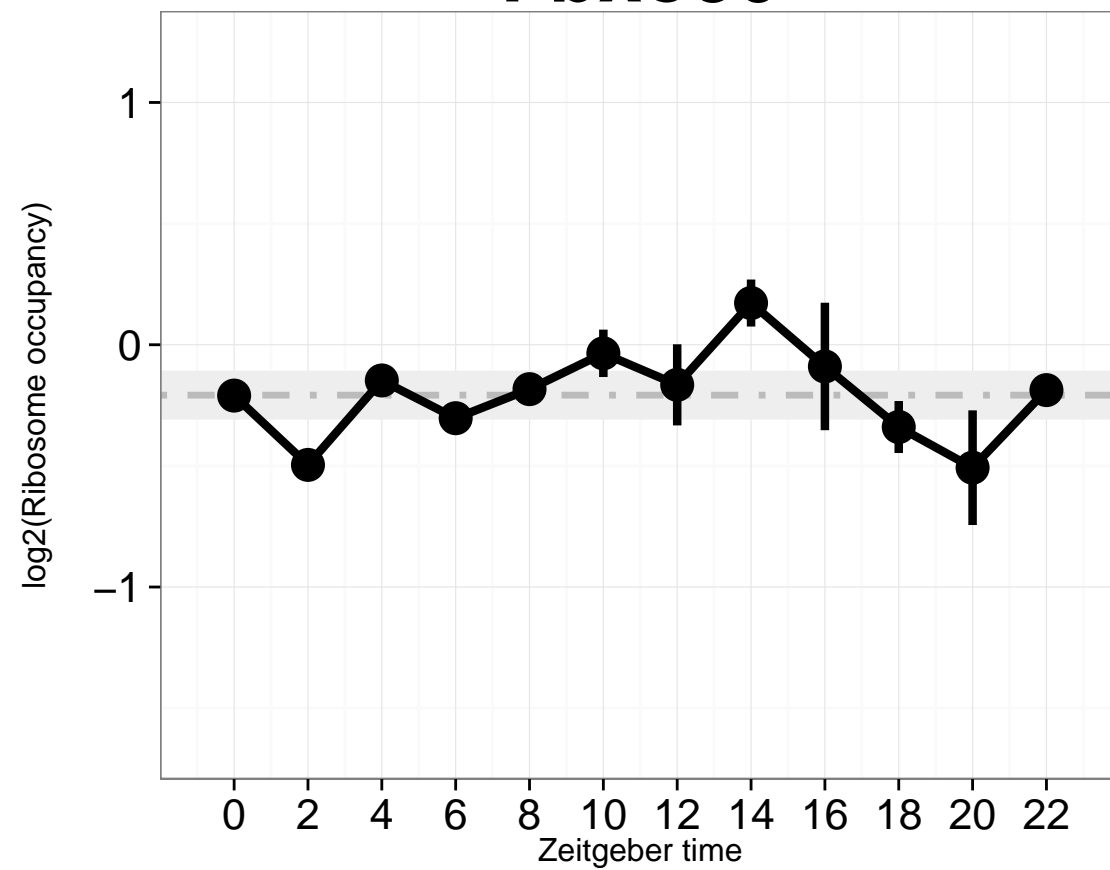

Supplement: Supplementary file 6489 [file 1]

## Macrocl1

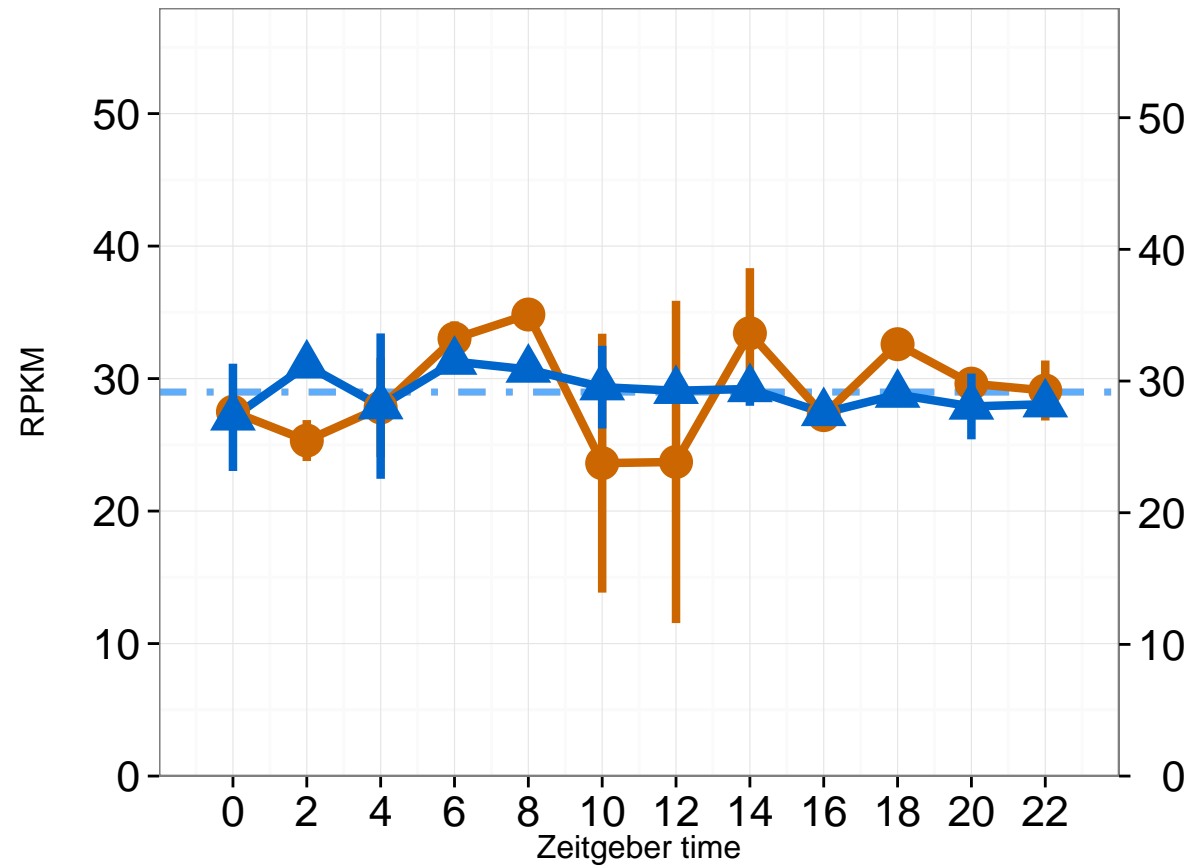

## Macrocl1

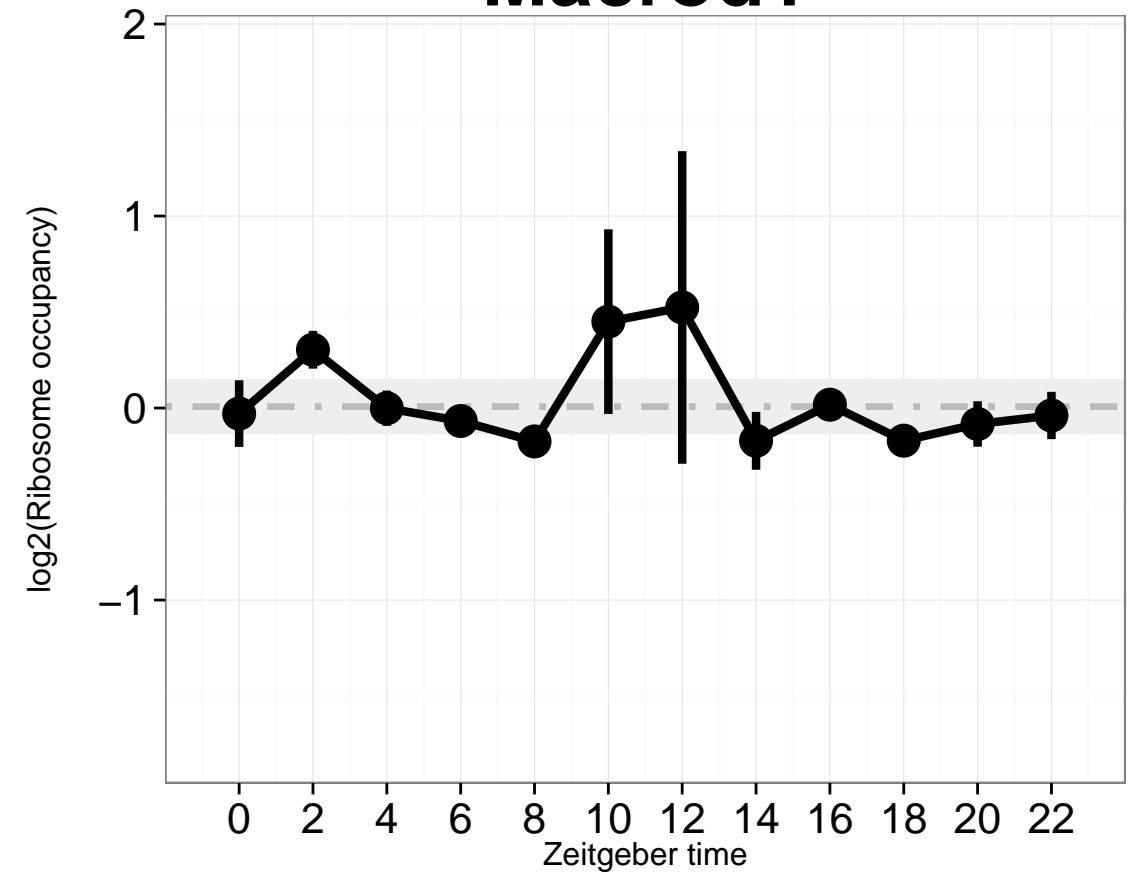

Supplement: Supplementary file 6490 [file 1]

## Kazn

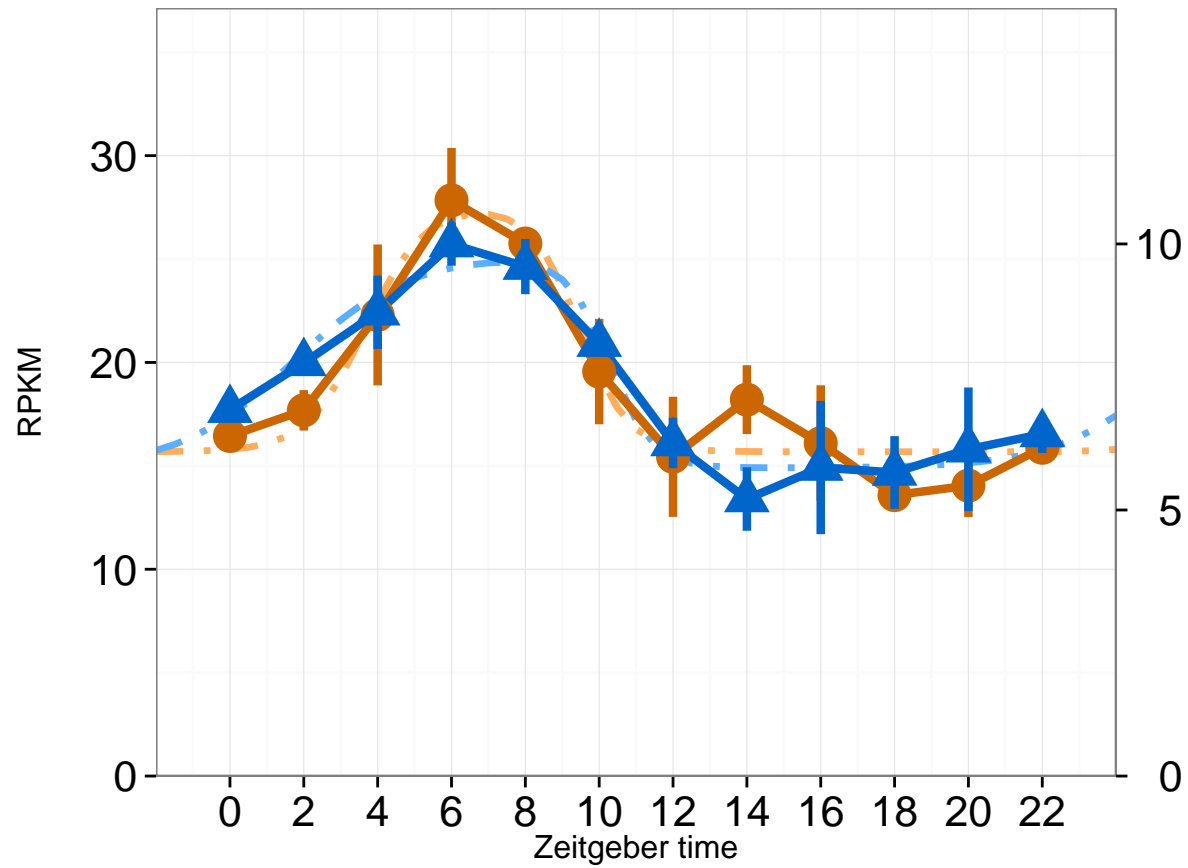

## Kazn

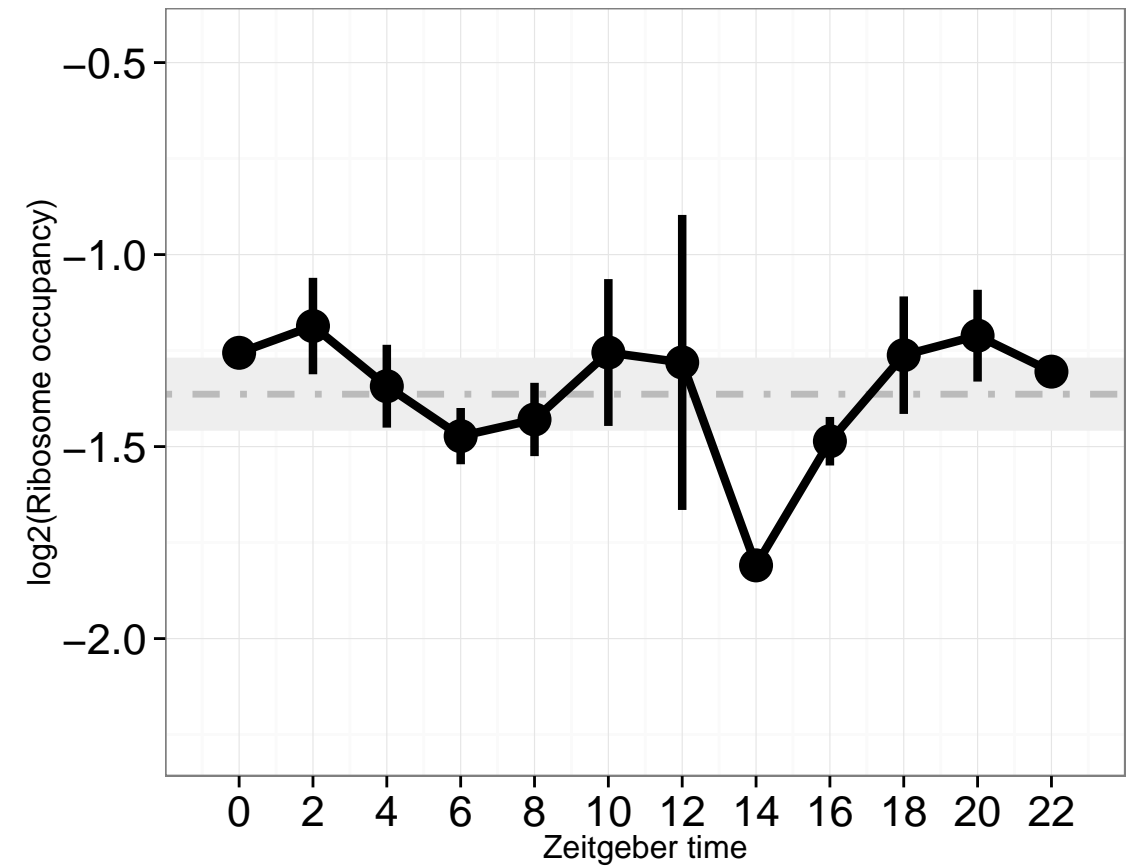

Supplement: Supplementary file 6491 [file 1]

## Hsd17b4

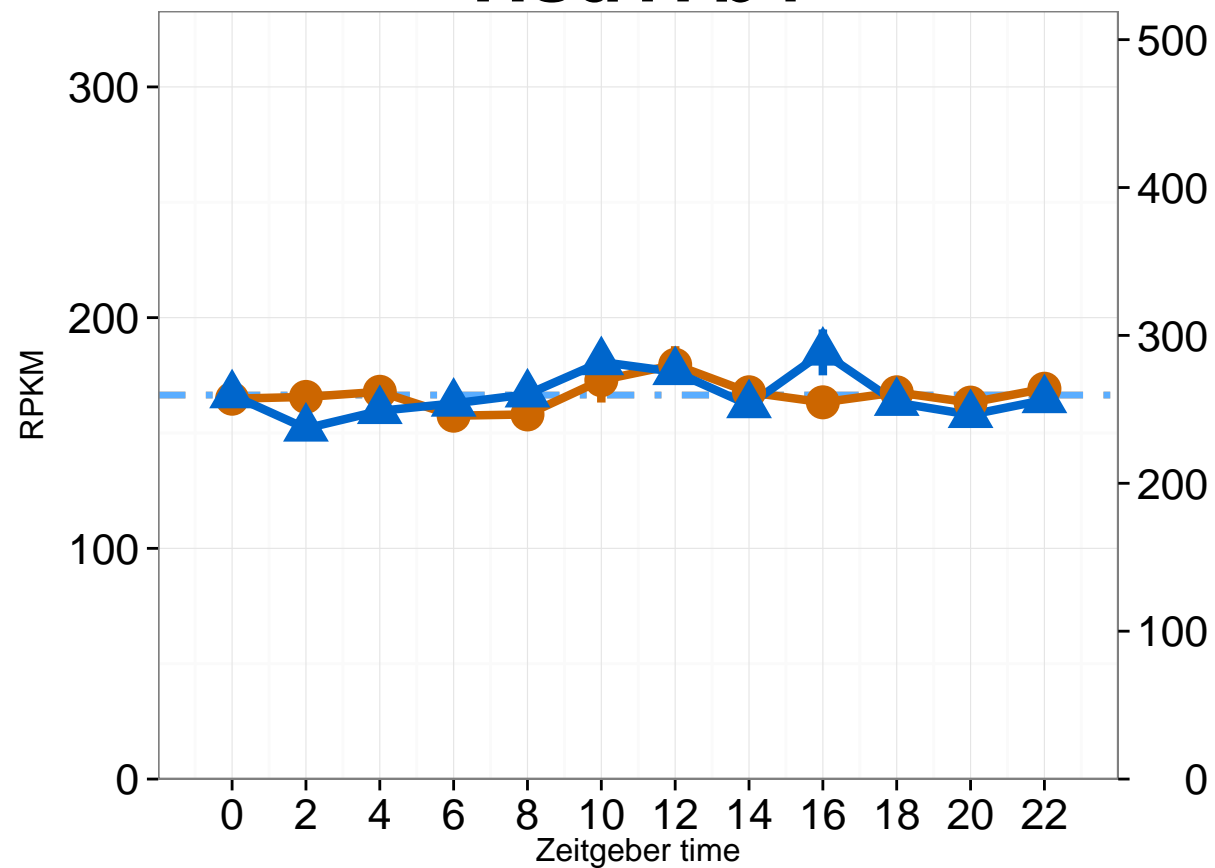

## Hsd17b4

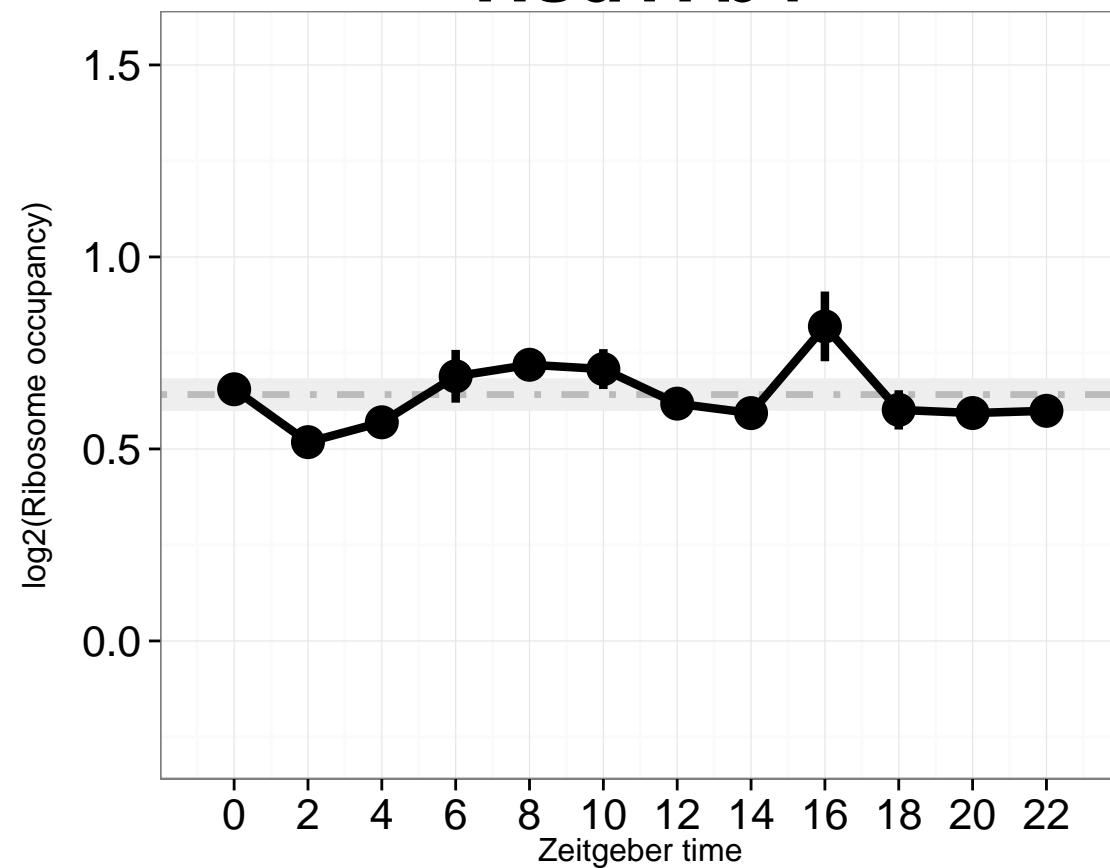

Supplement: Supplementary file 6492 [file 1]

## Ccl25

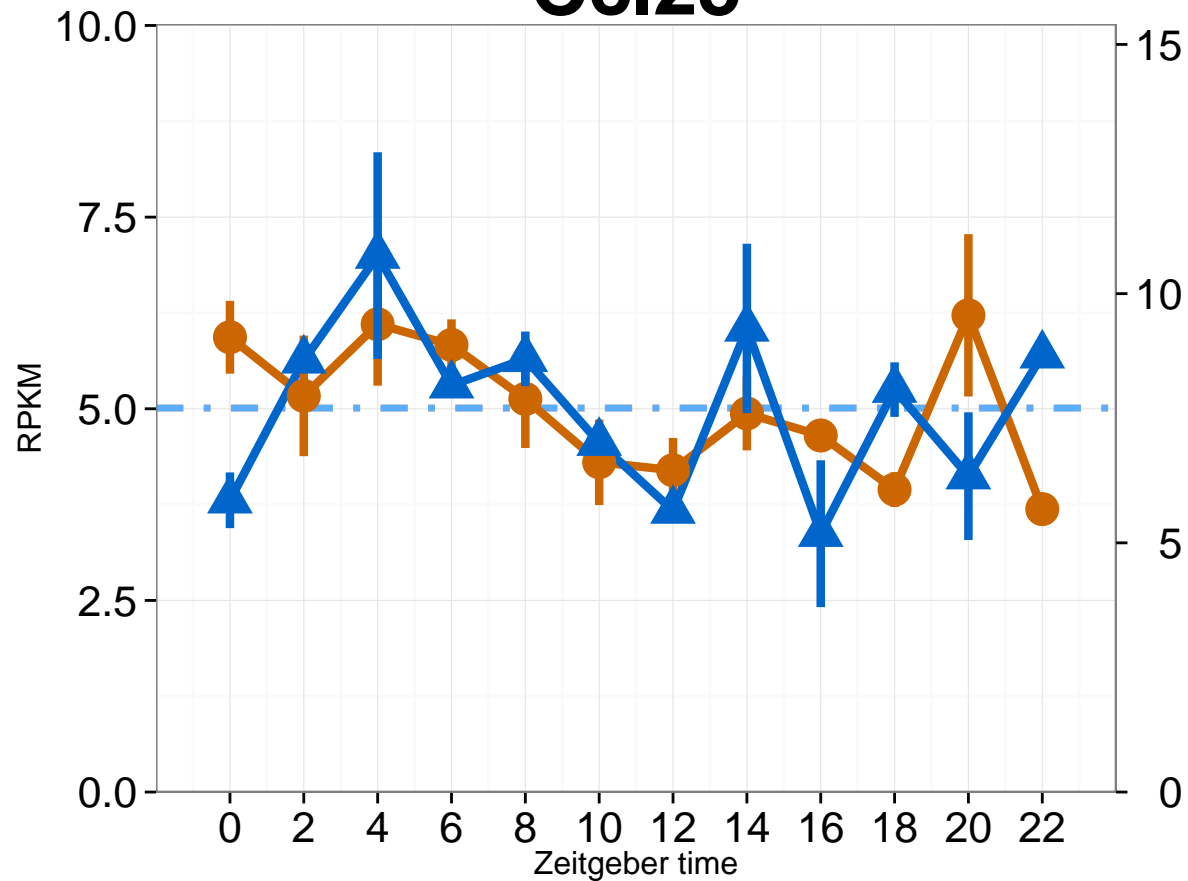

## Ccl25

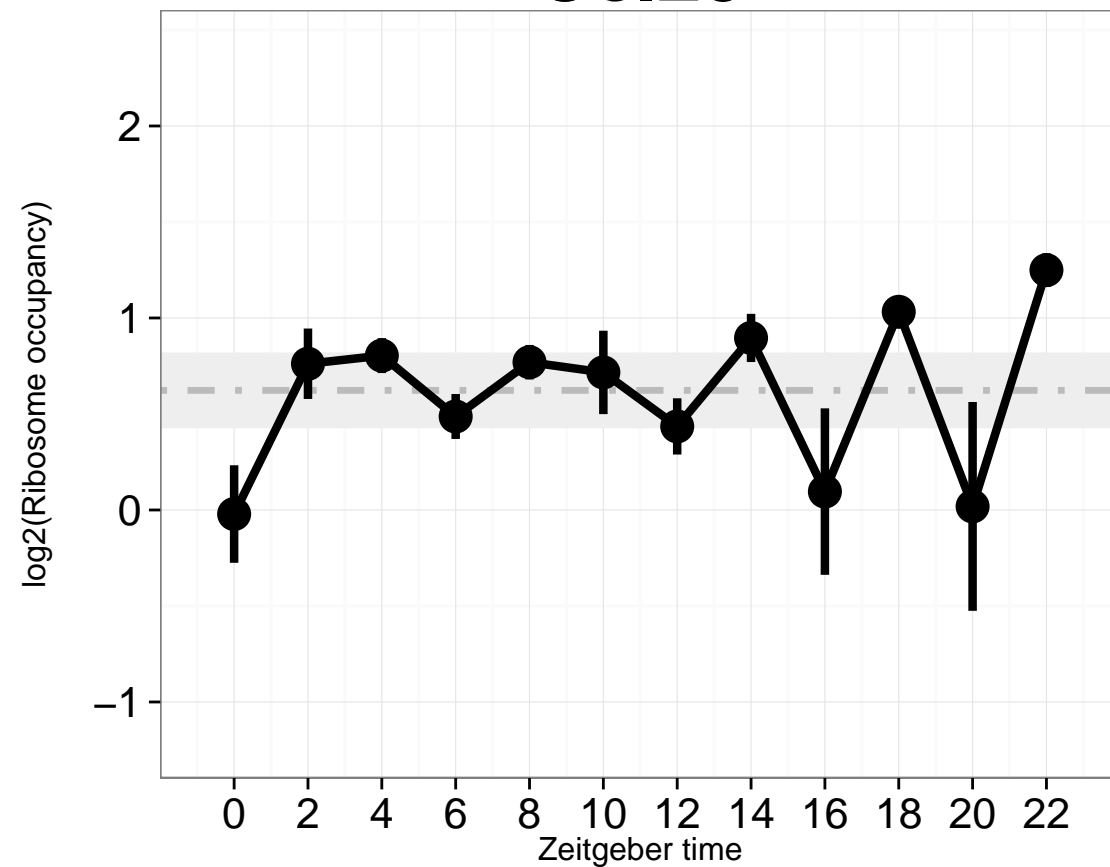

Supplement: Supplementary file 6493 [file 1]

## Uvrag

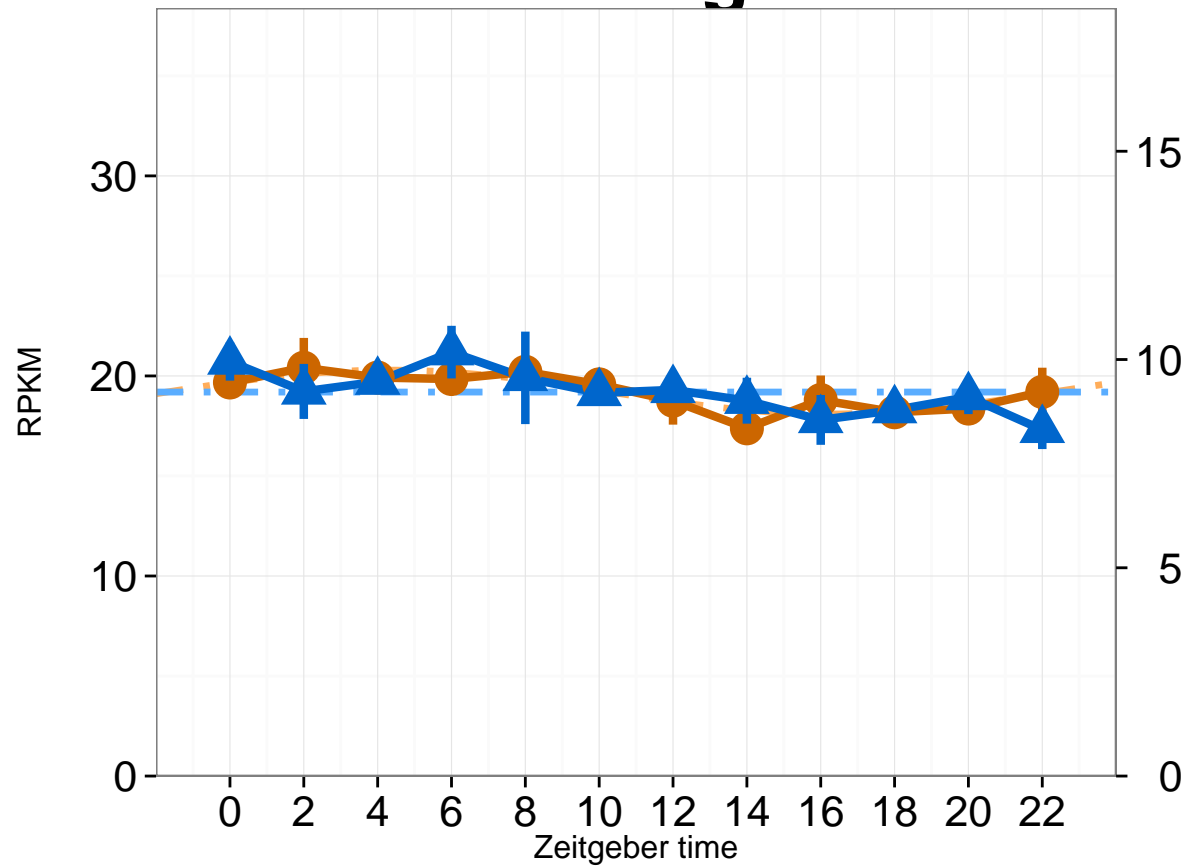

## Uvrag

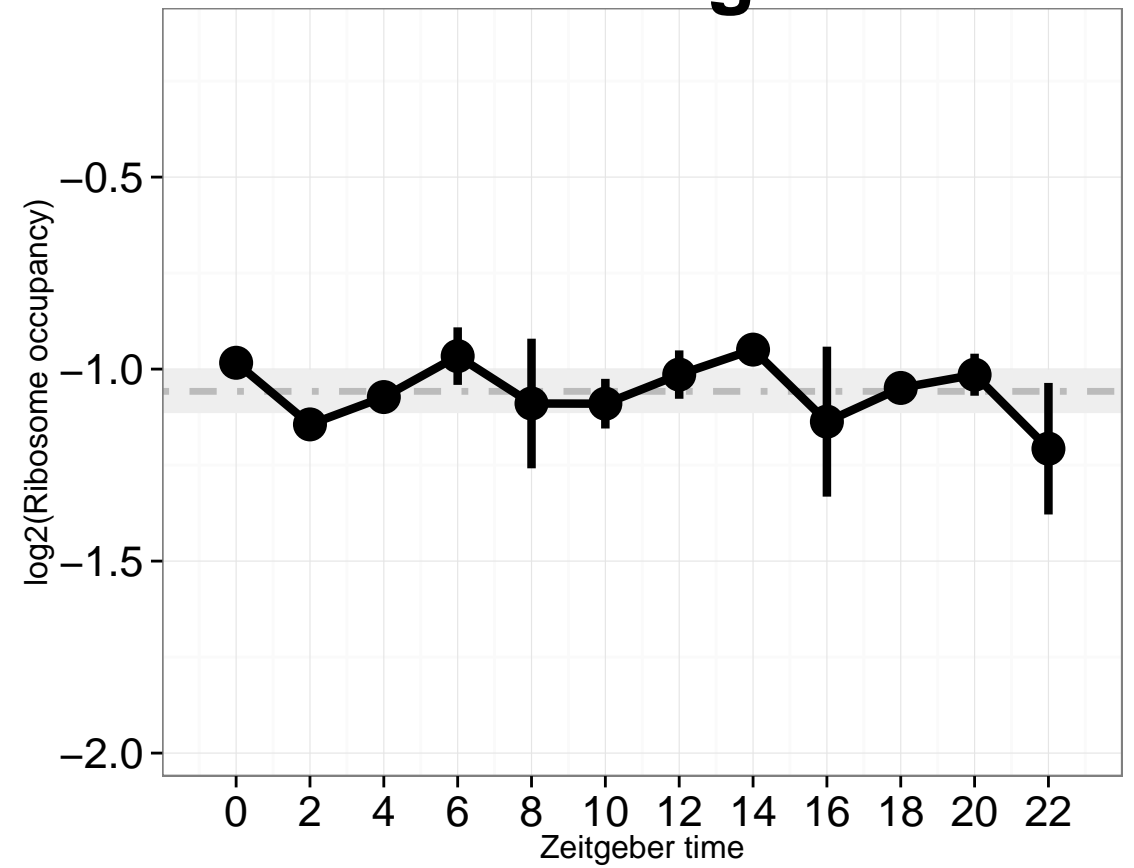

Supplement: Supplementary file 6494 [file 1]

# Zfp810

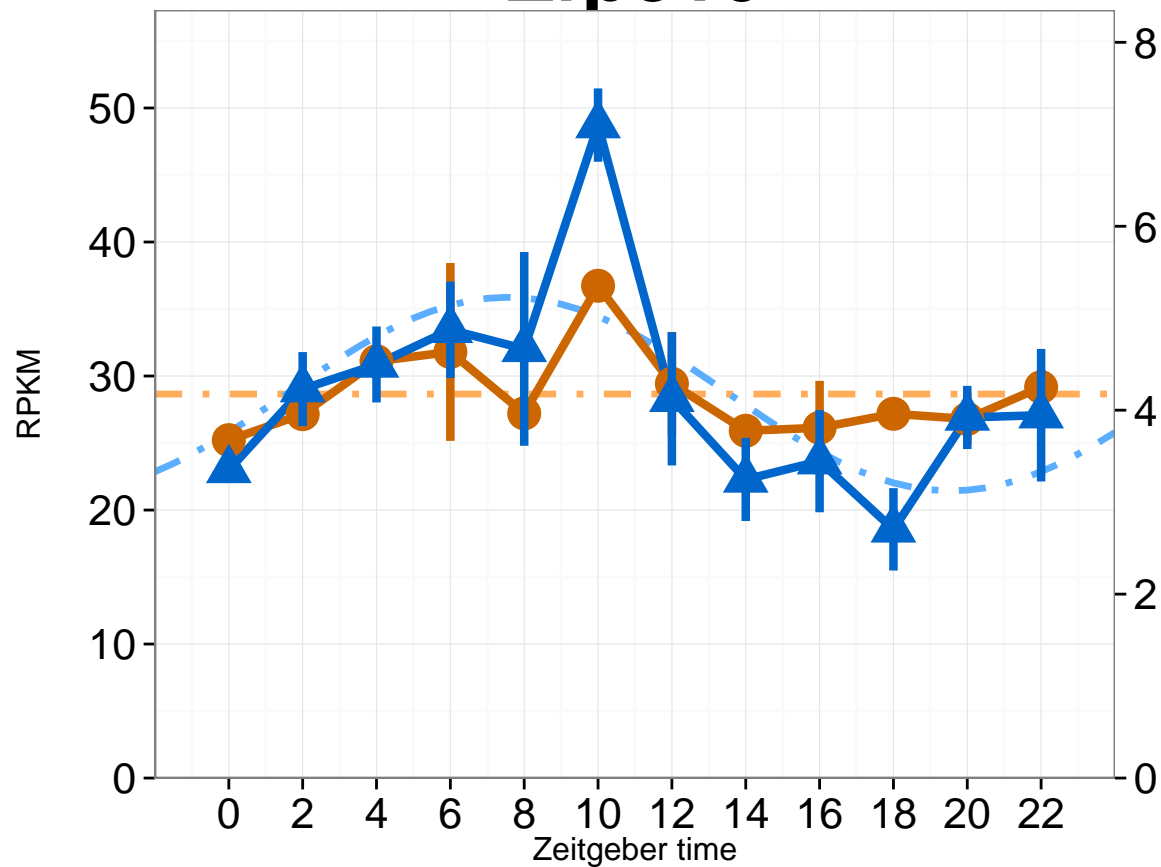

# Zfp810

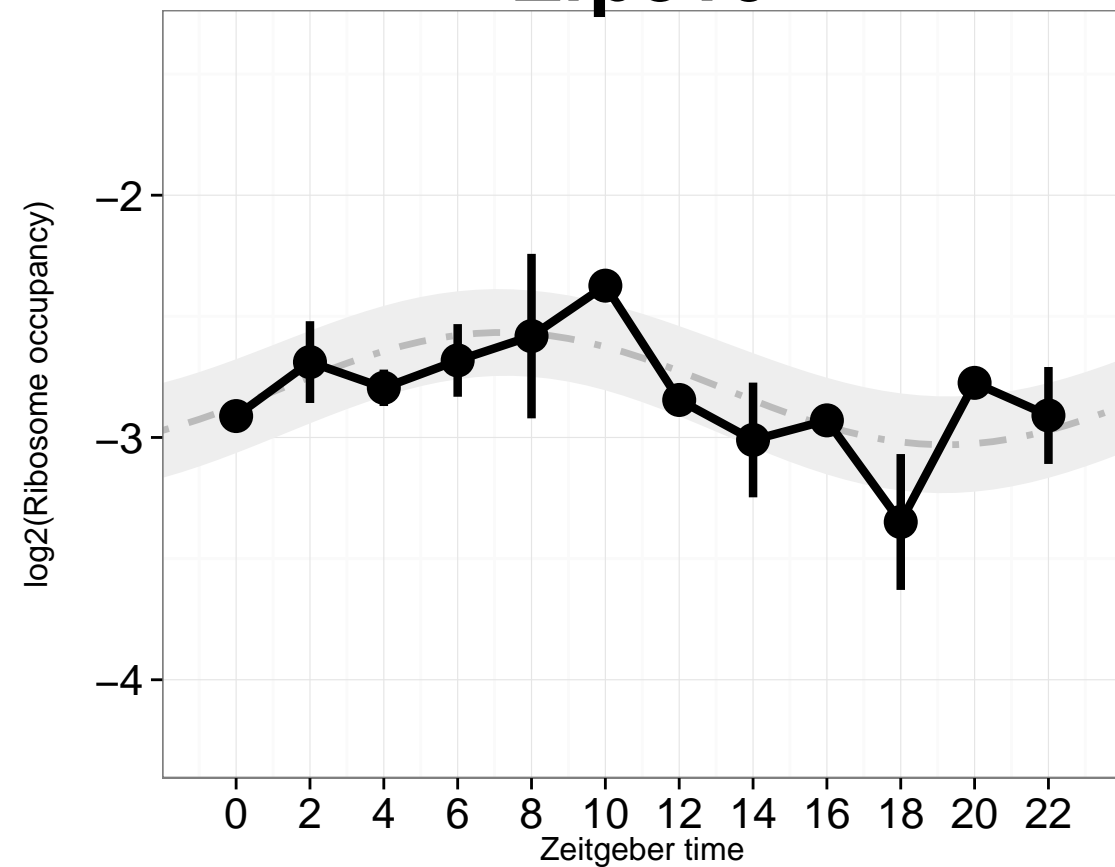

Supplement: Supplementary file 6495 [file 1]

# Htt

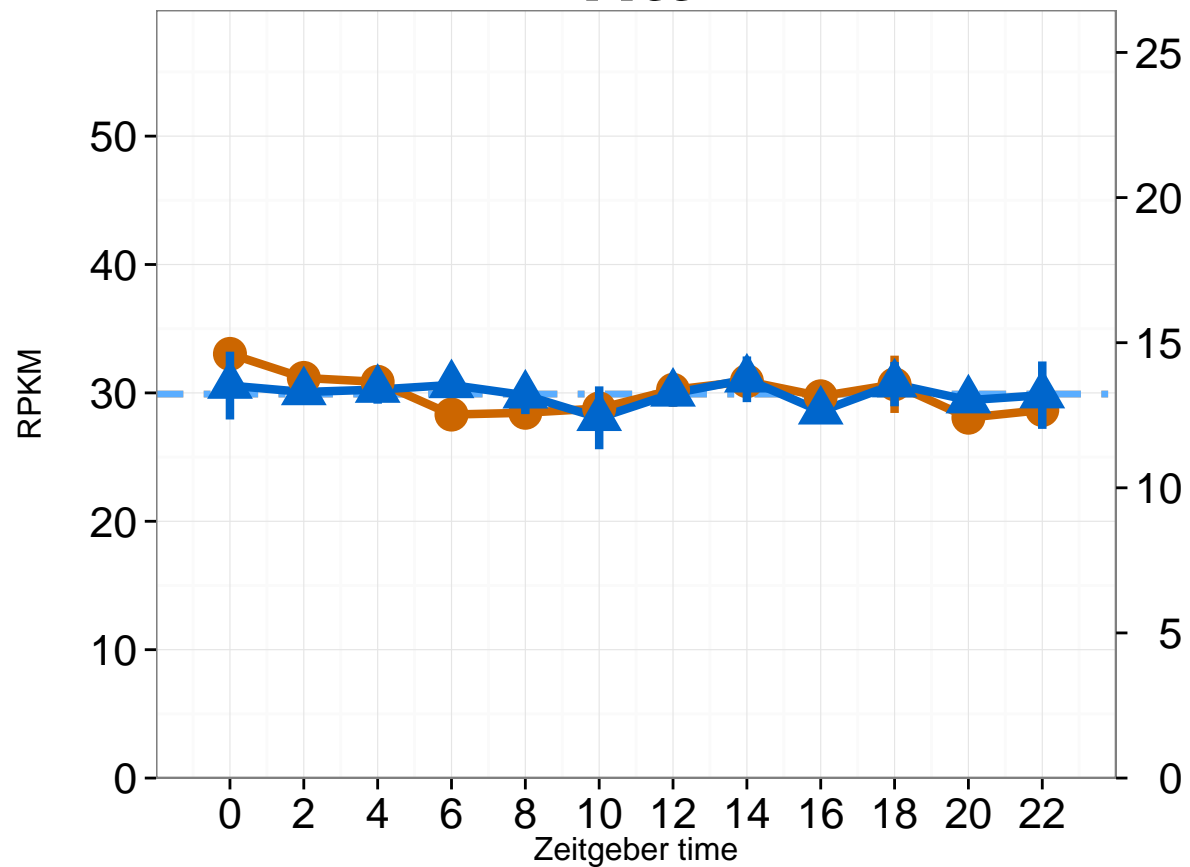

# Htt

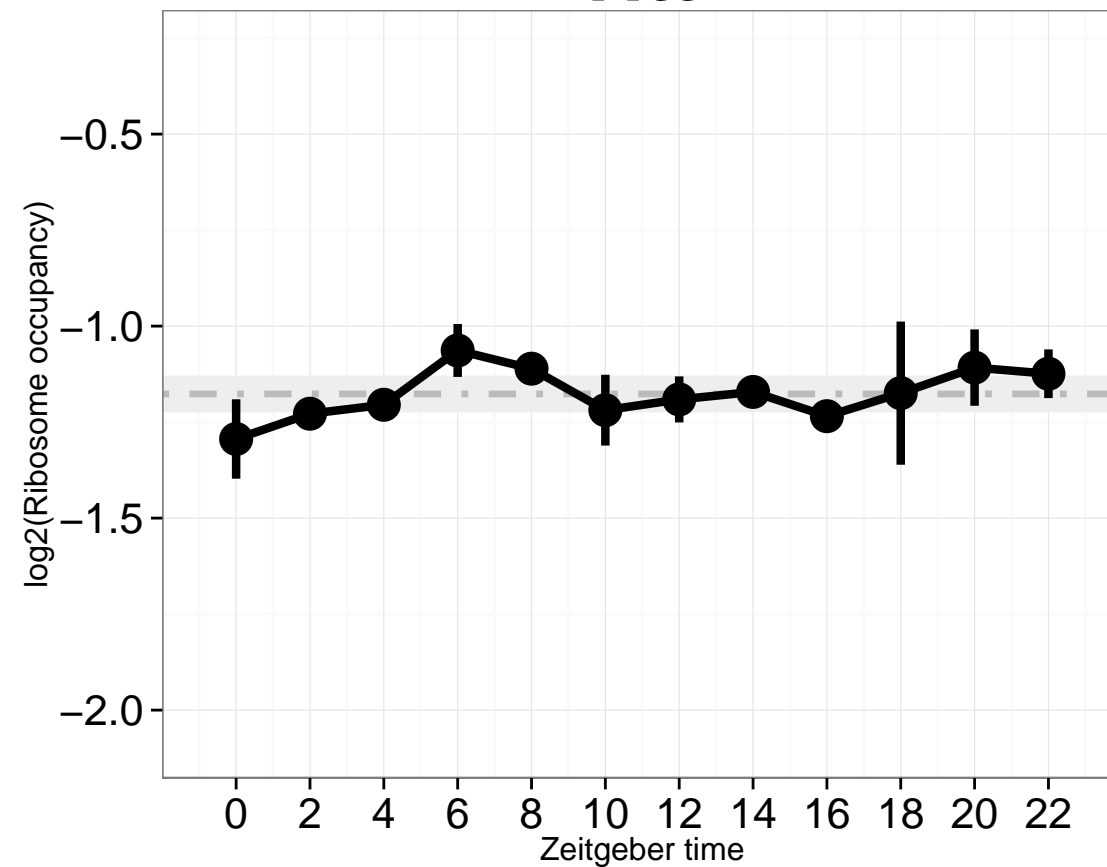

Supplement: Supplementary file 6496 [file 1]

## Mpp4

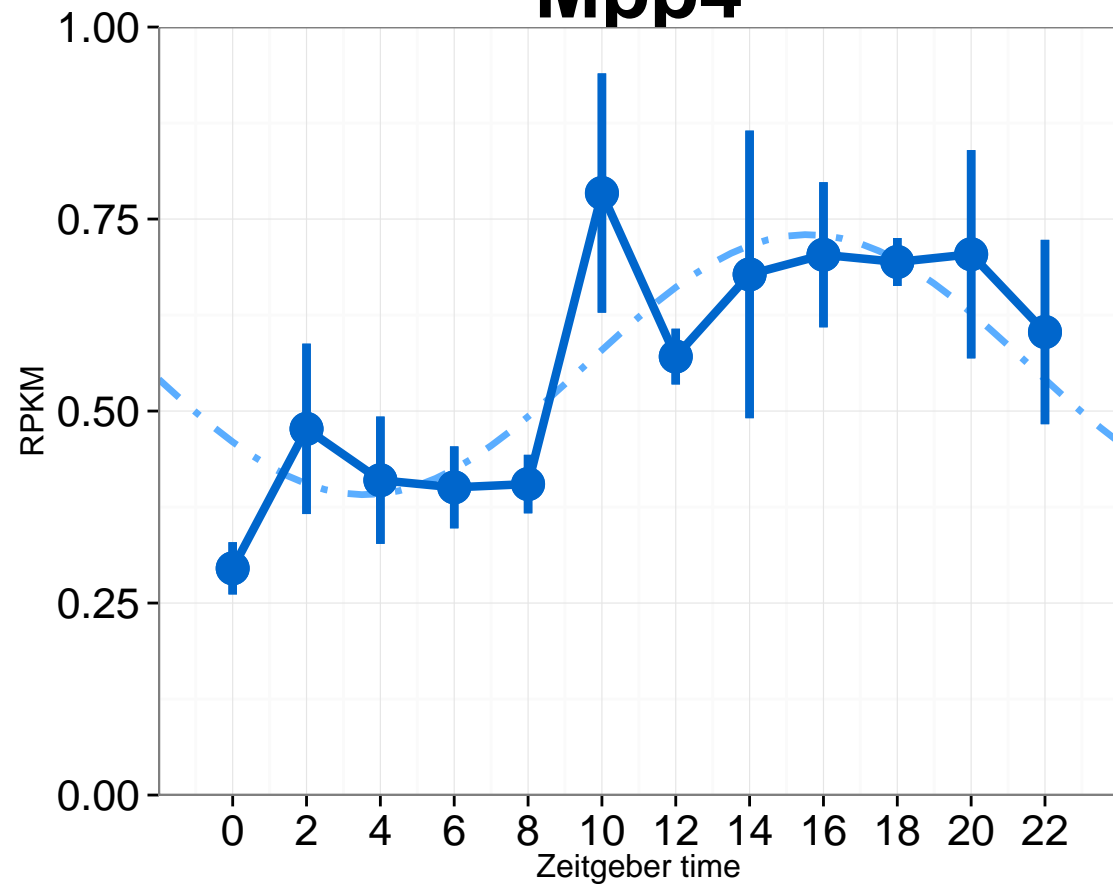

## Mpp4 log2(Ribosome occupancy)

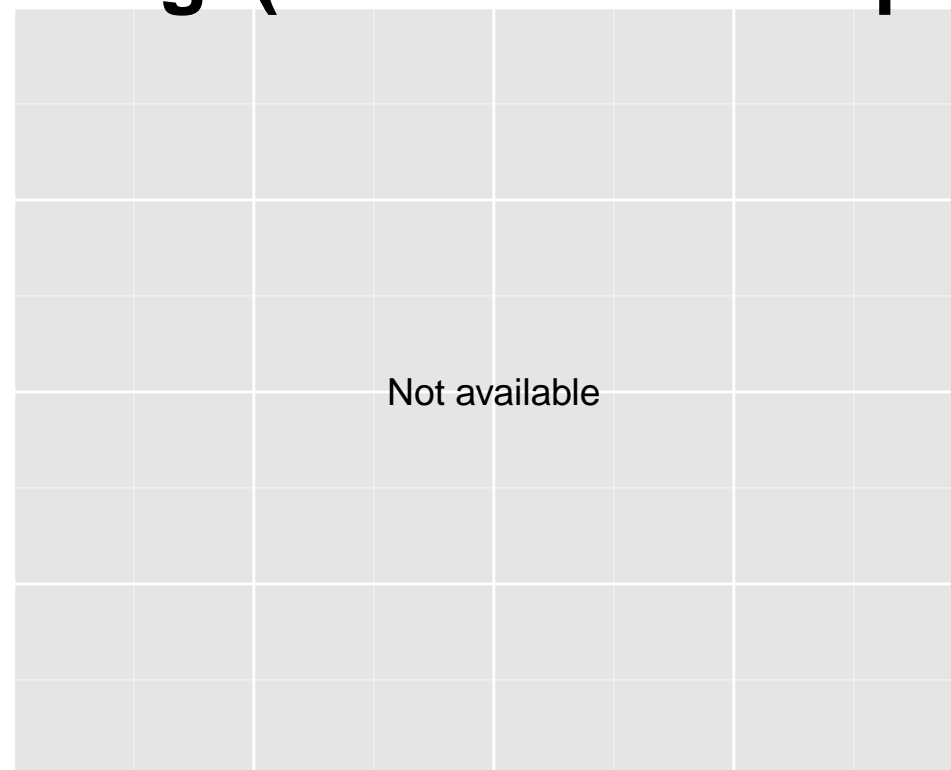

Supplement: Supplementary file 6497 [file 1]

# Fam117a

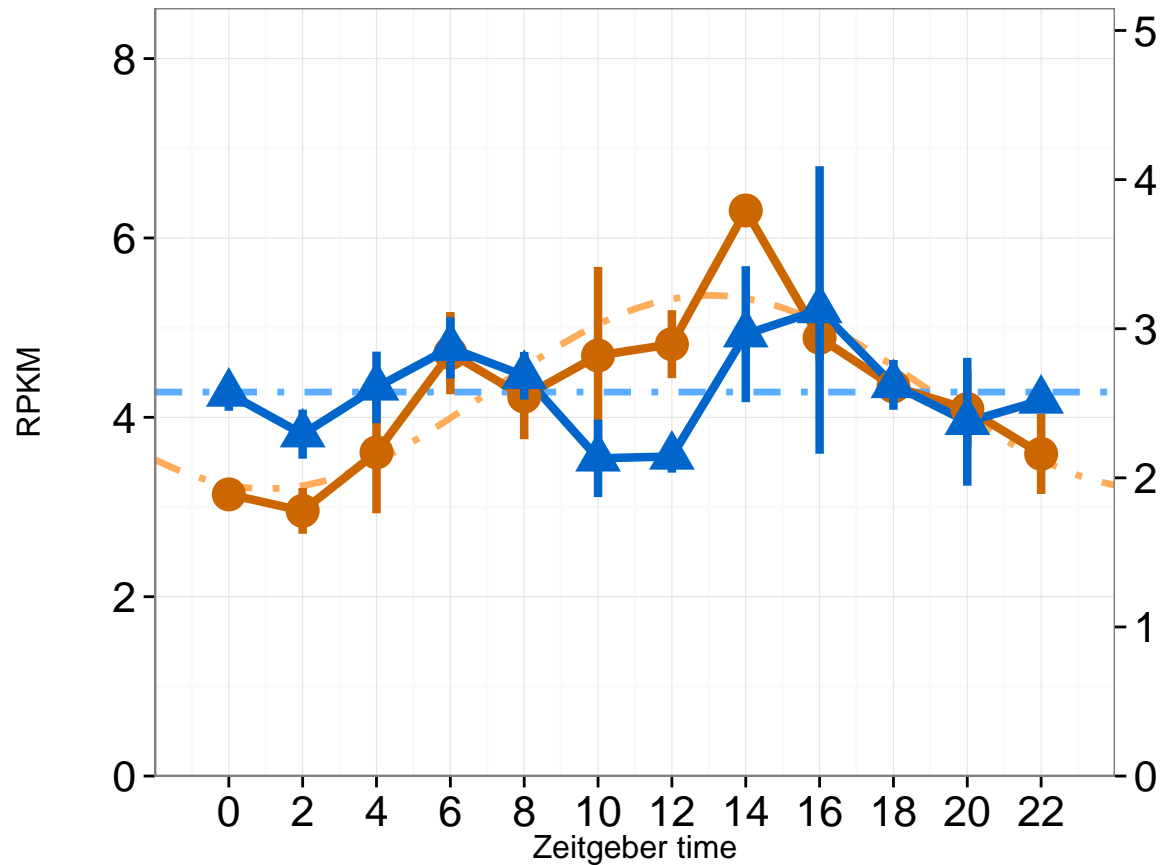

# Fam117a

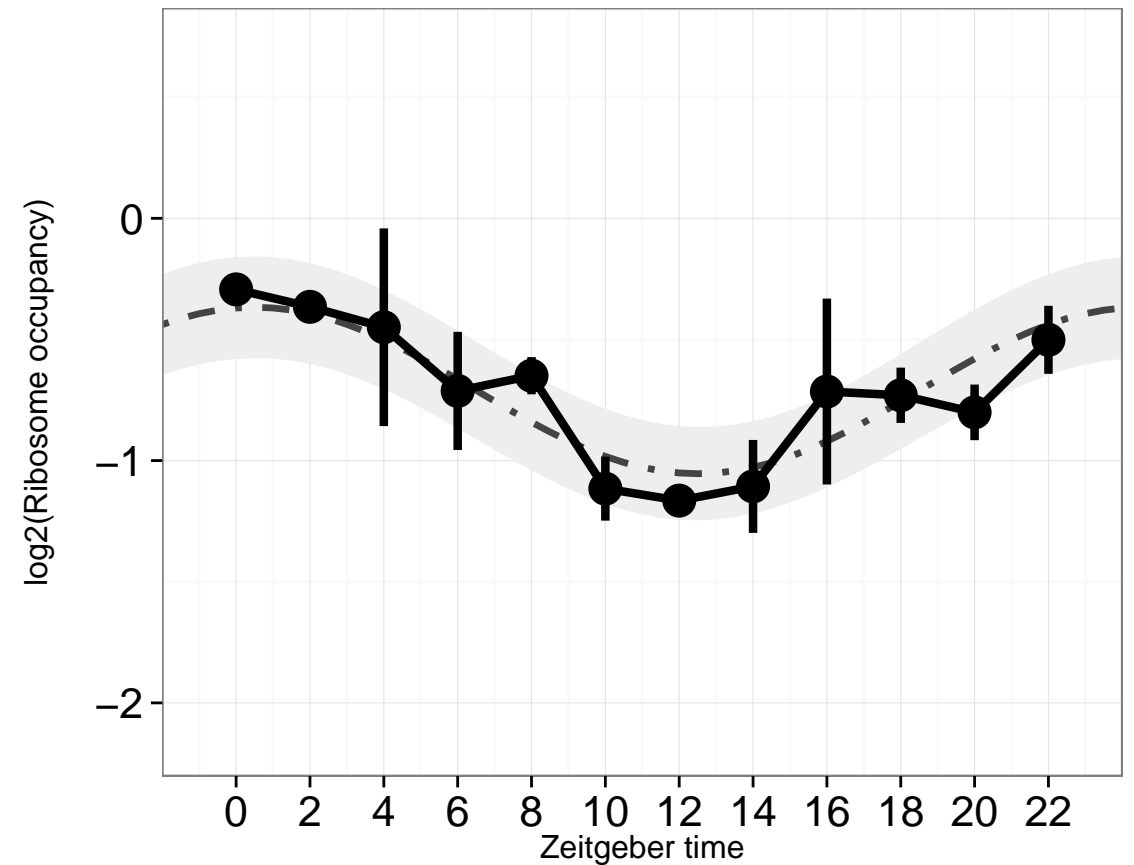

Supplement: Supplementary file 6498 [file 1]

# Zfp786

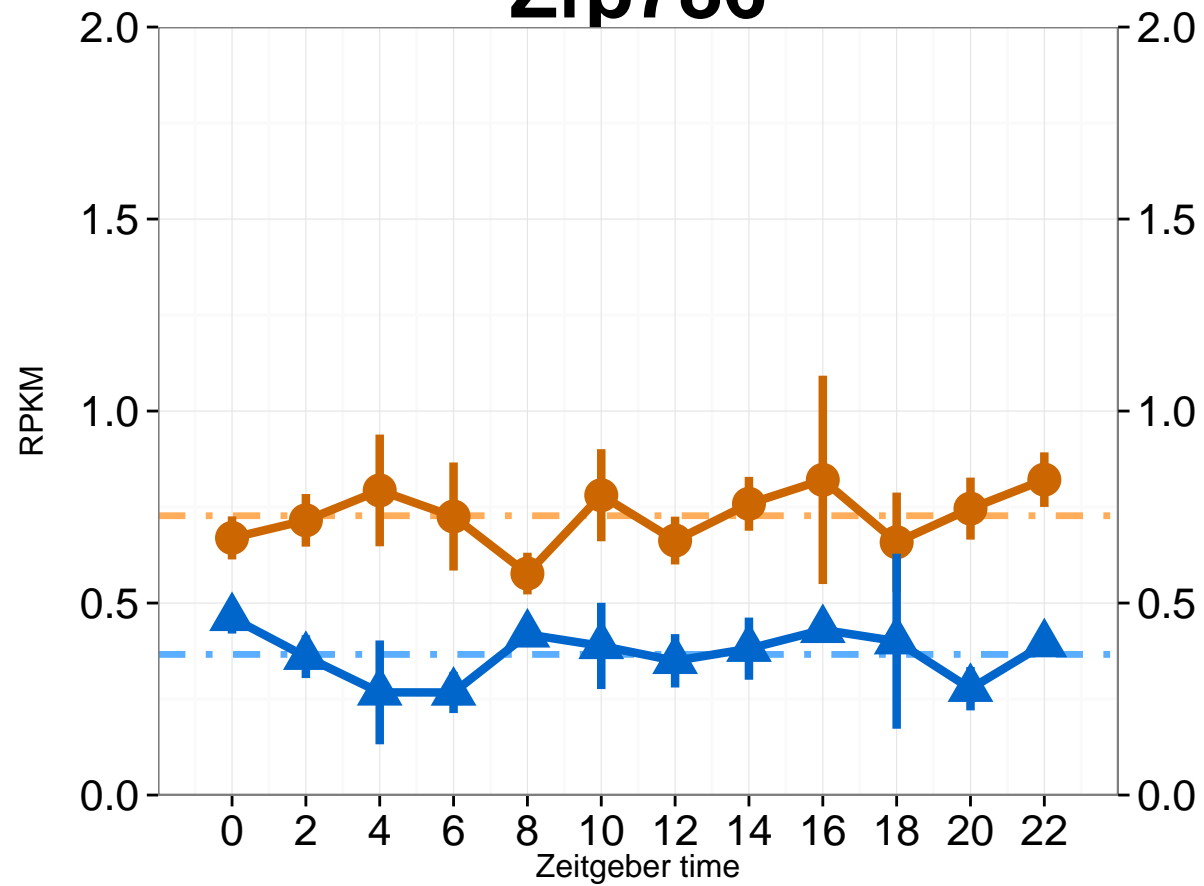

# Zfp786

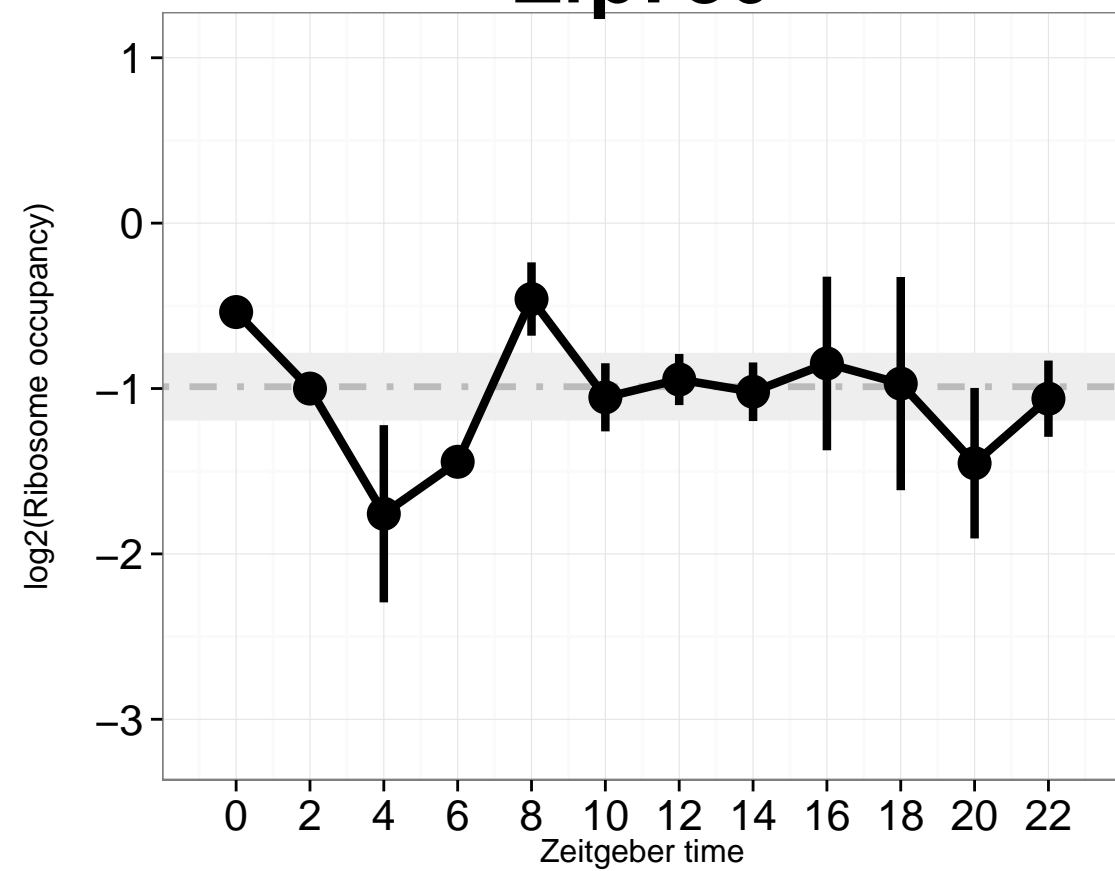

Supplement: Supplementary file 6499 [file 1]

## Setd3

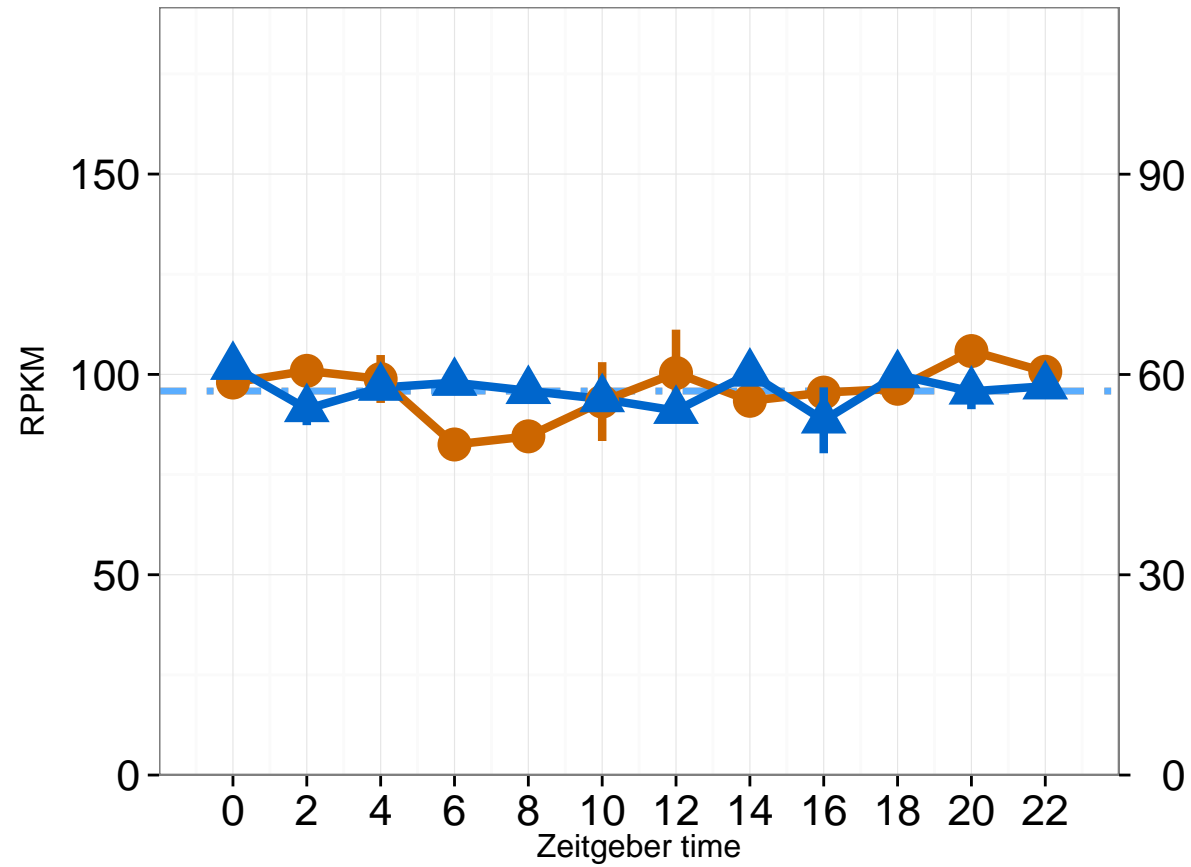

## Setd3

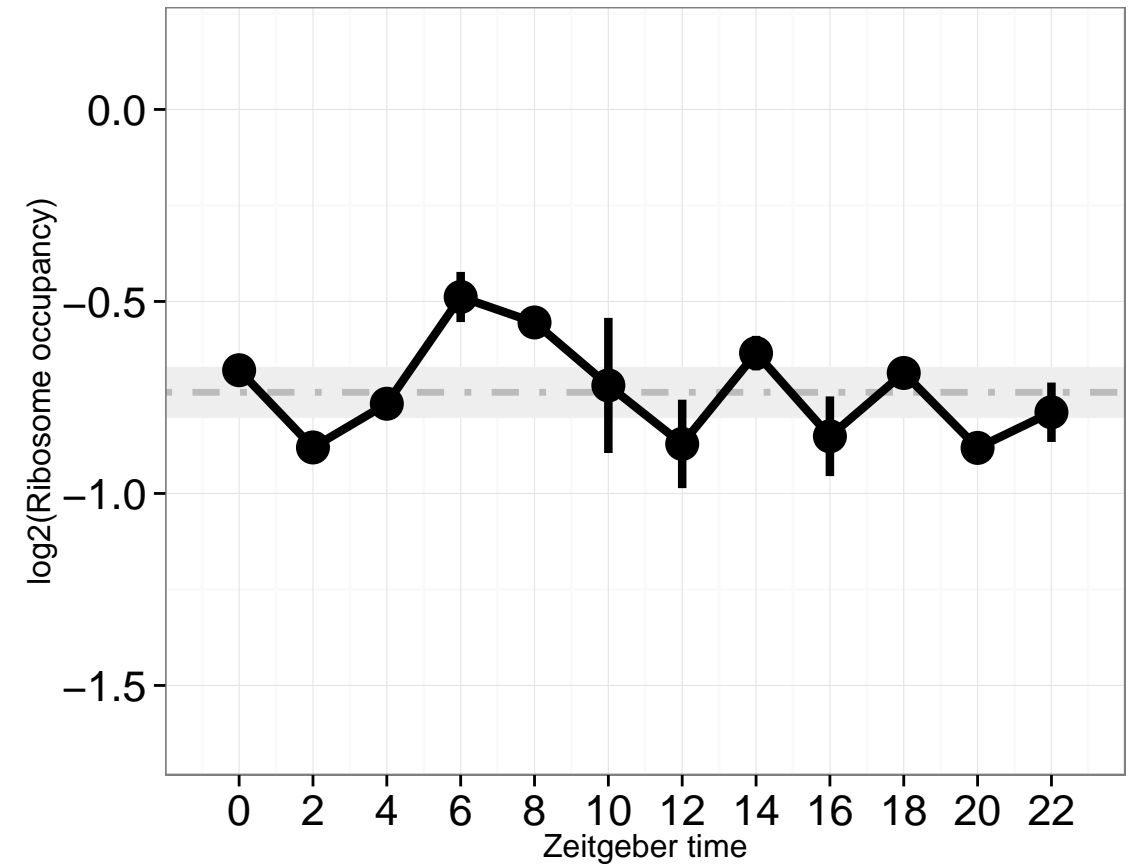

Supplement: Supplementary file 6500 [file 1]

## Pdlim4

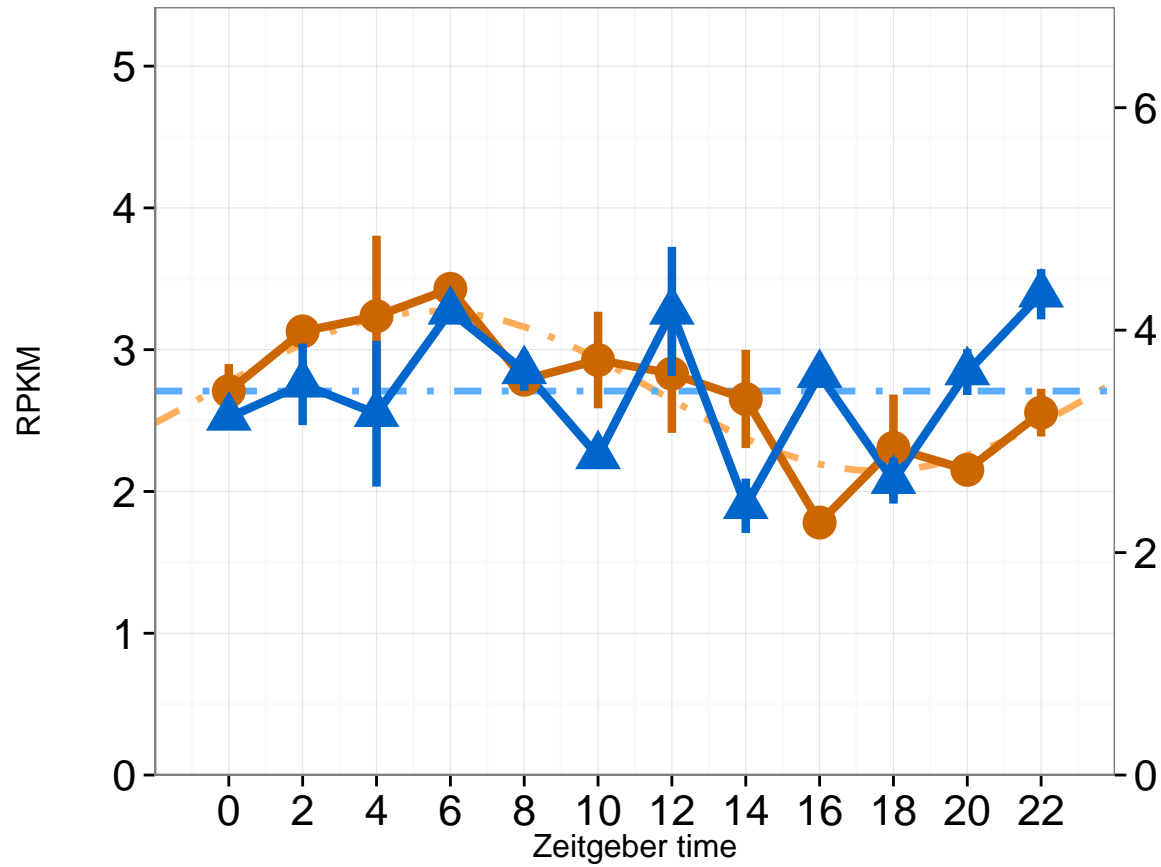

## Pdlim4

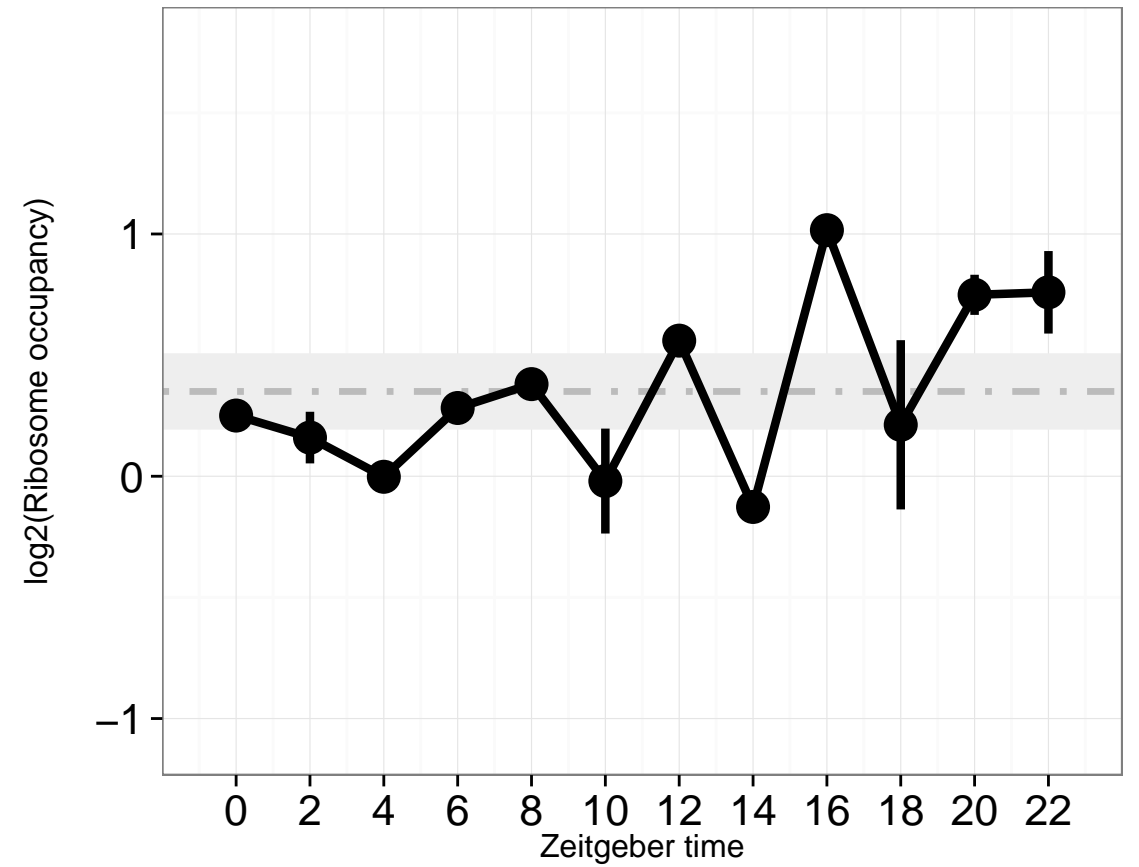

Supplement: Supplementary file 6501 [file 1]

## DnaI4

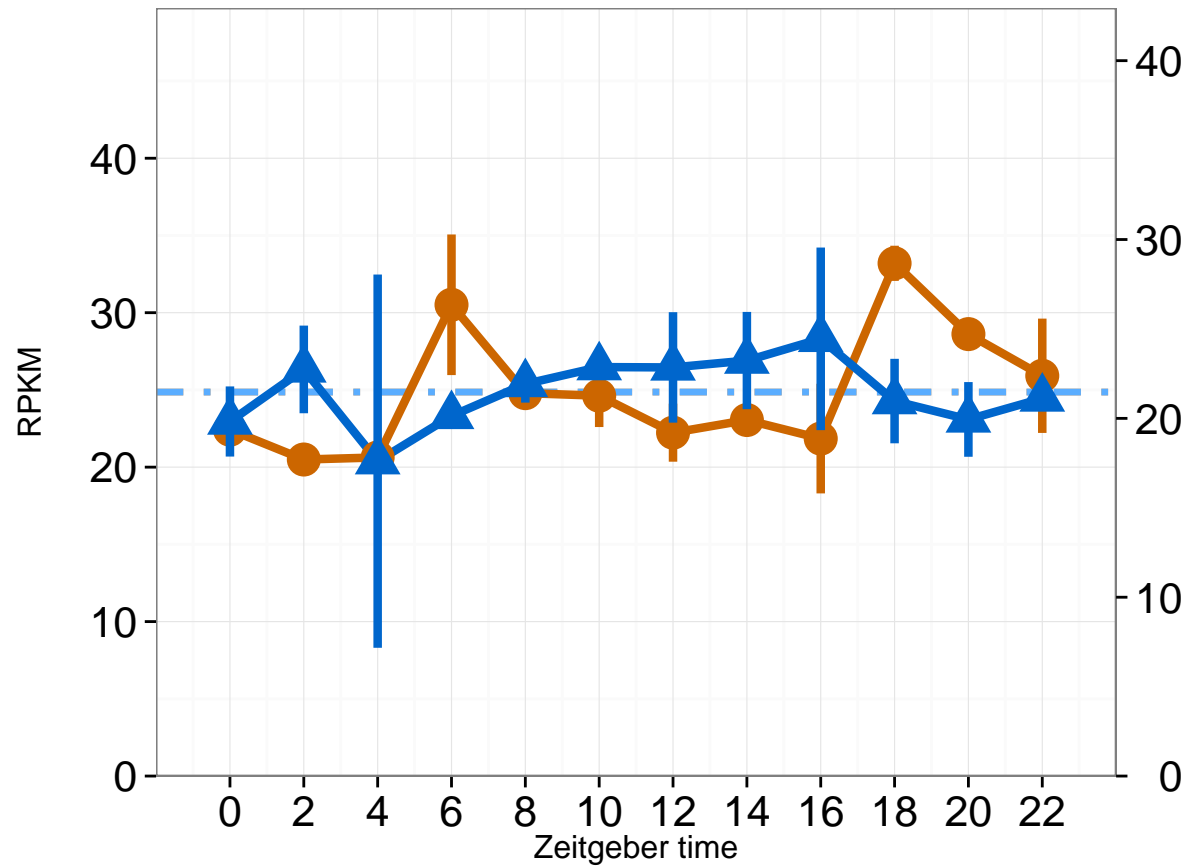

## DnaI4

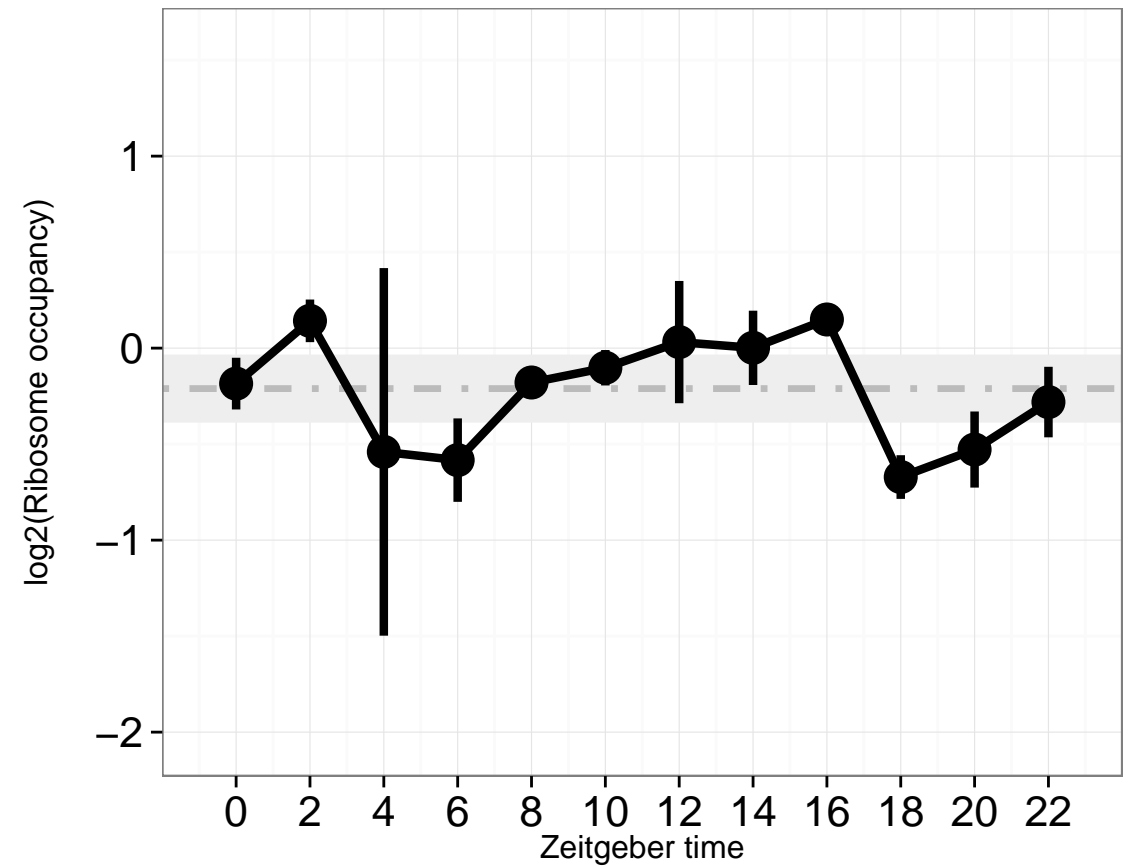

Supplement: Supplementary file 6502 [file 1]

## Pten

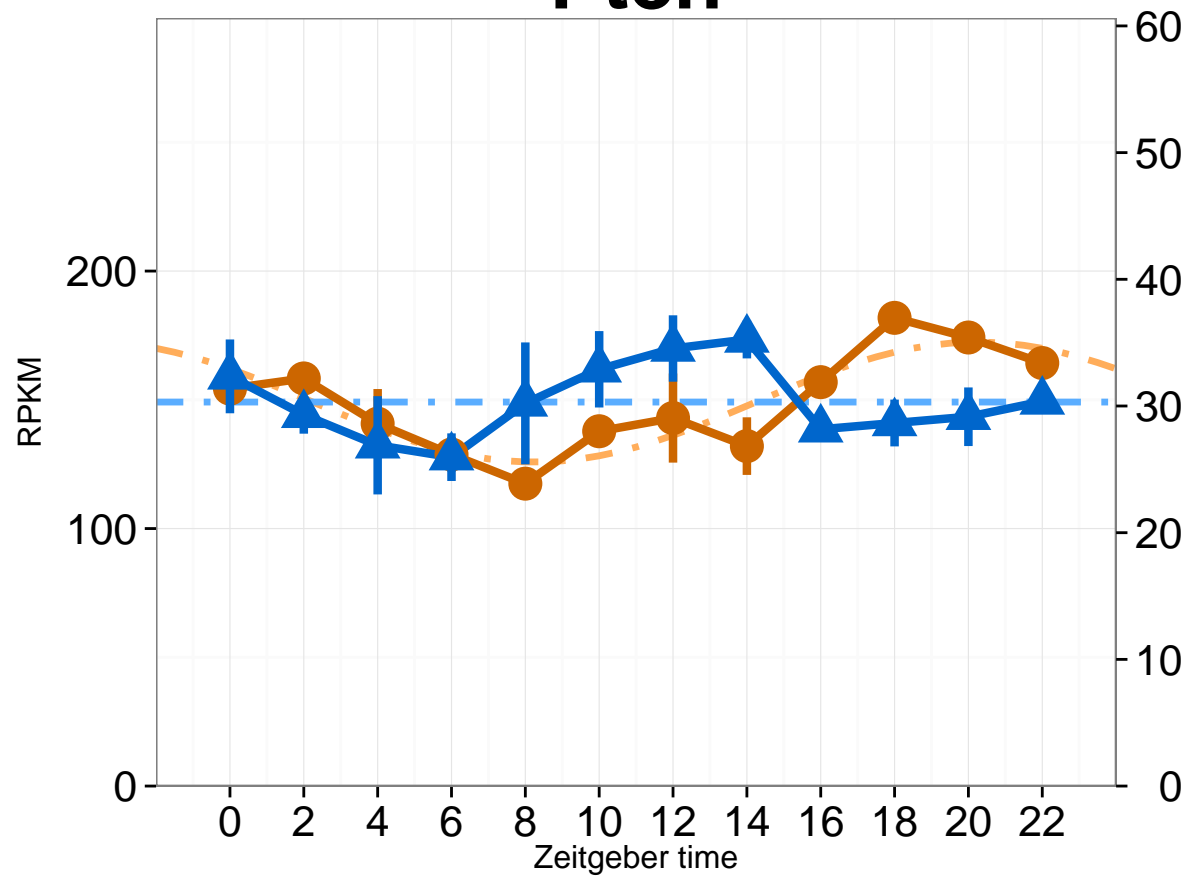

## Pten

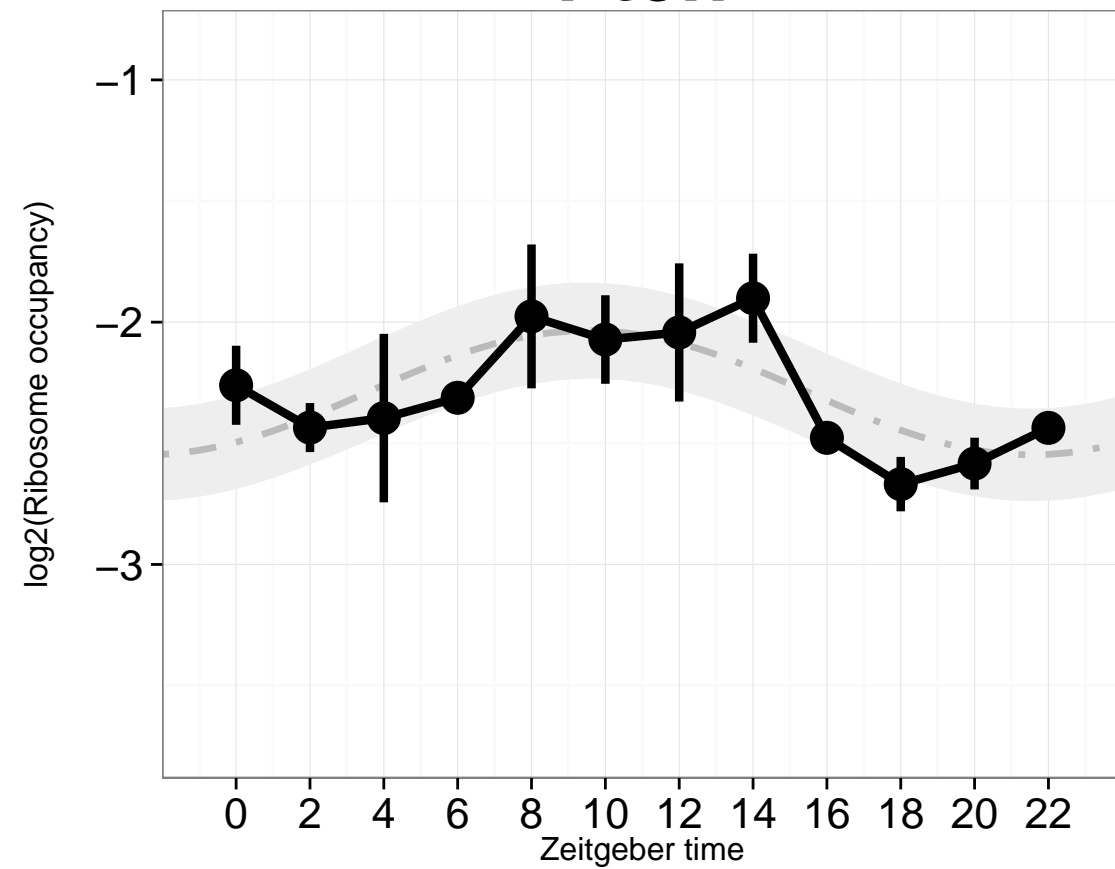

Supplement: Supplementary file 6503 [file 1]

## H2afv

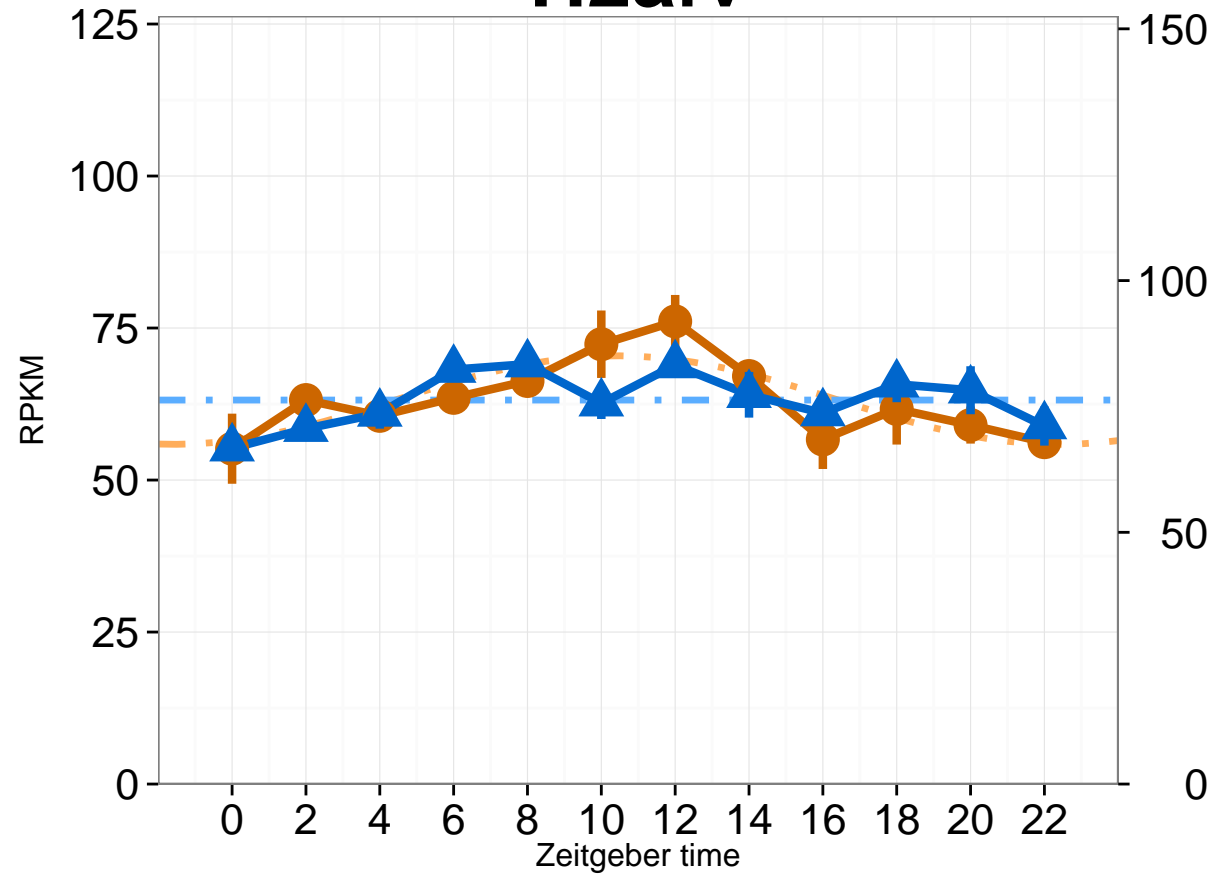

## H2afv

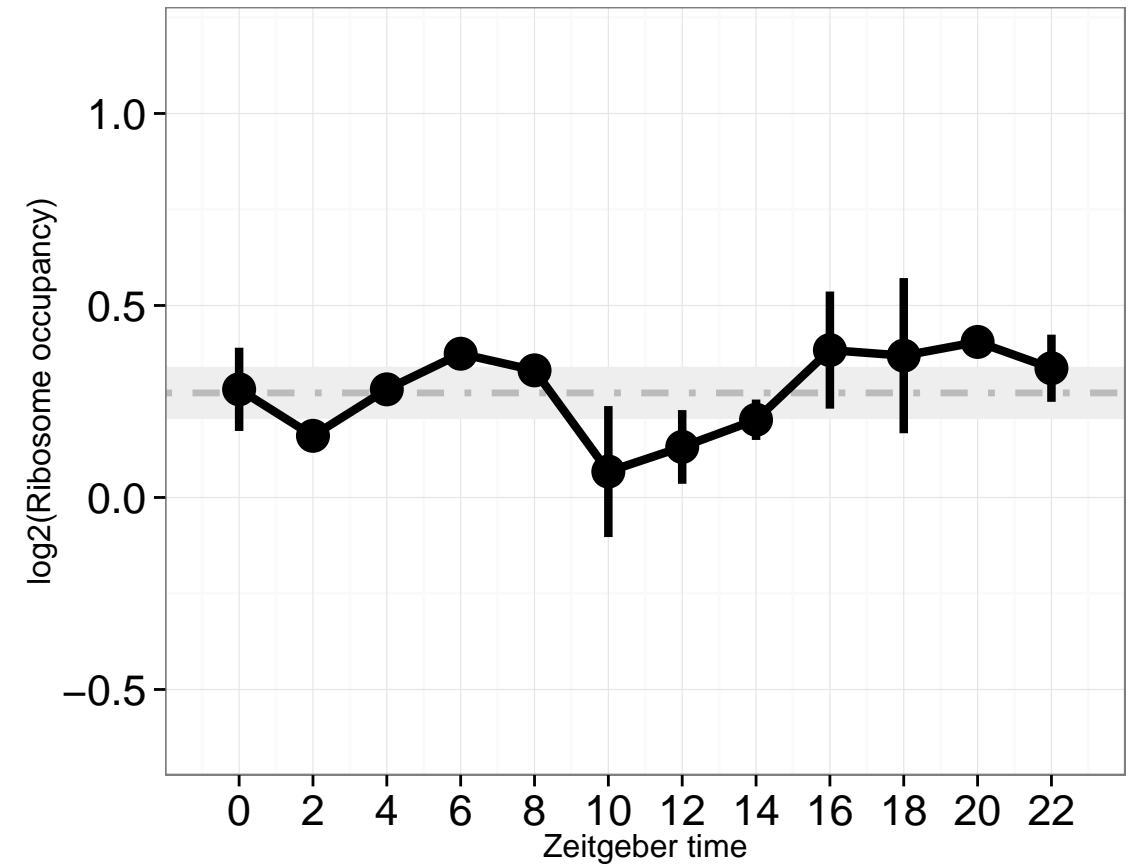

Supplement: Supplementary file 6504 [file 1]

**2810474O19Rik**

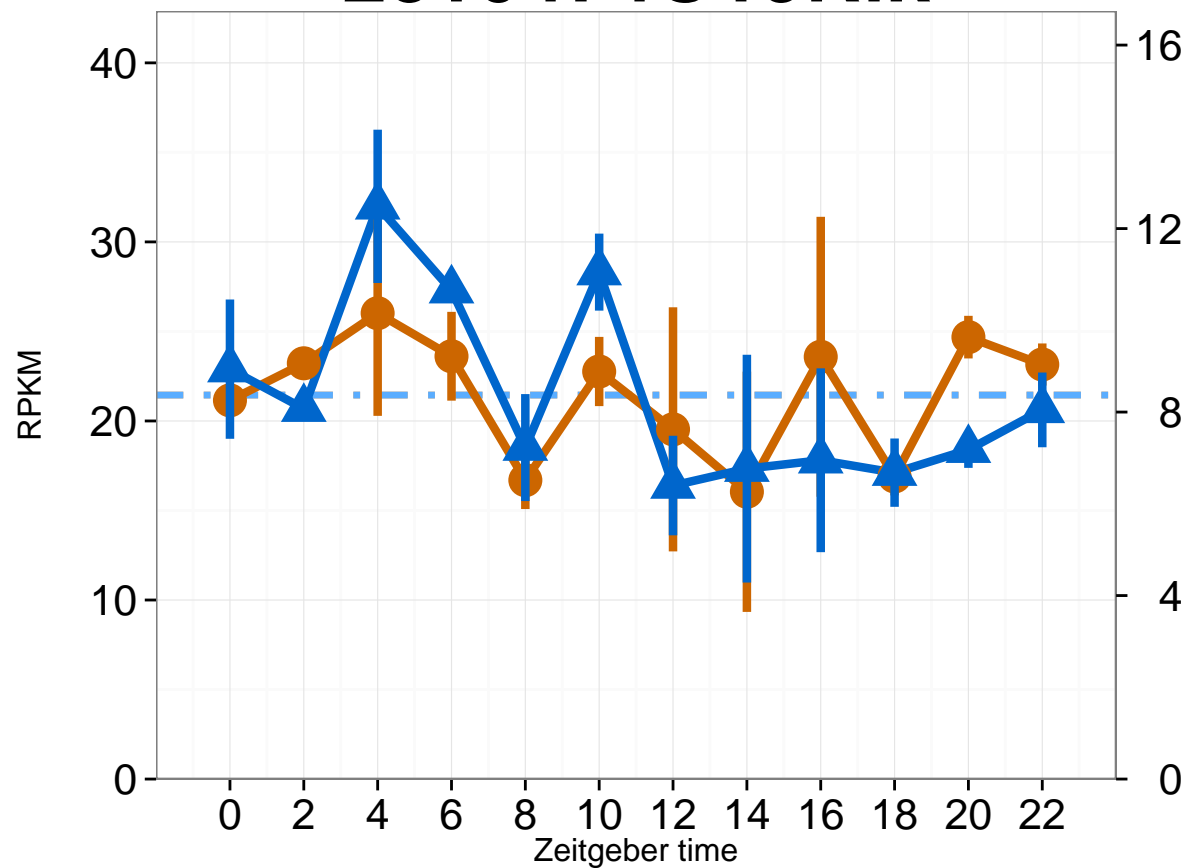

**2810474O19Rik**

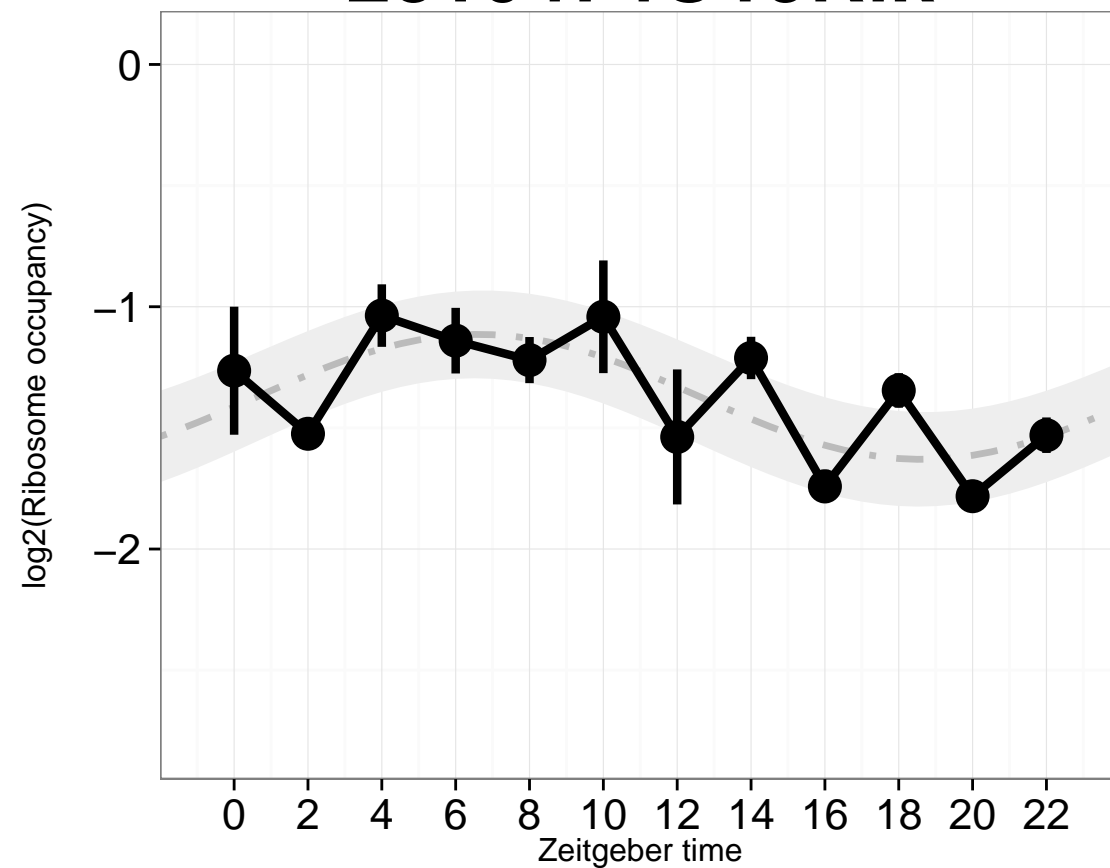

Supplement: Supplementary file 6505 [file 1]

# Rrp9

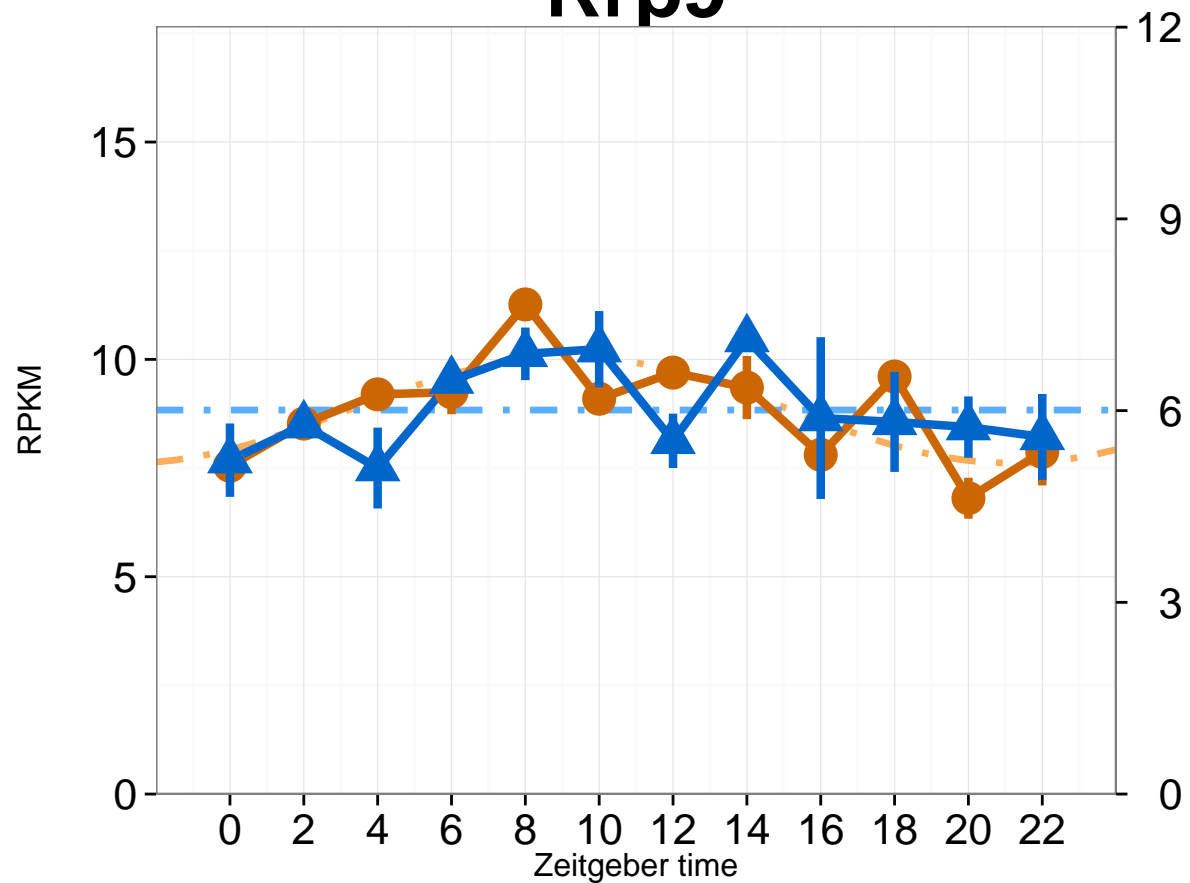

# Rrp9

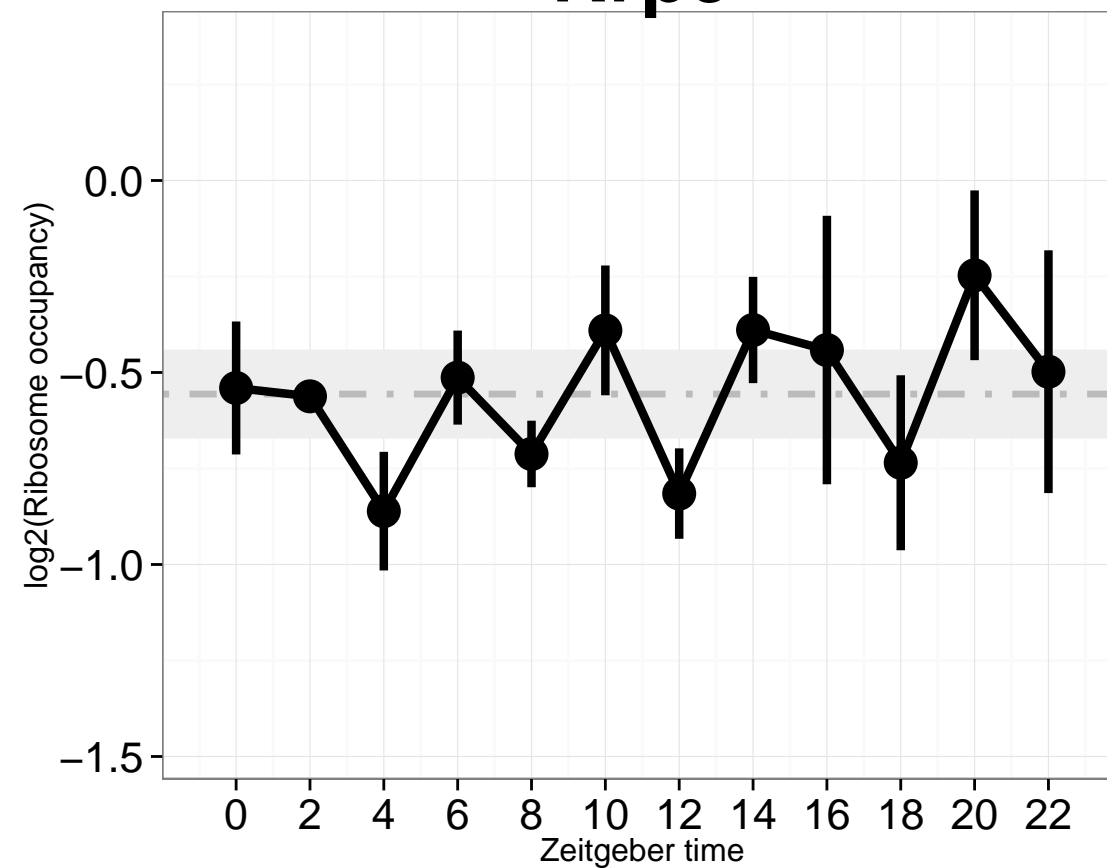

Supplement: Supplementary file 6506 [file 1]

# Usp12

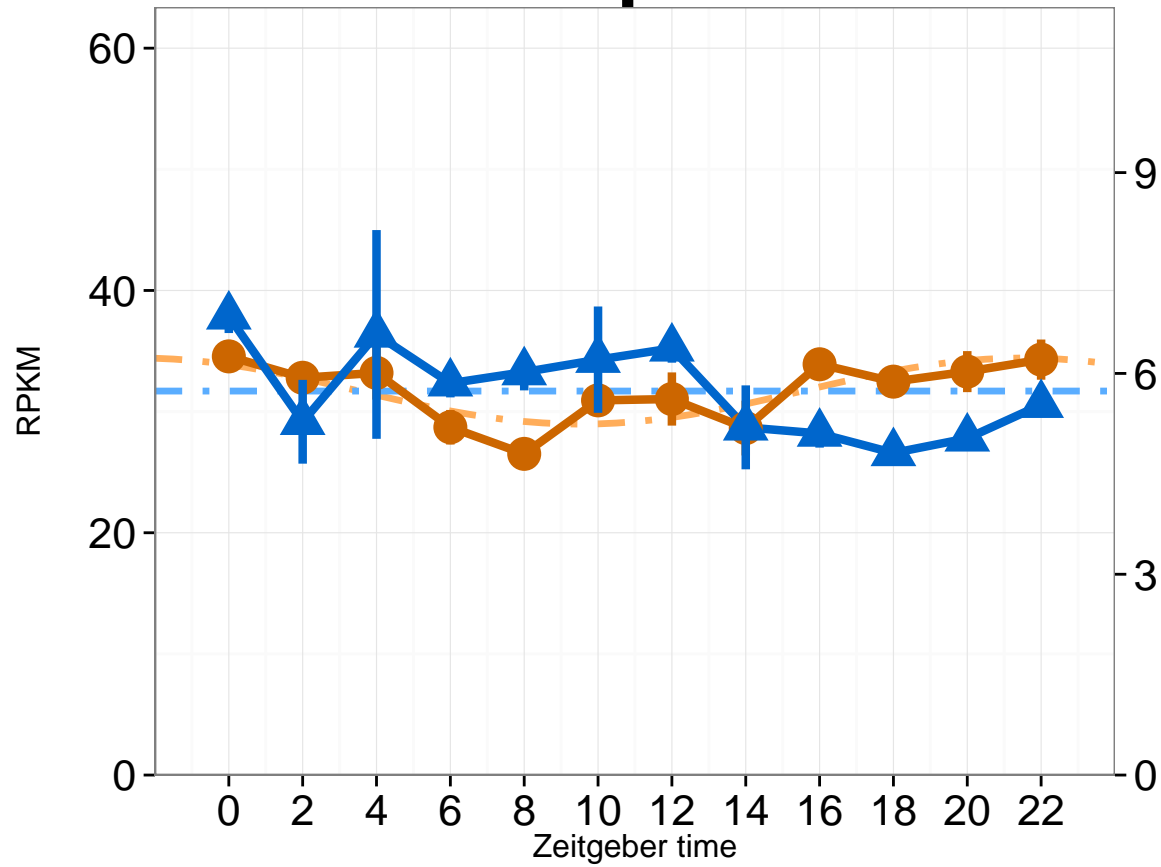

# Usp12

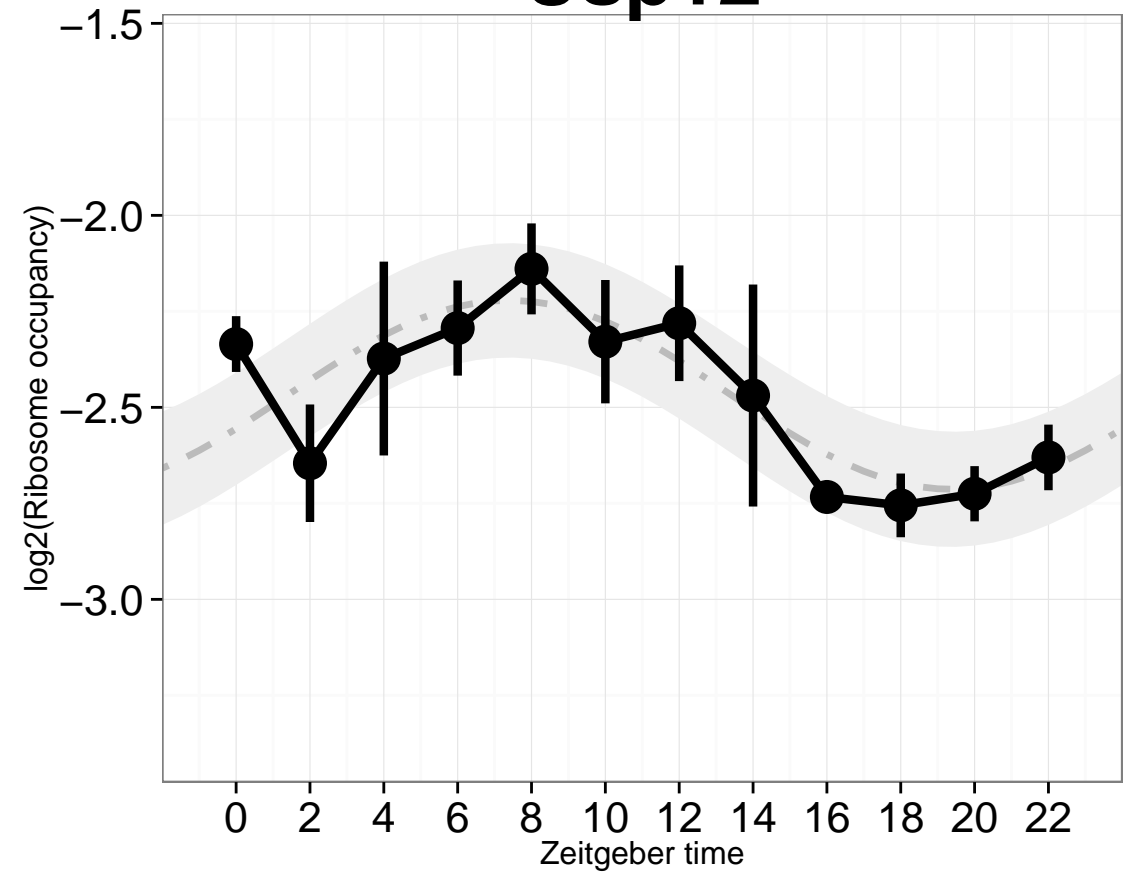

Supplement: Supplementary file 6507 [file 1]

## Runx2

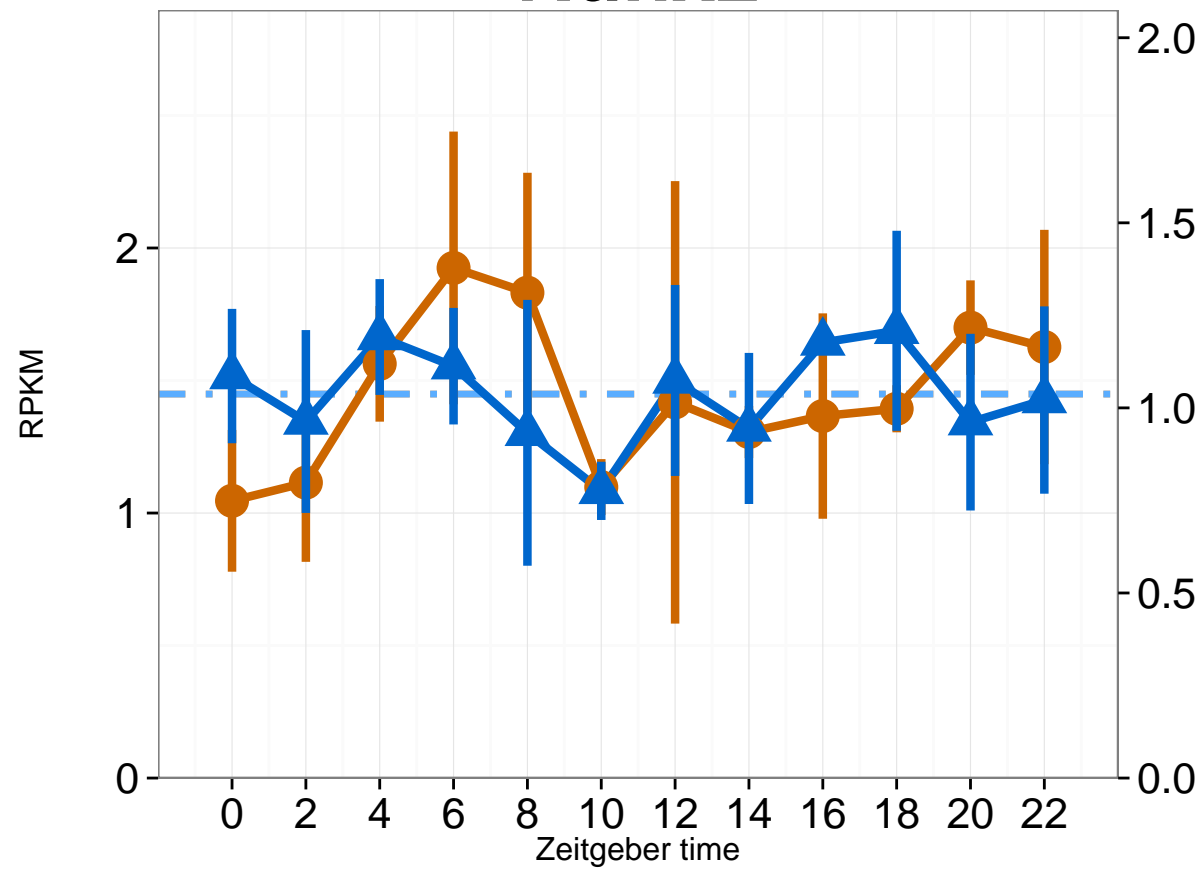

## Runx2

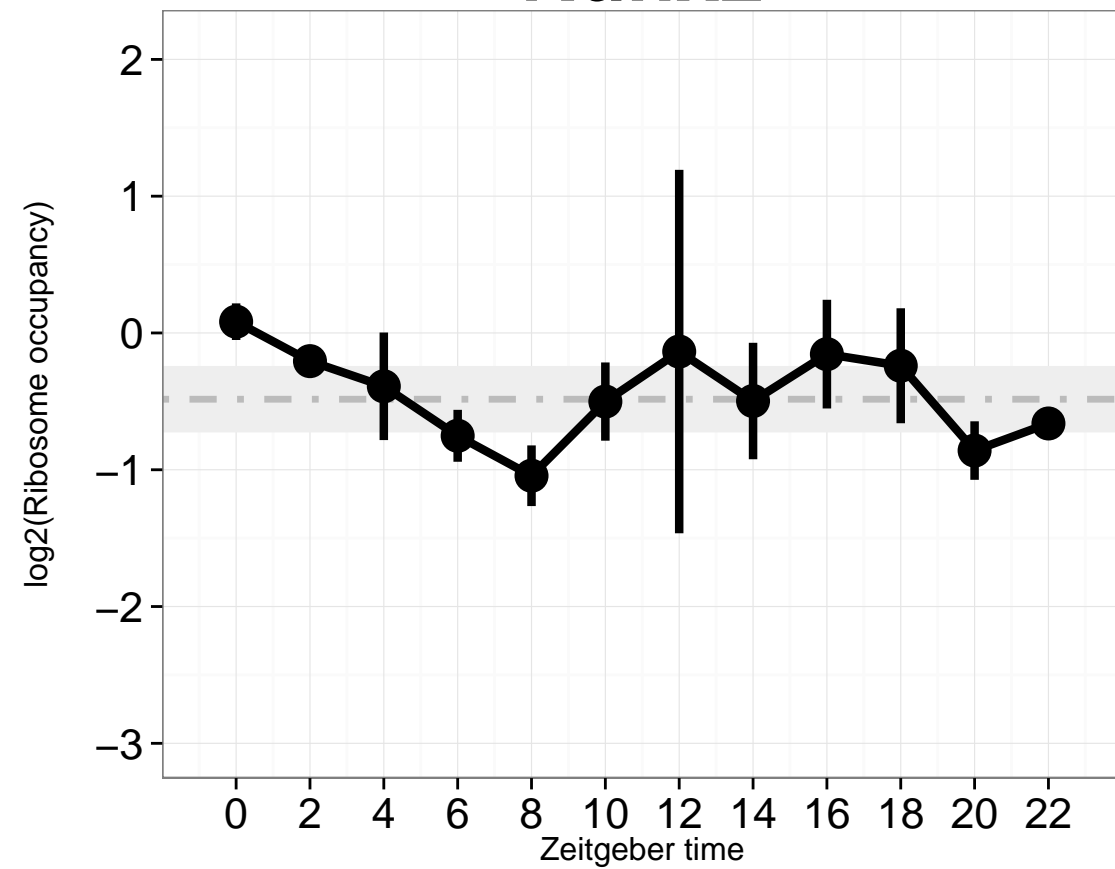

Supplement: Supplementary file 6508 [file 1]

## Lhx1

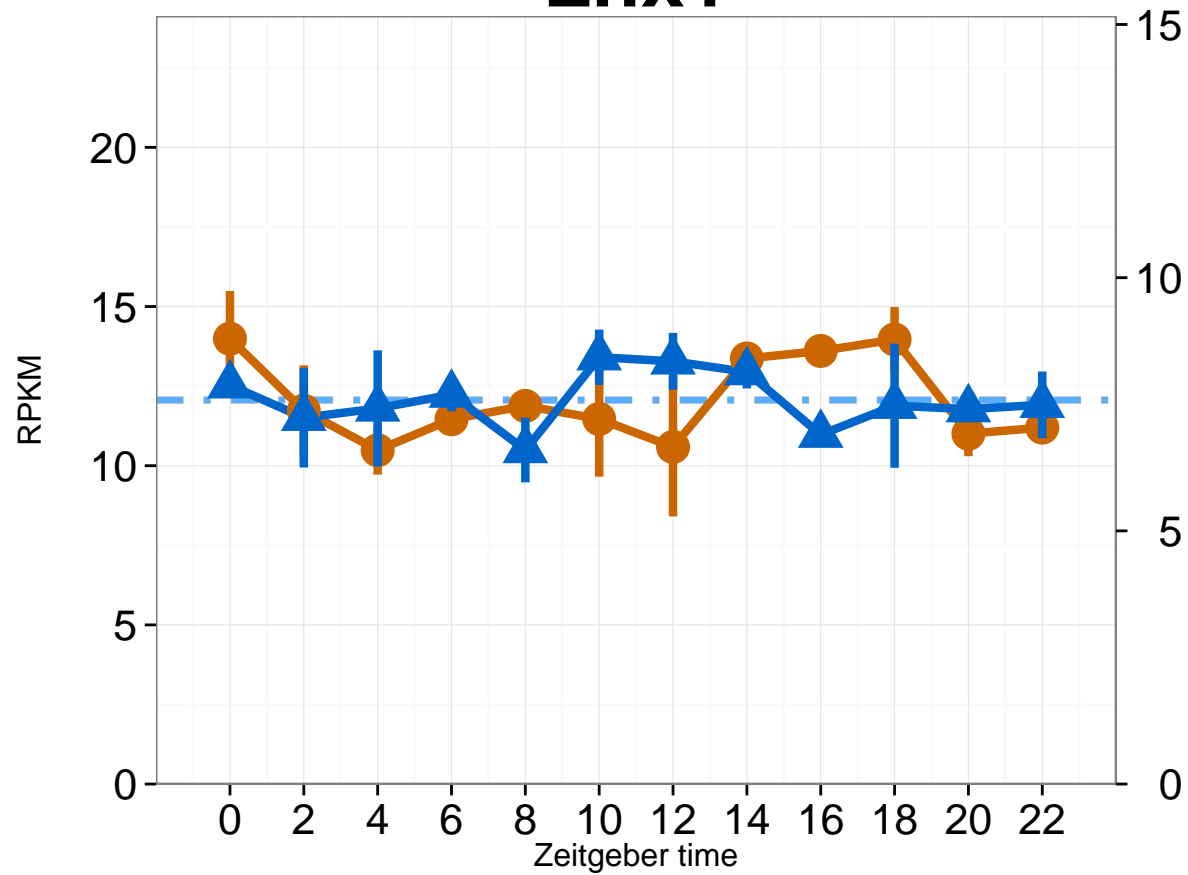

## Lhx1

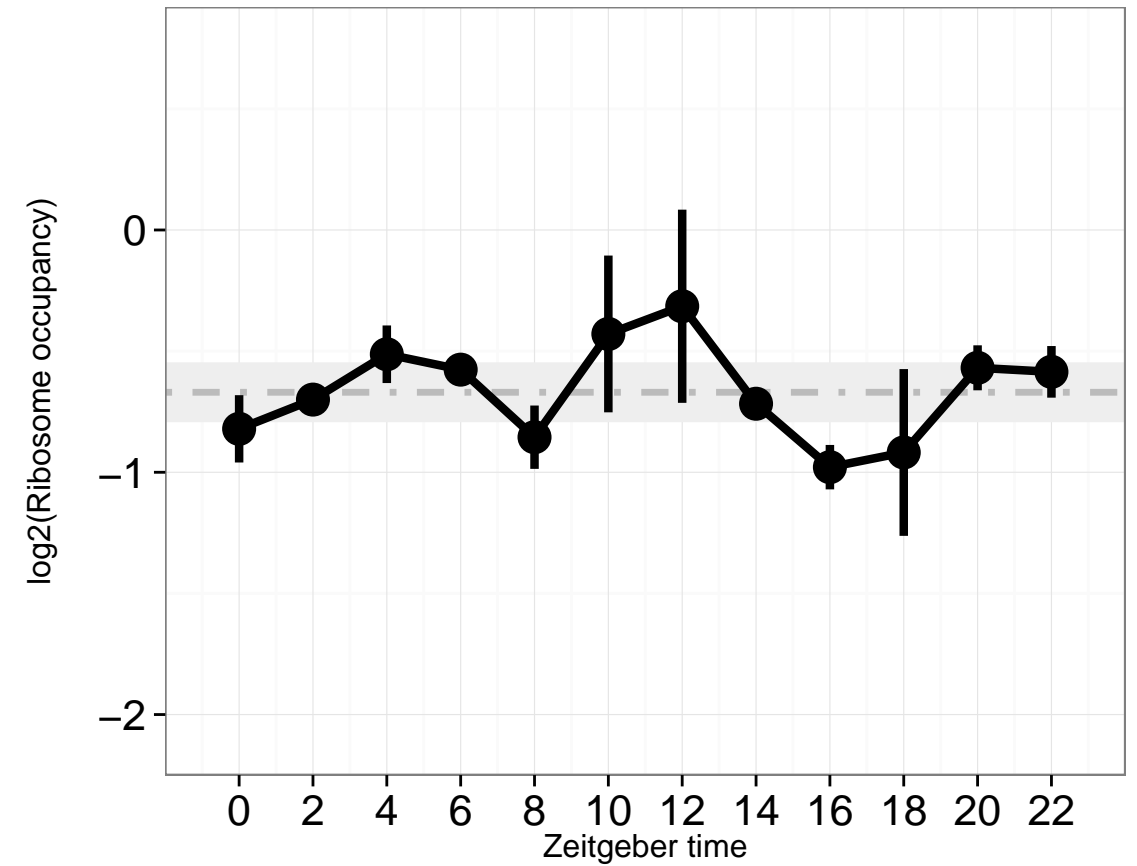

Supplement: Supplementary file 6509 [file 1]

## Nceh1

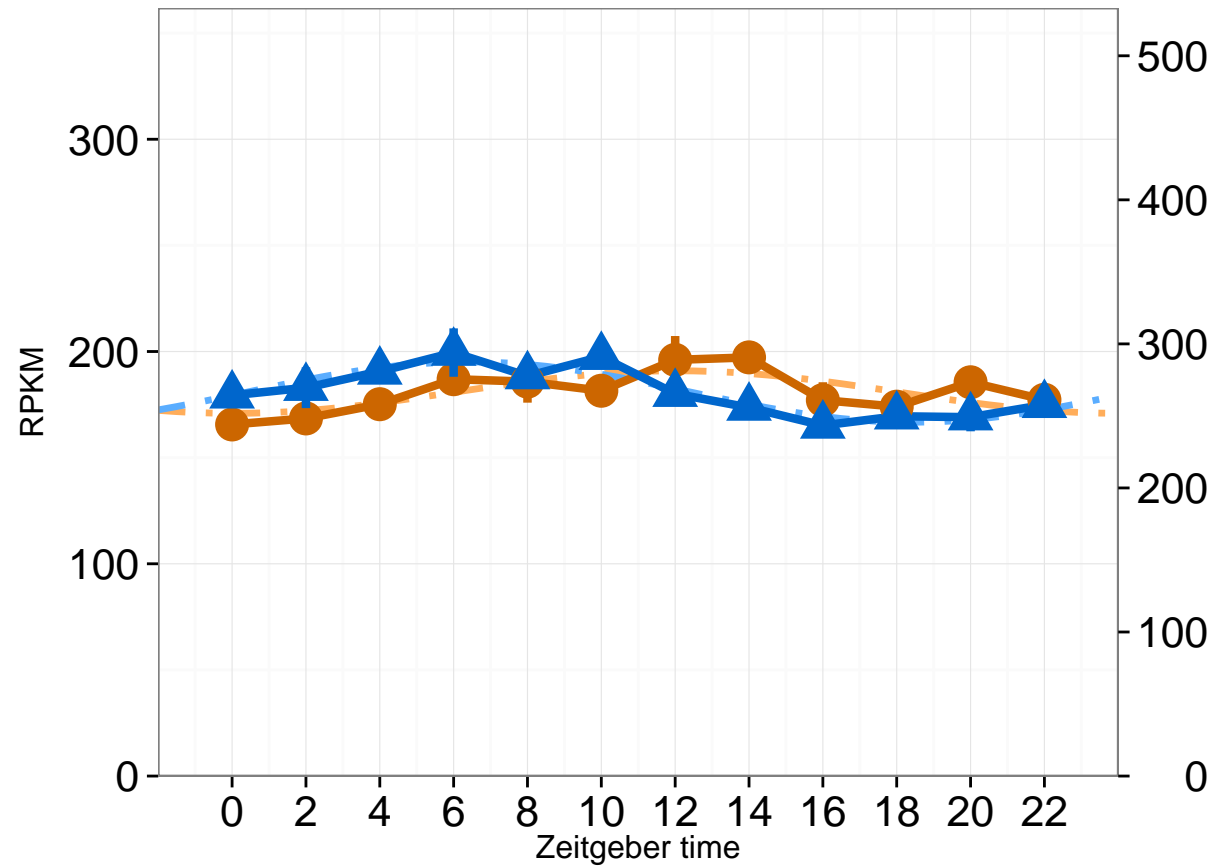

## Nceh1

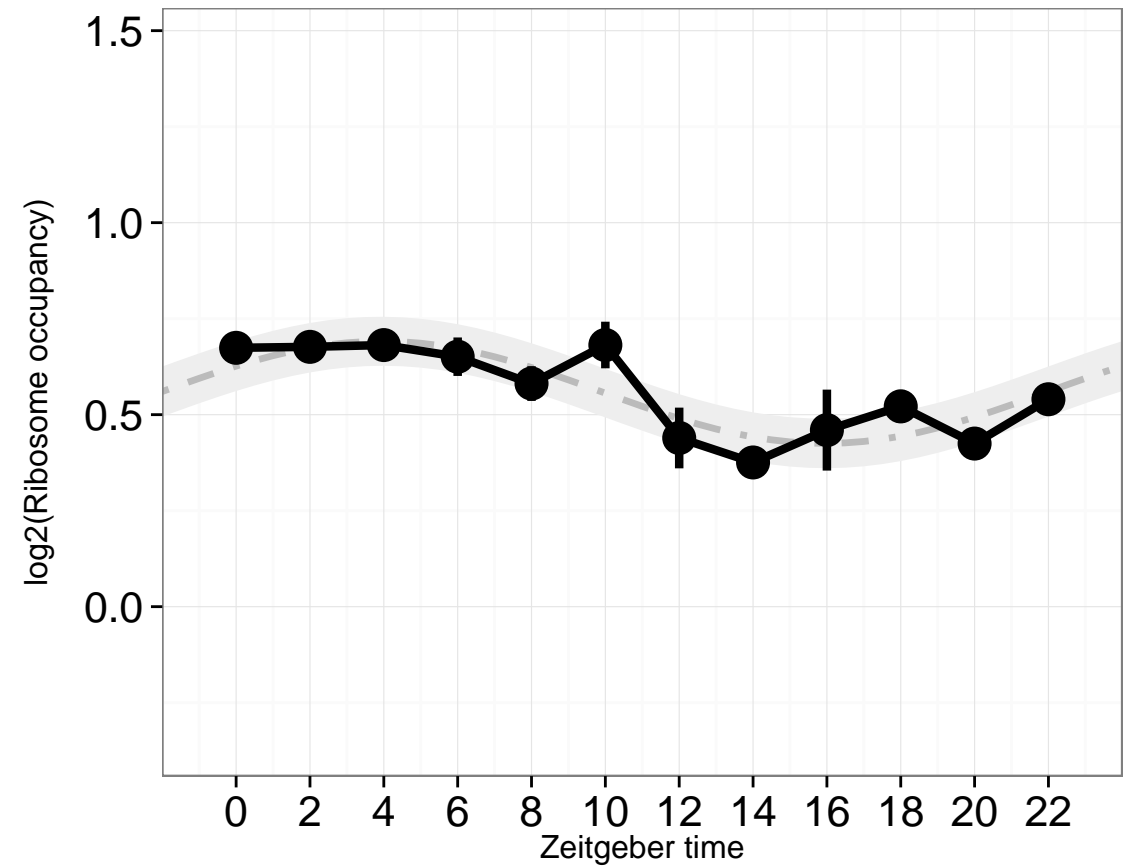

Supplement: Supplementary file 6510 [file 1]

## Nlrp6

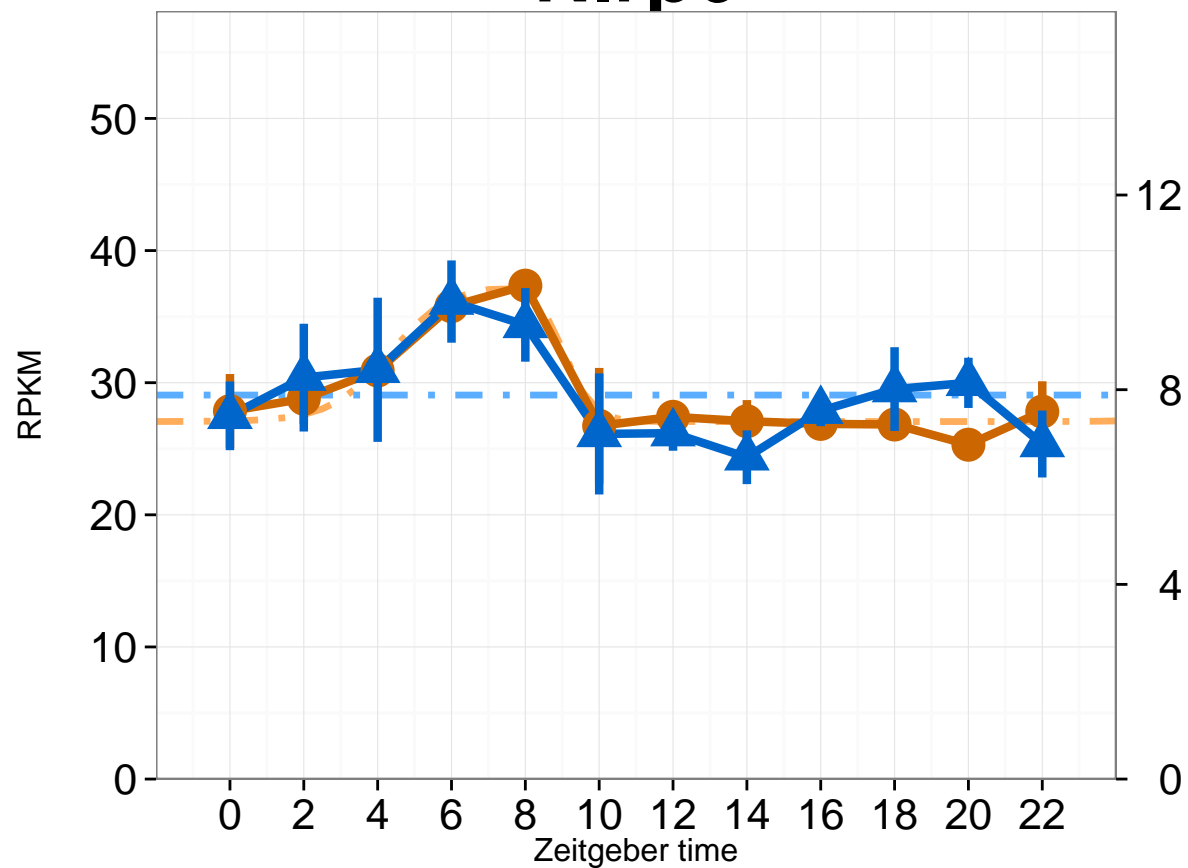

## Nlrp6

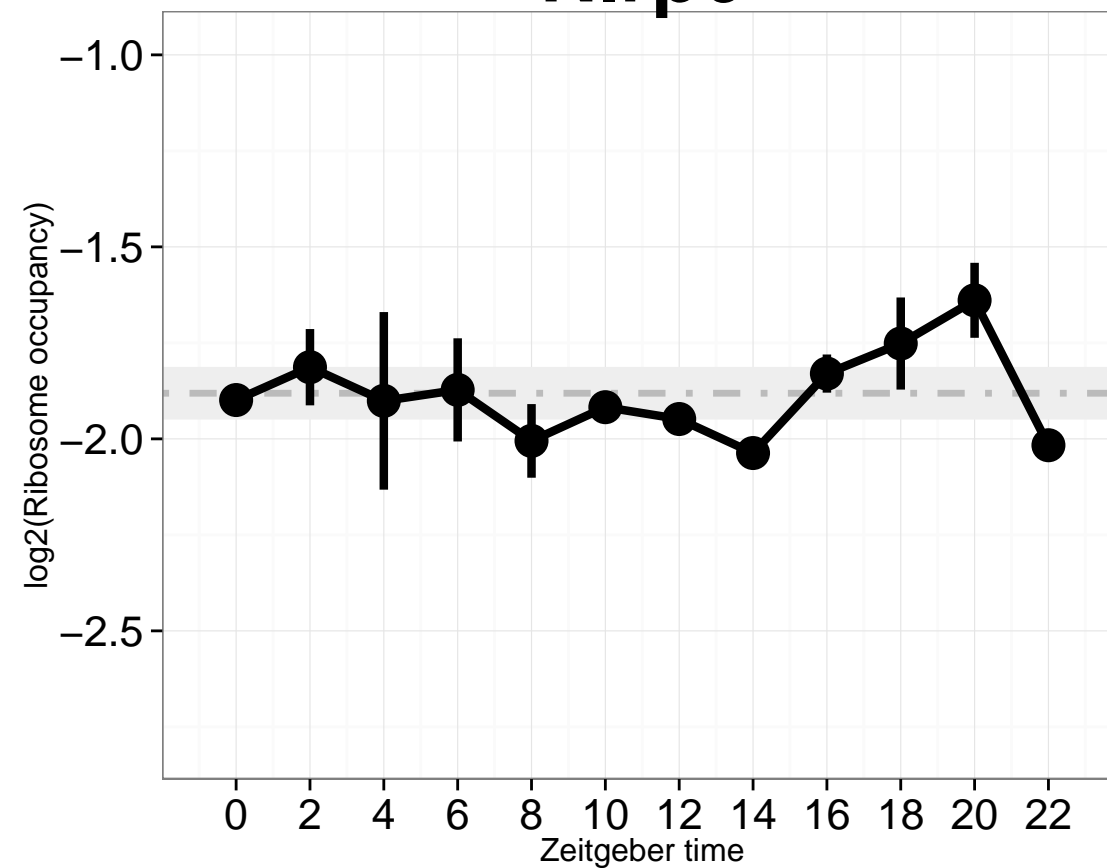

Supplement: Supplementary file 6511 [file 1]

## Upb1

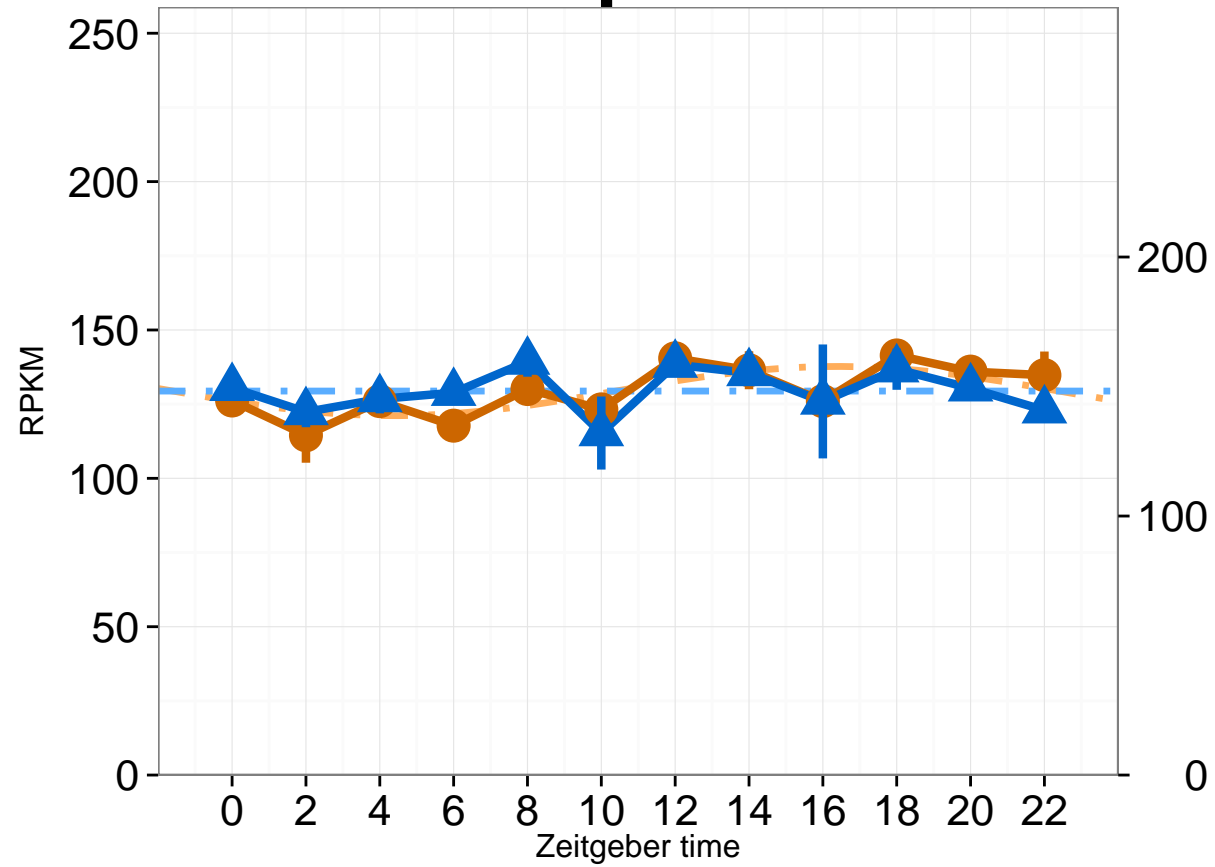

## Upb1

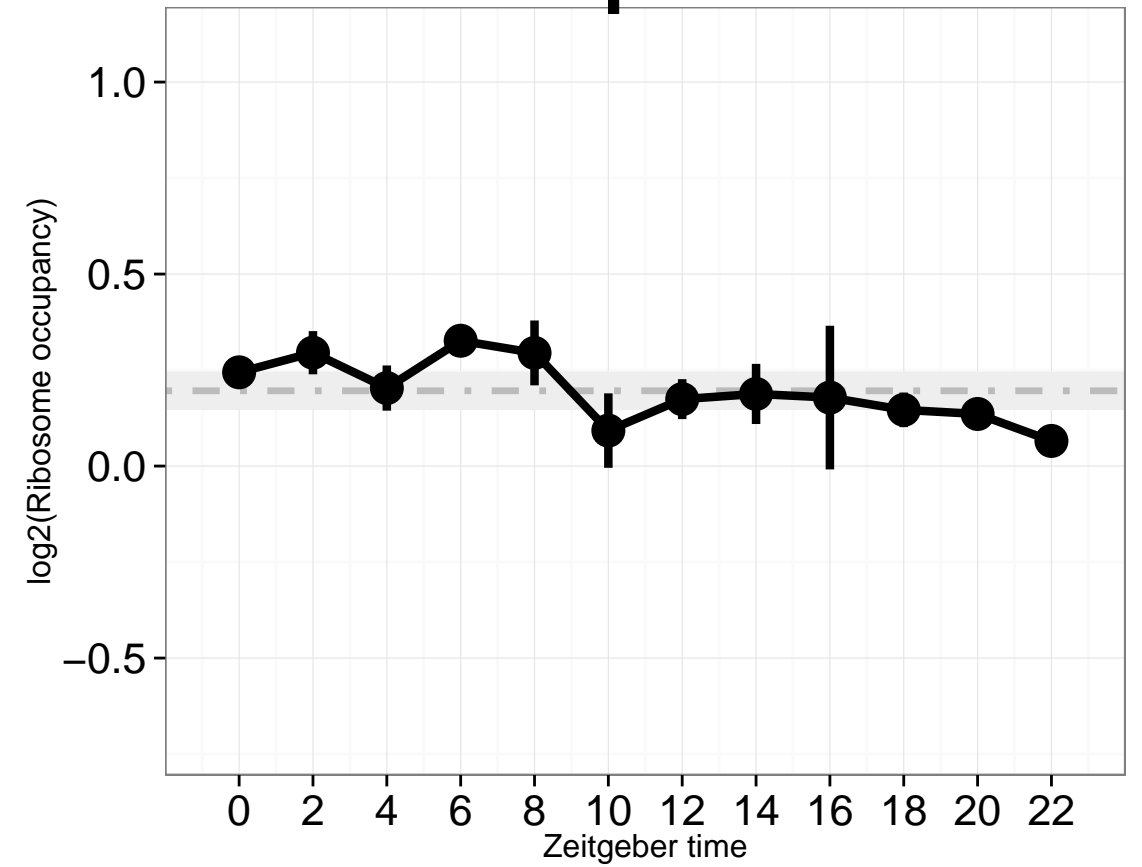

Supplement: Supplementary file 6512 [file 1]

## Pcolce

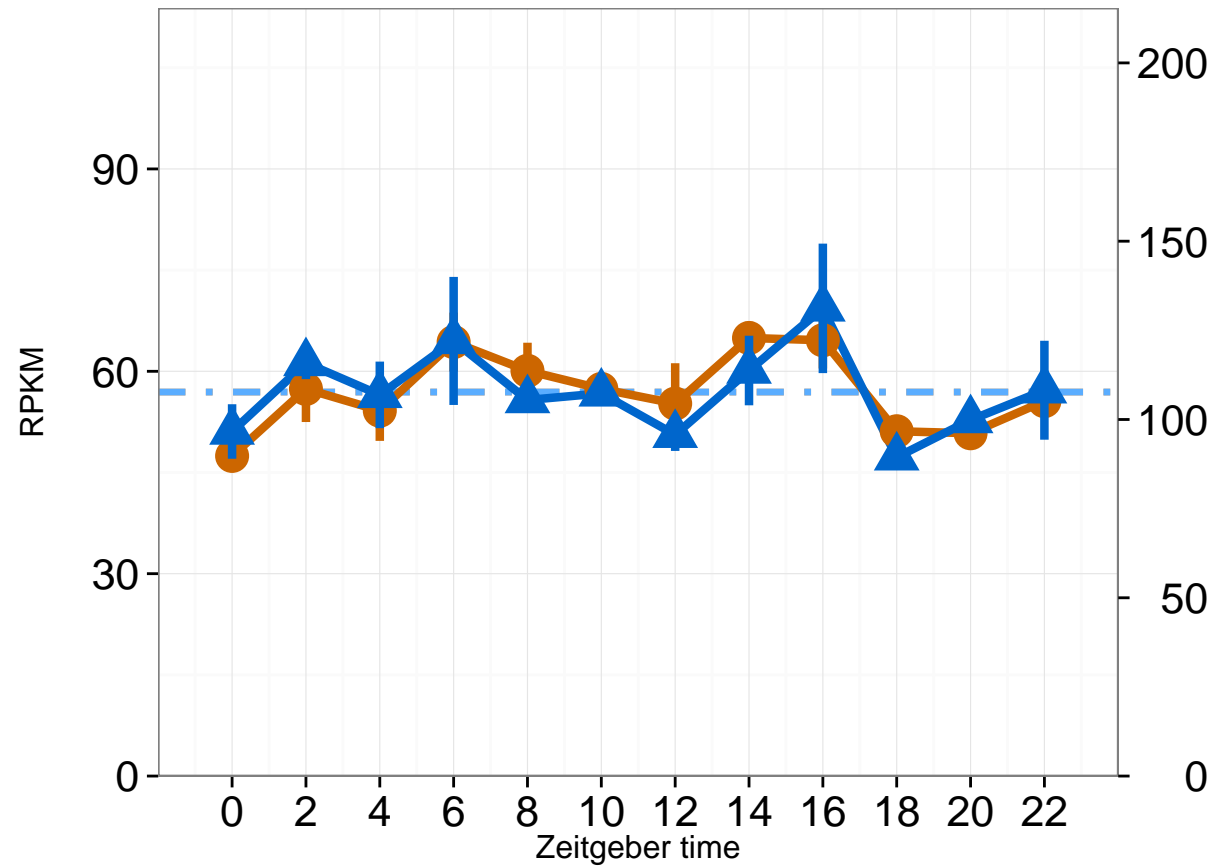

## Pcolce

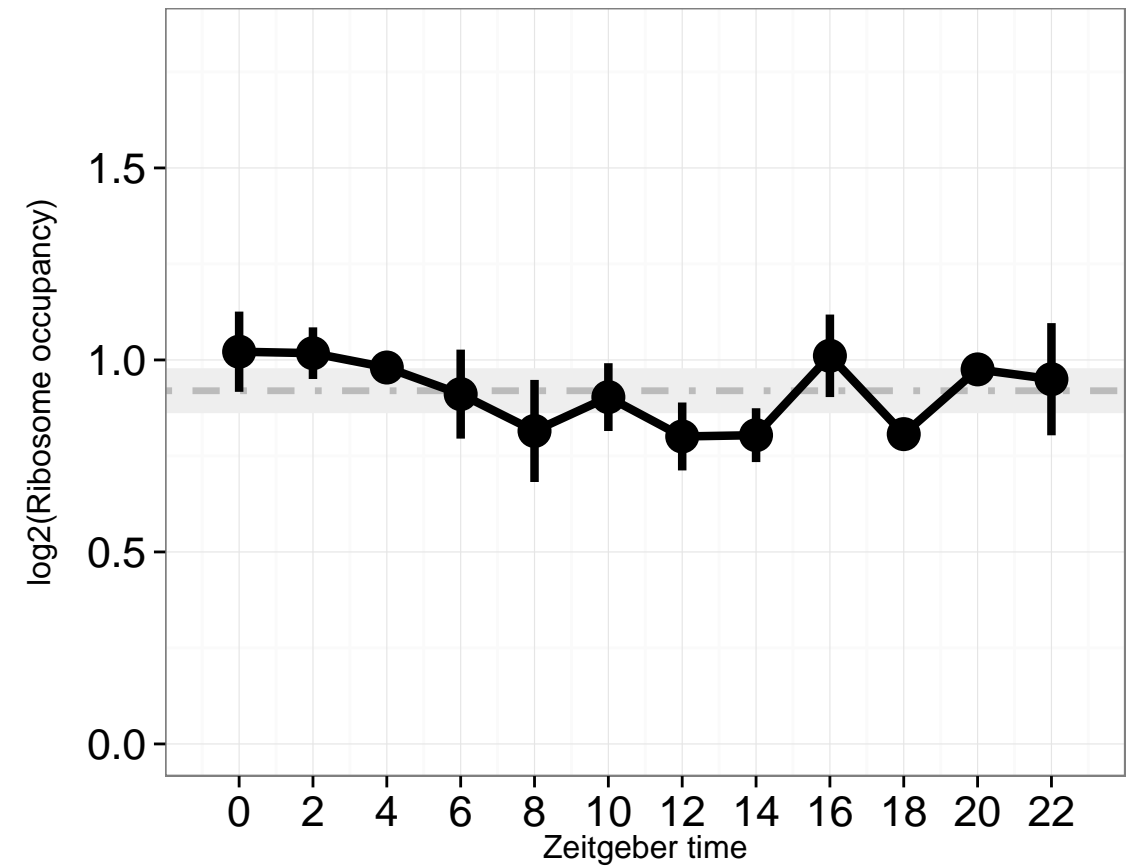

Supplement: Supplementary file 6513 [file 1]

# Tex21

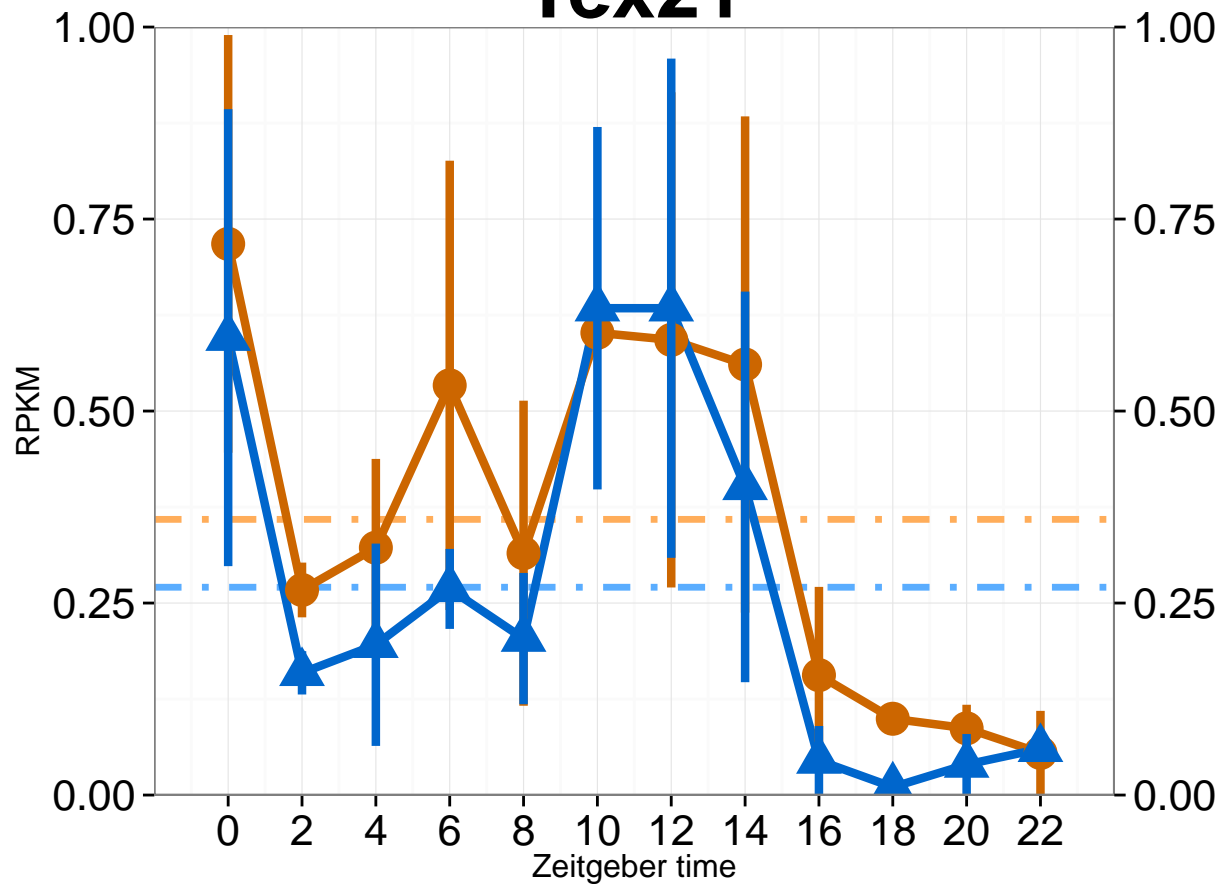

# Tex21

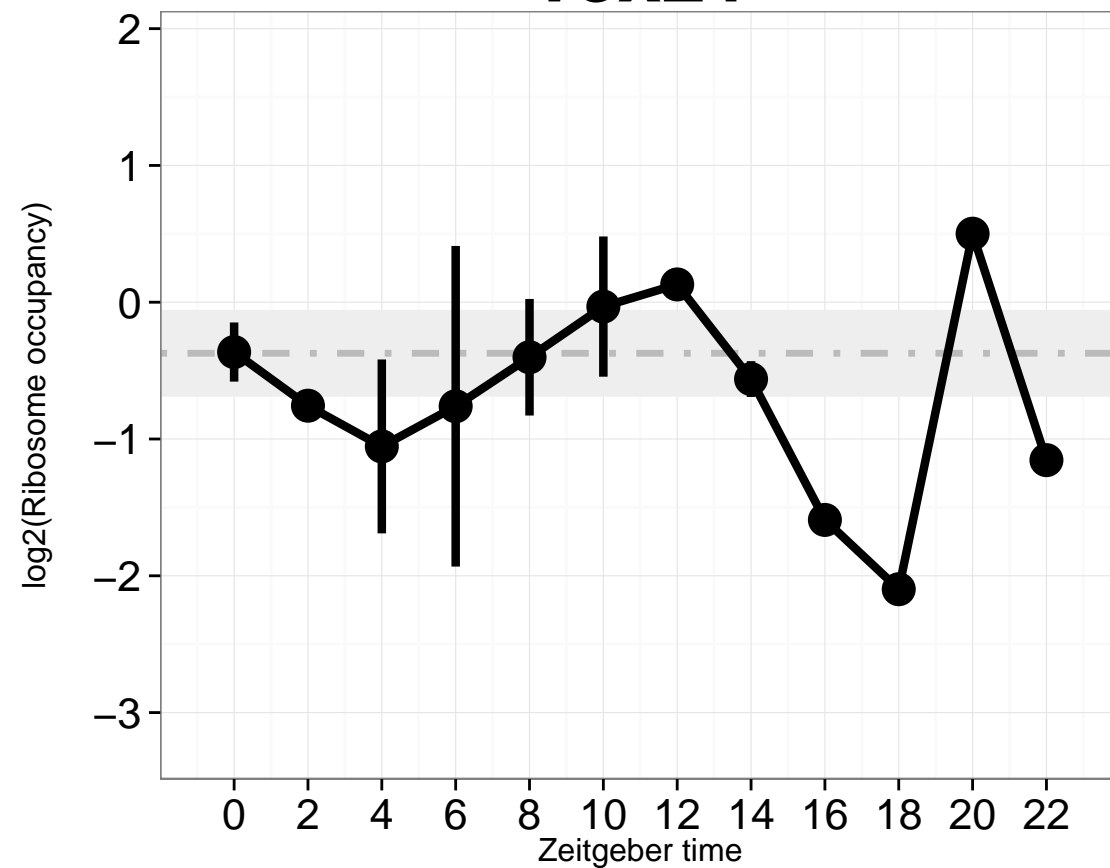

Supplement: Supplementary file 6514 [file 1]

## Nop58

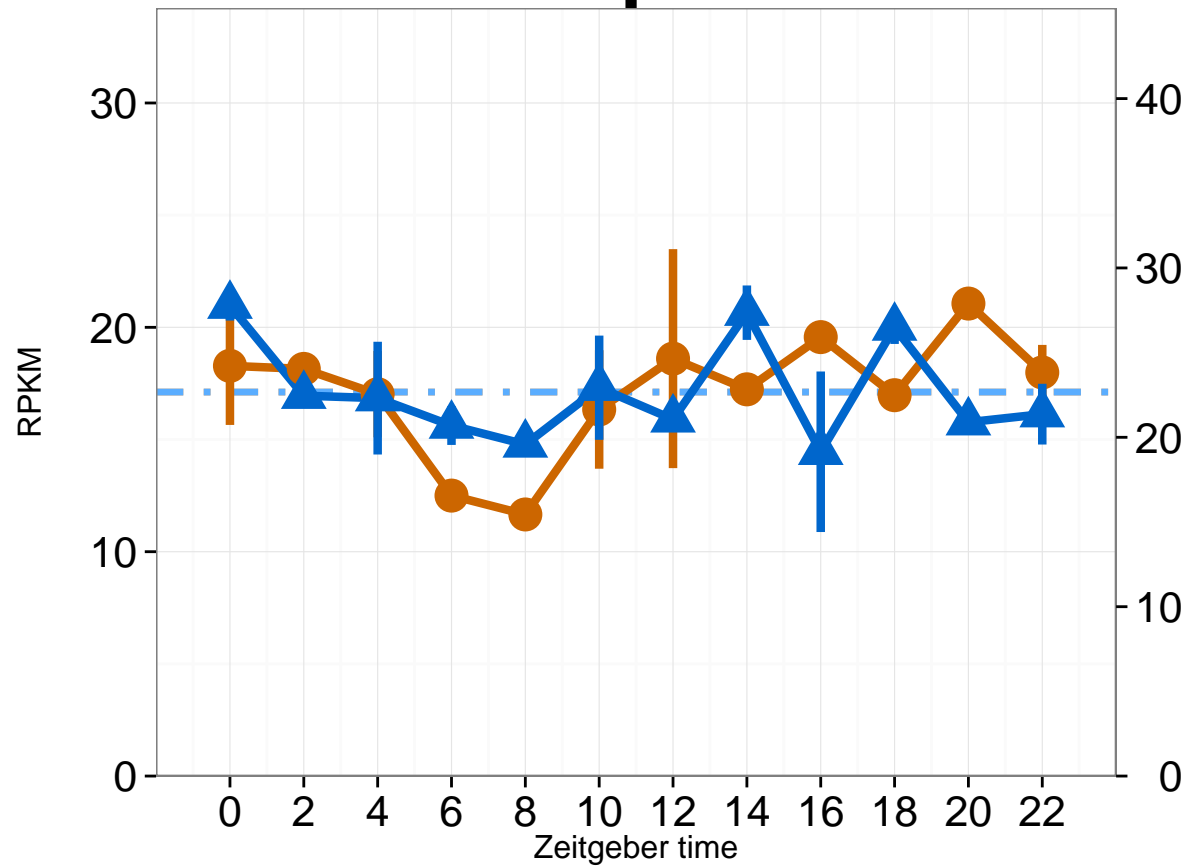

## Nop58

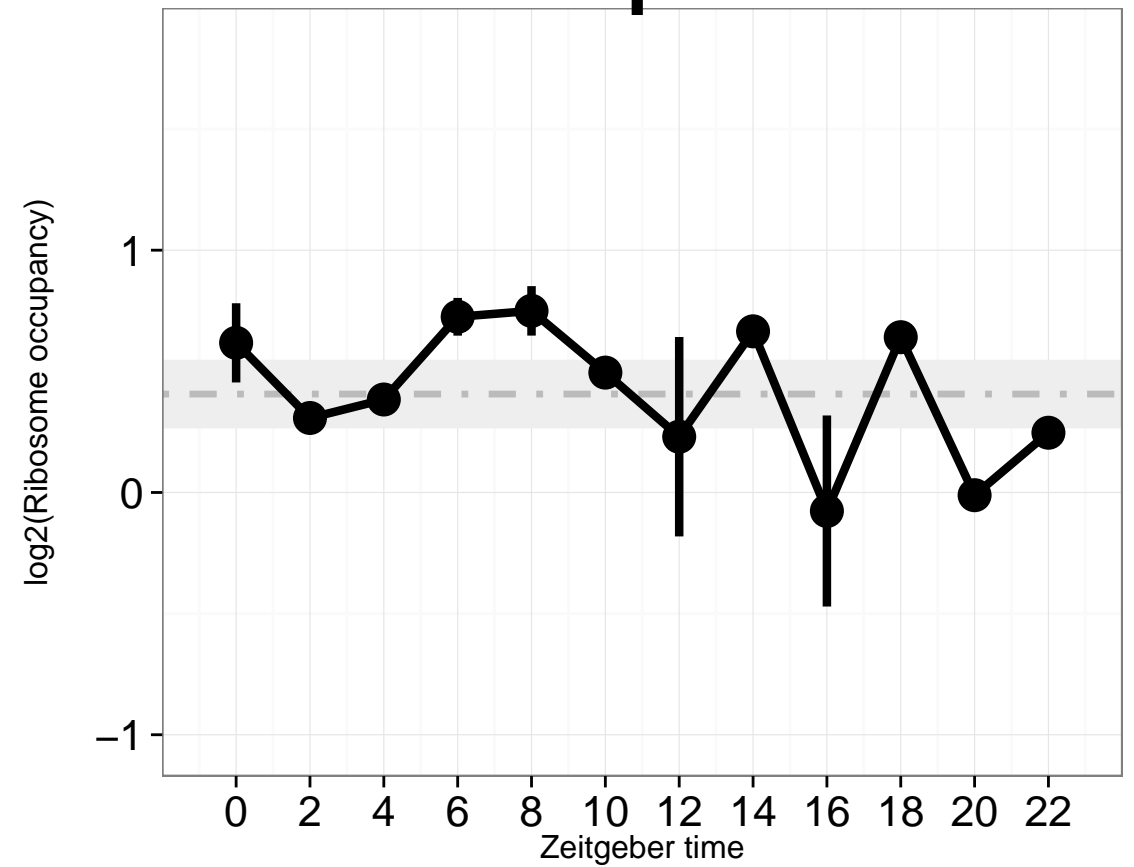

Supplement: Supplementary file 6515 [file 1]

## Ube2o

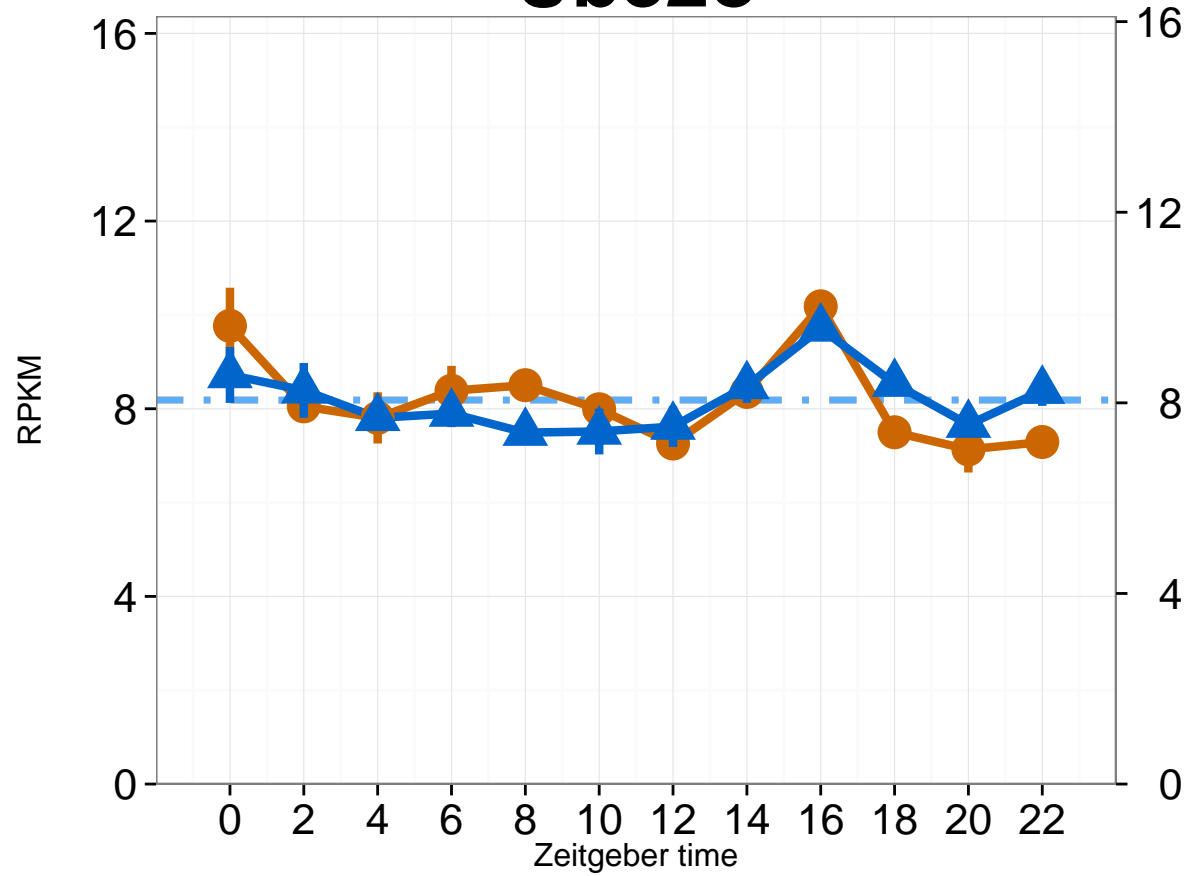

## Ube2o

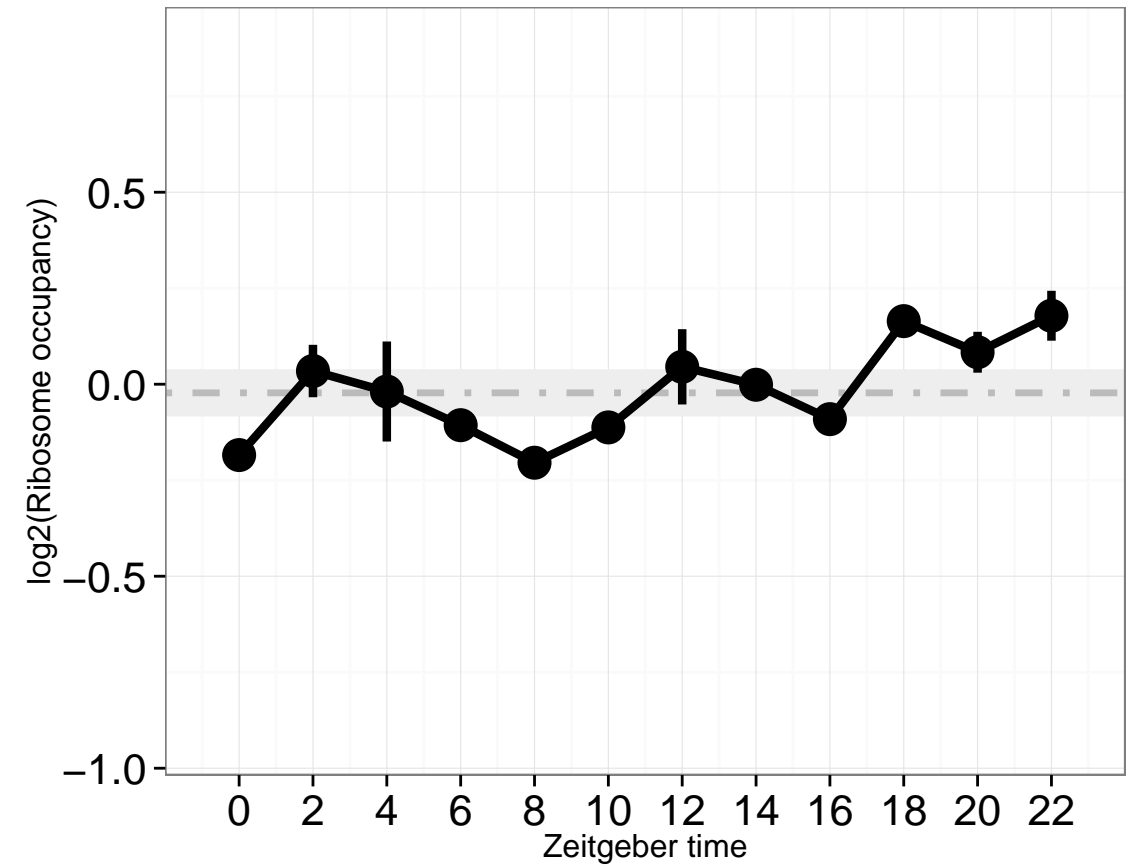

Supplement: Supplementary file 6516 [file 1]

## Fam120c

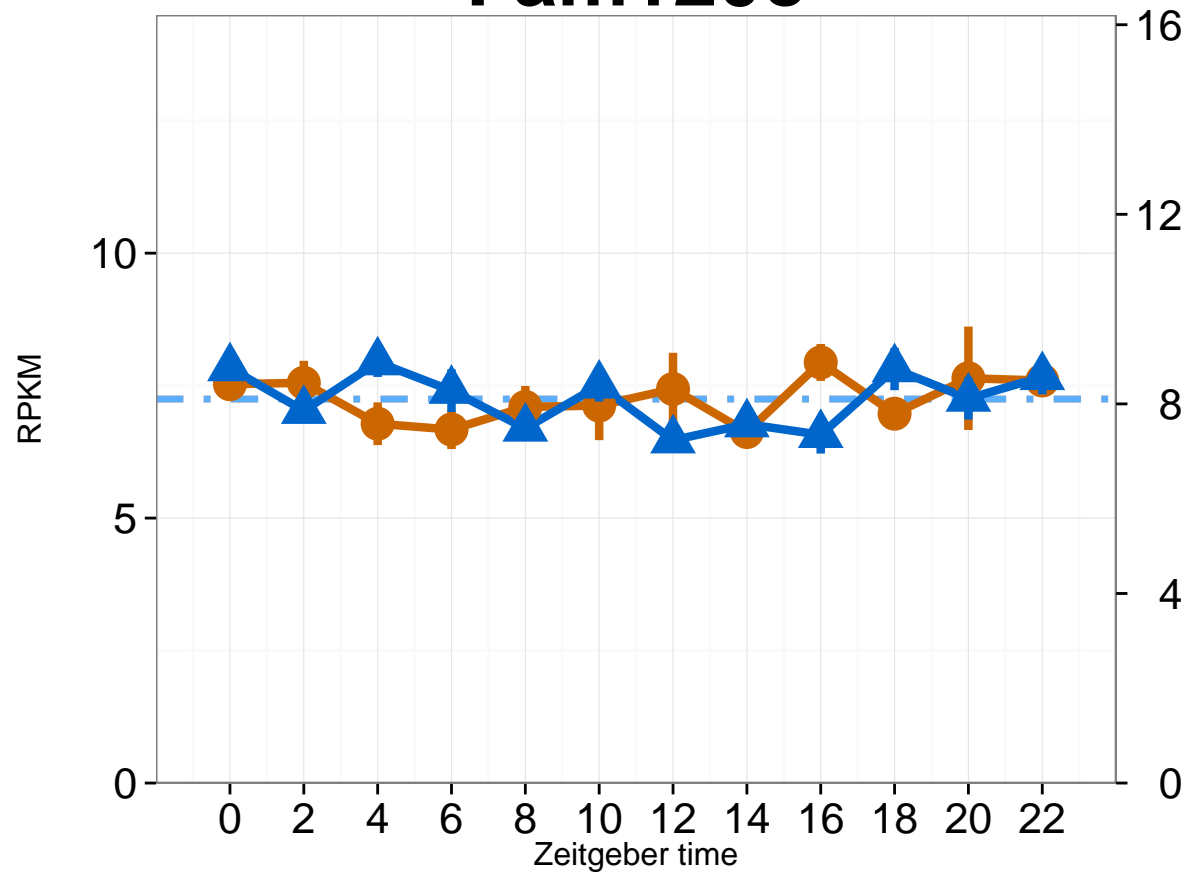

## Fam120c

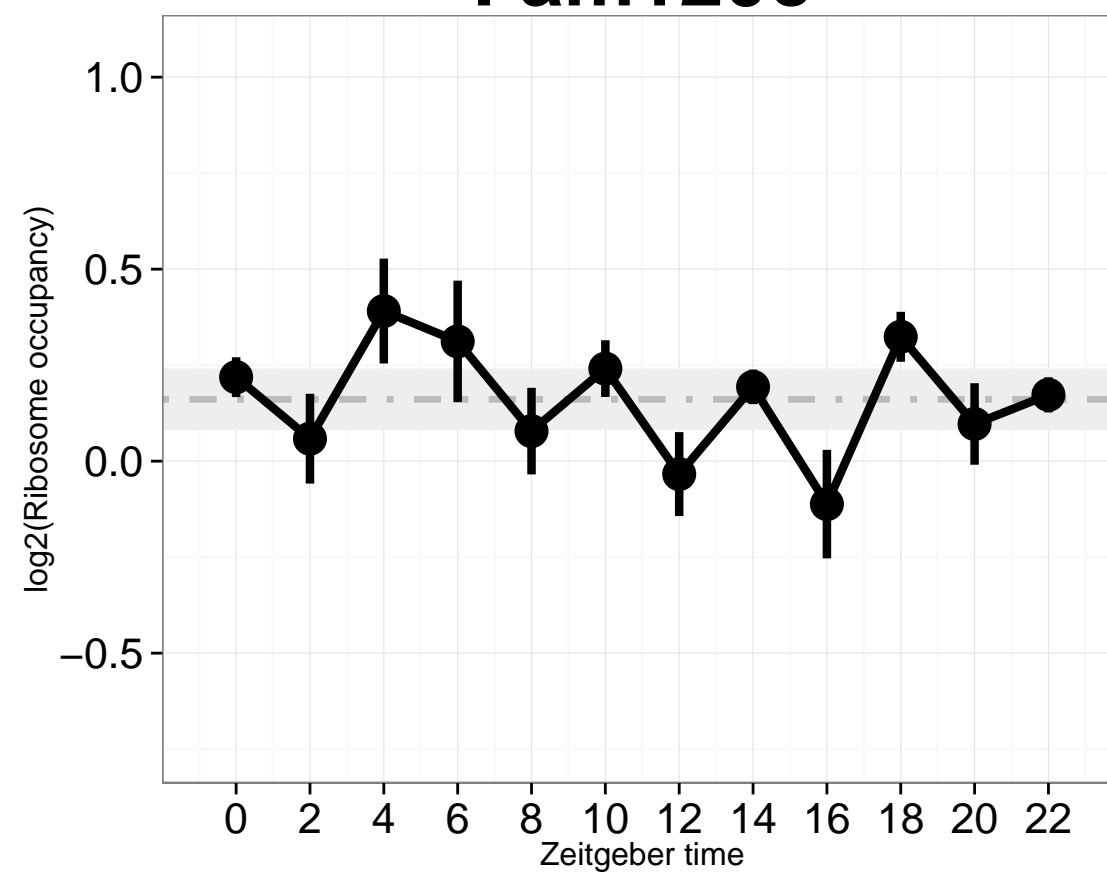

Supplement: Supplementary file 6517 [file 1]

## Ccdc127

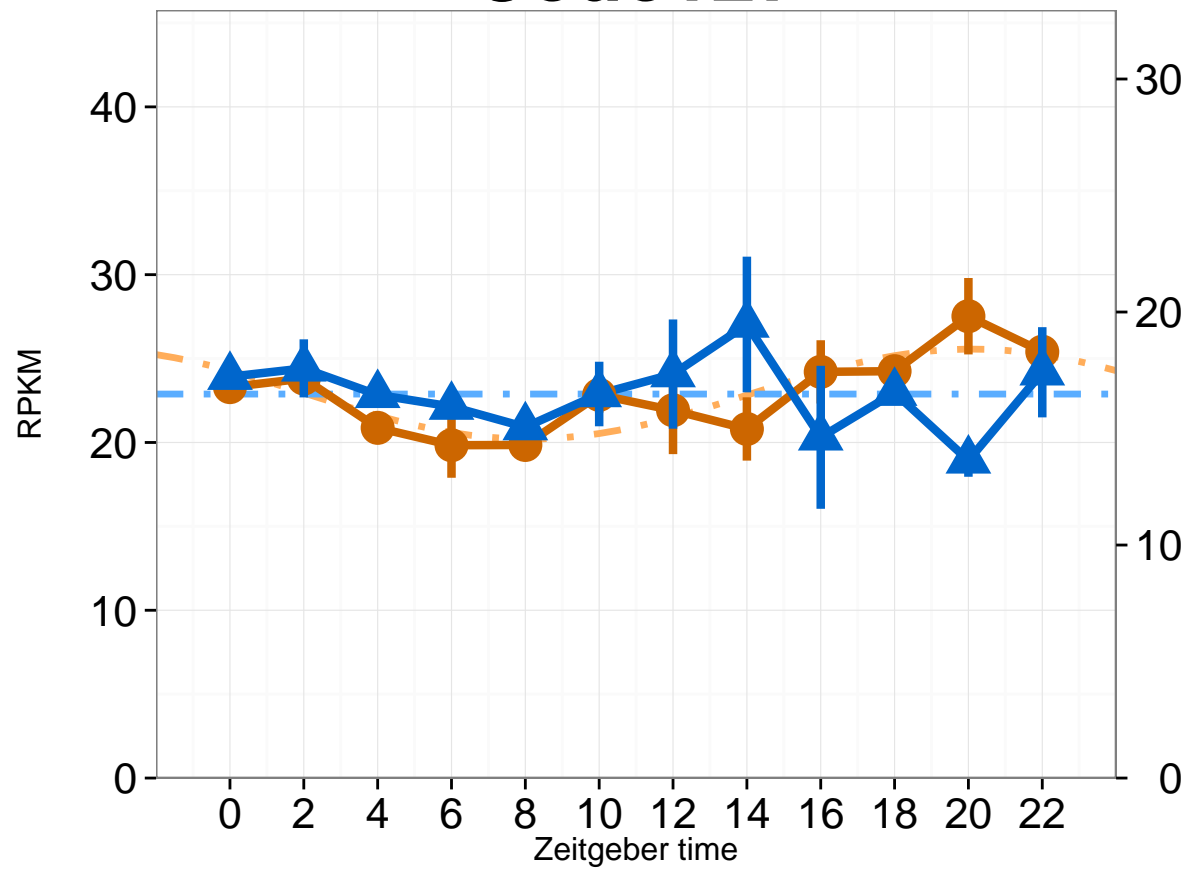

## Ccdc127

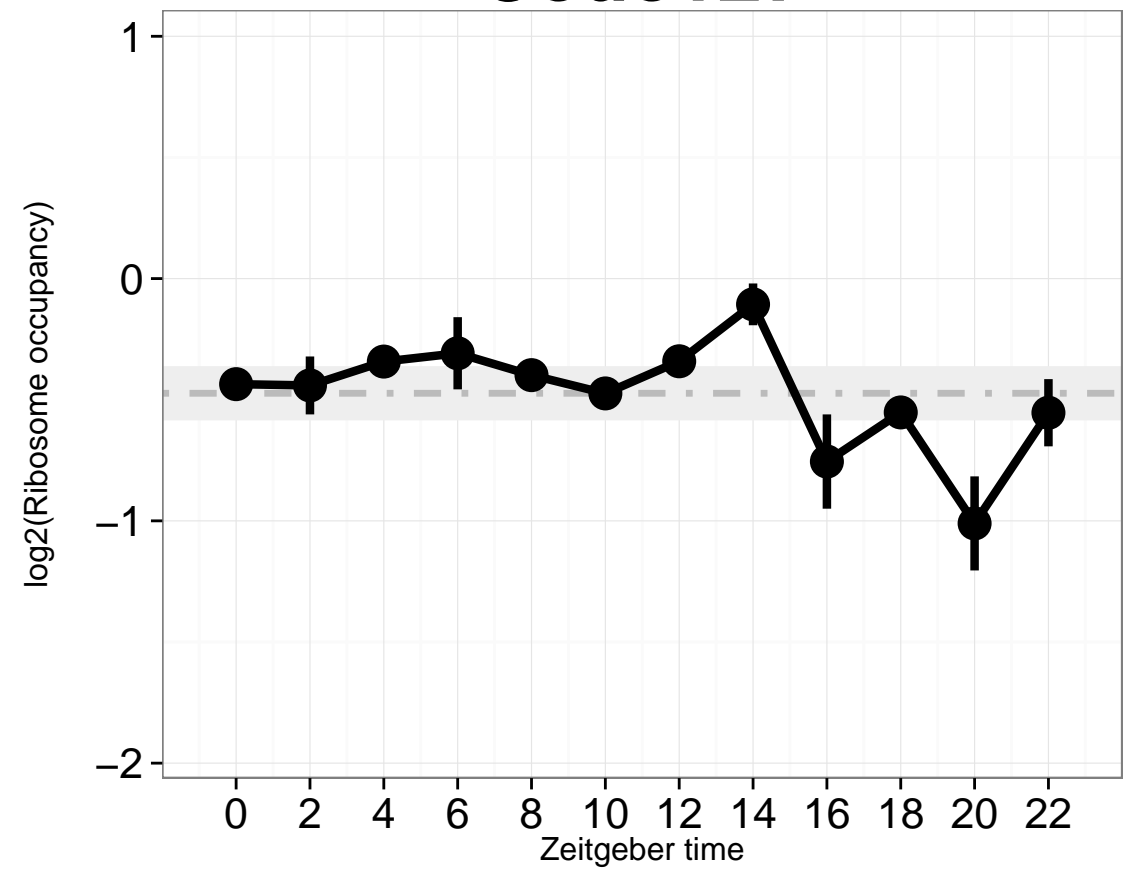

Supplement: Supplementary file 6518 [file 1]

# Col12a1

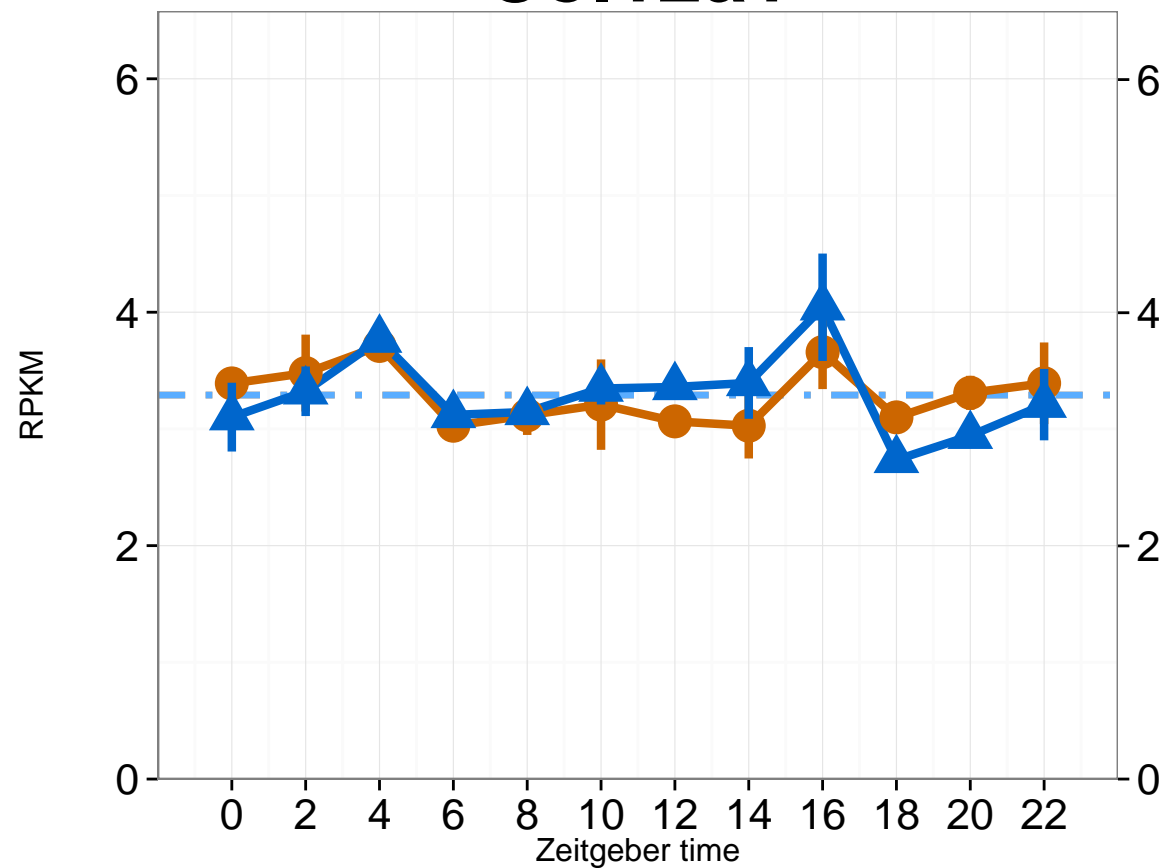

# Col12a1

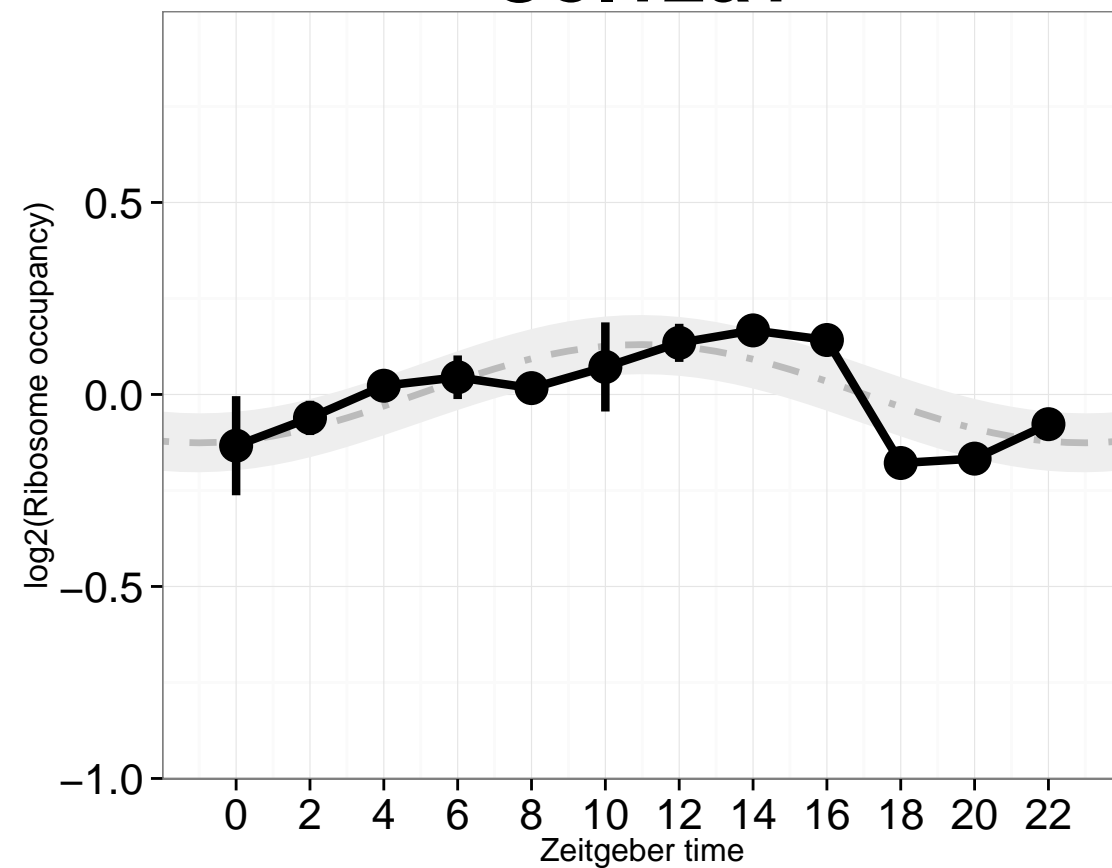

Supplement: Supplementary file 6519 [file 1]

## Arl8a

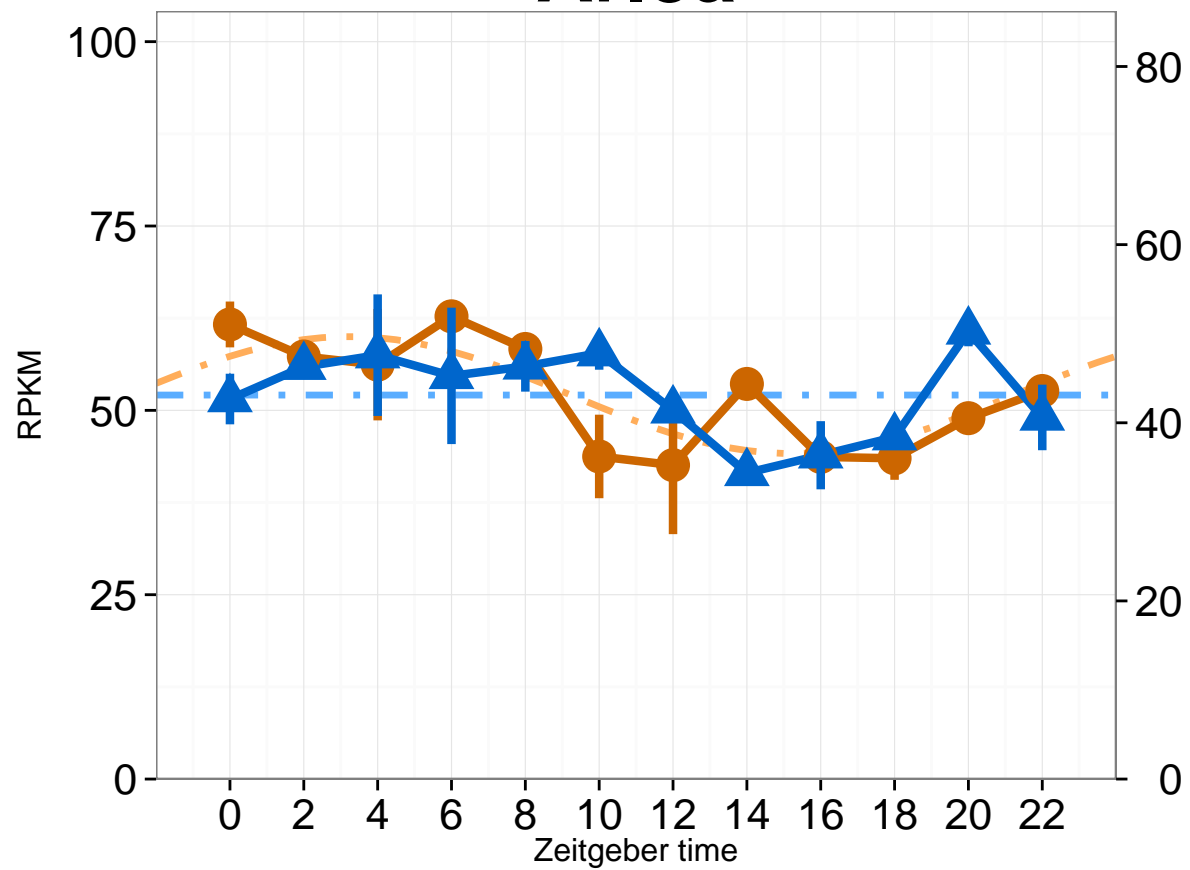

## Arl8a

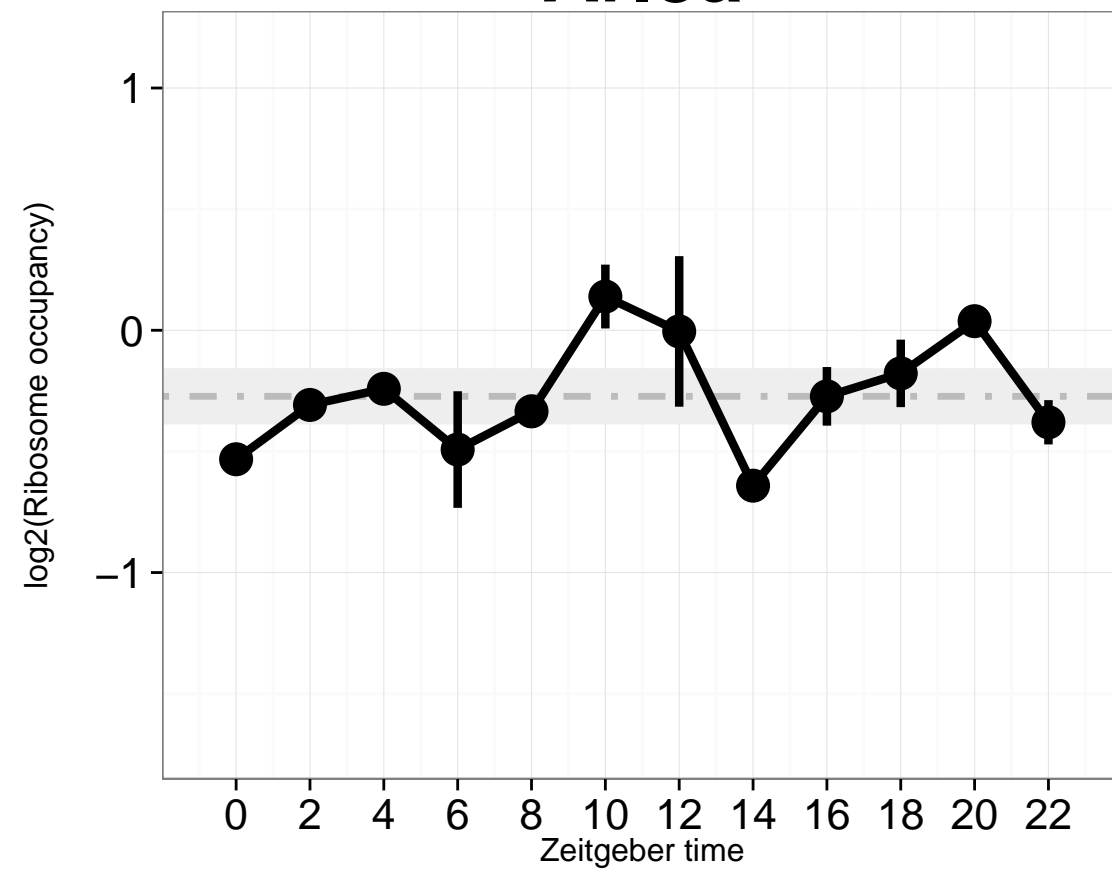

Supplement: Supplementary file 6520 [file 1]

**Slc22a3 TR**

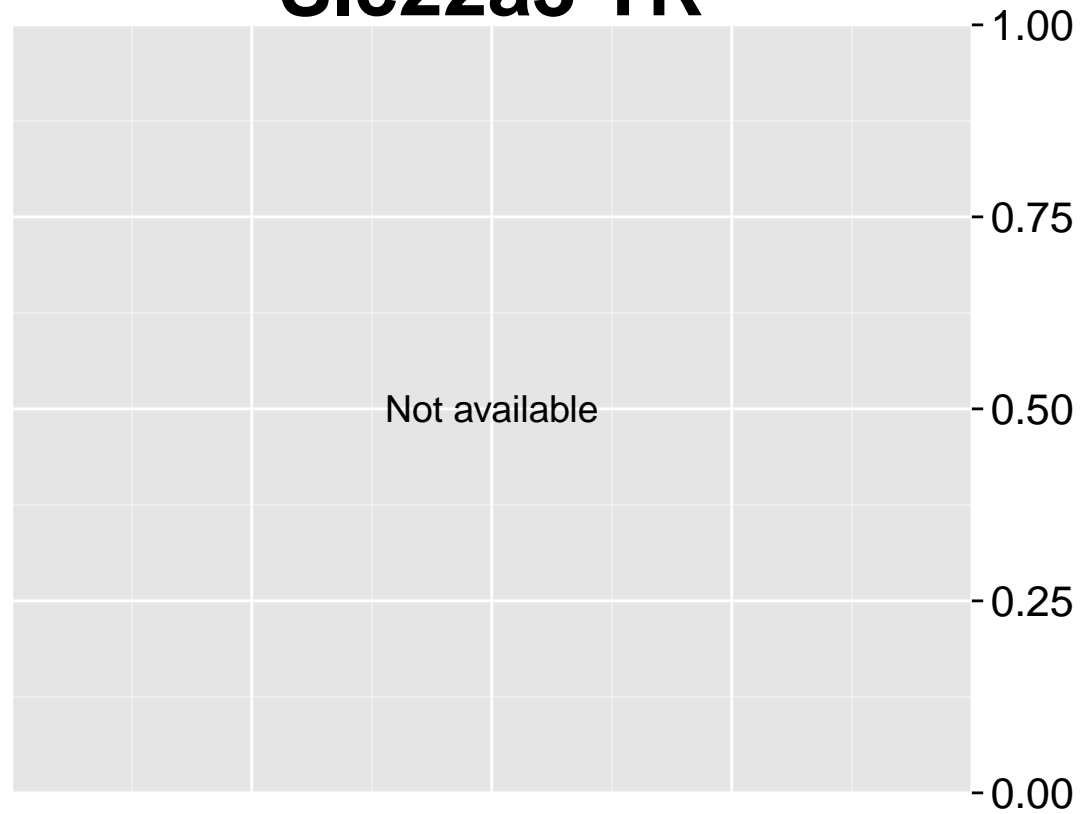

**Slc22a3 log2(Ribosome occupancy**

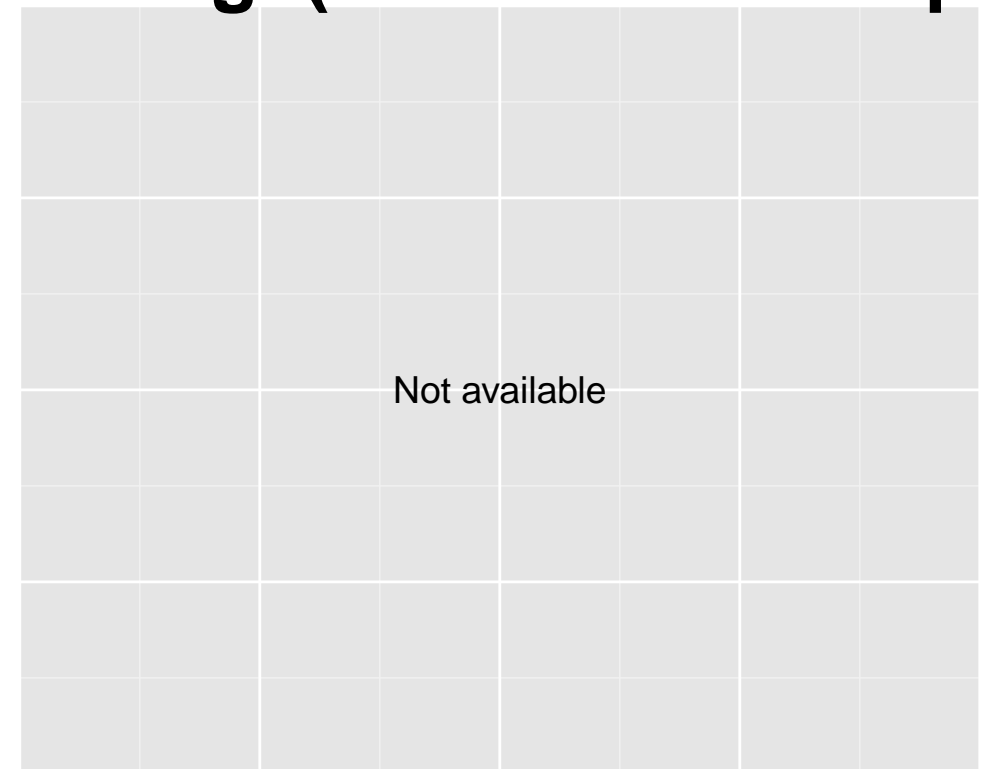

Supplement: Supplementary file 6521 [file 1]

## Dlst

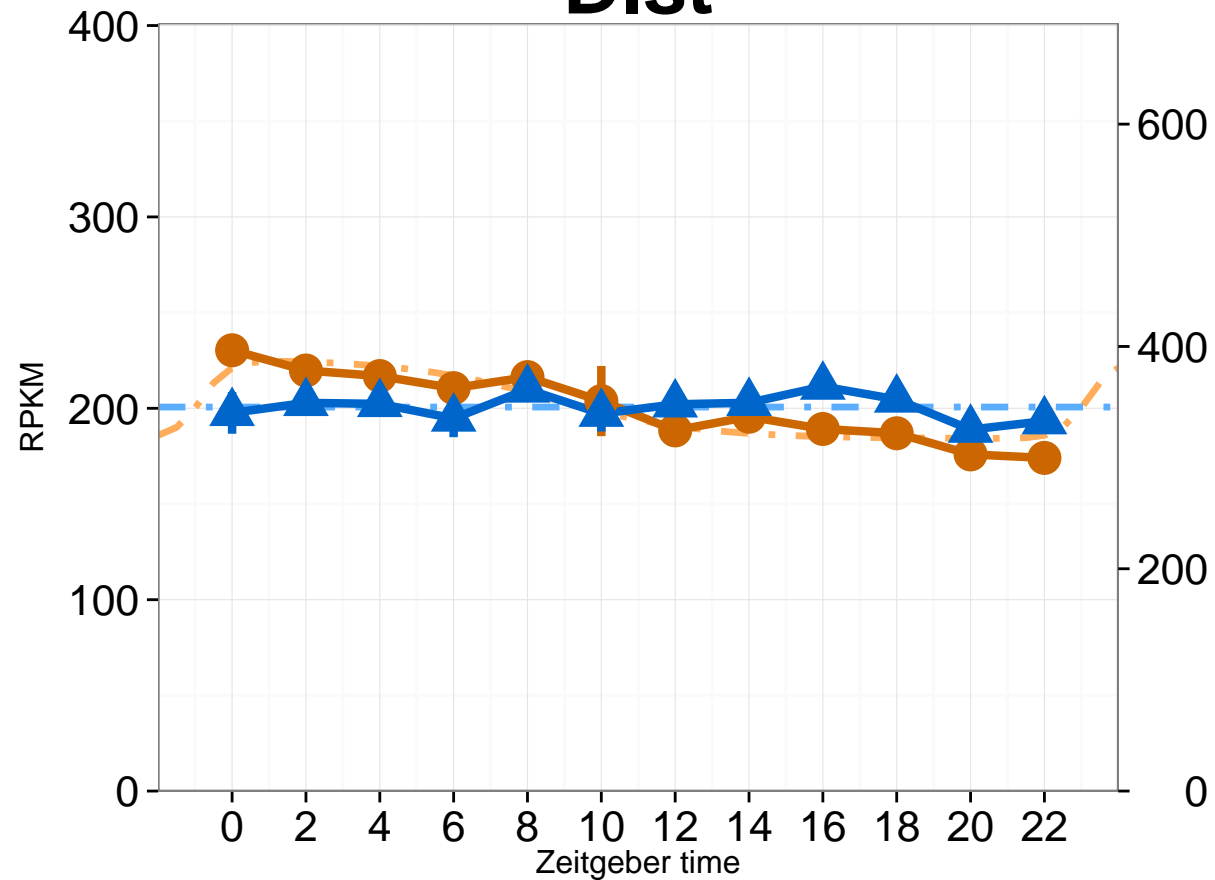

## Dlst

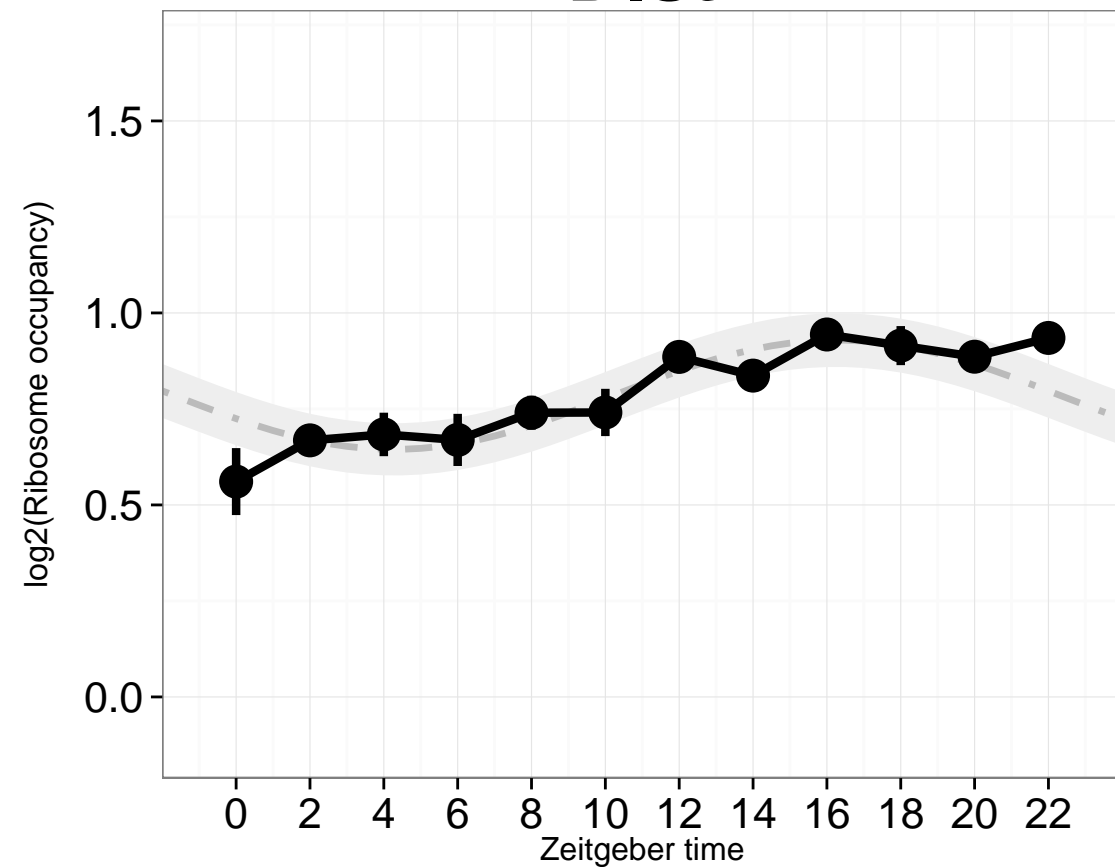

Supplement: Supplementary file 6522 [file 1]
