# Supplementary material (part 66 of 133)
Source: publisher figshare collection journal article supplement (https://springernature.figshare.com/articles/dataset/_/4903193)

## Idh1

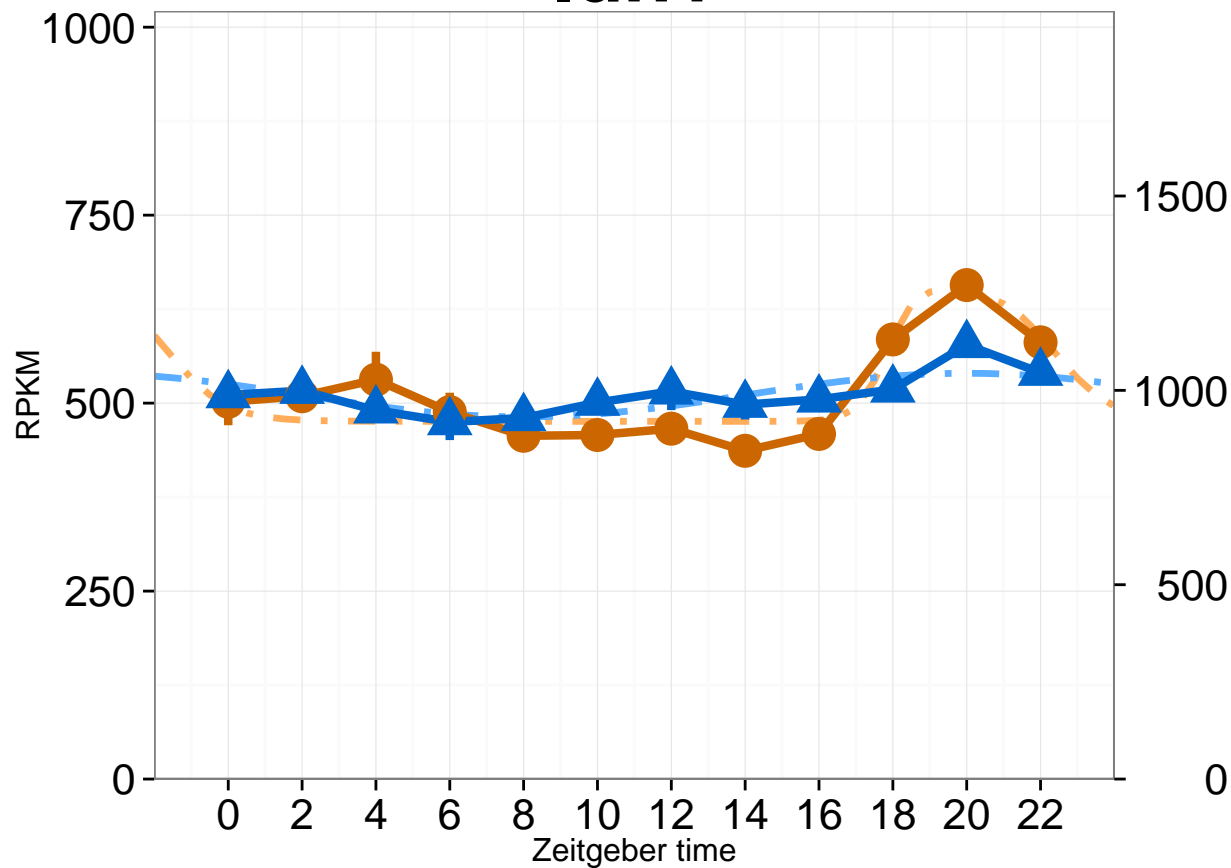

## Idh1

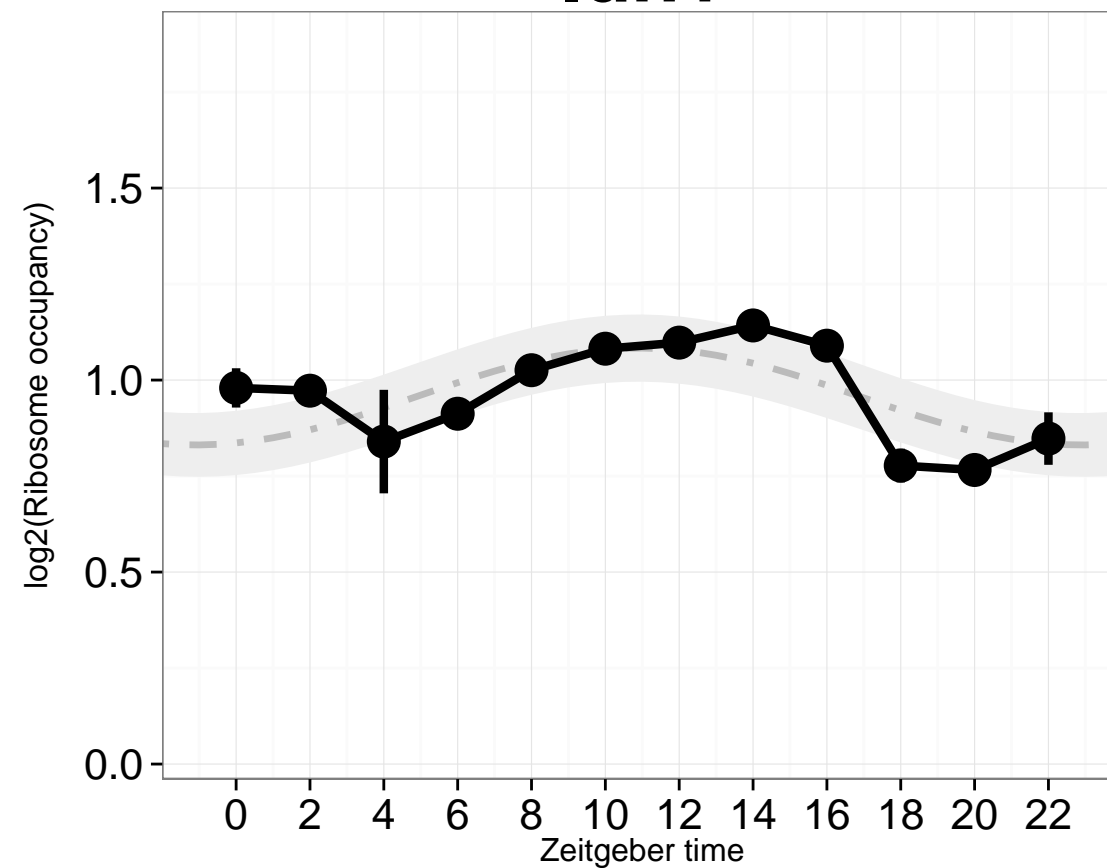

Supplement: Supplementary file 6523 [file 1]

# Trappc5

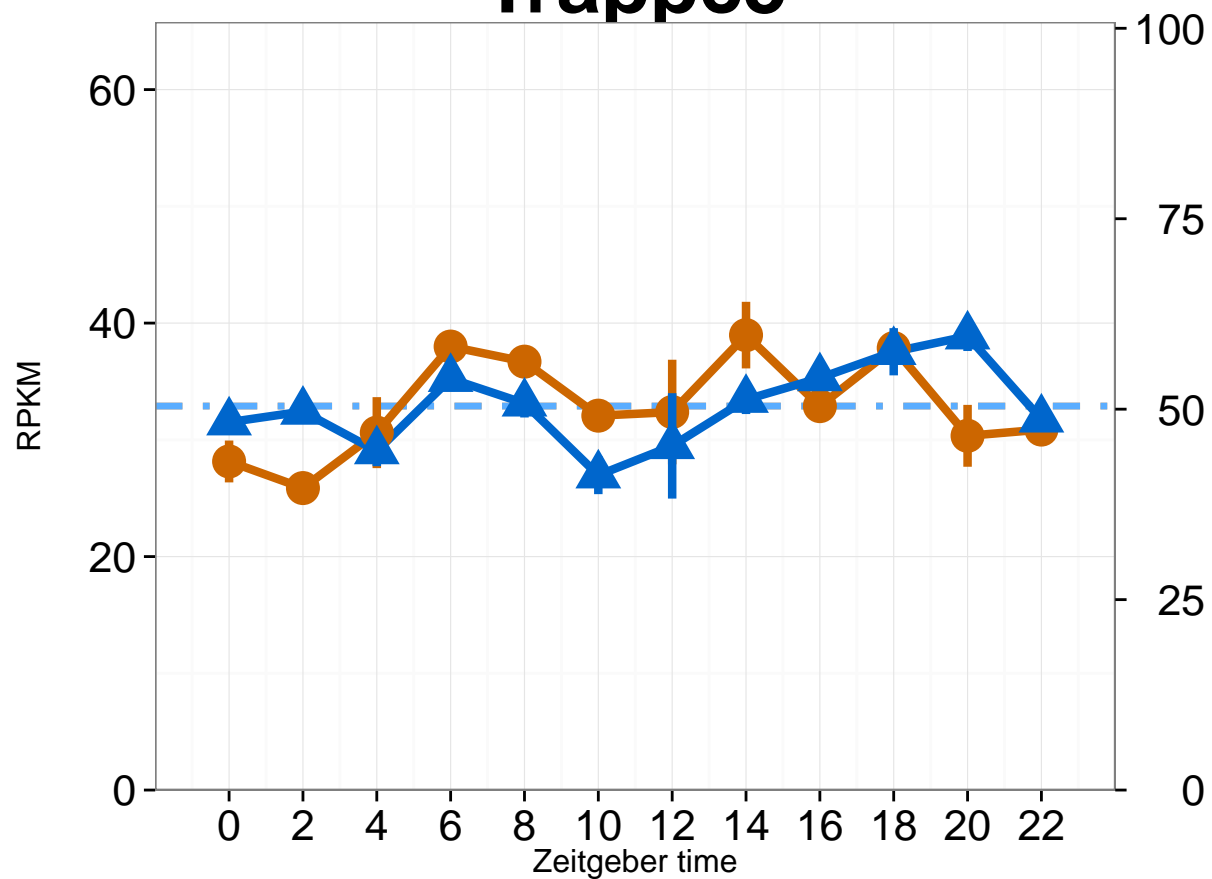

# Trappc5

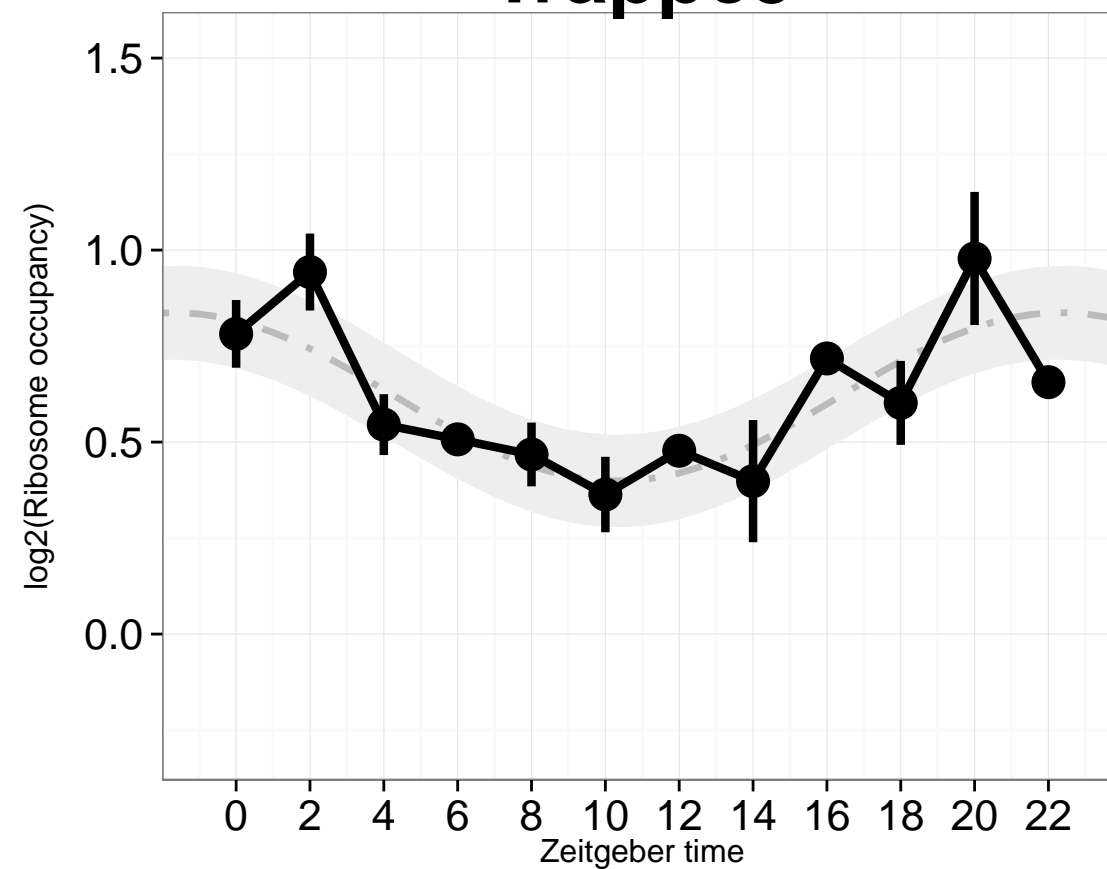

Supplement: Supplementary file 6524 [file 1]

# Pcgf1

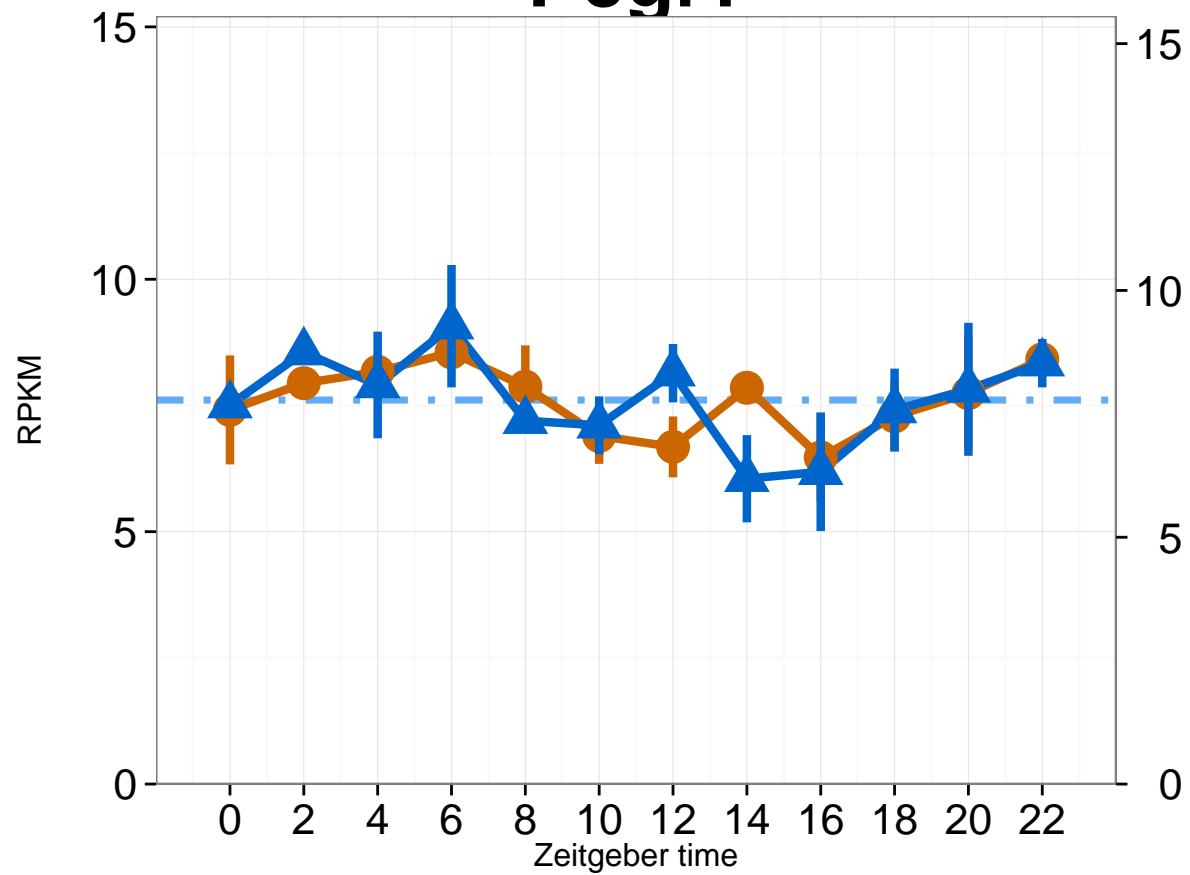

# Pcgf1

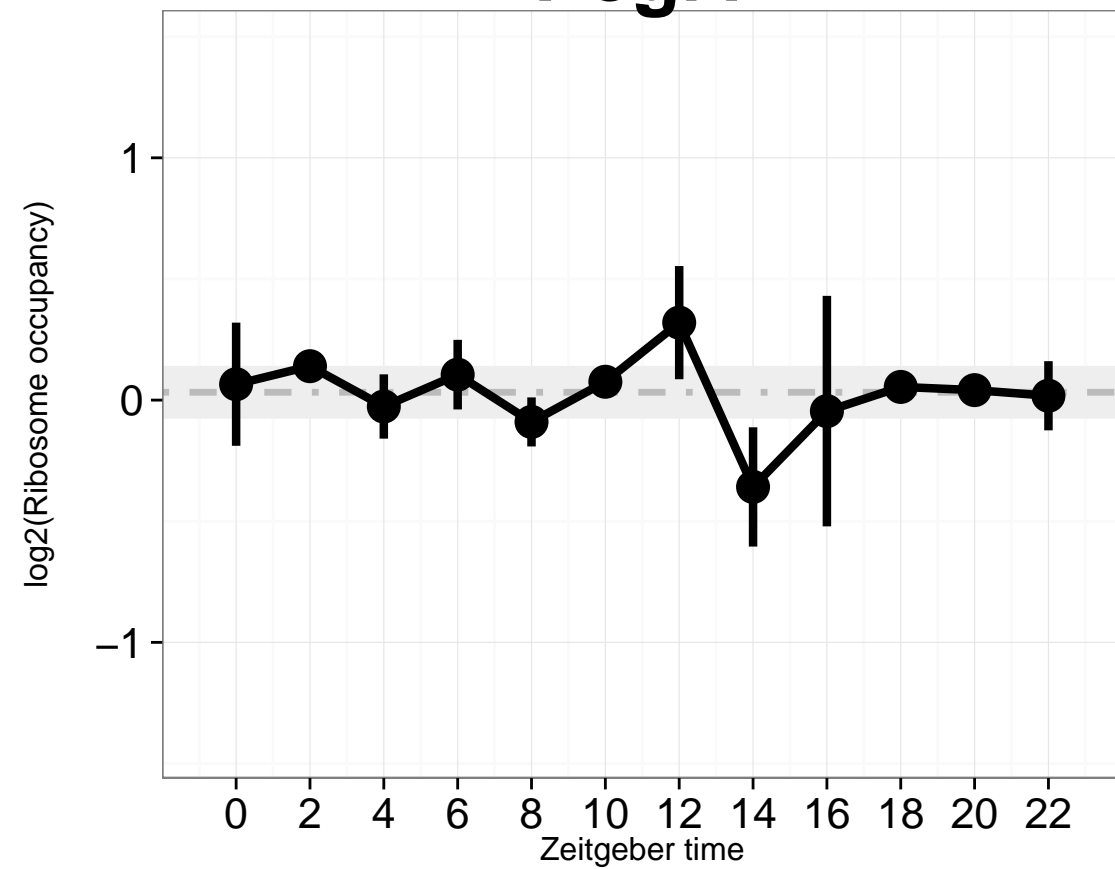

Supplement: Supplementary file 6525 [file 1]

# Lmtk2

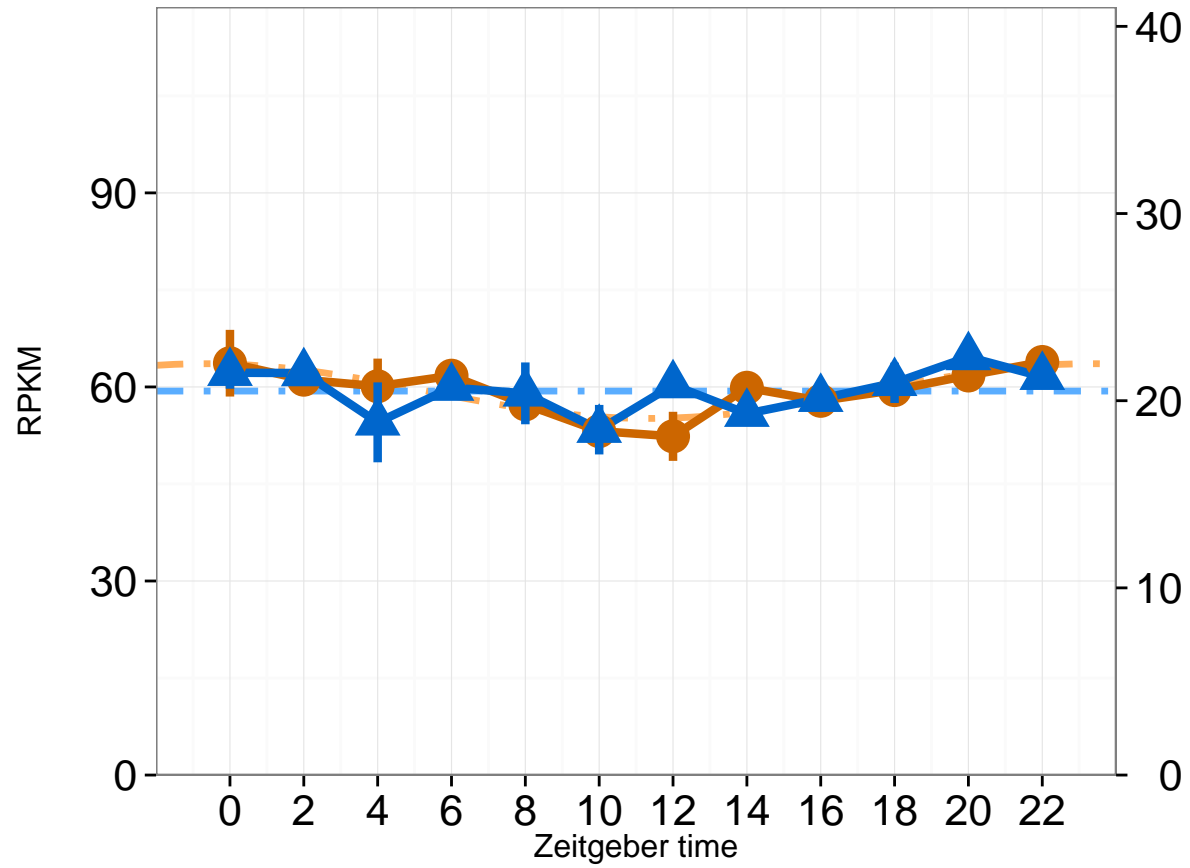

# Lmtk2

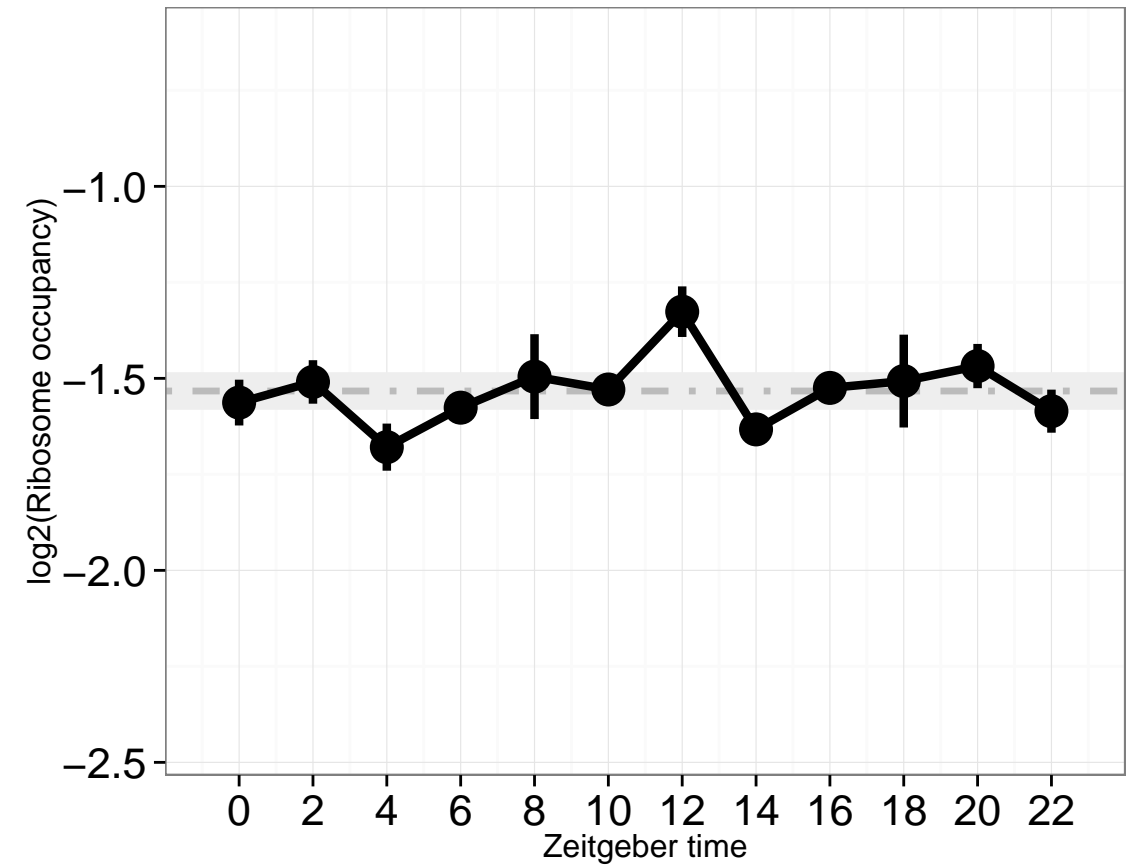

Supplement: Supplementary file 6526 [file 1]

# Hspa5

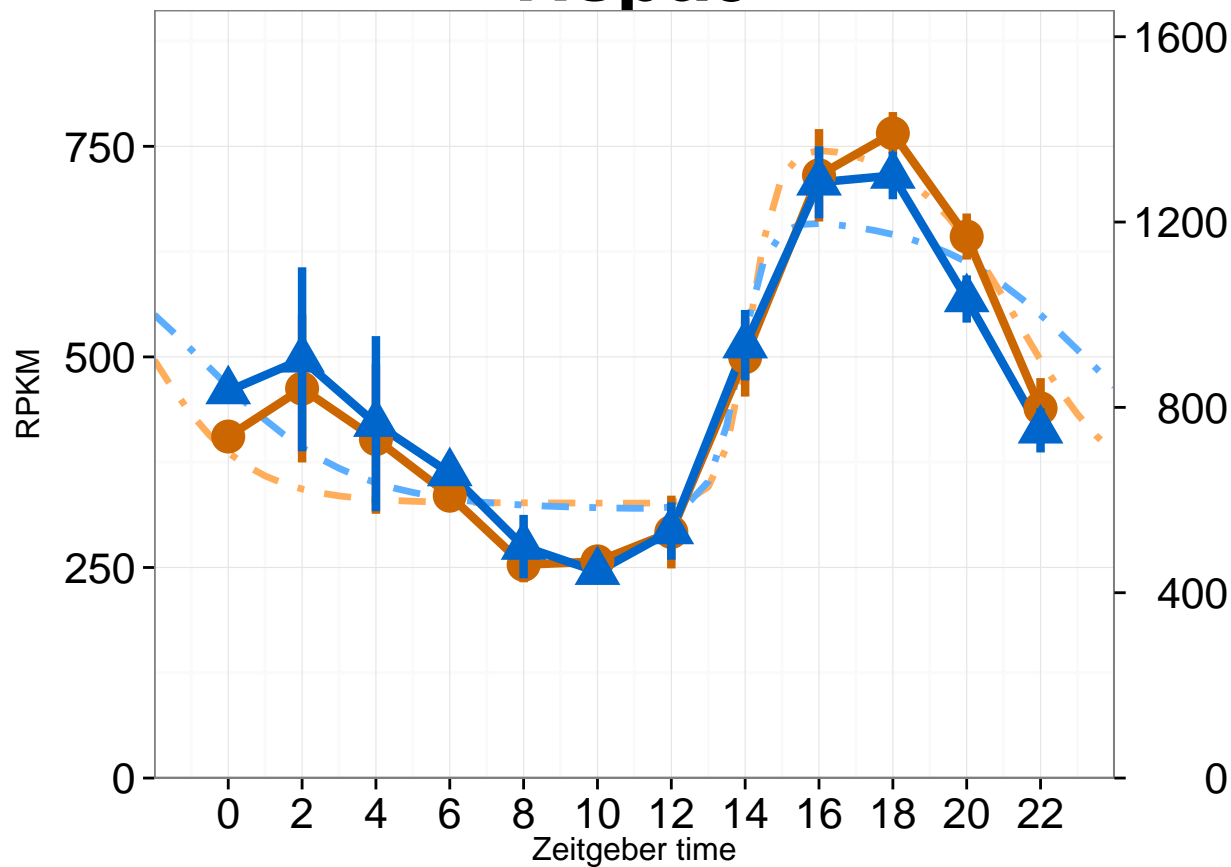

# Hspa5

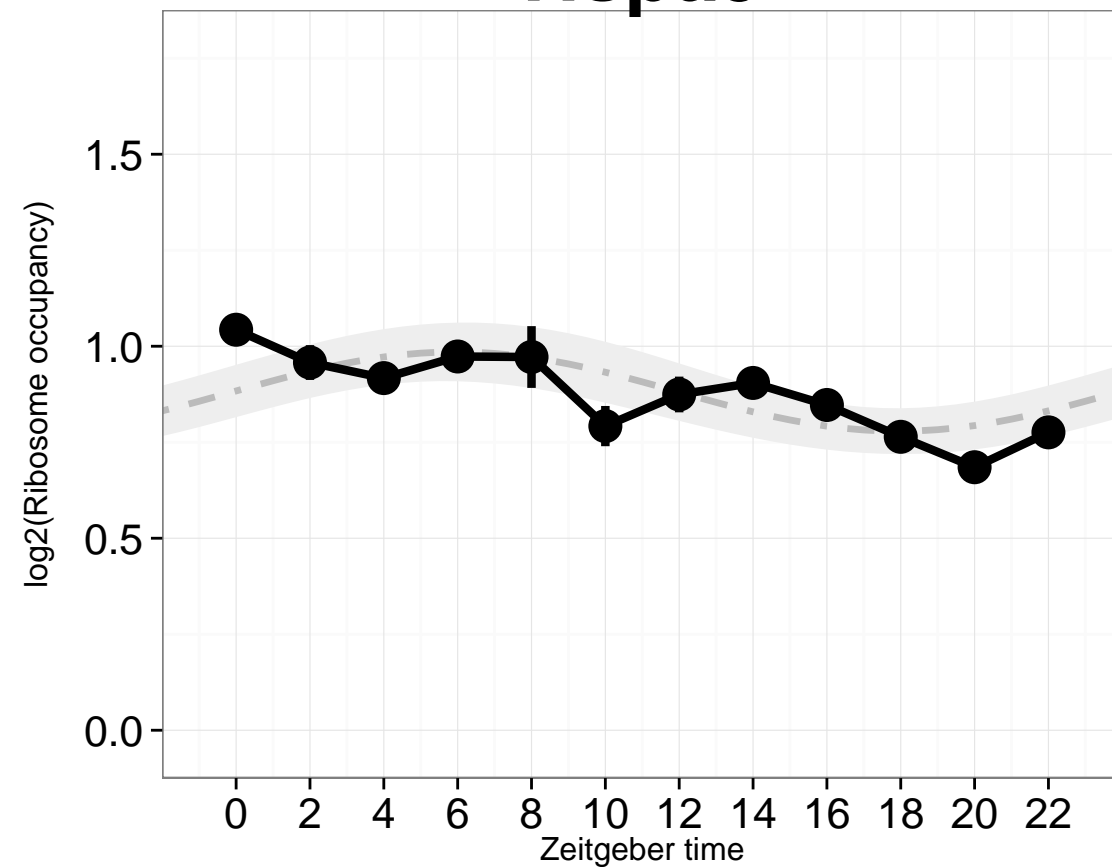

Supplement: Supplementary file 6527 [file 1]

# Snrnp35

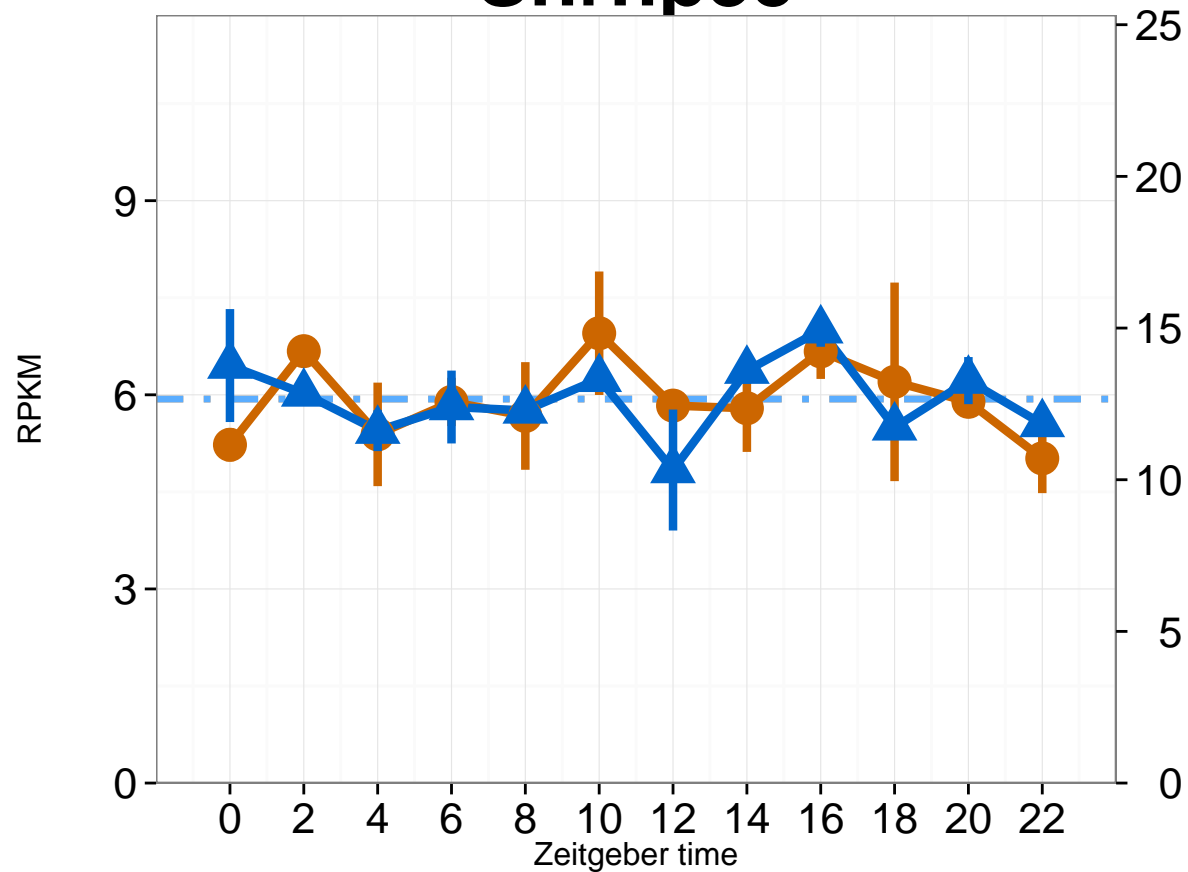

# Snrnp35

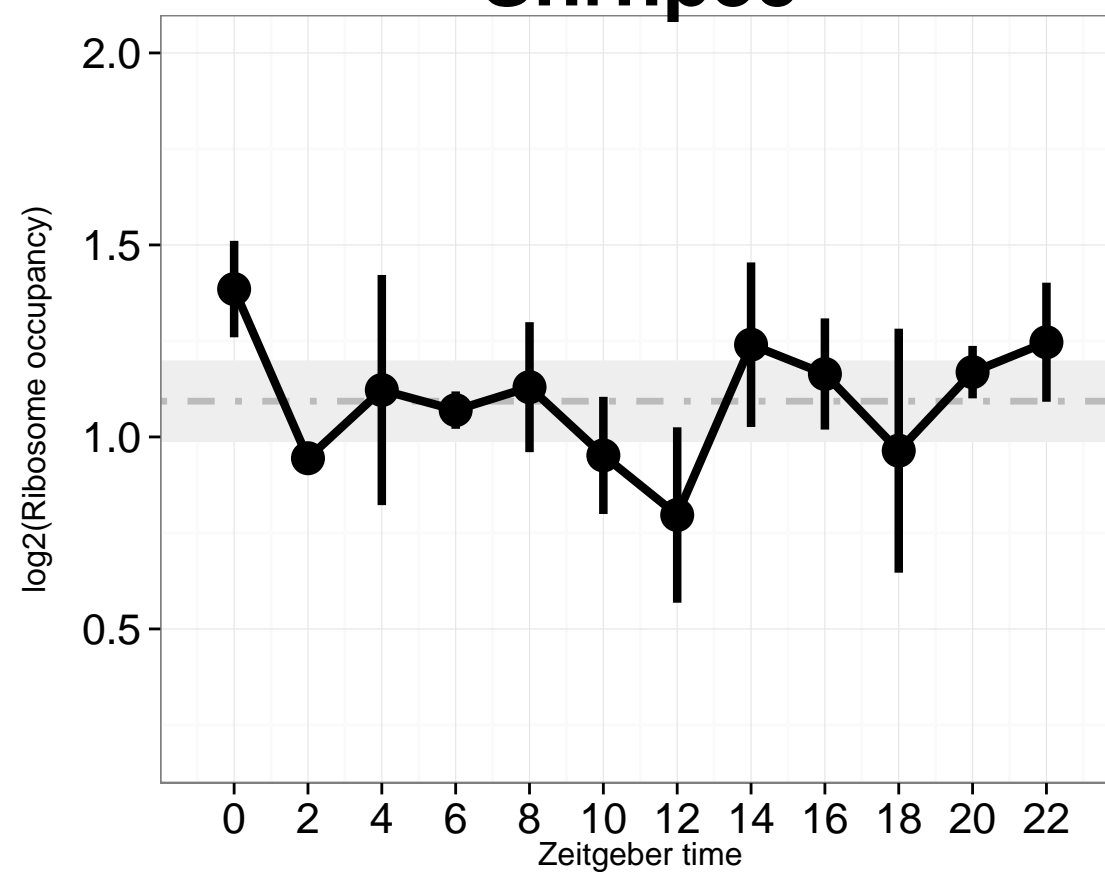

Supplement: Supplementary file 6528 [file 1]

# Ndufa2

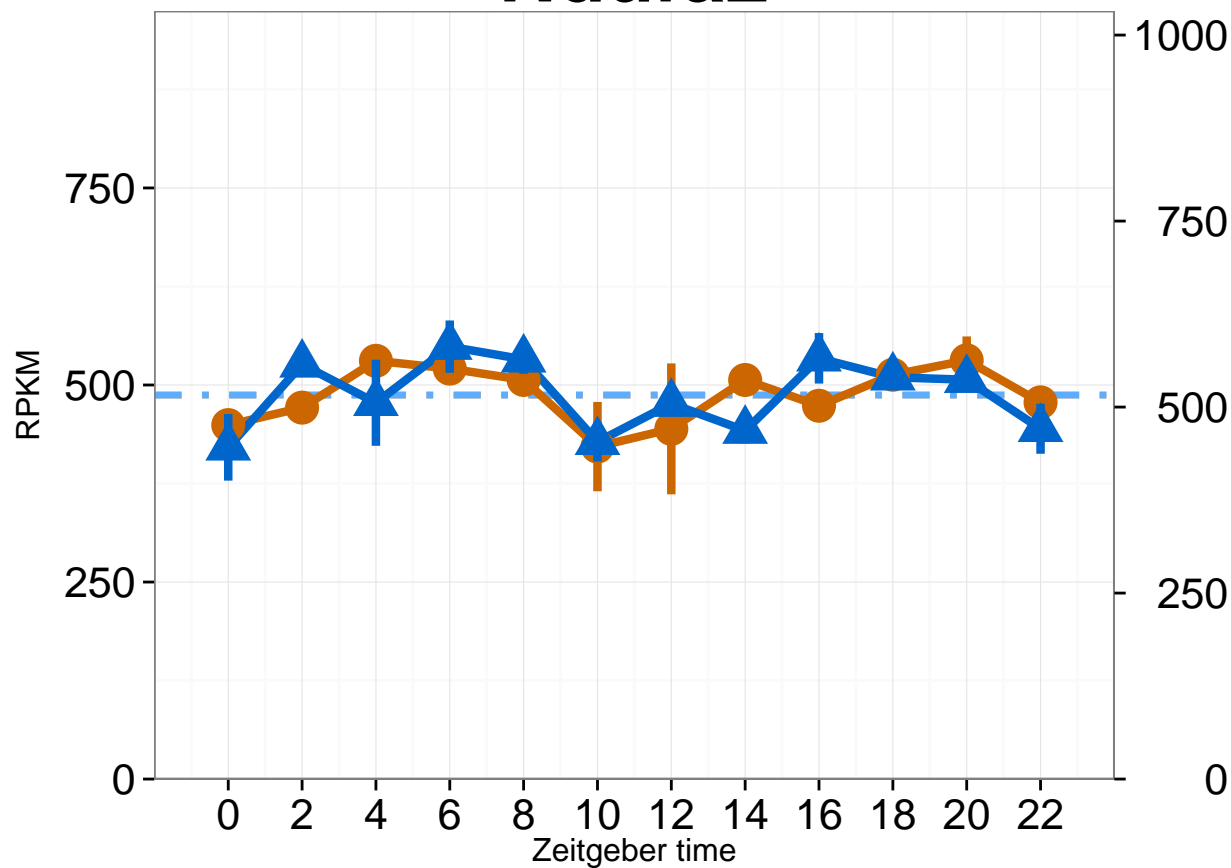

# Ndufa2

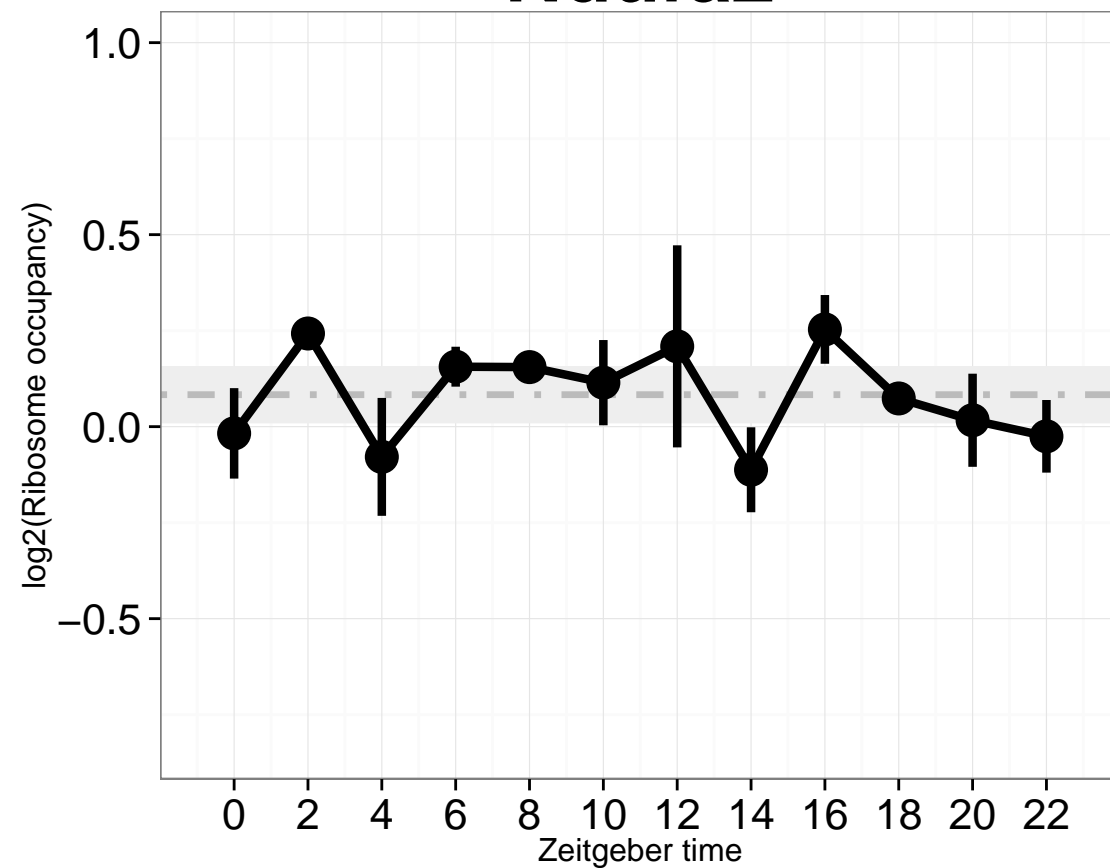

Supplement: Supplementary file 6529 [file 1]

## Dnajb1

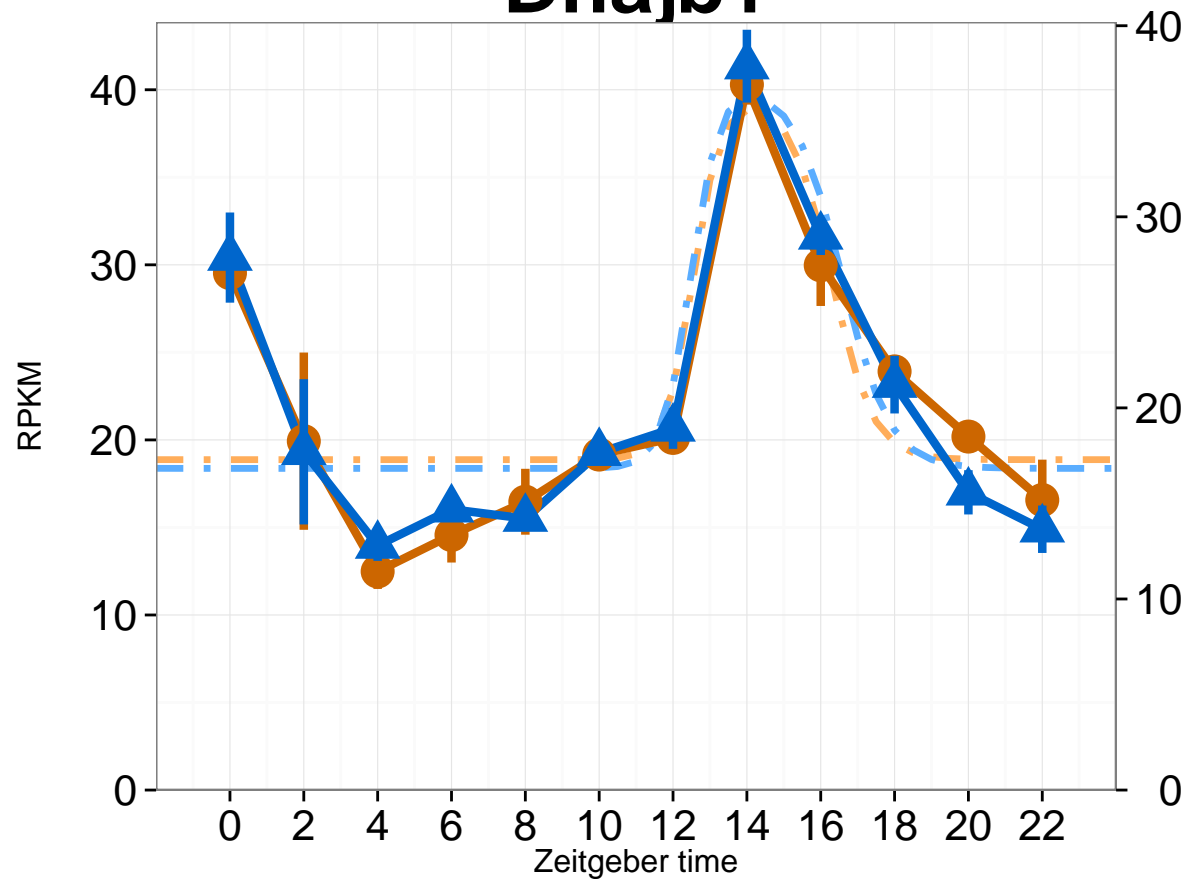

## Dnajb1

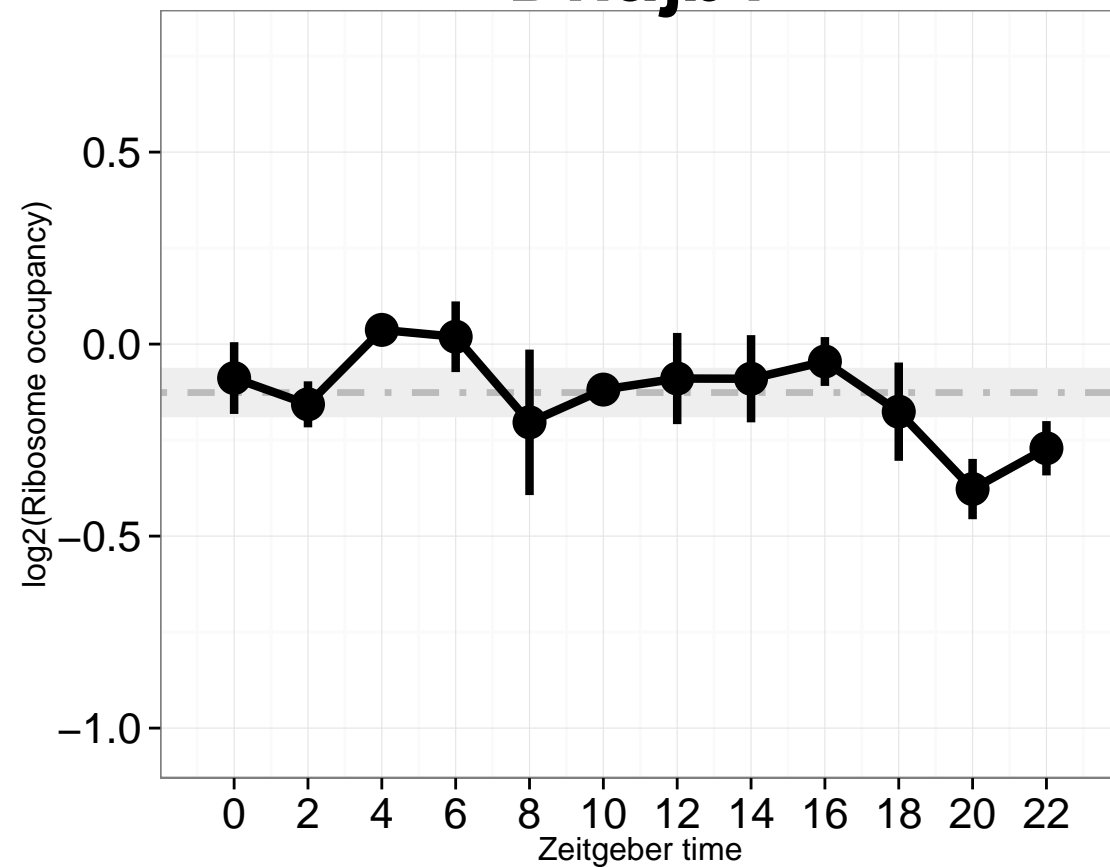

Supplement: Supplementary file 6530 [file 1]

# Tbxa2r

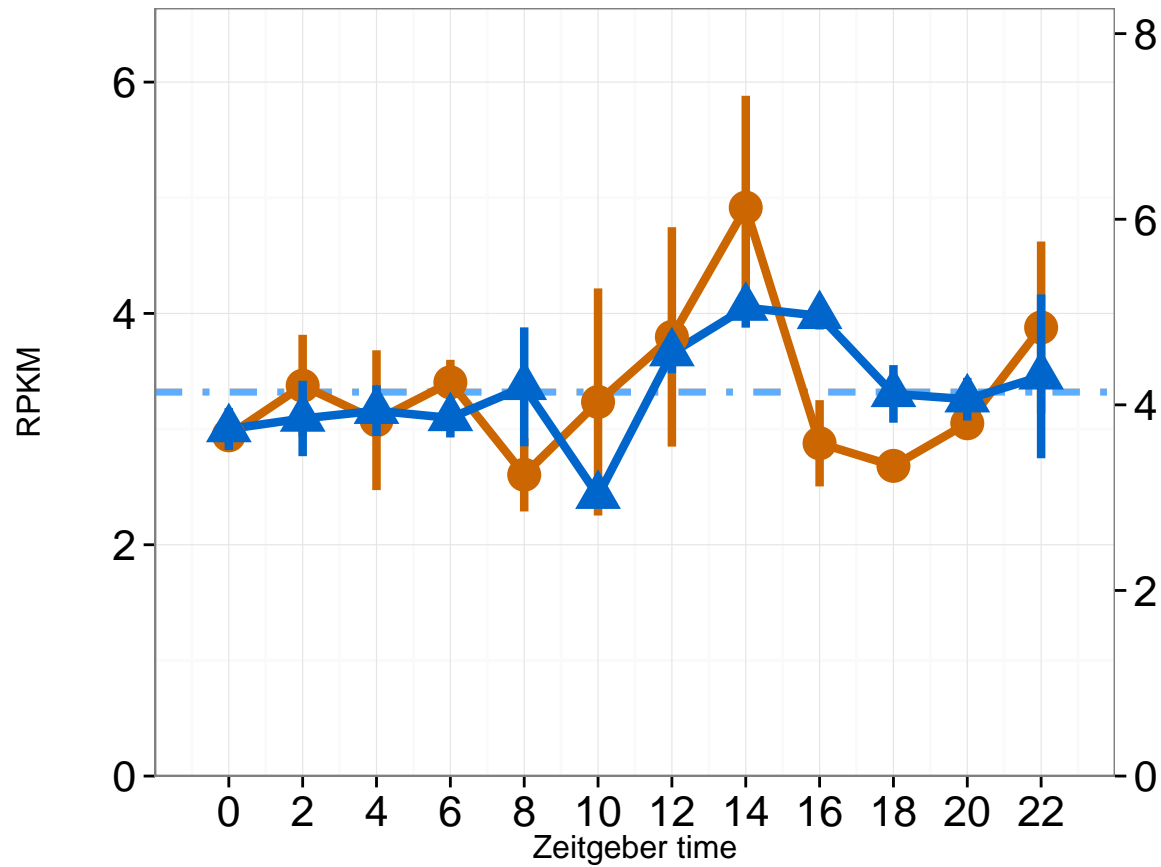

# Tbxa2r

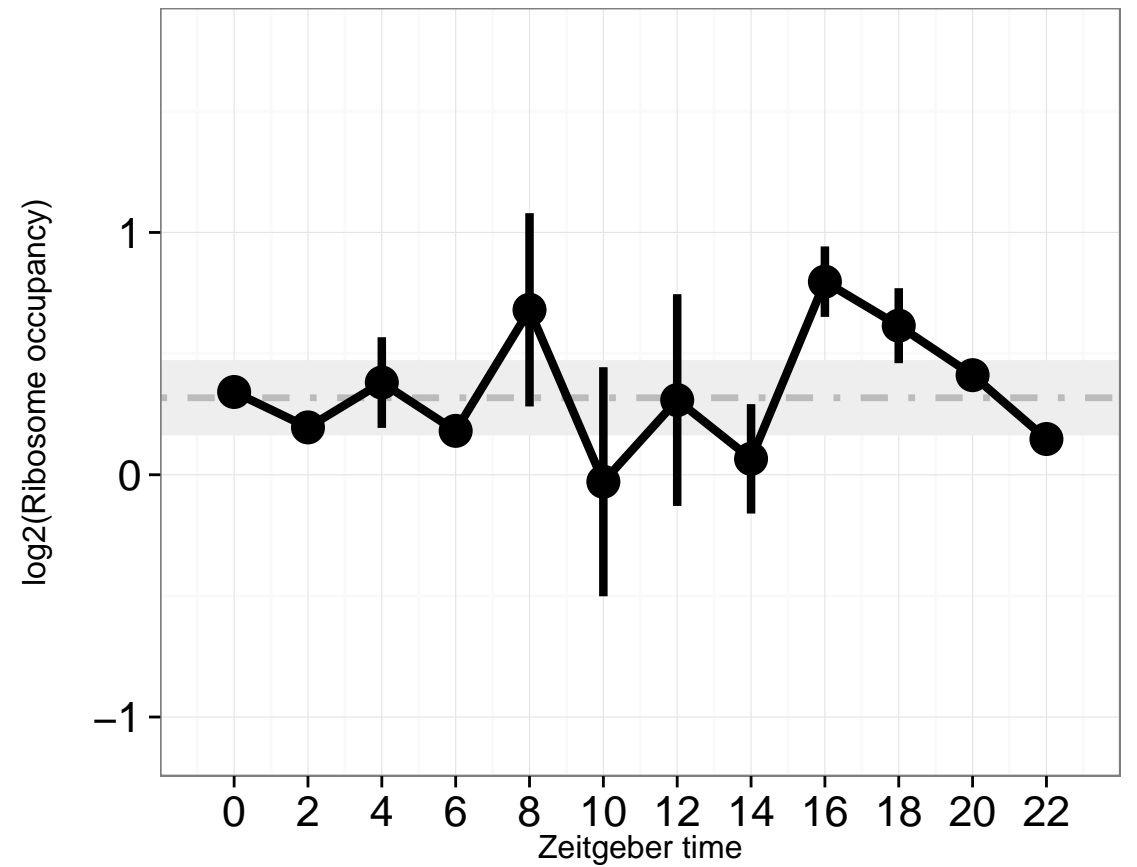

Supplement: Supplementary file 6531 [file 1]

## Rab21

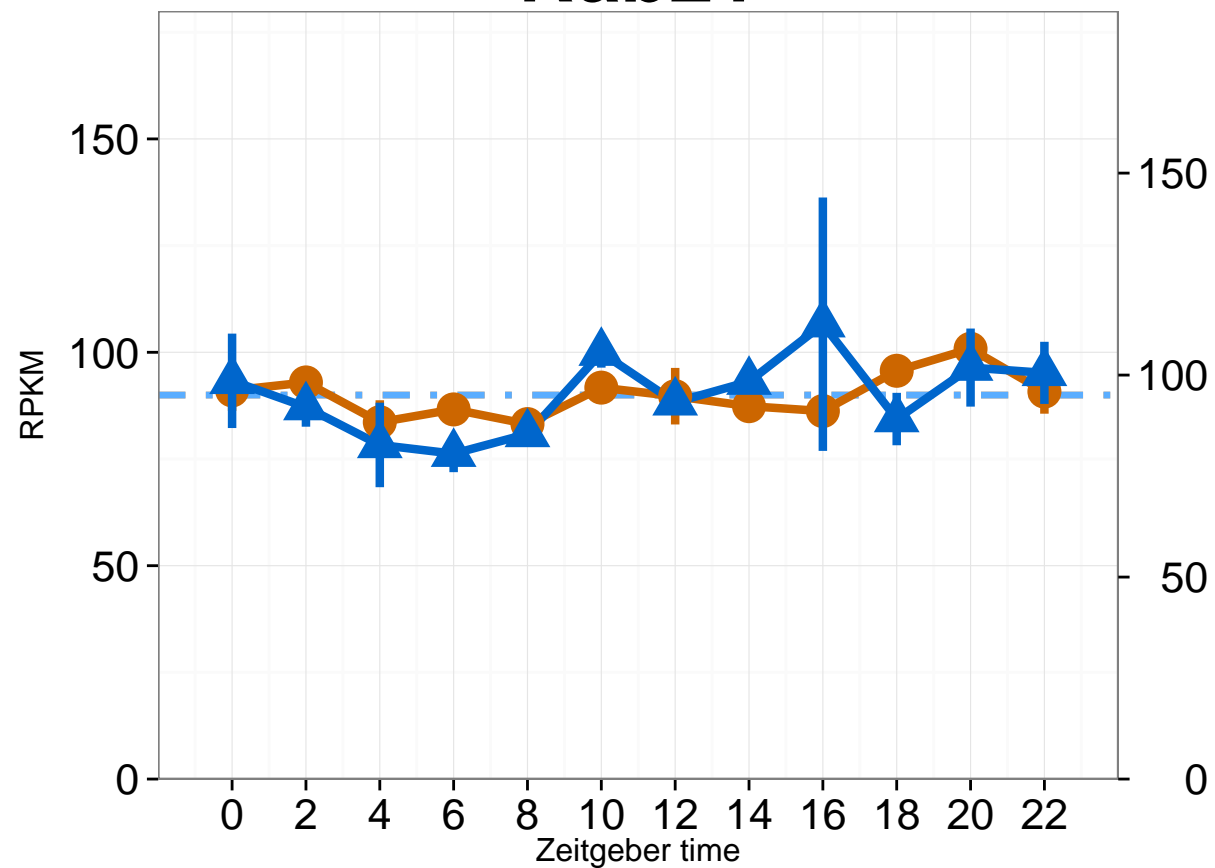

## Rab21

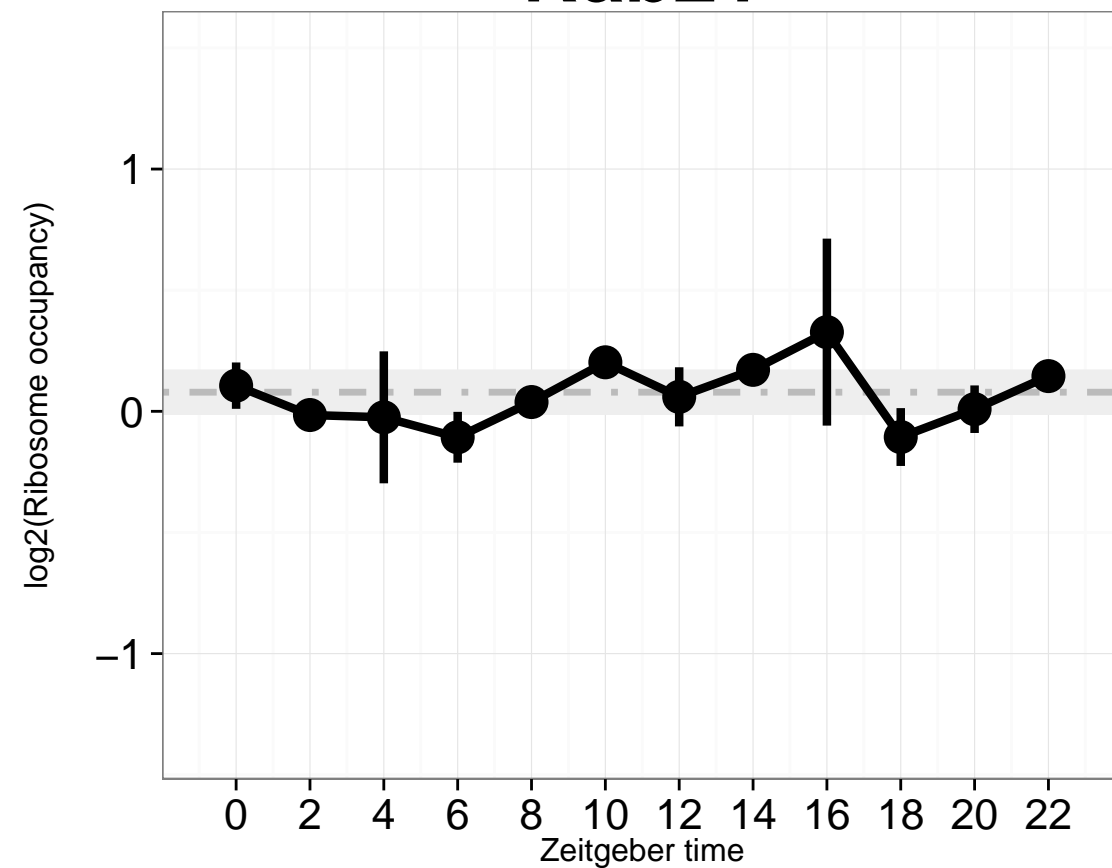

Supplement: Supplementary file 6532 [file 1]

## Klf13

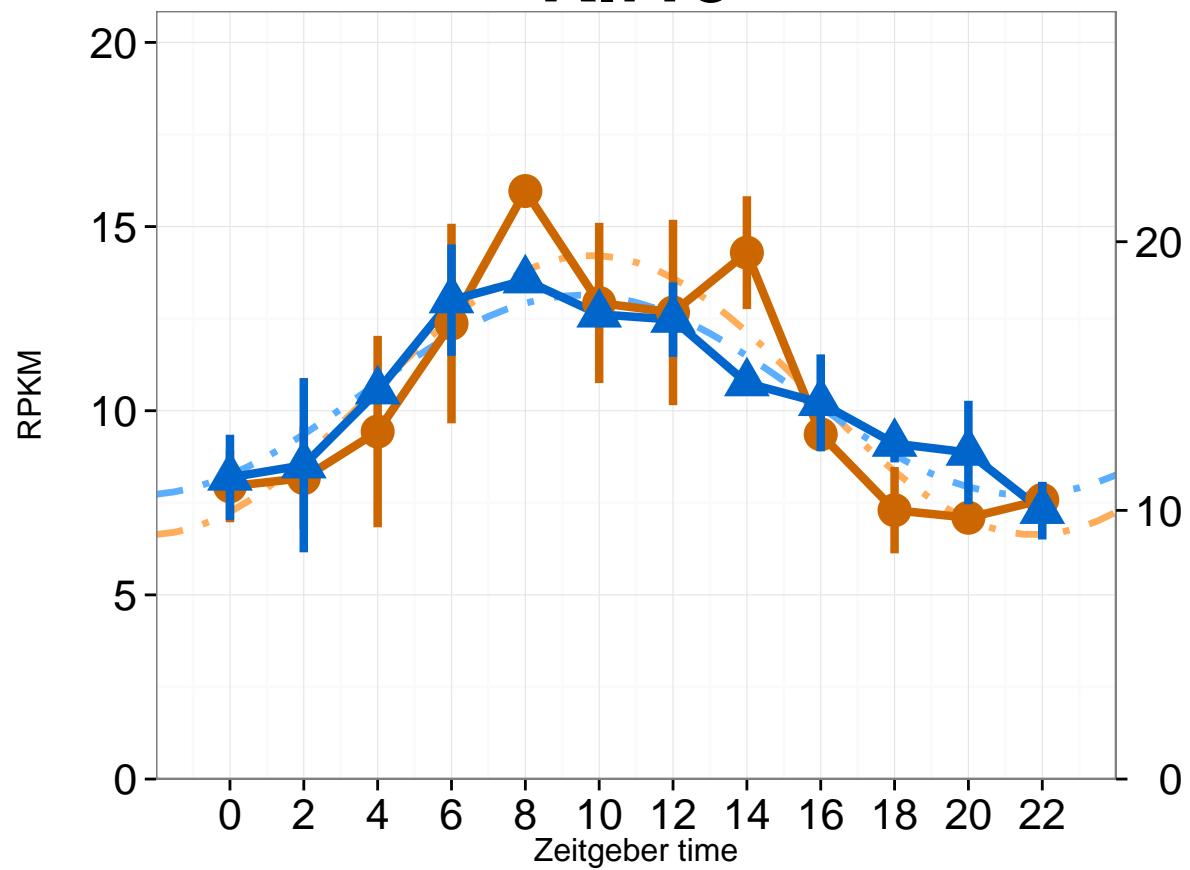

## Klf13

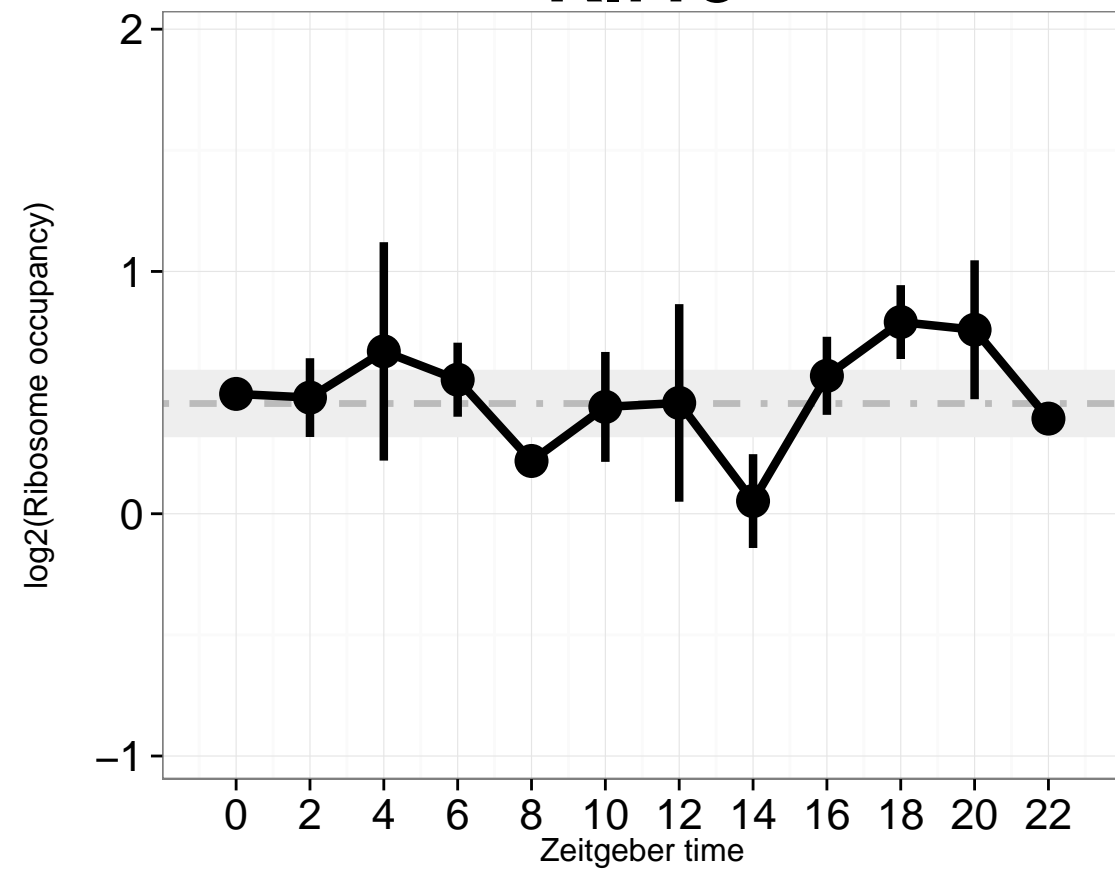

Supplement: Supplementary file 6533 [file 1]

## Prr3

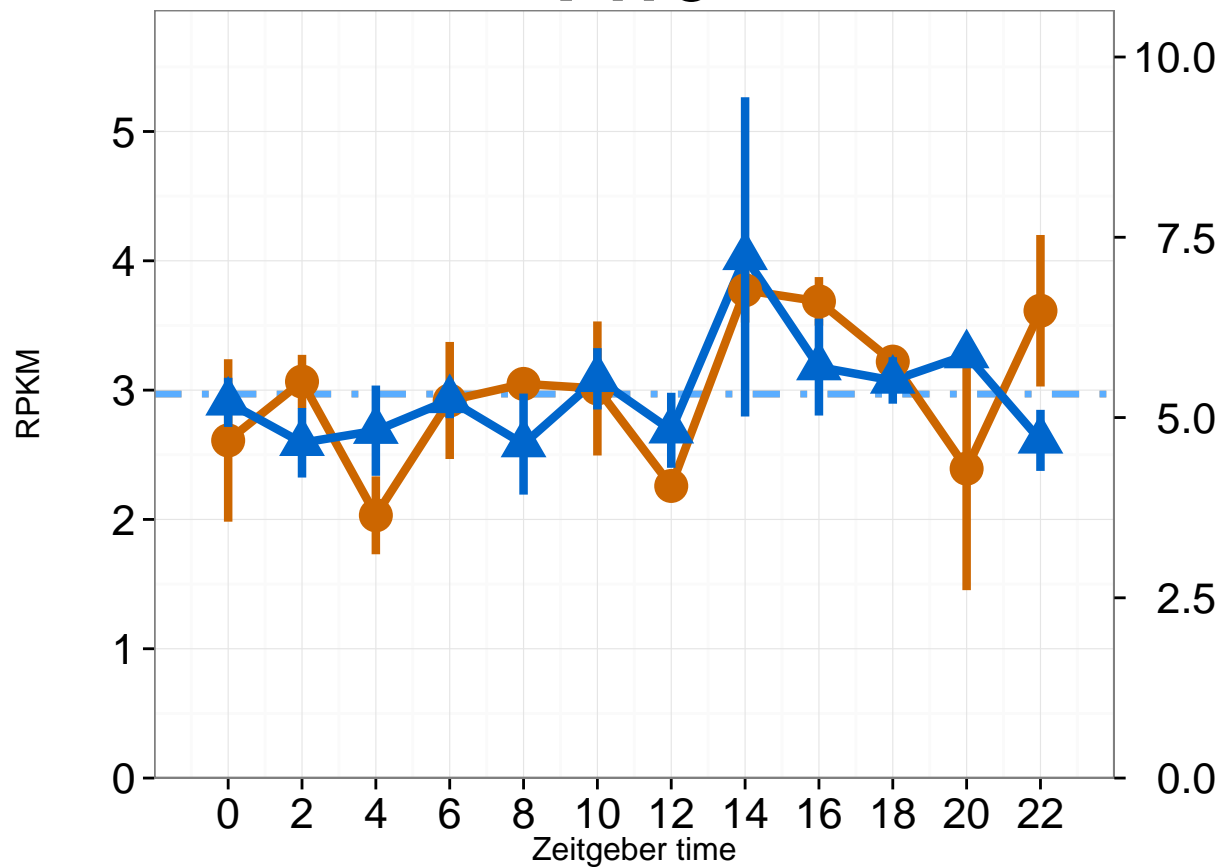

## Prr3

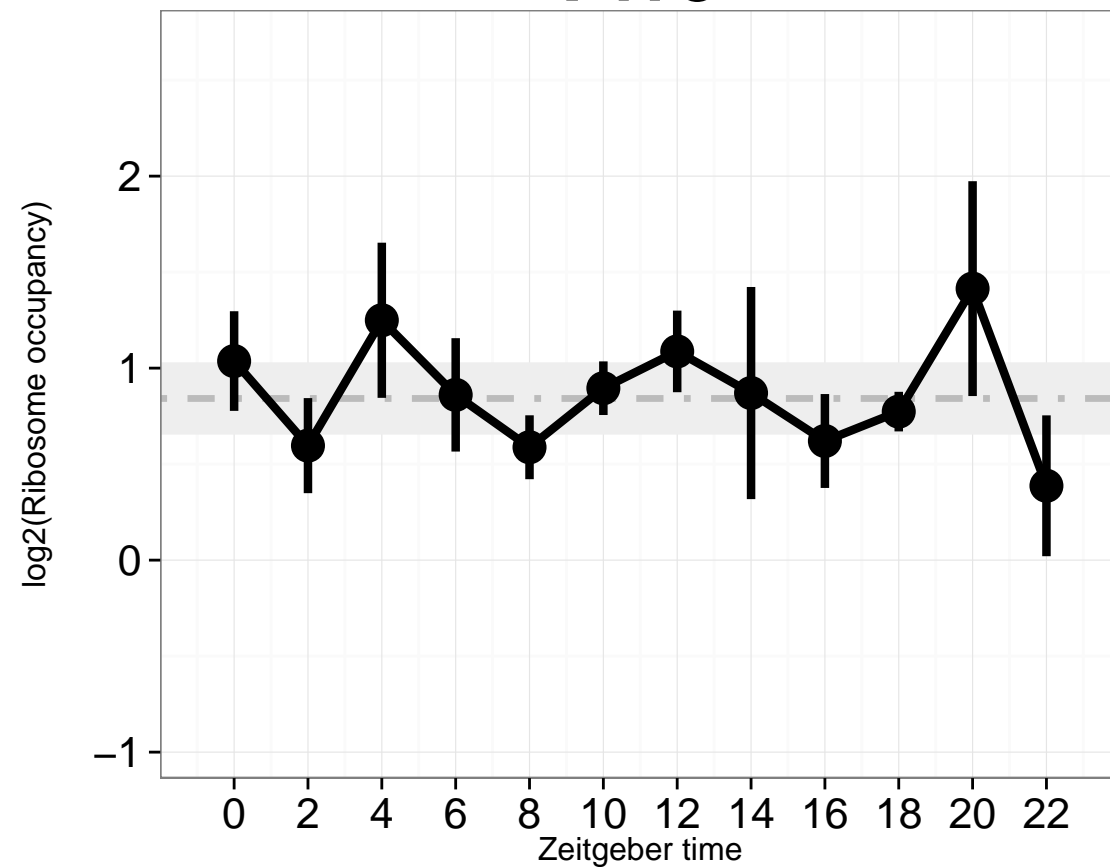

Supplement: Supplementary file 6534 [file 1]

# Apo10b

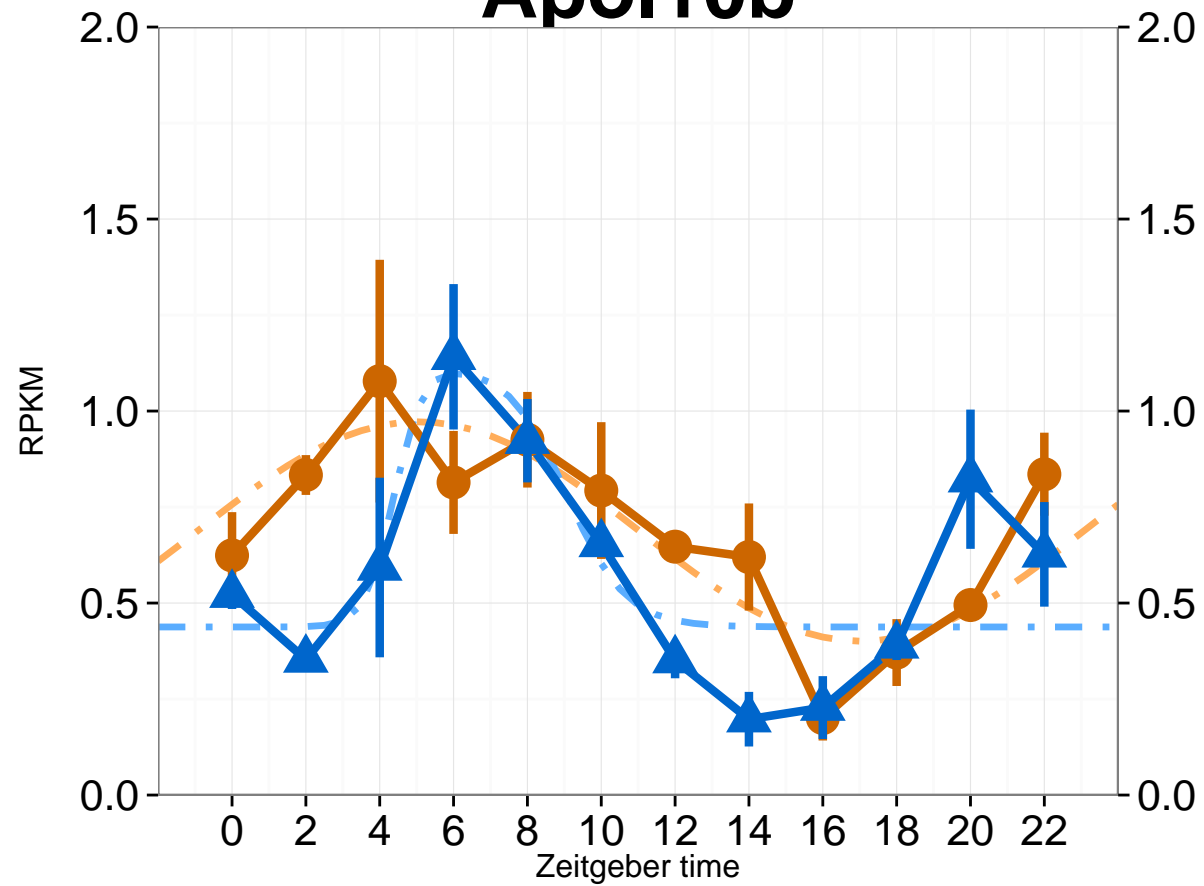

# Apo10b

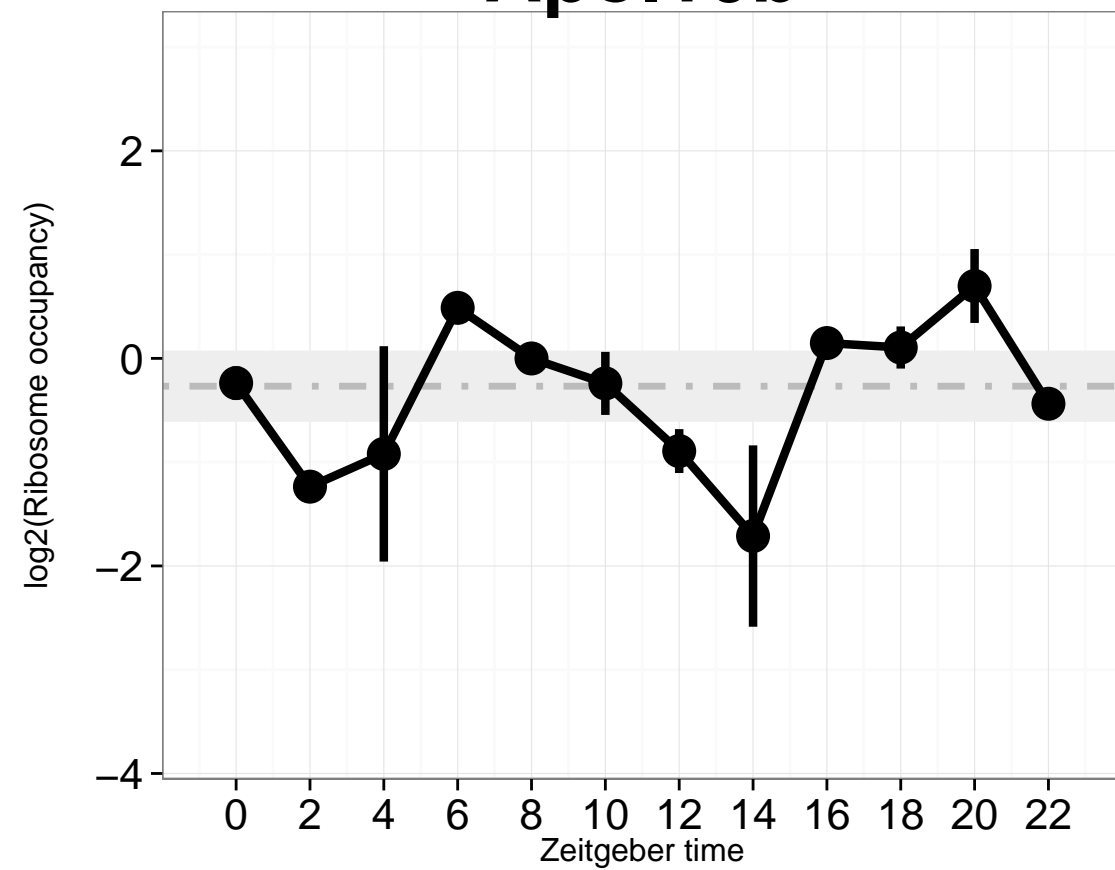

Supplement: Supplementary file 6535 [file 1]

# 5830415F09Rik

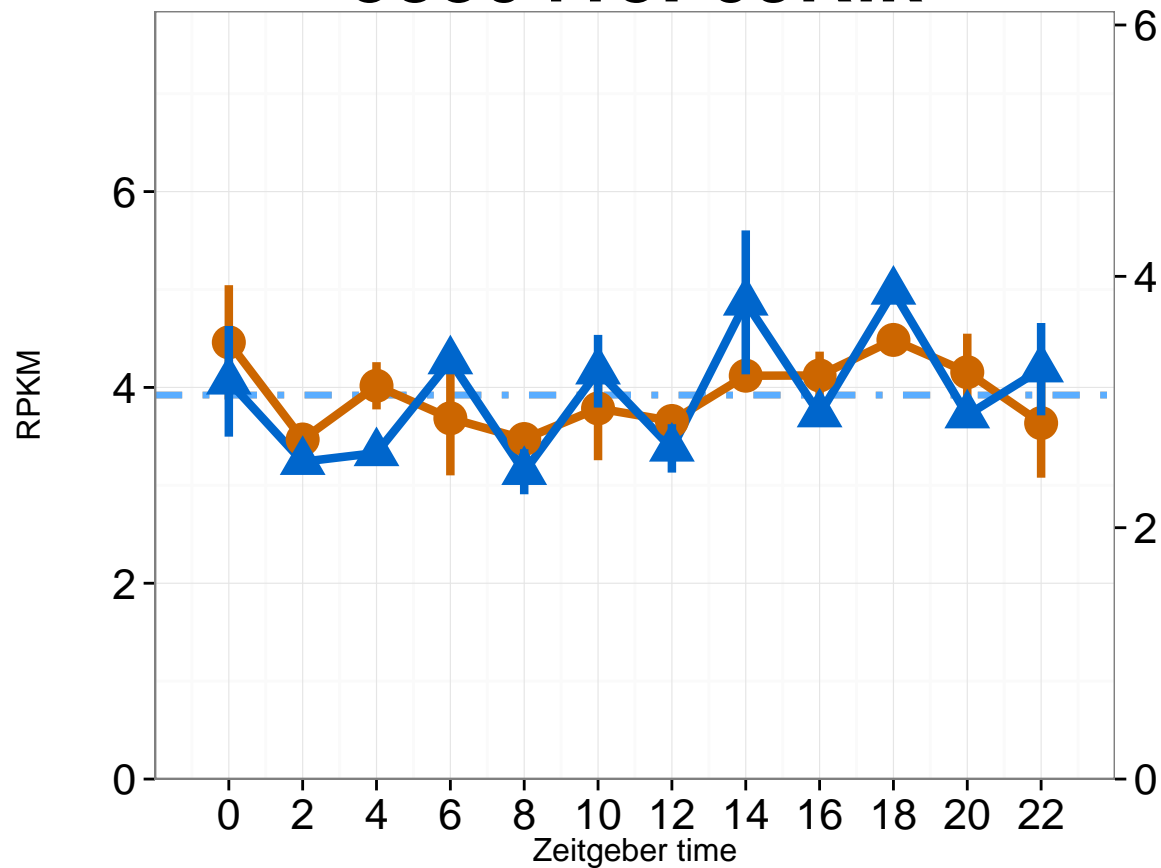

# 5830415F09Rik

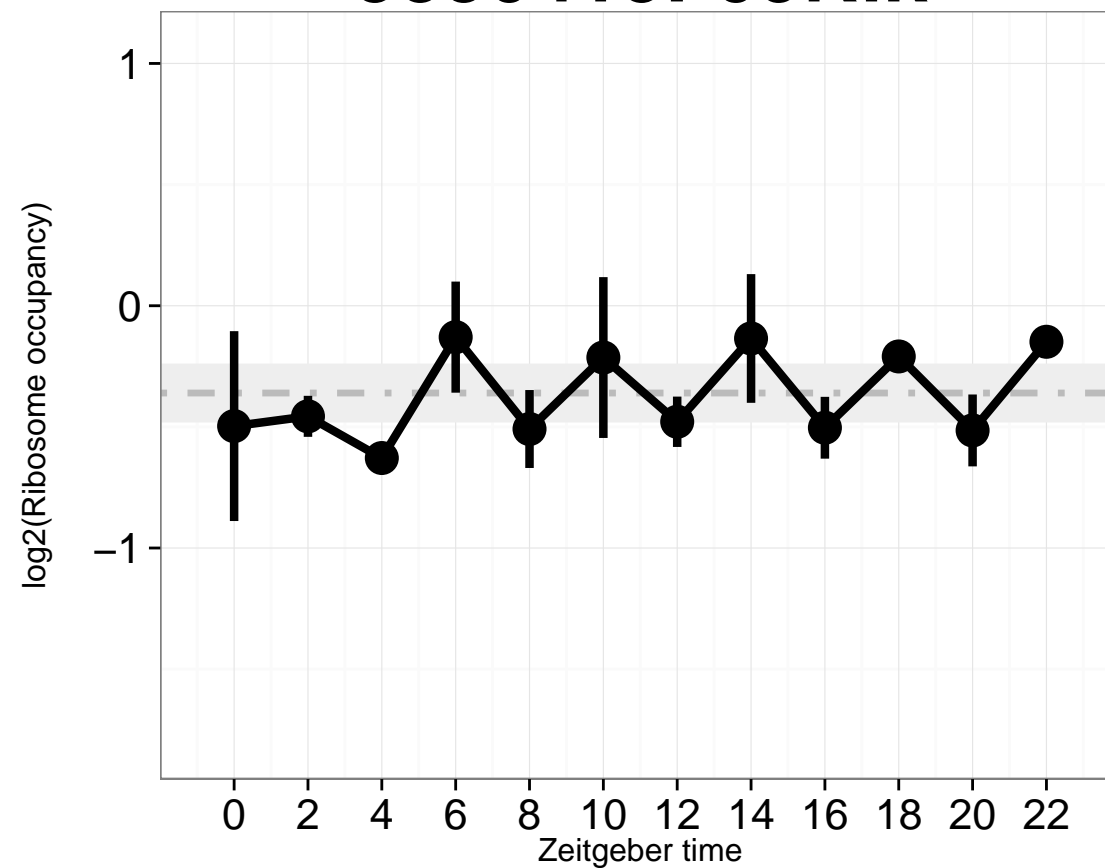

Supplement: Supplementary file 6536 [file 1]

# Ppp3ca

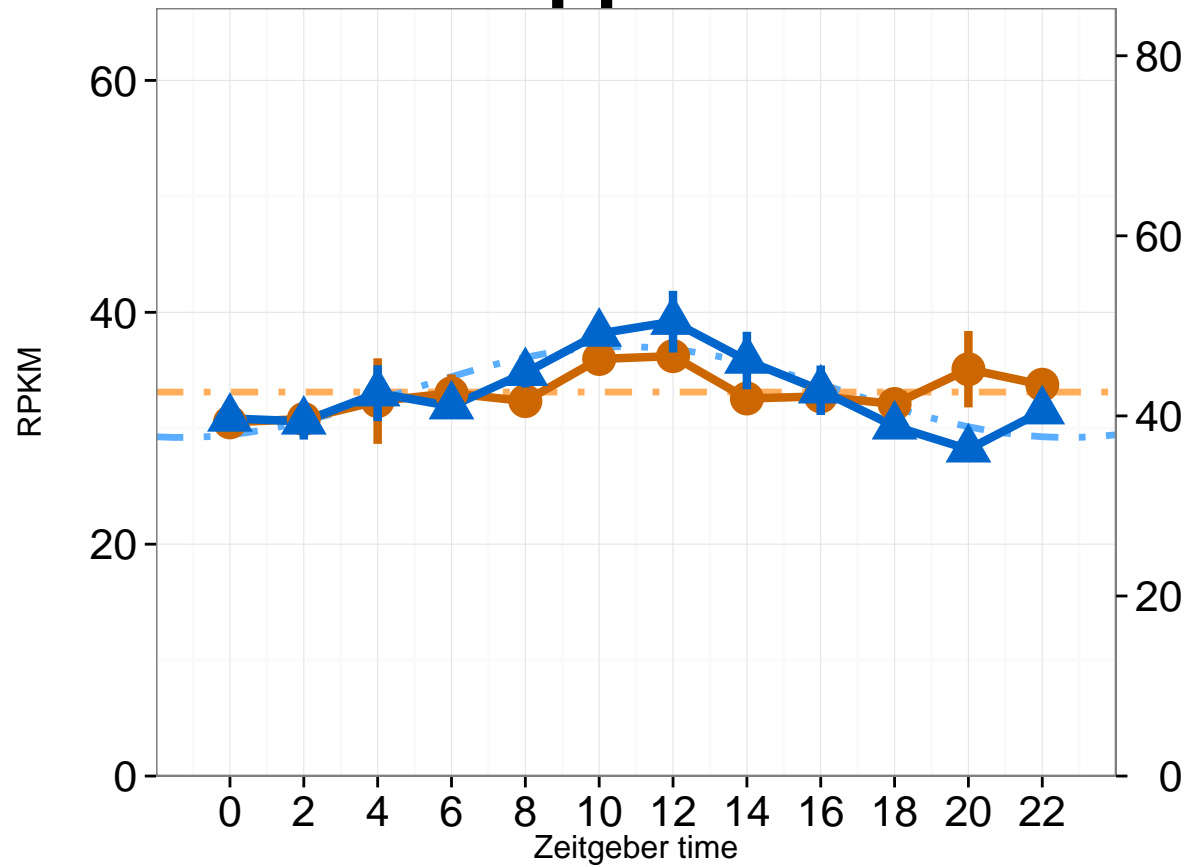

# Ppp3ca

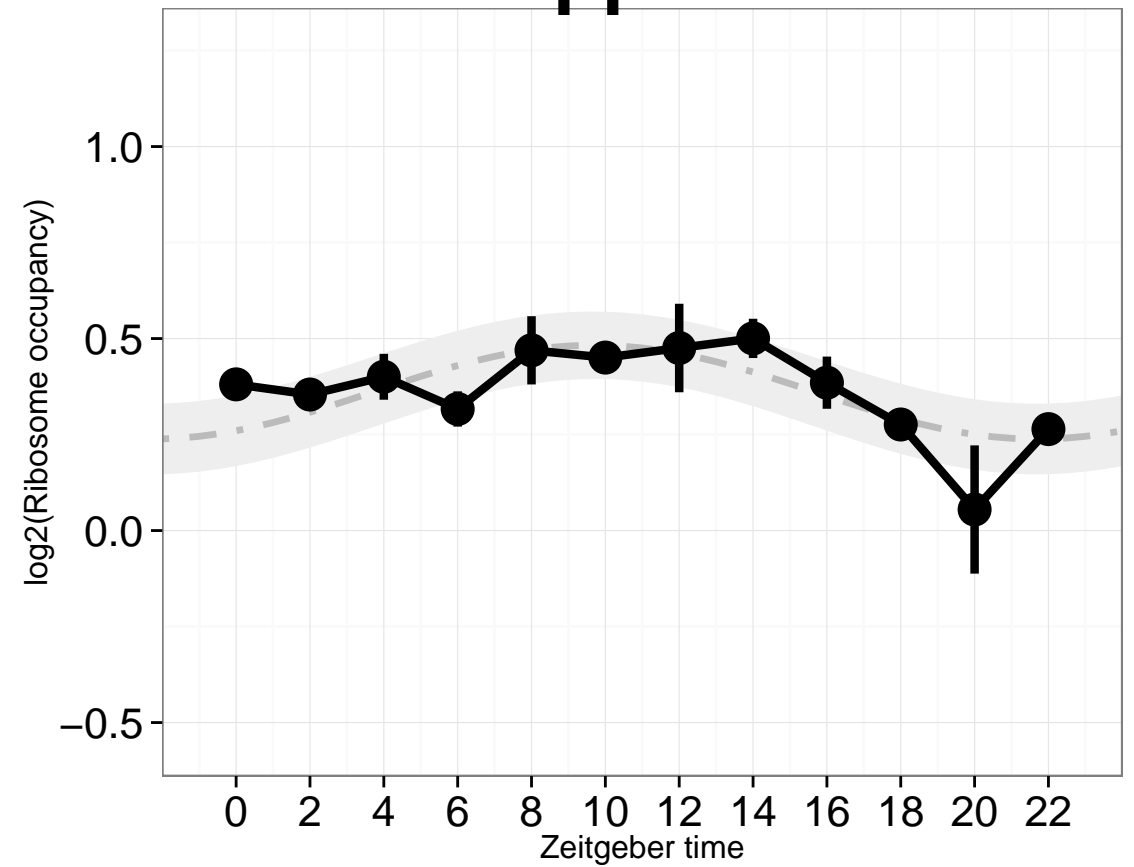

Supplement: Supplementary file 6537 [file 1]

## Mettl22

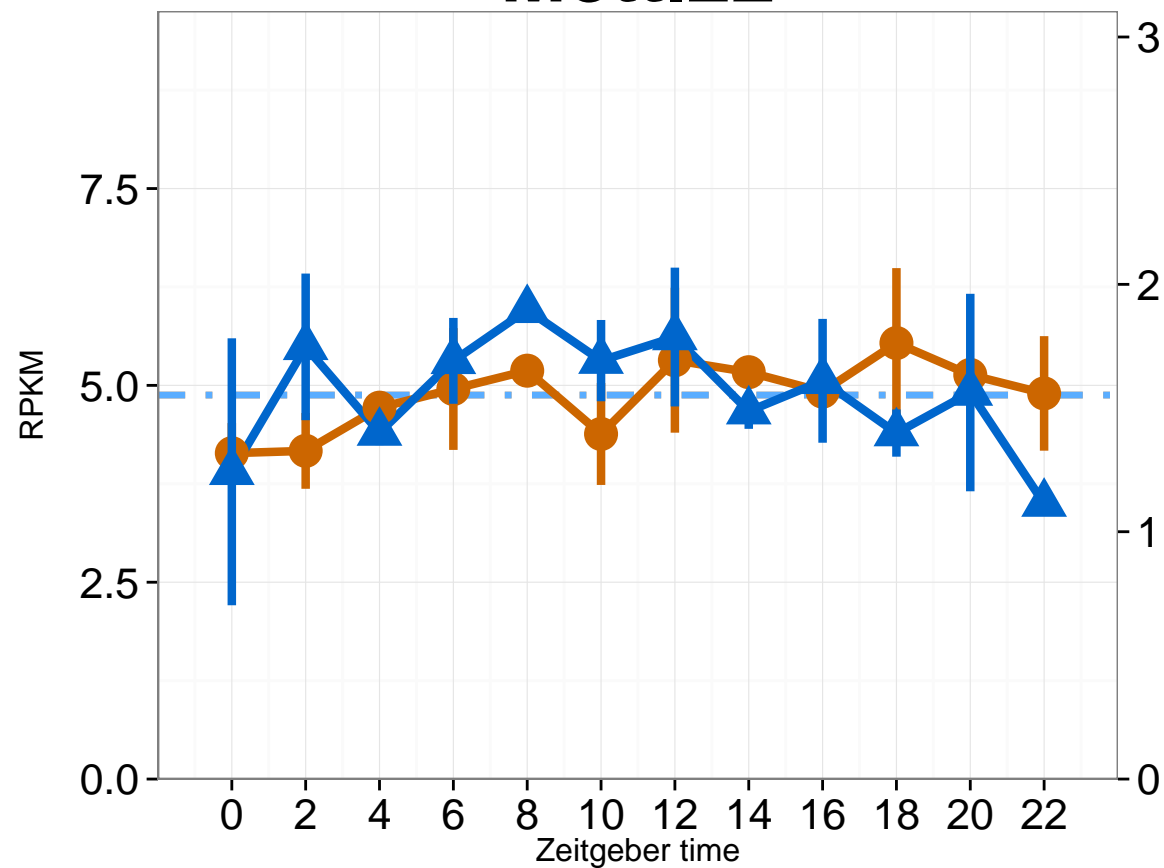

## Mettl22

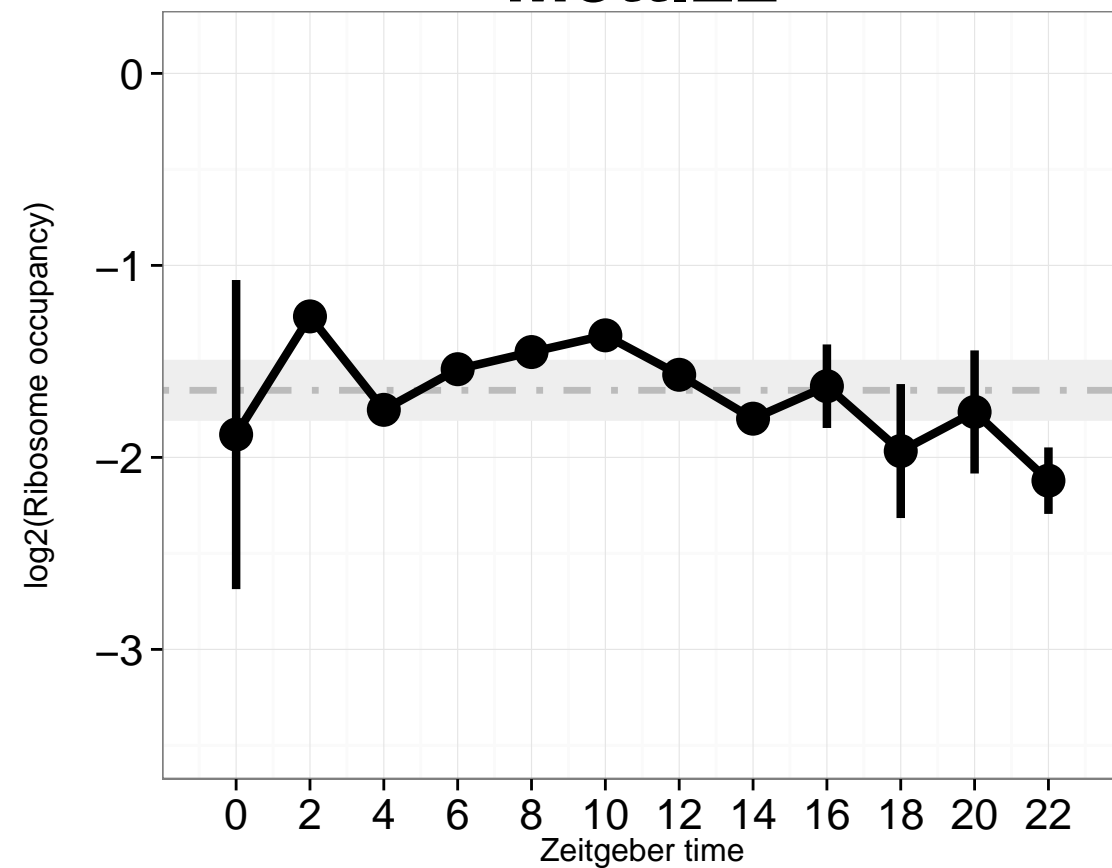

Supplement: Supplementary file 6538 [file 1]

# Ksr1

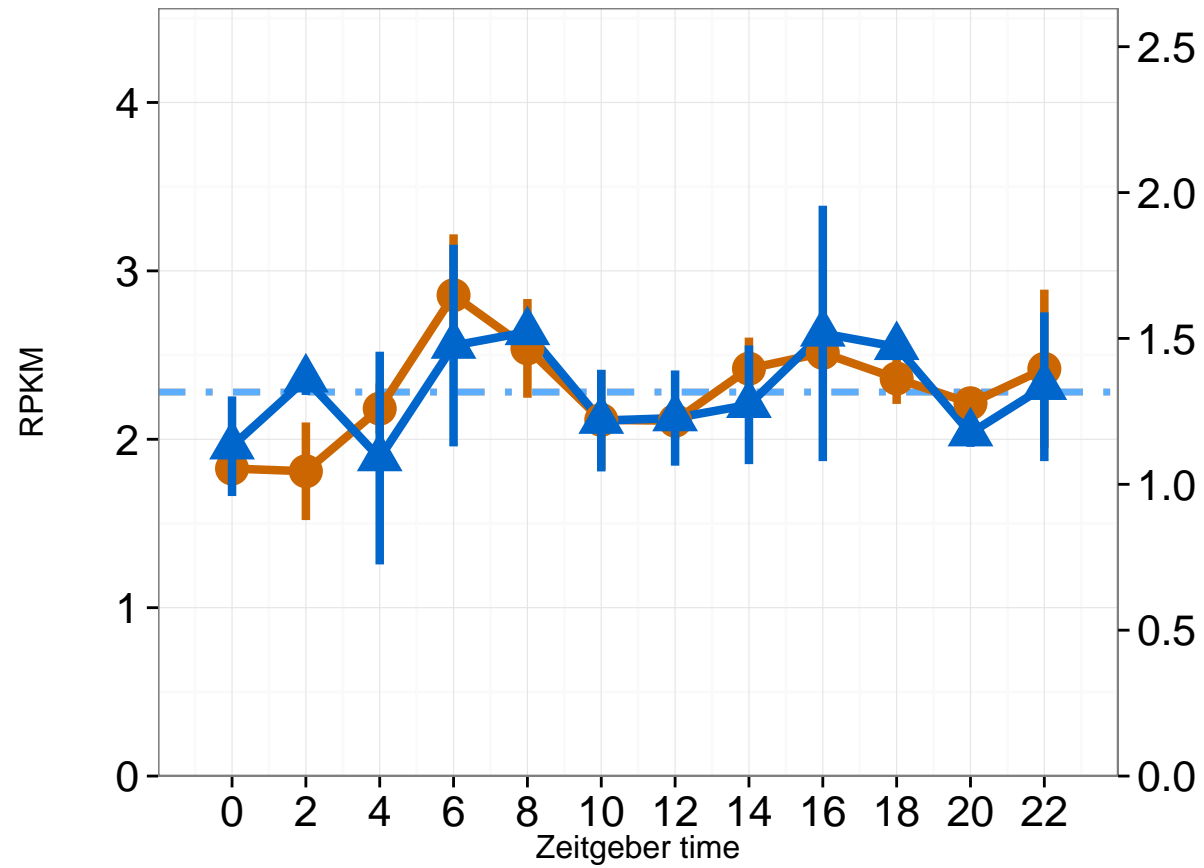

# Ksr1

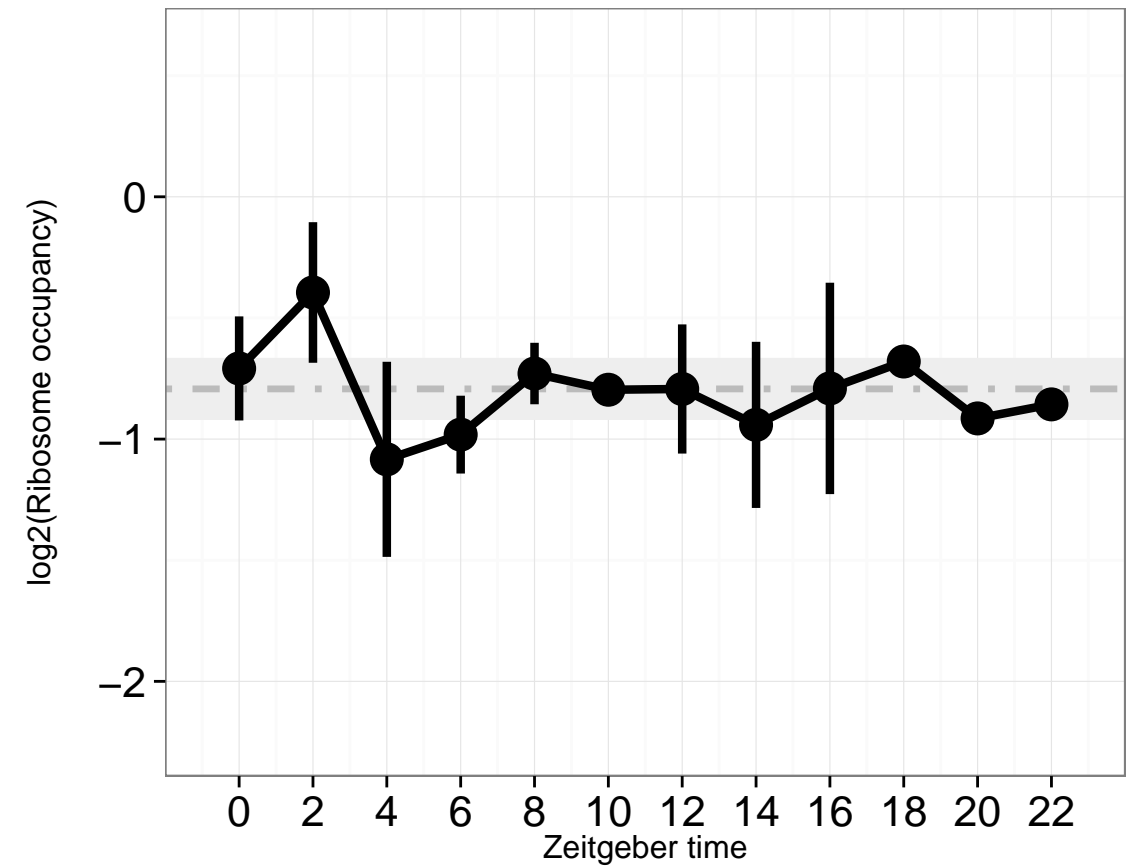

Supplement: Supplementary file 6539 [file 1]

# Fchsd1

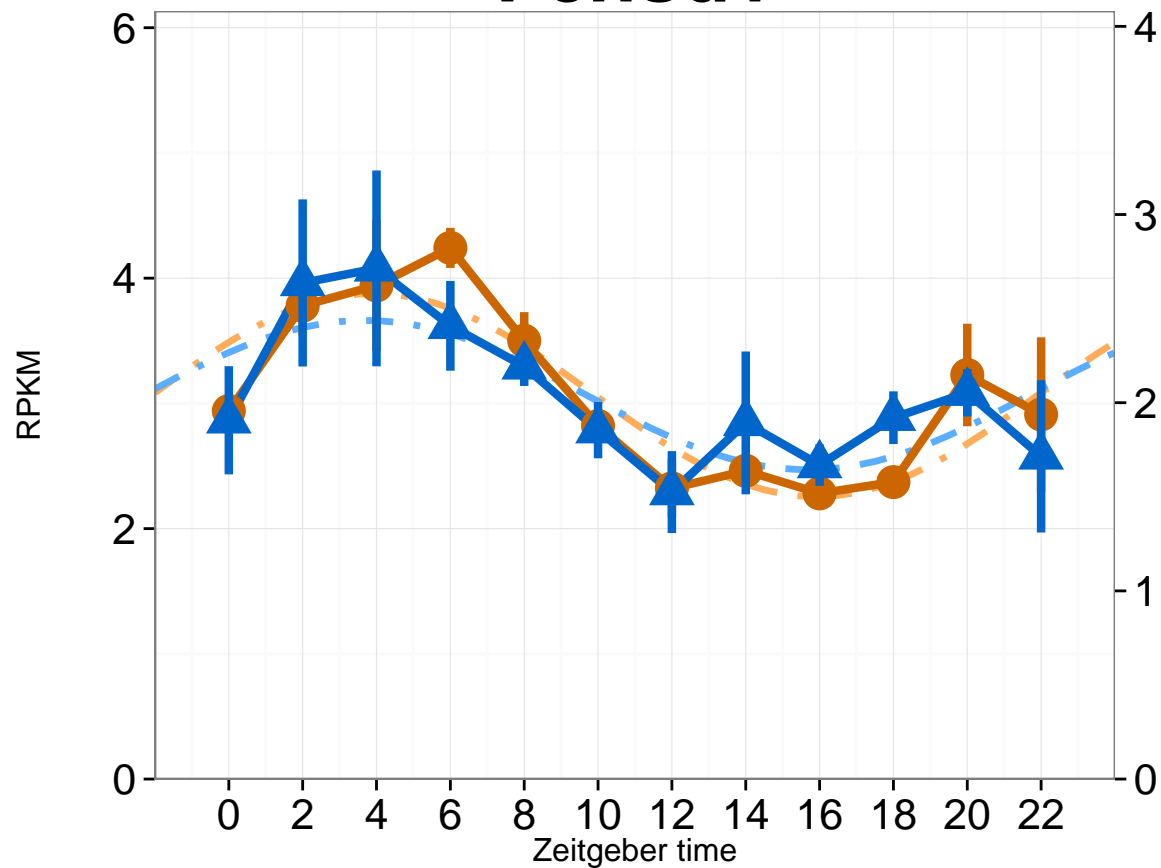

# Fchsd1

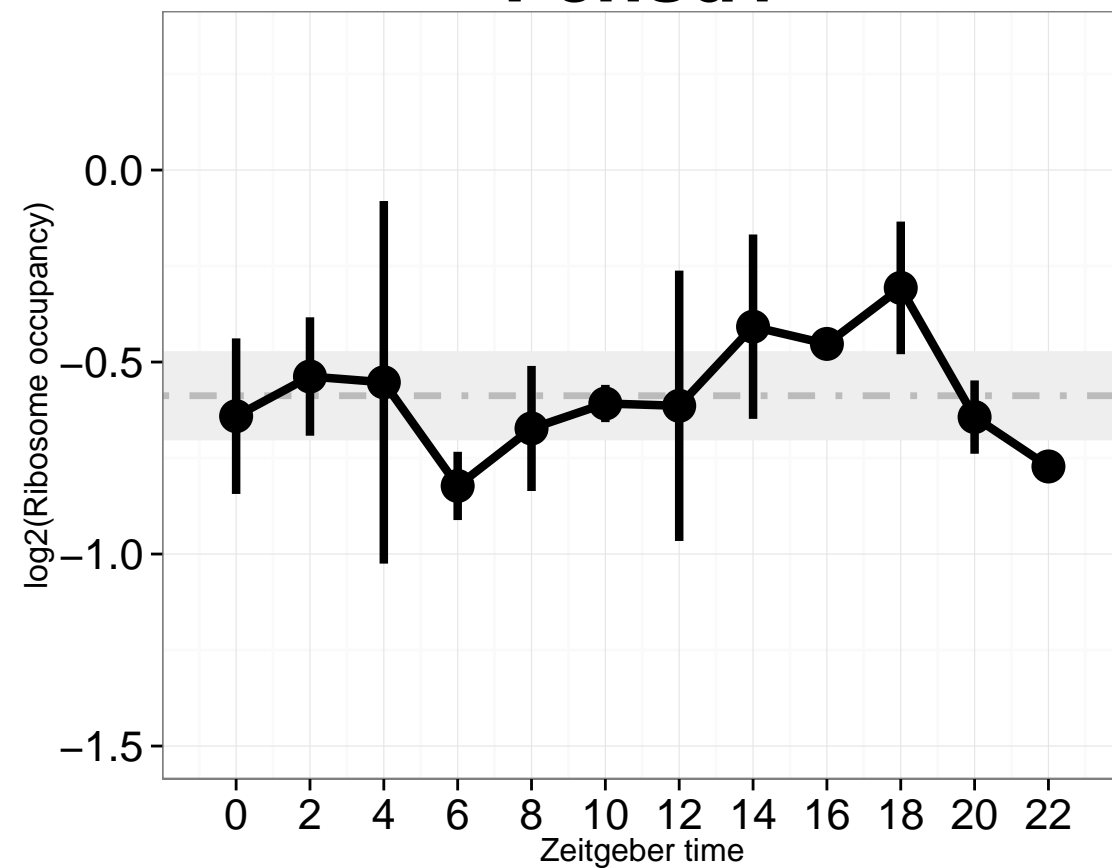

Supplement: Supplementary file 6540 [file 1]

## Rab24

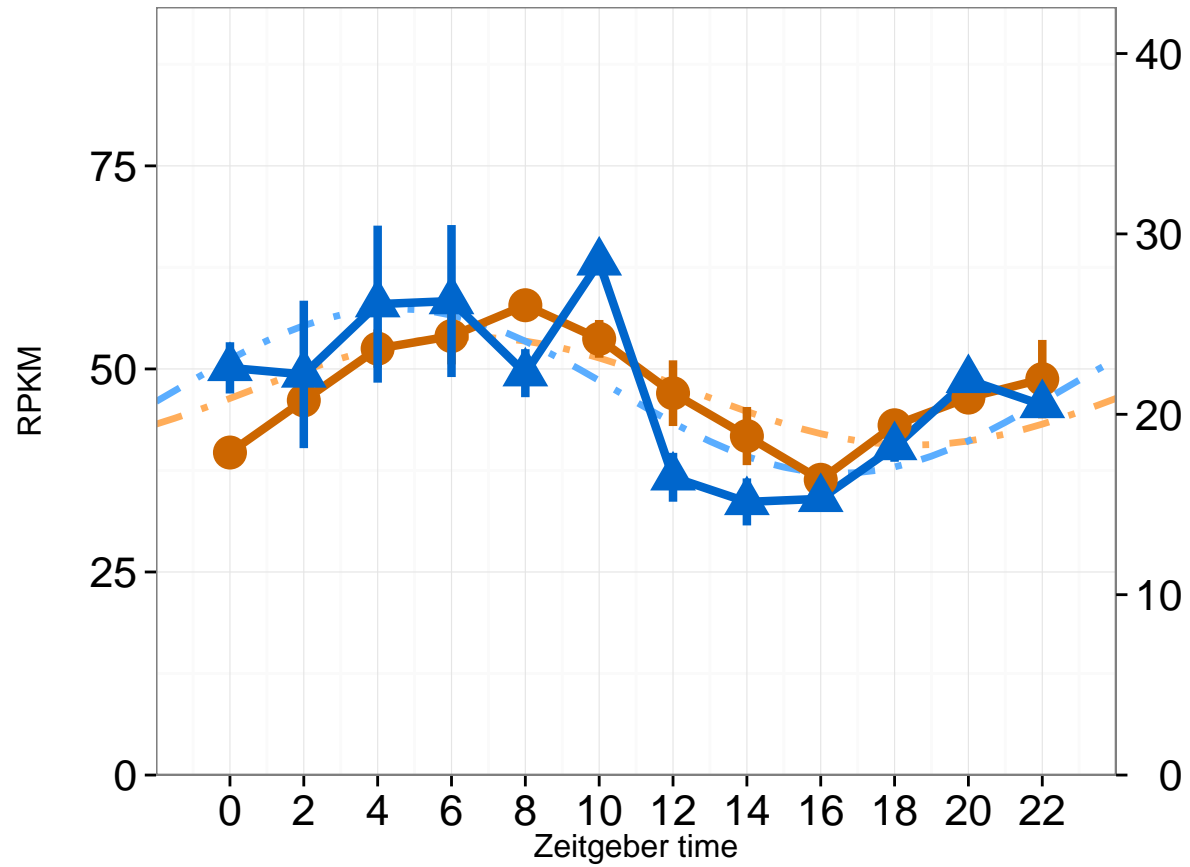

## Rab24

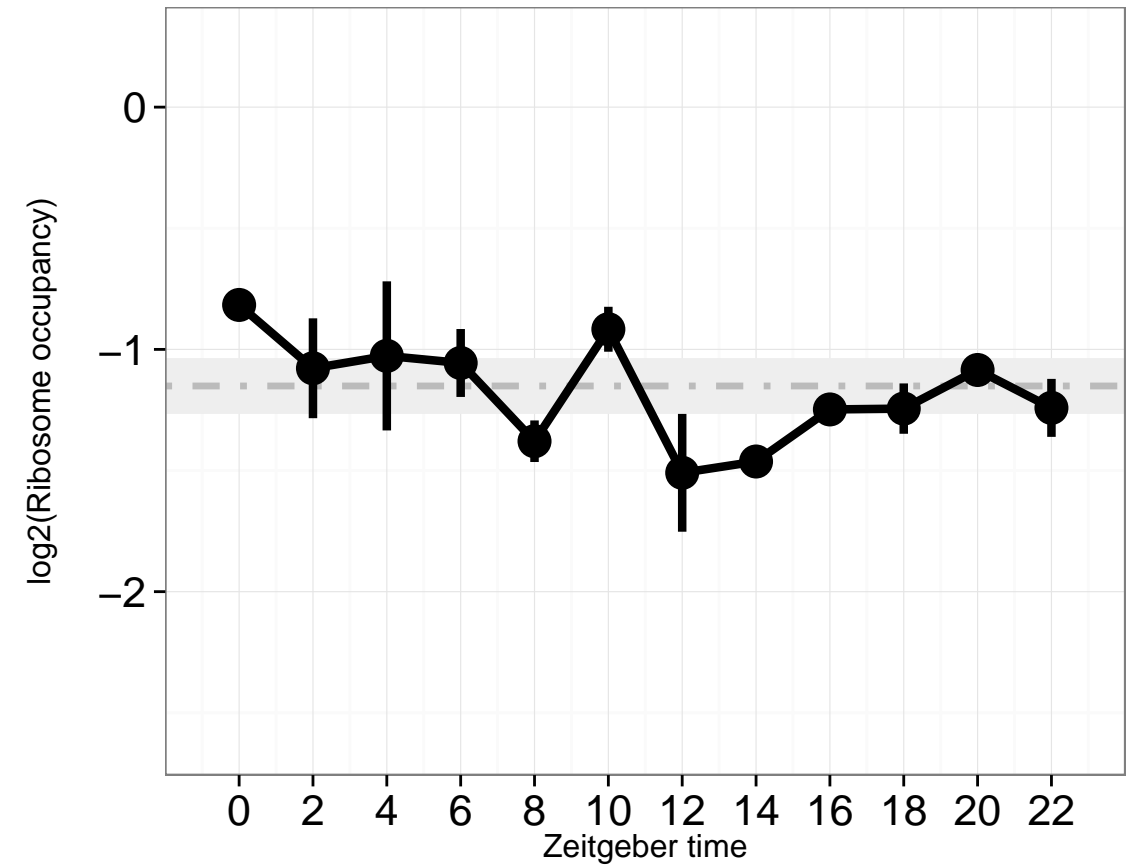

Supplement: Supplementary file 6541 [file 1]

# 1600012H06Rik

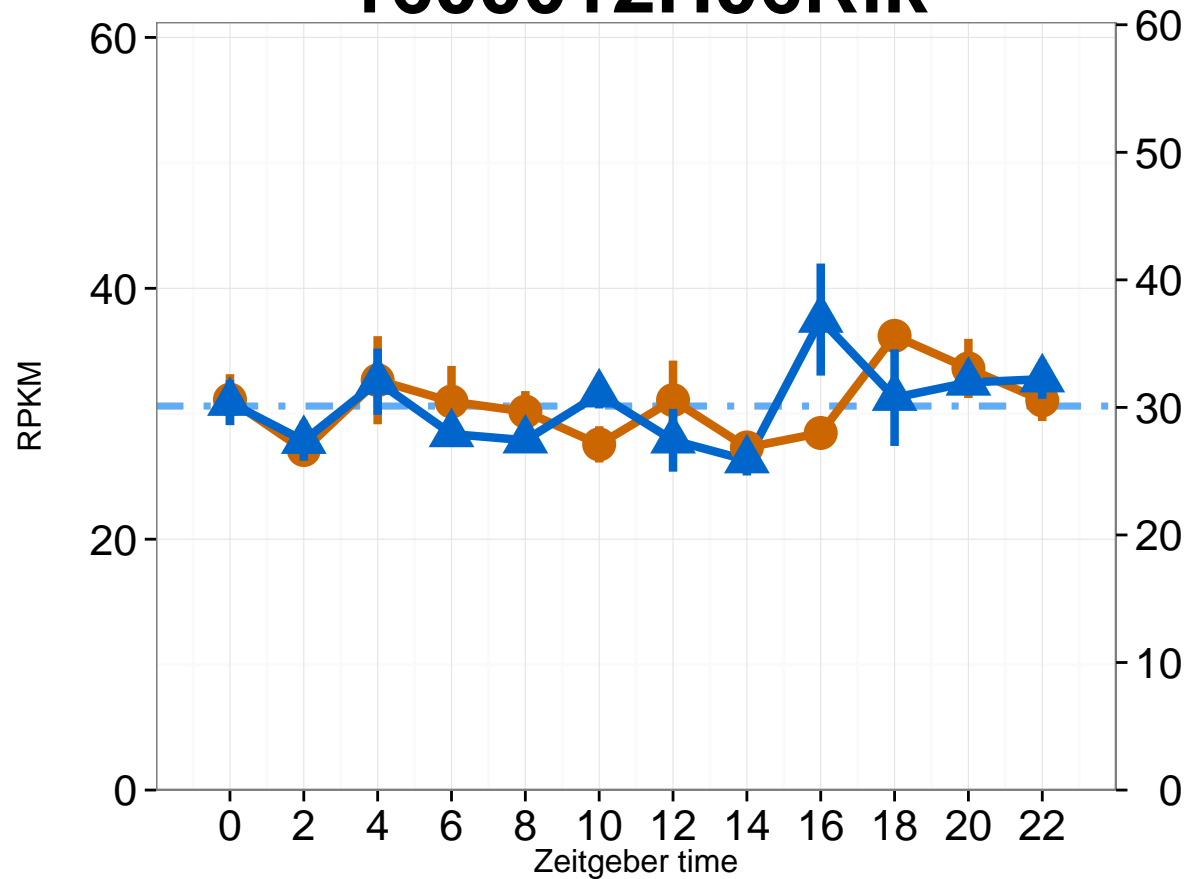

# 1600012H06Rik

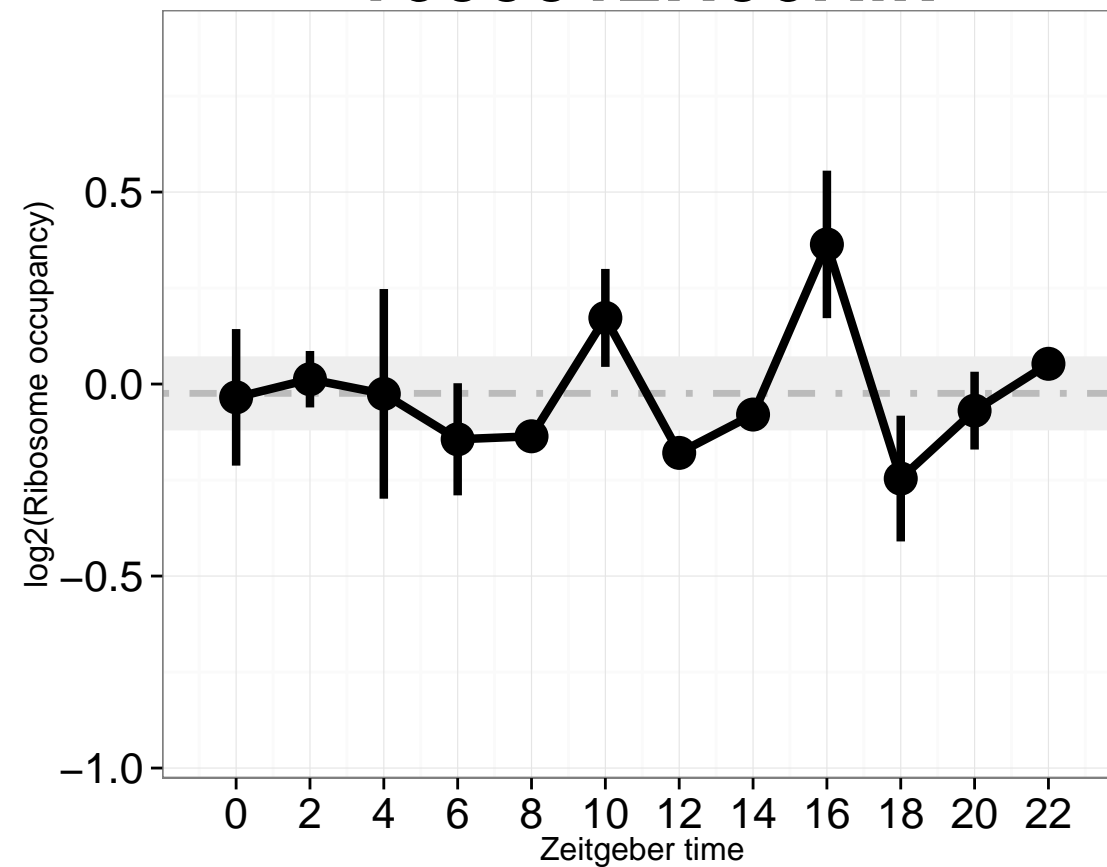

Supplement: Supplementary file 6542 [file 1]

# Fkrp

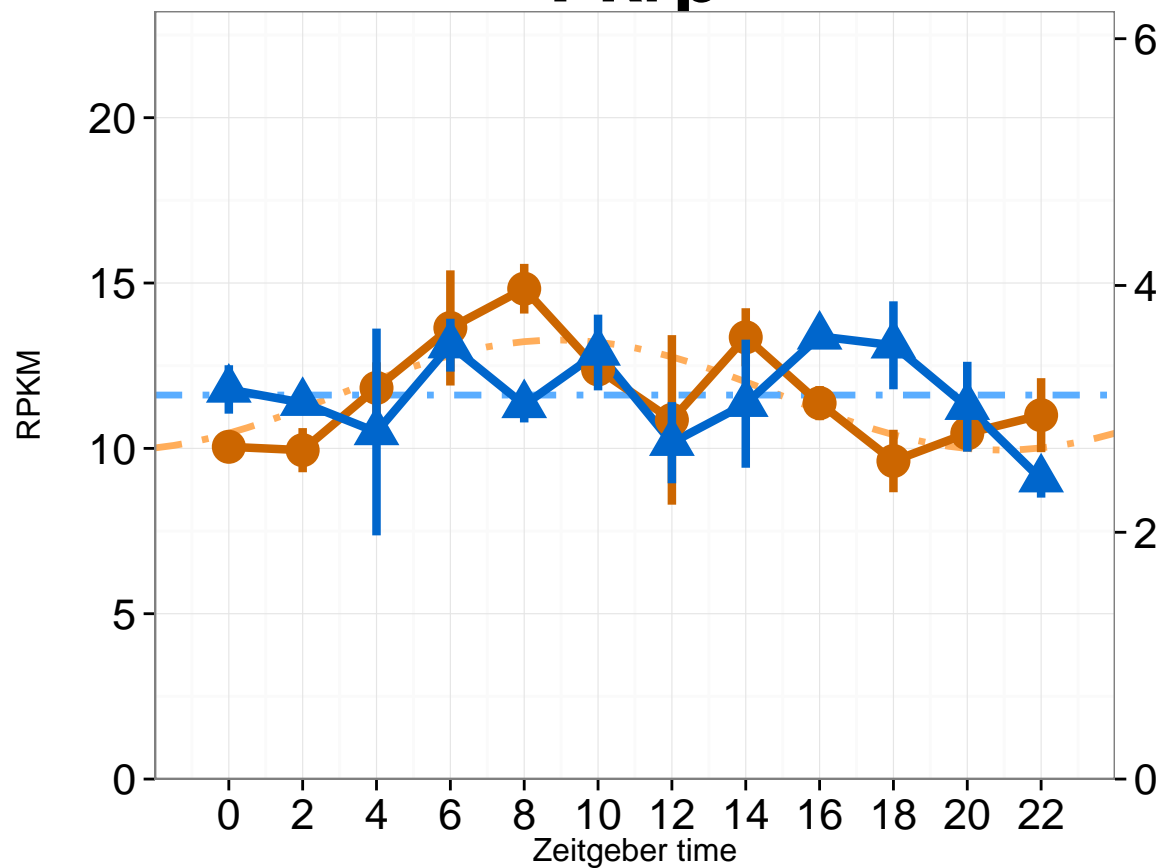

# Fkrp

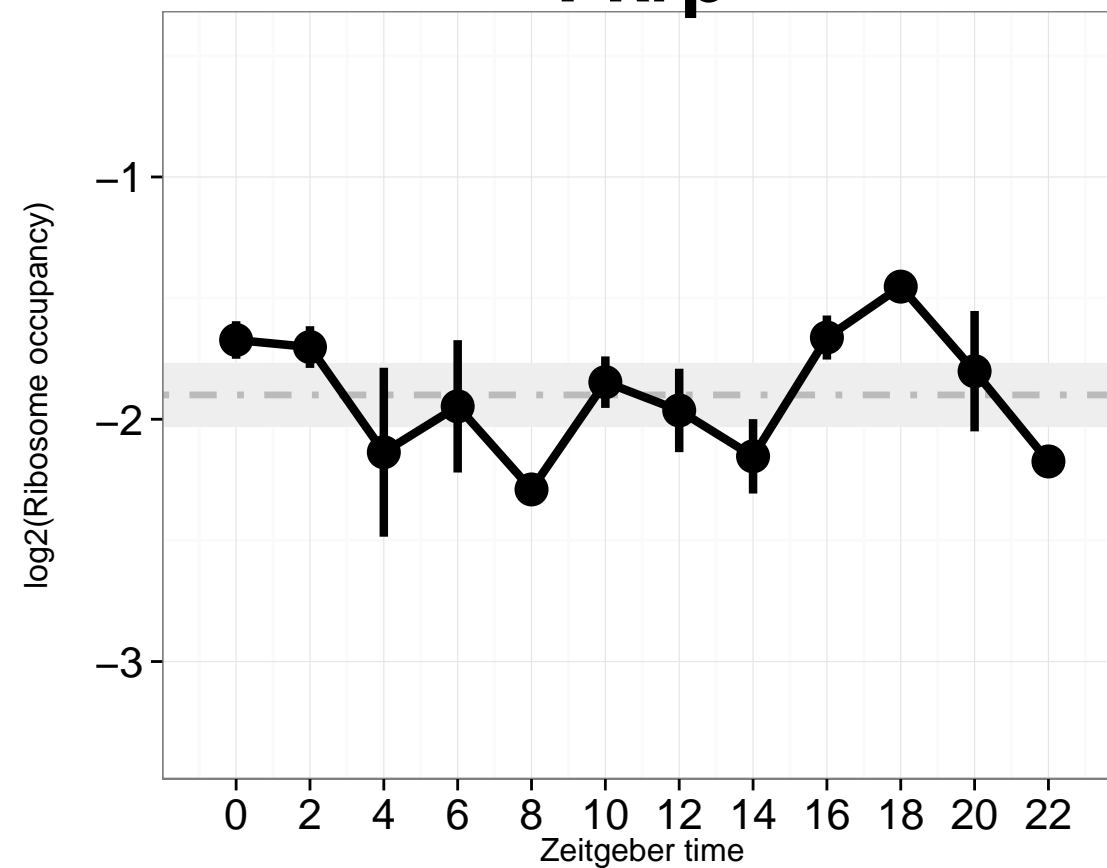

Supplement: Supplementary file 6543 [file 1]

## Dpy30

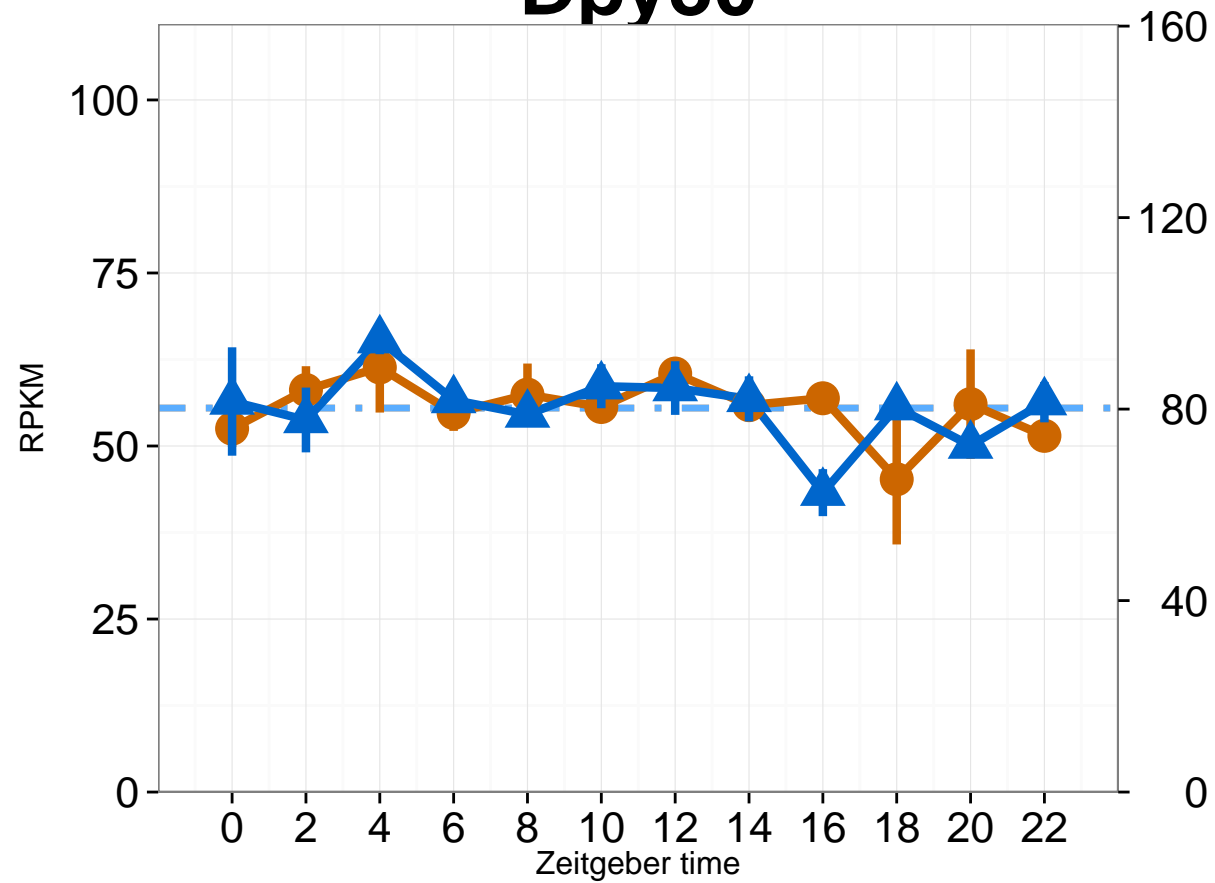

## Dpy30

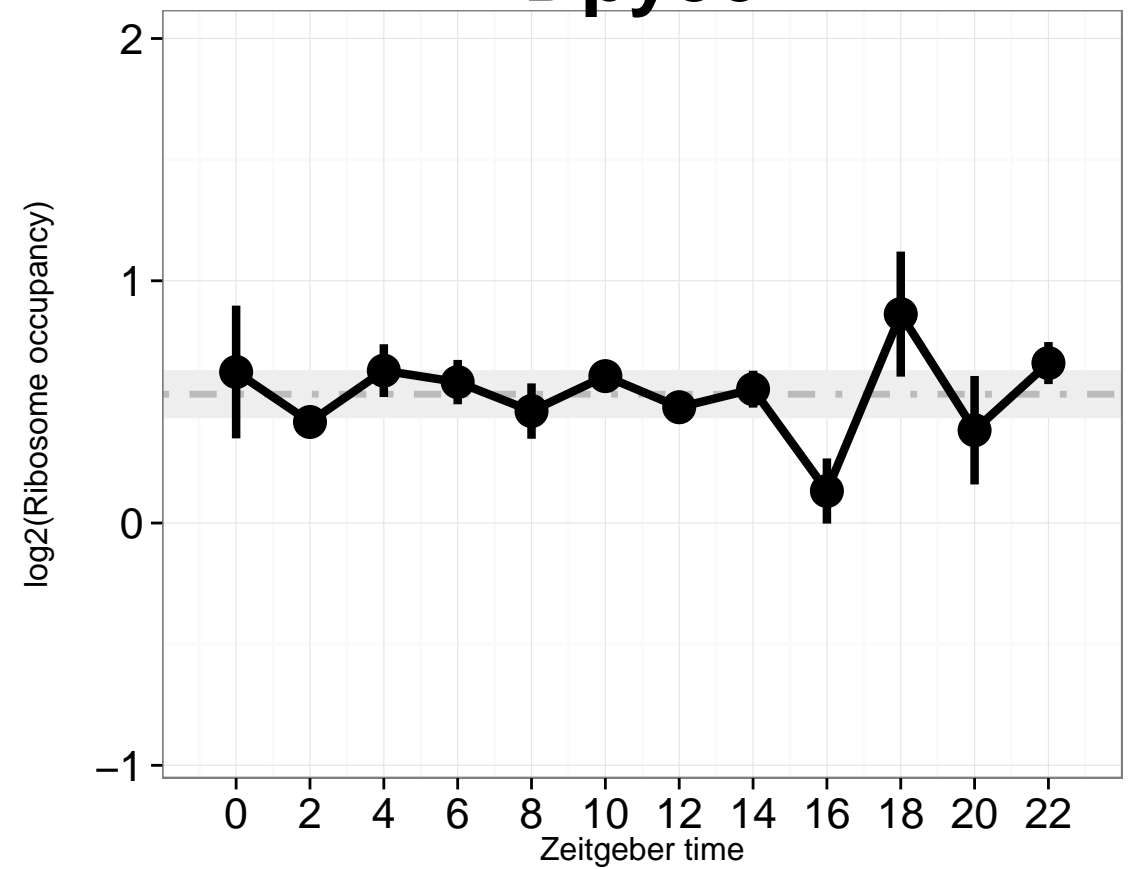

Supplement: Supplementary file 6544 [file 1]

# Fam98a

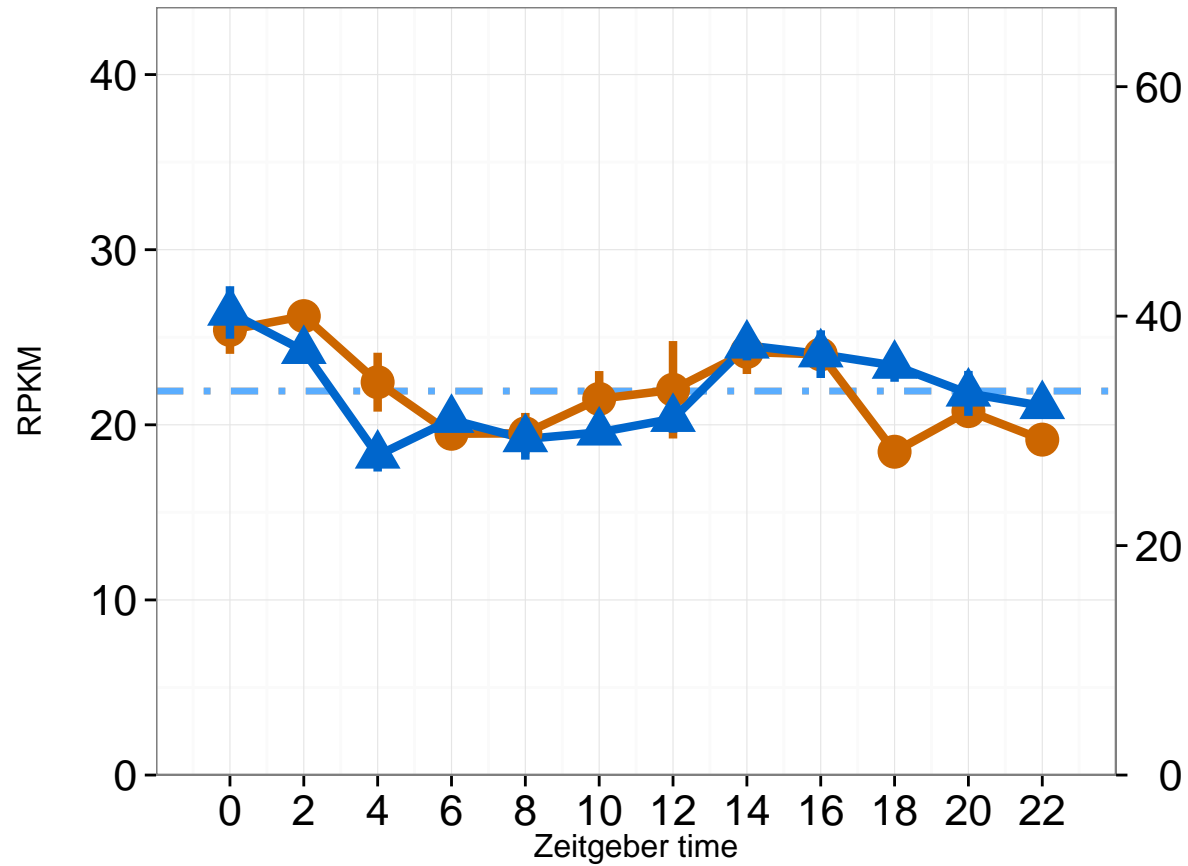

# Fam98a

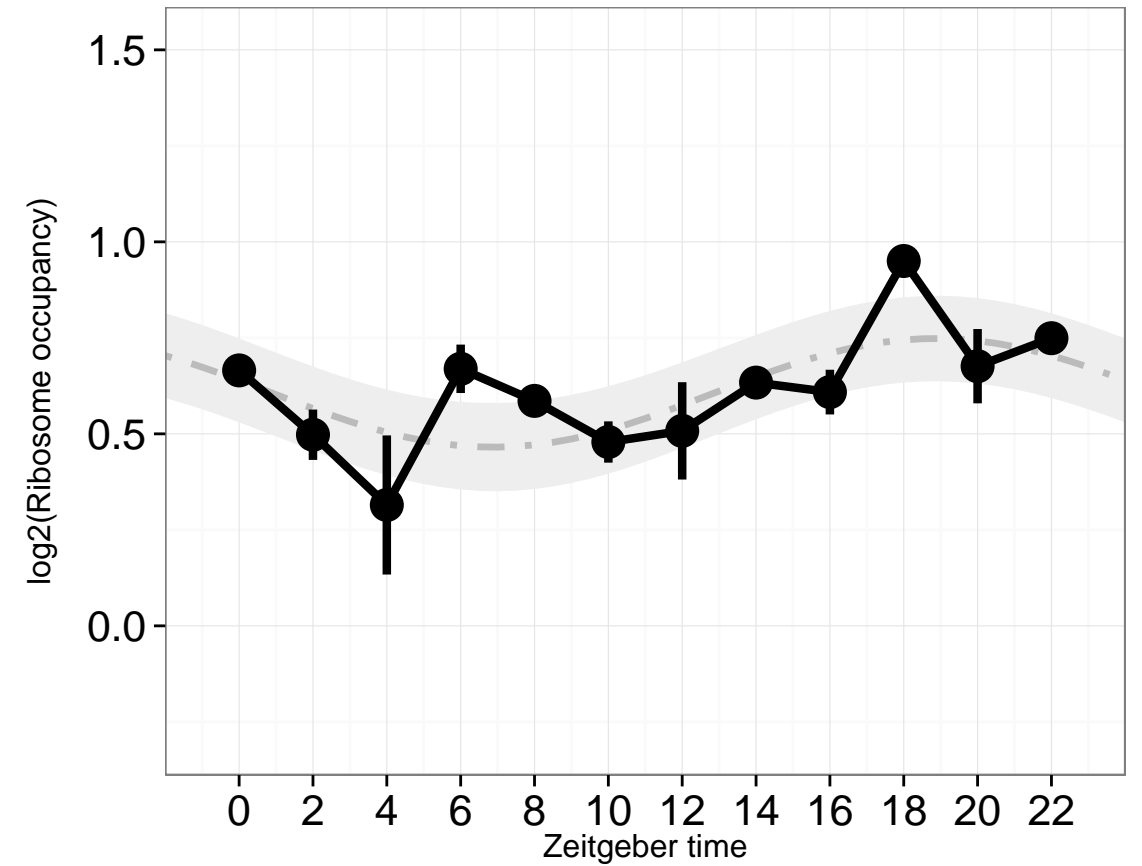

Supplement: Supplementary file 6545 [file 1]

# Trpv6

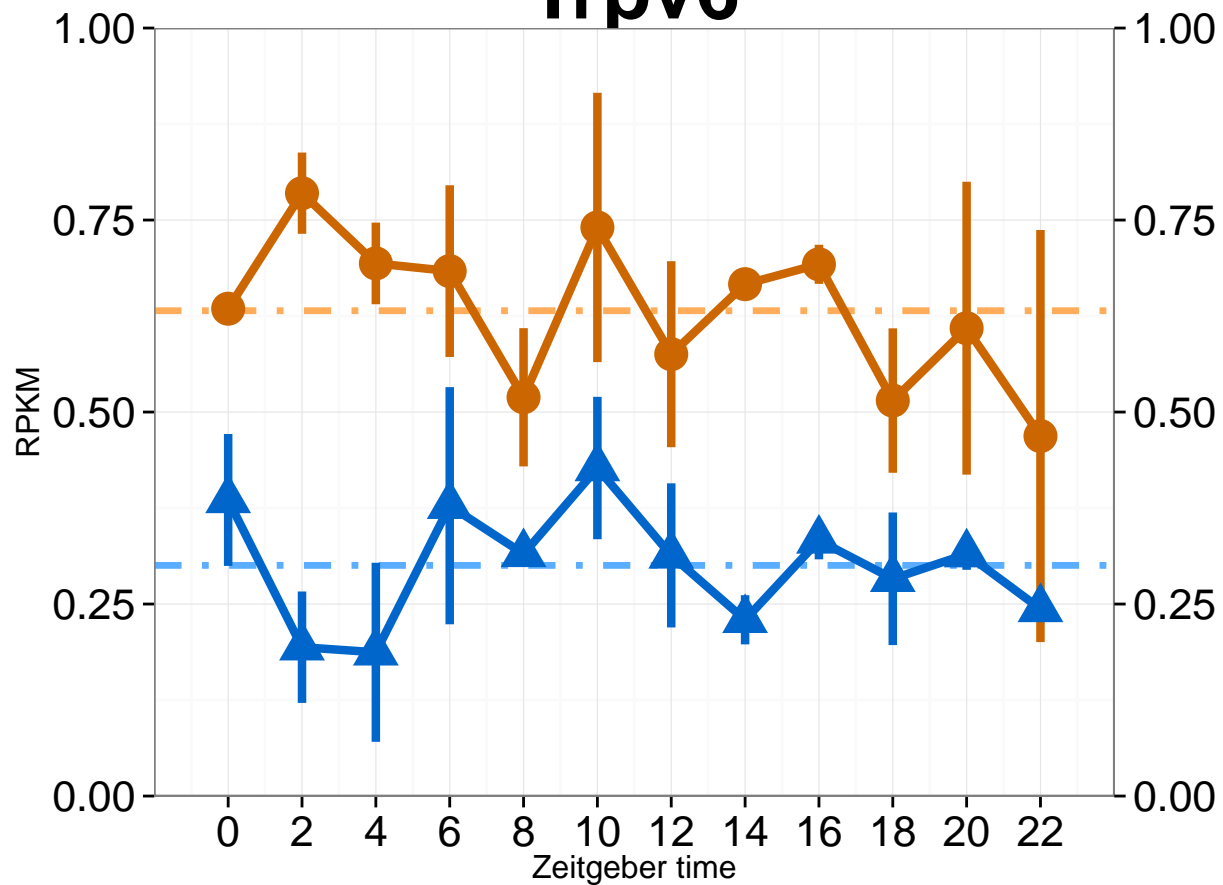

# Trpv6

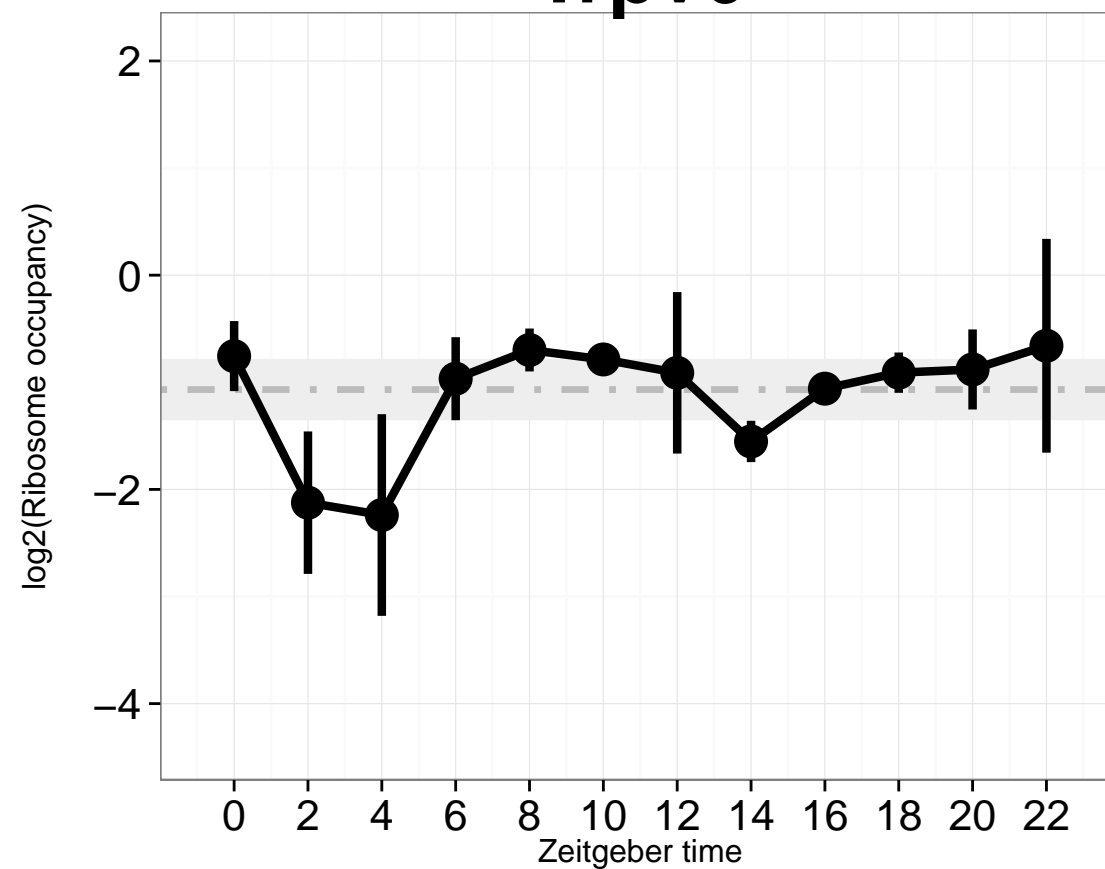

Supplement: Supplementary file 6546 [file 1]

## Wnk3

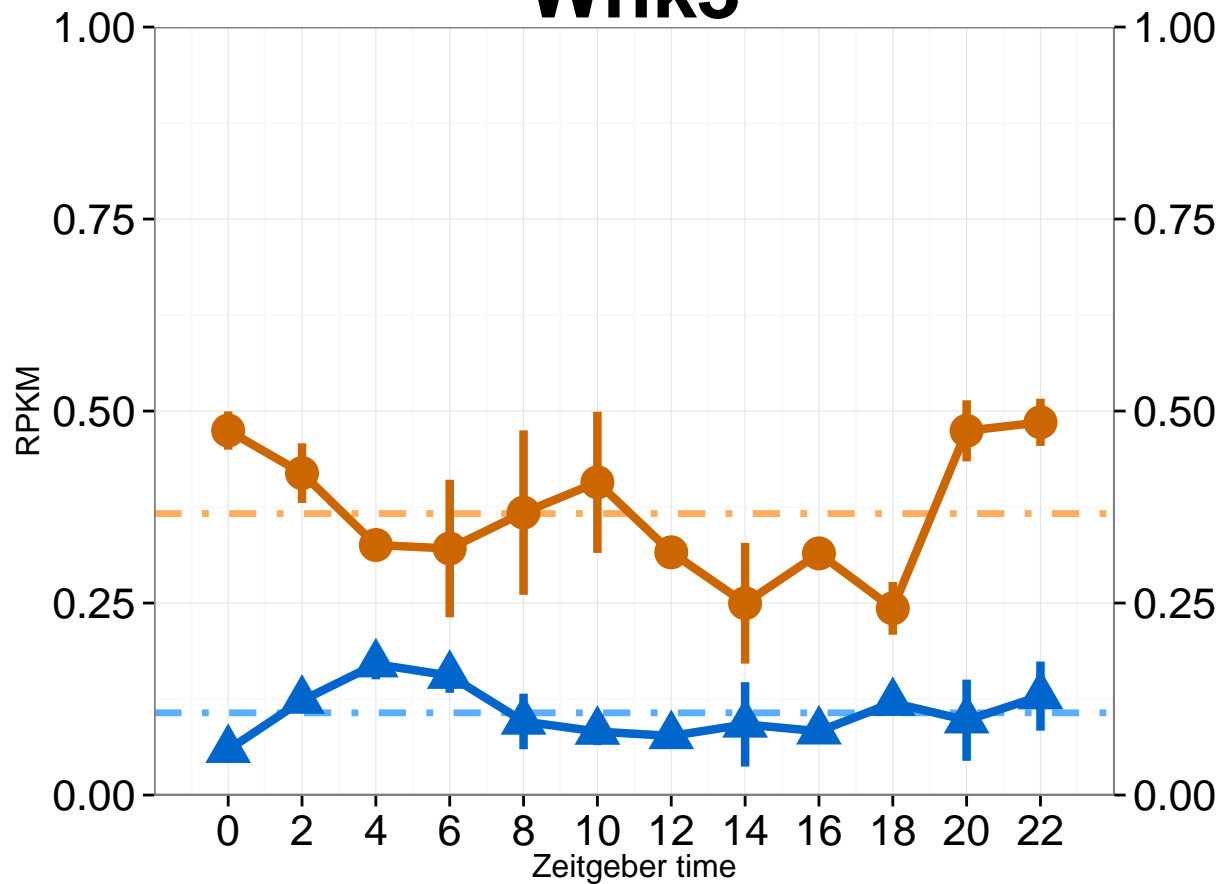

## Wnk3

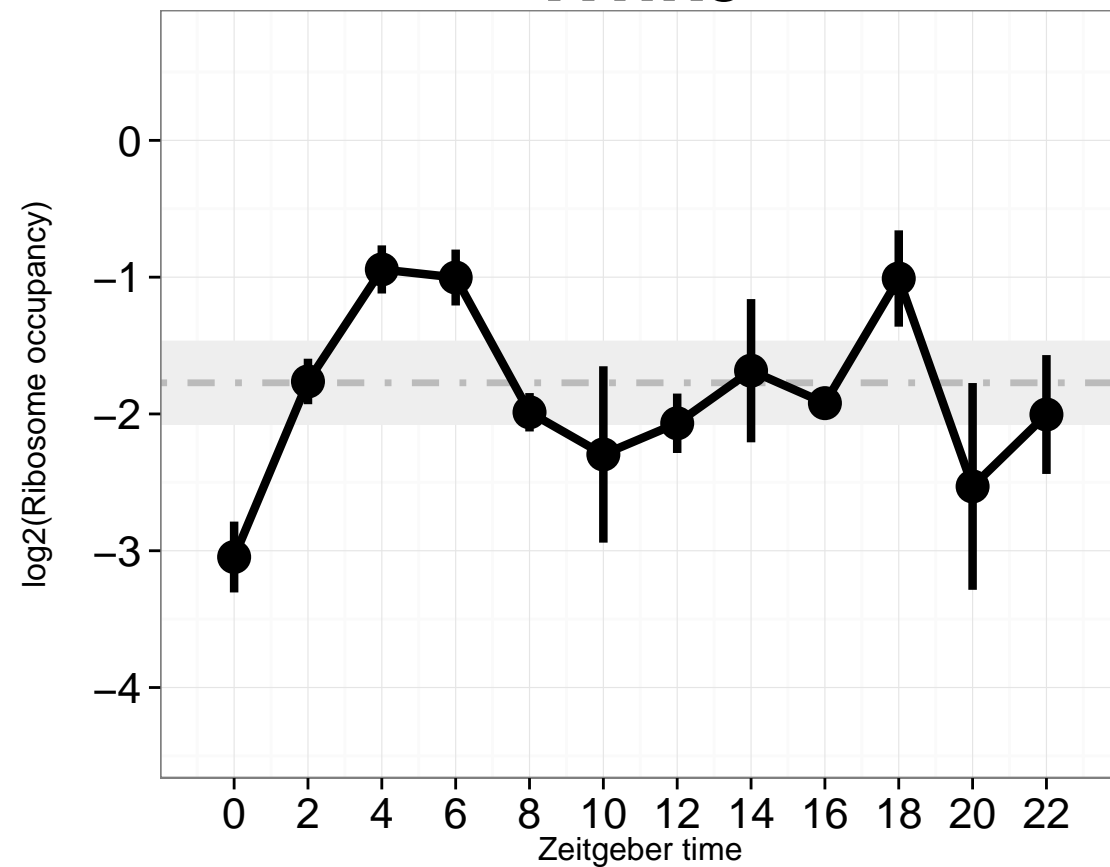

Supplement: Supplementary file 6547 [file 1]

## Nrros

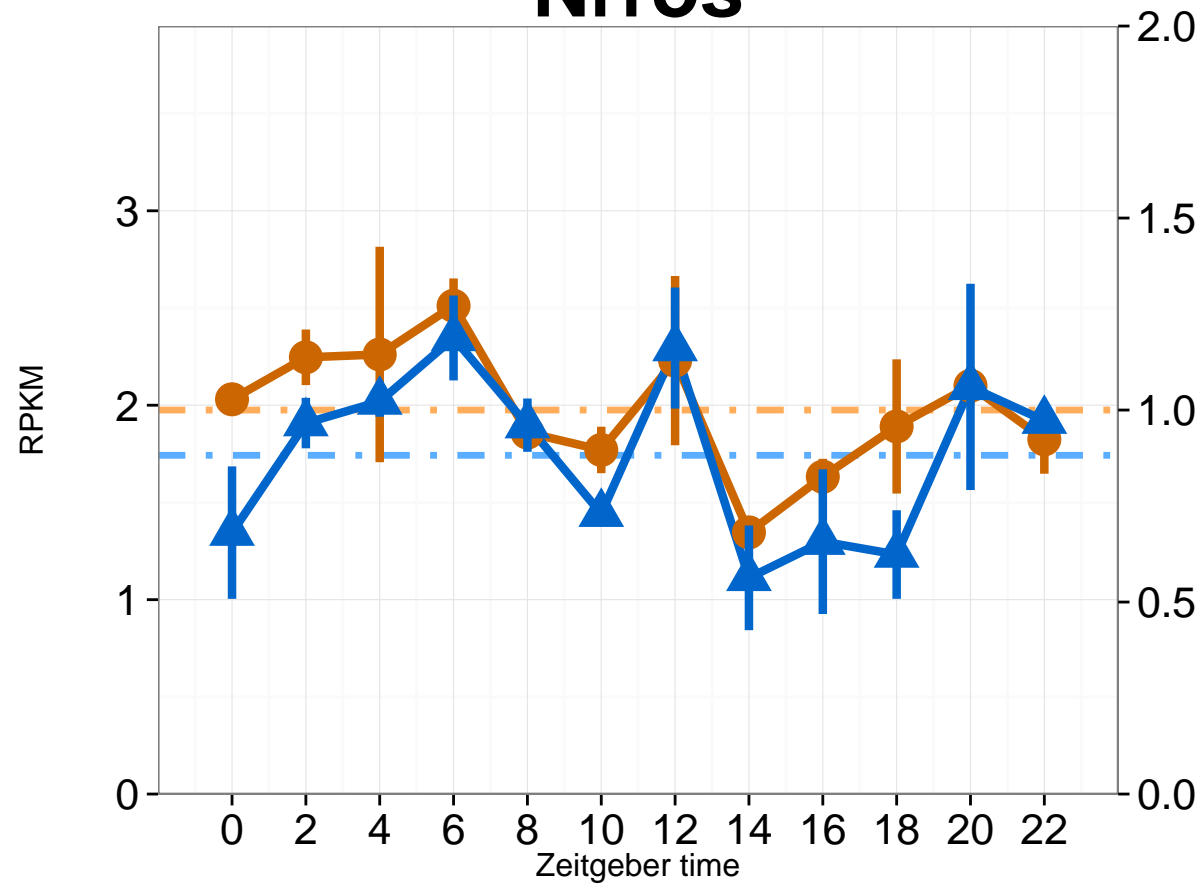

## Nrros

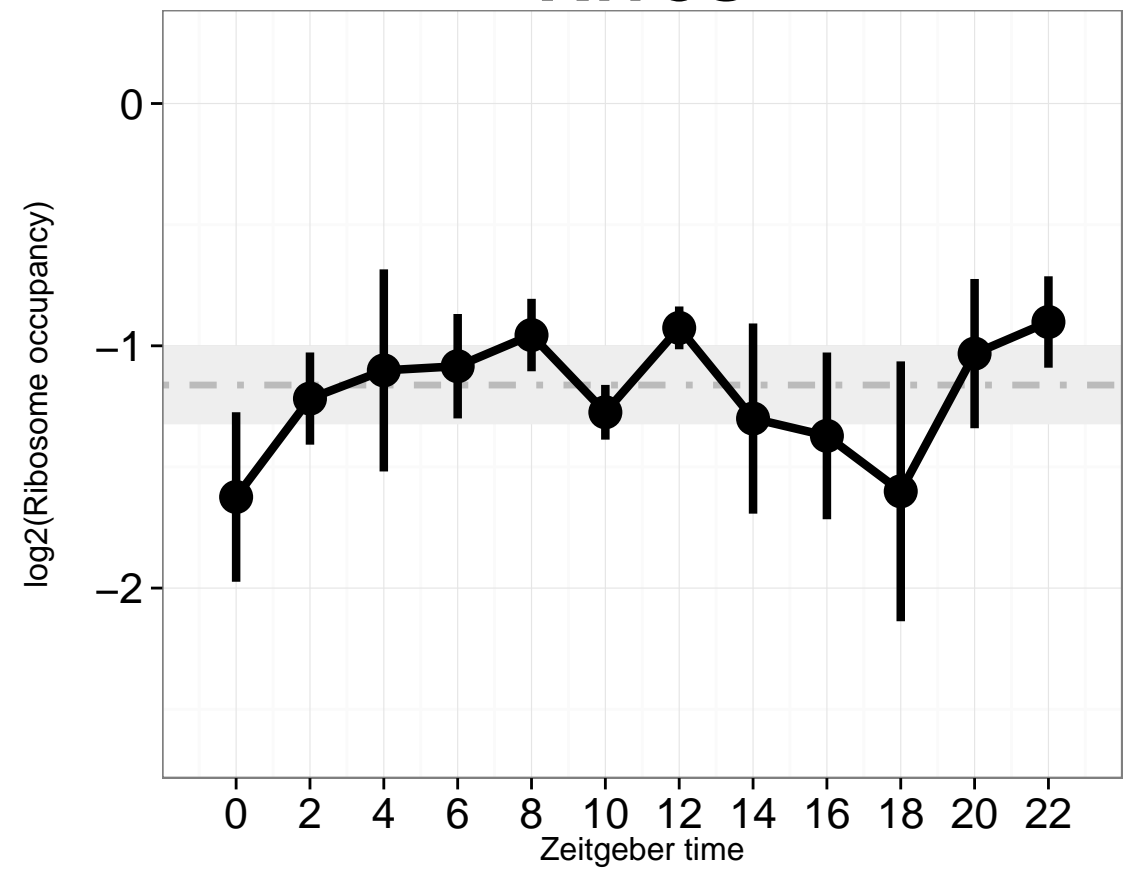

Supplement: Supplementary file 6548 [file 1]

## Lztfl1

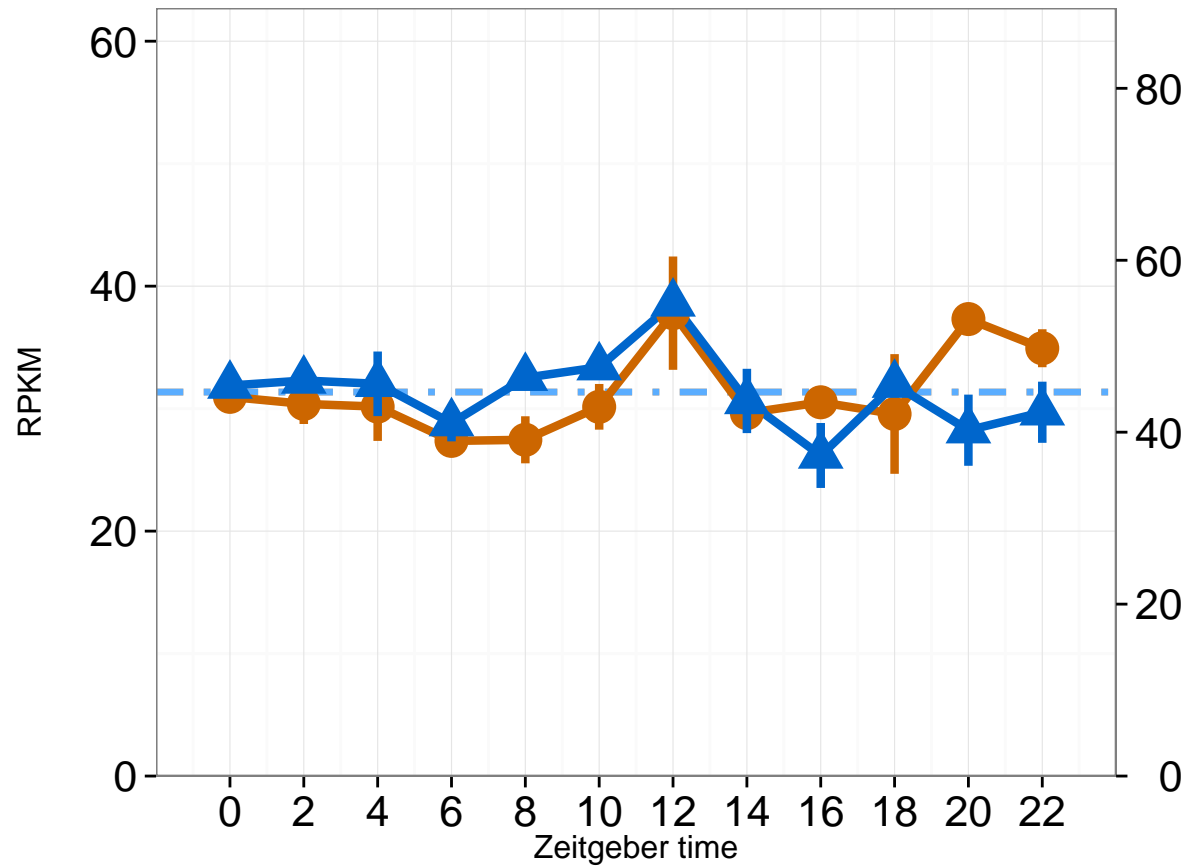

## Lztfl1

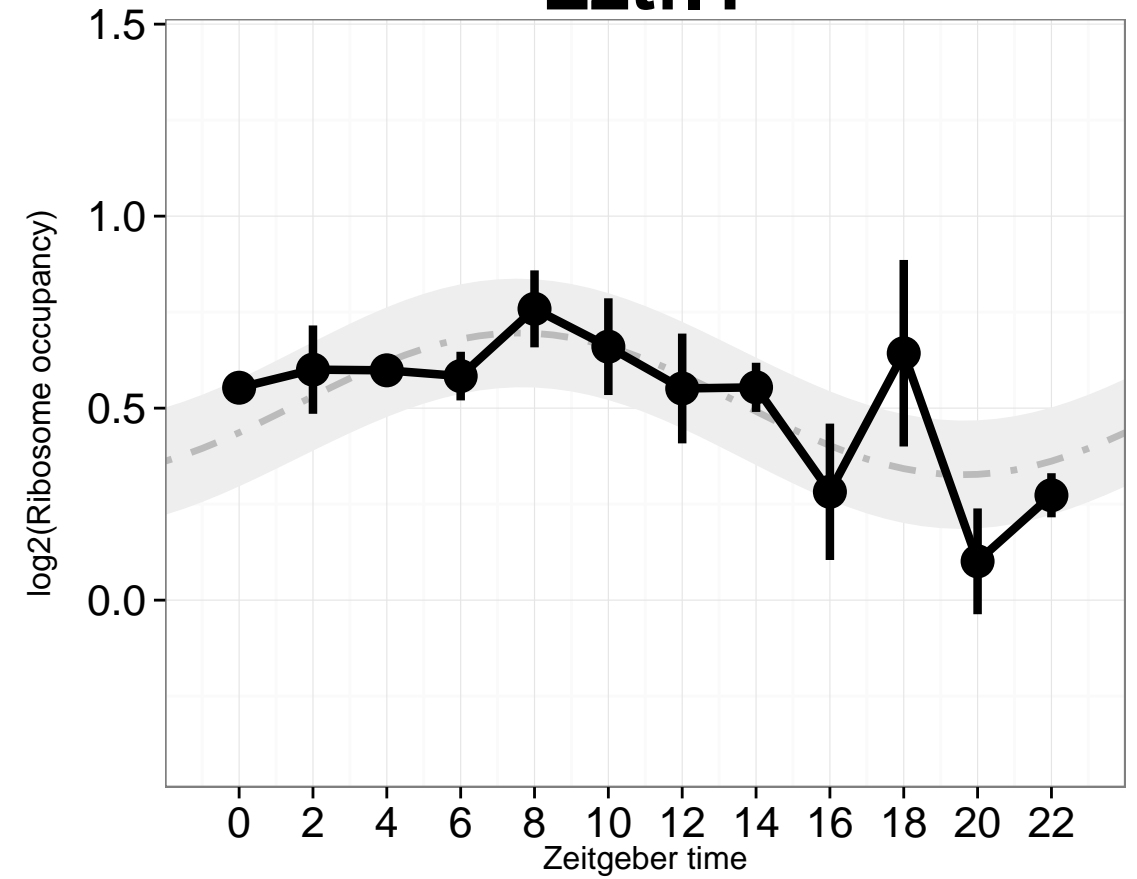

Supplement: Supplementary file 6549 [file 1]

## Pnpla2

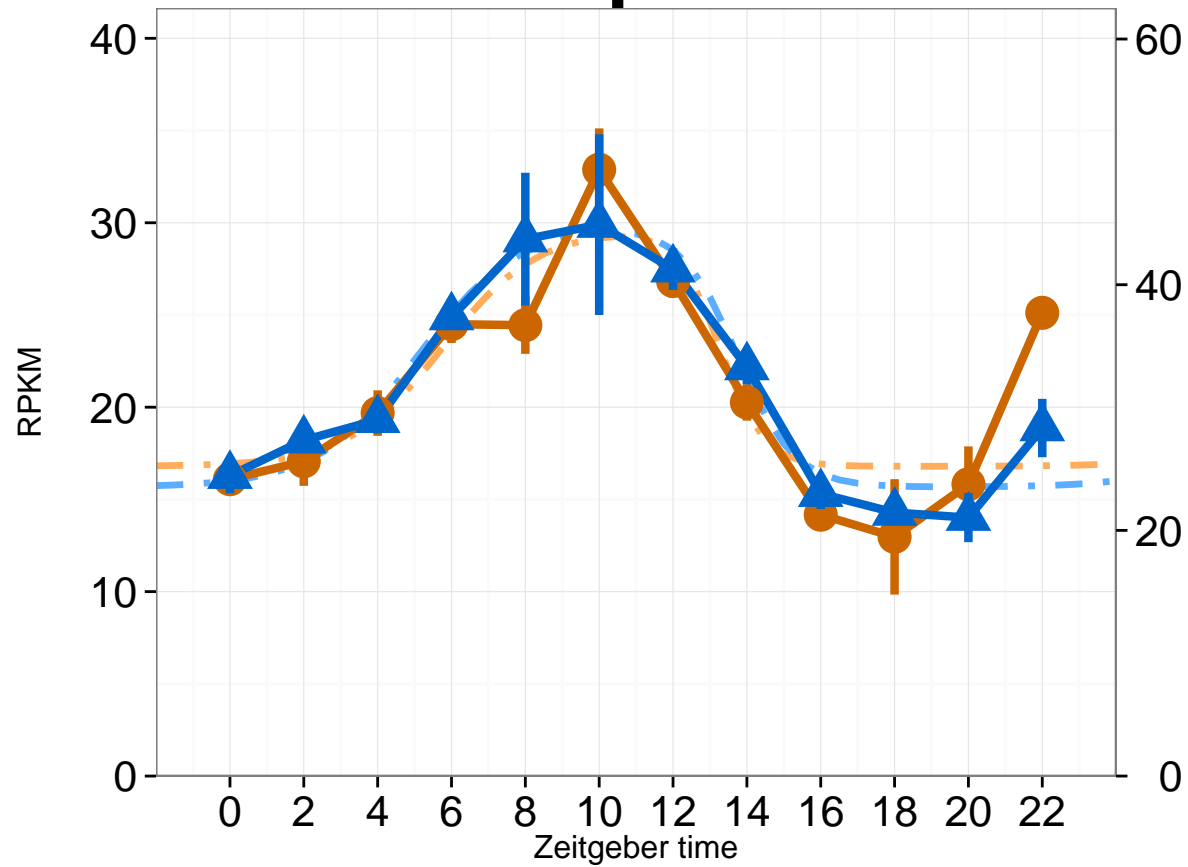

## Pnpla2

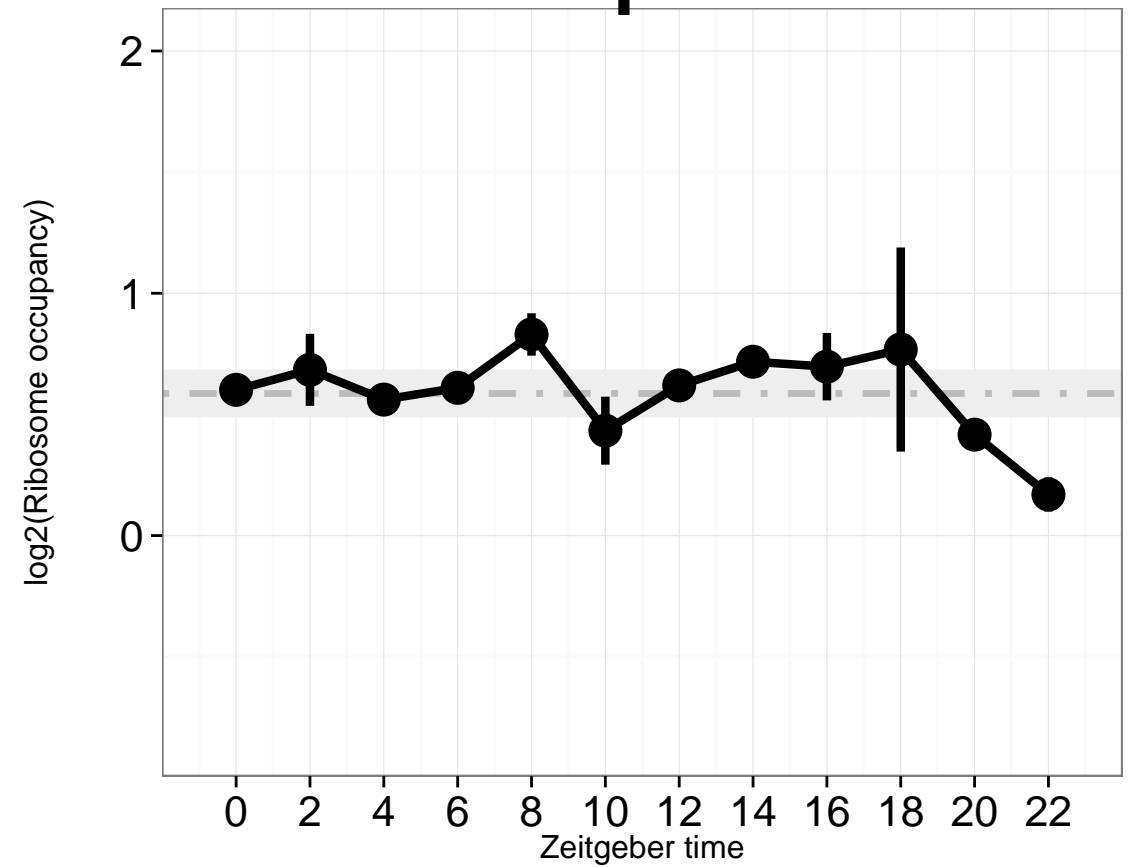

Supplement: Supplementary file 6550 [file 1]

# Psmc6

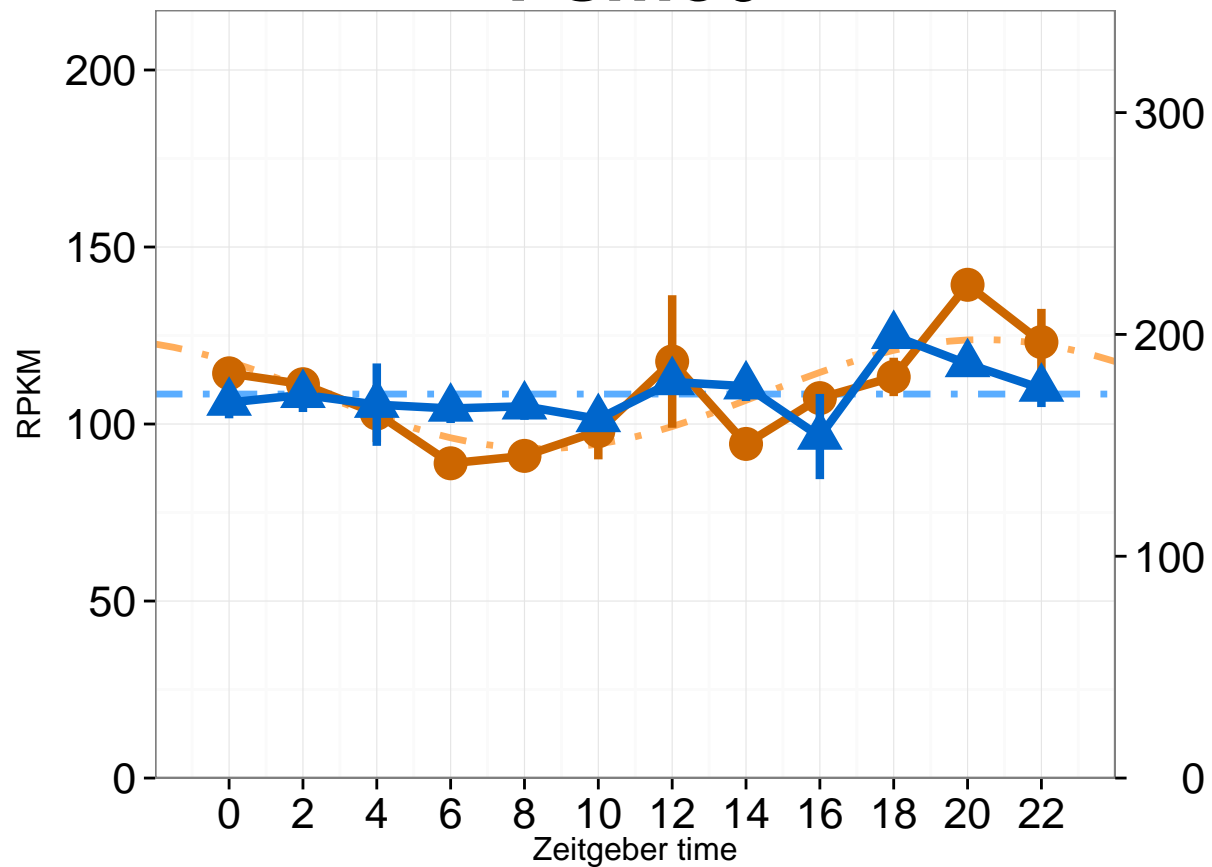

# Psmc6

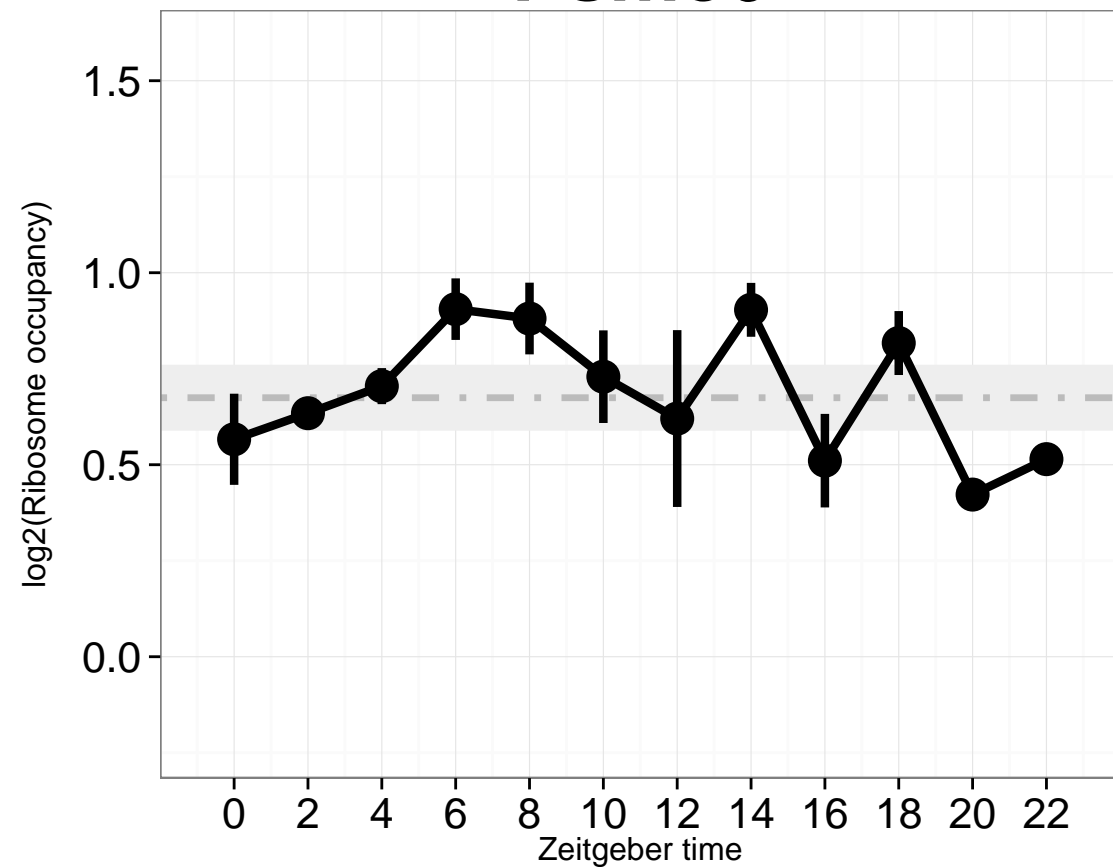

Supplement: Supplementary file 6551 [file 1]

# Bcap31

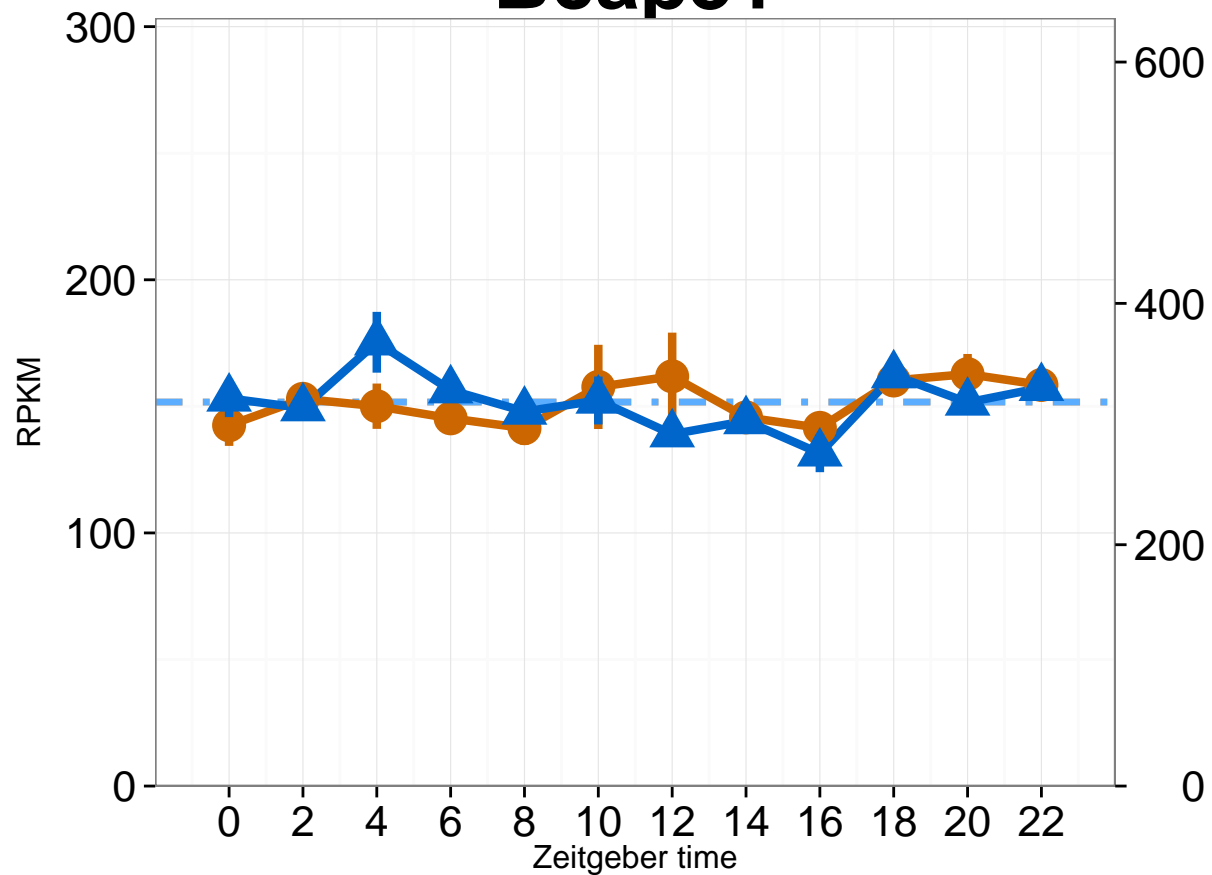

# Bcap31

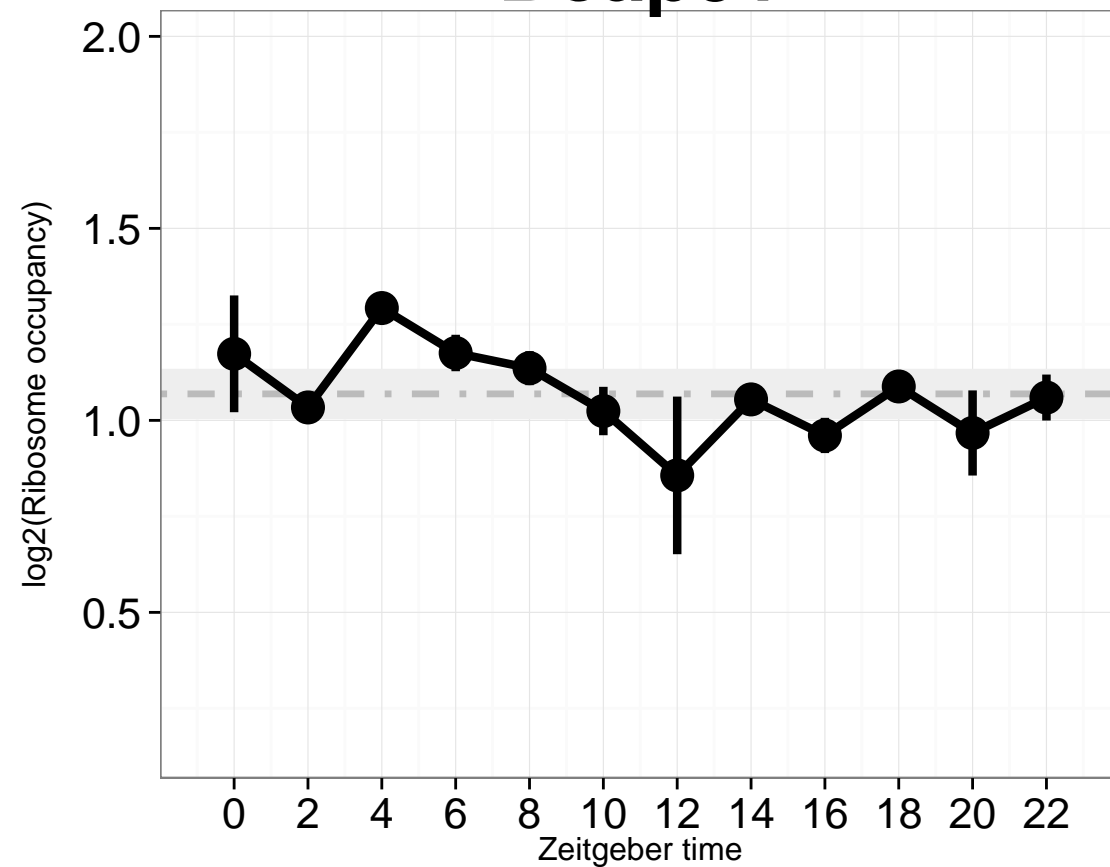

Supplement: Supplementary file 6552 [file 1]

# Slc28a1

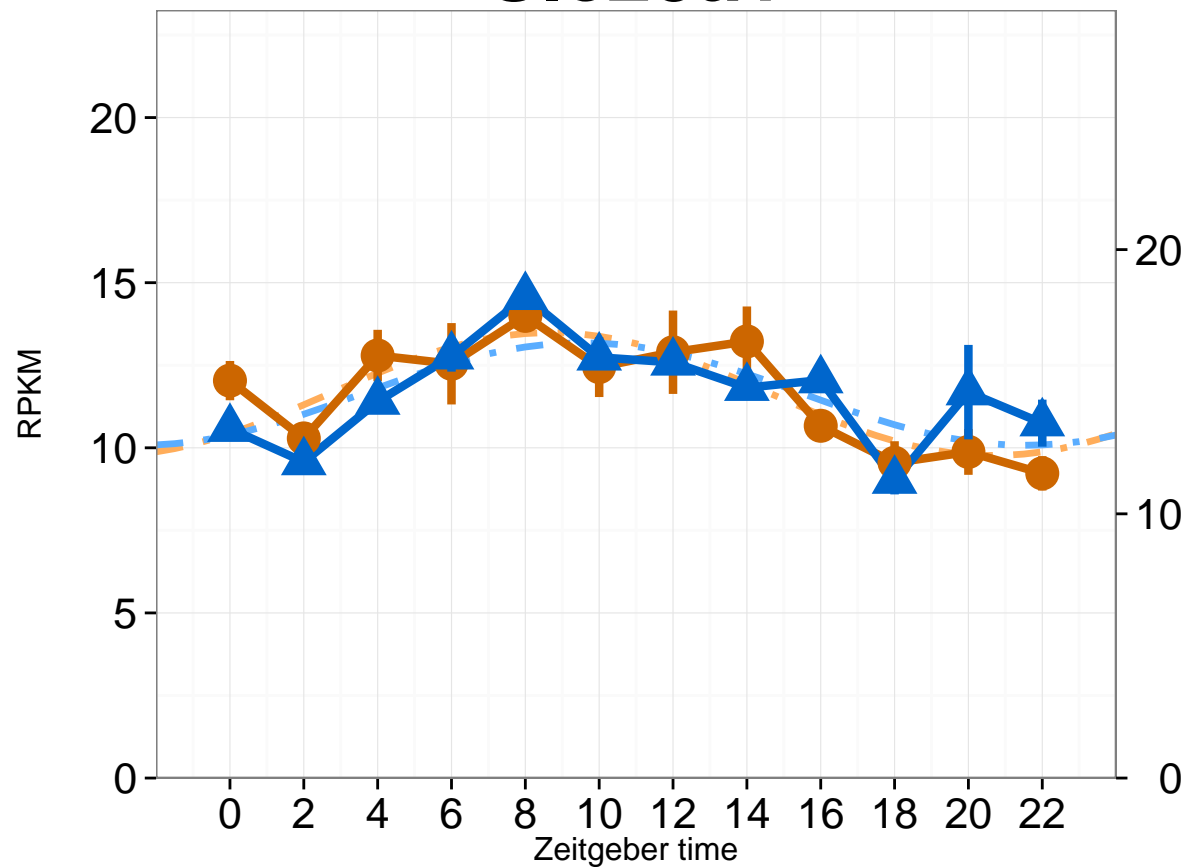

# Slc28a1

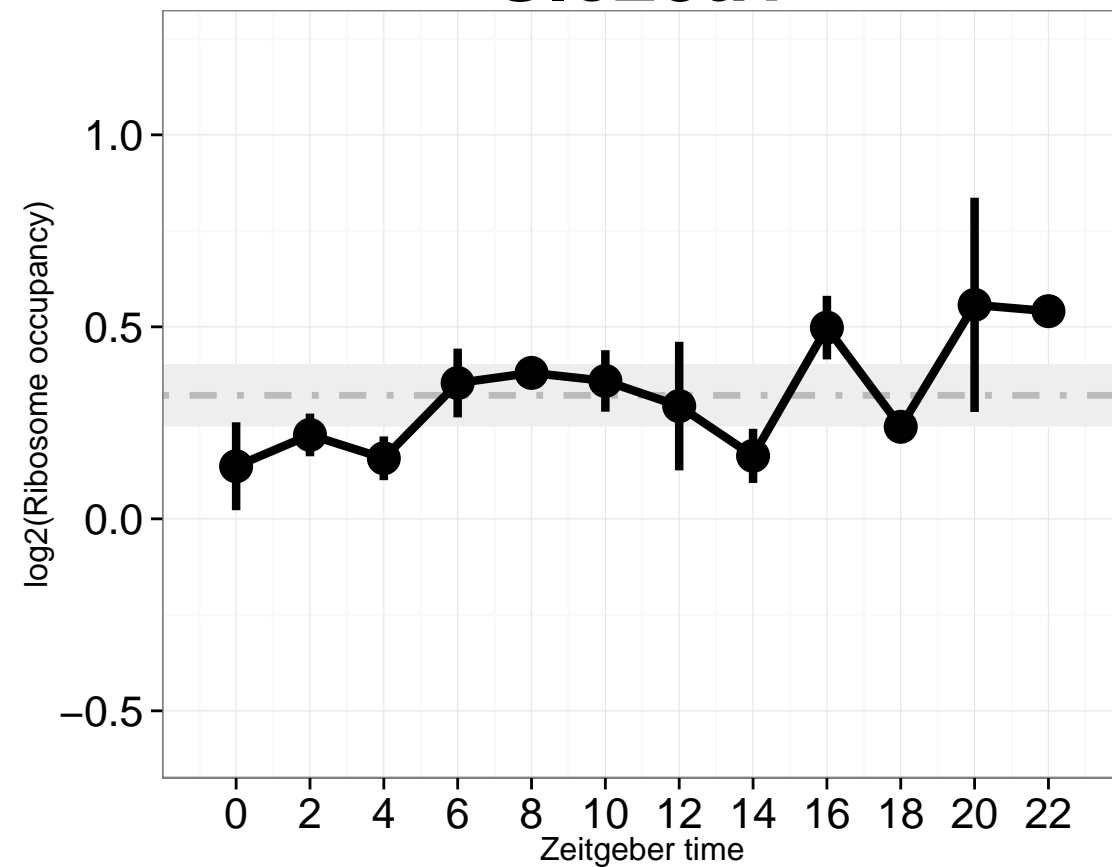

Supplement: Supplementary file 6553 [file 1]

# Cela1

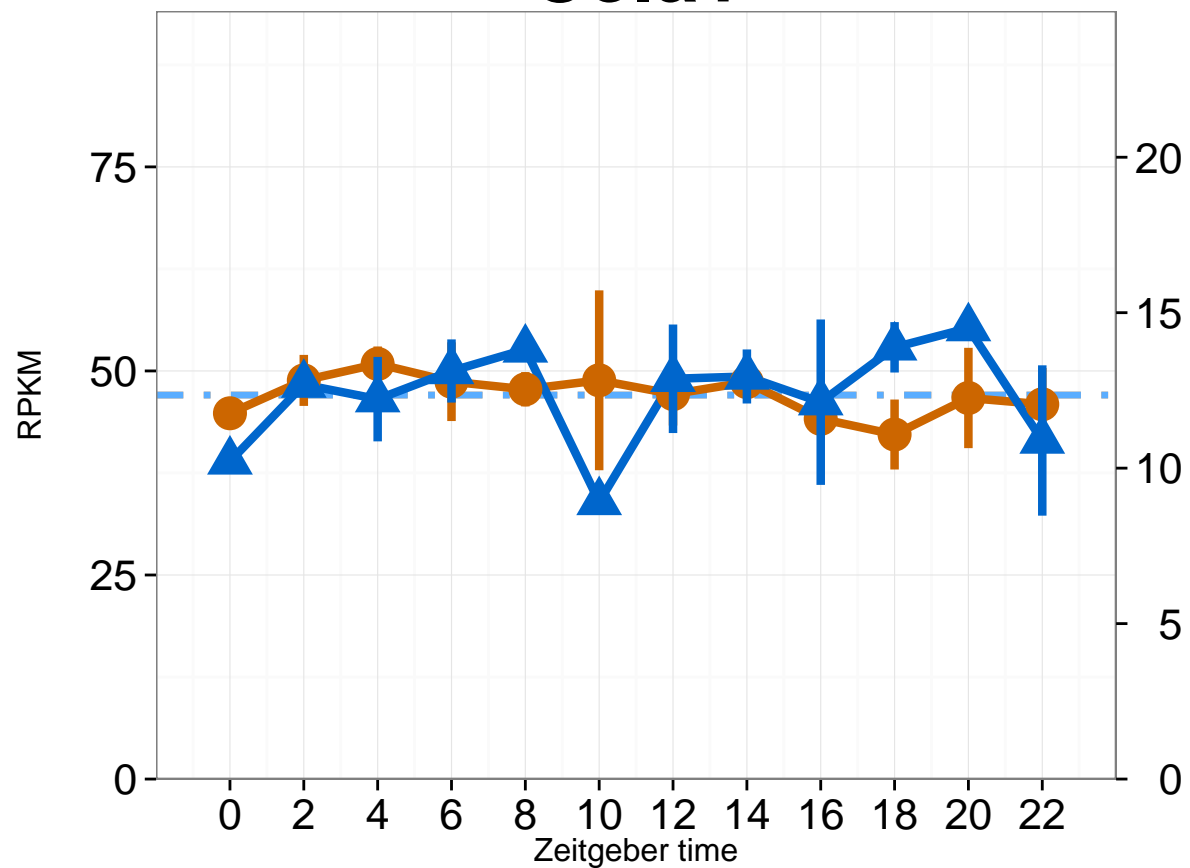

# Cela1

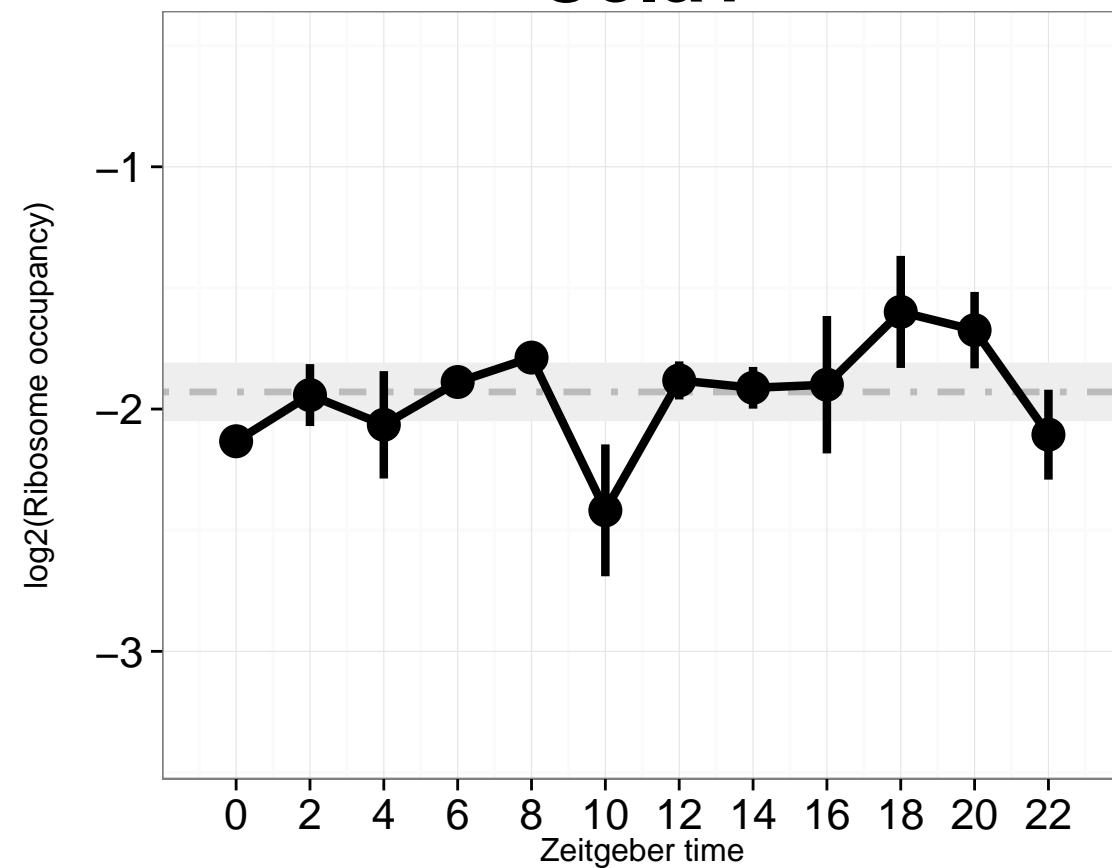

Supplement: Supplementary file 6554 [file 1]

## Agrn

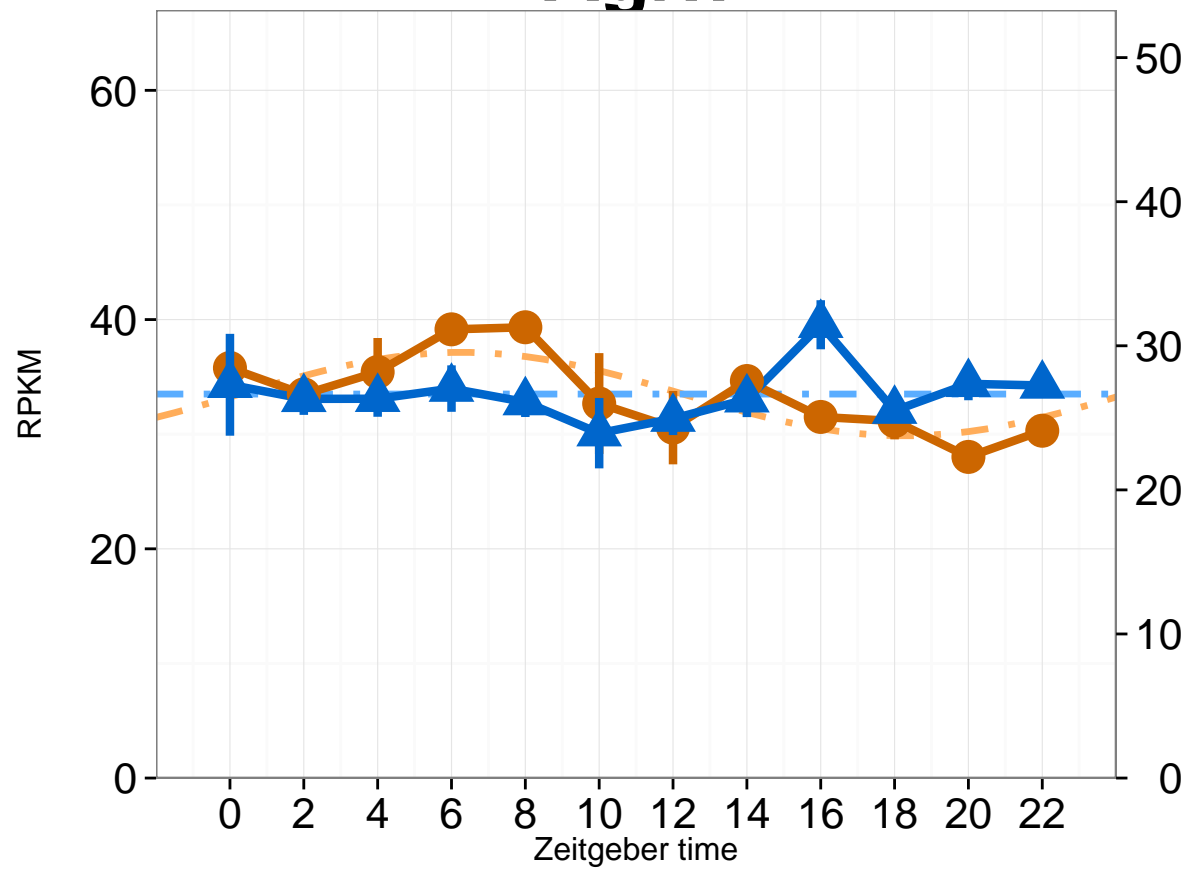

## Agrn

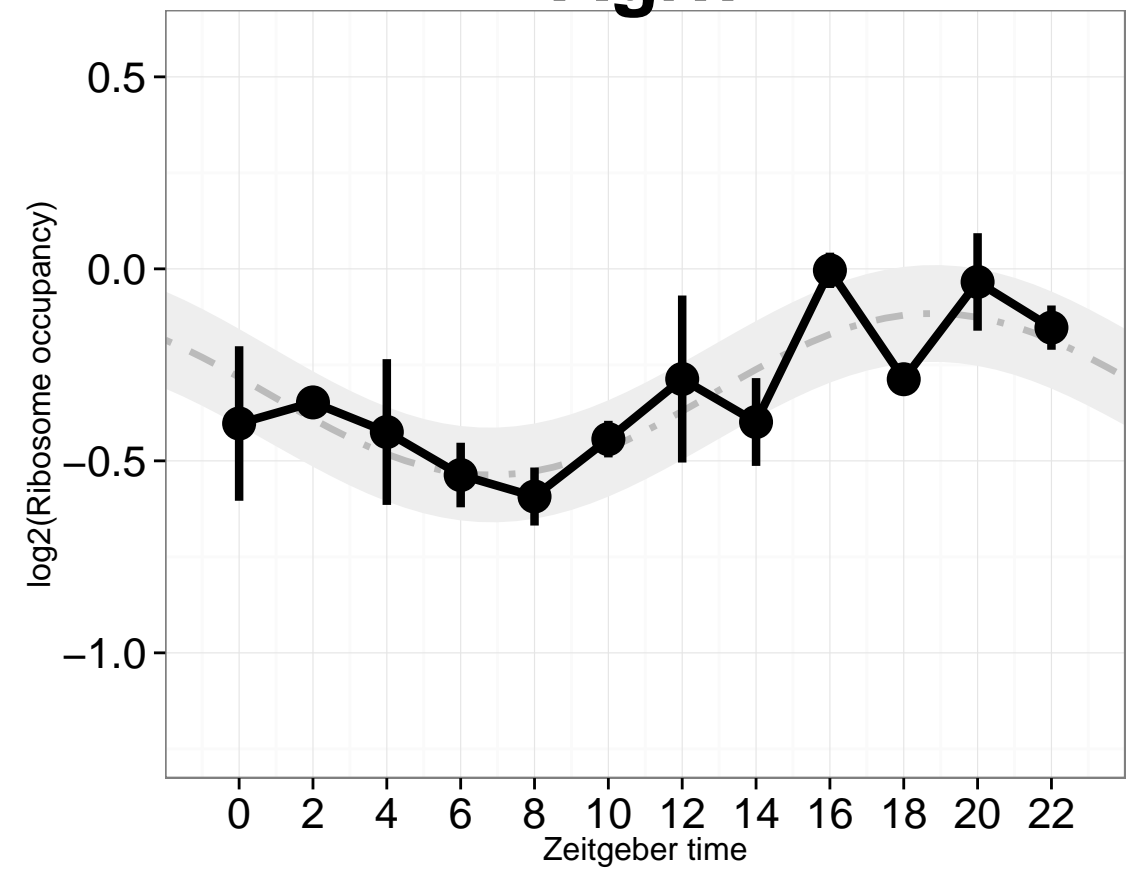

Supplement: Supplementary file 6555 [file 1]

# Sec22b

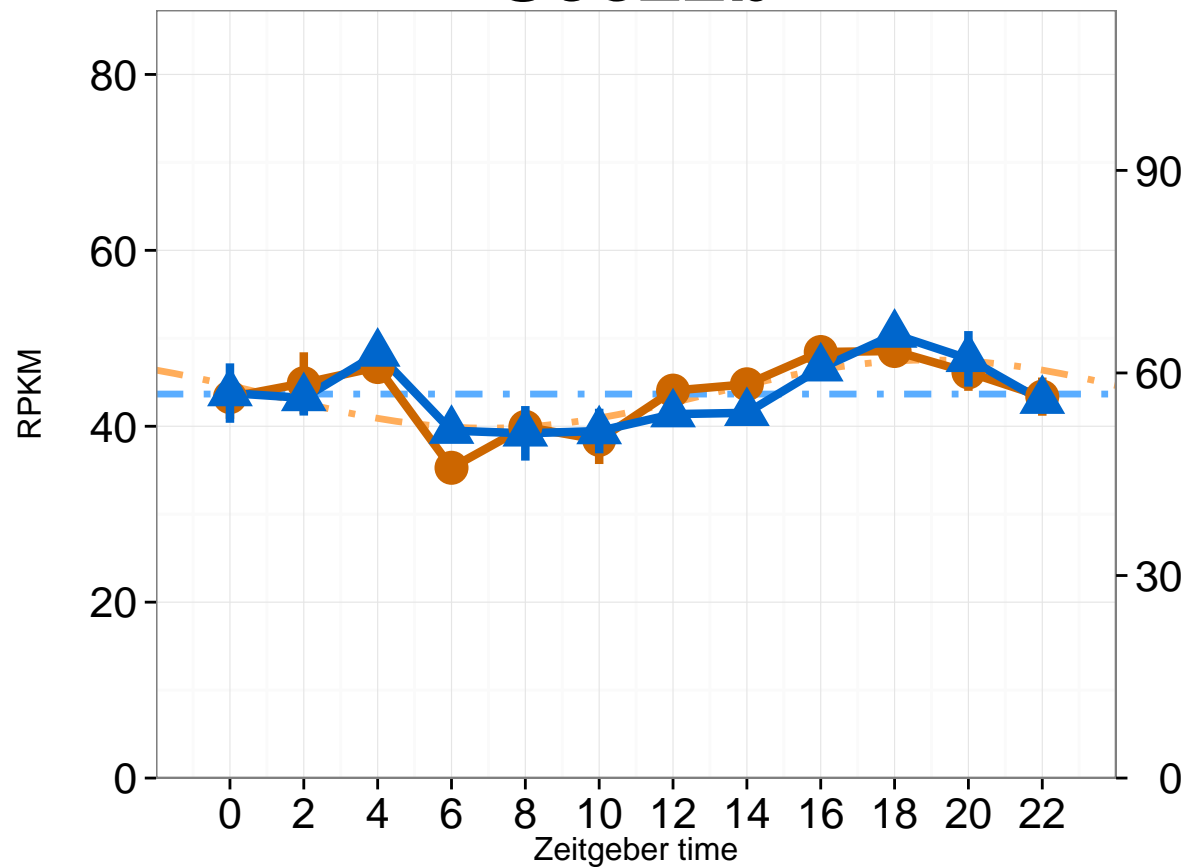

# Sec22b

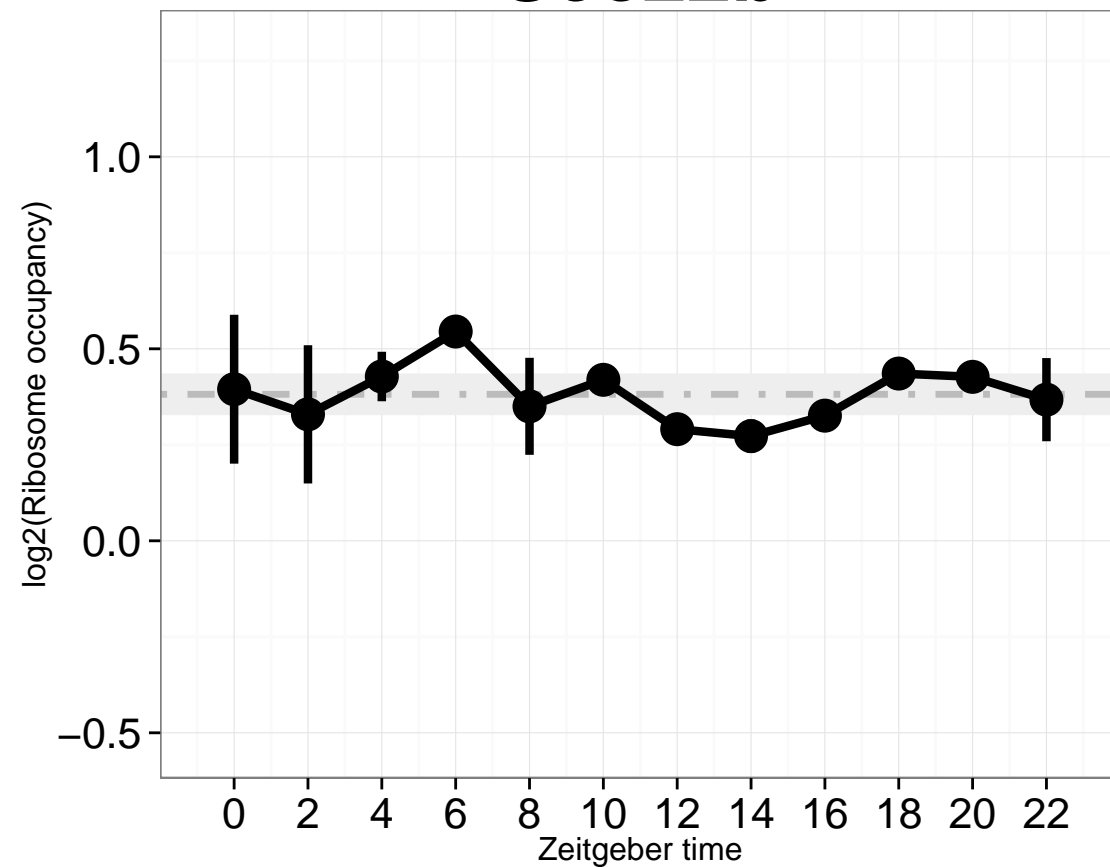

Supplement: Supplementary file 6556 [file 1]

# Serpina1c

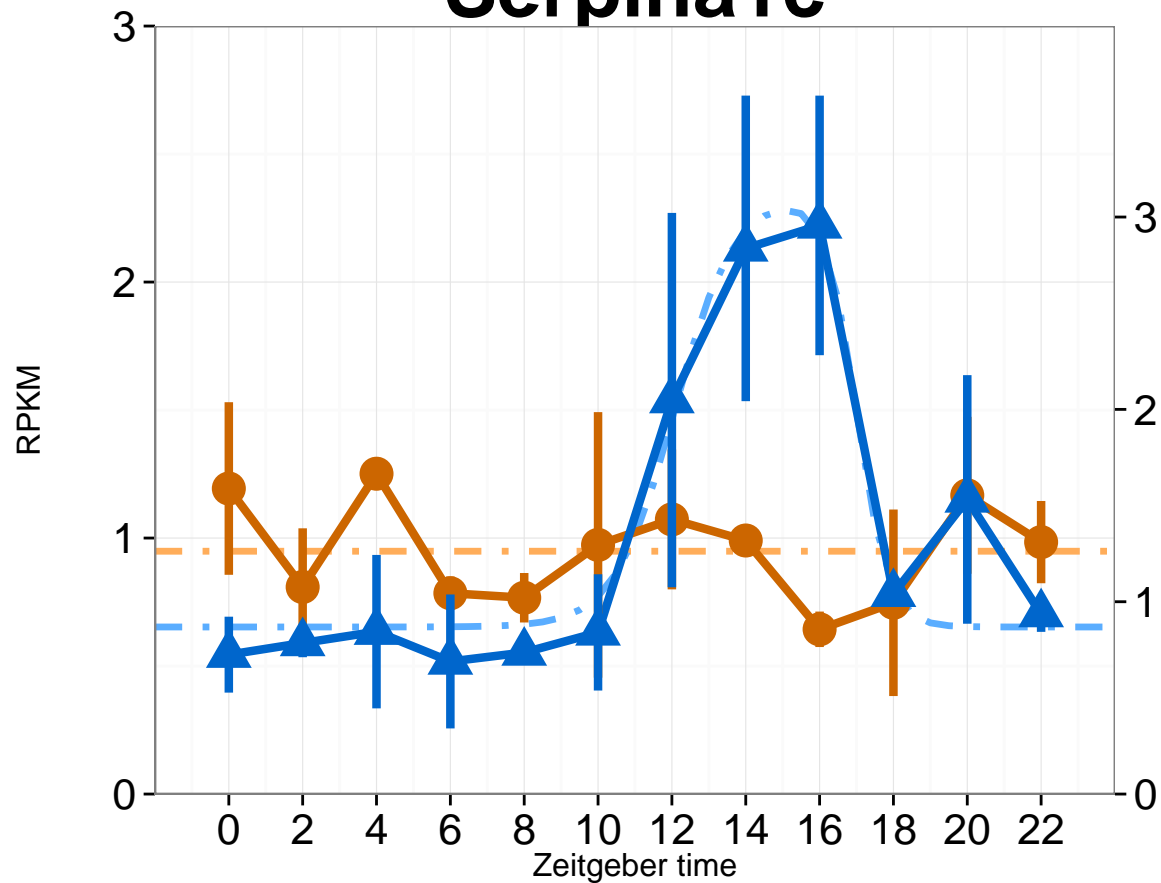

# Serpina1c

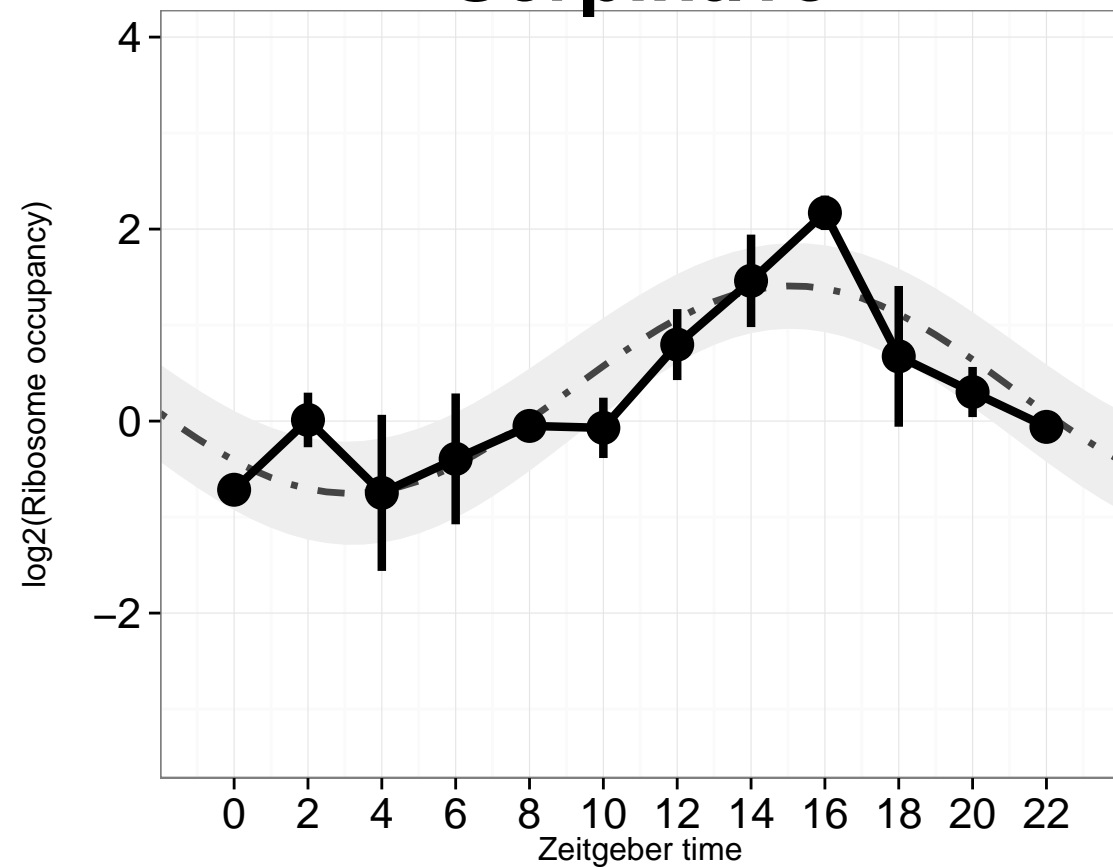

Supplement: Supplementary file 6557 [file 1]

## Kbtbd8

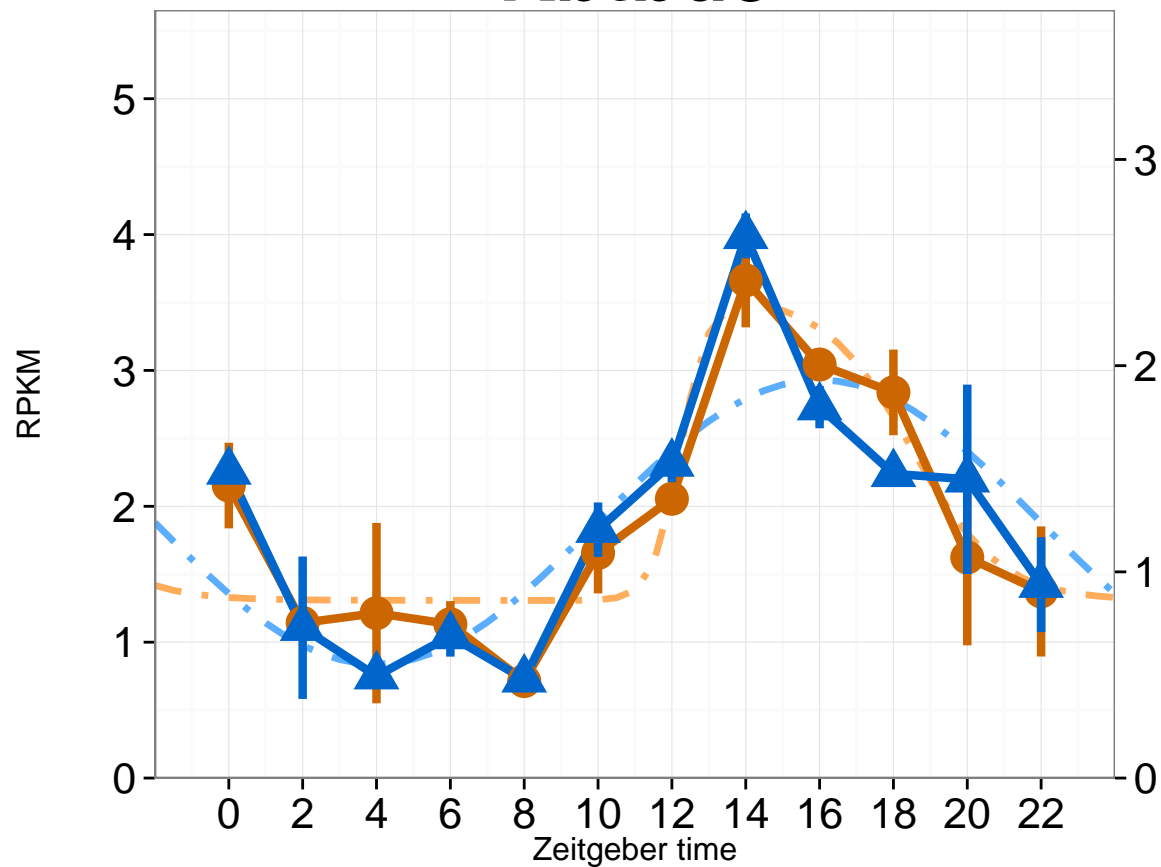

## Kbtbd8

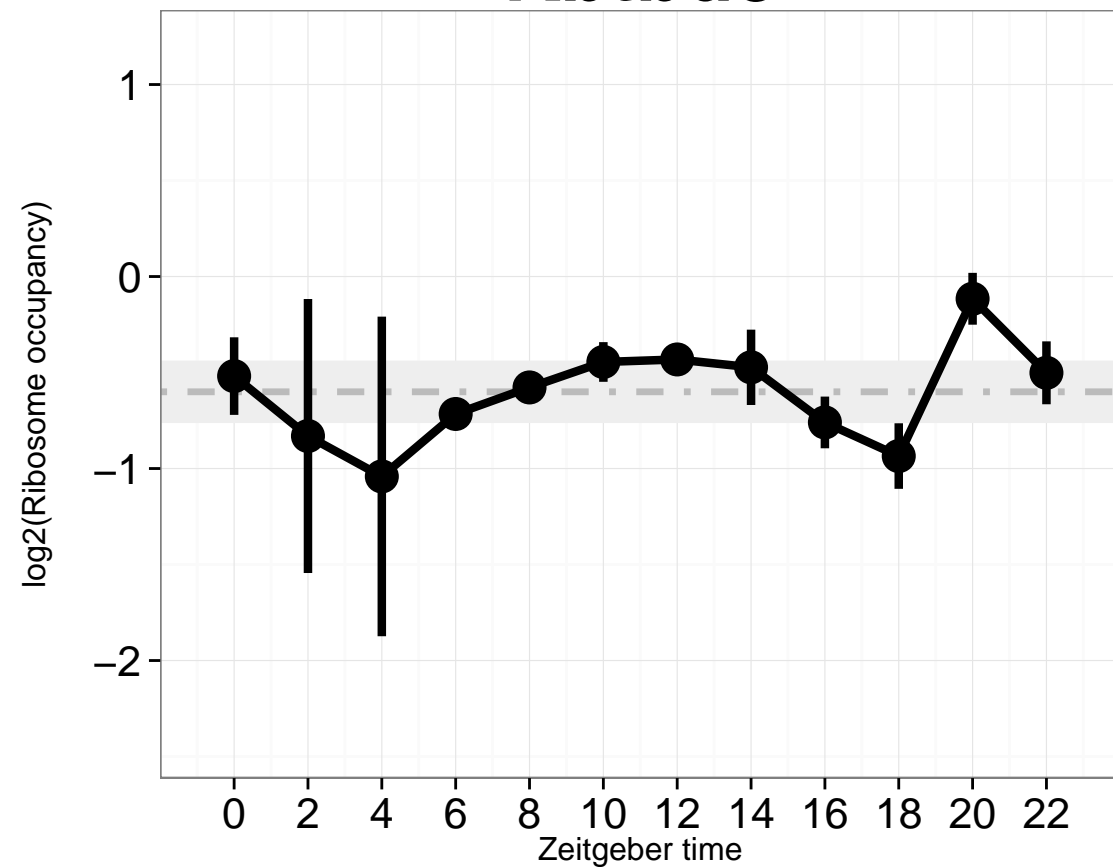

Supplement: Supplementary file 6558 [file 1]

# Pold2

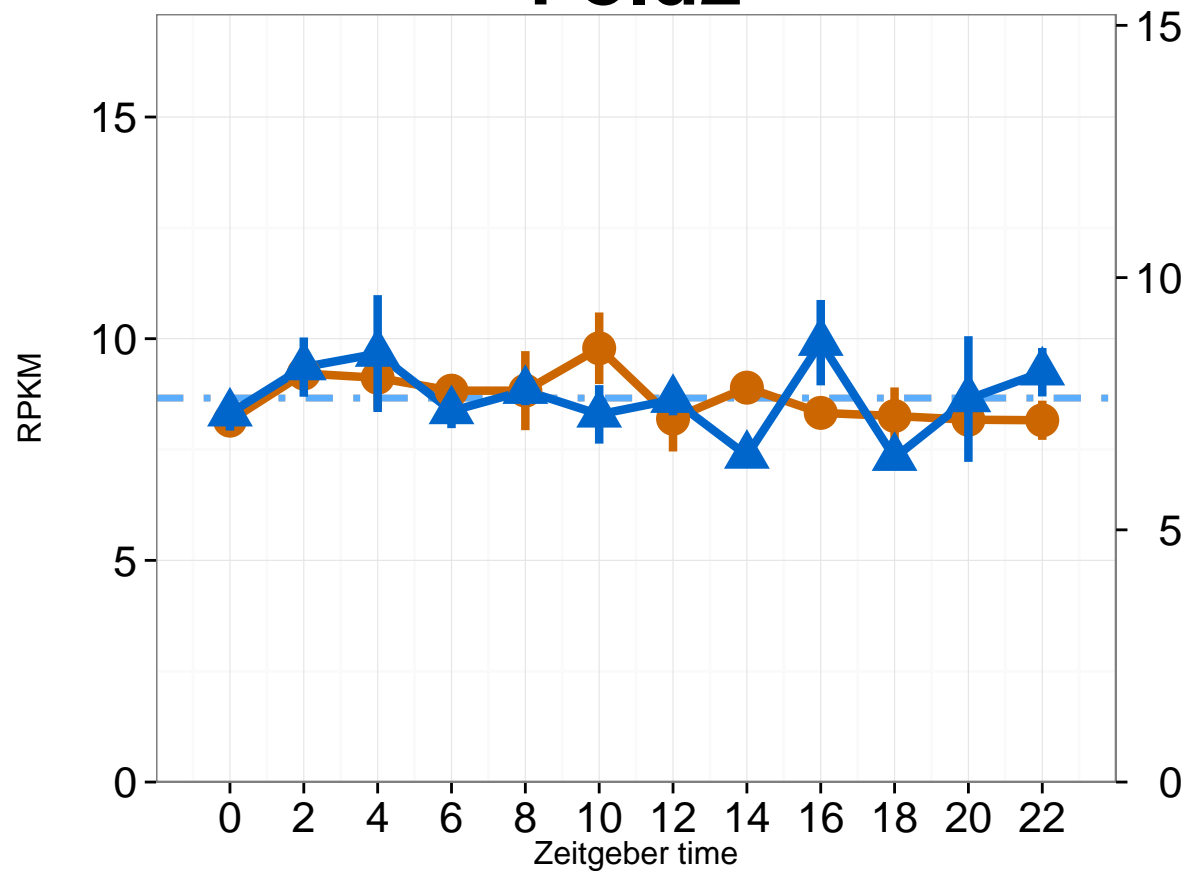

# Pold2

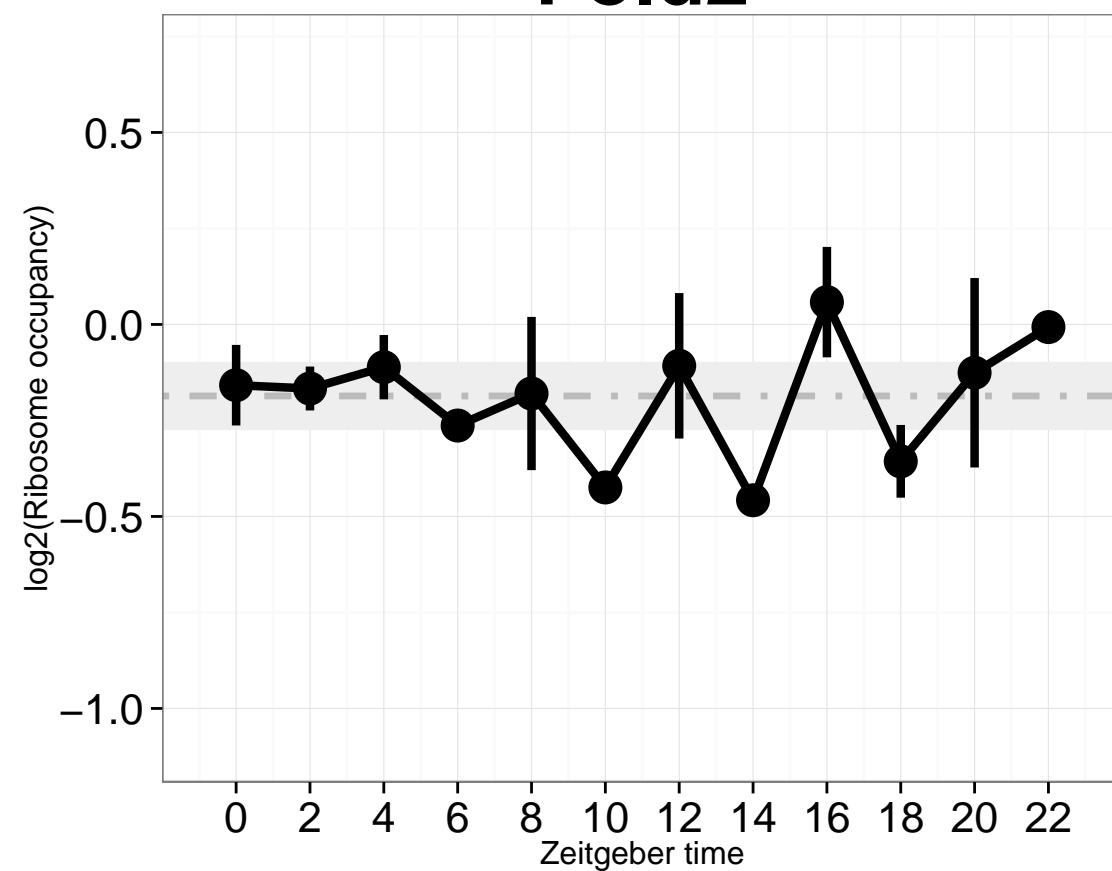

Supplement: Supplementary file 6559 [file 1]

Colec12

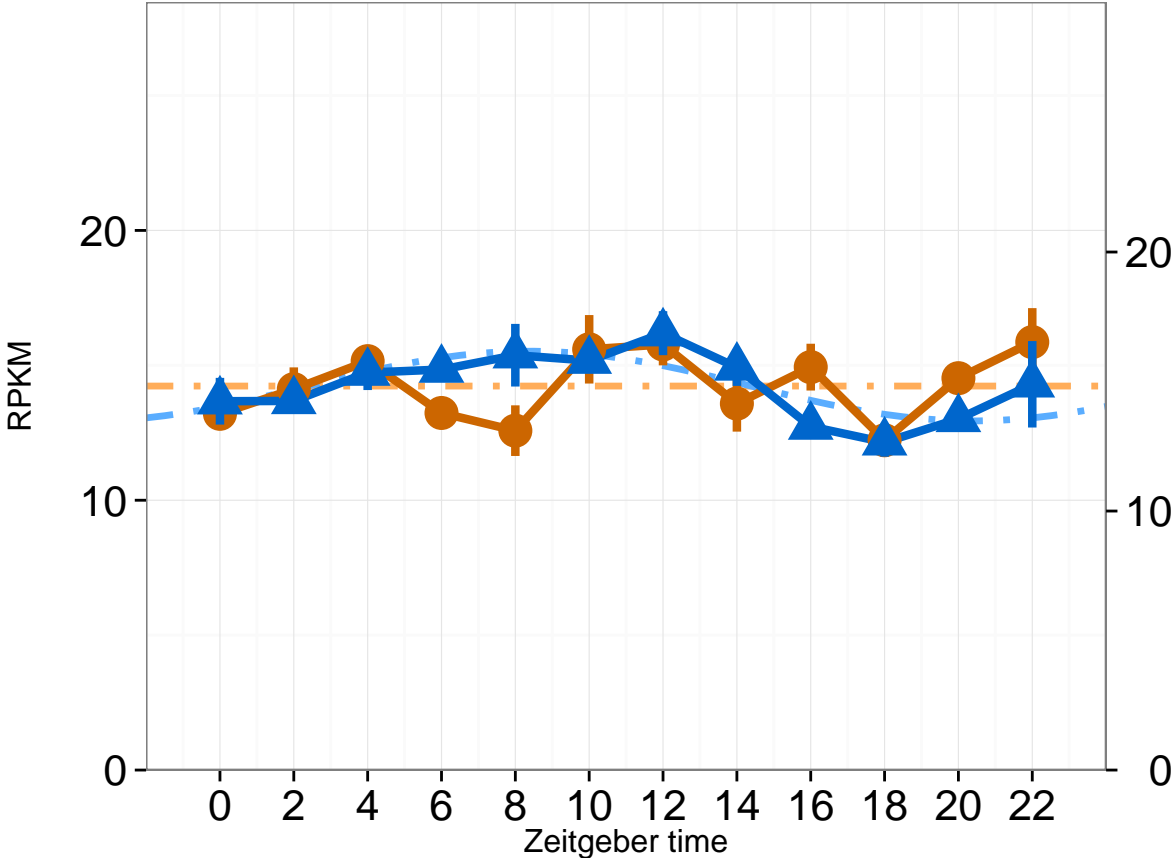

Colec12

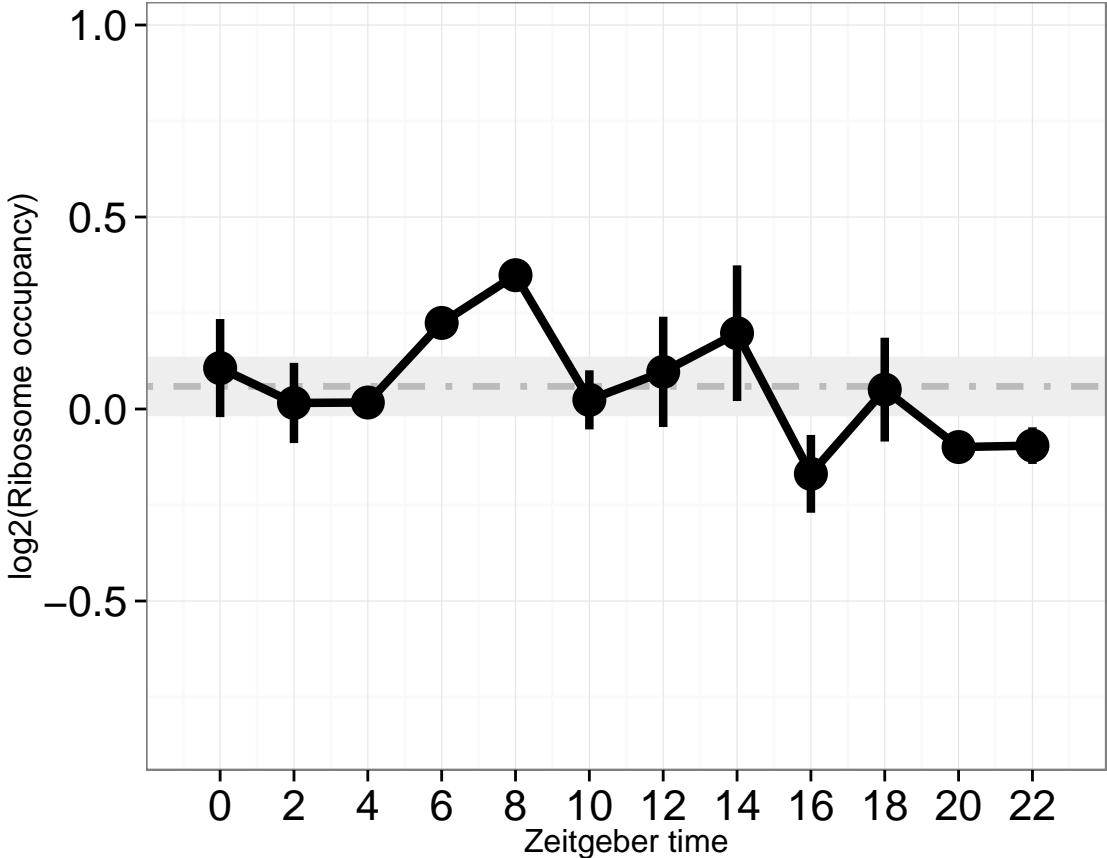

Supplement: Supplementary file 6560 [file 1]

# Slc9a9

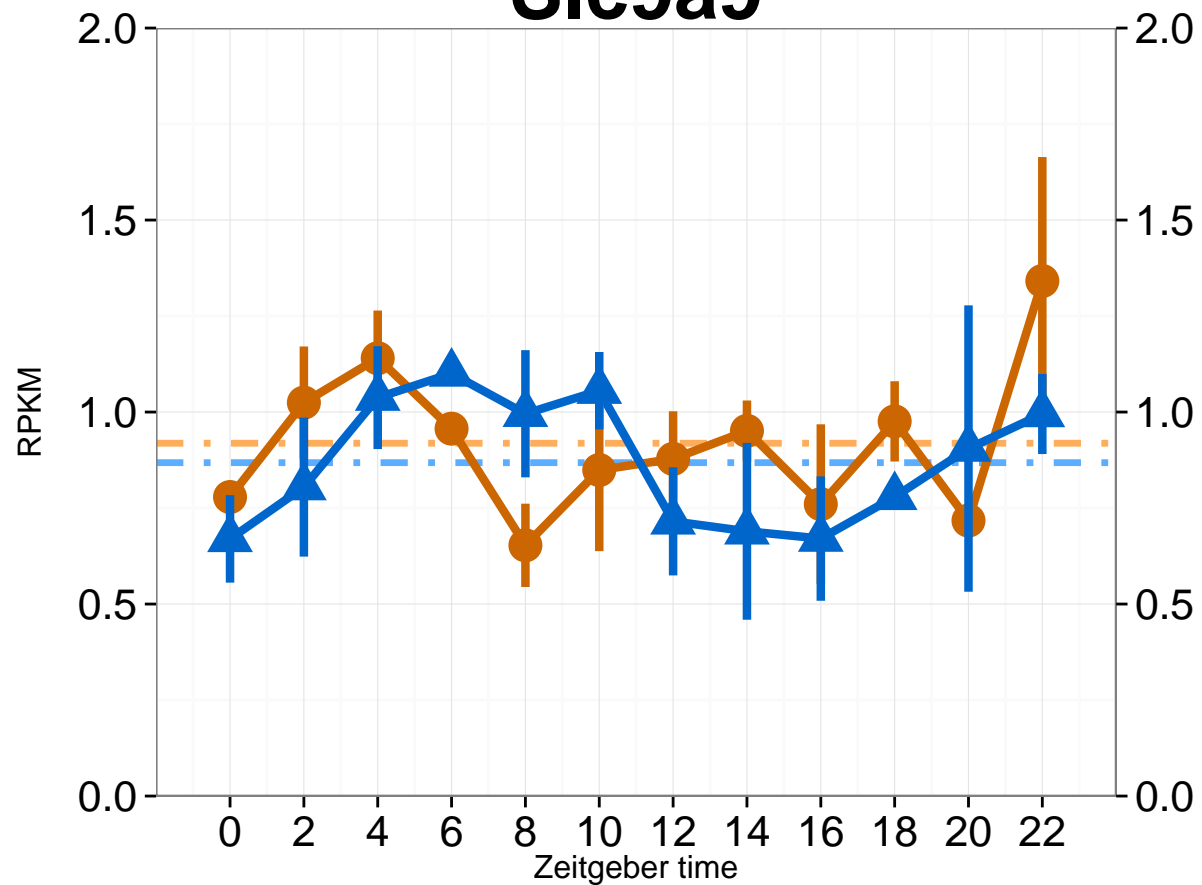

# Slc9a9

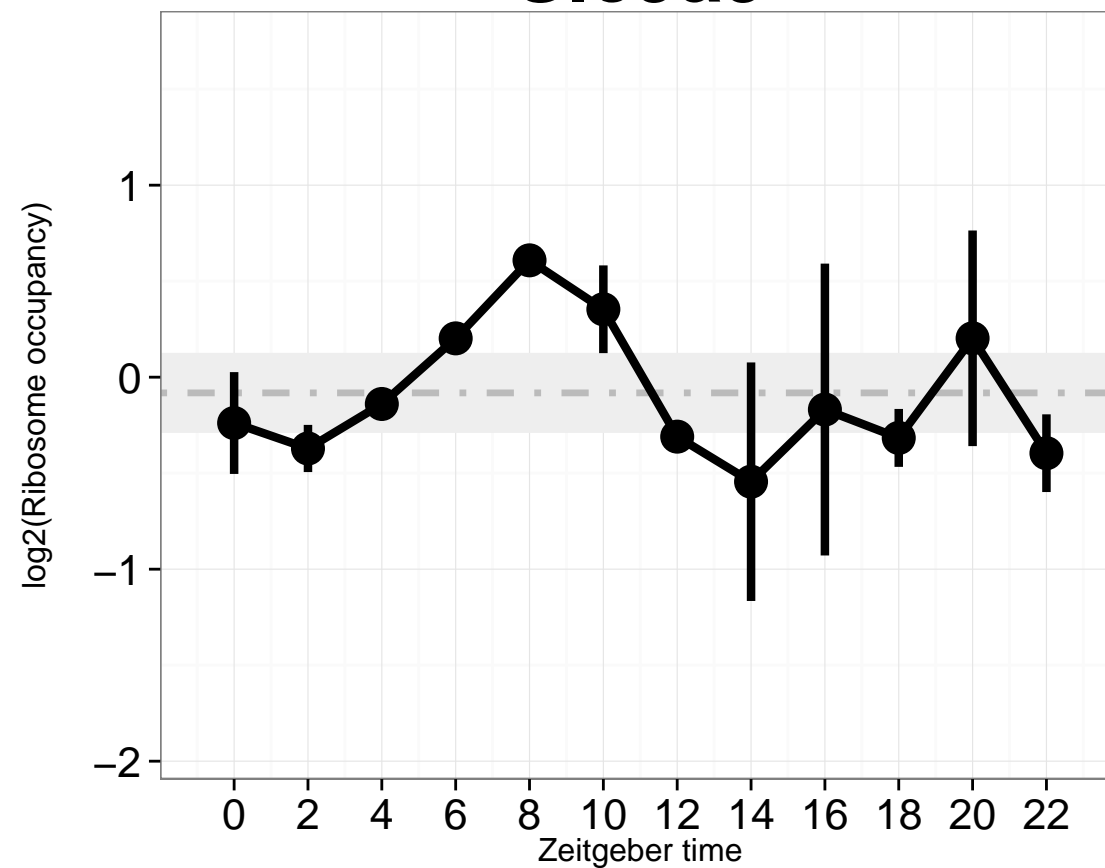

Supplement: Supplementary file 6561 [file 1]

## Ctdsp2

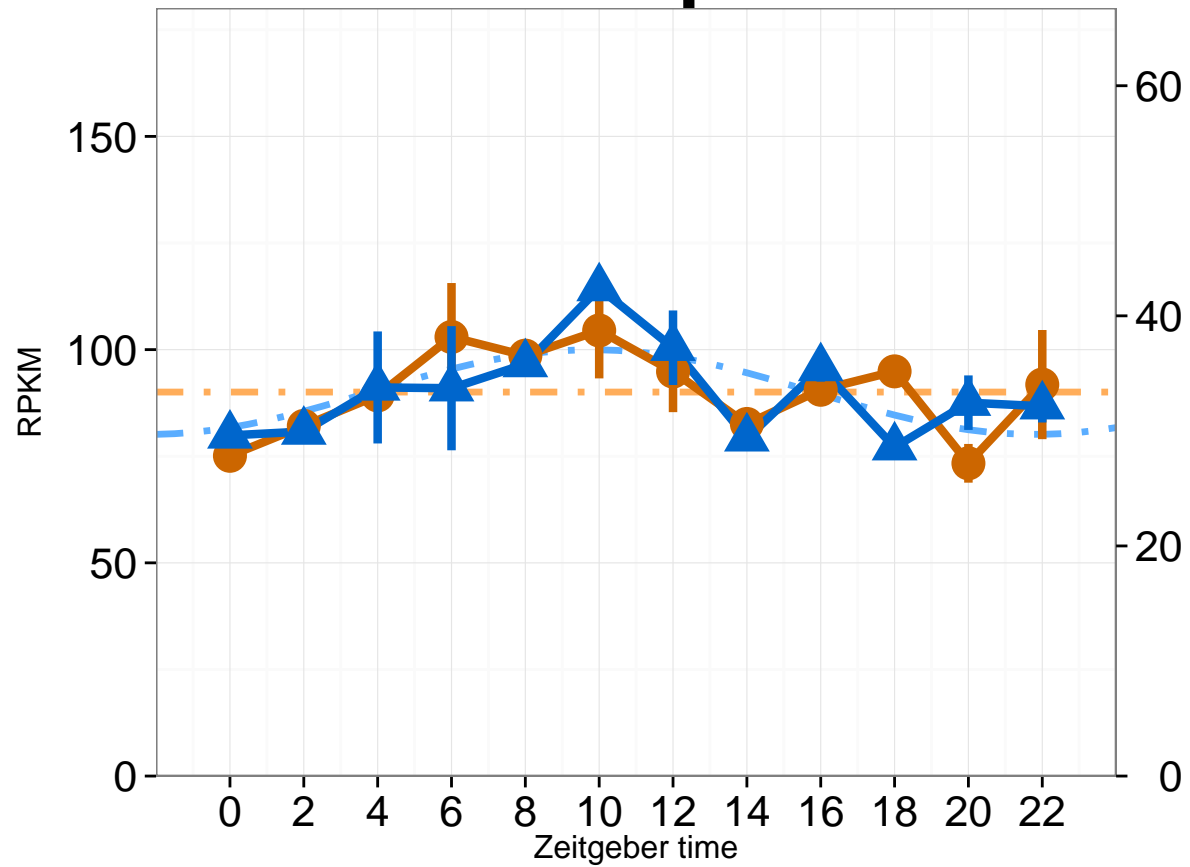

## Ctdsp2

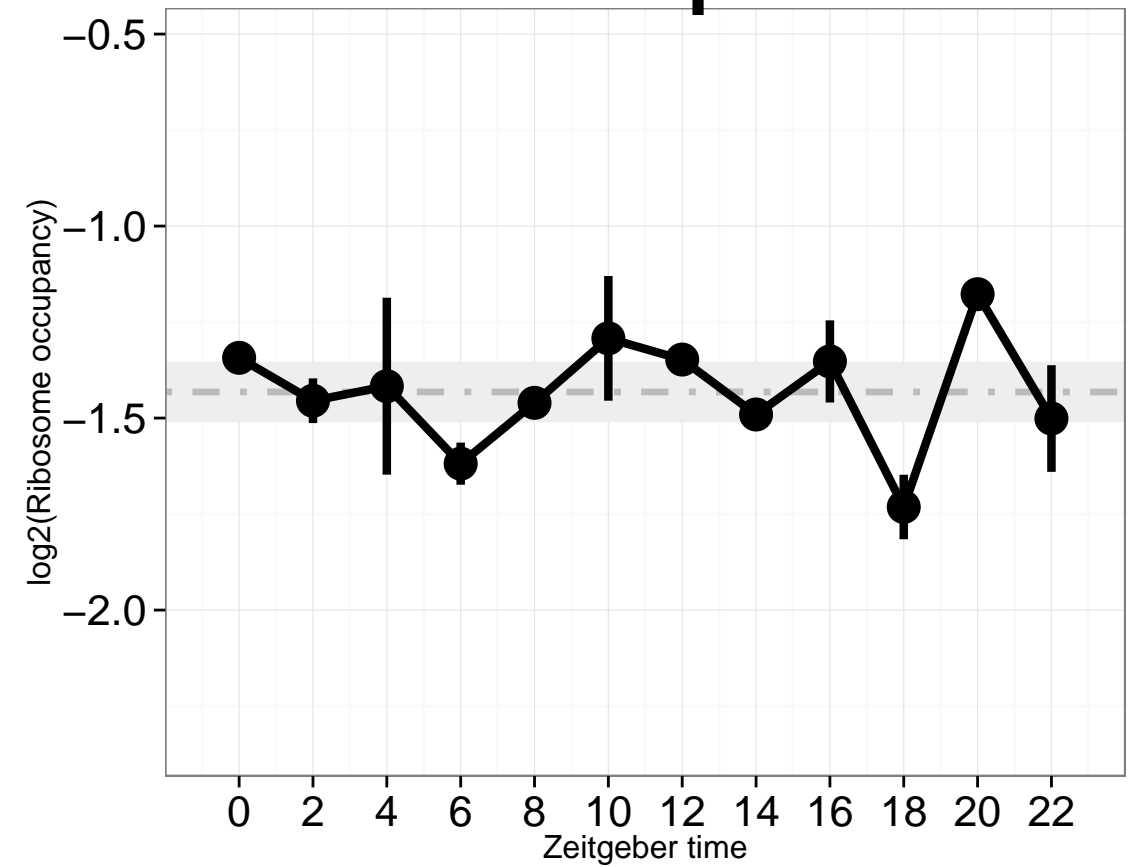

Supplement: Supplementary file 6562 [file 1]

# Fbxl2

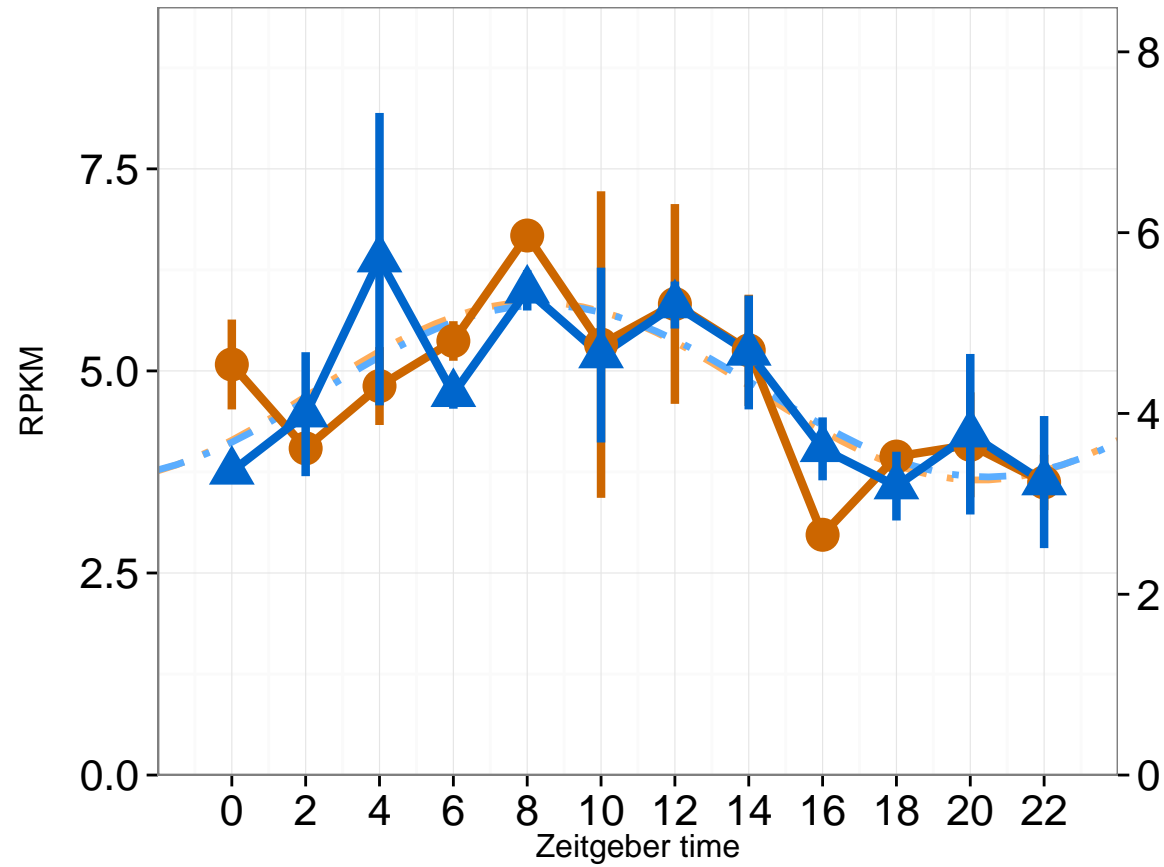

# Fbxl2

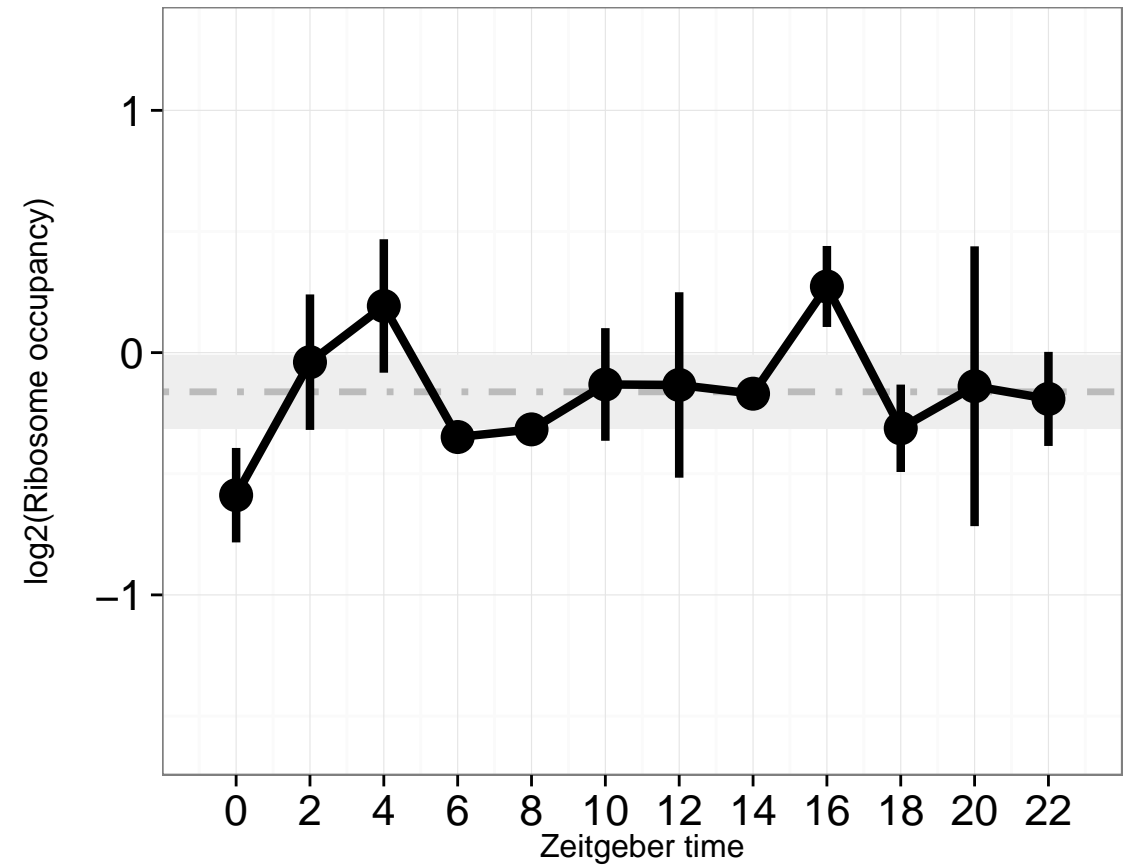

Supplement: Supplementary file 6563 [file 1]

# Pcmdt1

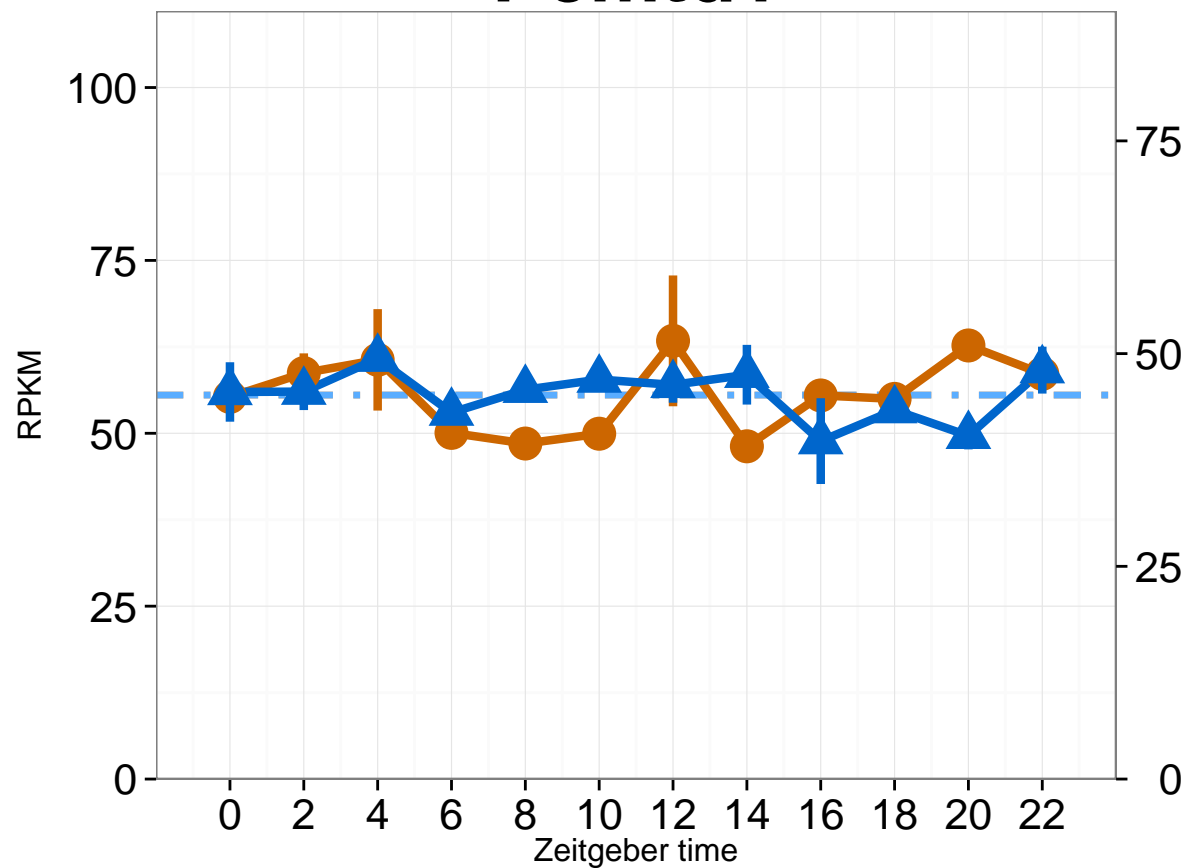

# Pcmdt1

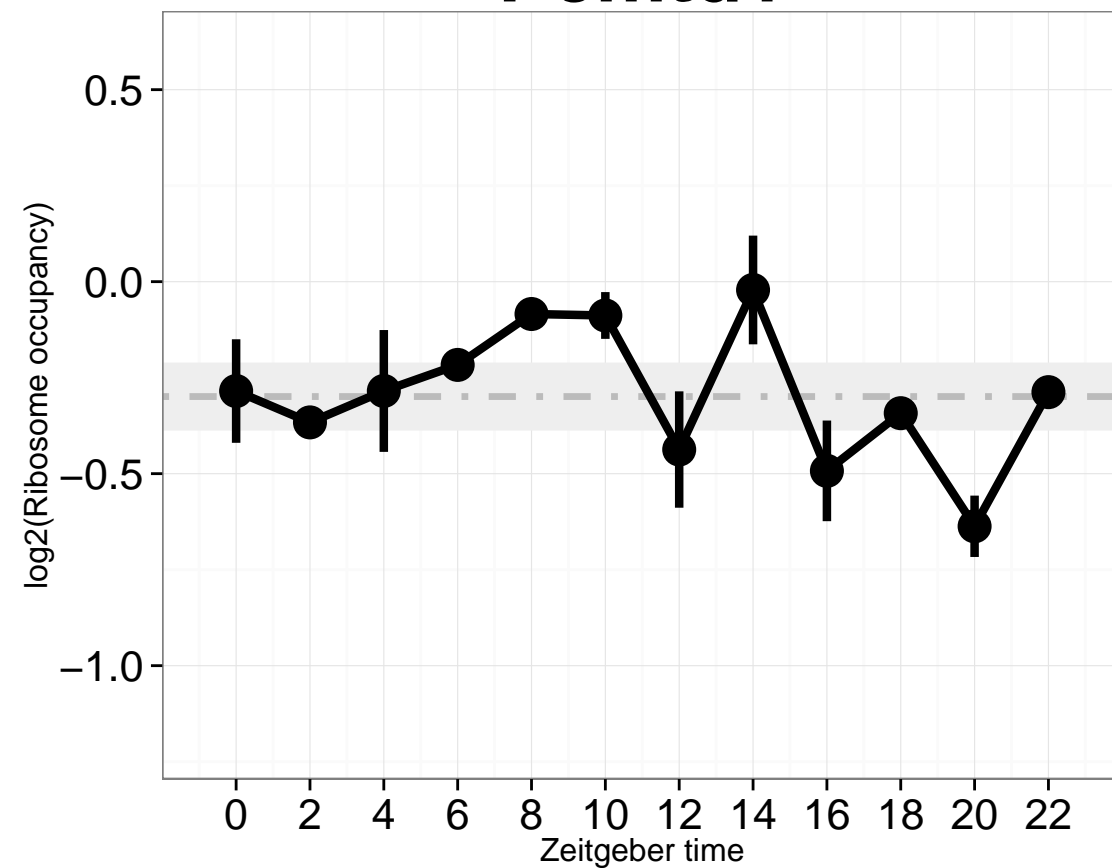

Supplement: Supplementary file 6564 [file 1]

# Gpr153

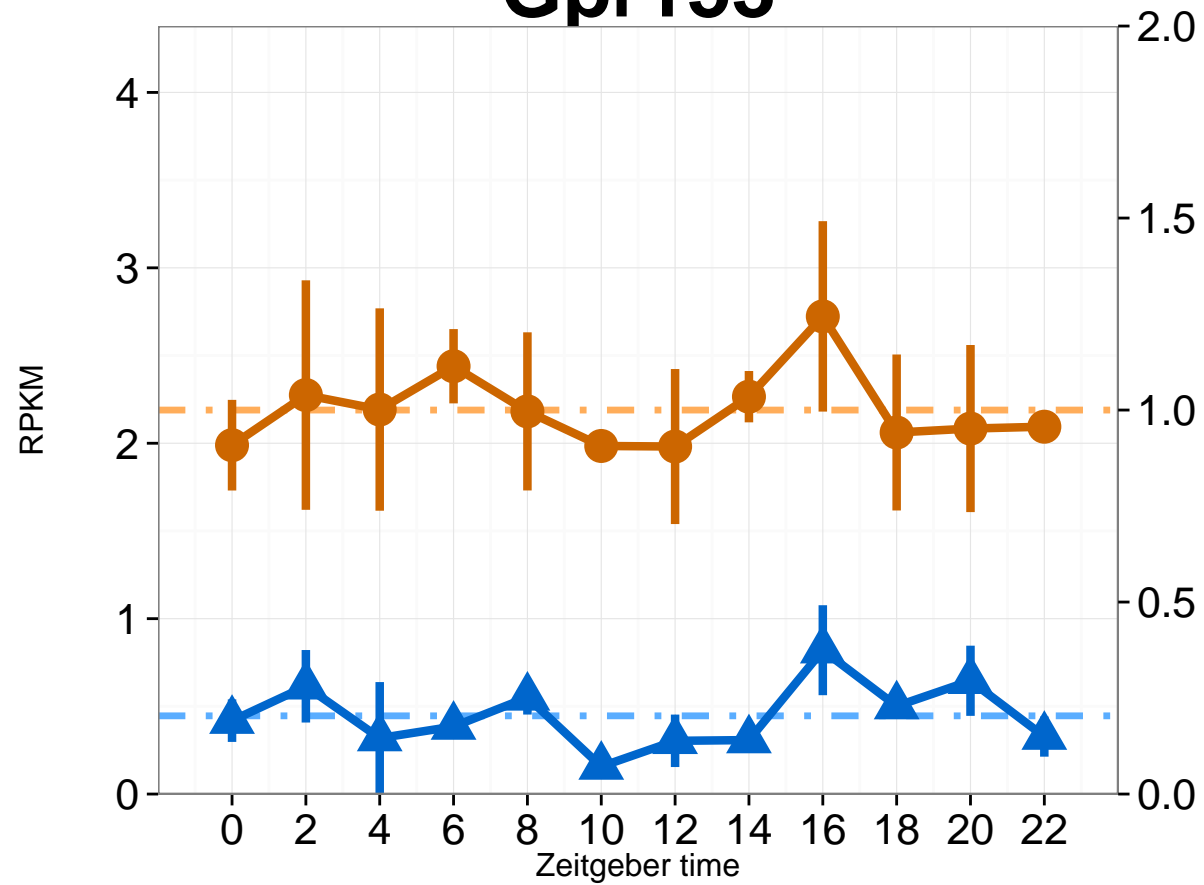

# Gpr153

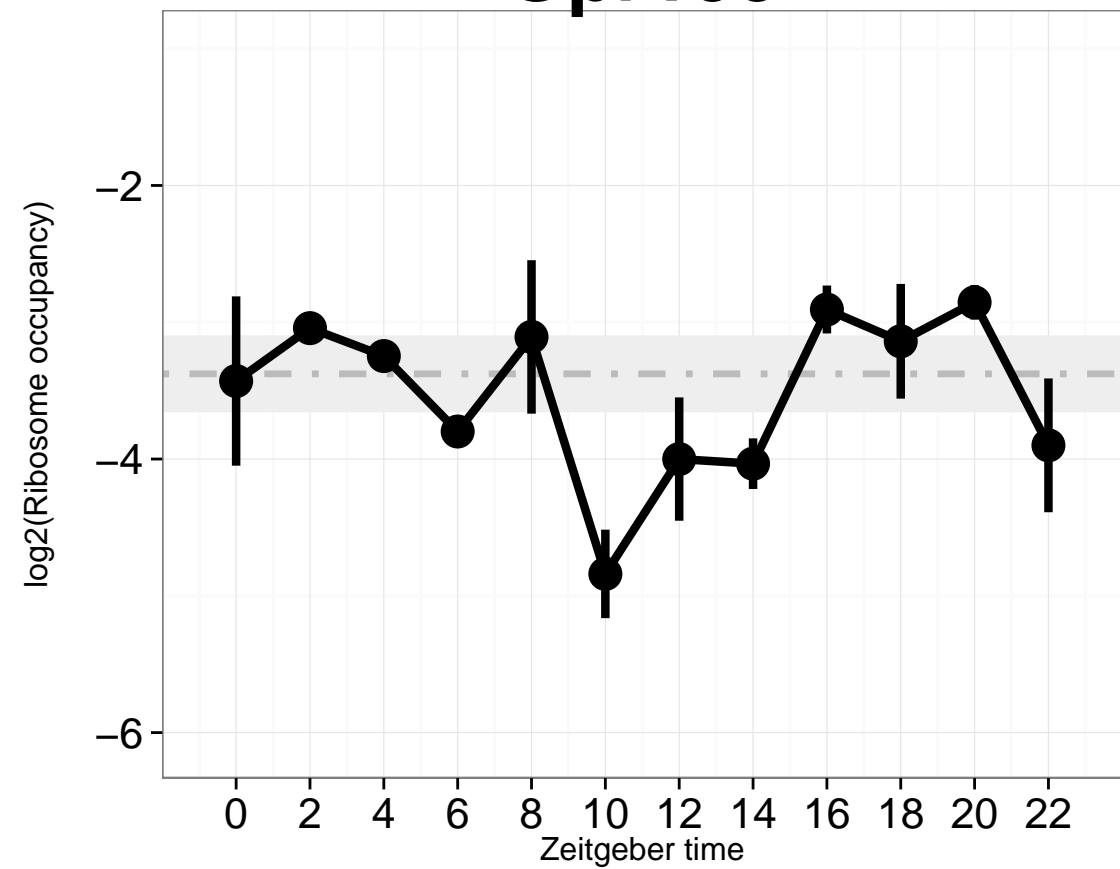

Supplement: Supplementary file 6565 [file 1]

## Gle1

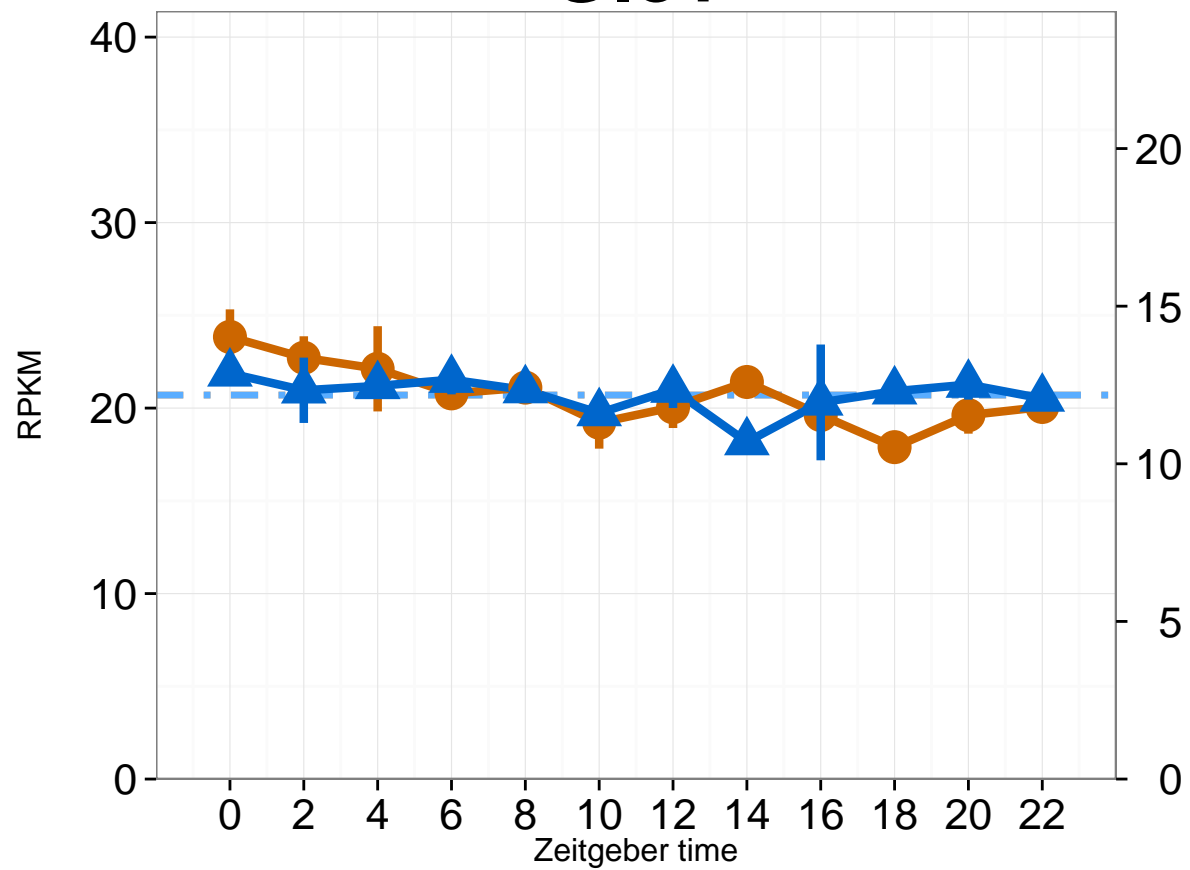

## Gle1

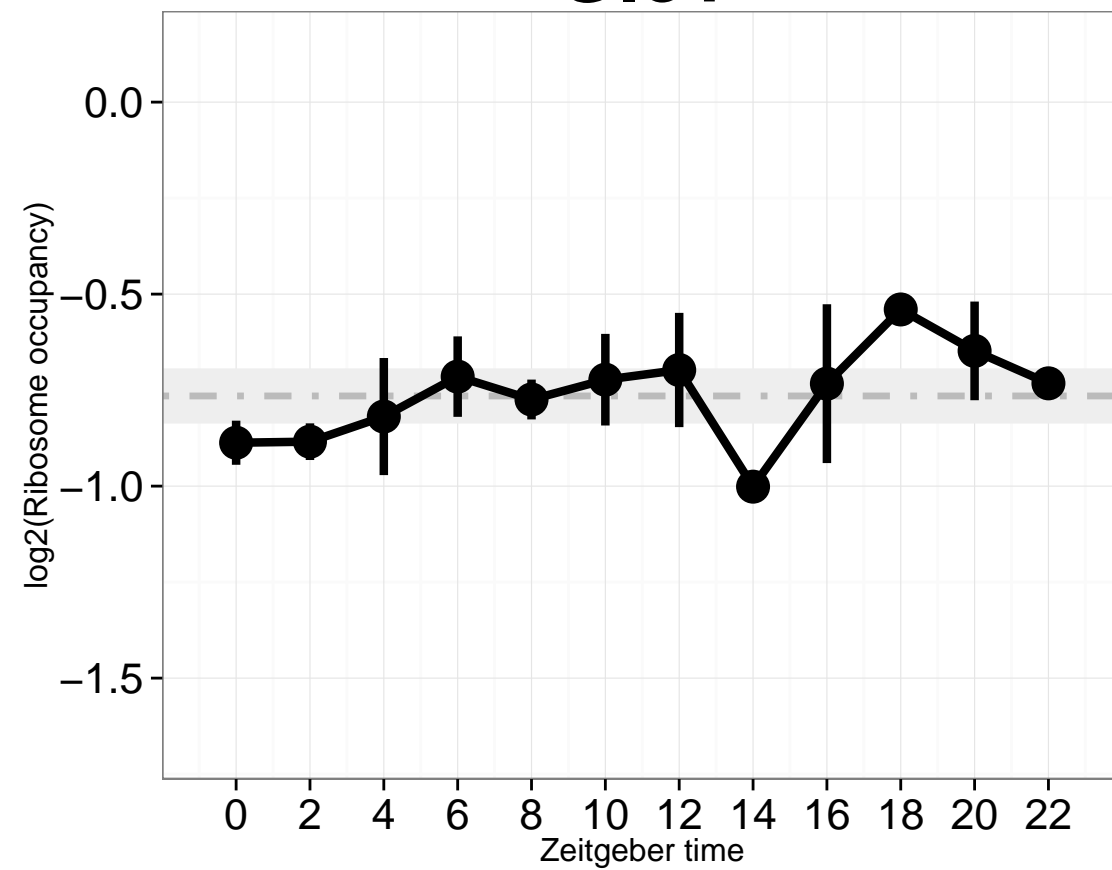

Supplement: Supplementary file 6566 [file 1]

# Dcp2

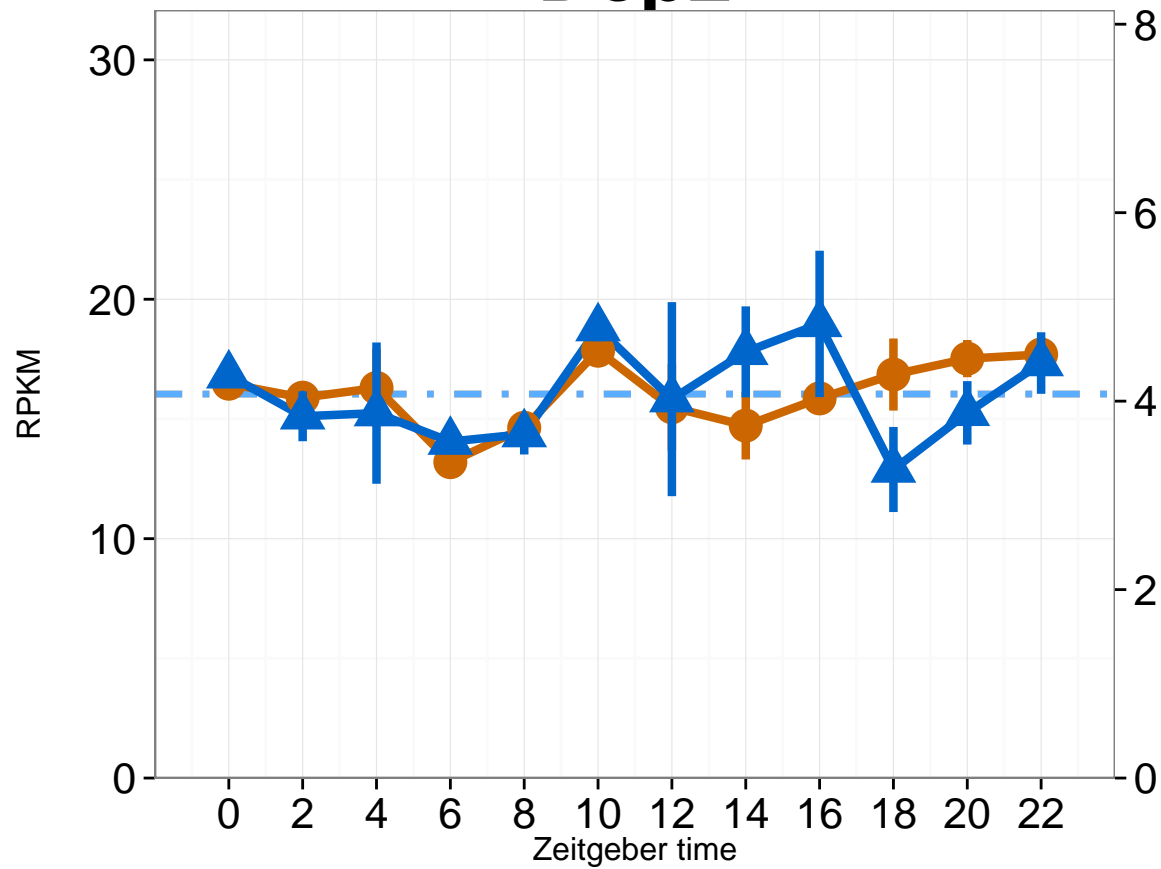

# Dcp2

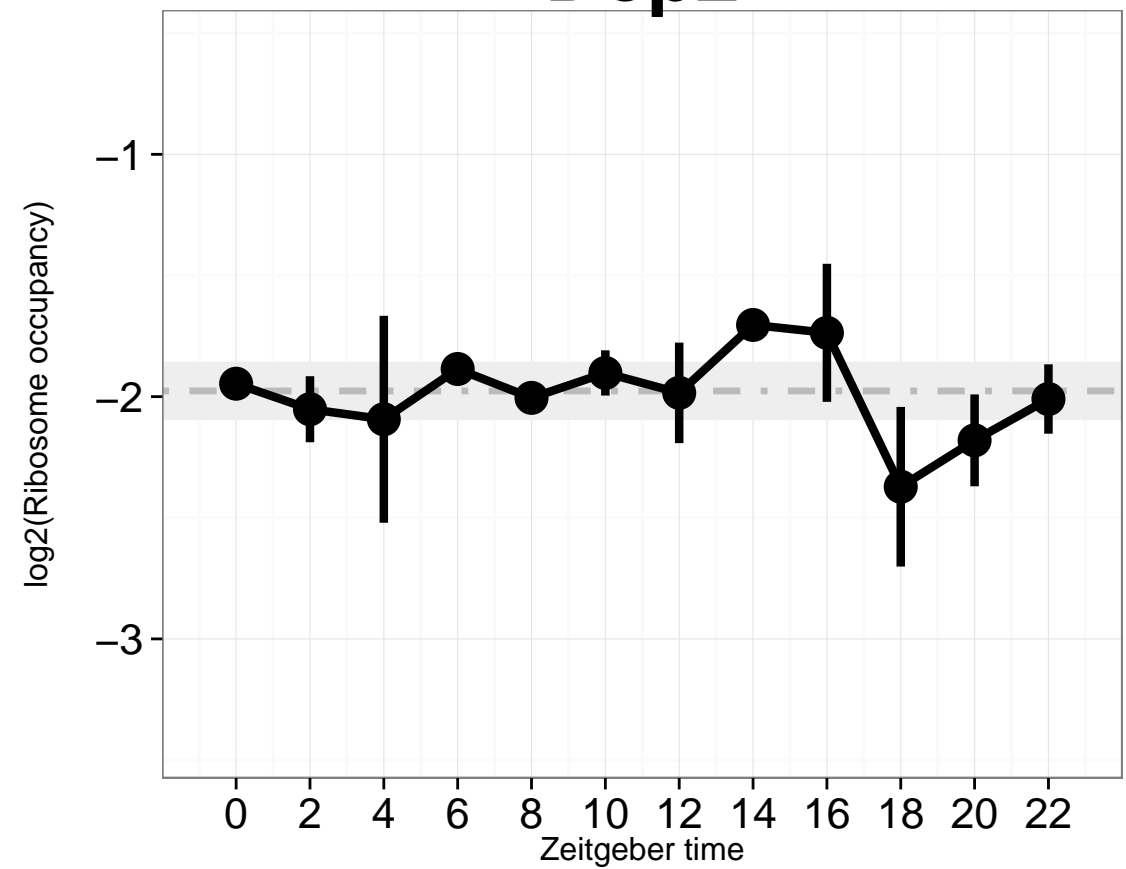

Supplement: Supplementary file 6567 [file 1]

## Rnh1

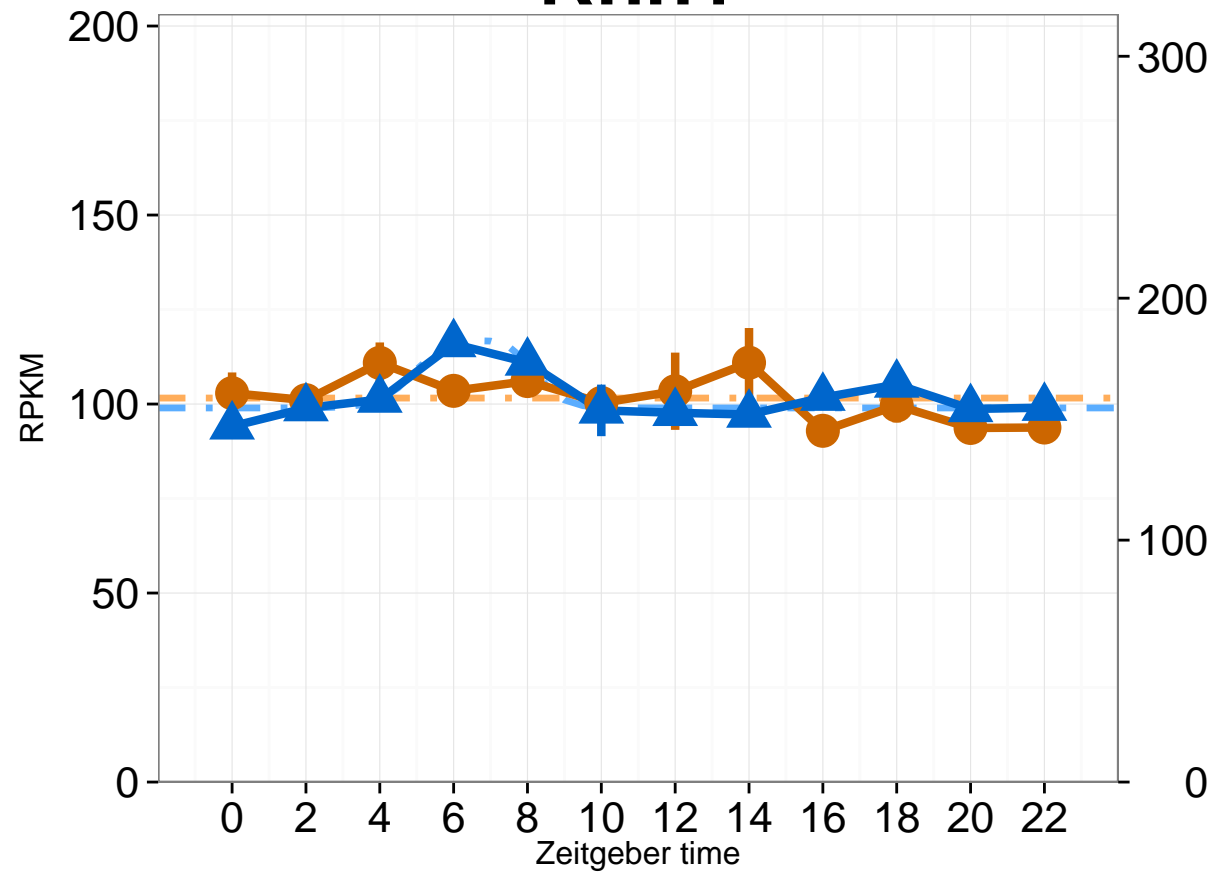

## Rnh1

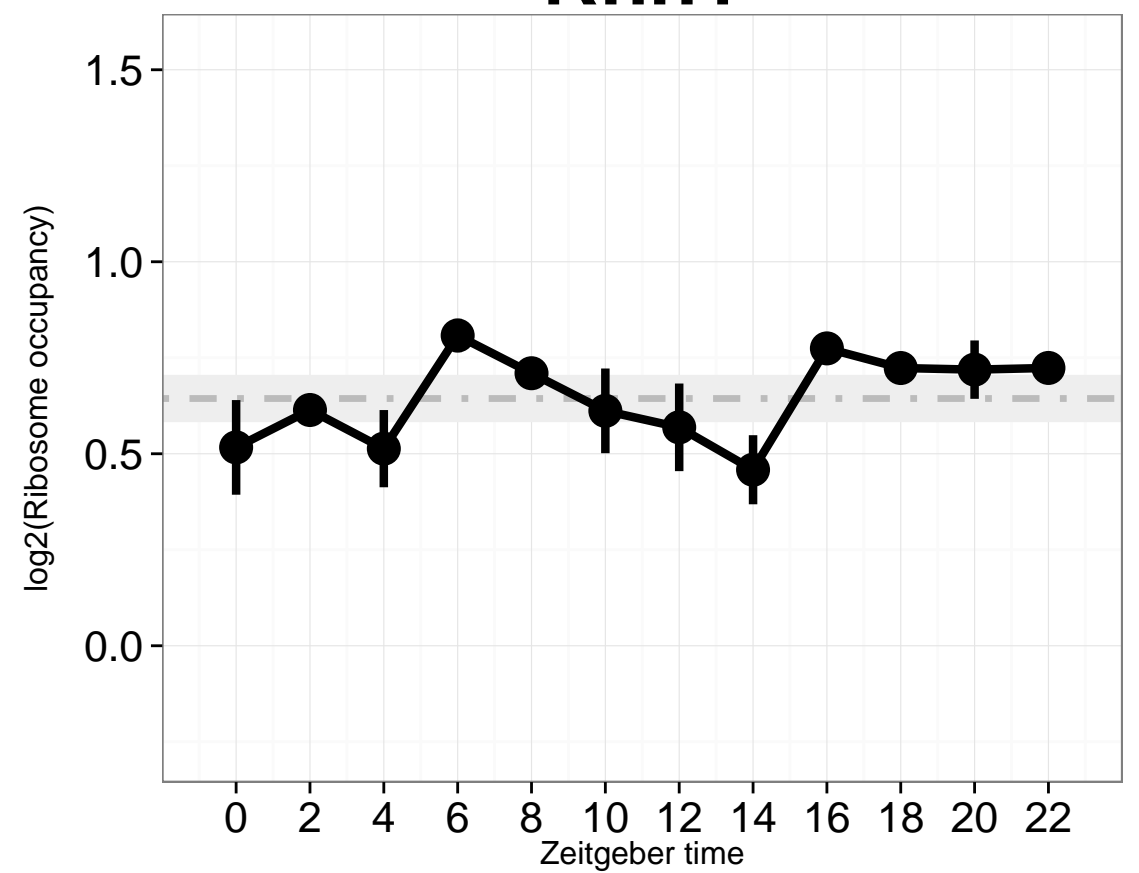

Supplement: Supplementary file 6568 [file 1]

# Iffo1

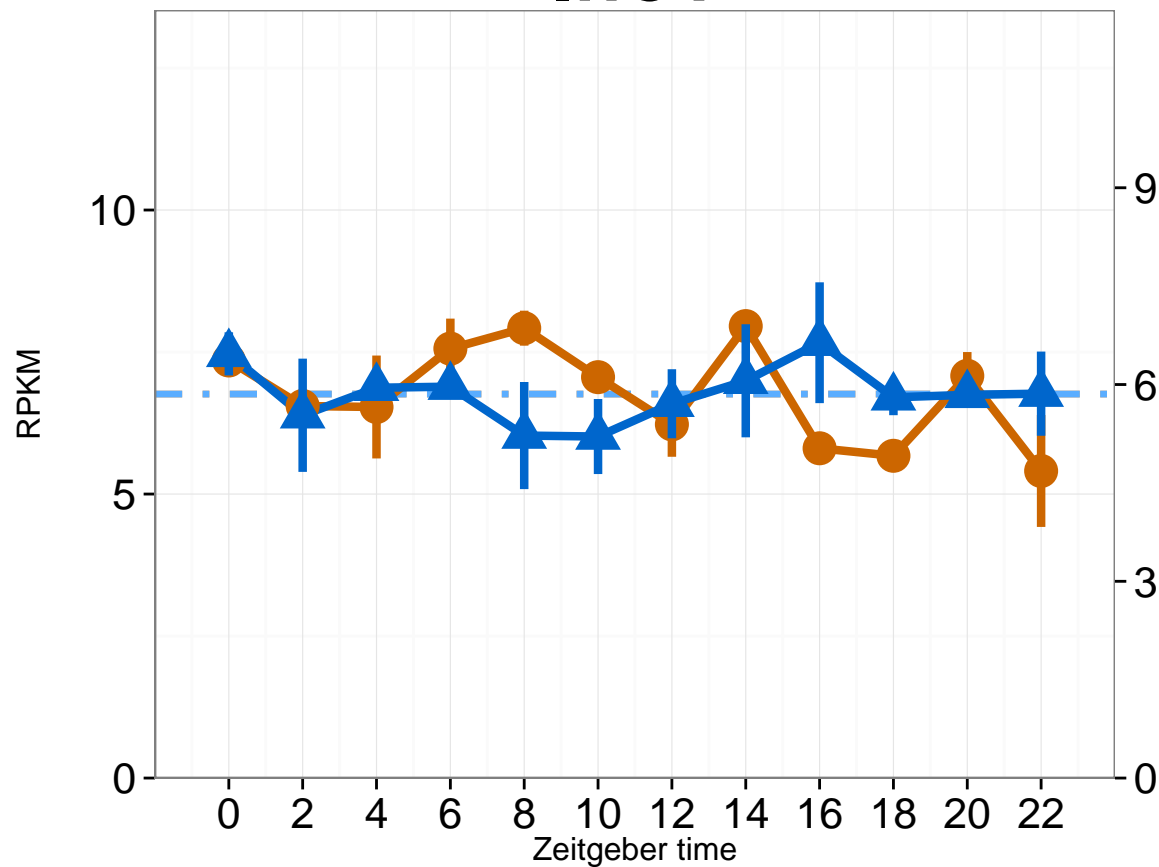

# Iffo1

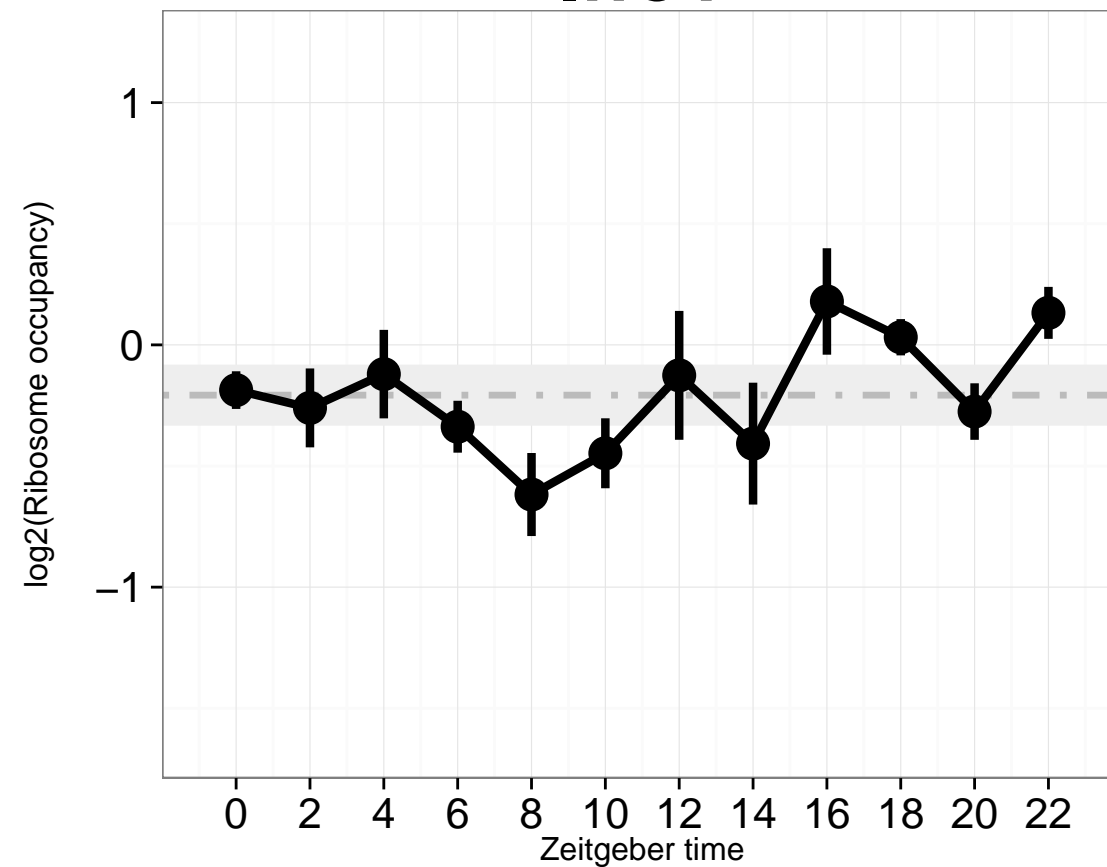

Supplement: Supplementary file 6569 [file 1]

# Trpv5

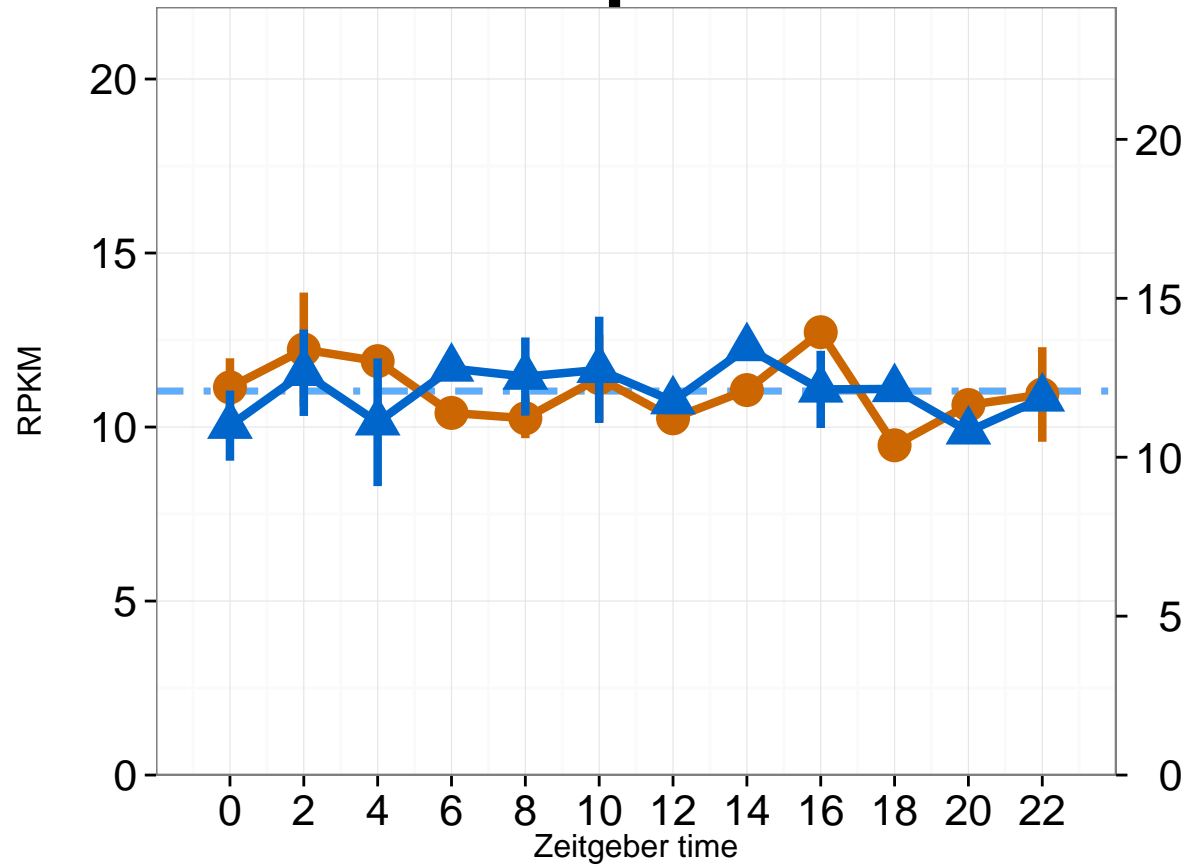

# Trpv5

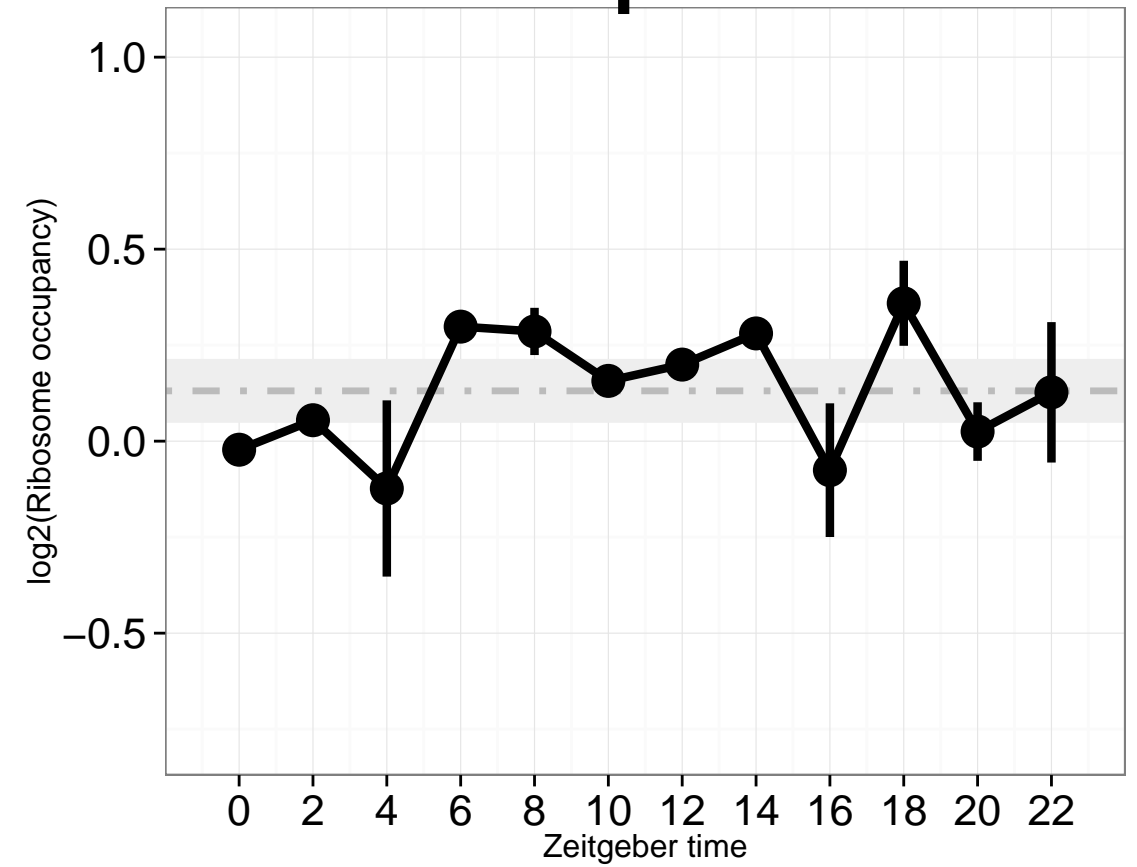

Supplement: Supplementary file 6570 [file 1]

# D8Ertd738e

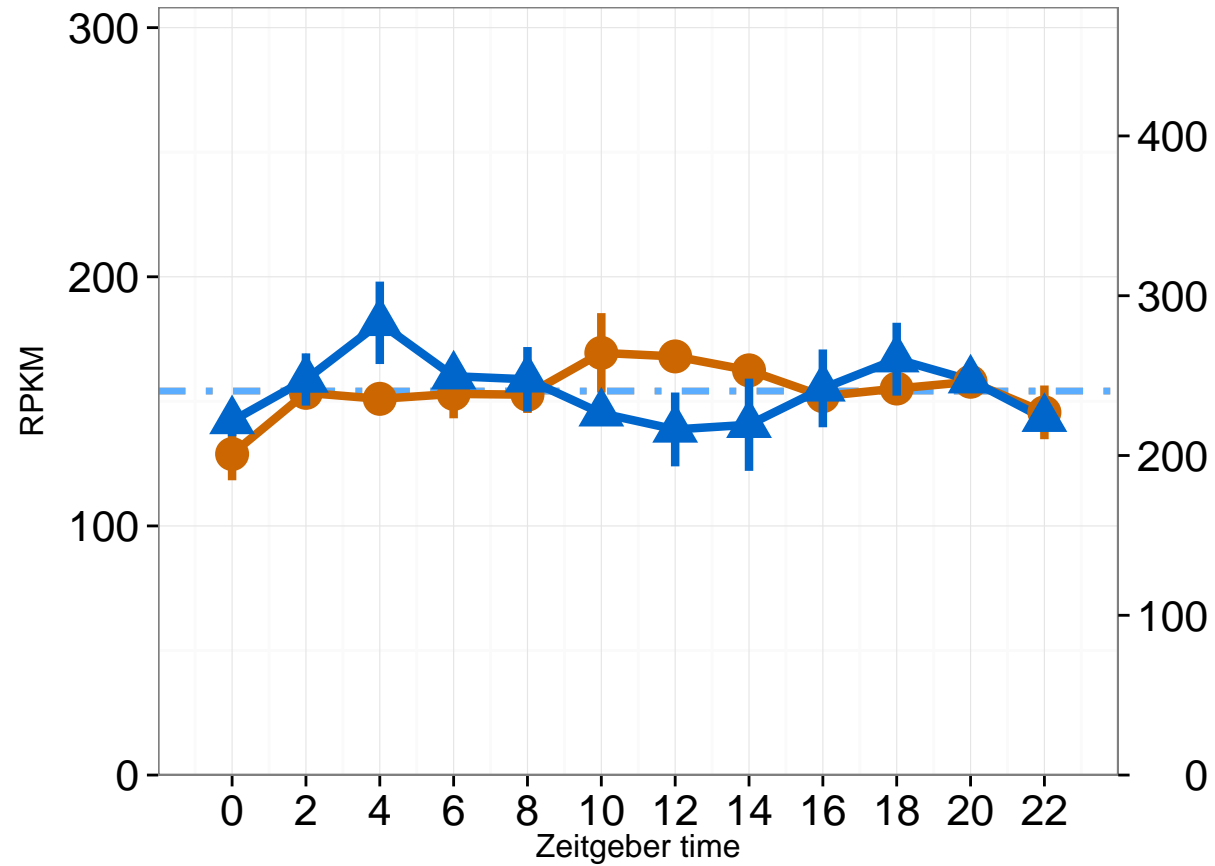

# D8Ertd738e

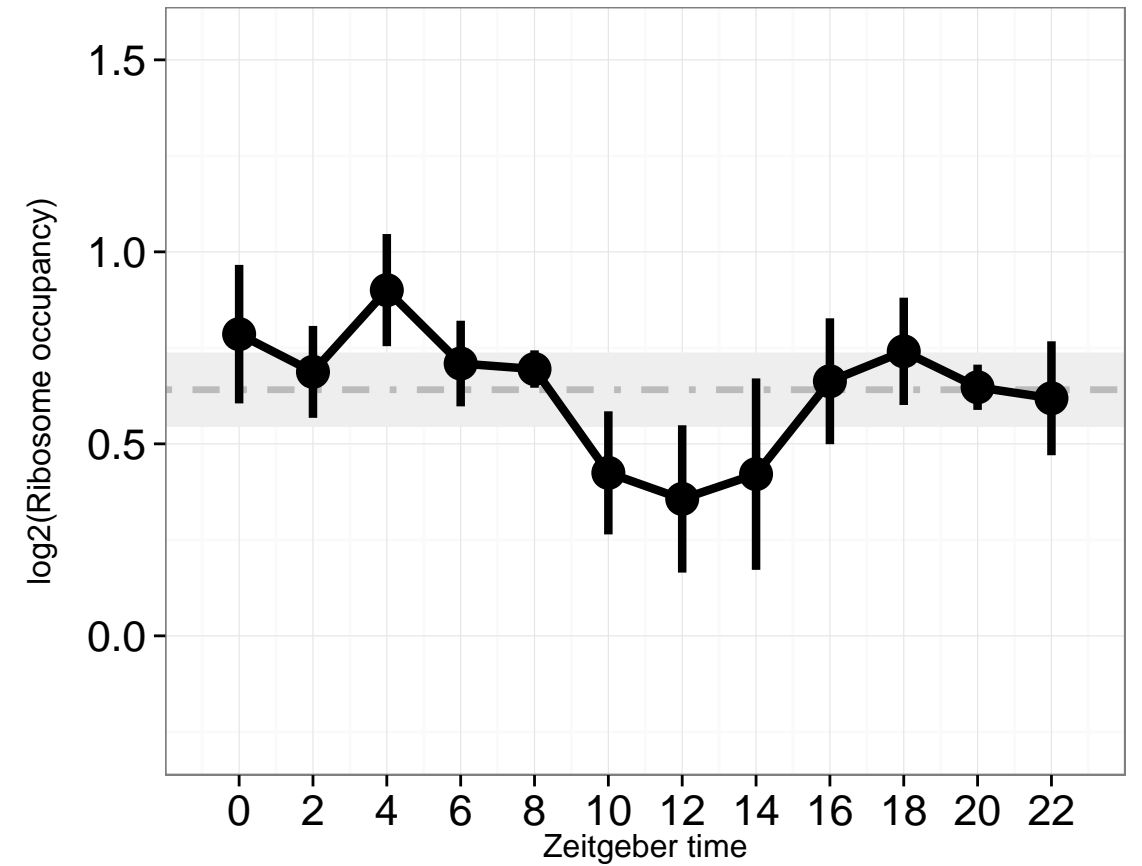

Supplement: Supplementary file 6571 [file 1]

## Gipc2

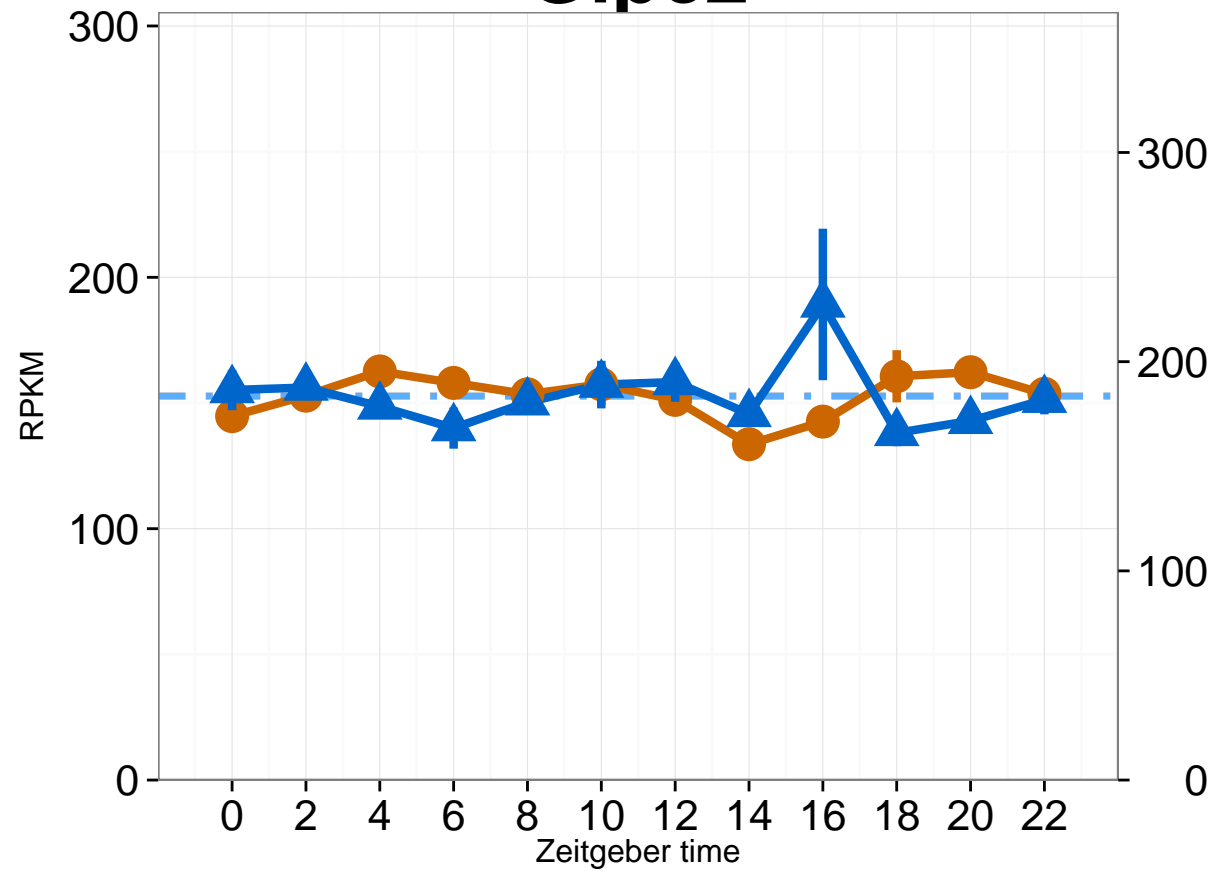

## Gipc2

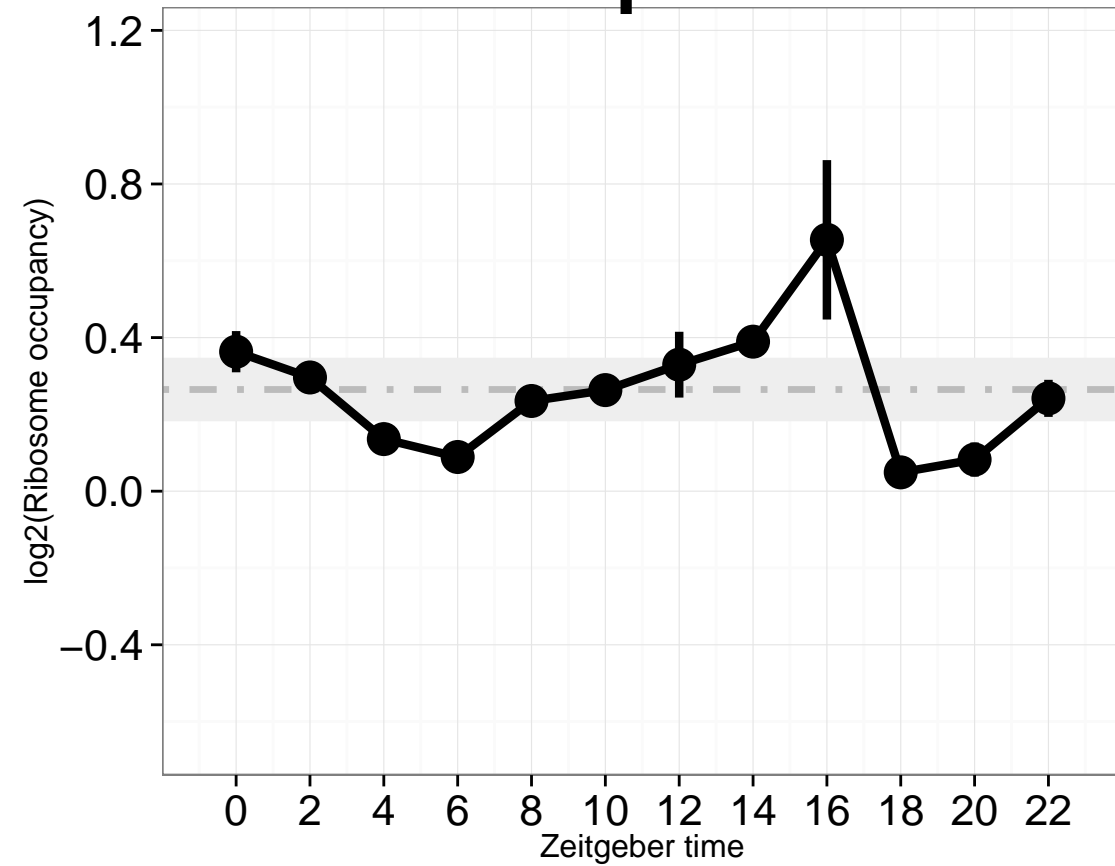

Supplement: Supplementary file 6572 [file 1]

## Nol8

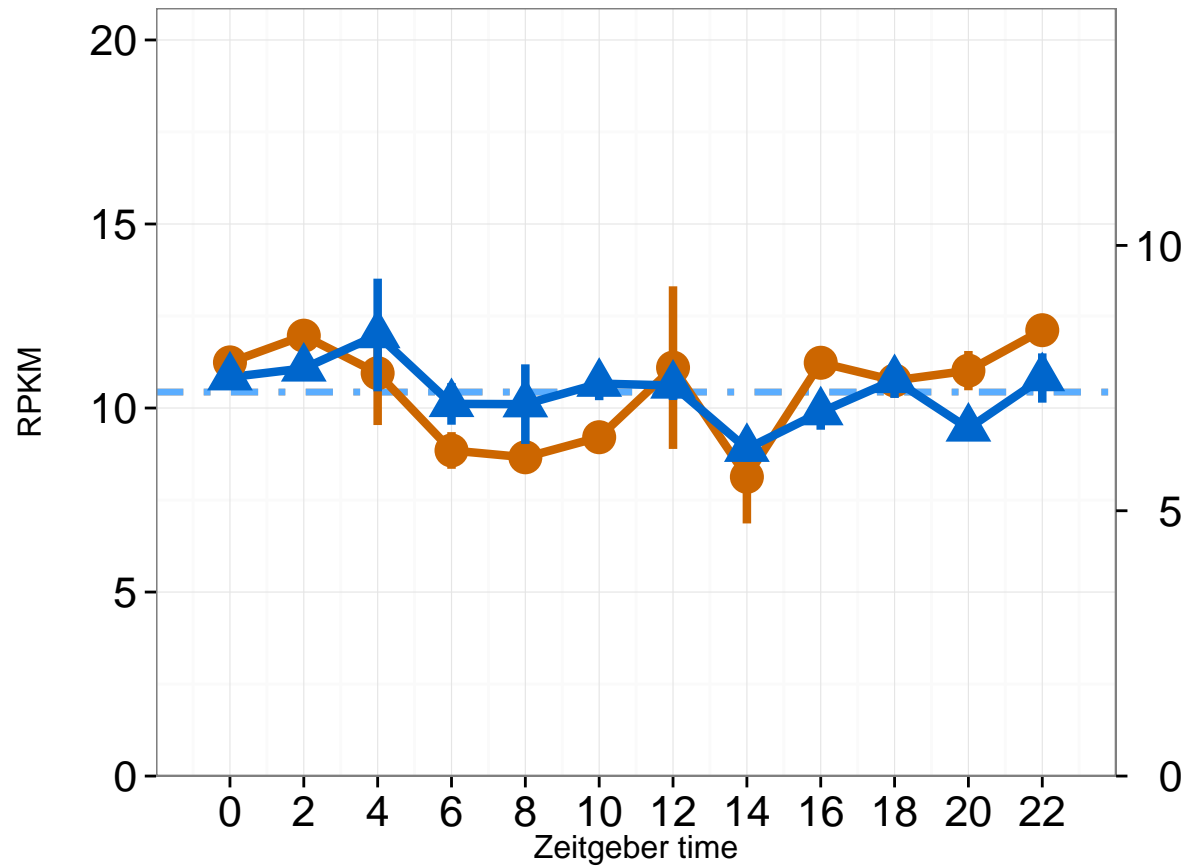

## Nol8

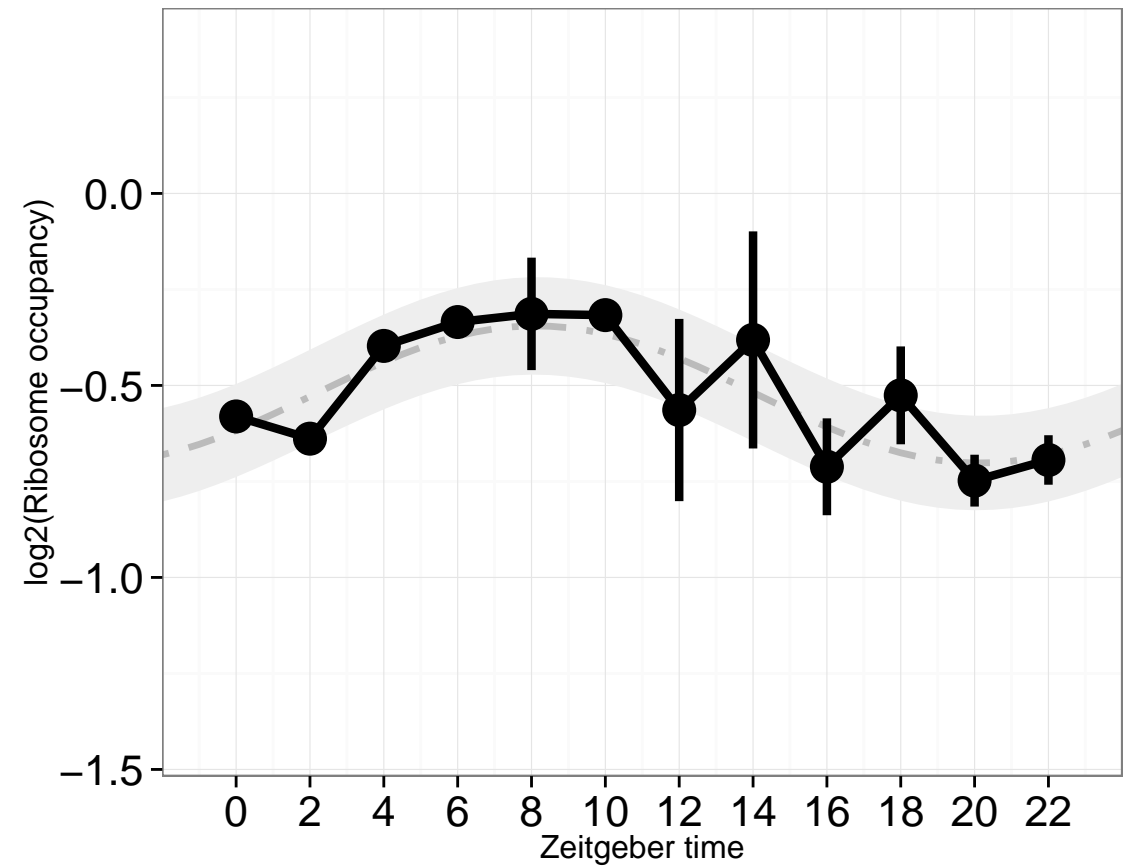

Supplement: Supplementary file 6573 [file 1]

## Polg

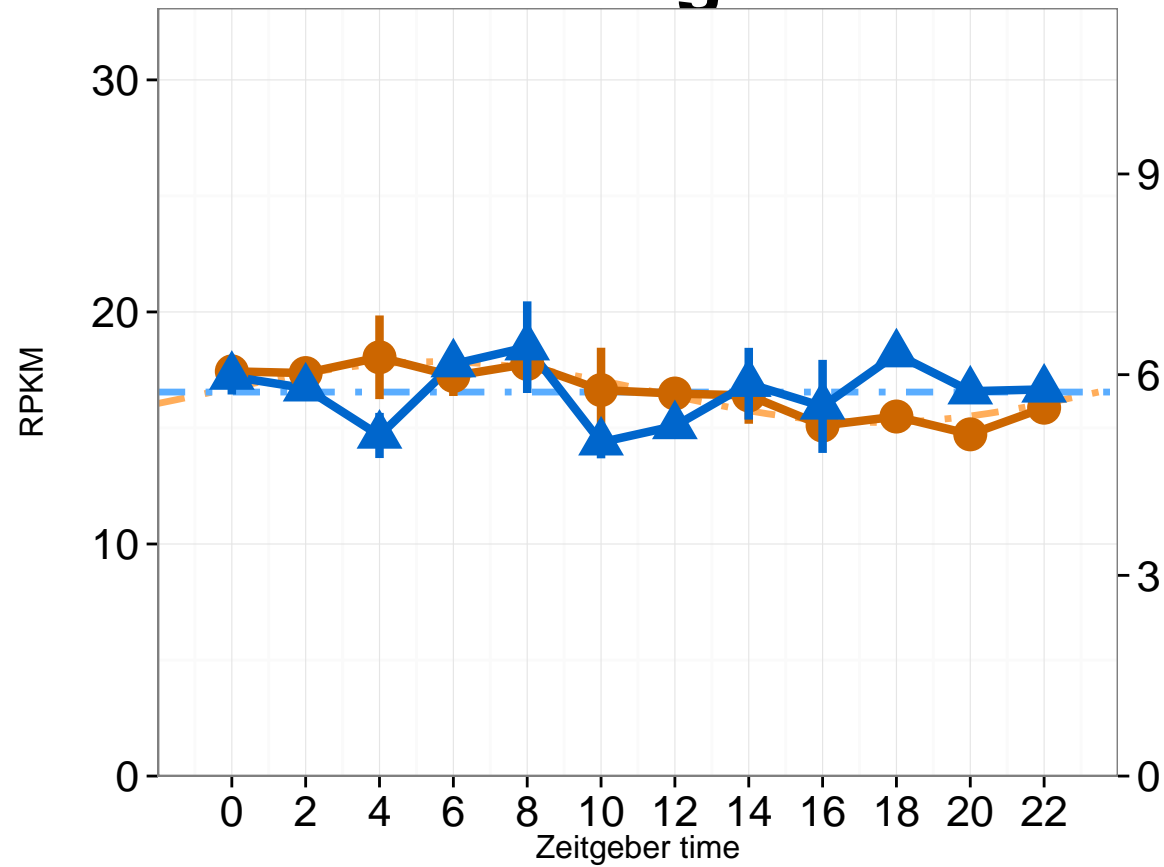

## Polg

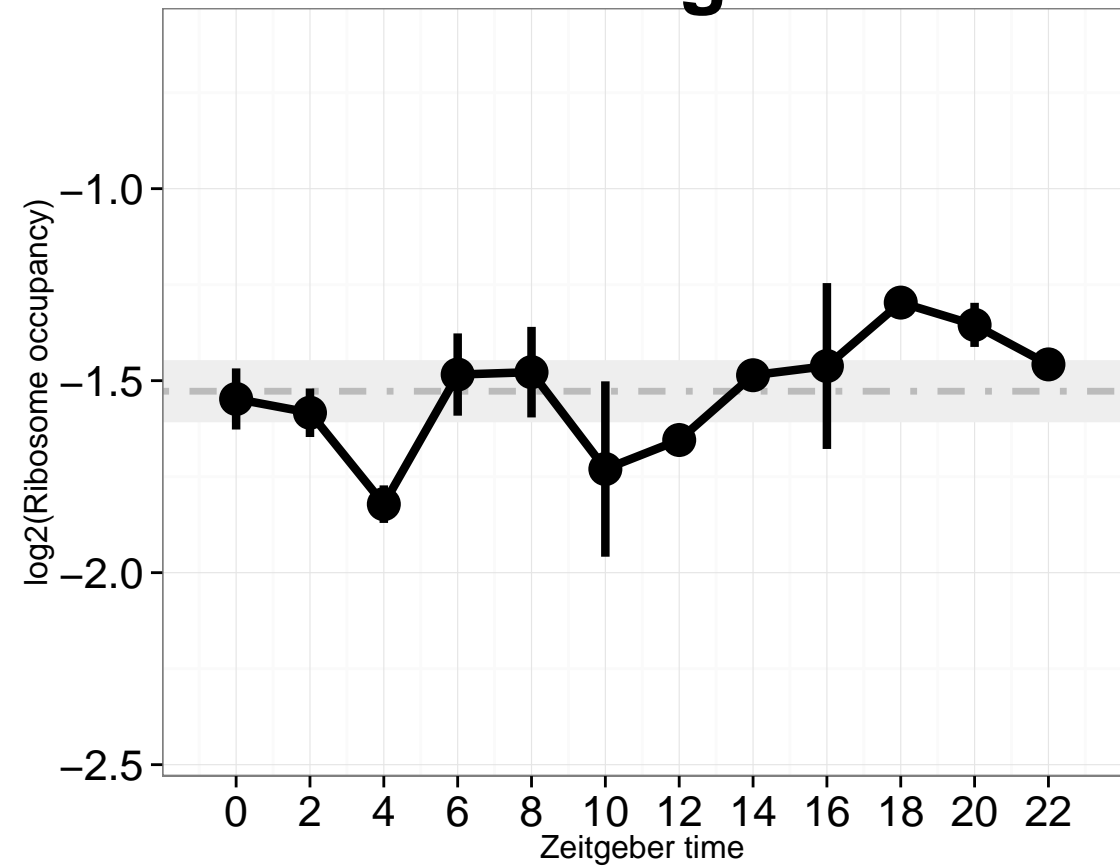

Supplement: Supplementary file 6574 [file 1]

## Abcf3

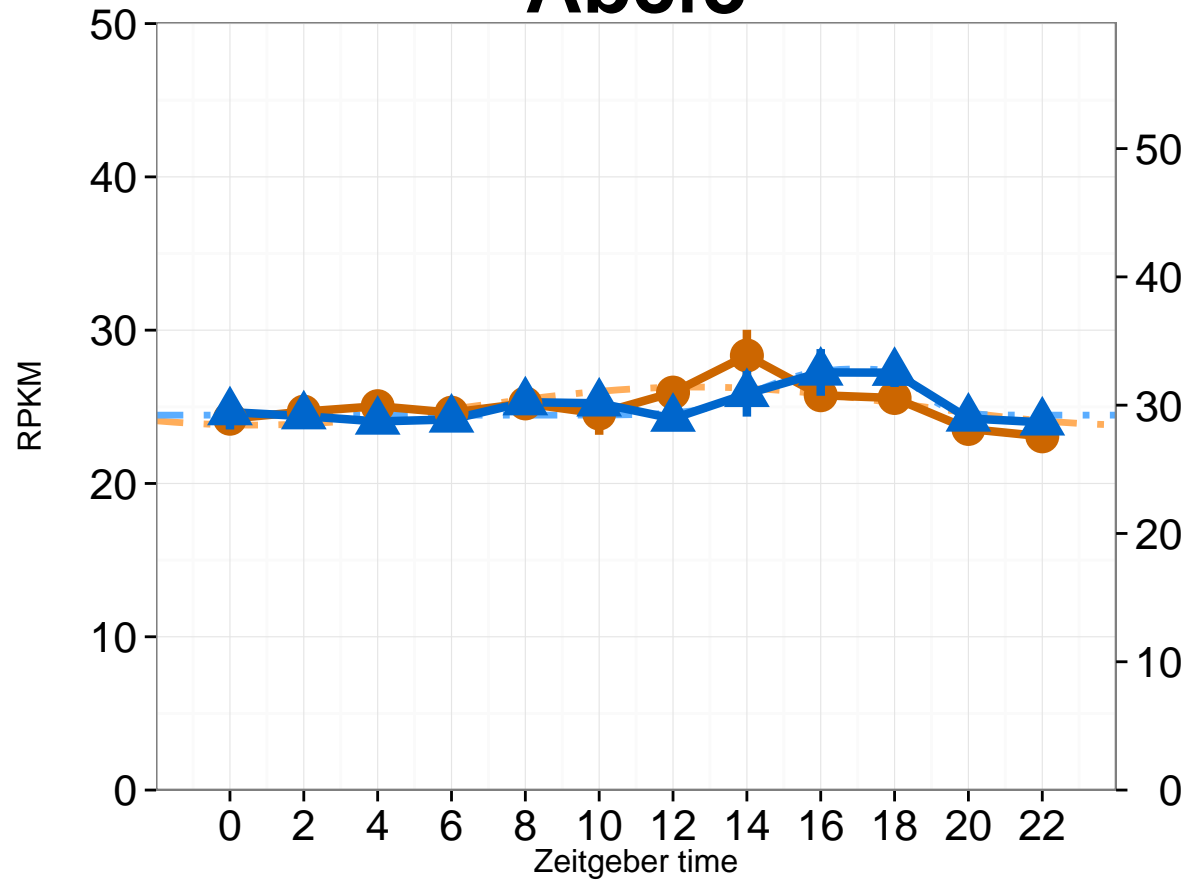

## Abcf3

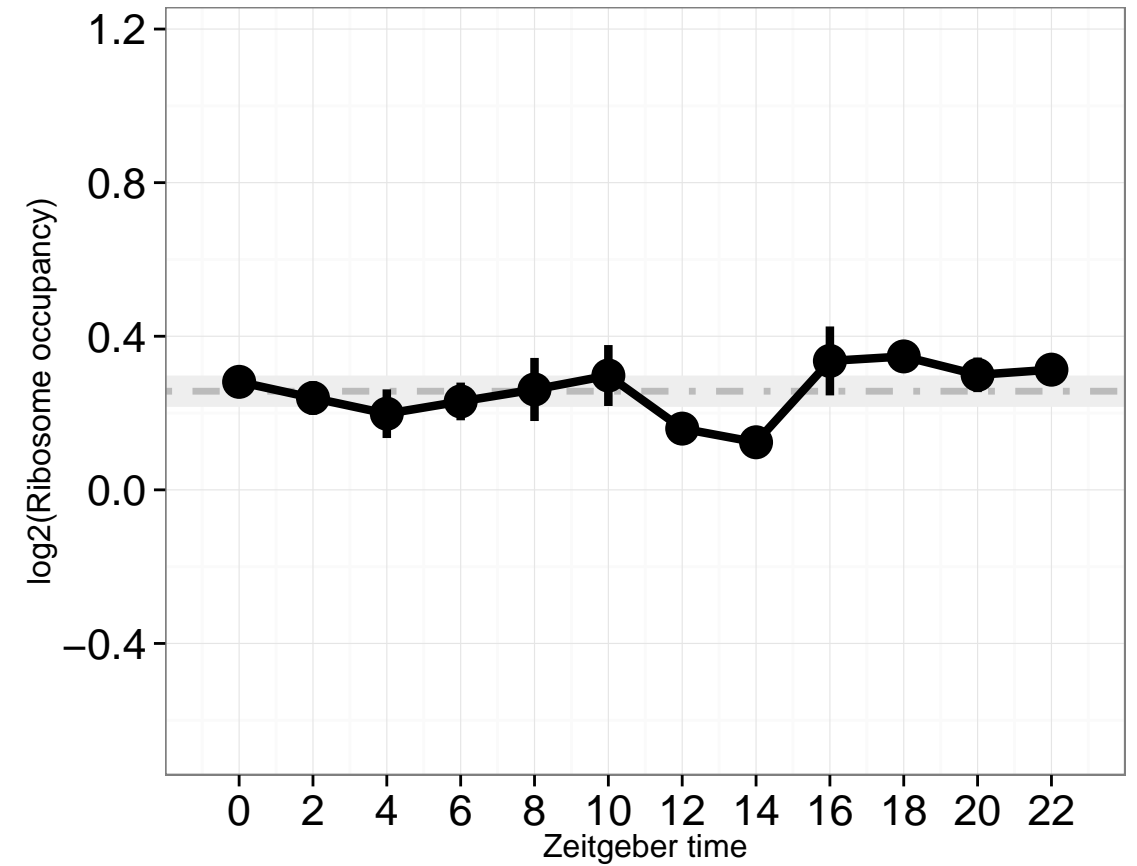

Supplement: Supplementary file 6575 [file 1]

# Otud1

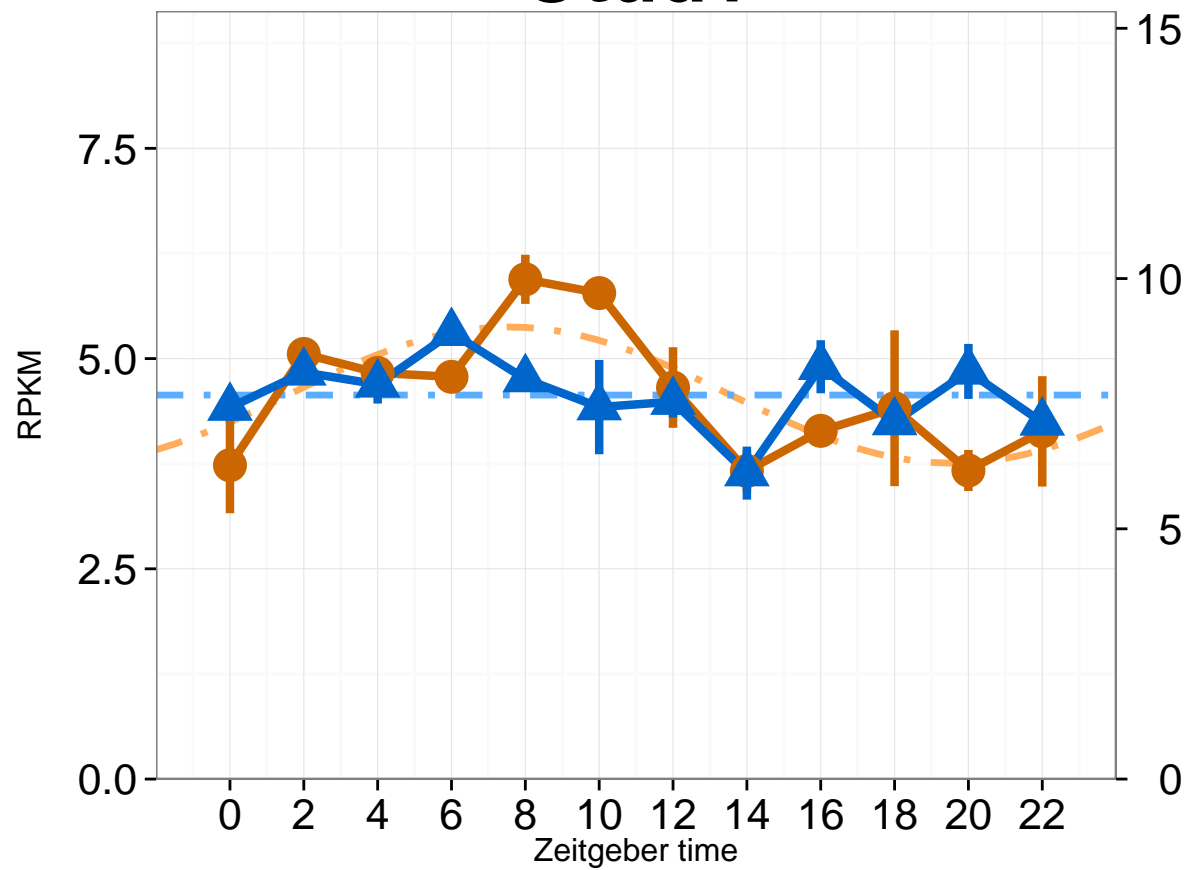

# Otud1

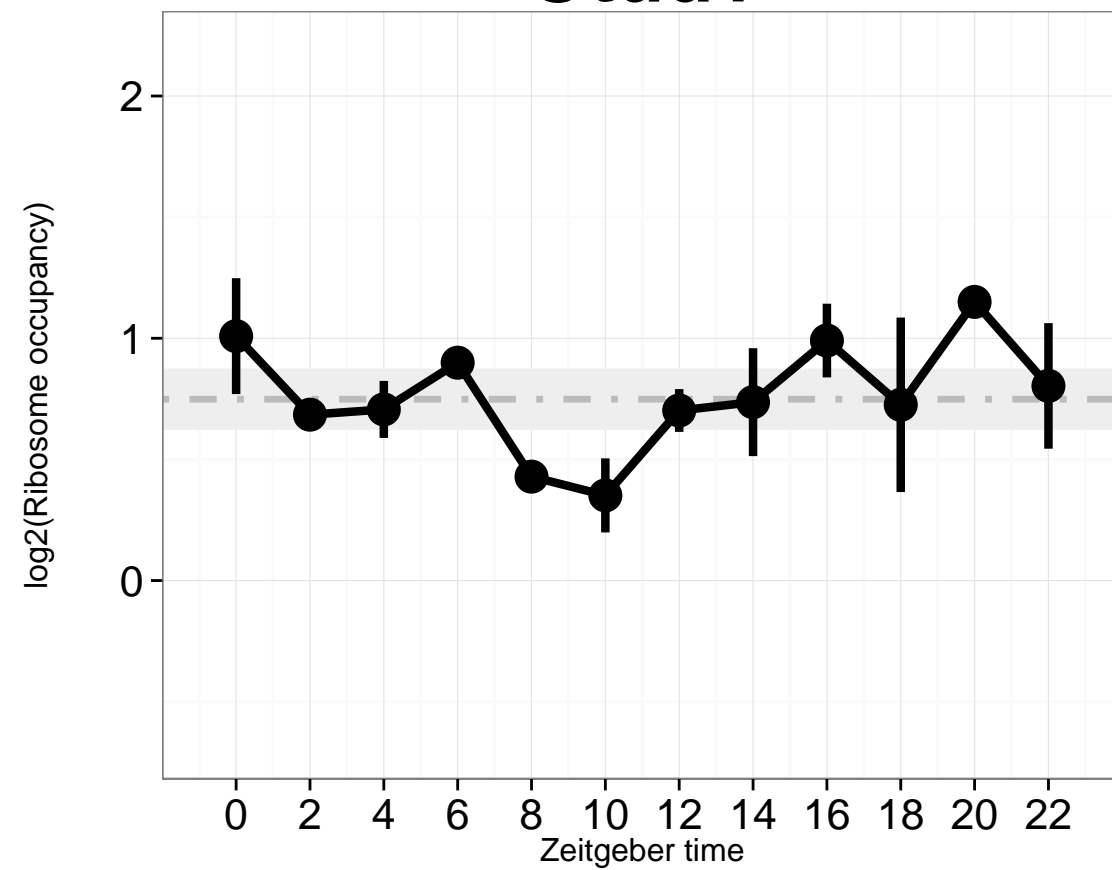

Supplement: Supplementary file 6576 [file 1]

## Pak2

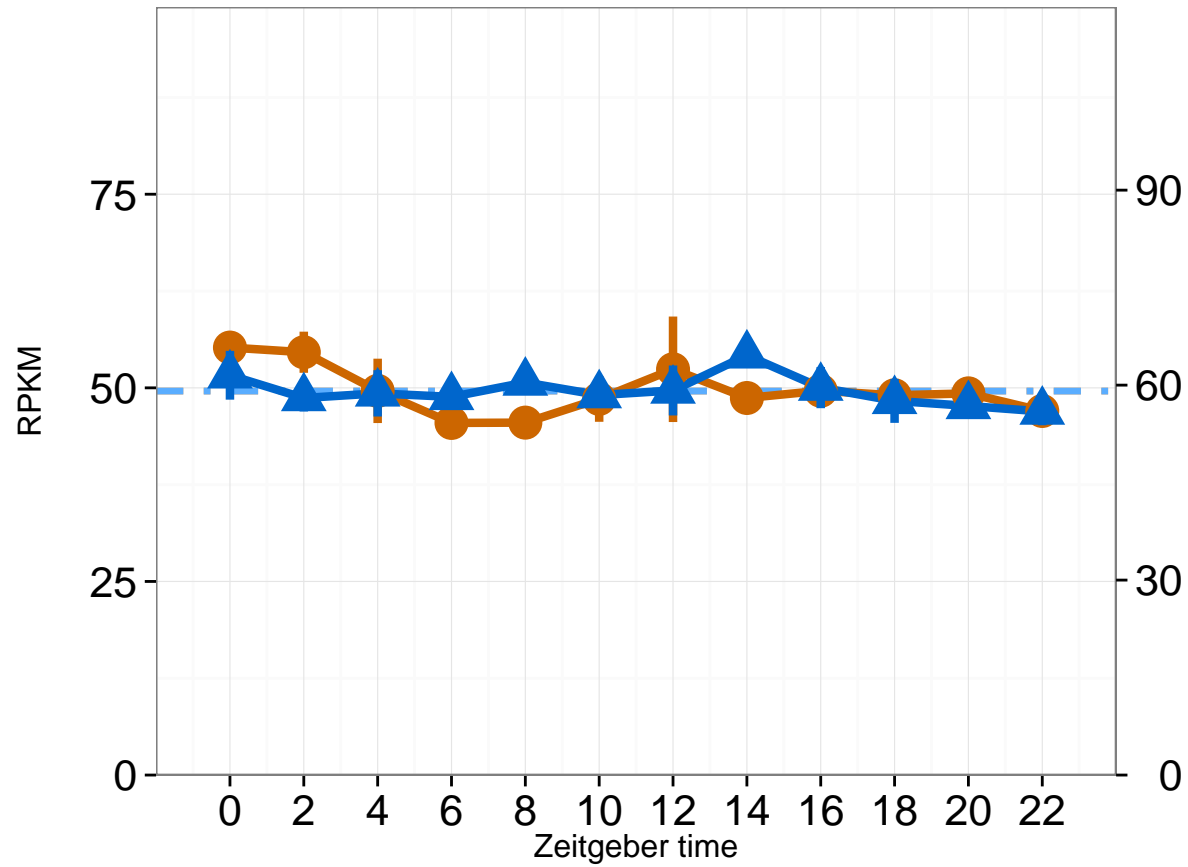

## Pak2

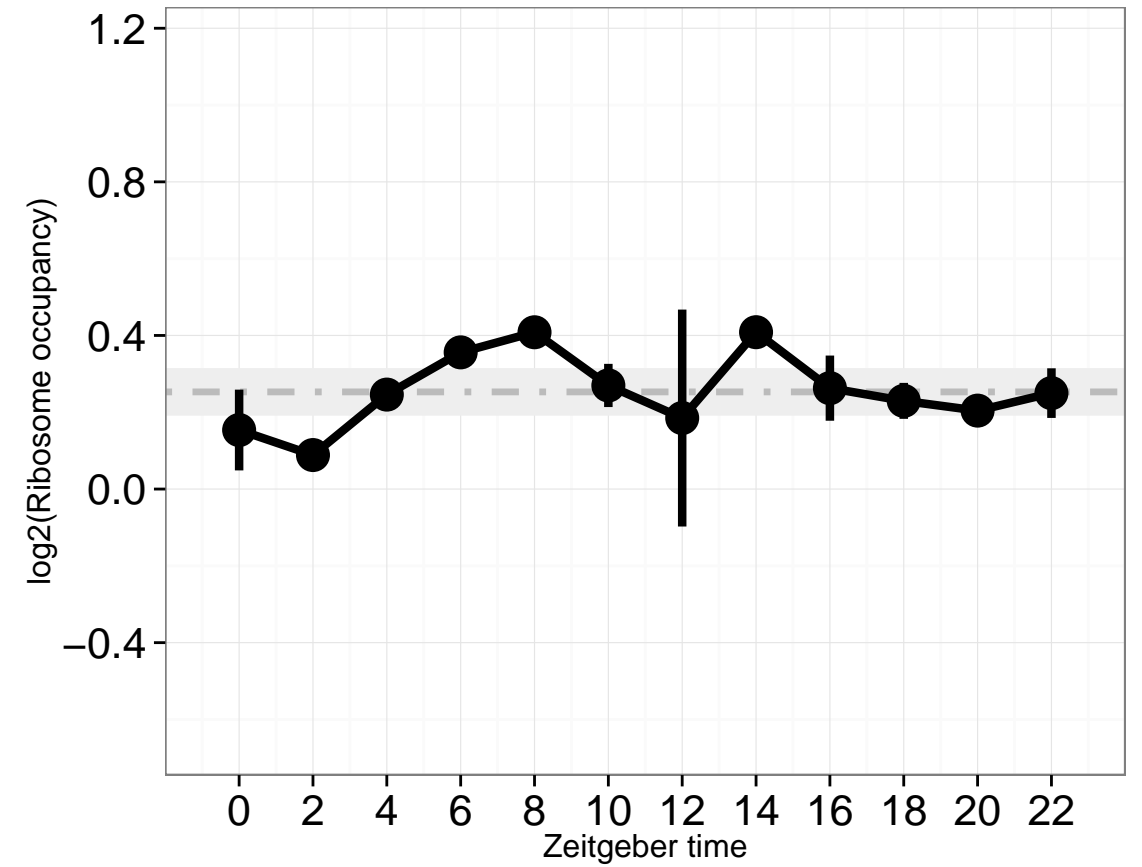

Supplement: Supplementary file 6577 [file 1]

## Alg9

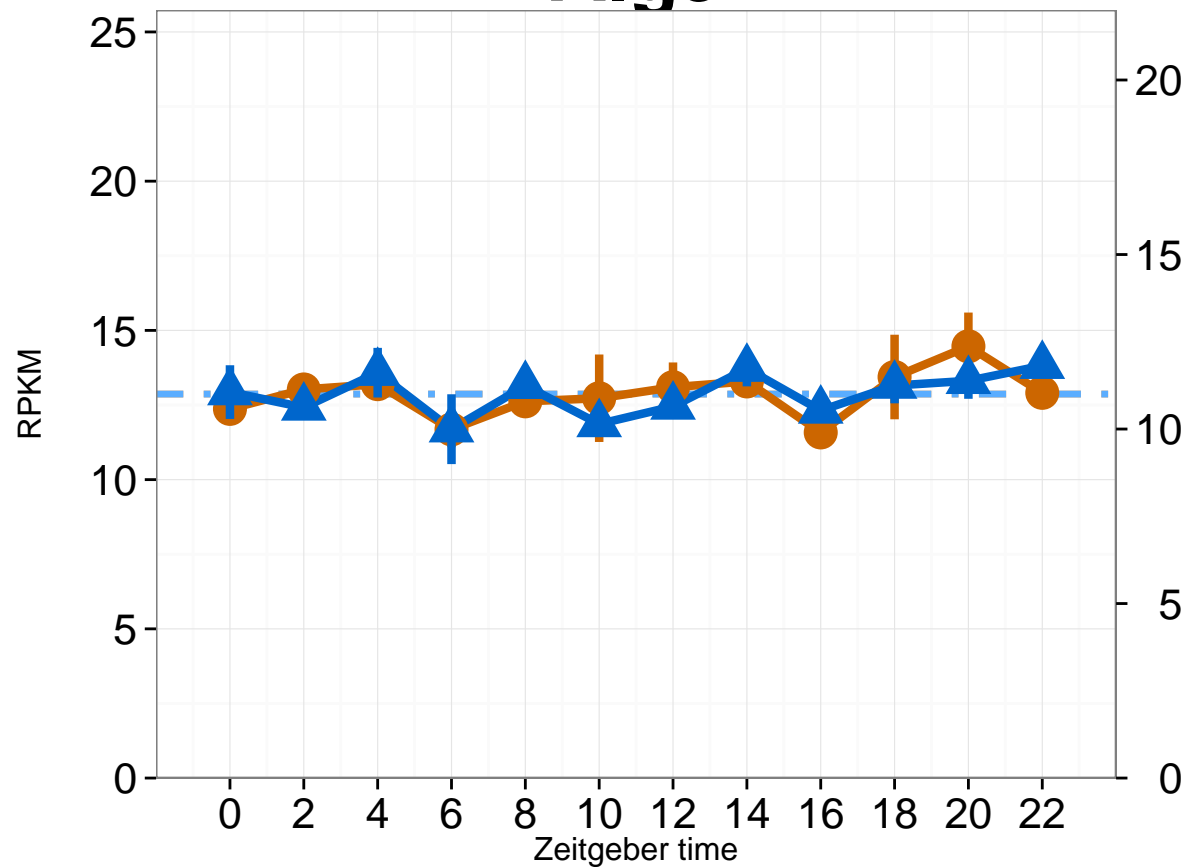

## Alg9

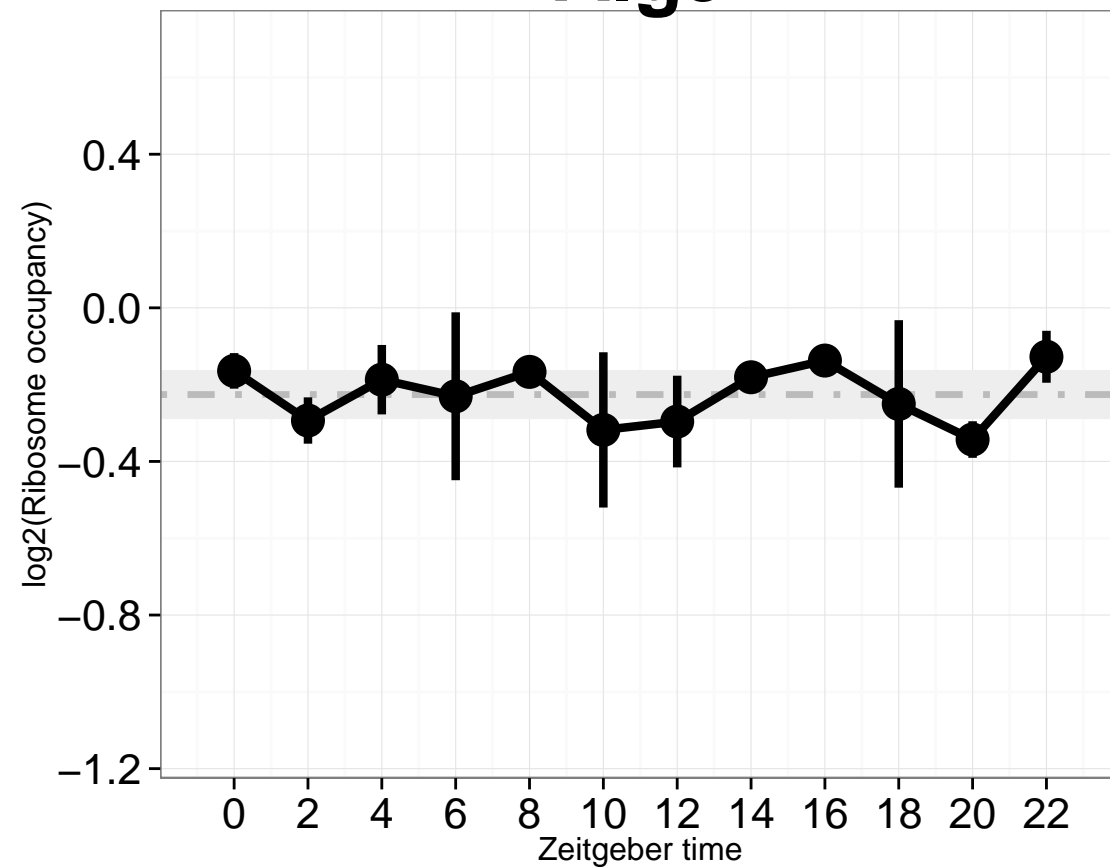

Supplement: Supplementary file 6578 [file 1]

## Plcl2

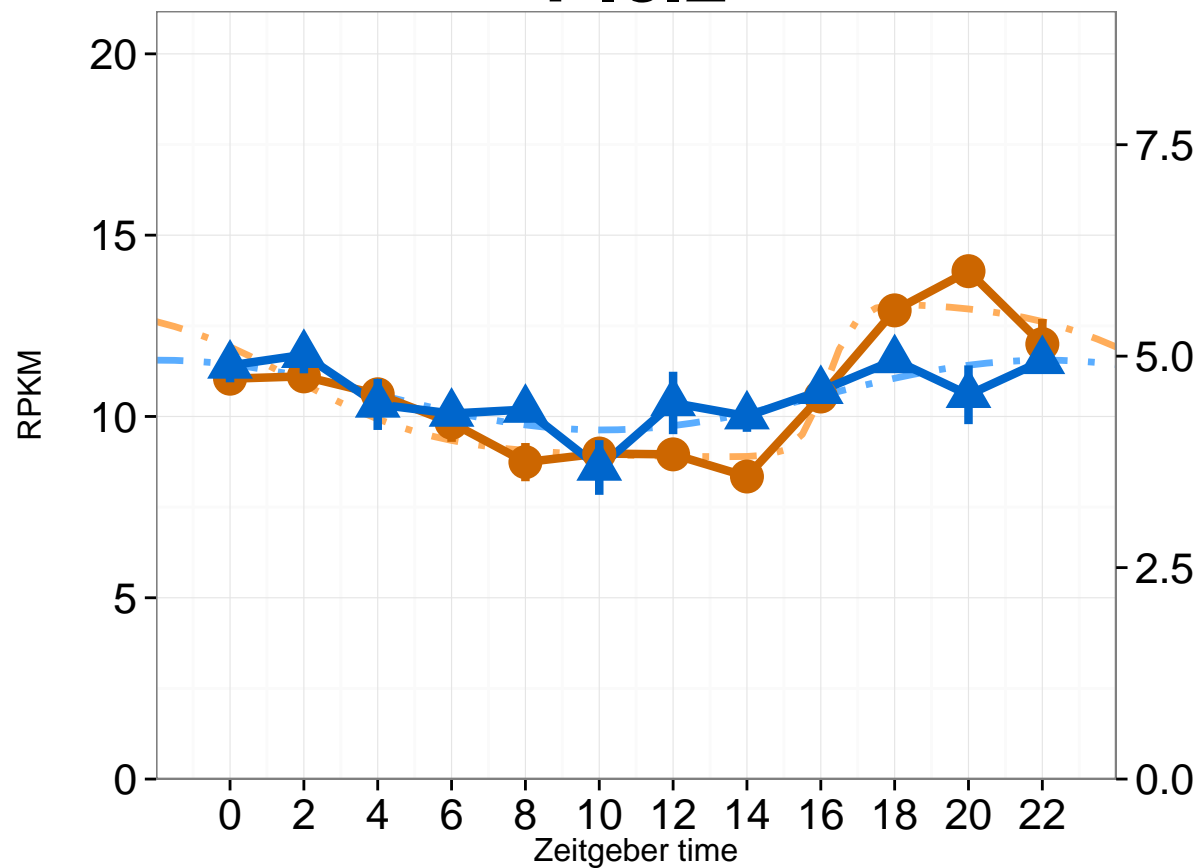

## Plcl2

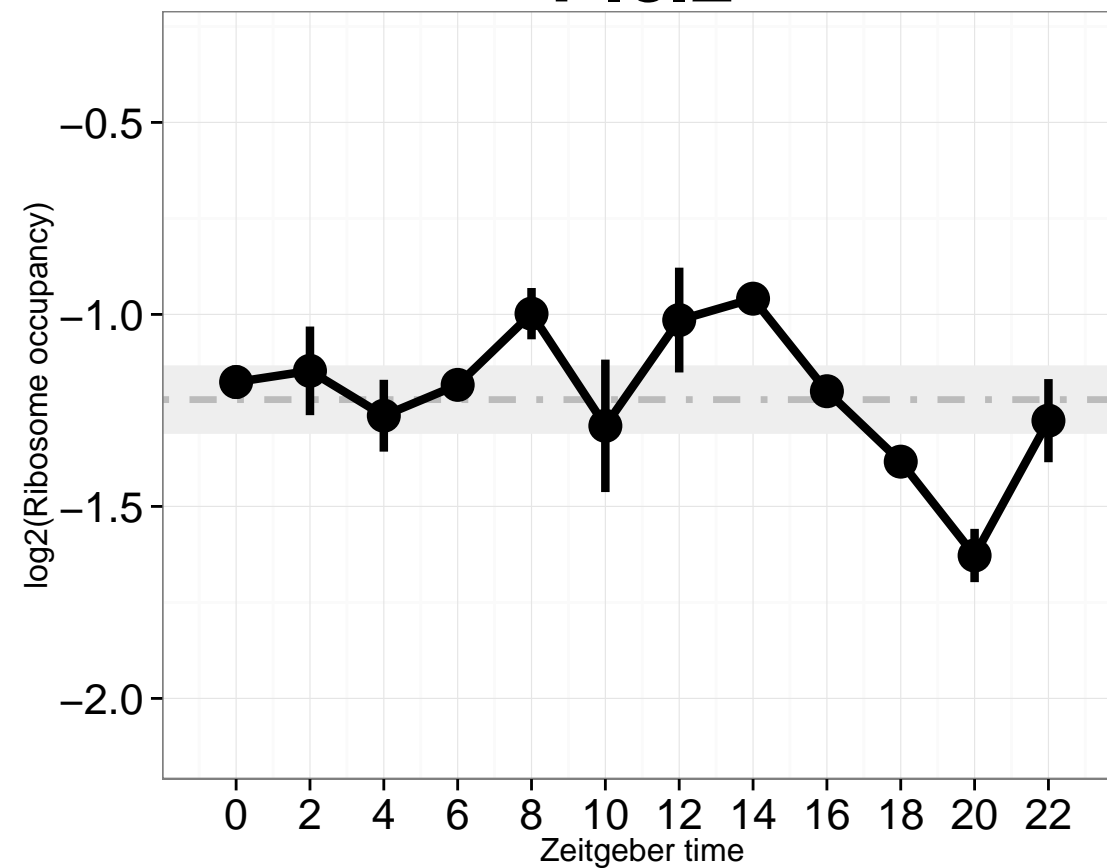

Supplement: Supplementary file 6579 [file 1]

# Tubb2a

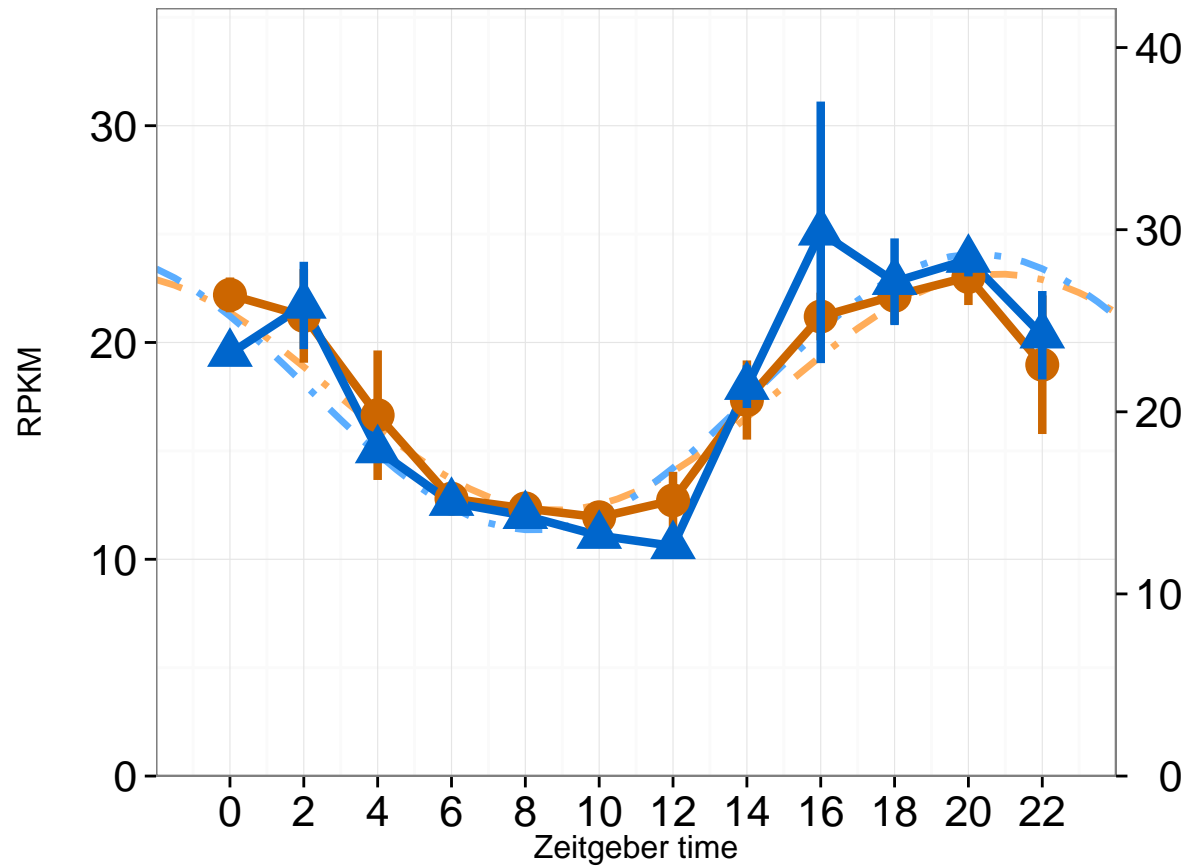

# Tubb2a

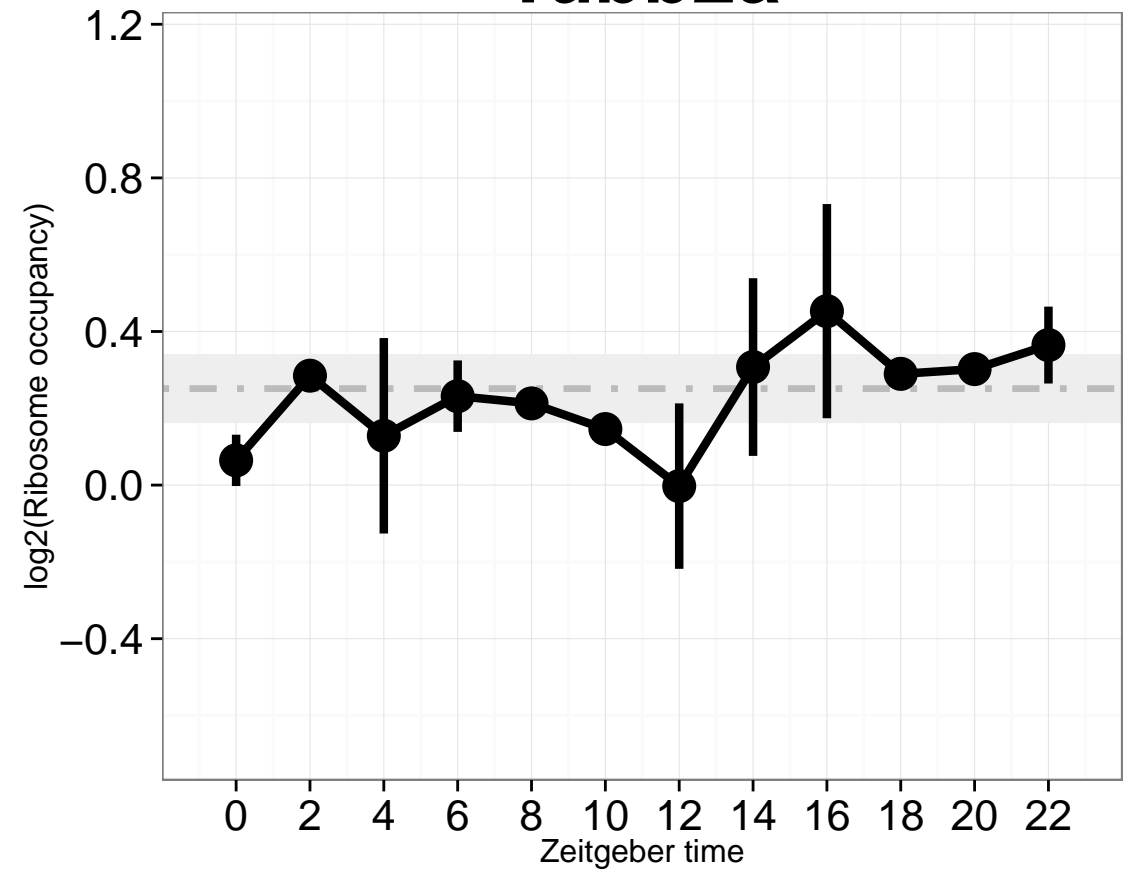

Supplement: Supplementary file 6580 [file 1]

## Crispld1

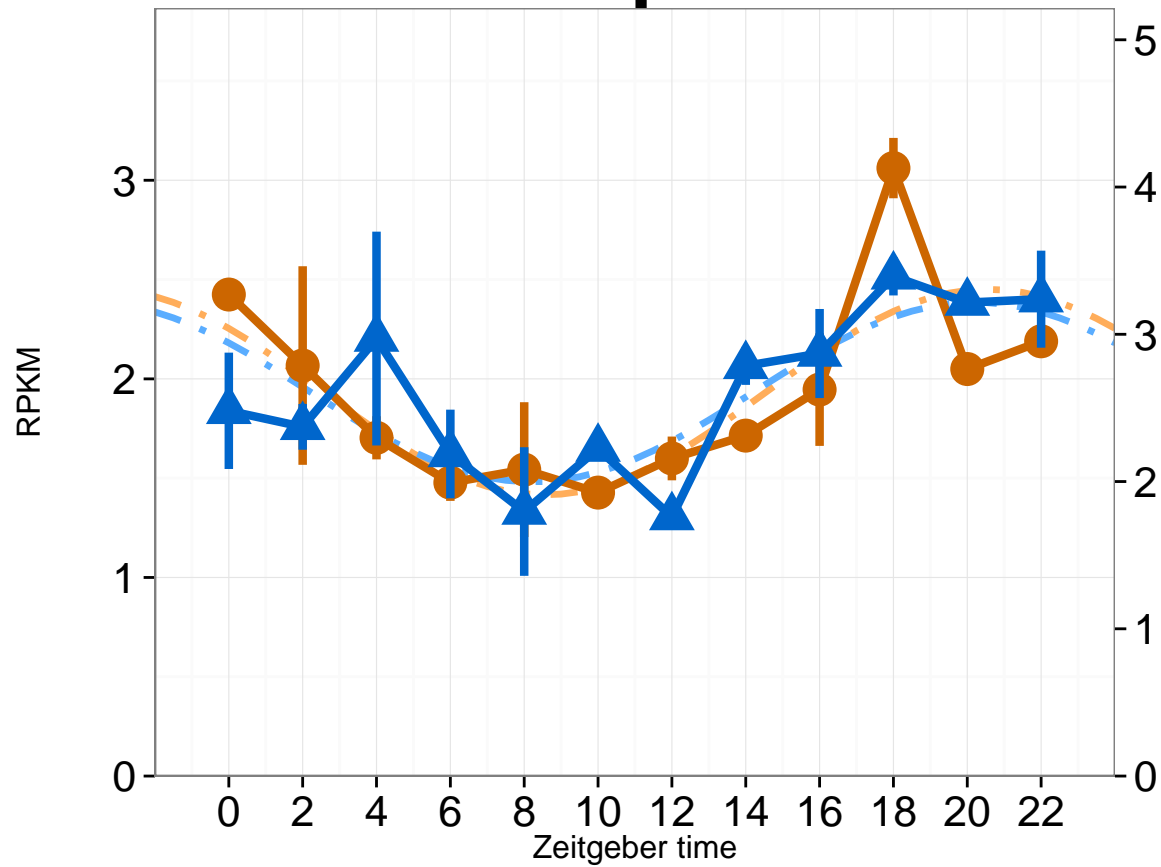

## Crispld1

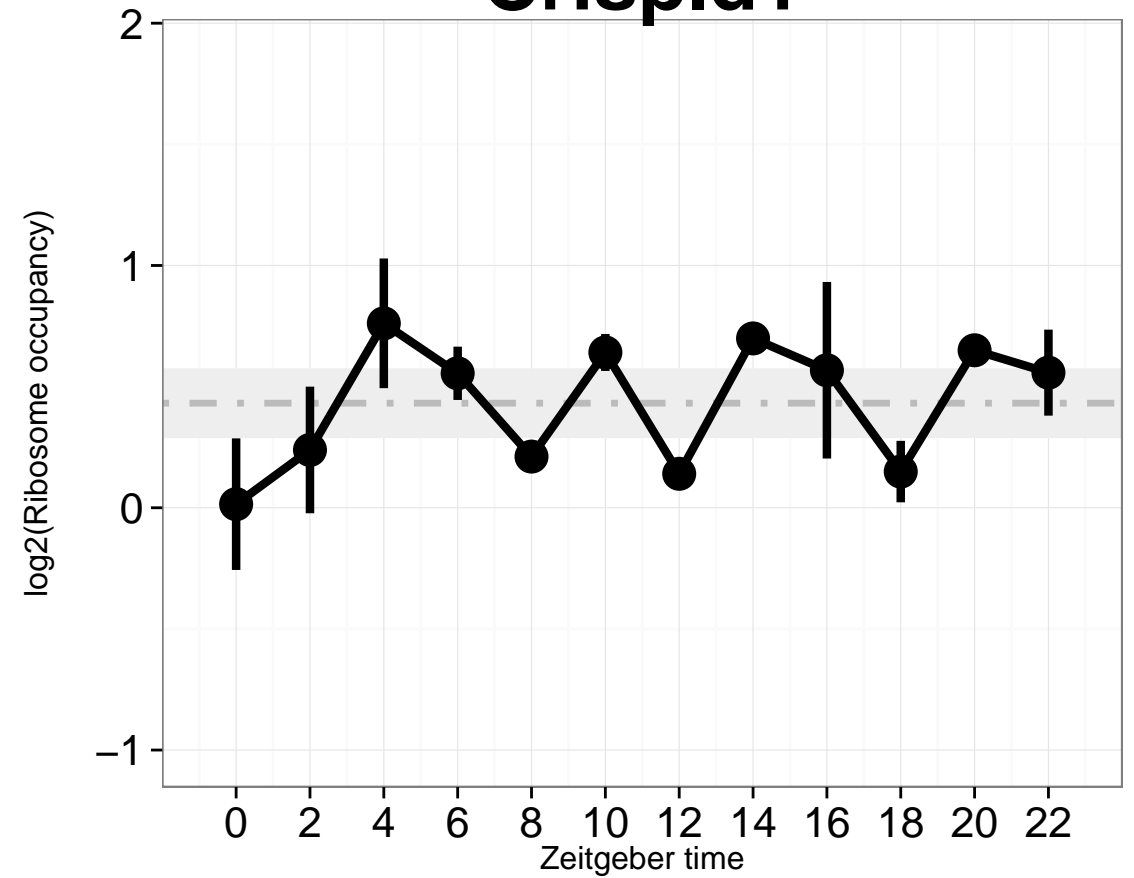

Supplement: Supplementary file 6581 [file 1]

## March3

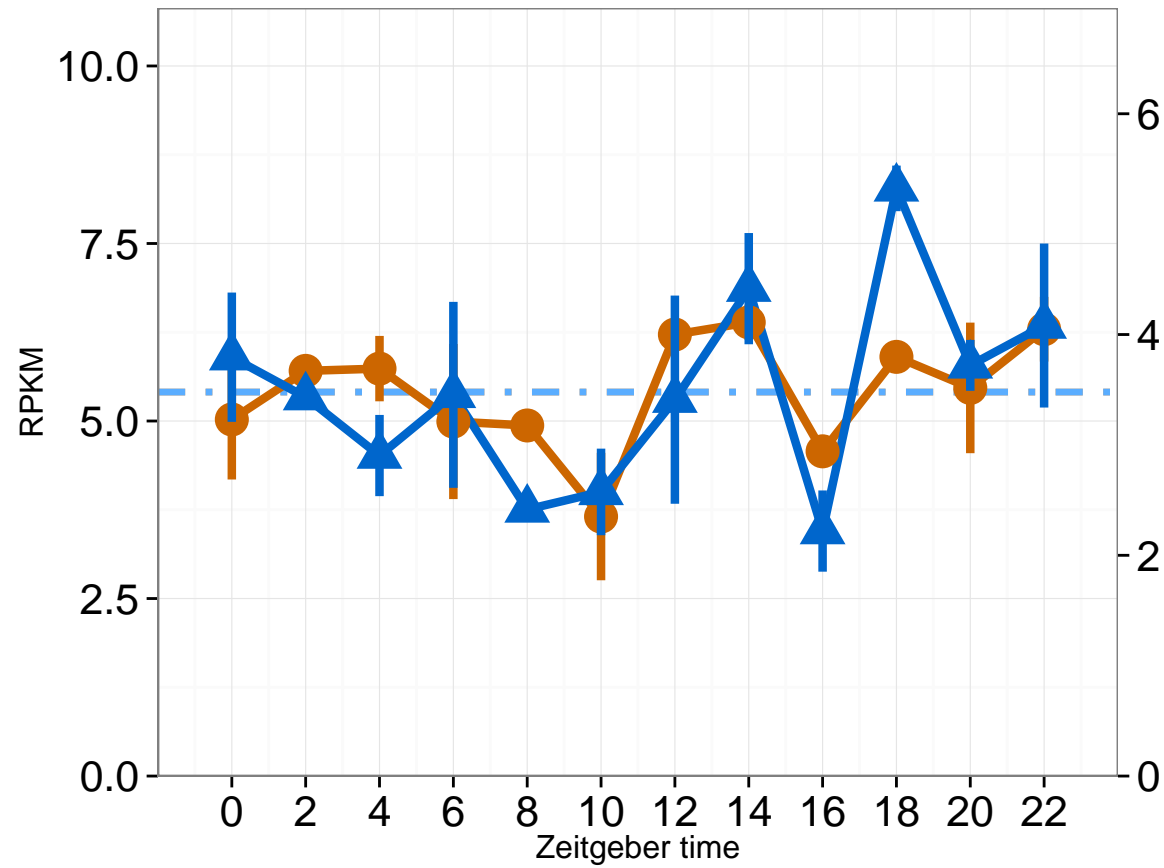

## March3

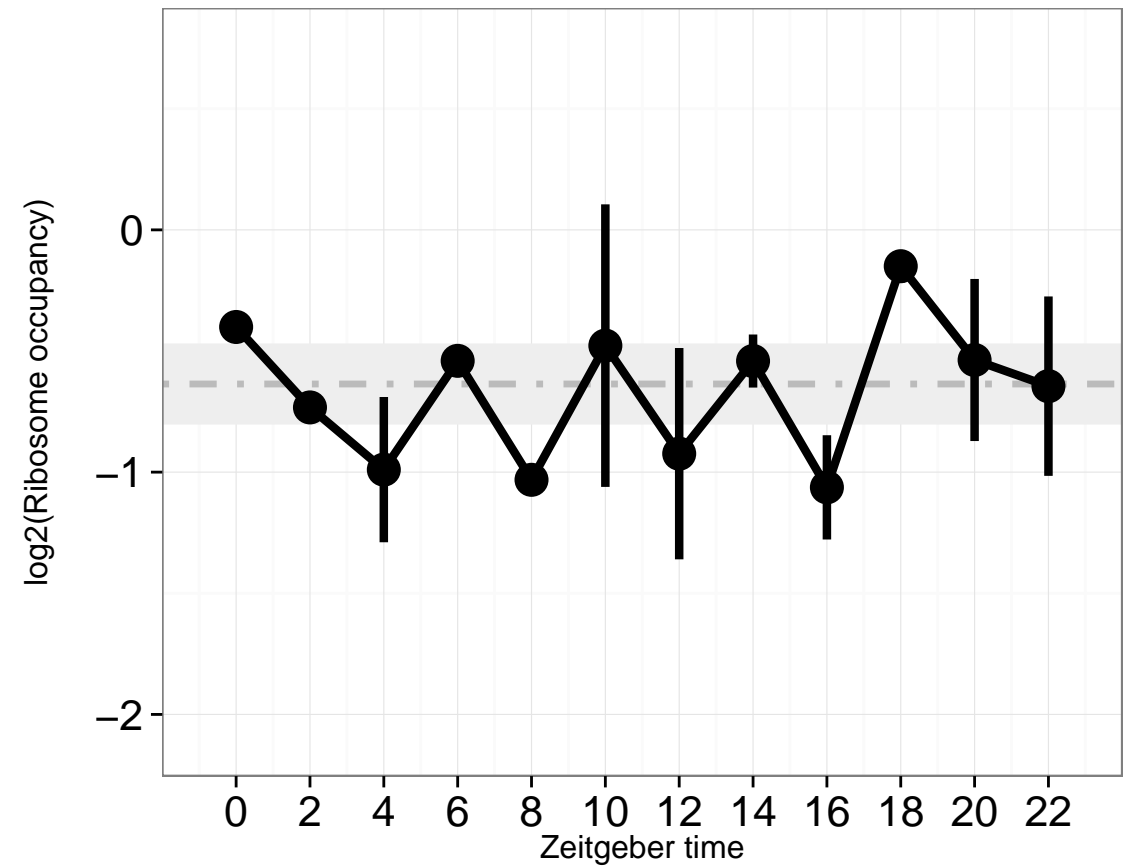

Supplement: Supplementary file 6582 [file 1]

## Idnk

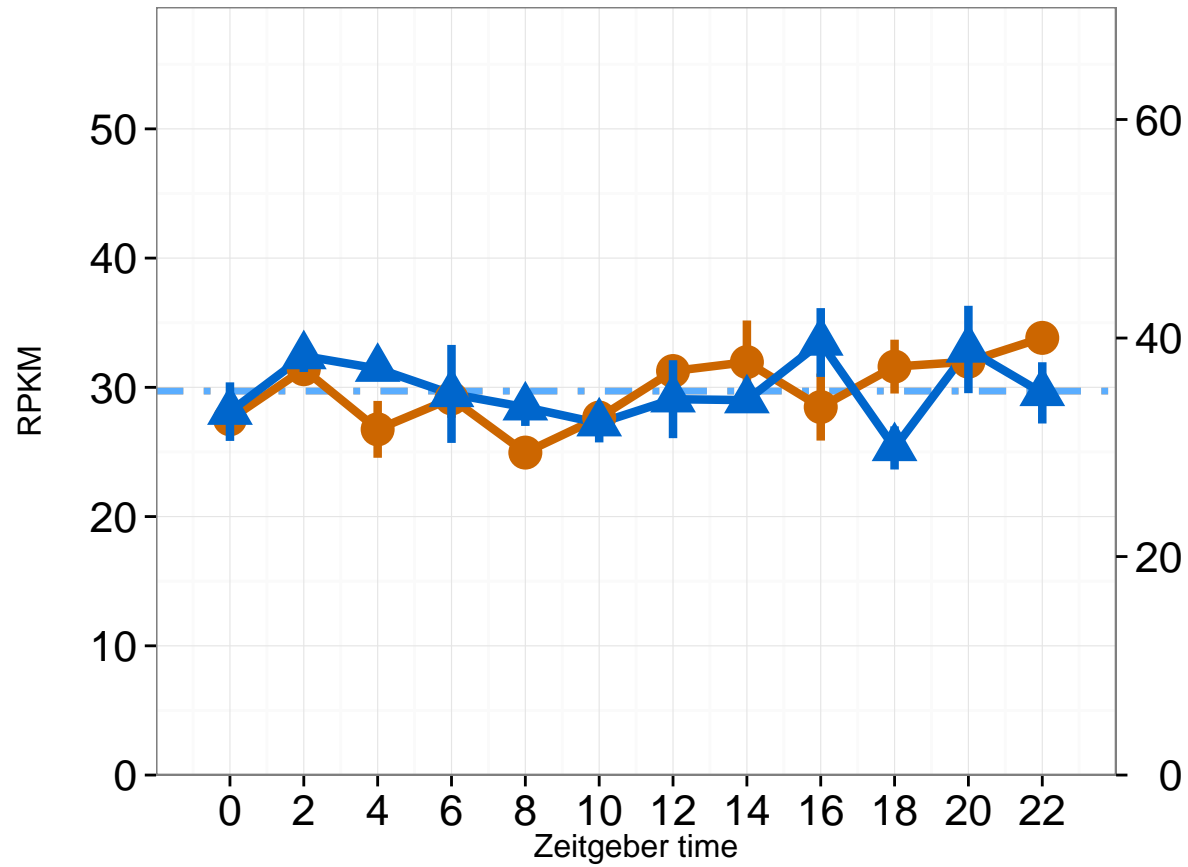

## Idnk

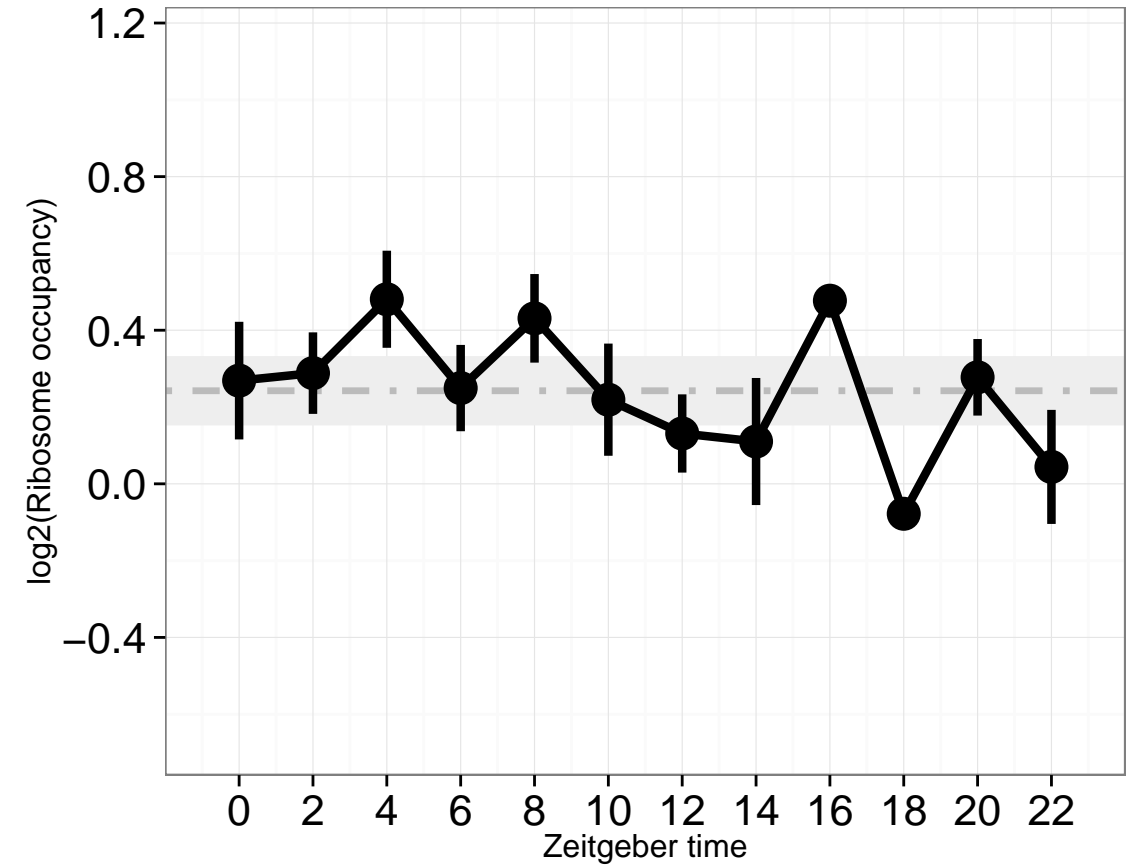

Supplement: Supplementary file 6583 [file 1]

# Hist2h2ac

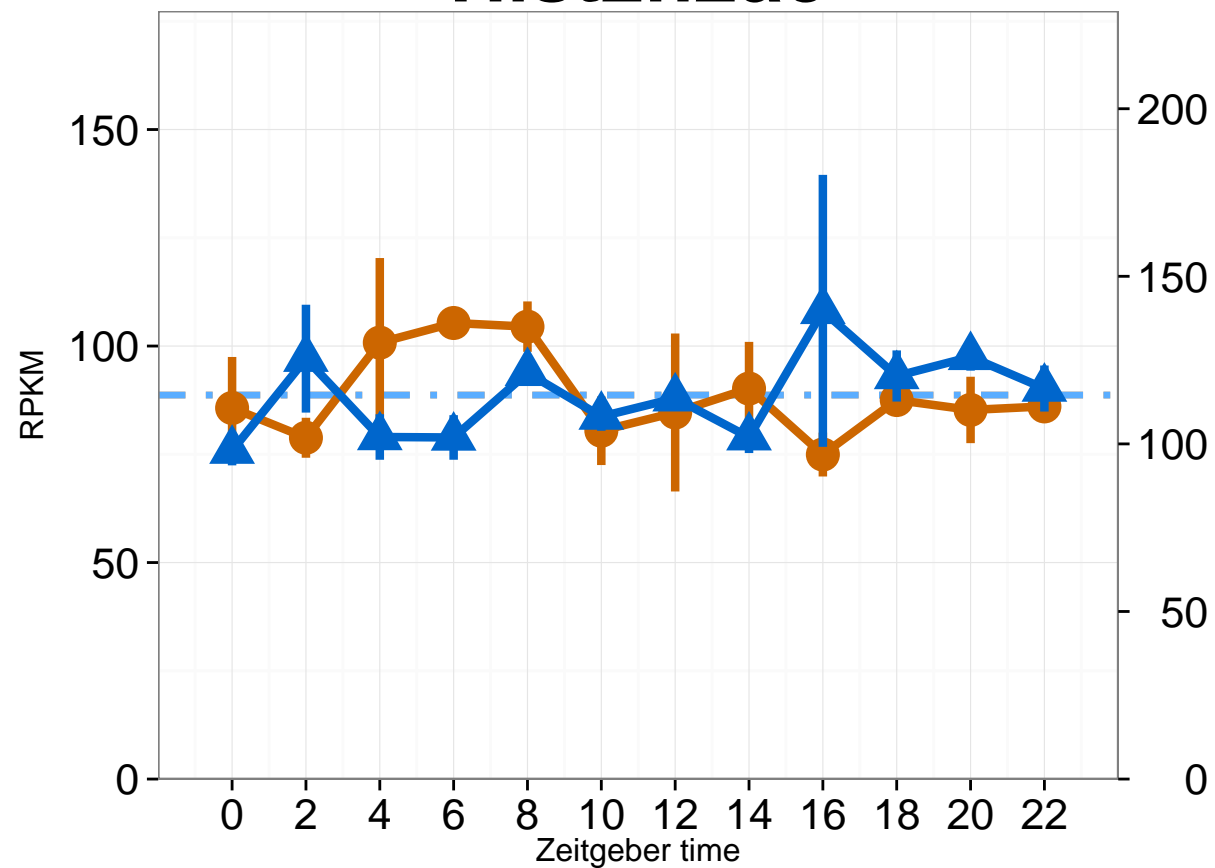

# Hist2h2ac

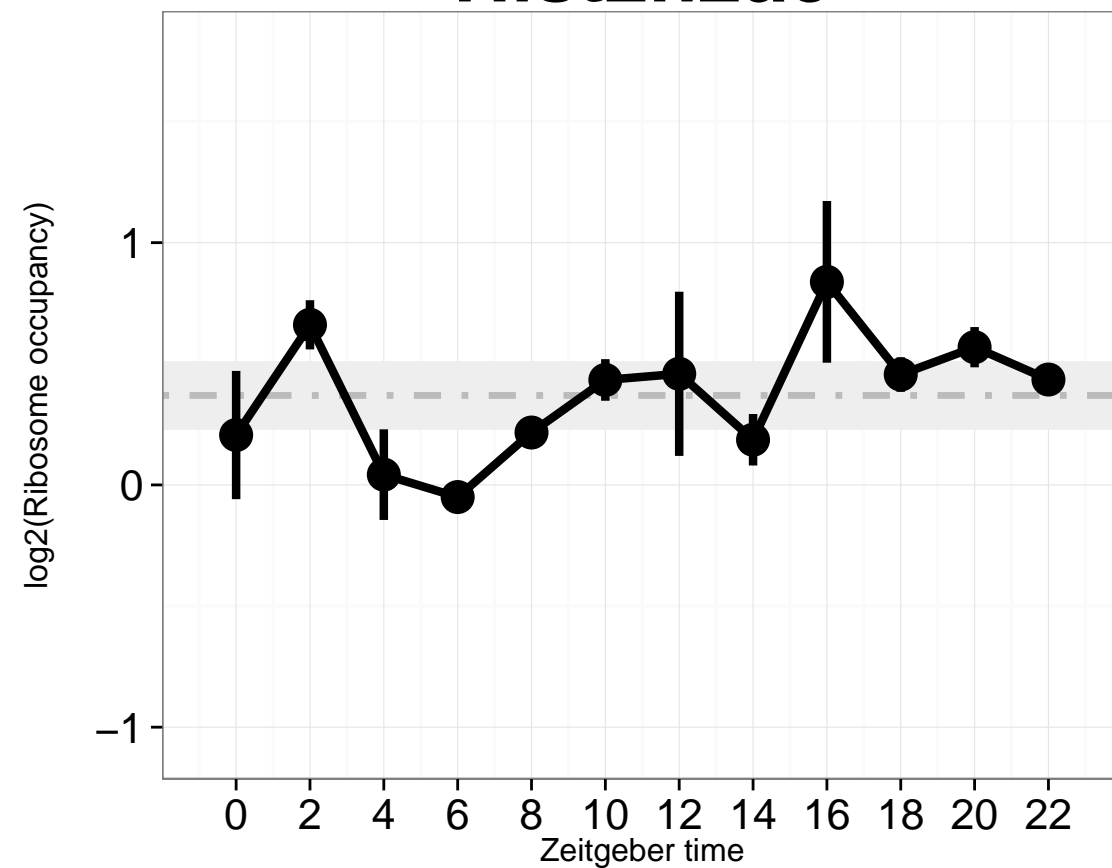

Supplement: Supplementary file 6584 [file 1]

## Ptplb

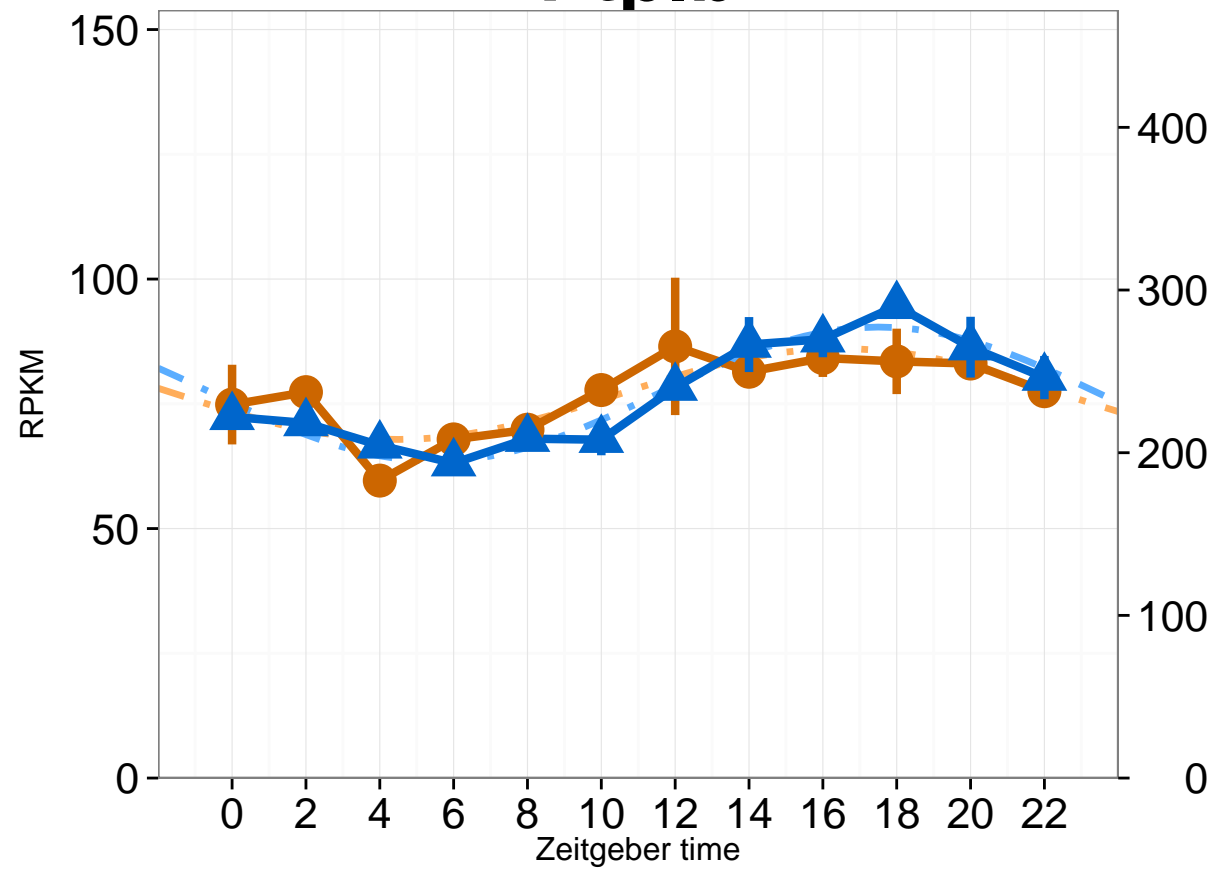

## Ptplb

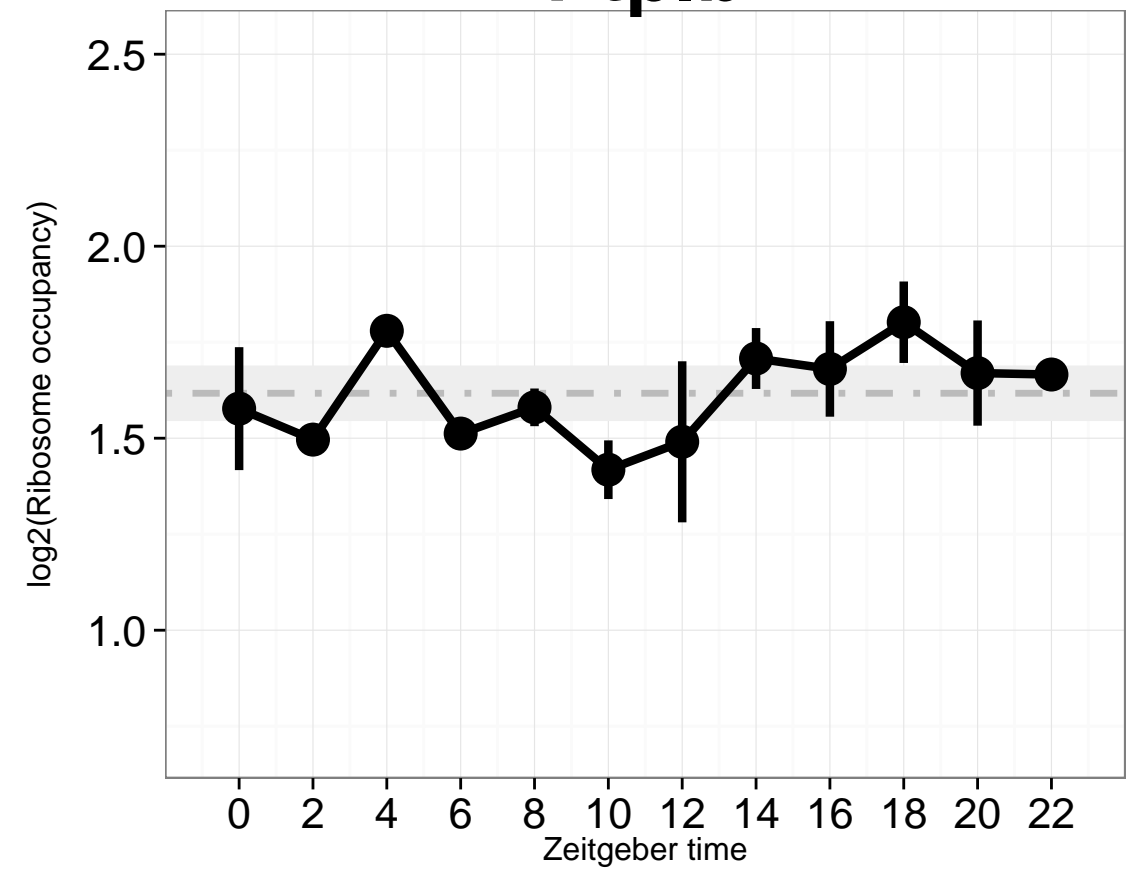

Supplement: Supplementary file 6585 [file 1]

# Sugt1

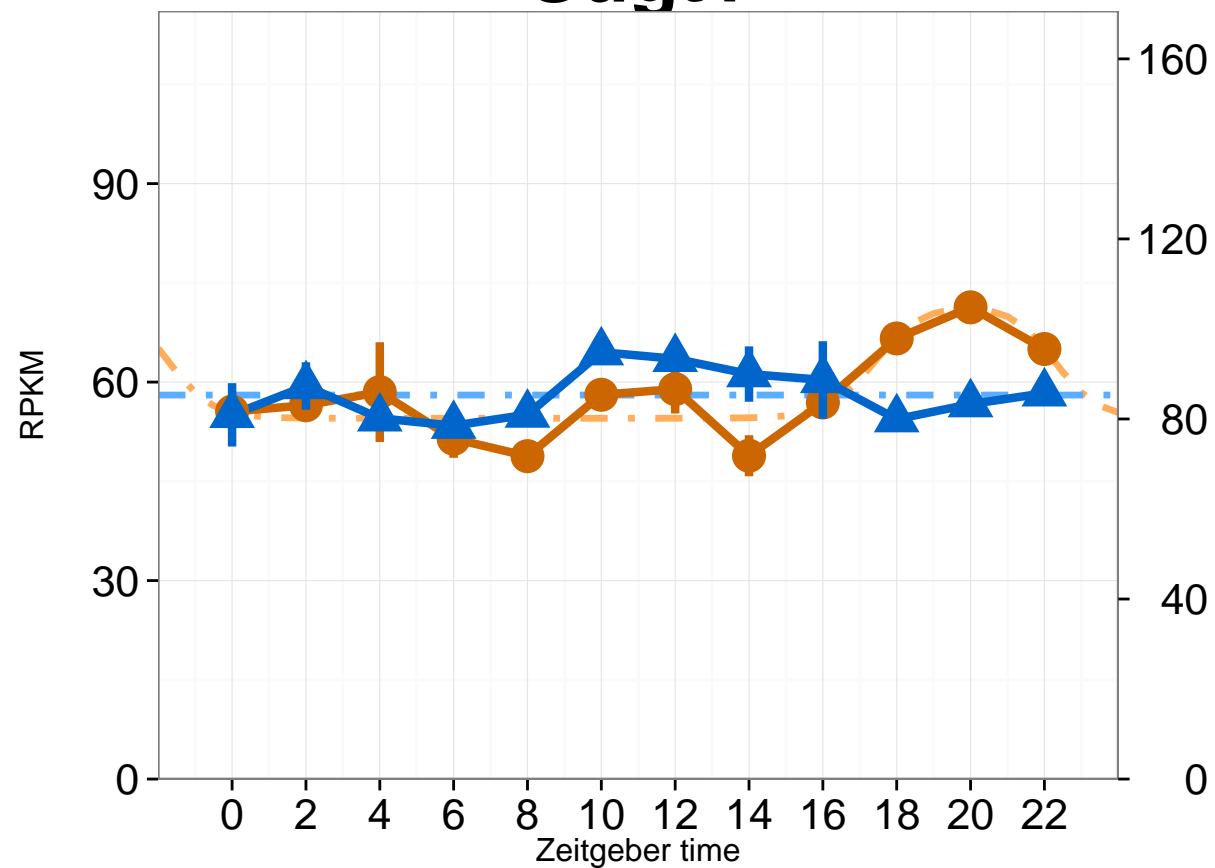

# Sugt1

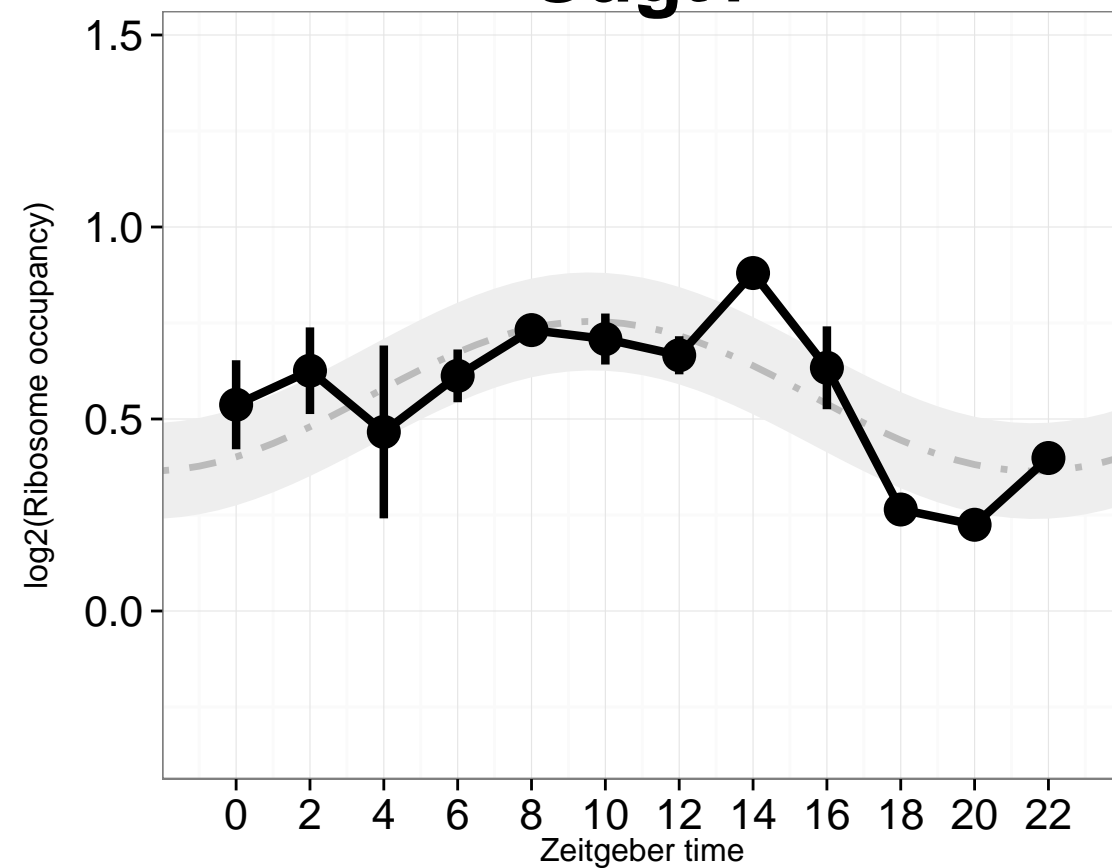

Supplement: Supplementary file 6586 [file 1]

## Tmem222

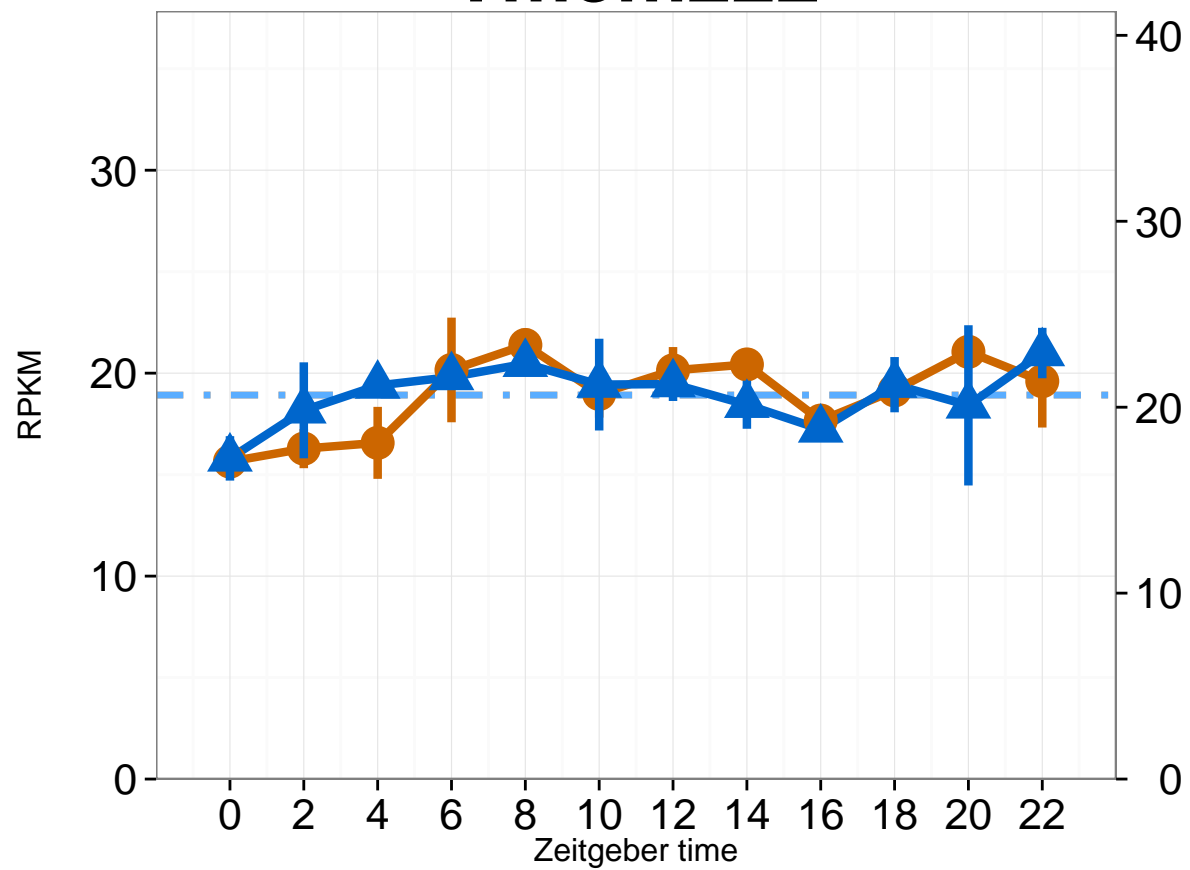

## Tmem222

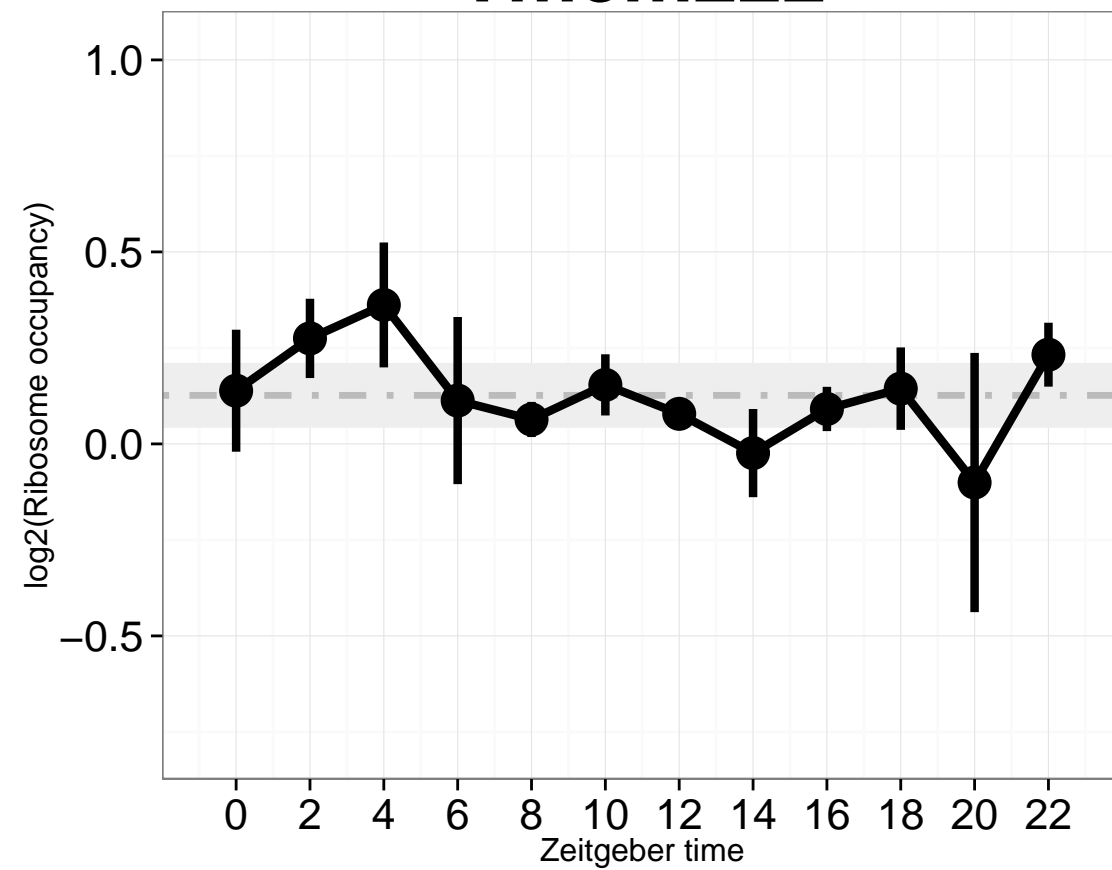

Supplement: Supplementary file 6587 [file 1]

# Tgm1

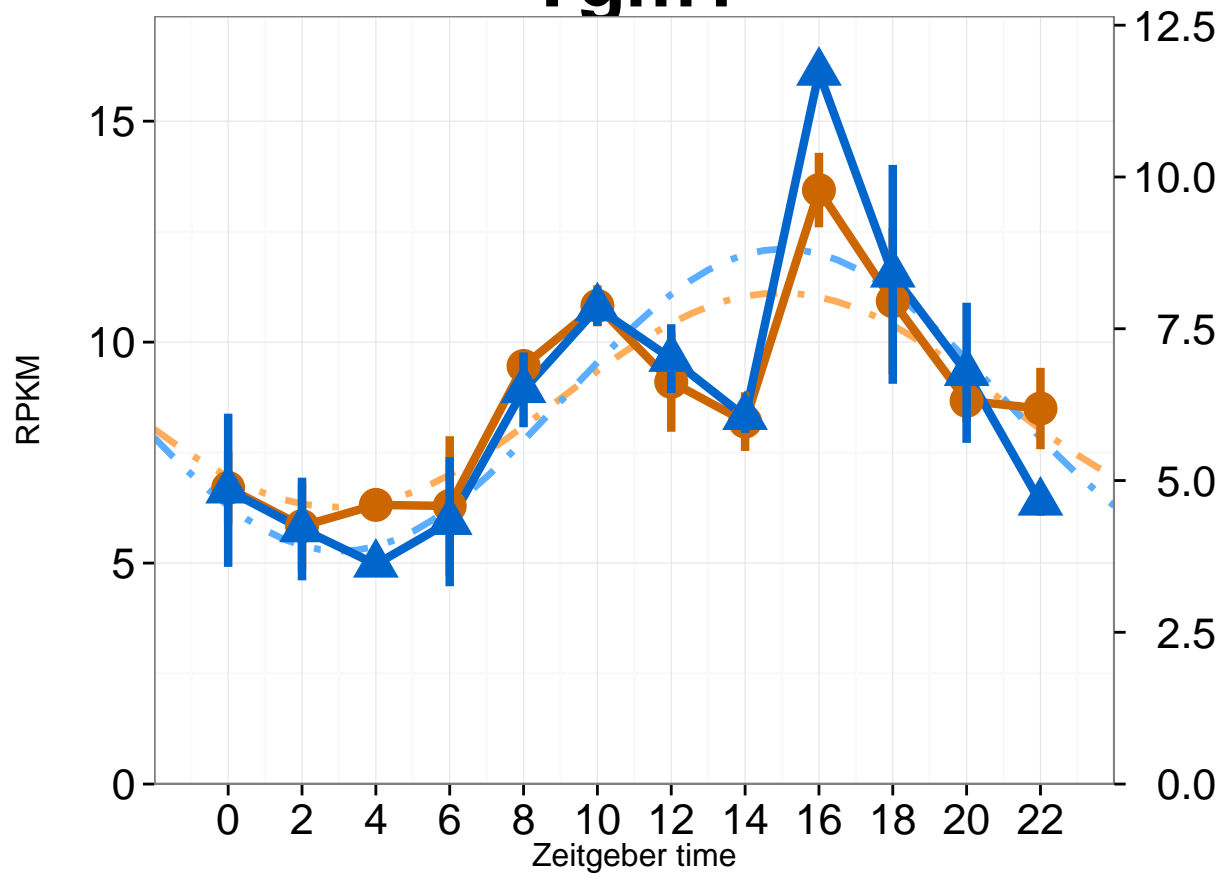

# Tgm1

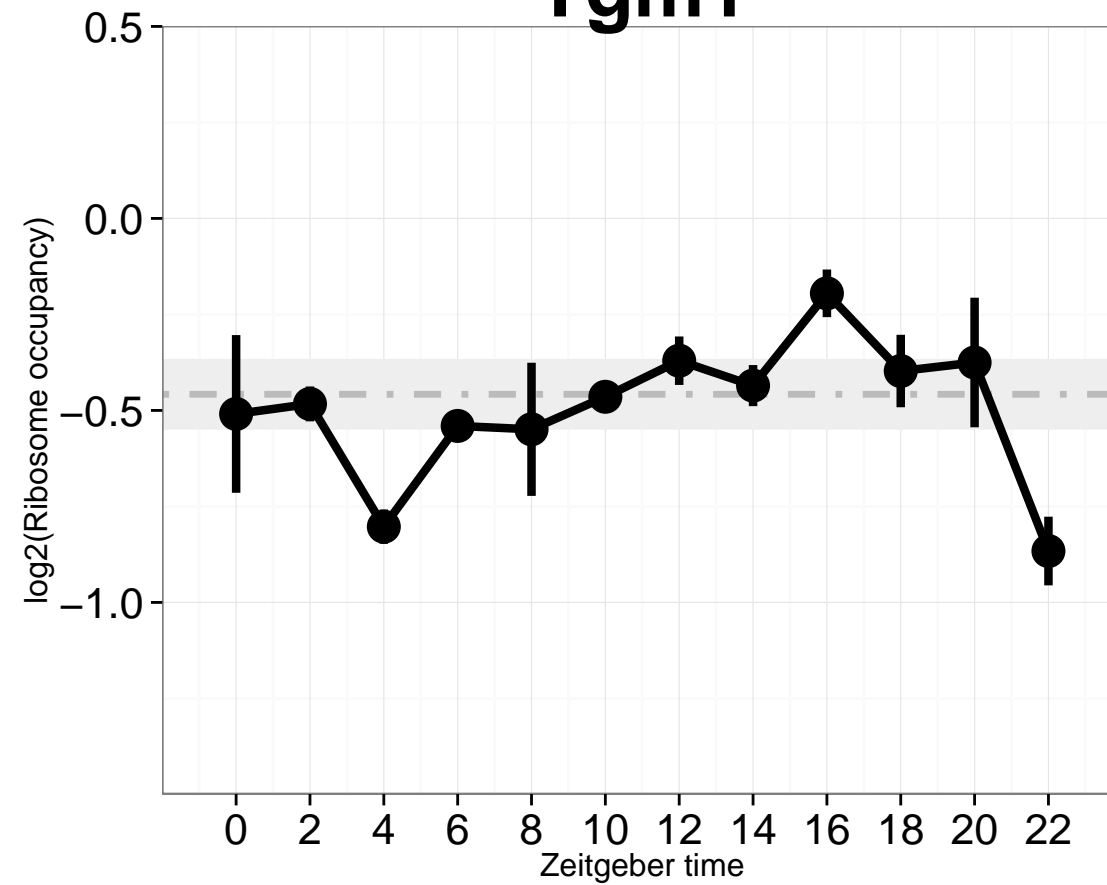

Supplement: Supplementary file 6588 [file 1]

# Fam118b

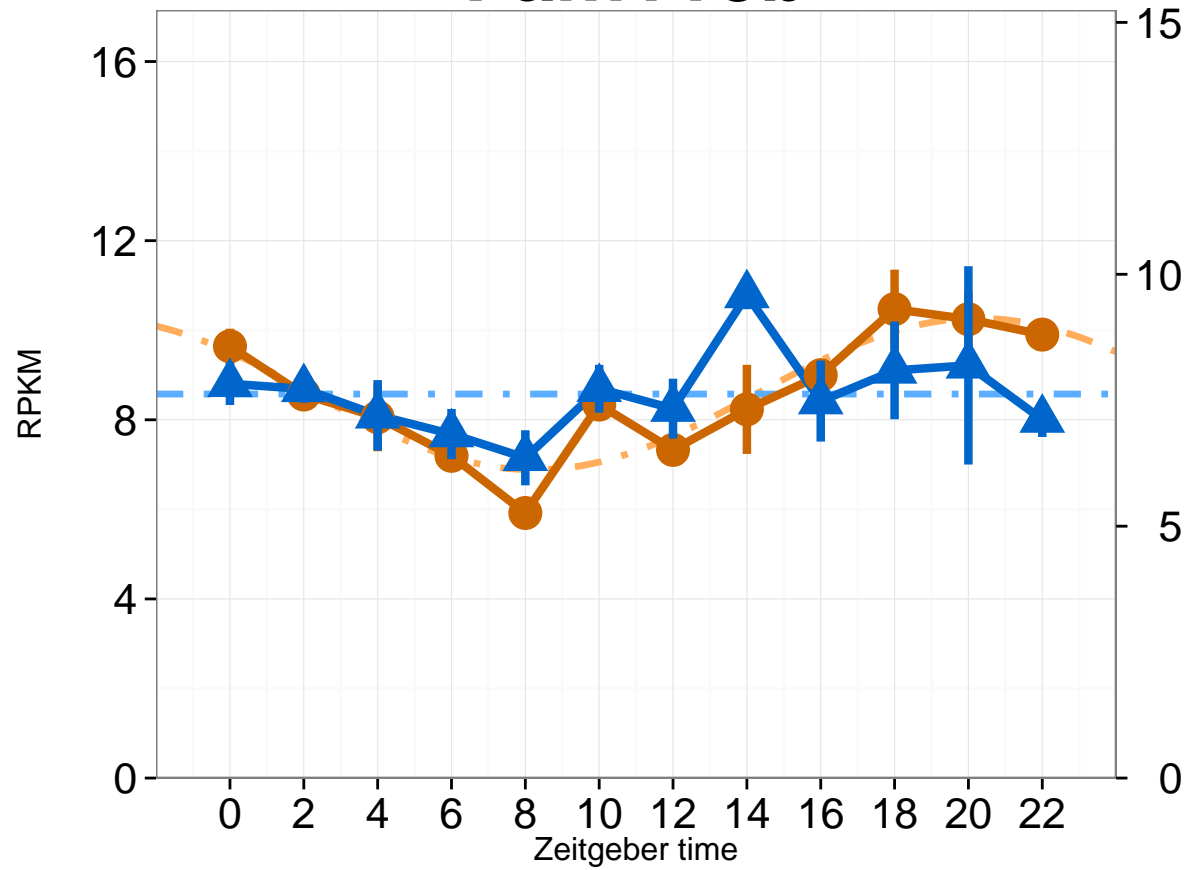

# Fam118b

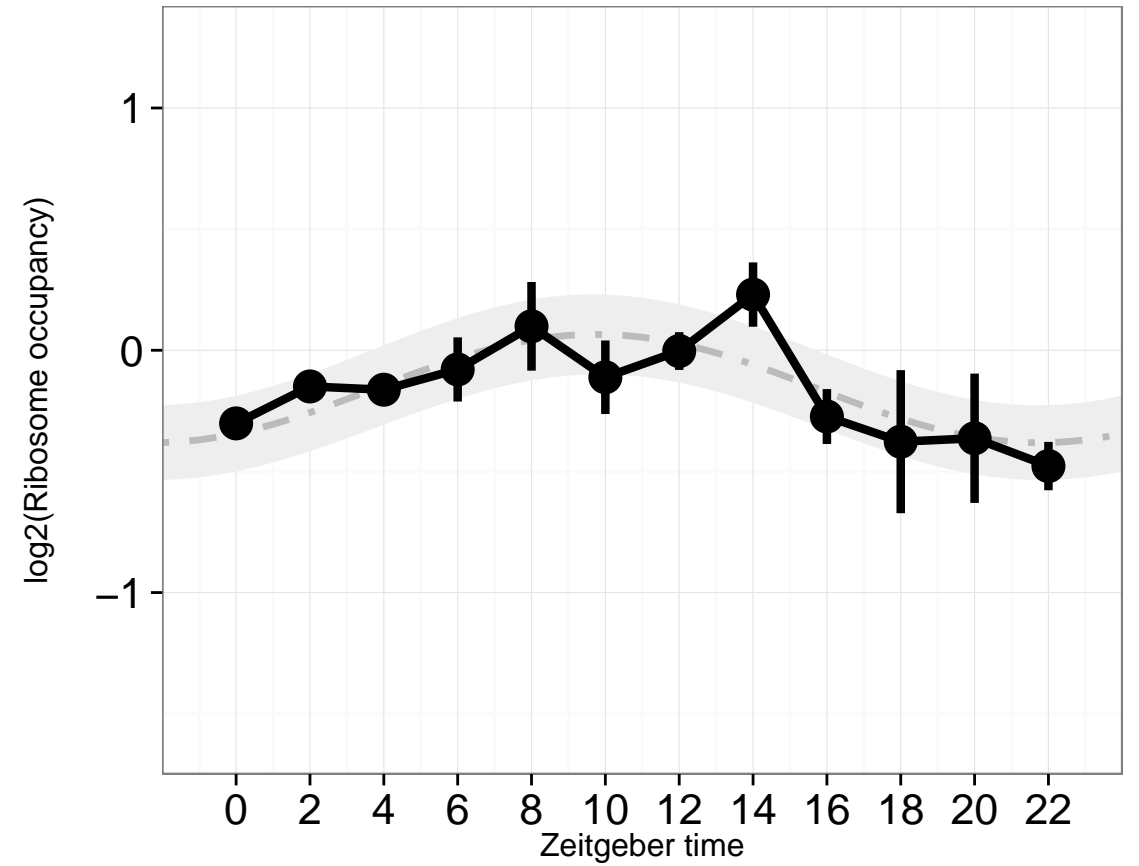

Supplement: Supplementary file 6589 [file 1]

## Slc22a18

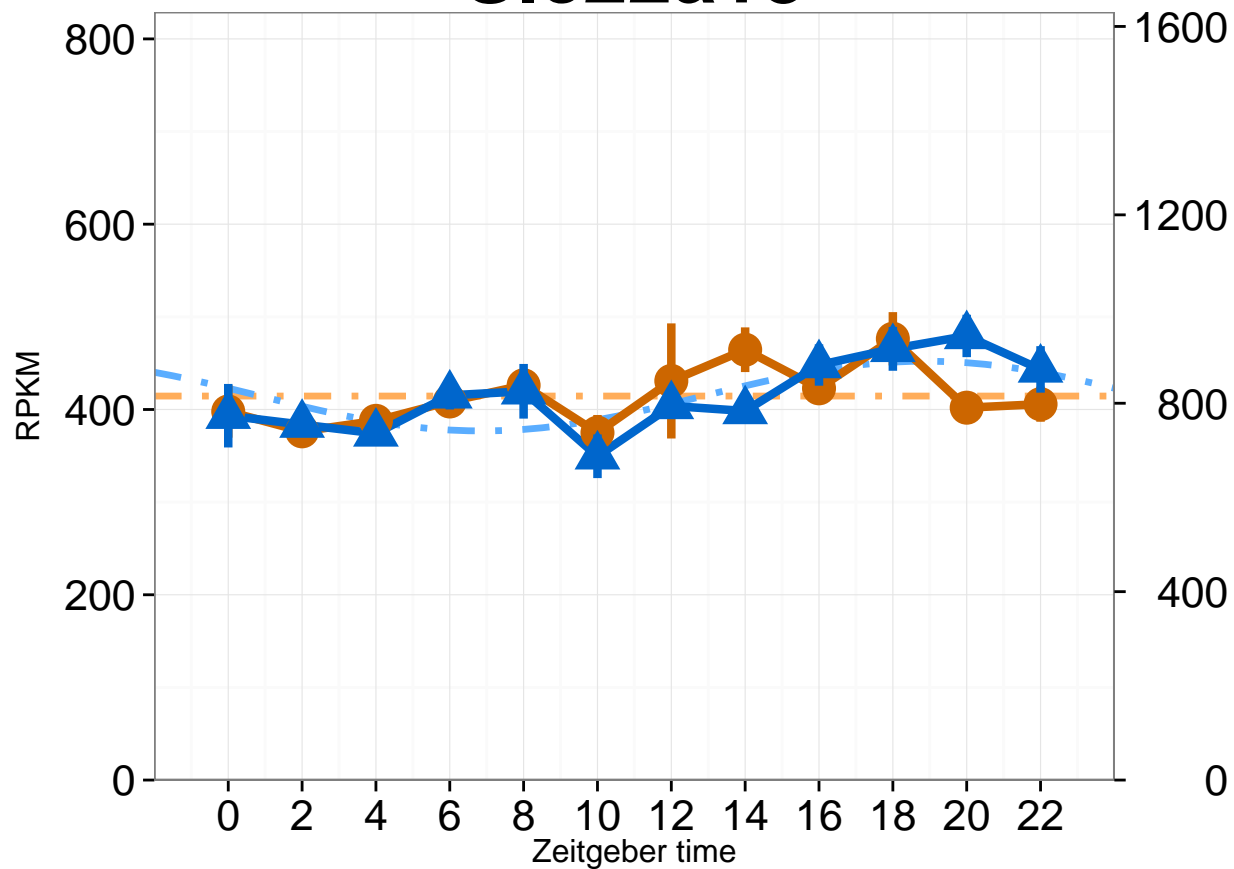

## Slc22a18

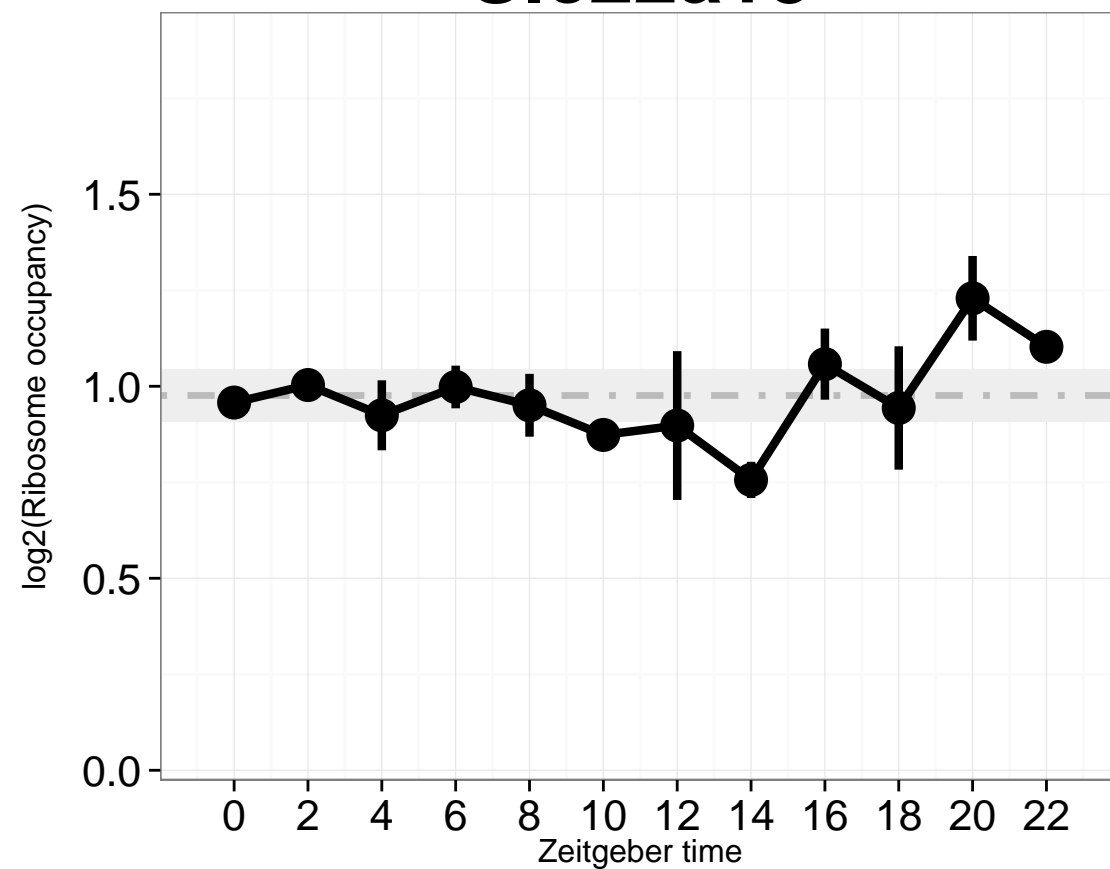

Supplement: Supplementary file 6590 [file 1]

## Sbno1

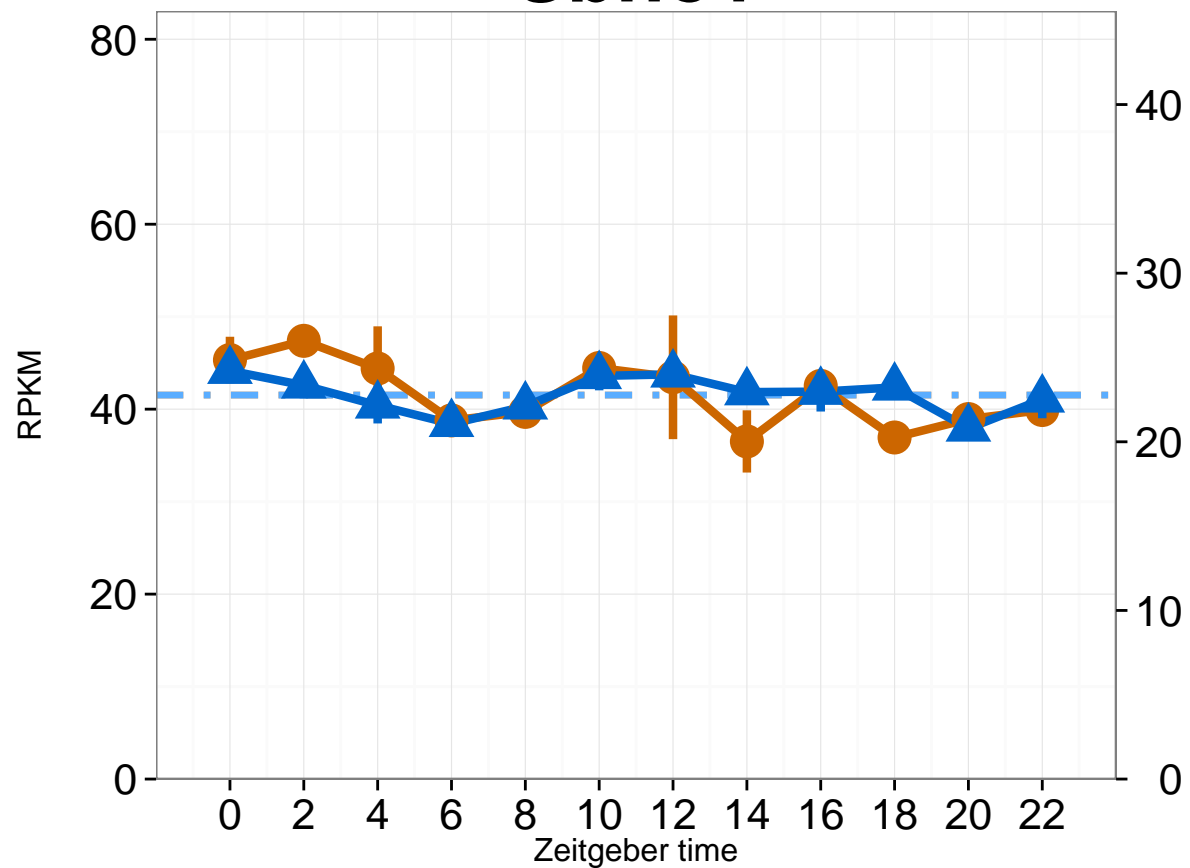

## Sbno1

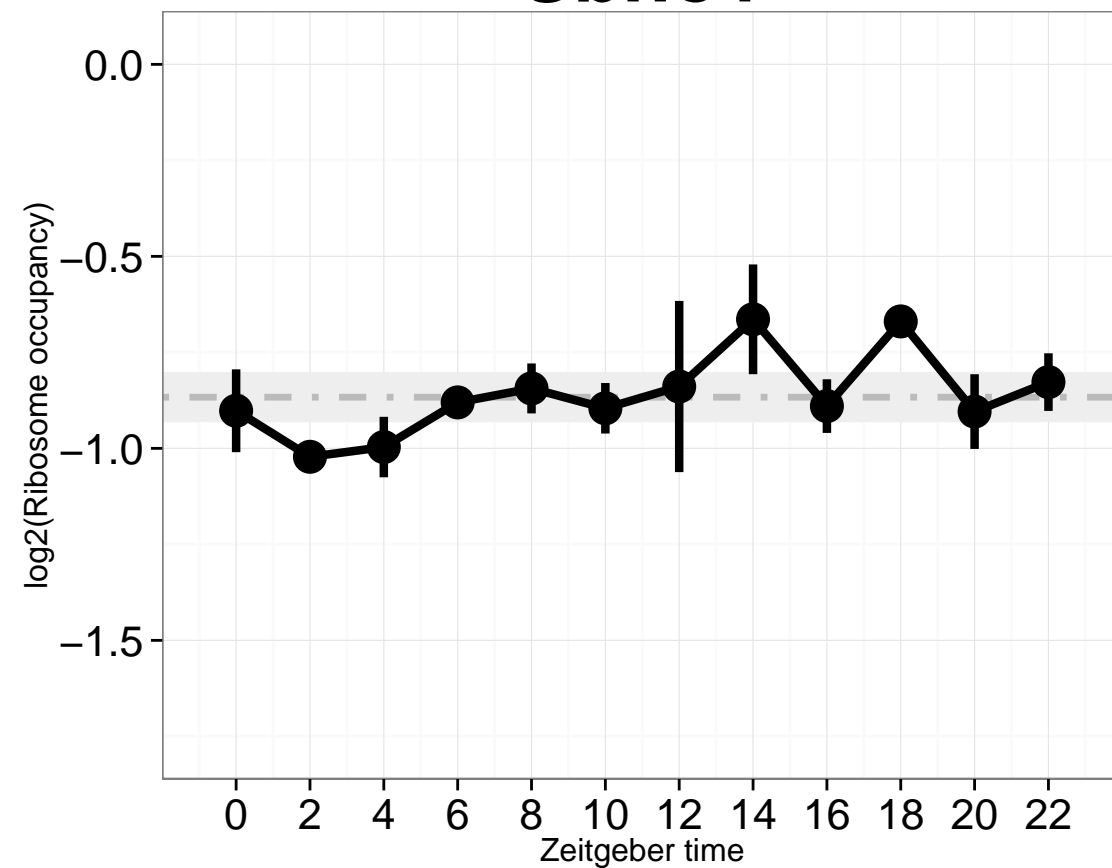

Supplement: Supplementary file 6591 [file 1]

# Zmym5

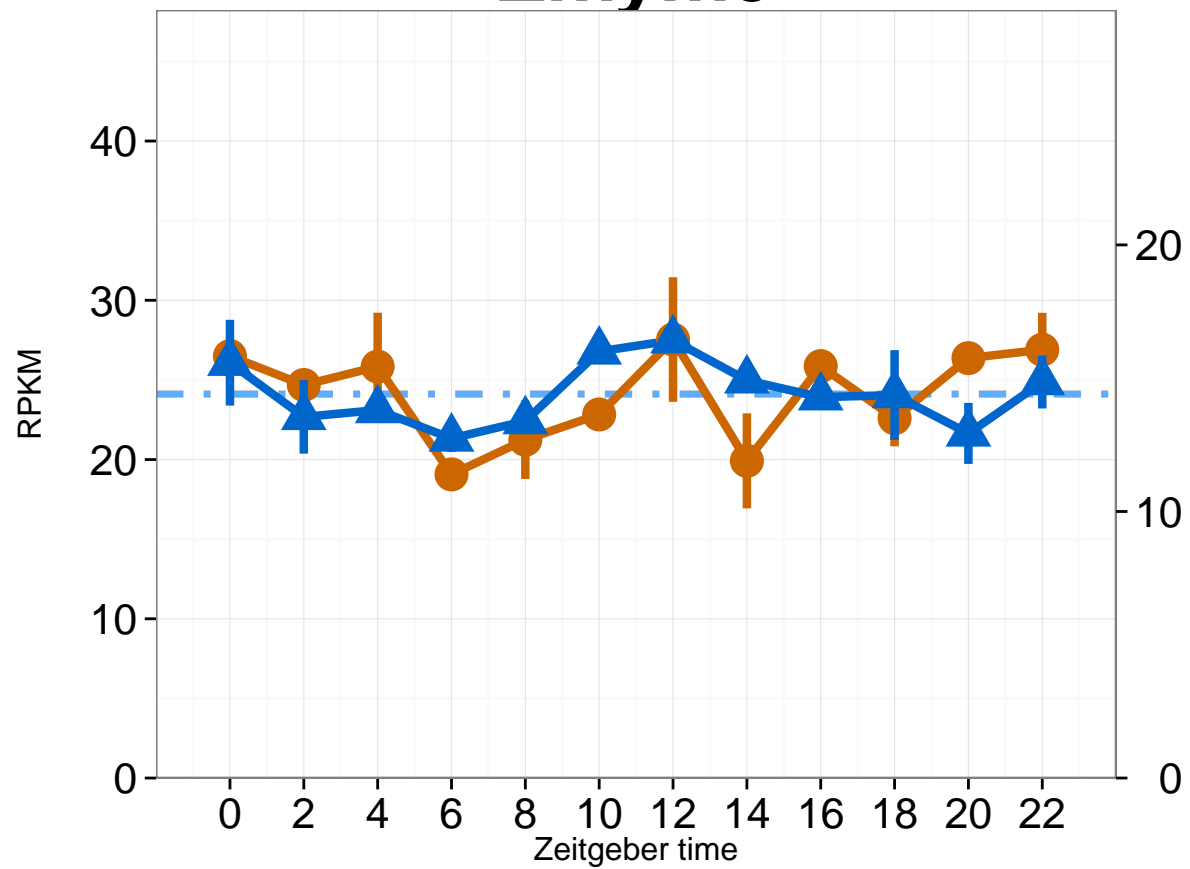

# Zmym5

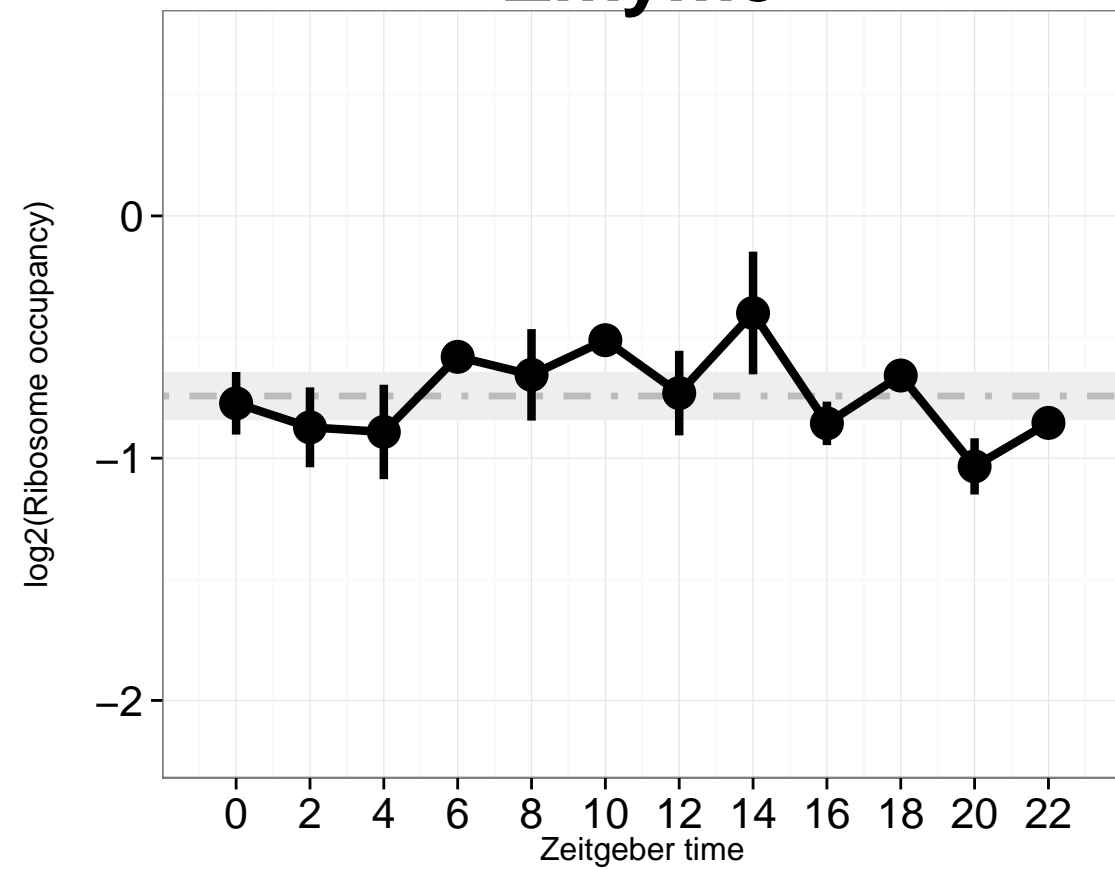

Supplement: Supplementary file 6592 [file 1]

## Nup35

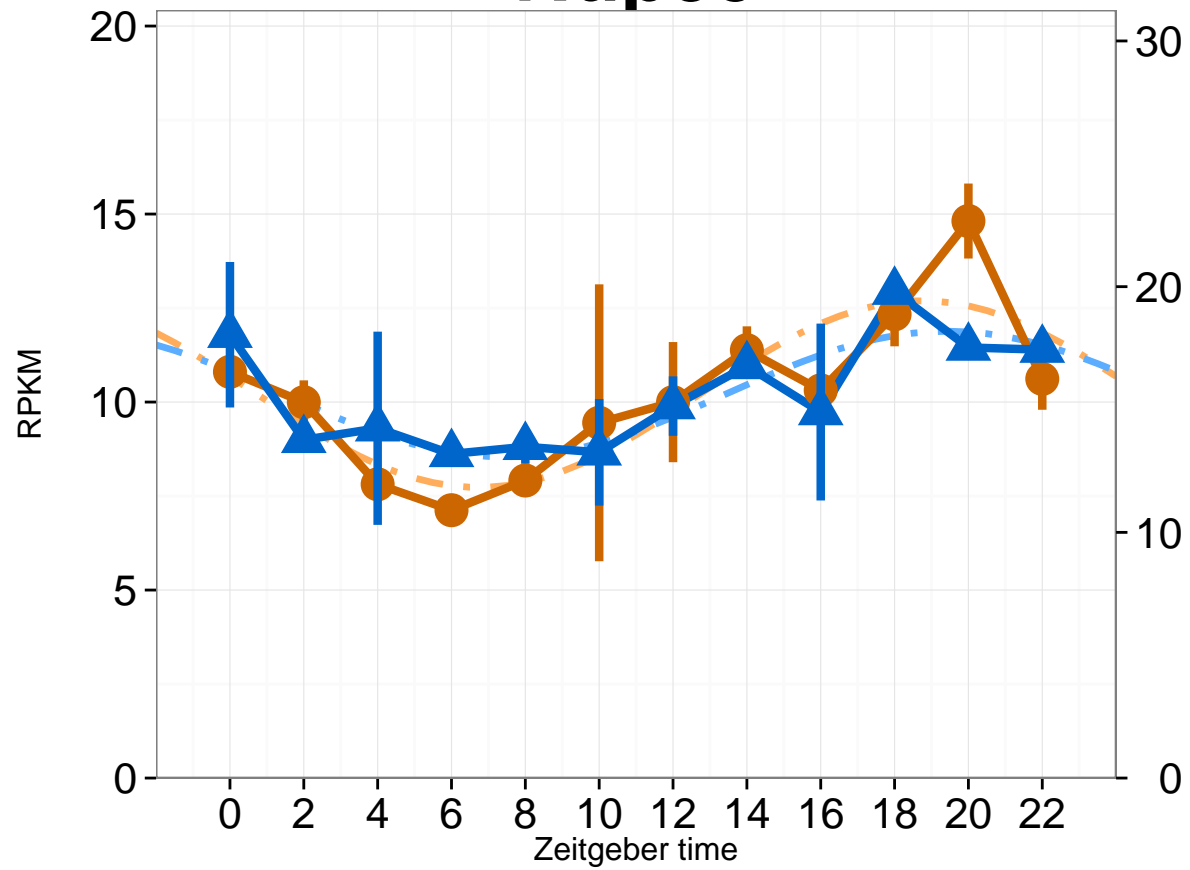

## Nup35

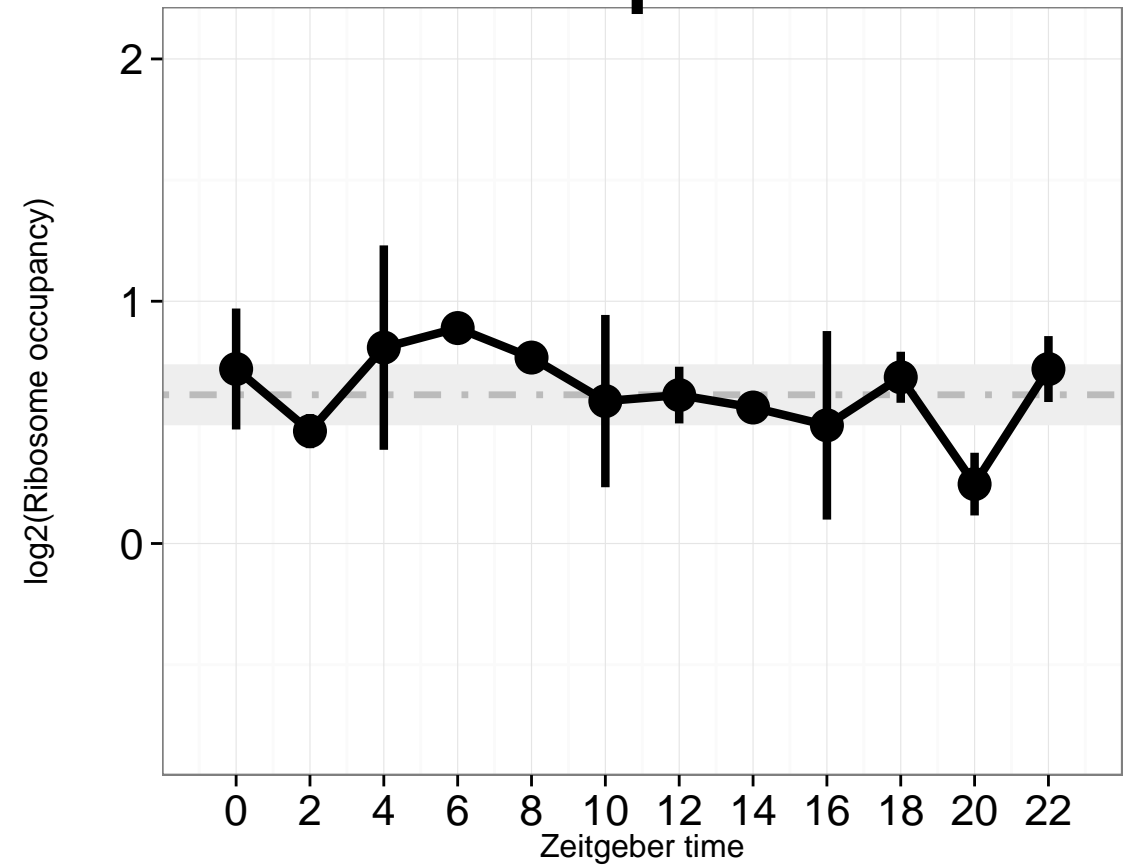

Supplement: Supplementary file 6593 [file 1]

# Slc10a7

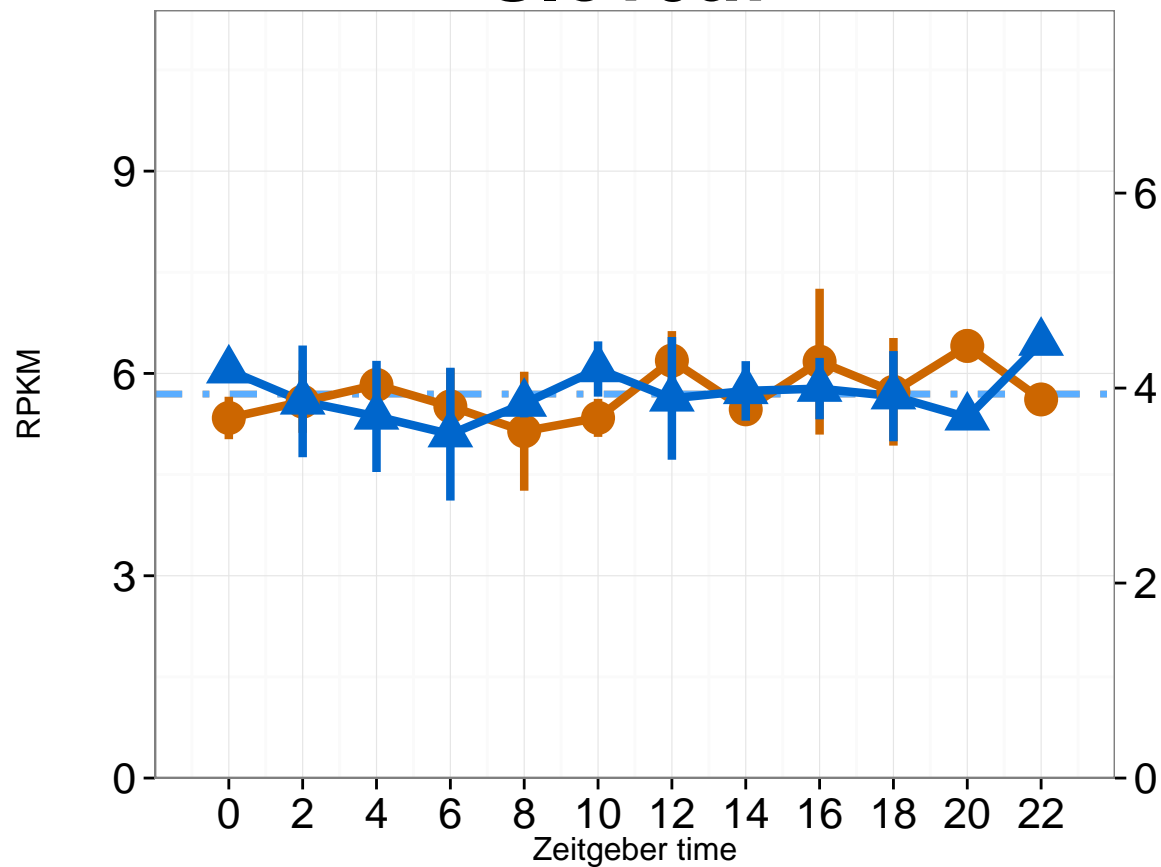

# Slc10a7

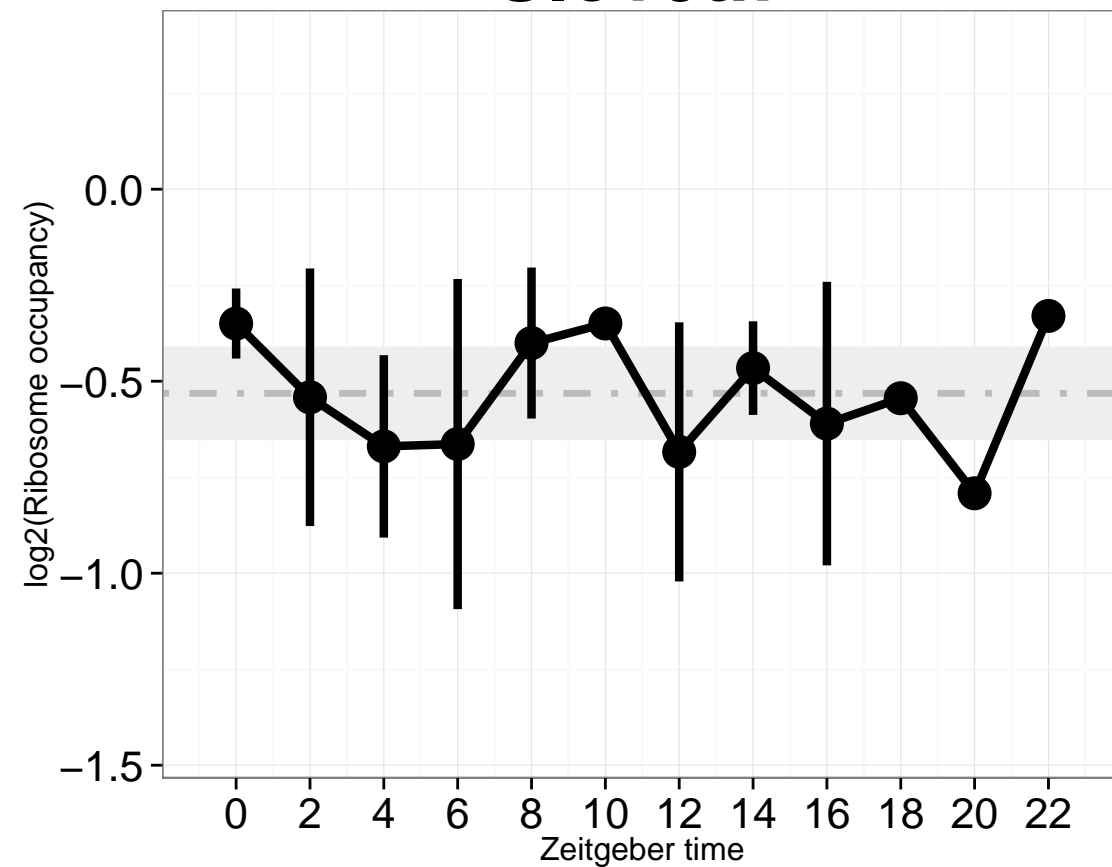

Supplement: Supplementary file 6594 [file 1]

## Slc5a2

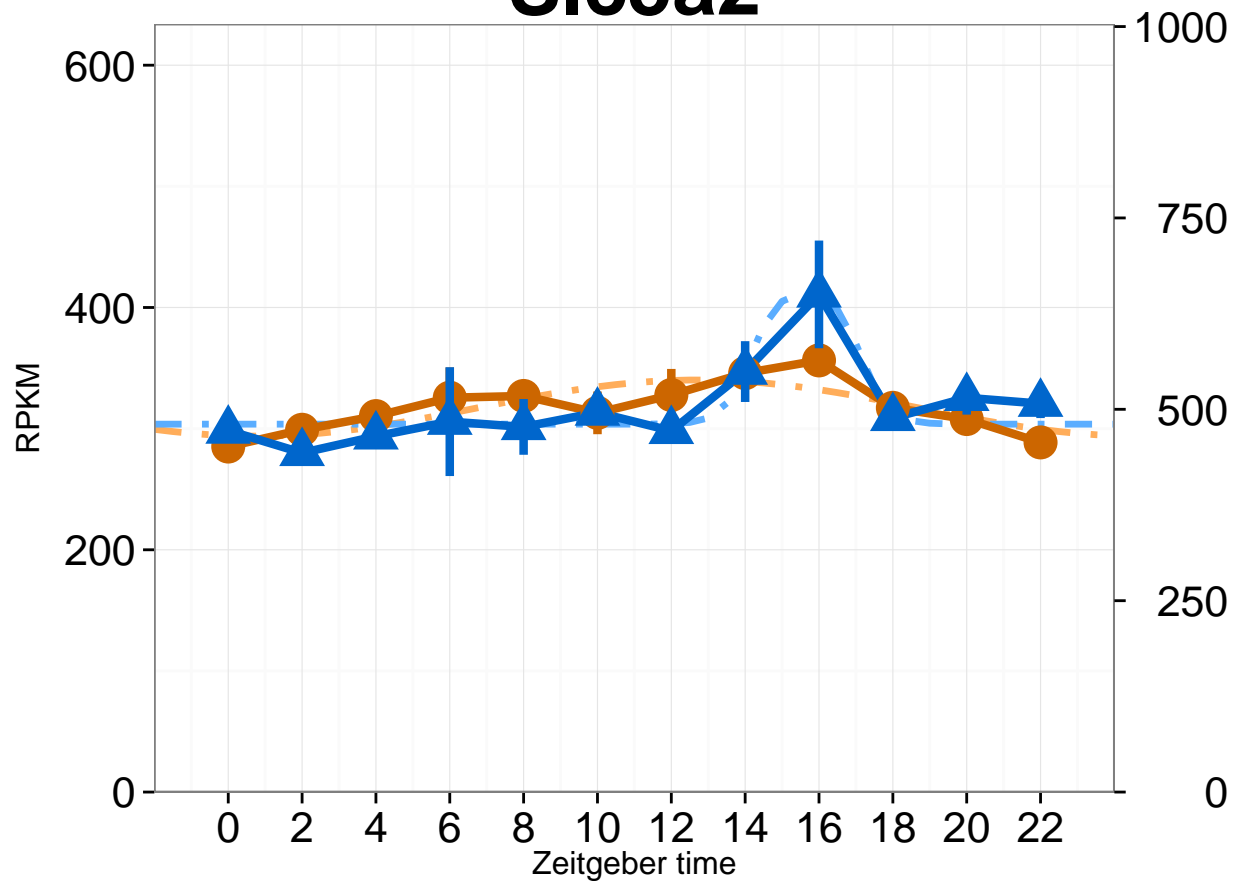

## Slc5a2

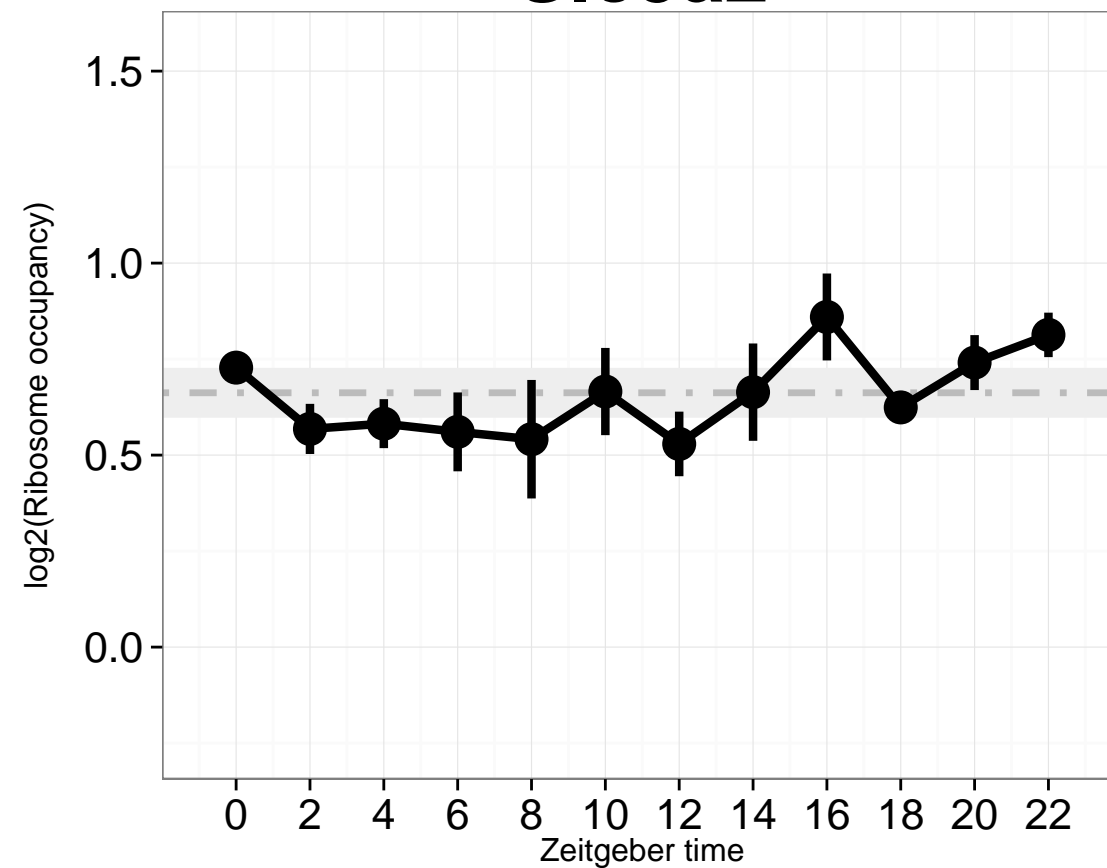

Supplement: Supplementary file 6595 [file 1]

## Rhof

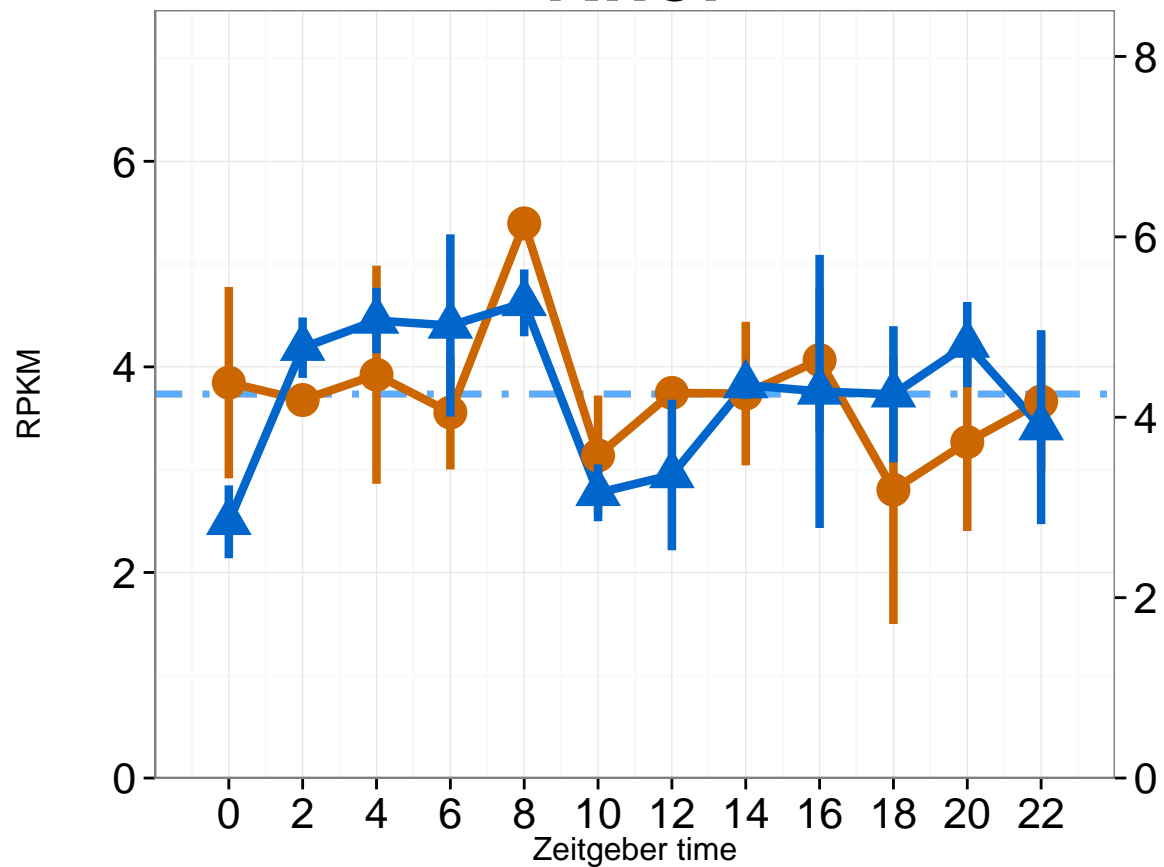

## Rhof

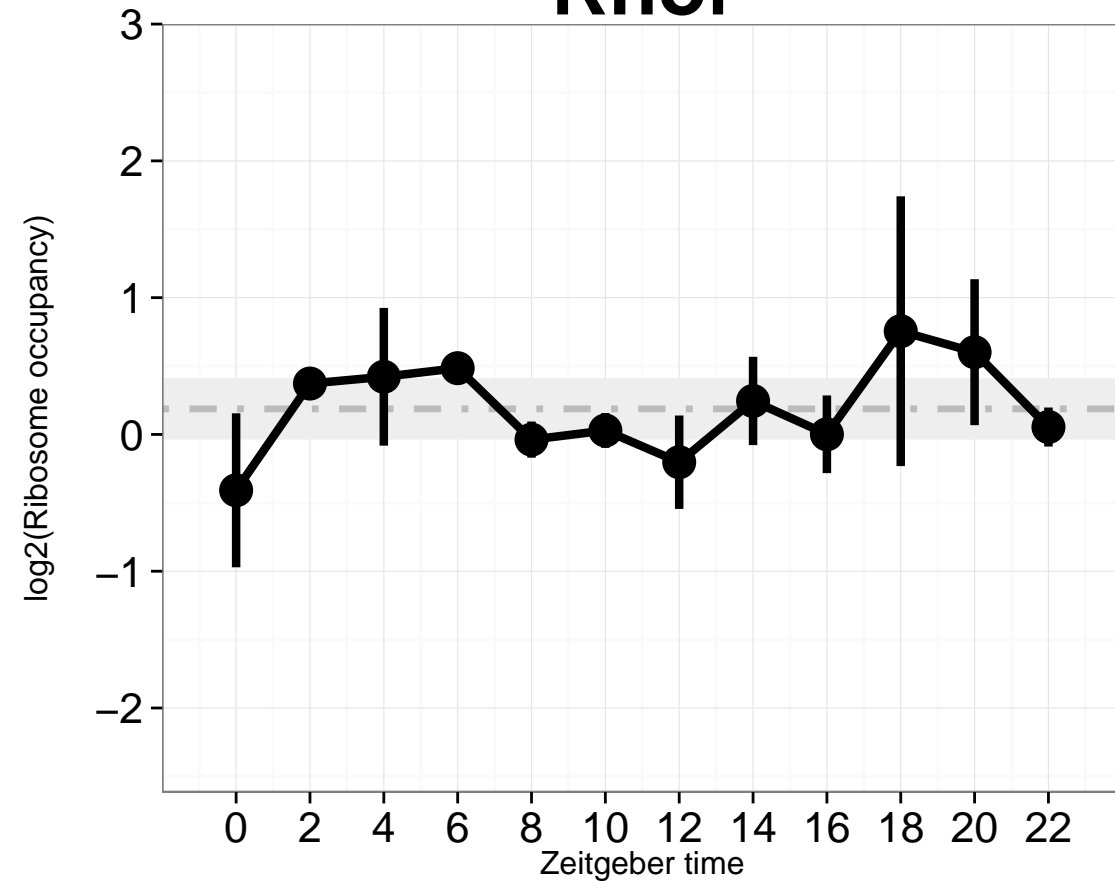

Supplement: Supplementary file 6596 [file 1]

## Dirc2

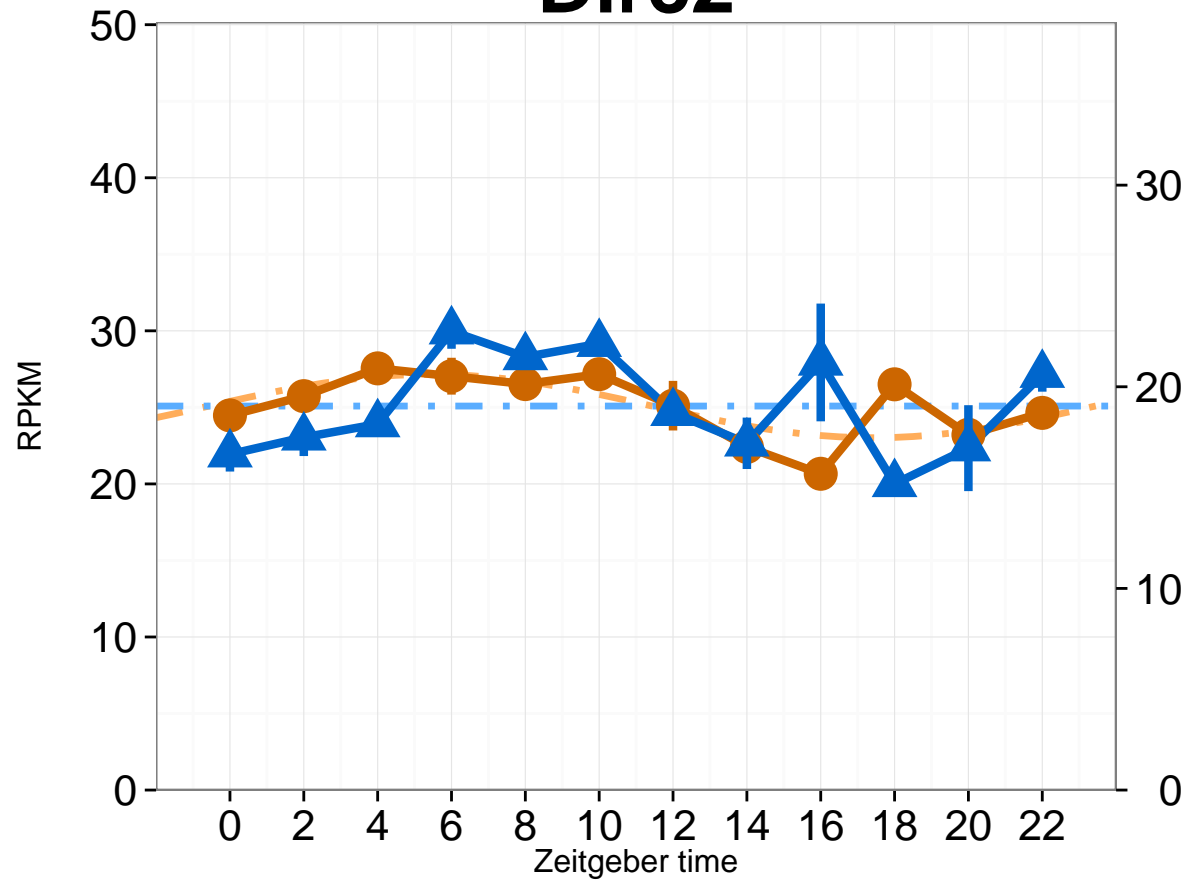

## Dirc2

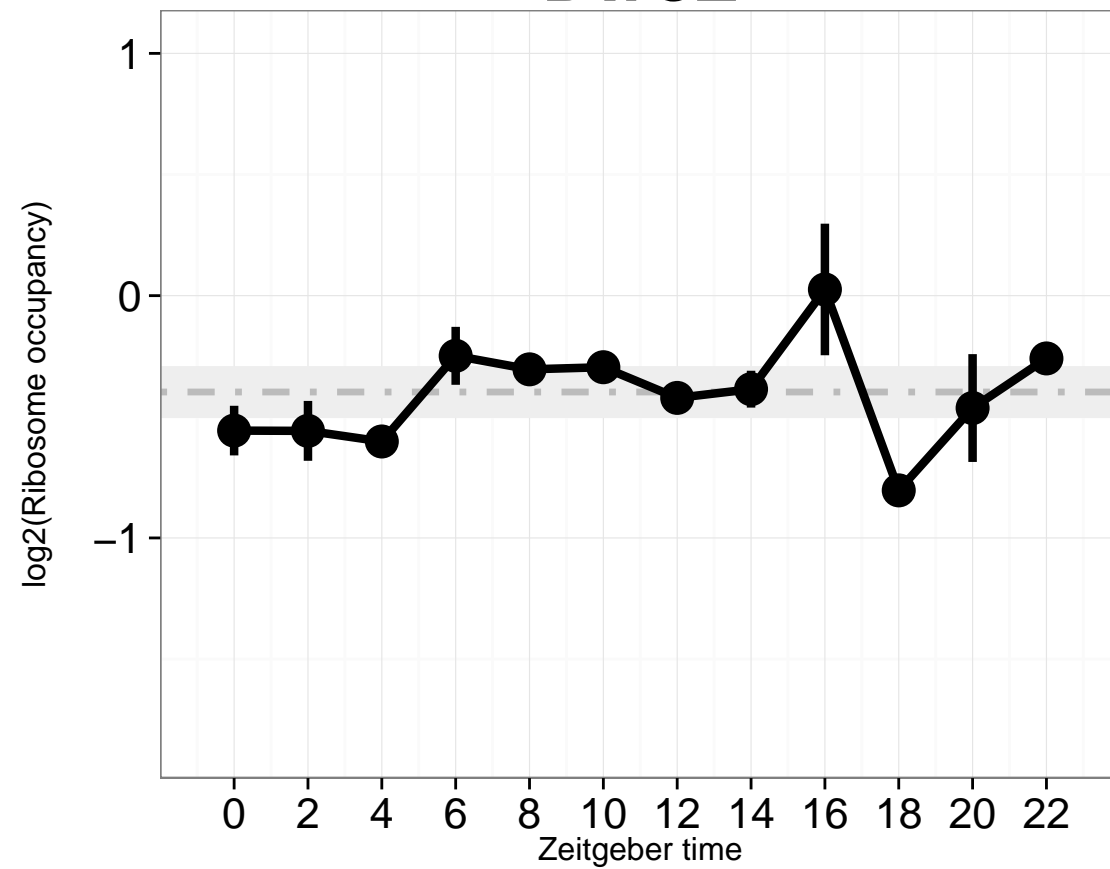

Supplement: Supplementary file 6597 [file 1]

## Numb

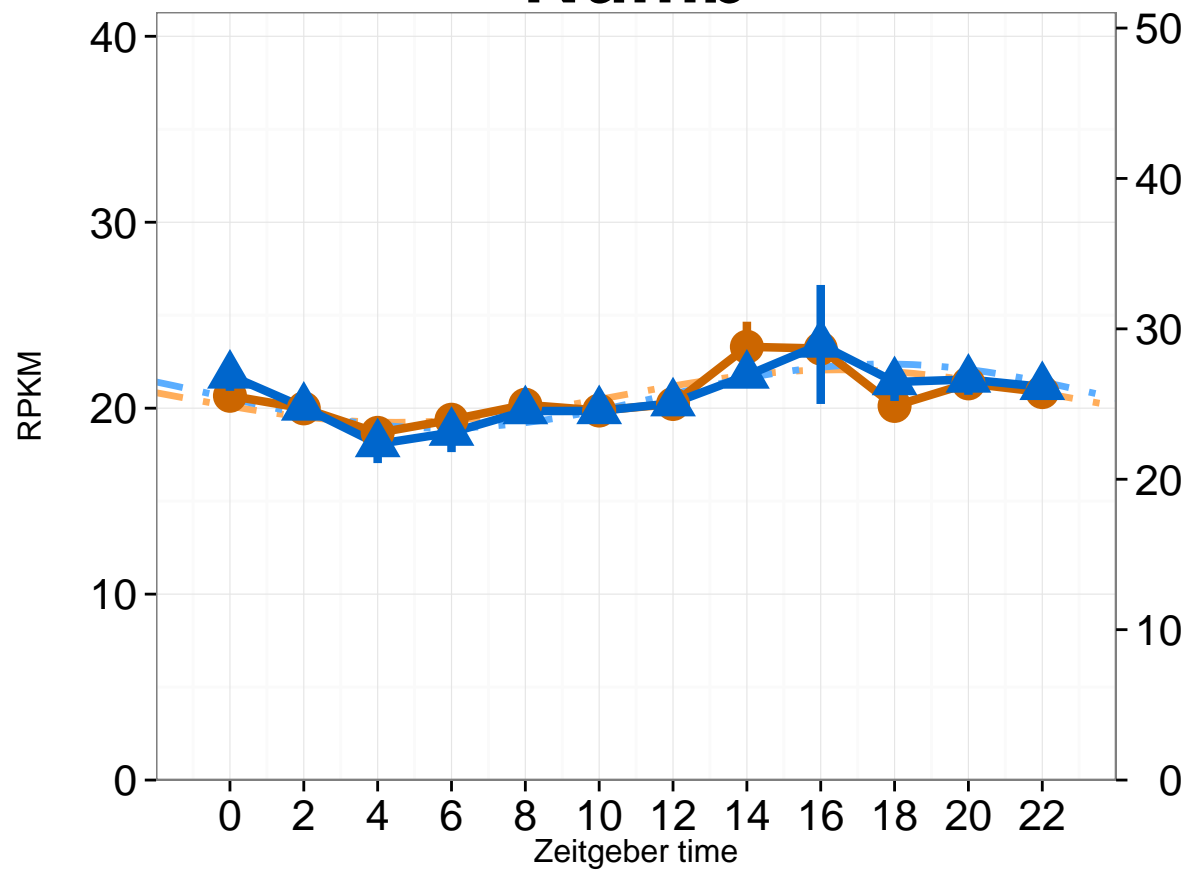

## Numb

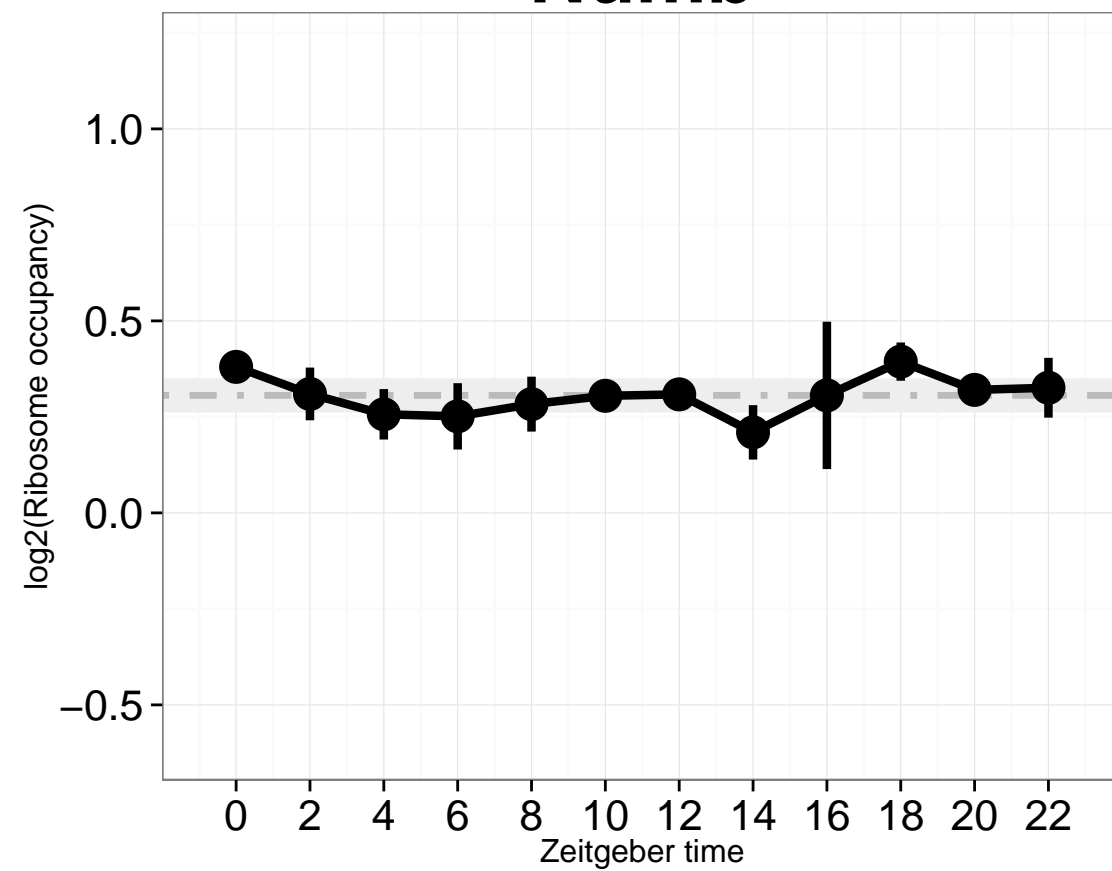

Supplement: Supplementary file 6598 [file 1]

# Tmem123

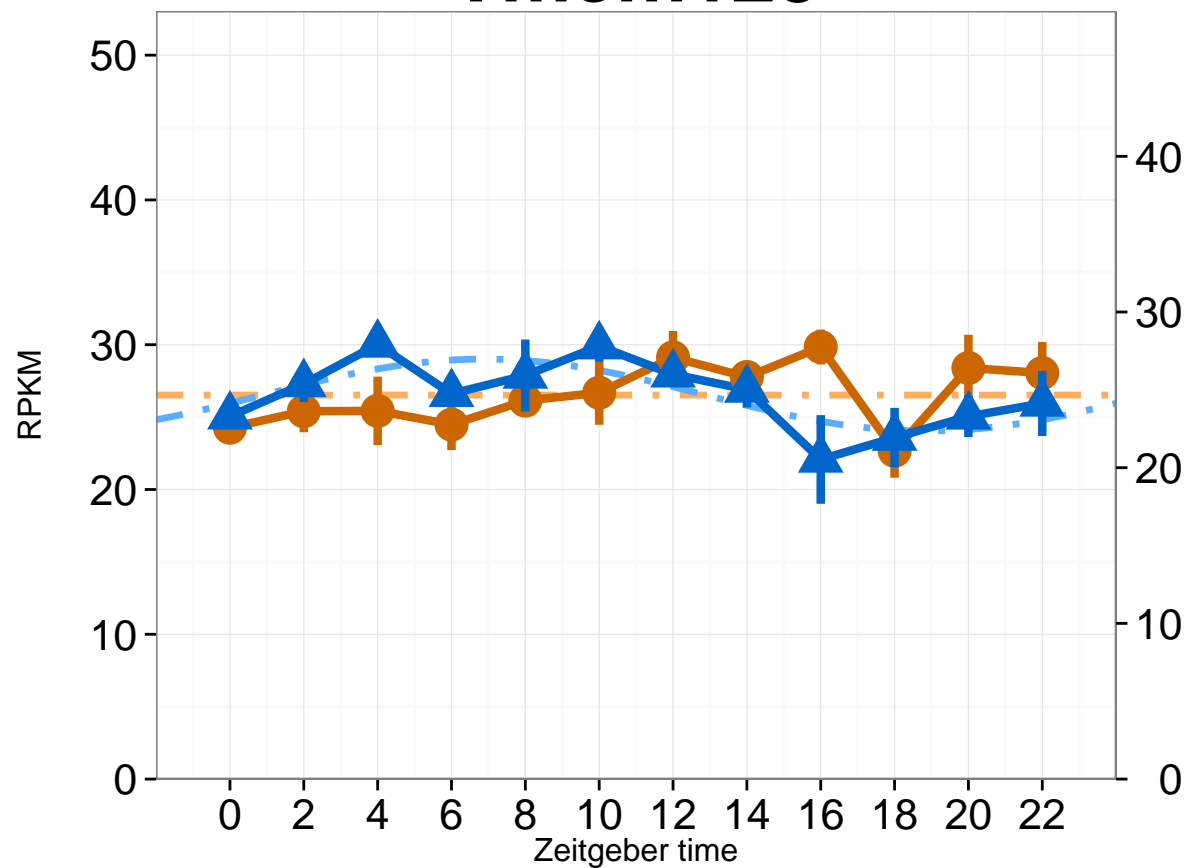

# Tmem123

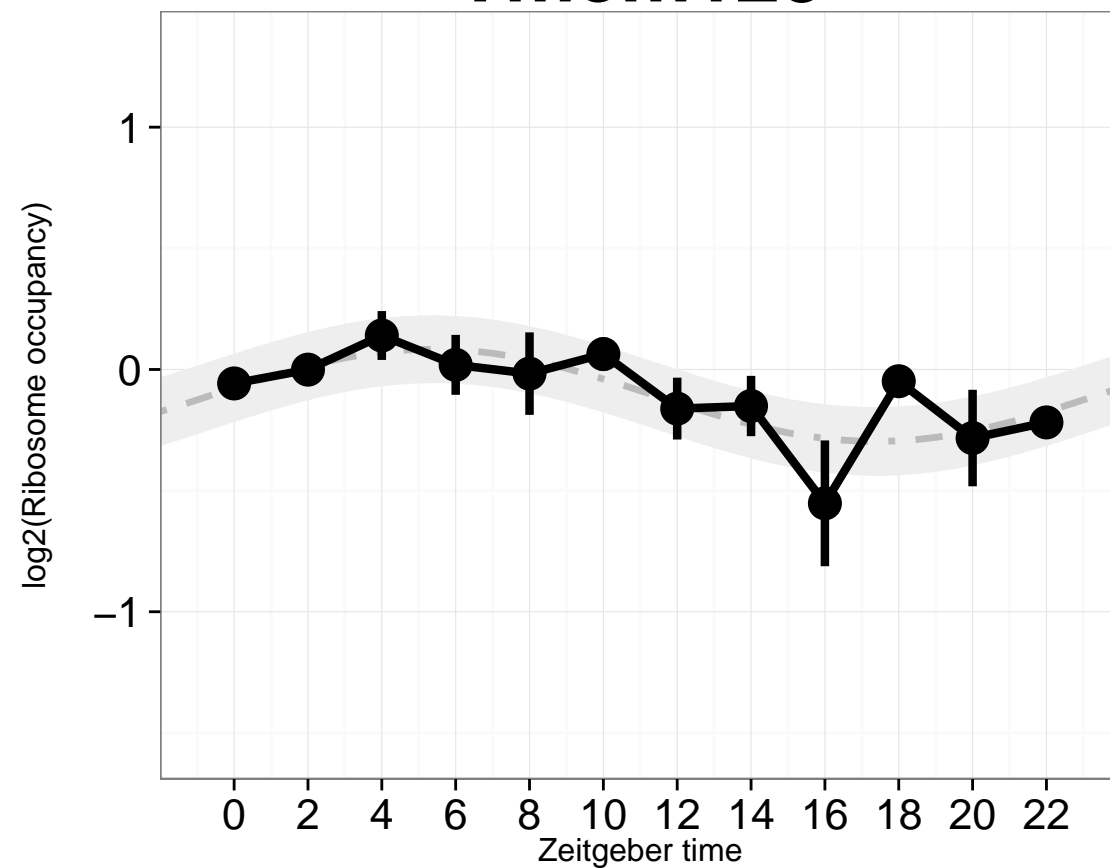

Supplement: Supplementary file 6599 [file 1]

# Gpr108

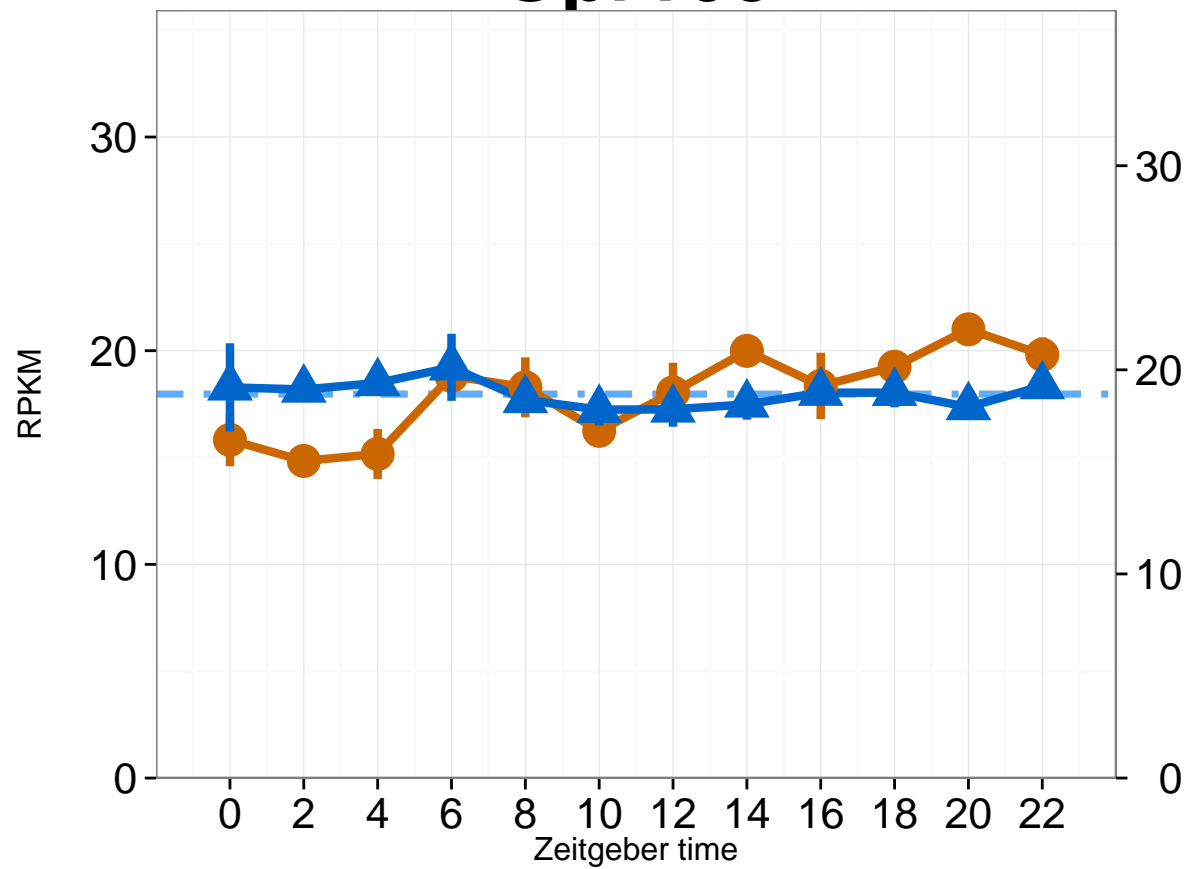

# Gpr108

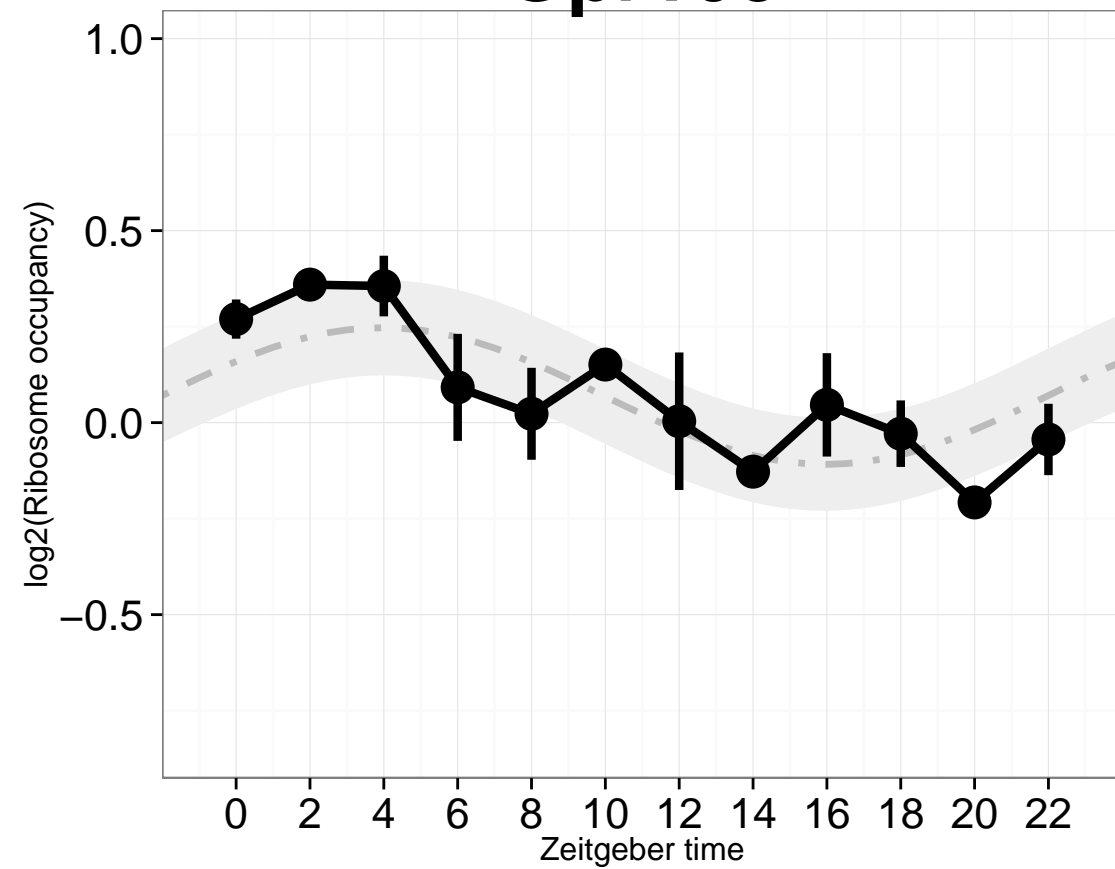

Supplement: Supplementary file 6600 [file 1]

# Cyb561a3

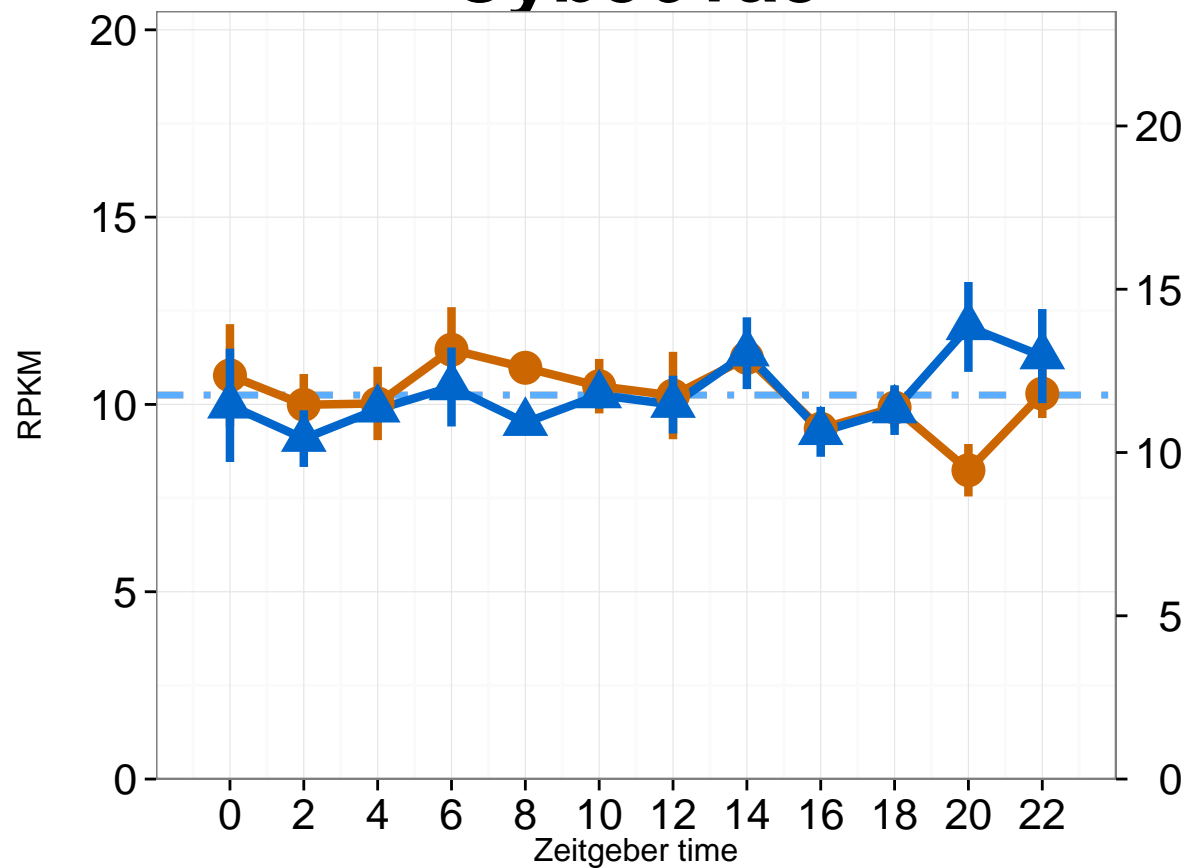

# Cyb561a3

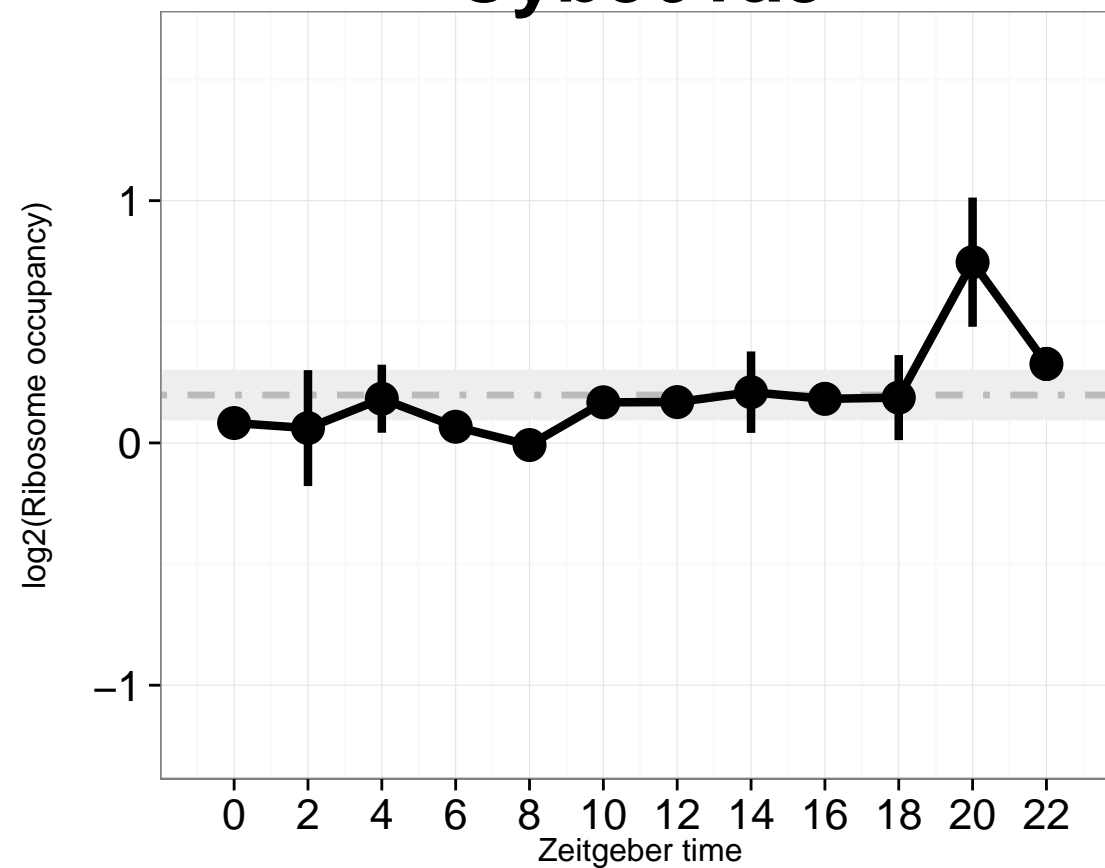

Supplement: Supplementary file 6601 [file 1]

## Fh1

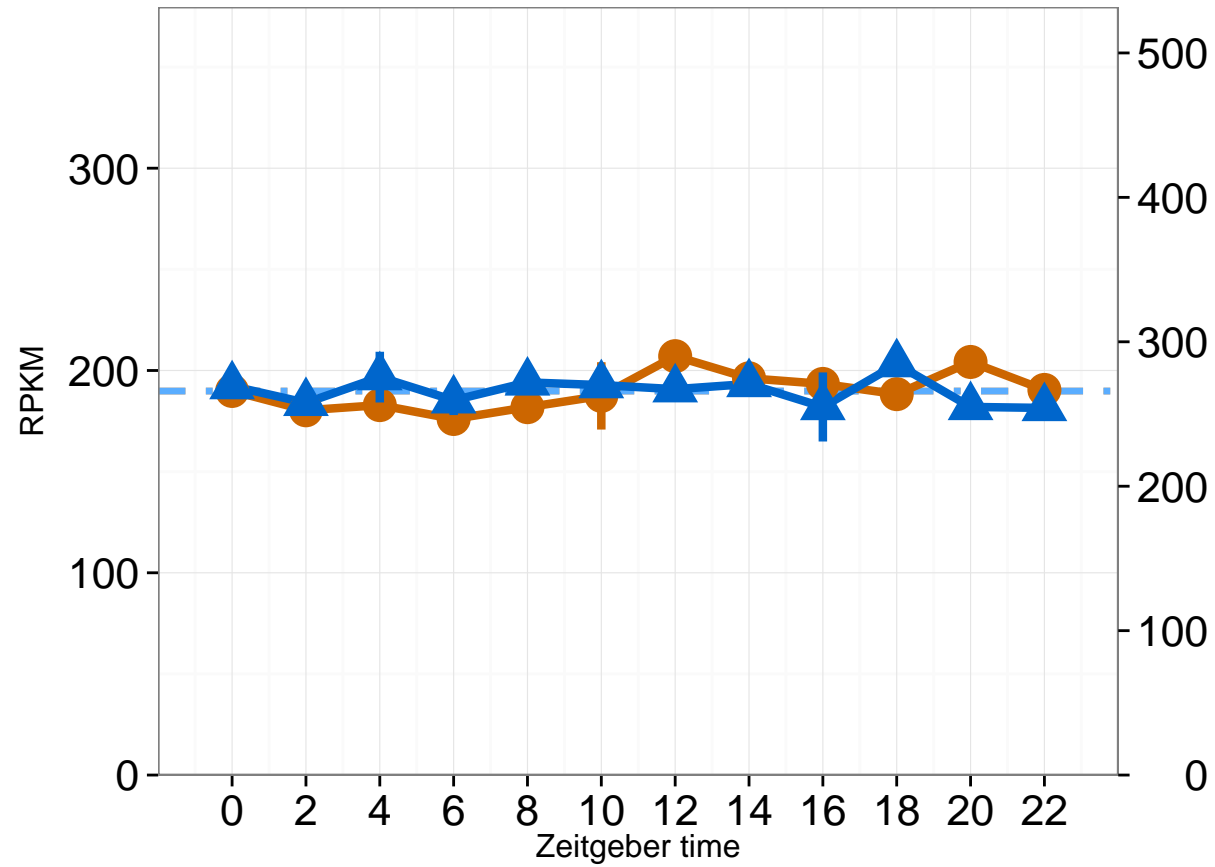

## Fh1

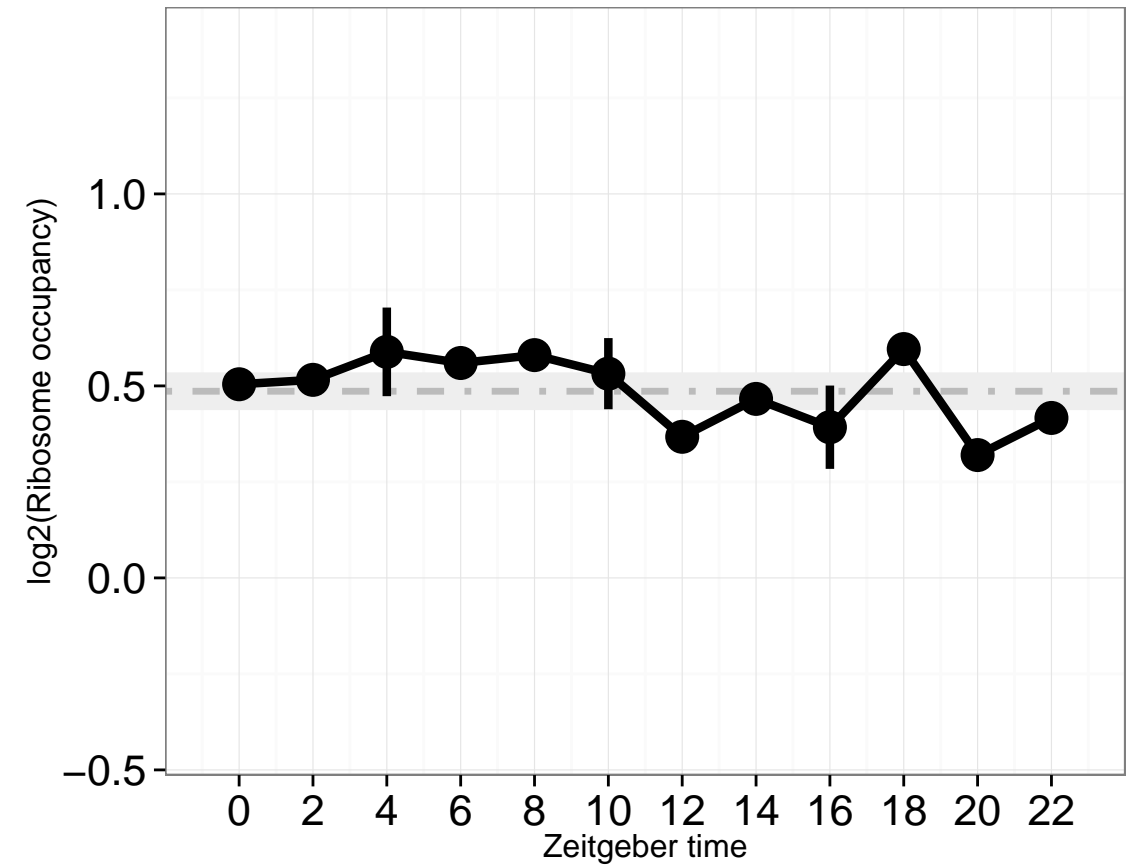

Supplement: Supplementary file 6602 [file 1]

# Lrriq3

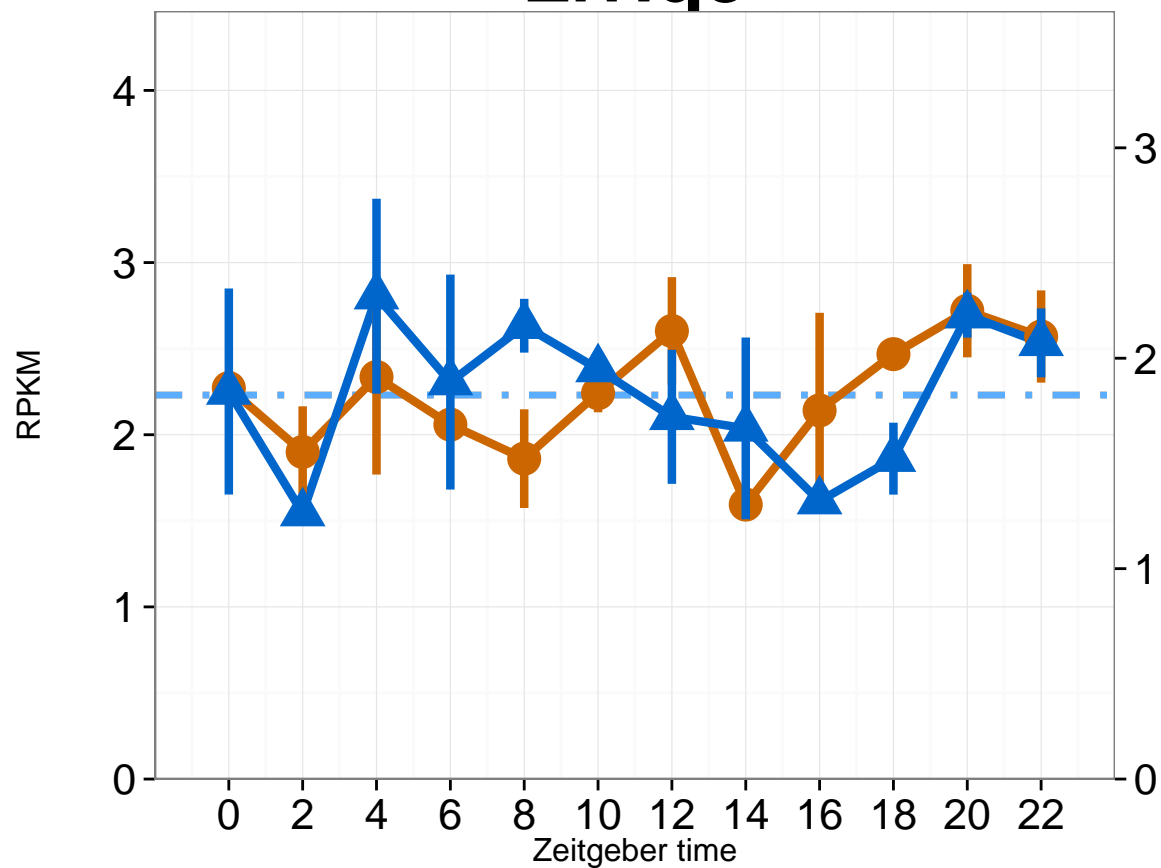

# Lrriq3

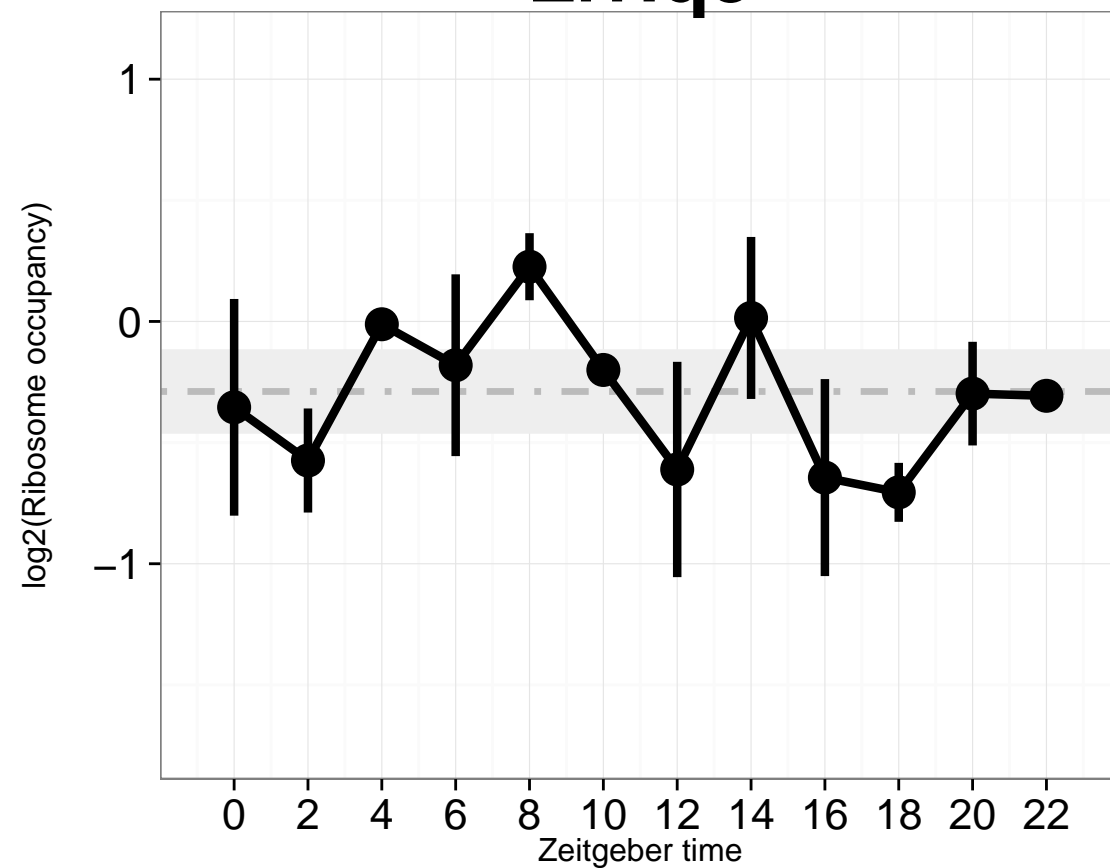

Supplement: Supplementary file 6603 [file 1]

# Rps4x

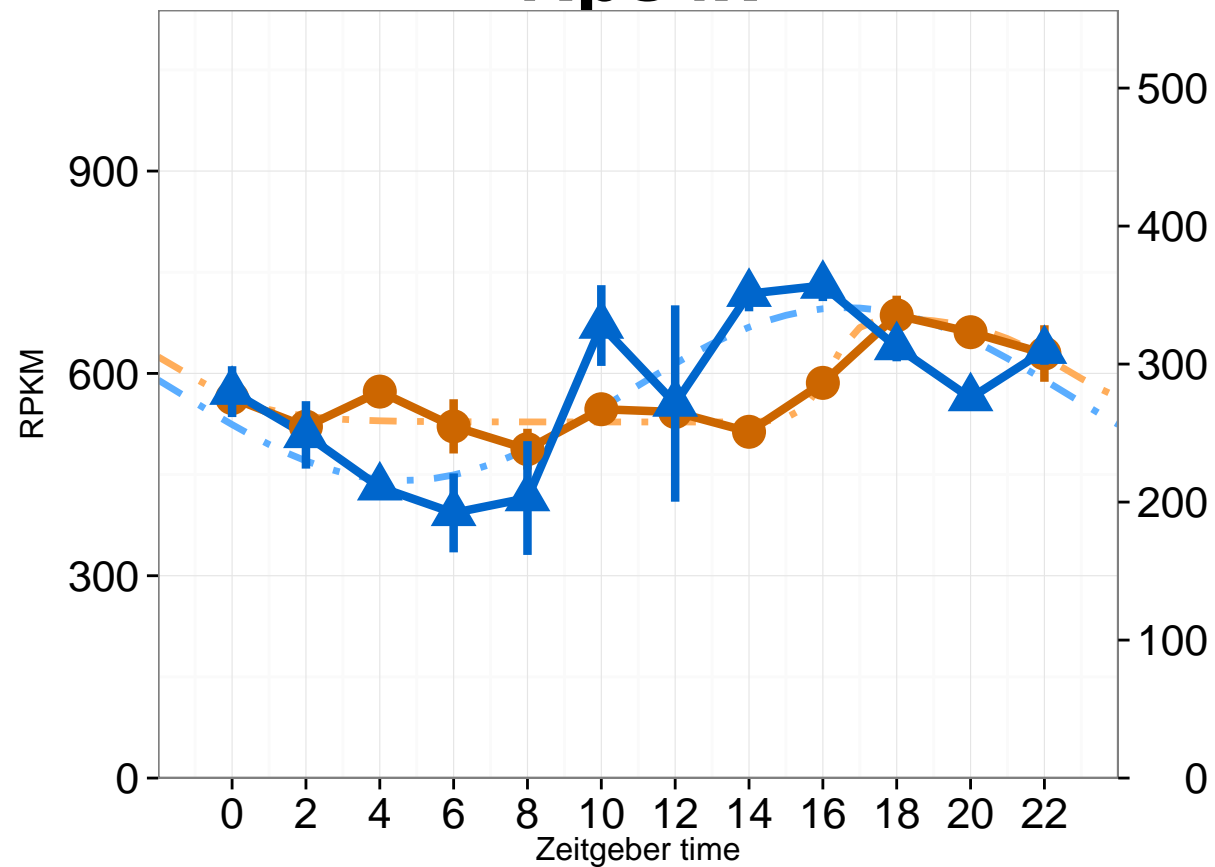

# Rps4x

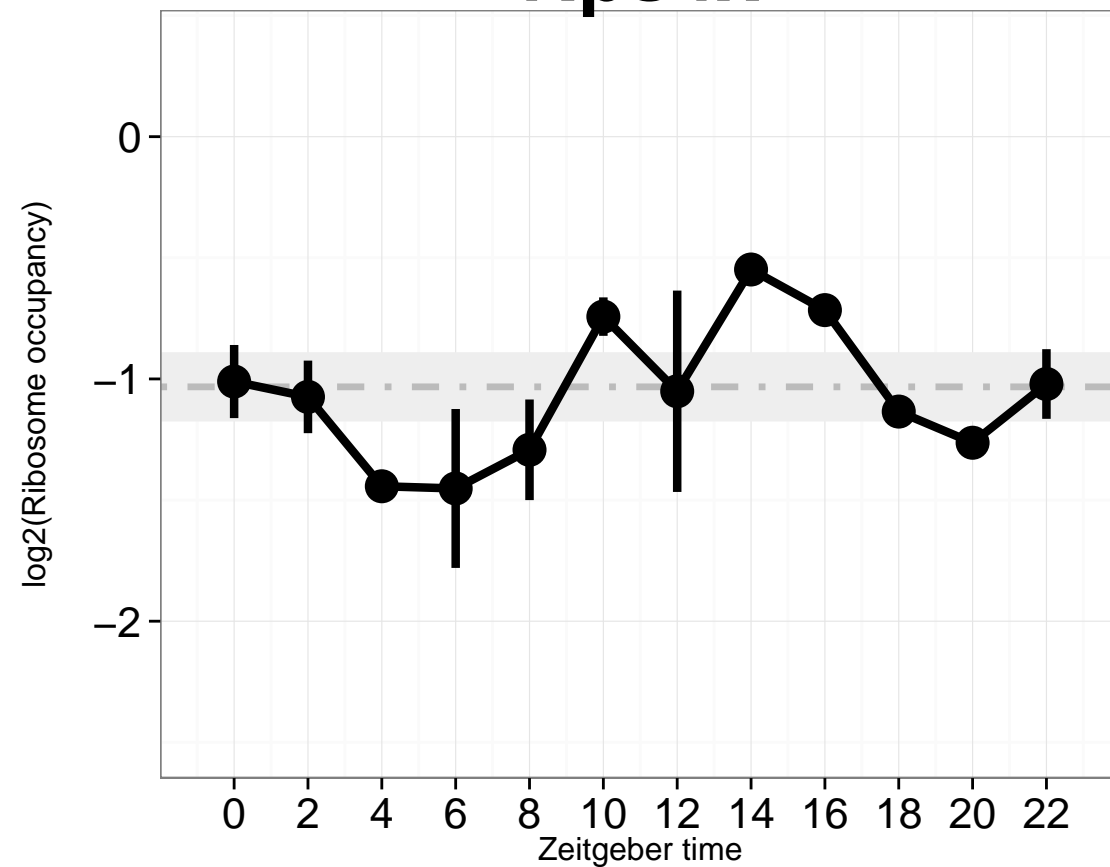

Supplement: Supplementary file 6604 [file 1]

# Cdc14a

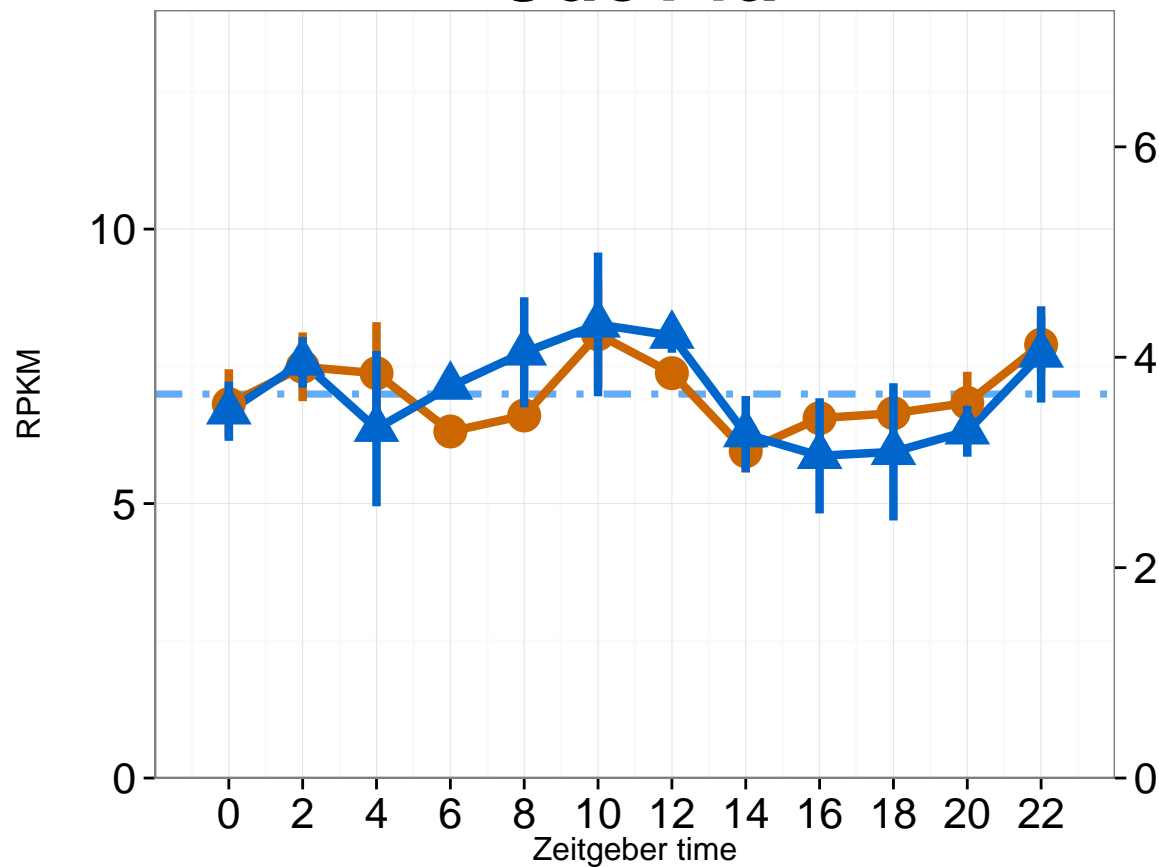

# Cdc14a

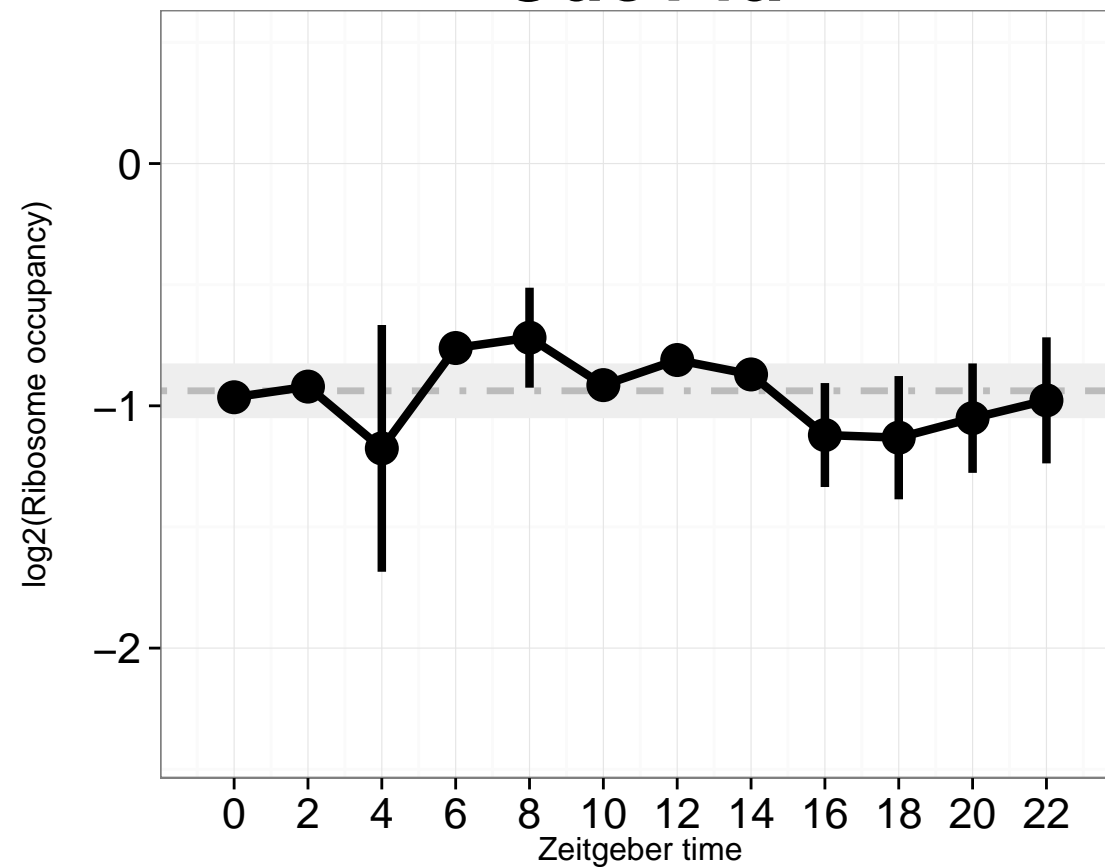

Supplement: Supplementary file 6605 [file 1]

## Nbeal1

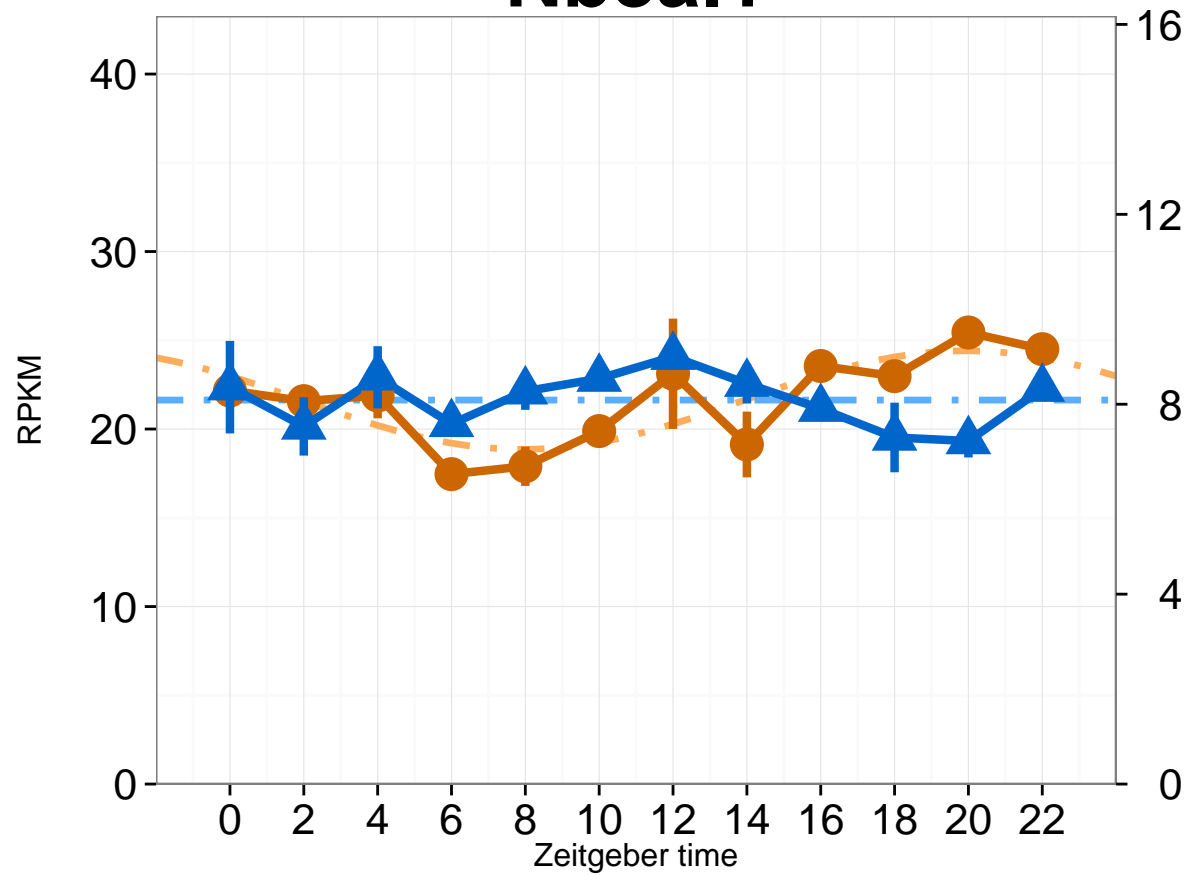

## Nbeal1

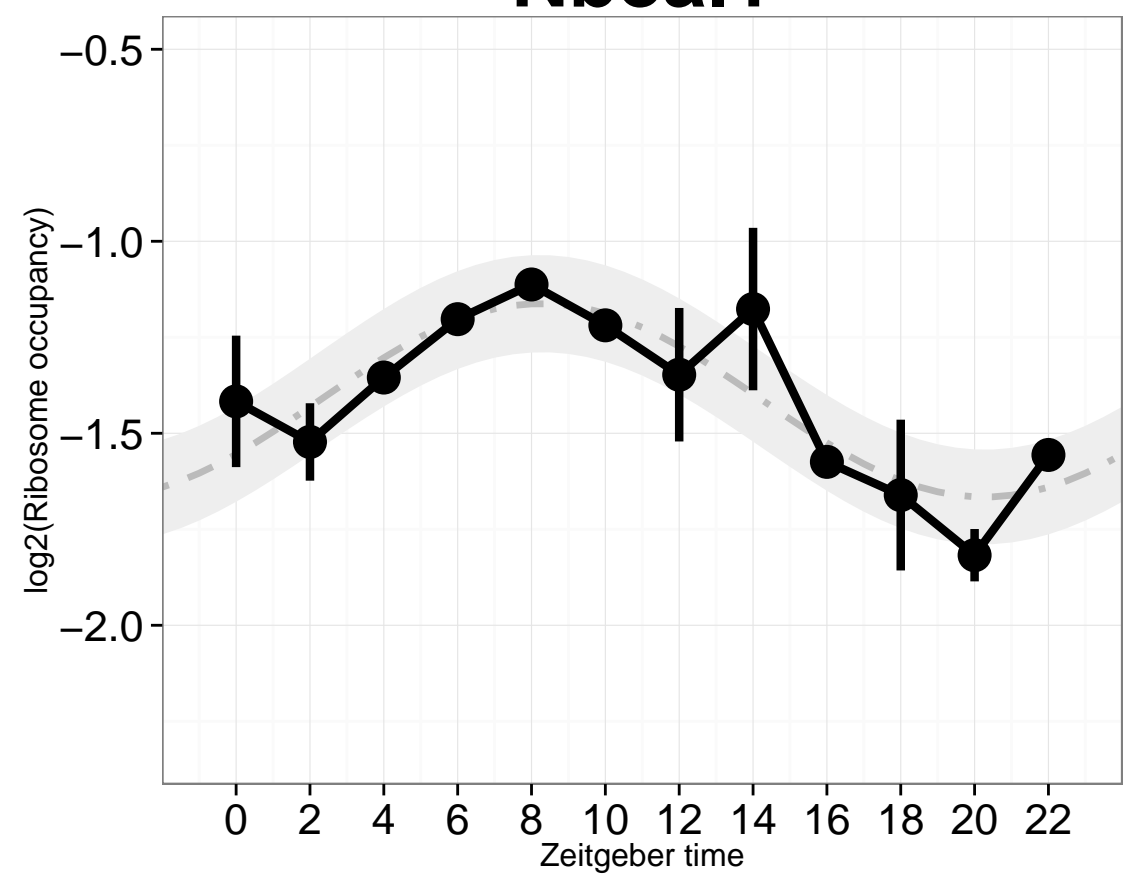

Supplement: Supplementary file 6606 [file 1]

## Pcbp2

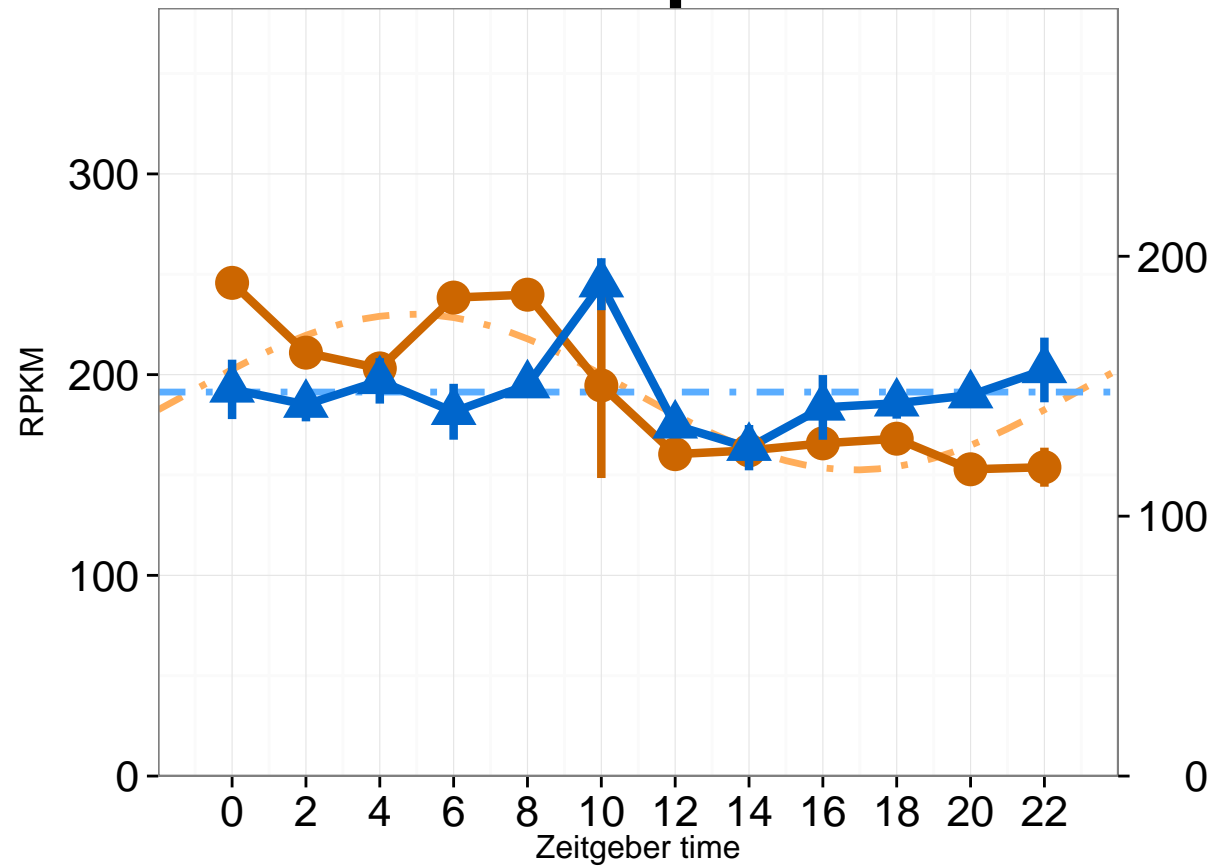

## Pcbp2

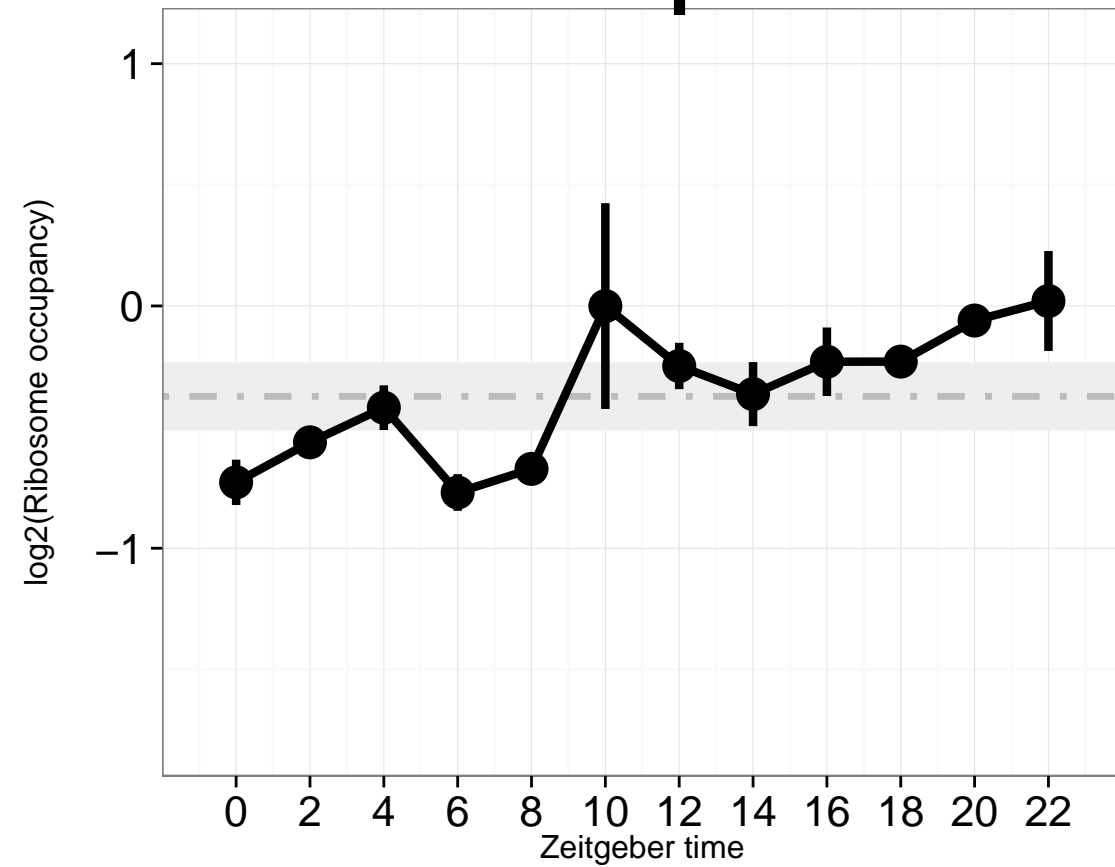

Supplement: Supplementary file 6607 [file 1]

## Izumo4

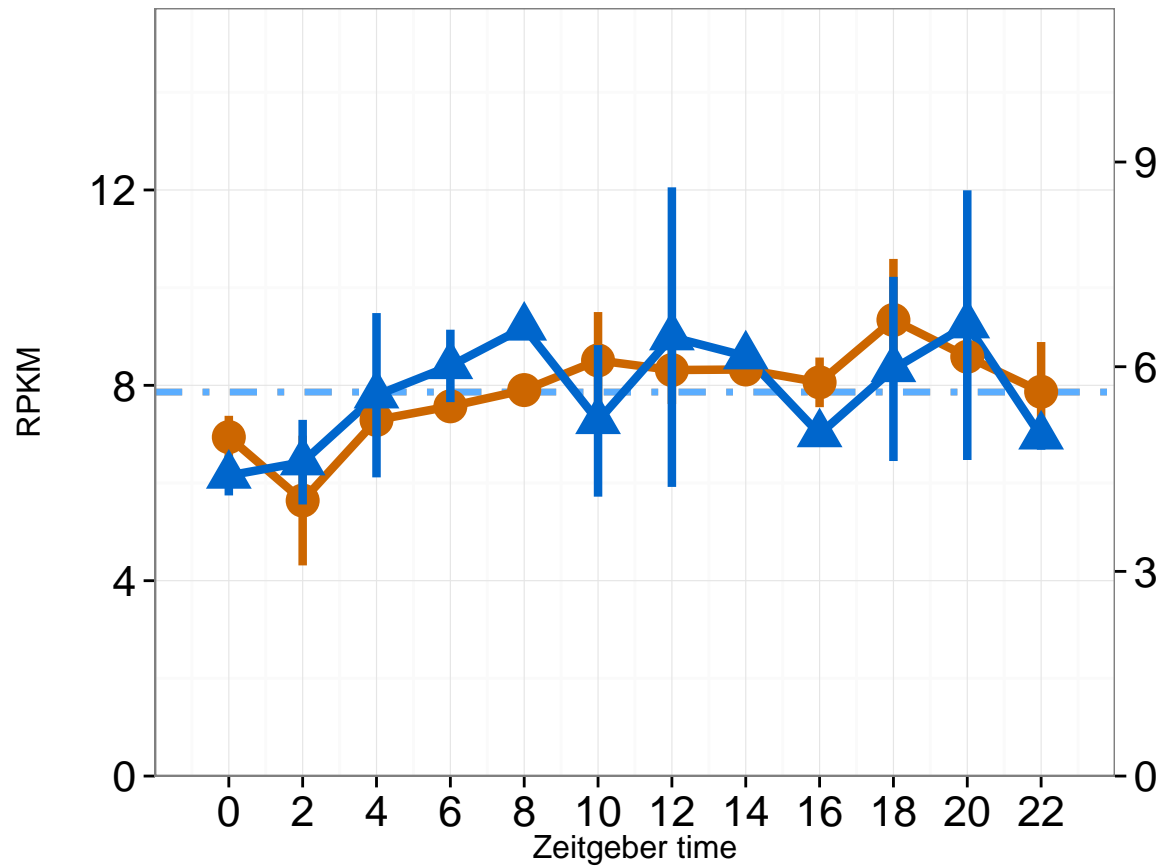

## Izumo4

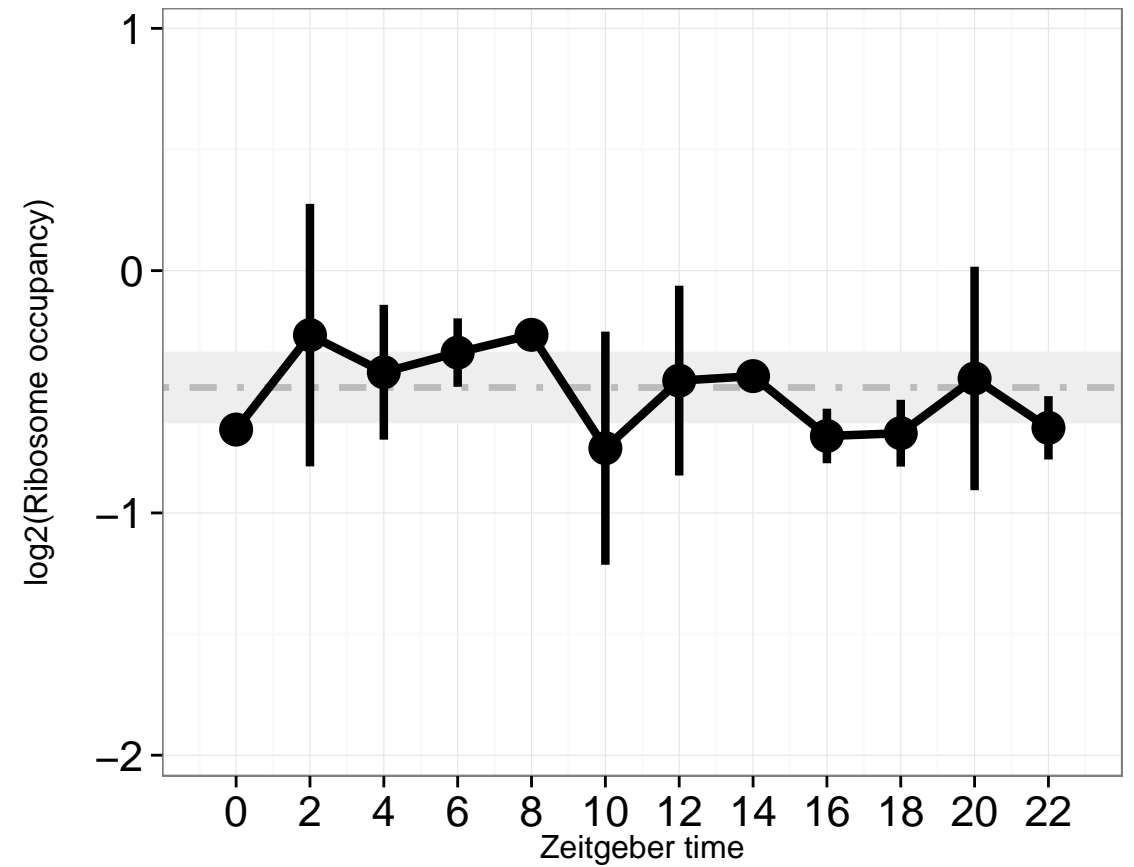

Supplement: Supplementary file 6608 [file 1]

# Glipr2

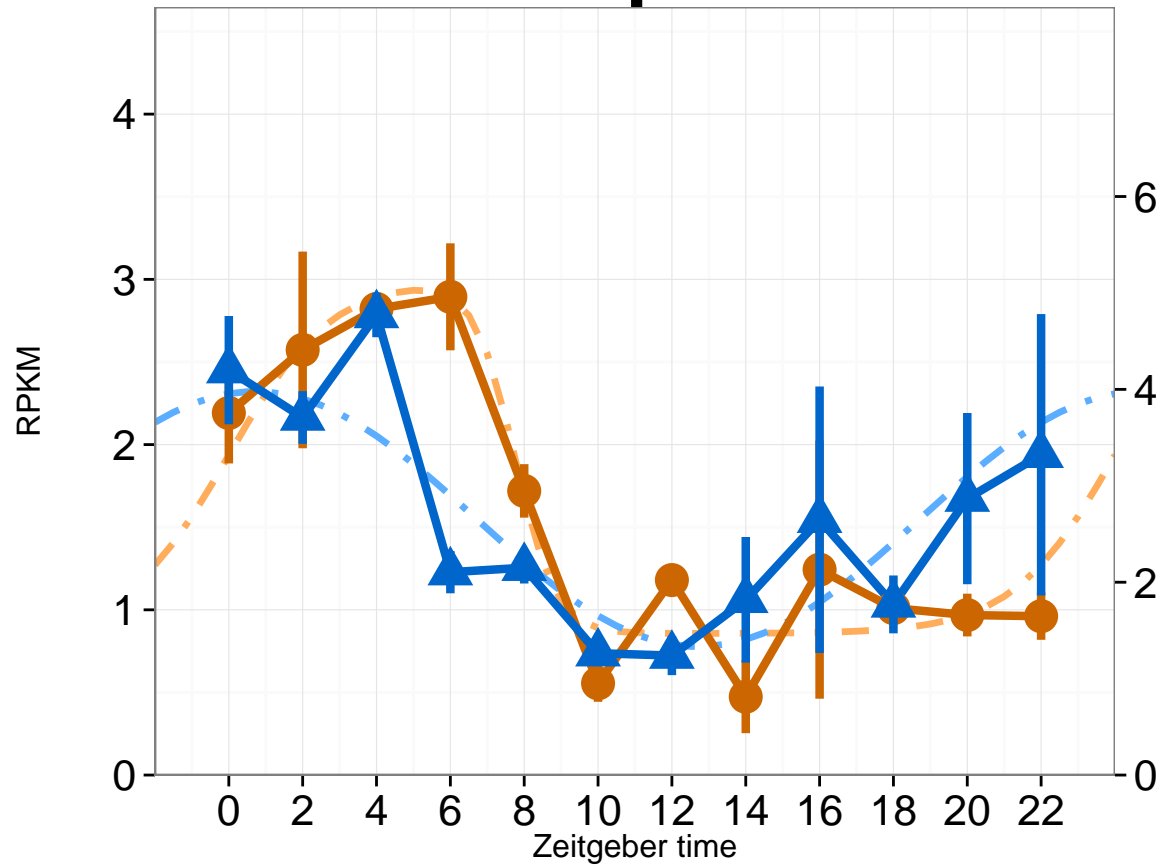

# Glipr2

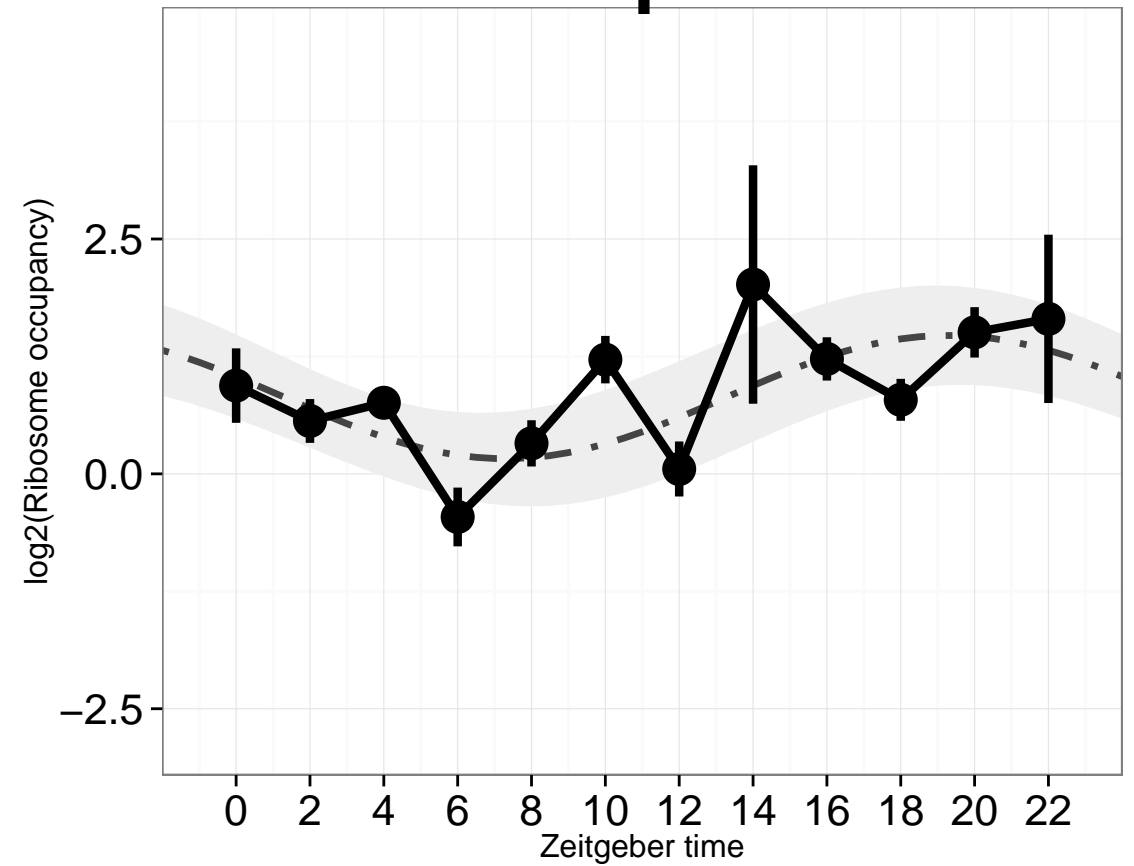

Supplement: Supplementary file 6609 [file 1]

# Stip1

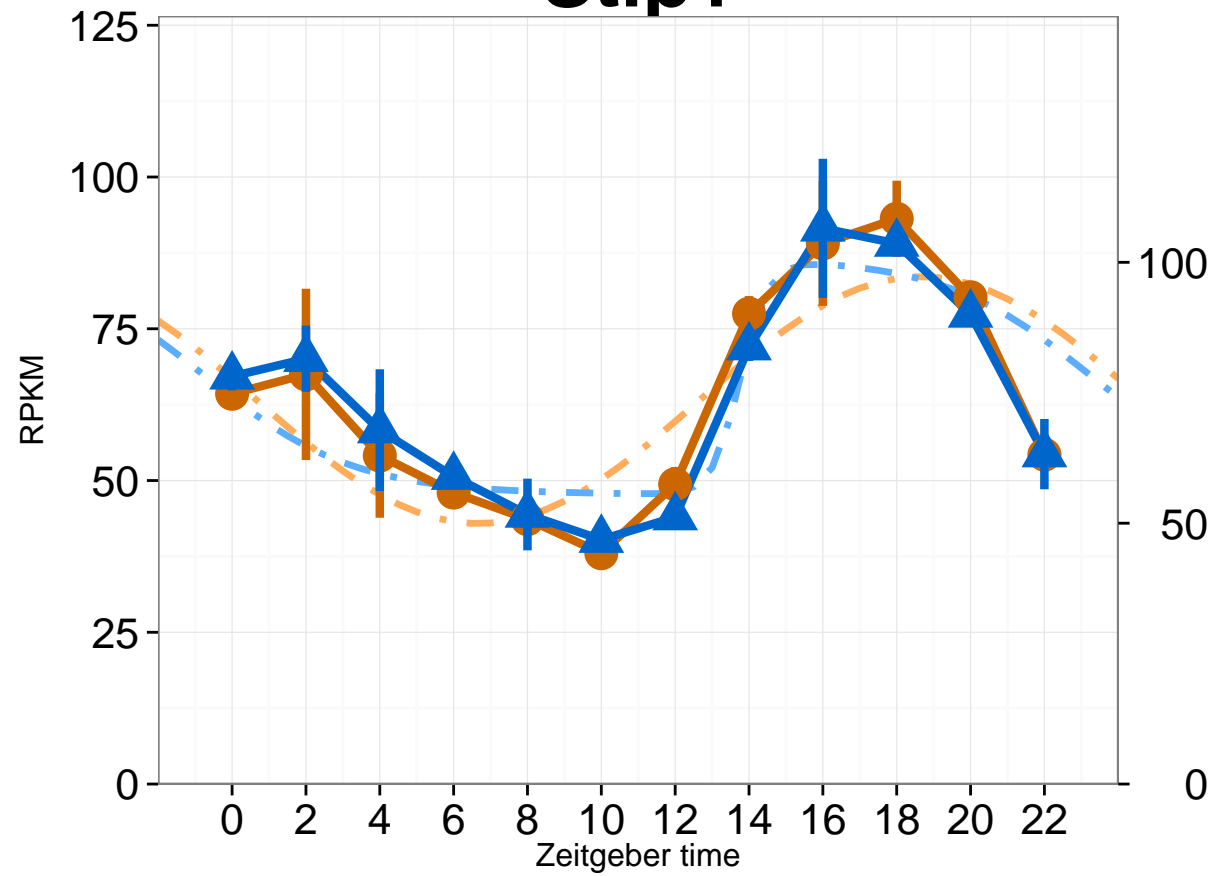

# Stip1

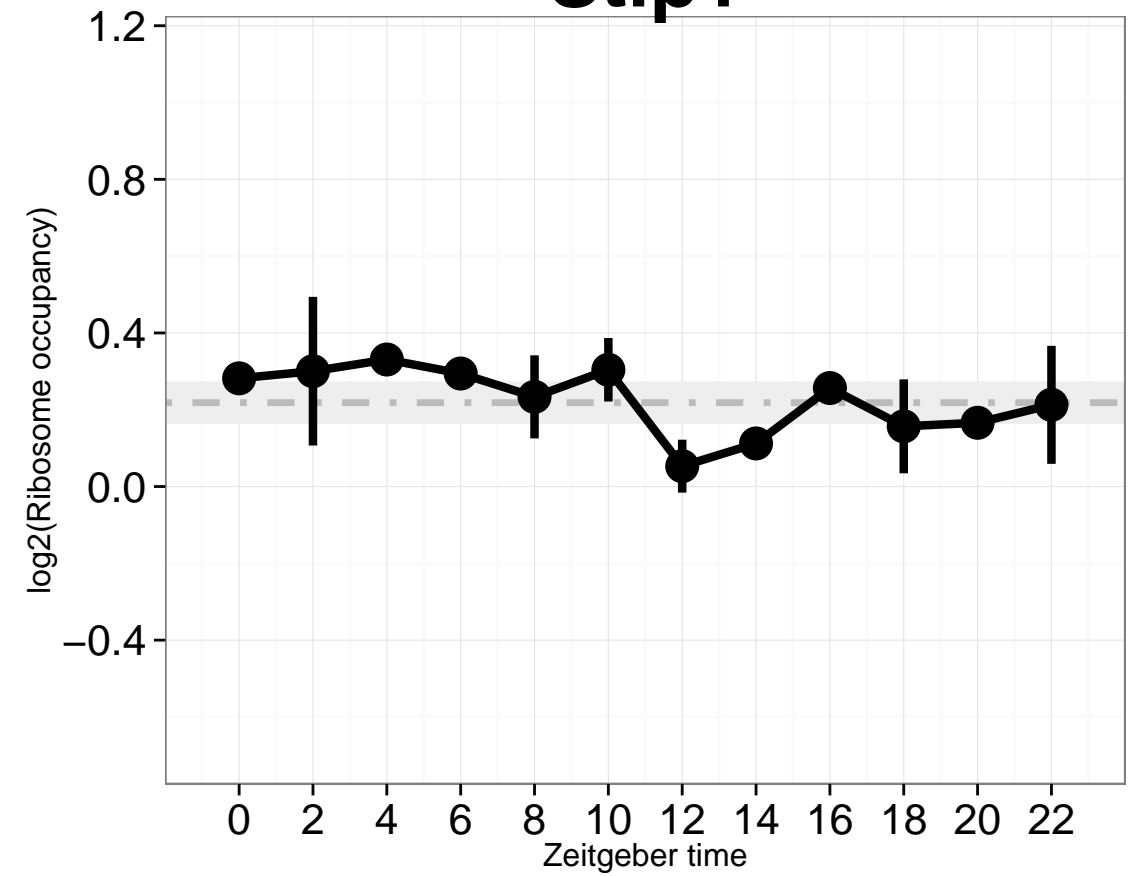

Supplement: Supplementary file 6610 [file 1]

# Pars2

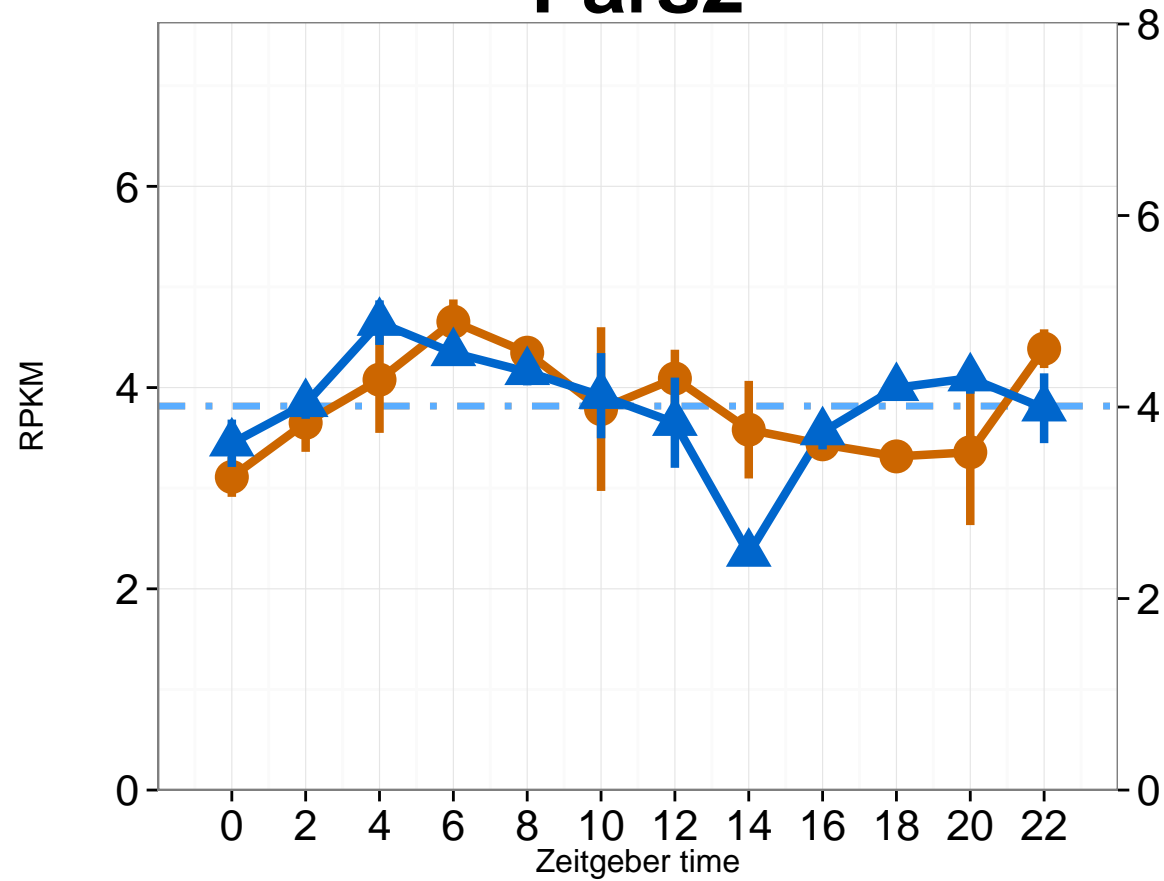

# Pars2

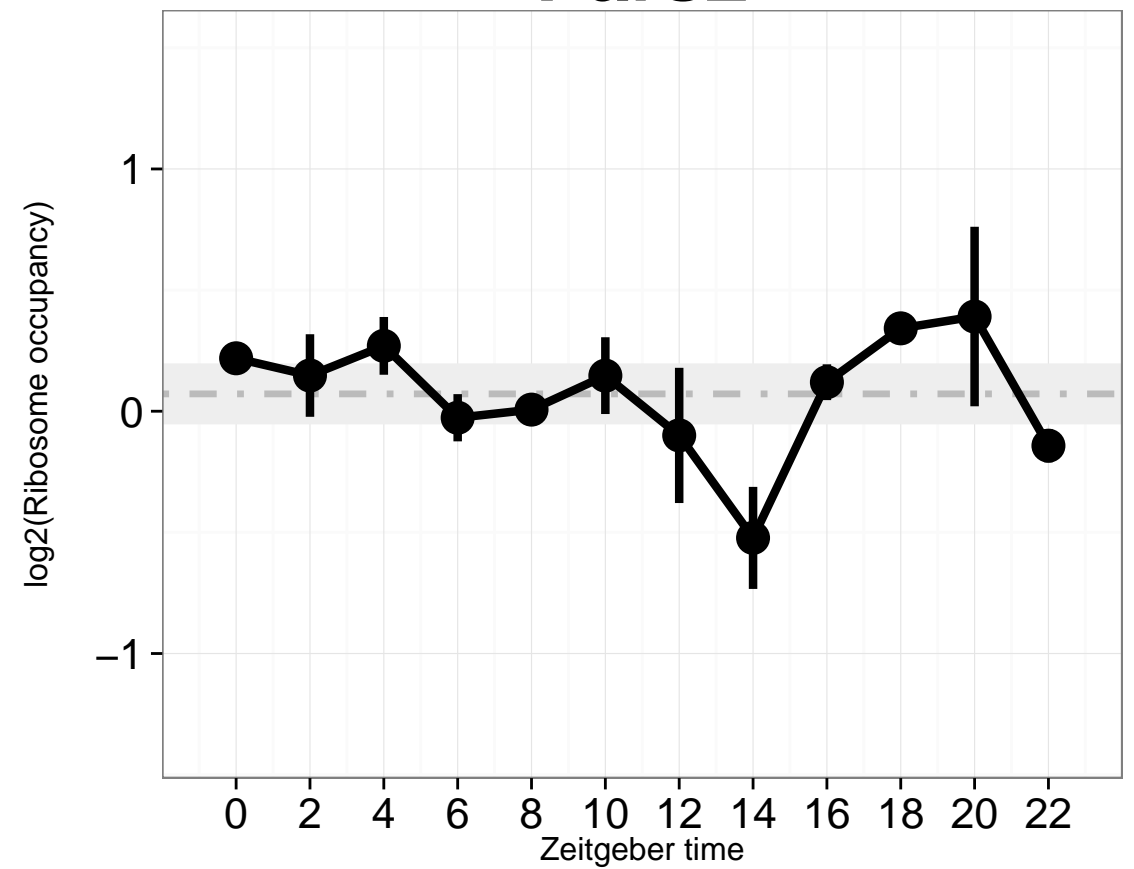

Supplement: Supplementary file 6611 [file 1]

## Edc3

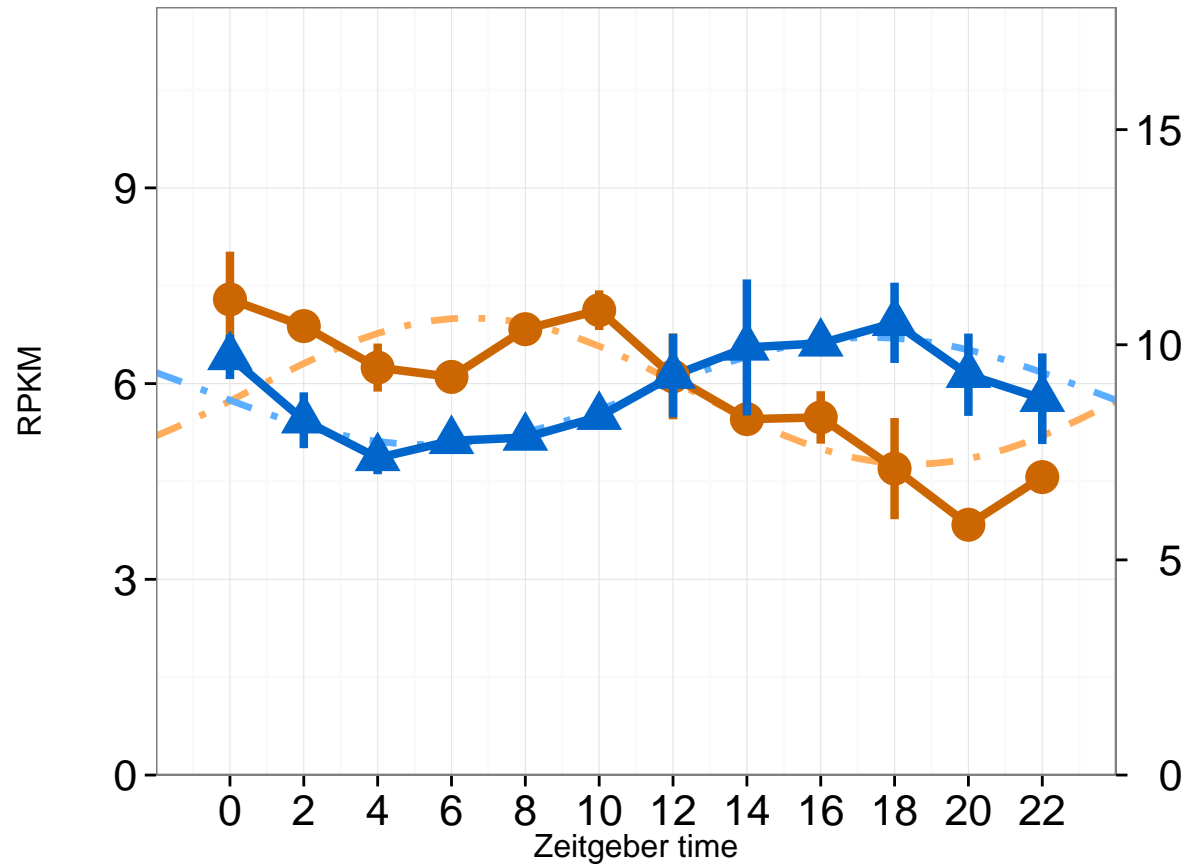

## Edc3

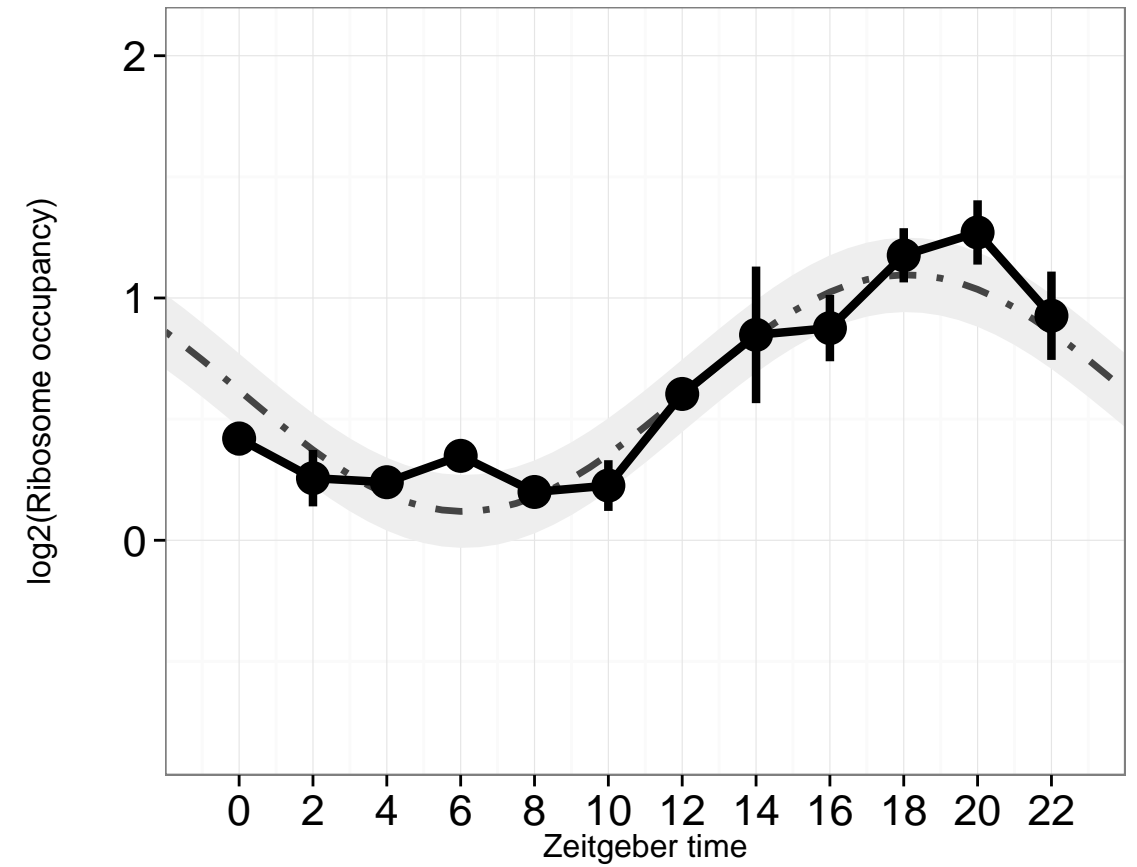

Supplement: Supplementary file 6612 [file 1]

# Bin1

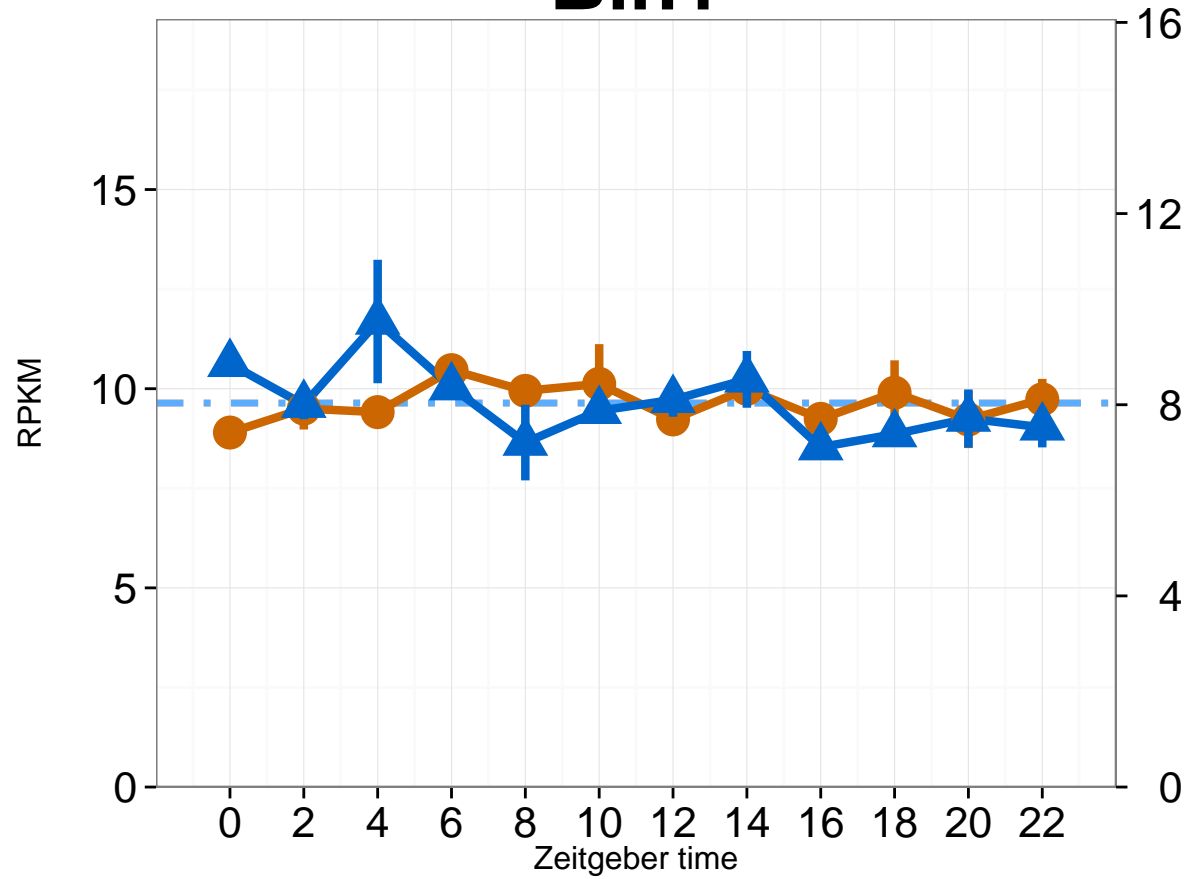

# Bin1

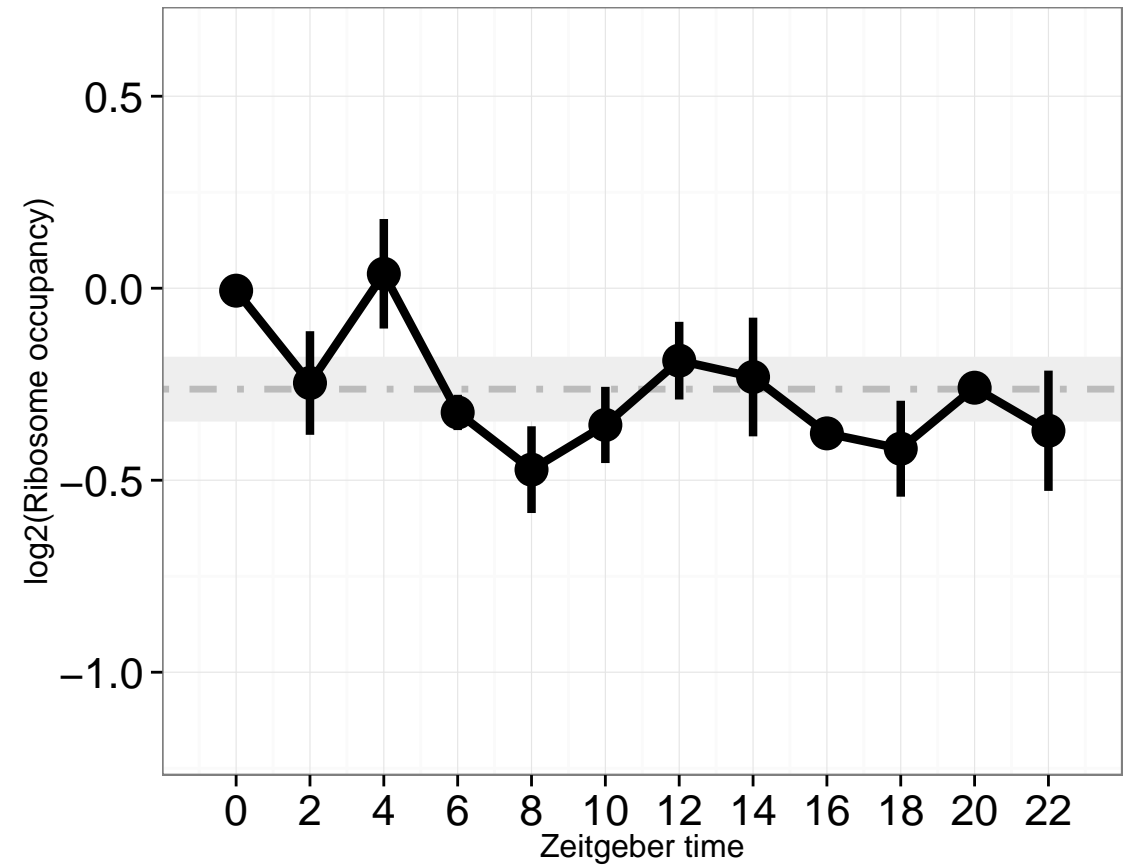

Supplement: Supplementary file 6613 [file 1]

## Slx4ip

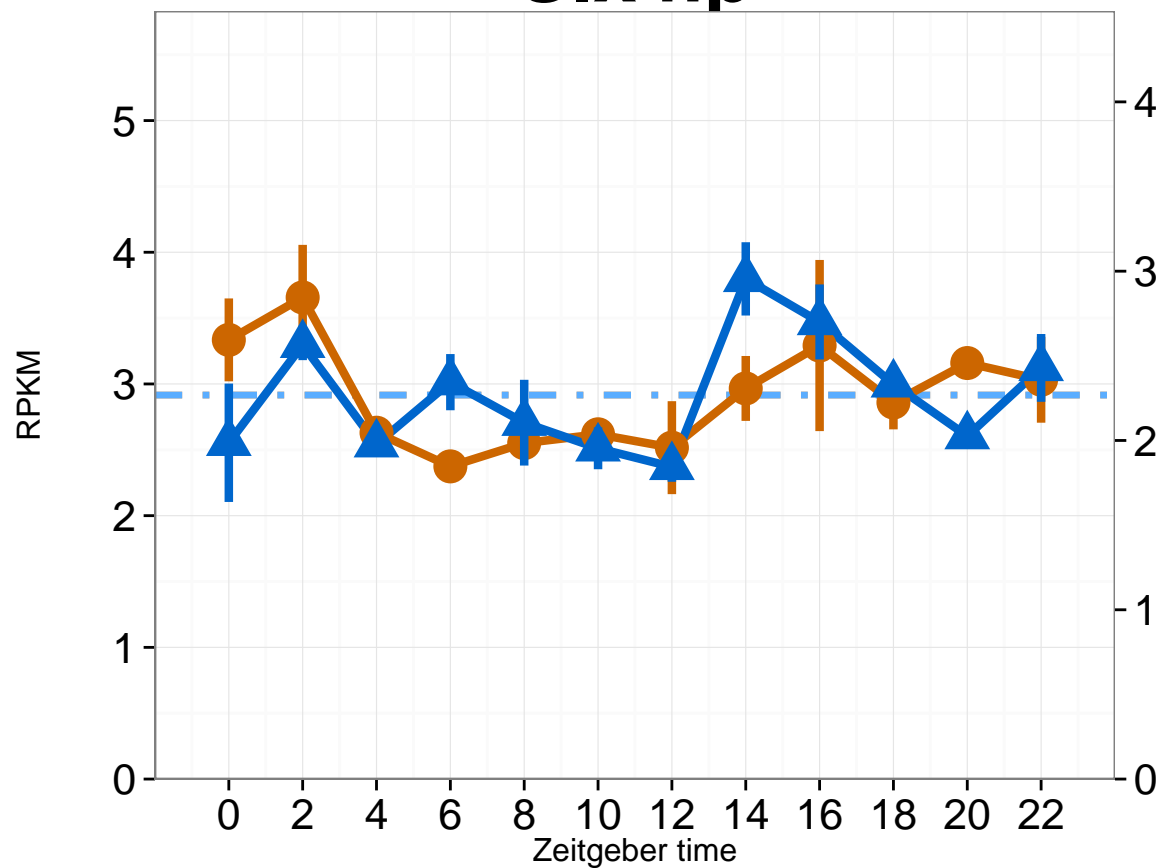

## Slx4ip

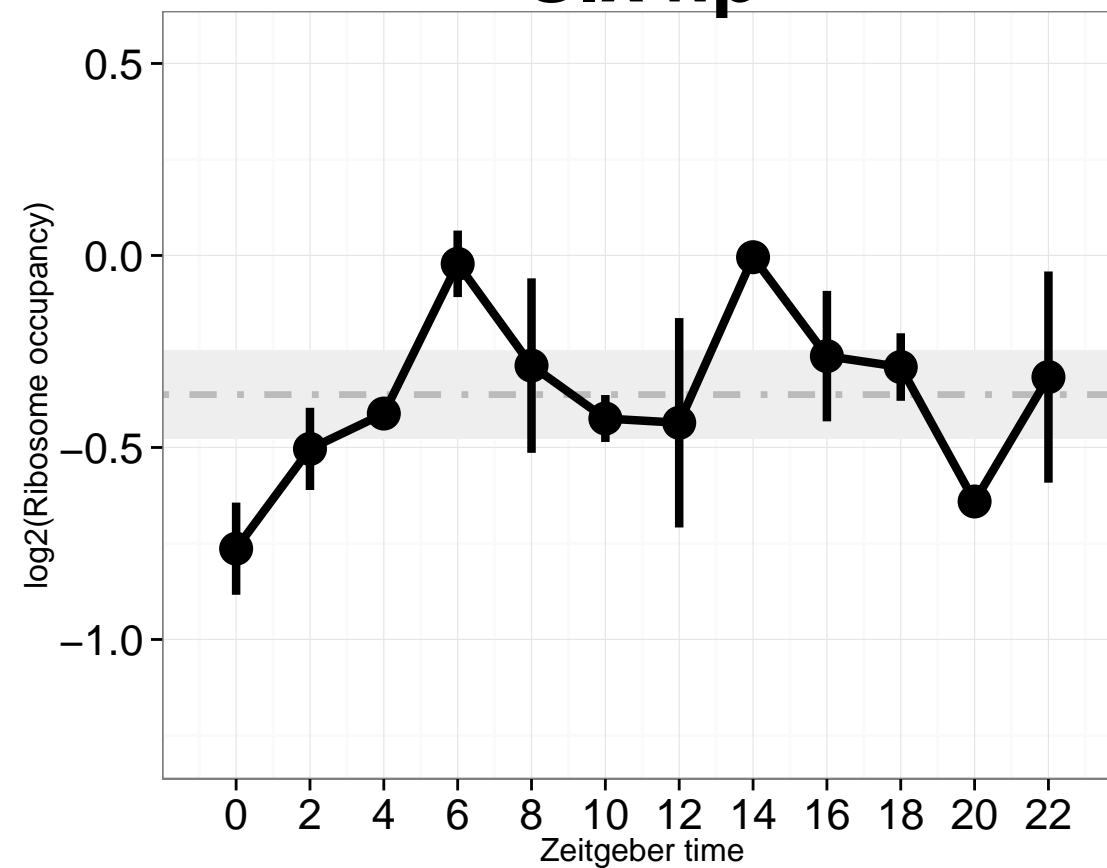

Supplement: Supplementary file 6614 [file 1]

# D11Wsu47e

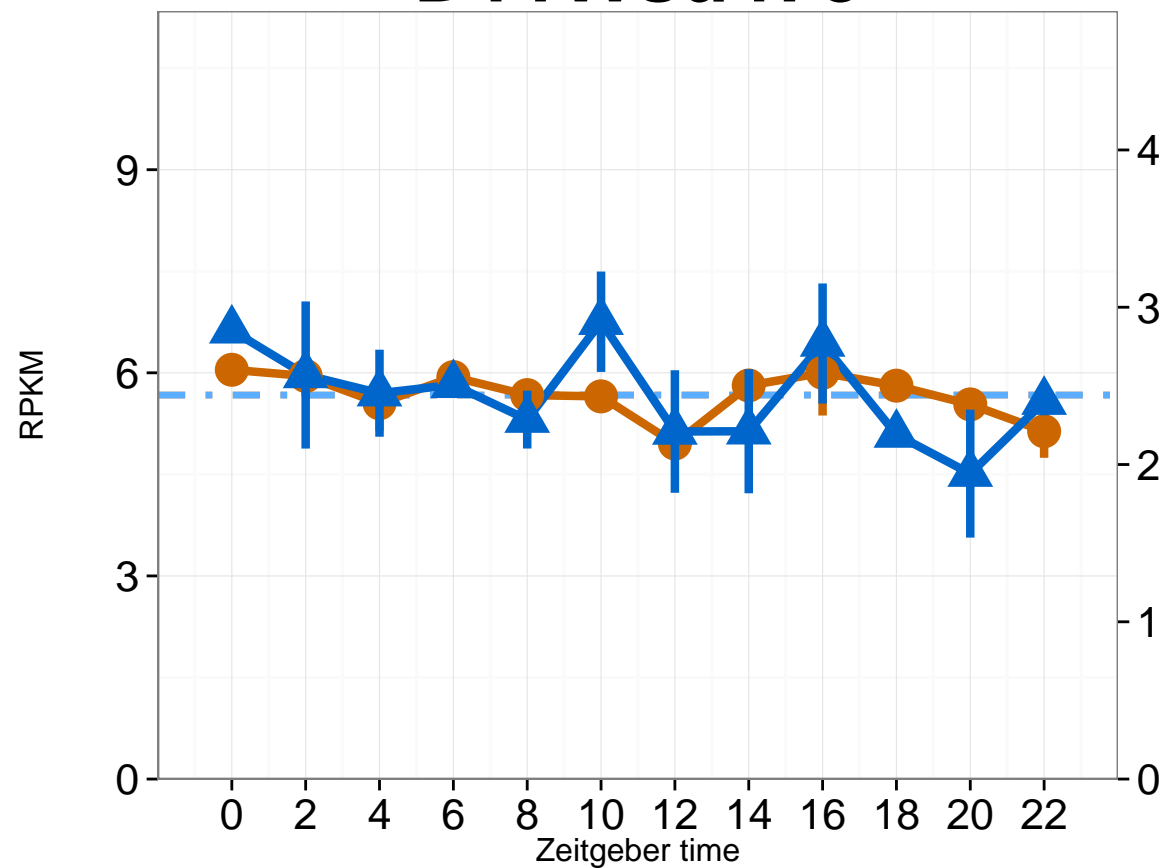

# D11Wsu47e

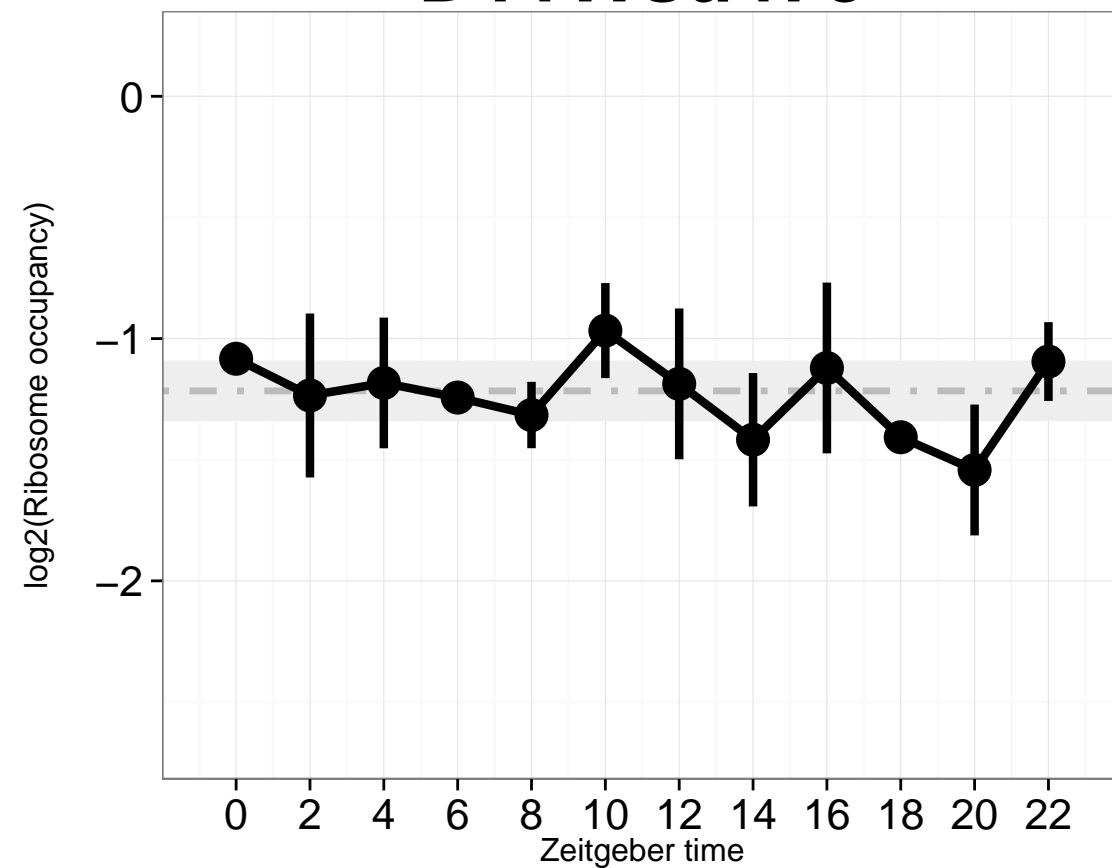

Supplement: Supplementary file 6615 [file 1]

## Cubn

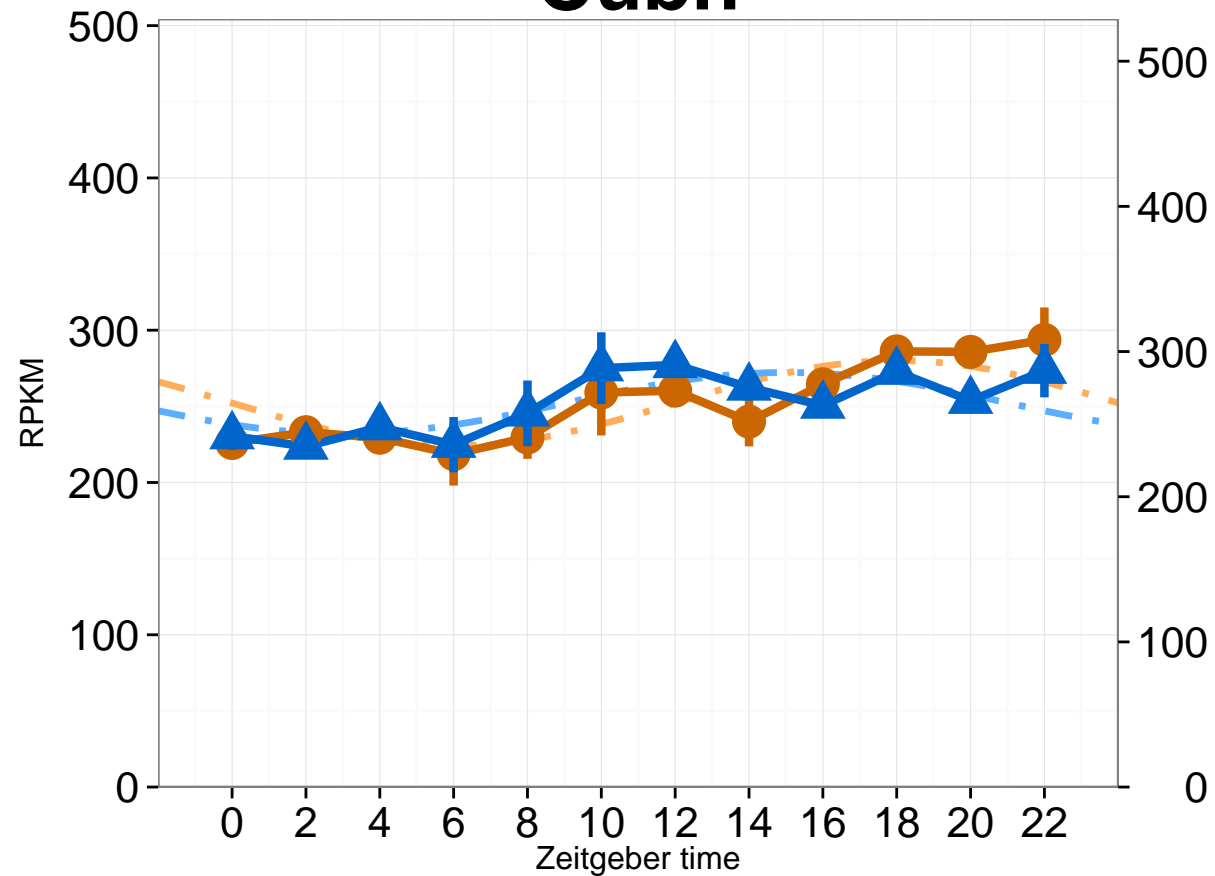

## Cubn

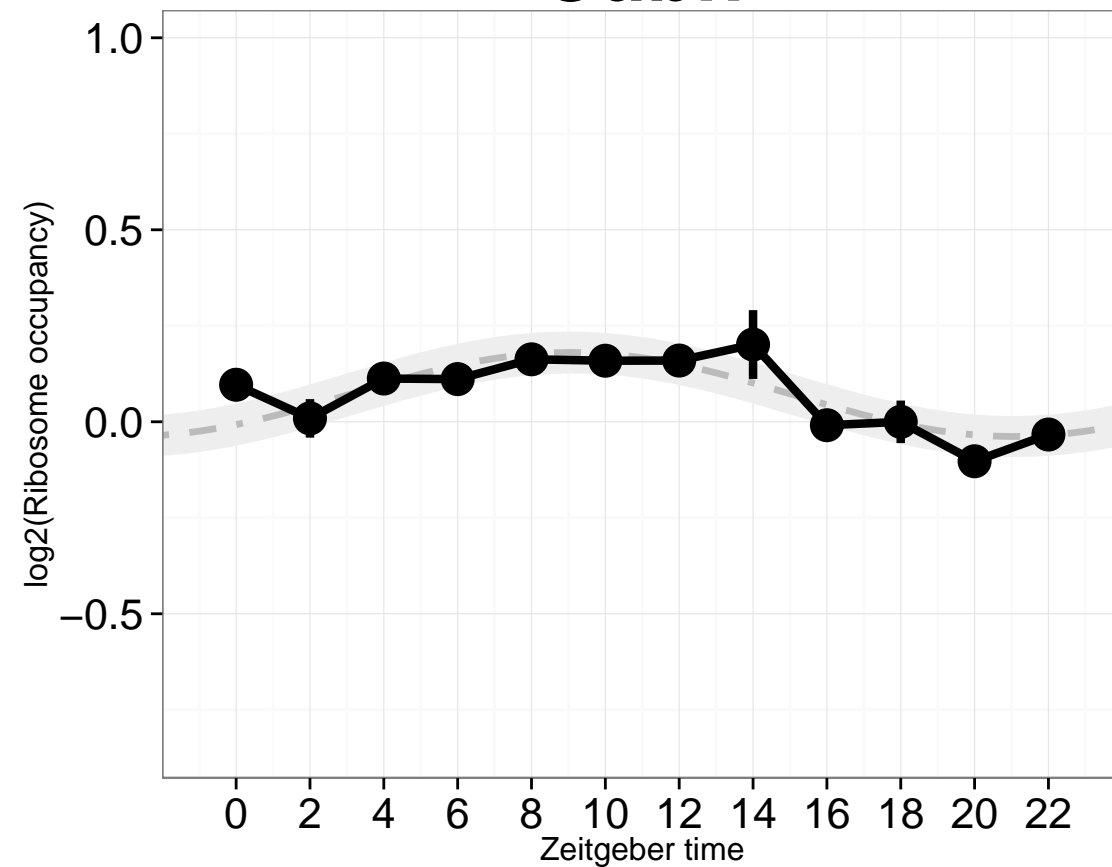

Supplement: Supplementary file 6616 [file 1]

# Mfap2

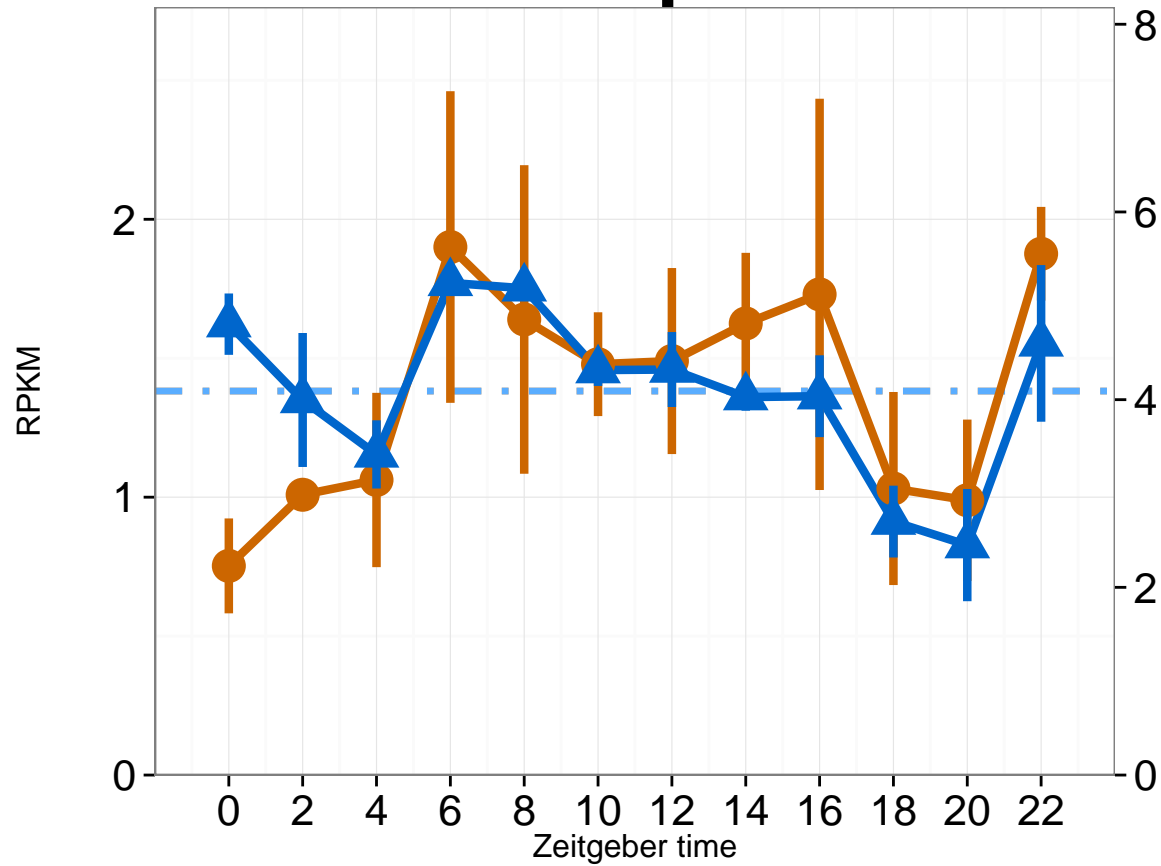

# Mfap2

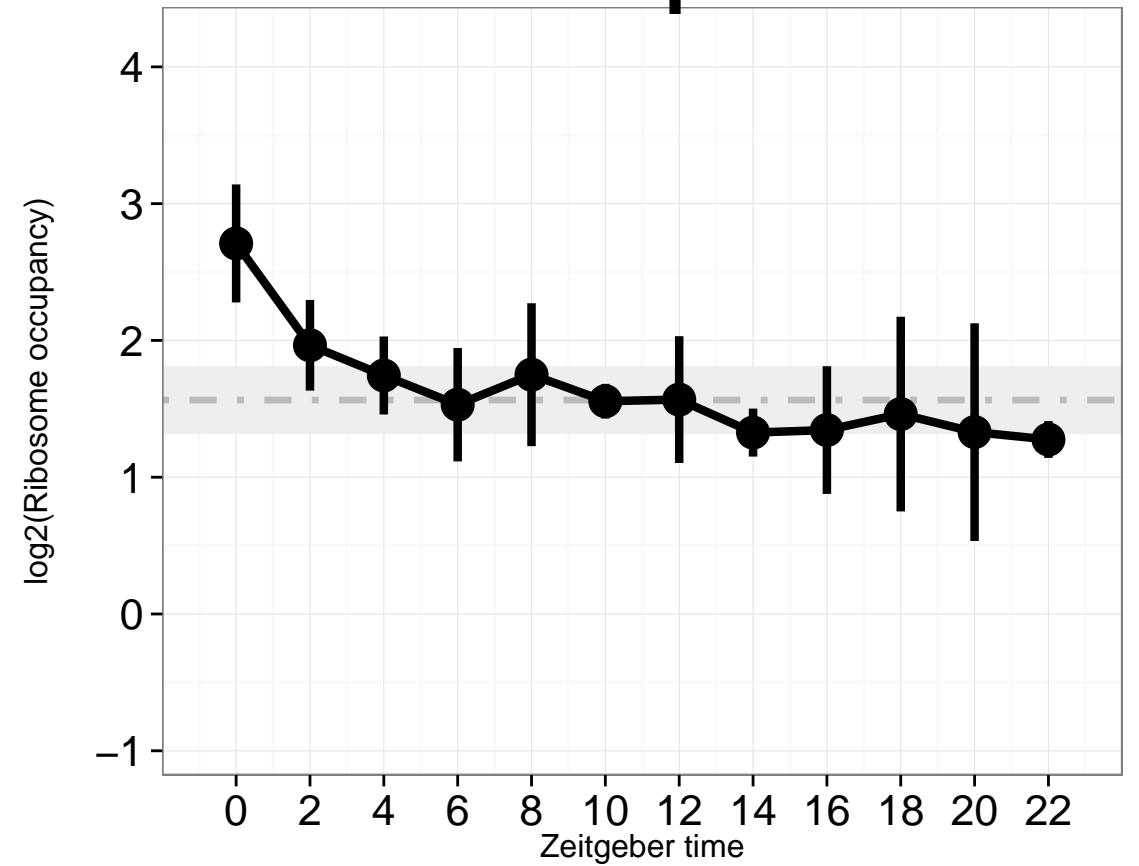

Supplement: Supplementary file 6617 [file 1]

# Card9

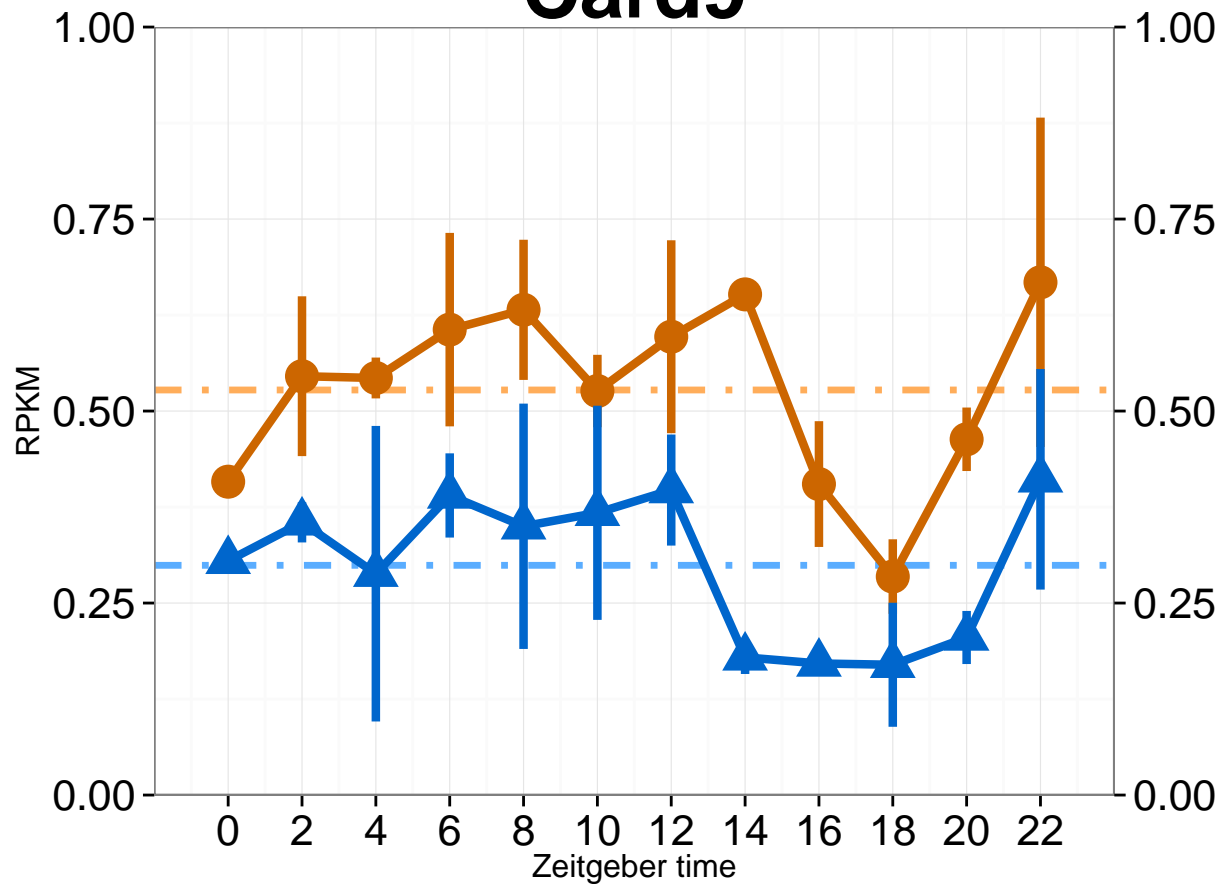

# Card9

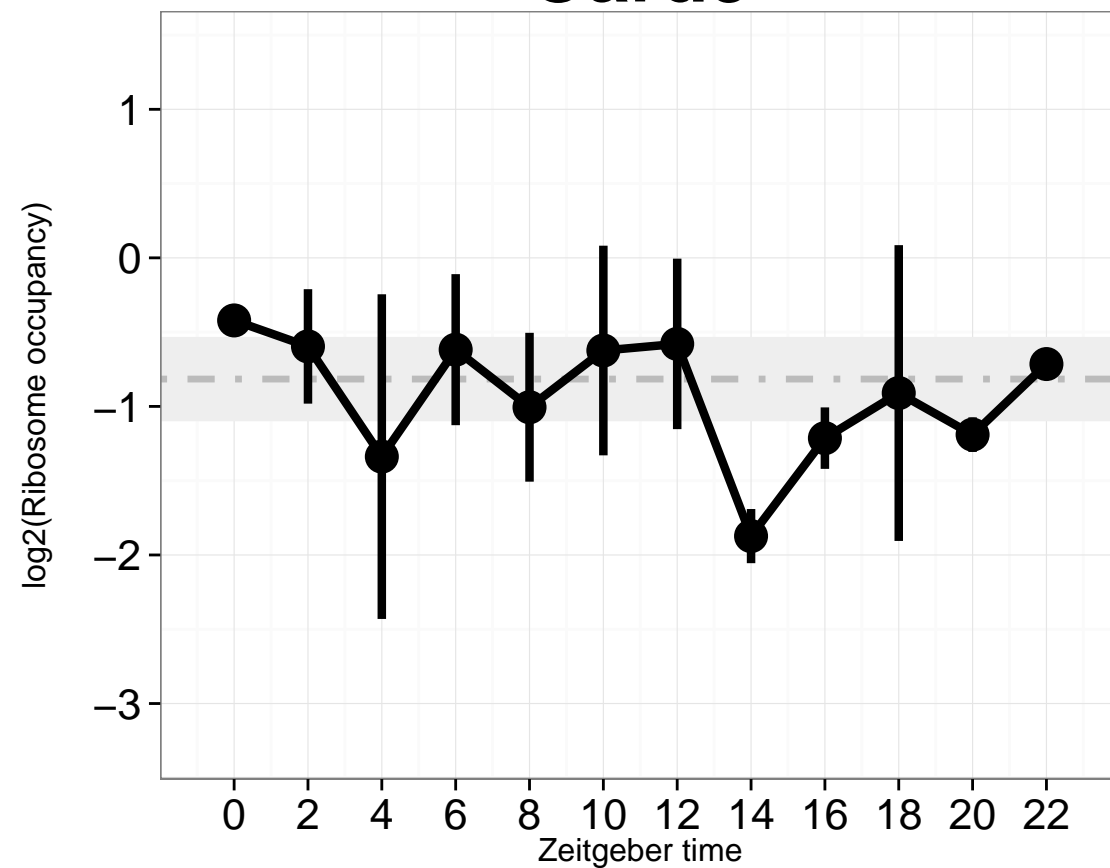

Supplement: Supplementary file 6618 [file 1]

# Fam173a

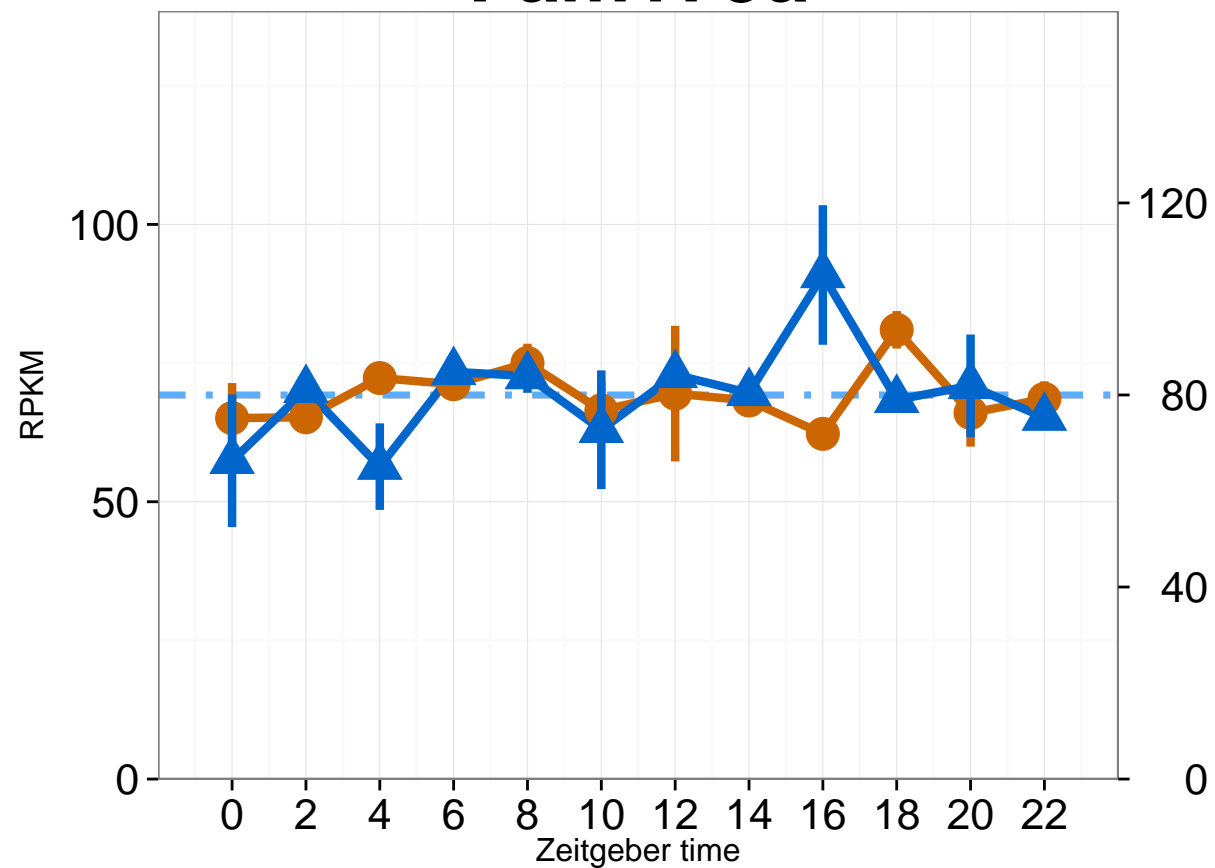

# Fam173a

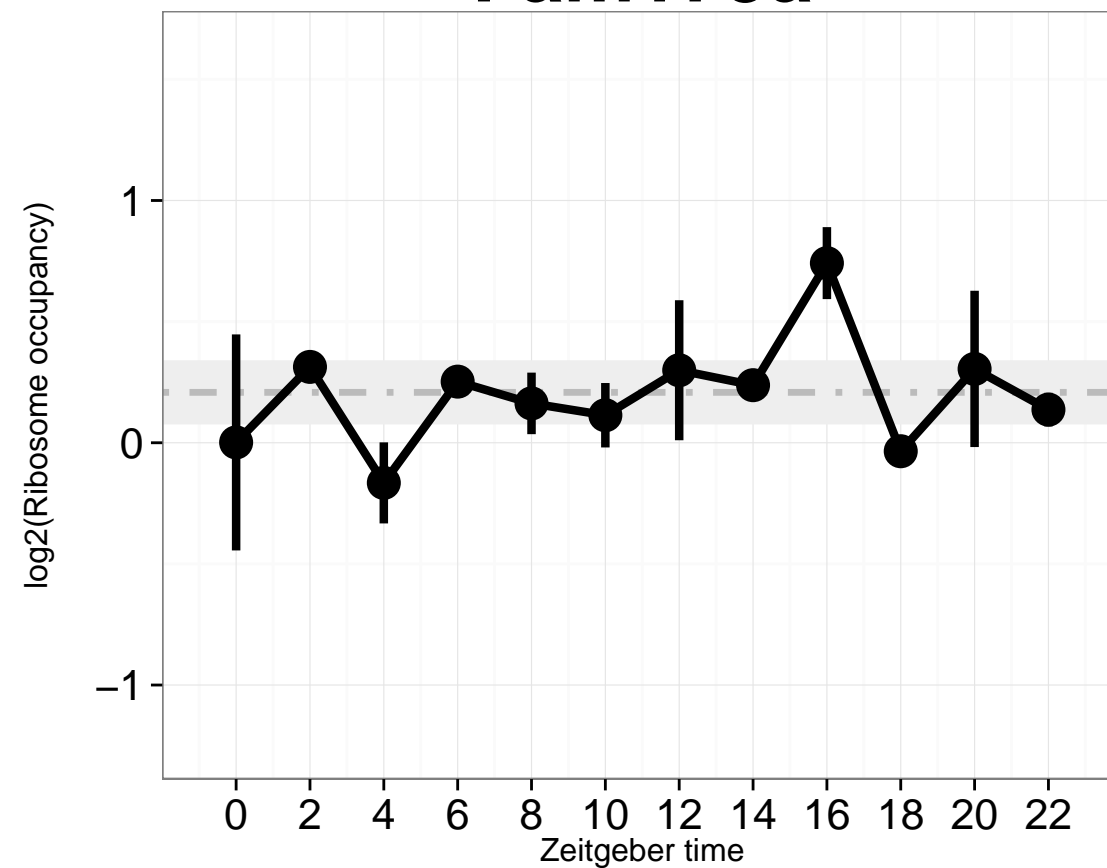

Supplement: Supplementary file 6619 [file 1]

## Car14

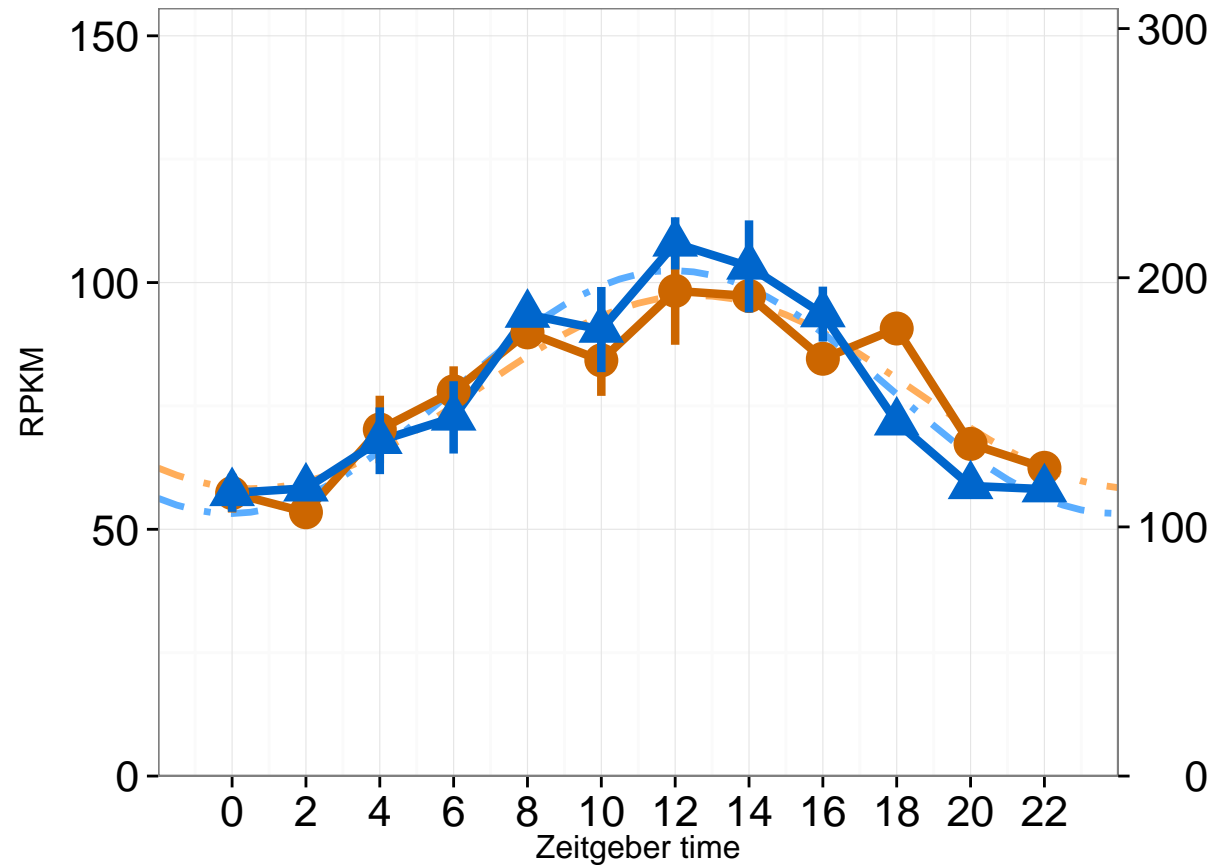

## Car14

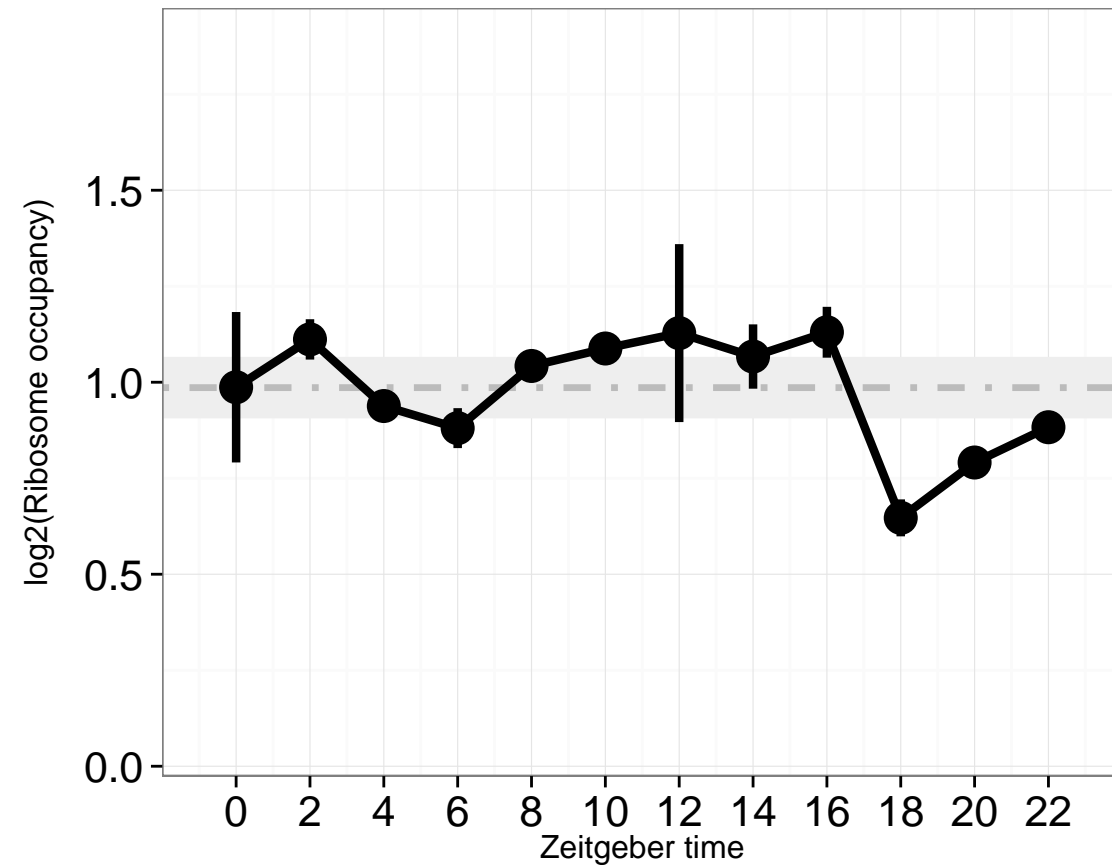

Supplement: Supplementary file 6620 [file 1]

# Zfp934

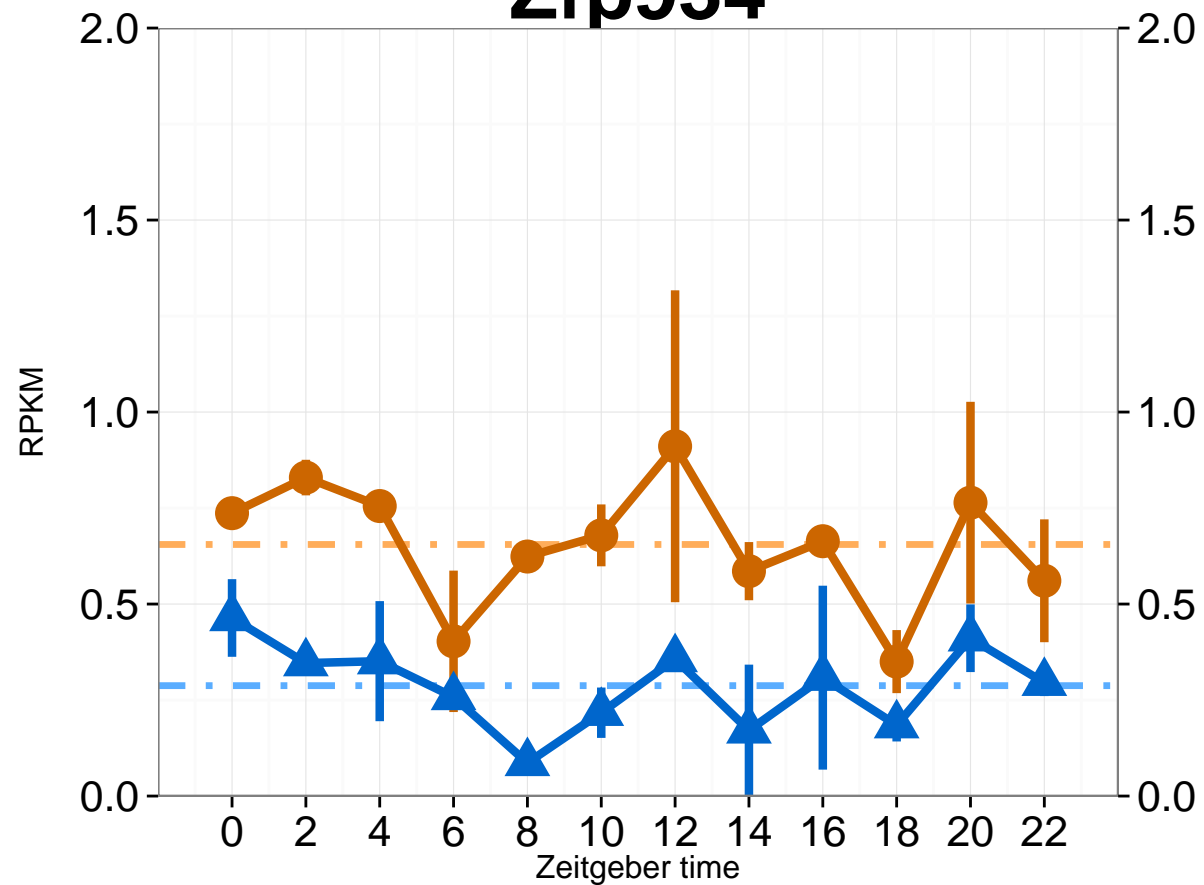

# Zfp934

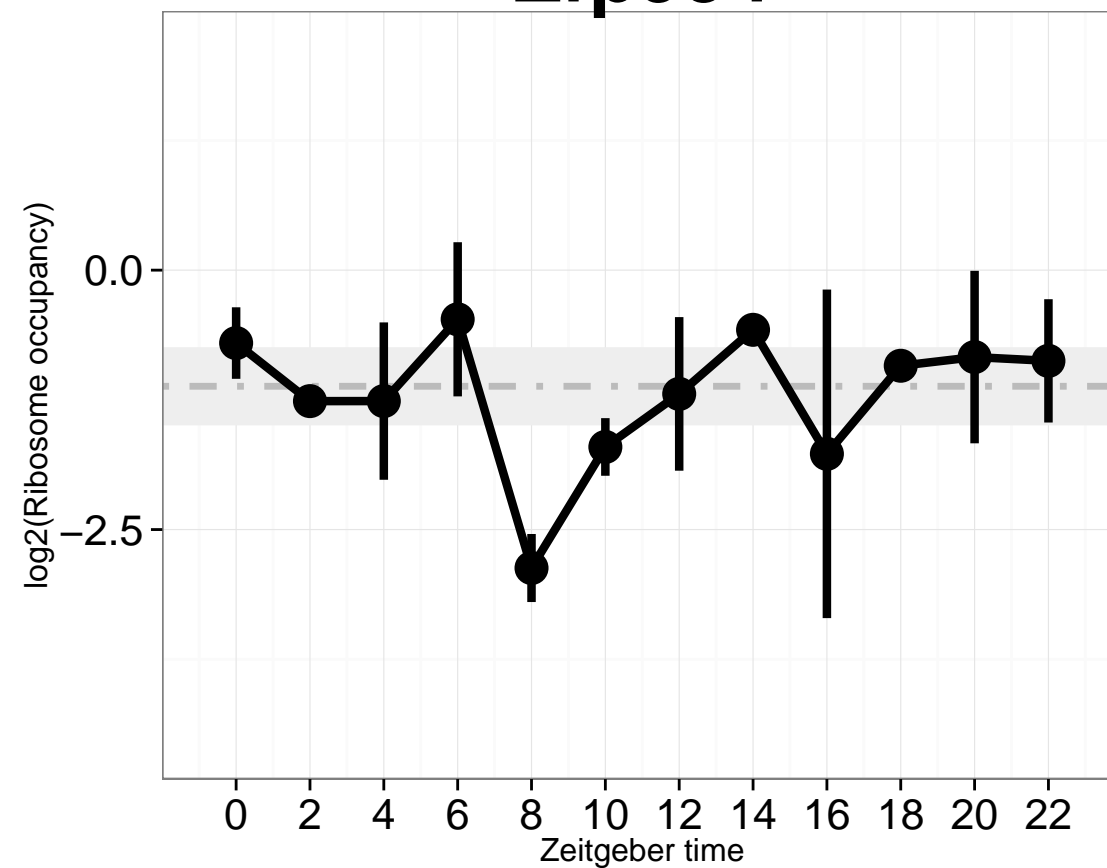

Supplement: Supplementary file 6621 [file 1]

## Asah2

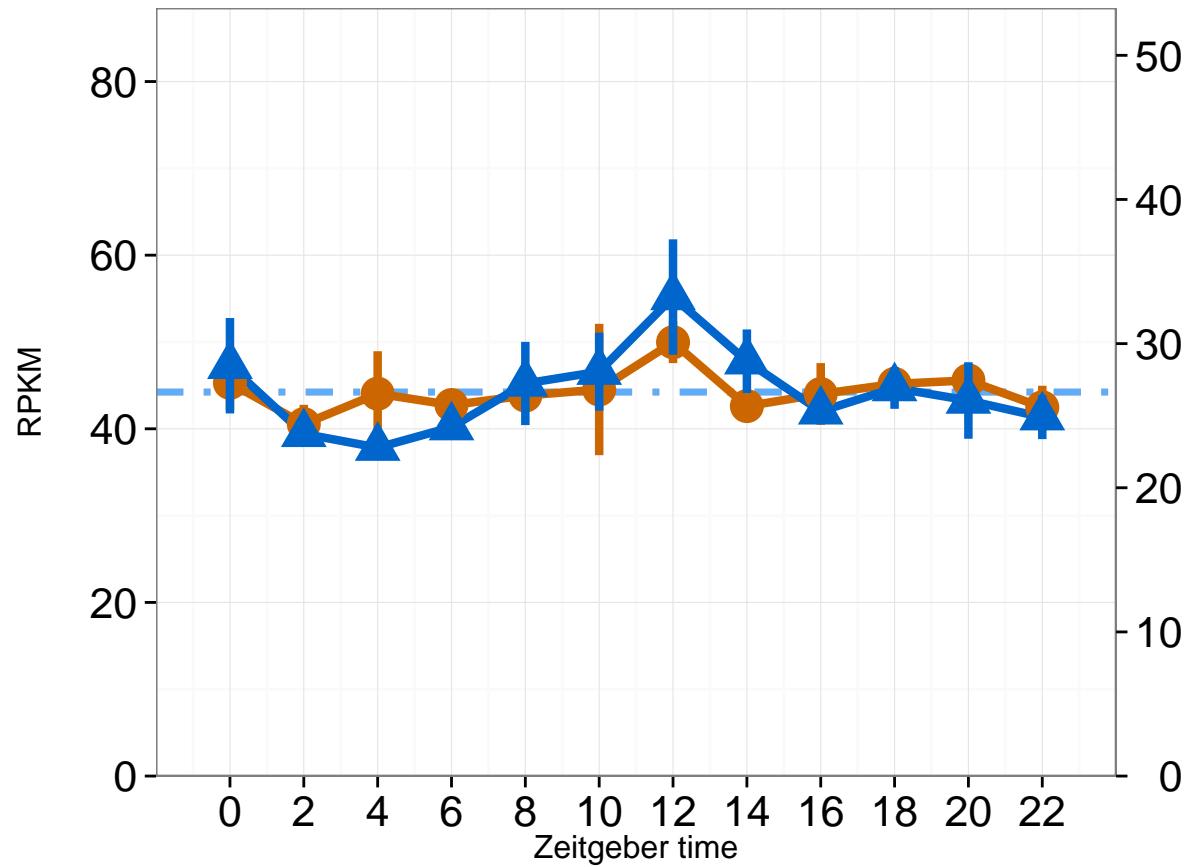

## Asah2

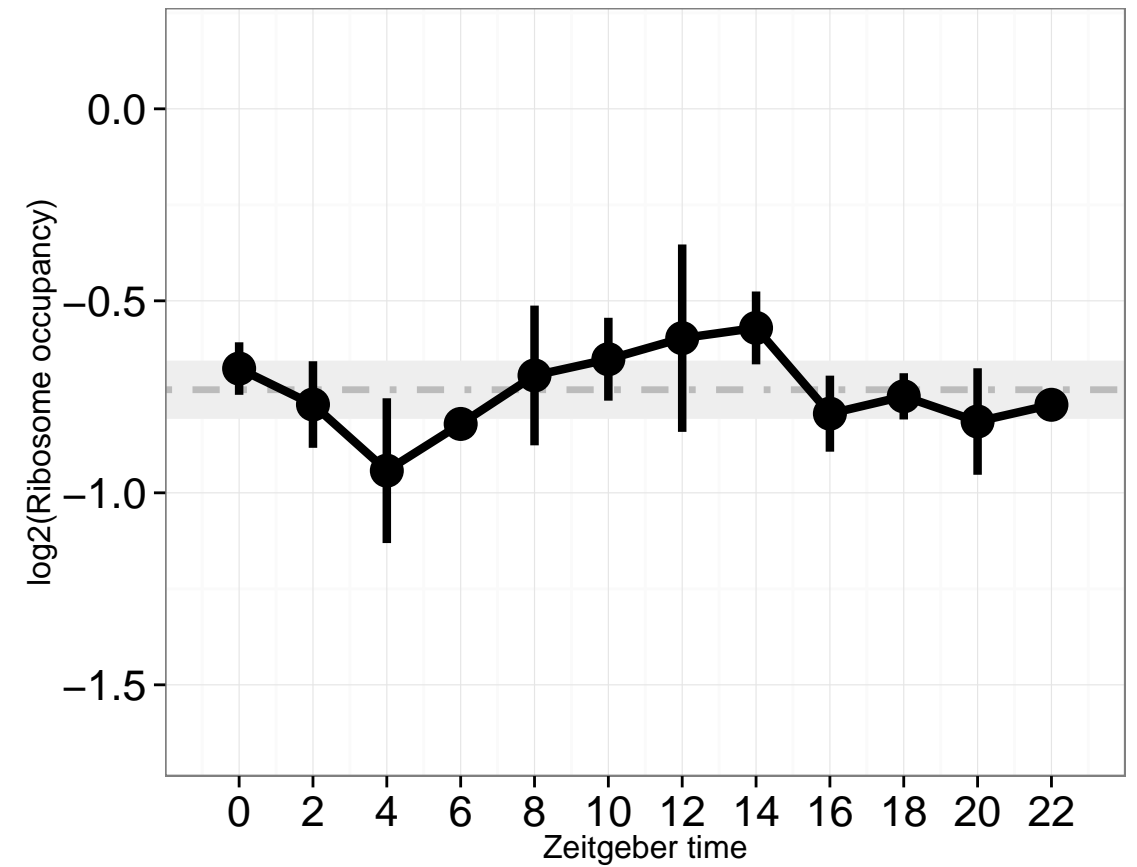

Supplement: Supplementary file 6622 [file 1]
