# Supplementary material (part 67 of 133)
Source: publisher figshare collection journal article supplement (https://springernature.figshare.com/articles/dataset/_/4903193)

## Malt1

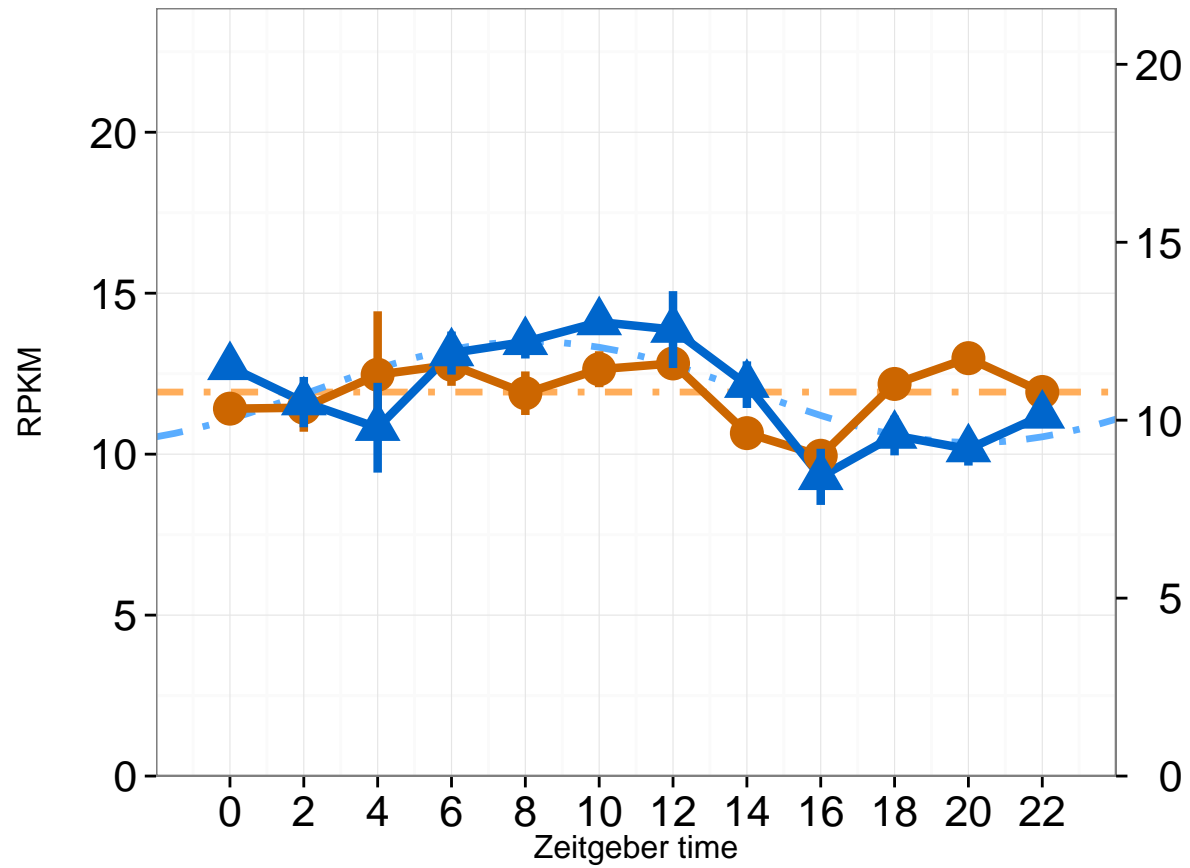

## Malt1

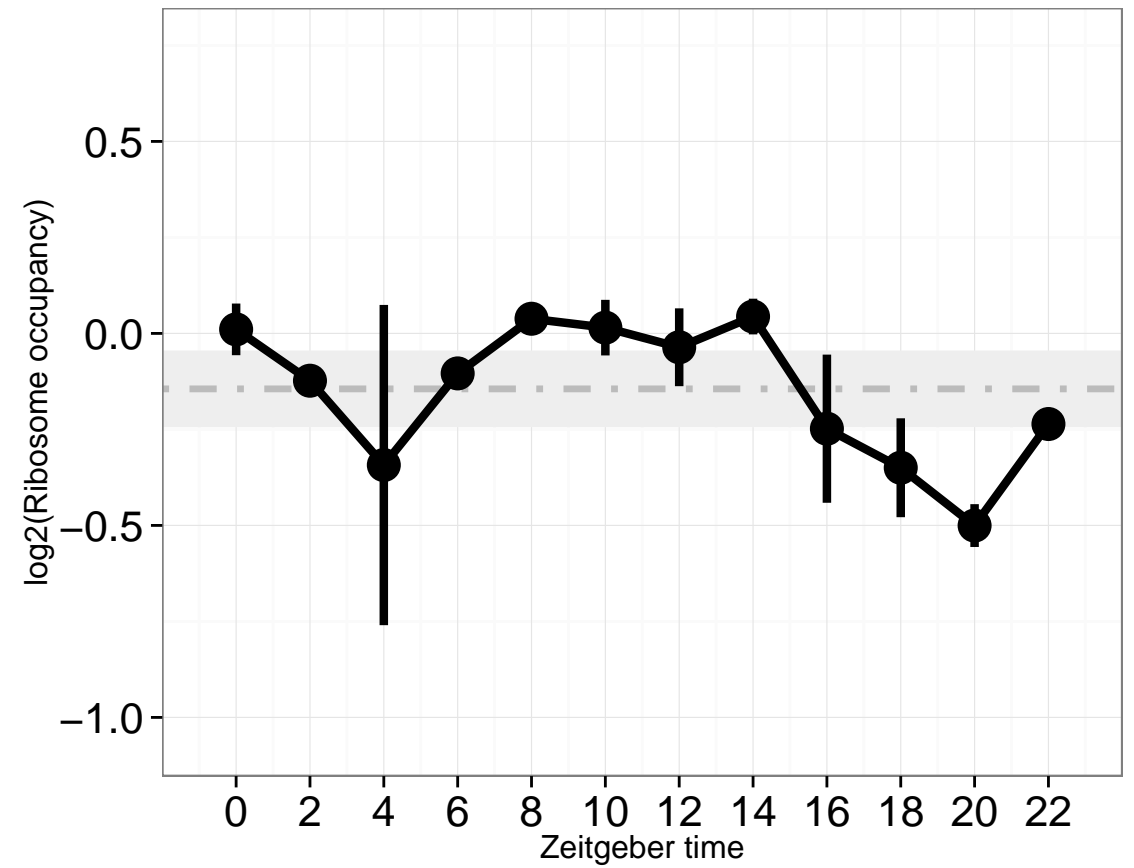

Supplement: Supplementary file 6623 [file 1]

# Tmem69

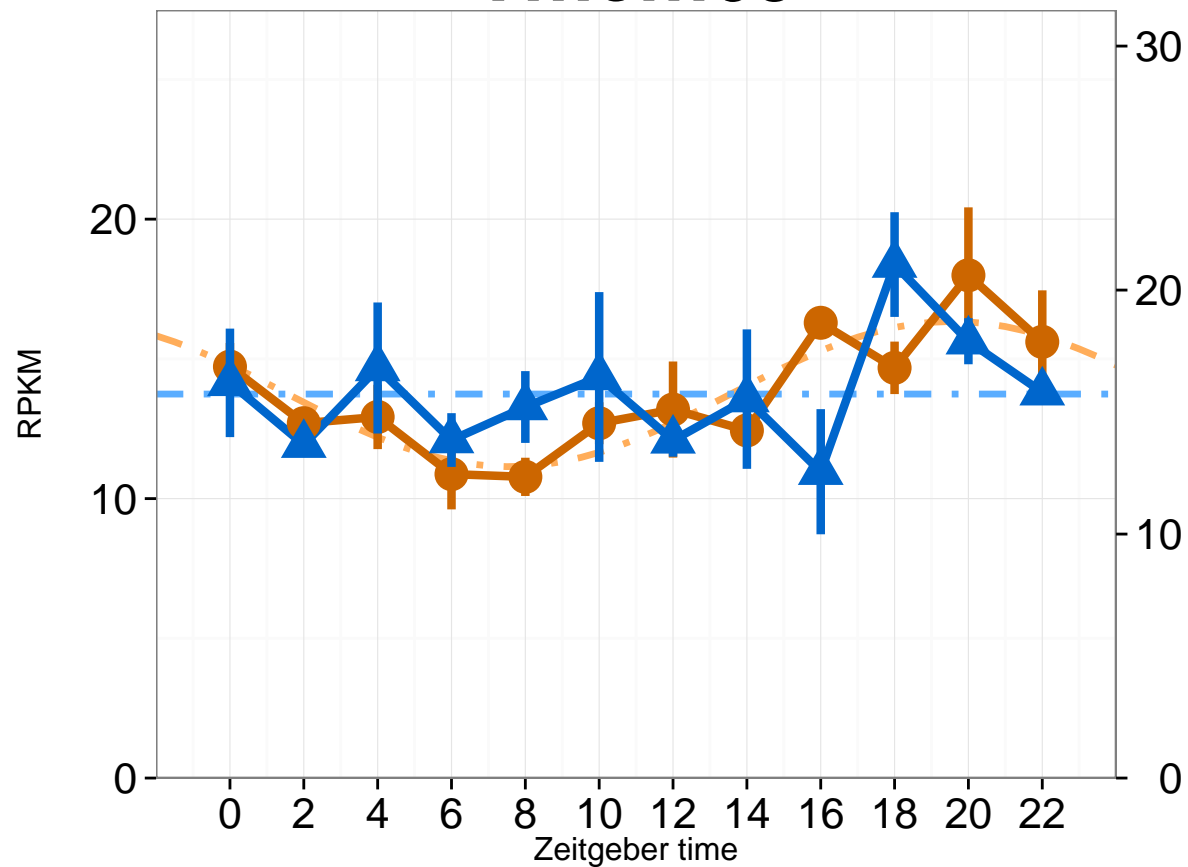

# Tmem69

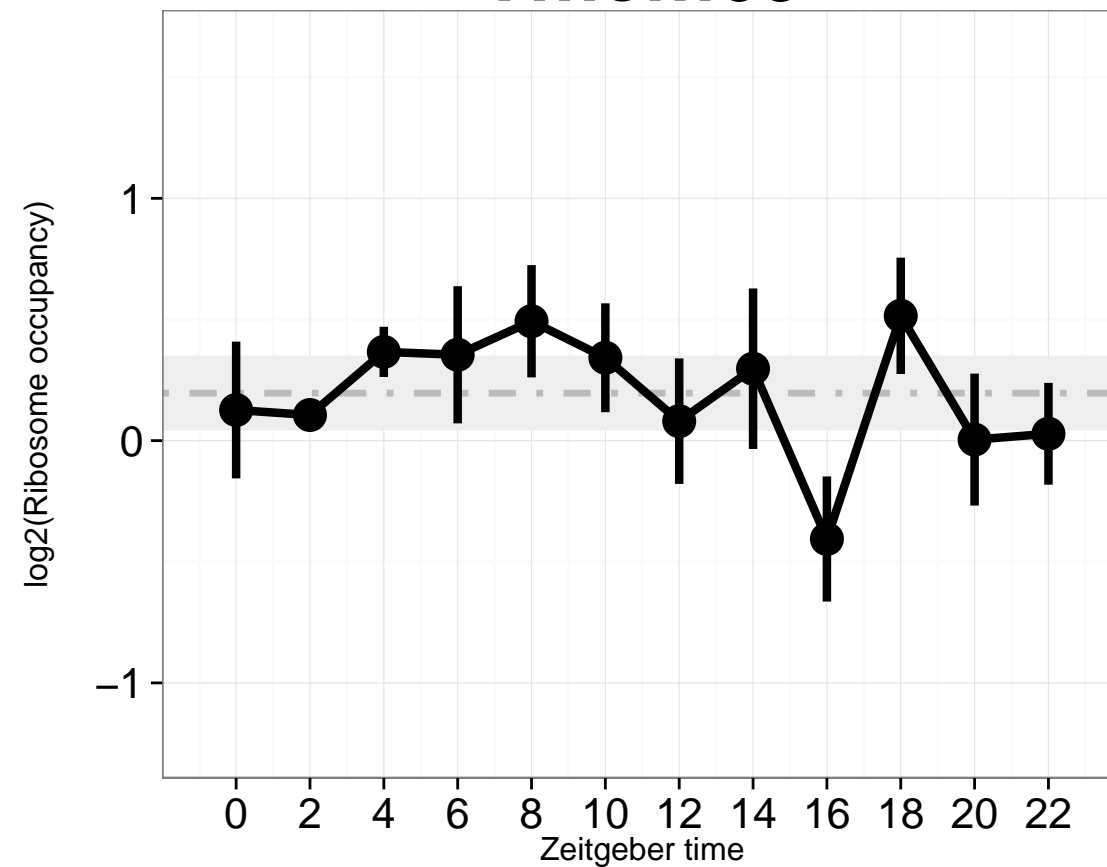

Supplement: Supplementary file 6624 [file 1]

## Aif1l

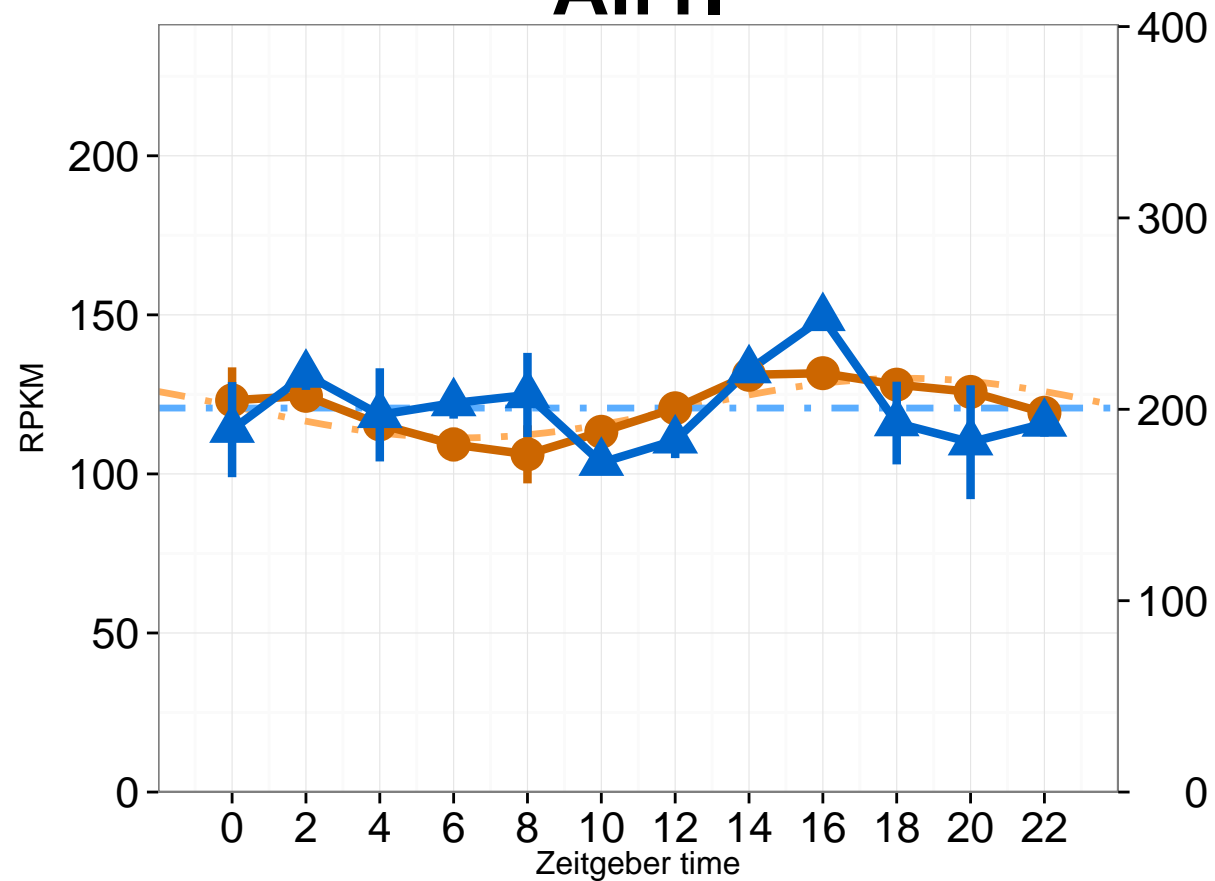

## Aif1l

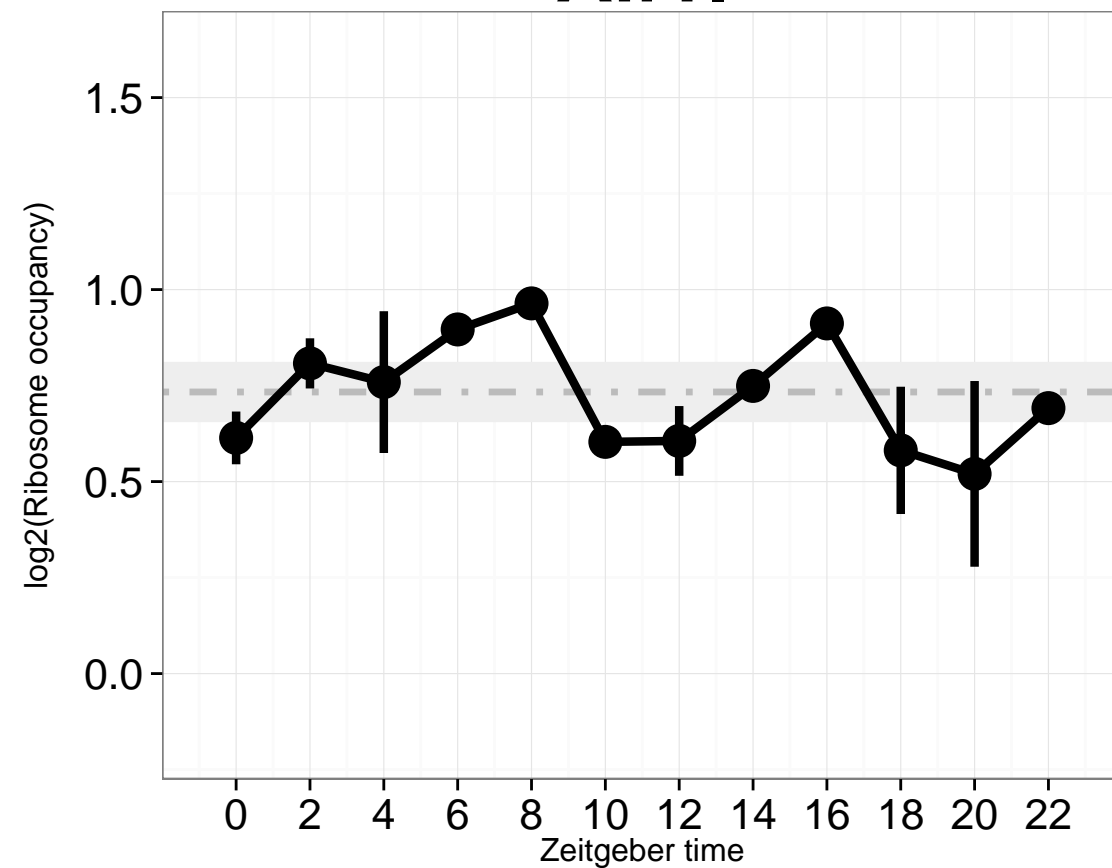

Supplement: Supplementary file 6625 [file 1]

# Trp53i11

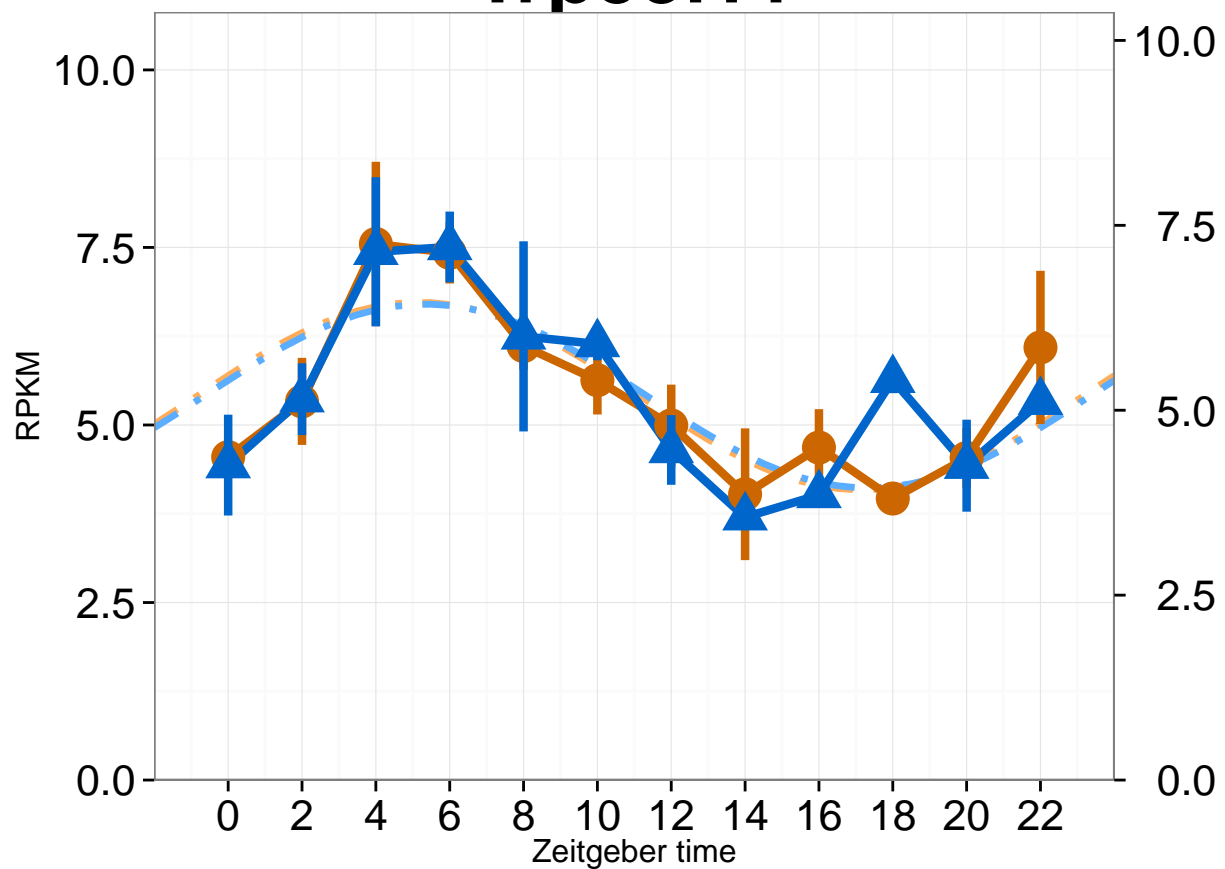

# Trp53i11

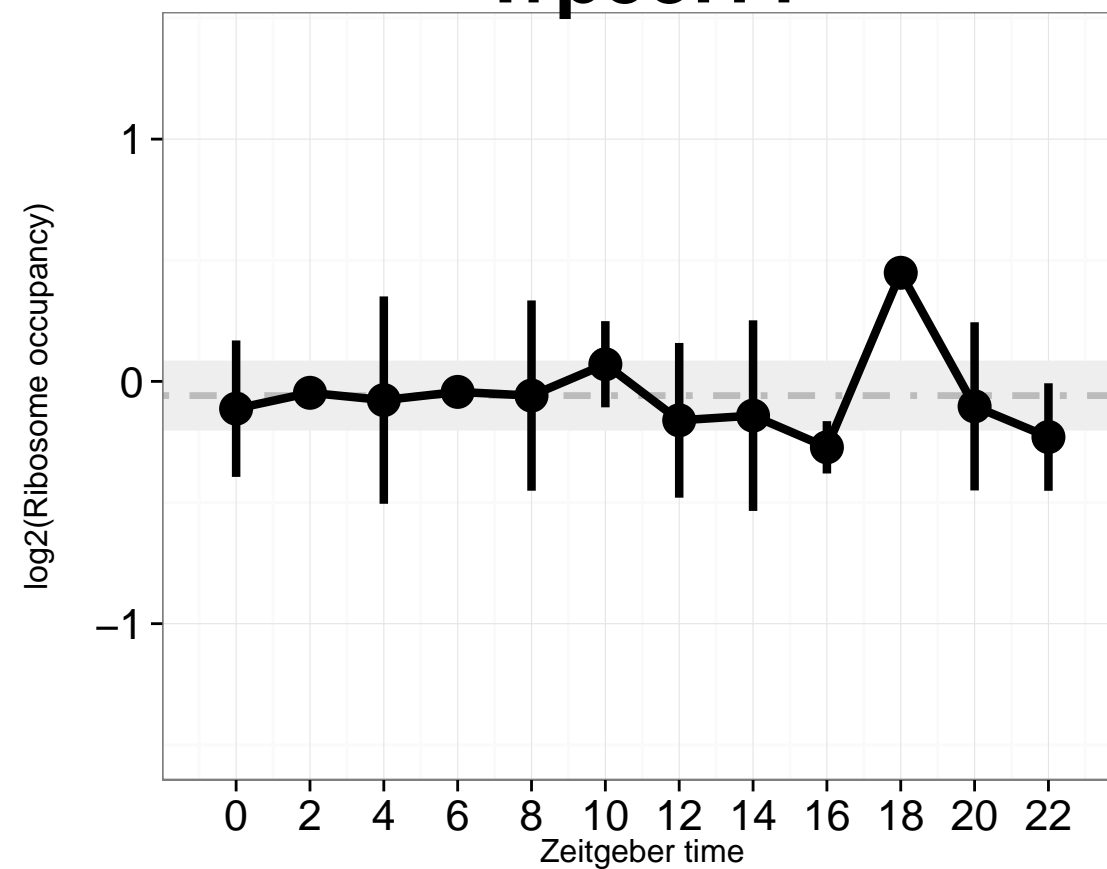

Supplement: Supplementary file 6626 [file 1]

# Tcf19

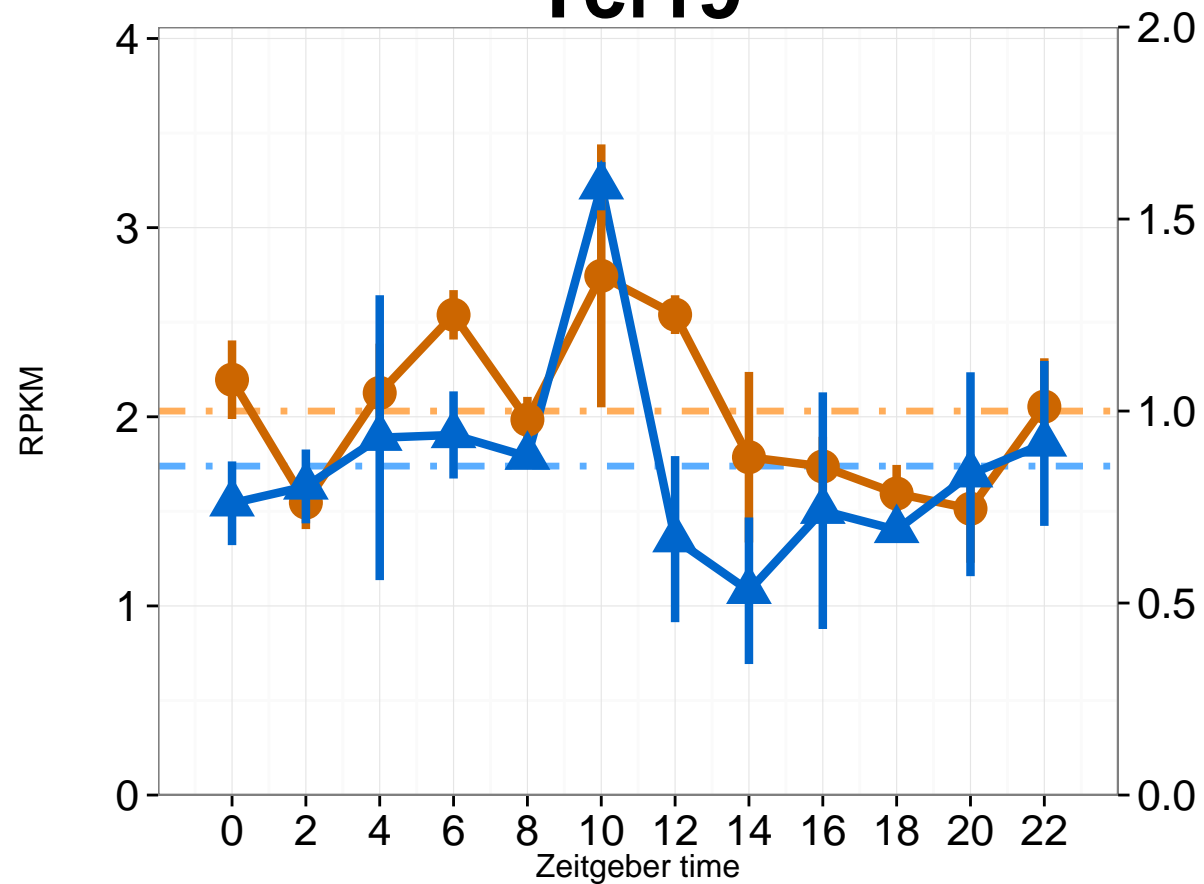

# Tcf19

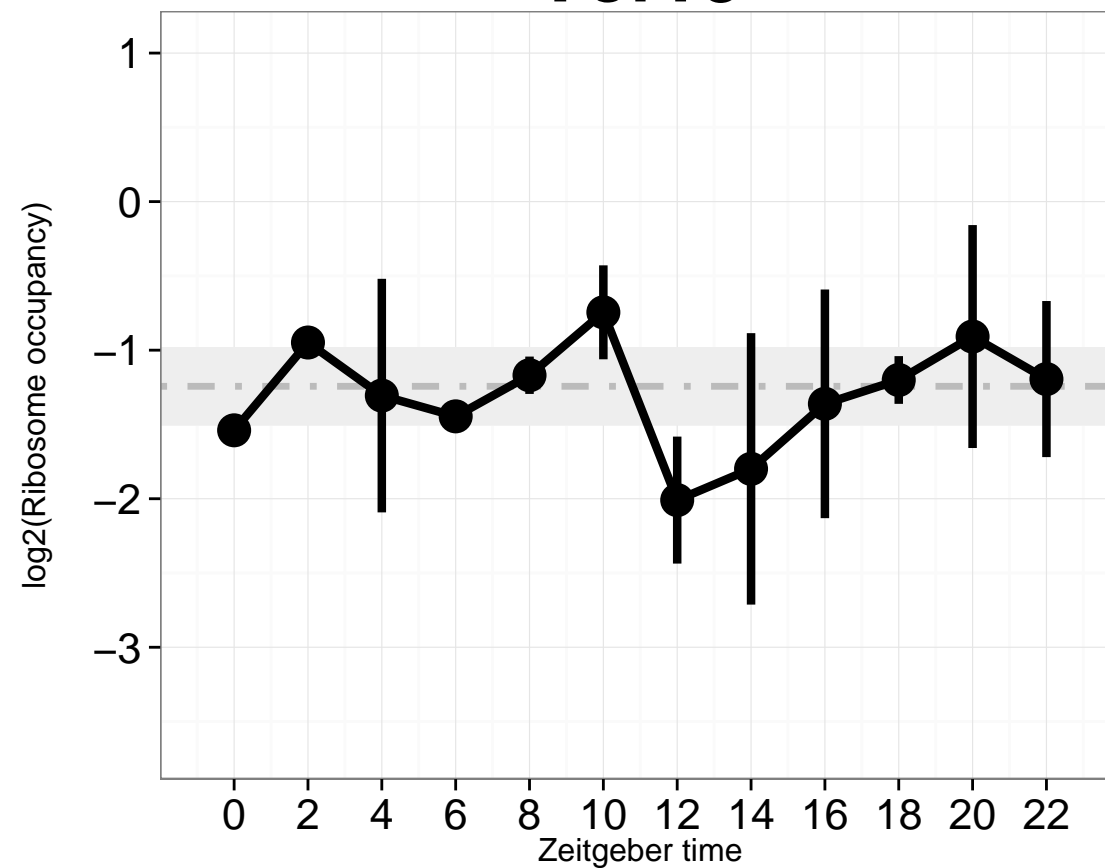

Supplement: Supplementary file 6627 [file 1]

## Fastkd2

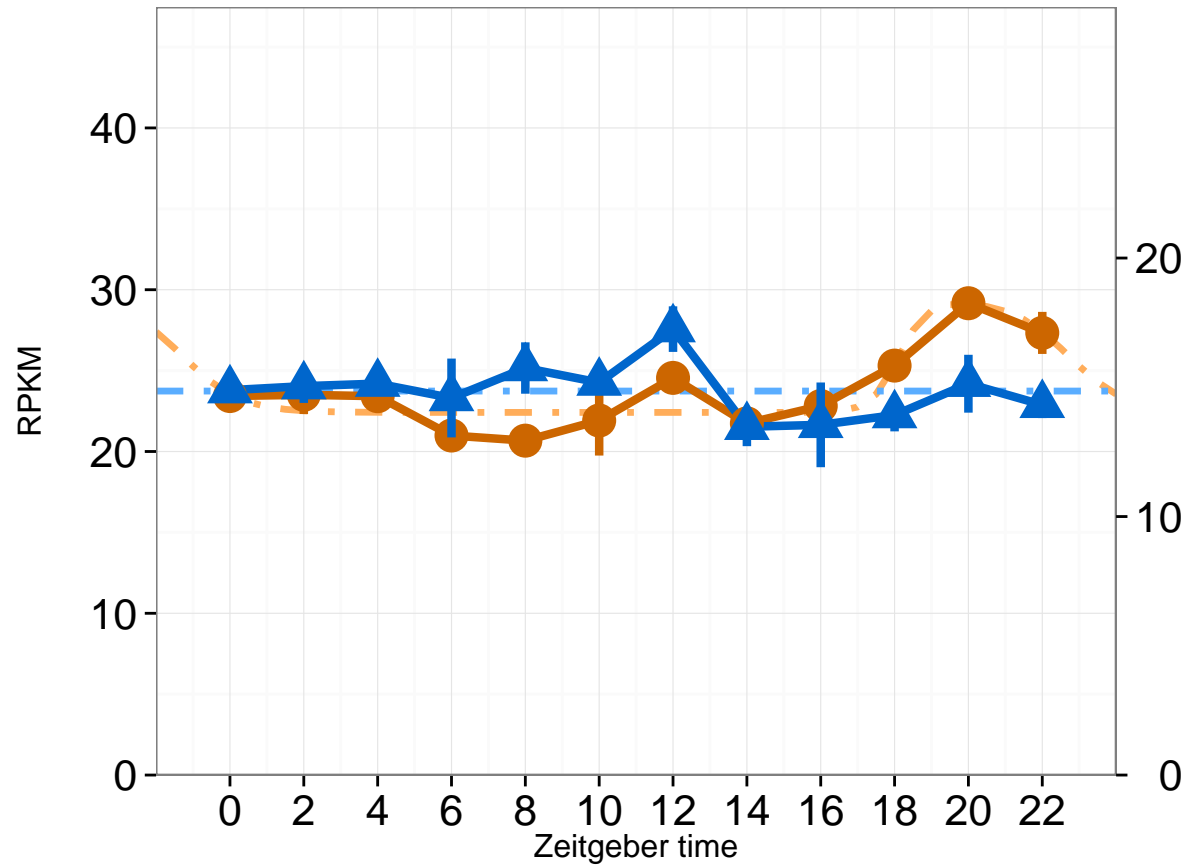

## Fastkd2

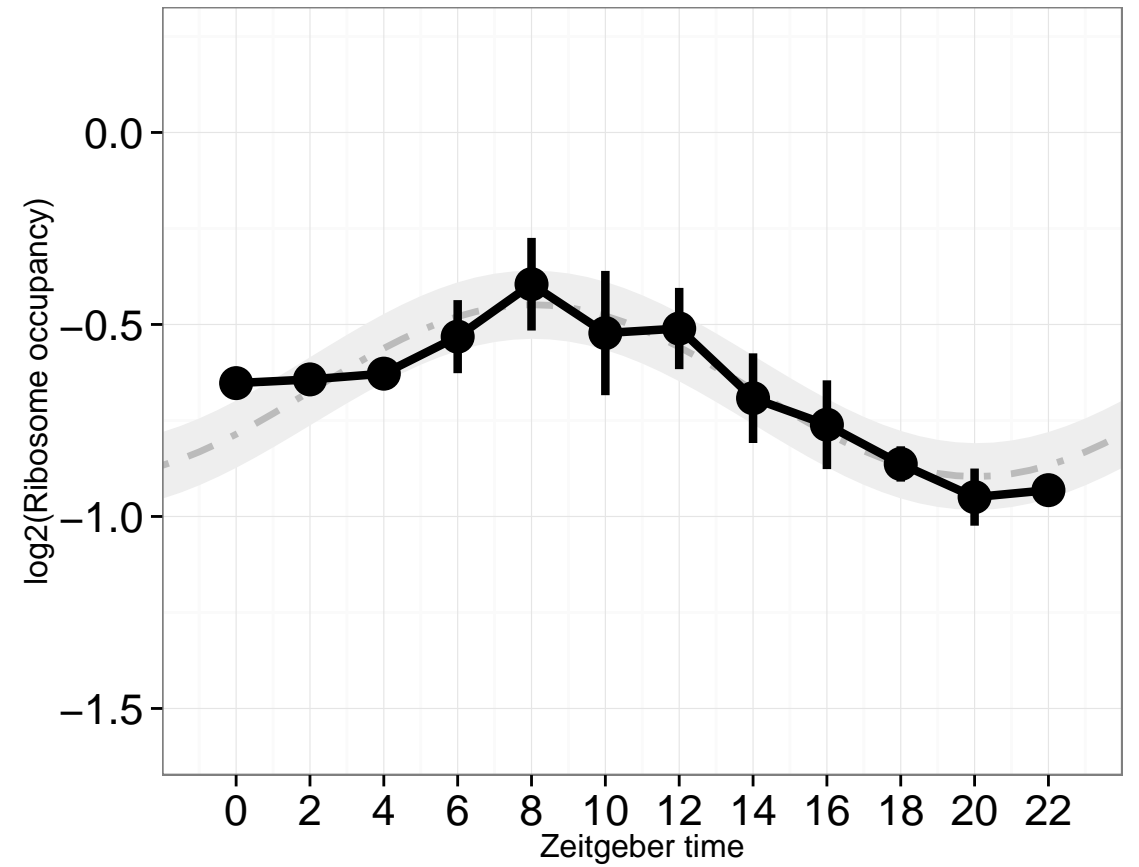

Supplement: Supplementary file 6628 [file 1]

## Gps2

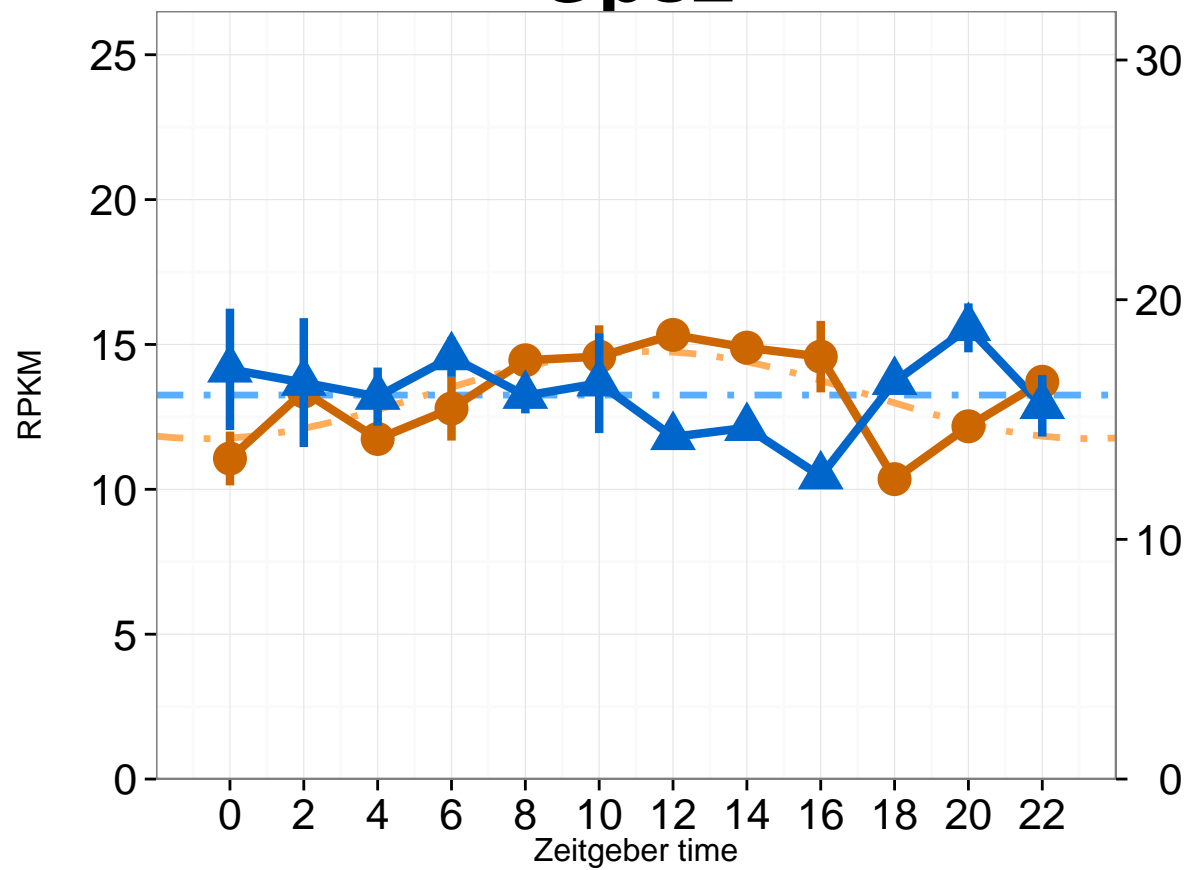

## Gps2

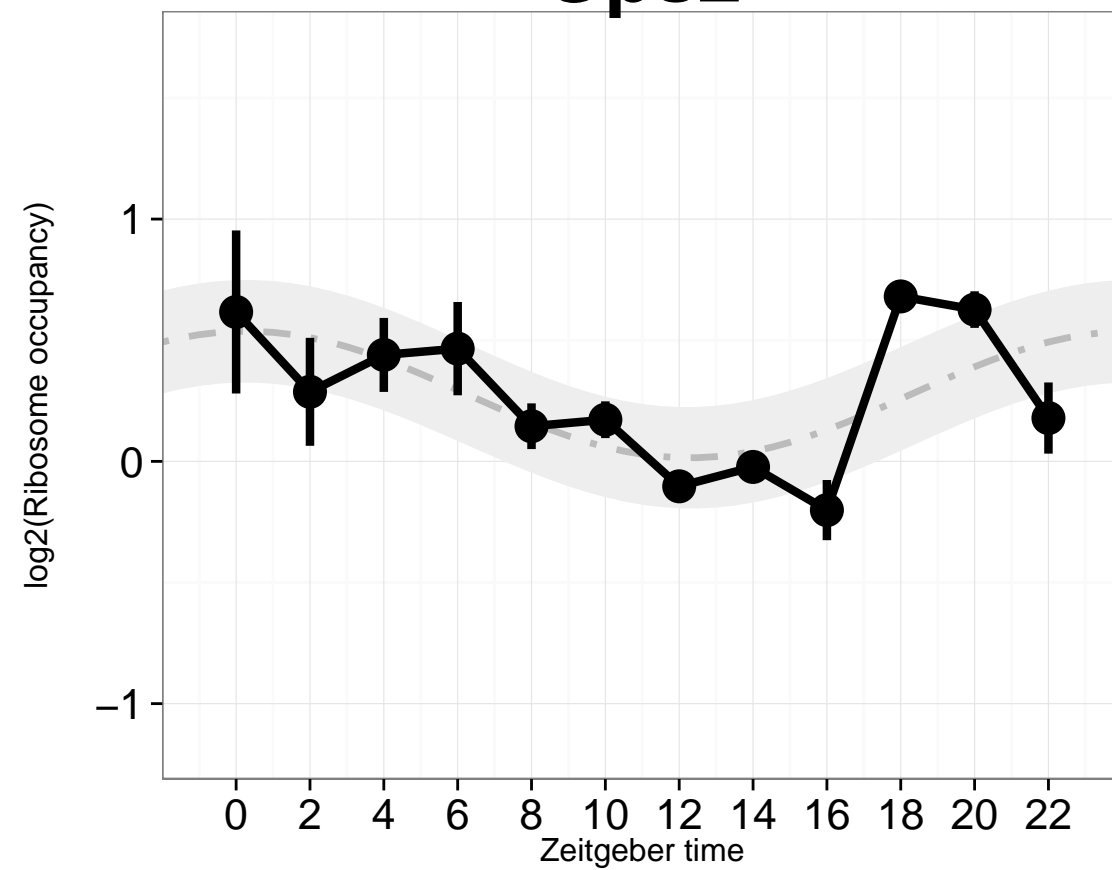

Supplement: Supplementary file 6629 [file 1]

## Ropn1l

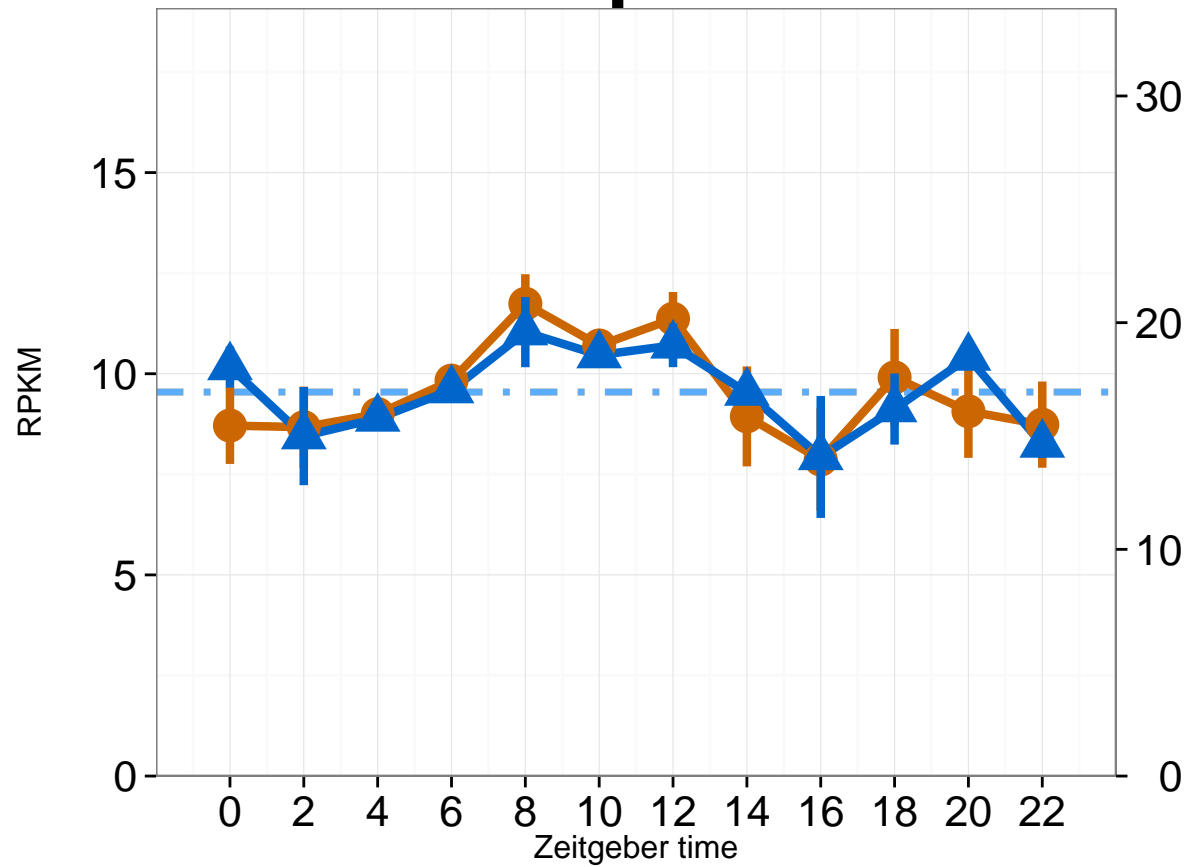

## Ropn1l

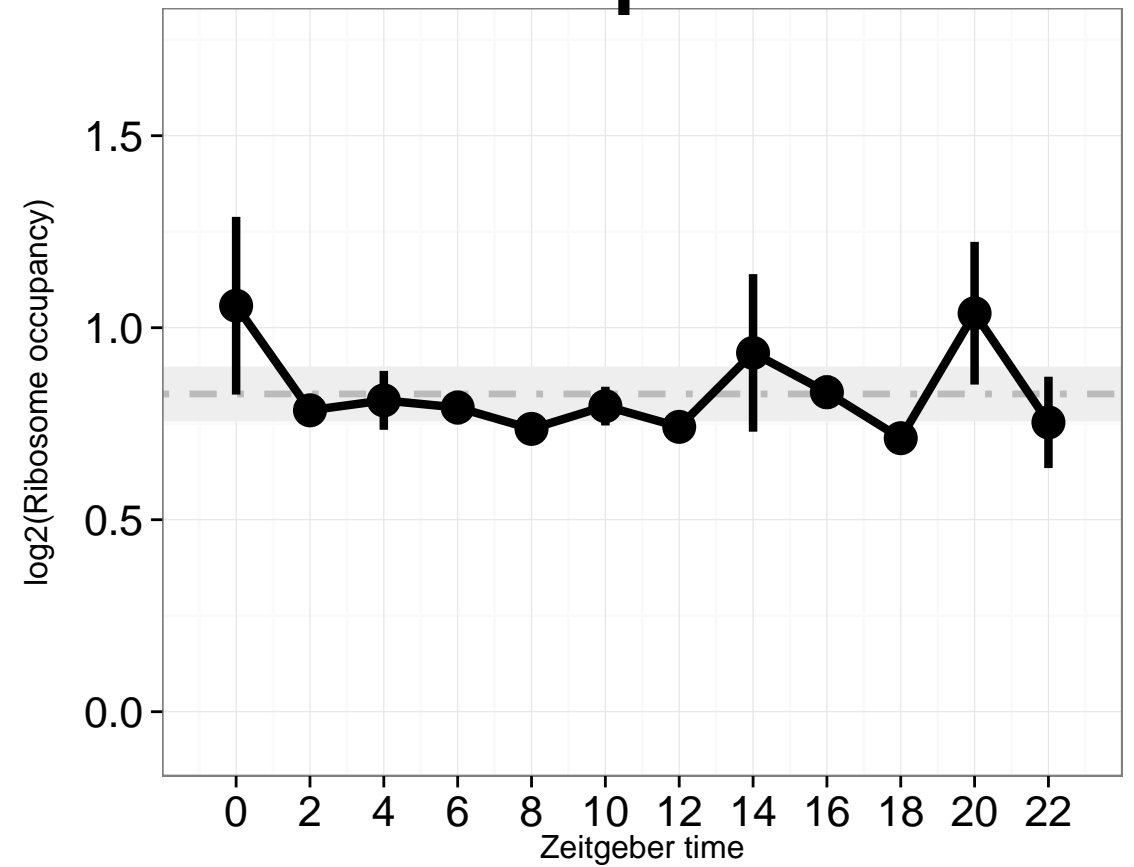

Supplement: Supplementary file 6630 [file 1]

# Hoxa9

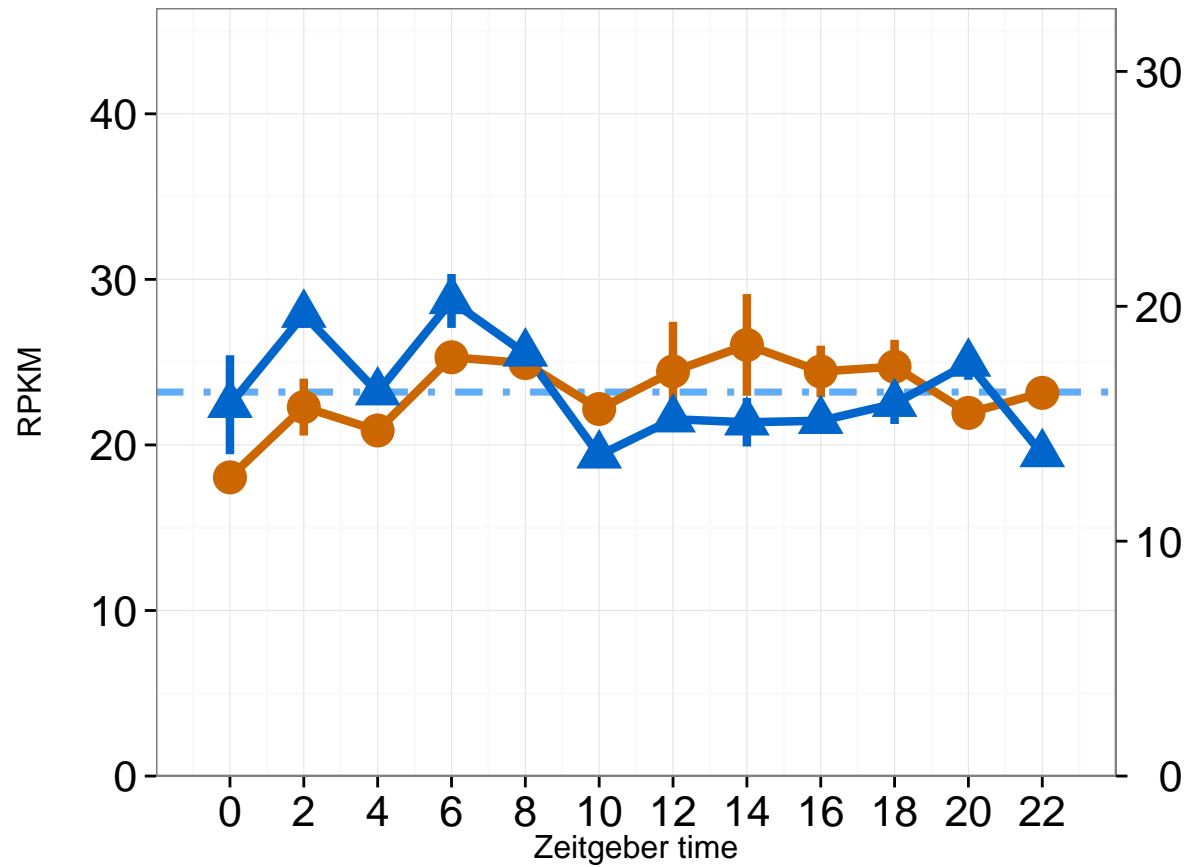

# Hoxa9

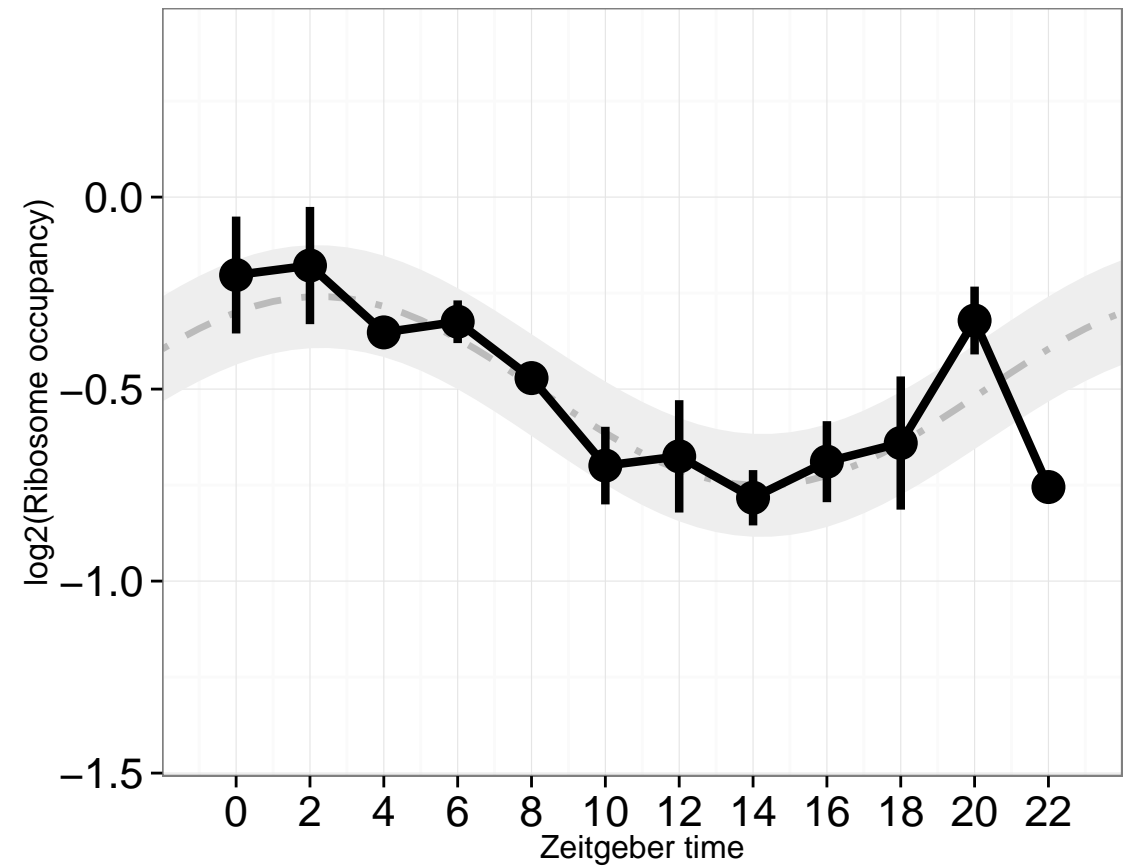

Supplement: Supplementary file 6631 [file 1]

# Oaz1

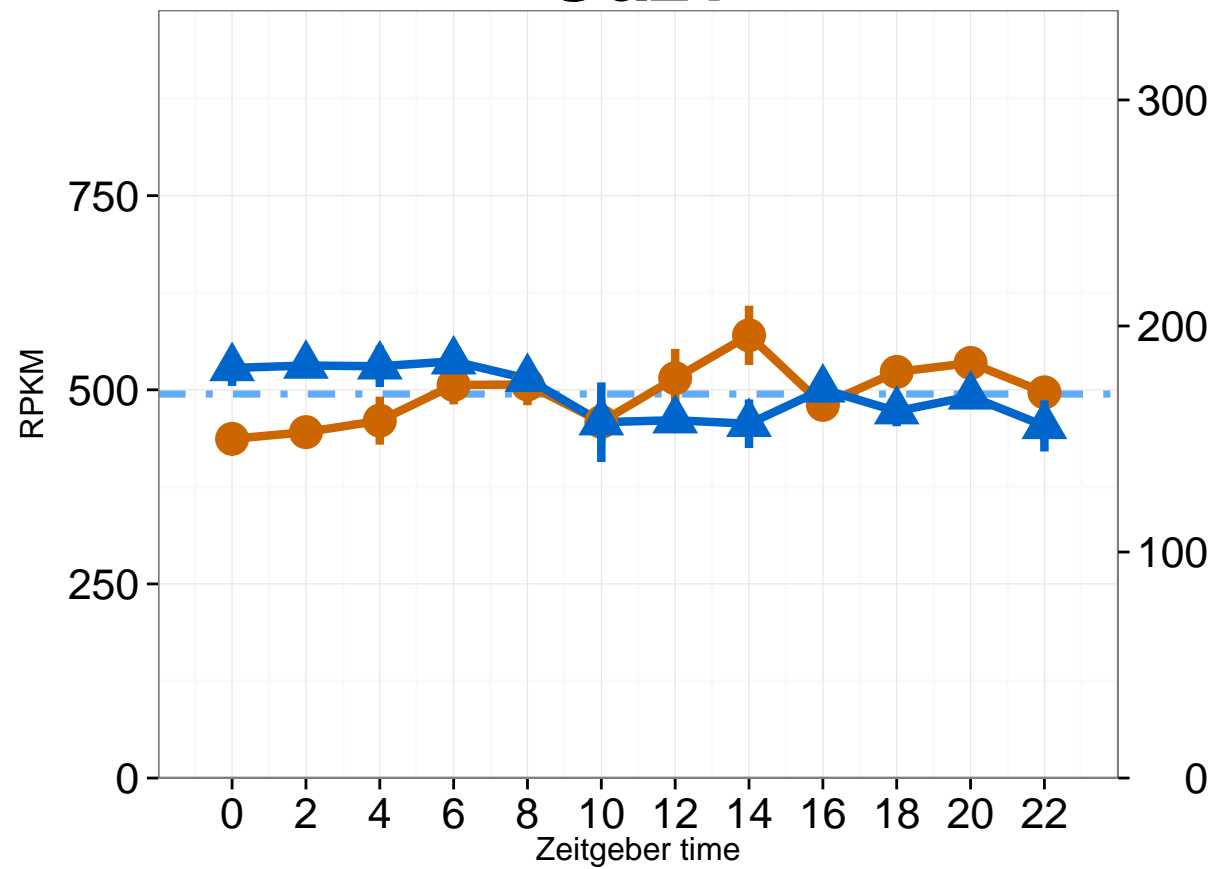

# Oaz1

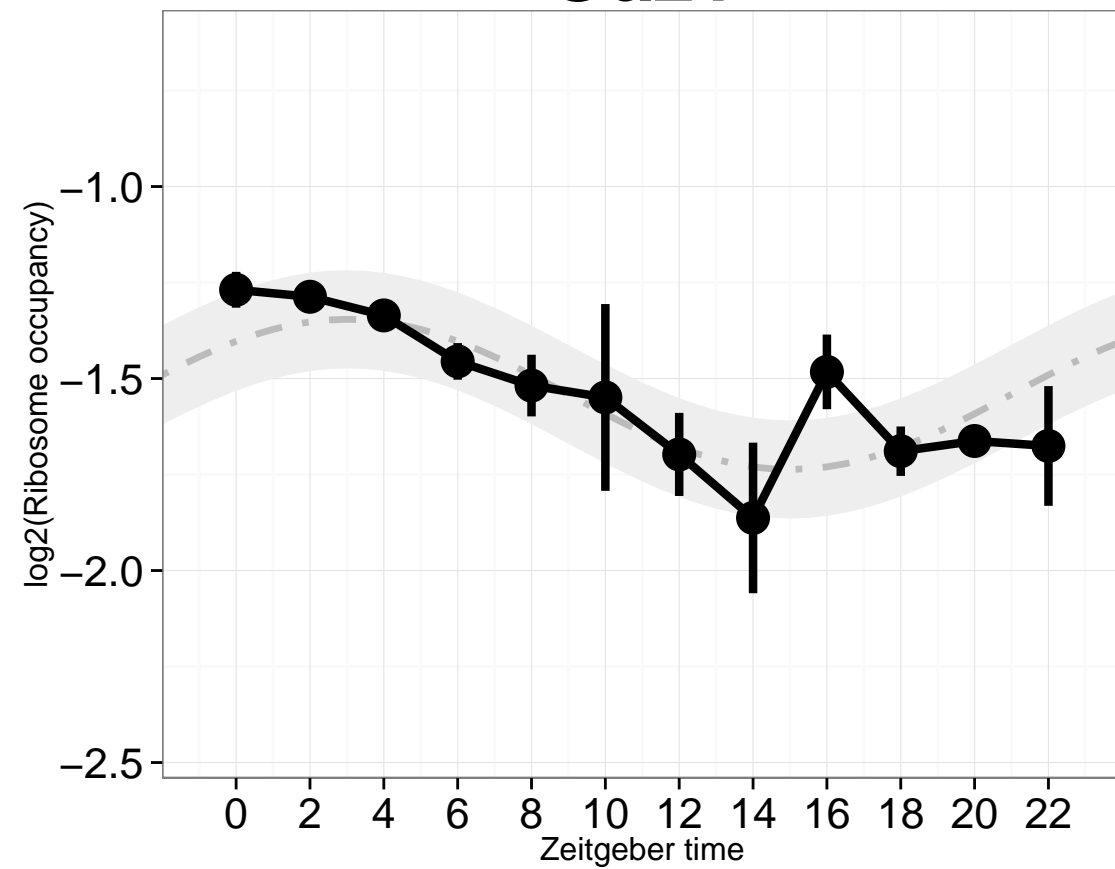

Supplement: Supplementary file 6632 [file 1]

## Hk3

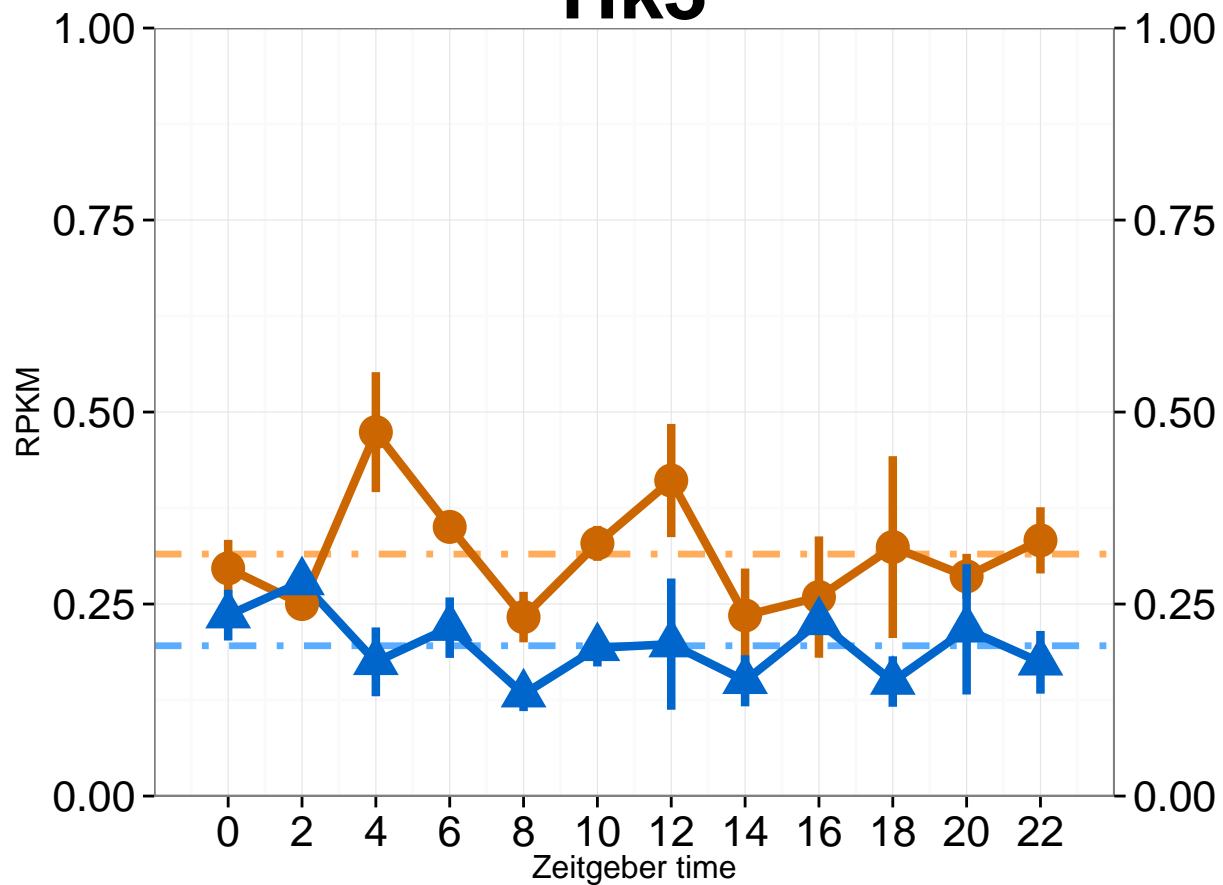

## Hk3

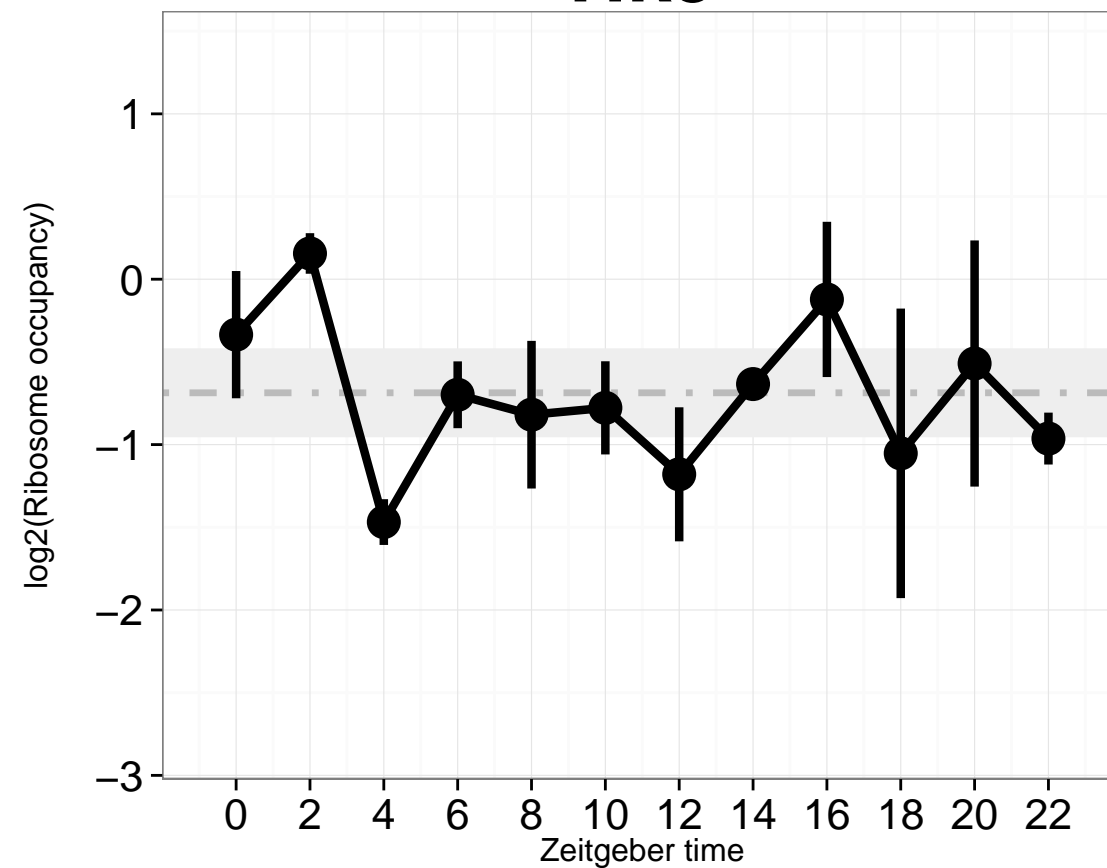

Supplement: Supplementary file 6633 [file 1]

**AW011738 TR**

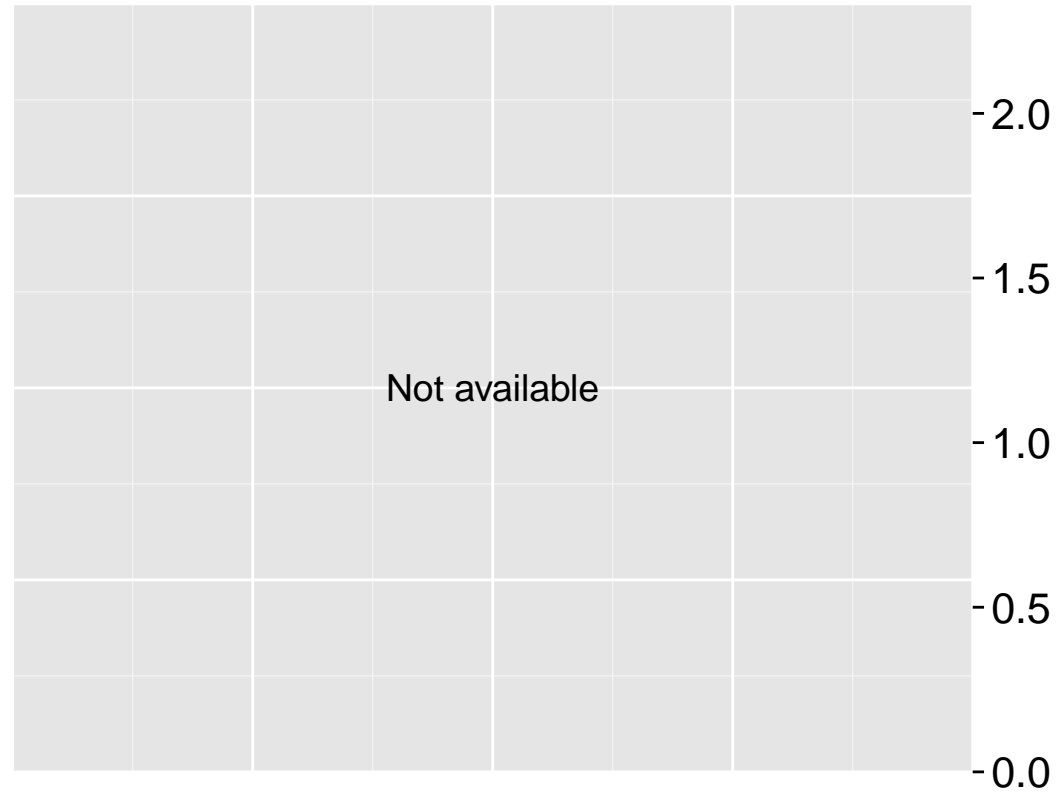

**AW011738 log2(Ribosome occupan**

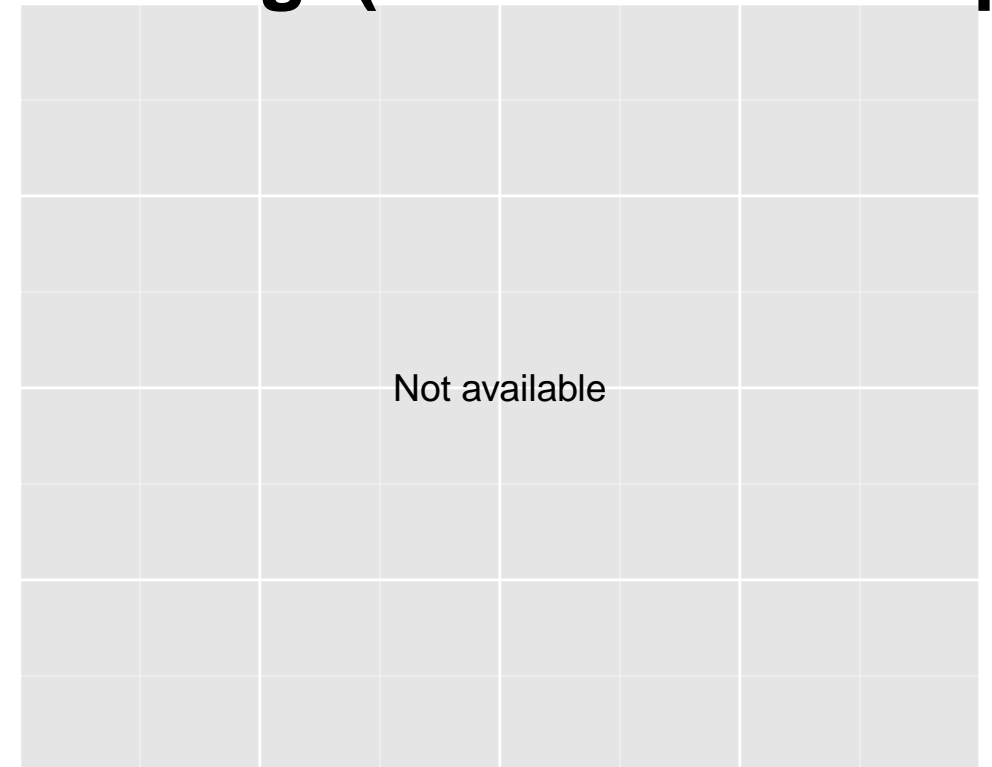

Supplement: Supplementary file 6634 [file 1]

## Prkcsh

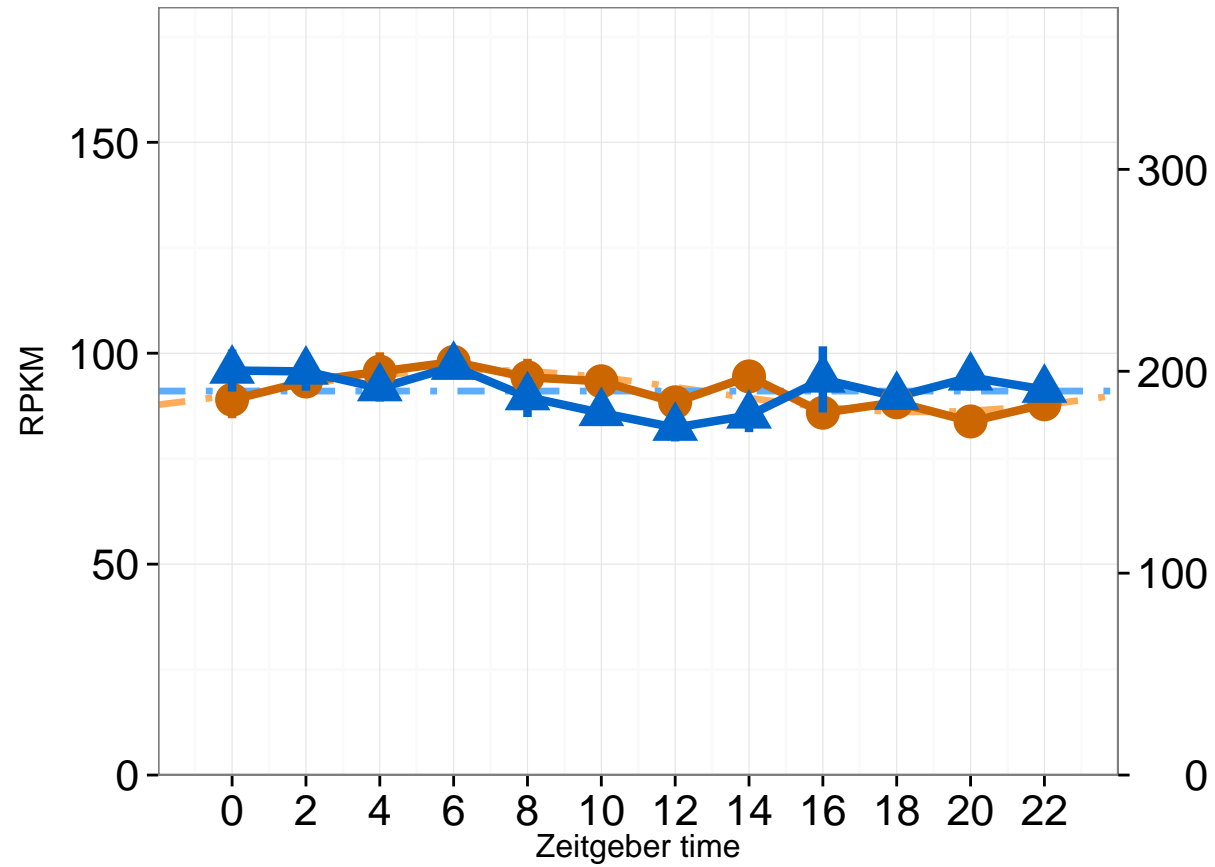

## Prkcsh

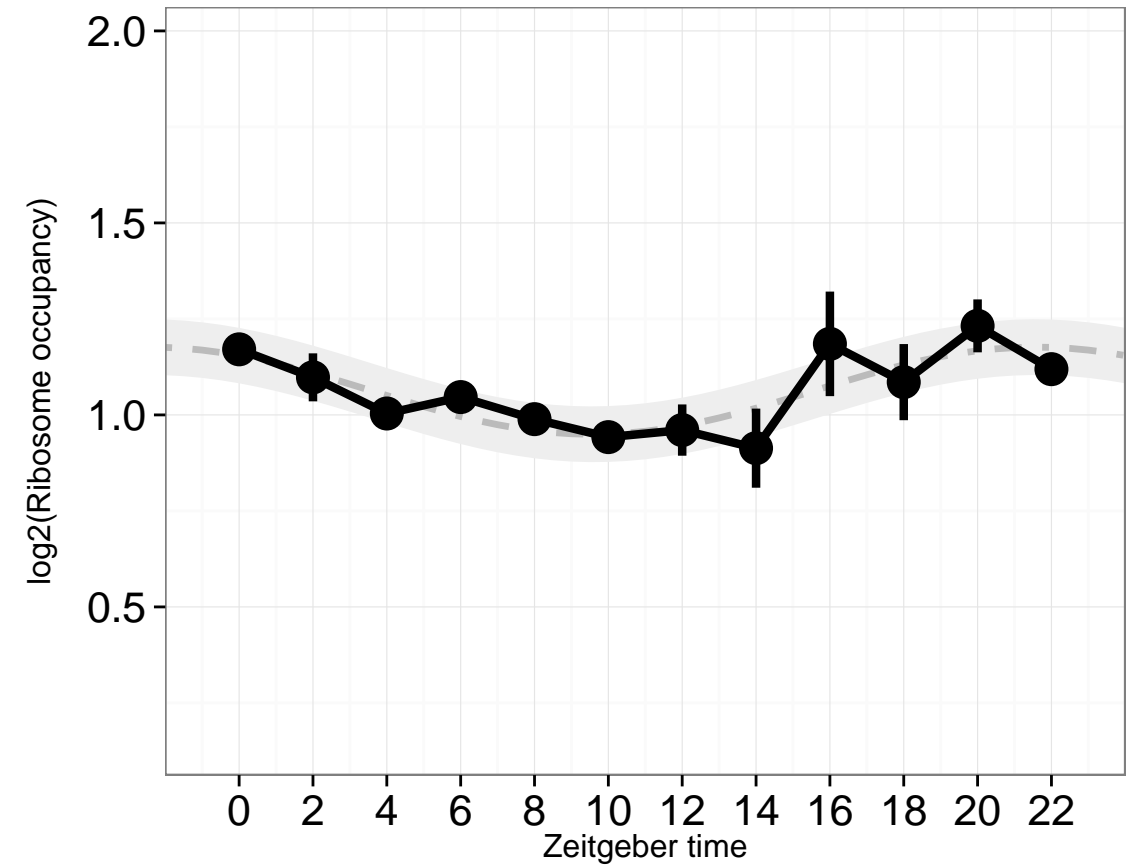

Supplement: Supplementary file 6635 [file 1]

# Hnrnpul1

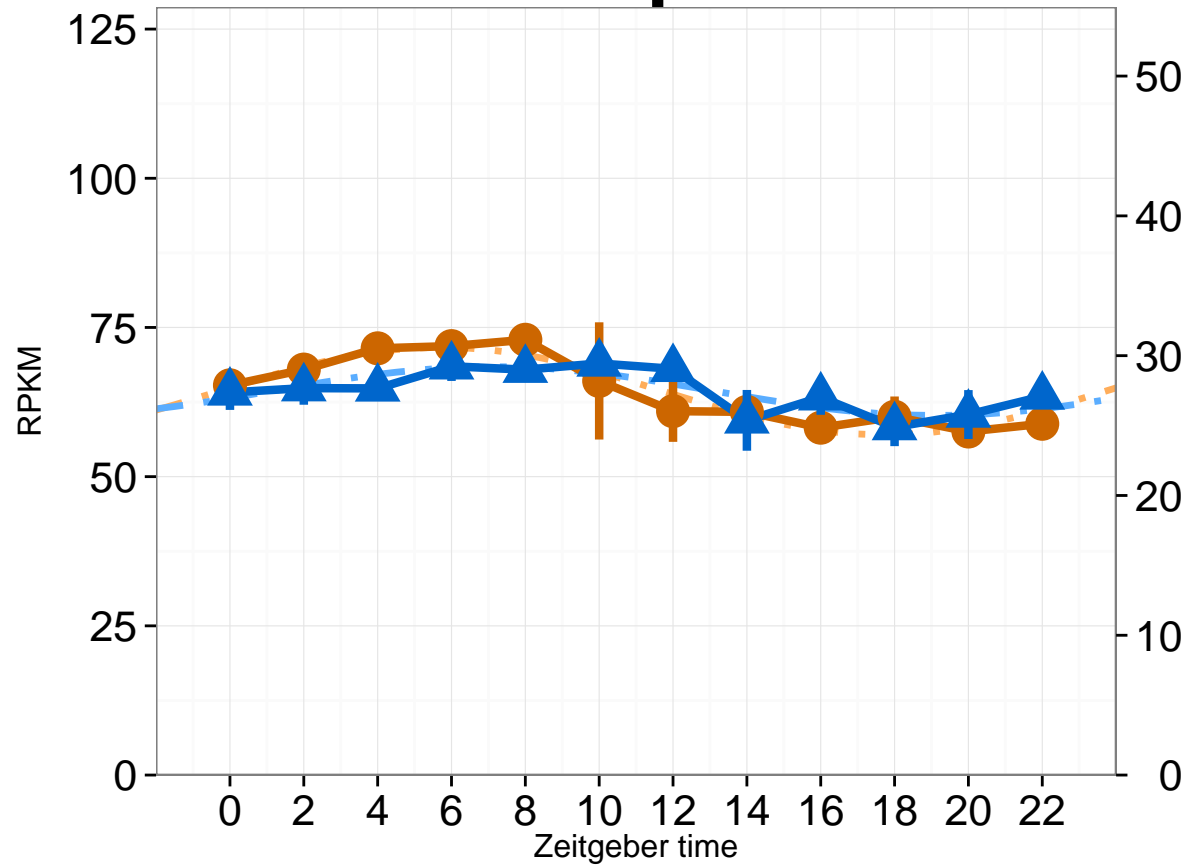

# Hnrnpul1

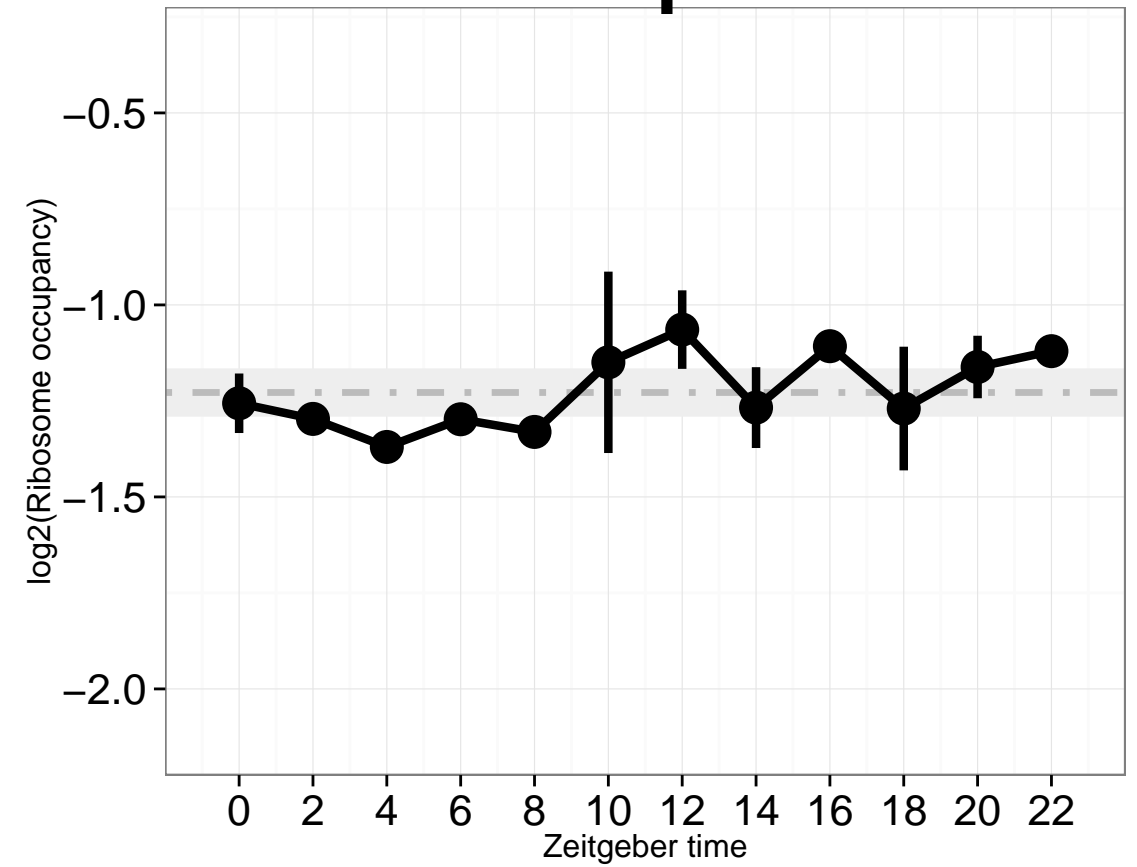

Supplement: Supplementary file 6636 [file 1]

# Cdc42bpg

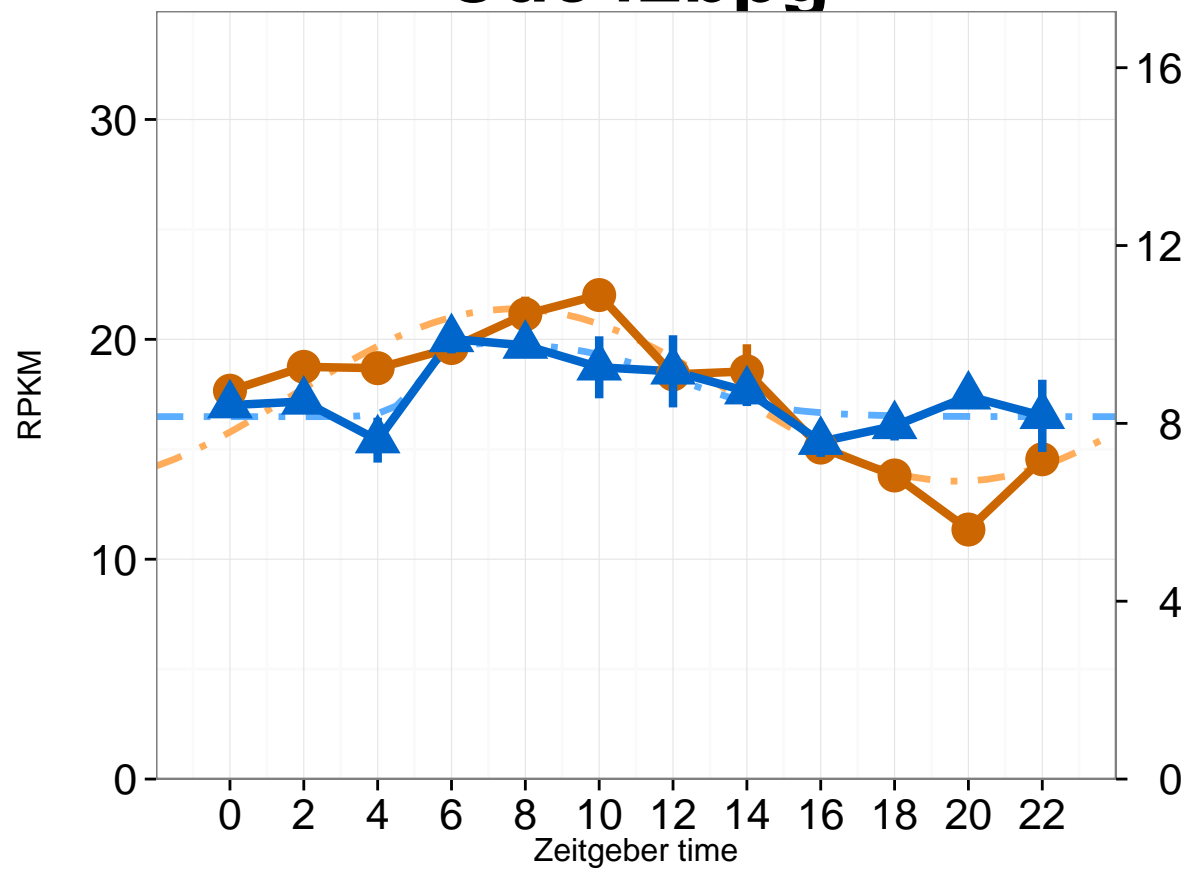

# Cdc42bpg

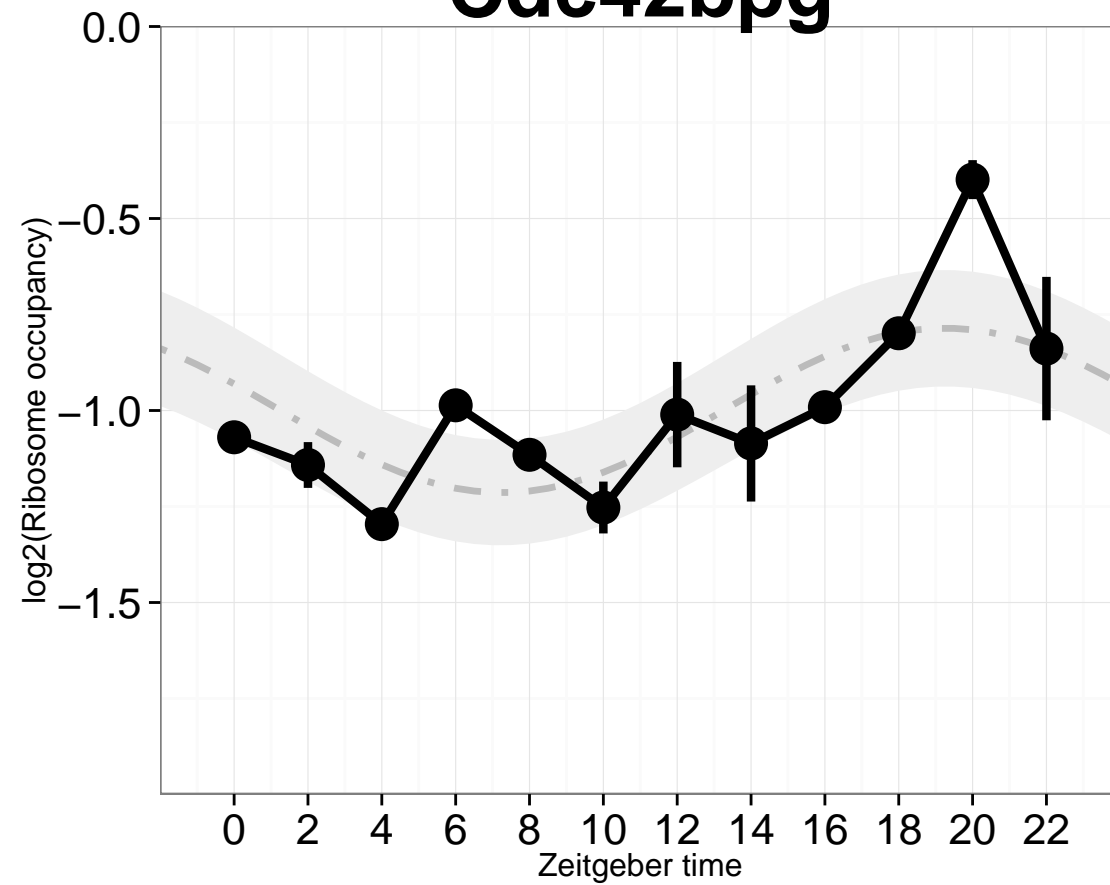

Supplement: Supplementary file 6637 [file 1]

# Adra1a

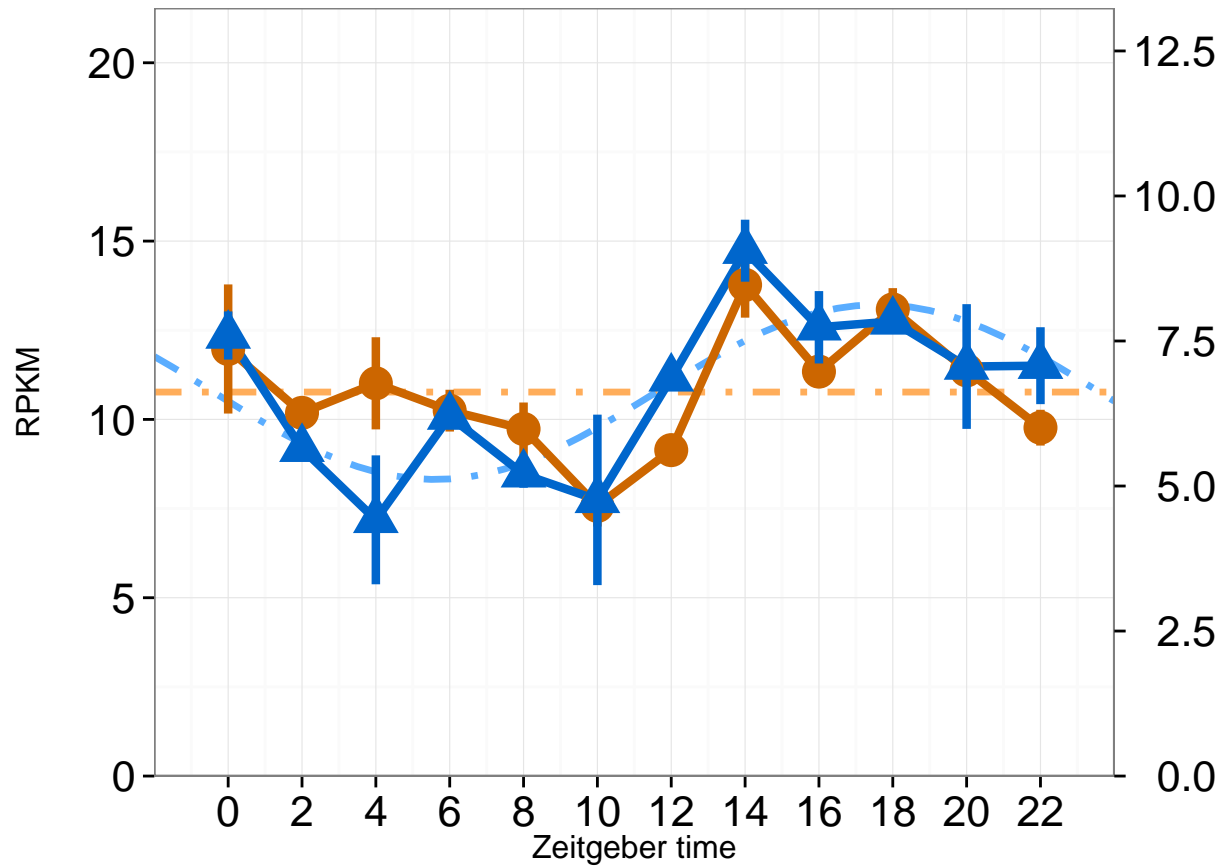

# Adra1a

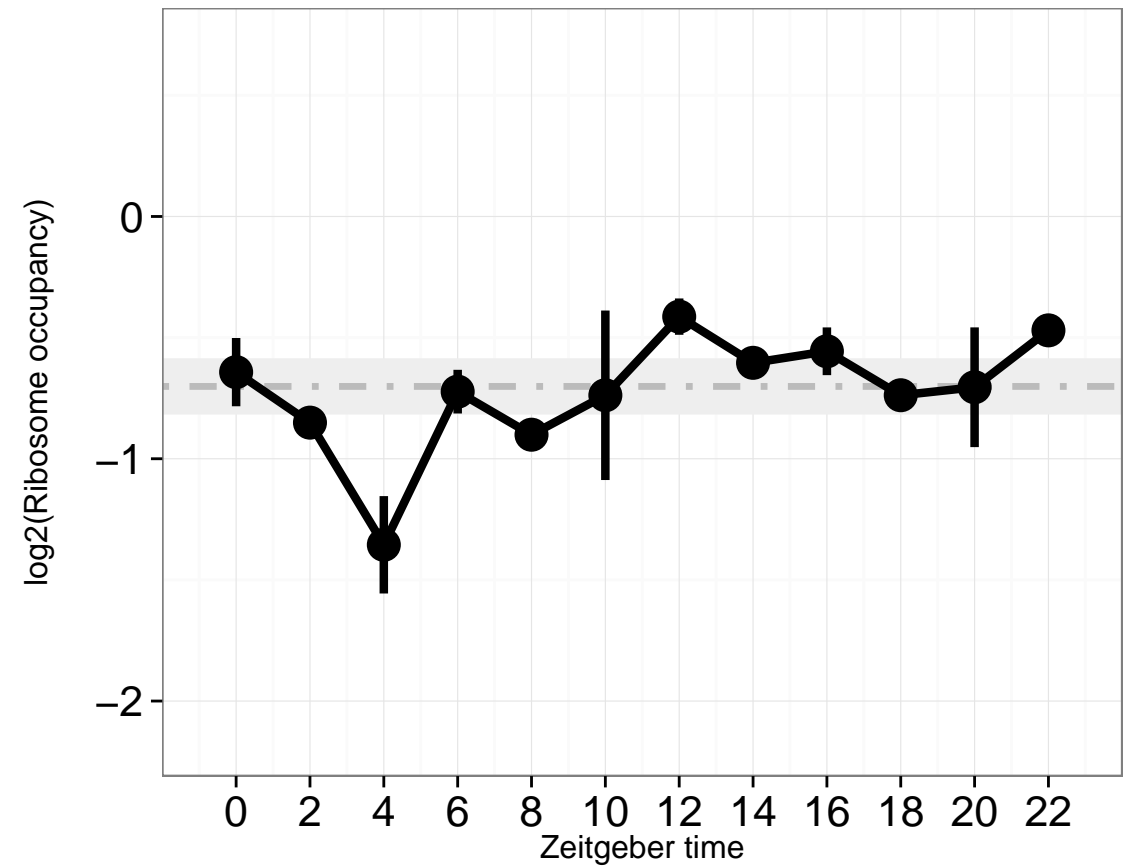

Supplement: Supplementary file 6638 [file 1]

## Rufy4

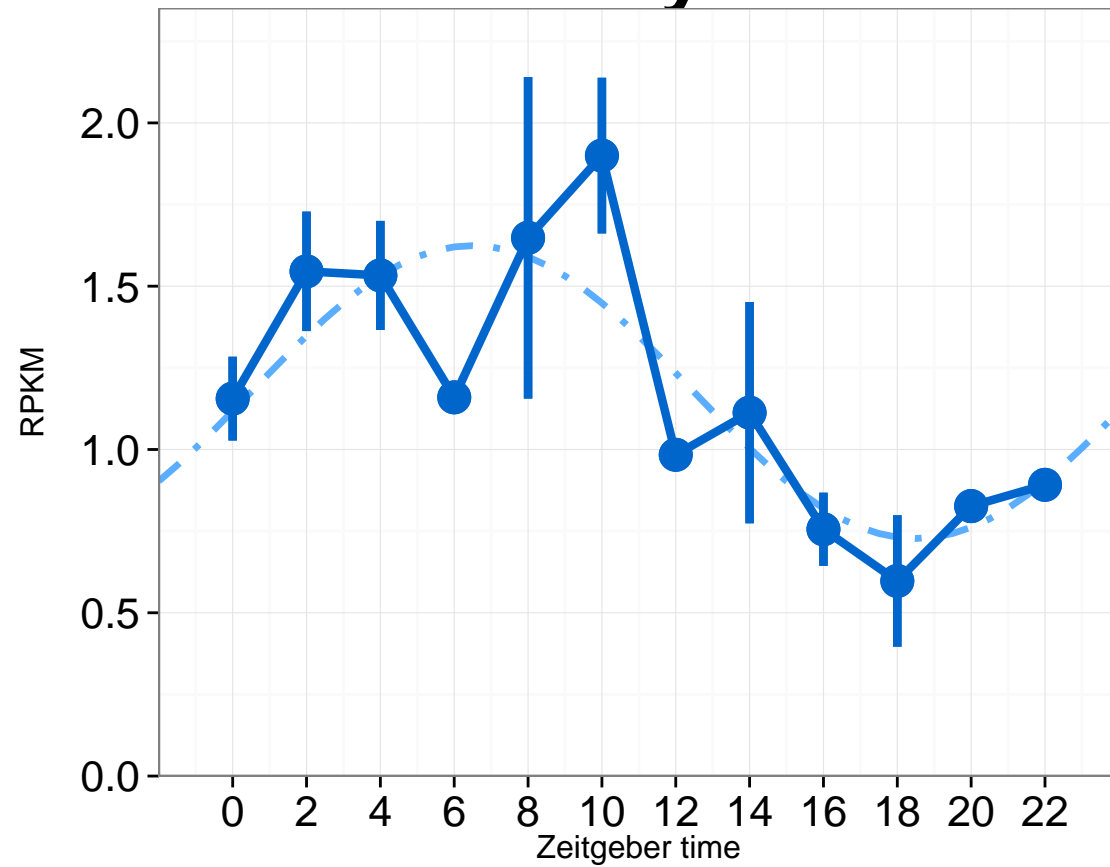

## Rufy4 log2(Ribosome occupancy

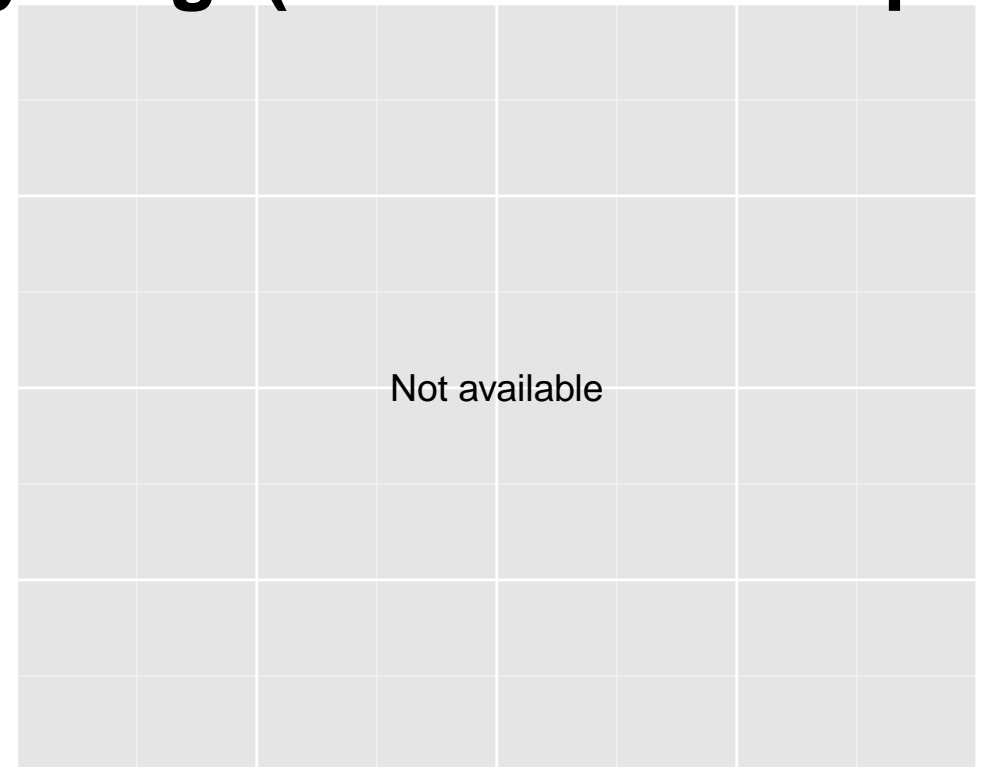

Supplement: Supplementary file 6639 [file 1]

## Pnkp

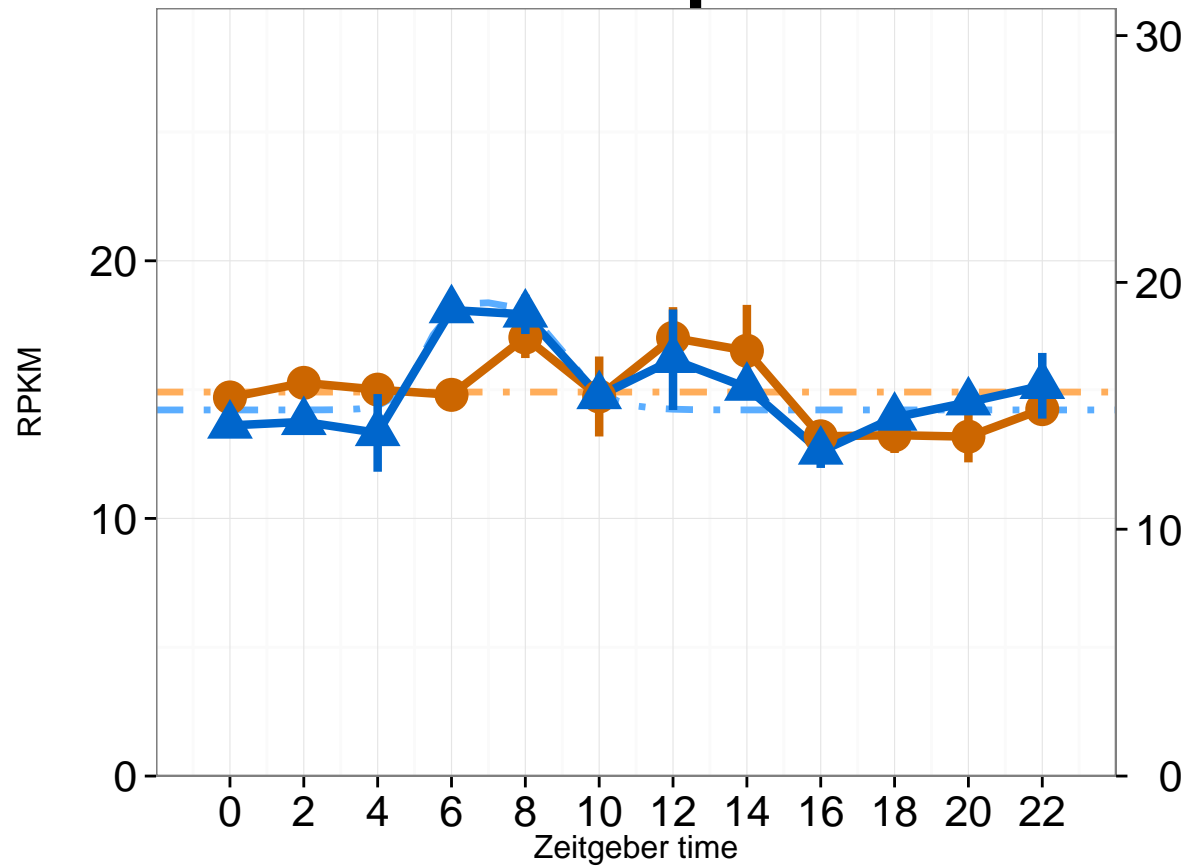

## Pnkp

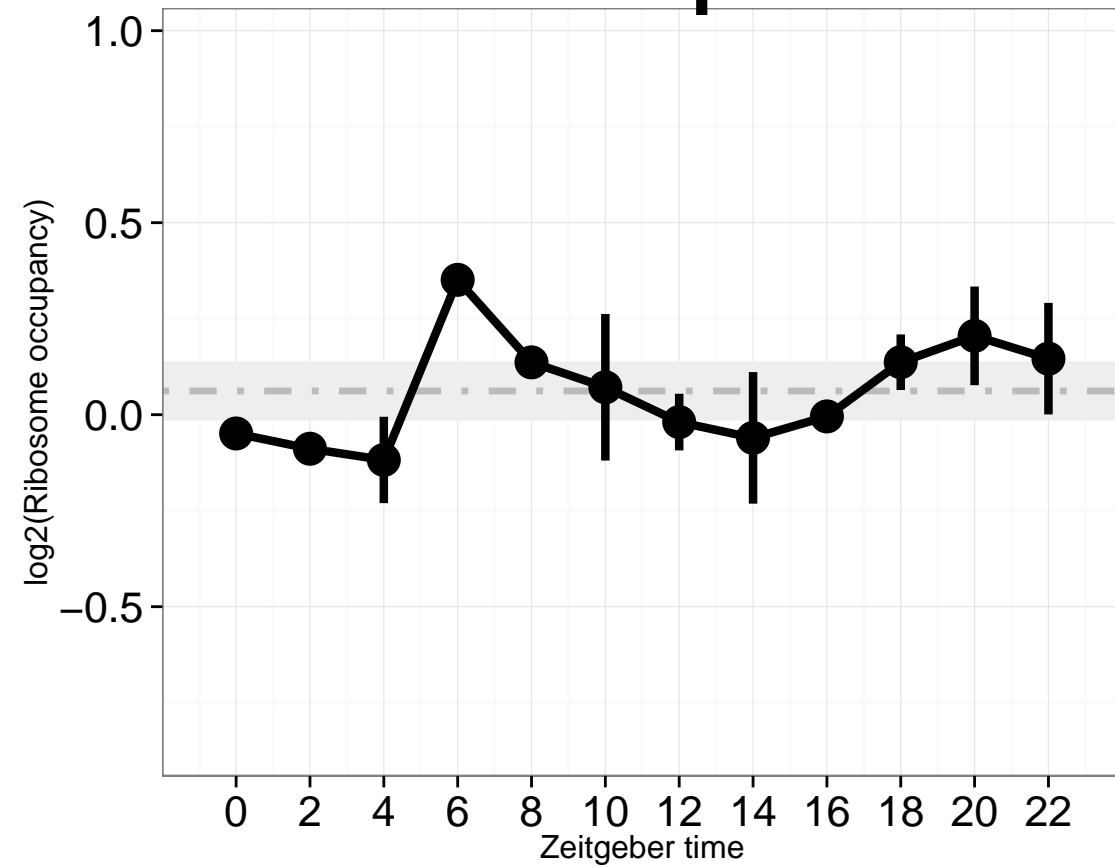

Supplement: Supplementary file 6640 [file 1]

# Zc3h12a

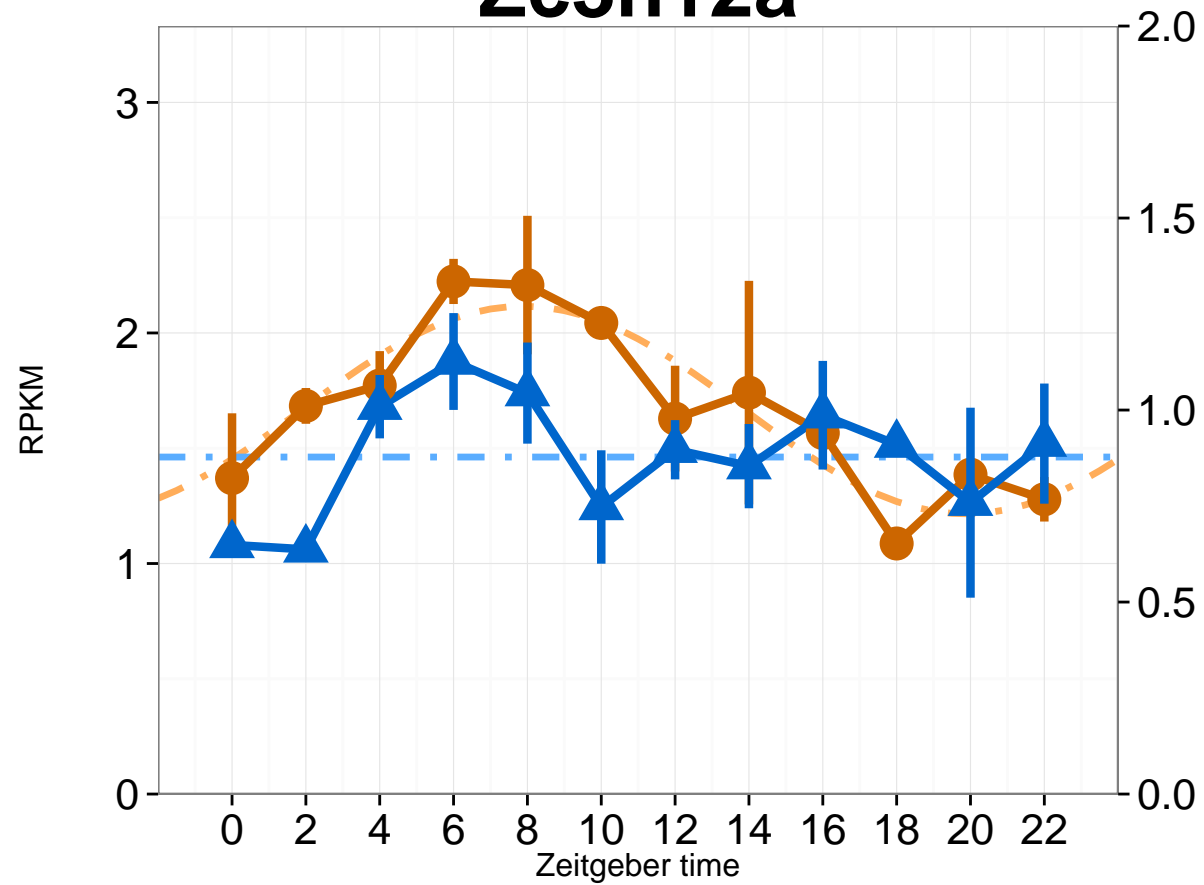

# Zc3h12a

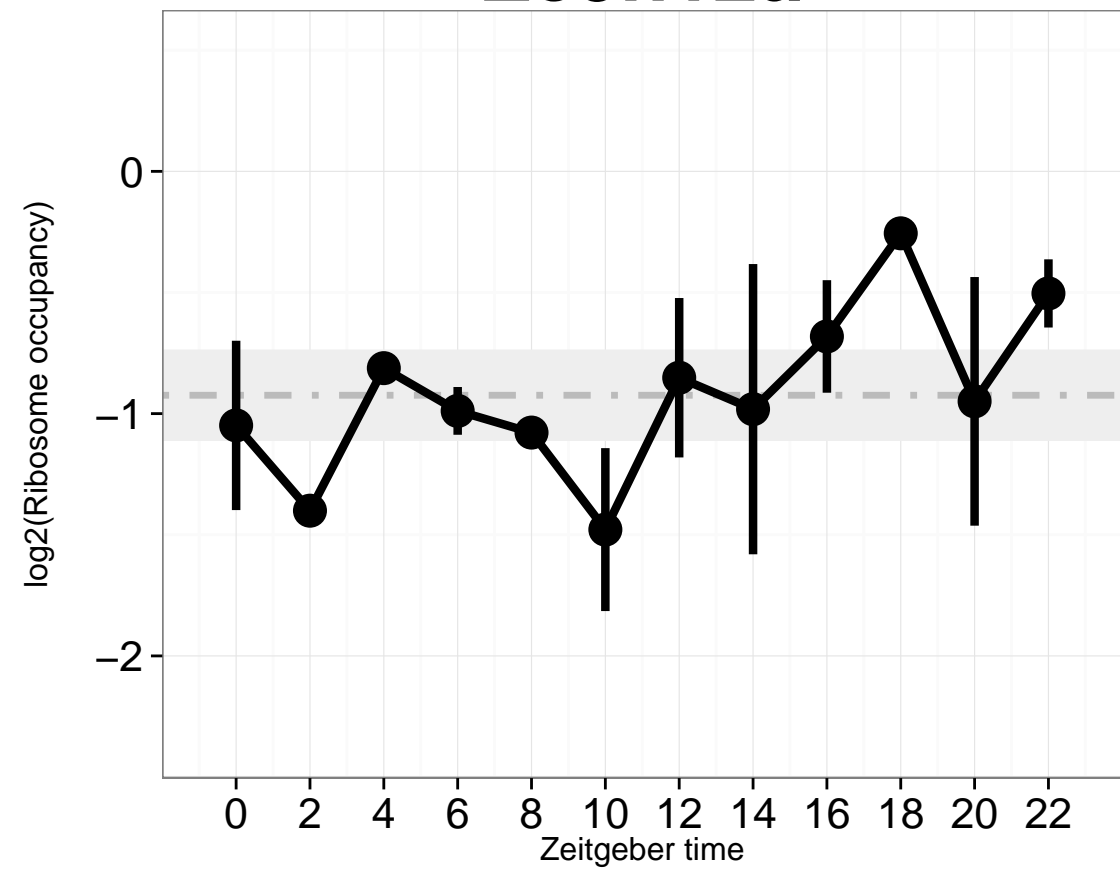

Supplement: Supplementary file 6641 [file 1]

## Rph3a1

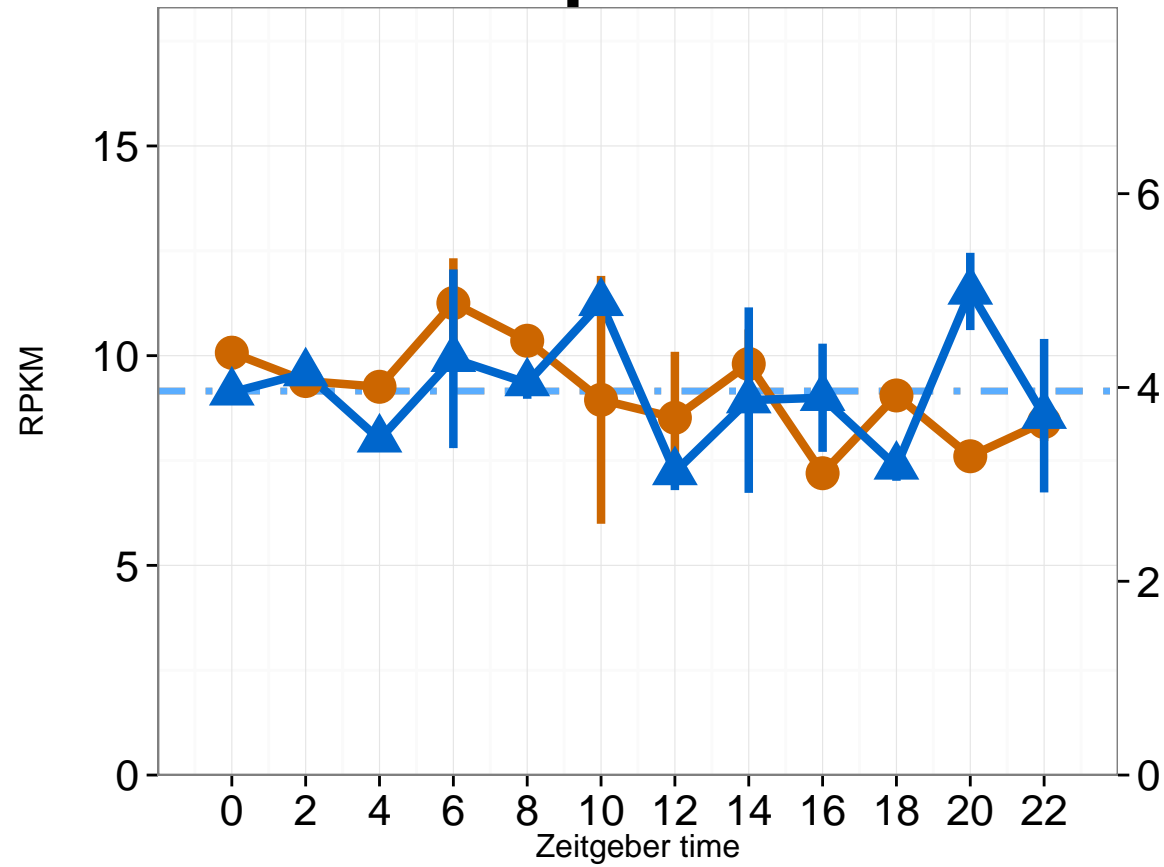

## Rph3a1

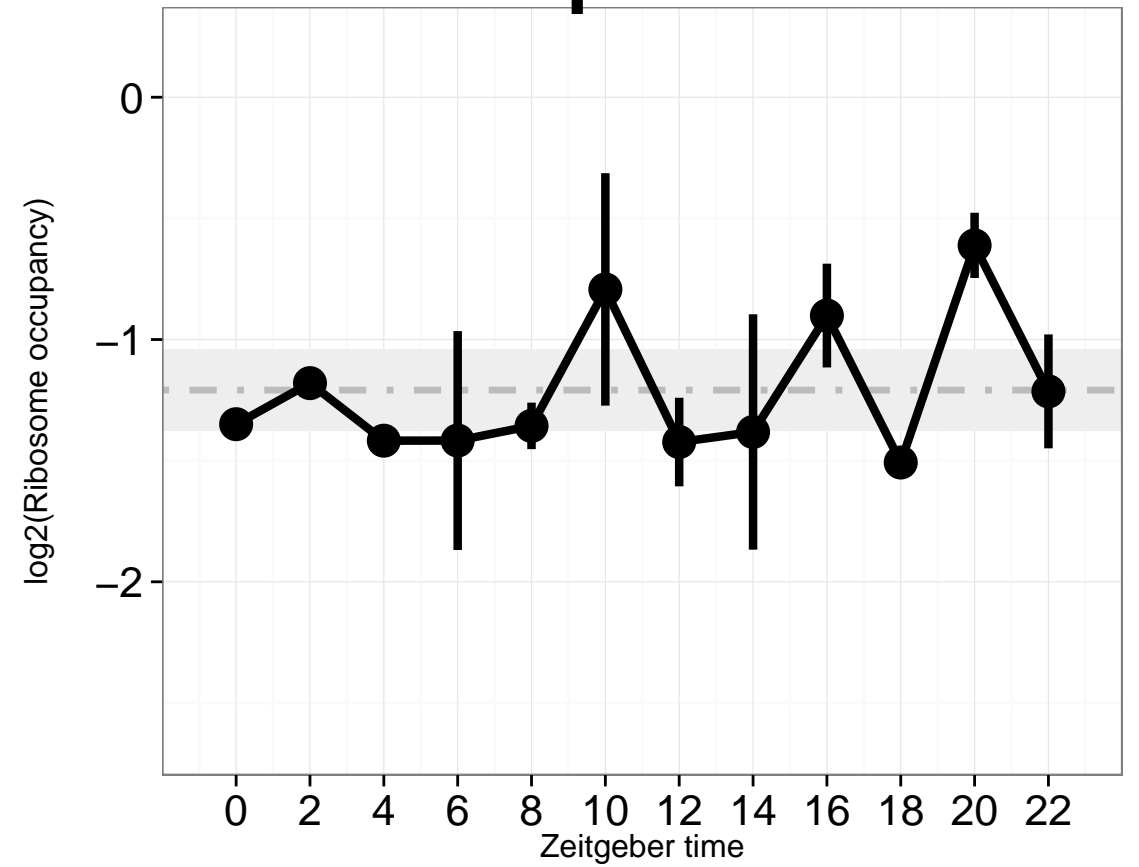

Supplement: Supplementary file 6642 [file 1]

## Ptrf

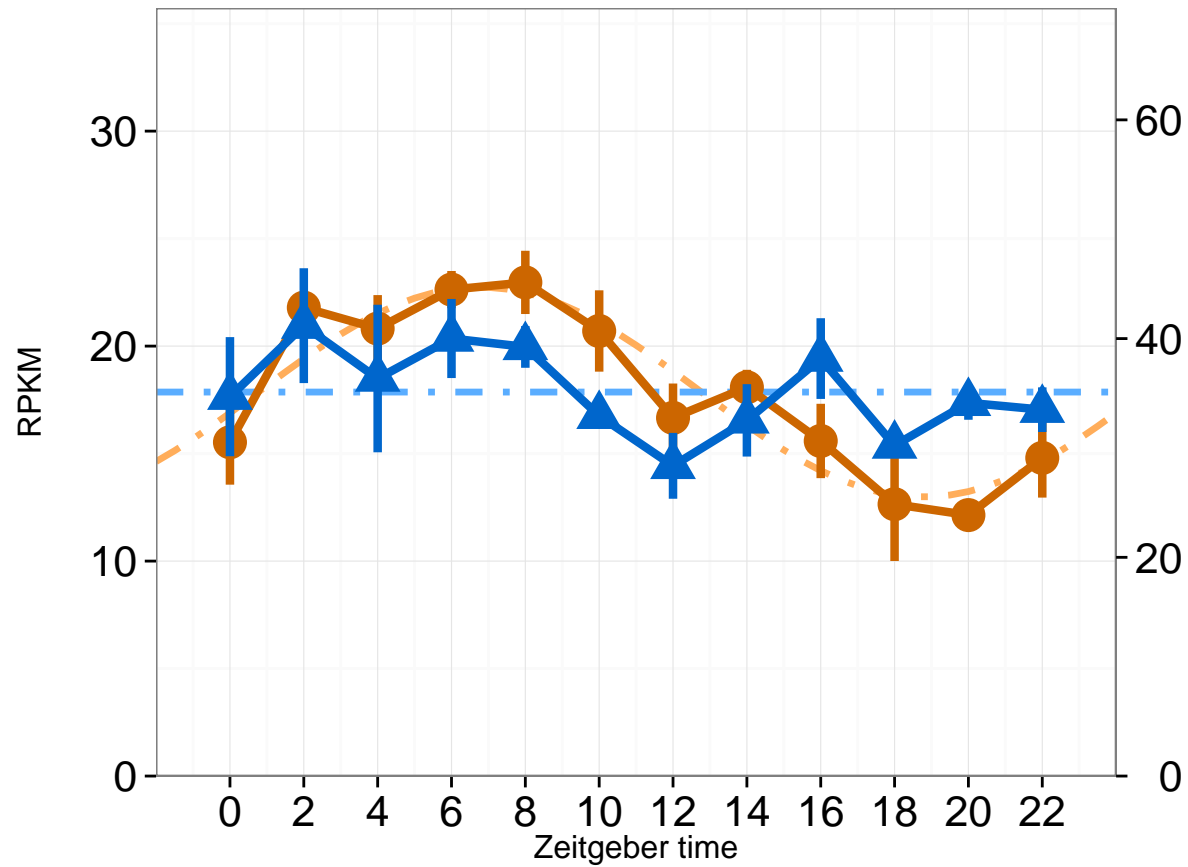

## Ptrf

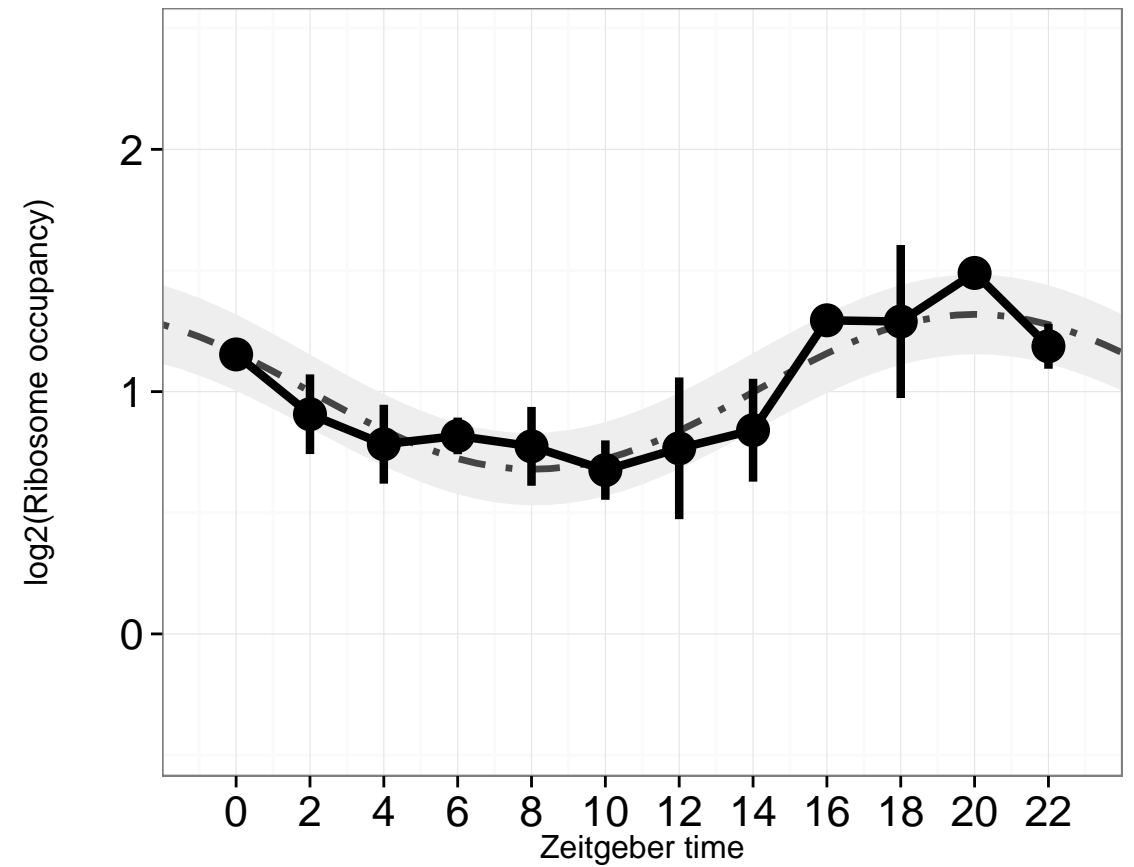

Supplement: Supplementary file 6643 [file 1]

## Akna

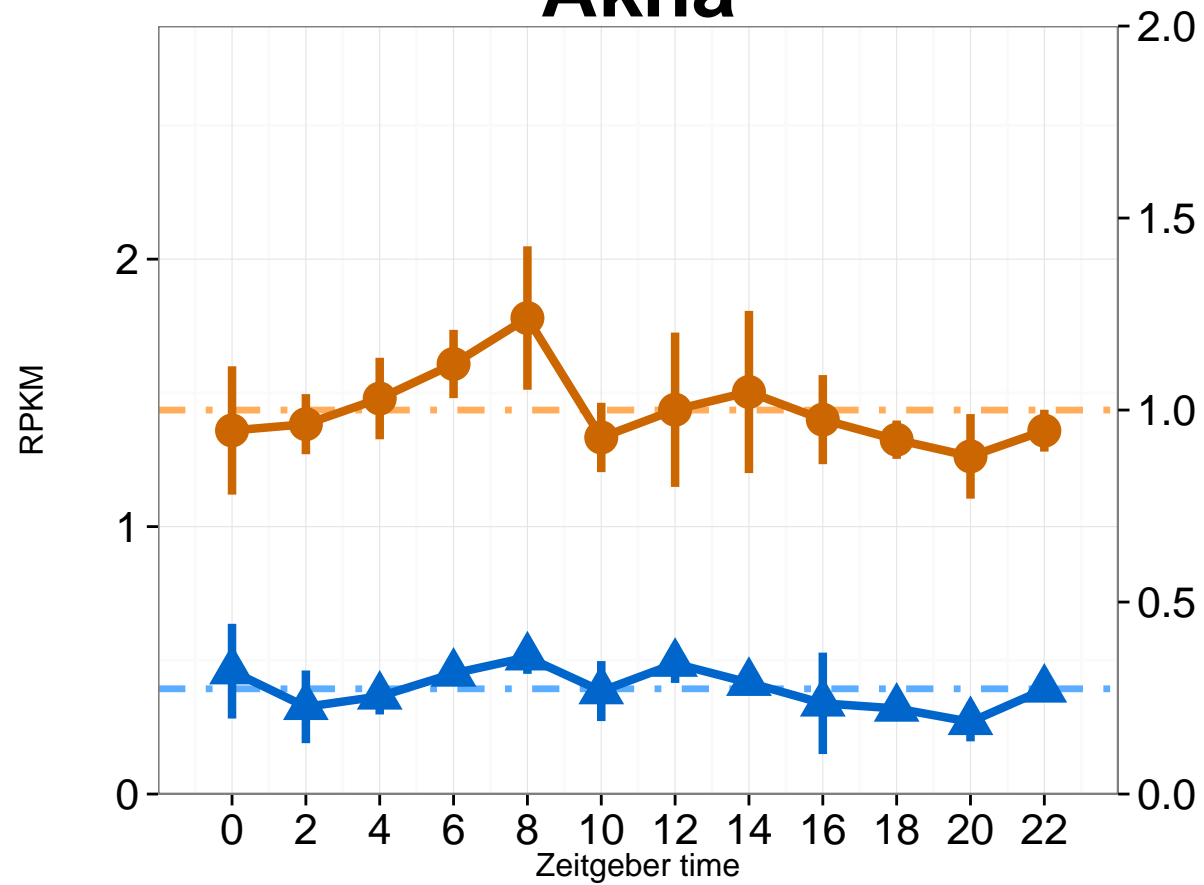

## Akna

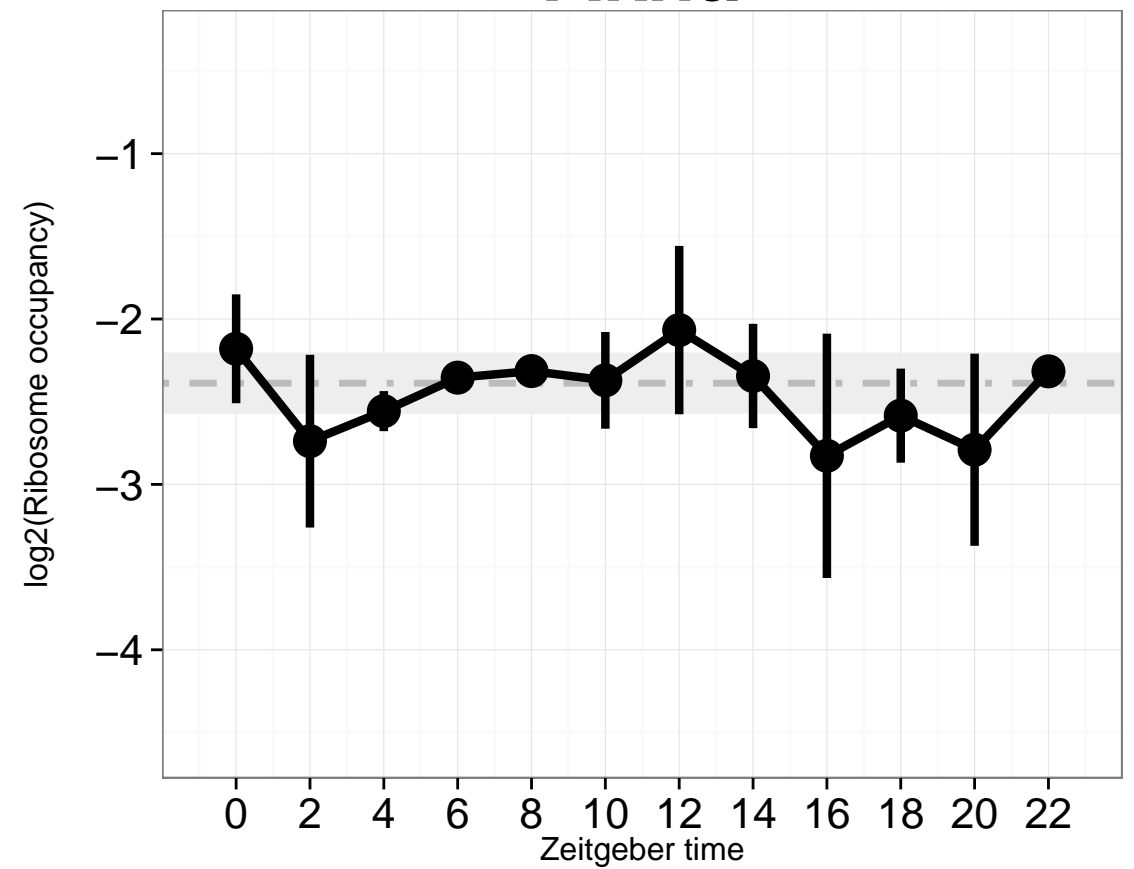

Supplement: Supplementary file 6644 [file 1]

# Ddx24

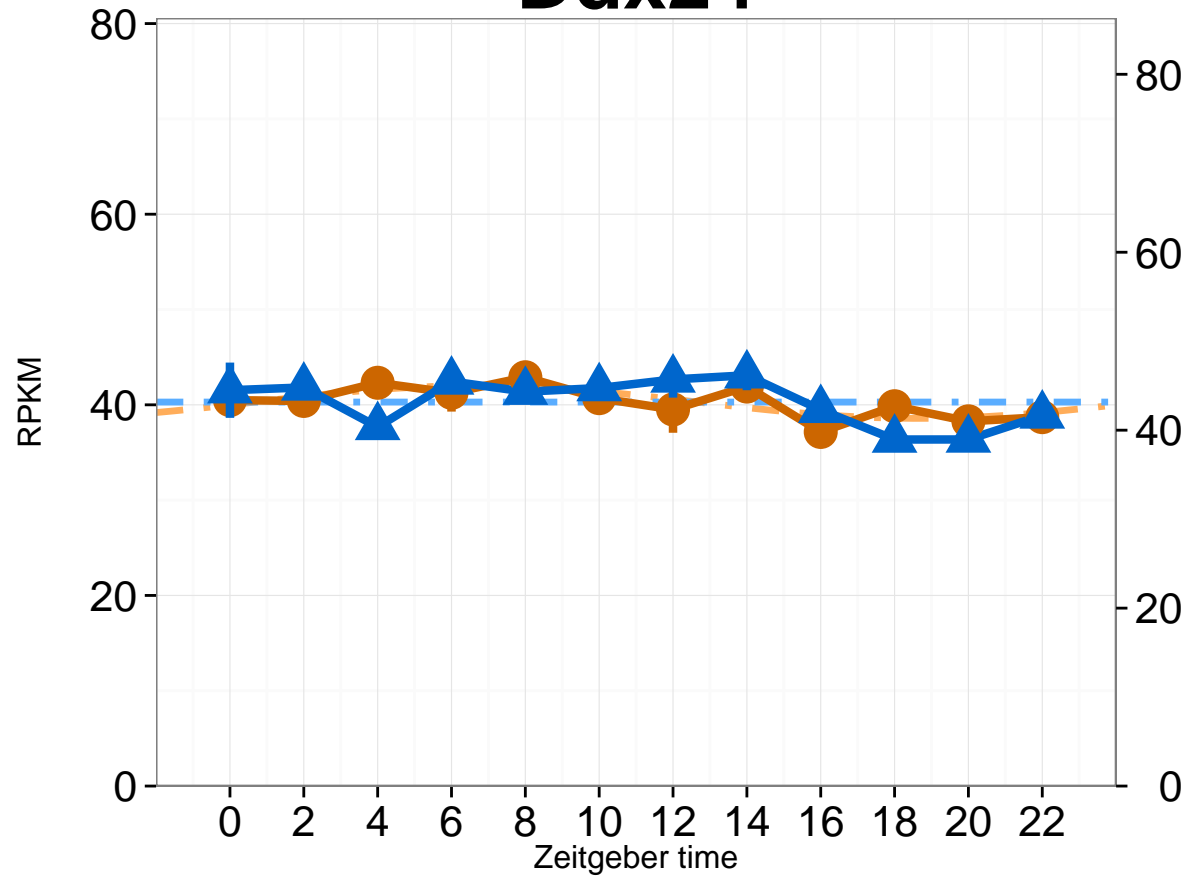

# Ddx24

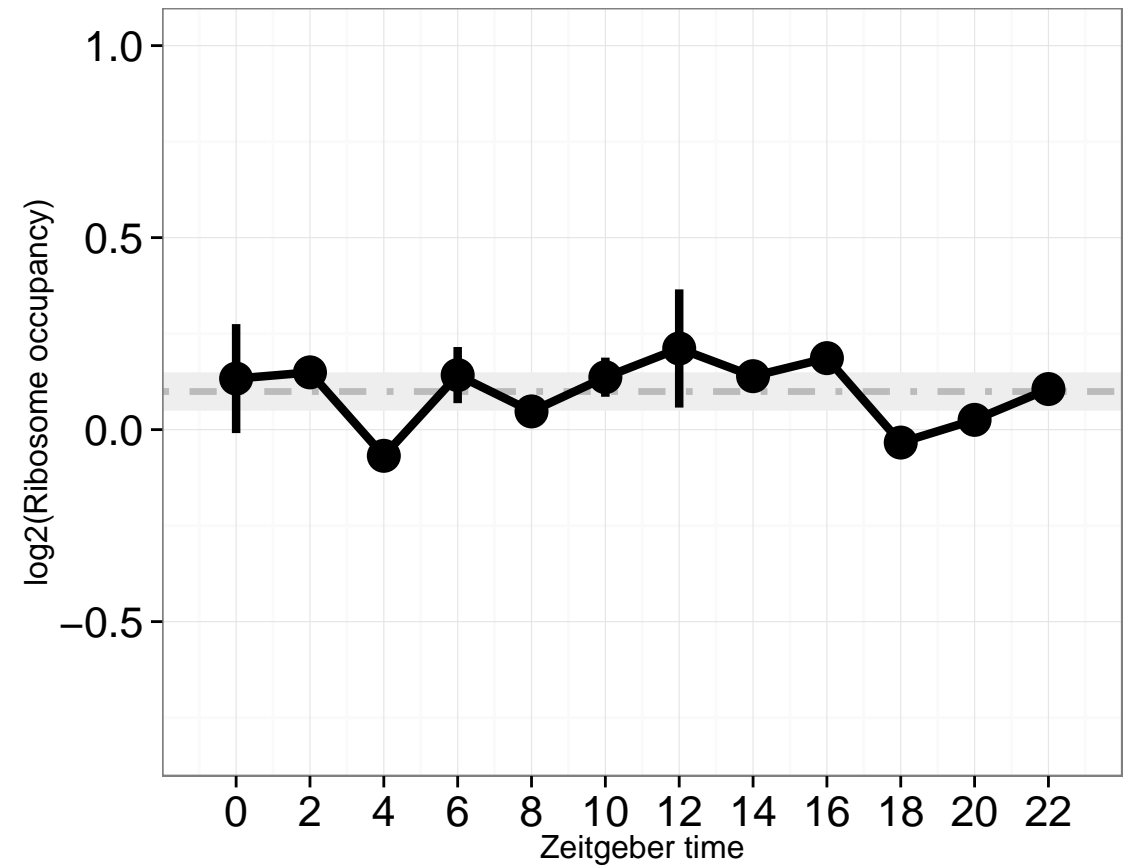

Supplement: Supplementary file 6645 [file 1]

## Nup93

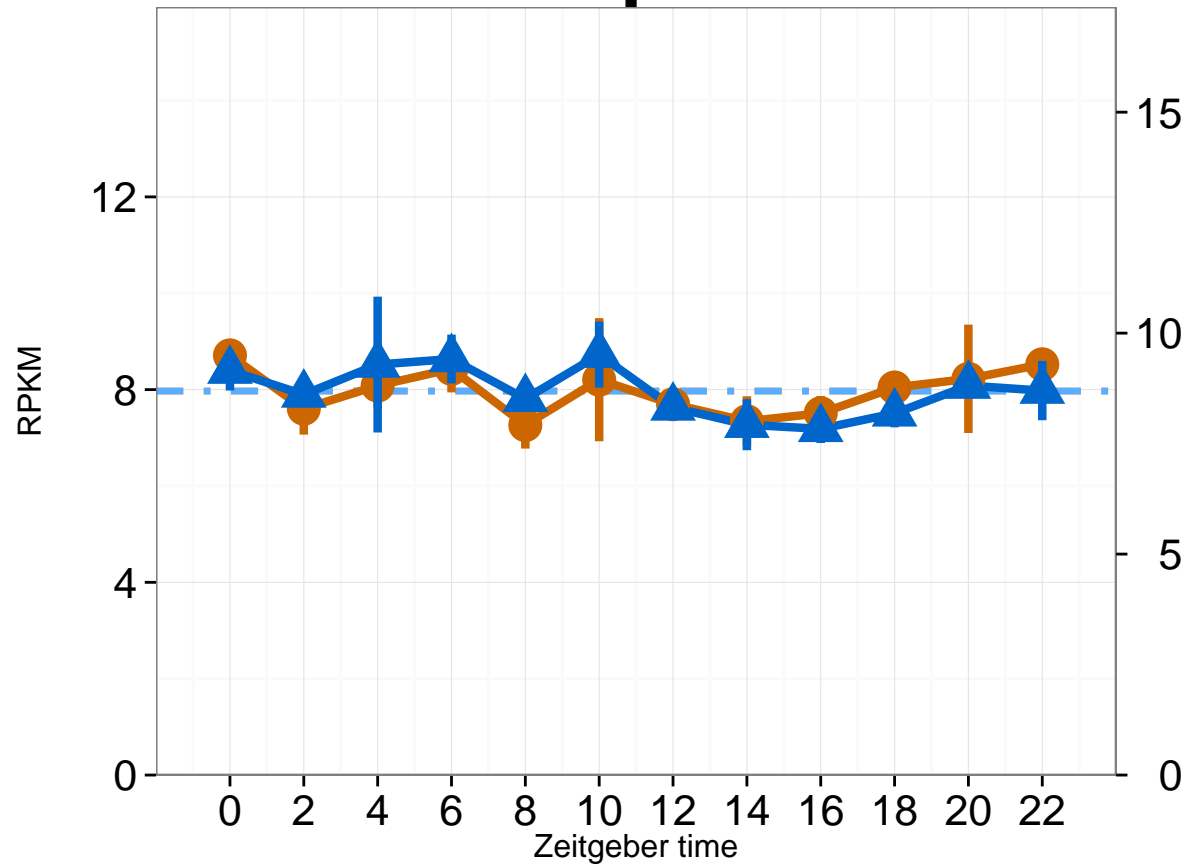

## Nup93

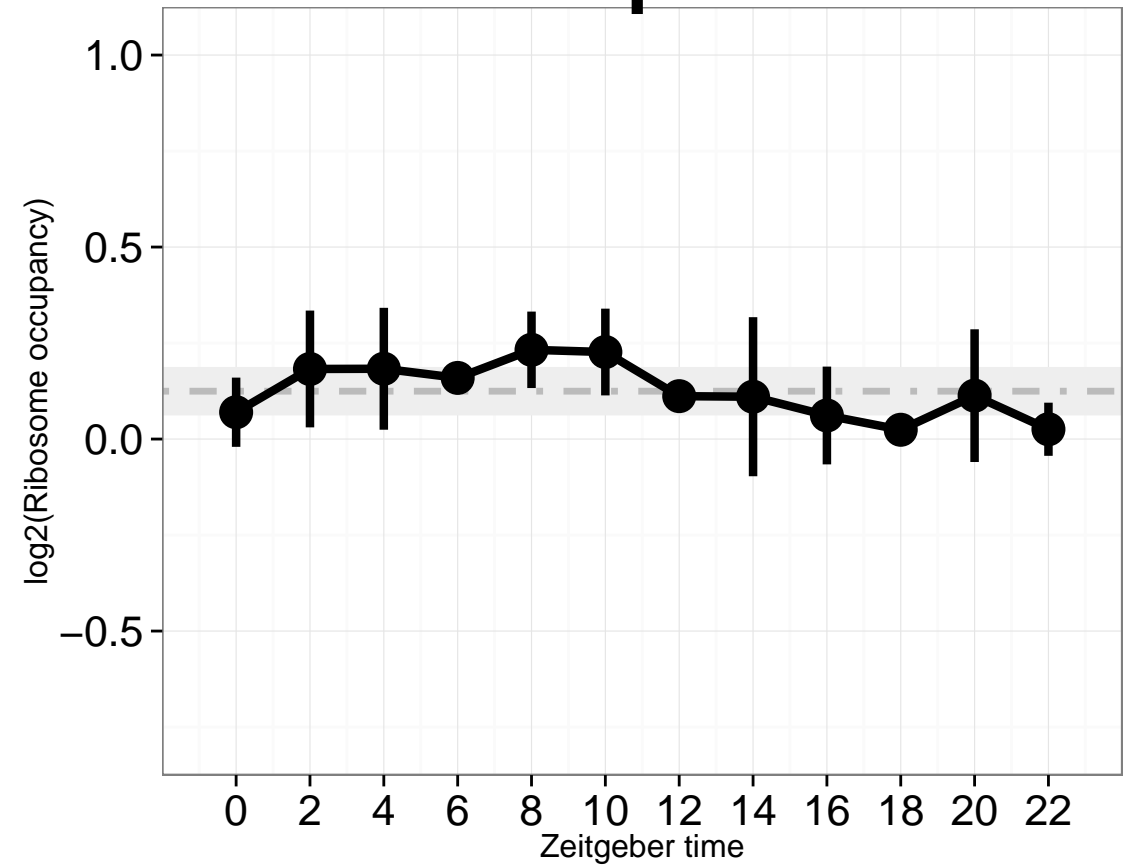

Supplement: Supplementary file 6646 [file 1]

## Gli2

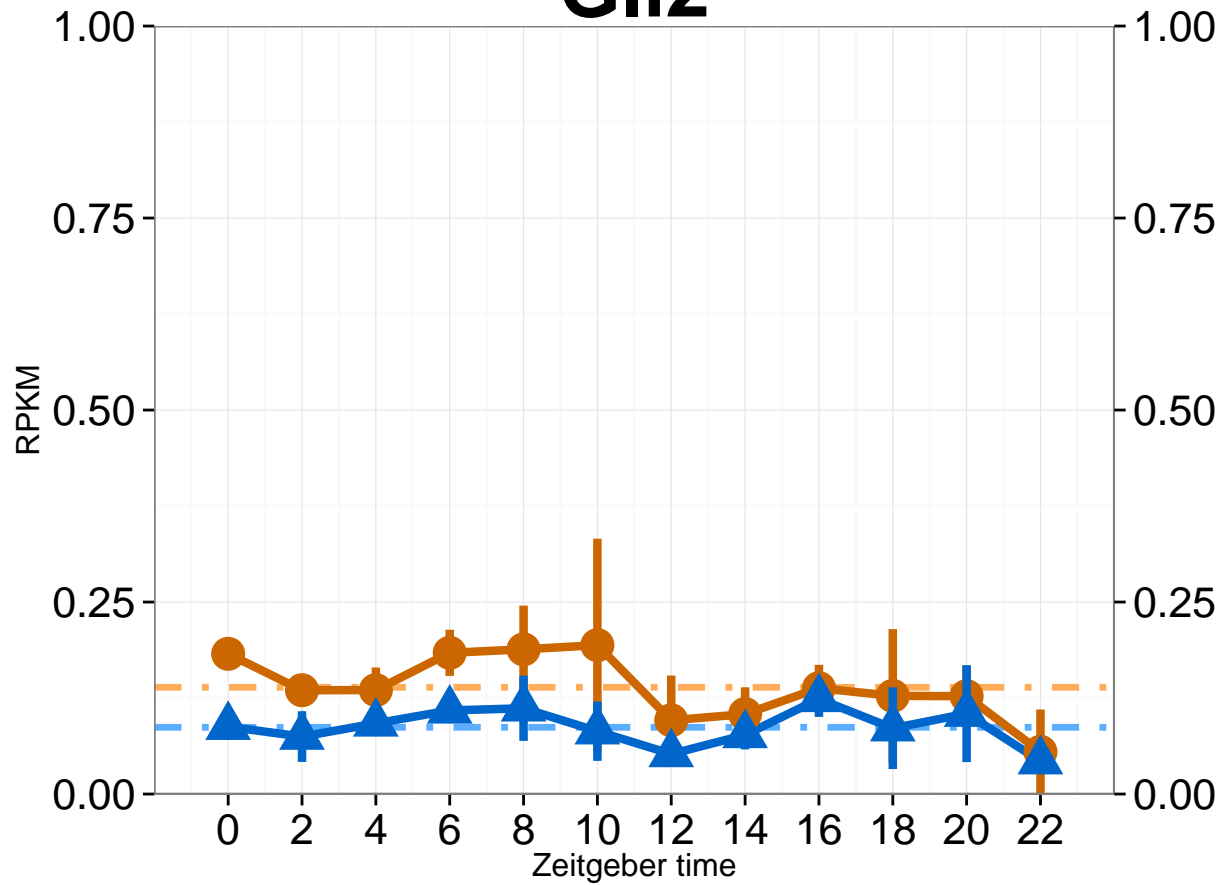

## Gli2

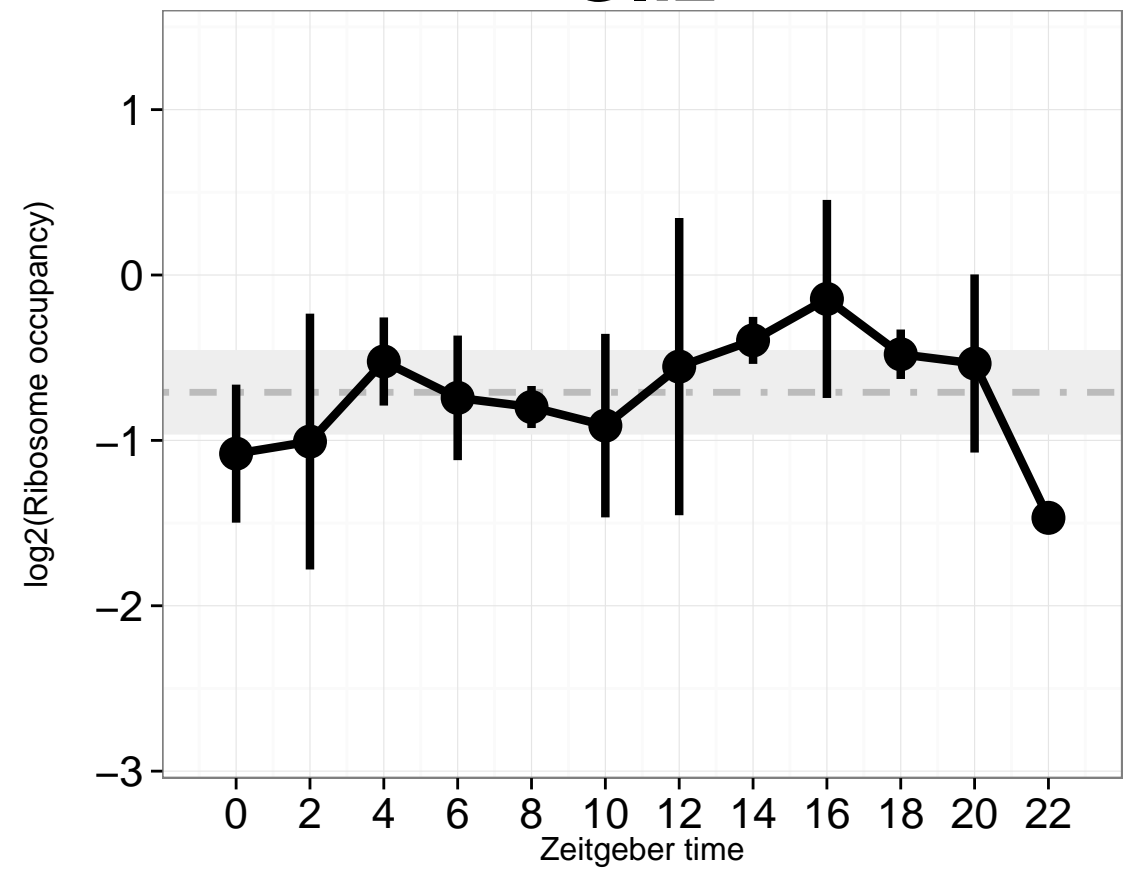

Supplement: Supplementary file 6647 [file 1]

## Gpd2

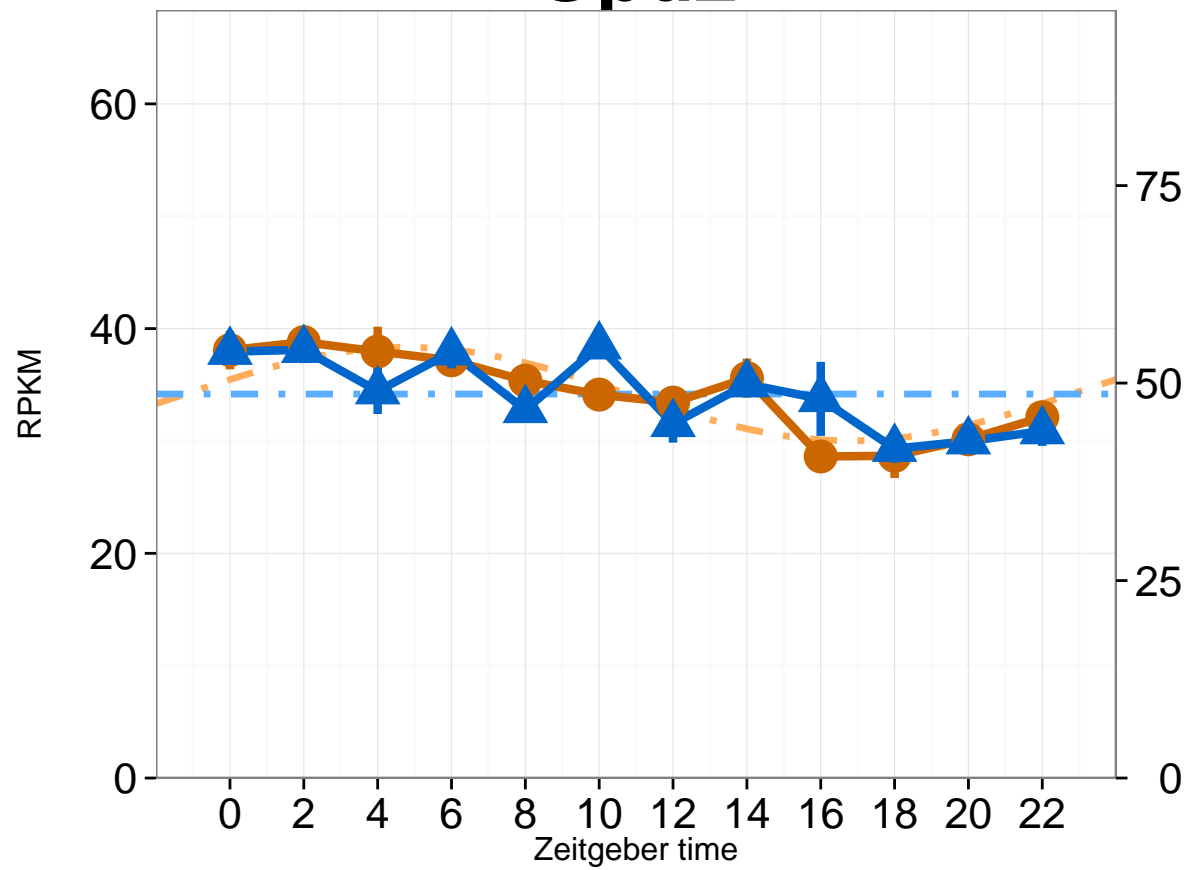

## Gpd2

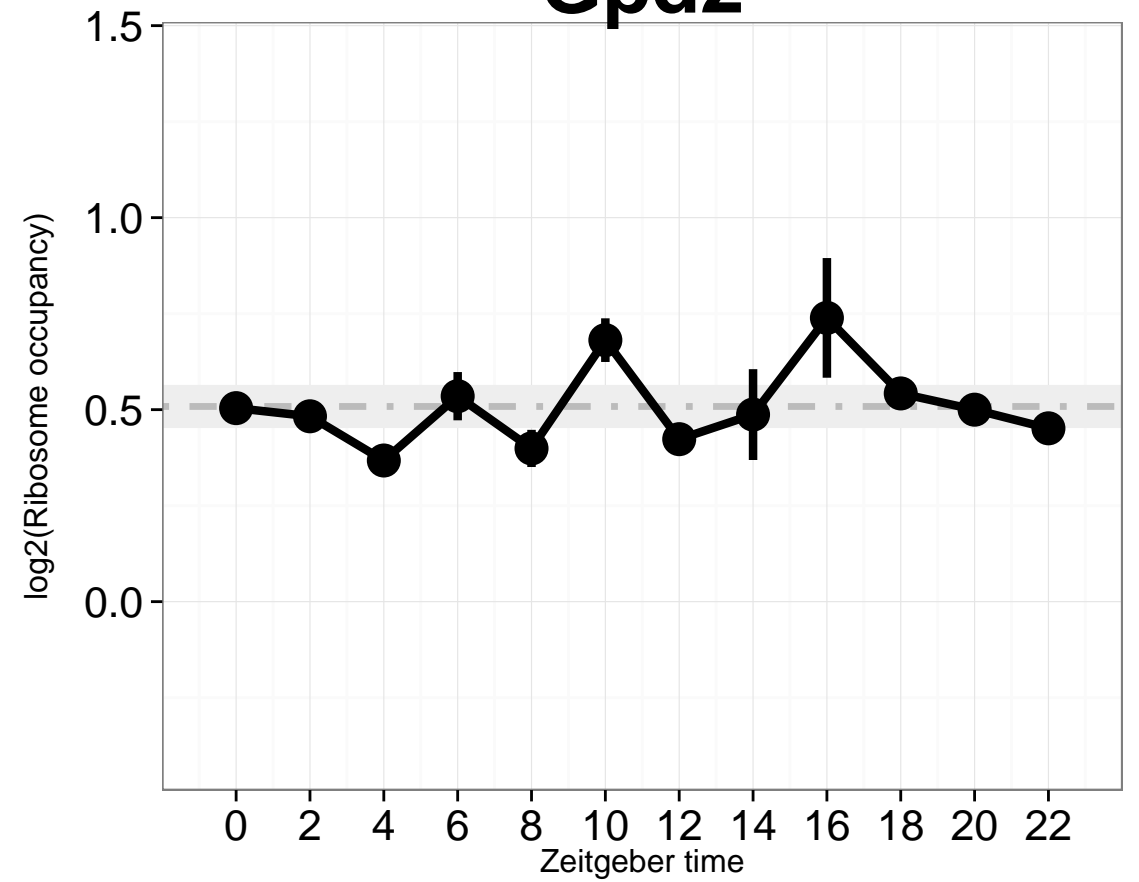

Supplement: Supplementary file 6648 [file 1]

## Rrs1

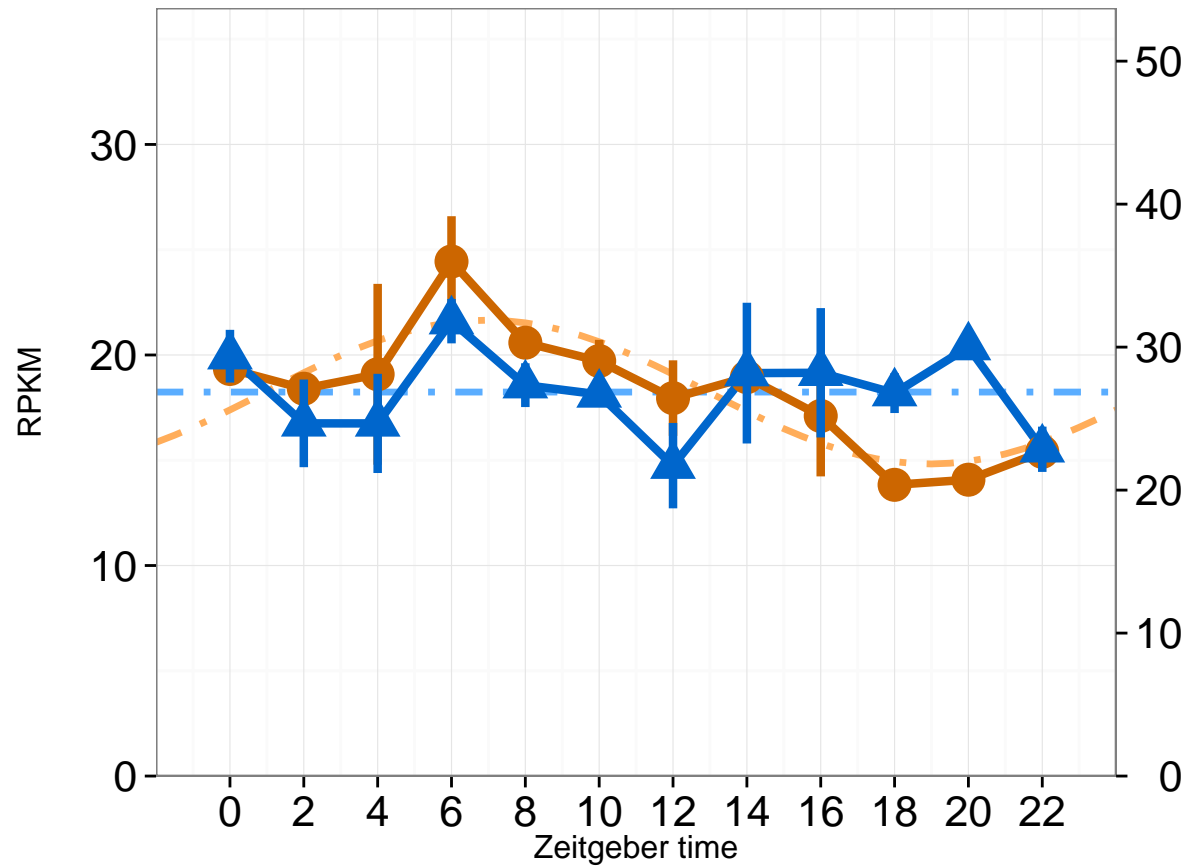

## Rrs1

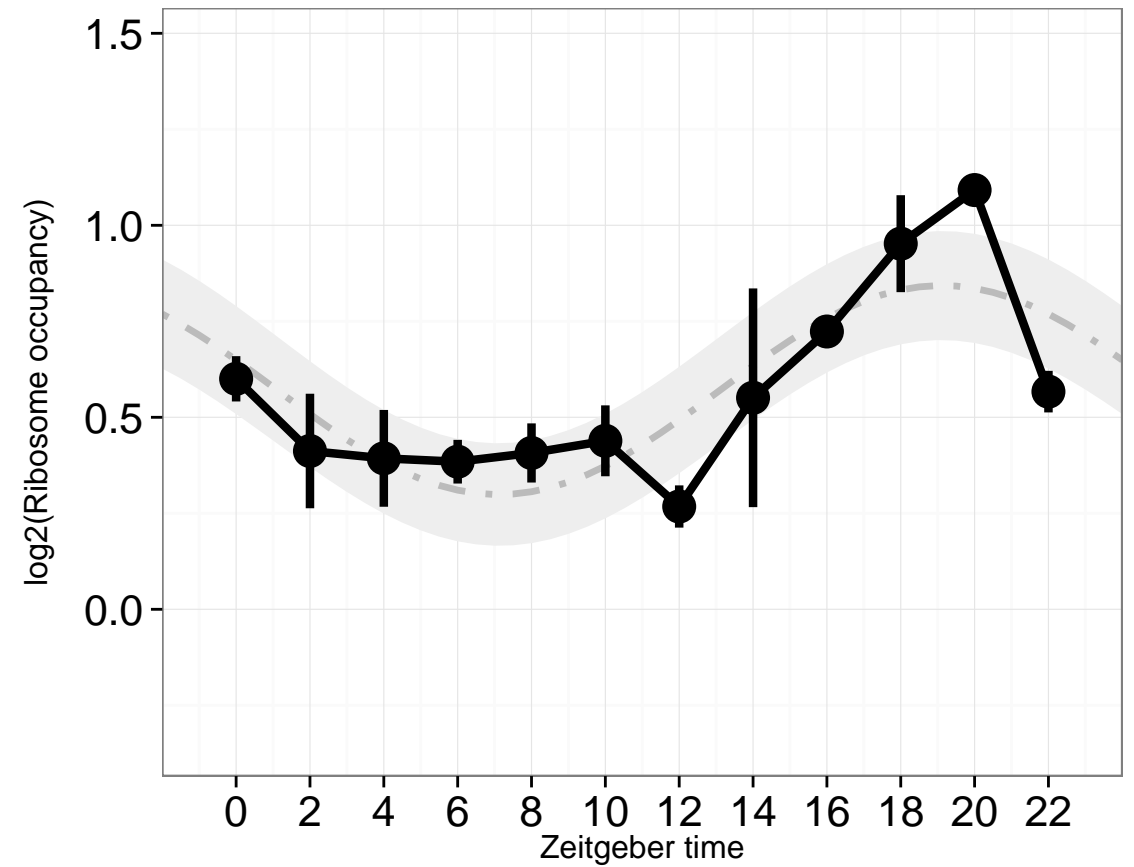

Supplement: Supplementary file 6649 [file 1]

## Mkl2

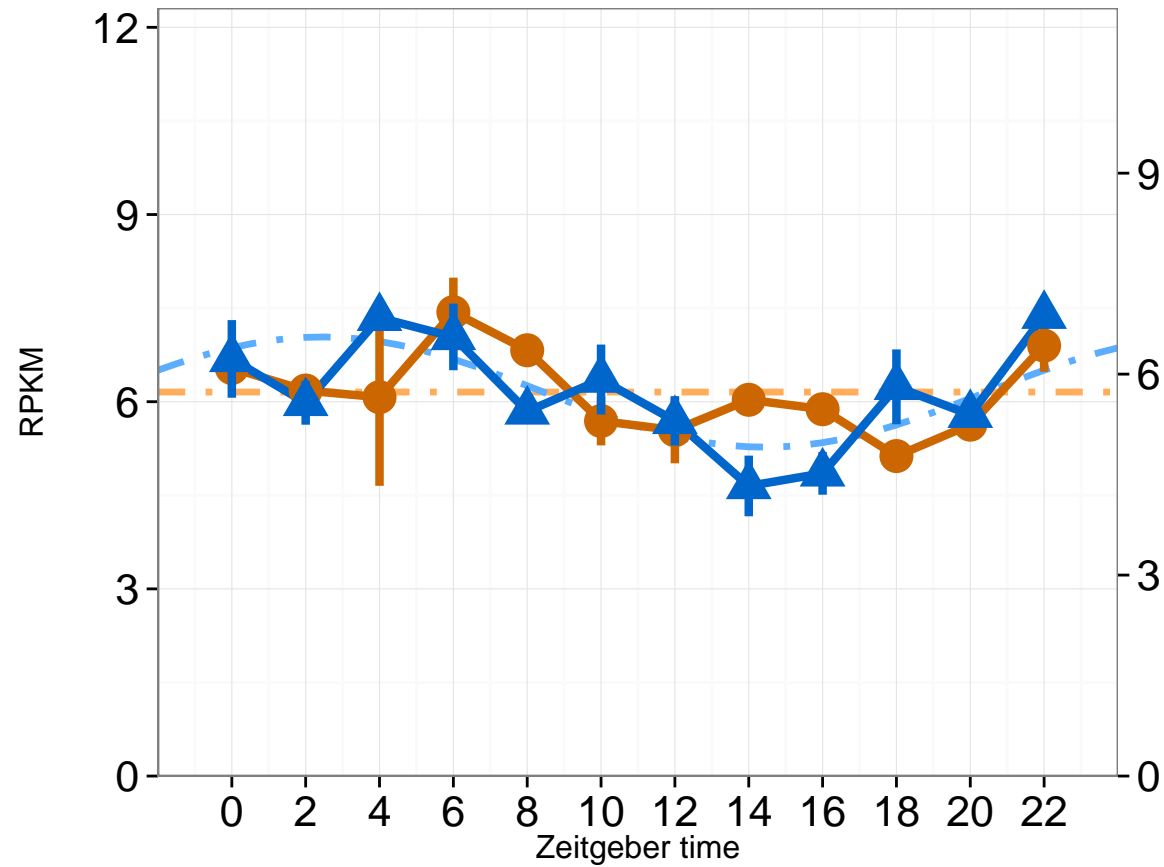

## Mkl2

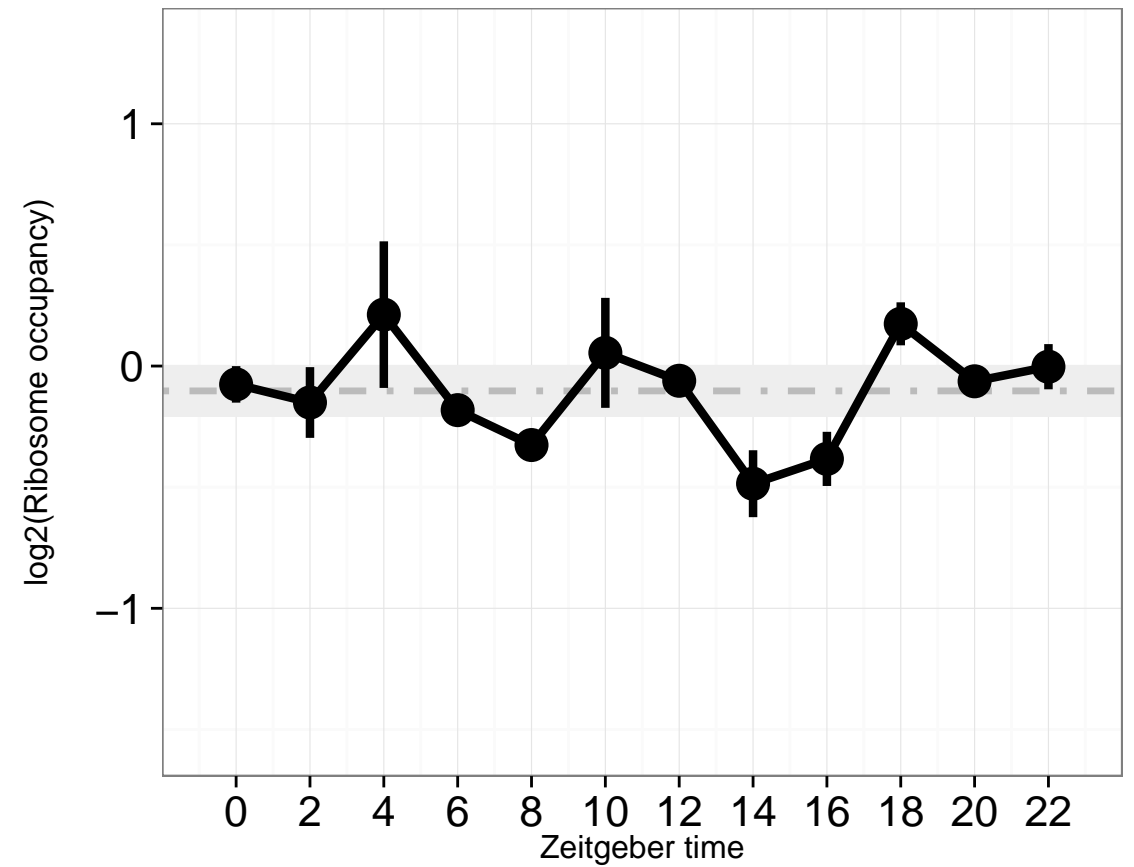

Supplement: Supplementary file 6650 [file 1]

4430402I18Rik

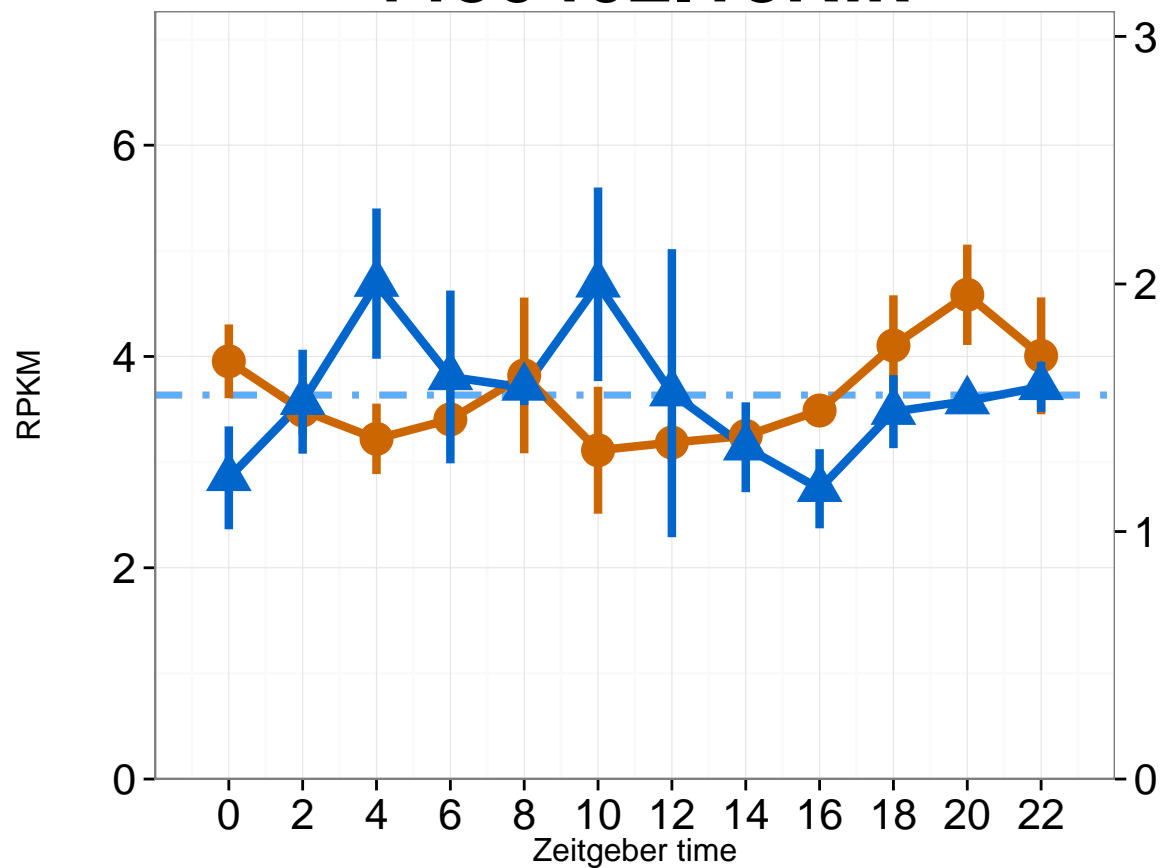

4430402I18Rik

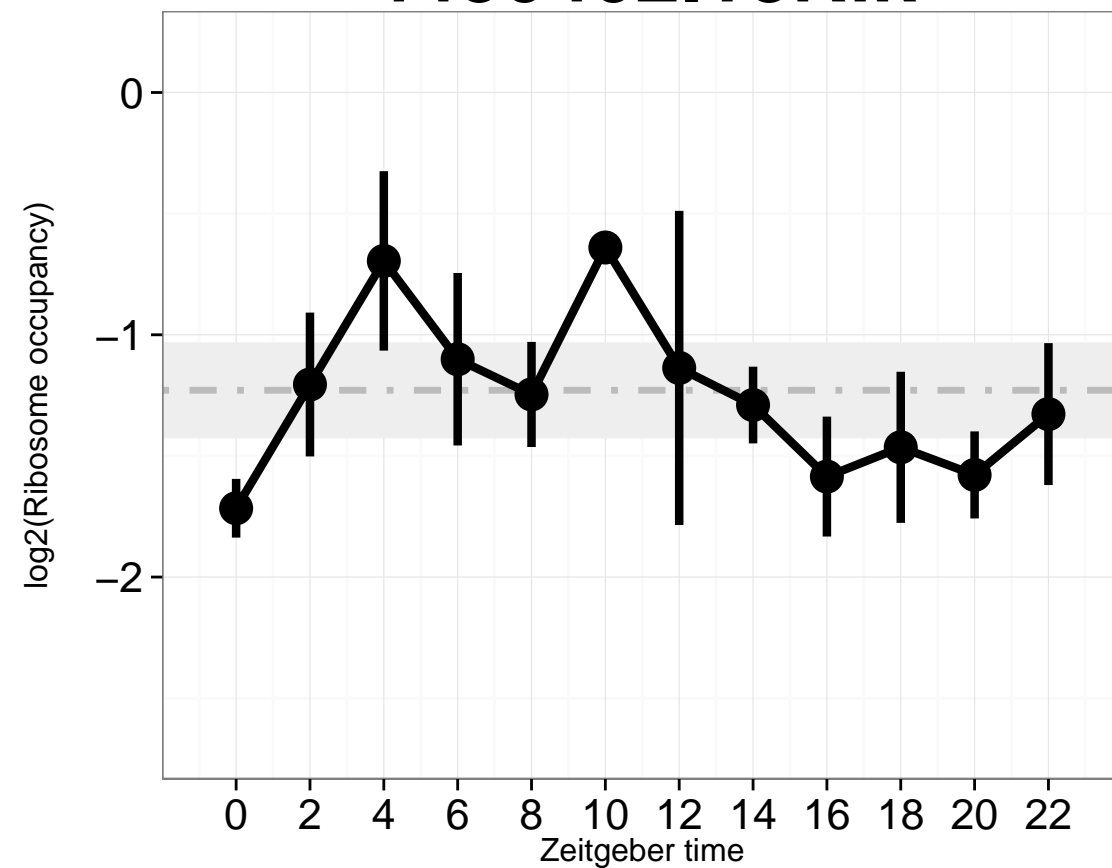

Supplement: Supplementary file 6651 [file 1]

## Pck1

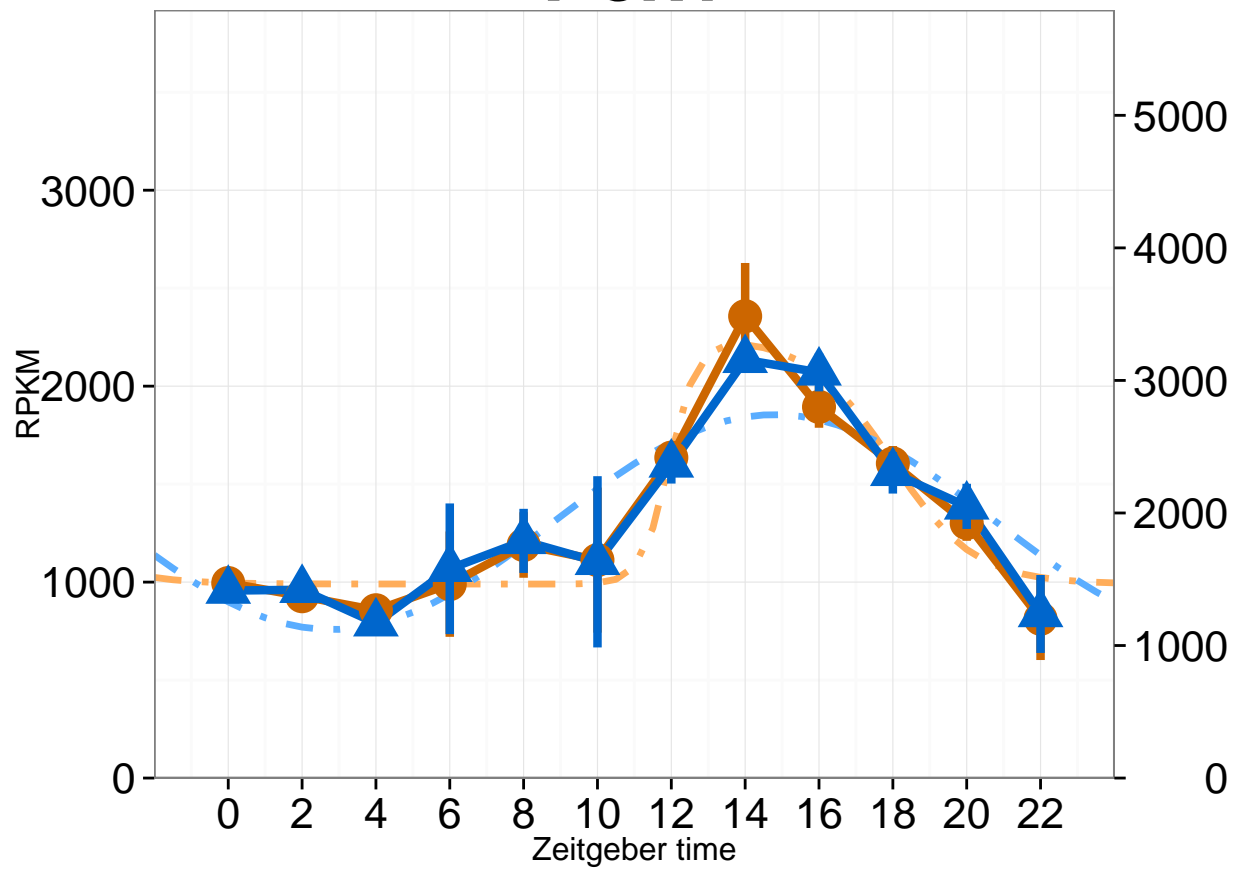

## Pck1

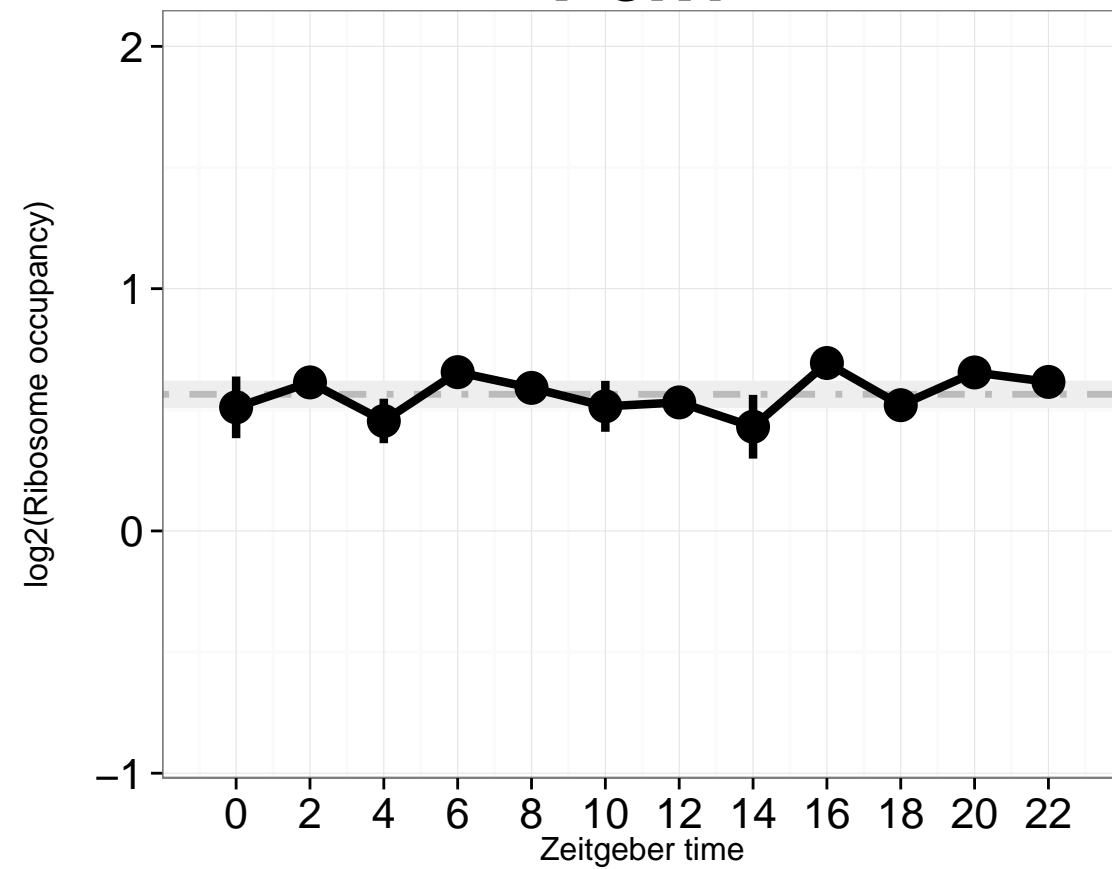

Supplement: Supplementary file 6652 [file 1]

## Fgfbp3

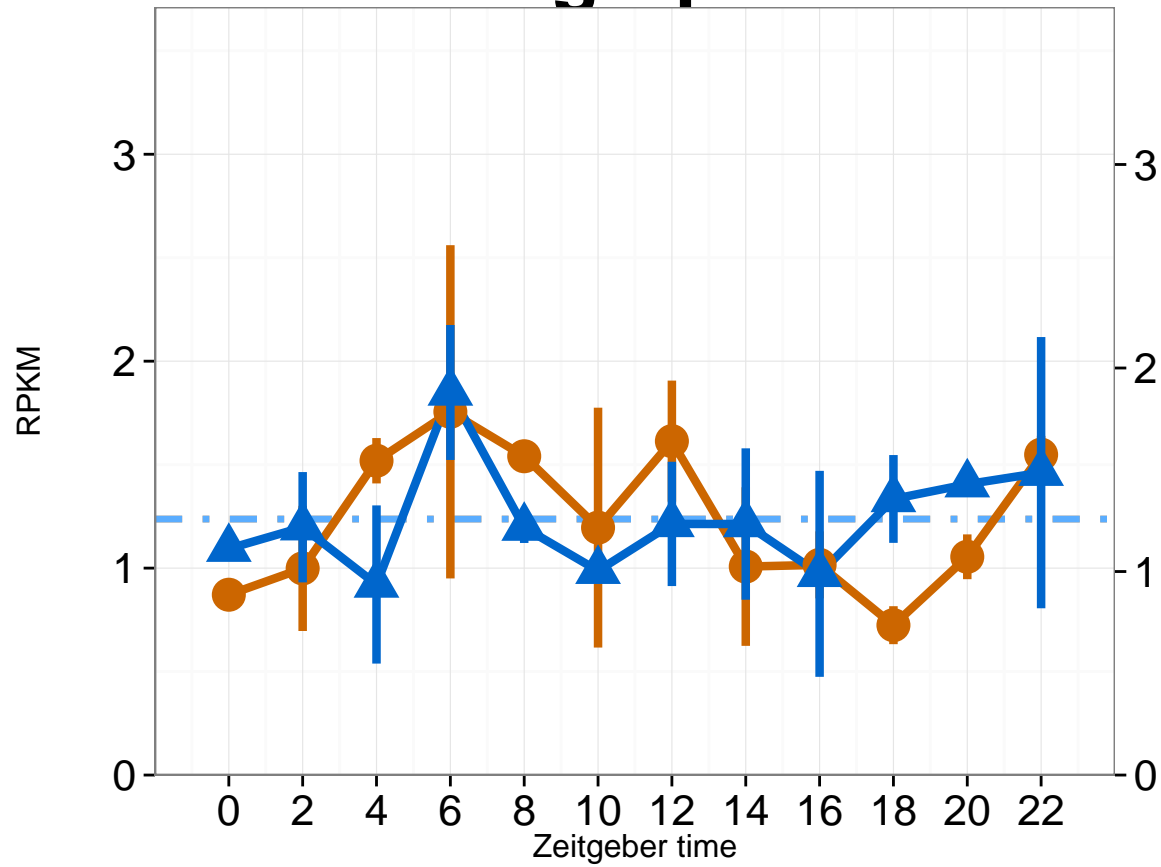

## Fgfbp3

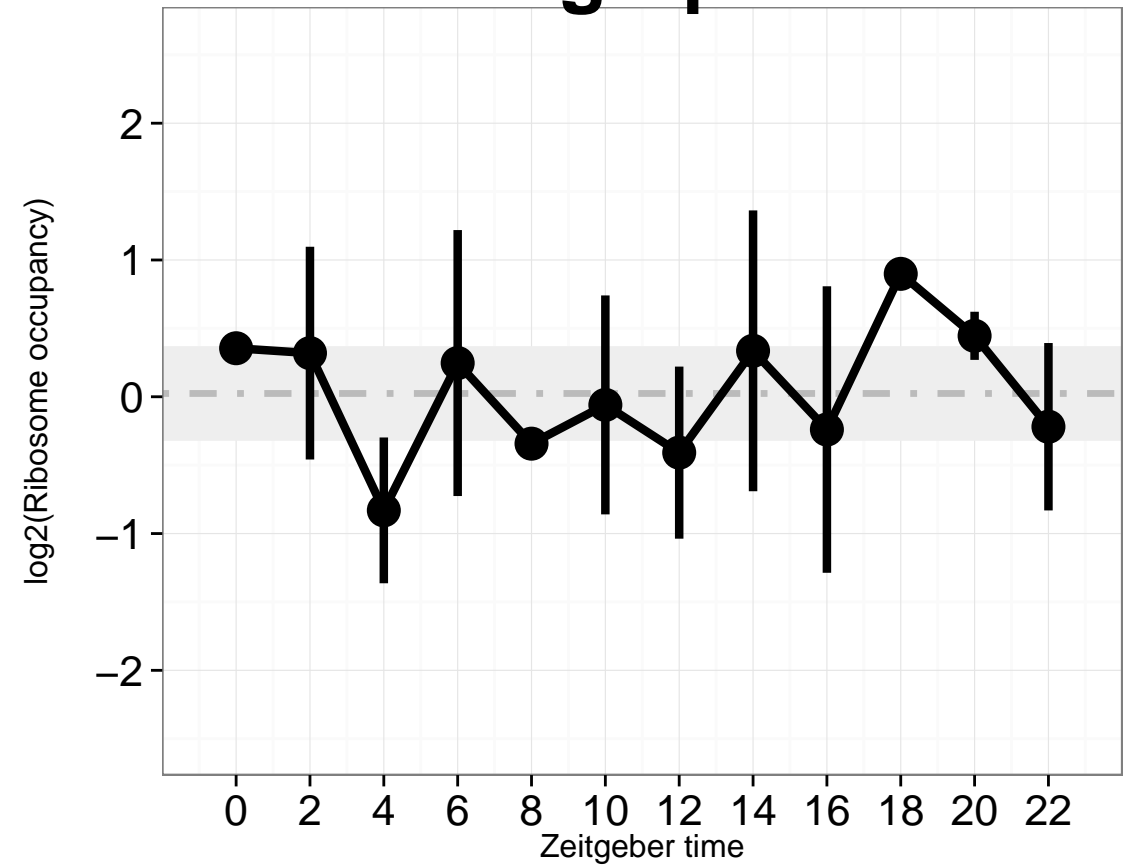

Supplement: Supplementary file 6653 [file 1]

# Copg2

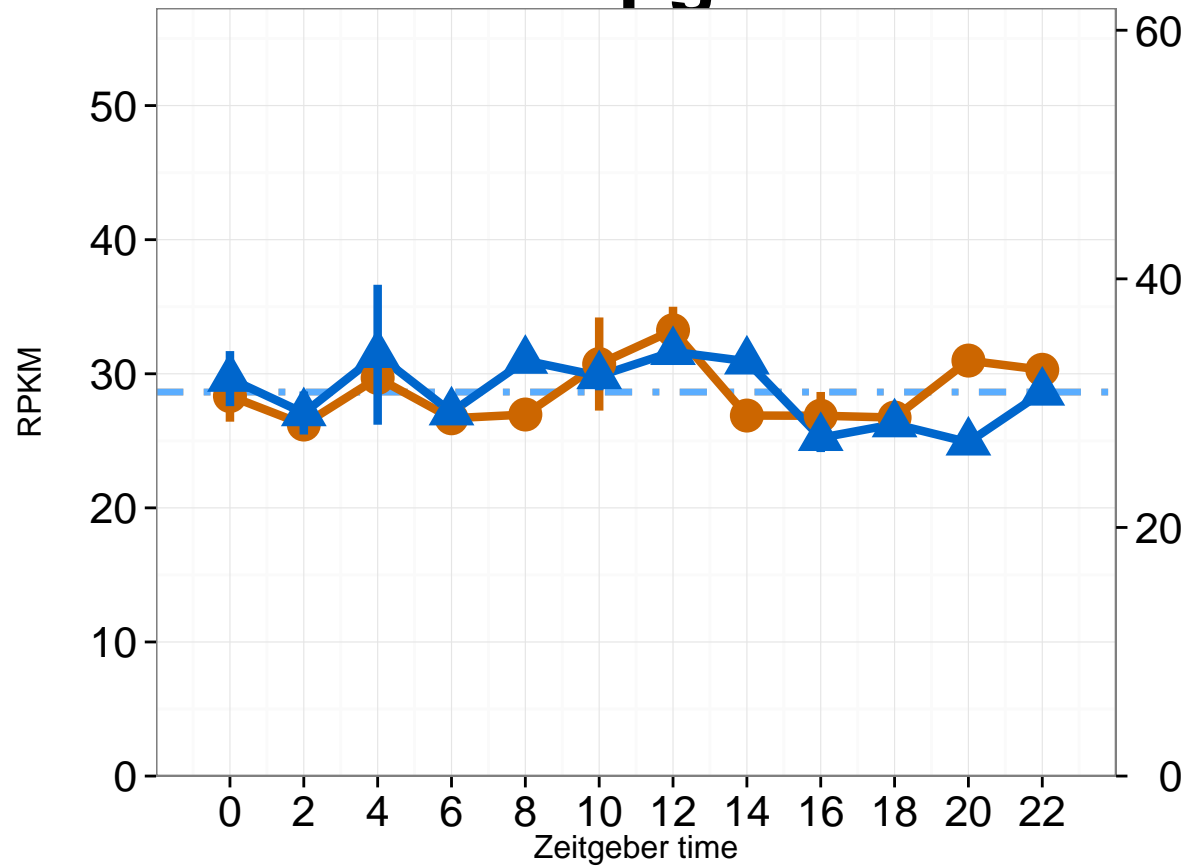

# Copg2

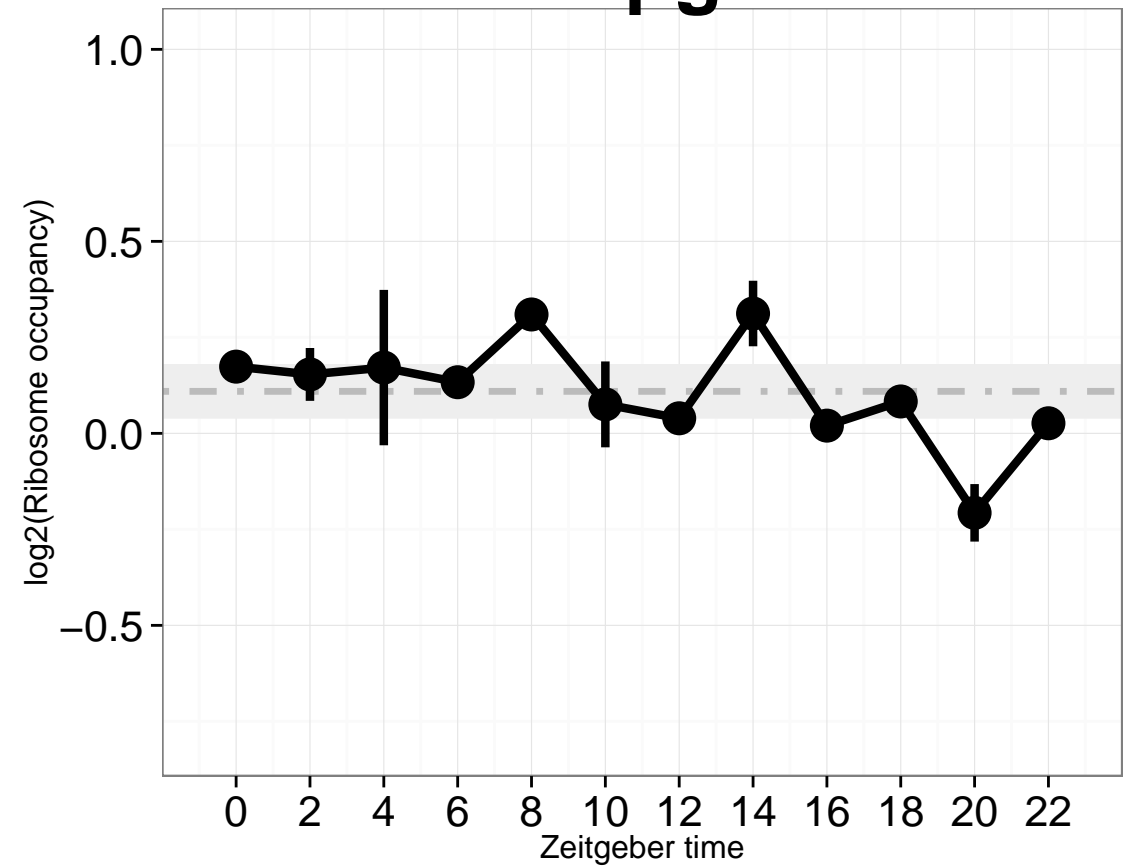

Supplement: Supplementary file 6654 [file 1]

## Ep300

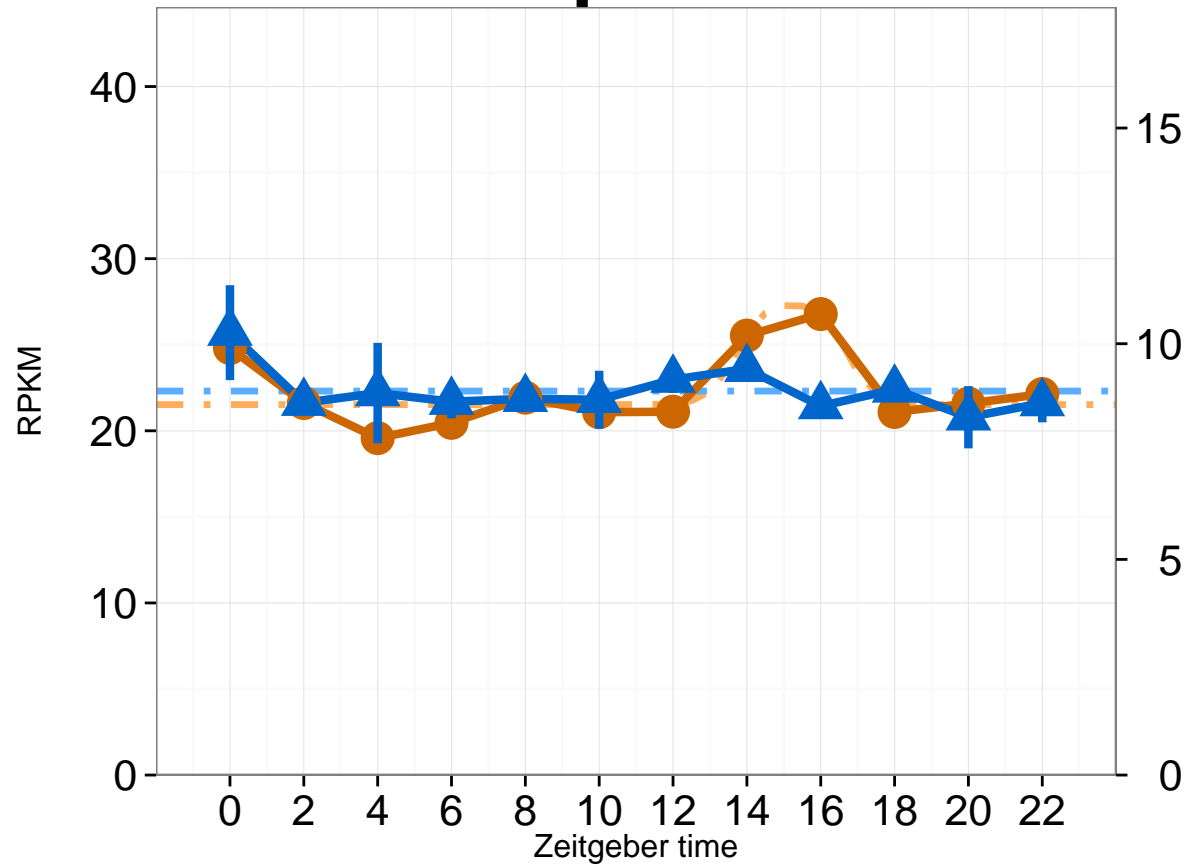

## Ep300

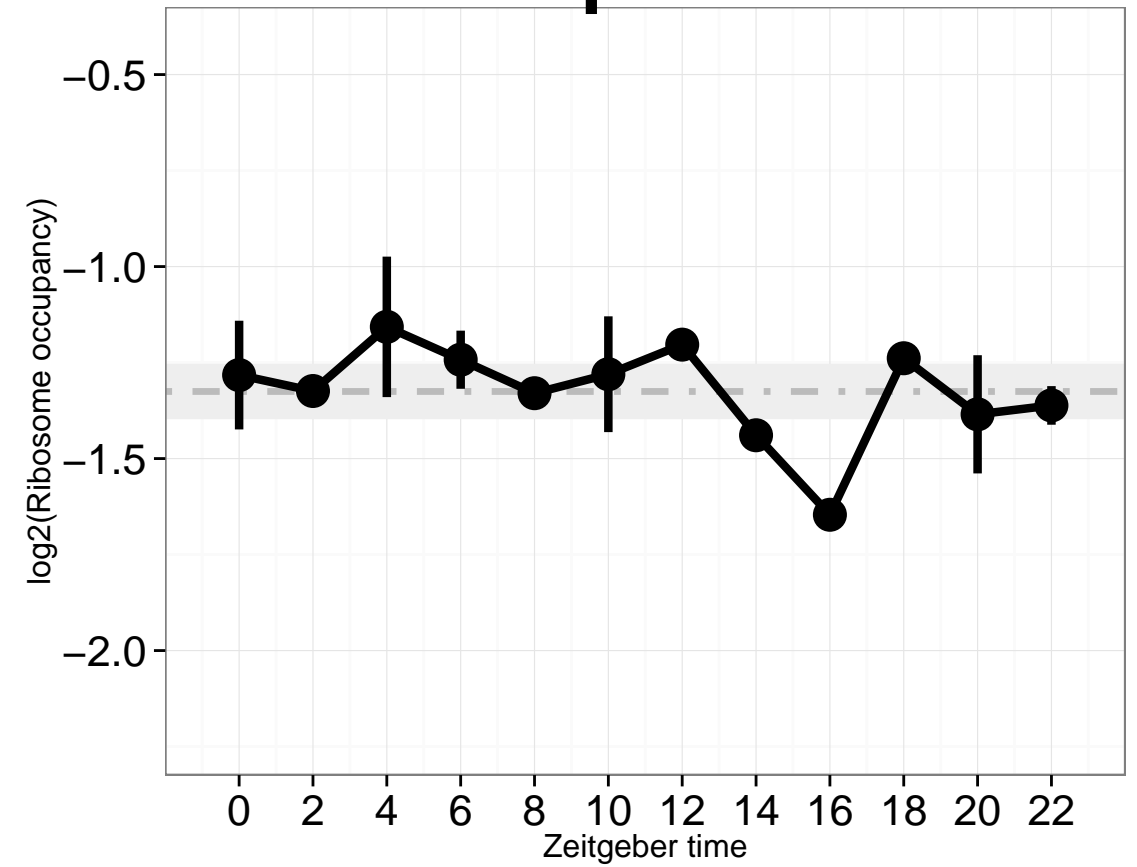

Supplement: Supplementary file 6655 [file 1]

# Itm2a

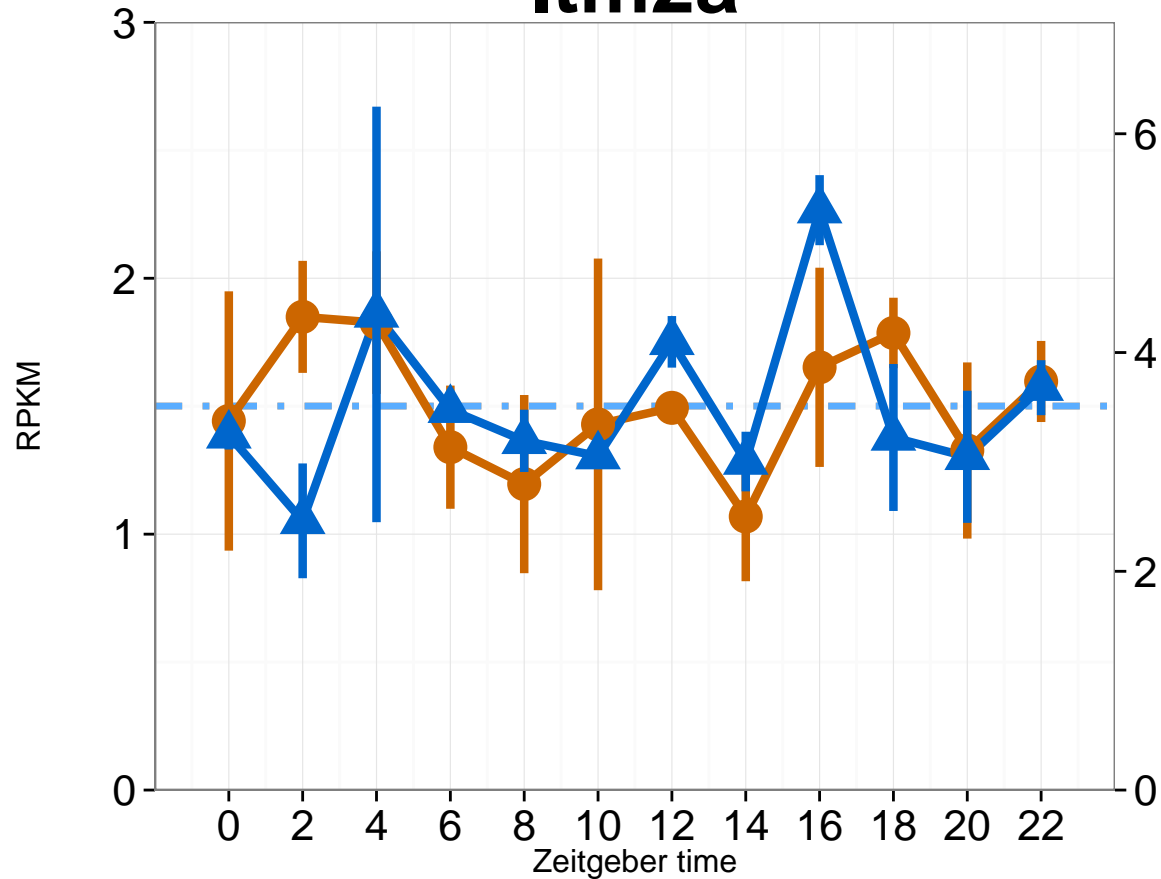

# Itm2a

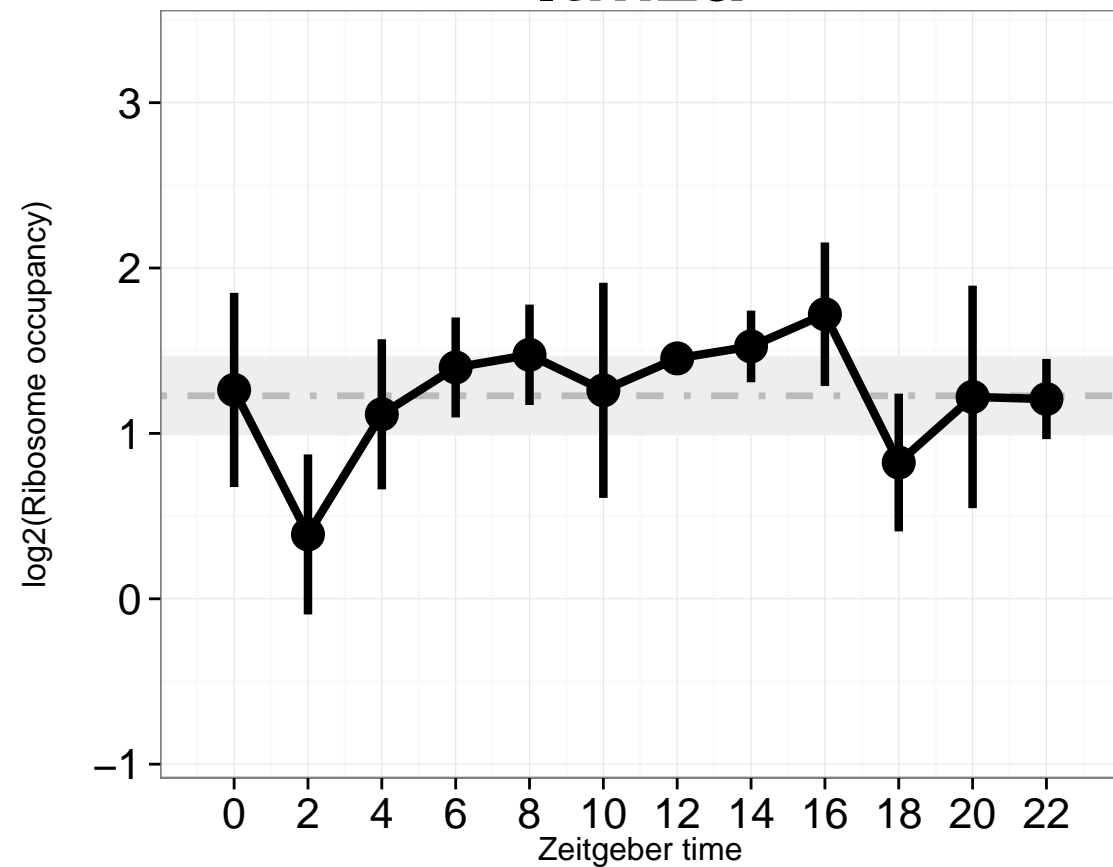

Supplement: Supplementary file 6656 [file 1]

## Oat

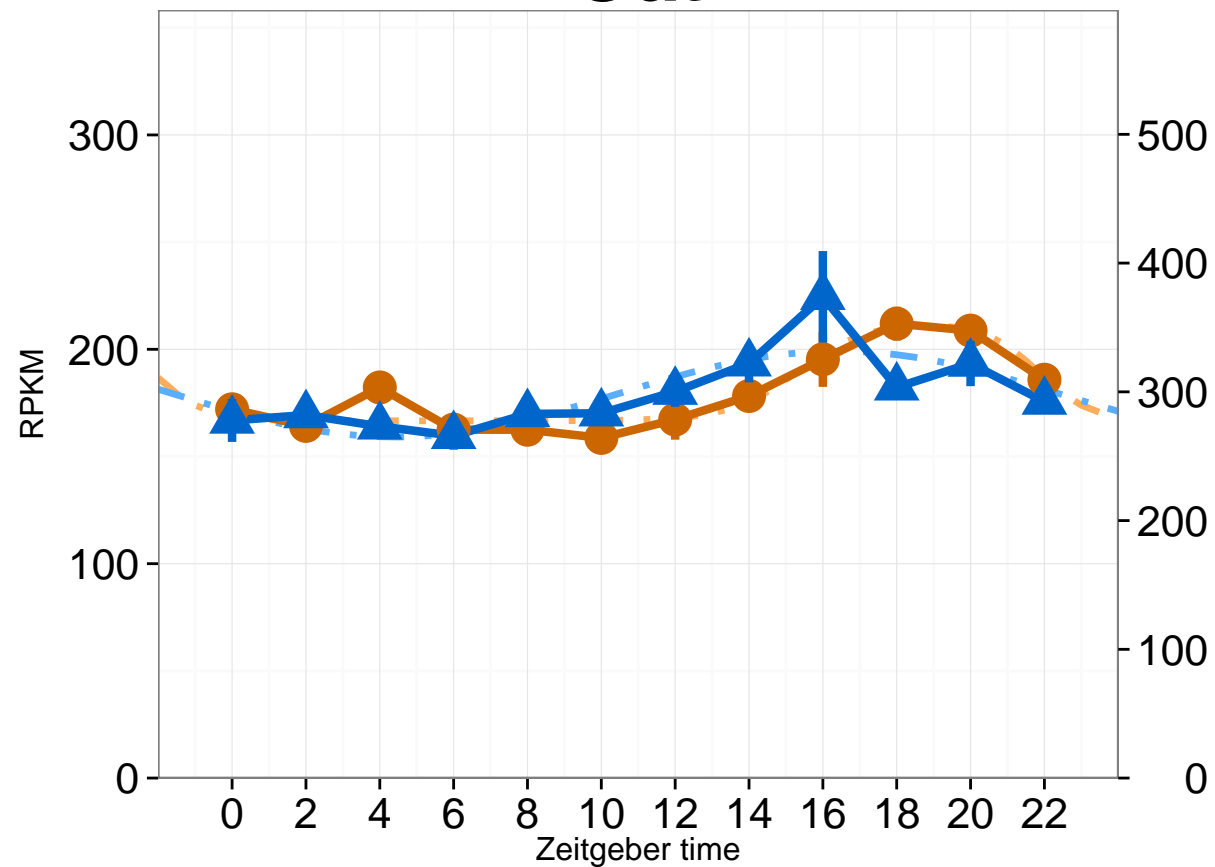

## Oat

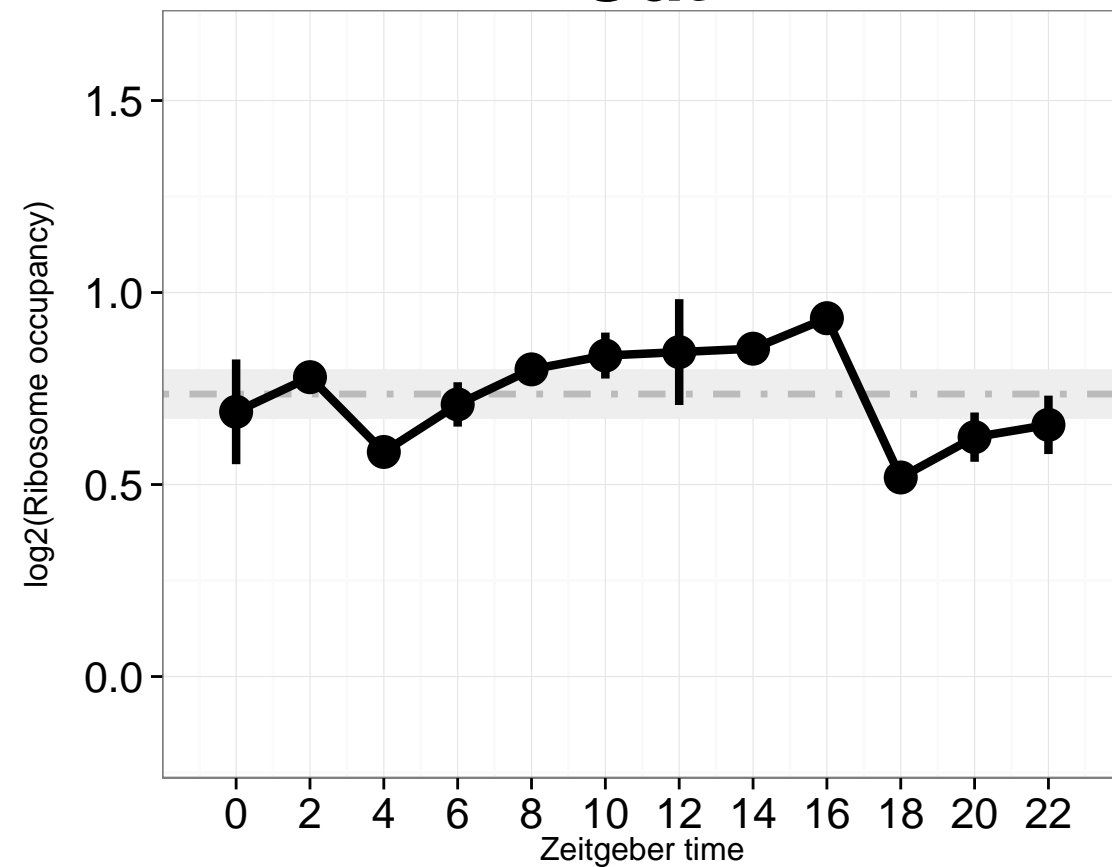

Supplement: Supplementary file 6657 [file 1]

## Efcab5

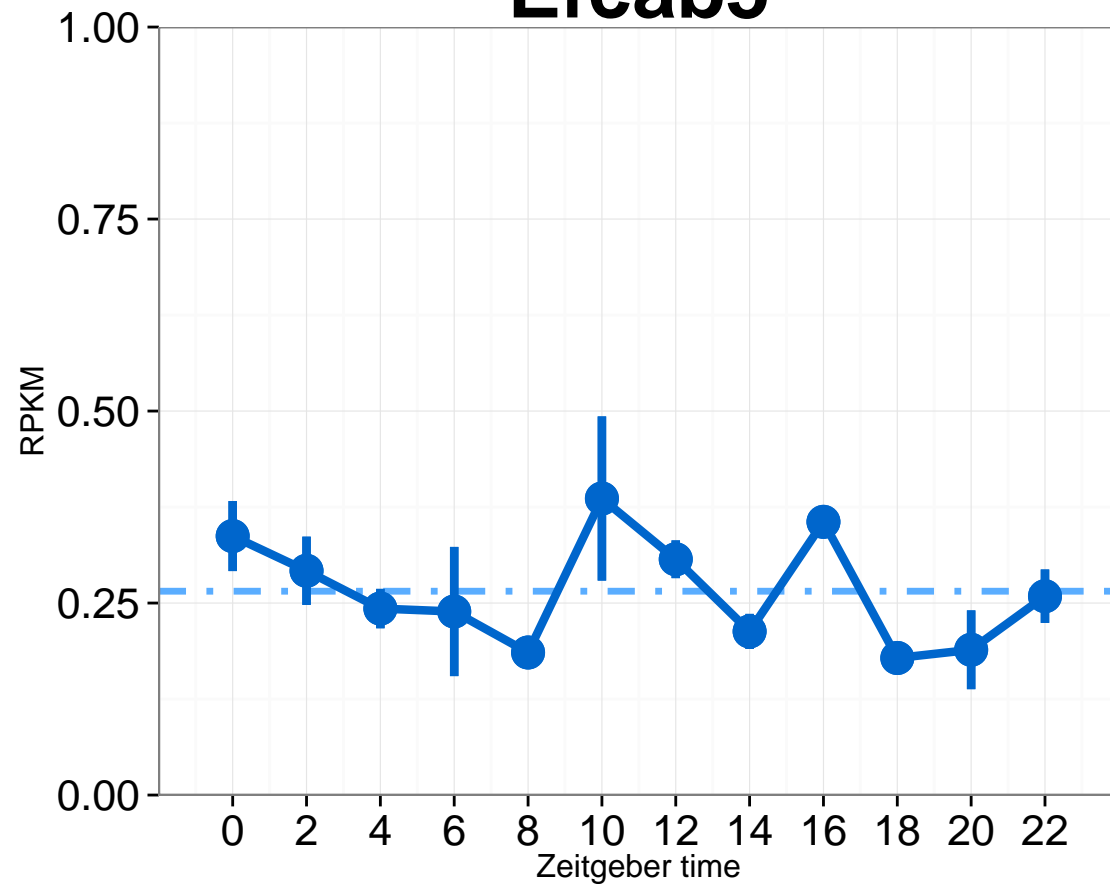

## Efcab5 log2(Ribosome occupancy

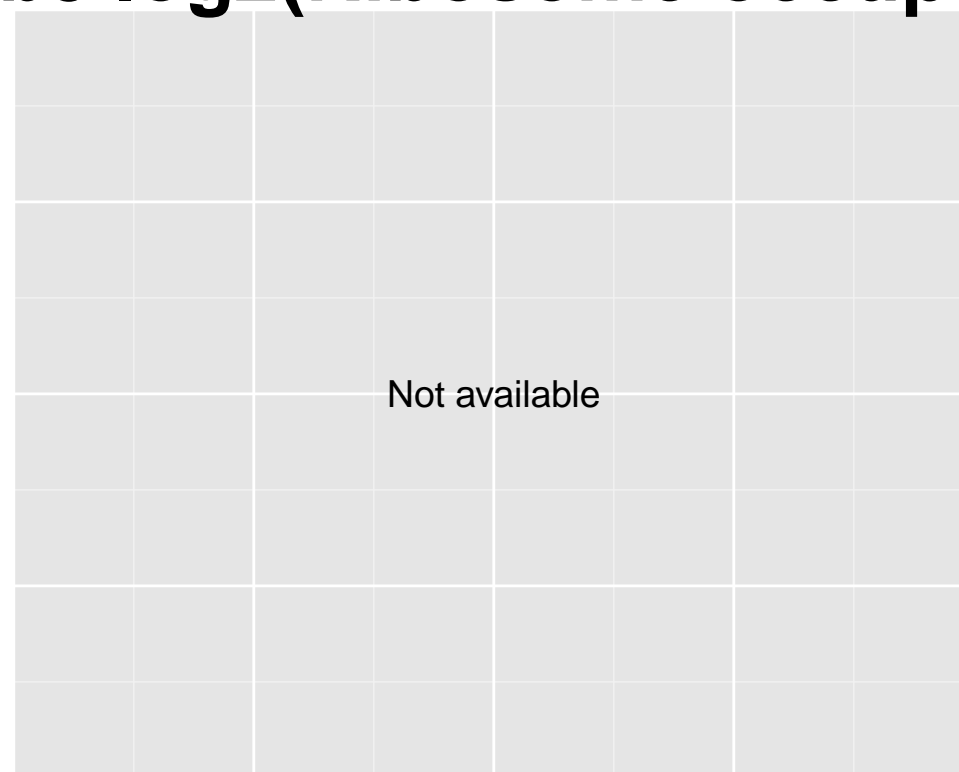

Supplement: Supplementary file 6658 [file 1]

# Pcyt1a

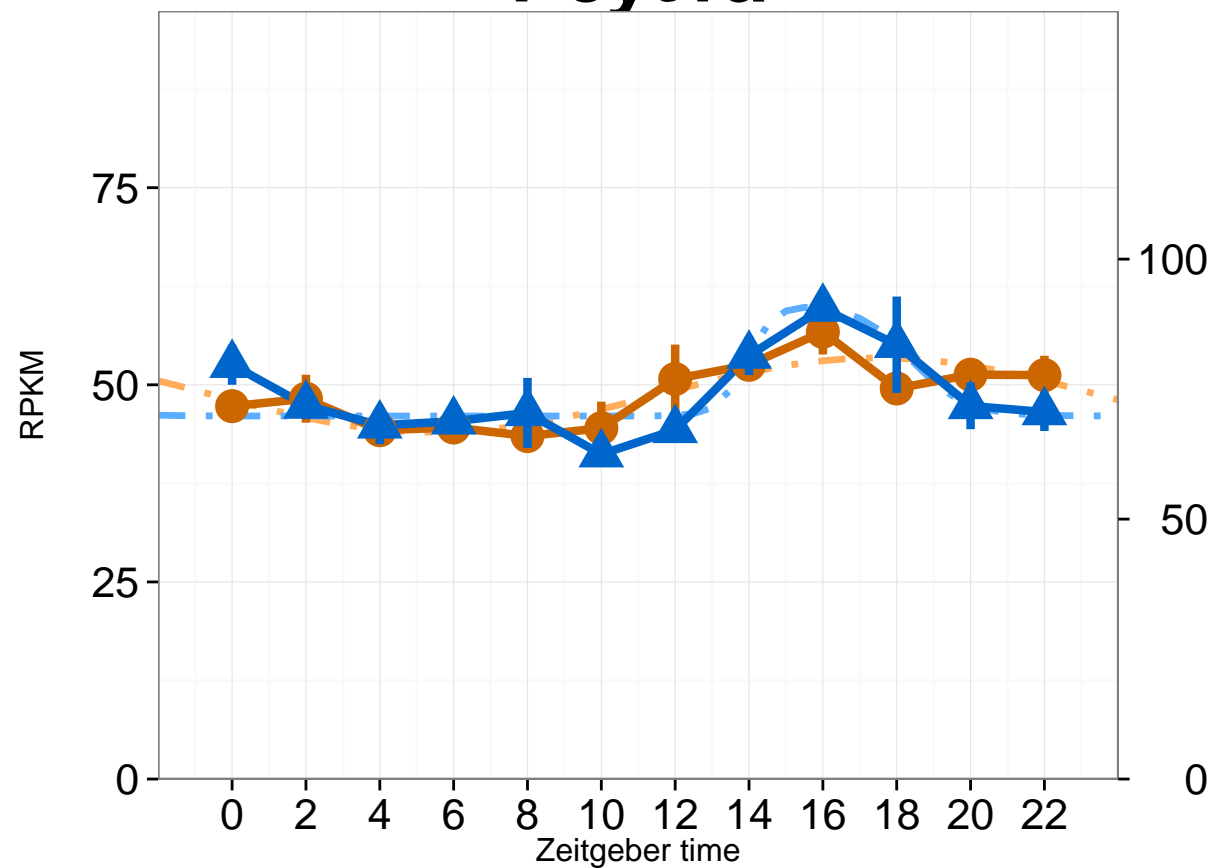

# Pcyt1a

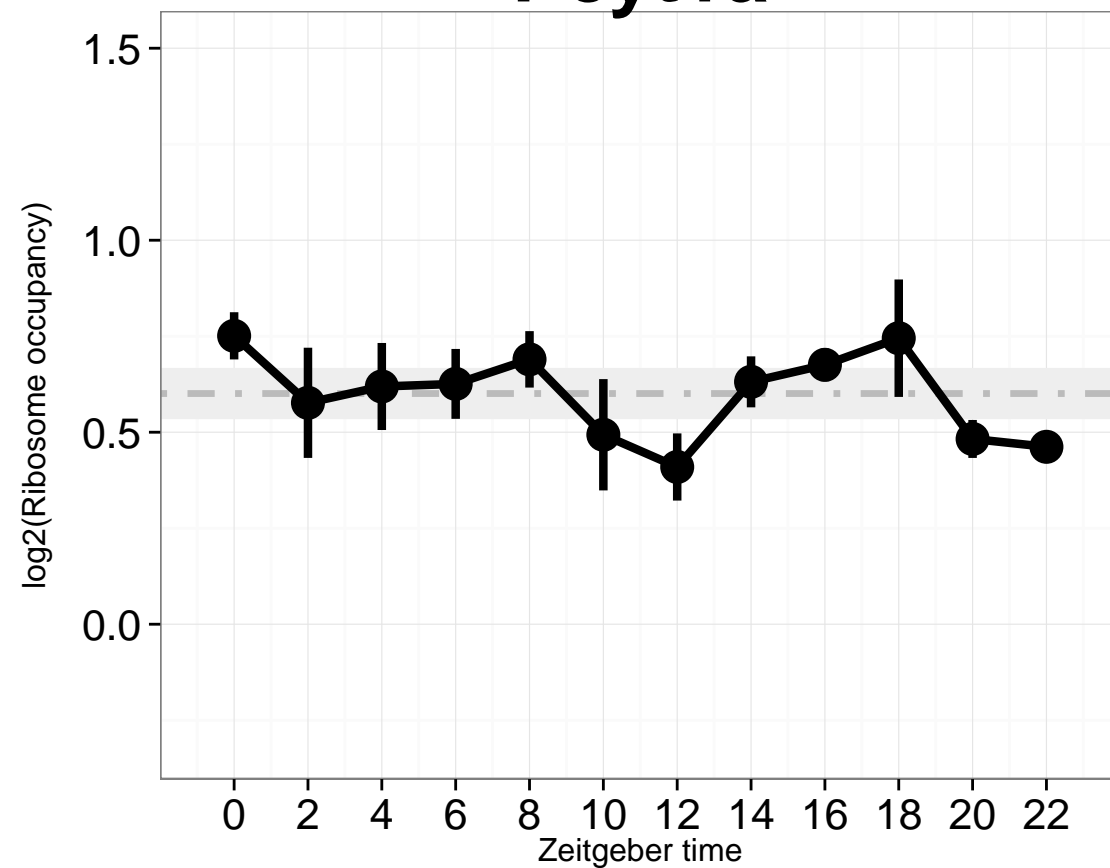

Supplement: Supplementary file 6659 [file 1]

## Ddx51

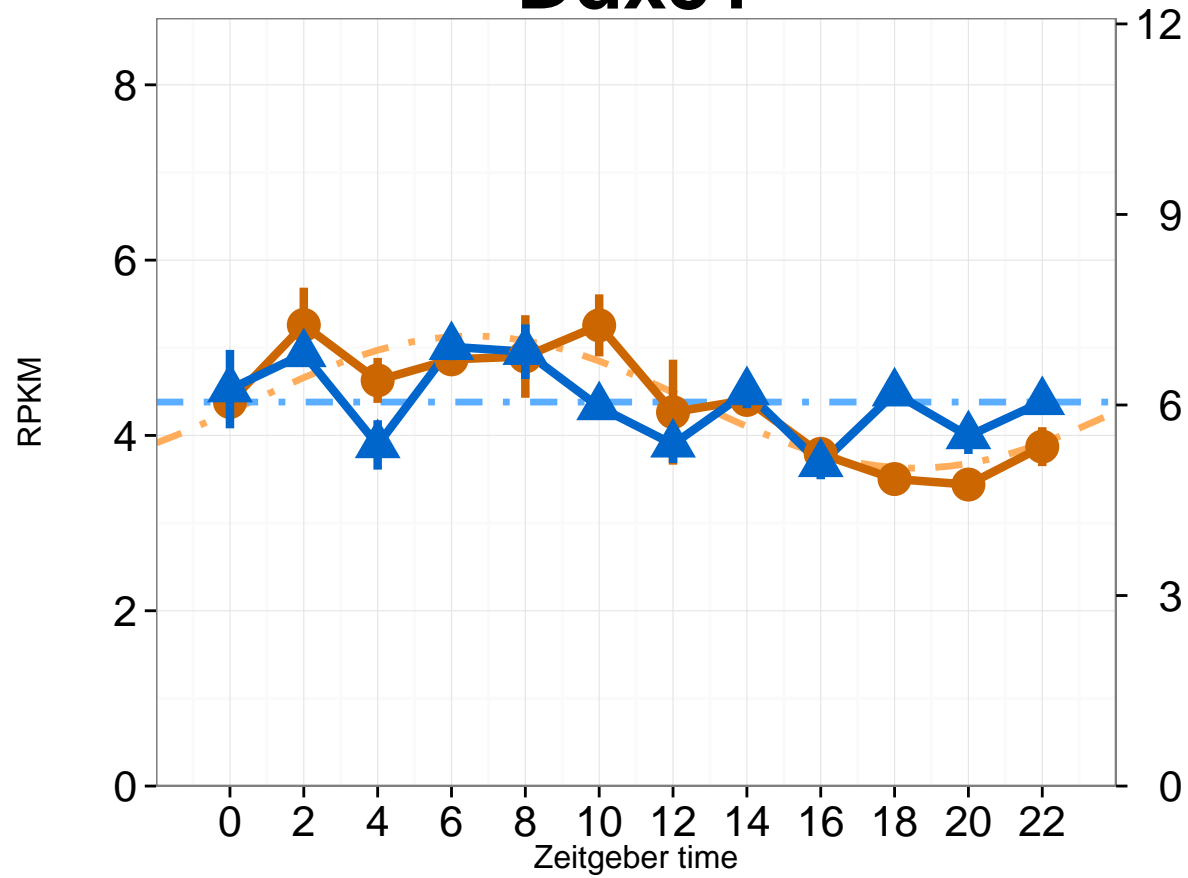

## Ddx51

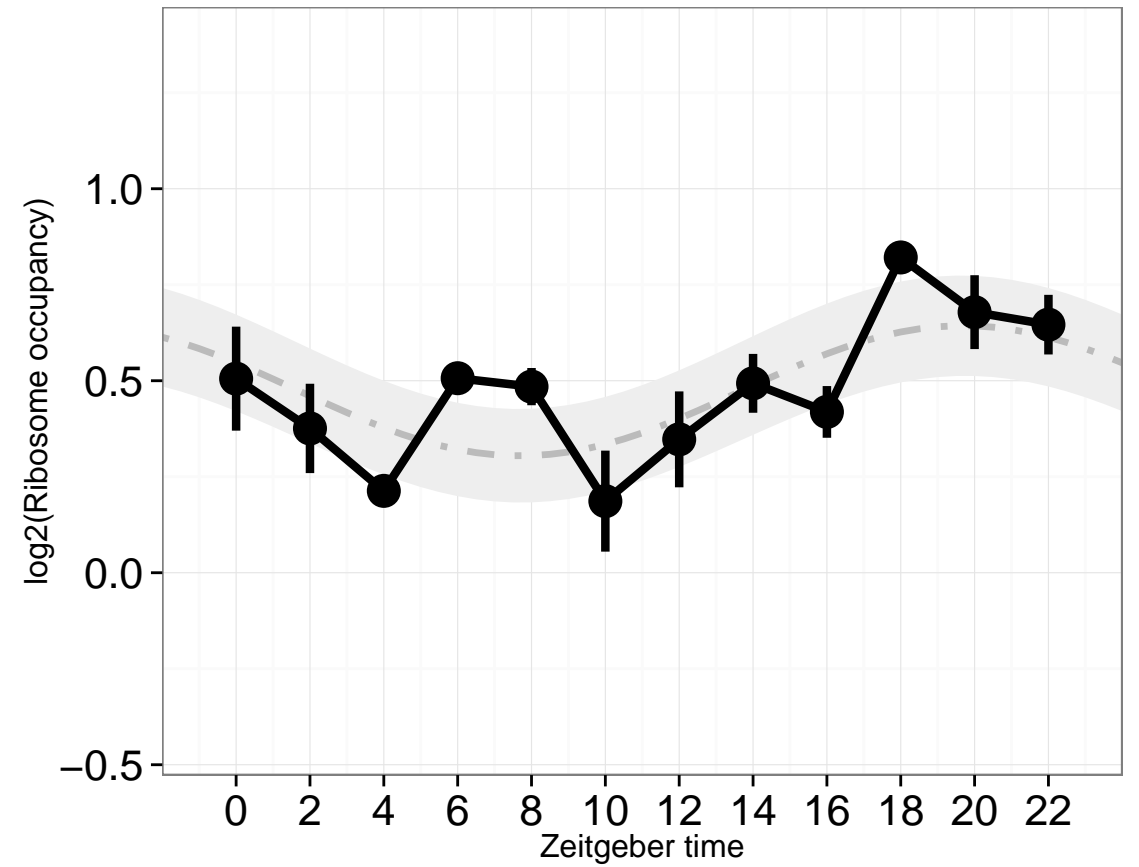

Supplement: Supplementary file 6660 [file 1]

# Chpf2

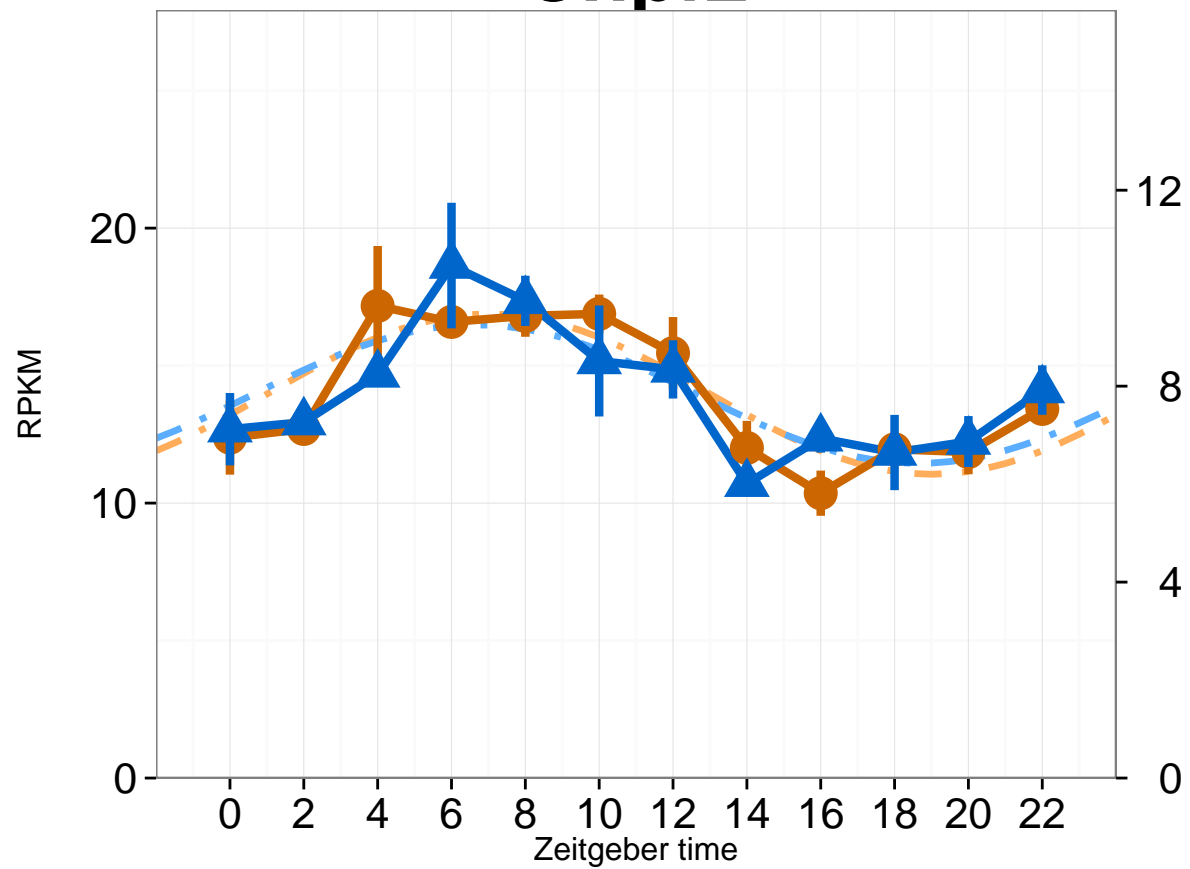

# Chpf2

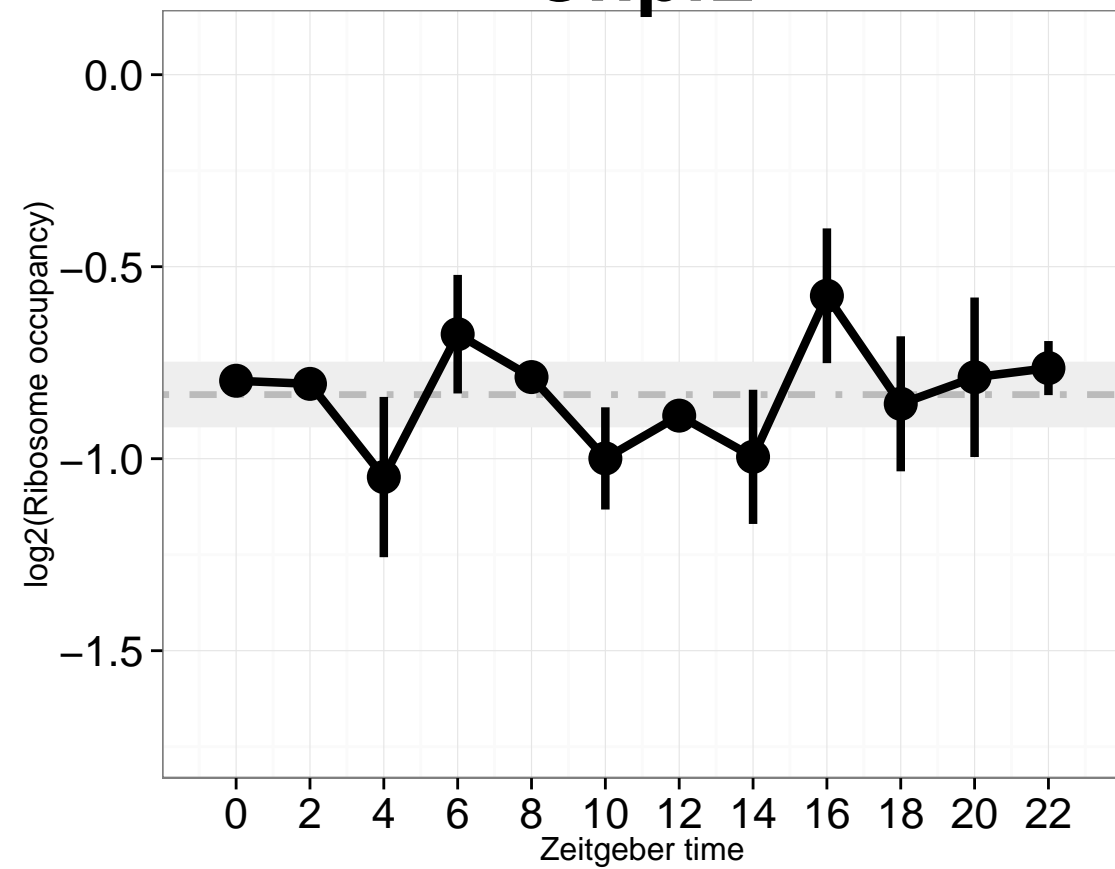

Supplement: Supplementary file 6661 [file 1]

## Nutf2

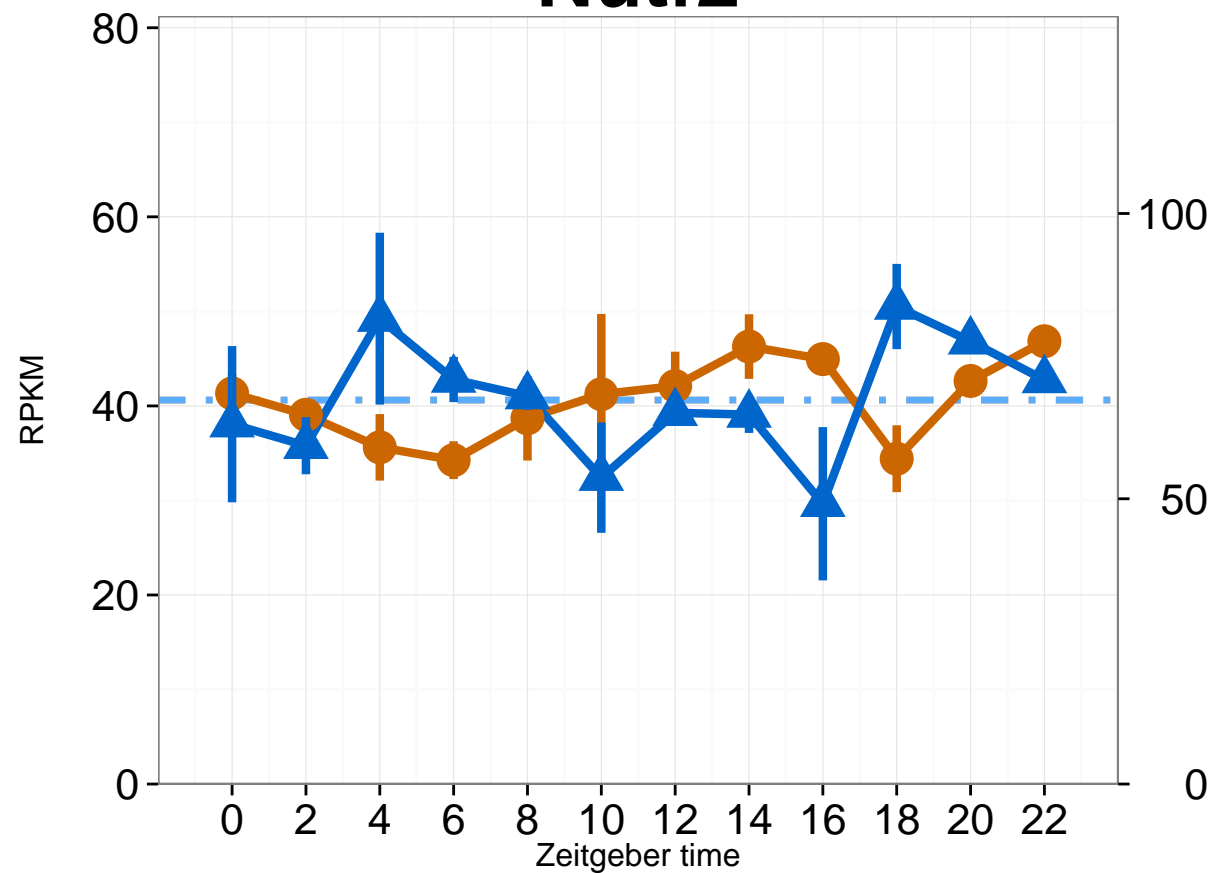

## Nutf2

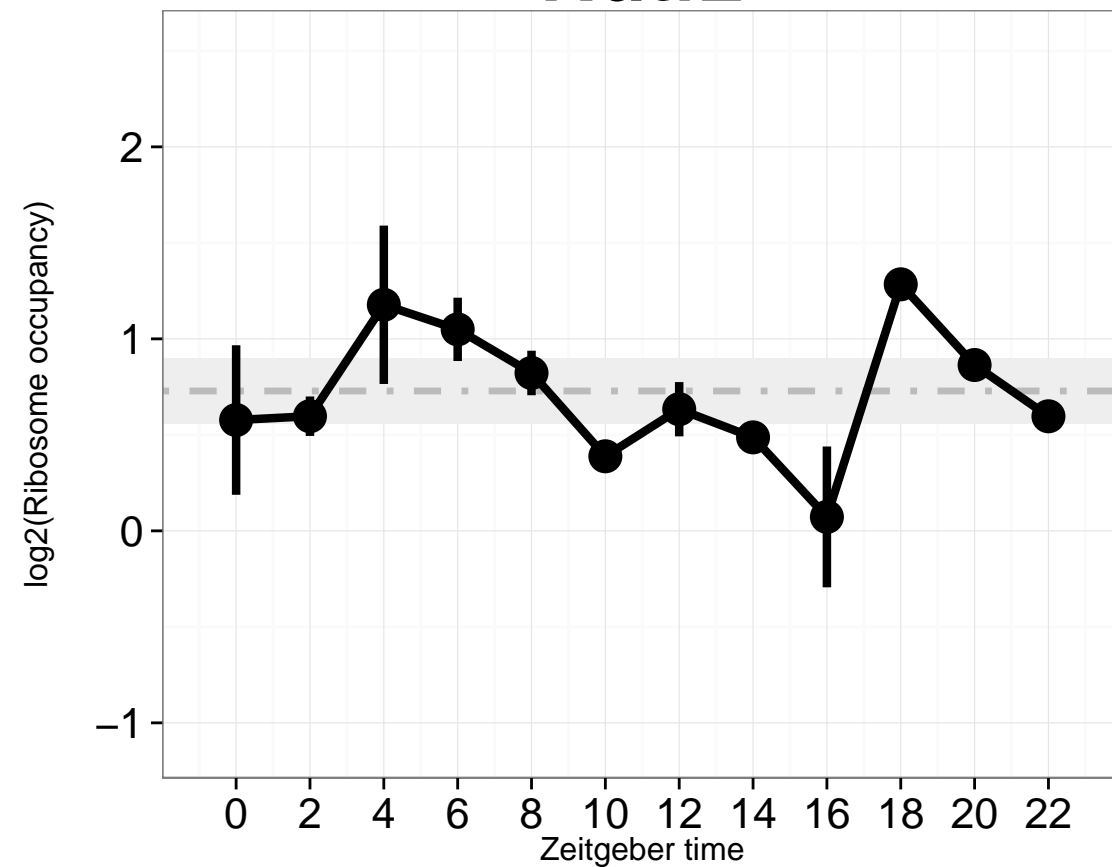

Supplement: Supplementary file 6662 [file 1]

## S100a10

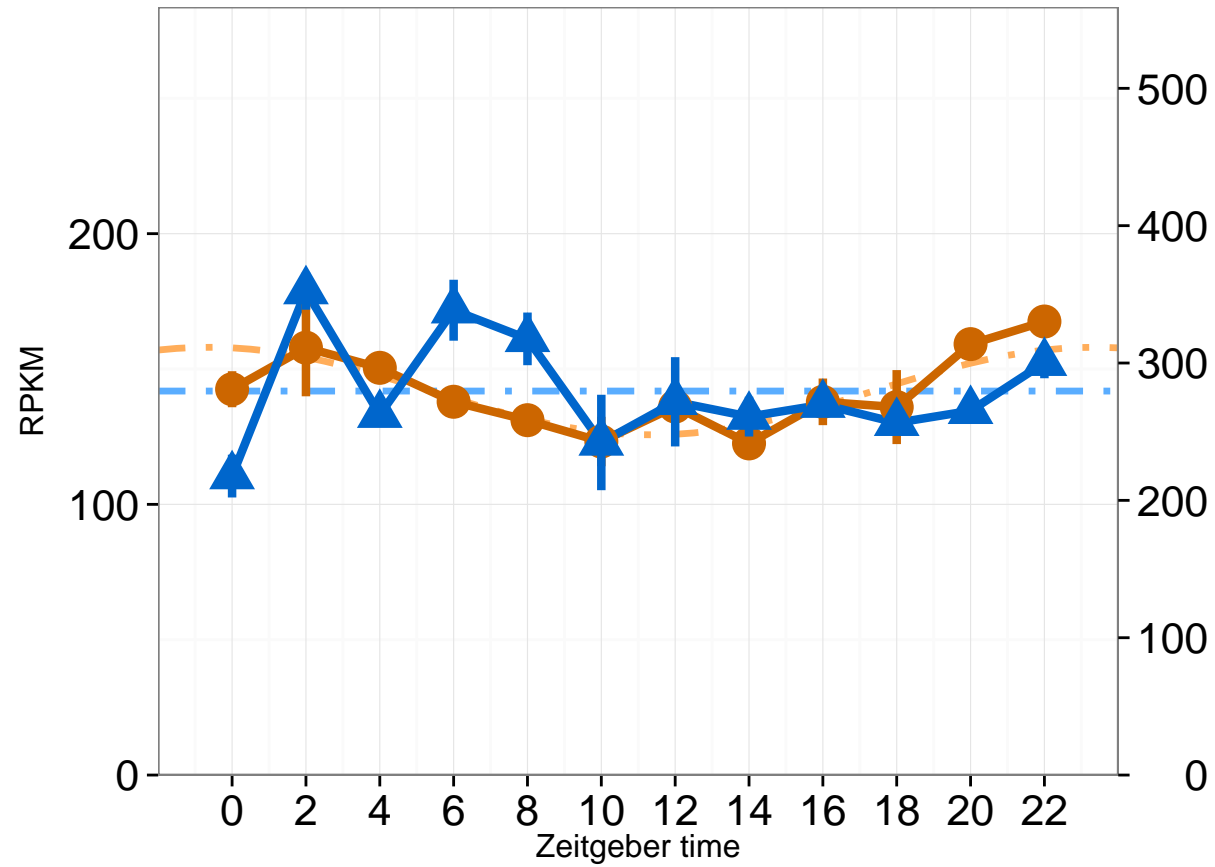

## S100a10

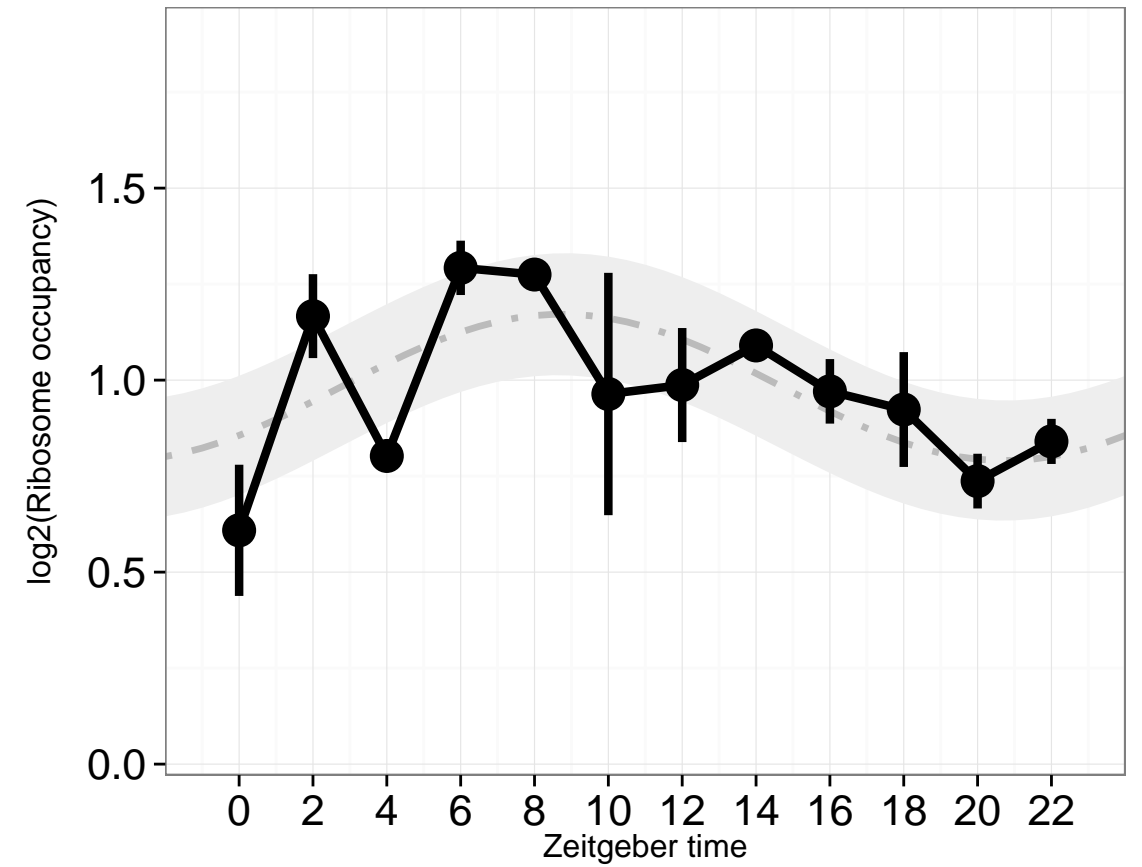

Supplement: Supplementary file 6663 [file 1]

## Epb4.1I3

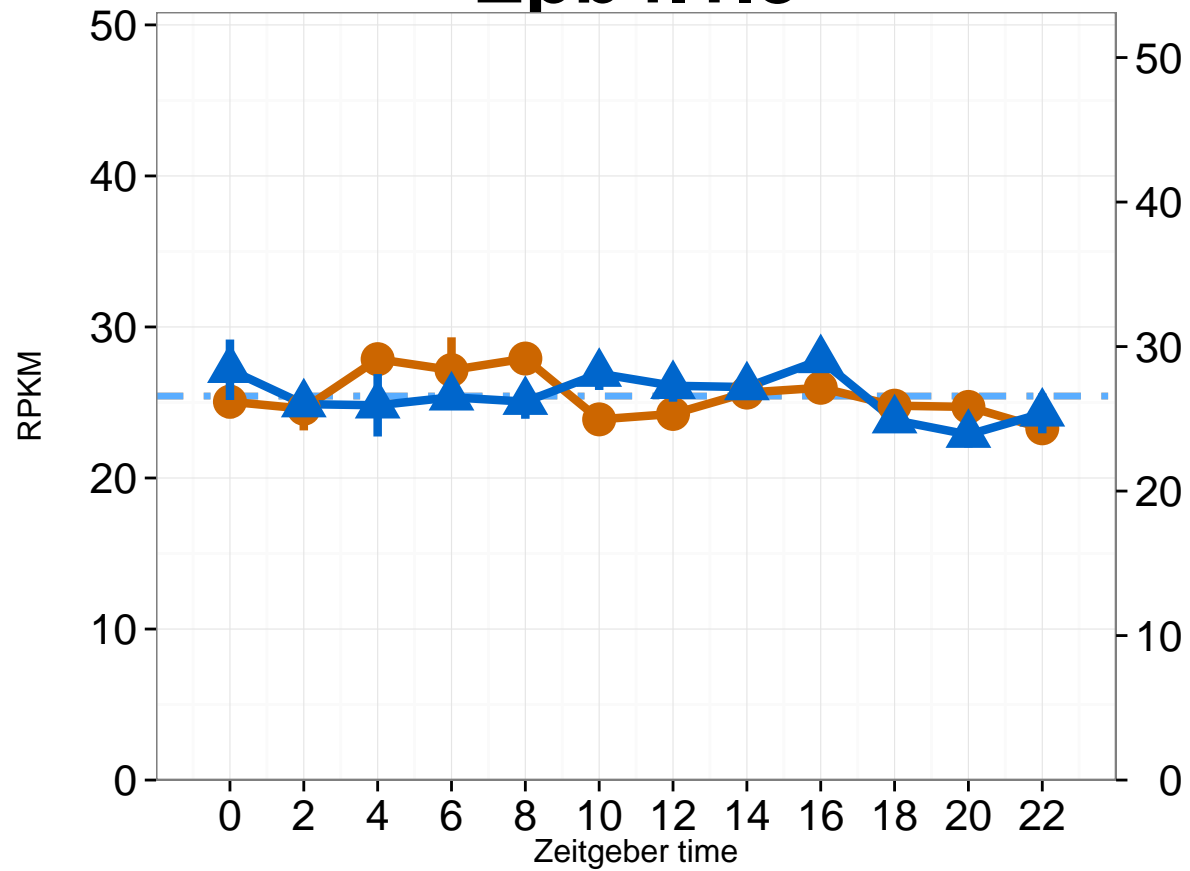

## Epb4.1I3

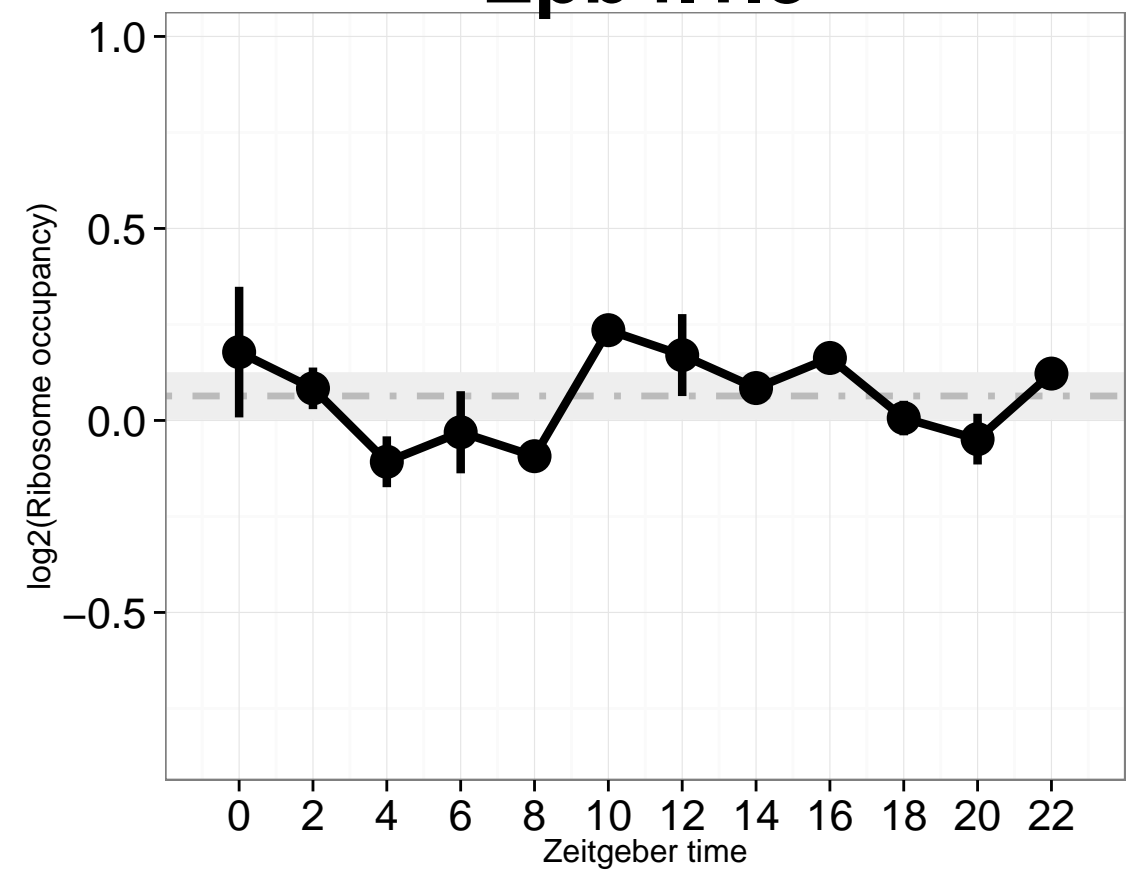

Supplement: Supplementary file 6664 [file 1]

# Nt5dc2

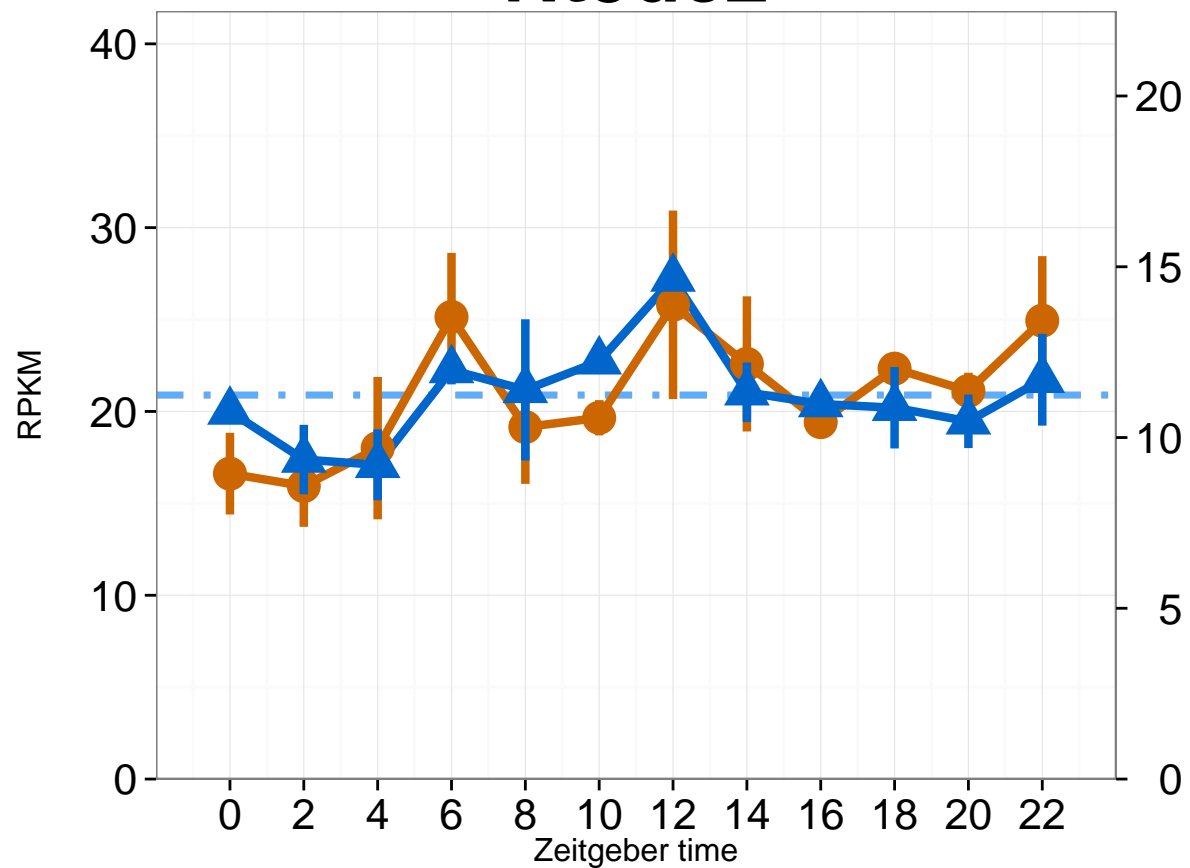

# Nt5dc2

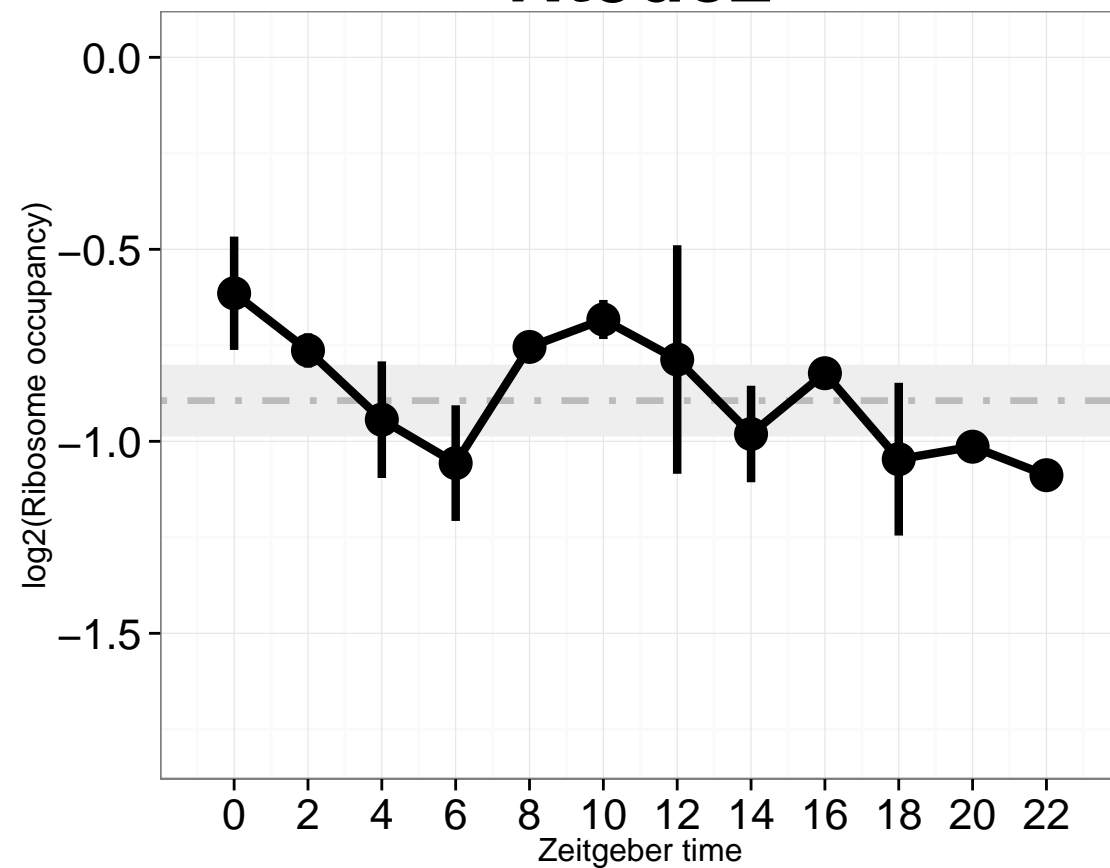

Supplement: Supplementary file 6665 [file 1]

# Zc3h7b

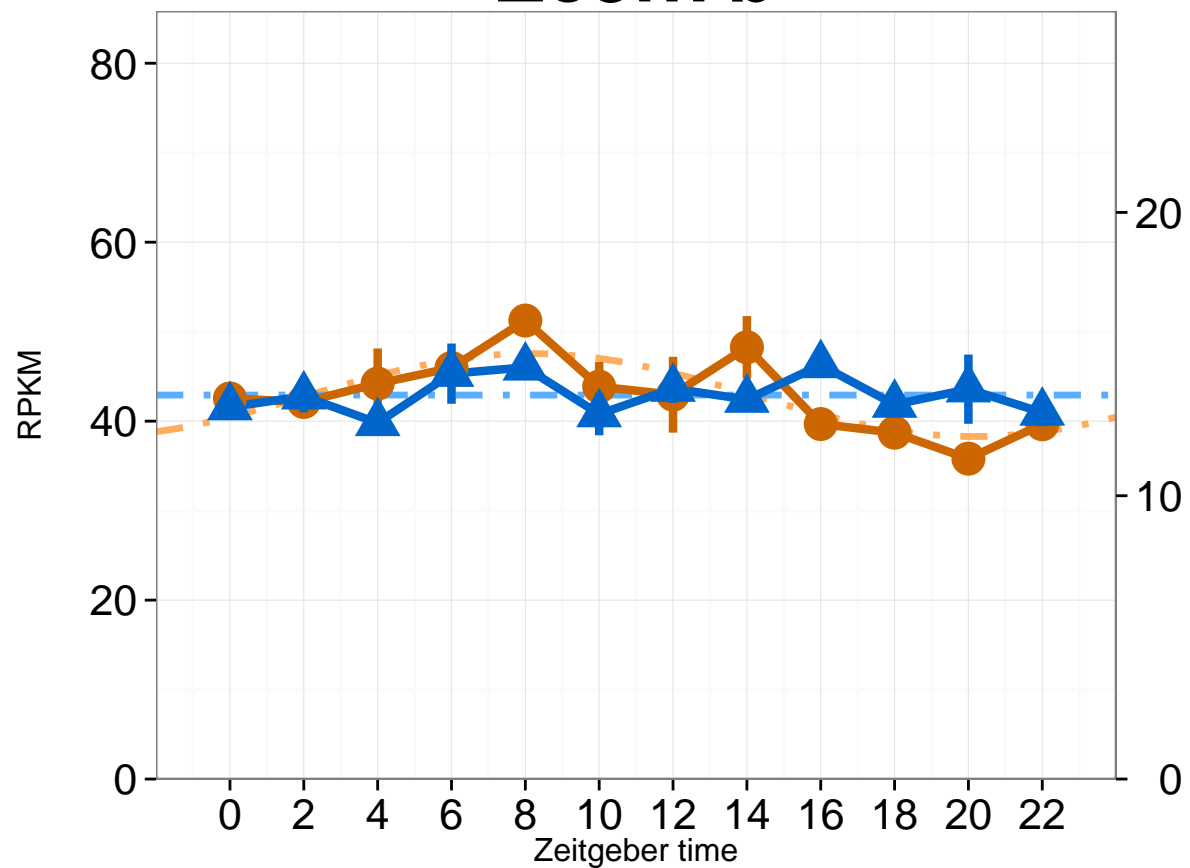

# Zc3h7b

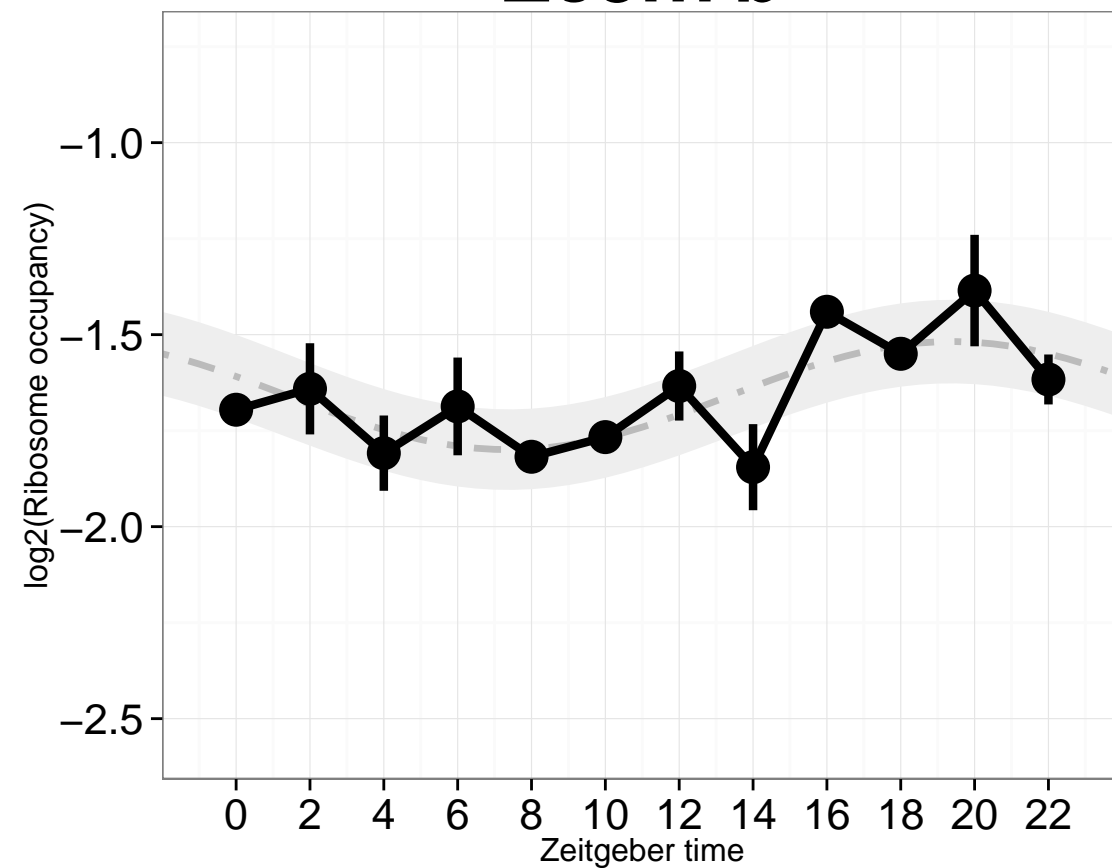

Supplement: Supplementary file 6666 [file 1]

# Rbm19

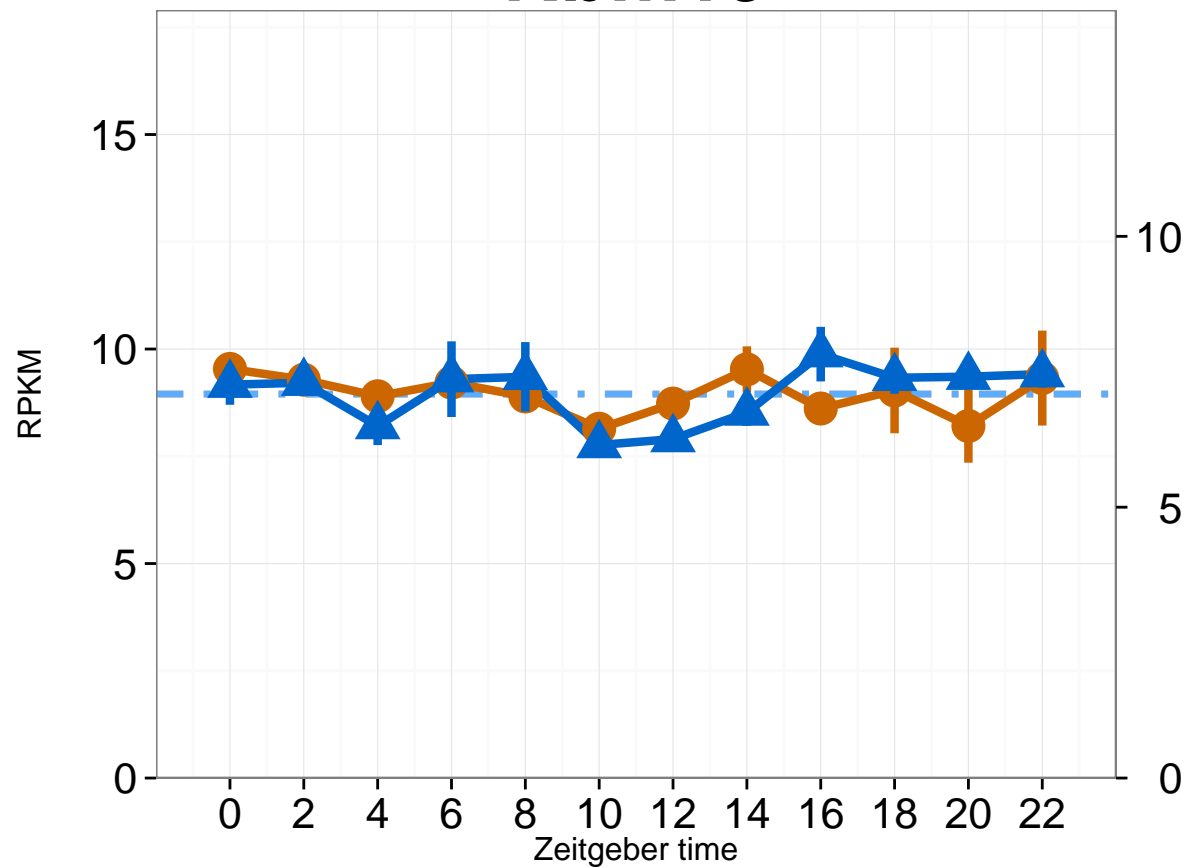

# Rbm19

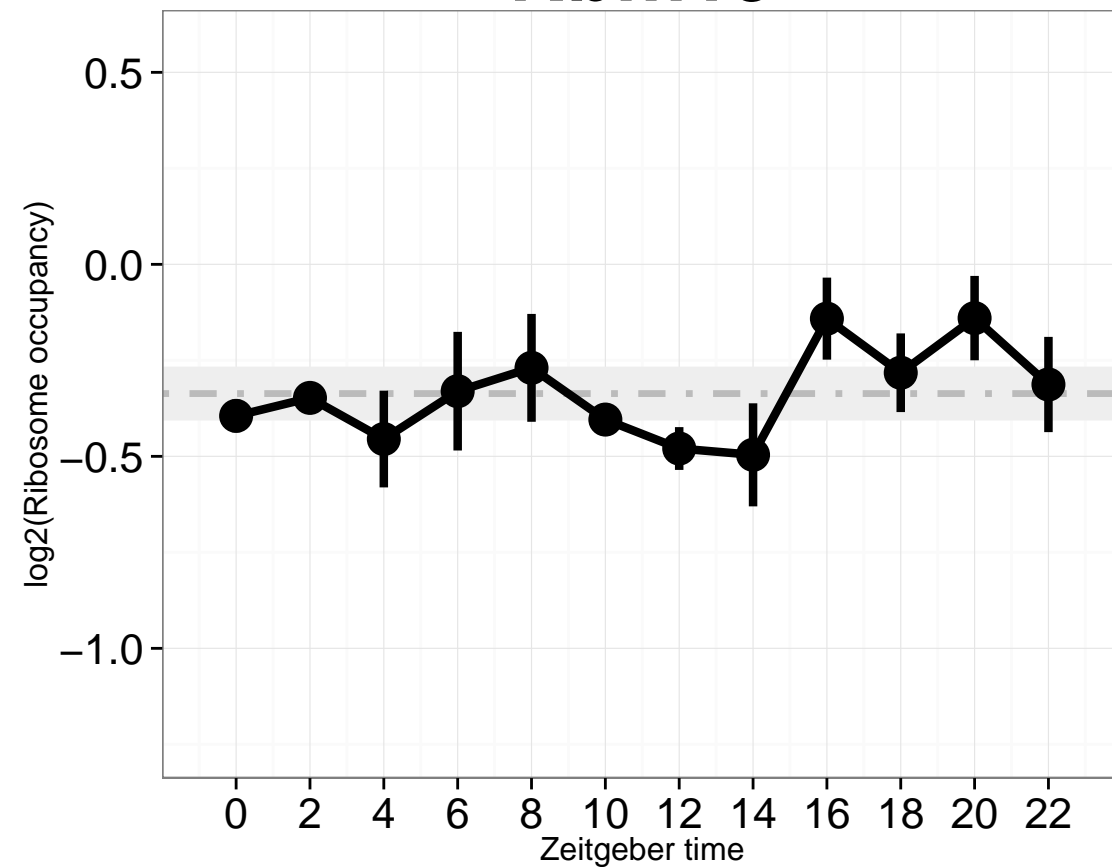

Supplement: Supplementary file 6667 [file 1]

# Amigo1

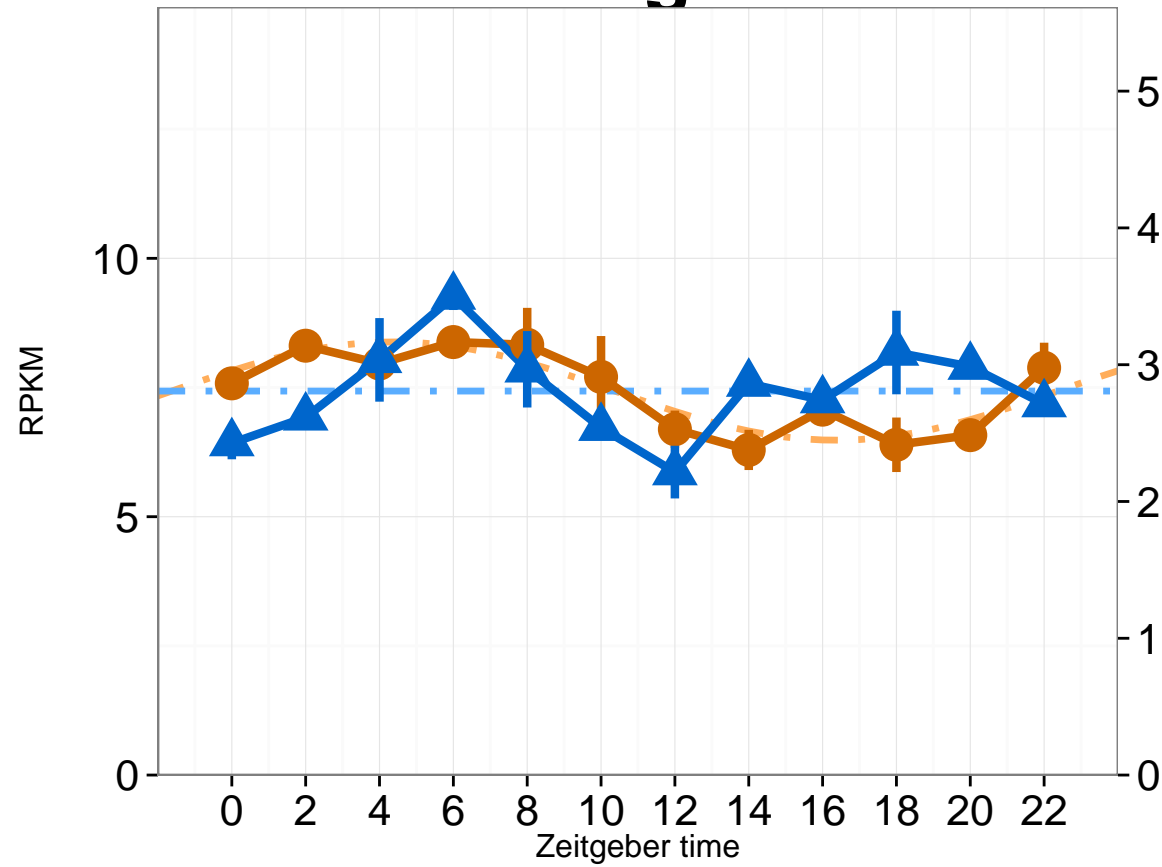

# Amigo1

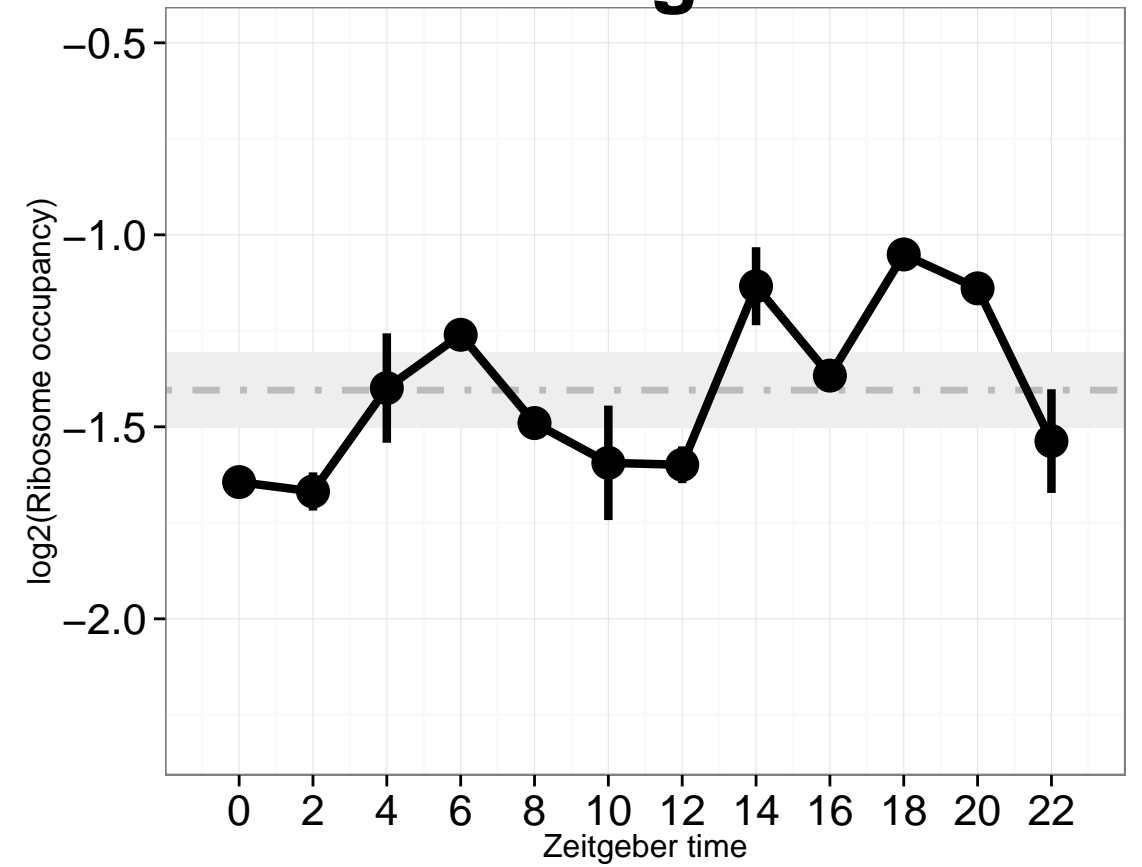

Supplement: Supplementary file 6668 [file 1]

# Eif4g1

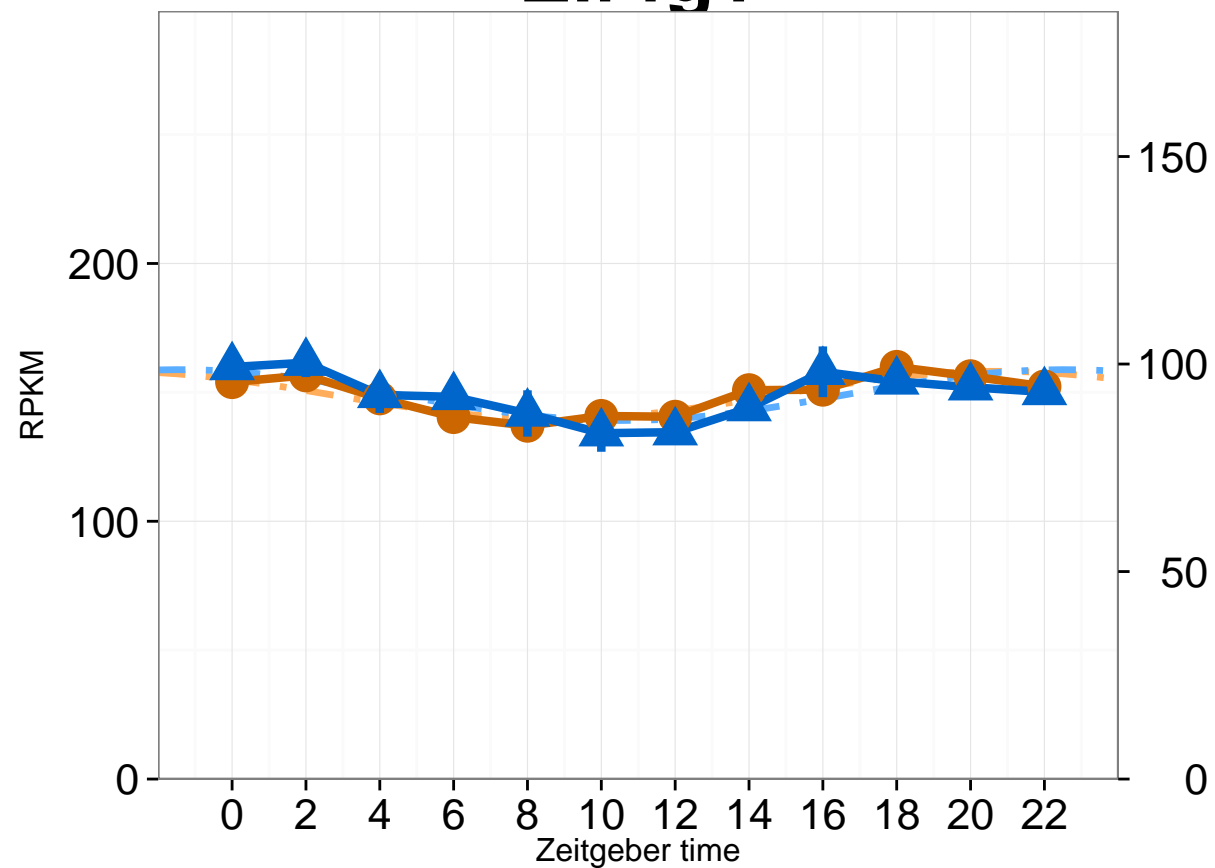

# Eif4g1

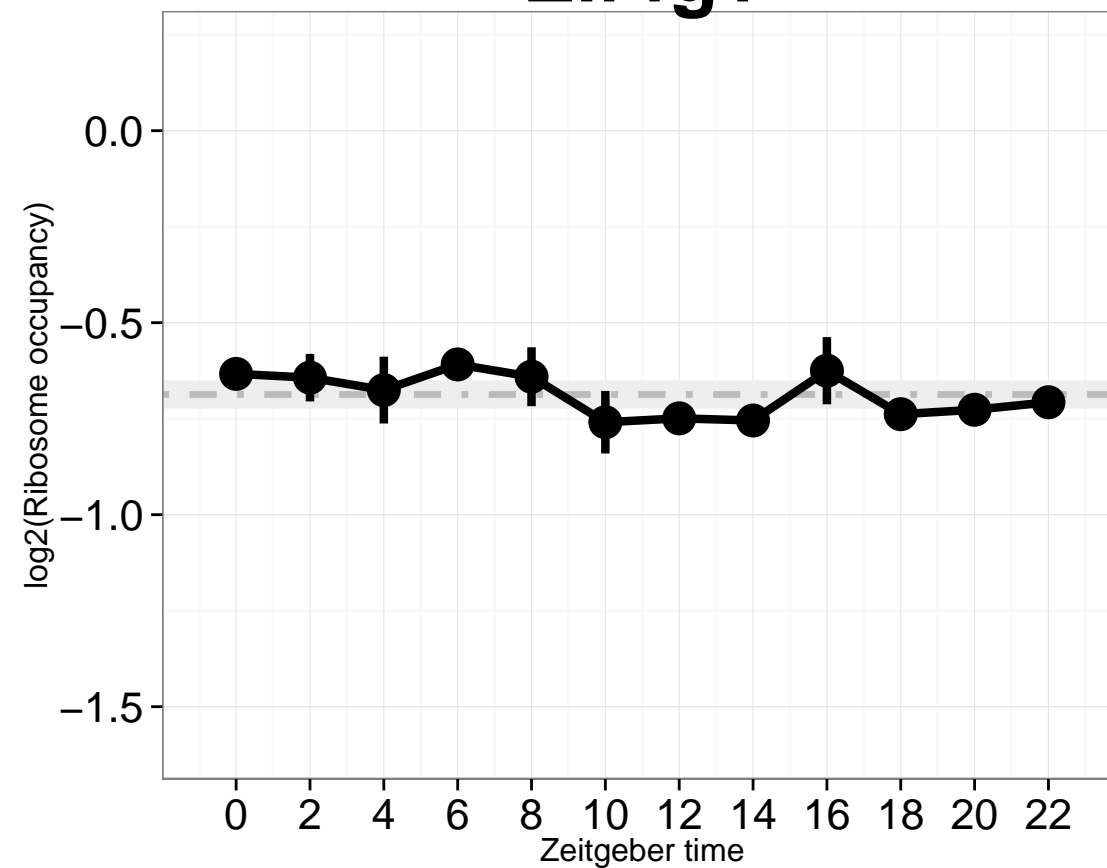

Supplement: Supplementary file 6669 [file 1]

## Hyal3

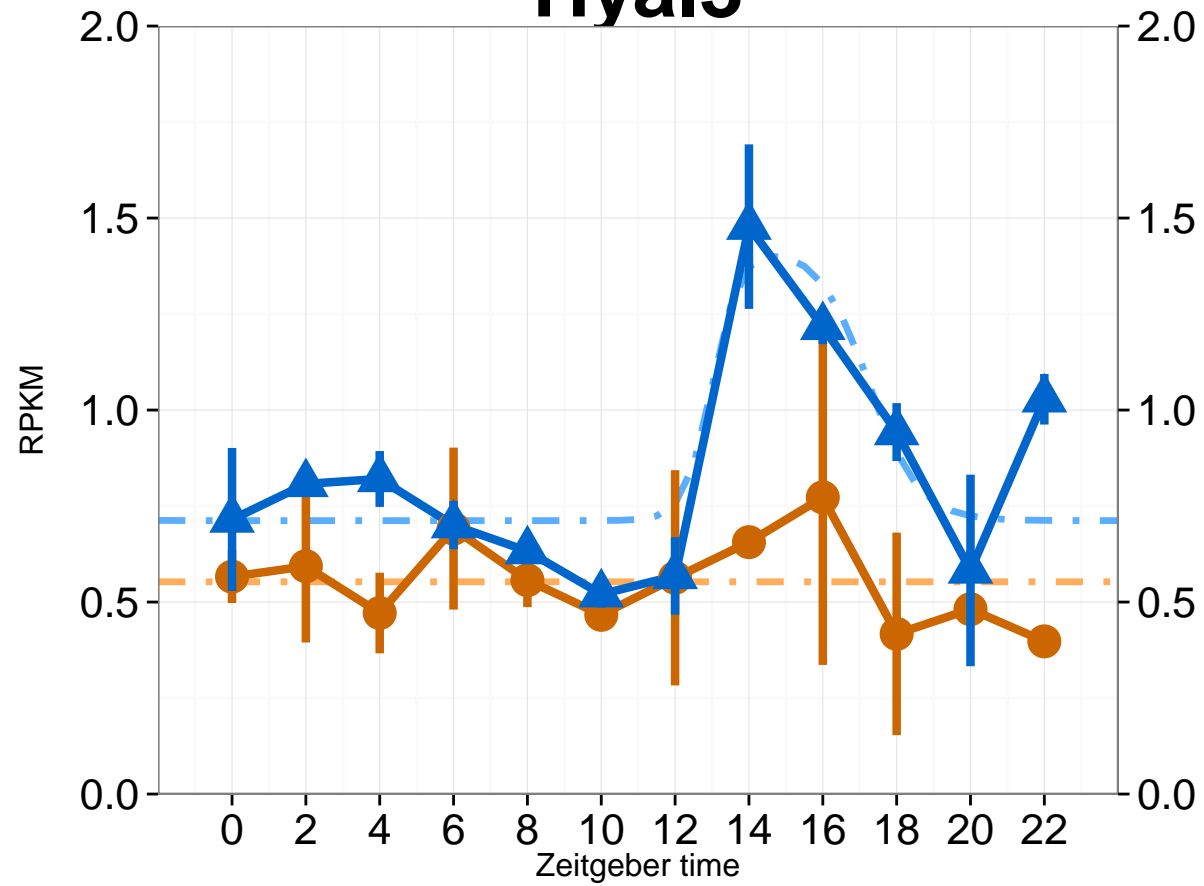

## Hyal3

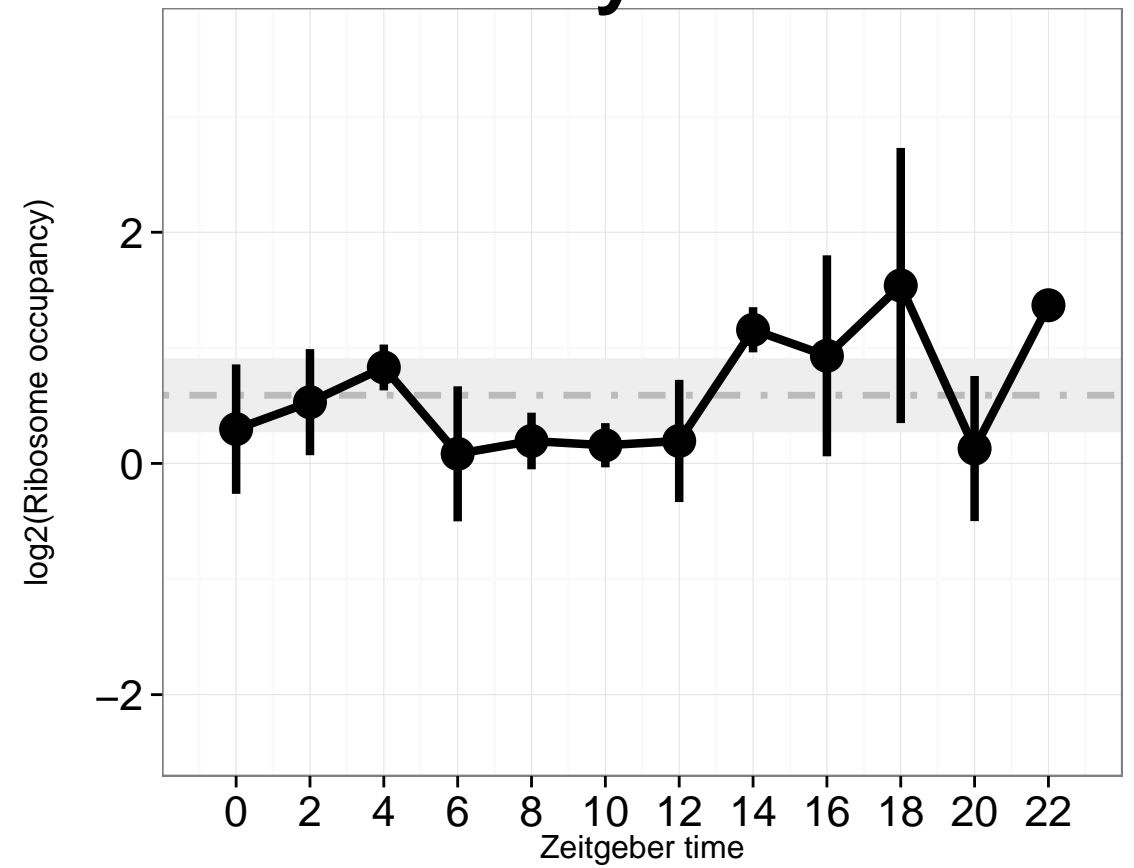

Supplement: Supplementary file 6670 [file 1]

## Siglece

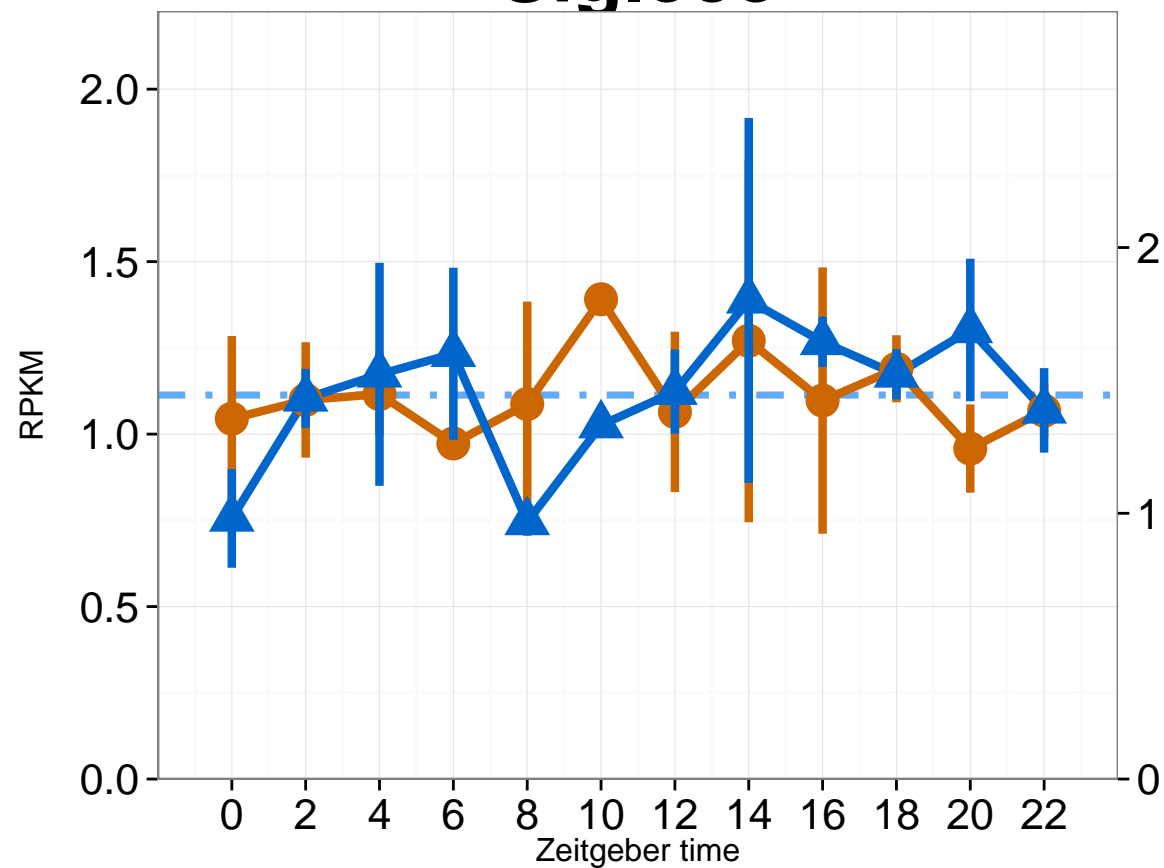

## Siglece

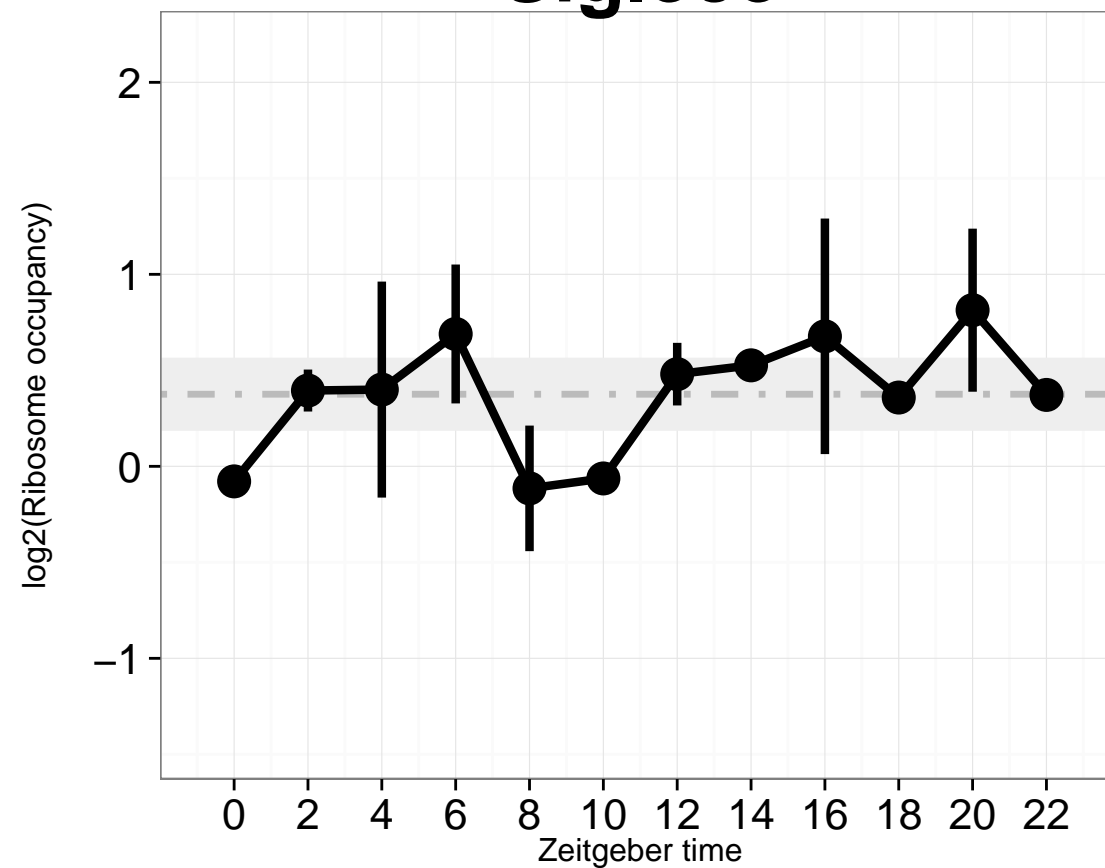

Supplement: Supplementary file 6671 [file 1]

# 6330419J24Rik

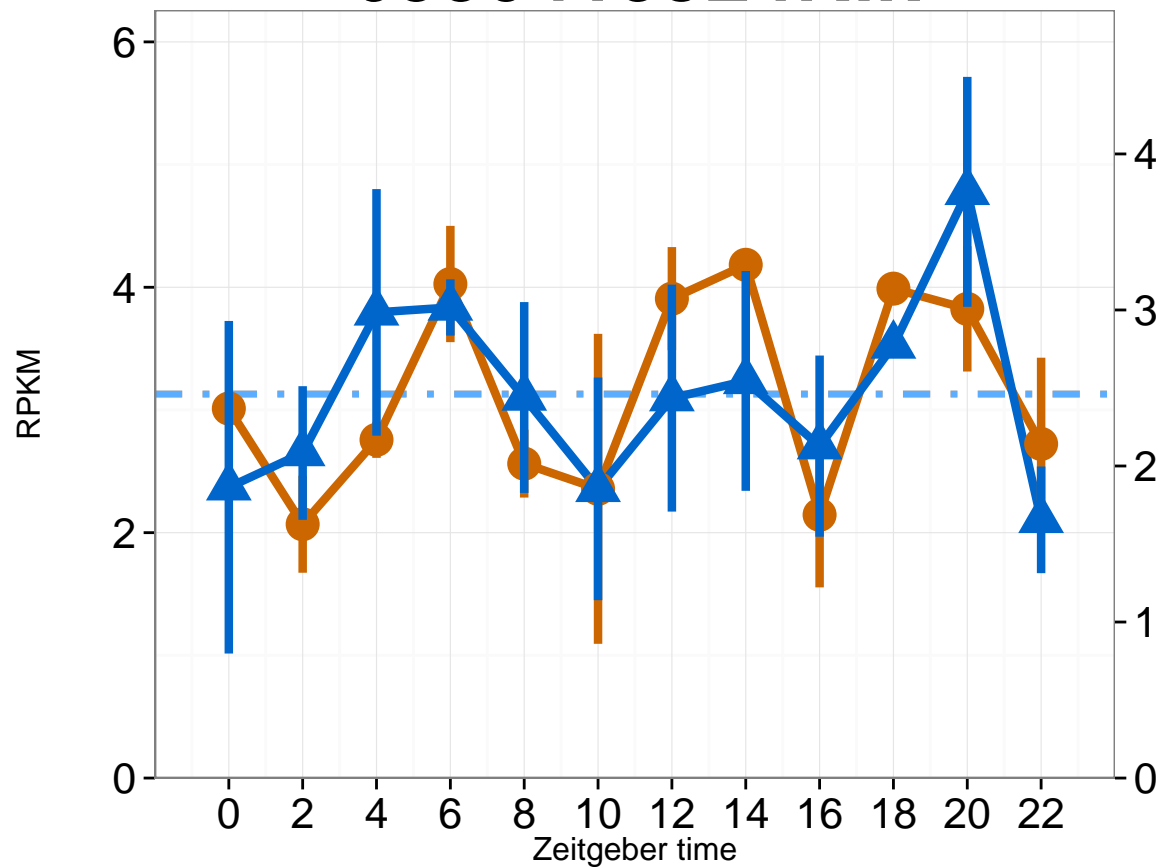

# 6330419J24Rik

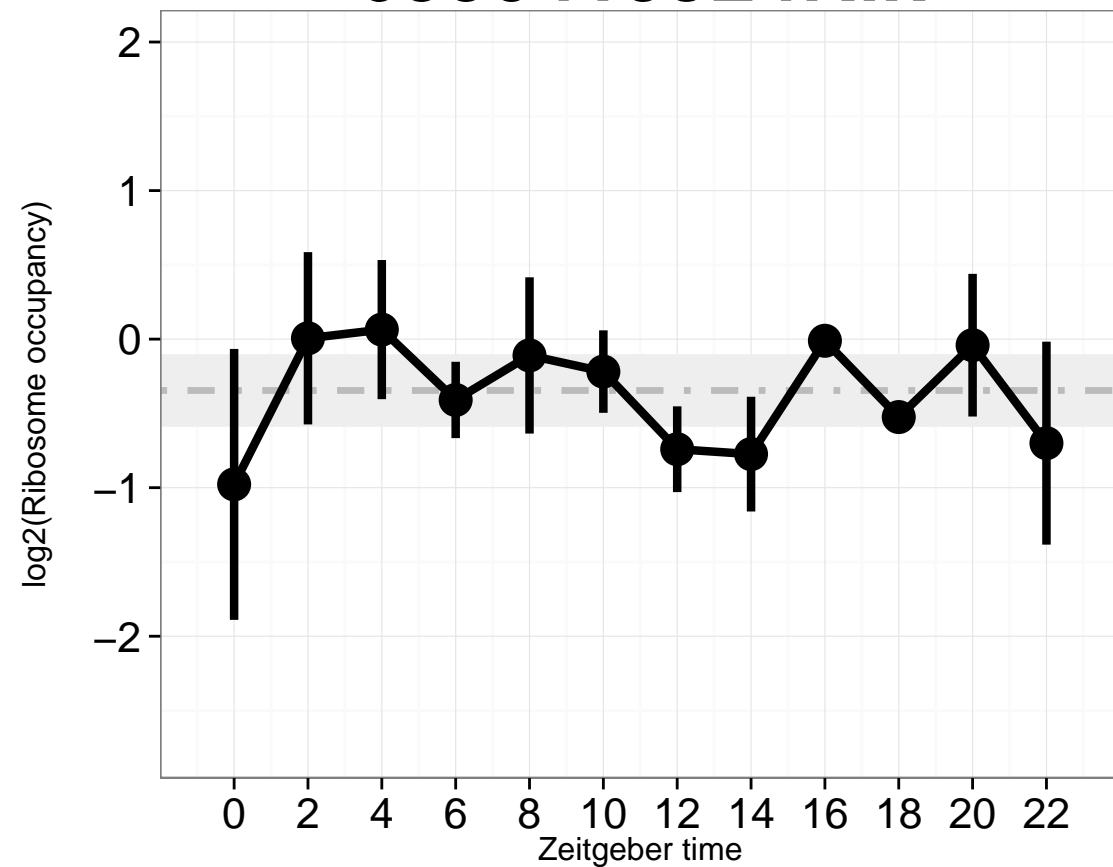

Supplement: Supplementary file 6672 [file 1]

# Prdm4

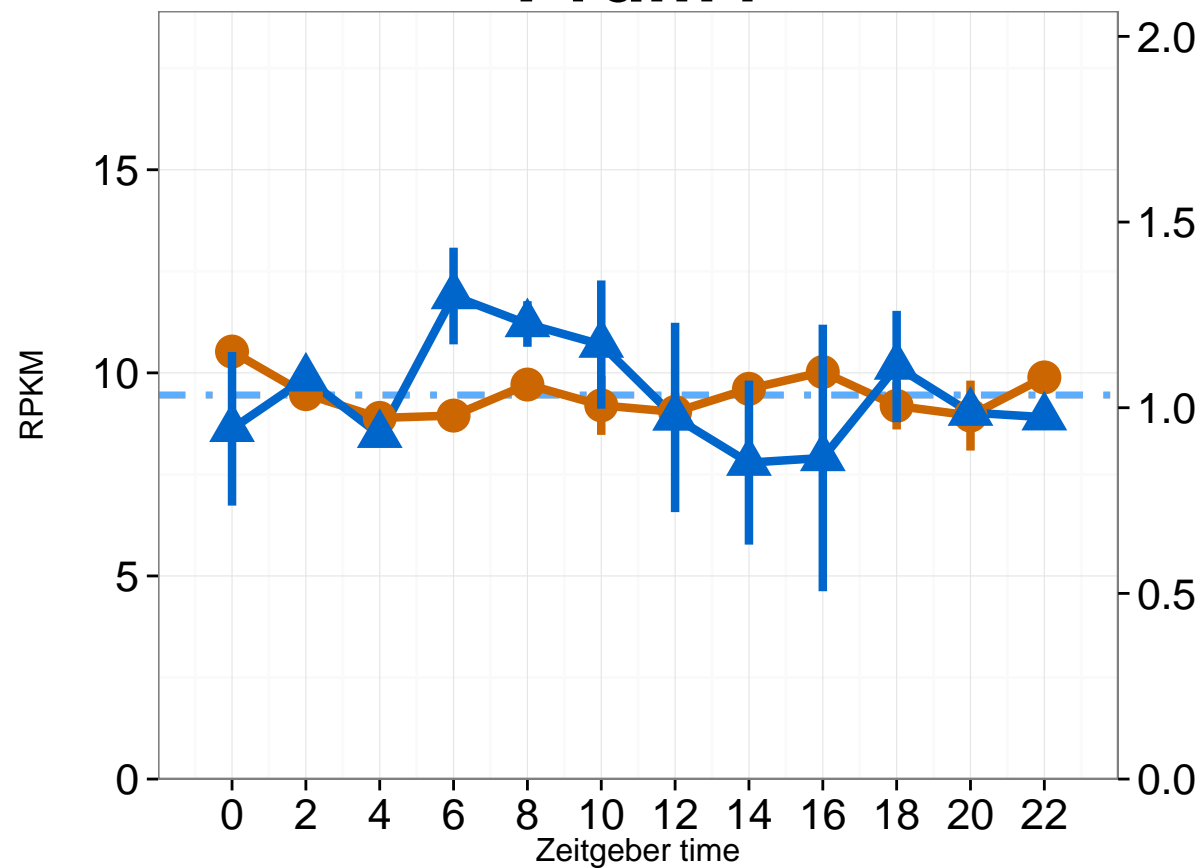

# Prdm4

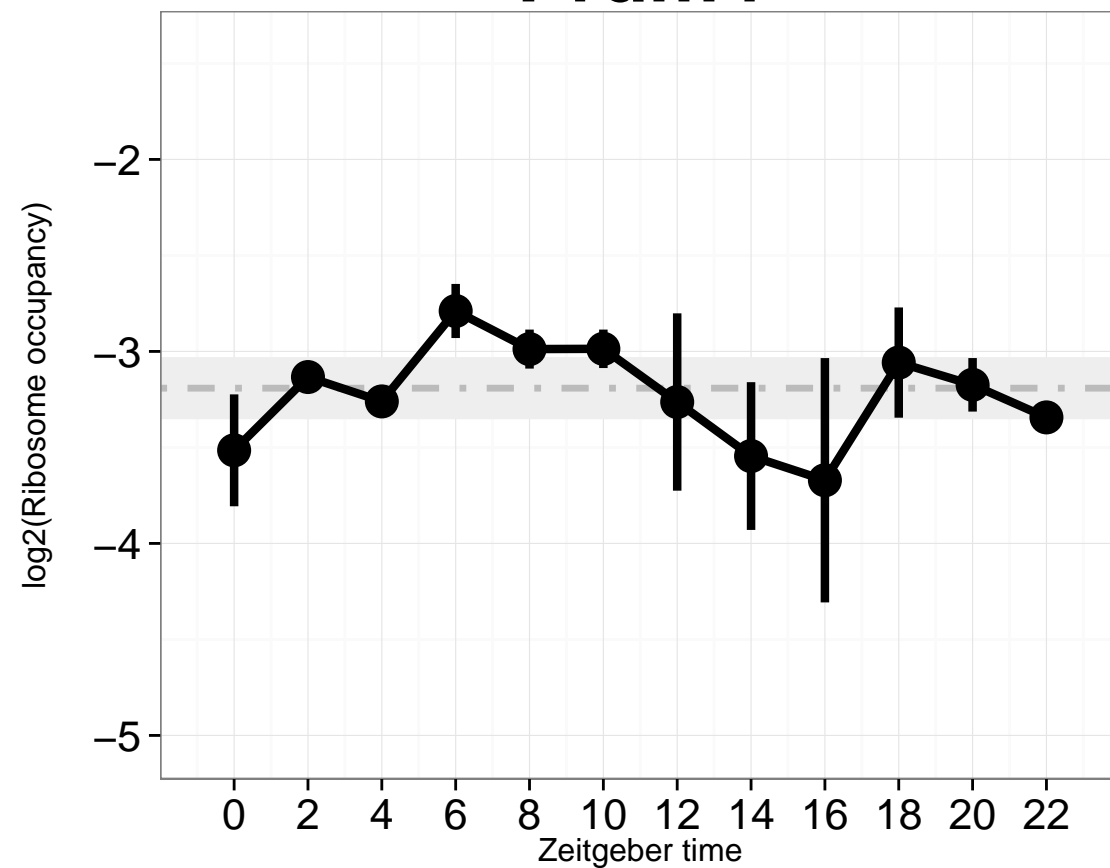

Supplement: Supplementary file 6673 [file 1]

# Zfp597

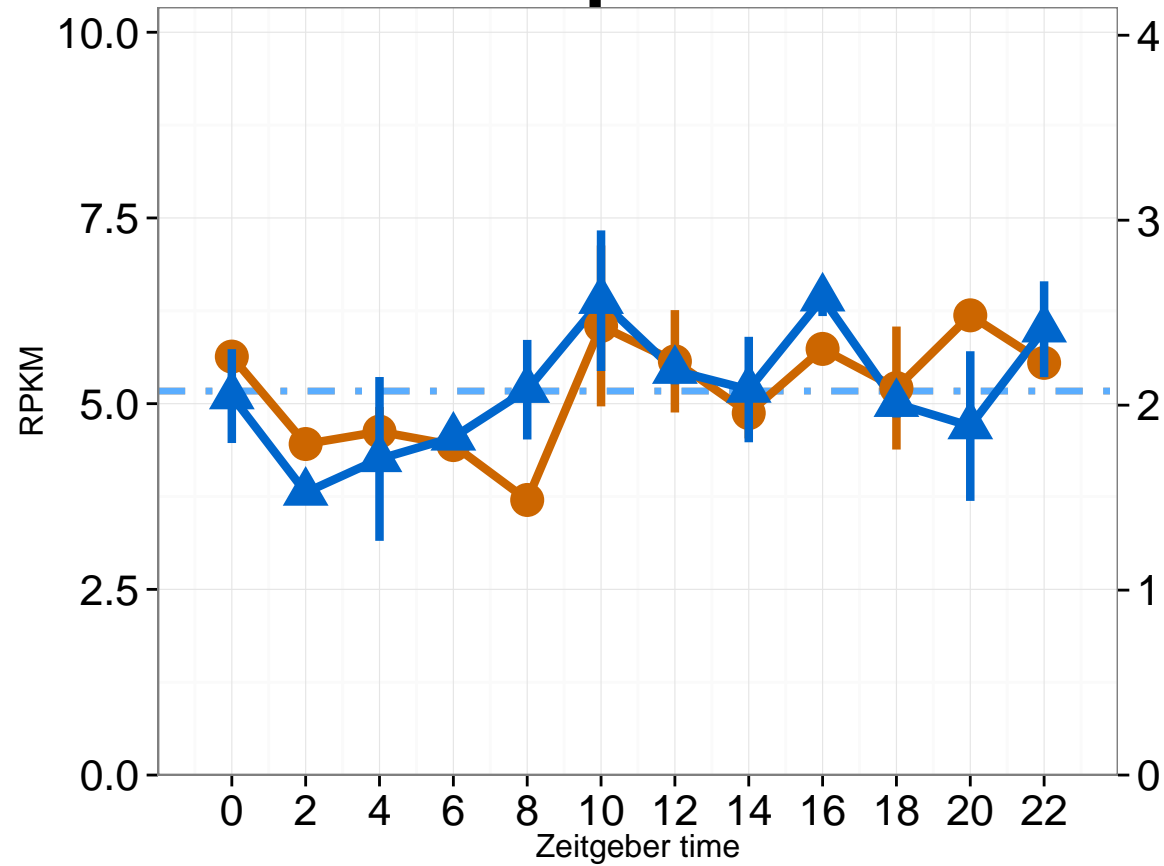

# Zfp597

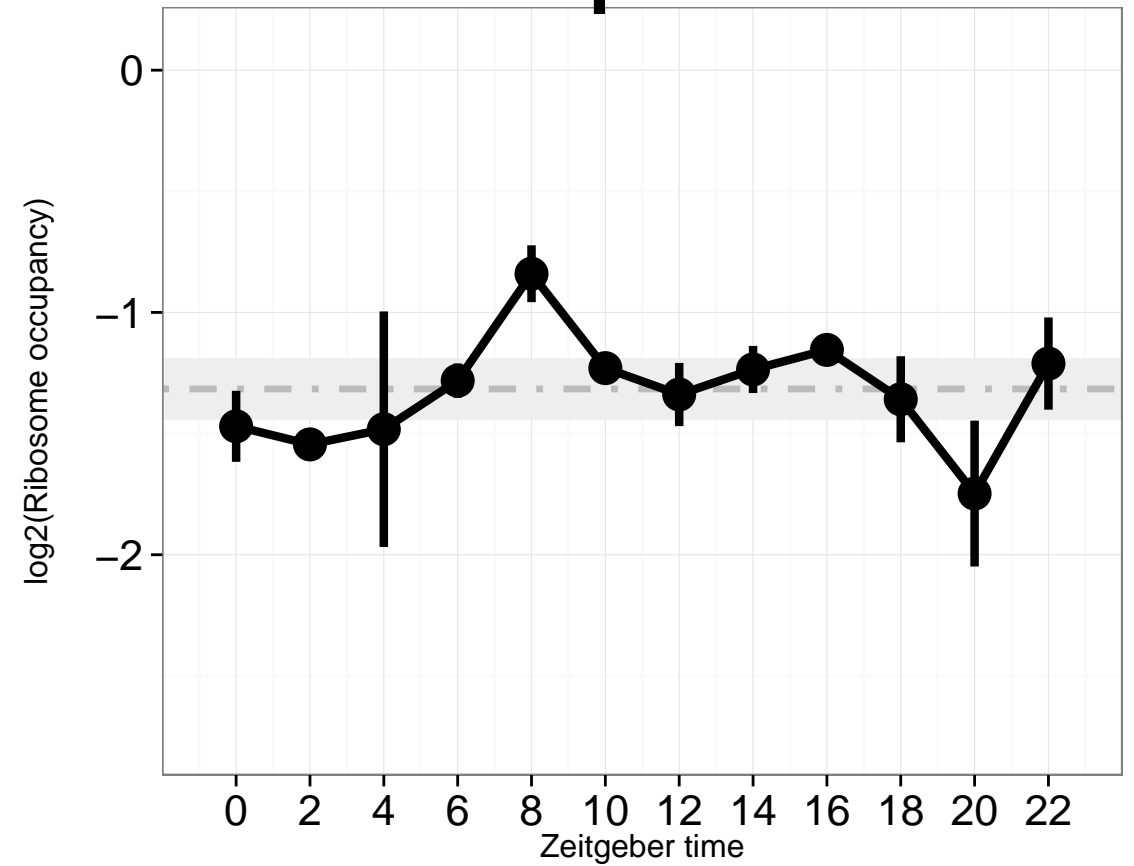

Supplement: Supplementary file 6674 [file 1]

# Dock1

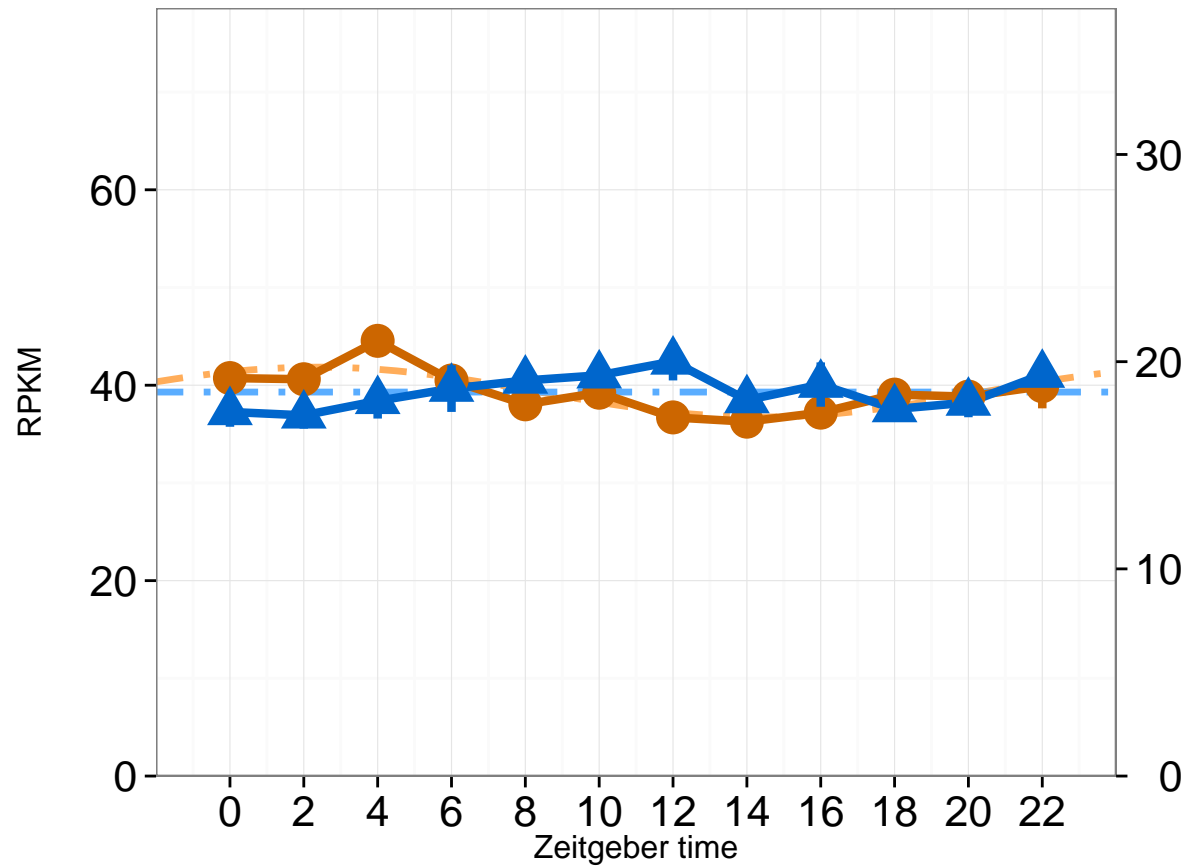

# Dock1

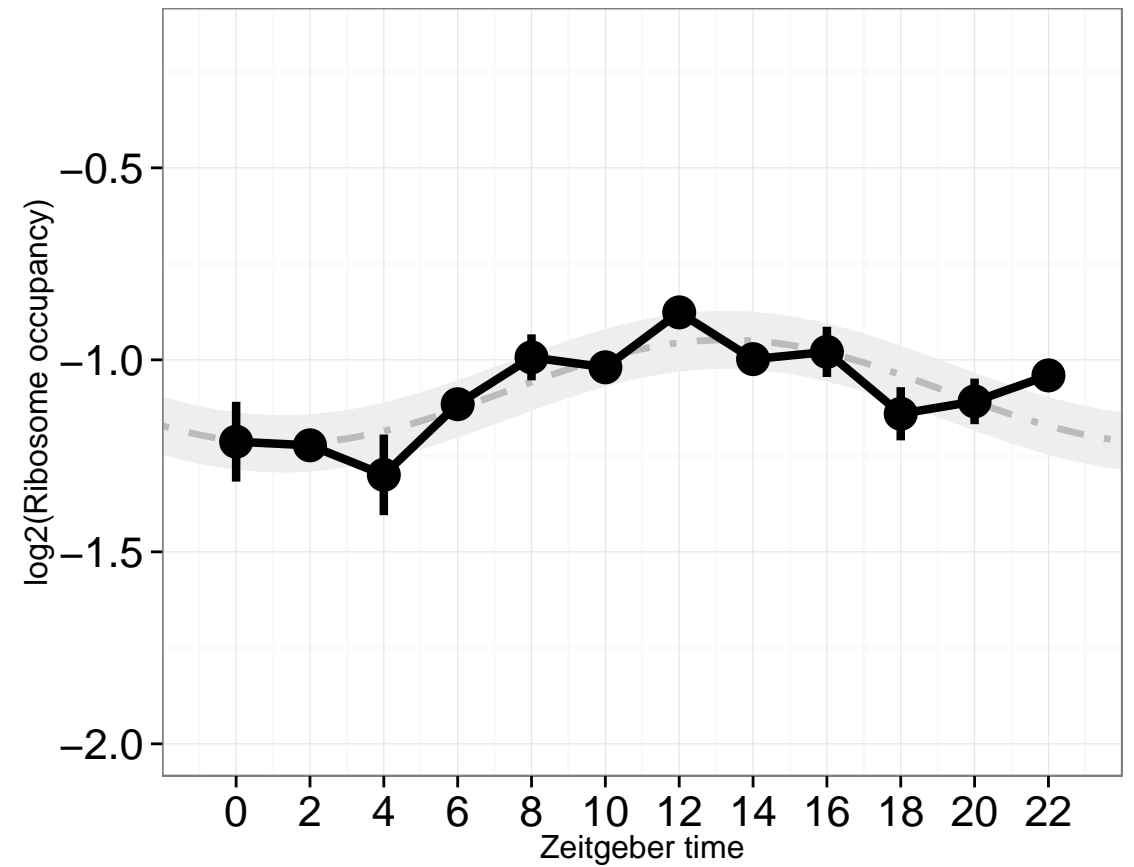

Supplement: Supplementary file 6675 [file 1]

## PvrI1

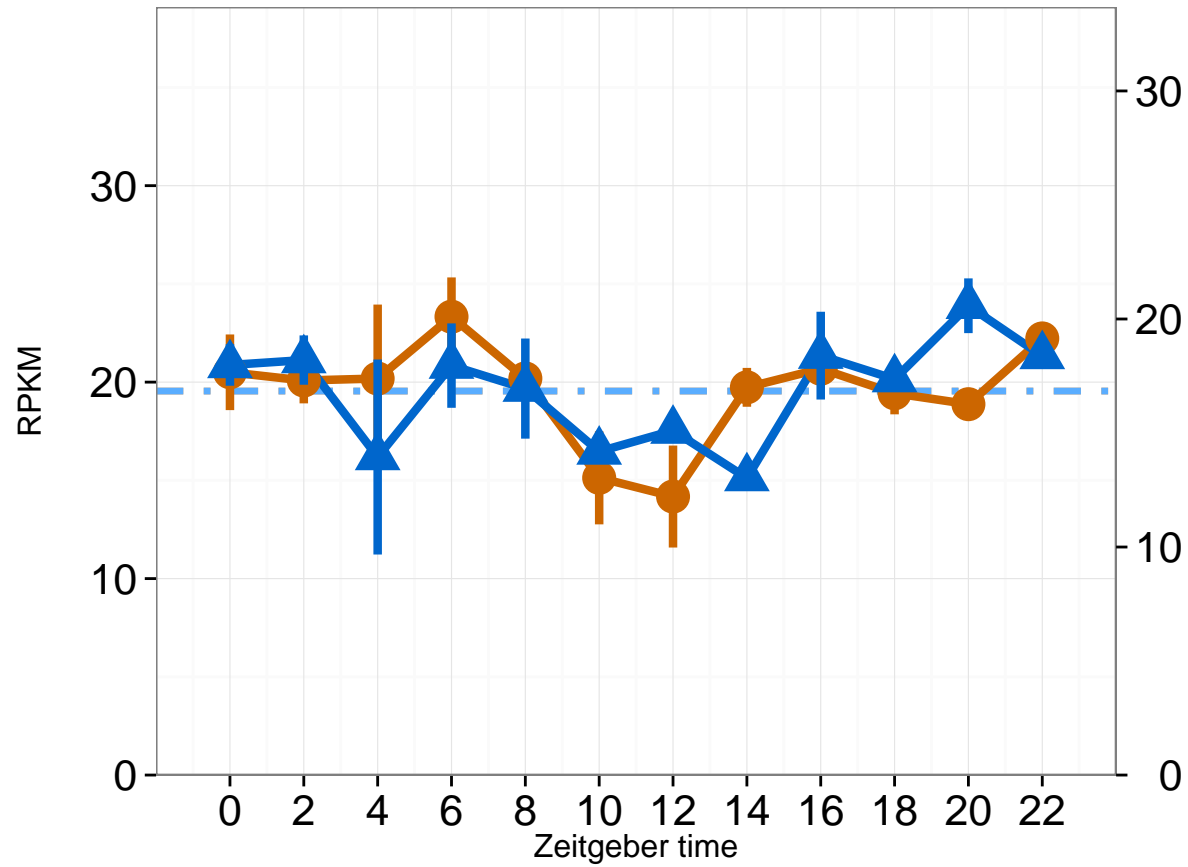

## PvrI1

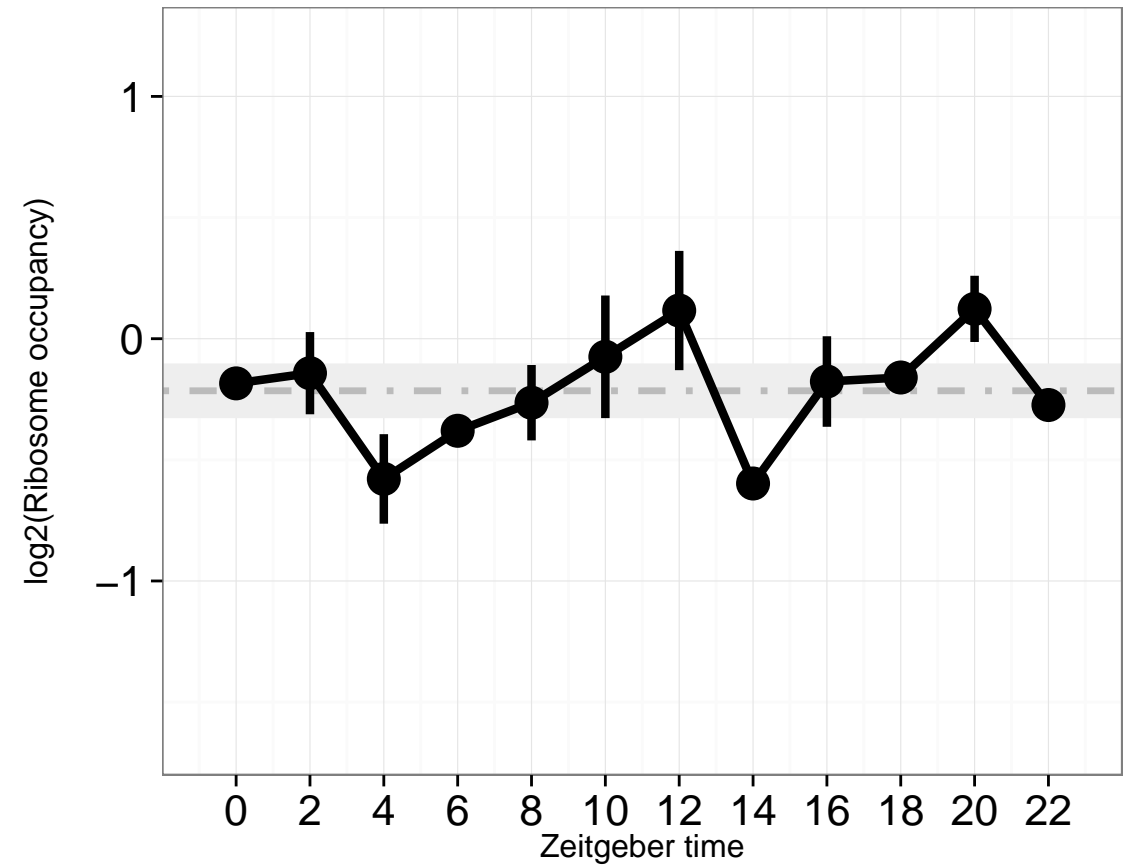

Supplement: Supplementary file 6676 [file 1]

## Cldn7

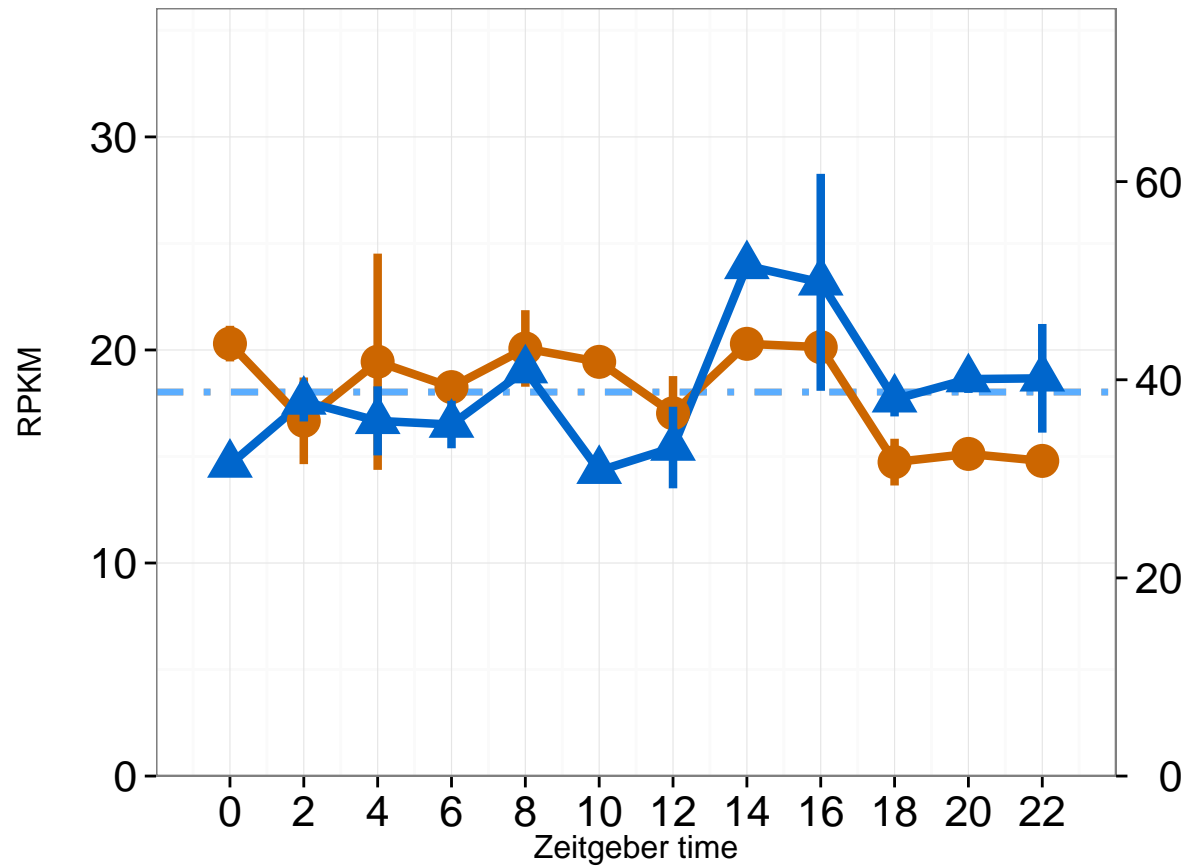

## Cldn7

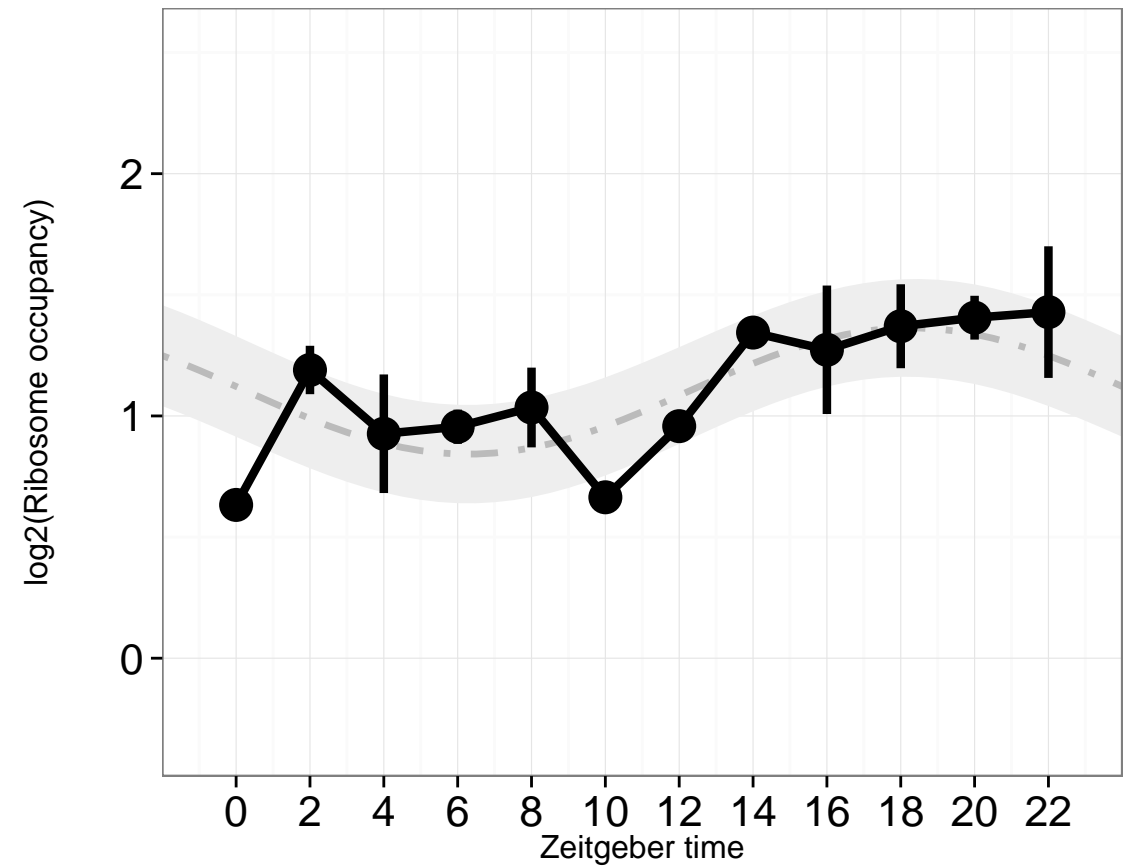

Supplement: Supplementary file 6677 [file 1]

# HnrnpII

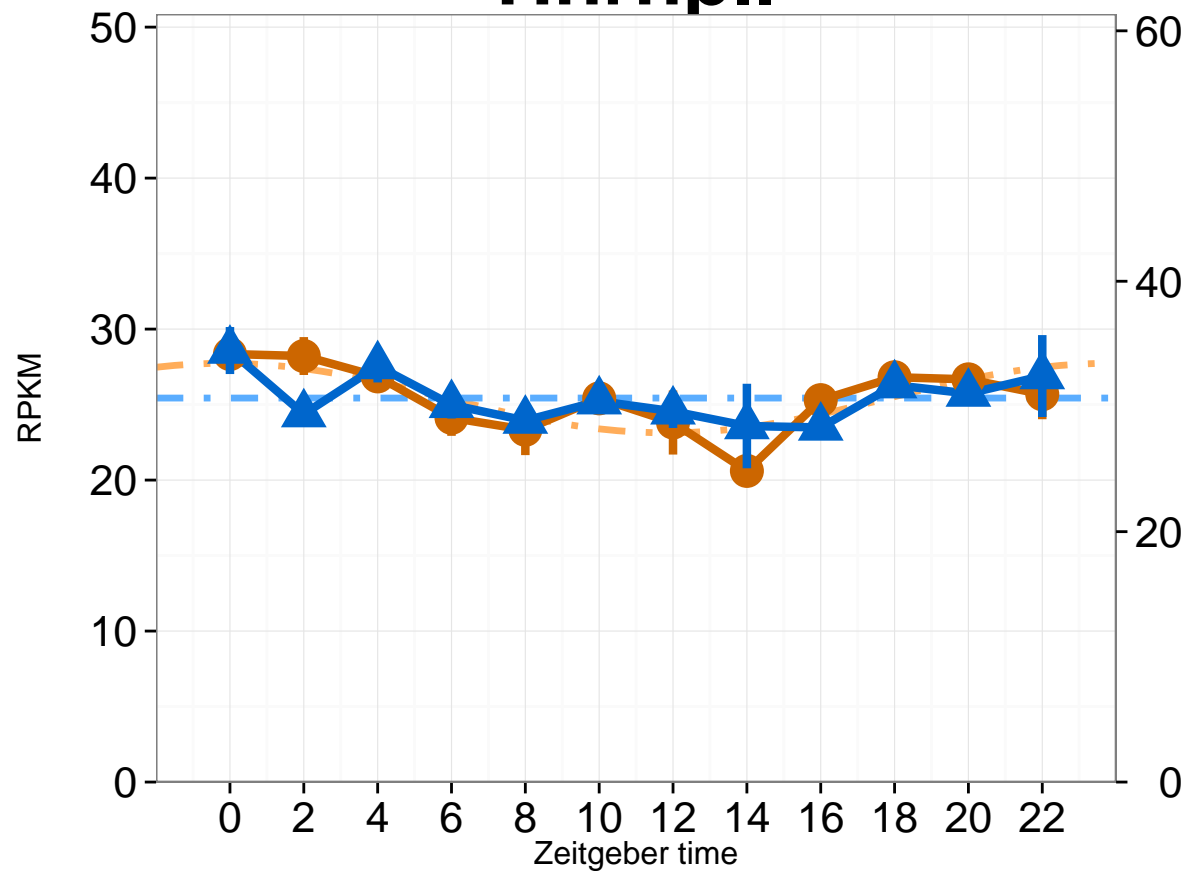

# HnrnpII

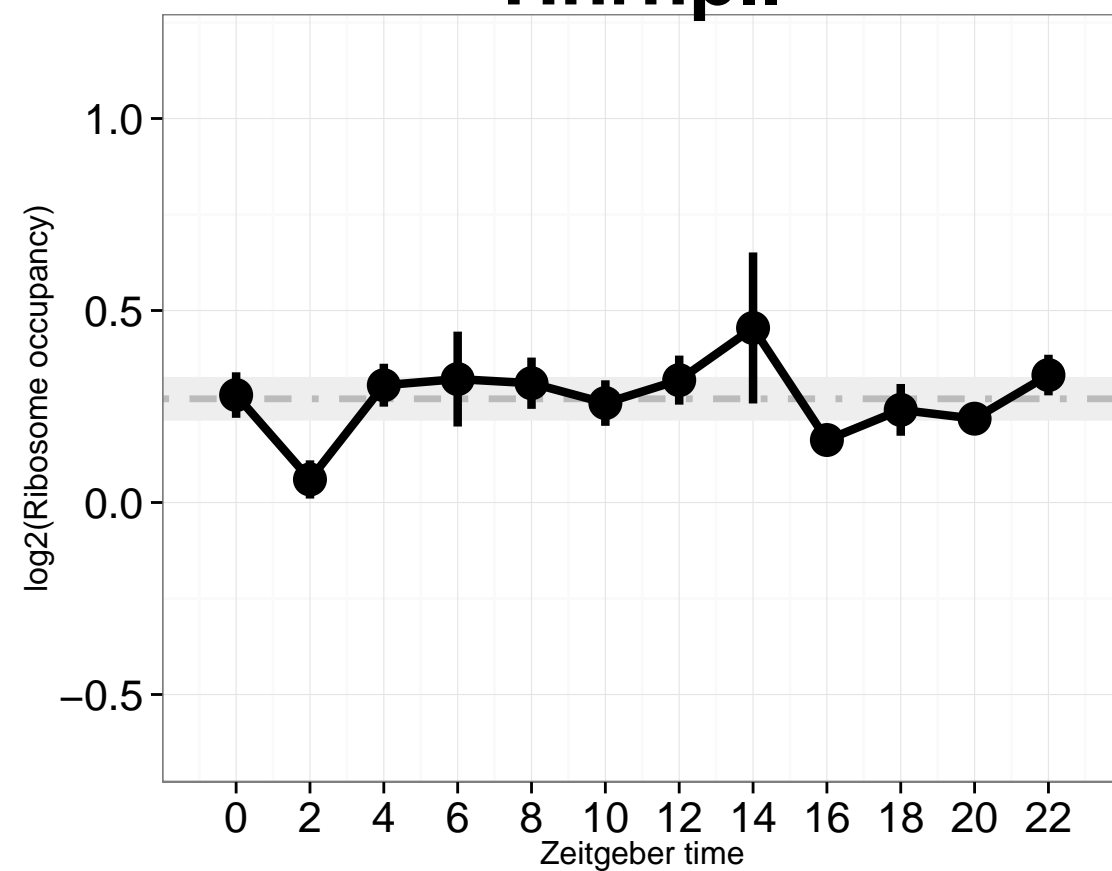

Supplement: Supplementary file 6678 [file 1]

## Wbp11

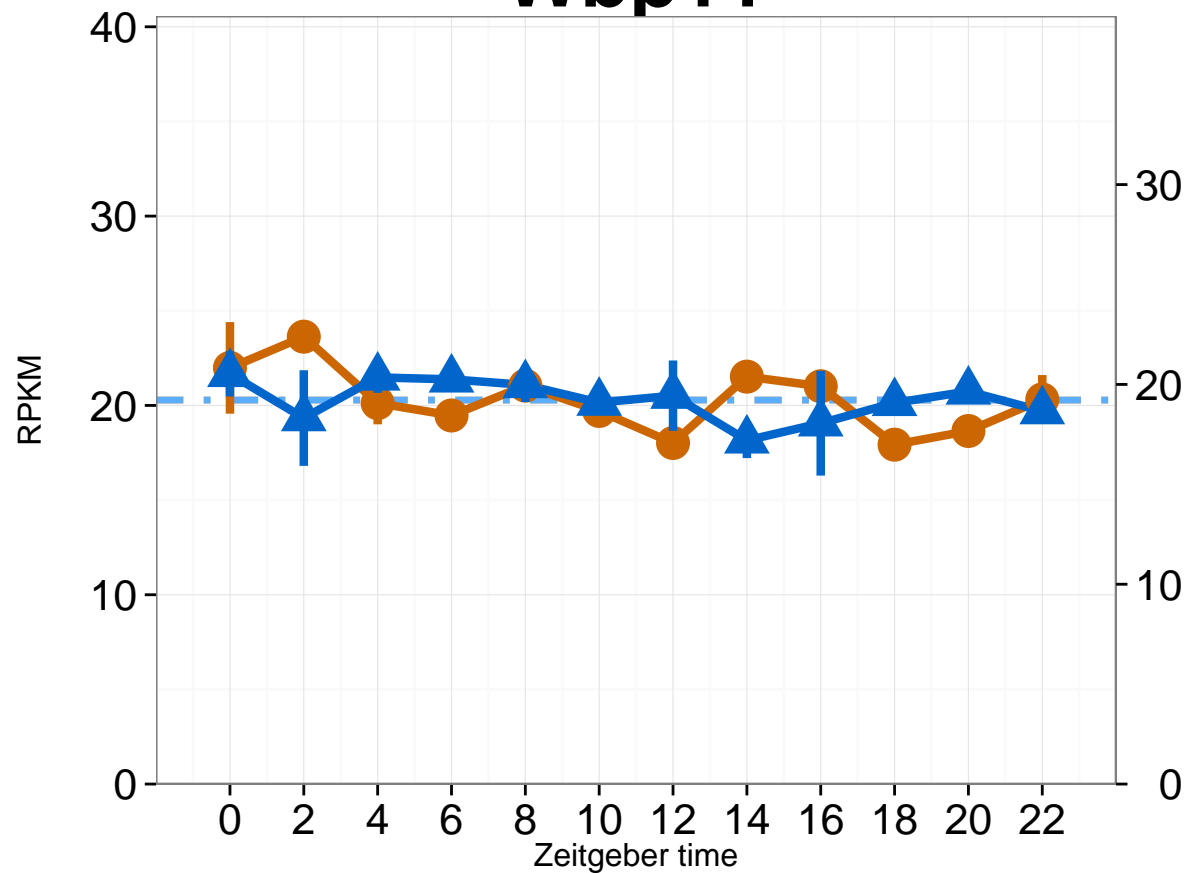

## Wbp11

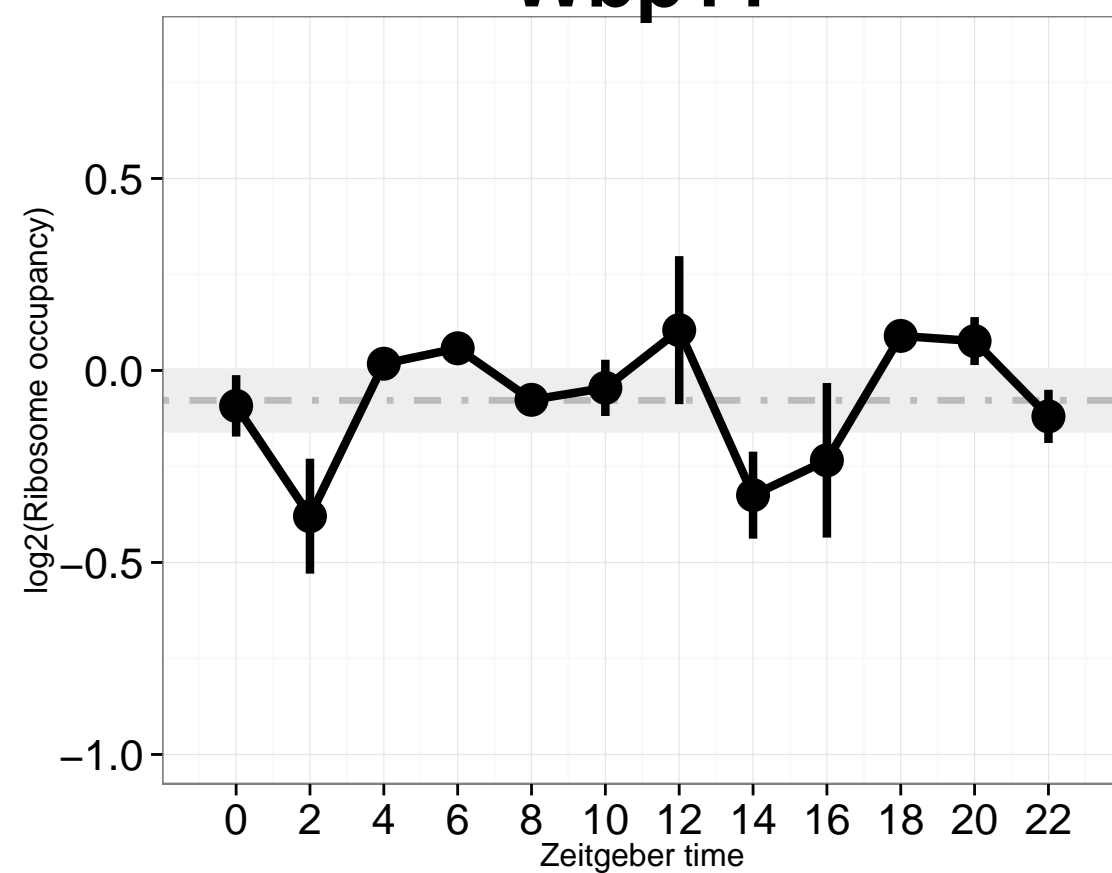

Supplement: Supplementary file 6679 [file 1]

## Smim15

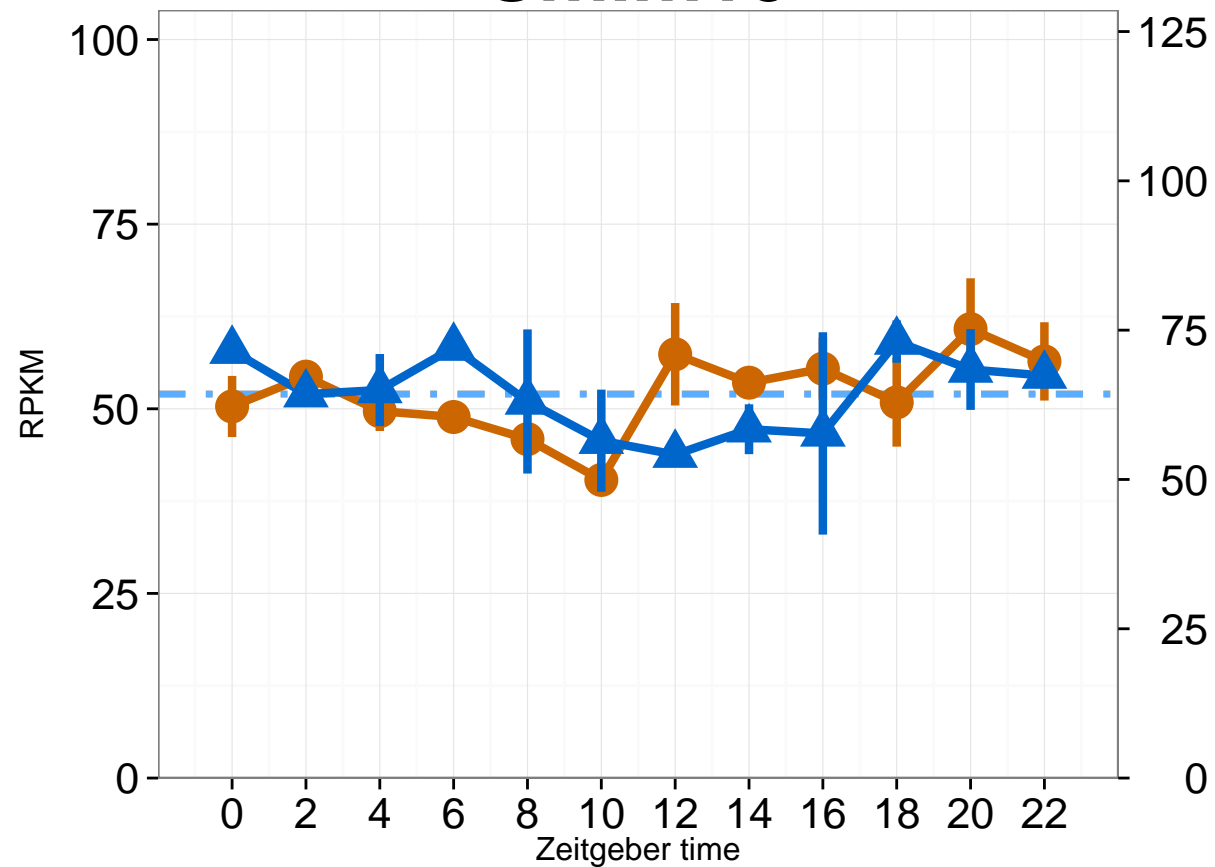

## Smim15

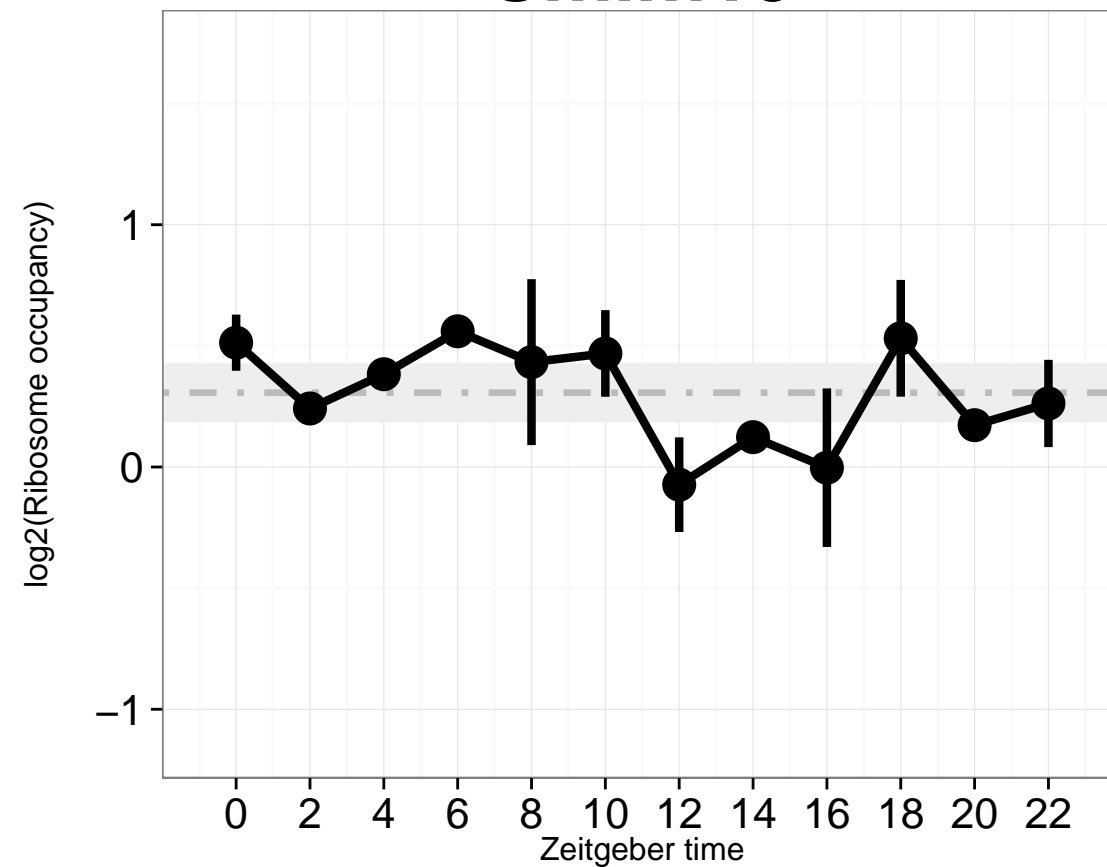

Supplement: Supplementary file 6680 [file 1]

## Tlr7

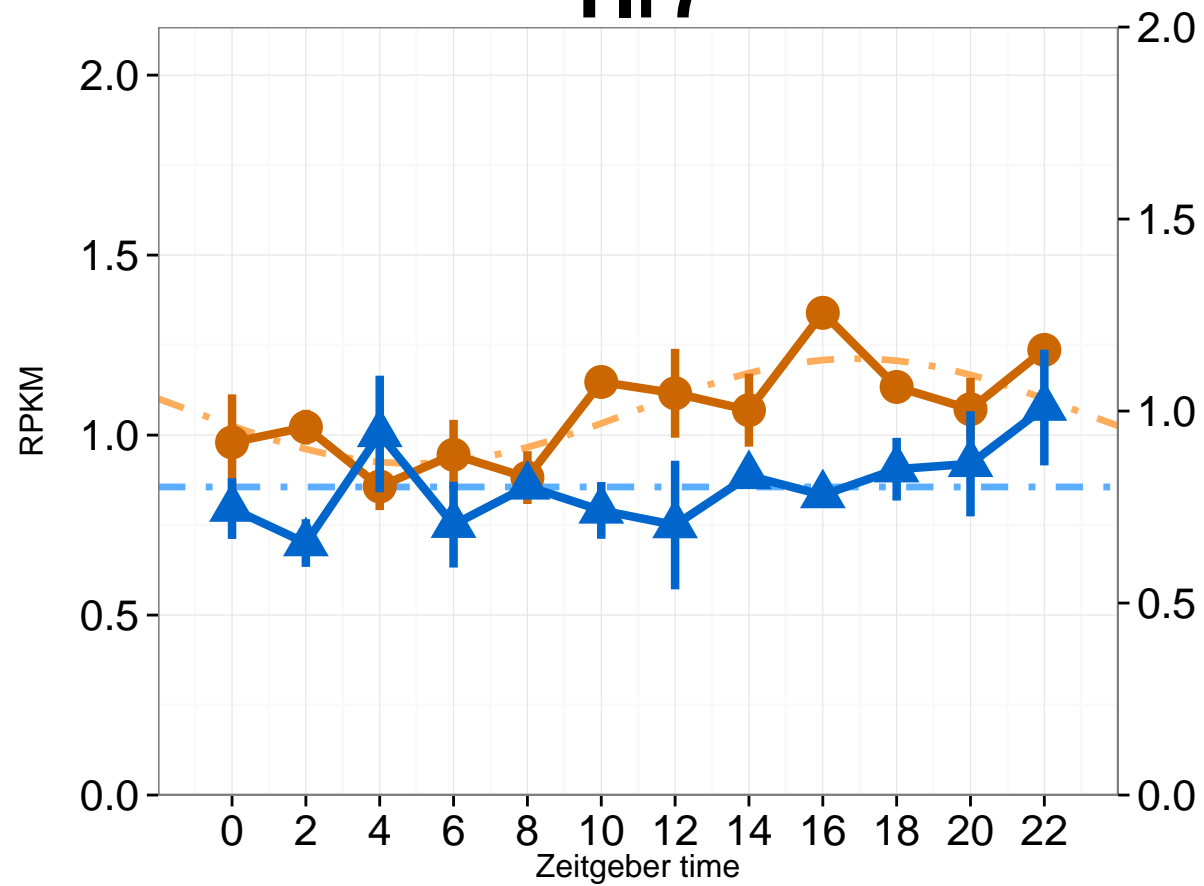

## Tlr7

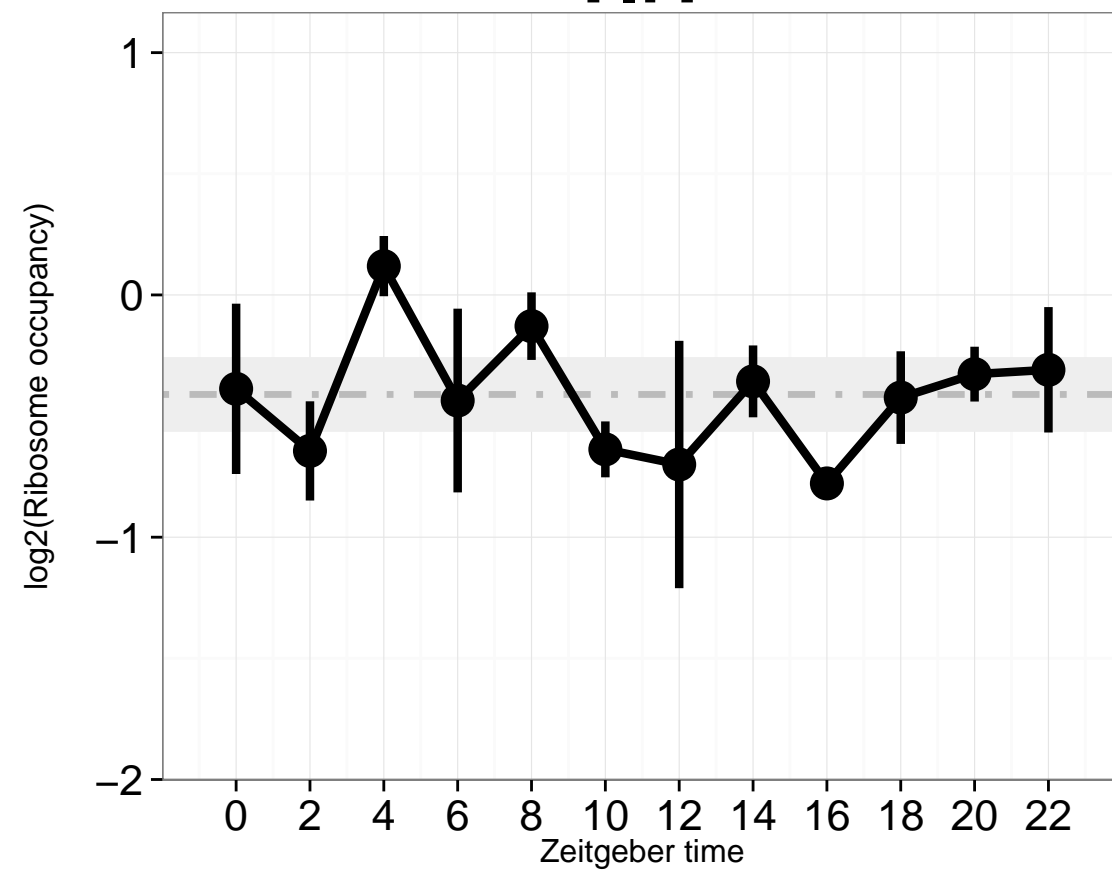

Supplement: Supplementary file 6681 [file 1]

# Zfp119b

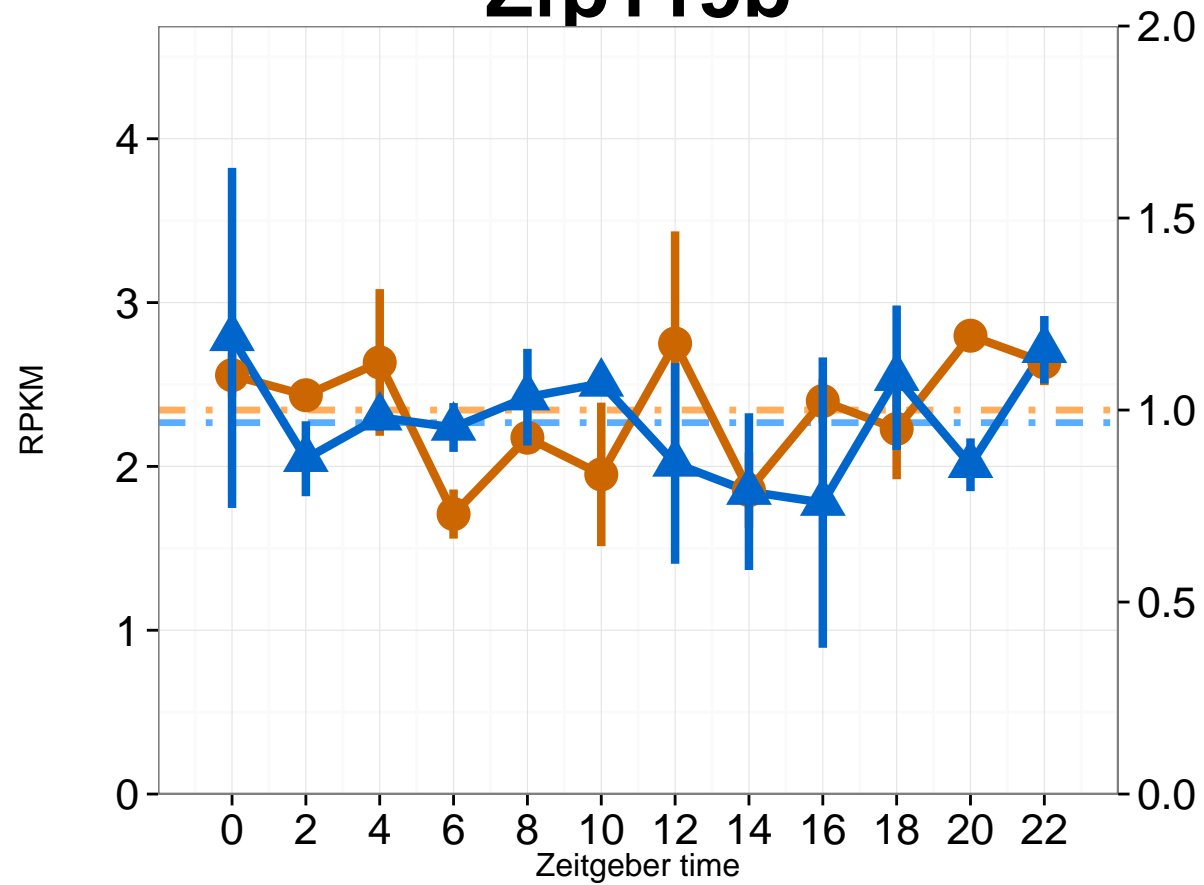

# Zfp119b

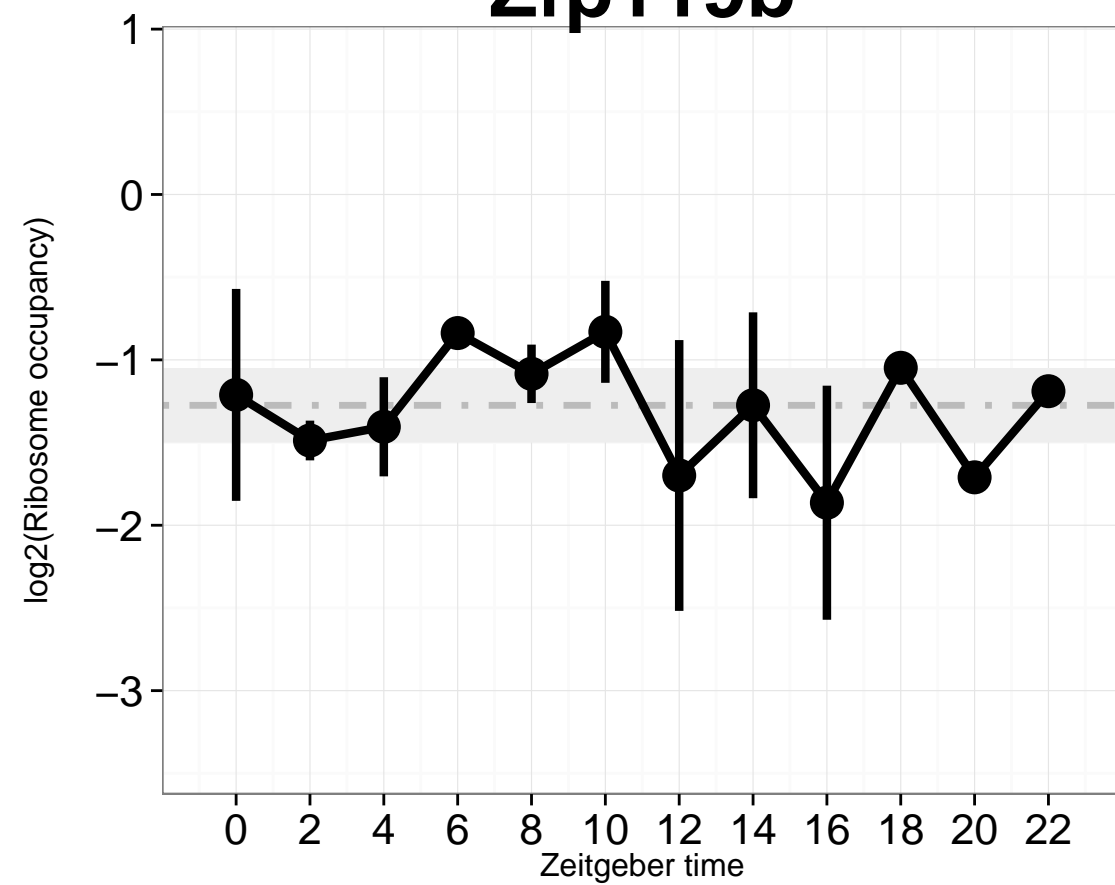

Supplement: Supplementary file 6682 [file 1]

## Pdcd10

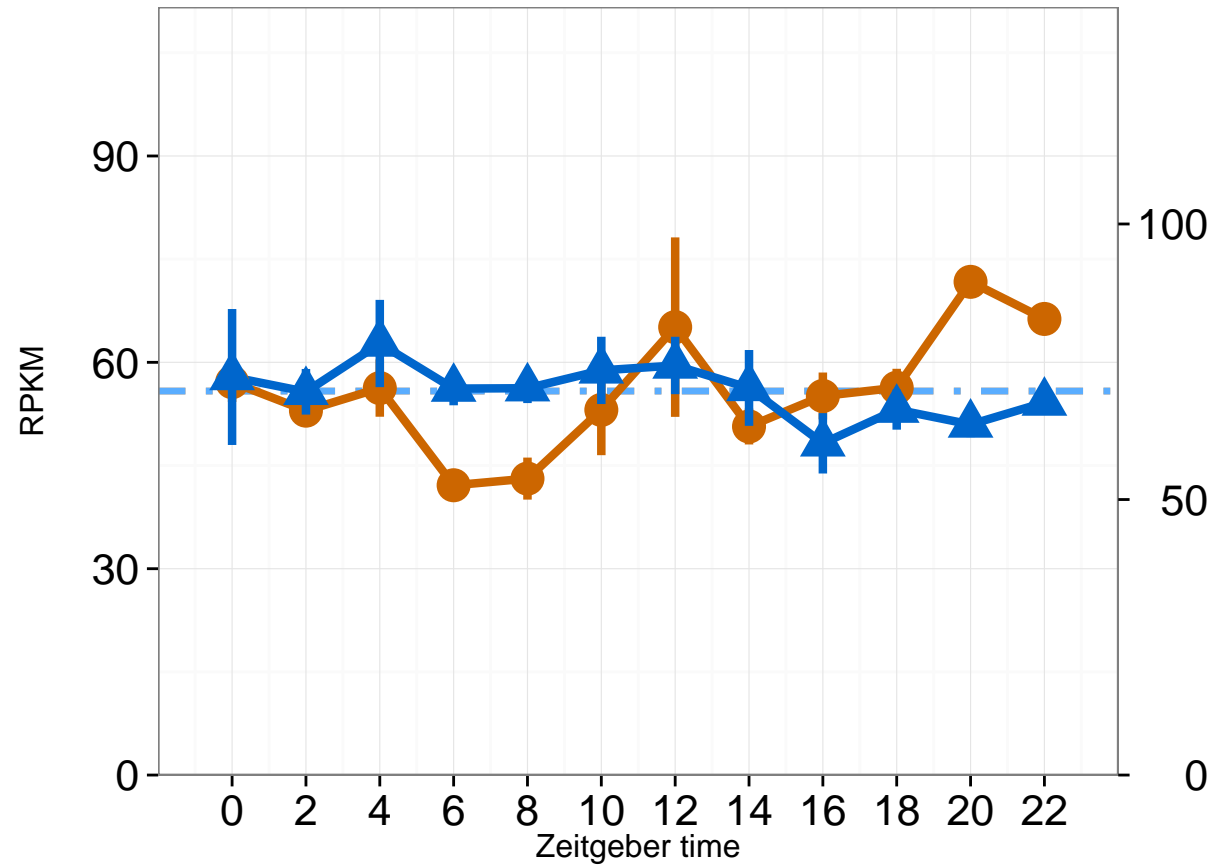

## Pdcd10

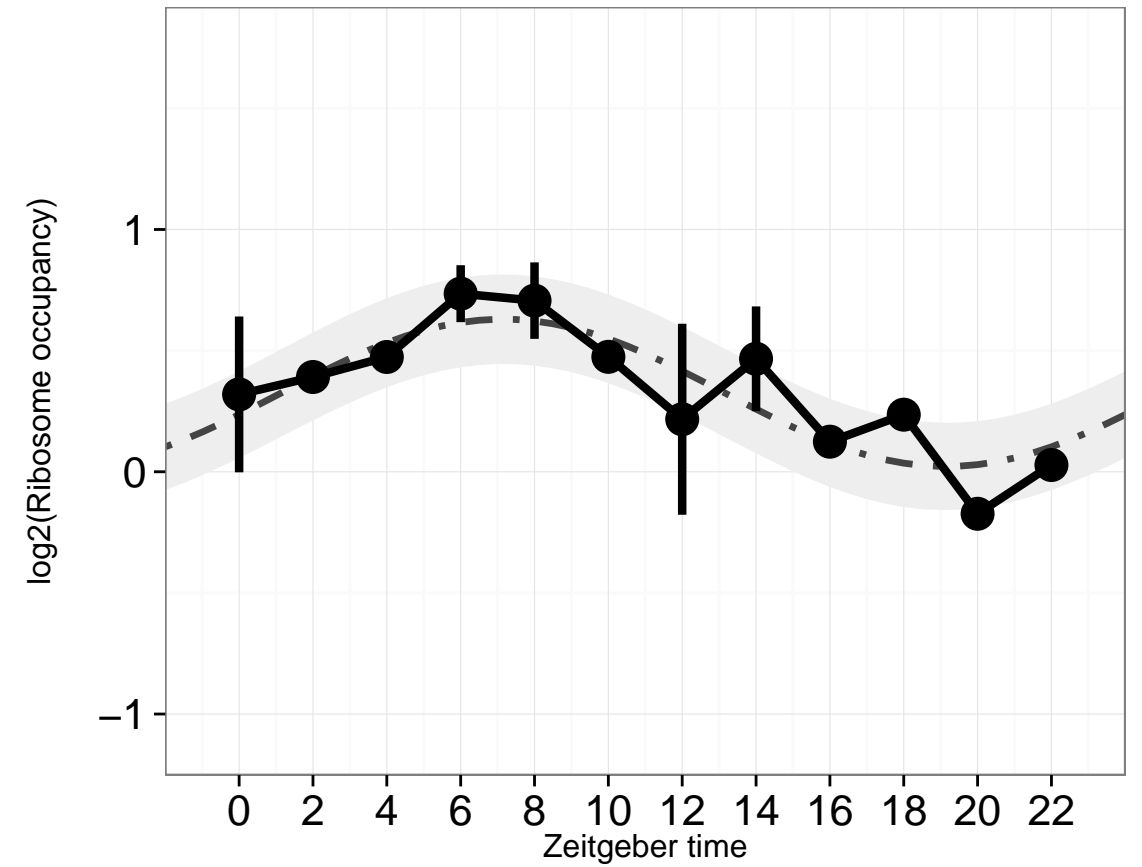

Supplement: Supplementary file 6683 [file 1]

## Clasp2

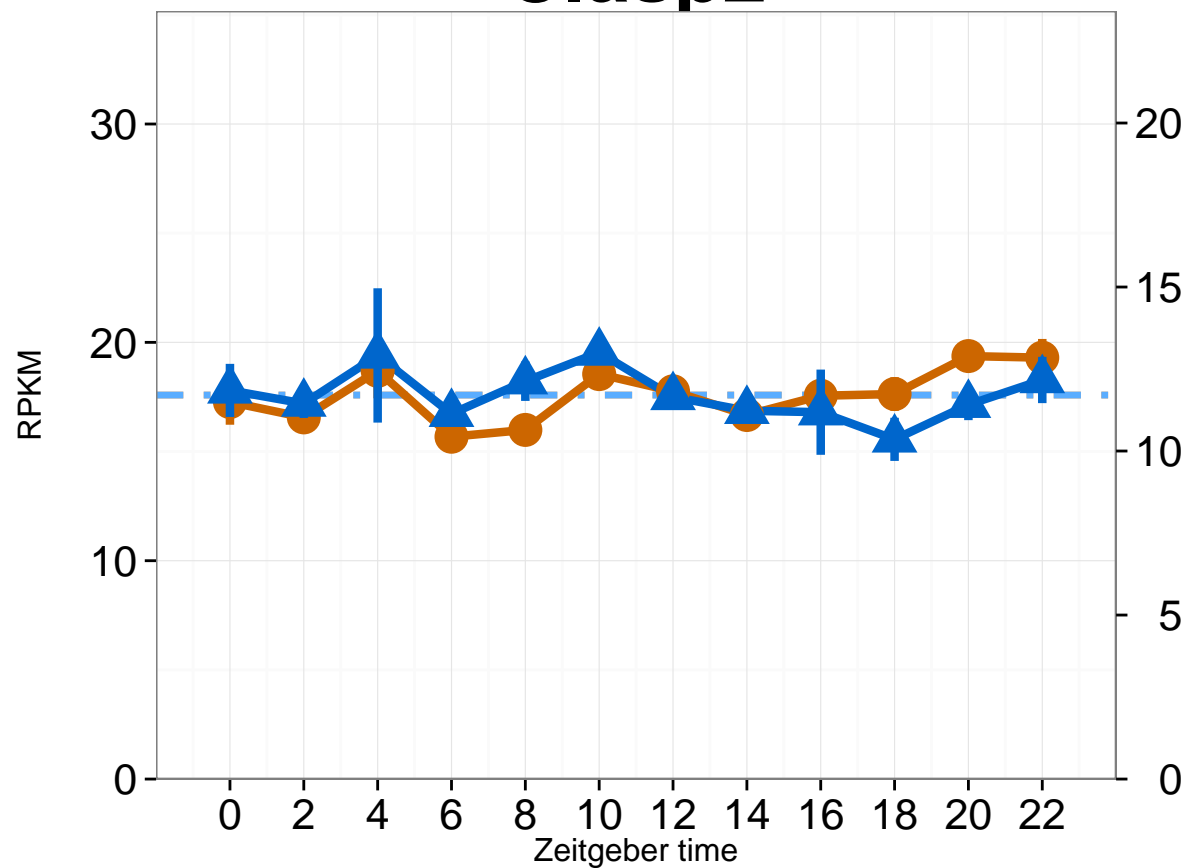

## Clasp2

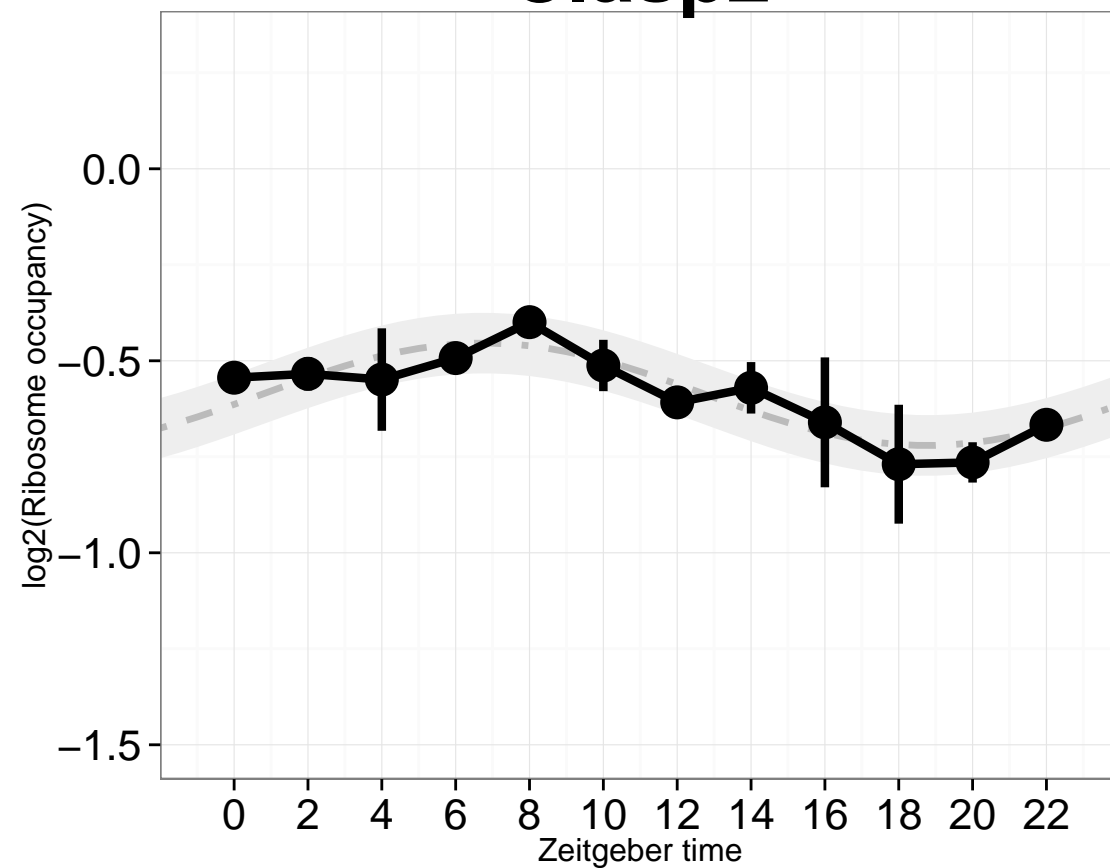

Supplement: Supplementary file 6684 [file 1]

# Krt19

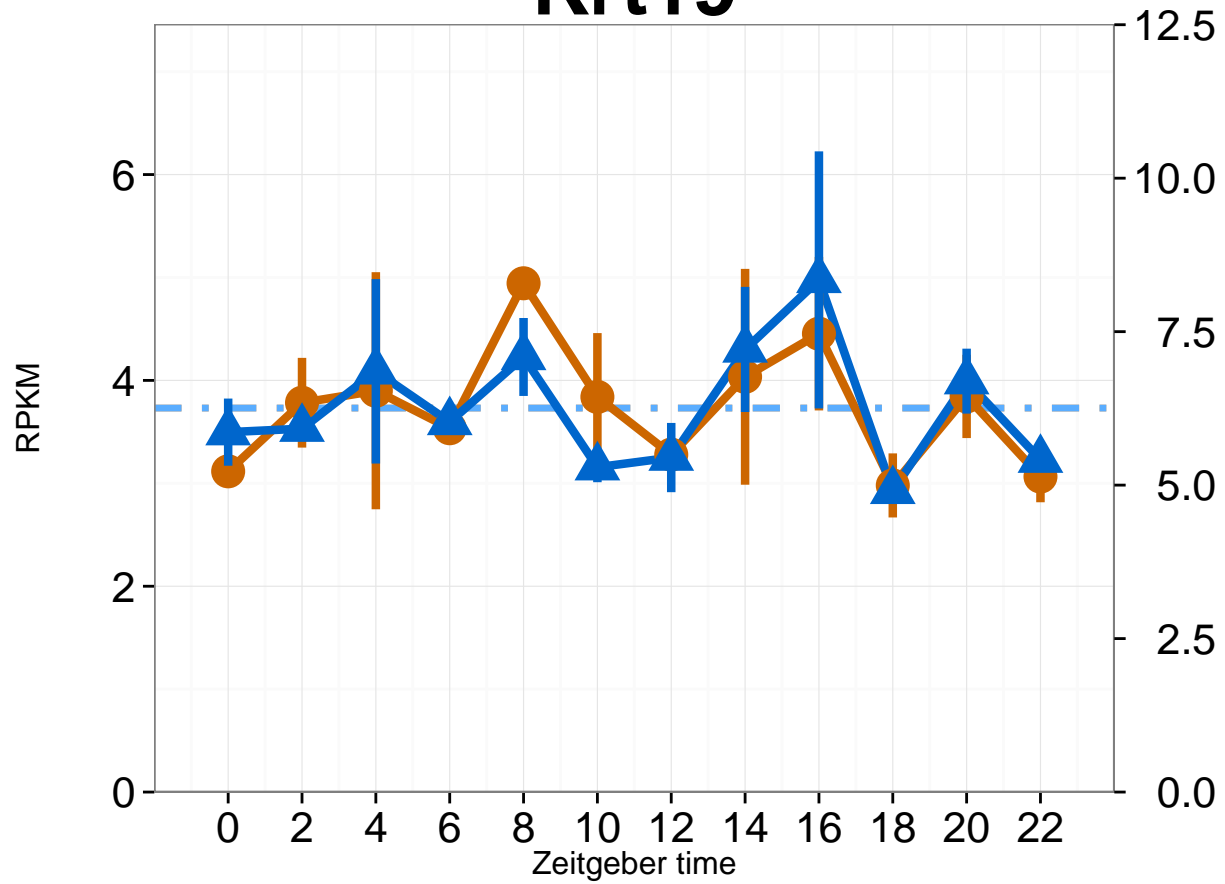

# Krt19

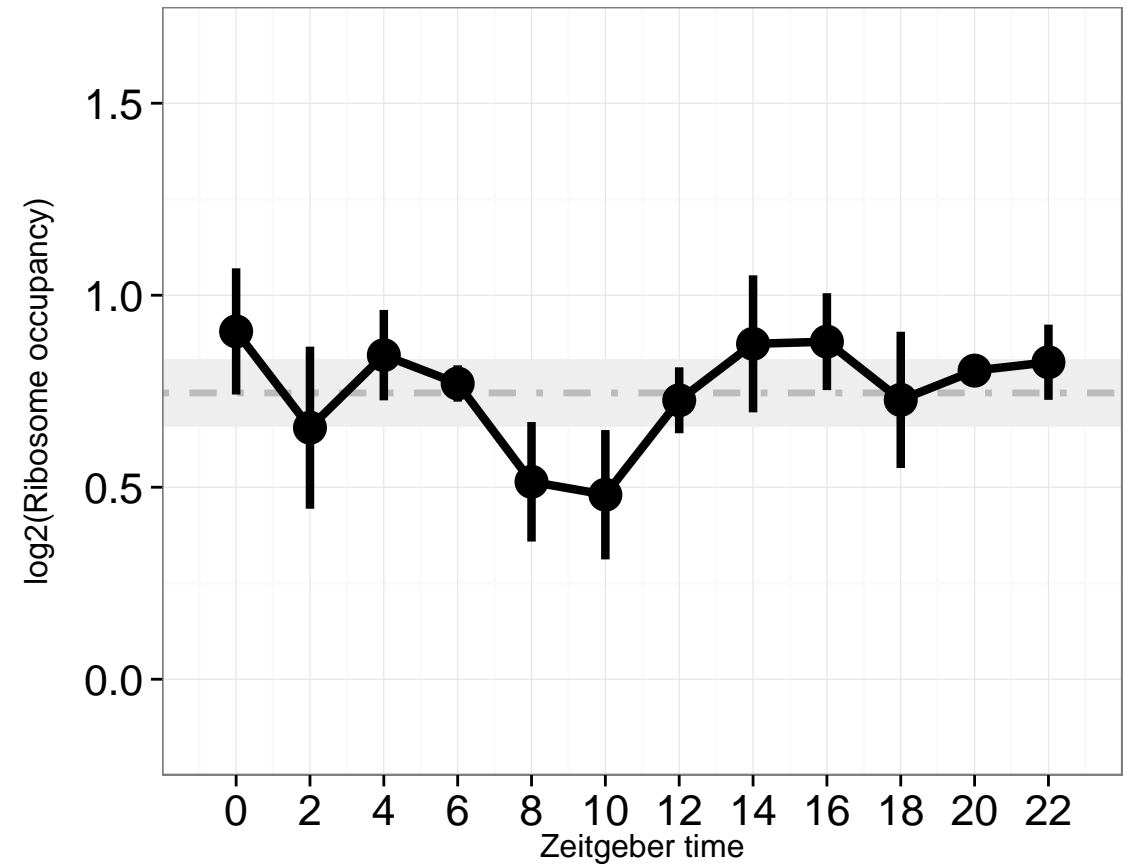

Supplement: Supplementary file 6685 [file 1]

## Nes

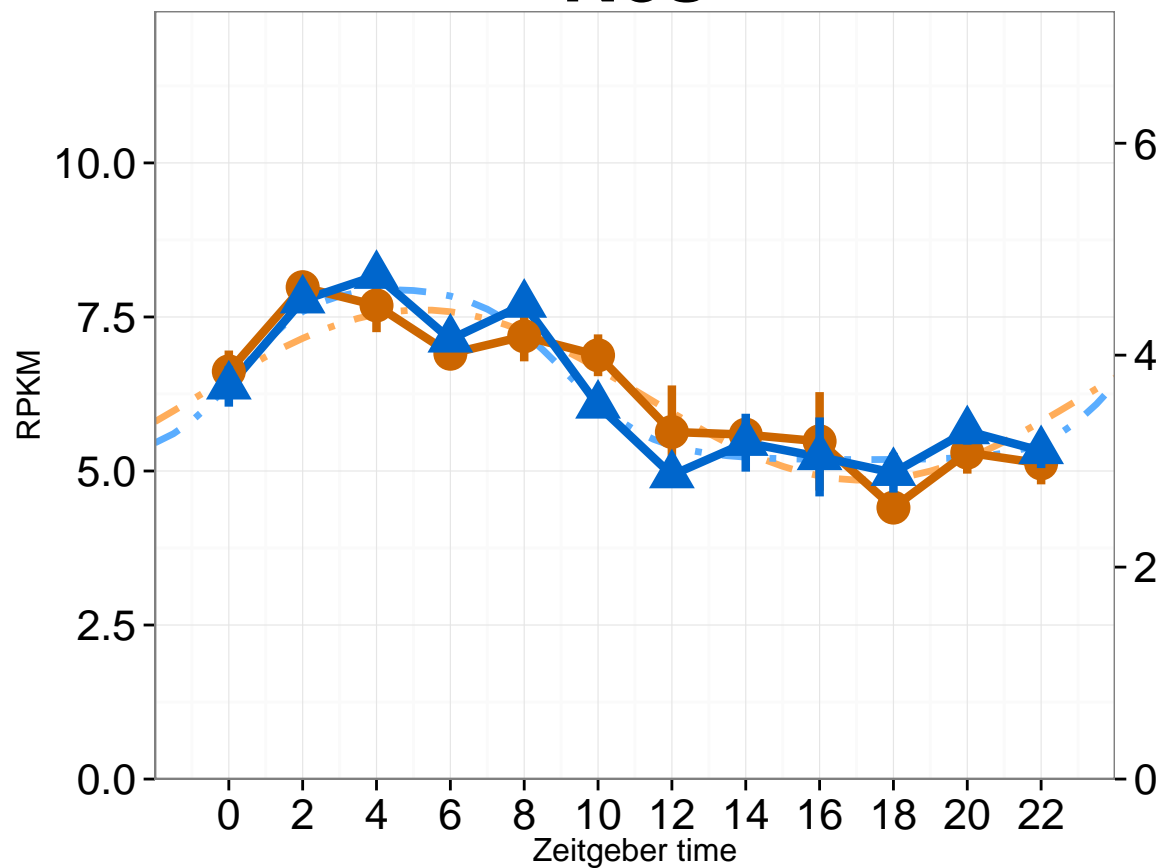

## Nes

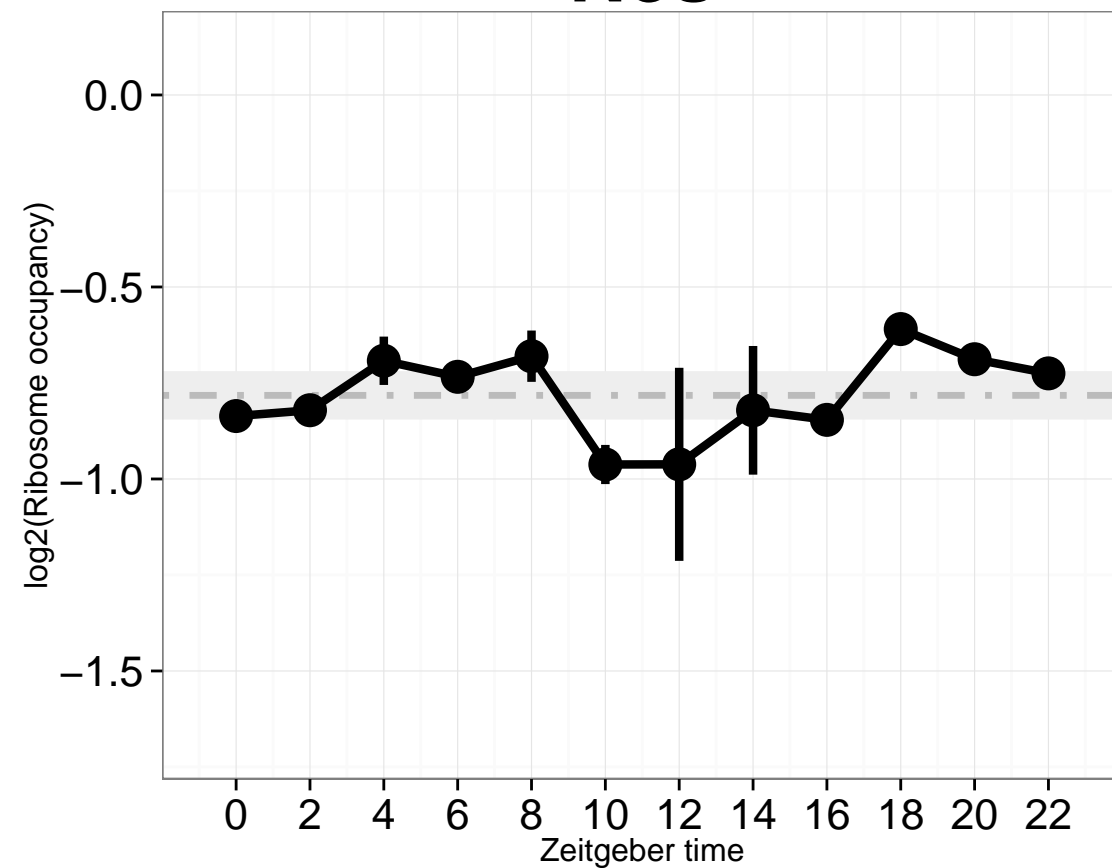

Supplement: Supplementary file 6686 [file 1]

# Bbc3

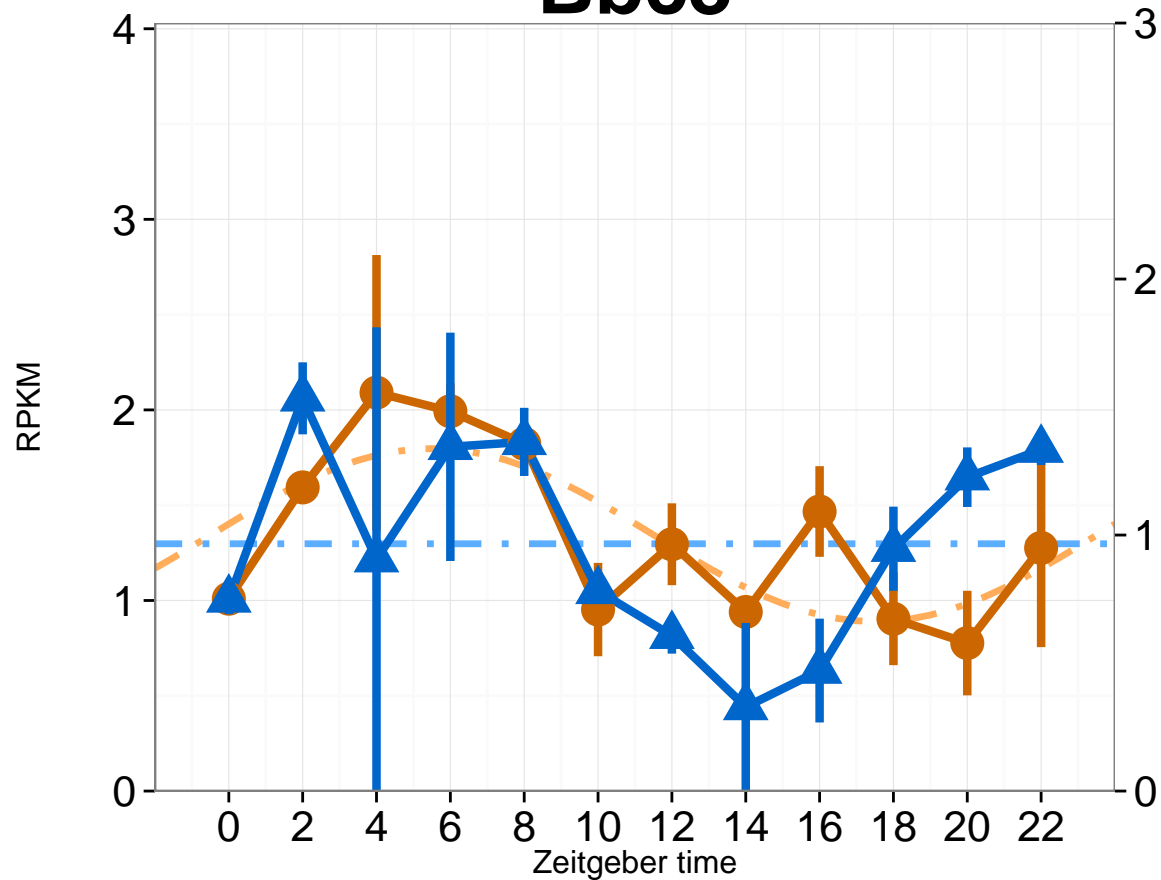

# Bbc3

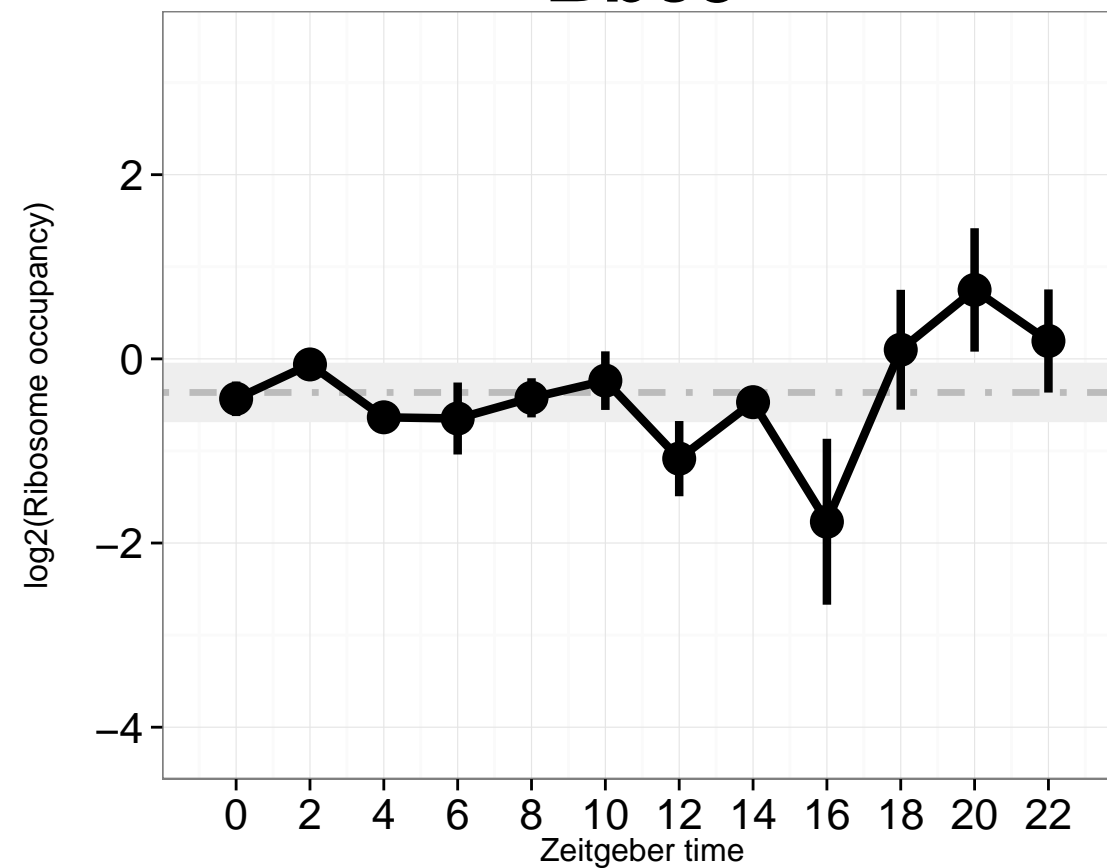

Supplement: Supplementary file 6687 [file 1]

## Shb

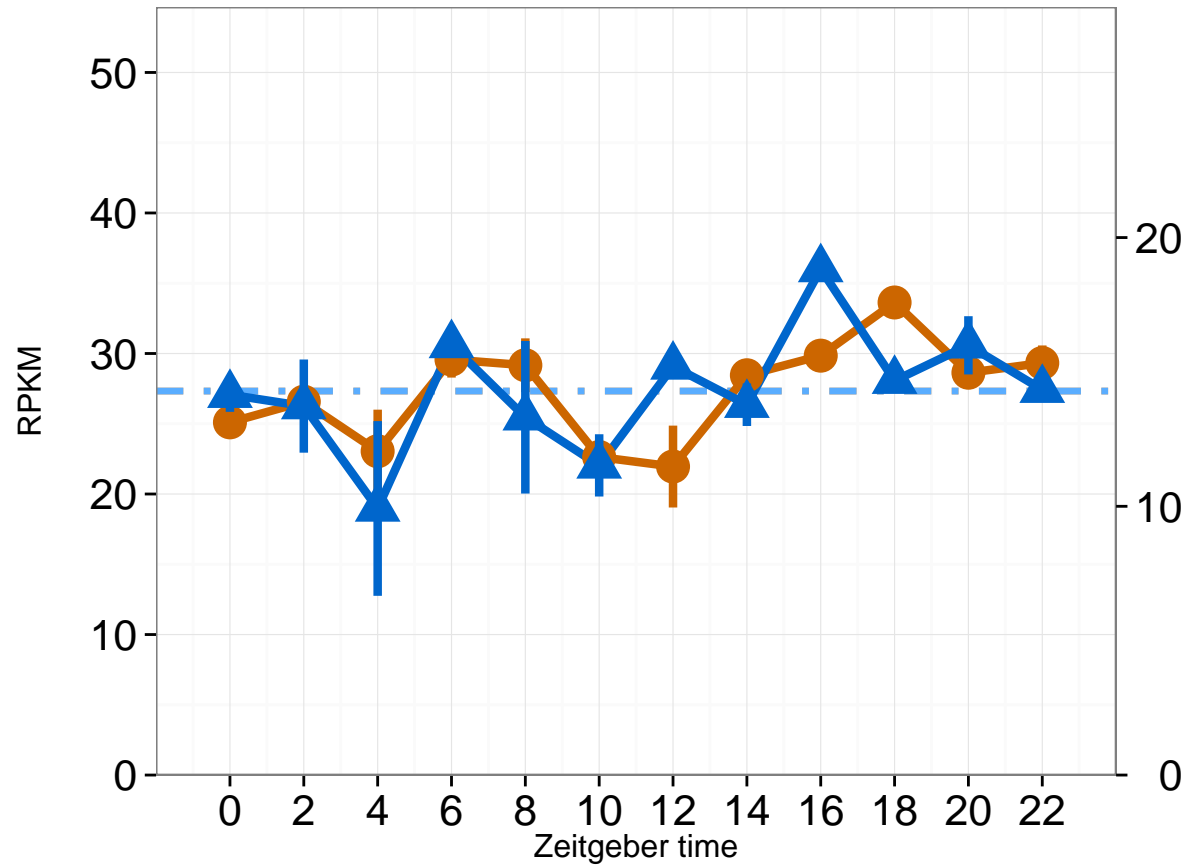

## Shb

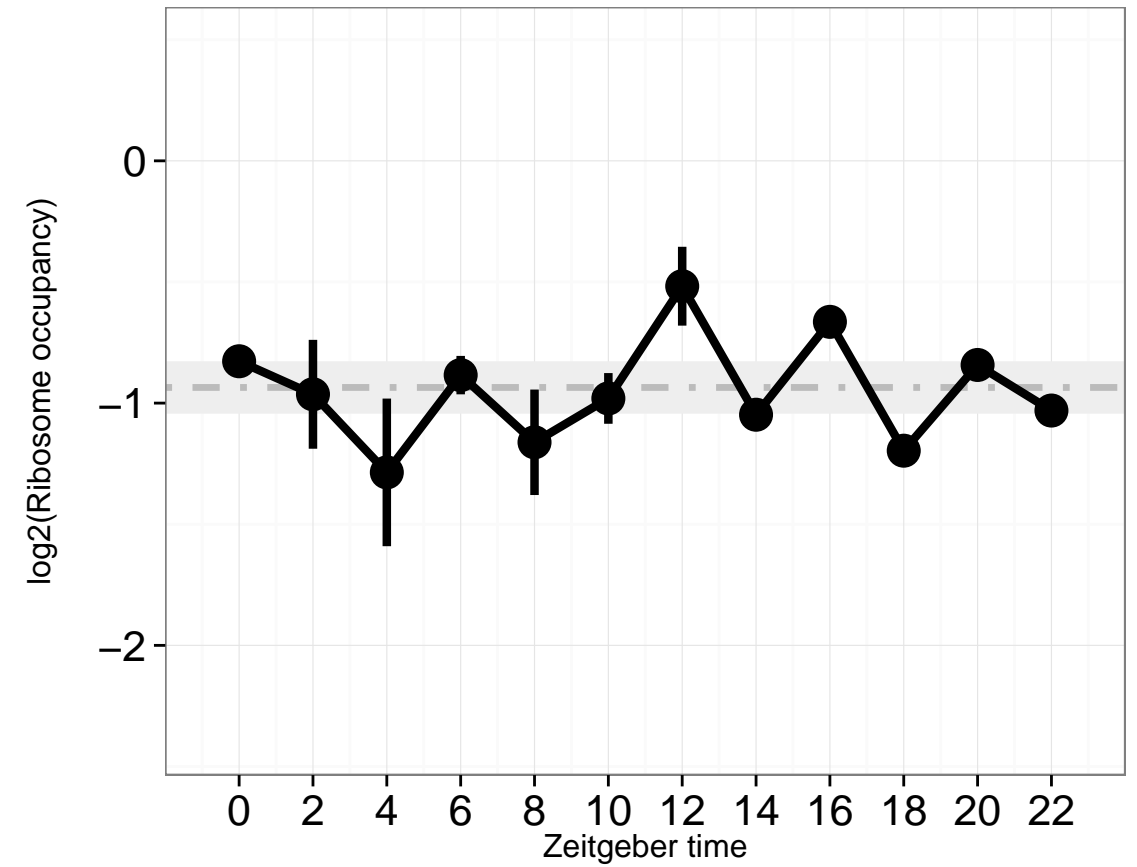

Supplement: Supplementary file 6688 [file 1]

## Pex13

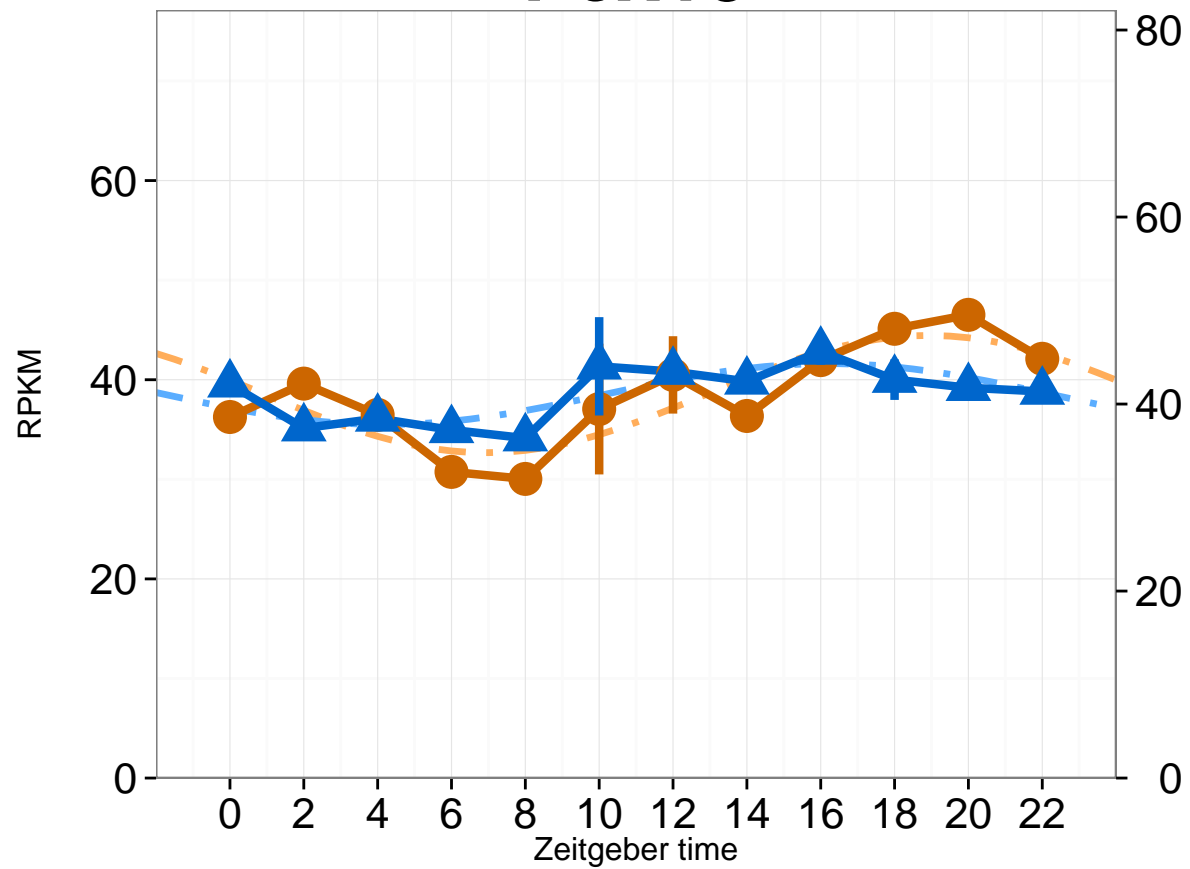

## Pex13

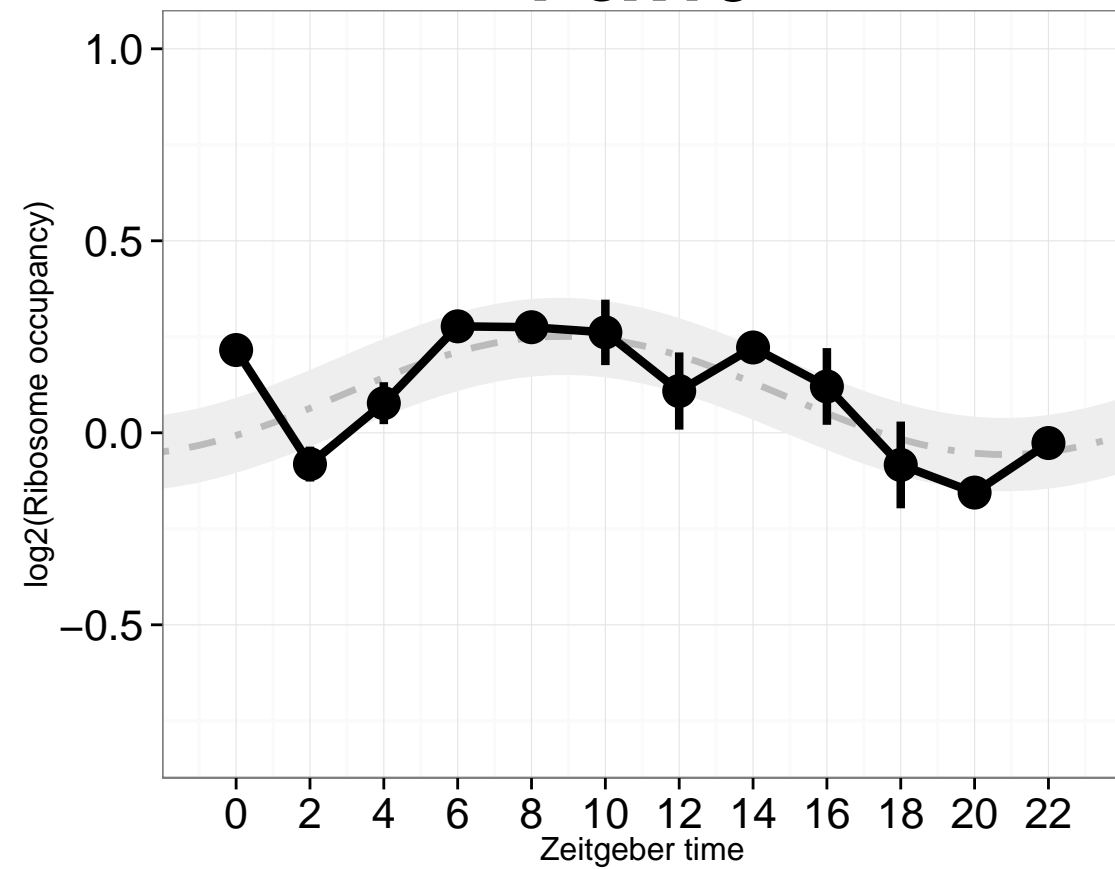

Supplement: Supplementary file 6689 [file 1]

# Pgpep1

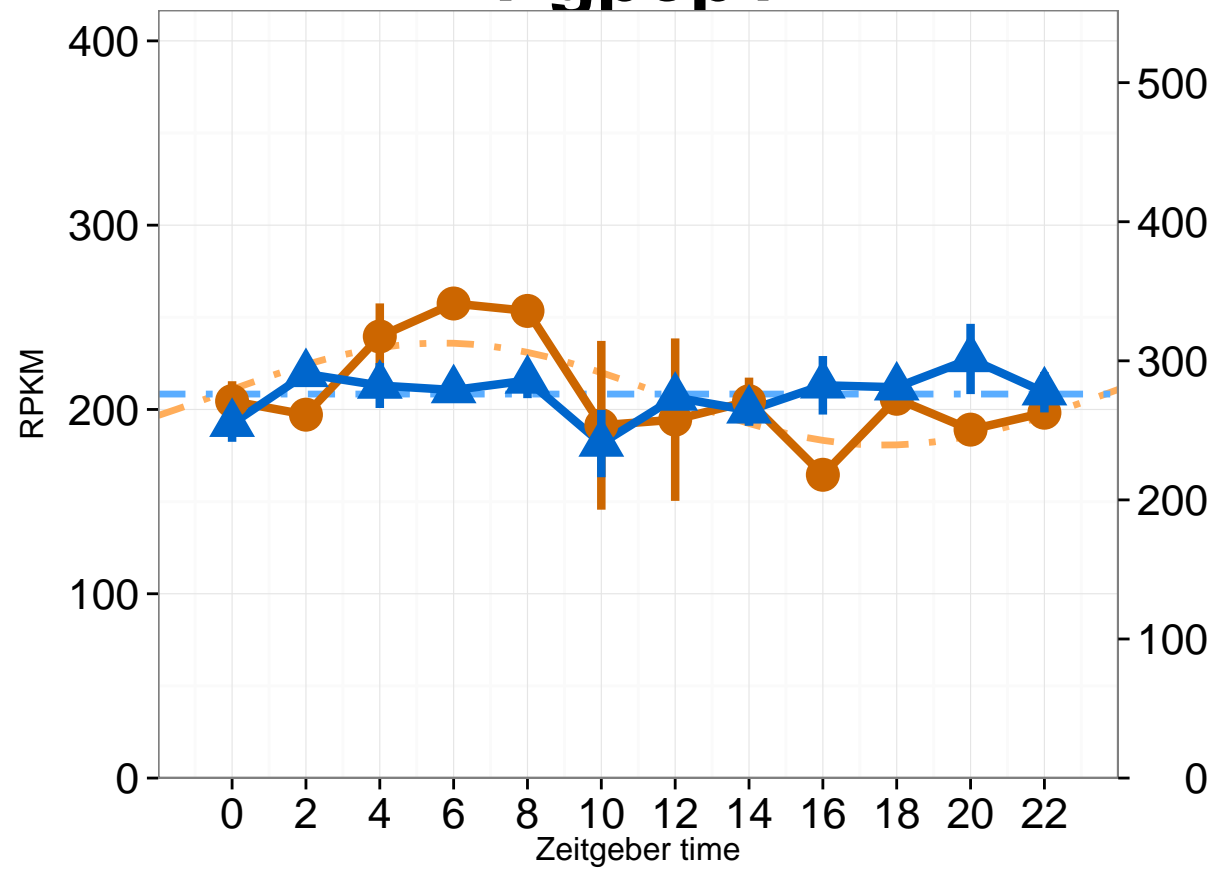

# Pgpep1

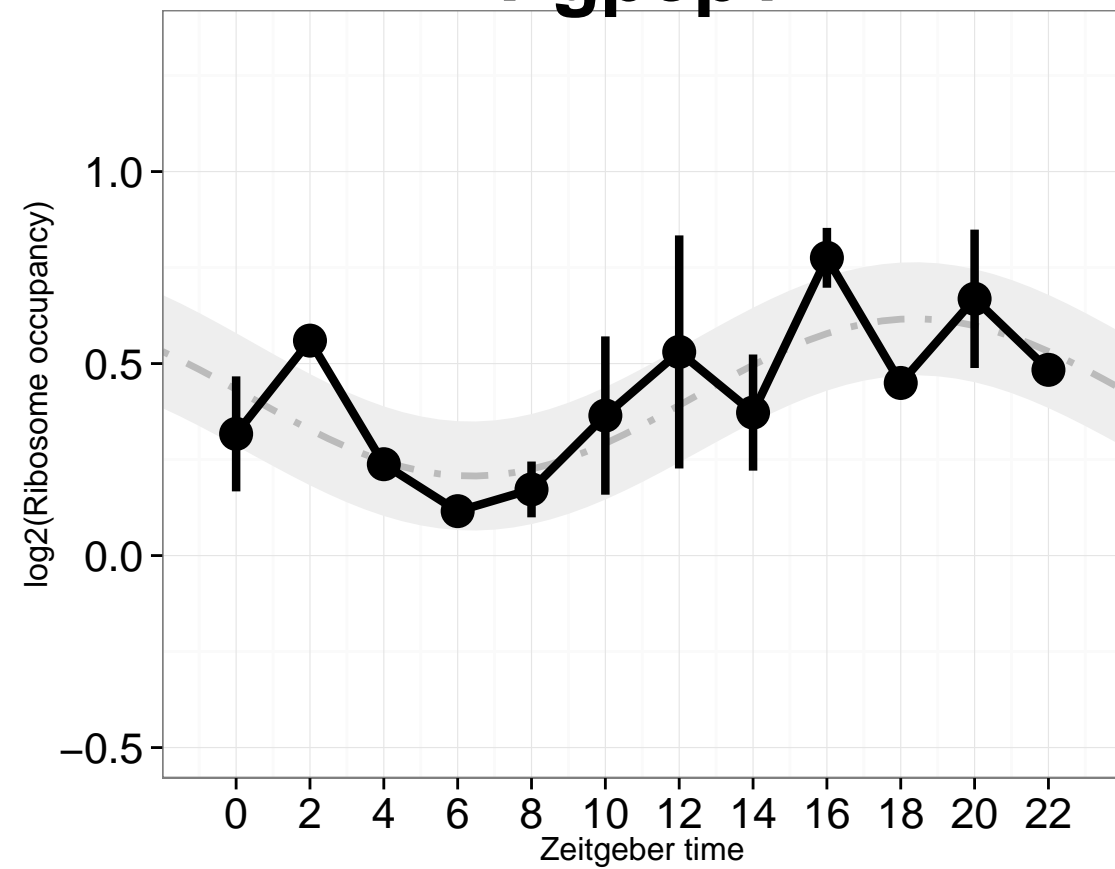

Supplement: Supplementary file 6690 [file 1]

## Abca8a

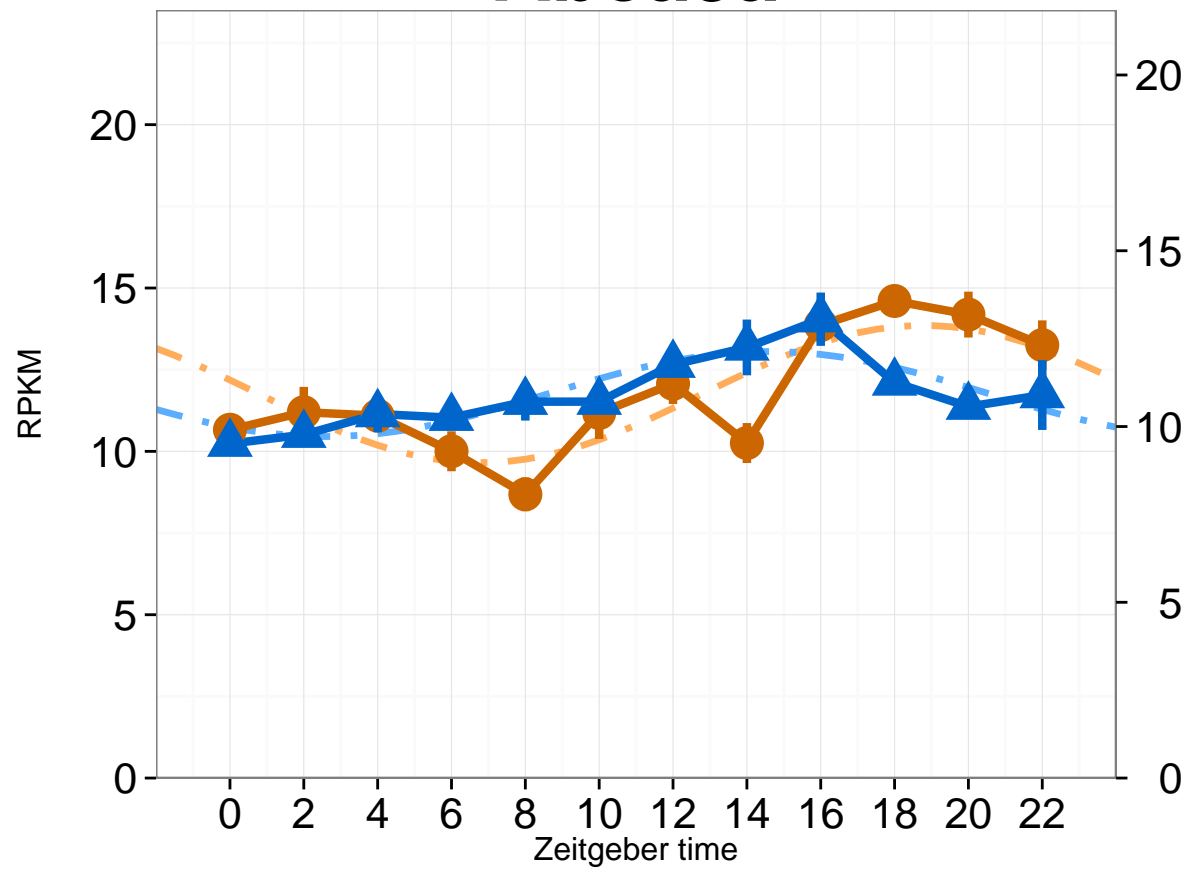

## Abca8a

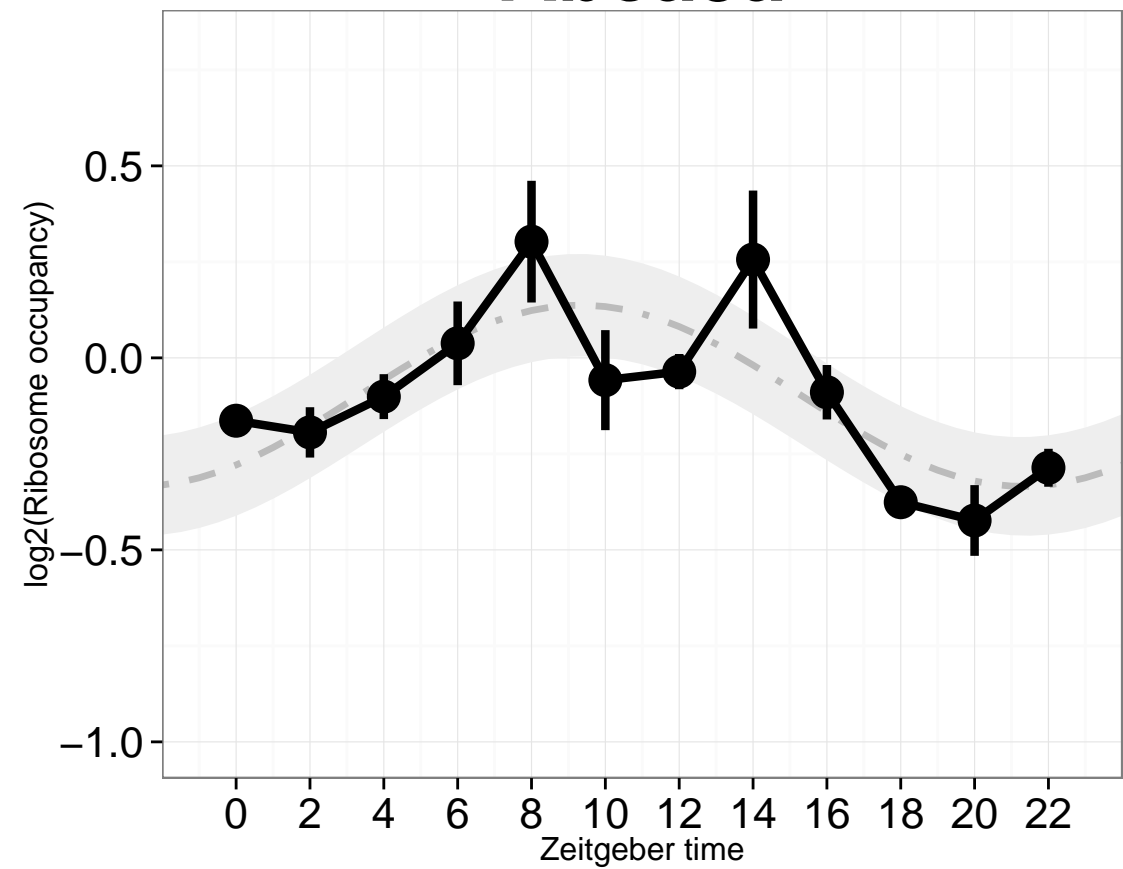

Supplement: Supplementary file 6691 [file 1]

## Ccnj

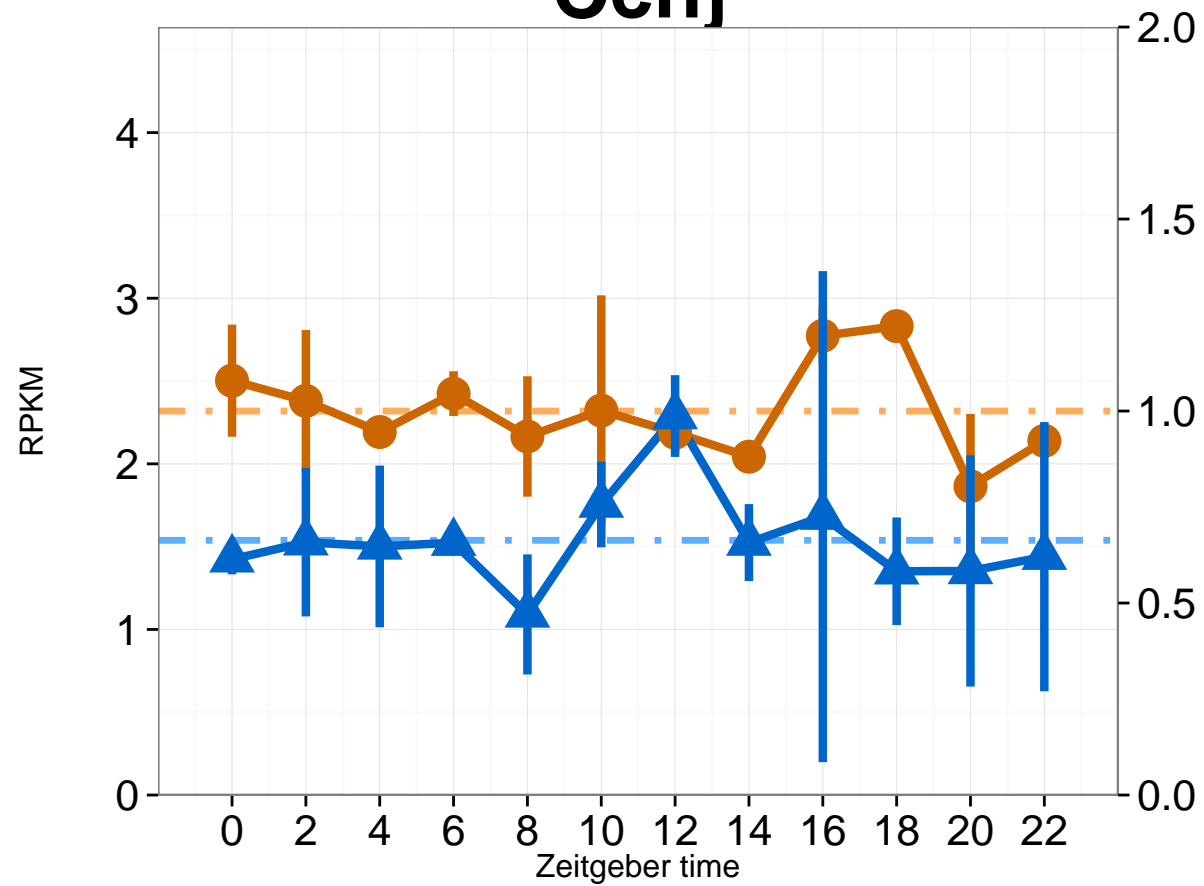

## Ccnj

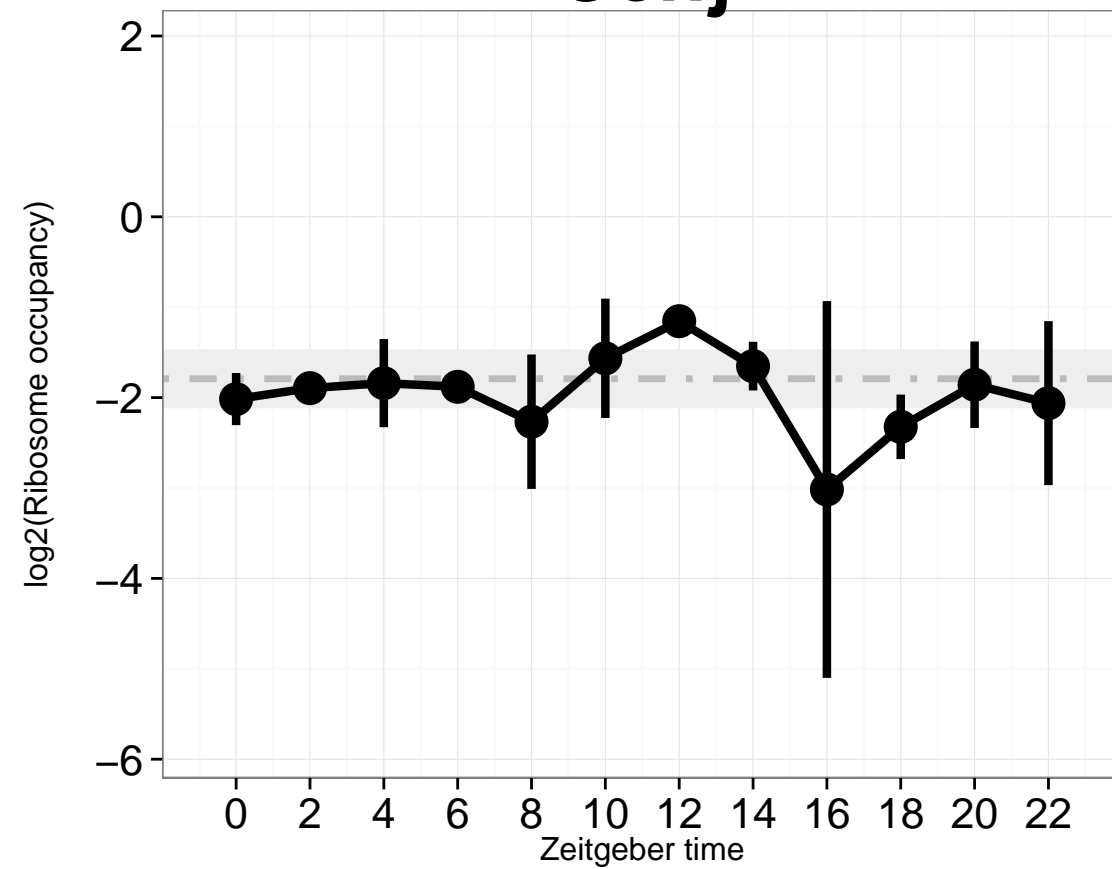

Supplement: Supplementary file 6692 [file 1]

**Morn5 TR**

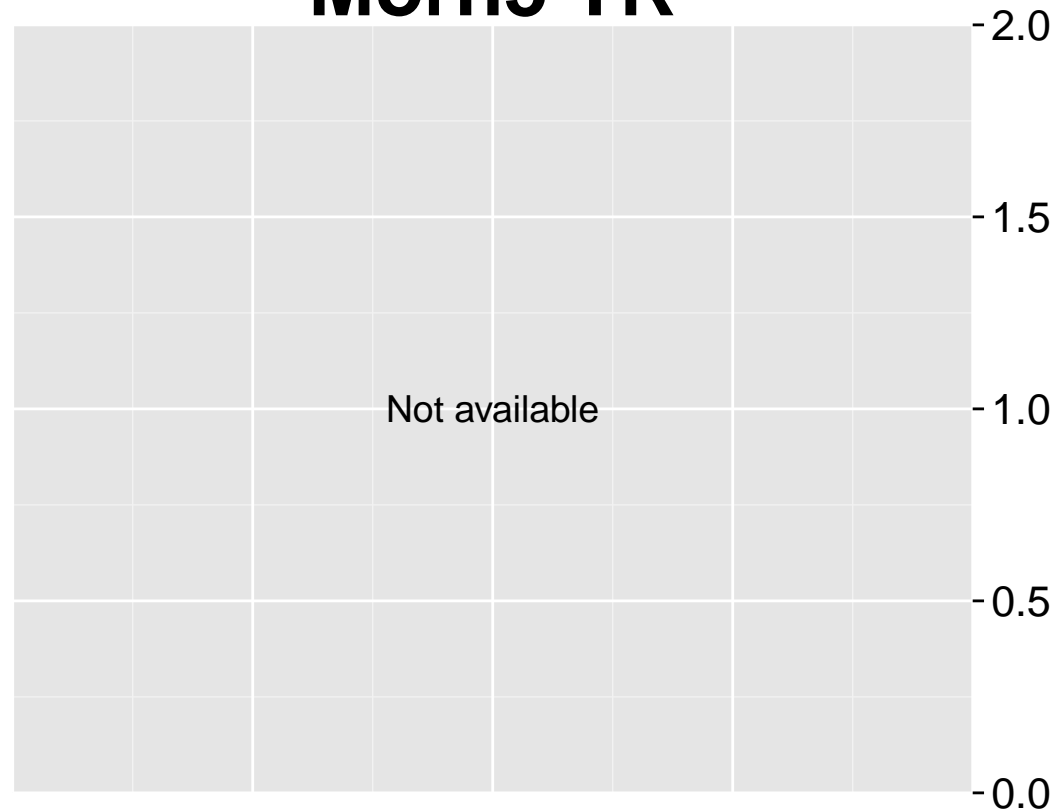

**Morn5 log2(Ribosome occupancy**

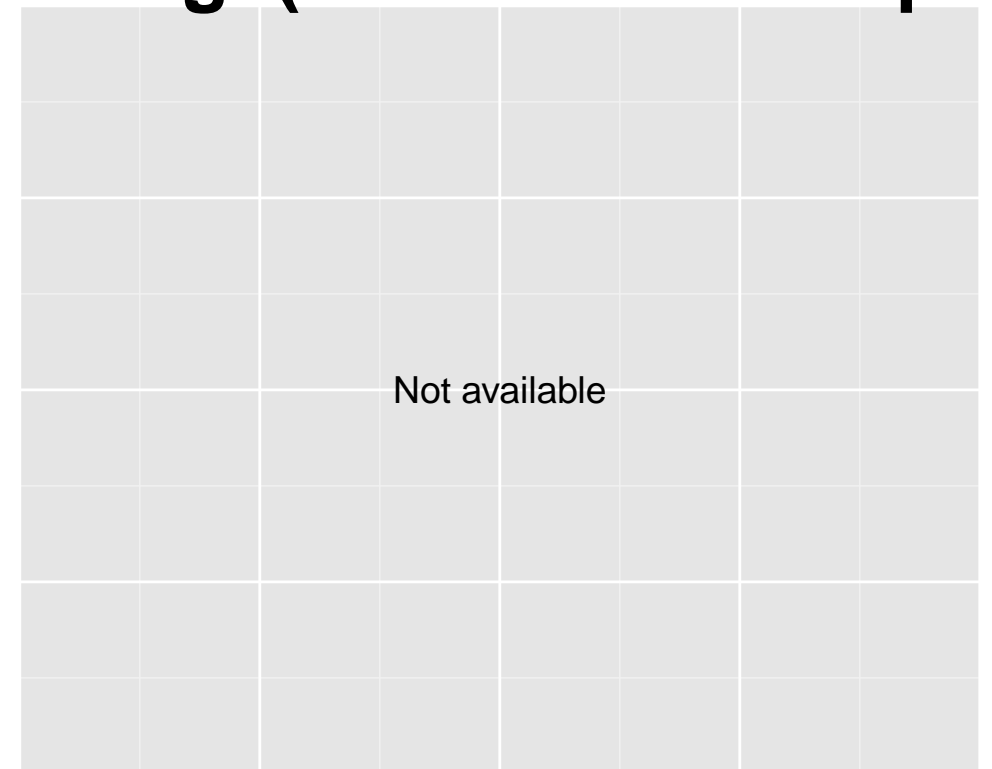

Supplement: Supplementary file 6693 [file 1]

## Psmf1

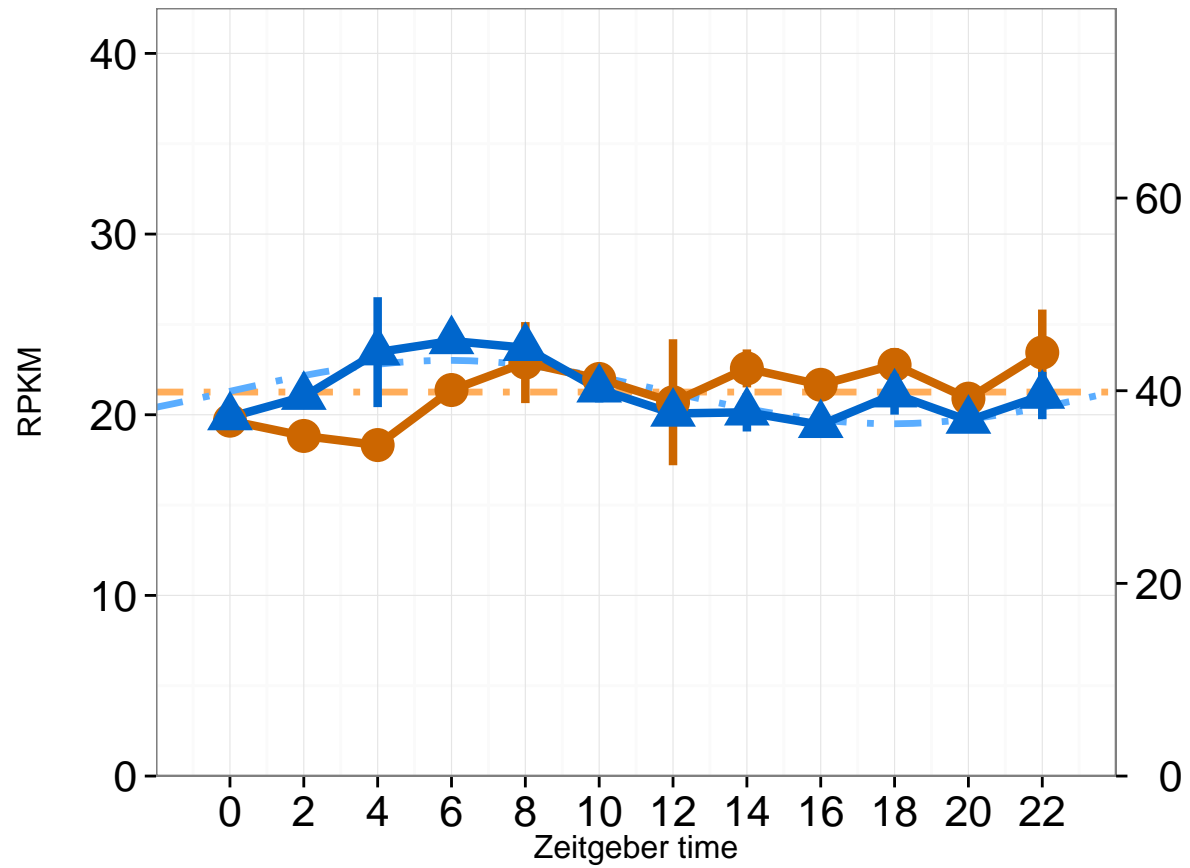

## Psmf1

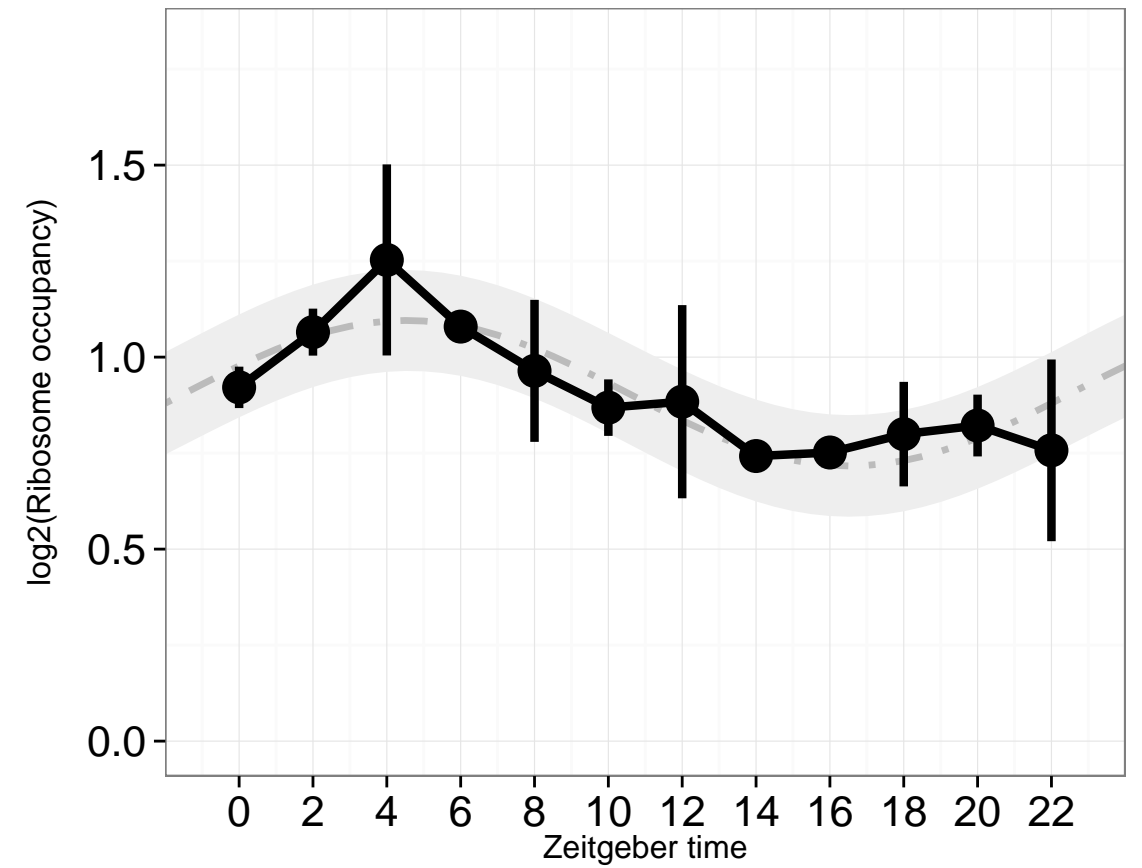

Supplement: Supplementary file 6694 [file 1]

## Nedc9

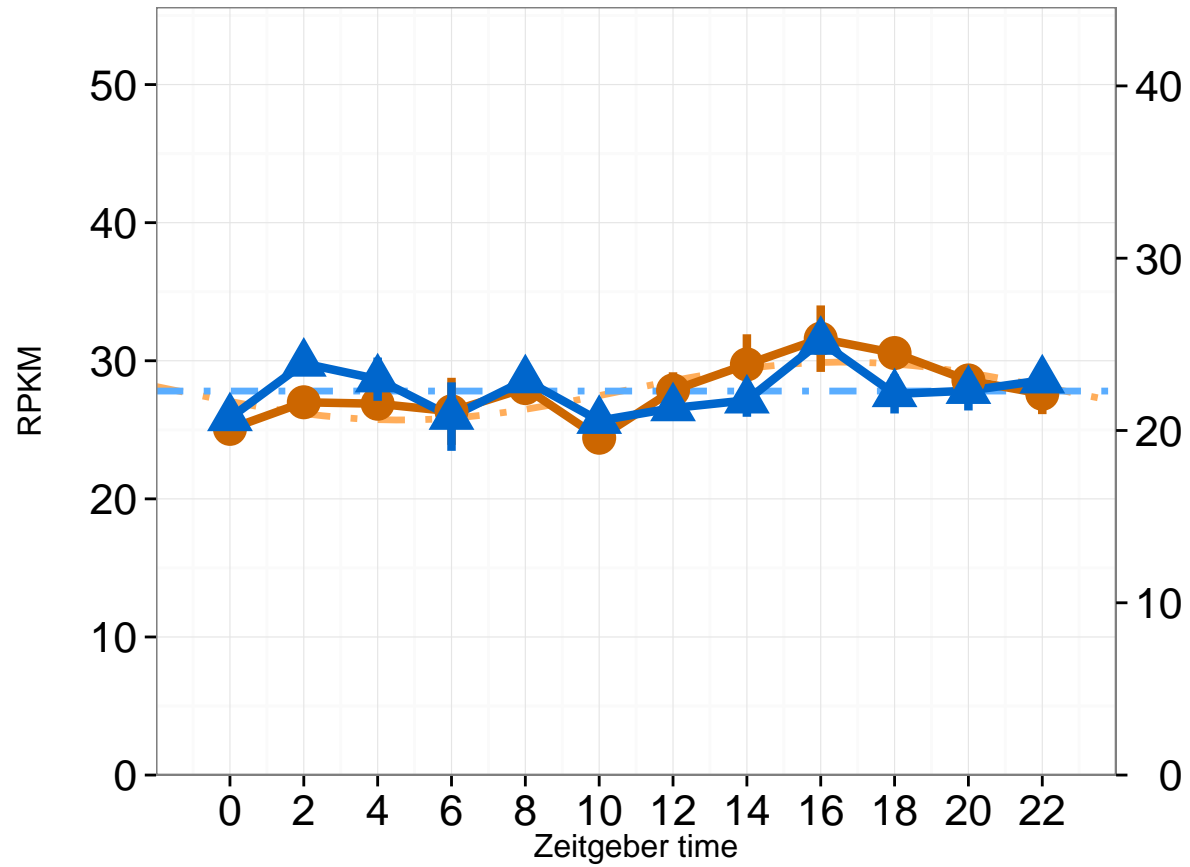

## Nedc9

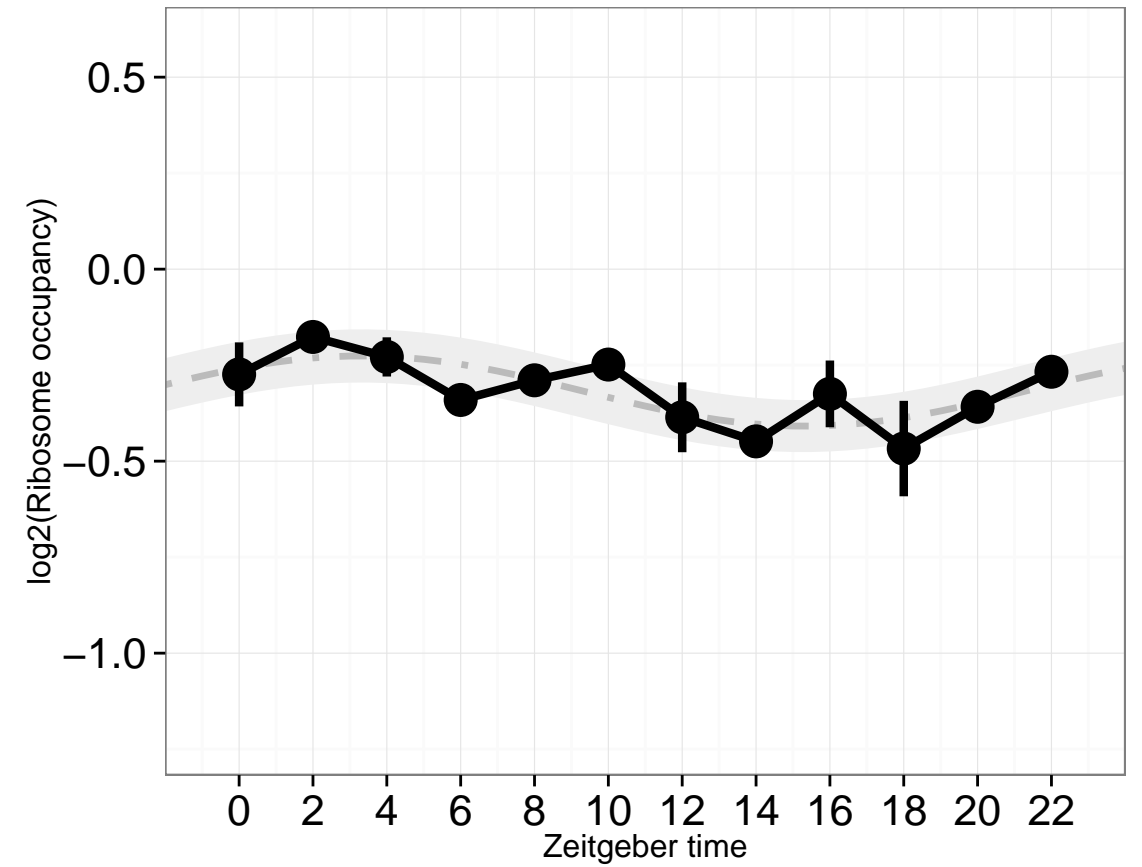

Supplement: Supplementary file 6695 [file 1]

# Dnajc21

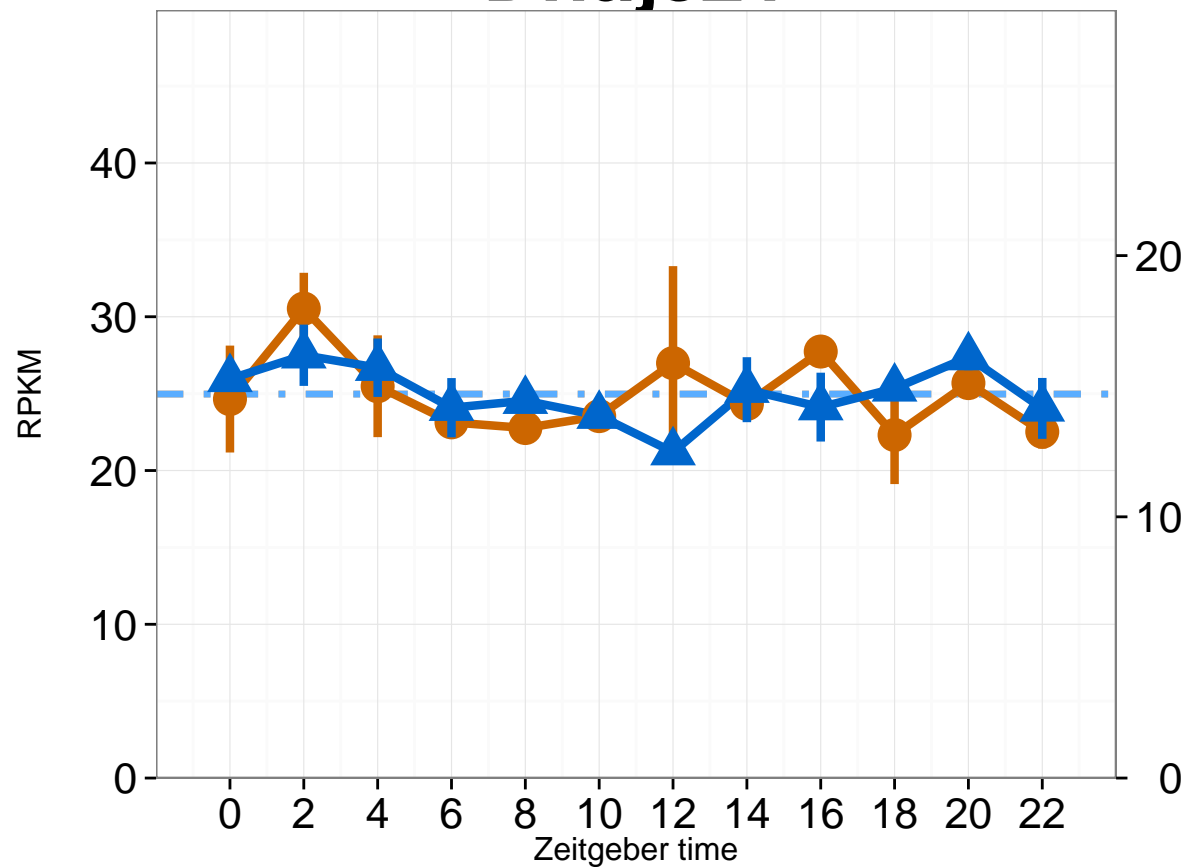

# Dnajc21

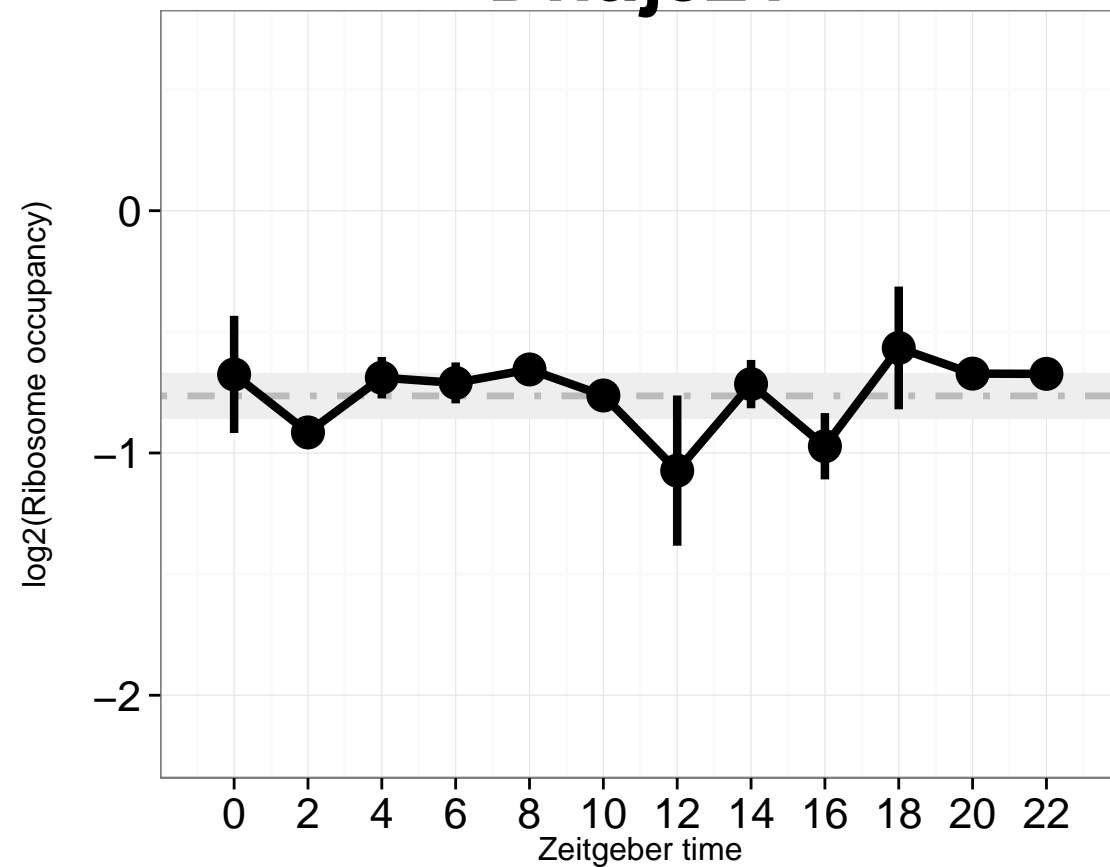

Supplement: Supplementary file 6696 [file 1]

# Mtap7d3

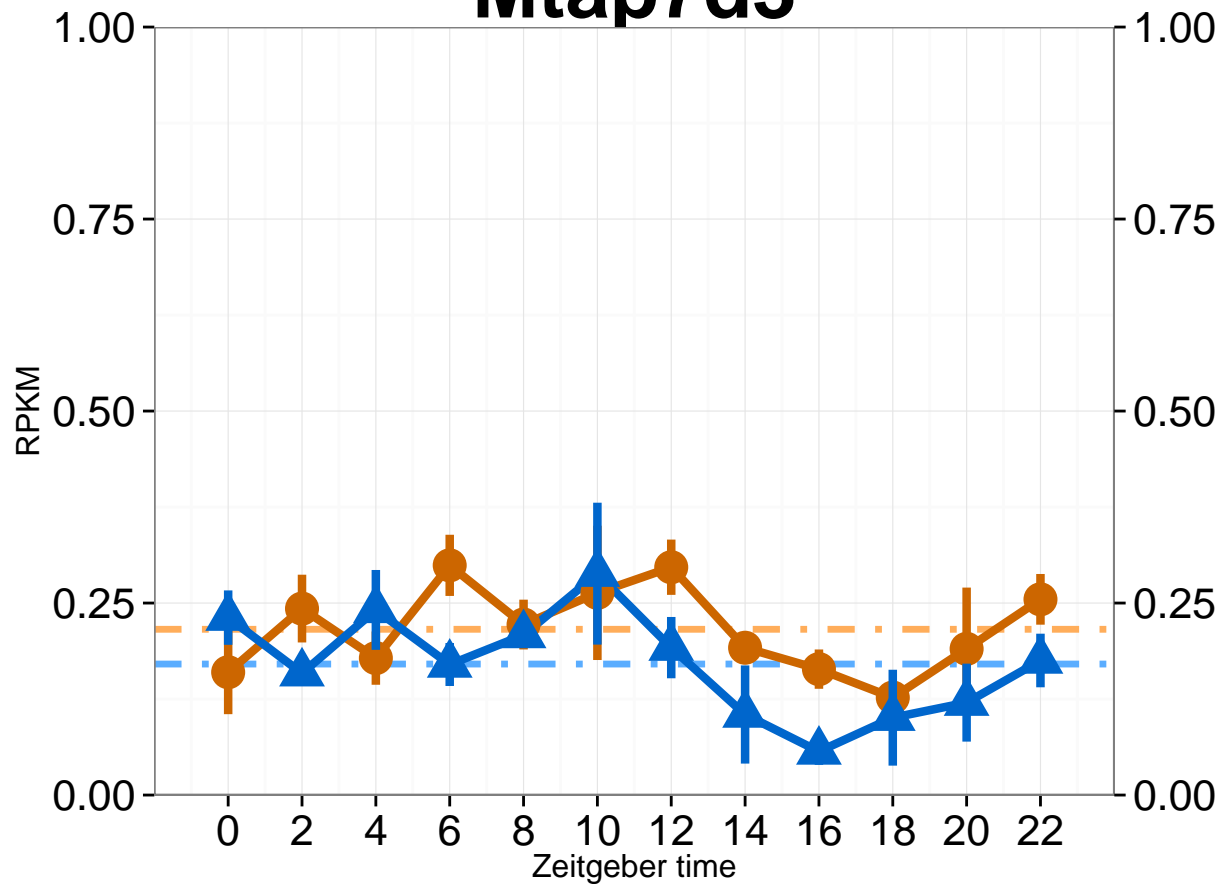

# Mtap7d3

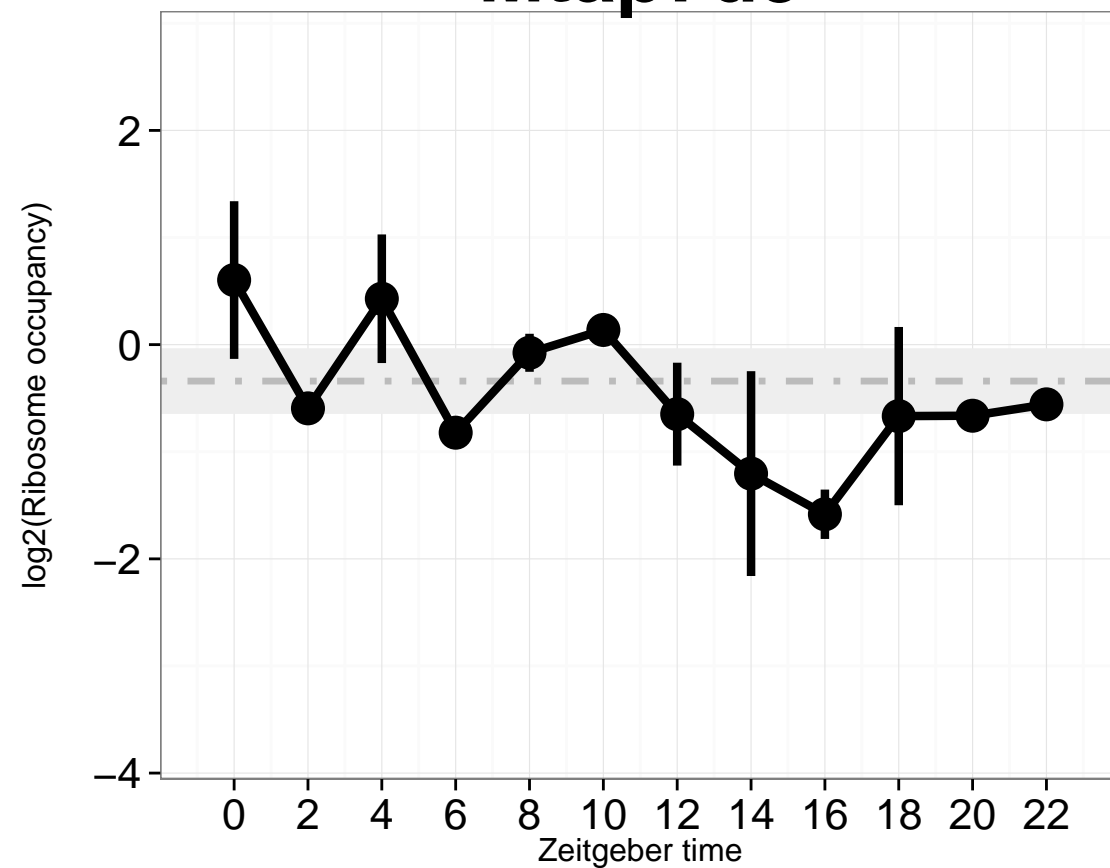

Supplement: Supplementary file 6697 [file 1]

# 1700029J07Rik

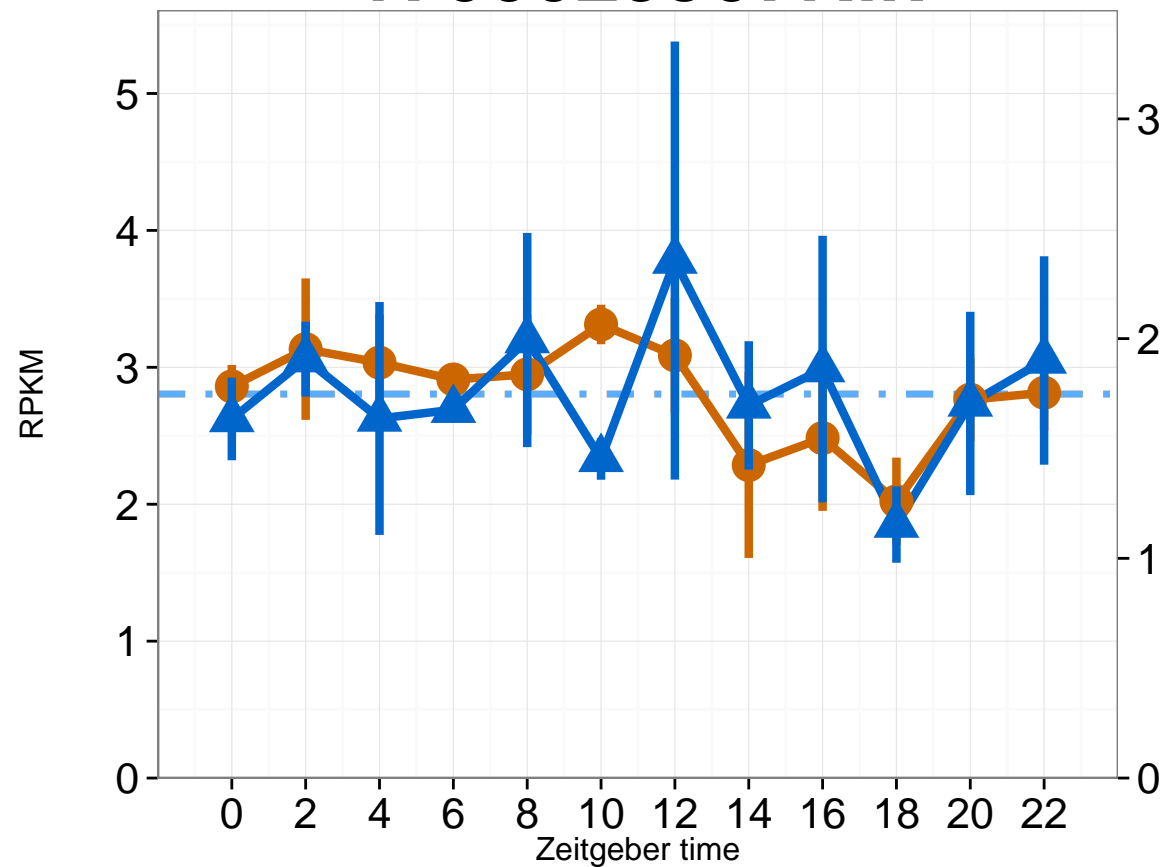

# 1700029J07Rik

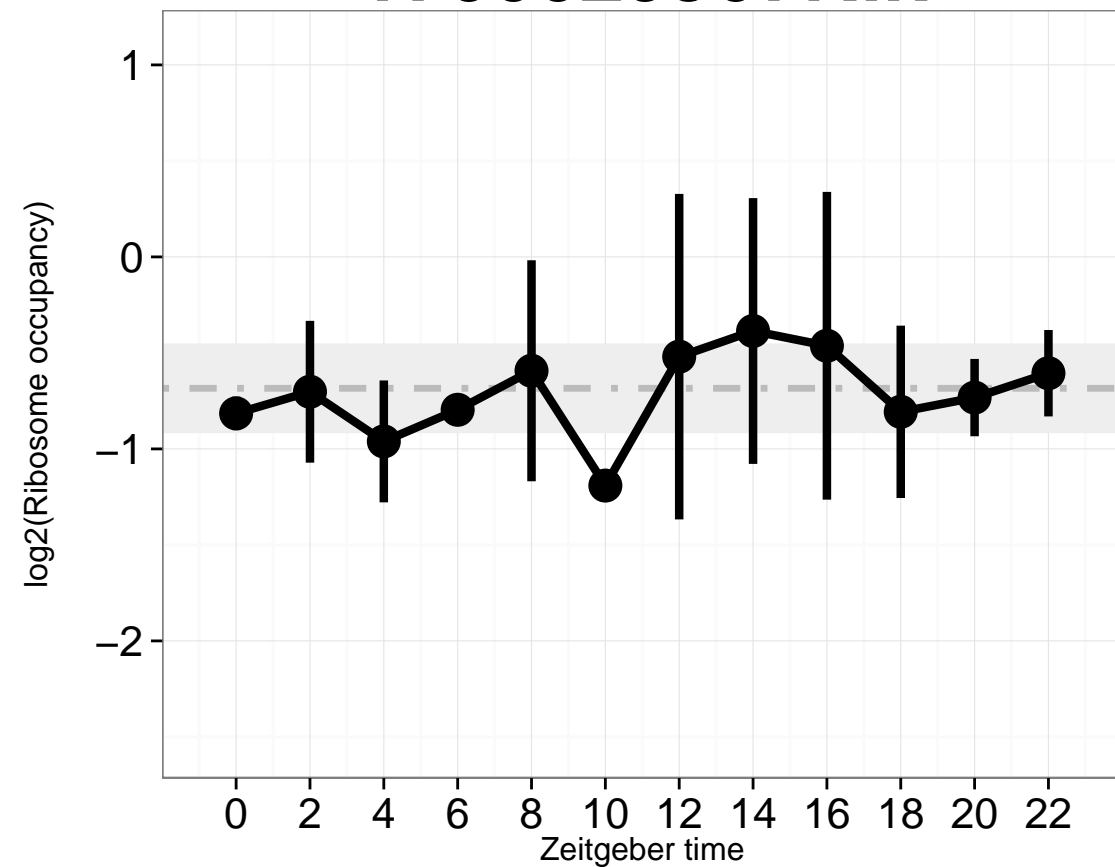

Supplement: Supplementary file 6698 [file 1]

## Ccdc181

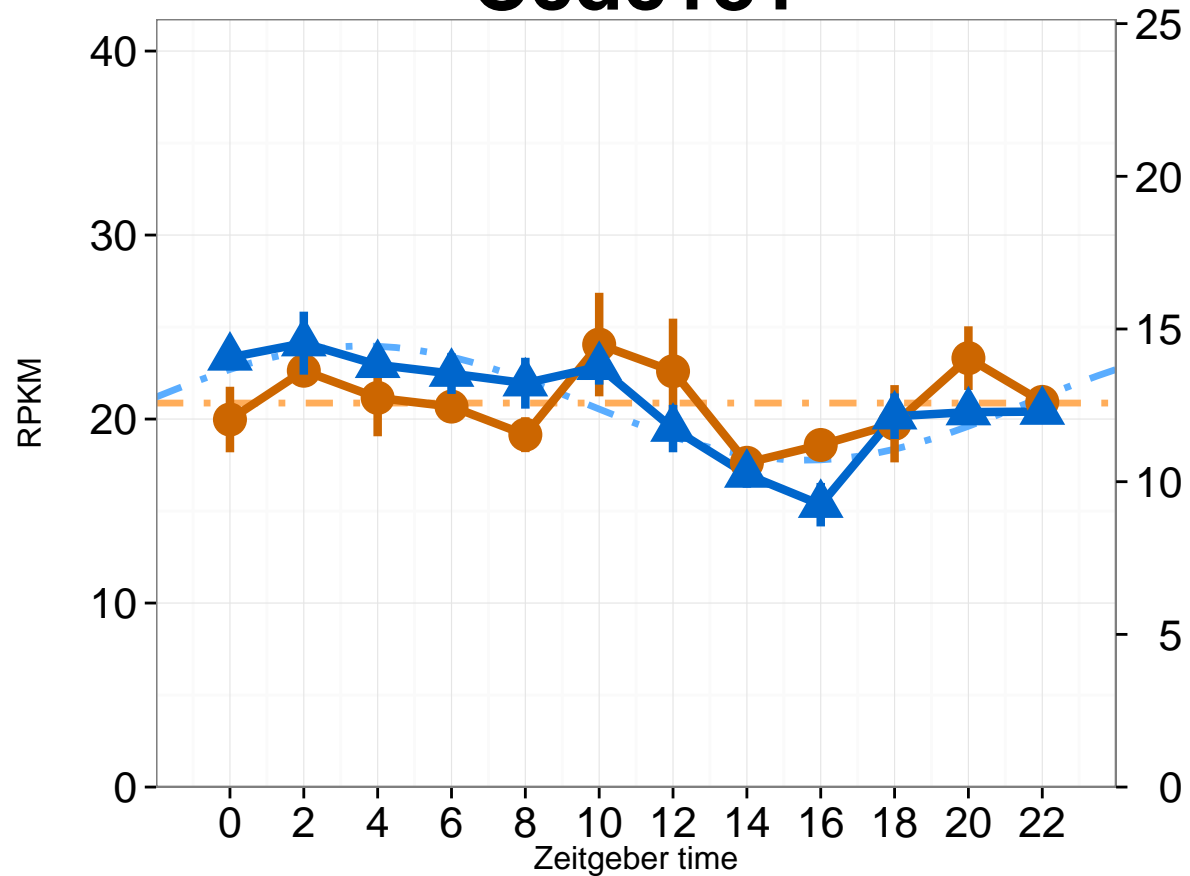

## Ccdc181

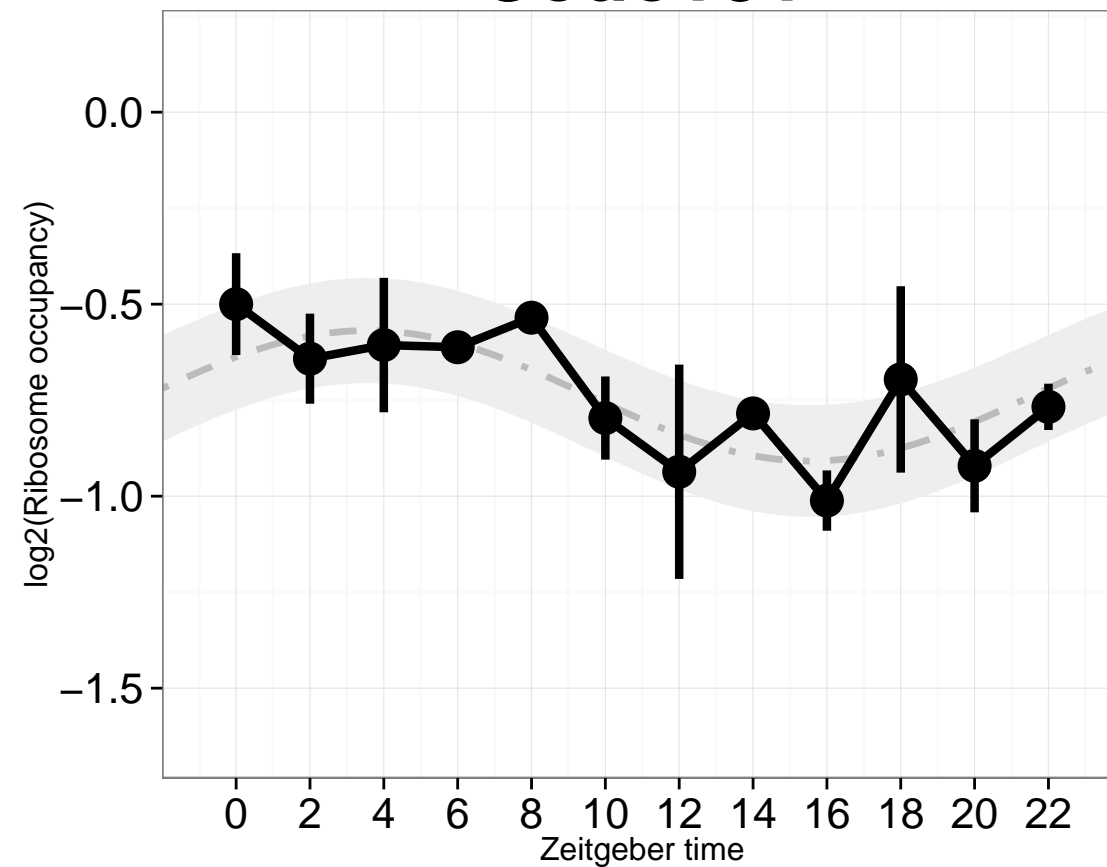

Supplement: Supplementary file 6699 [file 1]

# Hoxa10

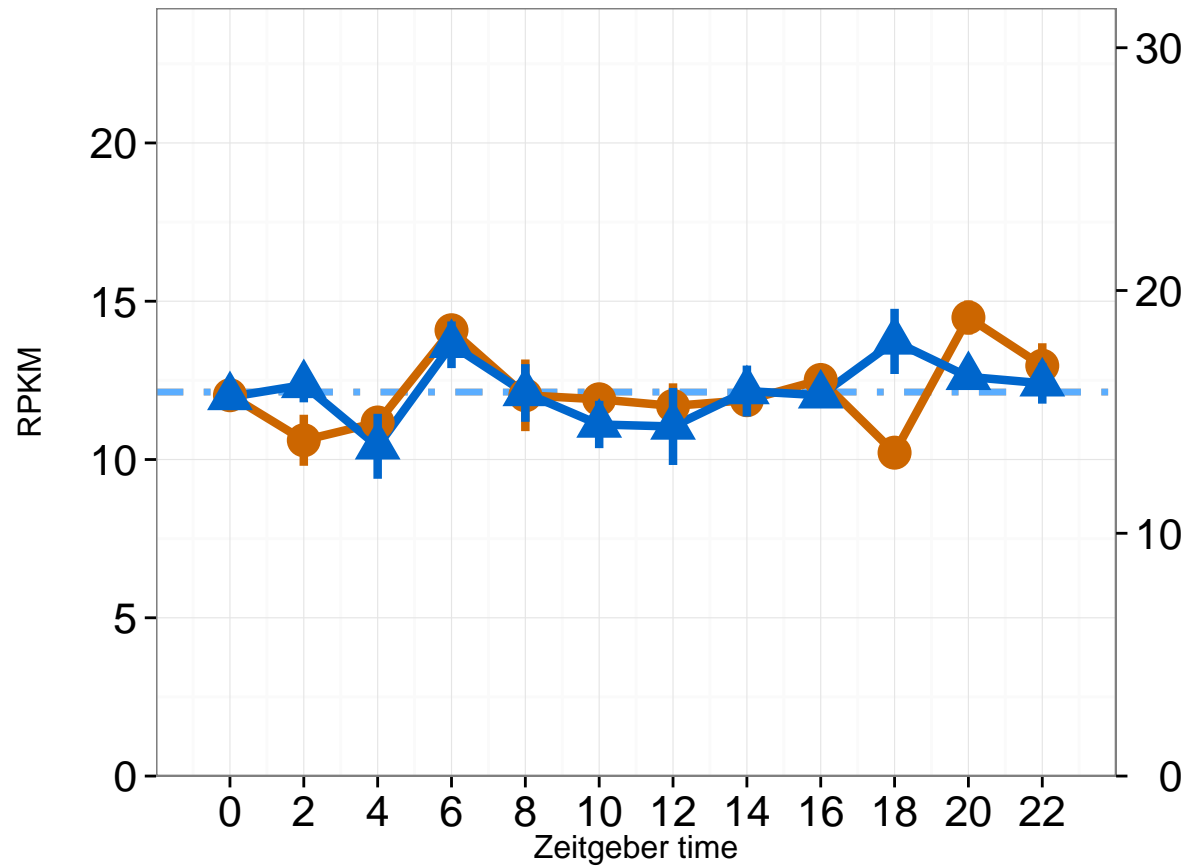

# Hoxa10

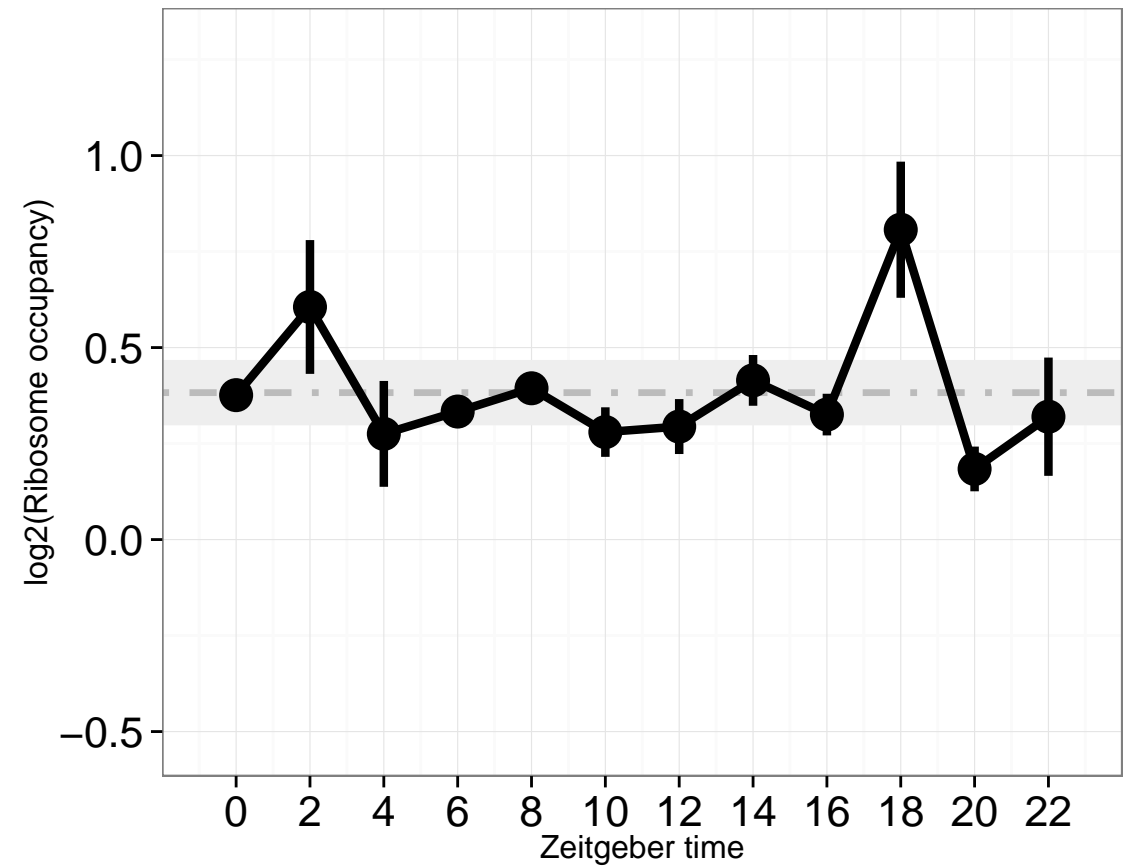

Supplement: Supplementary file 6700 [file 1]

# Trim21

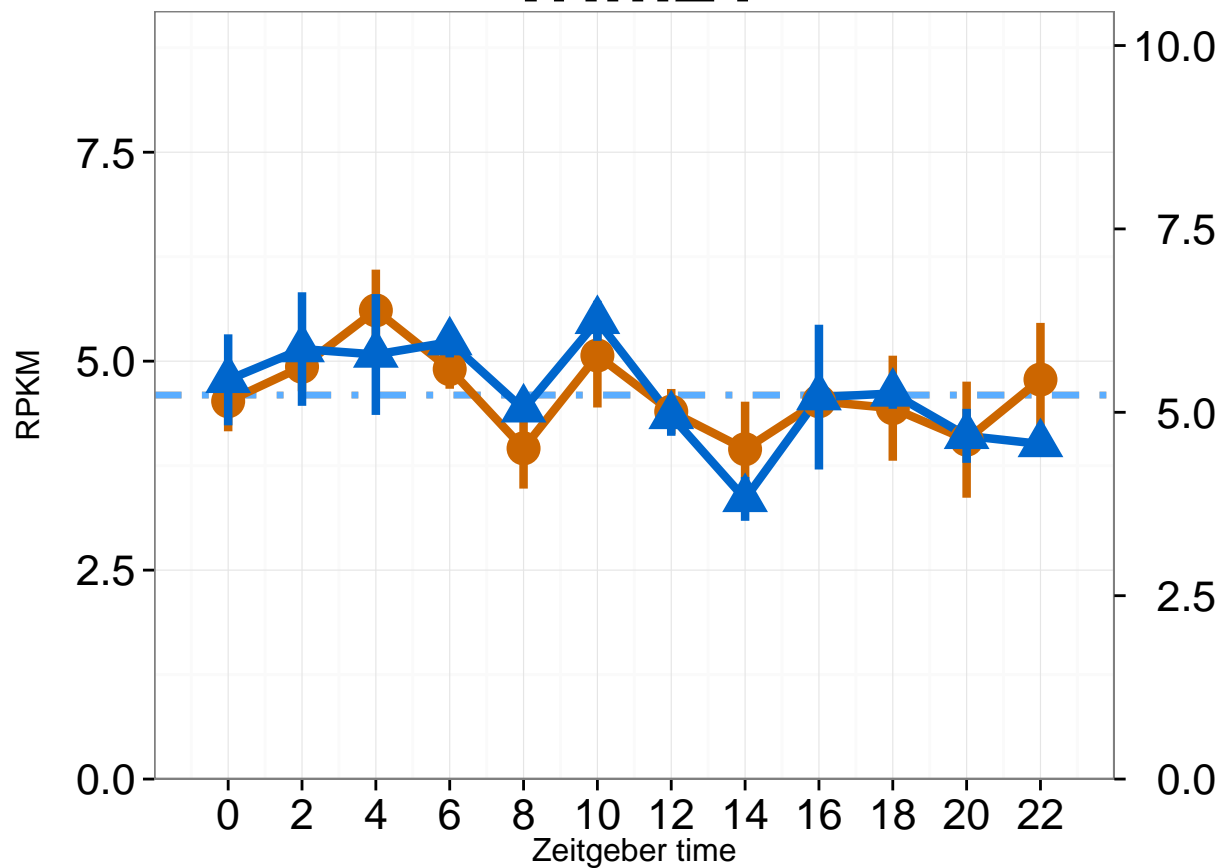

# Trim21

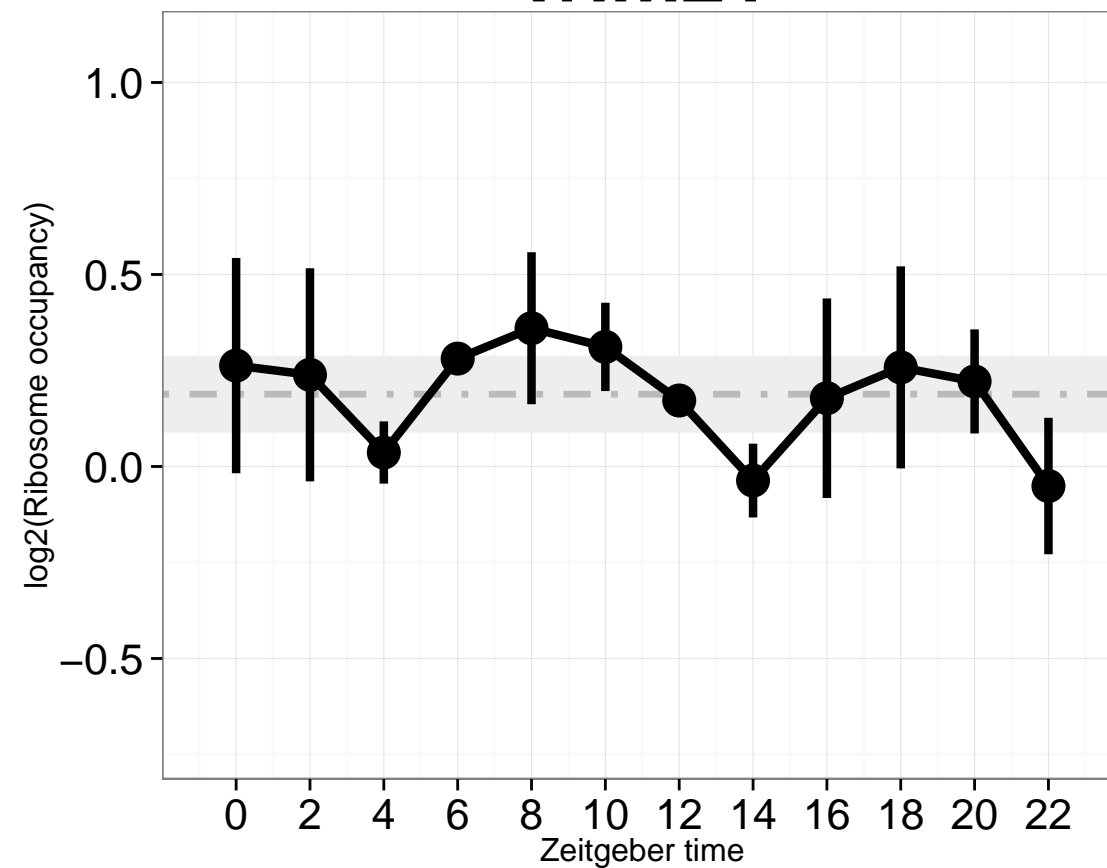

Supplement: Supplementary file 6701 [file 1]

# Dnajb11

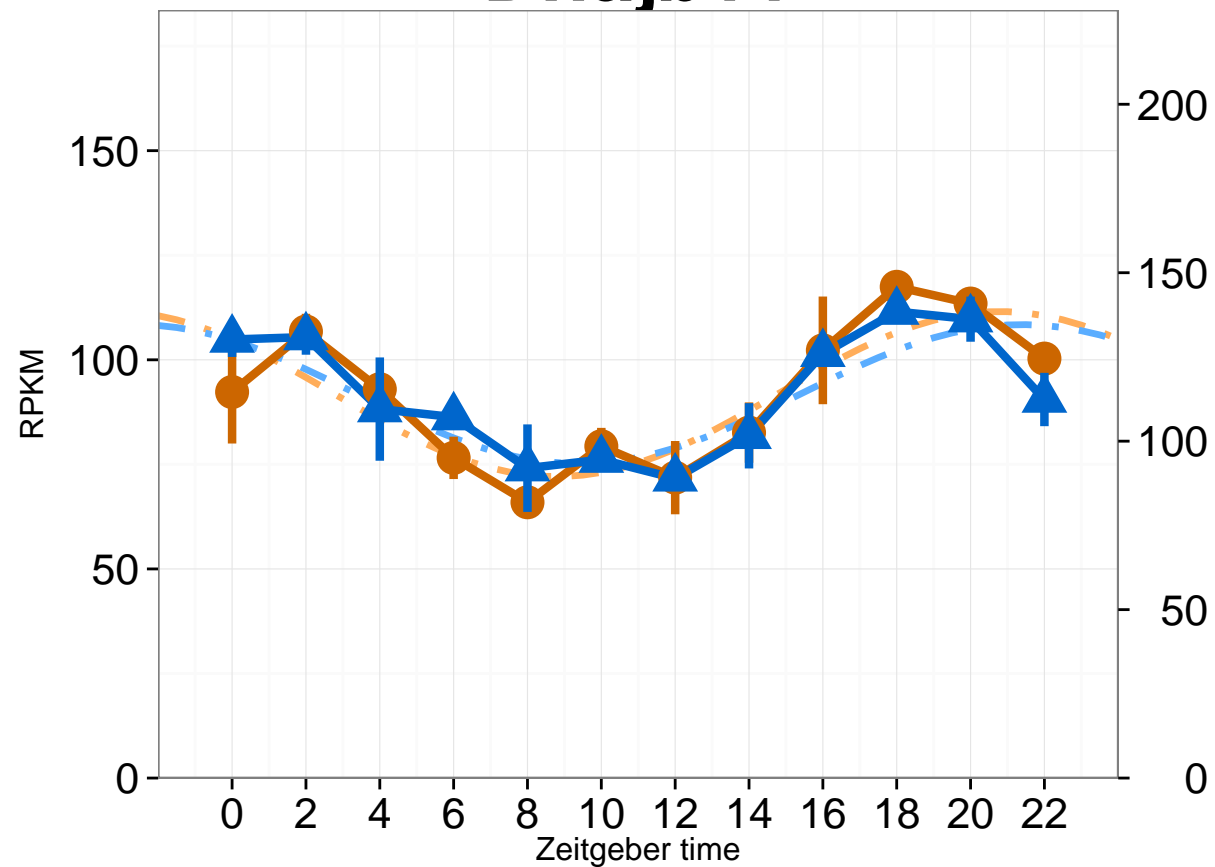

# Dnajb11

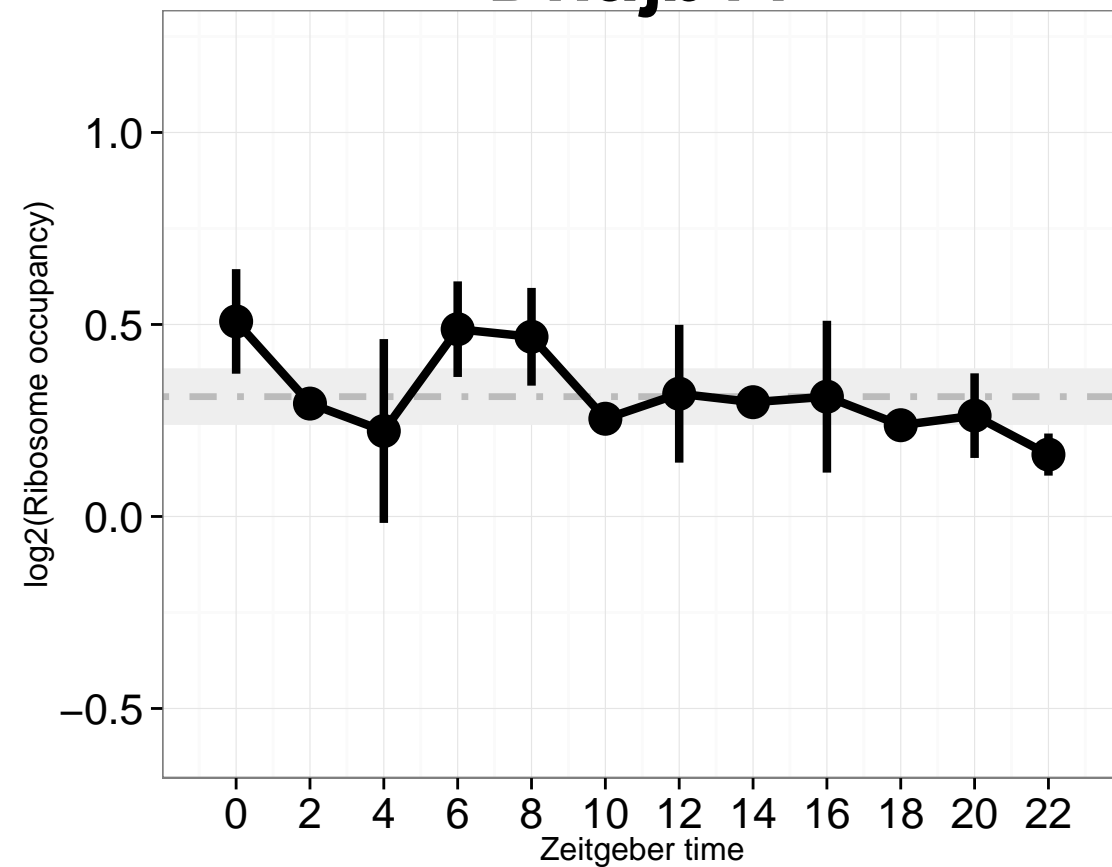

Supplement: Supplementary file 6702 [file 1]

# Fam20a

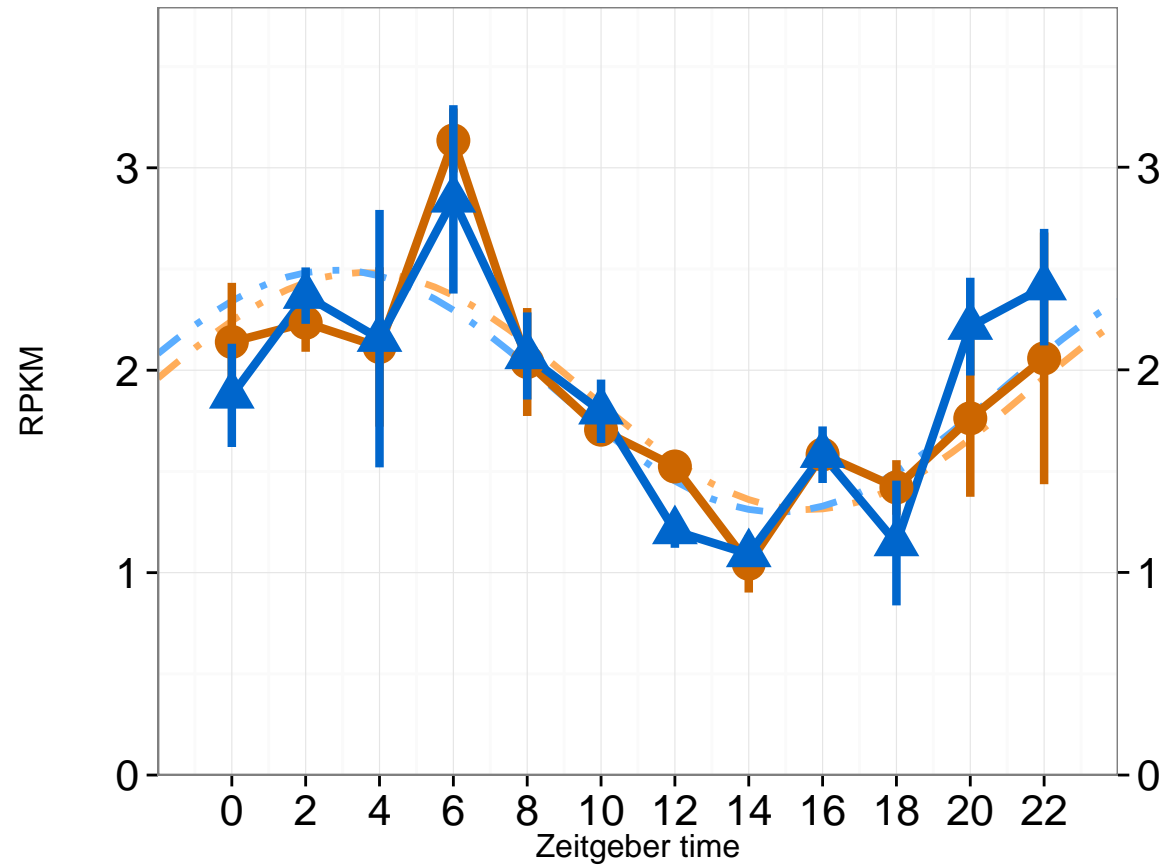

# Fam20a

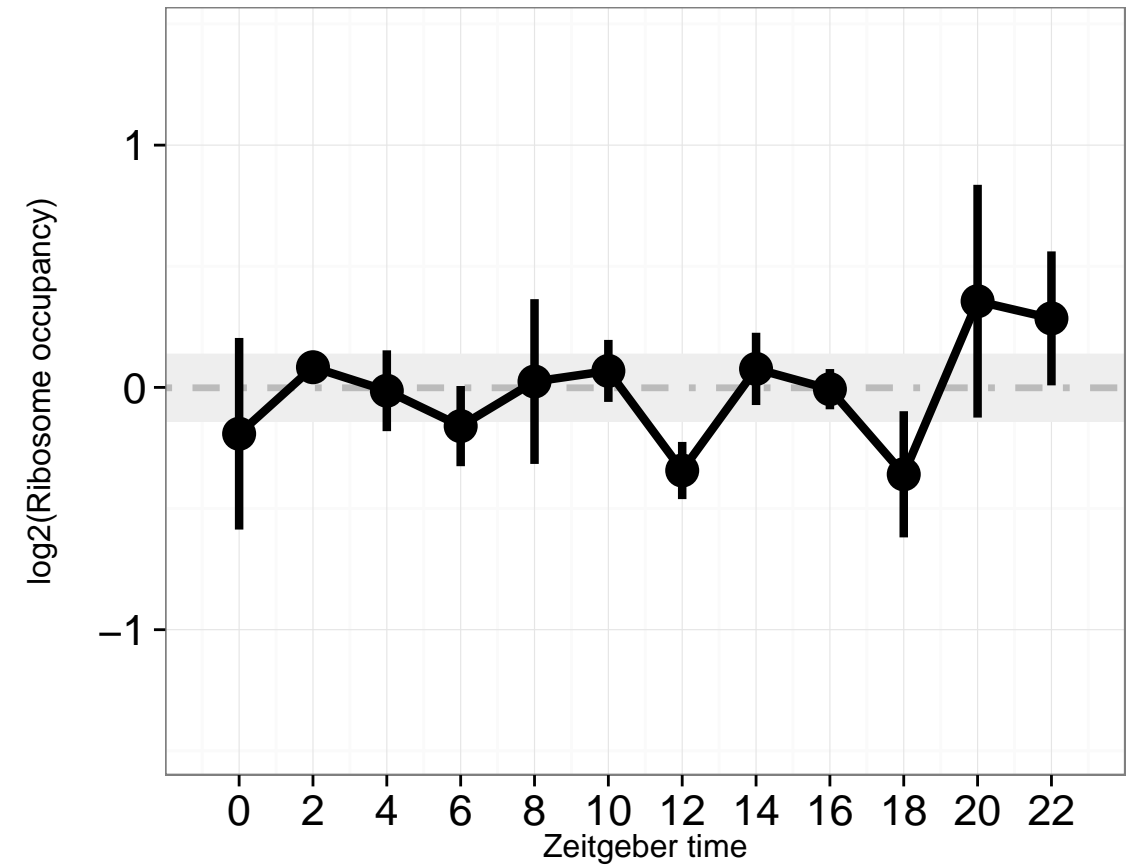

Supplement: Supplementary file 6703 [file 1]

# Rps28

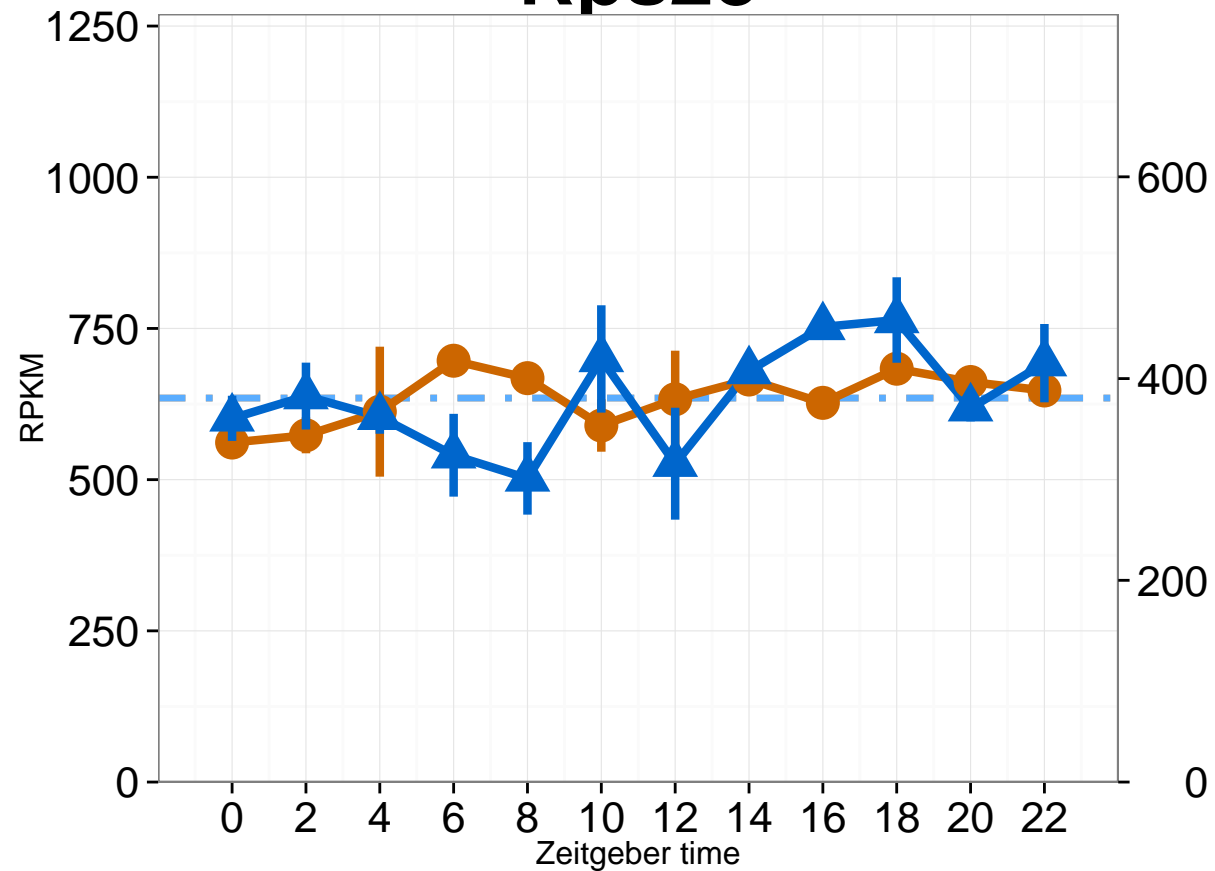

# Rps28

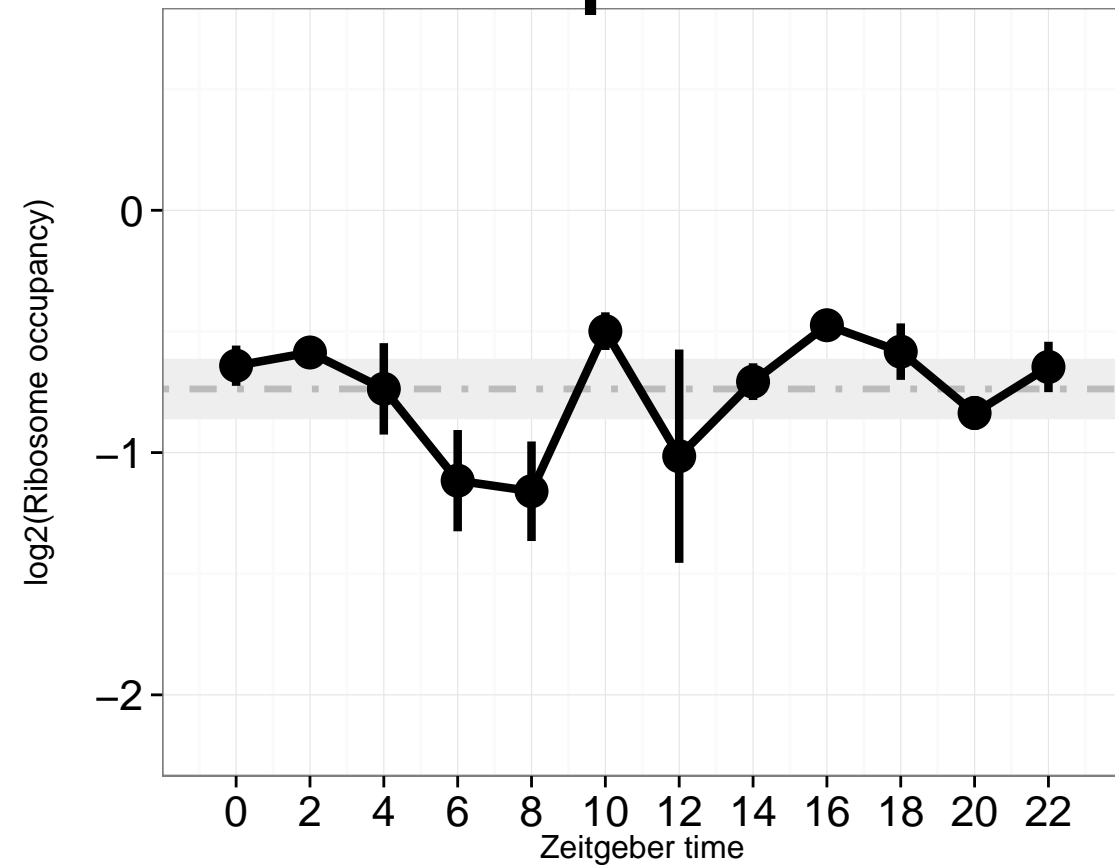

Supplement: Supplementary file 6704 [file 1]

# Adamts8

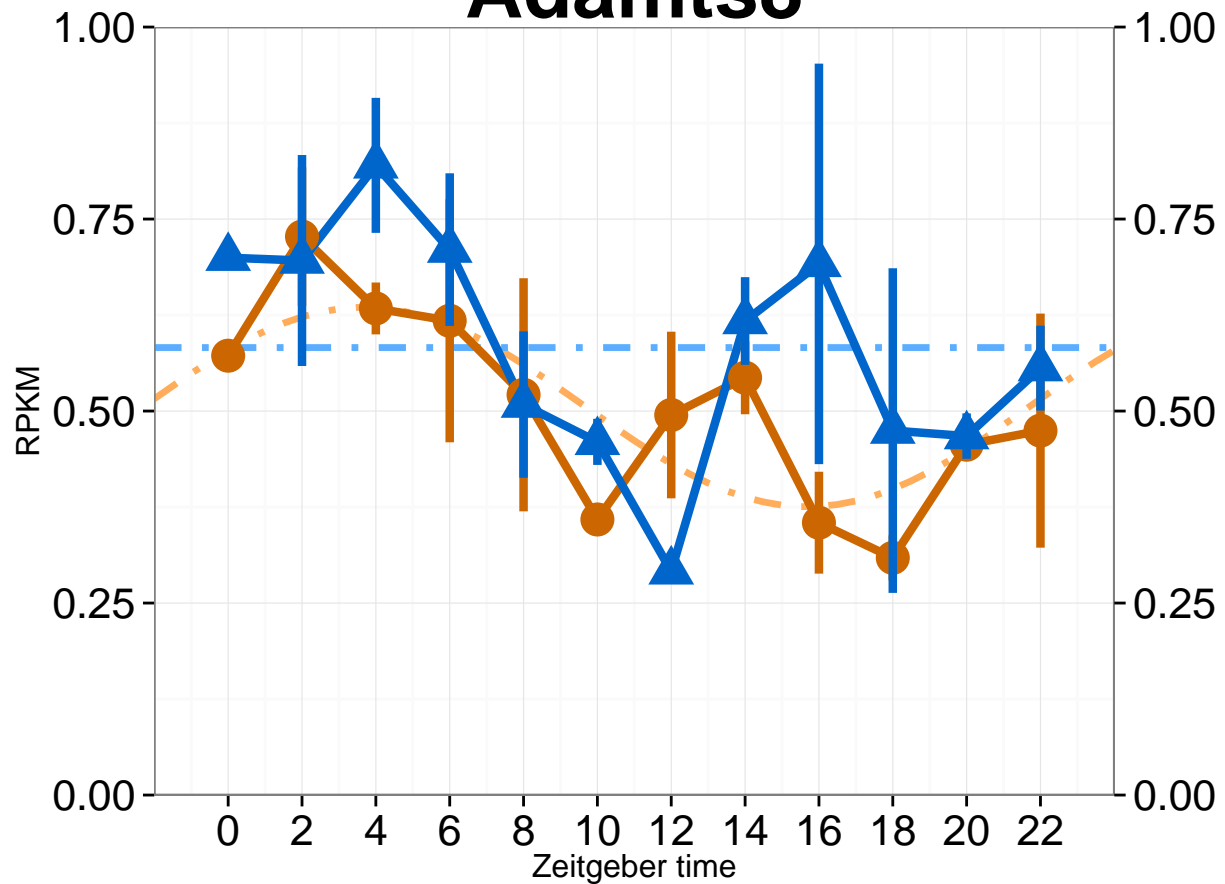

# Adamts8

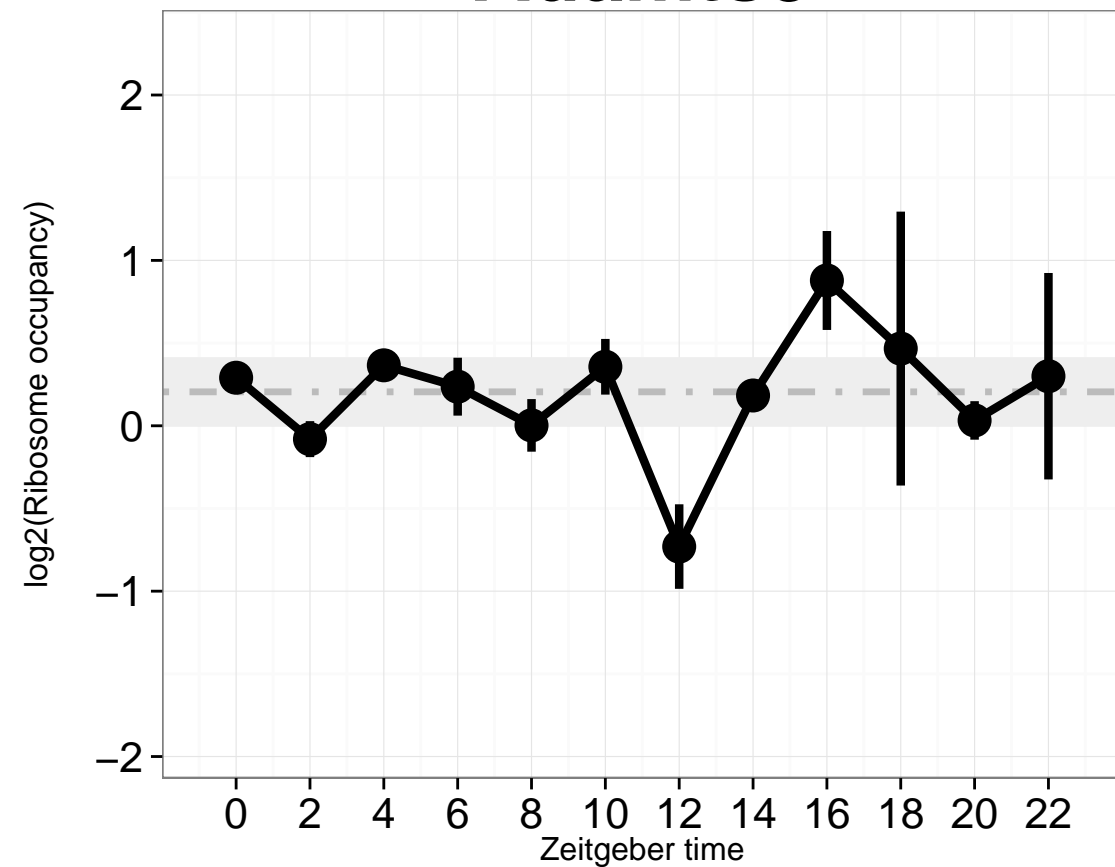

Supplement: Supplementary file 6705 [file 1]

## Aimp1

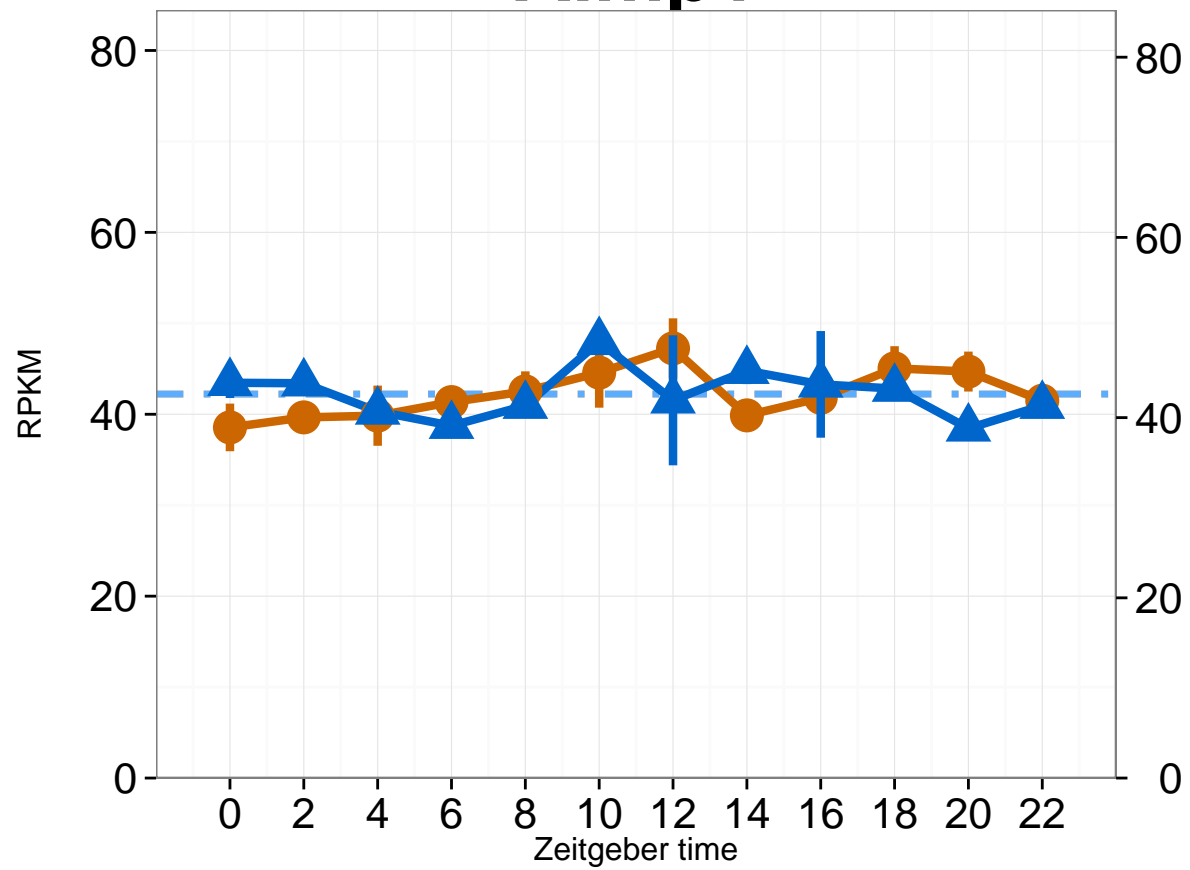

## Aimp1

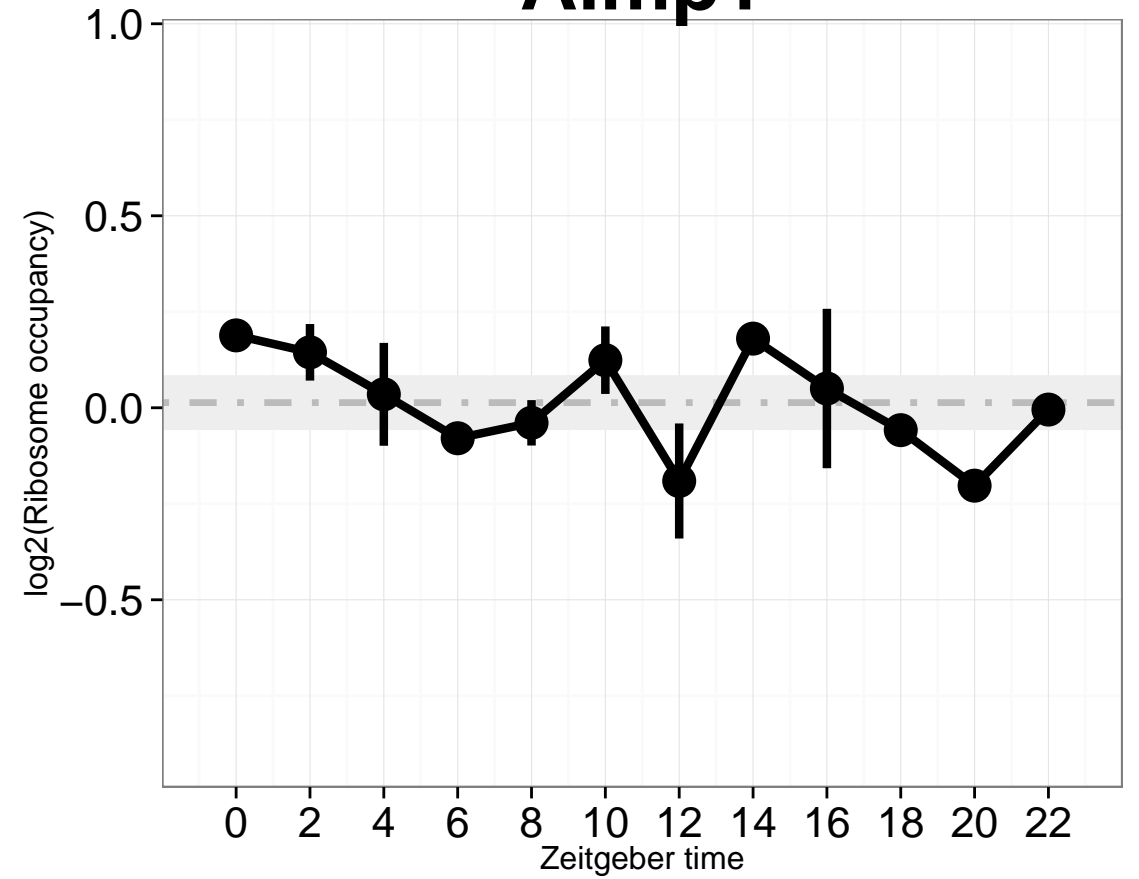

Supplement: Supplementary file 6706 [file 1]

# Zscan20

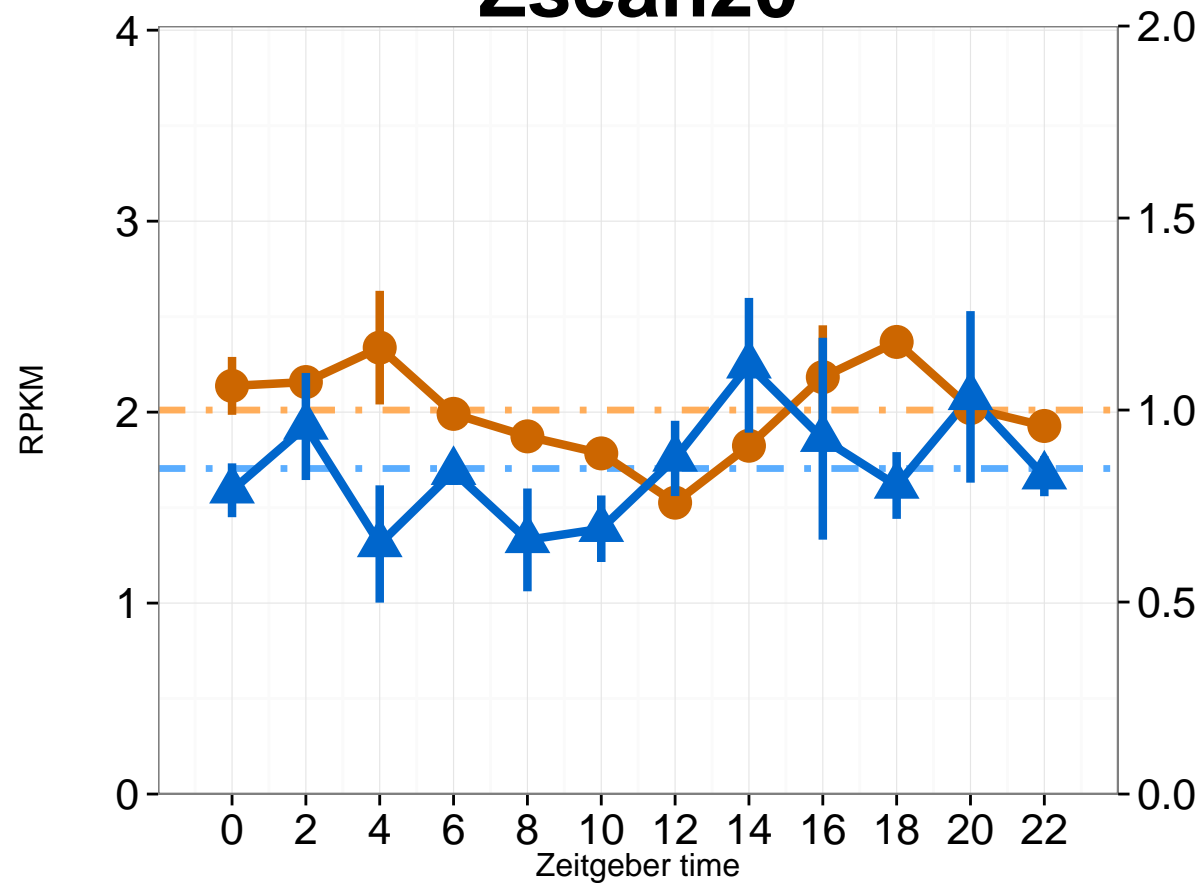

# Zscan20

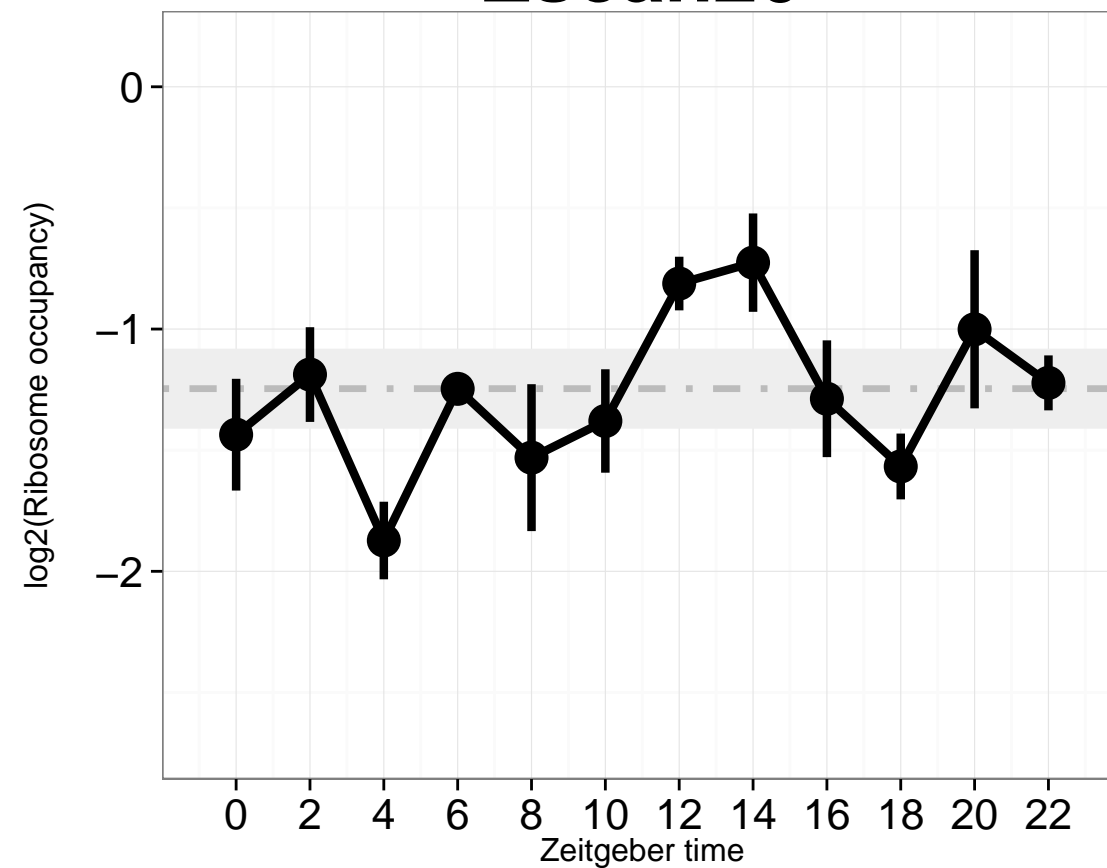

Supplement: Supplementary file 6707 [file 1]

# Tom1l2

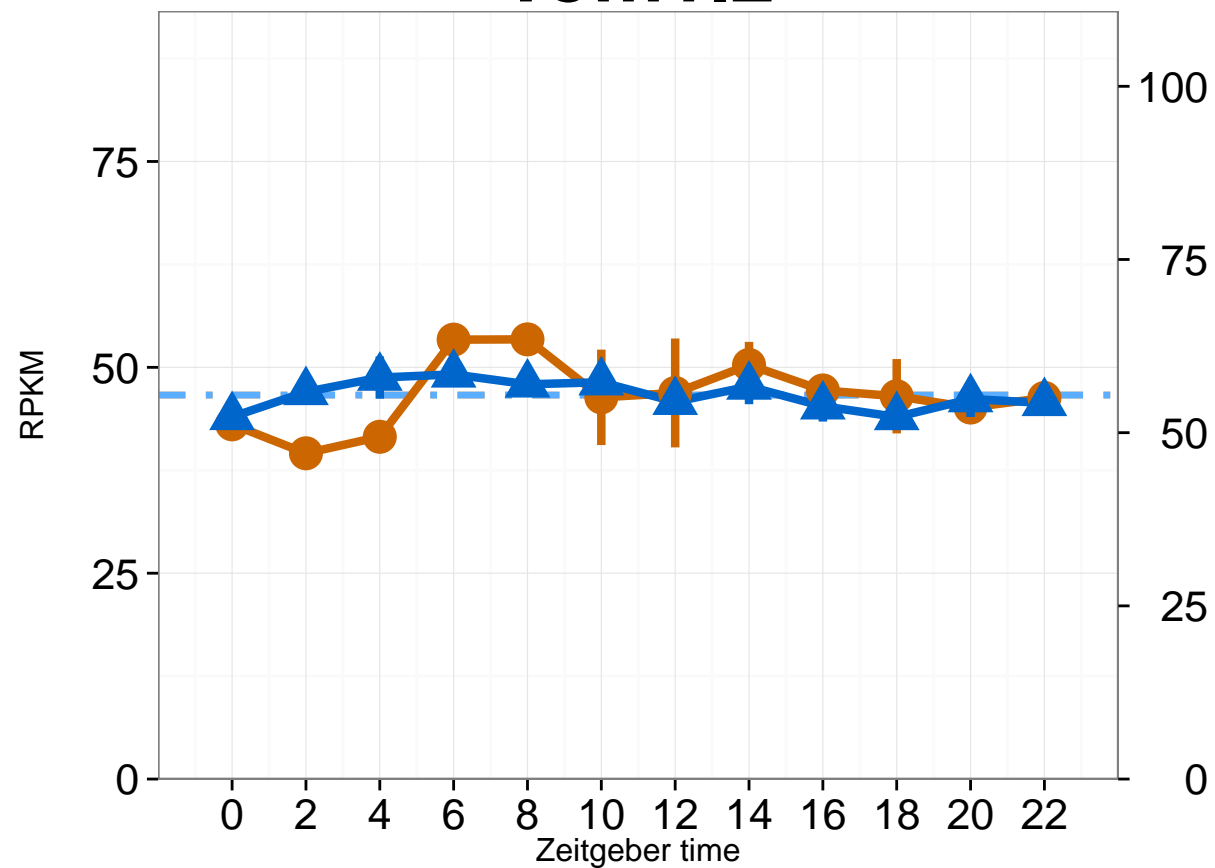

# Tom1l2

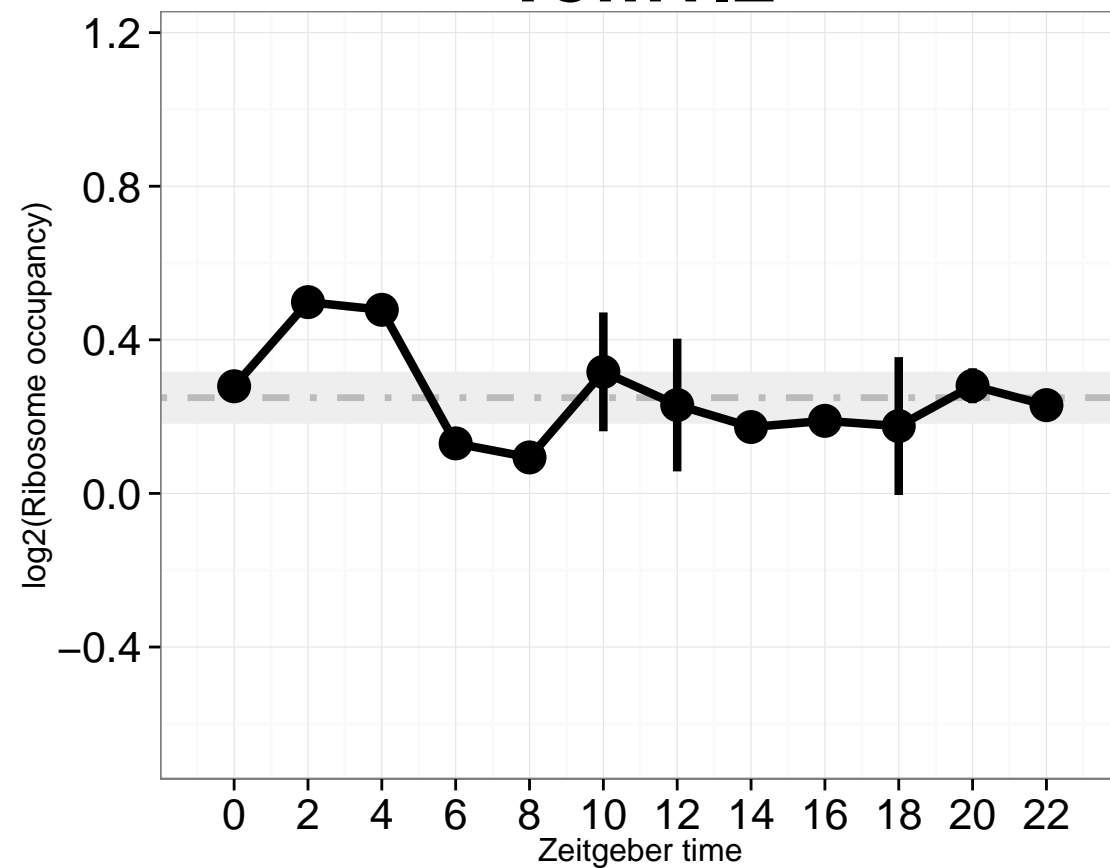

Supplement: Supplementary file 6708 [file 1]

# Trpc4ap

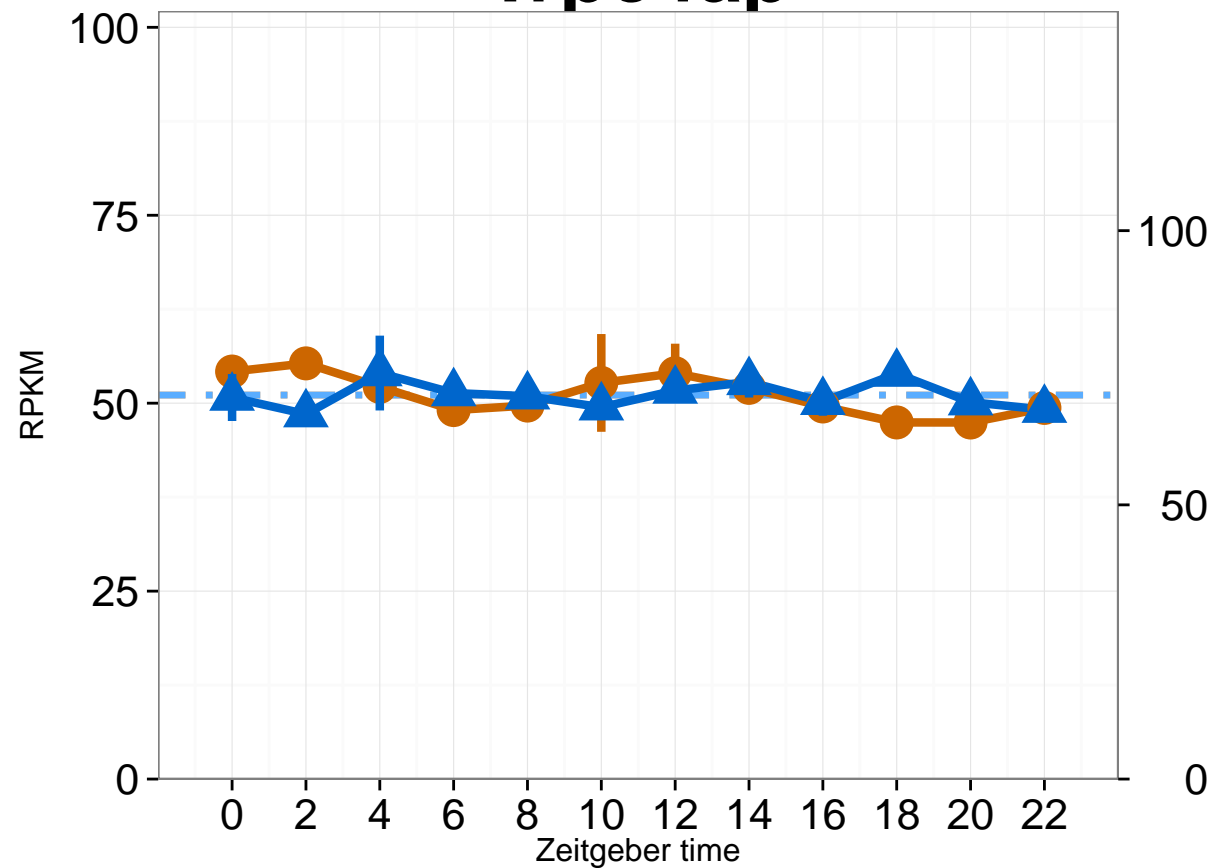

# Trpc4ap

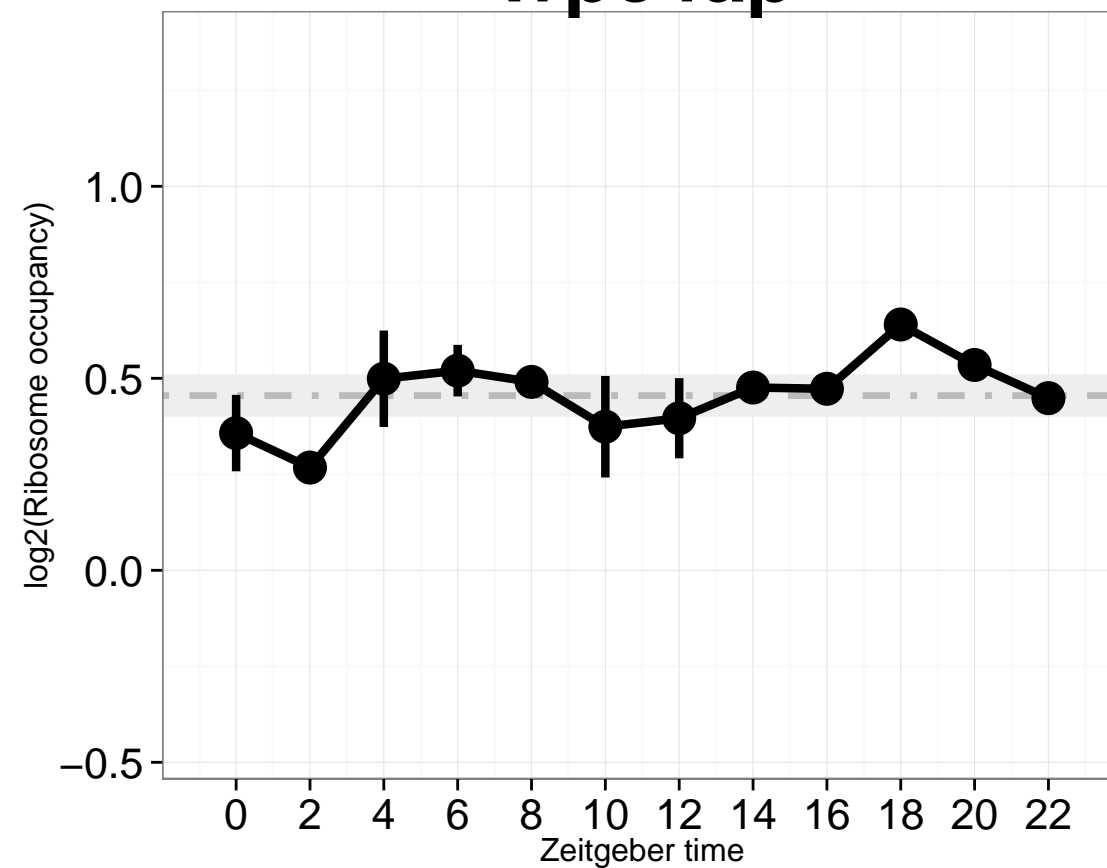

Supplement: Supplementary file 6709 [file 1]

## Pou3f3

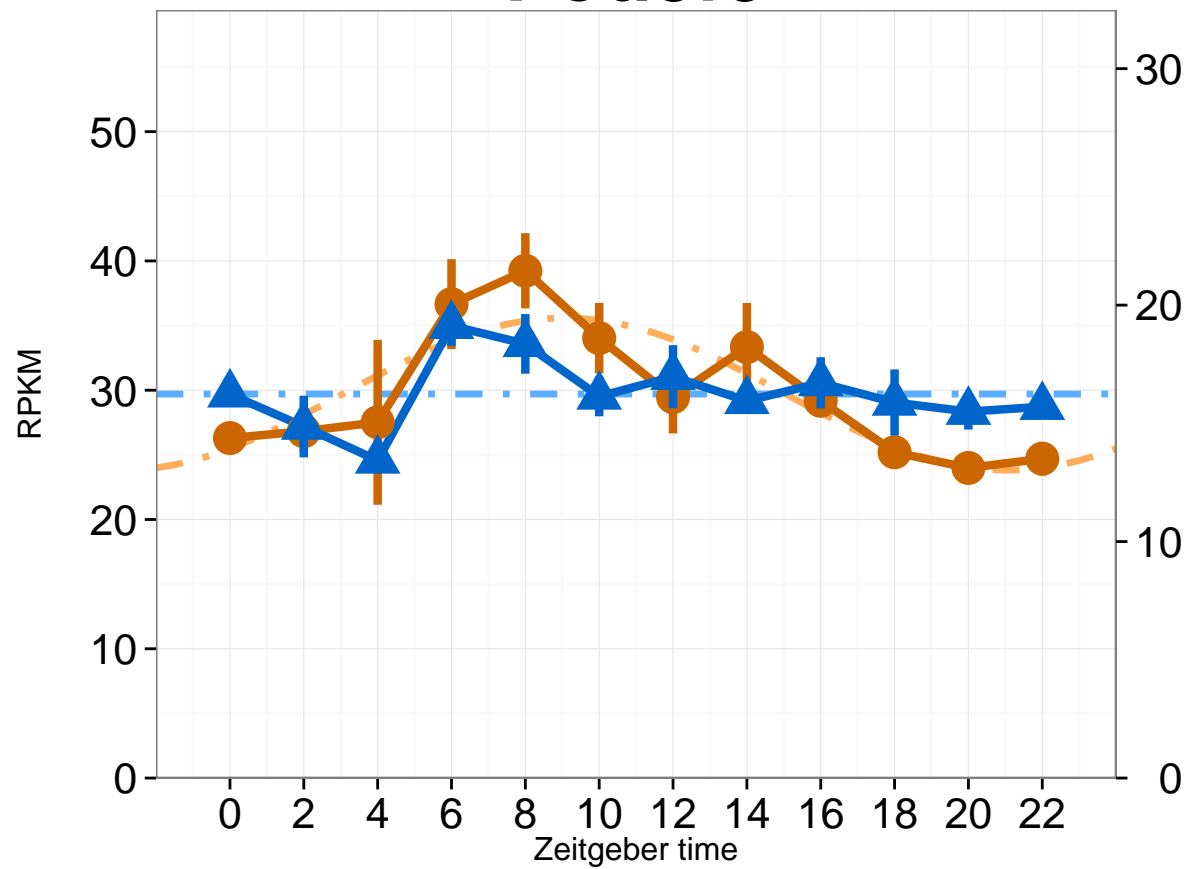

## Pou3f3

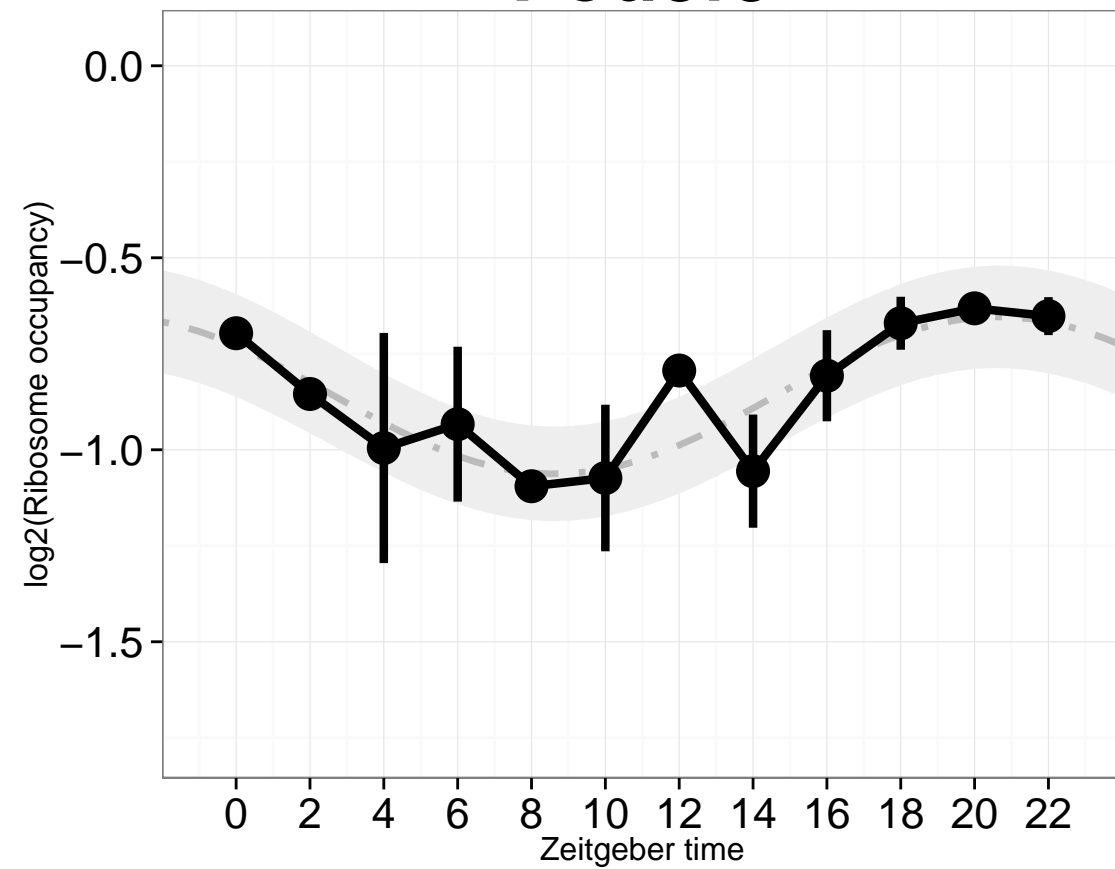

Supplement: Supplementary file 6710 [file 1]

## Dyrk2

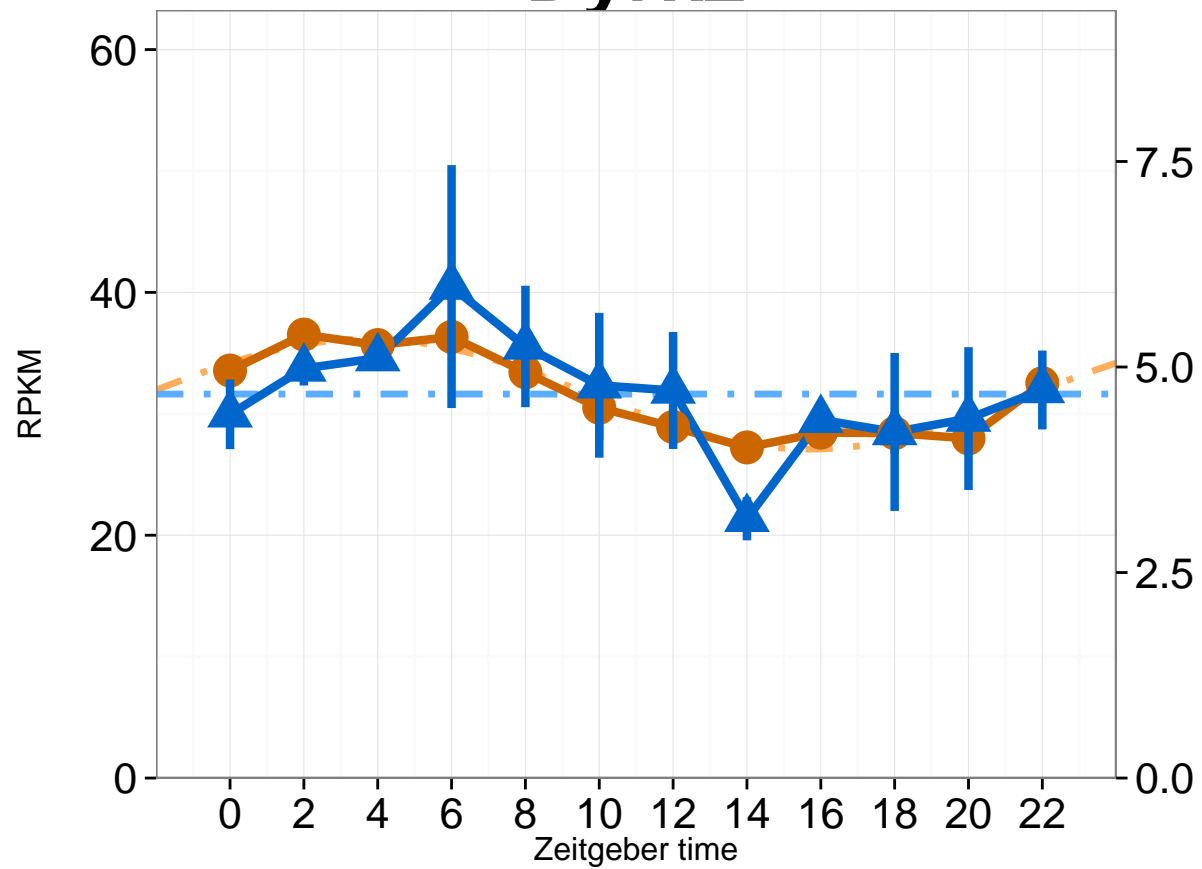

## Dyrk2

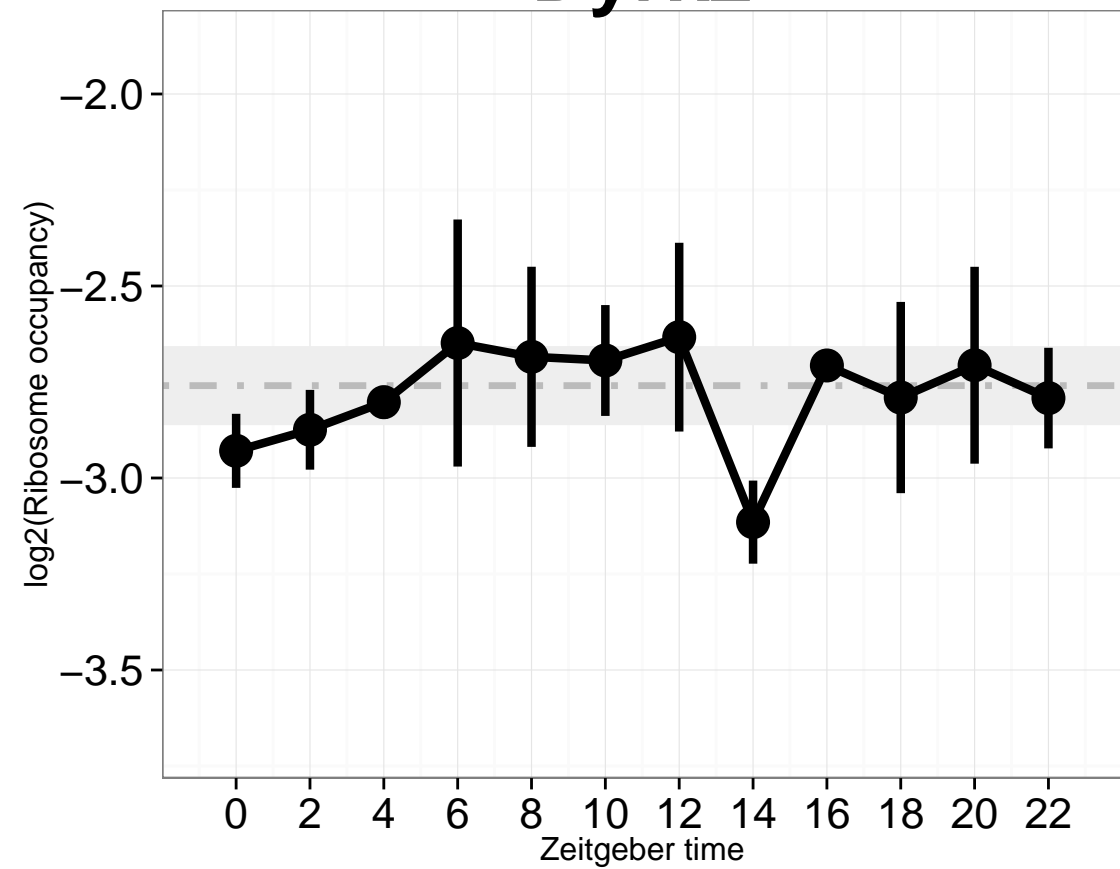

Supplement: Supplementary file 6711 [file 1]

# Ttc39b

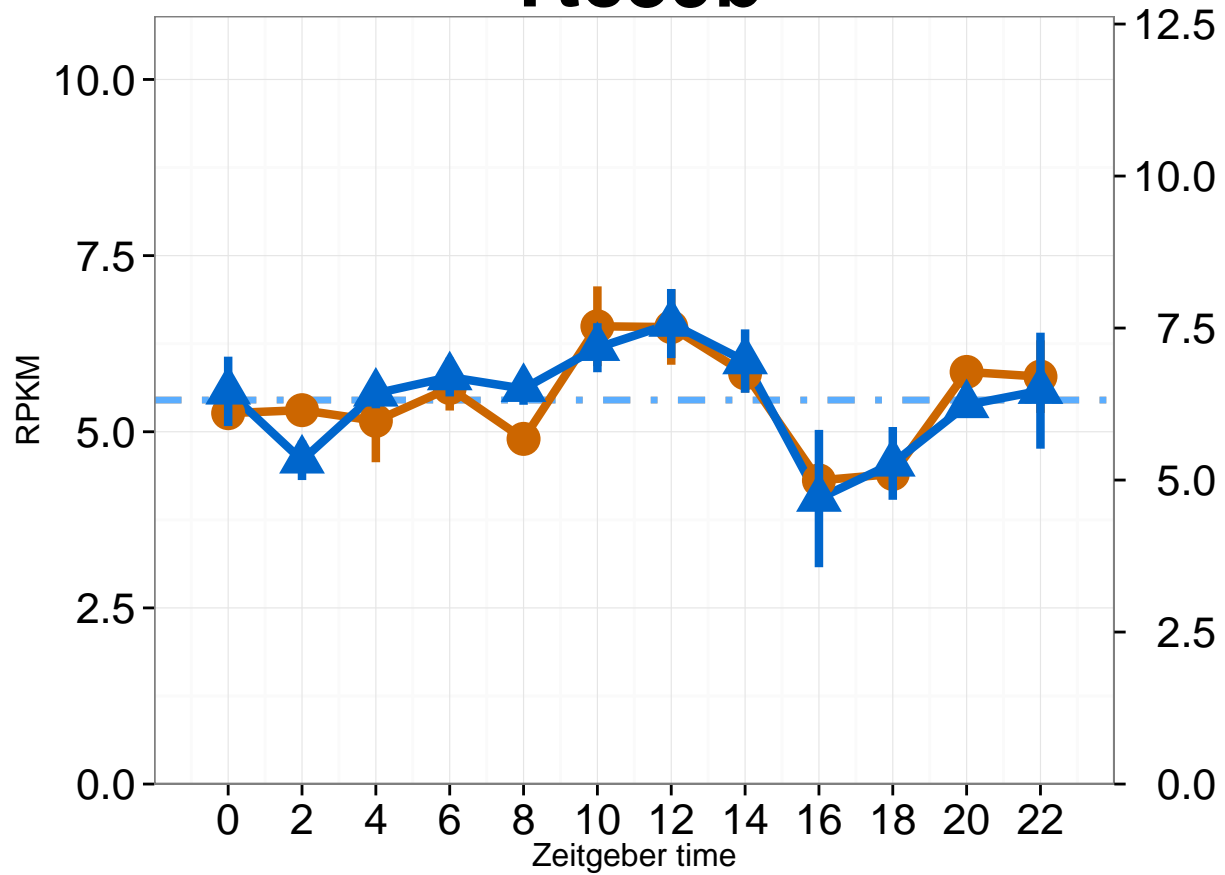

# Ttc39b

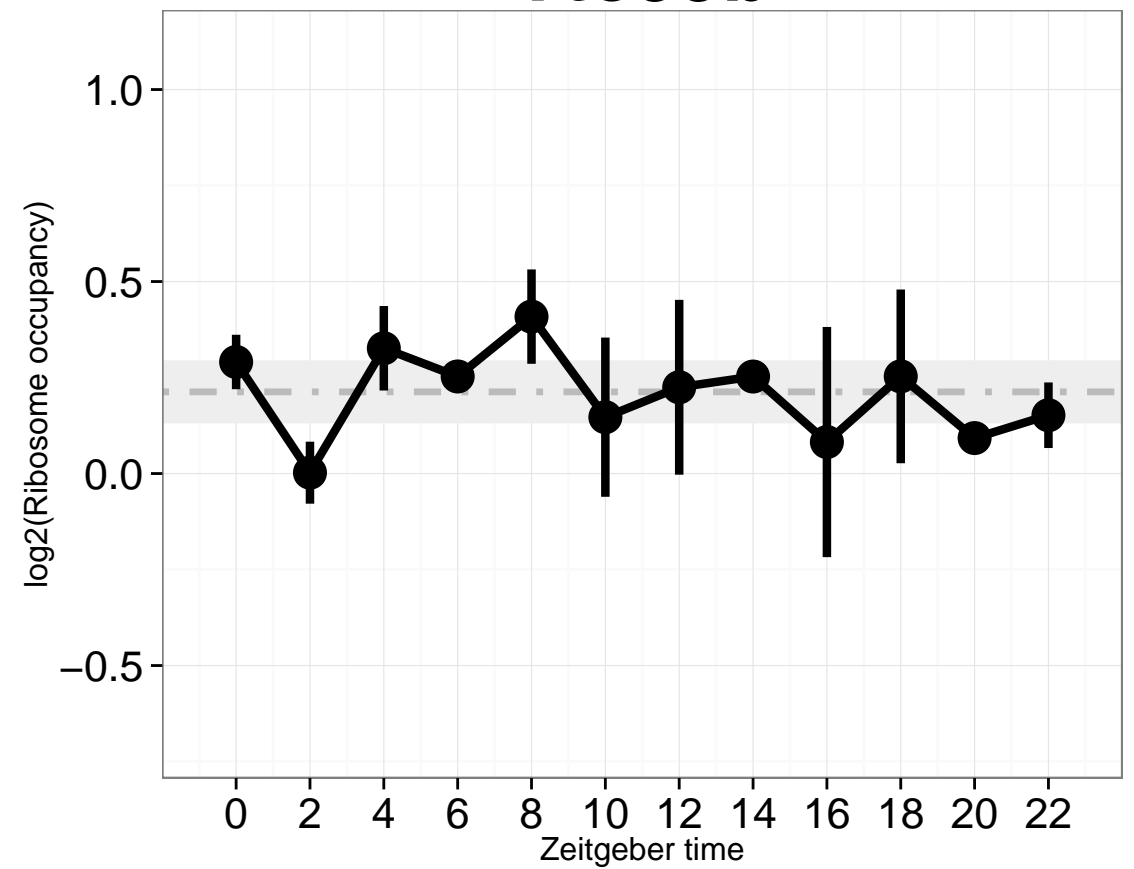

Supplement: Supplementary file 6712 [file 1]

## Nek7

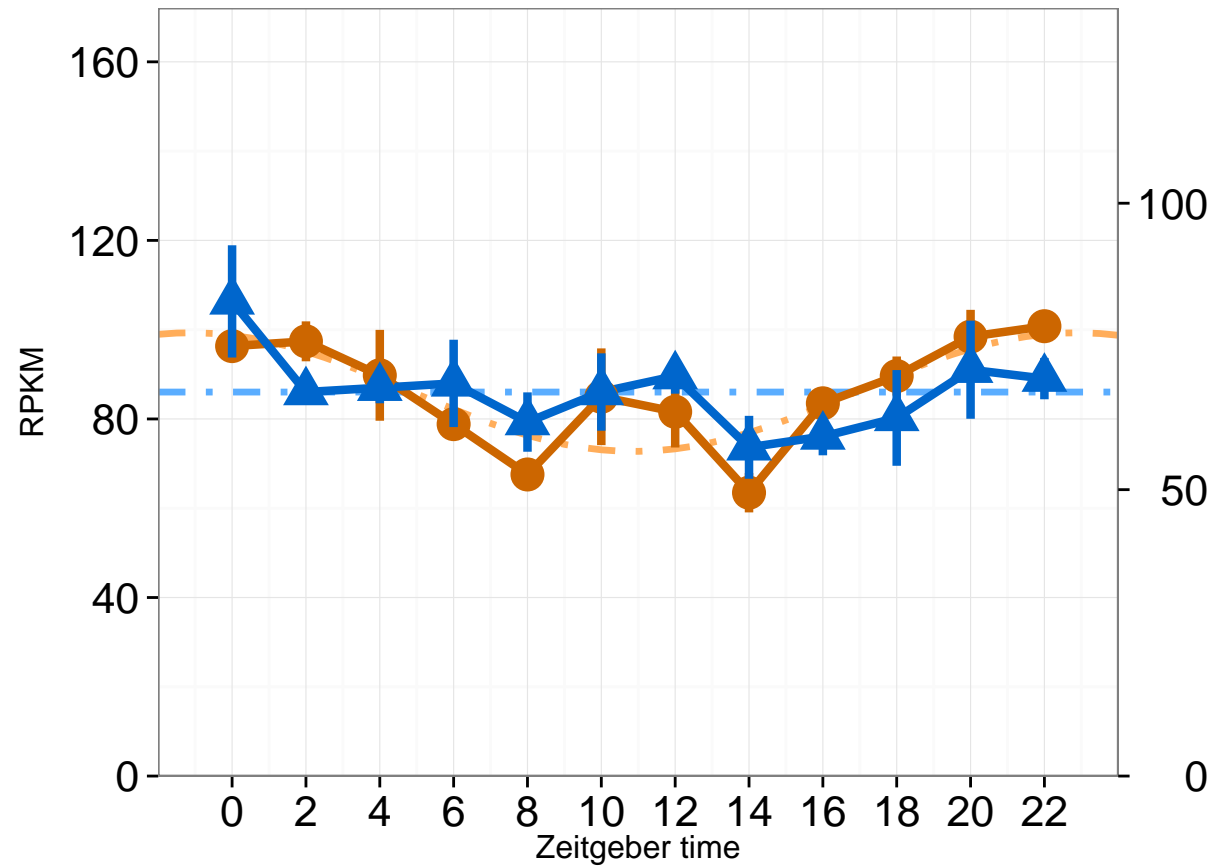

## Nek7

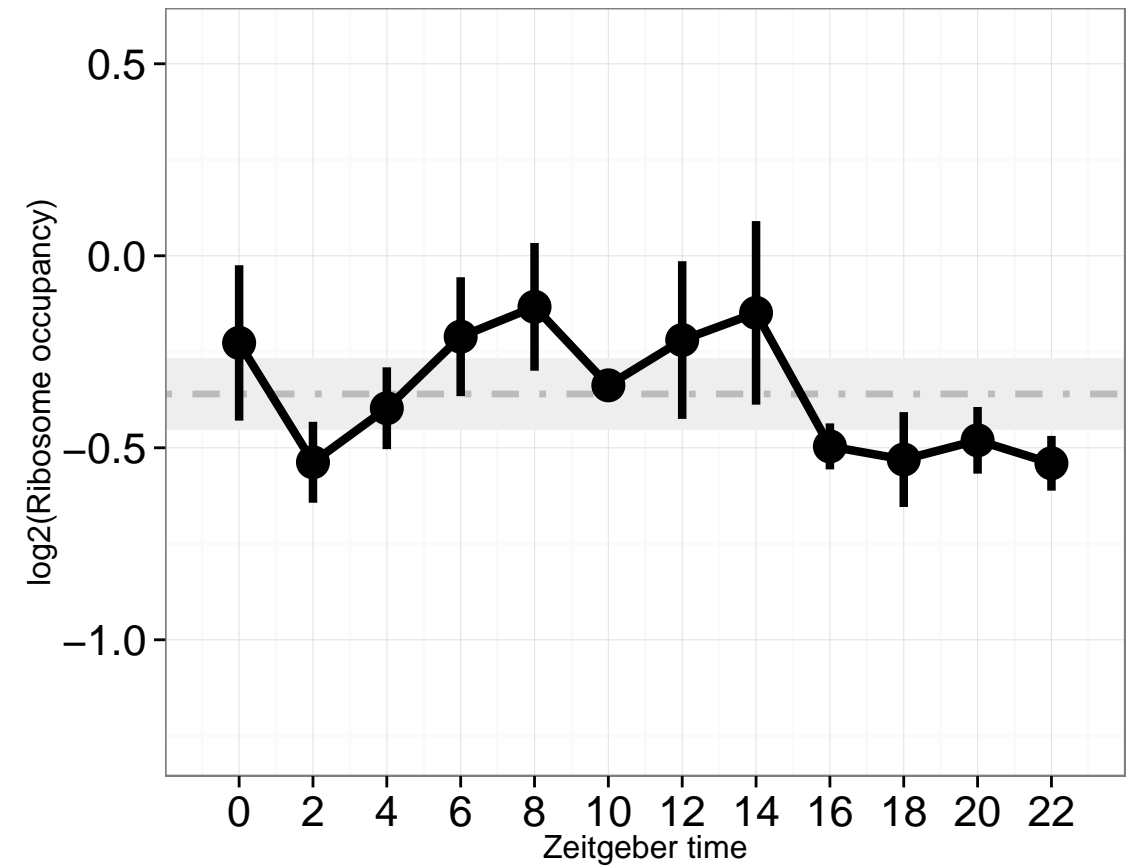

Supplement: Supplementary file 6713 [file 1]

## Mknk2

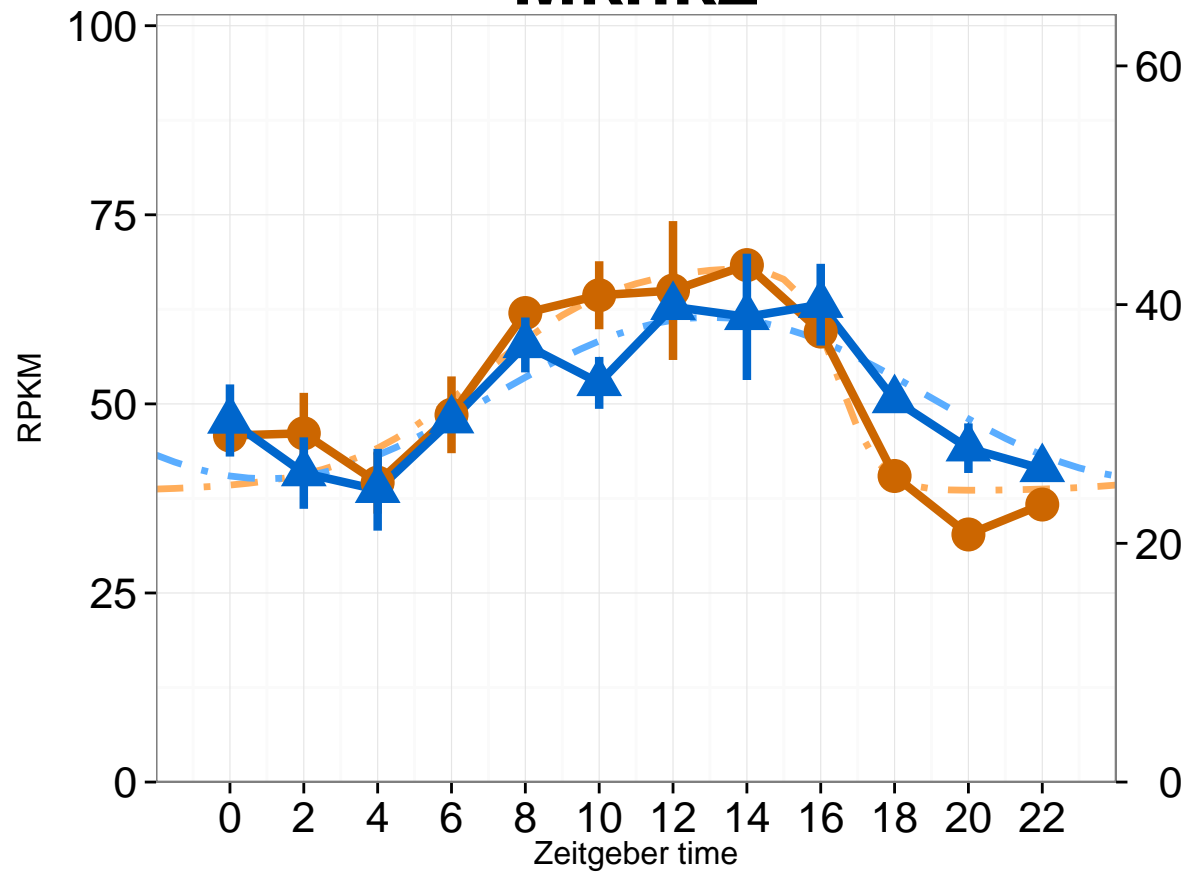

## Mknk2

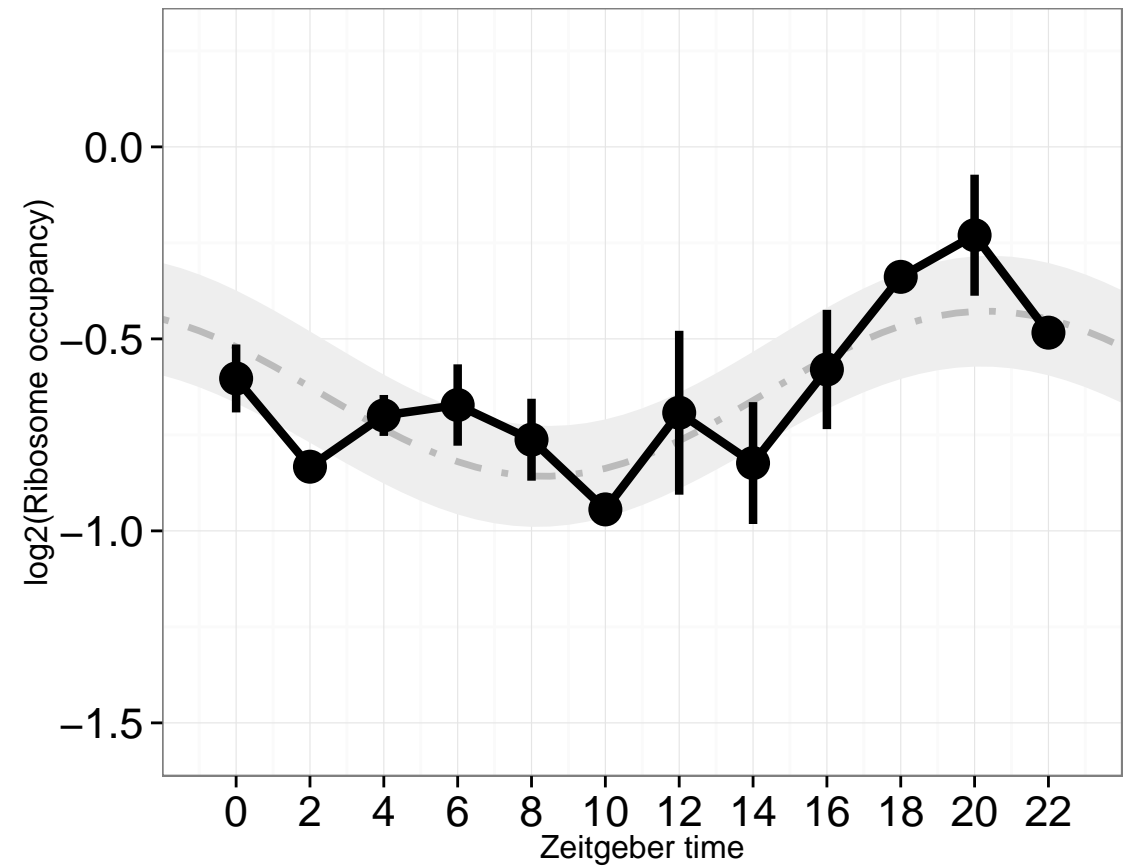

Supplement: Supplementary file 6714 [file 1]

## Ctsk

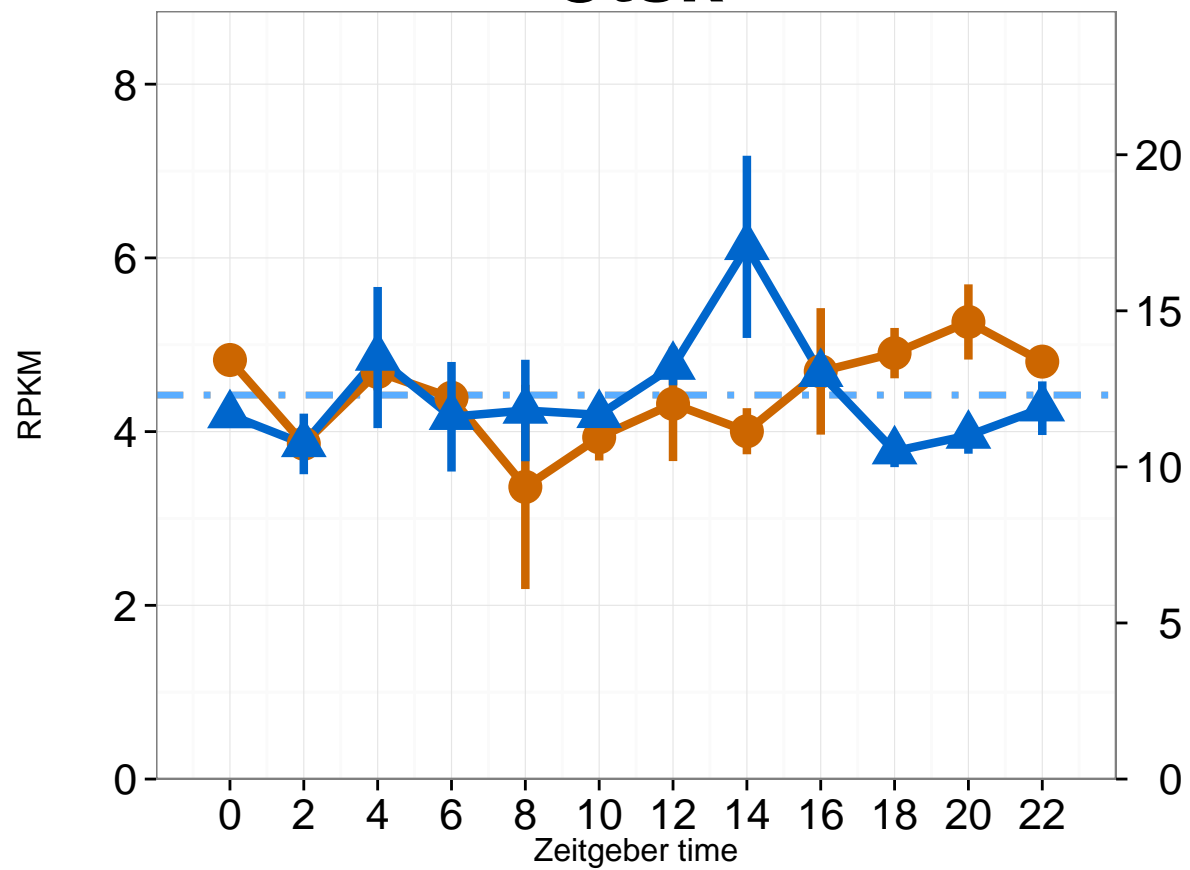

## Ctsk

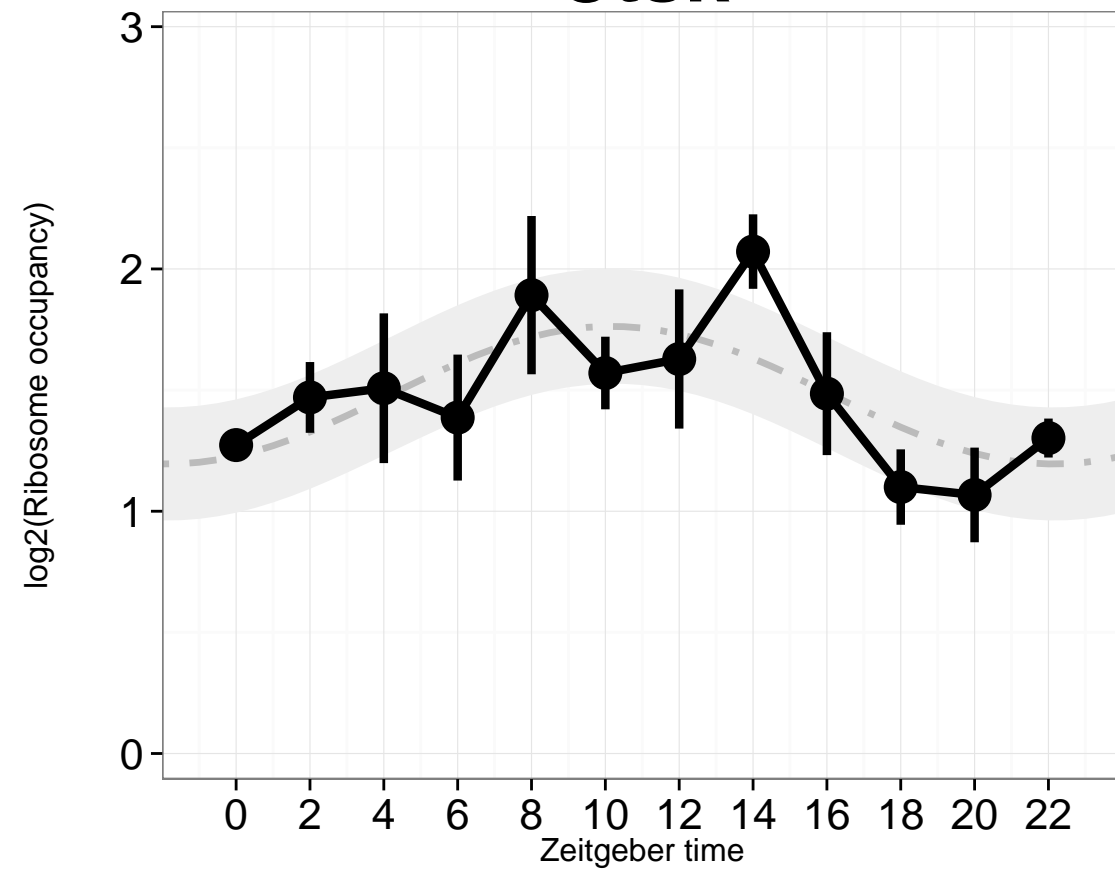

Supplement: Supplementary file 6715 [file 1]

# Col20a1

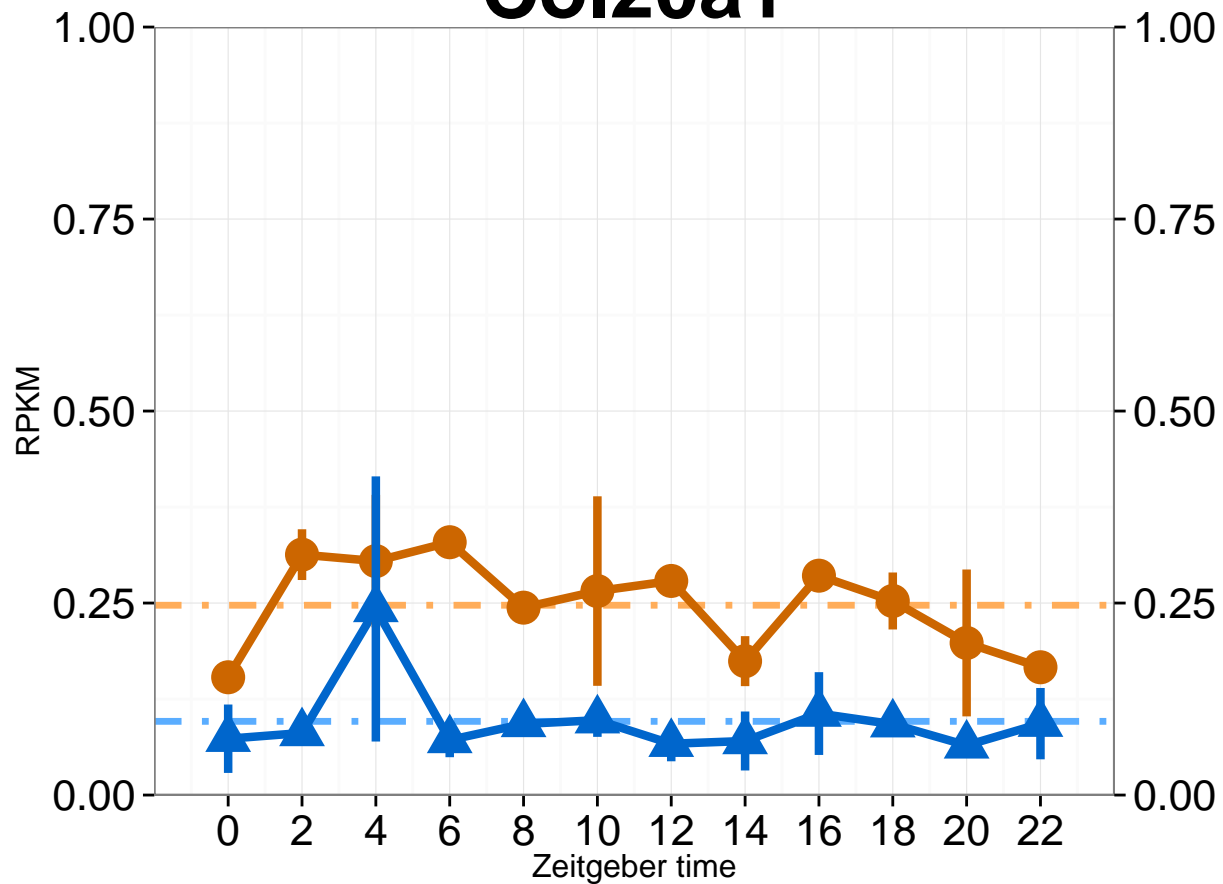

# Col20a1

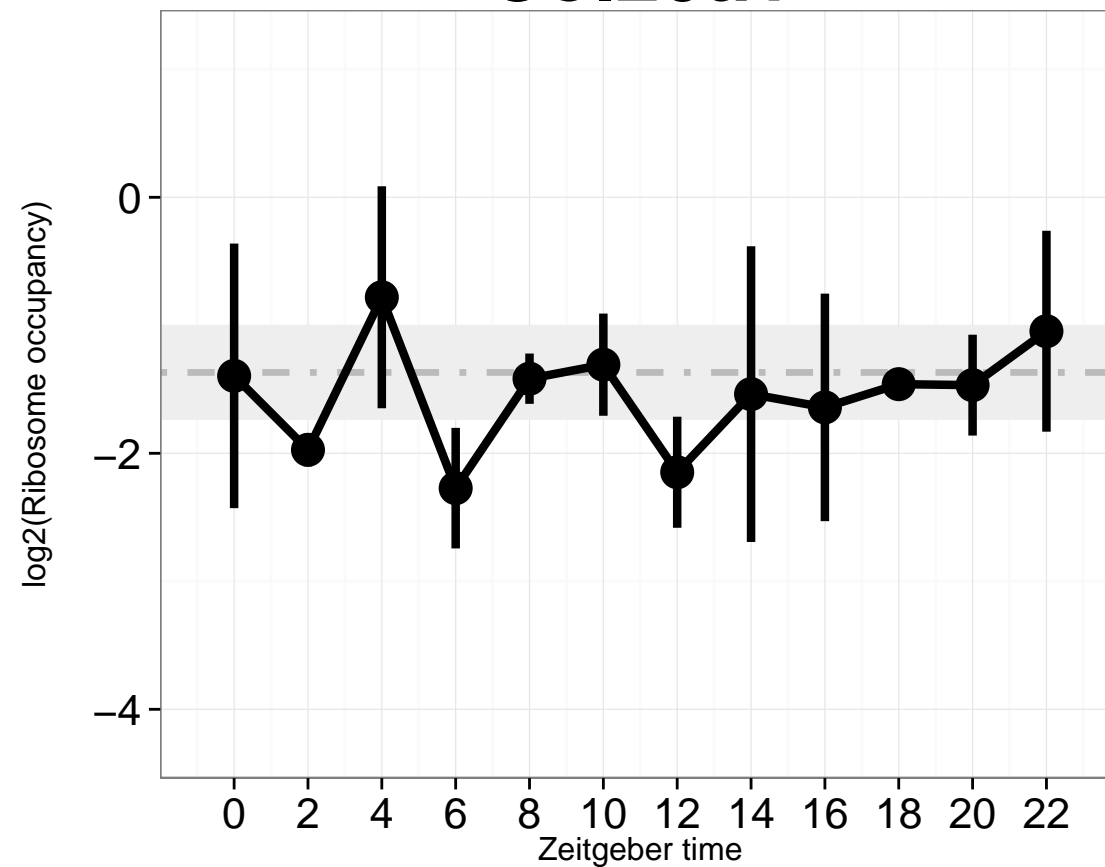

Supplement: Supplementary file 6716 [file 1]

# Ppargc1b

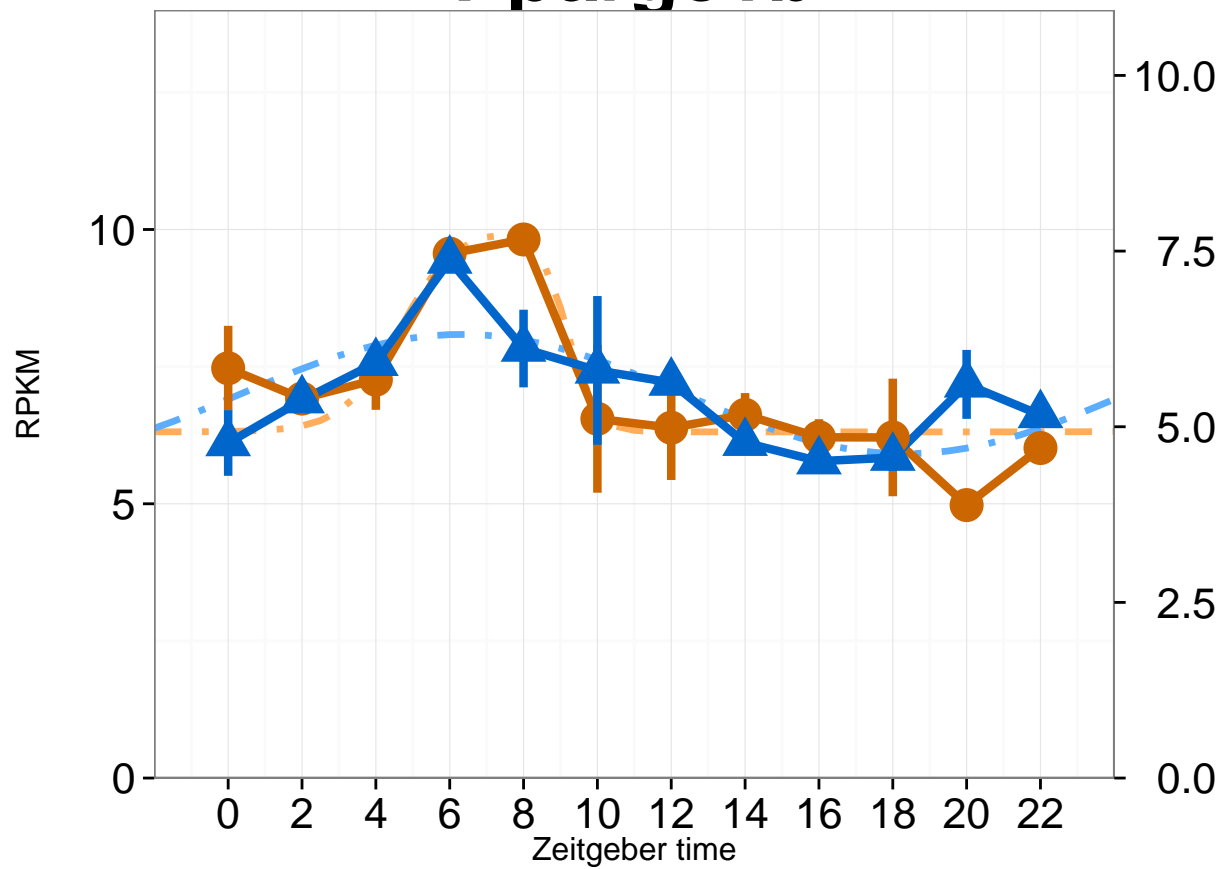

# Ppargc1b

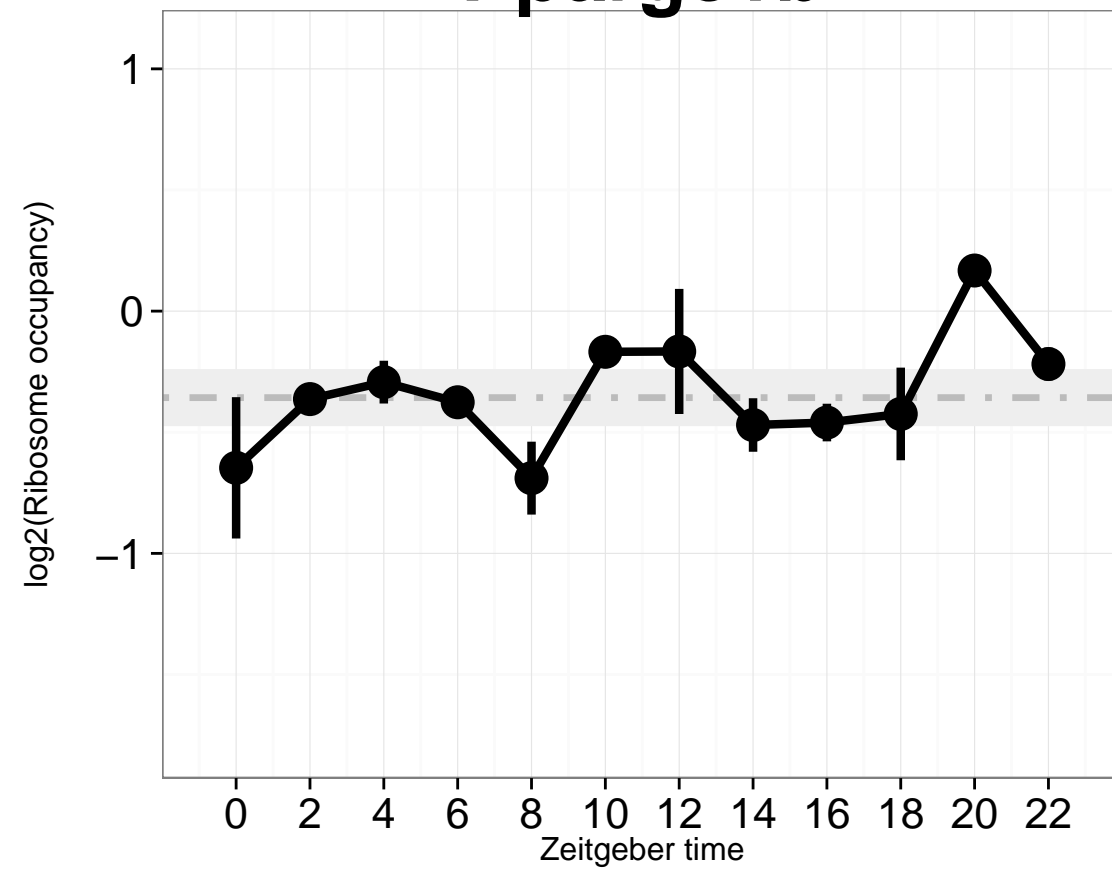

Supplement: Supplementary file 6717 [file 1]

## Casp6

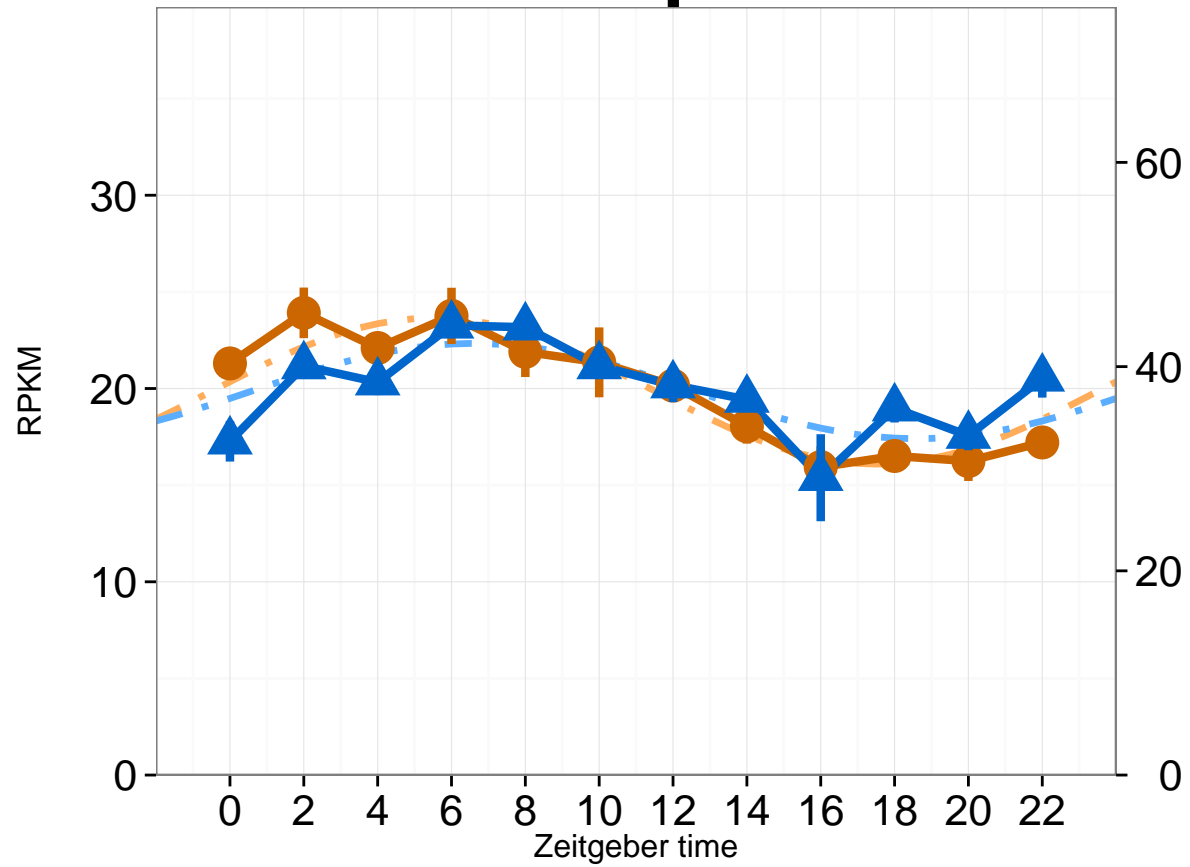

## Casp6

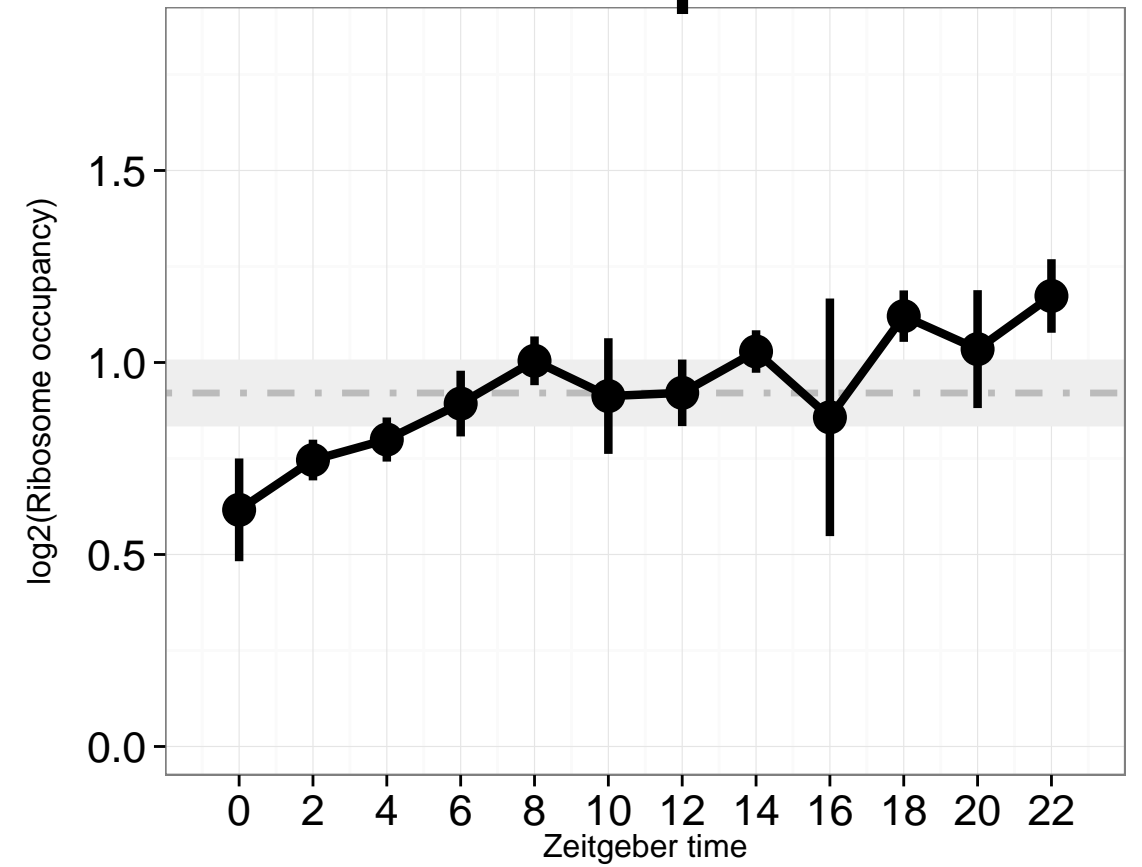

Supplement: Supplementary file 6718 [file 1]

## Ugdh

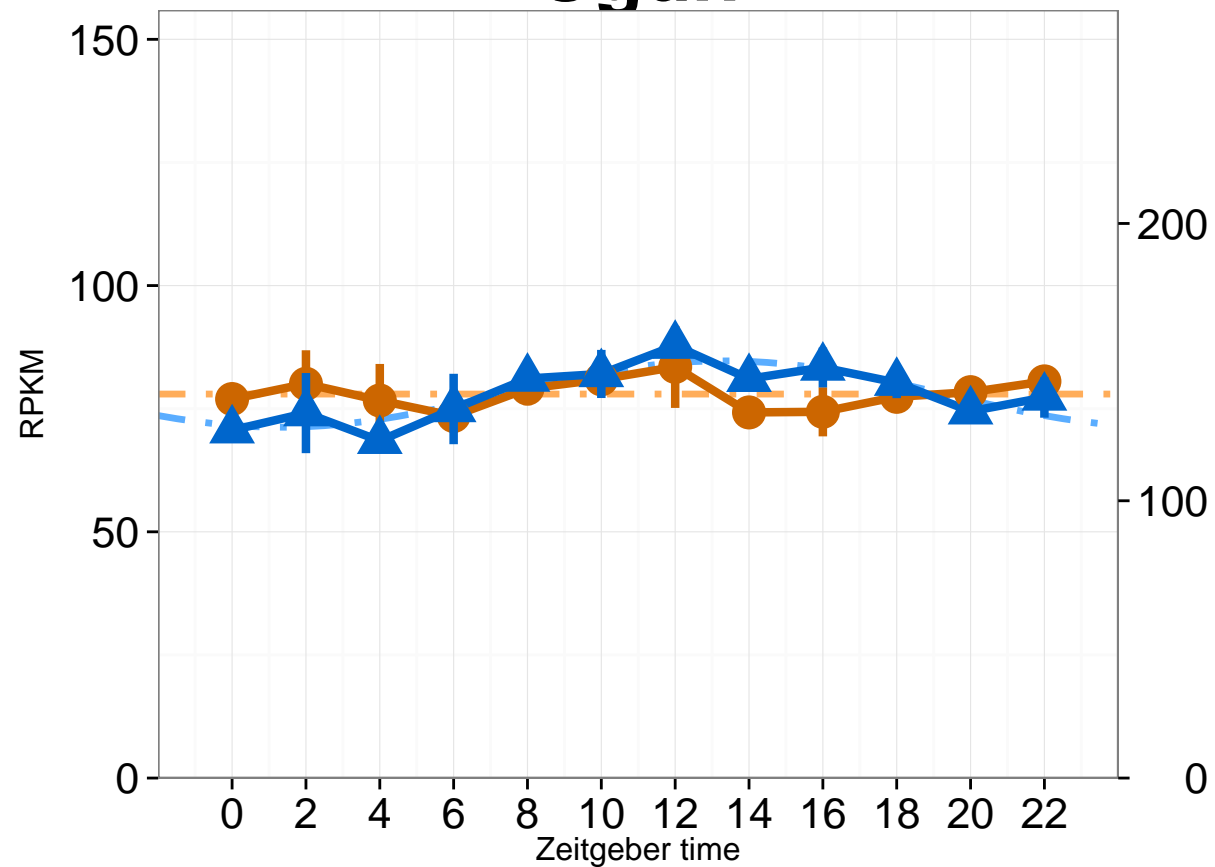

## Ugdh

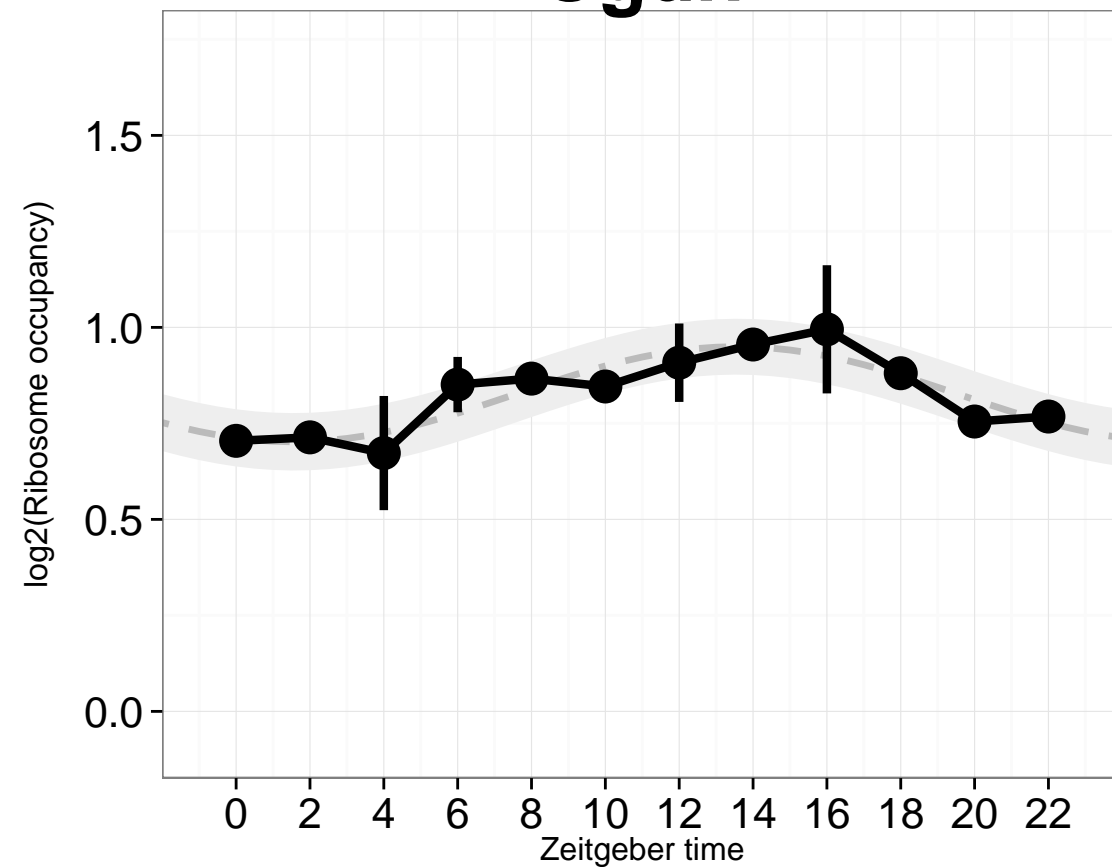

Supplement: Supplementary file 6719 [file 1]

# Adam22

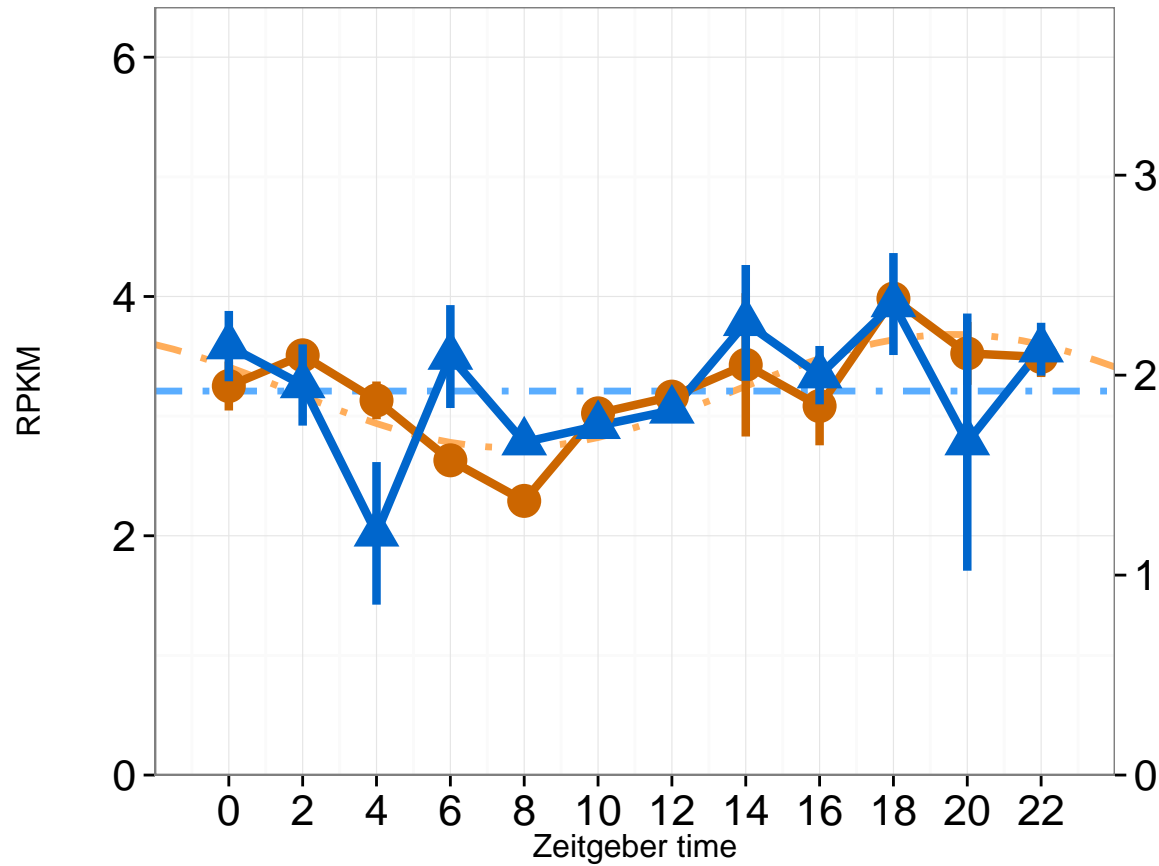

# Adam22

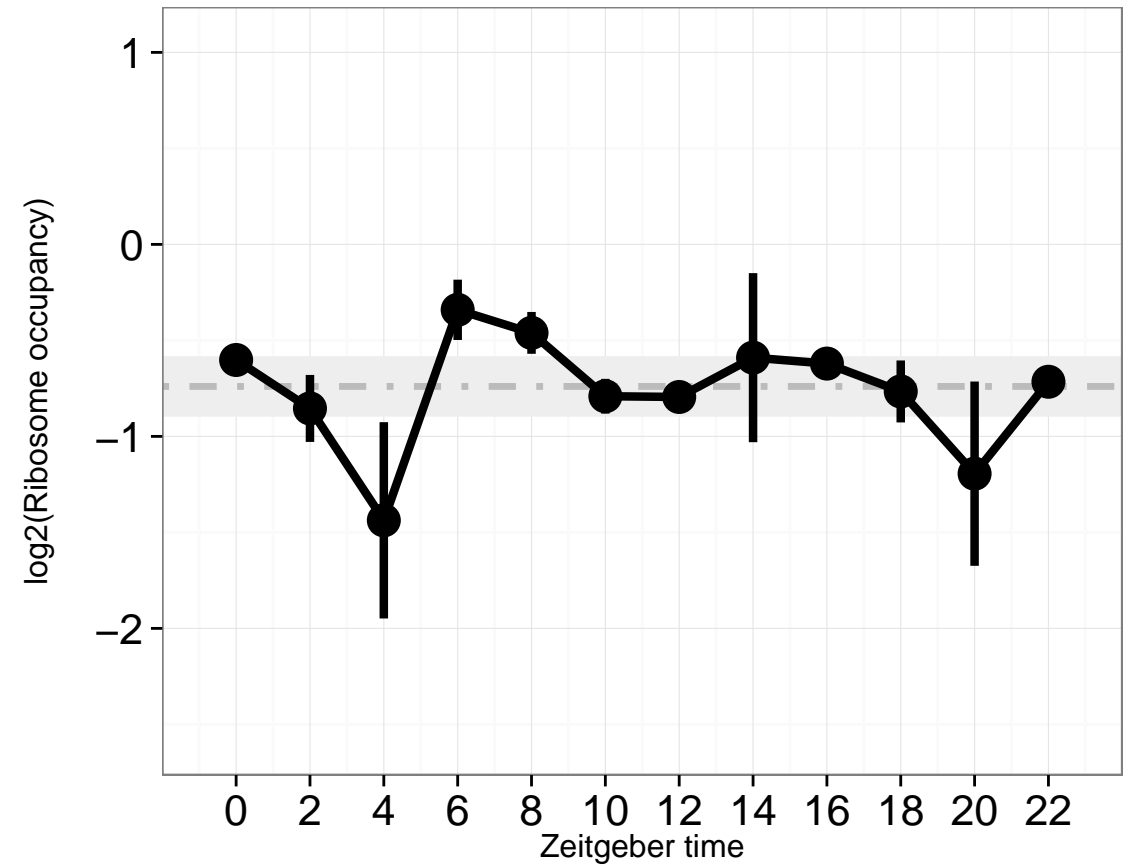

Supplement: Supplementary file 6720 [file 1]

## Arf2

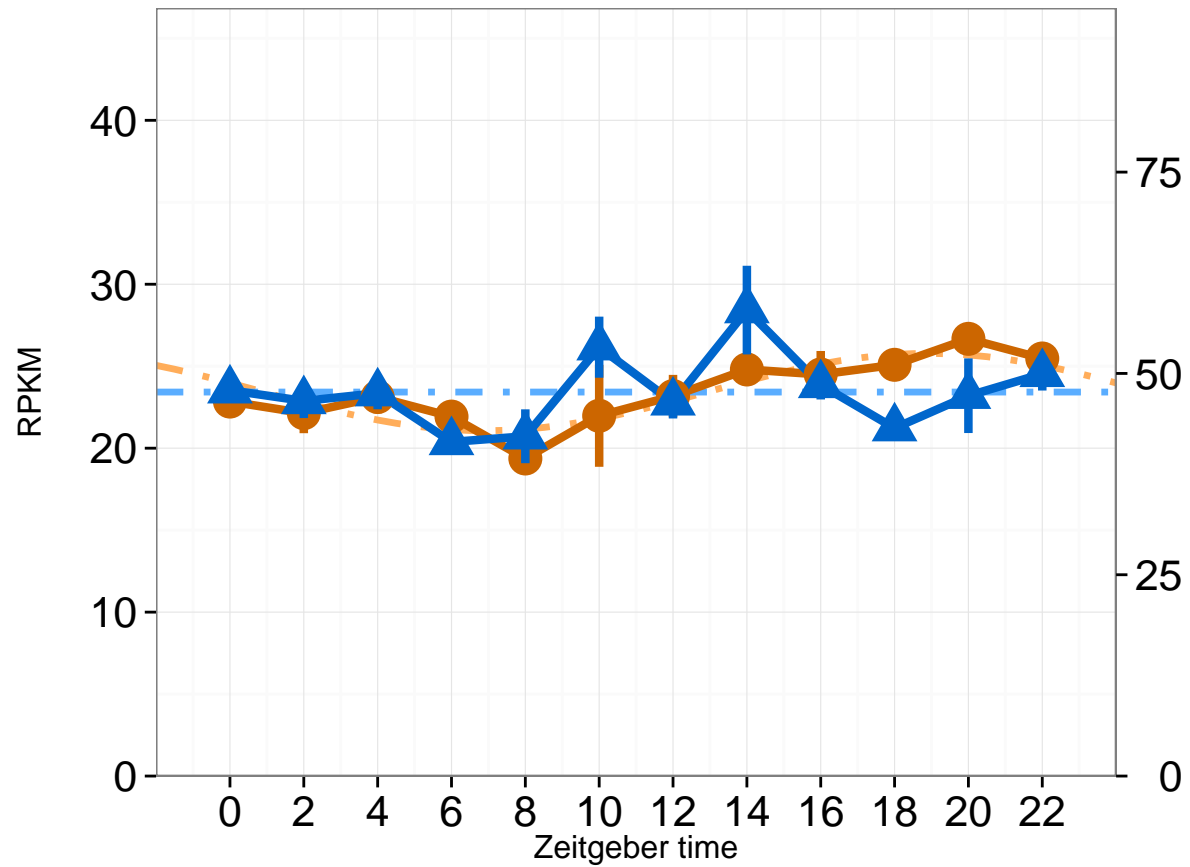

## Arf2

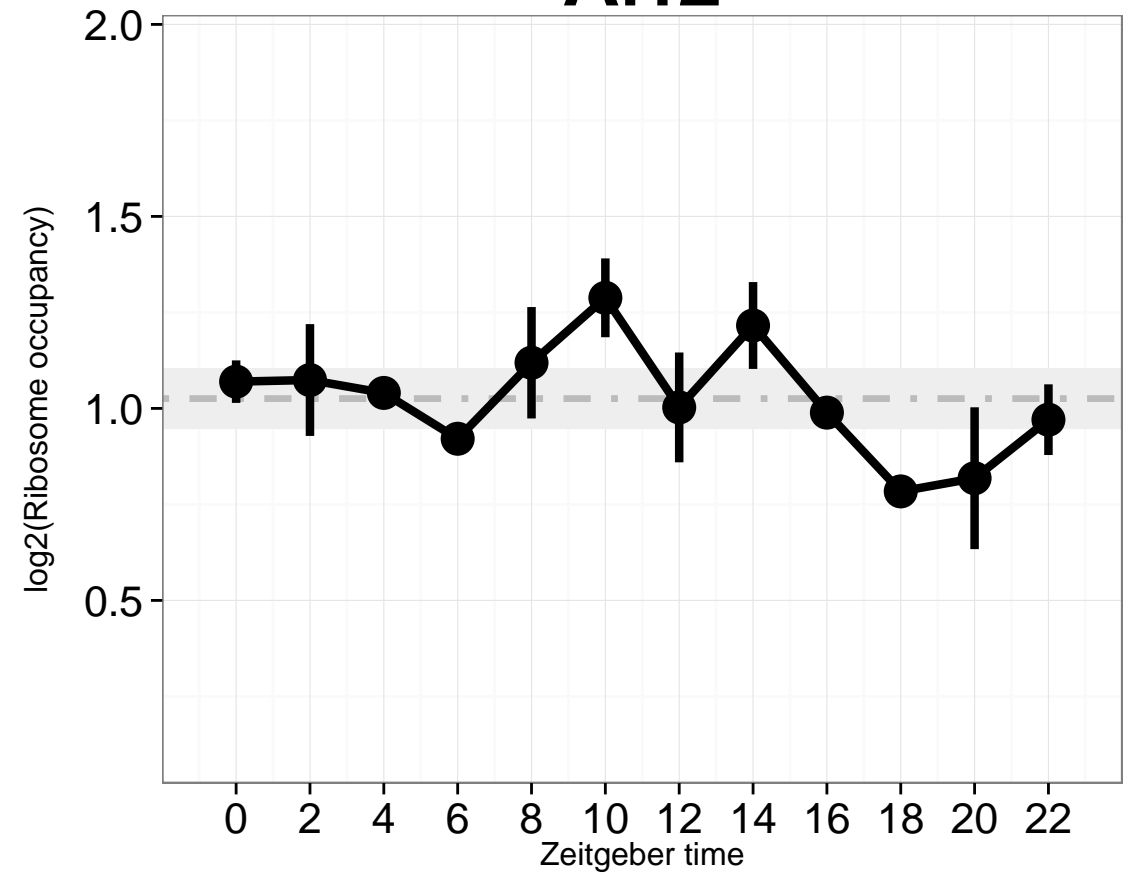

Supplement: Supplementary file 6721 [file 1]

## Ankrd9

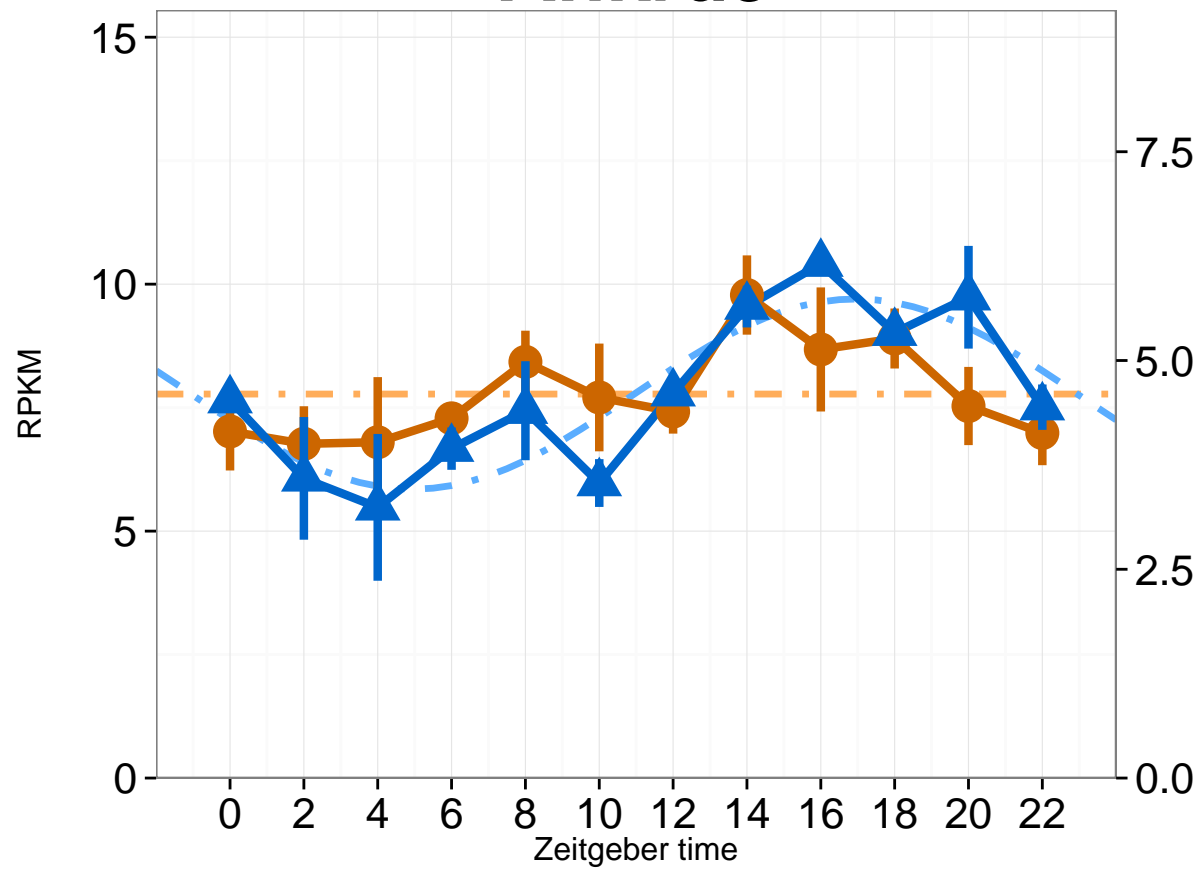

## Ankrd9

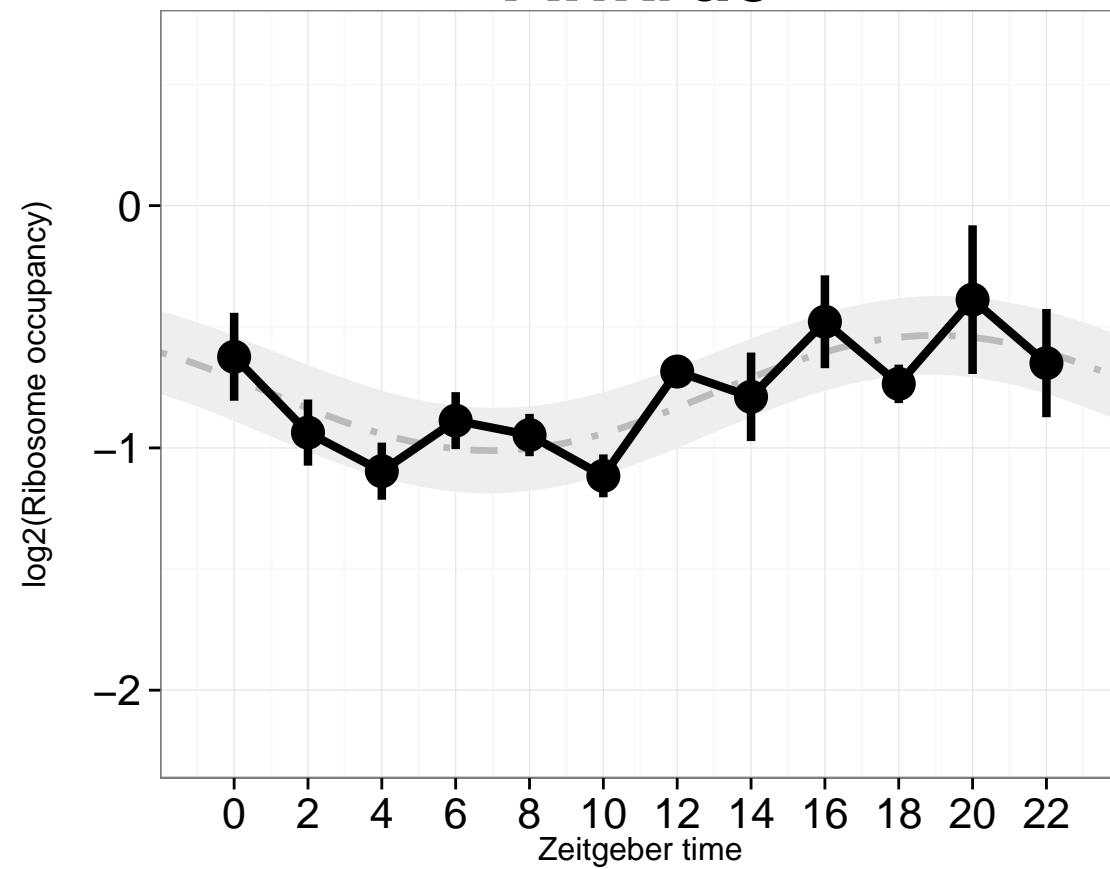

Supplement: Supplementary file 6722 [file 1]
