# Supplementary material (part 68 of 133)
Source: publisher figshare collection journal article supplement (https://springernature.figshare.com/articles/dataset/_/4903193)

## Ccno

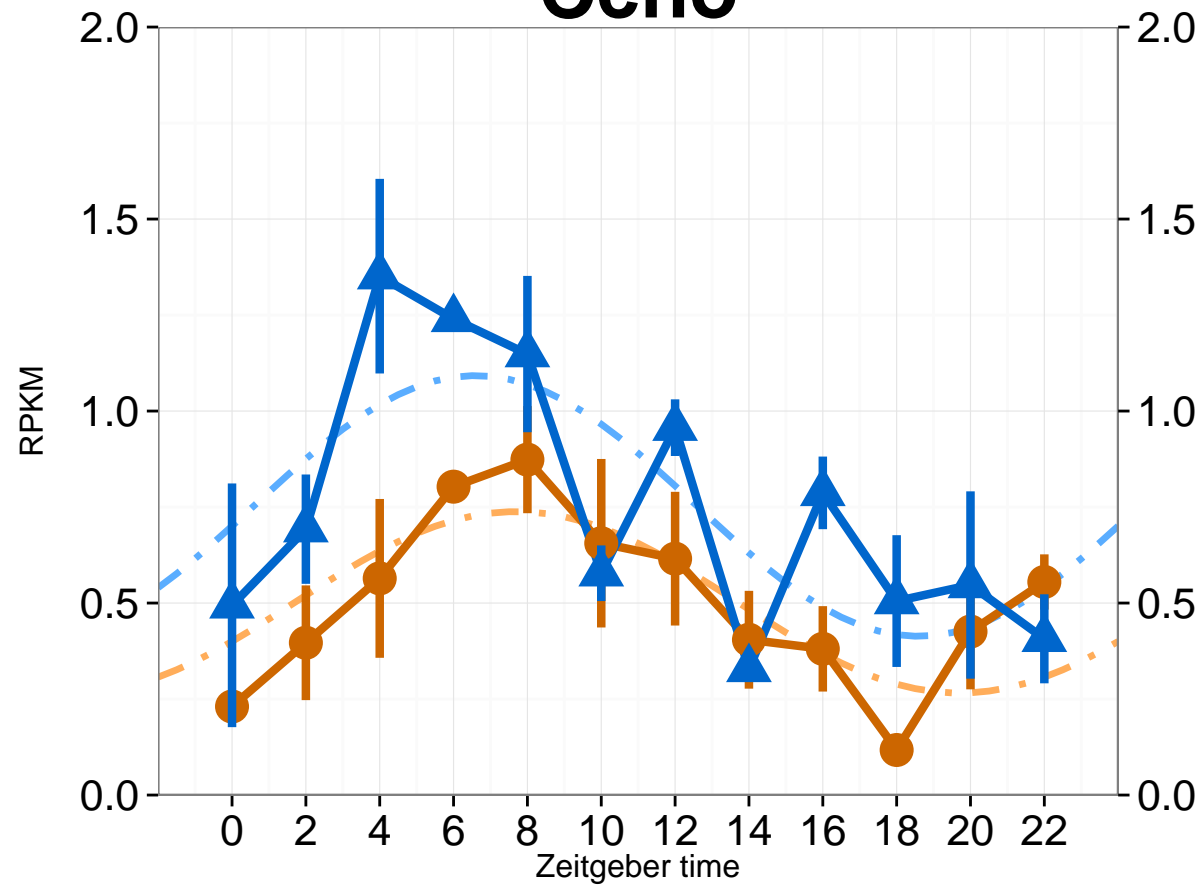

## Ccno

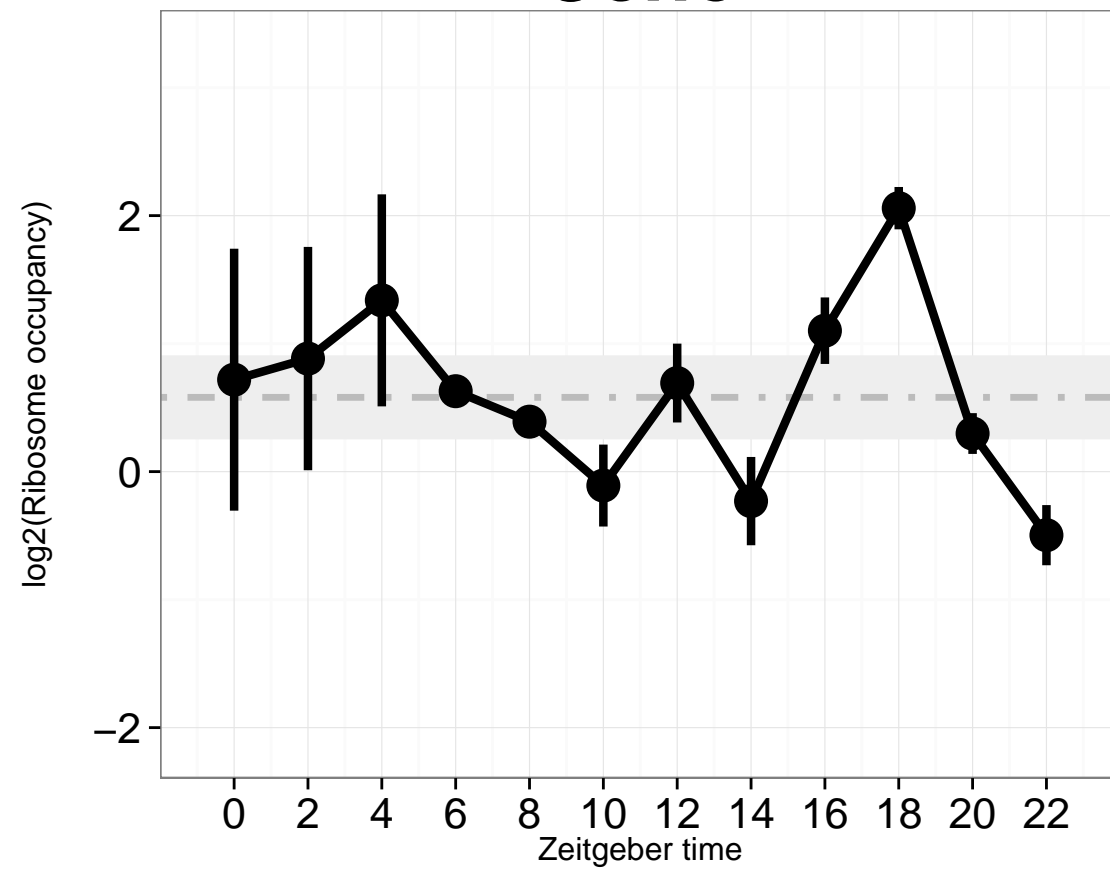

Supplement: Supplementary file 6723 [file 1]

## Naa16

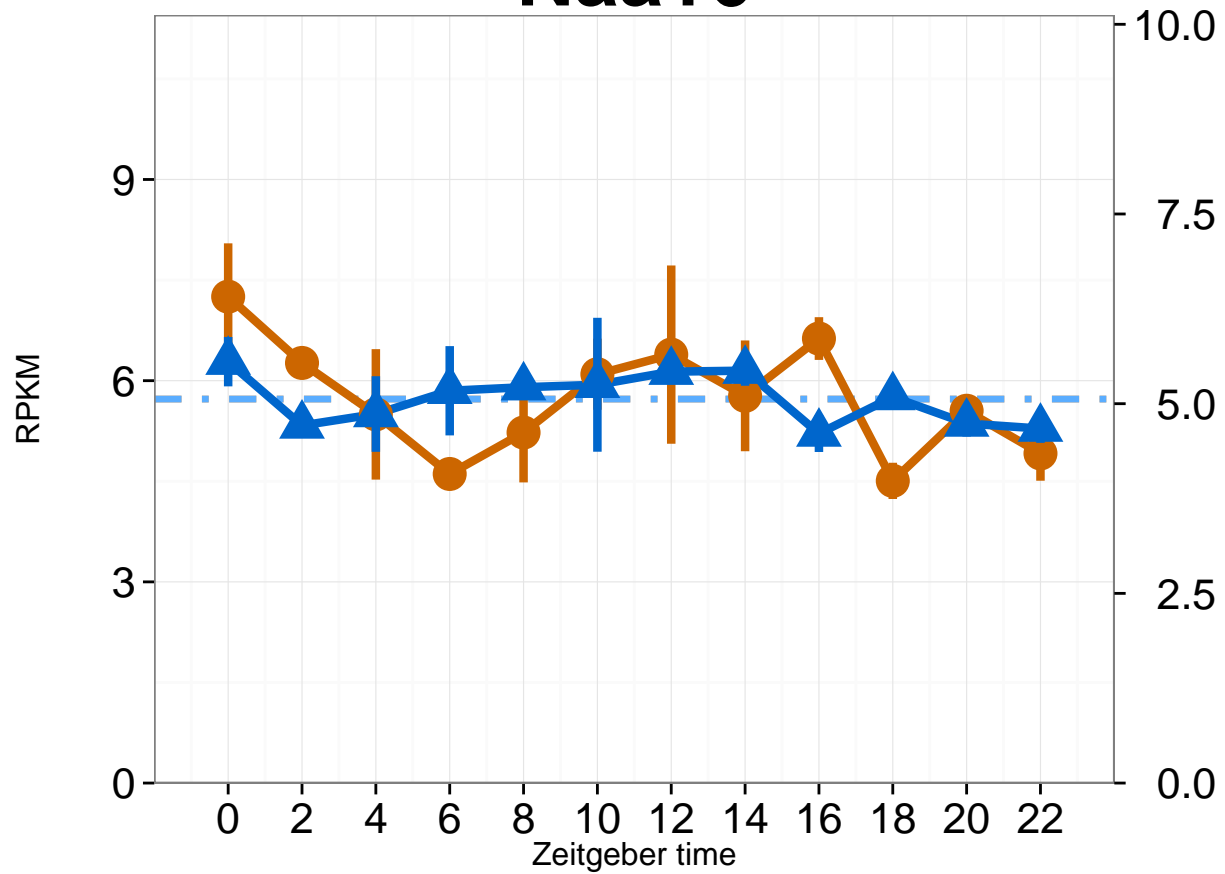

## Naa16

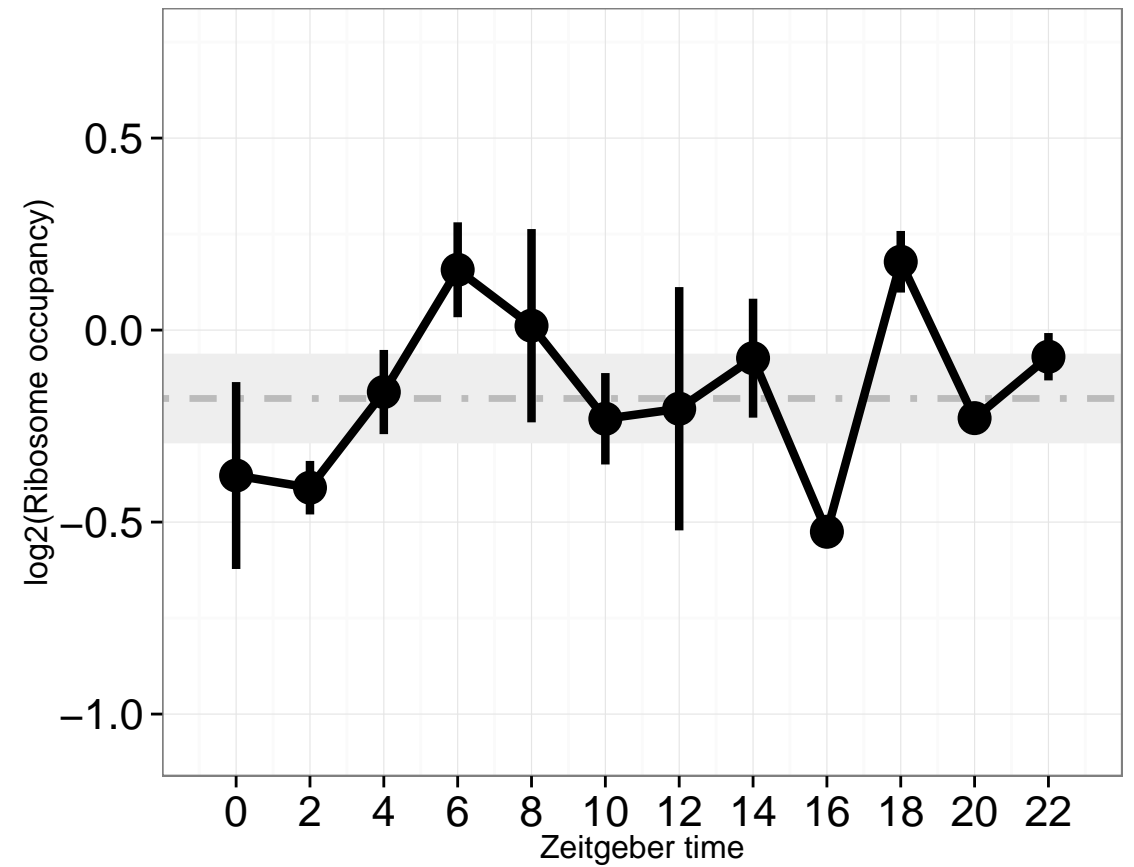

Supplement: Supplementary file 6724 [file 1]

# Xpr1

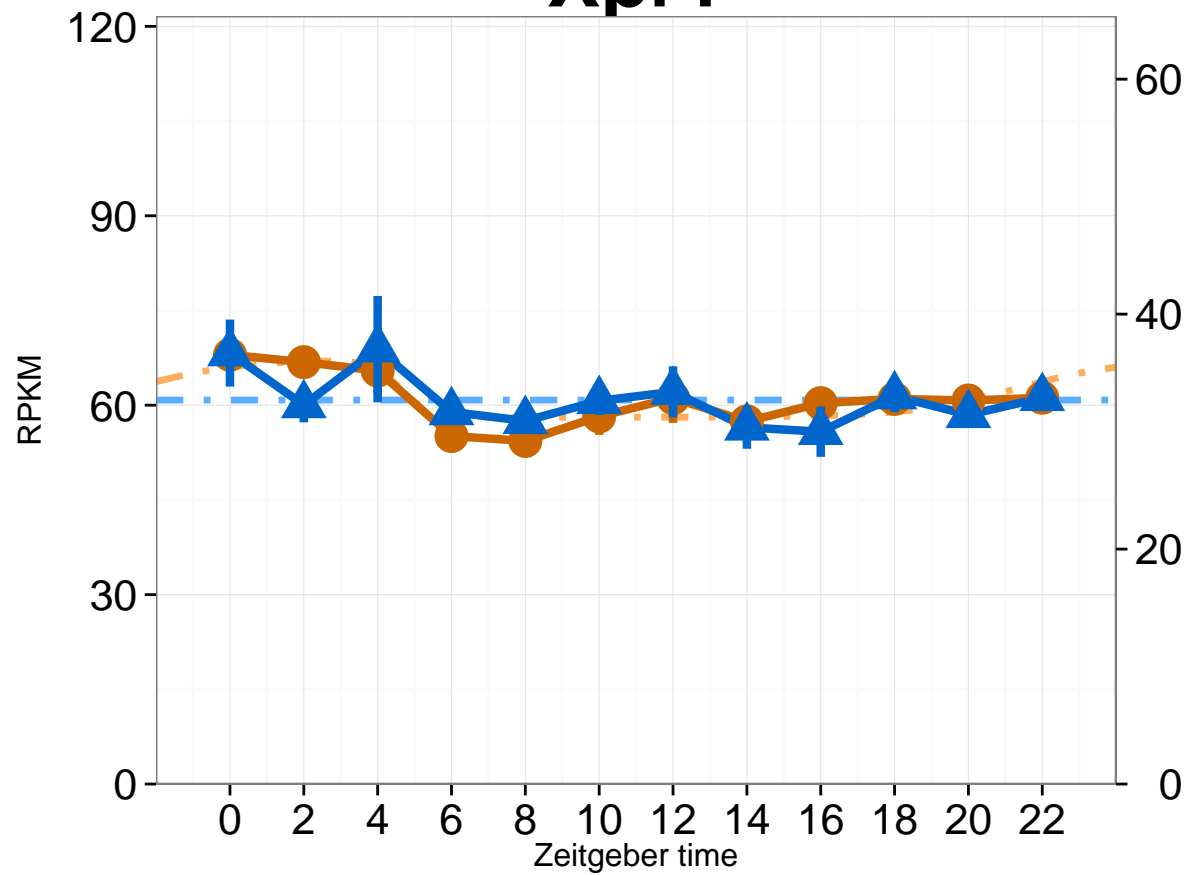

# Xpr1

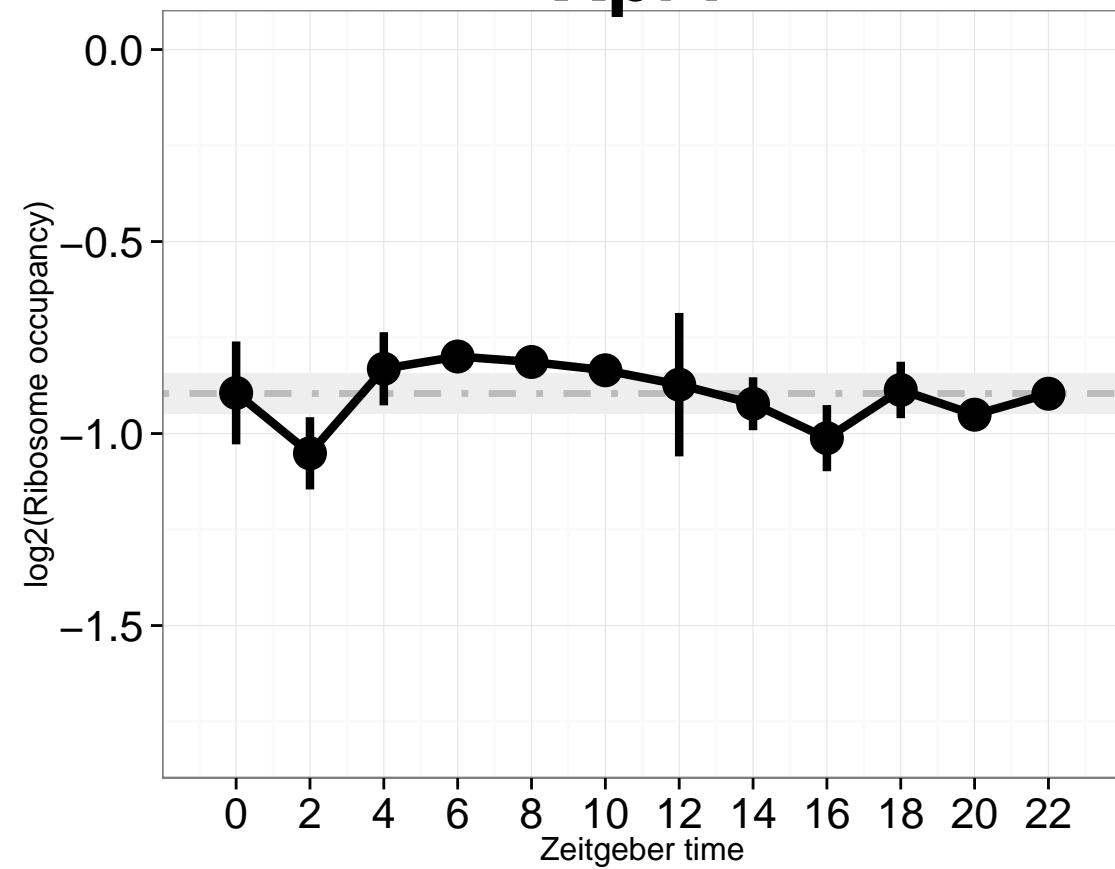

Supplement: Supplementary file 6725 [file 1]

## Gtf2h5

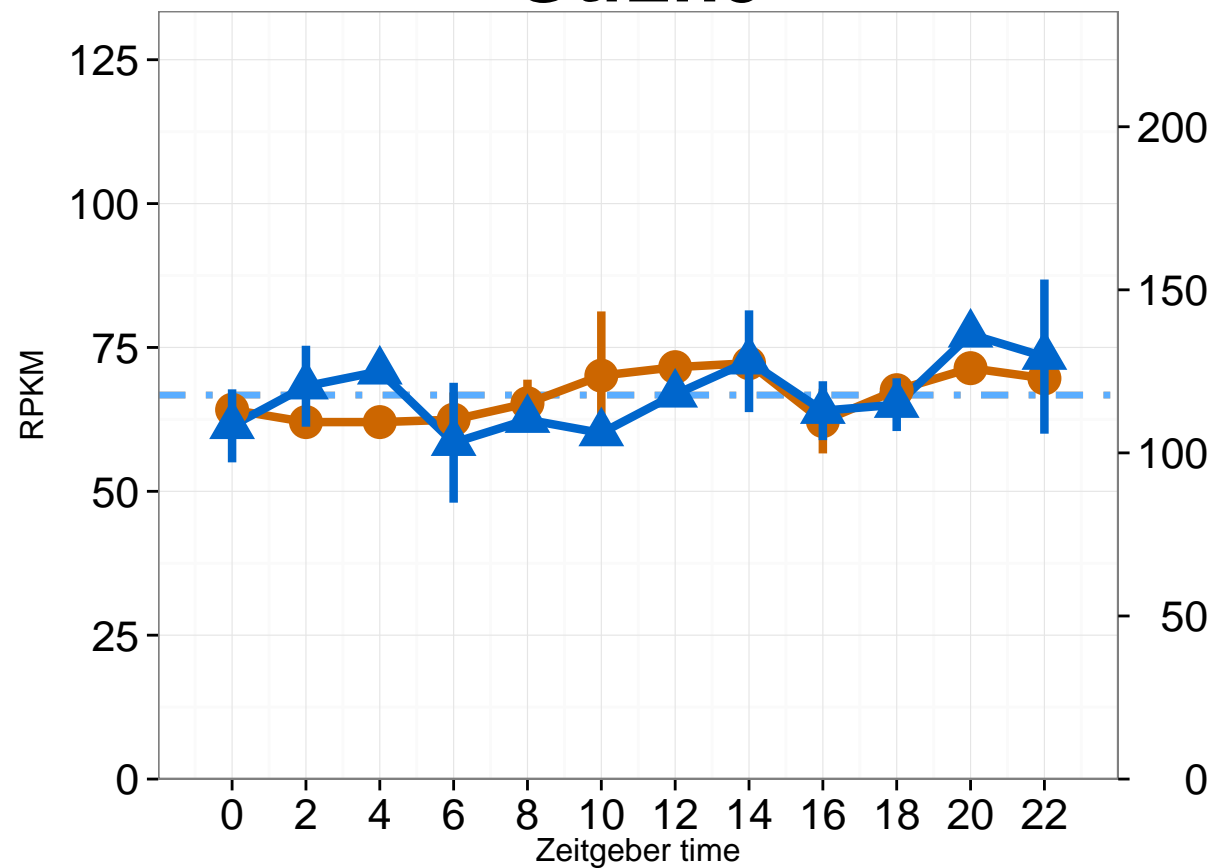

## Gtf2h5

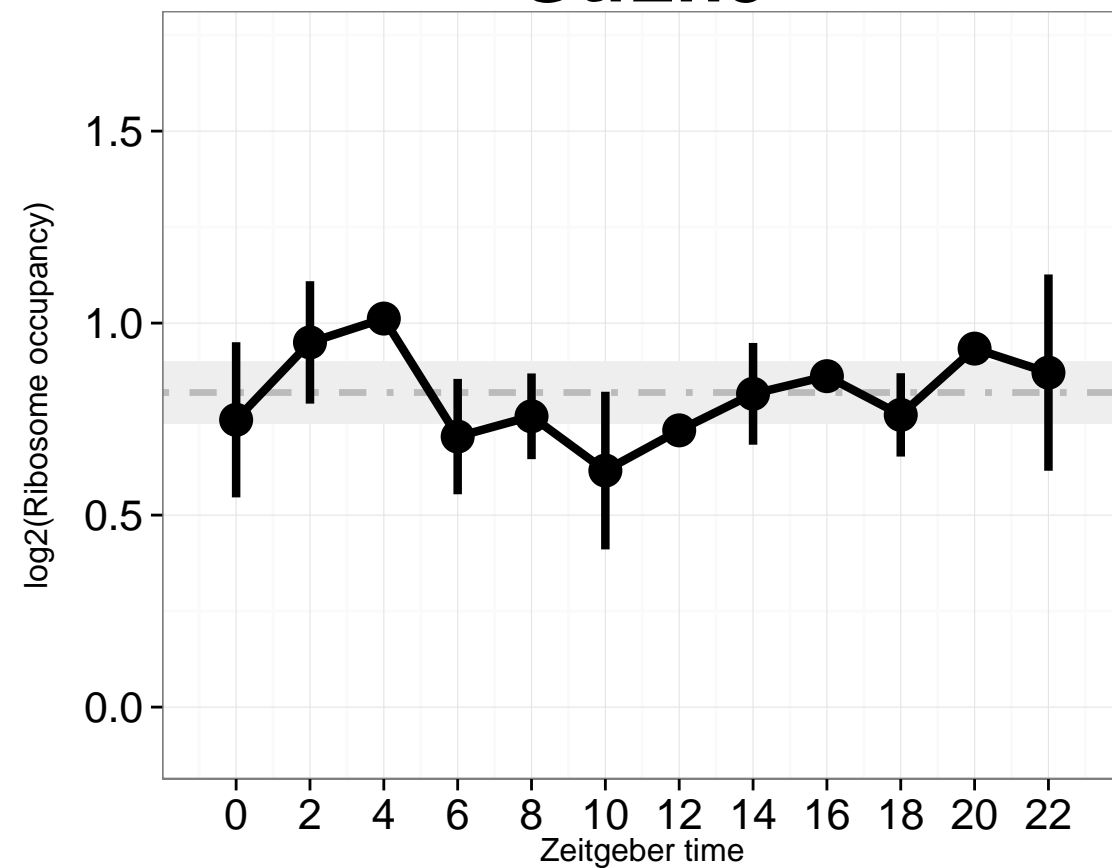

Supplement: Supplementary file 6726 [file 1]

**Tnfsf9 TR**

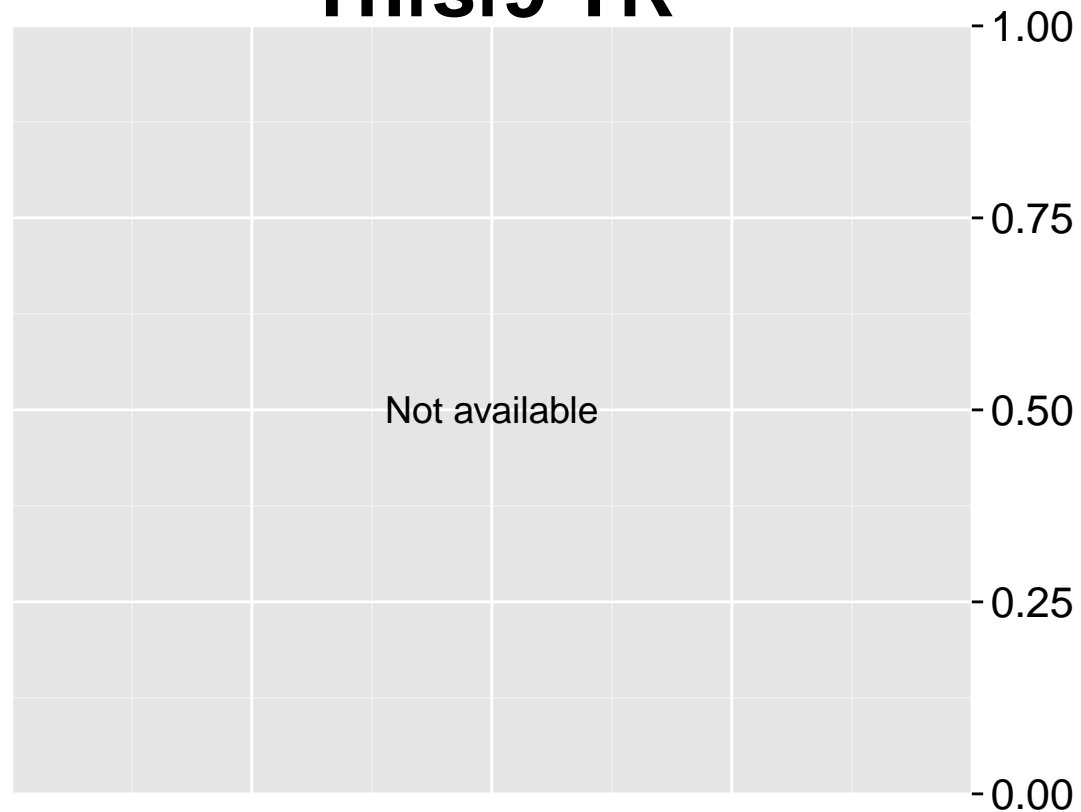

**Tnfsf9 log2(Ribosome occupancy**

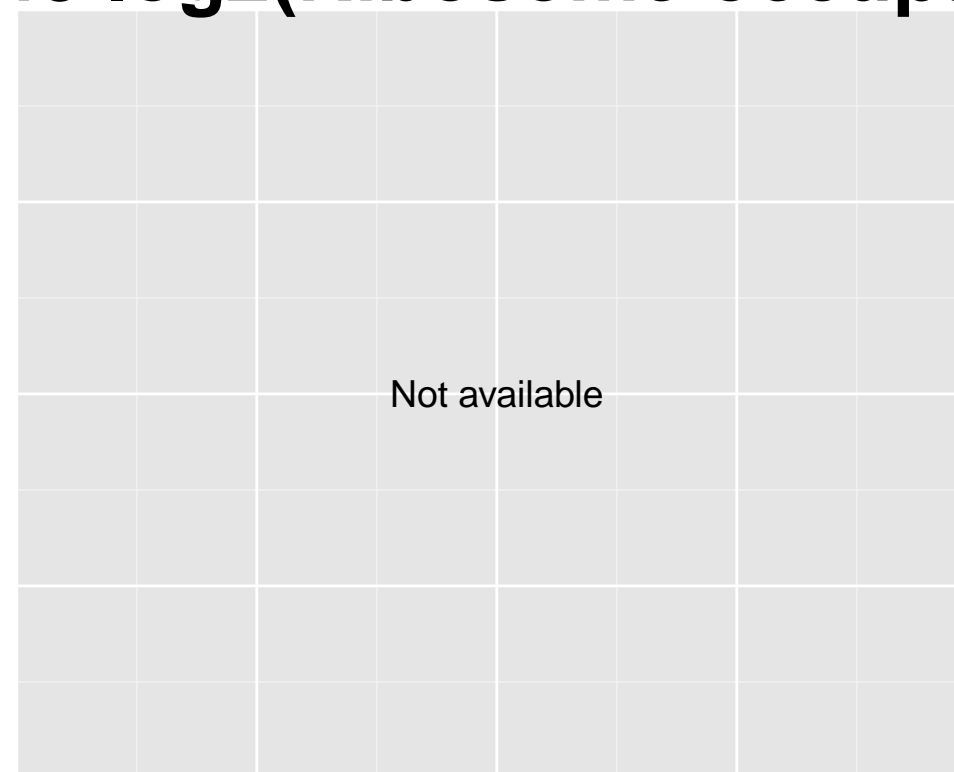

Supplement: Supplementary file 6727 [file 1]

## Mars

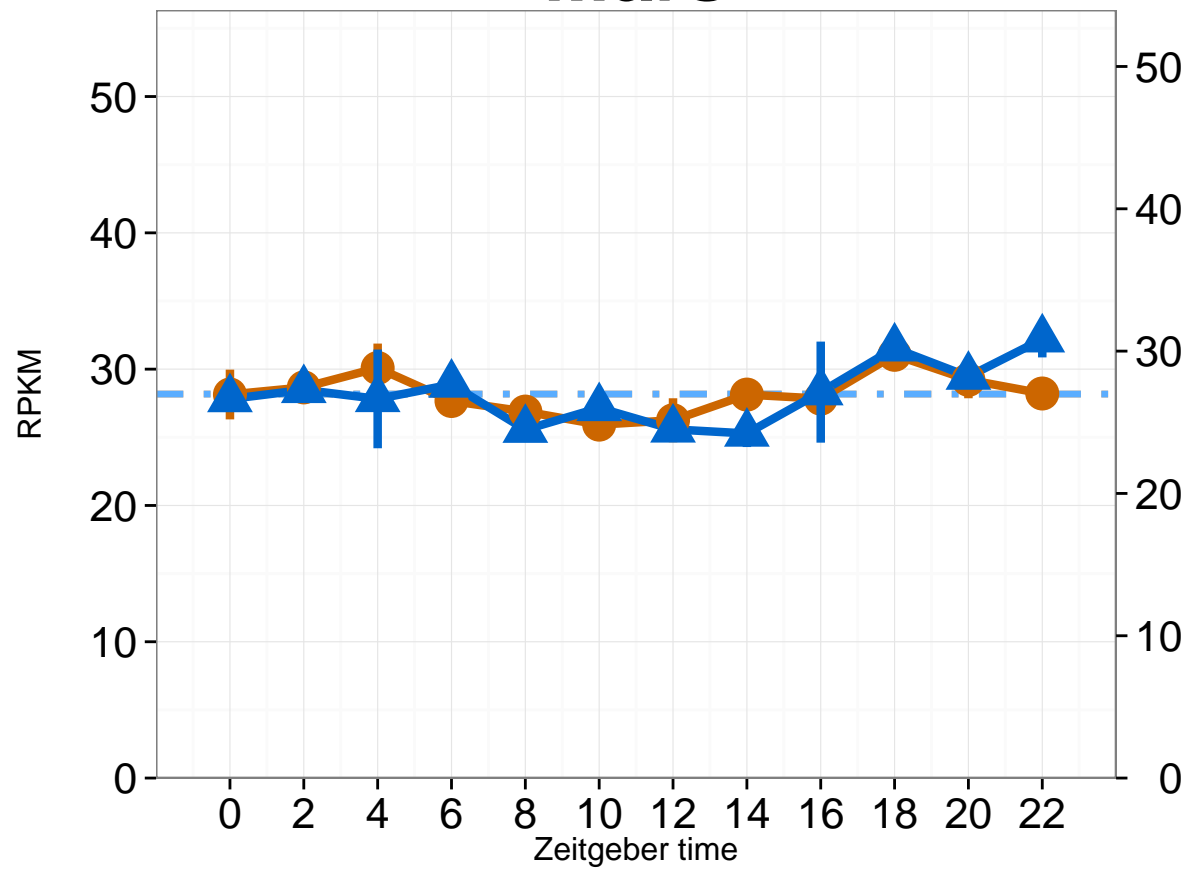

## Mars

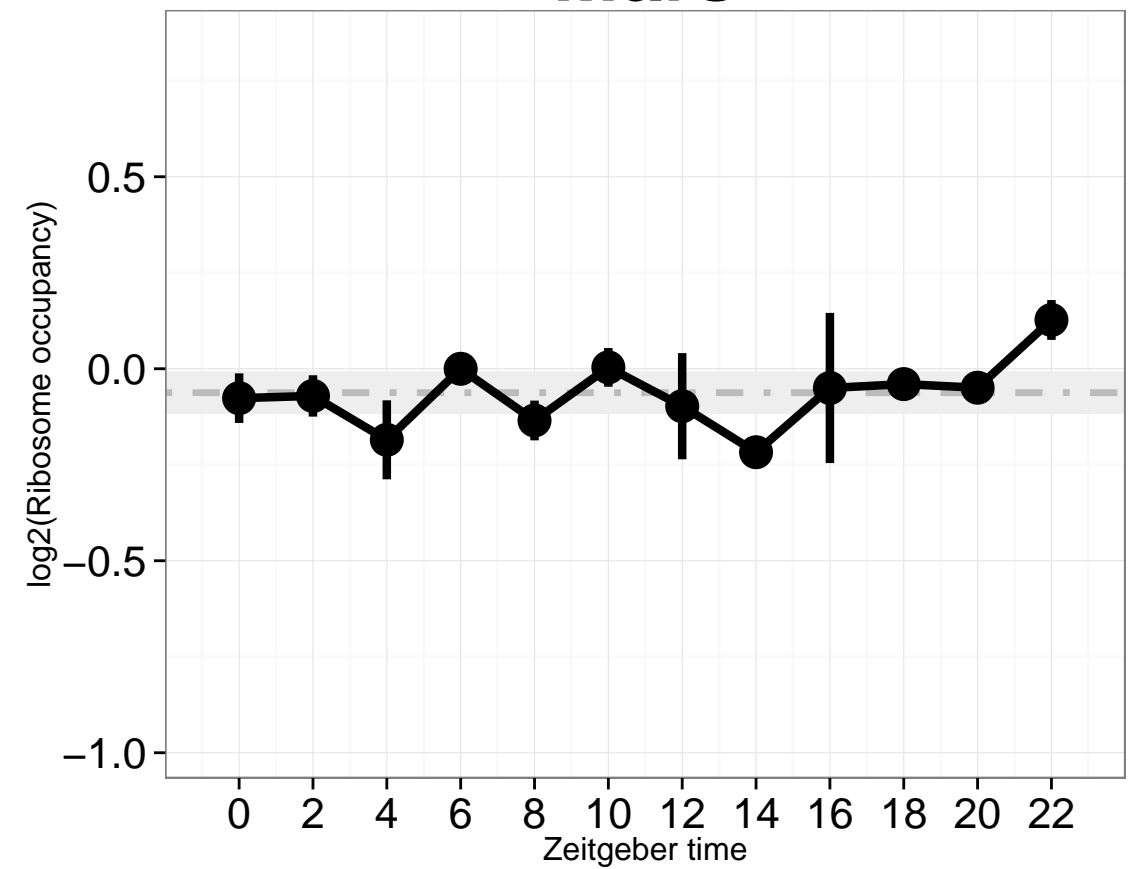

Supplement: Supplementary file 6728 [file 1]

# 3110052M02Rik

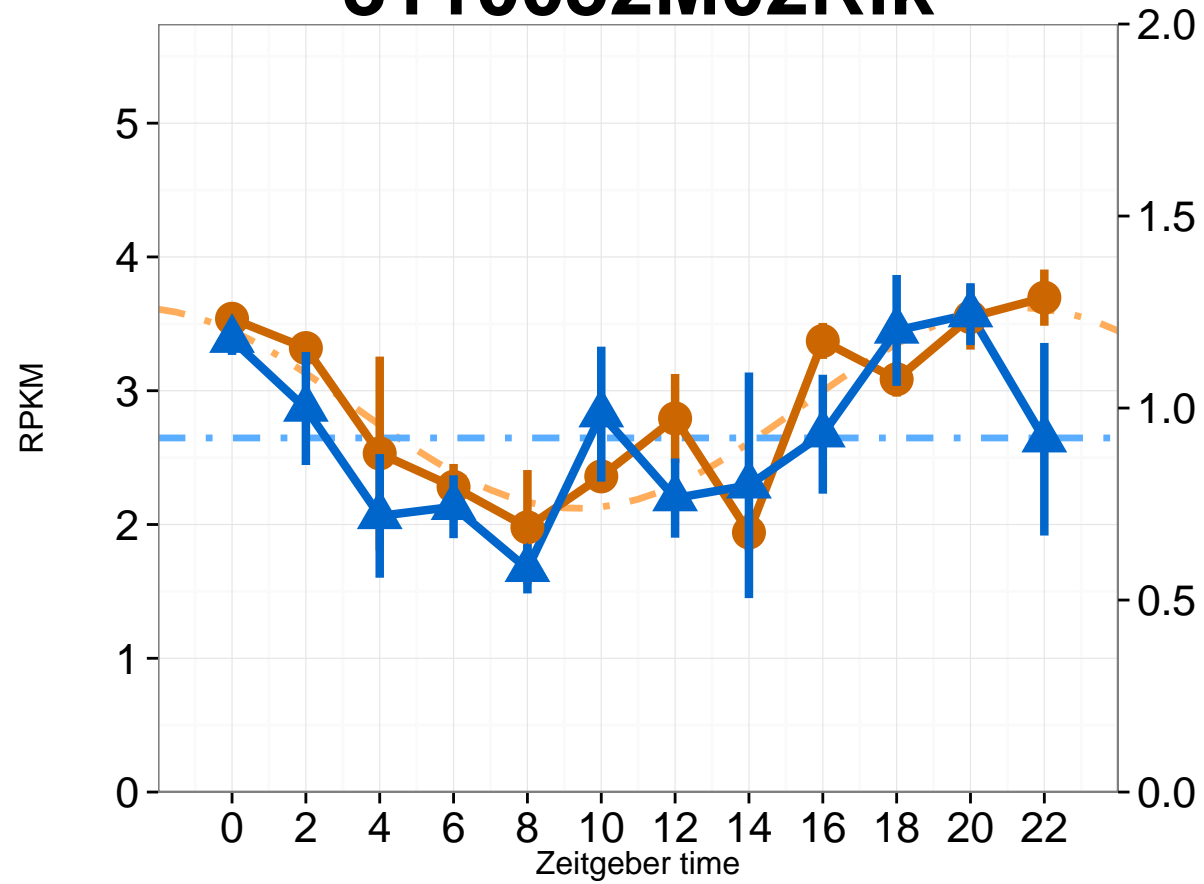

# 3110052M02Rik

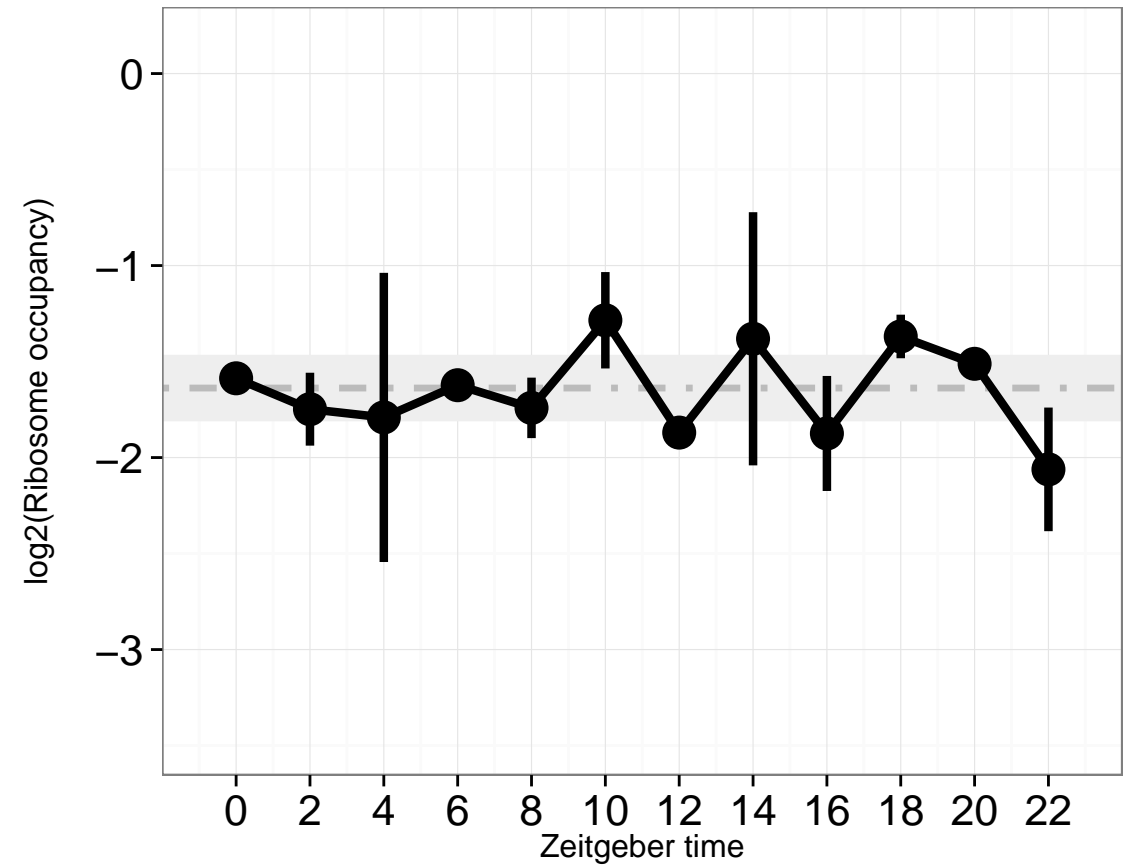

Supplement: Supplementary file 6729 [file 1]

# Cep85

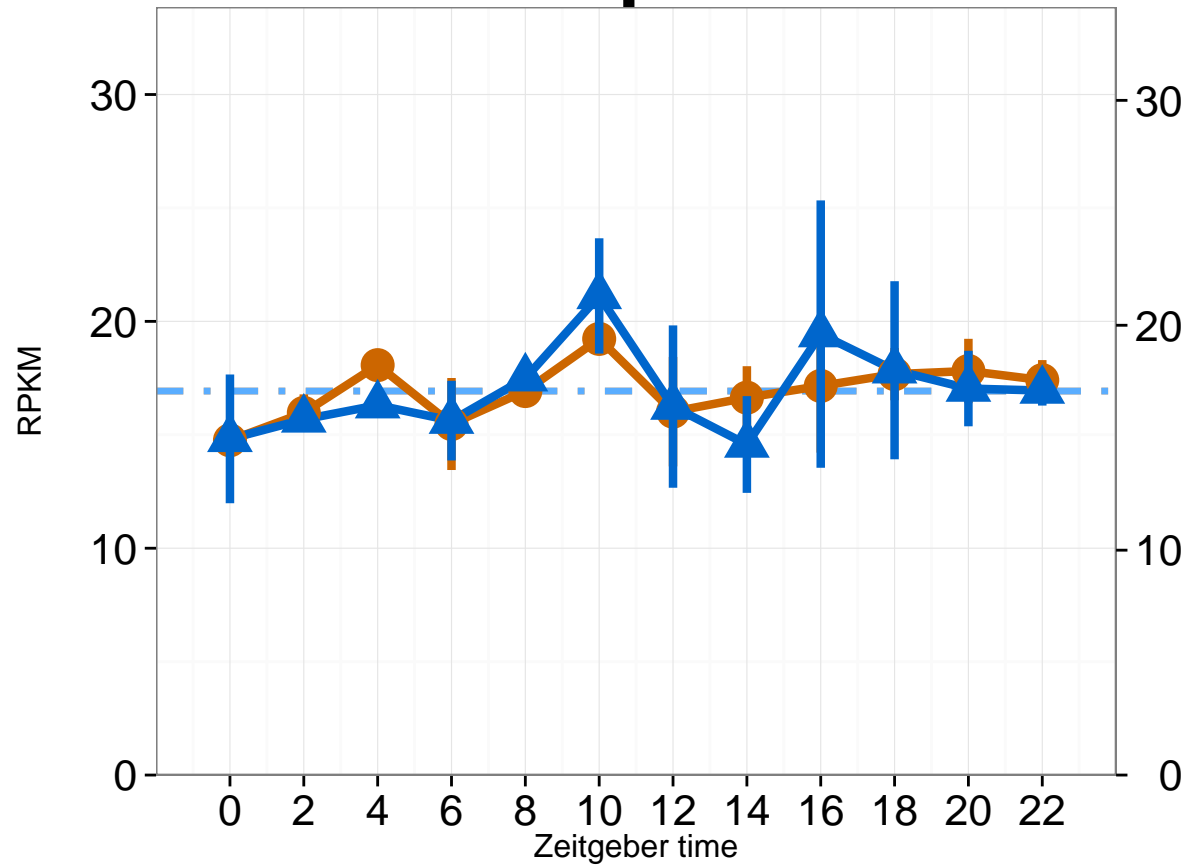

# Cep85

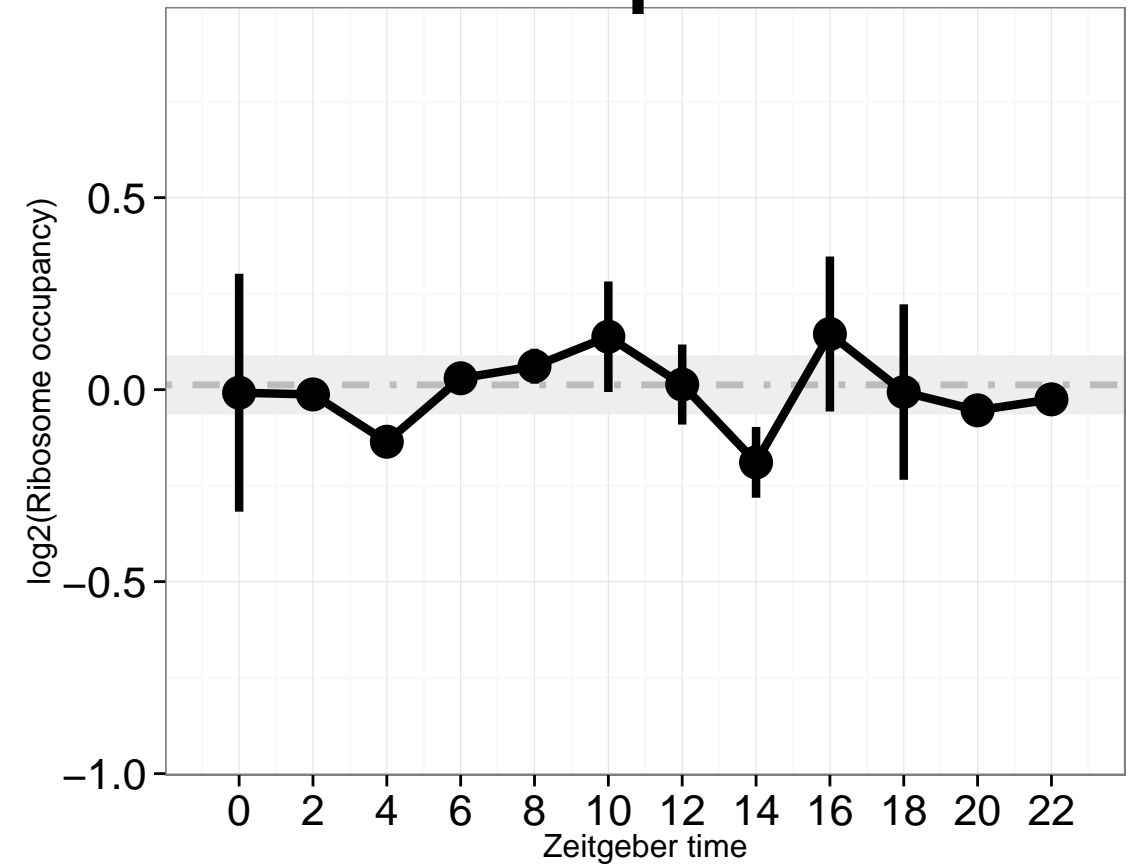

Supplement: Supplementary file 6730 [file 1]

## Kif3c

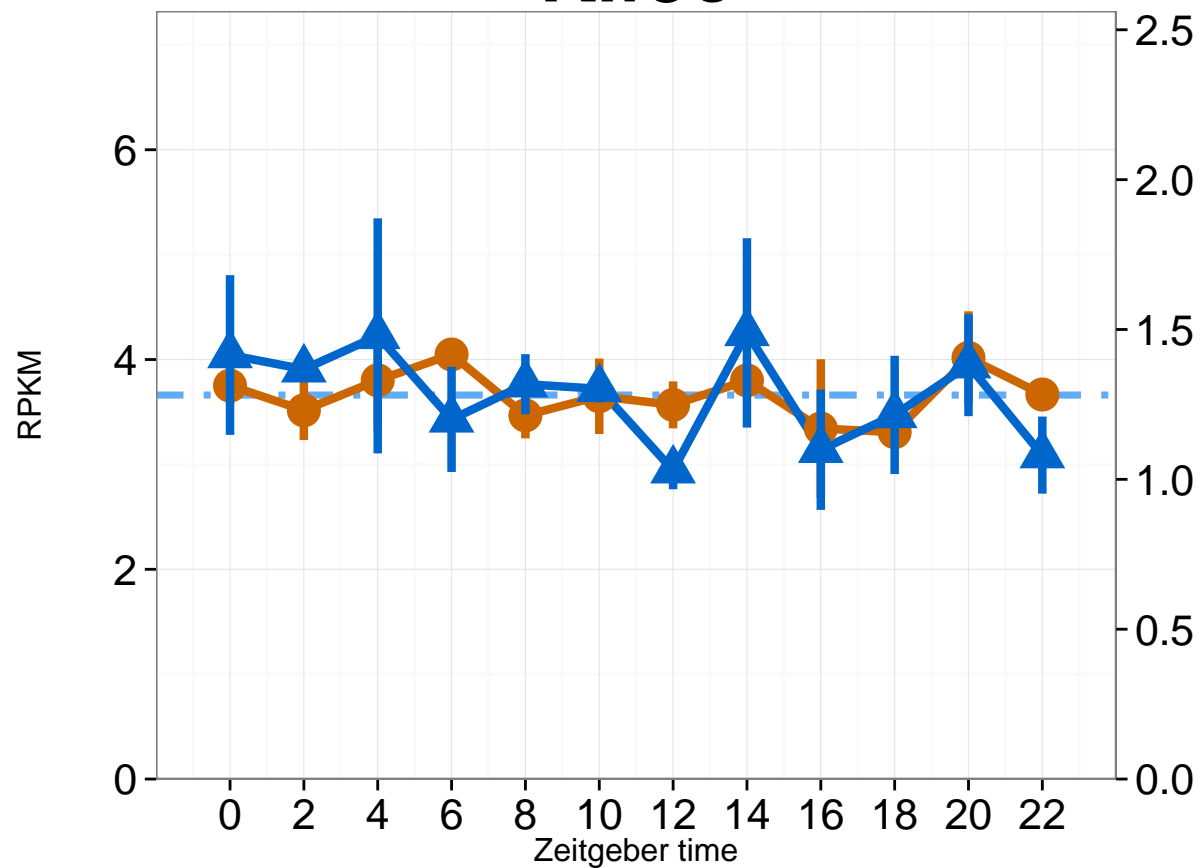

## Kif3c

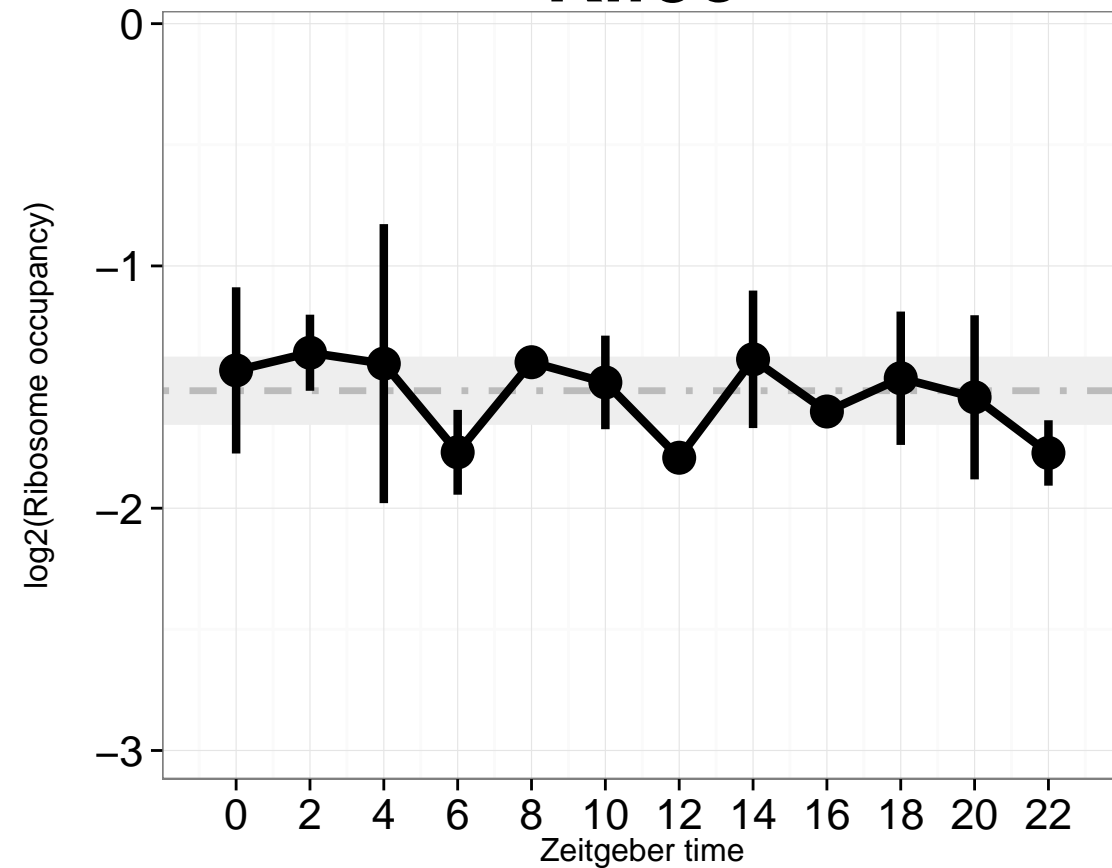

Supplement: Supplementary file 6731 [file 1]

## Hn1l

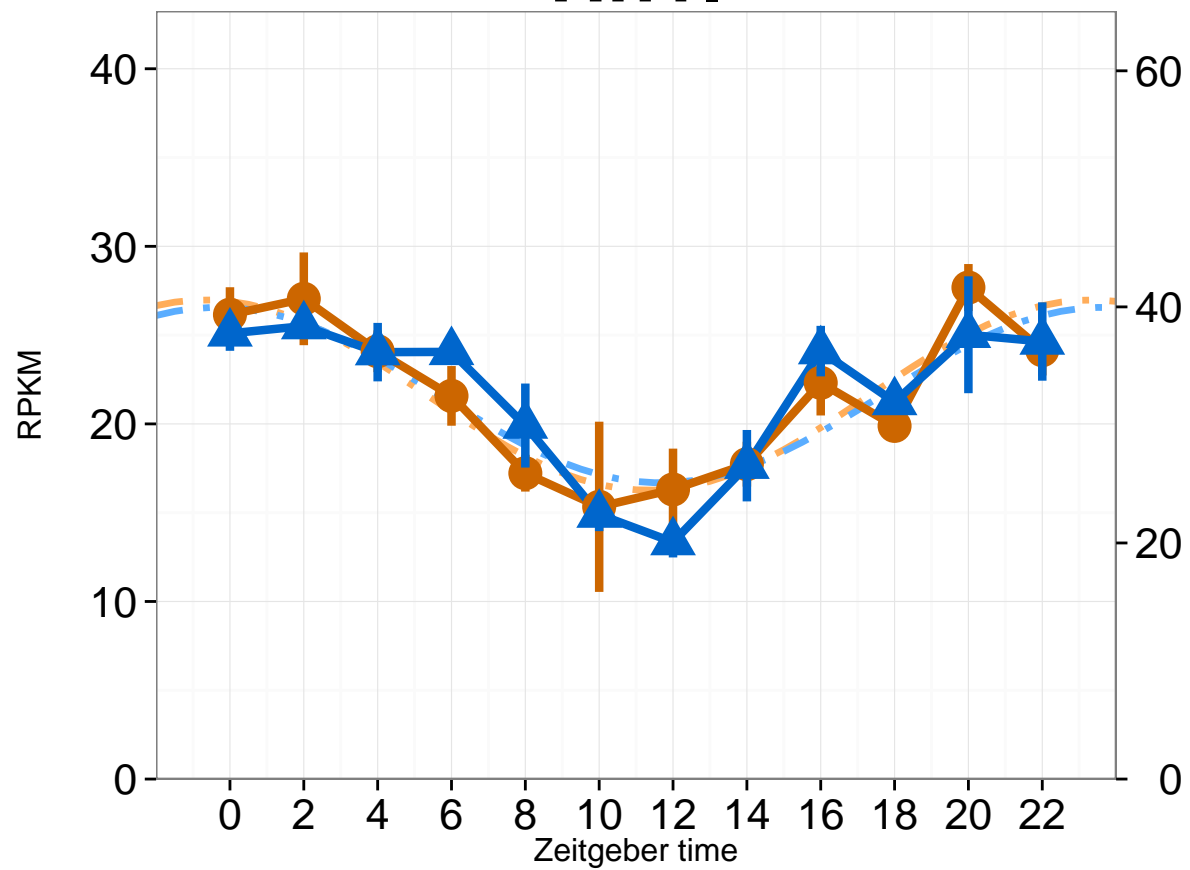

## Hn1l

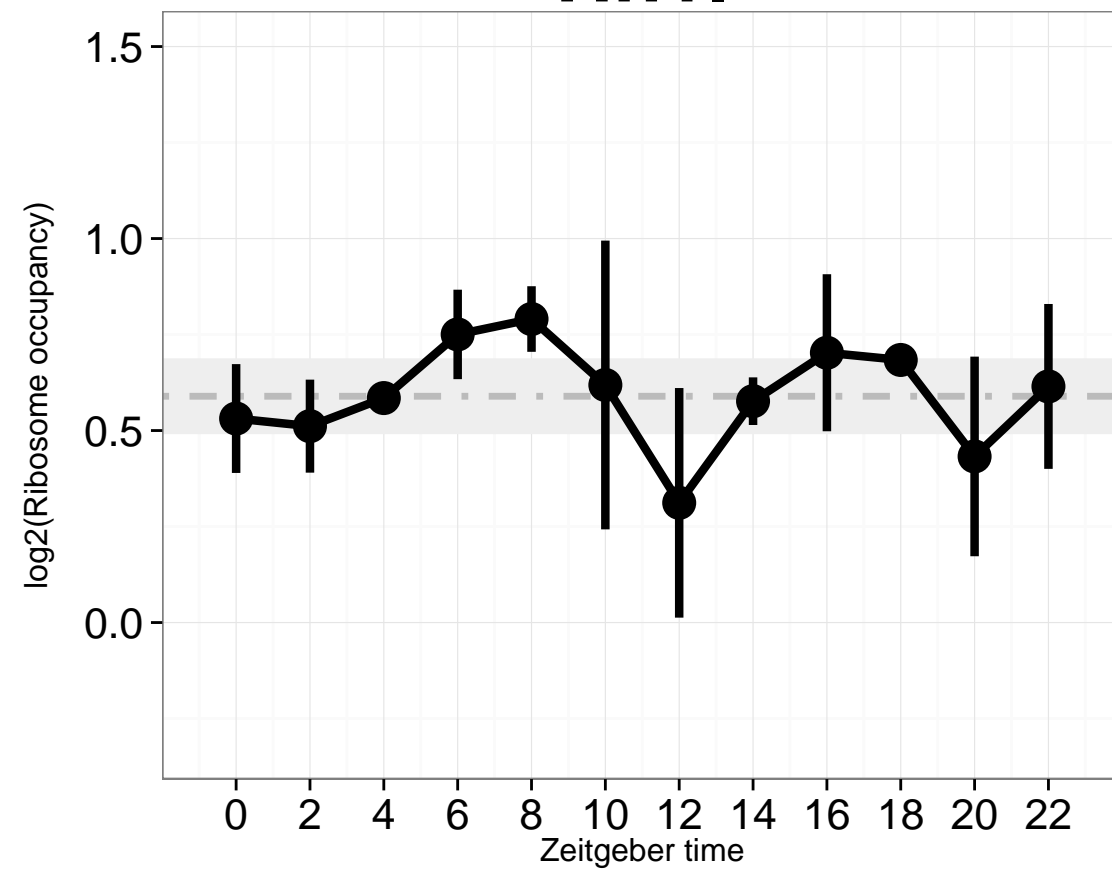

Supplement: Supplementary file 6732 [file 1]

## Ift46

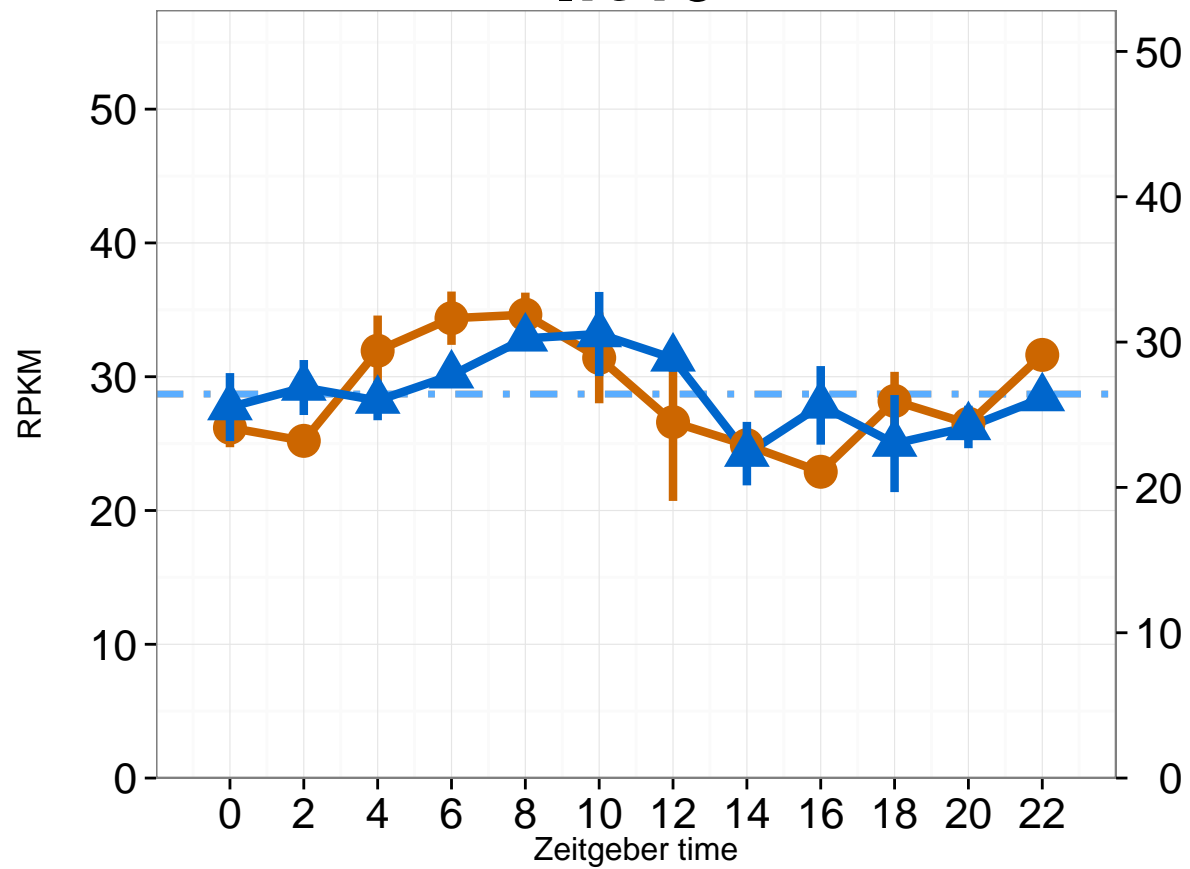

## Ift46

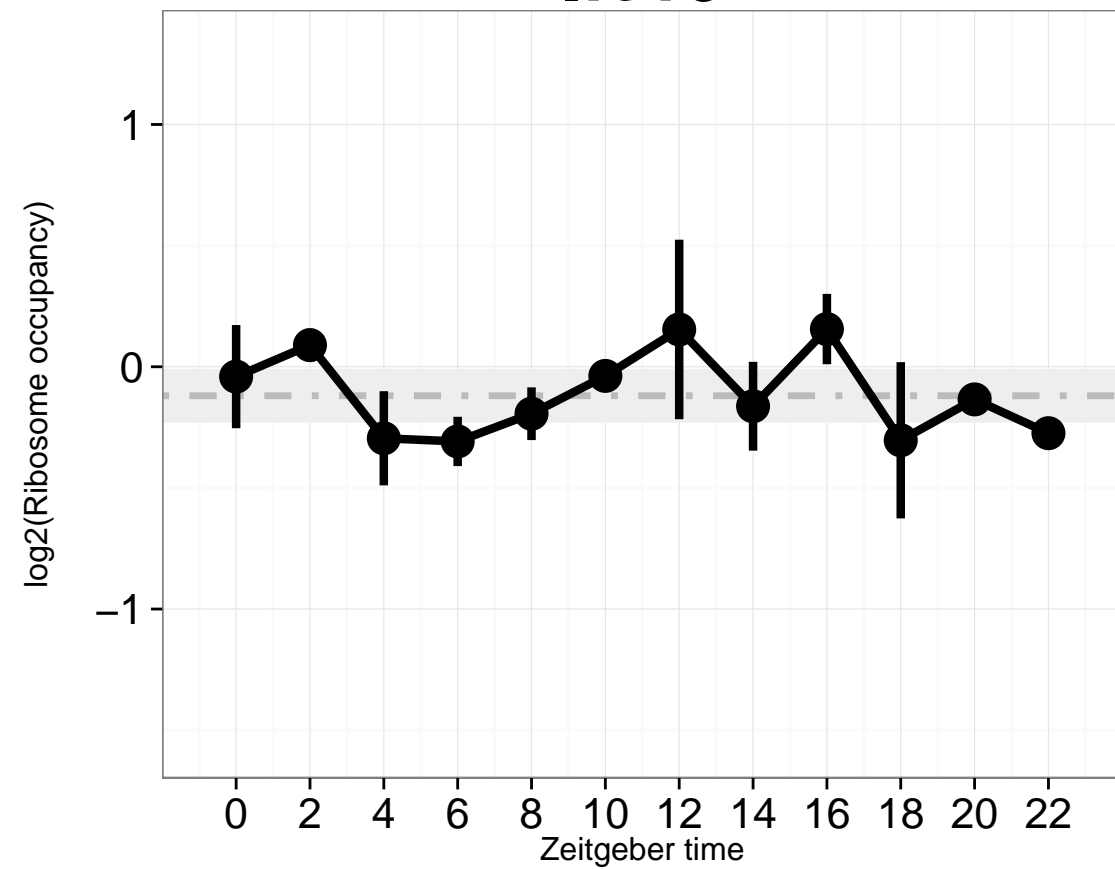

Supplement: Supplementary file 6733 [file 1]

# Mbd6

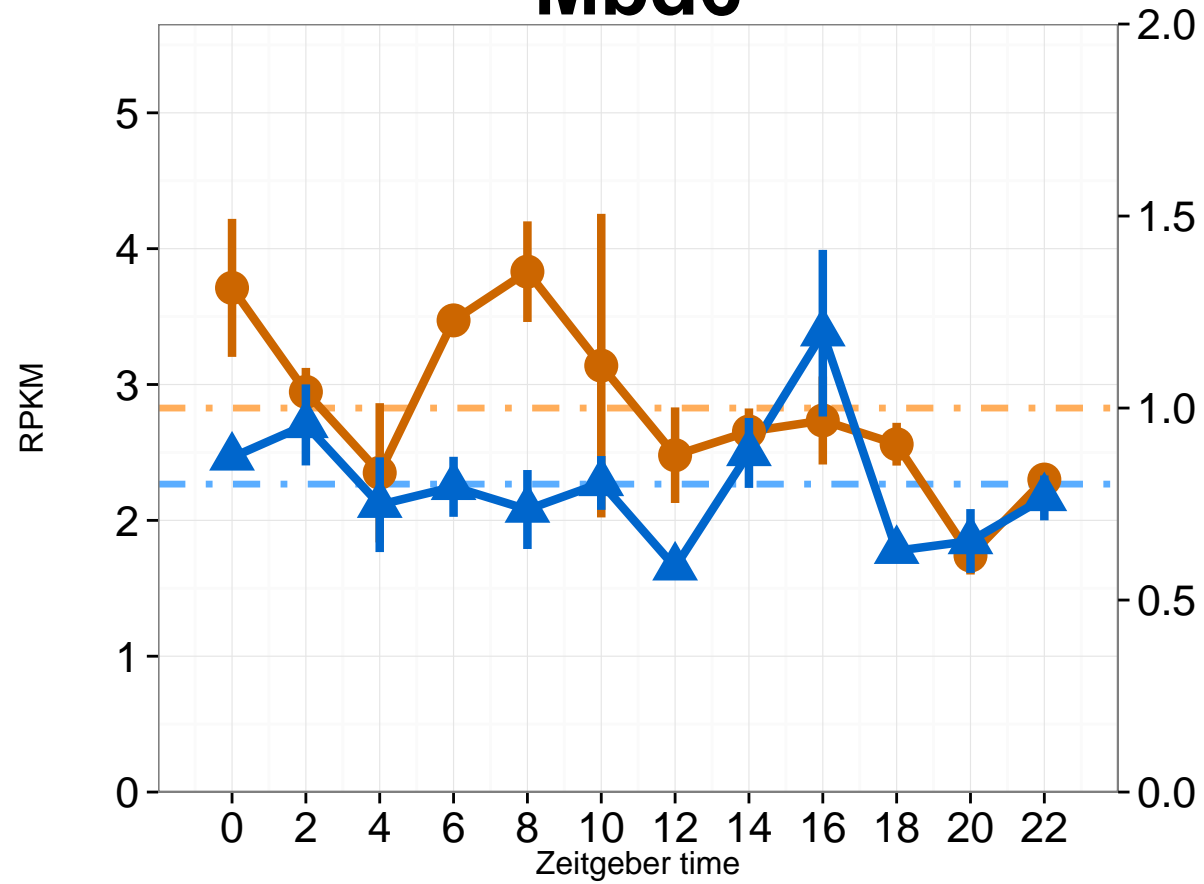

# Mbd6

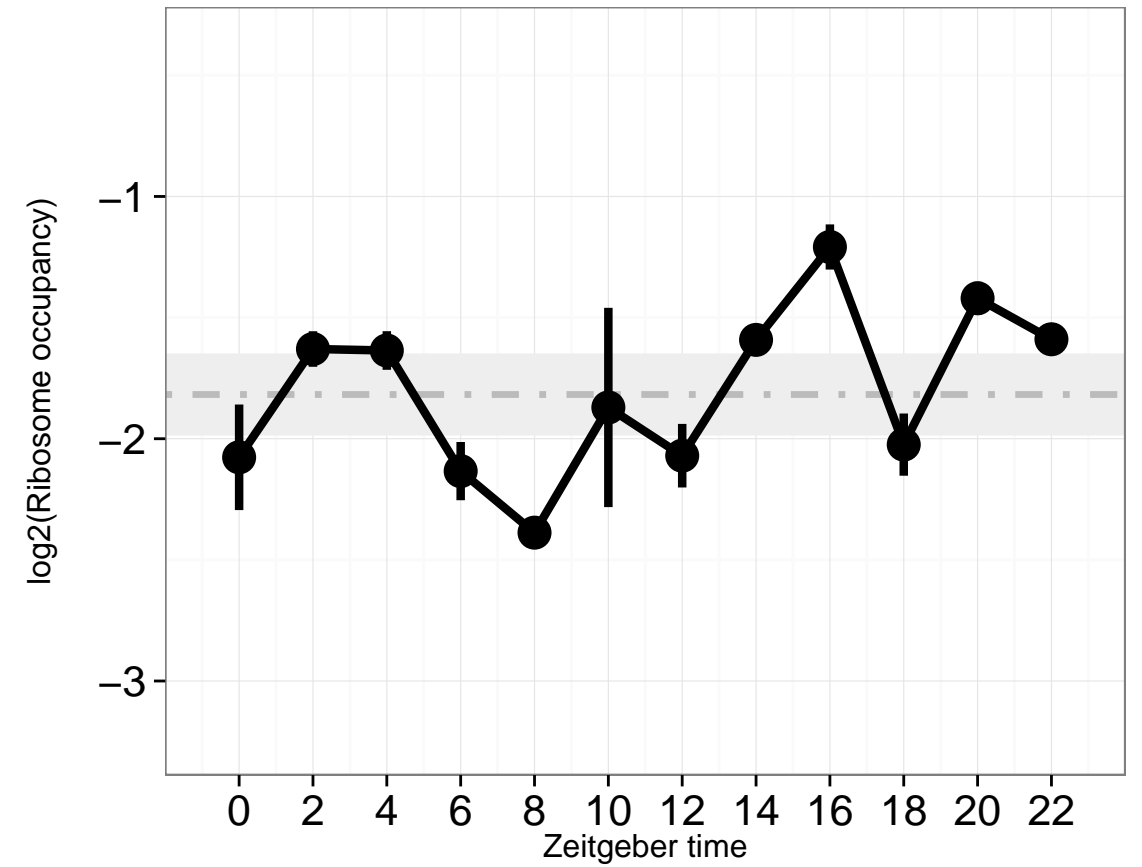

Supplement: Supplementary file 6734 [file 1]

## ErbB3

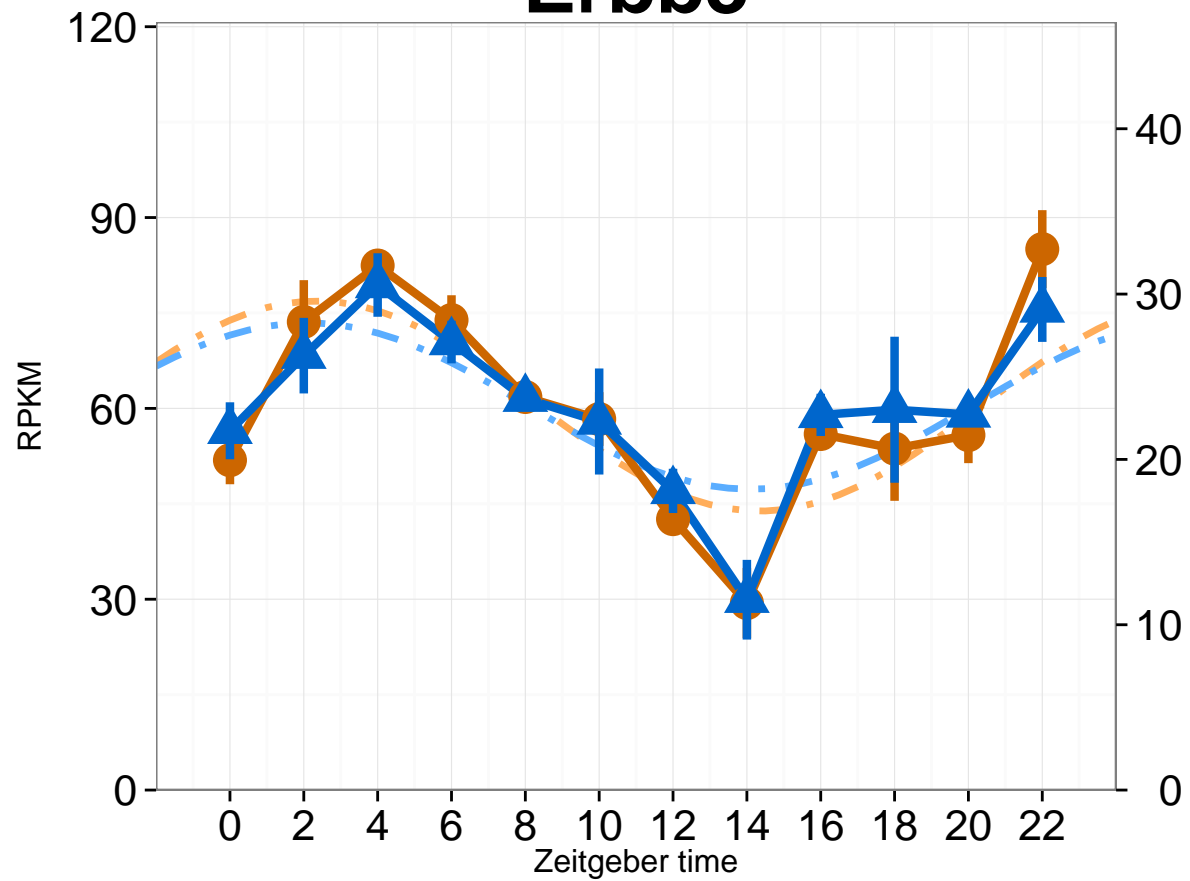

## ErbB3

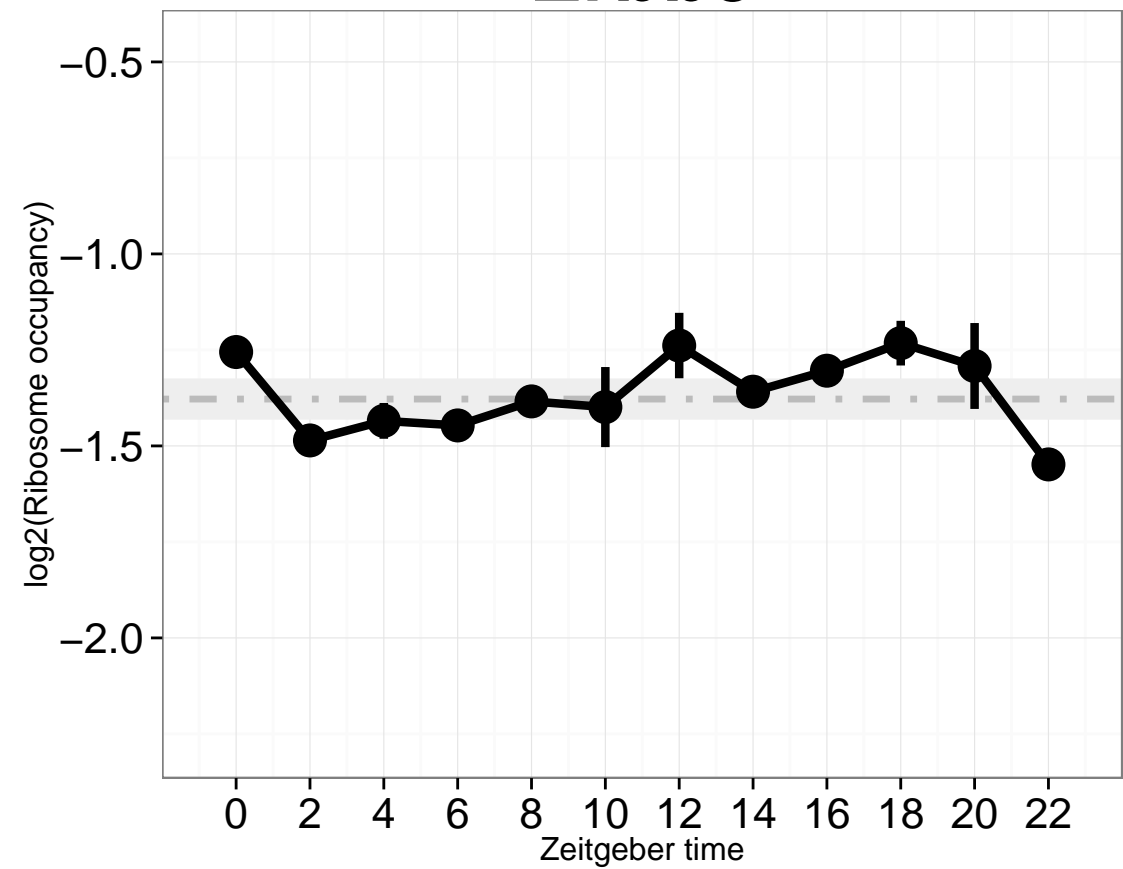

Supplement: Supplementary file 6735 [file 1]

# Slc26a7

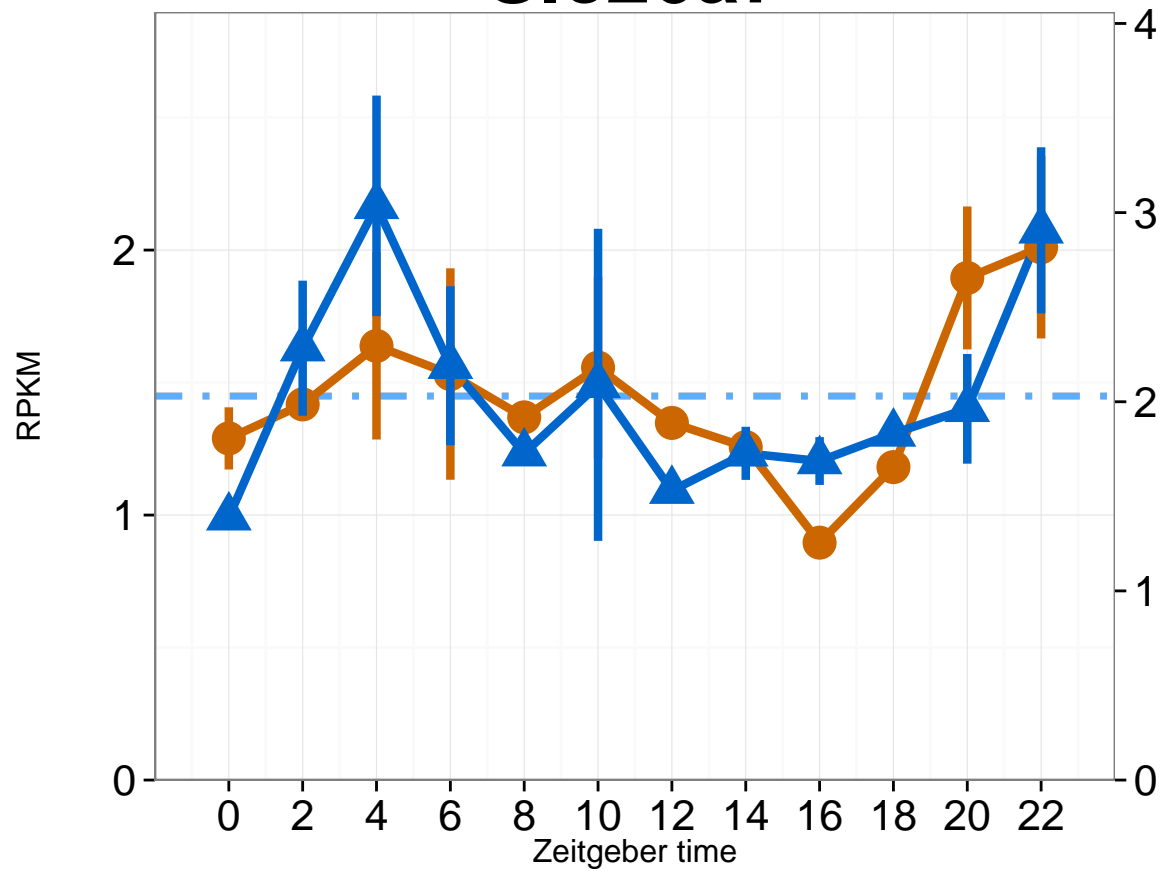

# Slc26a7

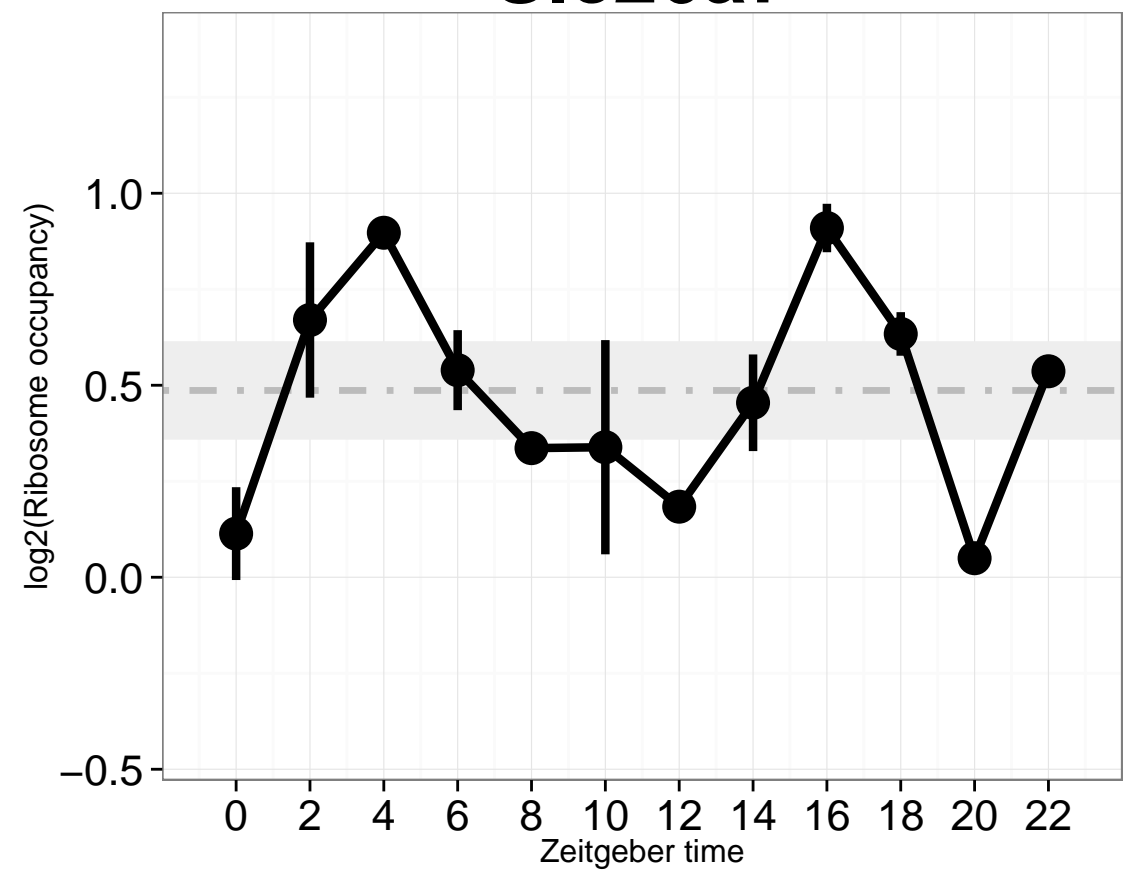

Supplement: Supplementary file 6736 [file 1]

## Junb

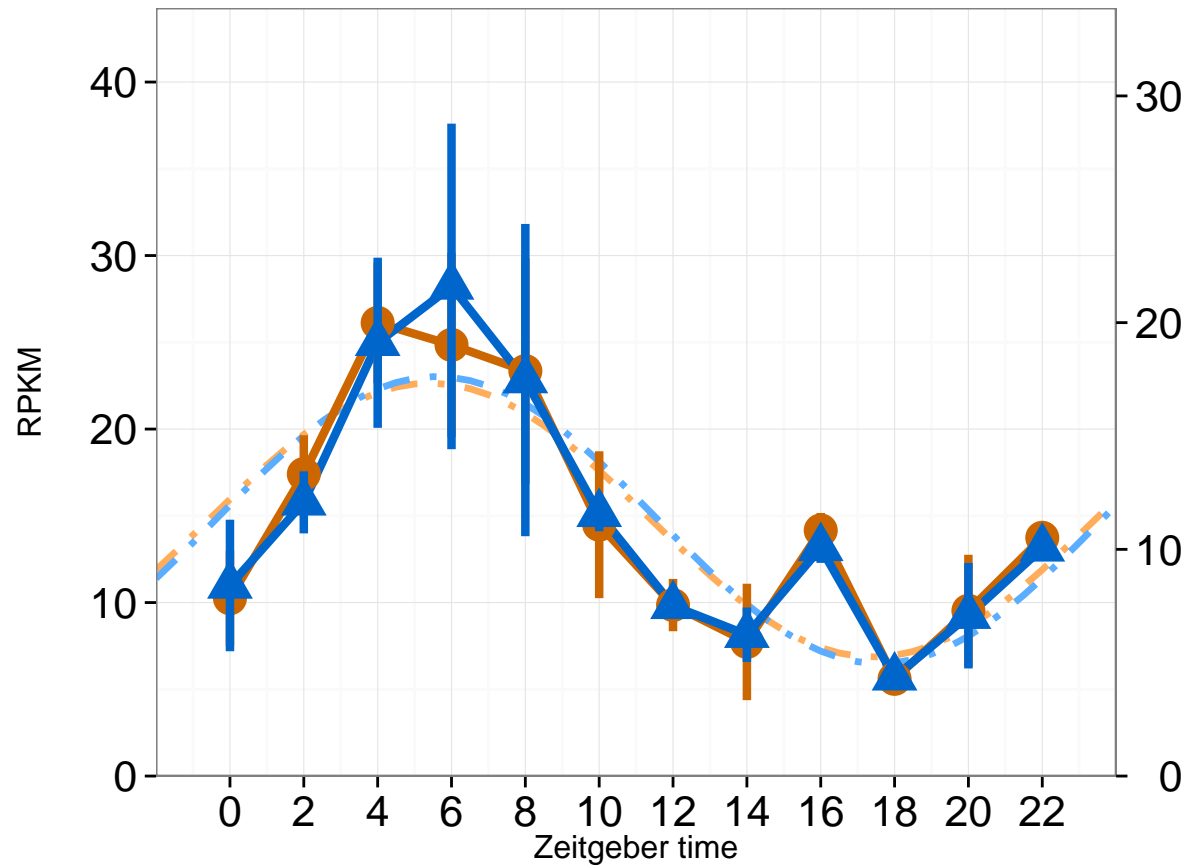

## Junb

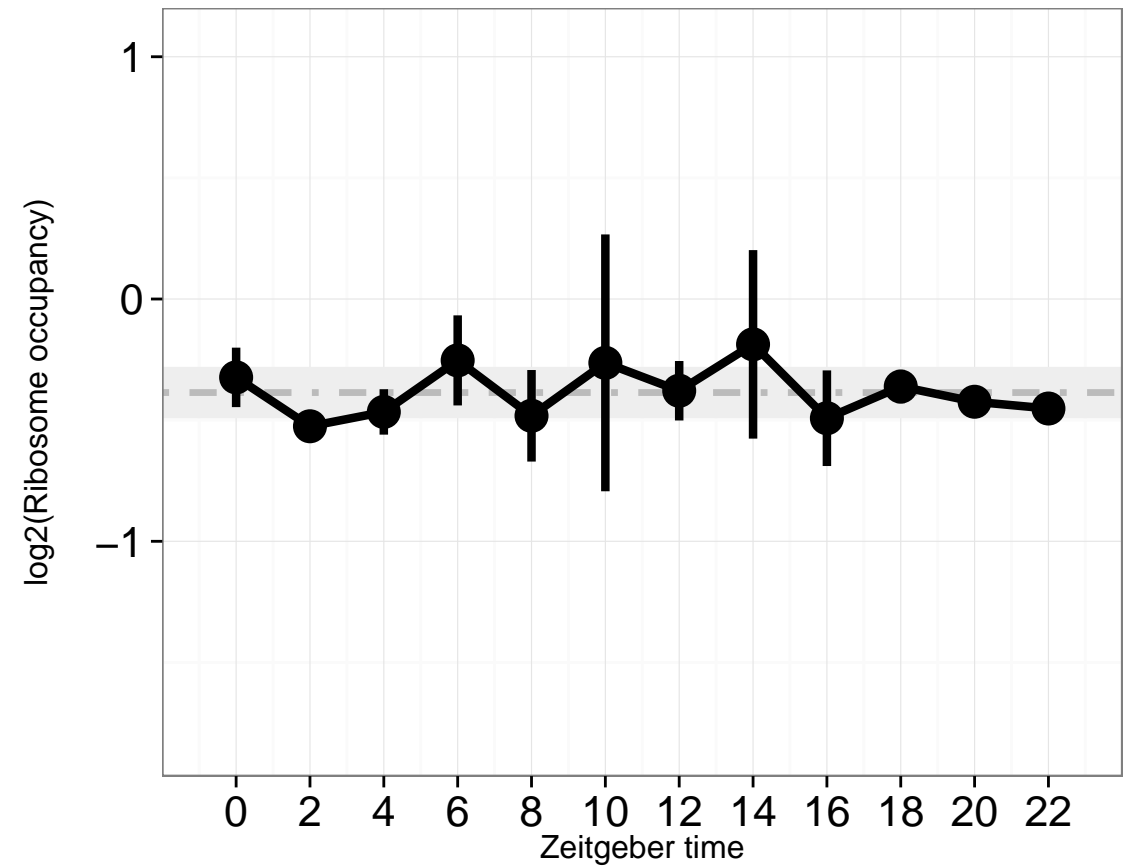

Supplement: Supplementary file 6737 [file 1]

# Ckap2l

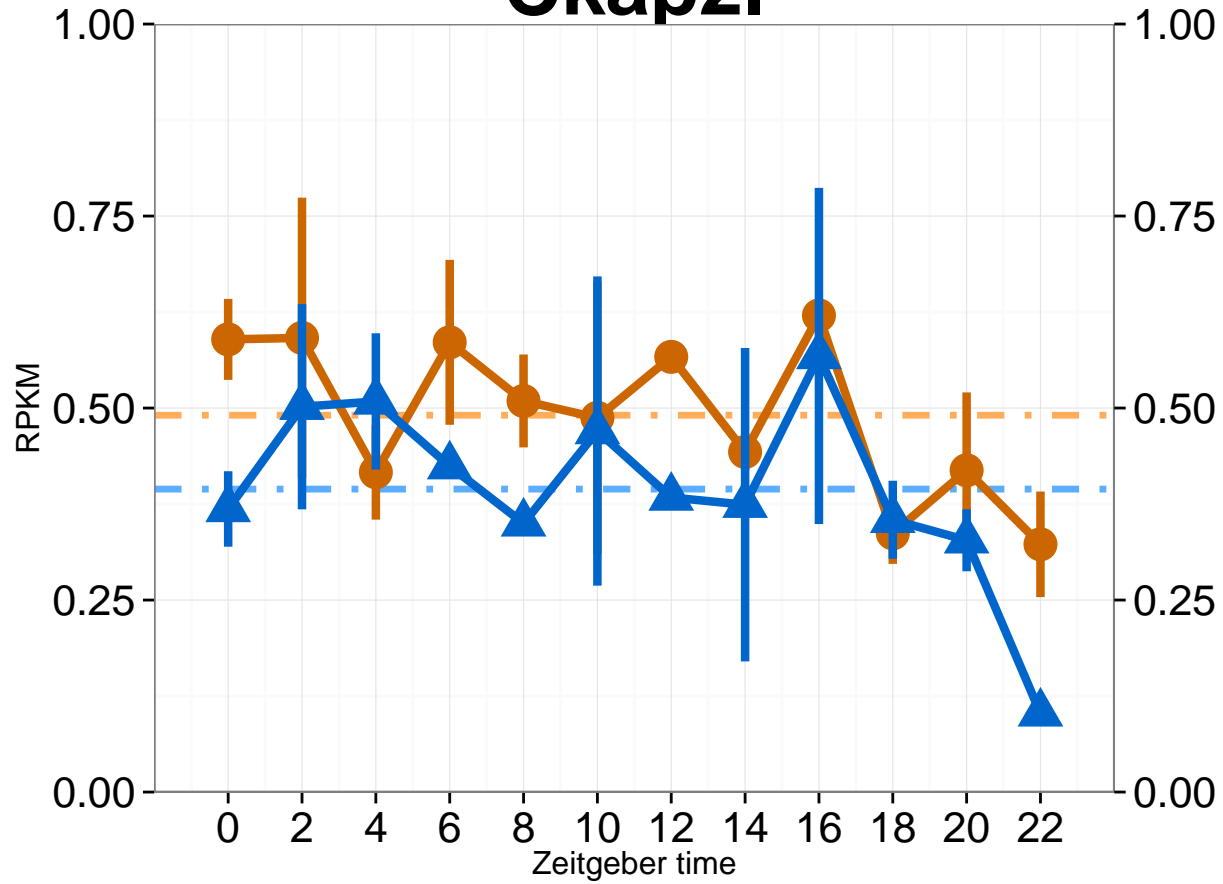

# Ckap2l

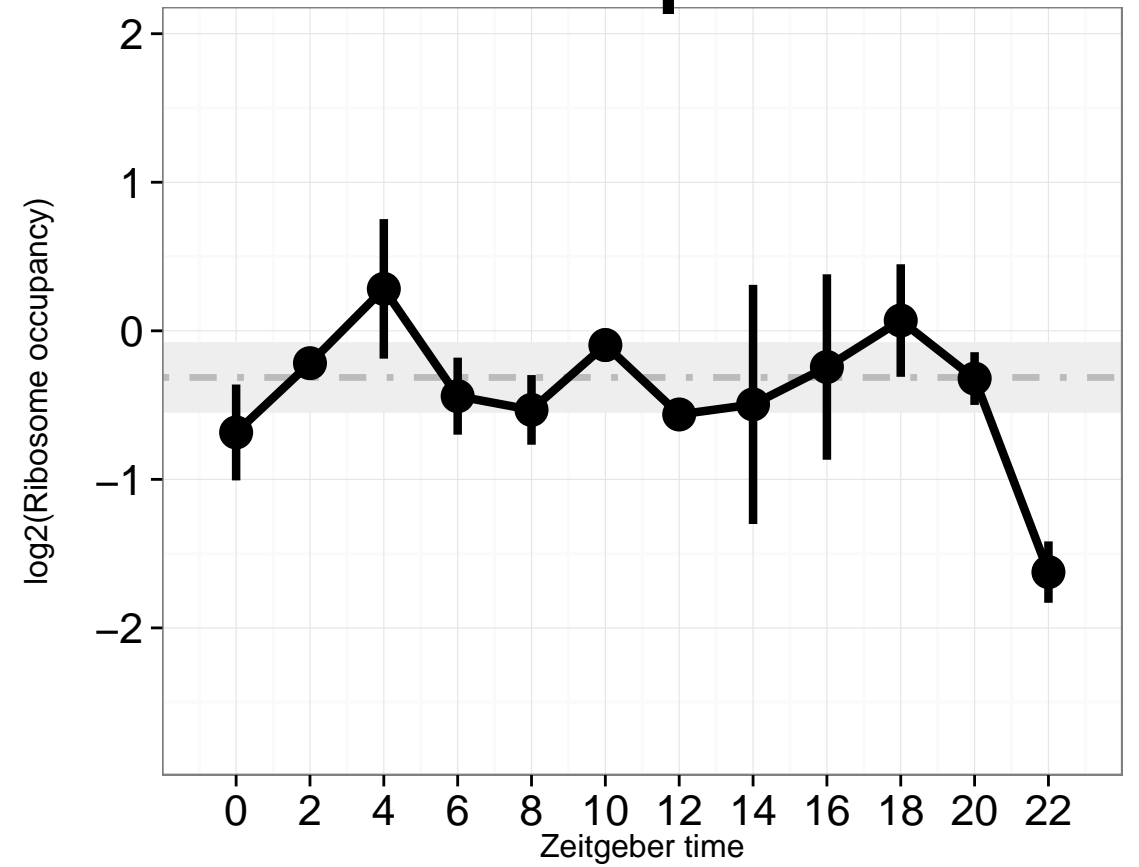

Supplement: Supplementary file 6738 [file 1]

## Tcf3

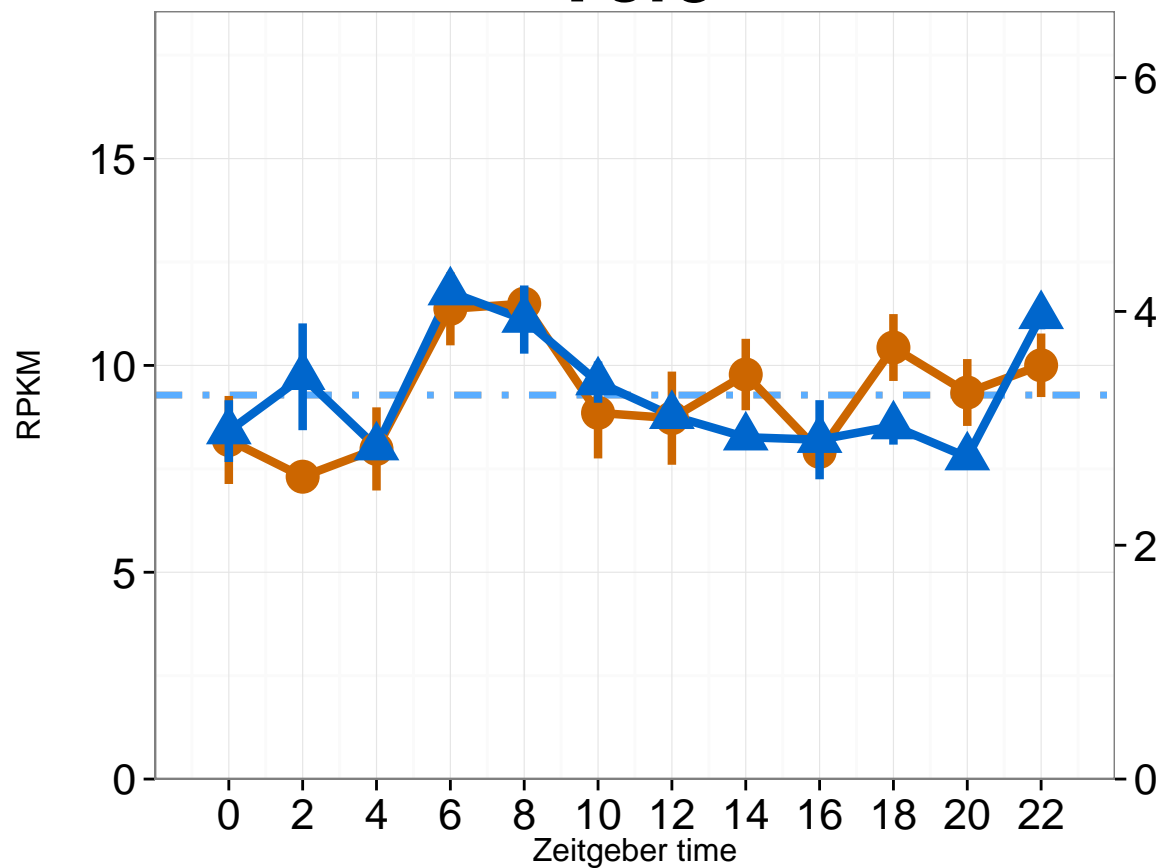

## Tcf3

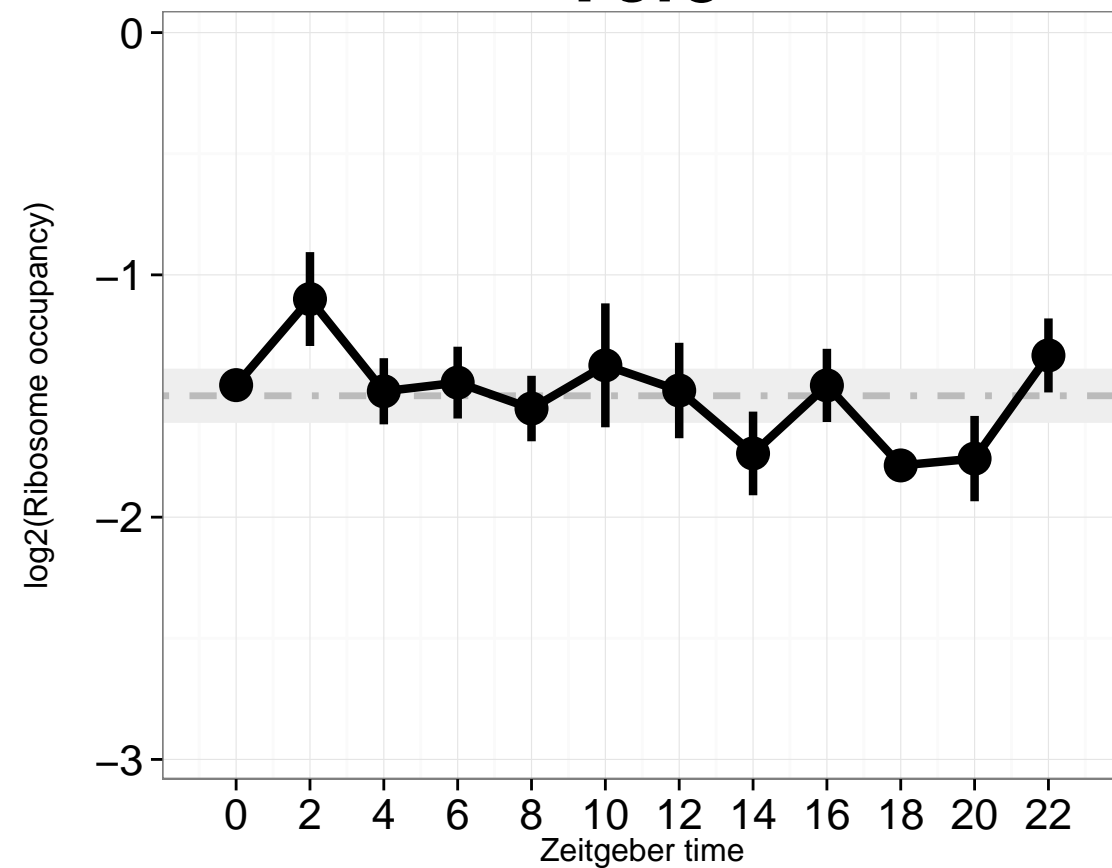

Supplement: Supplementary file 6739 [file 1]

## Isoc1

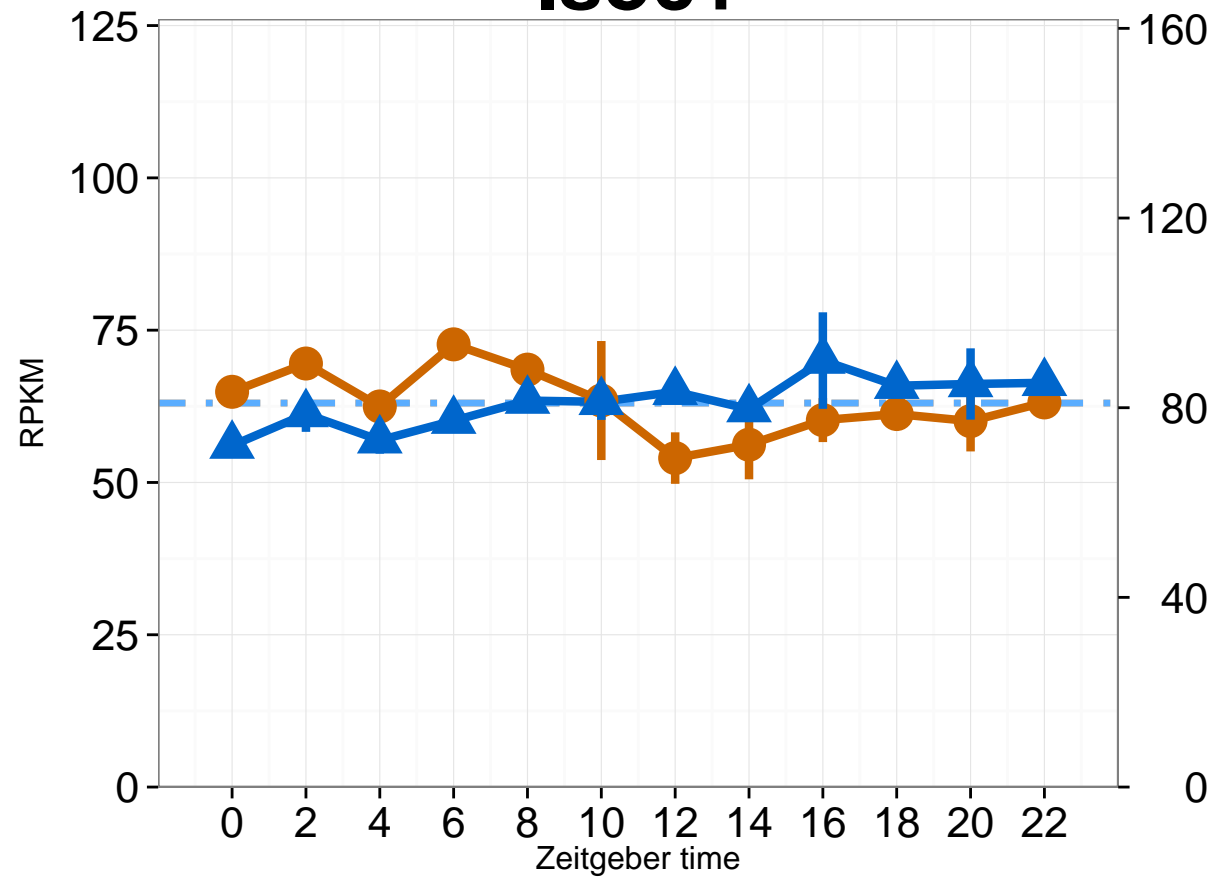

## Isoc1

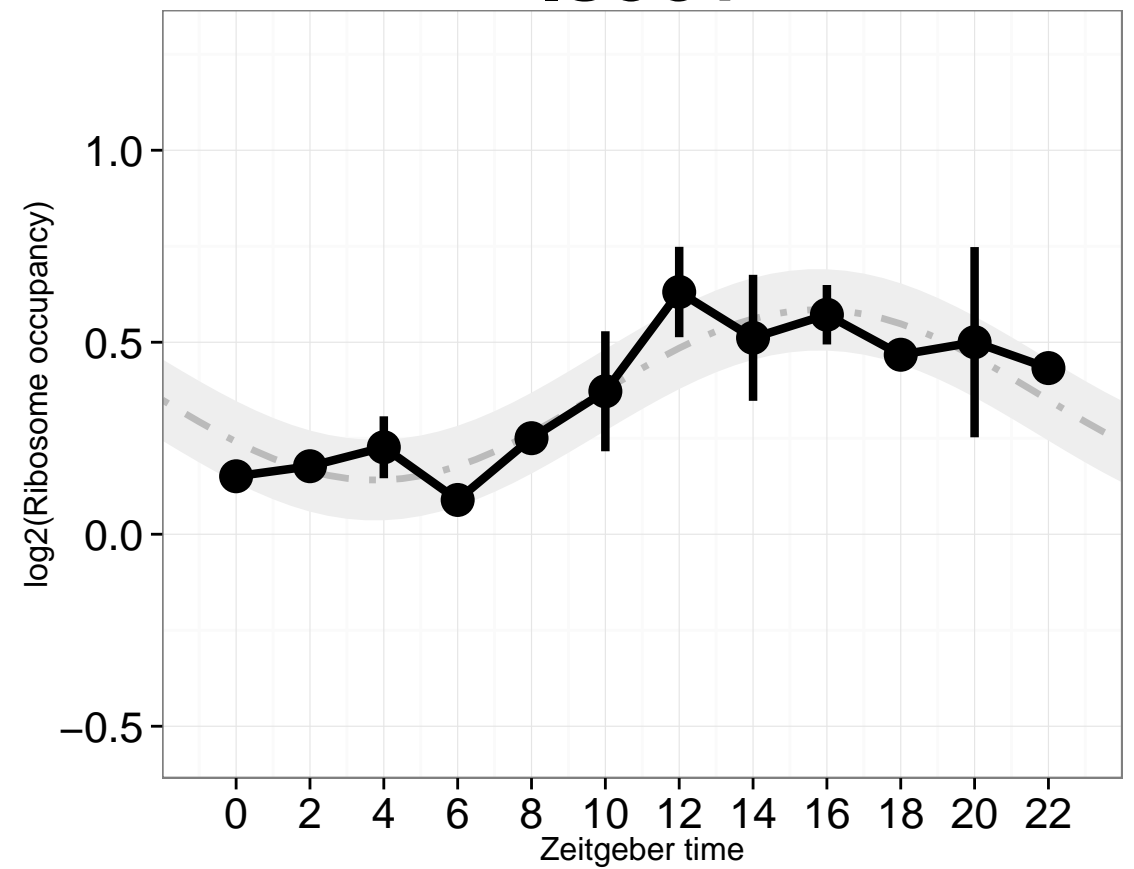

Supplement: Supplementary file 6740 [file 1]

# Henmt1

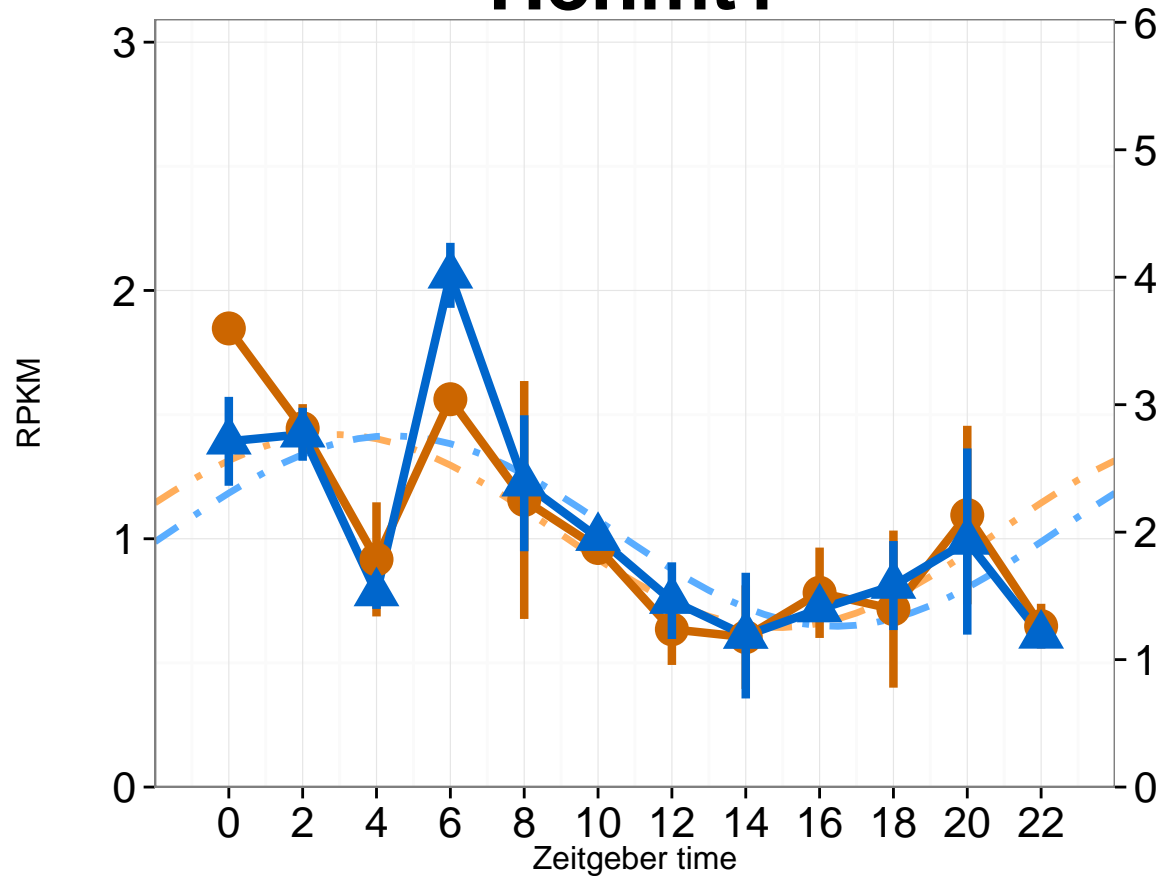

# Henmt1

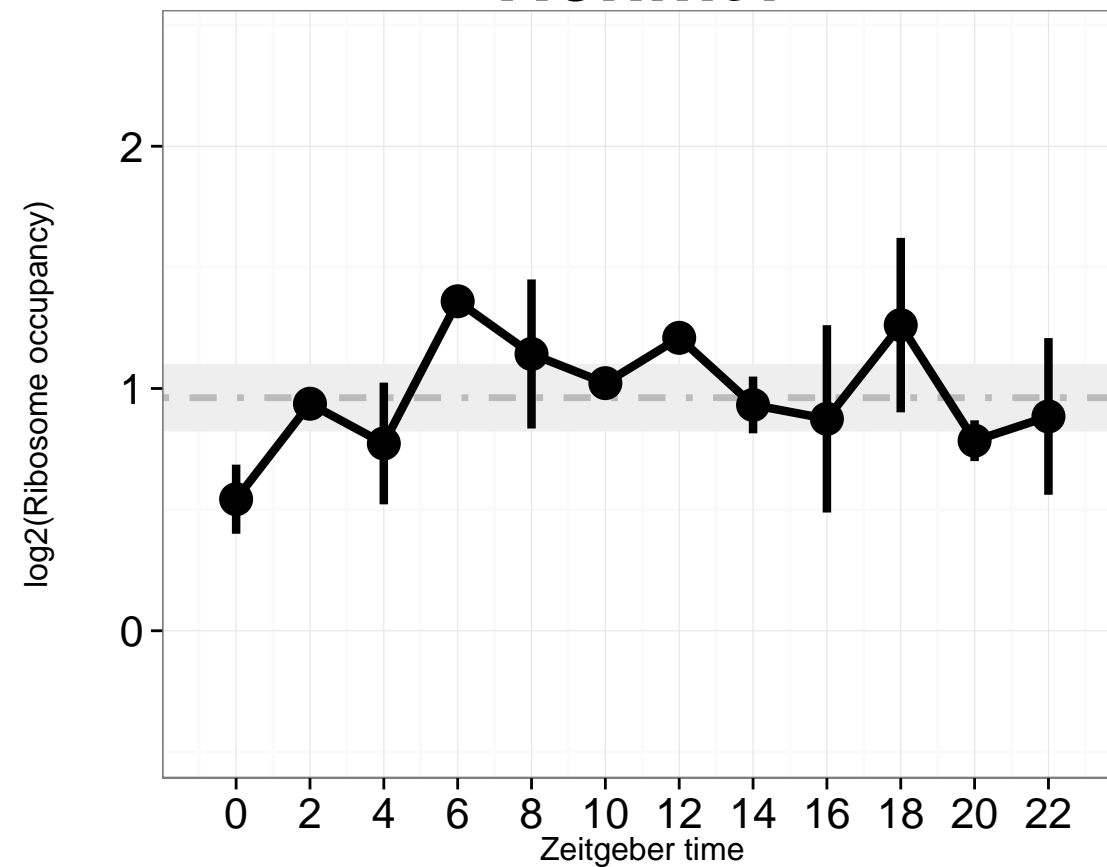

Supplement: Supplementary file 6741 [file 1]

# Trpc2

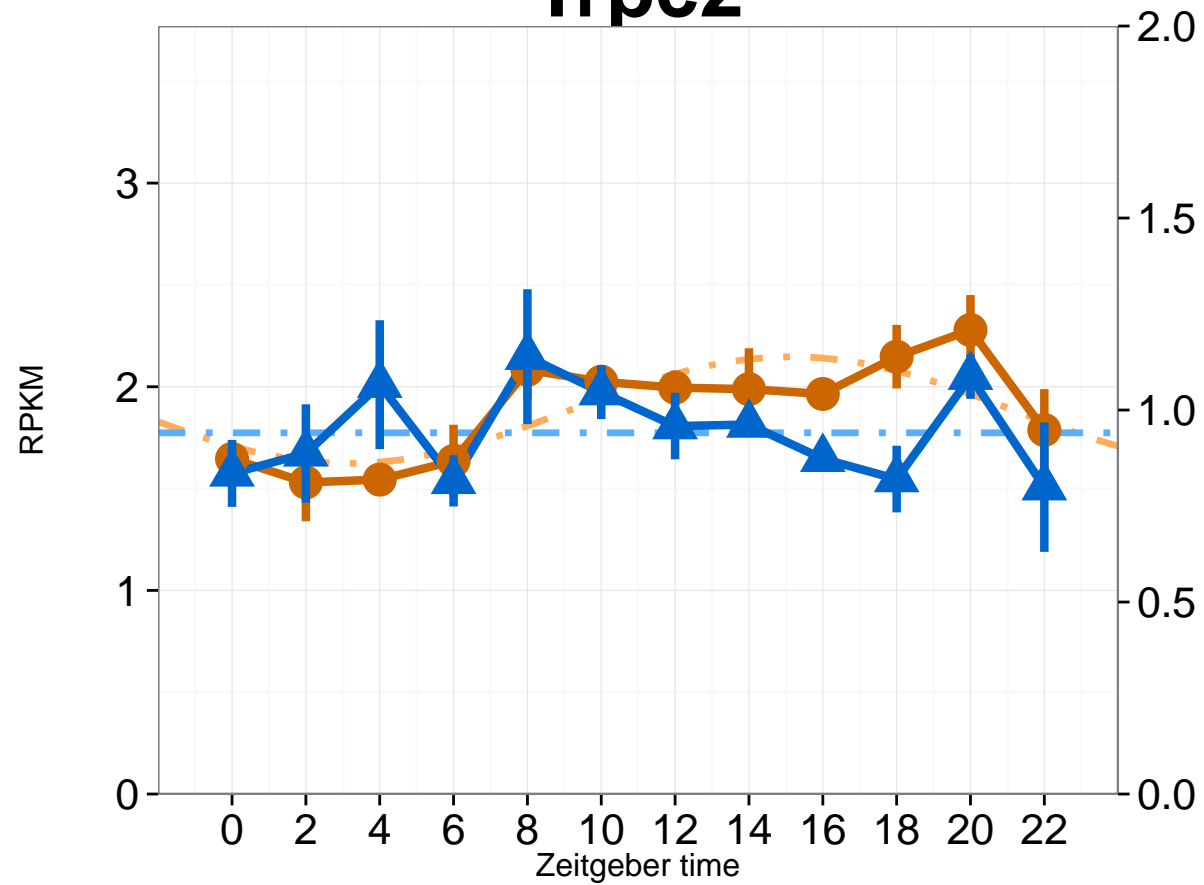

# Trpc2

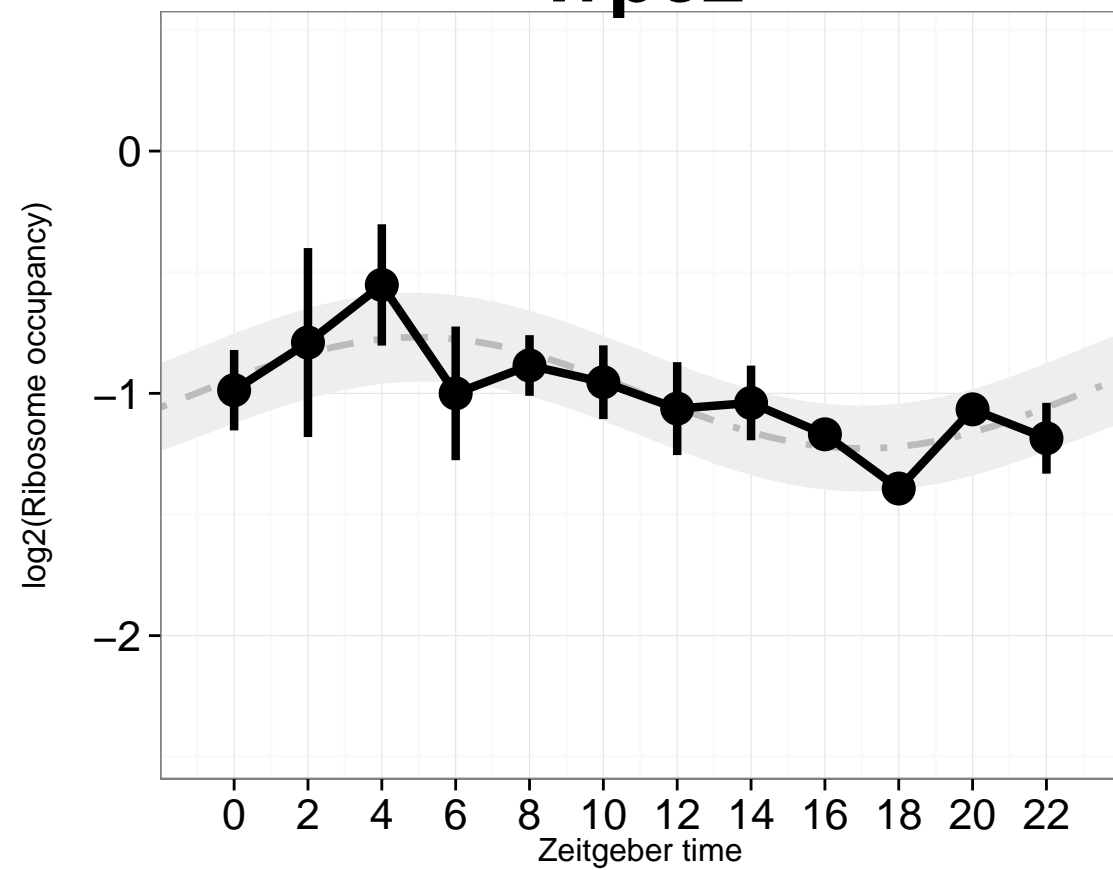

Supplement: Supplementary file 6742 [file 1]

# 1700003E16Rik

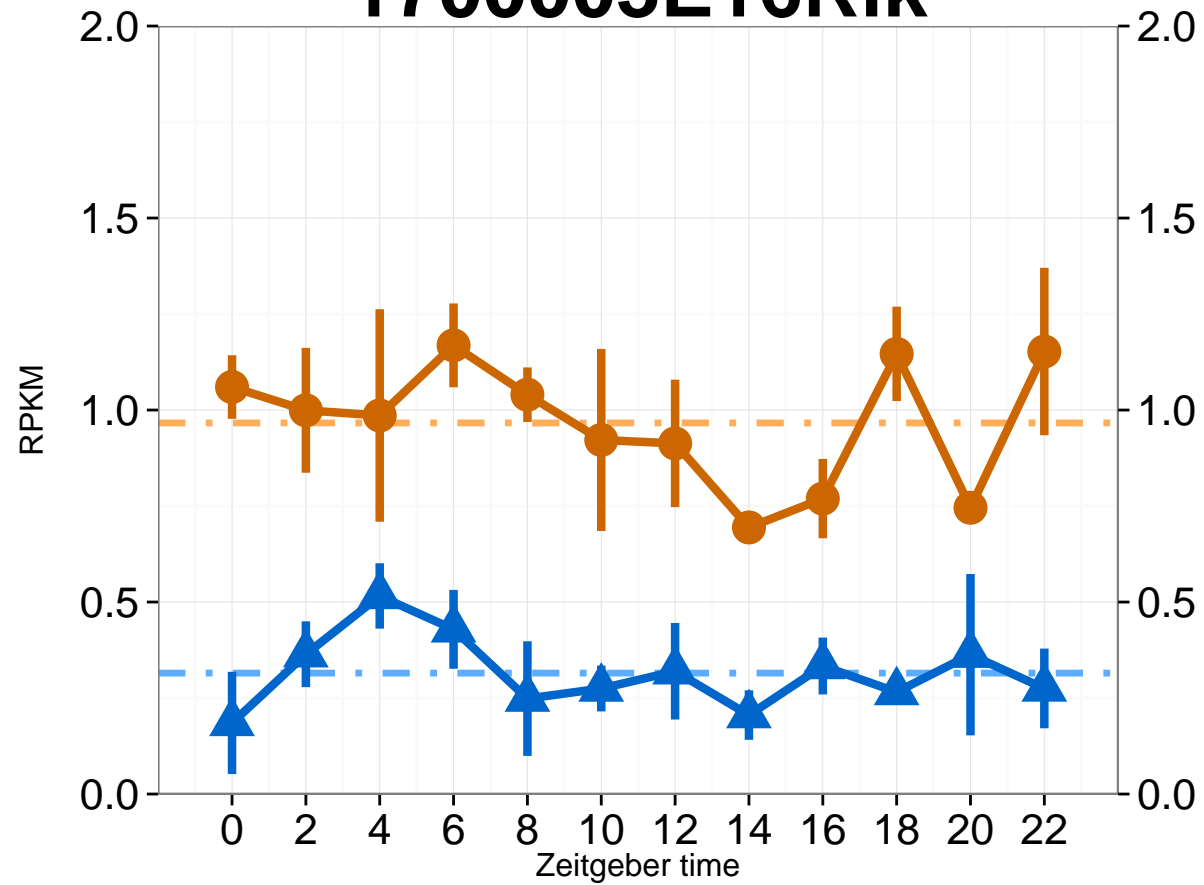

# 1700003E16Rik

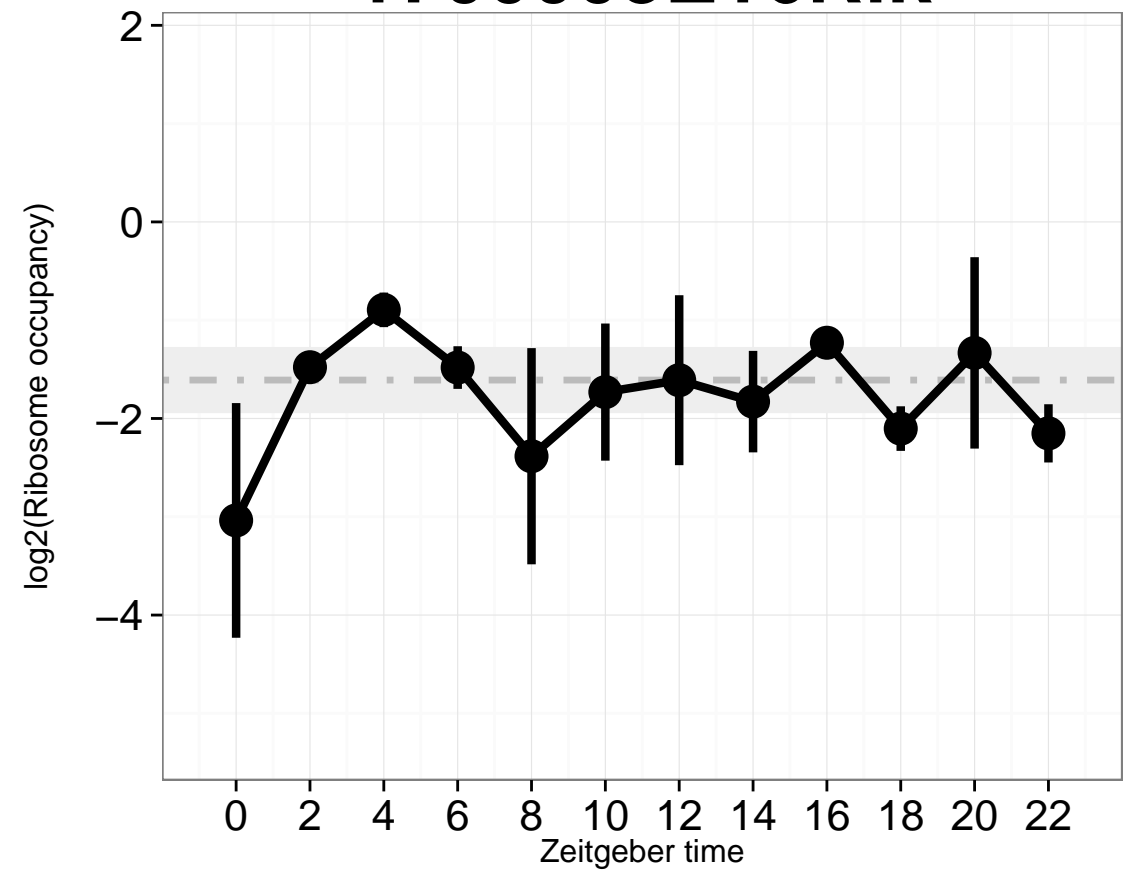

Supplement: Supplementary file 6743 [file 1]

## Cd1d1

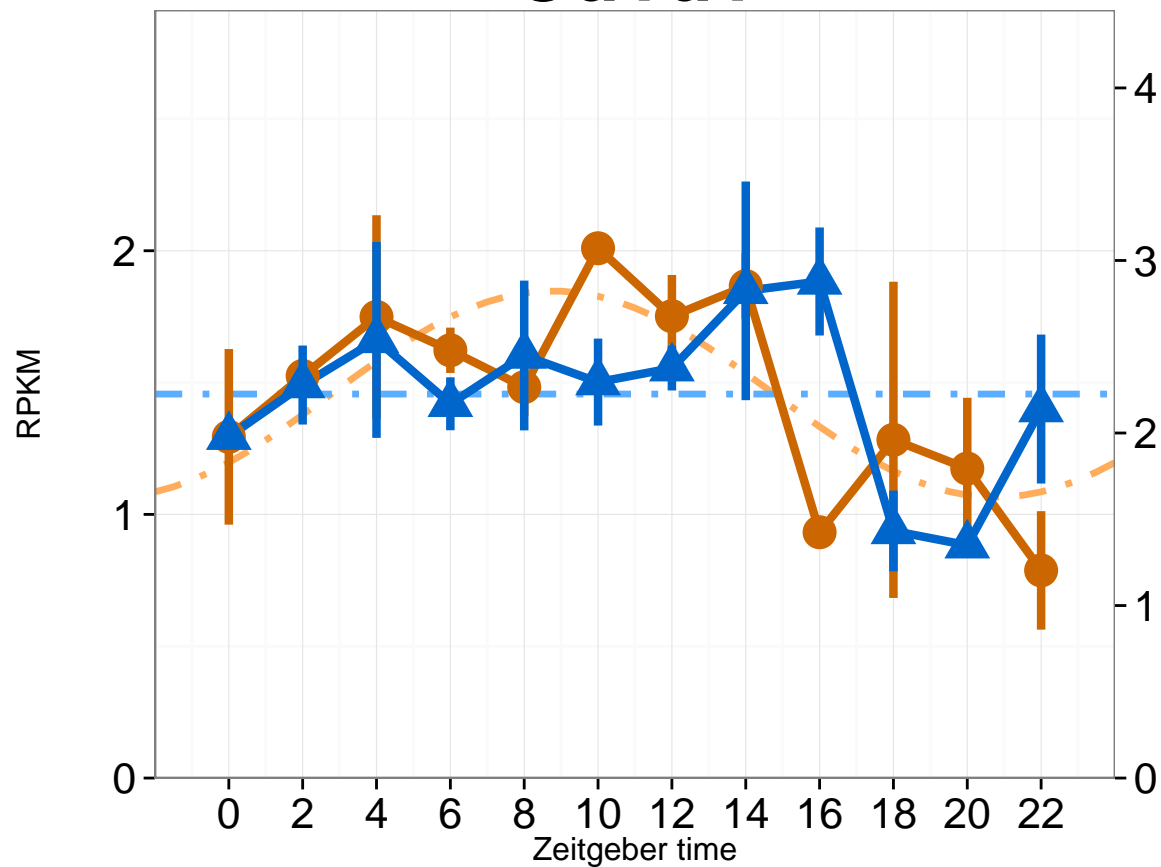

## Cd1d1

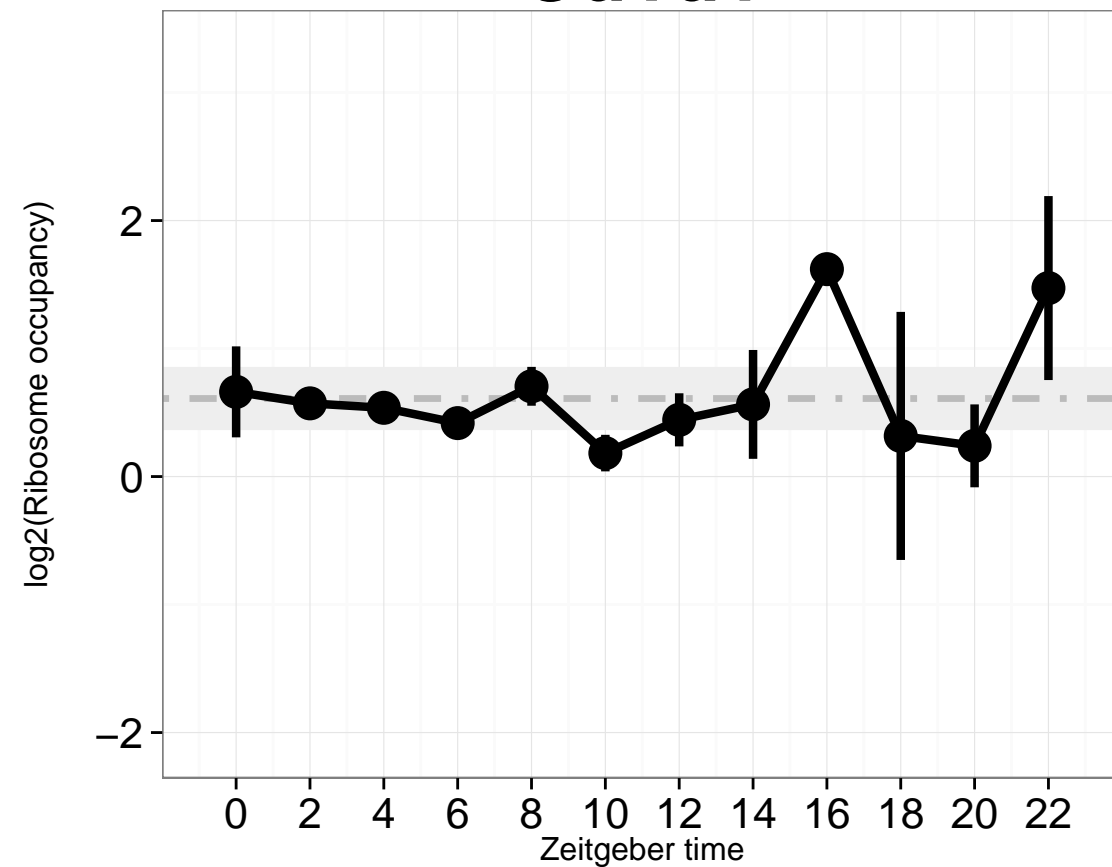

Supplement: Supplementary file 6744 [file 1]

## 2310061I04Rik

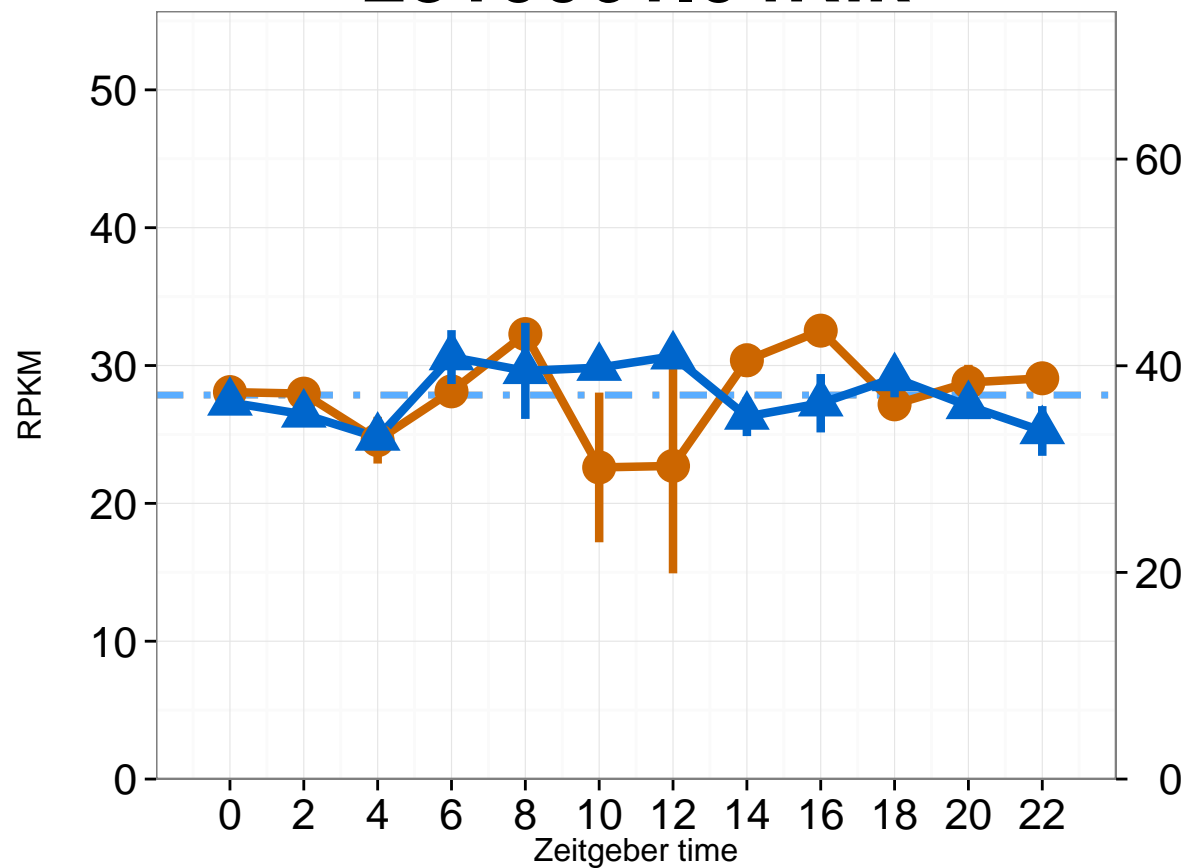

## 2310061I04Rik

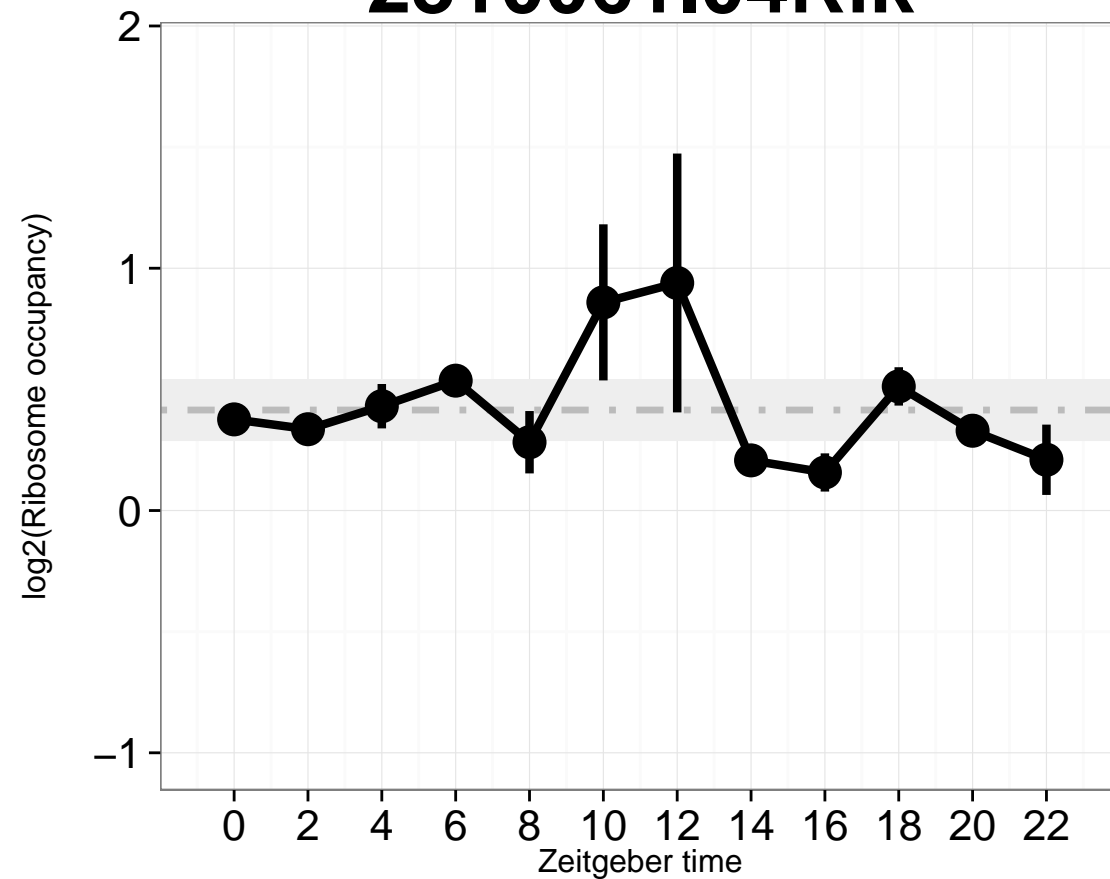

Supplement: Supplementary file 6745 [file 1]

# Cyp2c44

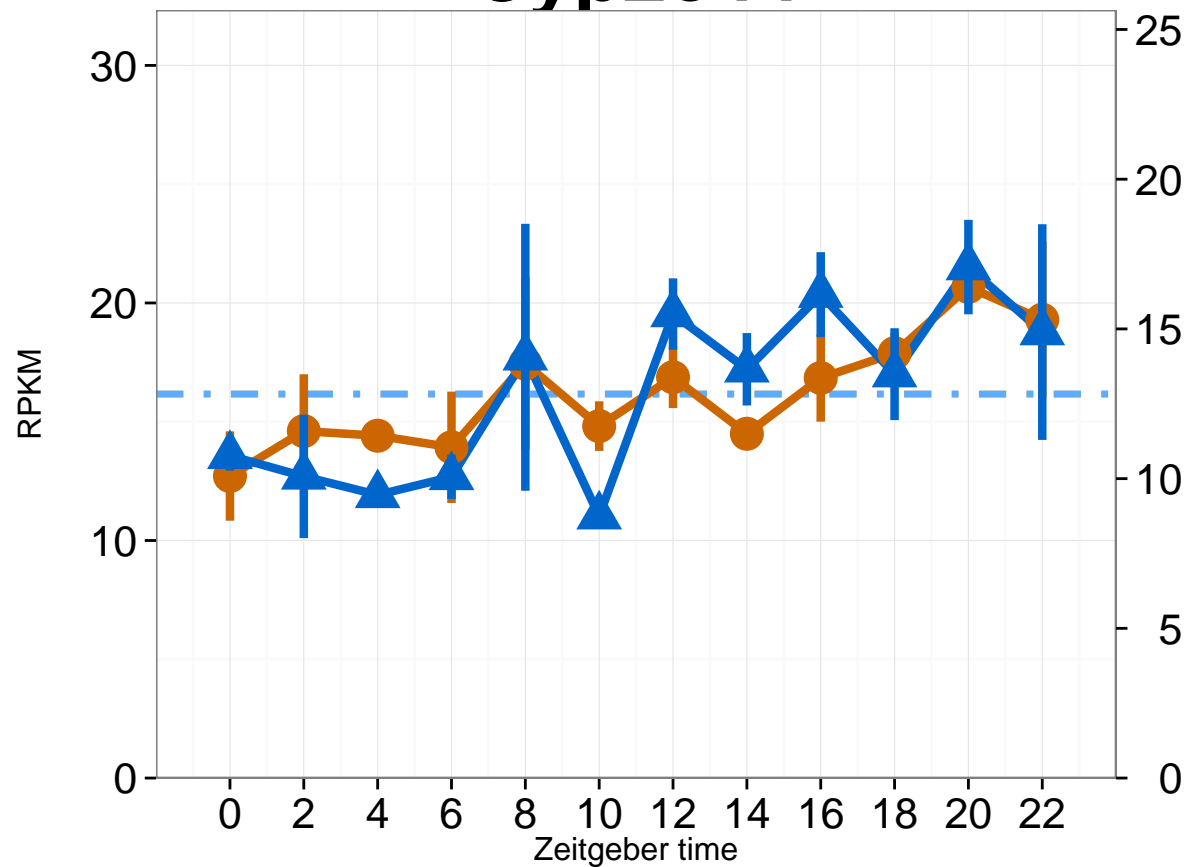

# Cyp2c44

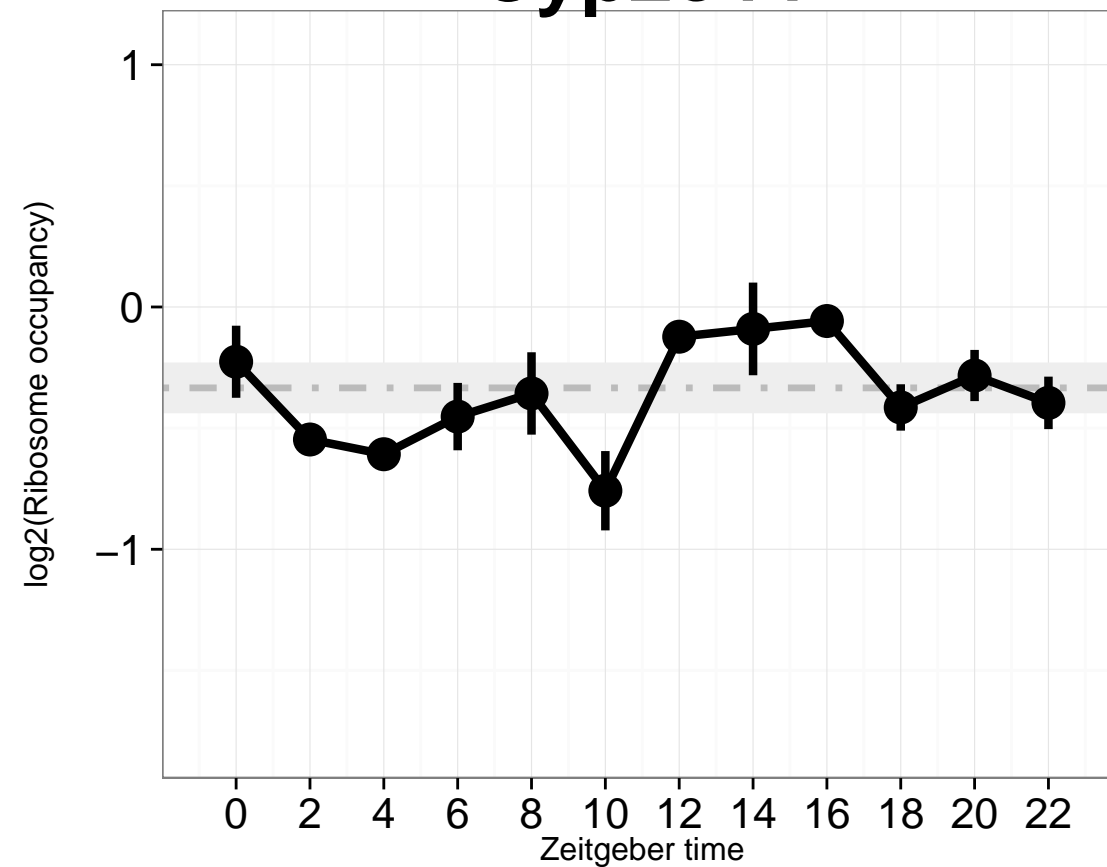

Supplement: Supplementary file 6746 [file 1]

## Hist4h4

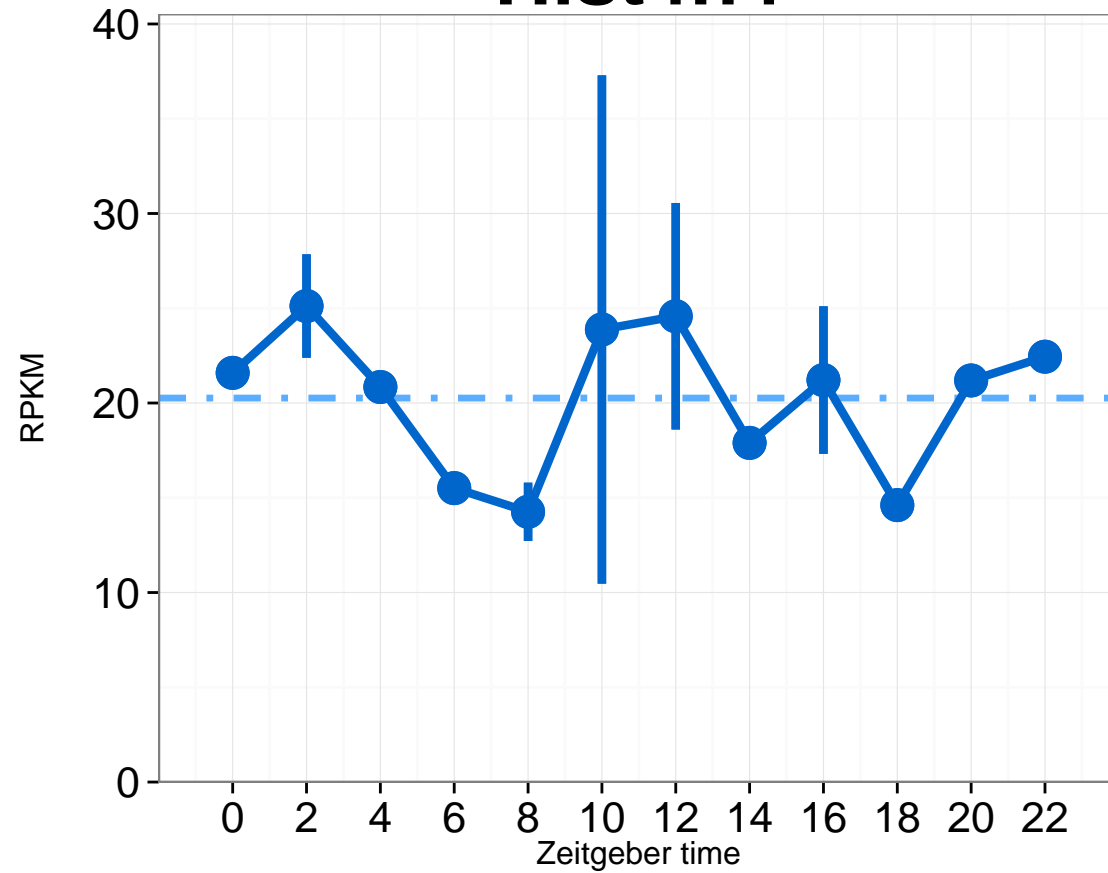

## Hist4h4 log2(Ribosome occupancy)

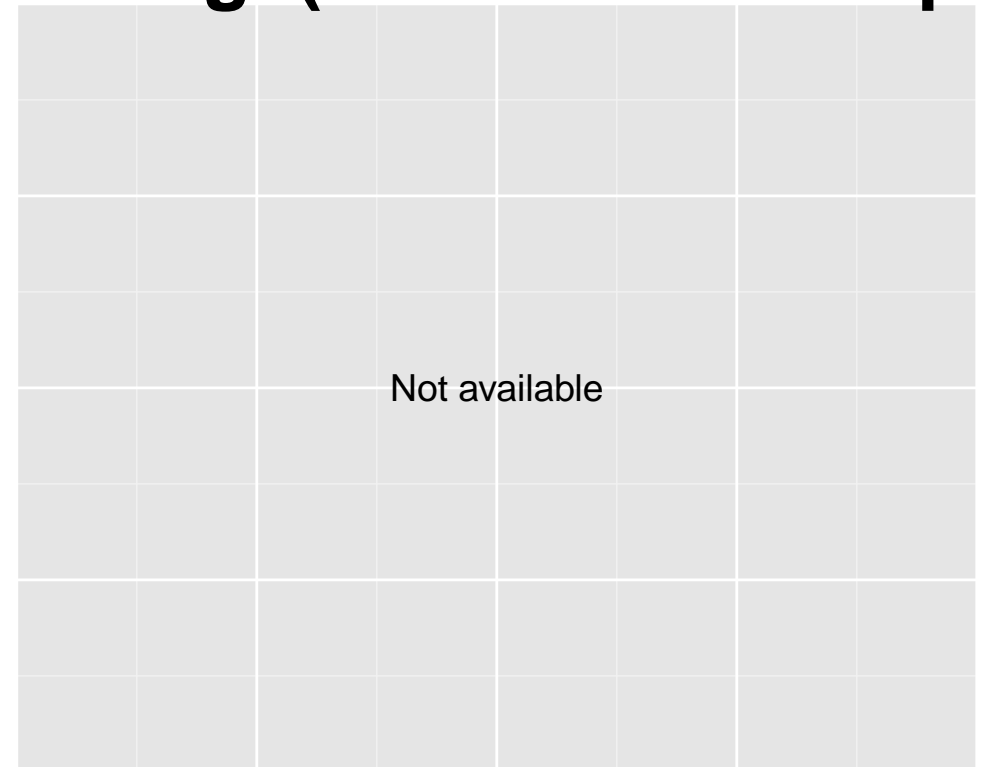

Supplement: Supplementary file 6747 [file 1]

# Csde1

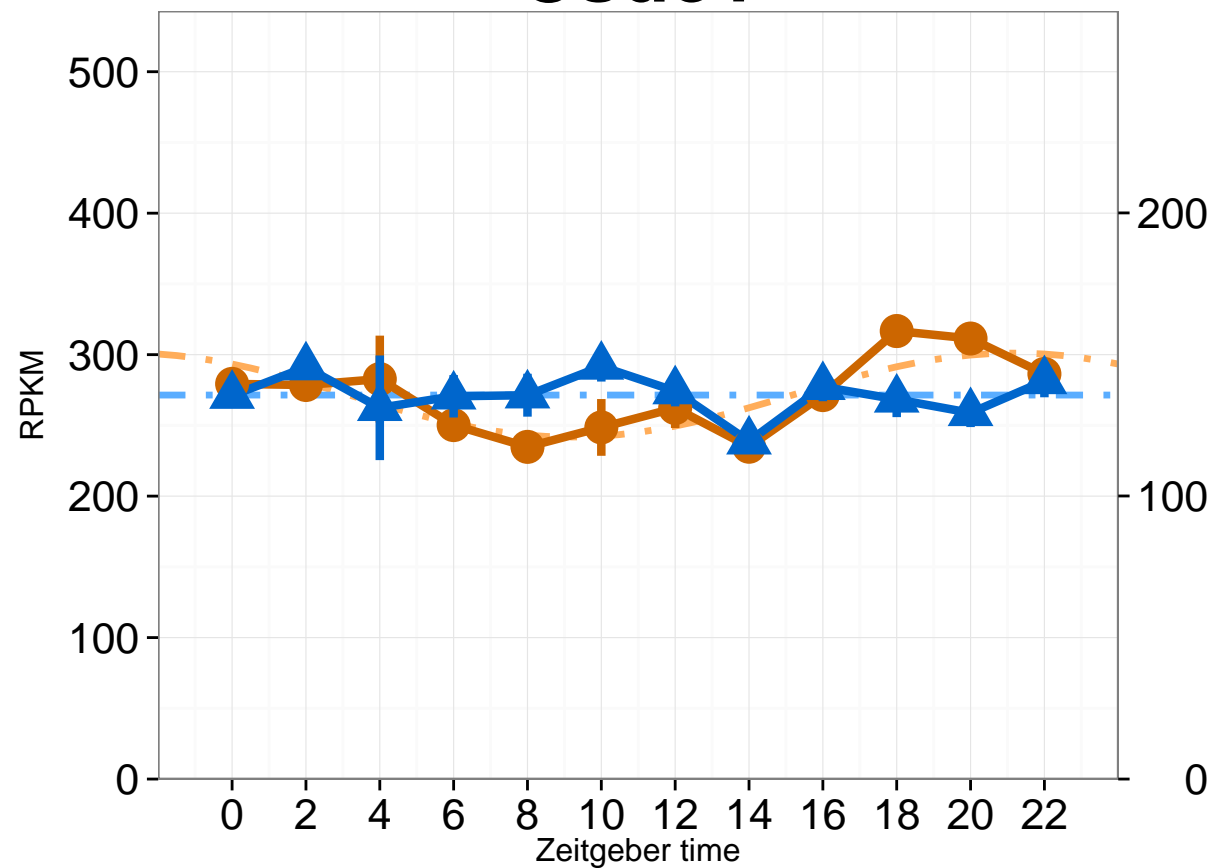

# Csde1

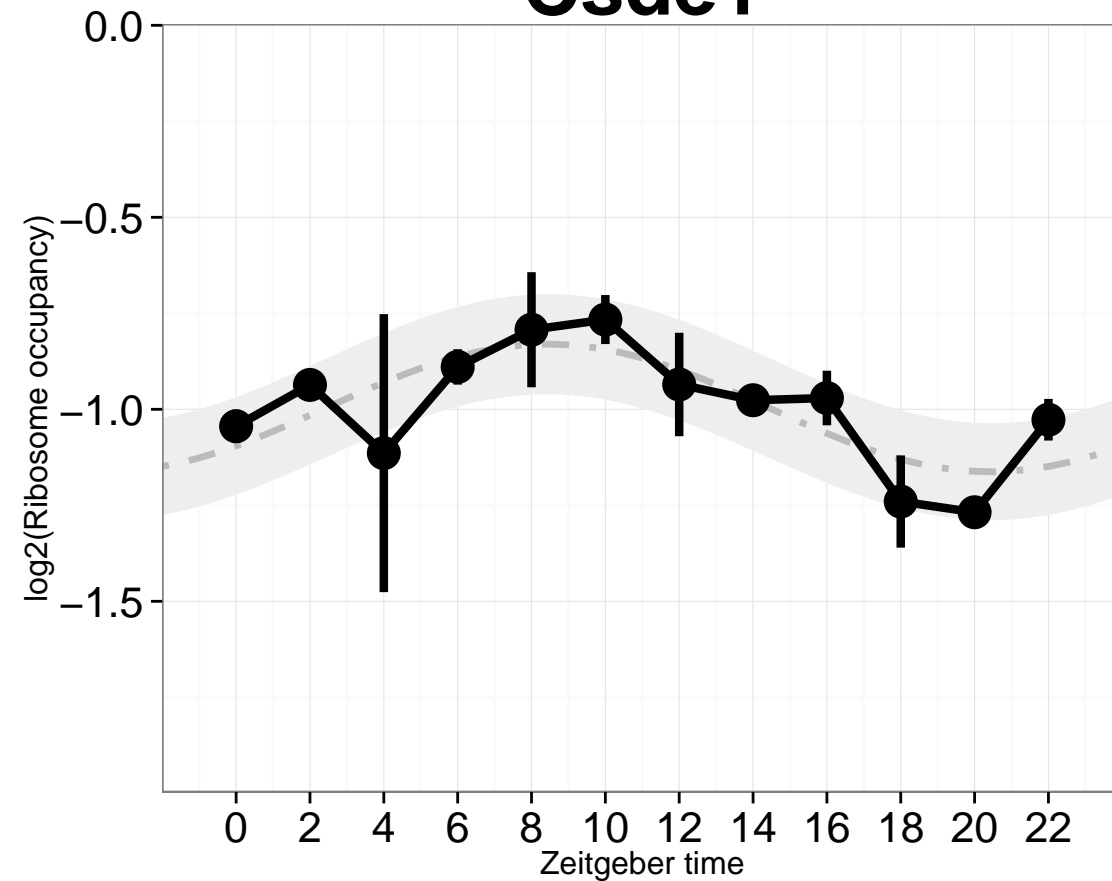

Supplement: Supplementary file 6748 [file 1]

# Cnpy3

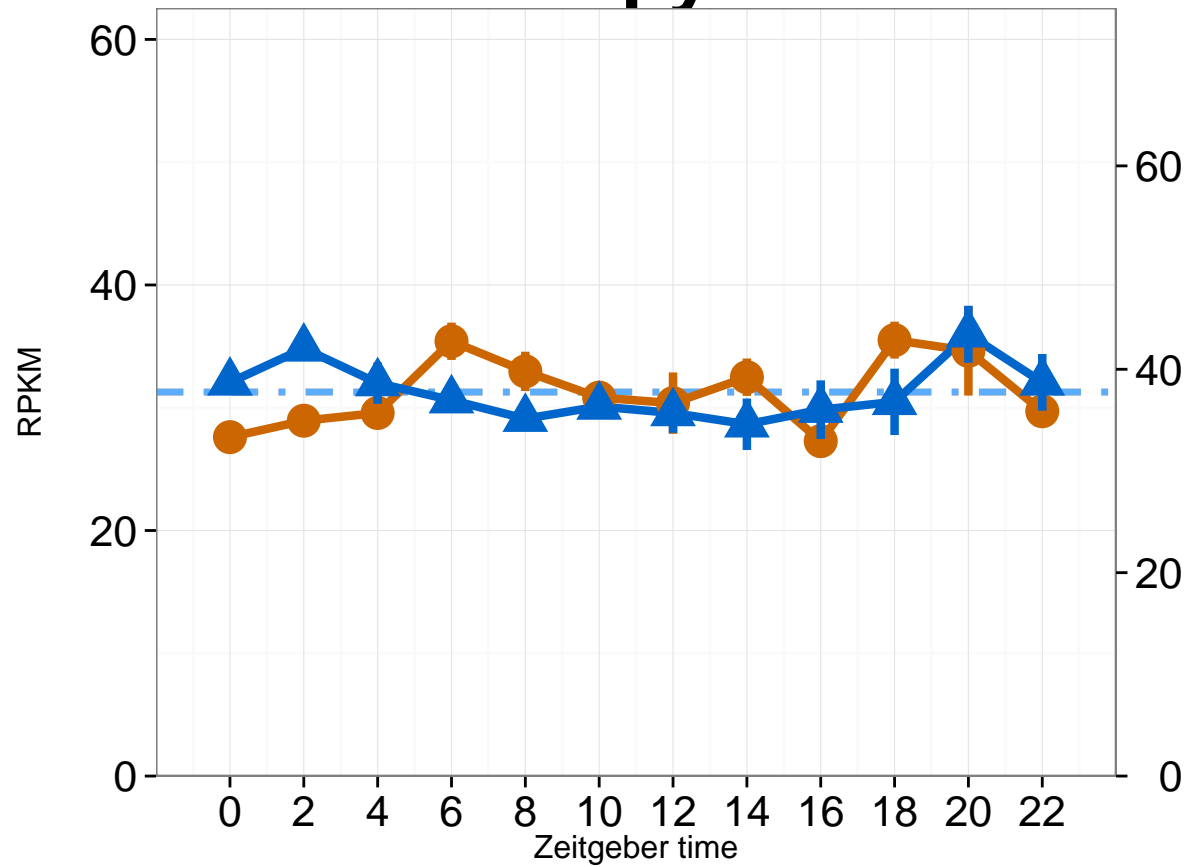

# Cnpy3

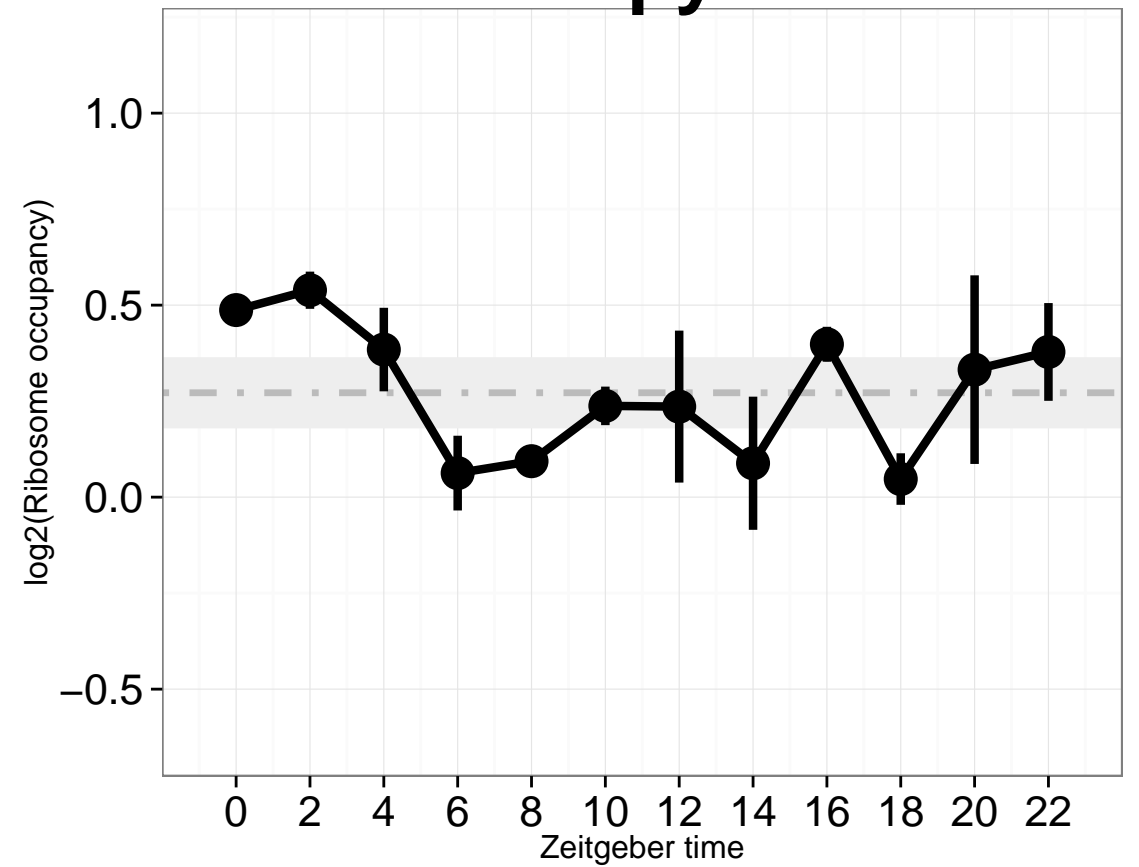

Supplement: Supplementary file 6749 [file 1]

## Hnrnpa0

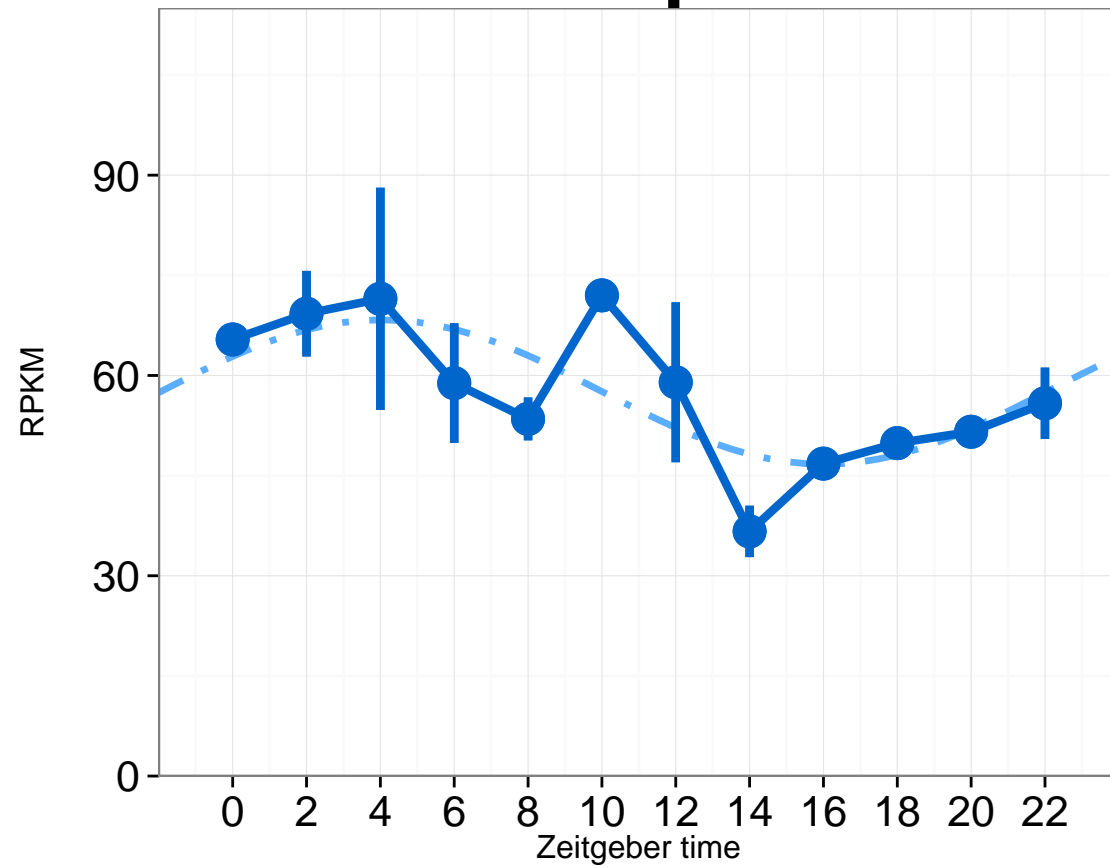

## Hnrnpa0 log2(Ribosome occupanc

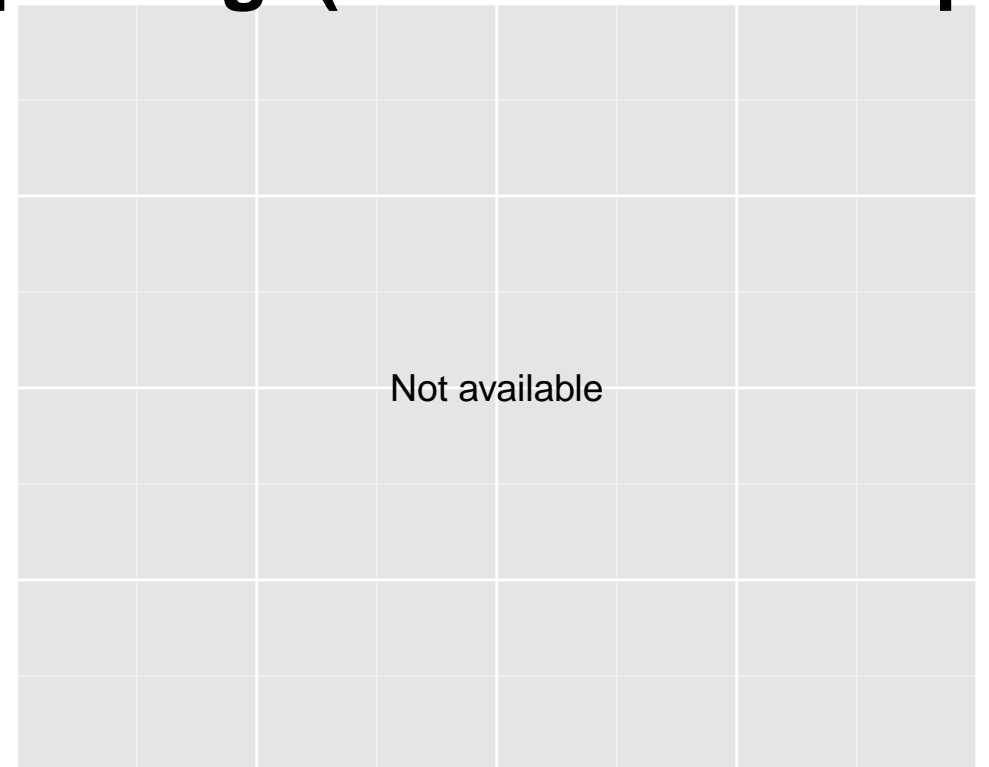

Supplement: Supplementary file 6750 [file 1]

## Dpf2

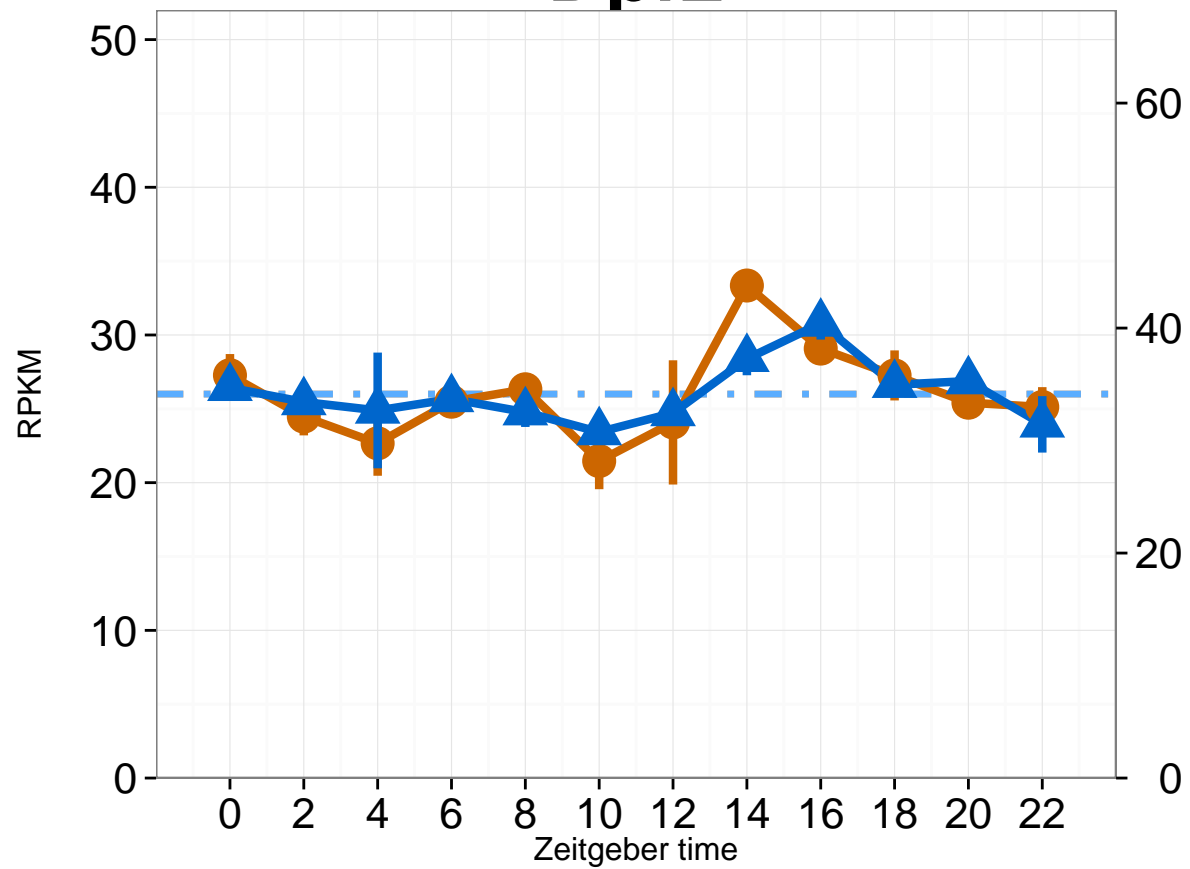

## Dpf2

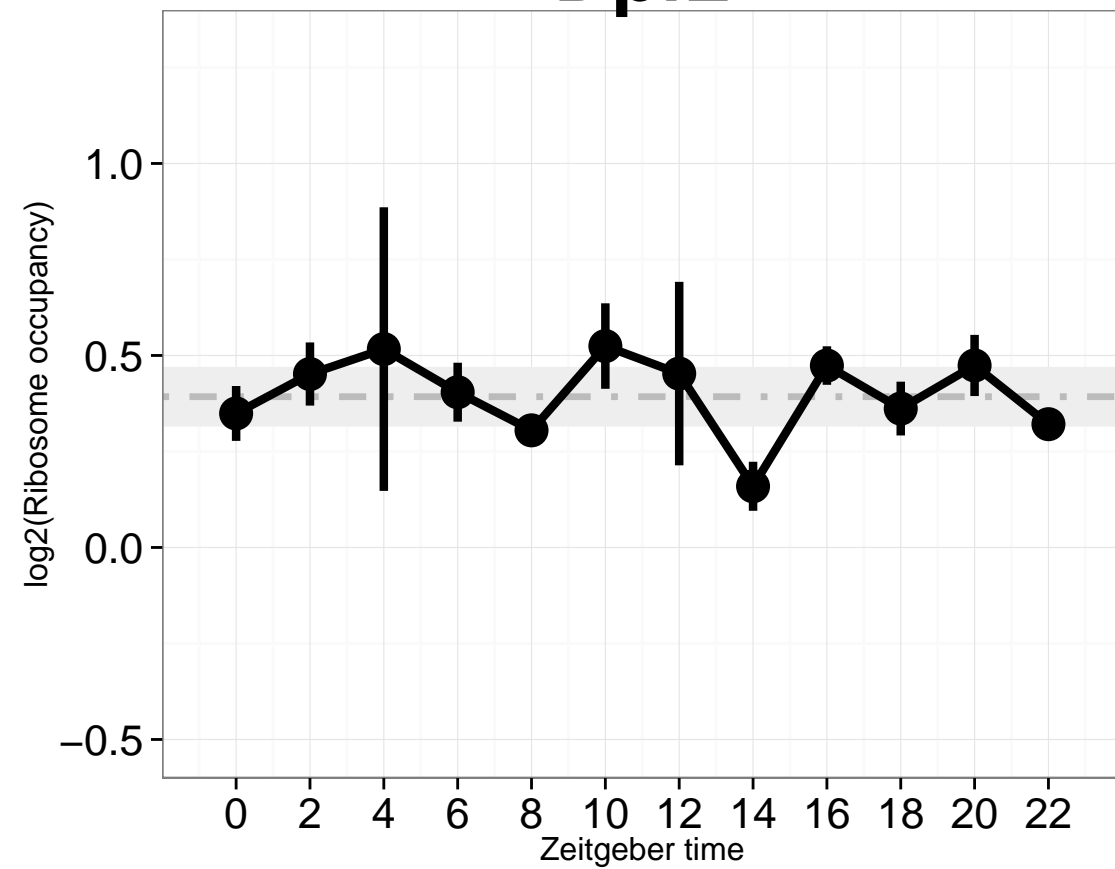

Supplement: Supplementary file 6751 [file 1]

## Zdhhc17

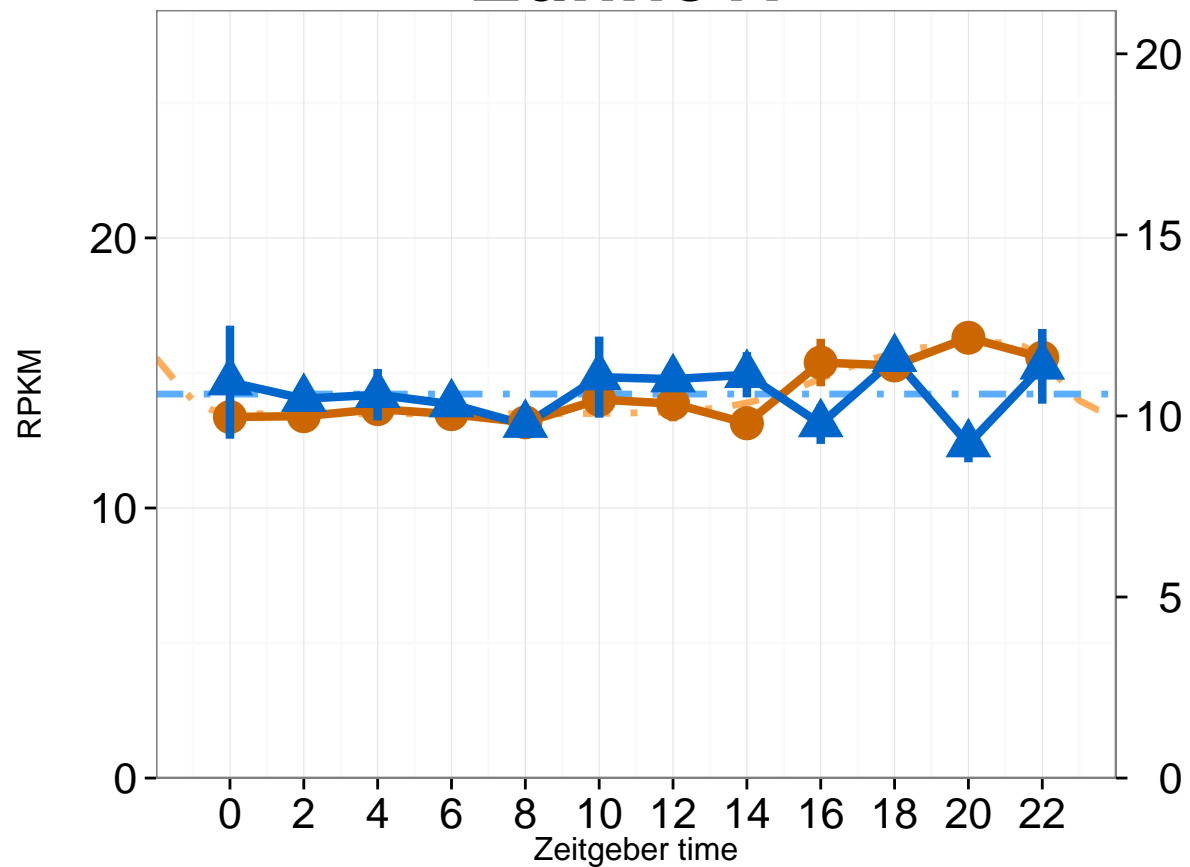

## Zdhhc17

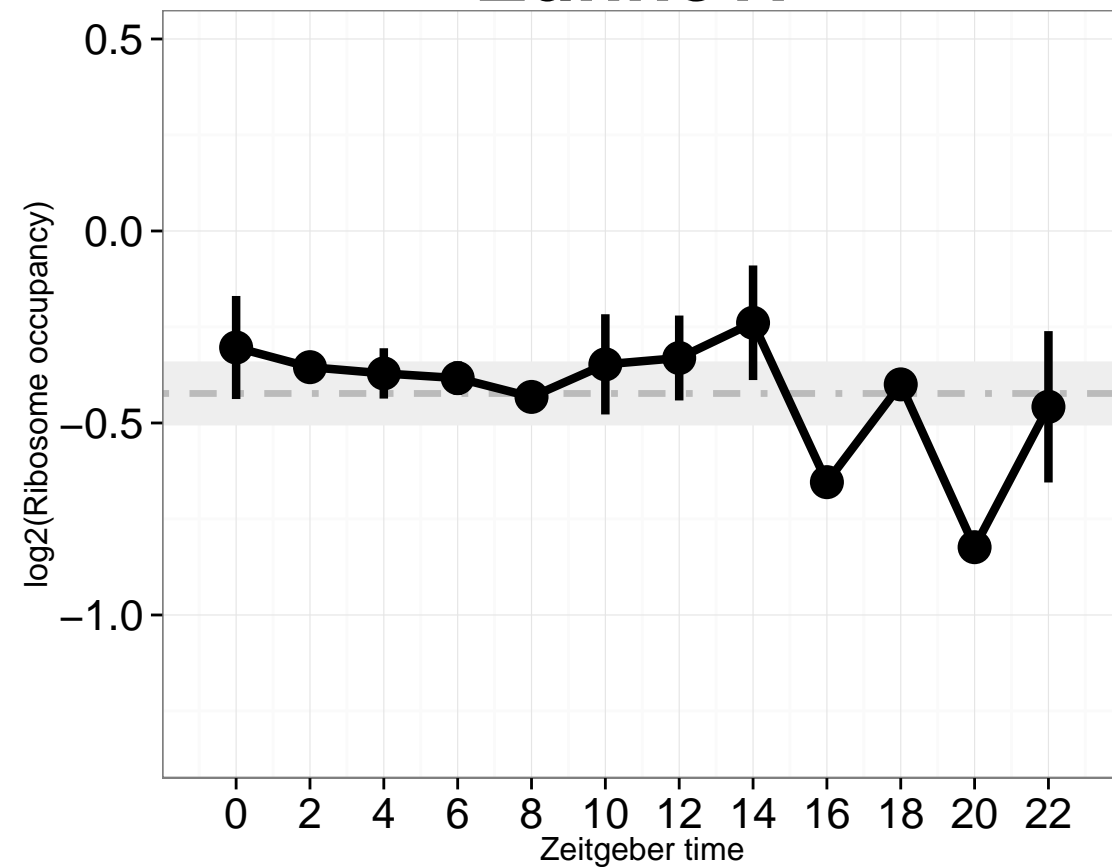

Supplement: Supplementary file 6752 [file 1]

# Gins1

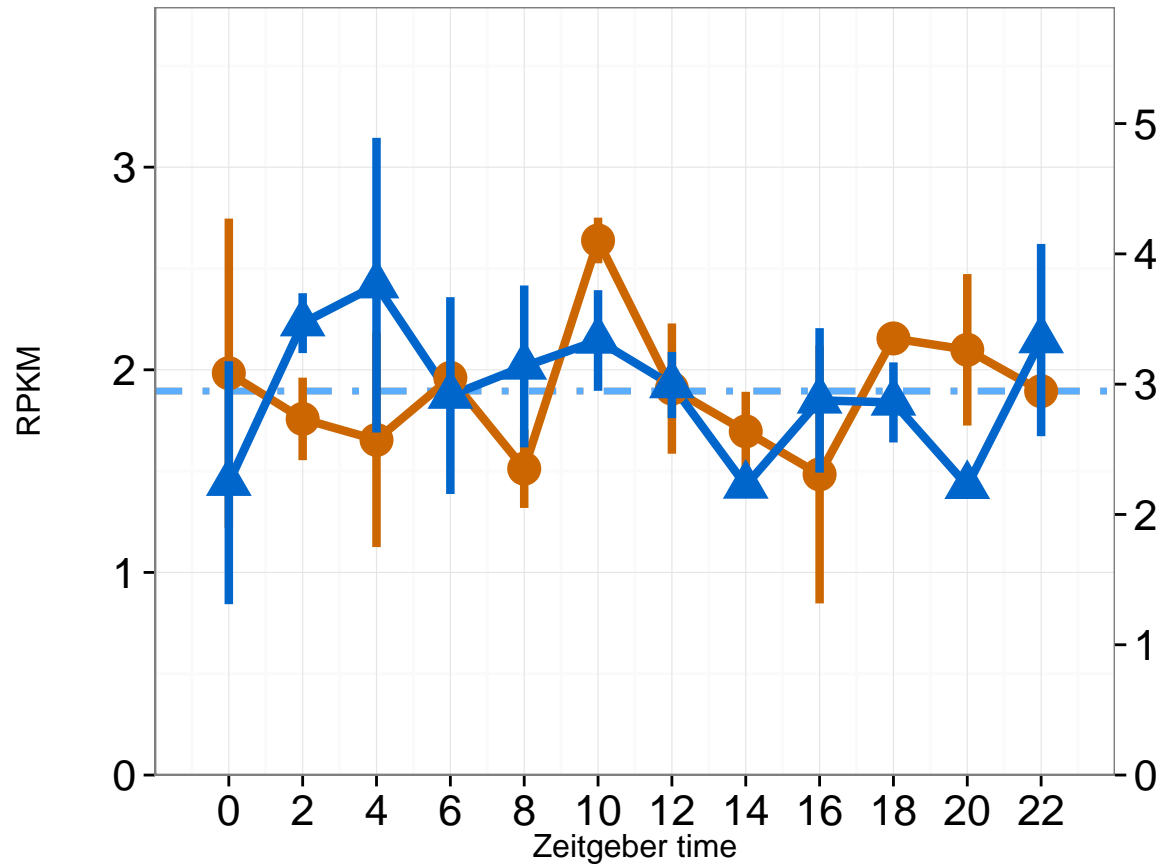

# Gins1

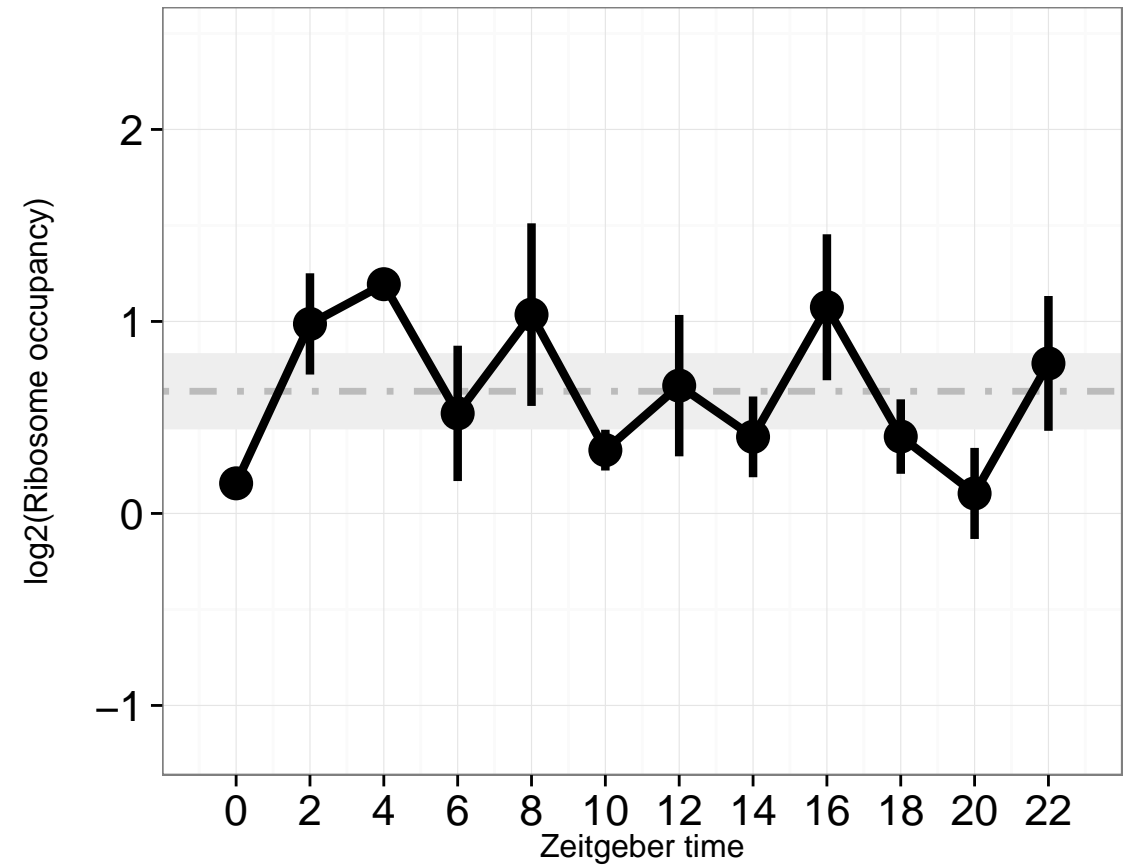

Supplement: Supplementary file 6753 [file 1]

## Commd10

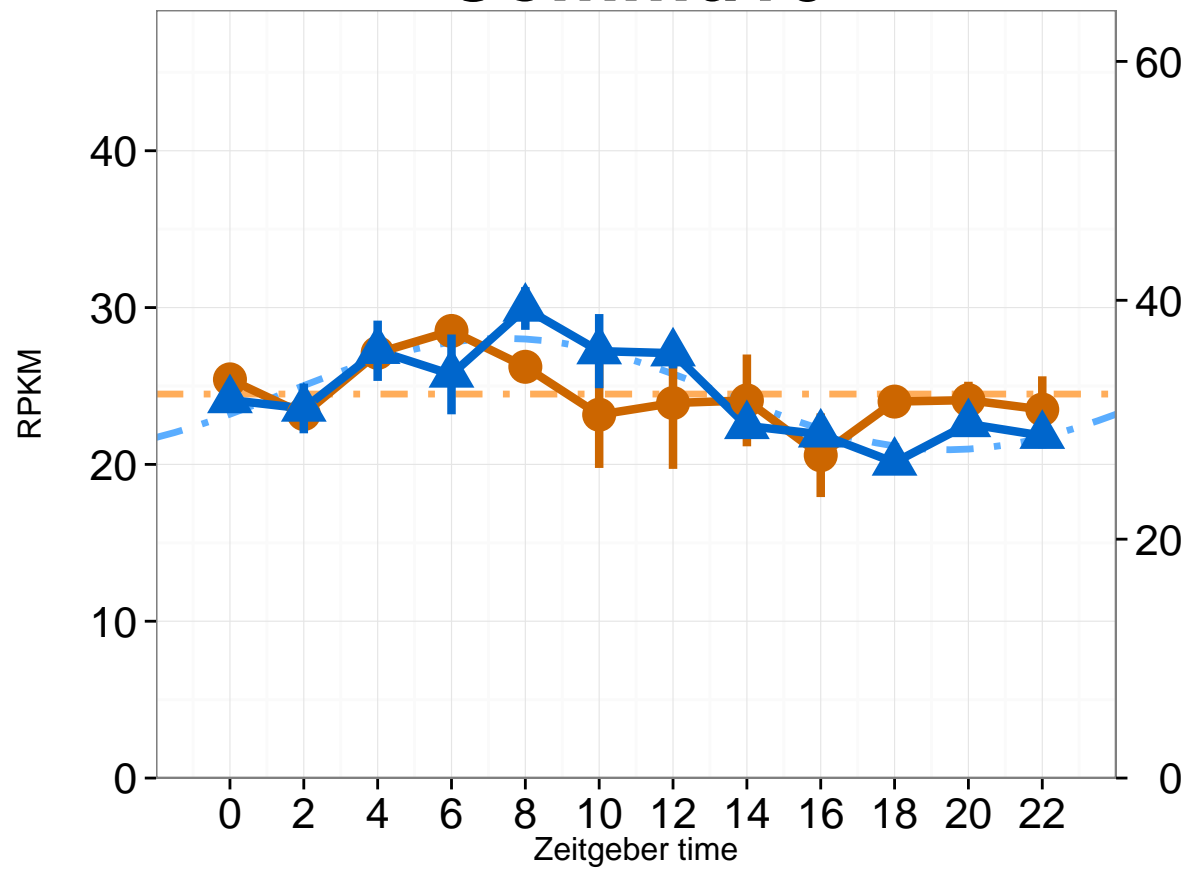

## Commd10

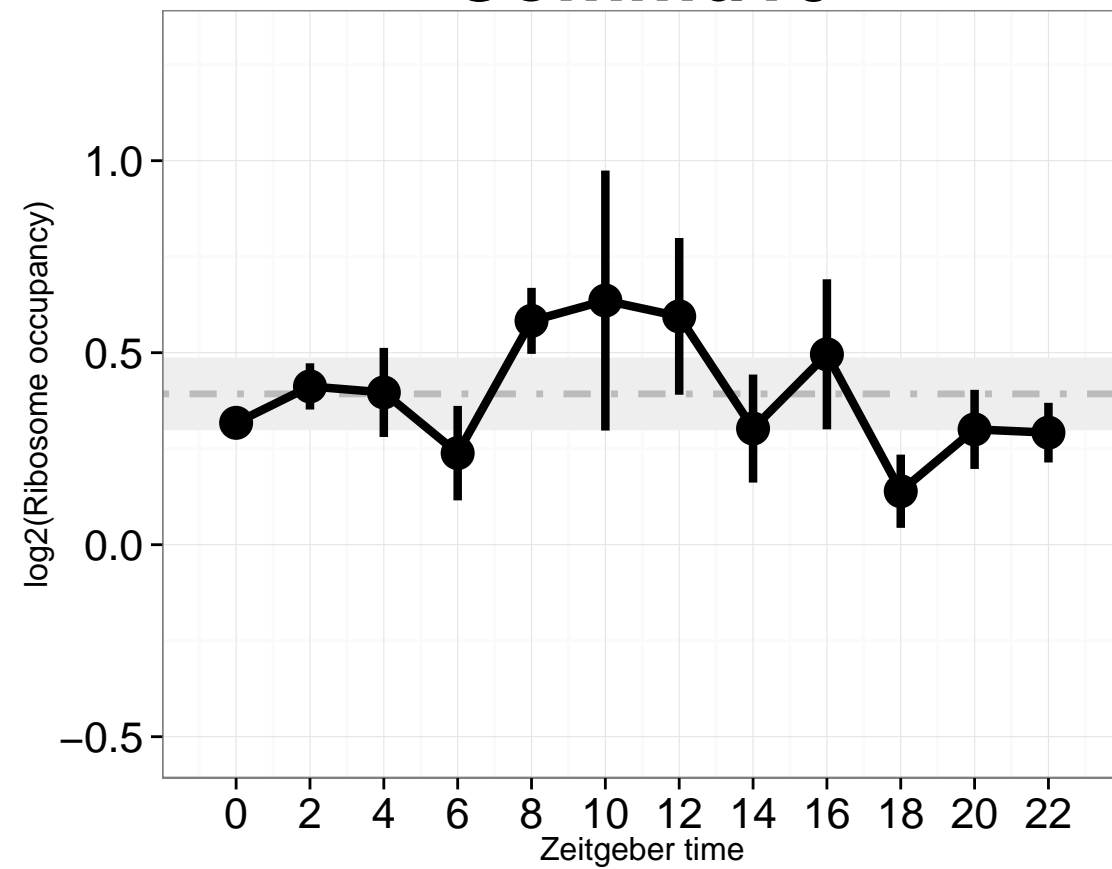

Supplement: Supplementary file 6754 [file 1]

## Lrch3

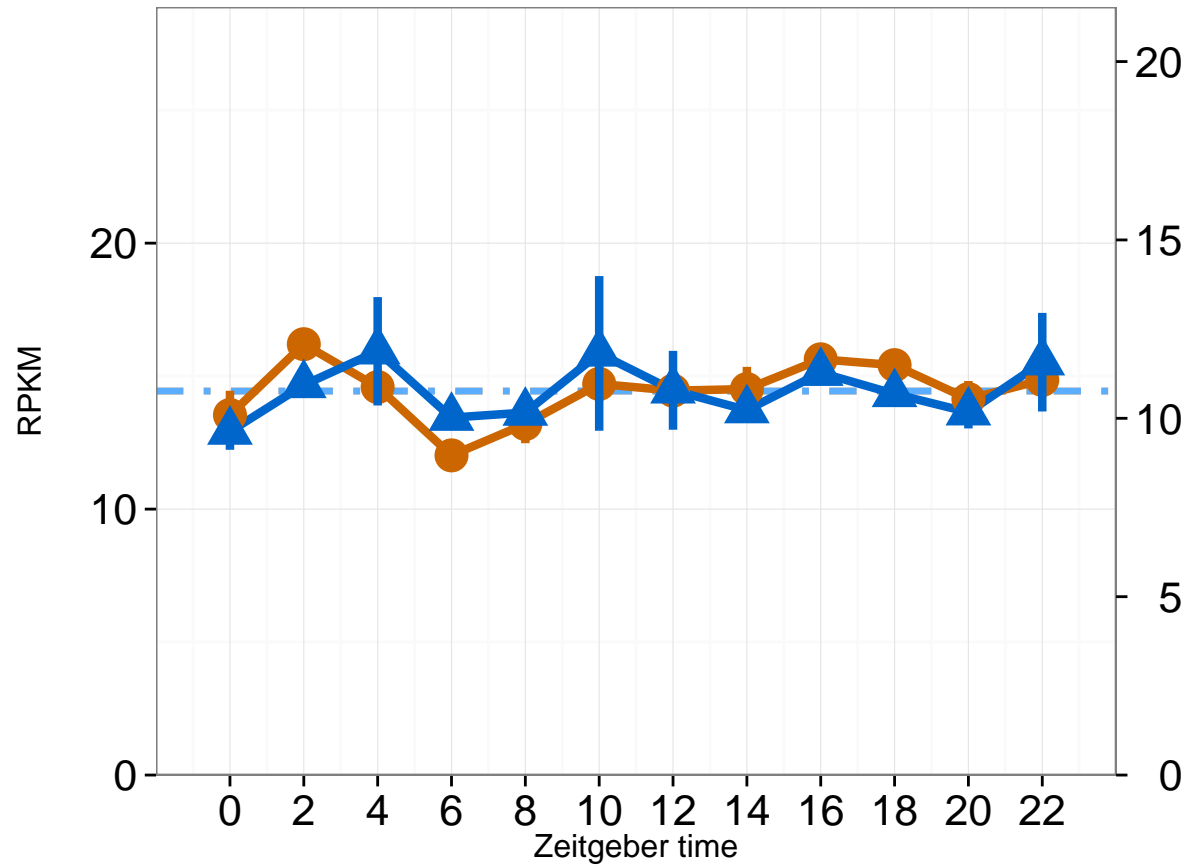

## Lrch3

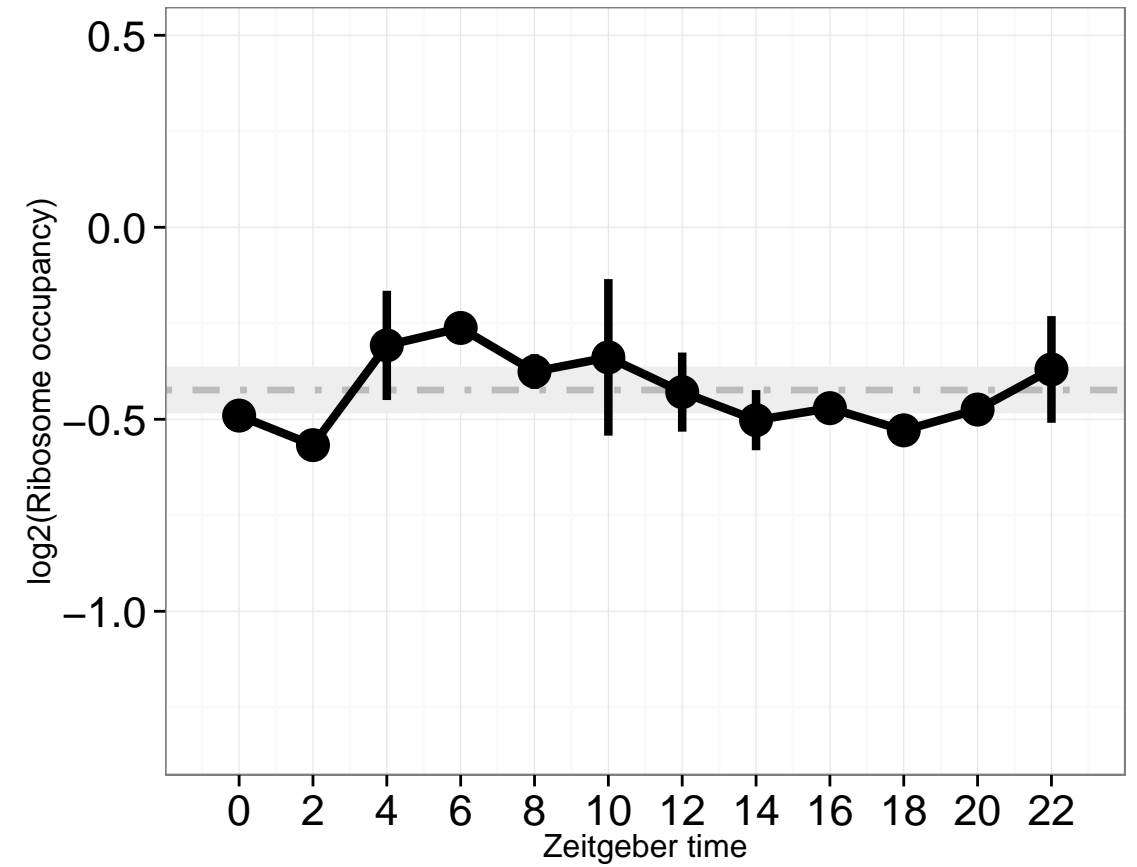

Supplement: Supplementary file 6755 [file 1]

## Jdp2

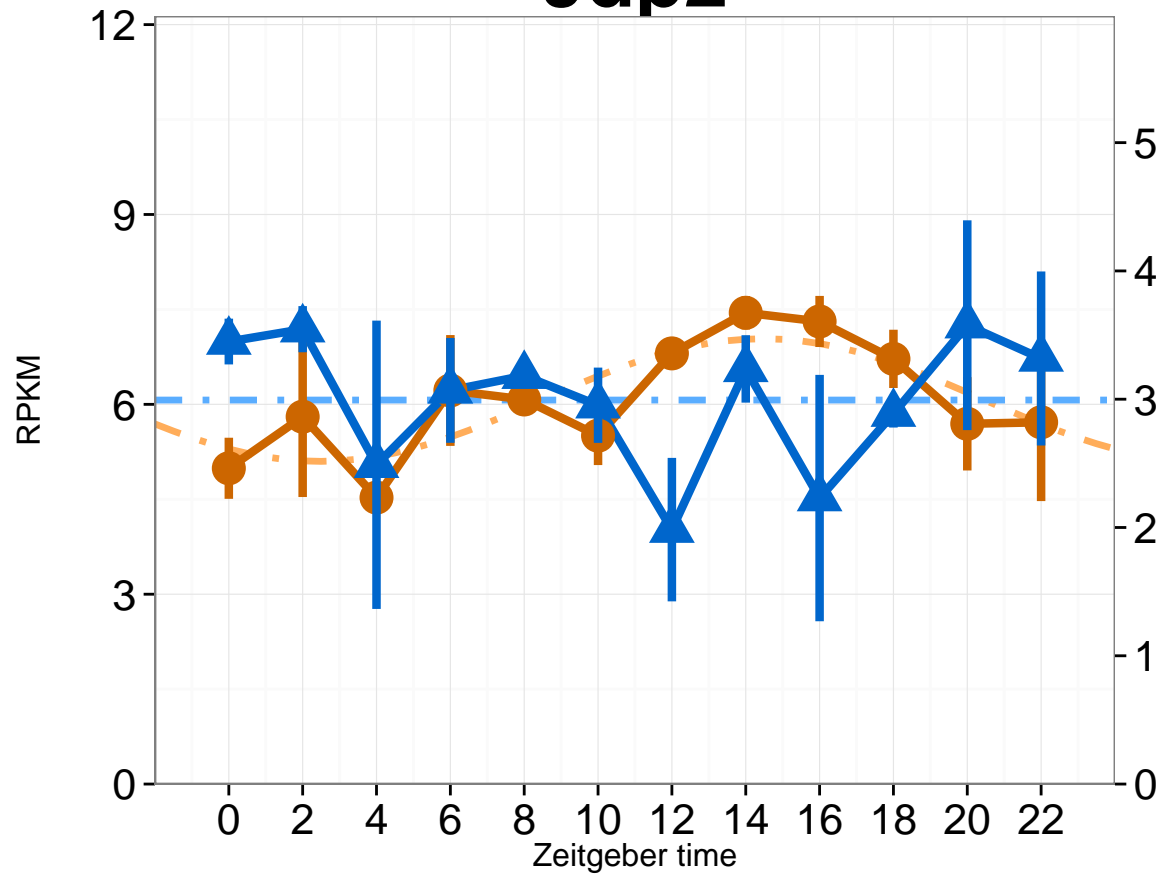

## Jdp2

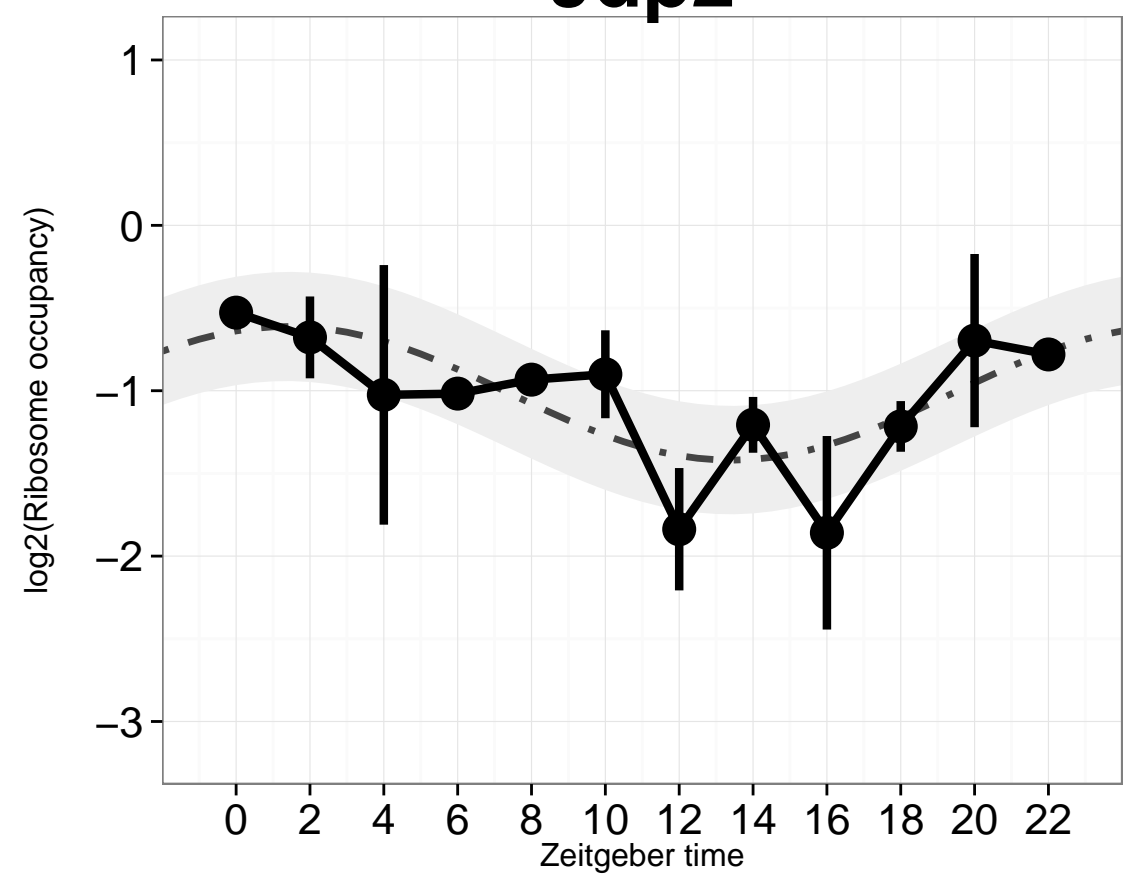

Supplement: Supplementary file 6756 [file 1]

# Nop16

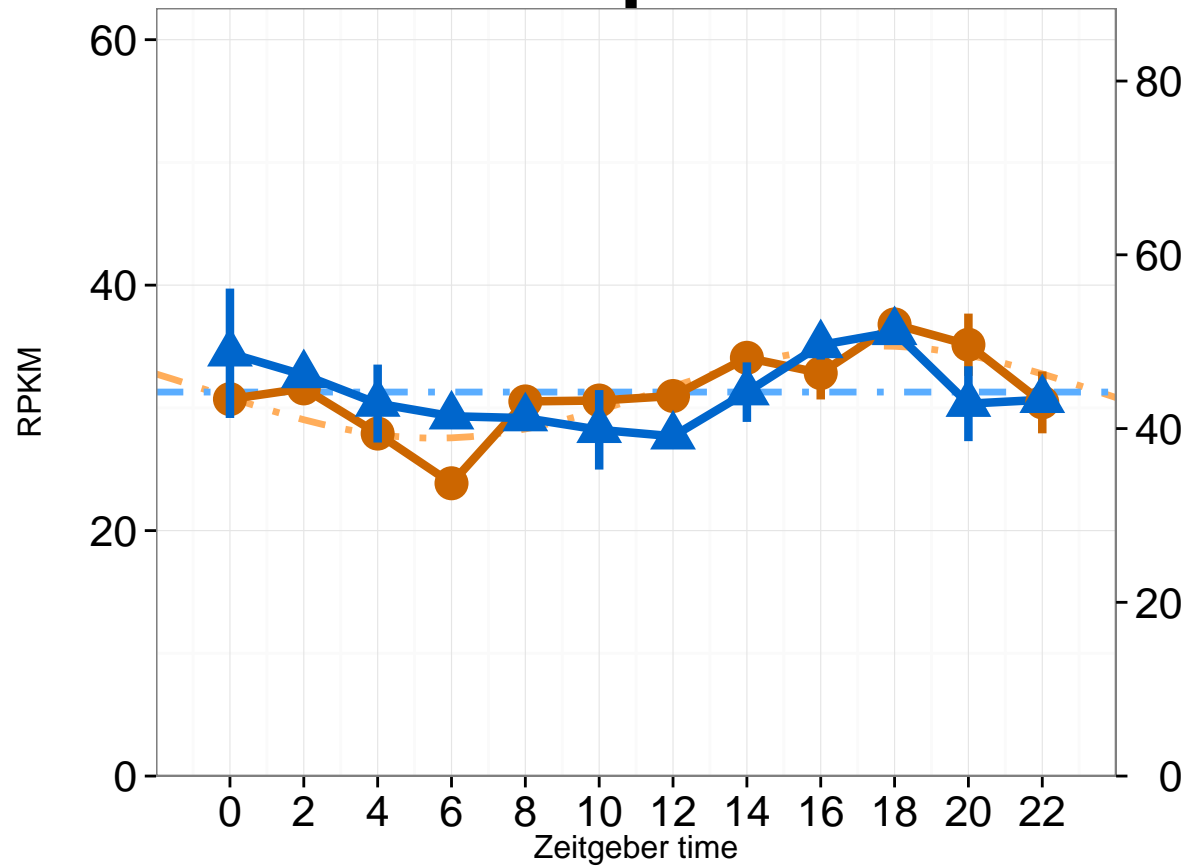

# Nop16

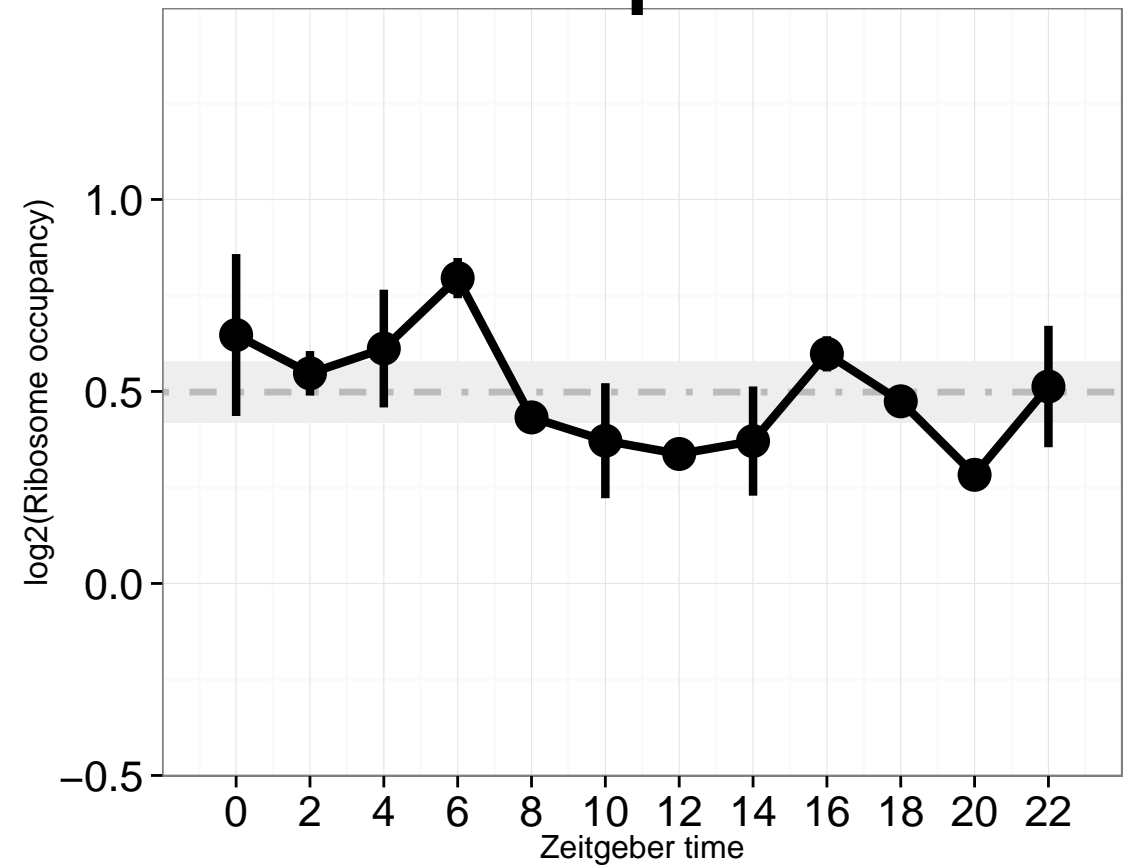

Supplement: Supplementary file 6757 [file 1]

## Qars

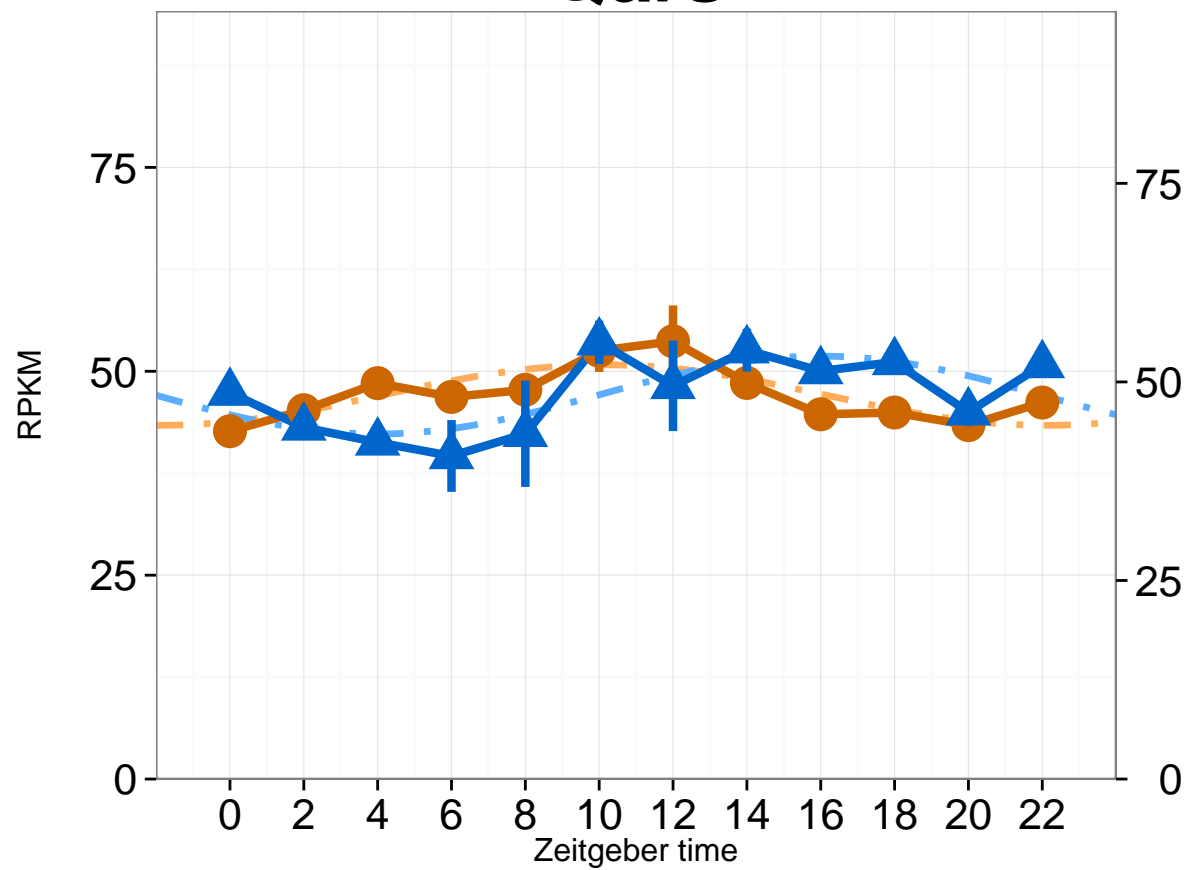

## Qars

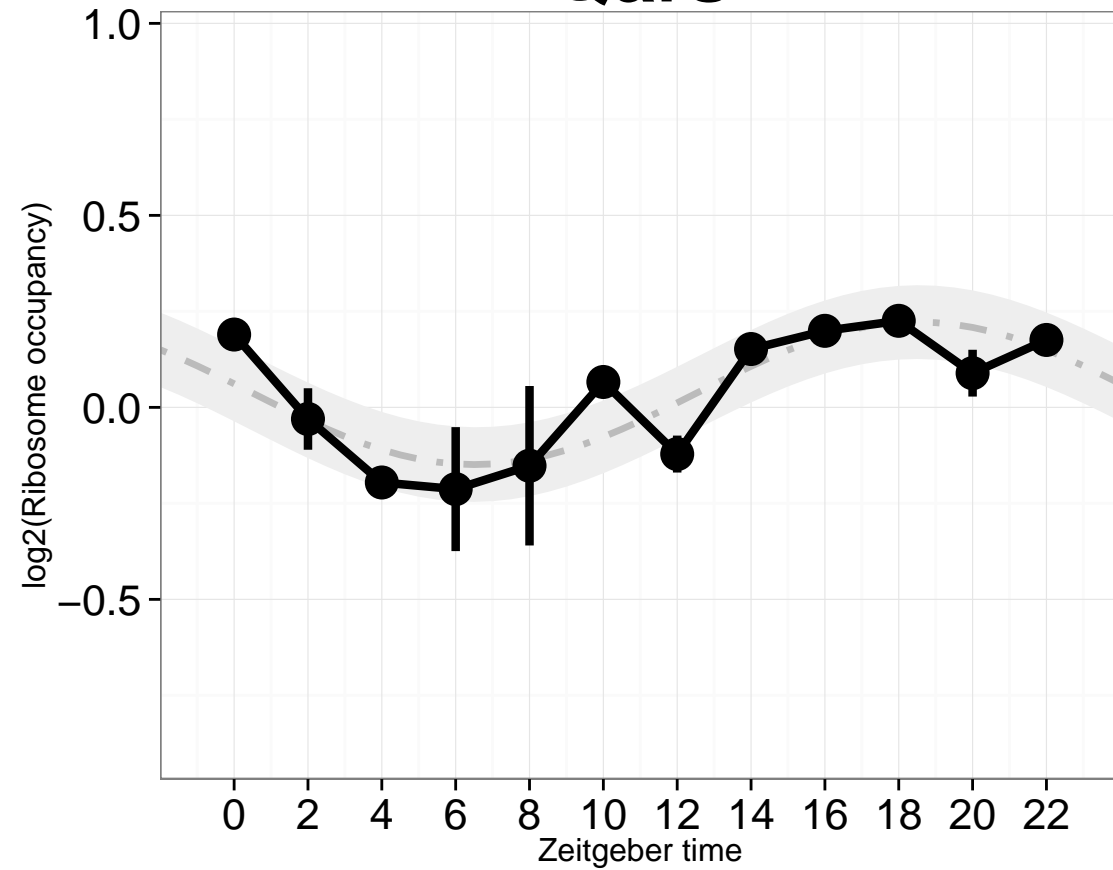

Supplement: Supplementary file 6758 [file 1]

## Ube2f

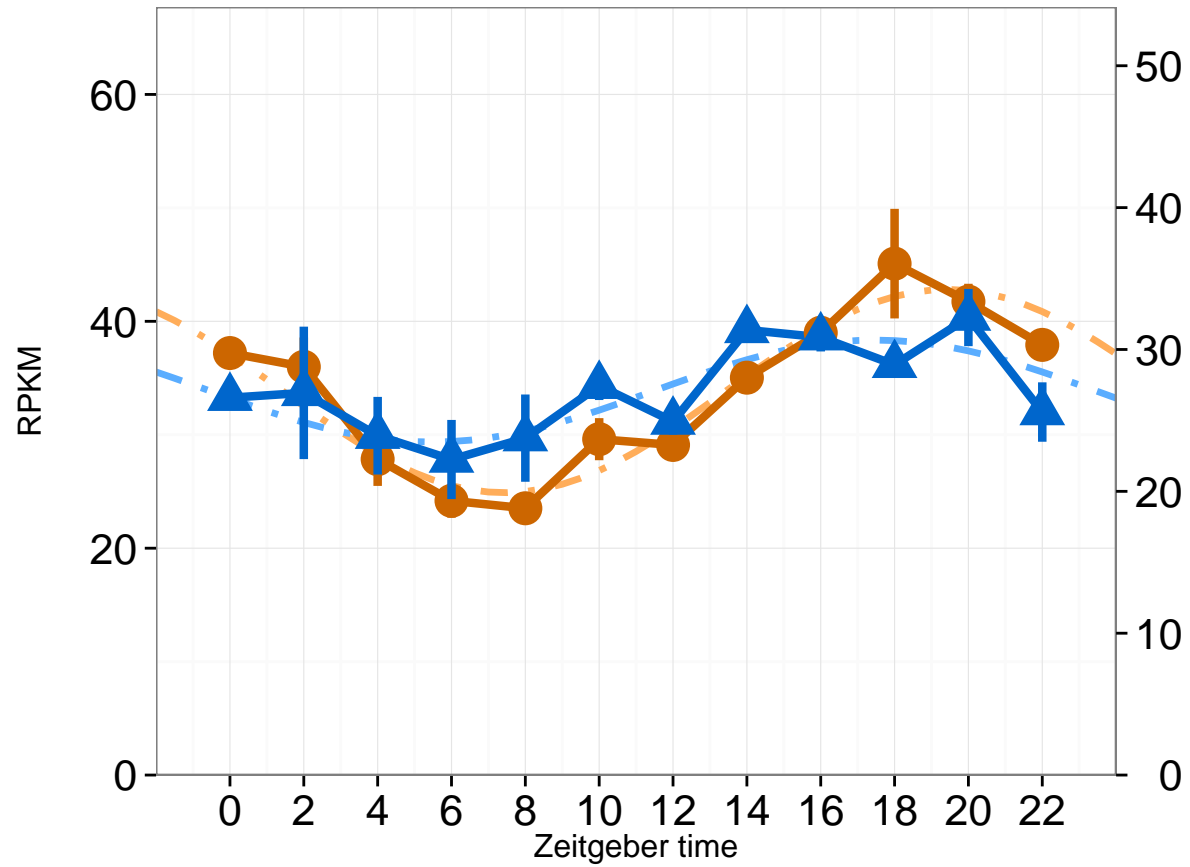

## Ube2f

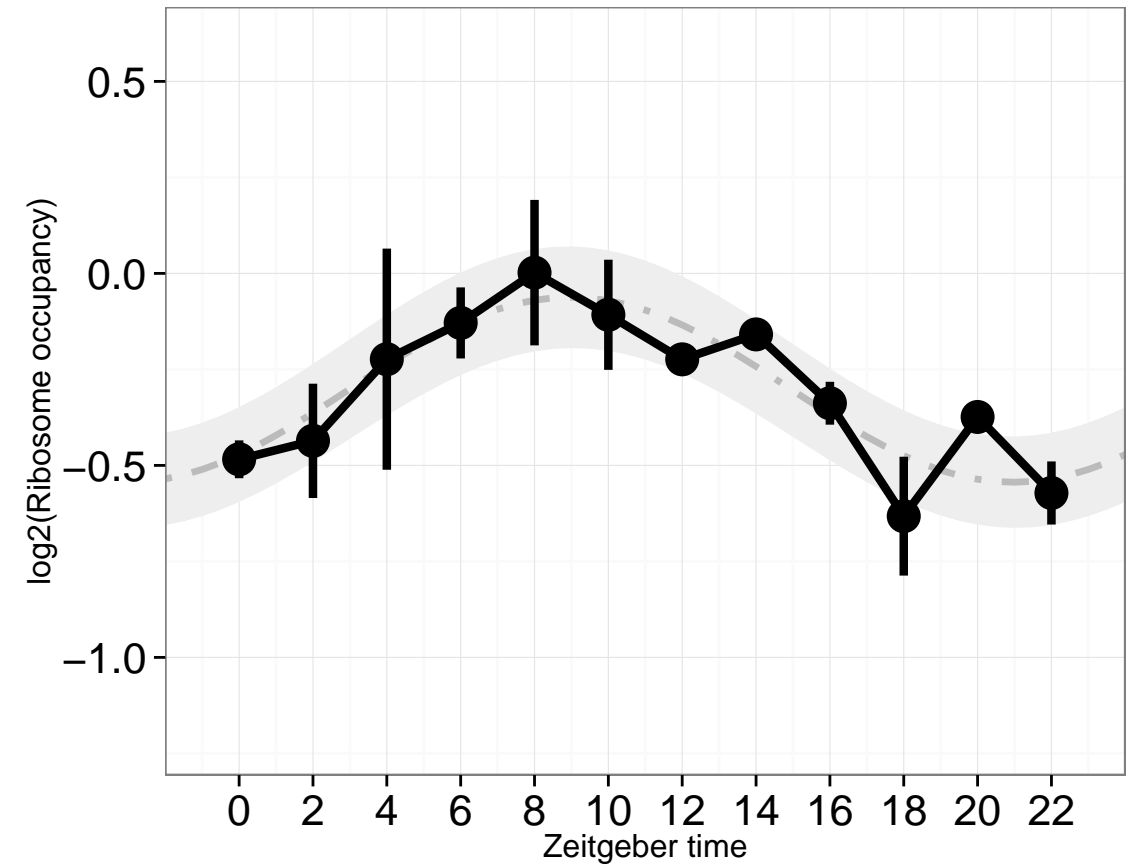

Supplement: Supplementary file 6759 [file 1]

# Trmt10c

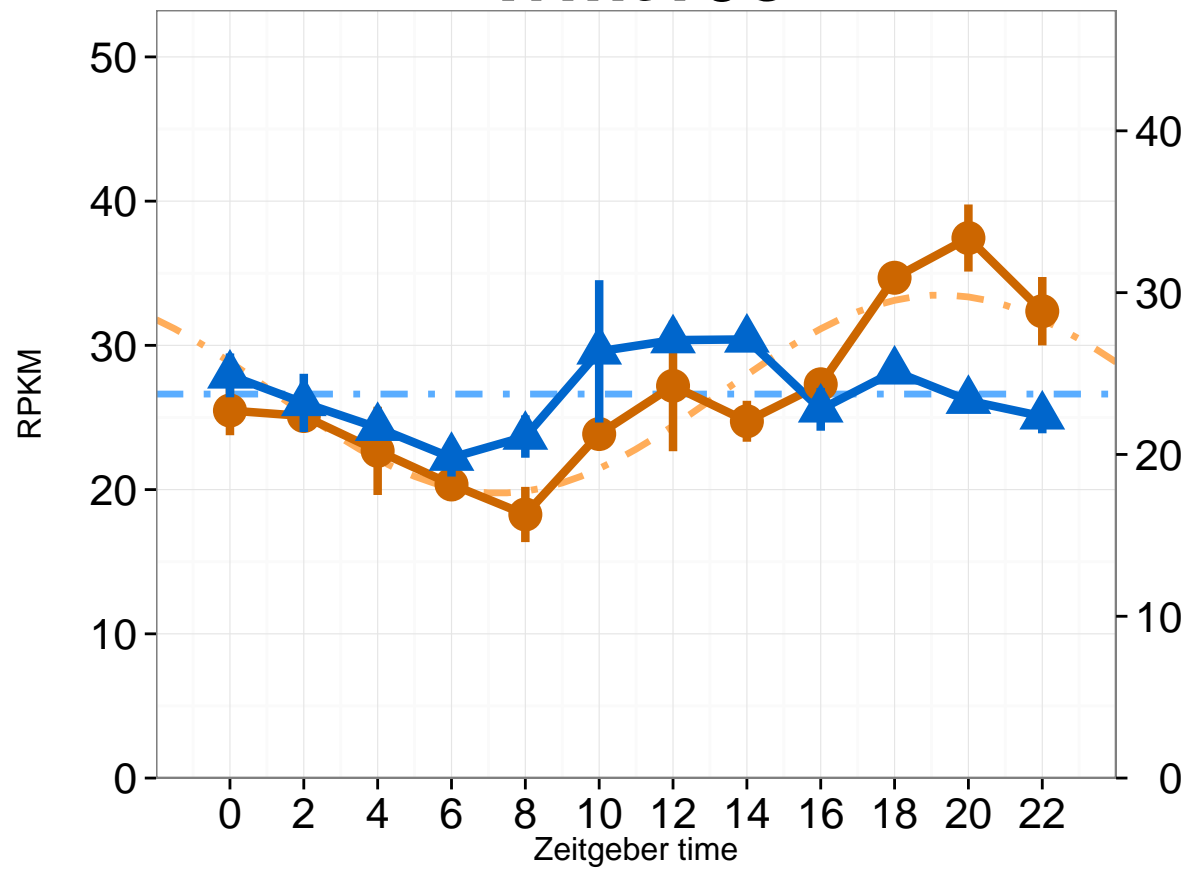

# Trmt10c

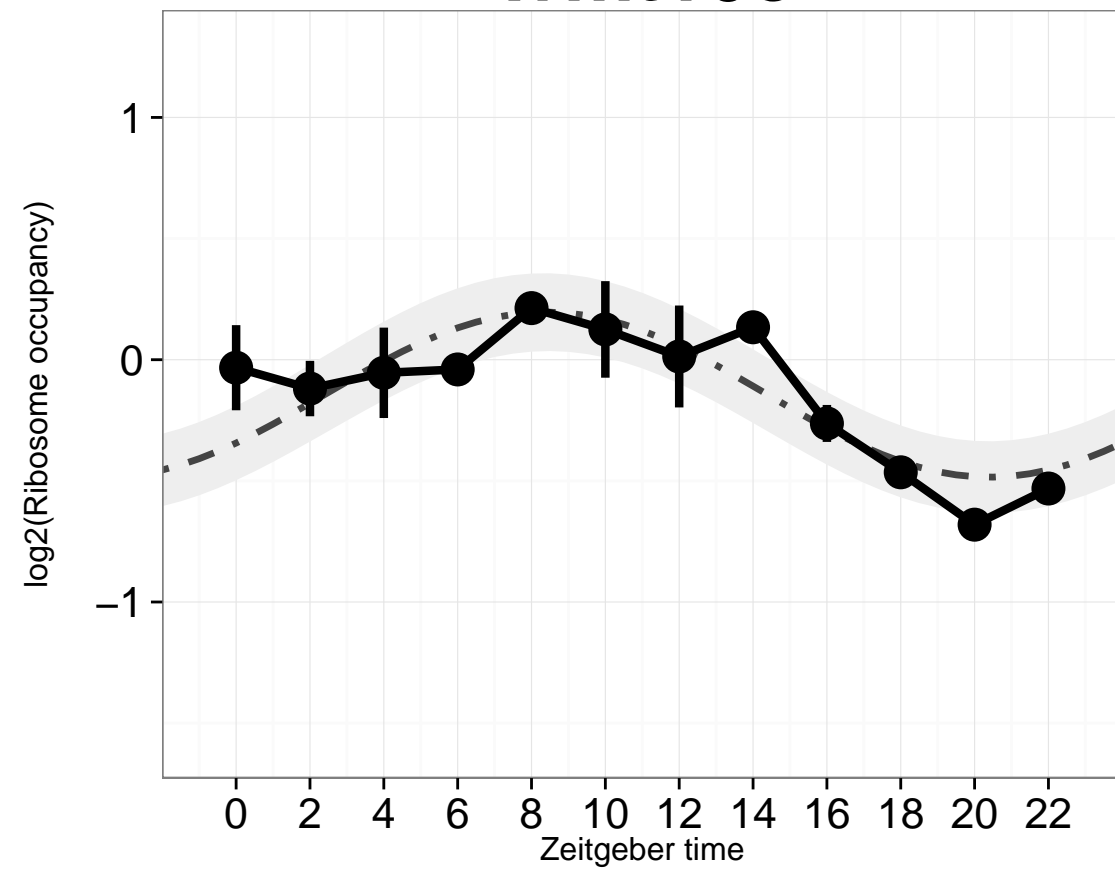

Supplement: Supplementary file 6760 [file 1]

## Dnlz

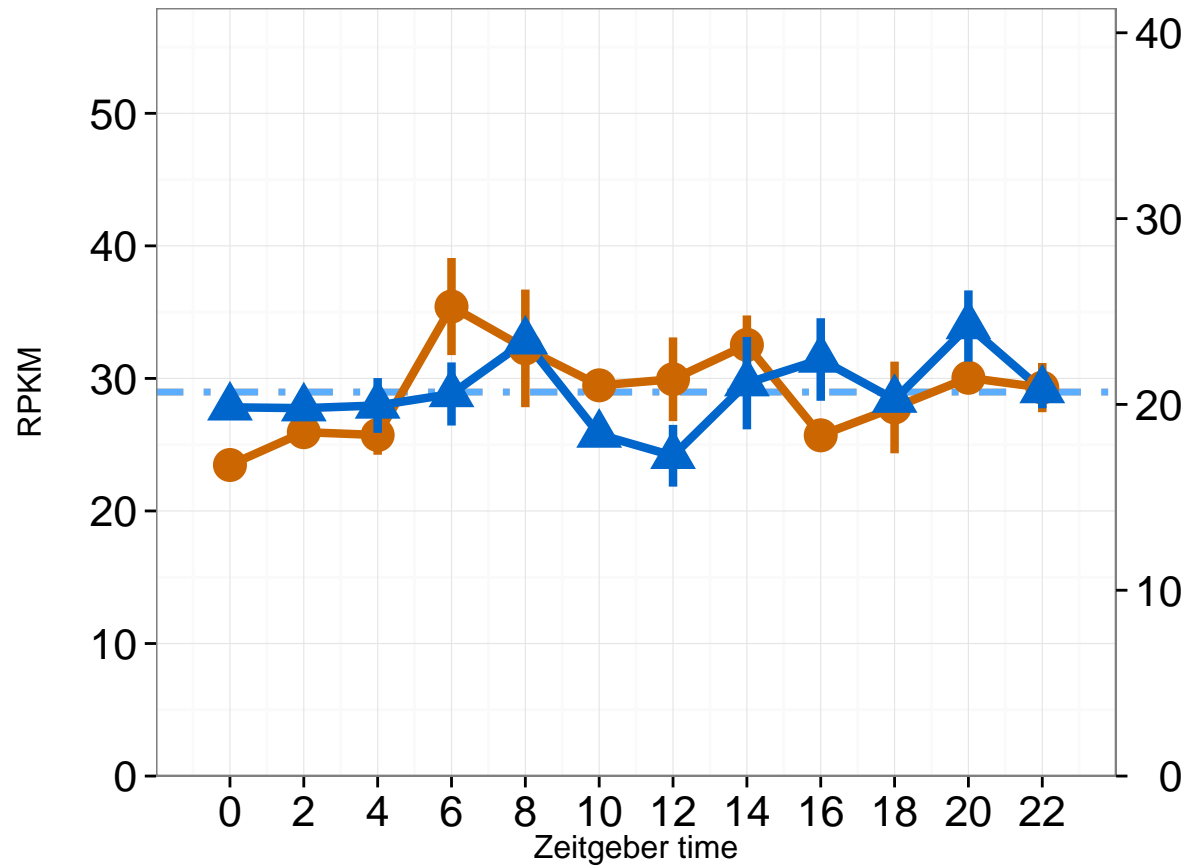

## Dnlz

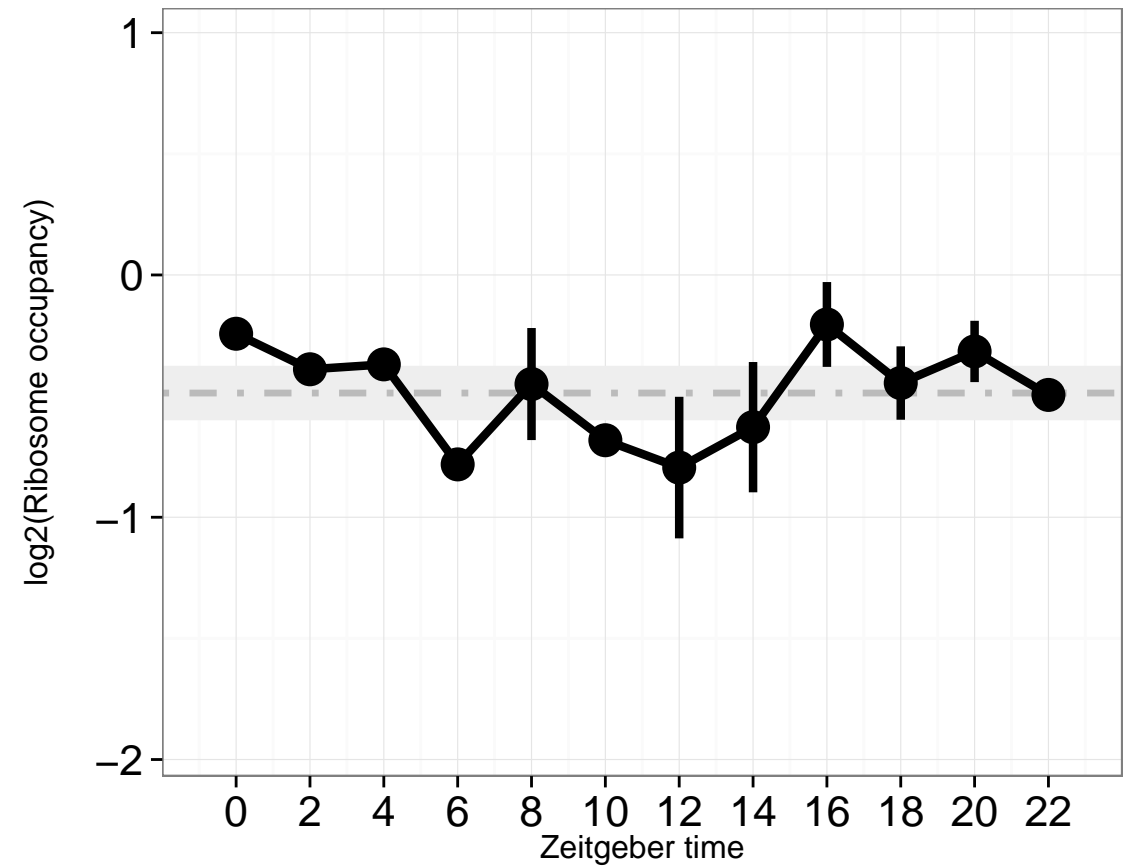

Supplement: Supplementary file 6761 [file 1]

## Abcc10

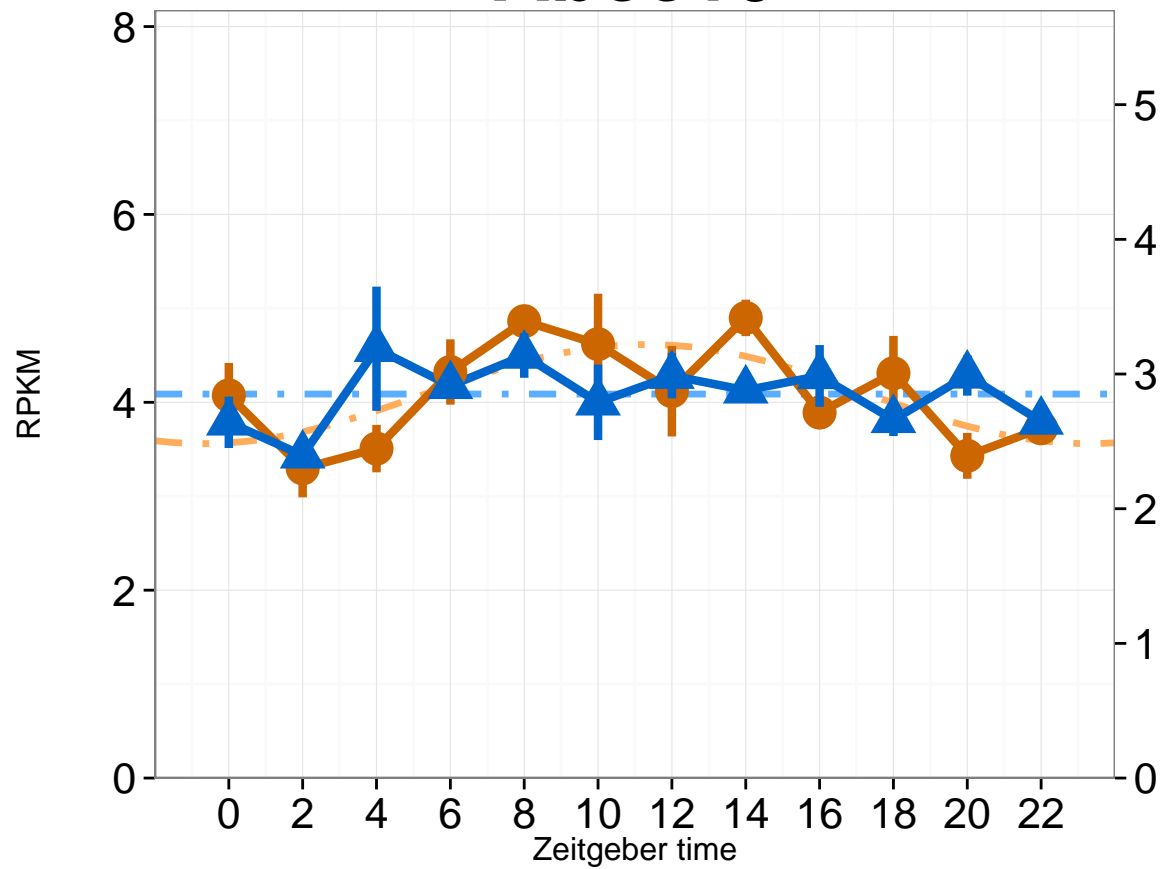

## Abcc10

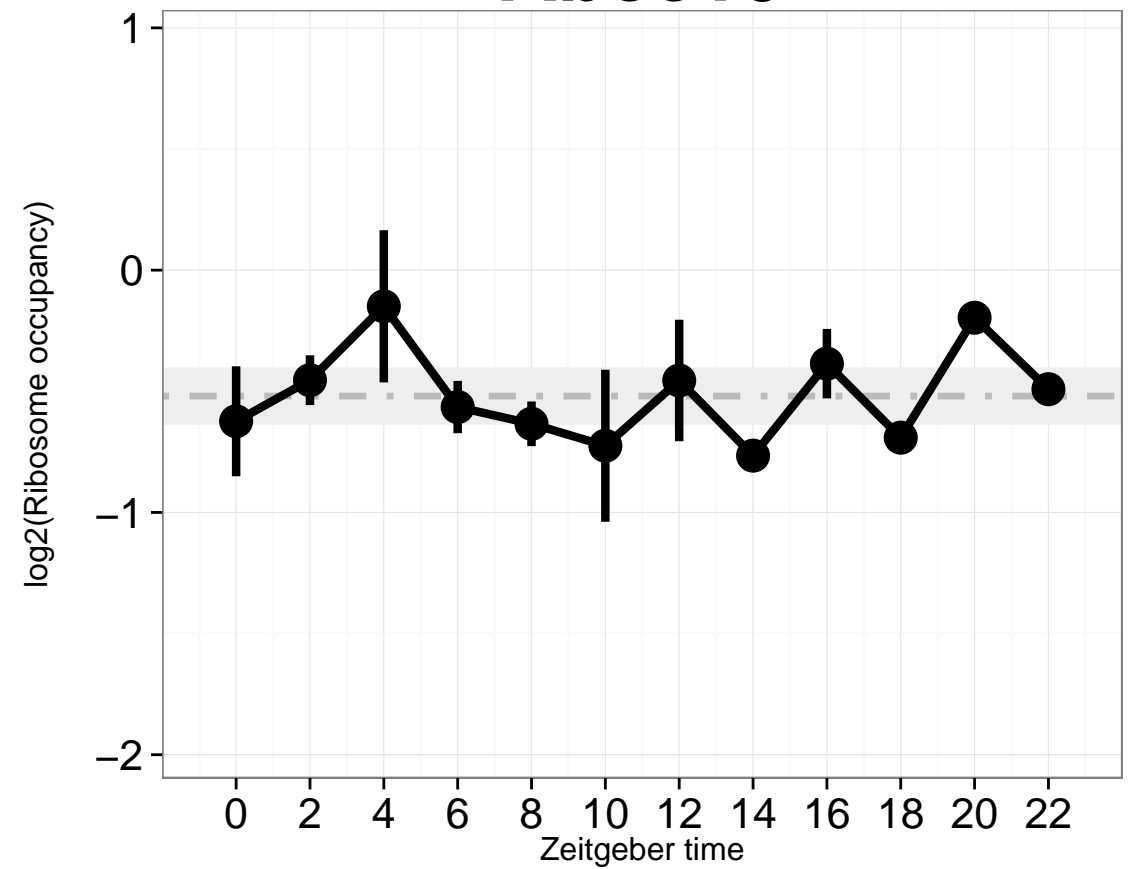

Supplement: Supplementary file 6762 [file 1]

## 2510039O18Rik

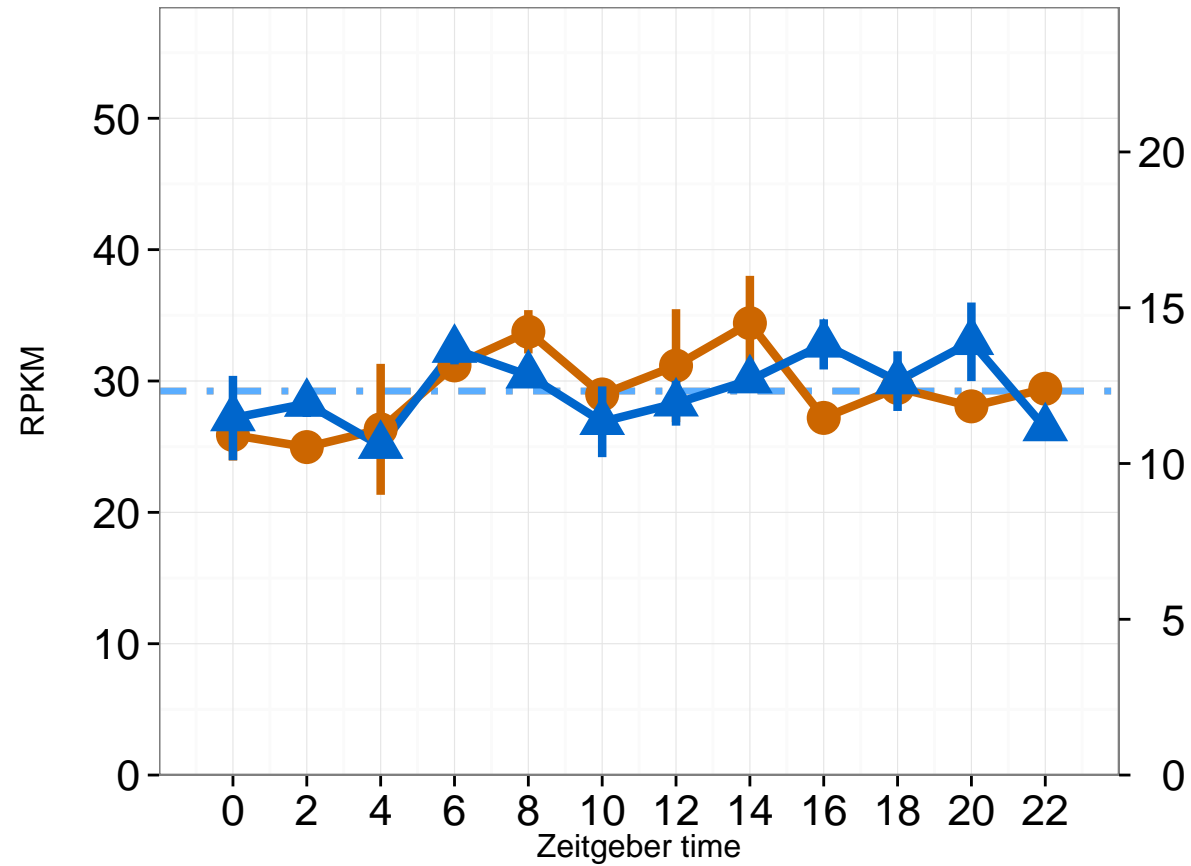

## 2510039O18Rik

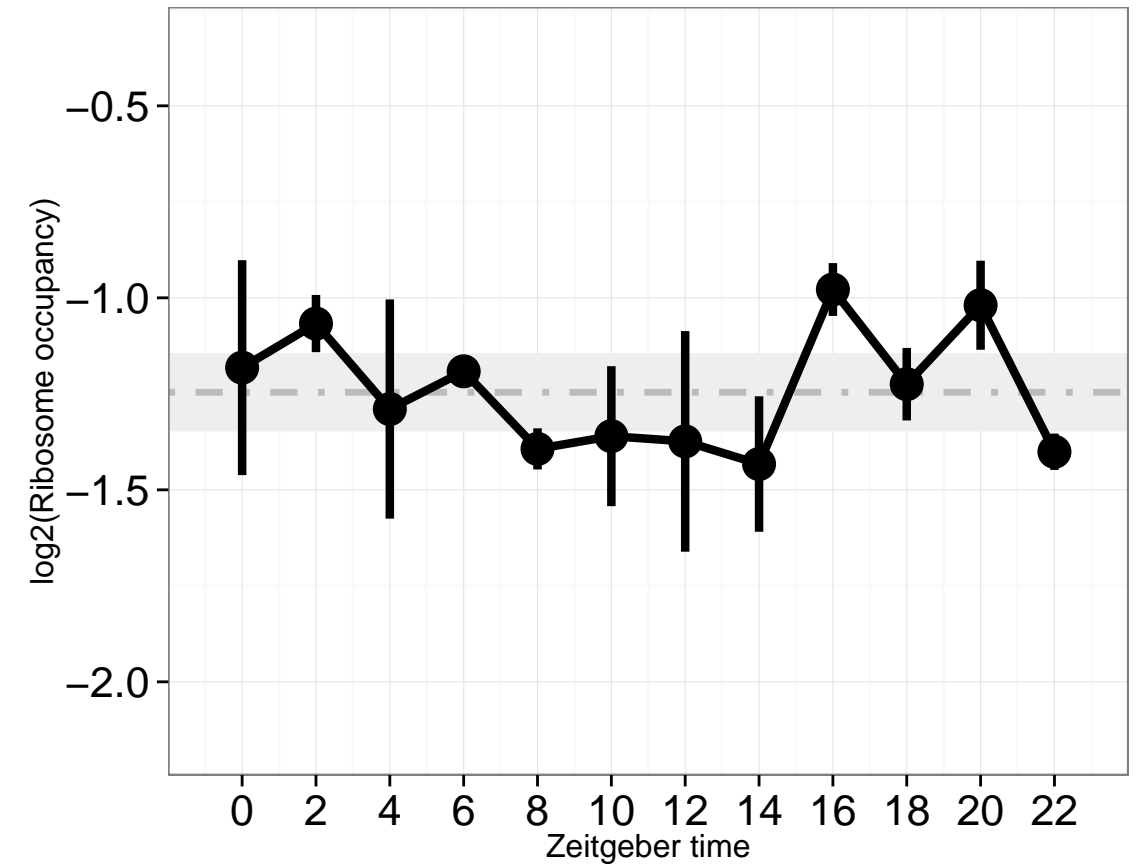

Supplement: Supplementary file 6763 [file 1]

## Slc5a10

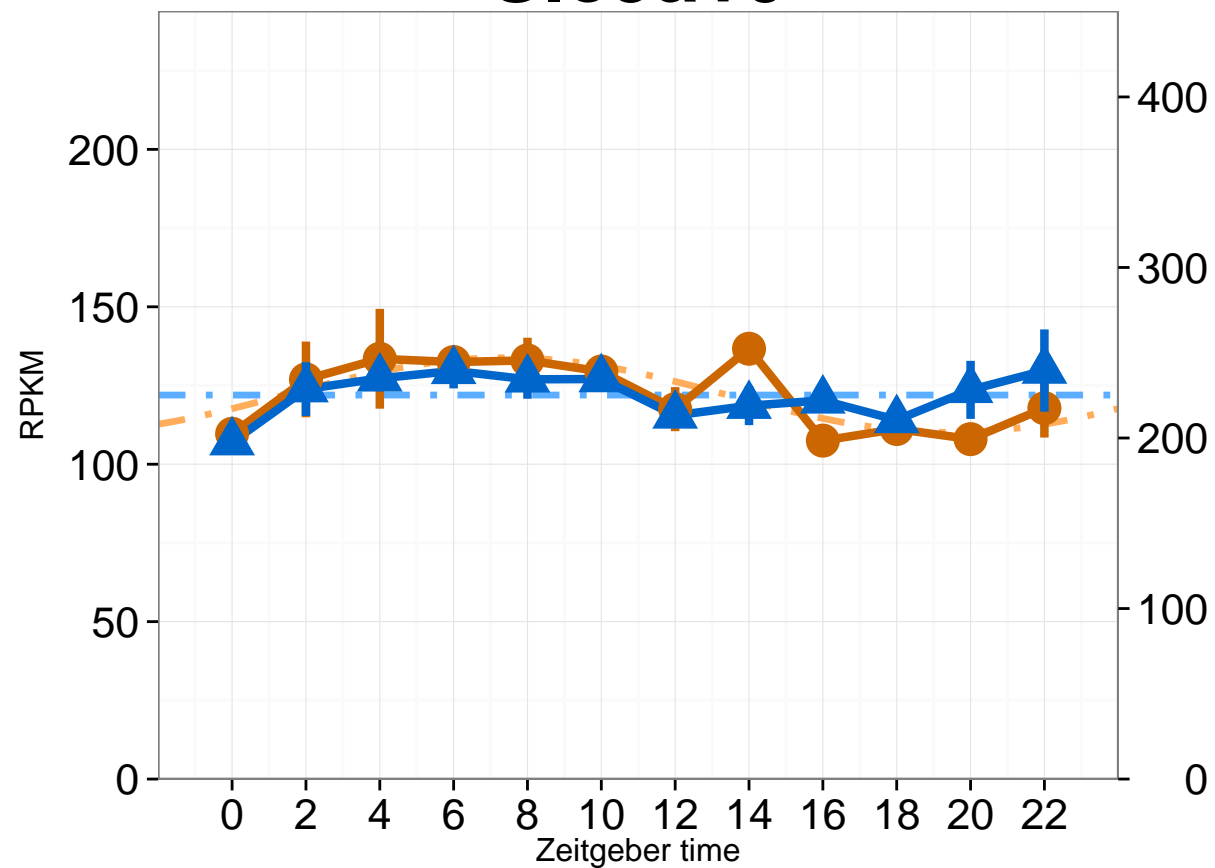

## Slc5a10

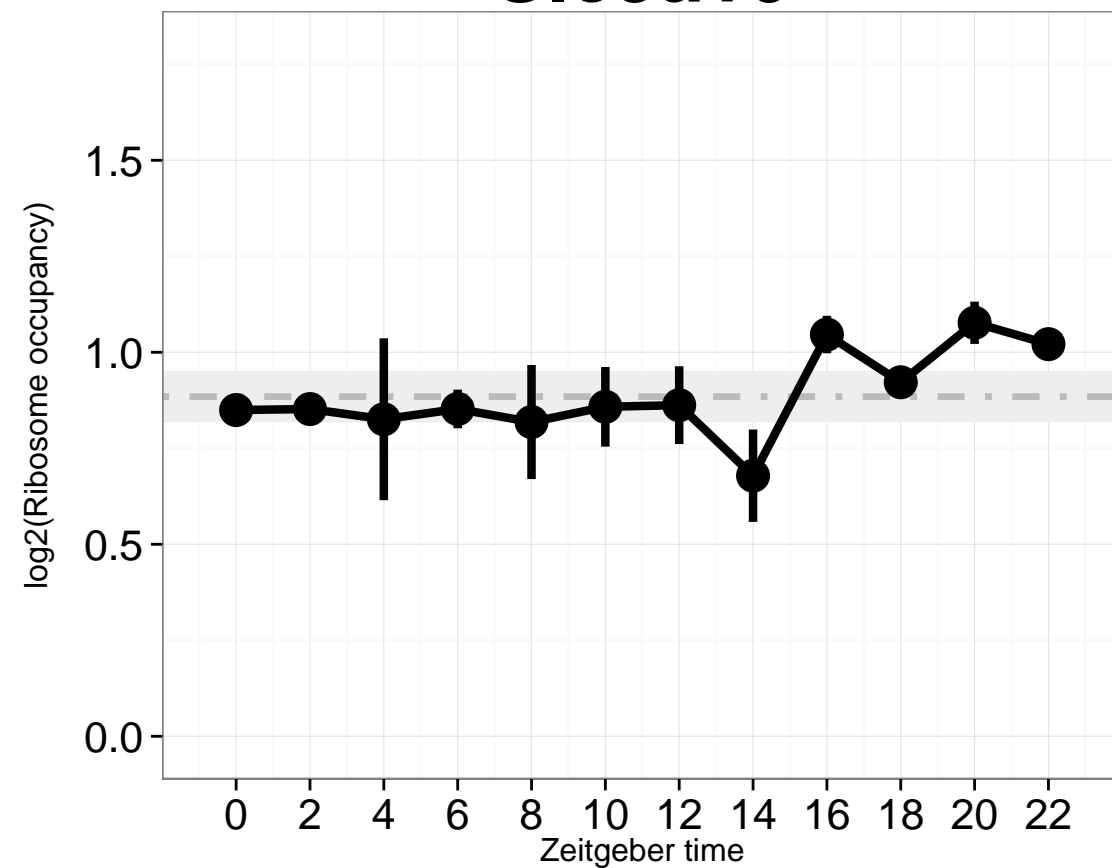

Supplement: Supplementary file 6764 [file 1]

## Vps52

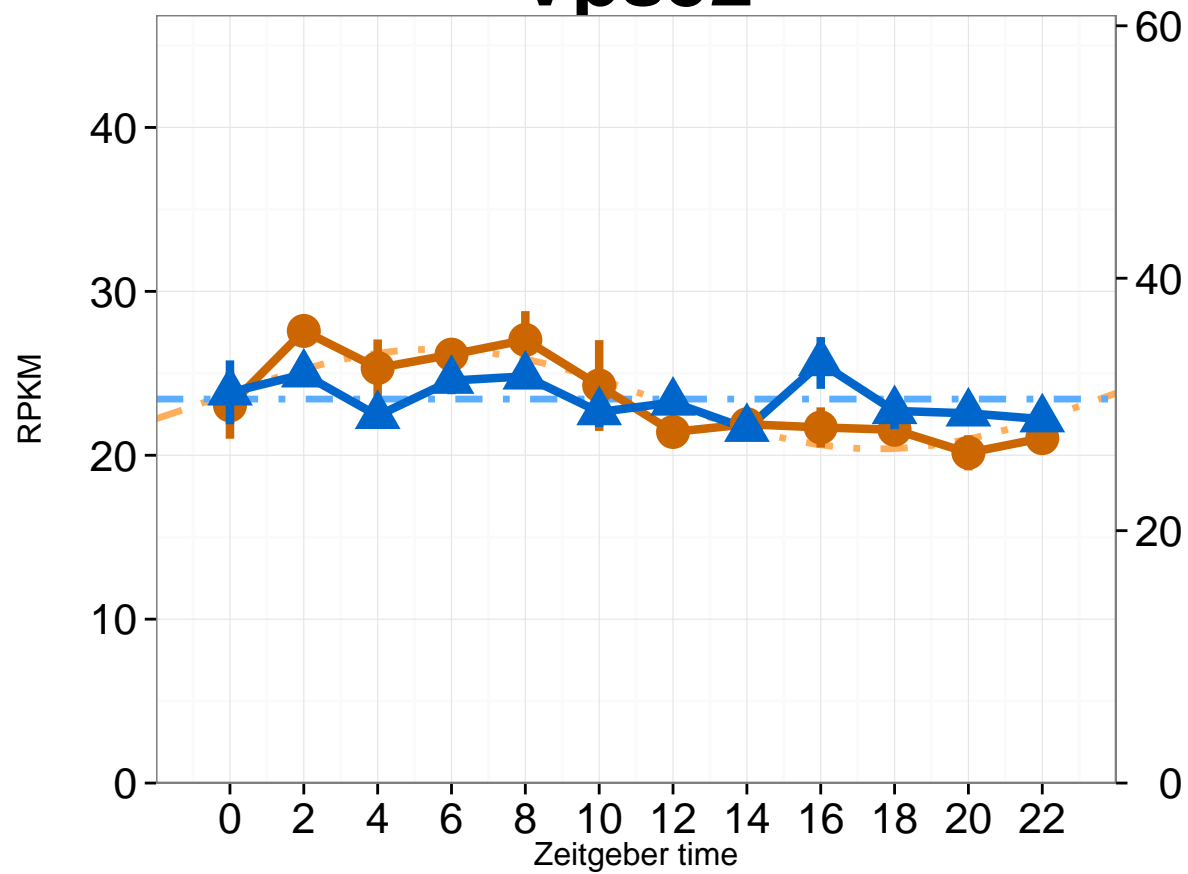

## Vps52

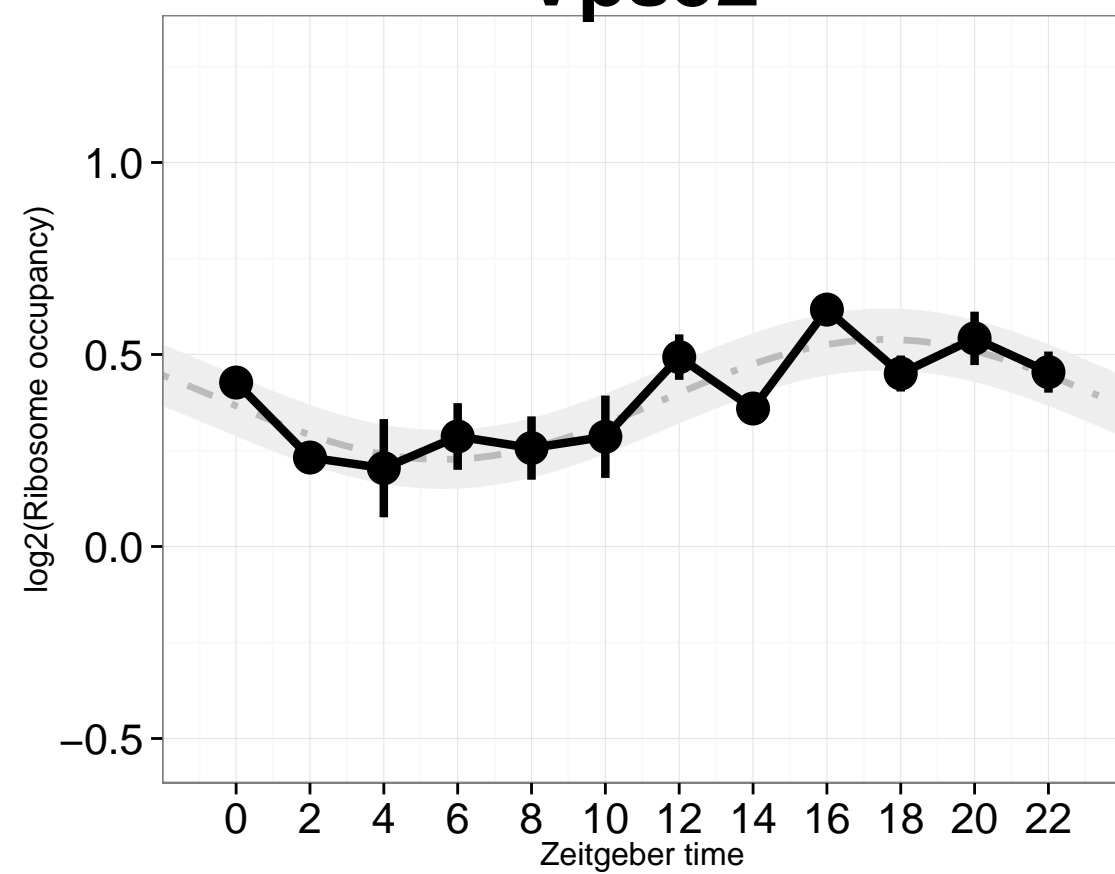

Supplement: Supplementary file 6765 [file 1]

## Cdh16

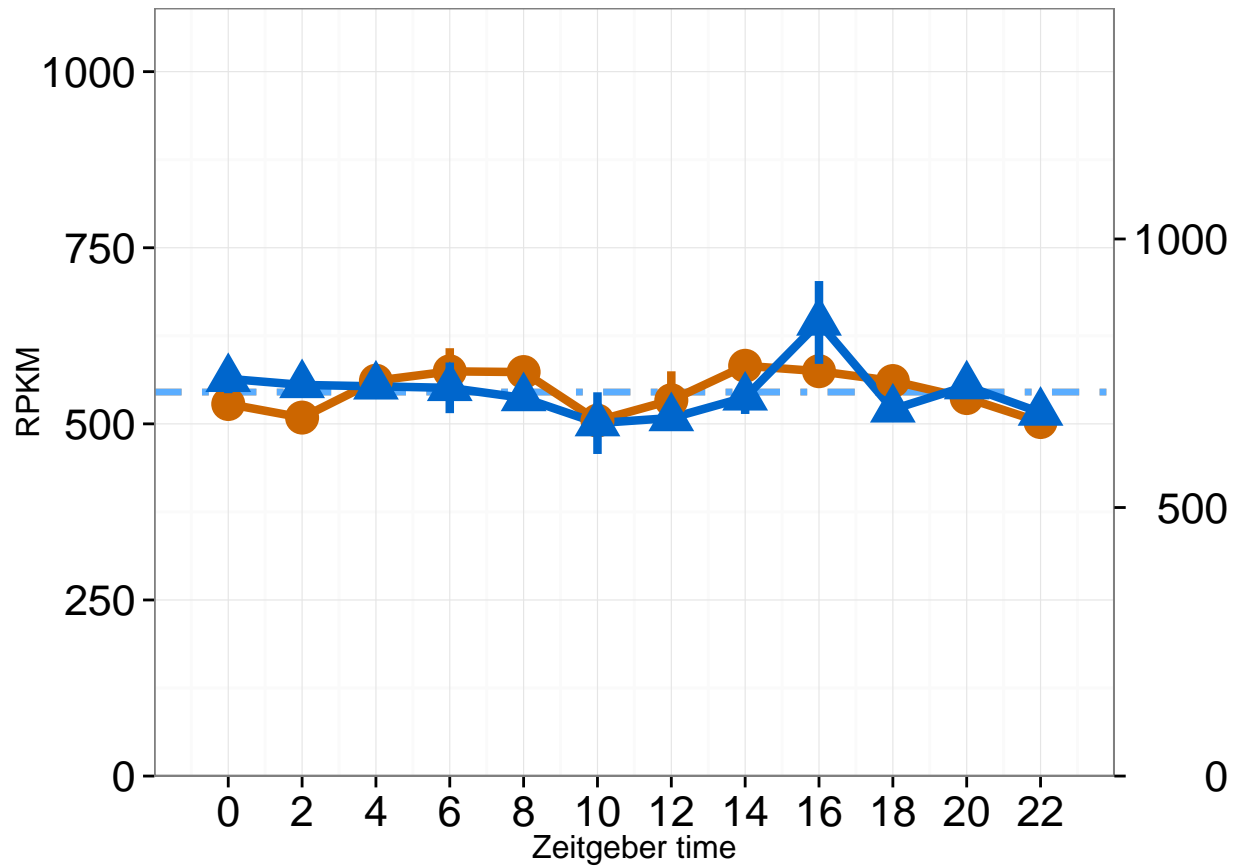

## Cdh16

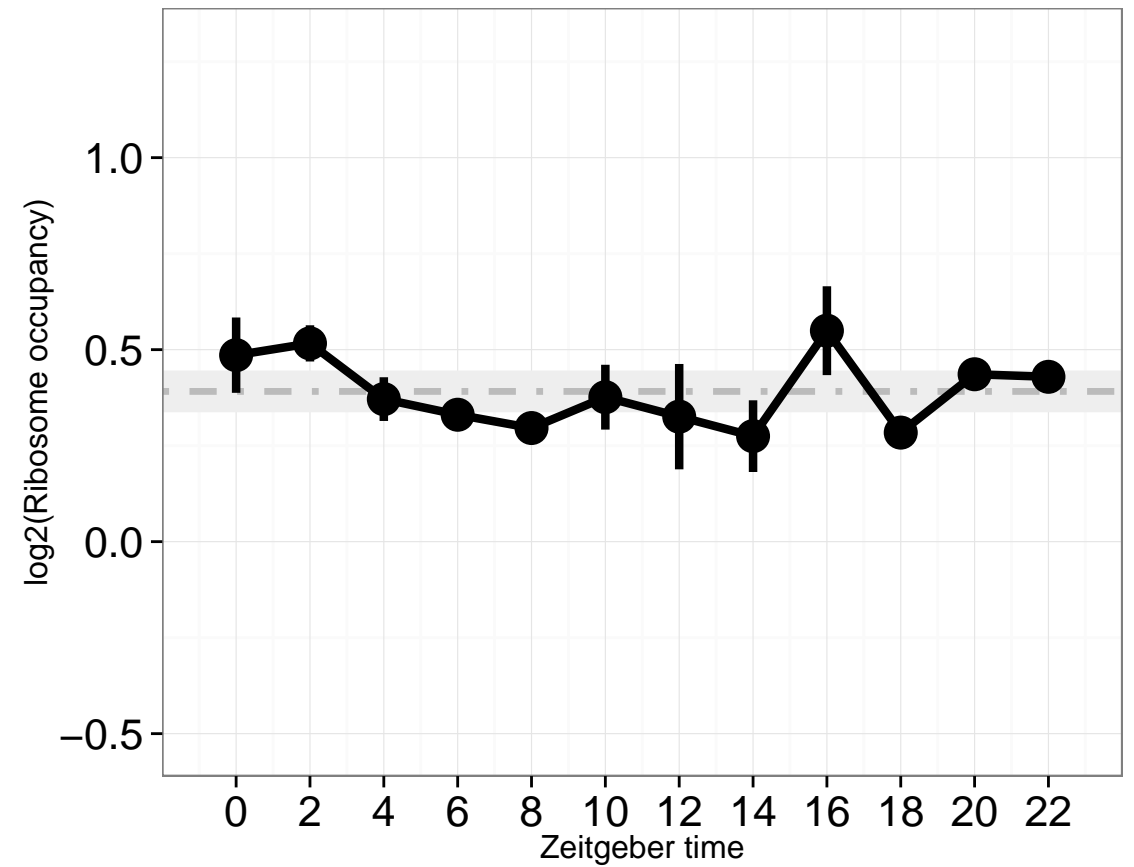

Supplement: Supplementary file 6766 [file 1]

## Pcnxl3

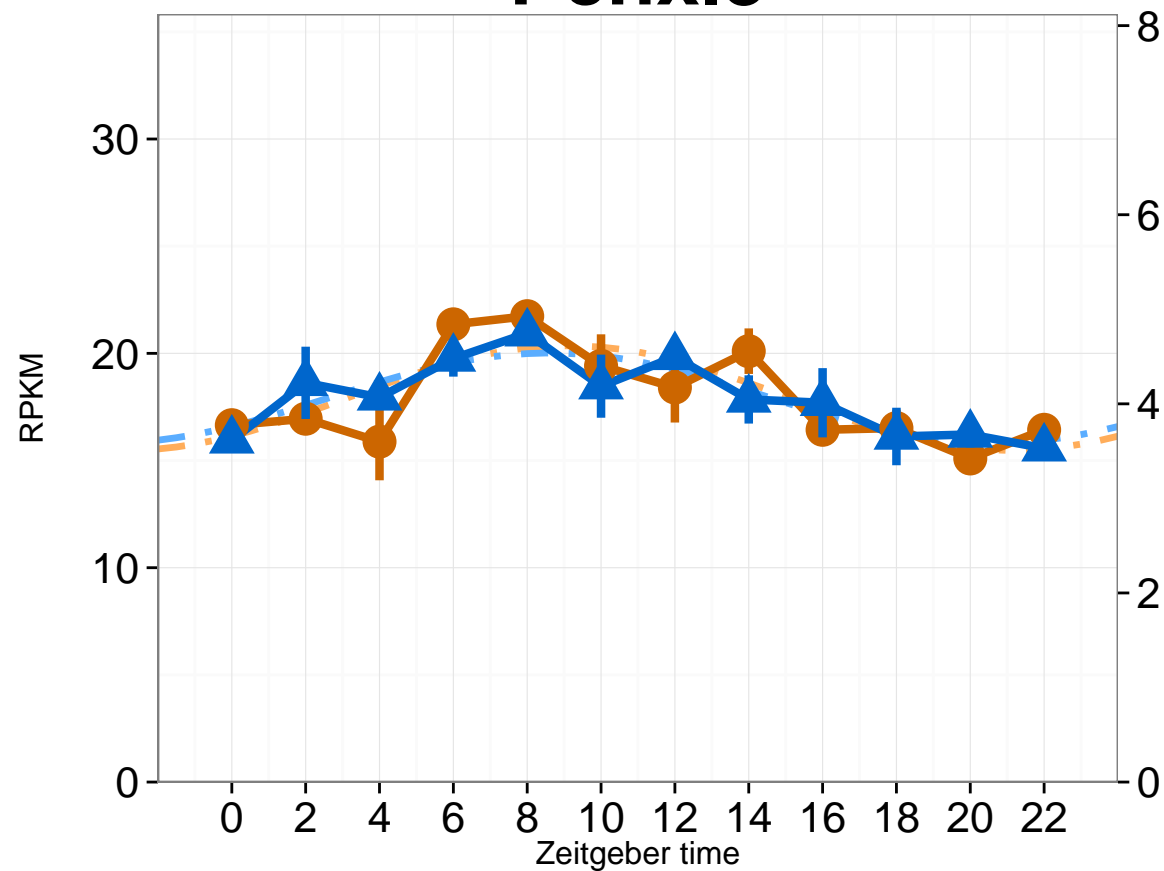

## Pcnxl3

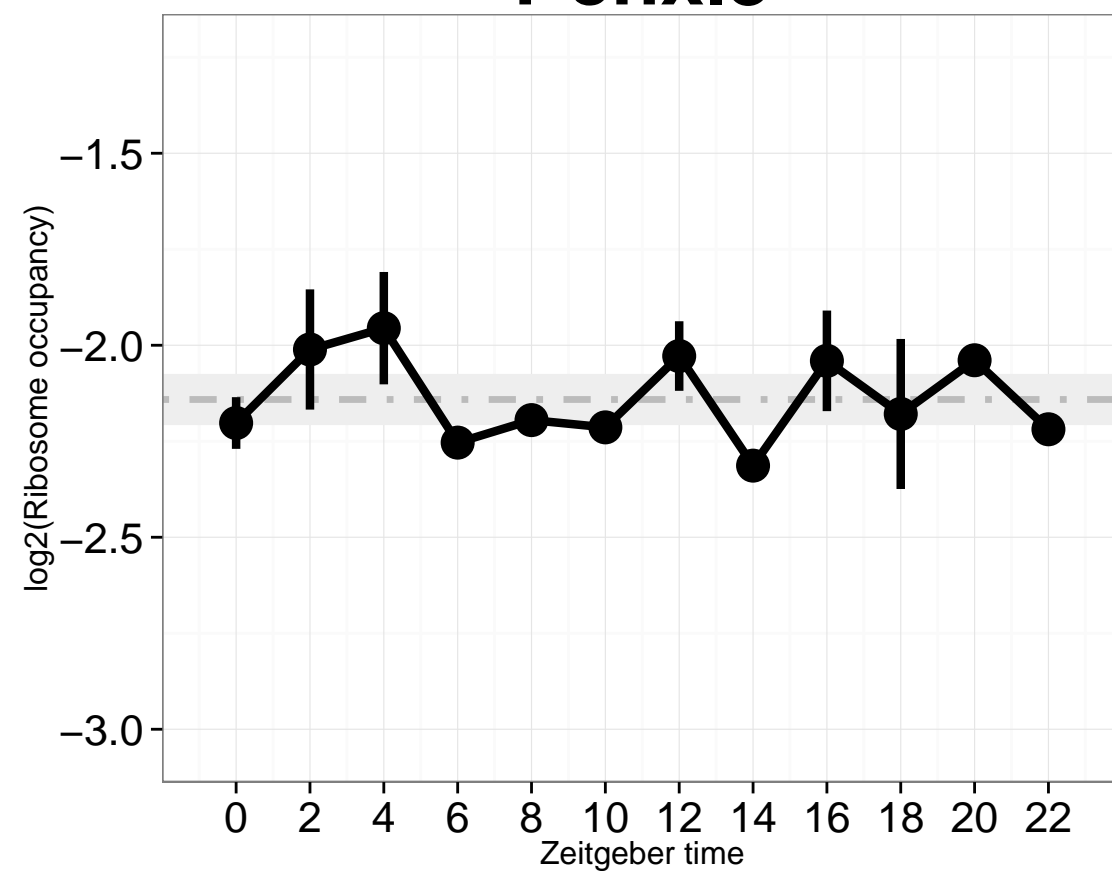

Supplement: Supplementary file 6767 [file 1]

## Tti1

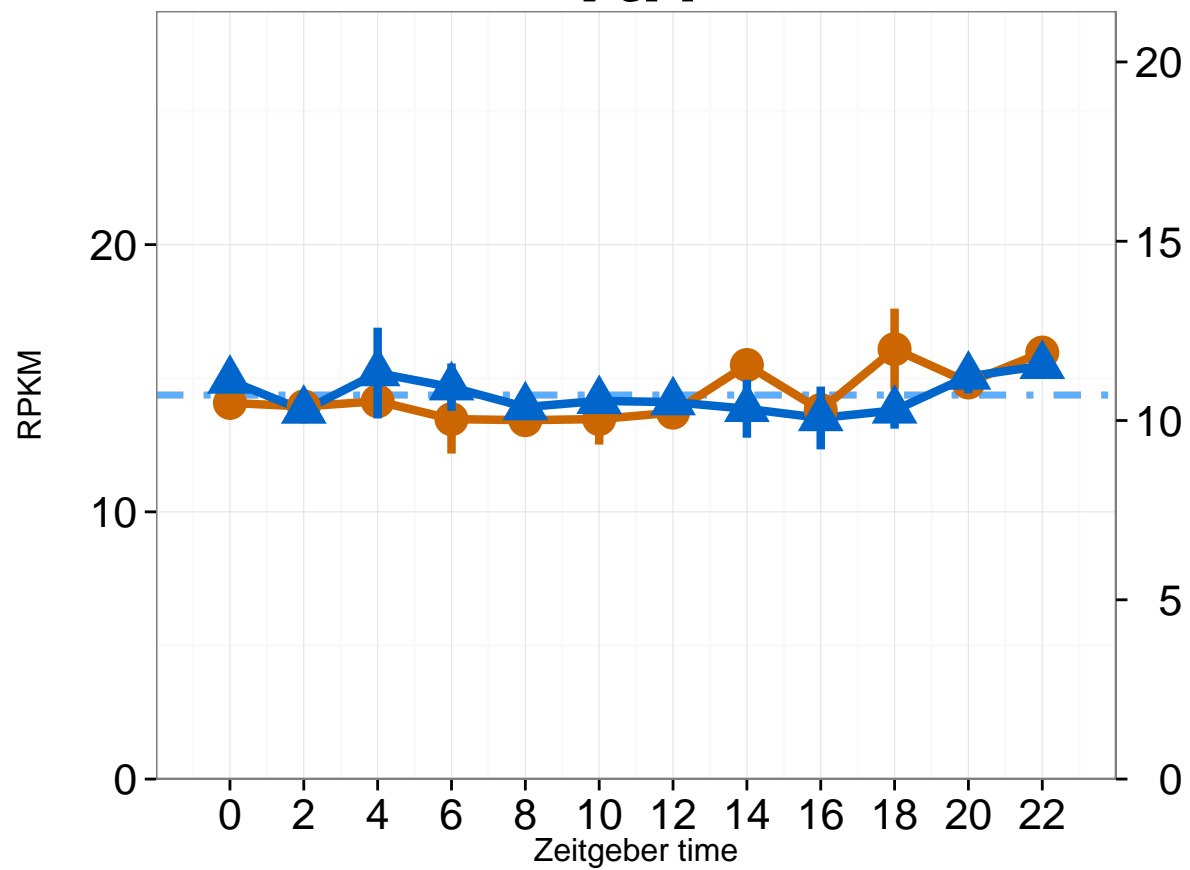

## Tti1

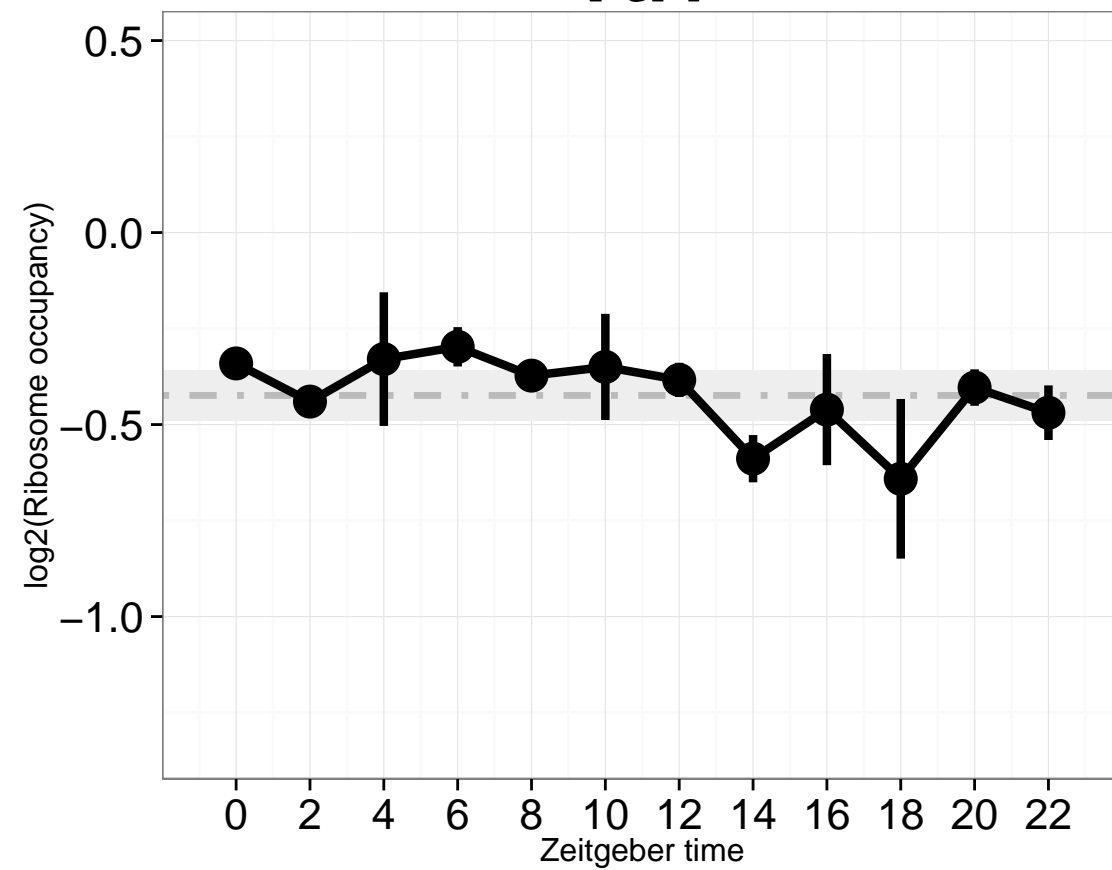

Supplement: Supplementary file 6768 [file 1]

# Rsph3b

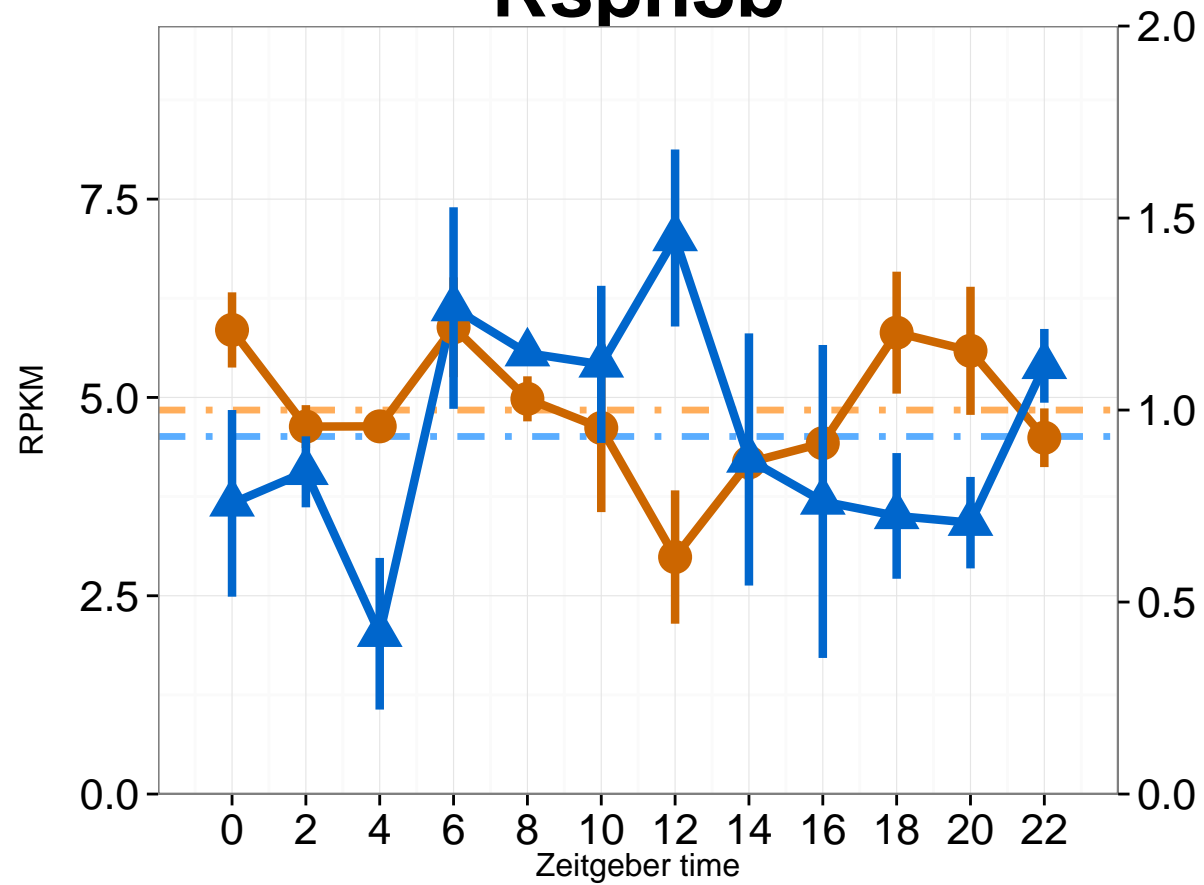

# Rsph3b

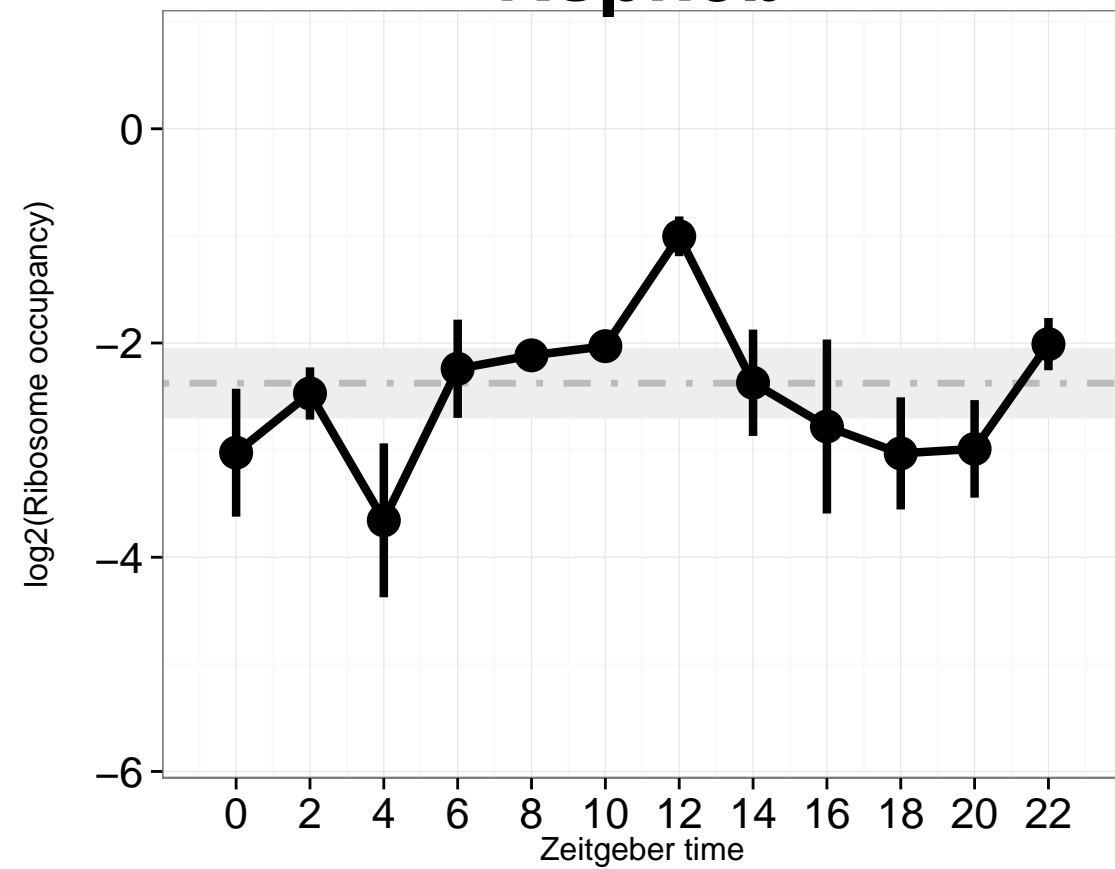

Supplement: Supplementary file 6769 [file 1]

## Fbxo36

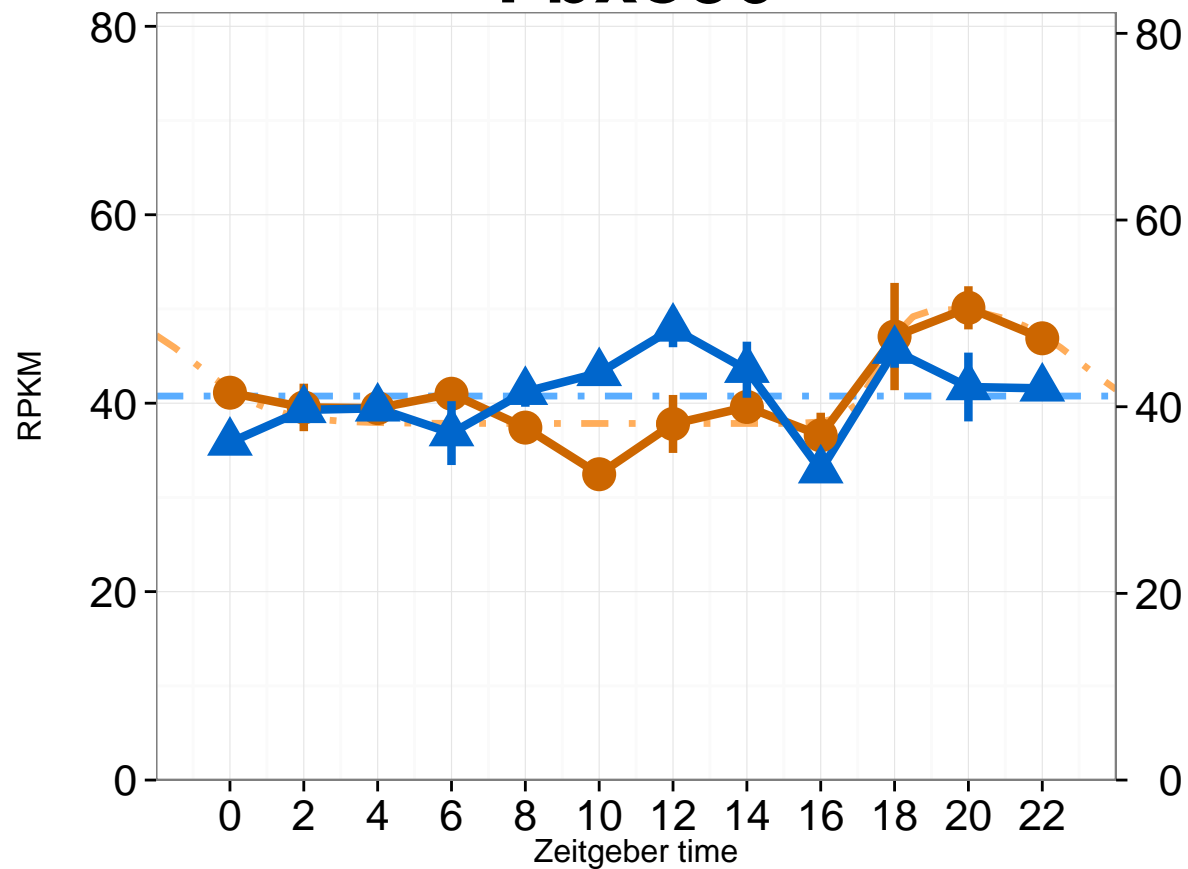

## Fbxo36

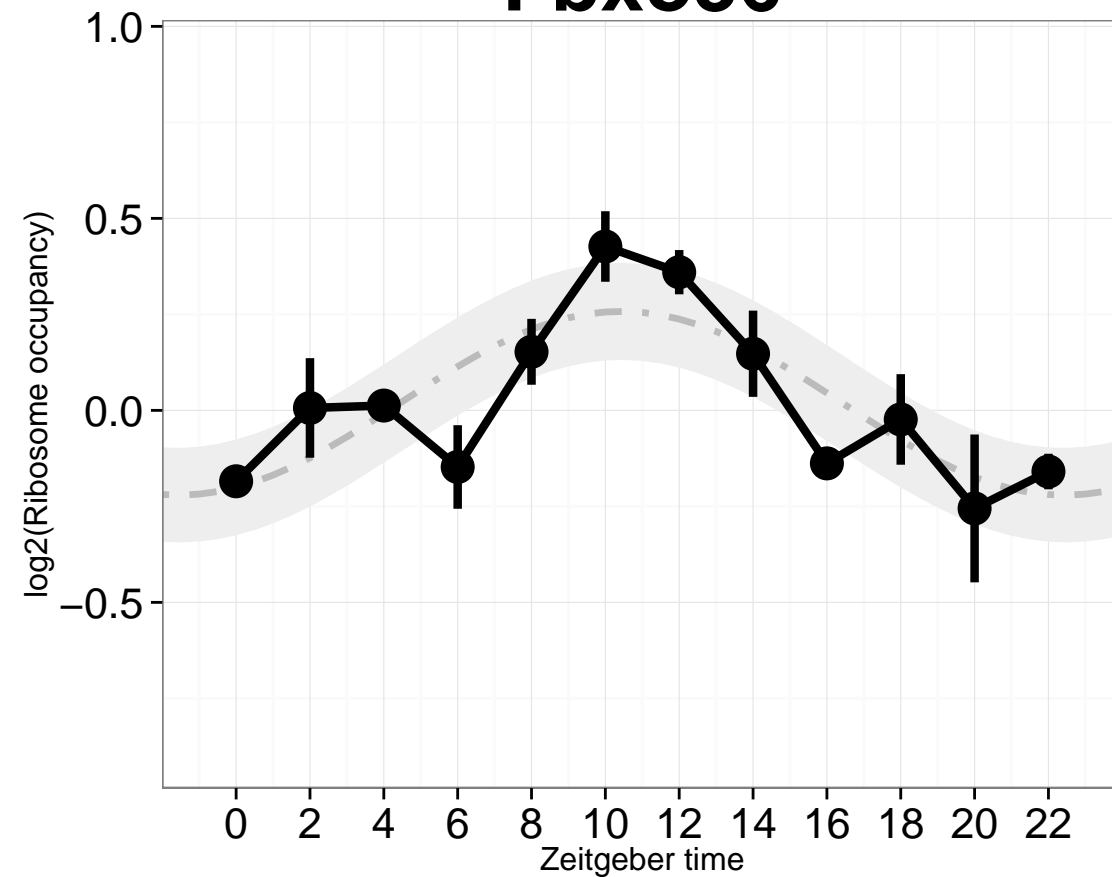

Supplement: Supplementary file 6770 [file 1]

## Smarcb1

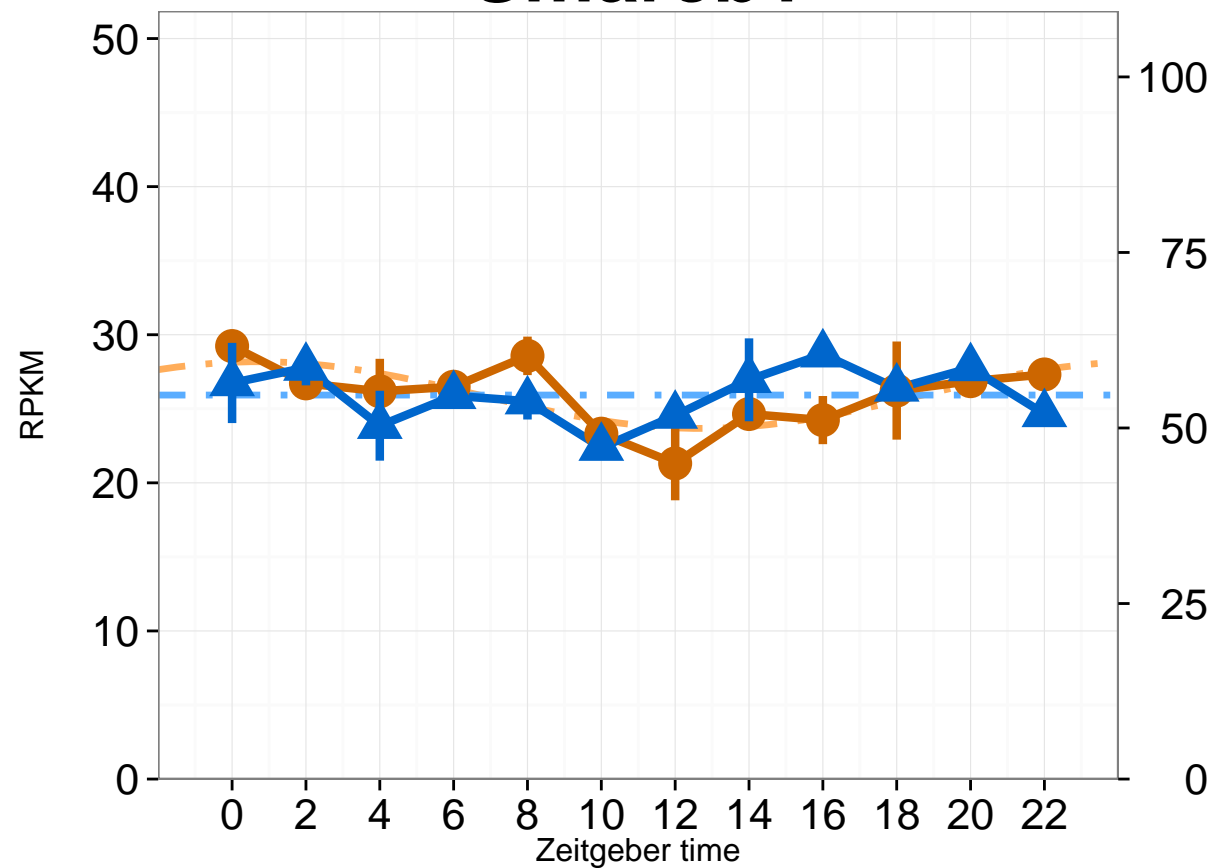

## Smarcb1

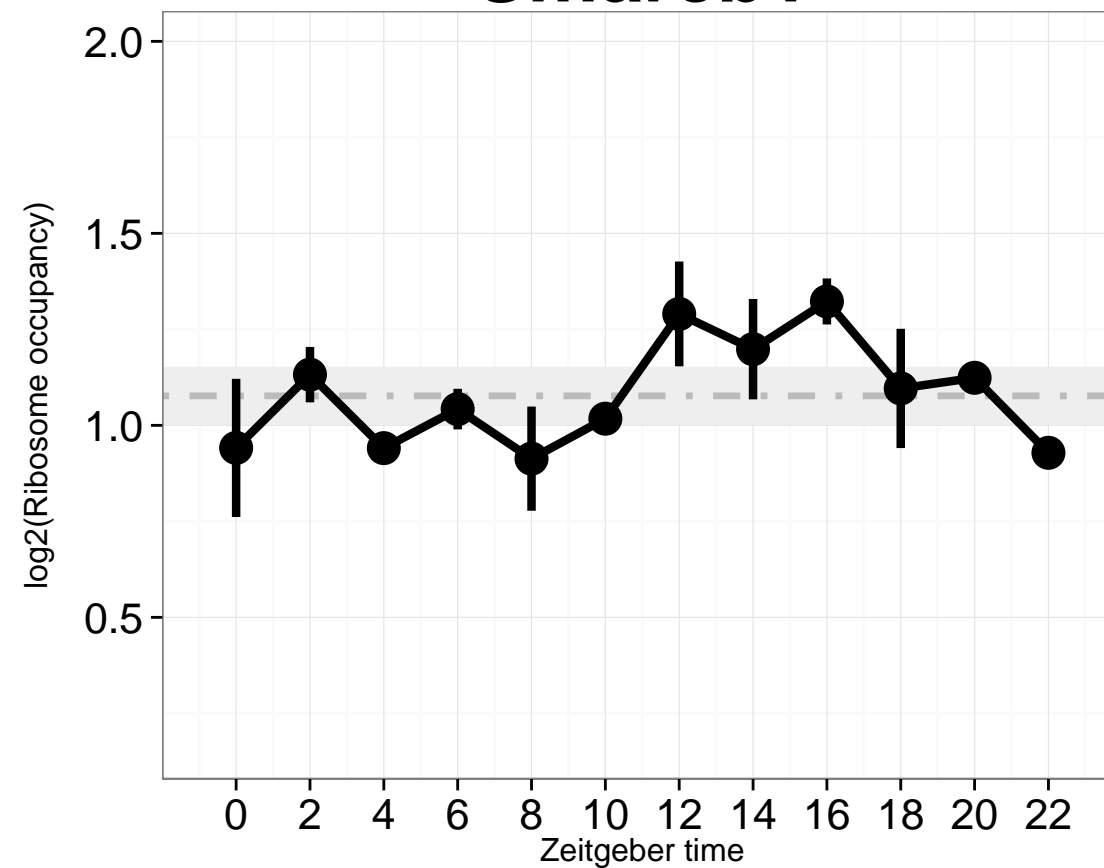

Supplement: Supplementary file 6771 [file 1]

## Phb

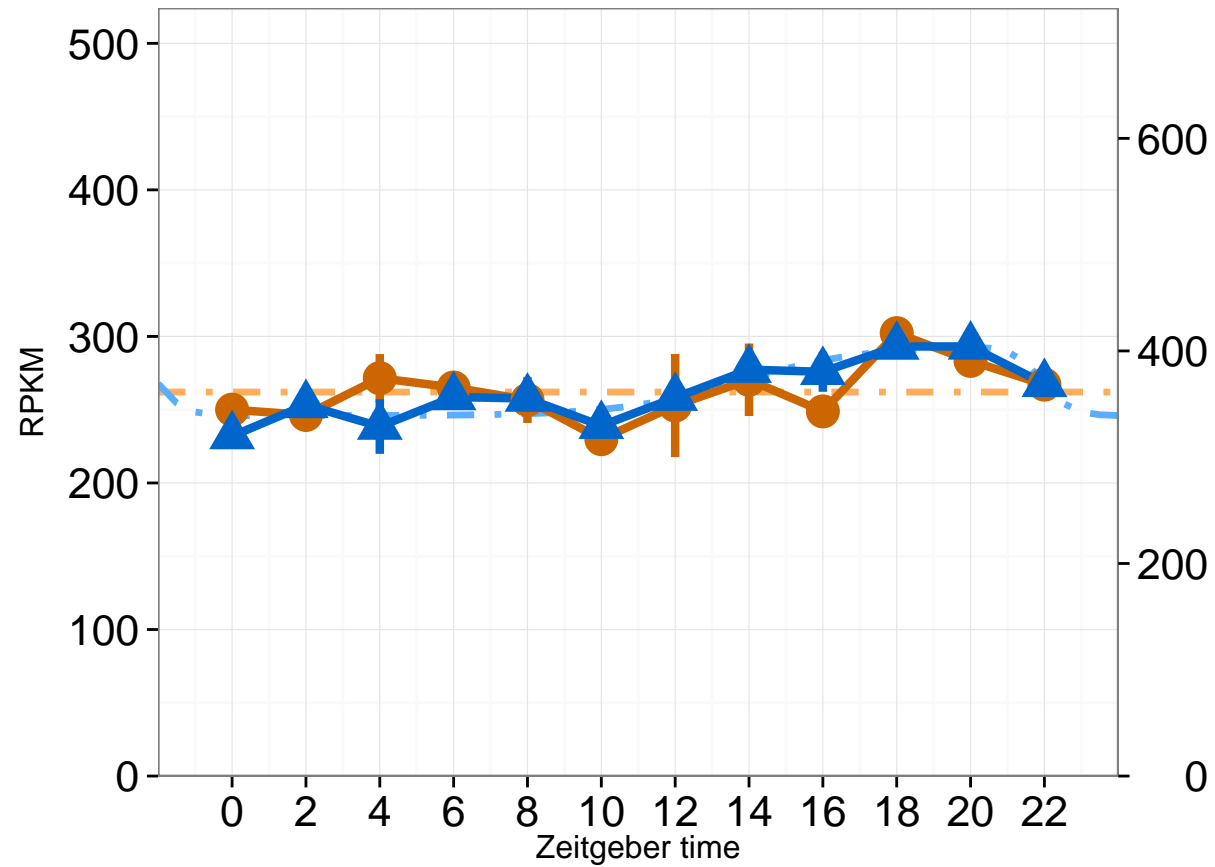

## Phb

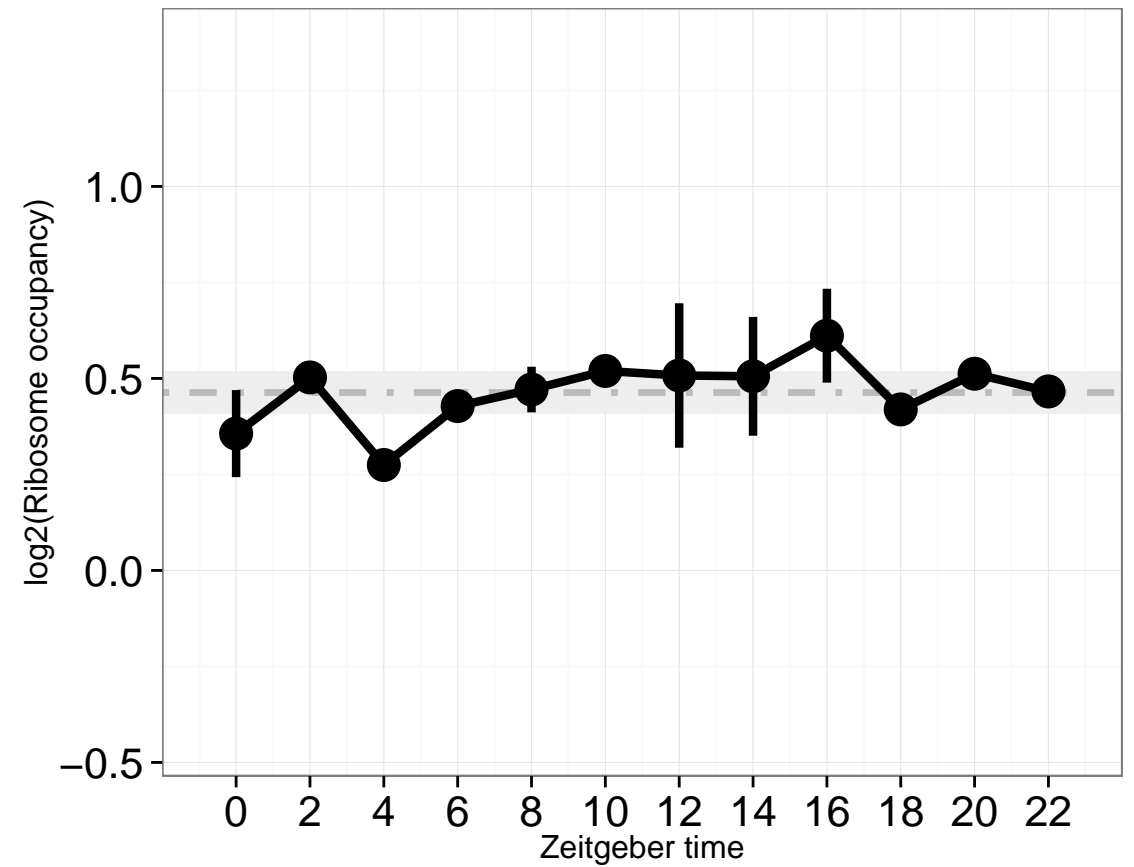

Supplement: Supplementary file 6772 [file 1]

## Dexi

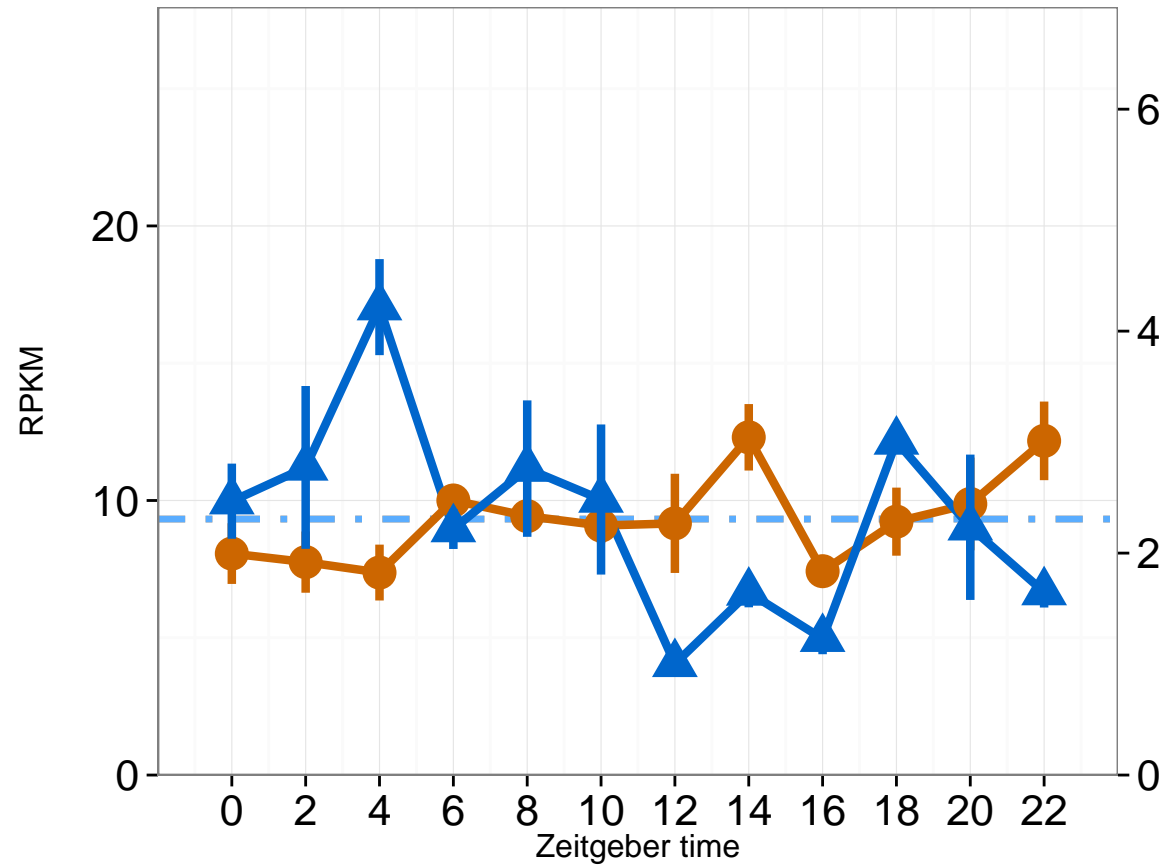

## Dexi

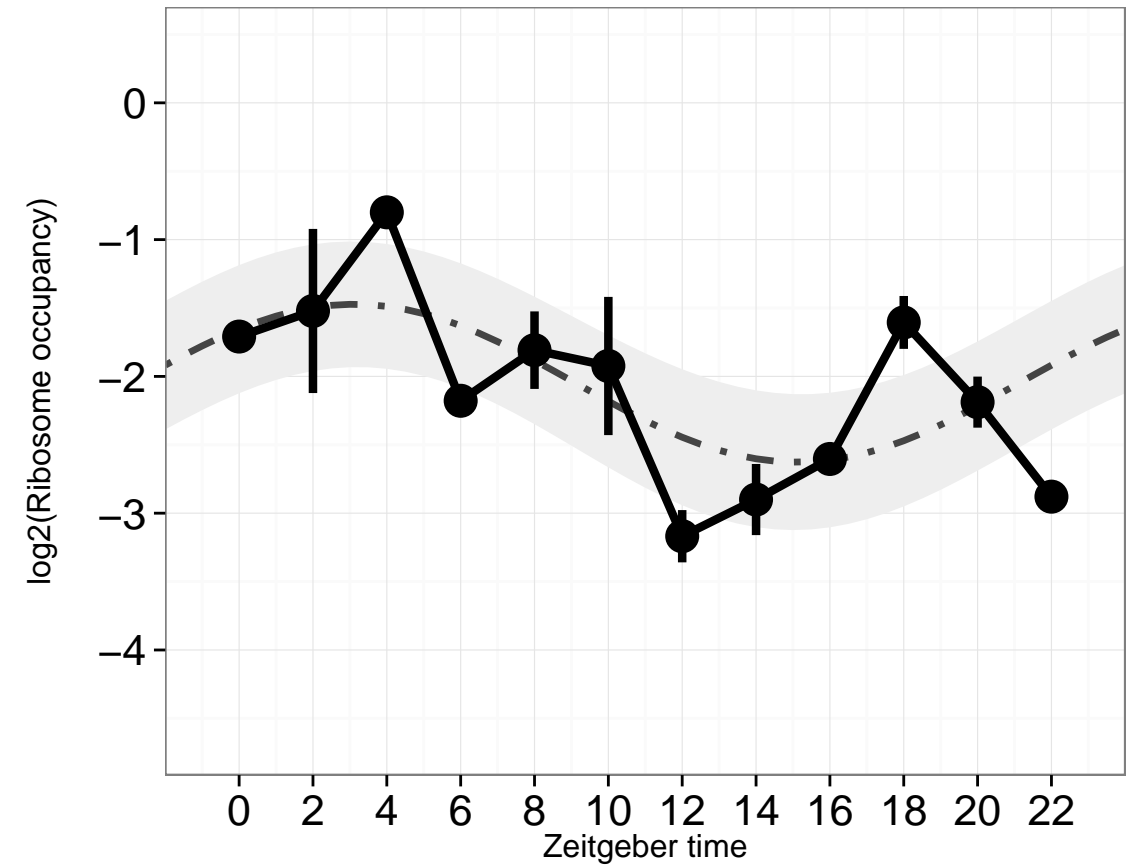

Supplement: Supplementary file 6773 [file 1]

## Alas1

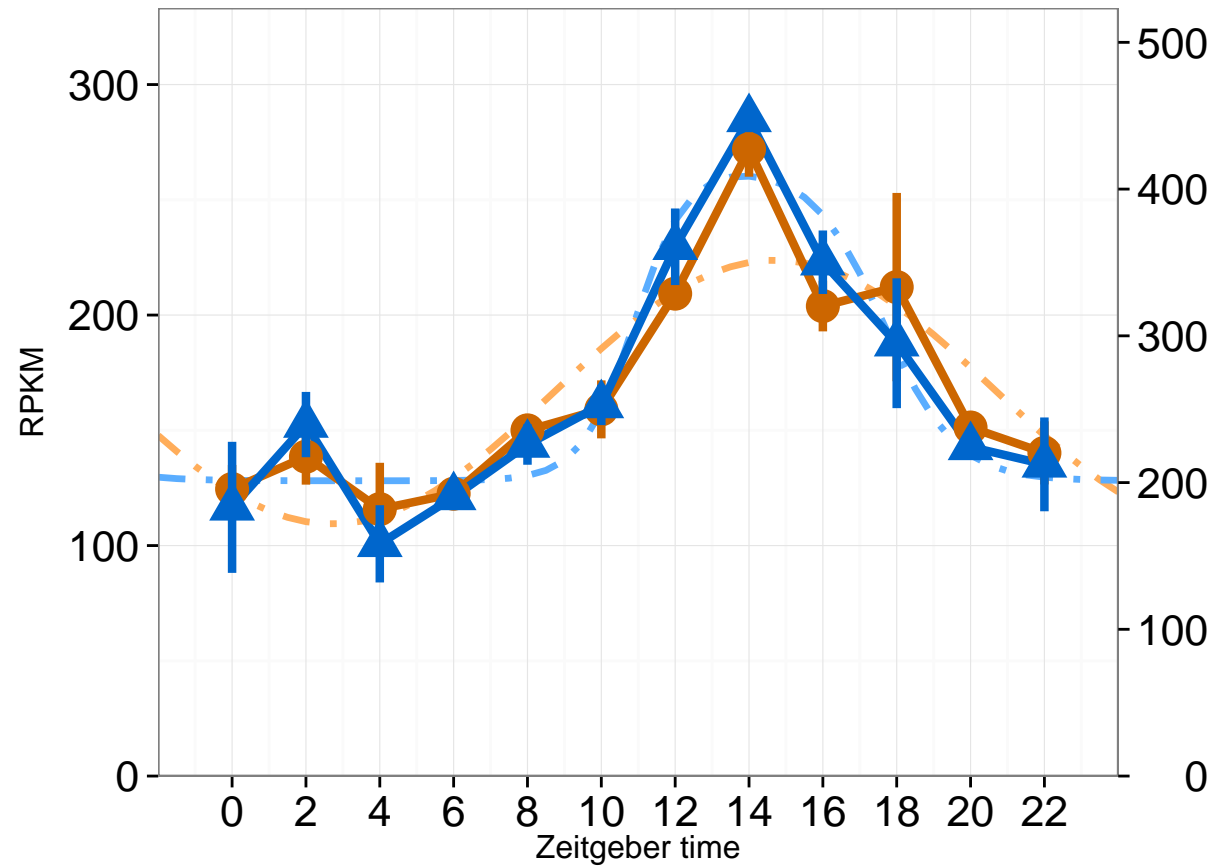

## Alas1

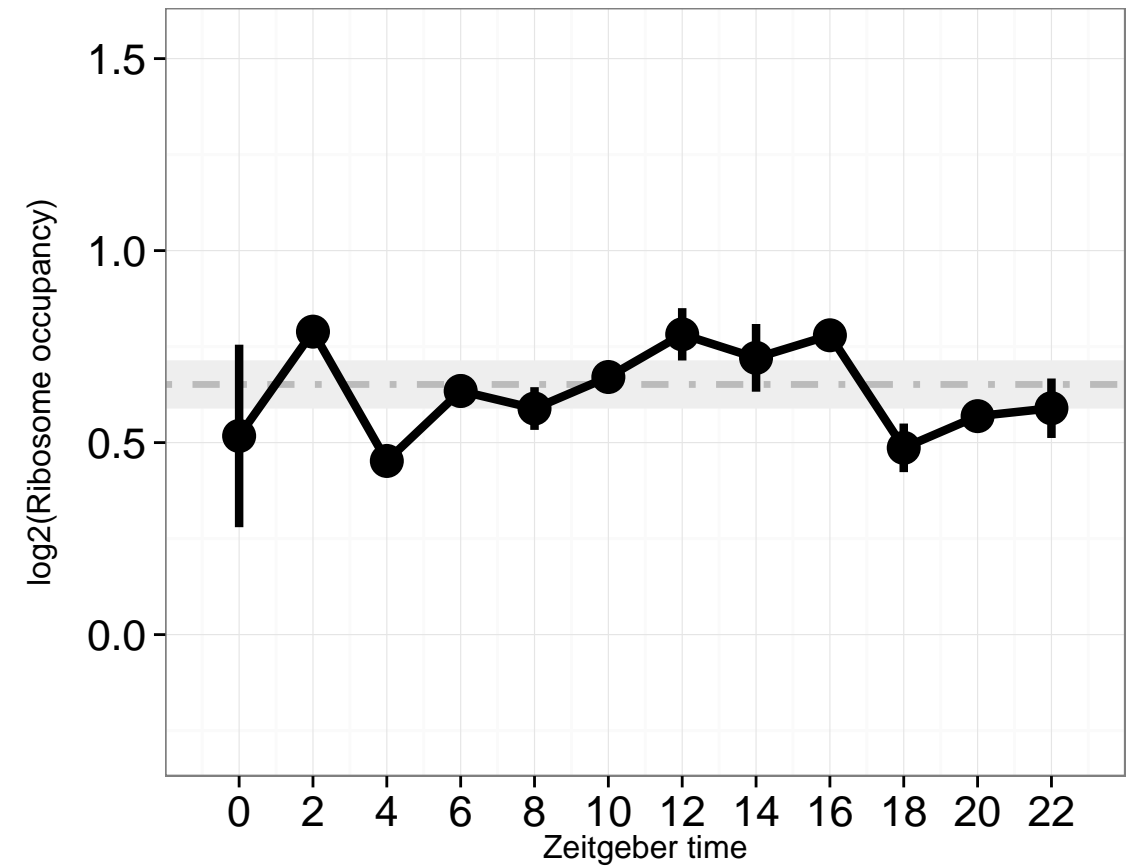

Supplement: Supplementary file 6774 [file 1]

## Xrcc3

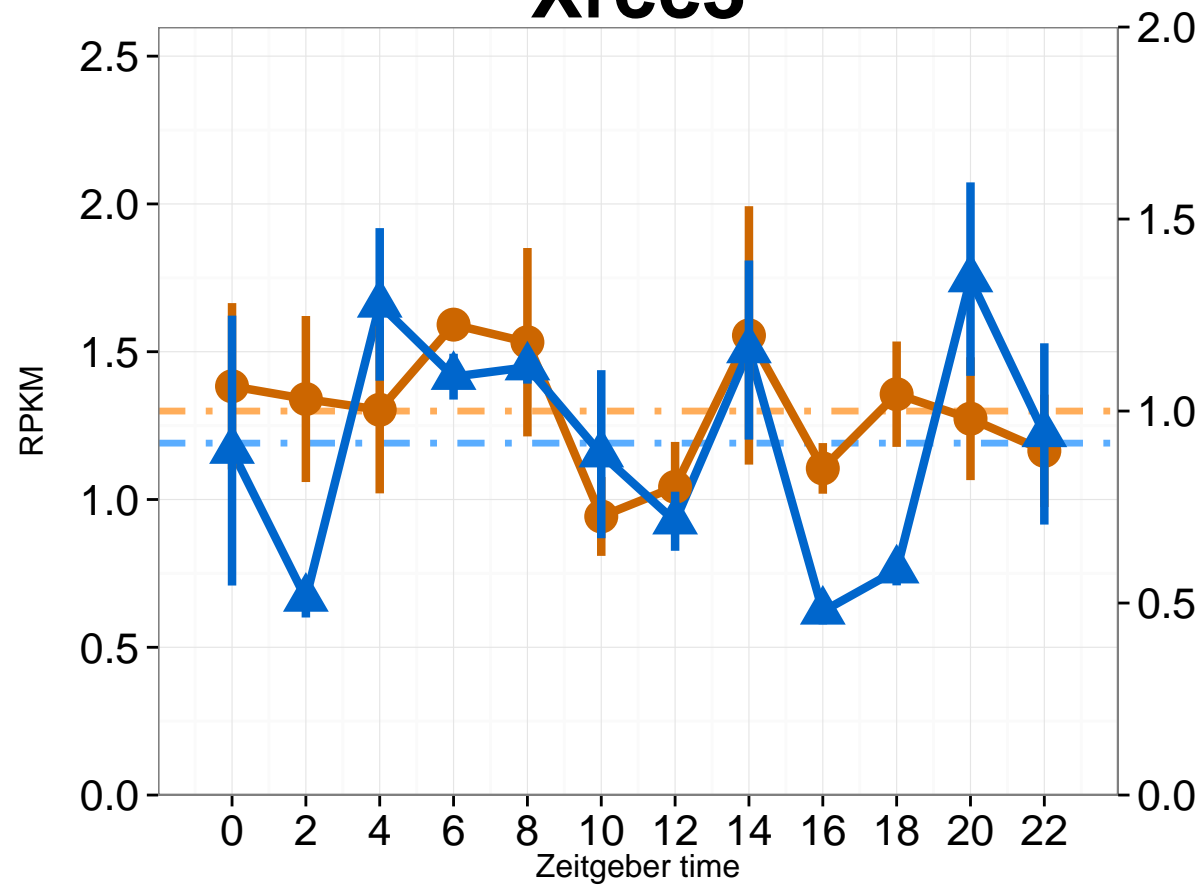

## Xrcc3

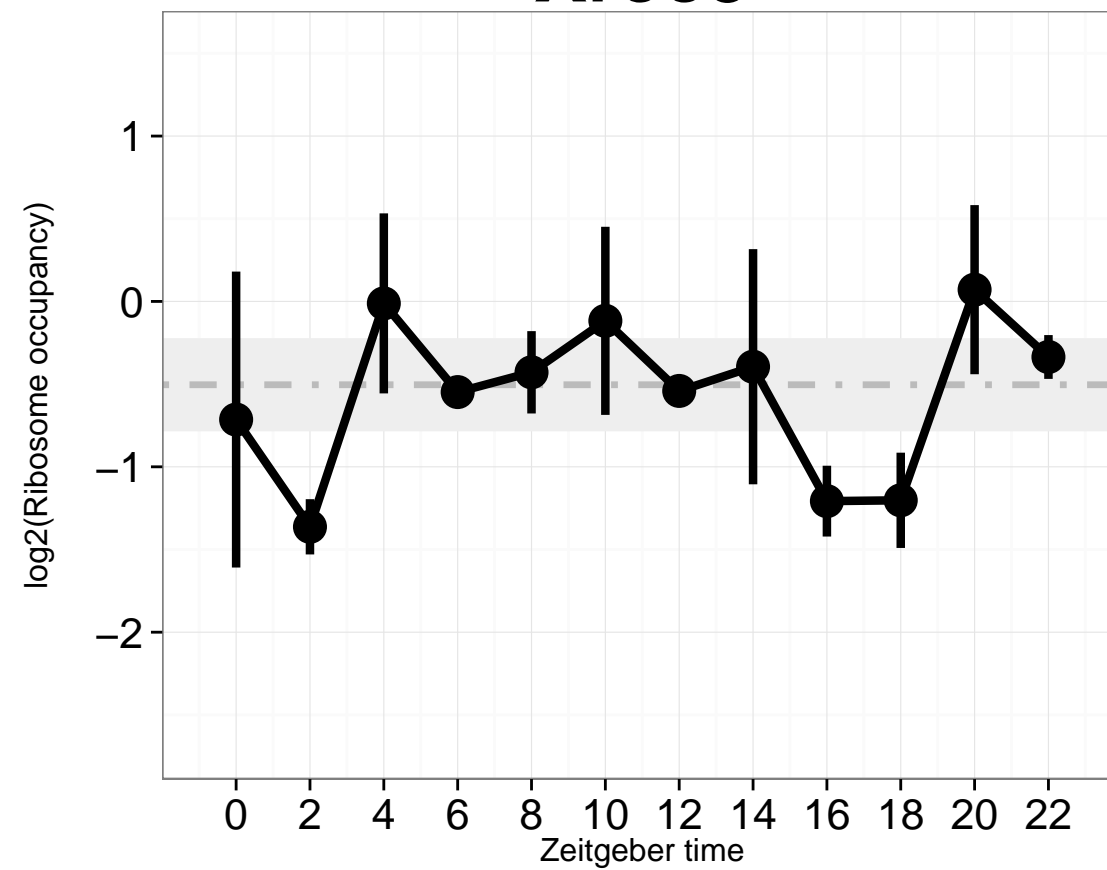

Supplement: Supplementary file 6775 [file 1]

# Fahd1

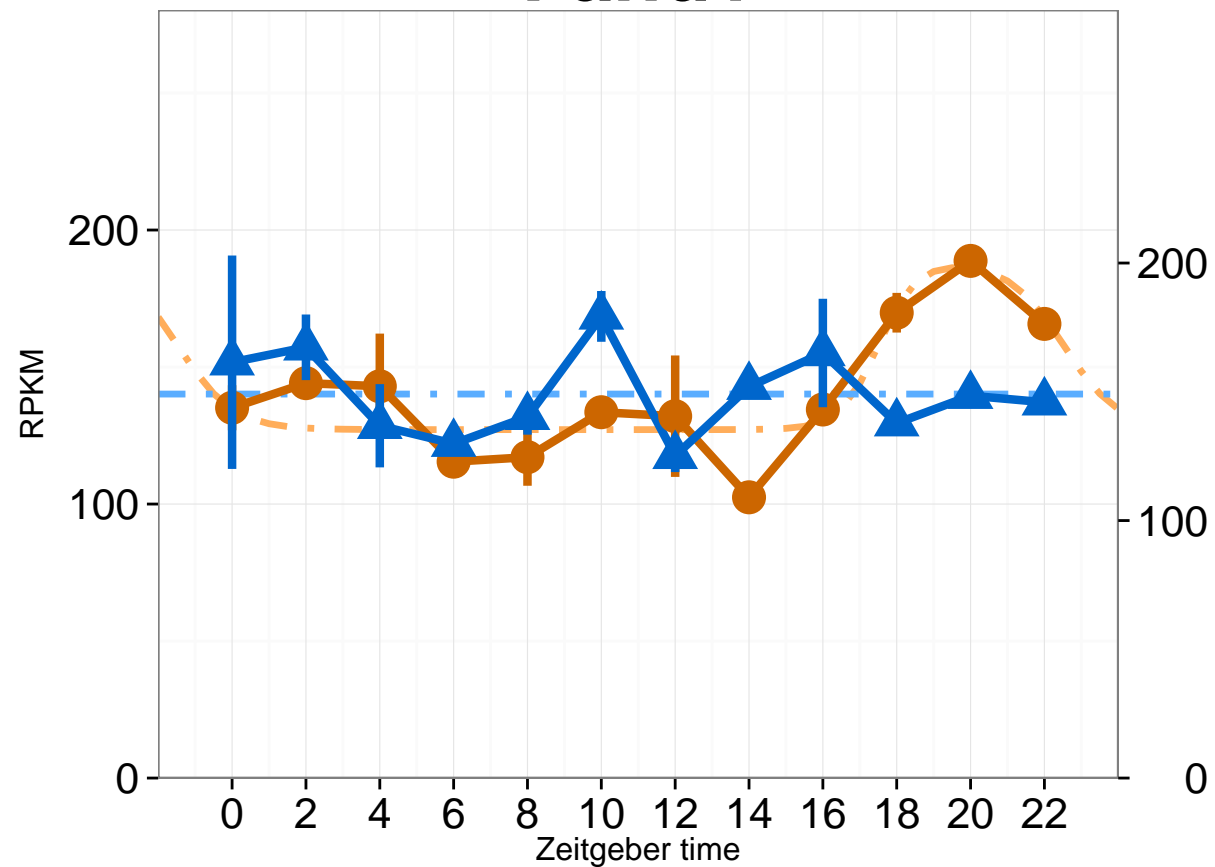

# Fahd1

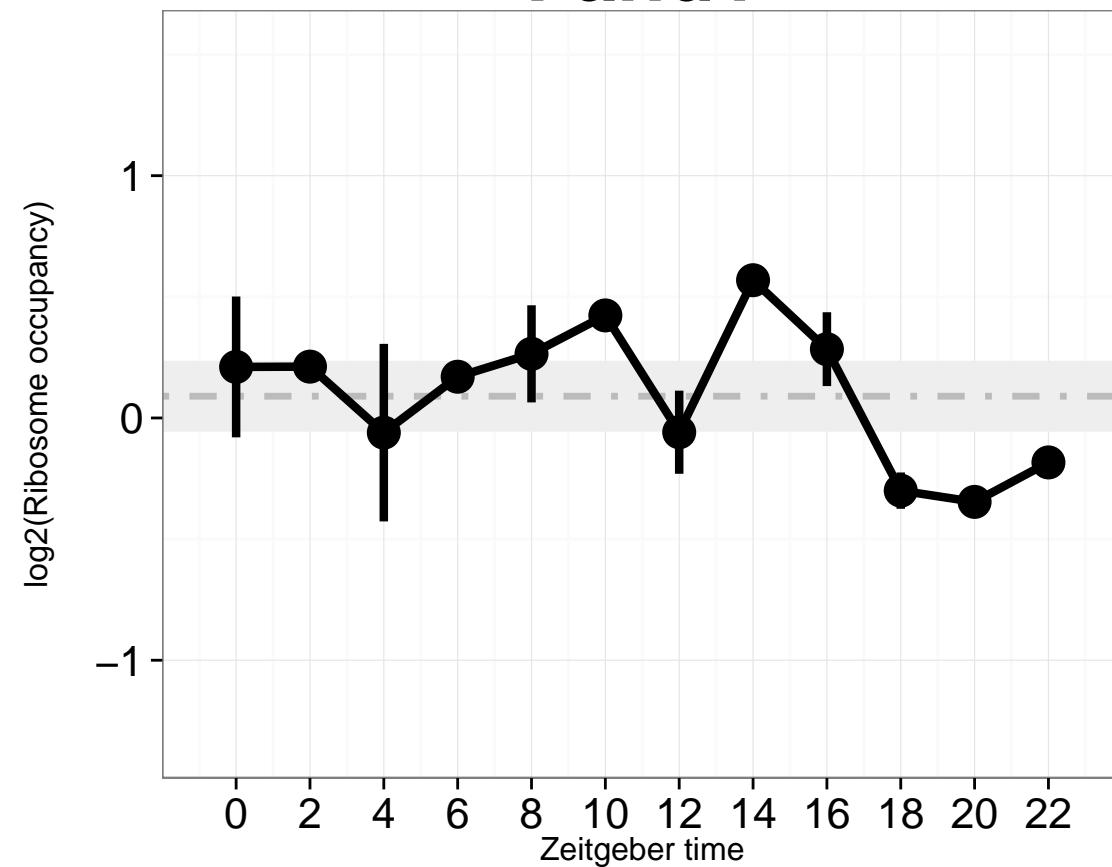

Supplement: Supplementary file 6776 [file 1]

## Tmem81

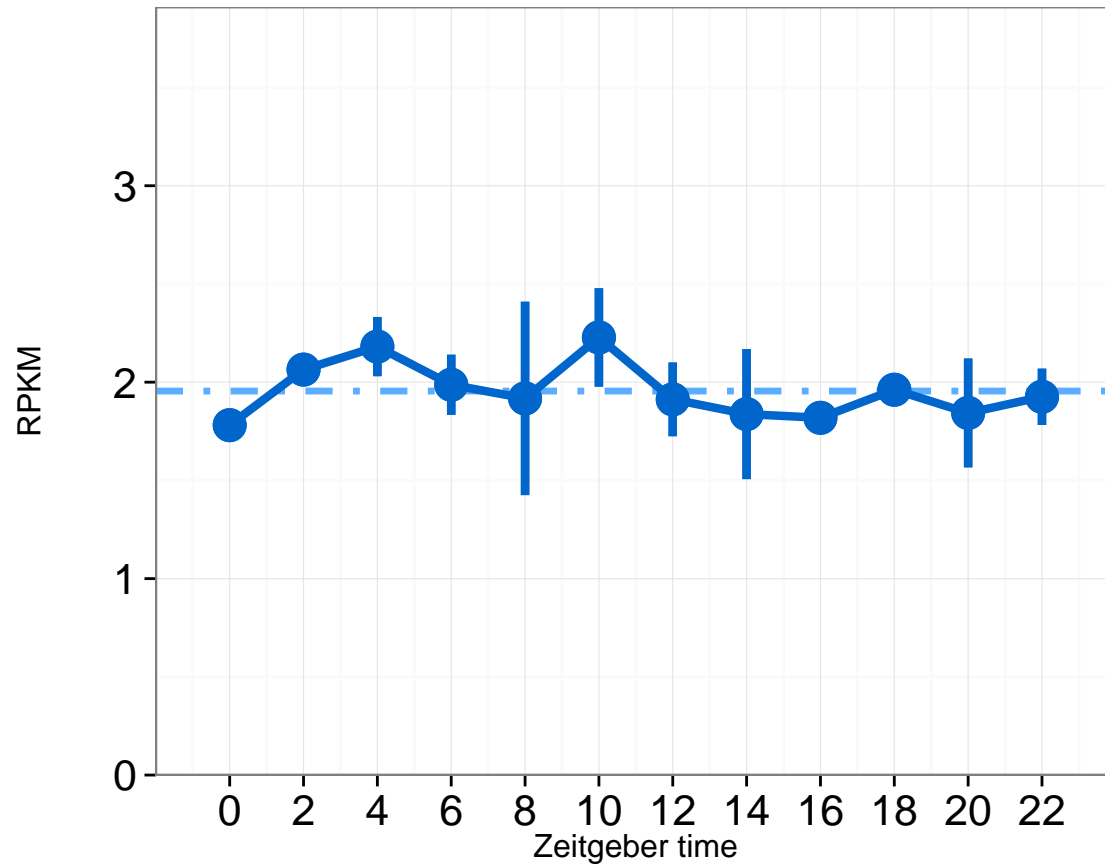

## Tmem81 log2(Ribosome occupanc

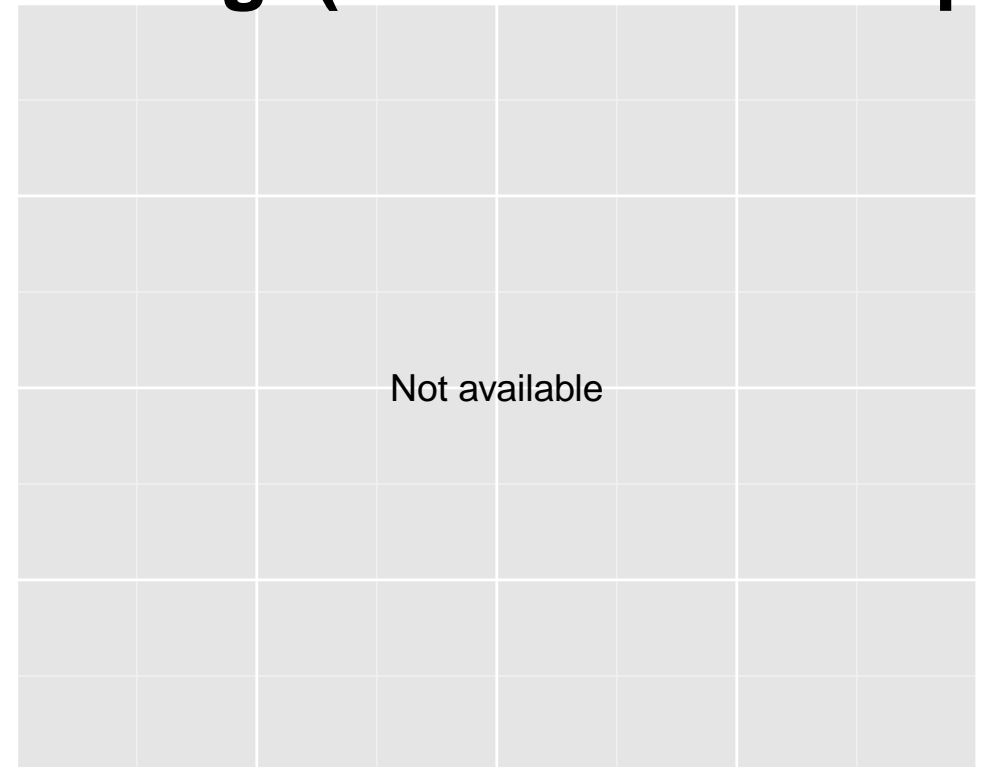

Supplement: Supplementary file 6777 [file 1]

## Scyl3

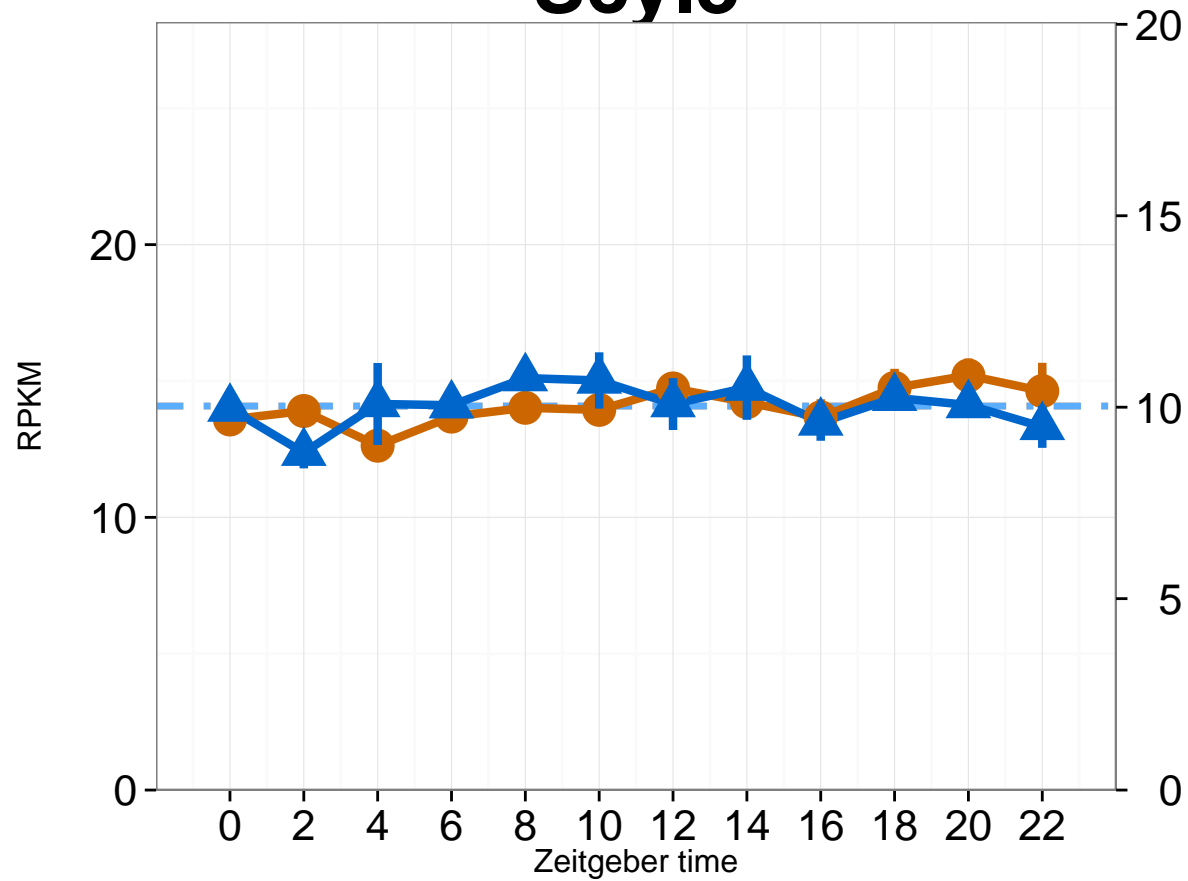

## Scyl3

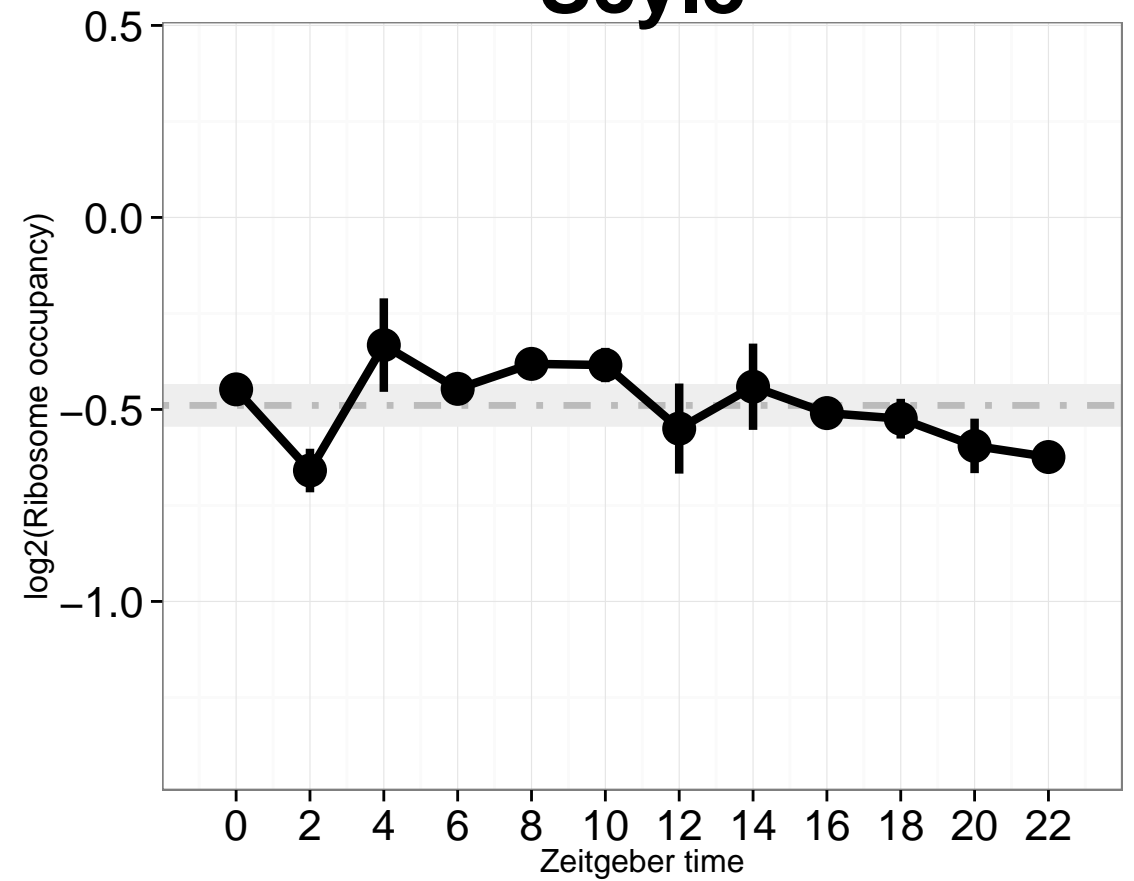

Supplement: Supplementary file 6778 [file 1]

# Gtf3c3

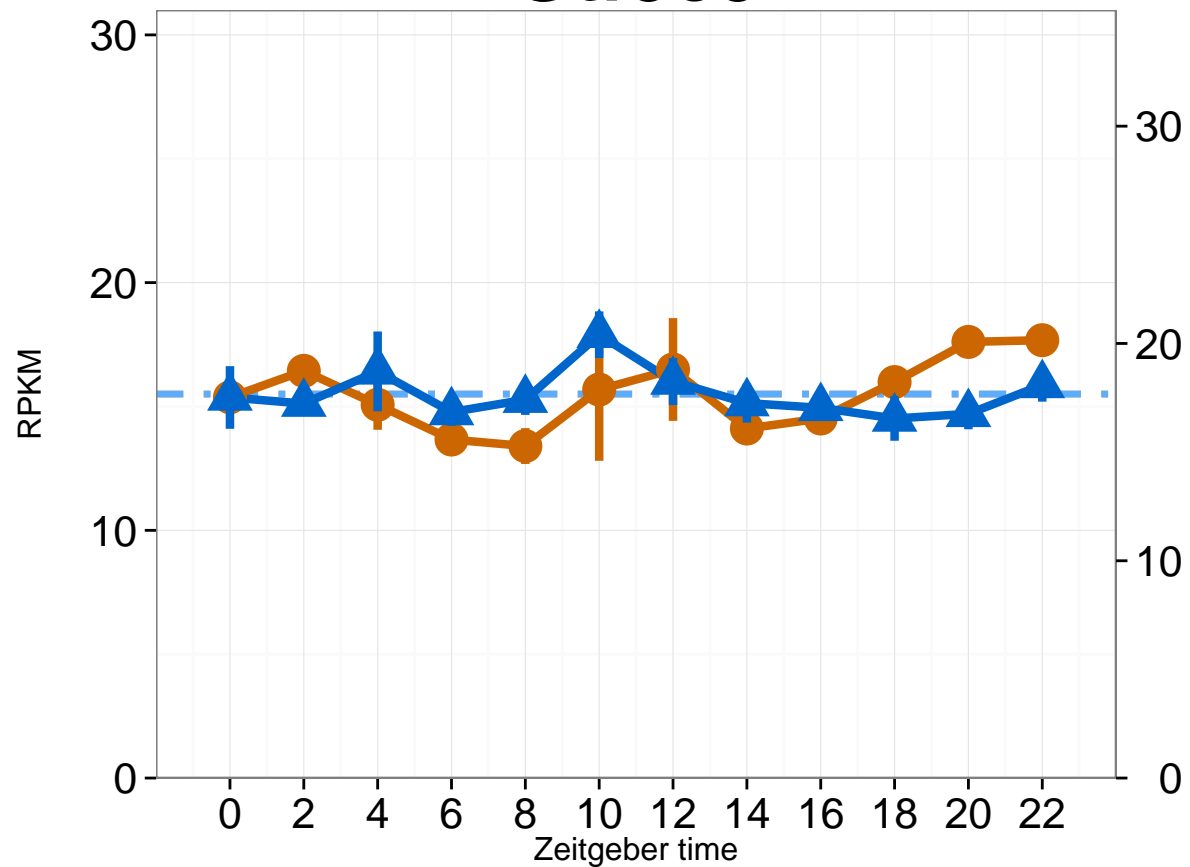

# Gtf3c3

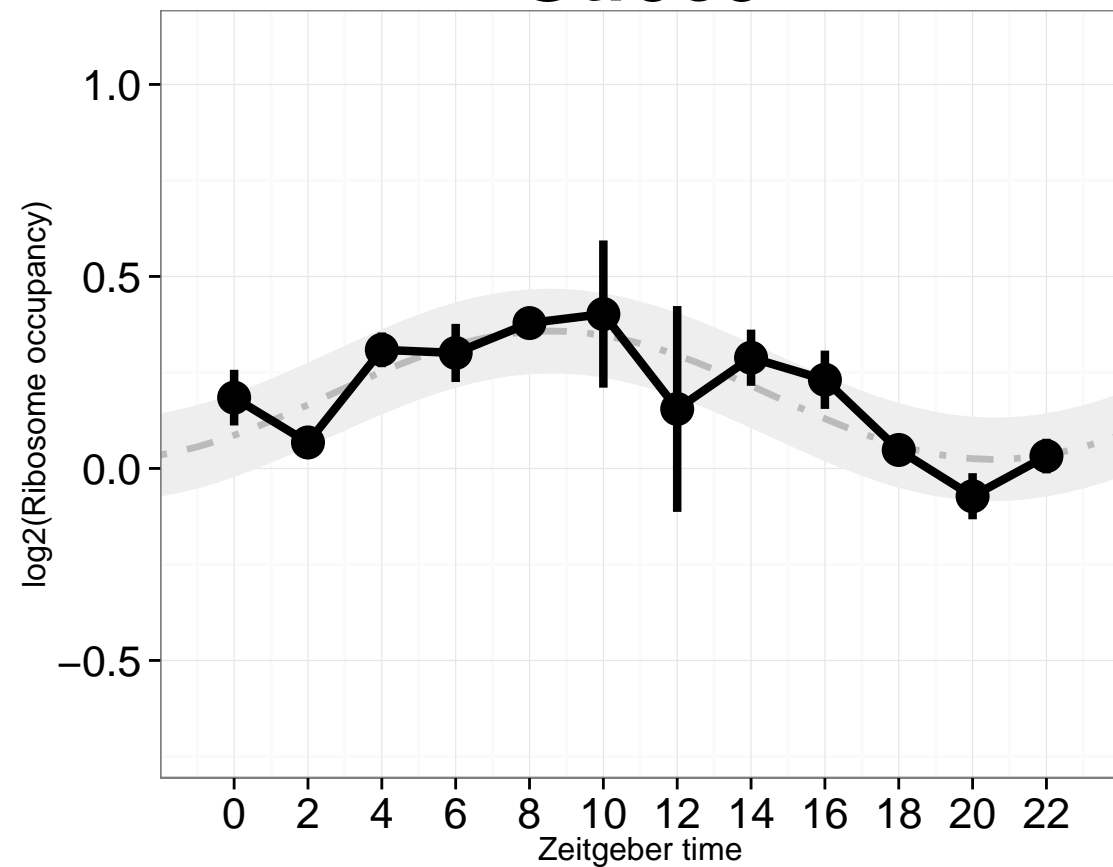

Supplement: Supplementary file 6779 [file 1]

# Lrrc8c

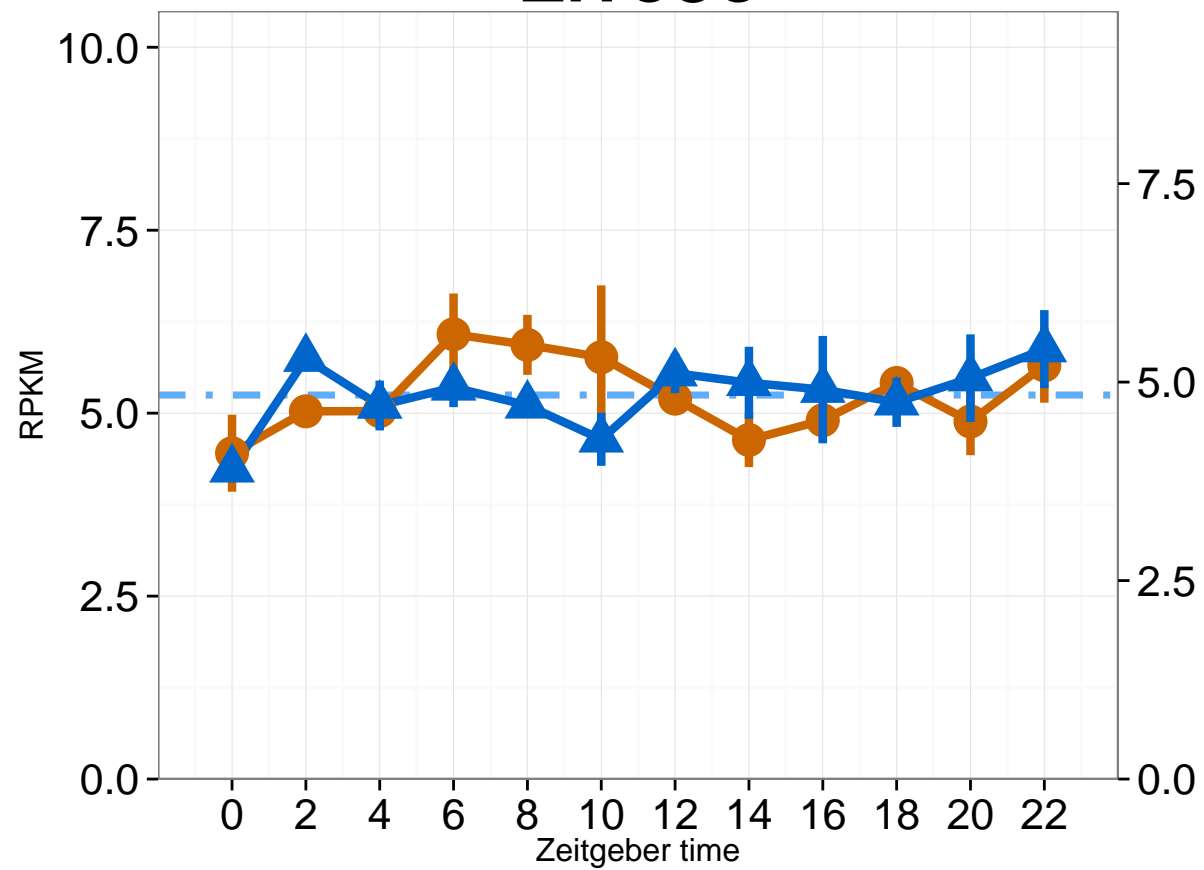

# Lrrc8c

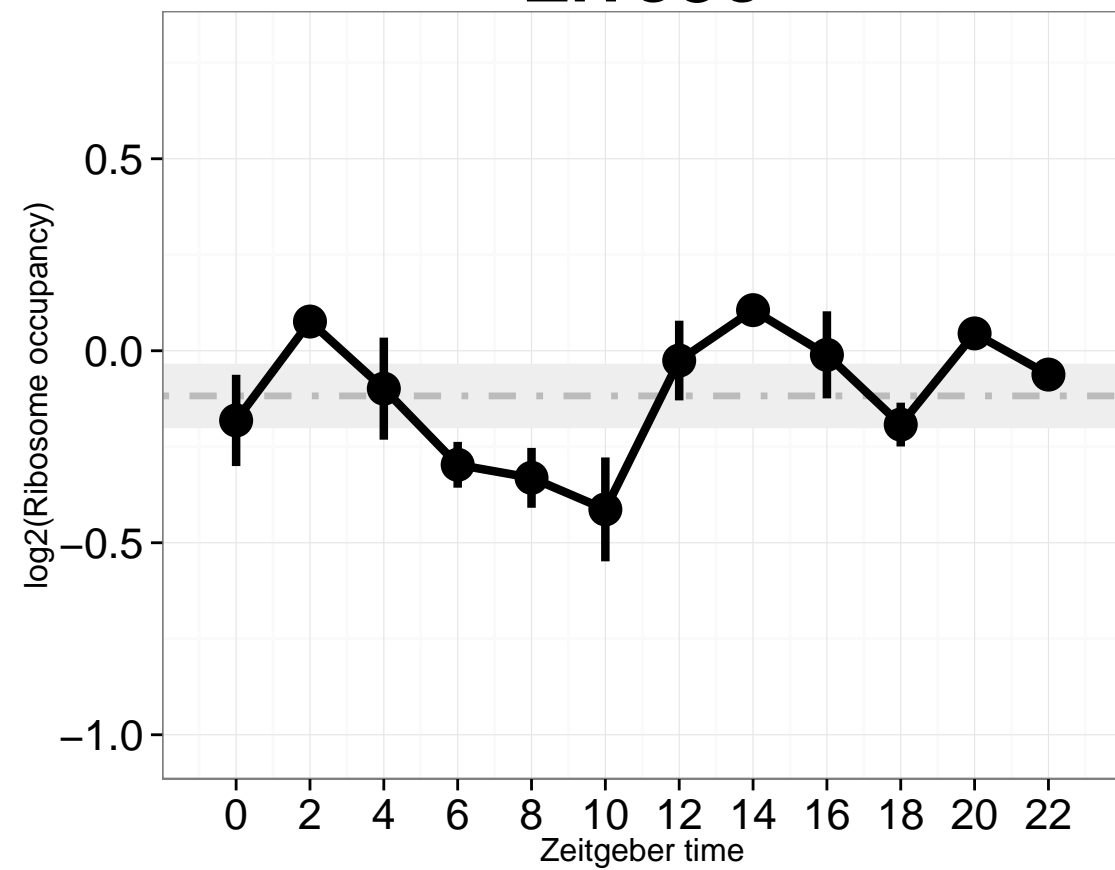

Supplement: Supplementary file 6780 [file 1]

## AU040320

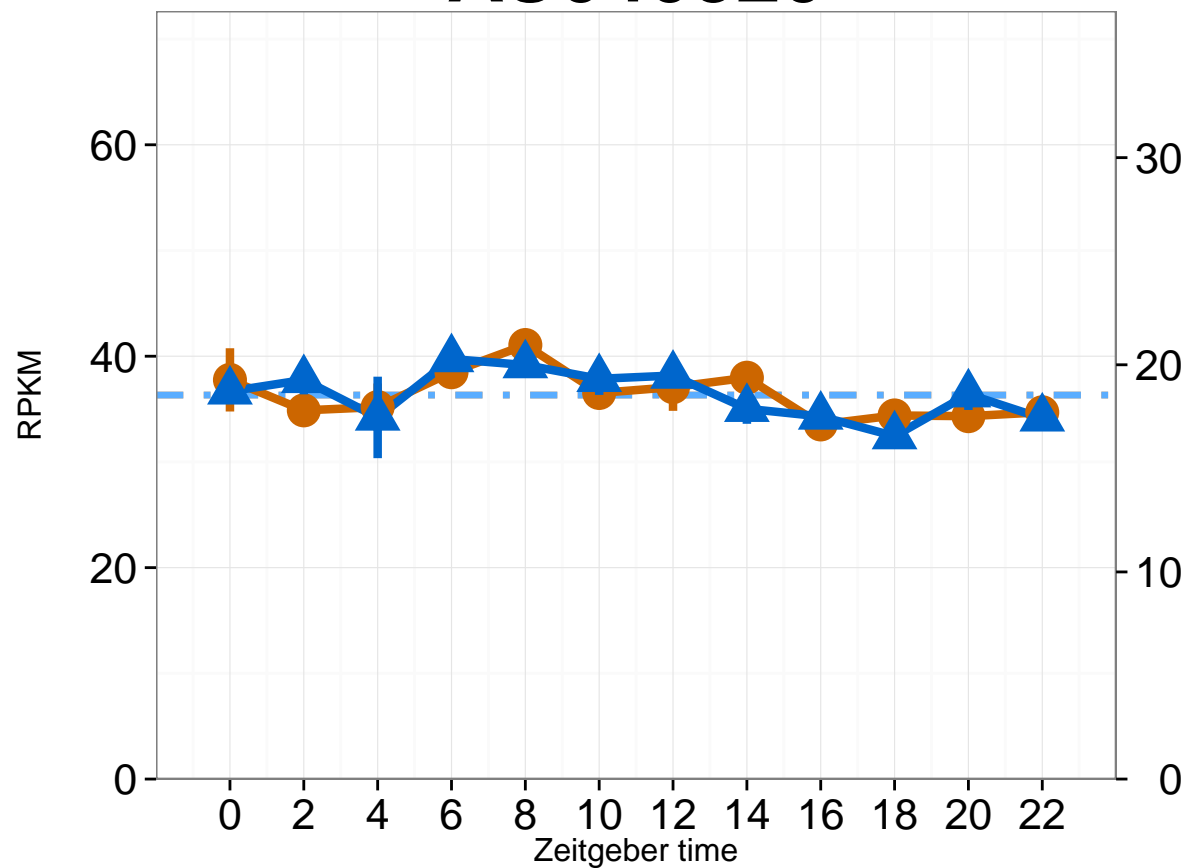

## AU040320

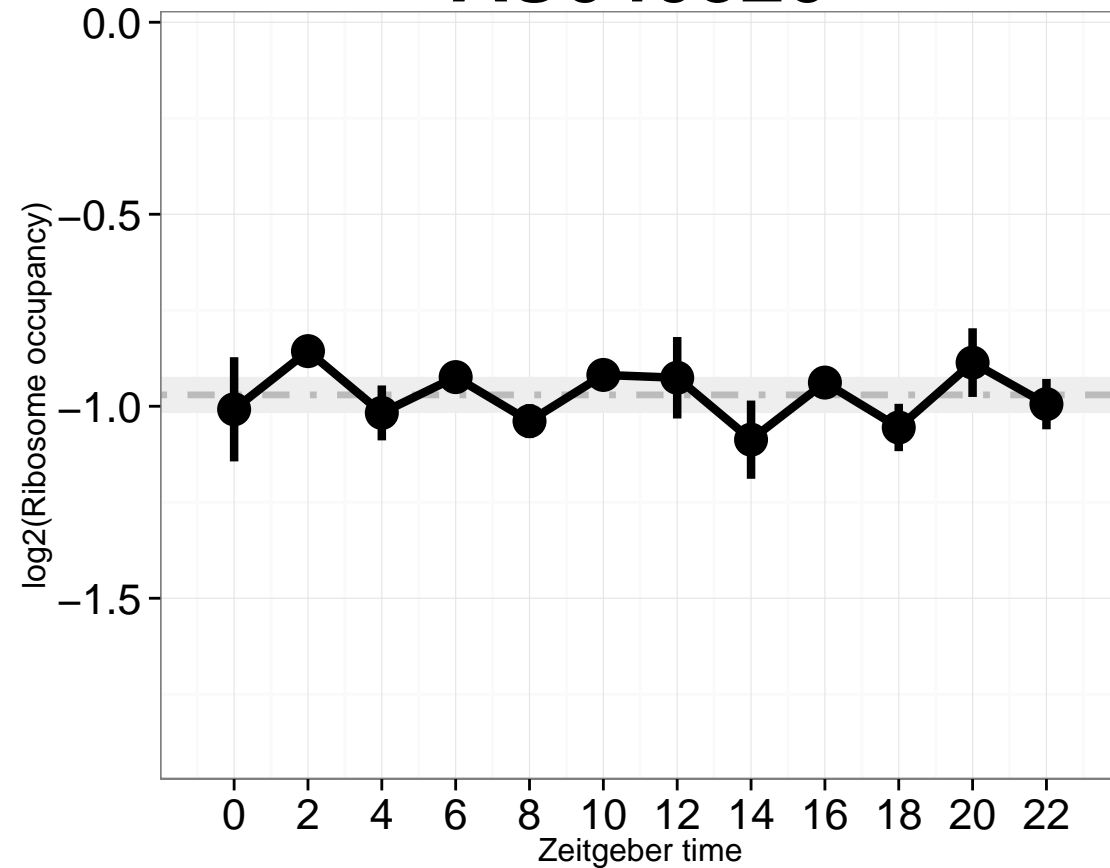

Supplement: Supplementary file 6781 [file 1]

**Jun**

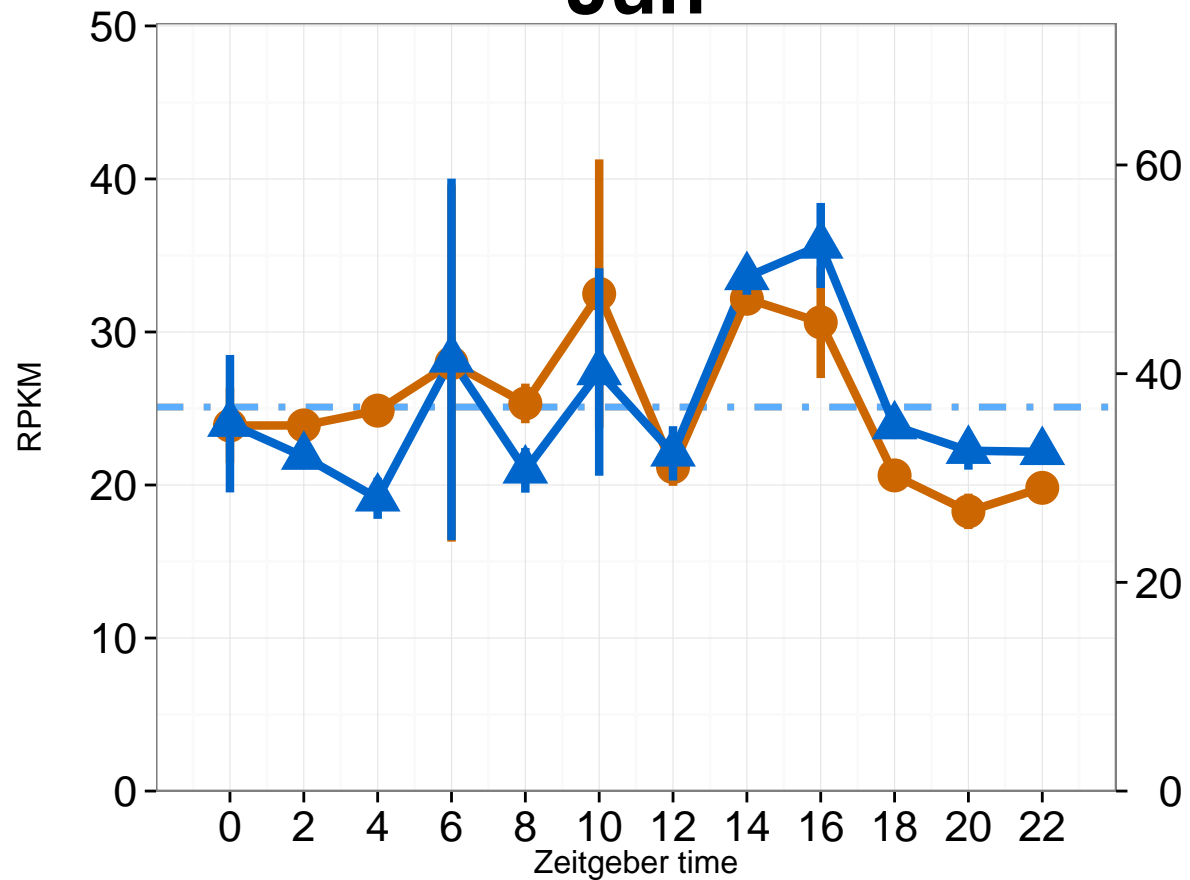

**Jun**

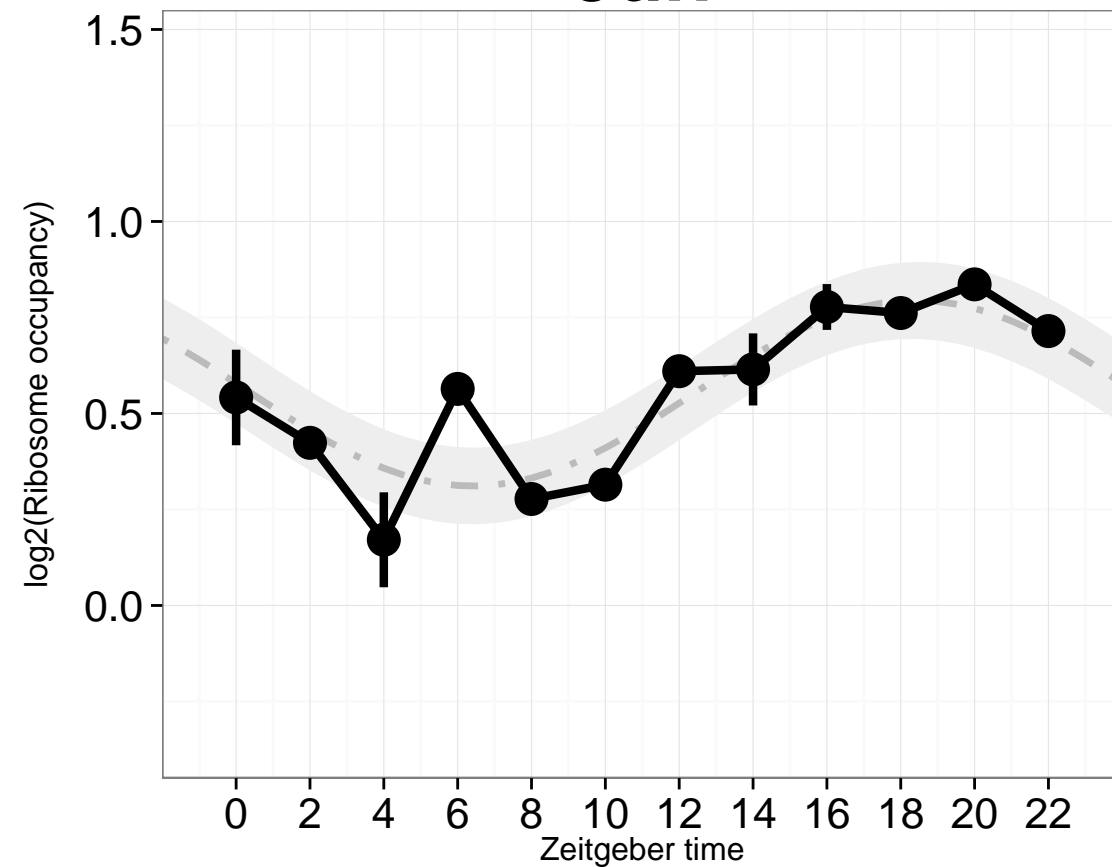

Supplement: Supplementary file 6782 [file 1]

## D2hgdh

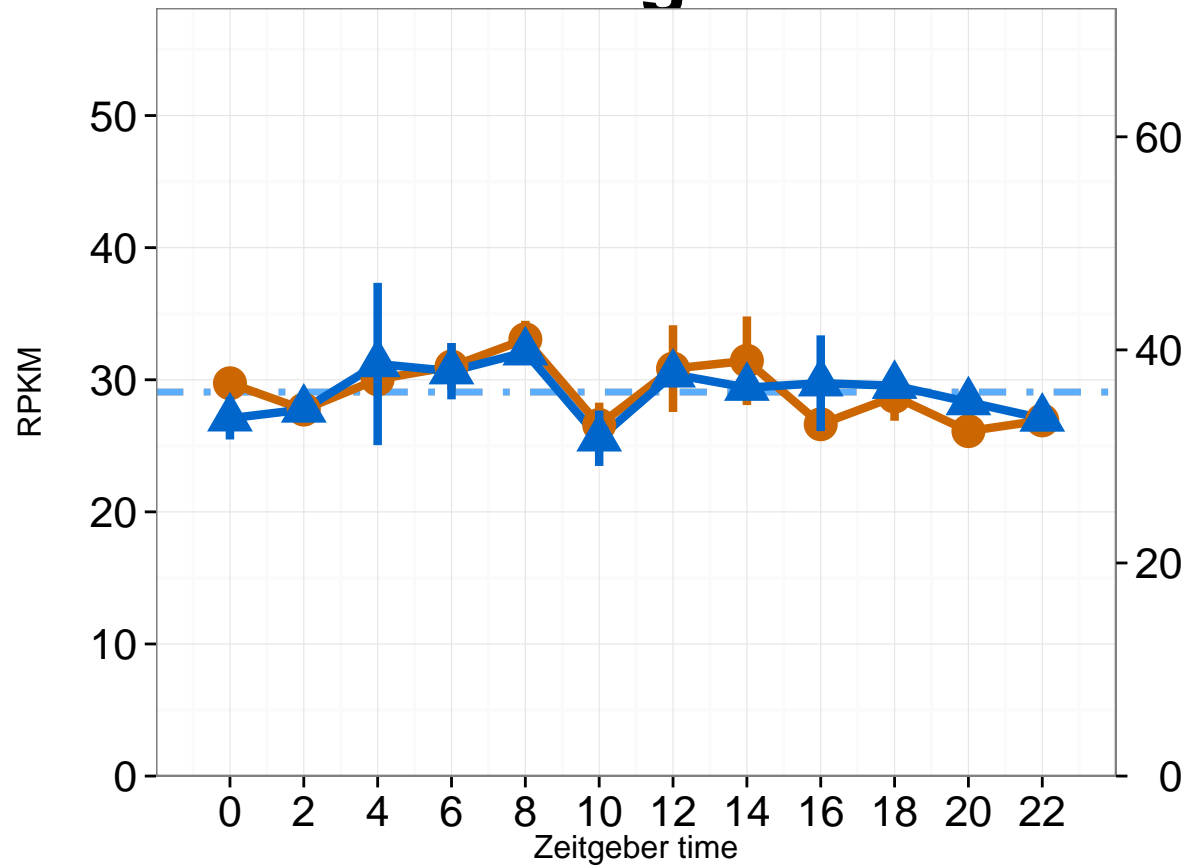

## D2hgdh

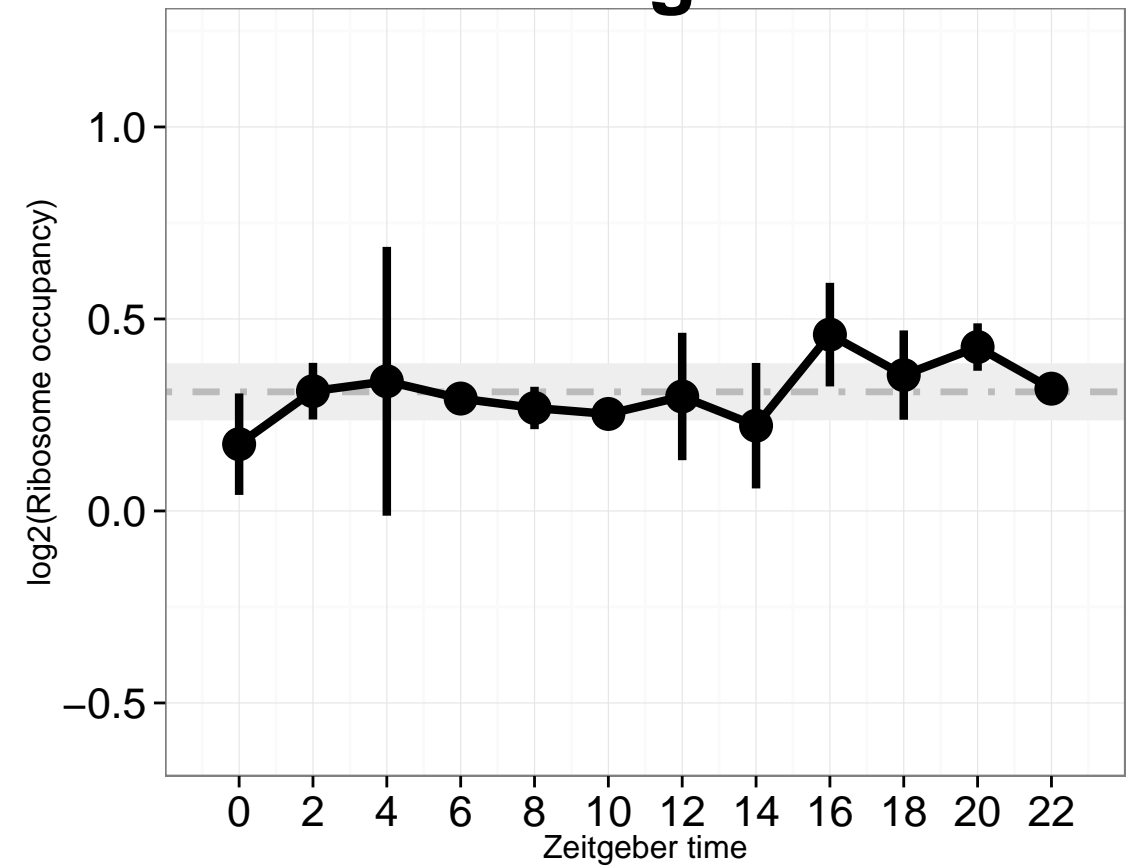

Supplement: Supplementary file 6783 [file 1]

## Carkd

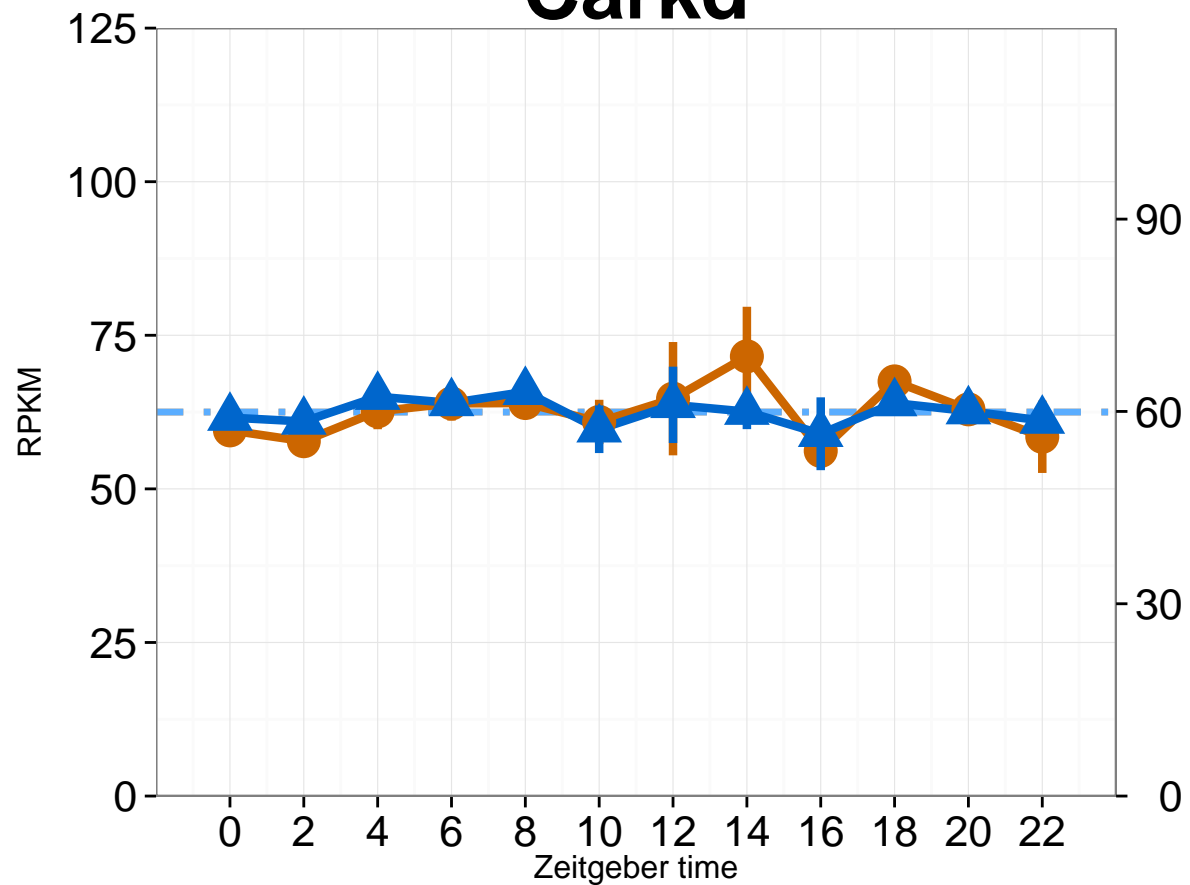

## Carkd

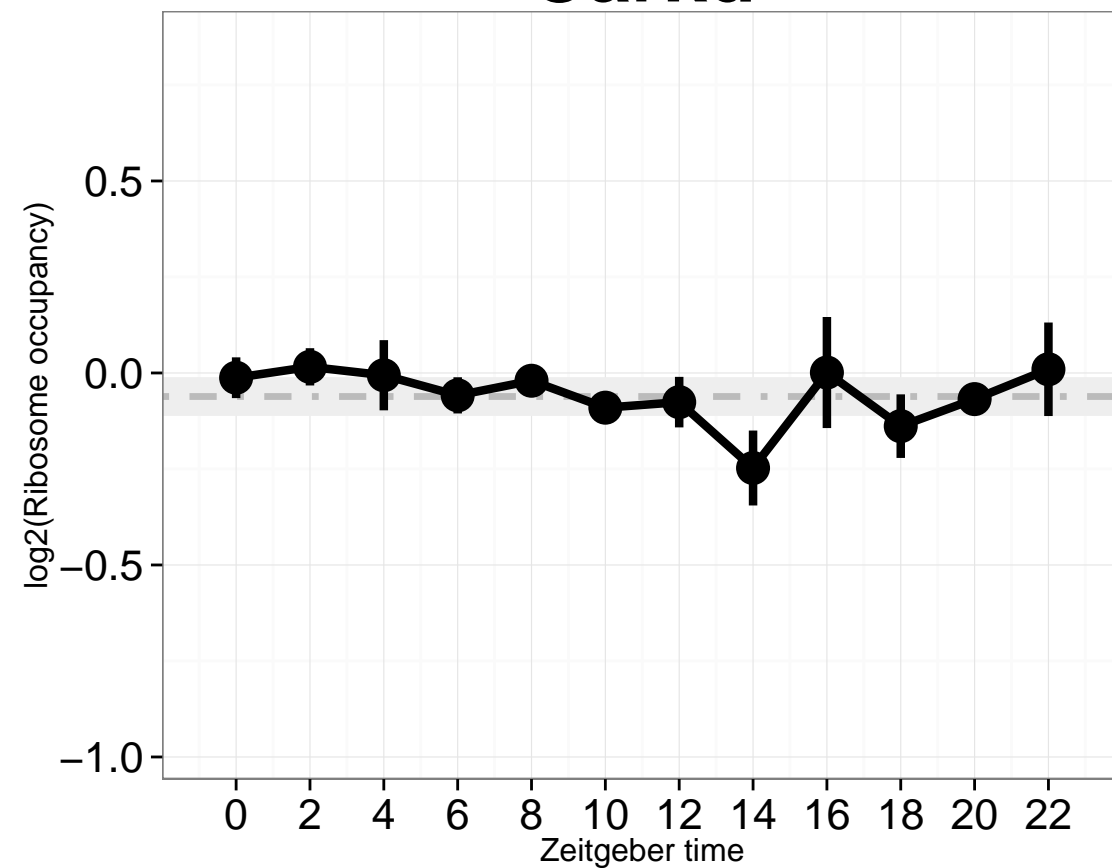

Supplement: Supplementary file 6784 [file 1]

# Rec8

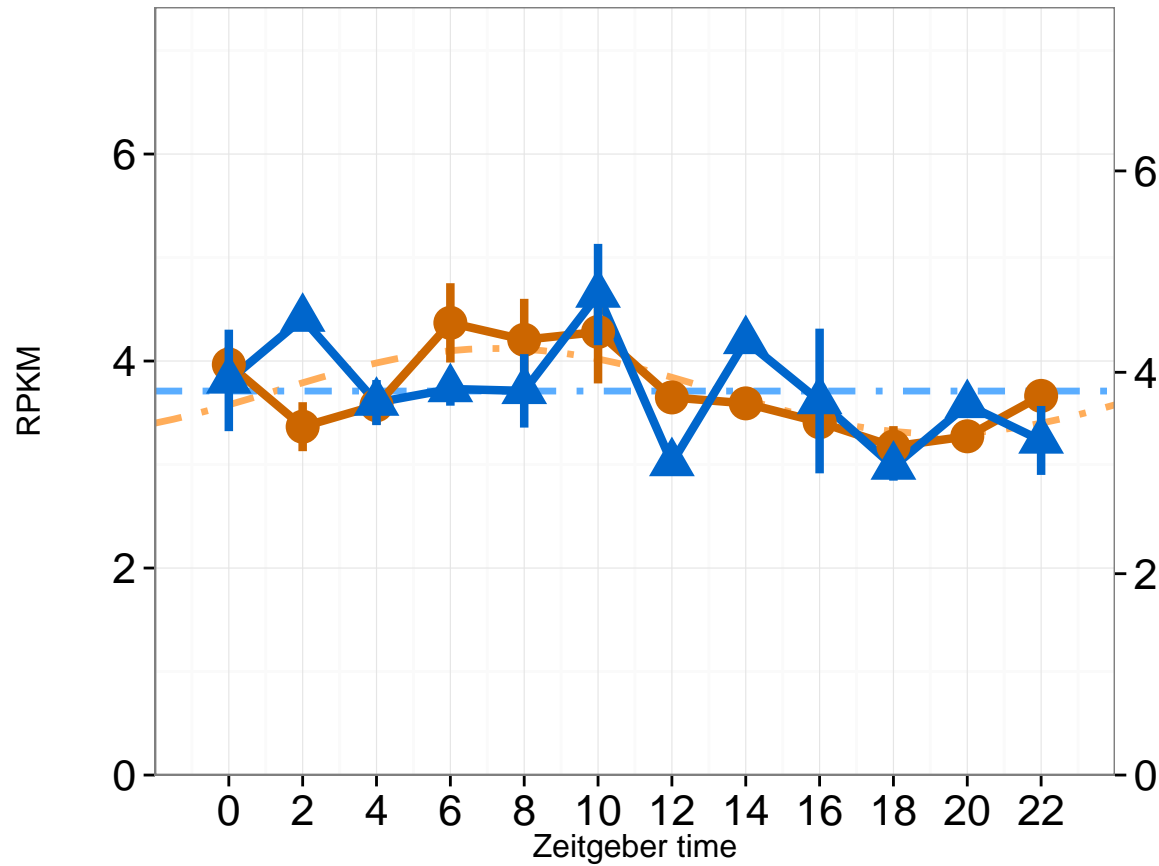

# Rec8

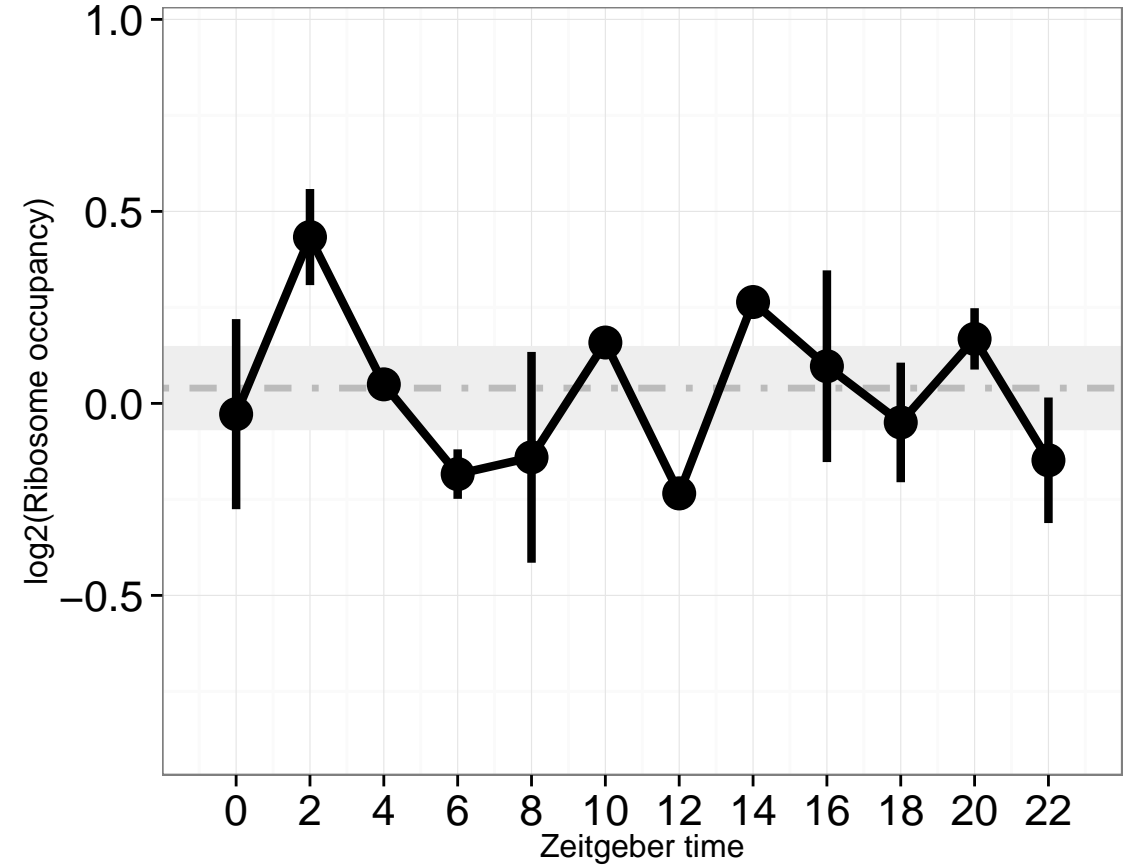

Supplement: Supplementary file 6785 [file 1]

# Slc51a

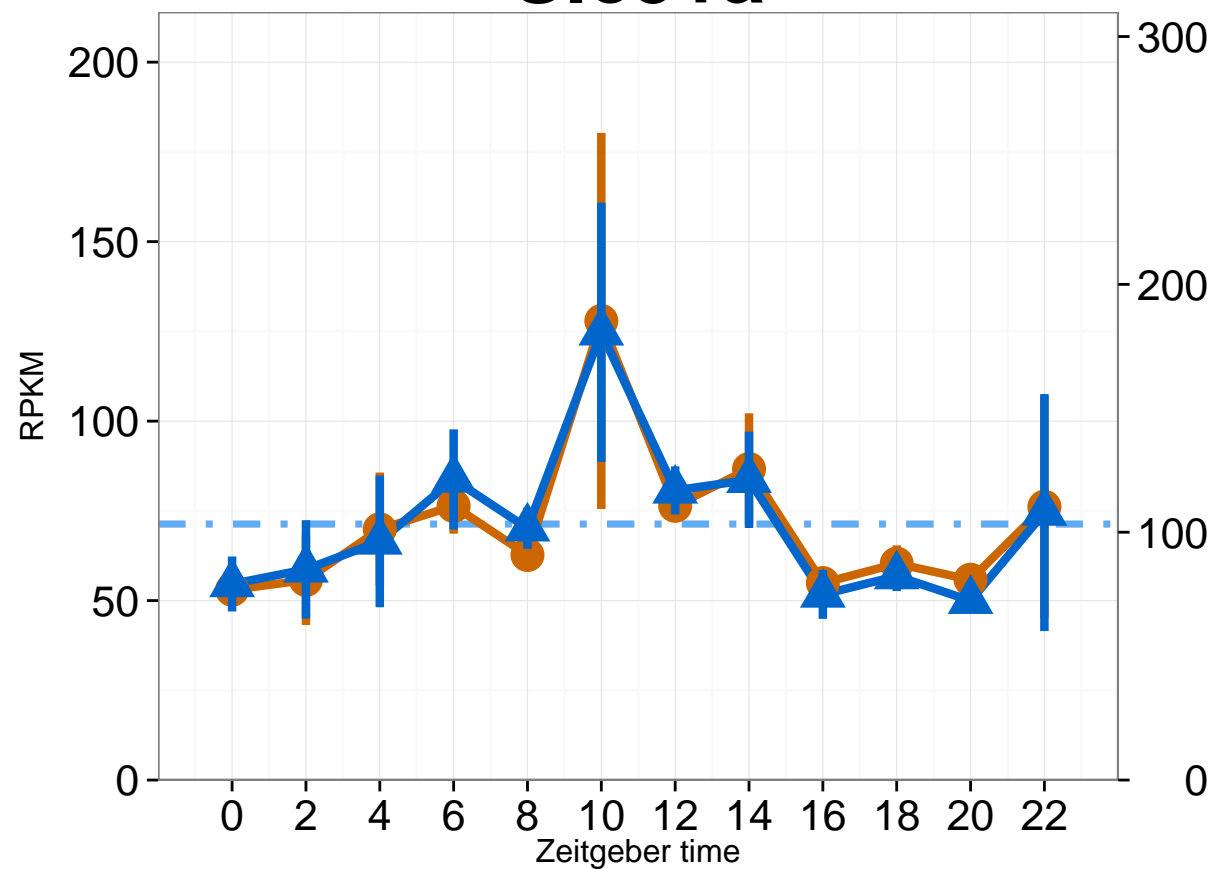

# Slc51a

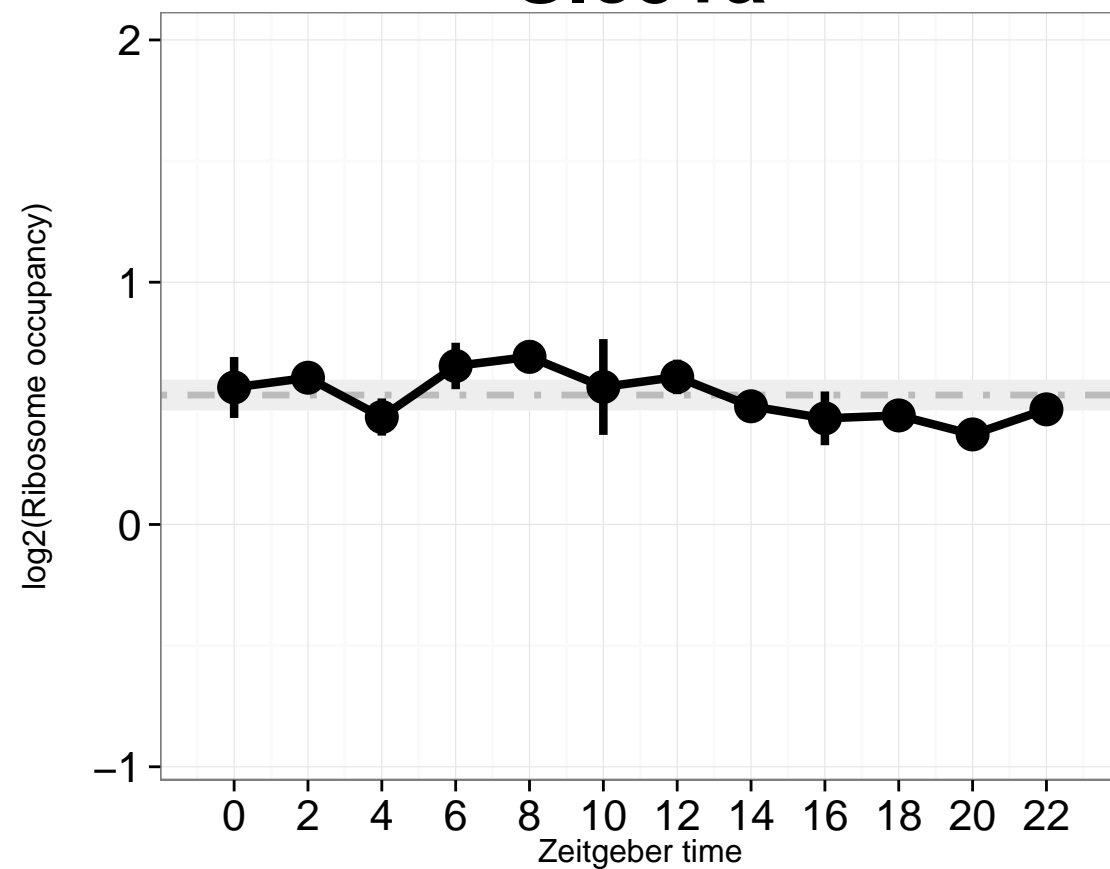

Supplement: Supplementary file 6786 [file 1]

# Wdr74

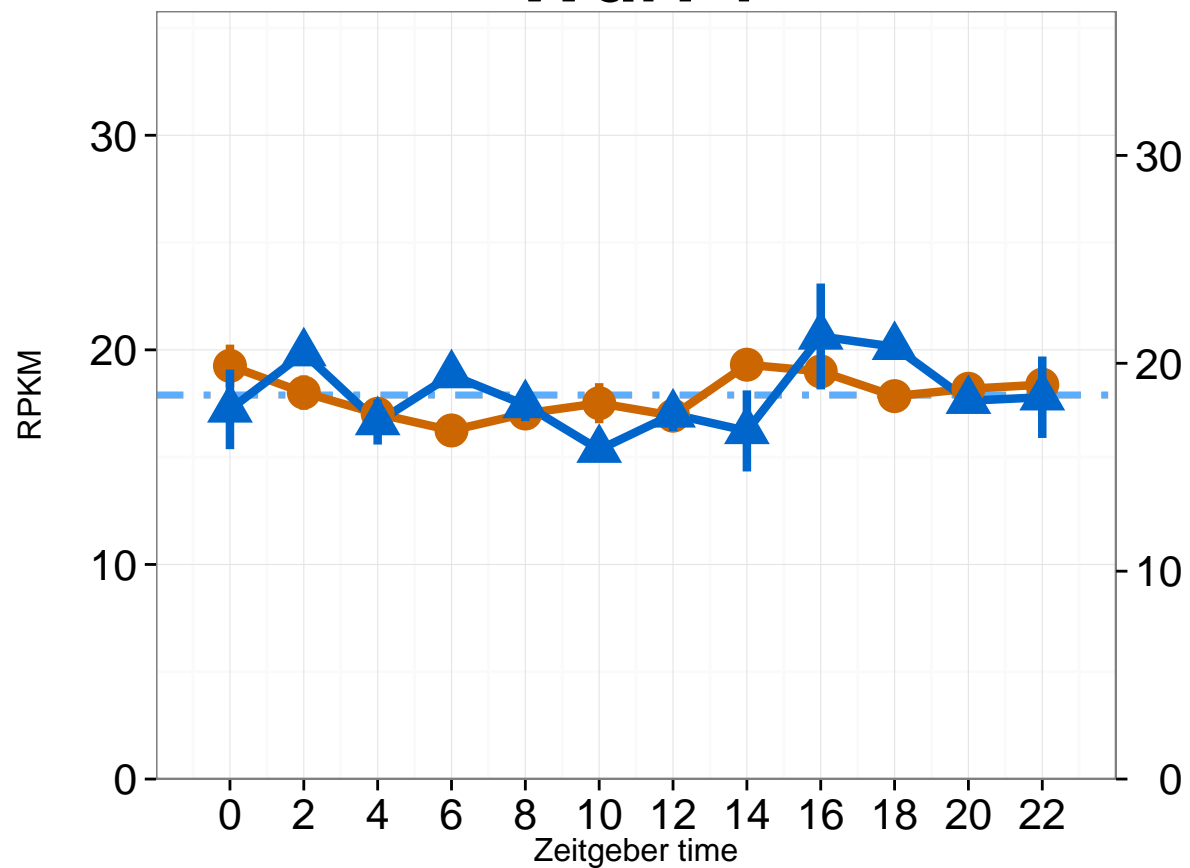

# Wdr74

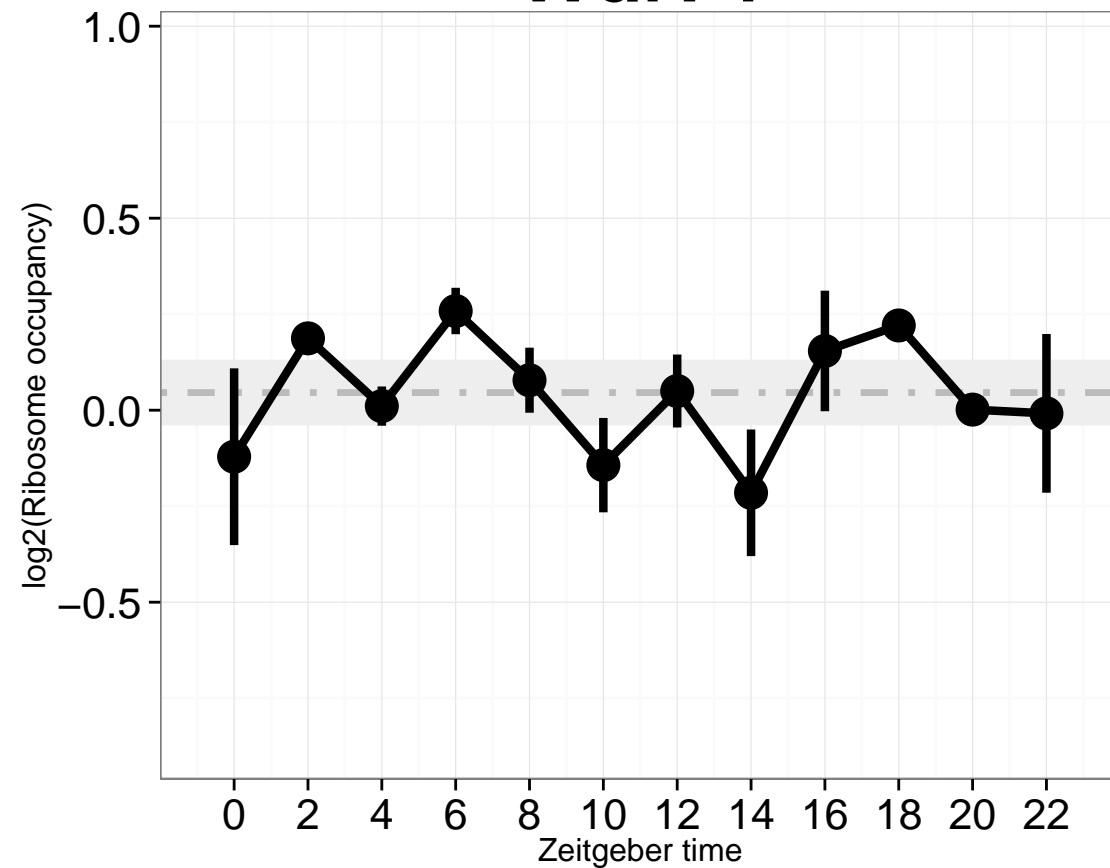

Supplement: Supplementary file 6787 [file 1]

## Wwp2

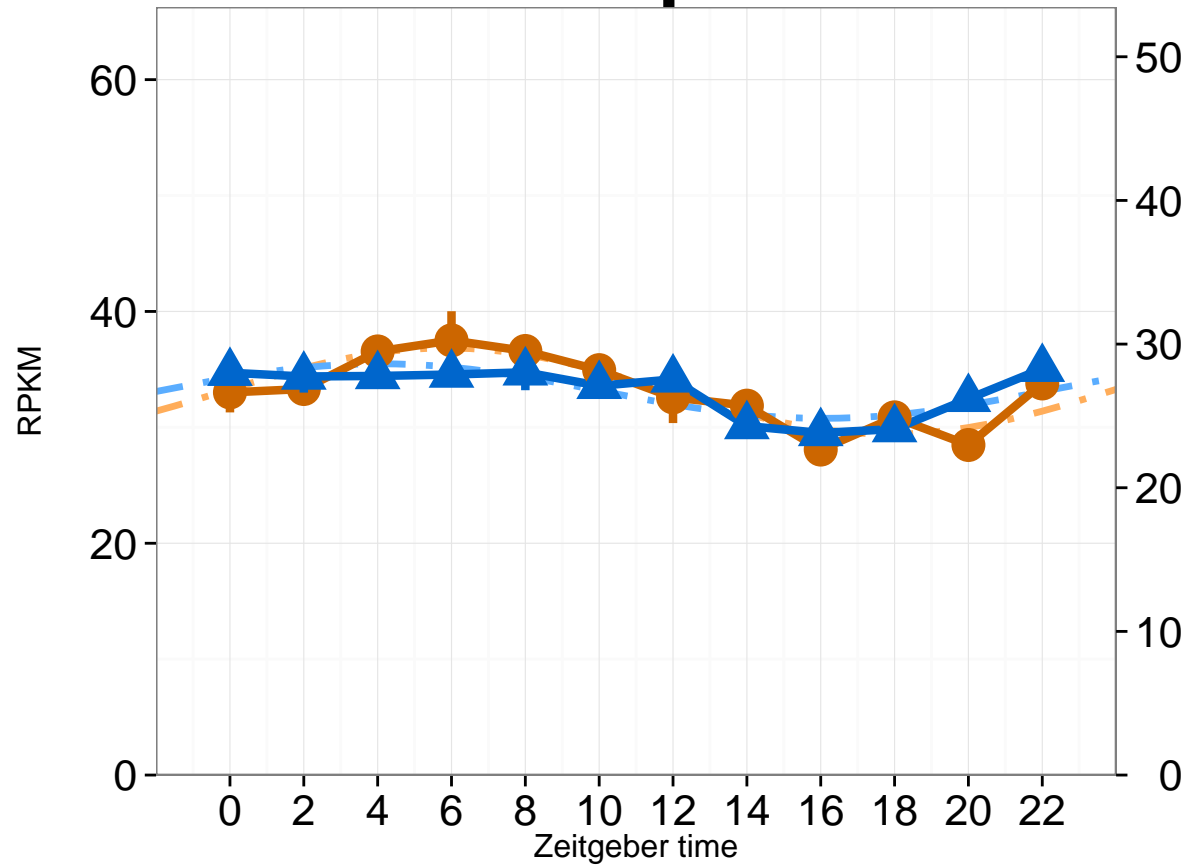

## Wwp2

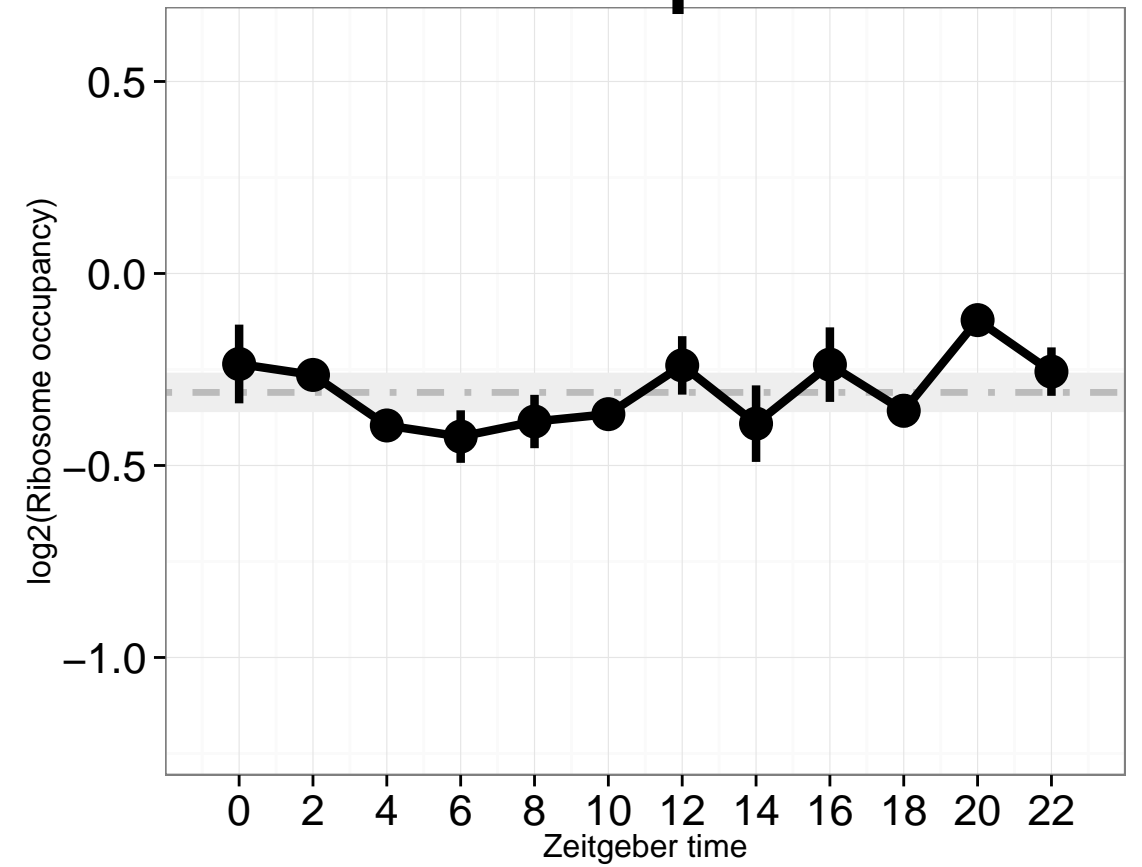

Supplement: Supplementary file 6788 [file 1]

# Man1c1

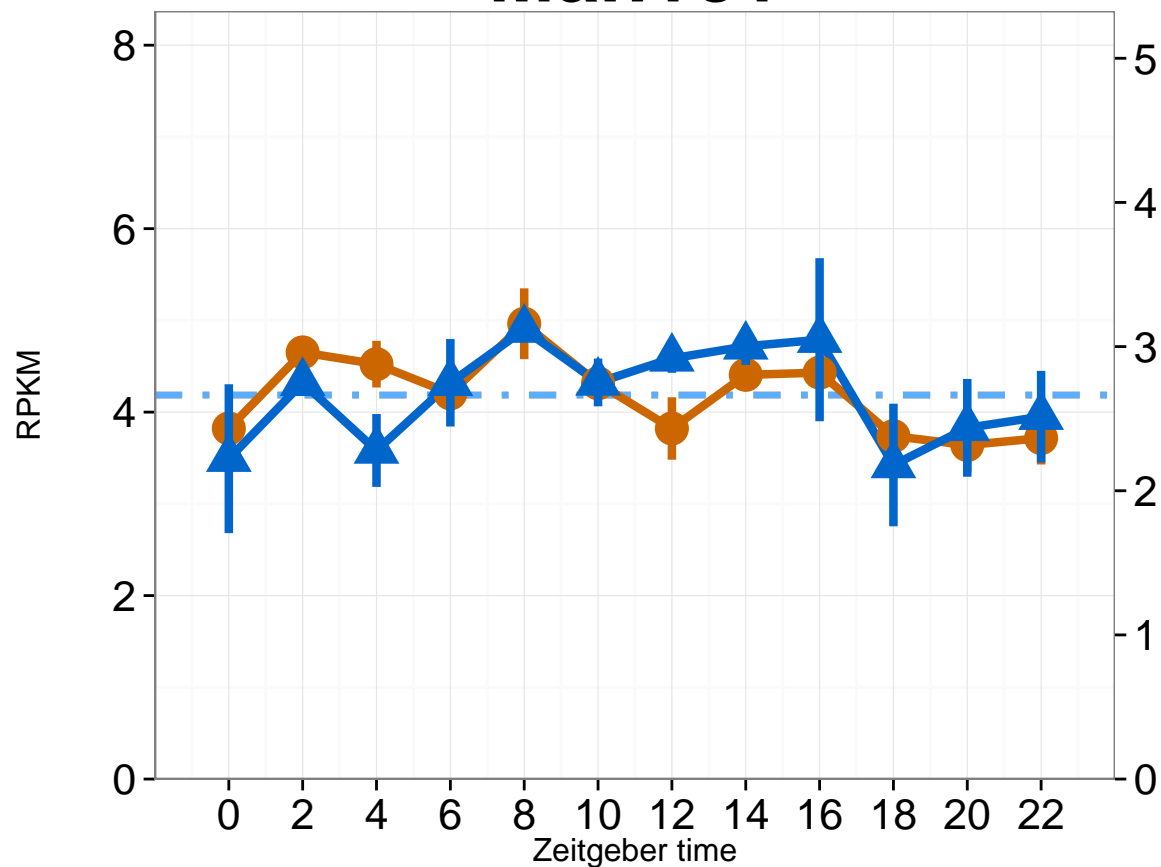

# Man1c1

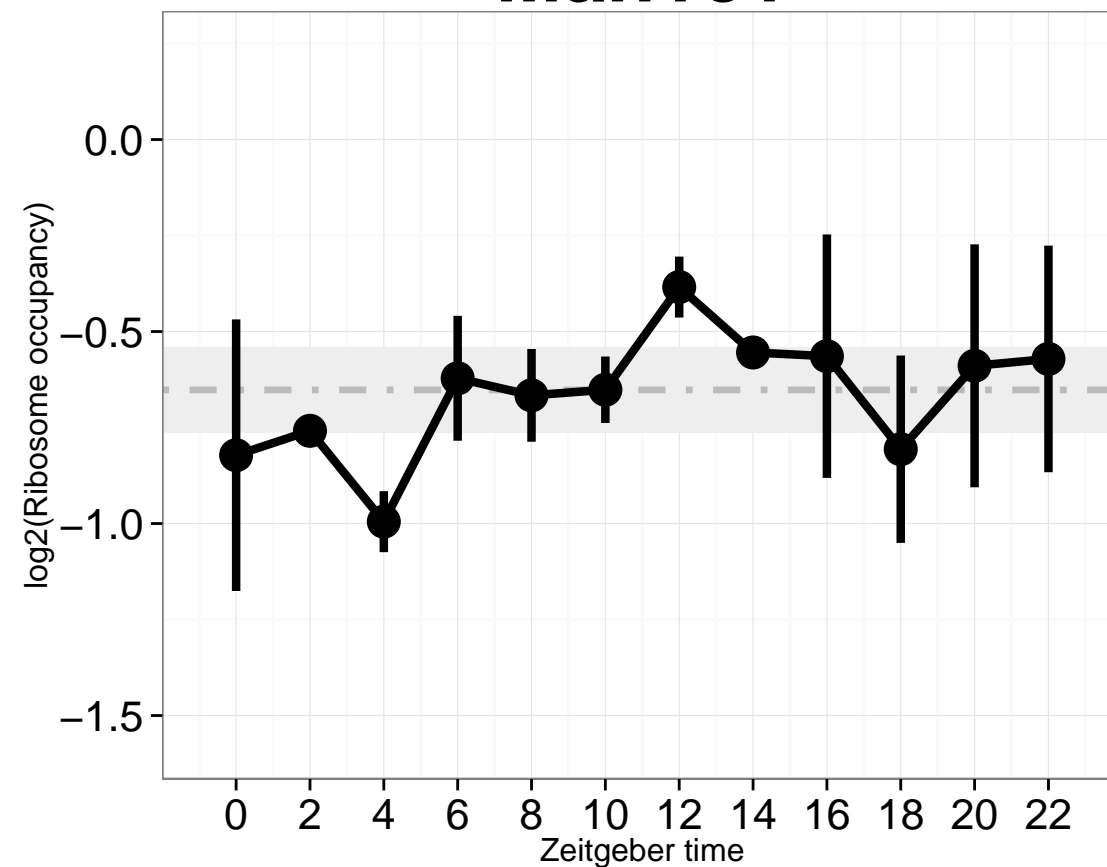

Supplement: Supplementary file 6789 [file 1]

# Snapc3

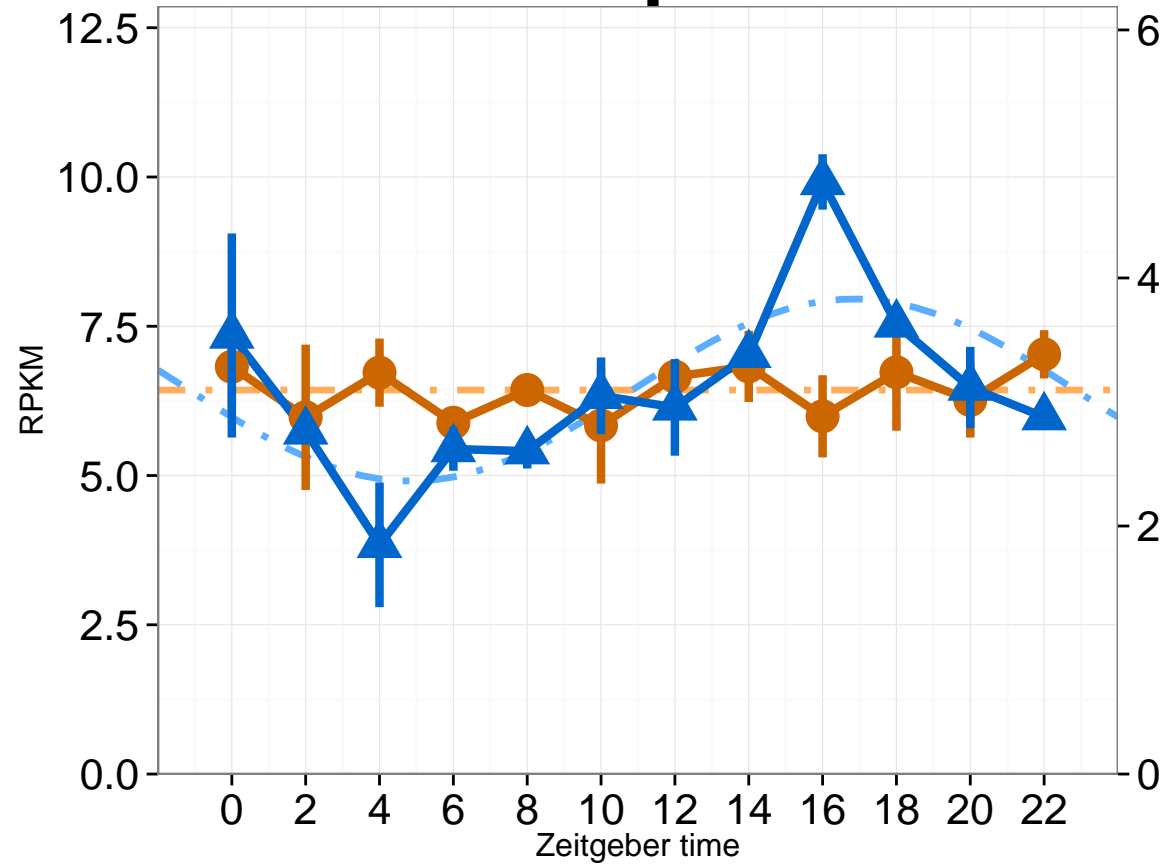

# Snapc3

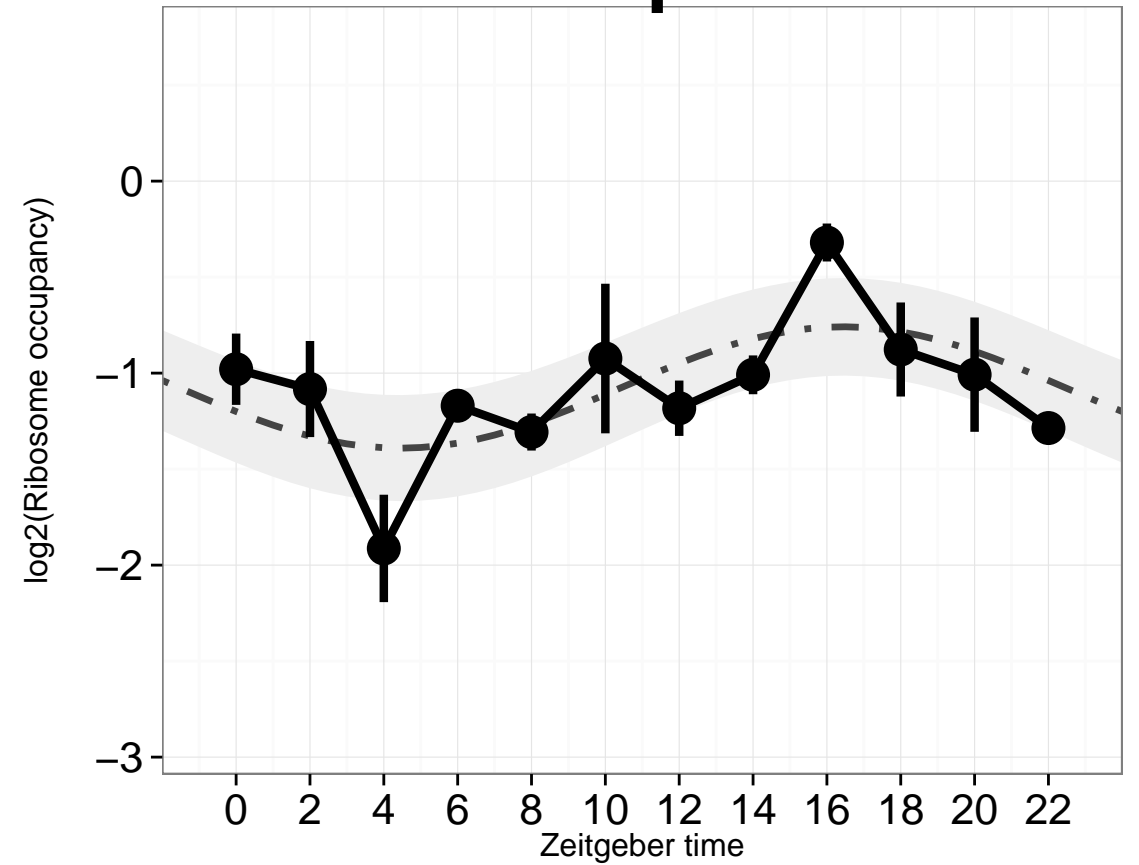

Supplement: Supplementary file 6790 [file 1]

## Smug1

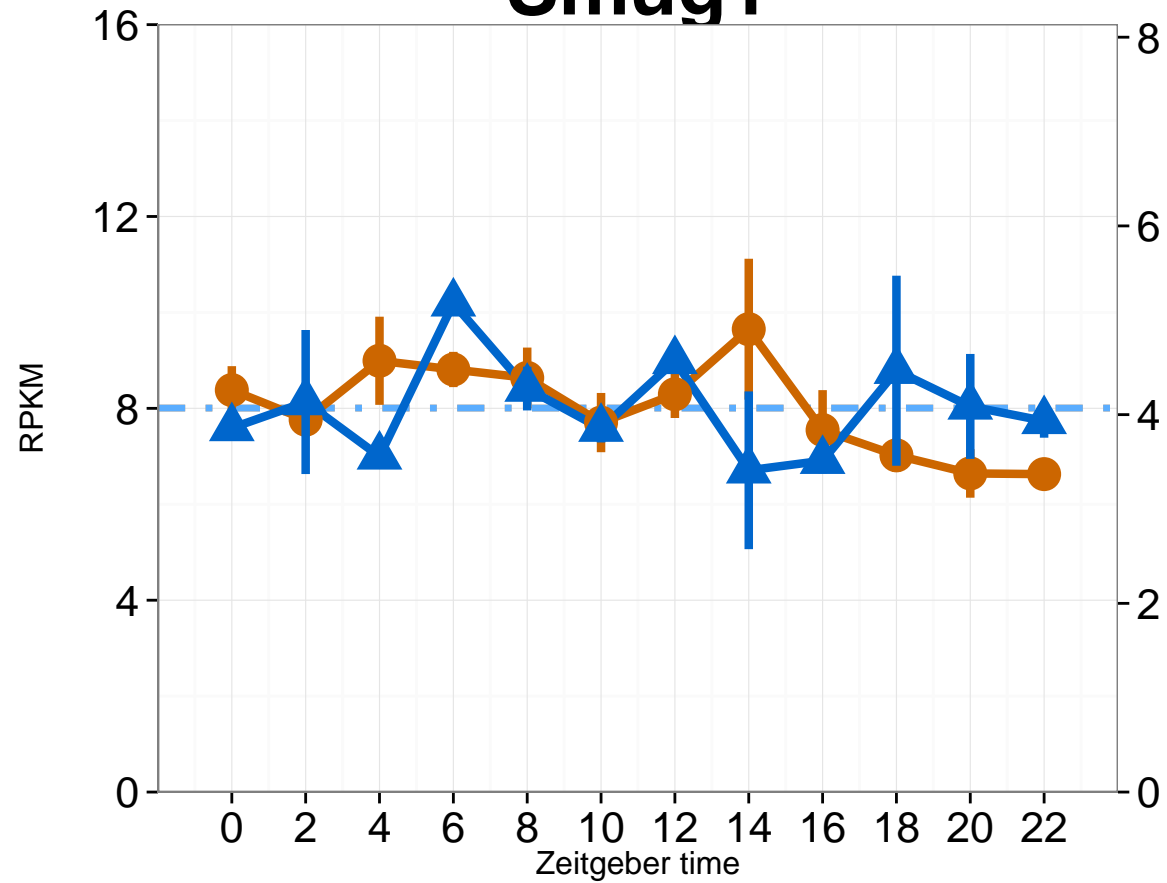

## Smug1

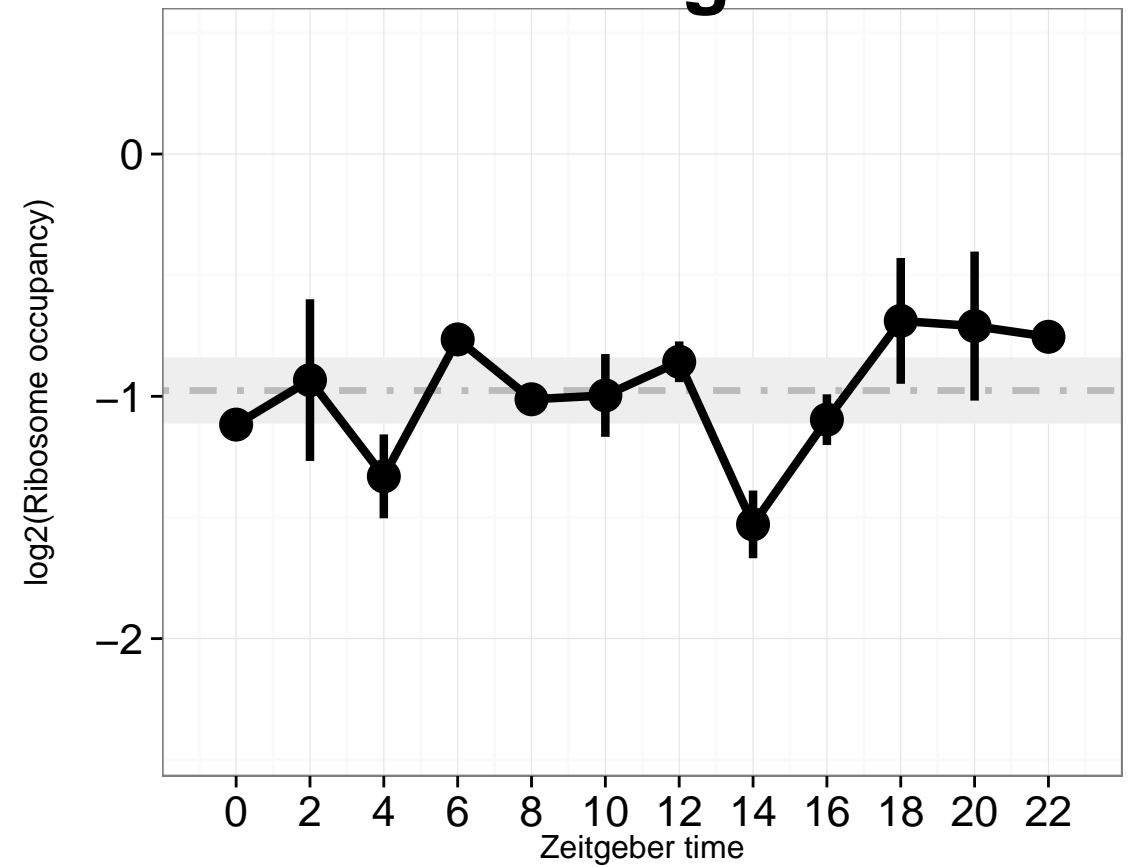

Supplement: Supplementary file 6791 [file 1]

## Uhrf1bp1l

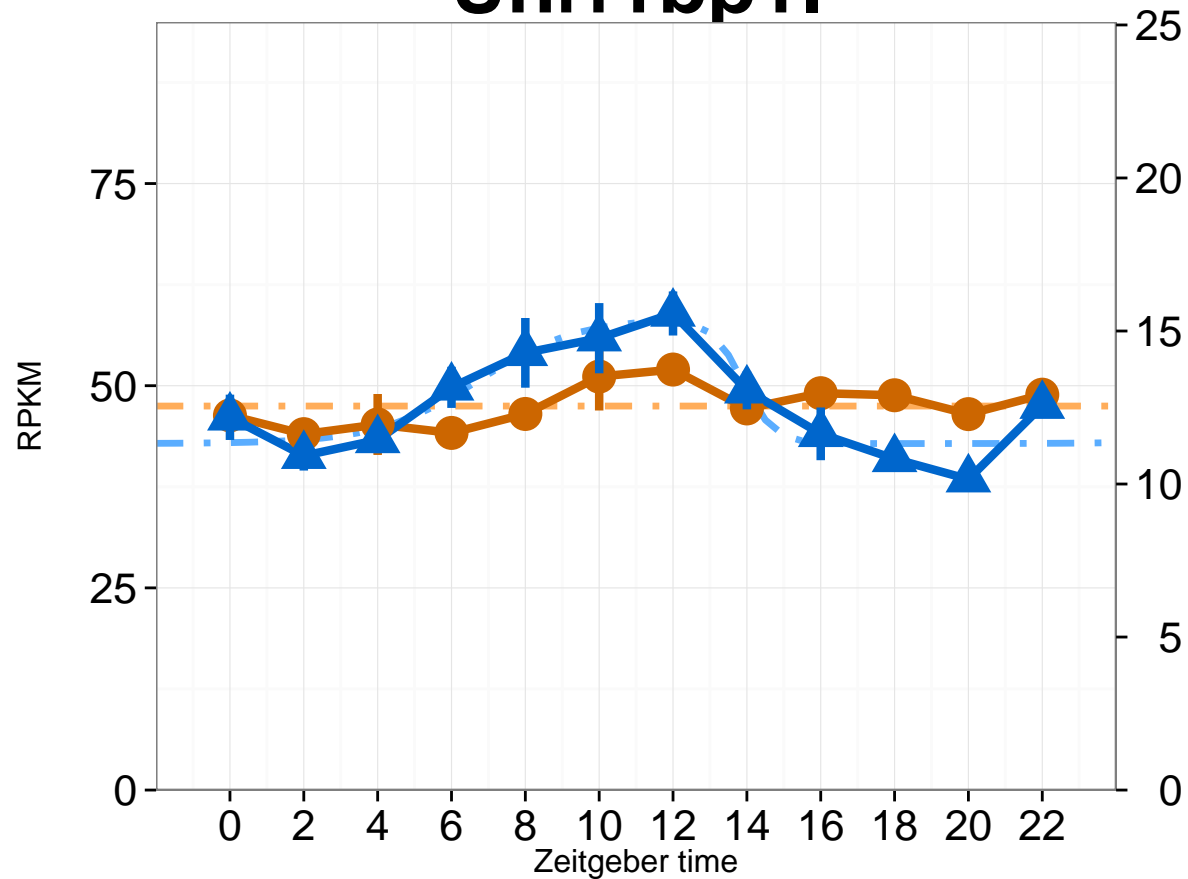

## Uhrf1bp1l

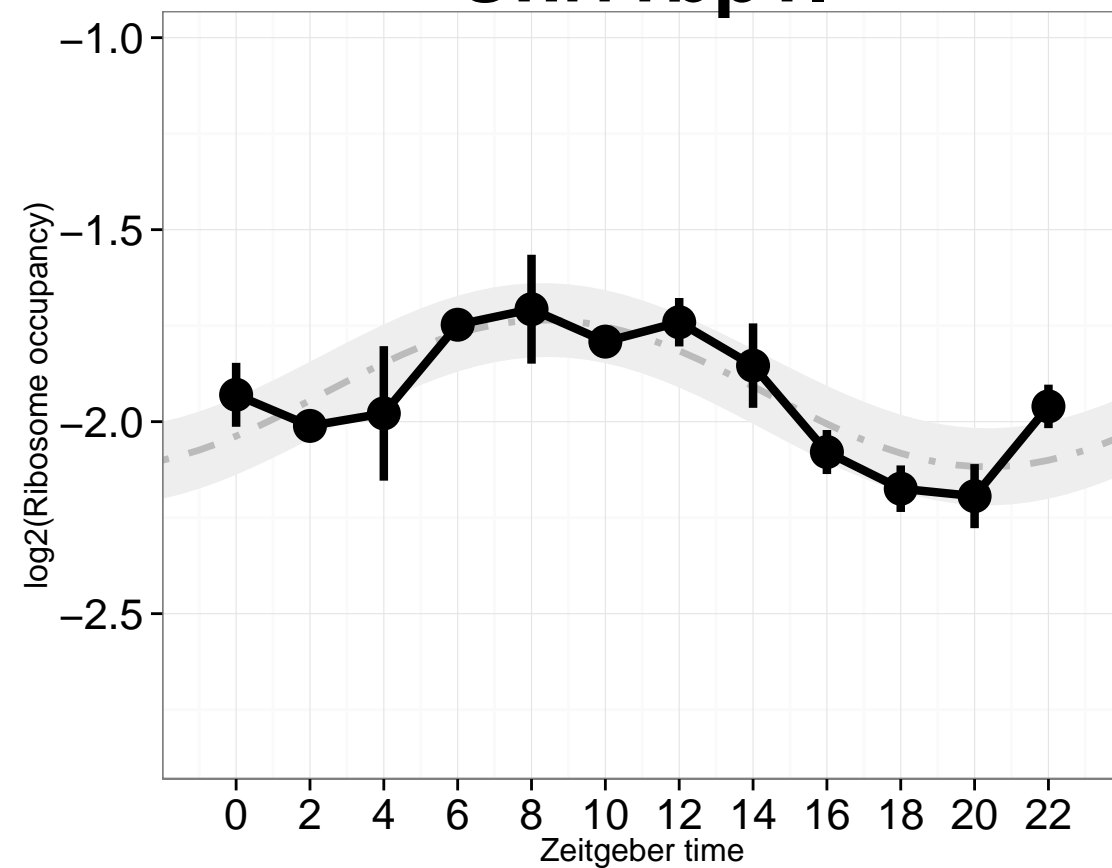

Supplement: Supplementary file 6792 [file 1]

# Prpf40b

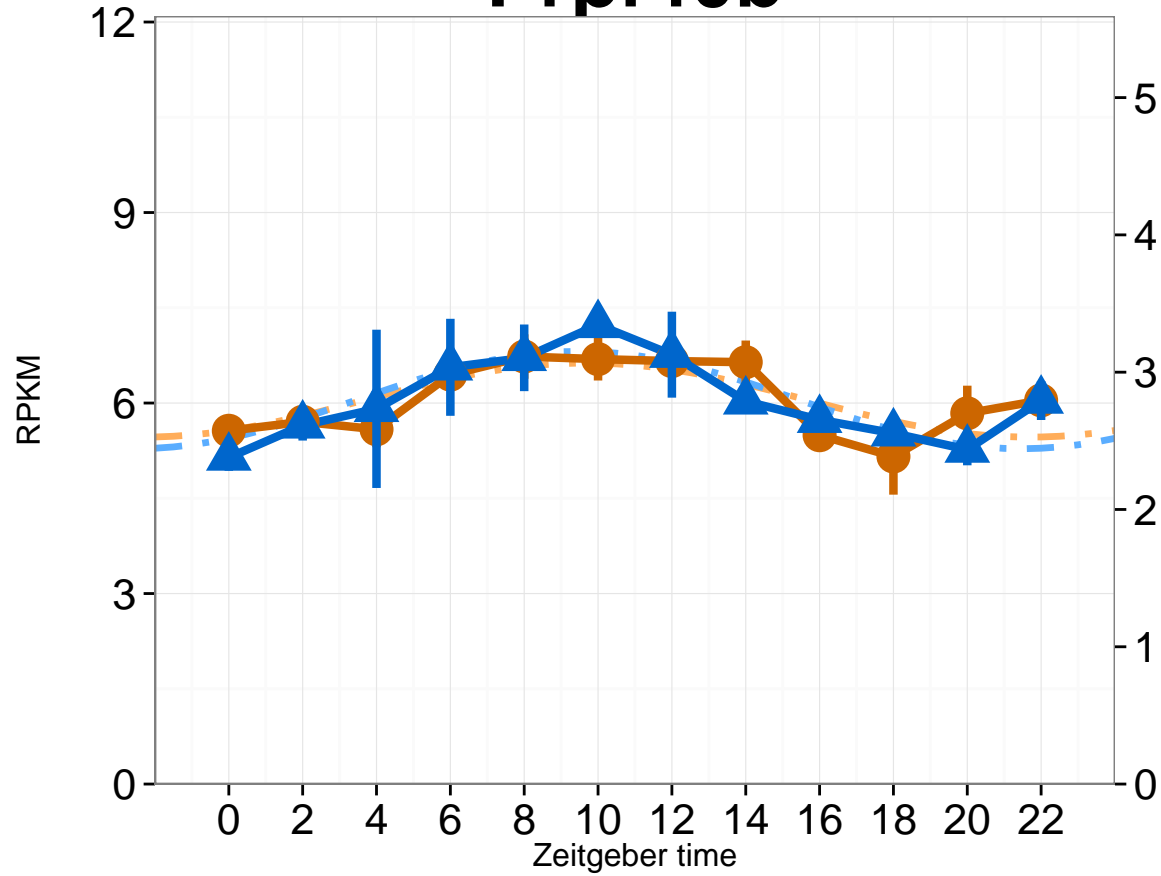

# Prpf40b

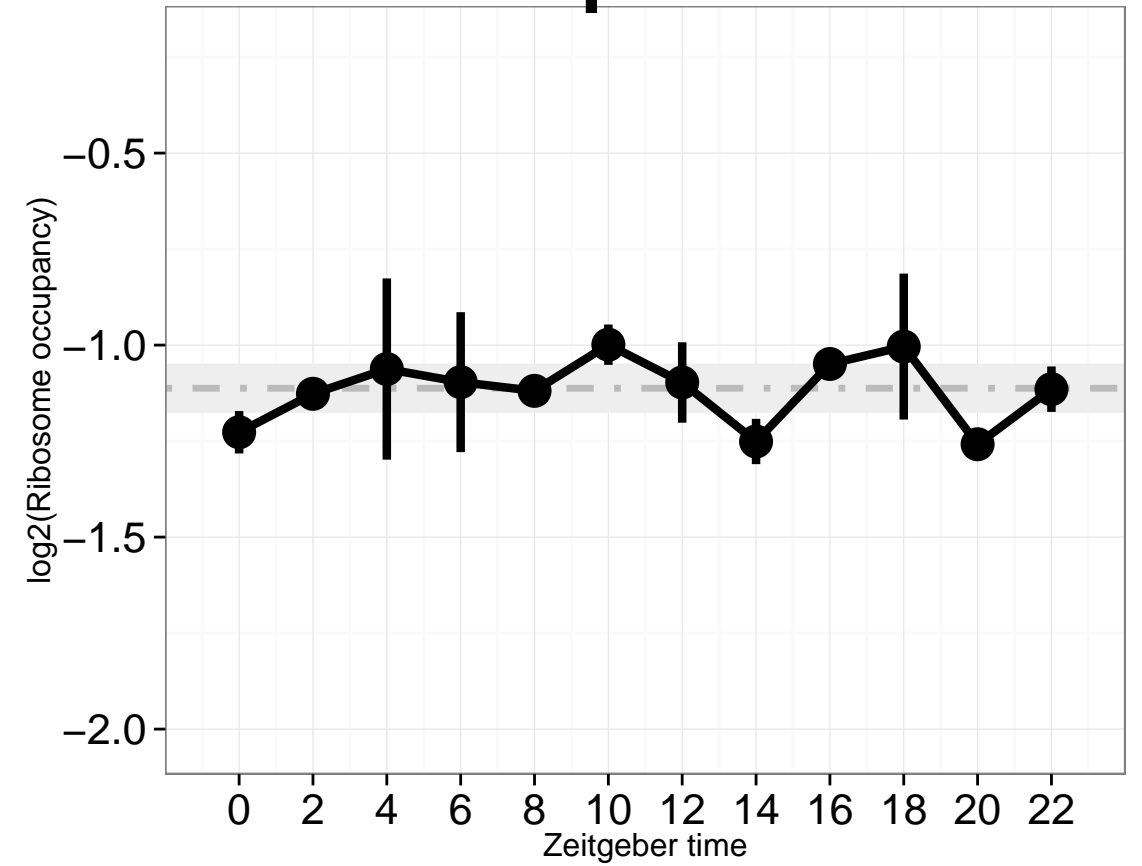

Supplement: Supplementary file 6793 [file 1]

## Gm6614

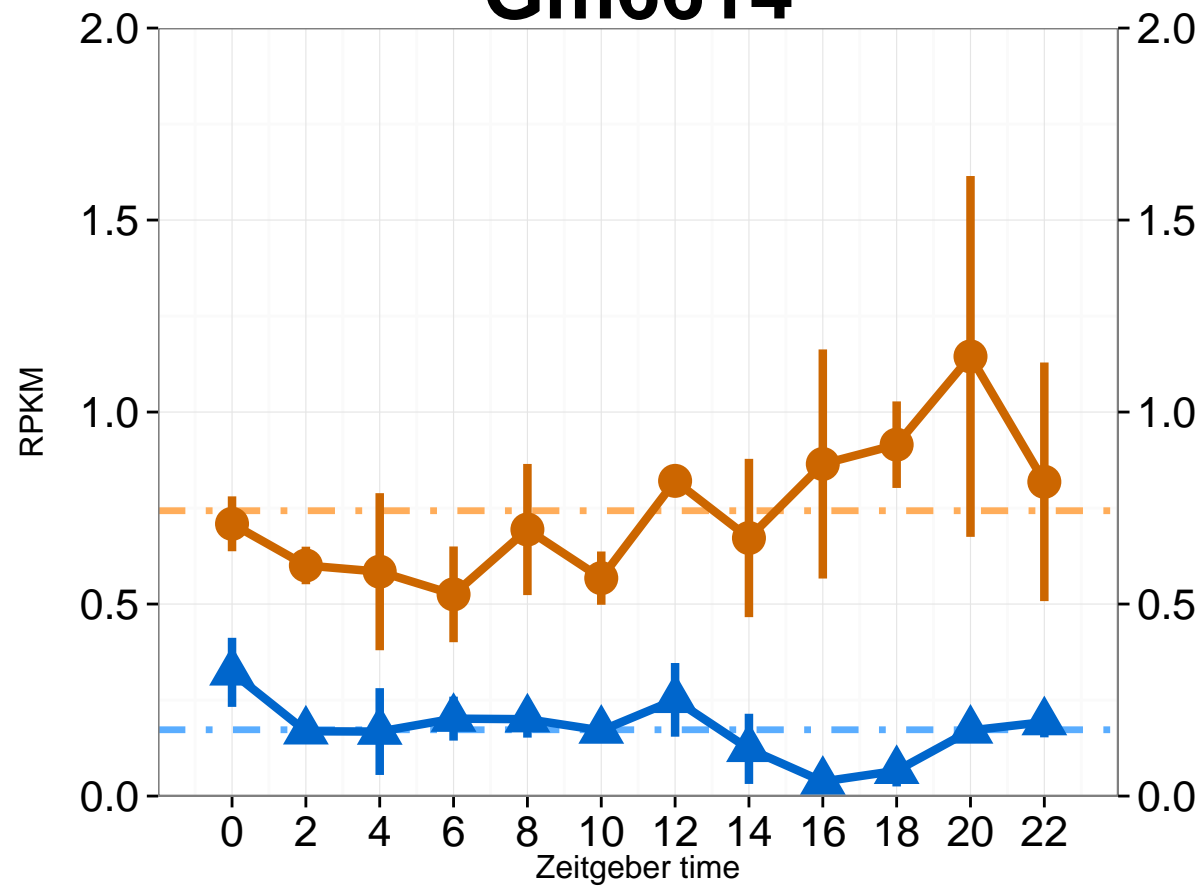

## Gm6614

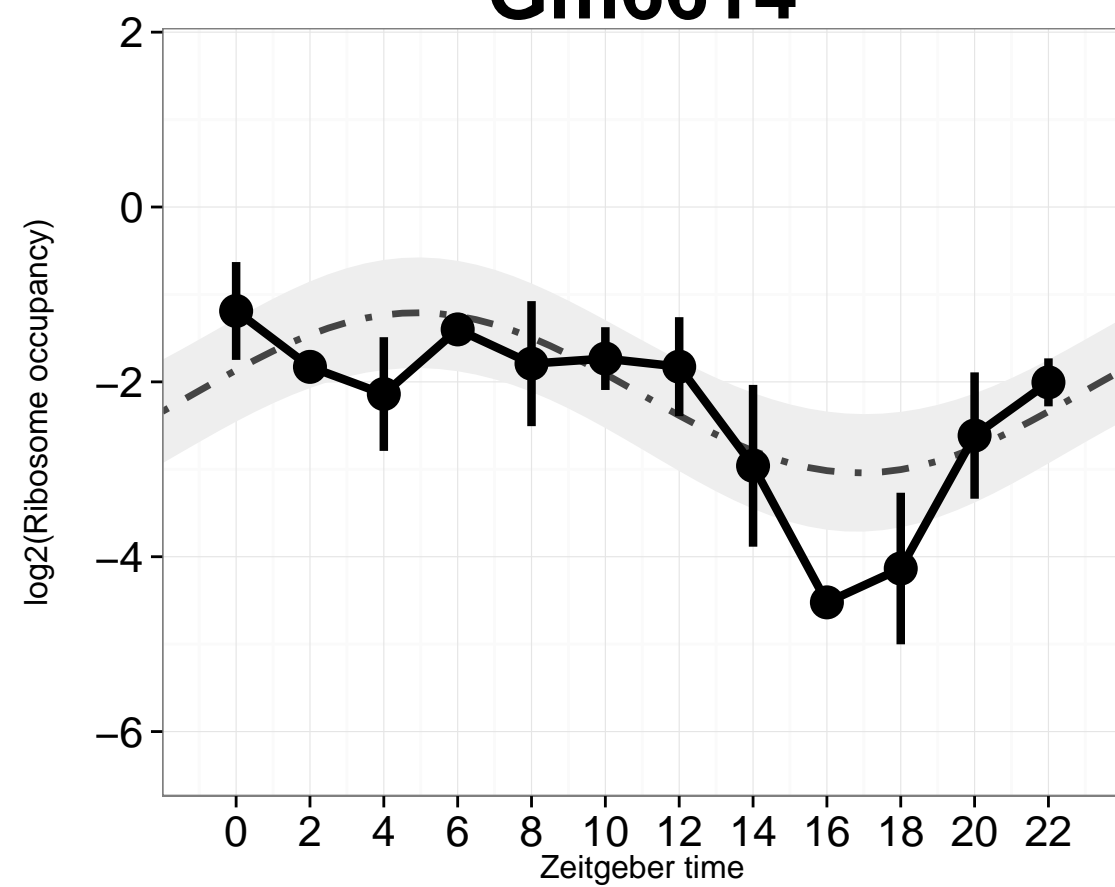

Supplement: Supplementary file 6794 [file 1]

# Tmem238

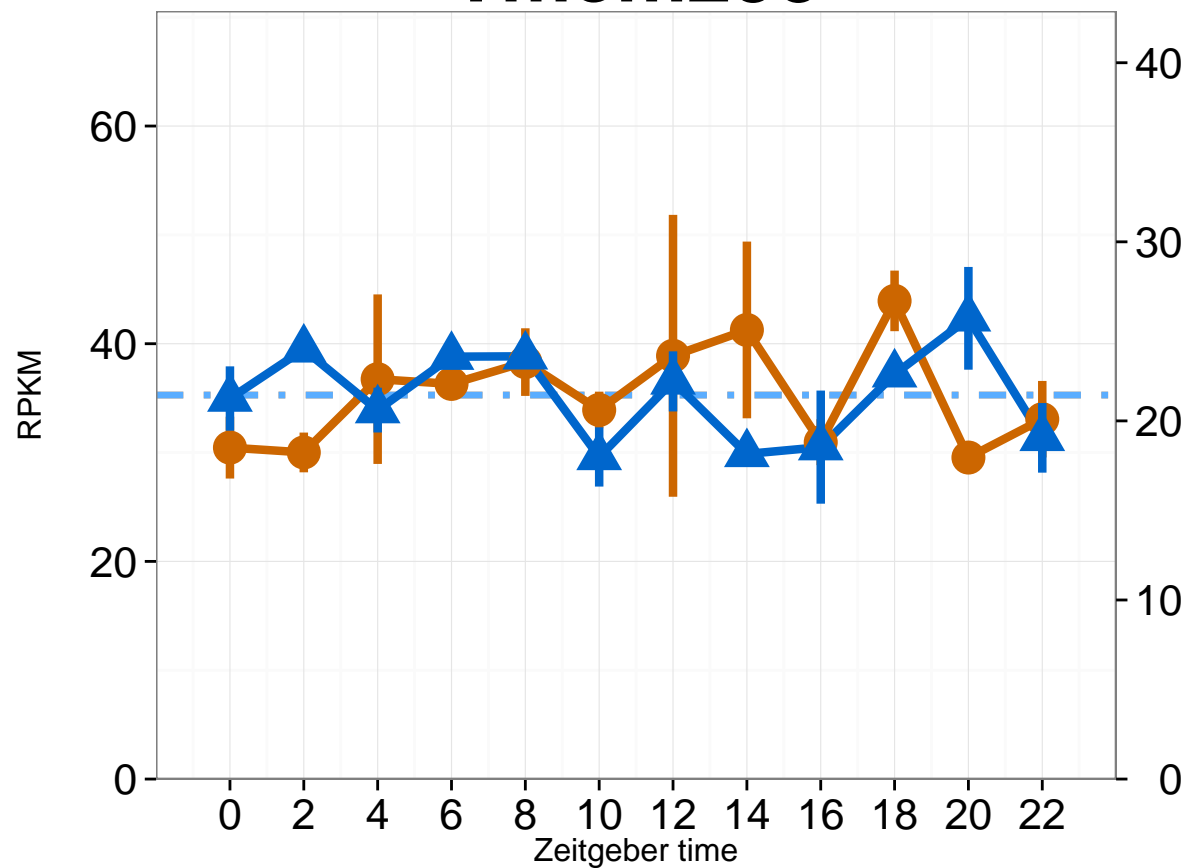

# Tmem238

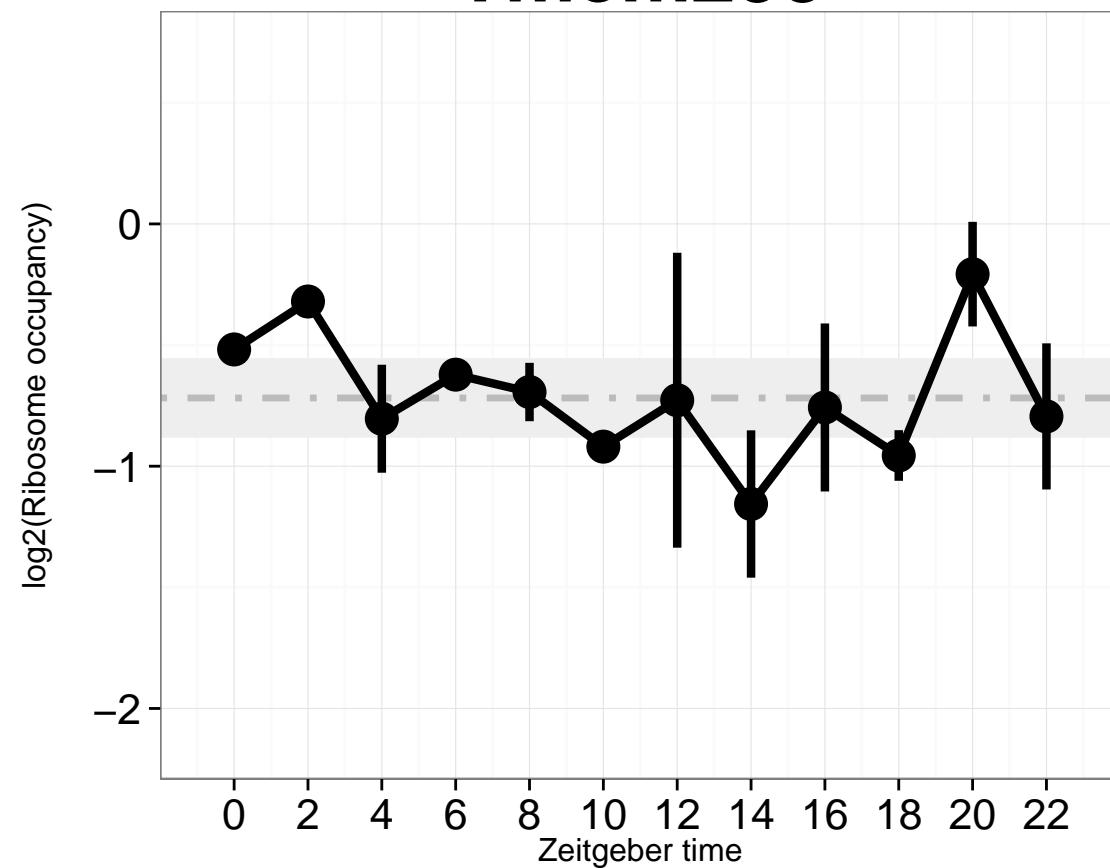

Supplement: Supplementary file 6795 [file 1]

## Gas6

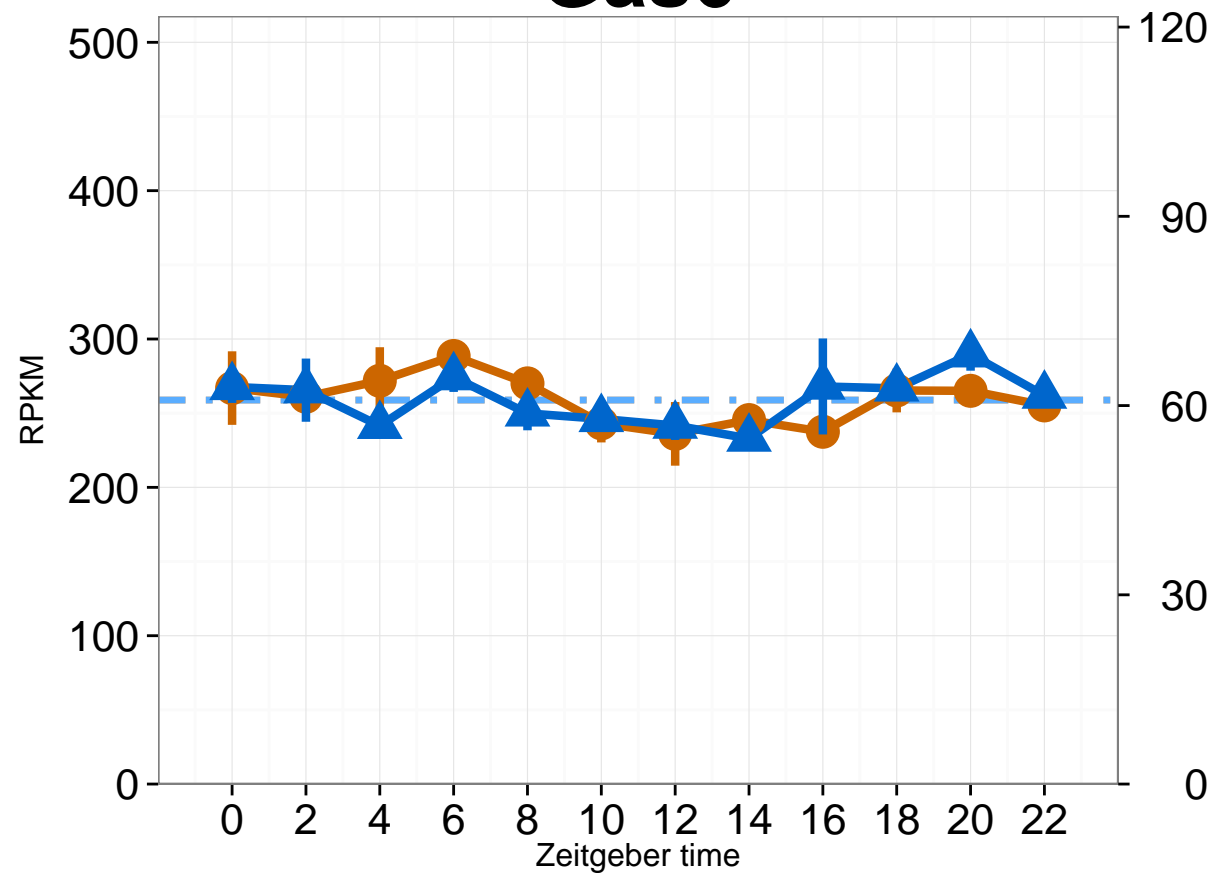

## Gas6

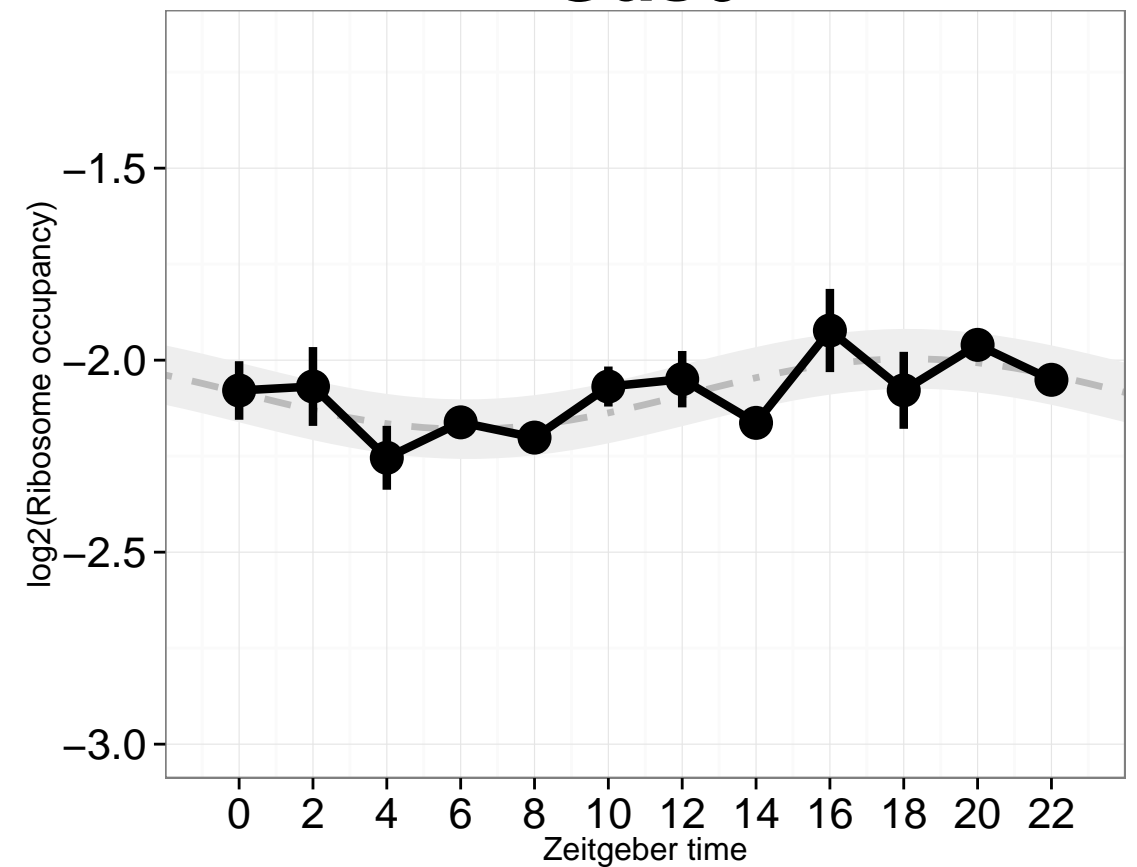

Supplement: Supplementary file 6796 [file 1]

## Papolg

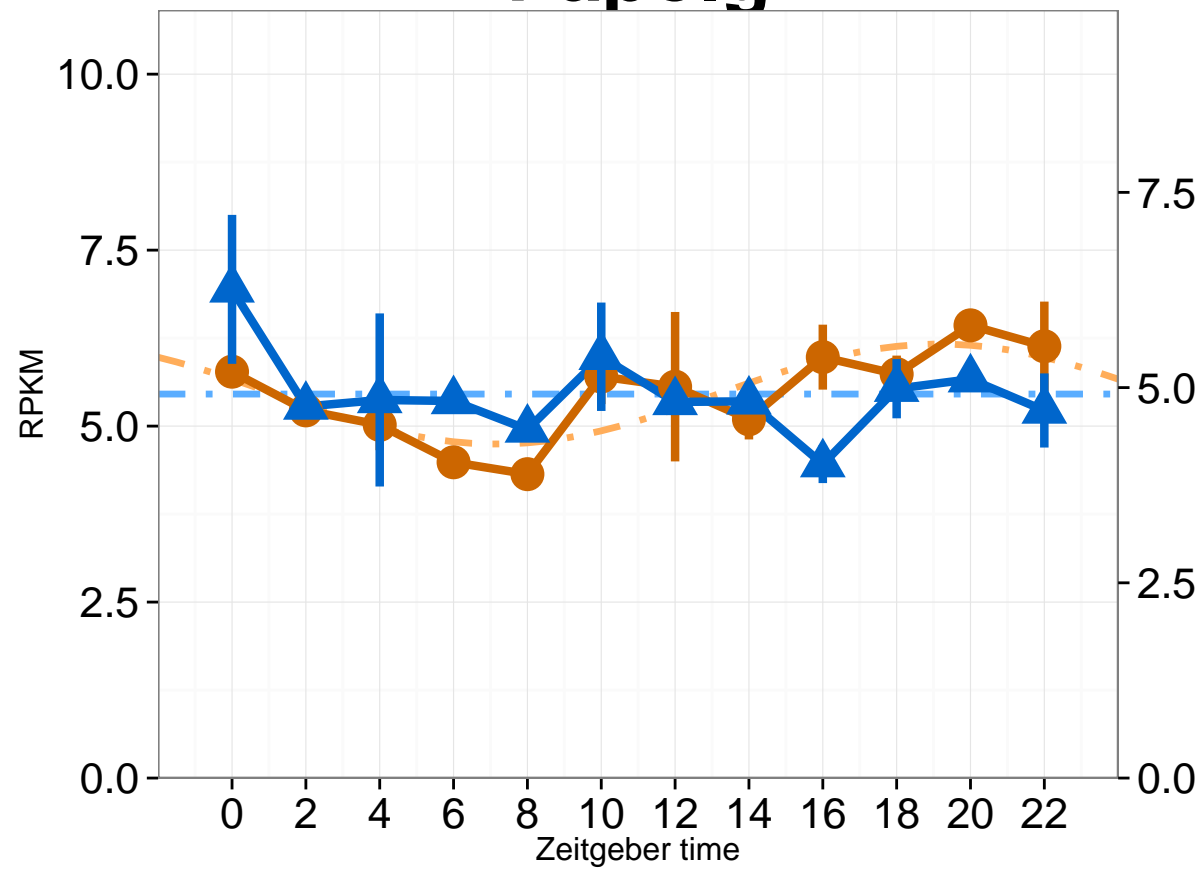

## Papolg

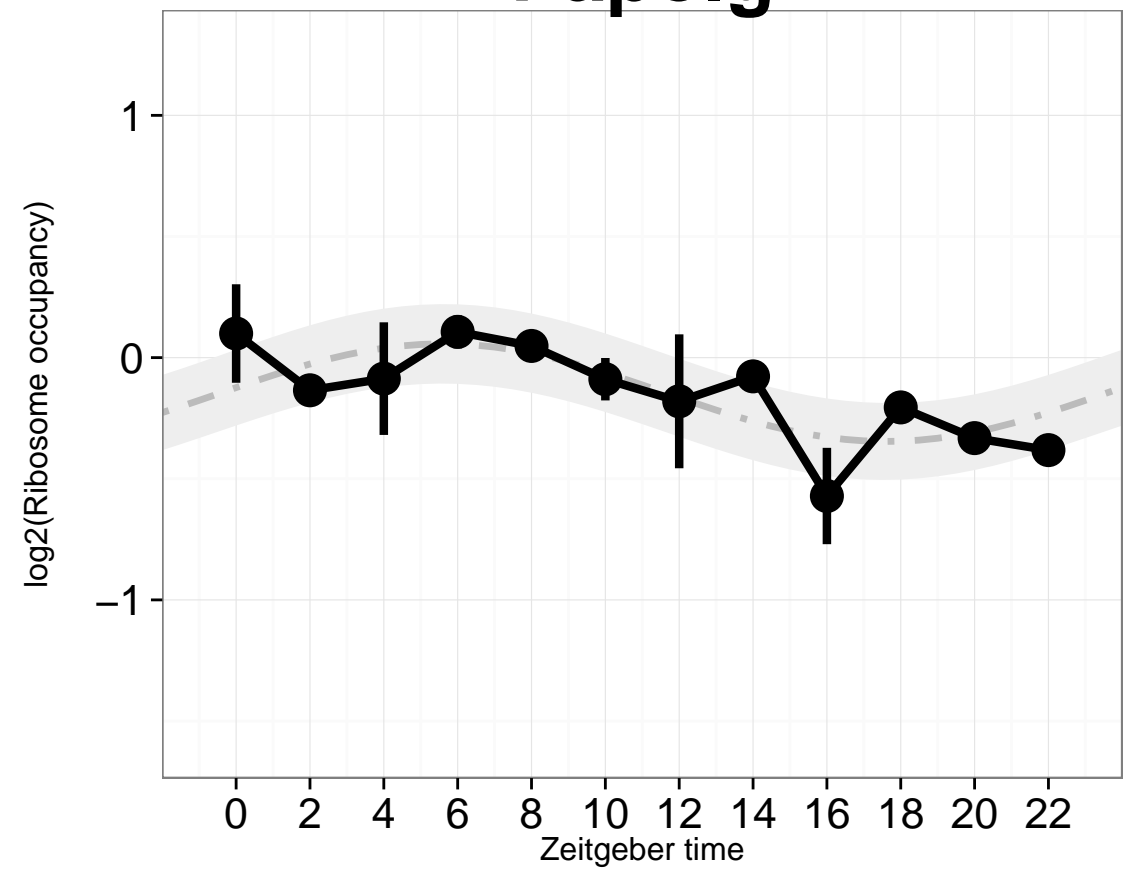

Supplement: Supplementary file 6797 [file 1]

# Mief1

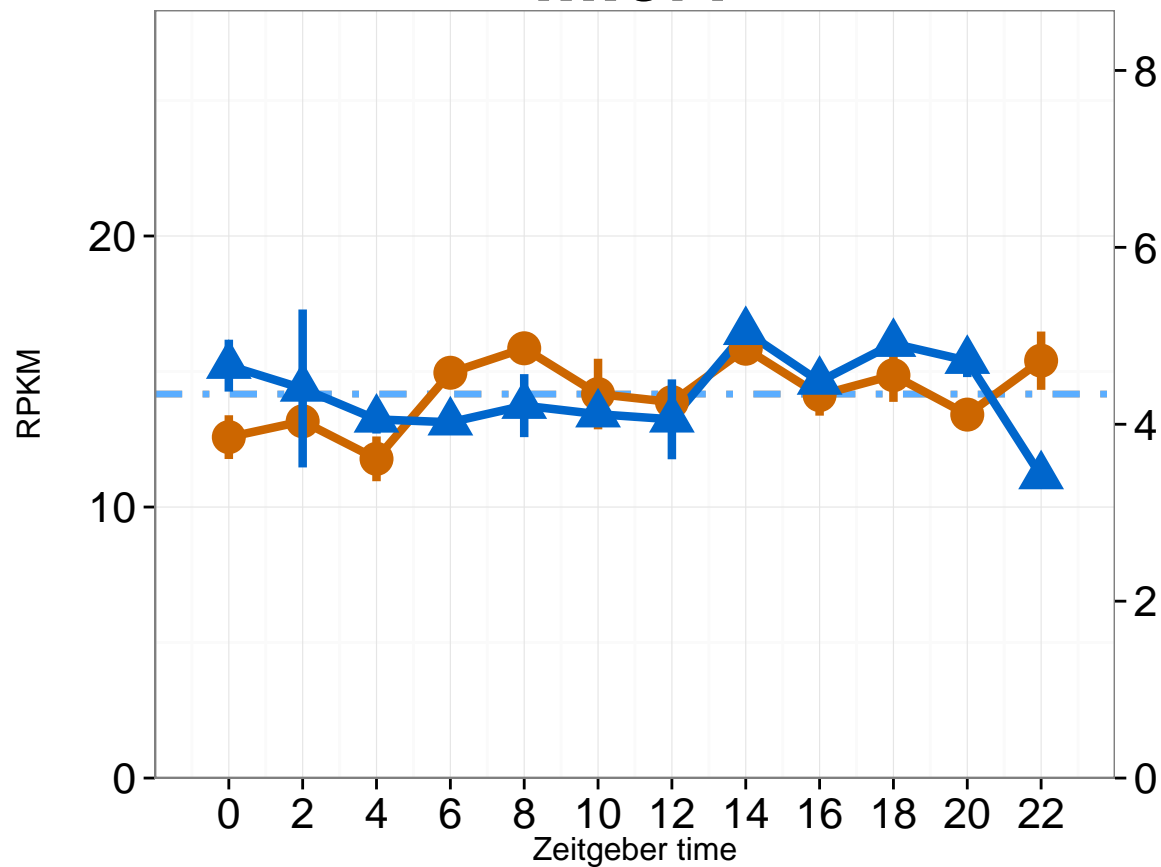

# Mief1

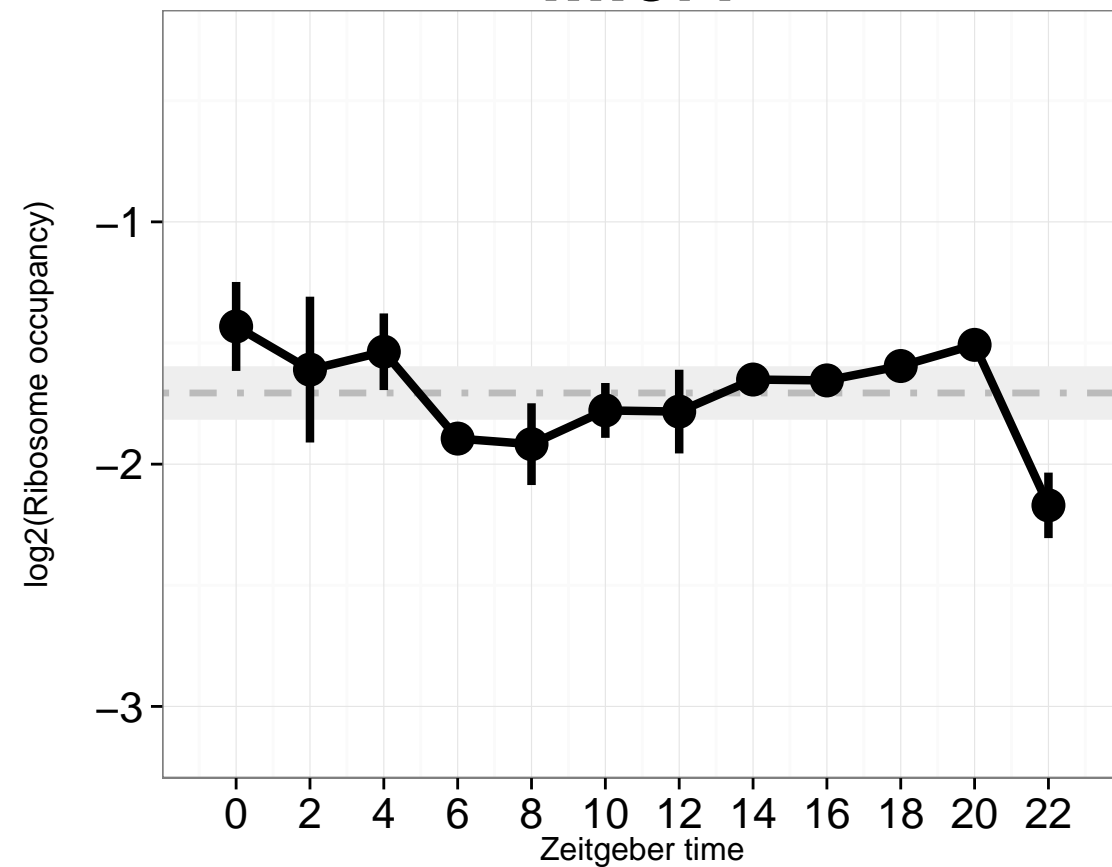

Supplement: Supplementary file 6798 [file 1]

## Uxs1

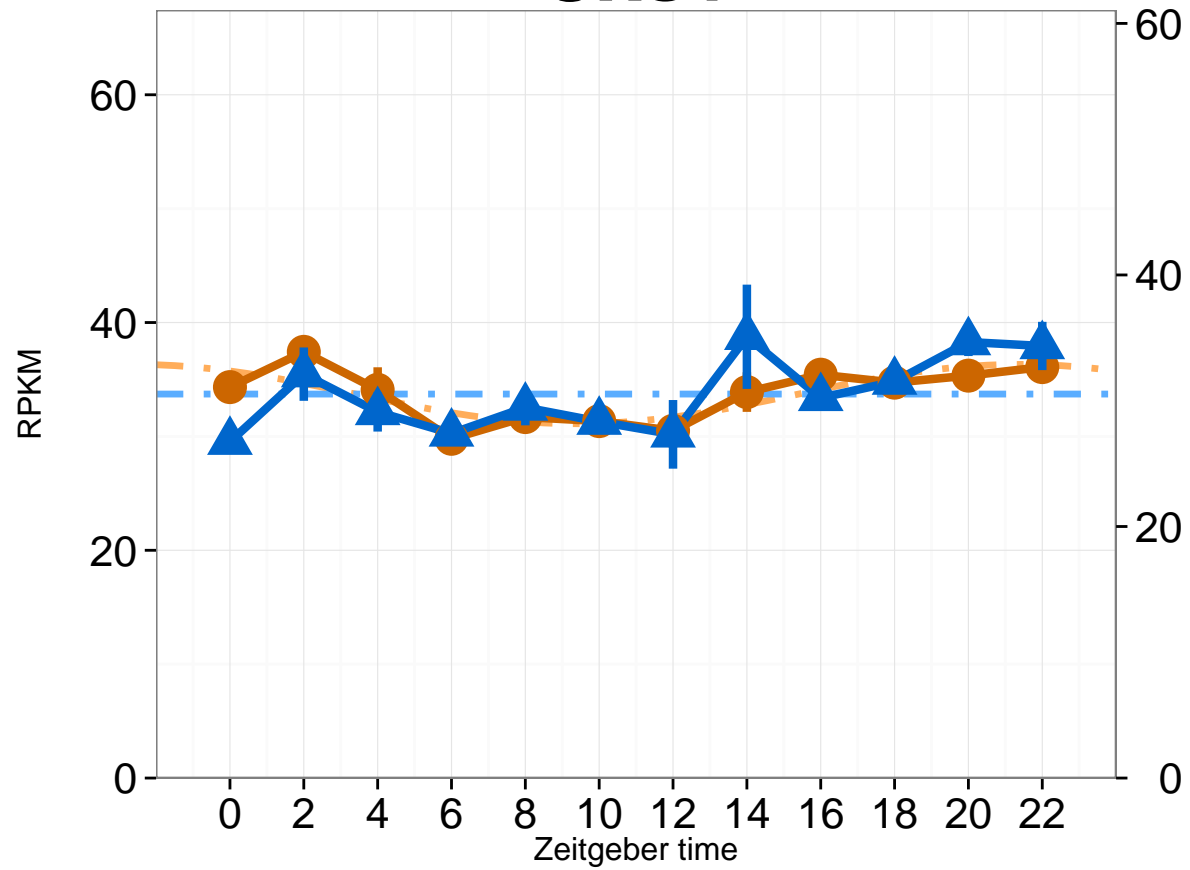

## Uxs1

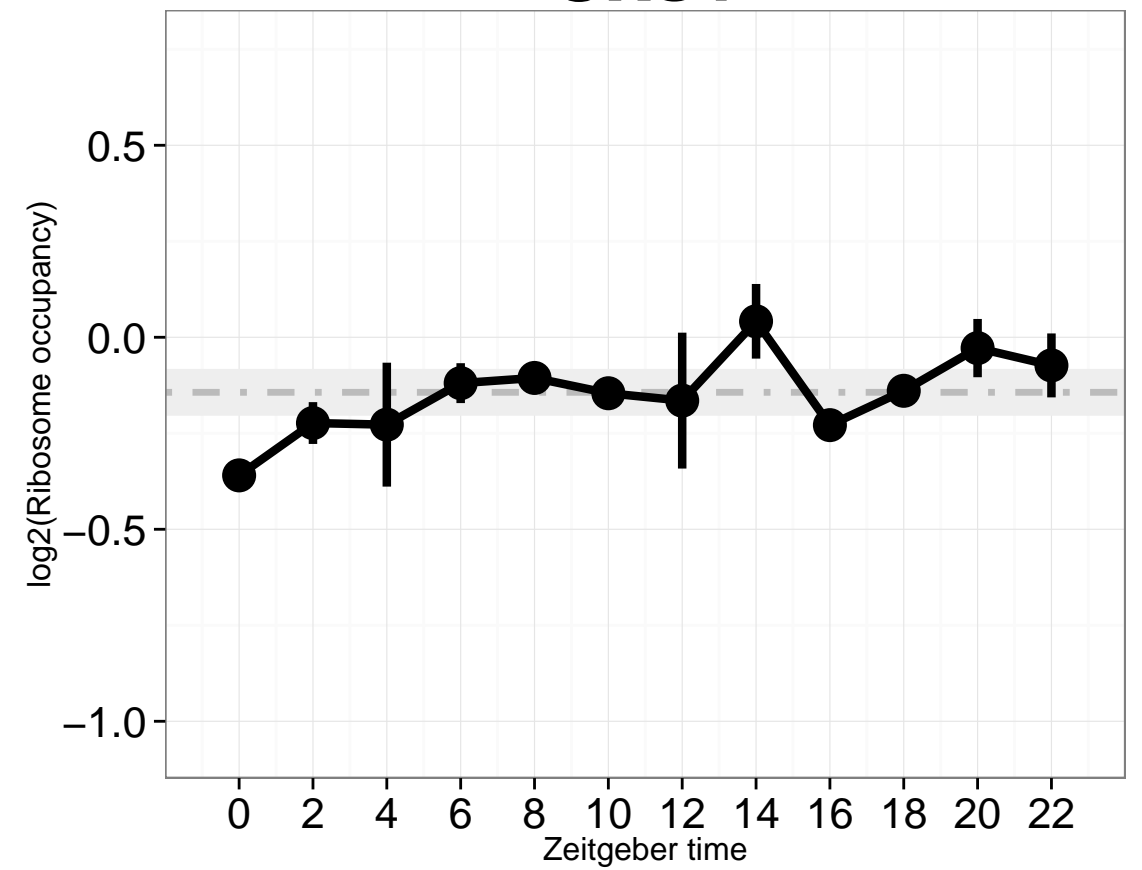

Supplement: Supplementary file 6799 [file 1]

## Tbcel

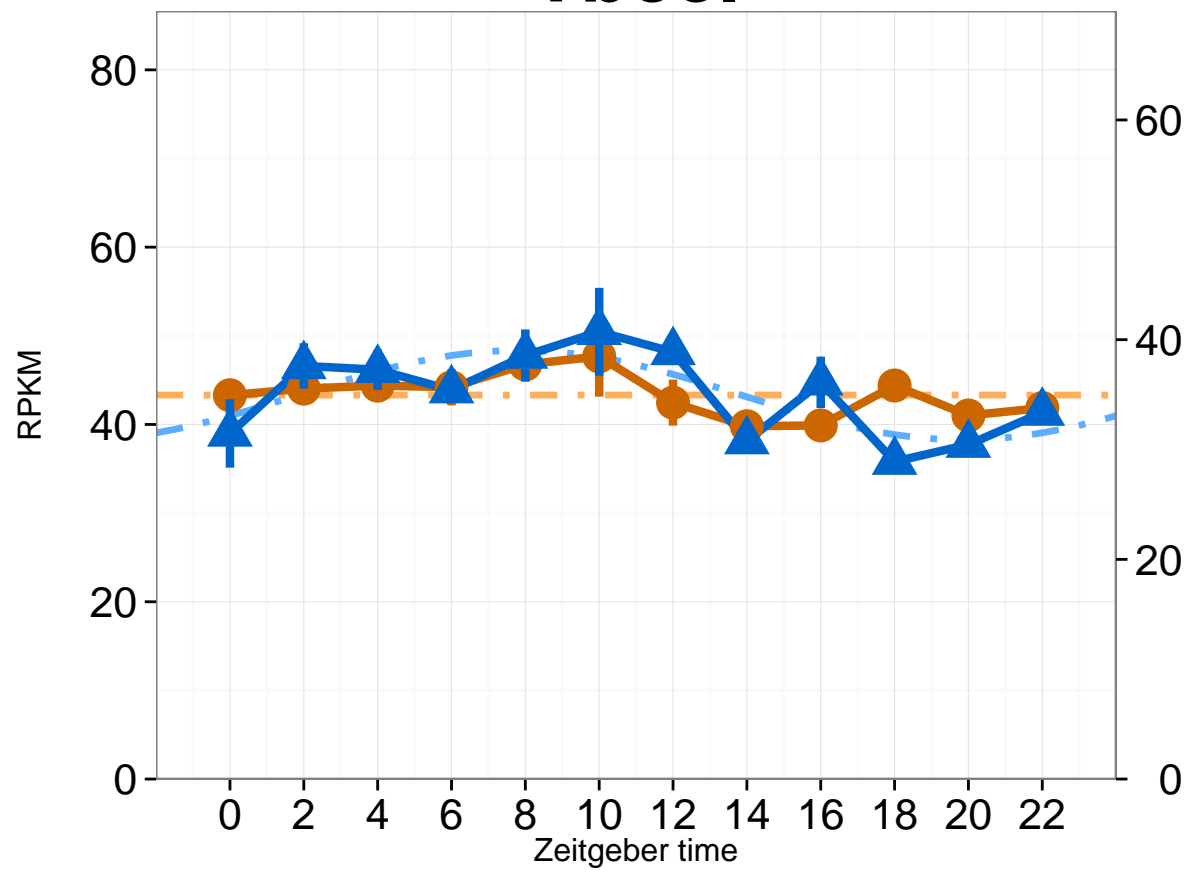

## Tbcel

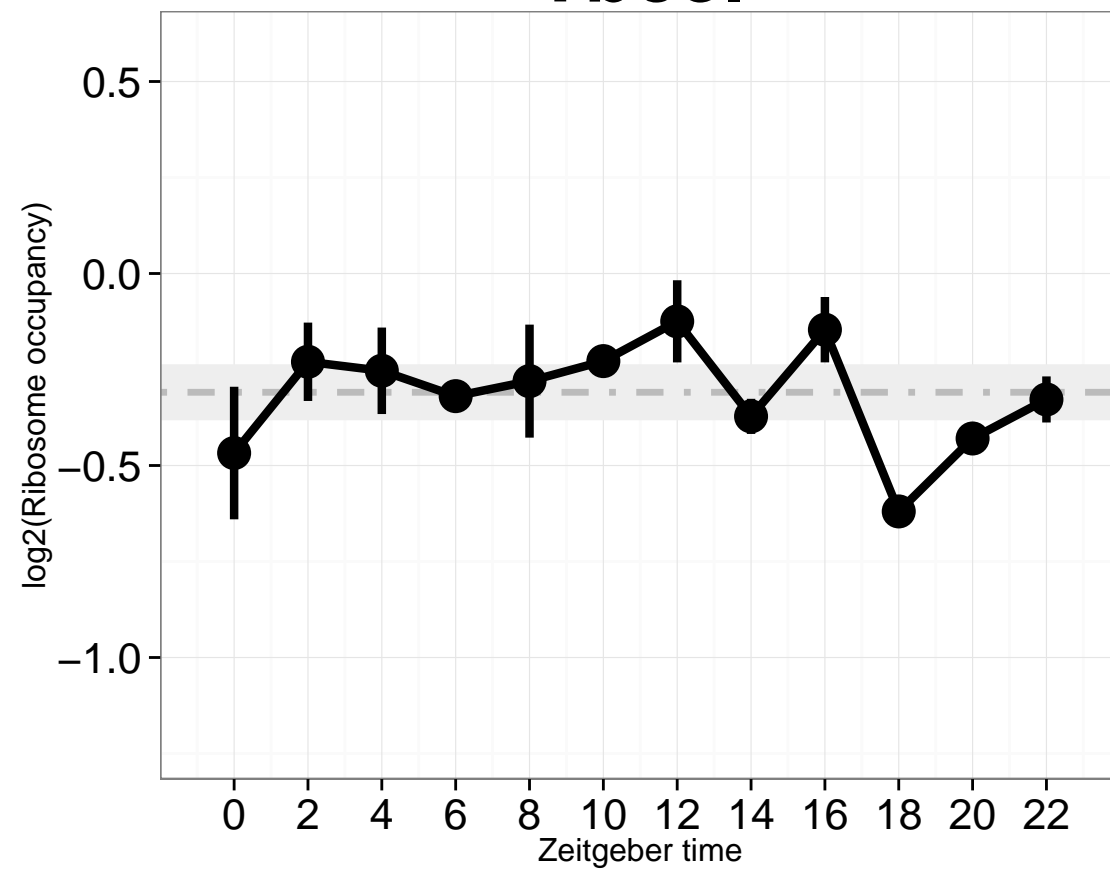

Supplement: Supplementary file 6800 [file 1]

## Mctp1

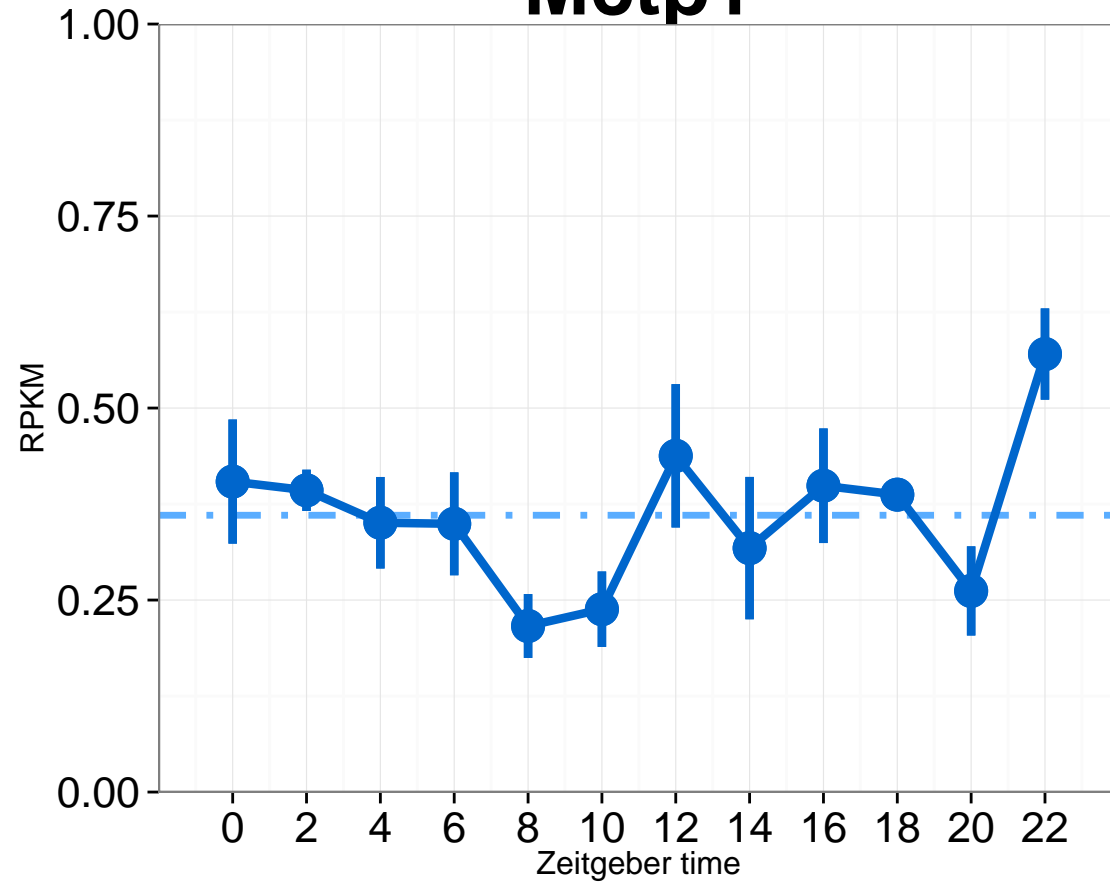

## Mctp1 log2(Ribosome occupancy

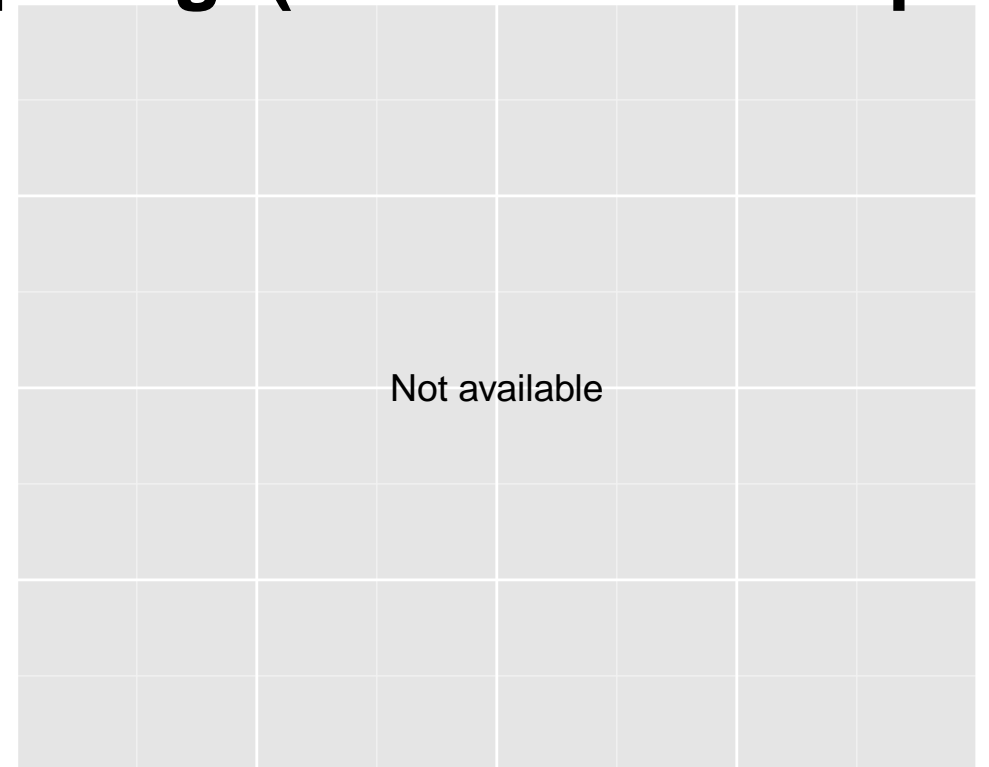

Supplement: Supplementary file 6801 [file 1]

## Ttf1

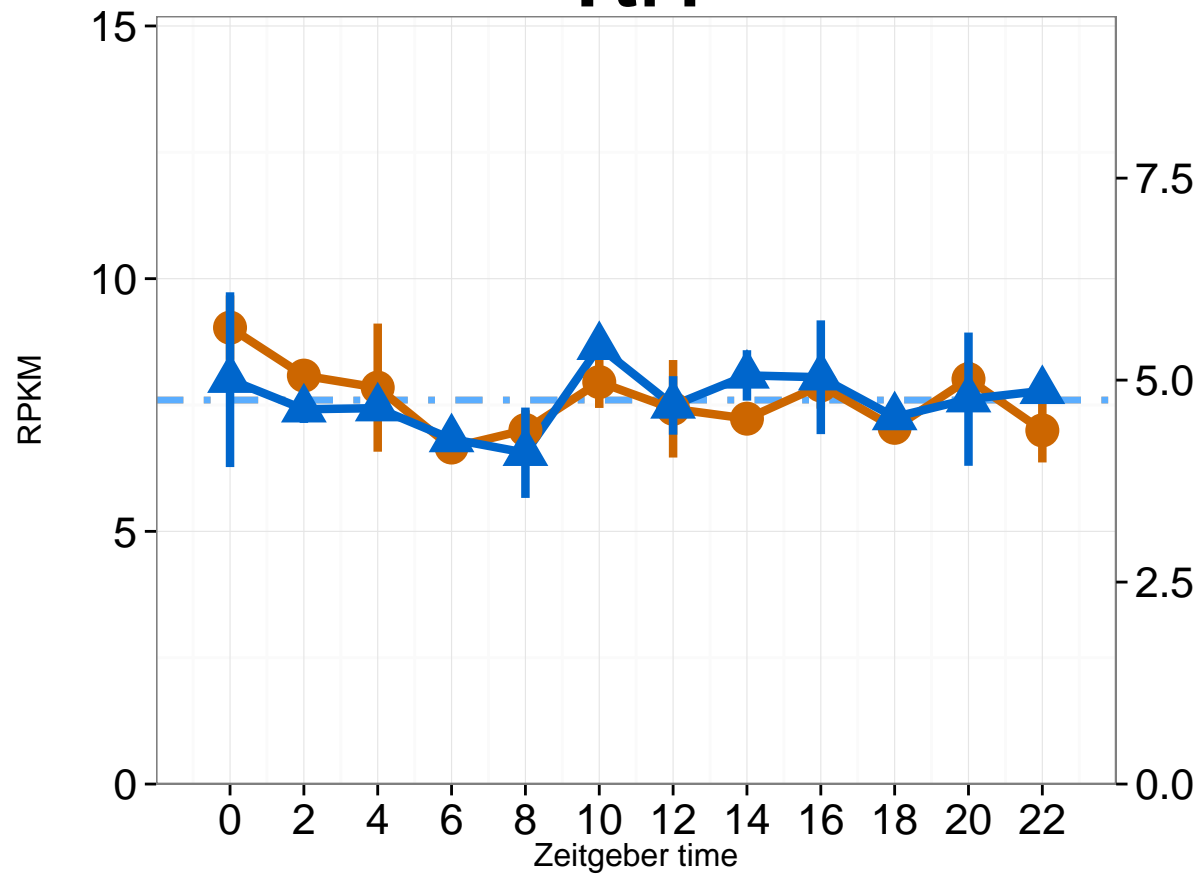

## Ttf1

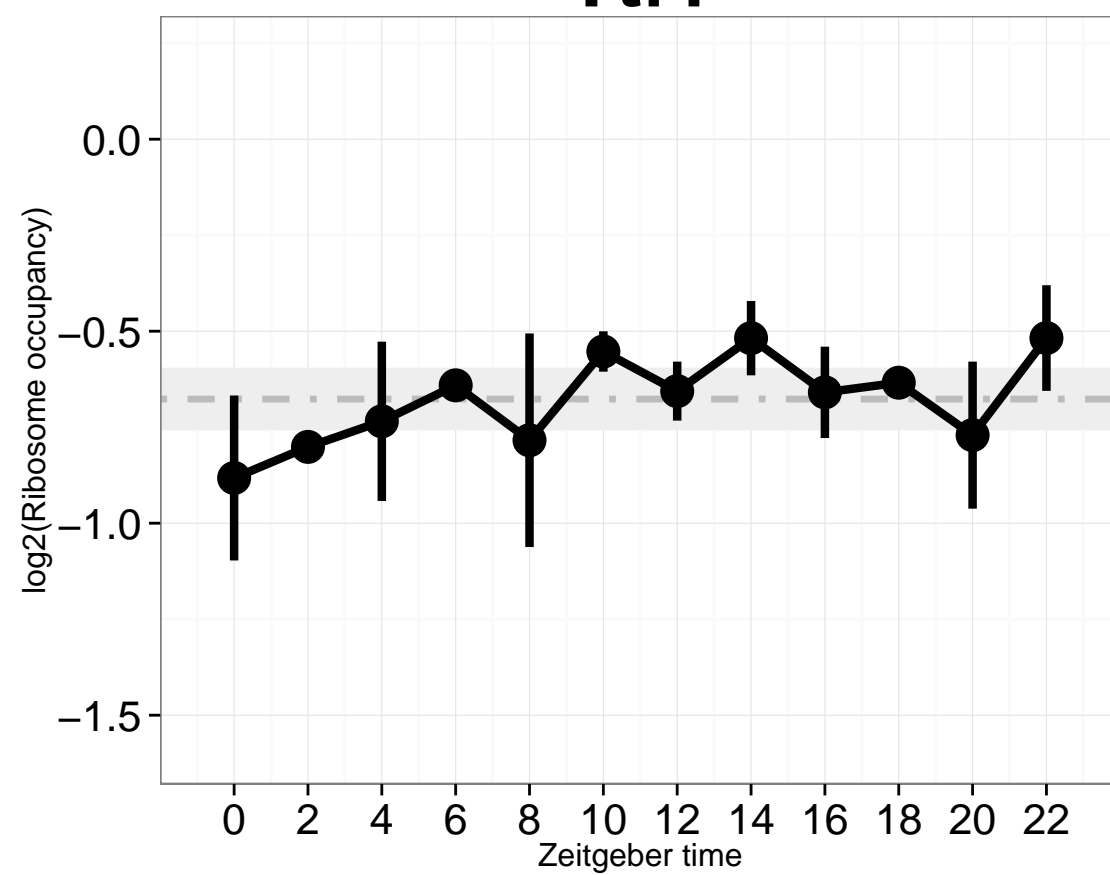

Supplement: Supplementary file 6802 [file 1]

## Ncoa2

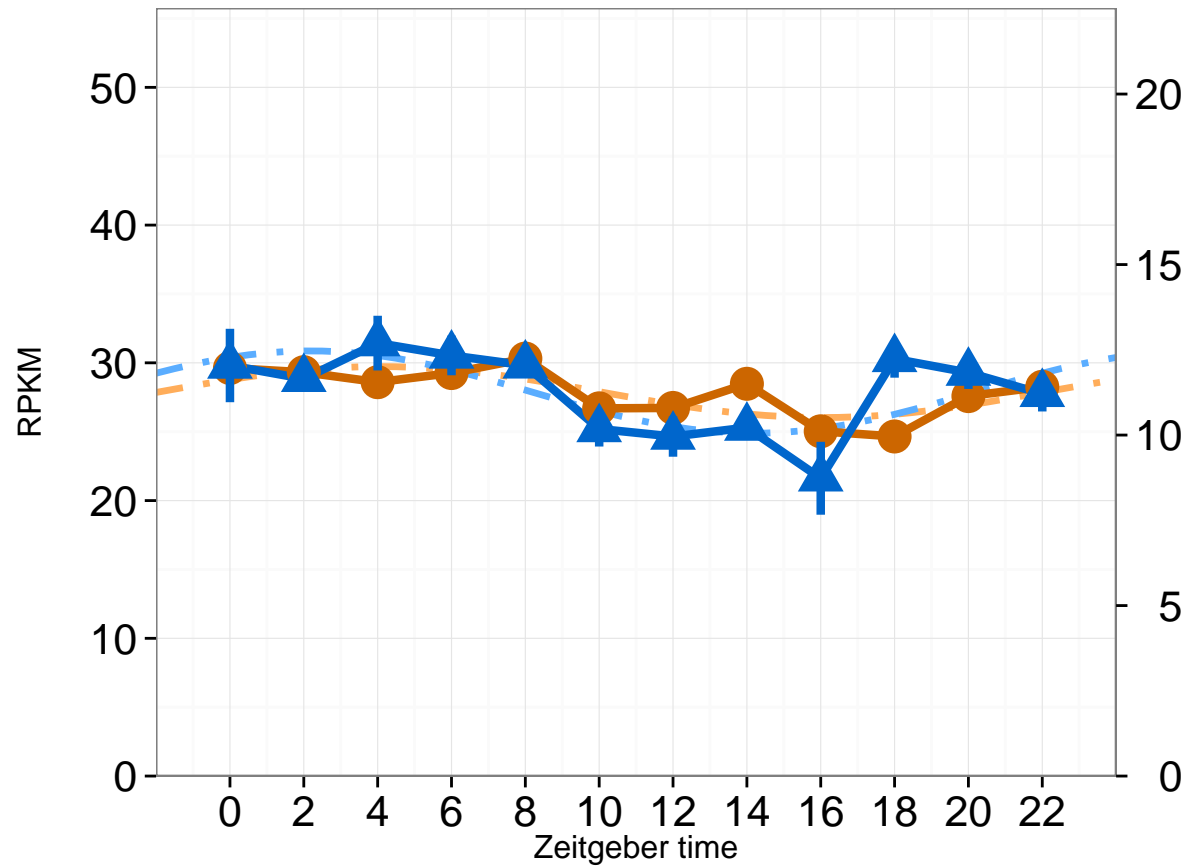

## Ncoa2

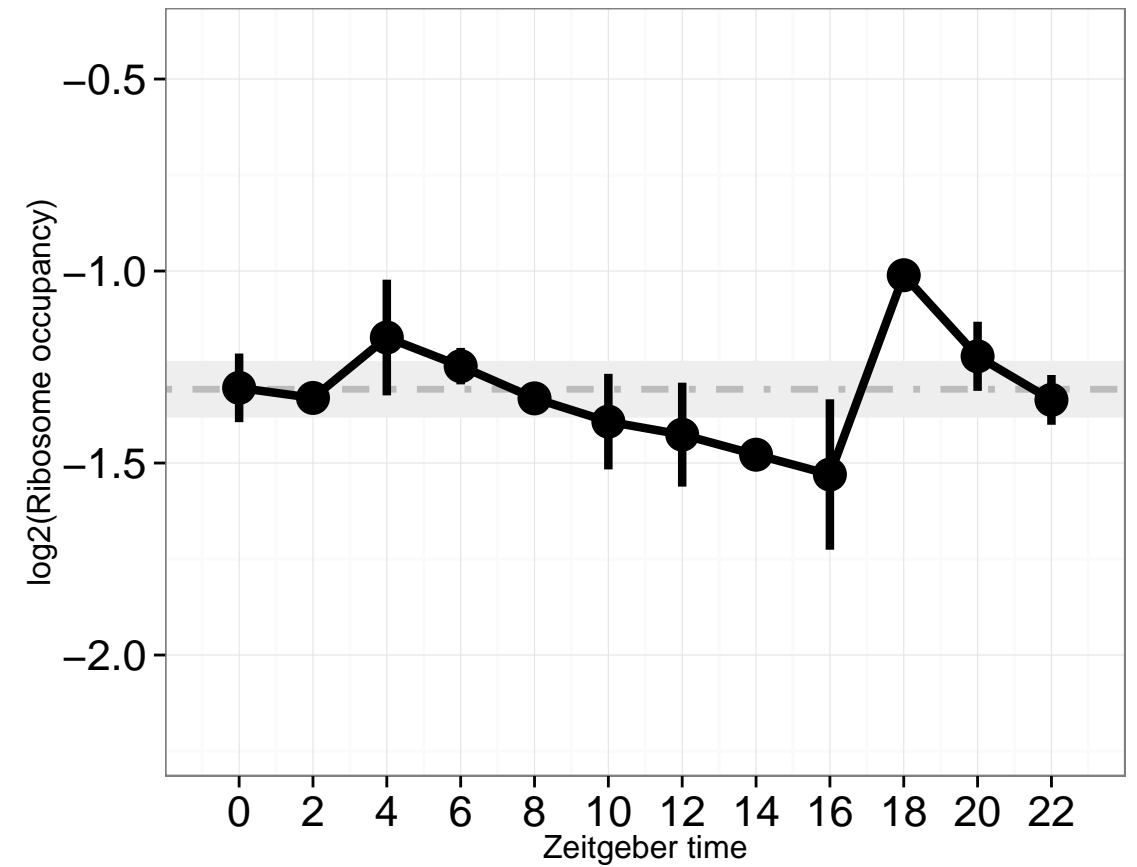

Supplement: Supplementary file 6803 [file 1]

## Pecr

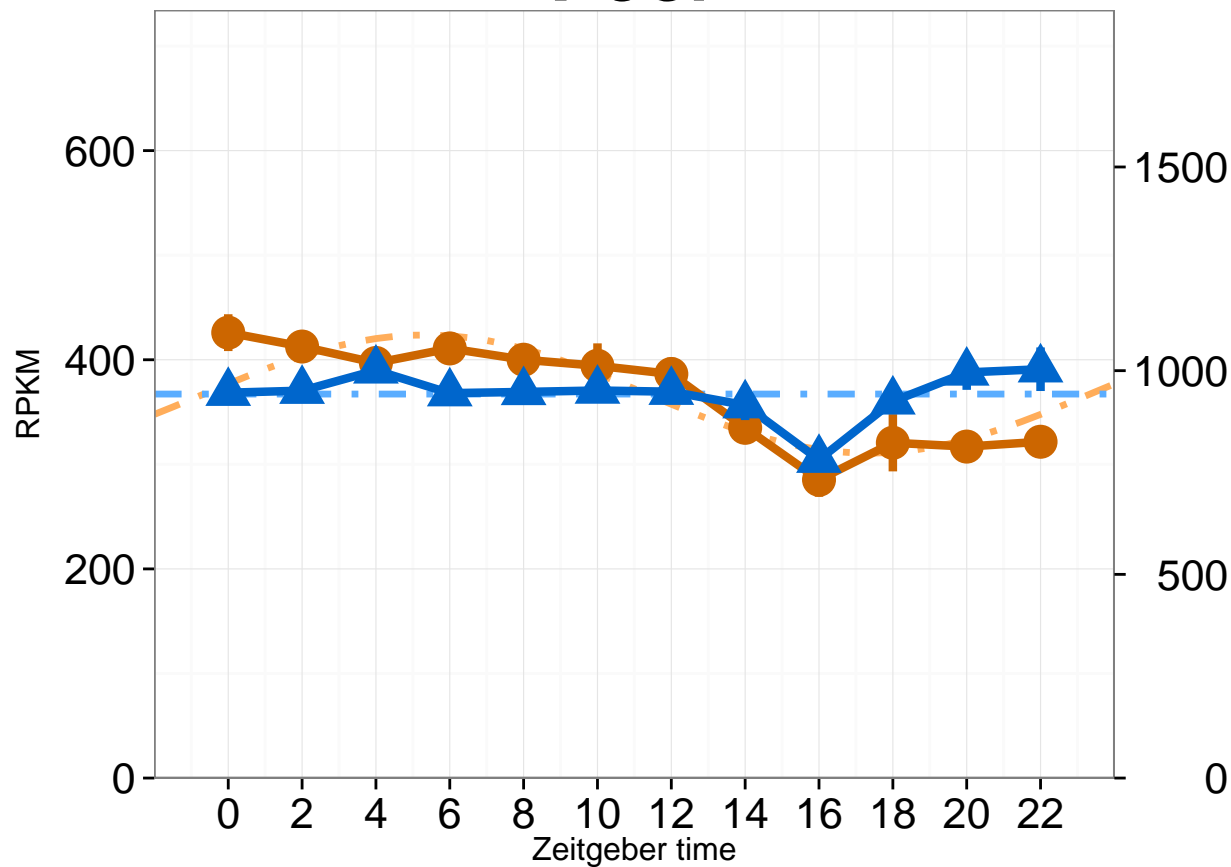

## Pecr

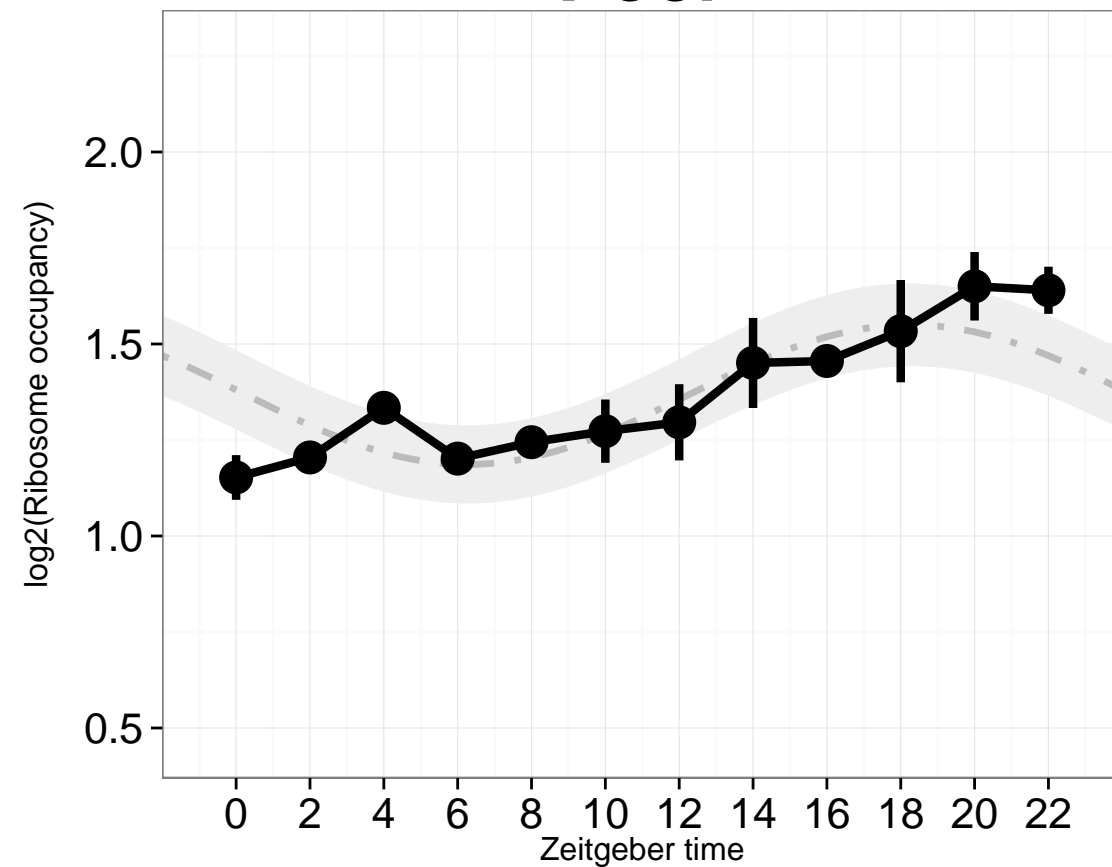

Supplement: Supplementary file 6804 [file 1]

## Rab4b

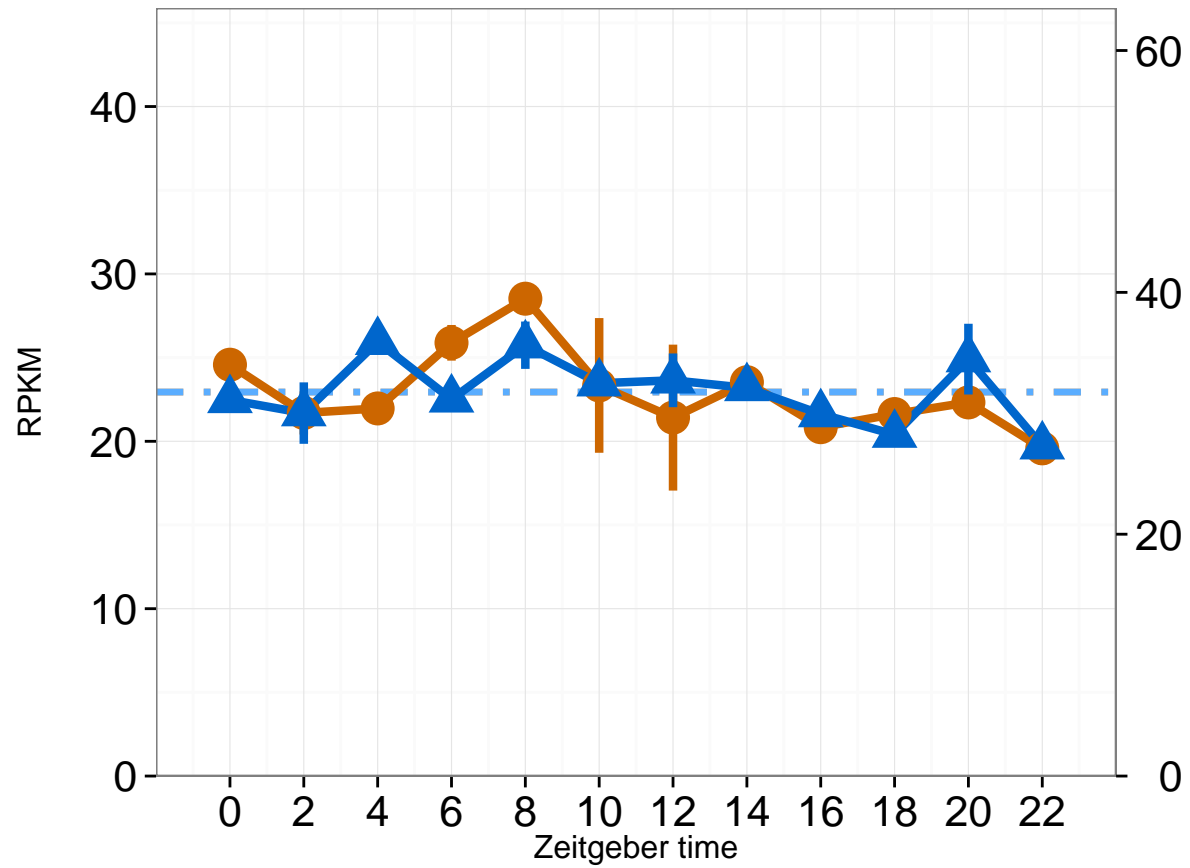

## Rab4b

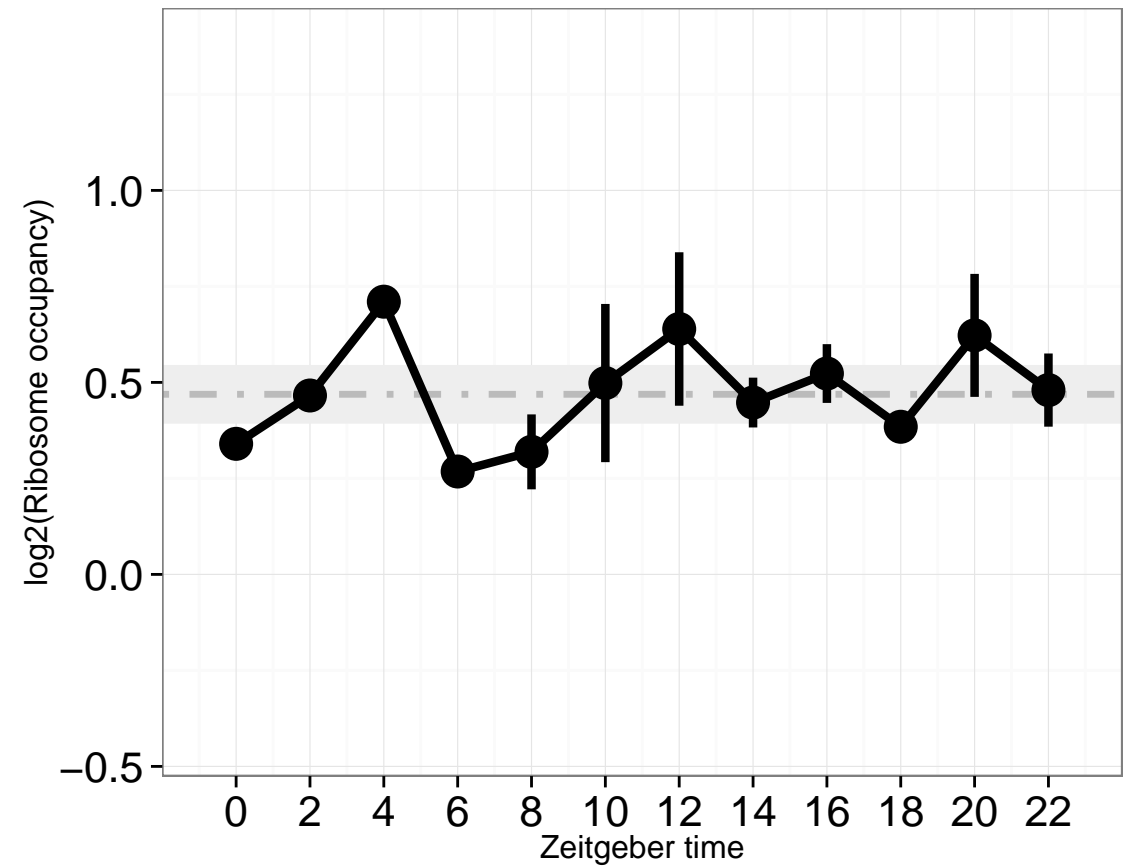

Supplement: Supplementary file 6805 [file 1]

# Mrpl36

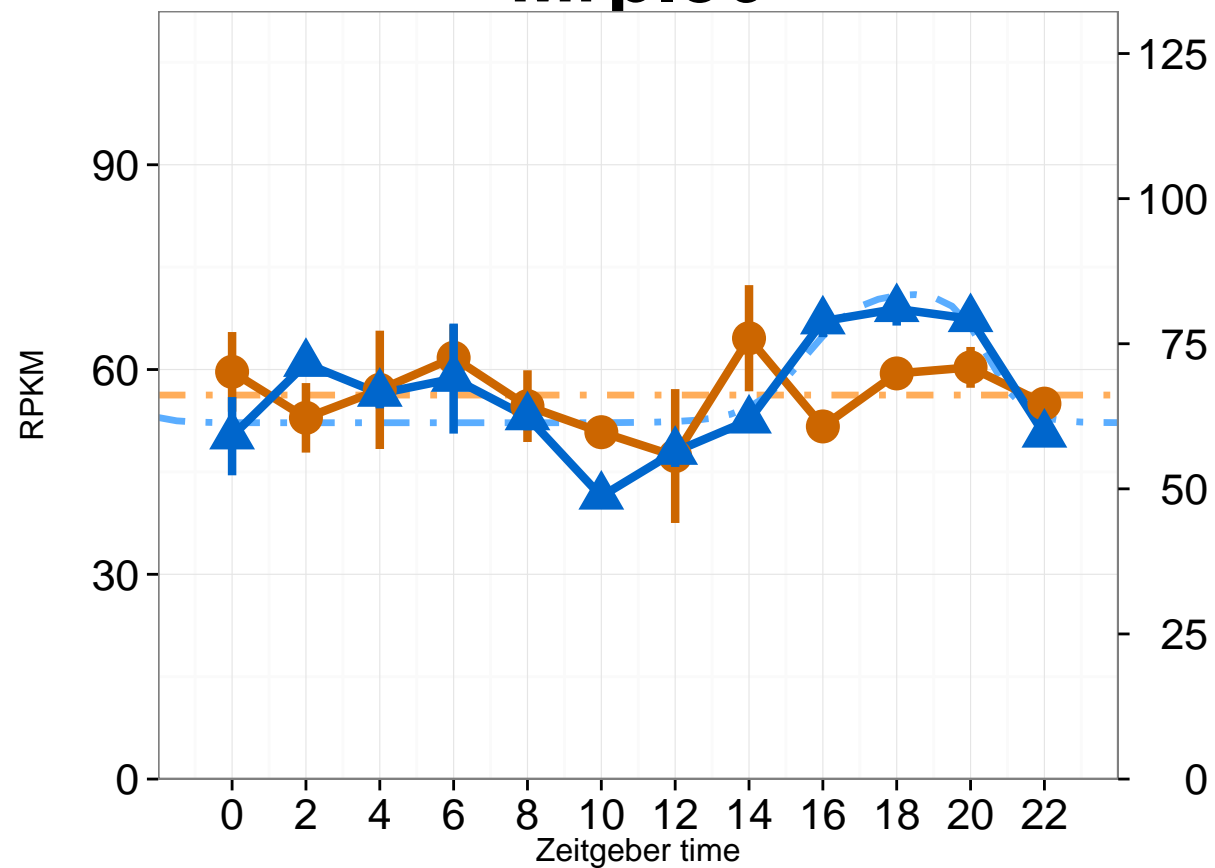

# Mrpl36

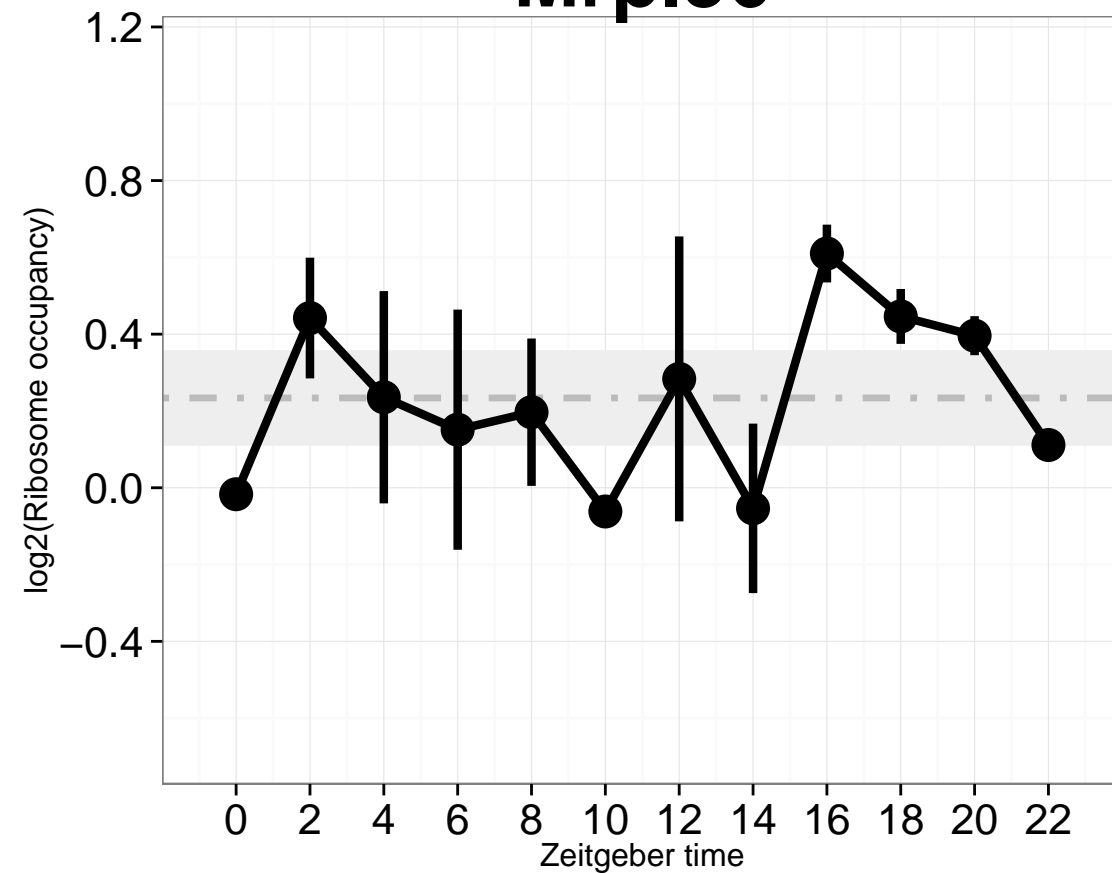

Supplement: Supplementary file 6806 [file 1]

## Loxl4

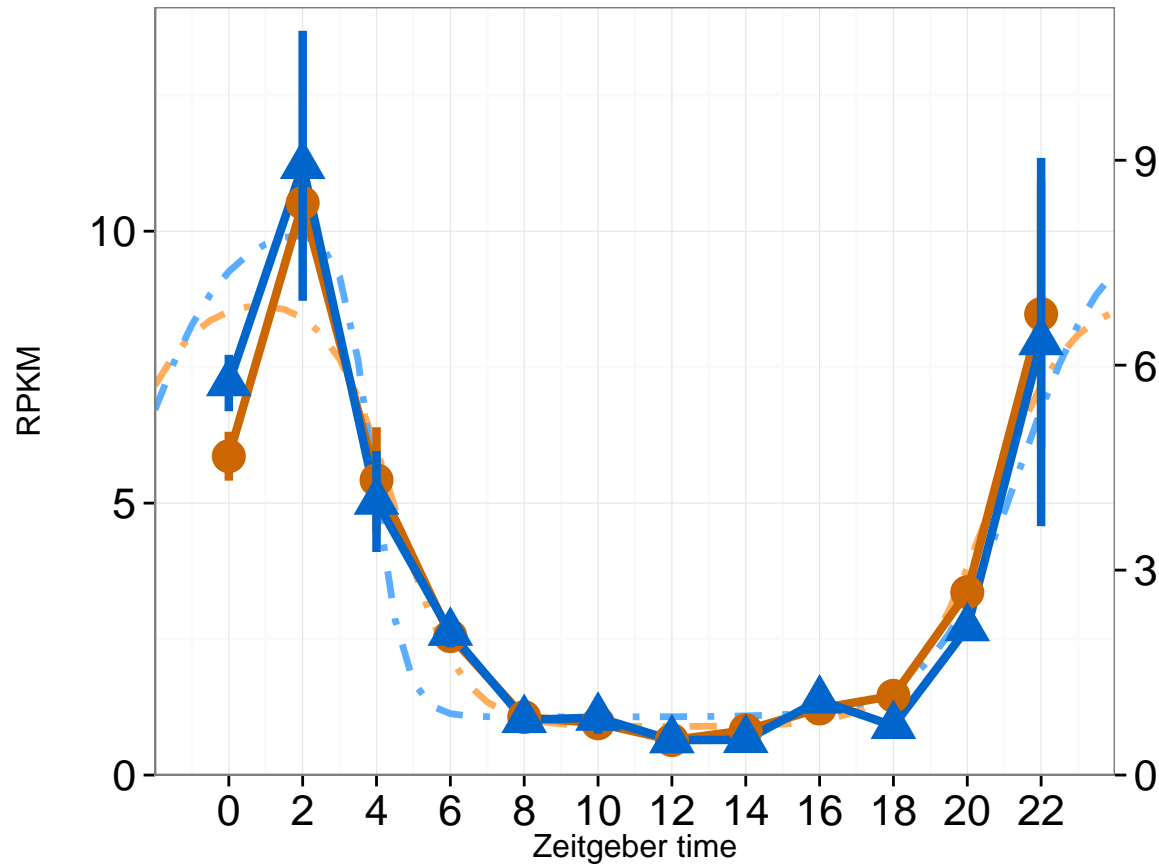

## Loxl4

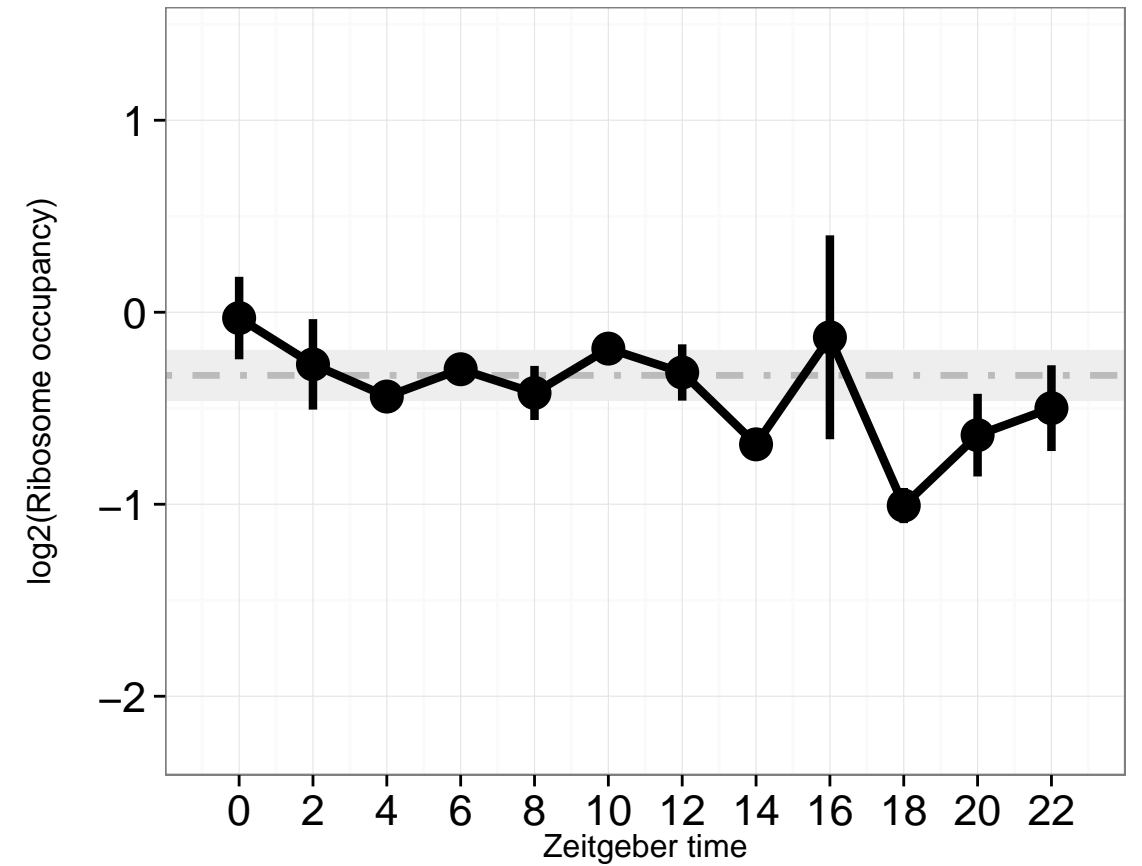

Supplement: Supplementary file 6807 [file 1]

## Gsk3a

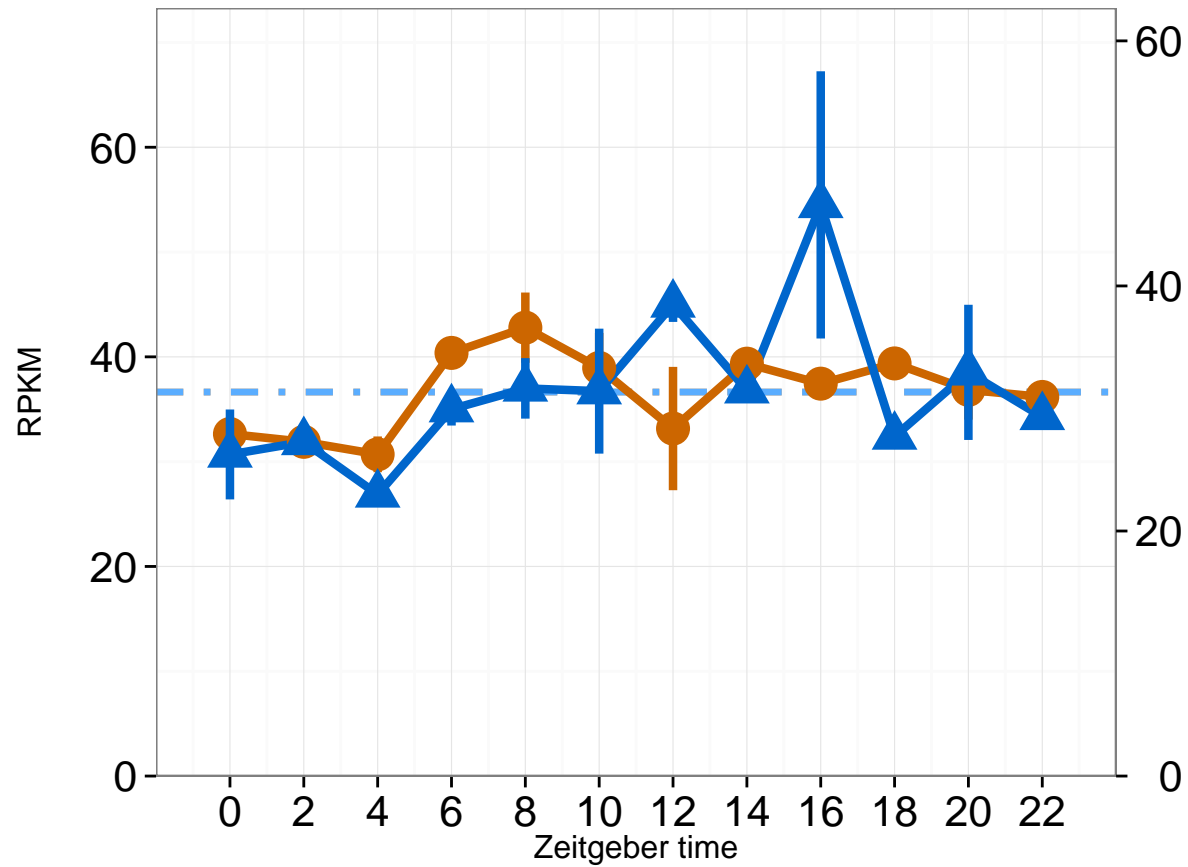

## Gsk3a

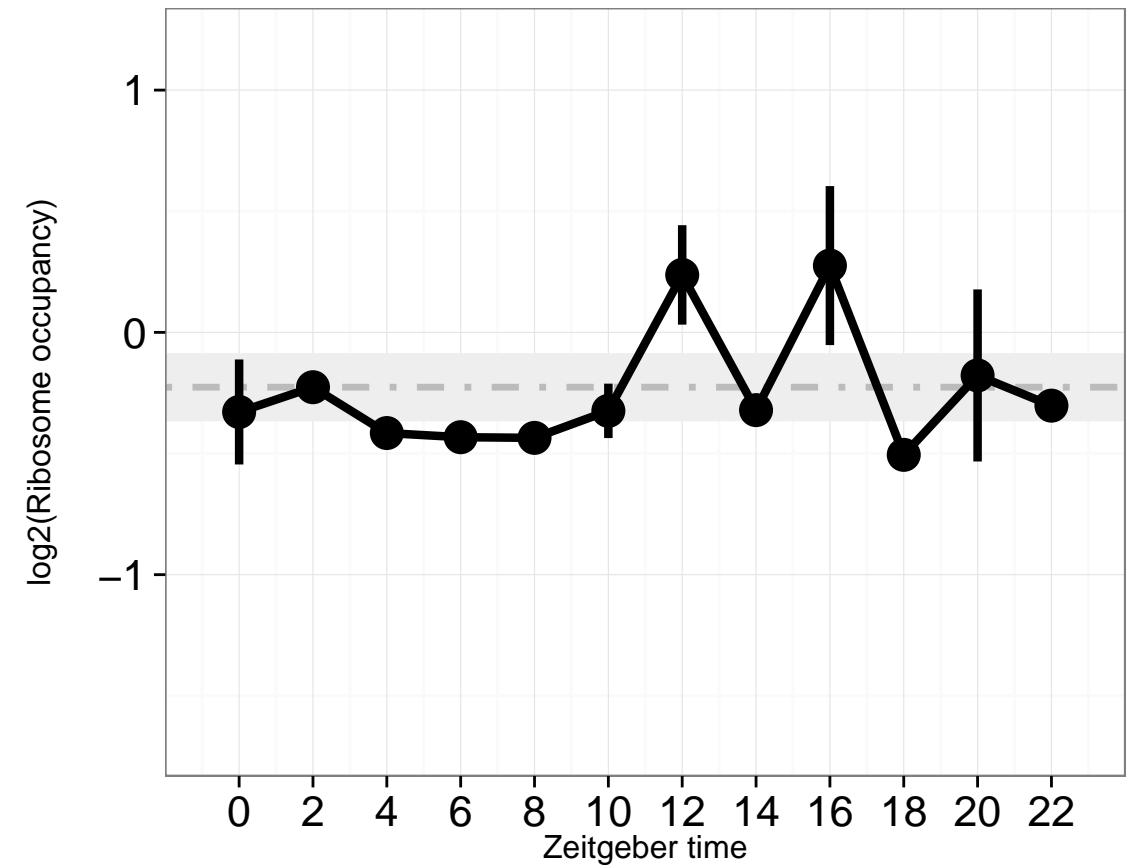

Supplement: Supplementary file 6808 [file 1]

## Ubp1

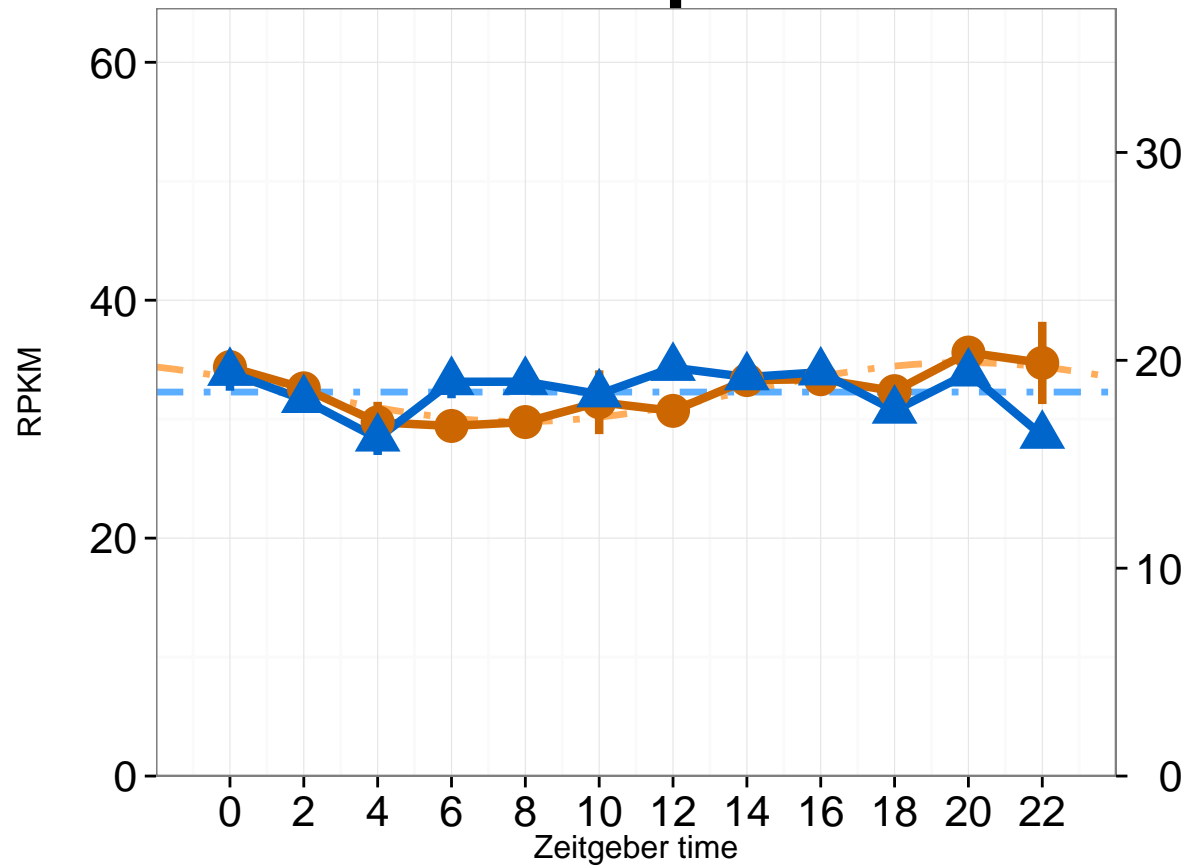

## Ubp1

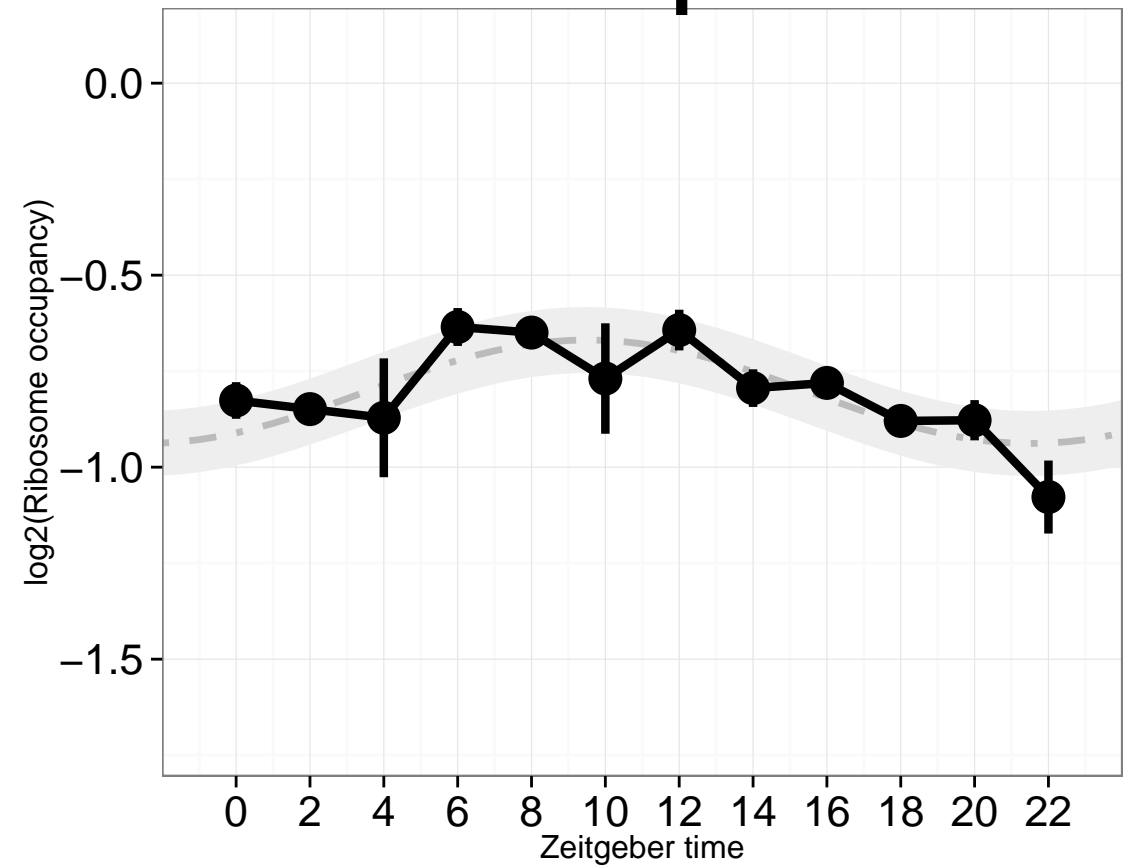

Supplement: Supplementary file 6809 [file 1]

## Myh14

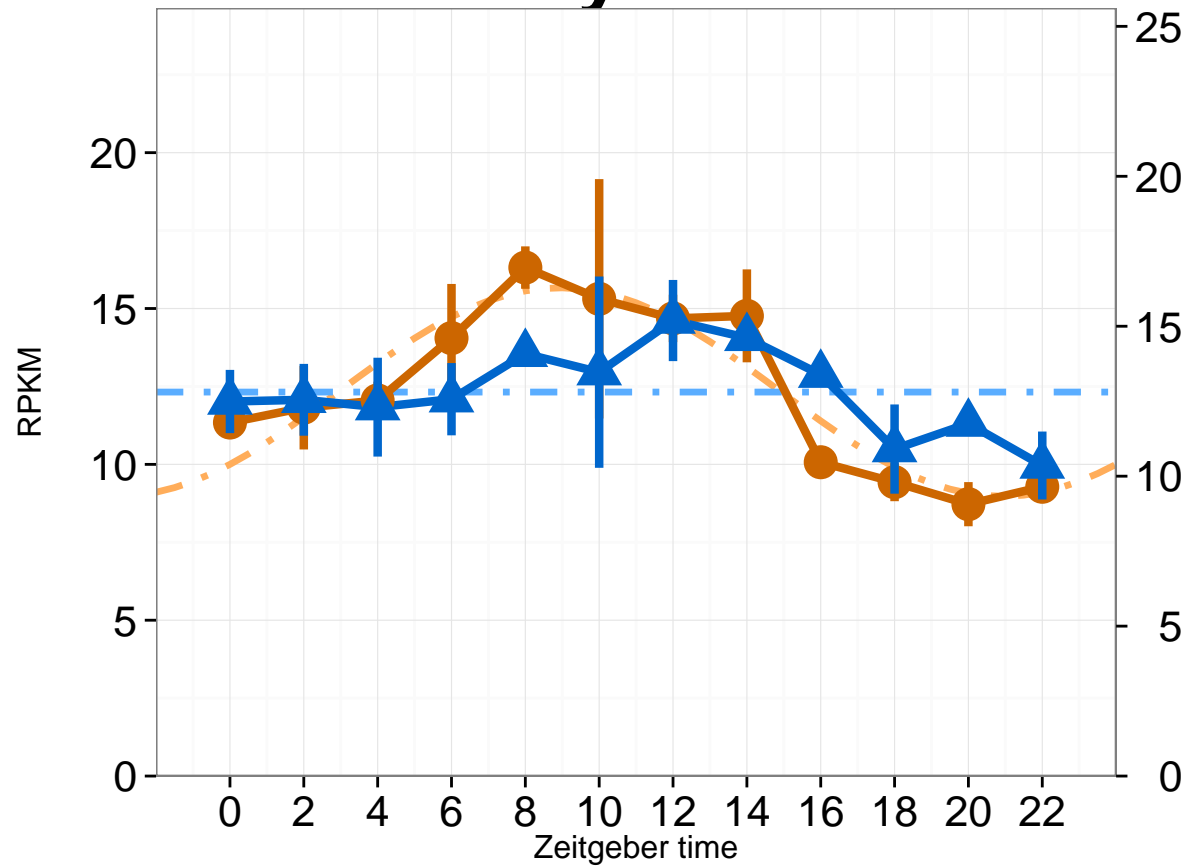

## Myh14

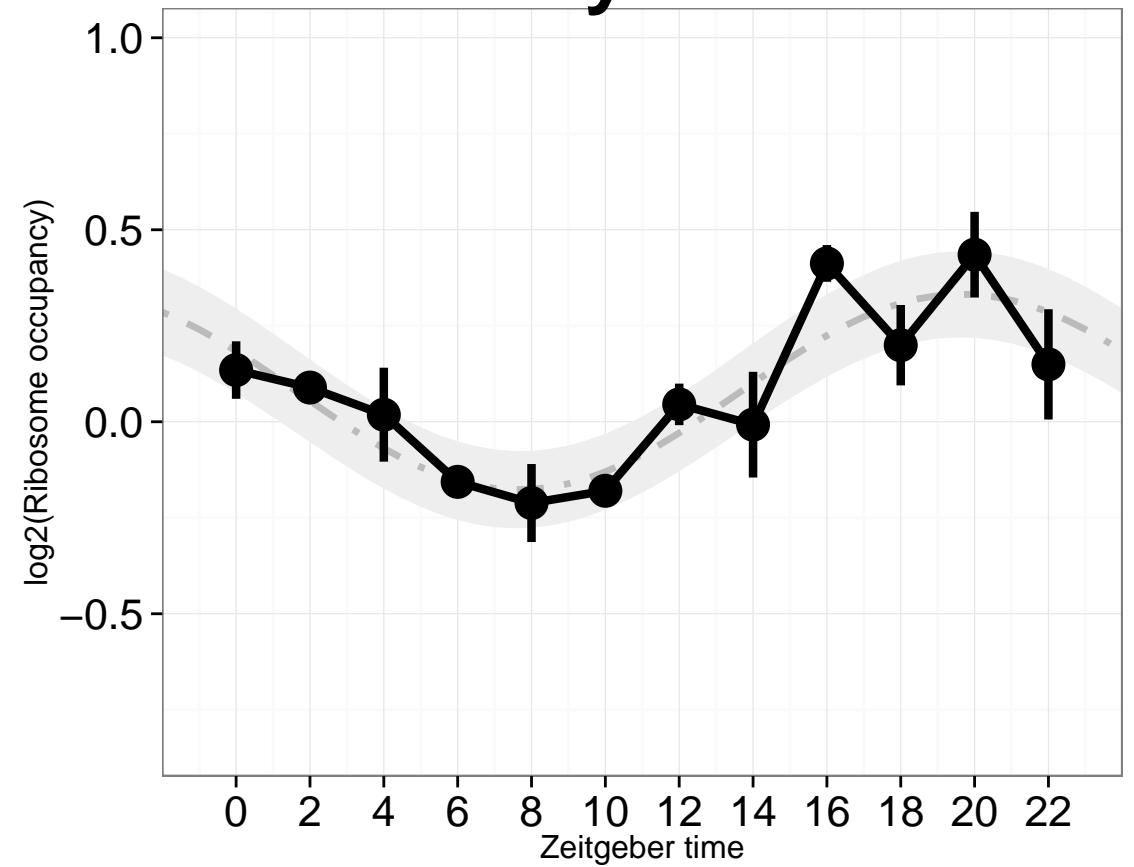

Supplement: Supplementary file 6810 [file 1]

## Wee1

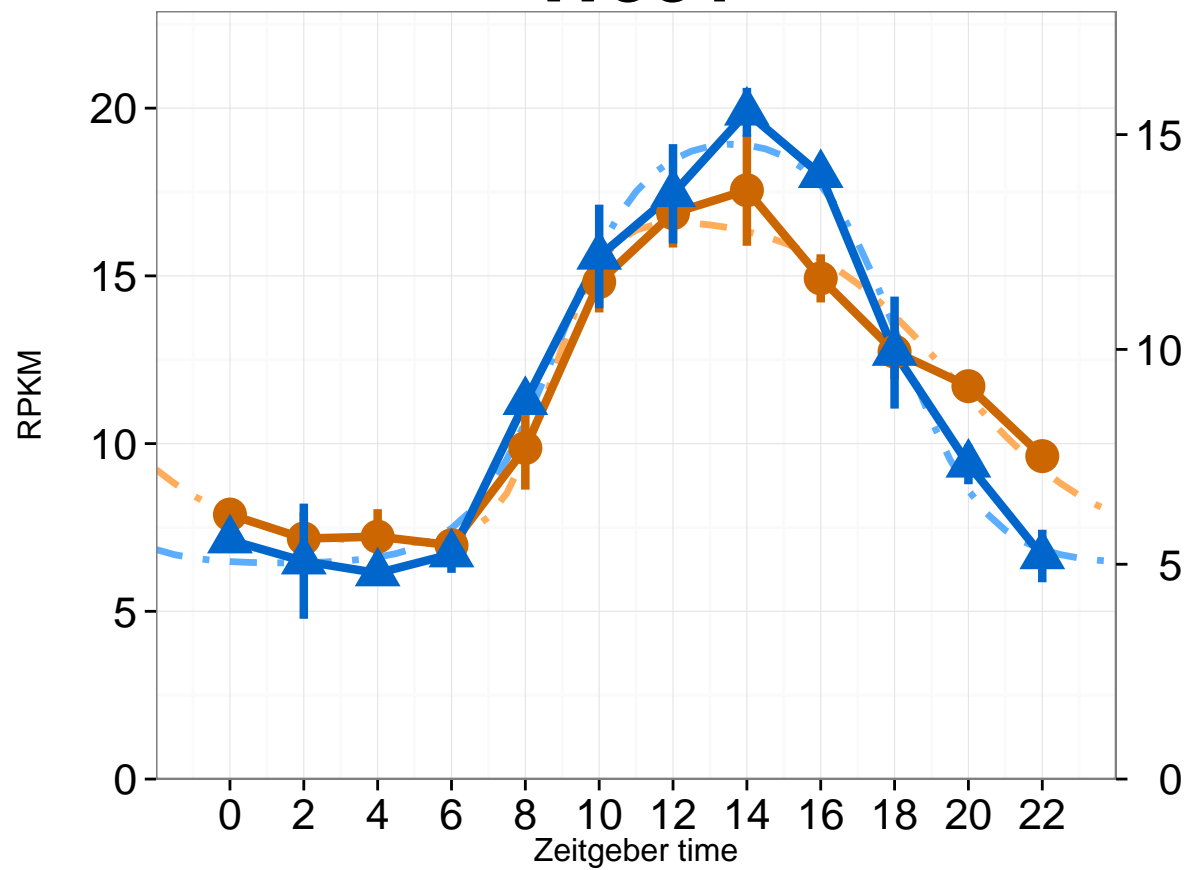

## Wee1

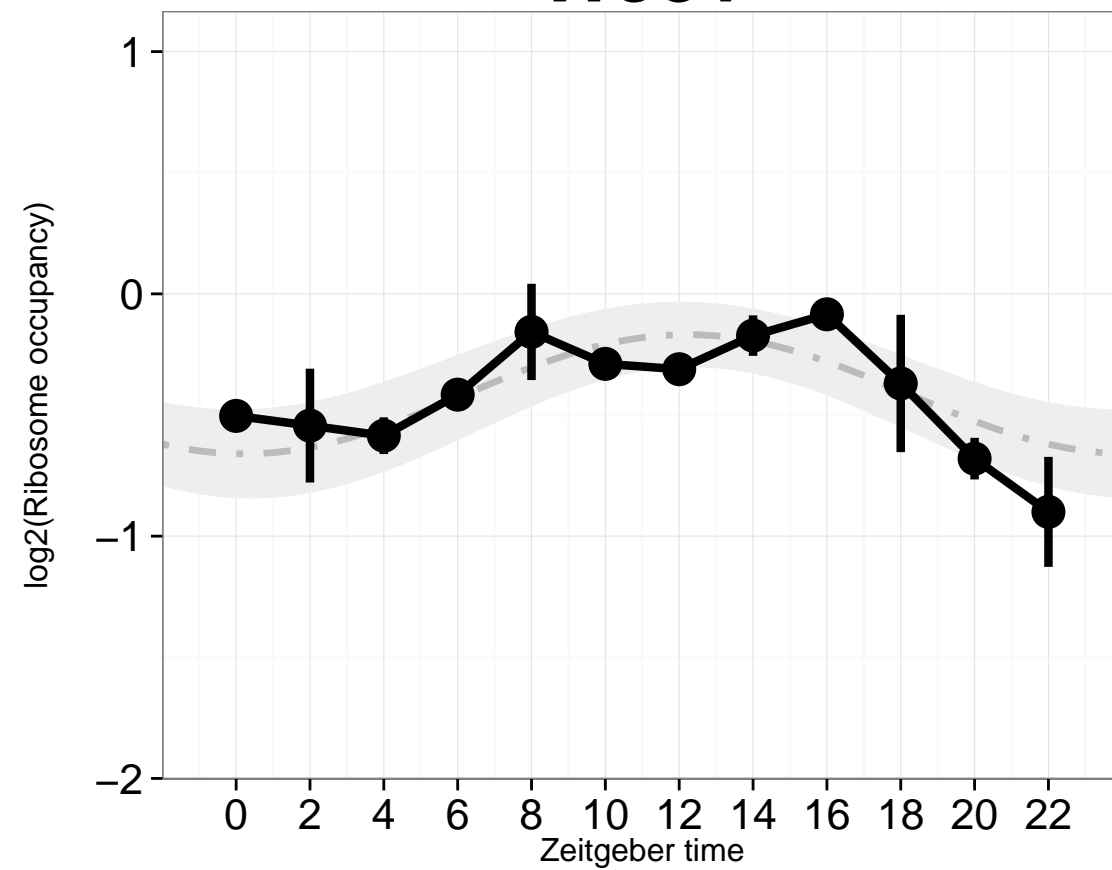

Supplement: Supplementary file 6811 [file 1]

## Trf

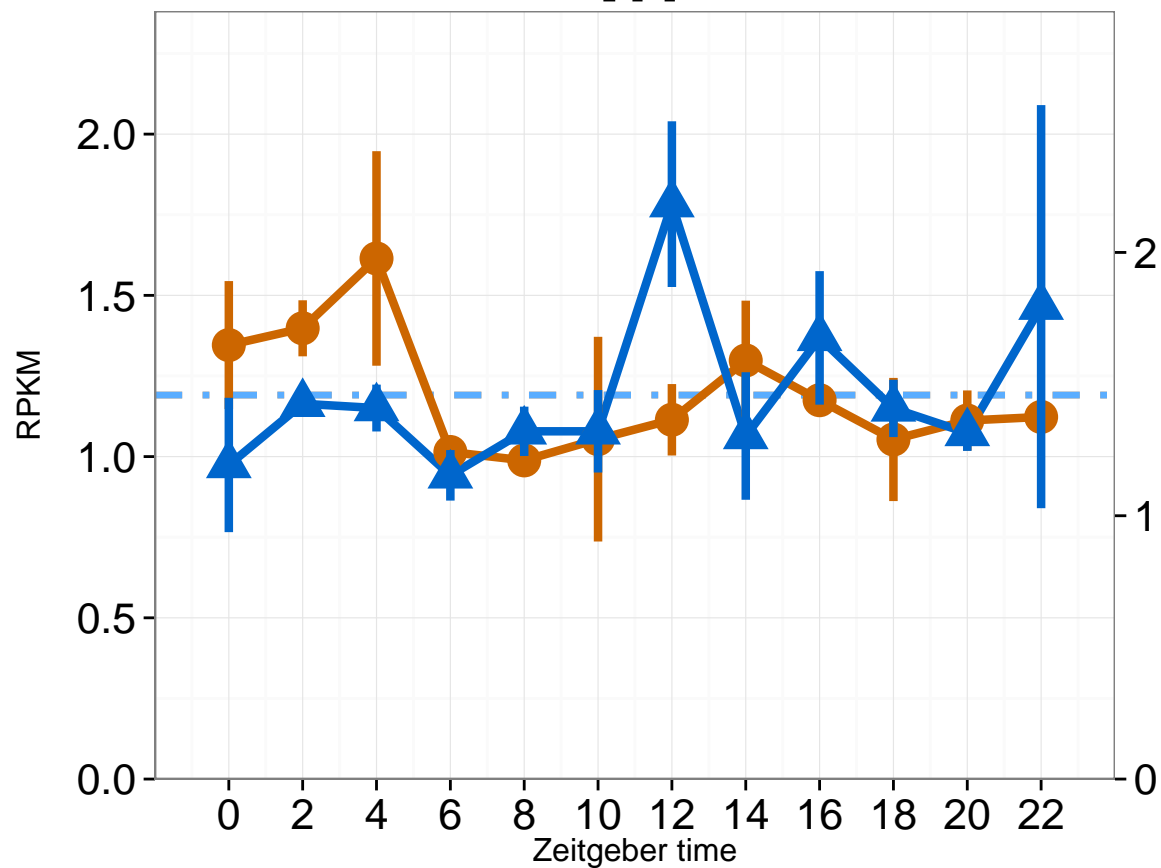

## Trf

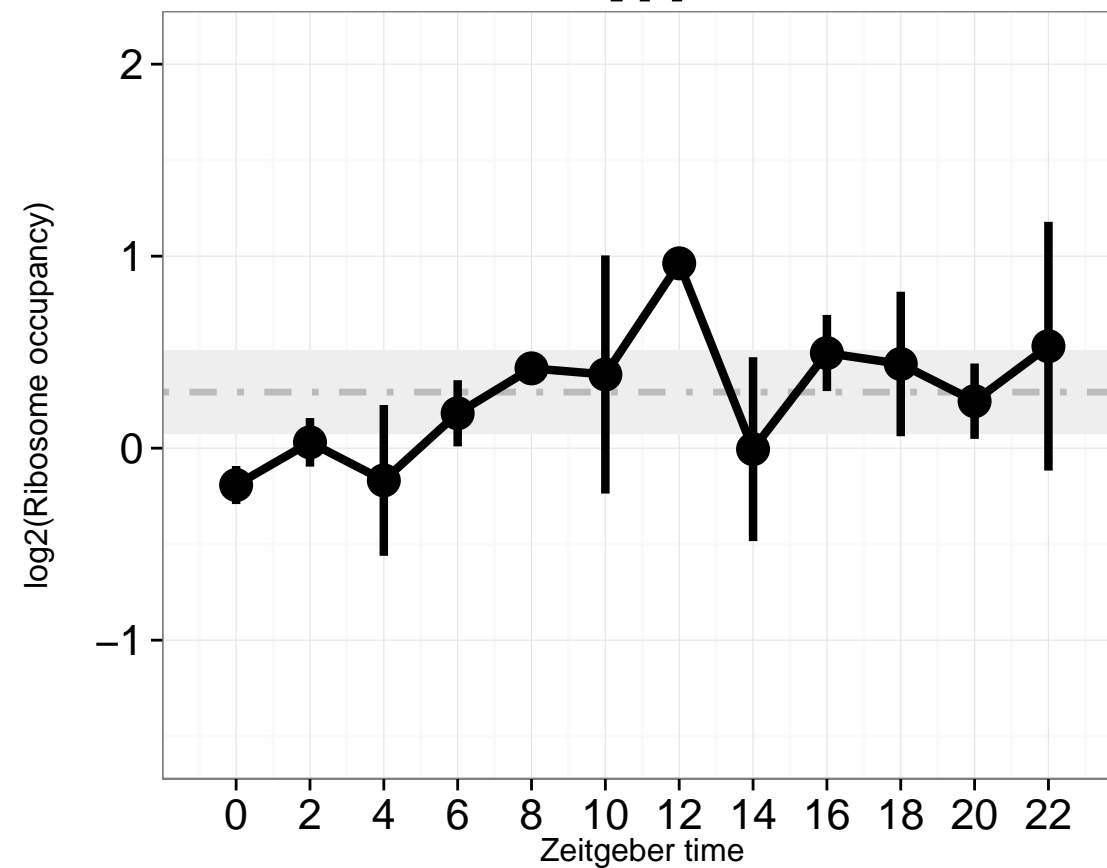

Supplement: Supplementary file 6812 [file 1]

## Hspa4l

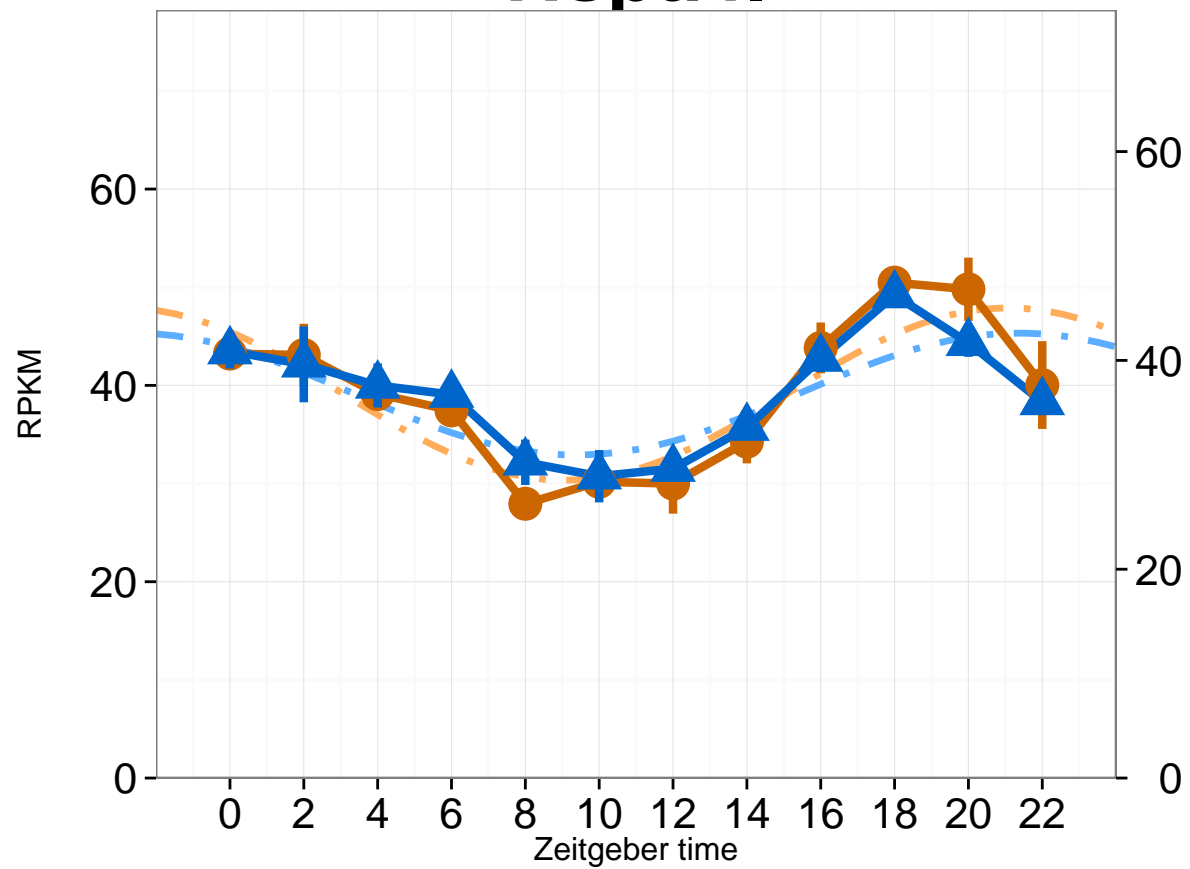

## Hspa4l

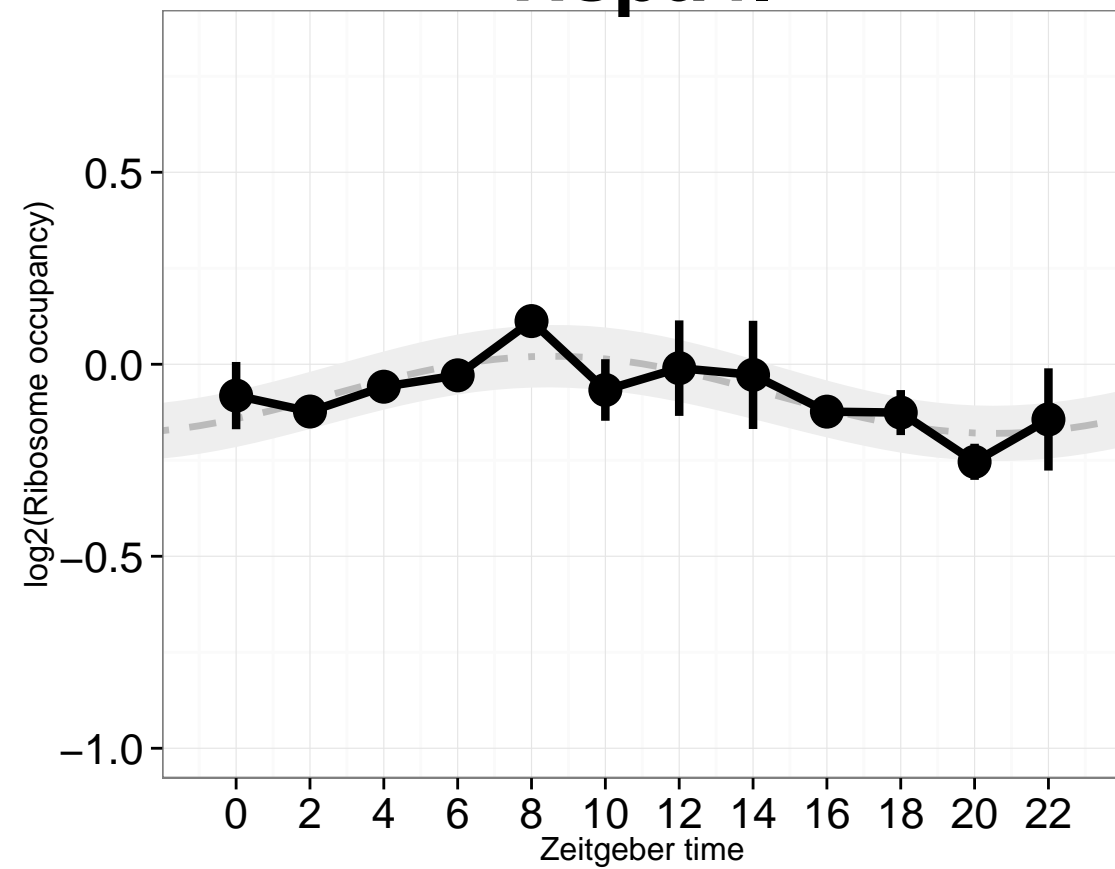

Supplement: Supplementary file 6813 [file 1]

# Pde8b

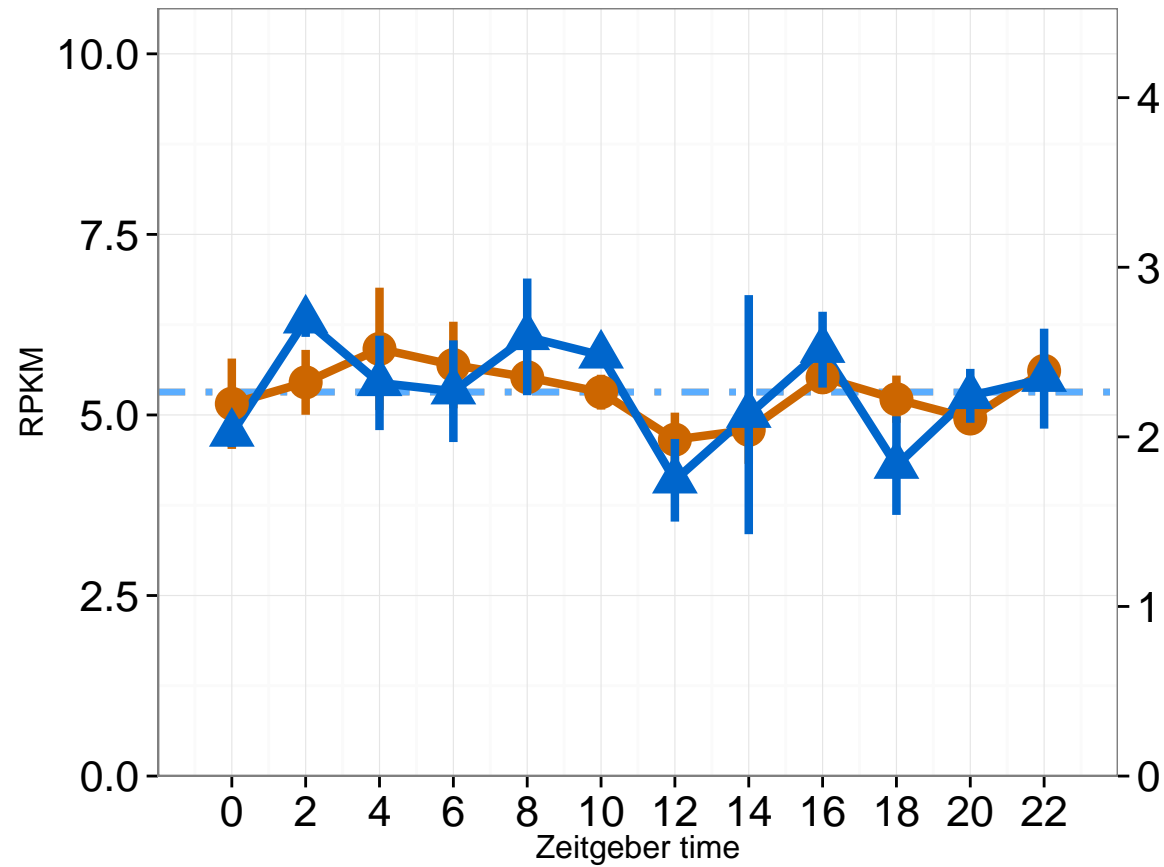

# Pde8b

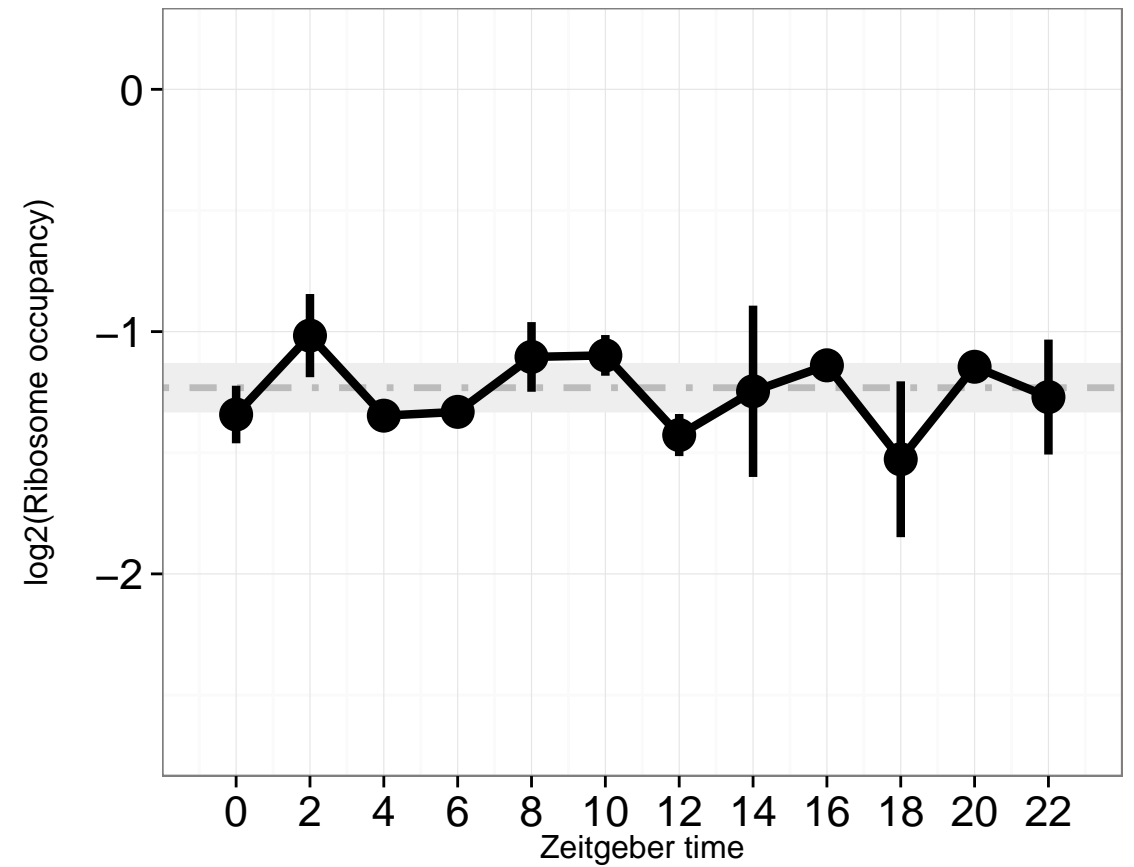

Supplement: Supplementary file 6814 [file 1]

# Man2b1

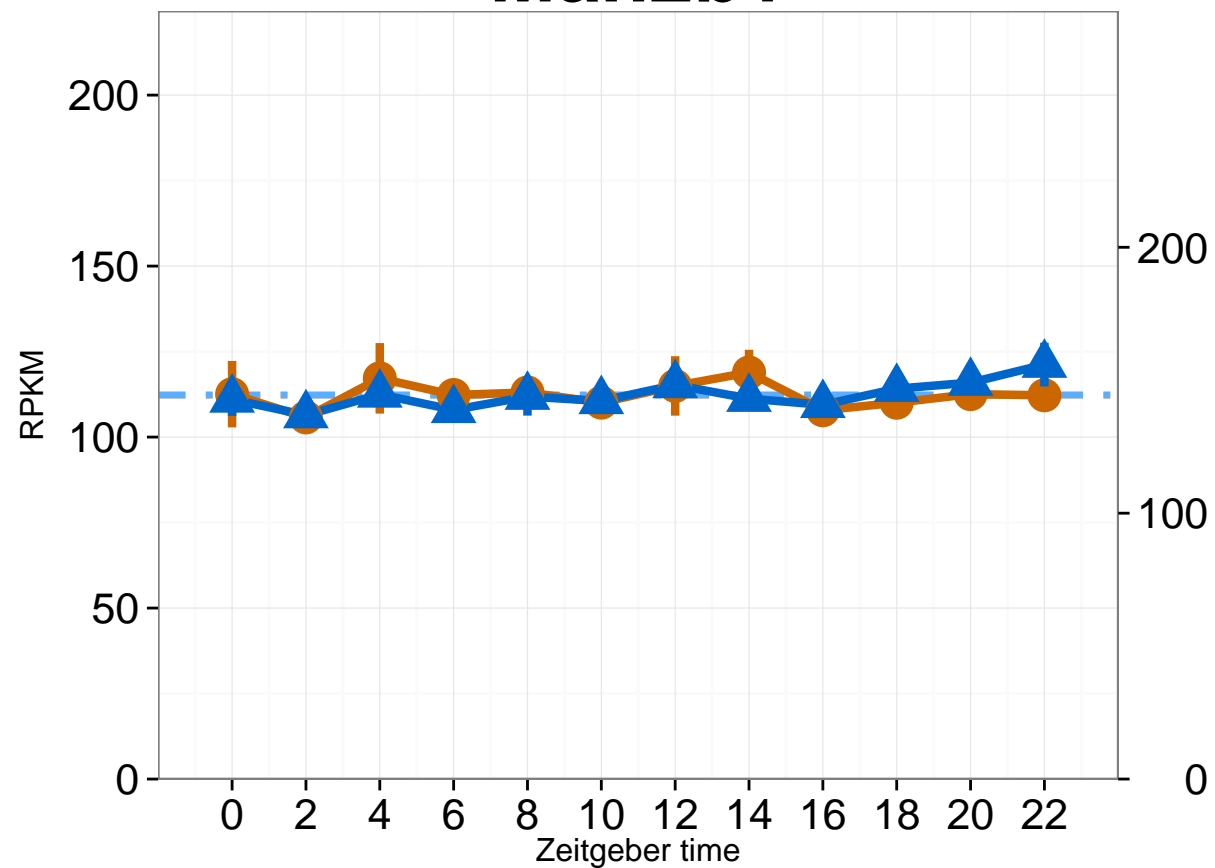

# Man2b1

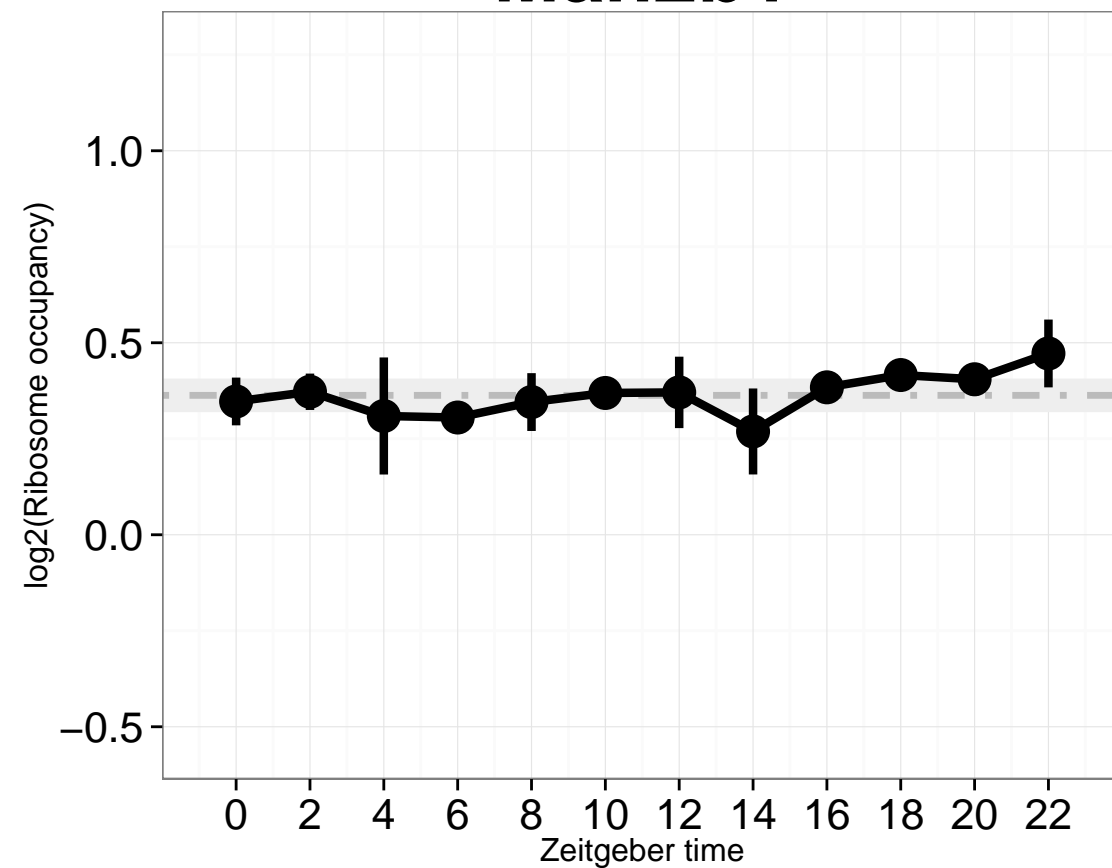

Supplement: Supplementary file 6815 [file 1]

## Bhlhe40

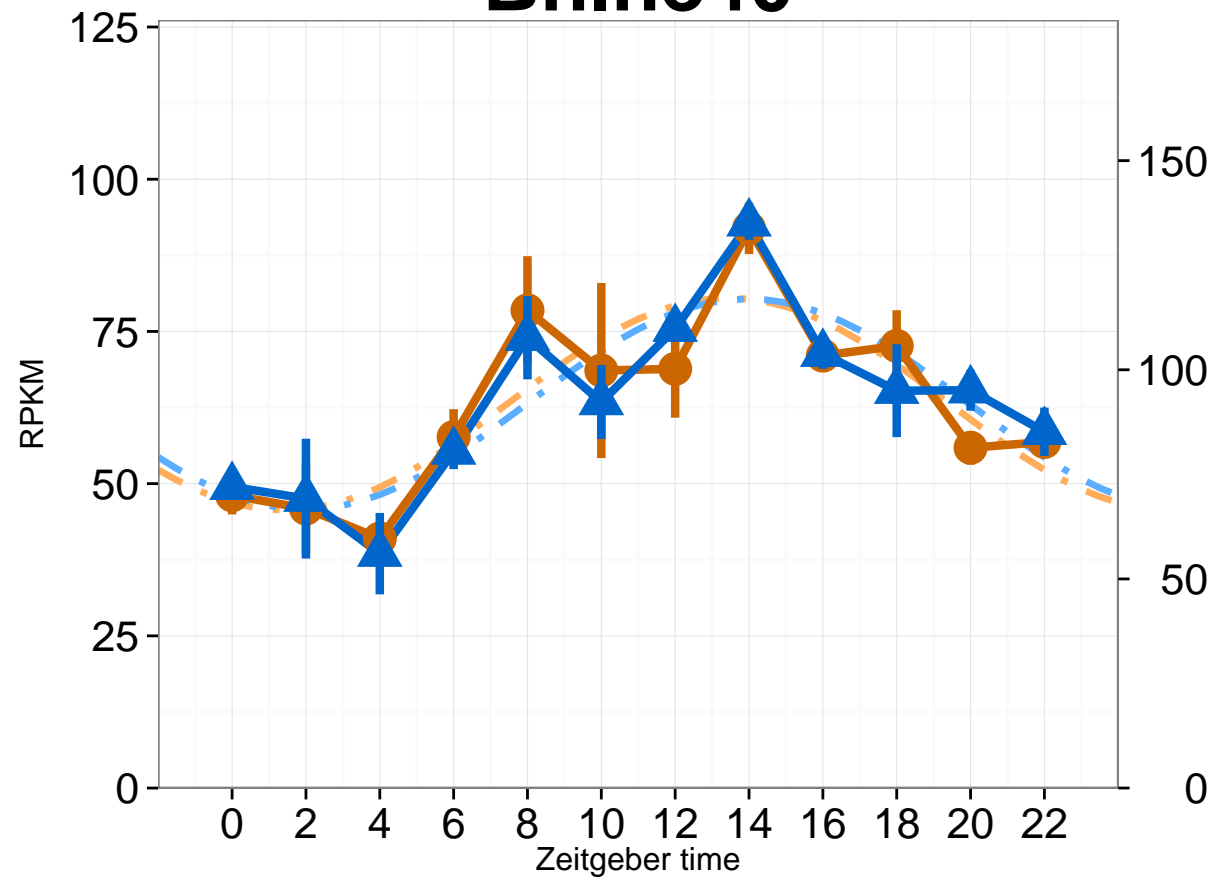

## Bhlhe40

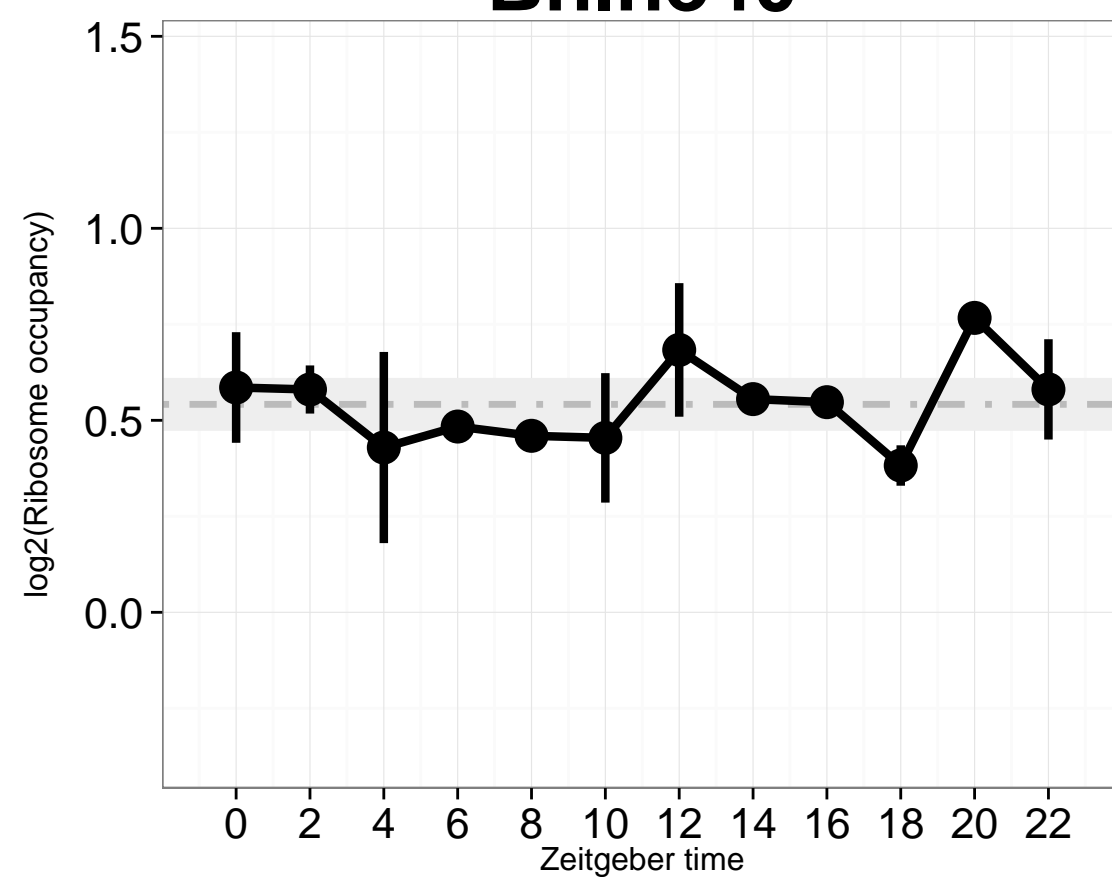

Supplement: Supplementary file 6816 [file 1]

# Epm2a

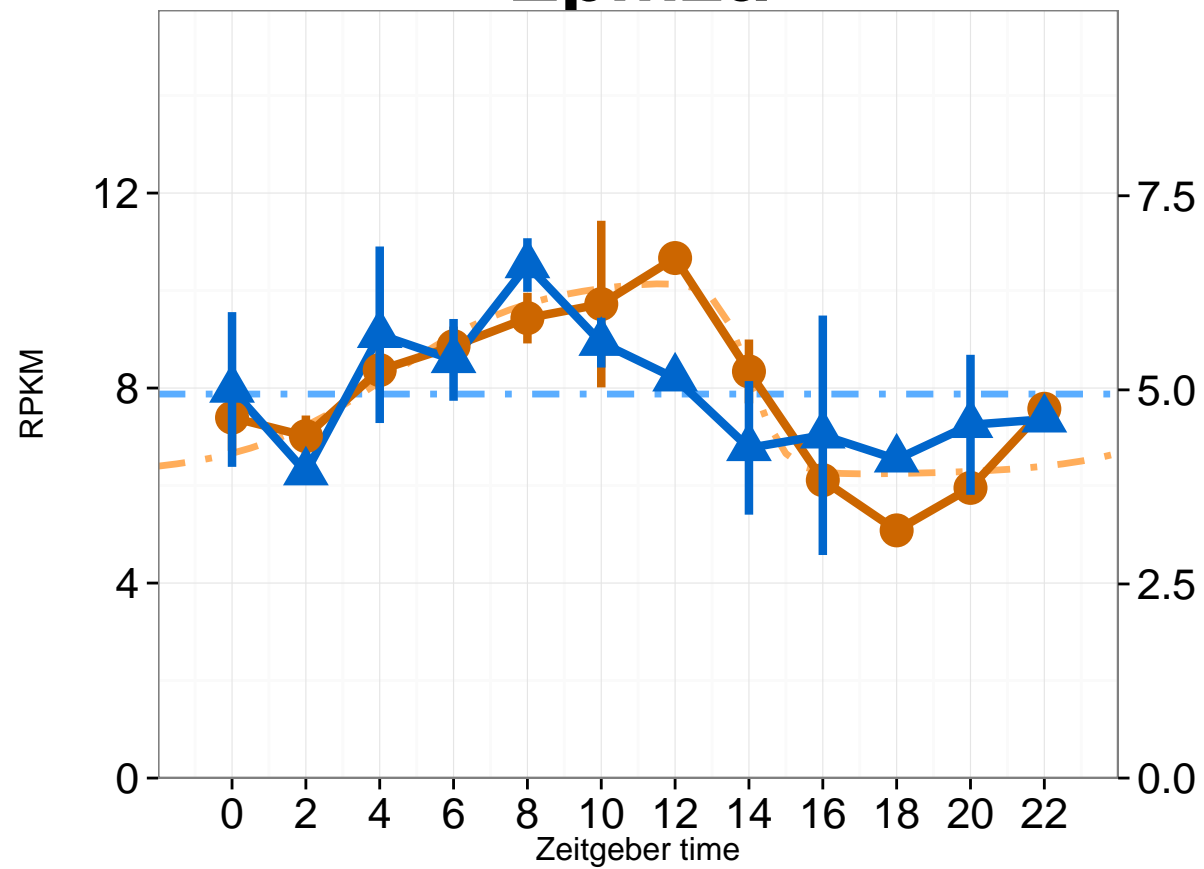

# Epm2a

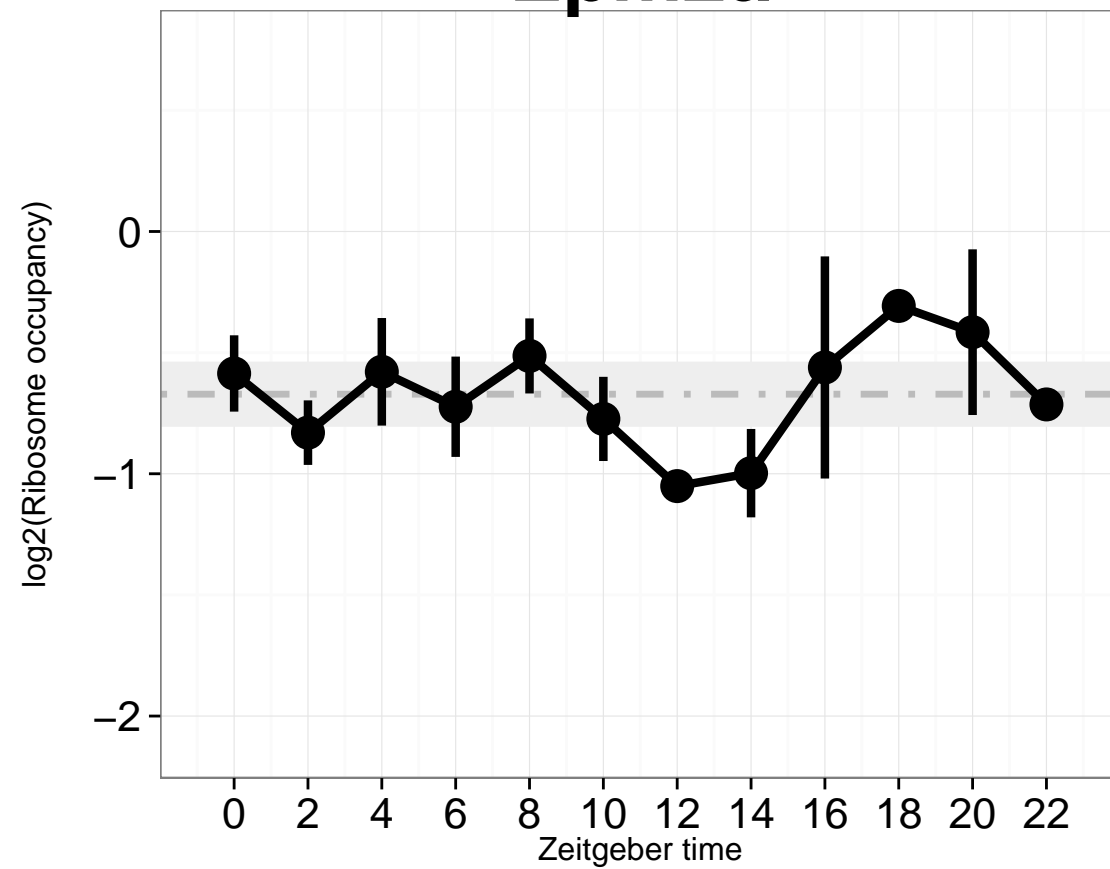

Supplement: Supplementary file 6817 [file 1]

# Gyk

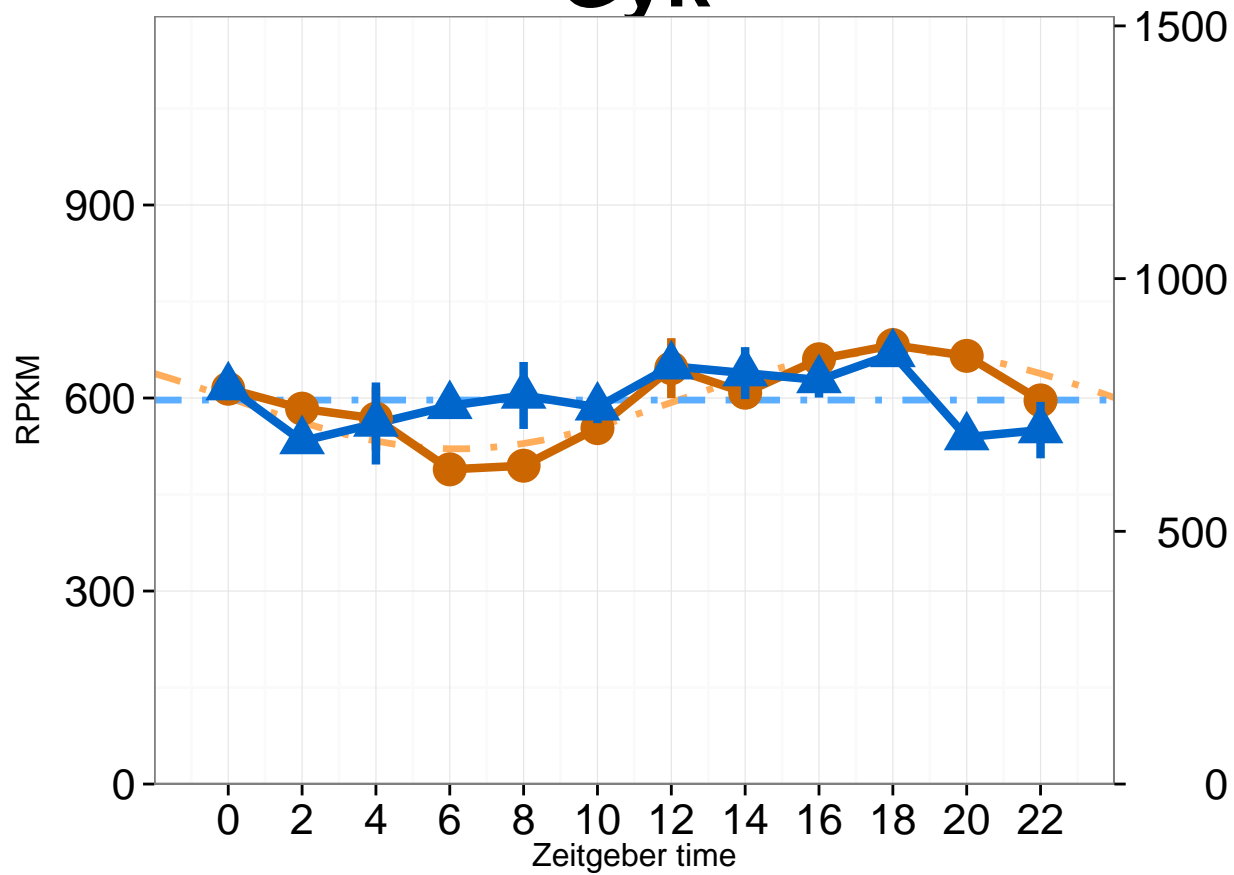

# Gyk

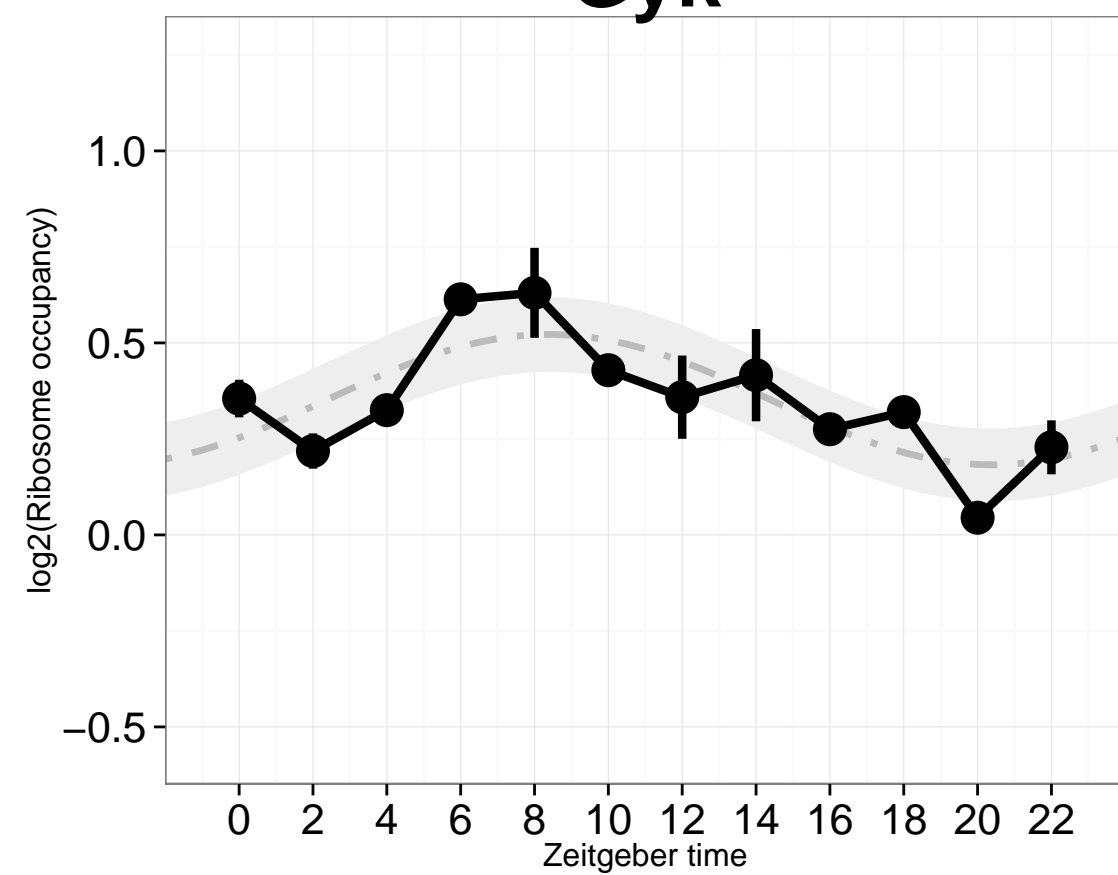

Supplement: Supplementary file 6818 [file 1]

# Them6

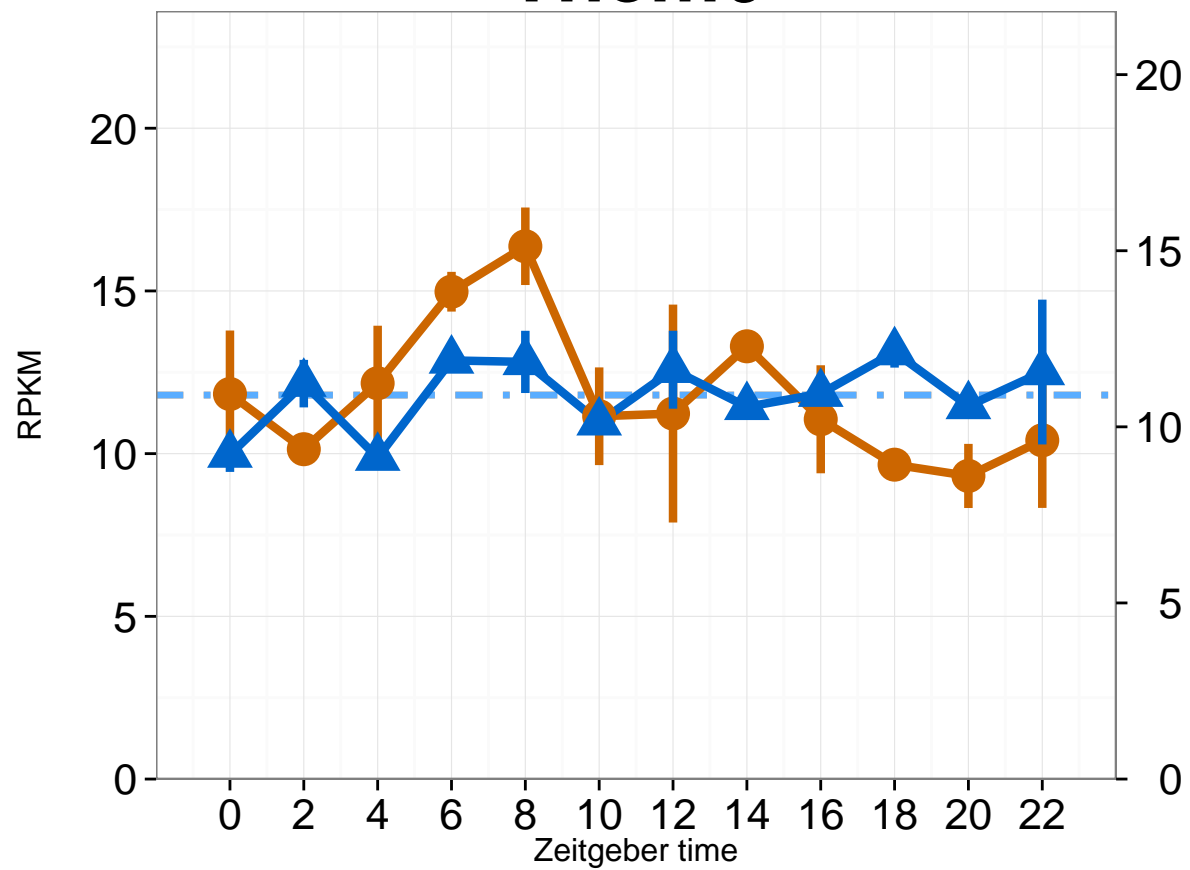

# Them6

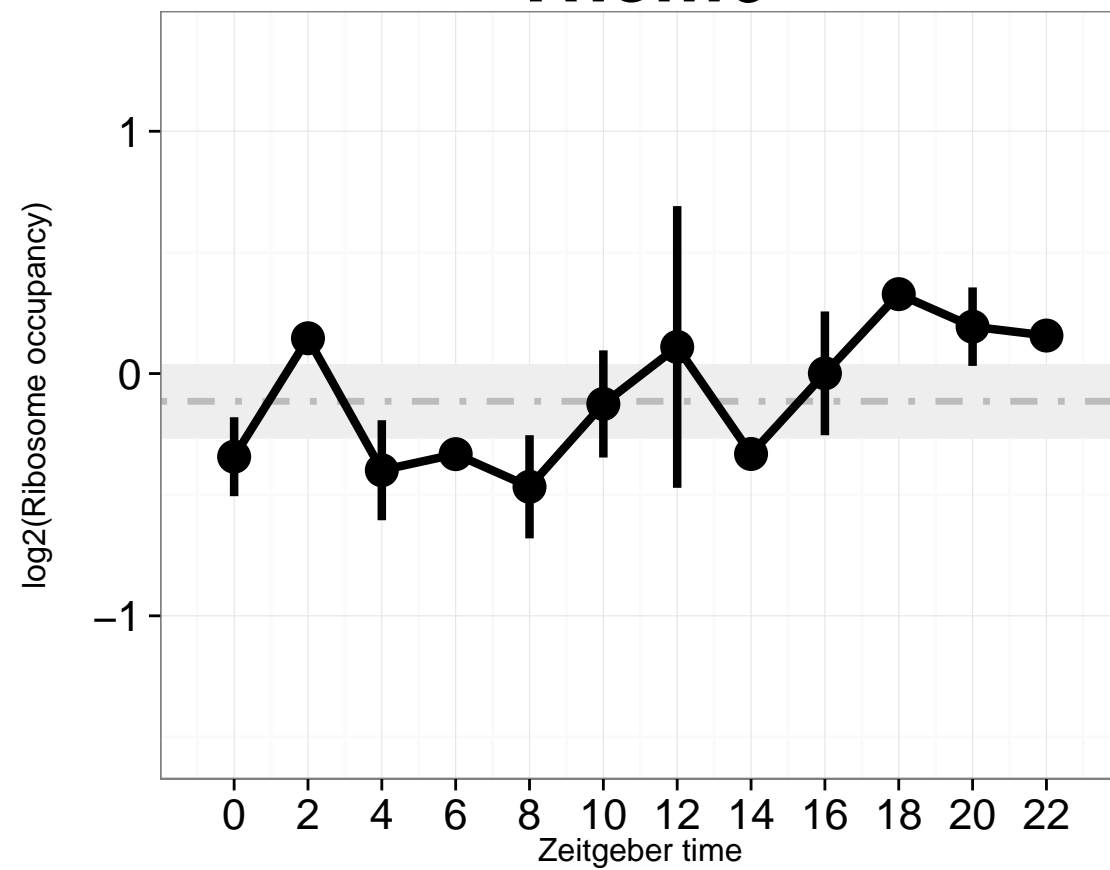

Supplement: Supplementary file 6819 [file 1]

# Slc30a9

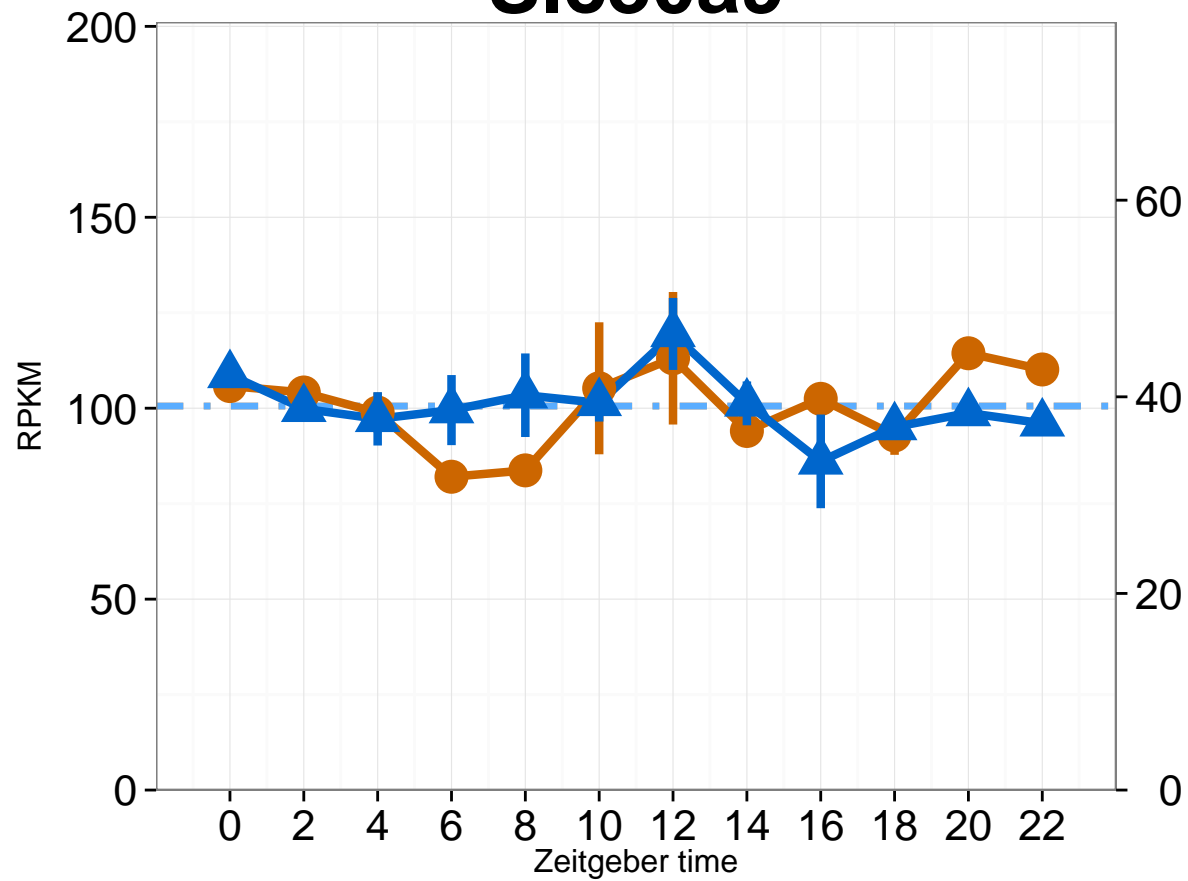

# Slc30a9

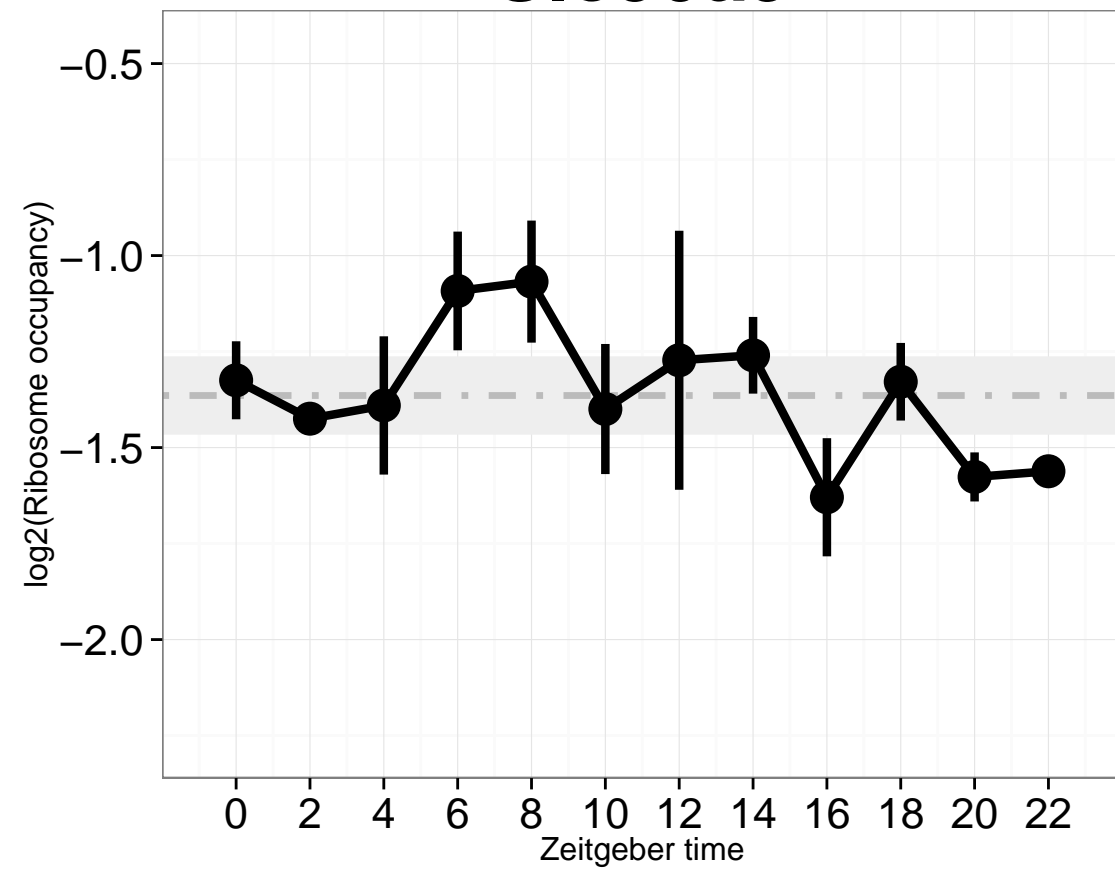

Supplement: Supplementary file 6820 [file 1]

## Osgin1

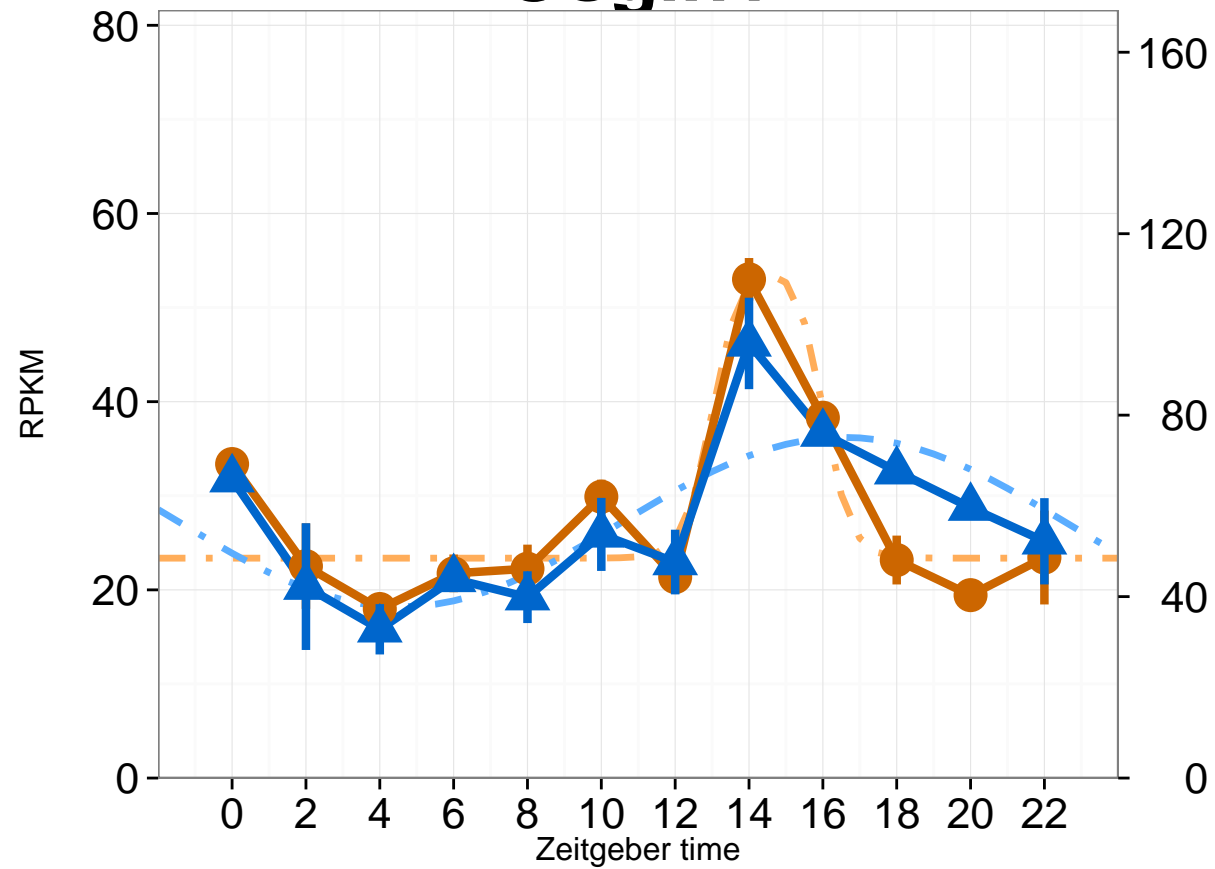

## Osgin1

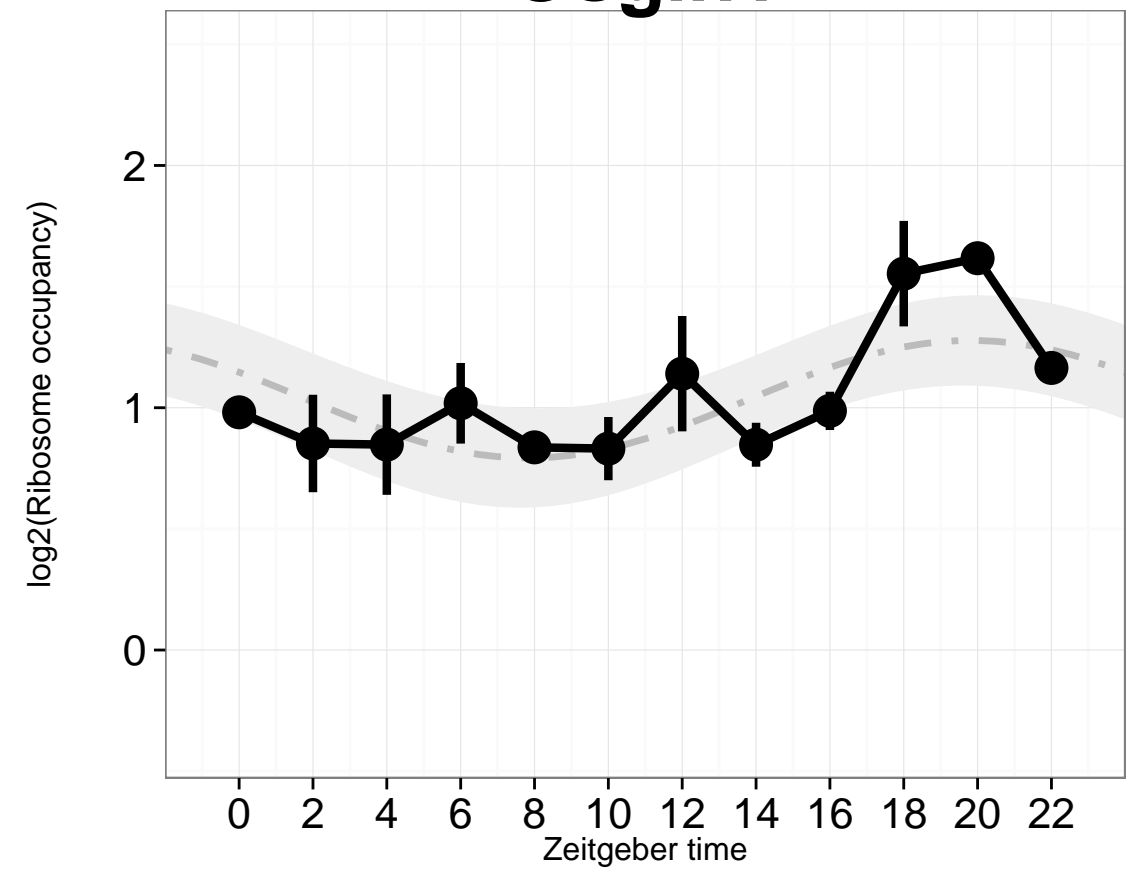

Supplement: Supplementary file 6821 [file 1]

## Ggh

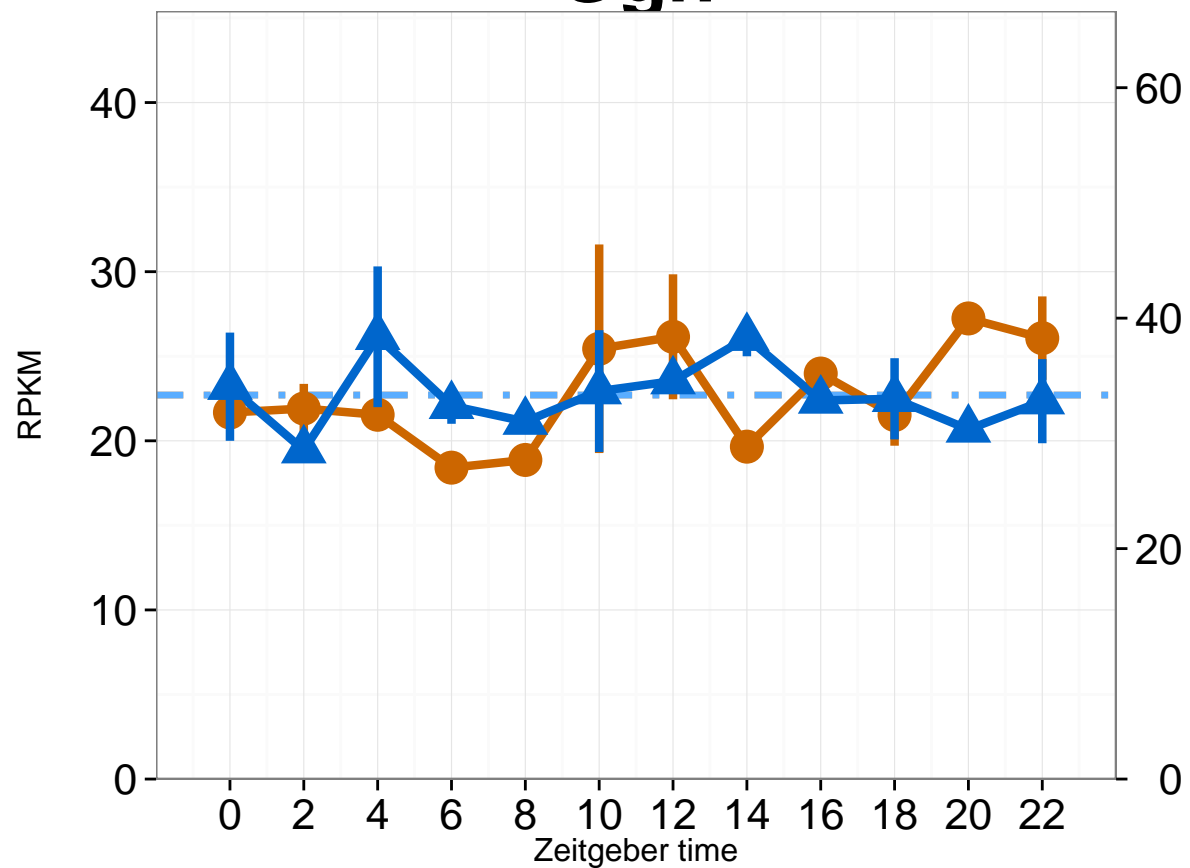

## Ggh

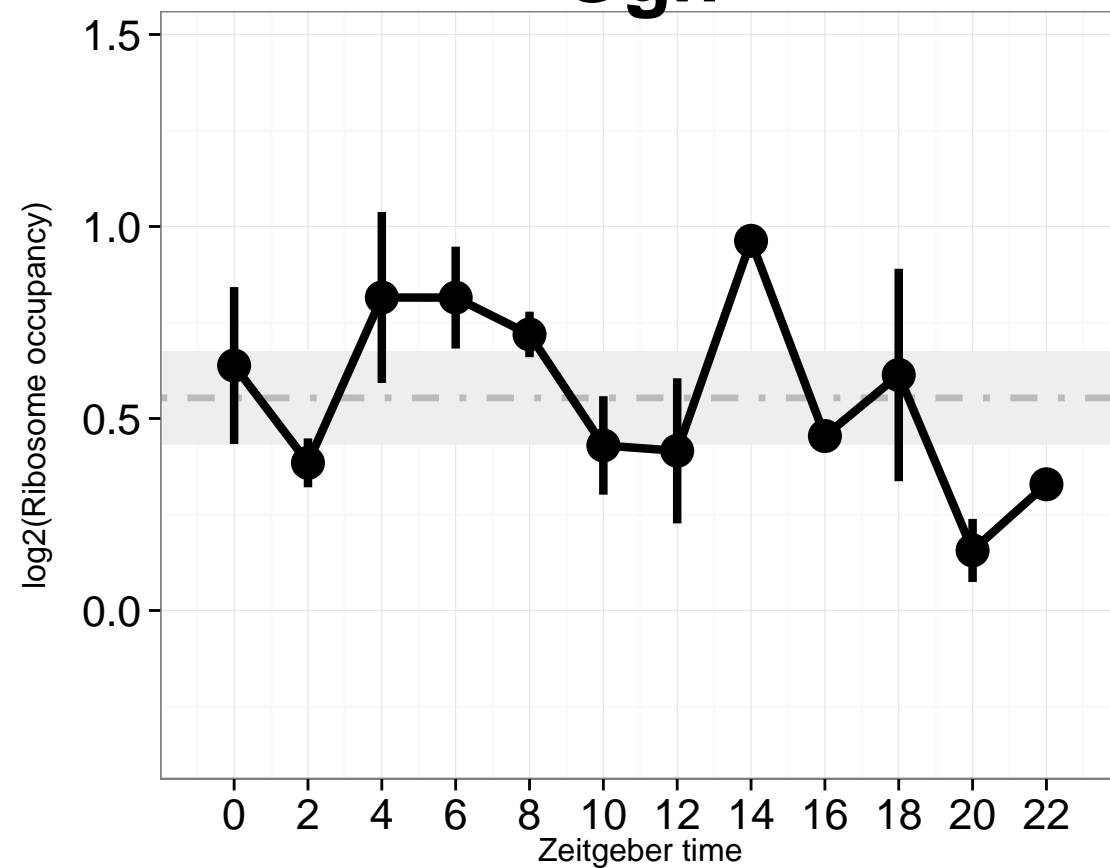

Supplement: Supplementary file 6822 [file 1]
