# Supplementary material (part 69 of 133)
Source: publisher figshare collection journal article supplement (https://springernature.figshare.com/articles/dataset/_/4903193)

# Nupr1l

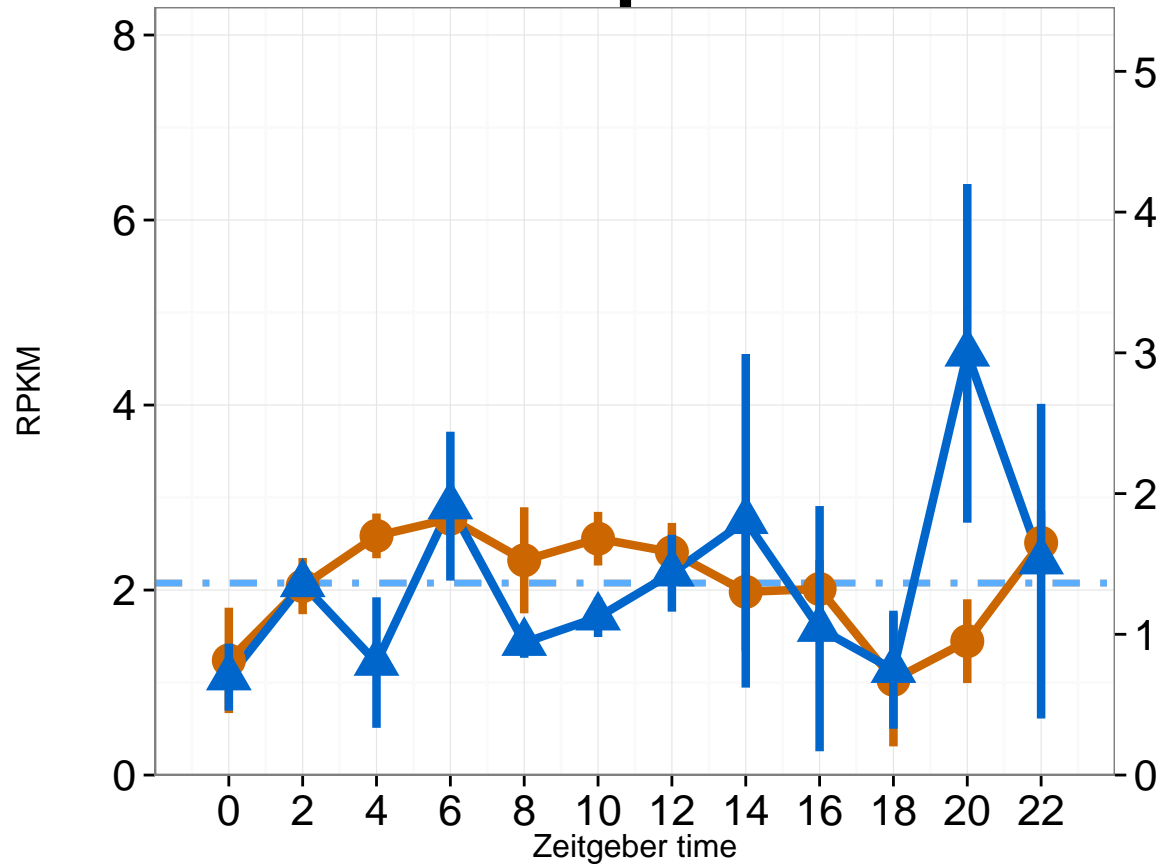

# Nupr1l

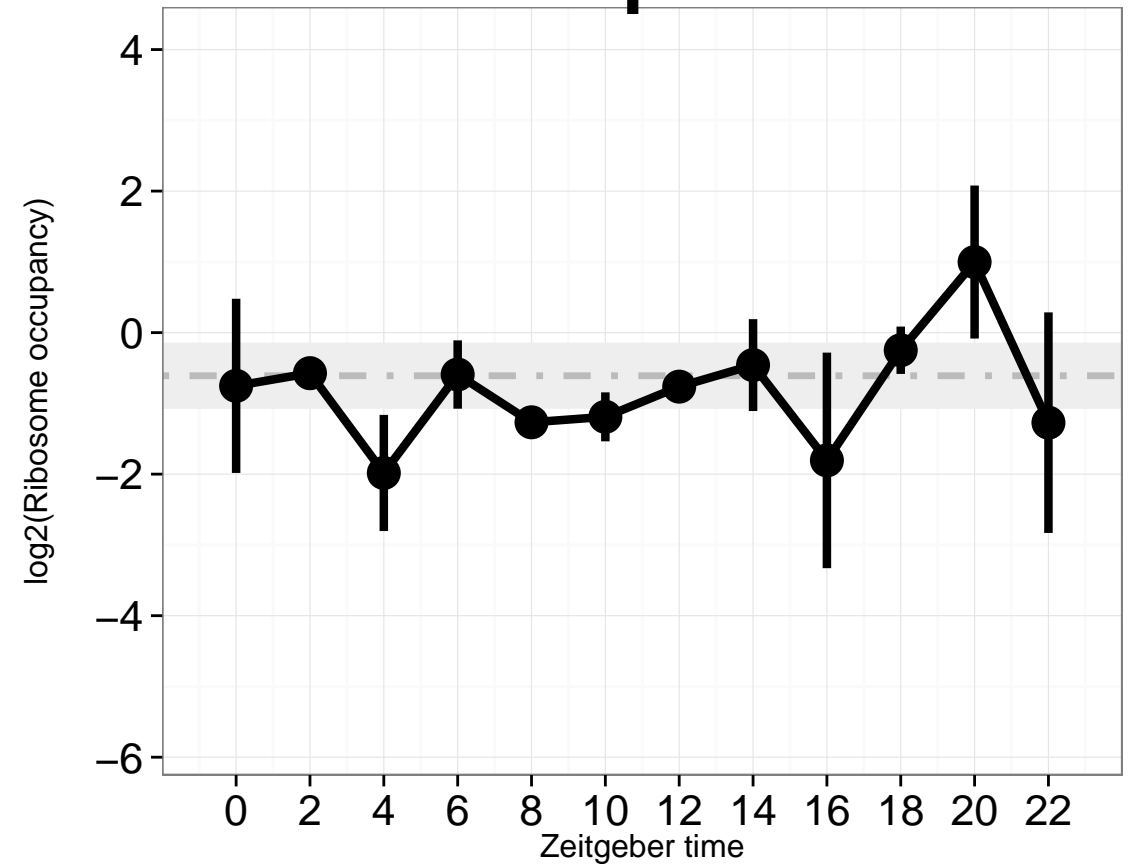

Supplement: Supplementary file 6823 [file 1]

# Bpnt1

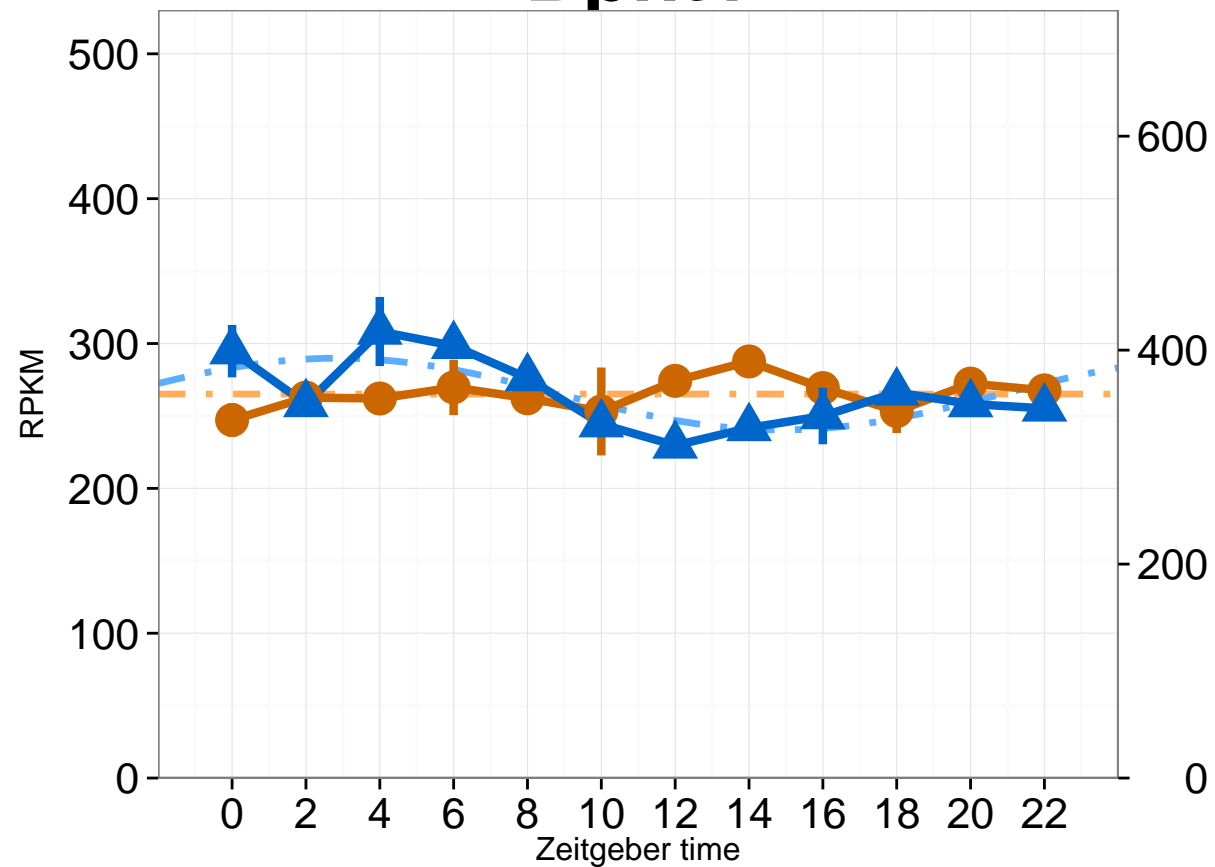

# Bpnt1

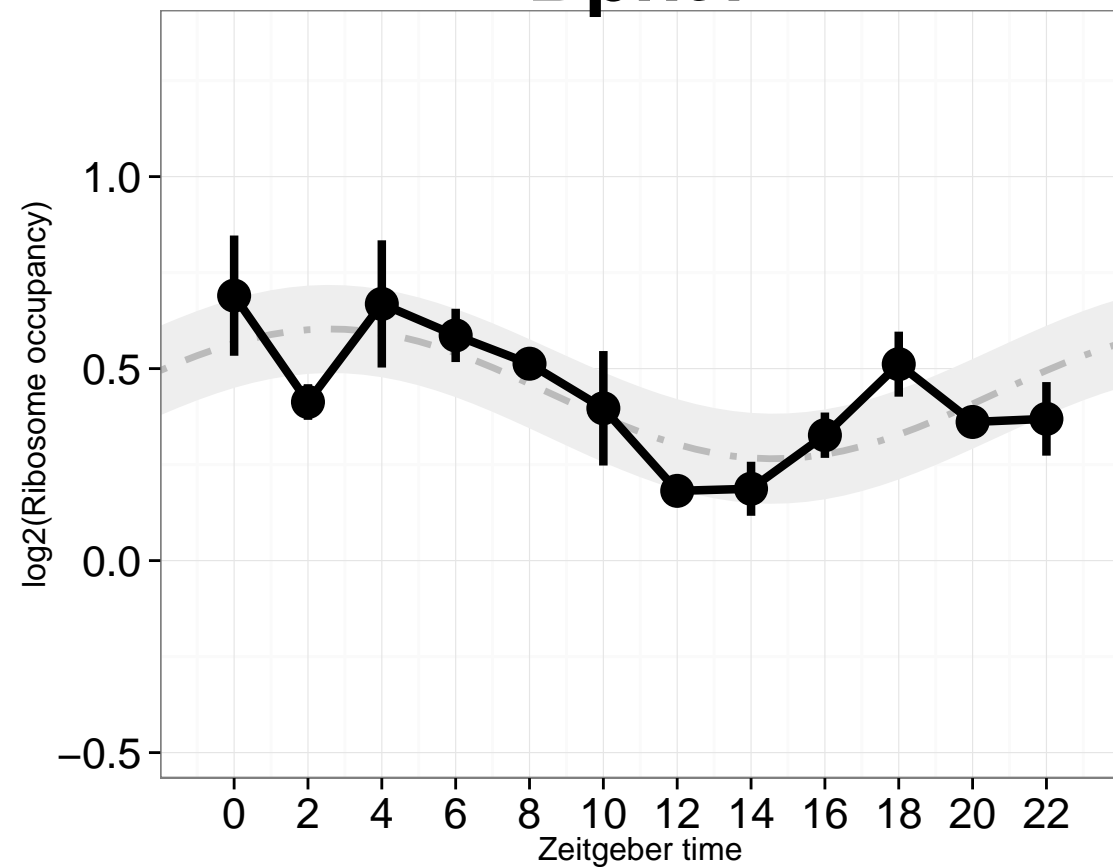

Supplement: Supplementary file 6824 [file 1]

## H2afx

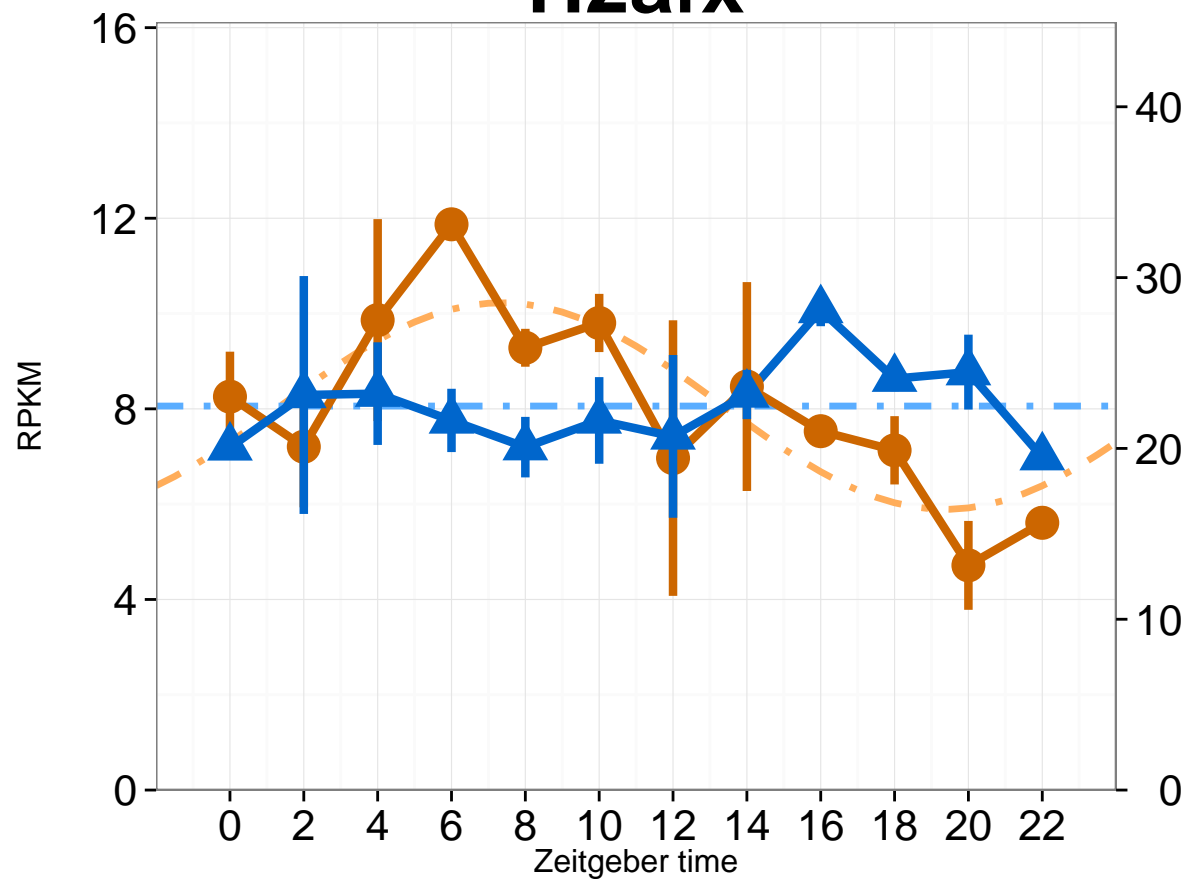

## H2afx

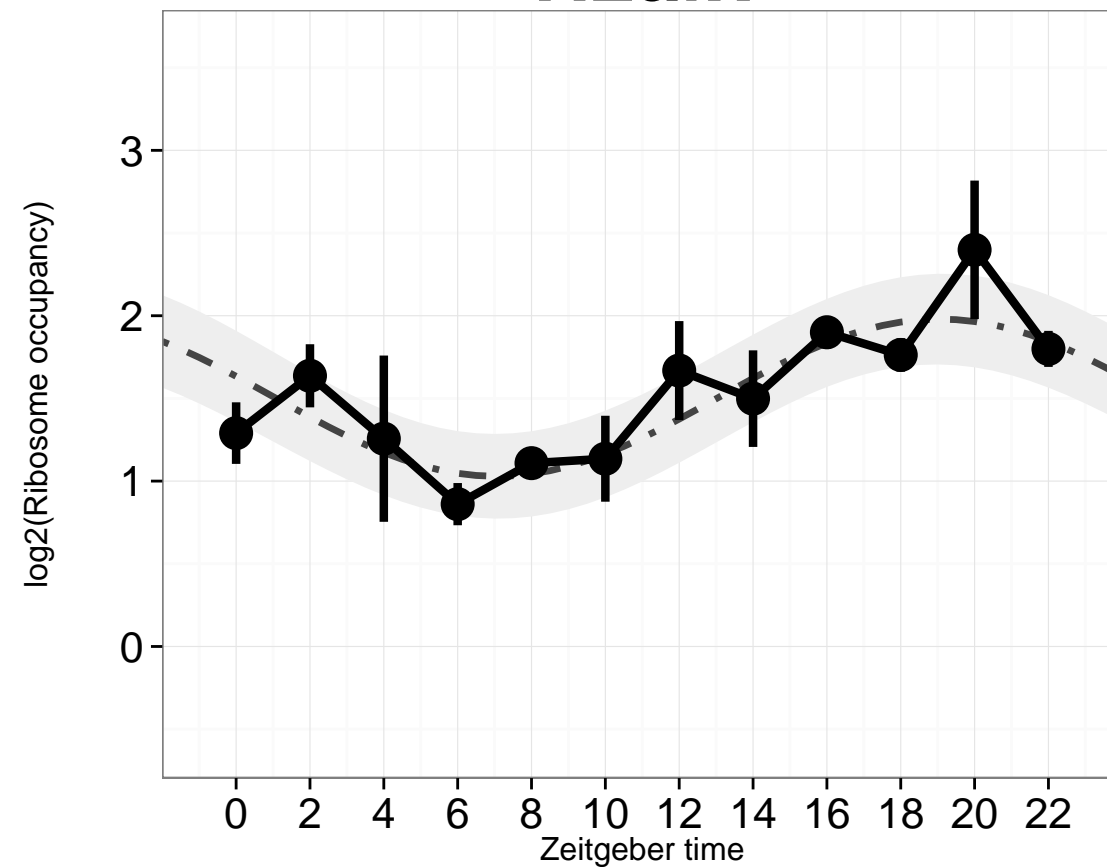

Supplement: Supplementary file 6825 [file 1]

## Snrpf

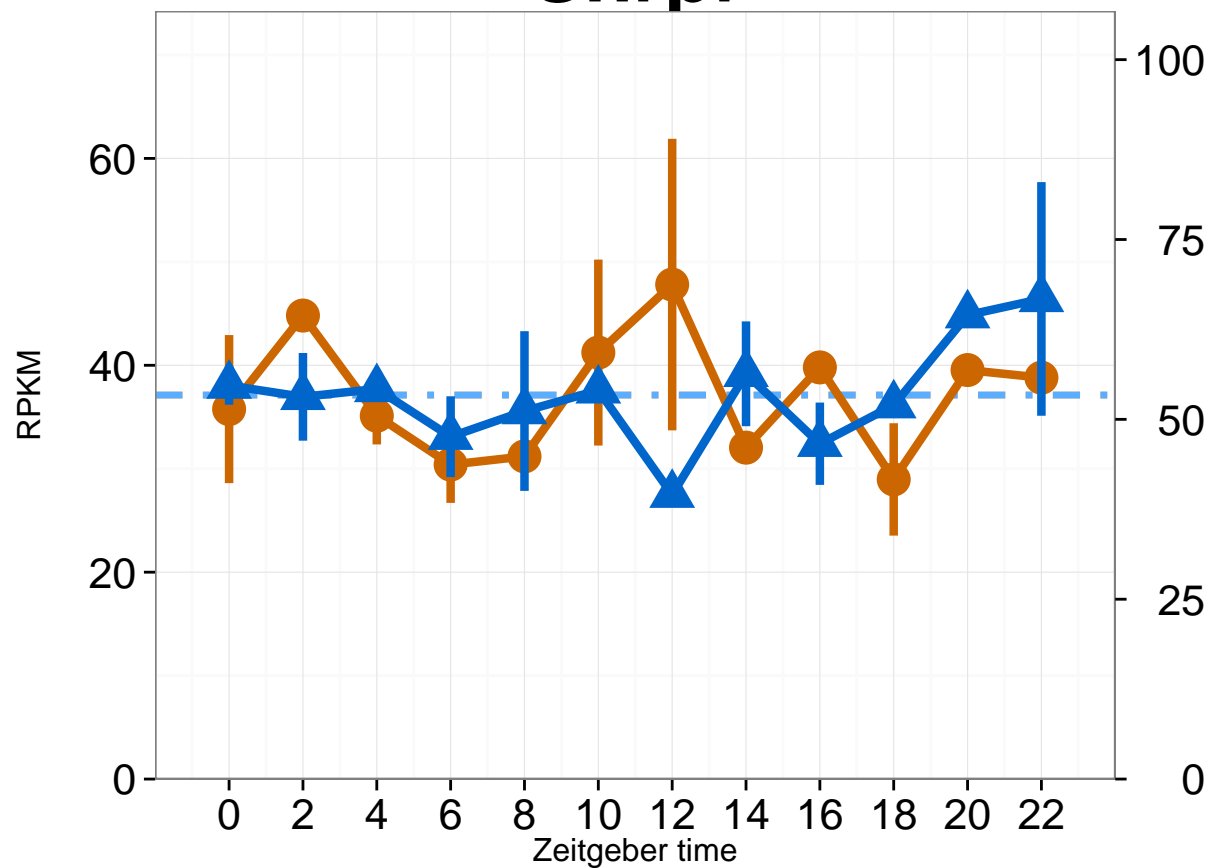

## Snrpf

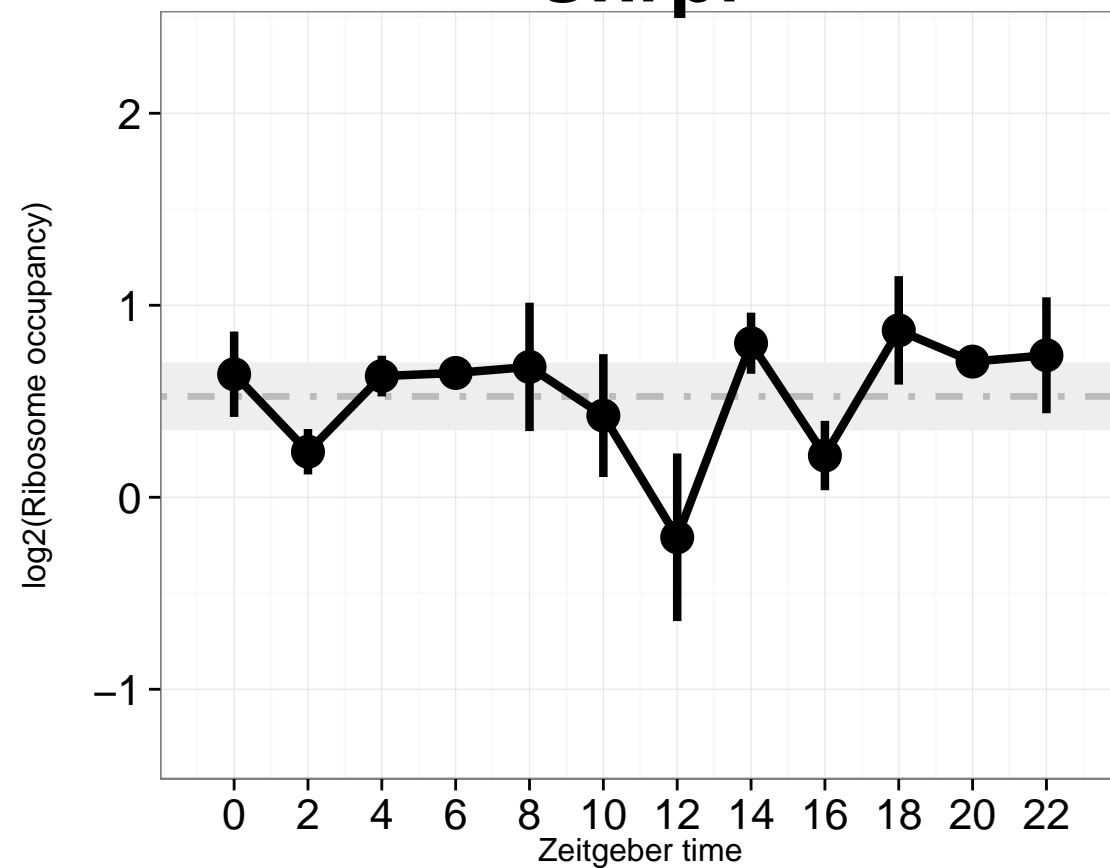

Supplement: Supplementary file 6826 [file 1]

## Ybx1

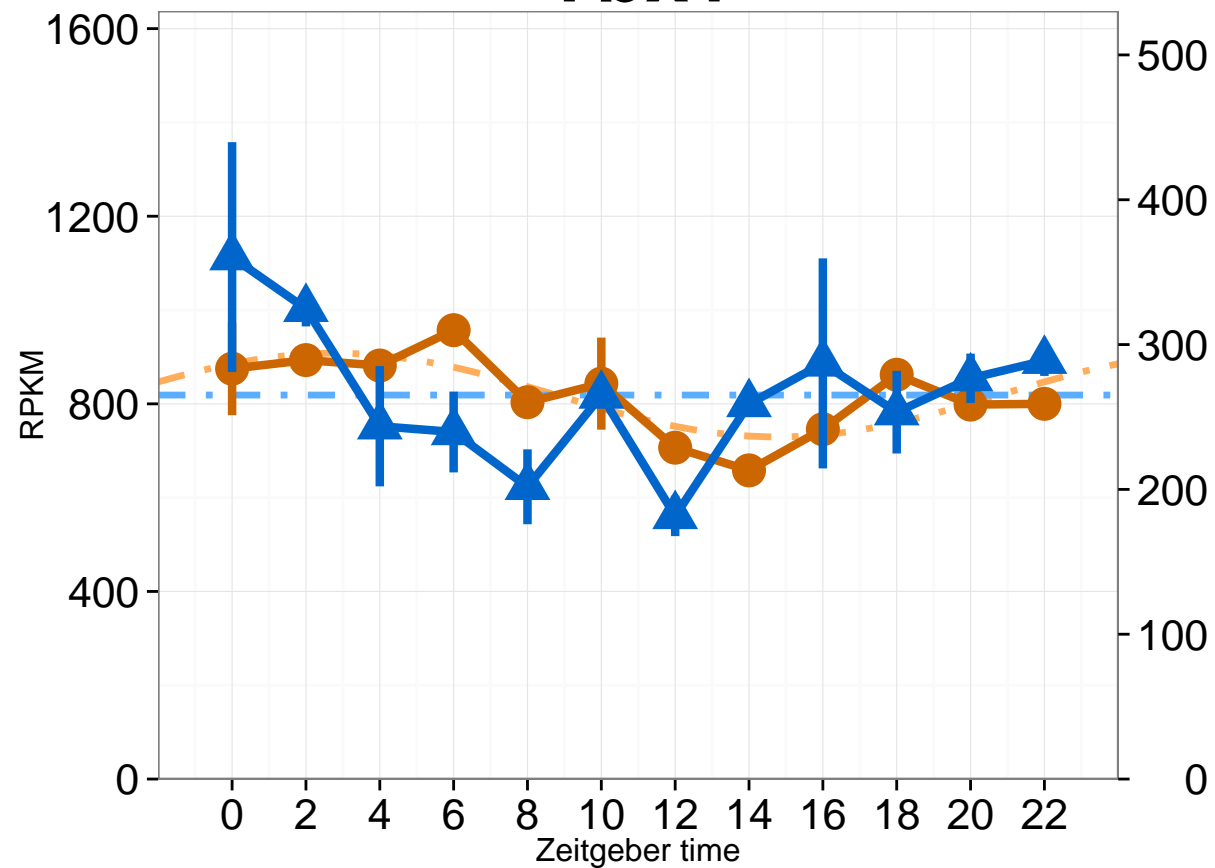

## Ybx1

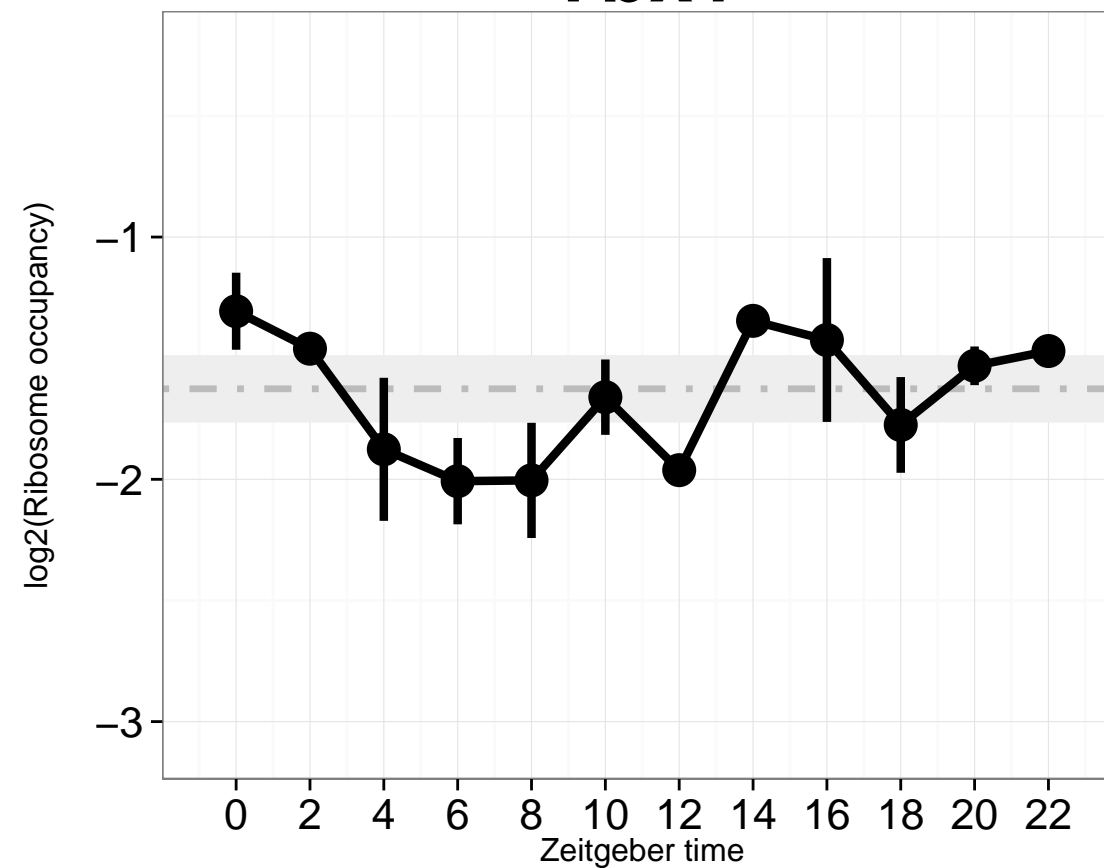

Supplement: Supplementary file 6827 [file 1]

# F11r

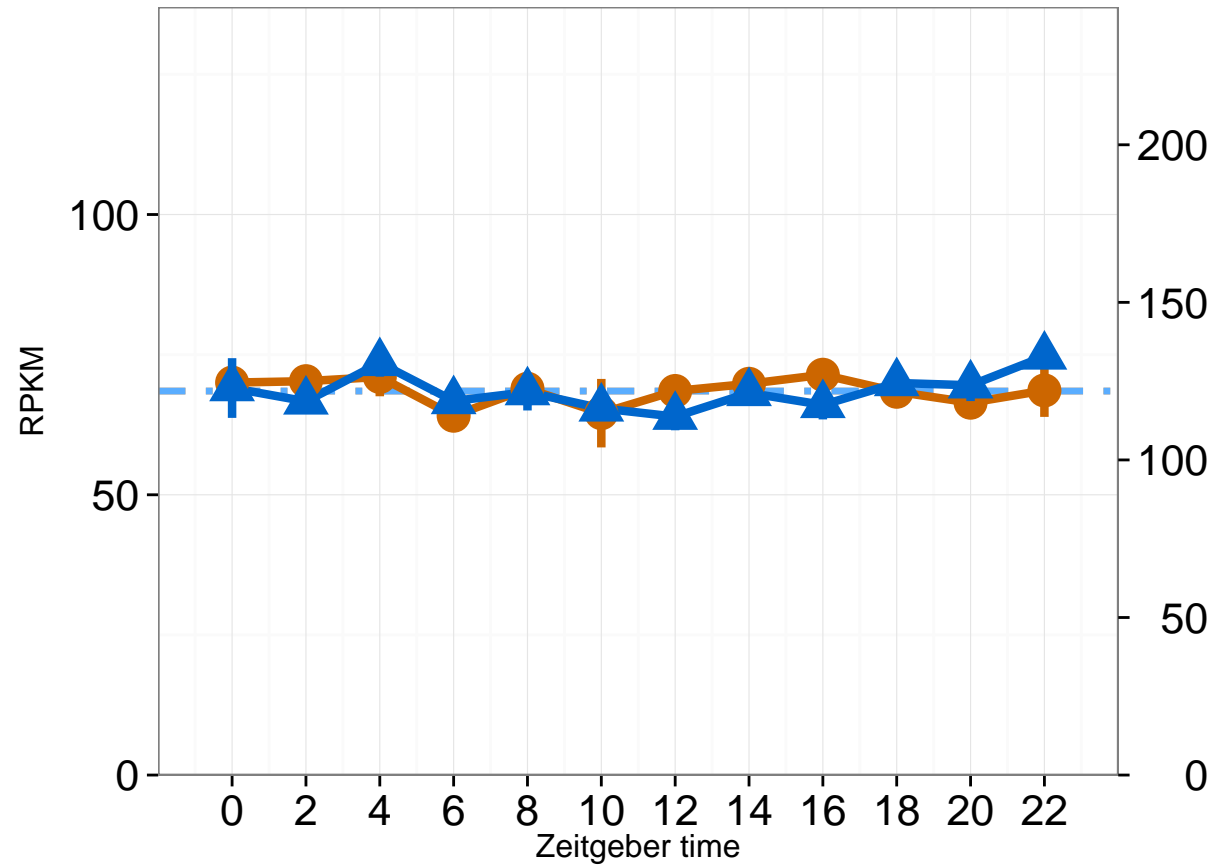

# F11r

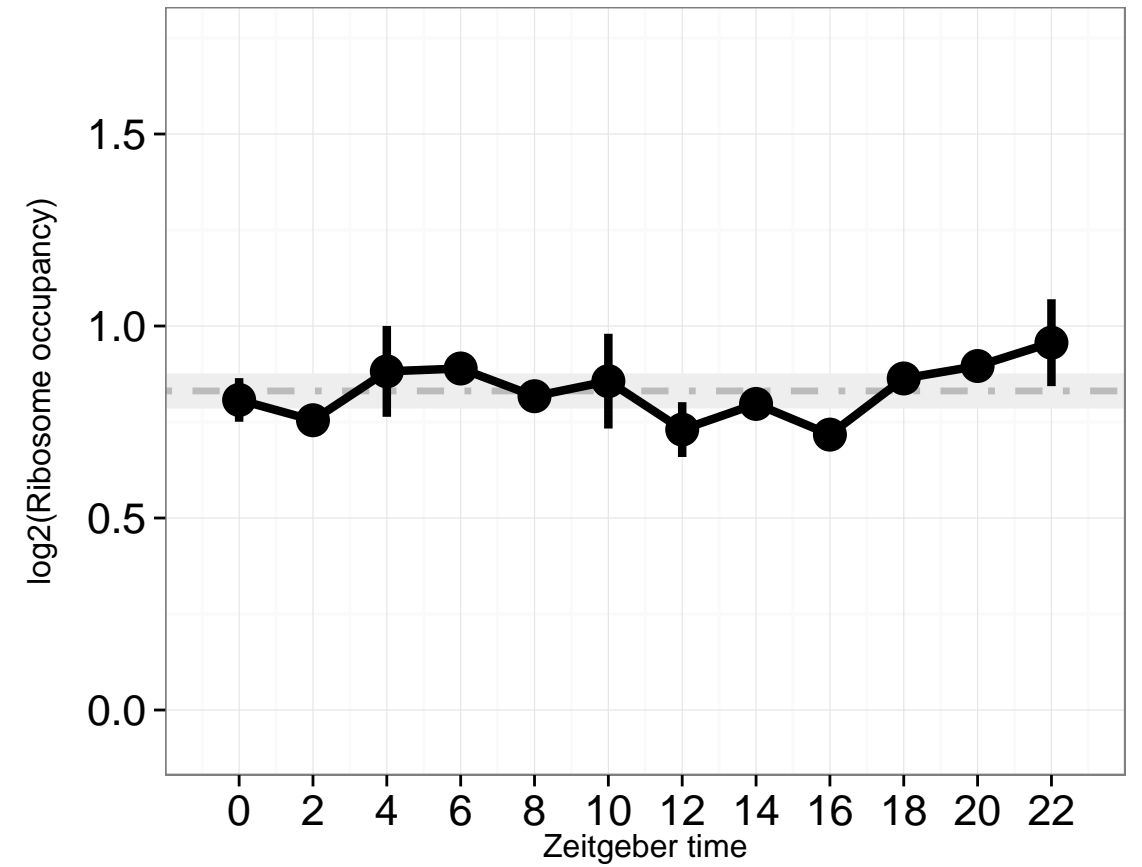

Supplement: Supplementary file 6828 [file 1]

## Eno1

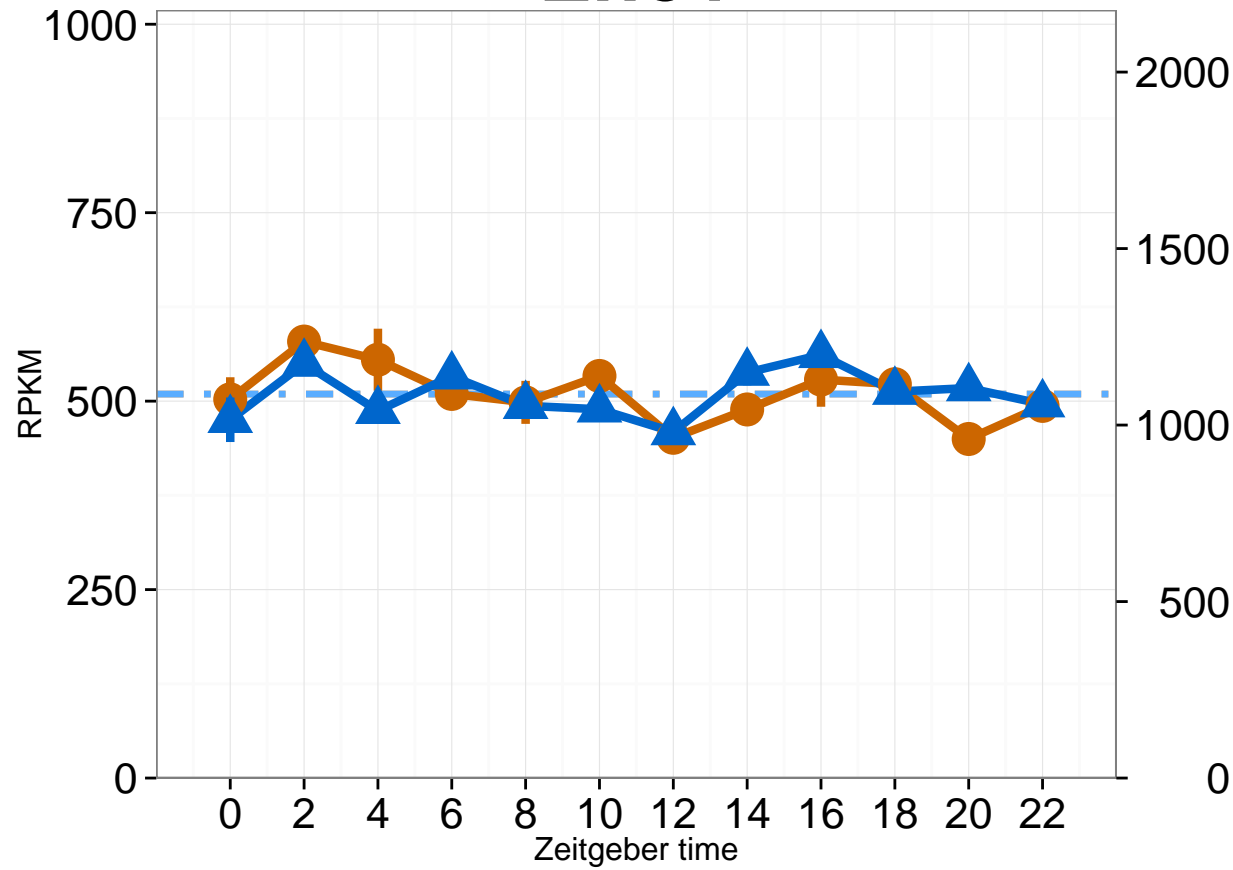

## Eno1

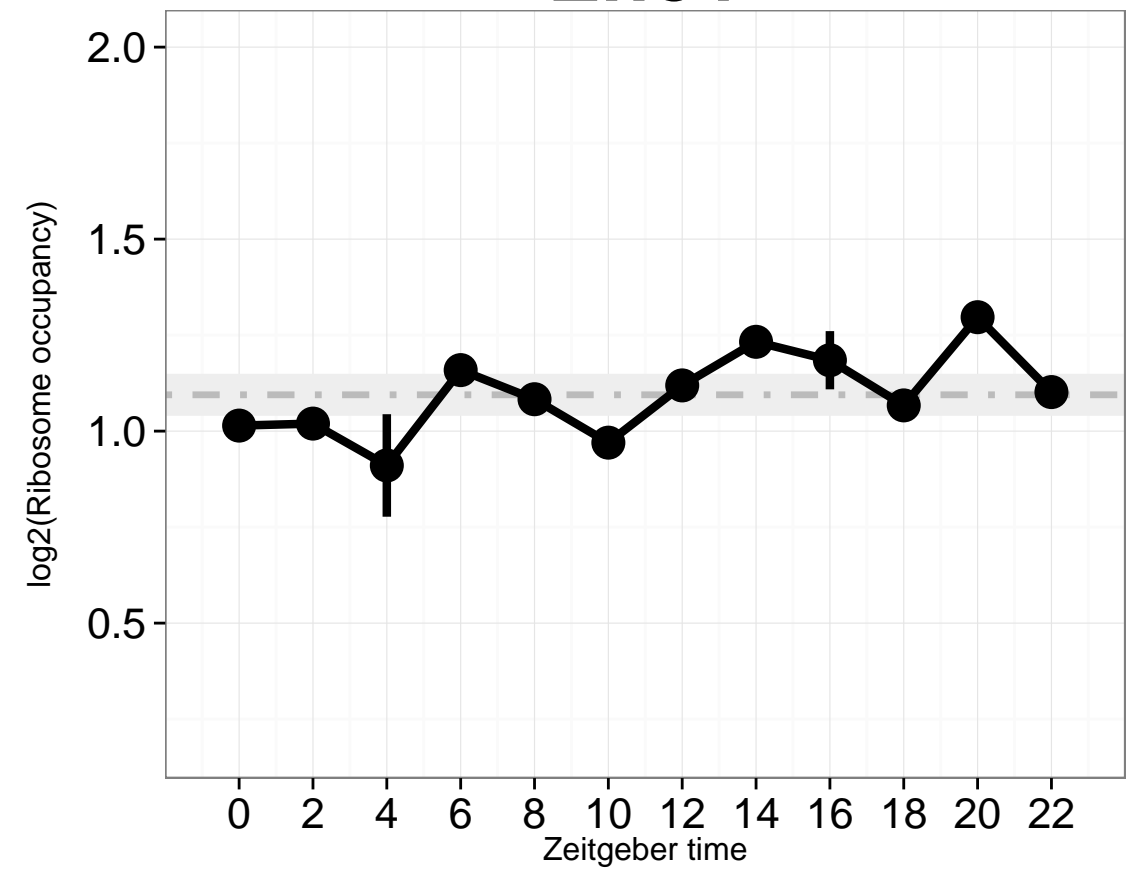

Supplement: Supplementary file 6829 [file 1]

# Fam175b

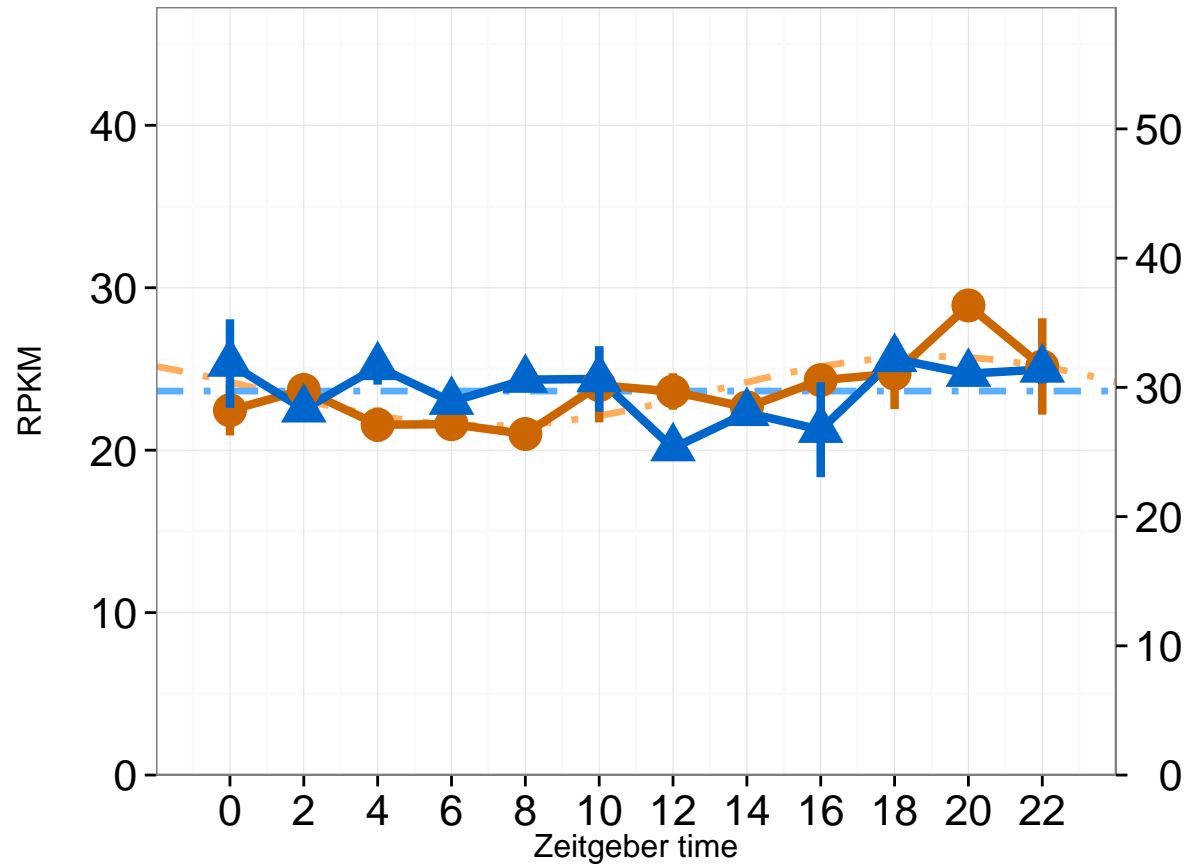

# Fam175b

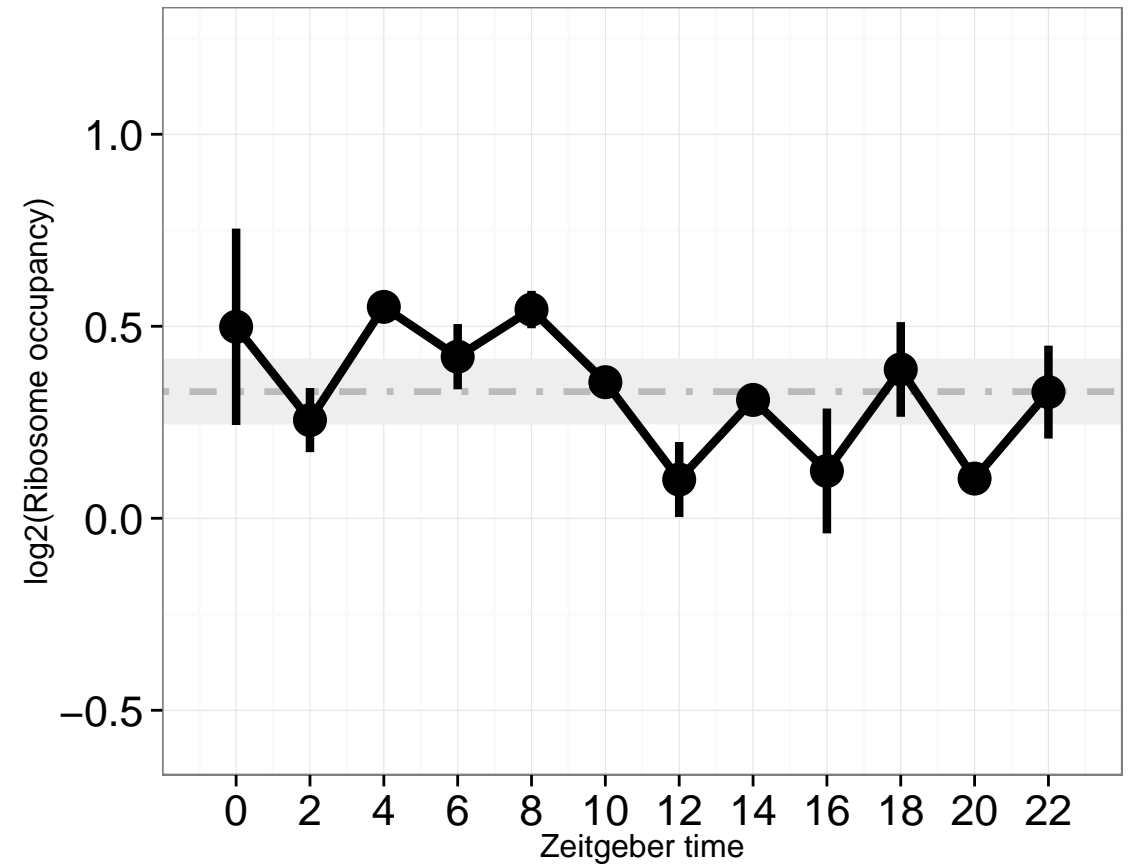

Supplement: Supplementary file 6830 [file 1]

# Isoc2a

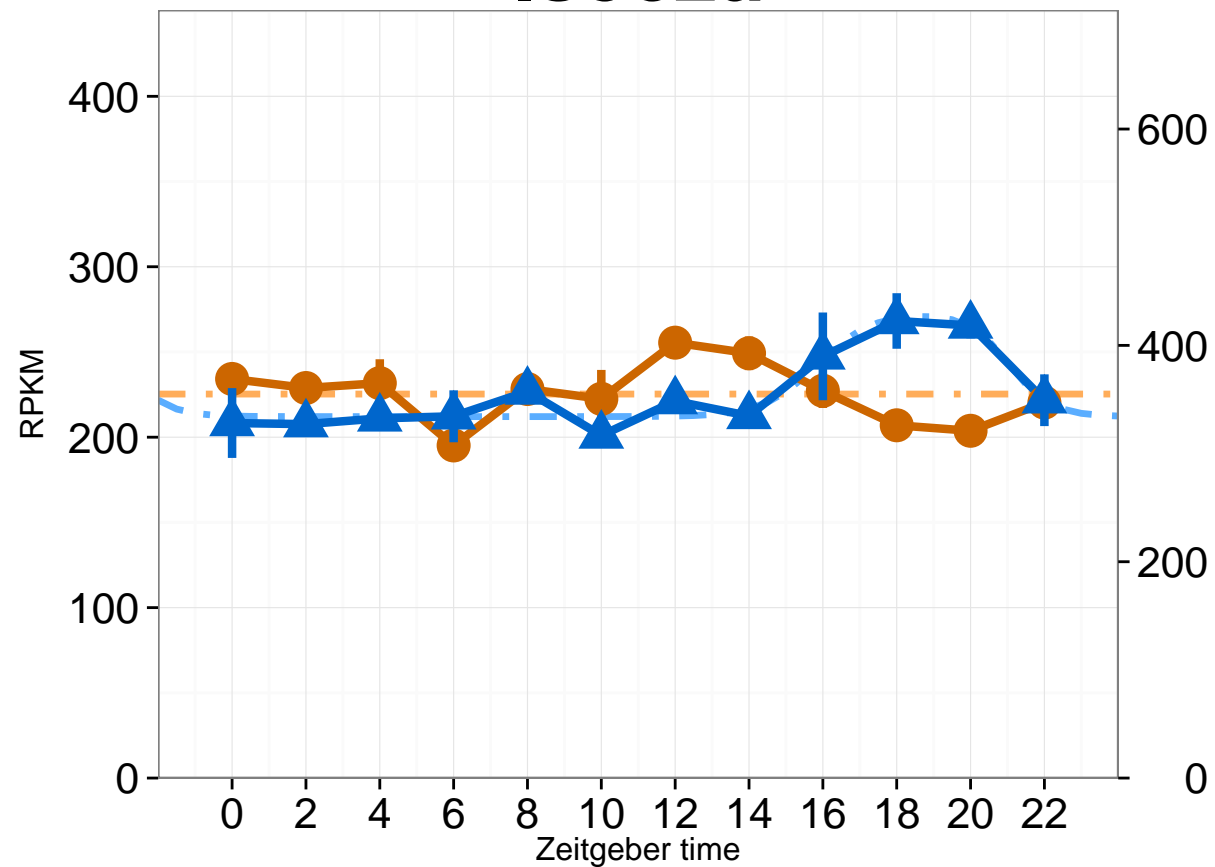

# Isoc2a

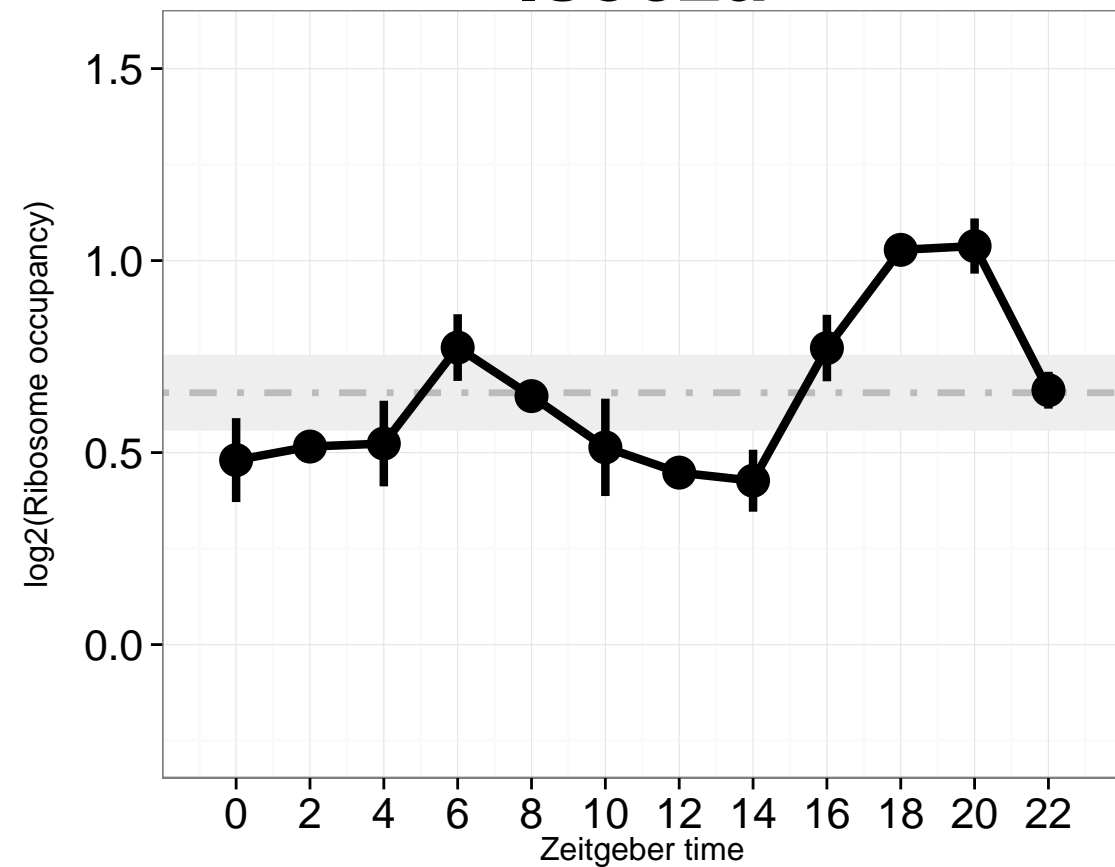

Supplement: Supplementary file 6831 [file 1]

## Pigg

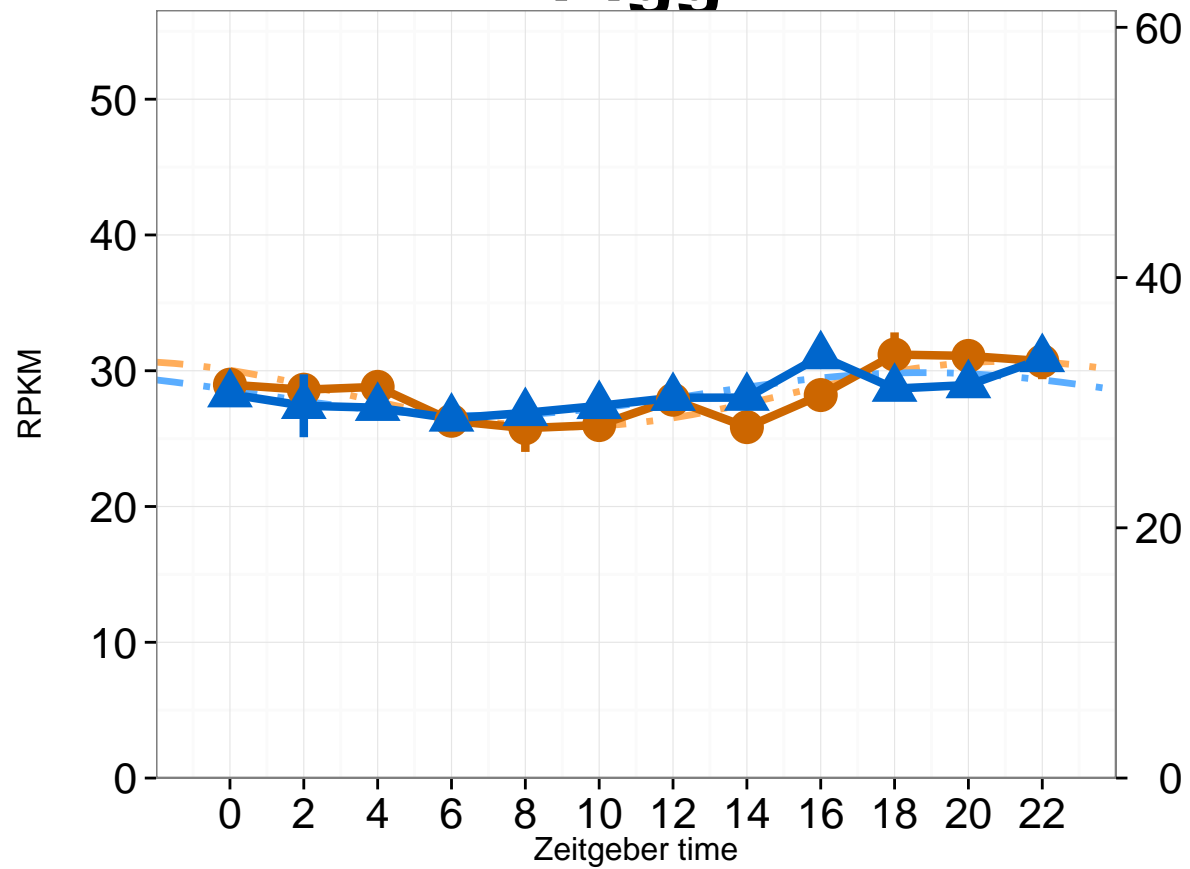

## Pigg

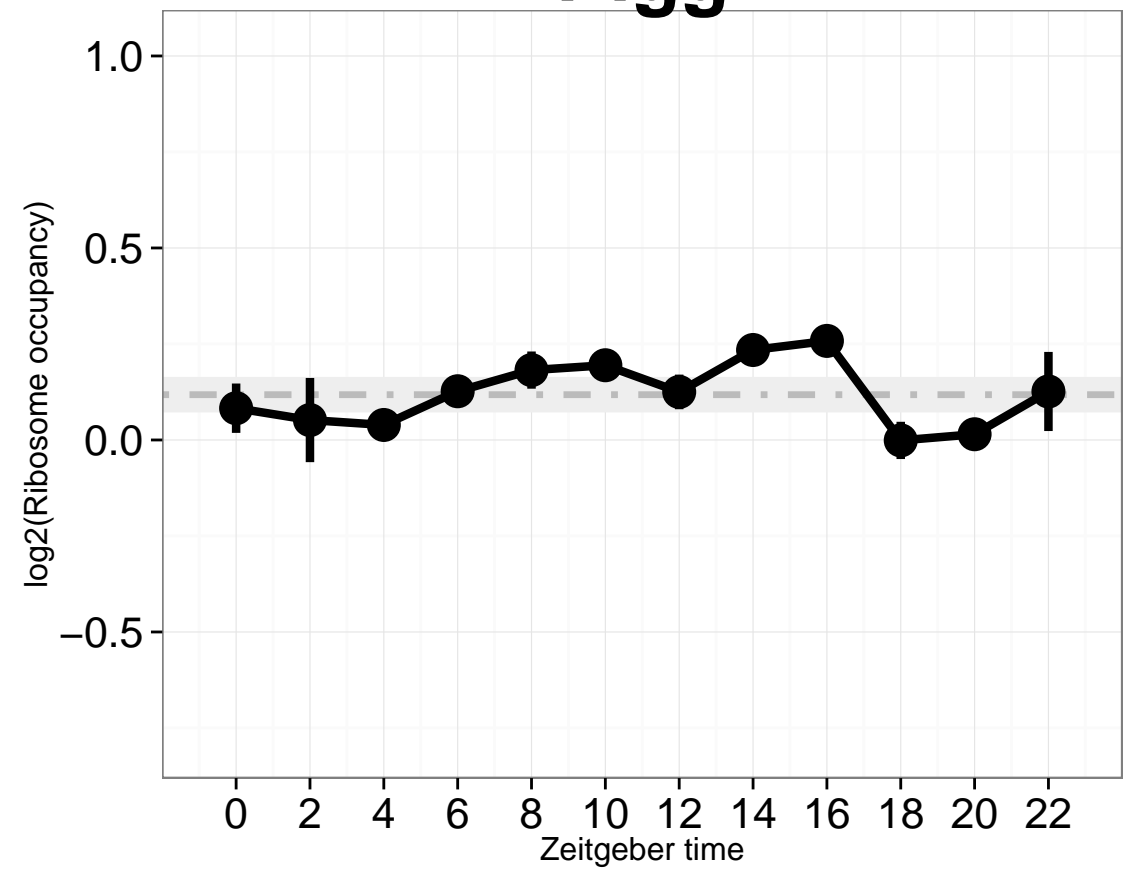

Supplement: Supplementary file 6832 [file 1]

## Nanp

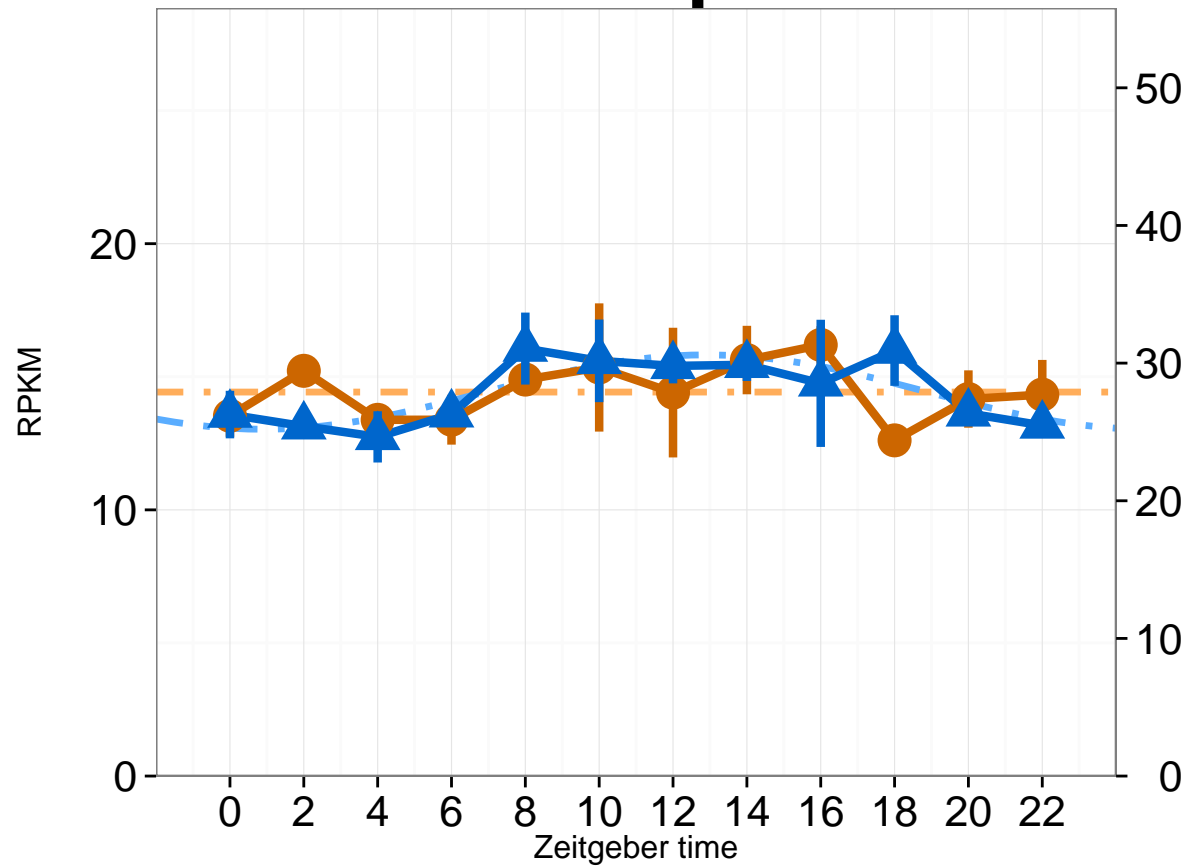

## Nanp

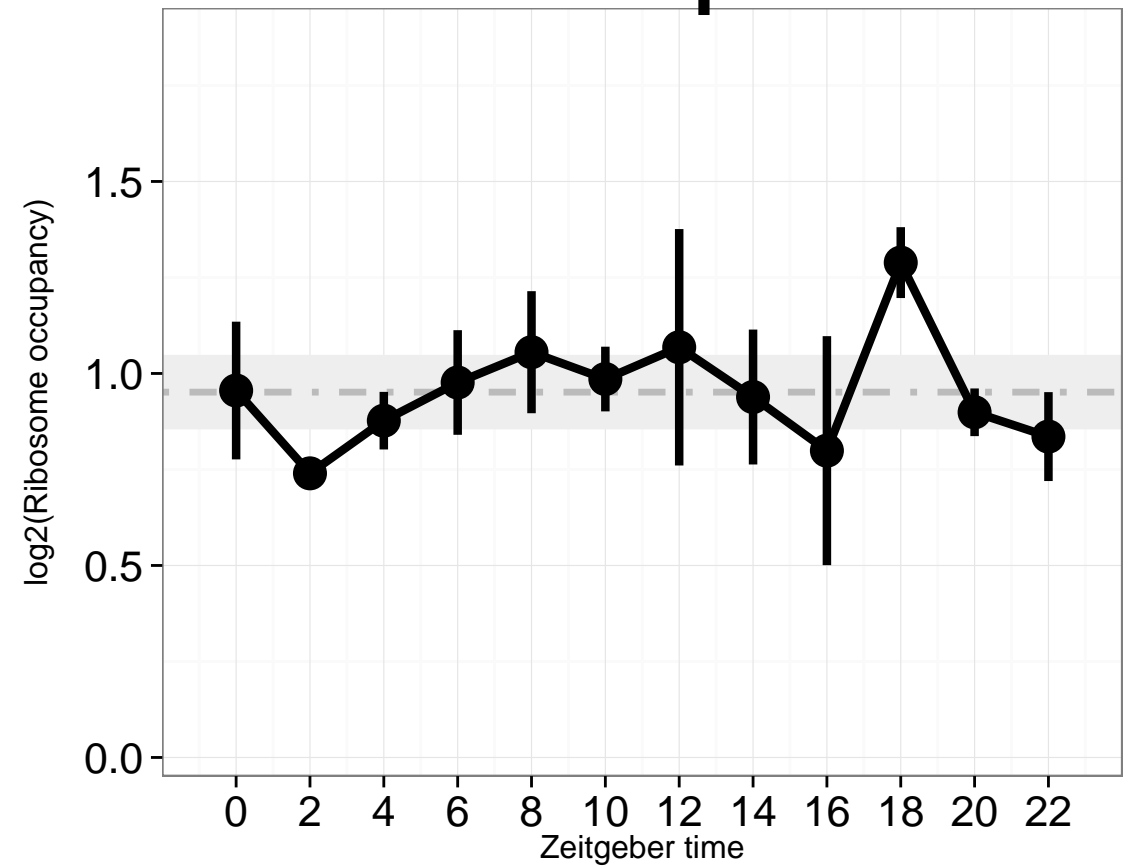

Supplement: Supplementary file 6833 [file 1]

**Hist3h2ba TR**

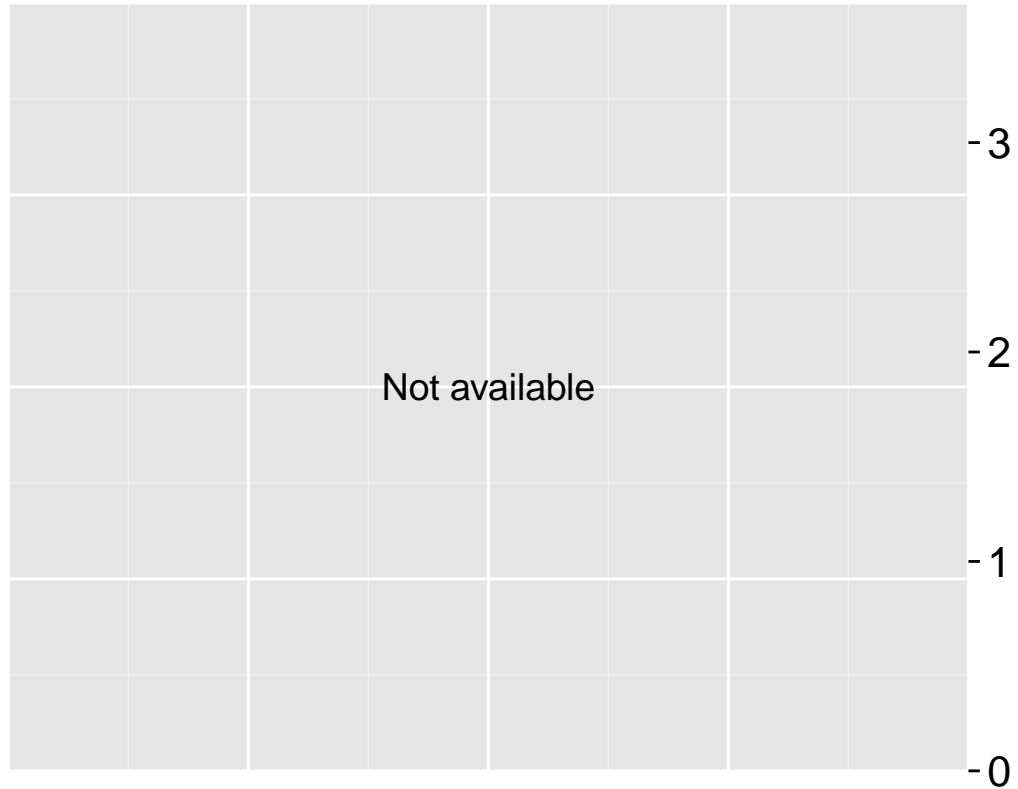

**Hist3h2ba log2(Ribosome occupanc**

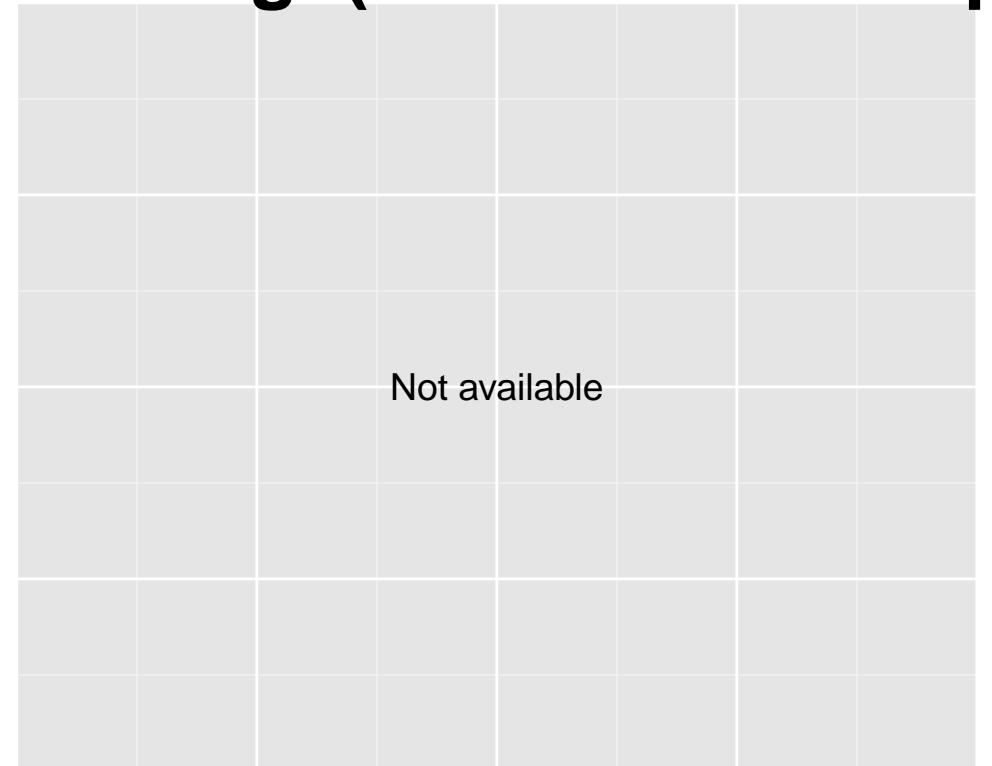

Supplement: Supplementary file 6834 [file 1]

# Katnal1

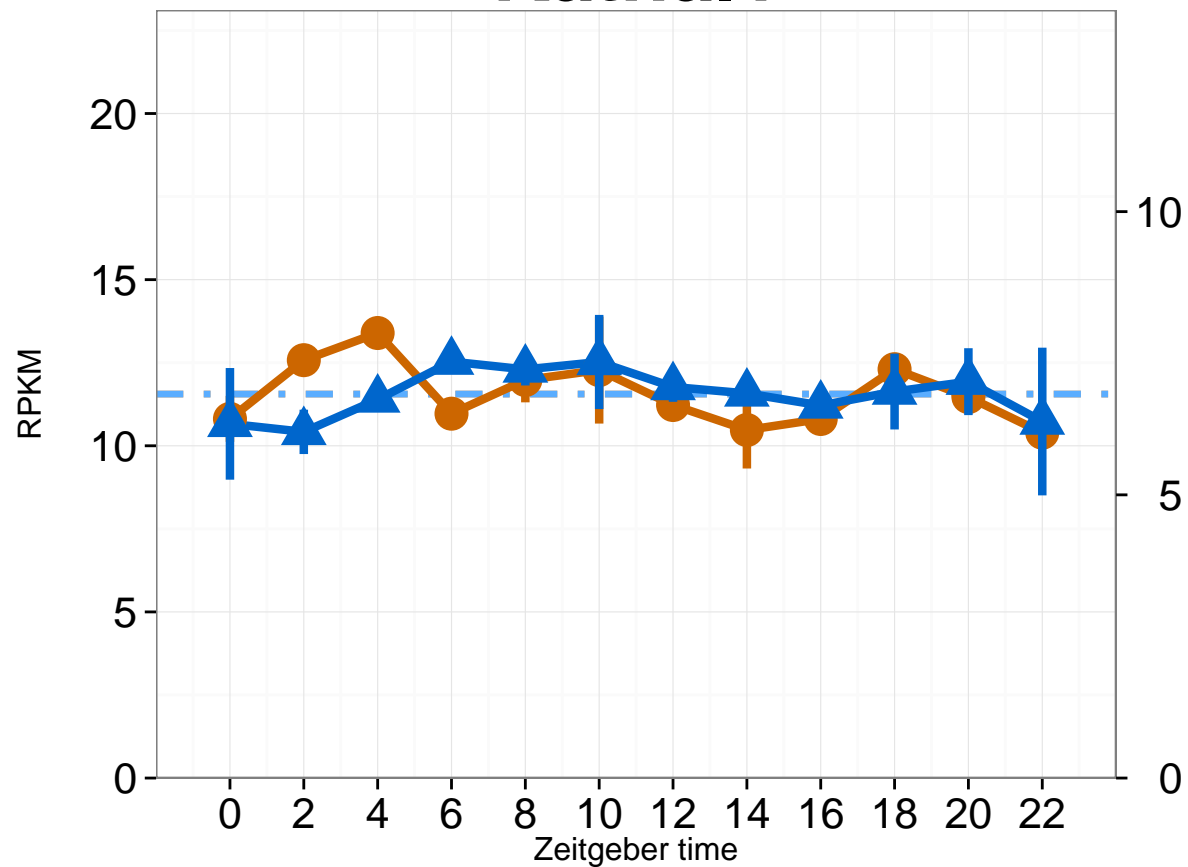

# Katnal1

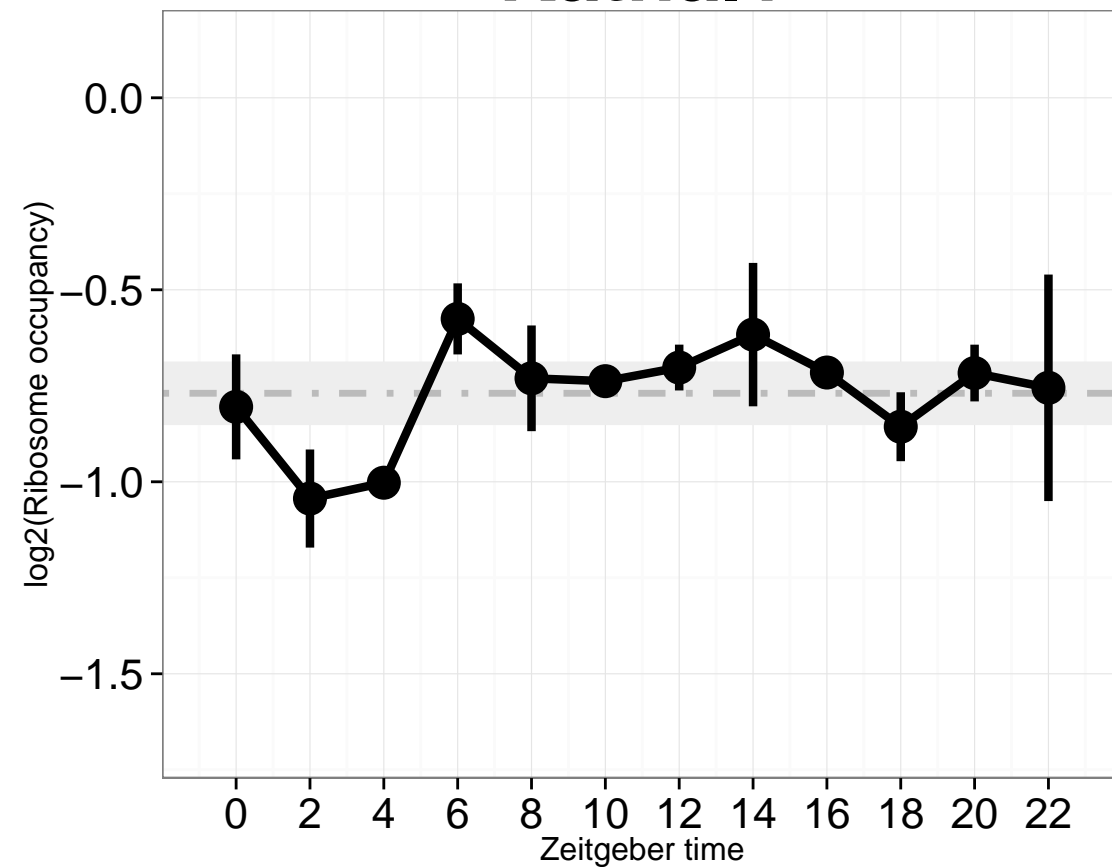

Supplement: Supplementary file 6835 [file 1]

## Gtf2f2

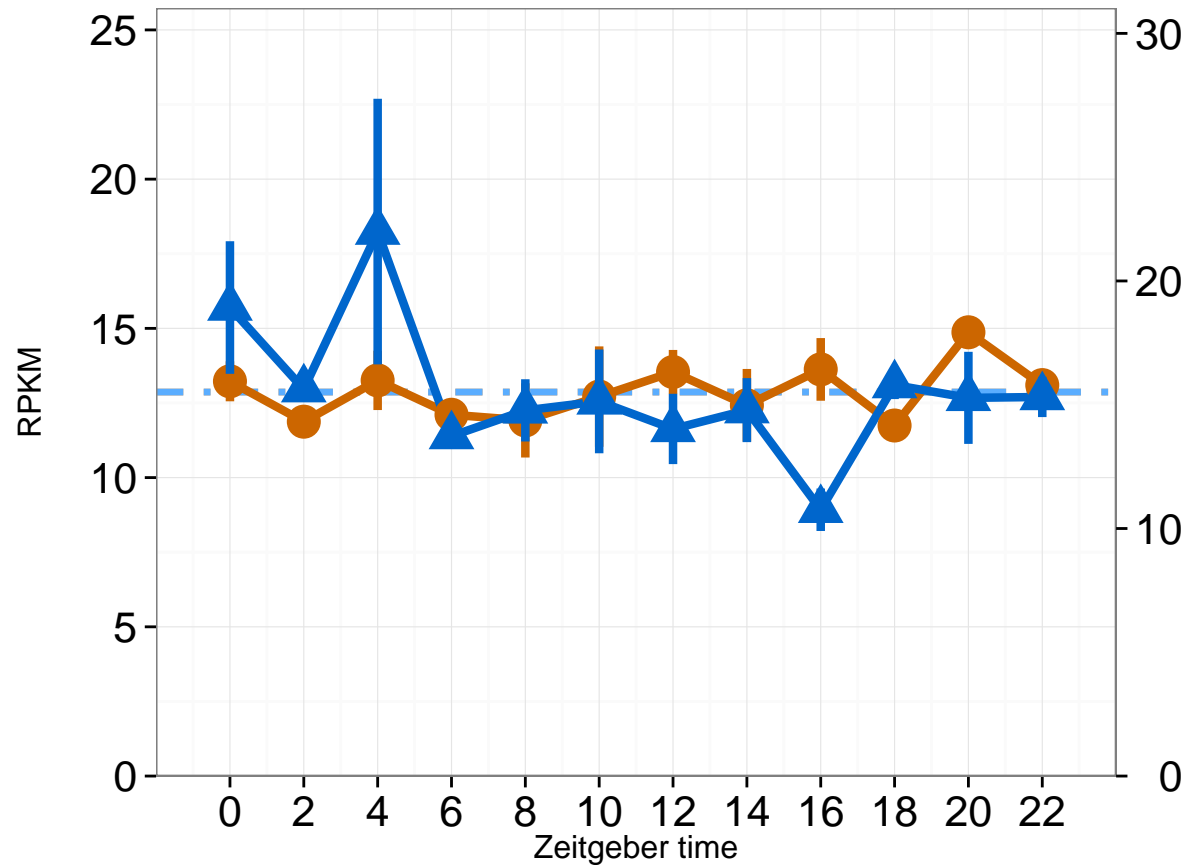

## Gtf2f2

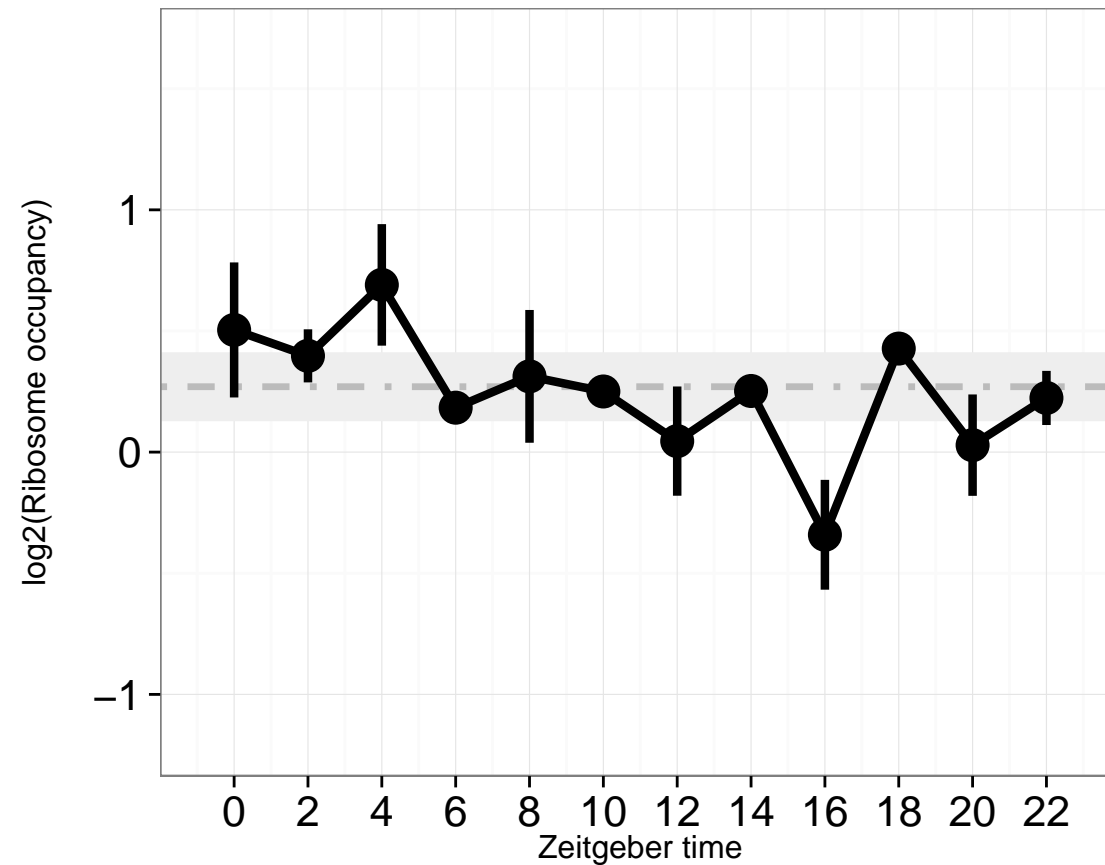

Supplement: Supplementary file 6836 [file 1]

# Wfdc17

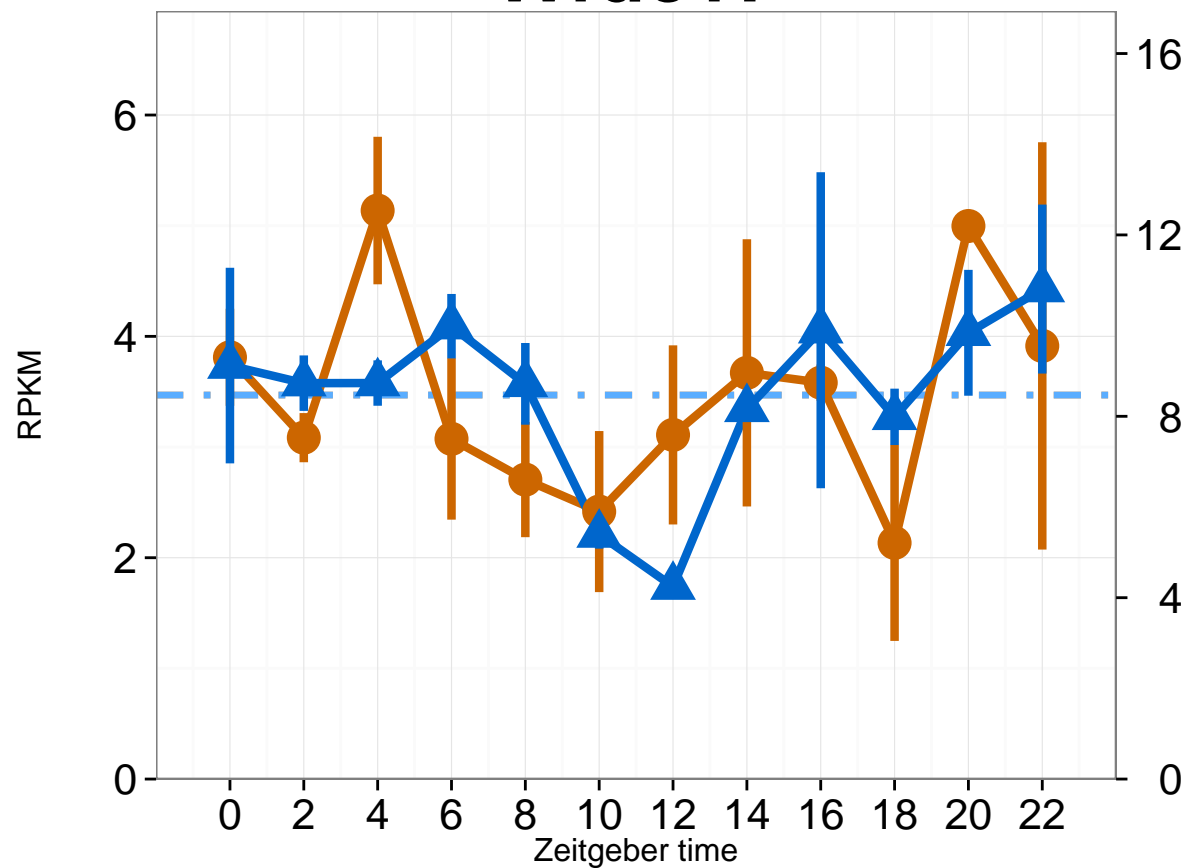

# Wfdc17

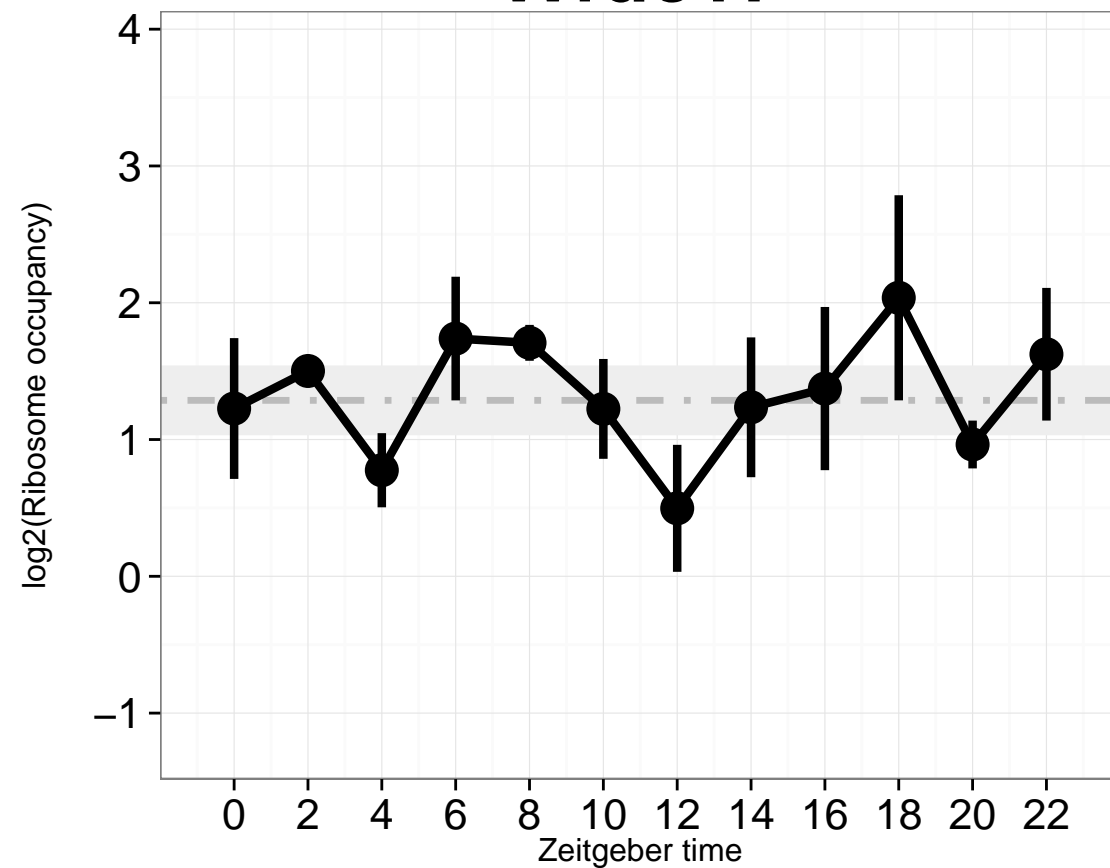

Supplement: Supplementary file 6837 [file 1]

## Bcl9

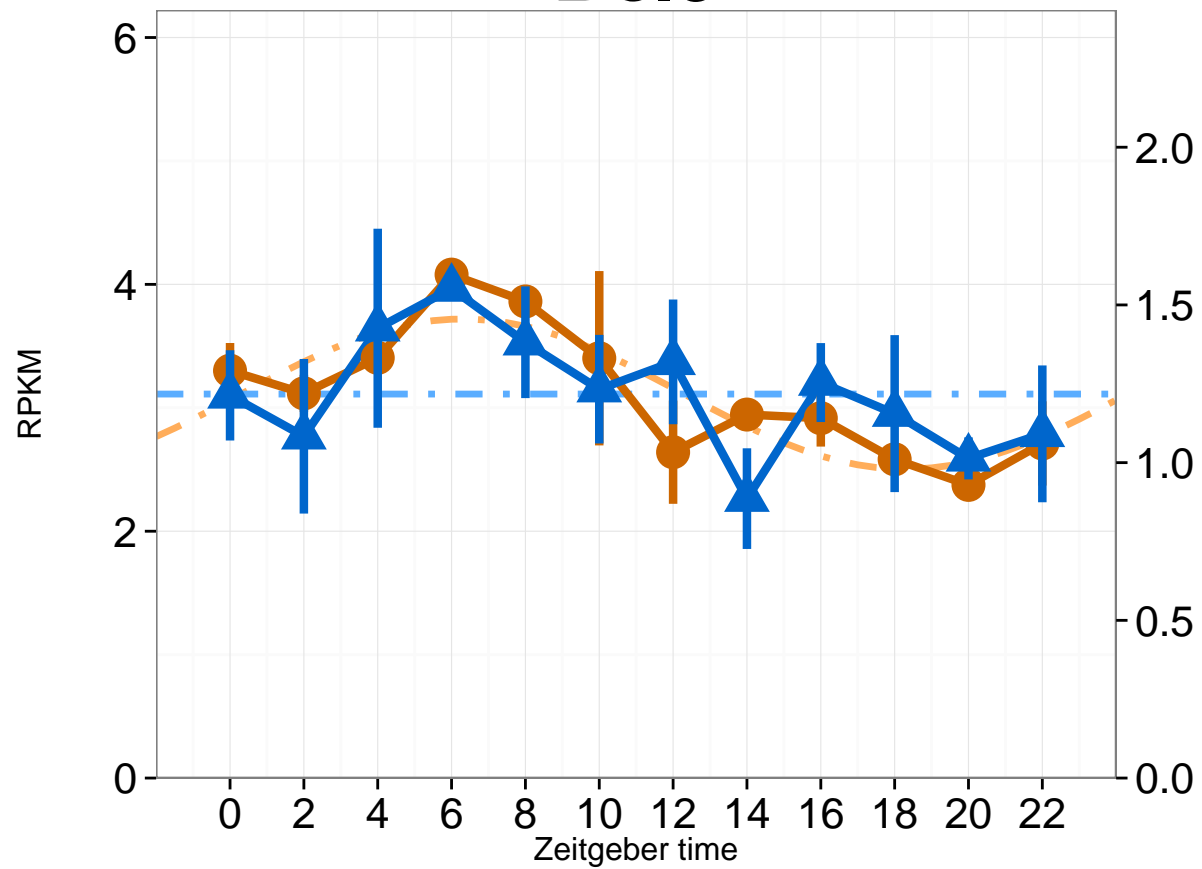

## Bcl9

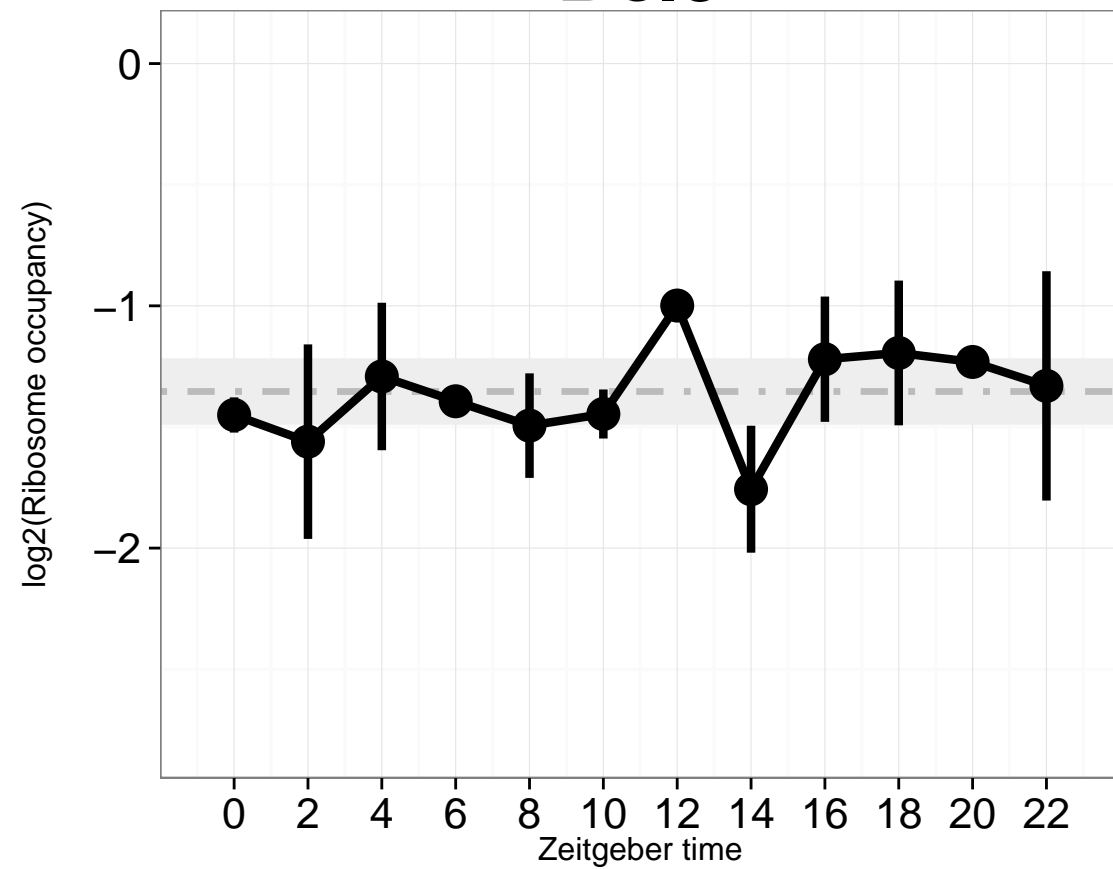

Supplement: Supplementary file 6838 [file 1]

# Tgm7

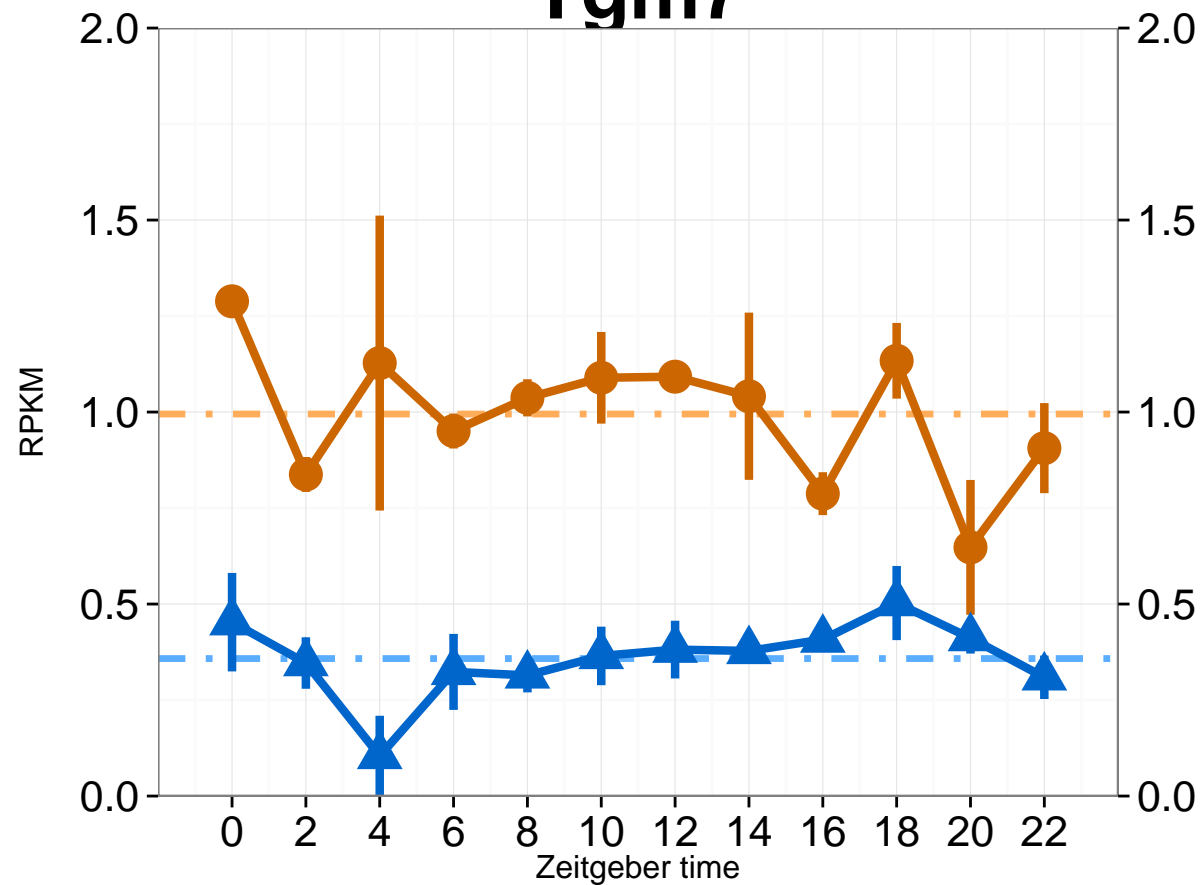

# Tgm7

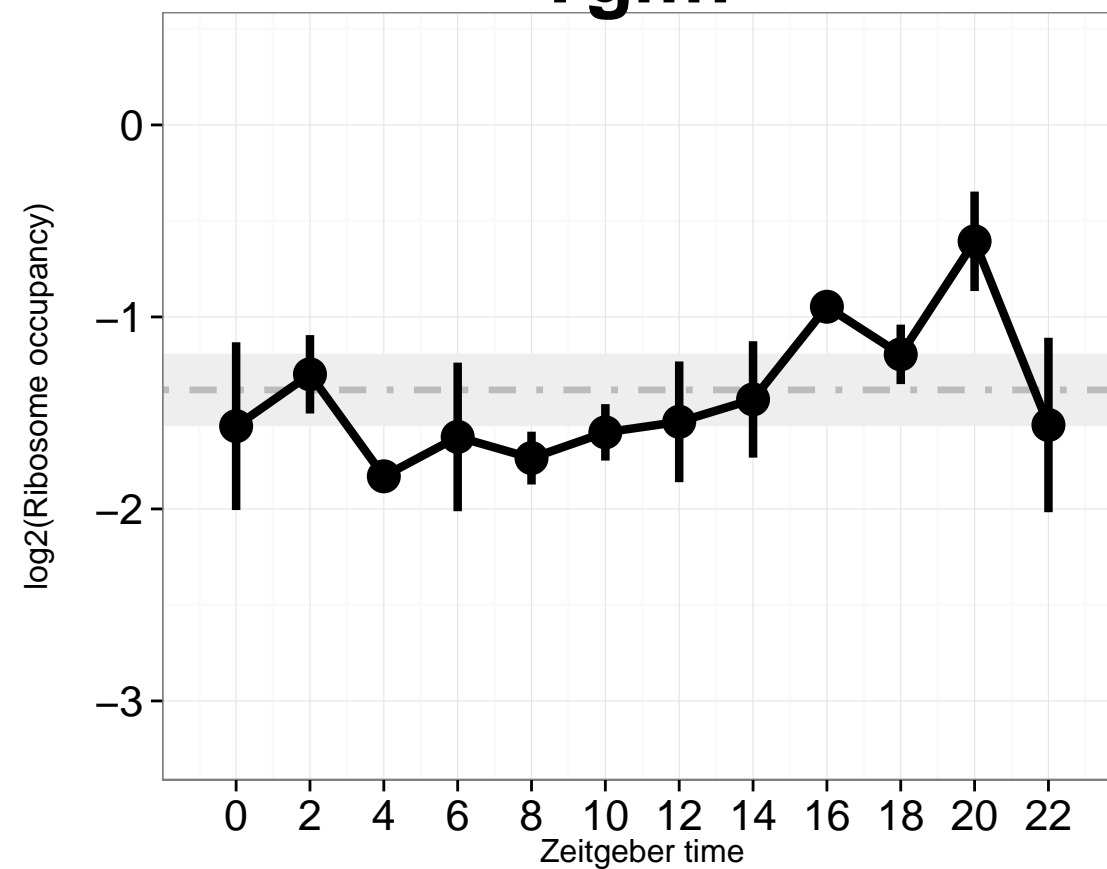

Supplement: Supplementary file 6839 [file 1]

# BC053749

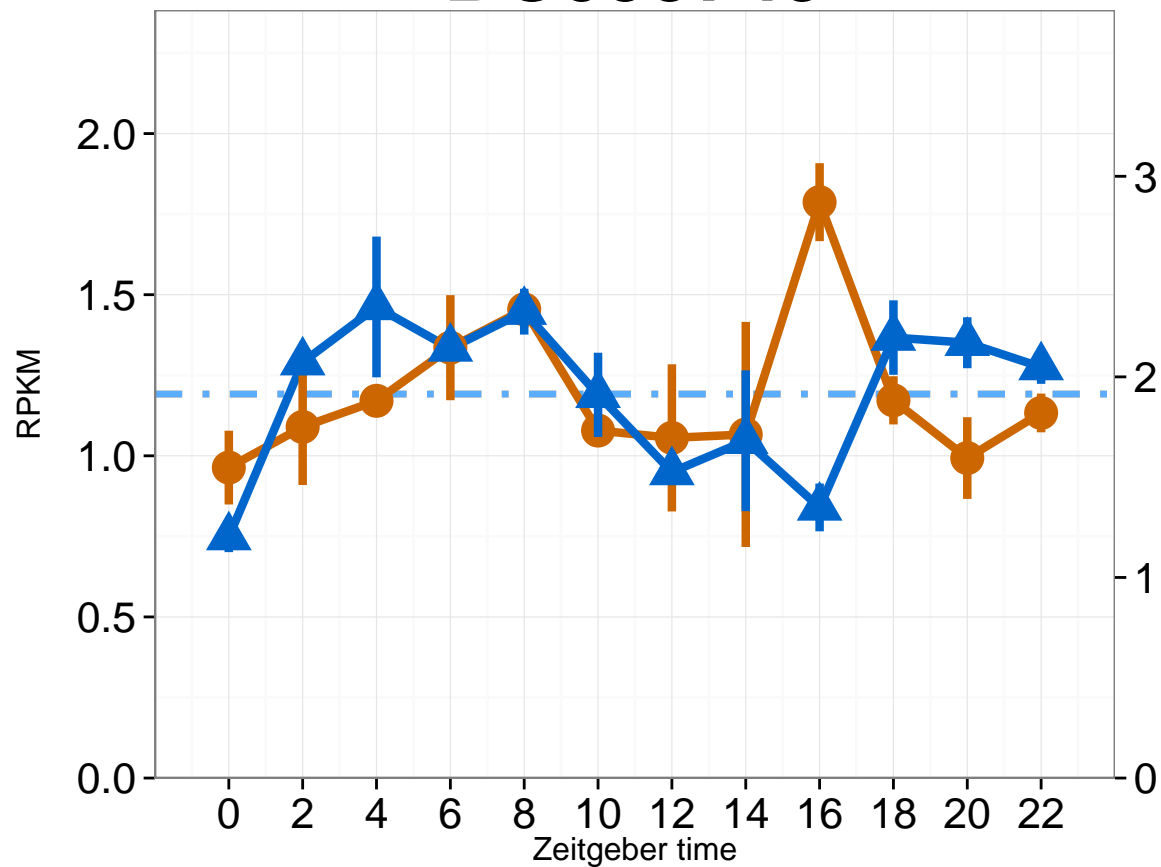

# BC053749

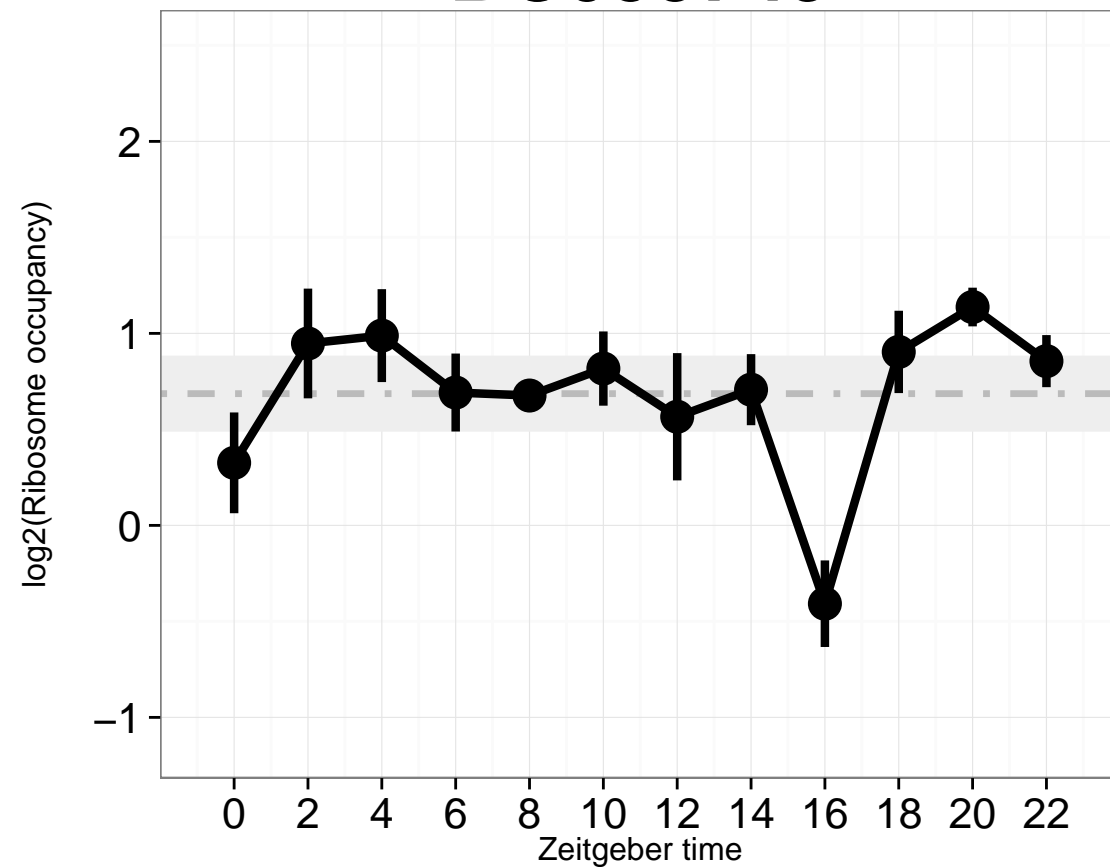

Supplement: Supplementary file 6840 [file 1]

# Pnrc1

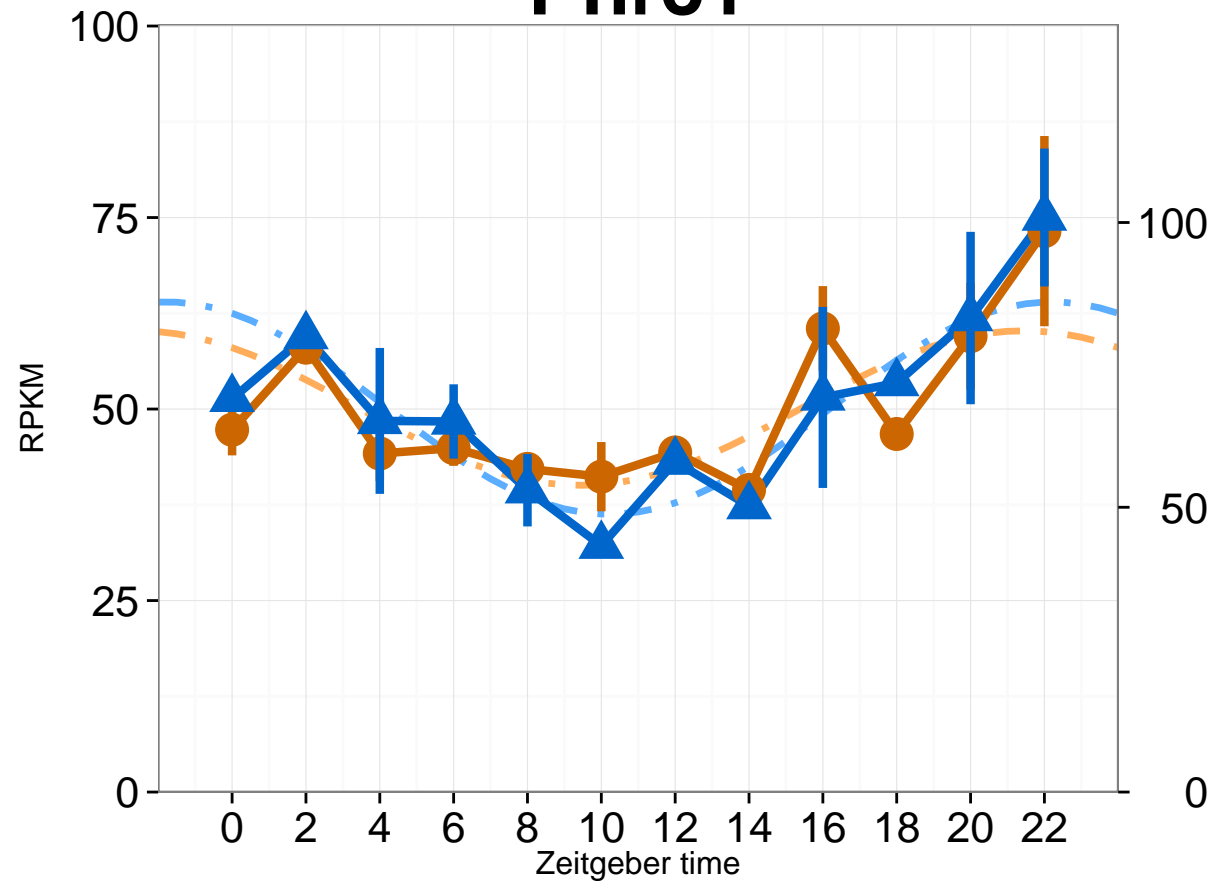

# Pnrc1

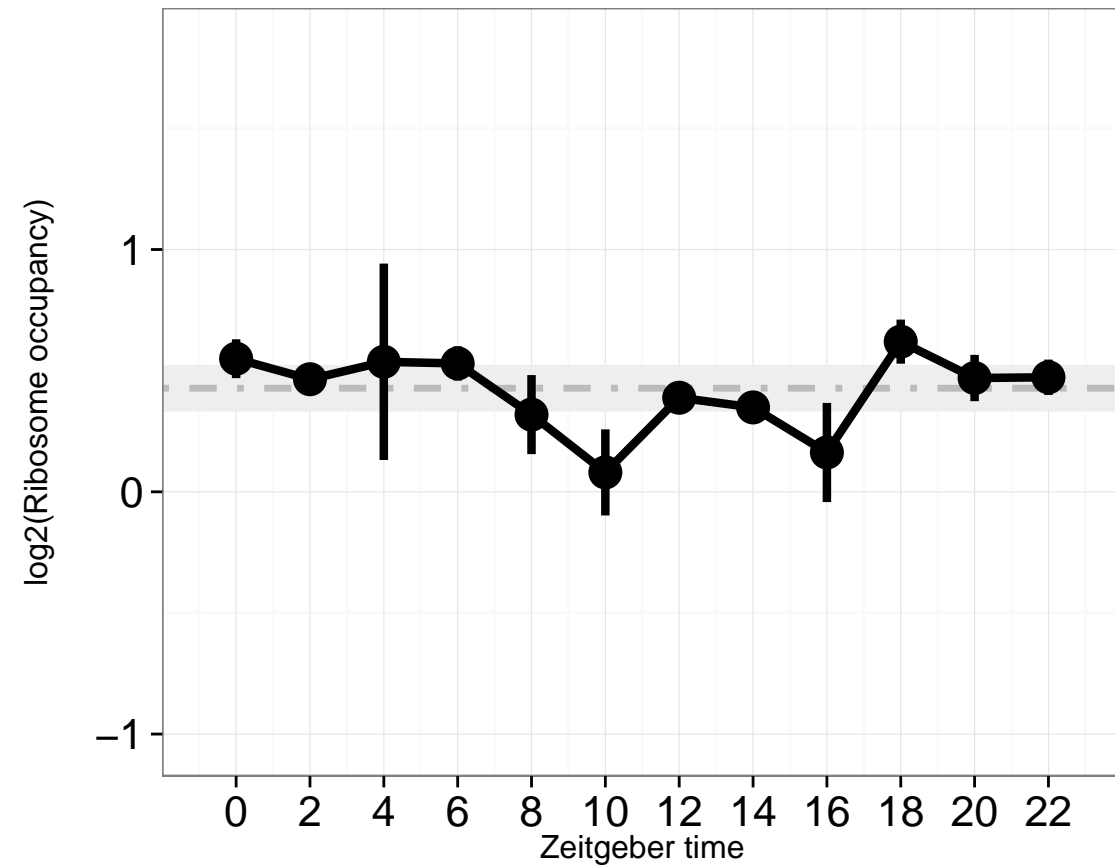

Supplement: Supplementary file 6841 [file 1]

# Utp23

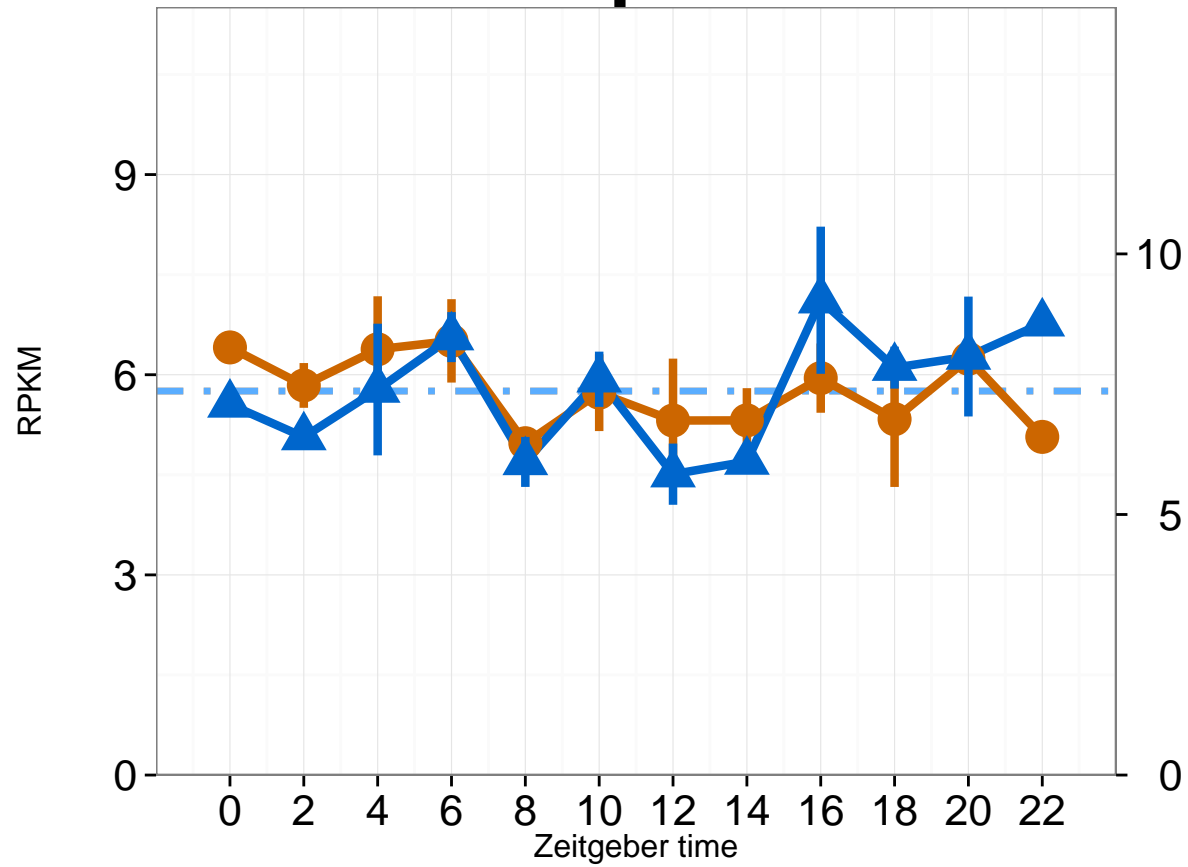

# Utp23

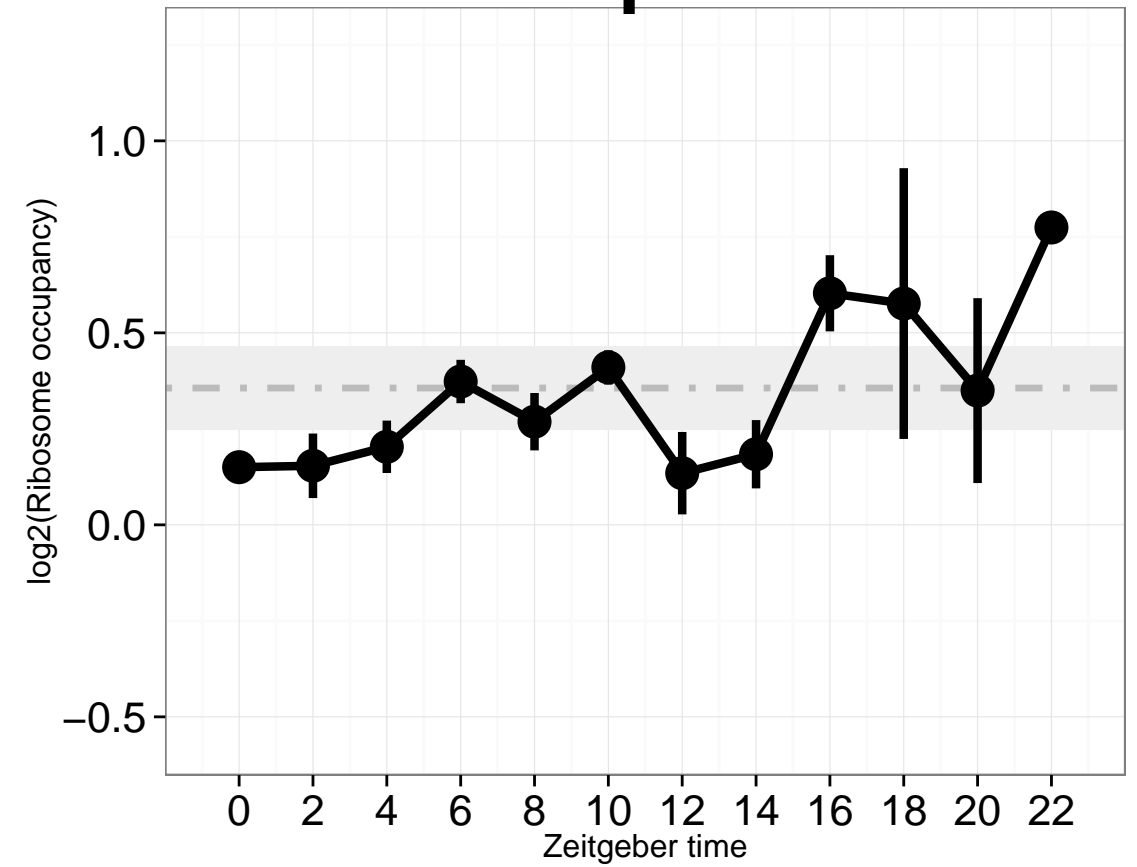

Supplement: Supplementary file 6842 [file 1]

# Dazap2

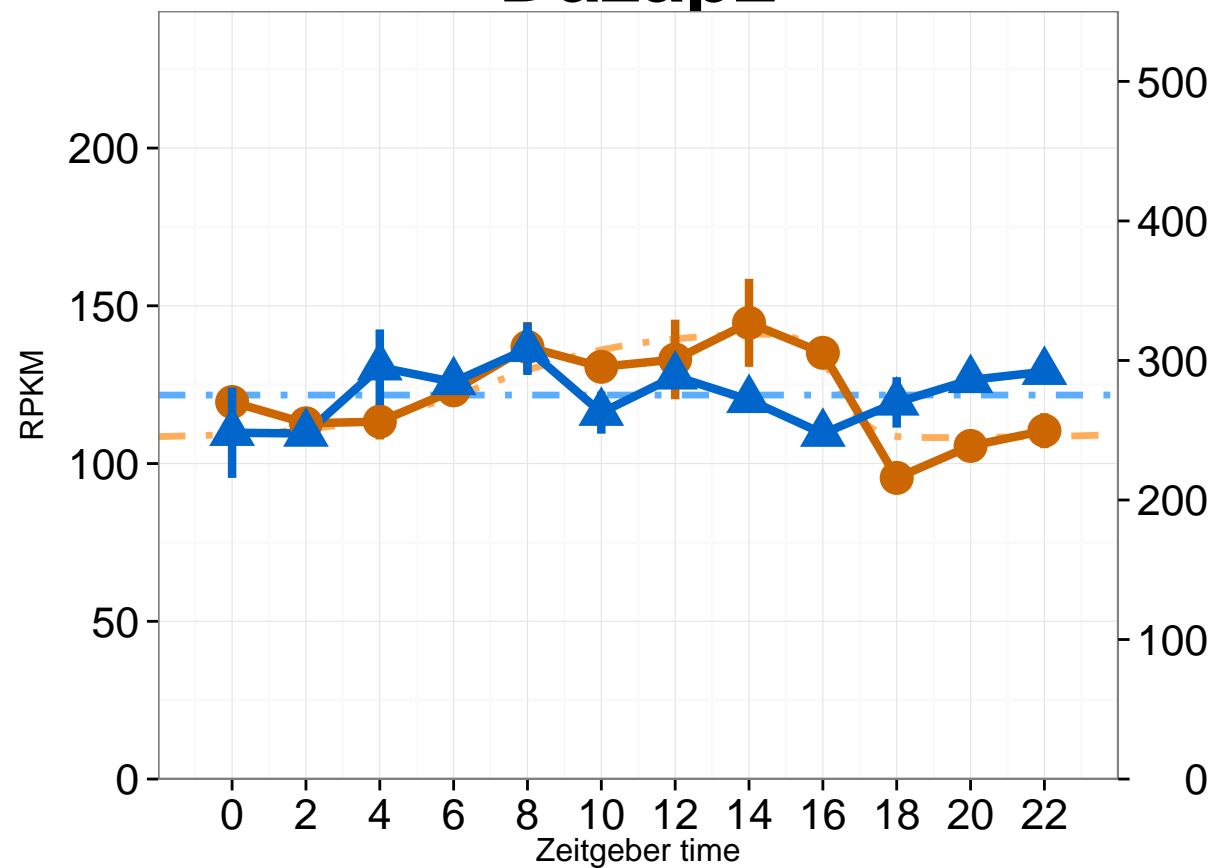

# Dazap2

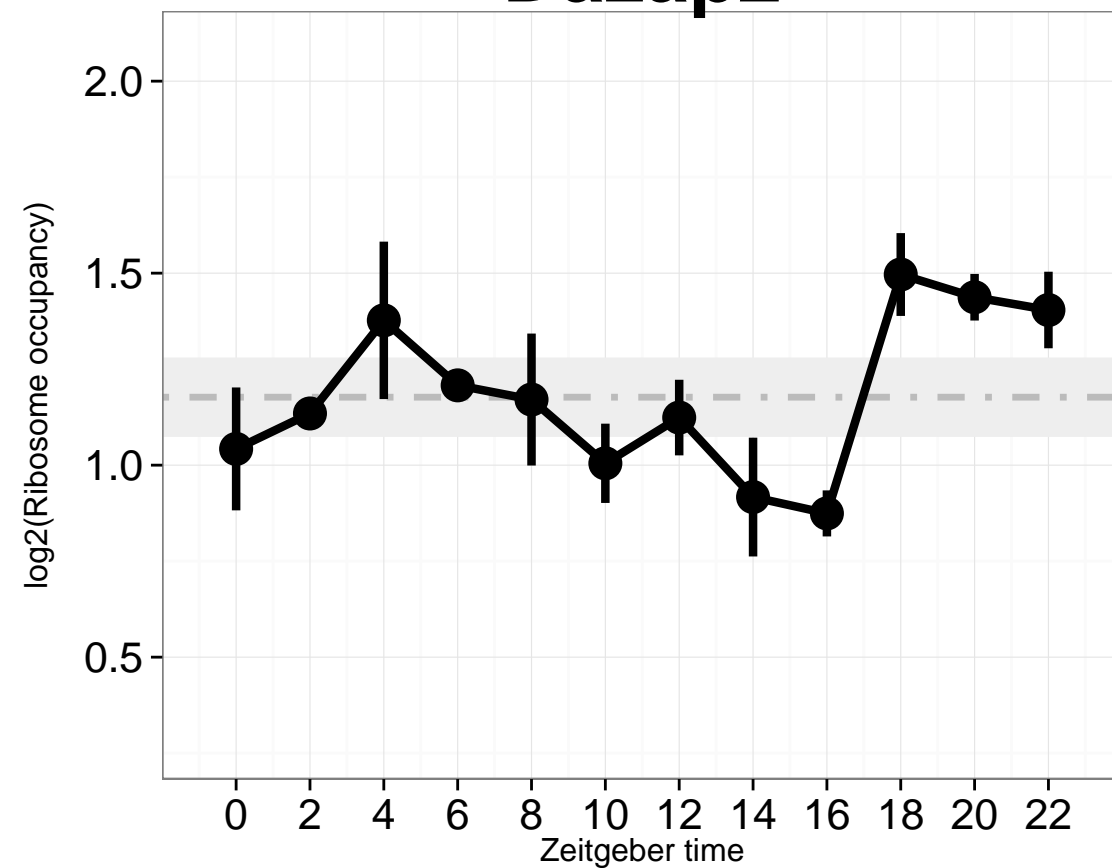

Supplement: Supplementary file 6843 [file 1]

## Hn1

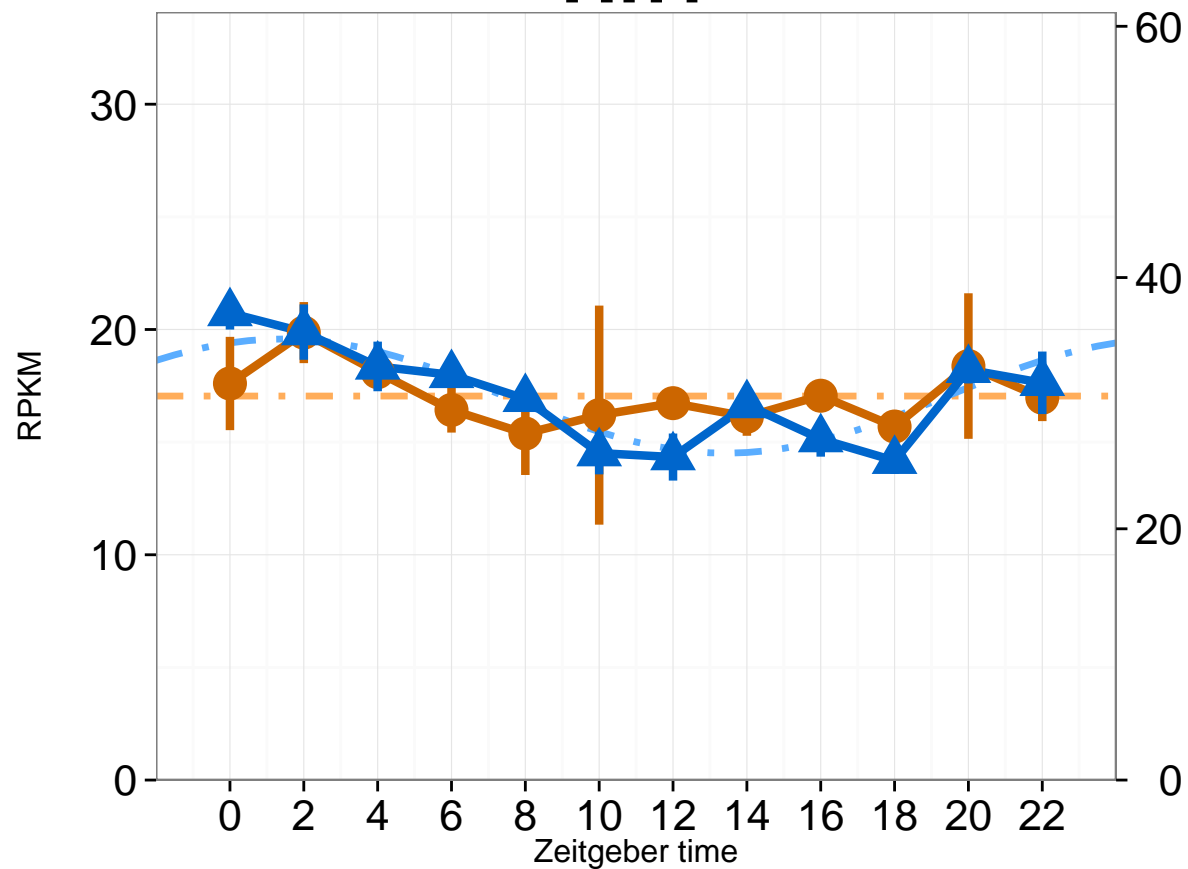

## Hn1

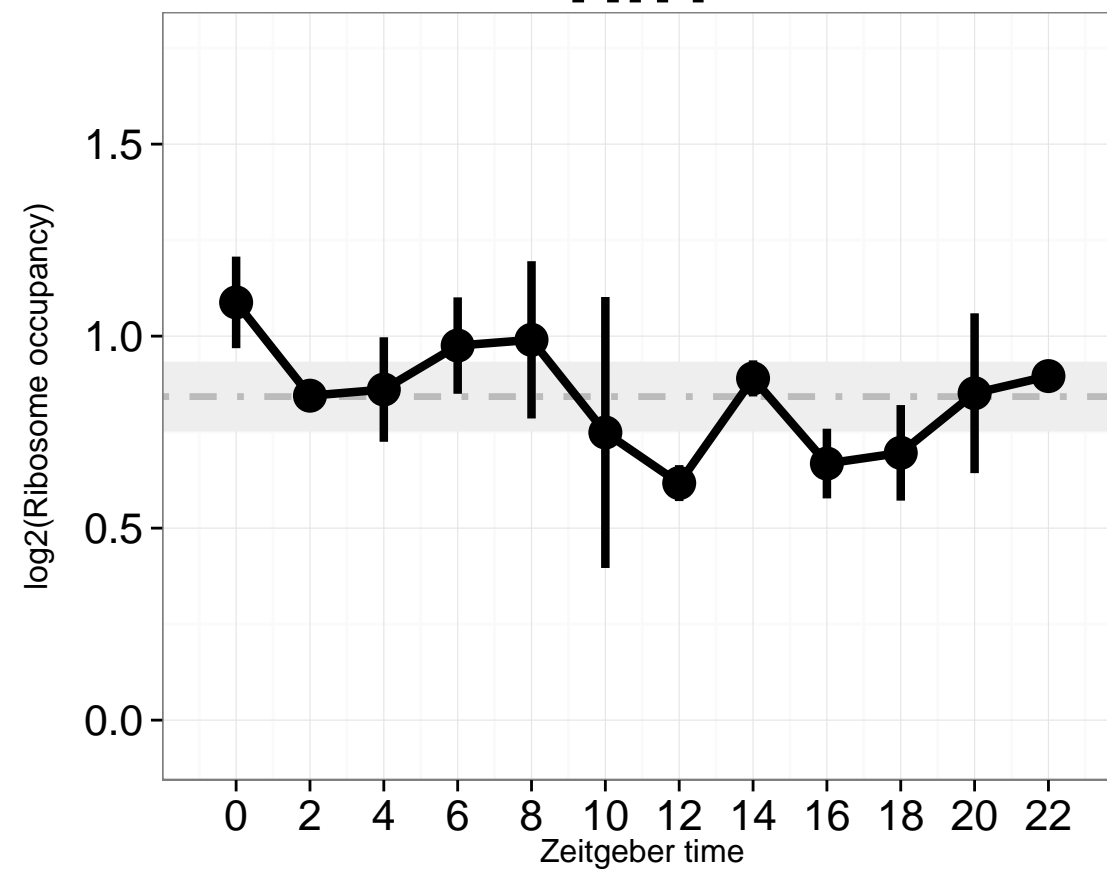

Supplement: Supplementary file 6844 [file 1]

# Rnf123

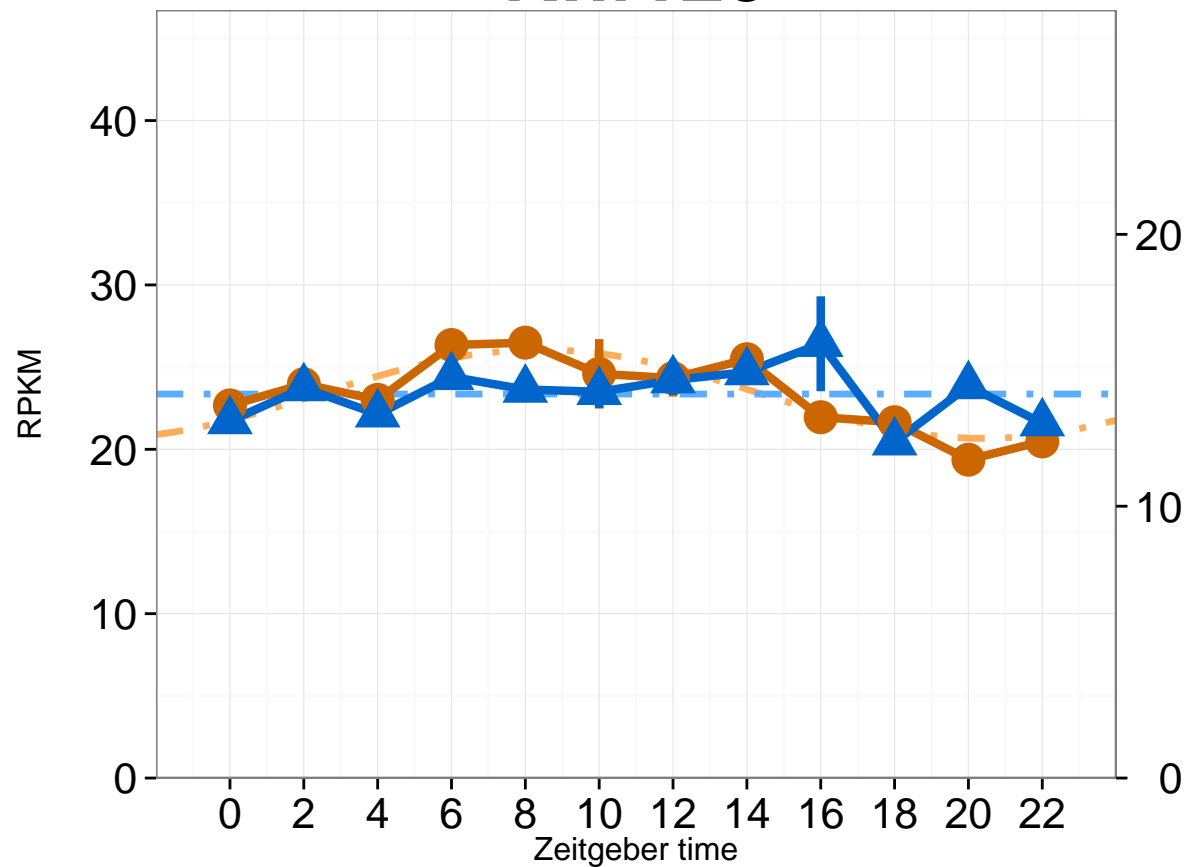

# Rnf123

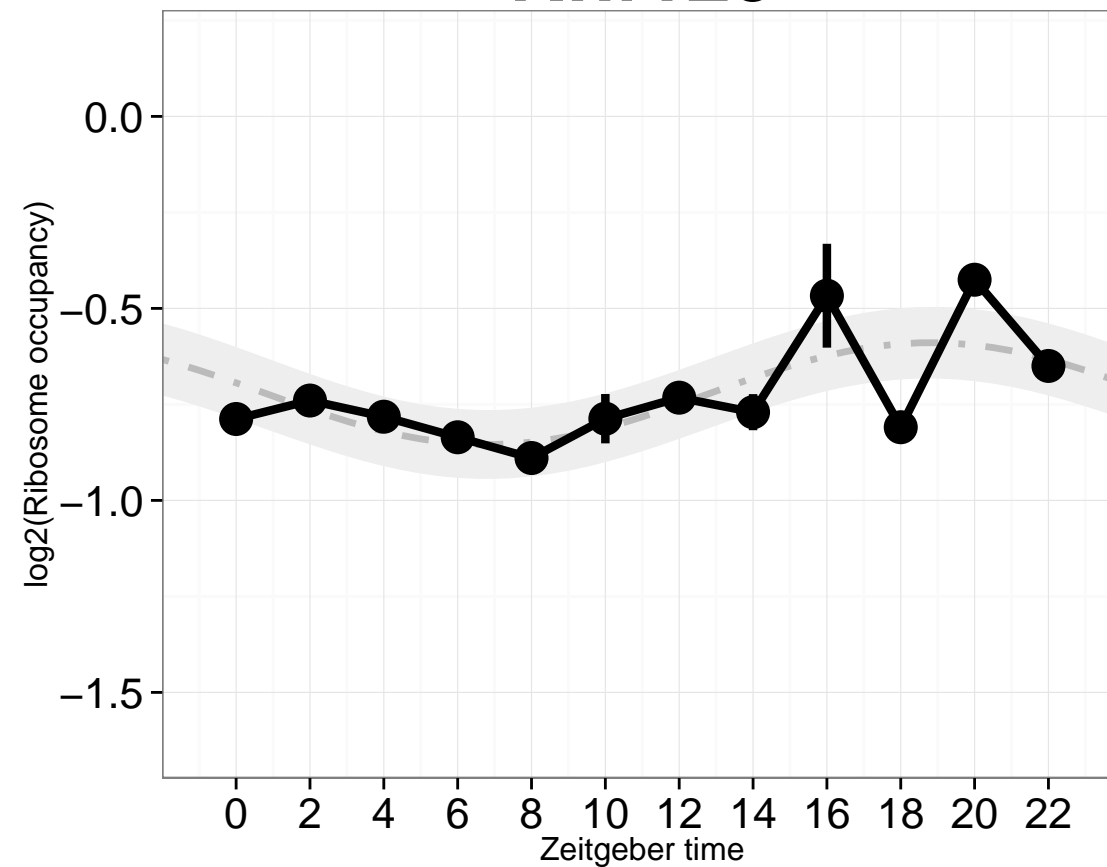

Supplement: Supplementary file 6845 [file 1]

## Ezr

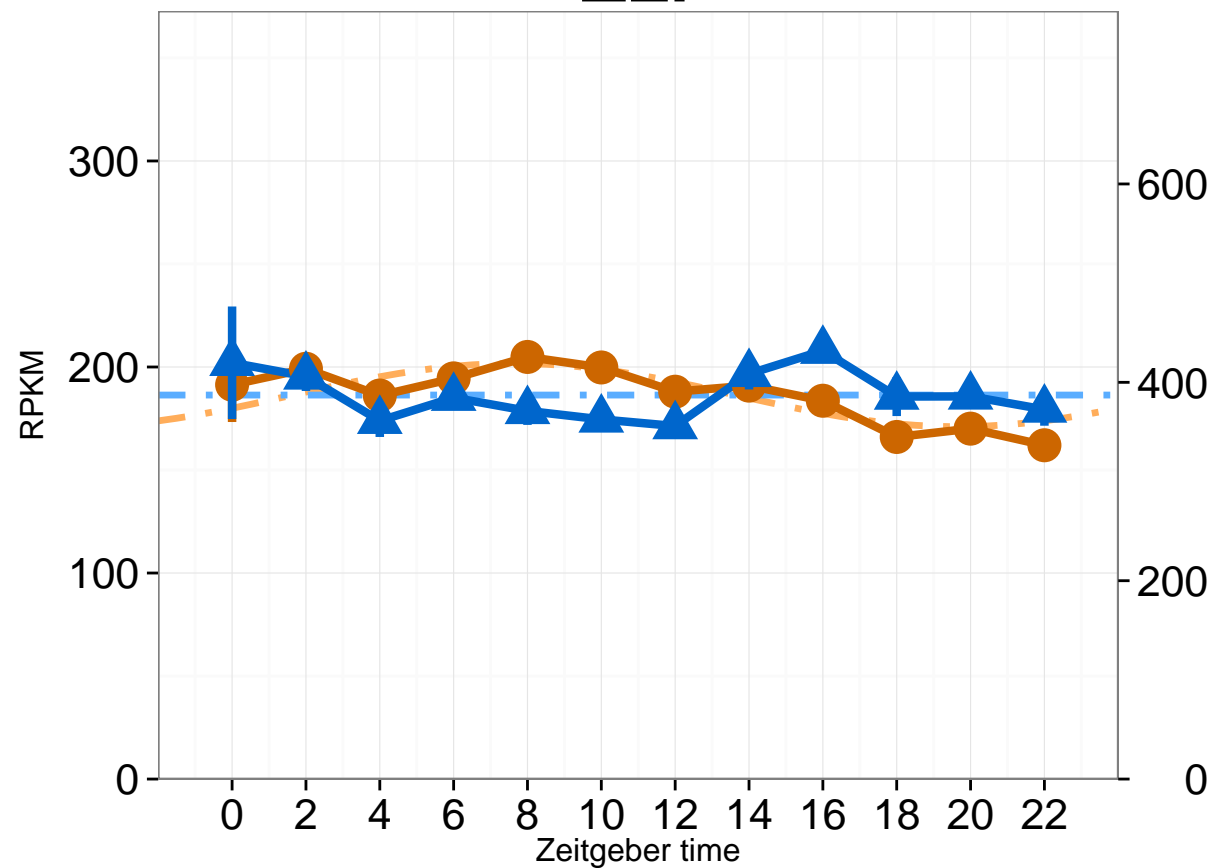

## Ezr

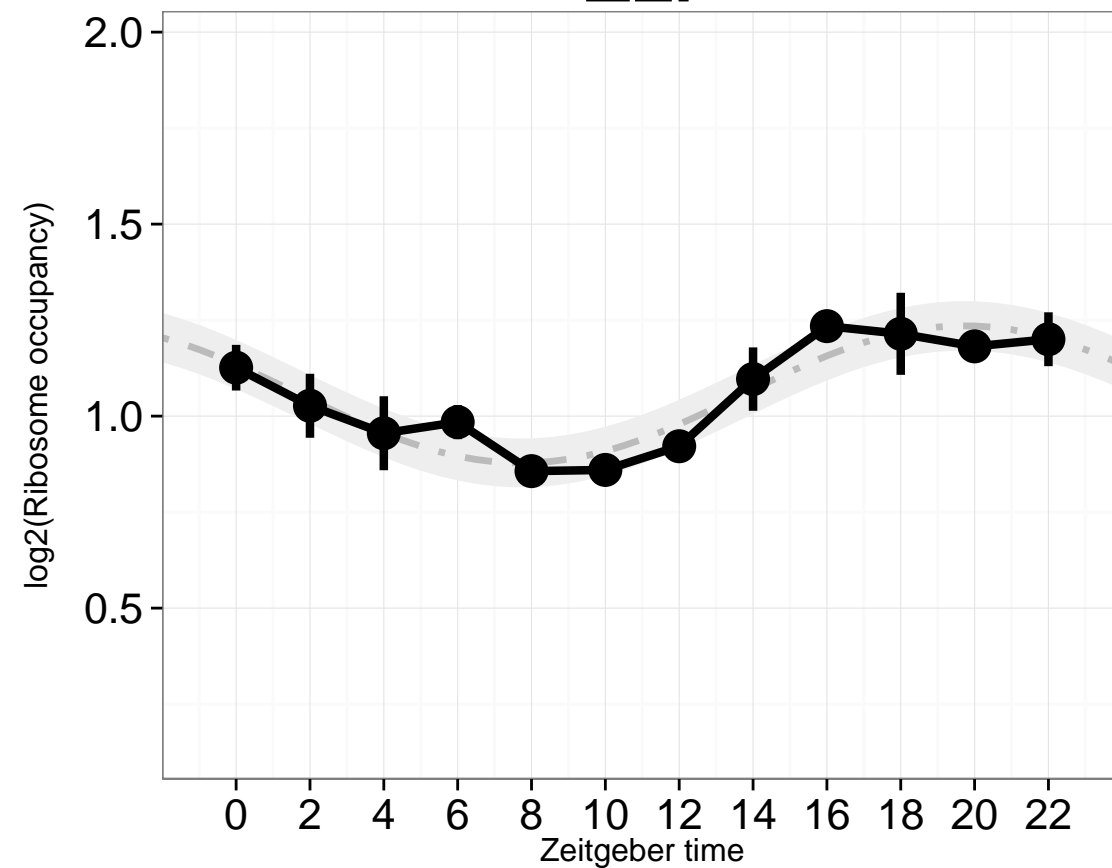

Supplement: Supplementary file 6846 [file 1]

## Skil

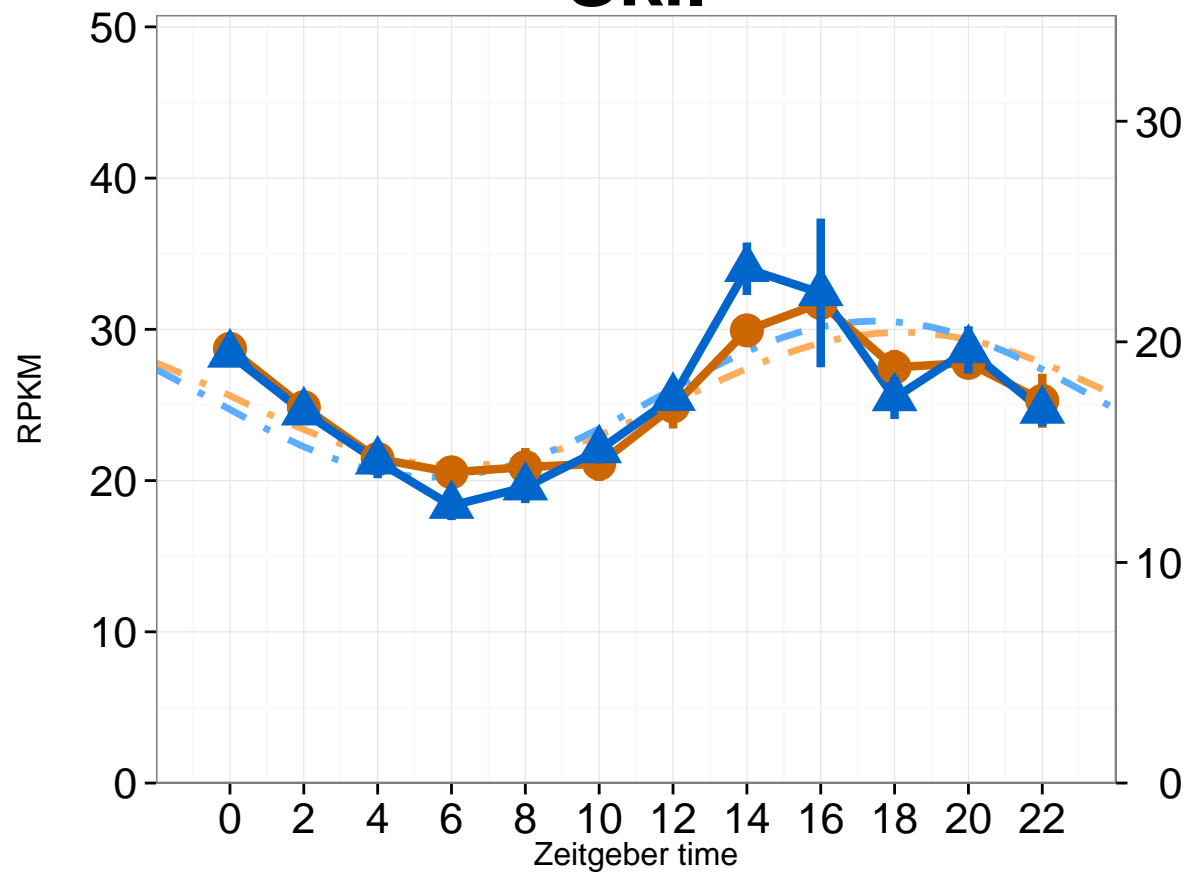

## Skil

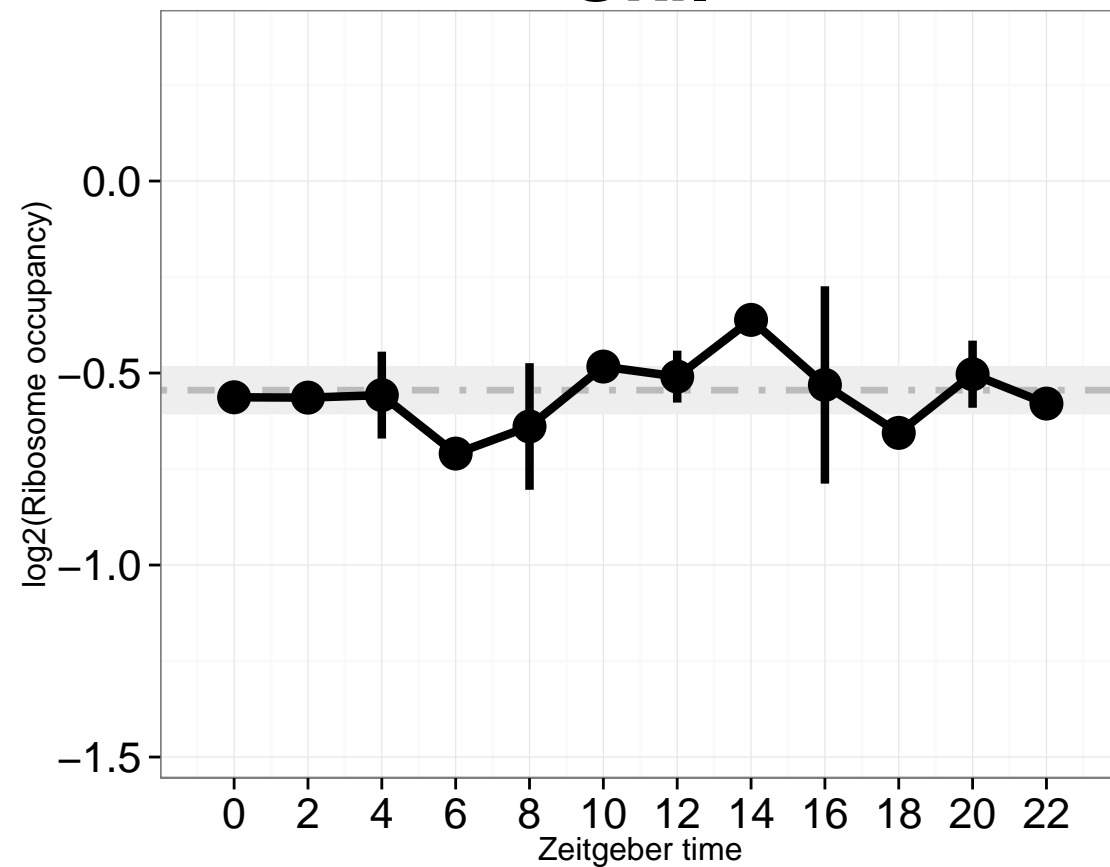

Supplement: Supplementary file 6847 [file 1]

## Hoxb7

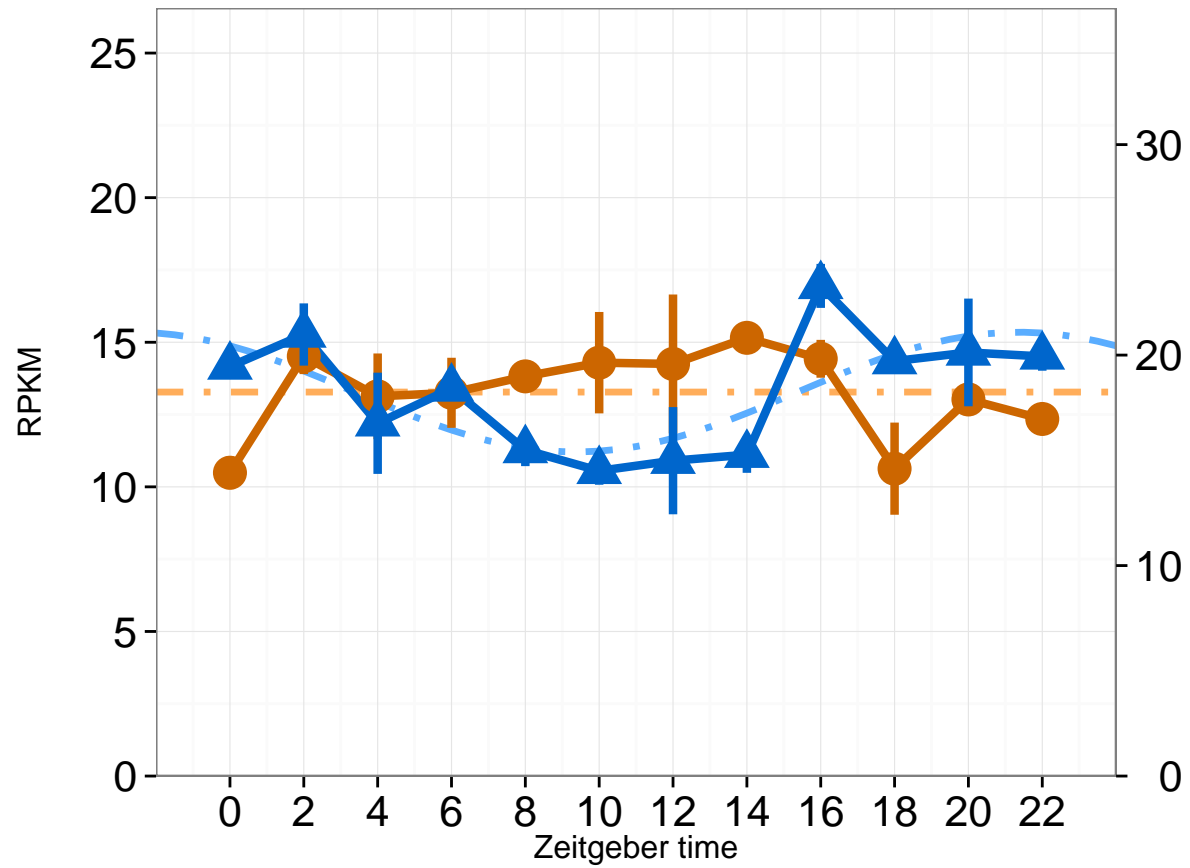

## Hoxb7

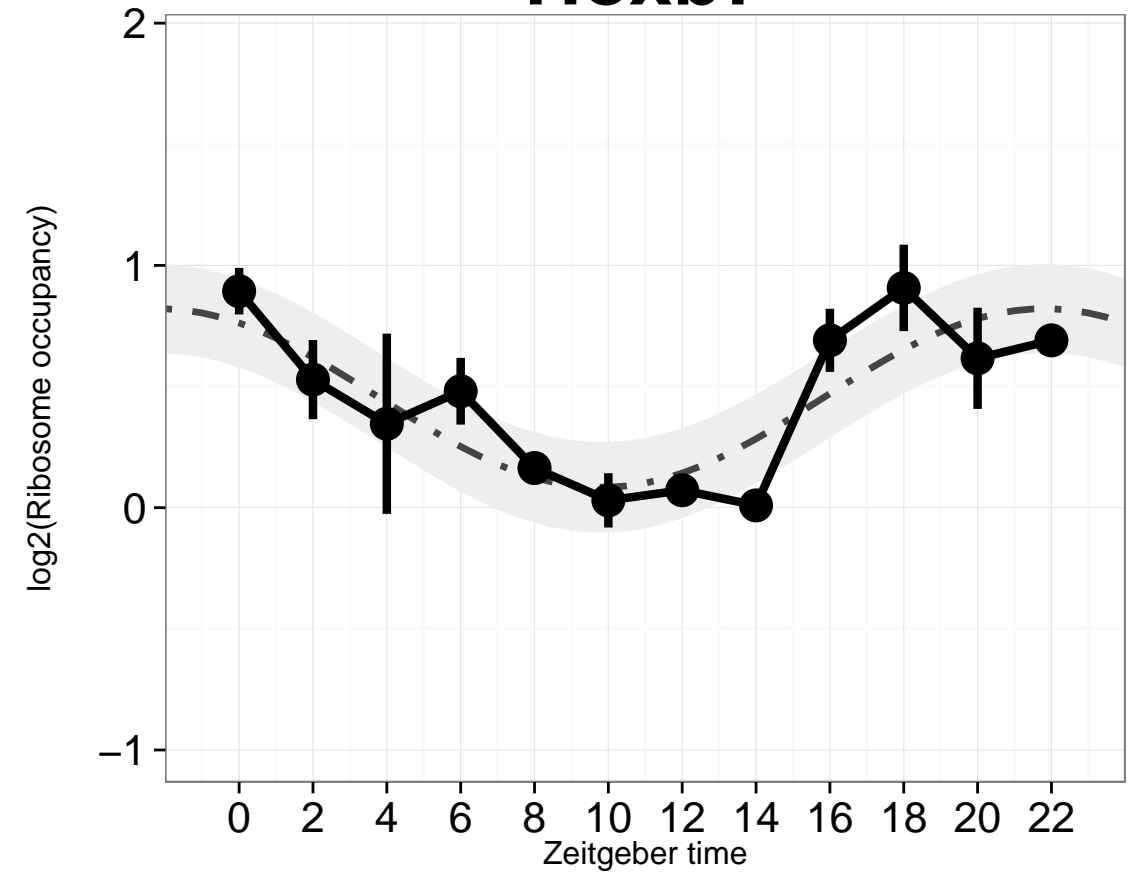

Supplement: Supplementary file 6848 [file 1]

## Pola2

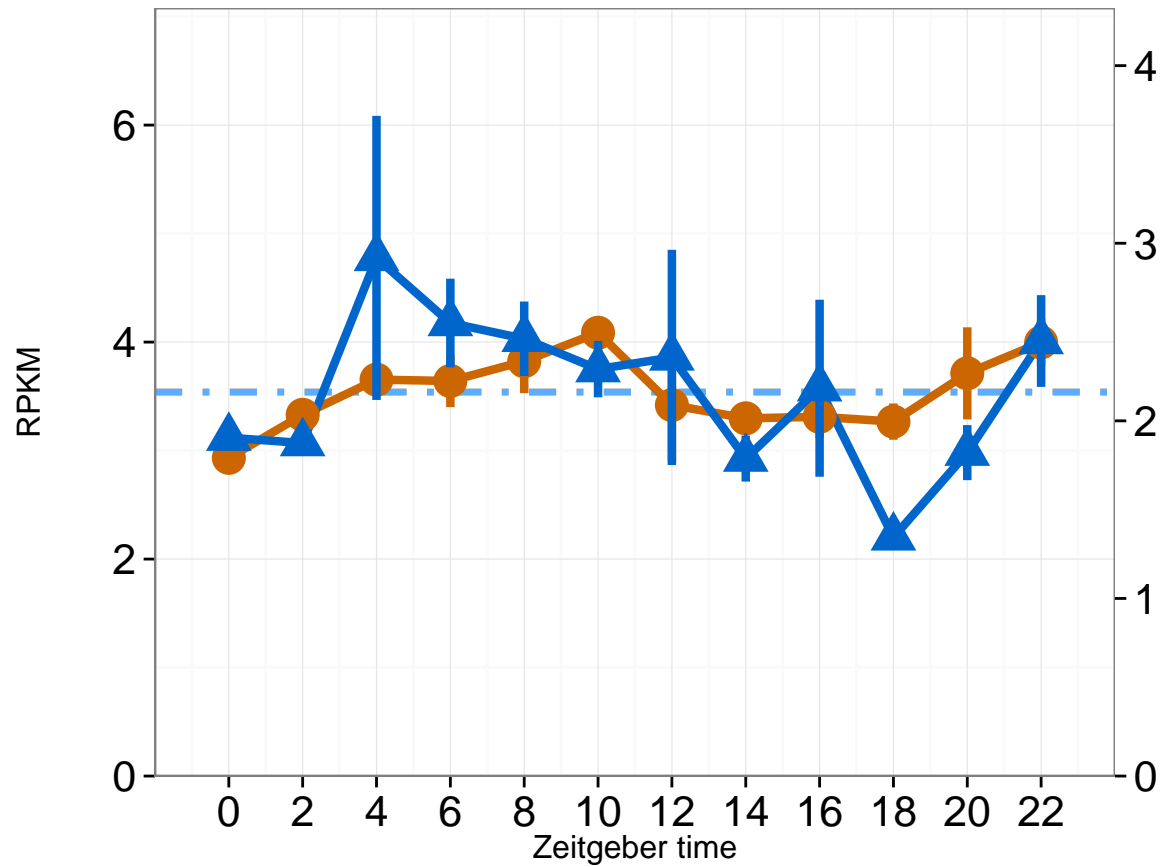

## Pola2

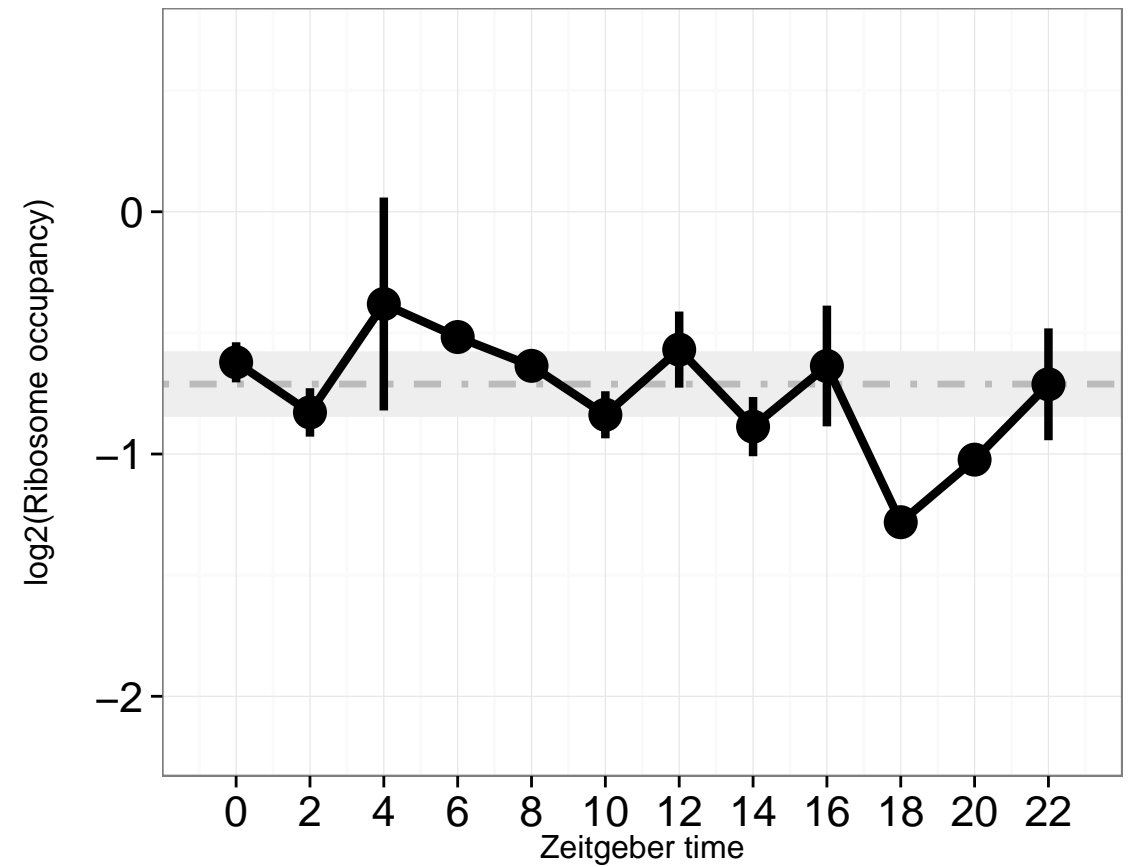

Supplement: Supplementary file 6849 [file 1]

## Mbtps2

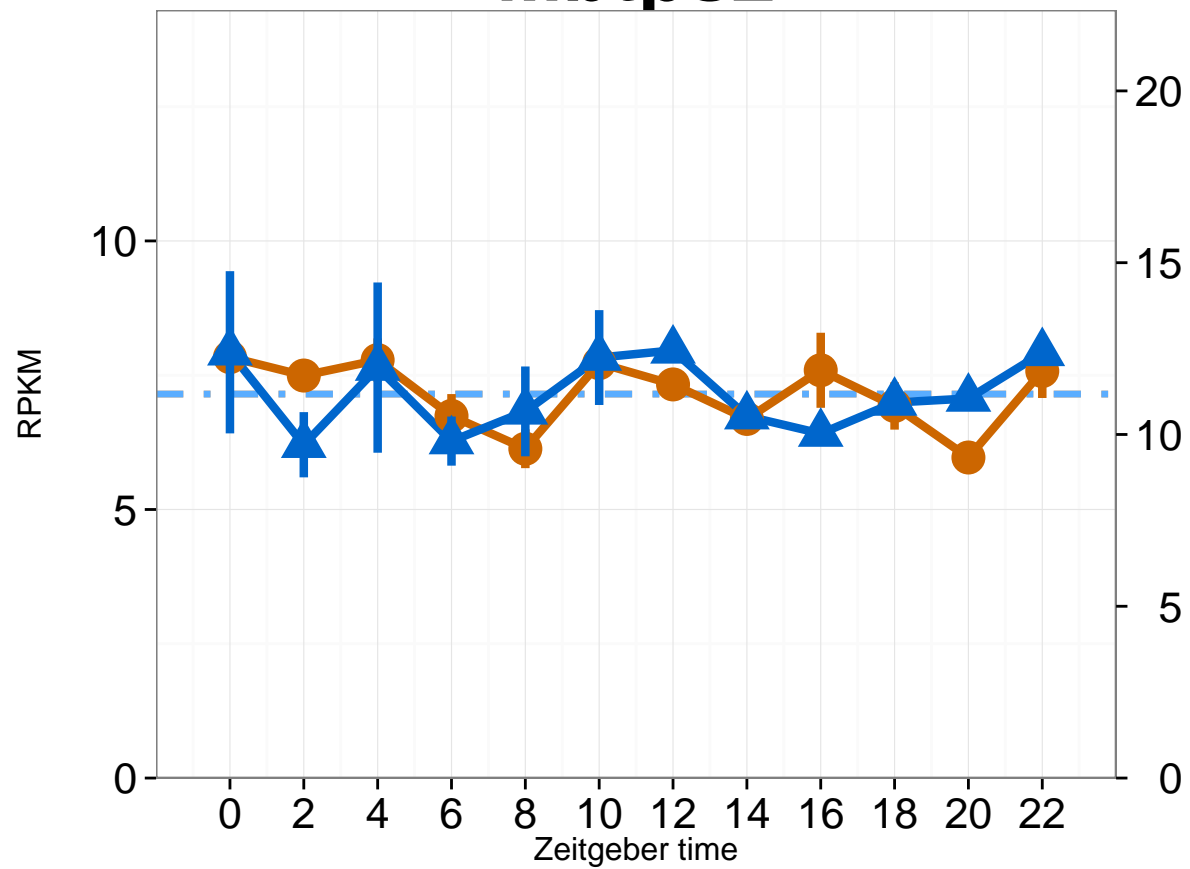

## Mbtps2

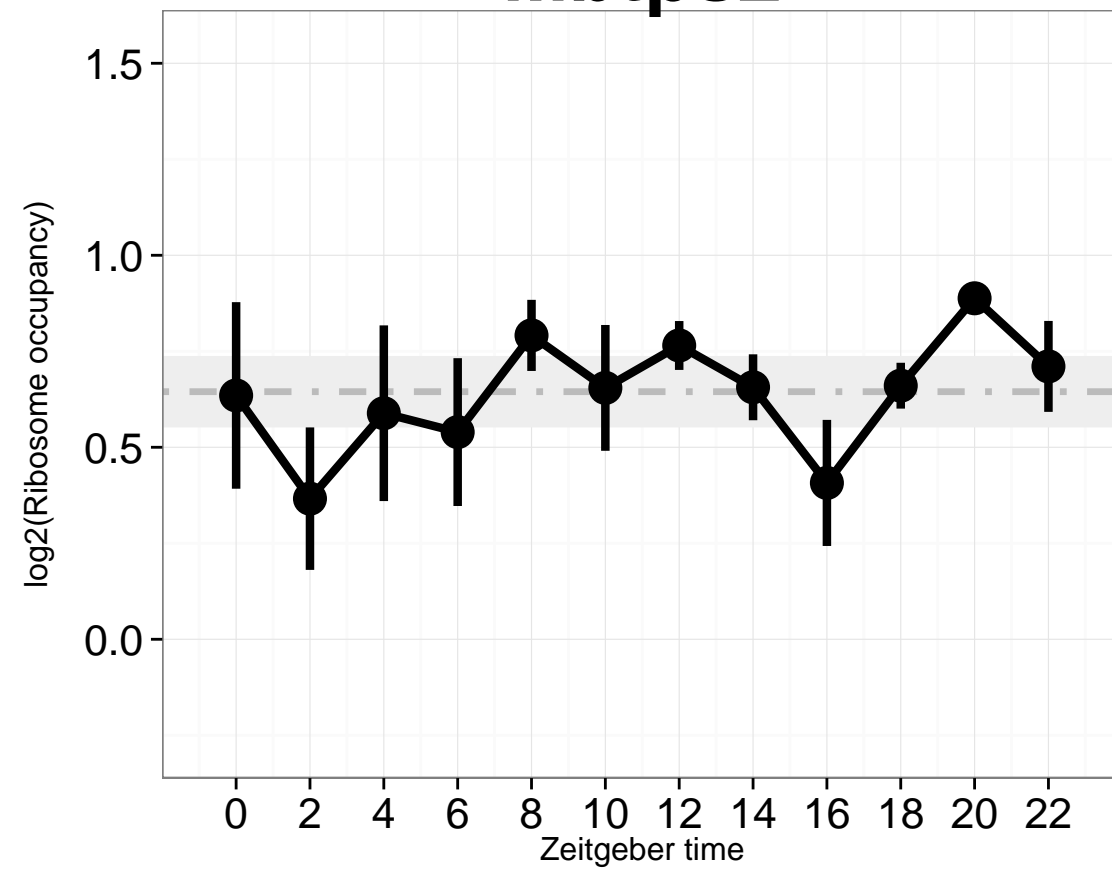

Supplement: Supplementary file 6850 [file 1]

# Coq10b

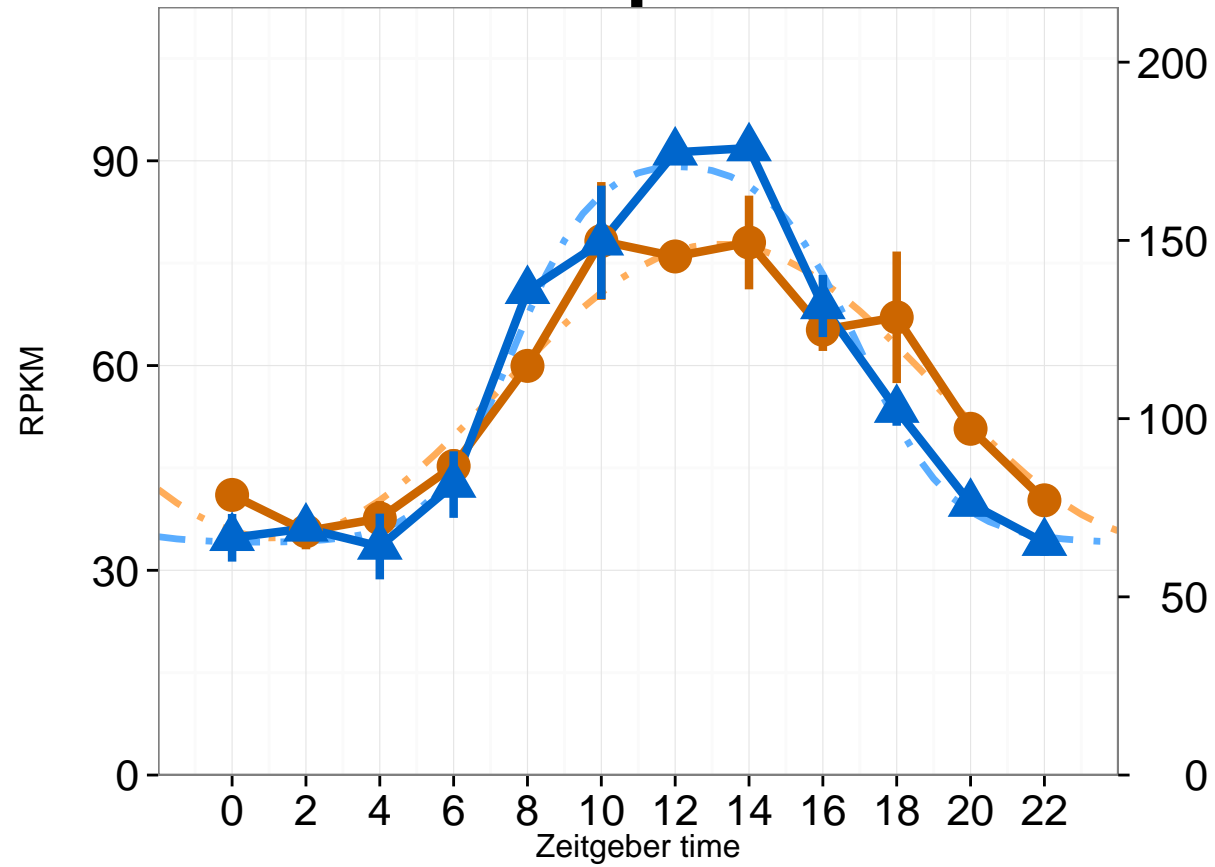

# Coq10b

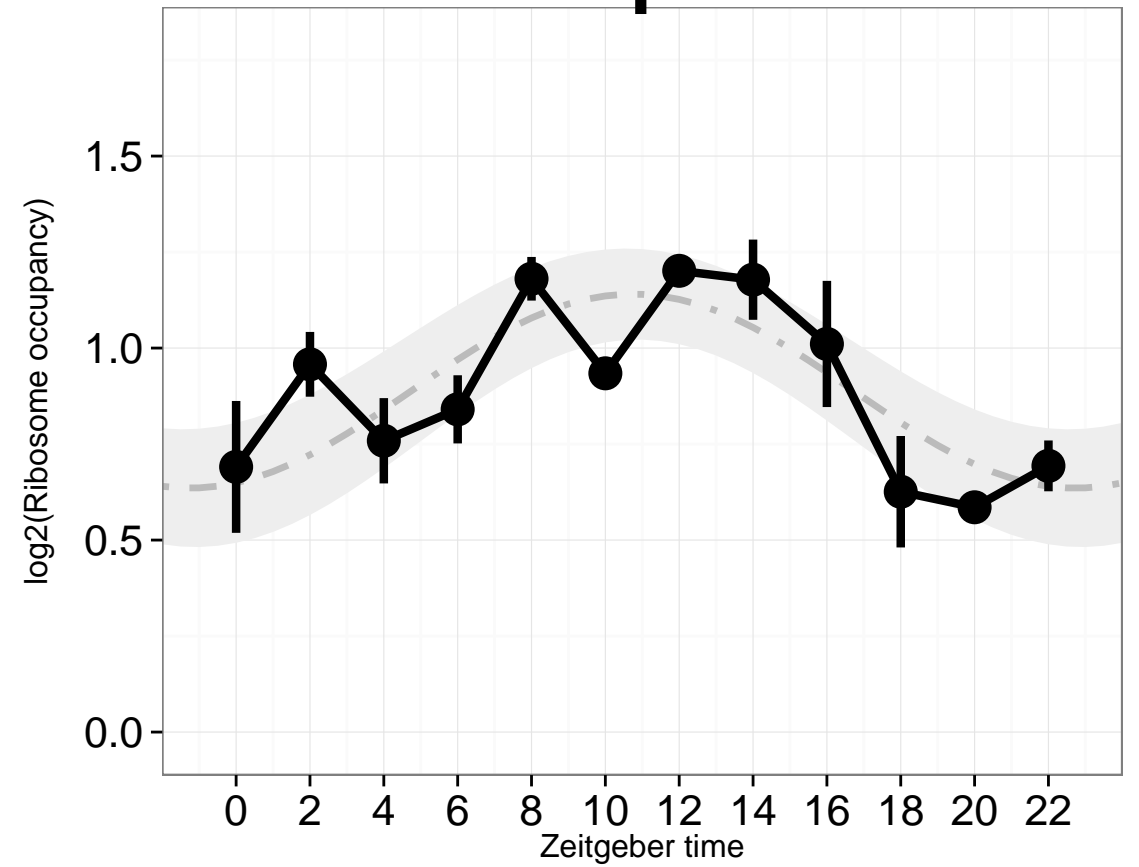

Supplement: Supplementary file 6851 [file 1]

# Pde4b

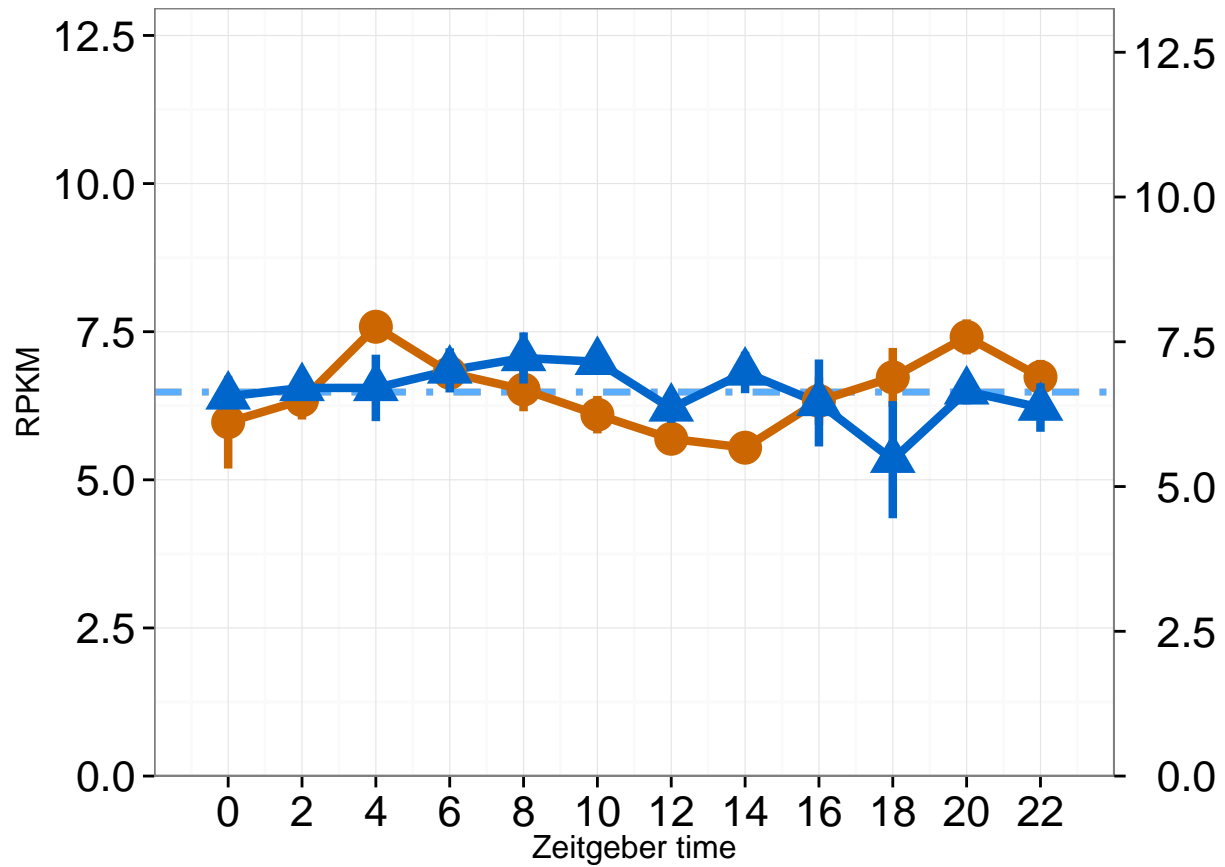

# Pde4b

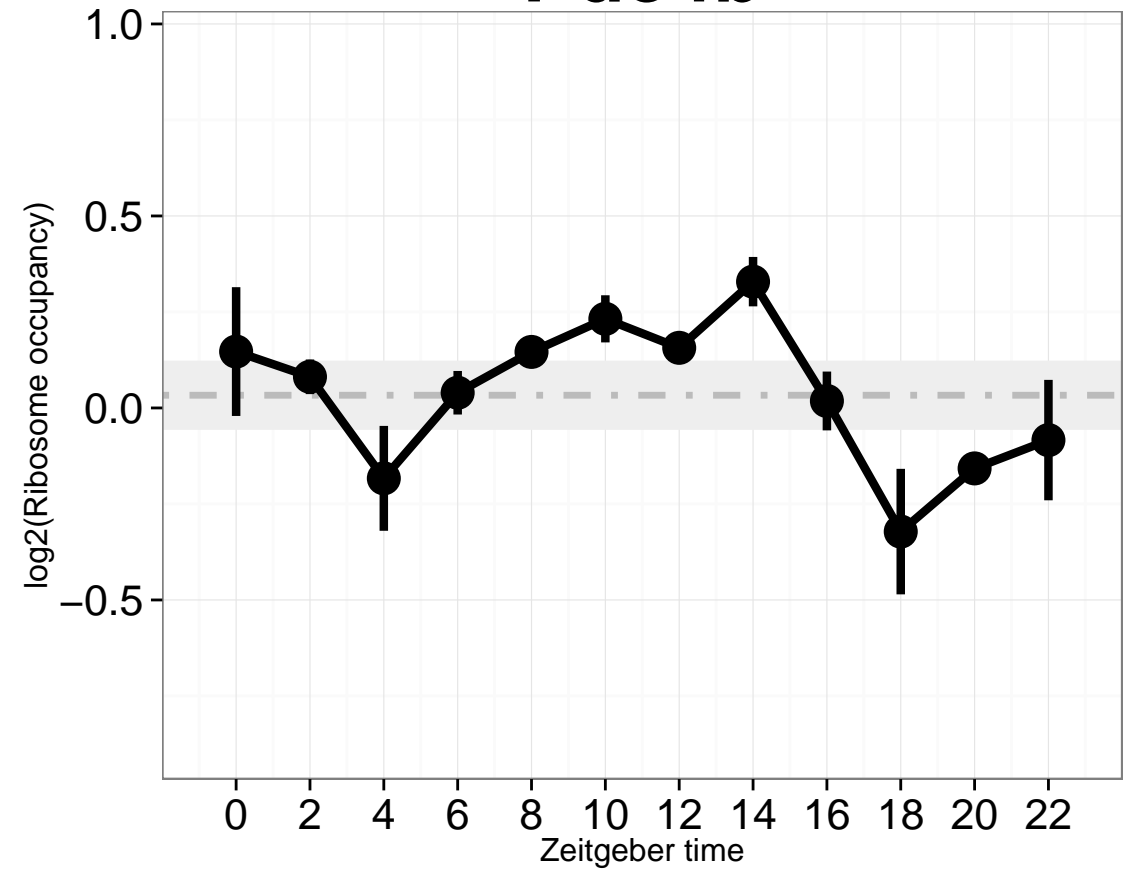

Supplement: Supplementary file 6852 [file 1]

# Erh

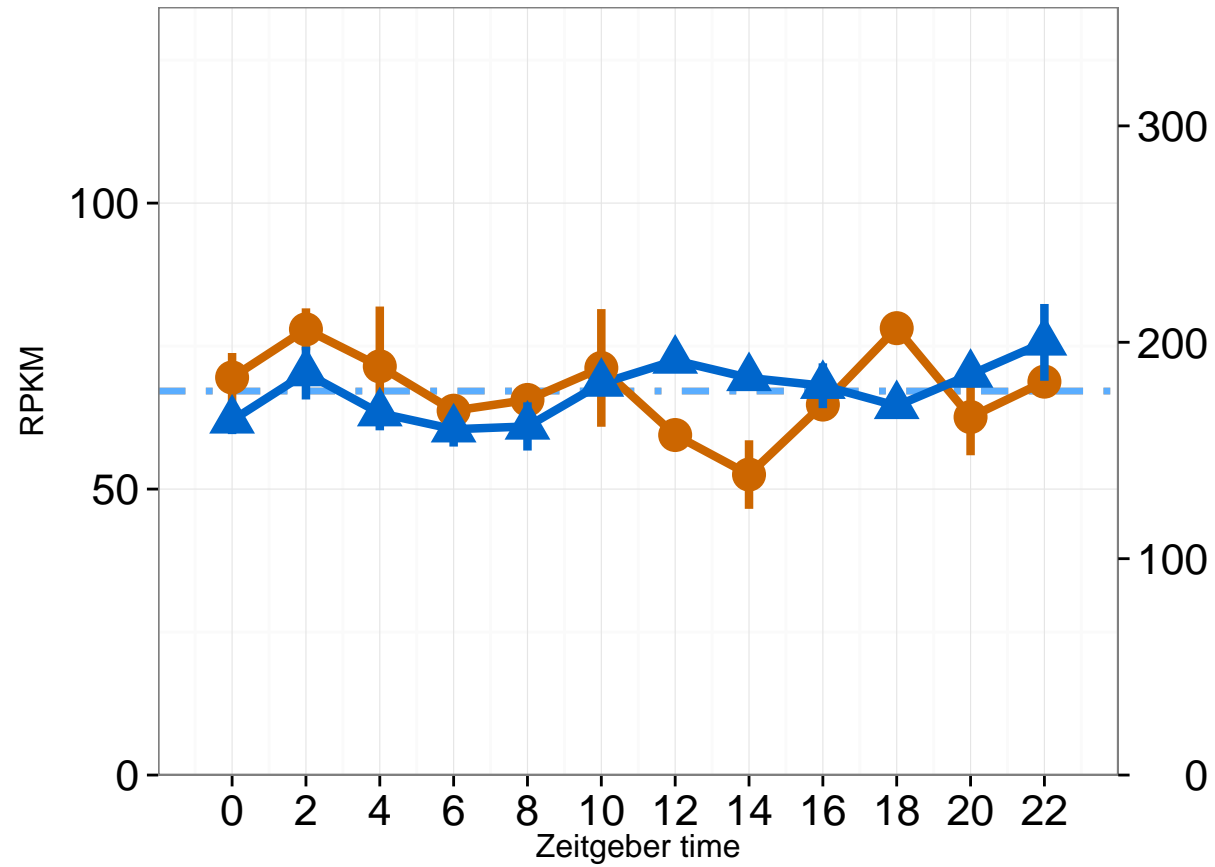

# Erh

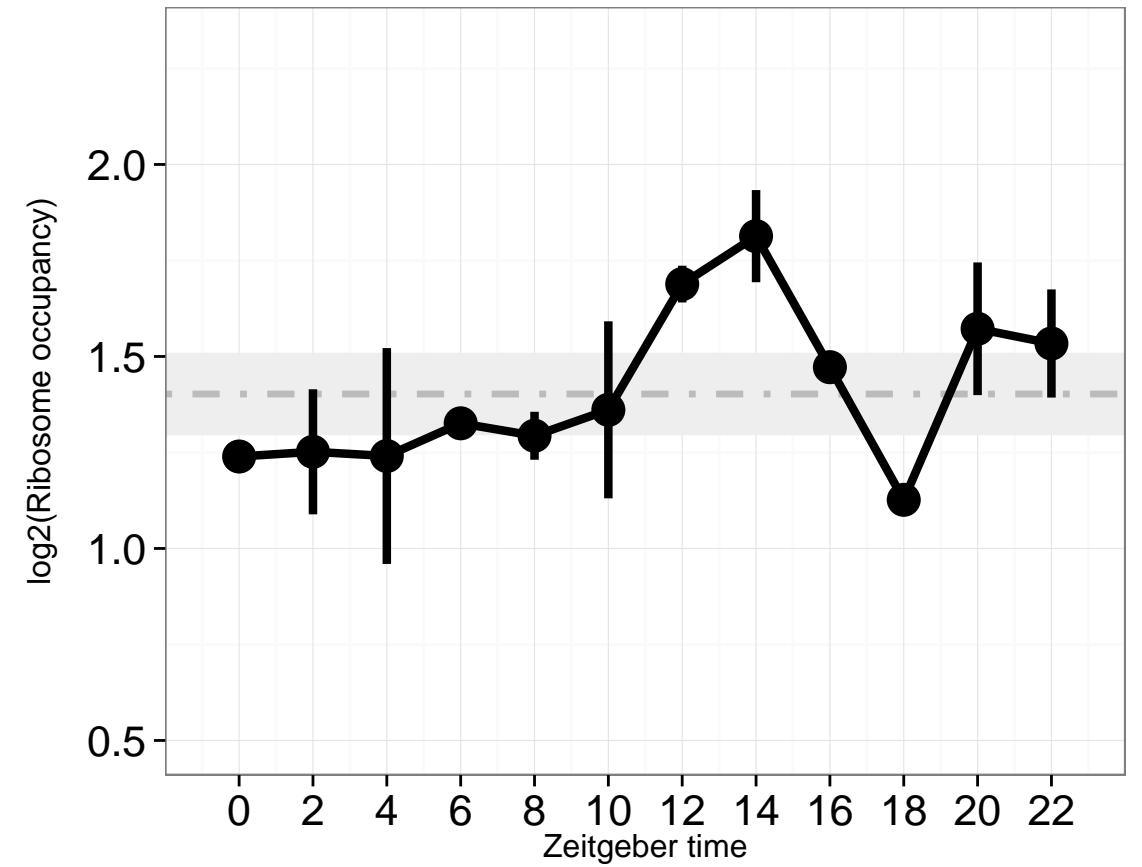

Supplement: Supplementary file 6853 [file 1]

## Srebf2

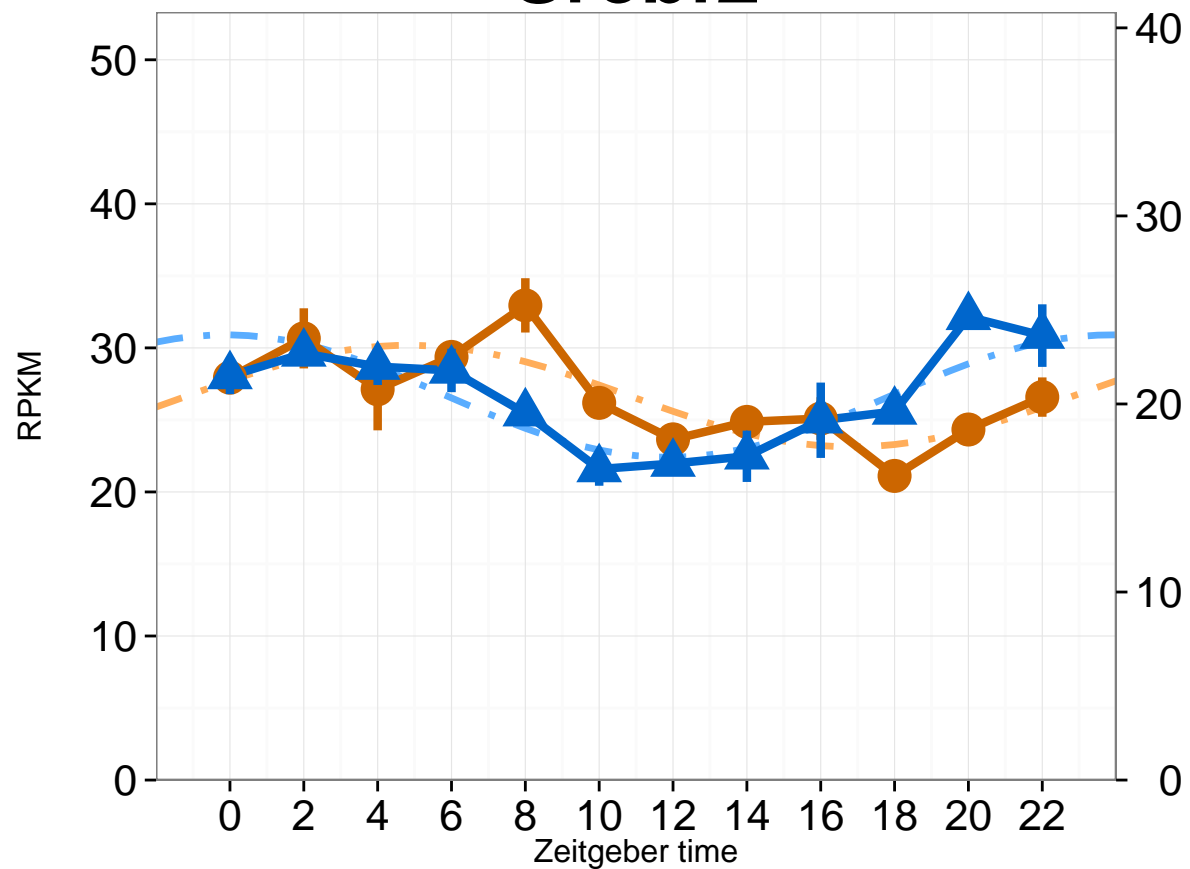

## Srebf2

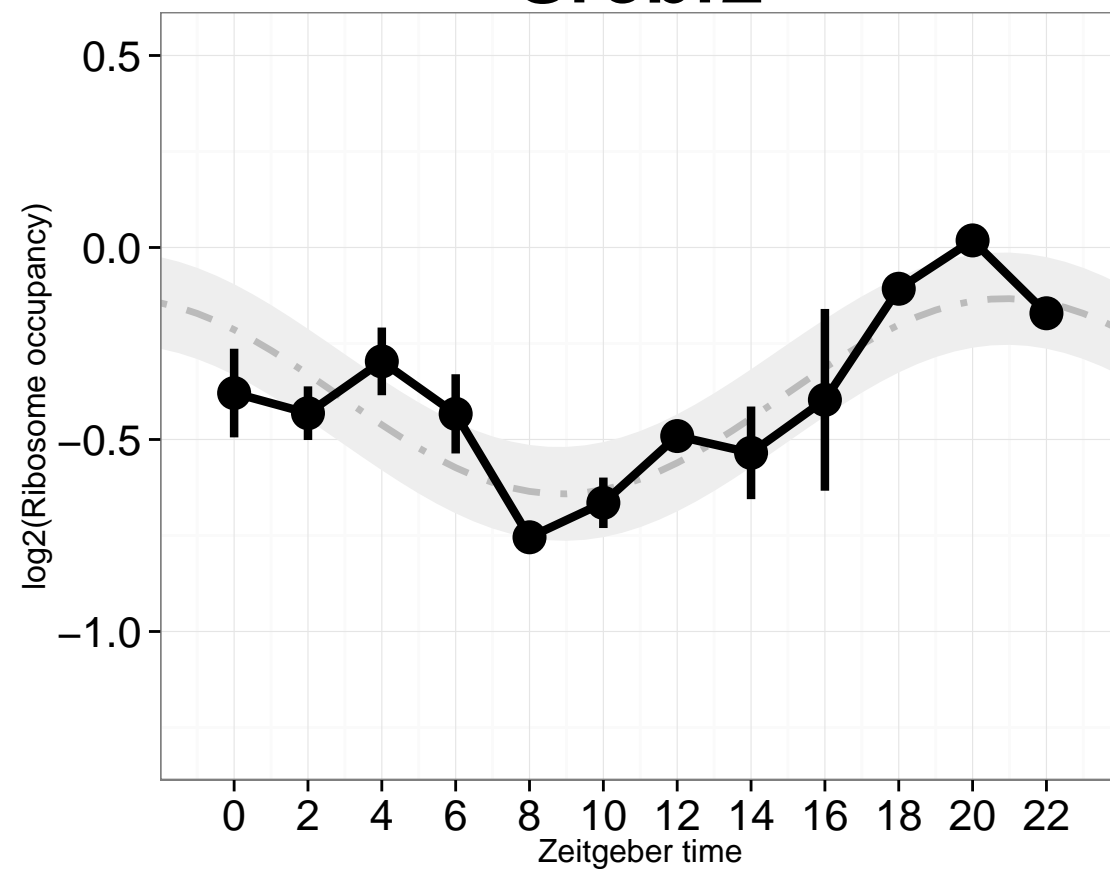

Supplement: Supplementary file 6854 [file 1]

## Tes

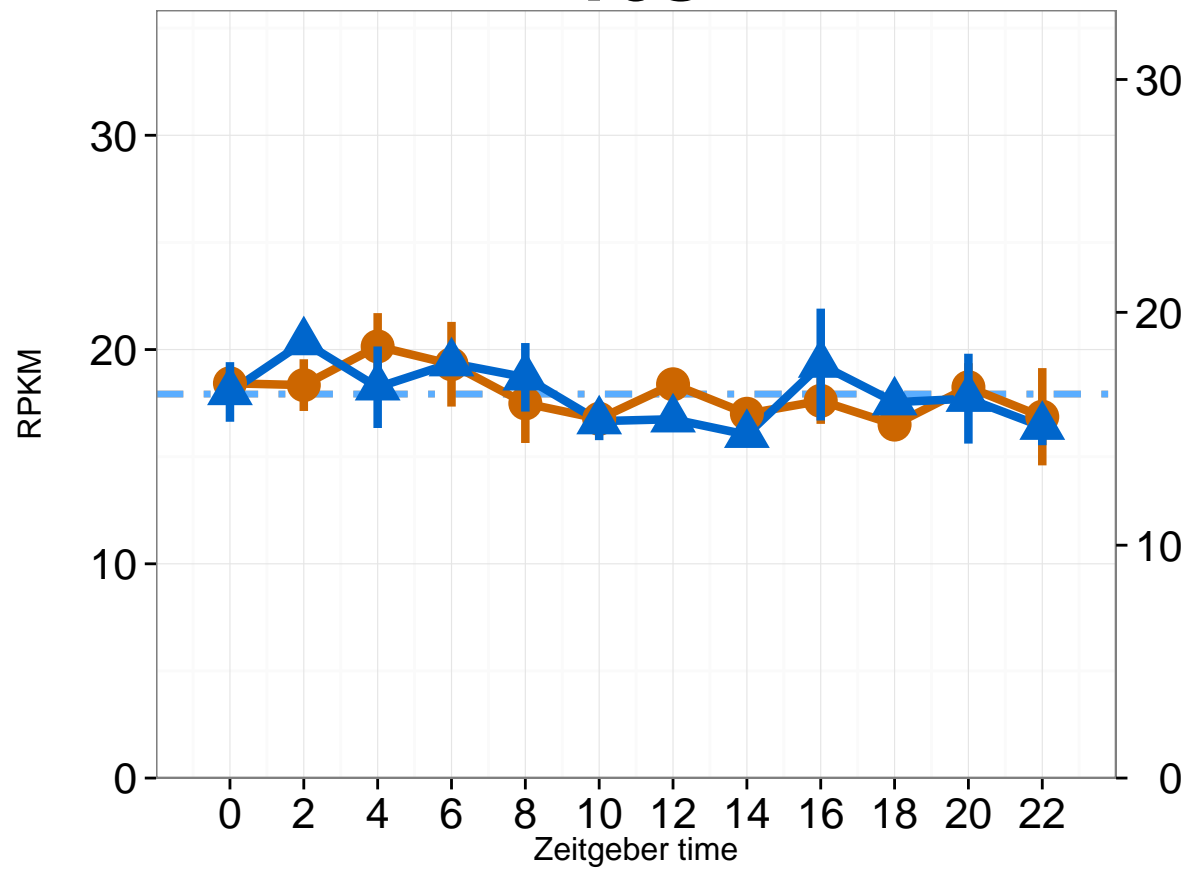

## Tes

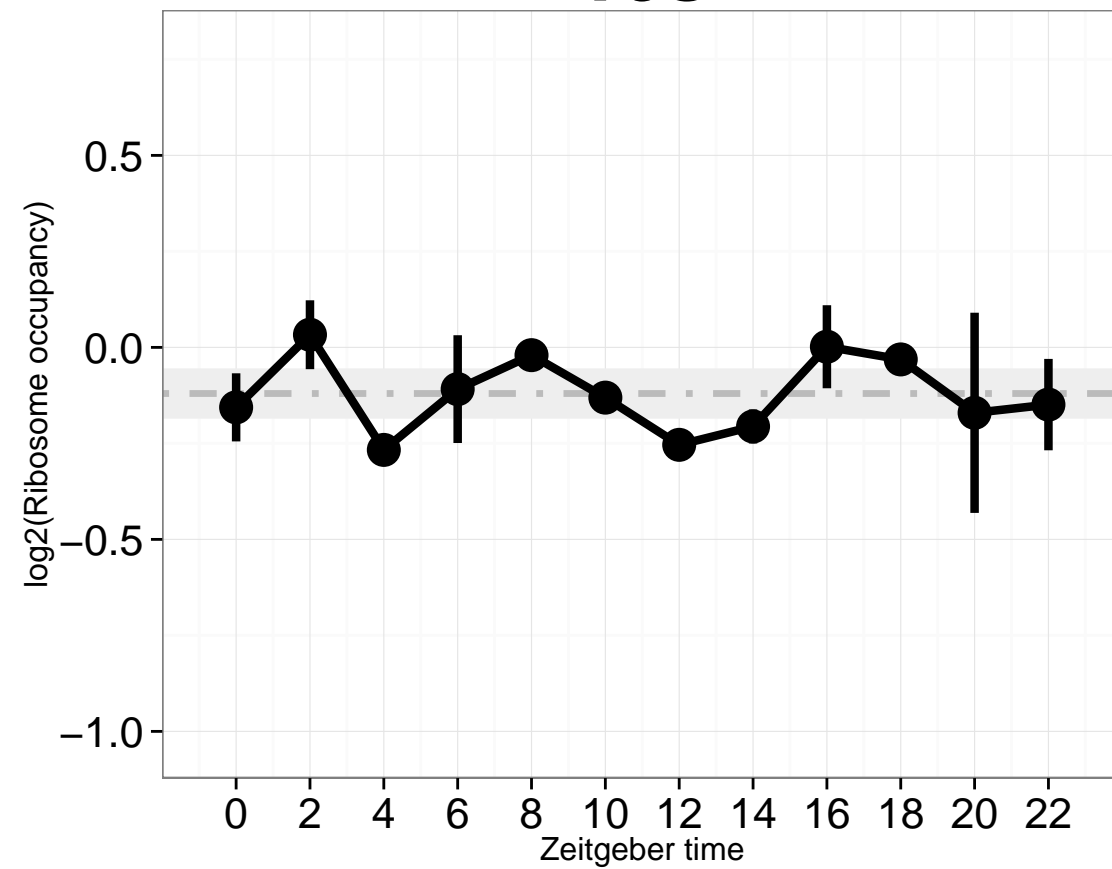

Supplement: Supplementary file 6855 [file 1]

## Bcap29

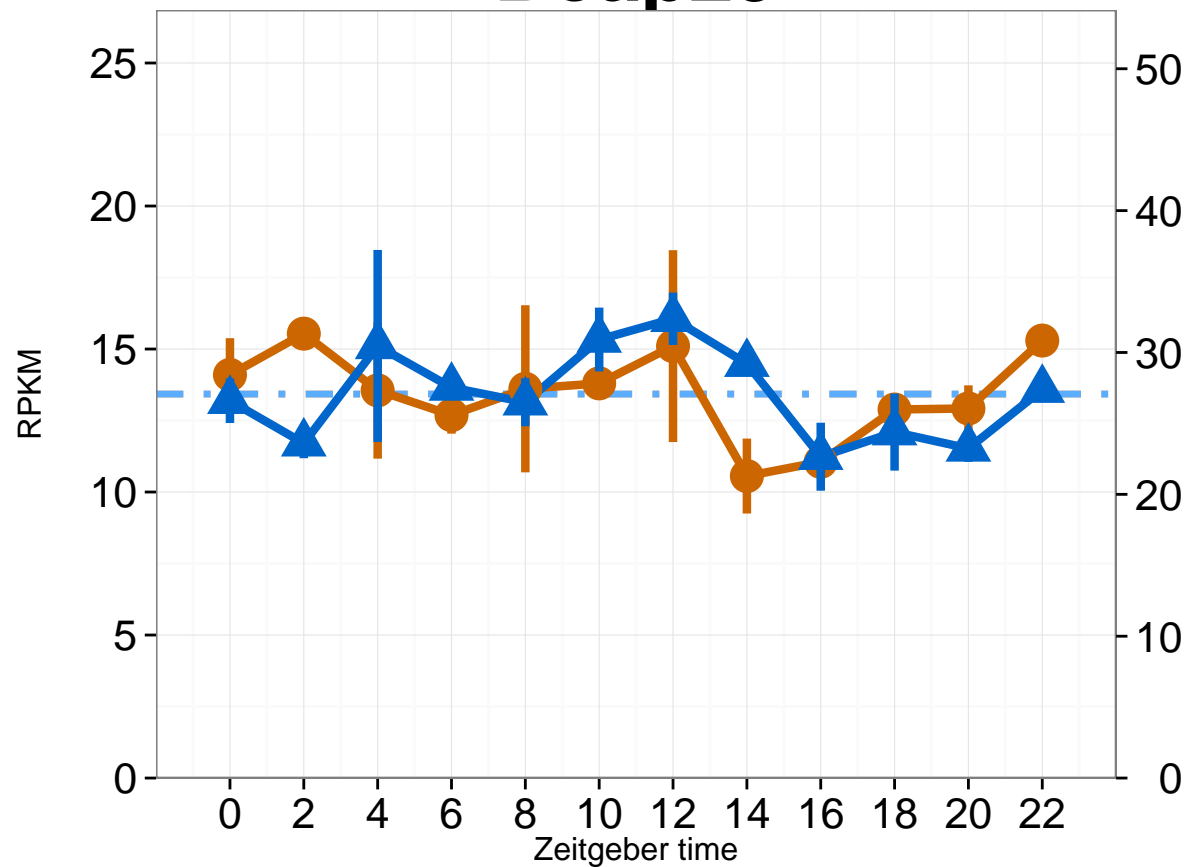

## Bcap29

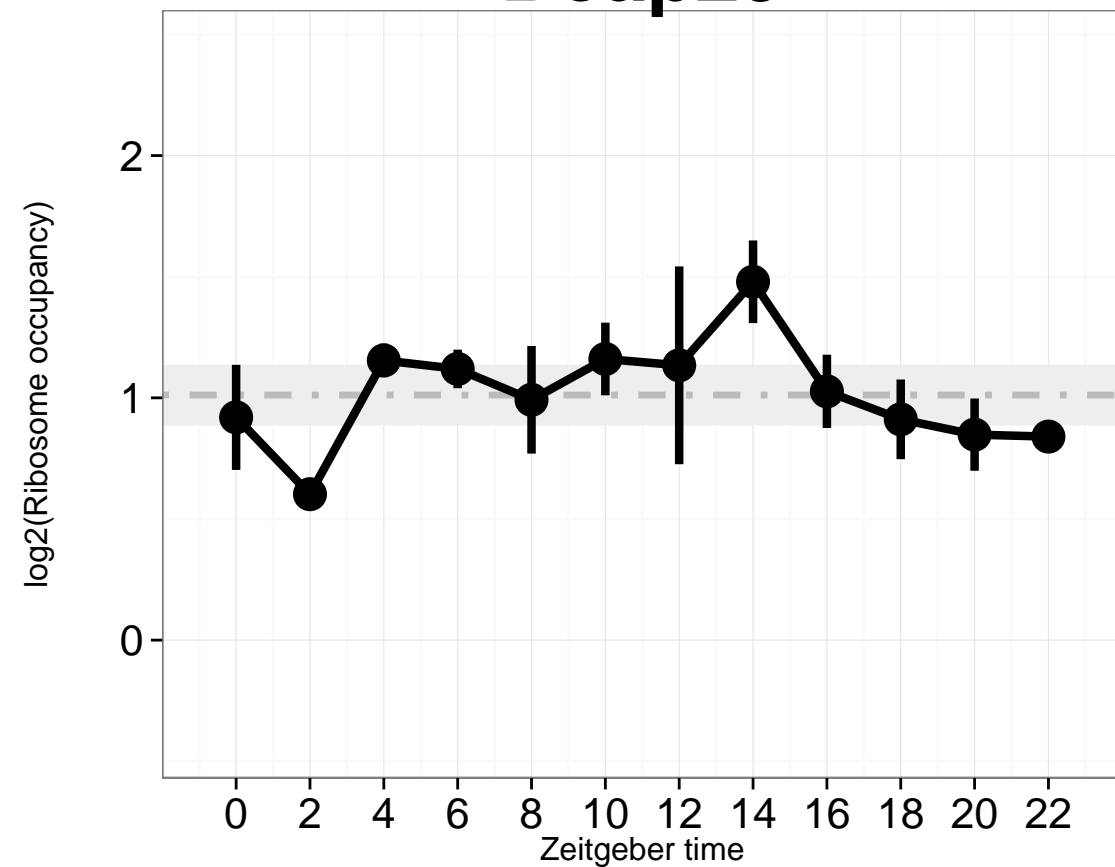

Supplement: Supplementary file 6856 [file 1]

## Wdr4

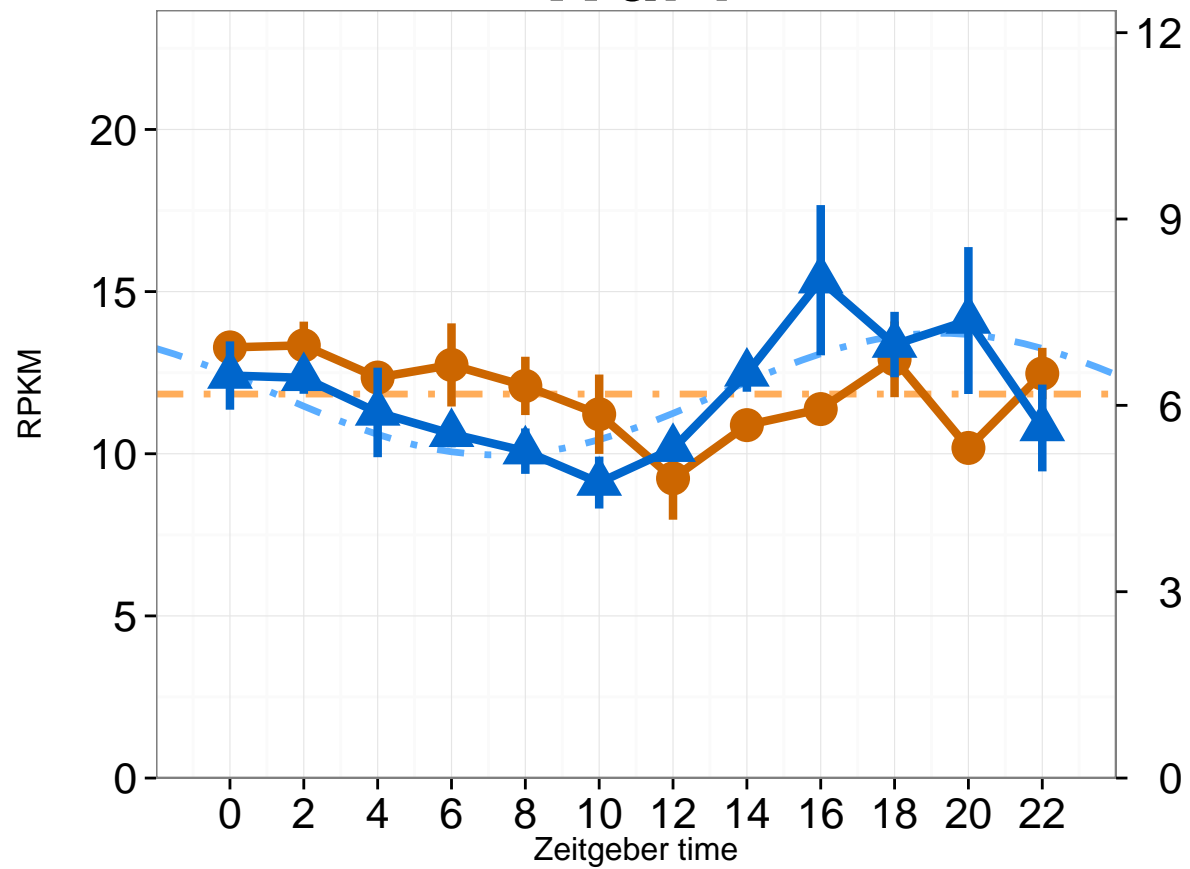

## Wdr4

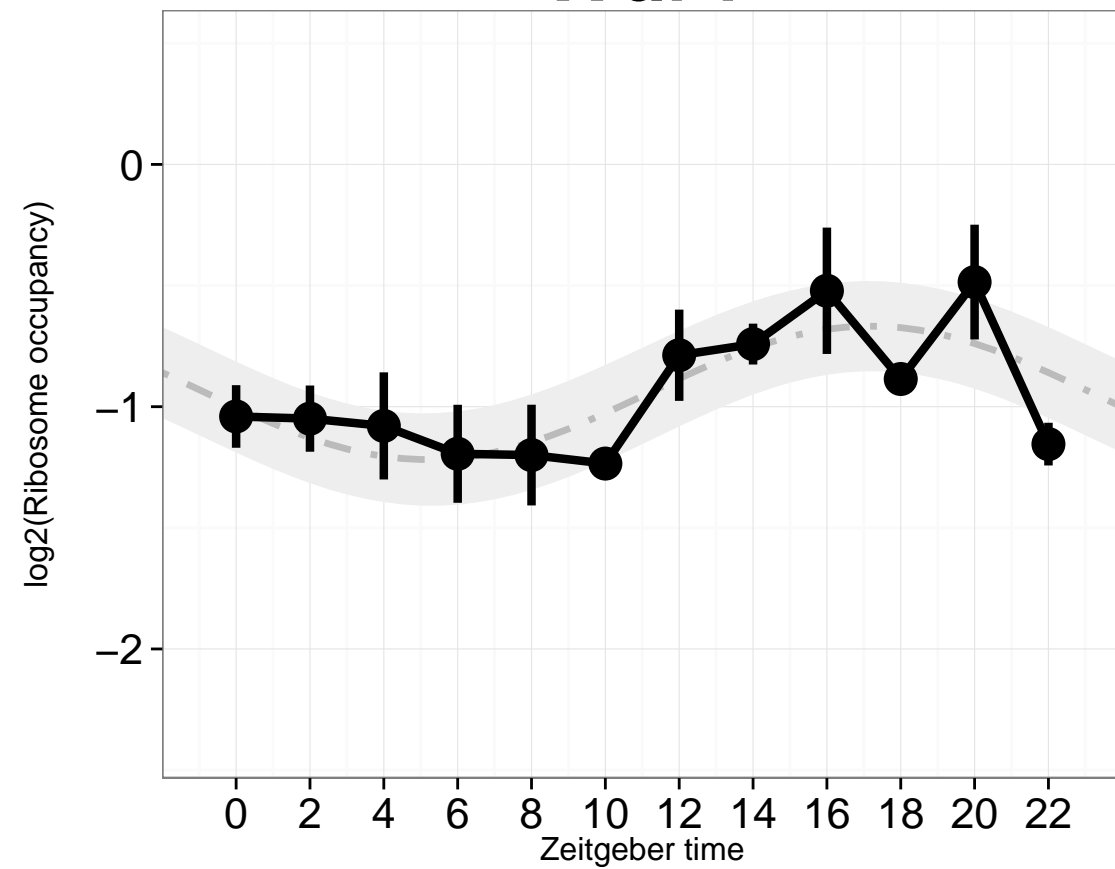

Supplement: Supplementary file 6857 [file 1]

# Stxbp5l

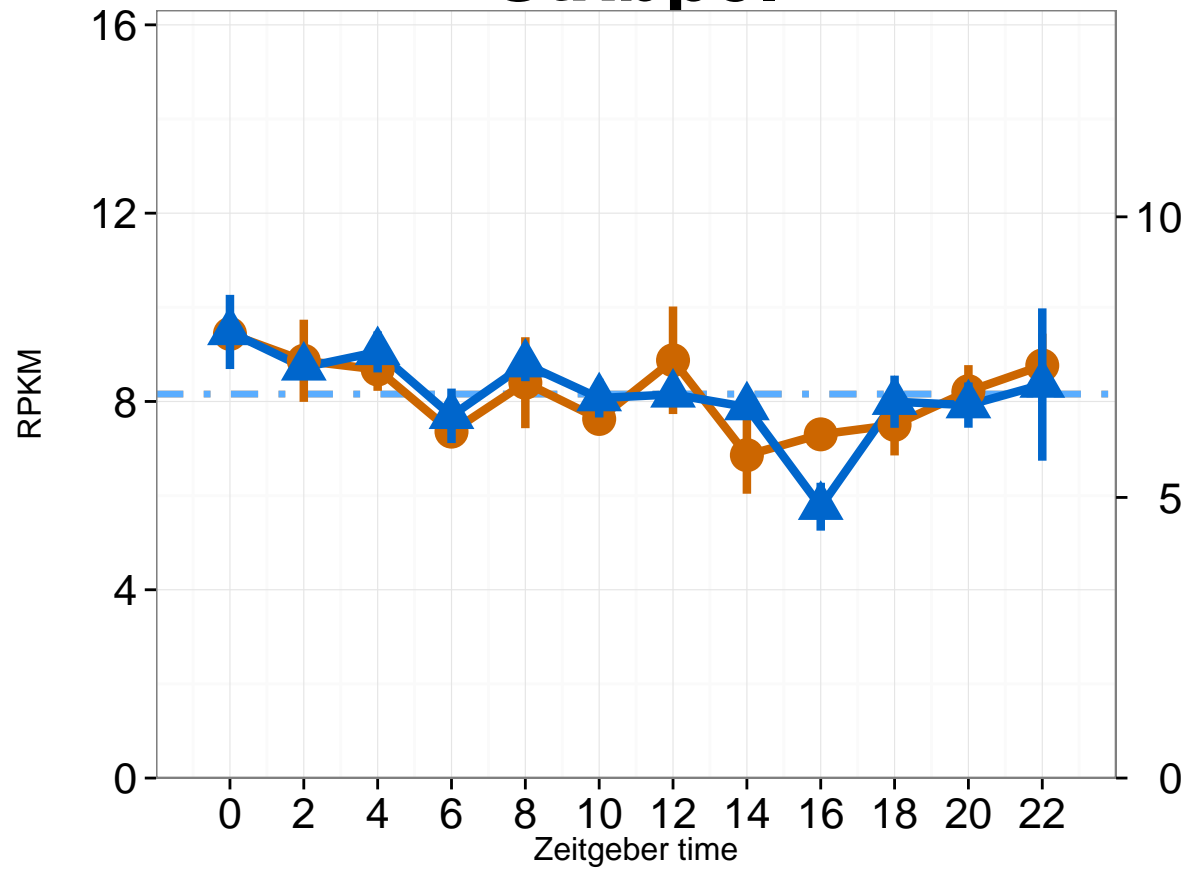

# Stxbp5l

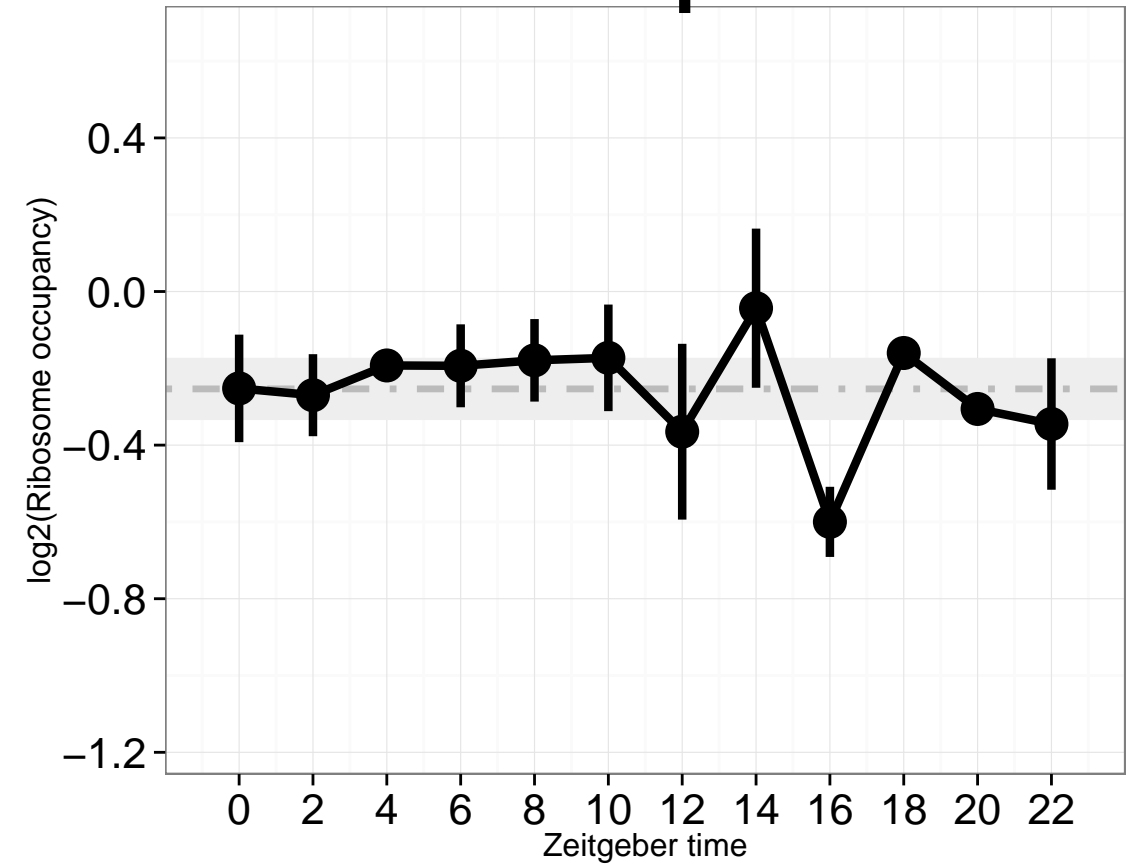

Supplement: Supplementary file 6858 [file 1]

## Gsta3

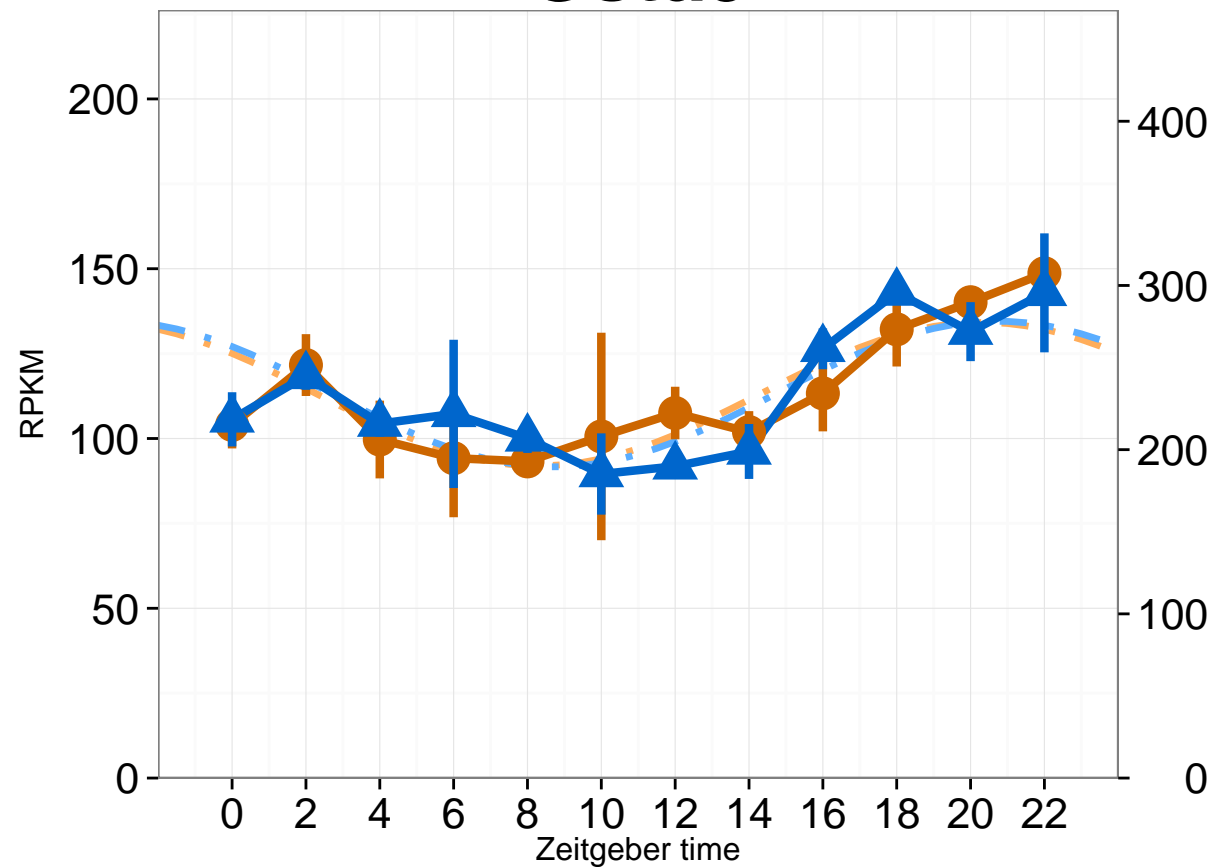

## Gsta3

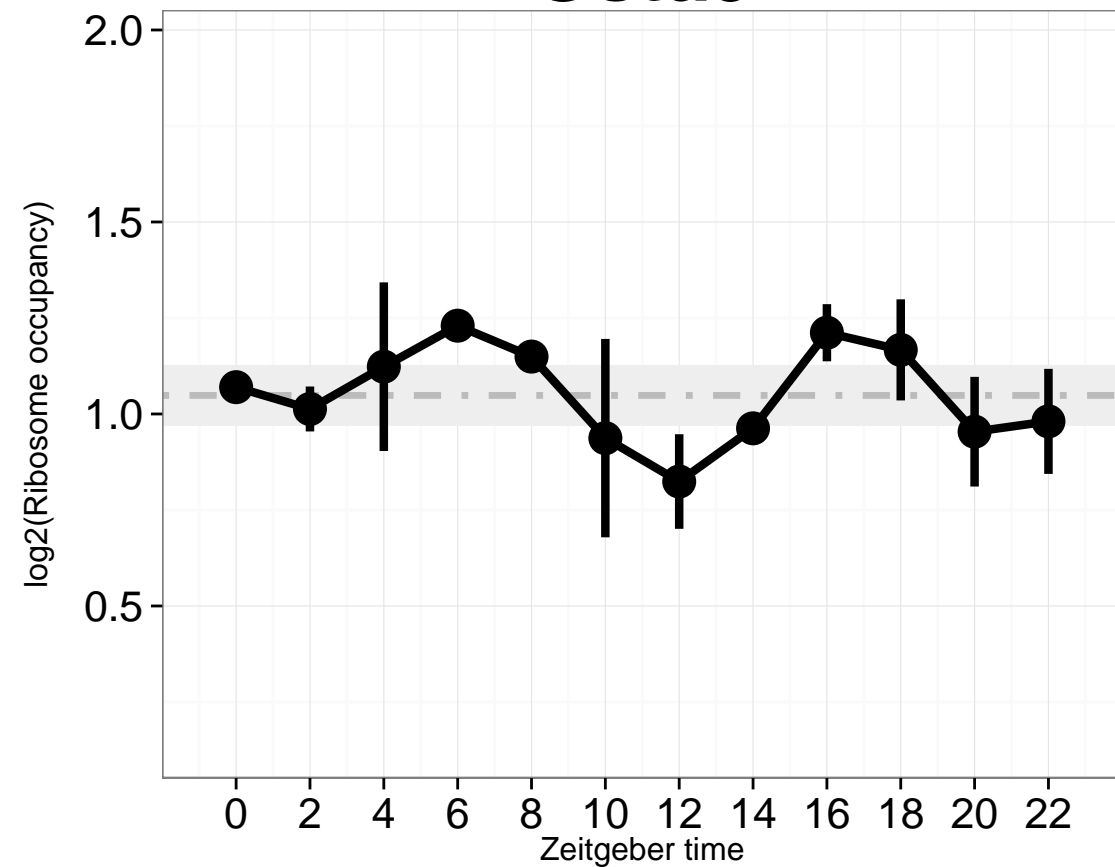

Supplement: Supplementary file 6859 [file 1]

## Pex16

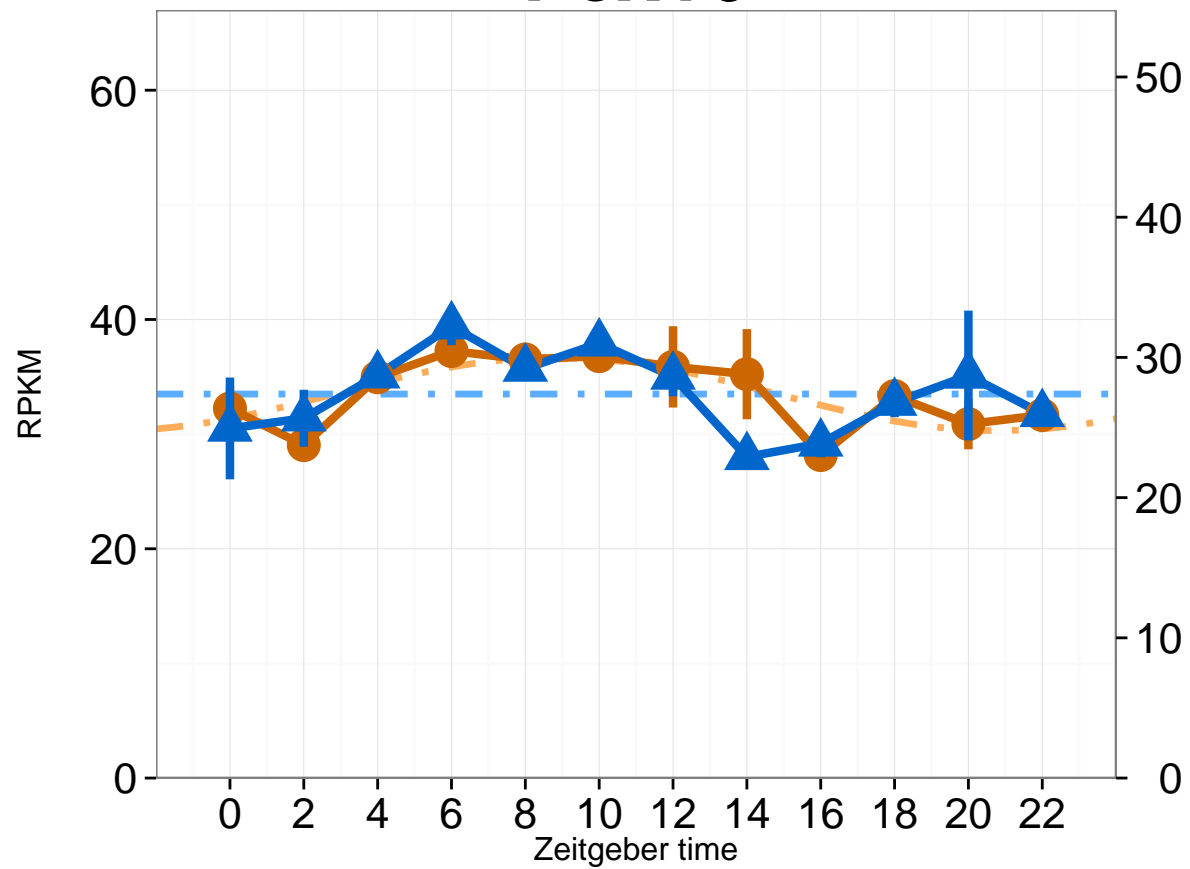

## Pex16

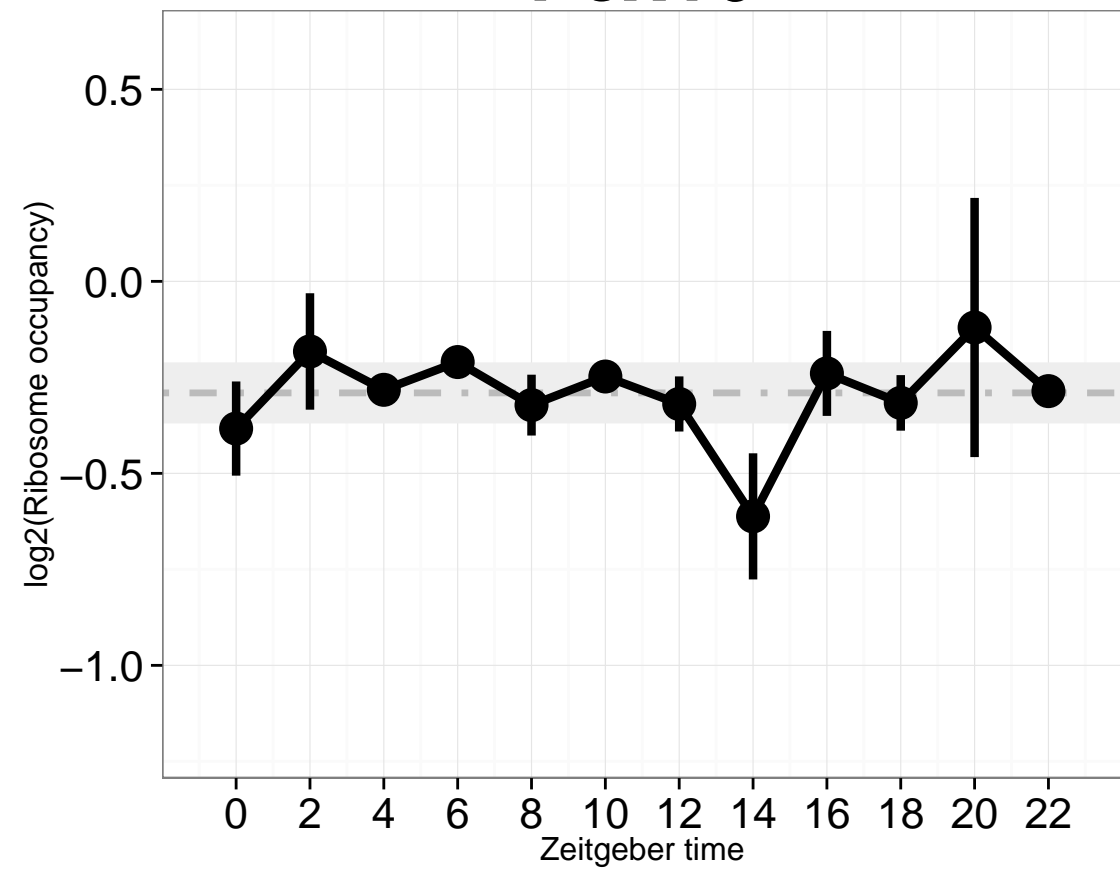

Supplement: Supplementary file 6860 [file 1]

## Nasp

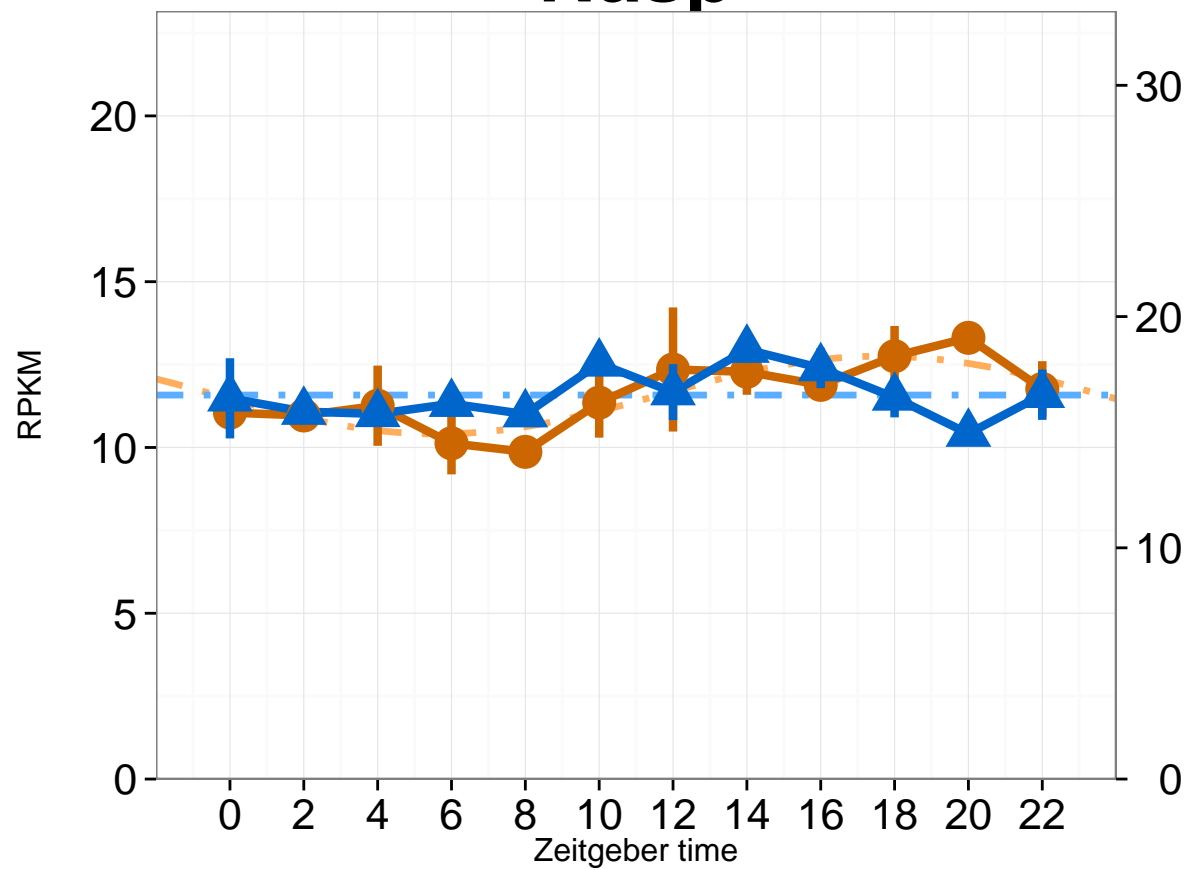

## Nasp

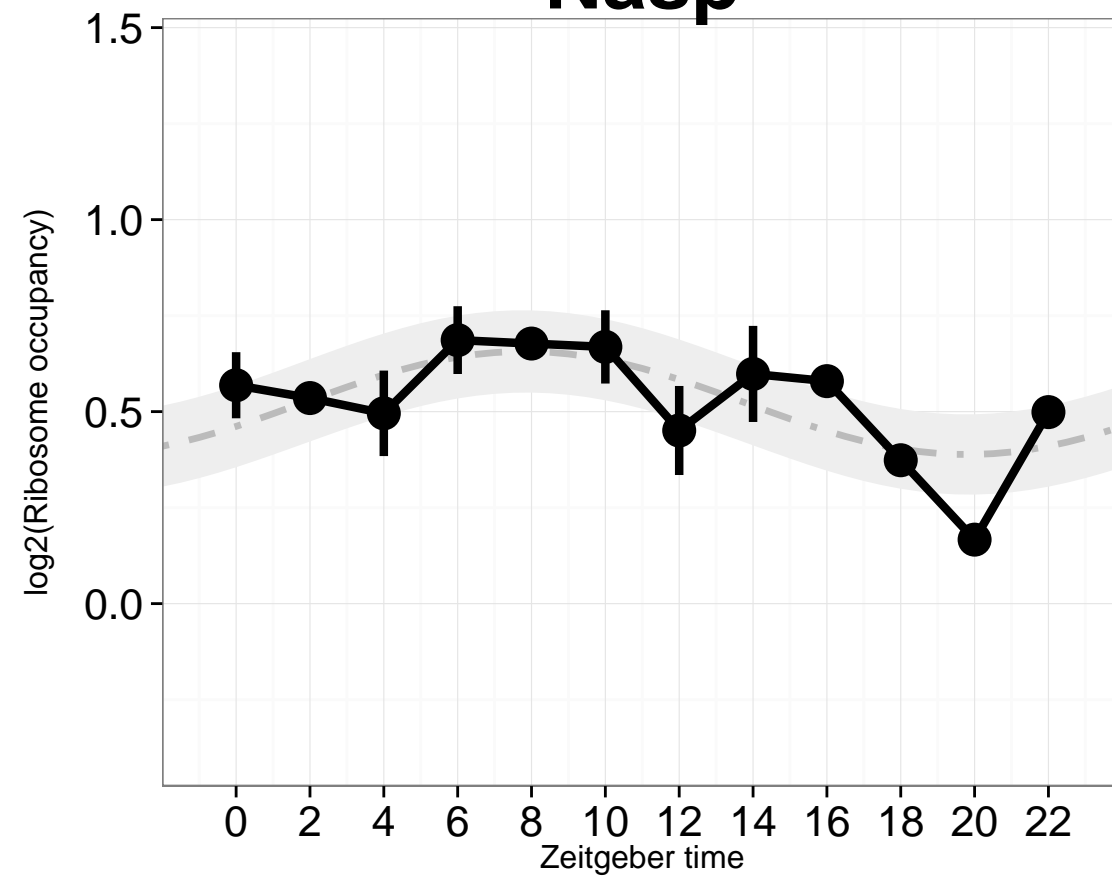

Supplement: Supplementary file 6861 [file 1]

## Ran

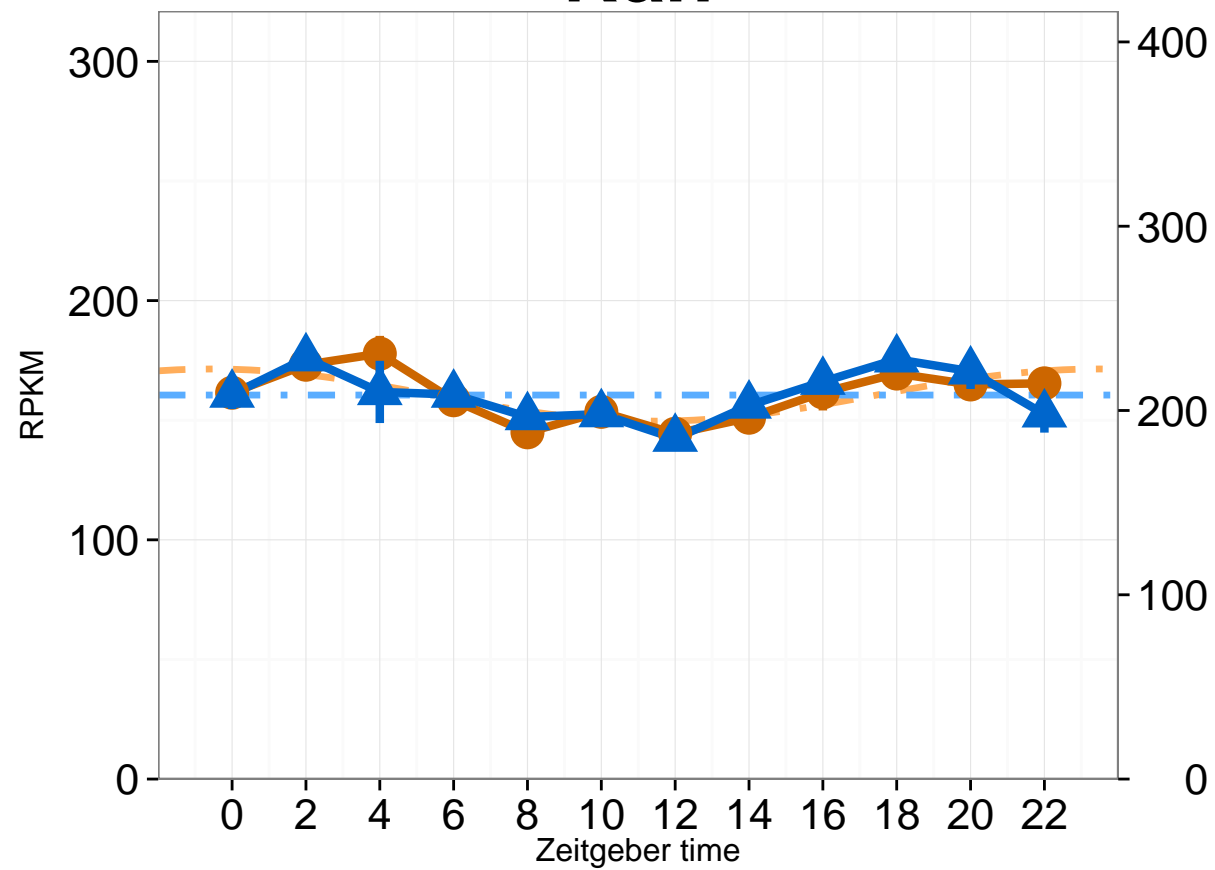

## Ran

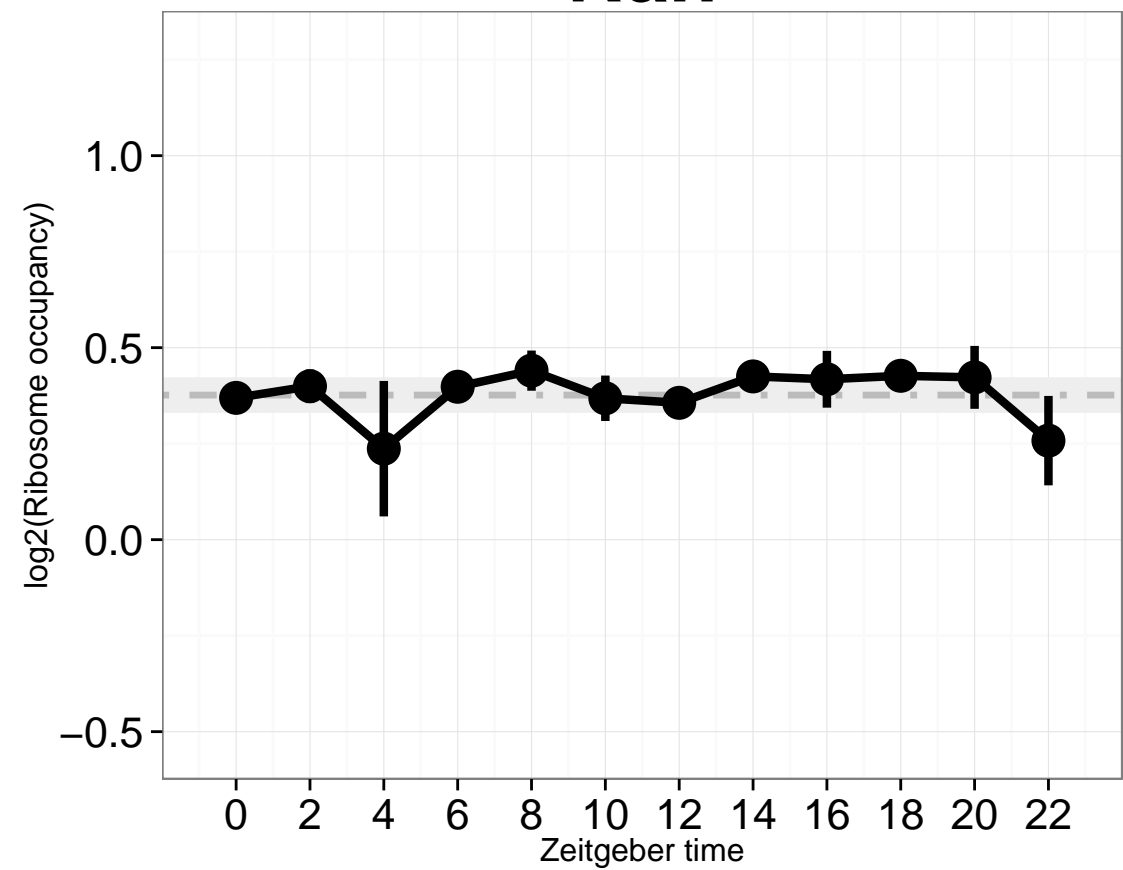

Supplement: Supplementary file 6862 [file 1]

## 2610507B11Rik

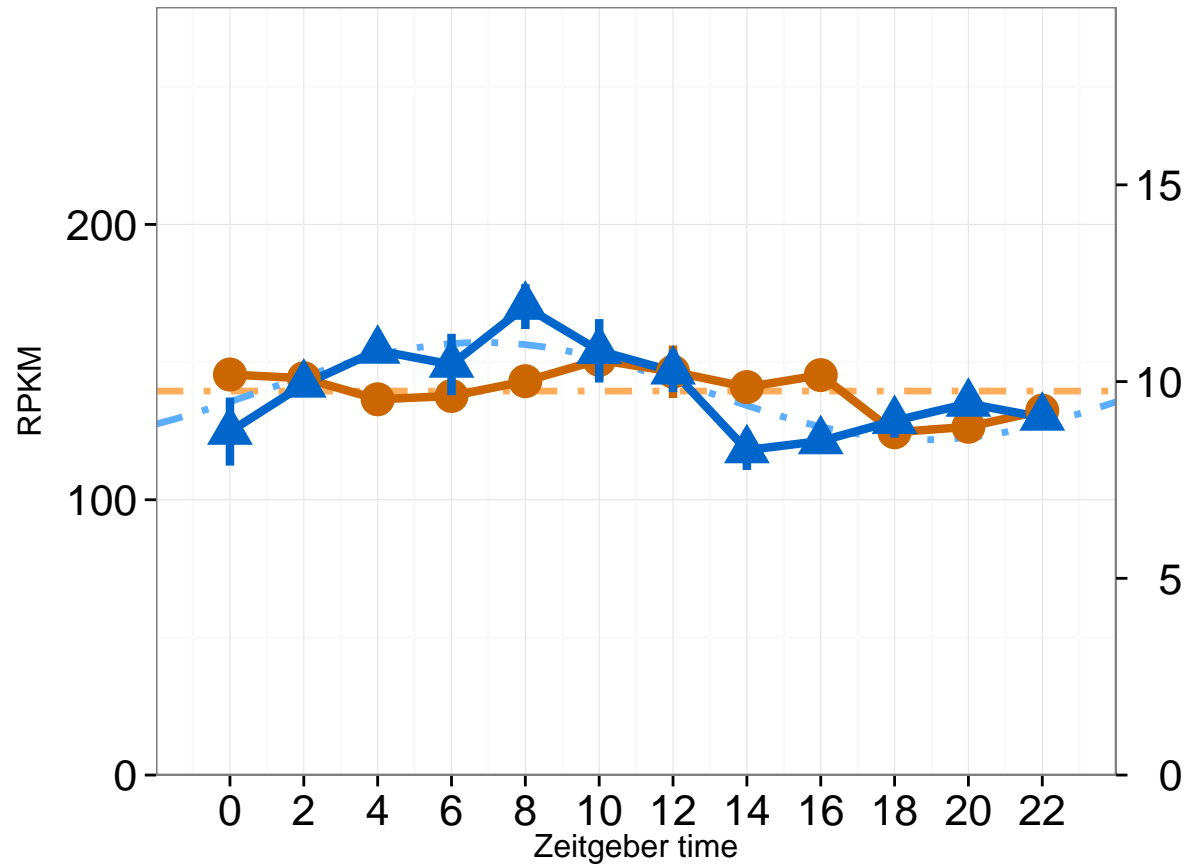

## 2610507B11Rik

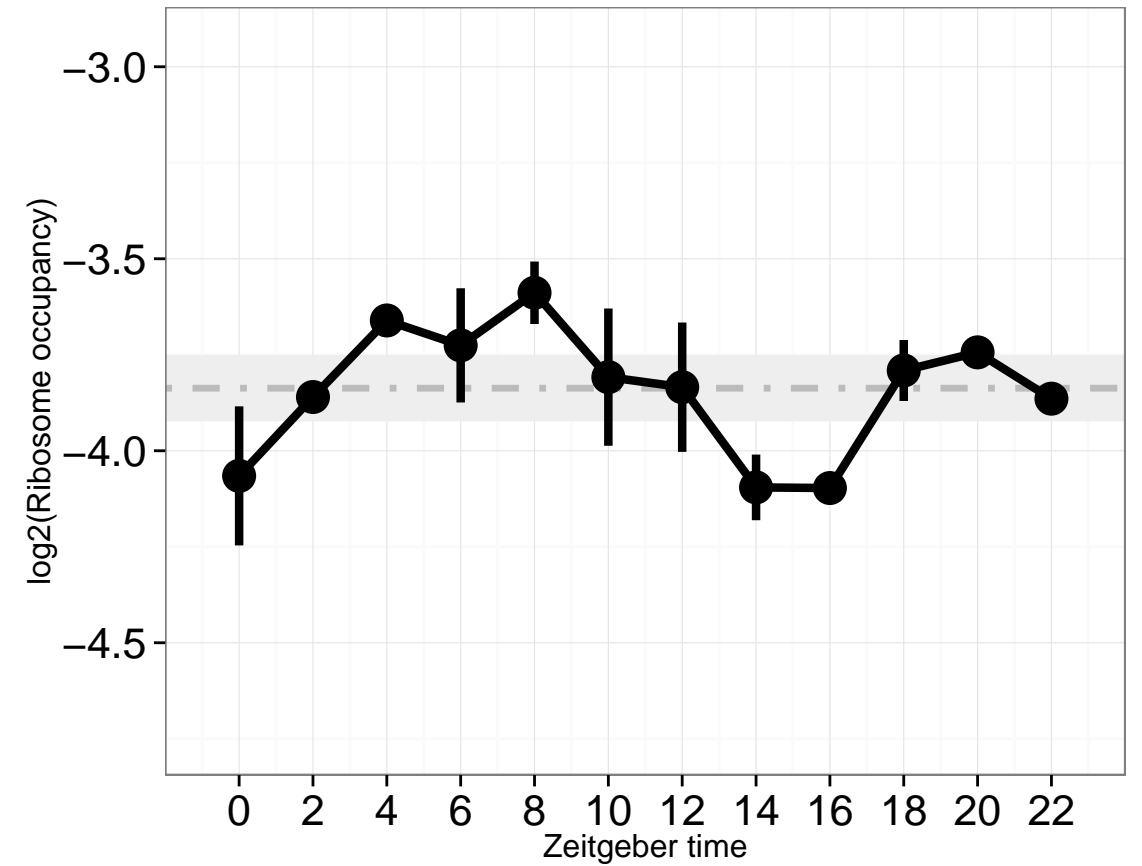

Supplement: Supplementary file 6863 [file 1]

## Me2

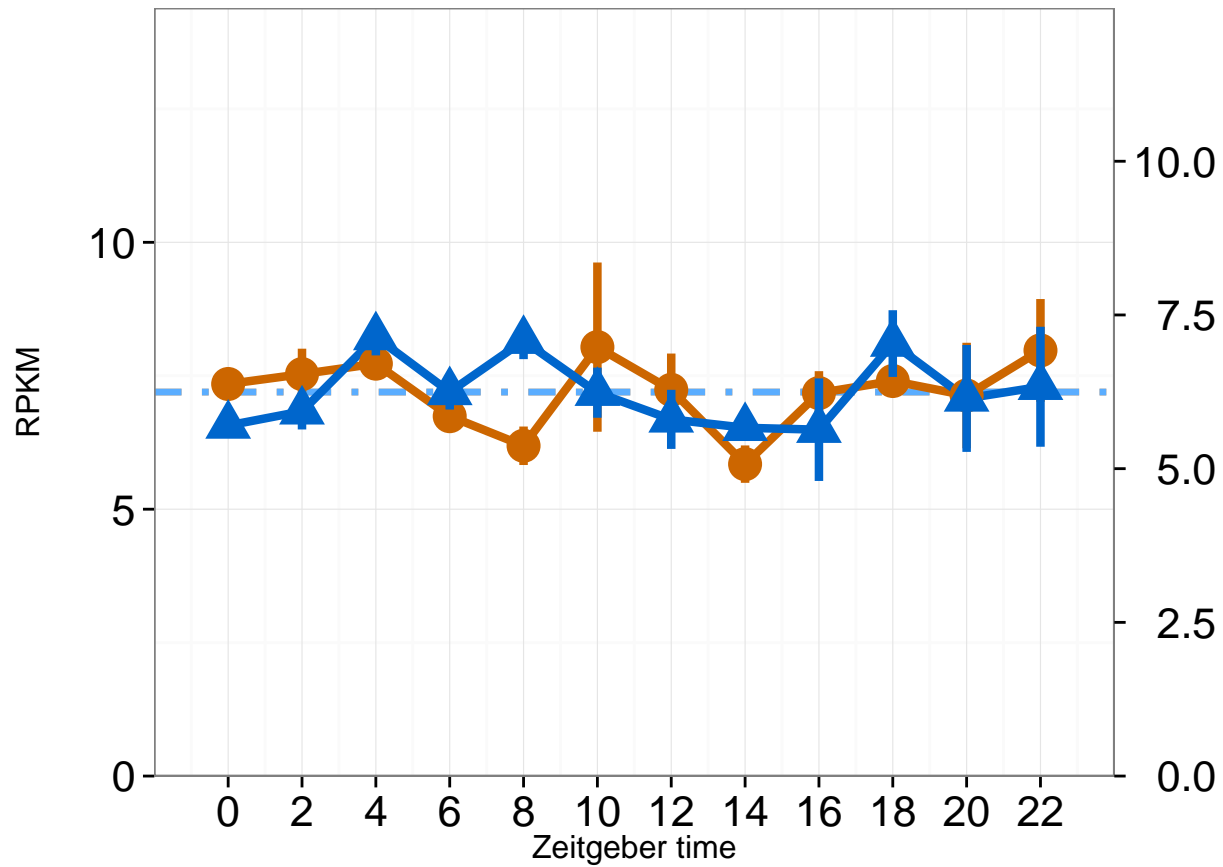

## Me2

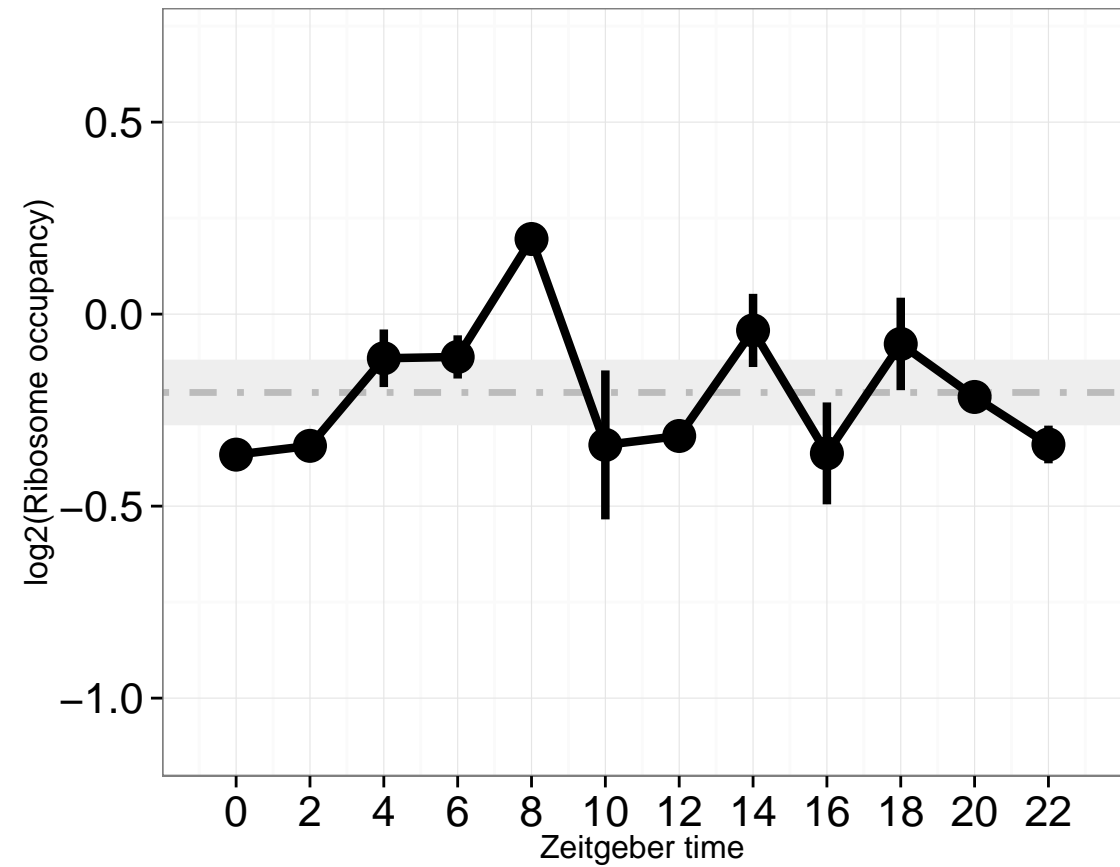

Supplement: Supplementary file 6864 [file 1]

## Cfi

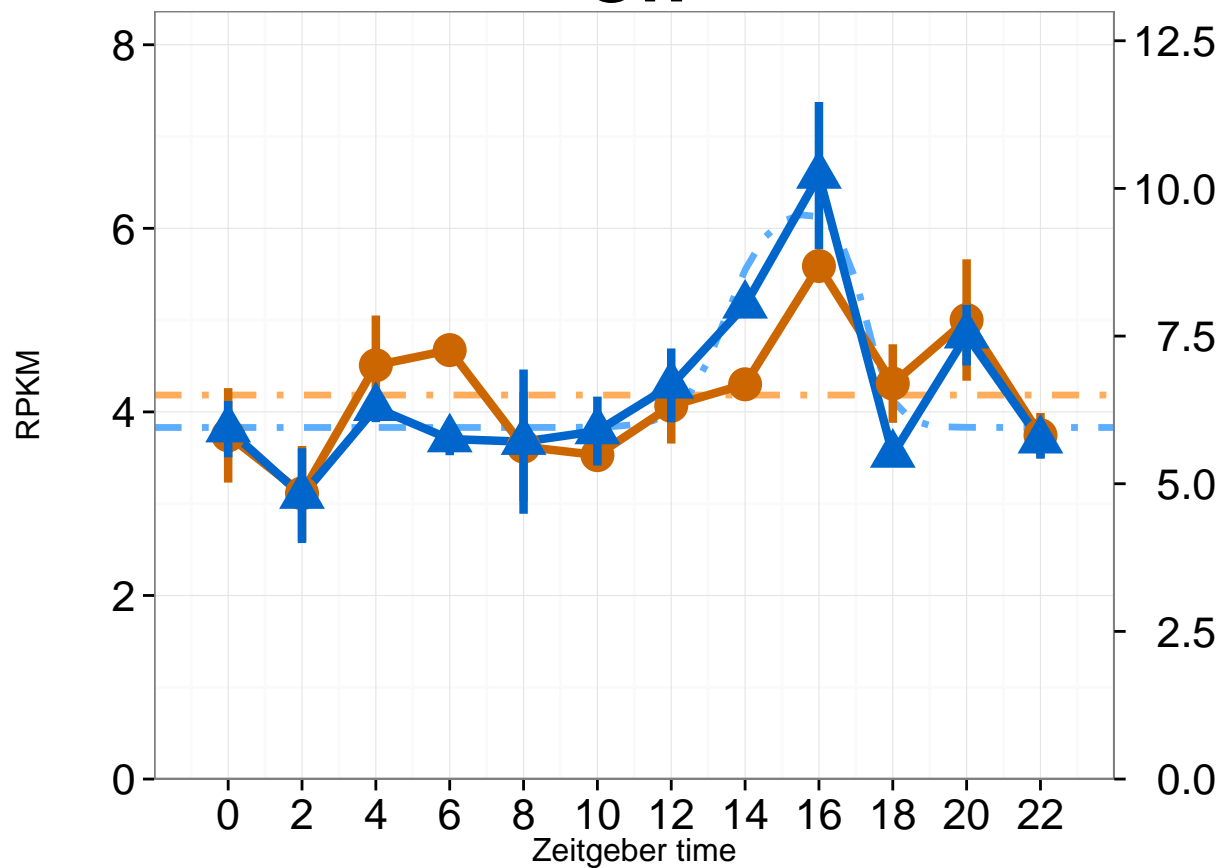

## Cfi

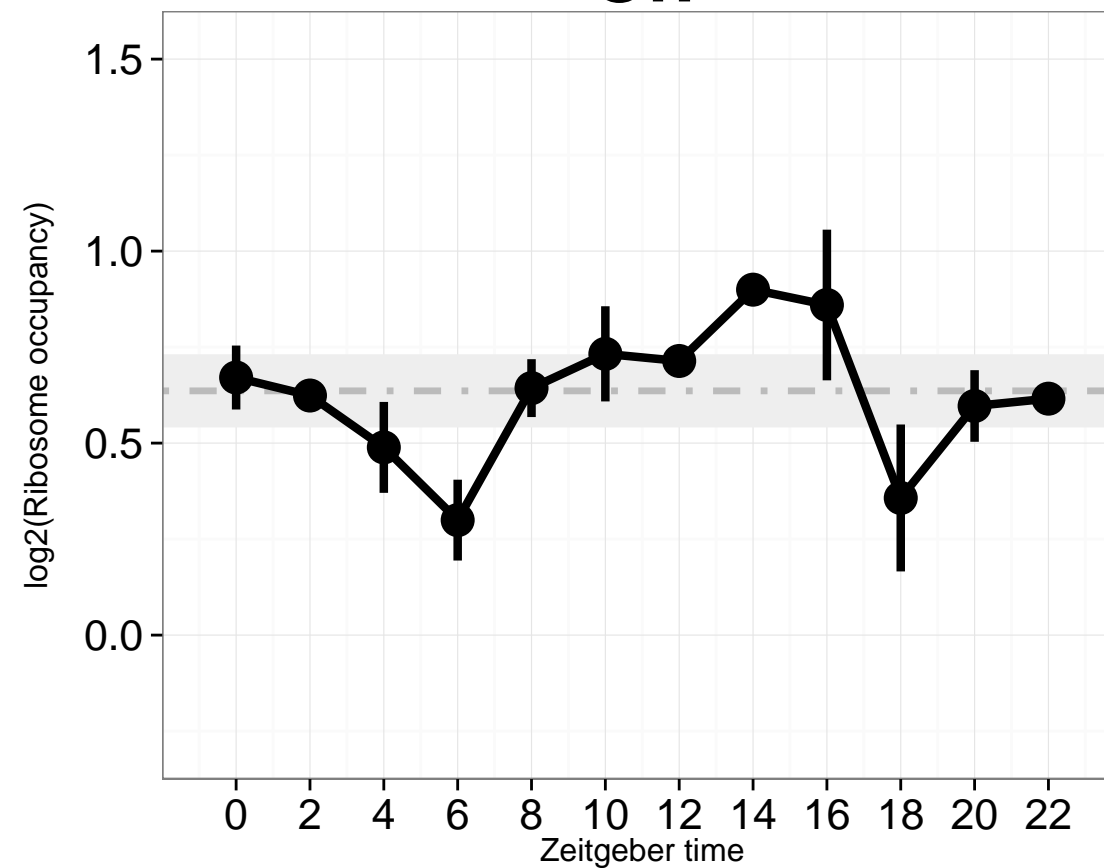

Supplement: Supplementary file 6865 [file 1]

## Gm4791

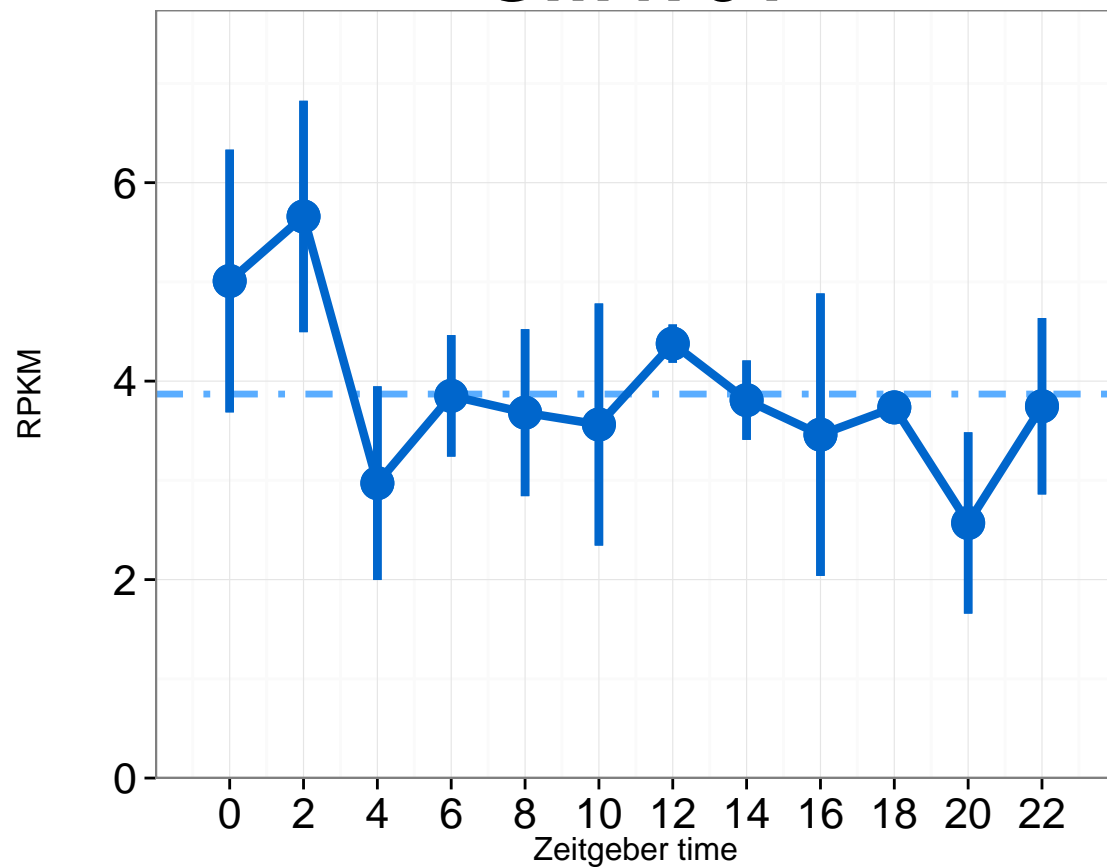

## Gm4791 log2(Ribosome occupanc

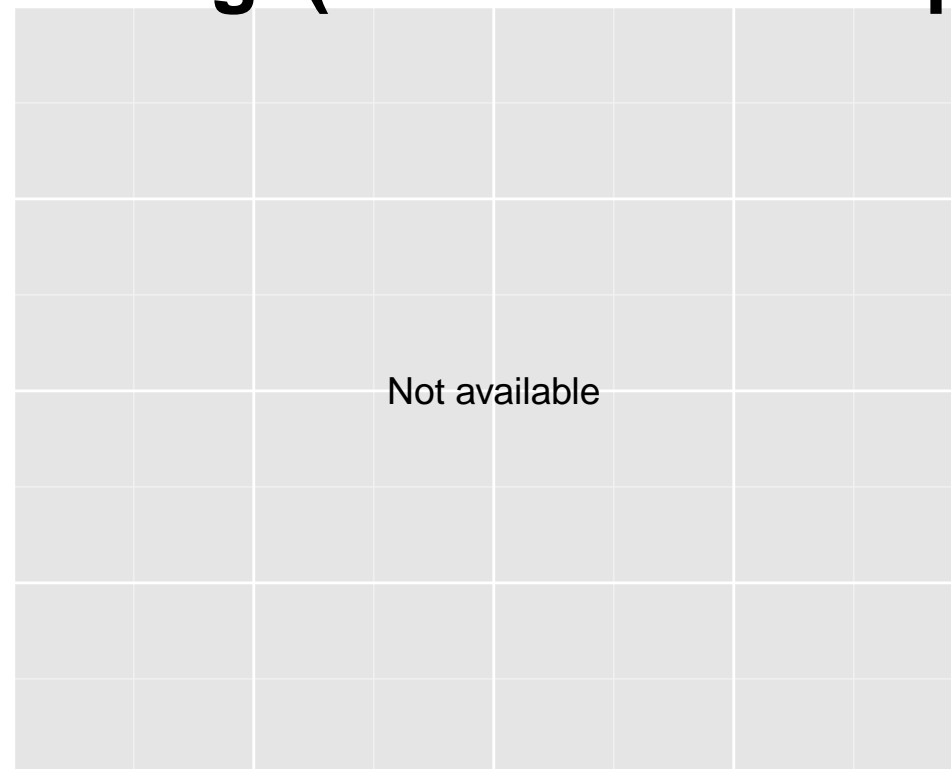

Supplement: Supplementary file 6866 [file 1]

# Calcr1

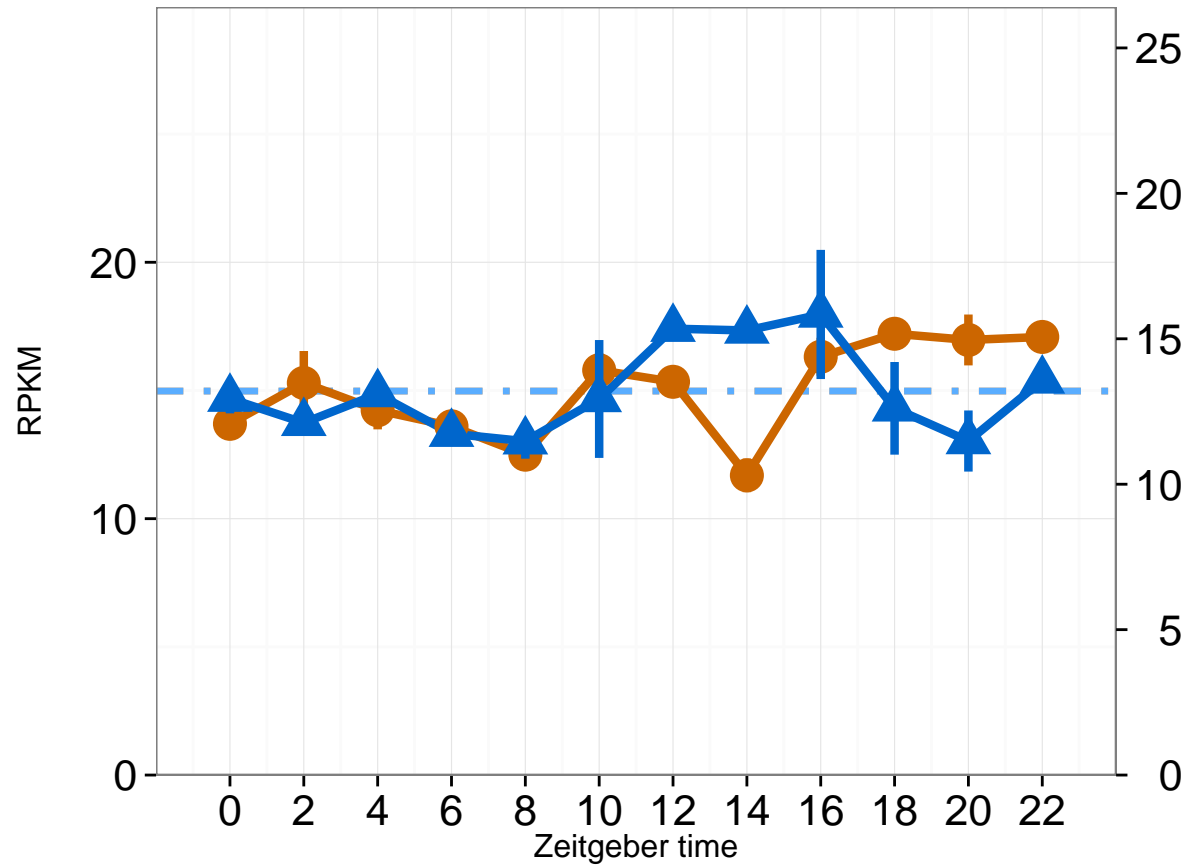

# Calcr1

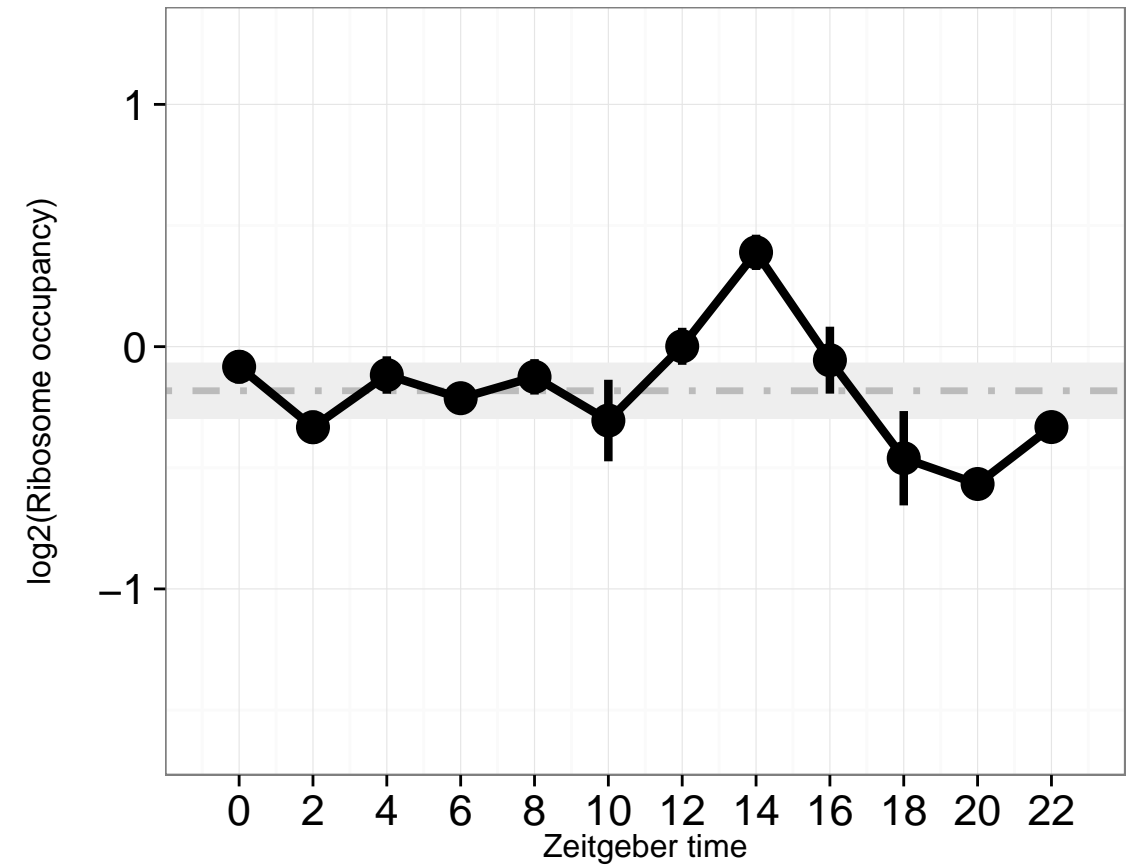

Supplement: Supplementary file 6867 [file 1]

## Ptafr

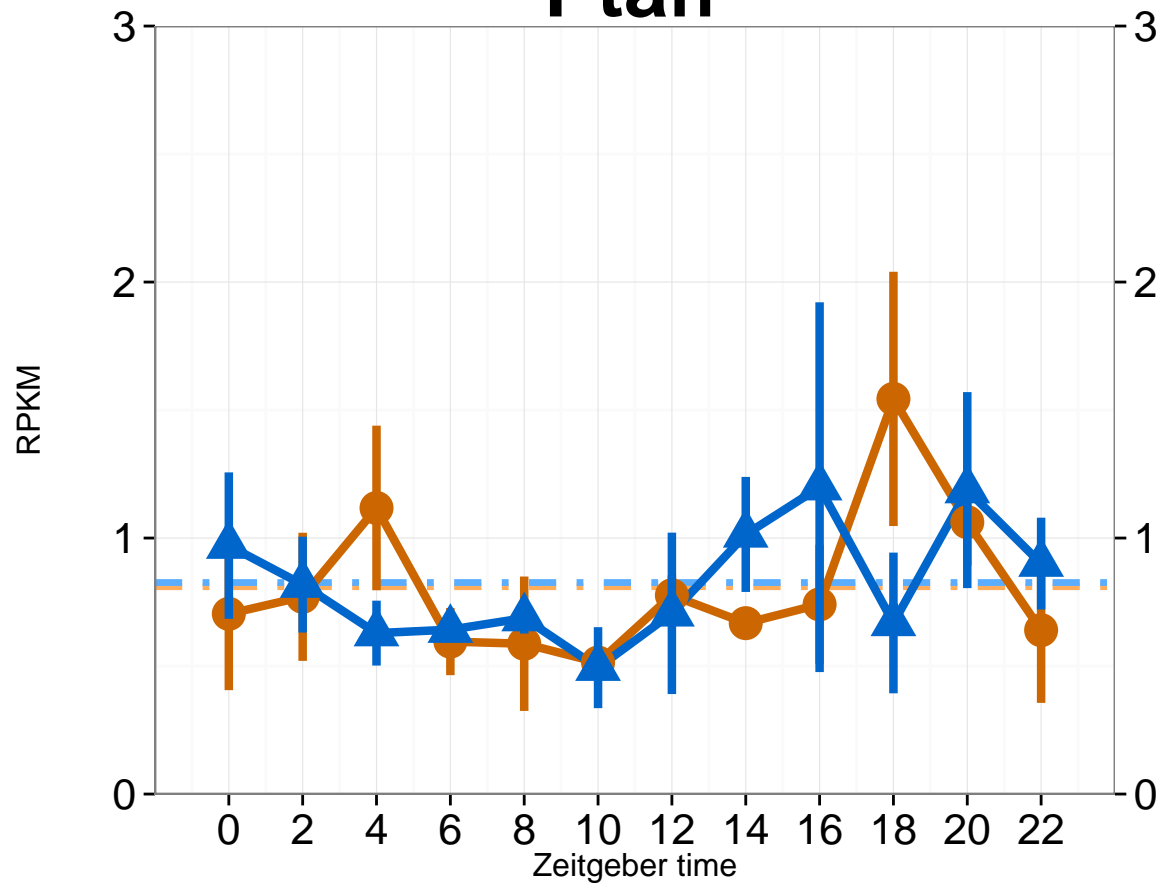

## Ptafr

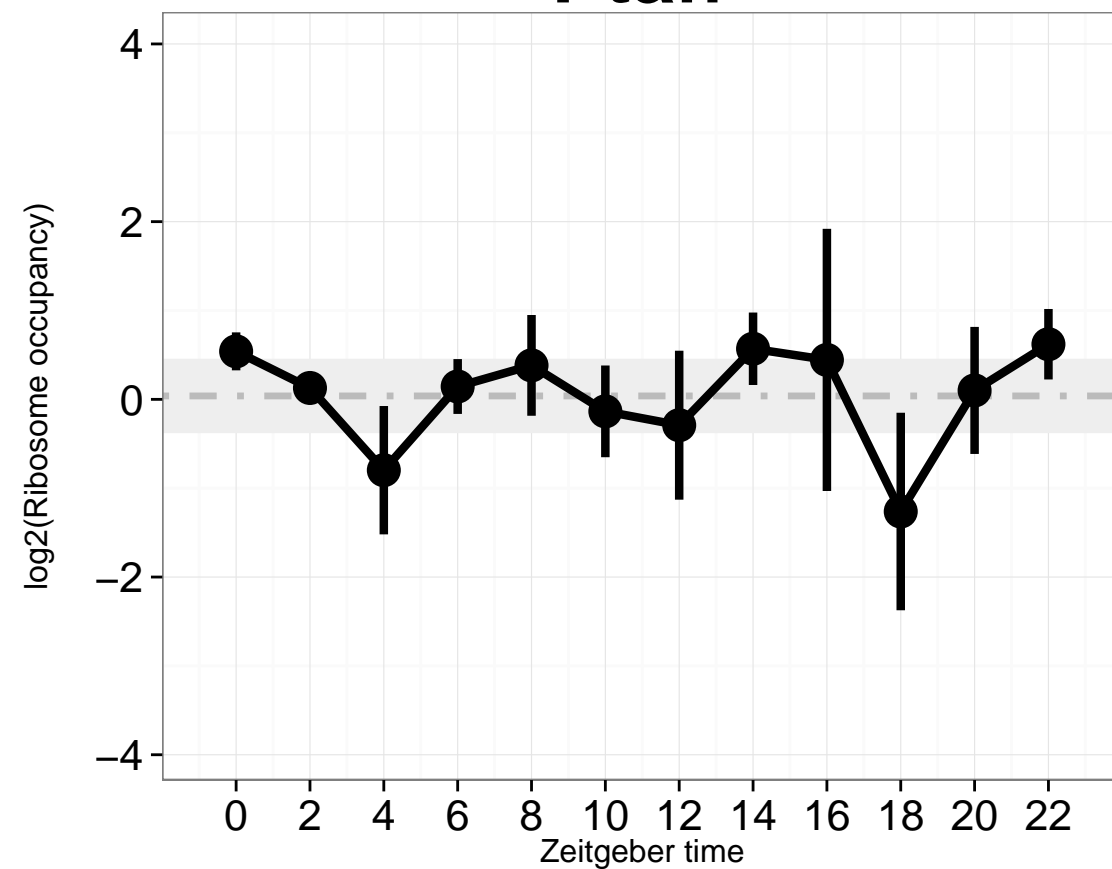

Supplement: Supplementary file 6868 [file 1]

# Pwwp2a

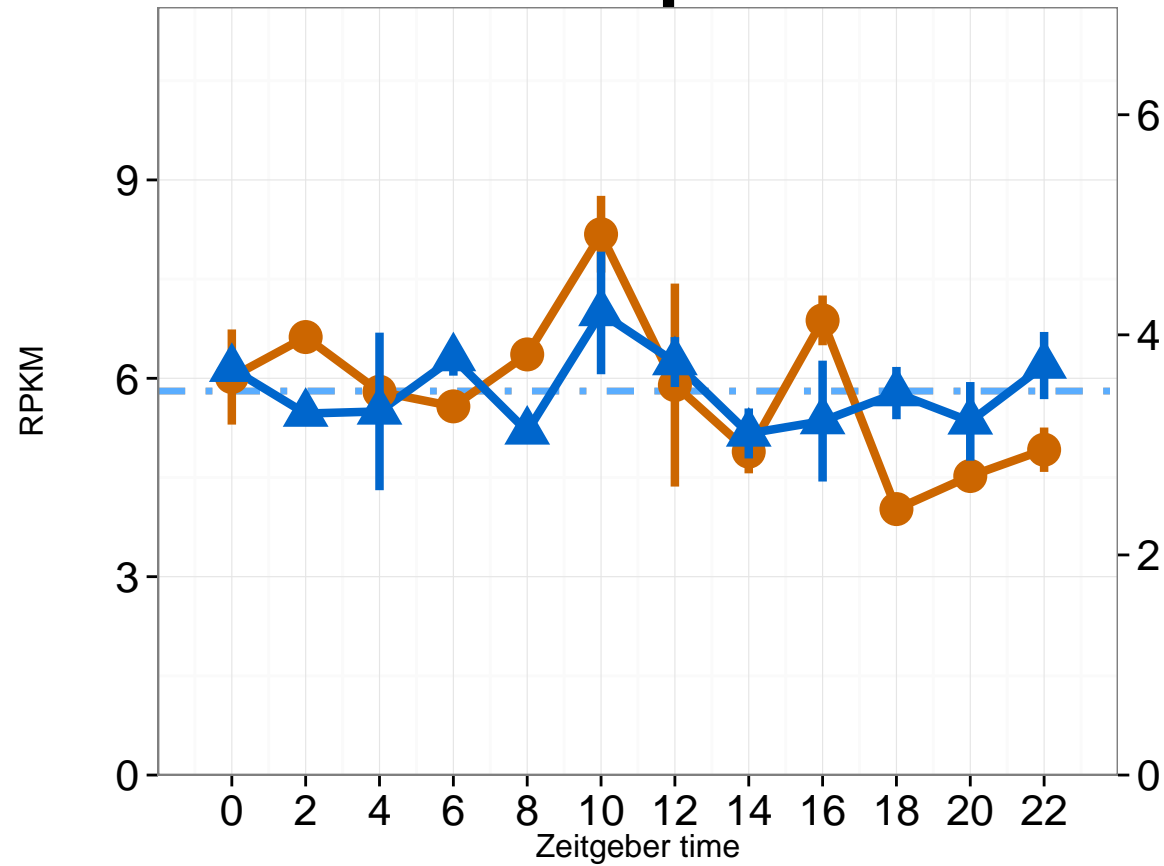

# Pwwp2a

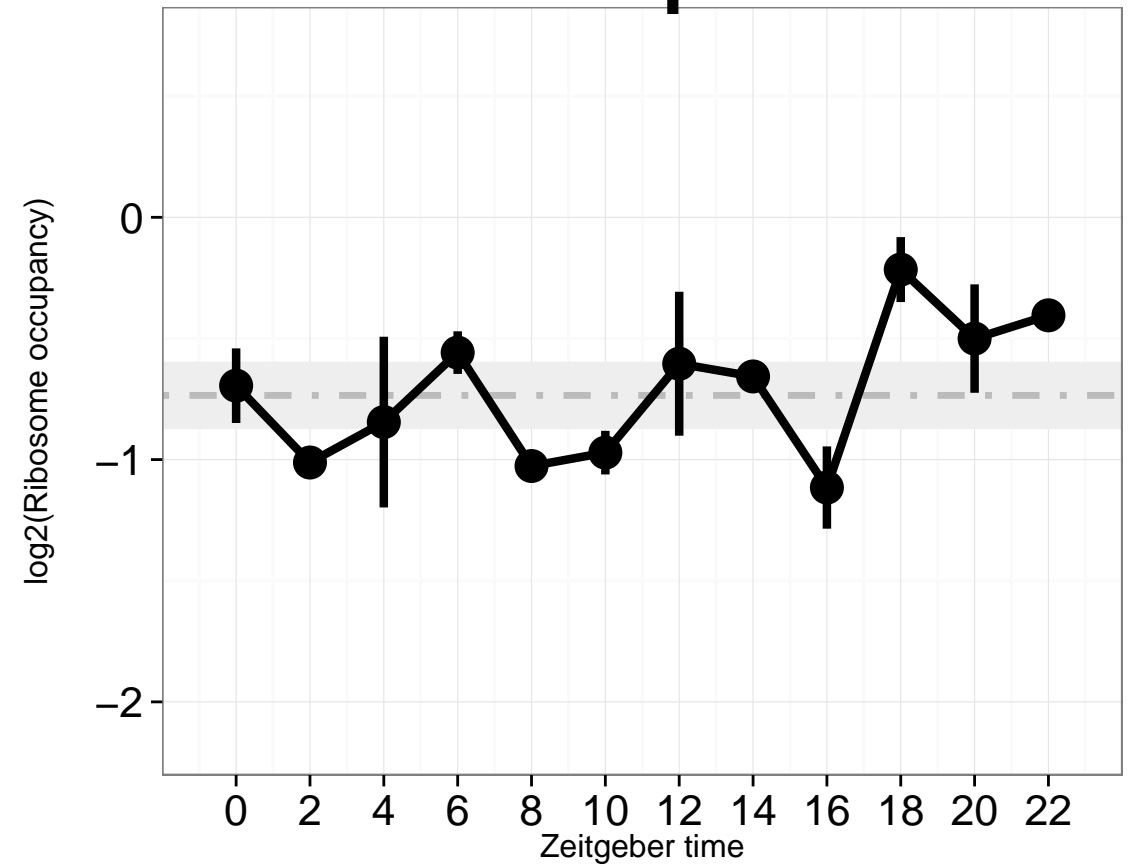

Supplement: Supplementary file 6869 [file 1]

## Orc3

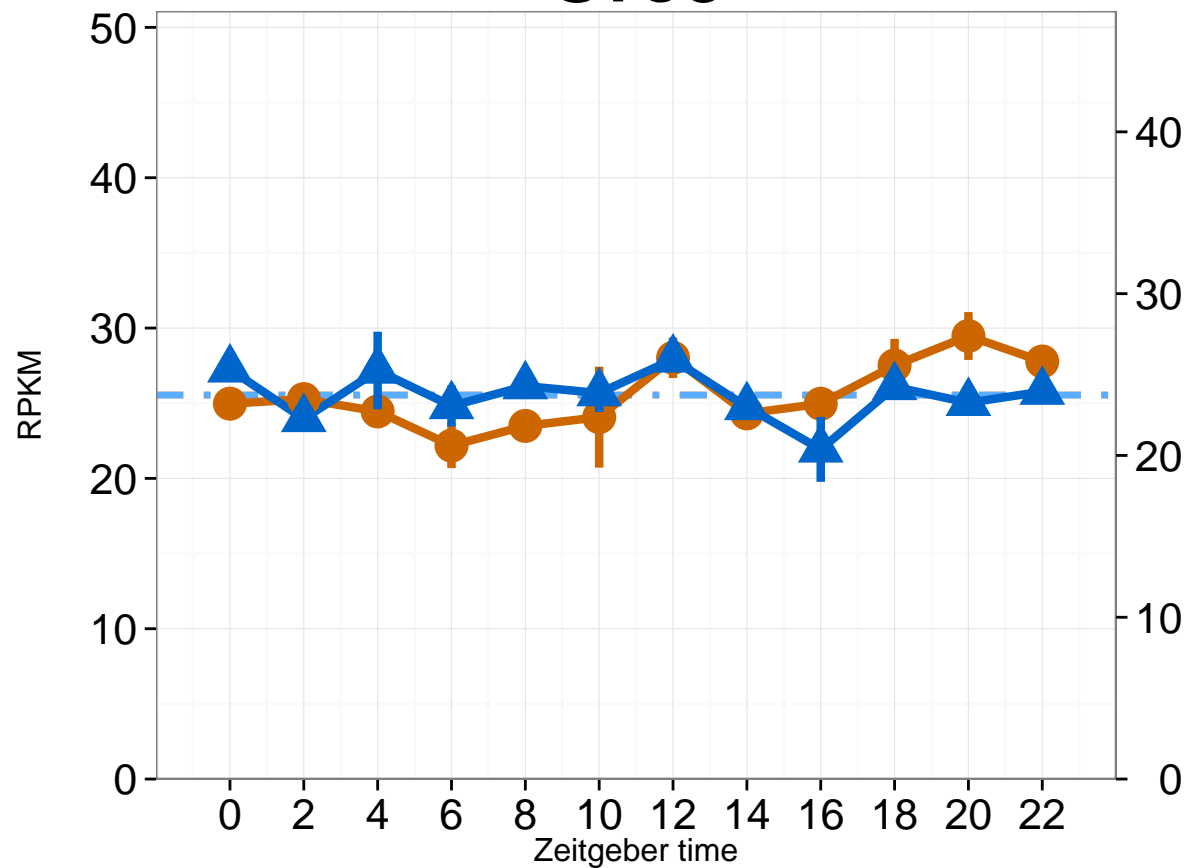

## Orc3

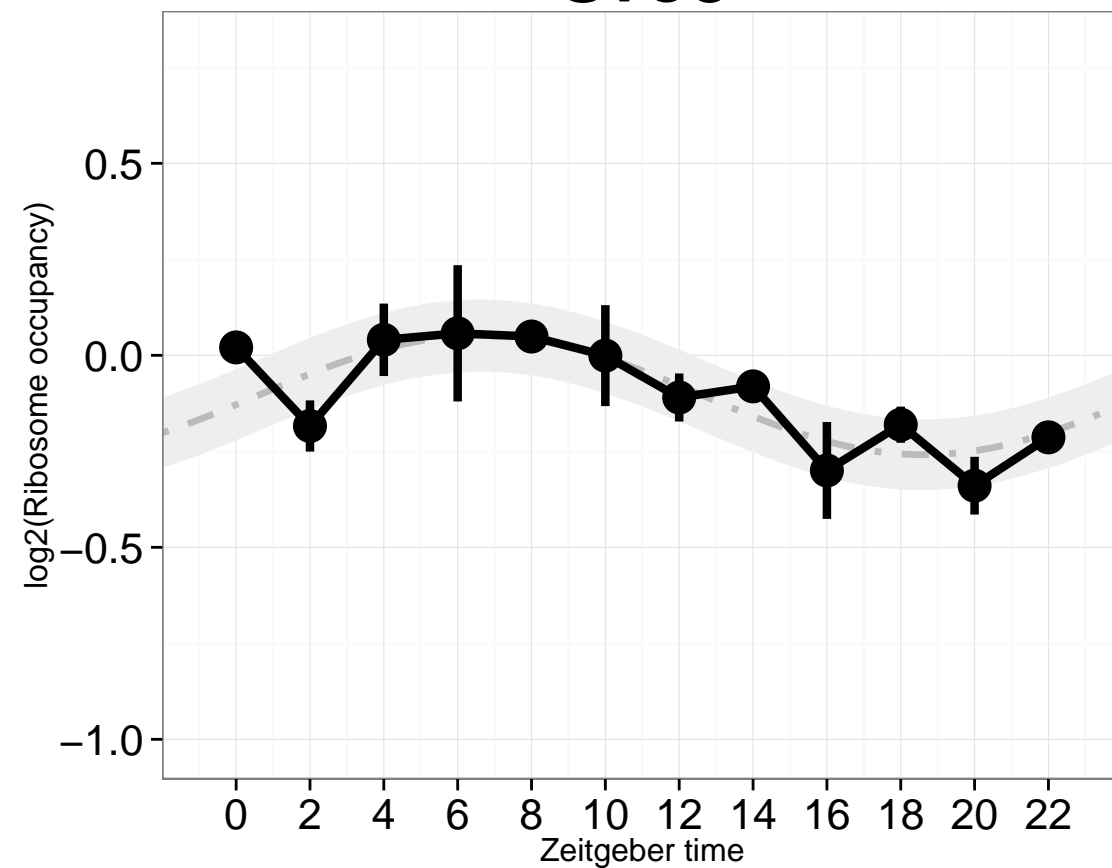

Supplement: Supplementary file 6870 [file 1]

# Zfp108

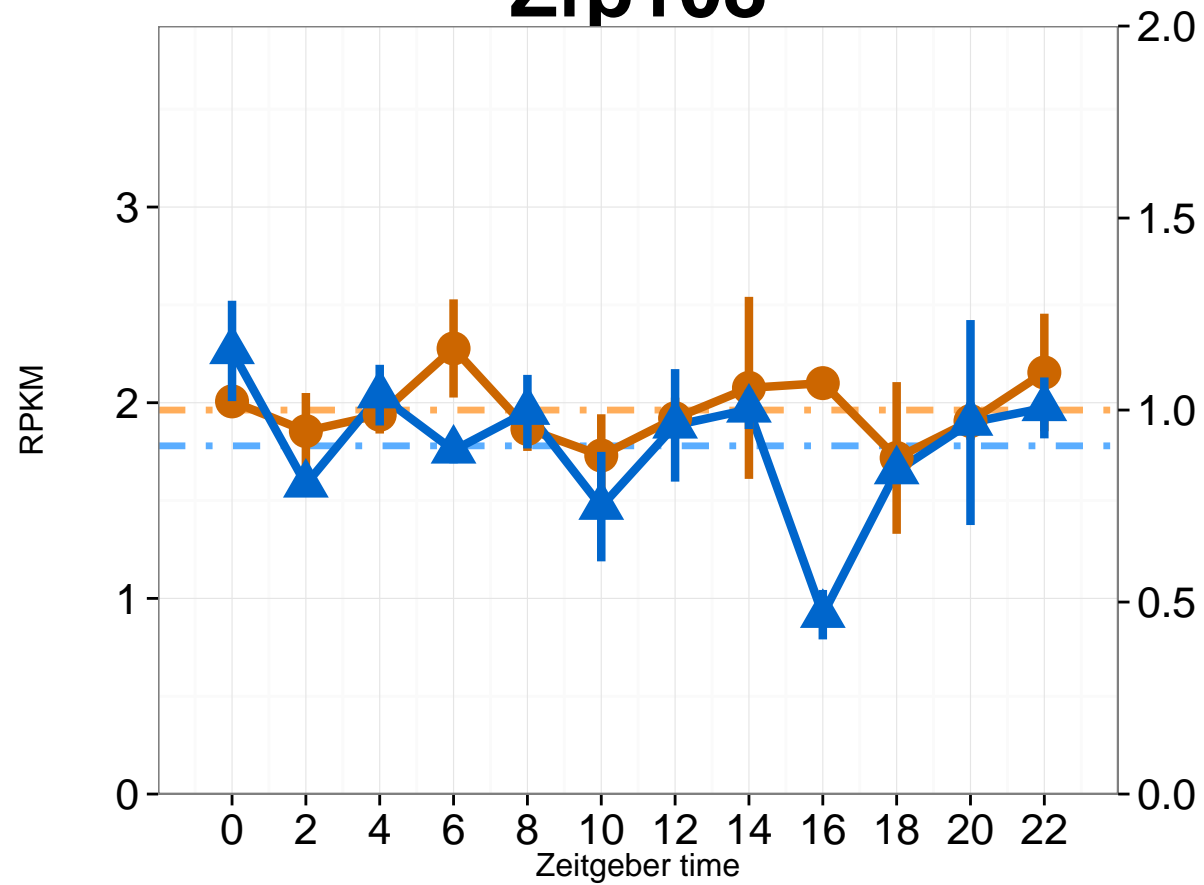

# Zfp108

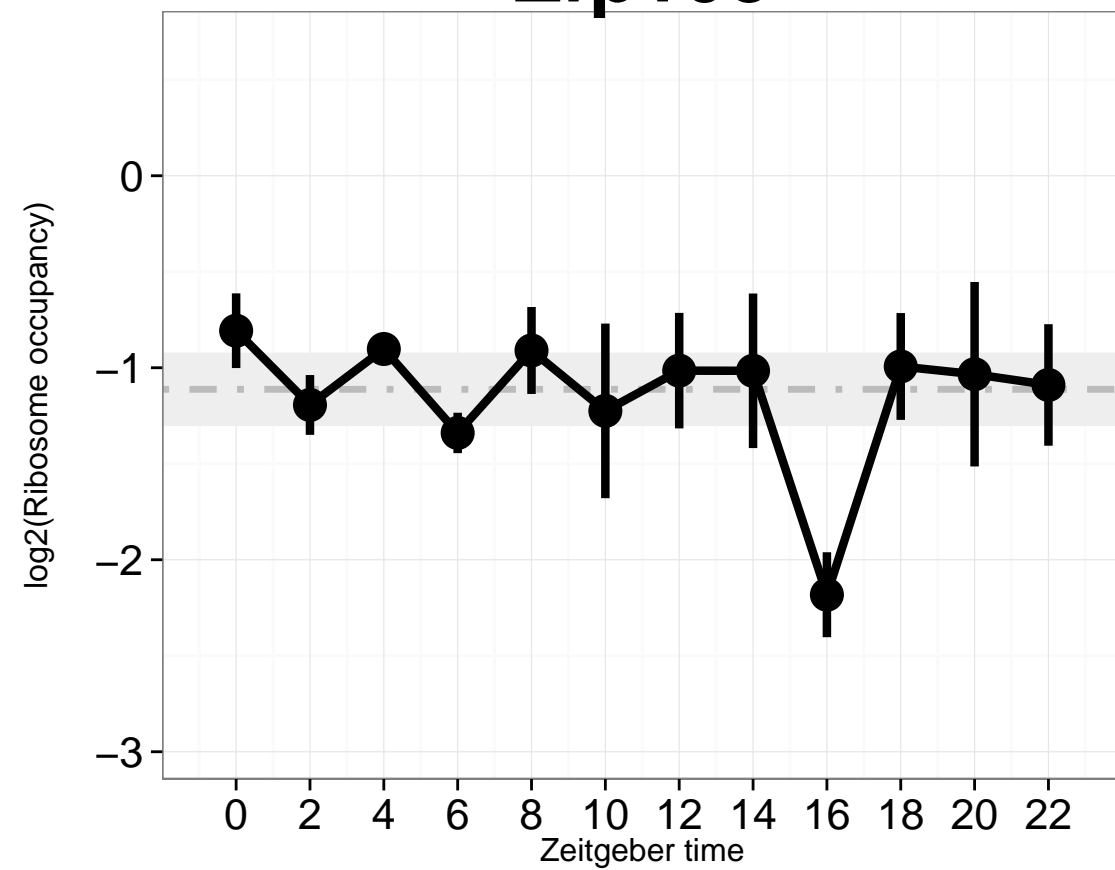

Supplement: Supplementary file 6871 [file 1]

## Myd88

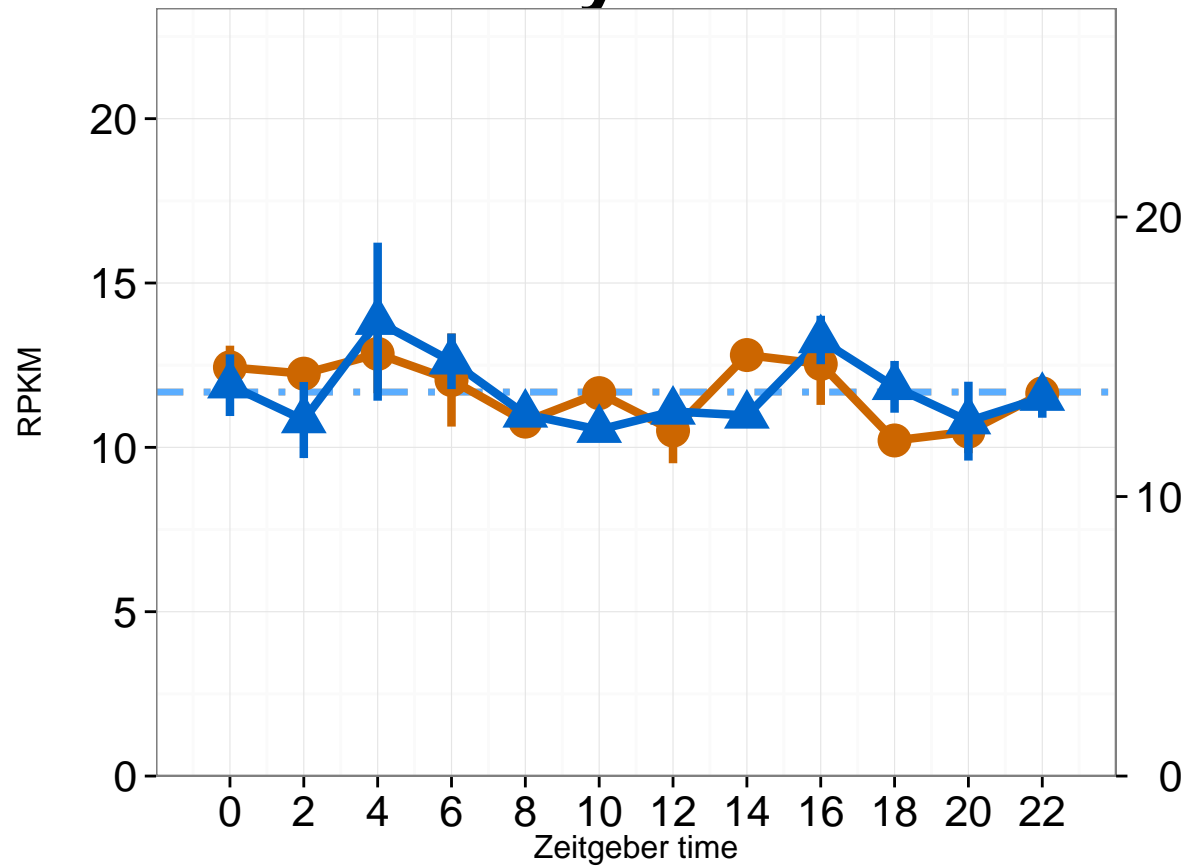

## Myd88

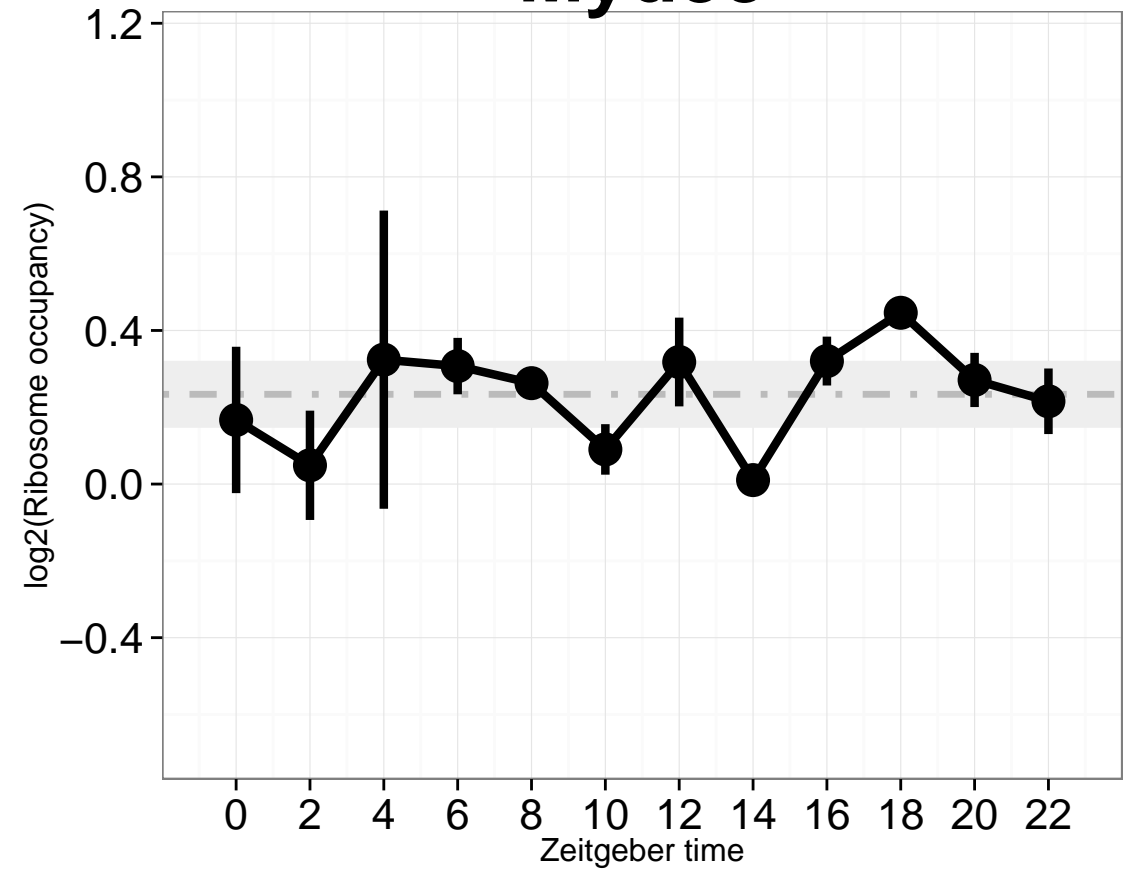

Supplement: Supplementary file 6872 [file 1]

# Zbtb42

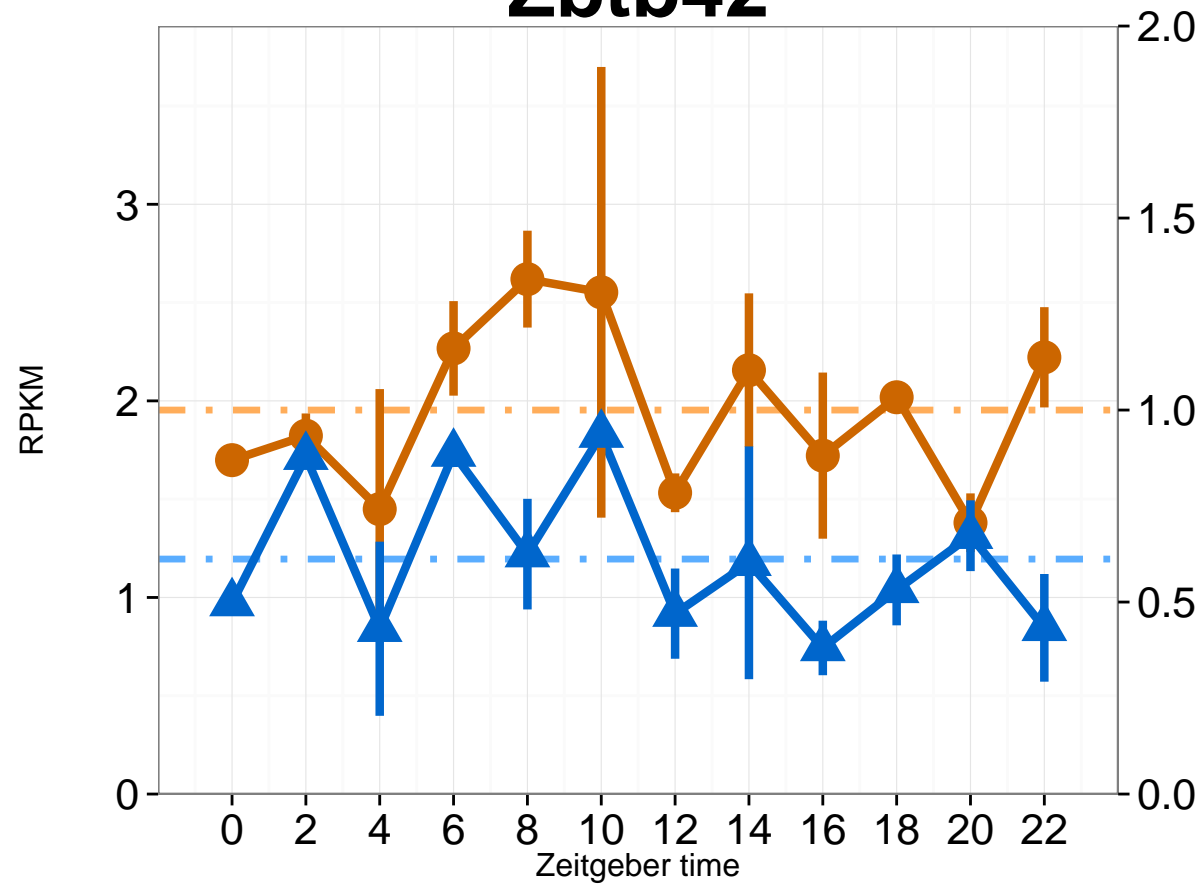

# Zbtb42

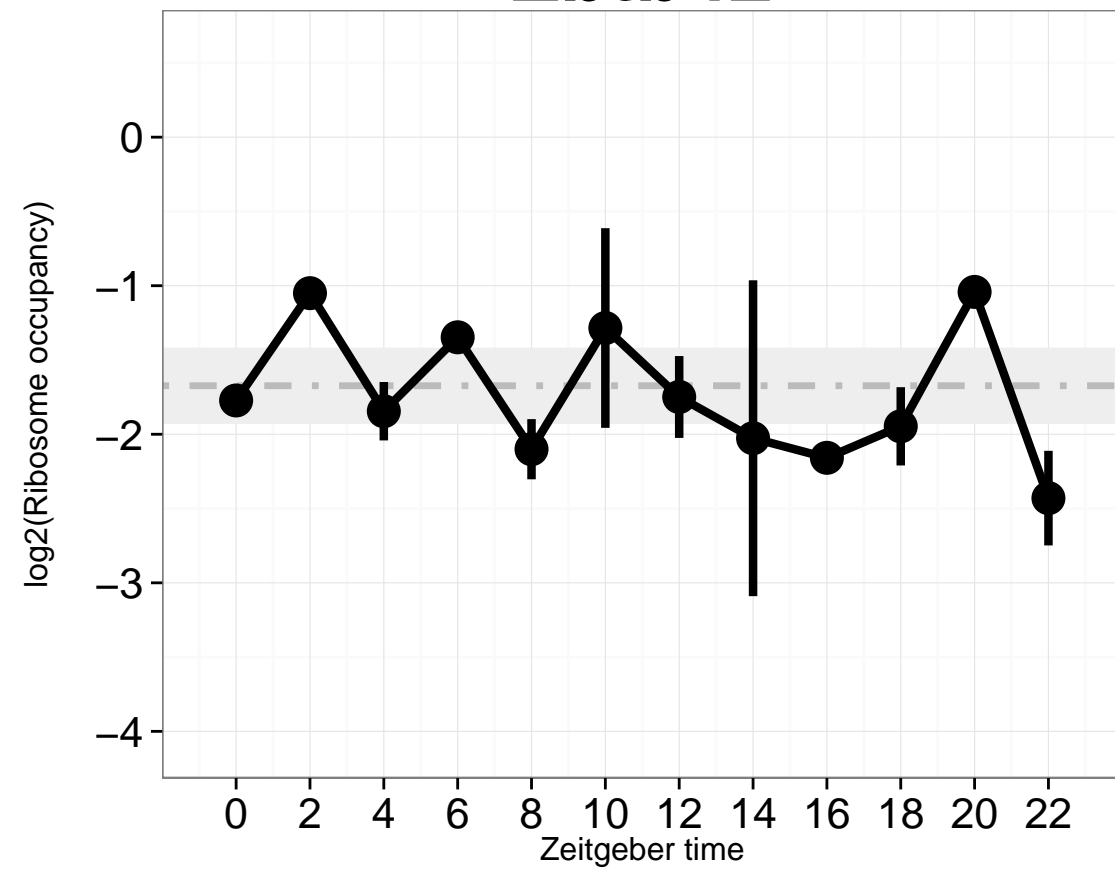

Supplement: Supplementary file 6873 [file 1]

## Edem1

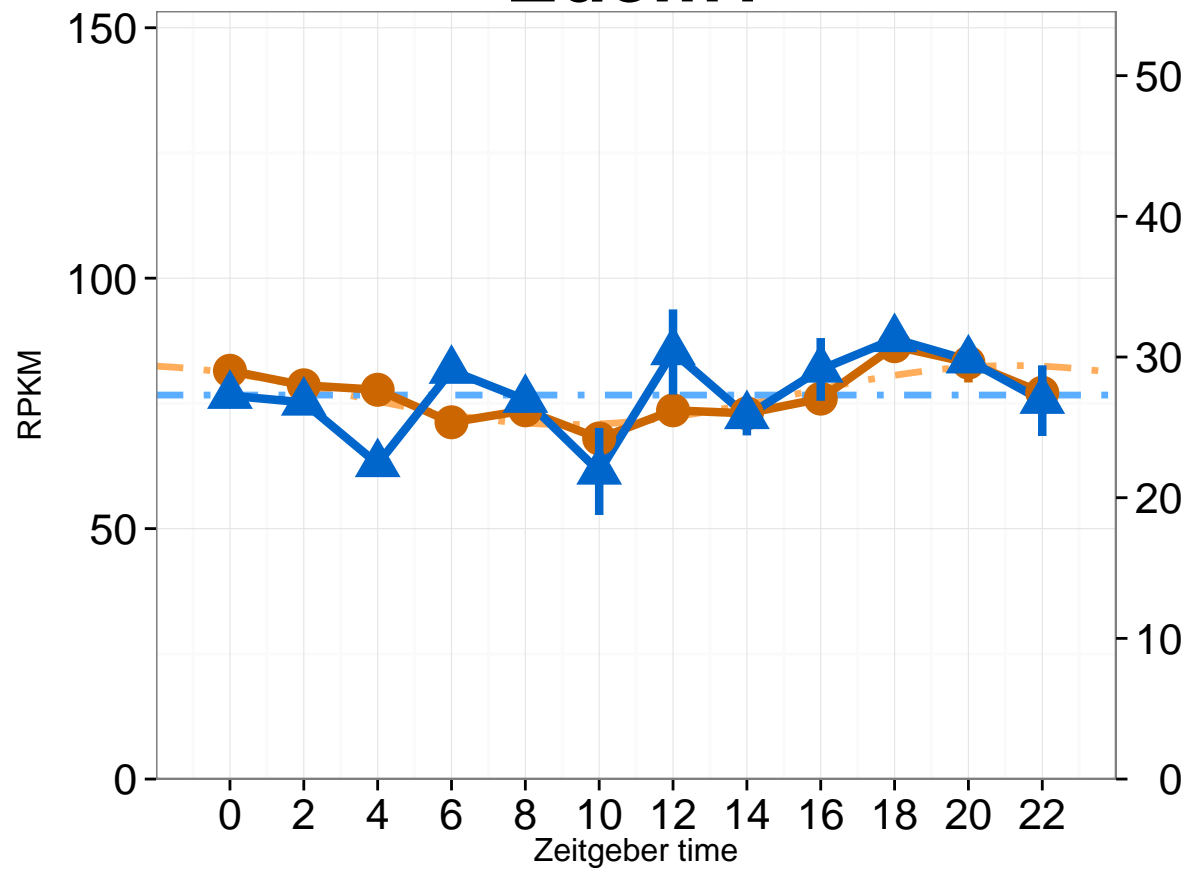

## Edem1

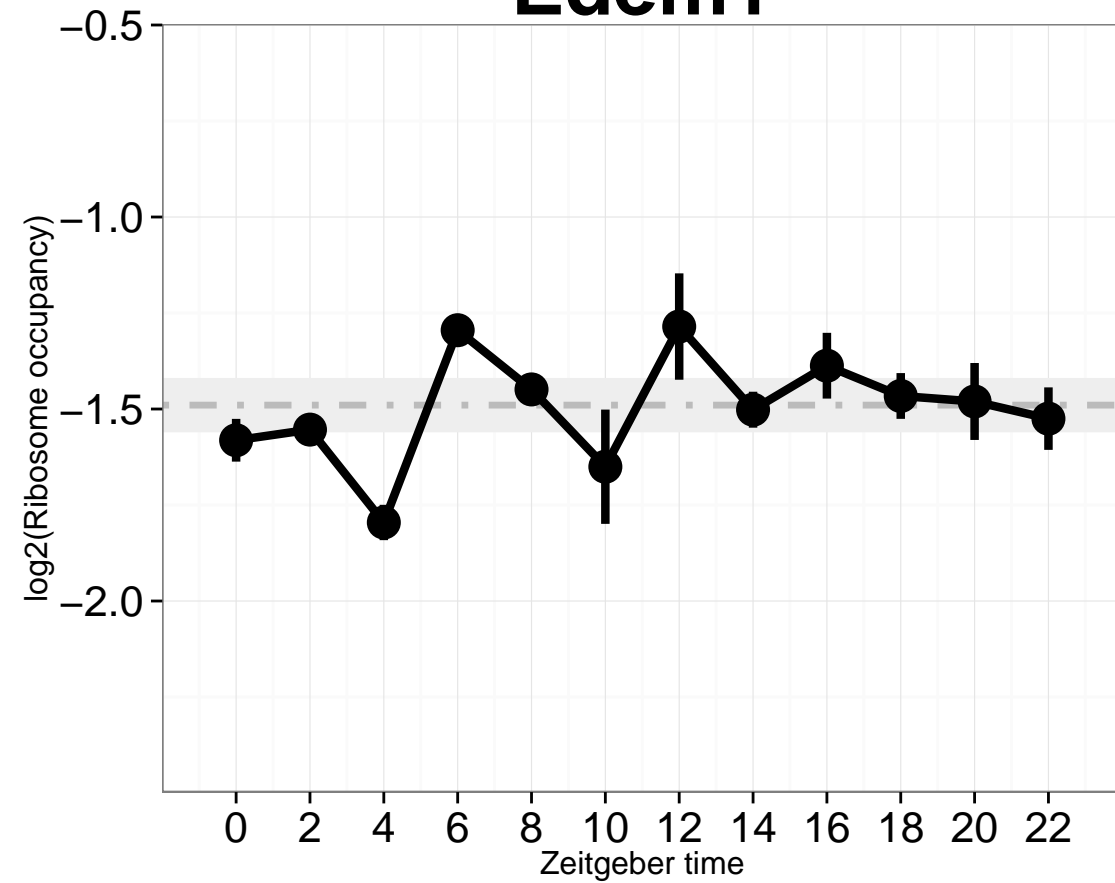

Supplement: Supplementary file 6874 [file 1]

## Mbnl3

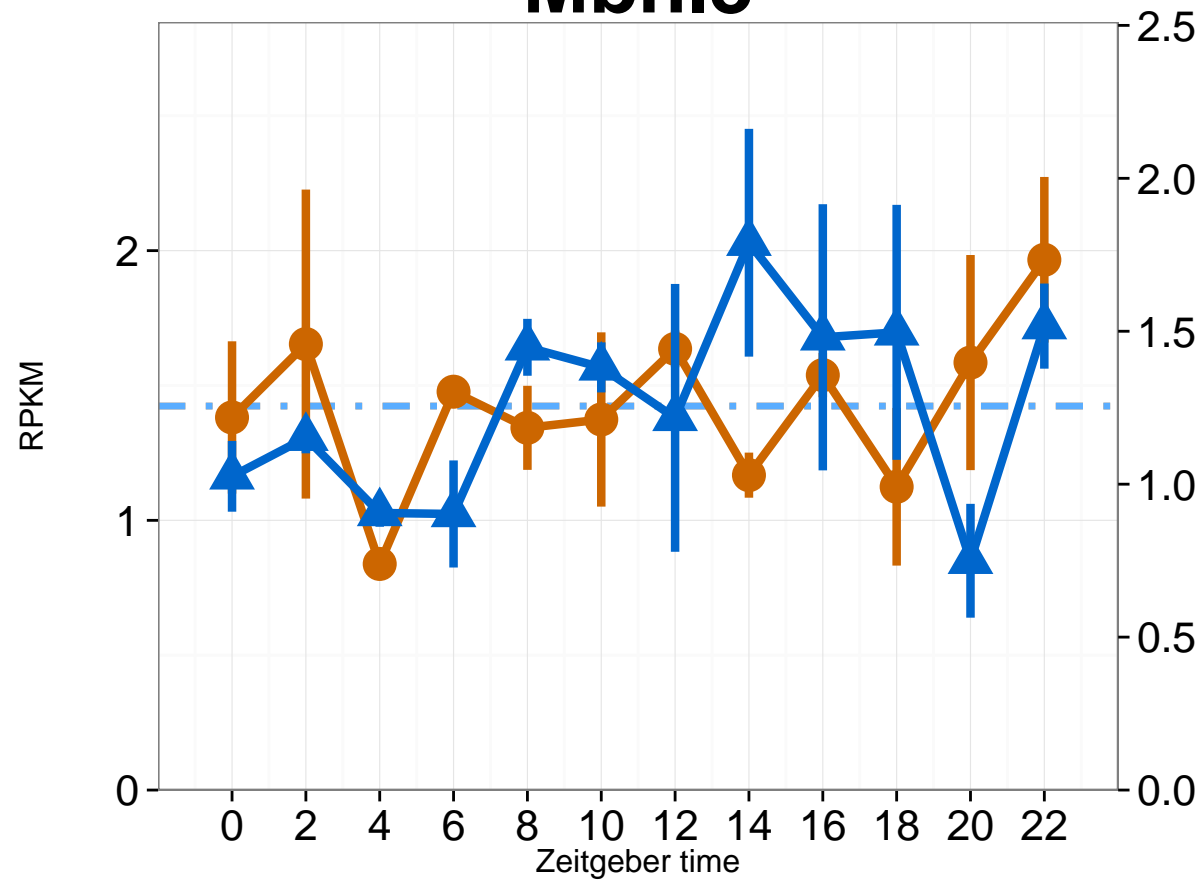

## Mbnl3

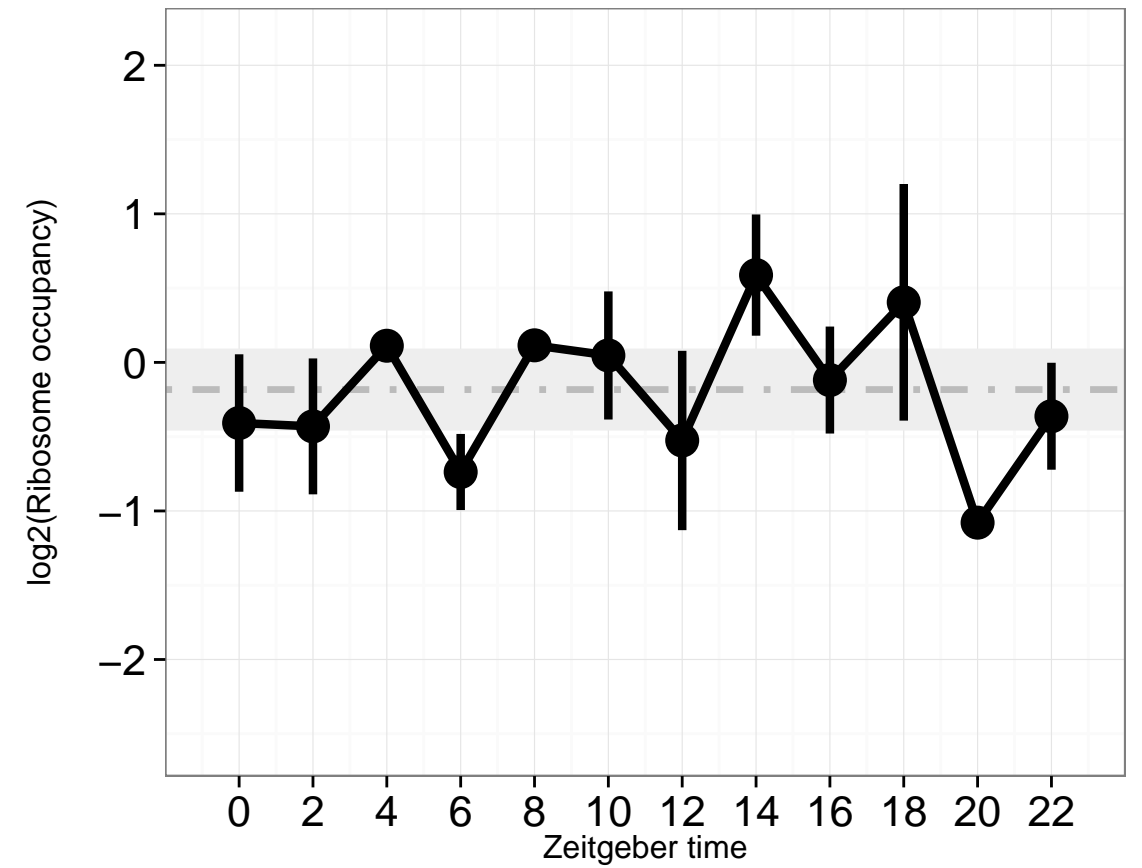

Supplement: Supplementary file 6875 [file 1]

## Cytip

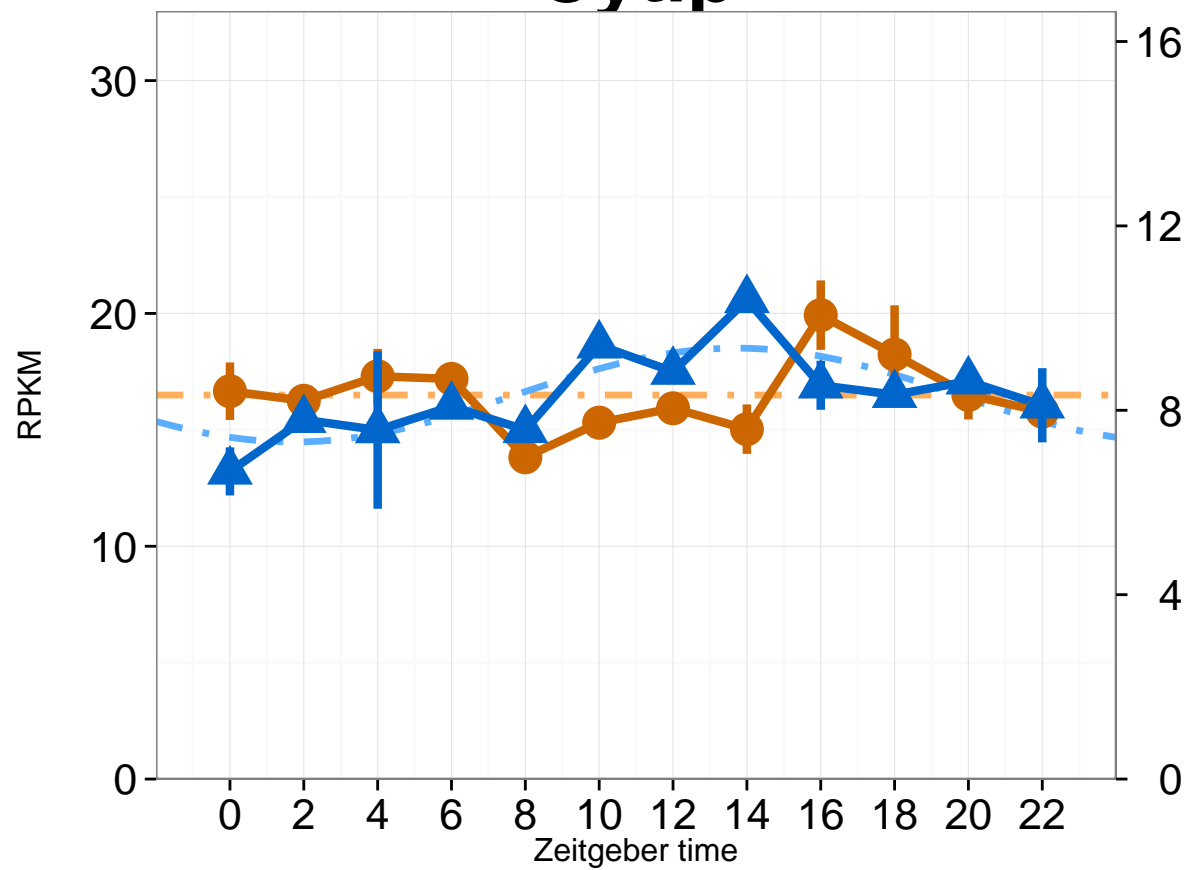

## Cytip

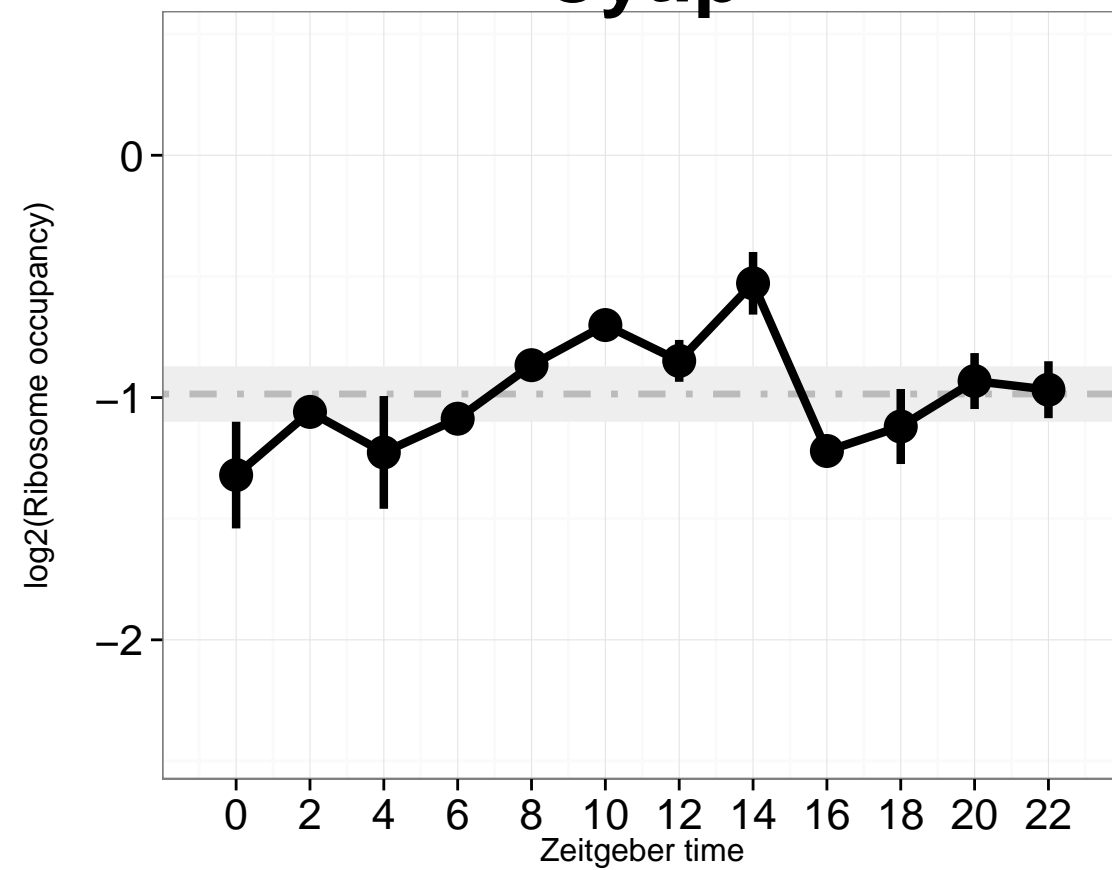

Supplement: Supplementary file 6876 [file 1]

# Rab27a

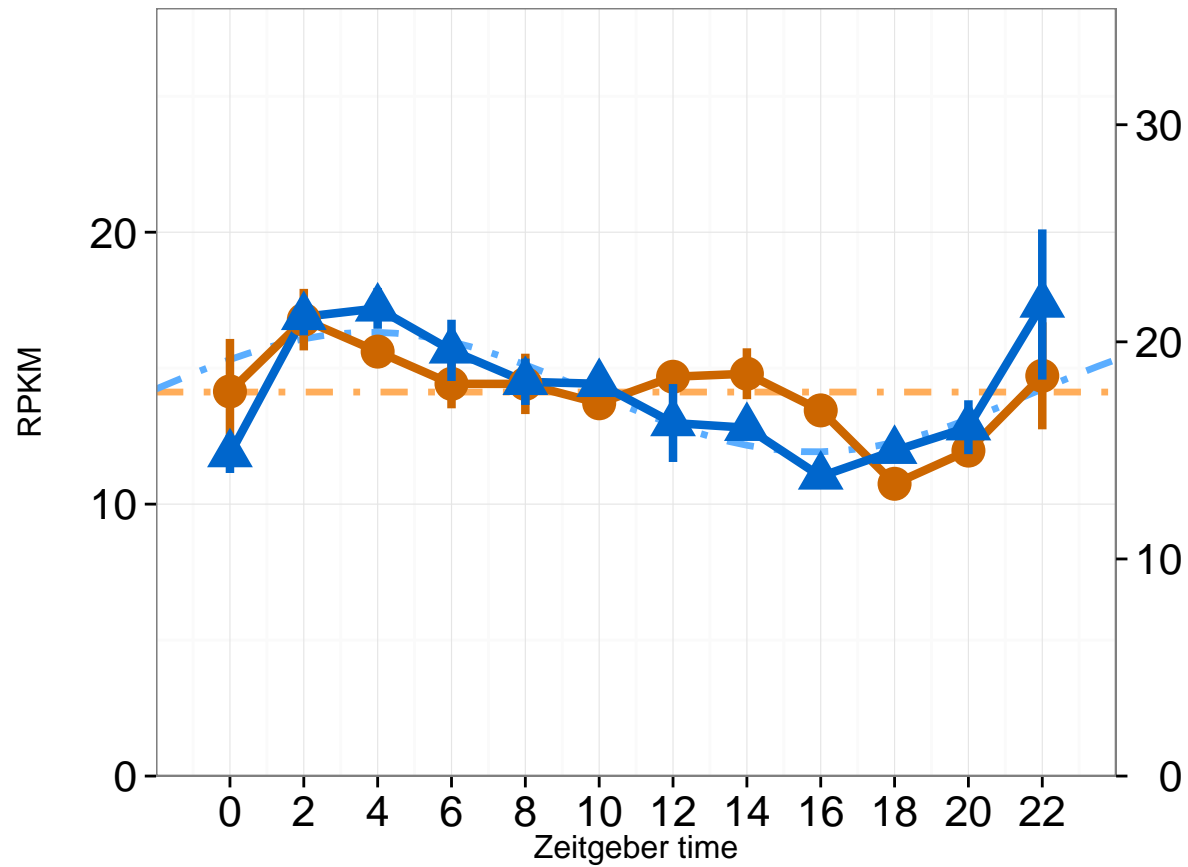

# Rab27a

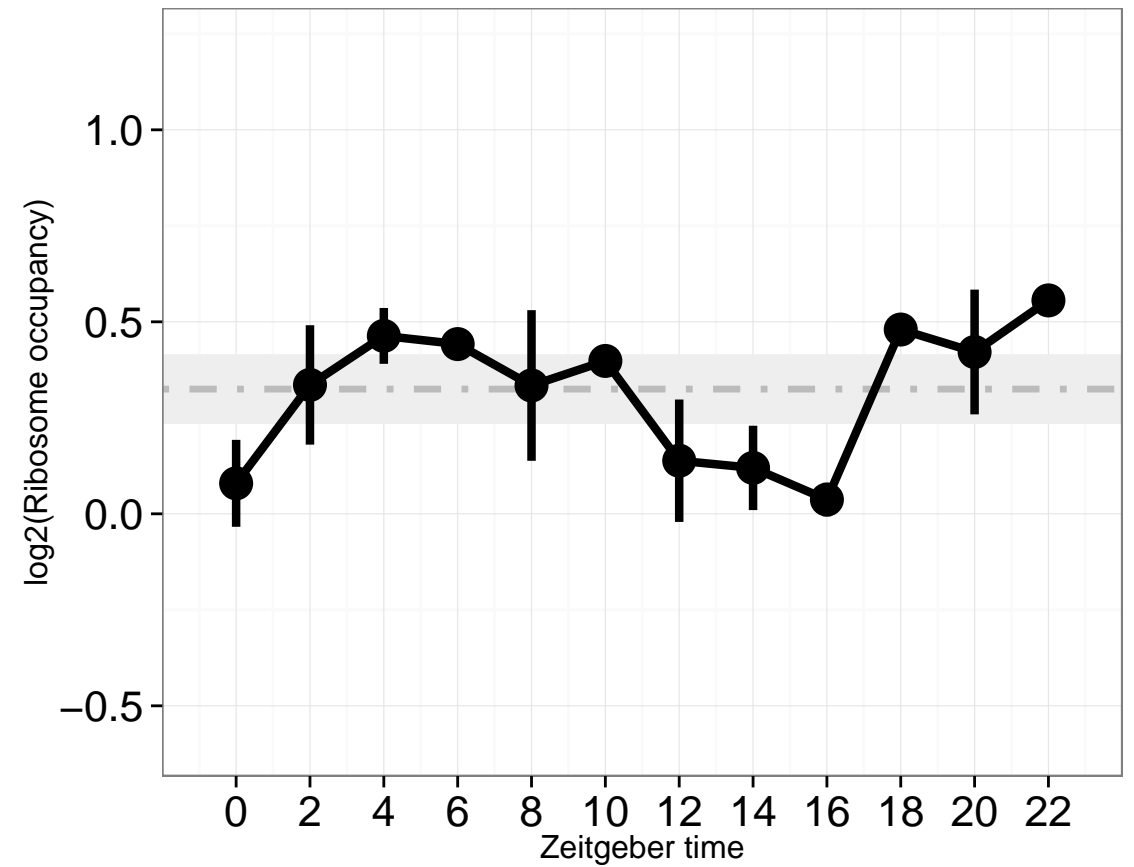

Supplement: Supplementary file 6877 [file 1]

# Srsf1

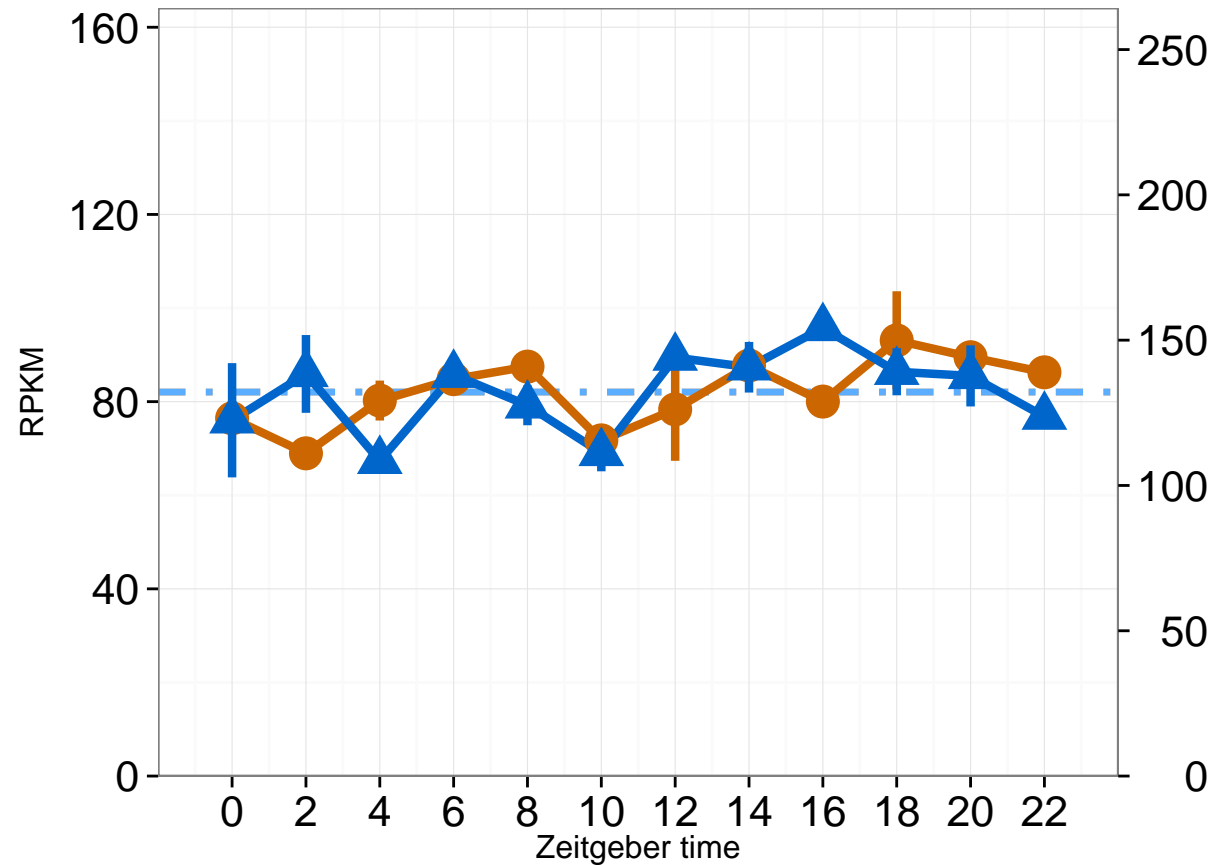

# Srsf1

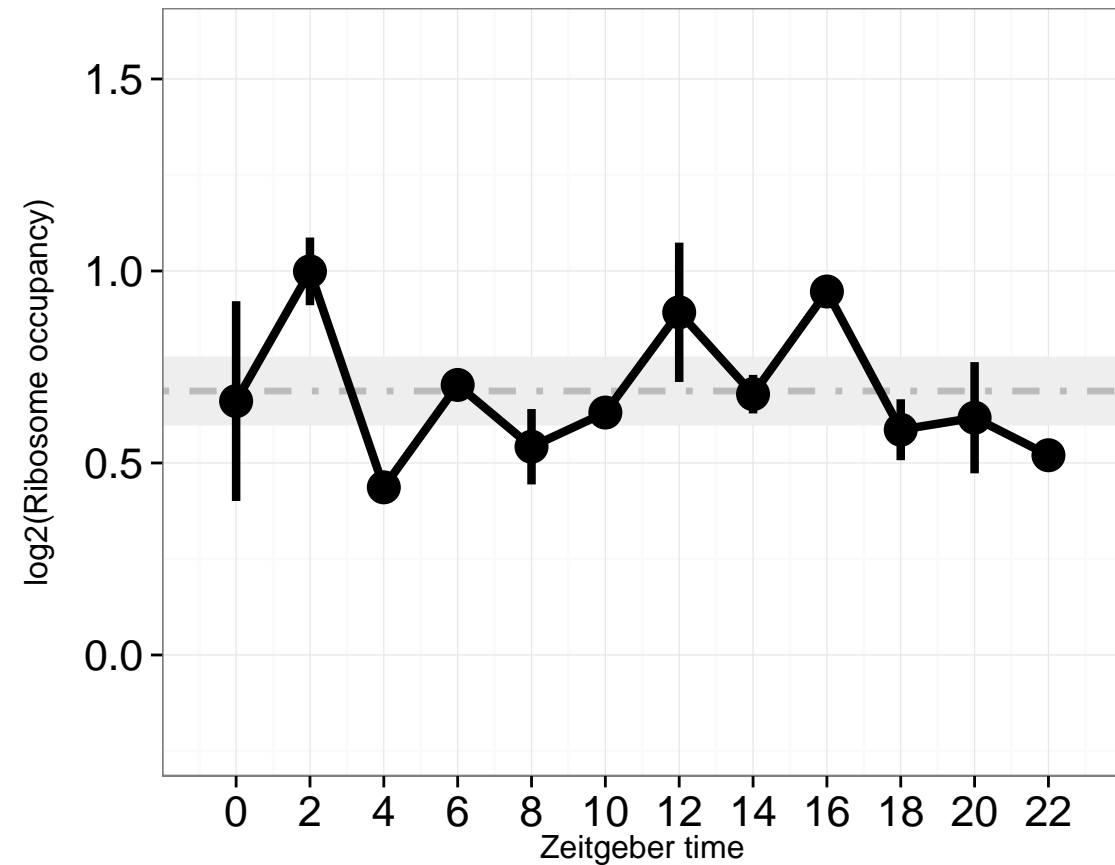

Supplement: Supplementary file 6878 [file 1]

# Yeats4

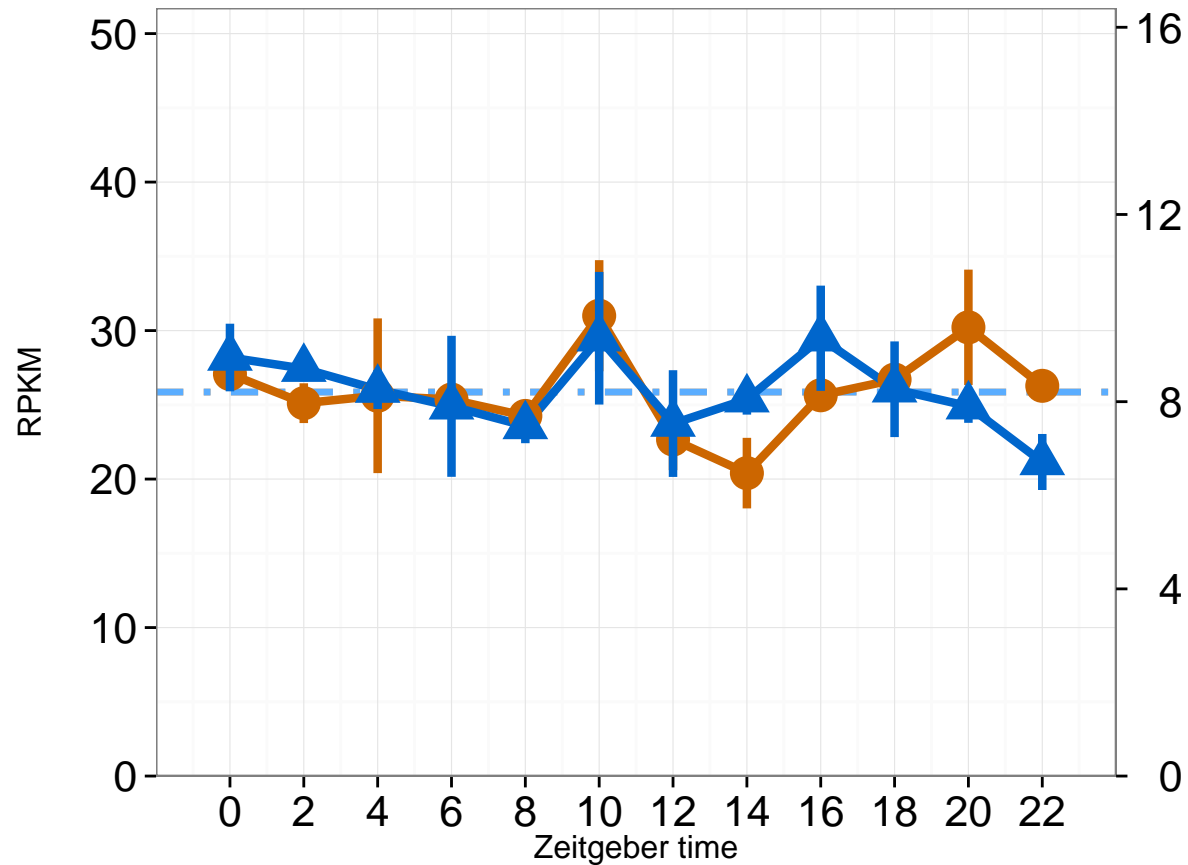

# Yeats4

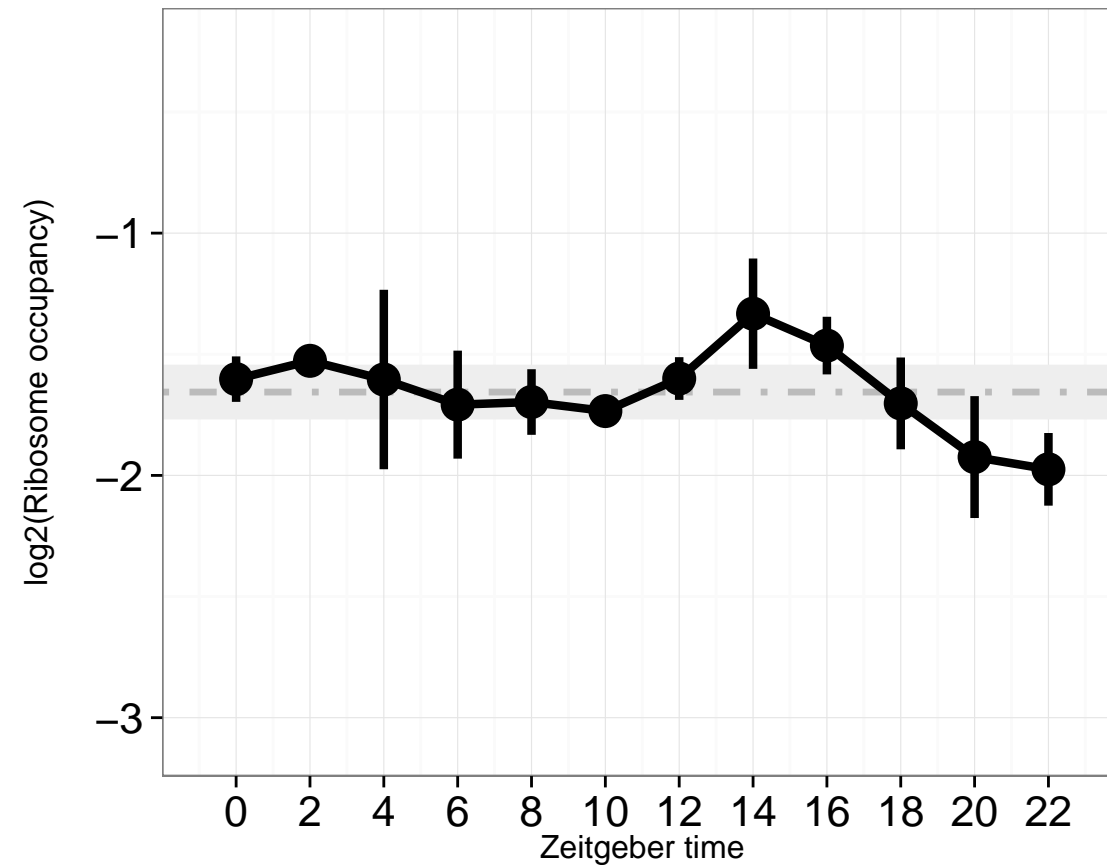

Supplement: Supplementary file 6879 [file 1]

## Ngfr

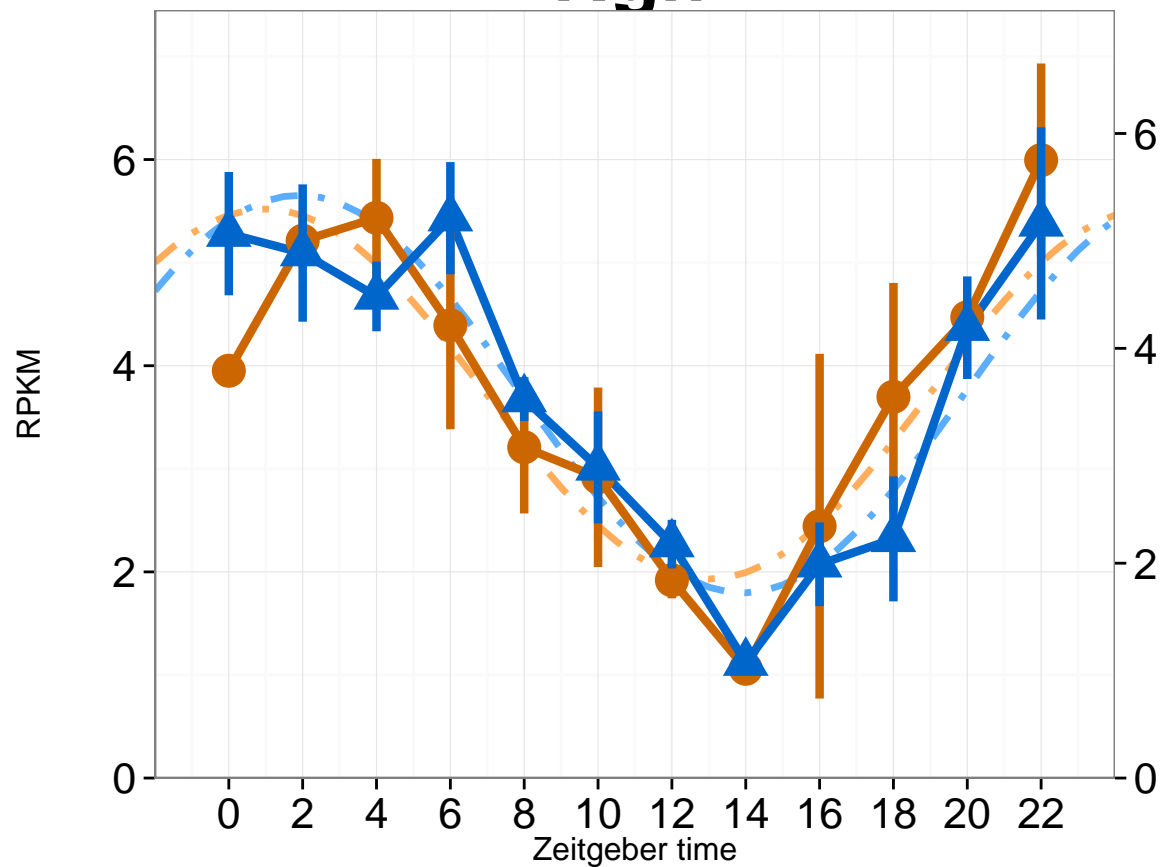

## Ngfr

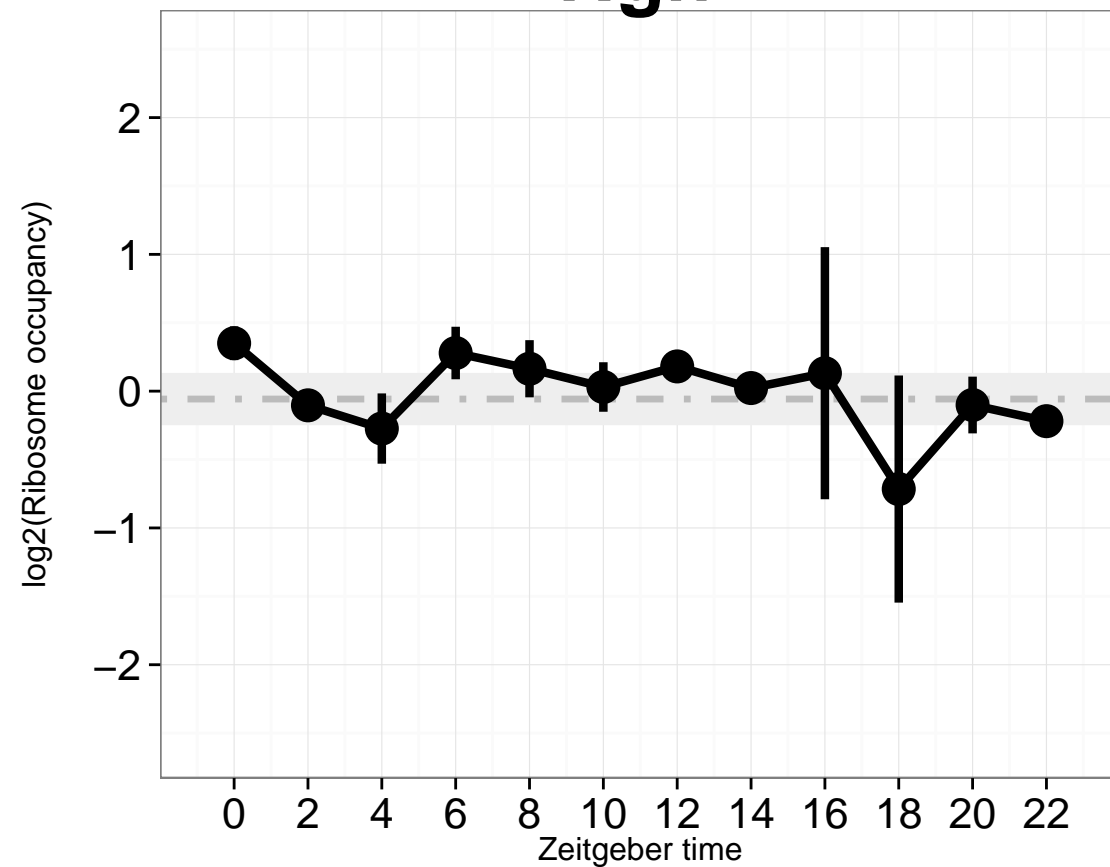

Supplement: Supplementary file 6880 [file 1]

# Pias3

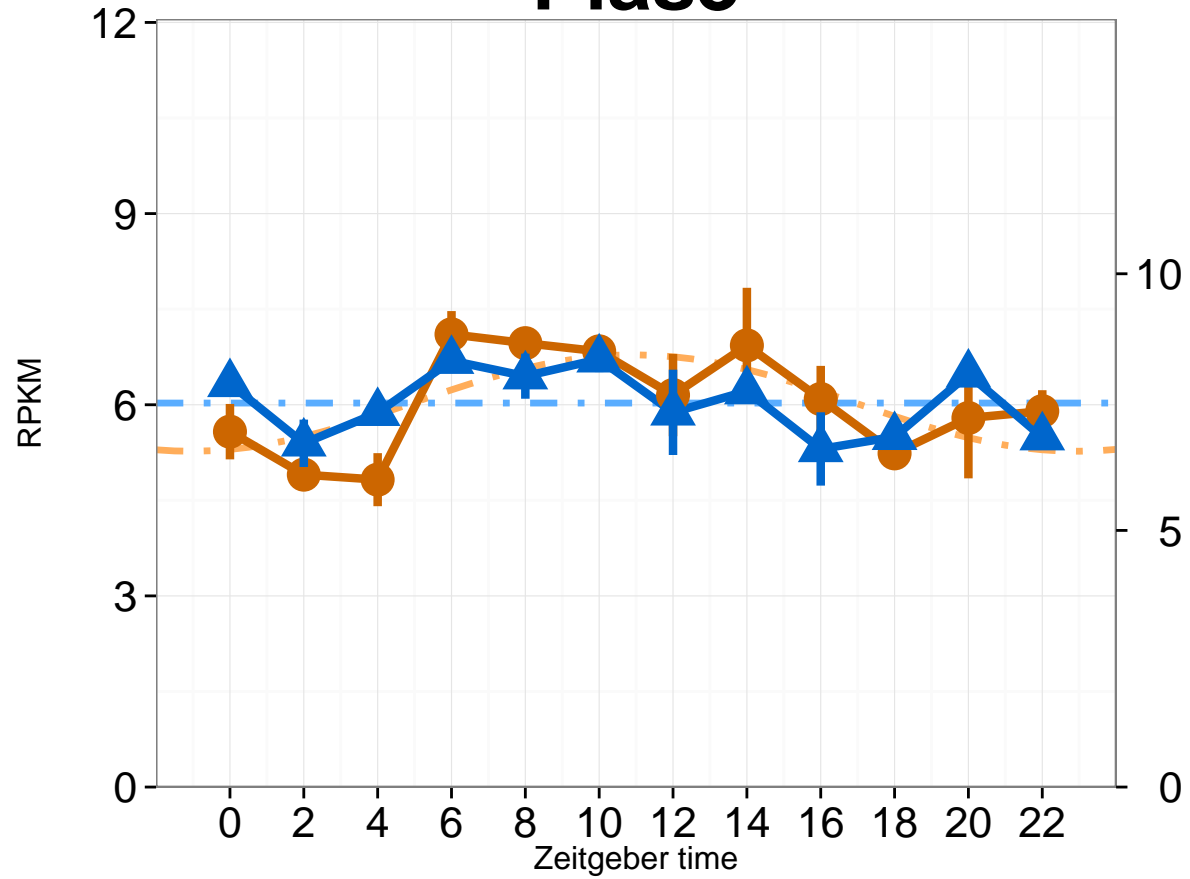

# Pias3

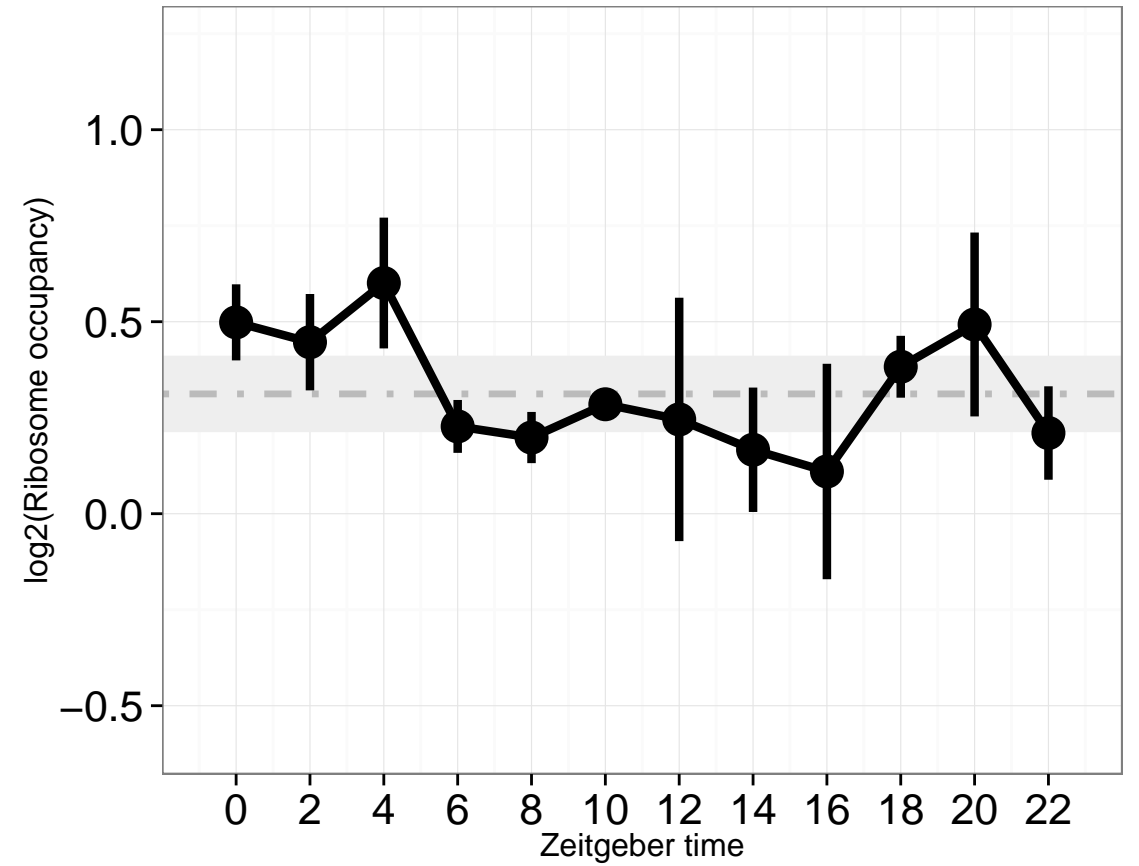

Supplement: Supplementary file 6881 [file 1]

# Gm17296

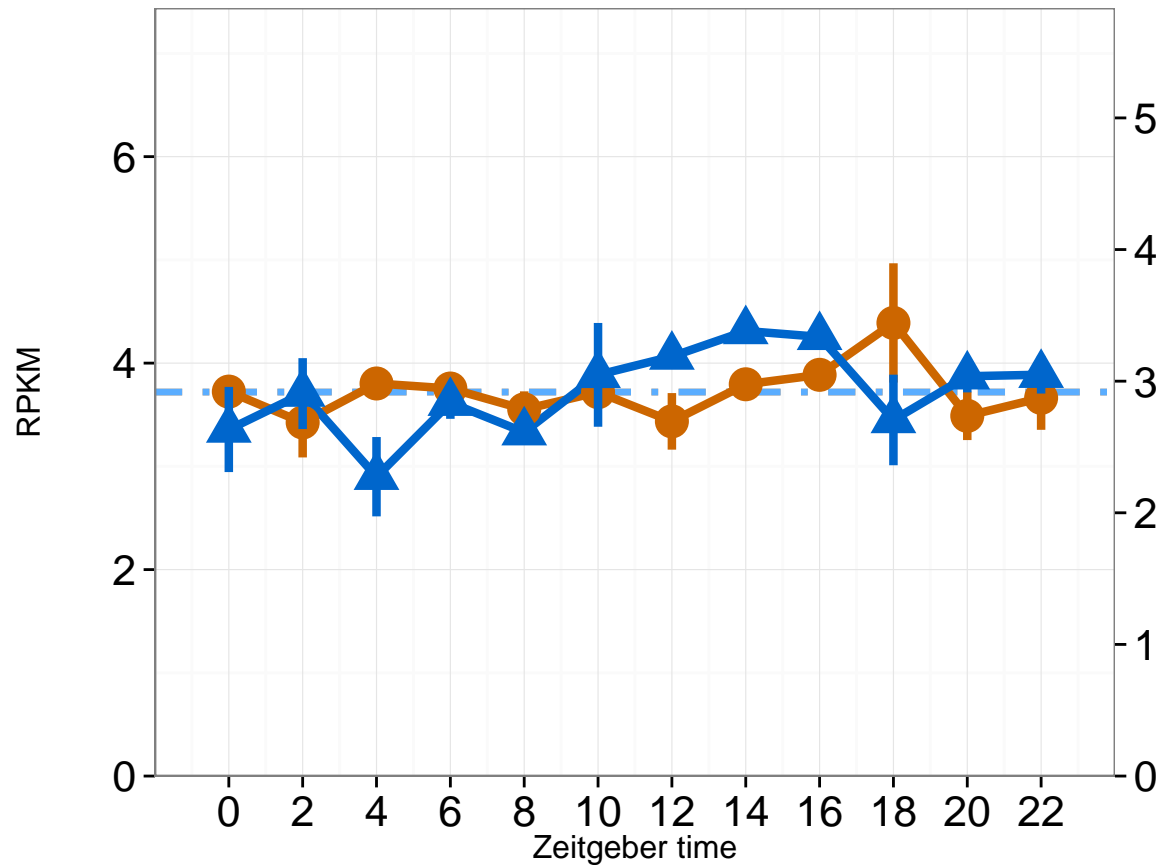

# Gm17296

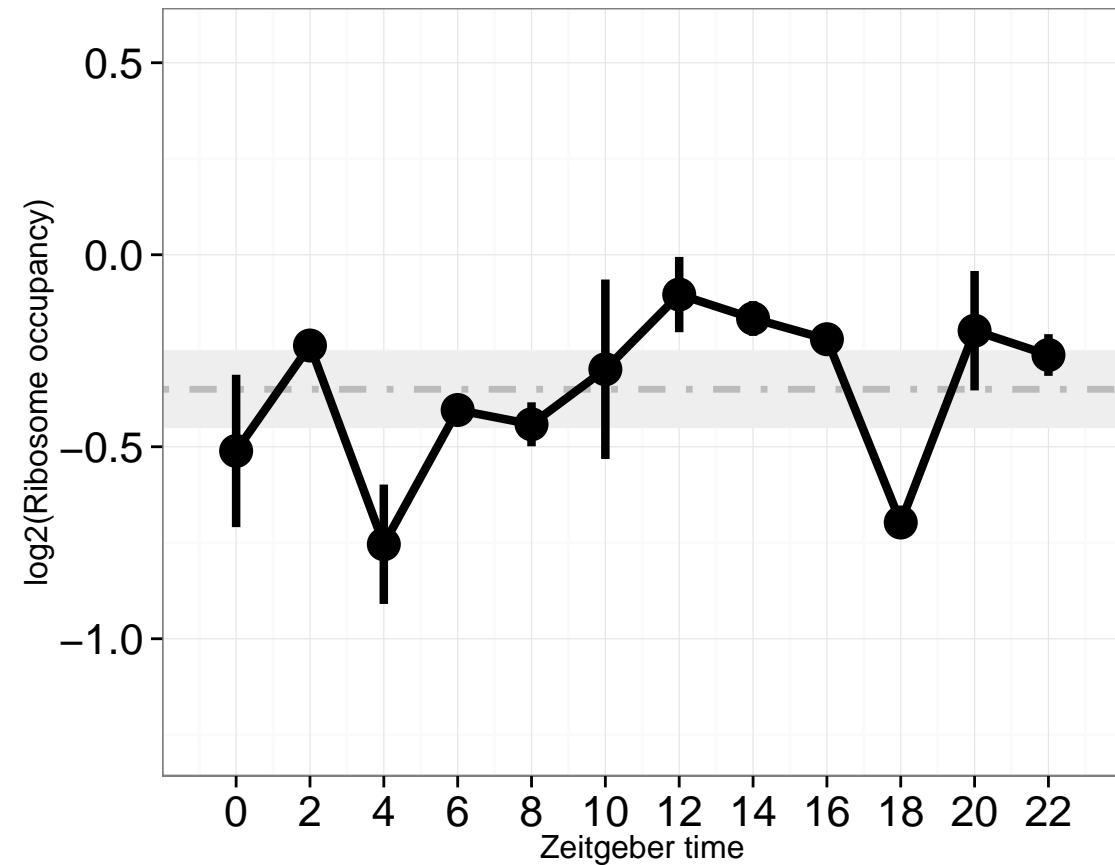

Supplement: Supplementary file 6882 [file 1]

## Mid1

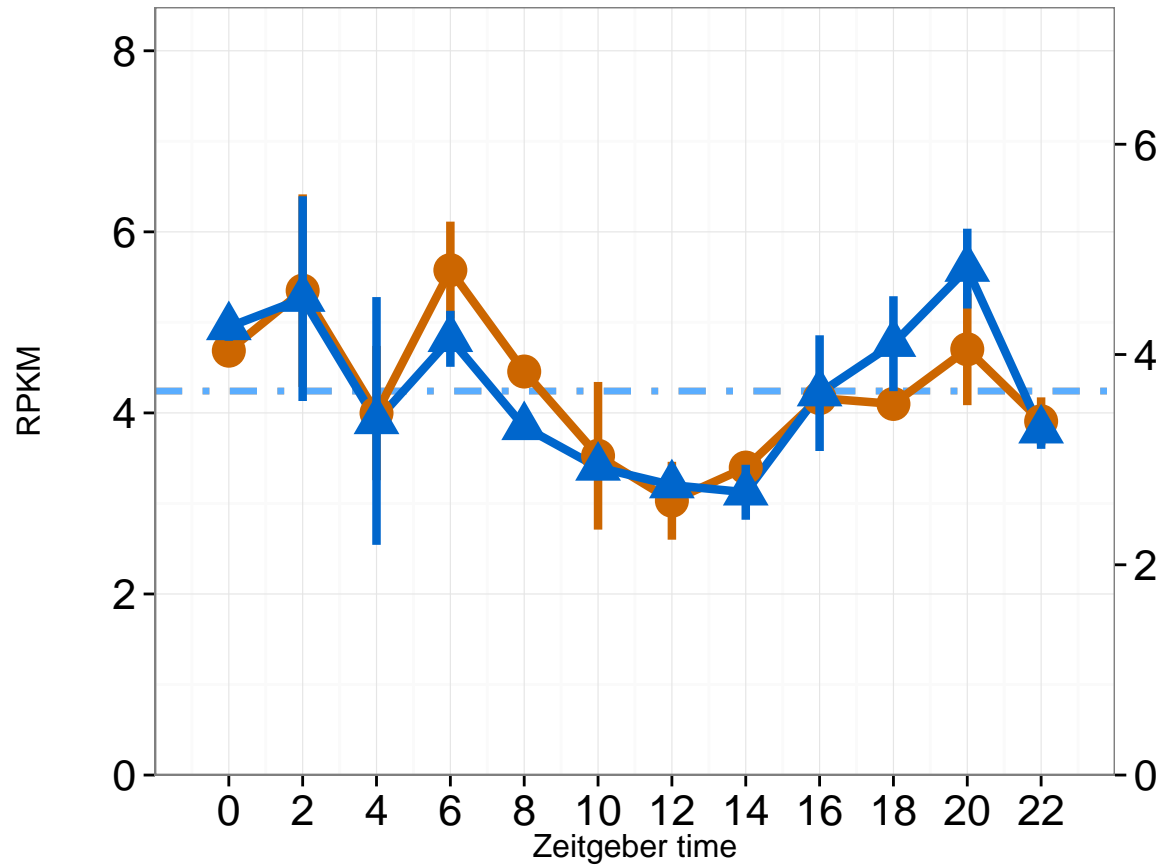

## Mid1

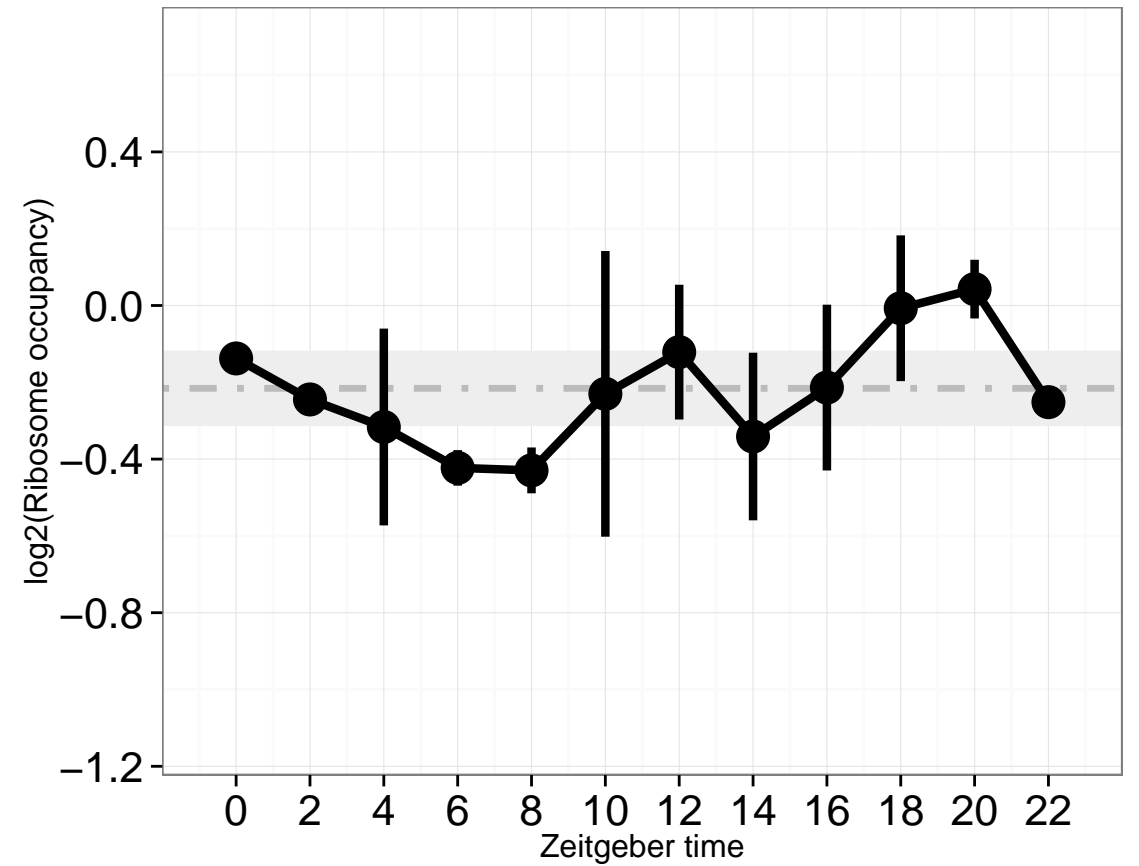

Supplement: Supplementary file 6883 [file 1]

# Col13a1

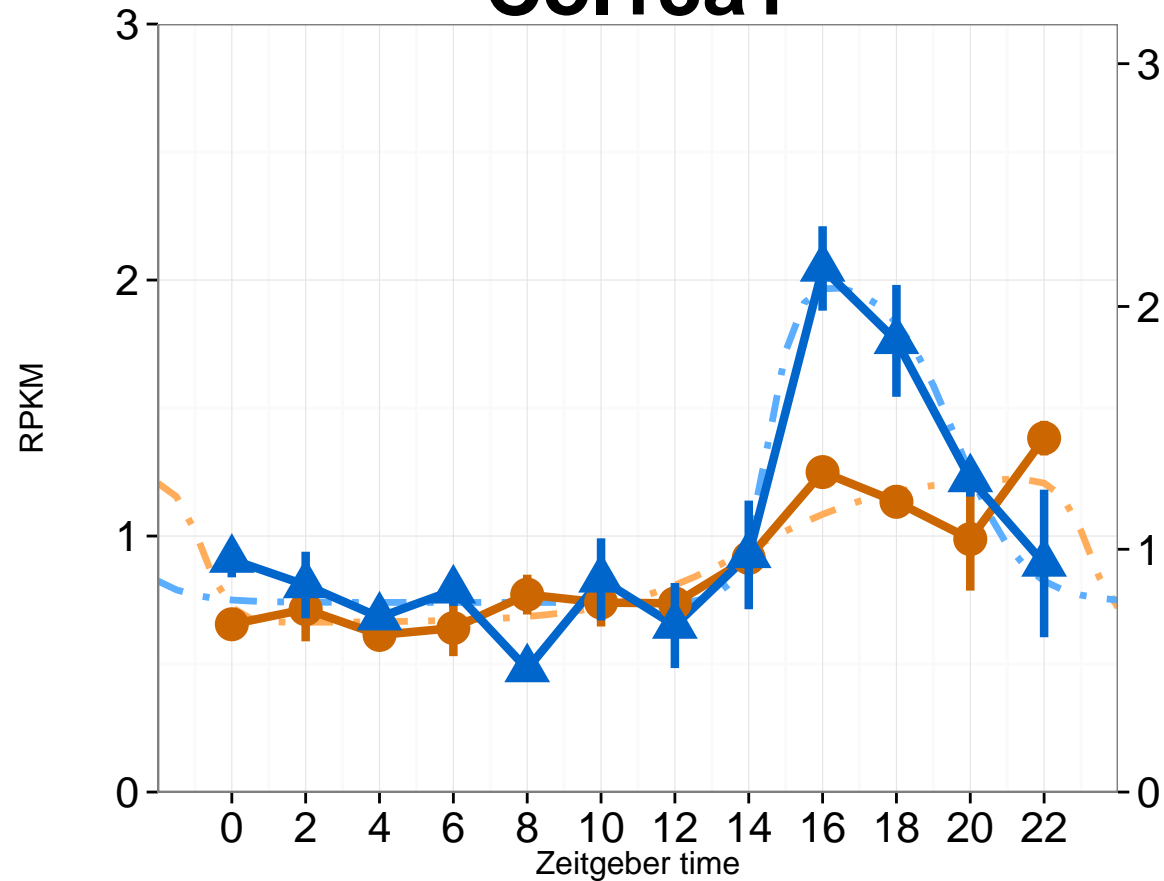

# Col13a1

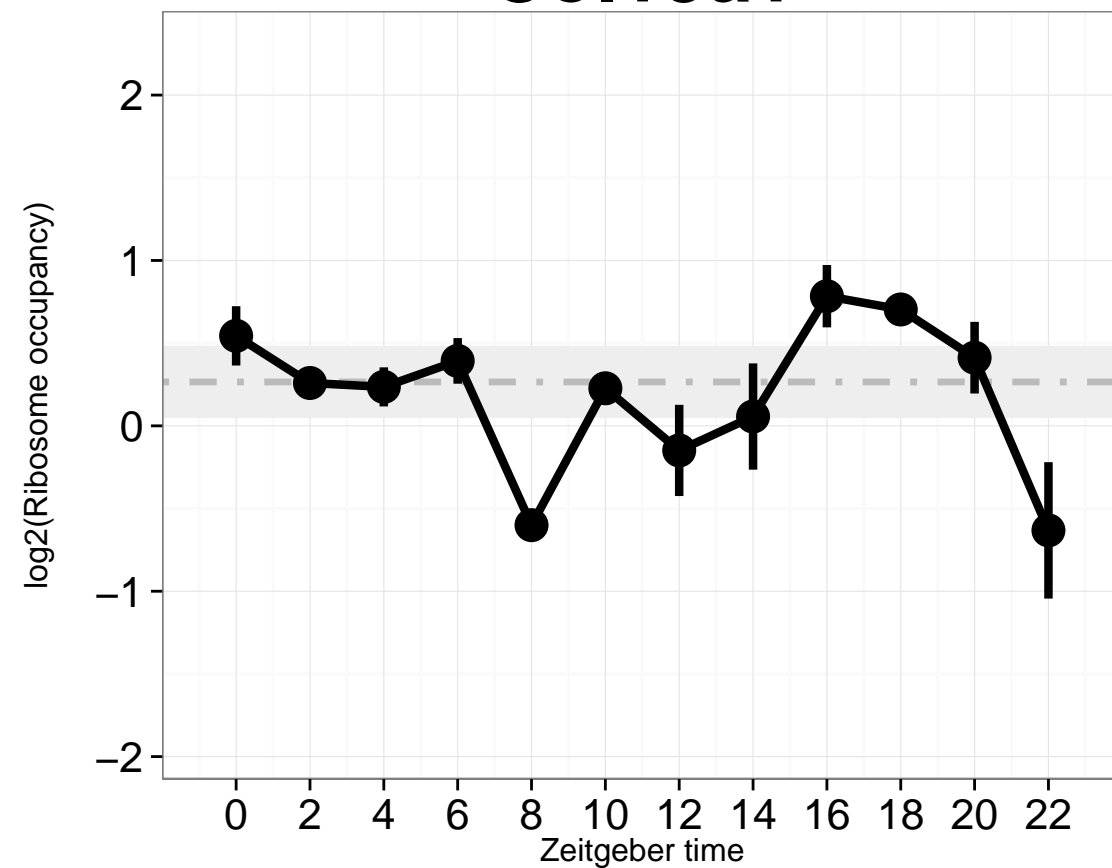

Supplement: Supplementary file 6884 [file 1]

# Srrm1

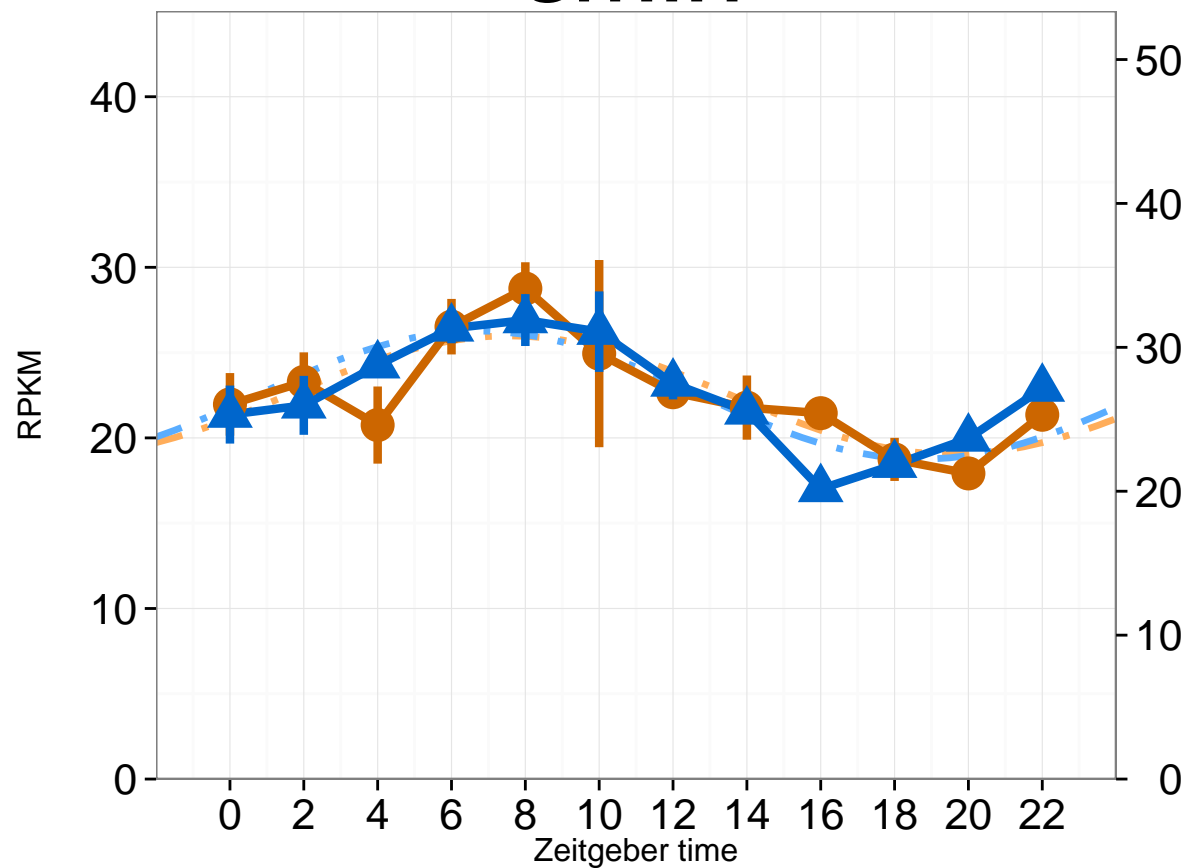

# Srrm1

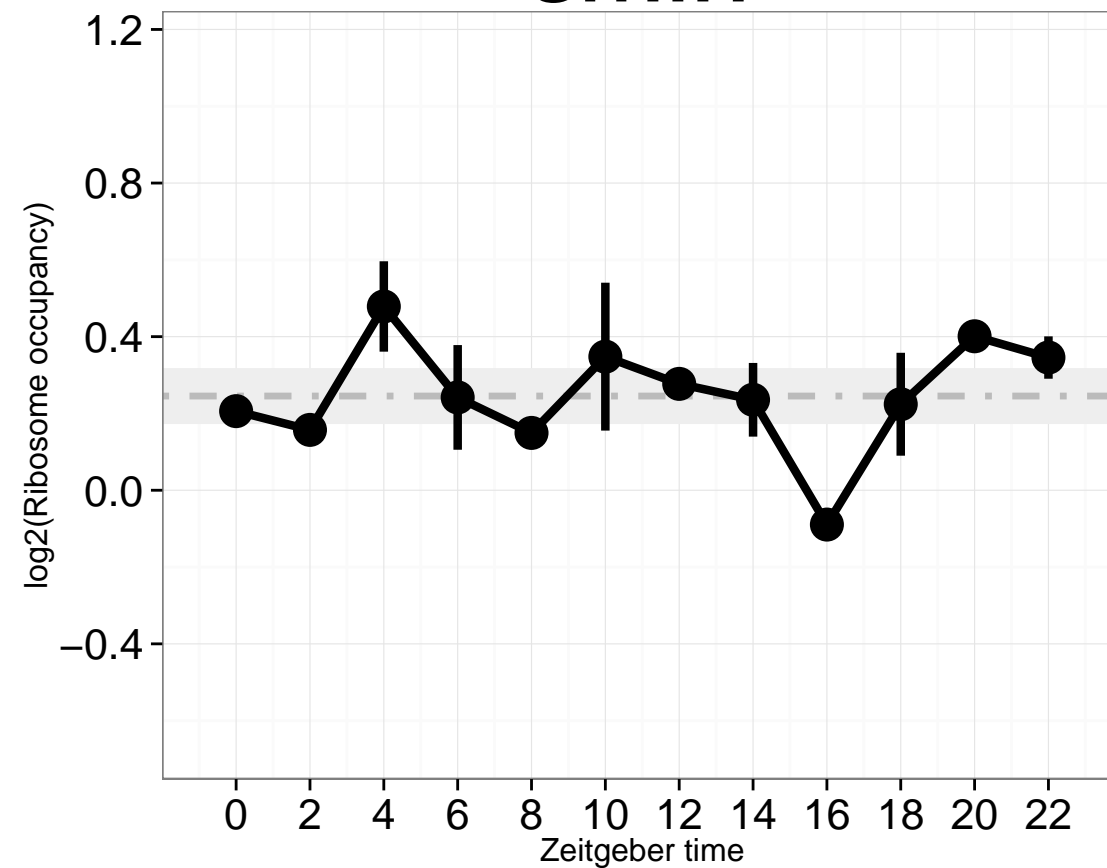

Supplement: Supplementary file 6885 [file 1]

# Hnrnpdl

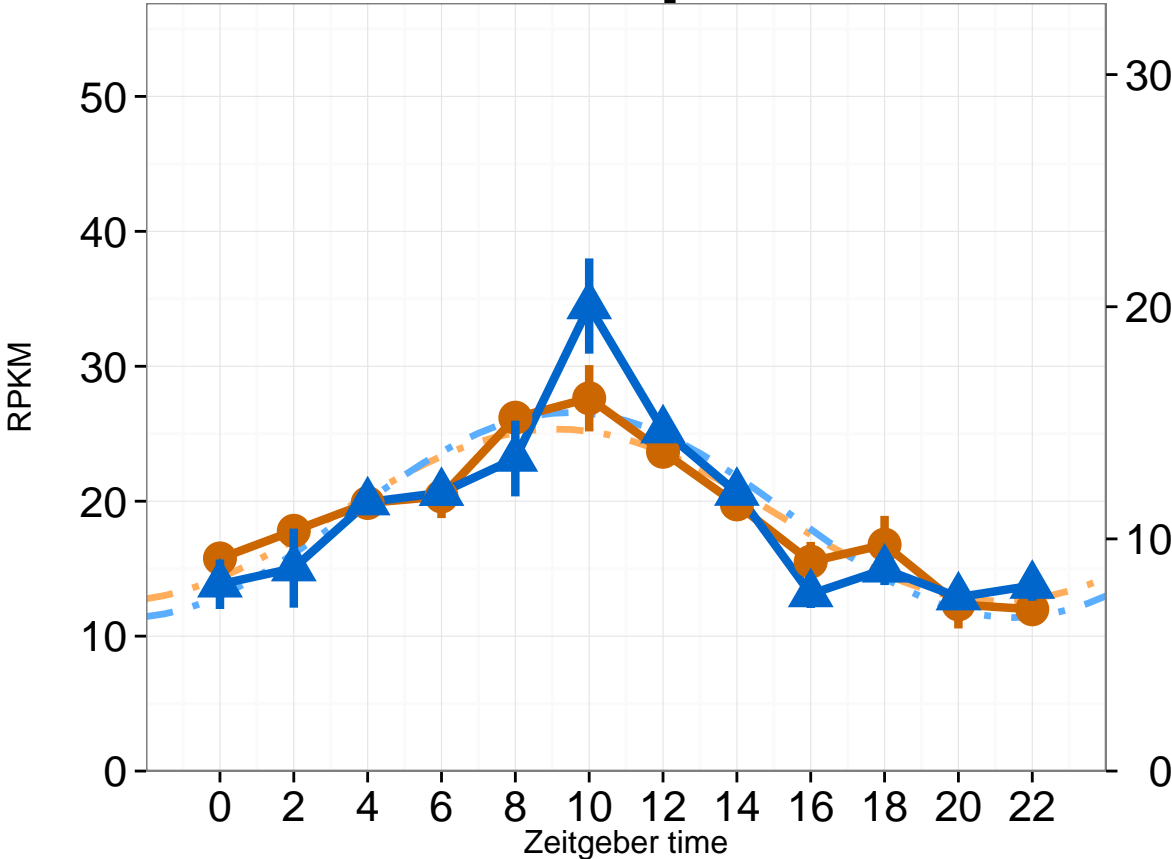

# Hnrnpdl

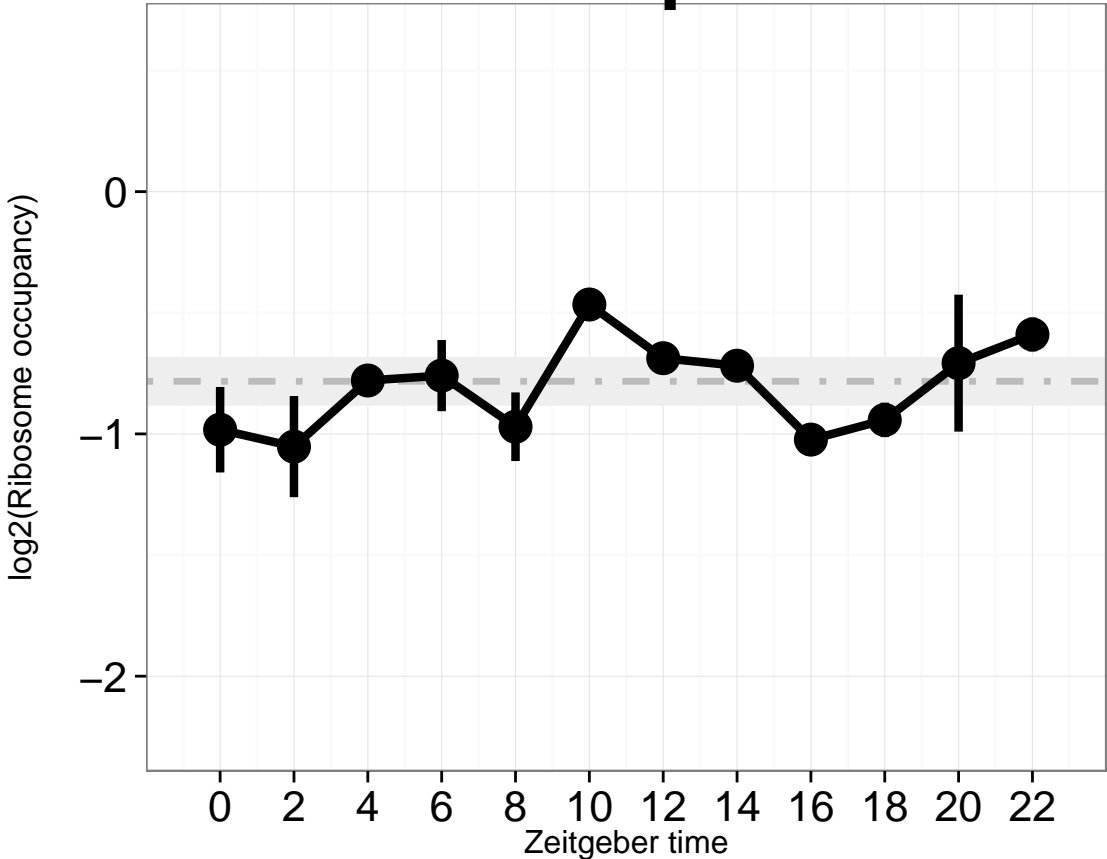

Supplement: Supplementary file 6886 [file 1]

# Uggt2

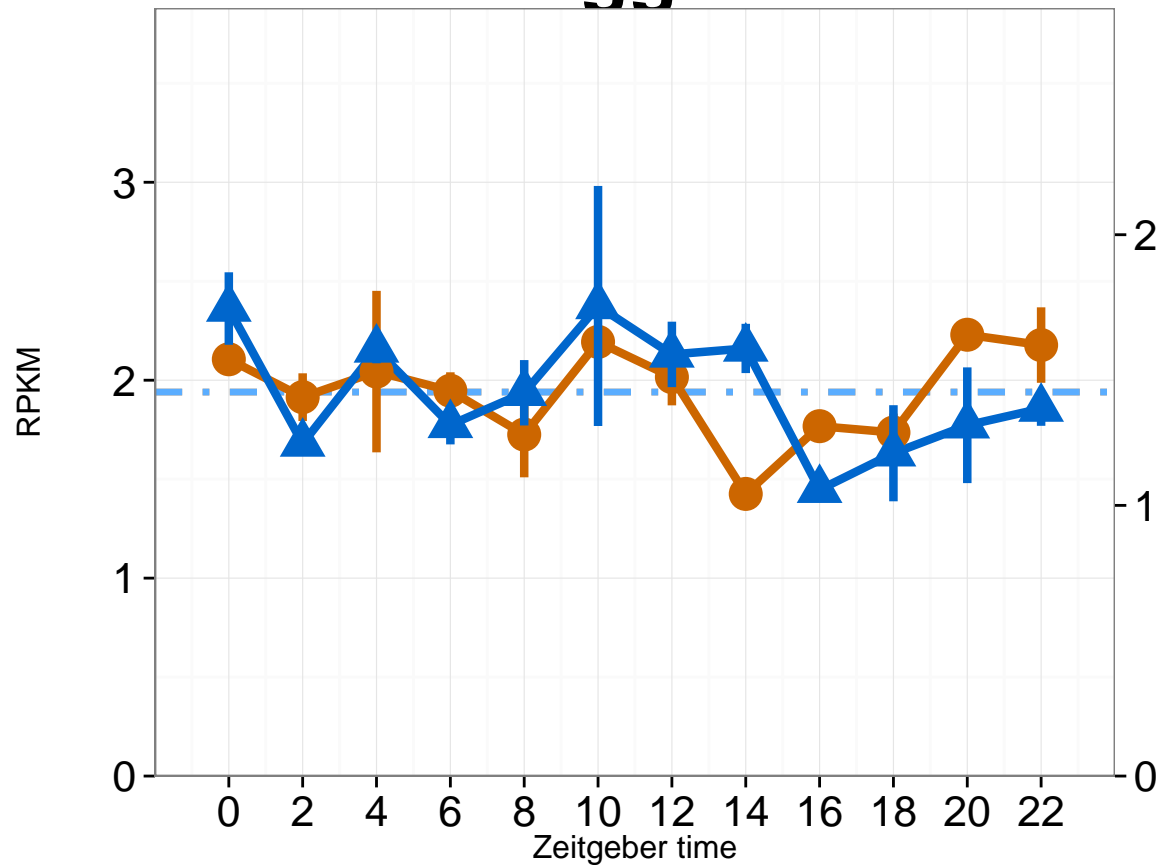

# Uggt2

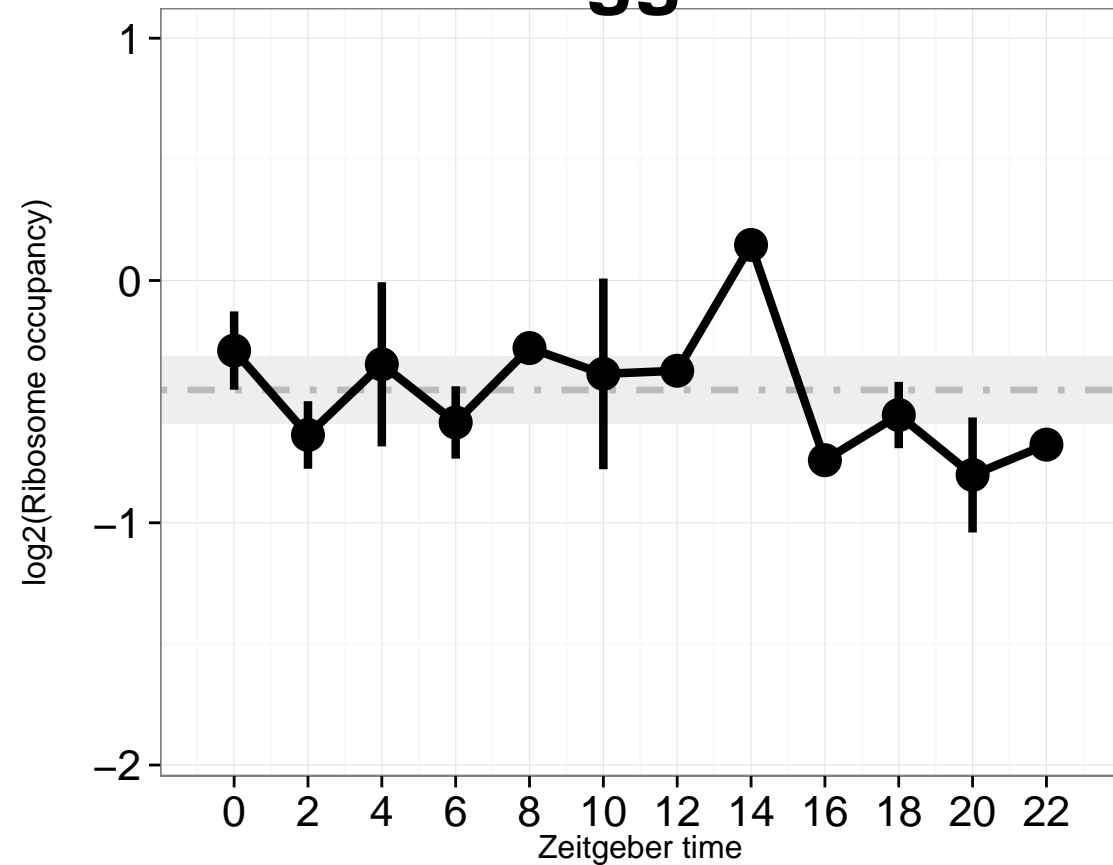

Supplement: Supplementary file 6887 [file 1]

# Eif4enif1

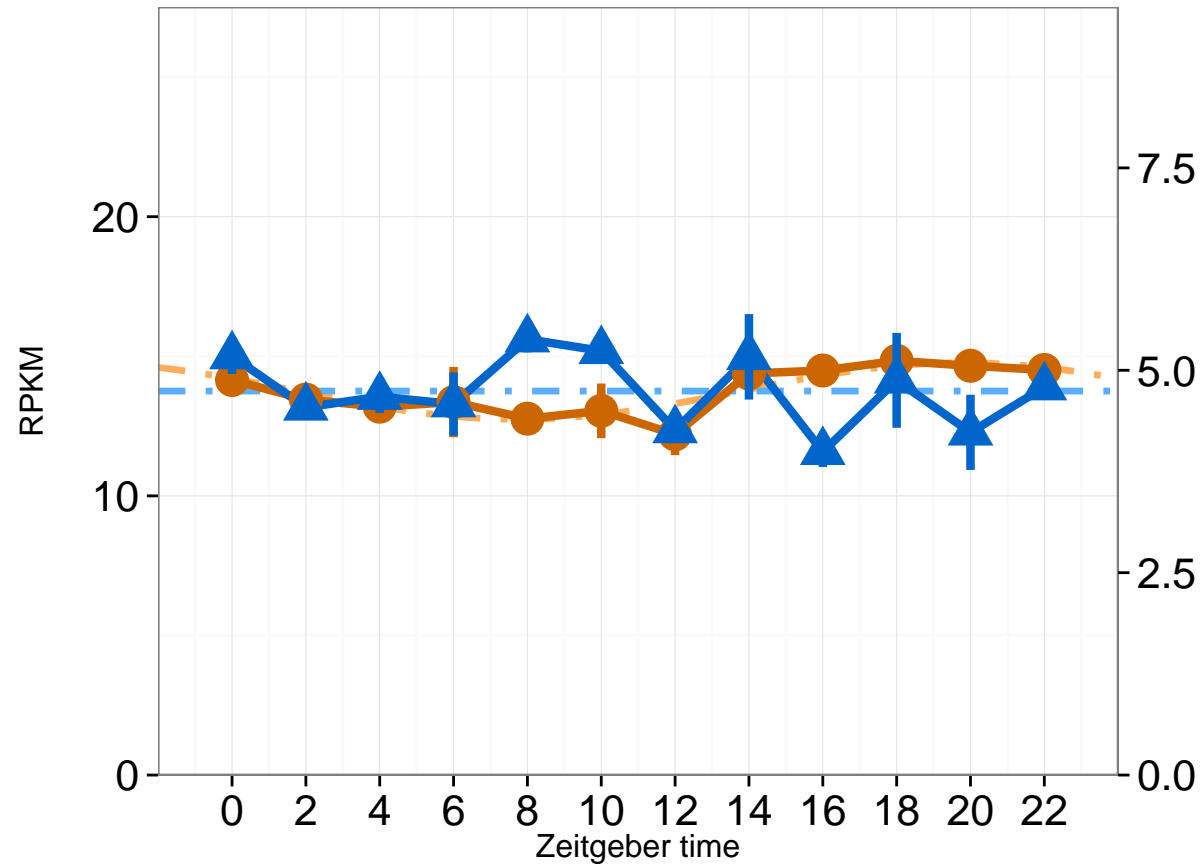

# Eif4enif1

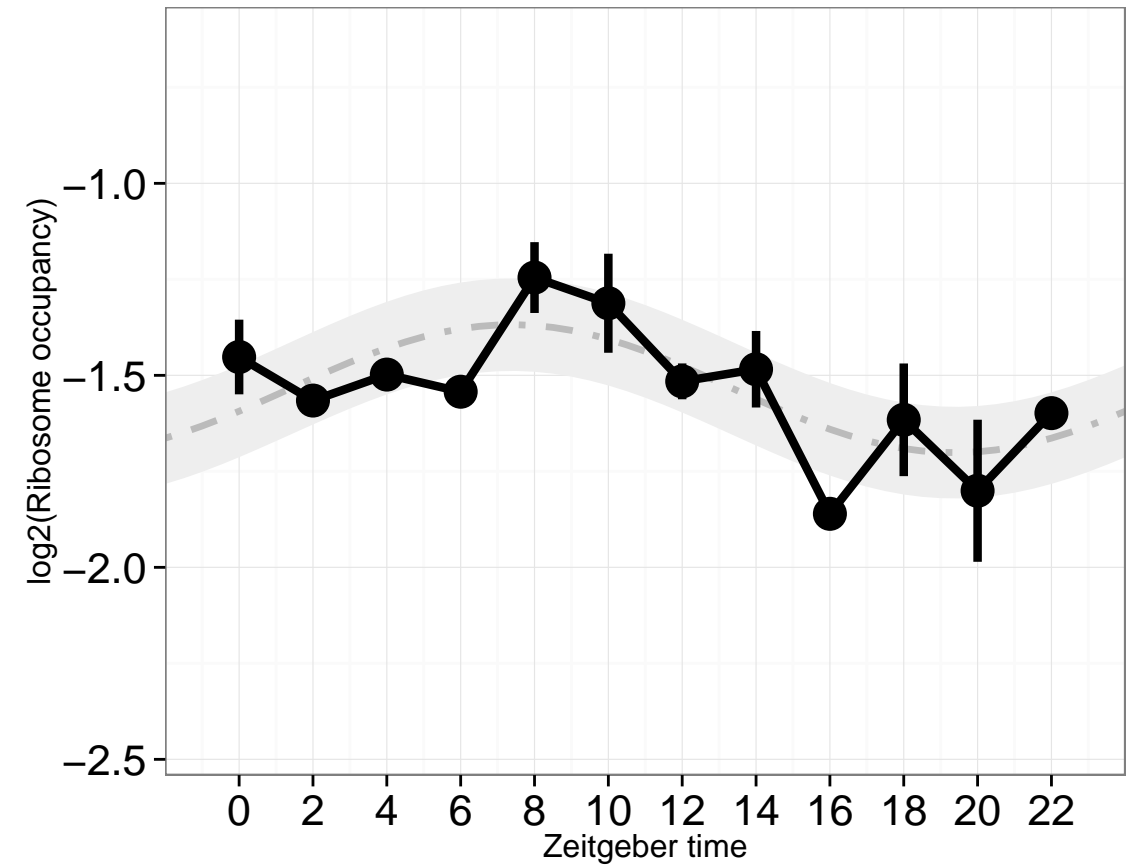

Supplement: Supplementary file 6888 [file 1]

## Ano9

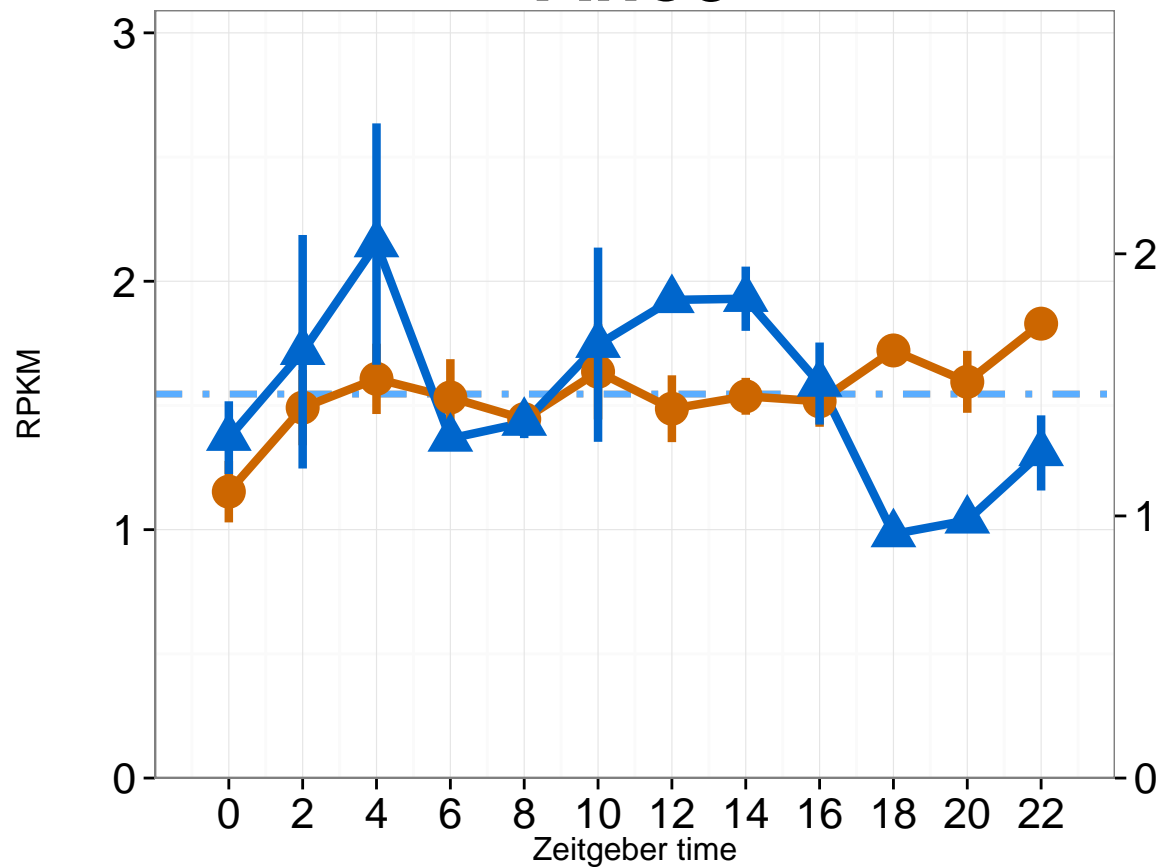

## Ano9

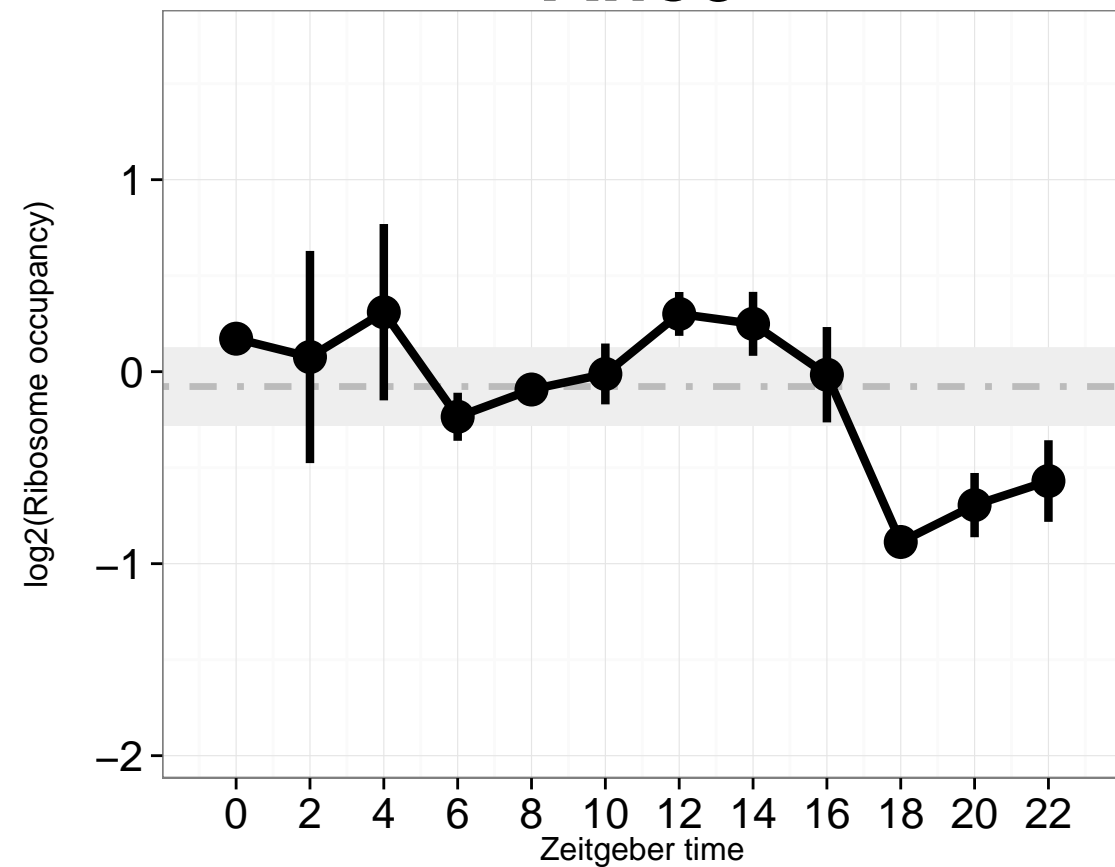

Supplement: Supplementary file 6889 [file 1]

## Etnk2

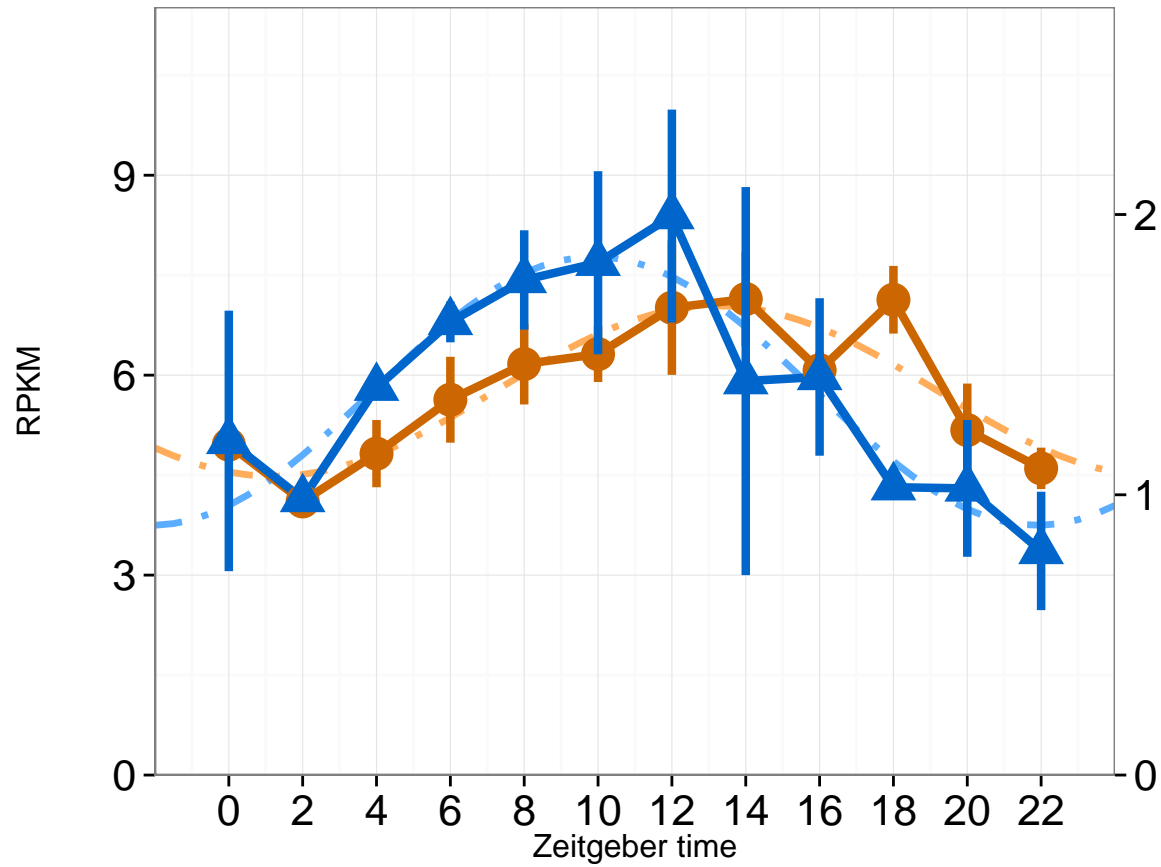

## Etnk2

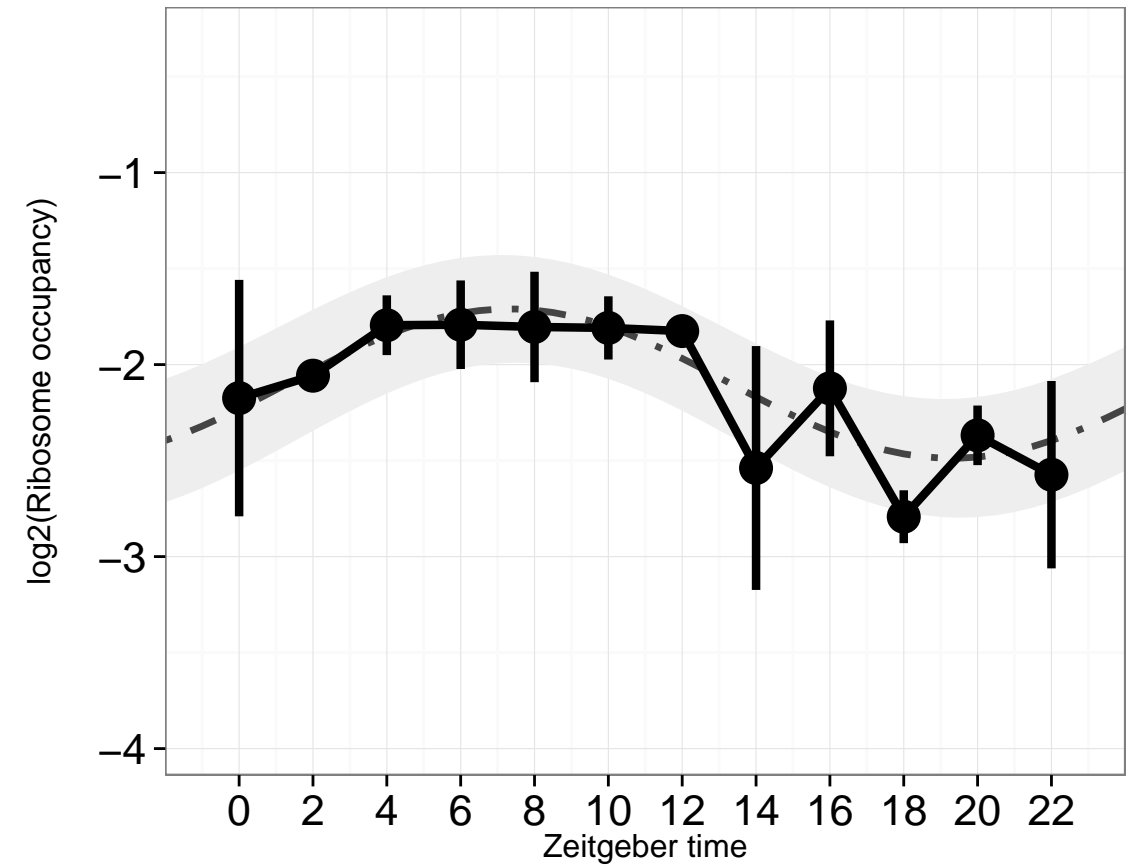

Supplement: Supplementary file 6890 [file 1]

## Srr

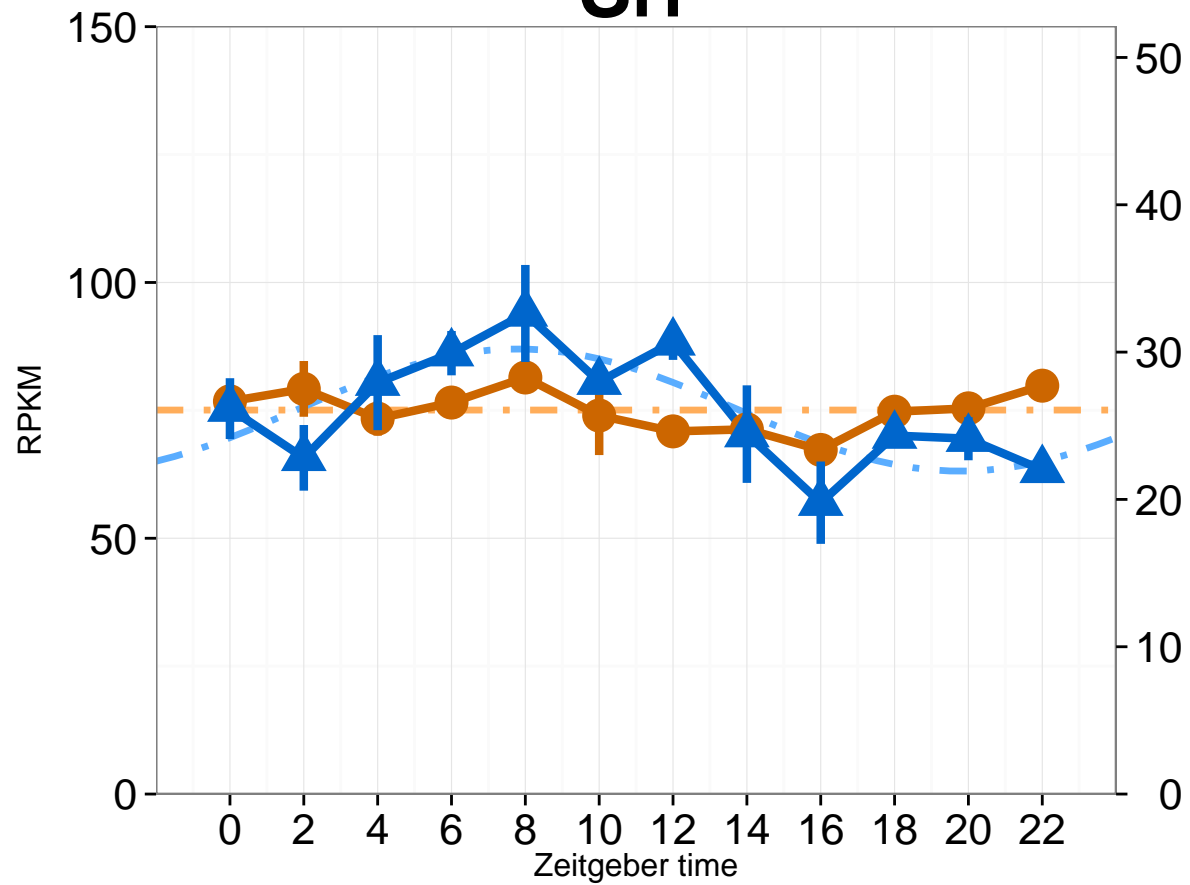

## Srr

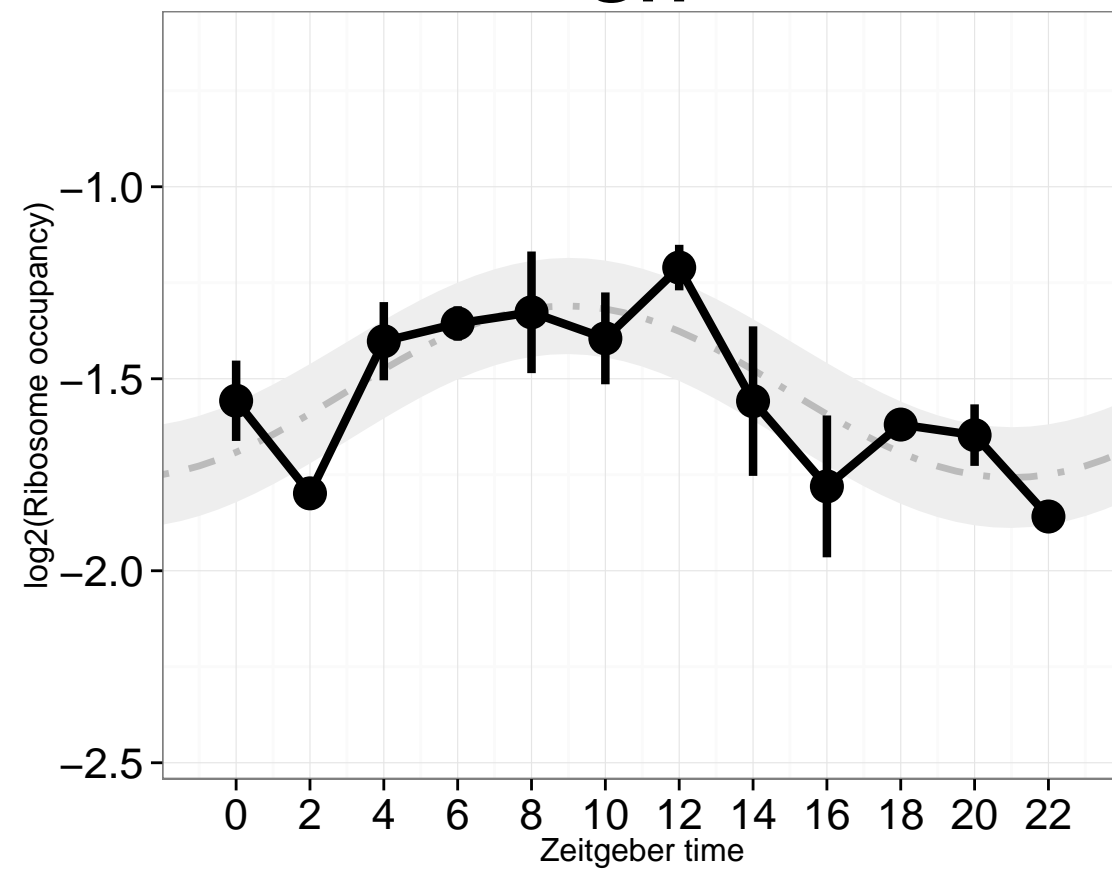

Supplement: Supplementary file 6891 [file 1]

# Morc2a

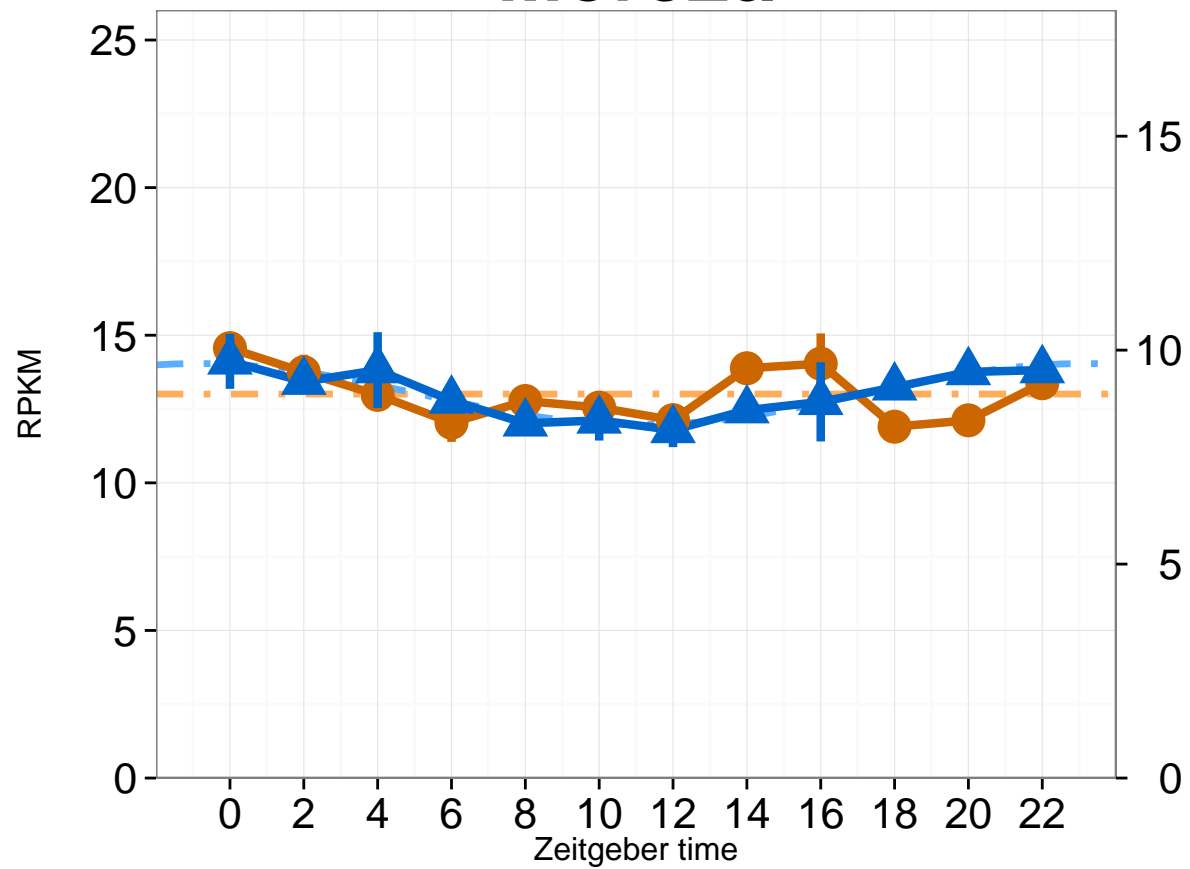

# Morc2a

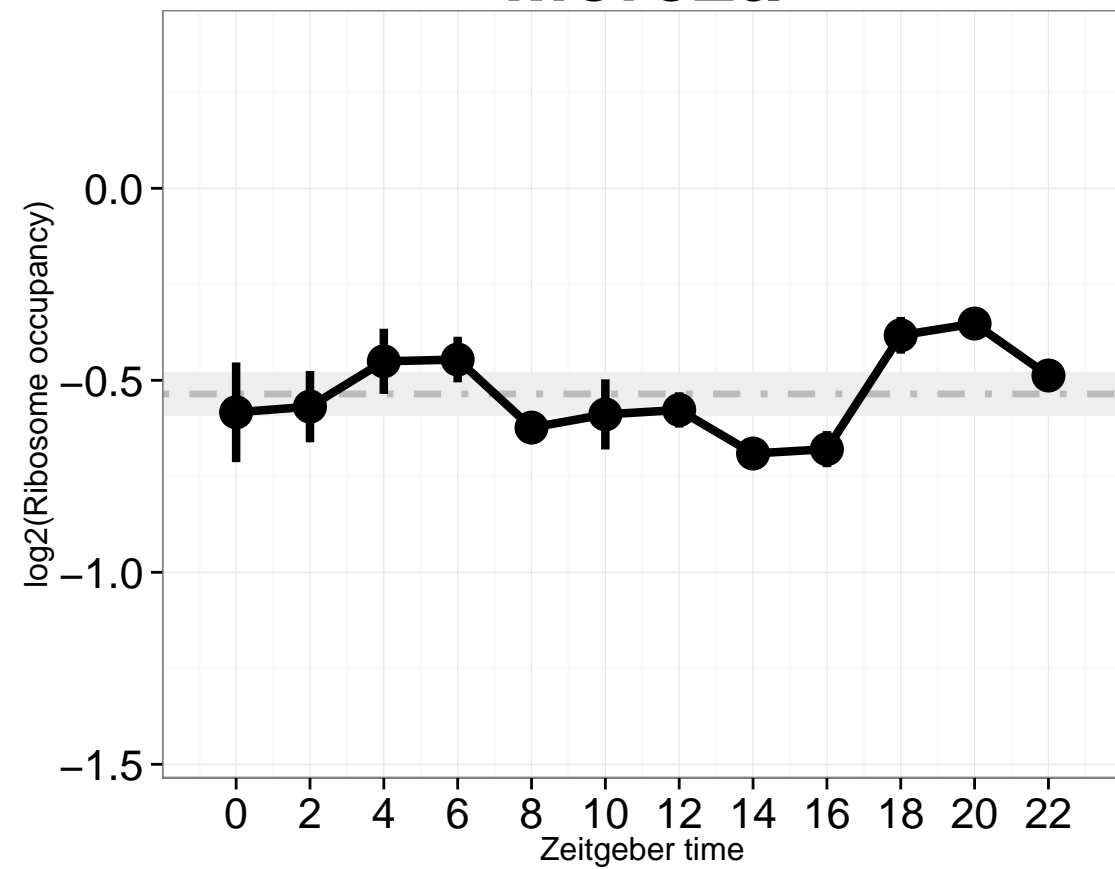

Supplement: Supplementary file 6892 [file 1]

## Cldn19

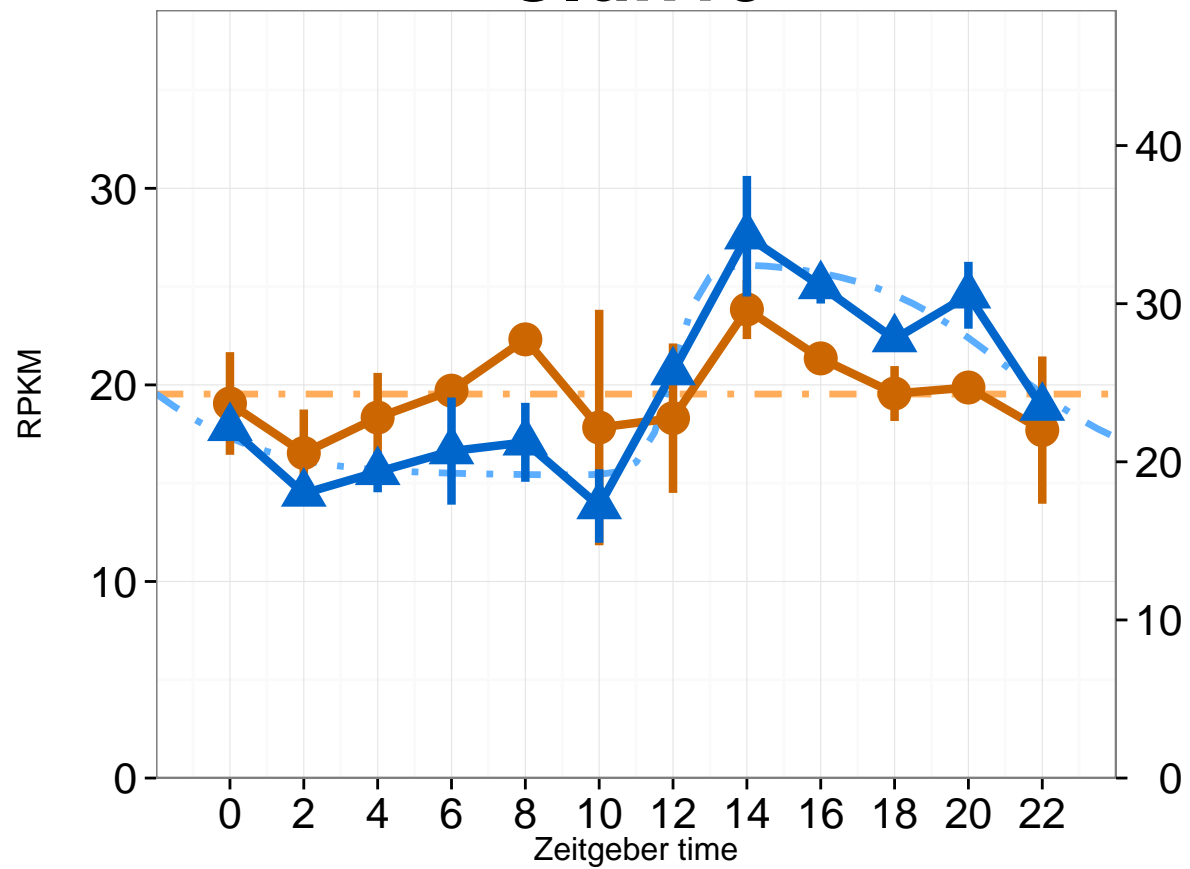

## Cldn19

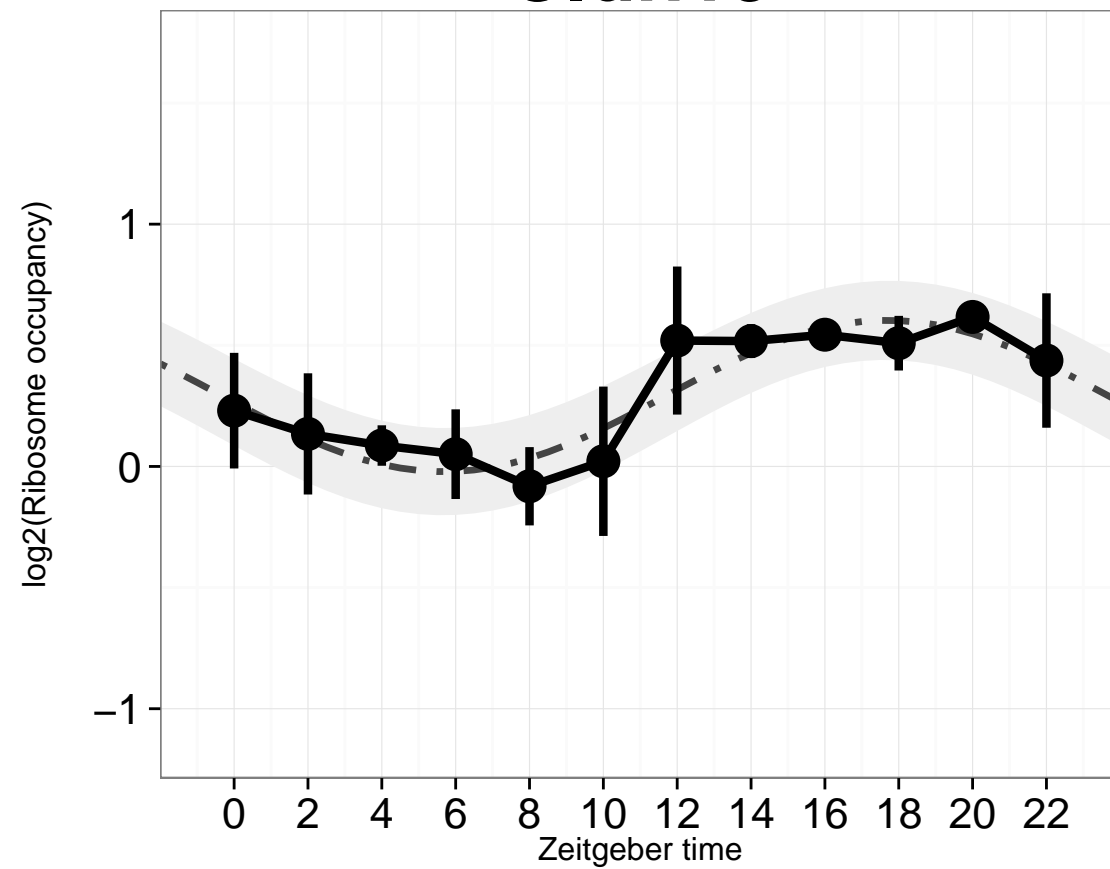

Supplement: Supplementary file 6893 [file 1]

# Prkag1

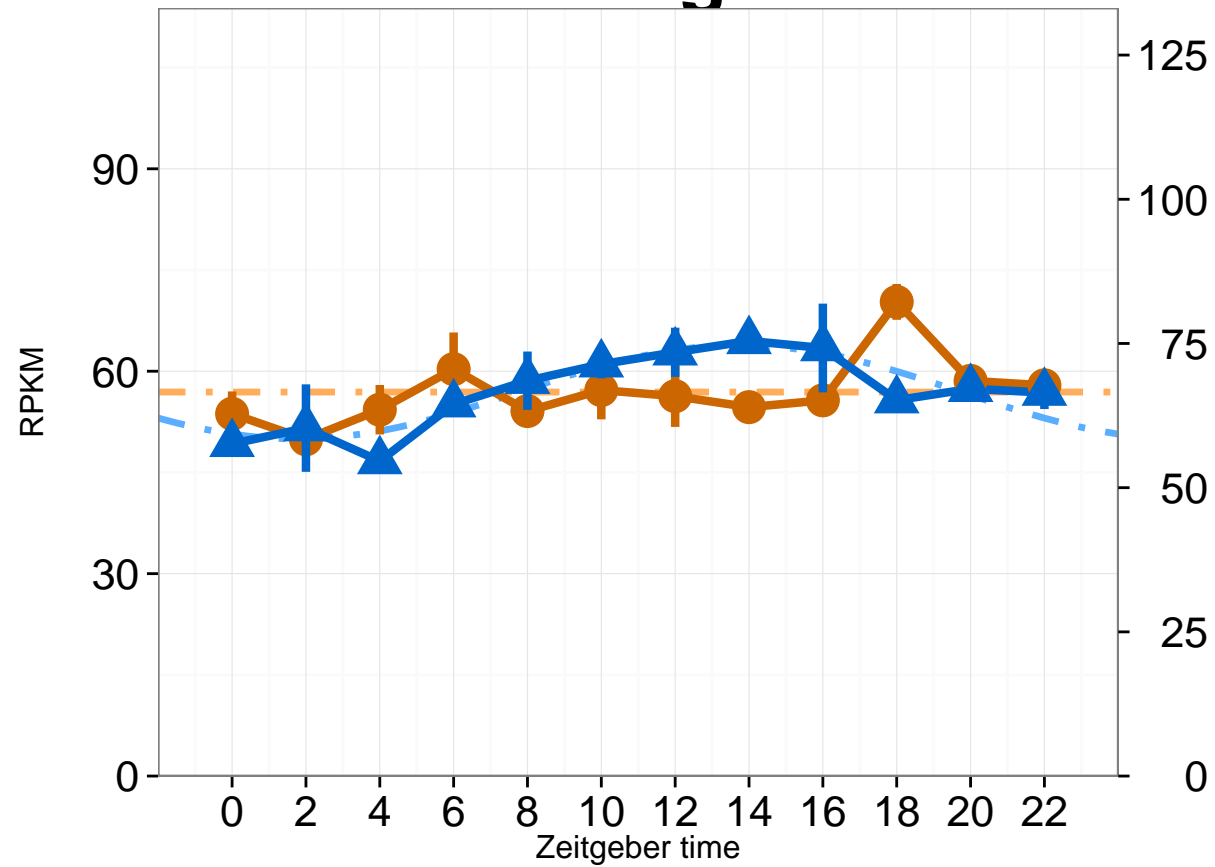

# Prkag1

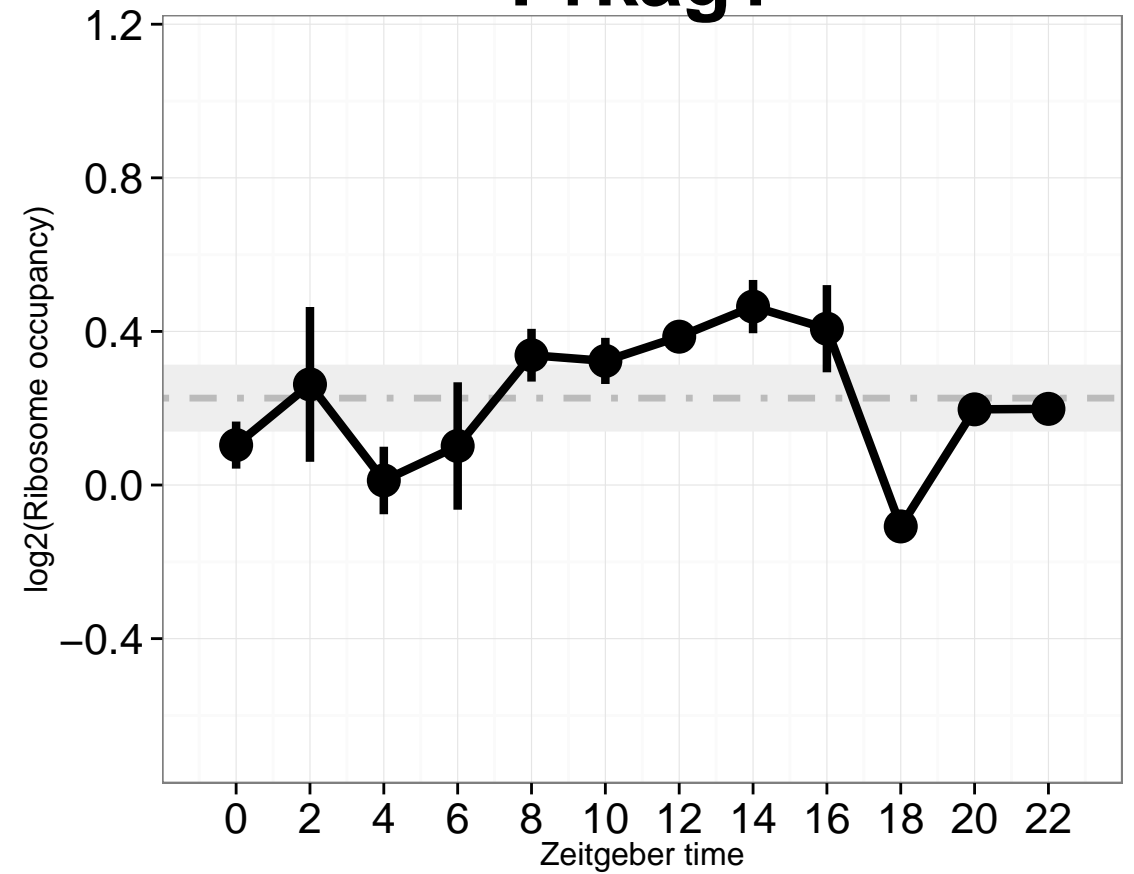

Supplement: Supplementary file 6894 [file 1]

**Ilk**

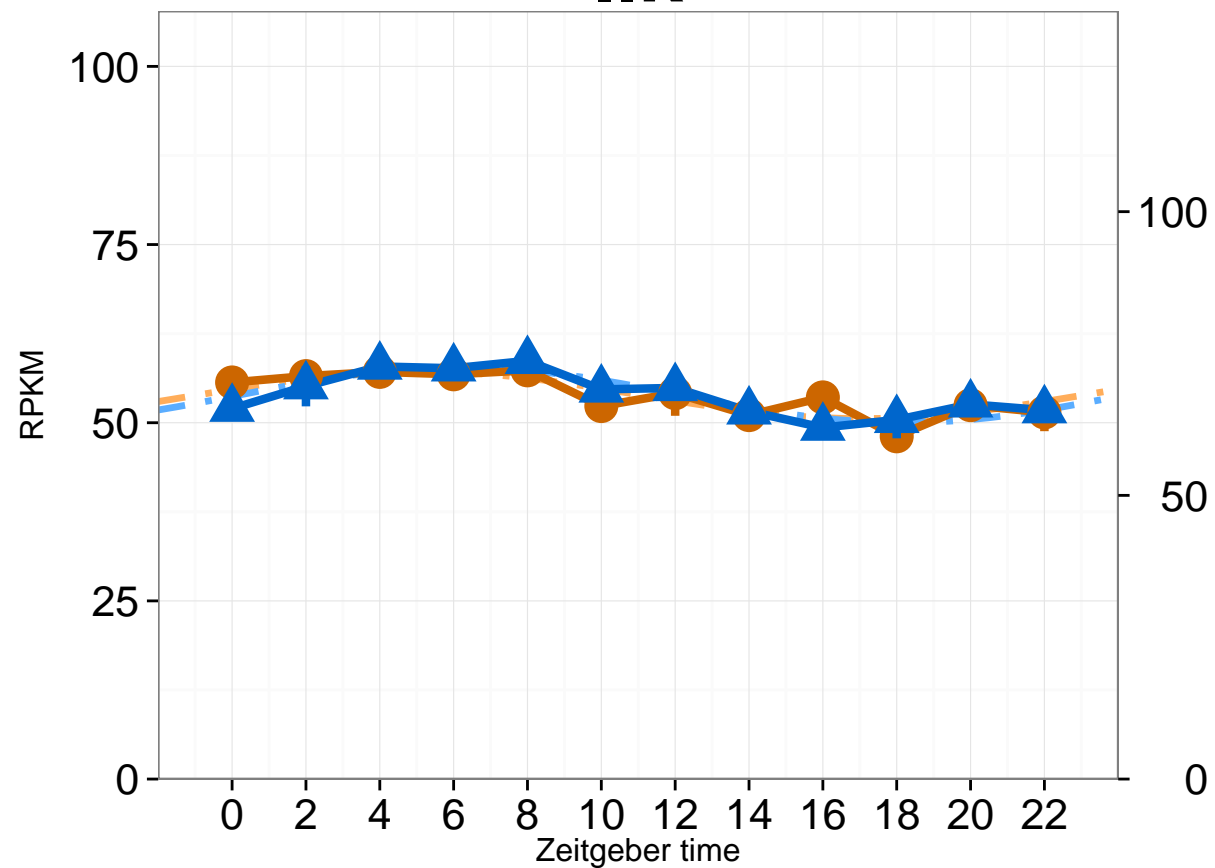

**Ilk**

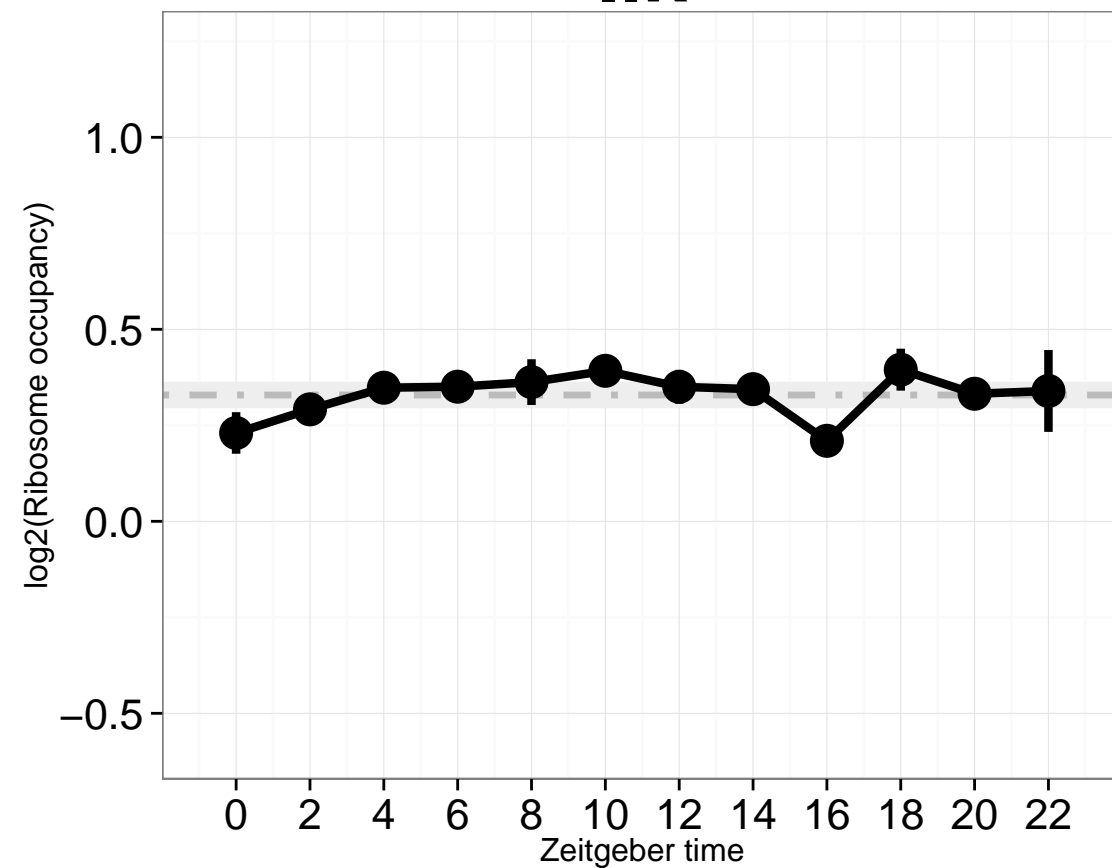

Supplement: Supplementary file 6895 [file 1]

## Baiap2

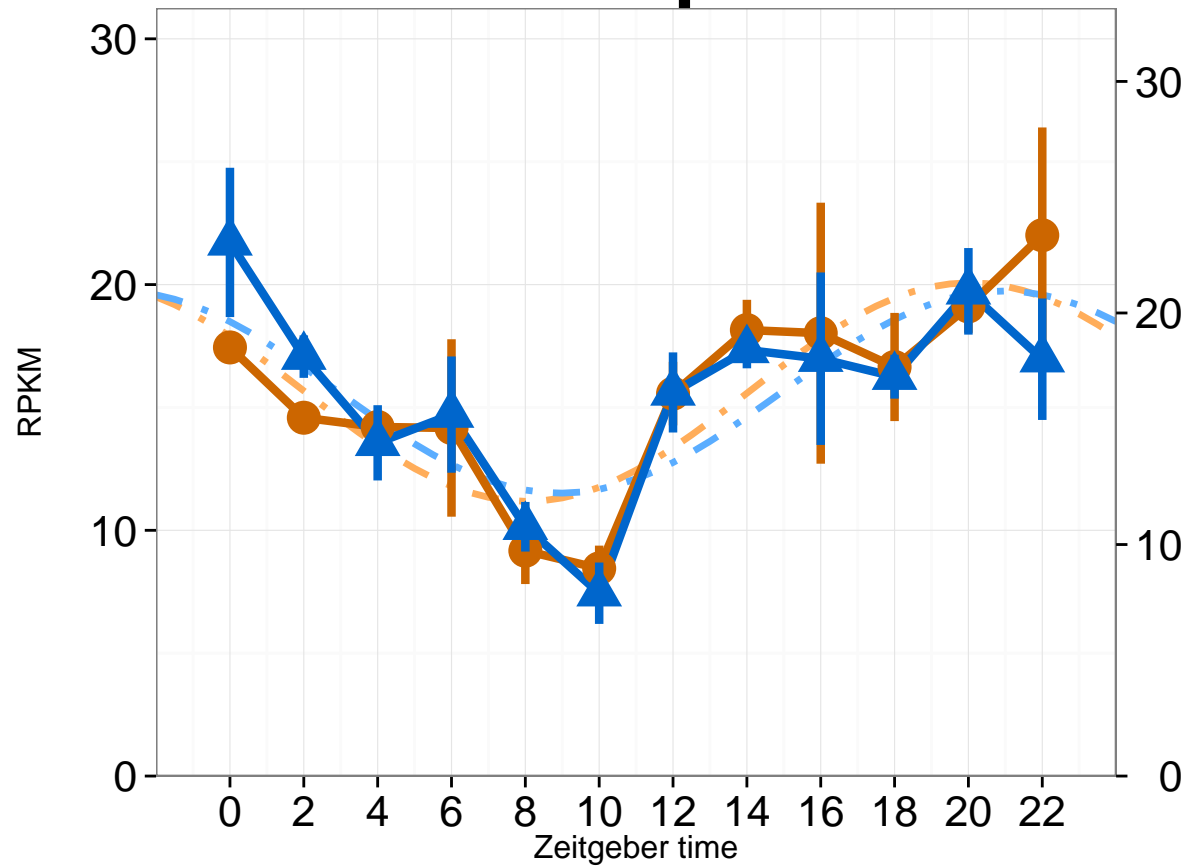

## Baiap2

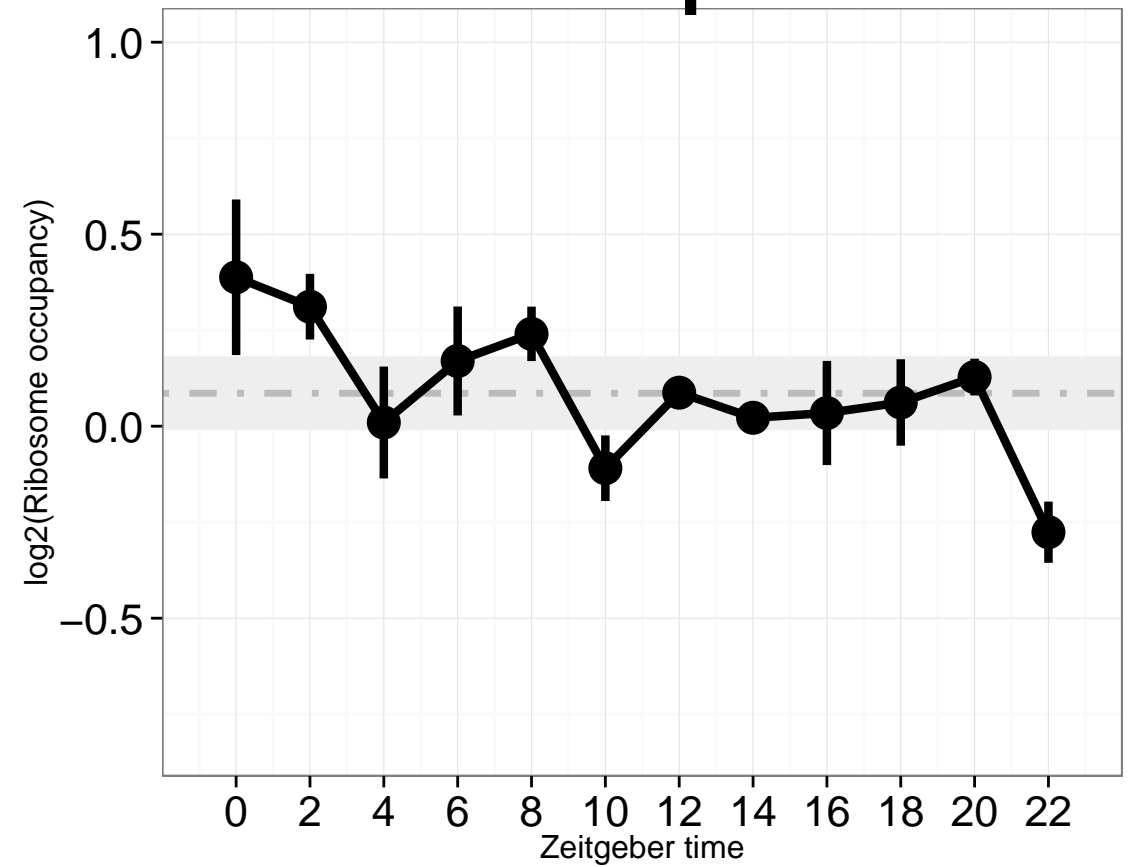

Supplement: Supplementary file 6896 [file 1]

# Zkscan14

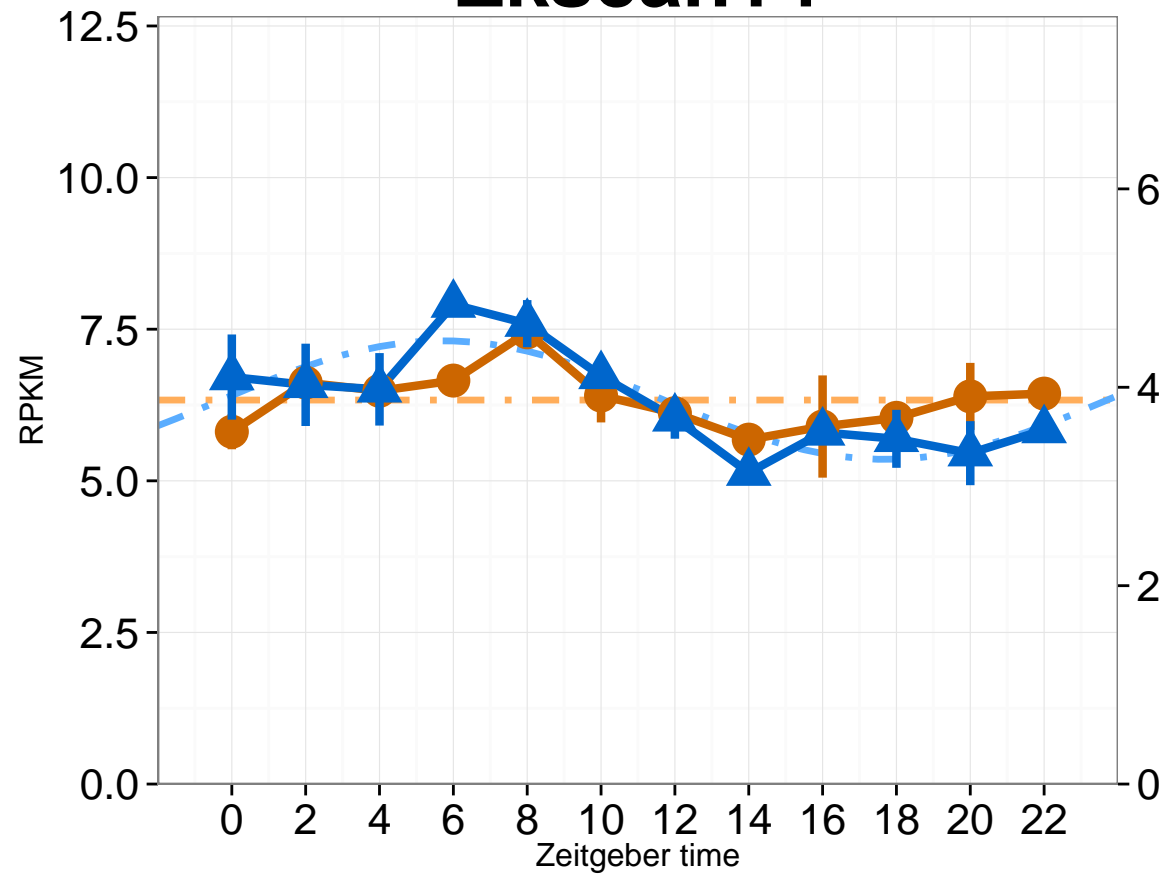

# Zkscan14

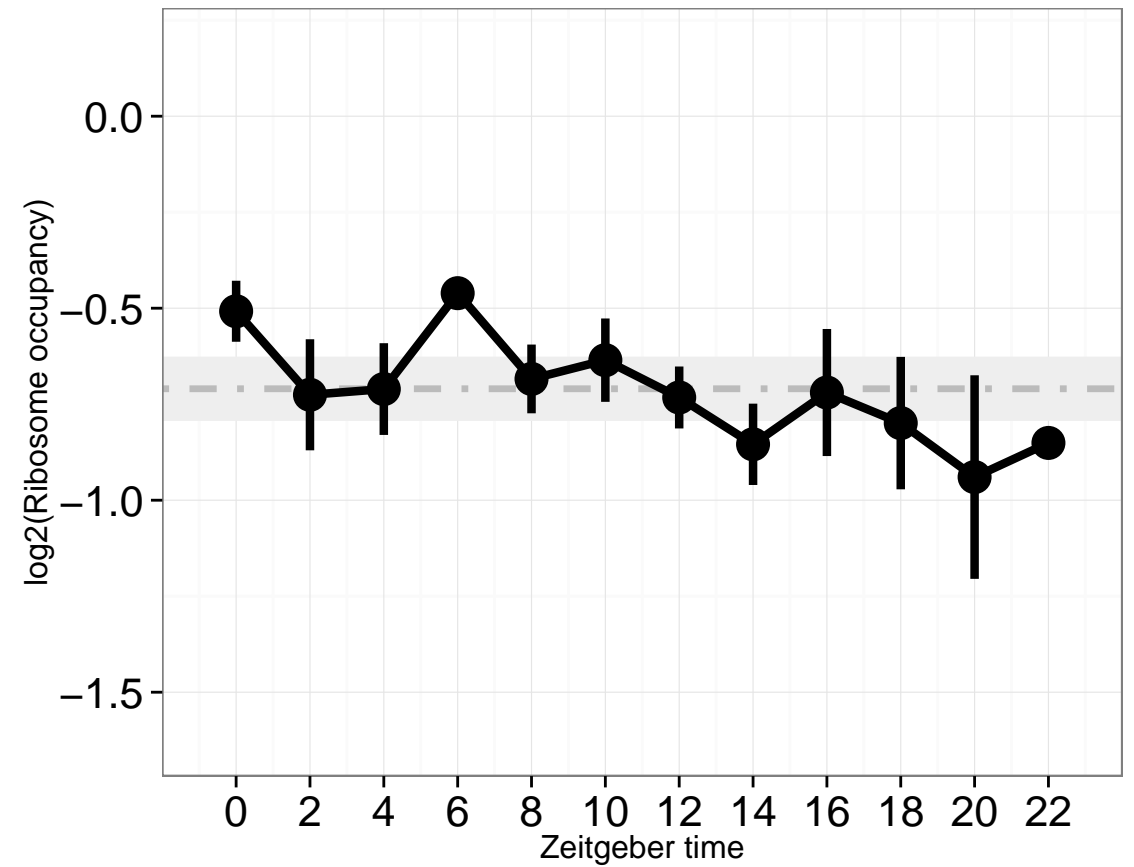

Supplement: Supplementary file 6897 [file 1]

# Cmas

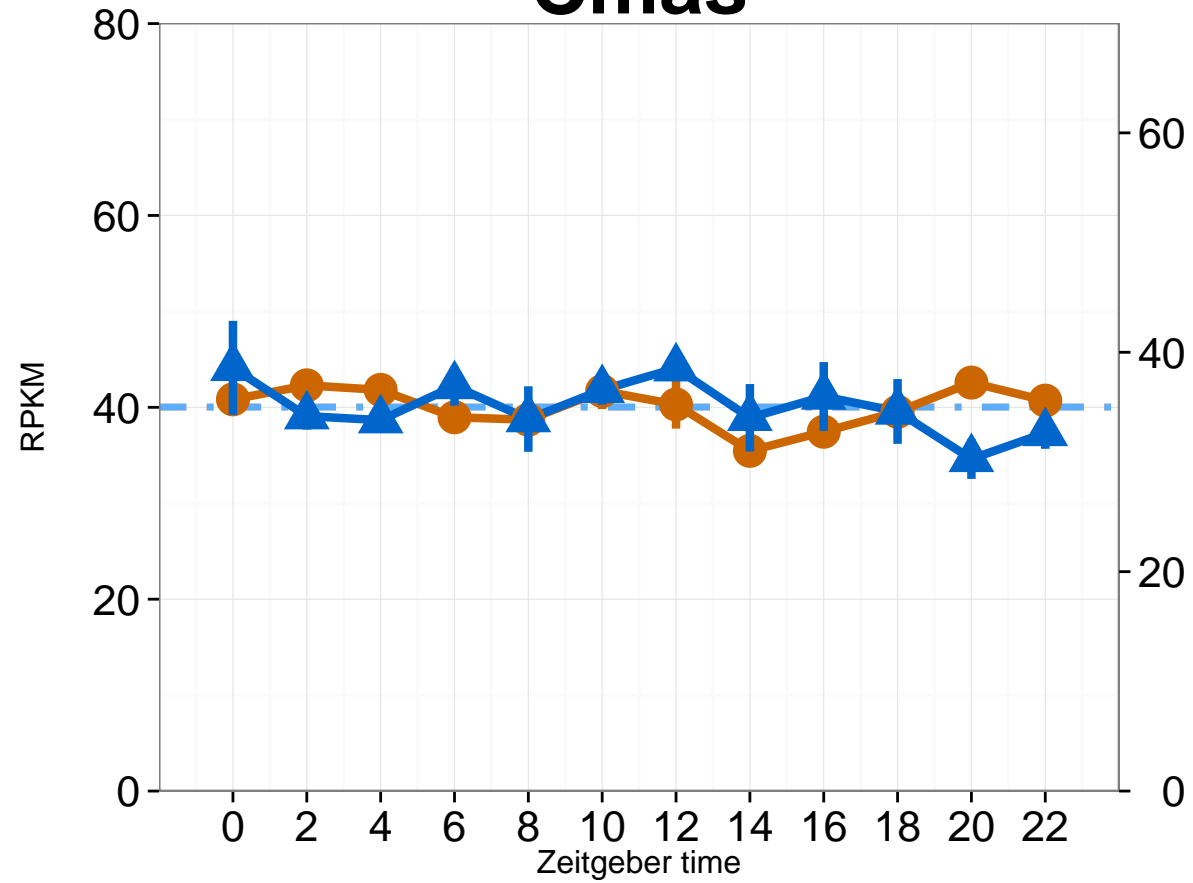

# Cmas

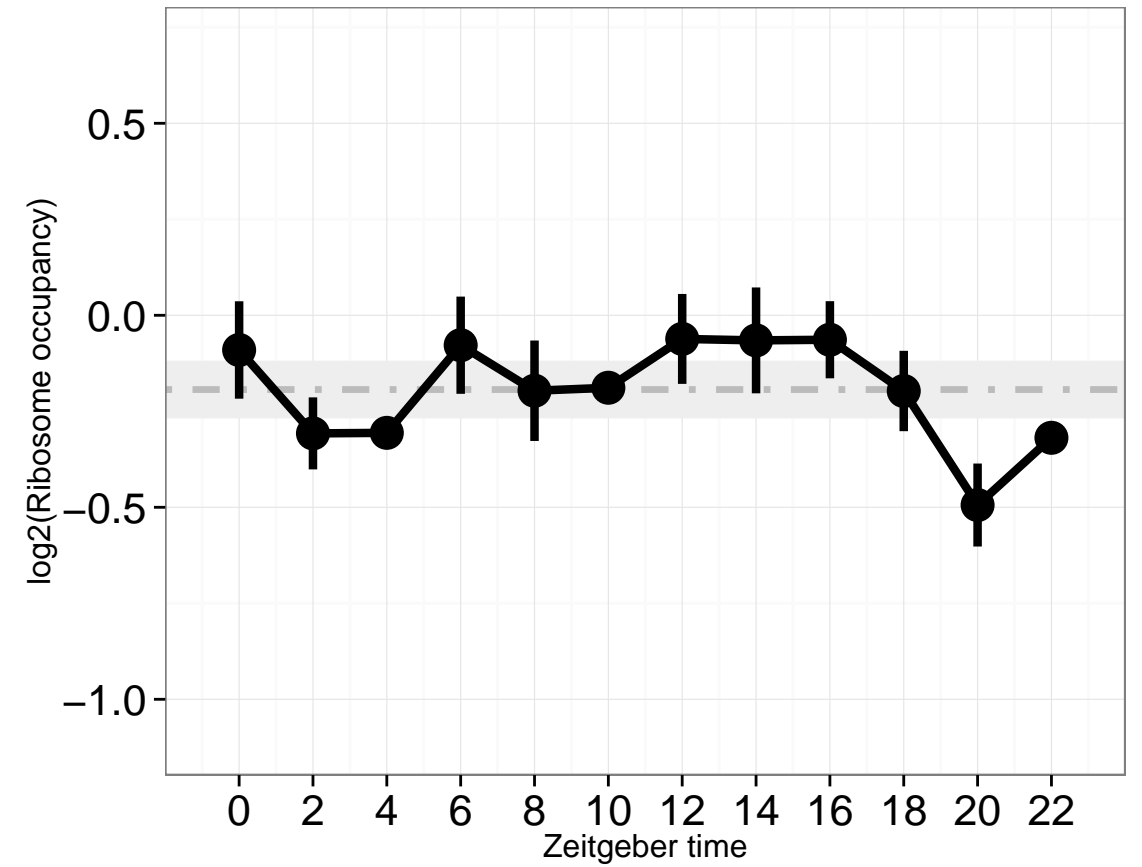

Supplement: Supplementary file 6898 [file 1]

## Dchs1

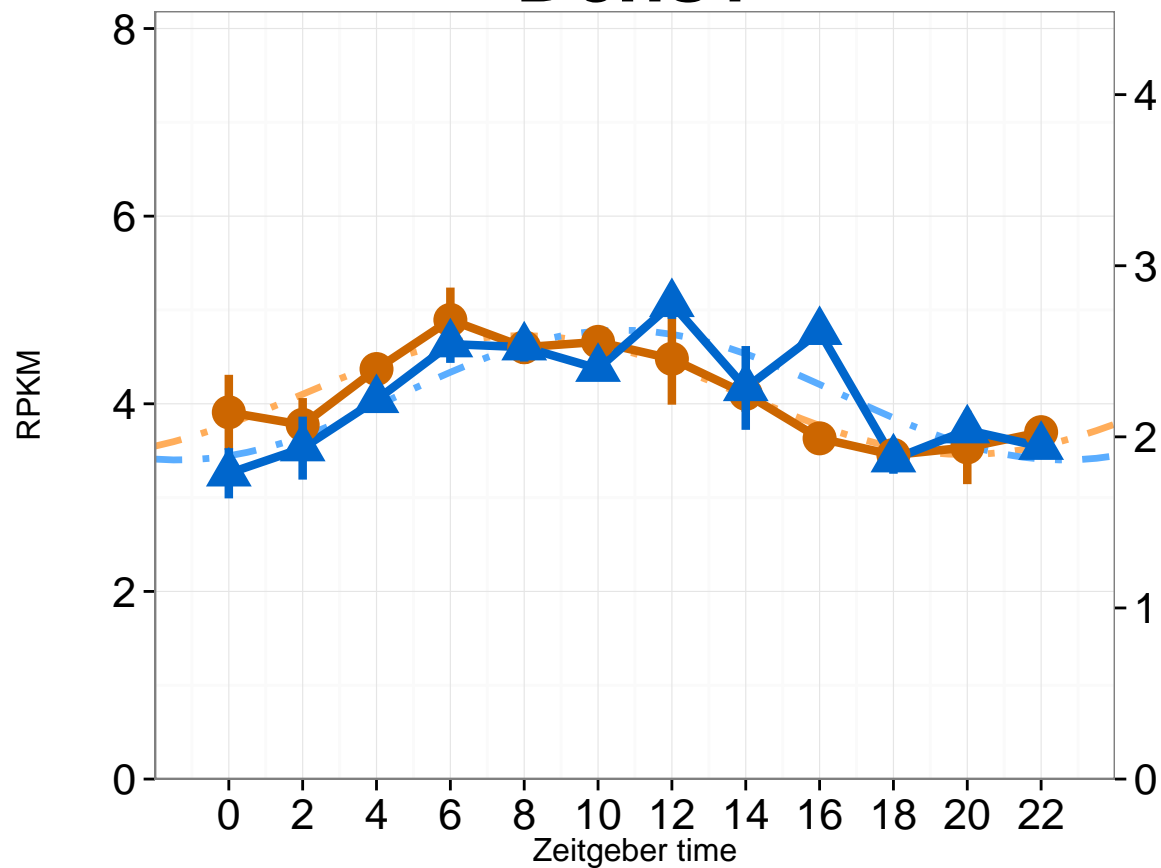

## Dchs1

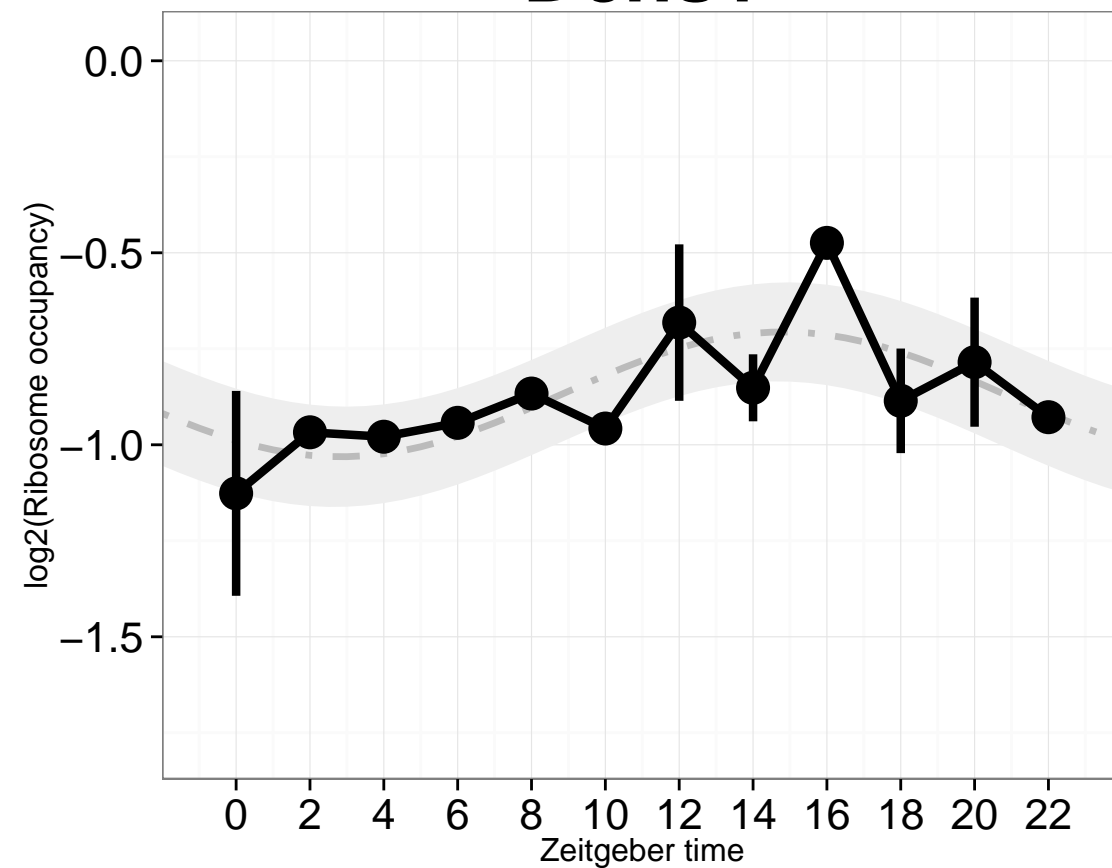

Supplement: Supplementary file 6899 [file 1]

# Osbp1a

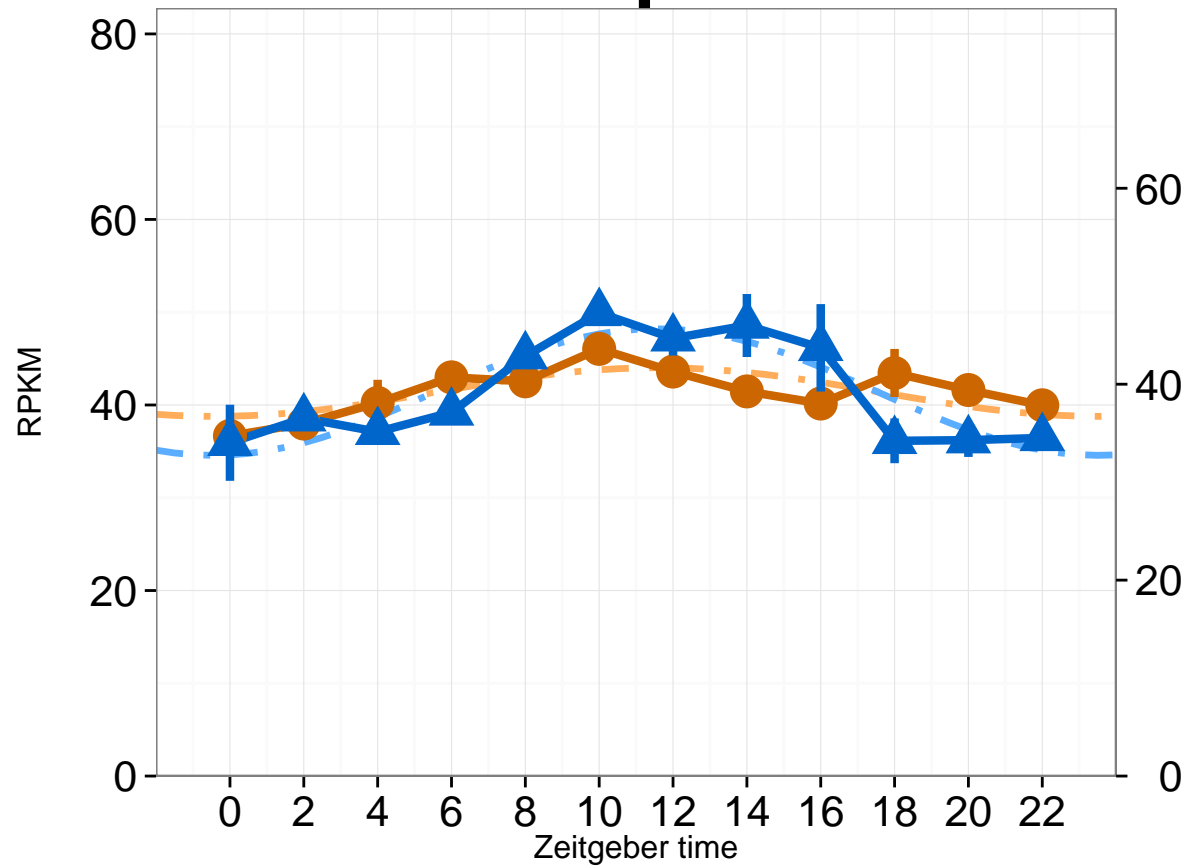

# Osbp1a

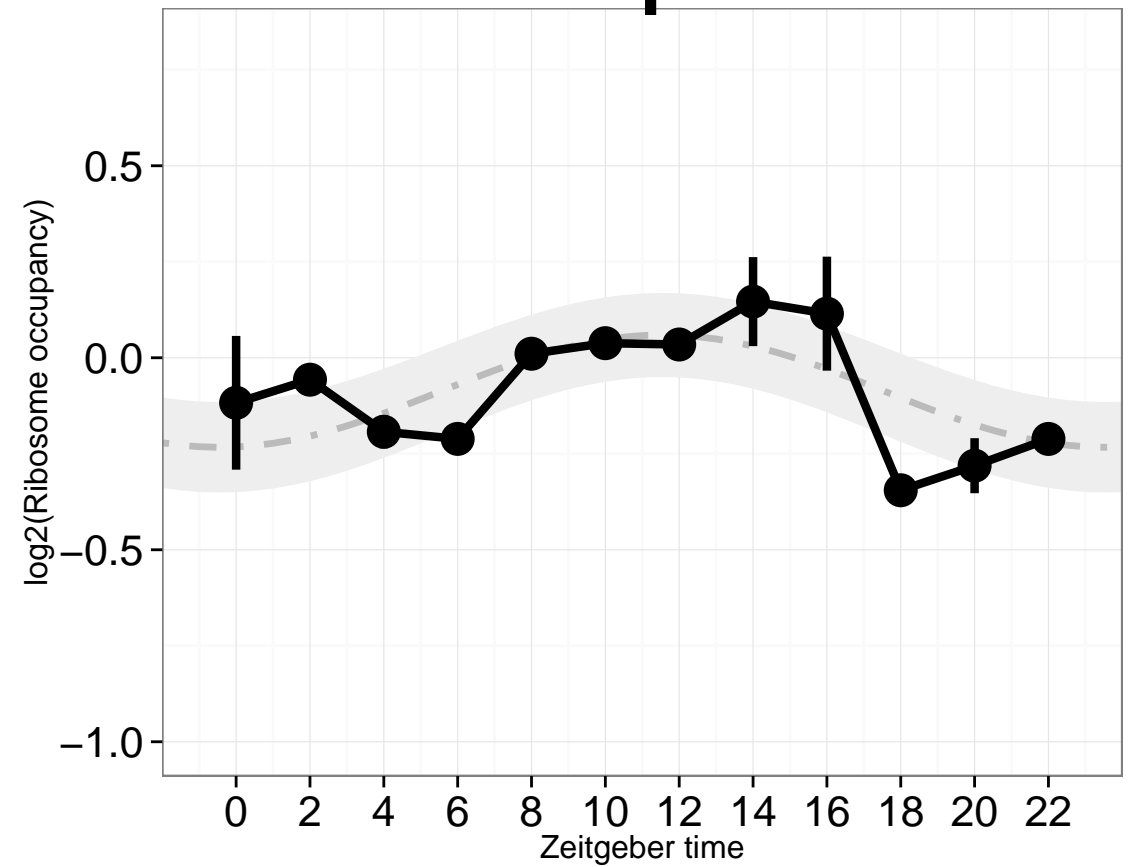

Supplement: Supplementary file 6900 [file 1]

# Syt13

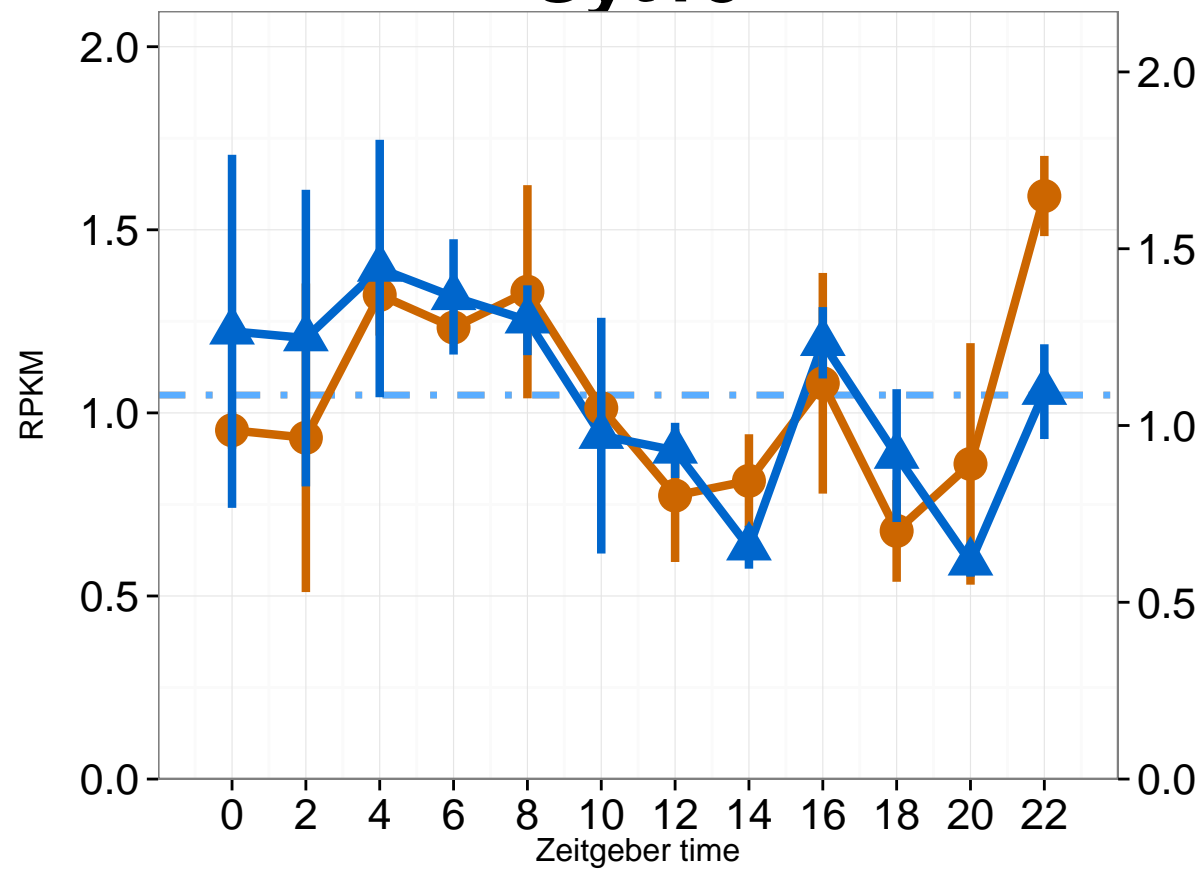

# Syt13

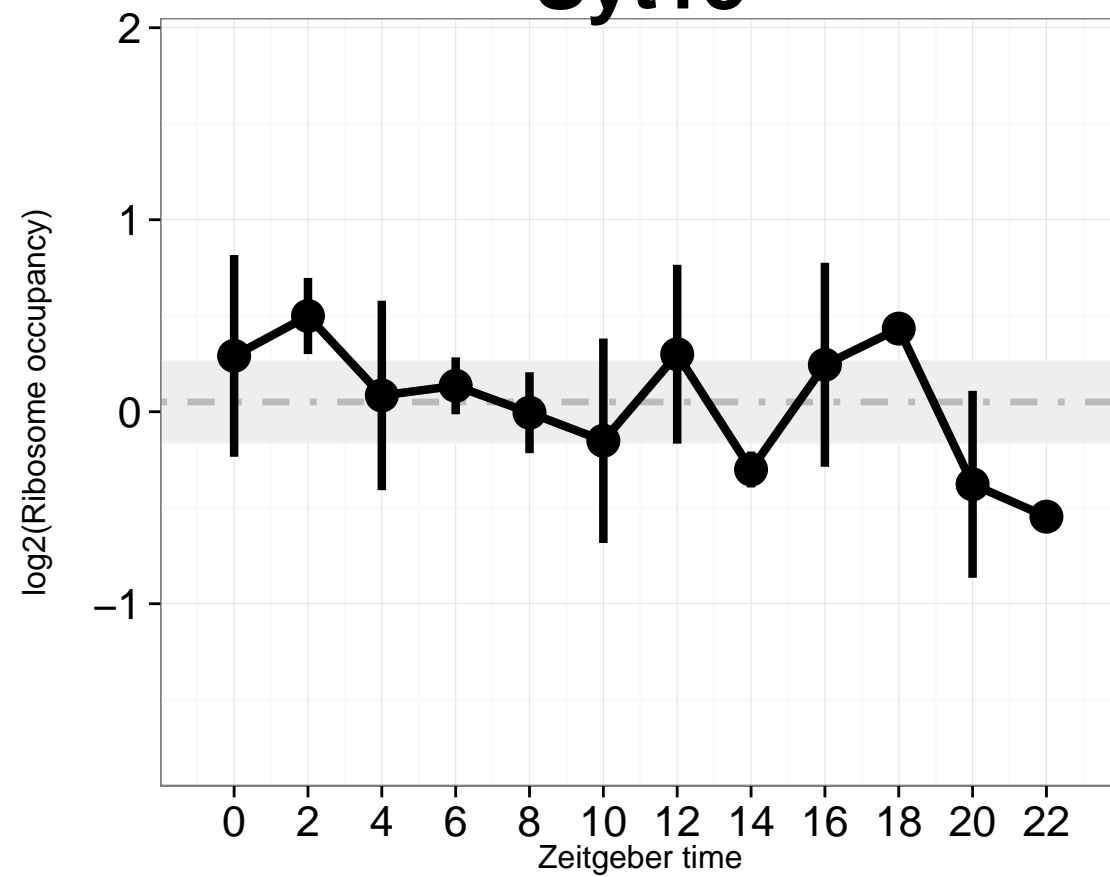

Supplement: Supplementary file 6901 [file 1]

# Baiap3

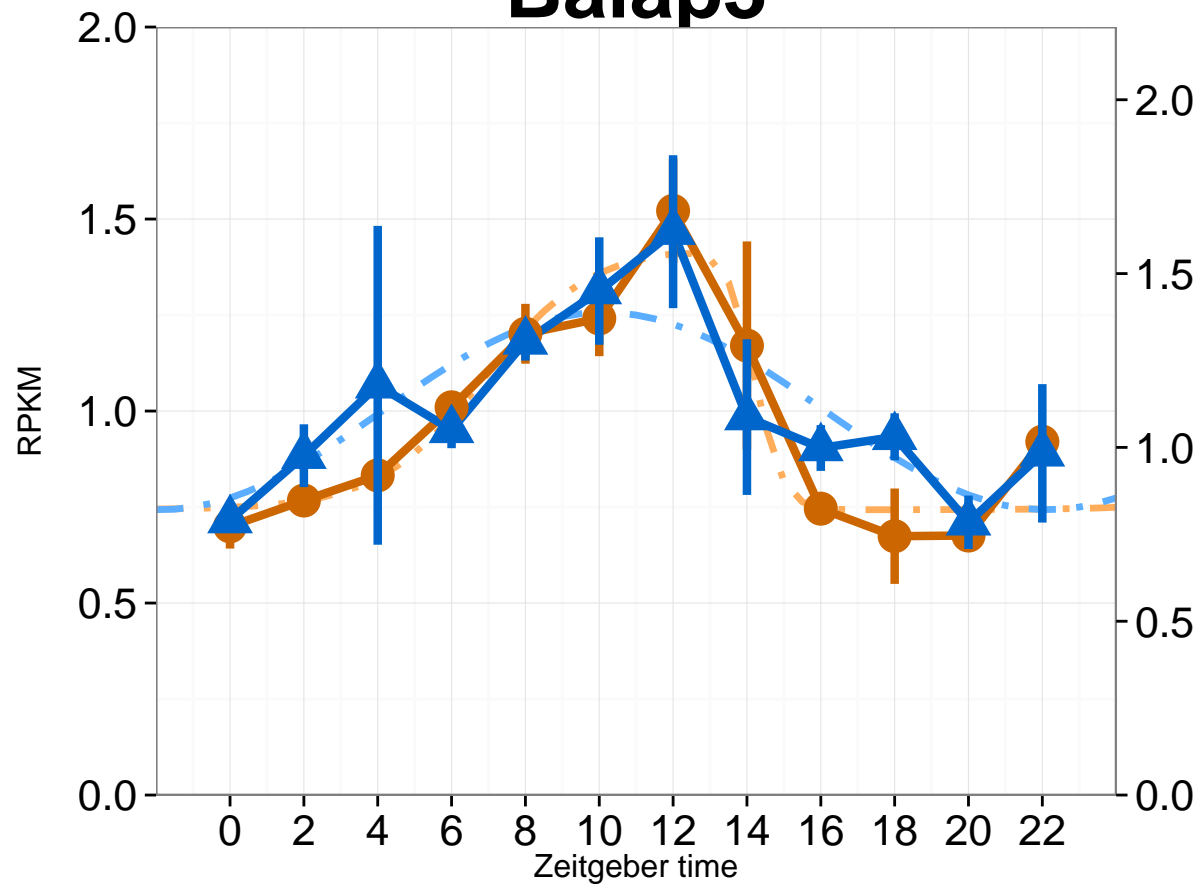

# Baiap3

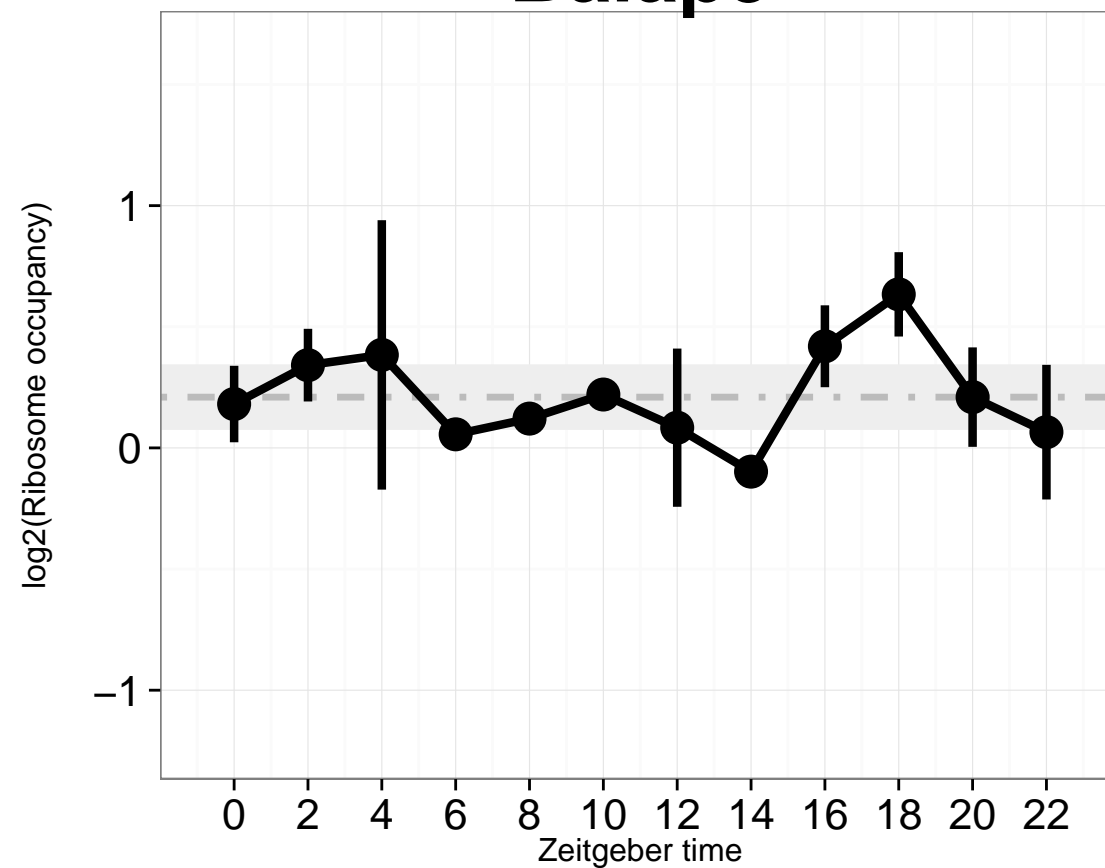

Supplement: Supplementary file 6902 [file 1]

# Rps6ka1

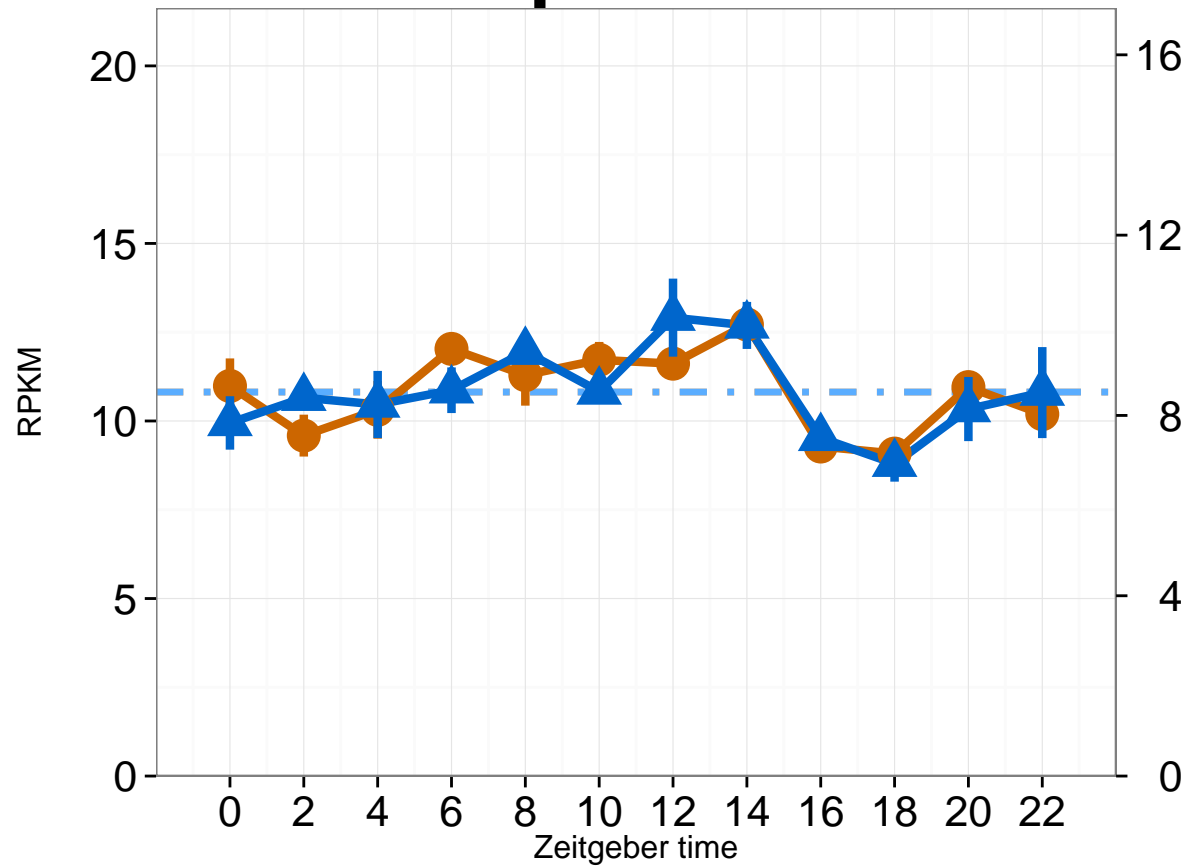

# Rps6ka1

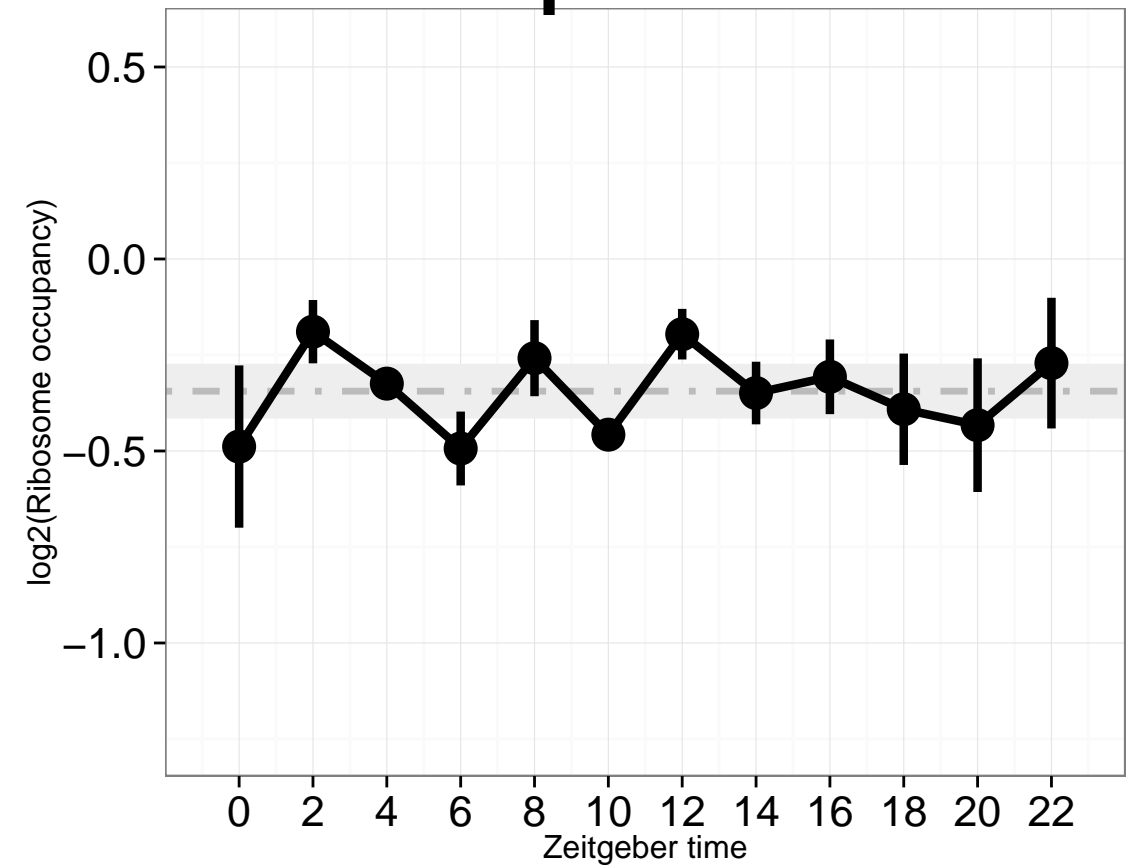

Supplement: Supplementary file 6903 [file 1]

# Tacc3

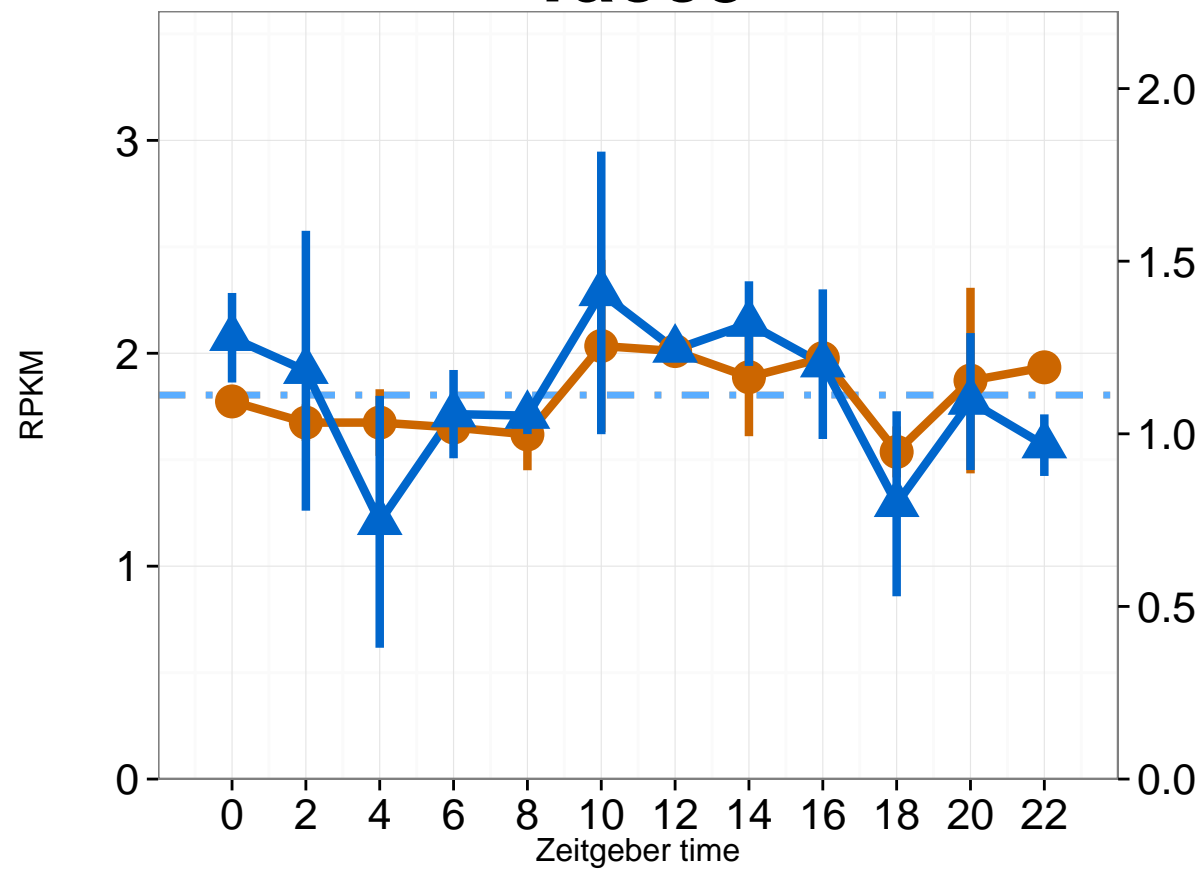

# Tacc3

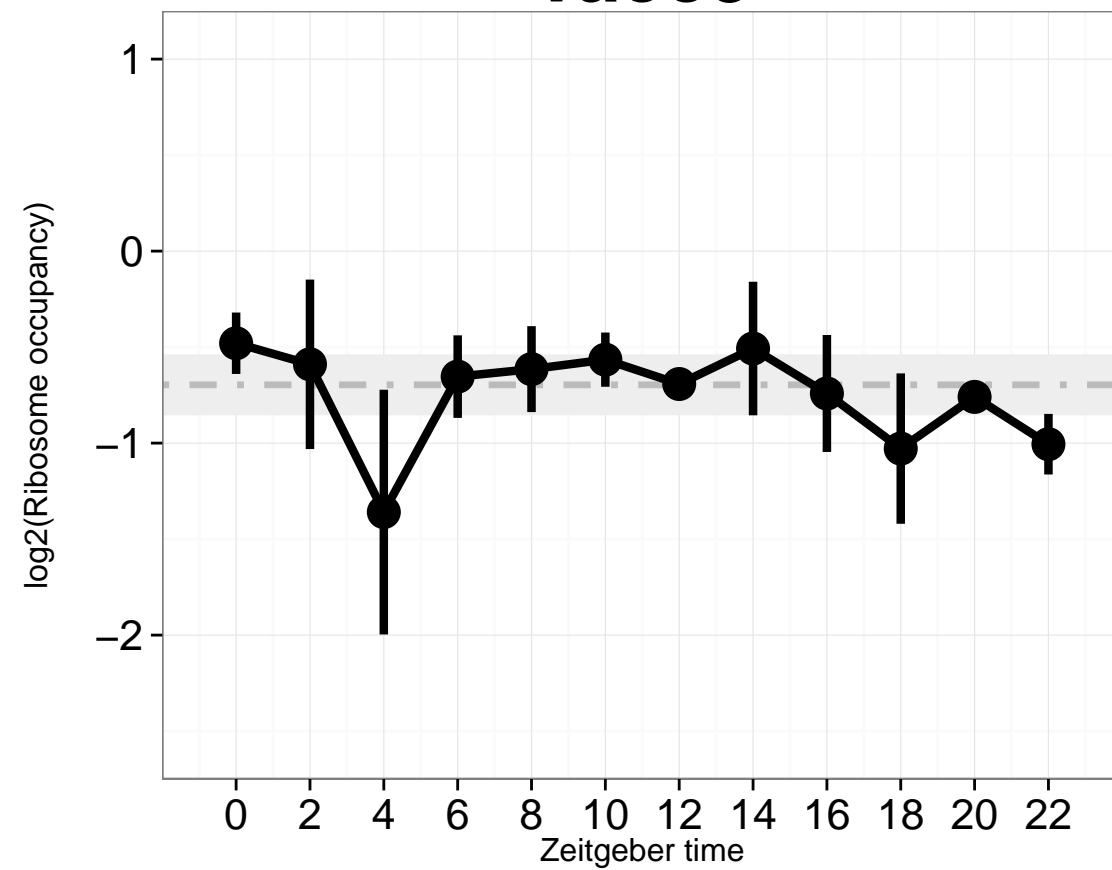

Supplement: Supplementary file 6904 [file 1]

# Gm20939

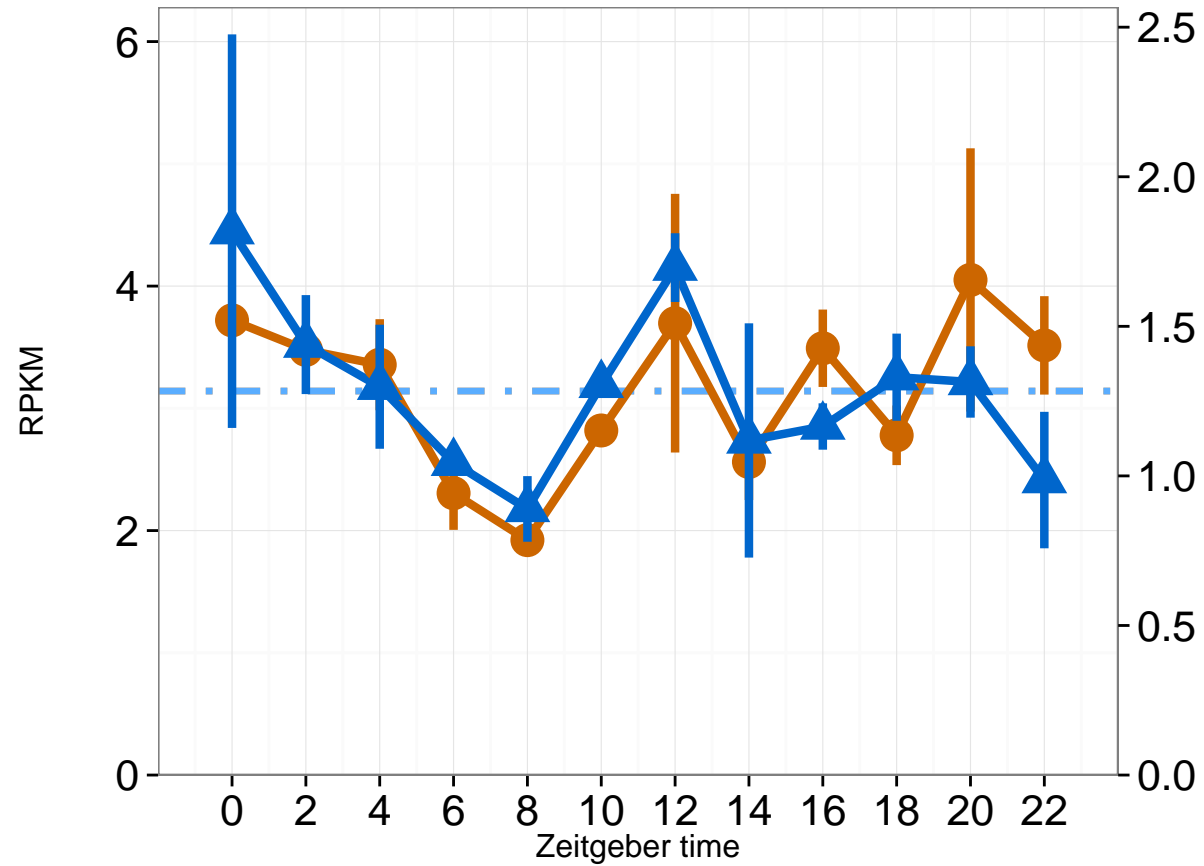

# Gm20939

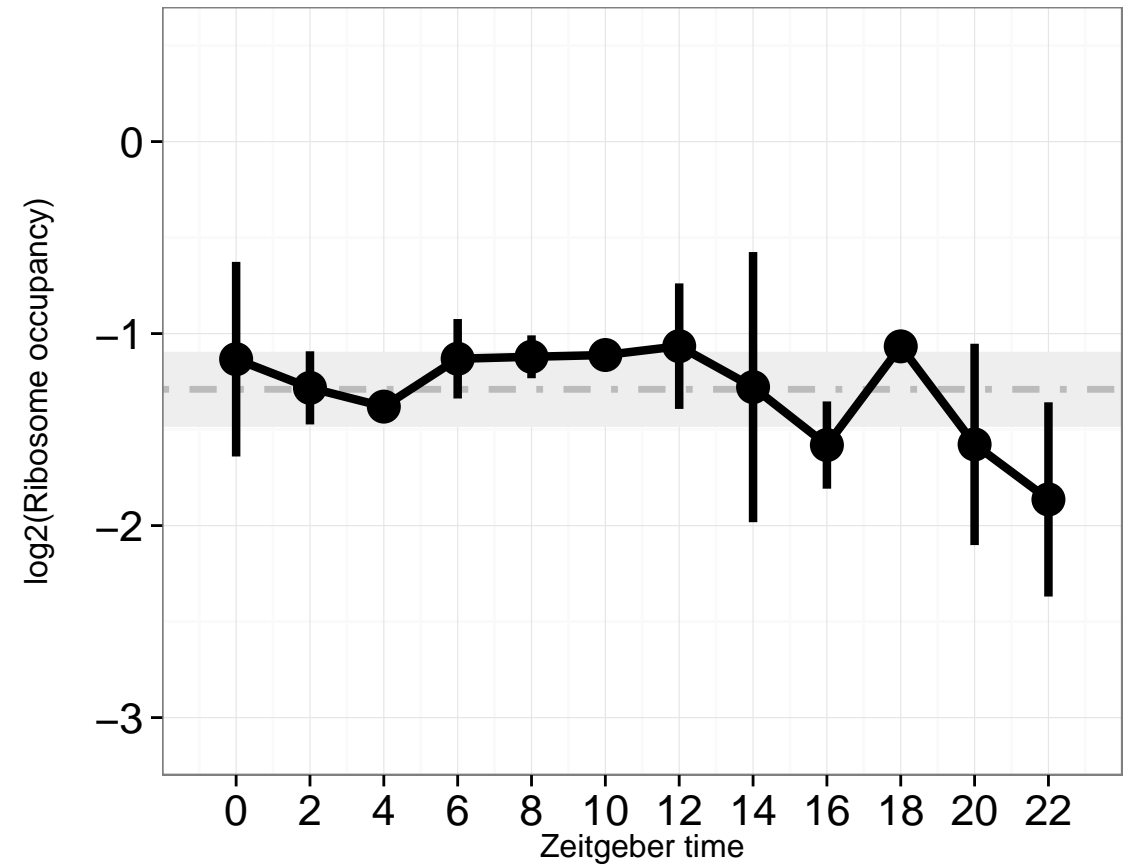

Supplement: Supplementary file 6905 [file 1]

# Fam43a

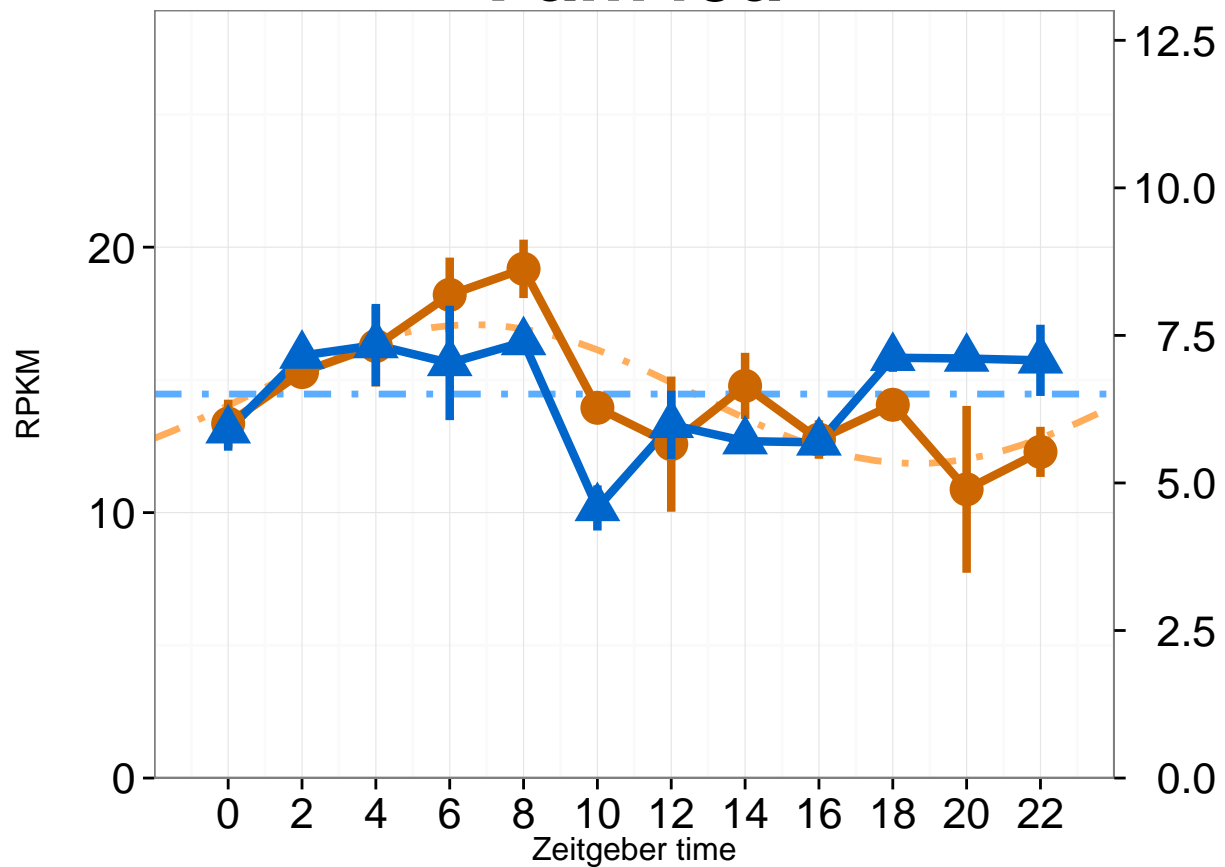

# Fam43a

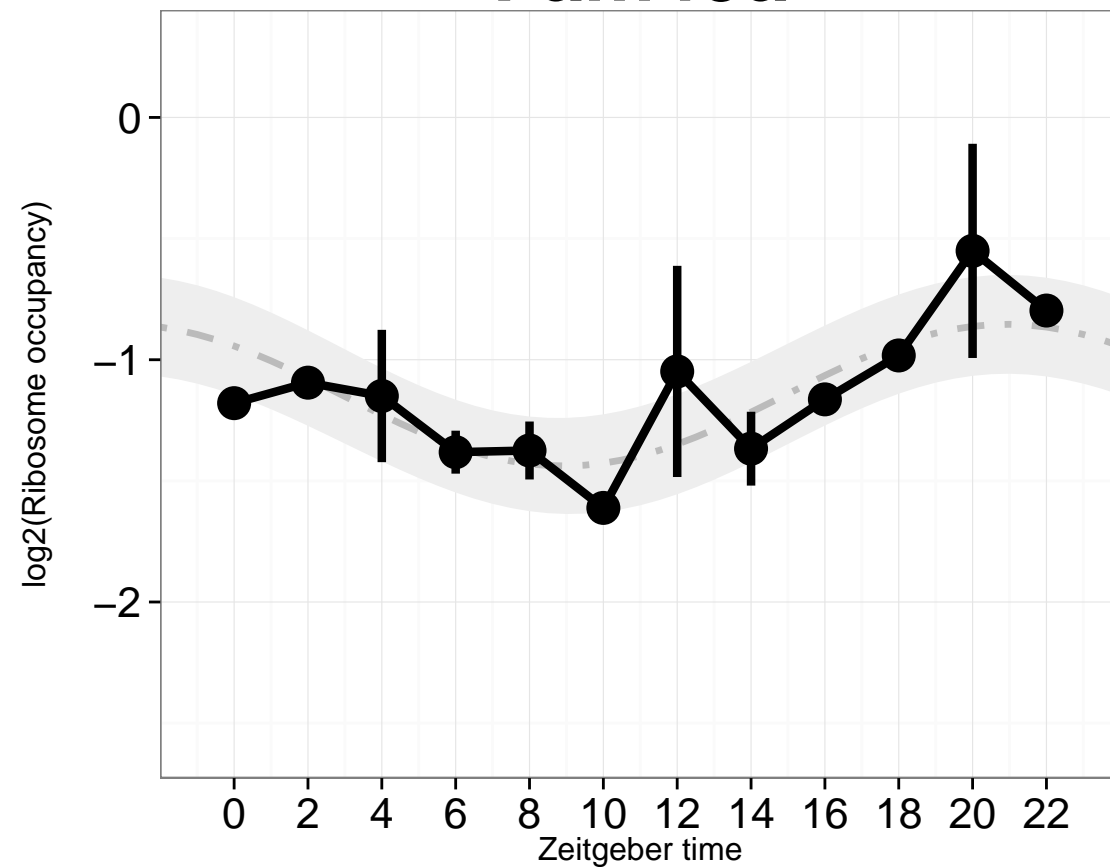

Supplement: Supplementary file 6906 [file 1]

# D17Wsu92e

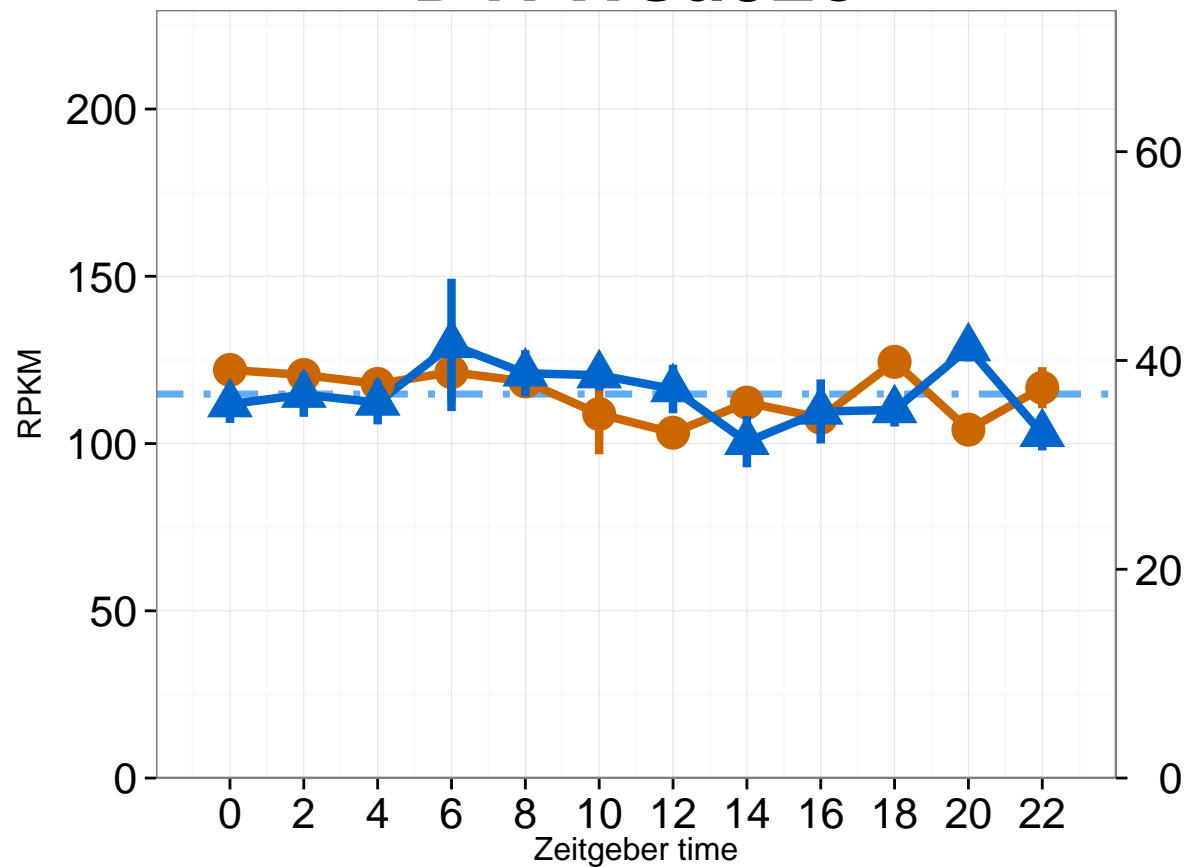

# D17Wsu92e

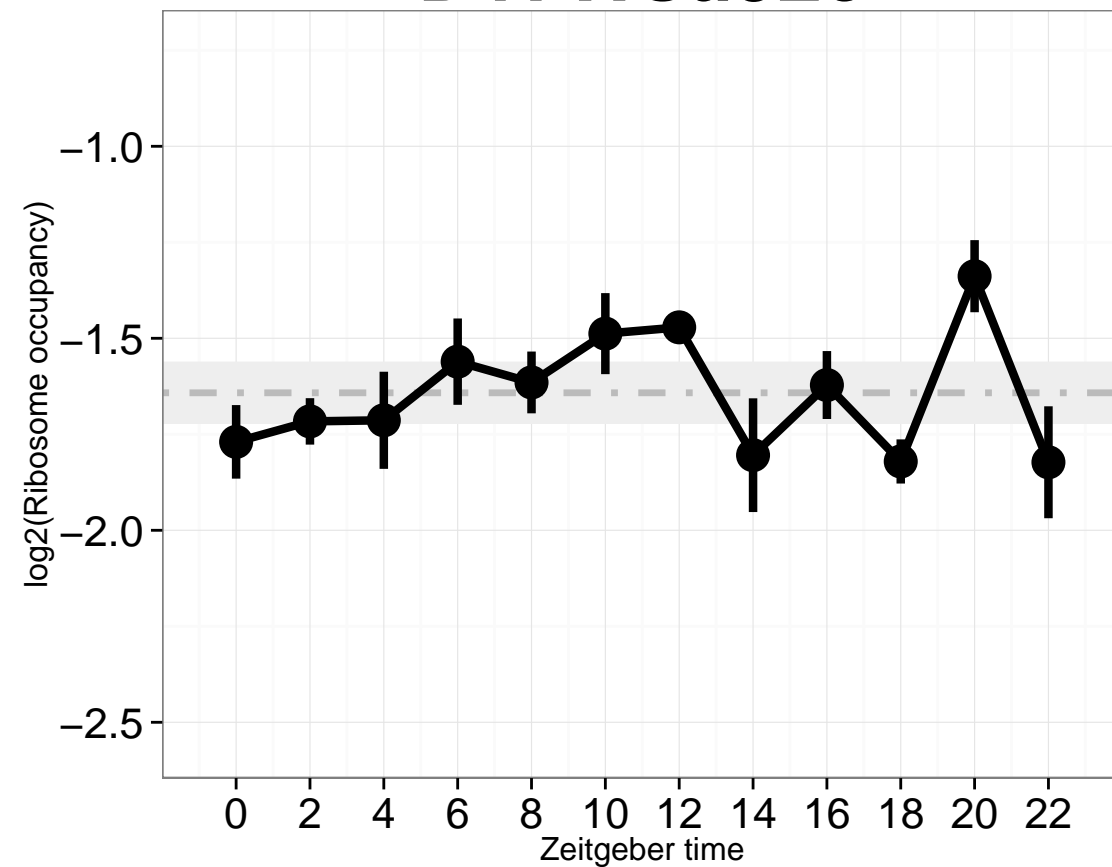

Supplement: Supplementary file 6907 [file 1]

# Zfp598

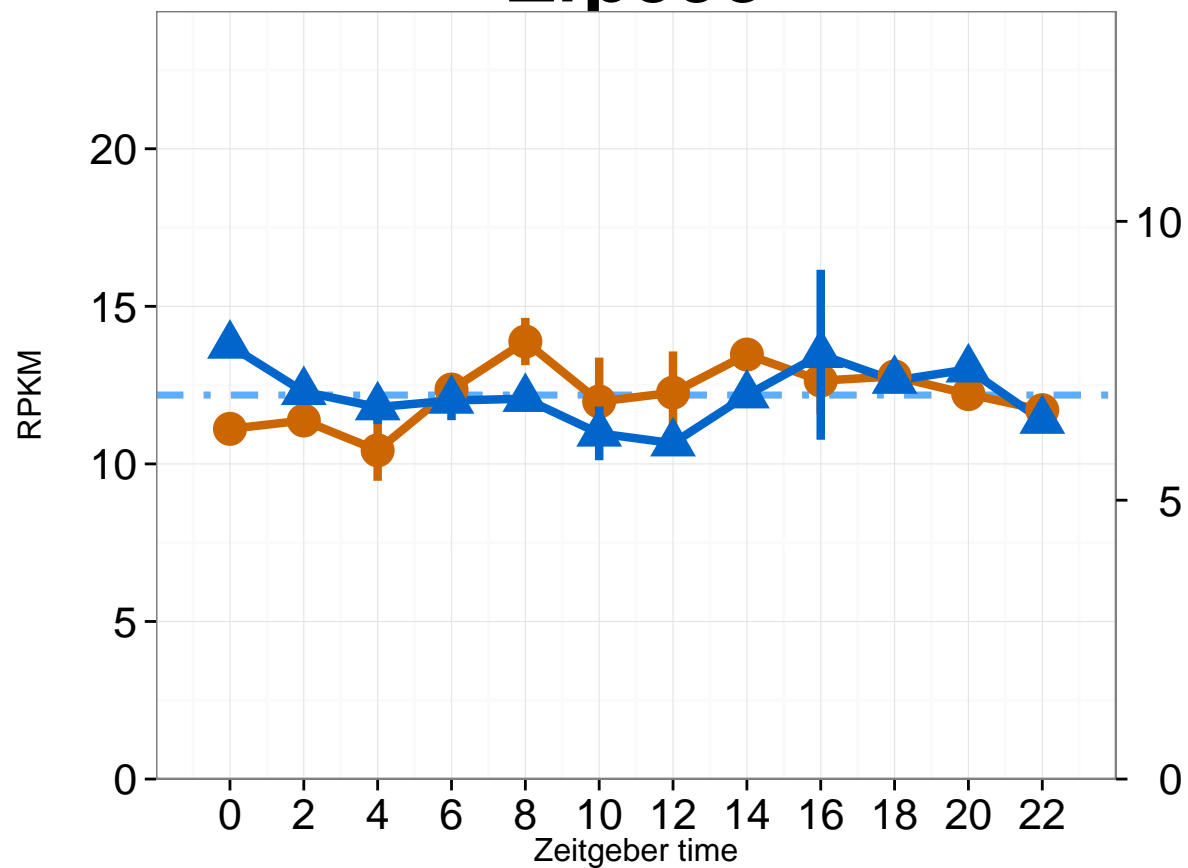

# Zfp598

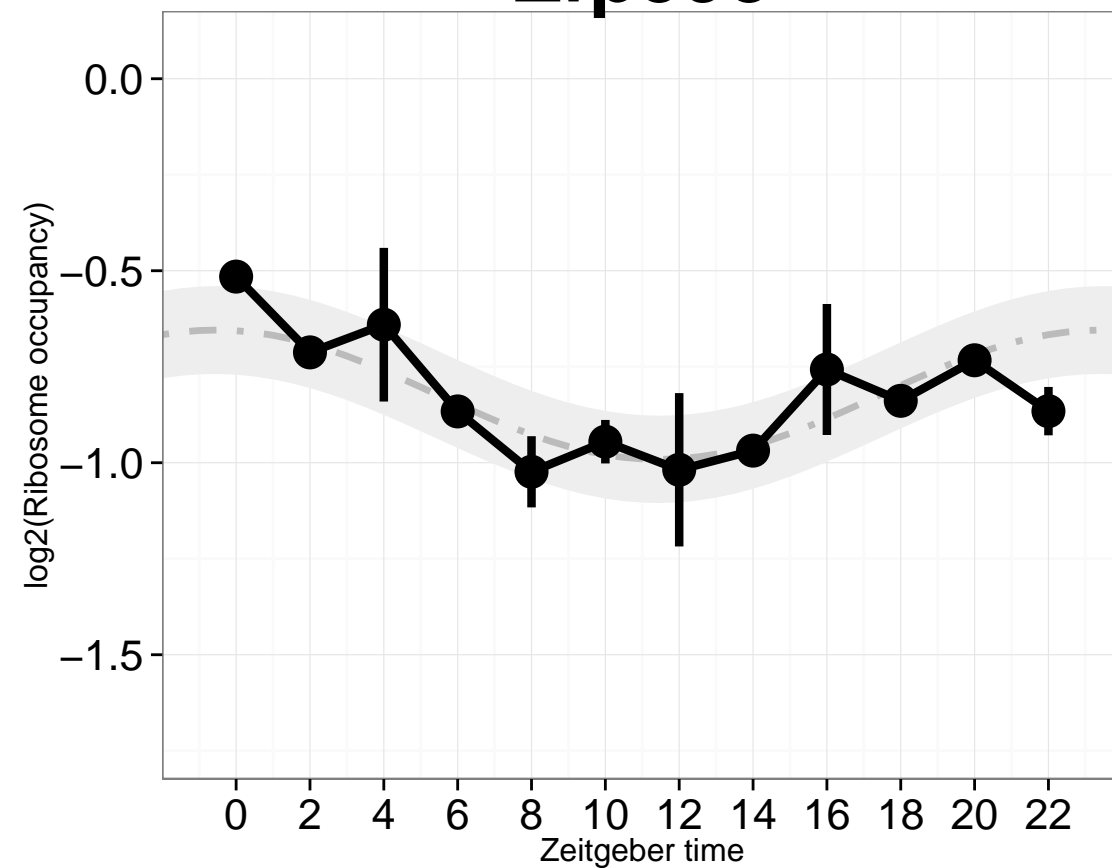

Supplement: Supplementary file 6908 [file 1]

# Nfatc2ip

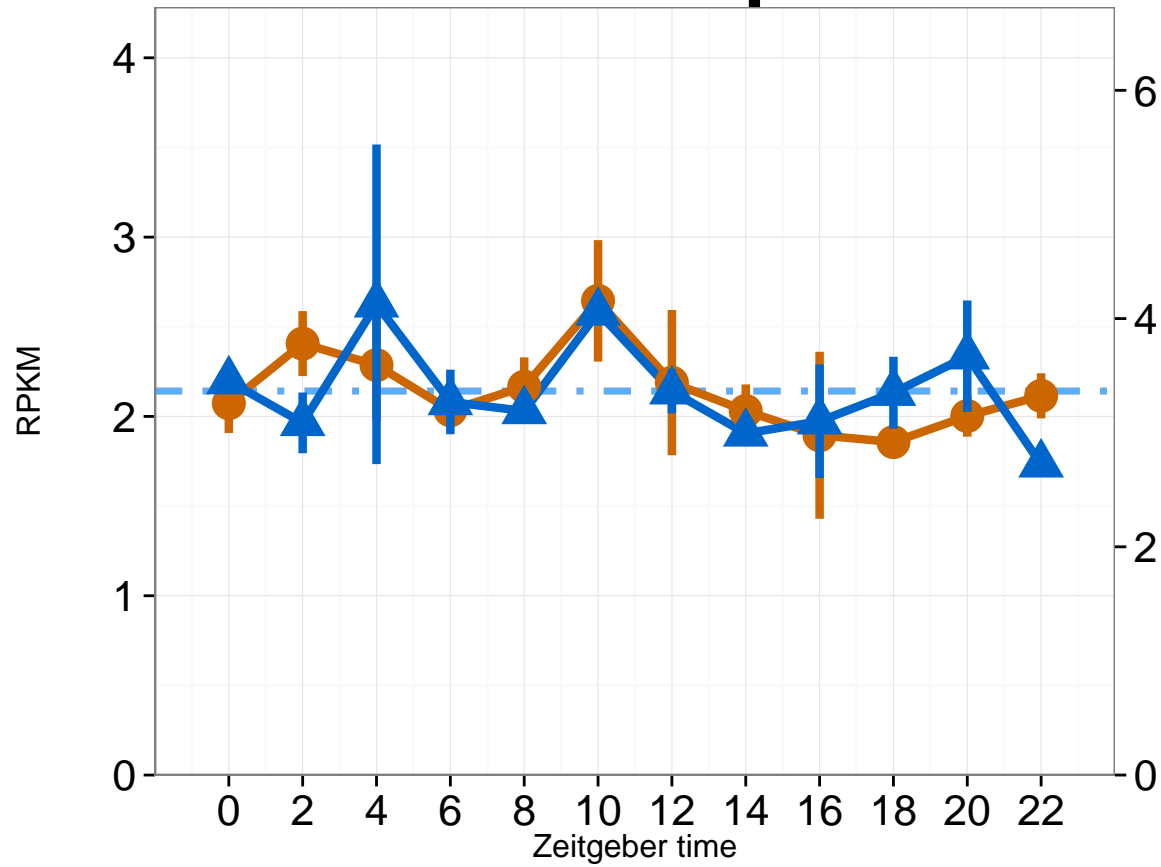

# Nfatc2ip

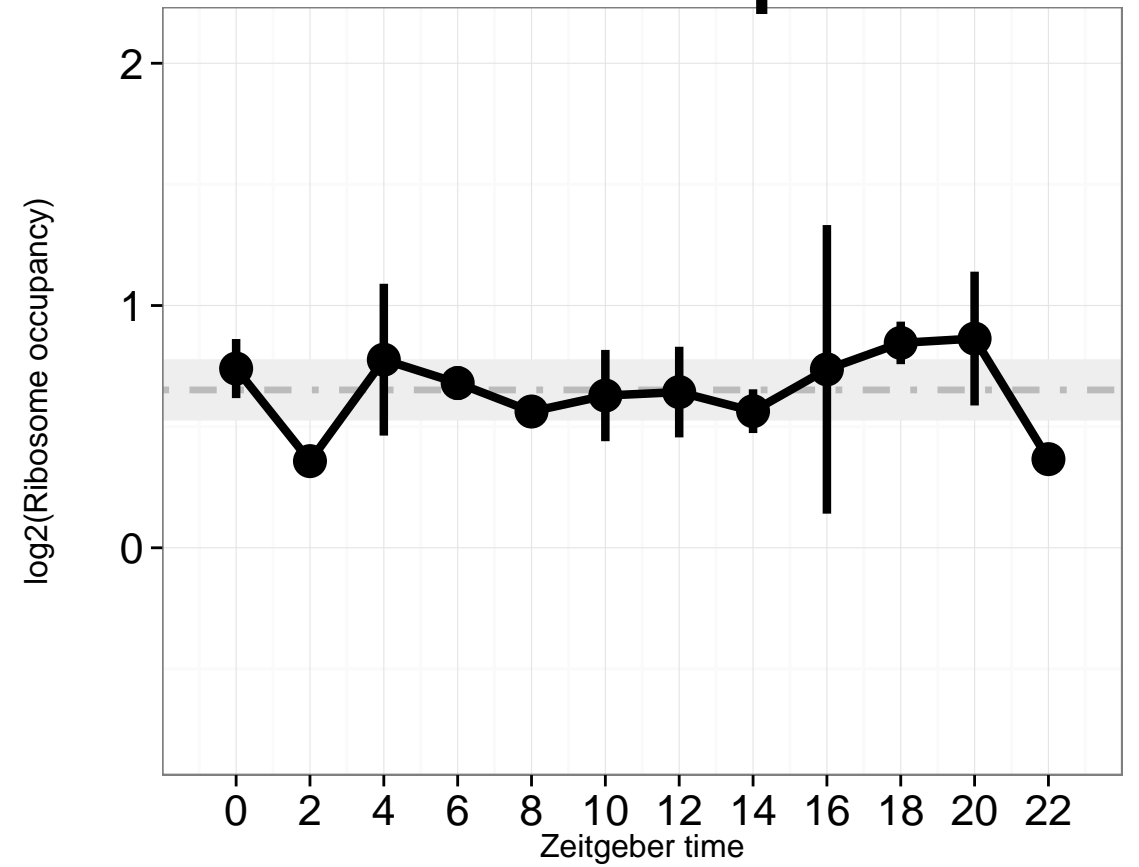

Supplement: Supplementary file 6909 [file 1]

## Acot7

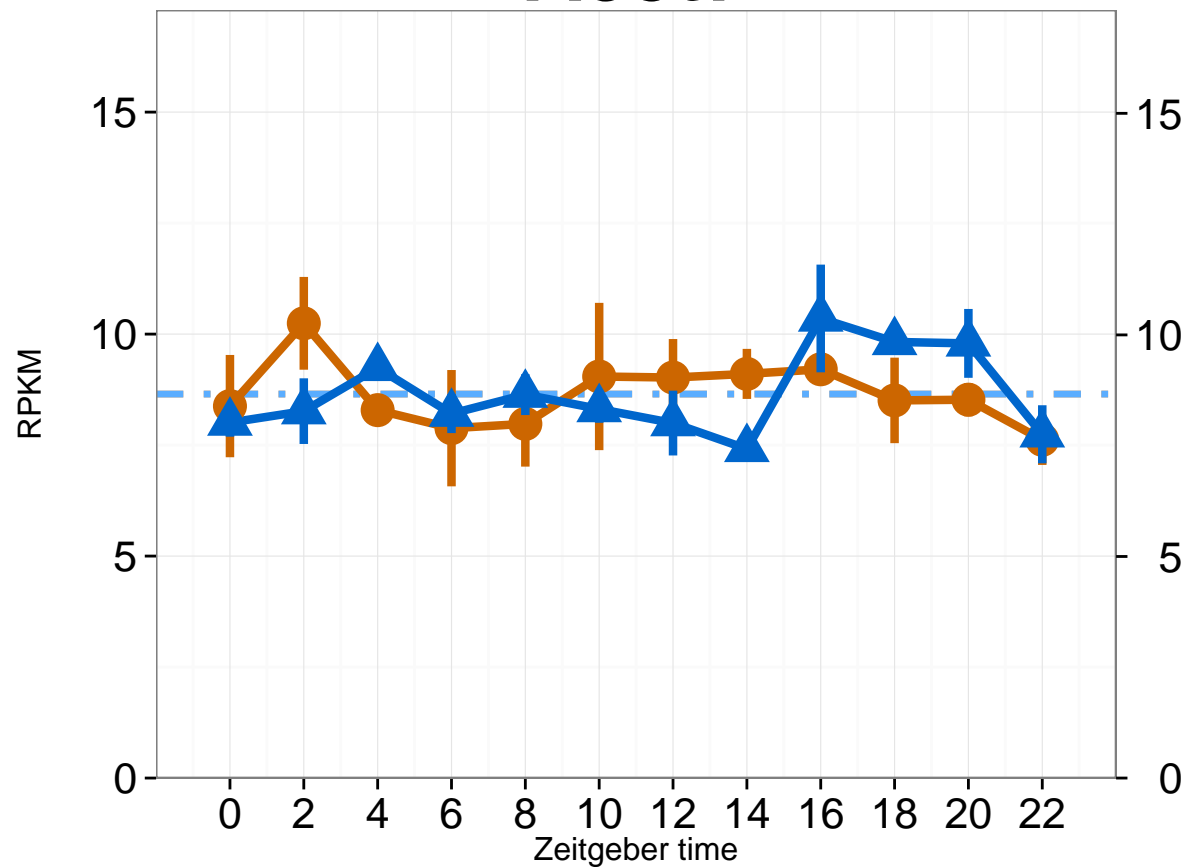

## Acot7

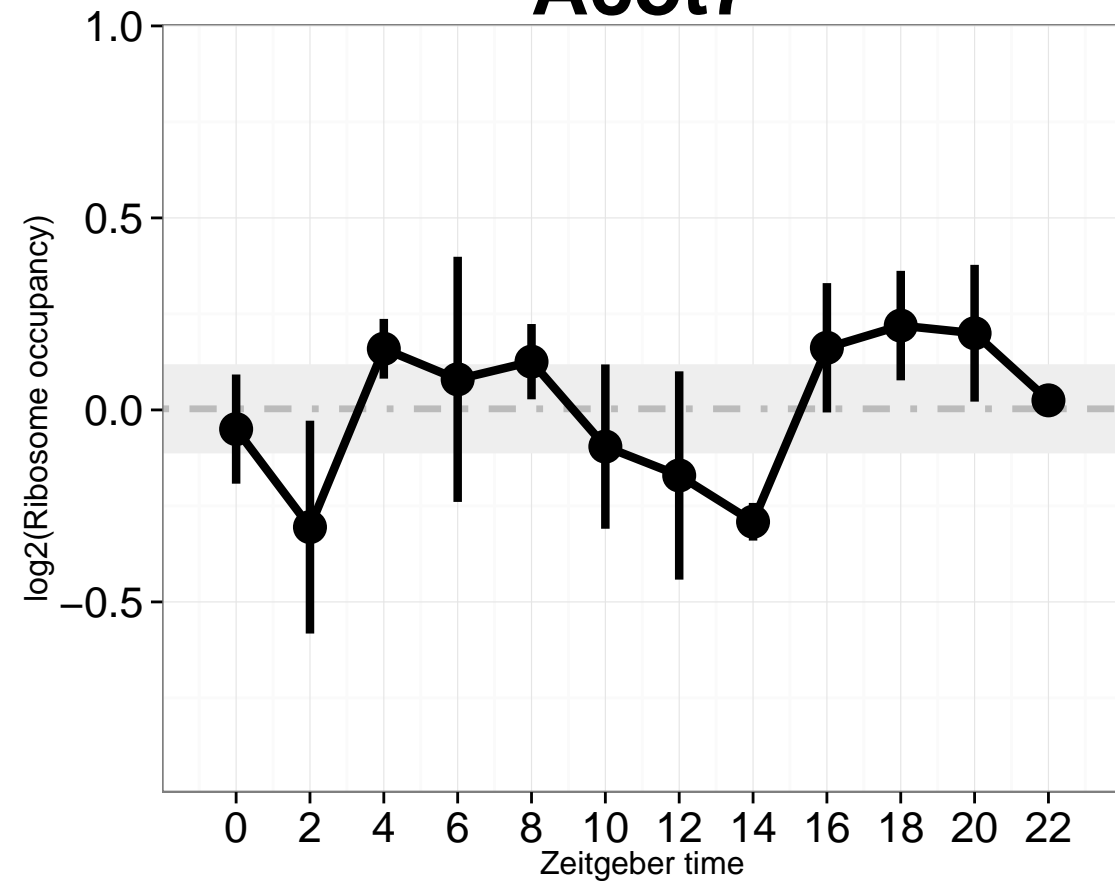

Supplement: Supplementary file 6910 [file 1]

## Dusp9

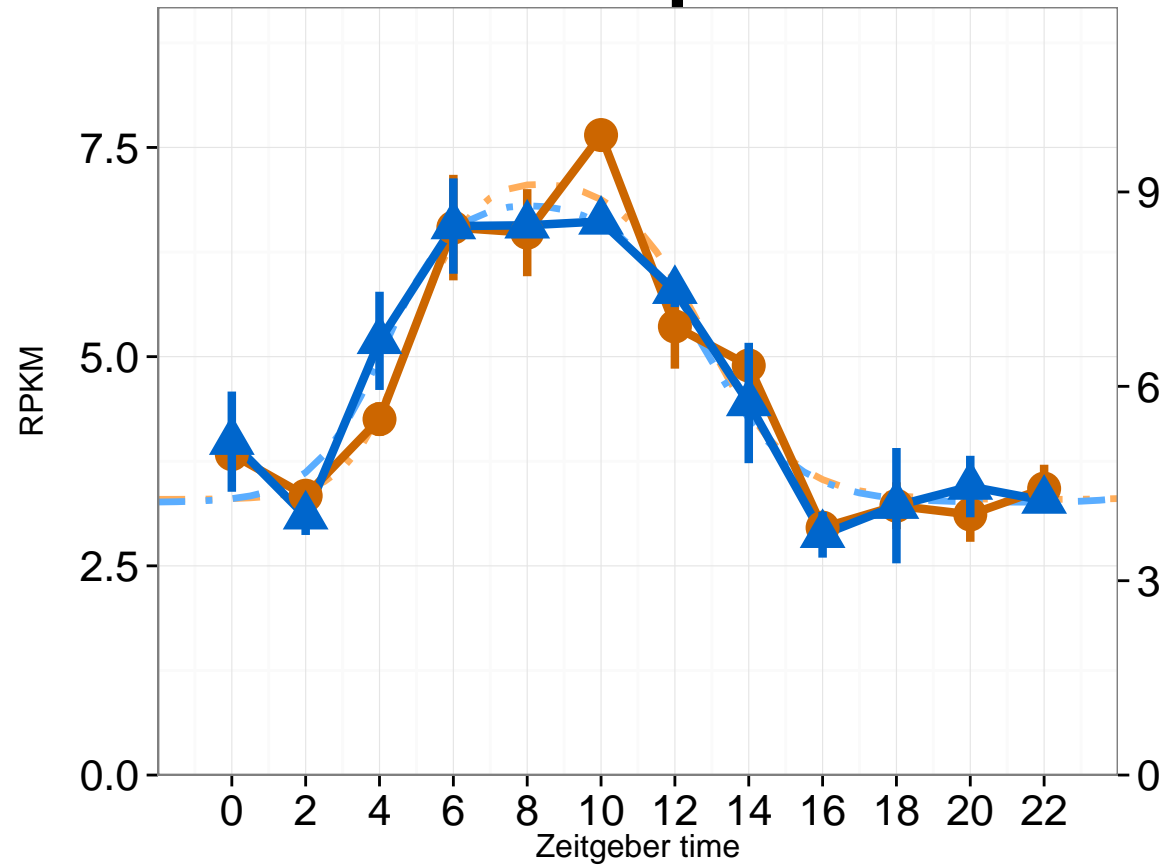

## Dusp9

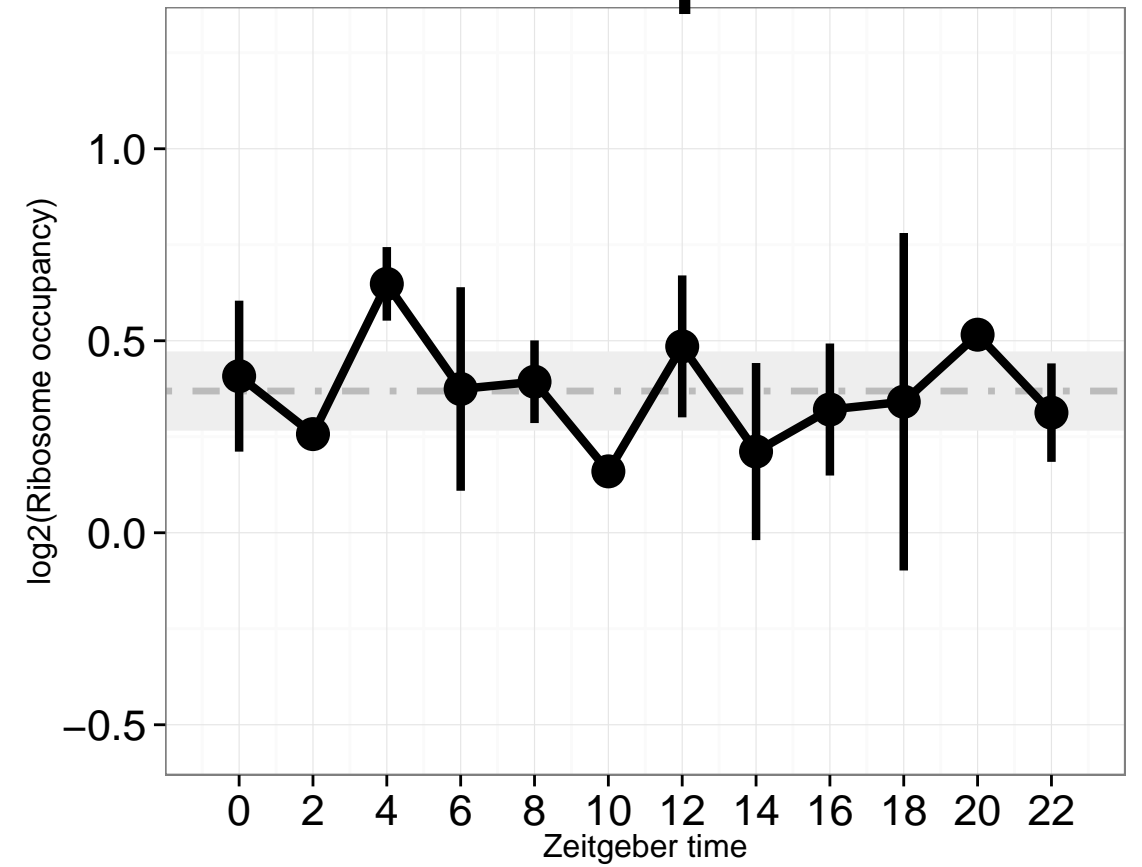

Supplement: Supplementary file 6911 [file 1]

## Tjp3

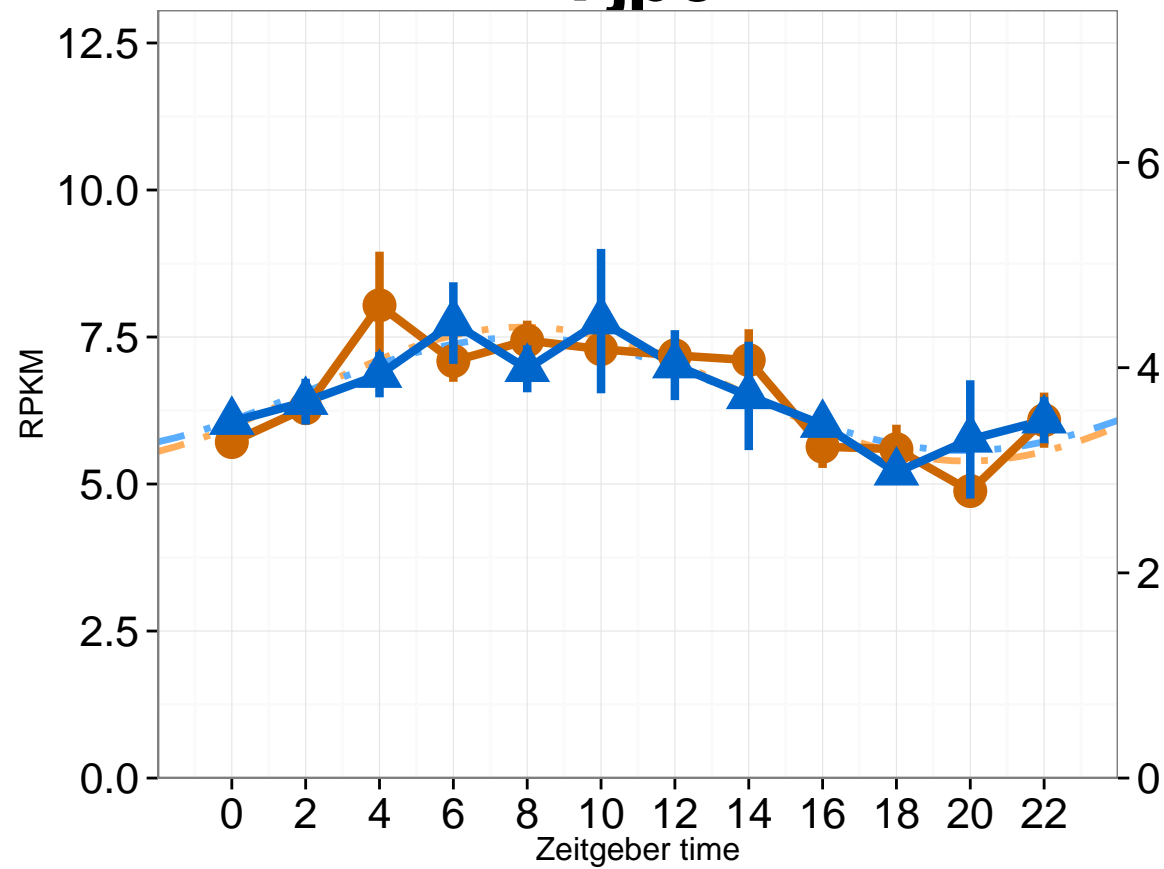

## Tjp3

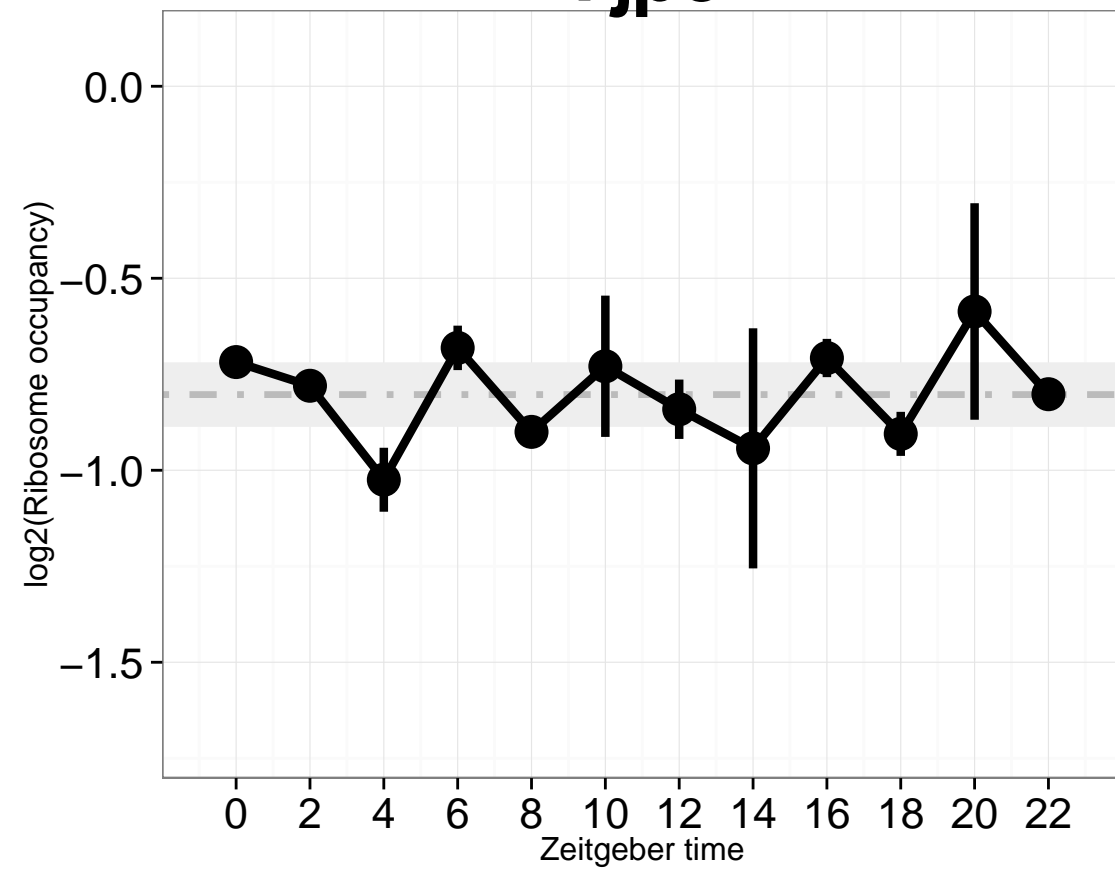

Supplement: Supplementary file 6912 [file 1]

# 6430571L13Rik

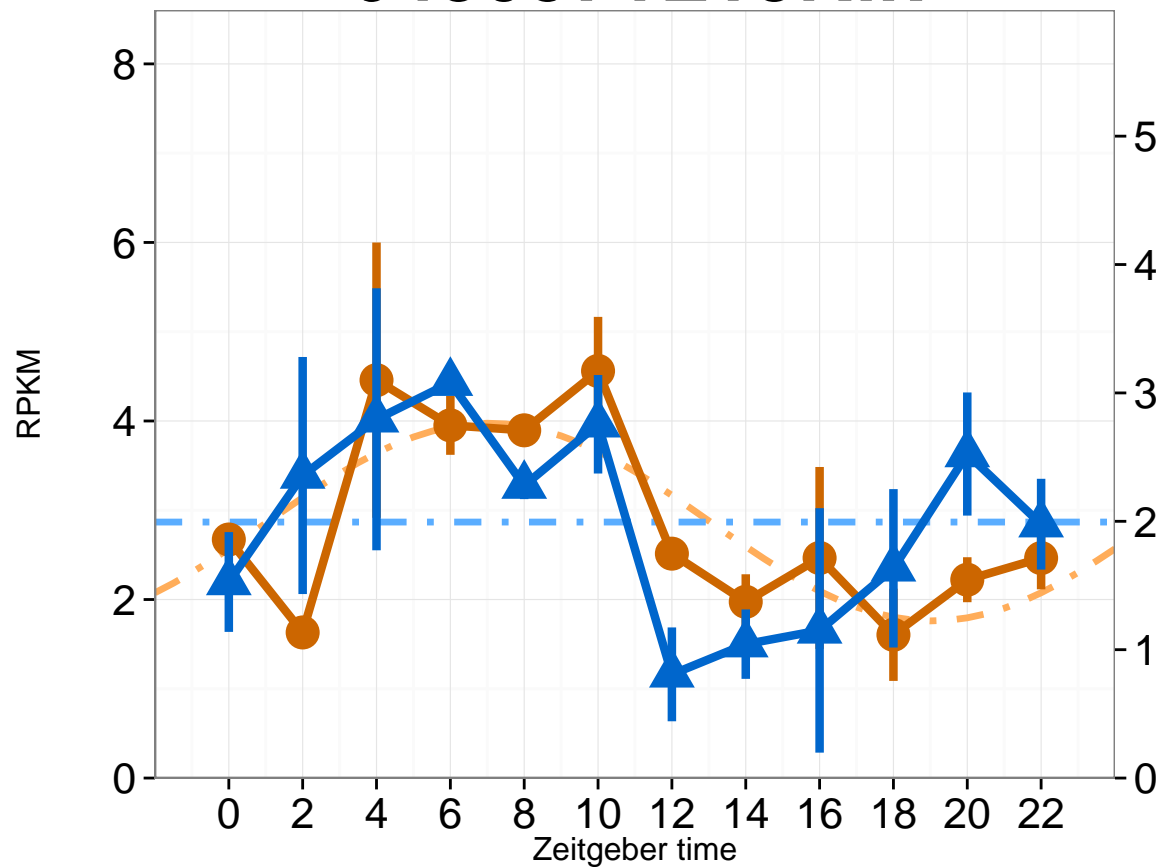

# 6430571L13Rik

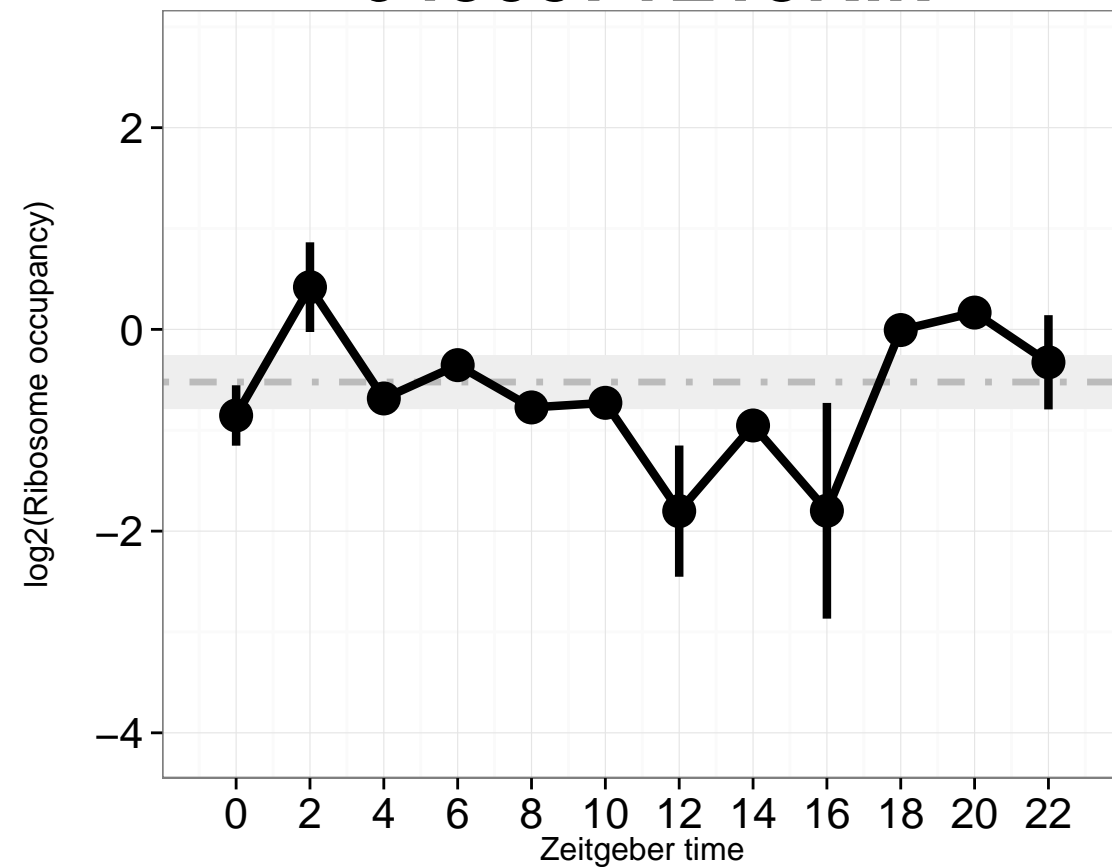

Supplement: Supplementary file 6913 [file 1]

## Pdia5

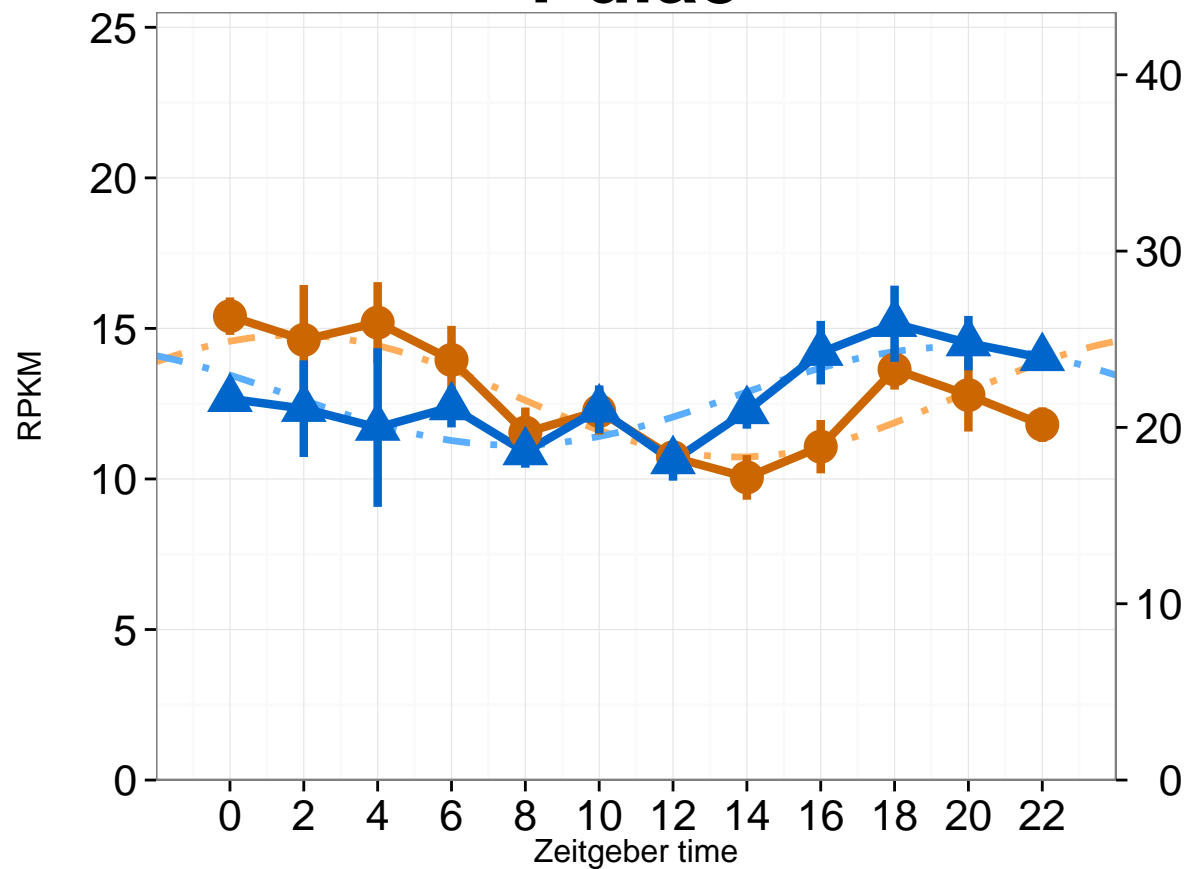

## Pdia5

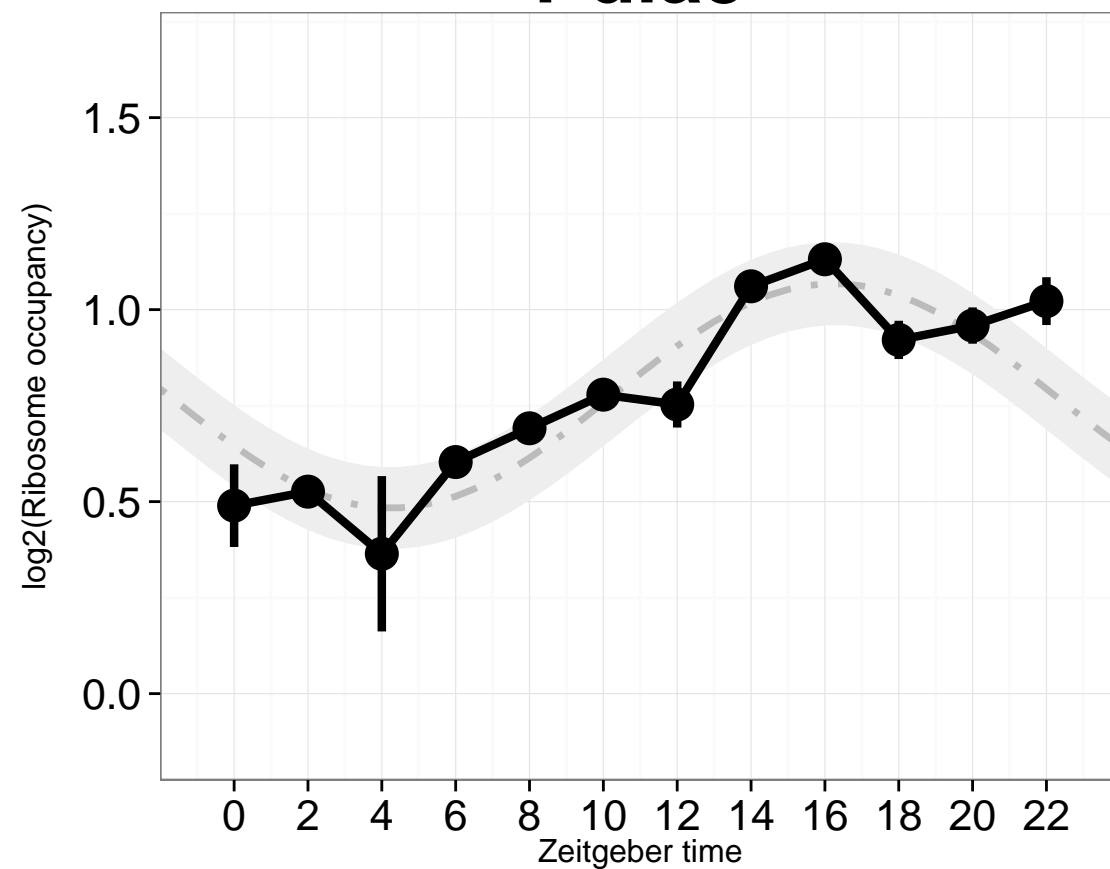

Supplement: Supplementary file 6914 [file 1]

## Mogs

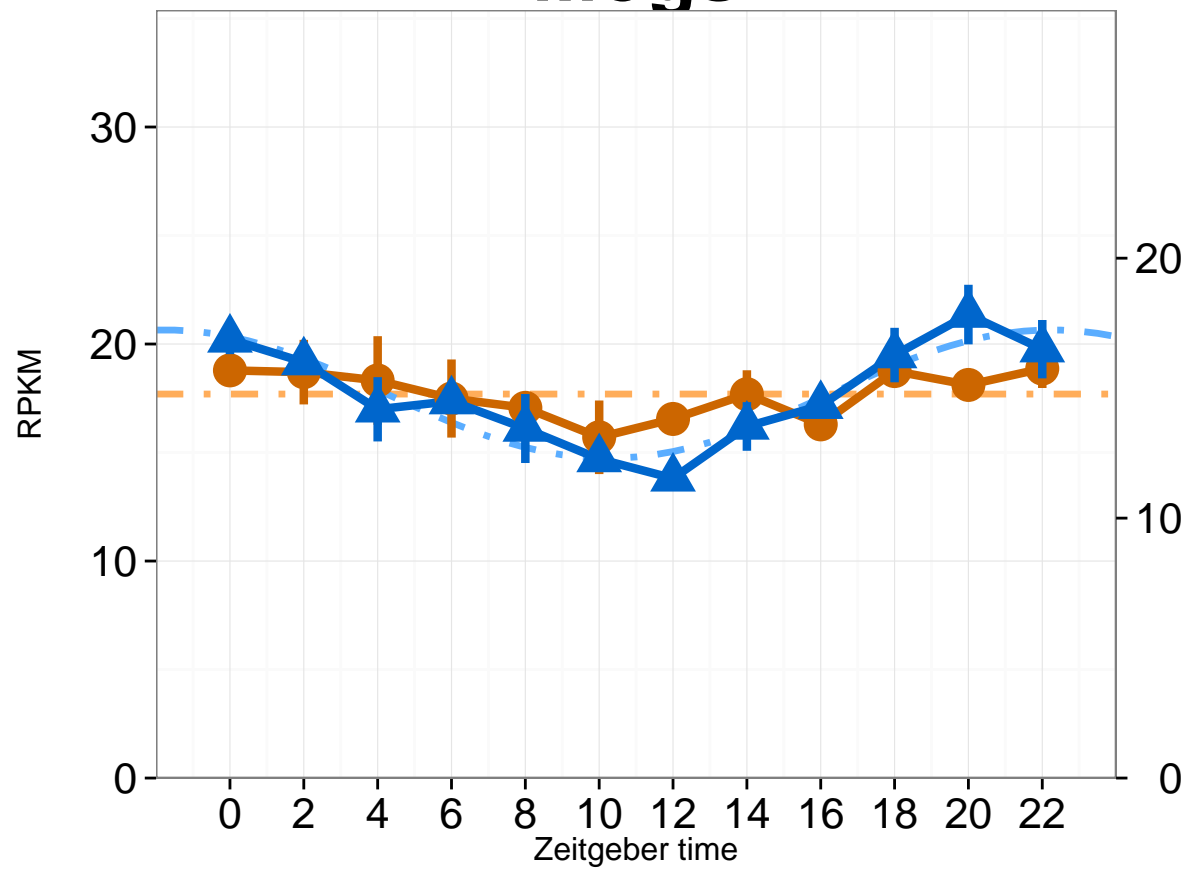

## Mogs

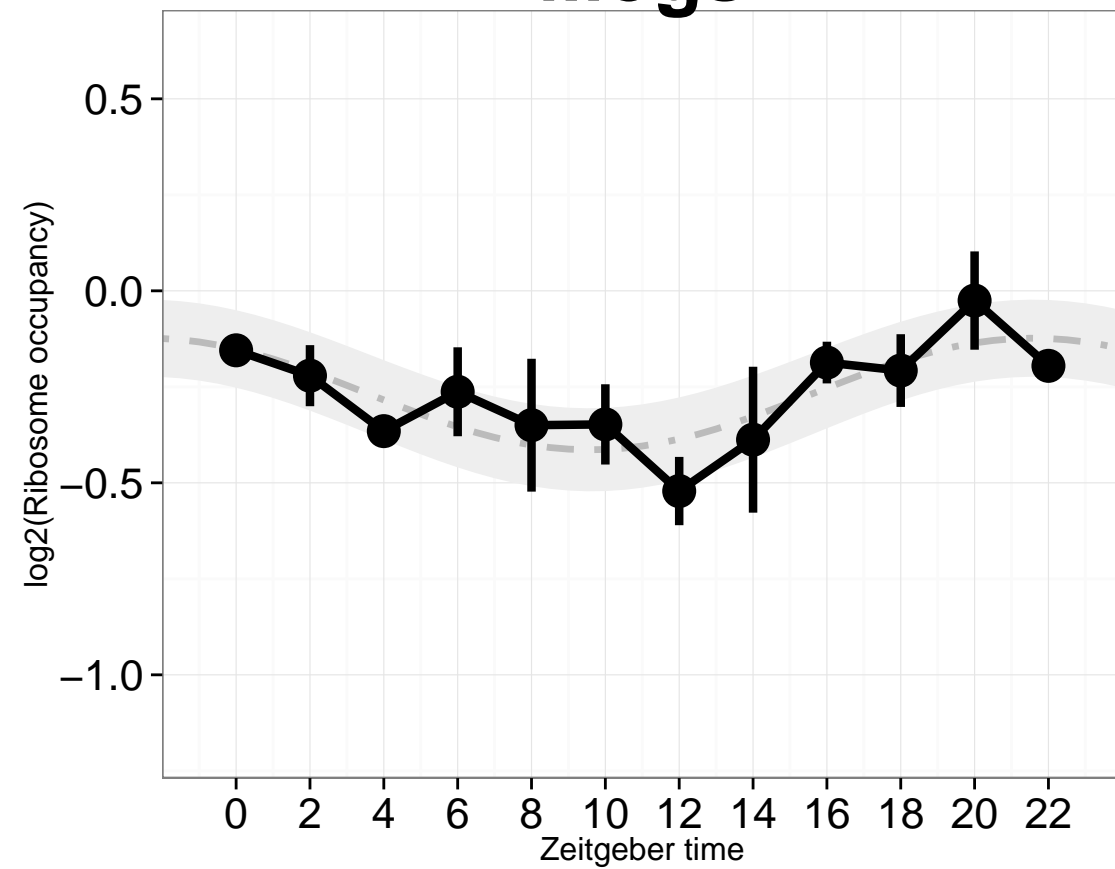

Supplement: Supplementary file 6915 [file 1]

## Jag2

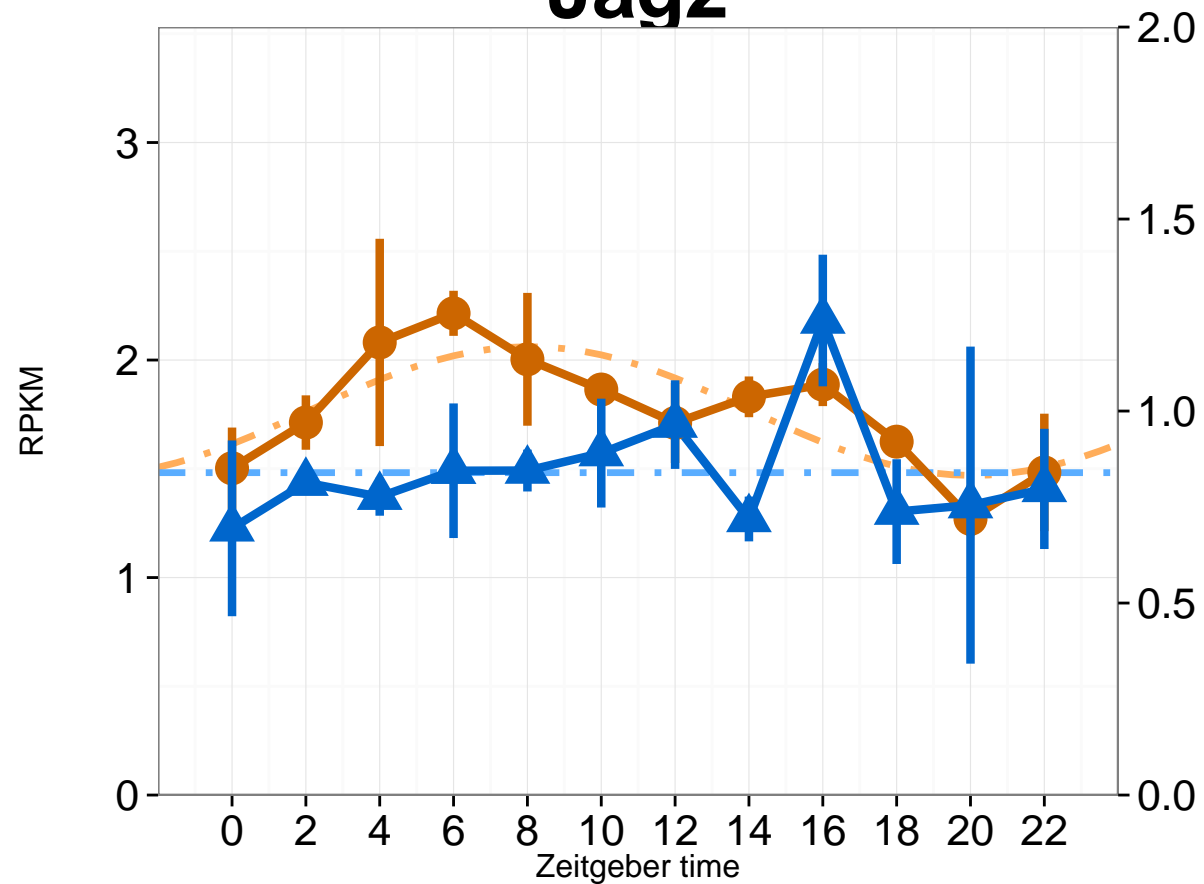

## Jag2

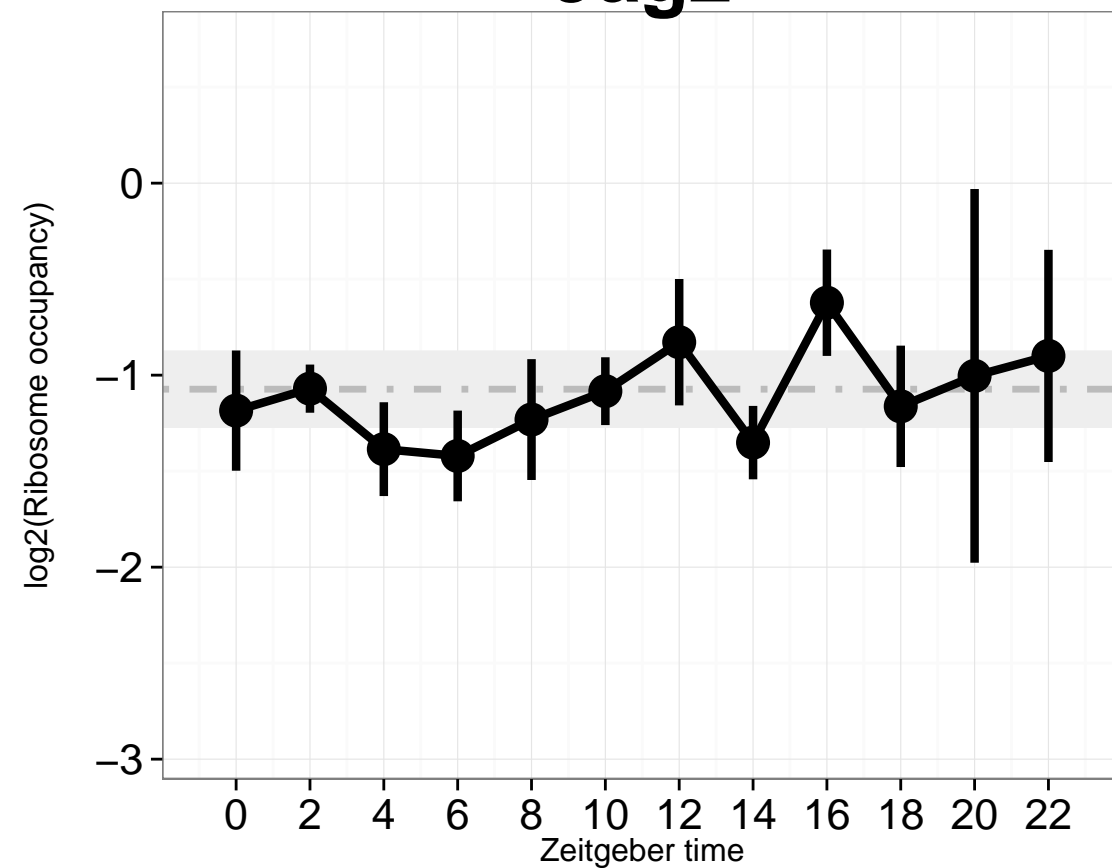

Supplement: Supplementary file 6916 [file 1]

## Rnf145

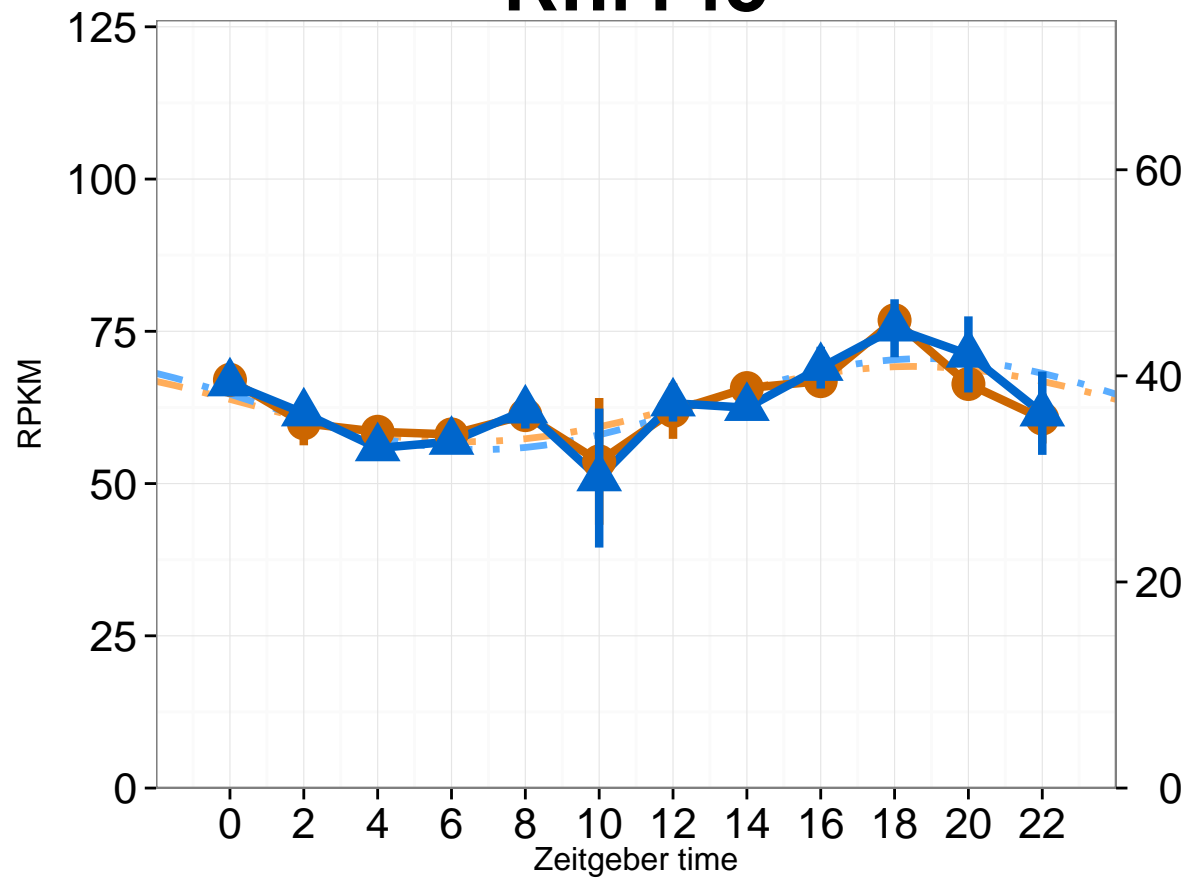

## Rnf145

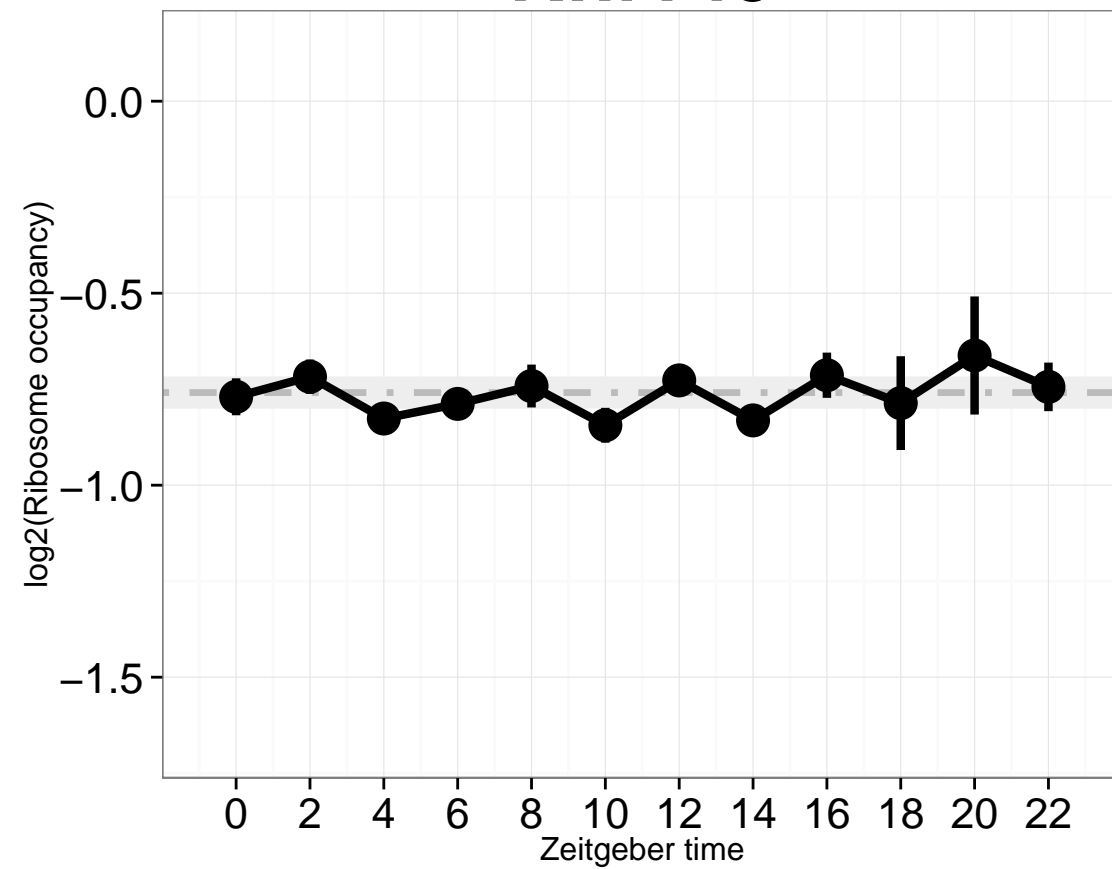

Supplement: Supplementary file 6917 [file 1]

# Crtc1

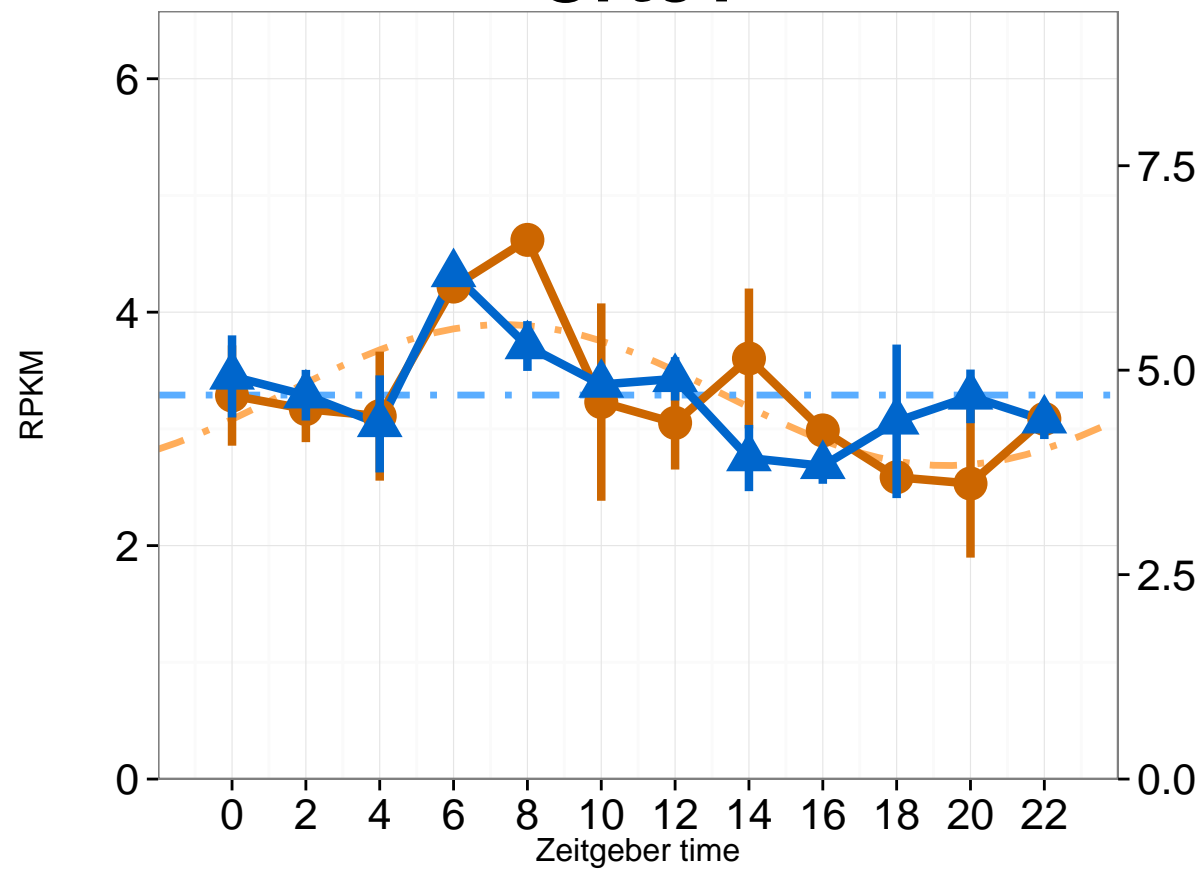

# Crtc1

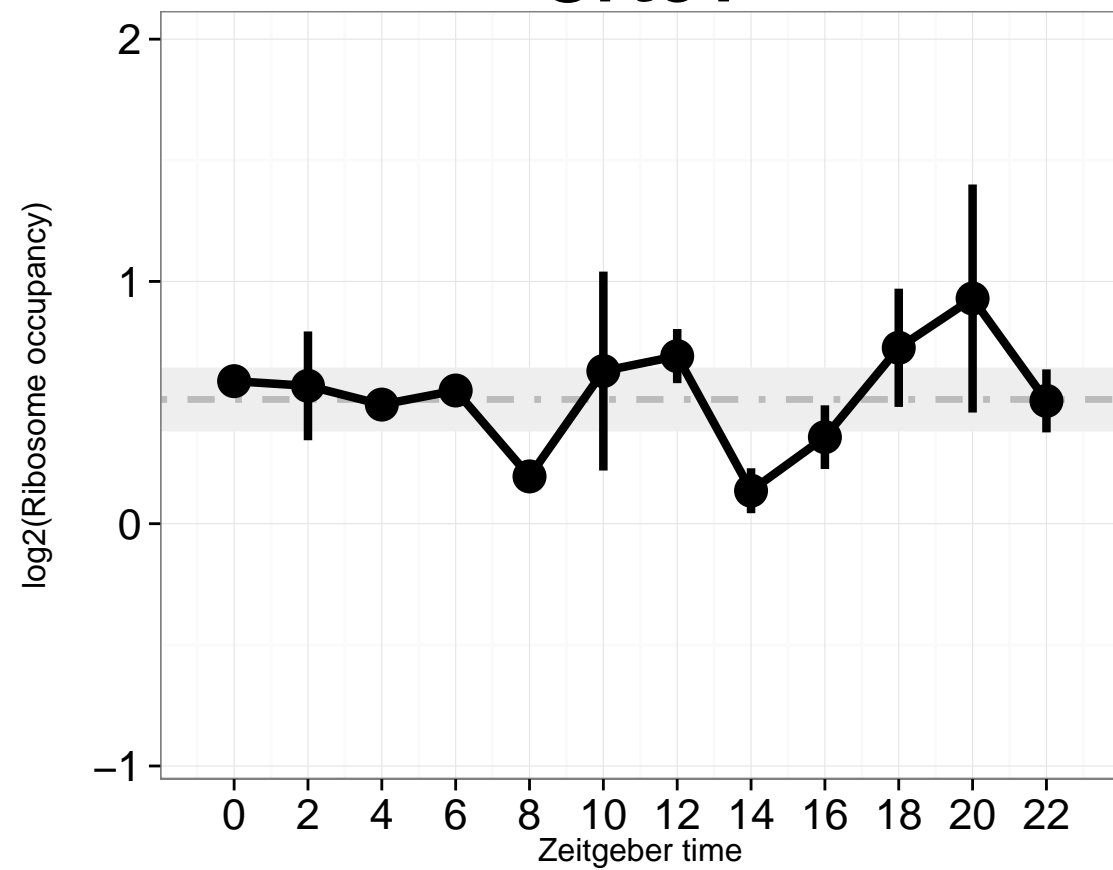

Supplement: Supplementary file 6918 [file 1]

# Ctnna2

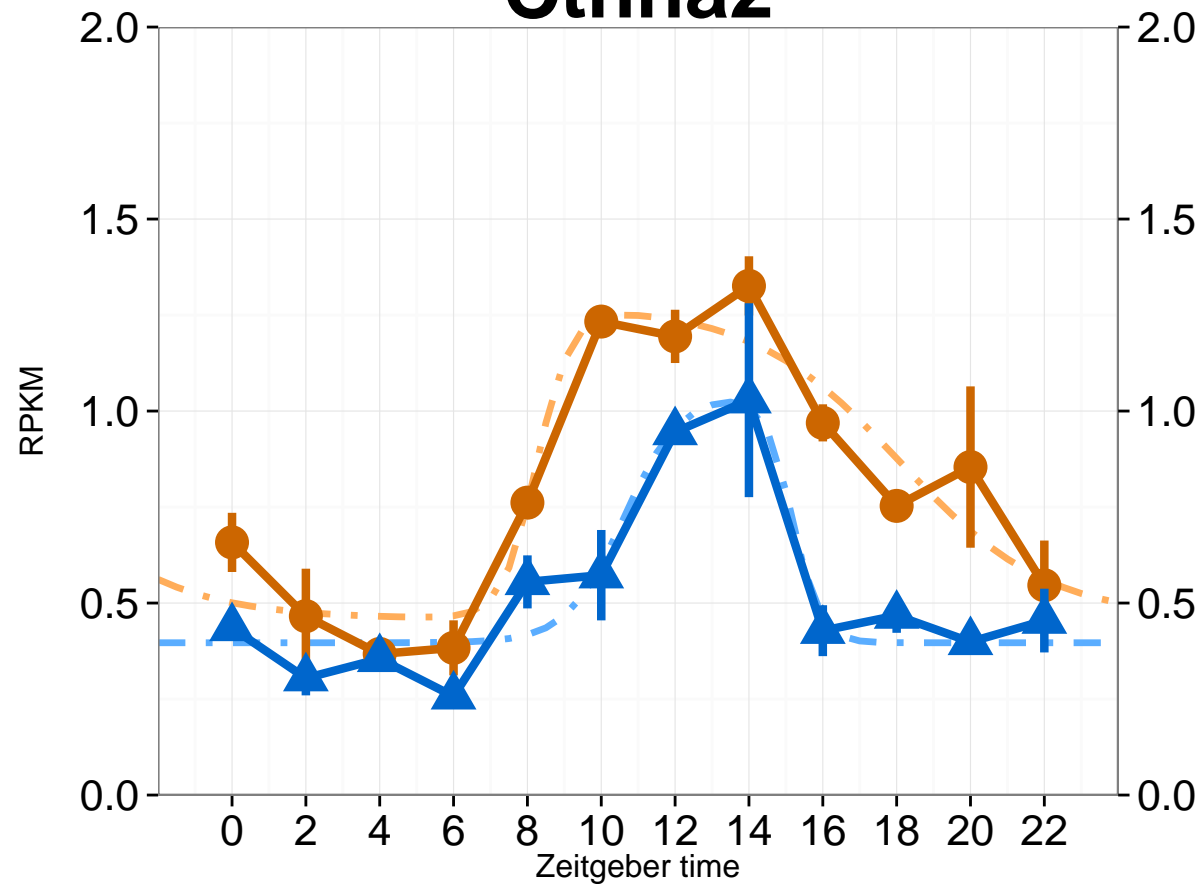

# Ctnna2

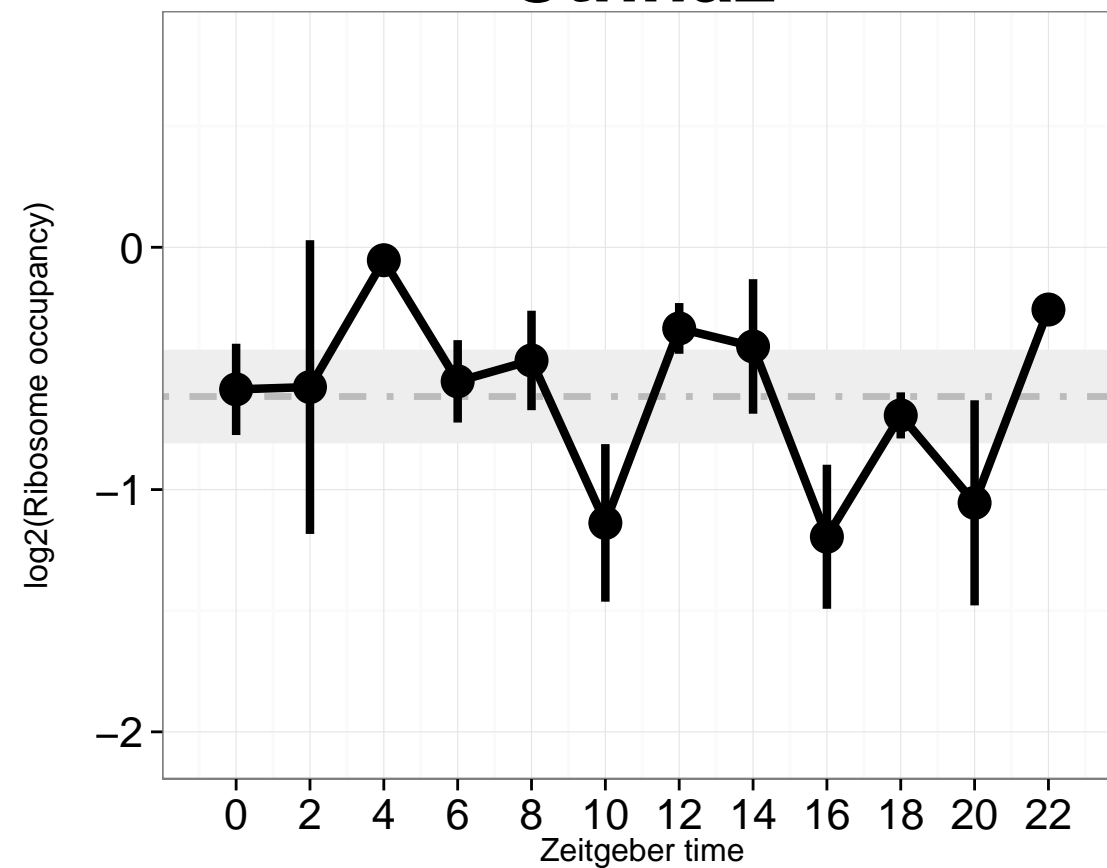

Supplement: Supplementary file 6919 [file 1]

# Klhl11

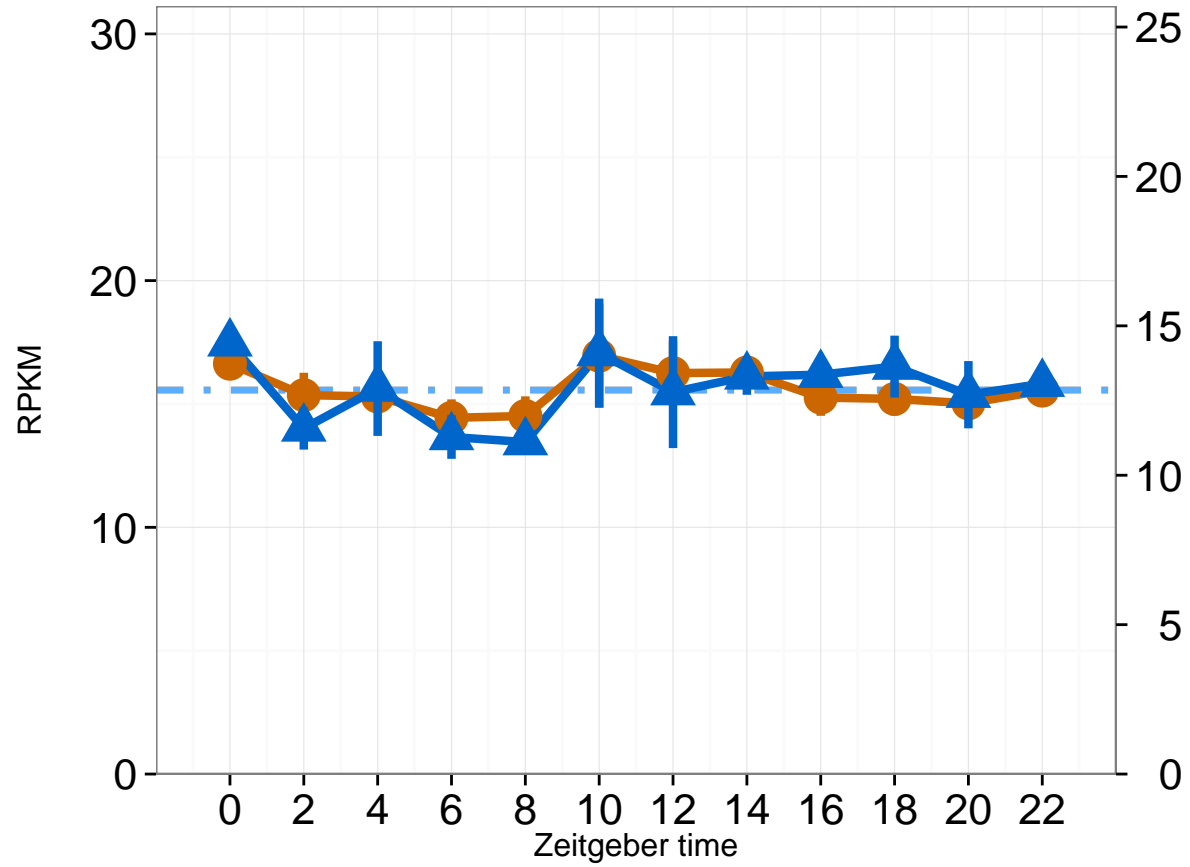

# Klhl11

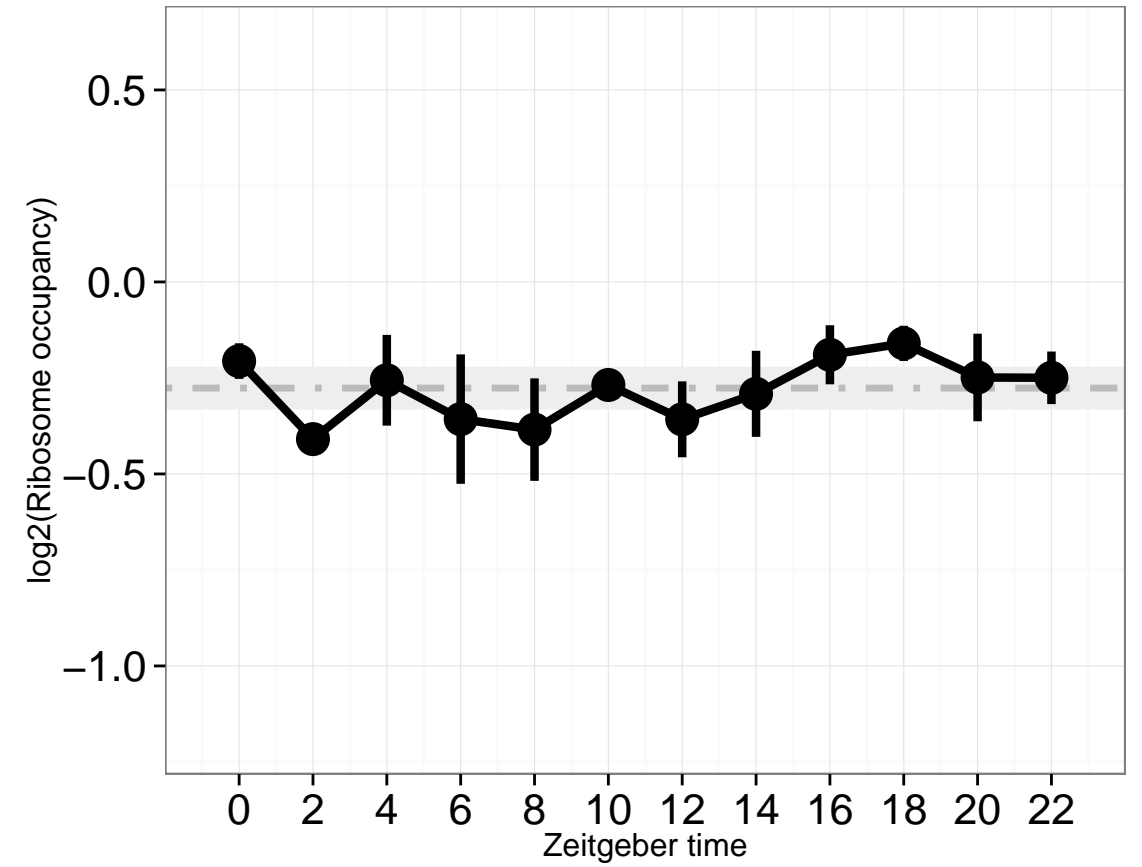

Supplement: Supplementary file 6920 [file 1]

## Rgs9

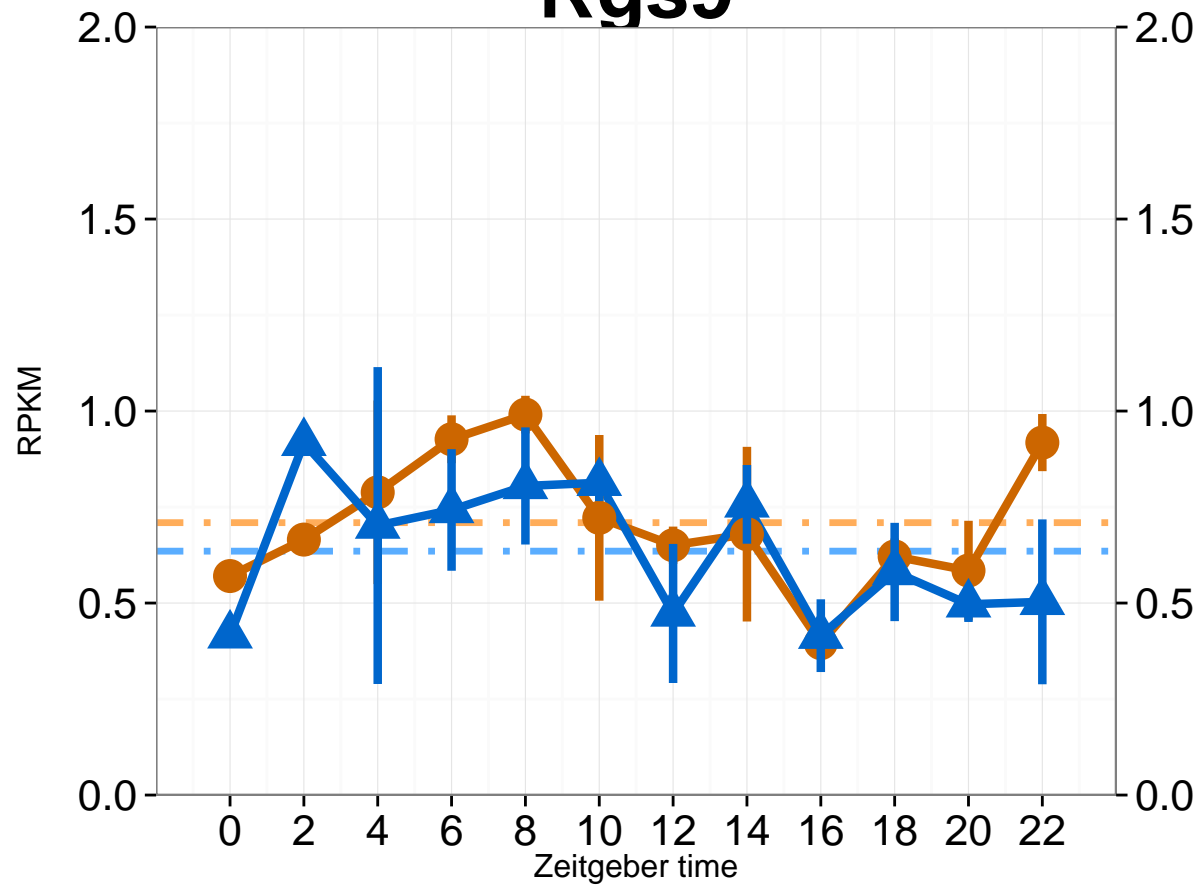

## Rgs9

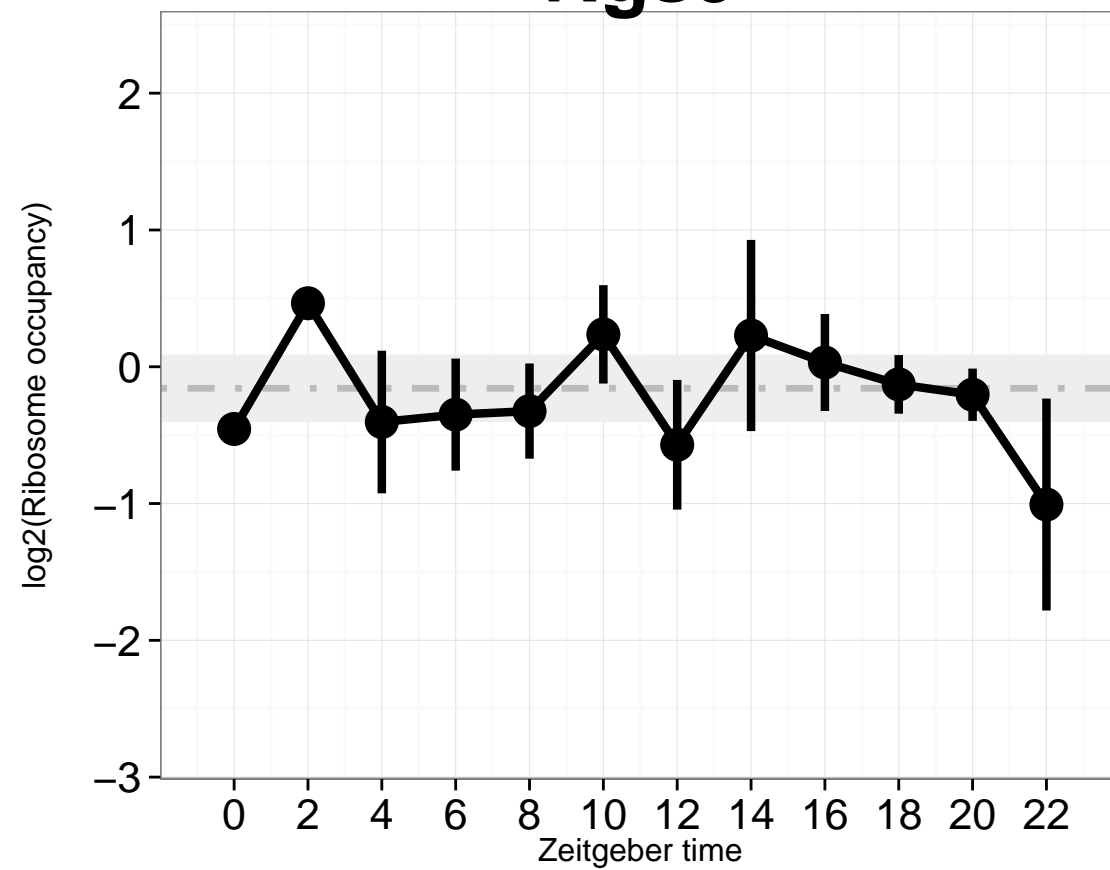

Supplement: Supplementary file 6921 [file 1]

# Zfp260

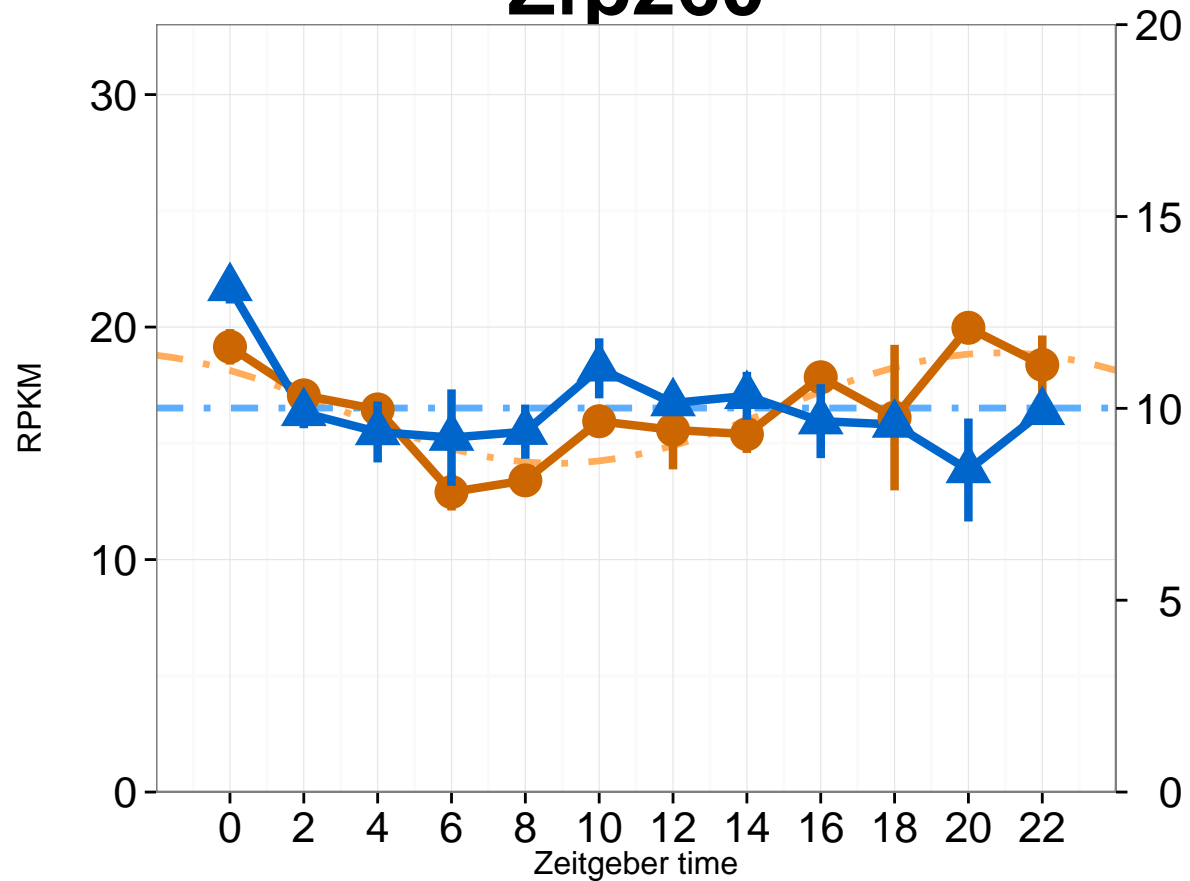

# Zfp260

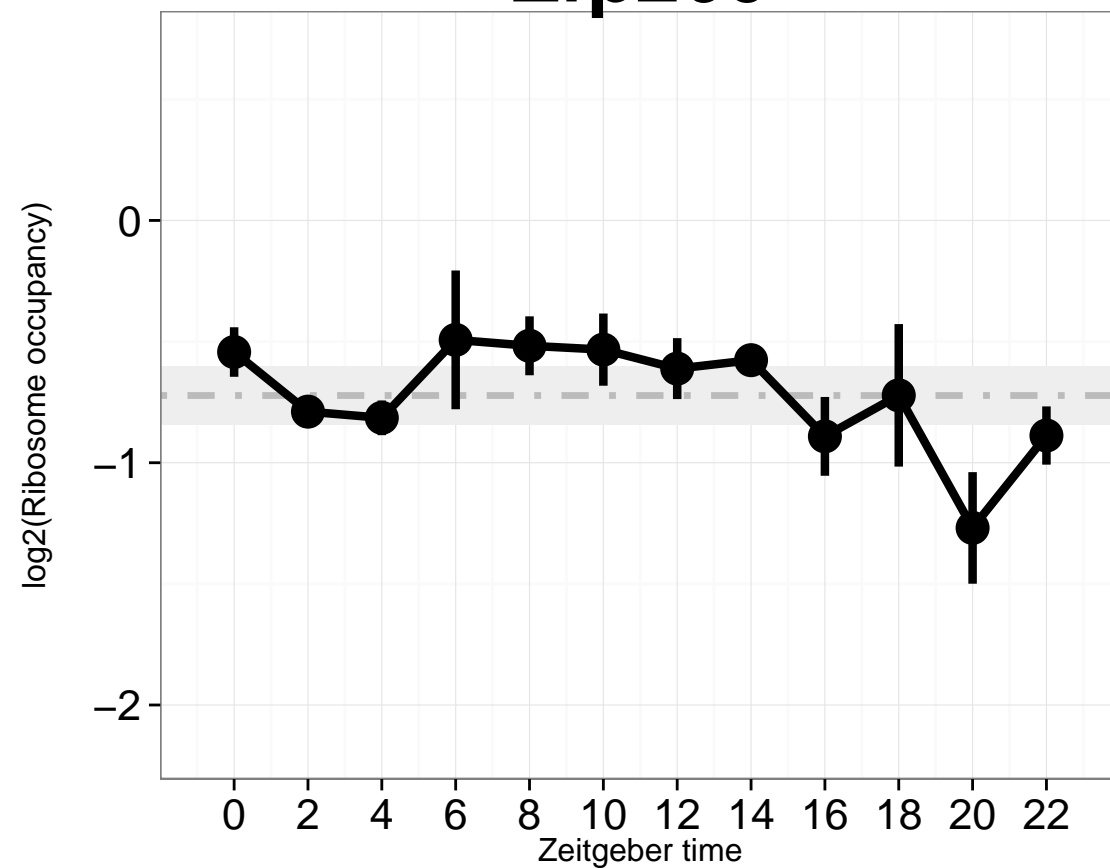

Supplement: Supplementary file 6922 [file 1]
