# Supplementary material (part 70 of 133)
Source: publisher figshare collection journal article supplement (https://springernature.figshare.com/articles/dataset/_/4903193)

## Wdfy3

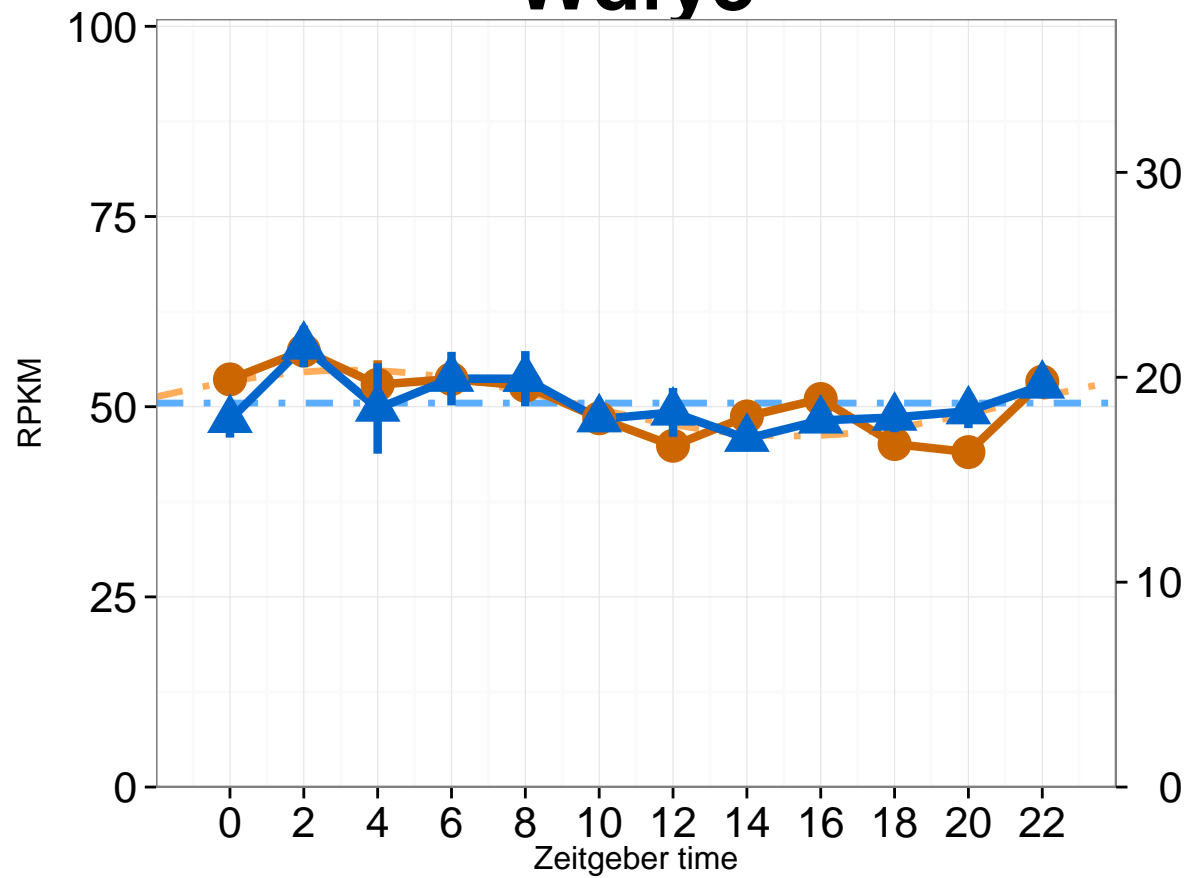

## Wdfy3

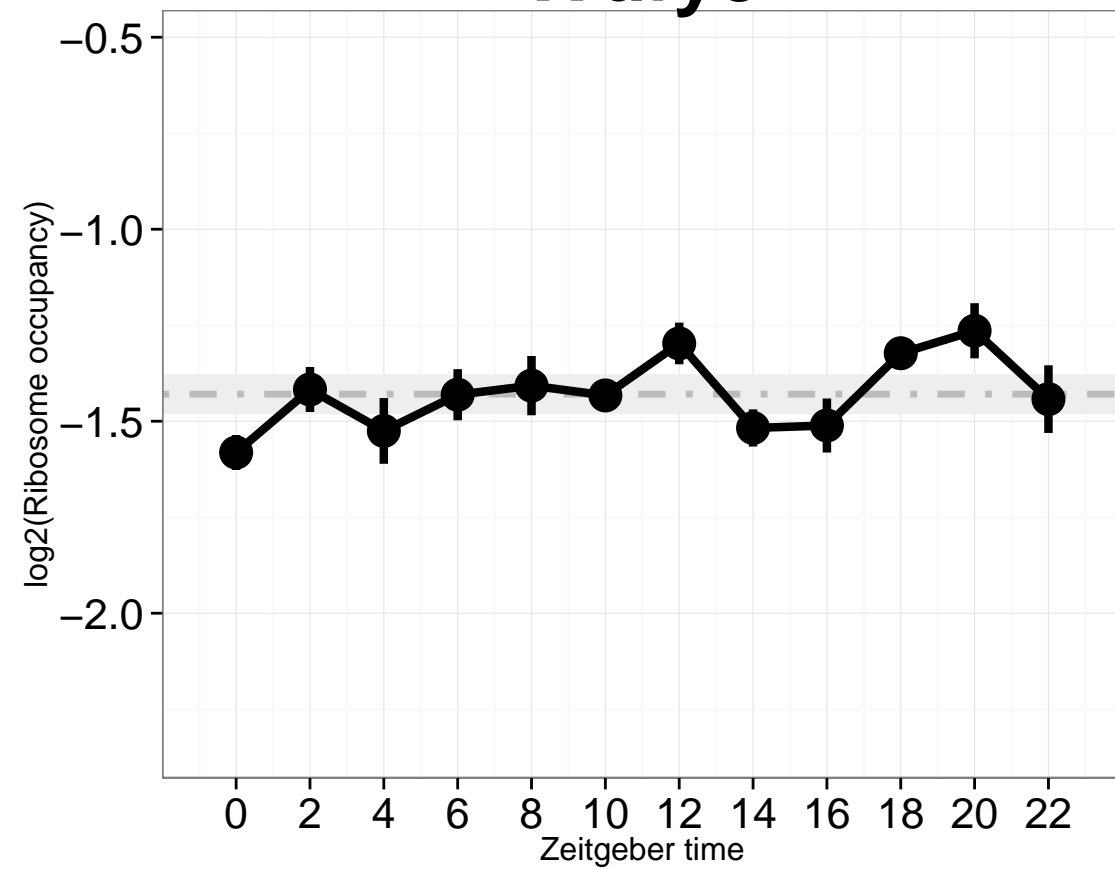

Supplement: Supplementary file 6923 [file 1]

## Grb2

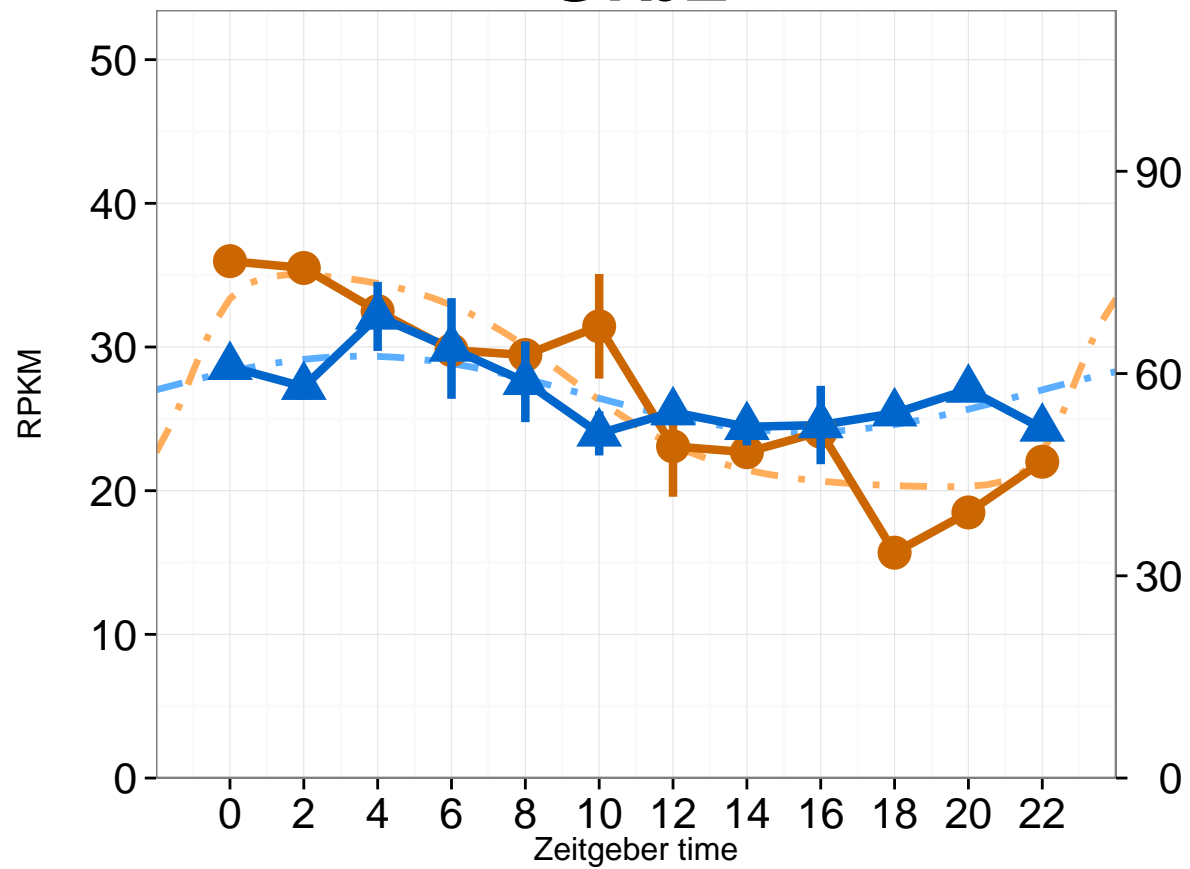

## Grb2

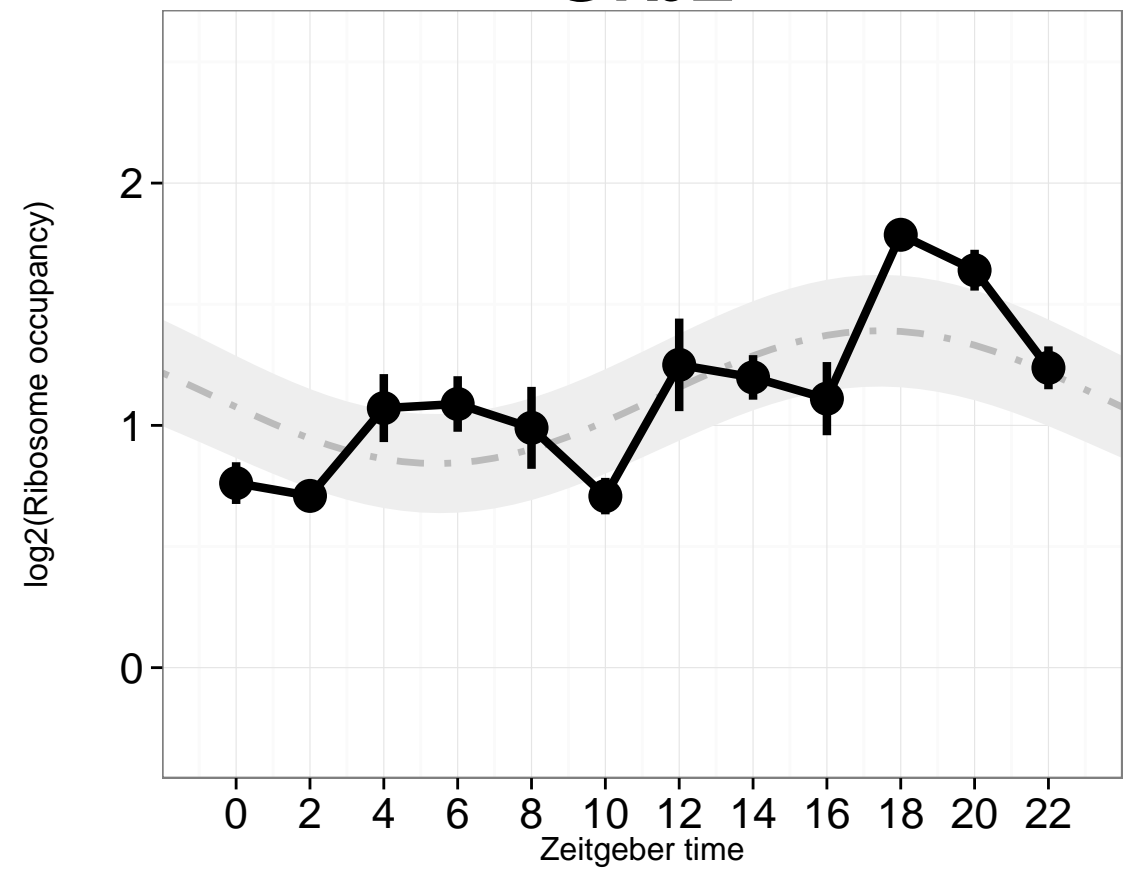

Supplement: Supplementary file 6924 [file 1]

# Cyb5

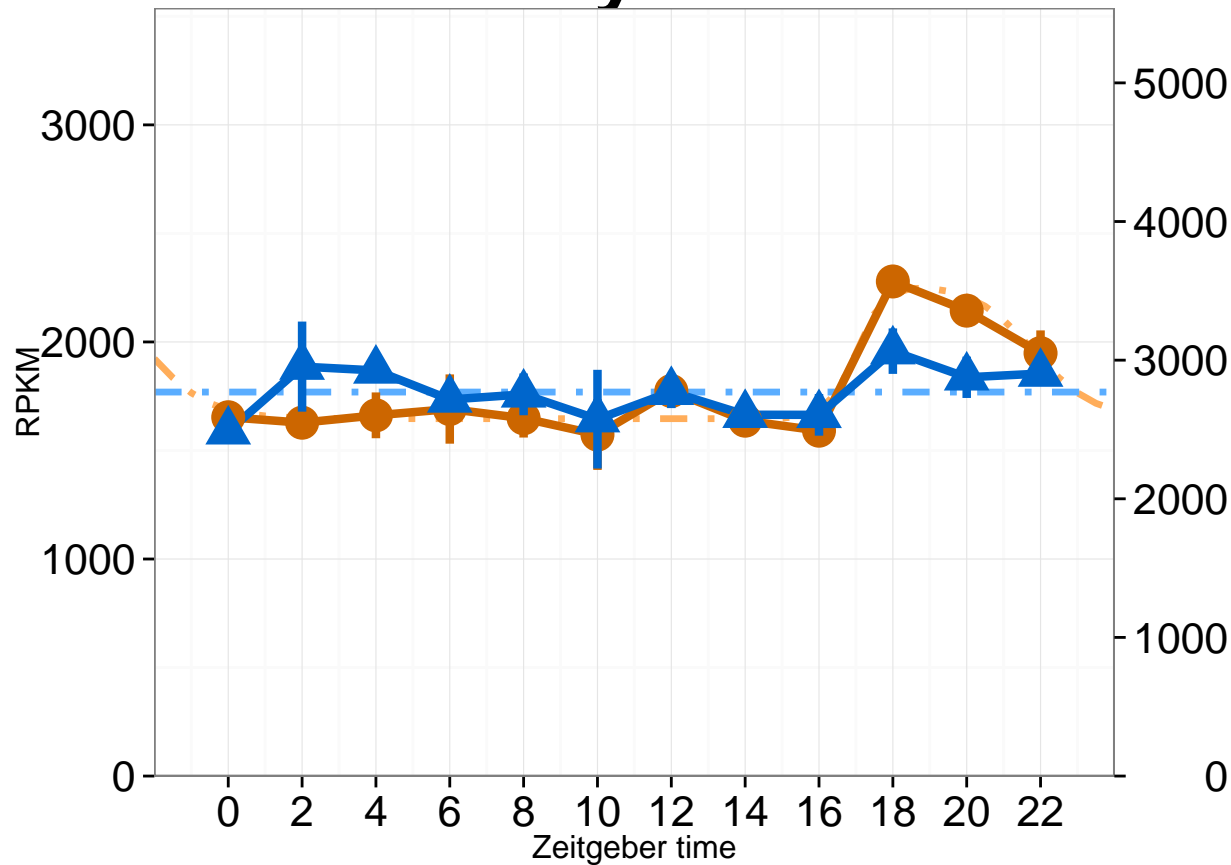

# Cyb5

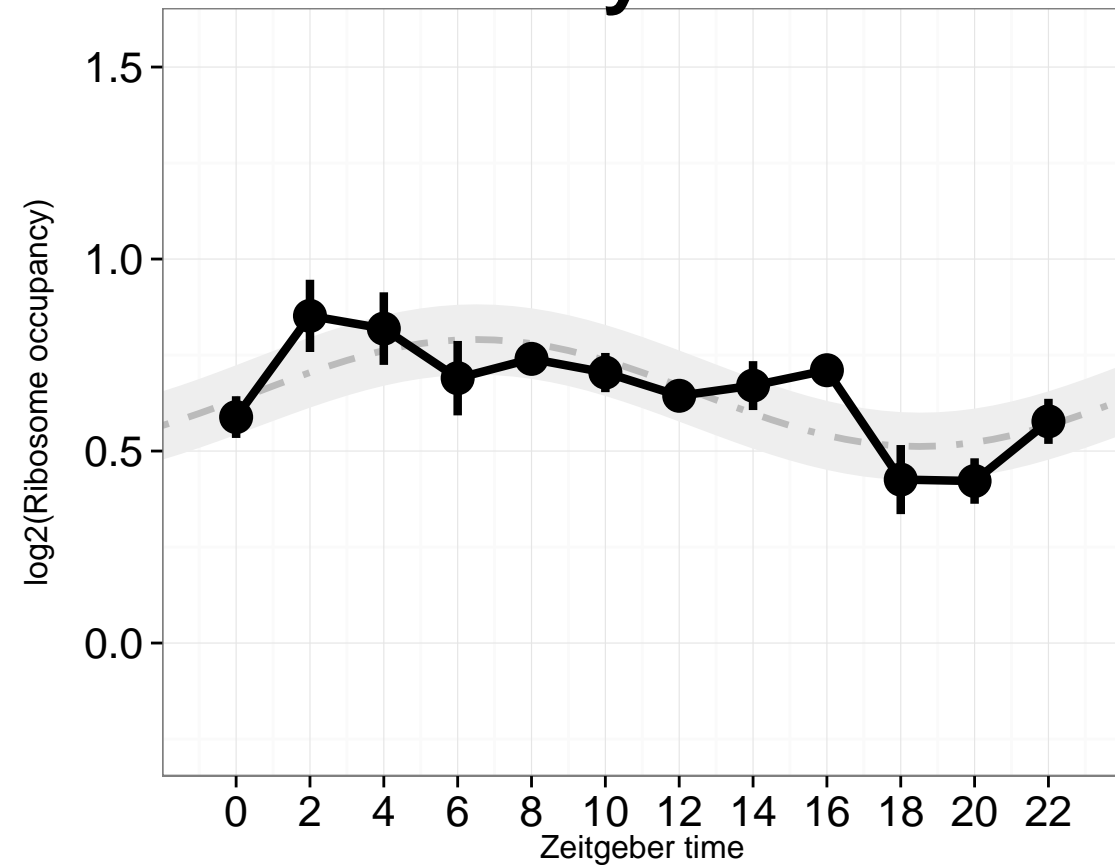

Supplement: Supplementary file 6925 [file 1]

## Nr2f2

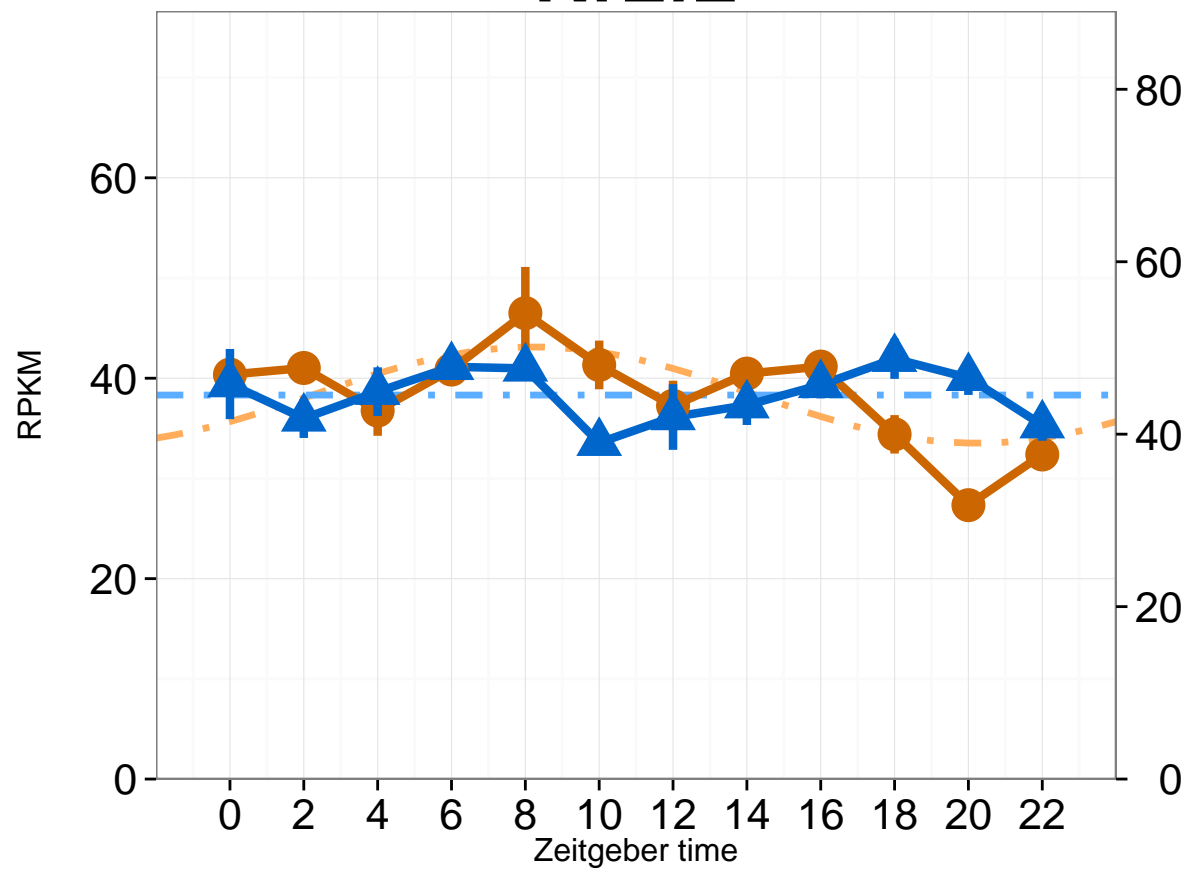

## Nr2f2

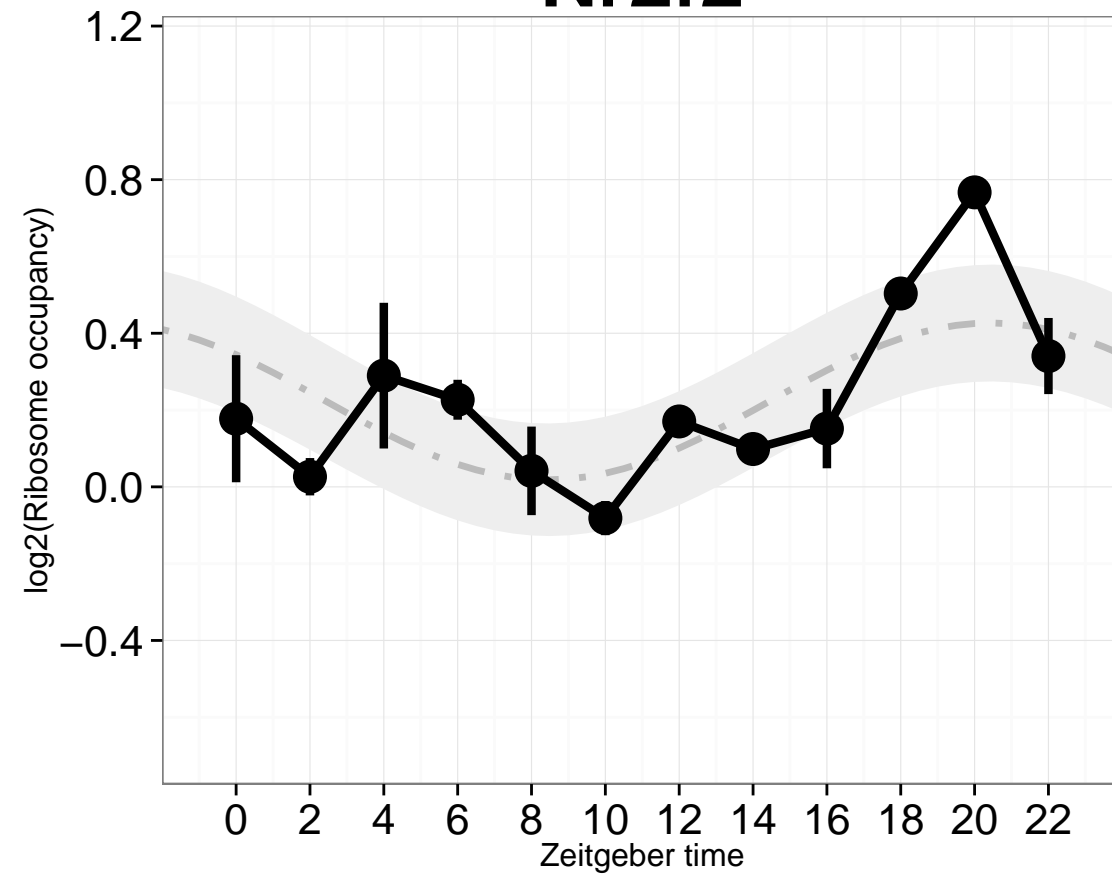

Supplement: Supplementary file 6926 [file 1]

## Bckdhb

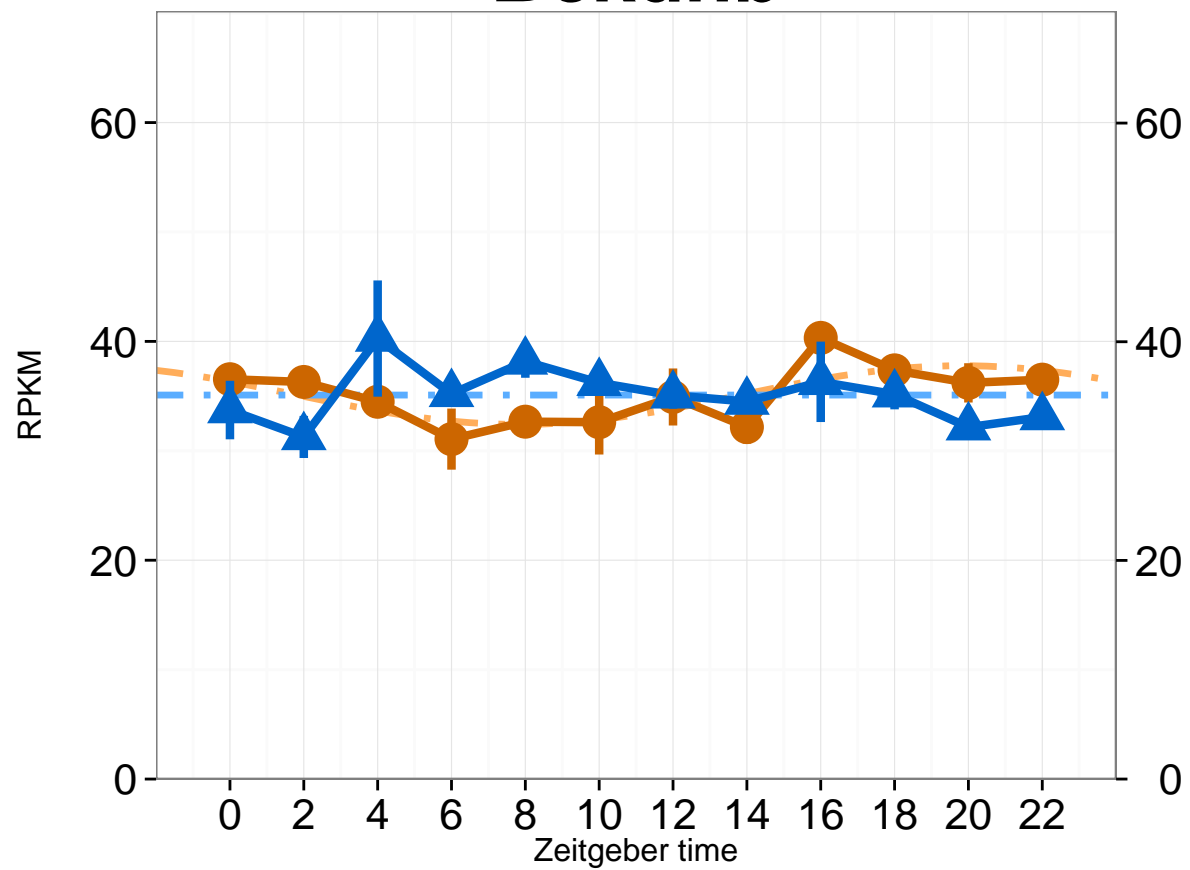

## Bckdhb

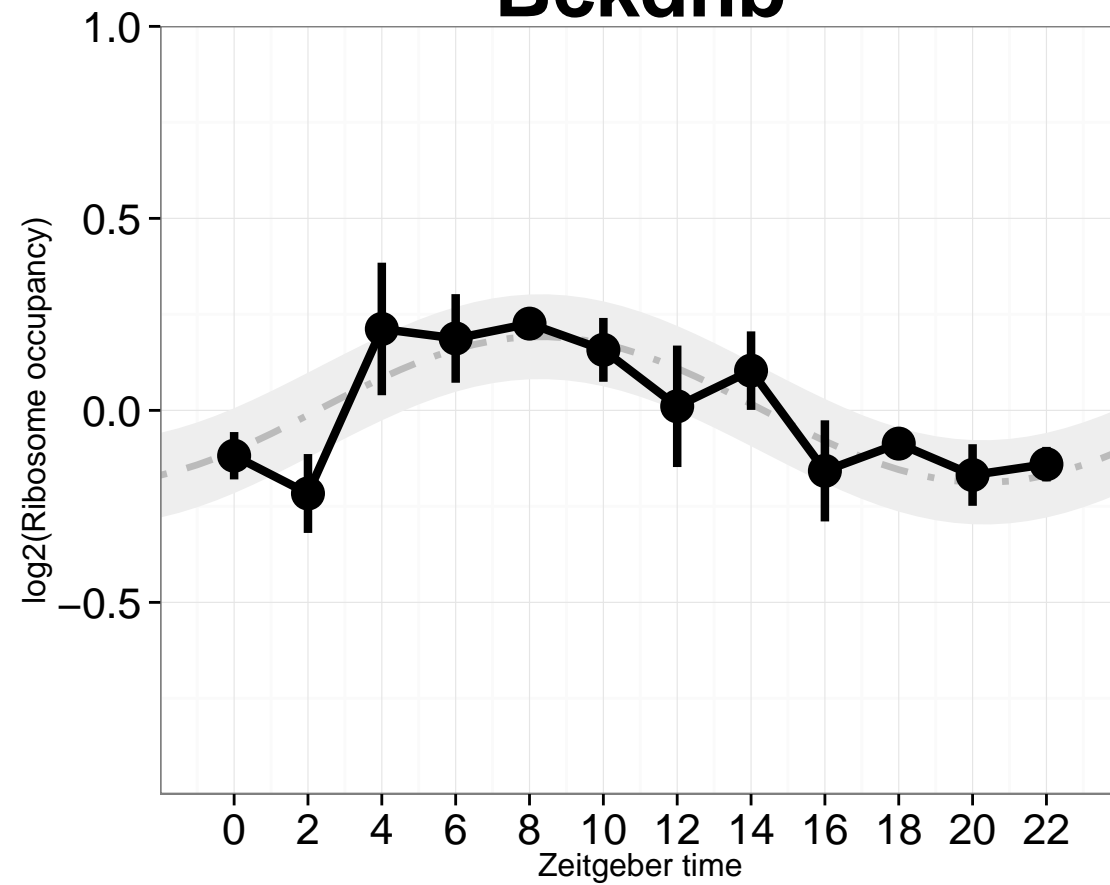

Supplement: Supplementary file 6927 [file 1]

## Rhbdd2

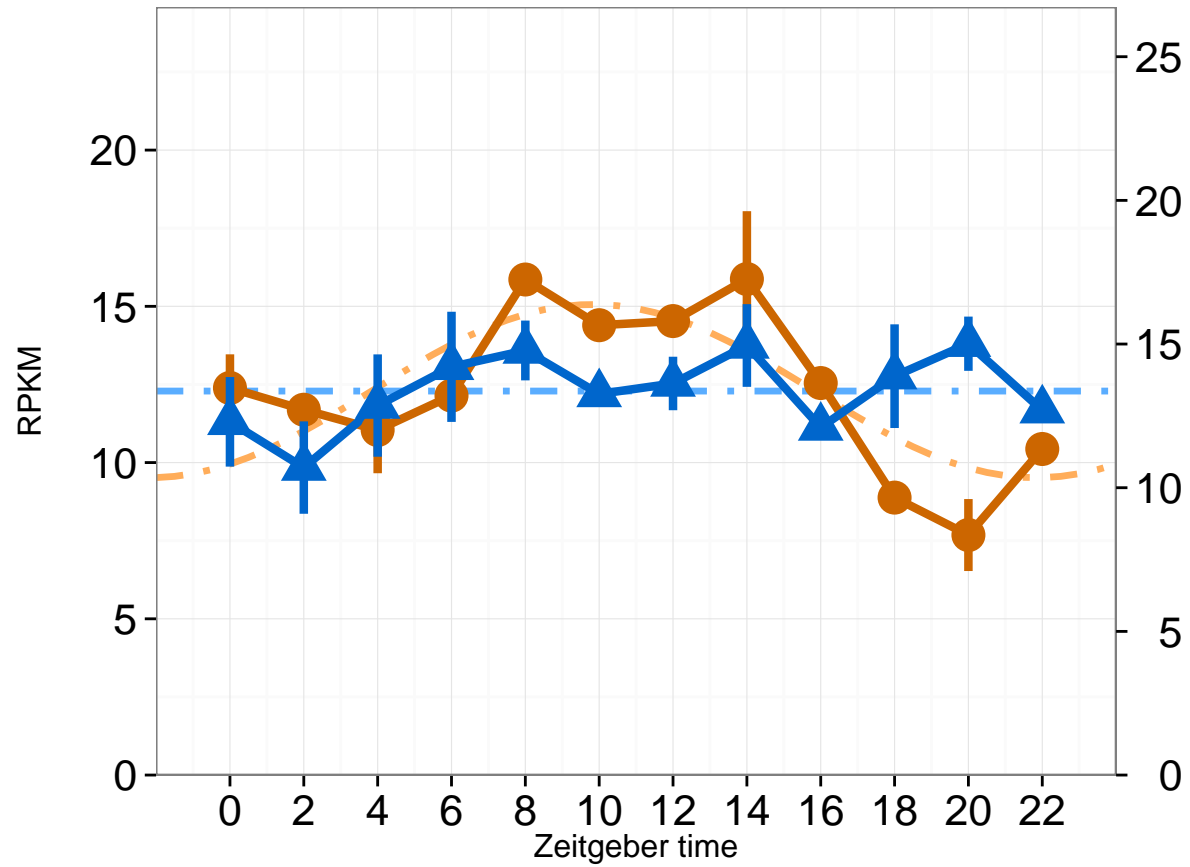

## Rhbdd2

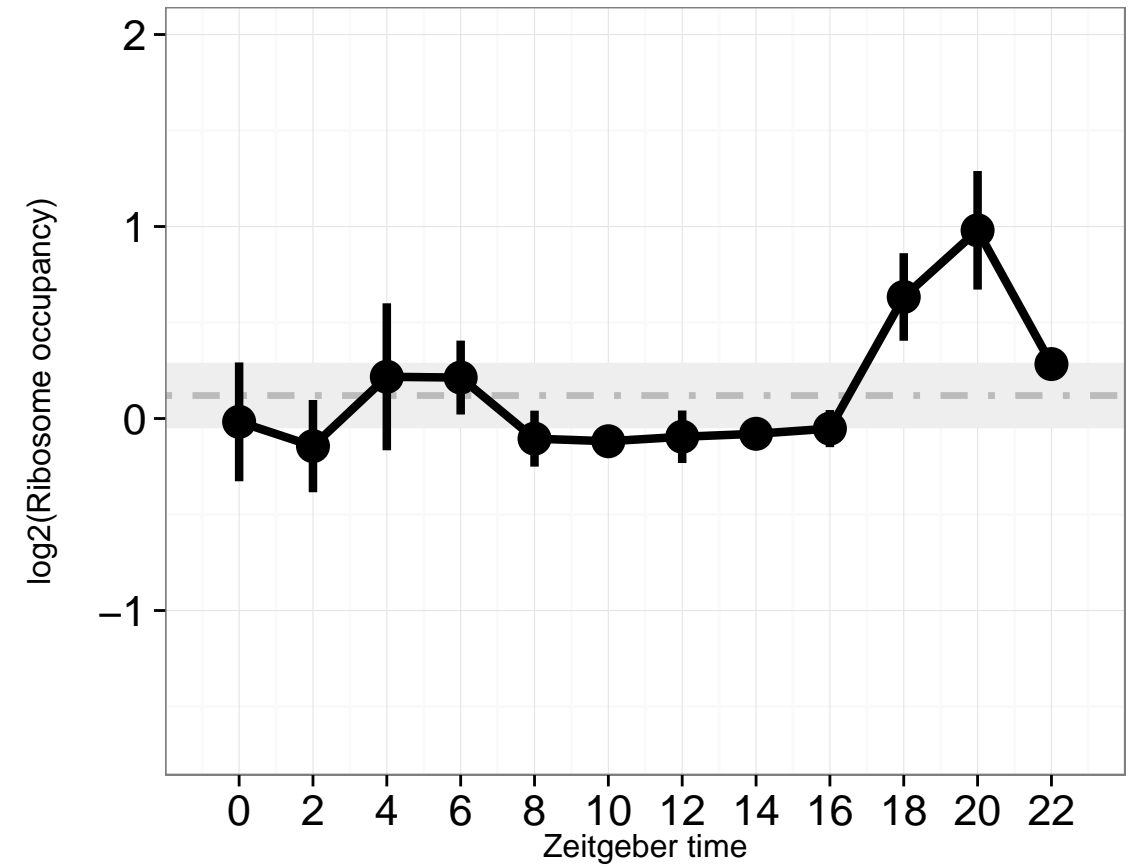

Supplement: Supplementary file 6928 [file 1]

# Zfp280c

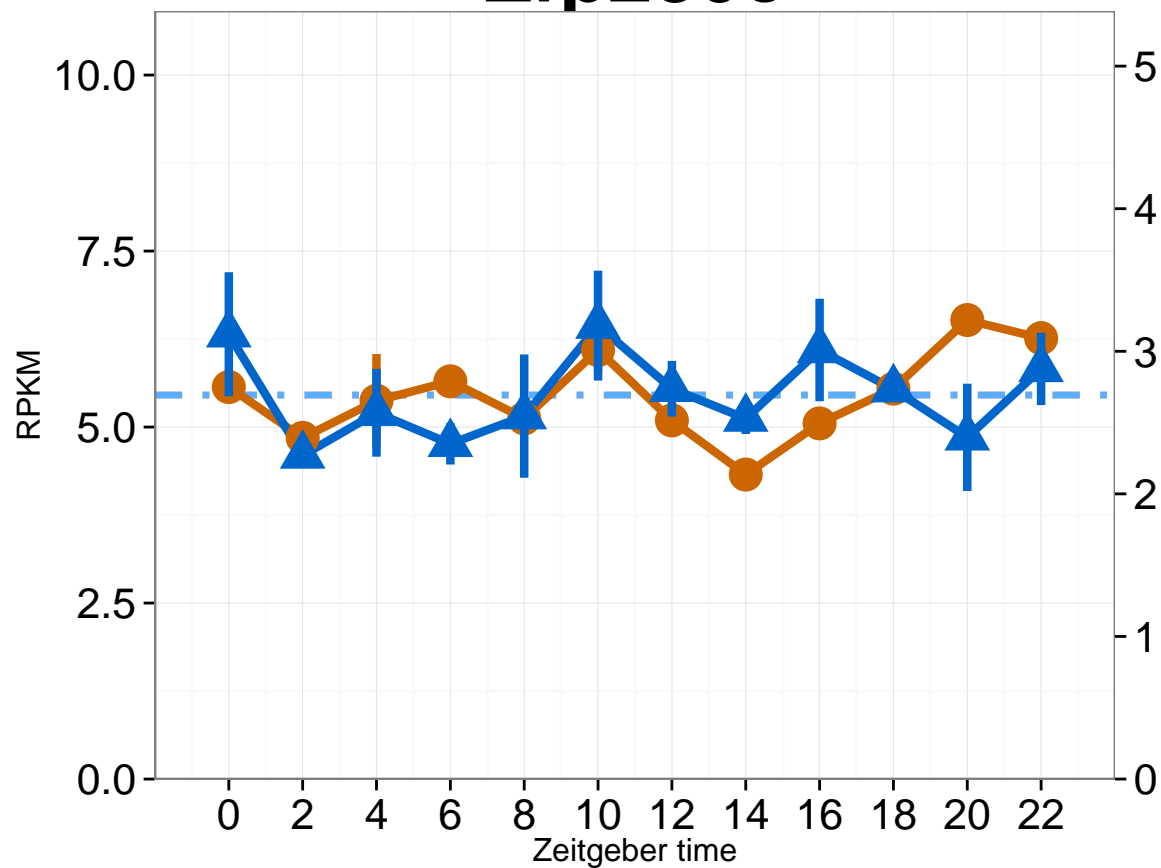

# Zfp280c

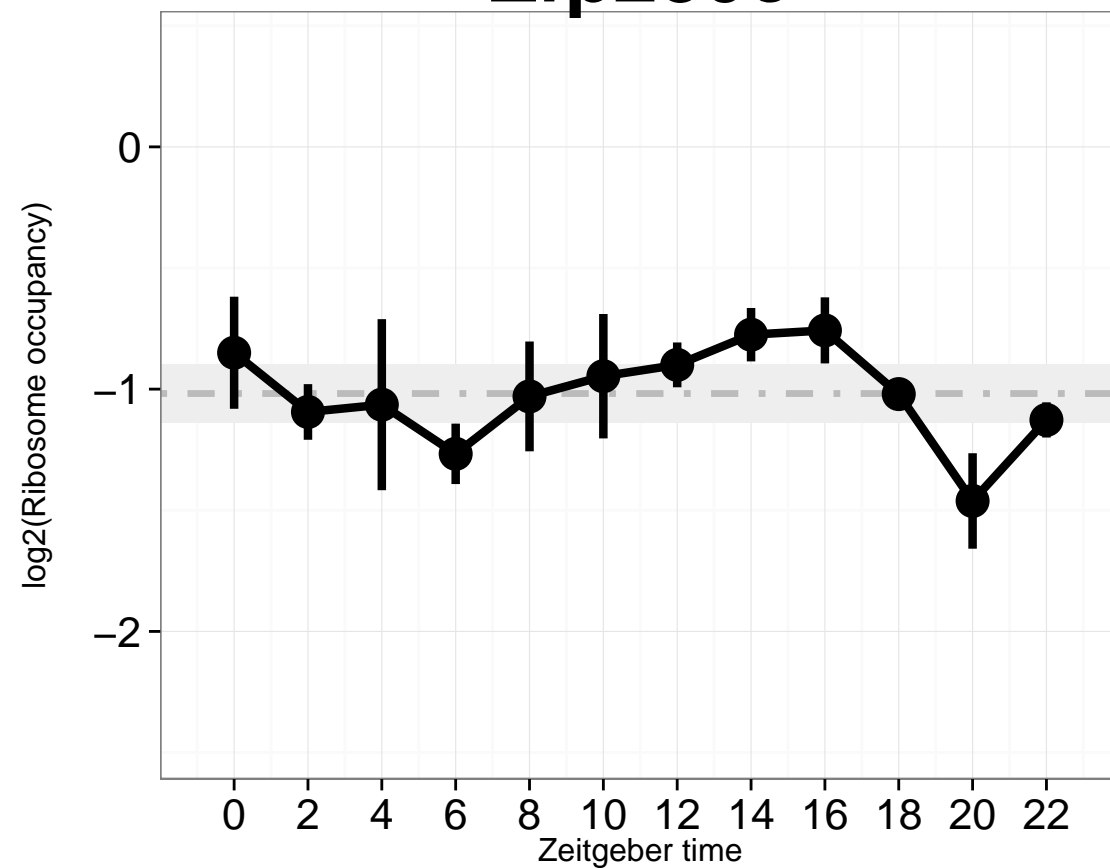

Supplement: Supplementary file 6929 [file 1]

# Cacnb3

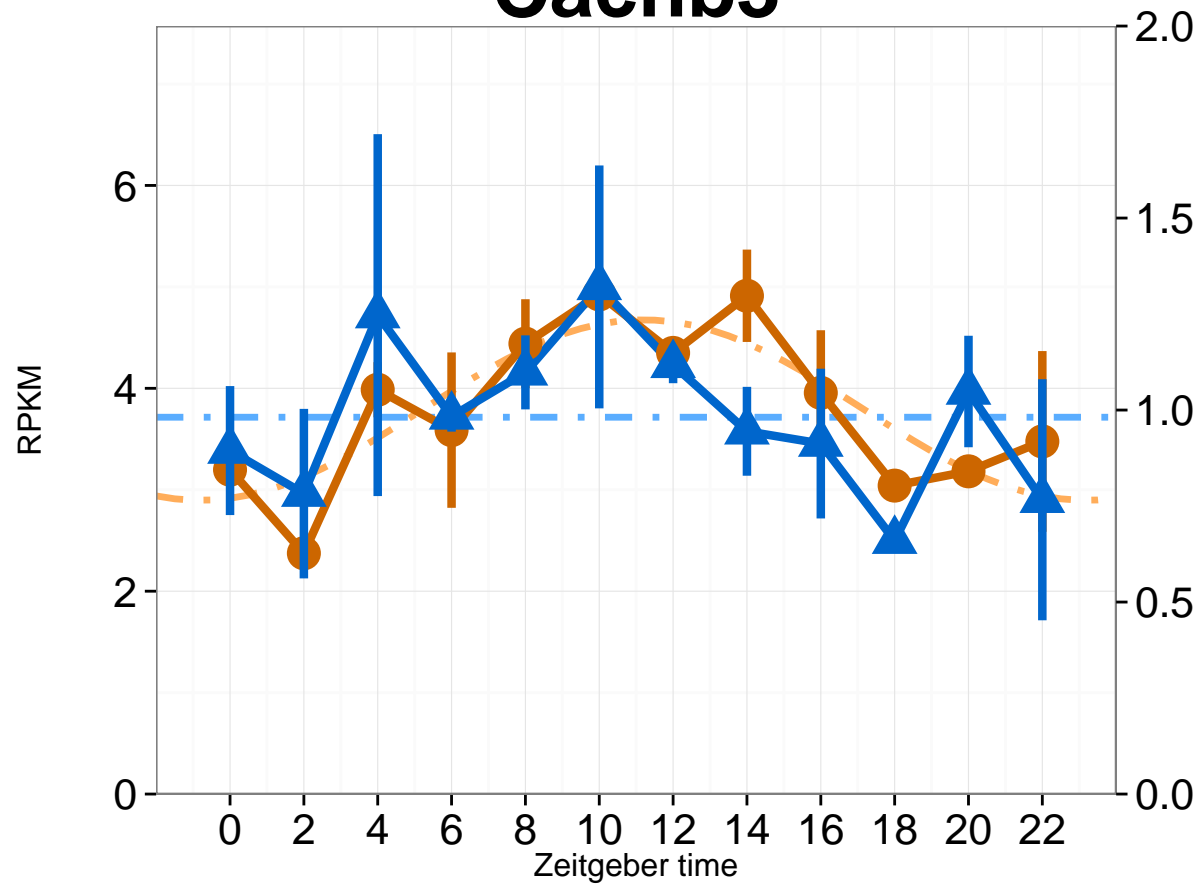

# Cacnb3

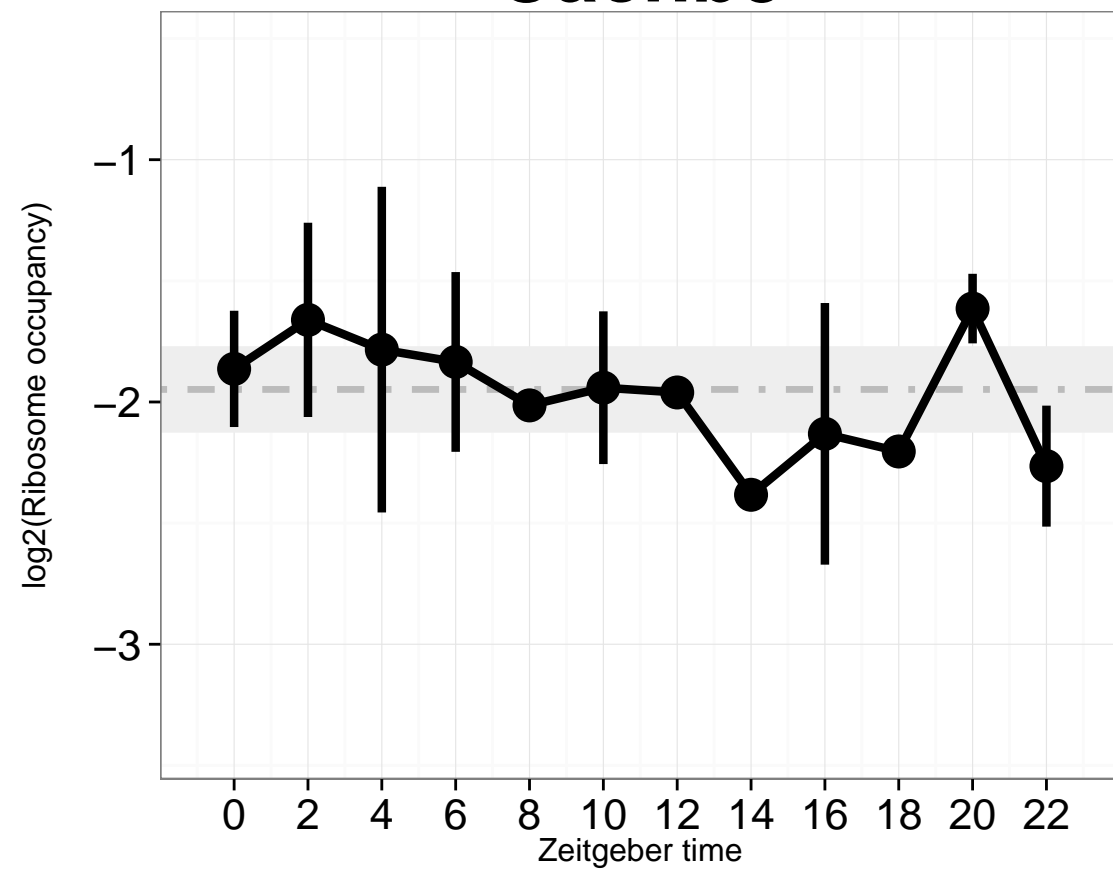

Supplement: Supplementary file 6930 [file 1]

## Lrp10

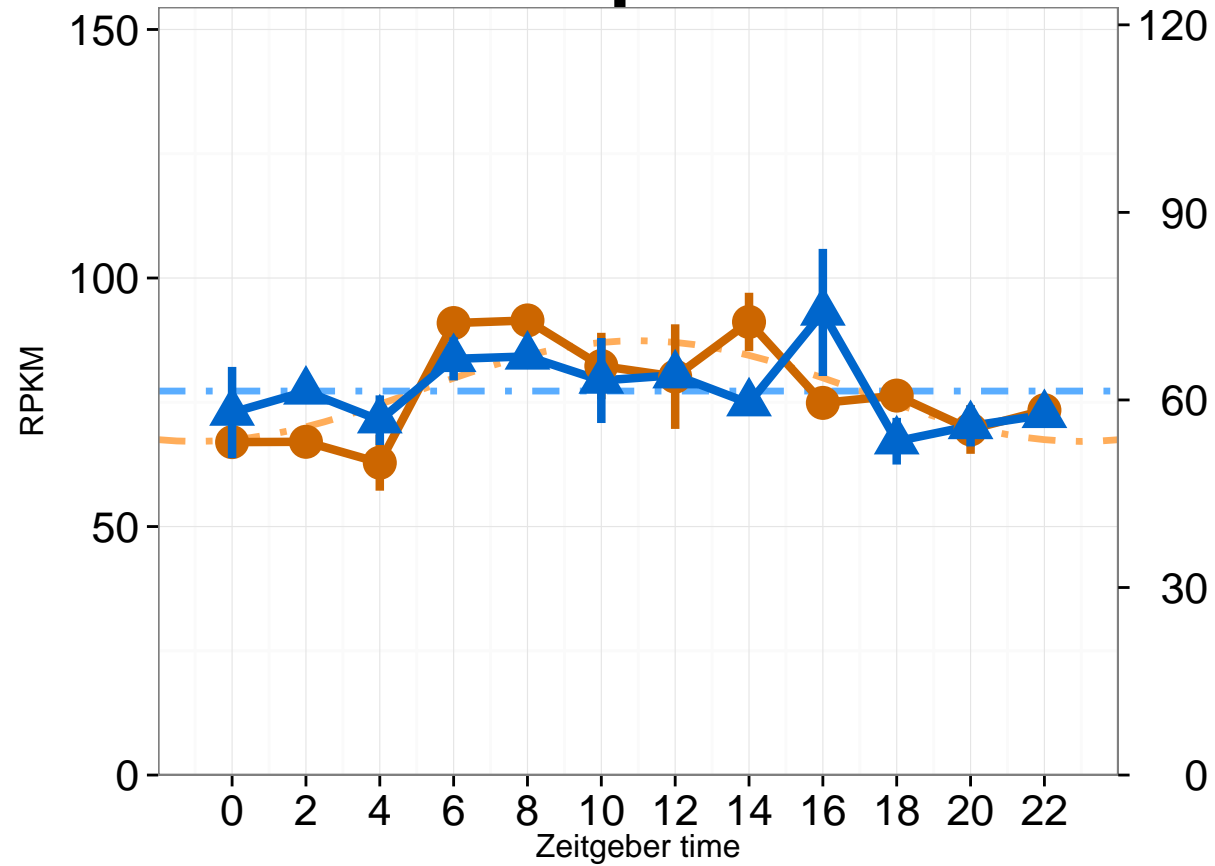

## Lrp10

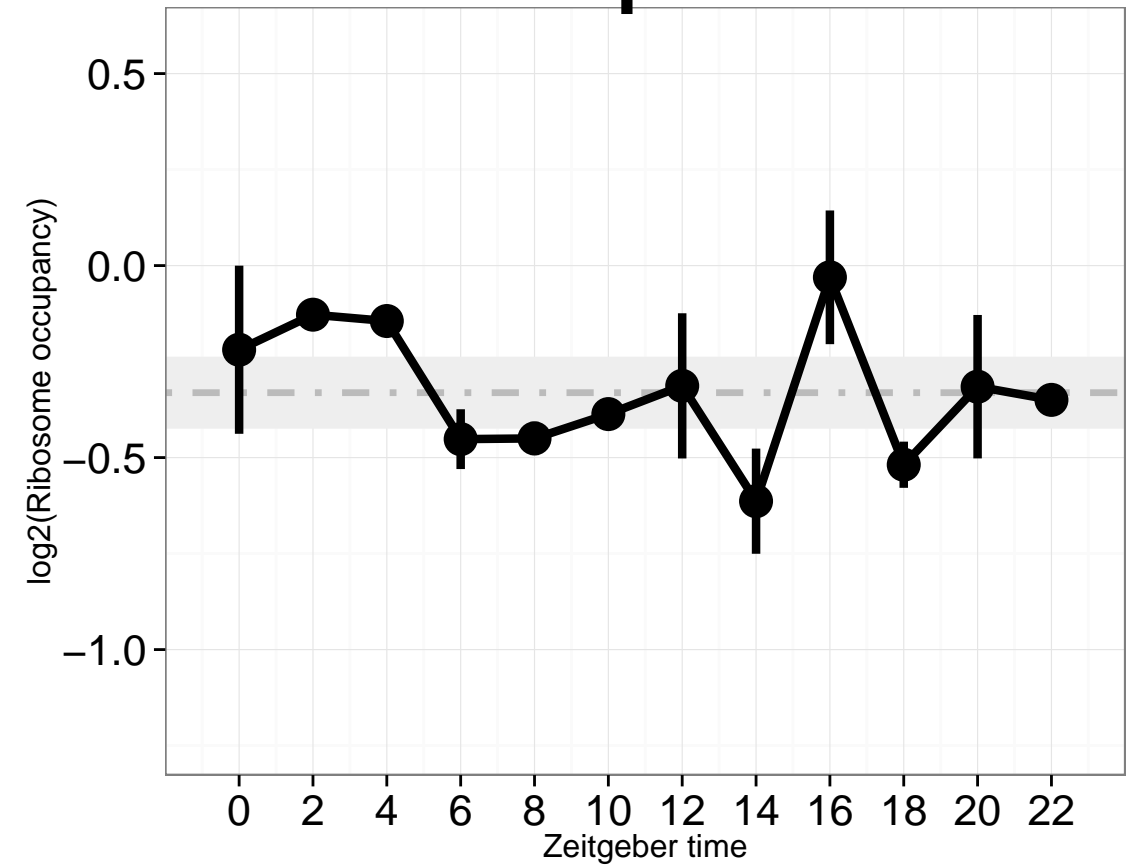

Supplement: Supplementary file 6931 [file 1]

# Zfp472

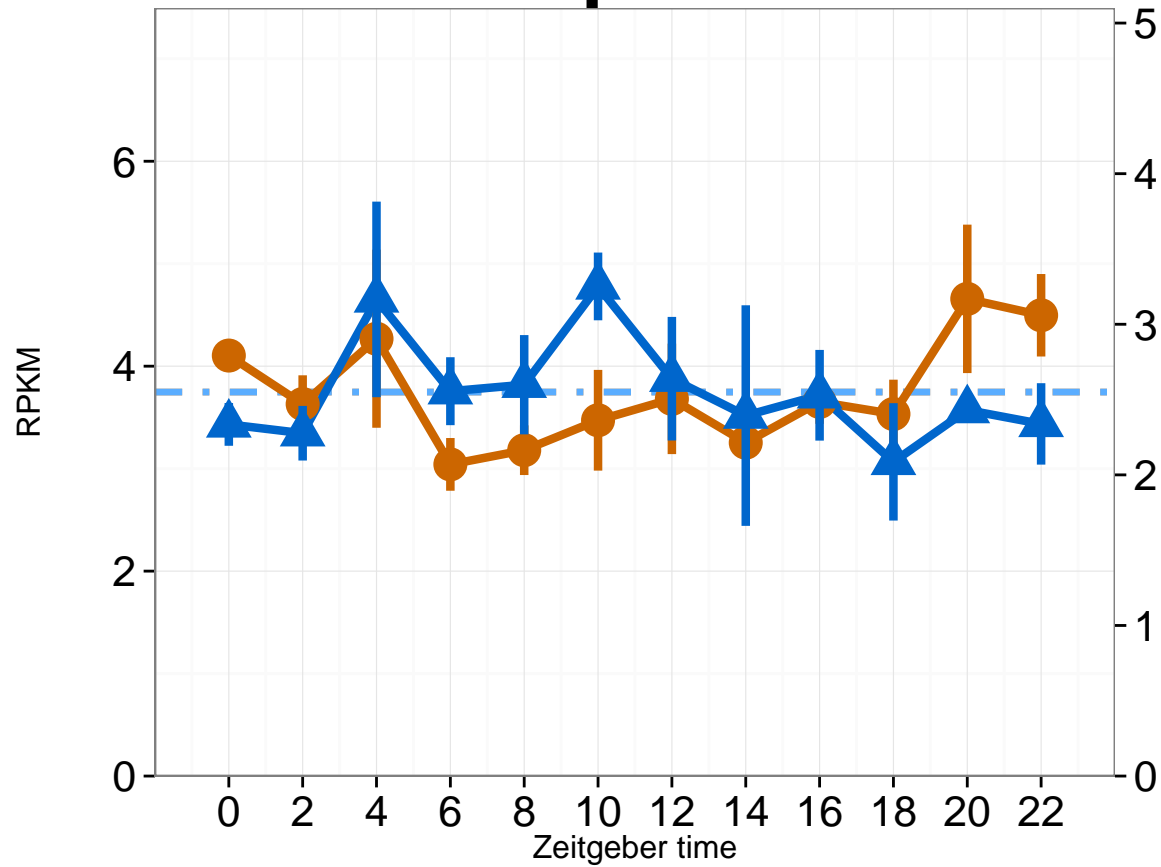

# Zfp472

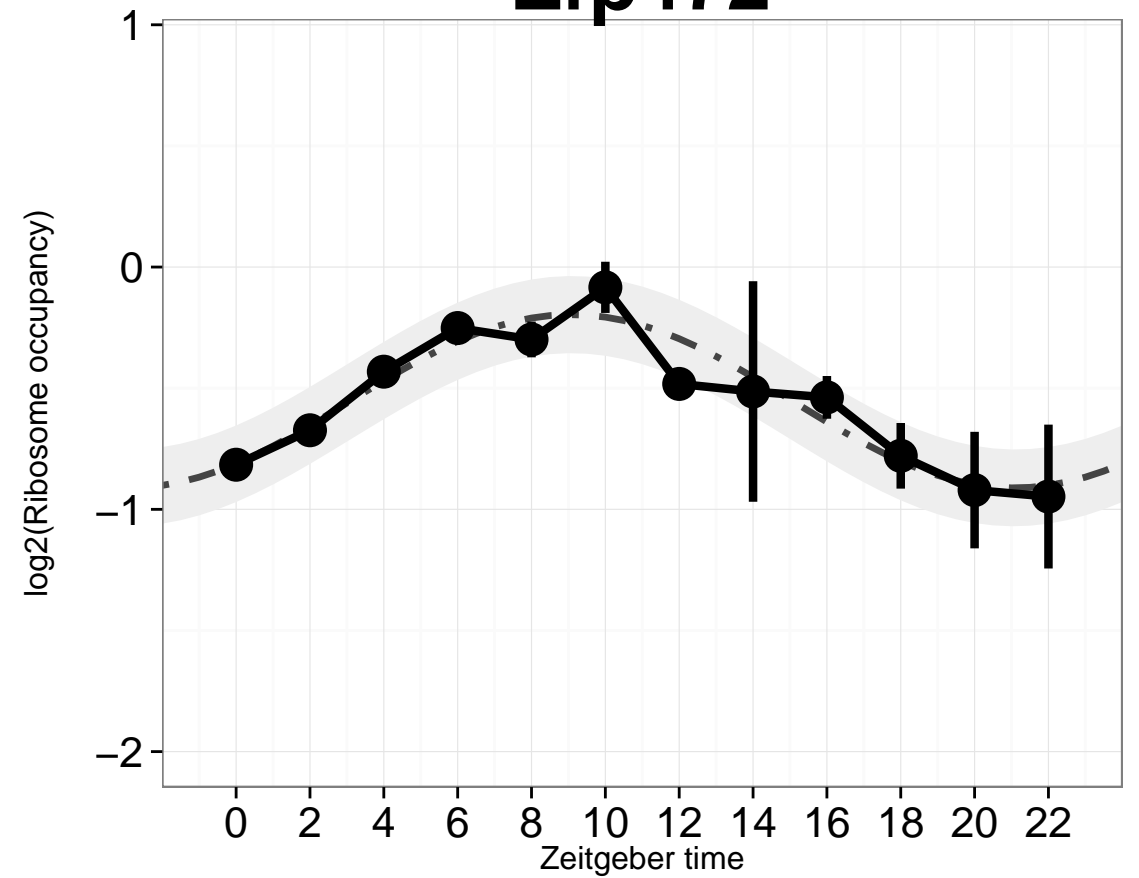

Supplement: Supplementary file 6932 [file 1]

# Cap1

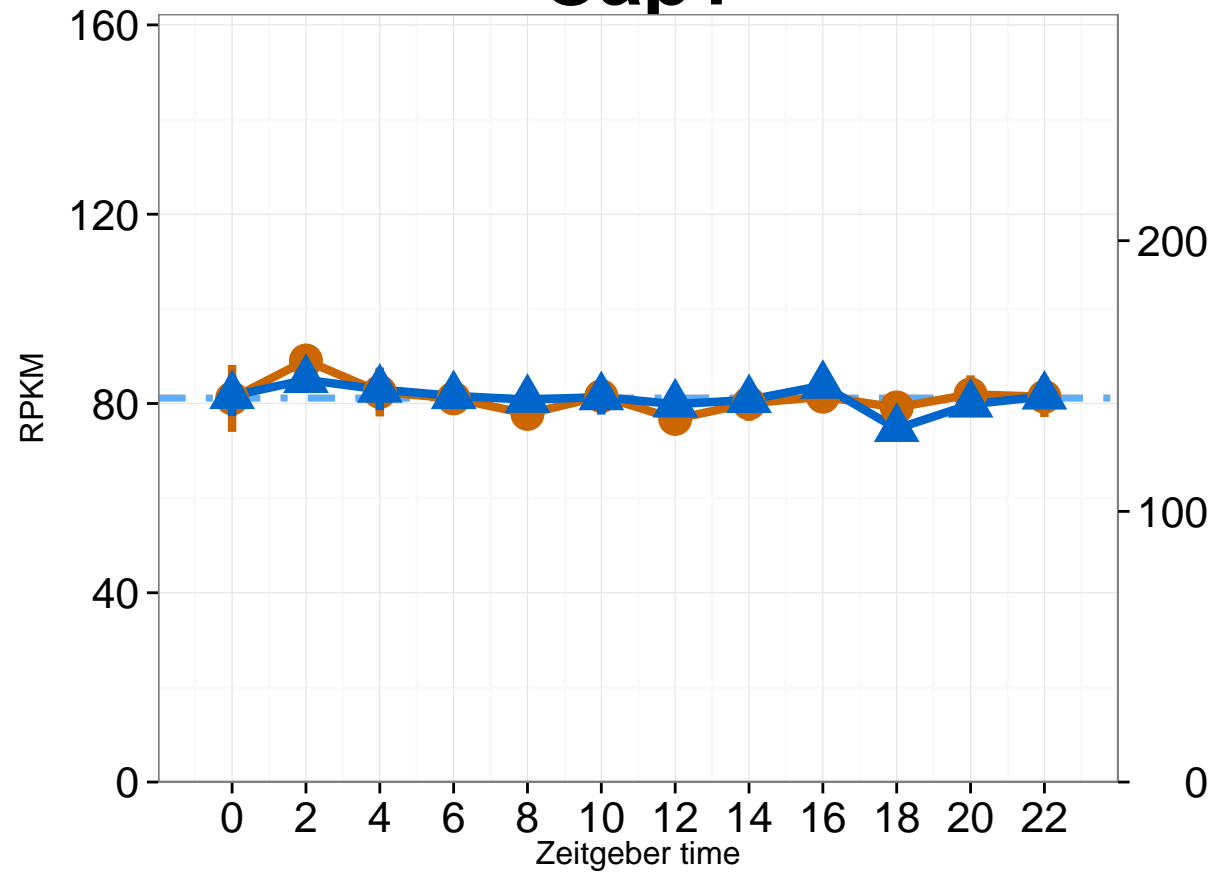

# Cap1

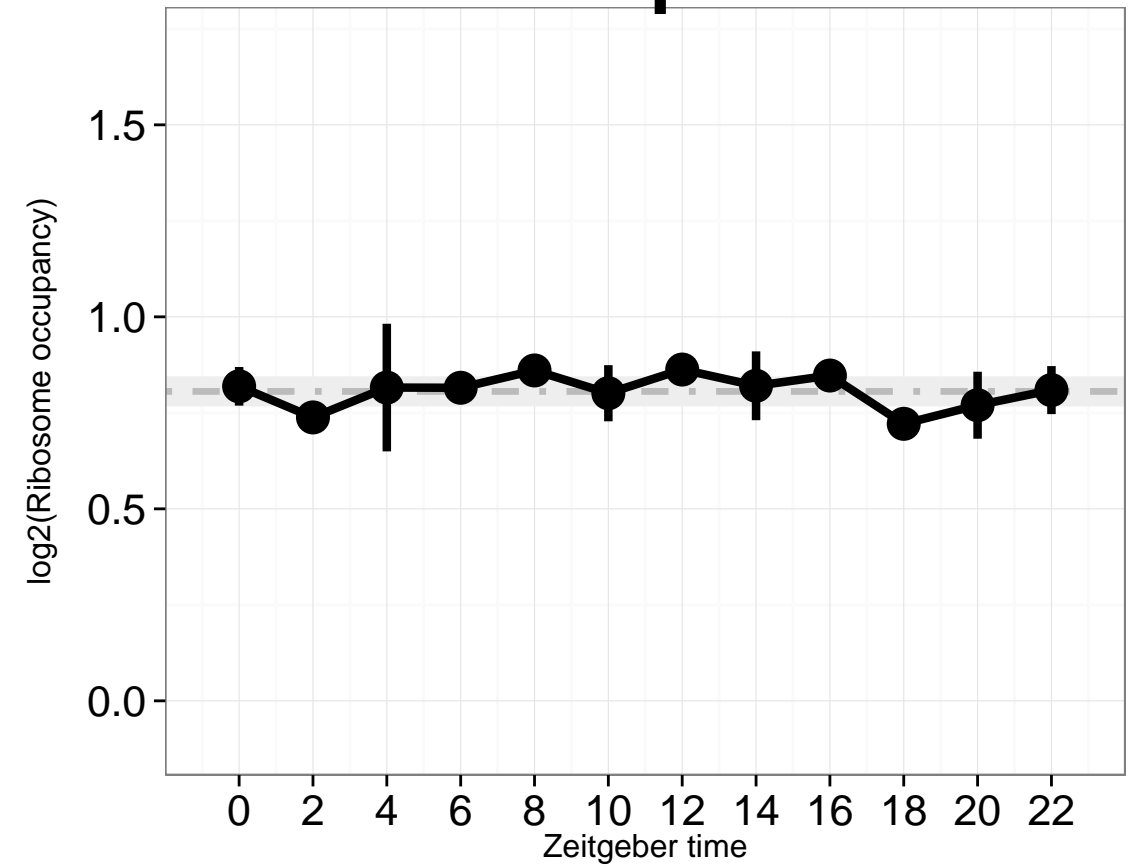

Supplement: Supplementary file 6933 [file 1]

# Fam92a

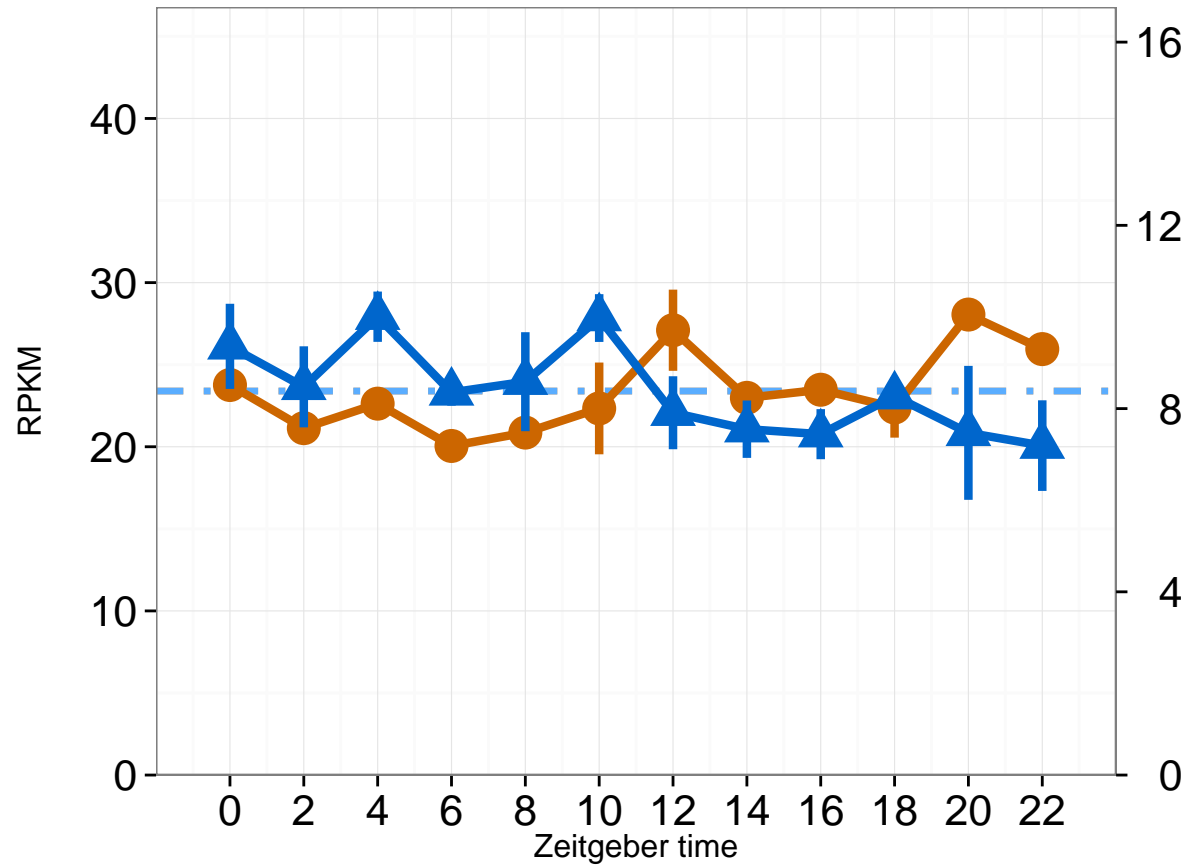

# Fam92a

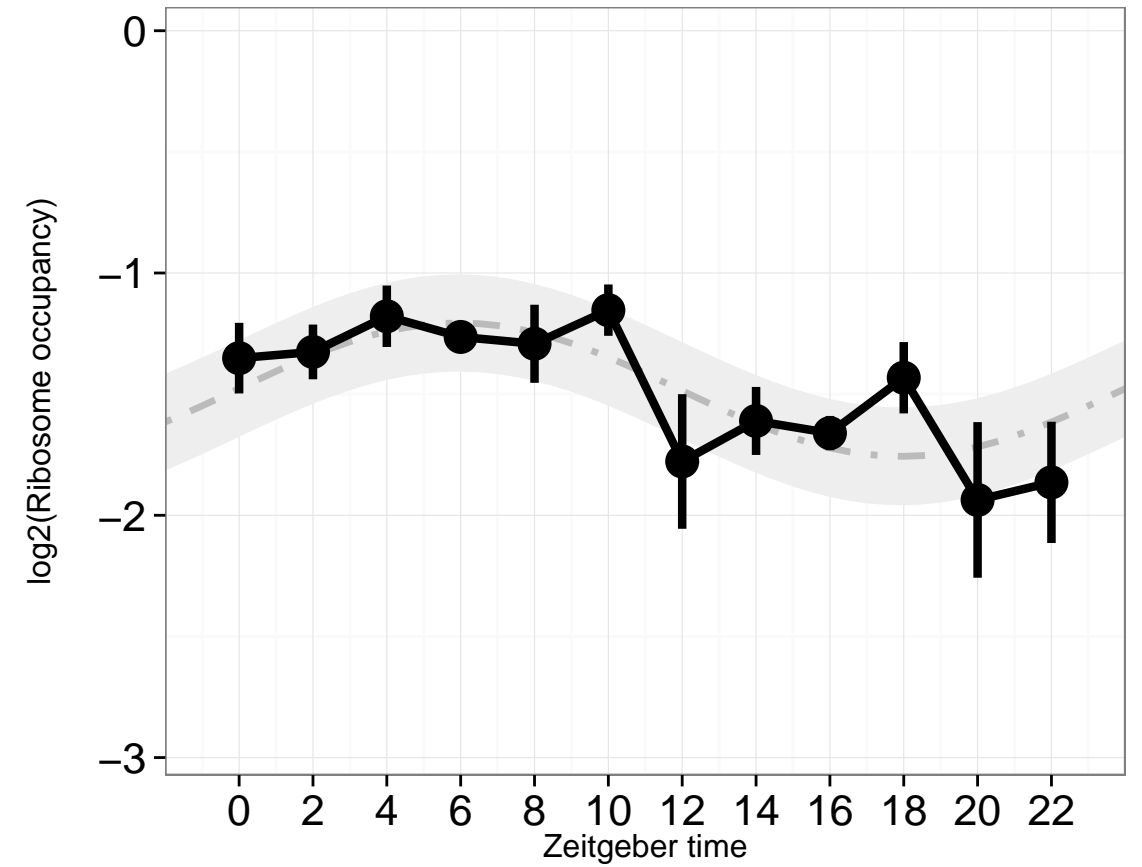

Supplement: Supplementary file 6934 [file 1]

## Ahcyl2

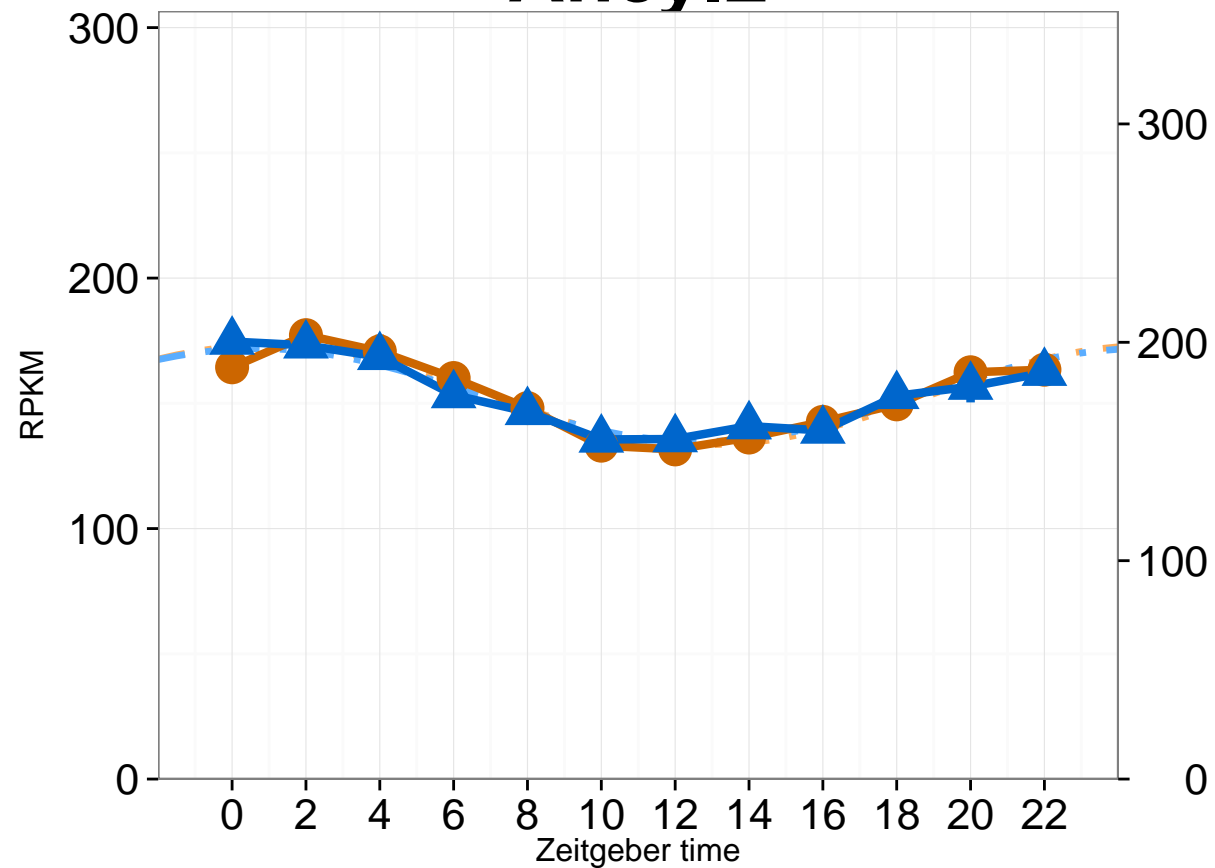

## Ahcyl2

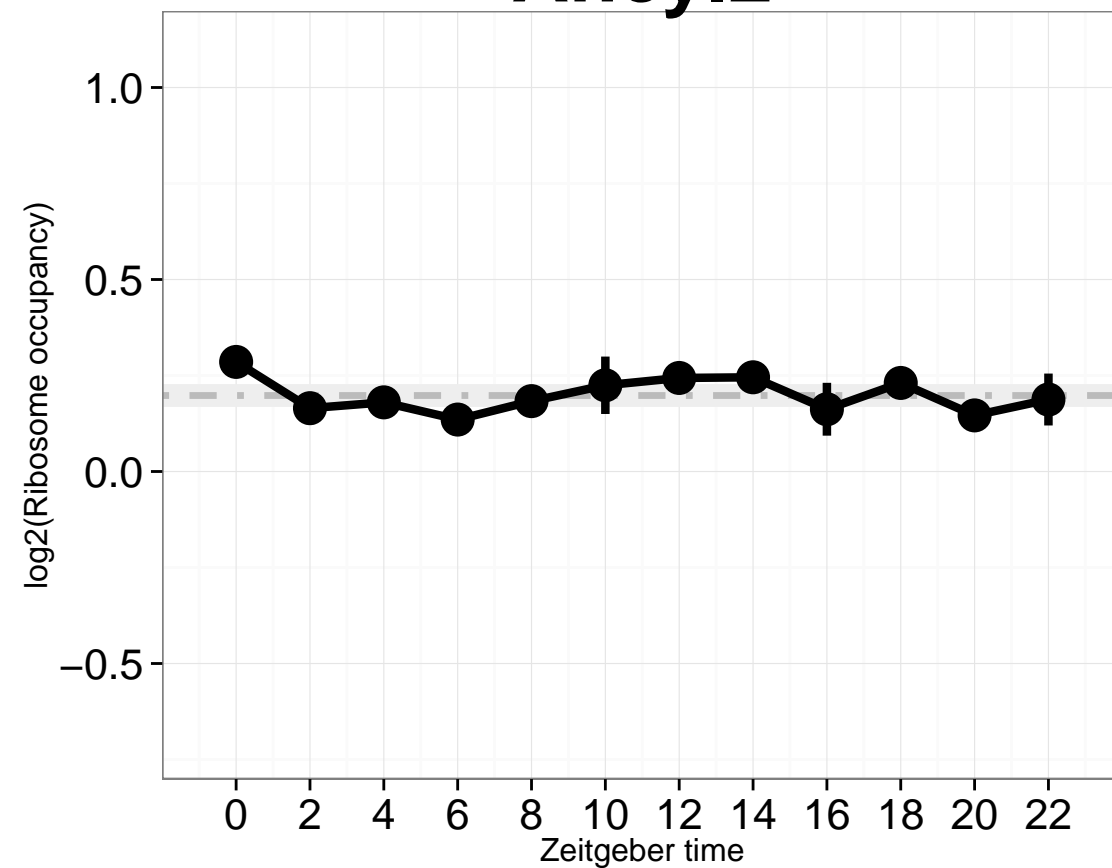

Supplement: Supplementary file 6935 [file 1]

## Fbxo34

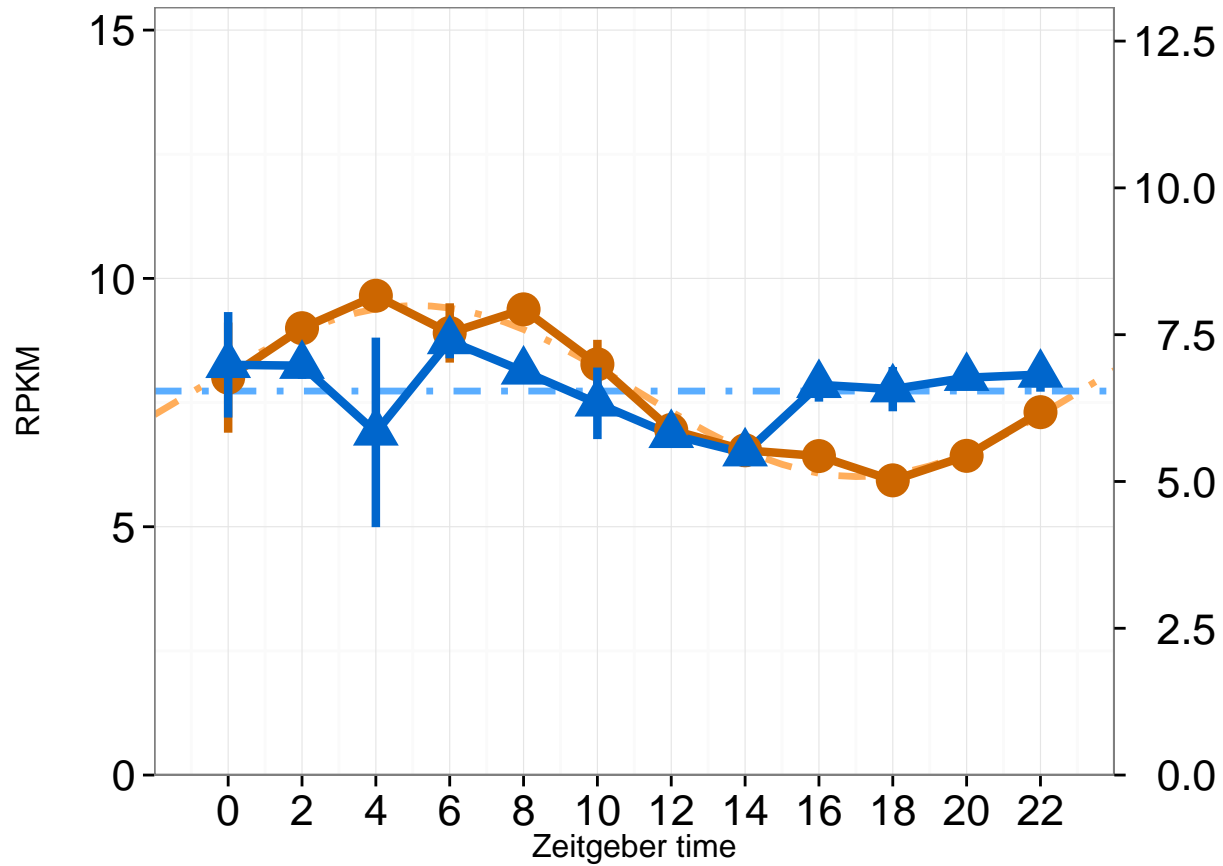

## Fbxo34

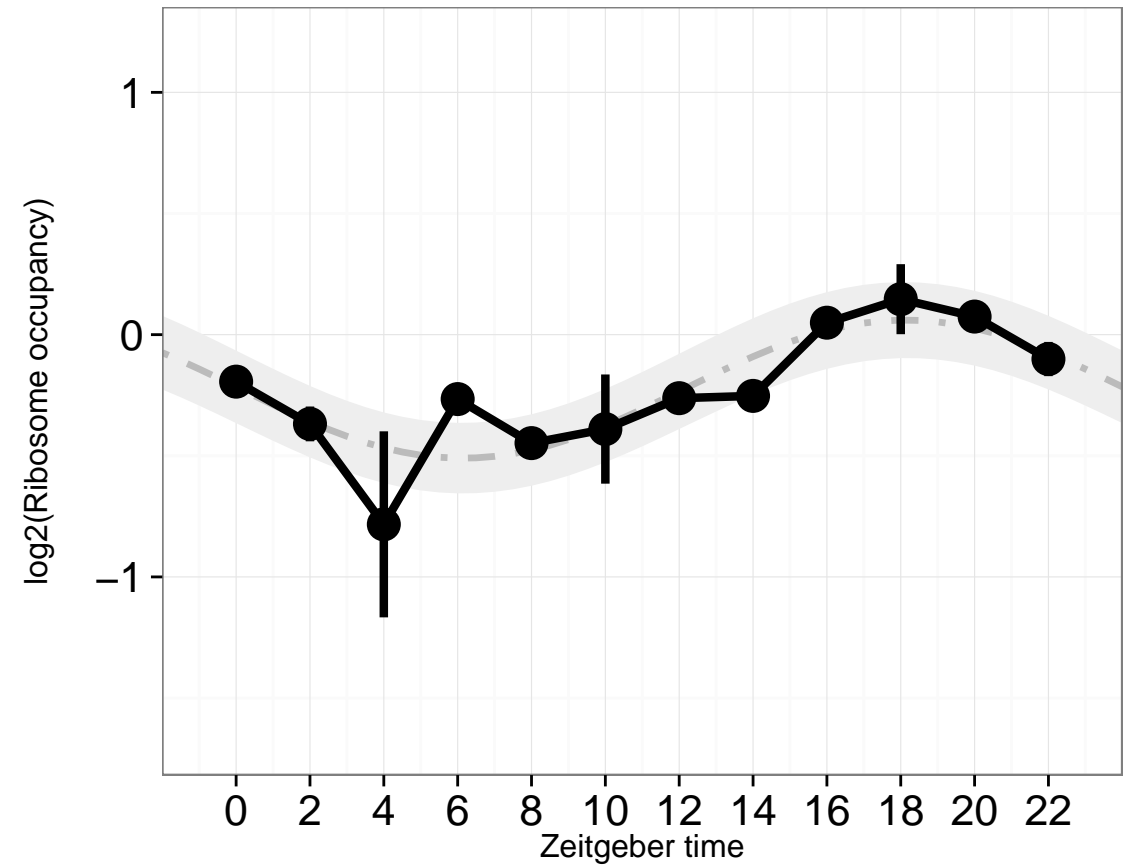

Supplement: Supplementary file 6936 [file 1]

## Fras1

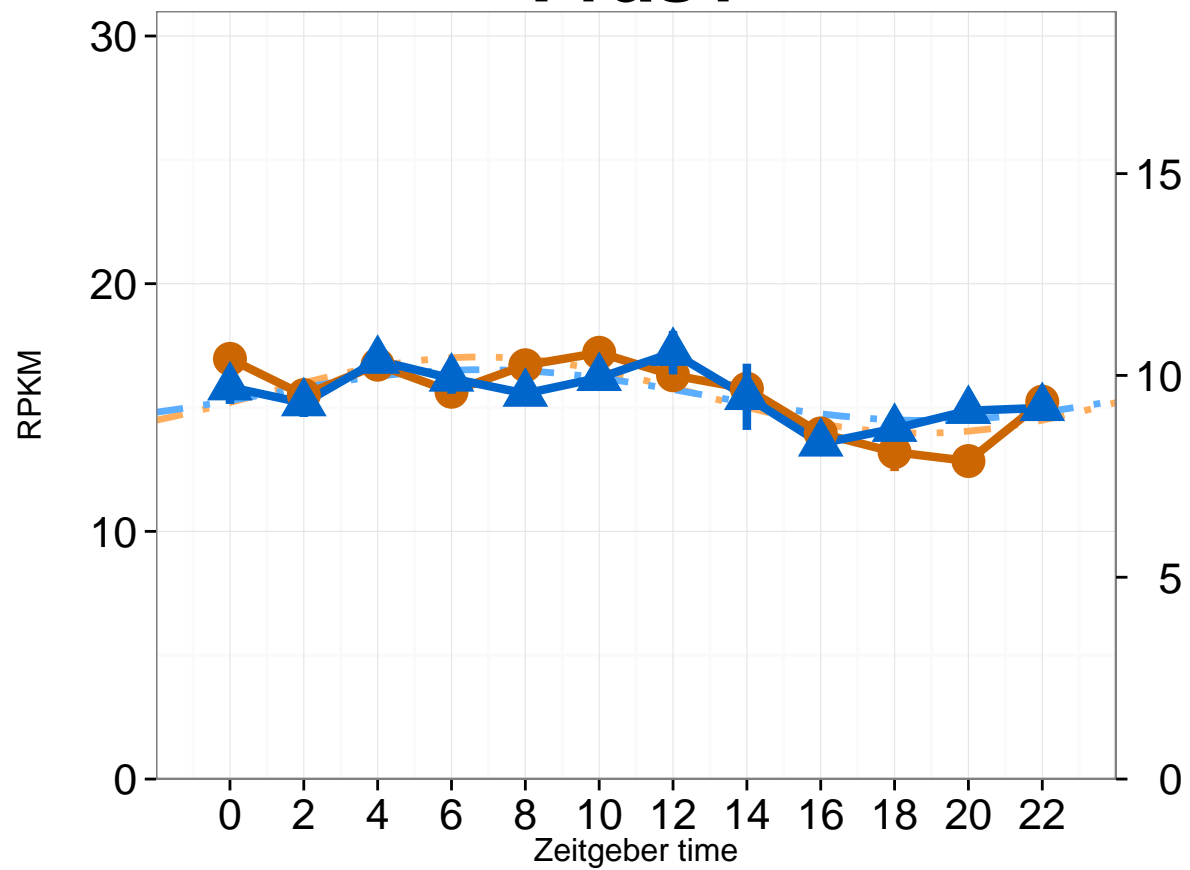

## Fras1

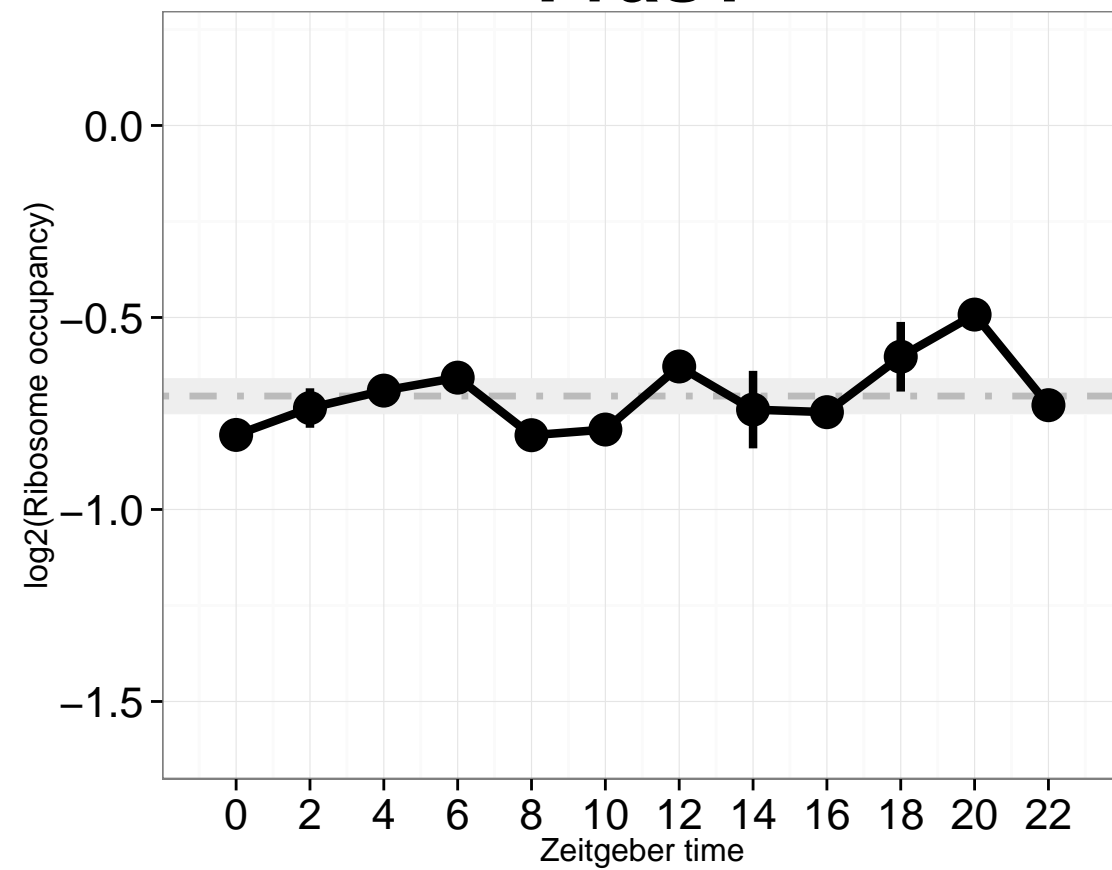

Supplement: Supplementary file 6937 [file 1]

## Oxsr1

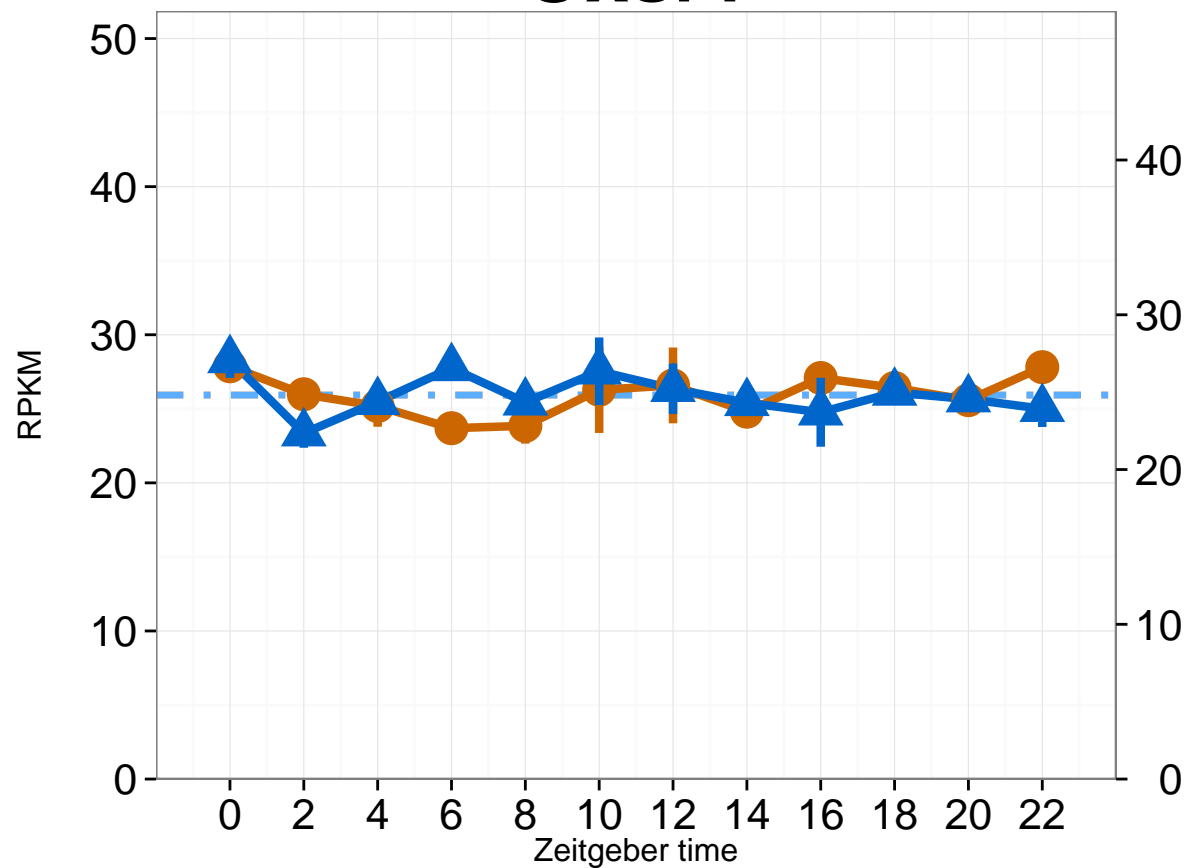

## Oxsr1

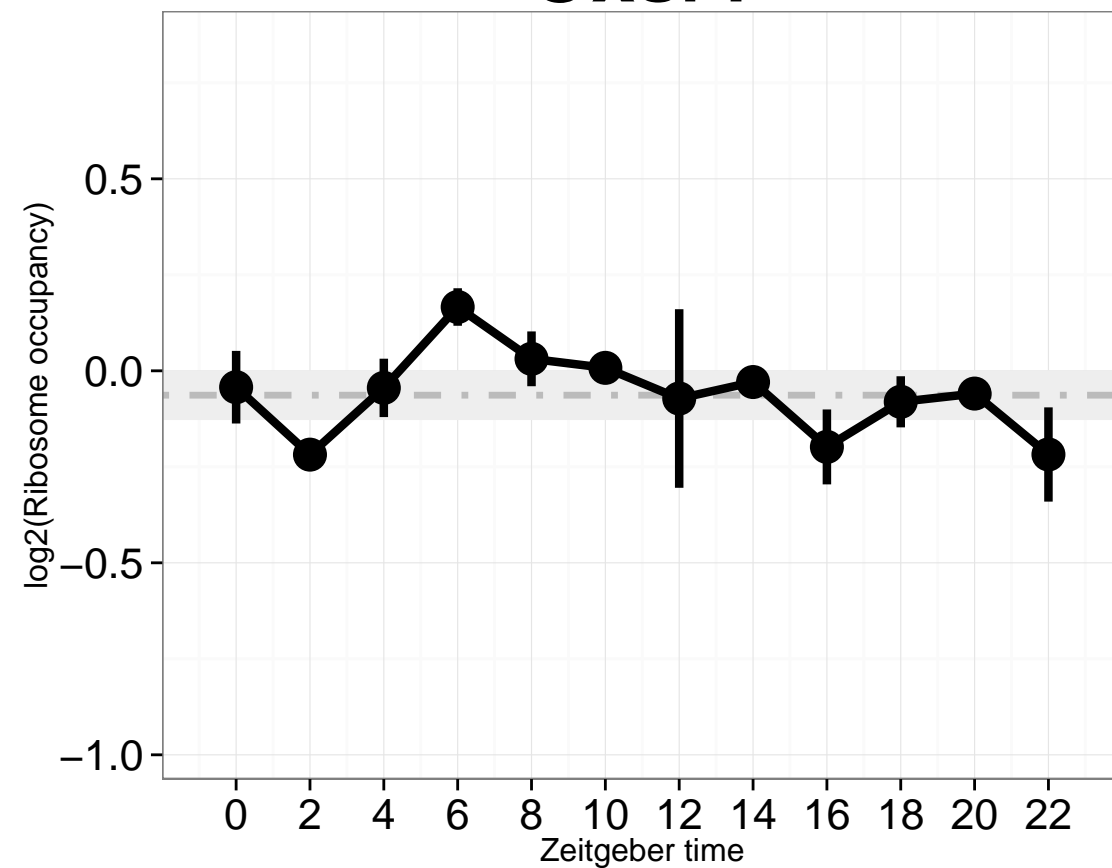

Supplement: Supplementary file 6938 [file 1]

## Fkbp10

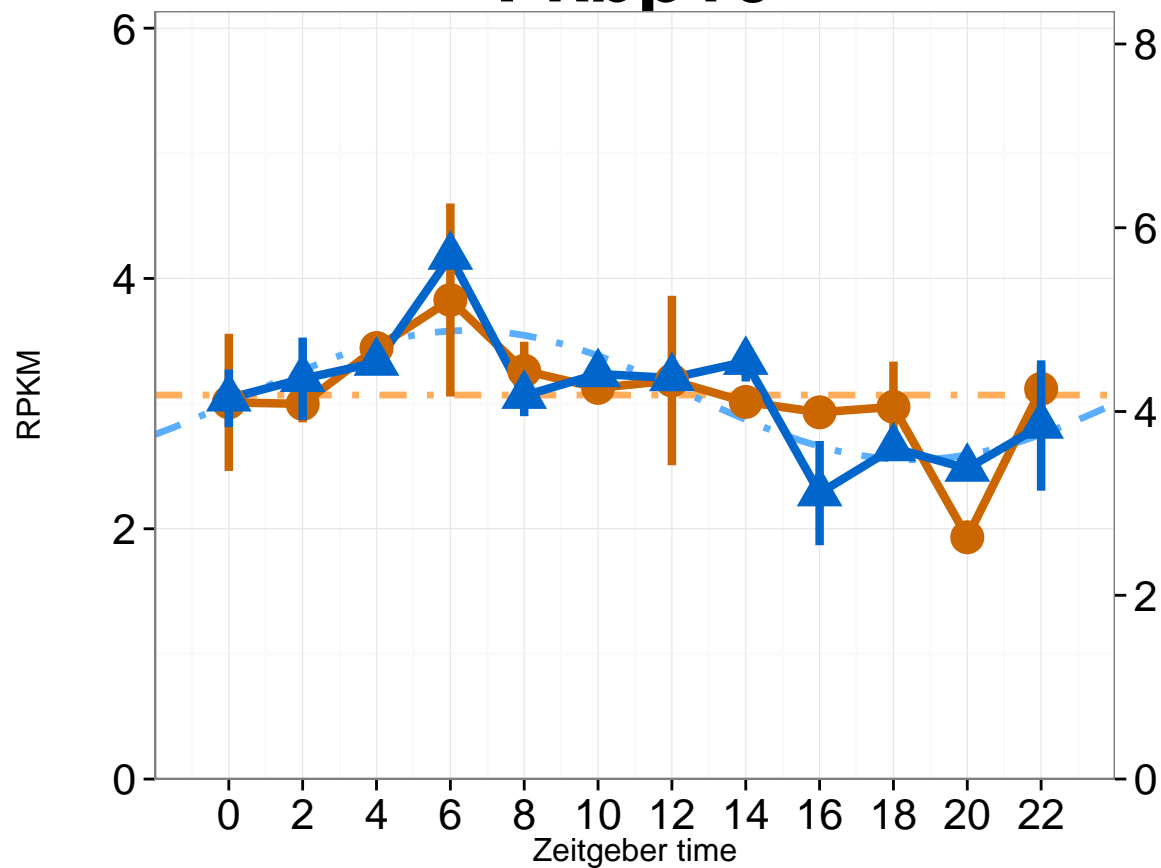

## Fkbp10

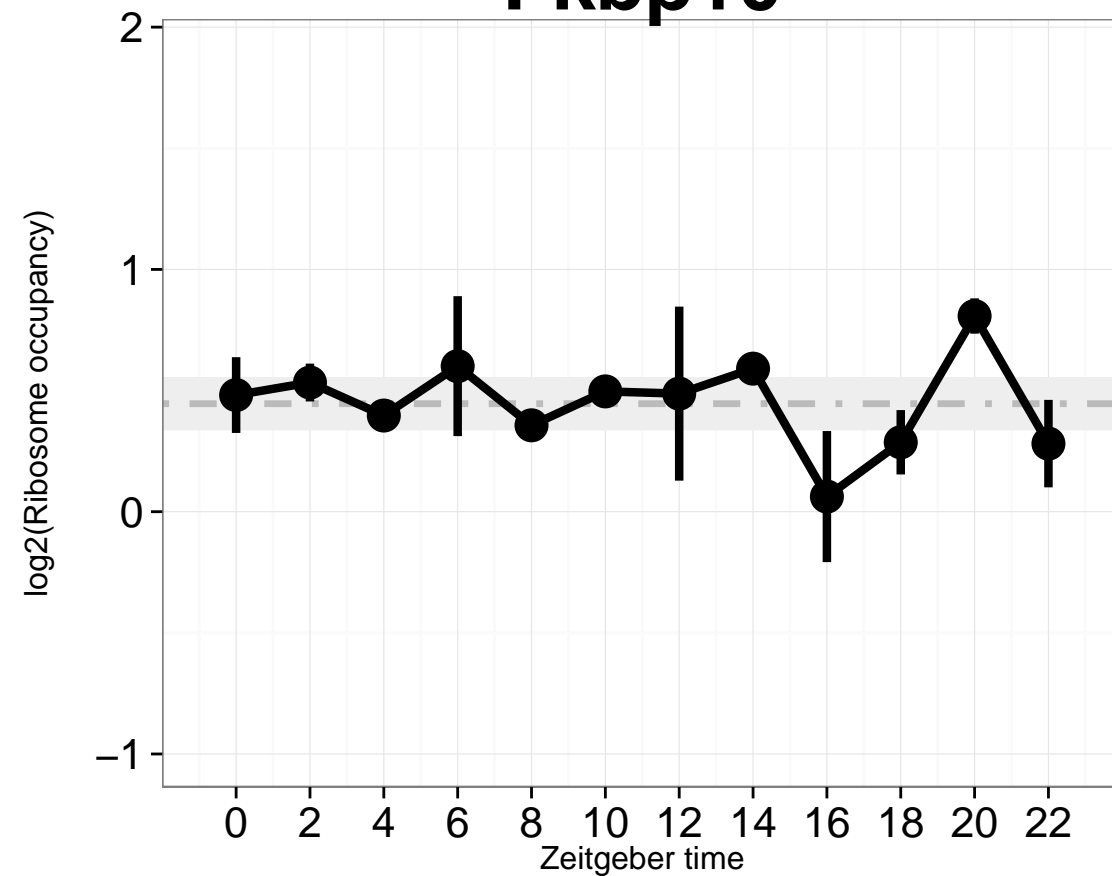

Supplement: Supplementary file 6939 [file 1]

# Zfp39

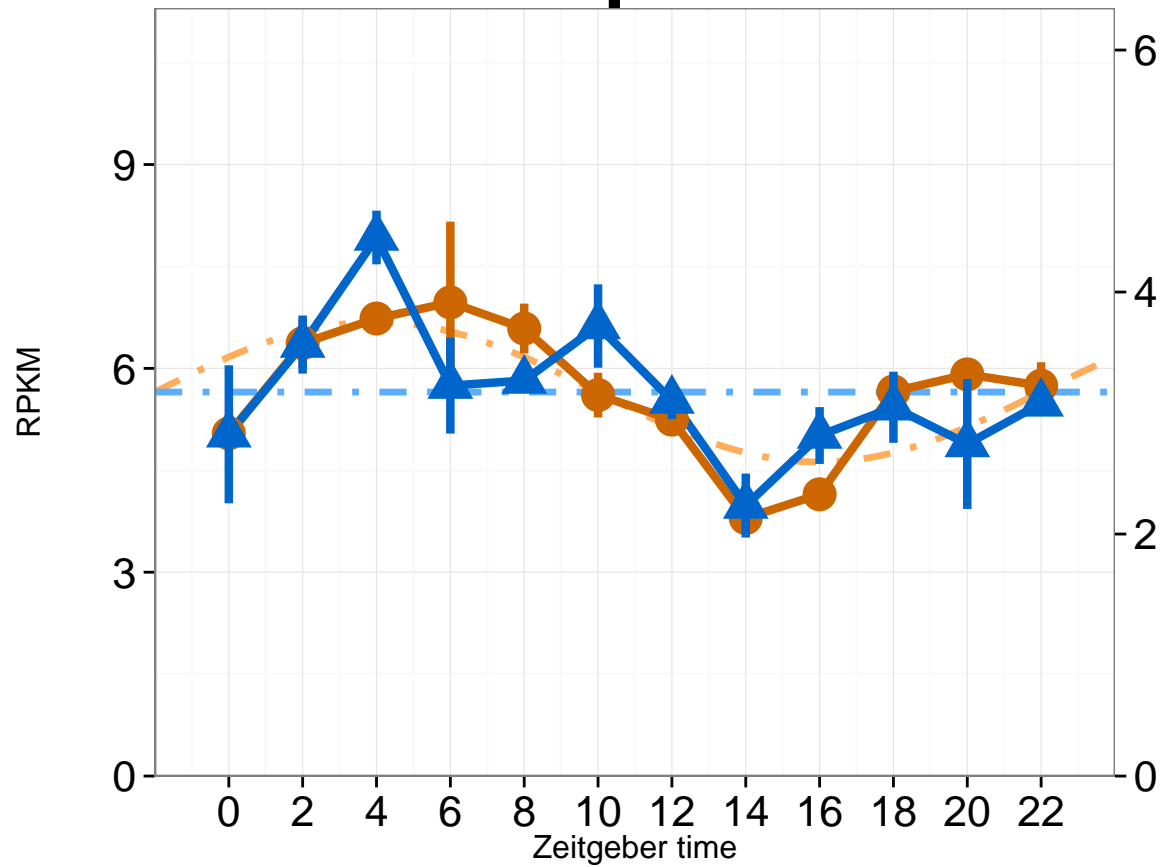

# Zfp39

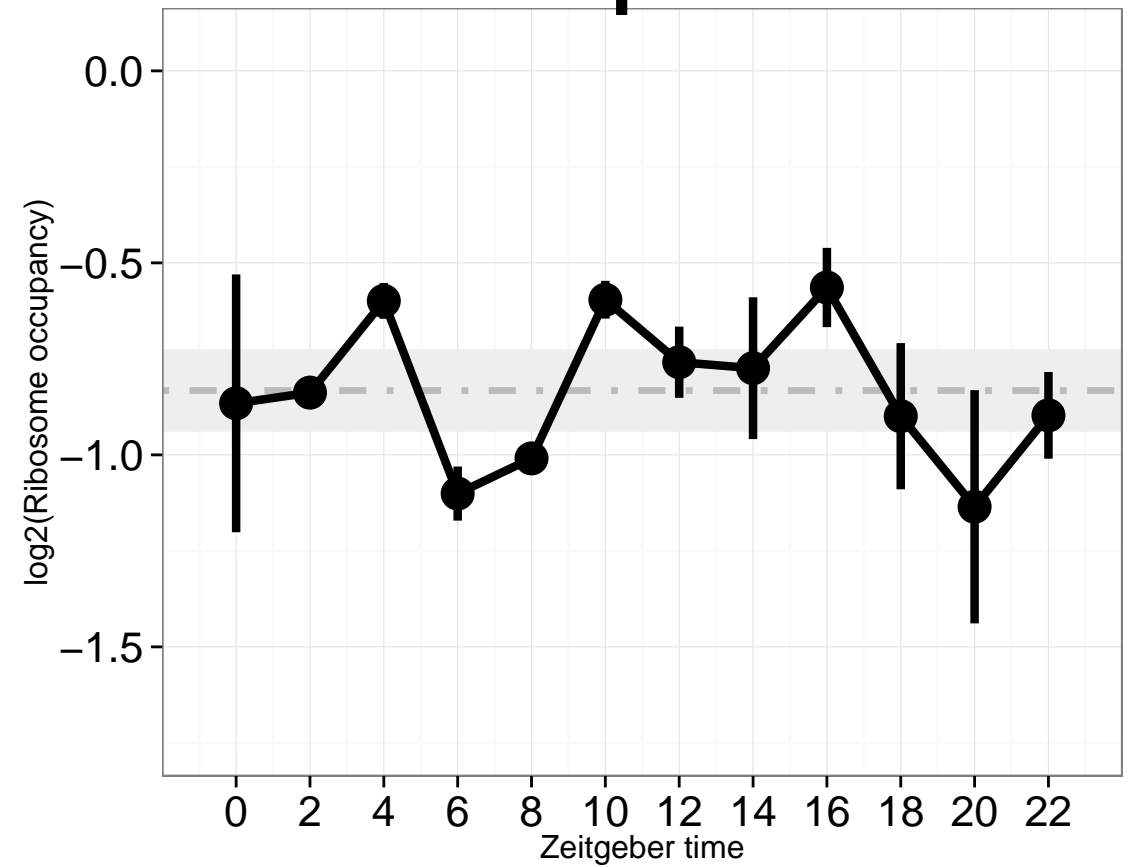

Supplement: Supplementary file 6940 [file 1]

## Zbtb38

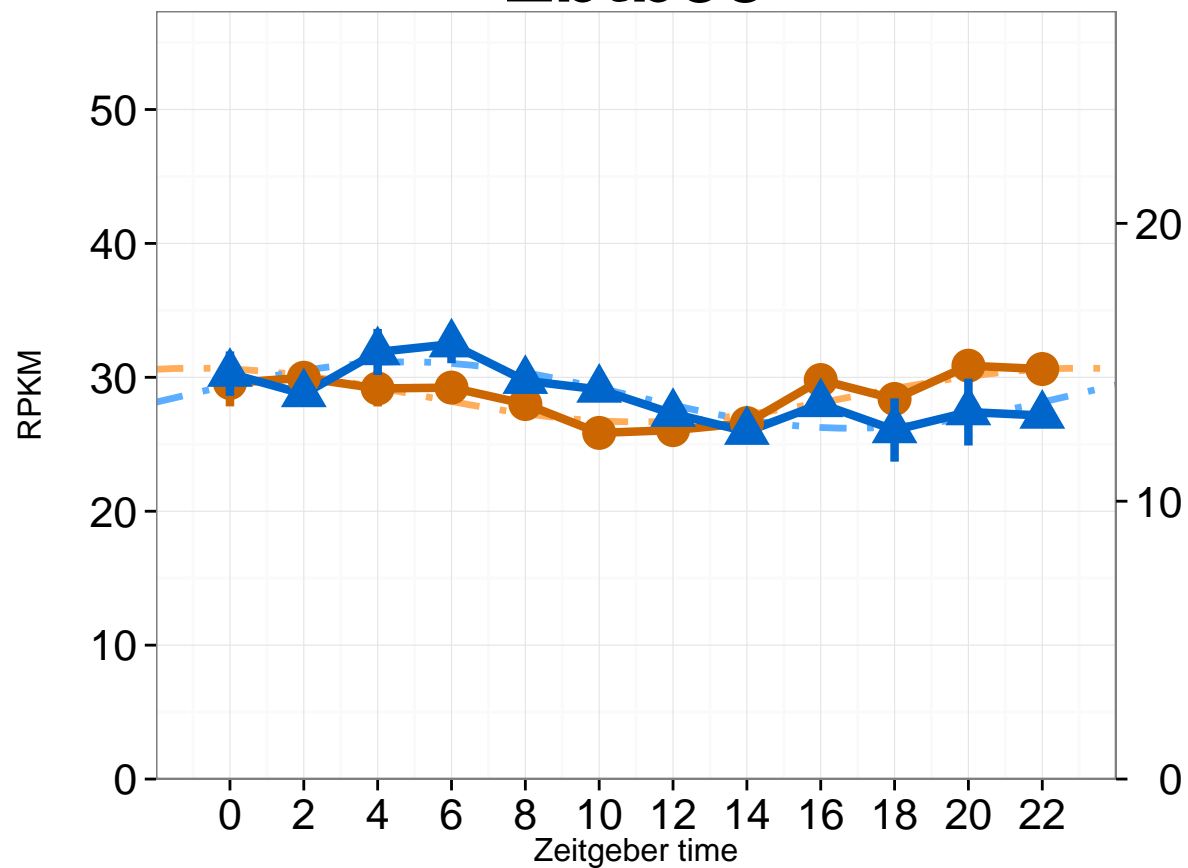

## Zbtb38

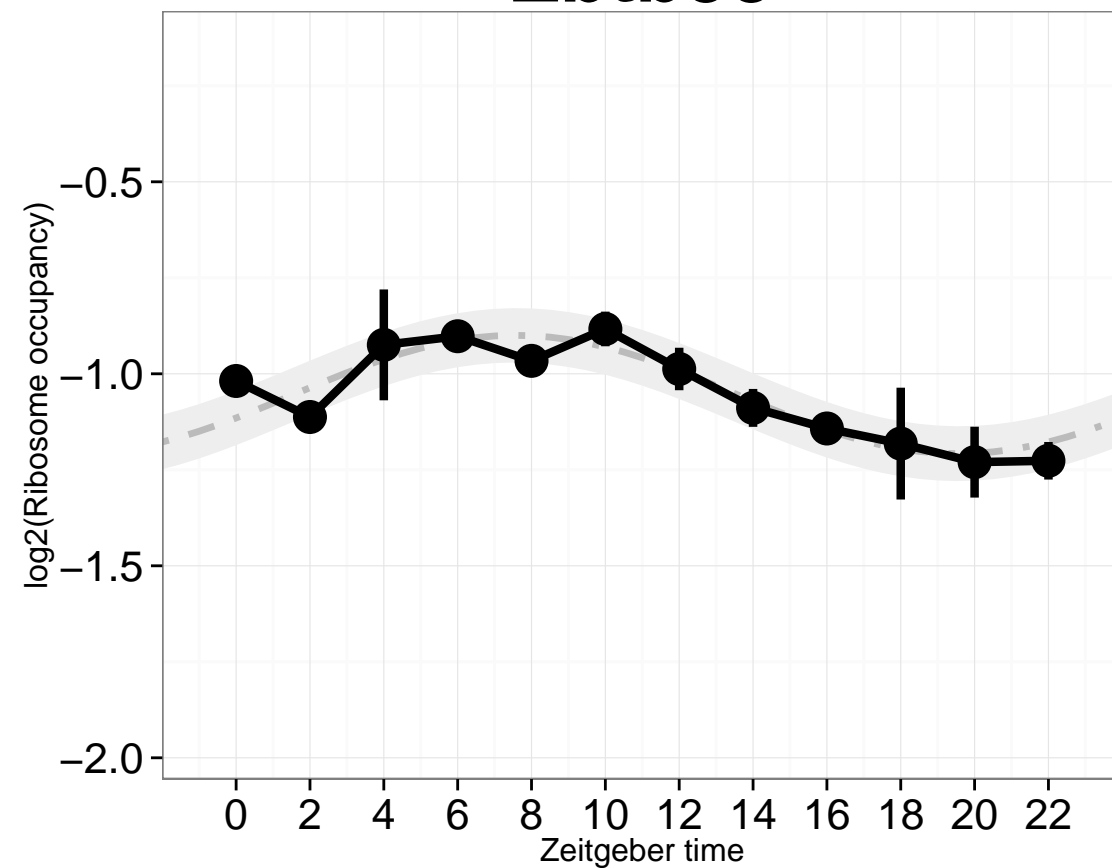

Supplement: Supplementary file 6941 [file 1]

## Setd8

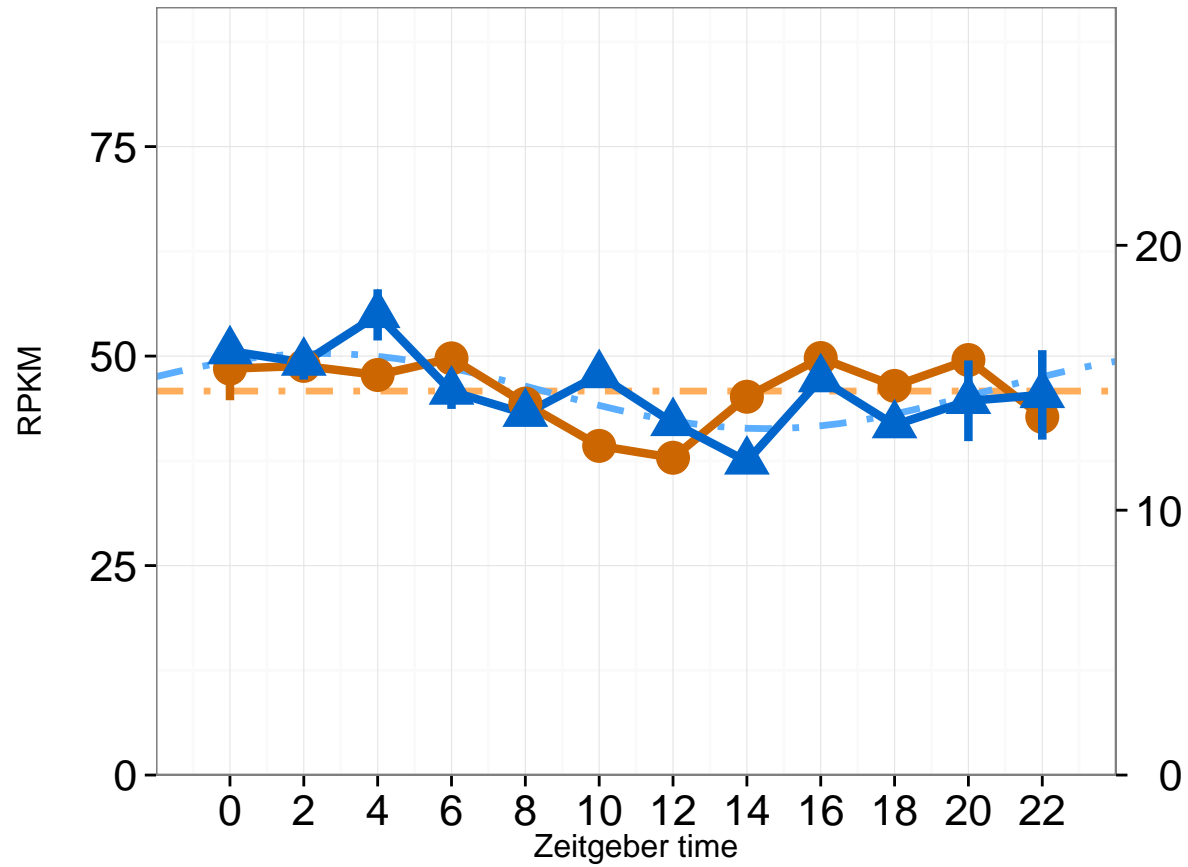

## Setd8

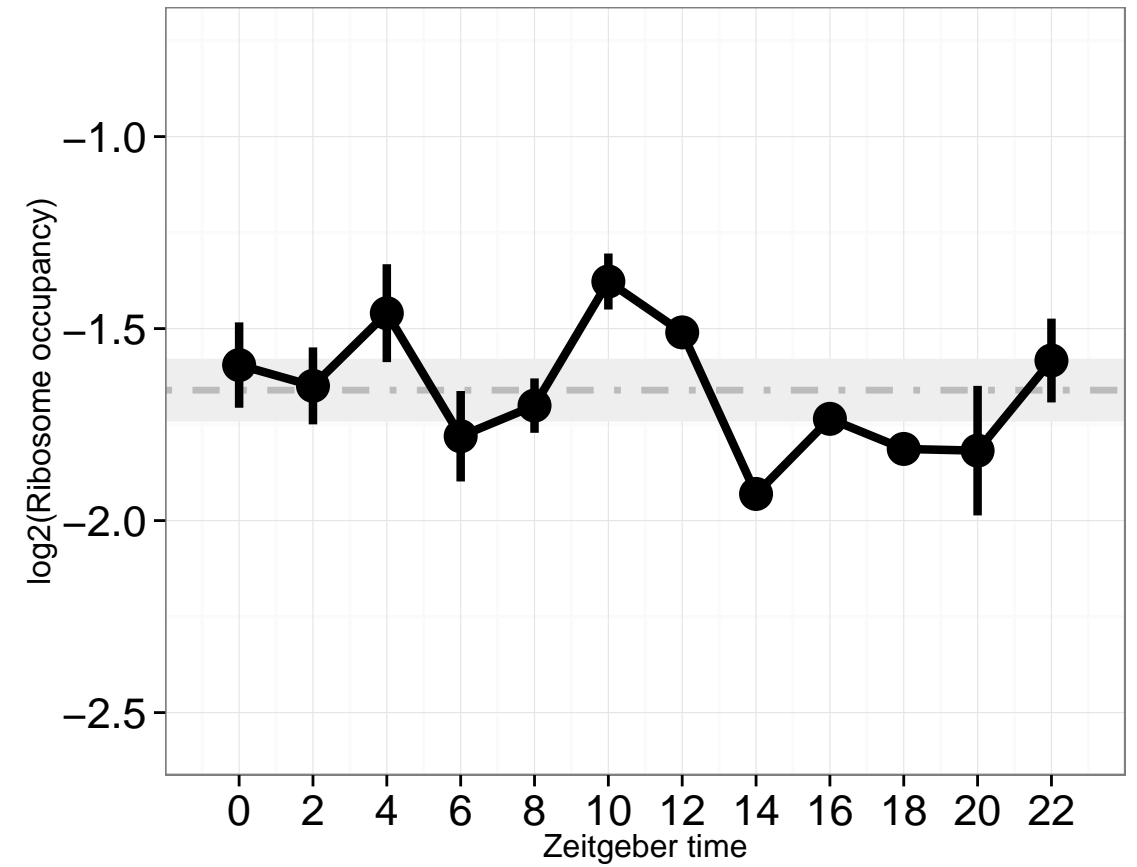

Supplement: Supplementary file 6942 [file 1]

# Samd10

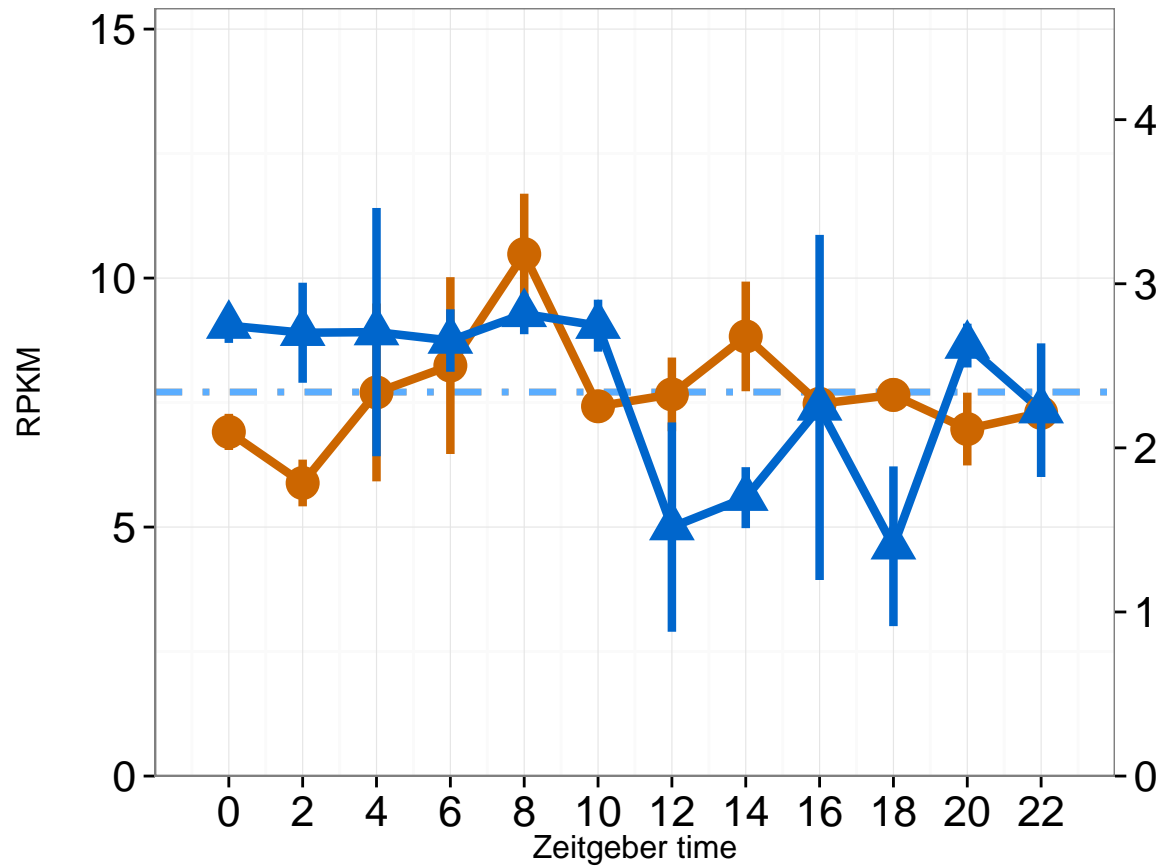

# Samd10

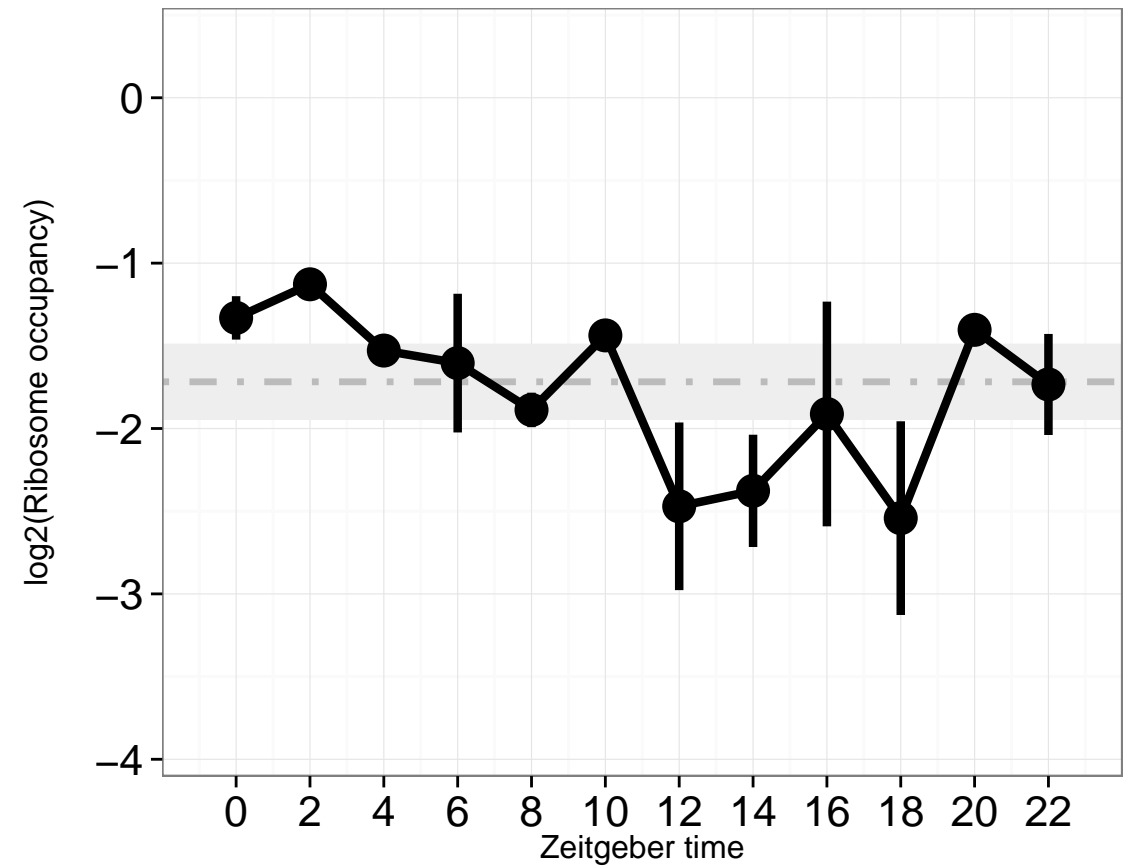

Supplement: Supplementary file 6943 [file 1]

**Ube2t TR**

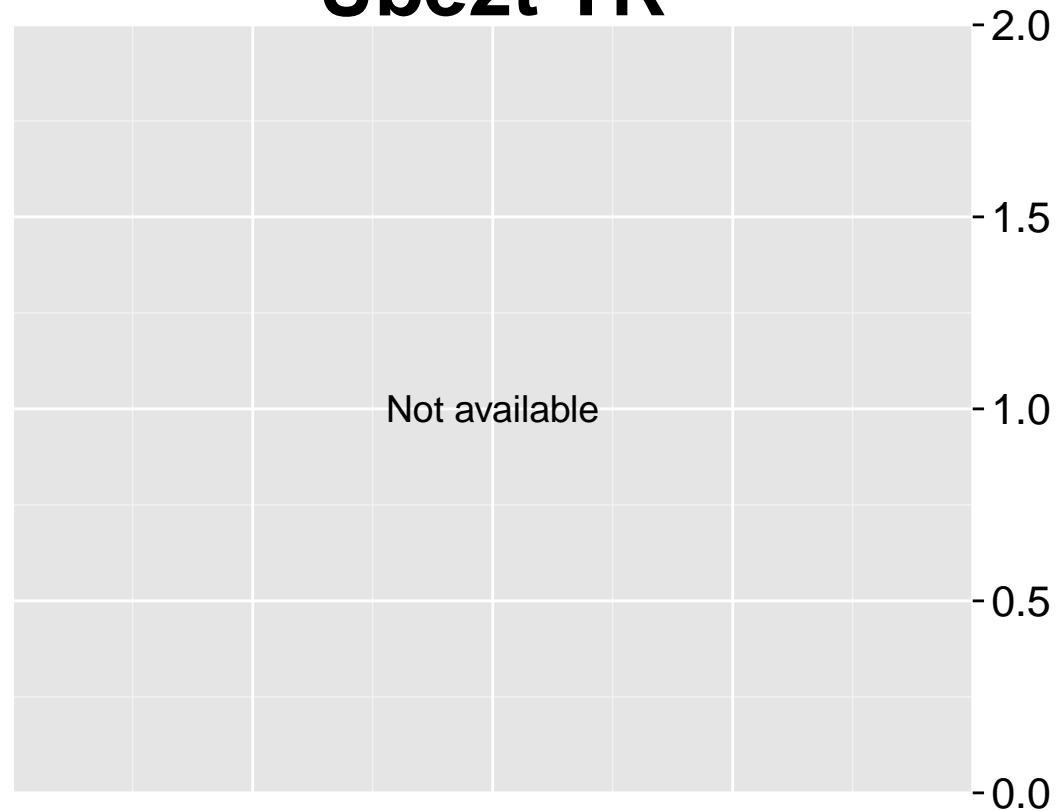

**Ube2t log2(Ribosome occupancy**

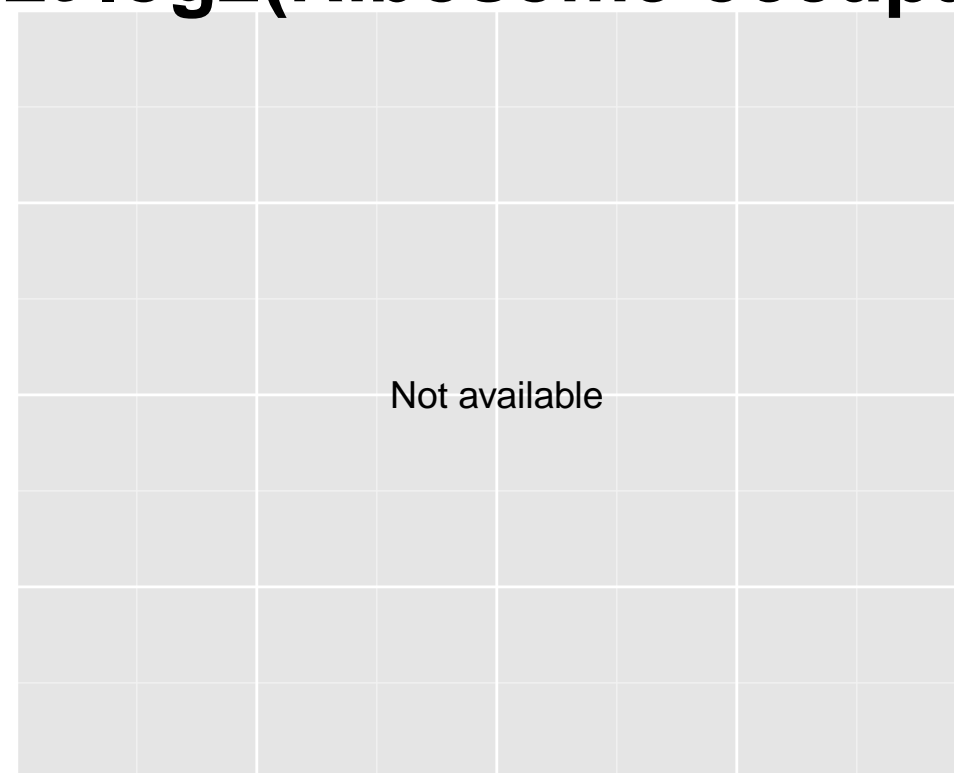

Supplement: Supplementary file 6944 [file 1]

## Shd

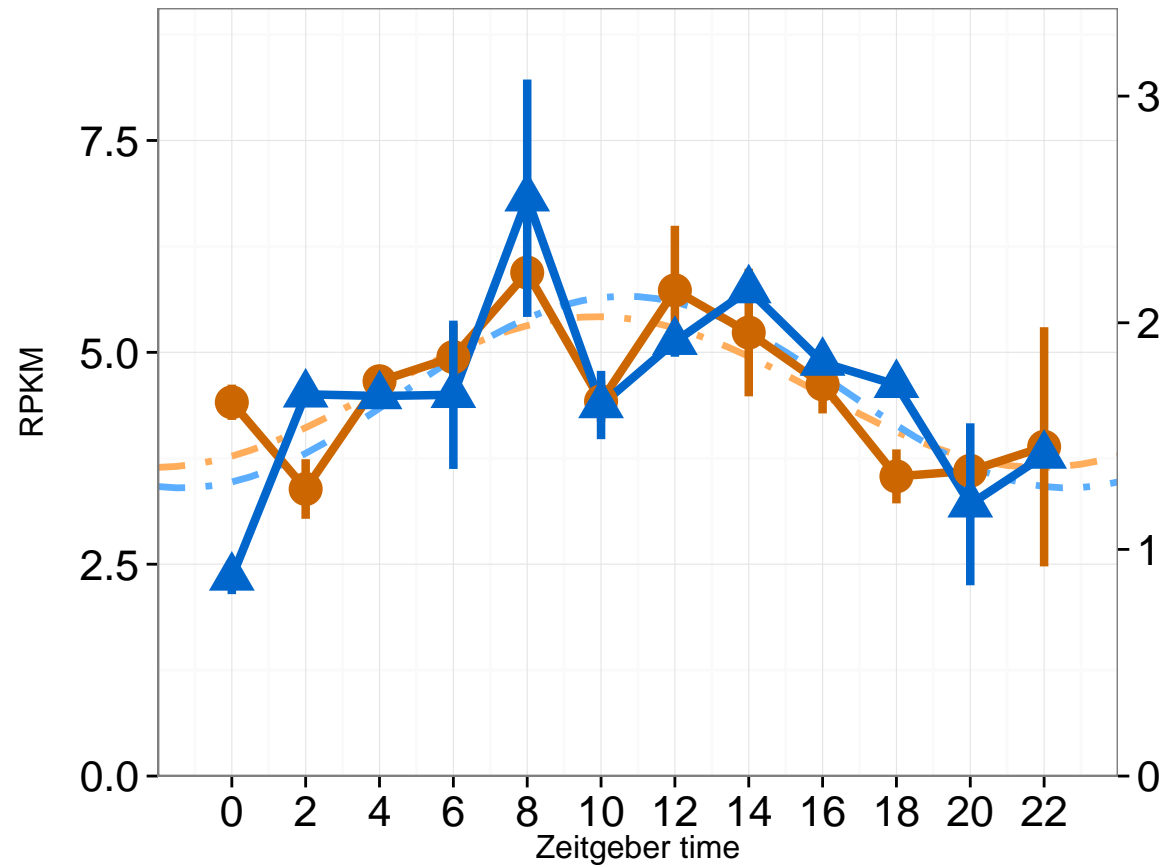

## Shd

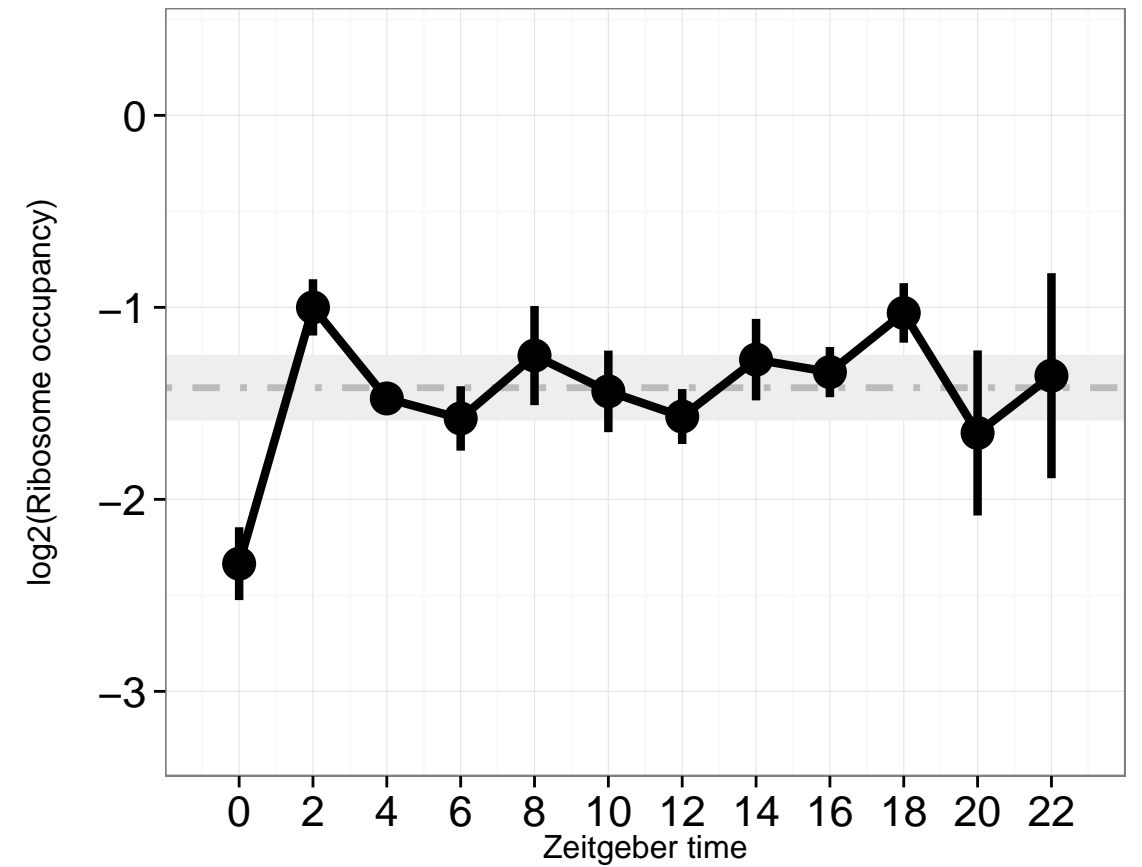

Supplement: Supplementary file 6945 [file 1]

# Lage3

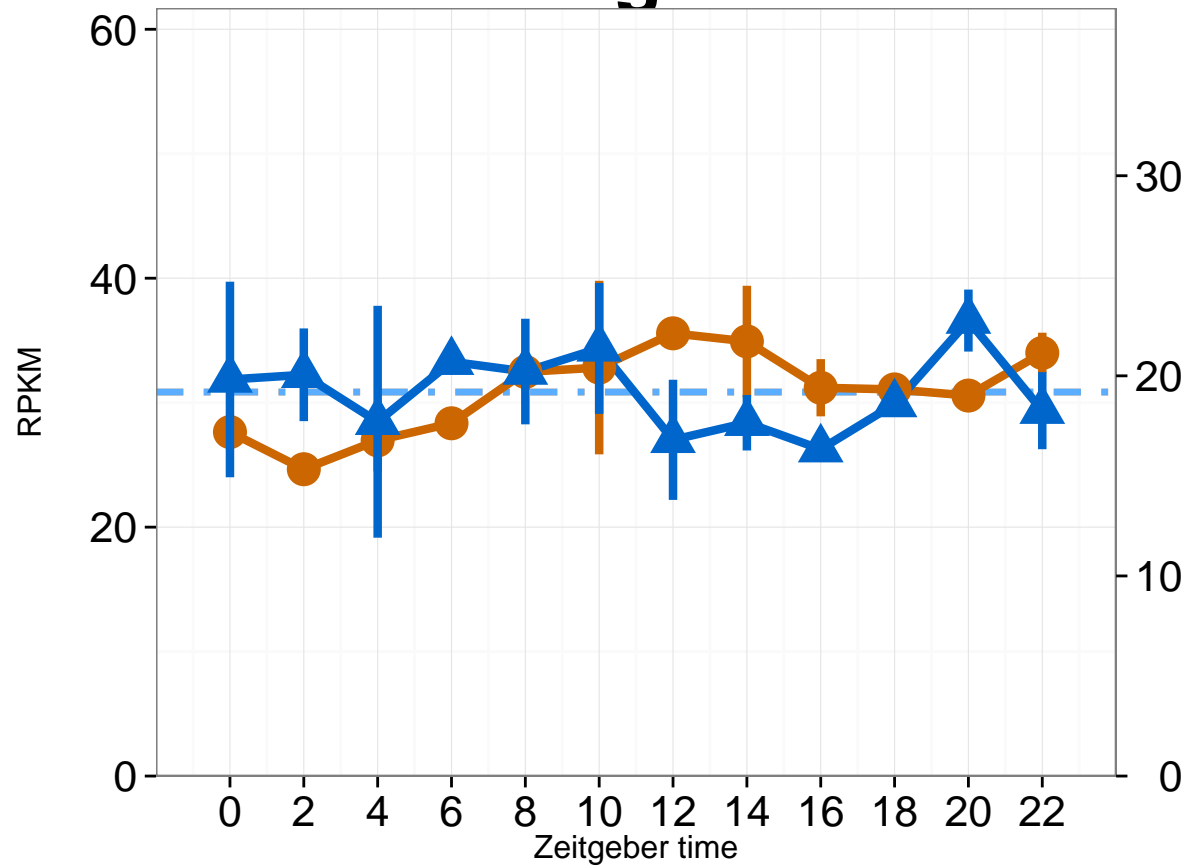

# Lage3

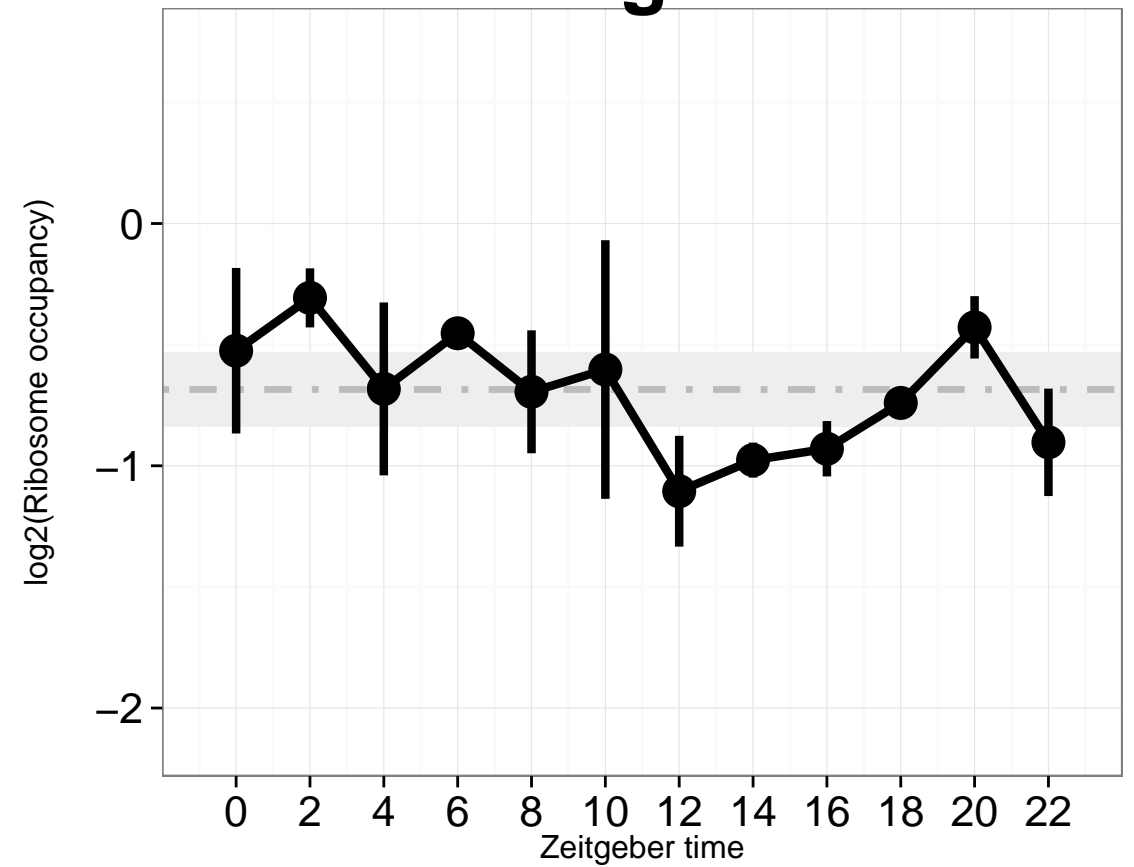

Supplement: Supplementary file 6946 [file 1]

## Rerg

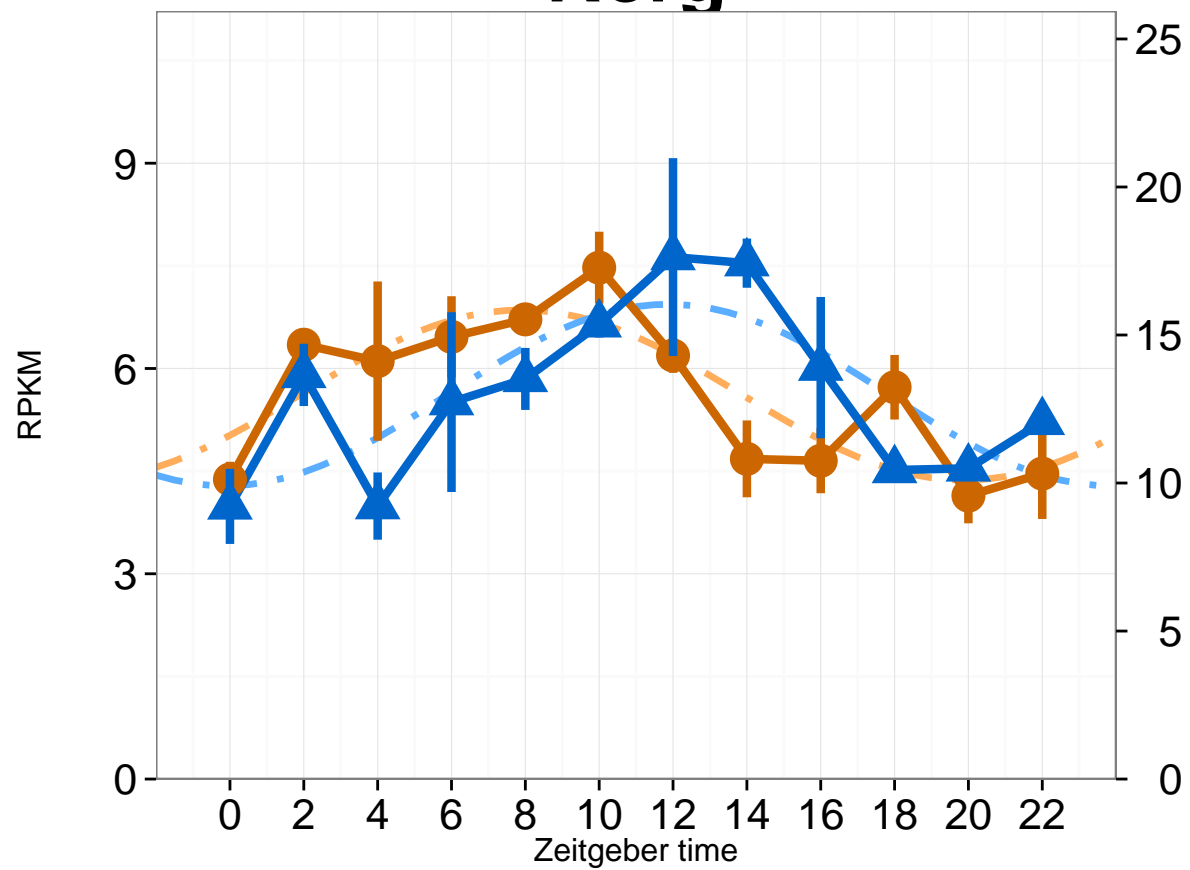

## Rerg

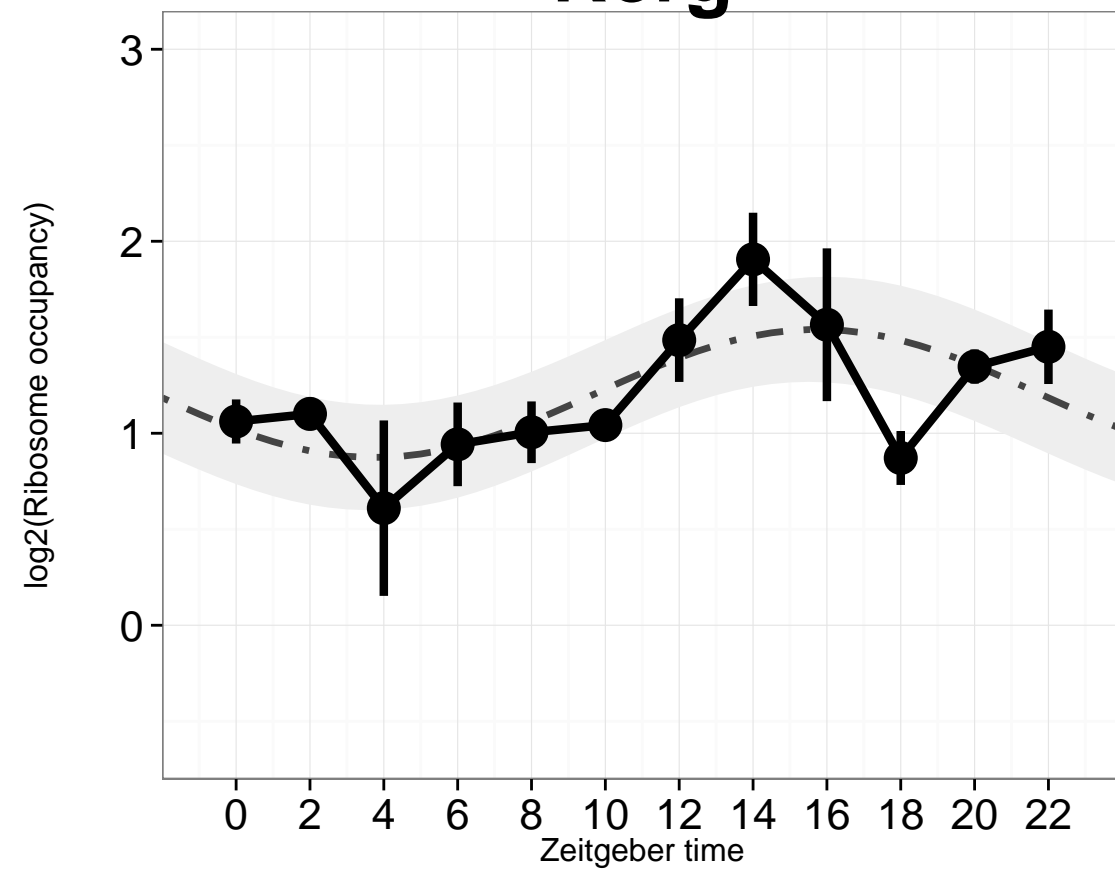

Supplement: Supplementary file 6947 [file 1]

# Cyp2a4

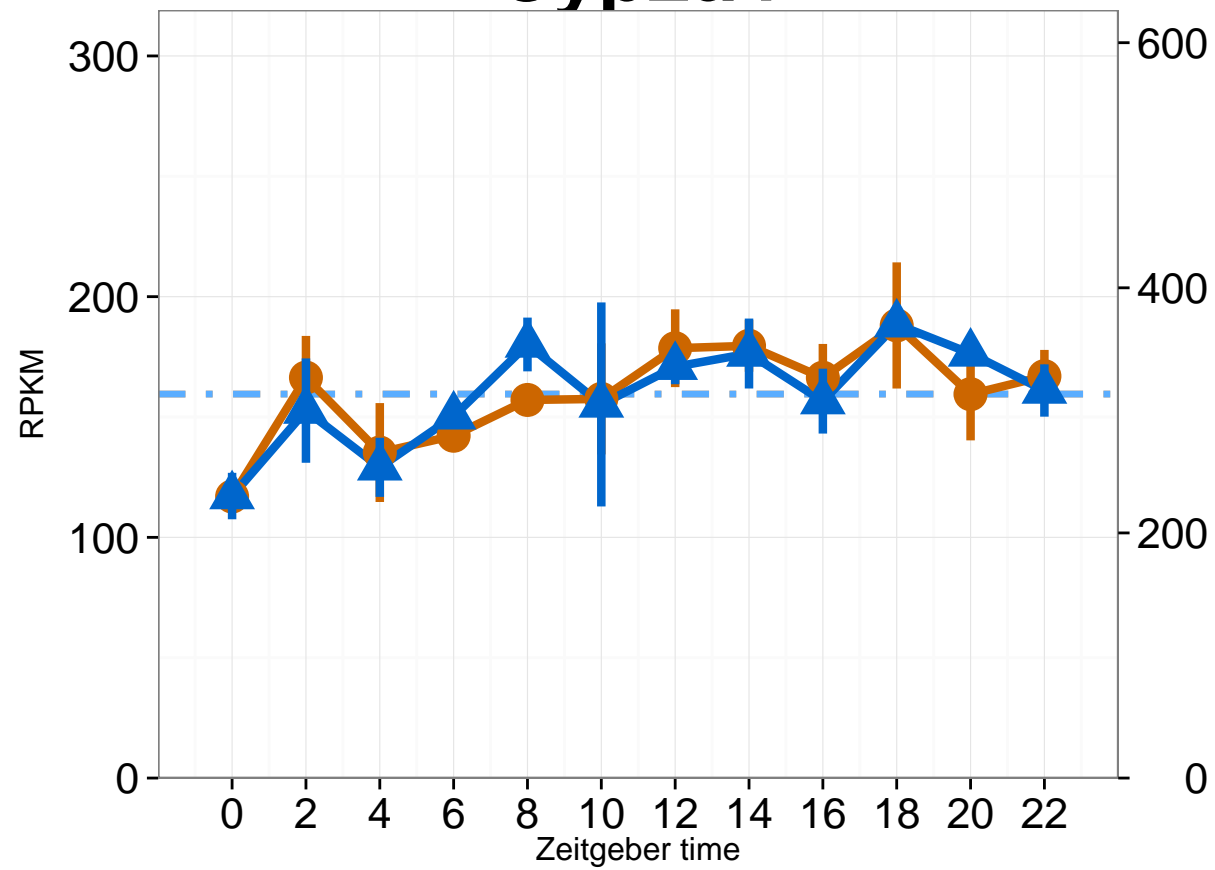

# Cyp2a4

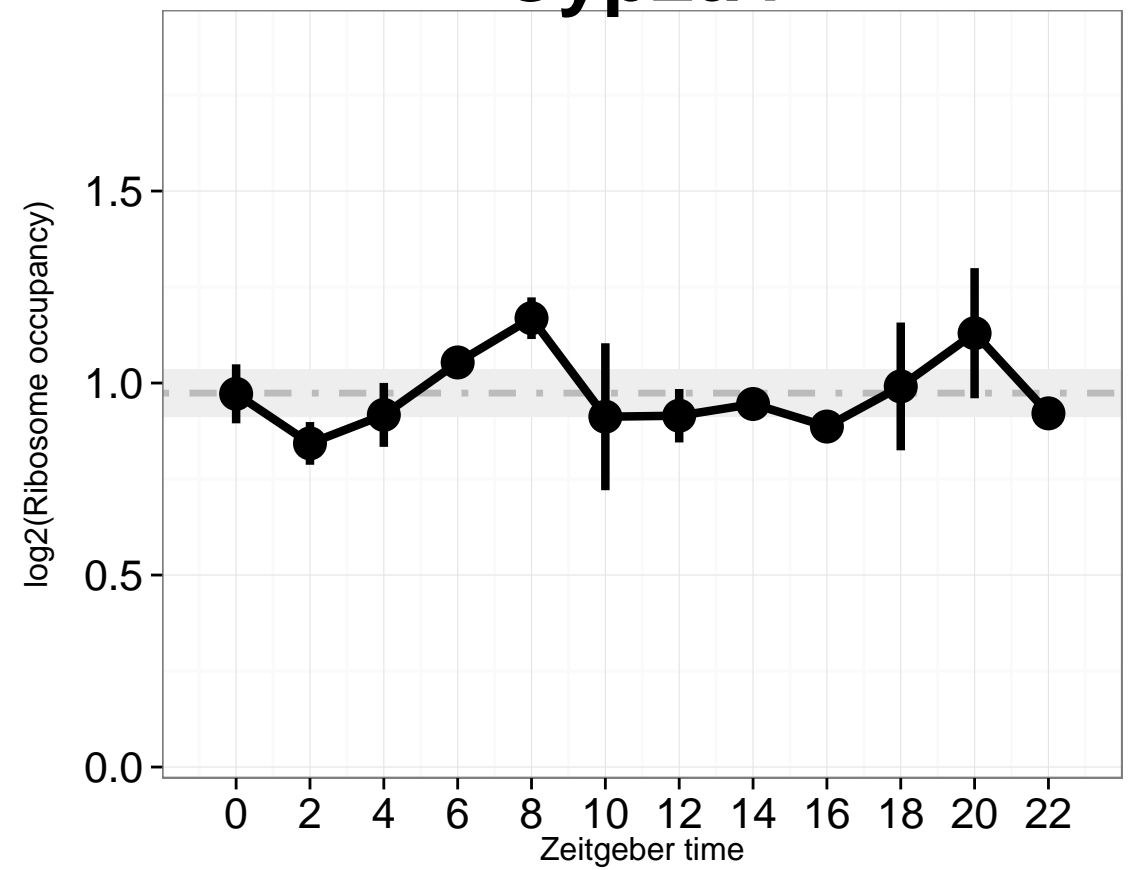

Supplement: Supplementary file 6948 [file 1]

## Pigc

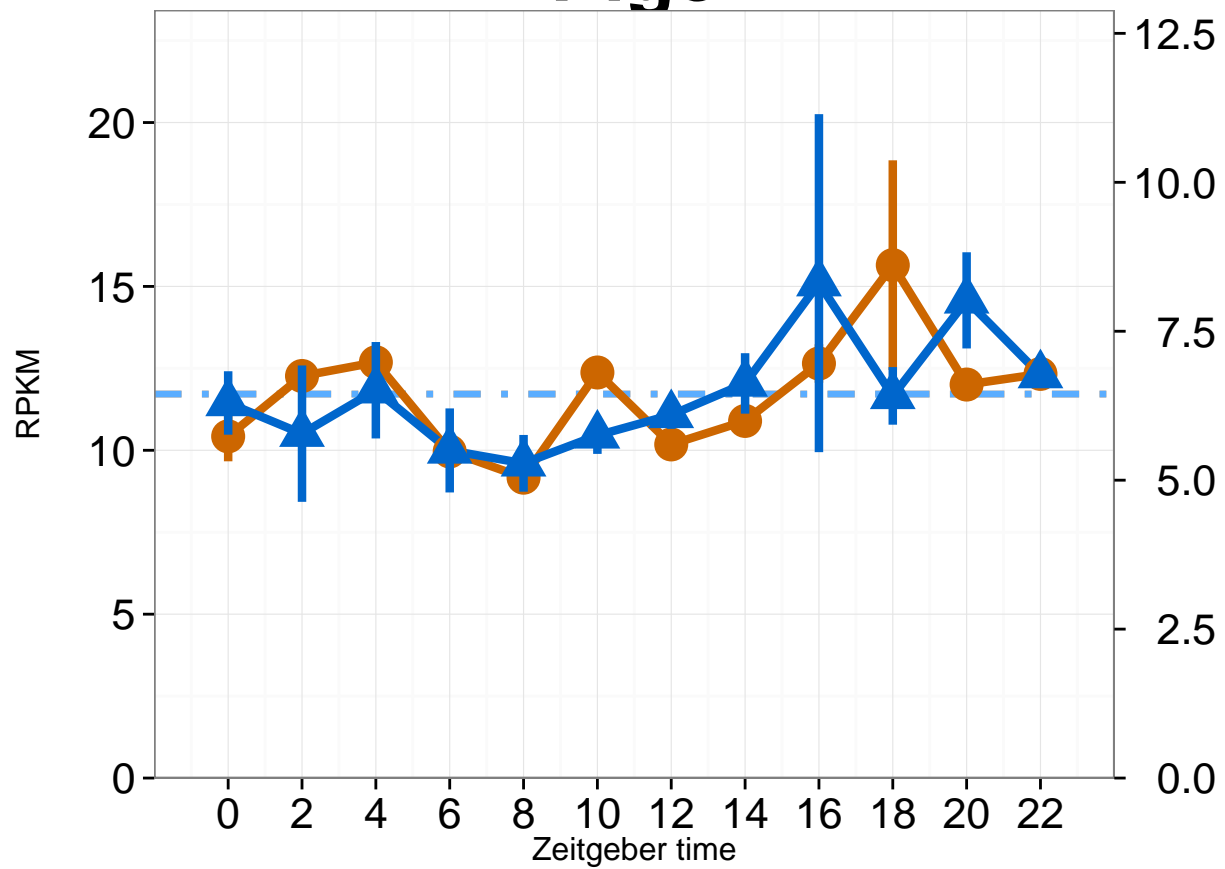

## Pigc

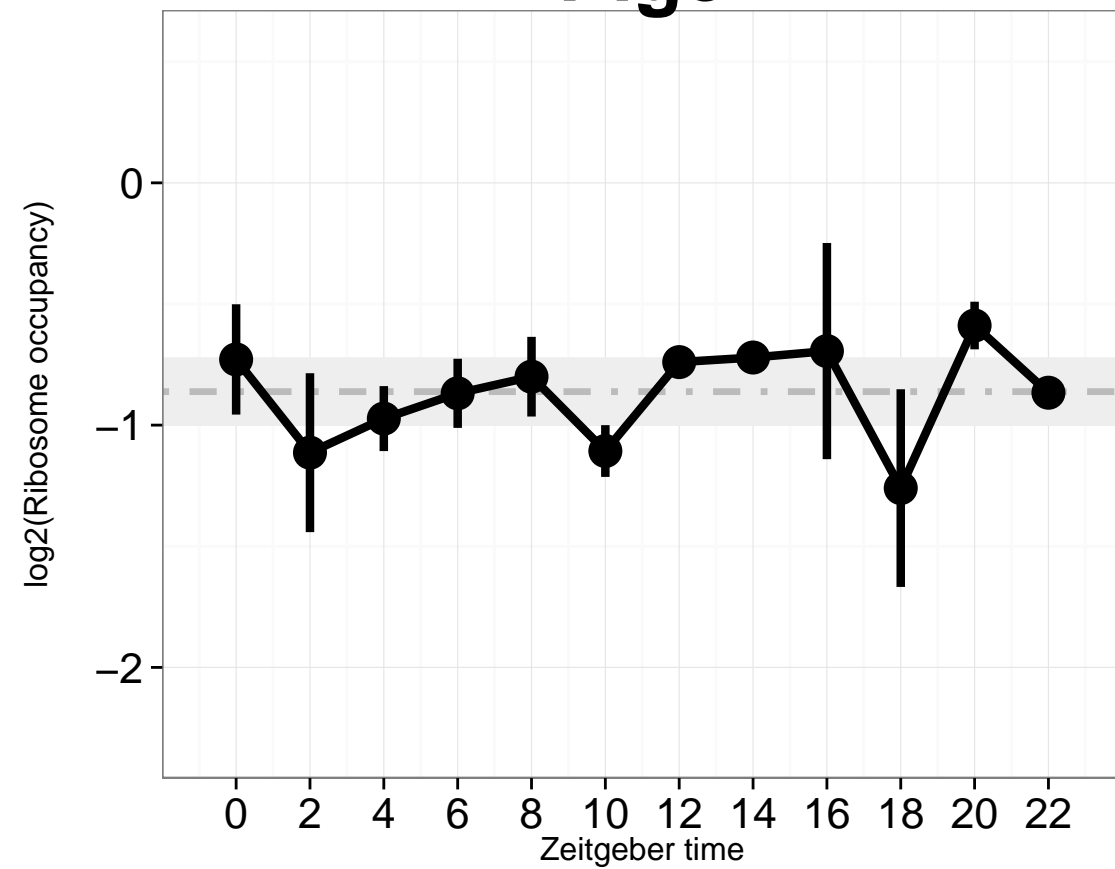

Supplement: Supplementary file 6949 [file 1]

# Zfyve26

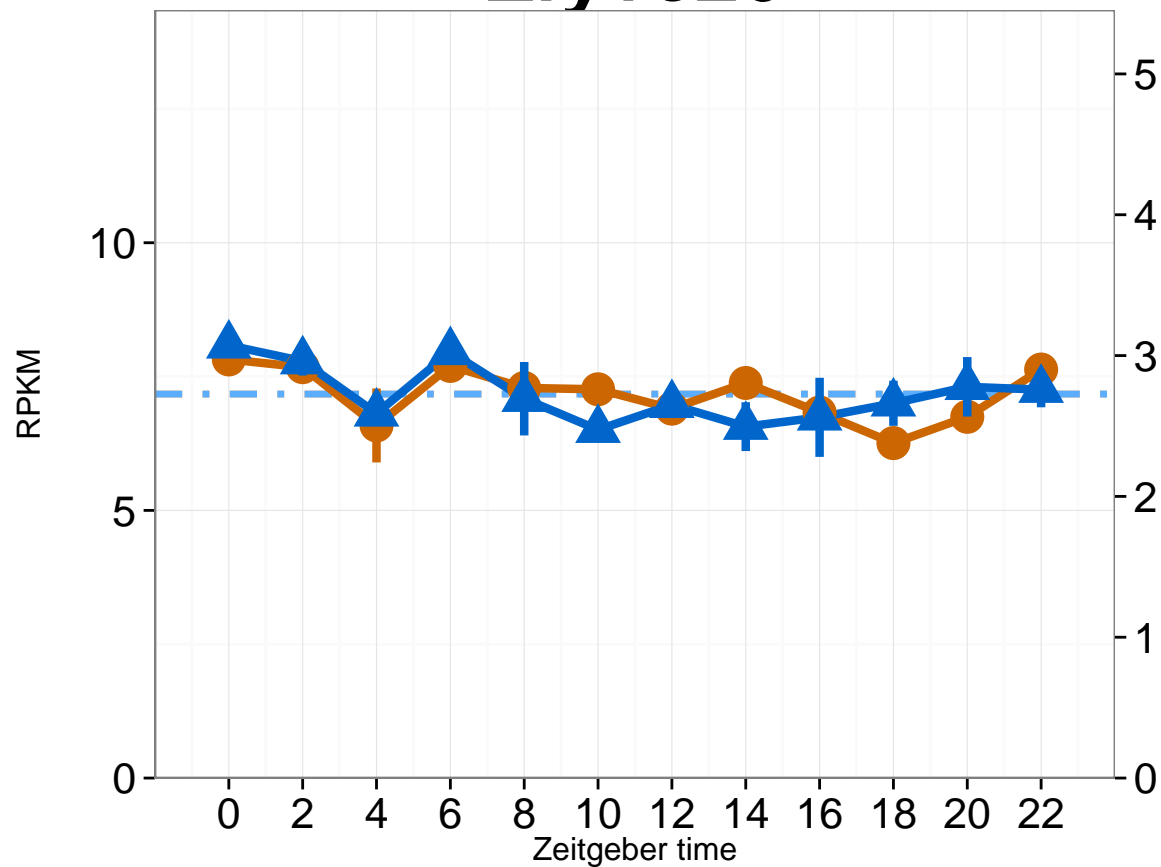

# Zfyve26

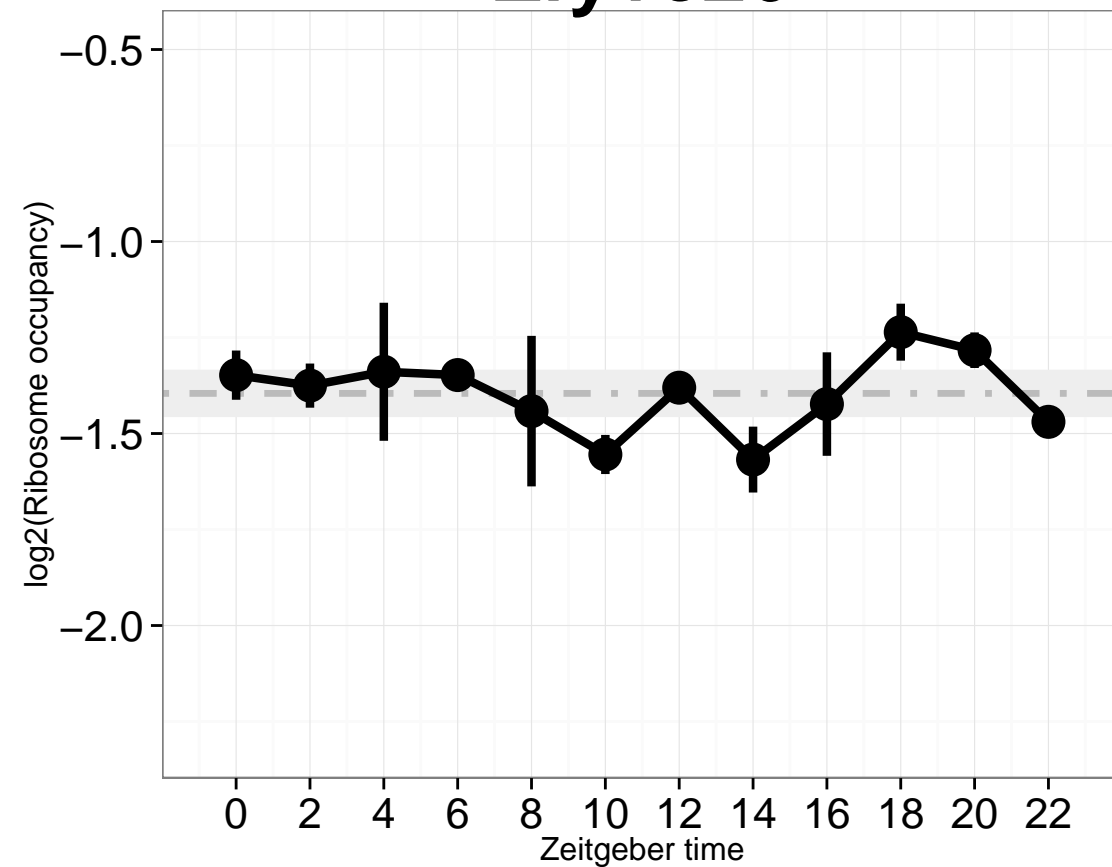

Supplement: Supplementary file 6950 [file 1]

## Ift172

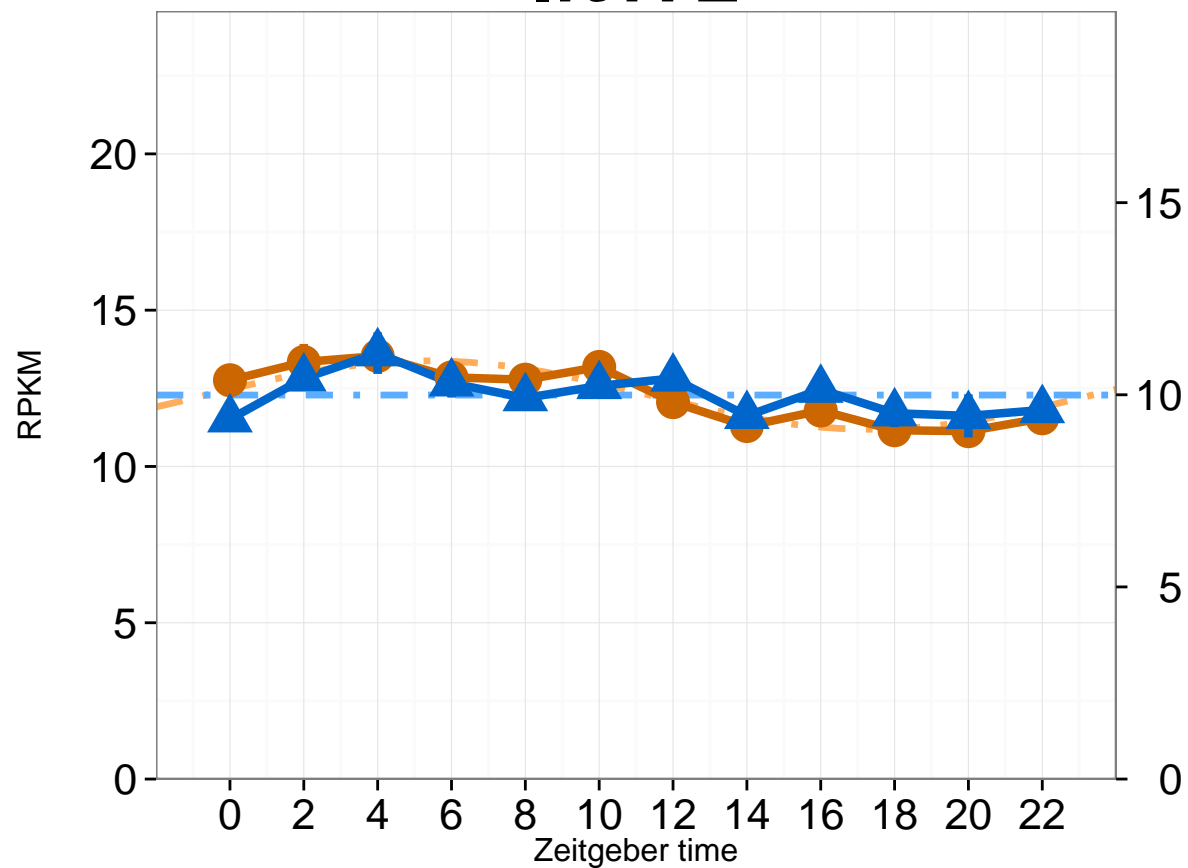

## Ift172

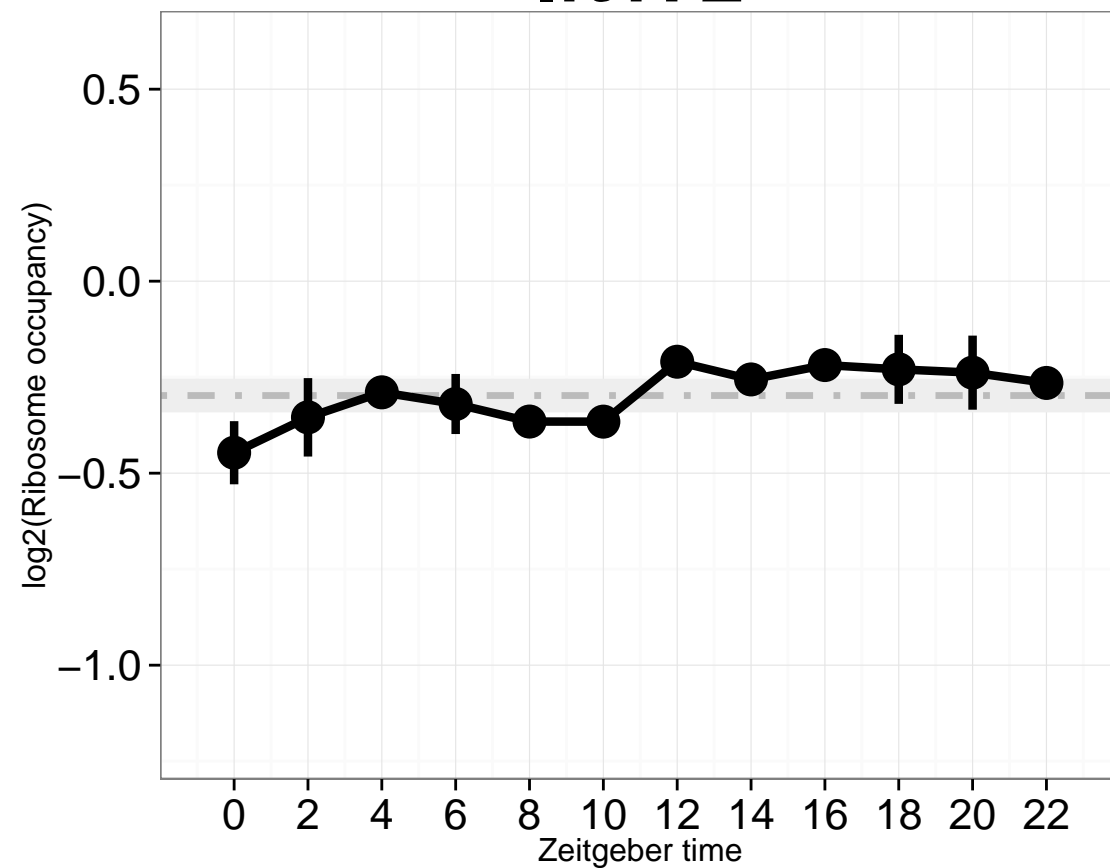

Supplement: Supplementary file 6951 [file 1]

## Xpo1

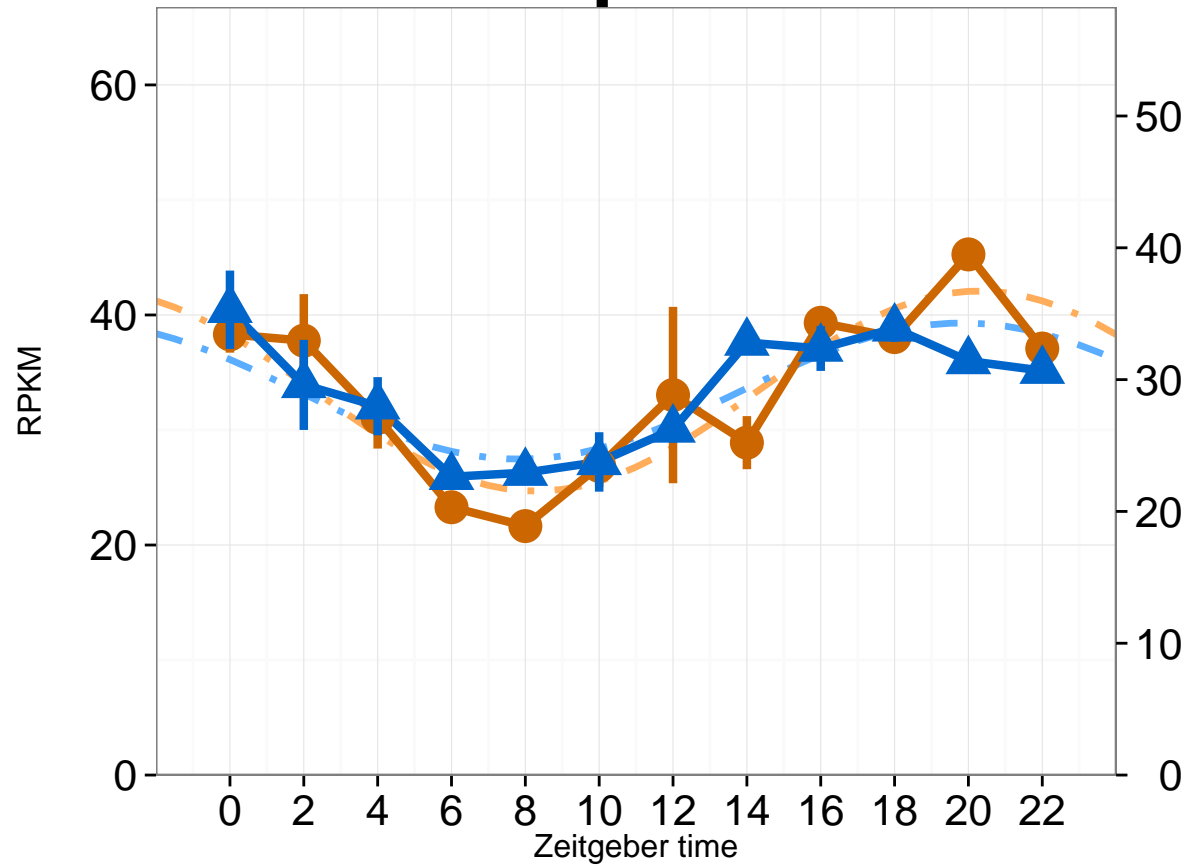

## Xpo1

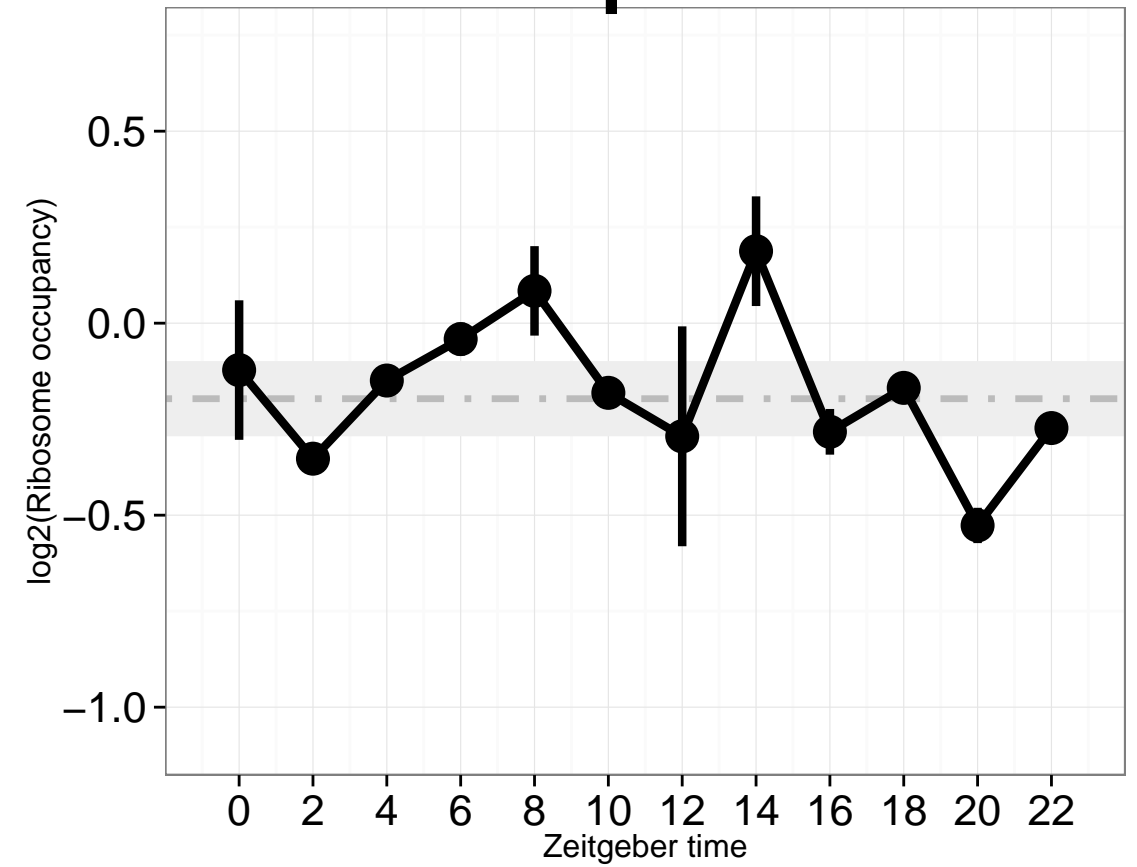

Supplement: Supplementary file 6952 [file 1]

## Itgax

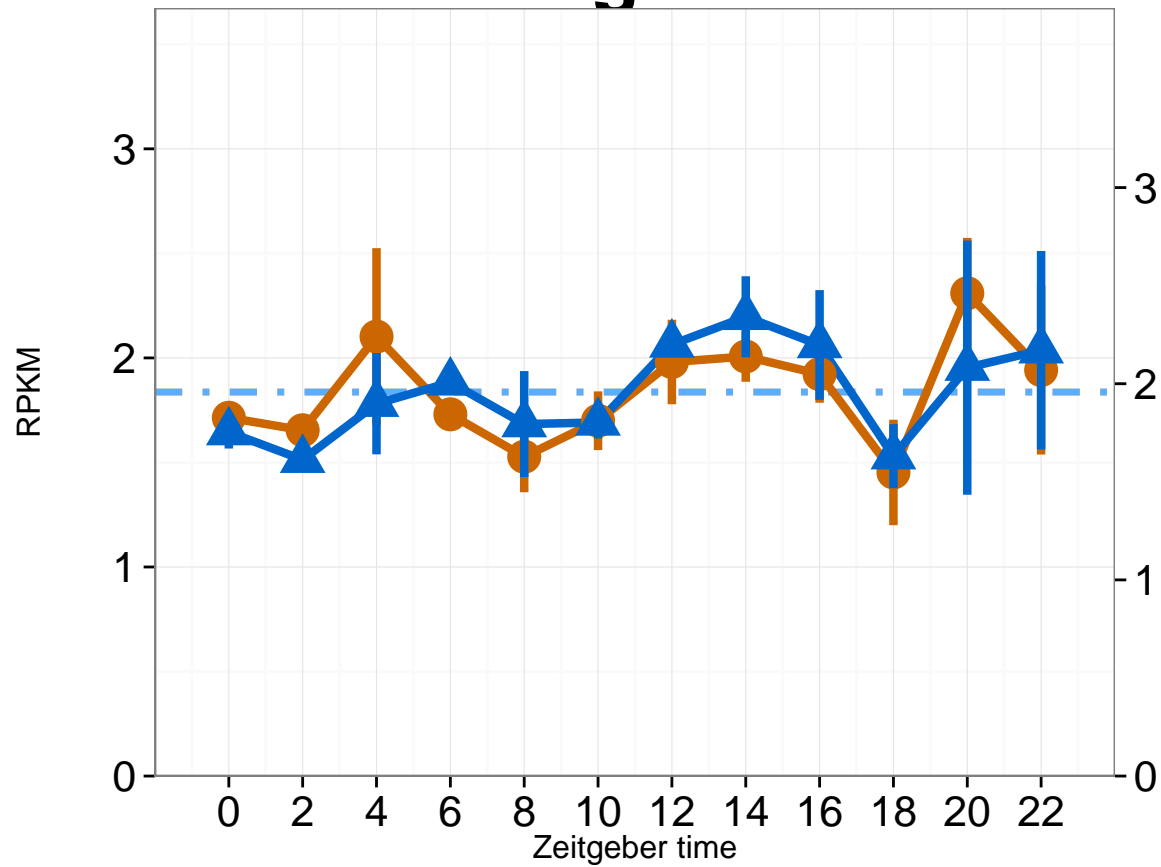

## Itgax

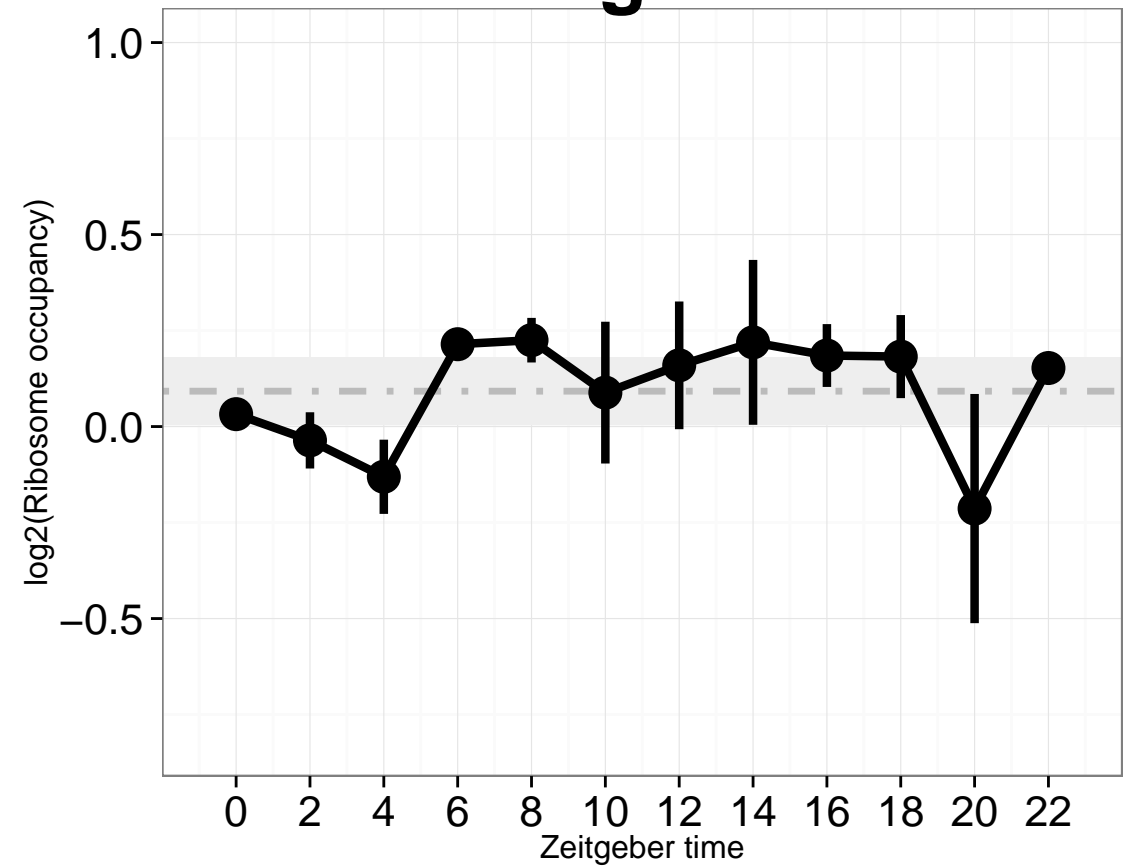

Supplement: Supplementary file 6953 [file 1]

# Zfp362

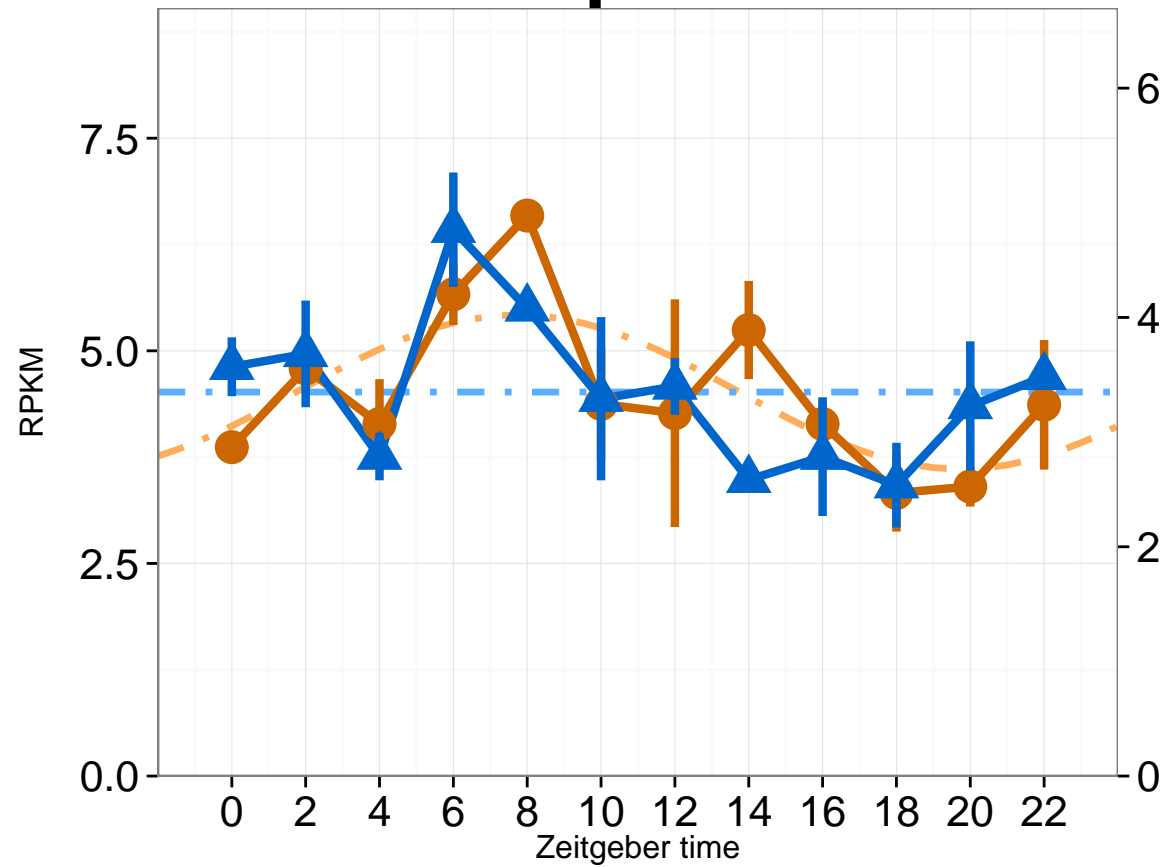

# Zfp362

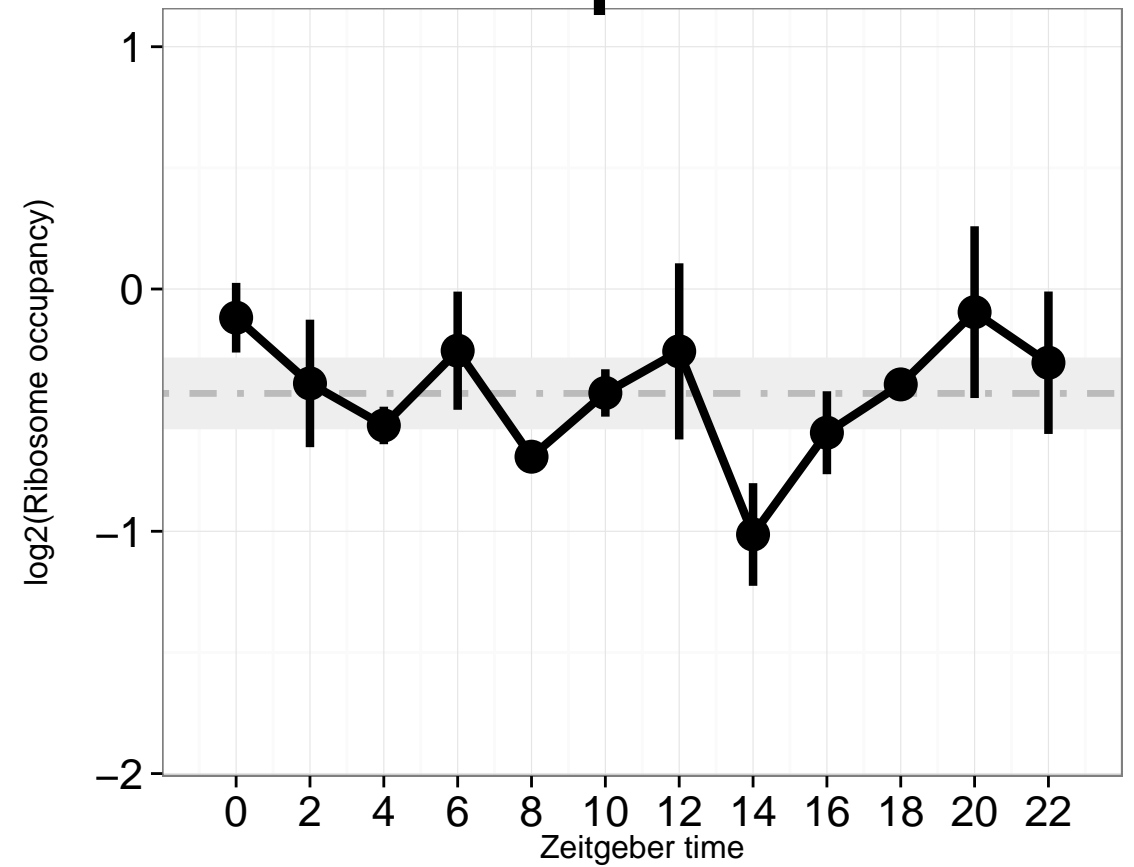

Supplement: Supplementary file 6954 [file 1]

**BtnI10 TR**

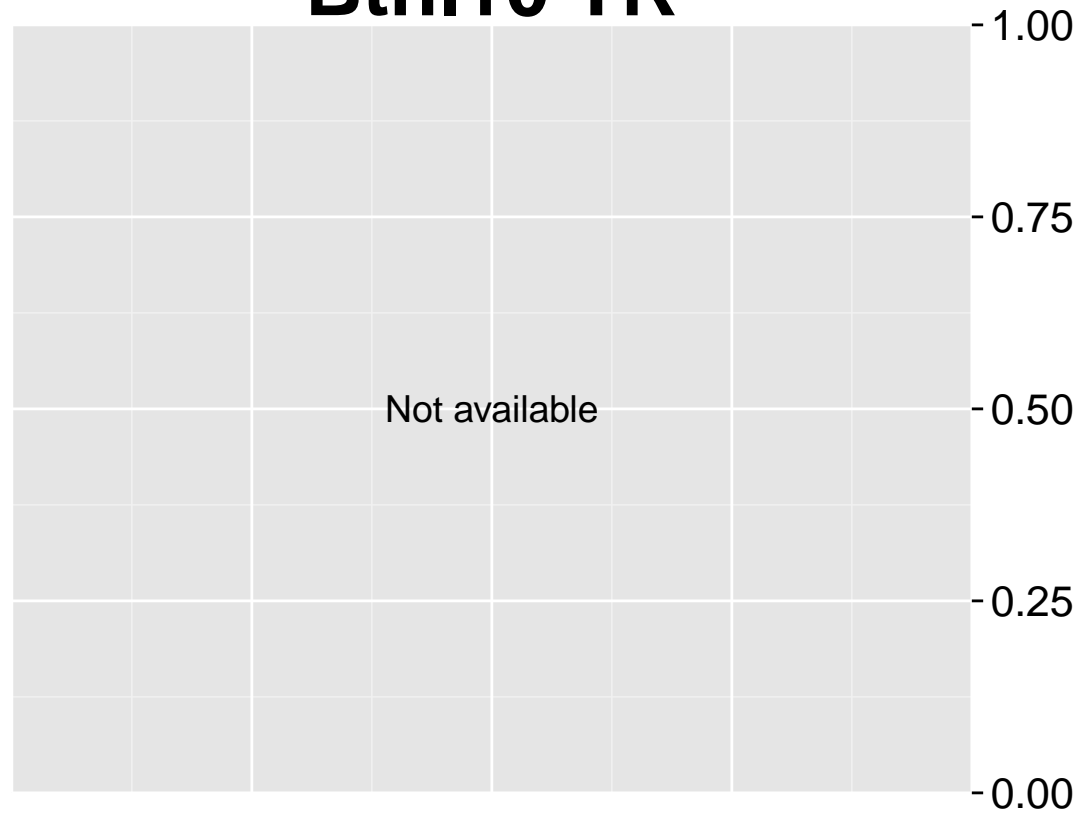

**BtnI10 log2(Ribosome occupancy**

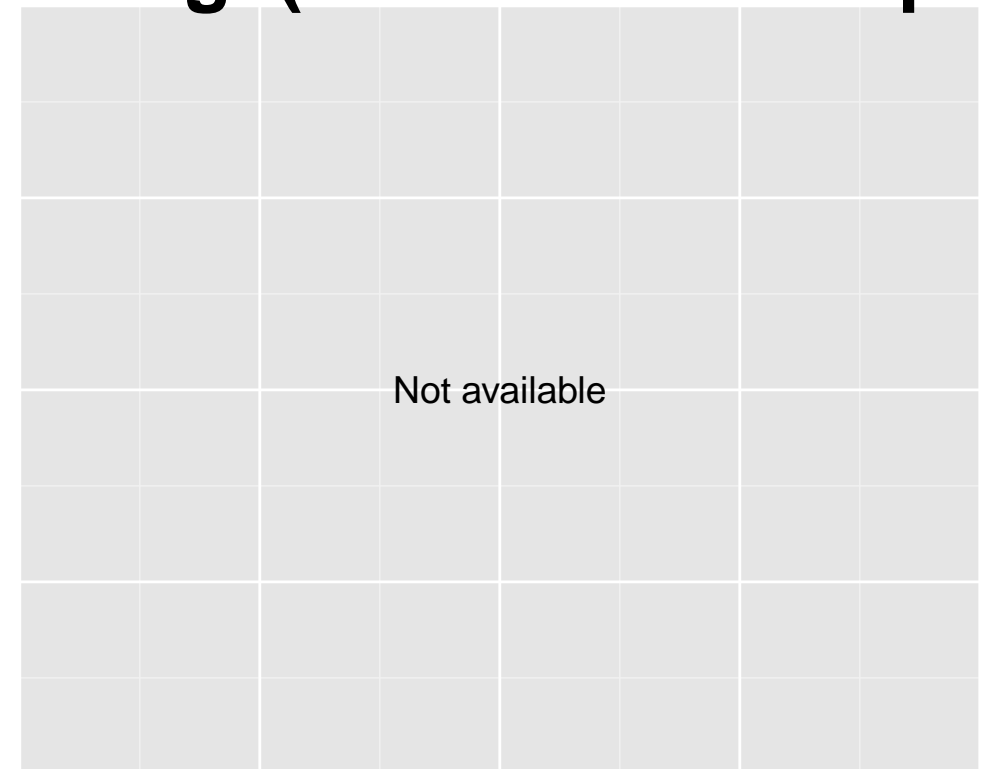

Supplement: Supplementary file 6955 [file 1]

## C77080

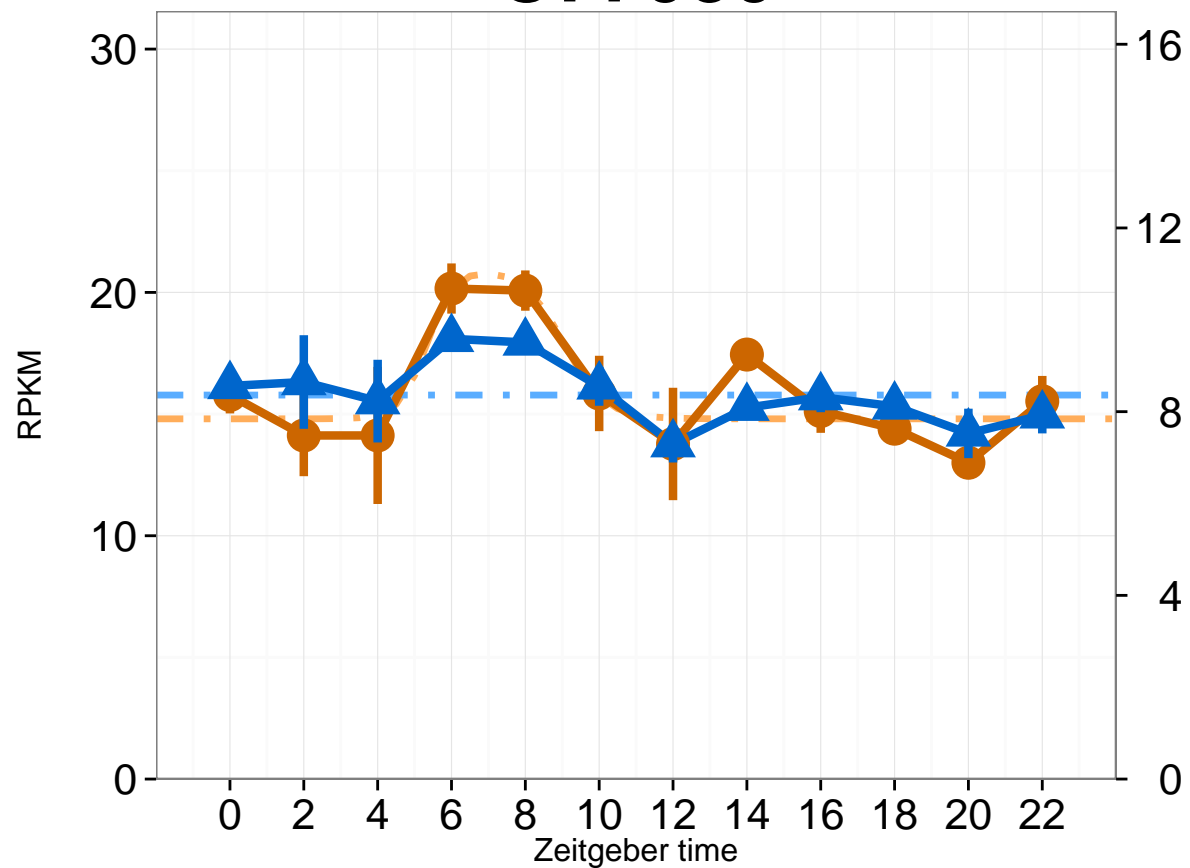

## C77080

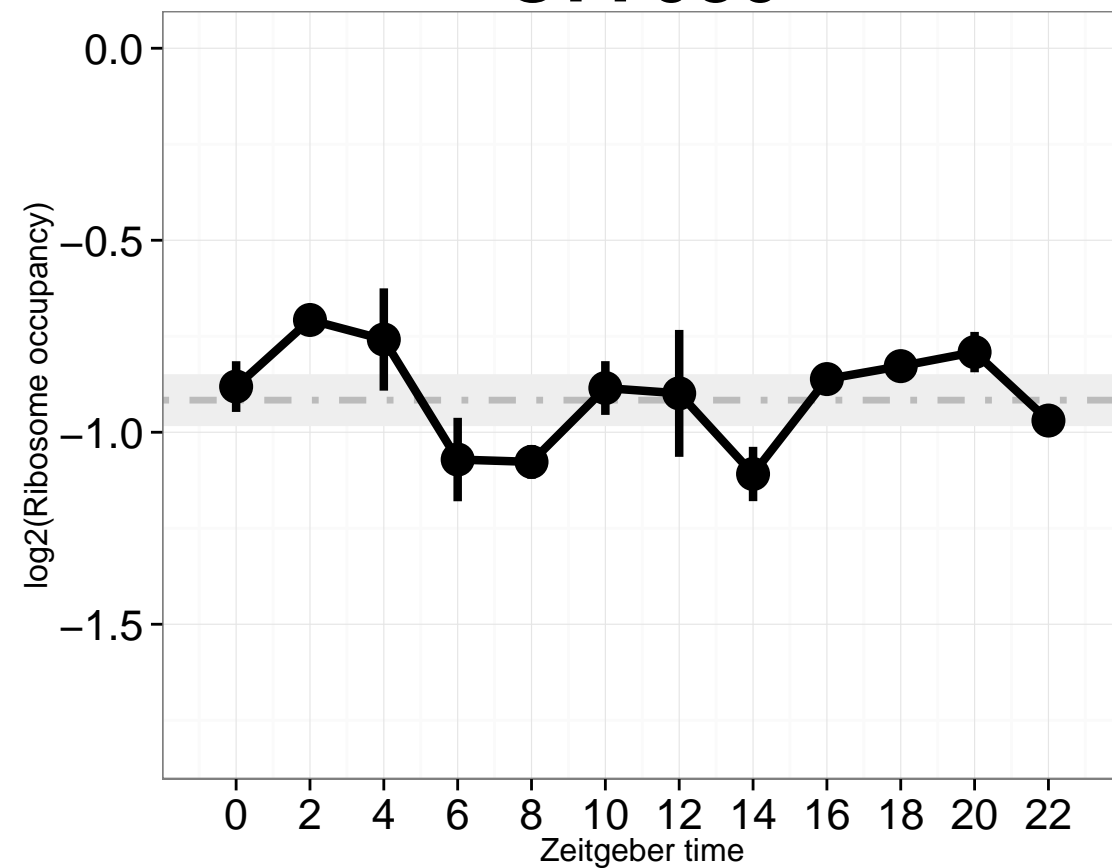

Supplement: Supplementary file 6956 [file 1]

## Lims2

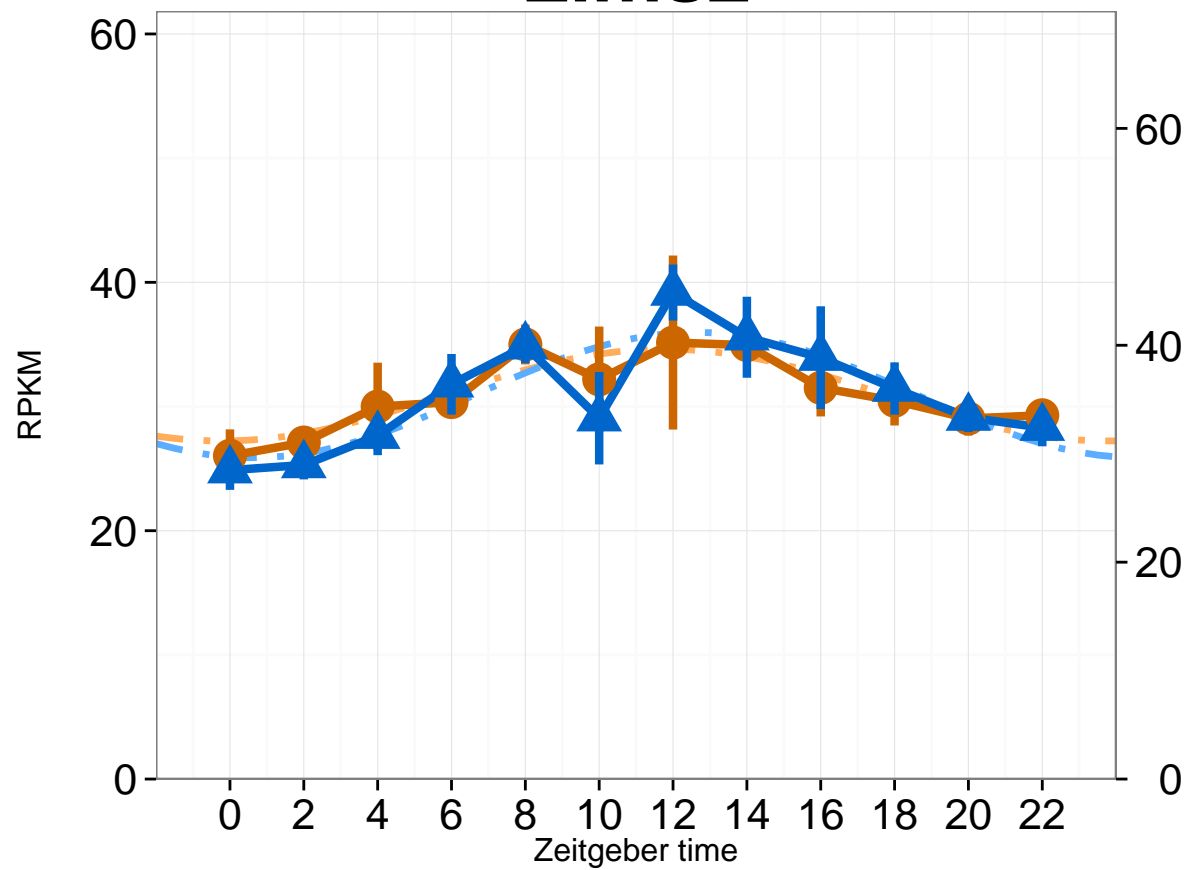

## Lims2

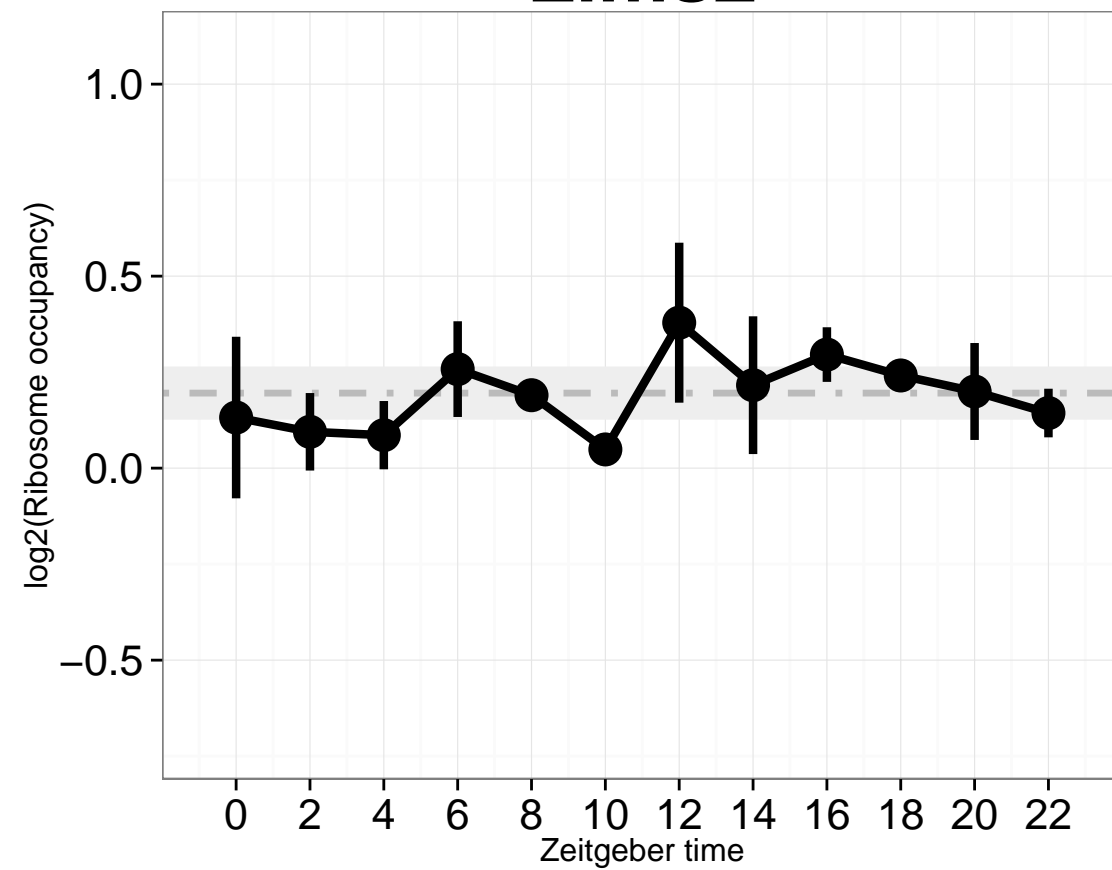

Supplement: Supplementary file 6957 [file 1]

# Ggnbp1

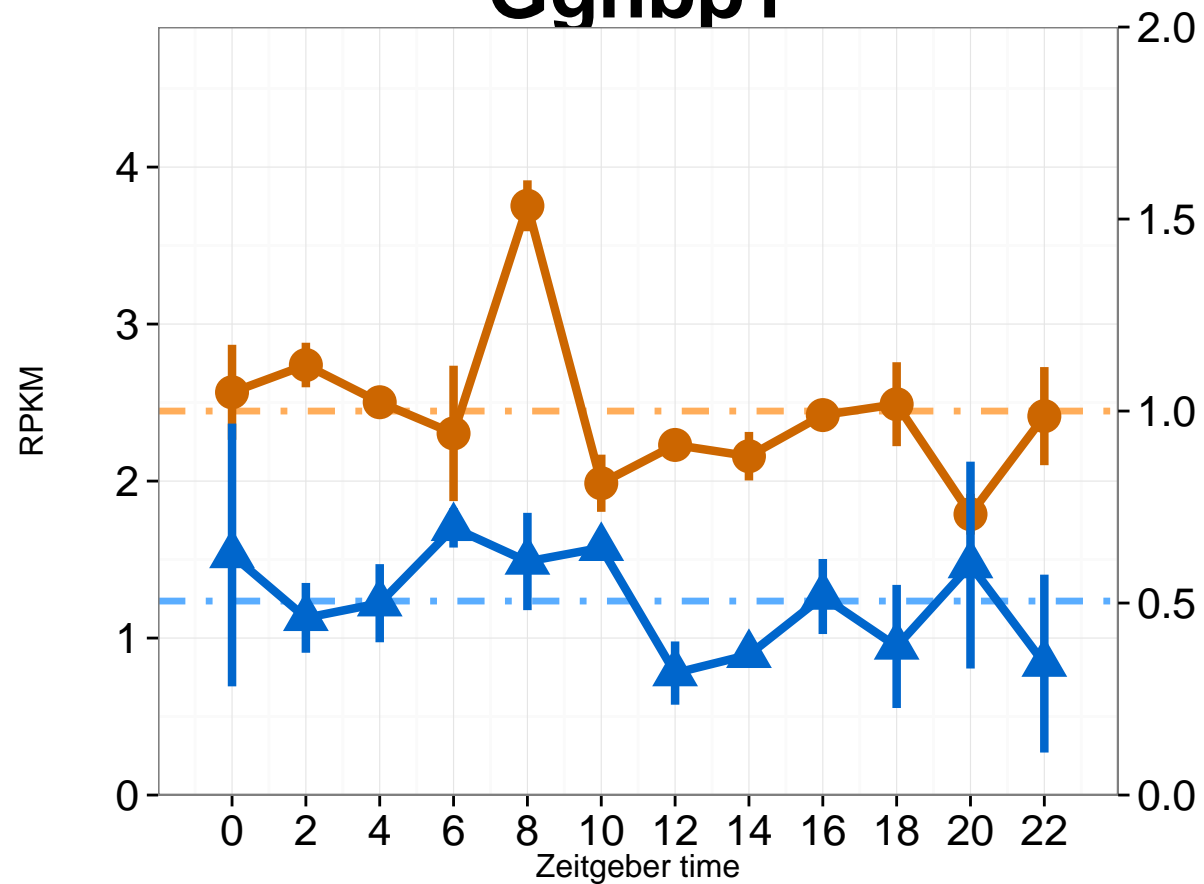

# Ggnbp1

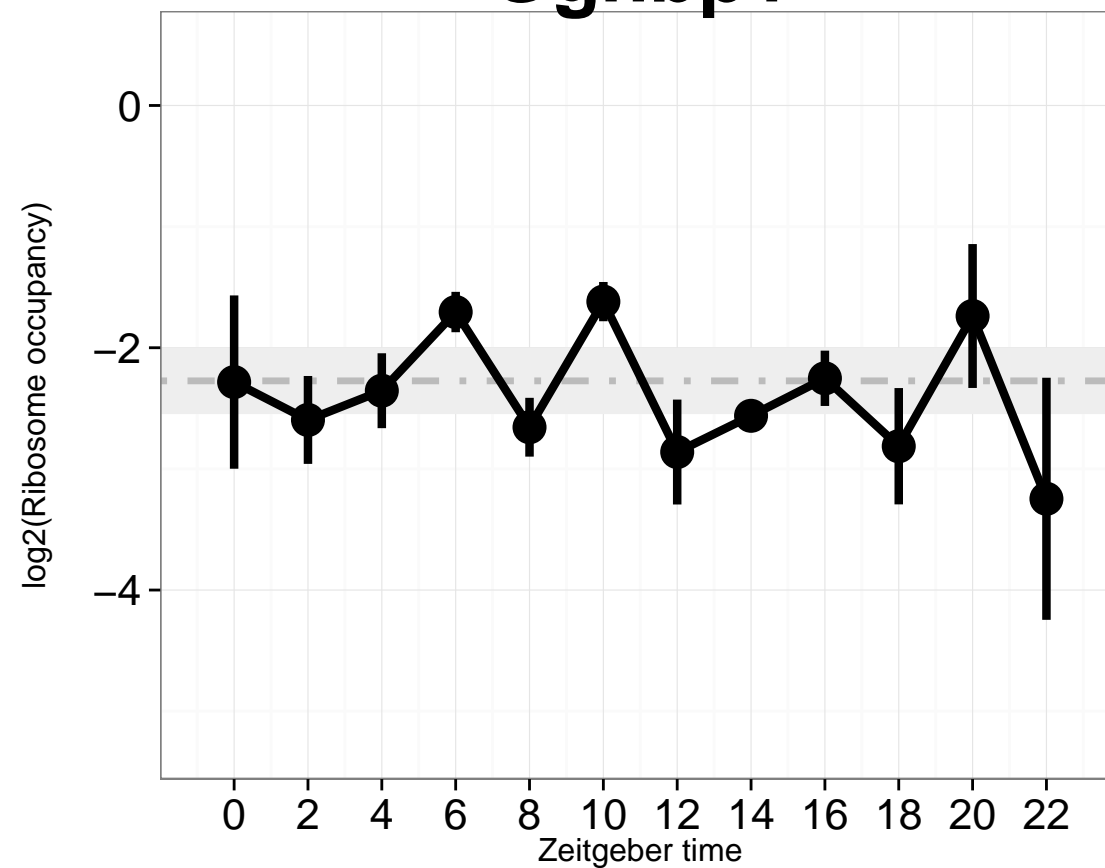

Supplement: Supplementary file 6958 [file 1]

# Myct1

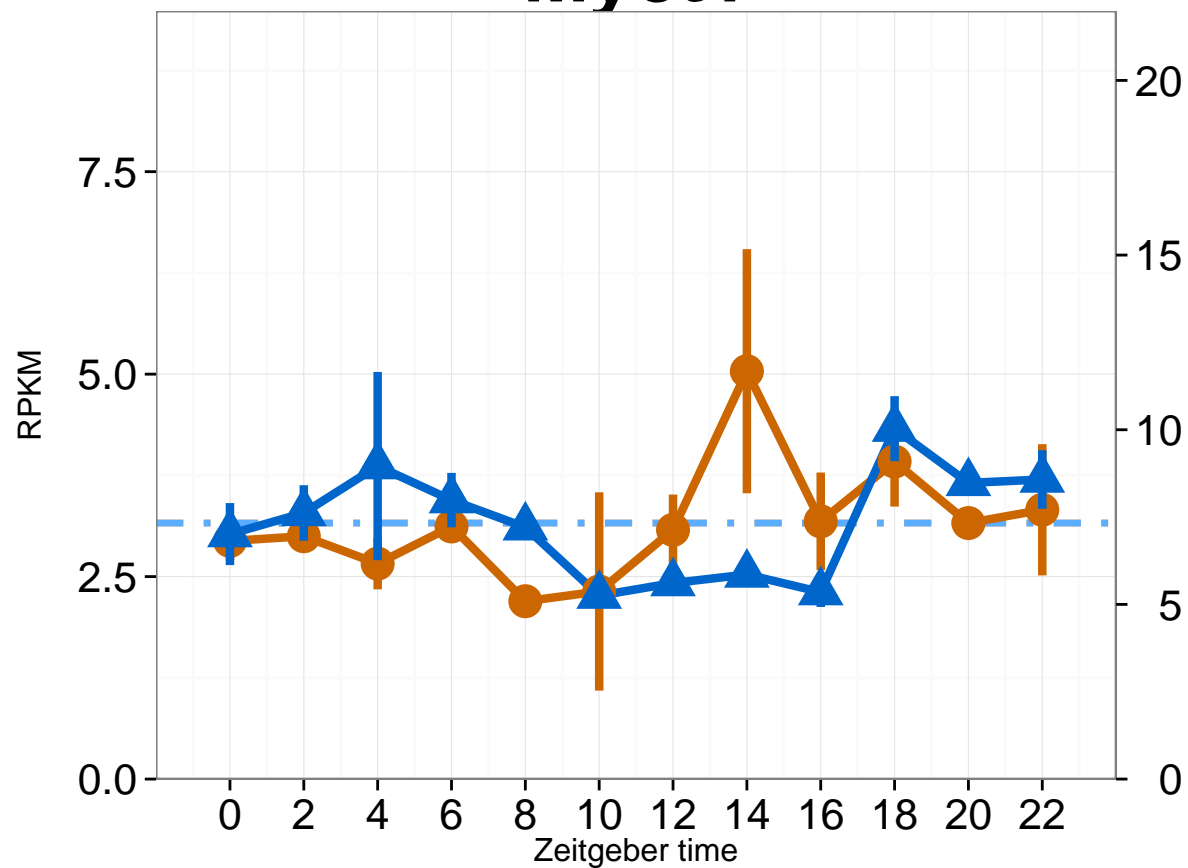

# Myct1

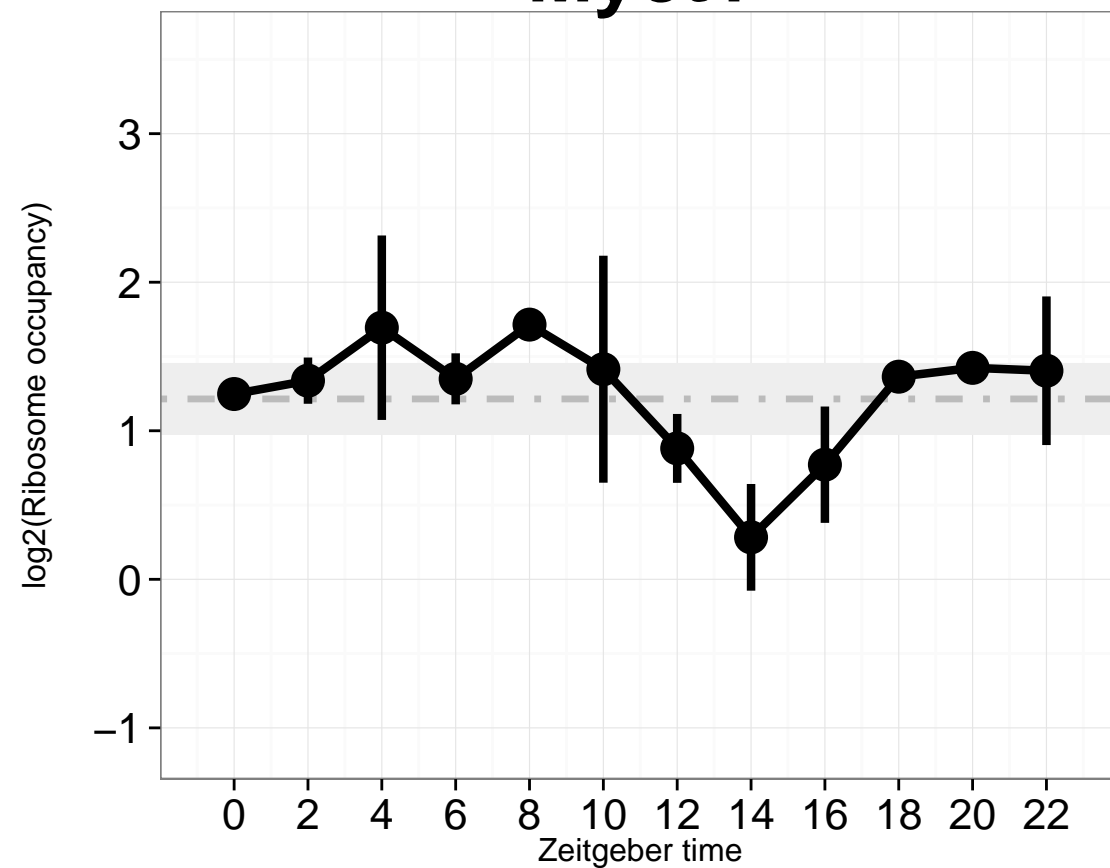

Supplement: Supplementary file 6959 [file 1]

# Dcaf6

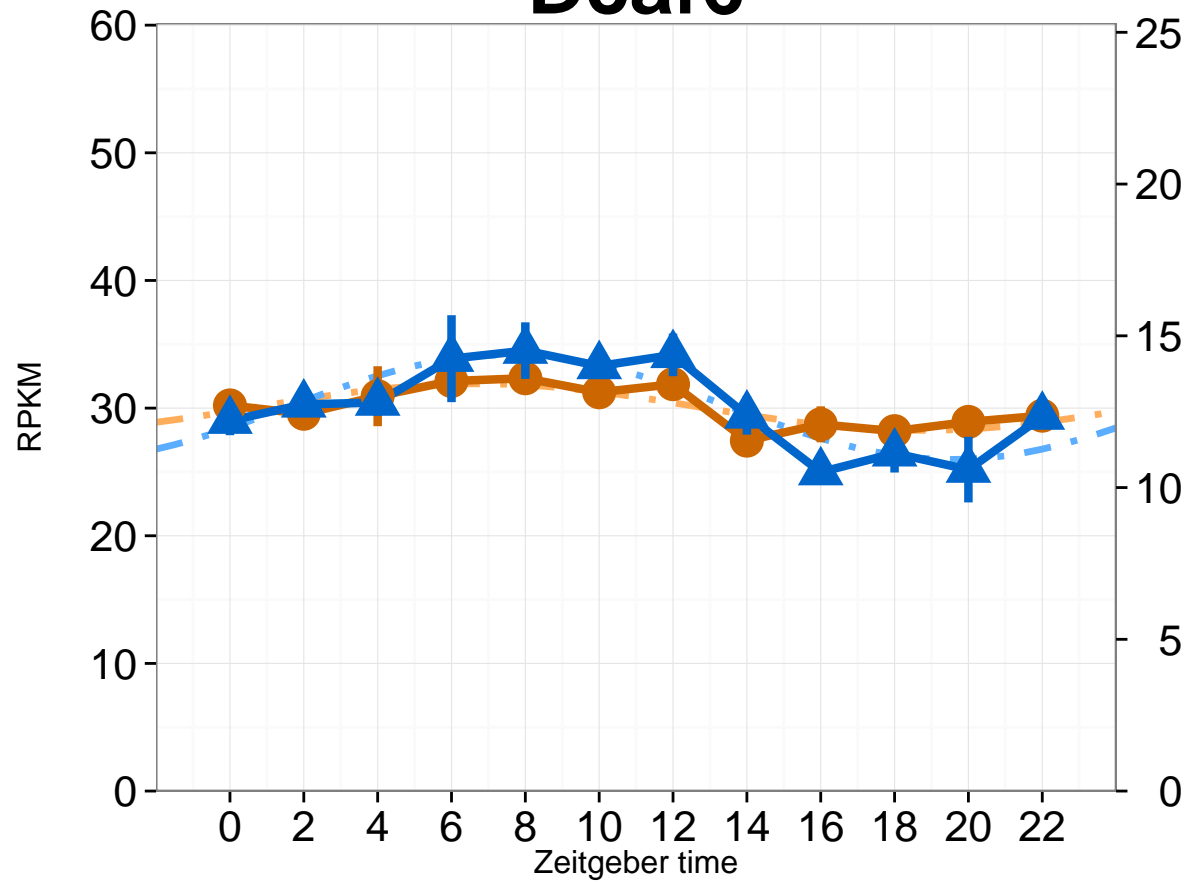

# Dcaf6

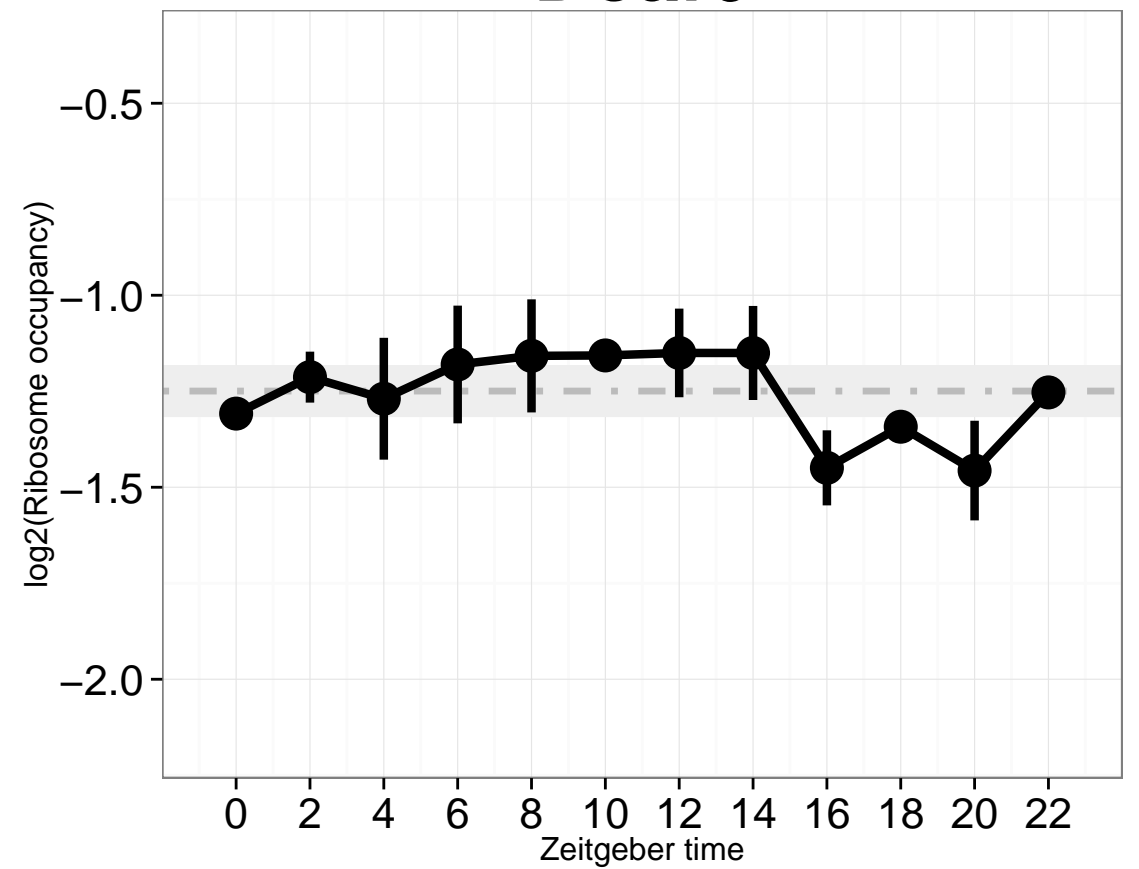

Supplement: Supplementary file 6960 [file 1]

# Ptpre

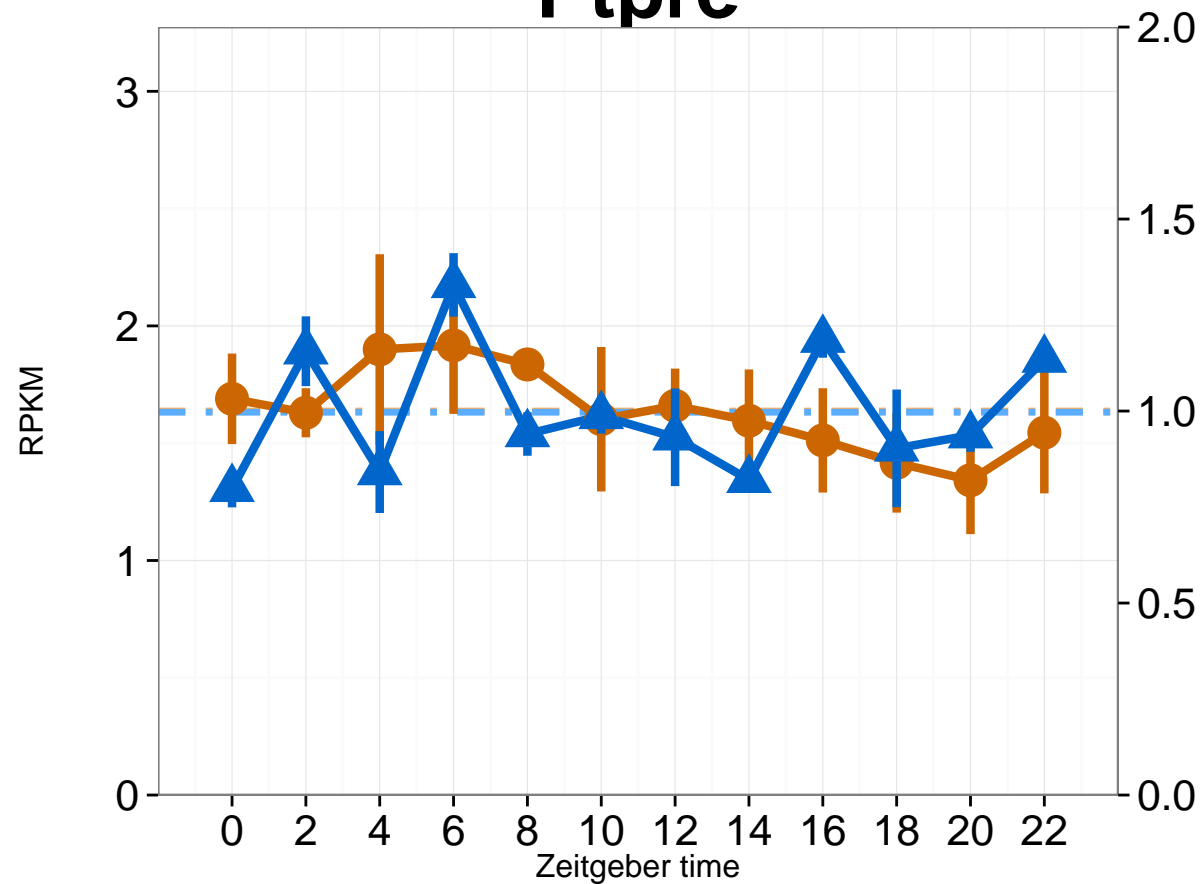

# Ptpre

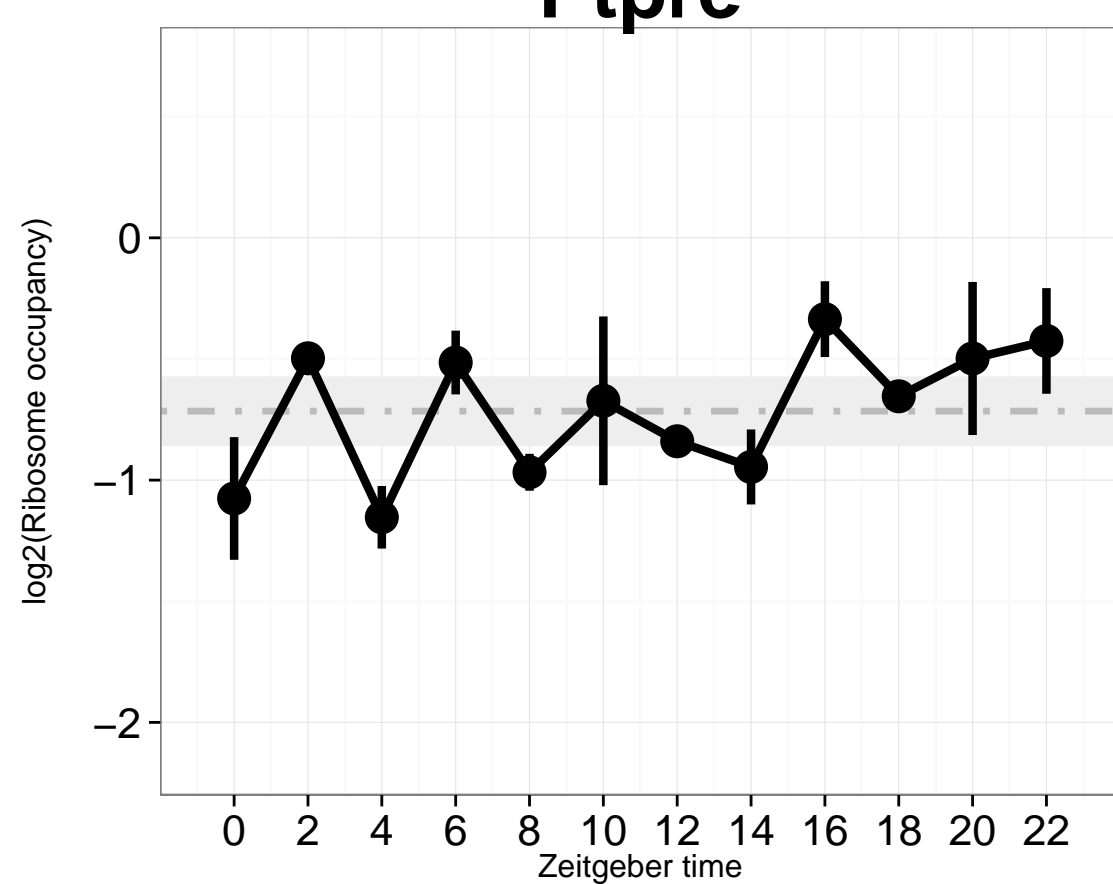

Supplement: Supplementary file 6961 [file 1]

# Dot1l

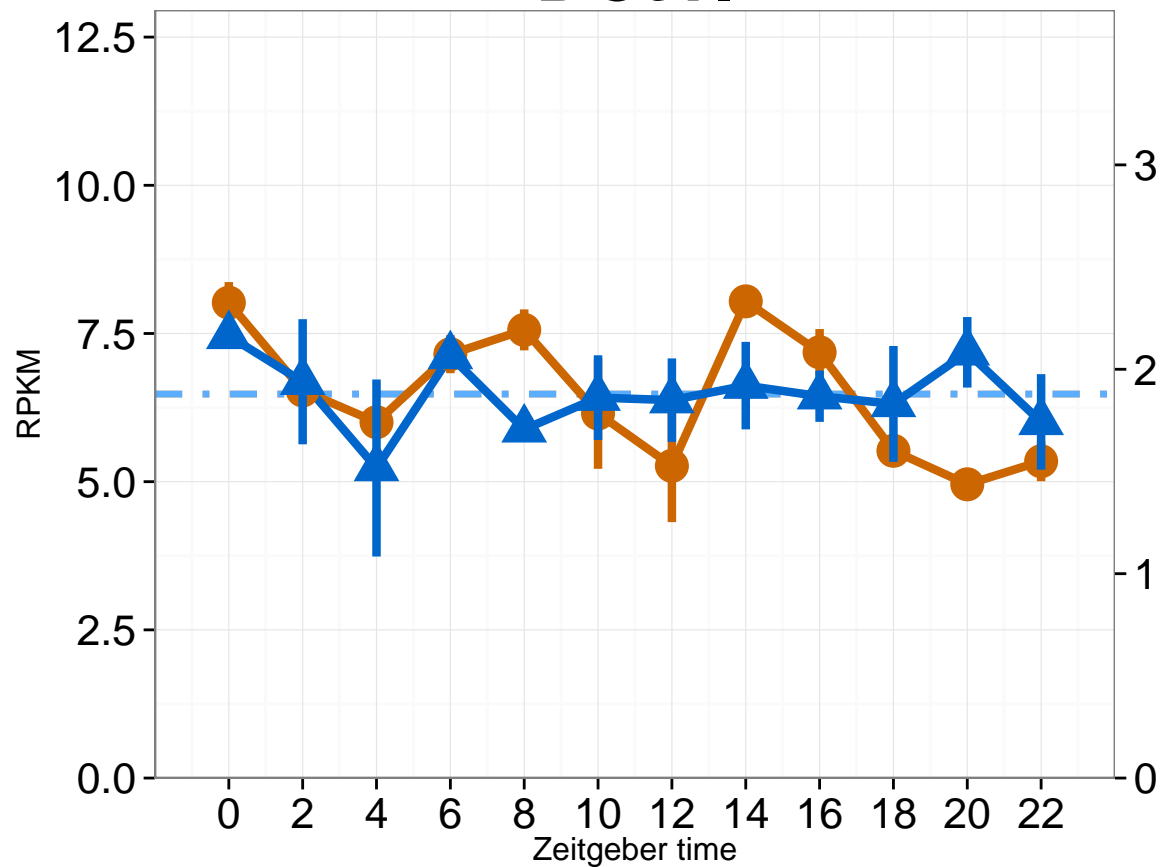

# Dot1l

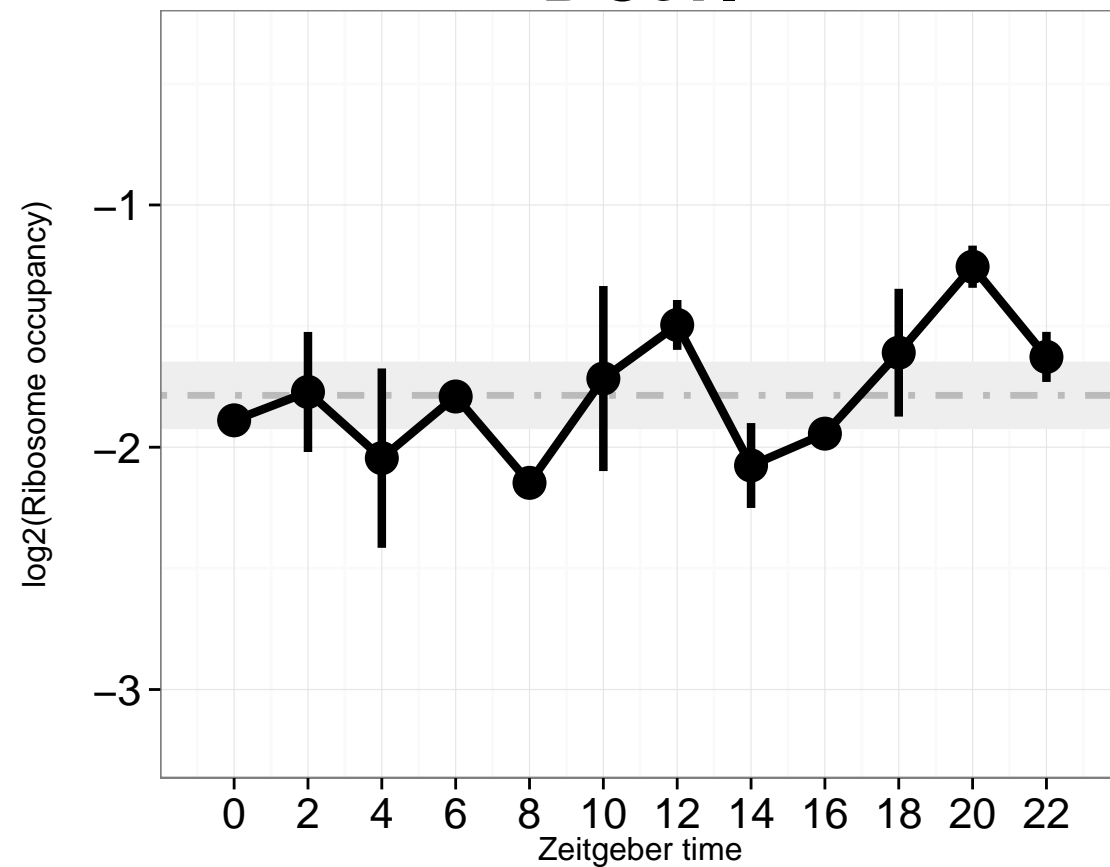

Supplement: Supplementary file 6962 [file 1]

# Lypd2

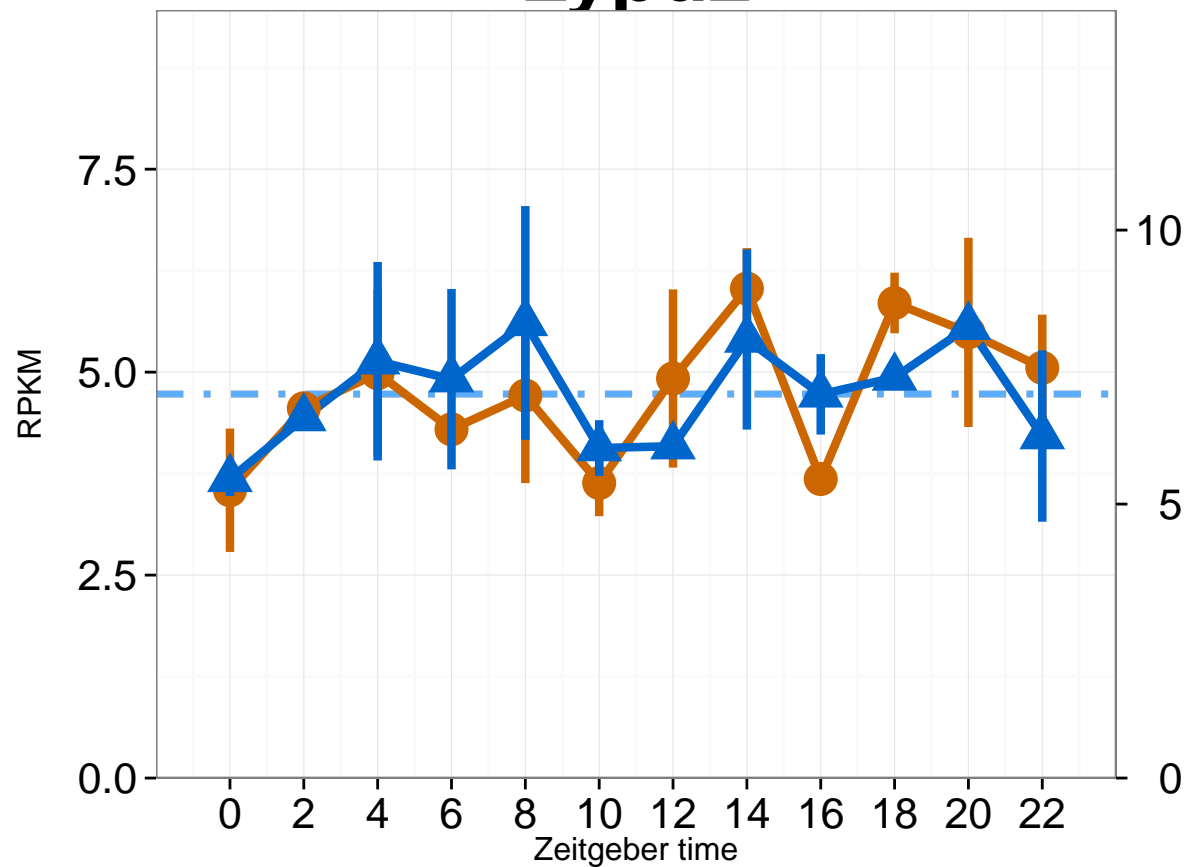

# Lypd2

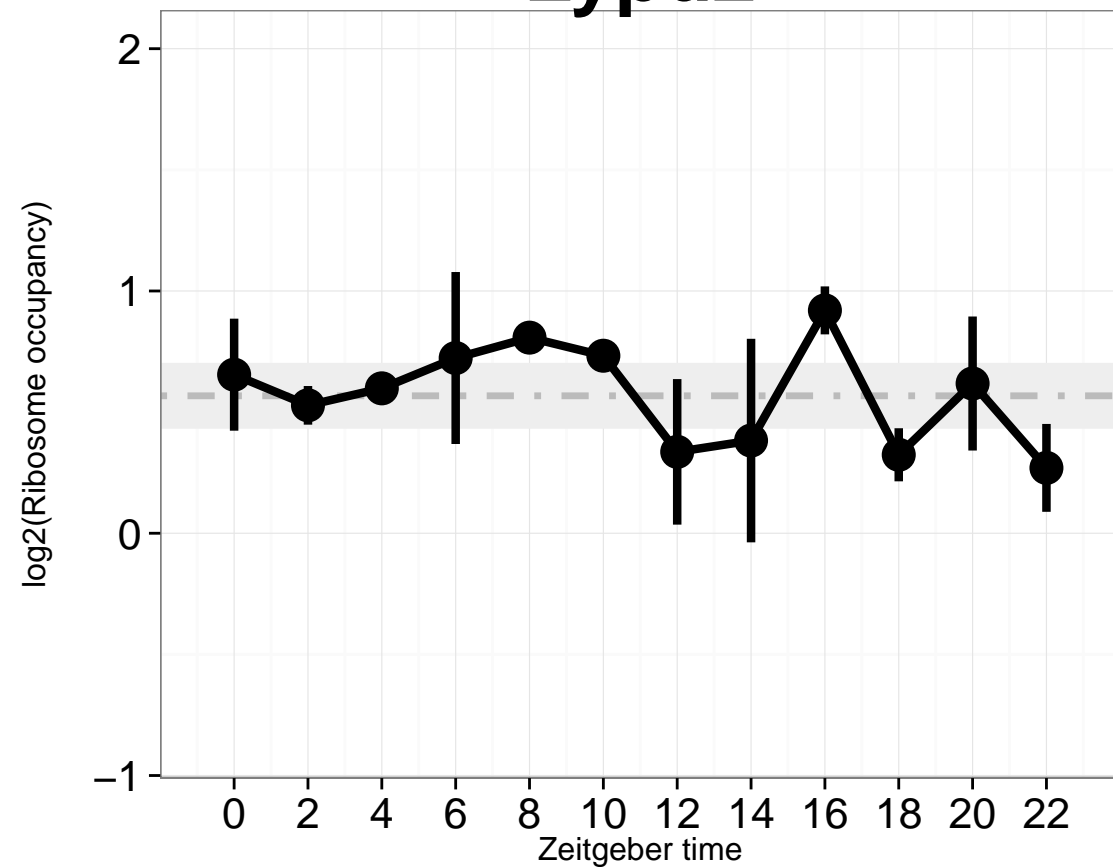

Supplement: Supplementary file 6963 [file 1]

## Itga5

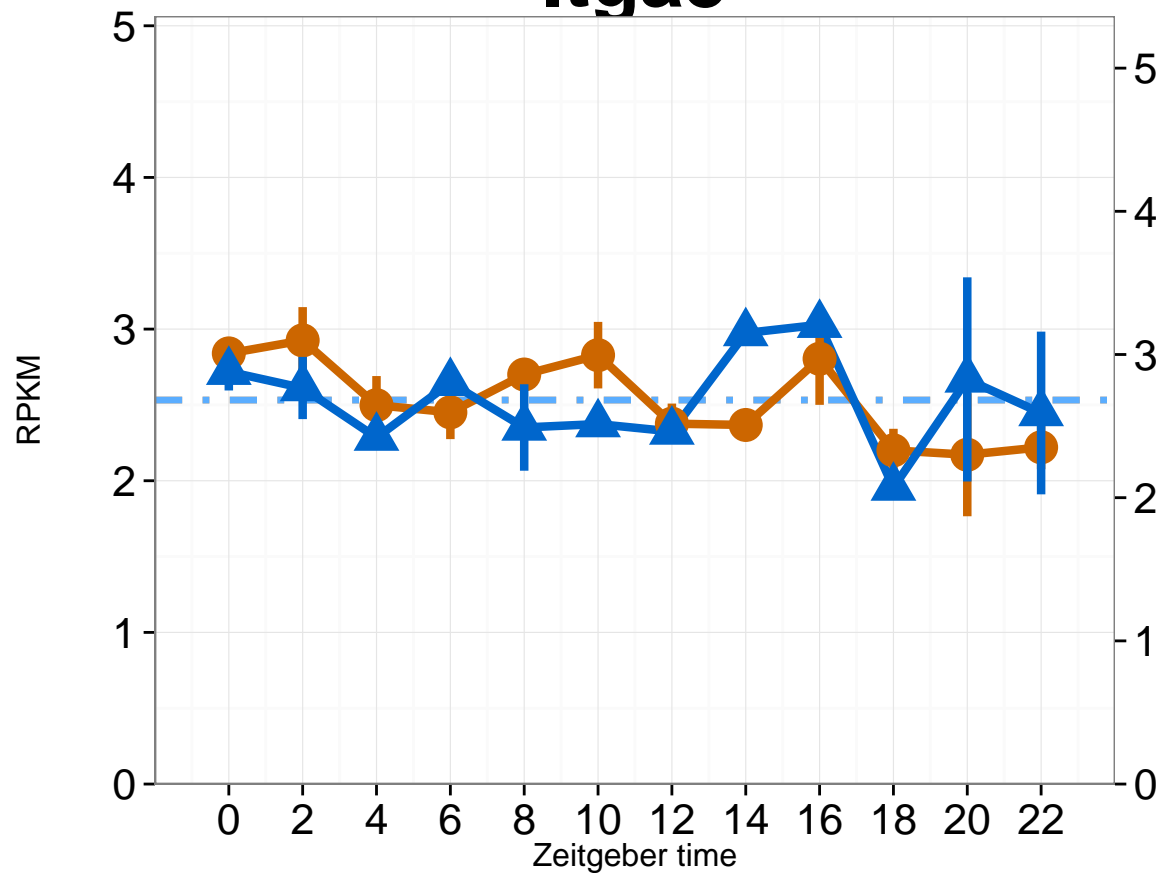

## Itga5

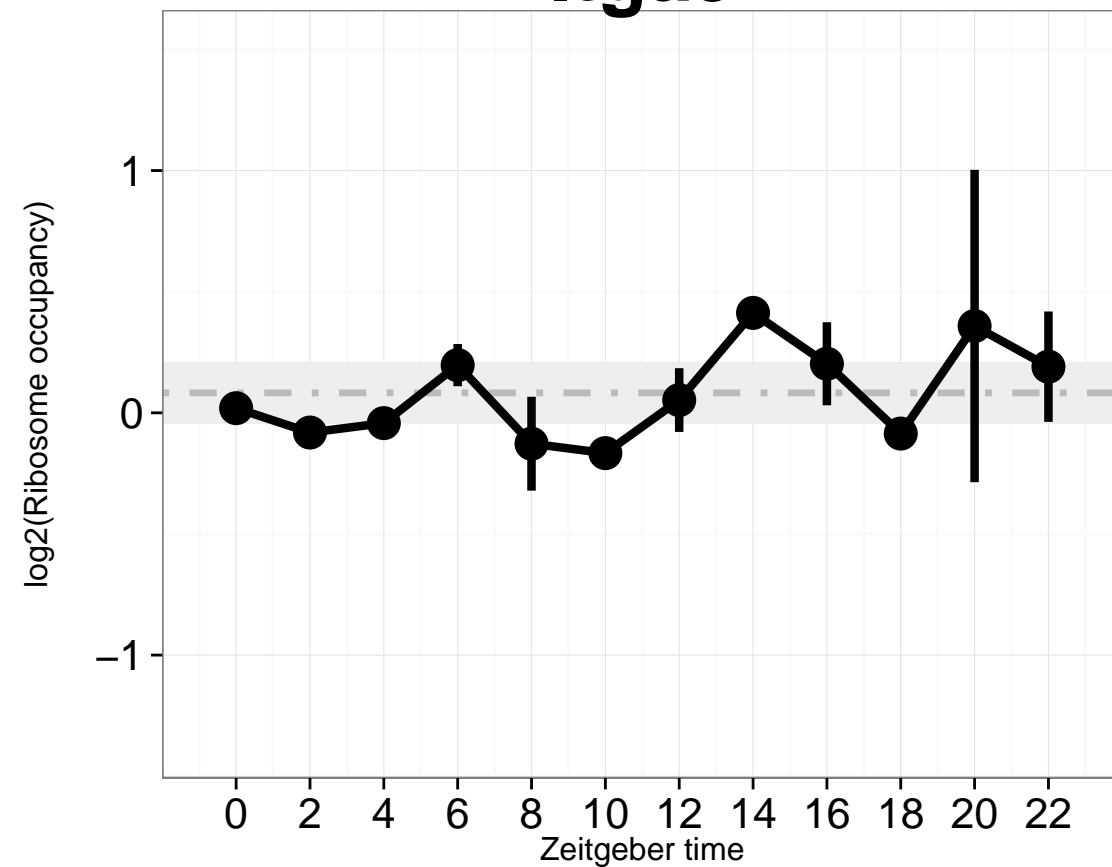

Supplement: Supplementary file 6964 [file 1]

# Disc1

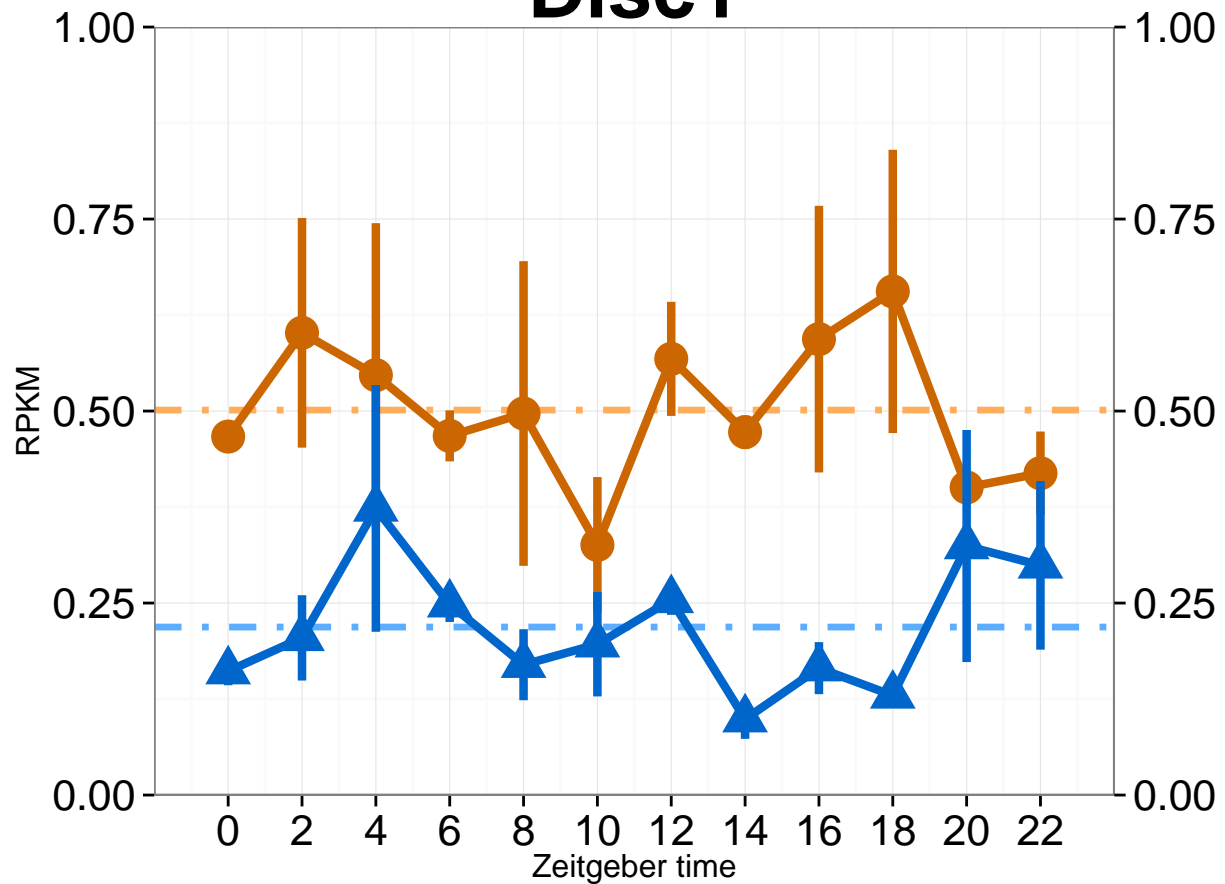

# Disc1

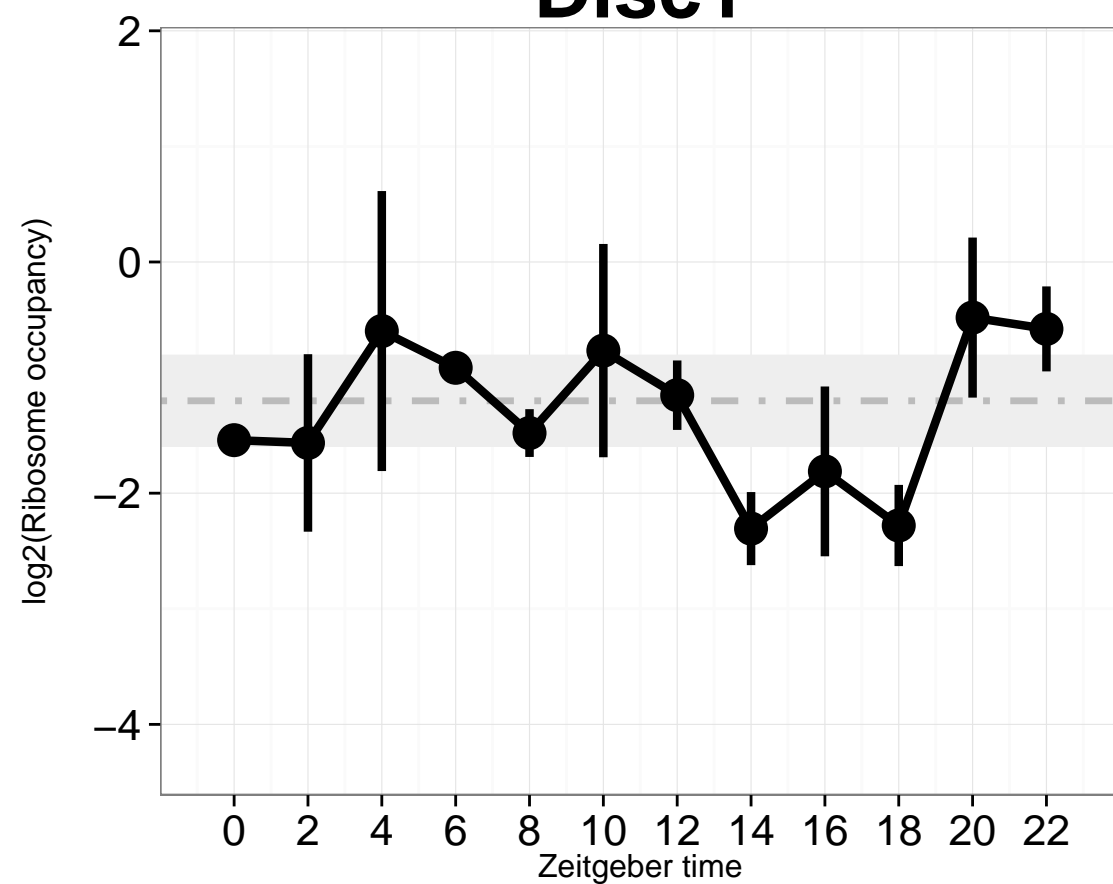

Supplement: Supplementary file 6965 [file 1]

# Zfp938

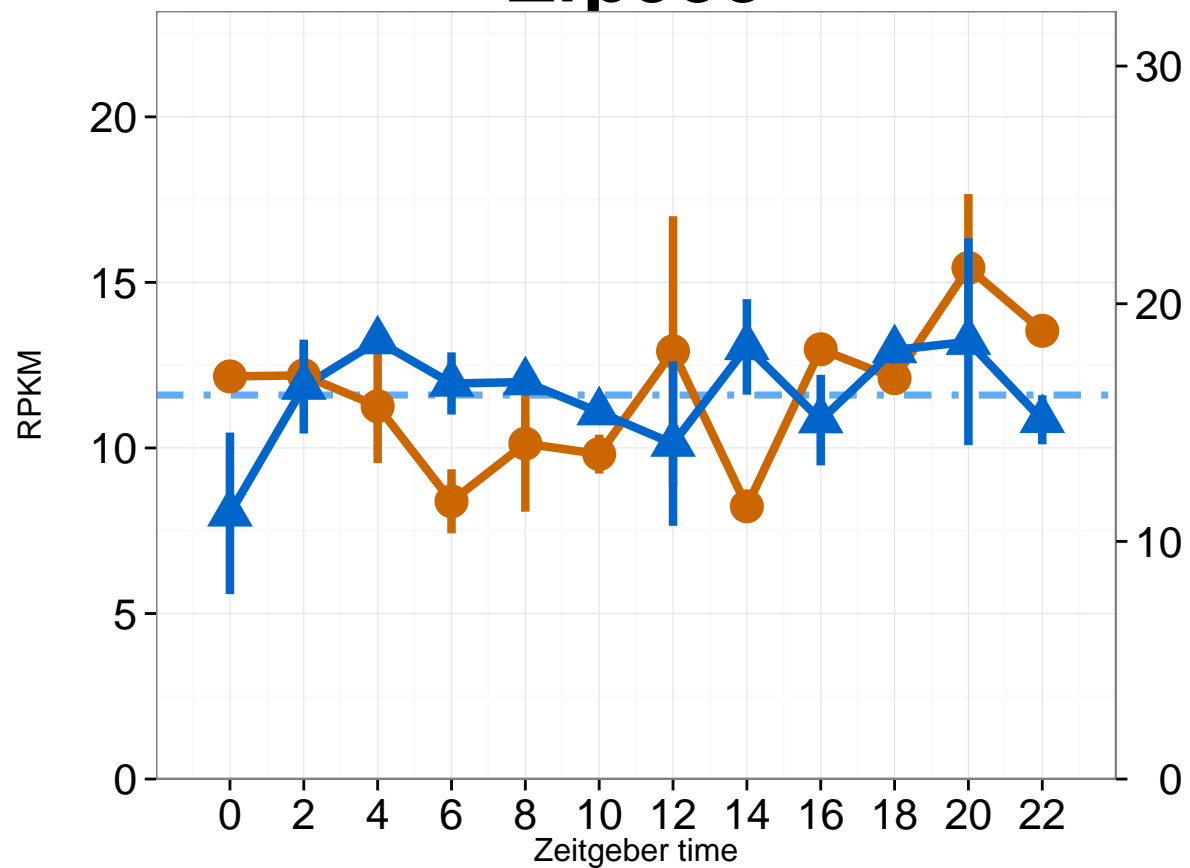

# Zfp938

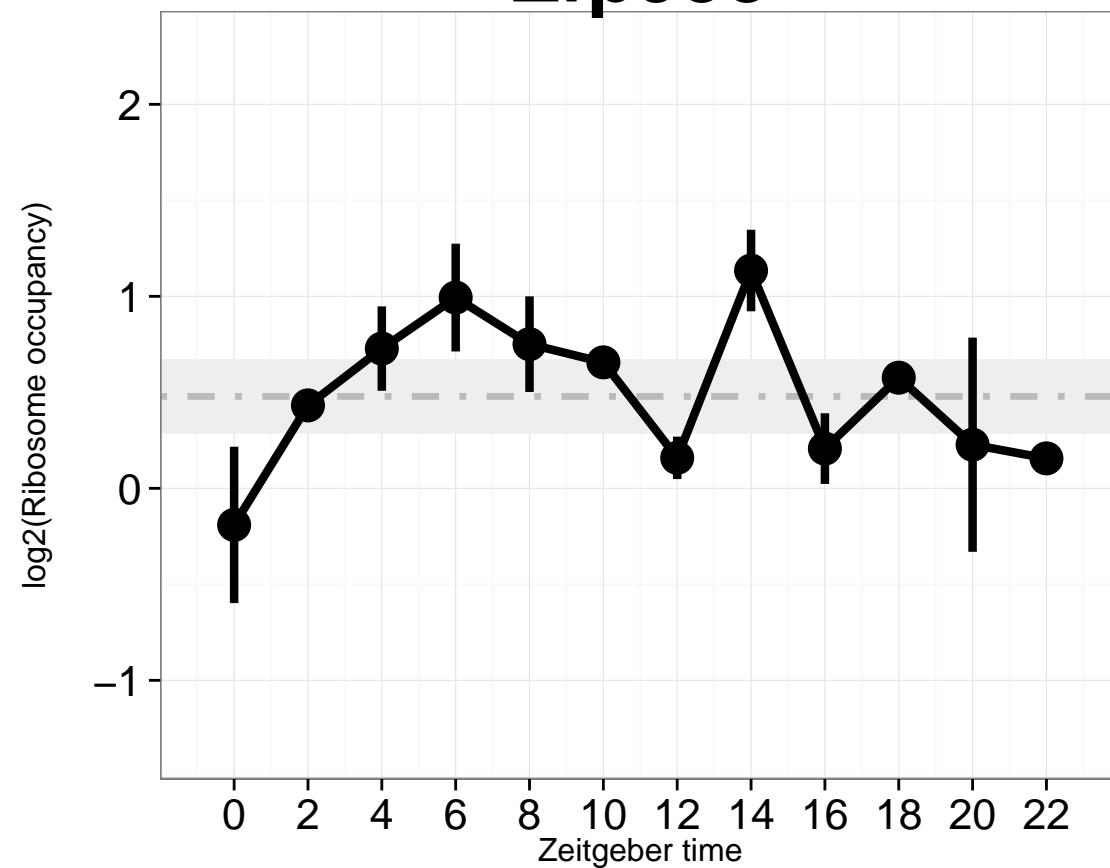

Supplement: Supplementary file 6966 [file 1]

## Ramp3

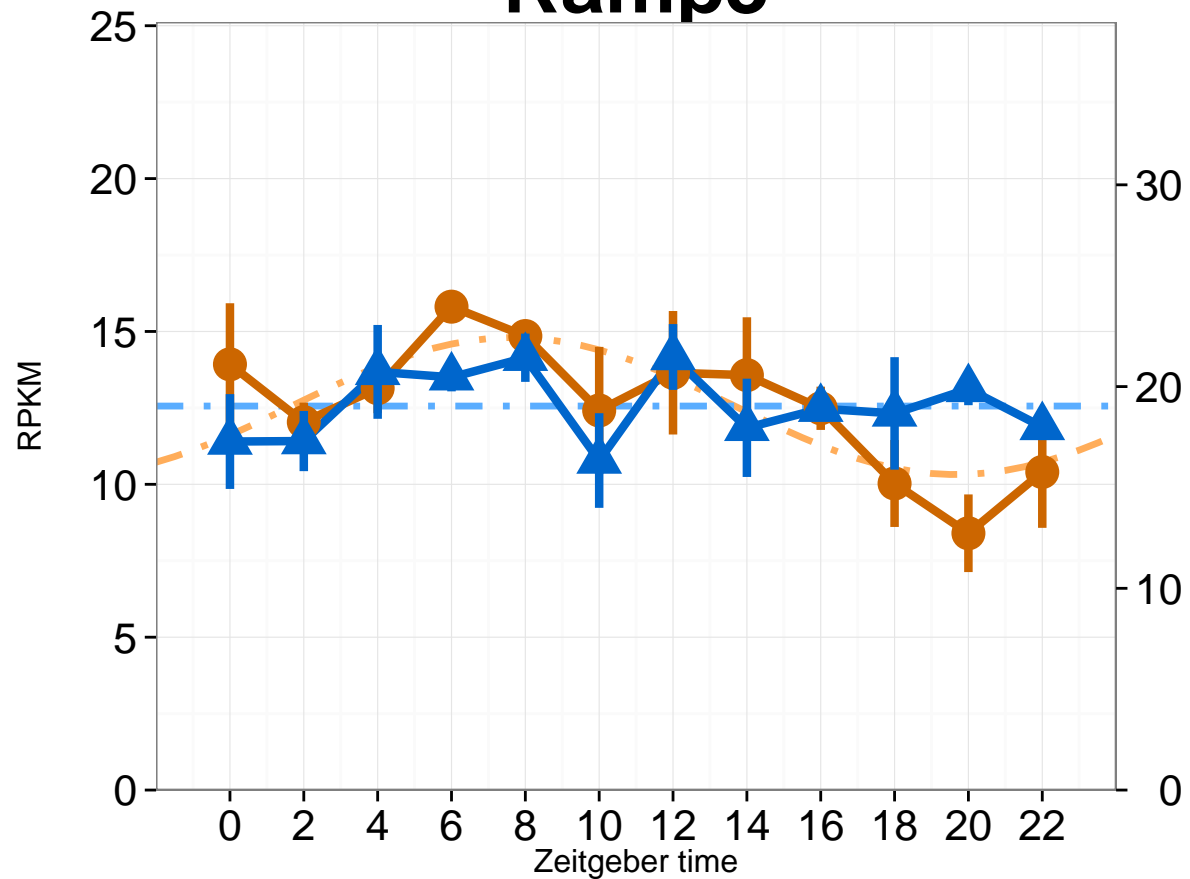

## Ramp3

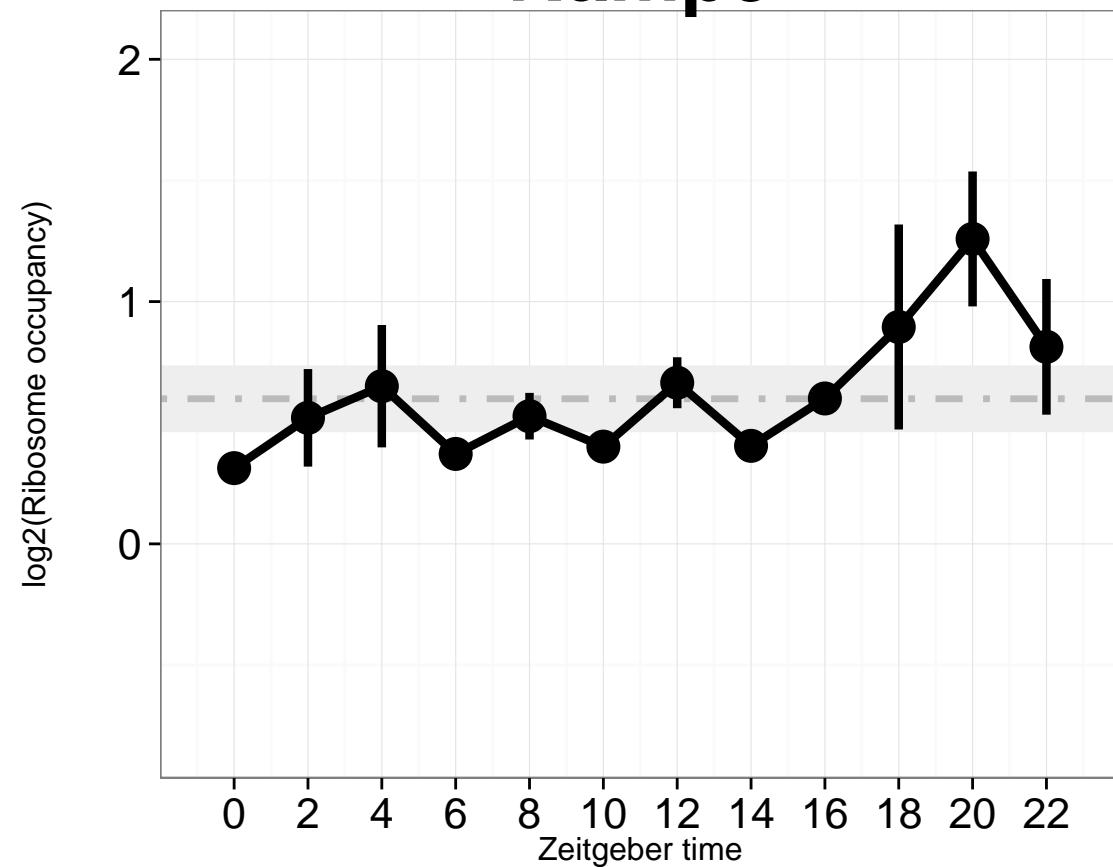

Supplement: Supplementary file 6967 [file 1]

## Kcnd3

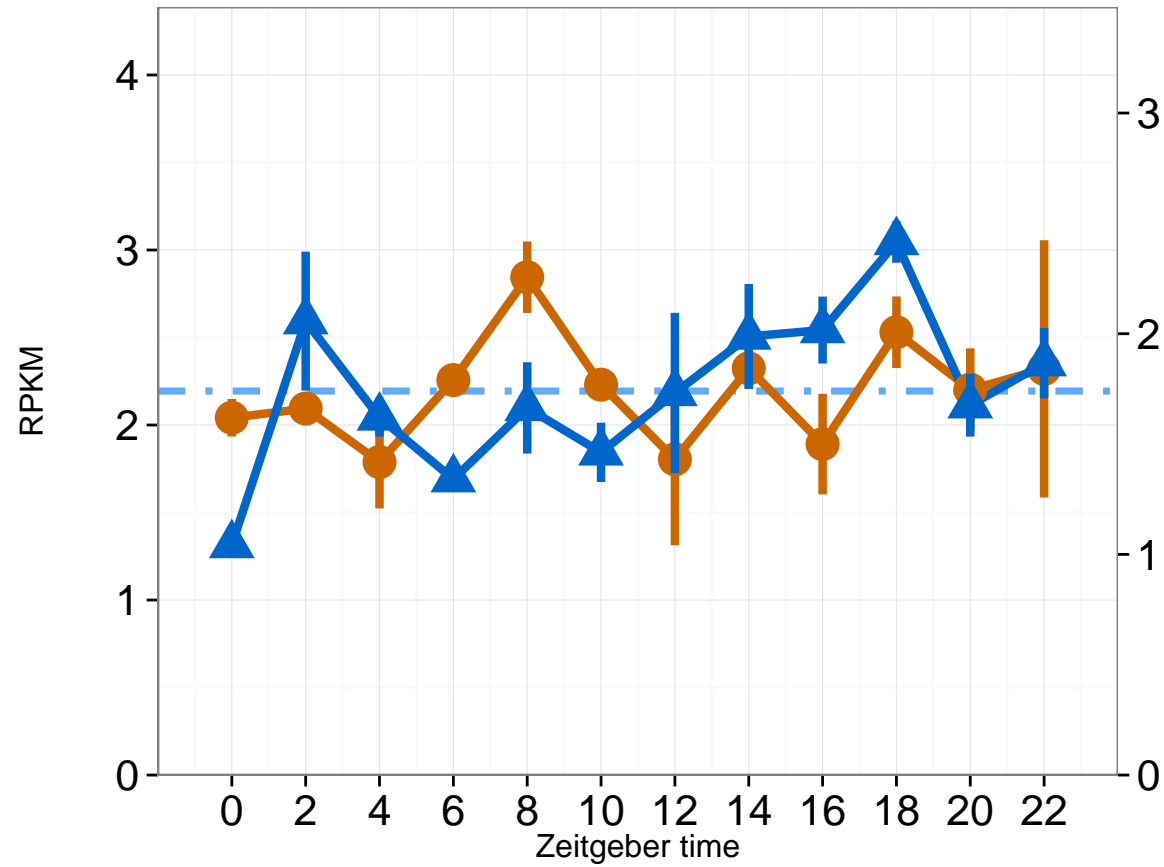

## Kcnd3

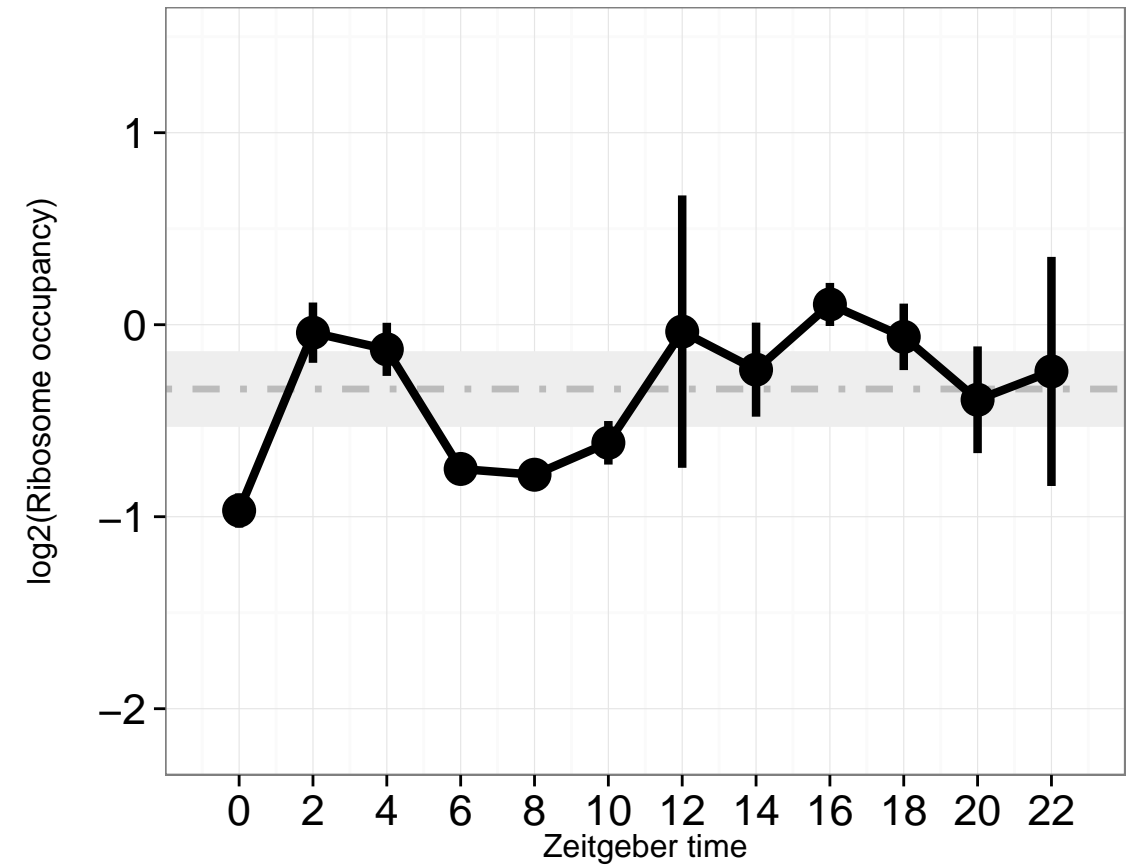

Supplement: Supplementary file 6968 [file 1]

## Tshz1

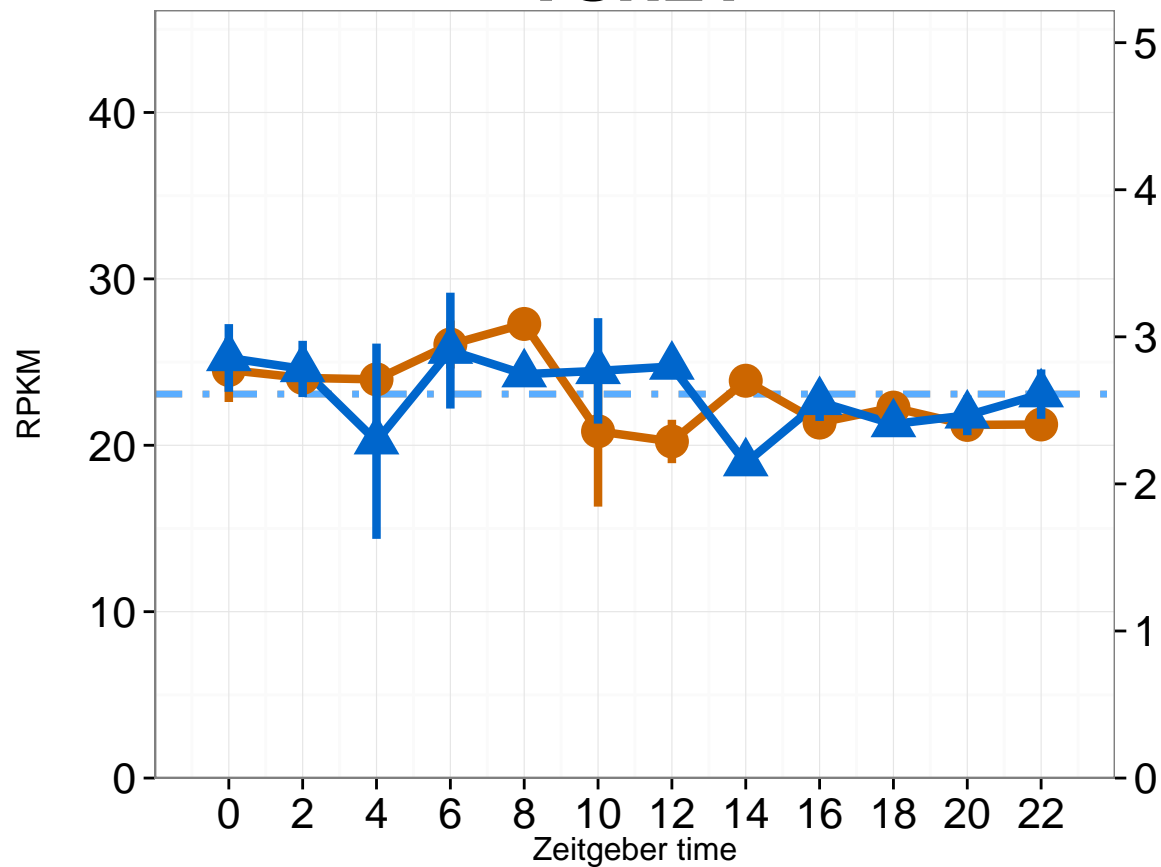

## Tshz1

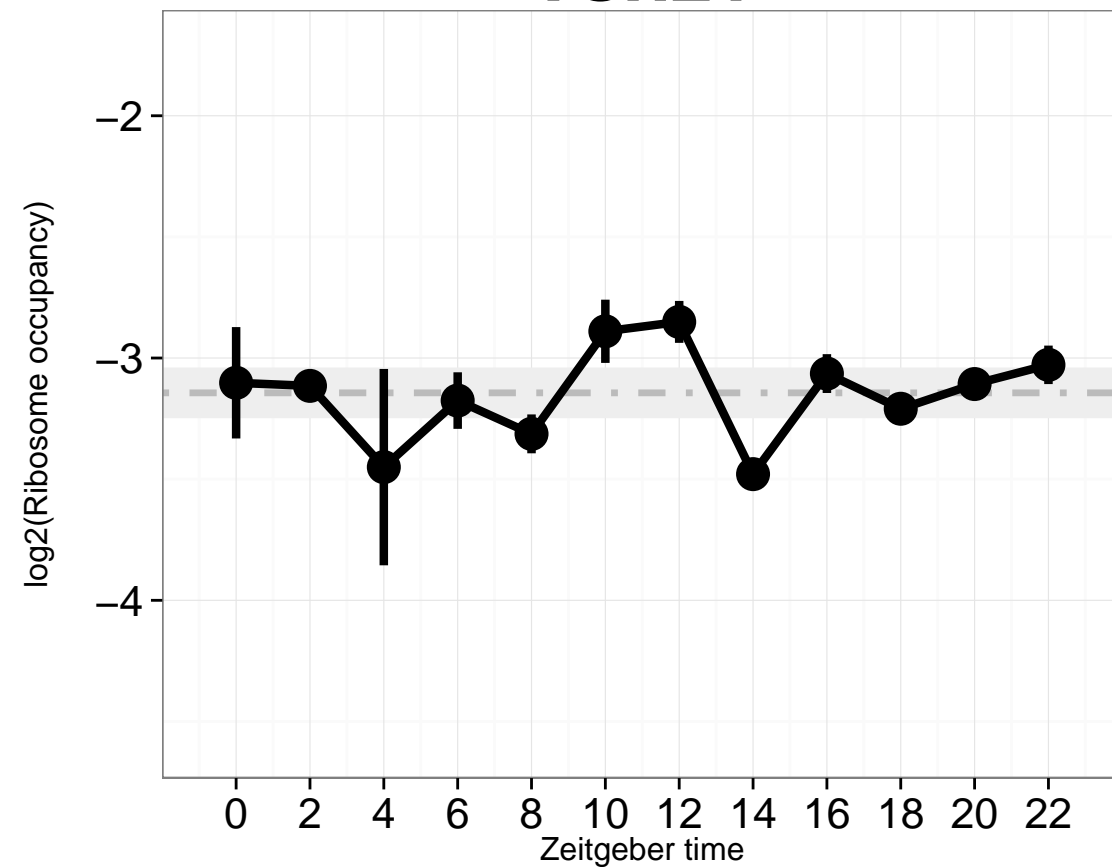

Supplement: Supplementary file 6969 [file 1]

# Fam199x

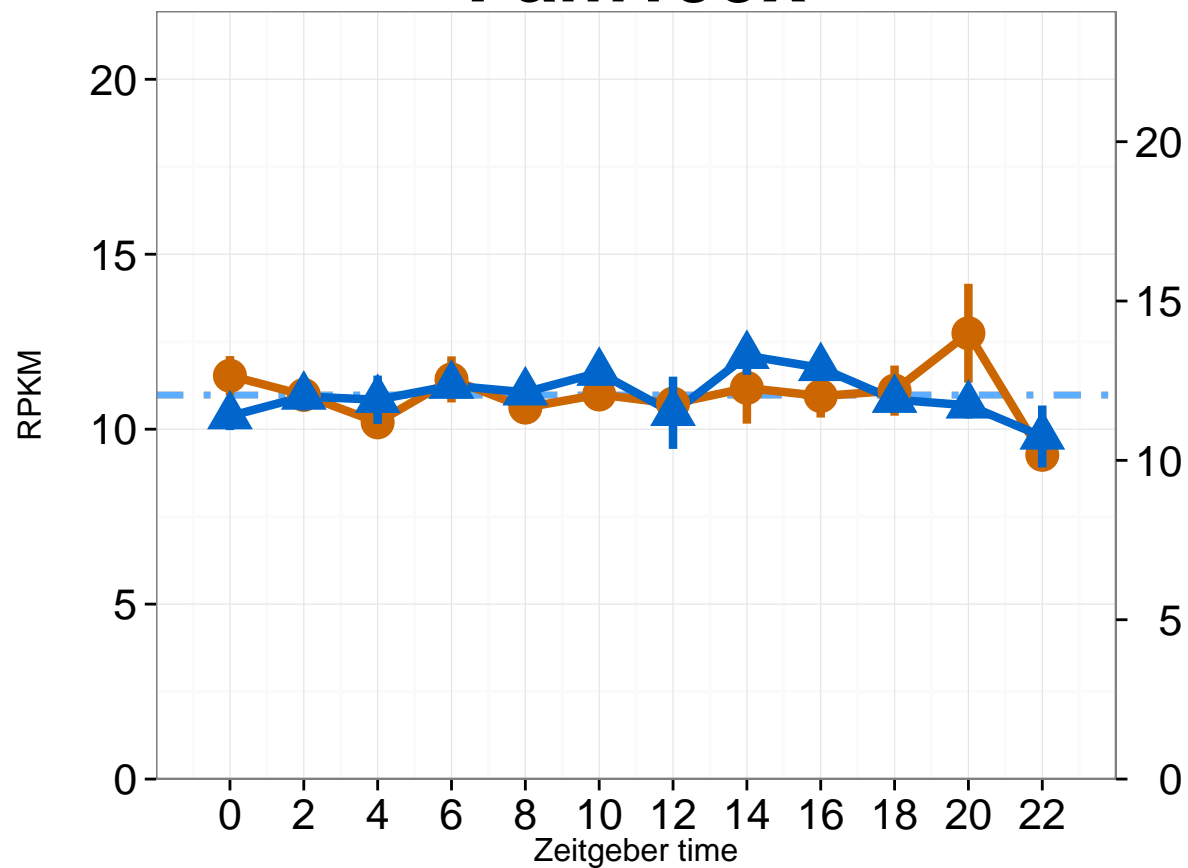

# Fam199x

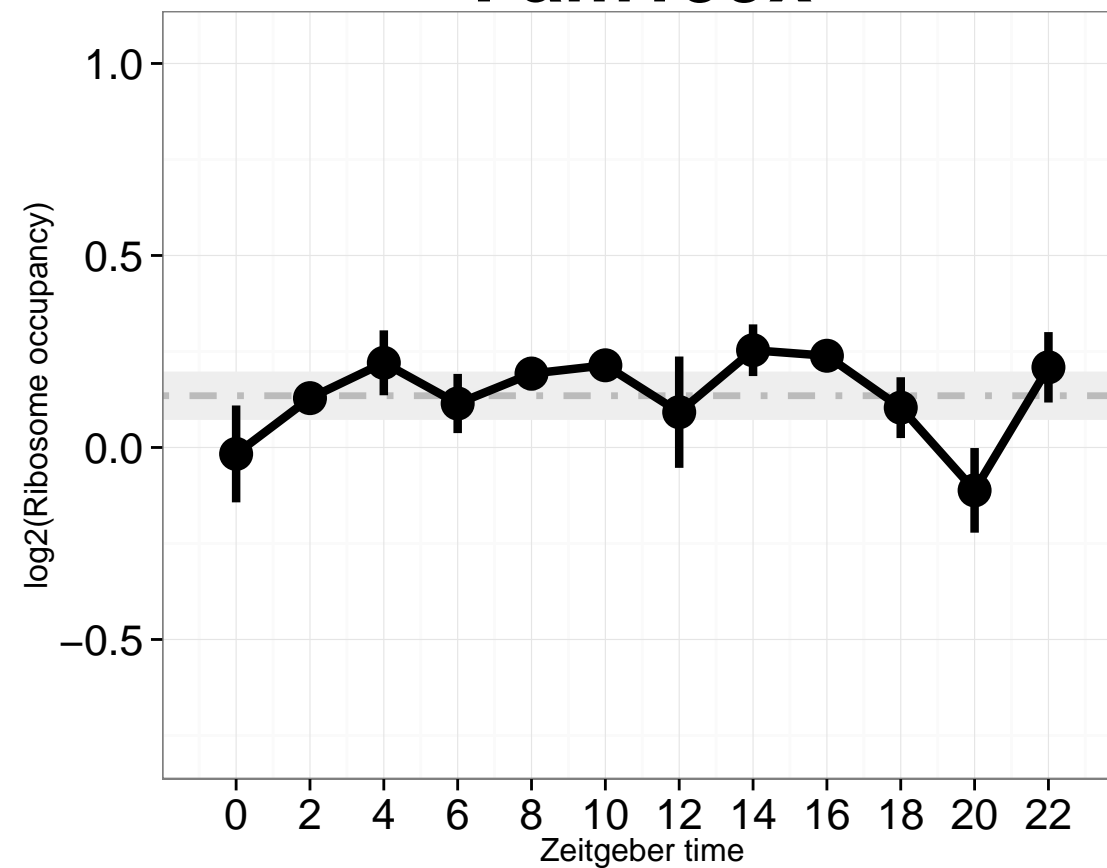

Supplement: Supplementary file 6970 [file 1]

# Eepd1

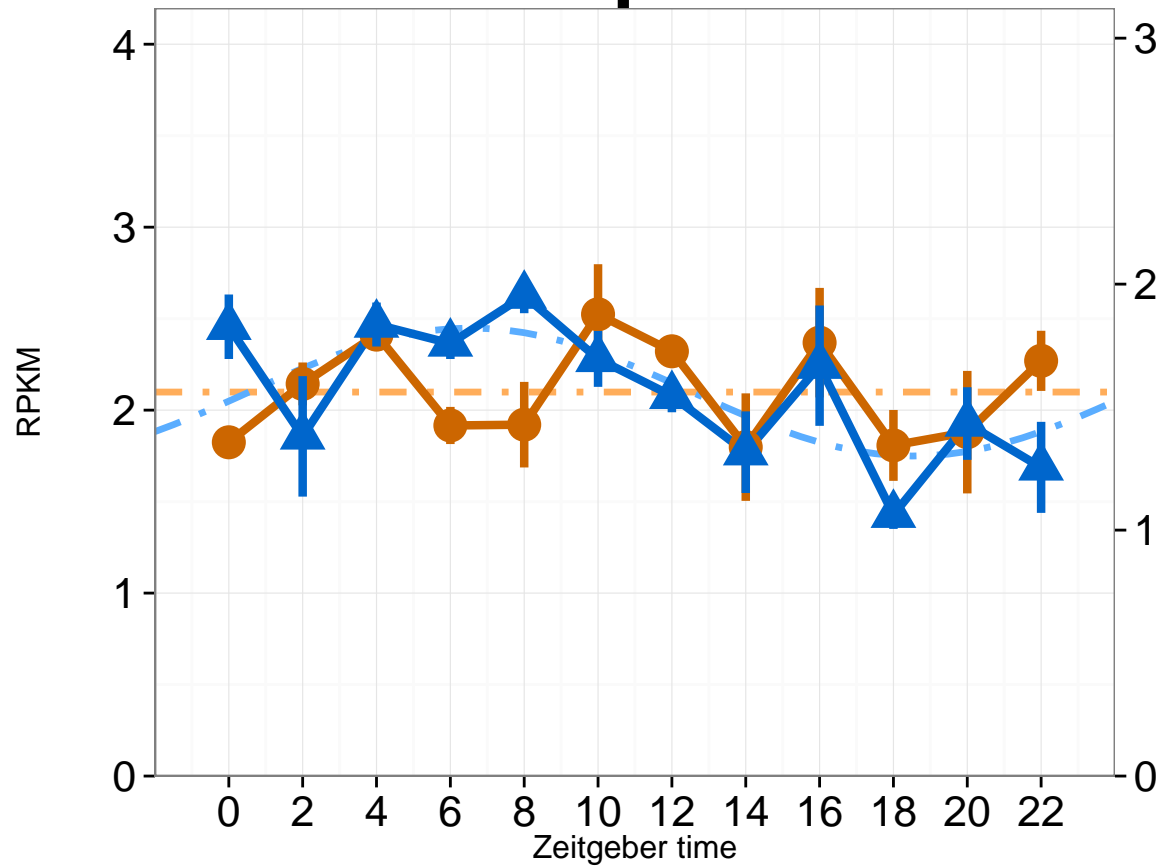

# Eepd1

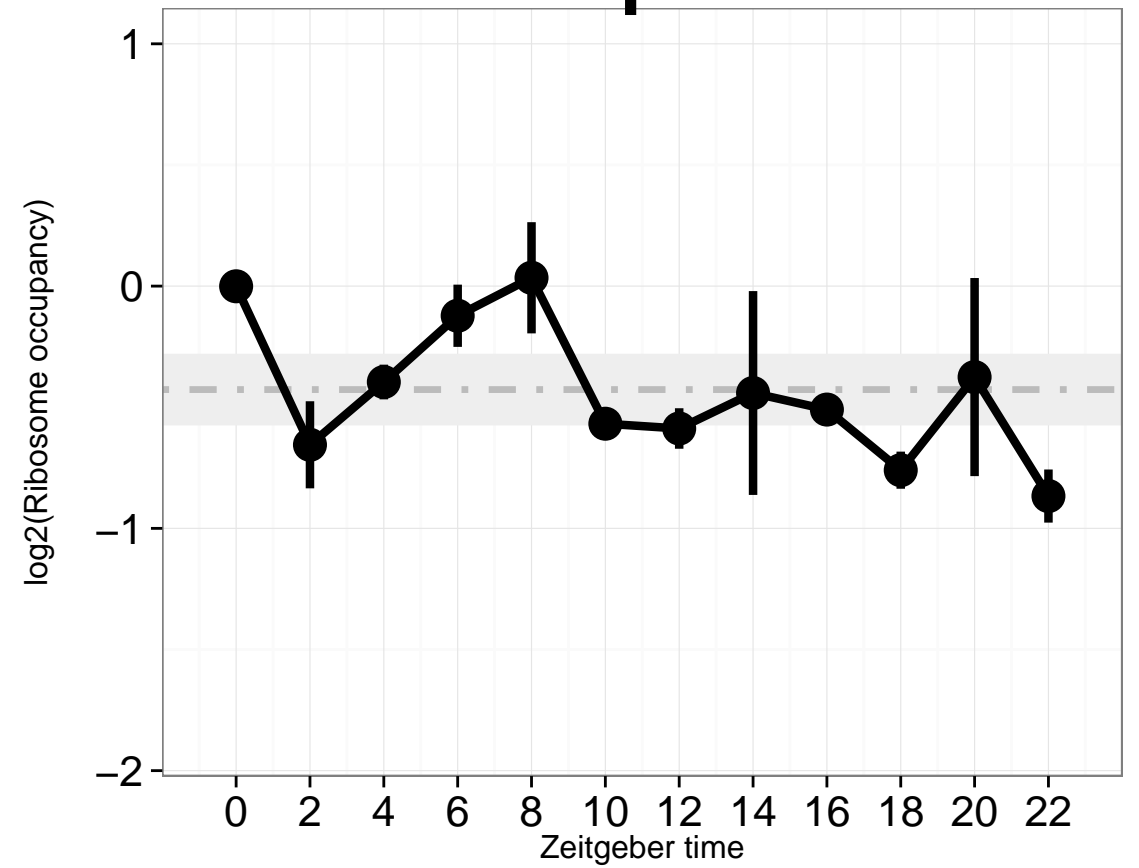

Supplement: Supplementary file 6971 [file 1]

# Mtmr4

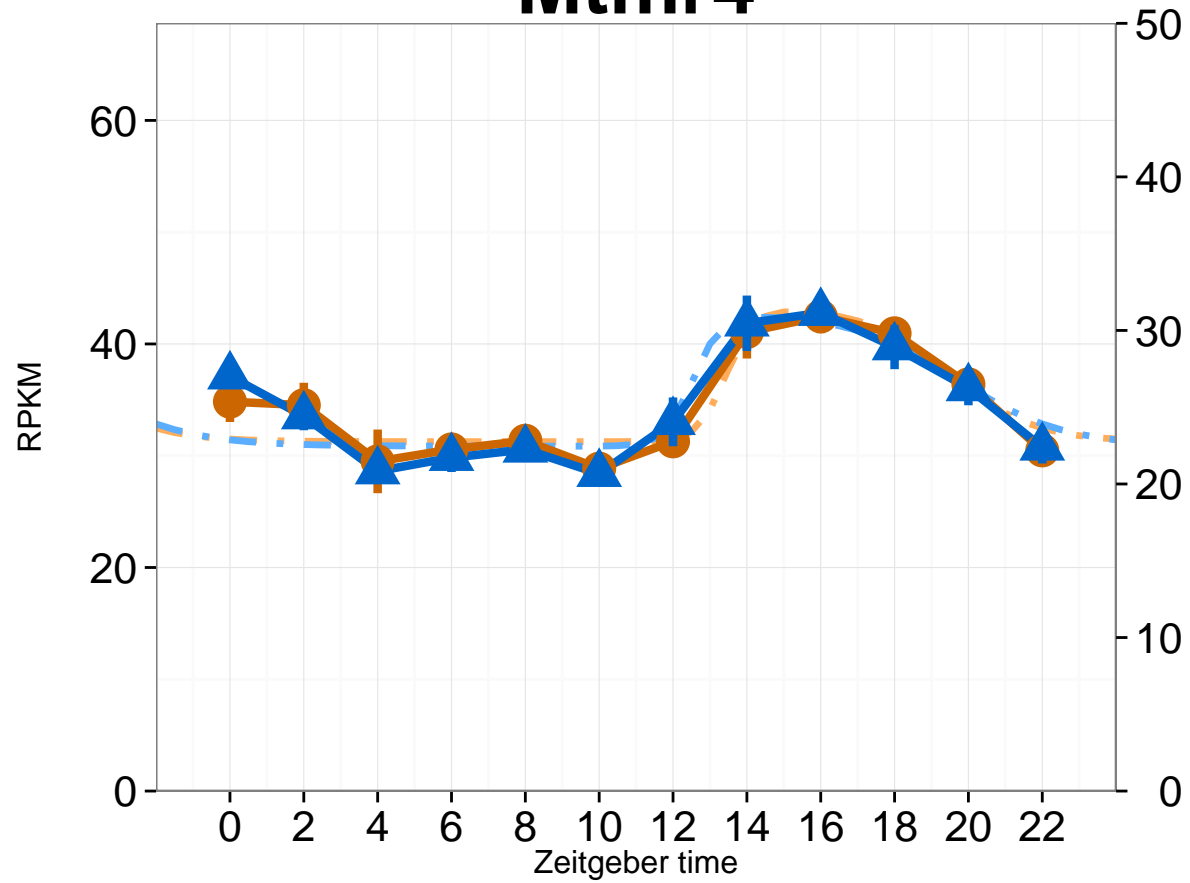

# Mtmr4

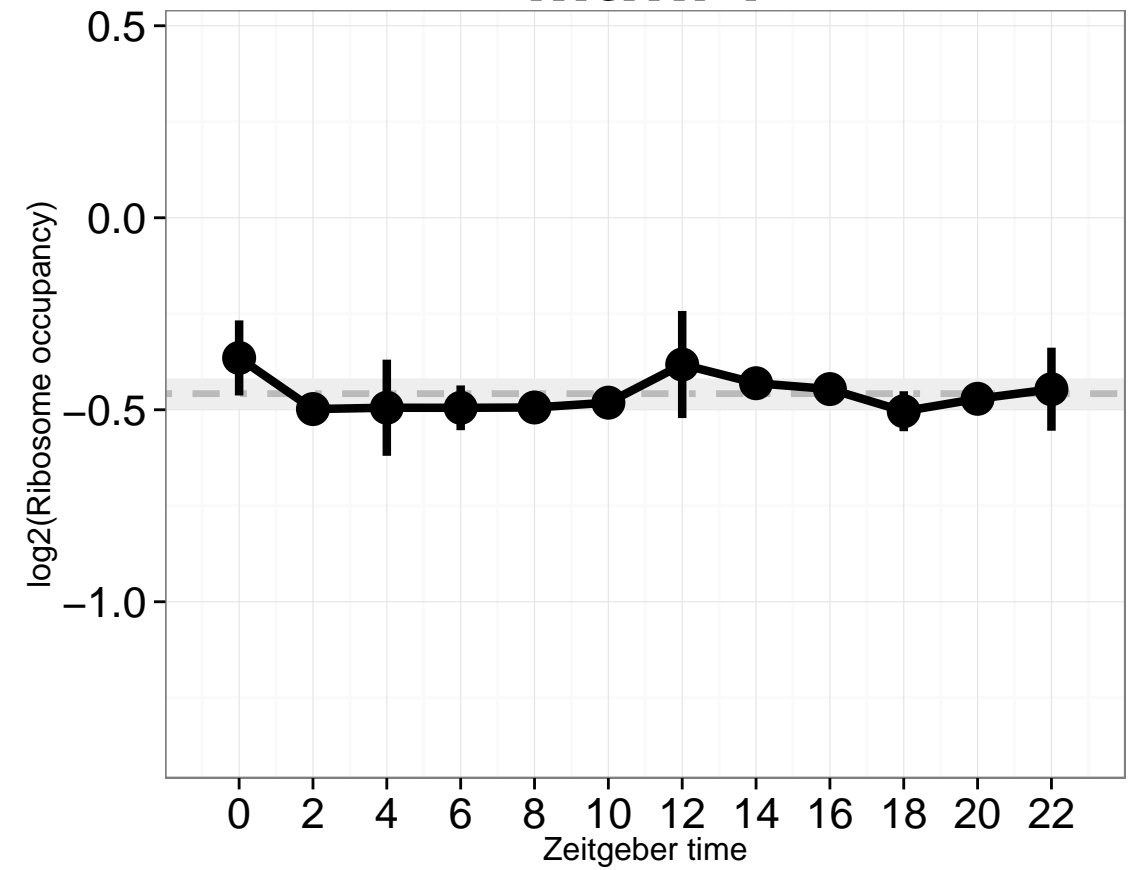

Supplement: Supplementary file 6972 [file 1]

# Icam1

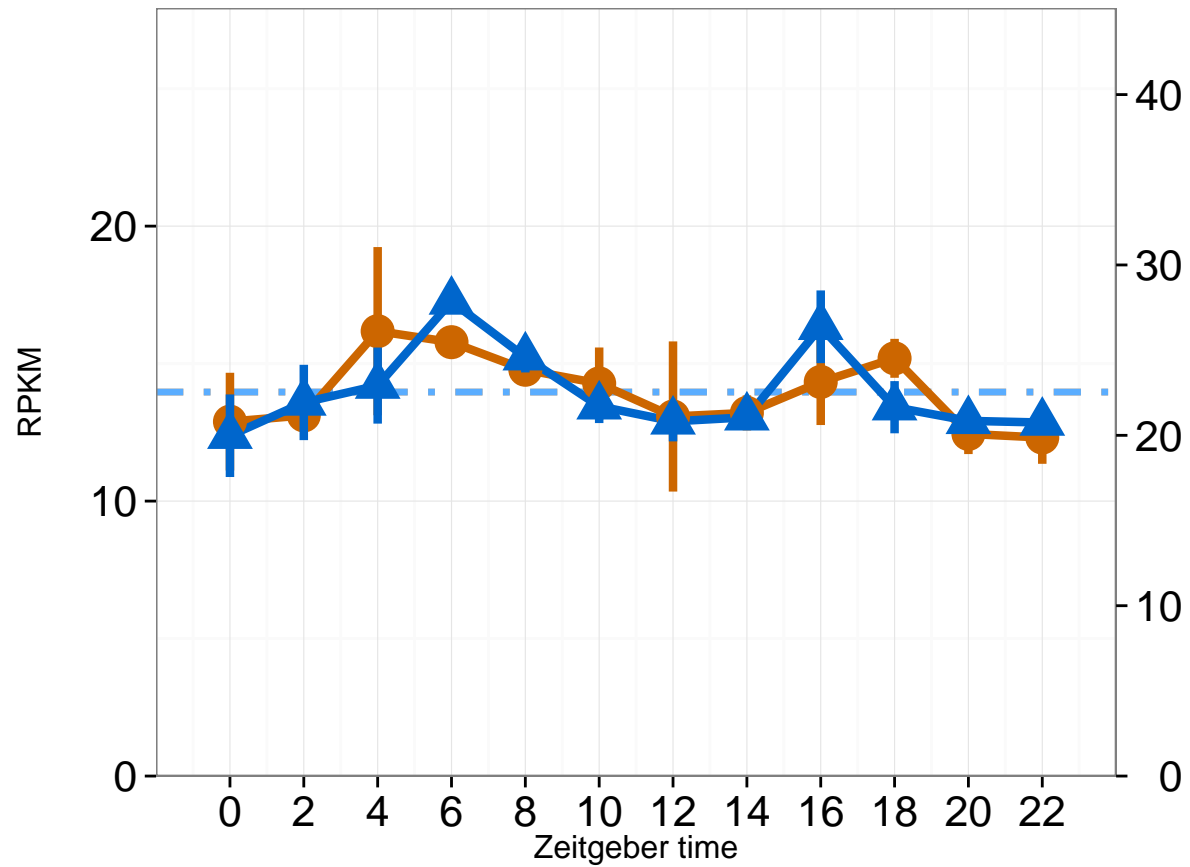

# Icam1

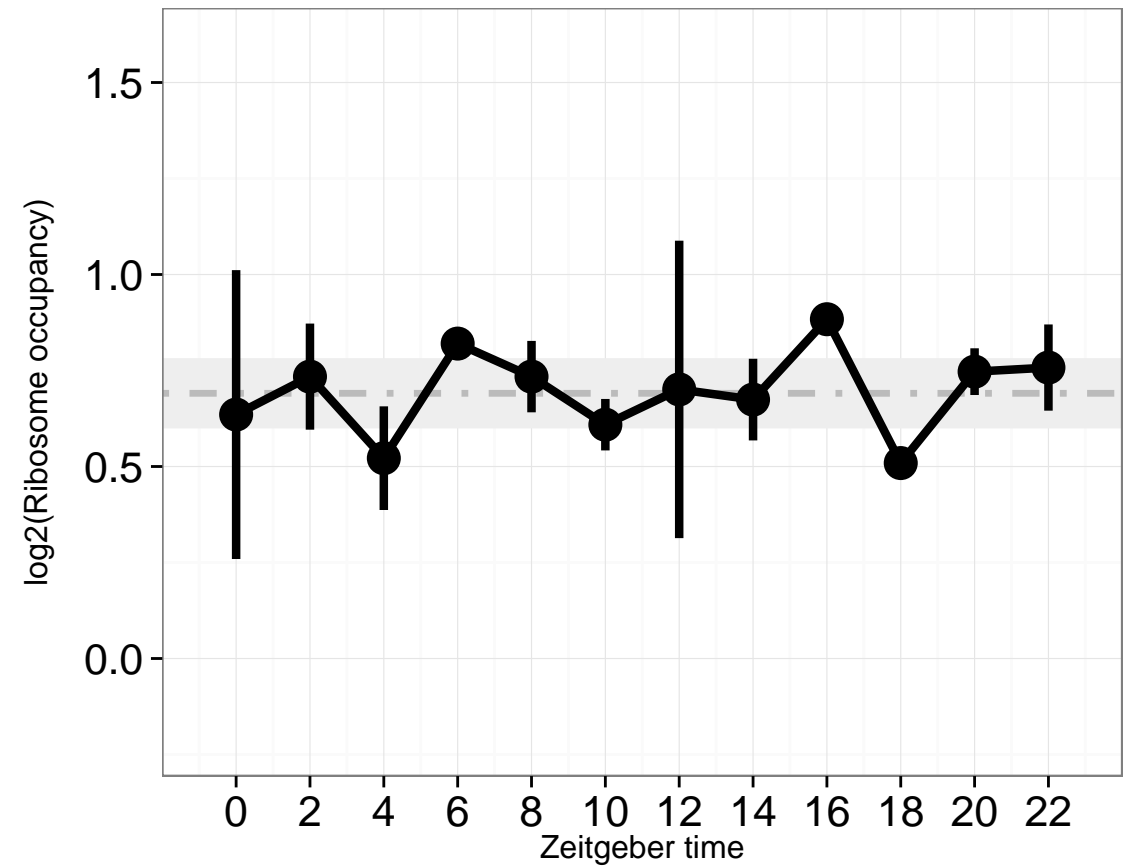

Supplement: Supplementary file 6973 [file 1]

## Fam98b

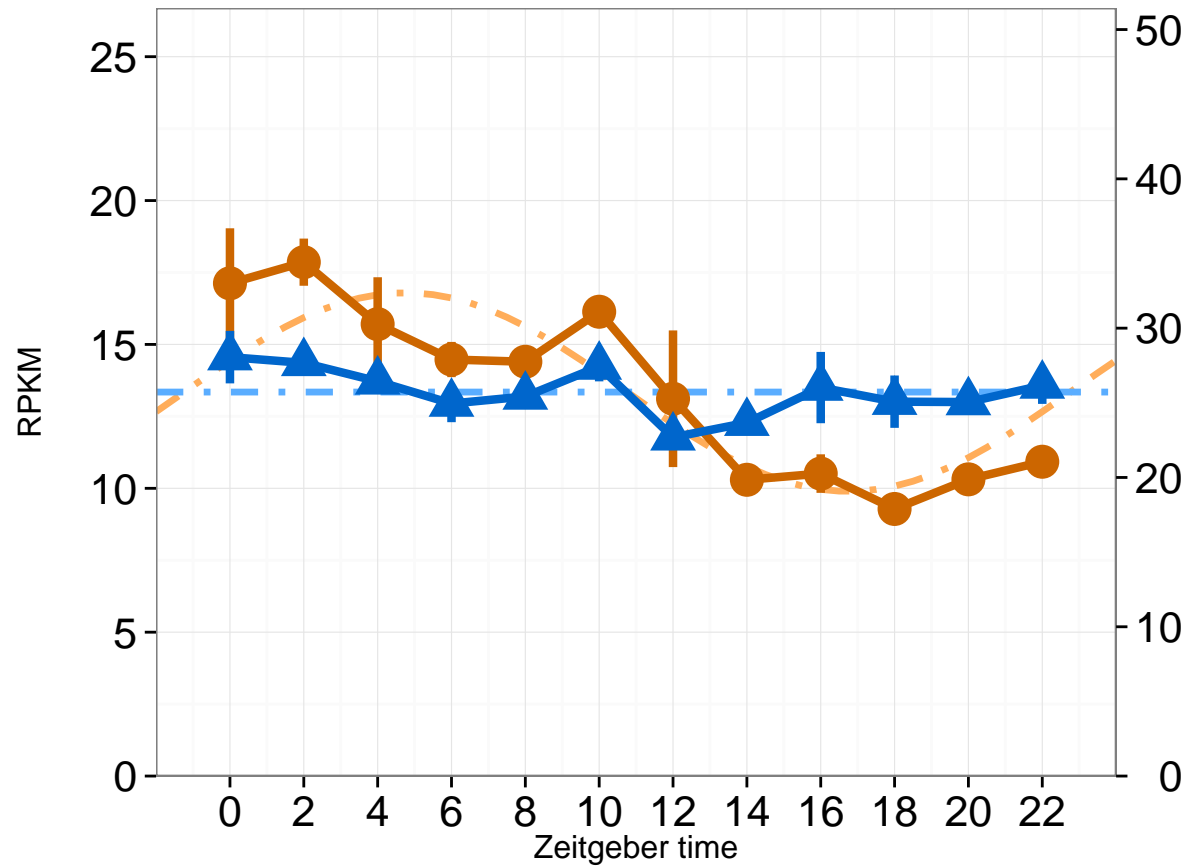

## Fam98b

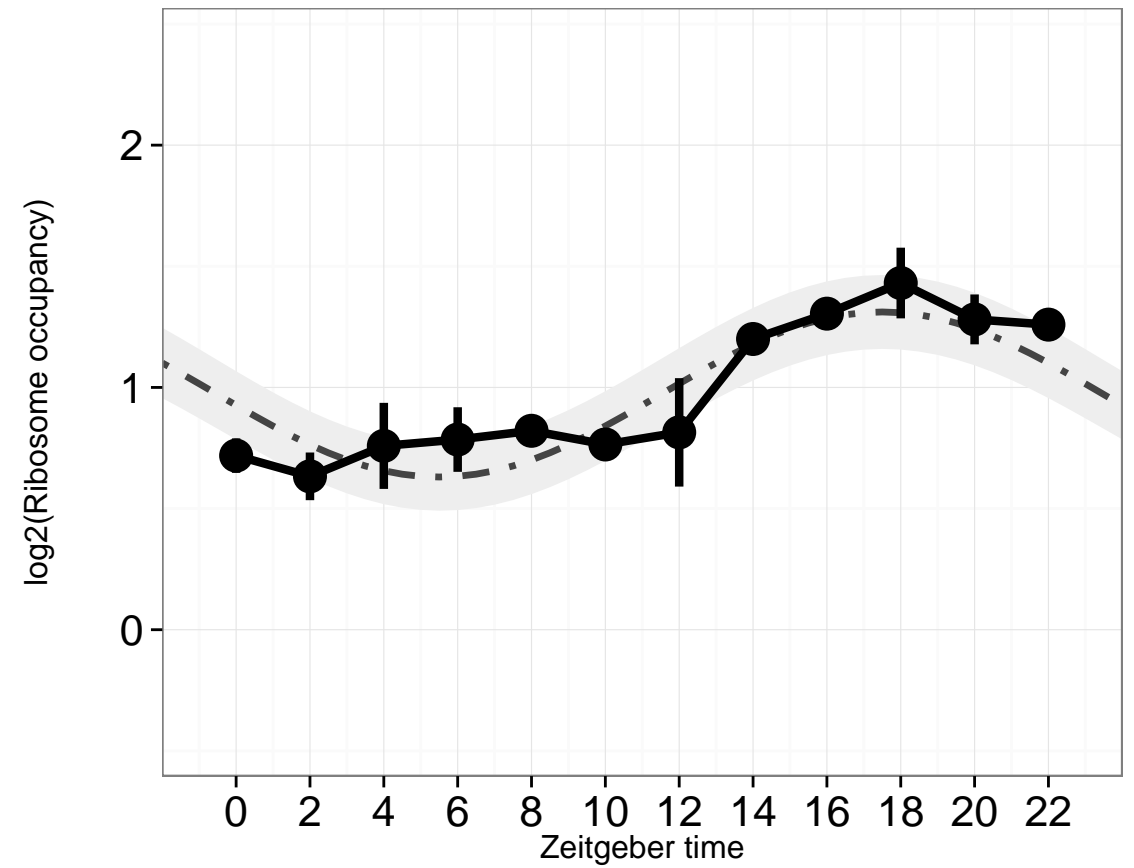

Supplement: Supplementary file 6974 [file 1]

# Zfp90

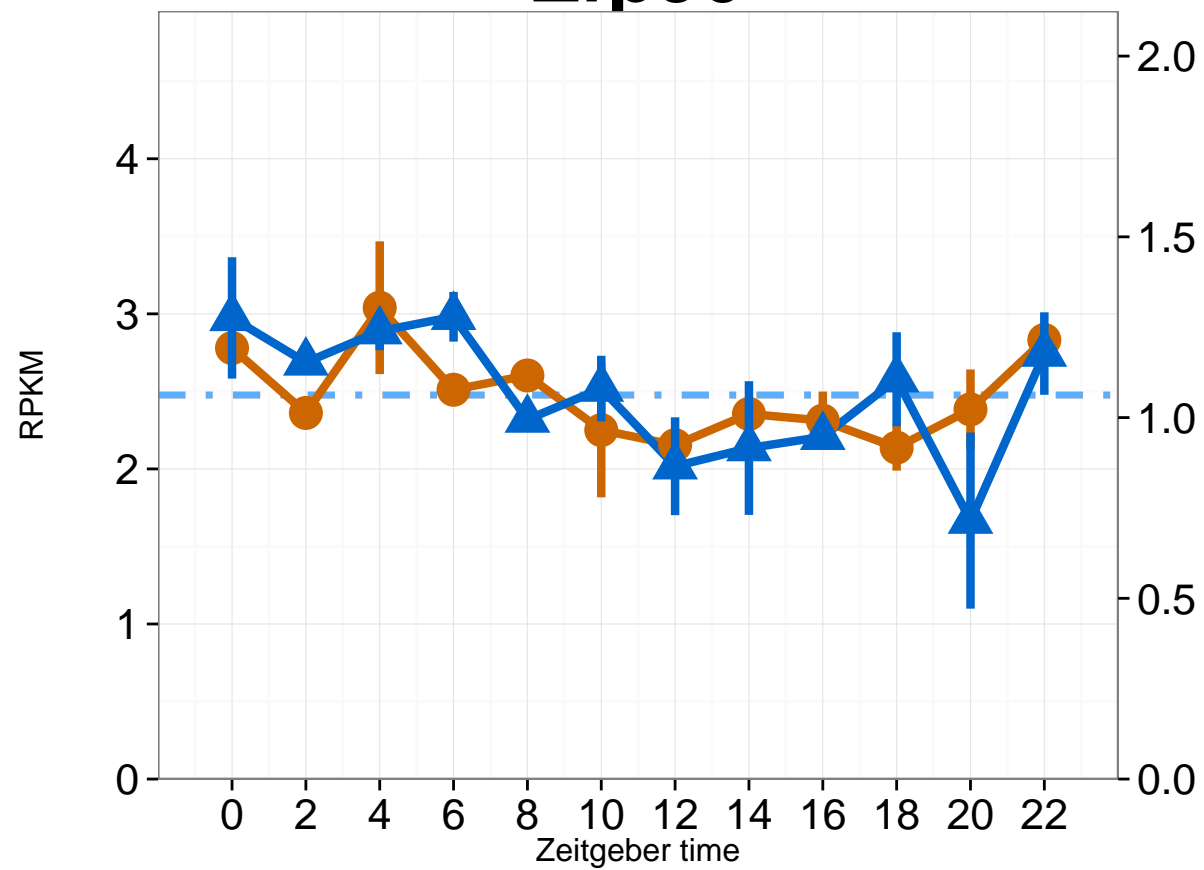

# Zfp90

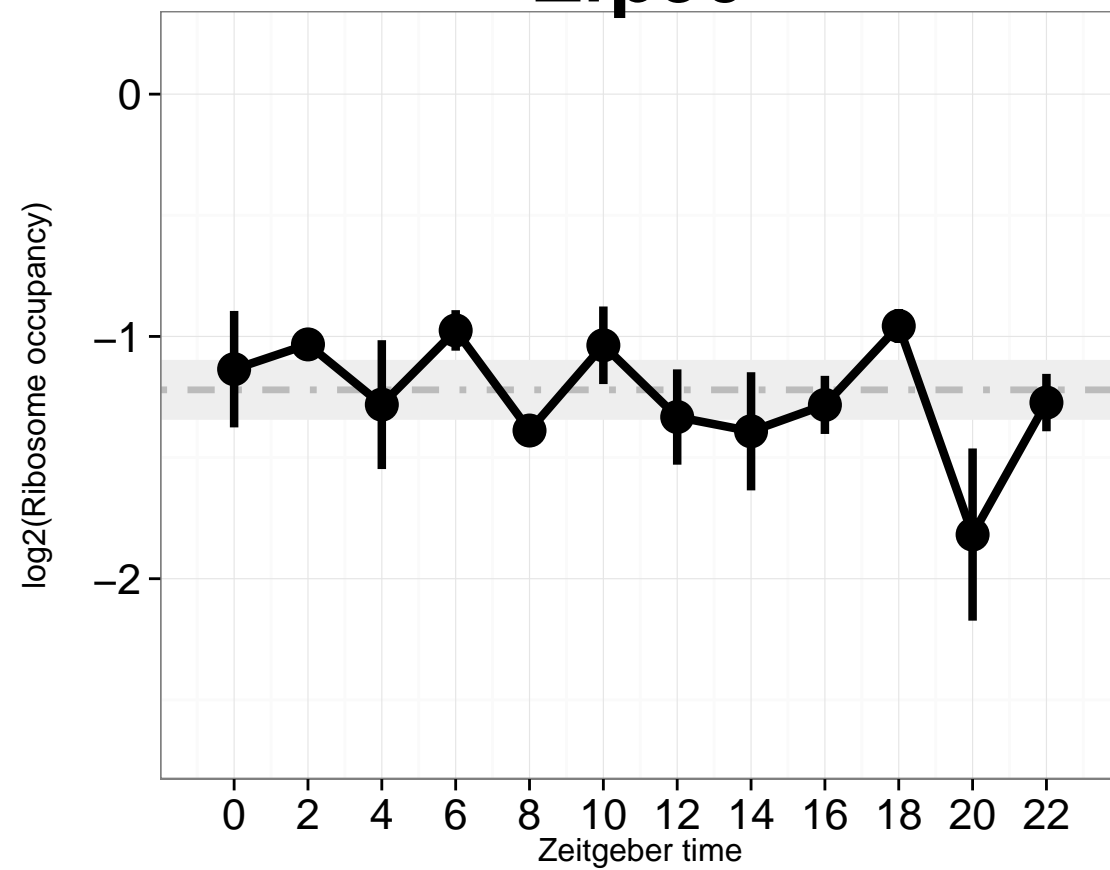

Supplement: Supplementary file 6975 [file 1]

## Bex4

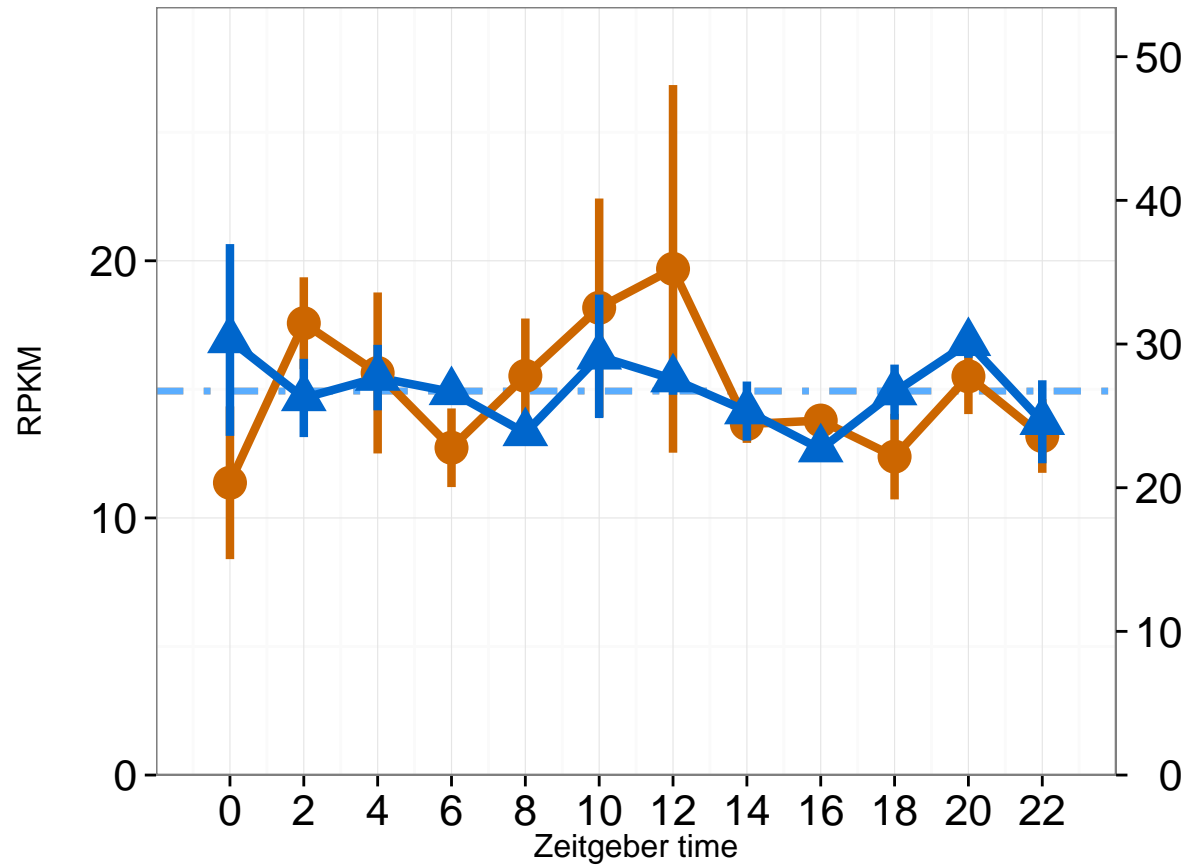

## Bex4

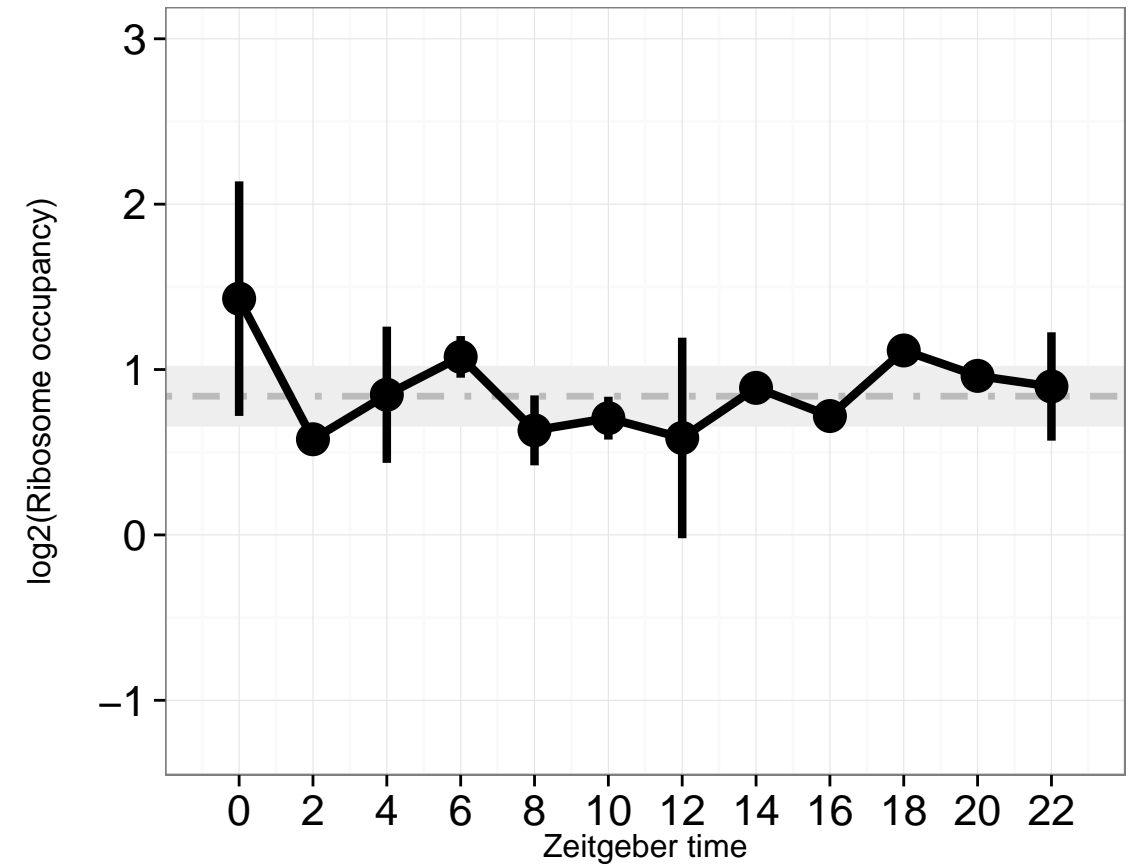

Supplement: Supplementary file 6976 [file 1]

# Slc12a6

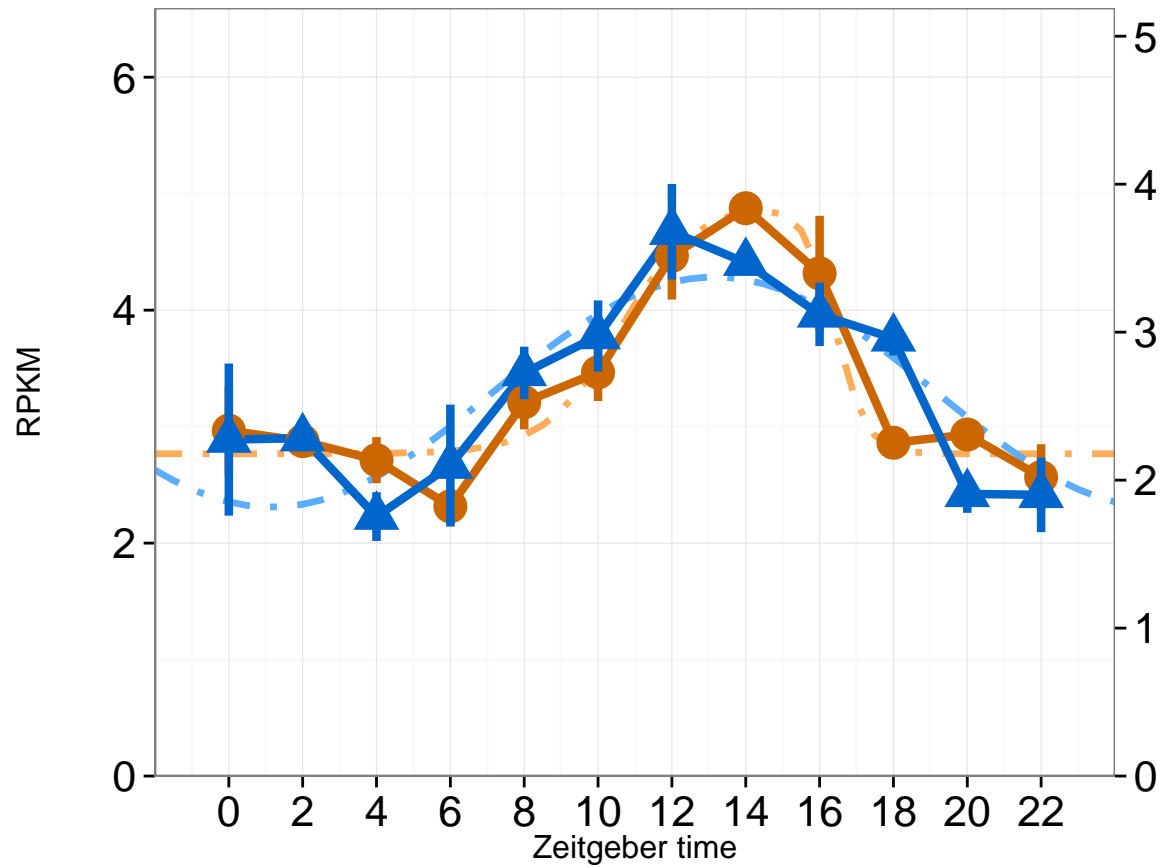

# Slc12a6

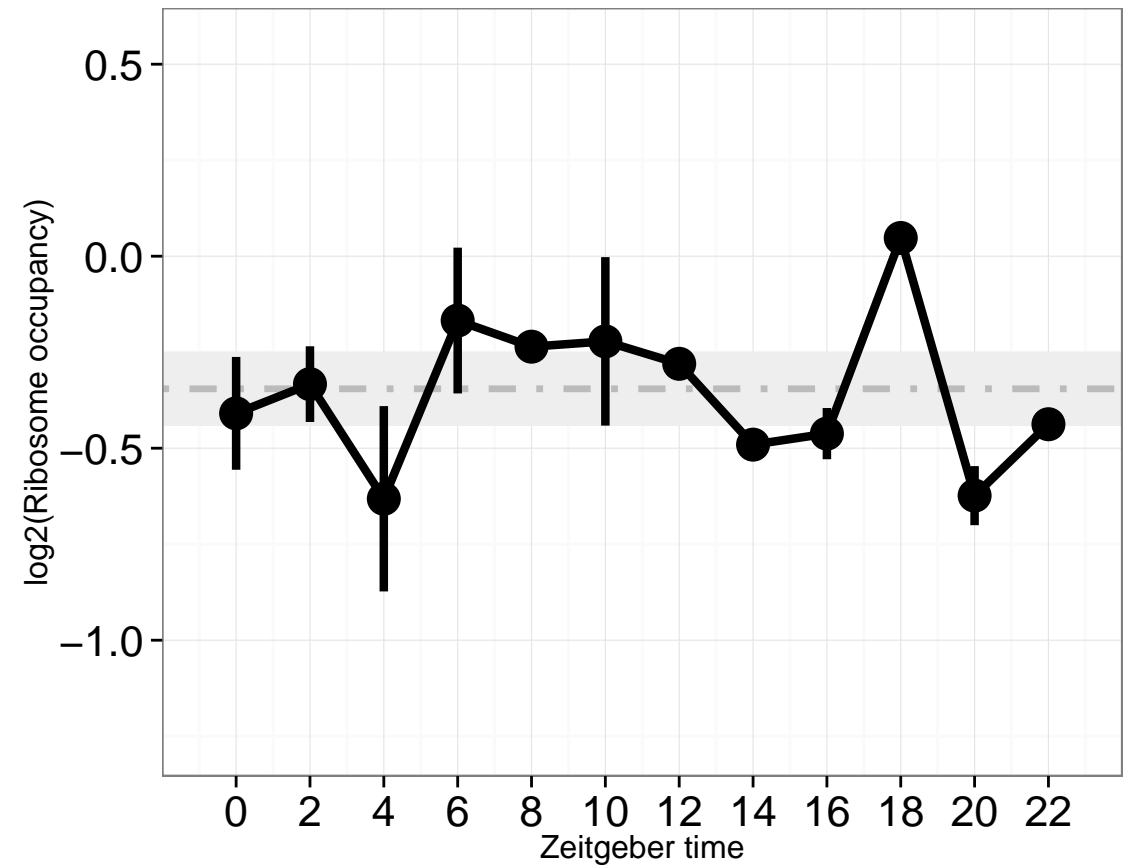

Supplement: Supplementary file 6977 [file 1]

# Gpc1

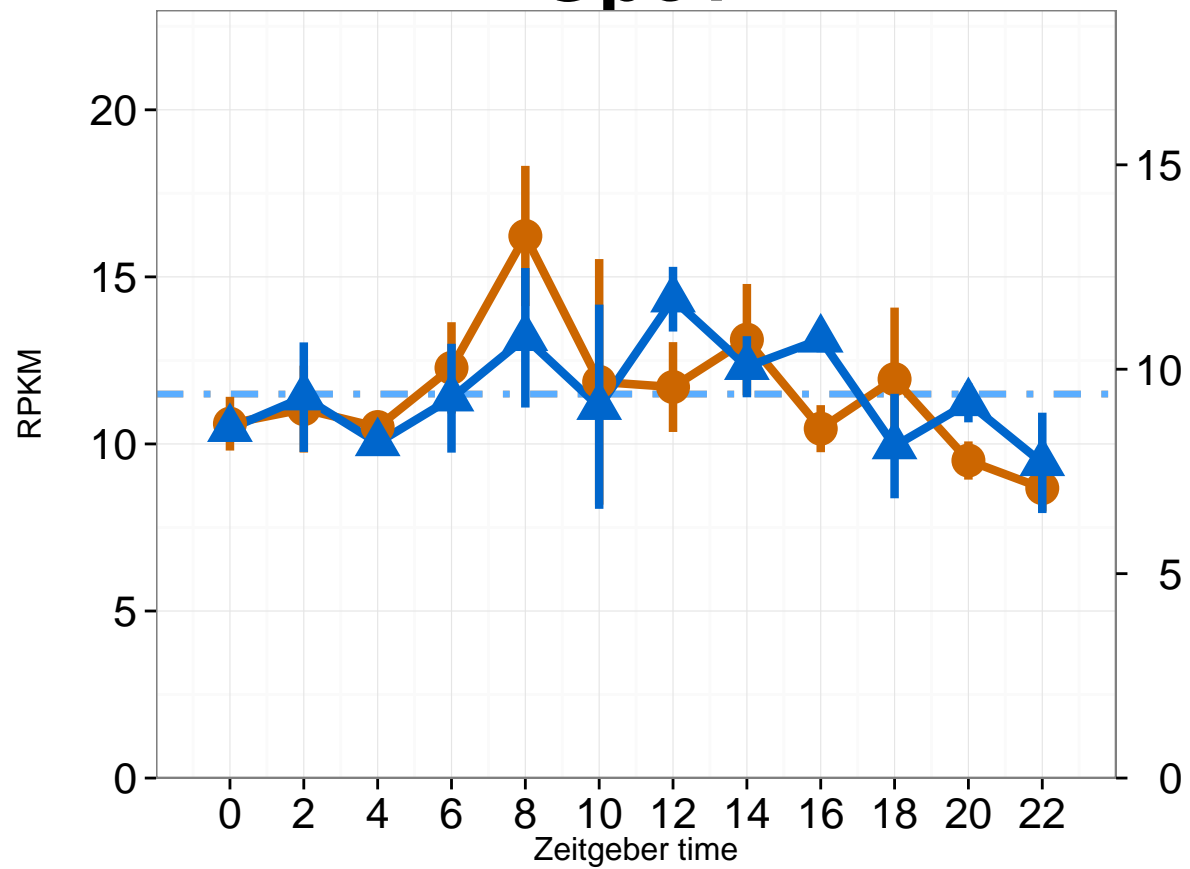

# Gpc1

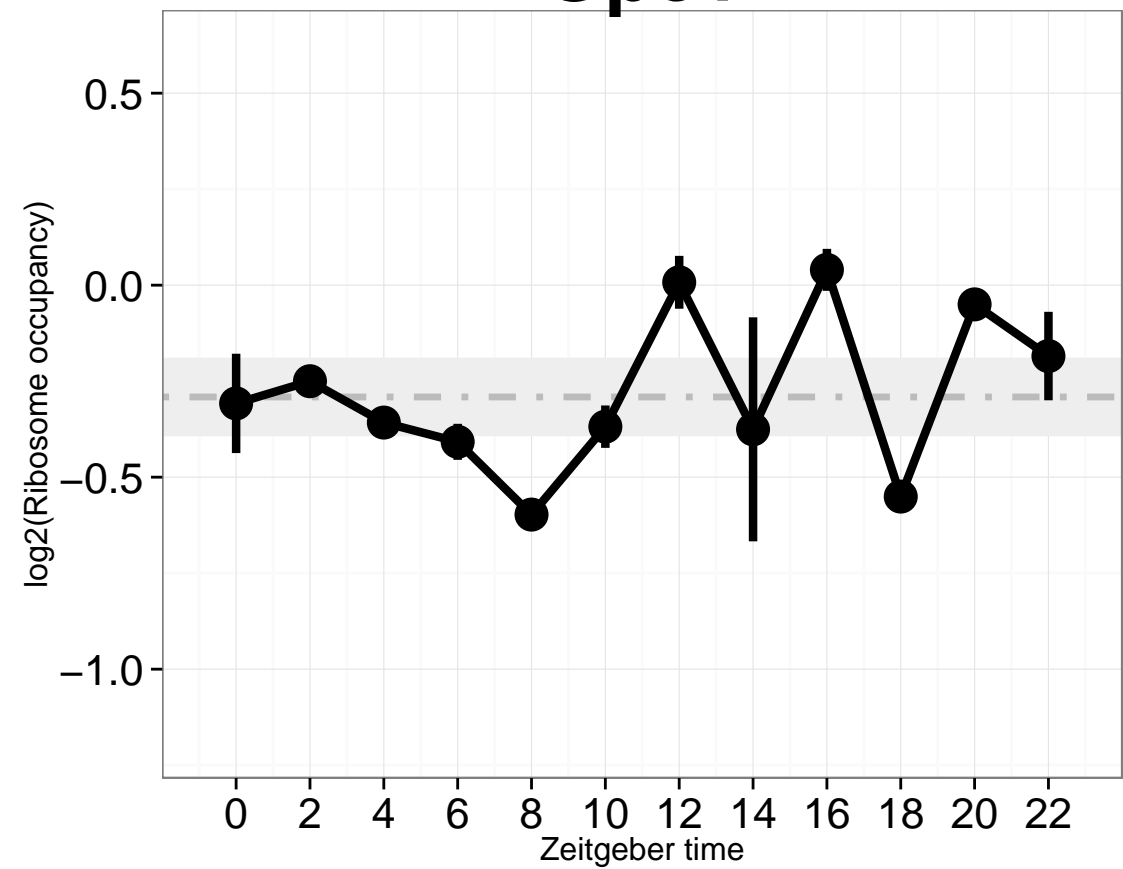

Supplement: Supplementary file 6978 [file 1]

## Wbp2

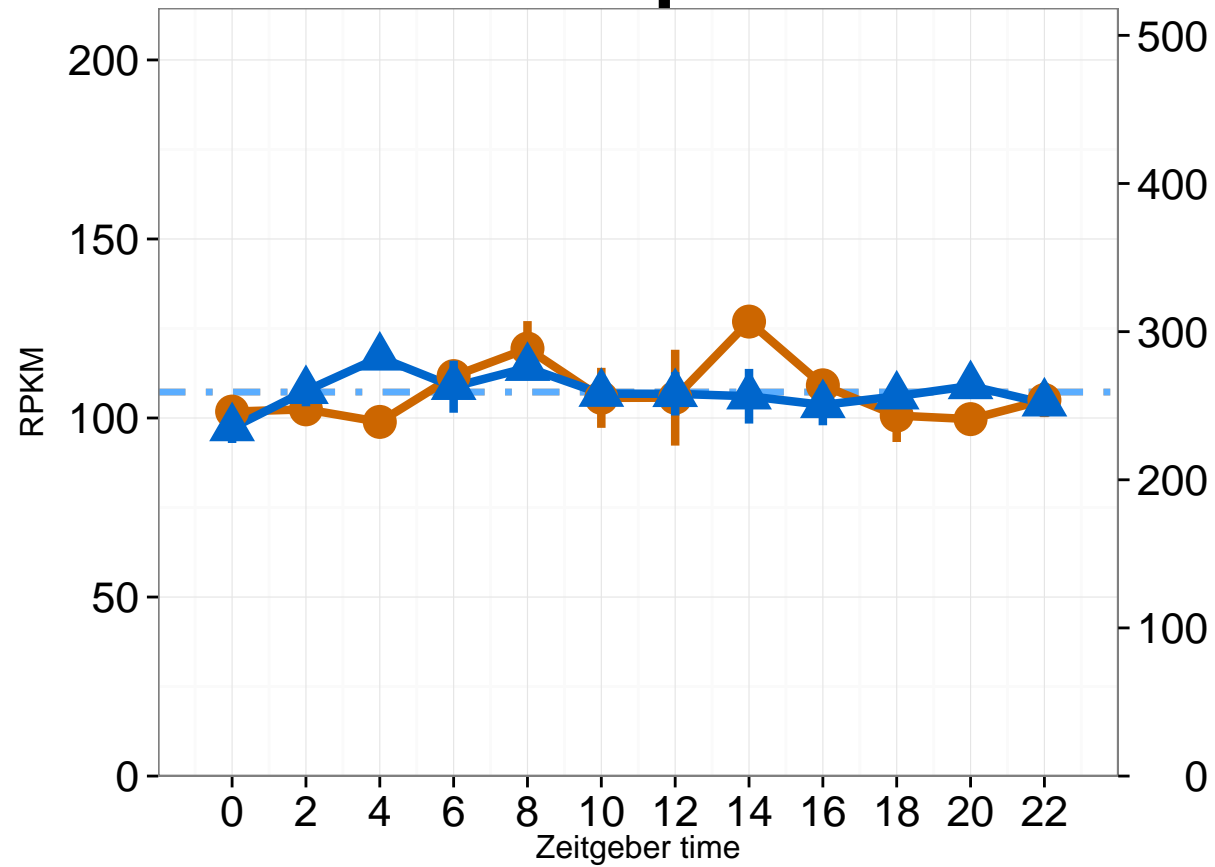

## Wbp2

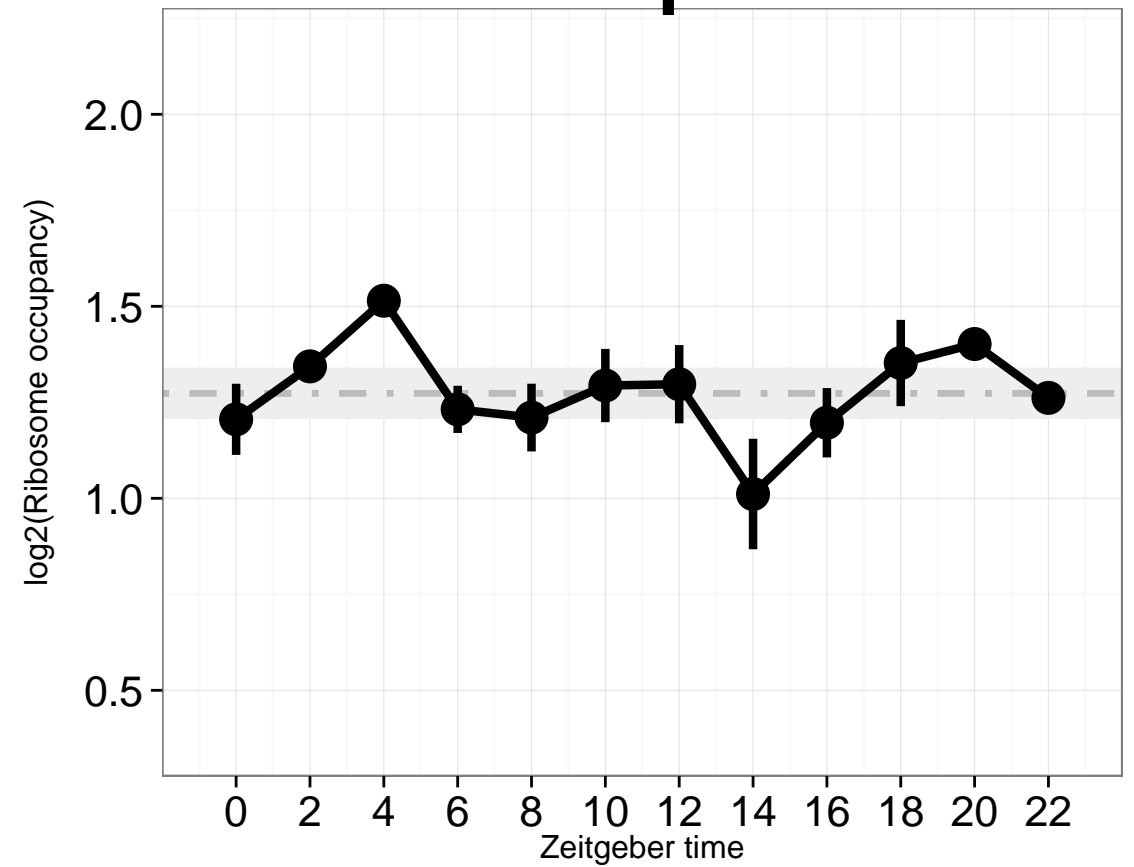

Supplement: Supplementary file 6979 [file 1]

## Rs1

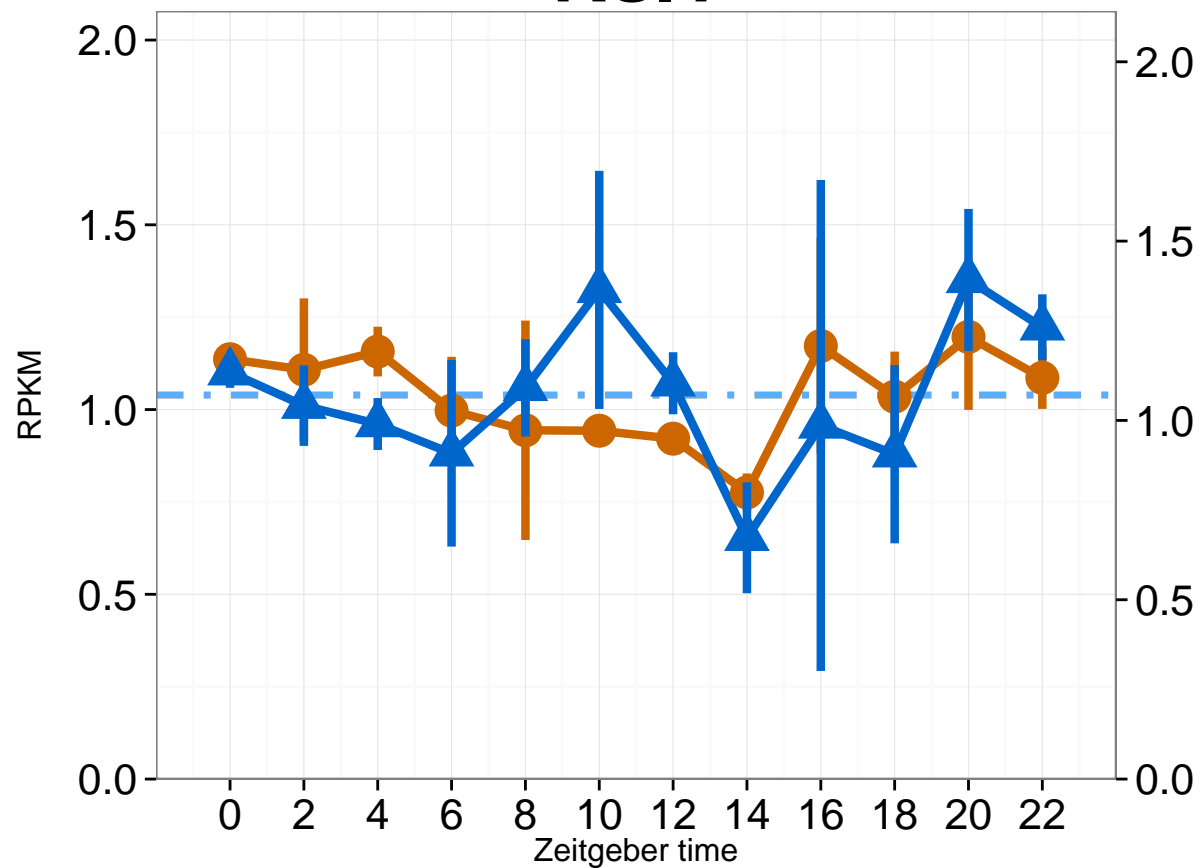

## Rs1

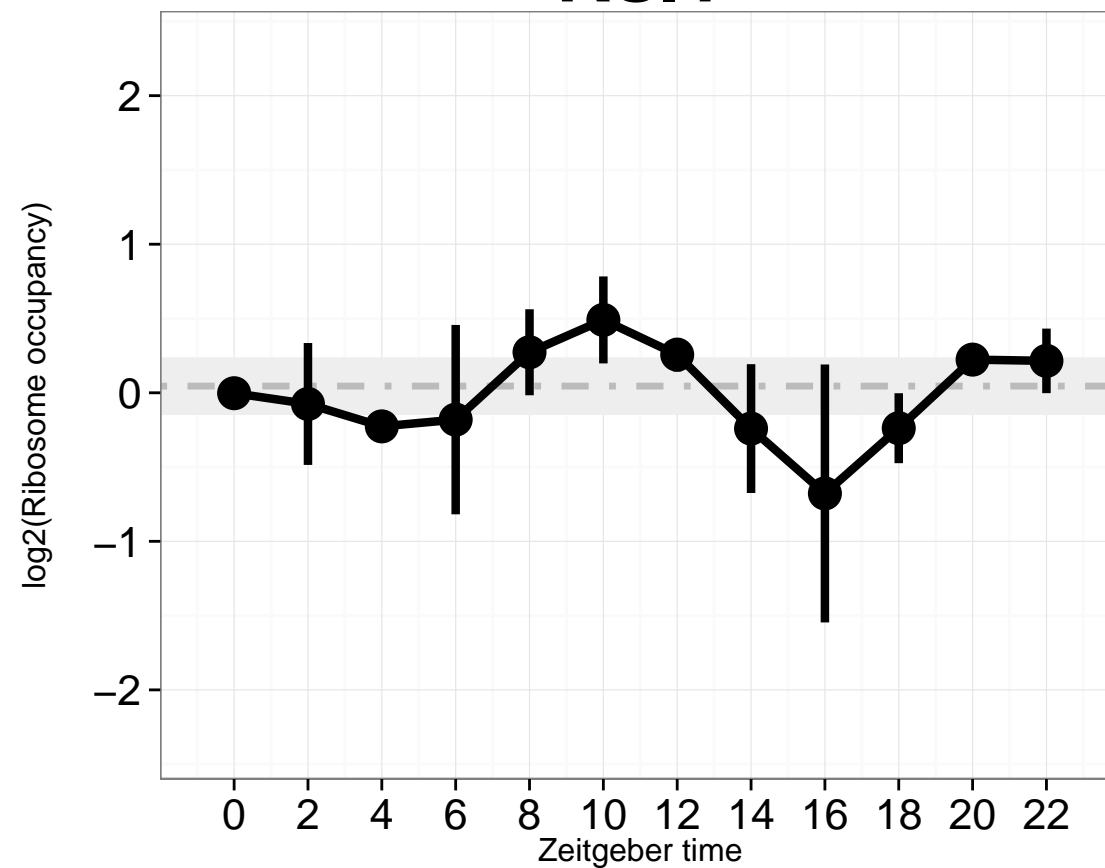

Supplement: Supplementary file 6980 [file 1]

## Desi2

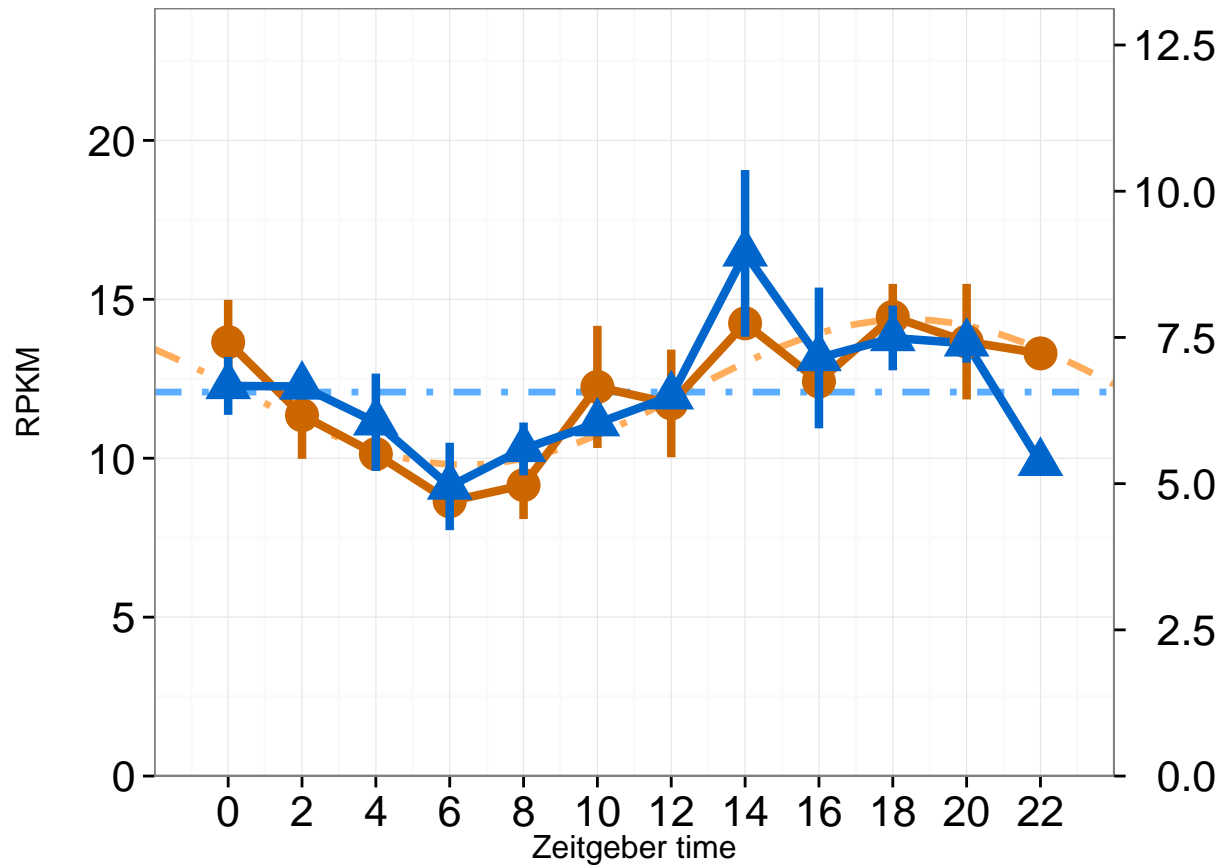

## Desi2

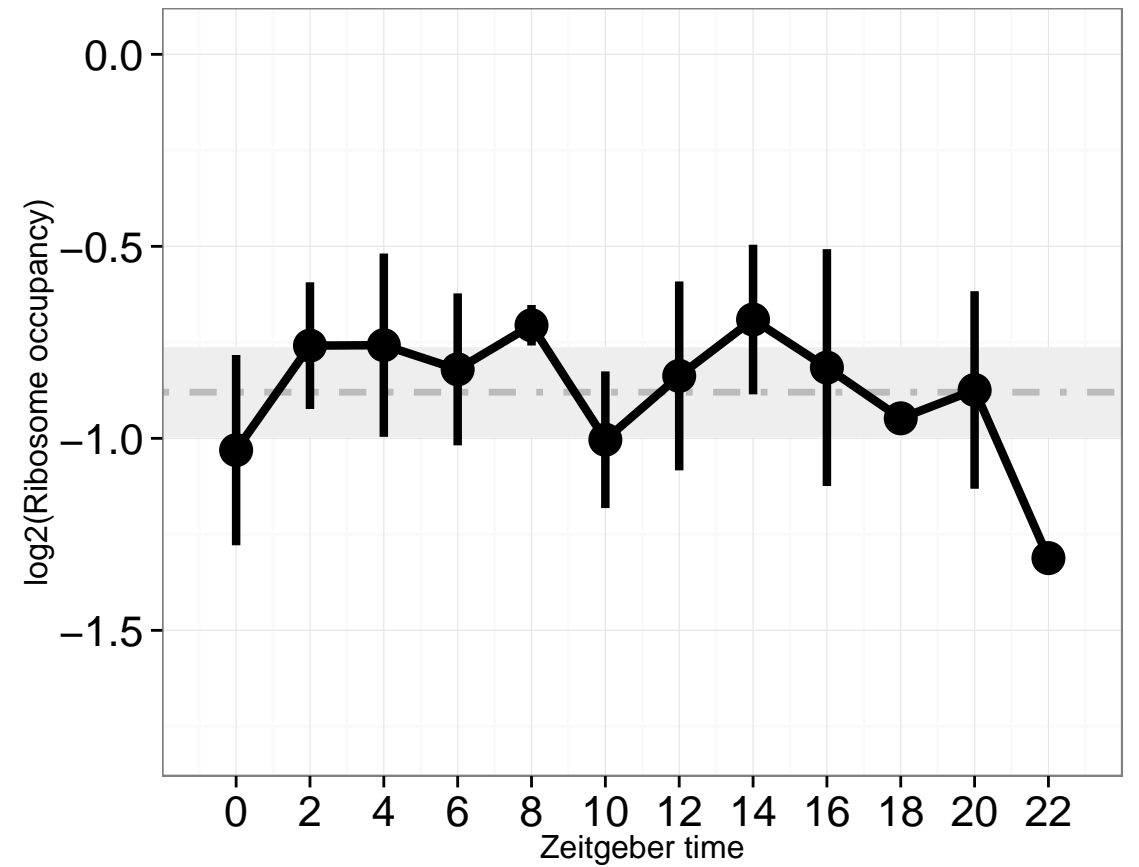

Supplement: Supplementary file 6981 [file 1]

## Etnppl

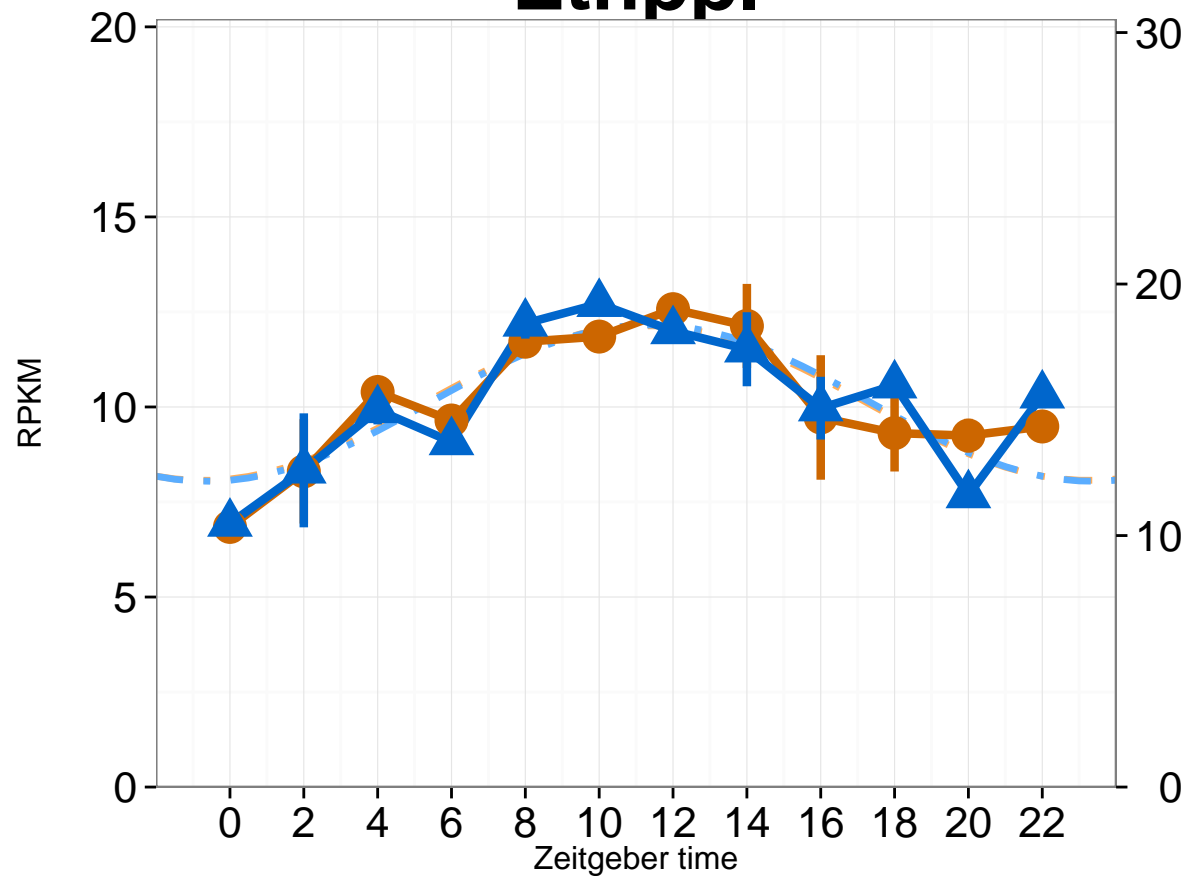

## Etnppl

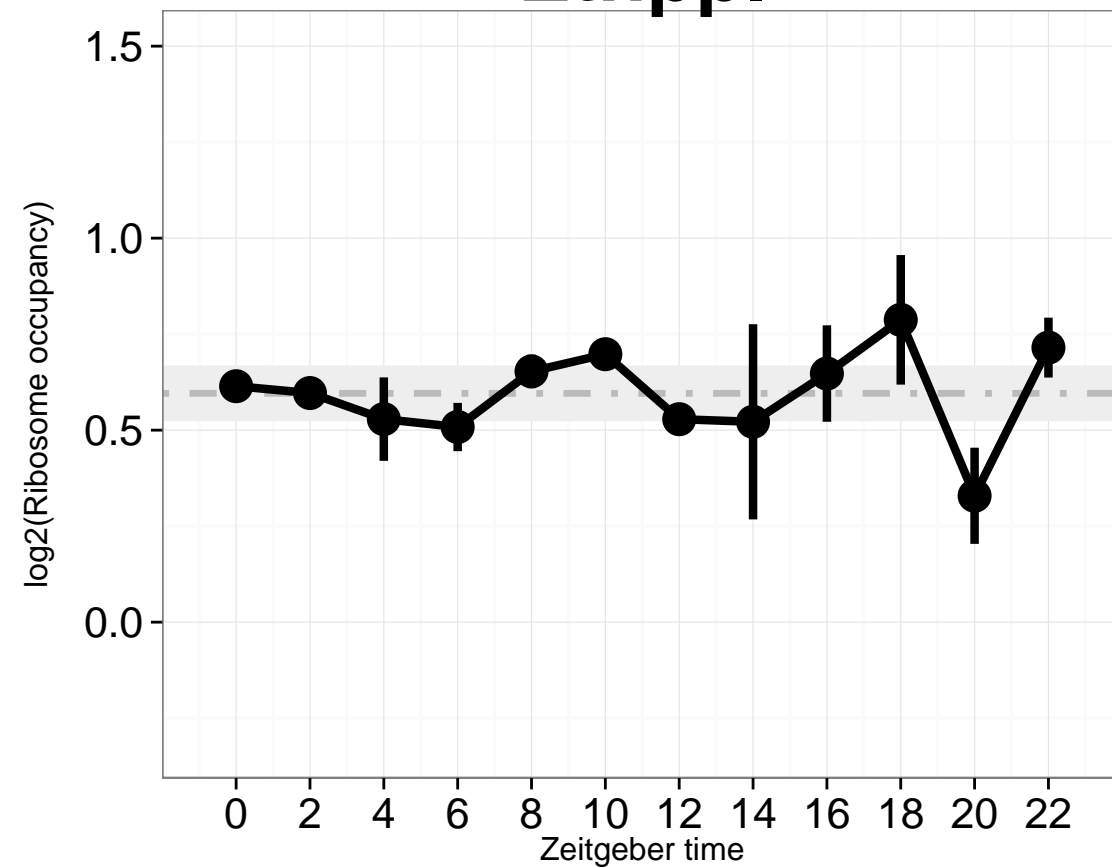

Supplement: Supplementary file 6982 [file 1]

## Cltc

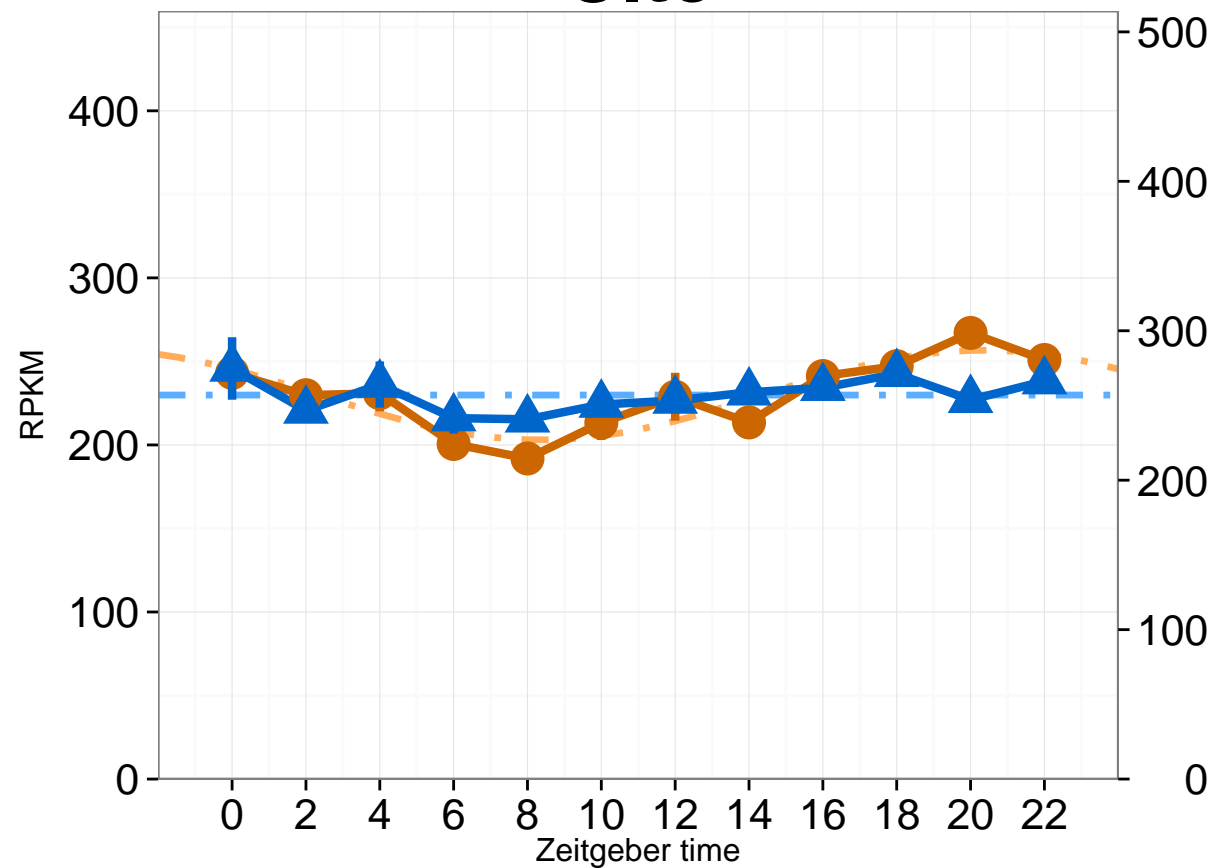

## Cltc

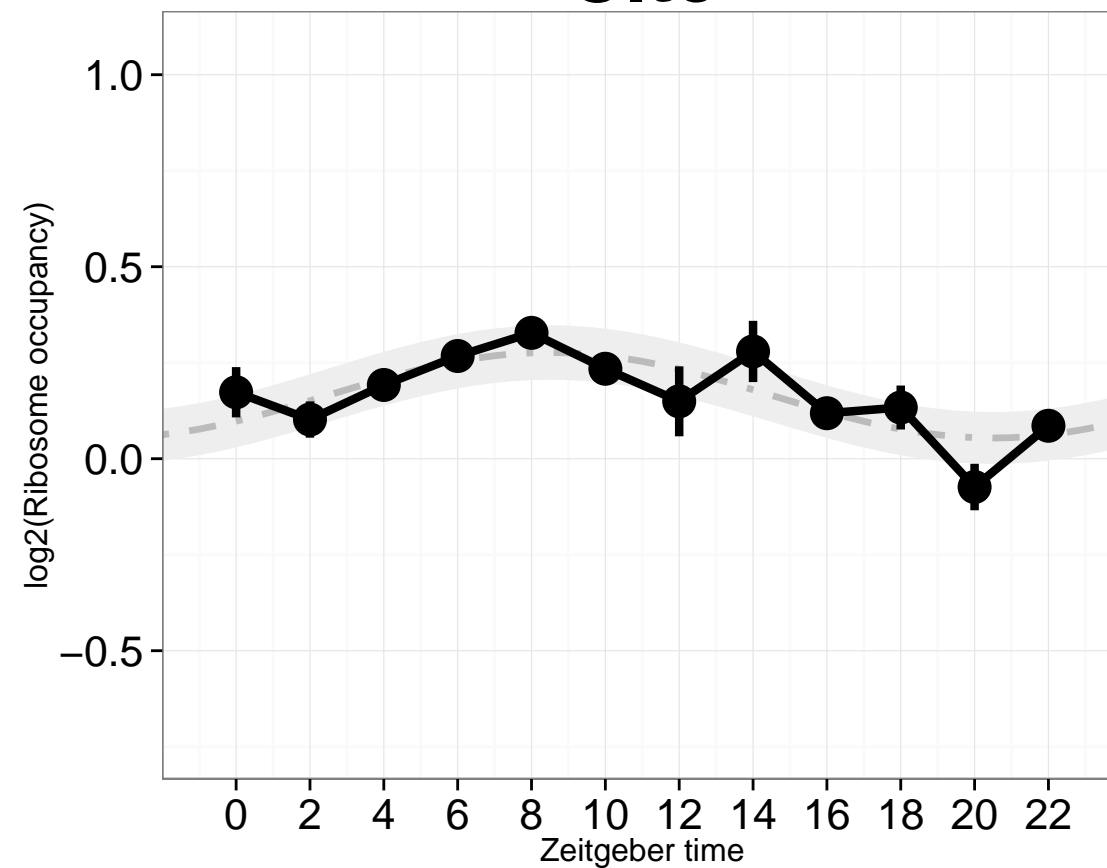

Supplement: Supplementary file 6983 [file 1]

# Ccdc14

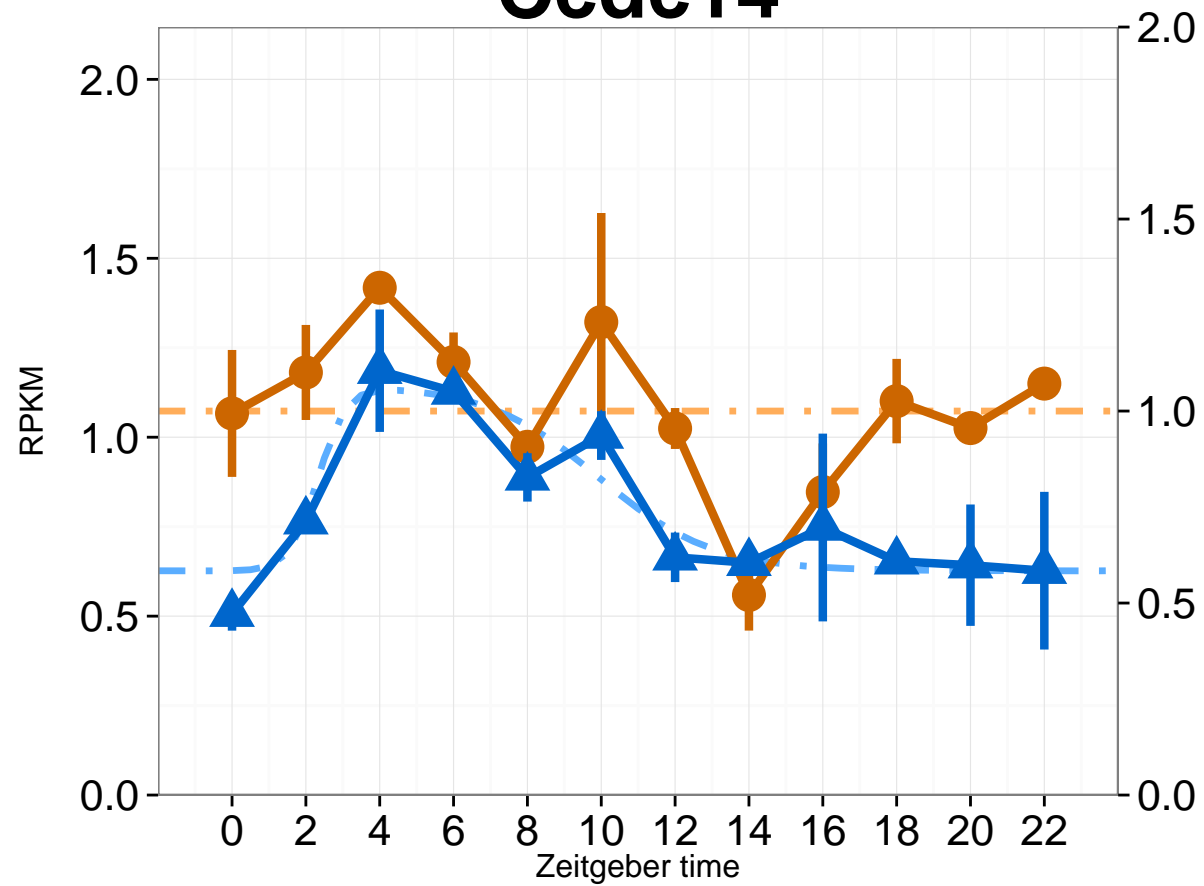

# Ccdc14

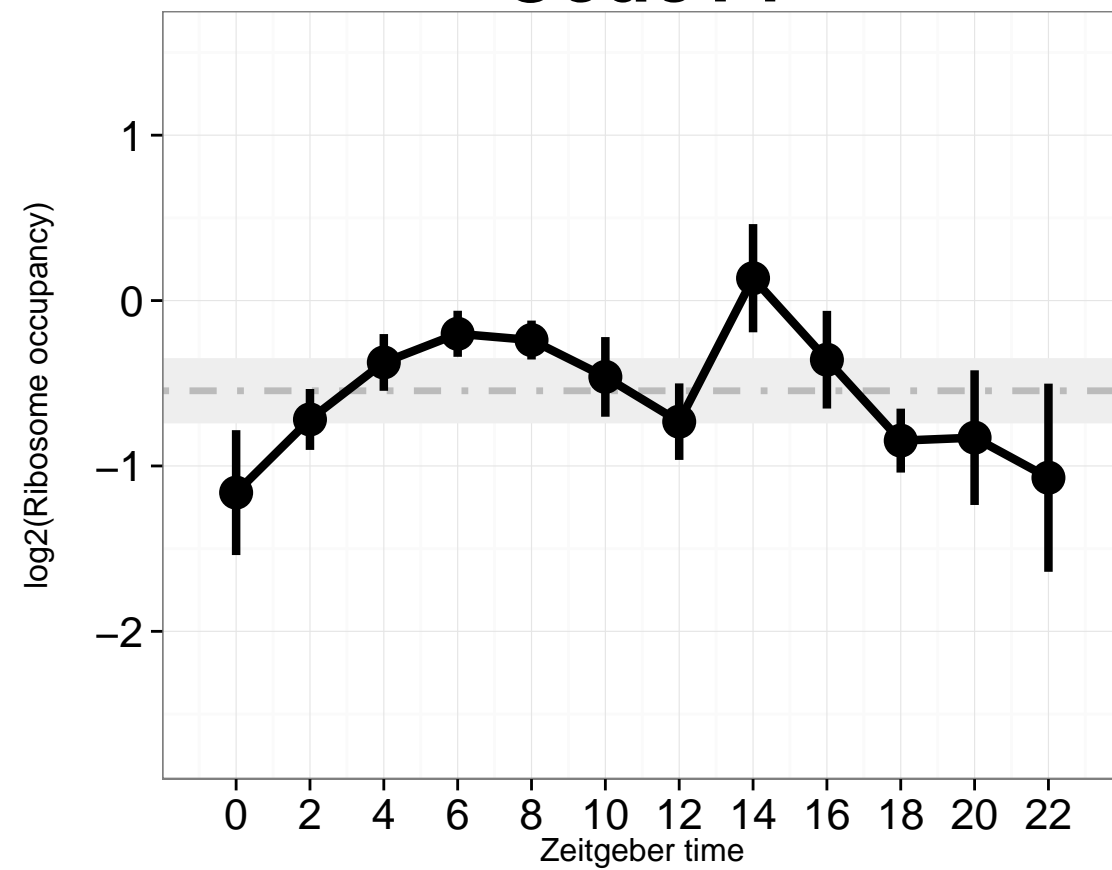

Supplement: Supplementary file 6984 [file 1]

## Slc2a5

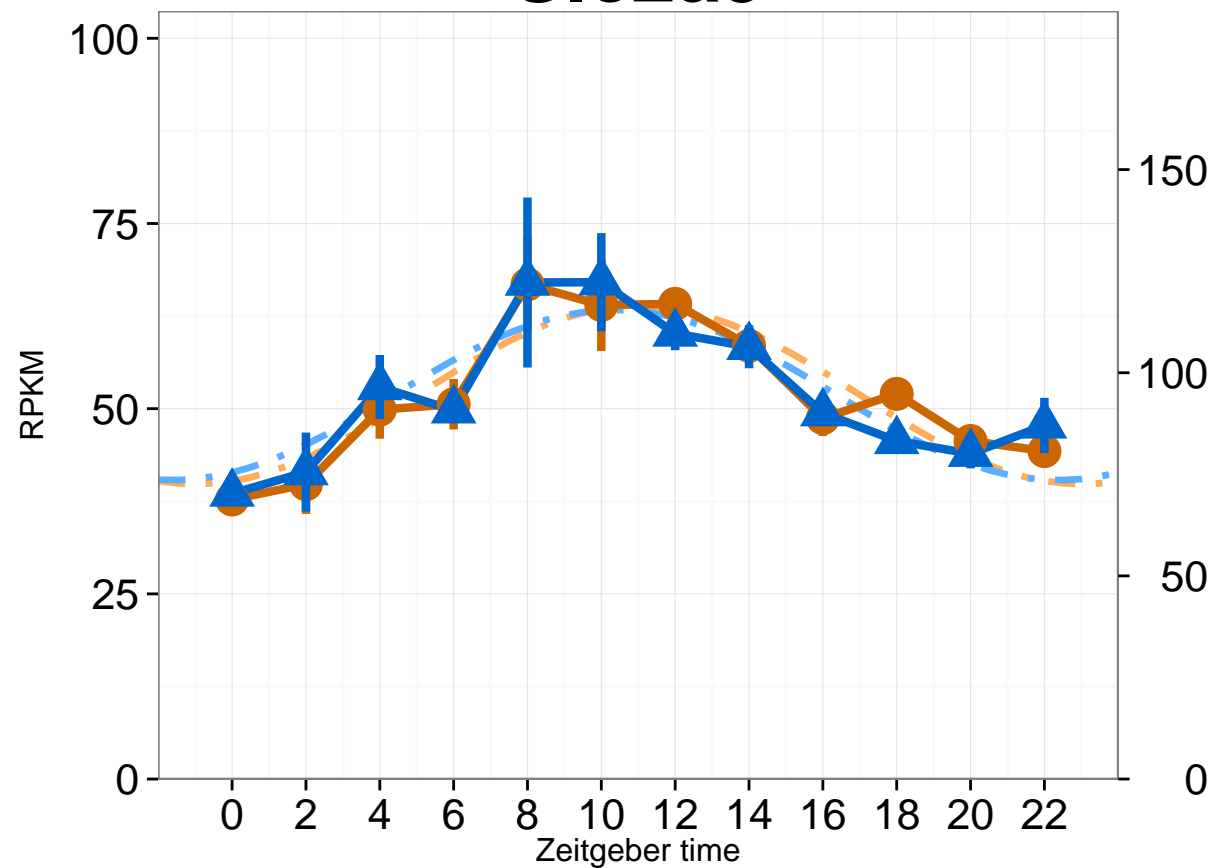

## Slc2a5

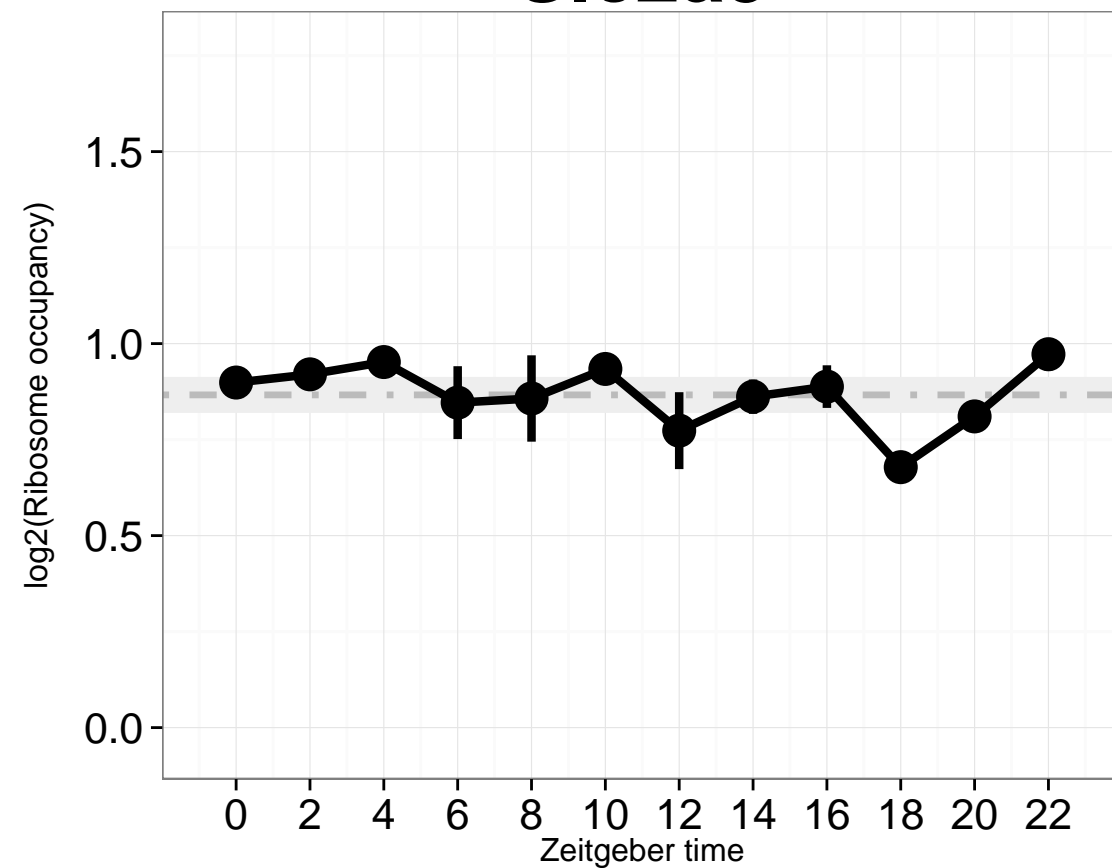

Supplement: Supplementary file 6985 [file 1]

# Ccnb1

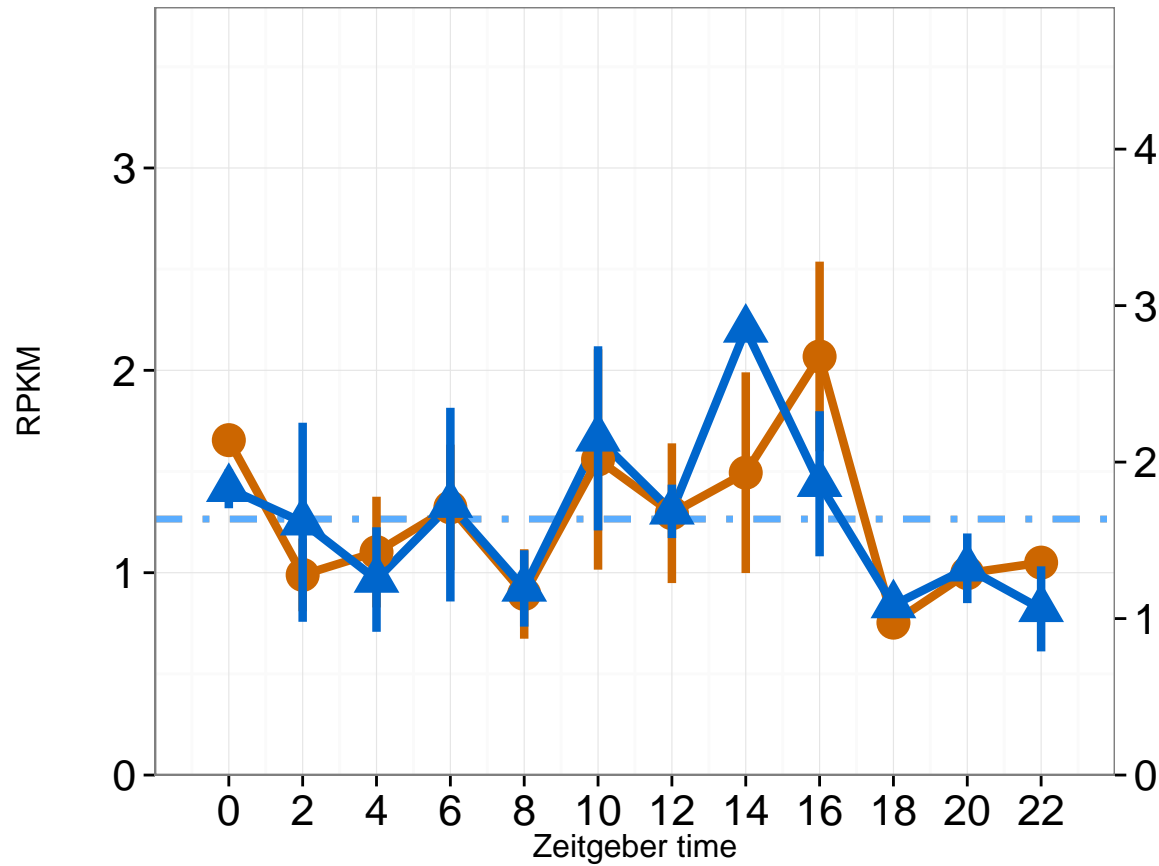

# Ccnb1

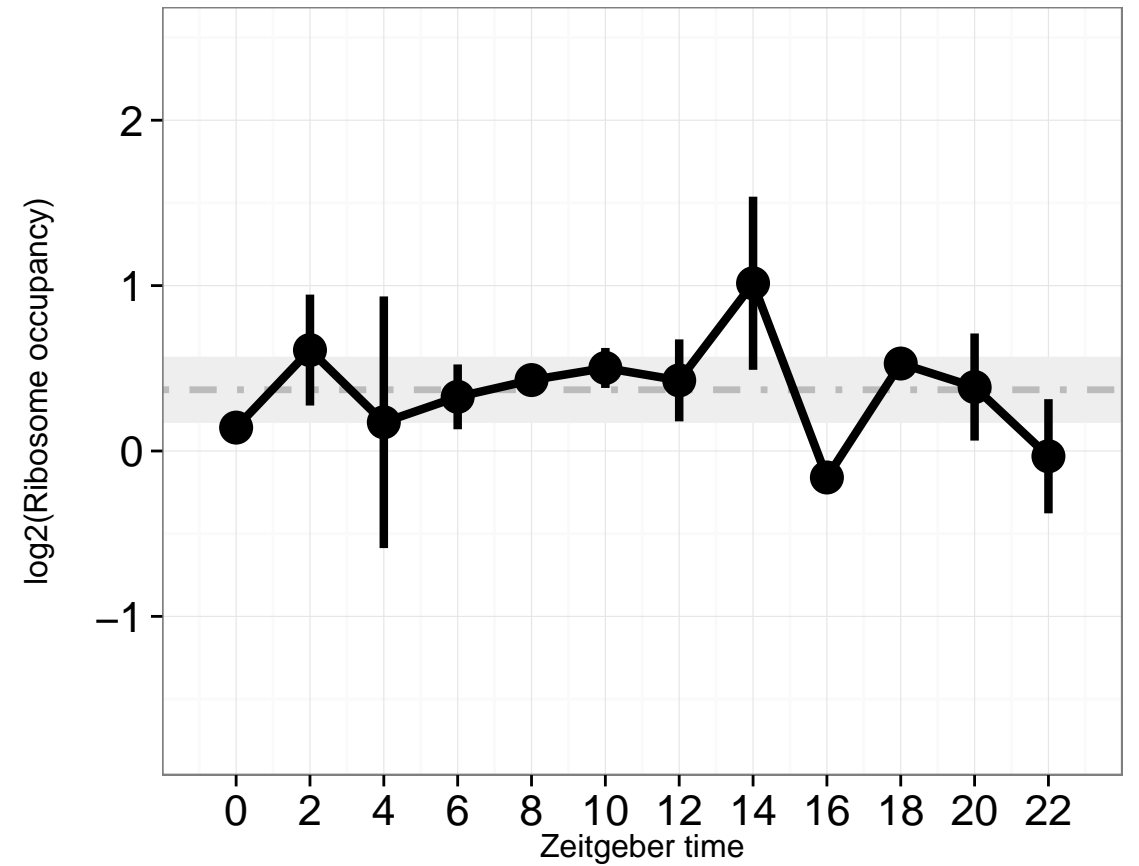

Supplement: Supplementary file 6986 [file 1]

# Apbb1

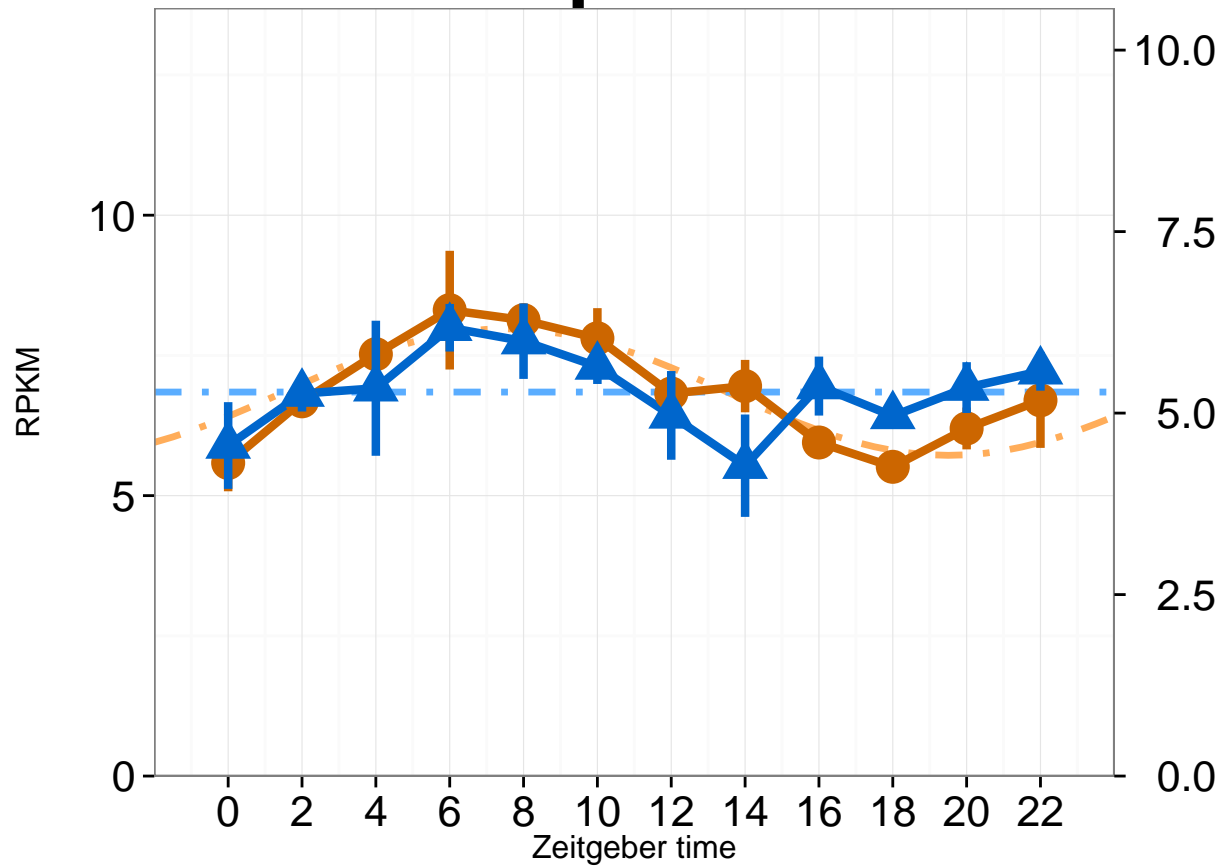

# Apbb1

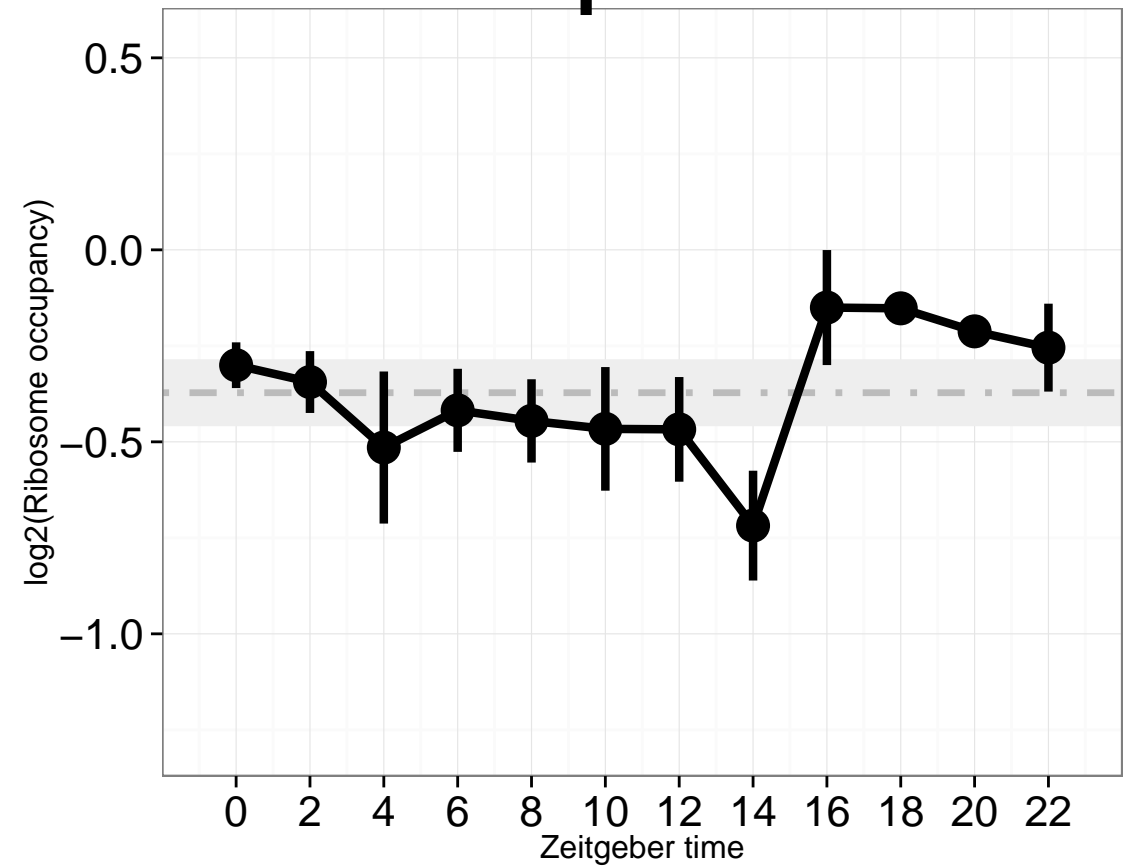

Supplement: Supplementary file 6987 [file 1]

# Supt5

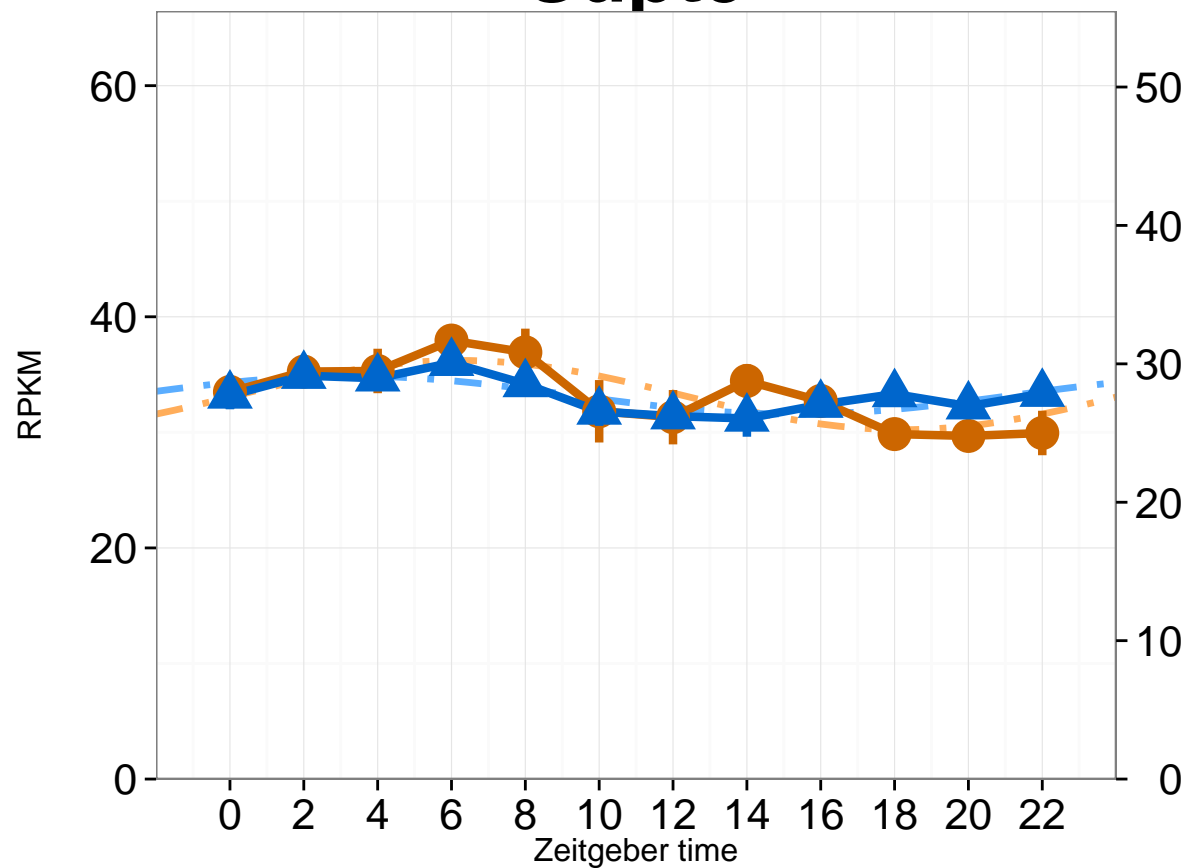

# Supt5

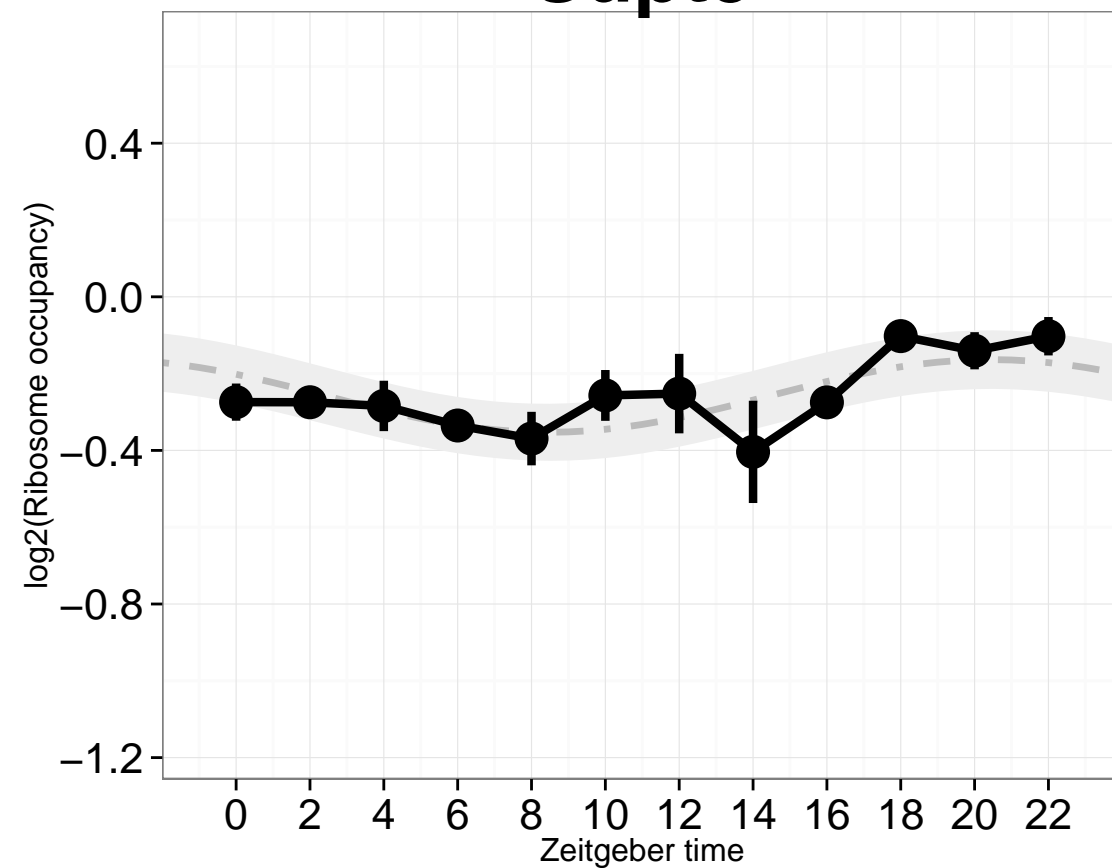

Supplement: Supplementary file 6988 [file 1]

# Ubfd1

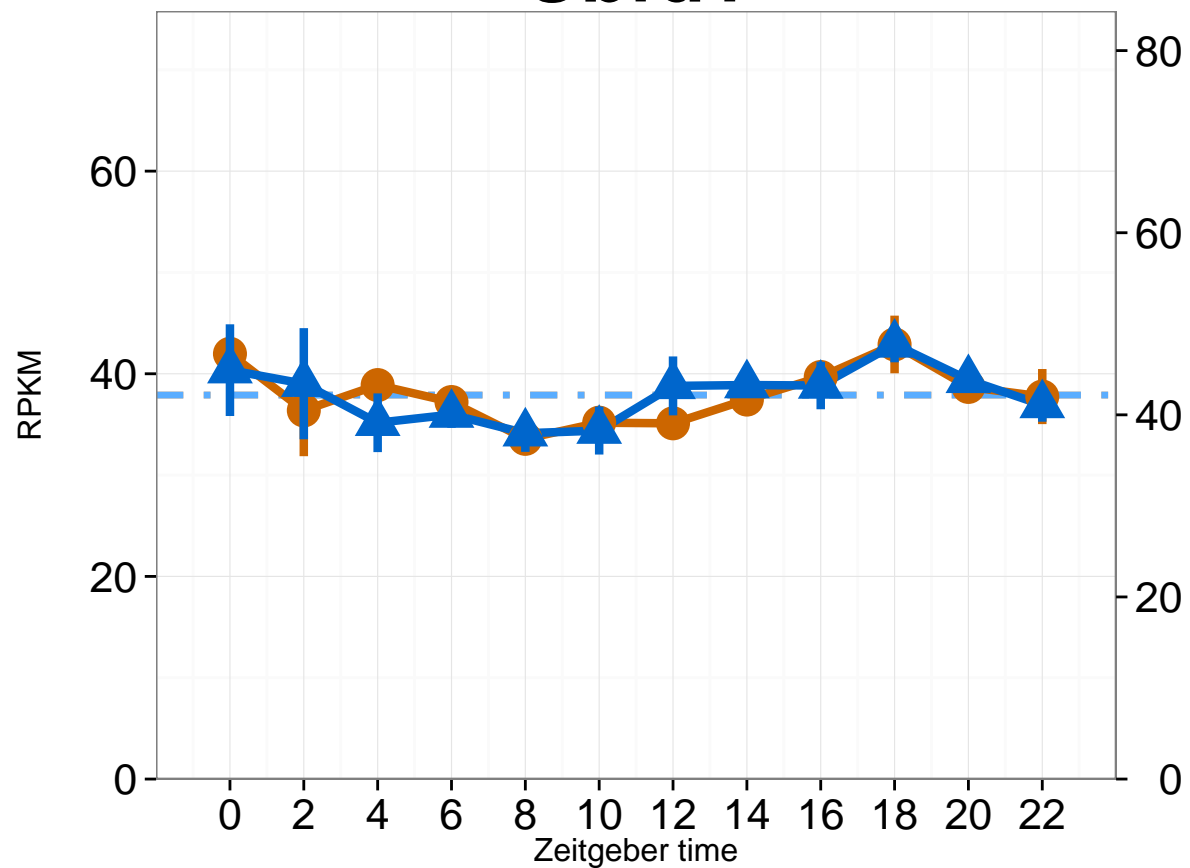

# Ubfd1

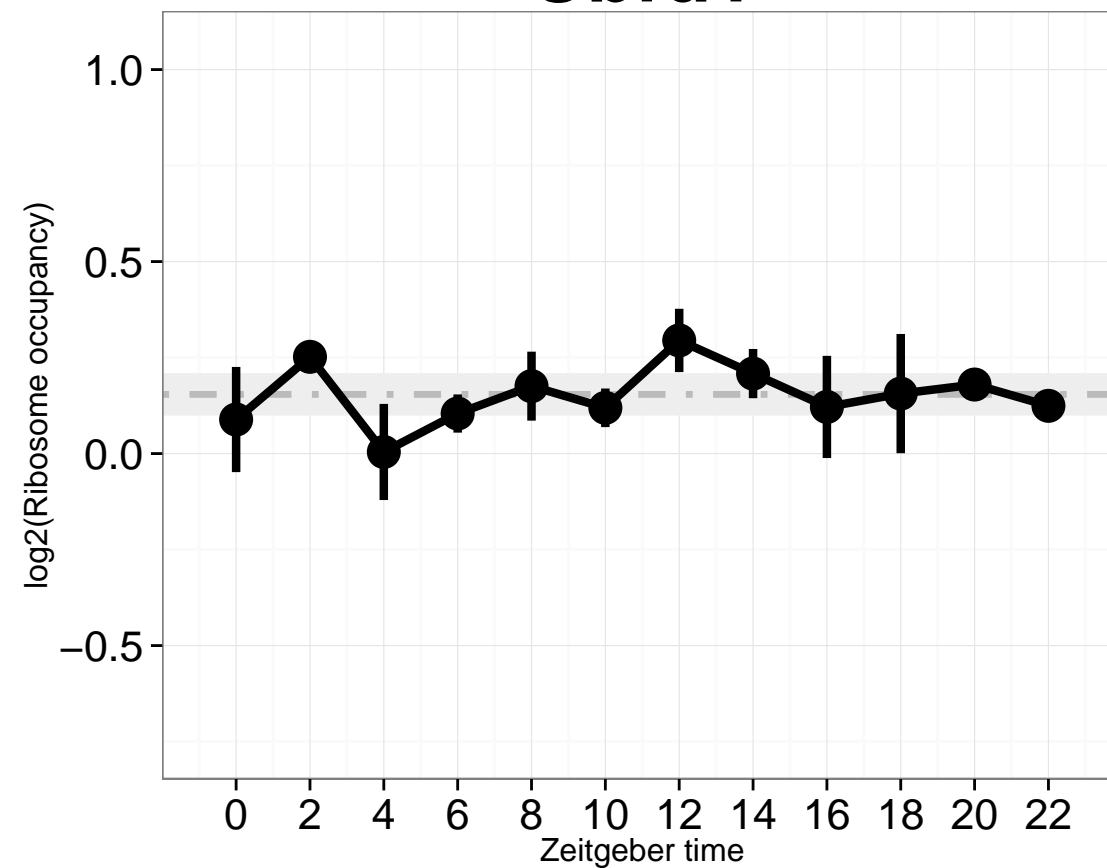

Supplement: Supplementary file 6989 [file 1]

## Doc2g

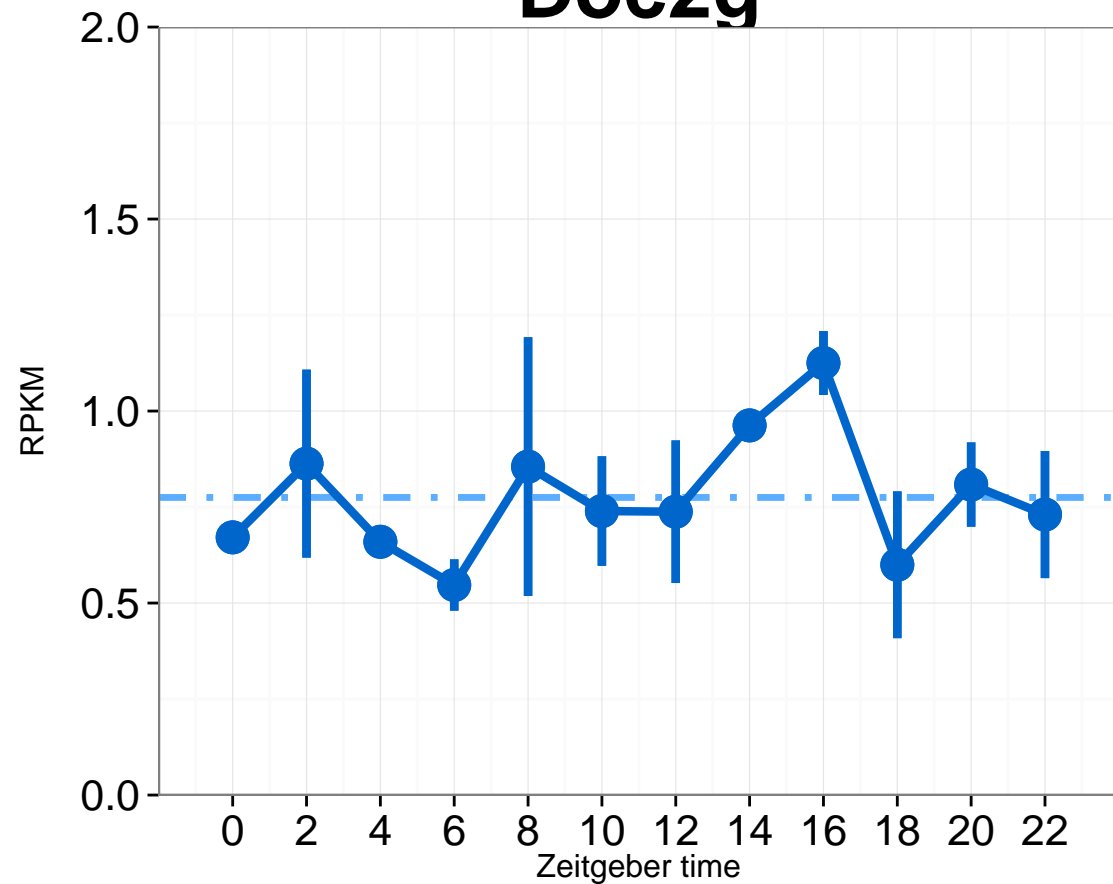

## Doc2g log2(Ribosome occupancy

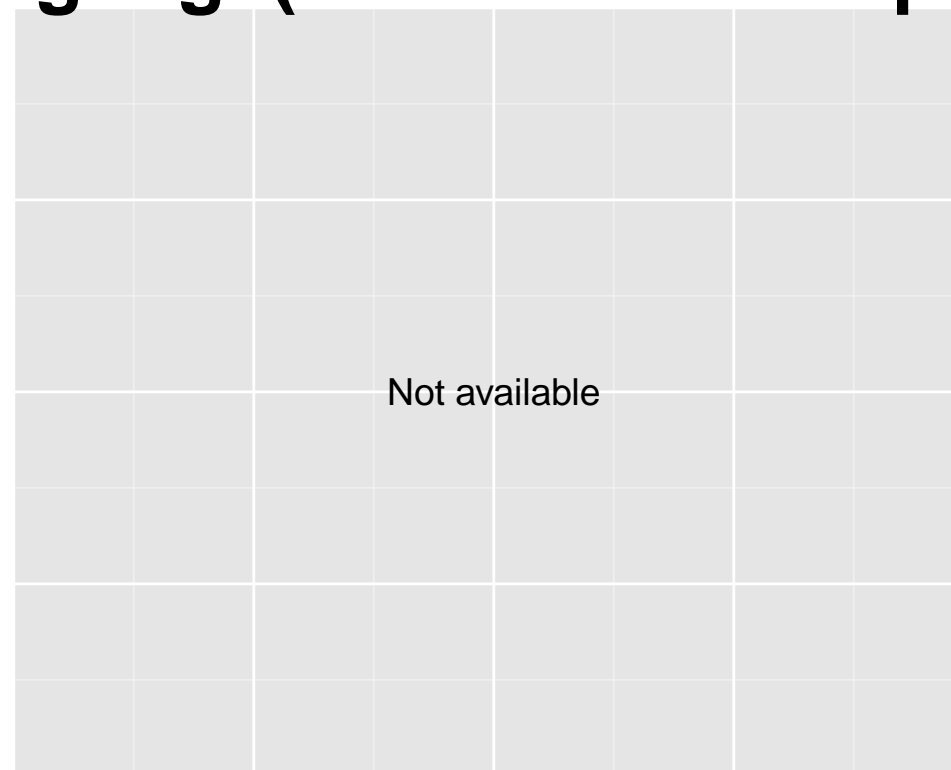

Supplement: Supplementary file 6990 [file 1]

## Tomm34

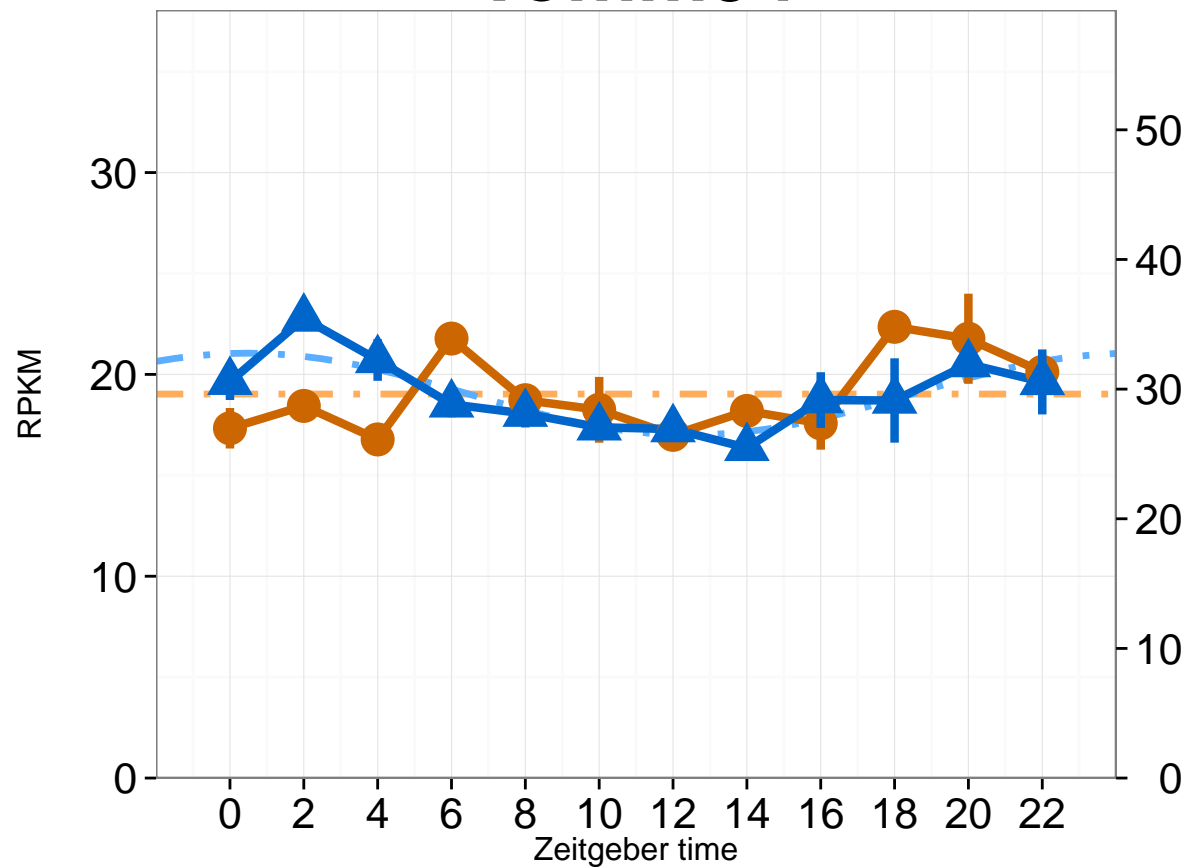

## Tomm34

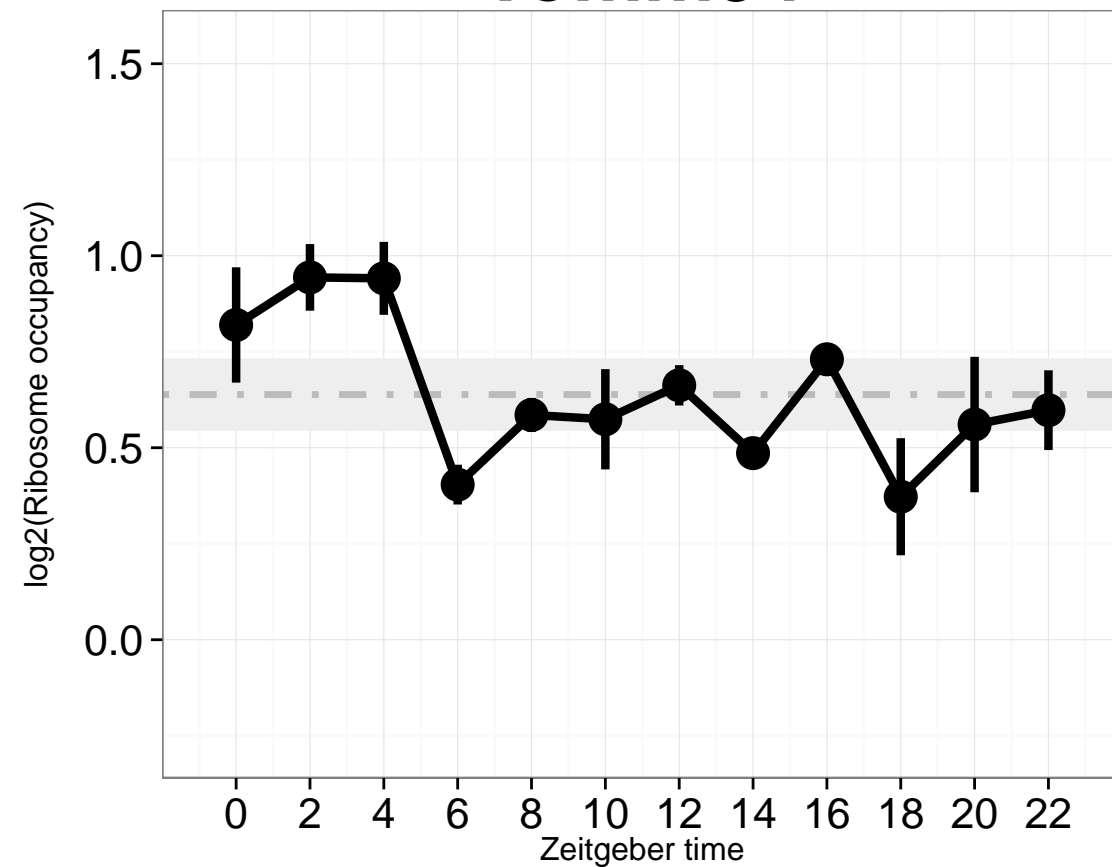

Supplement: Supplementary file 6992 [file 1]

## Hebp2

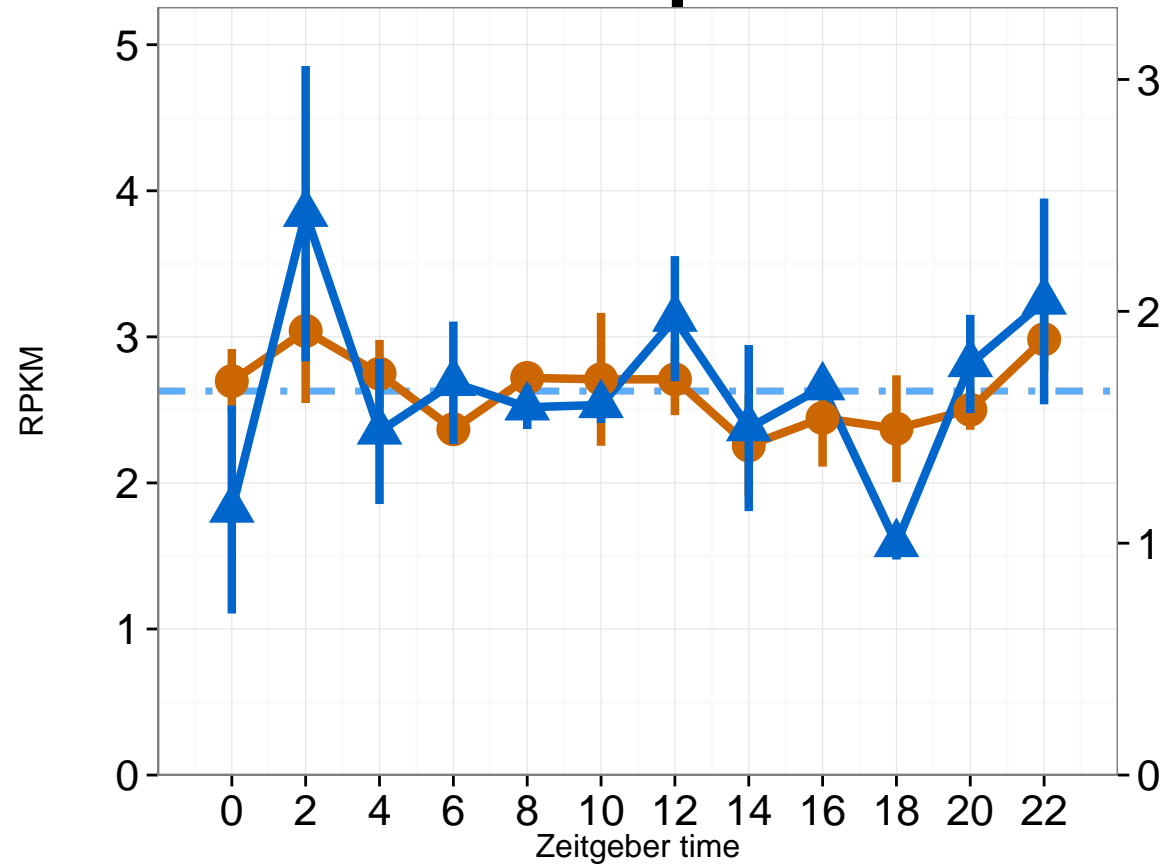

## Hebp2

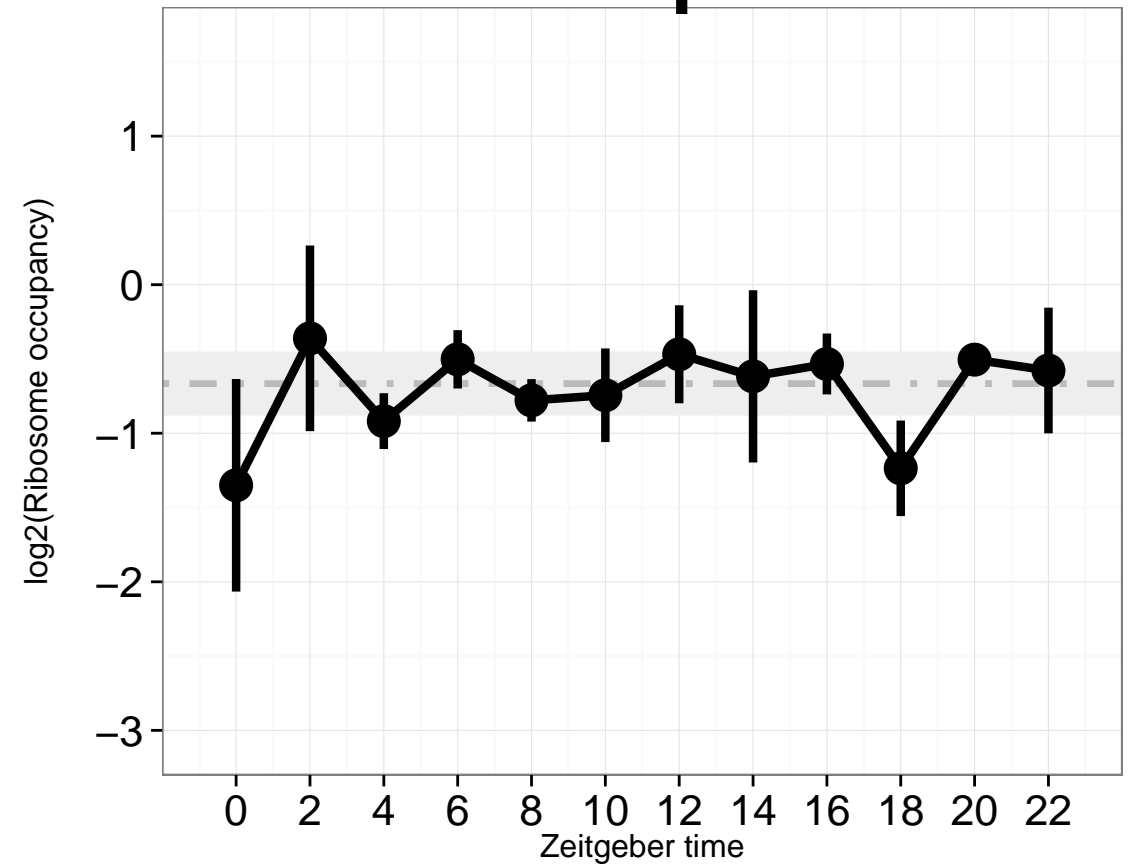

Supplement: Supplementary file 6993 [file 1]

## Ddx52

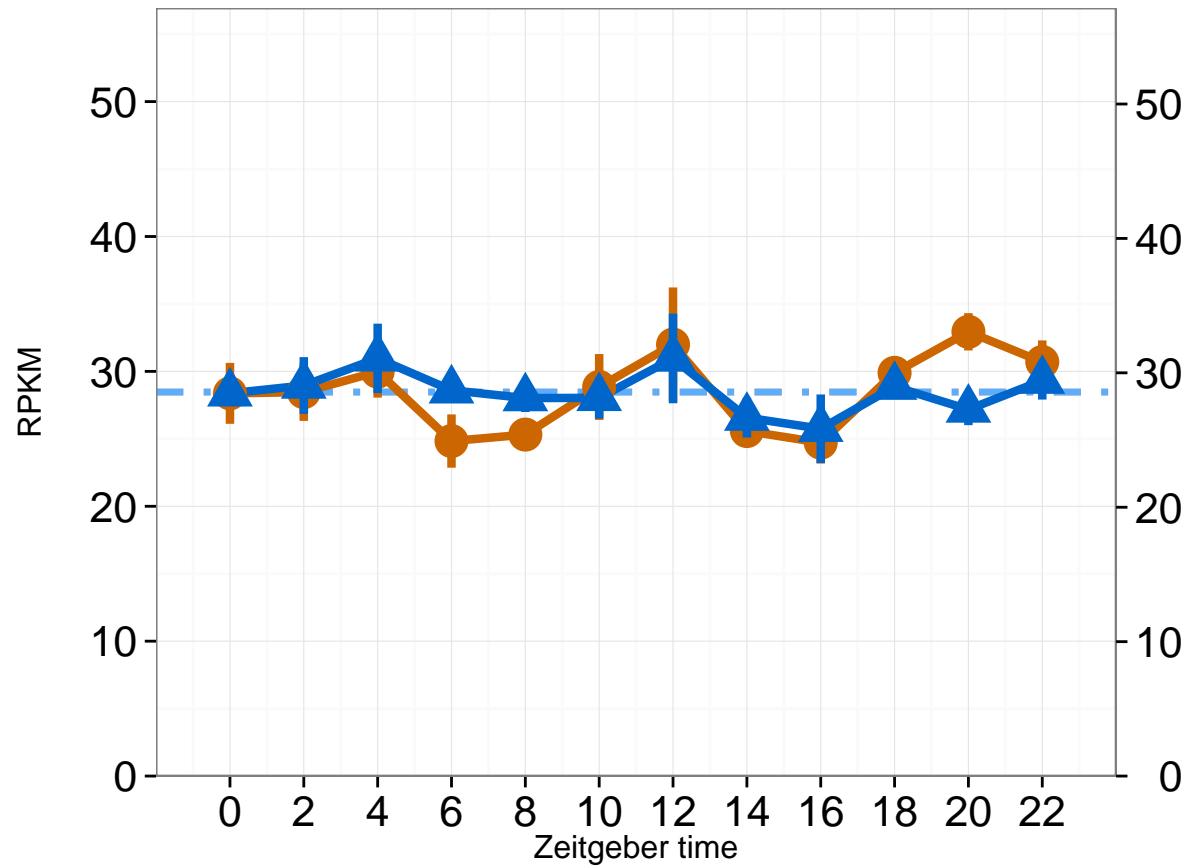

## Ddx52

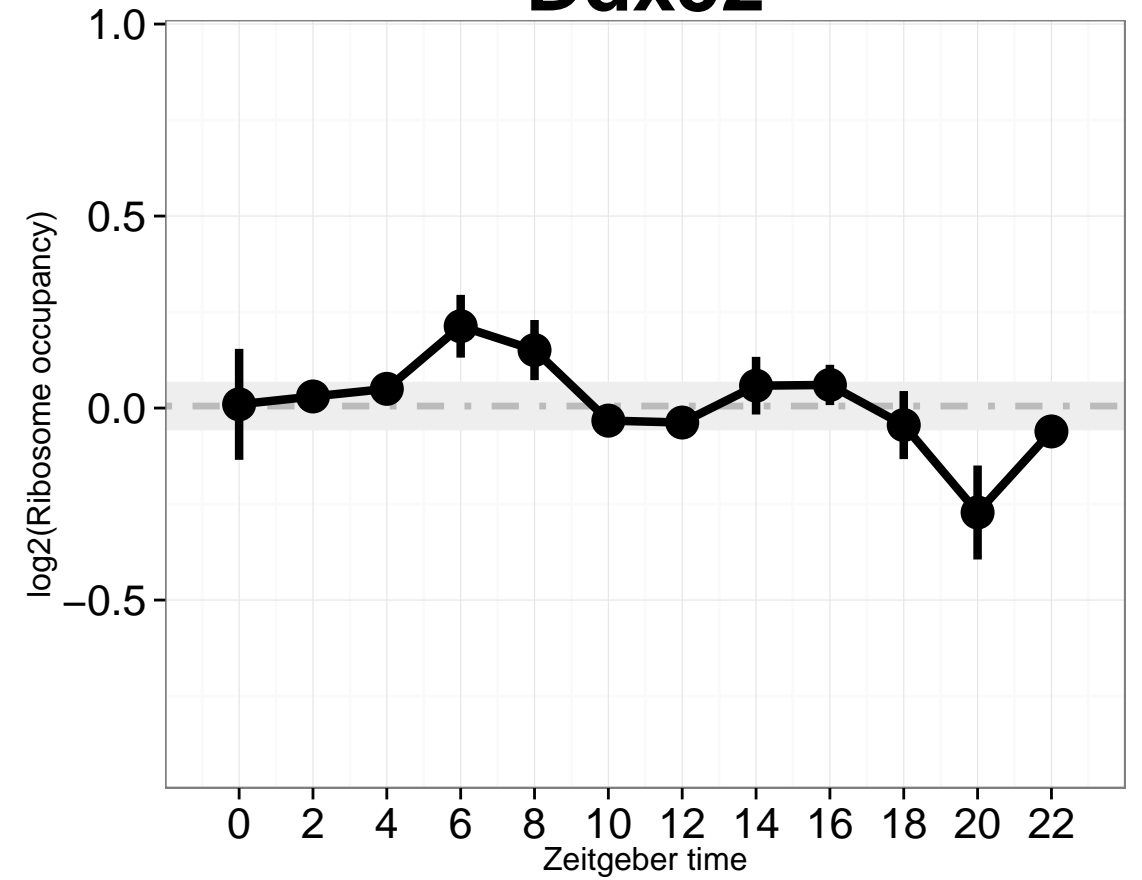

Supplement: Supplementary file 6994 [file 1]

# Hist1h2ak

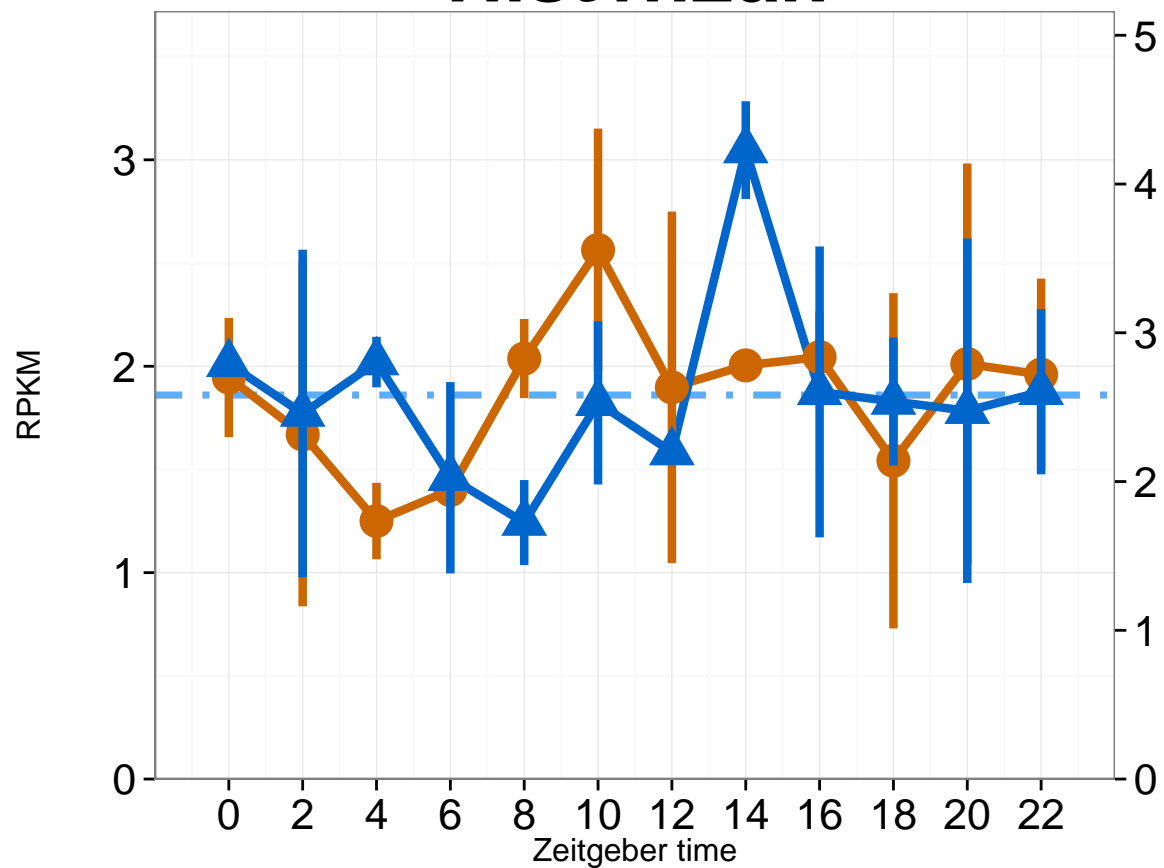

# Hist1h2ak

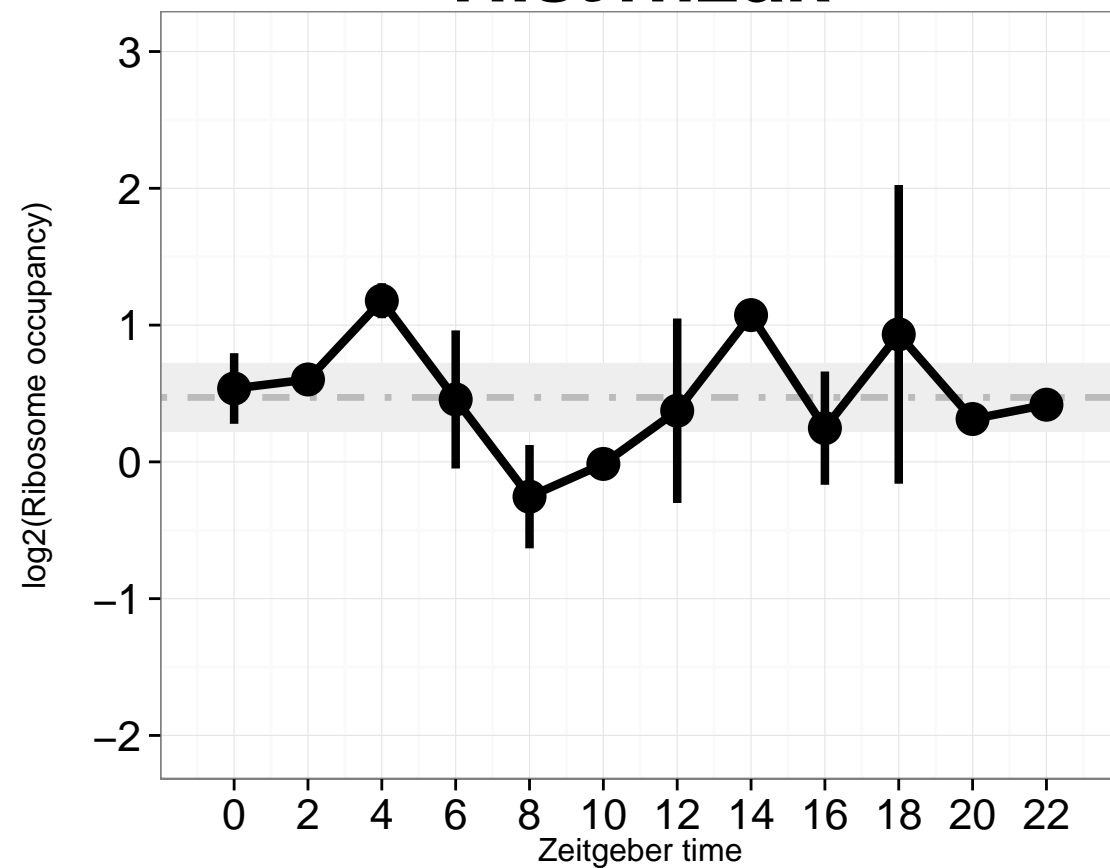

Supplement: Supplementary file 6995 [file 1]

## Smurf1

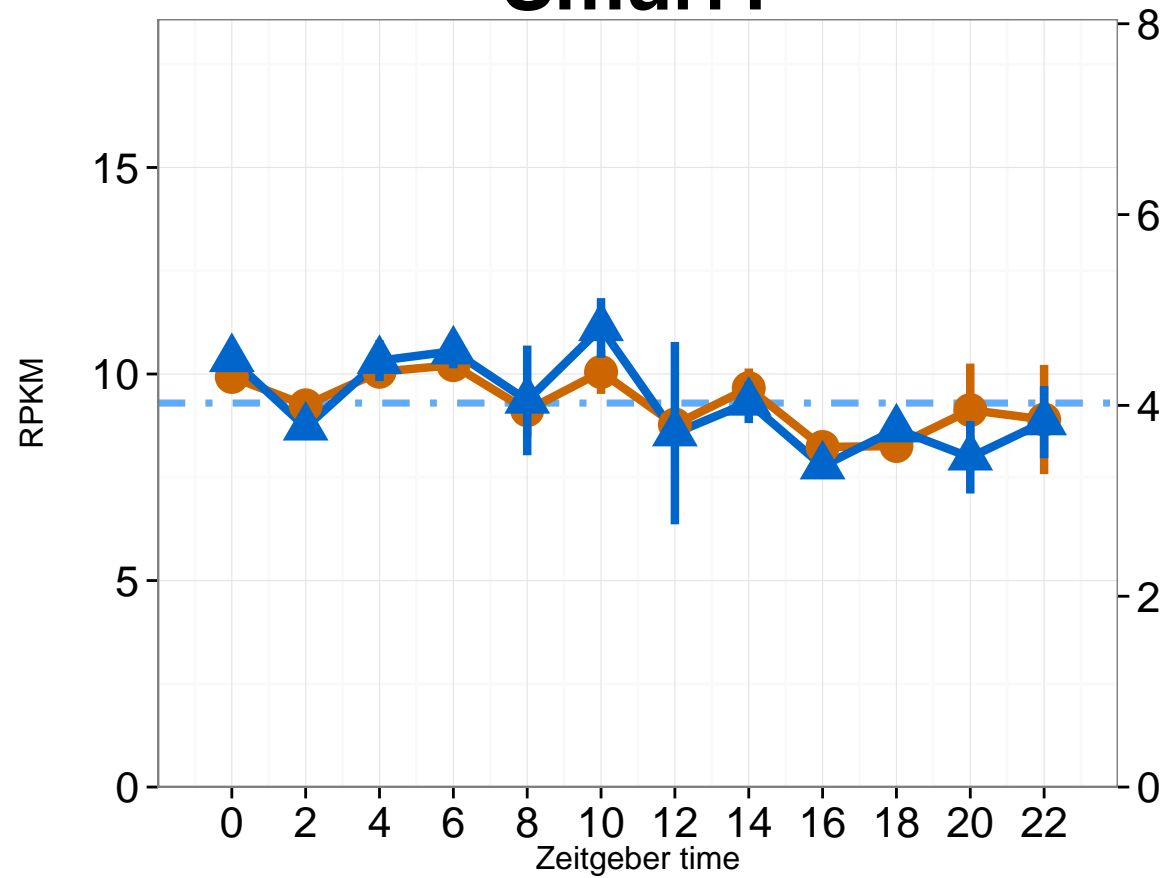

## Smurf1

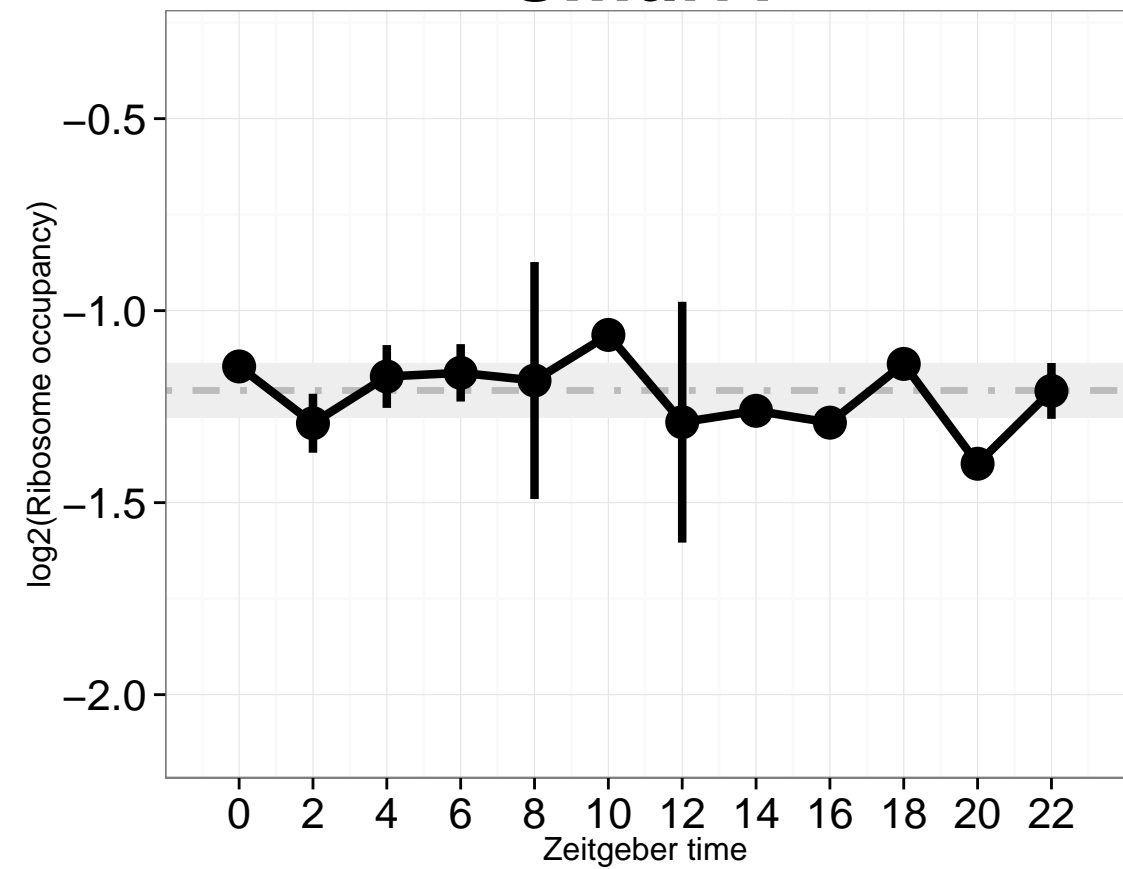

Supplement: Supplementary file 6996 [file 1]

# Topbp1

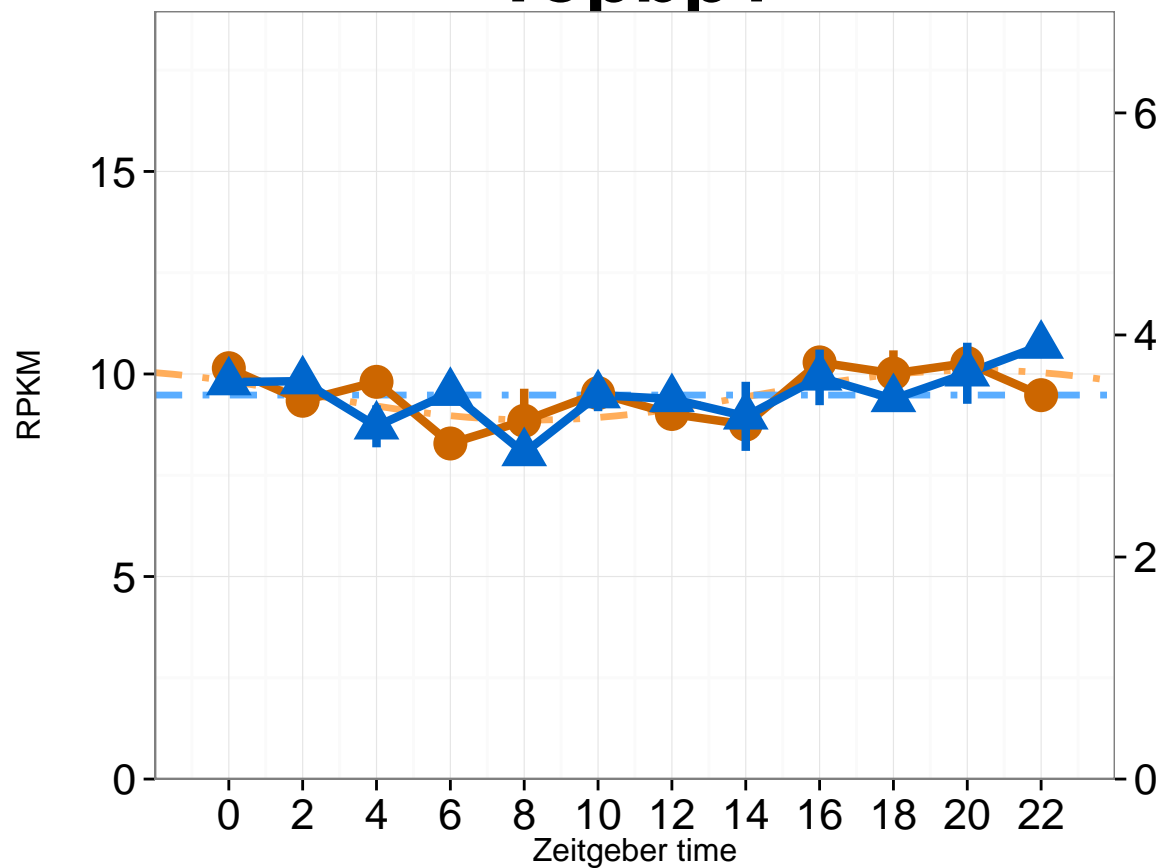

# Topbp1

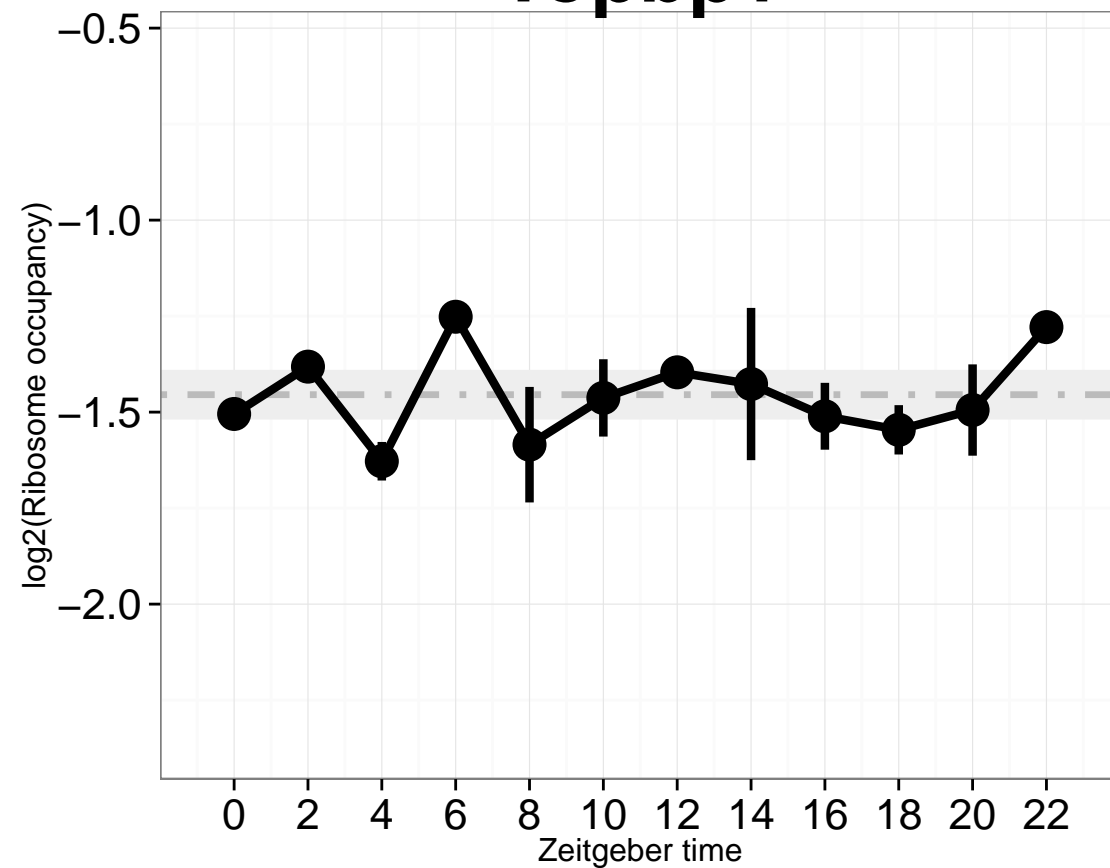

Supplement: Supplementary file 6997 [file 1]

## Ergic3

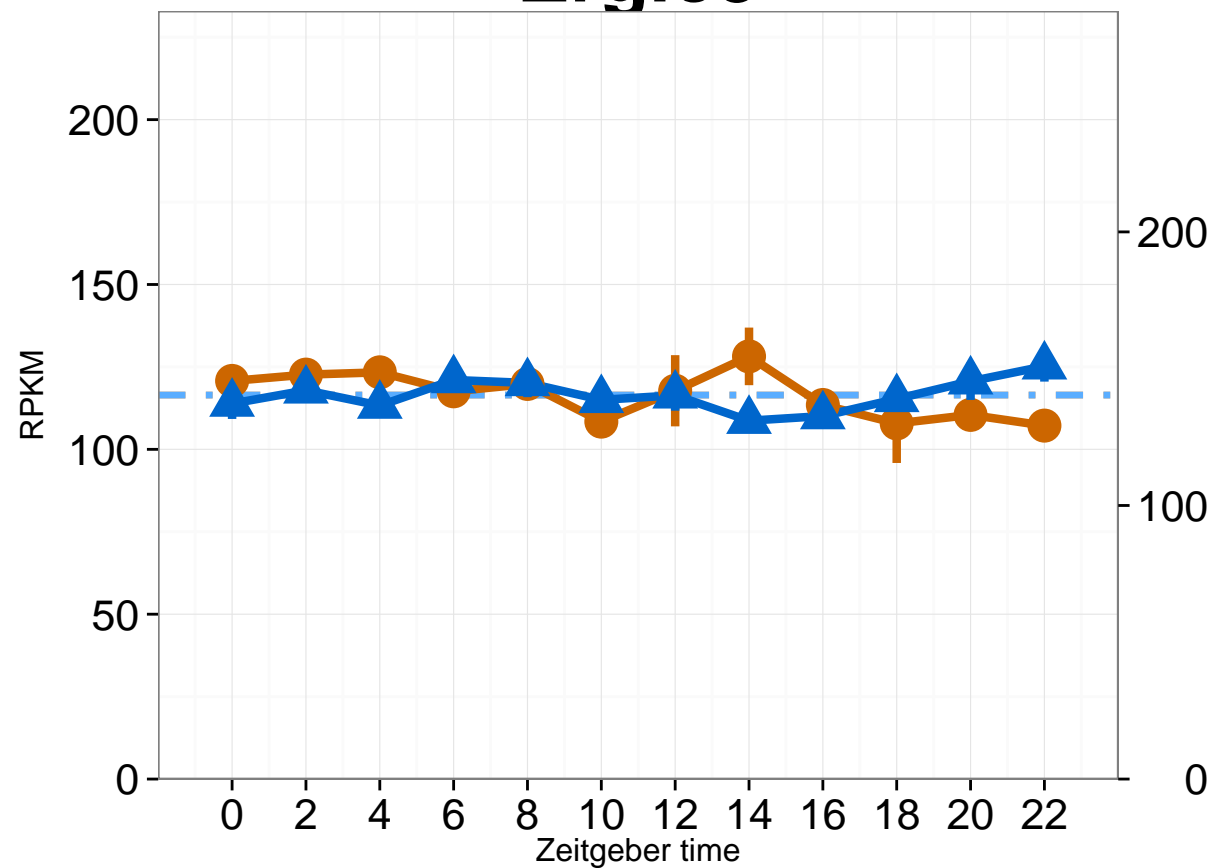

## Ergic3

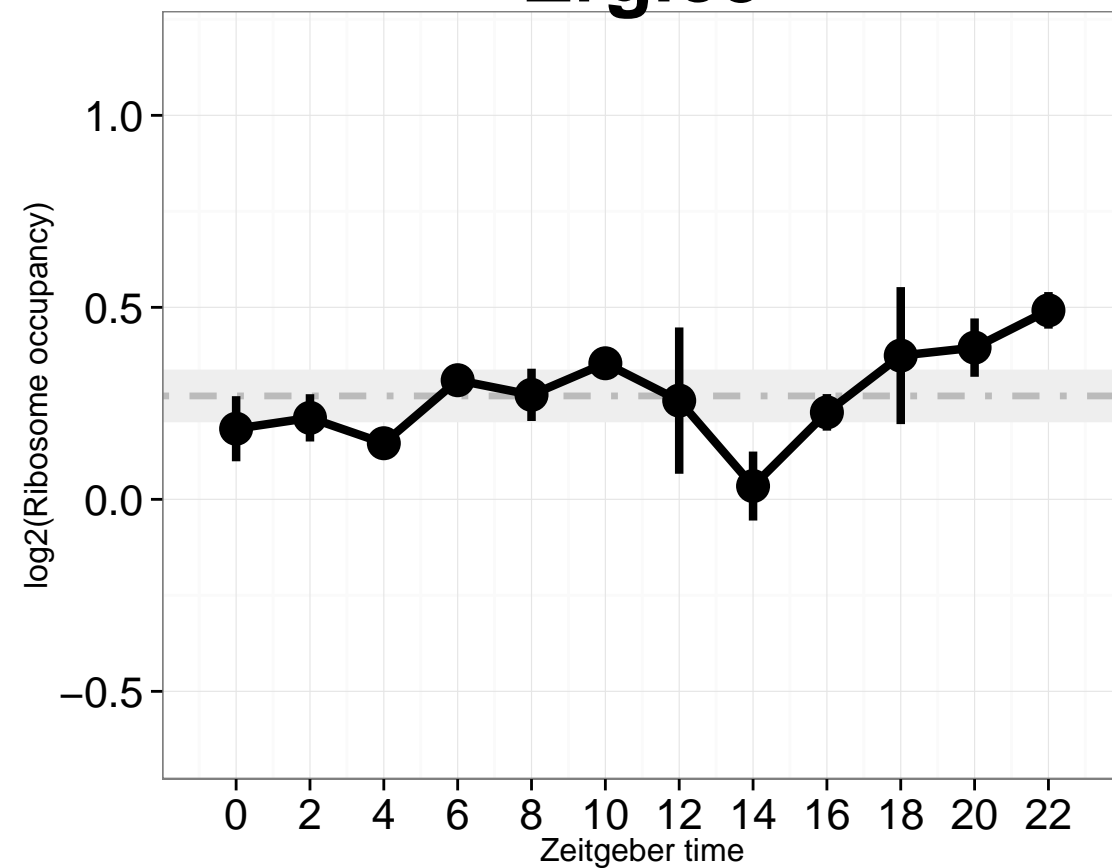

Supplement: Supplementary file 6998 [file 1]

# Asb11

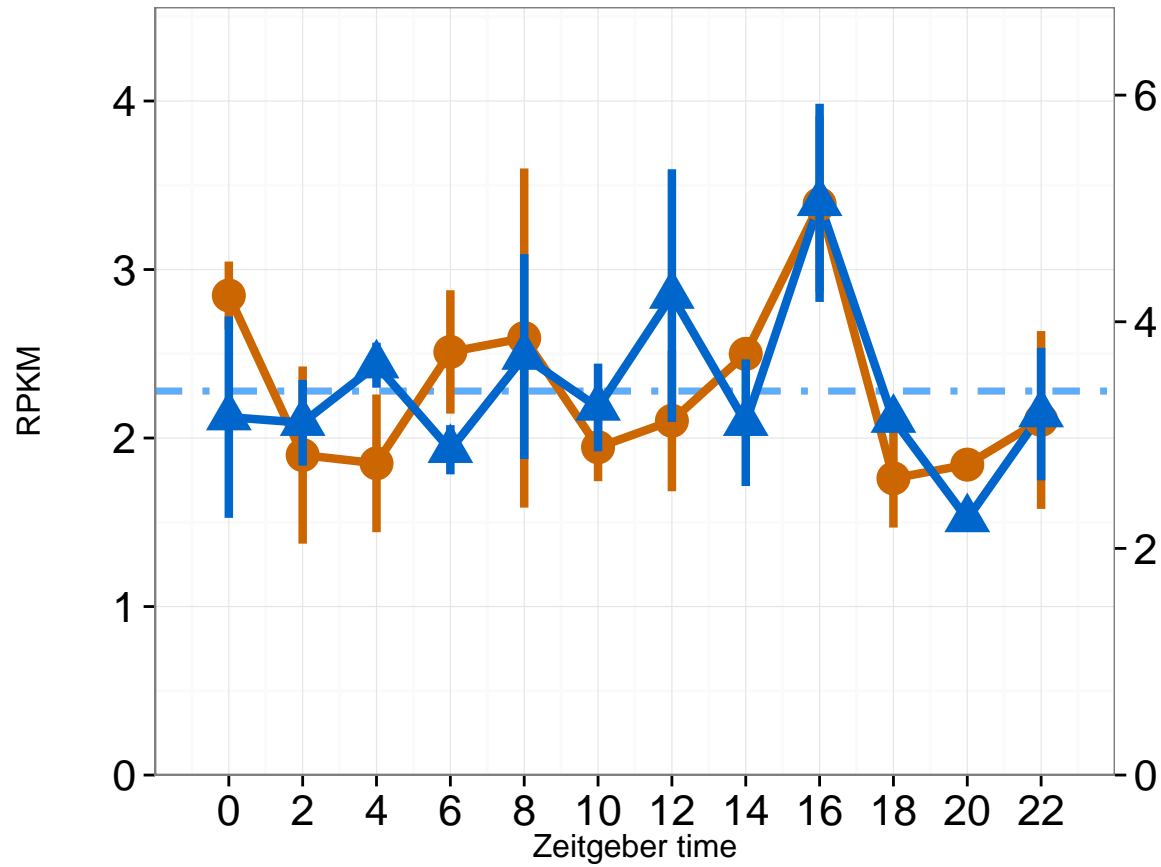

# Asb11

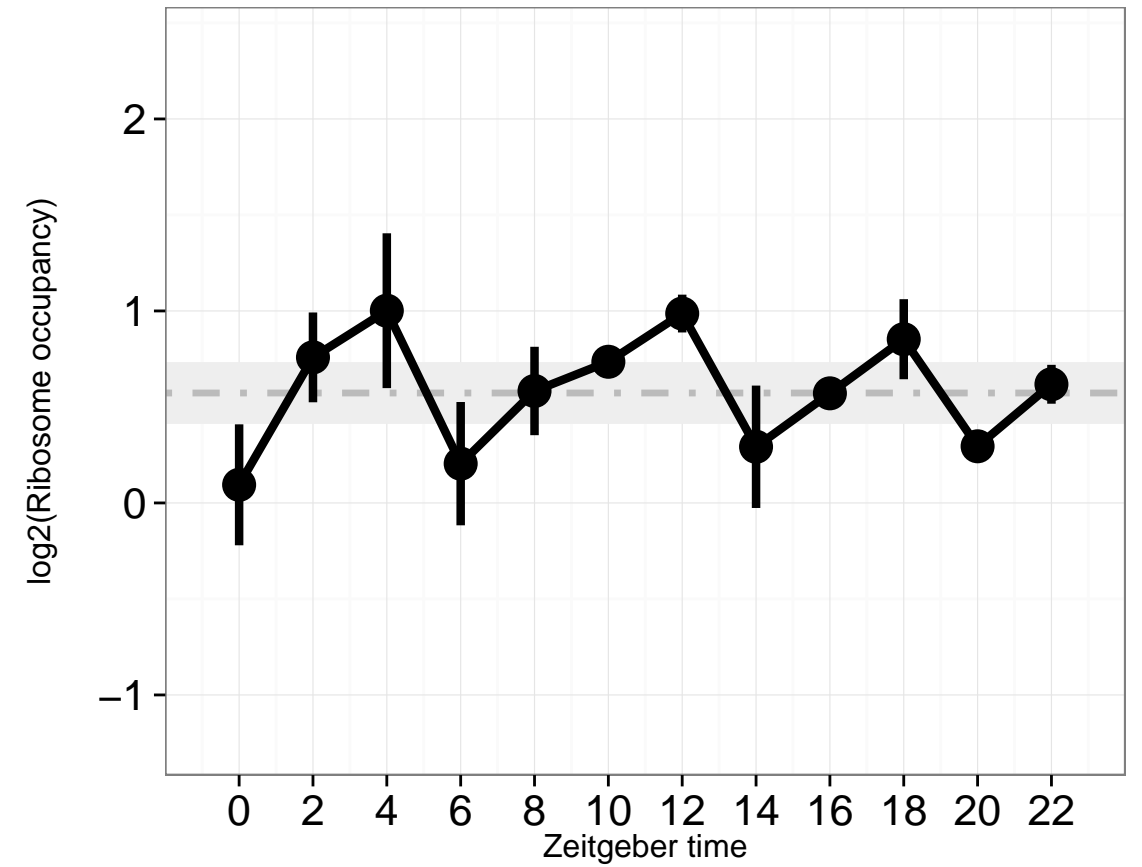

Supplement: Supplementary file 6999 [file 1]

# Bin3

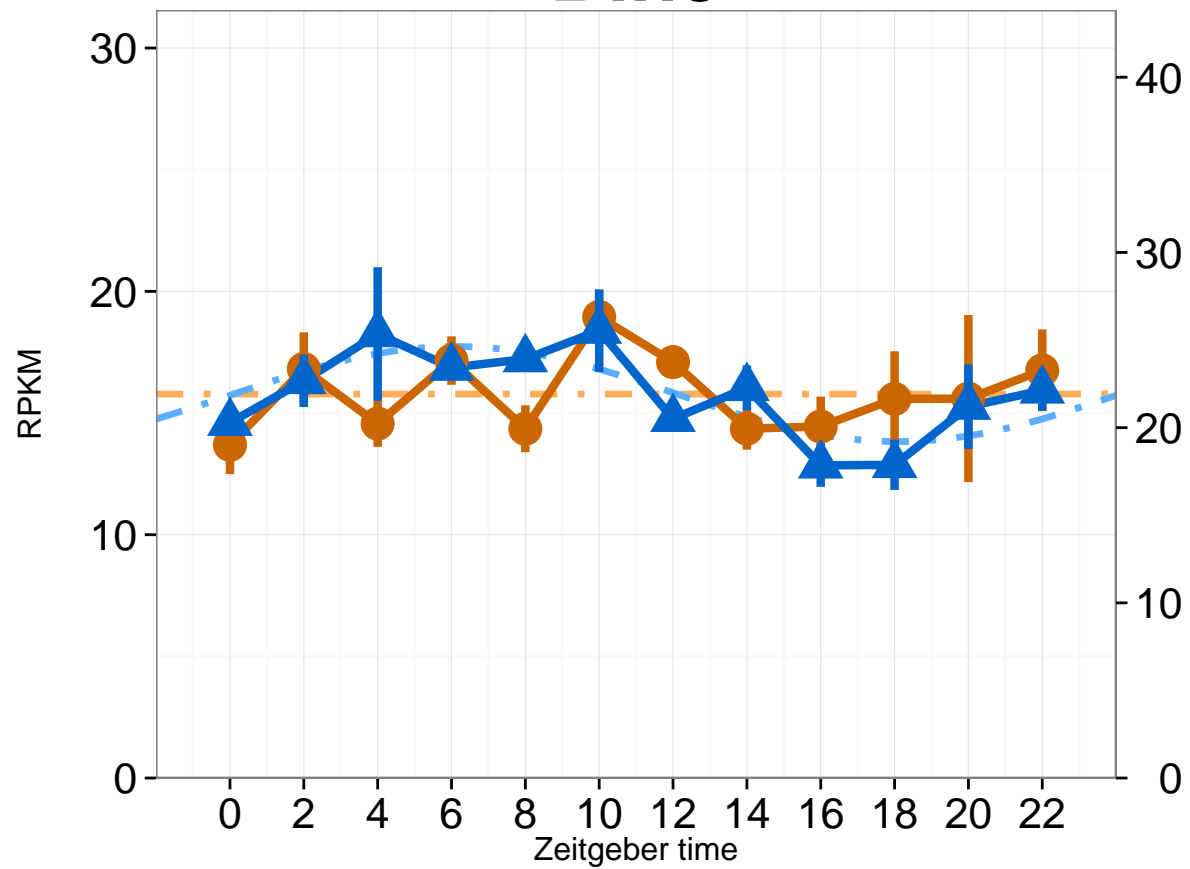

# Bin3

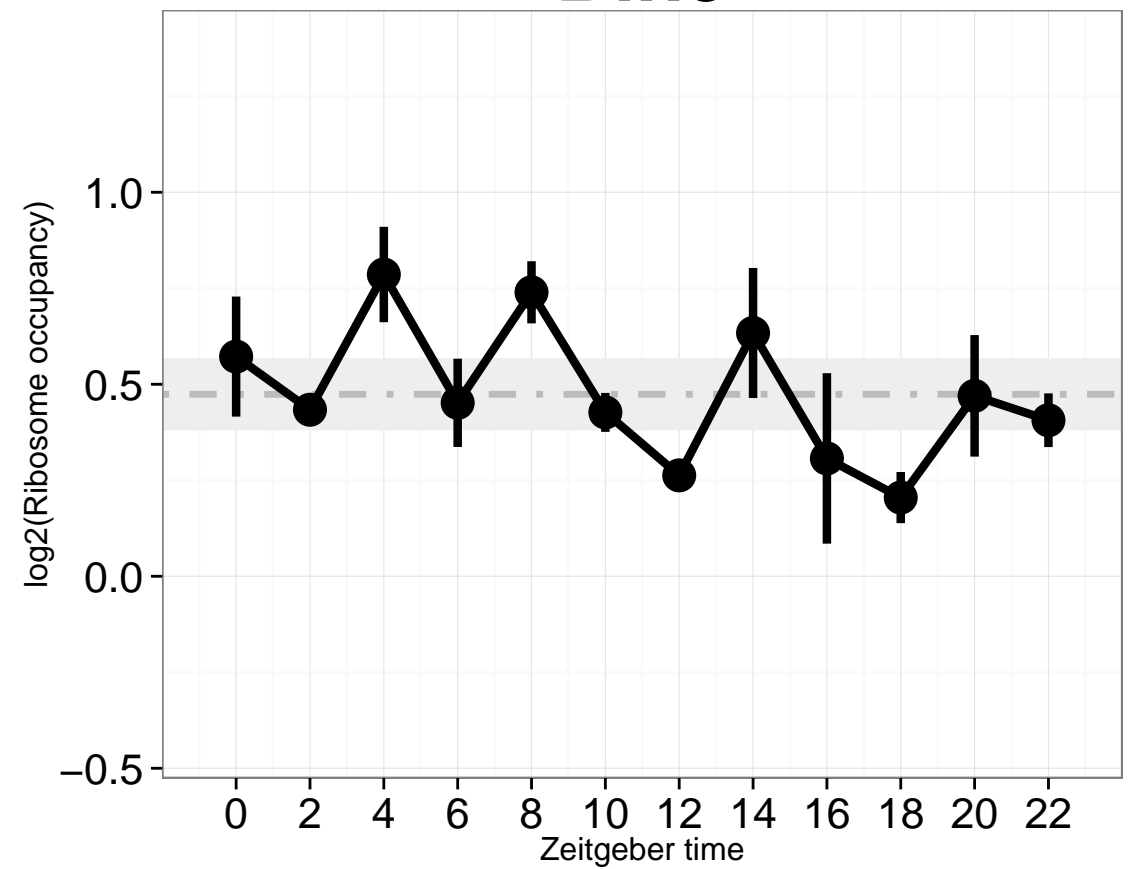

Supplement: Supplementary file 7000 [file 1]

# S100a9

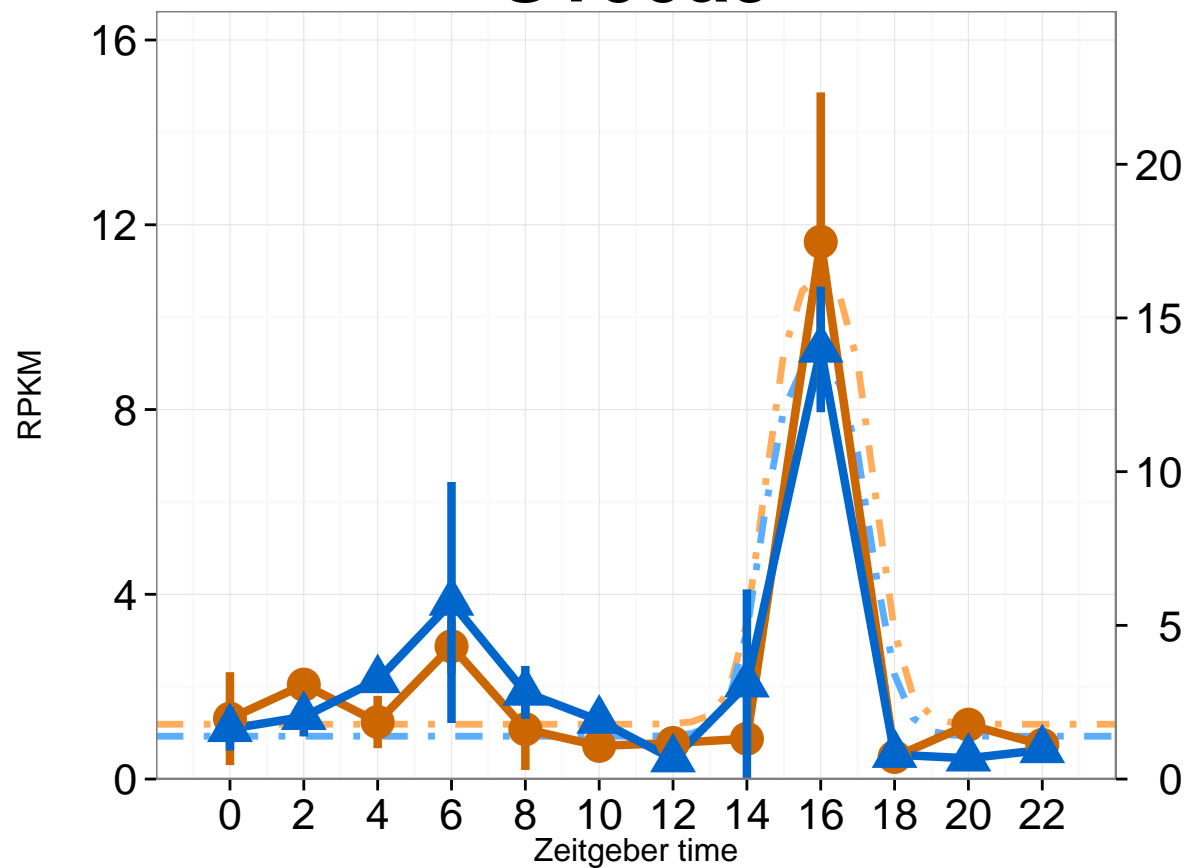

# S100a9

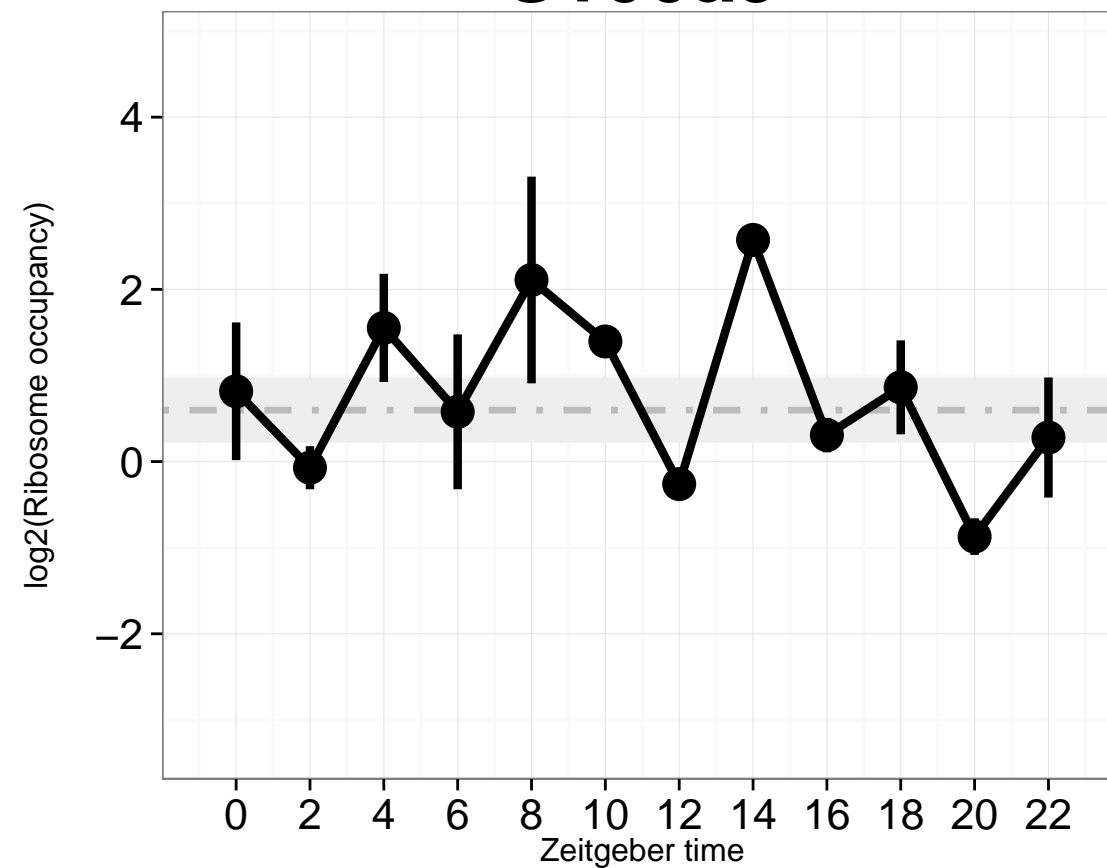

Supplement: Supplementary file 7001 [file 1]

# Baz2a

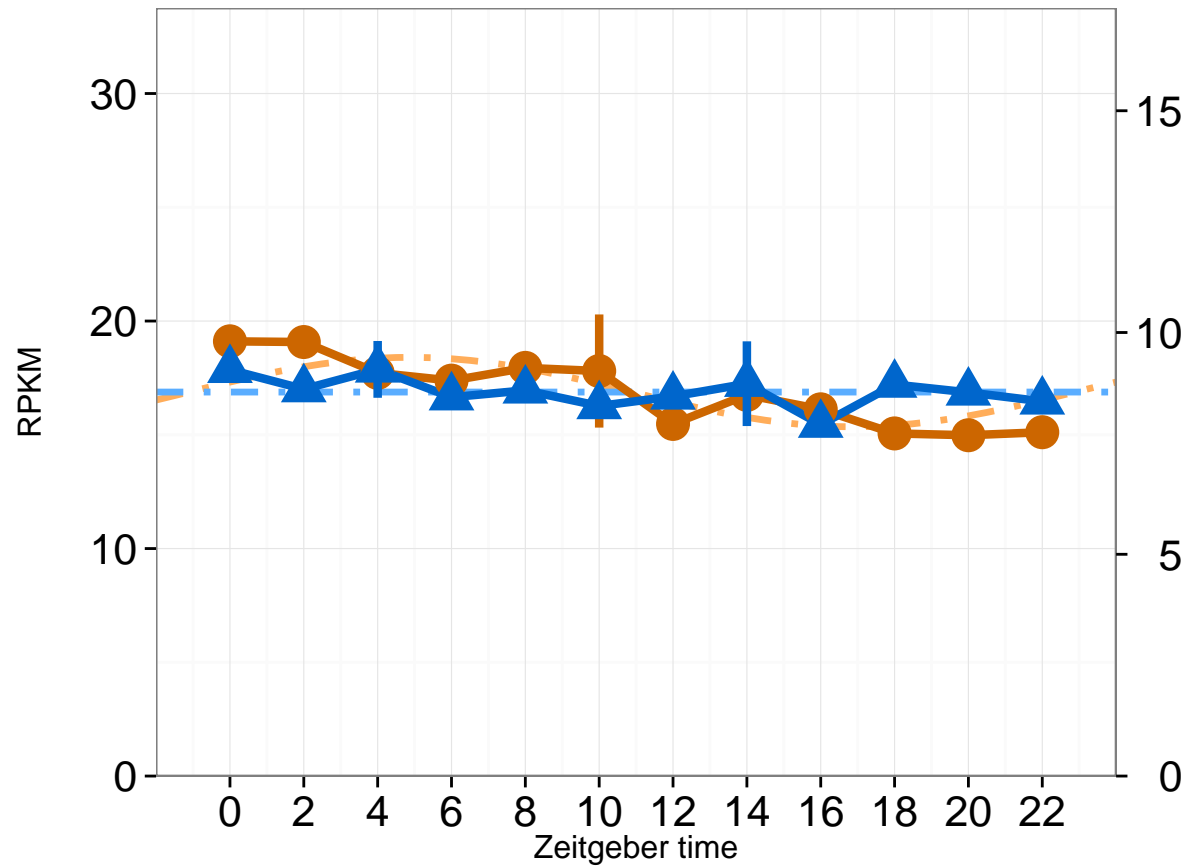

# Baz2a

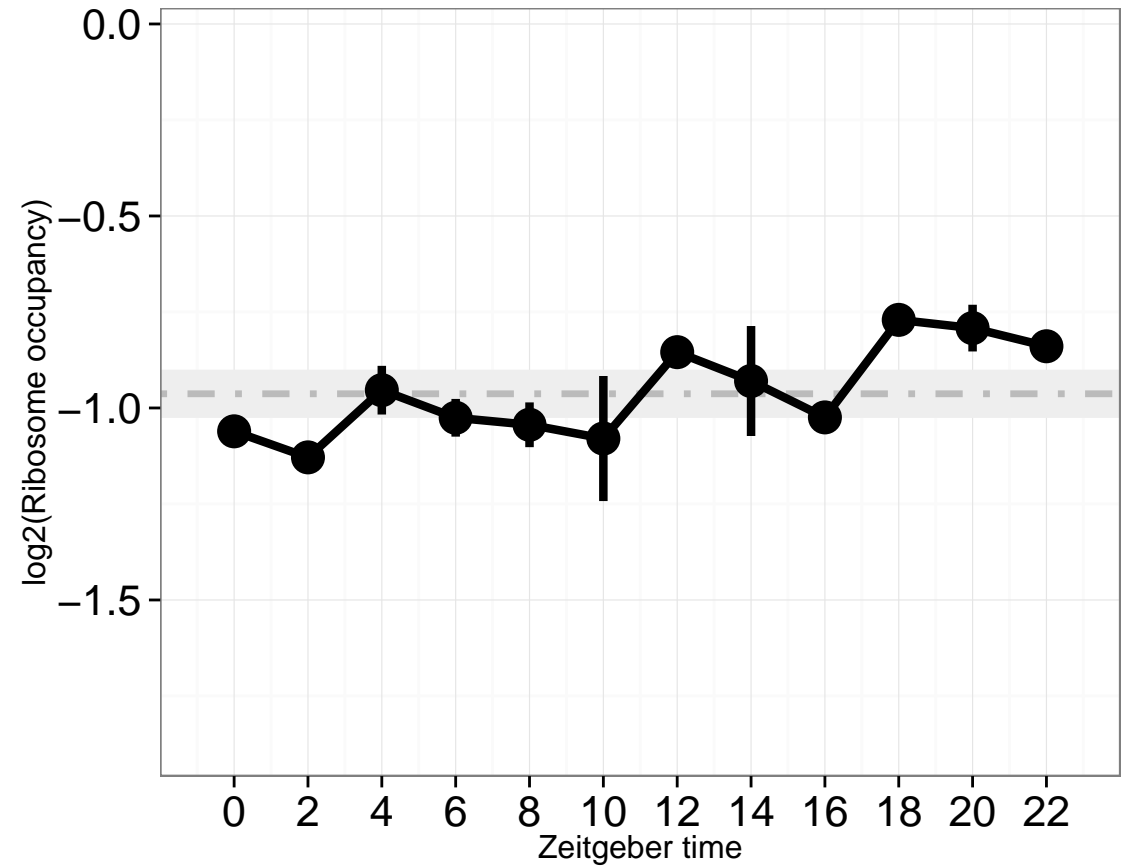

Supplement: Supplementary file 7002 [file 1]

## Acot4

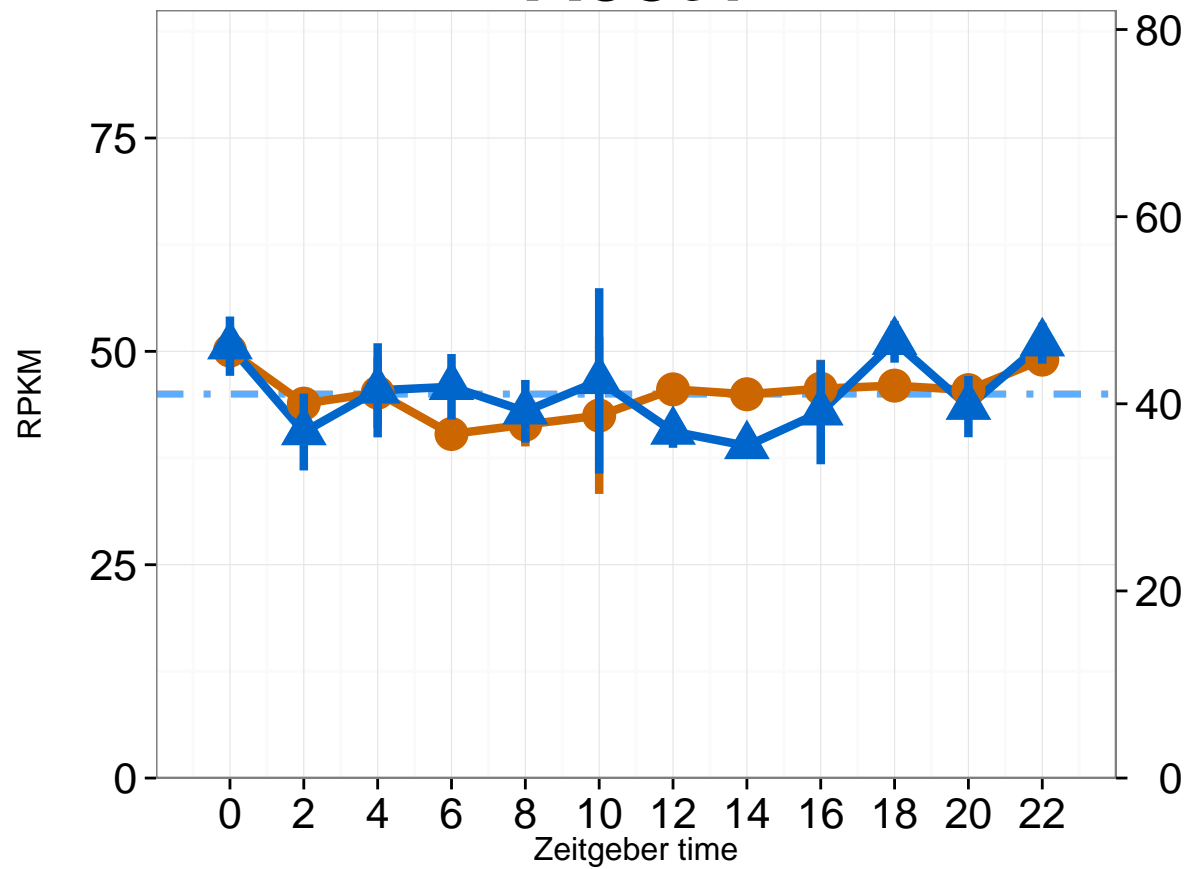

## Acot4

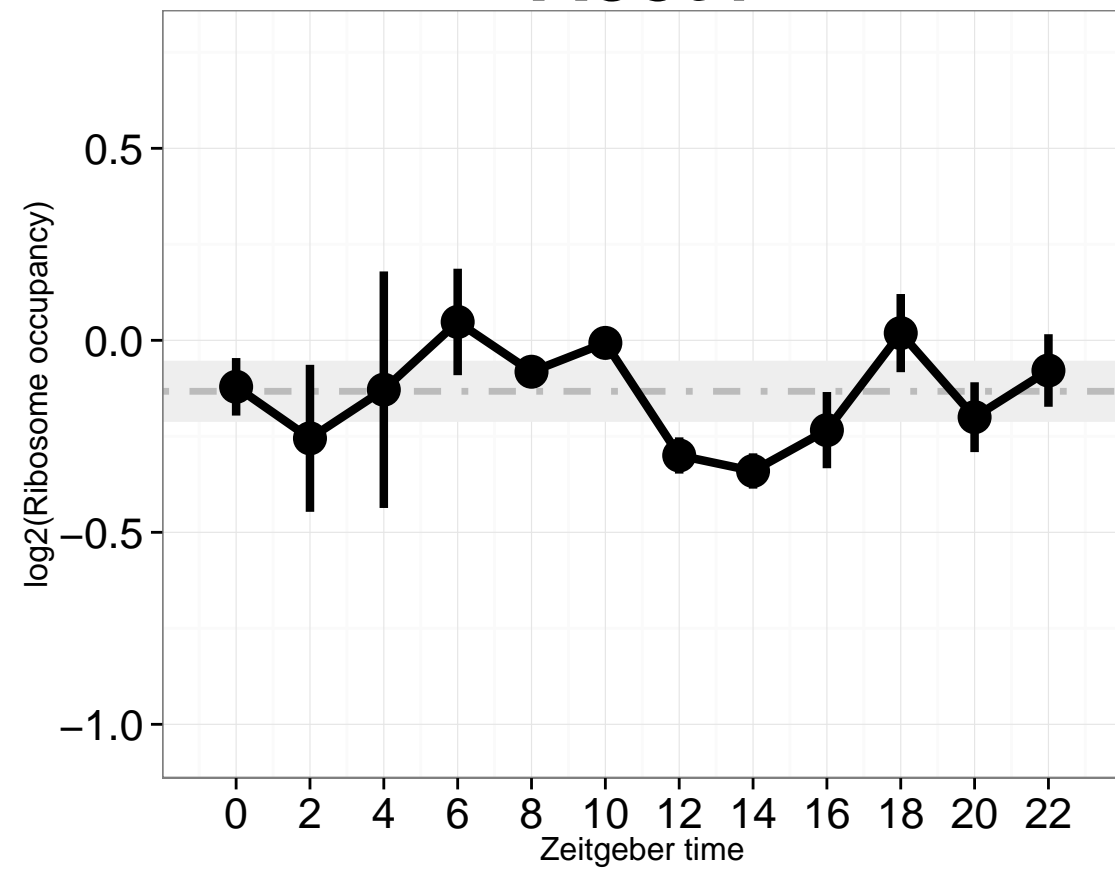

Supplement: Supplementary file 7003 [file 1]

## Spin4

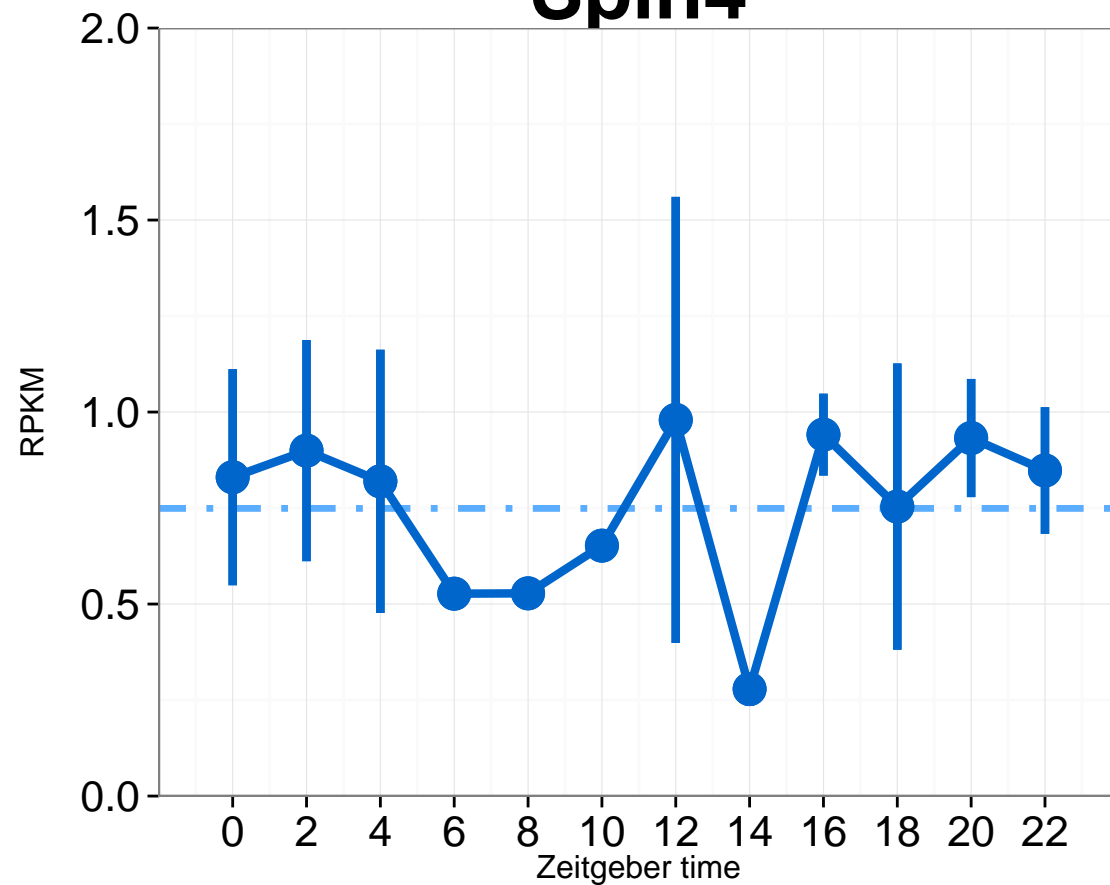

## Spin4 log2(Ribosome occupancy)

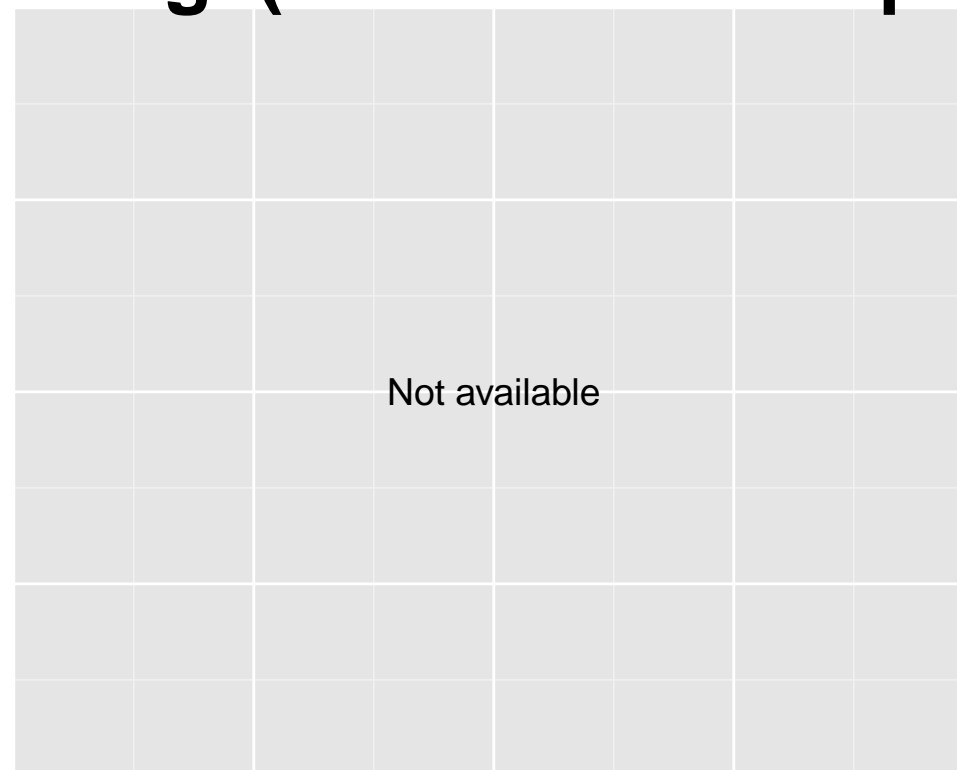

Supplement: Supplementary file 7004 [file 1]

## Lctl

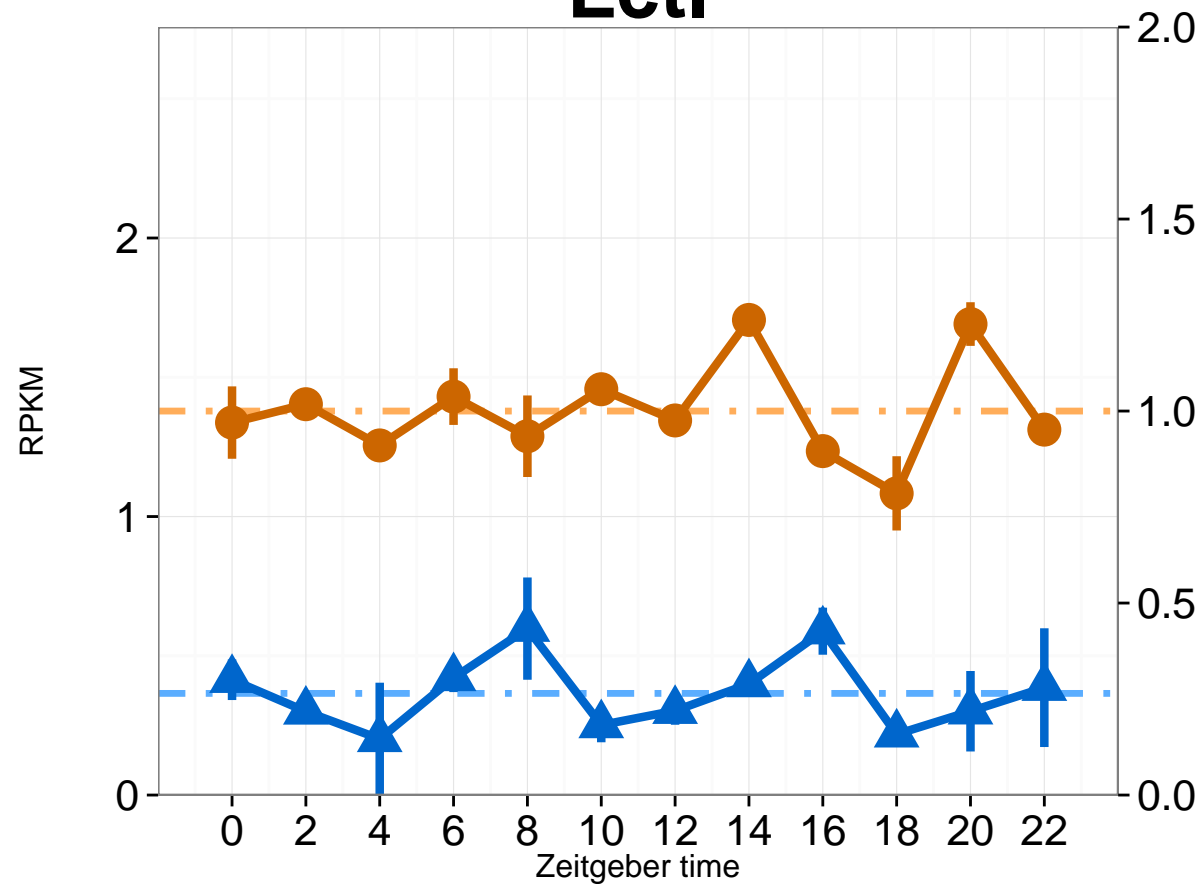

## Lctl

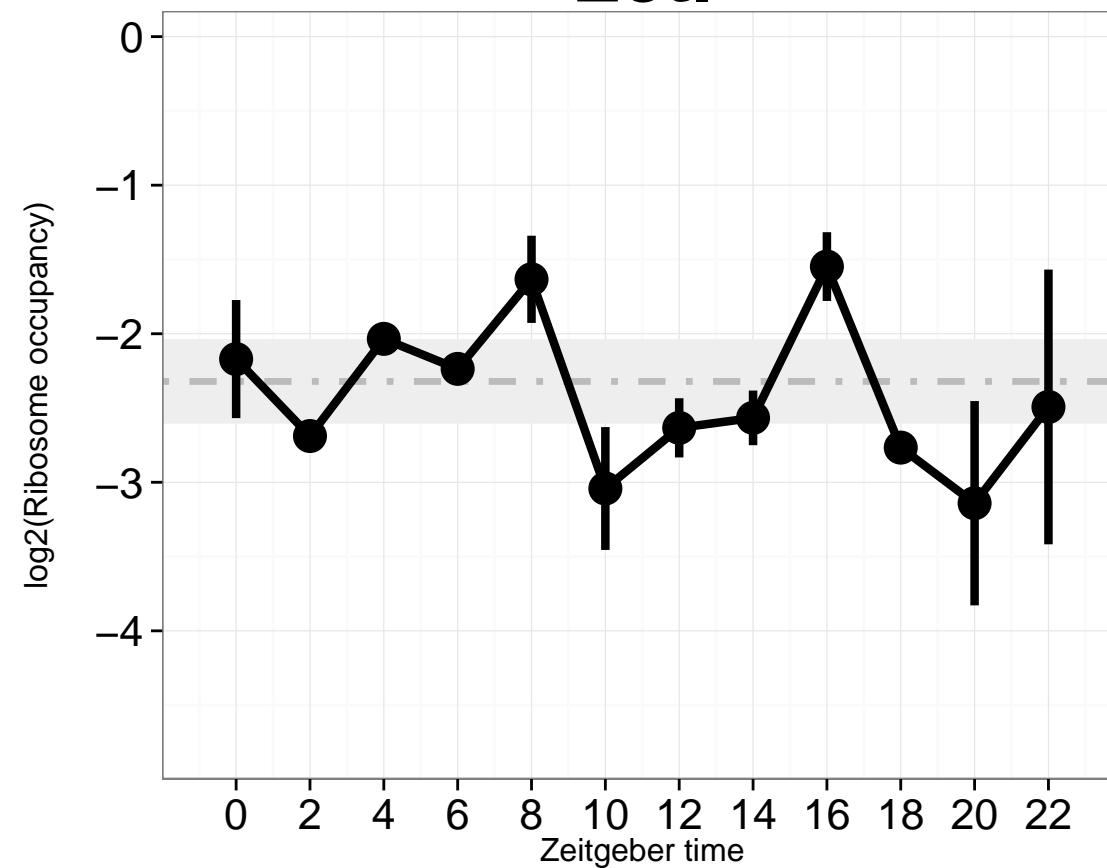

Supplement: Supplementary file 7005 [file 1]

## Pnliprp1

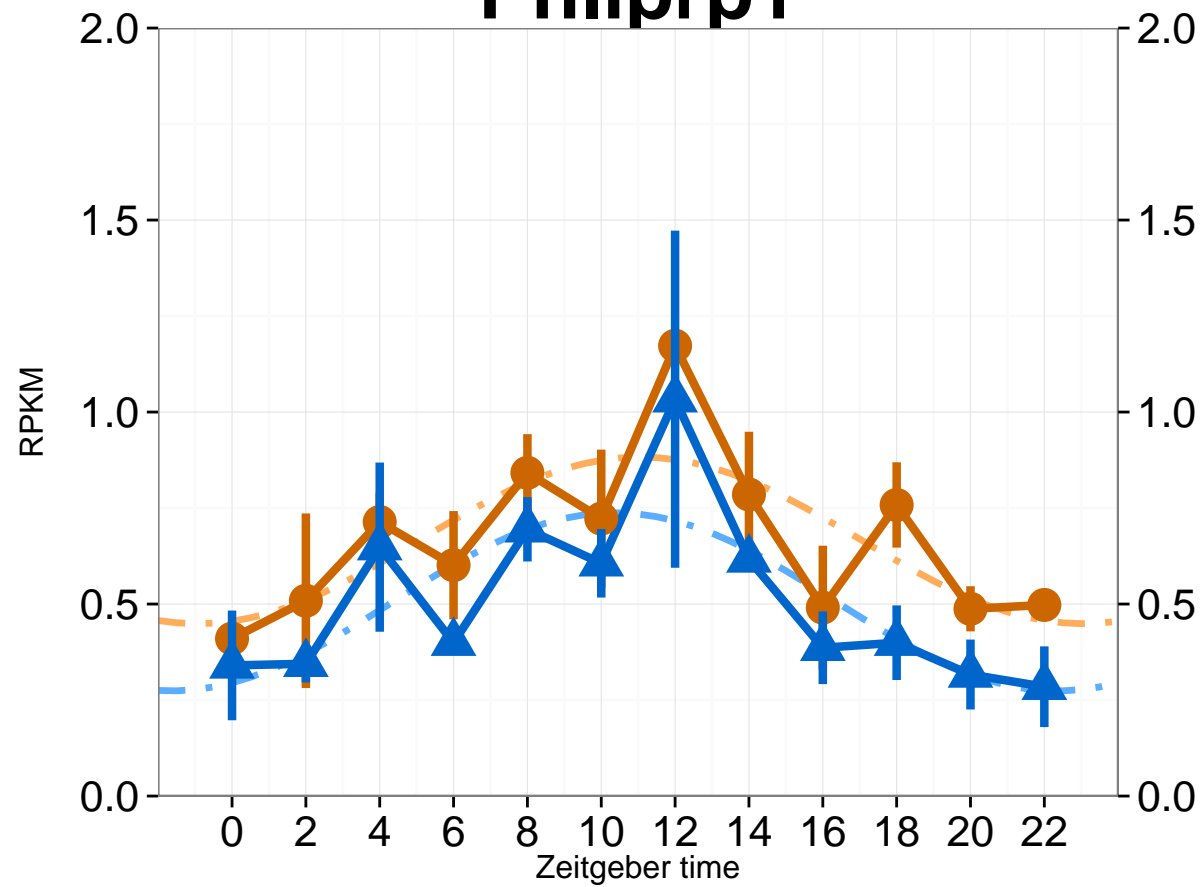

## Pnliprp1

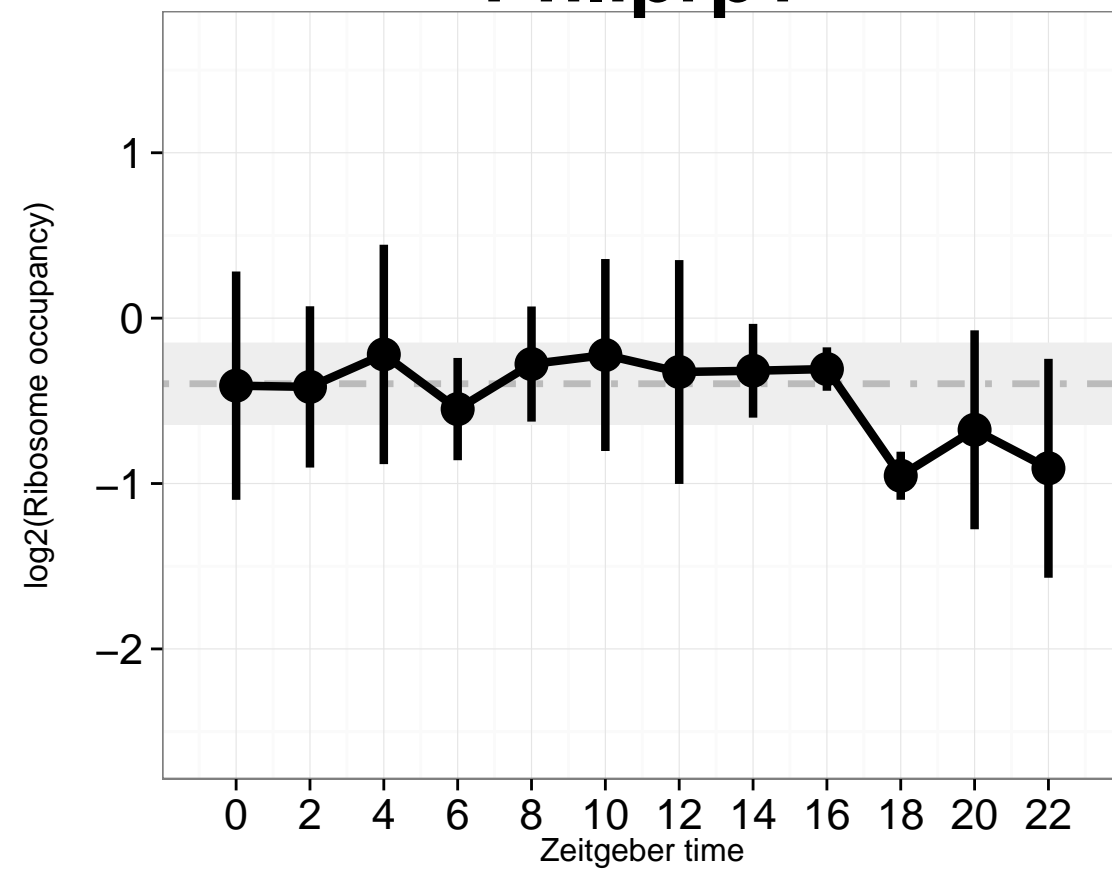

Supplement: Supplementary file 7006 [file 1]

# Syde1

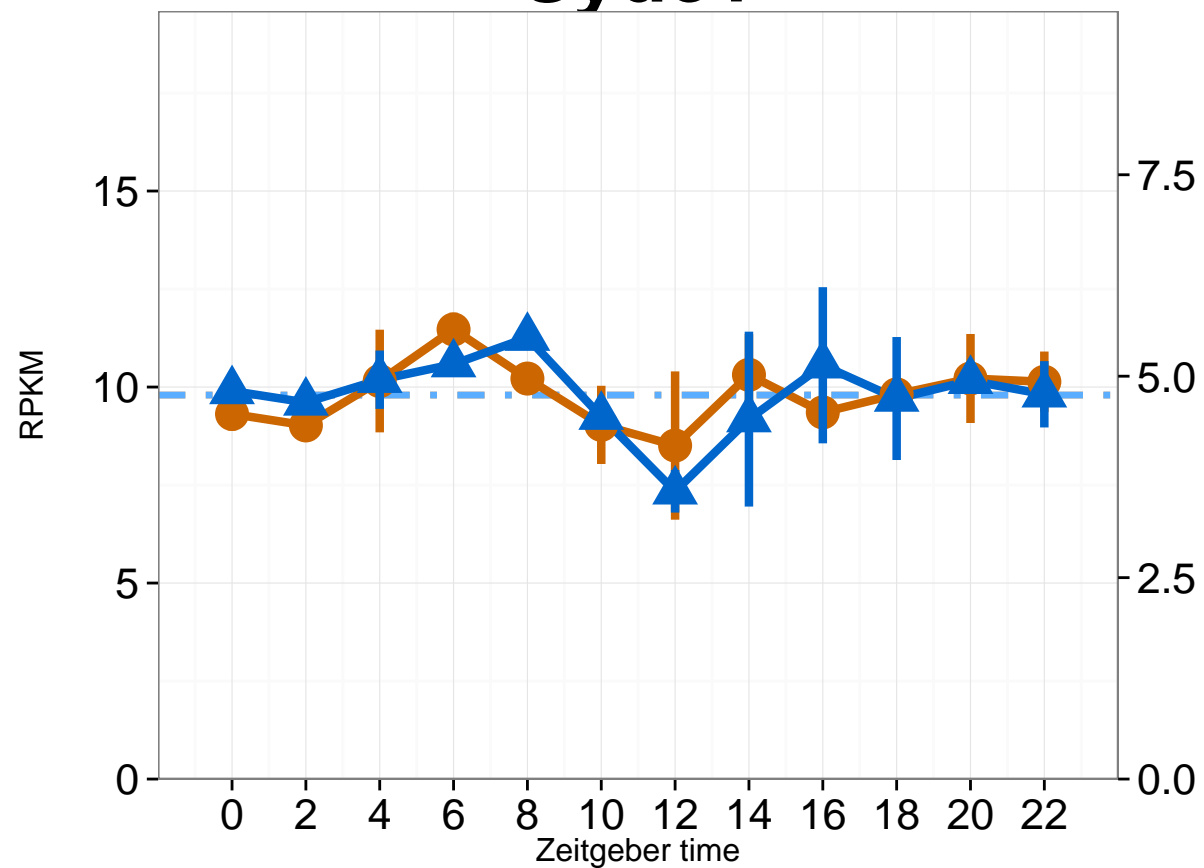

# Syde1

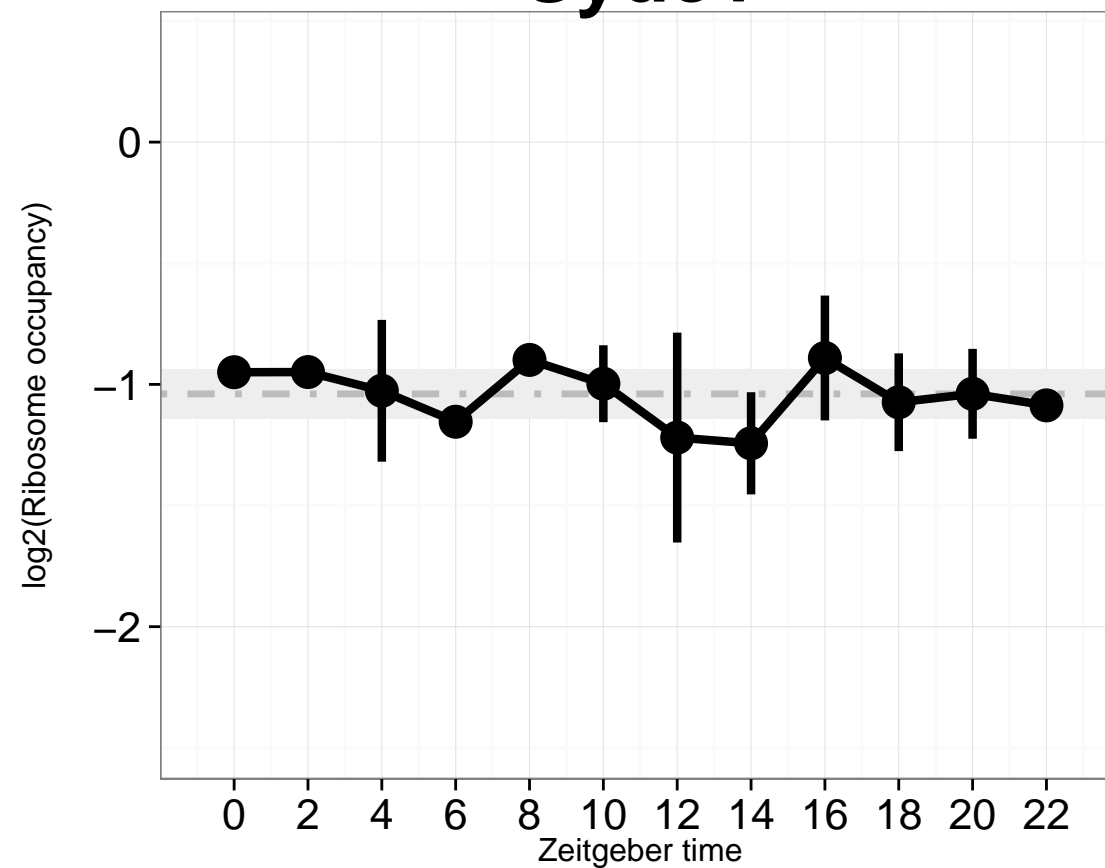

Supplement: Supplementary file 7007 [file 1]

## Sec14l3

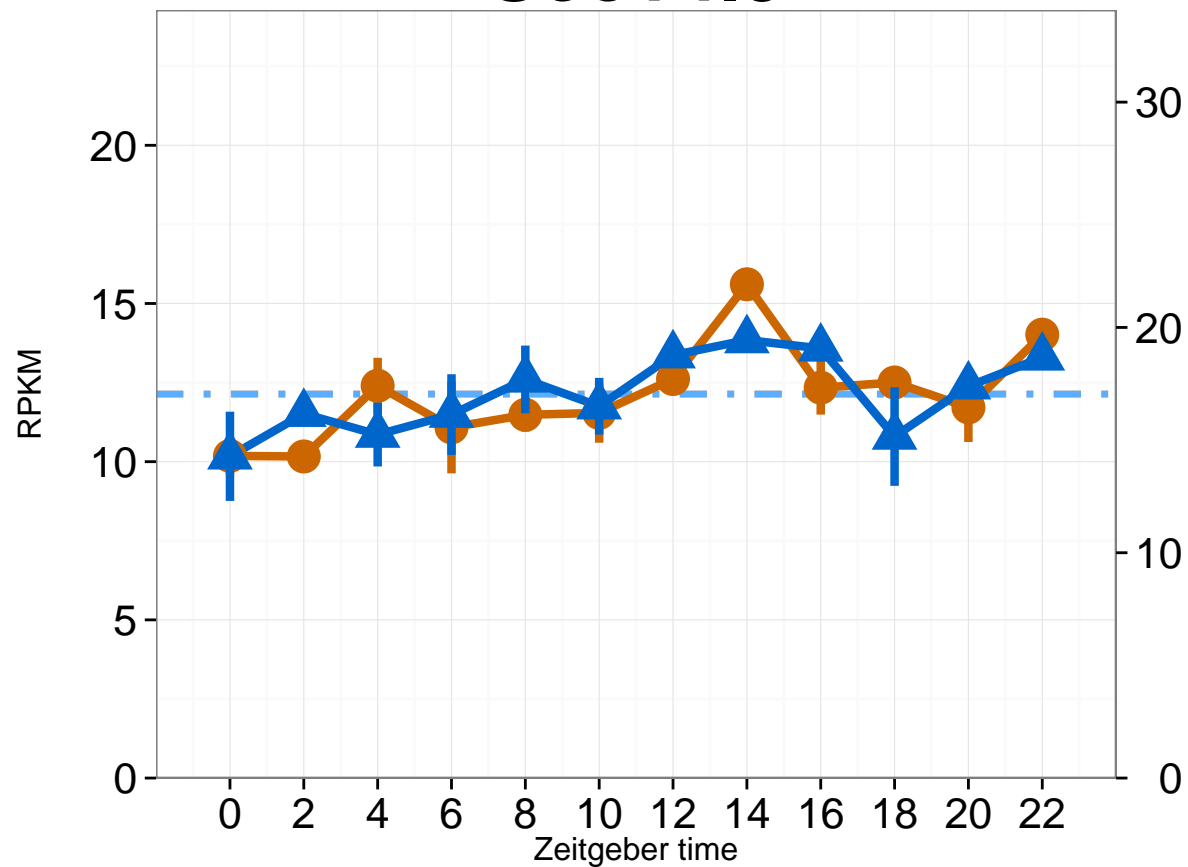

## Sec14l3

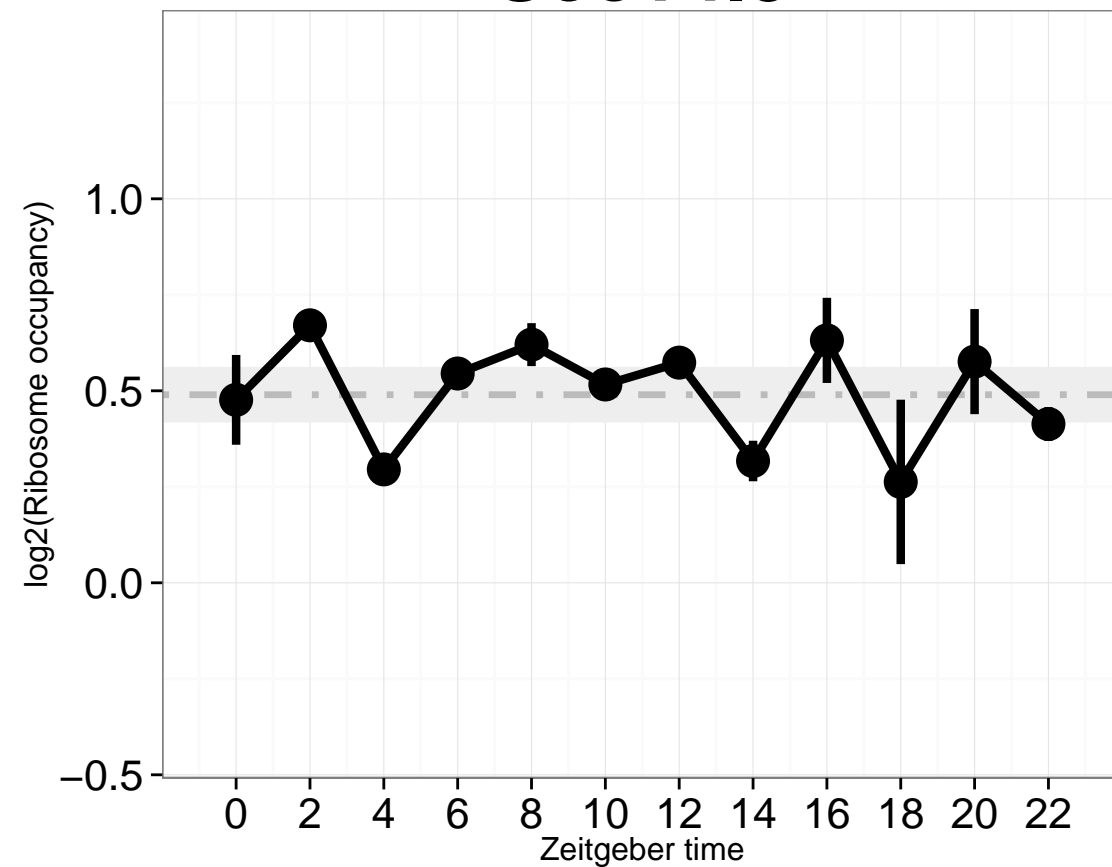

Supplement: Supplementary file 7008 [file 1]

## Rrp15

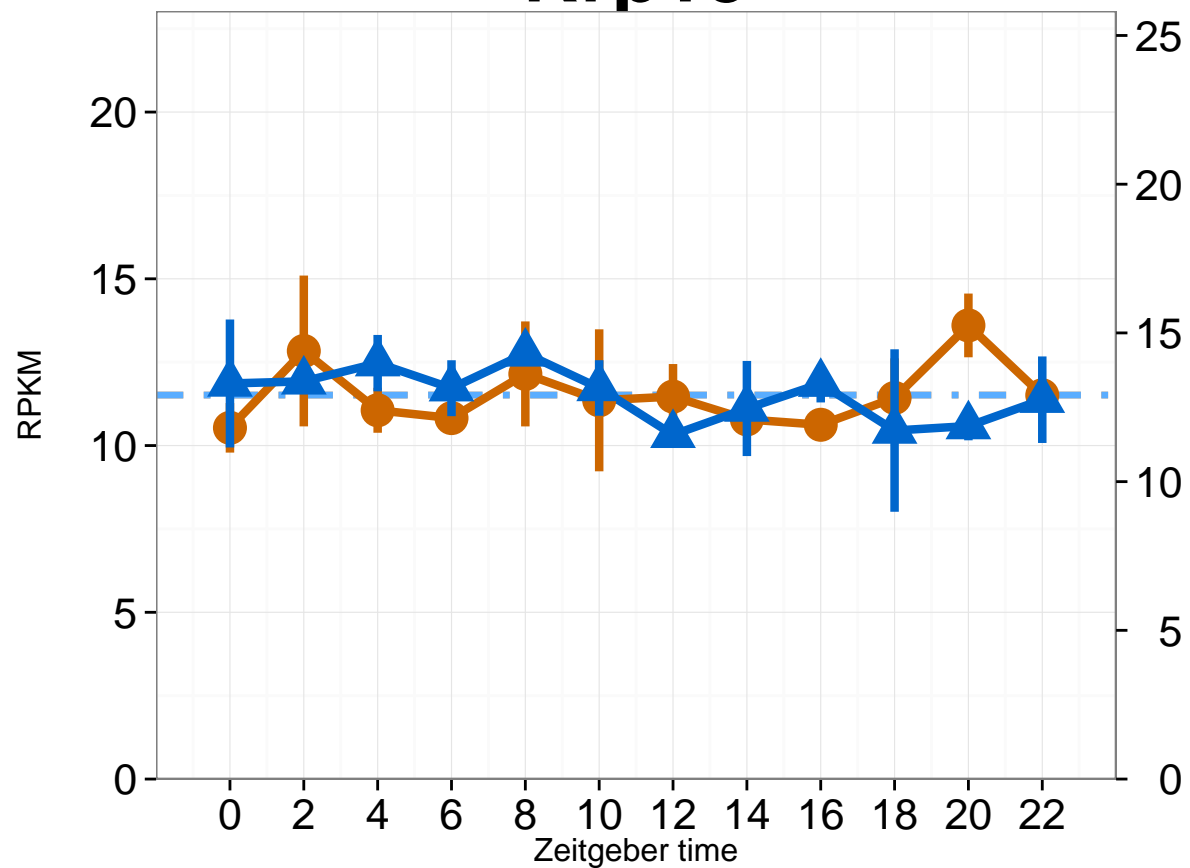

## Rrp15

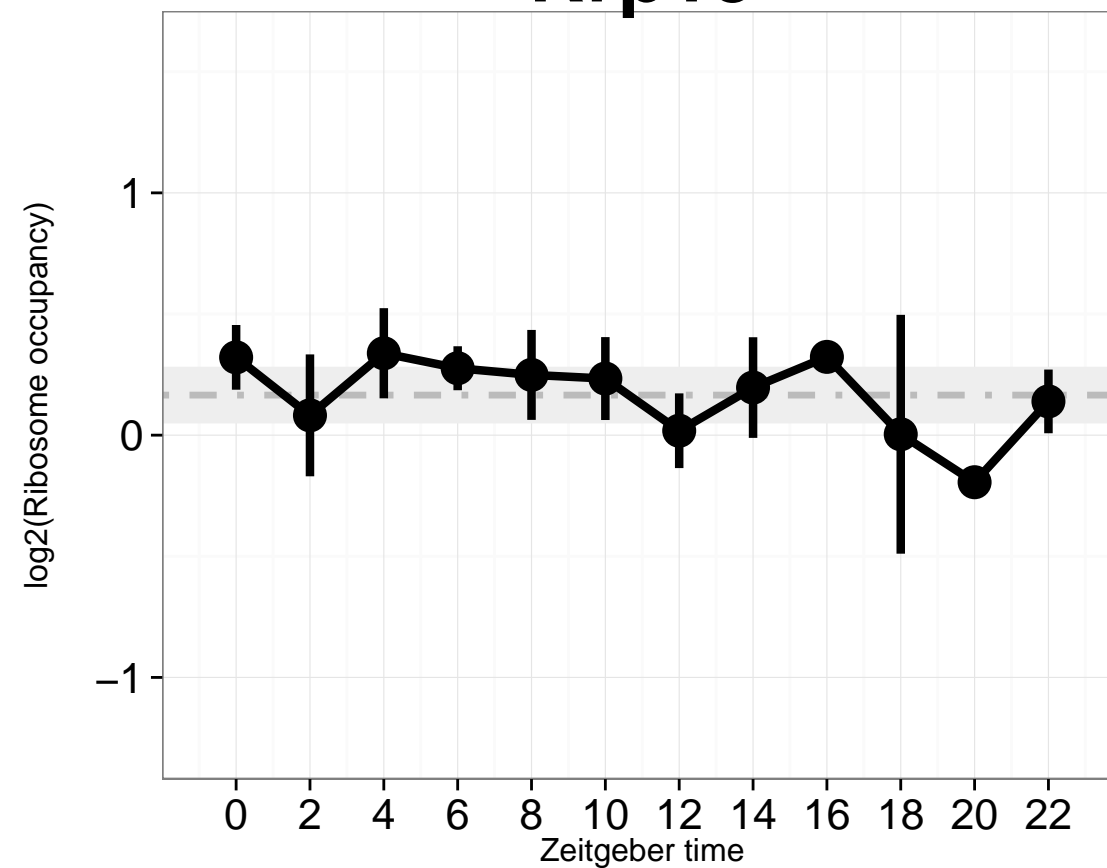

Supplement: Supplementary file 7009 [file 1]

## Shank2

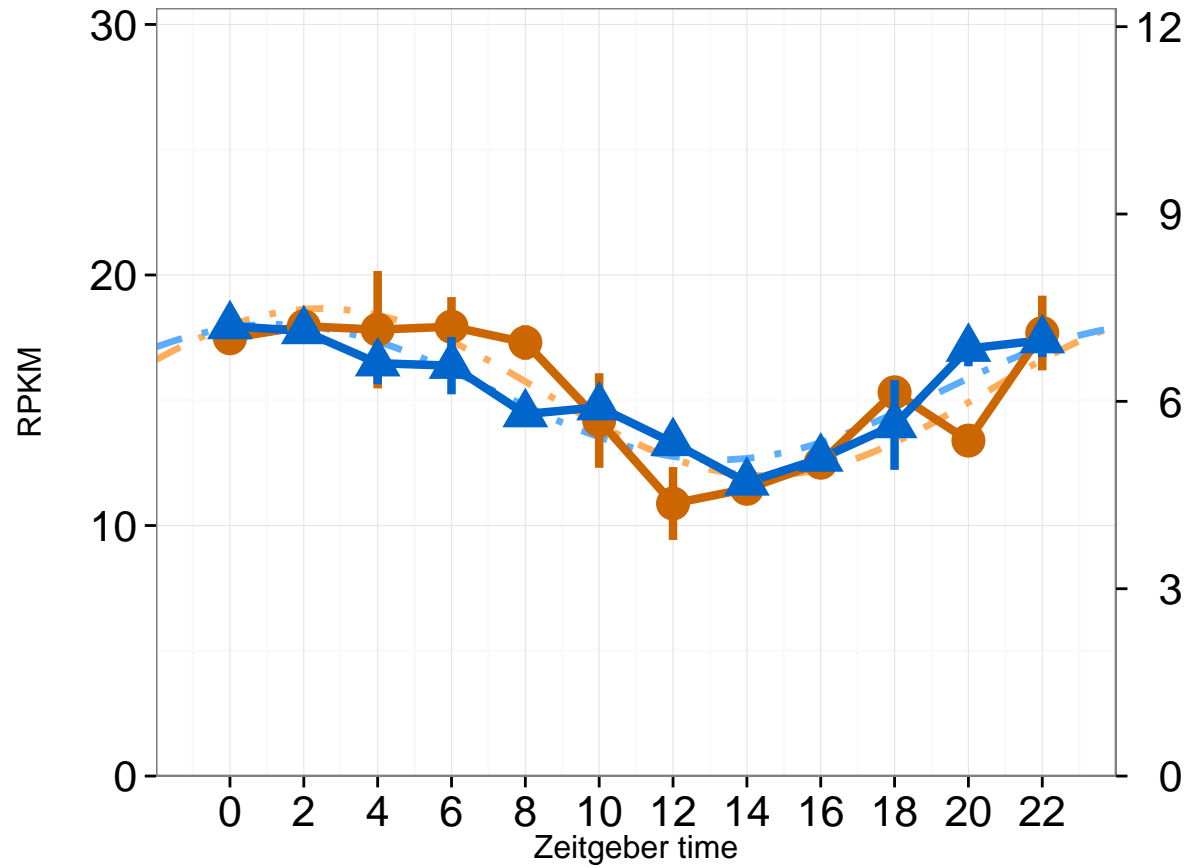

## Shank2

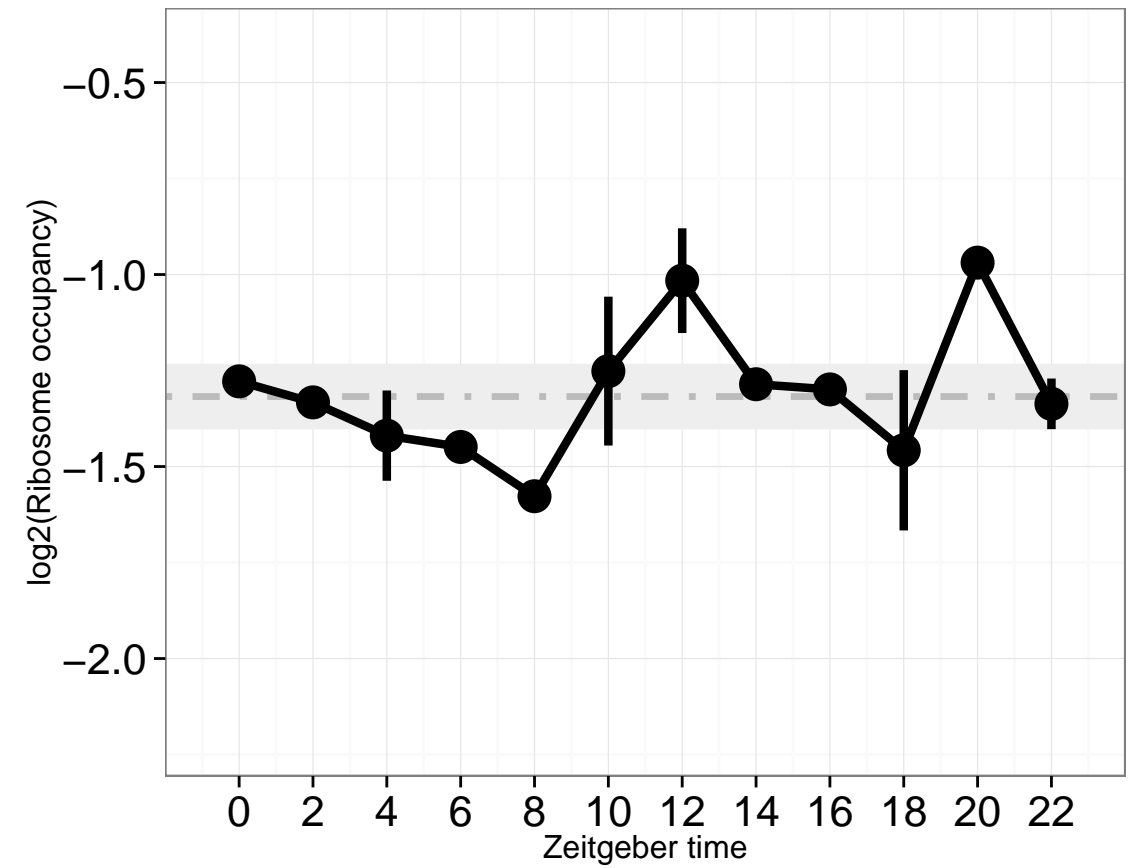

Supplement: Supplementary file 7010 [file 1]

# Abca9

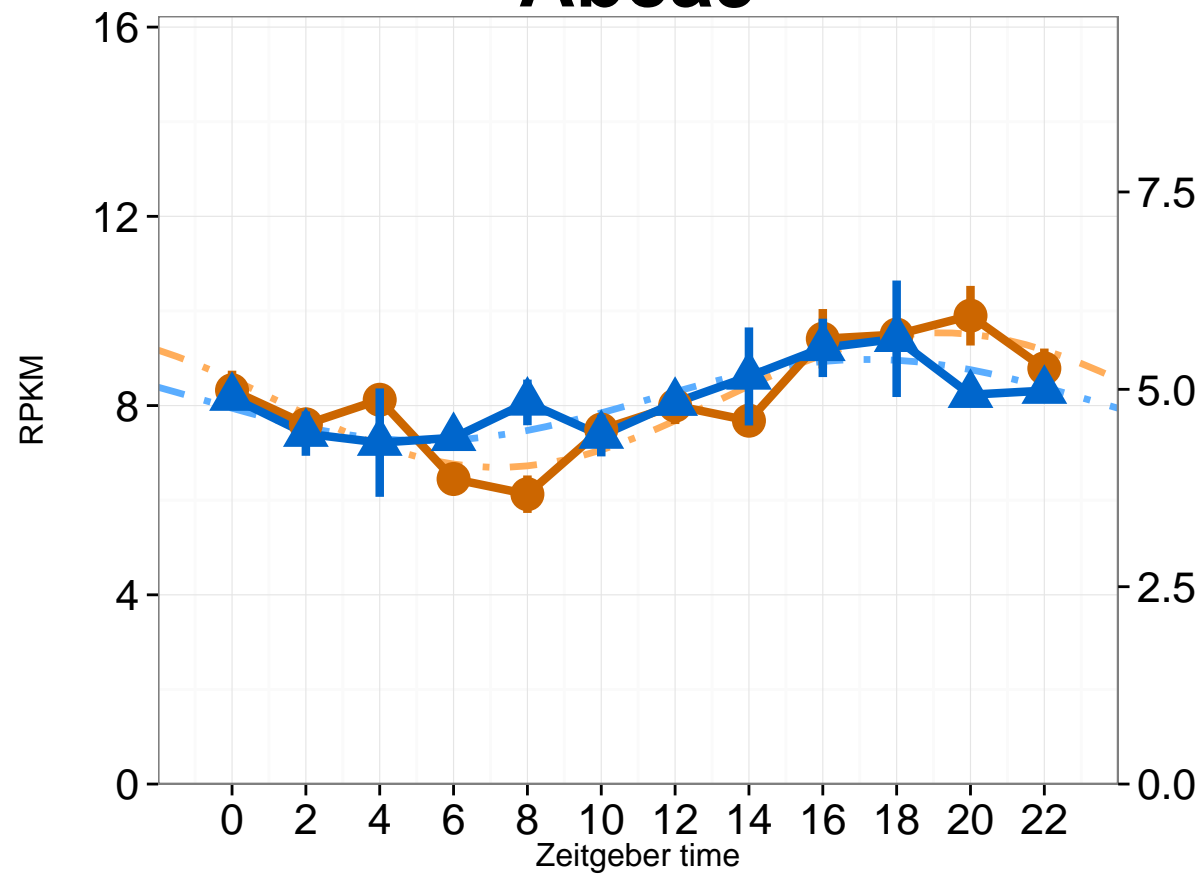

# Abca9

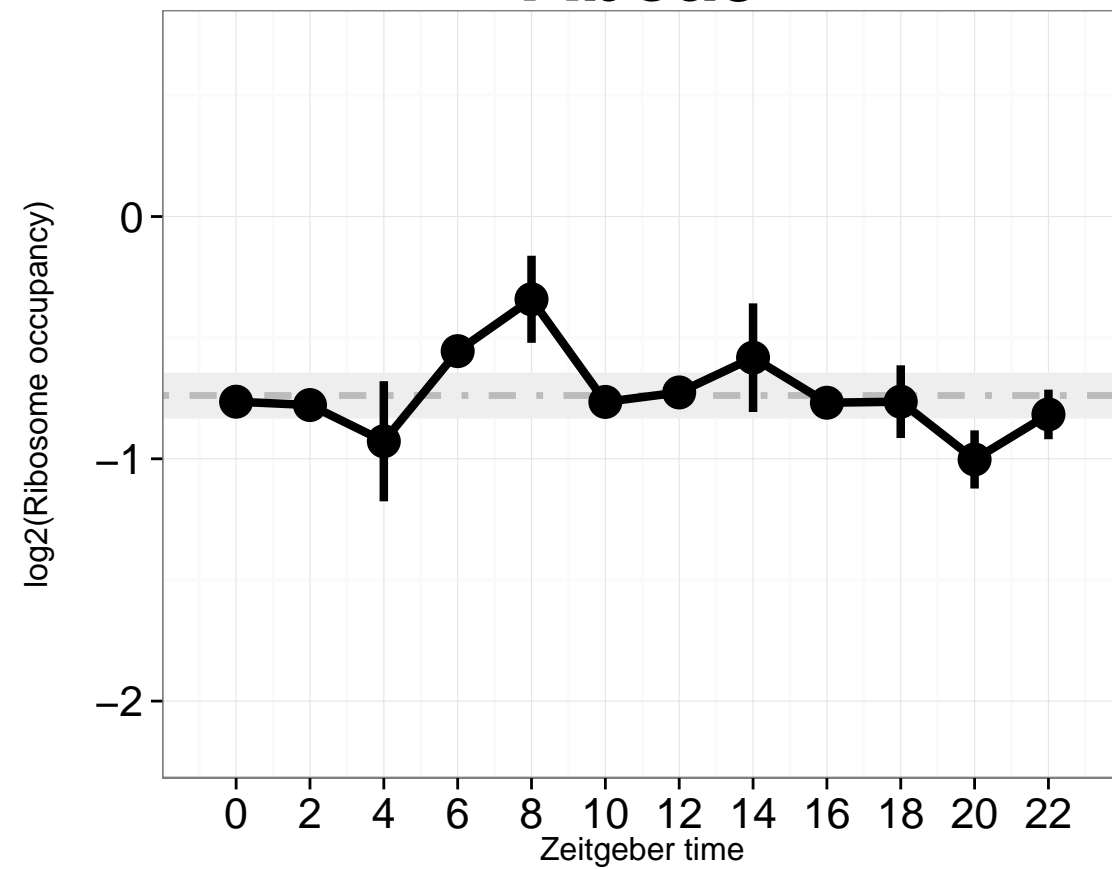

Supplement: Supplementary file 7011 [file 1]

**Tarm1**

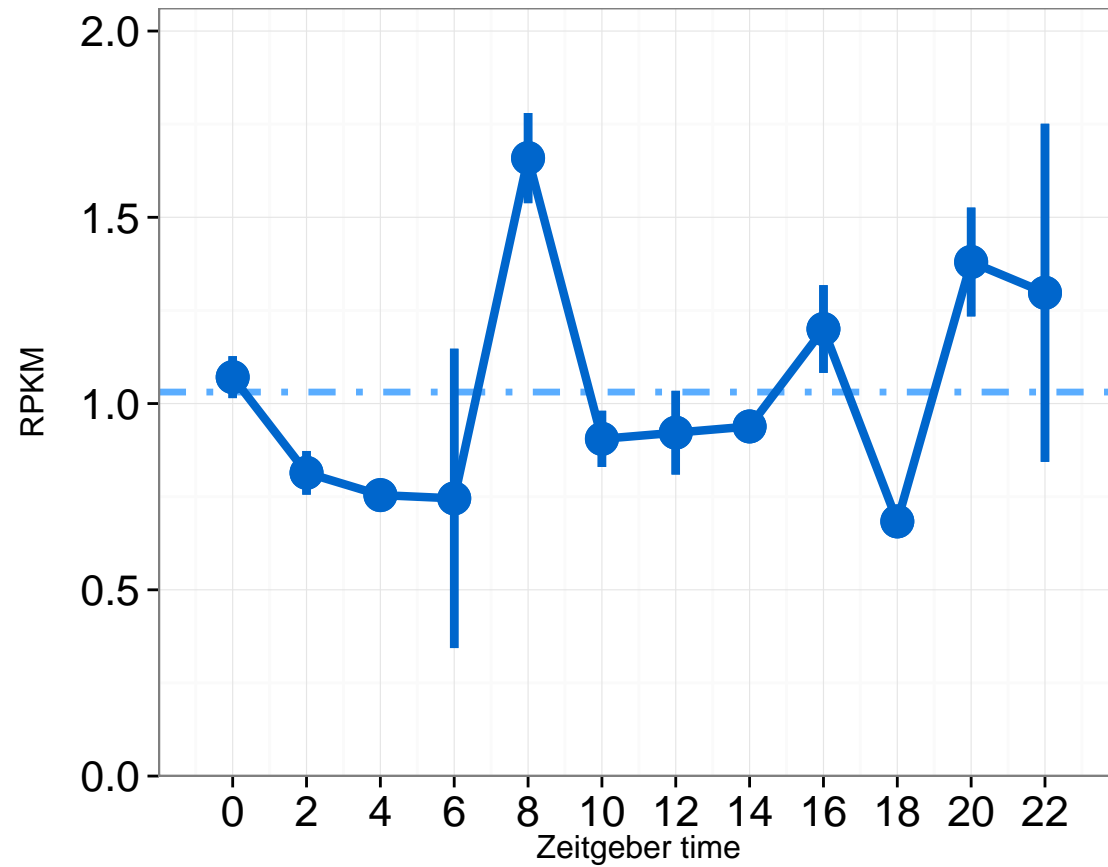

**Tarm1 log2(Ribosome occupancy**

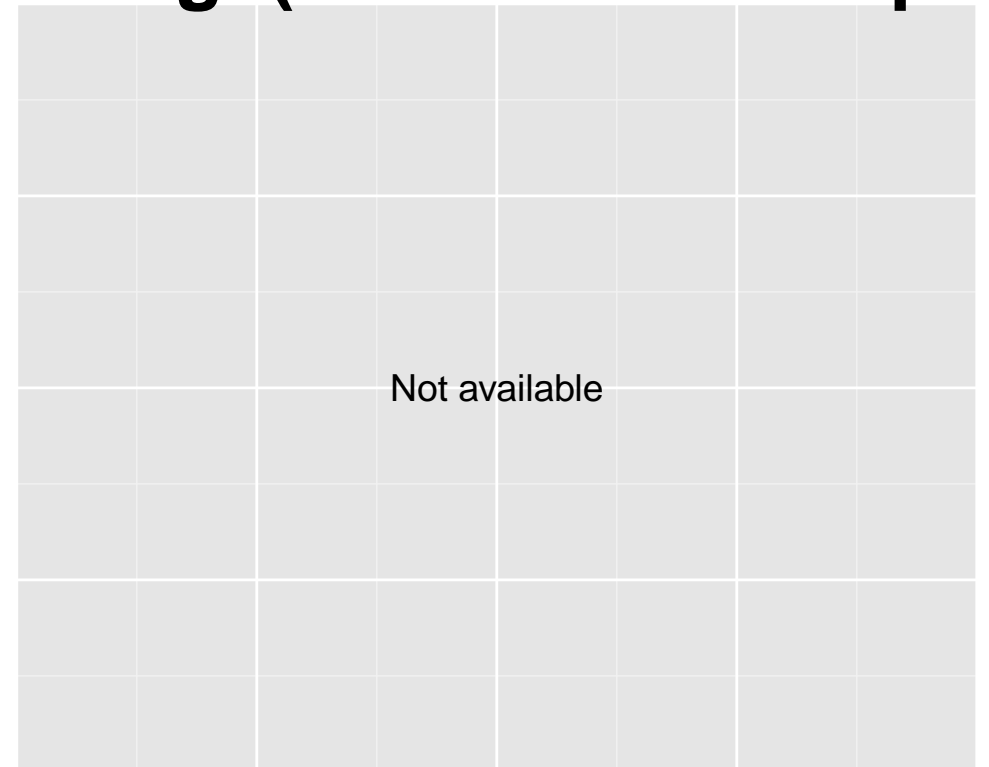

Supplement: Supplementary file 7012 [file 1]

## Hras

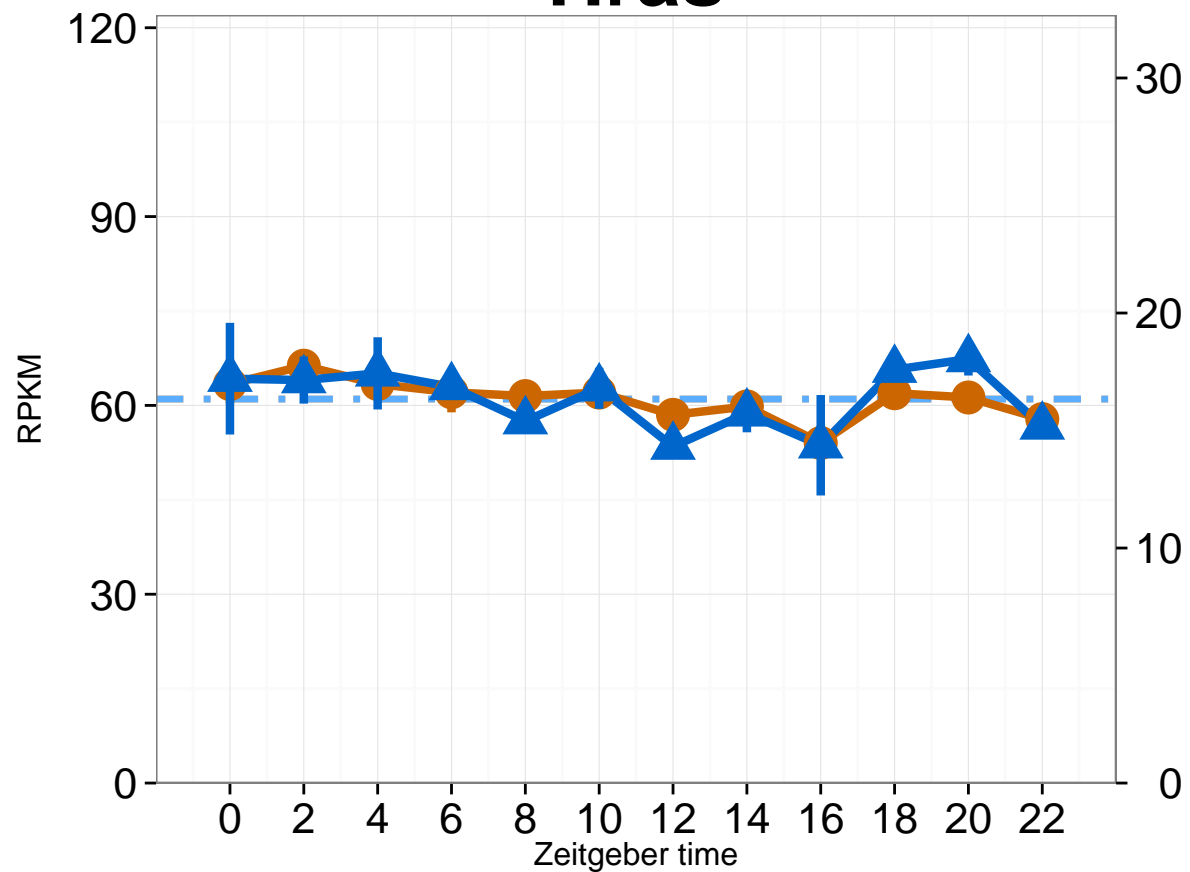

## Hras

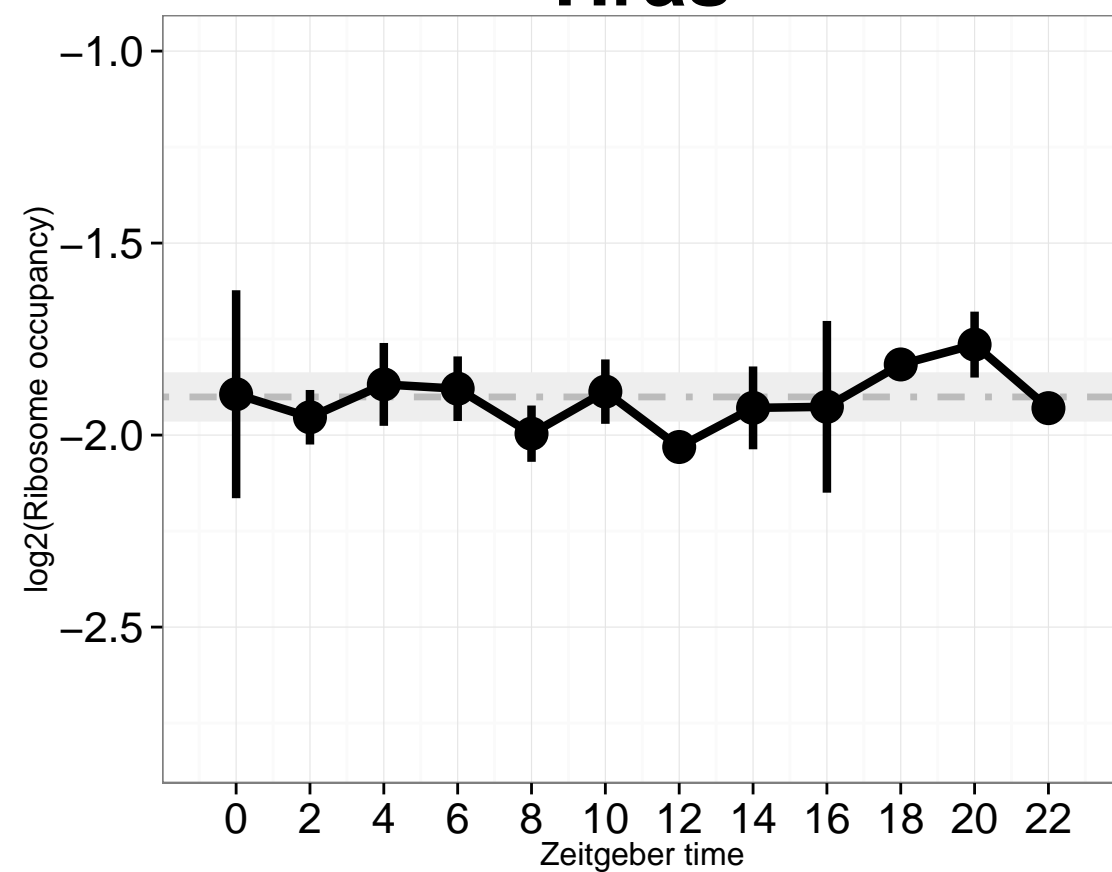

Supplement: Supplementary file 7013 [file 1]

## 5830473C10Rik

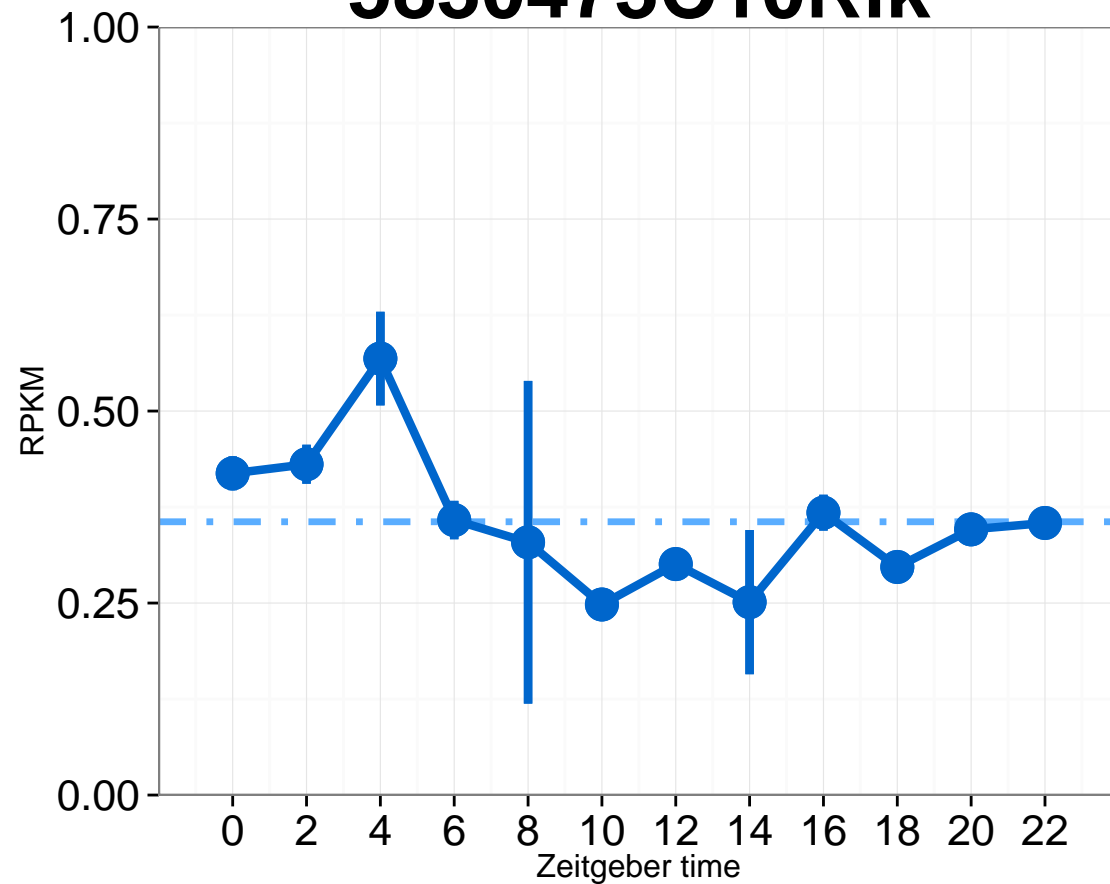

## 5830473C10Rik log<sub>2</sub>(Ribosome occup

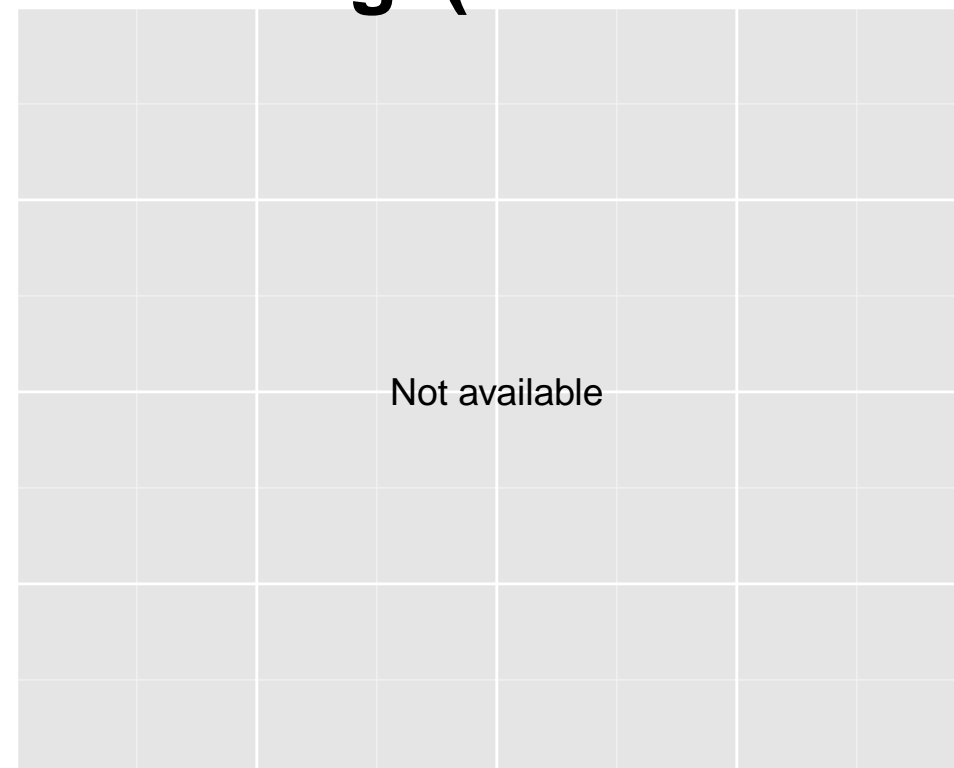

Supplement: Supplementary file 7014 [file 1]

# Mrpl21

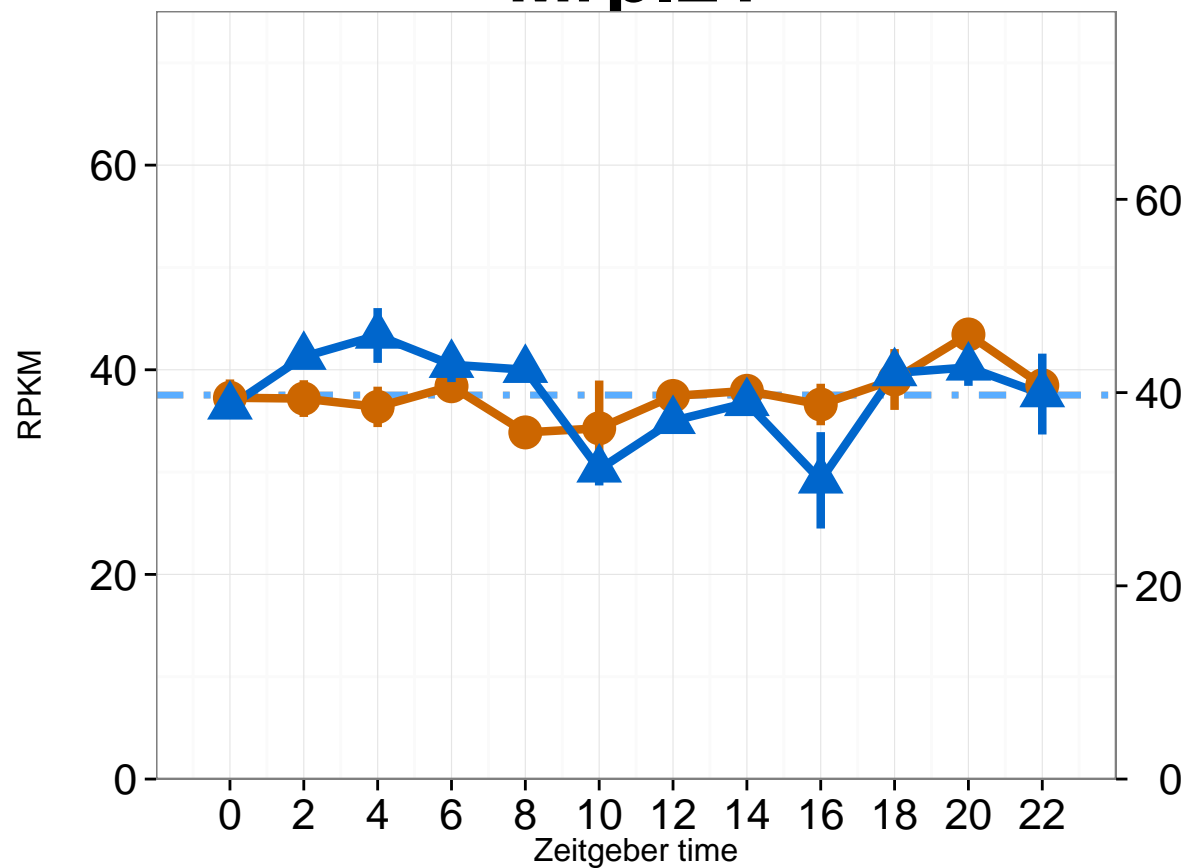

# Mrpl21

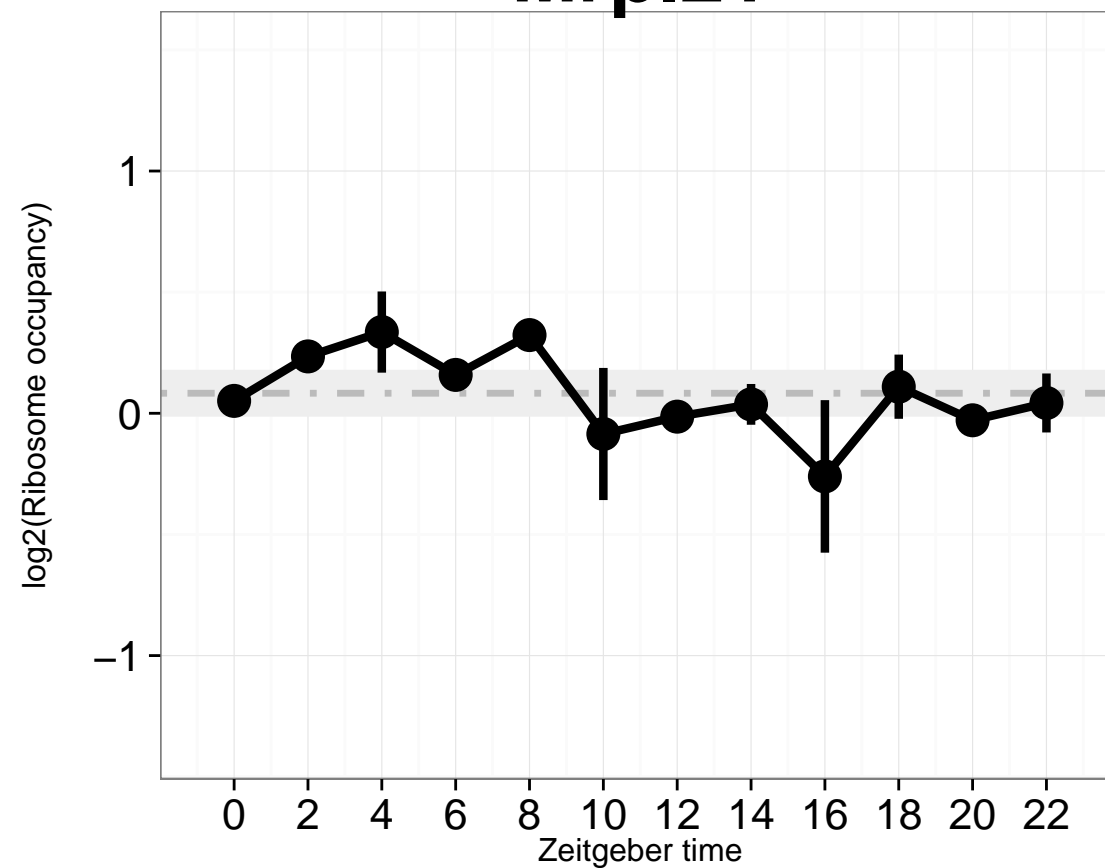

Supplement: Supplementary file 7015 [file 1]

## Vps54

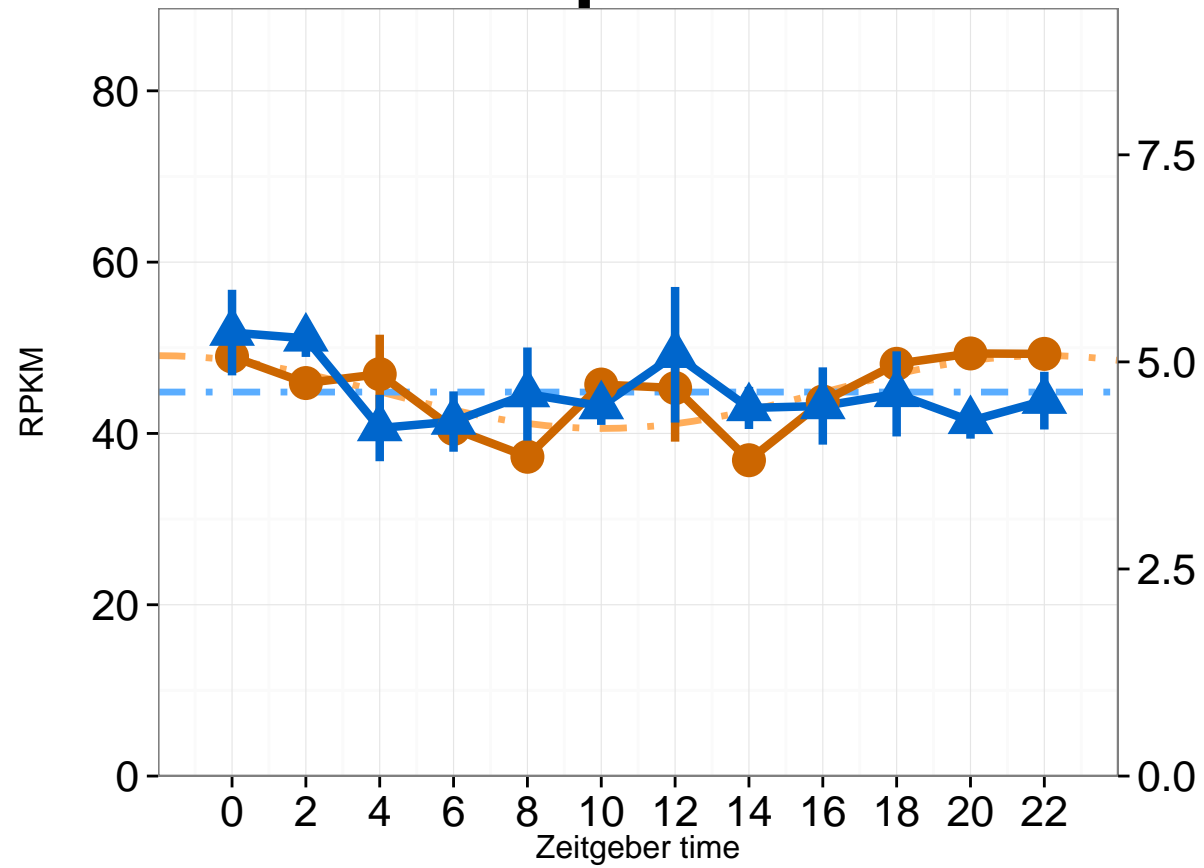

## Vps54

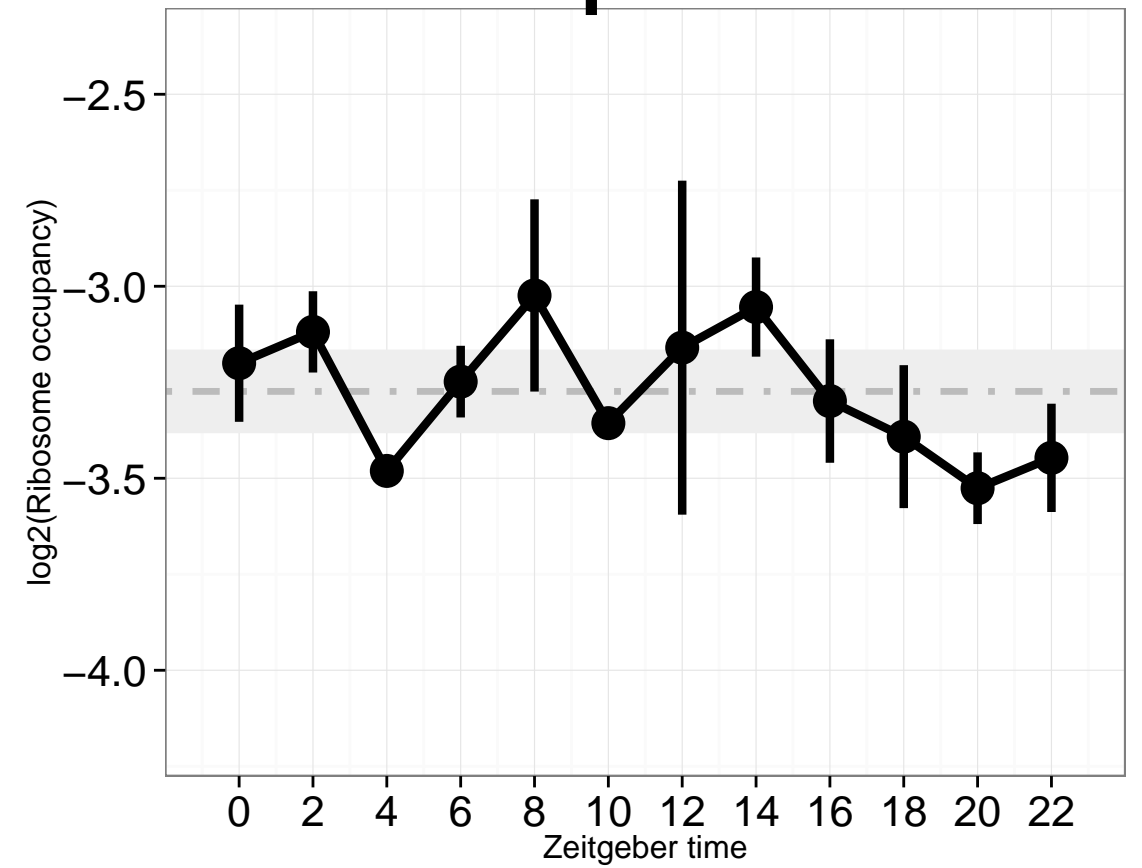

Supplement: Supplementary file 7016 [file 1]

# Prob1

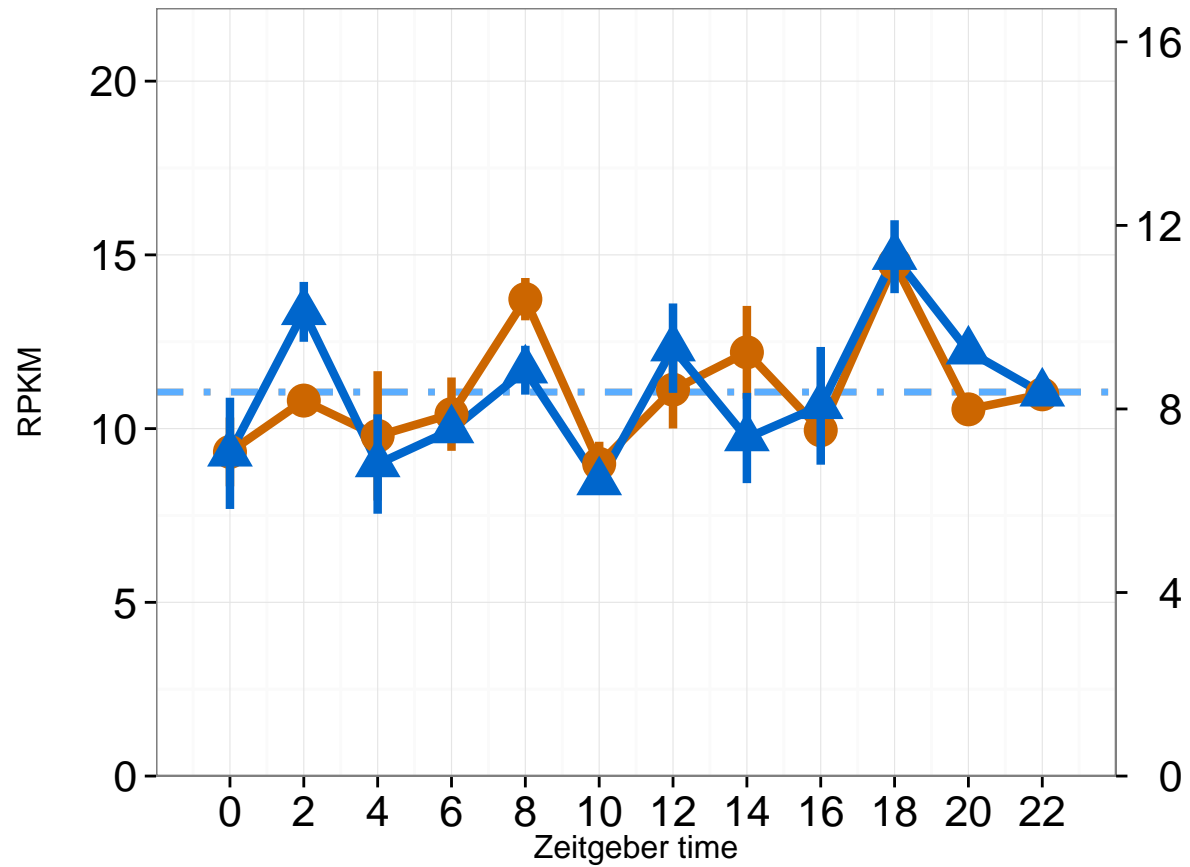

# Prob1

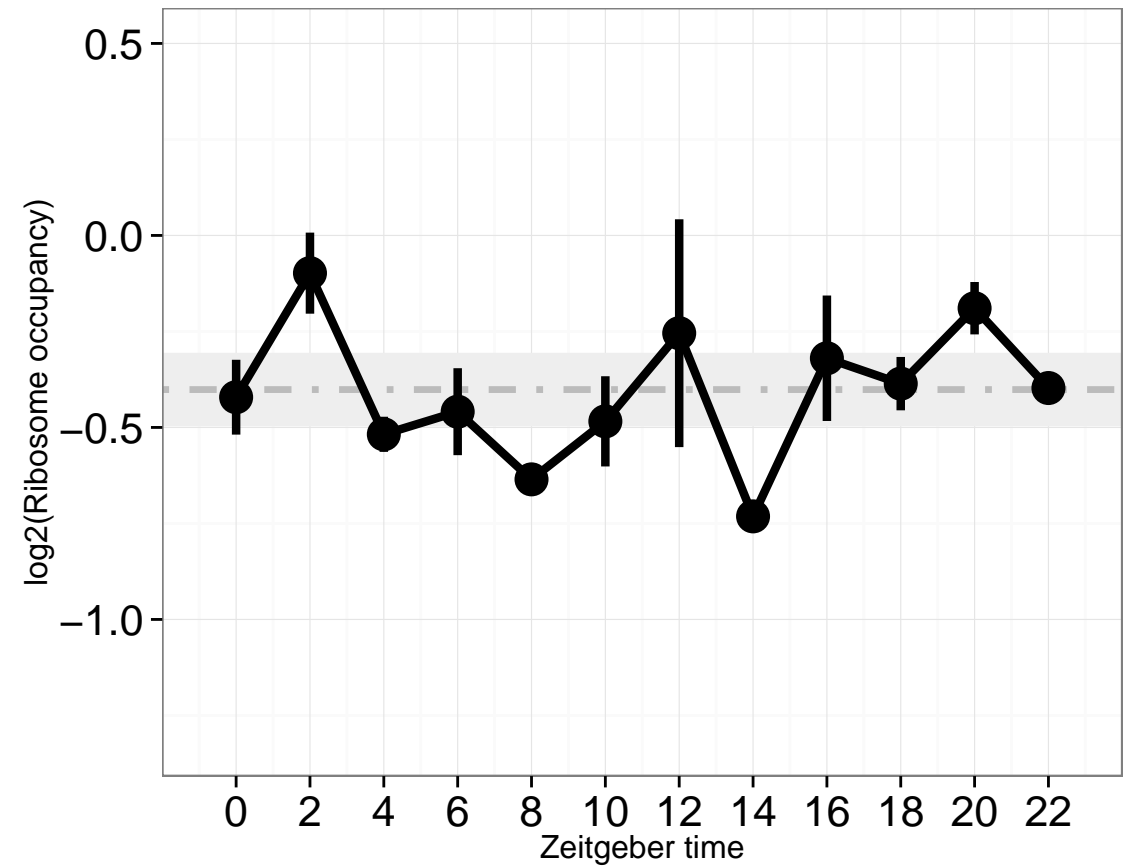

Supplement: Supplementary file 7017 [file 1]

# Hexim1

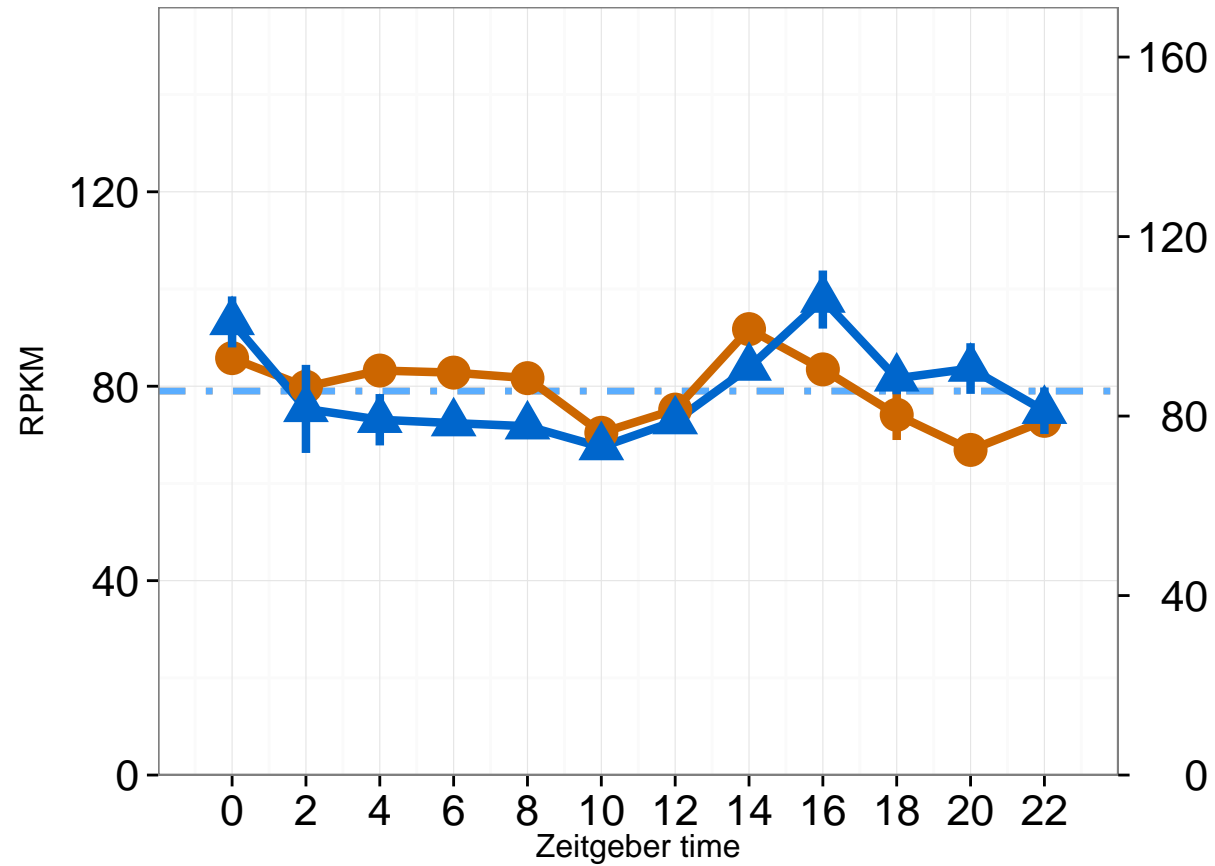

# Hexim1

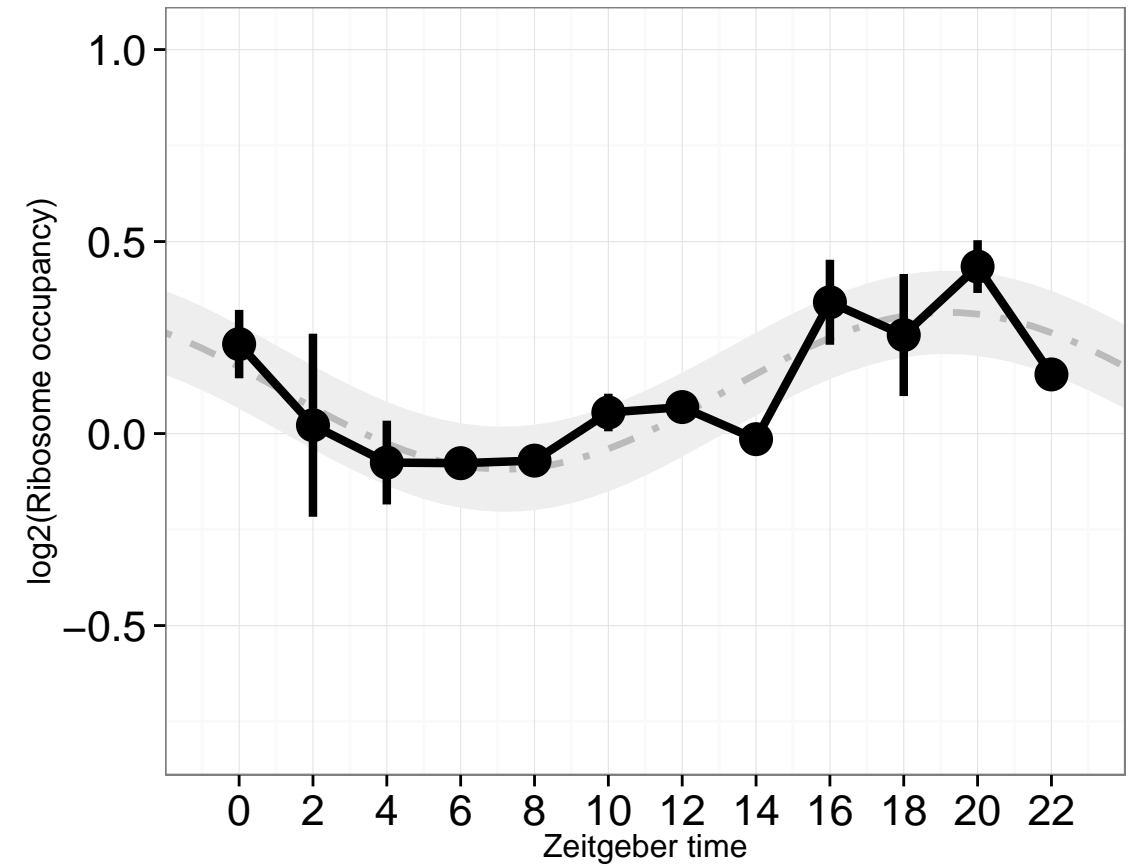

Supplement: Supplementary file 7018 [file 1]

# Psma1

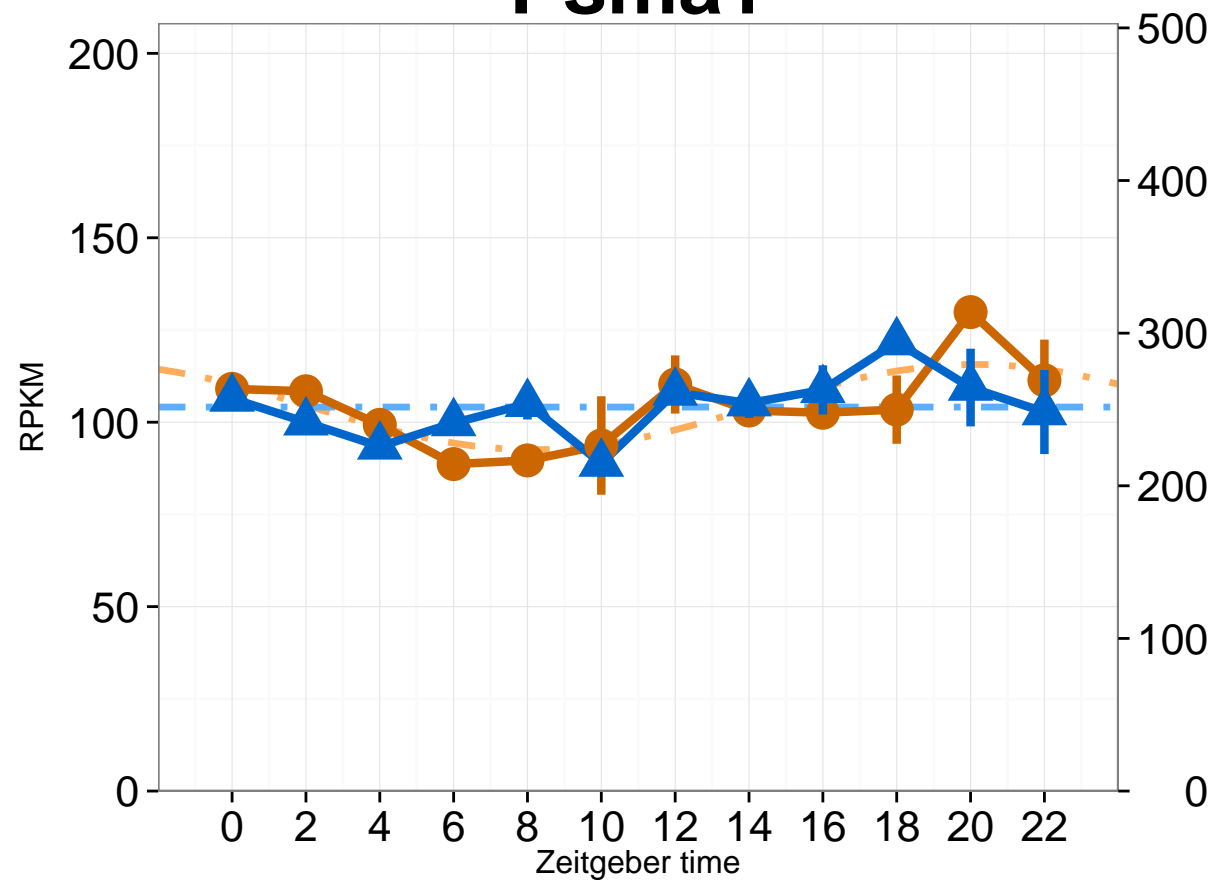

# Psma1

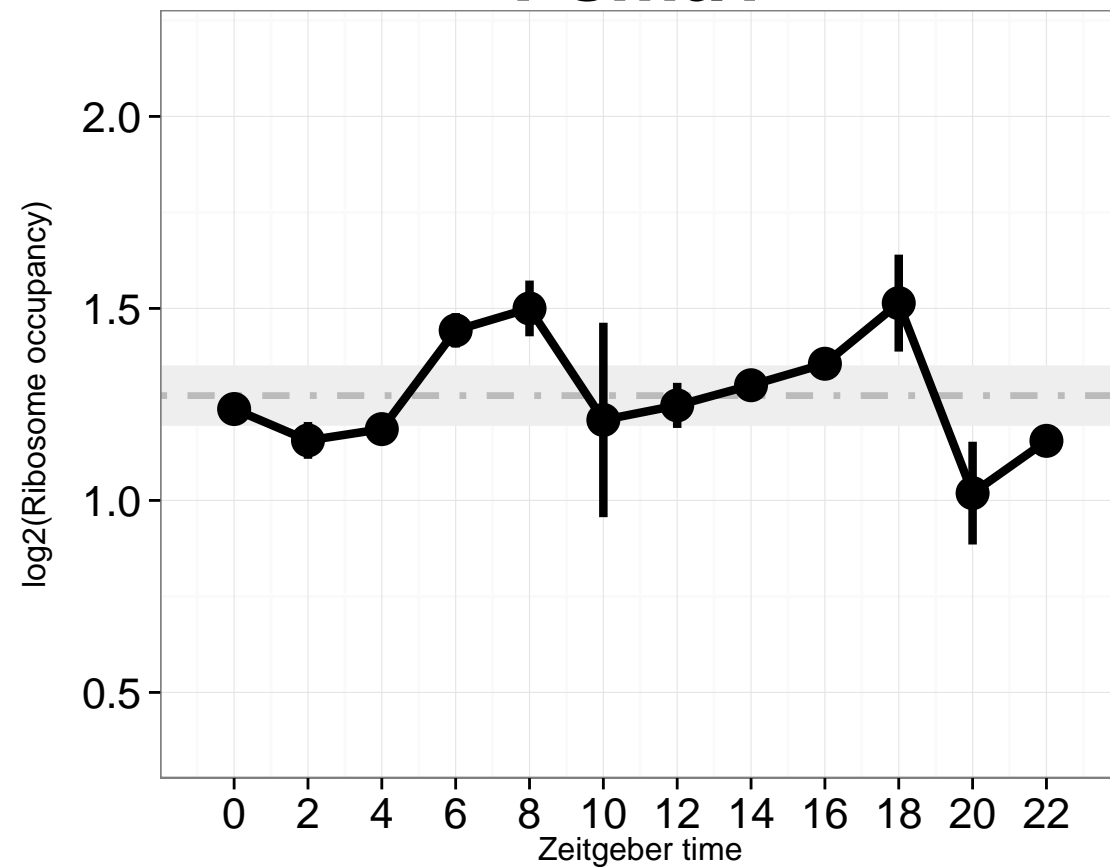

Supplement: Supplementary file 7019 [file 1]

## Mlt10

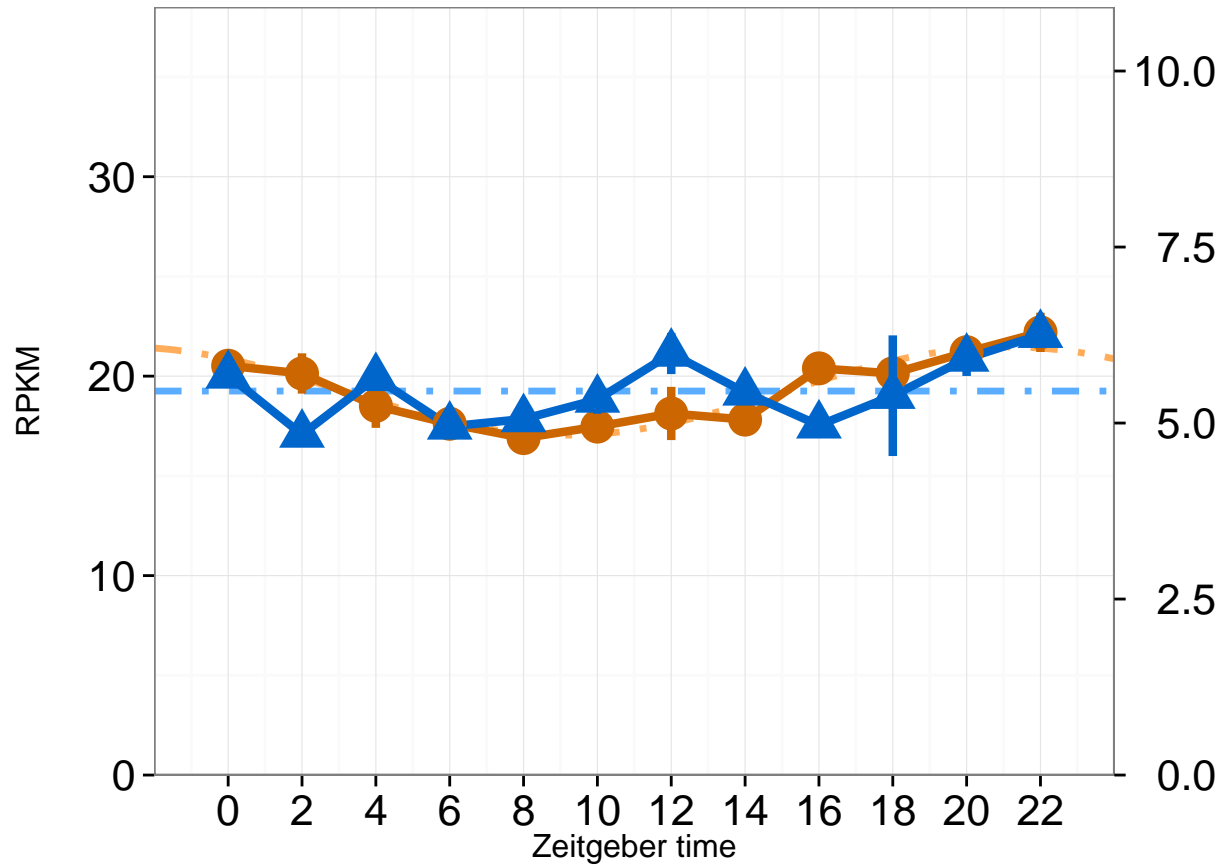

## Mlt10

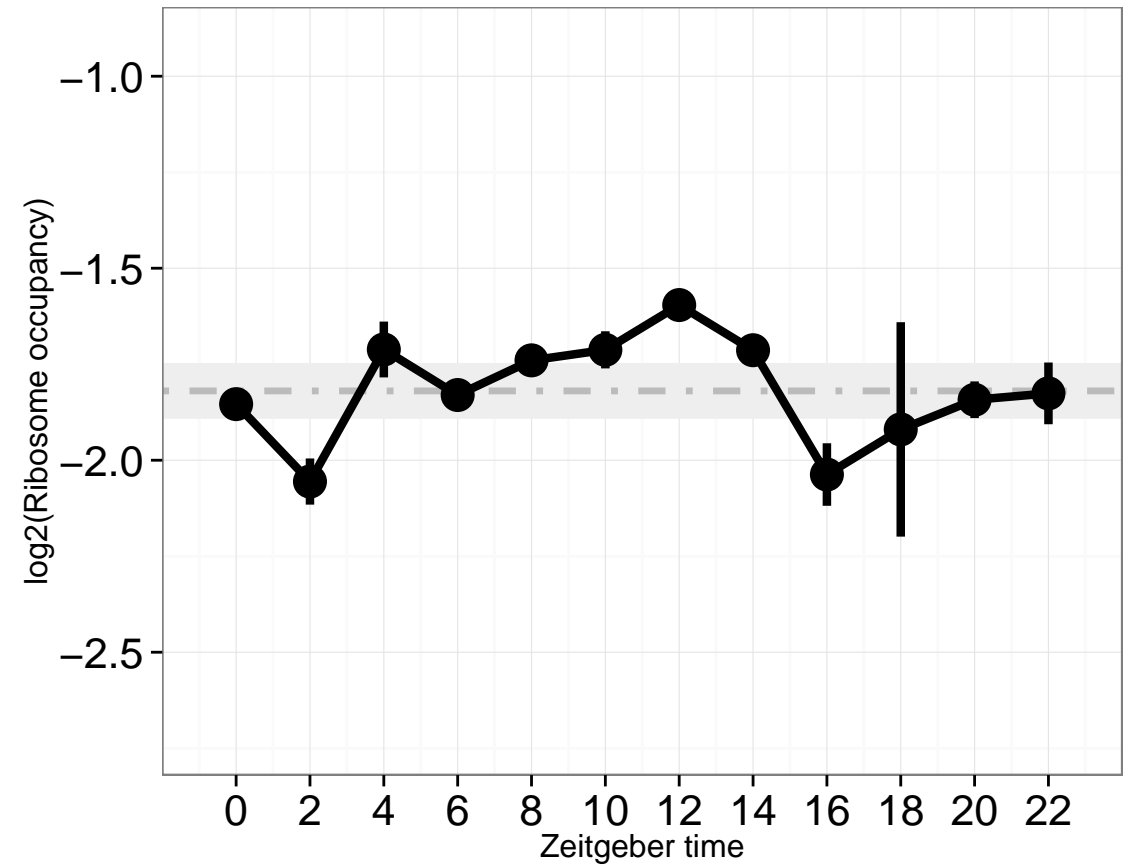

Supplement: Supplementary file 7020 [file 1]

## Hoxc9

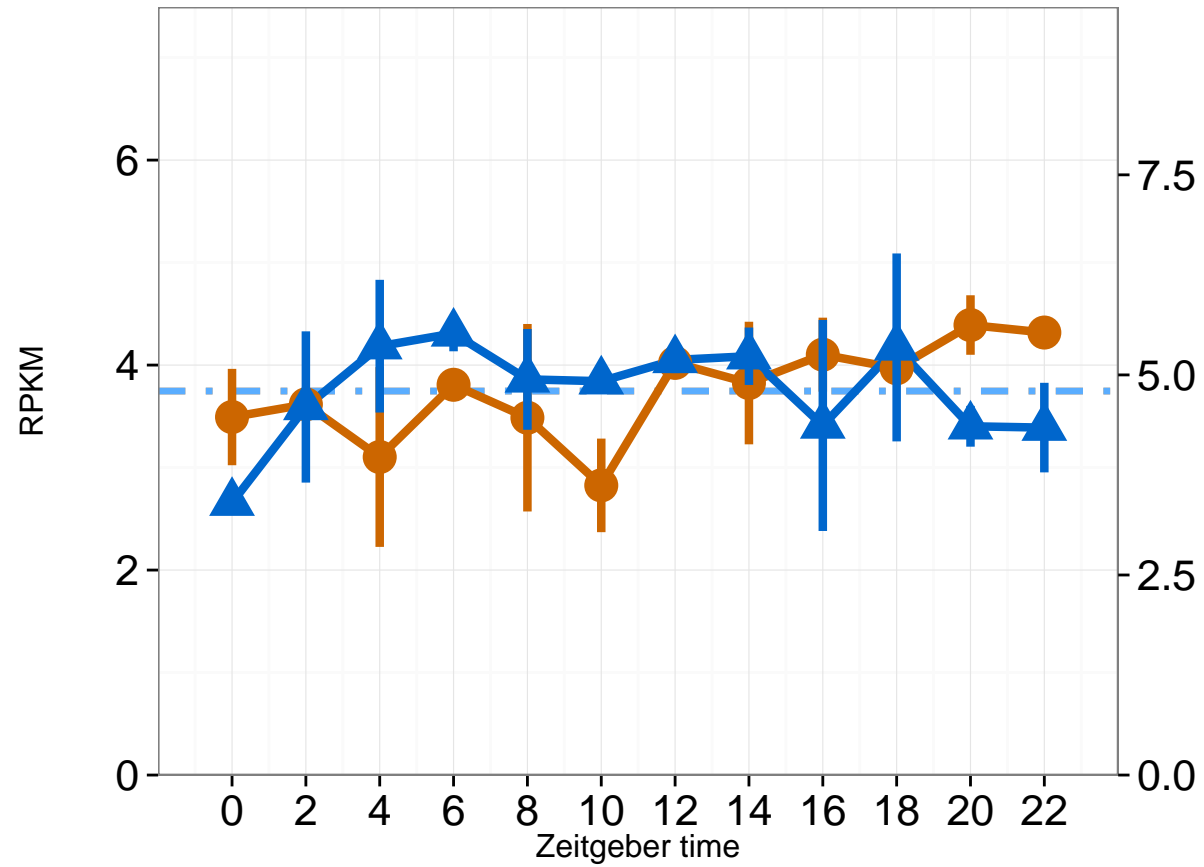

## Hoxc9

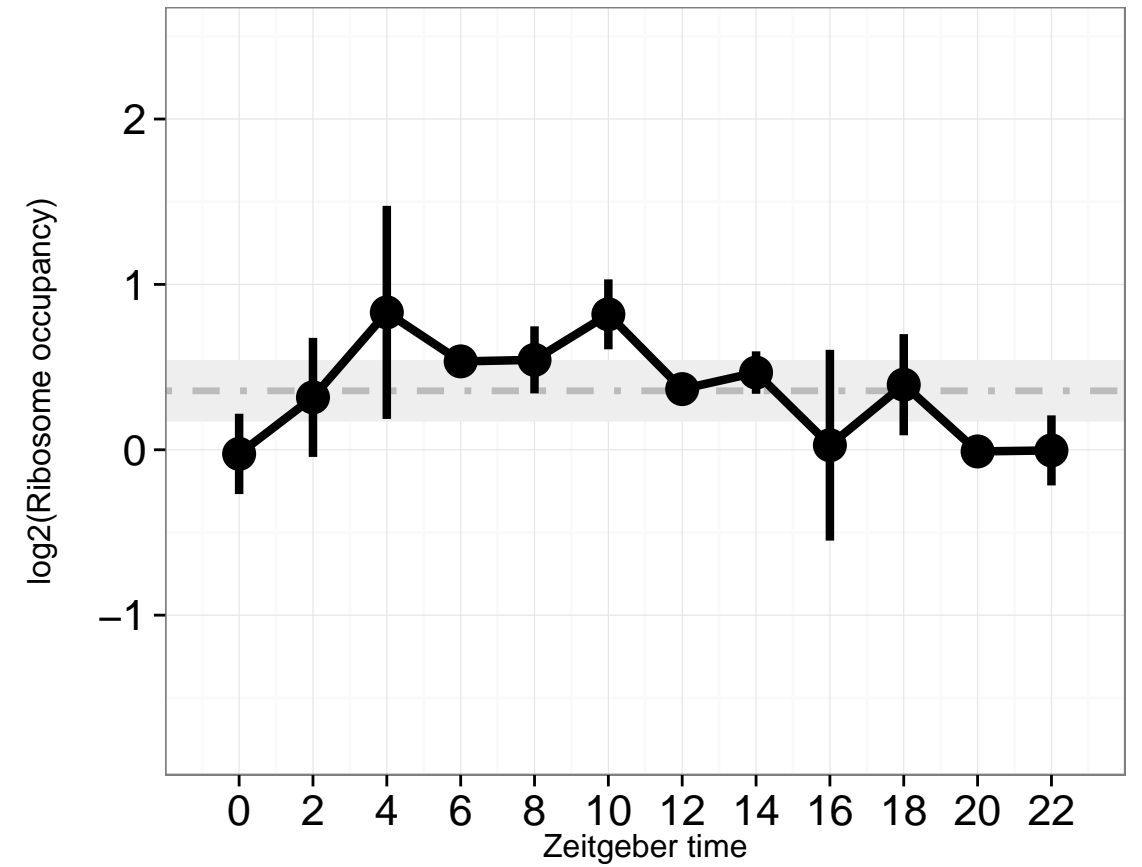

Supplement: Supplementary file 7021 [file 1]

## Coq4

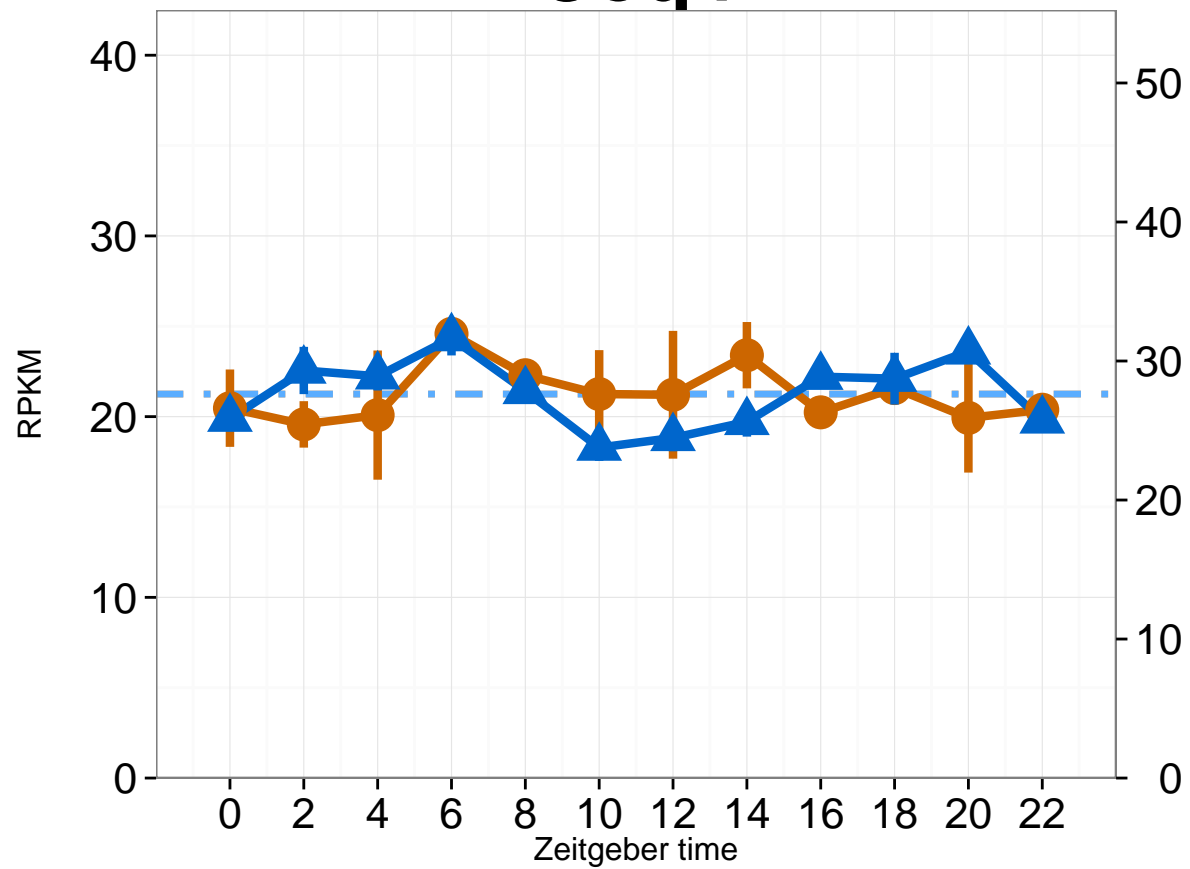

## Coq4

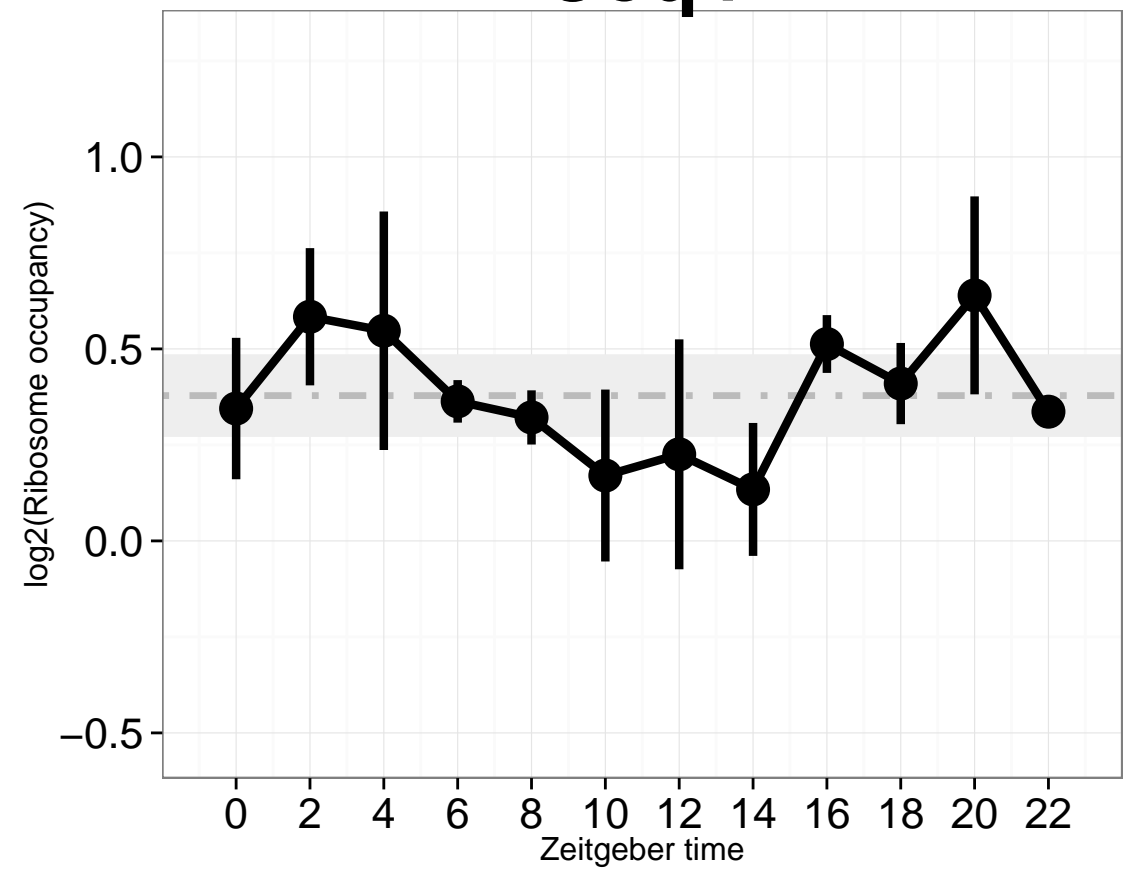

Supplement: Supplementary file 7022 [file 1]

## Dph5

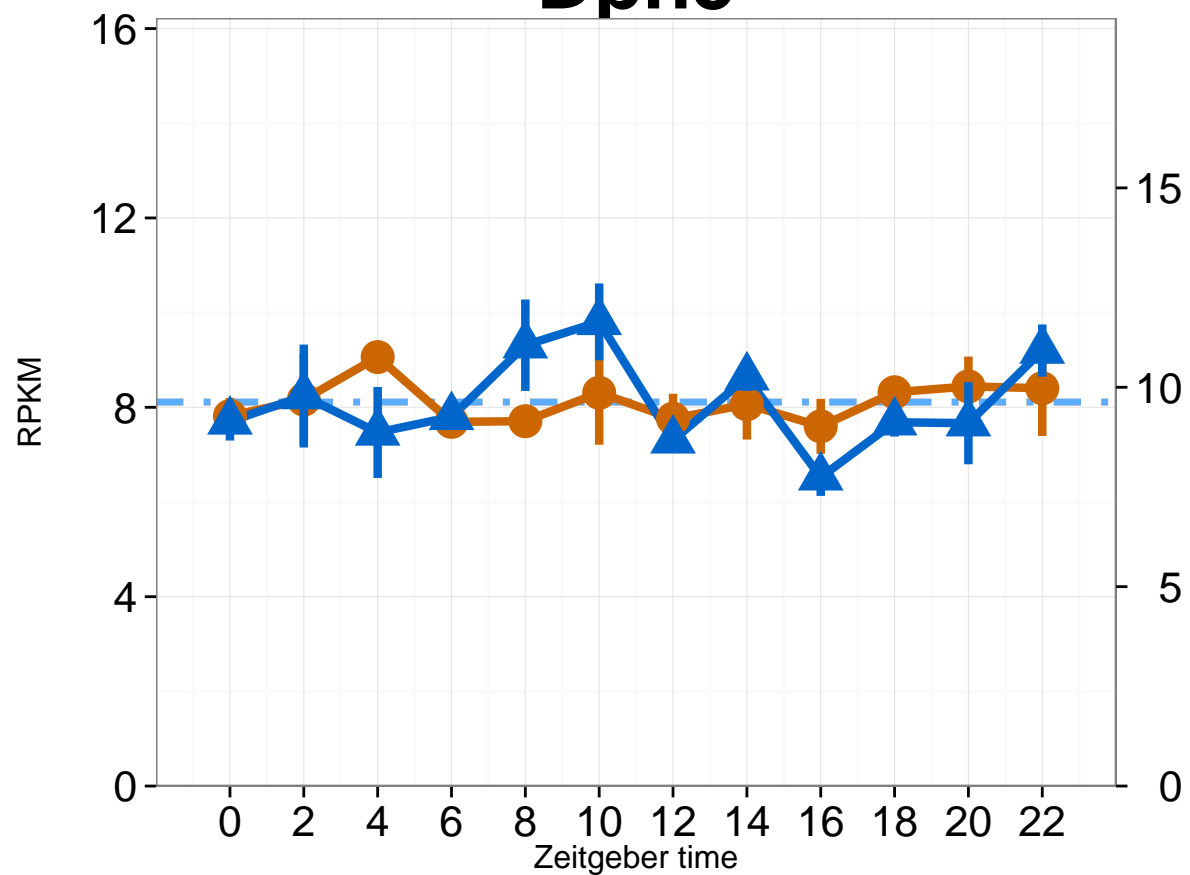

## Dph5

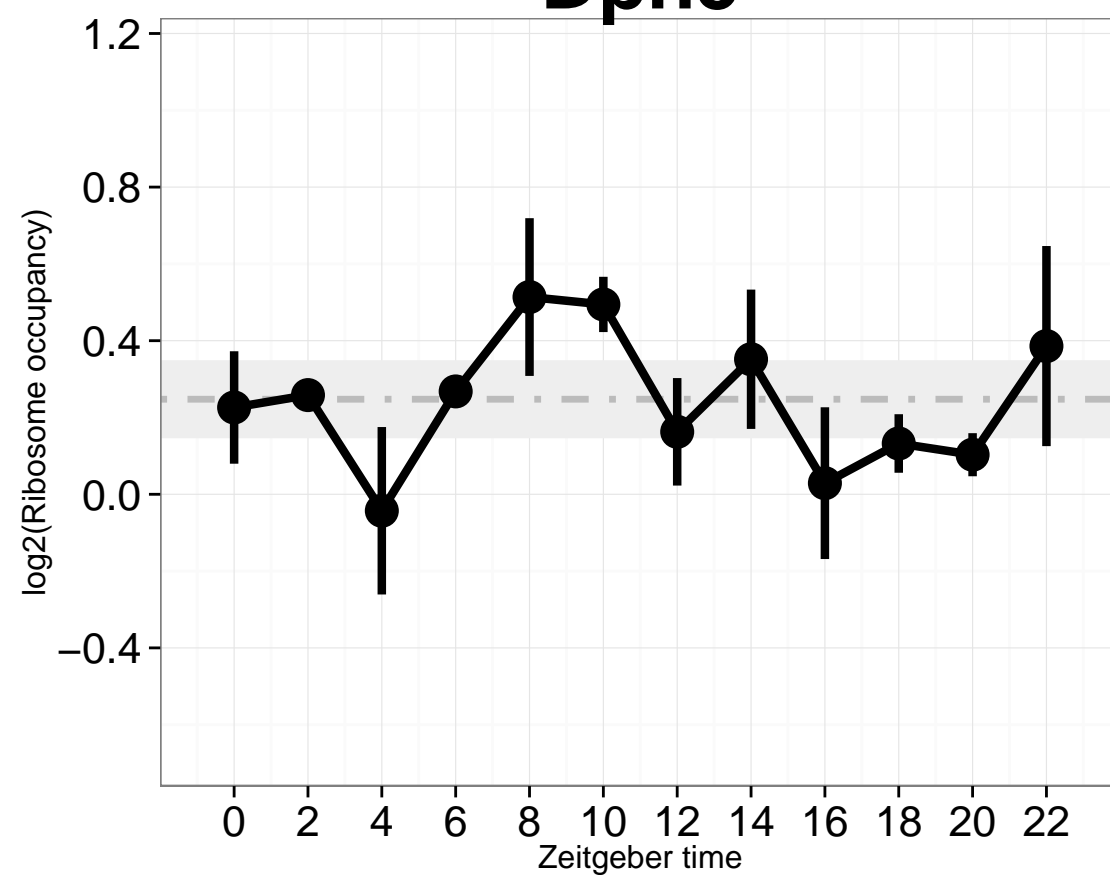

Supplement: Supplementary file 7023 [file 1]
