# Supplementary material (part 71 of 133)
Source: publisher figshare collection journal article supplement (https://springernature.figshare.com/articles/dataset/_/4903193)

## Khk

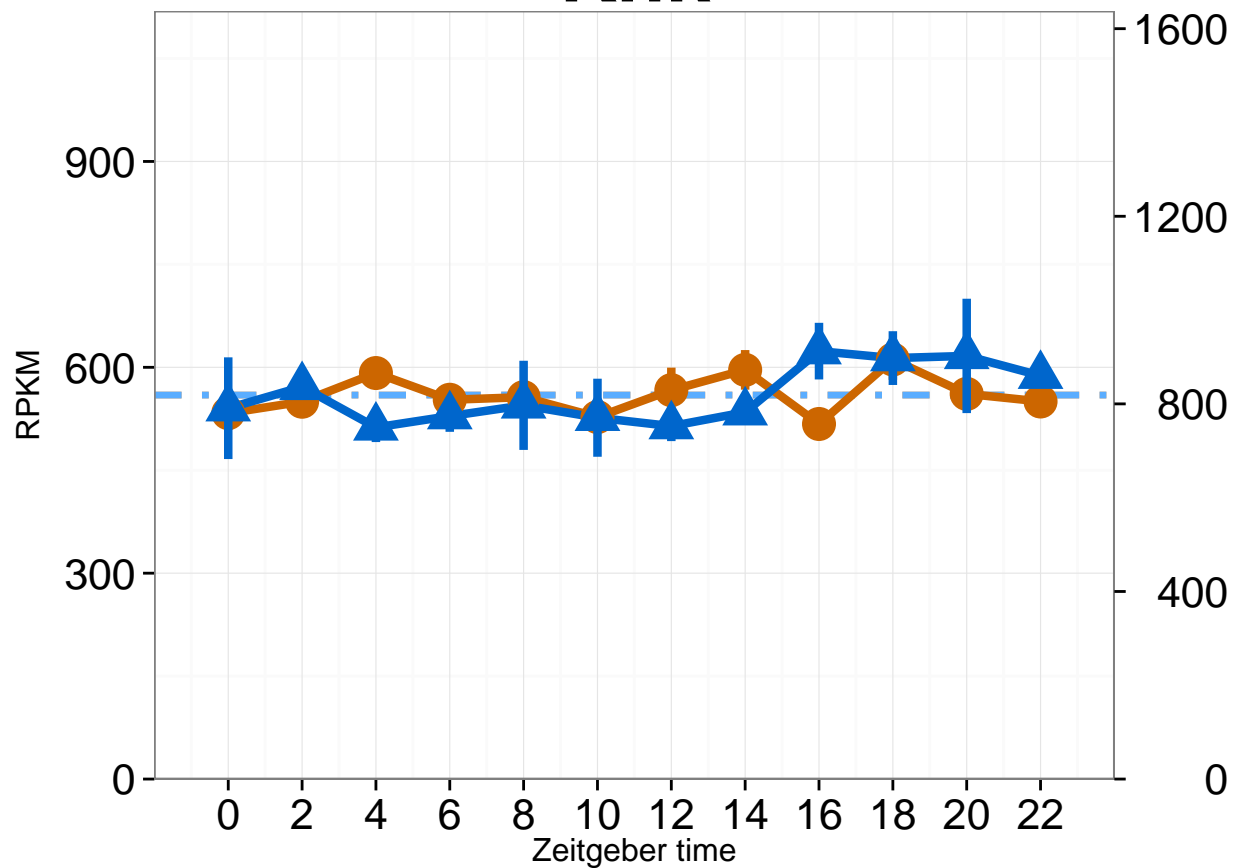

## Khk

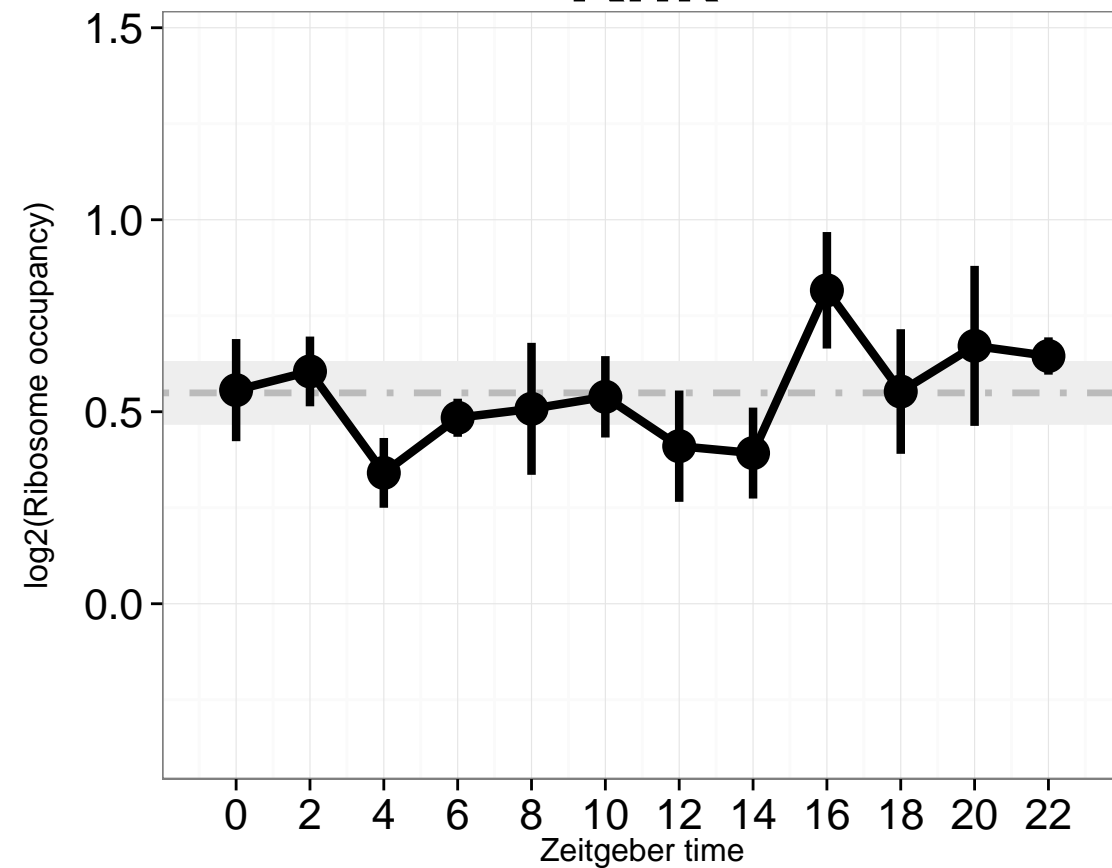

Supplement: Supplementary file 7024 [file 1]

# Agpat1

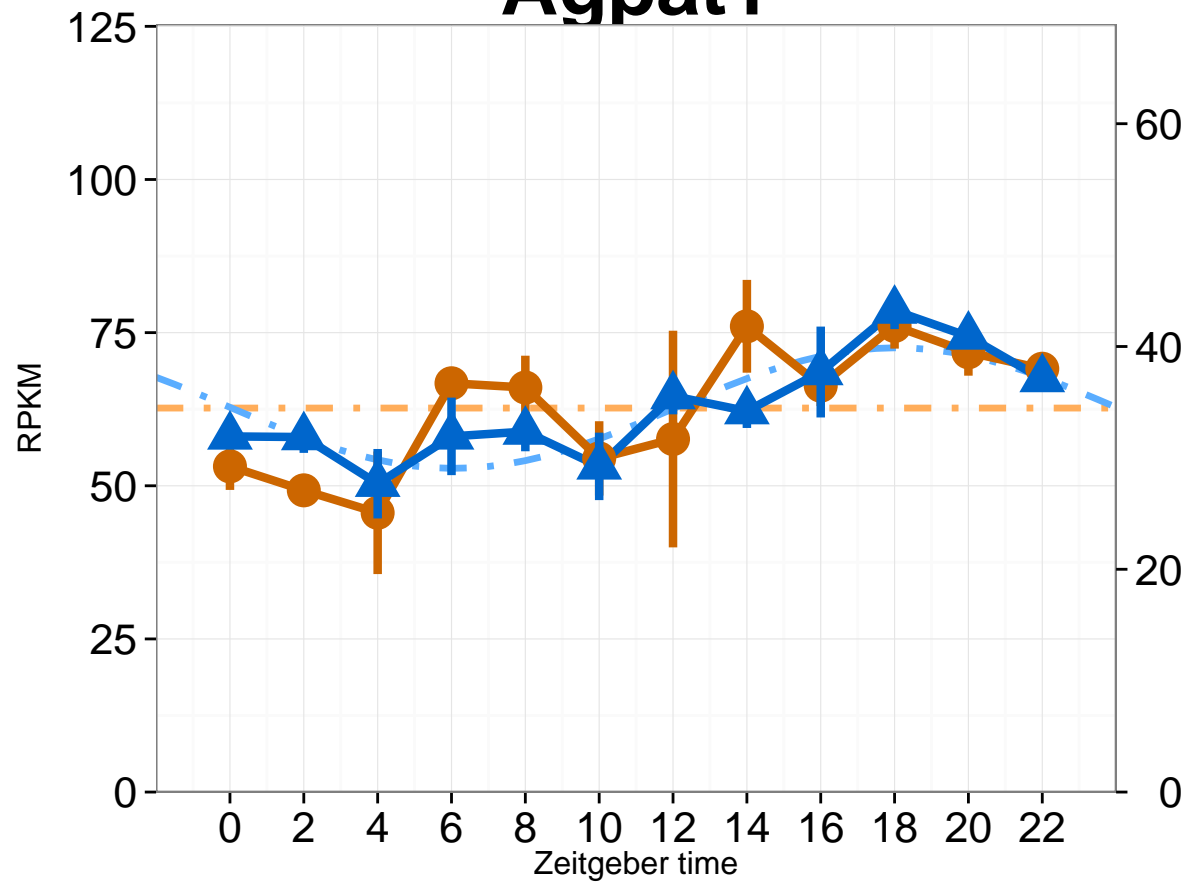

# Agpat1

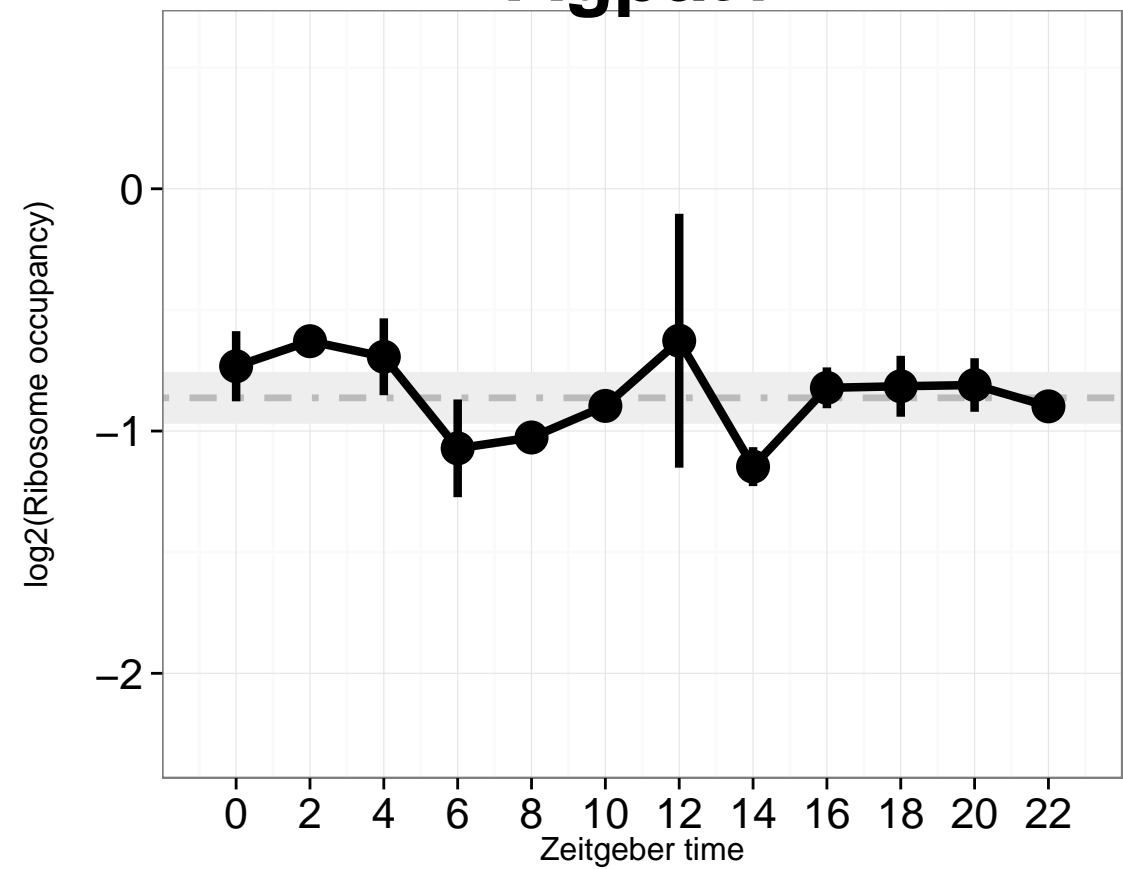

Supplement: Supplementary file 7025 [file 1]

## Cybb

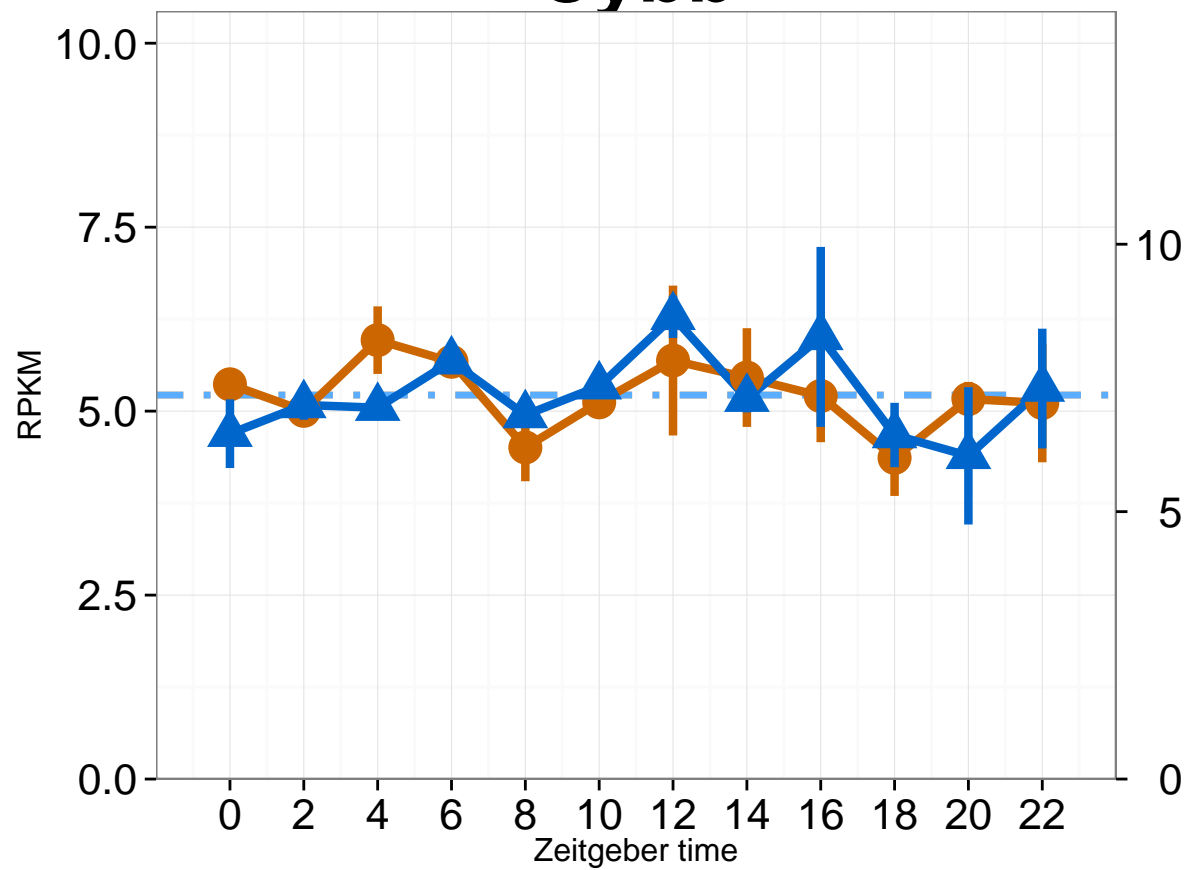

## Cybb

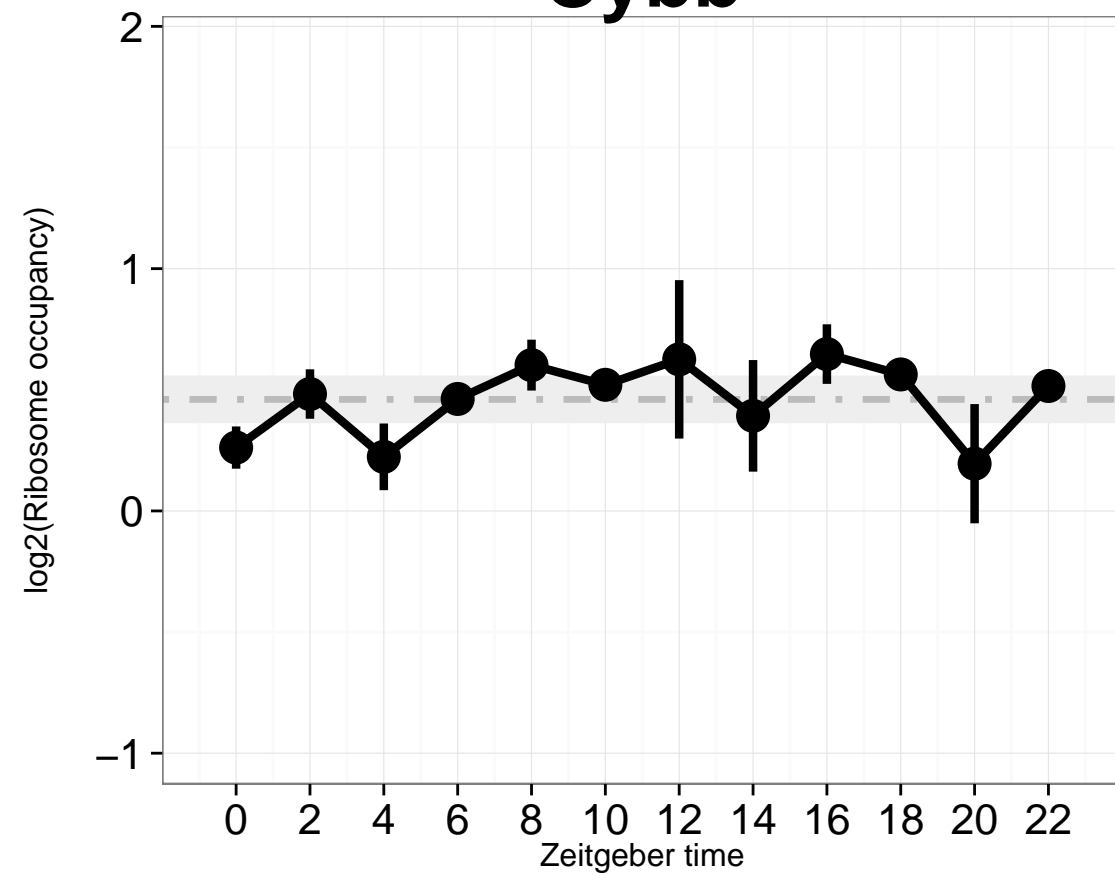

Supplement: Supplementary file 7026 [file 1]

## Slc35a2

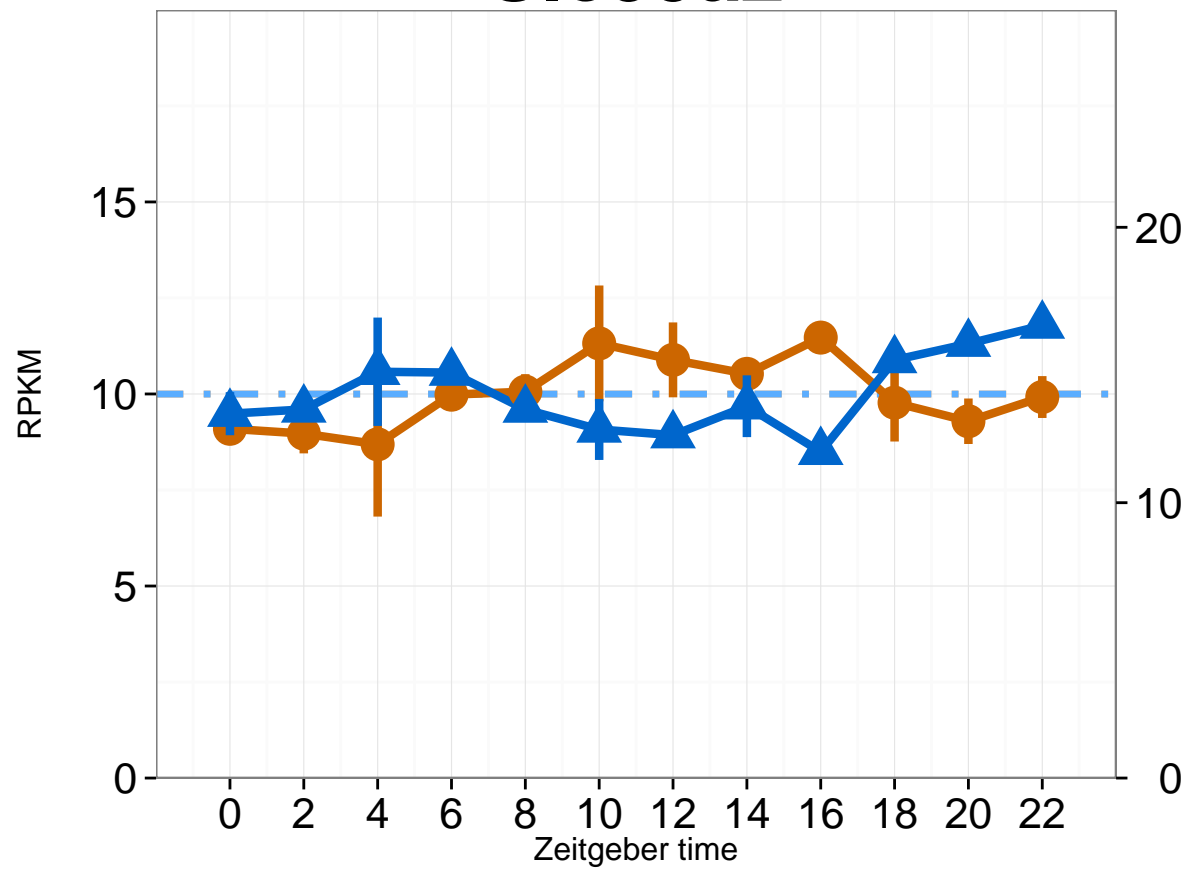

## Slc35a2

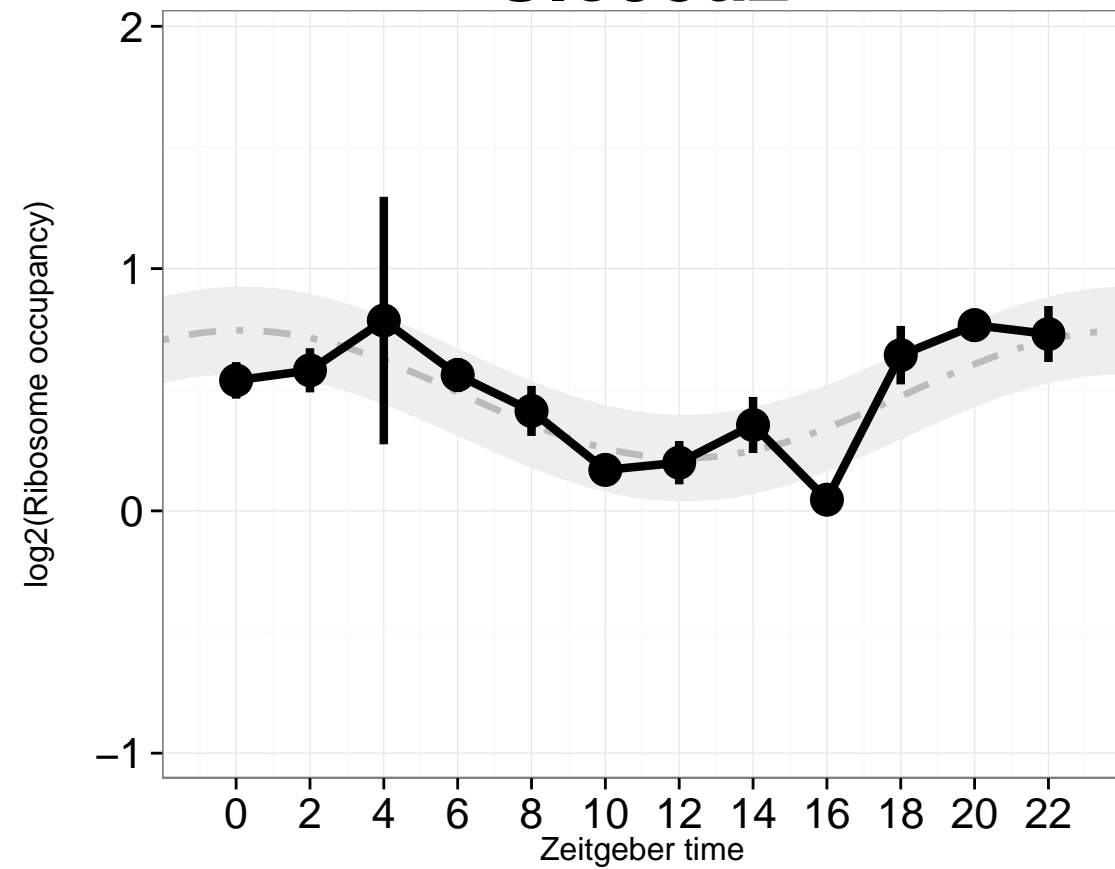

Supplement: Supplementary file 7027 [file 1]

## Mid2

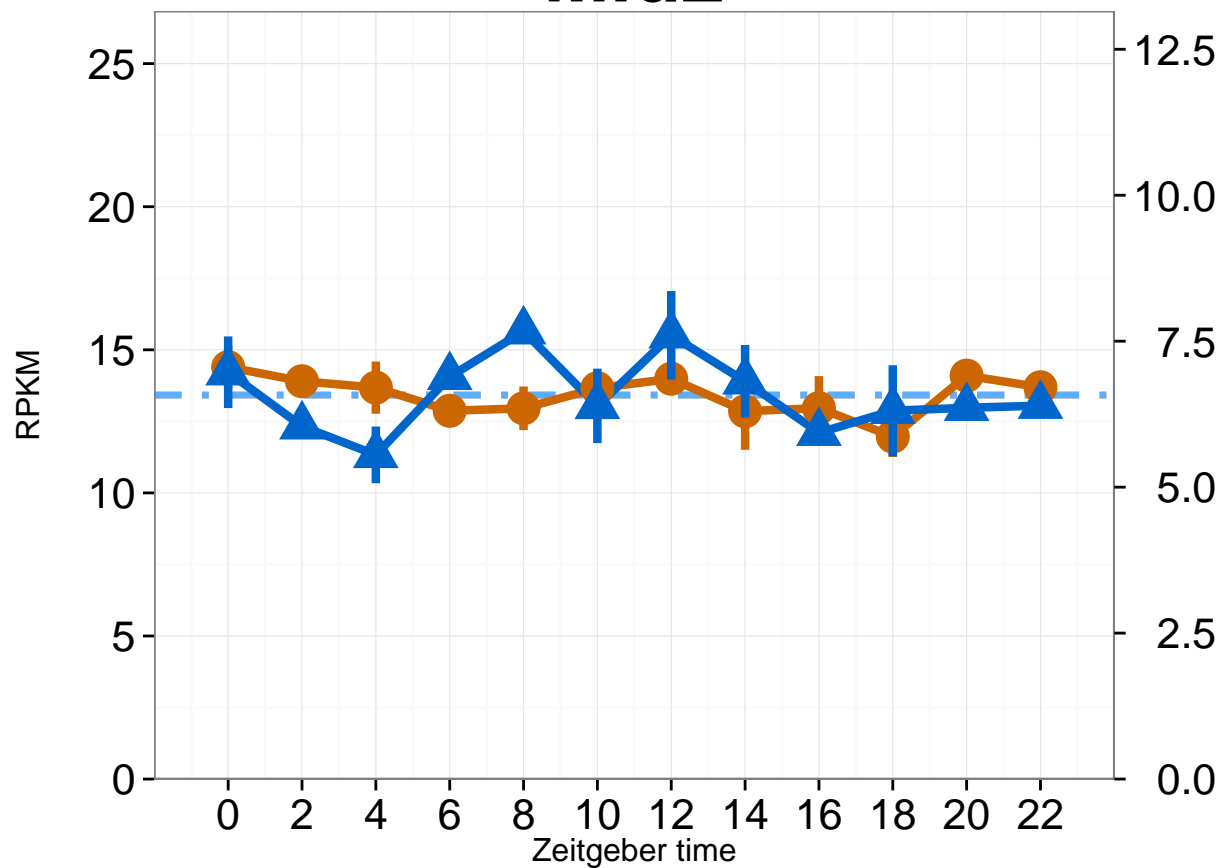

## Mid2

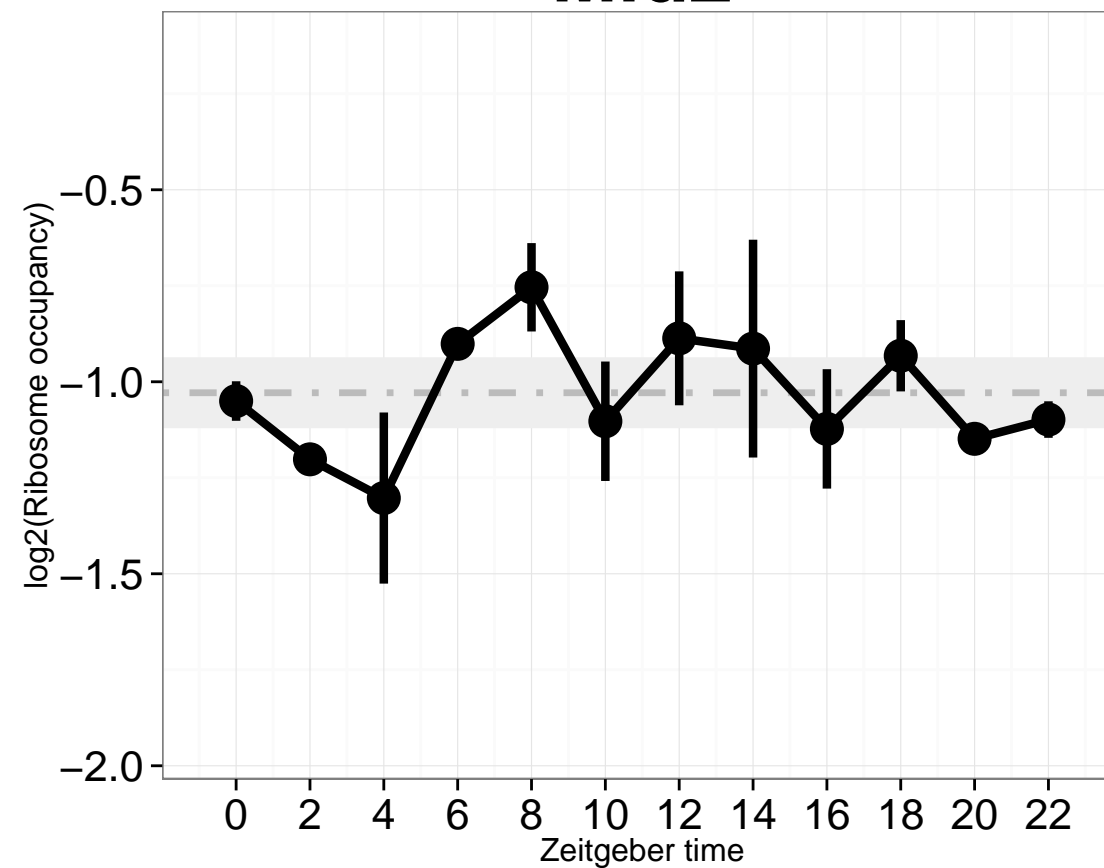

Supplement: Supplementary file 7028 [file 1]

## Rps15

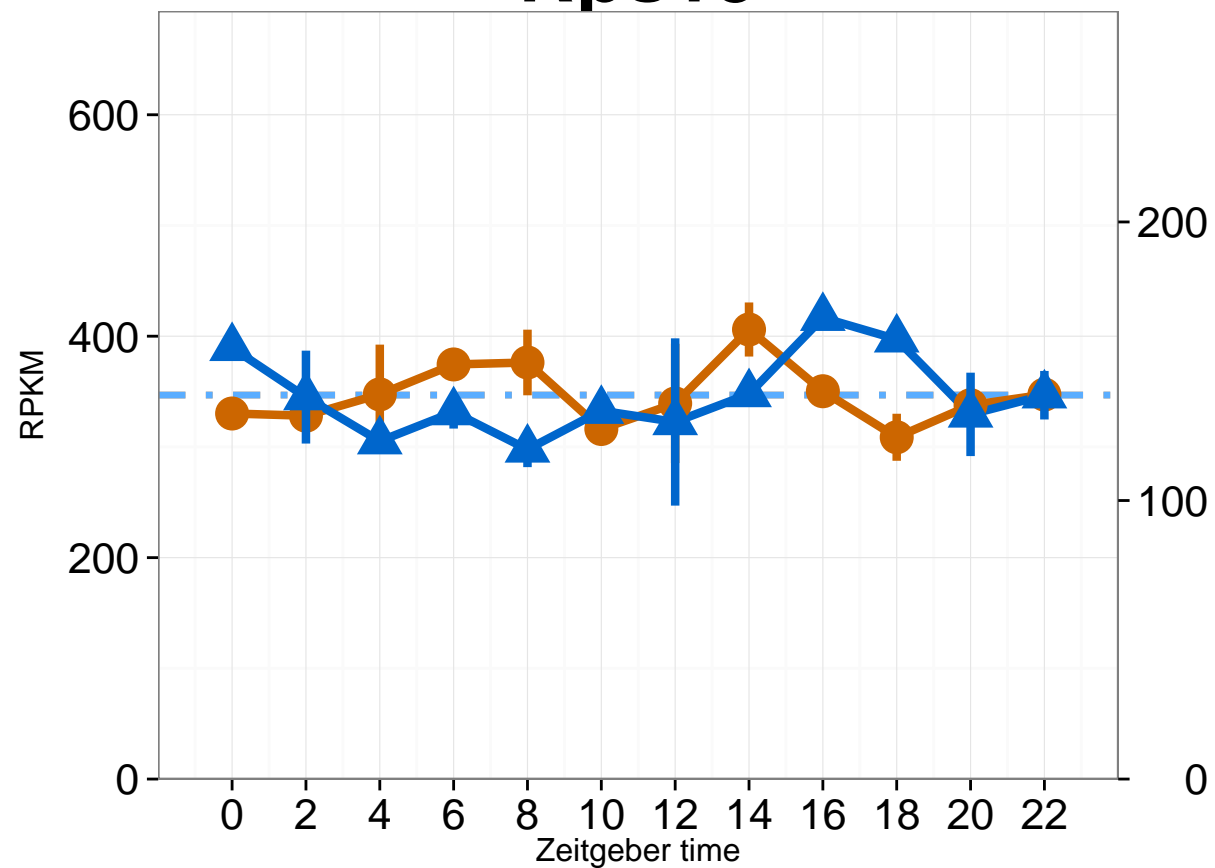

## Rps15

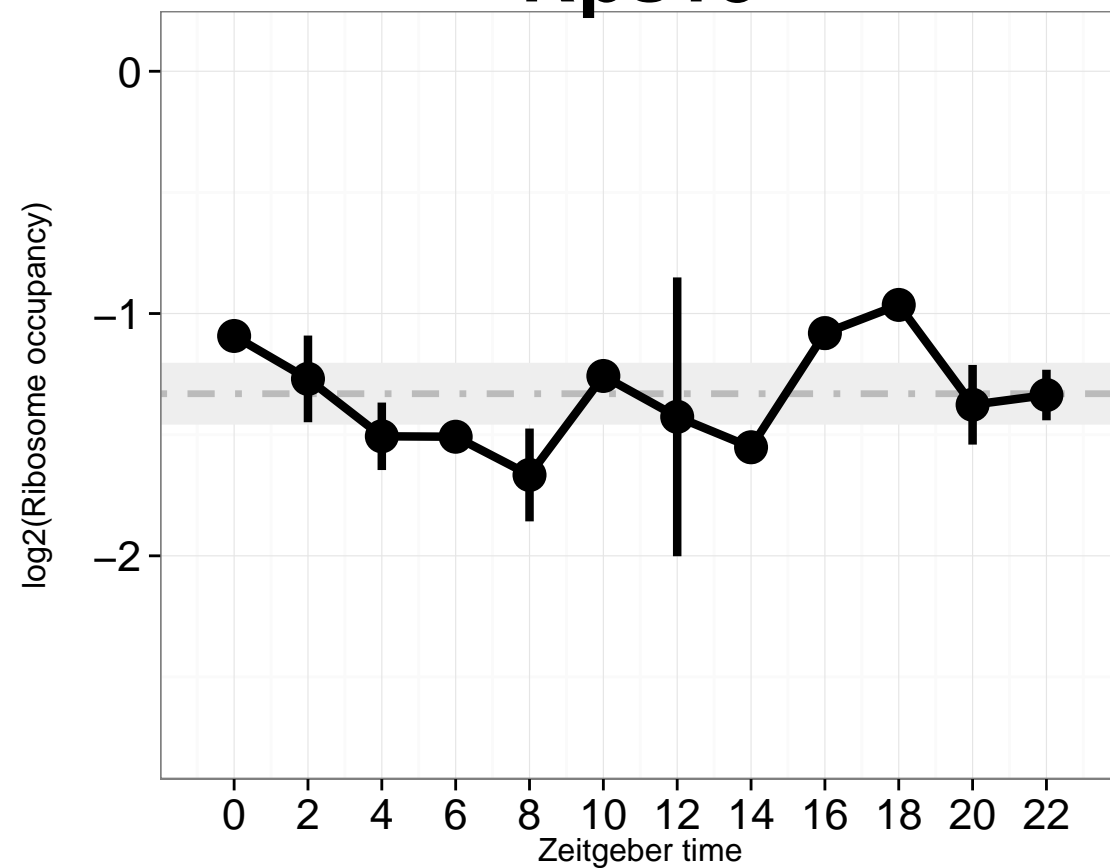

Supplement: Supplementary file 7029 [file 1]

## Pdzd3

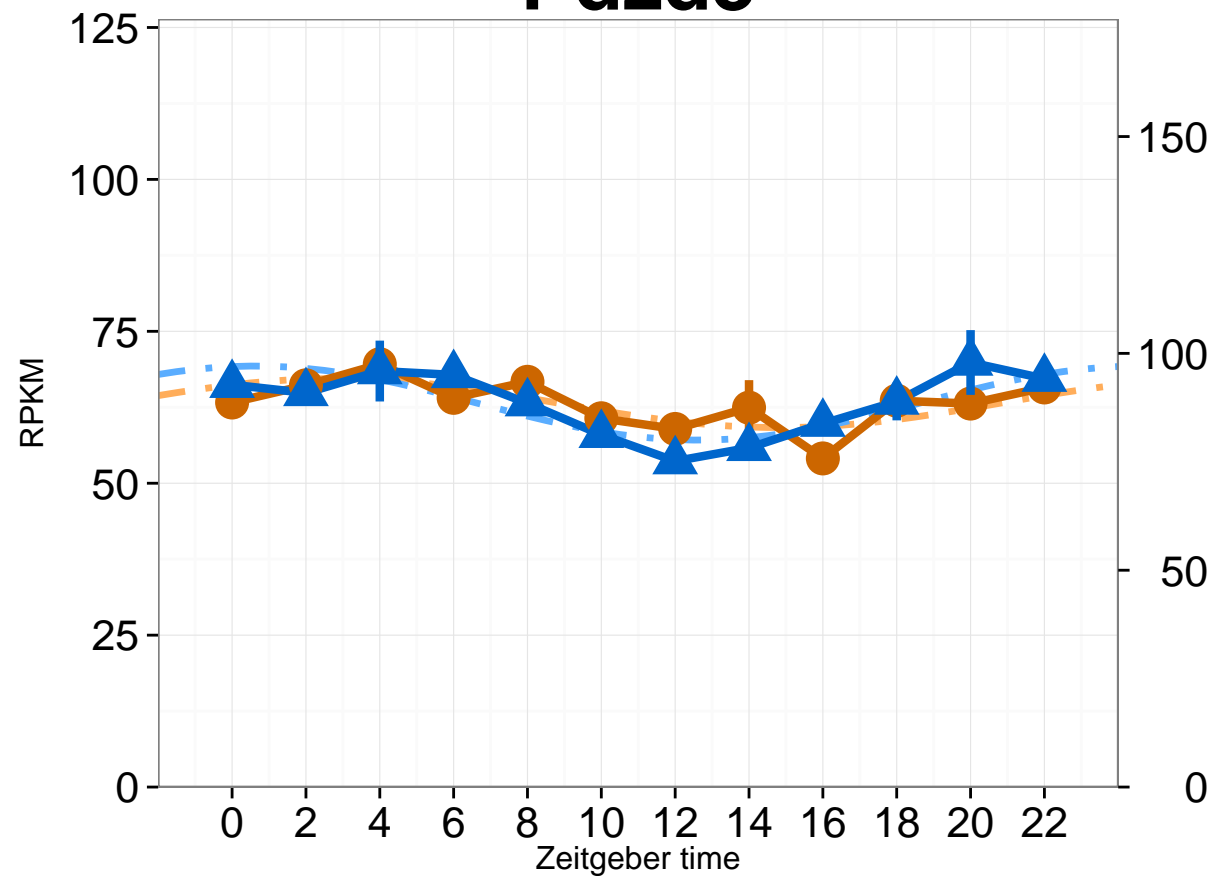

## Pdzd3

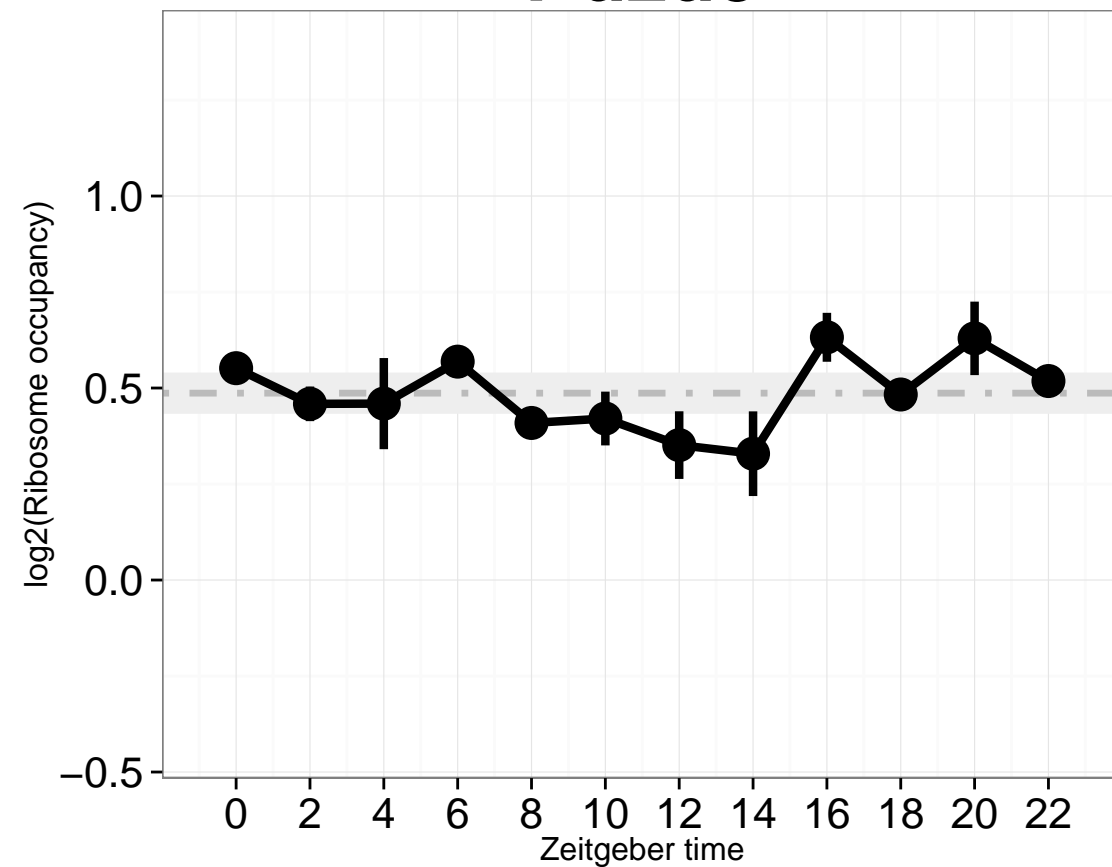

Supplement: Supplementary file 7030 [file 1]

## Khdrbs3

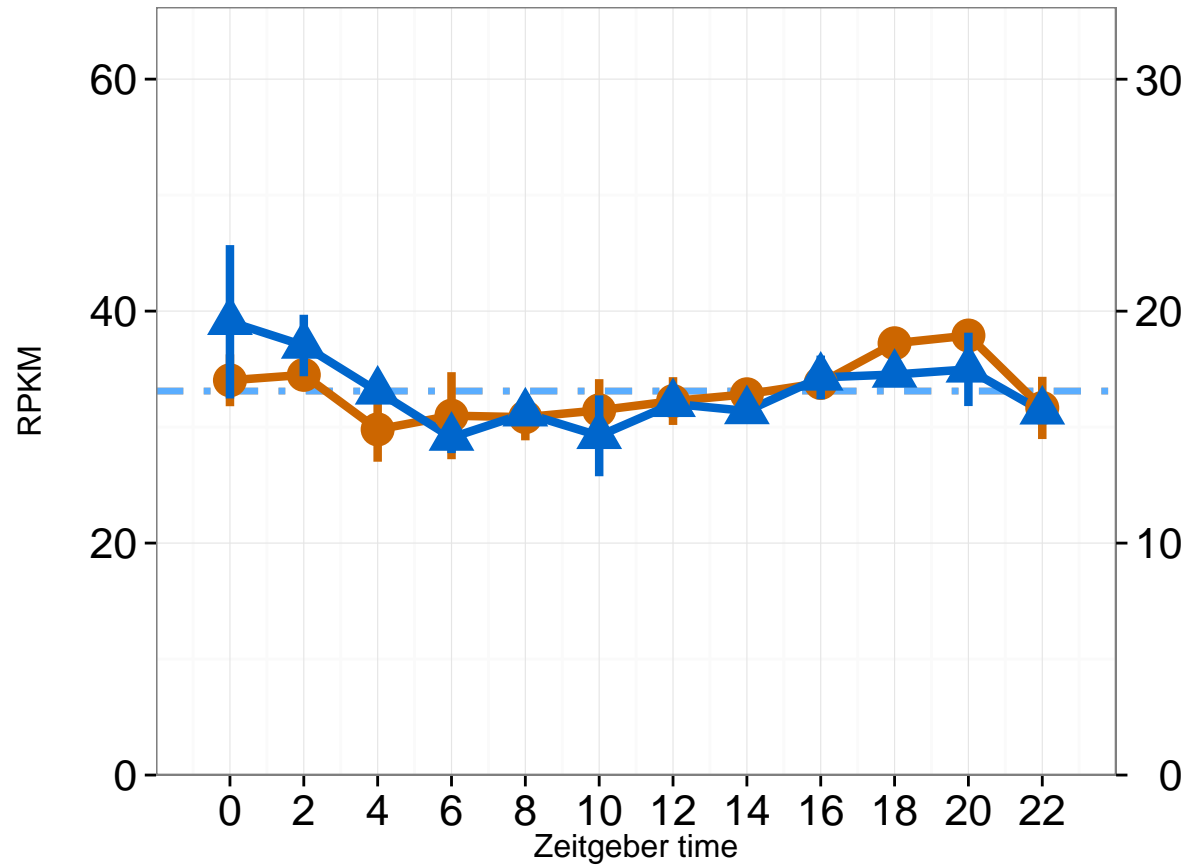

## Khdrbs3

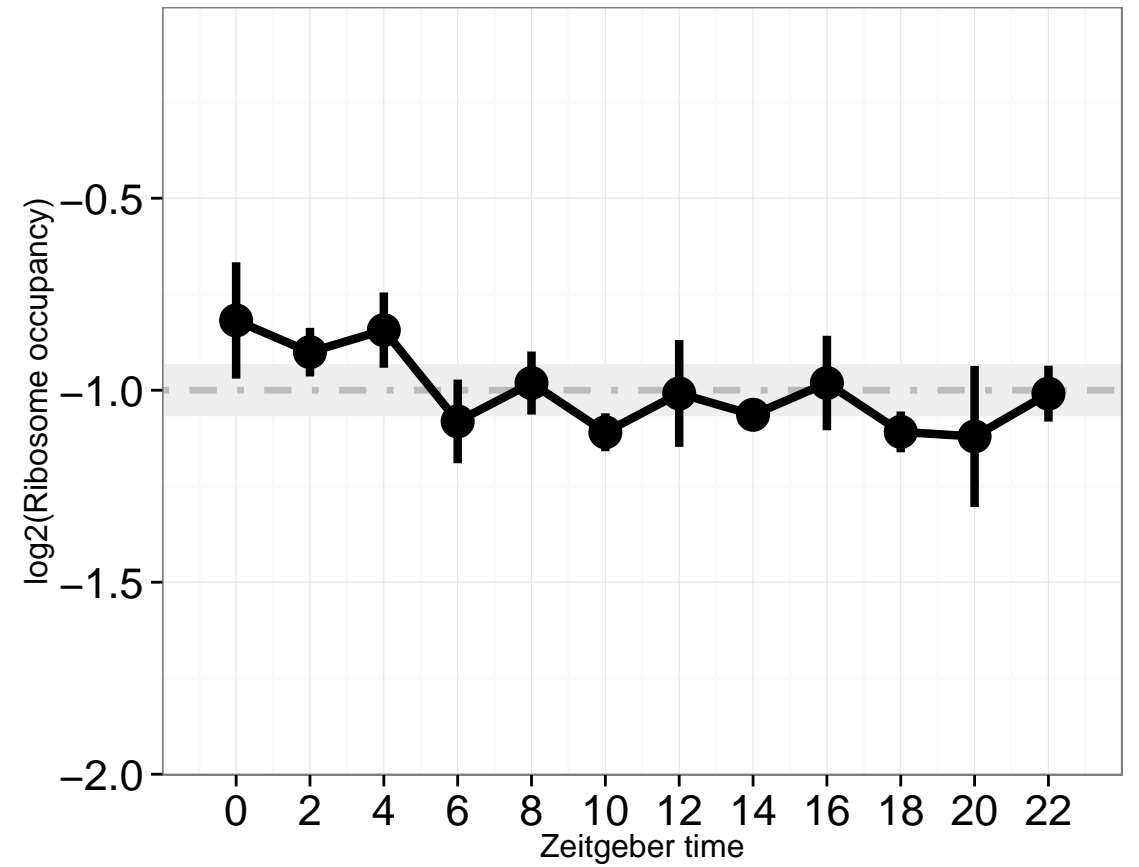

Supplement: Supplementary file 7031 [file 1]

# Bhlhe41

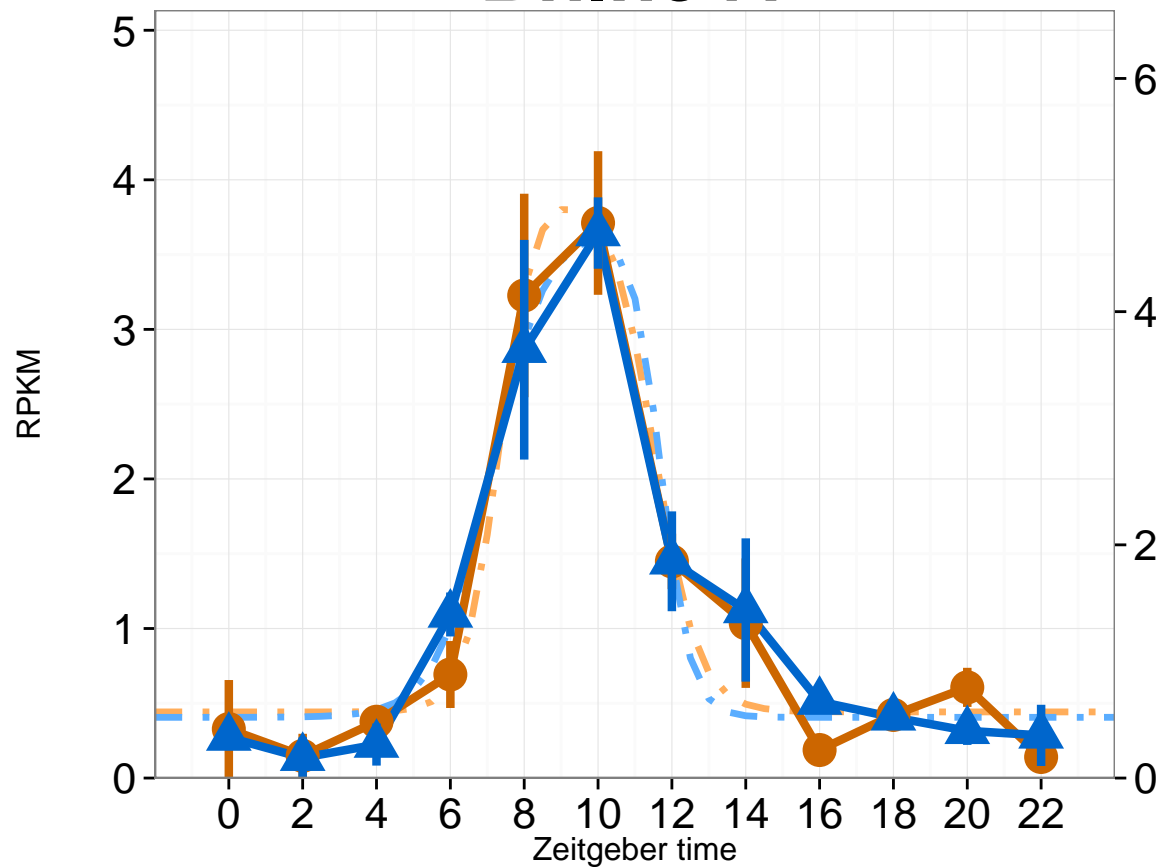

# Bhlhe41

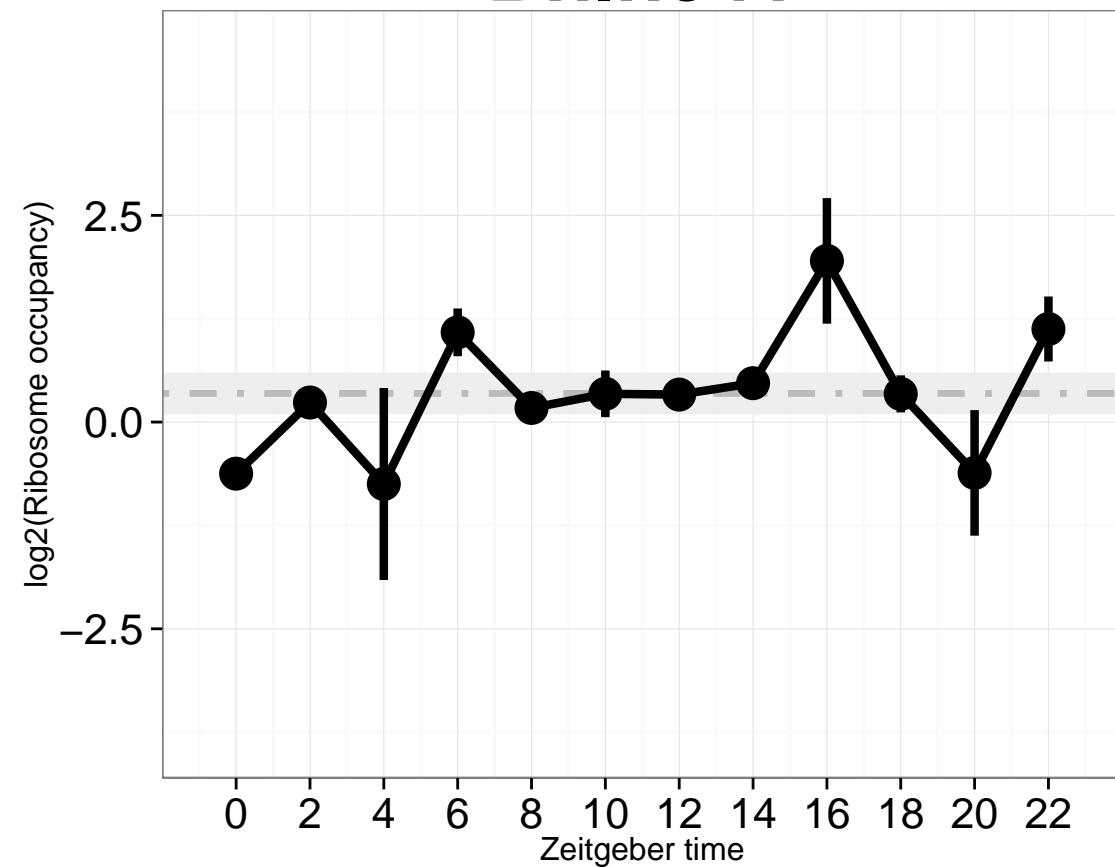

Supplement: Supplementary file 7032 [file 1]

# Itsn2

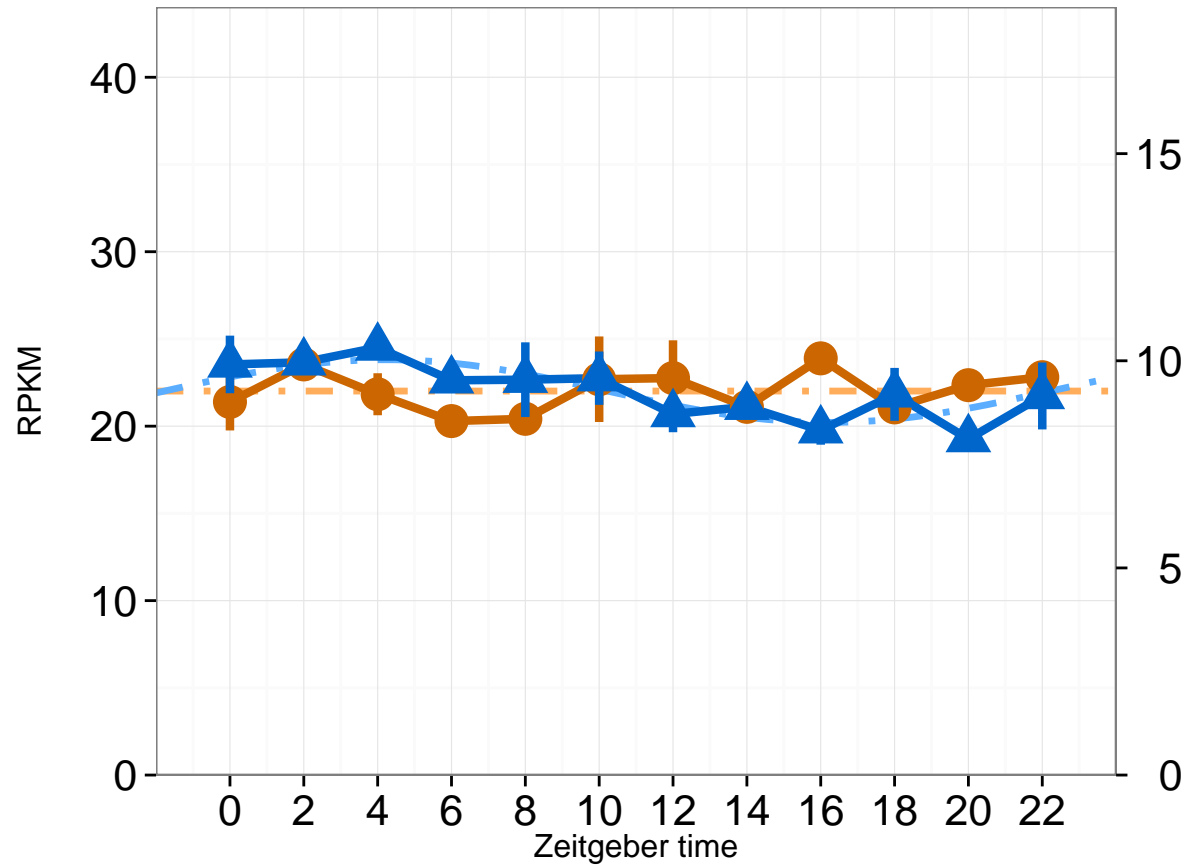

# Itsn2

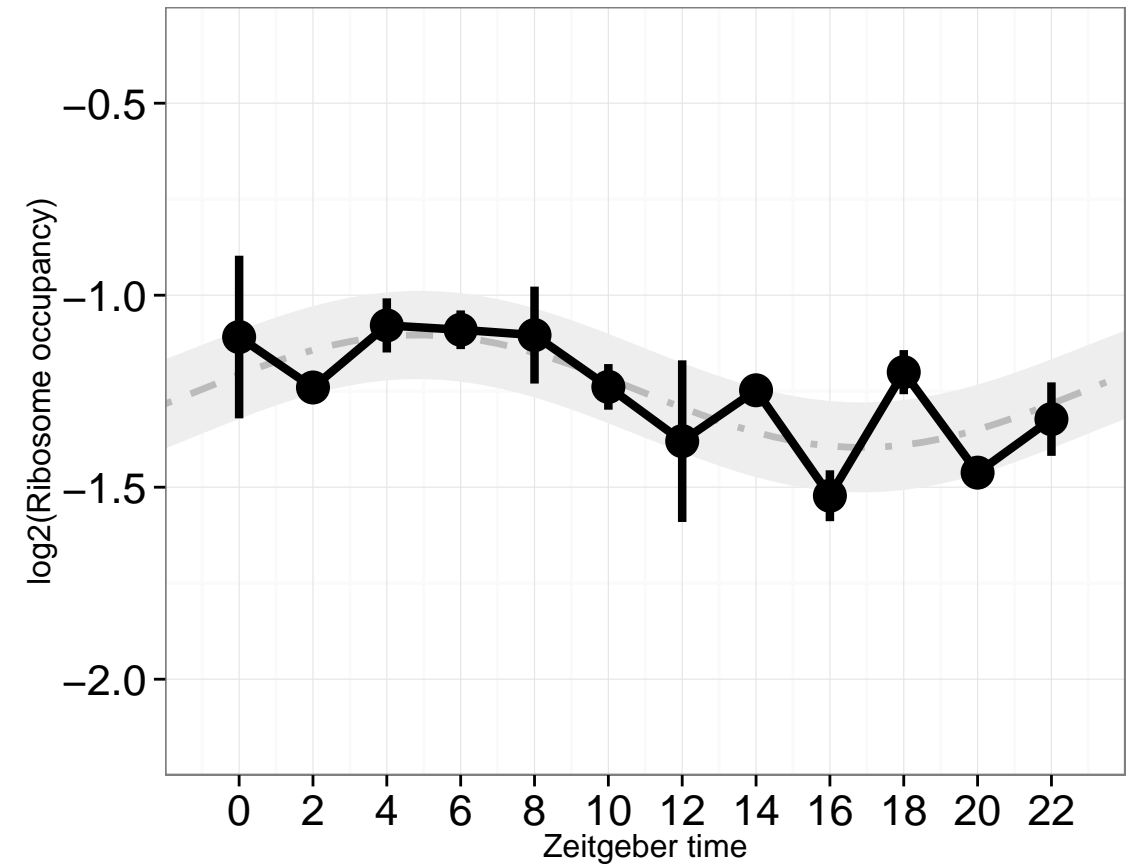

Supplement: Supplementary file 7033 [file 1]

# Ssna1

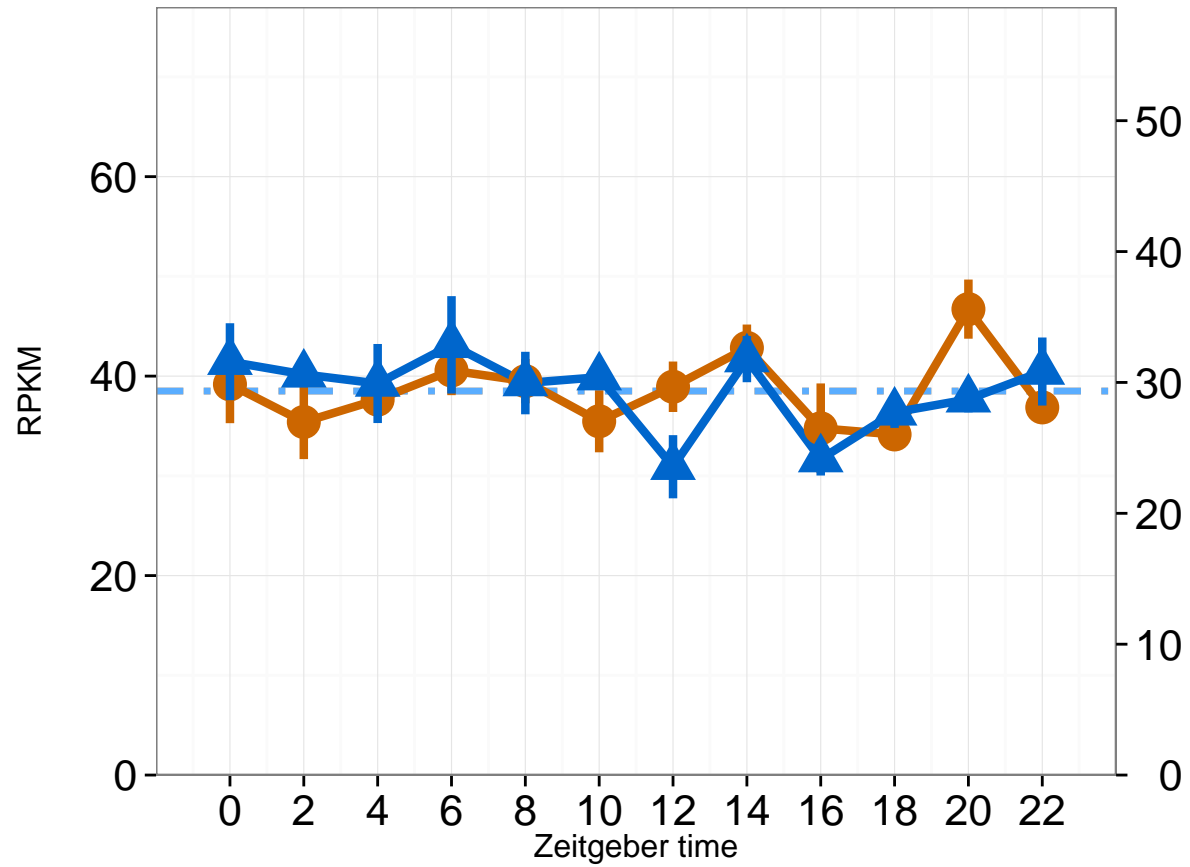

# Ssna1

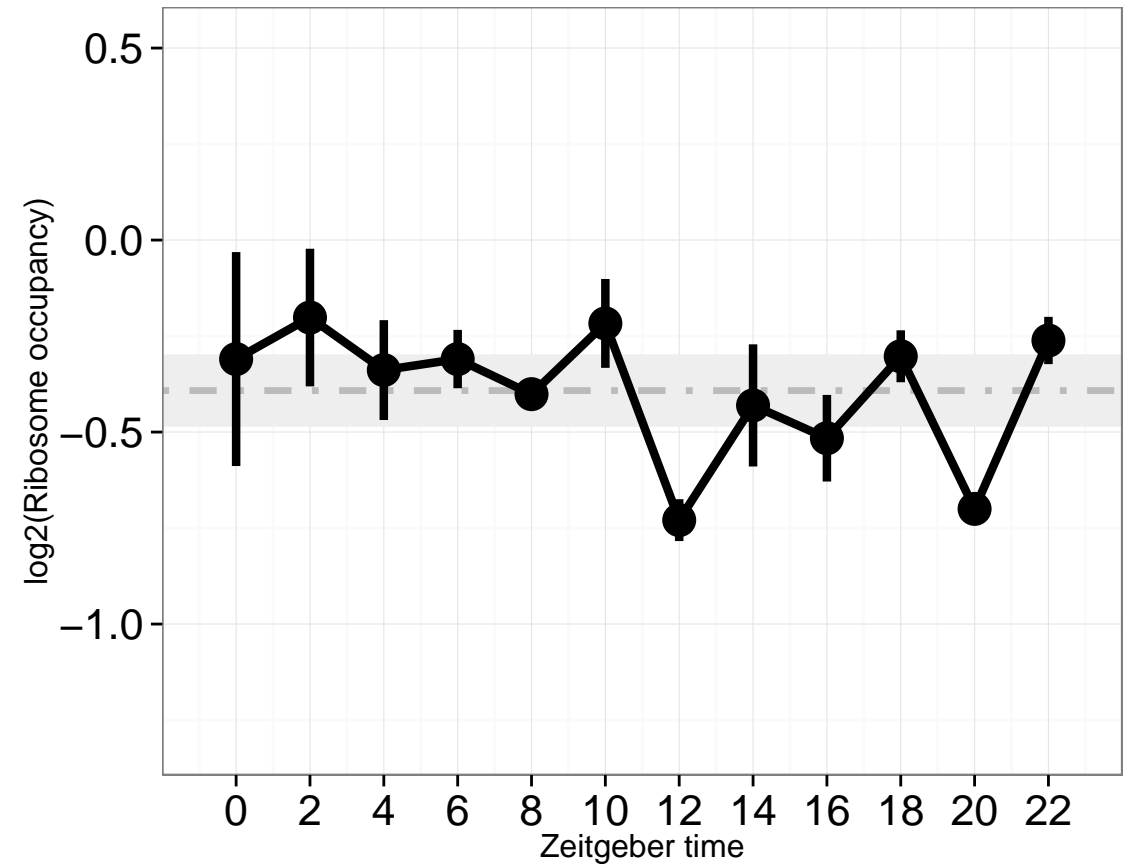

Supplement: Supplementary file 7034 [file 1]

# Rab11fip4

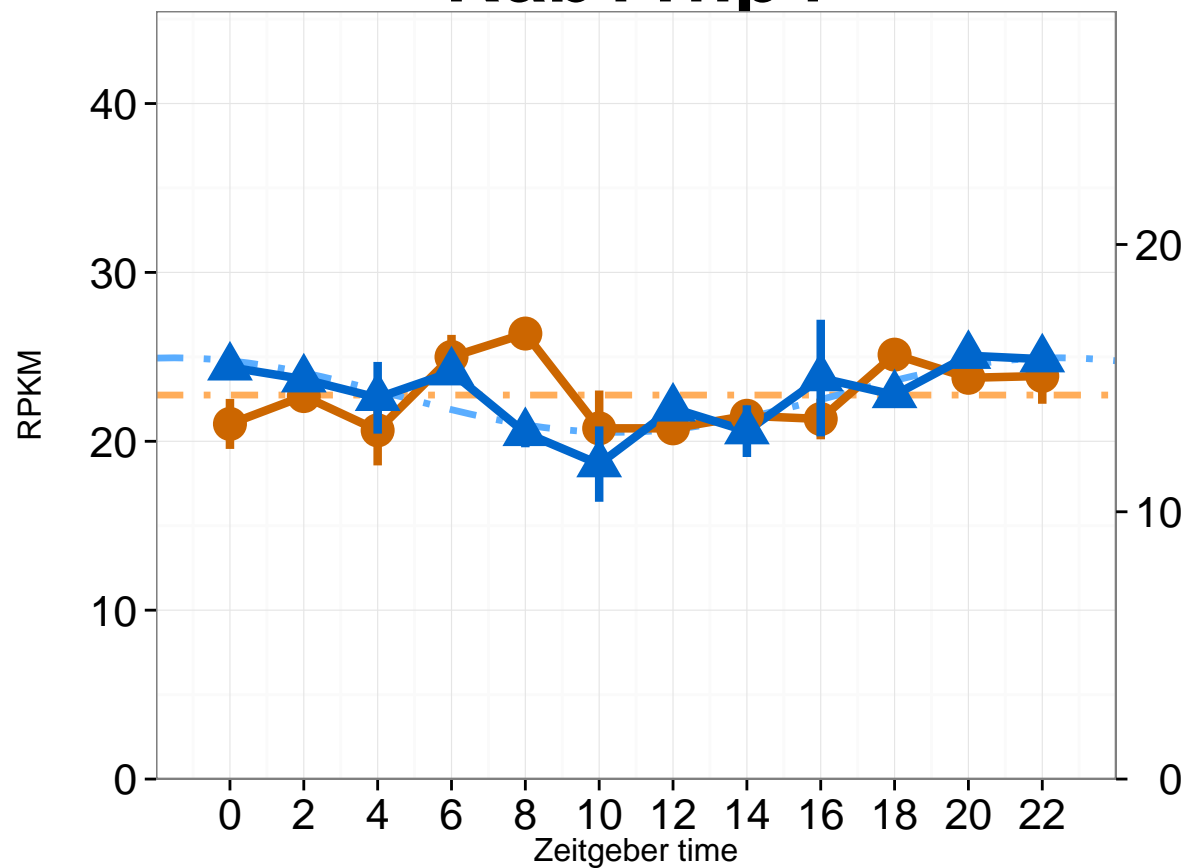

# Rab11fip4

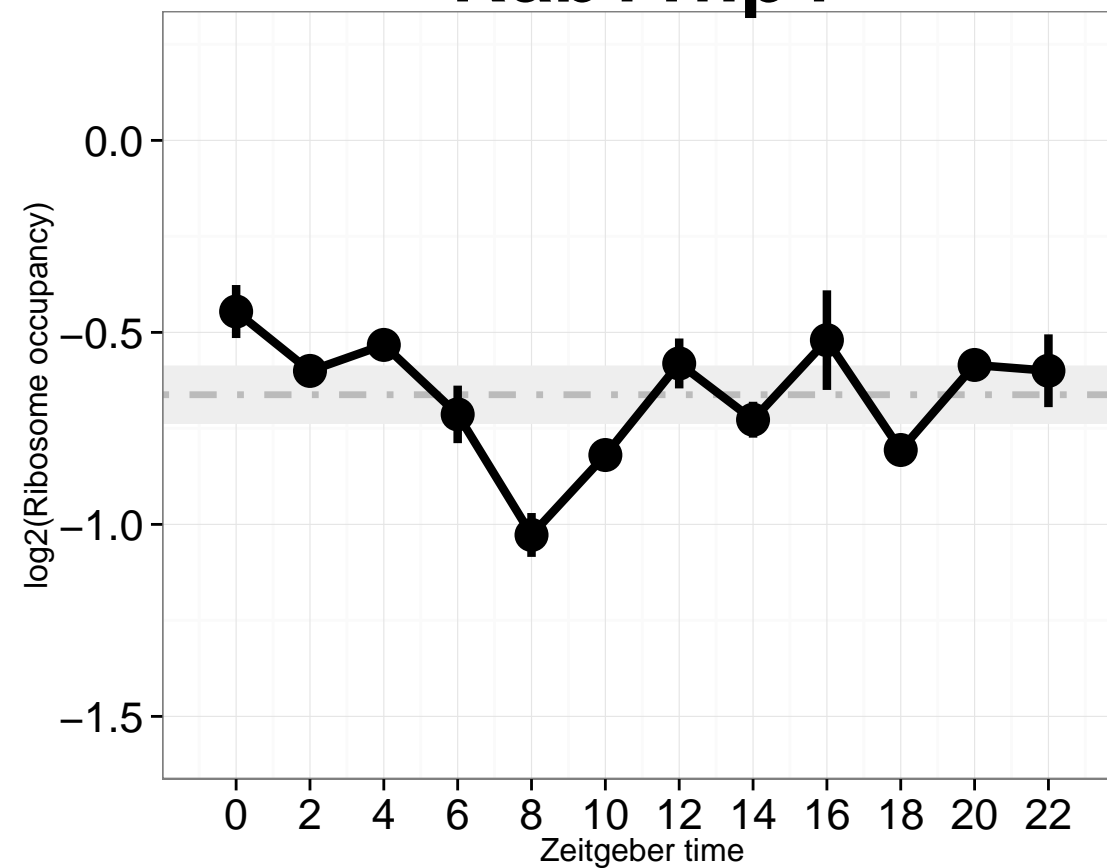

Supplement: Supplementary file 7035 [file 1]

# Ino80c

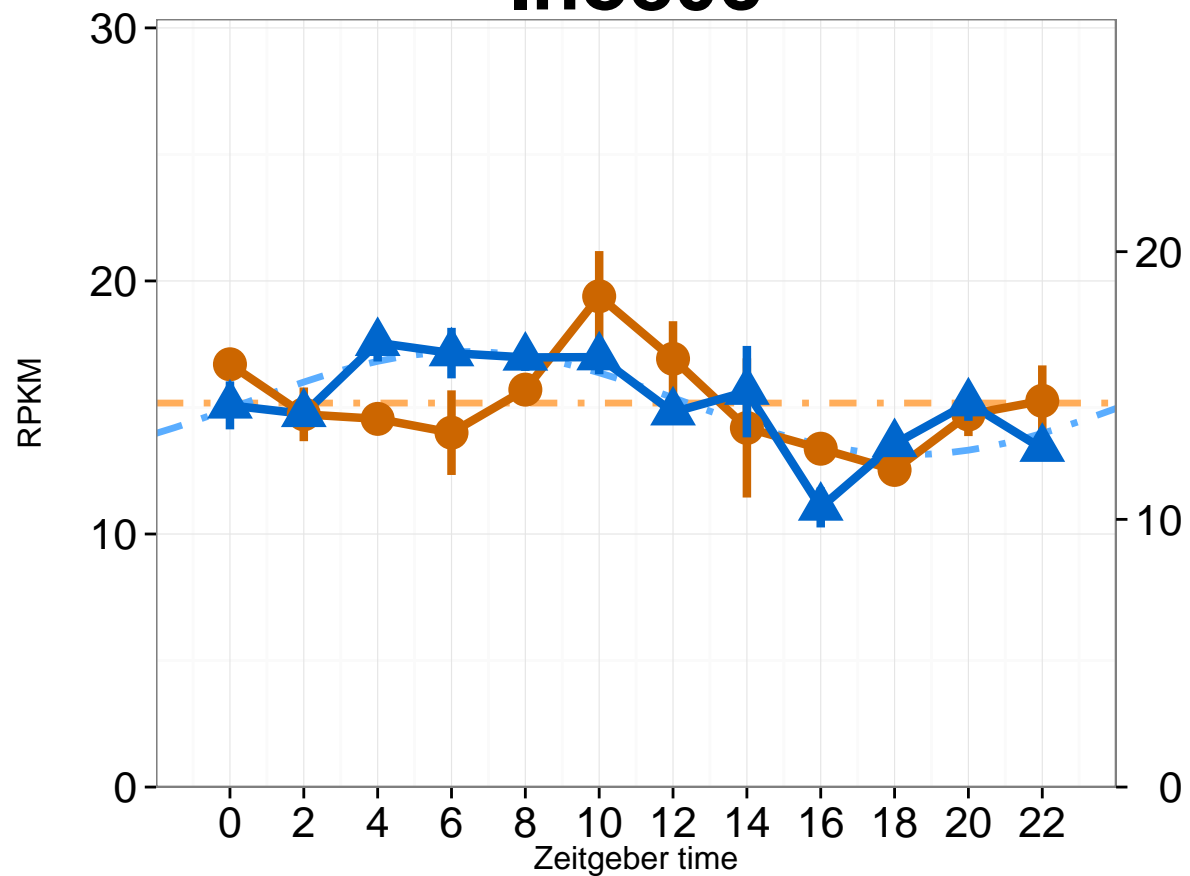

# Ino80c

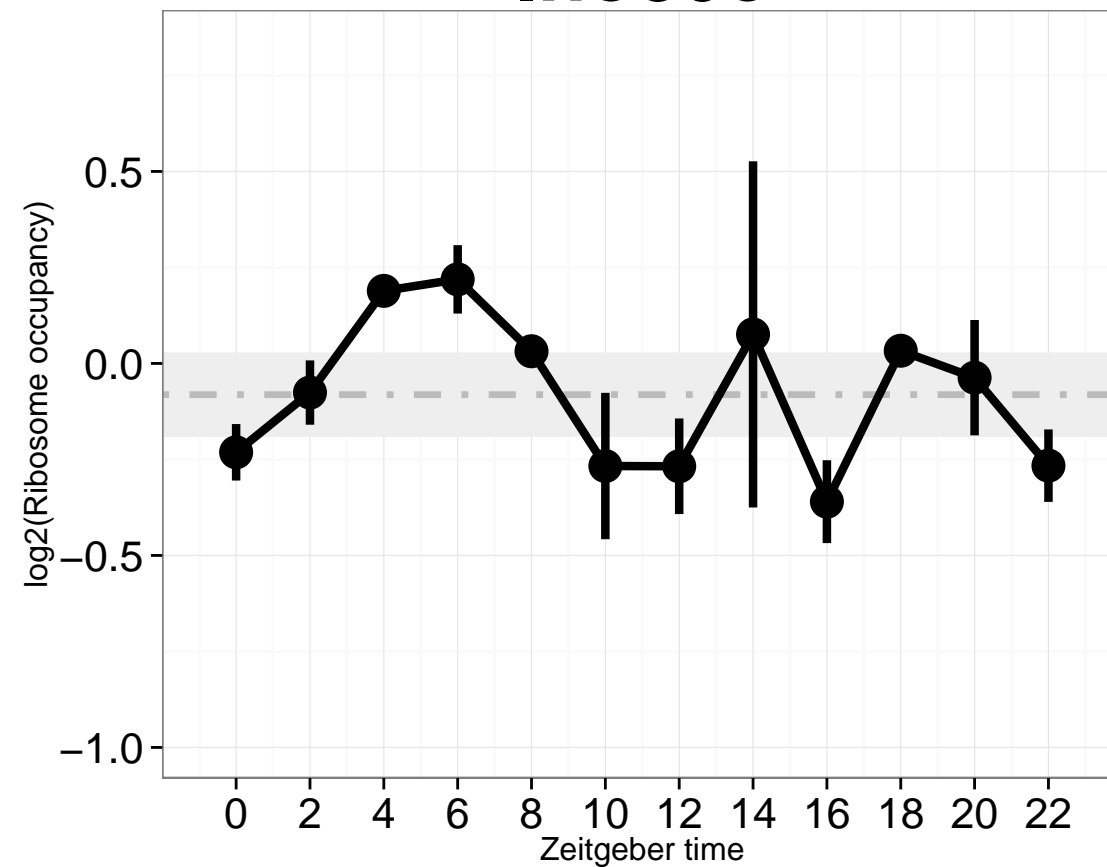

Supplement: Supplementary file 7036 [file 1]

# Map3k9

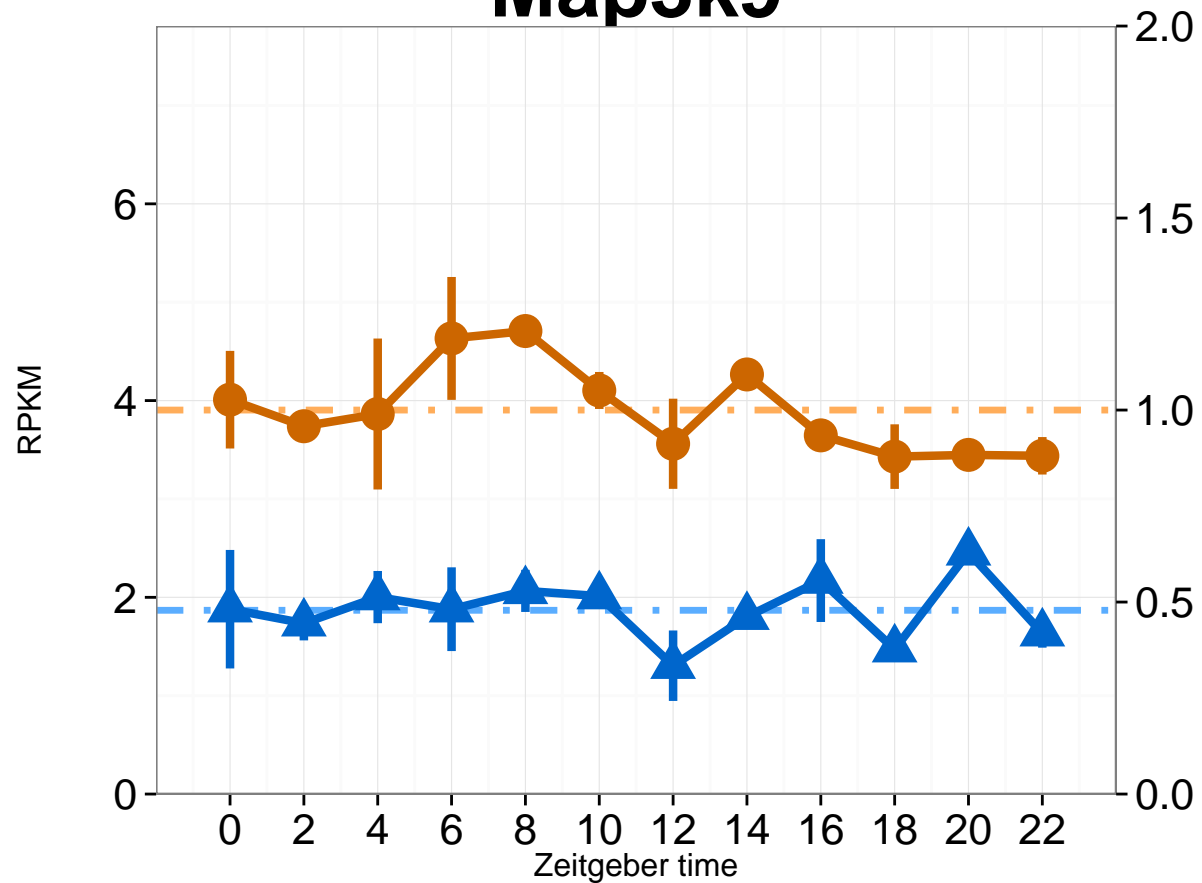

# Map3k9

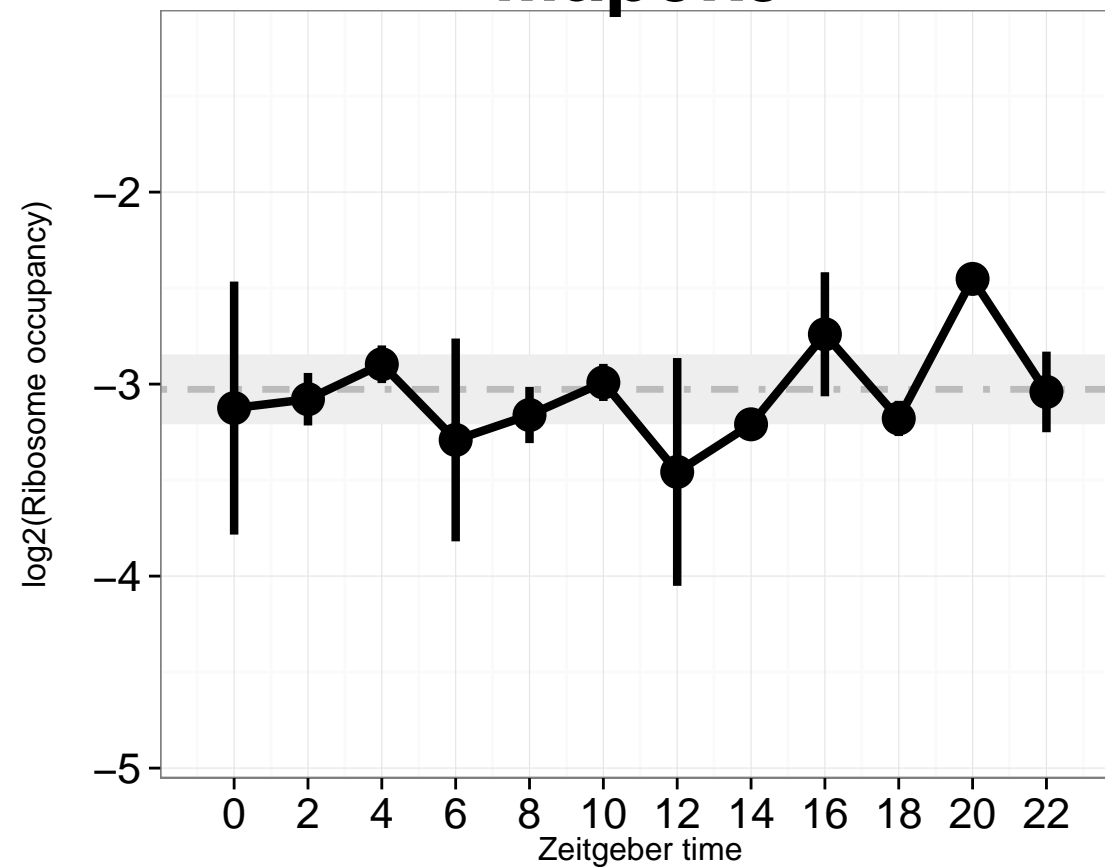

Supplement: Supplementary file 7037 [file 1]

## Plekhhg3

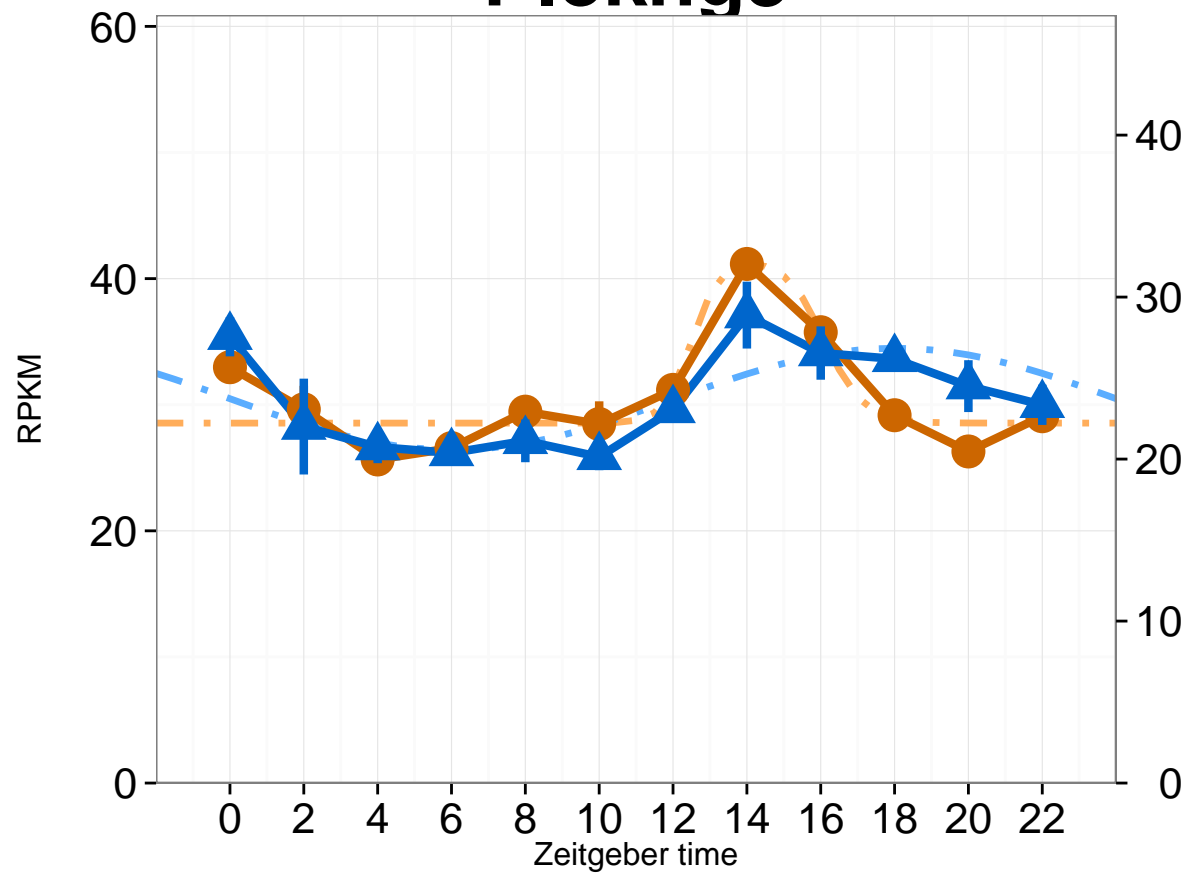

## Plekhhg3

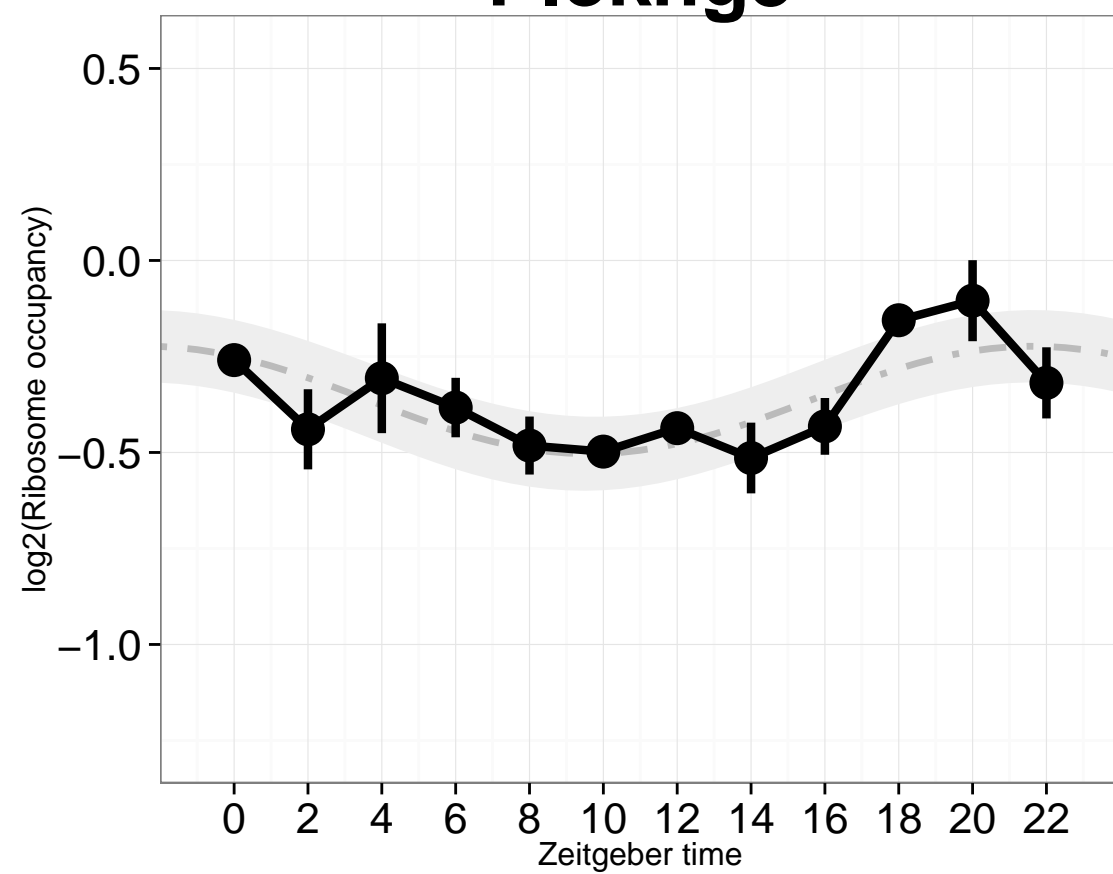

Supplement: Supplementary file 7038 [file 1]

## 0610009O20Rik

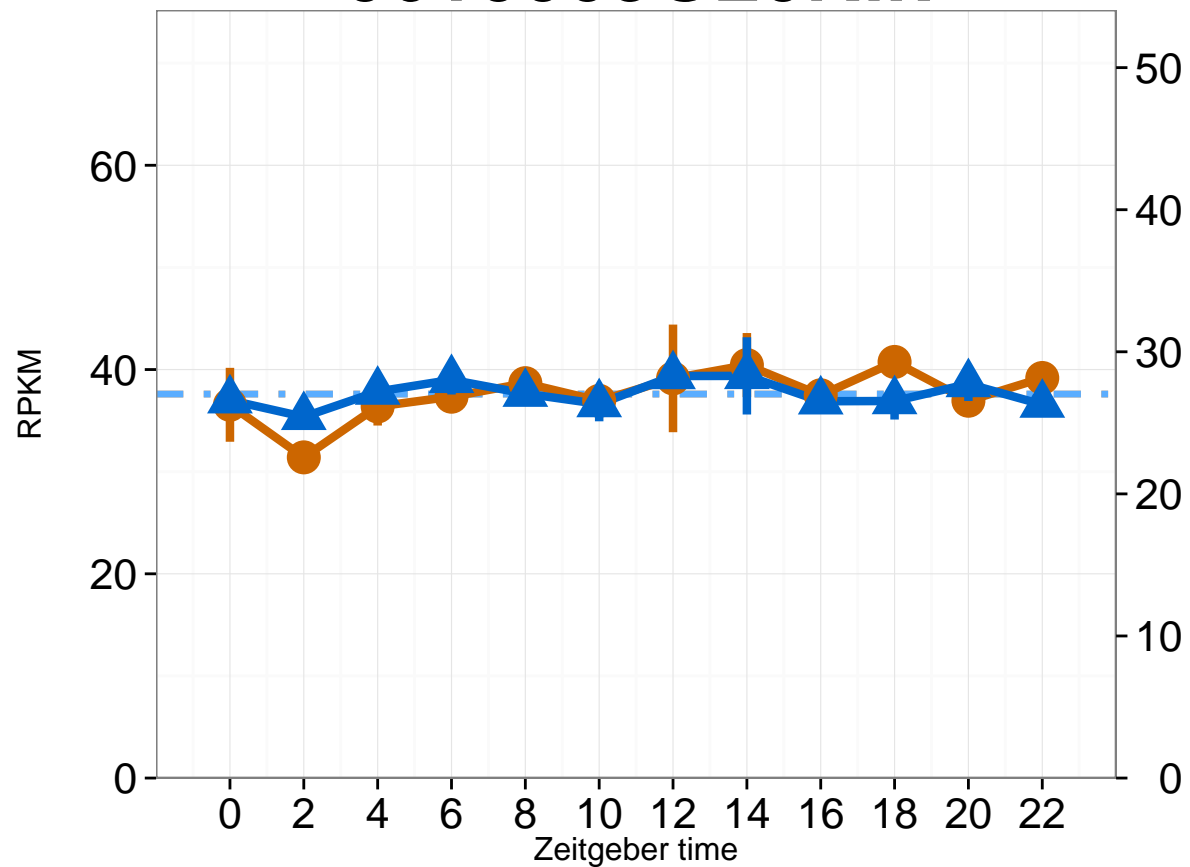

## 0610009O20Rik

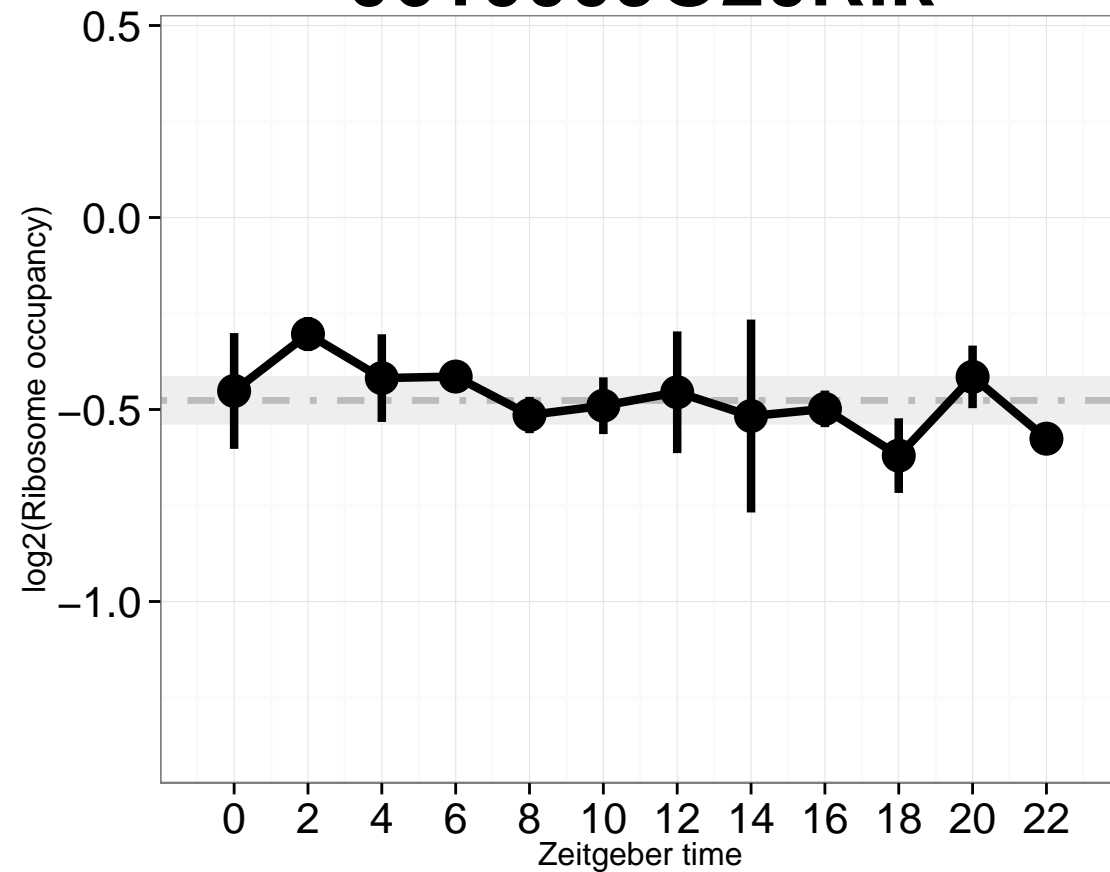

Supplement: Supplementary file 7039 [file 1]

## Emilin2

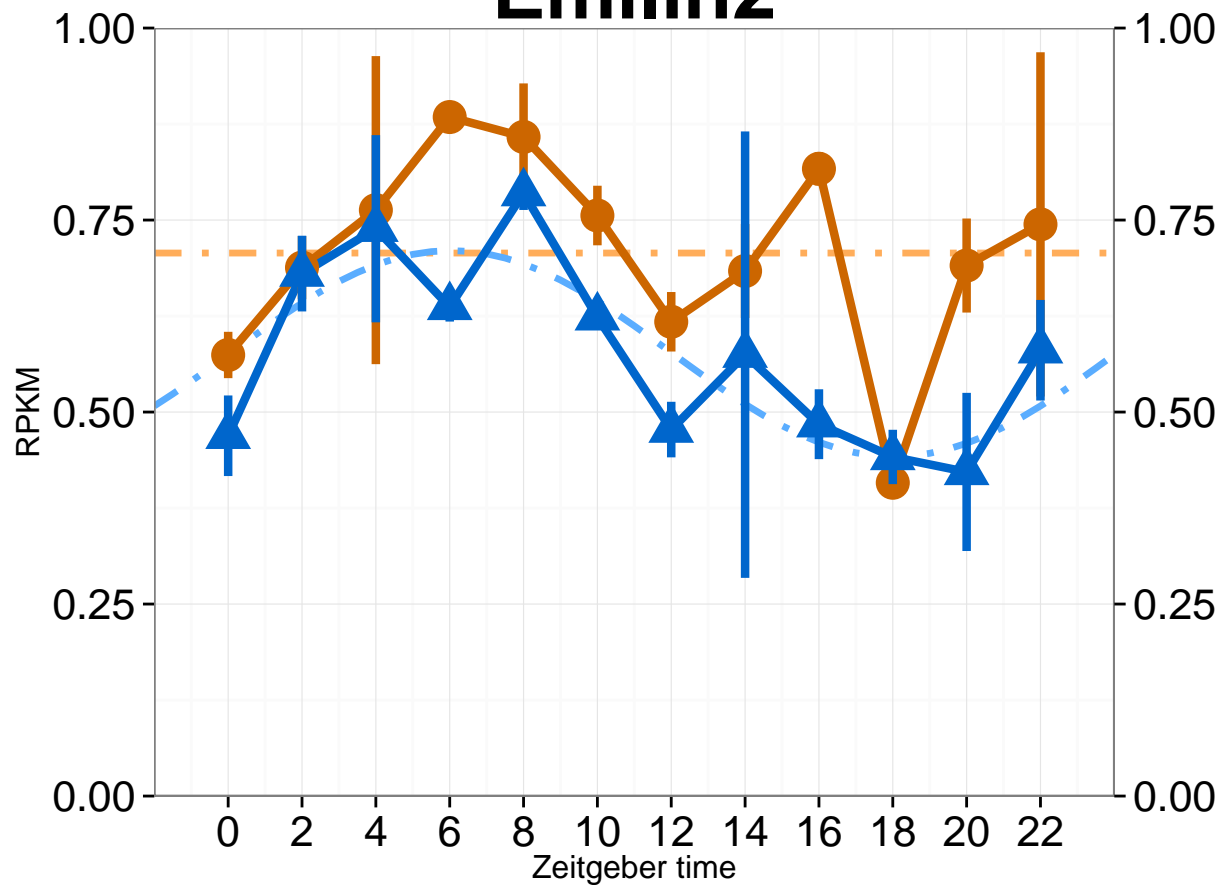

## Emilin2

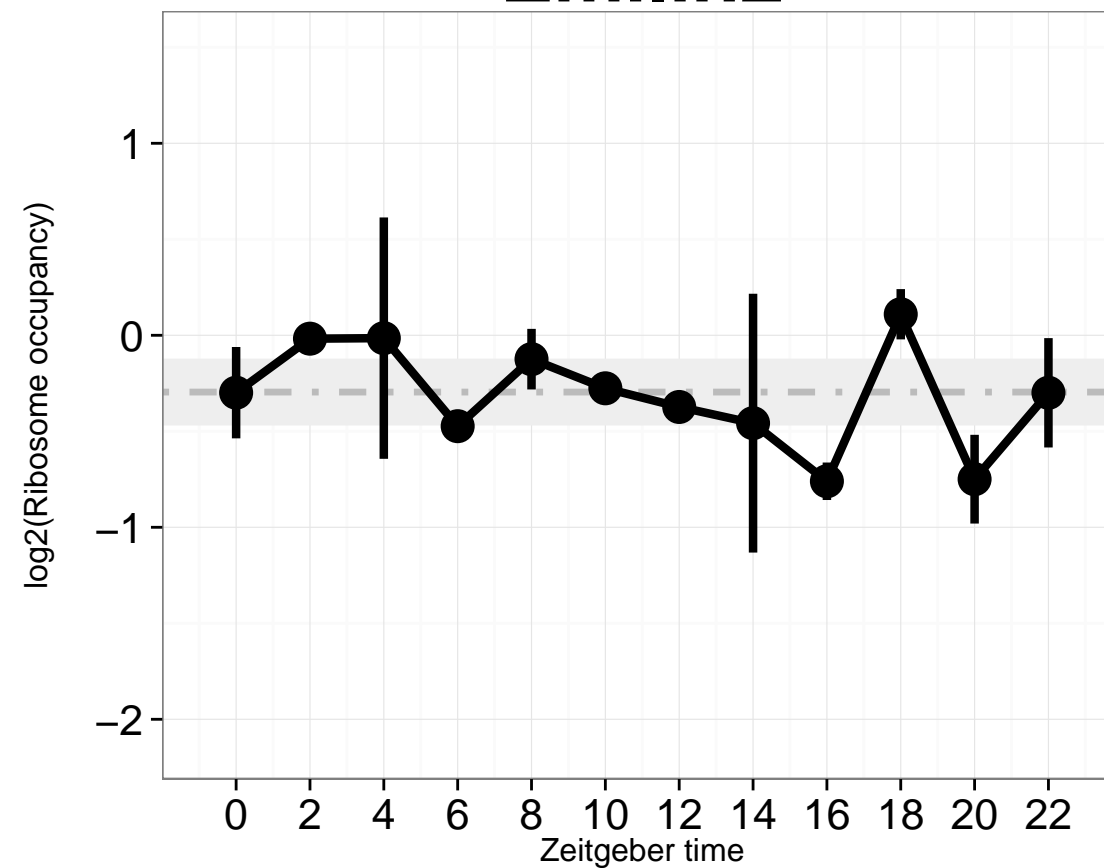

Supplement: Supplementary file 7040 [file 1]

# Ccdc28b

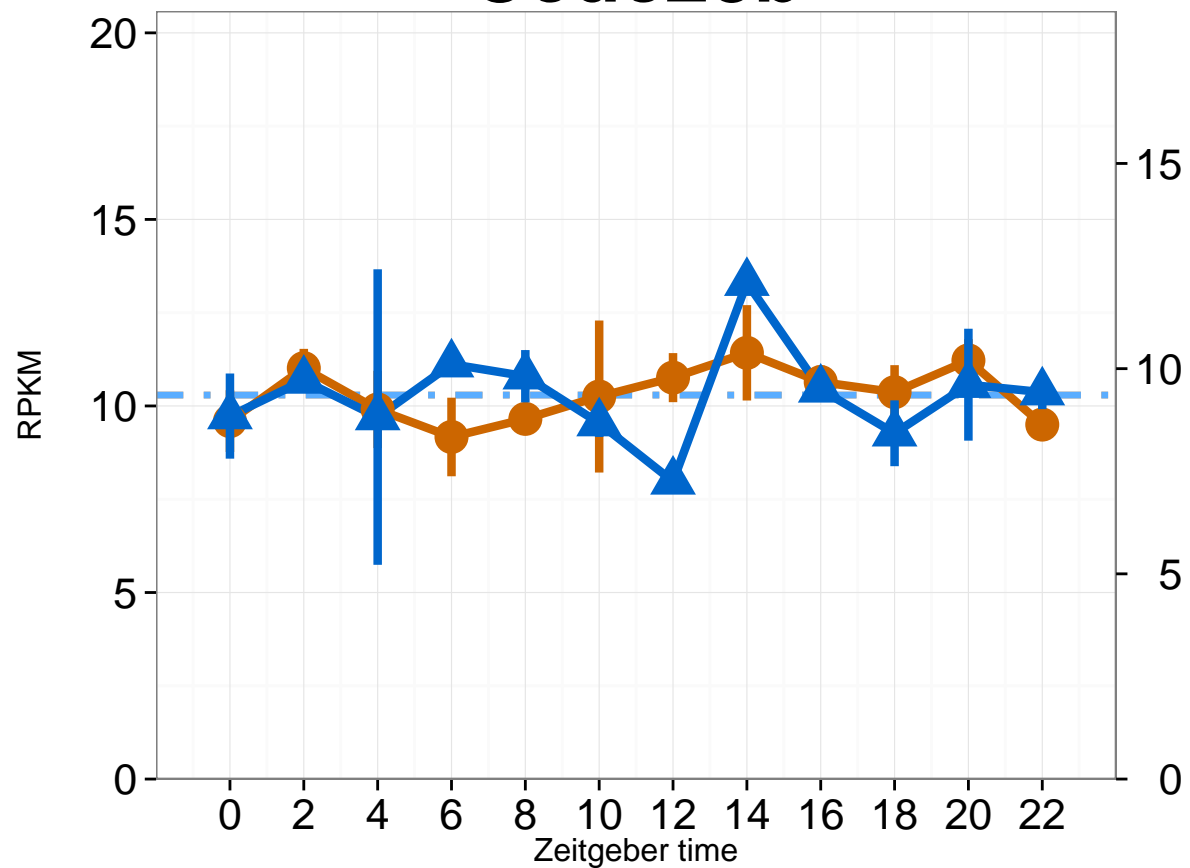

# Ccdc28b

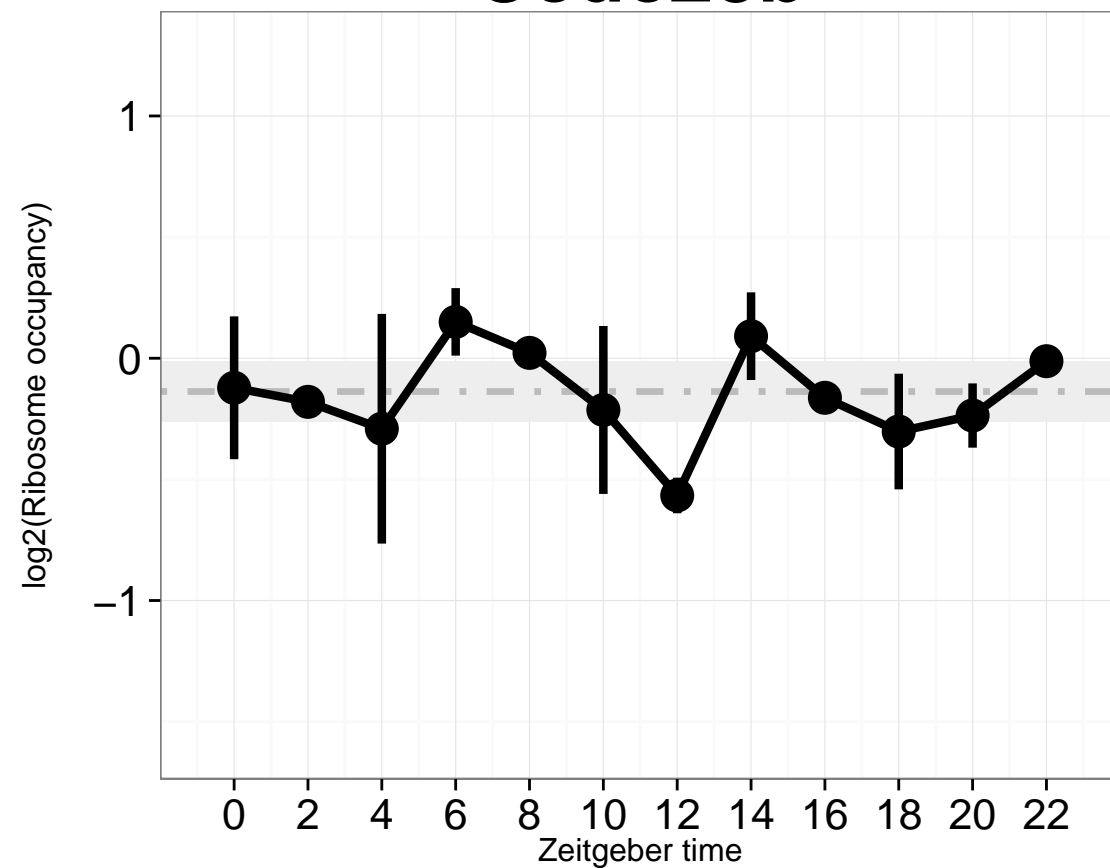

Supplement: Supplementary file 7041 [file 1]

## Bcl10

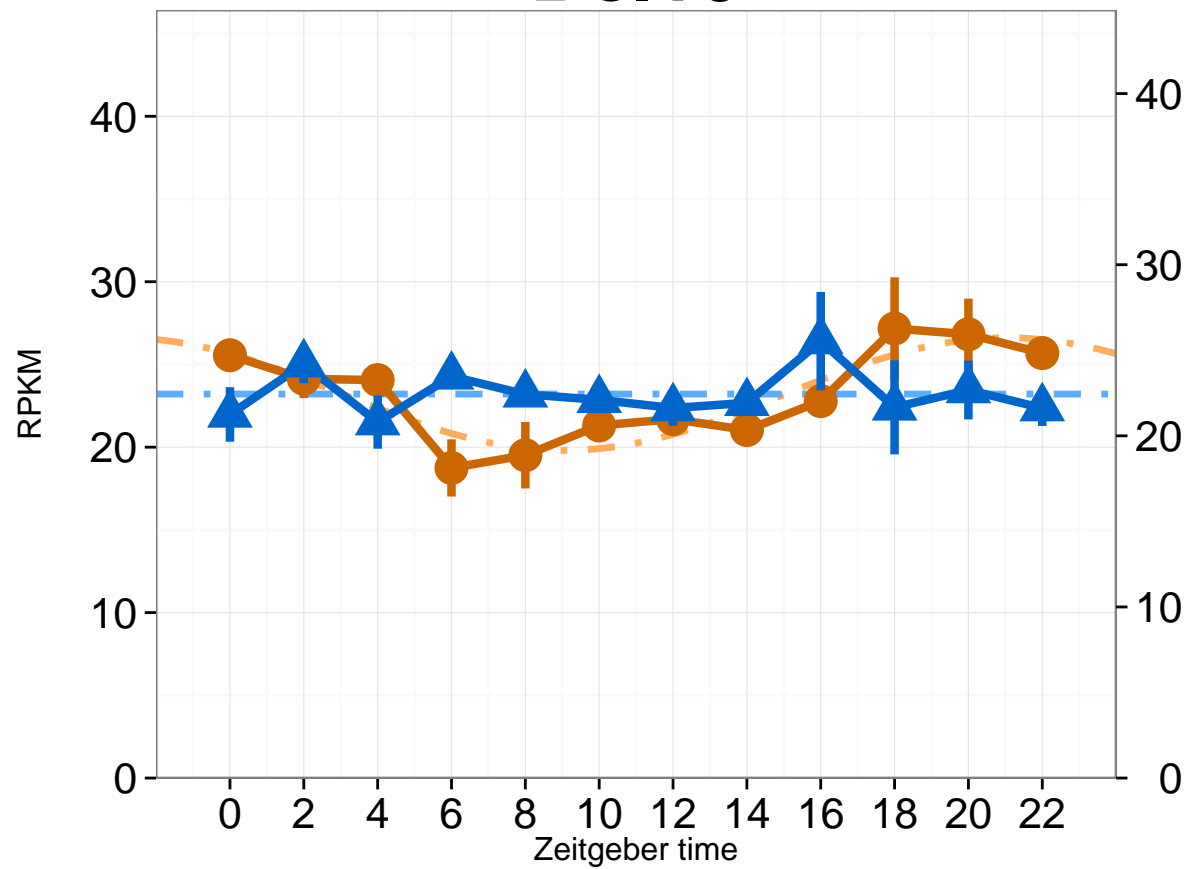

## Bcl10

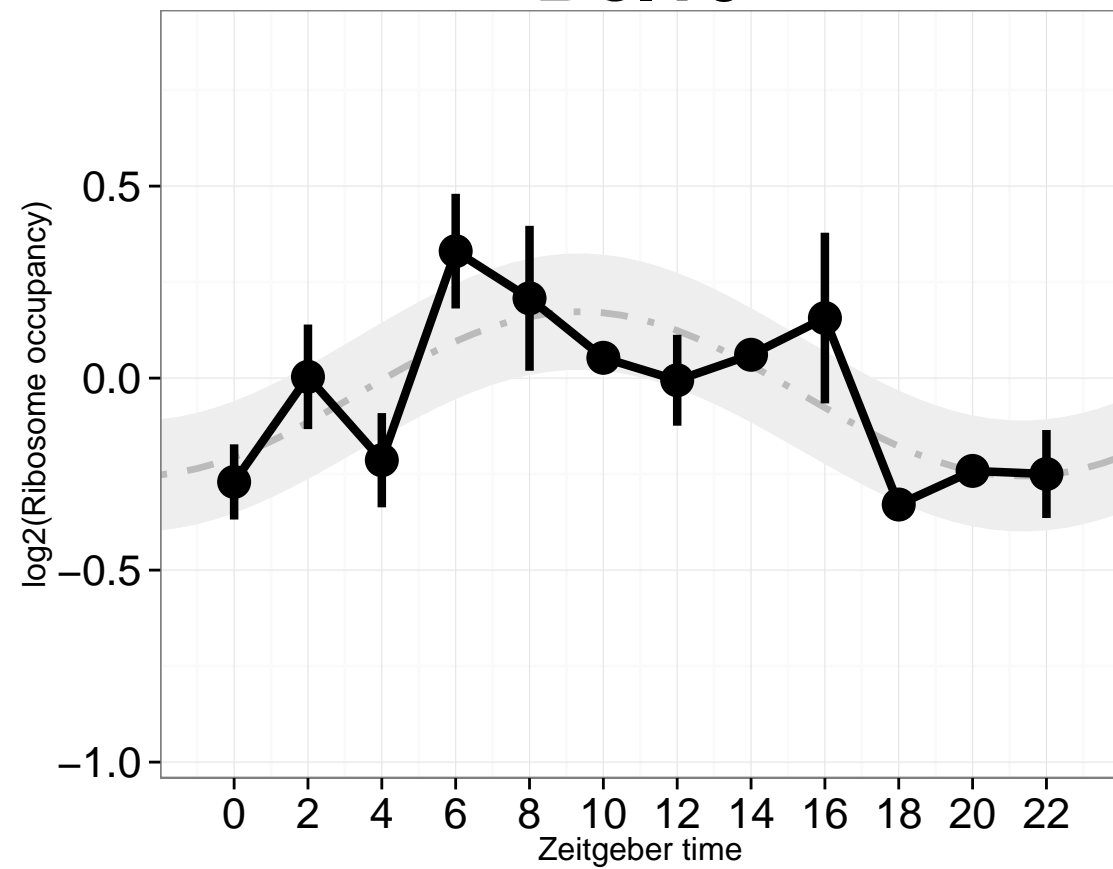

Supplement: Supplementary file 7042 [file 1]

# Ppp1r3b

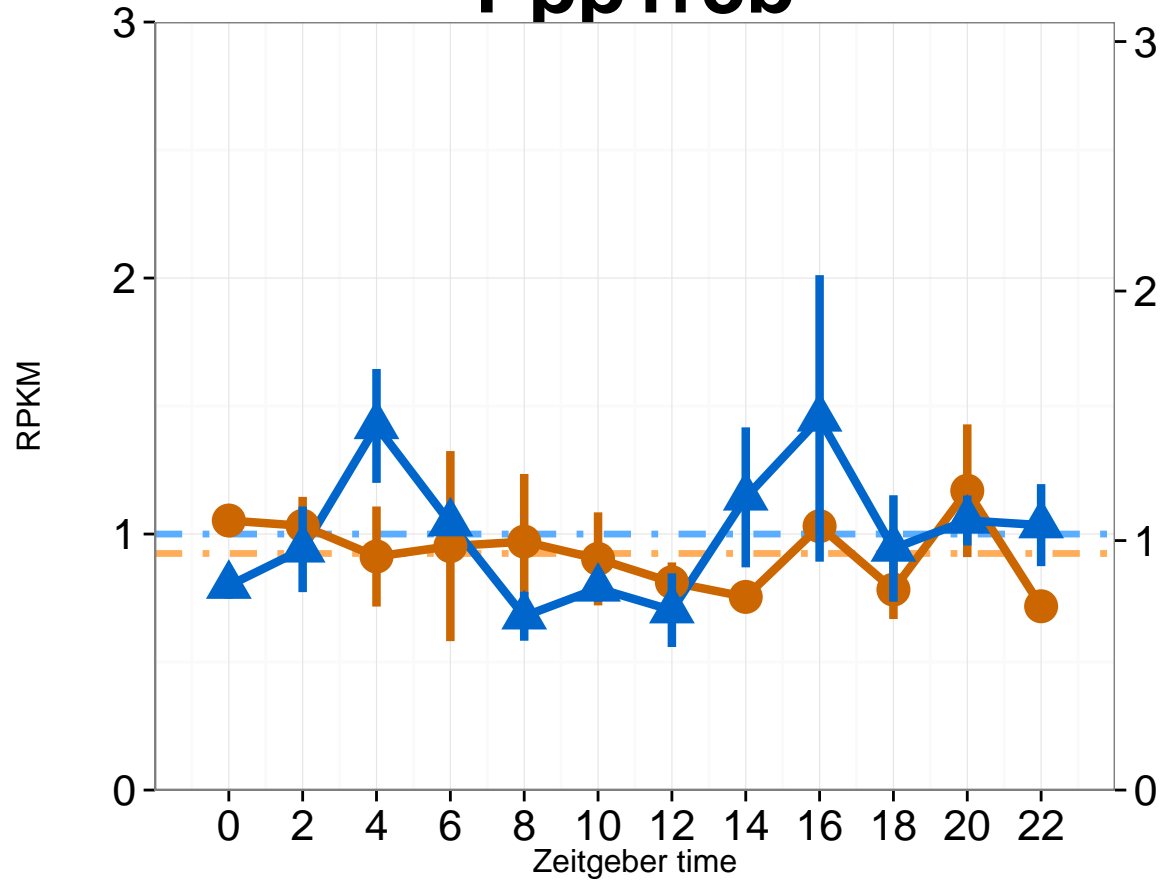

# Ppp1r3b

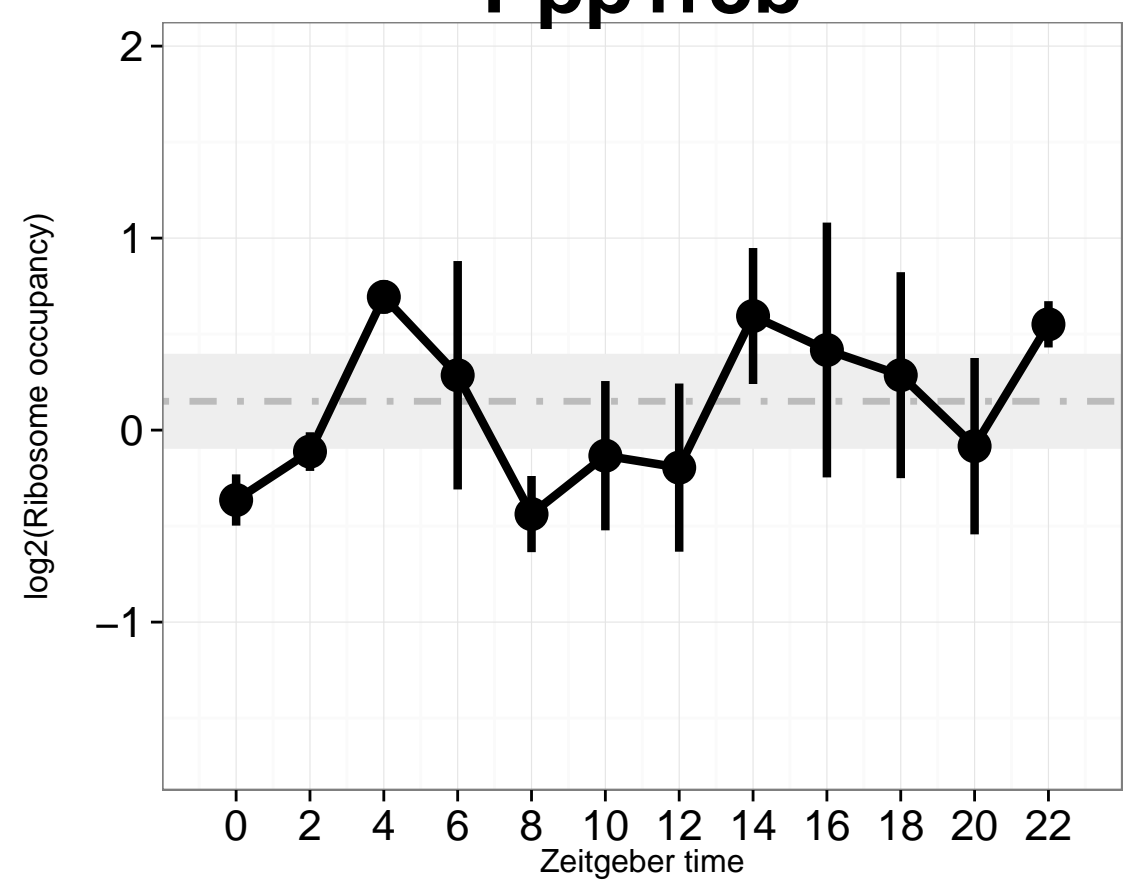

Supplement: Supplementary file 7043 [file 1]

## Slc25a29

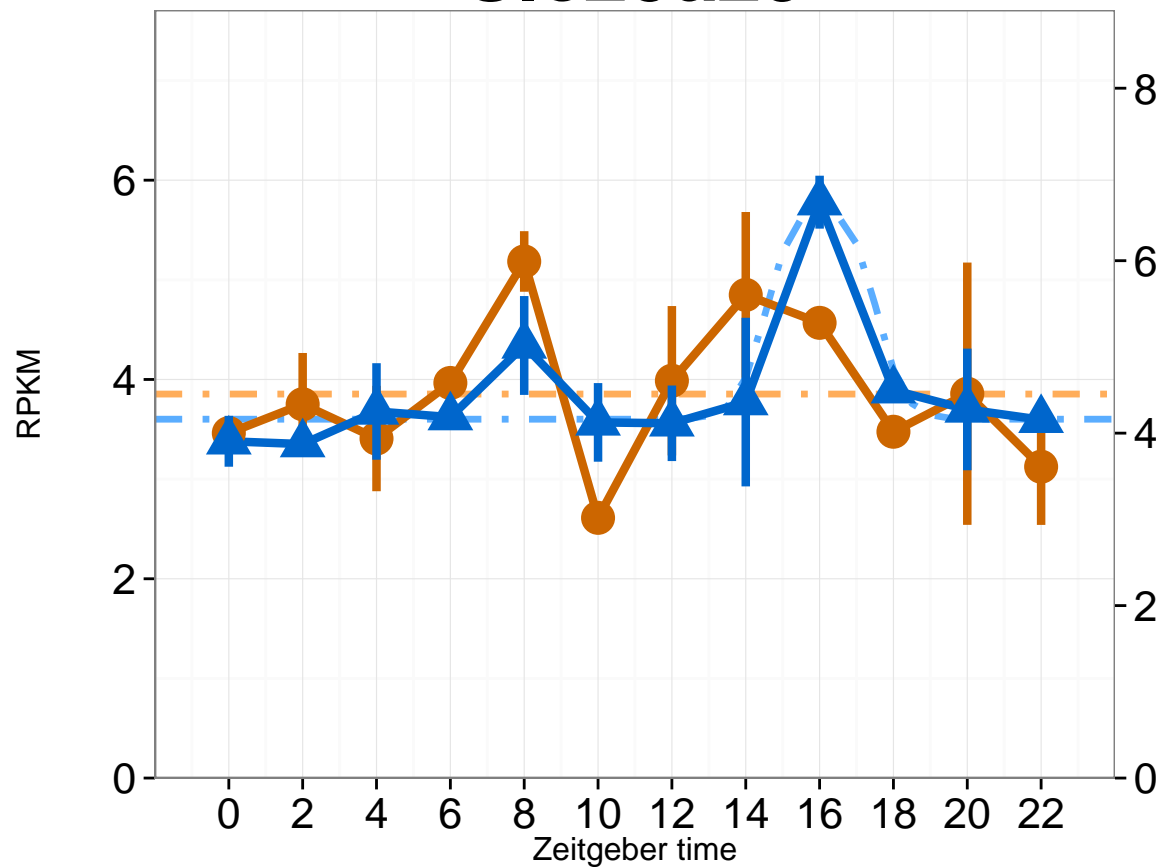

## Slc25a29

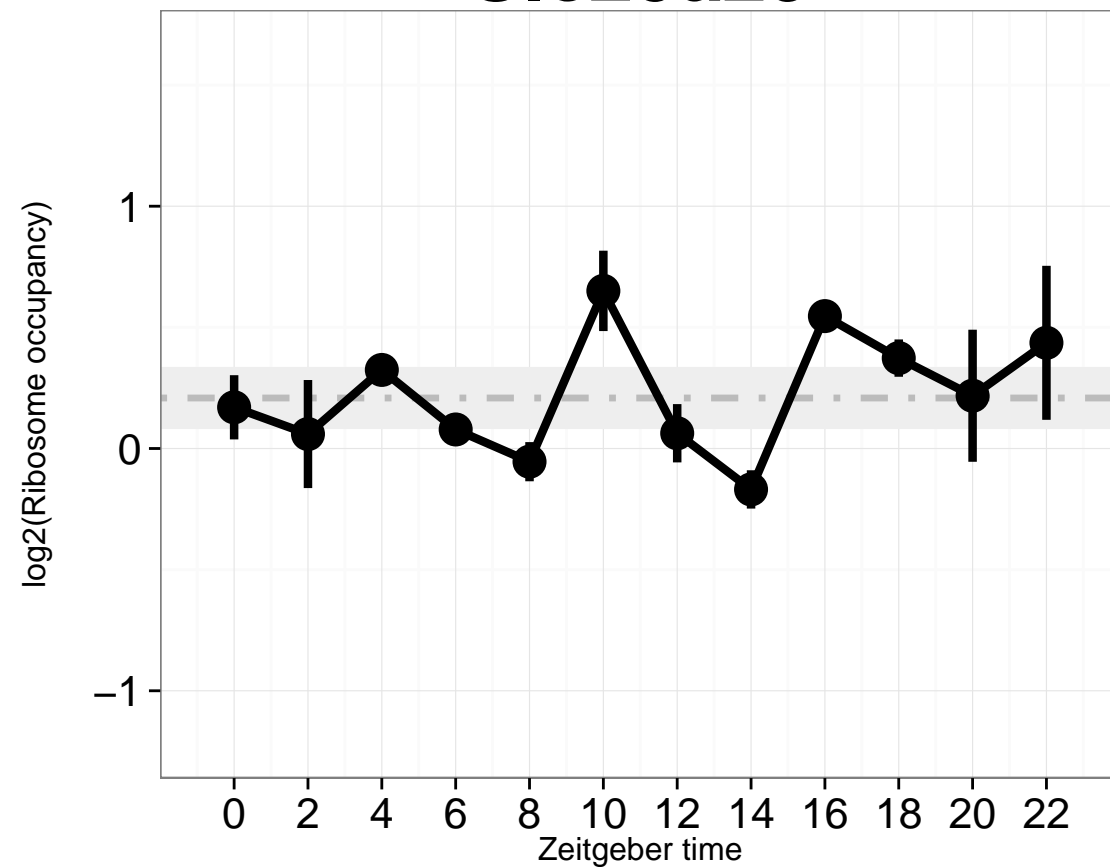

Supplement: Supplementary file 7044 [file 1]

## Phf1

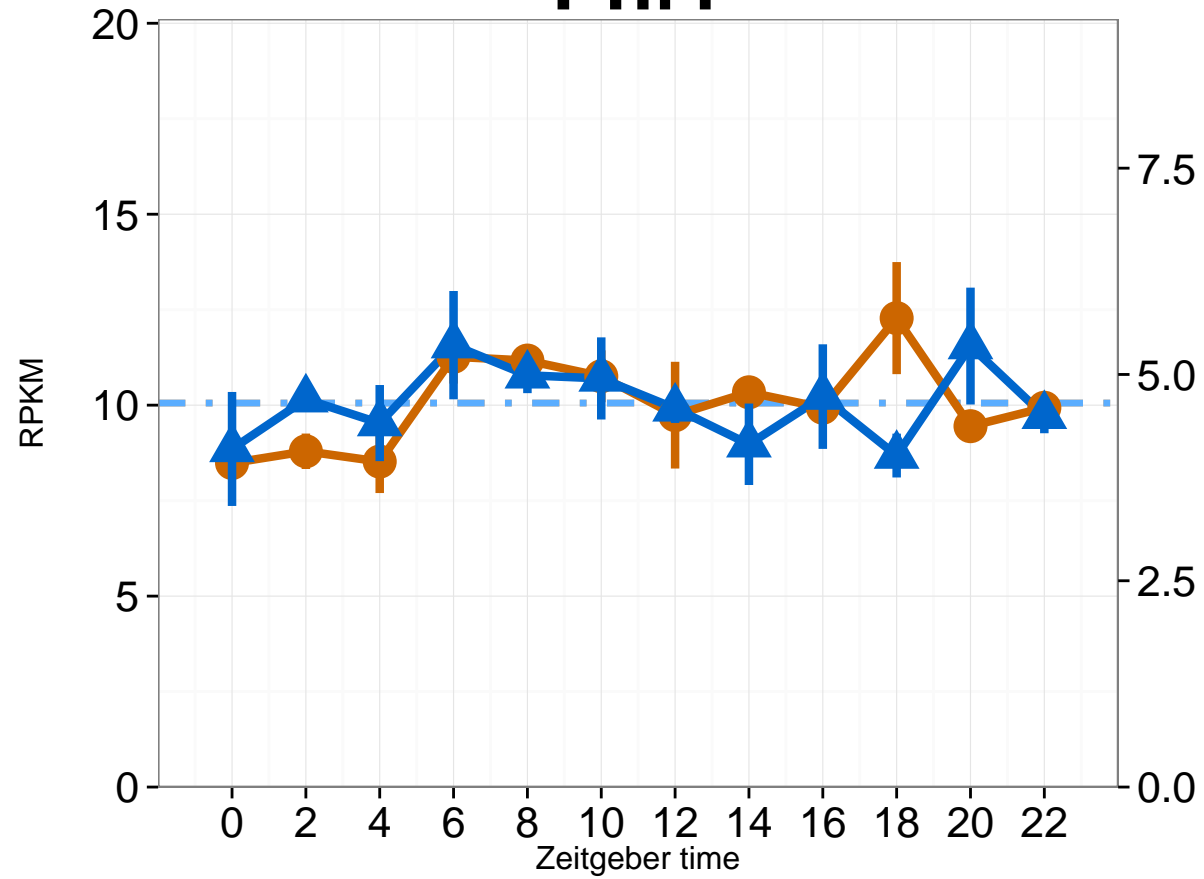

## Phf1

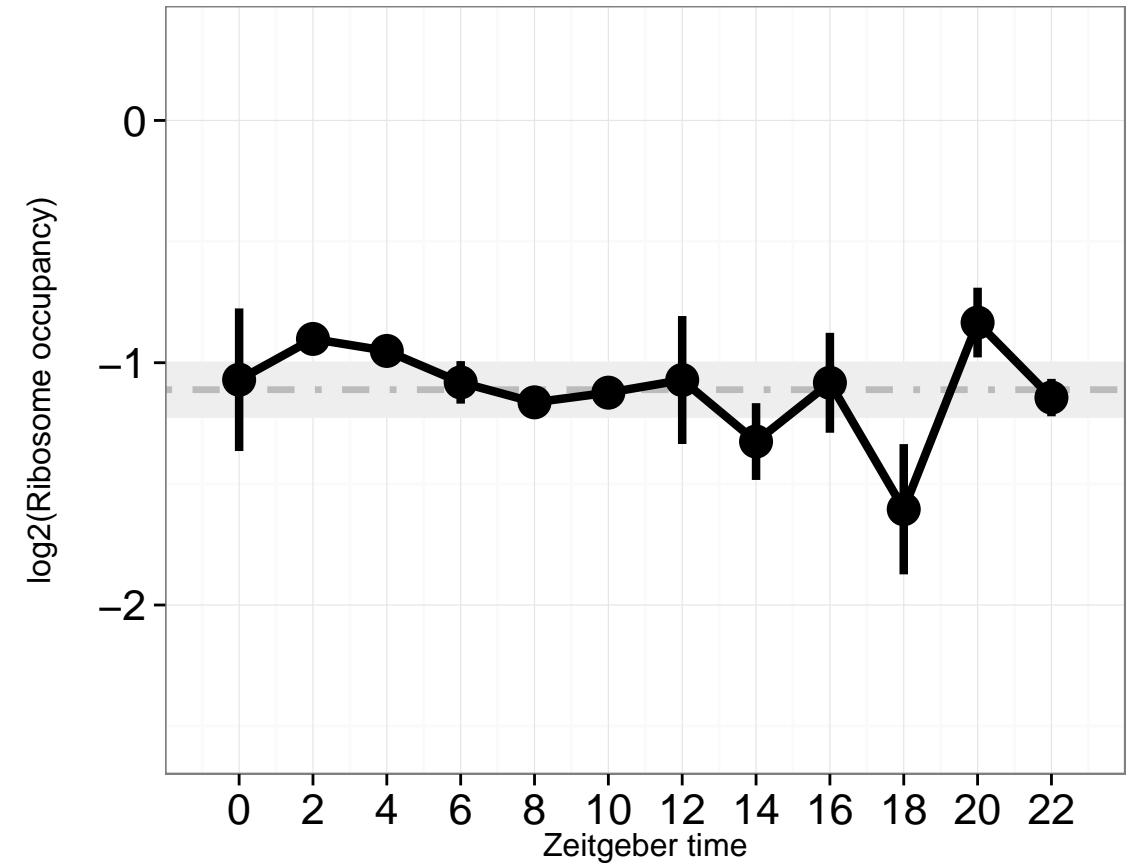

Supplement: Supplementary file 7045 [file 1]

# Nfyb

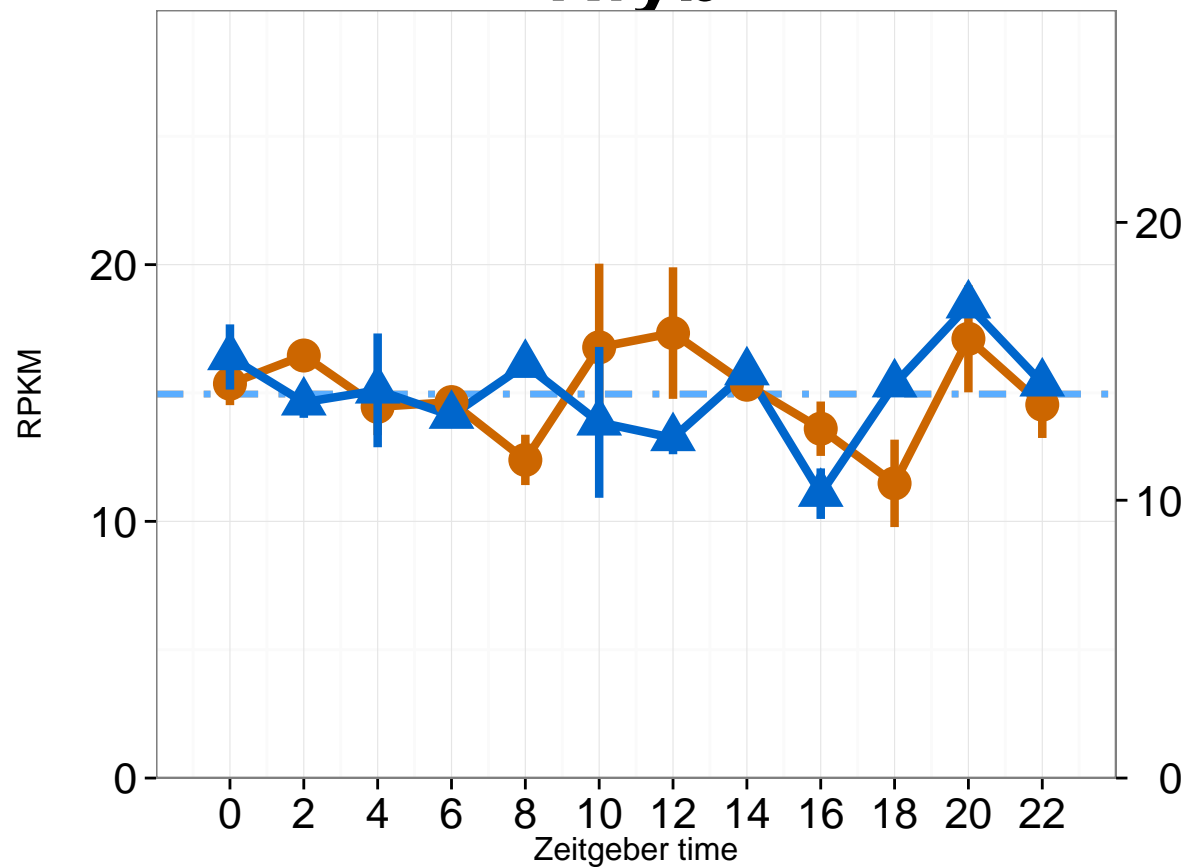

# Nfyb

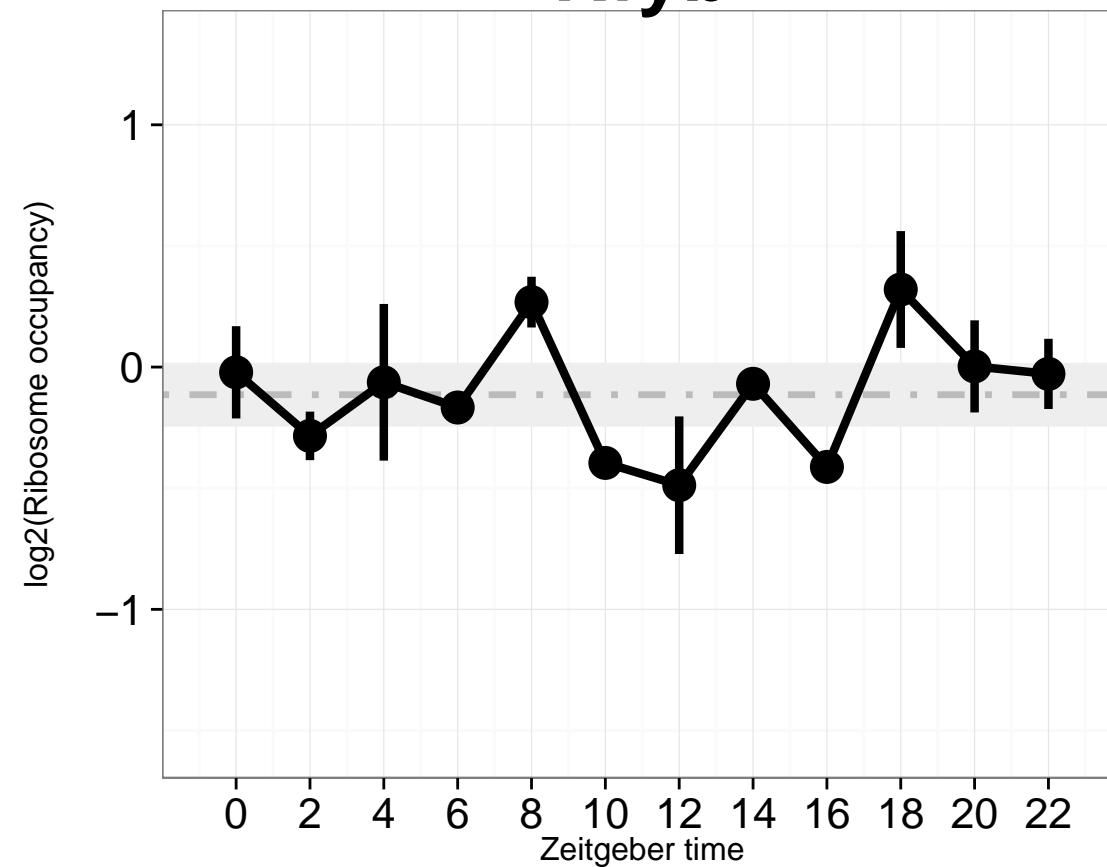

Supplement: Supplementary file 7046 [file 1]

# Mtm1

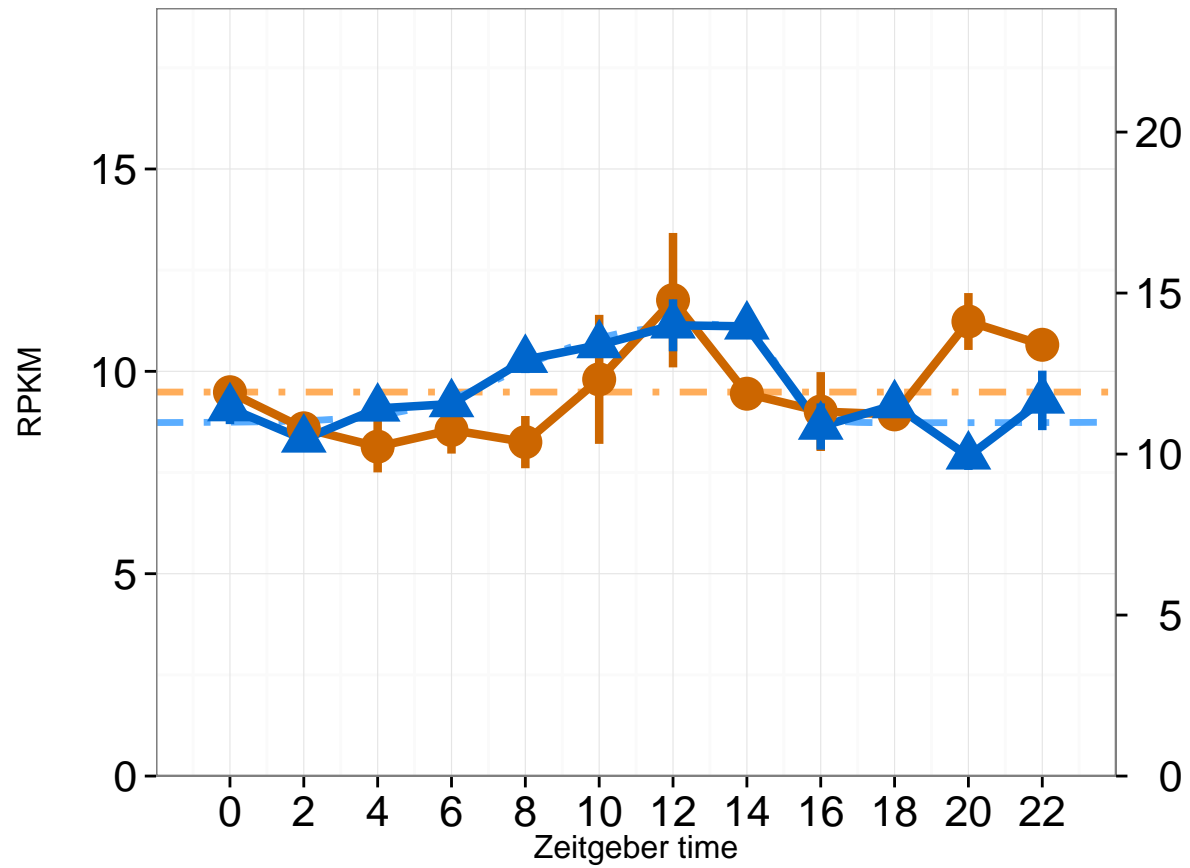

# Mtm1

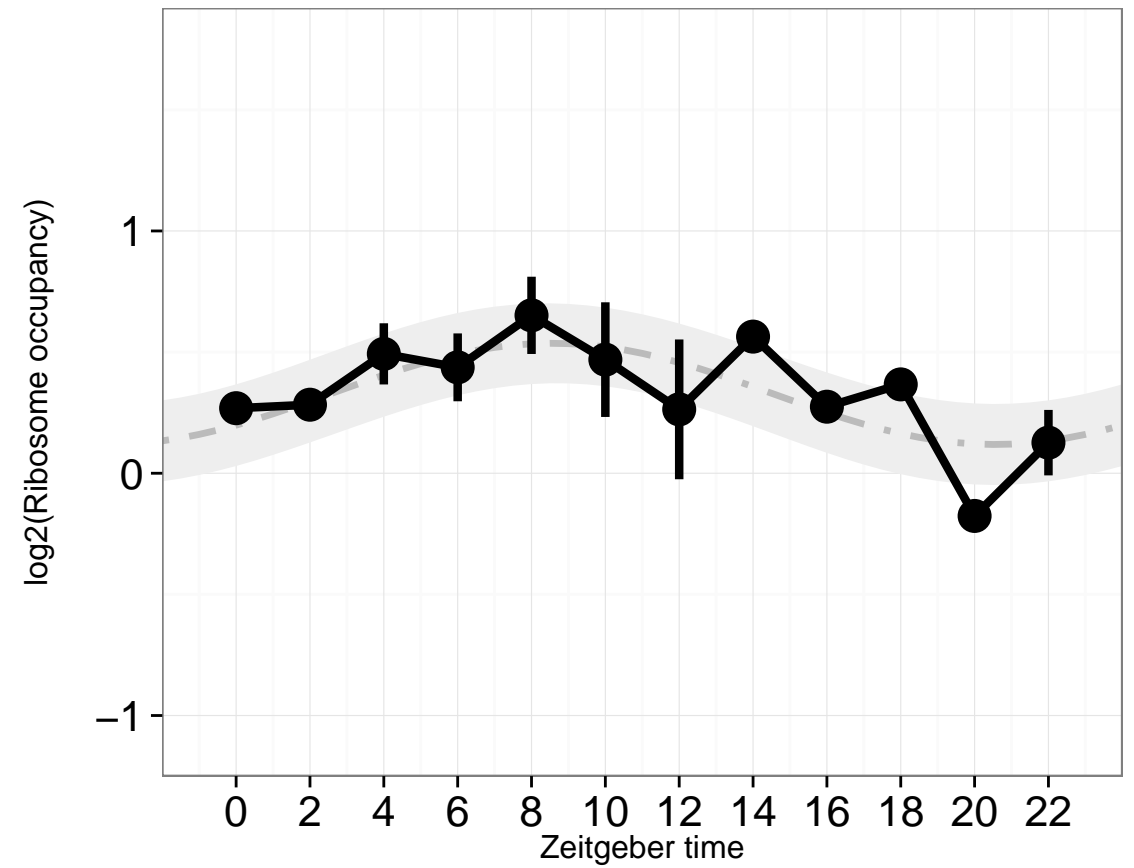

Supplement: Supplementary file 7047 [file 1]

## Fyttd1

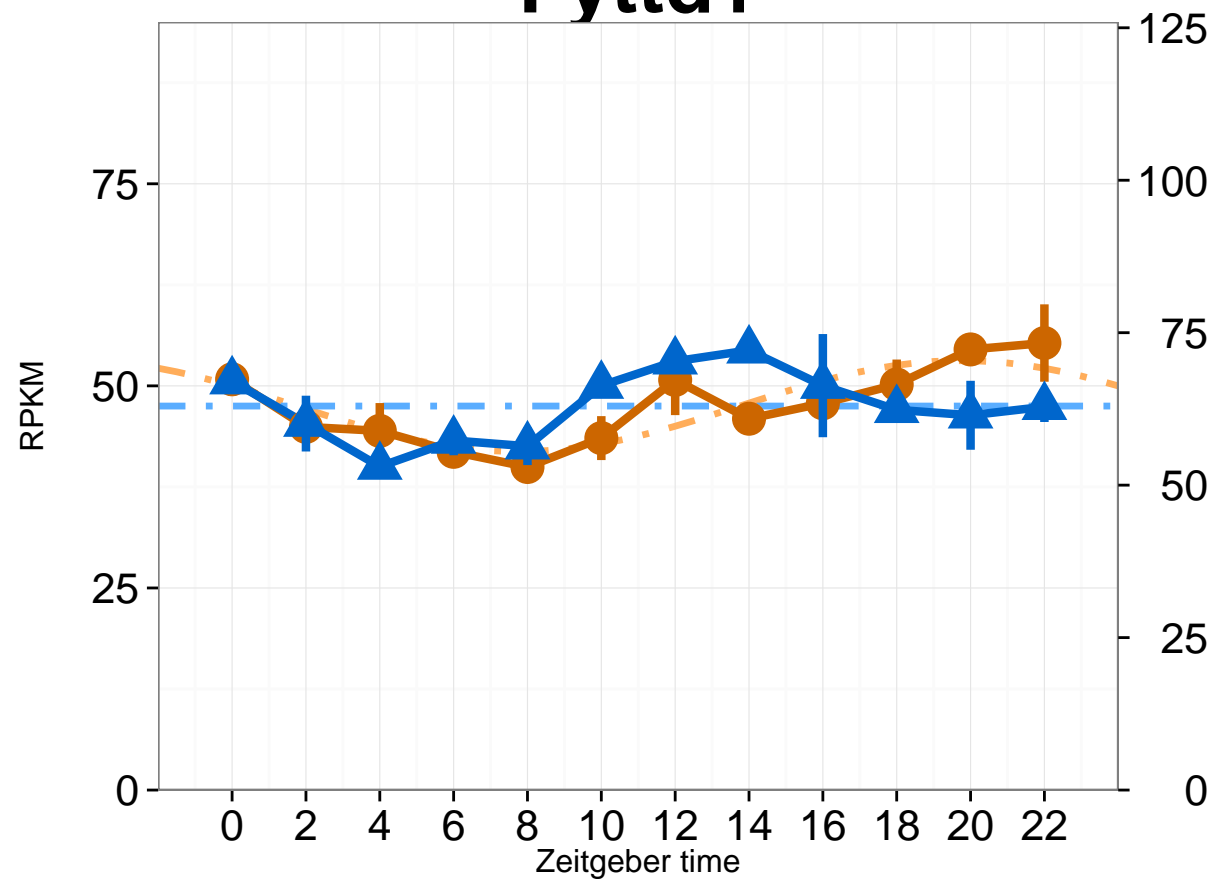

## Fyttd1

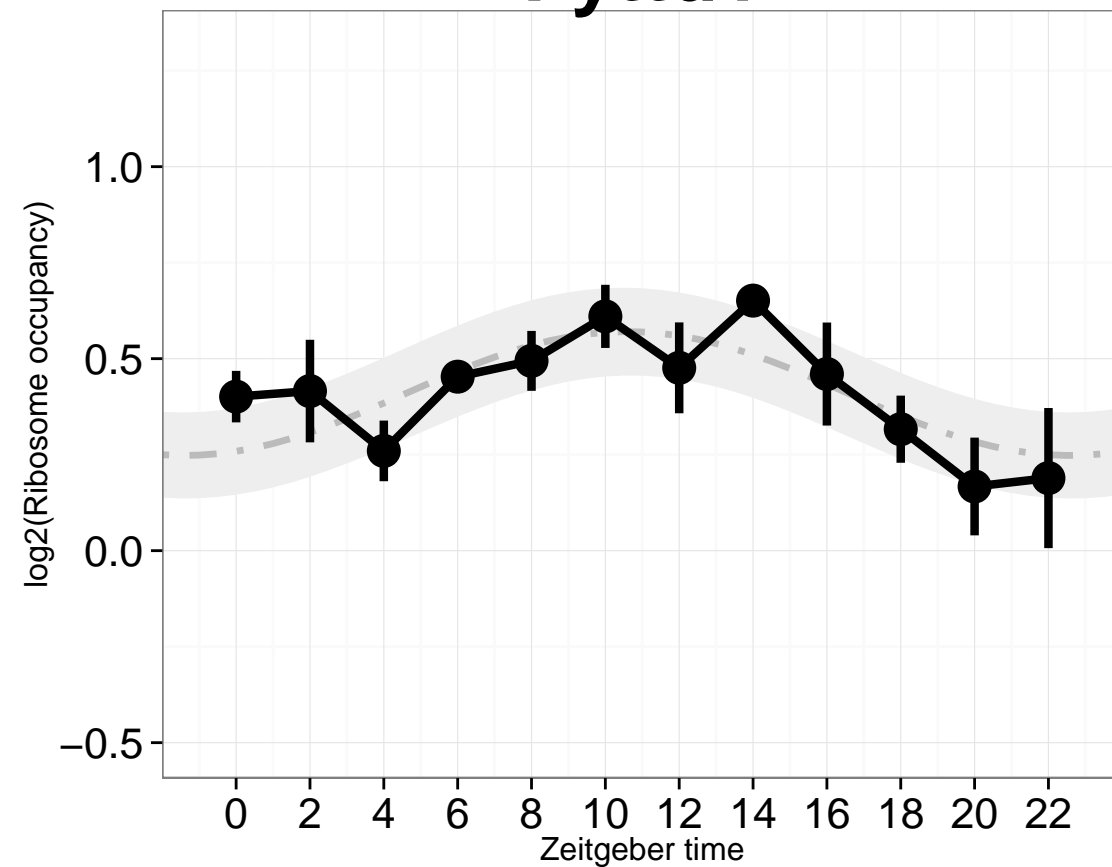

Supplement: Supplementary file 7048 [file 1]

# Avpr1a

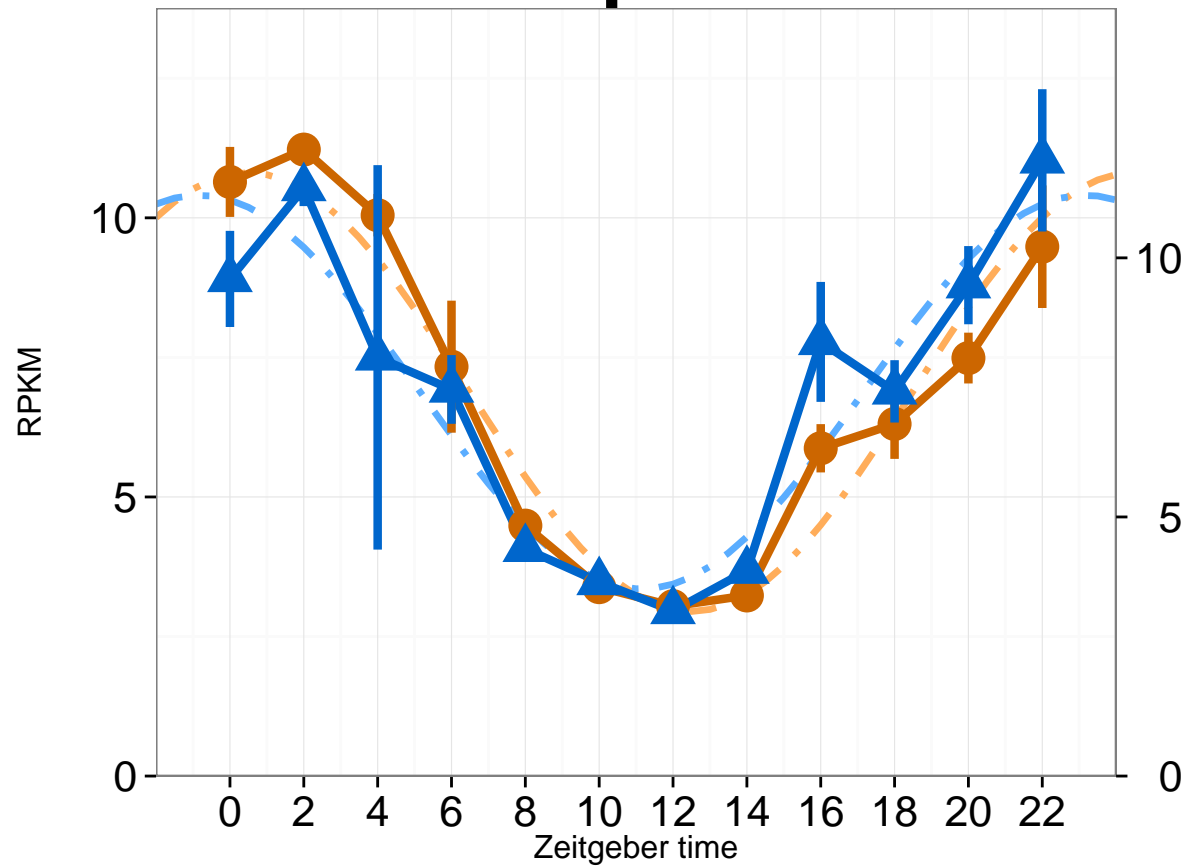

# Avpr1a

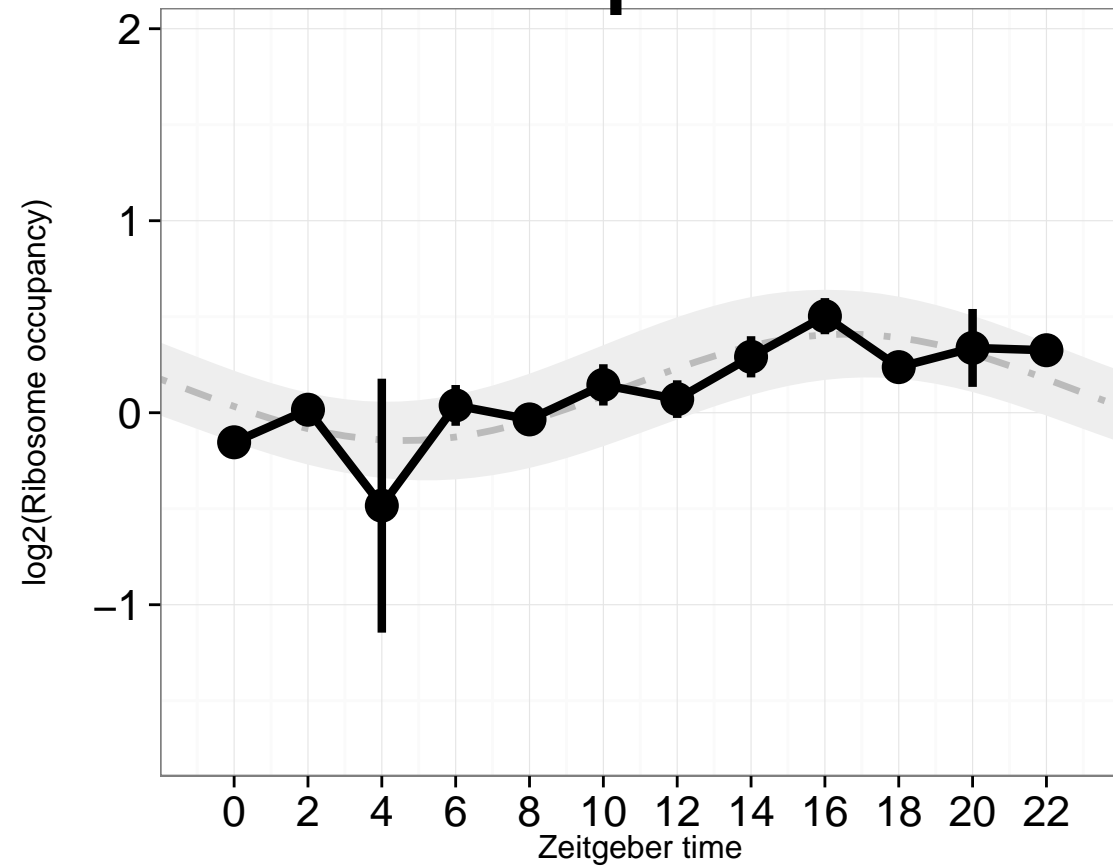

Supplement: Supplementary file 7049 [file 1]

## Bok

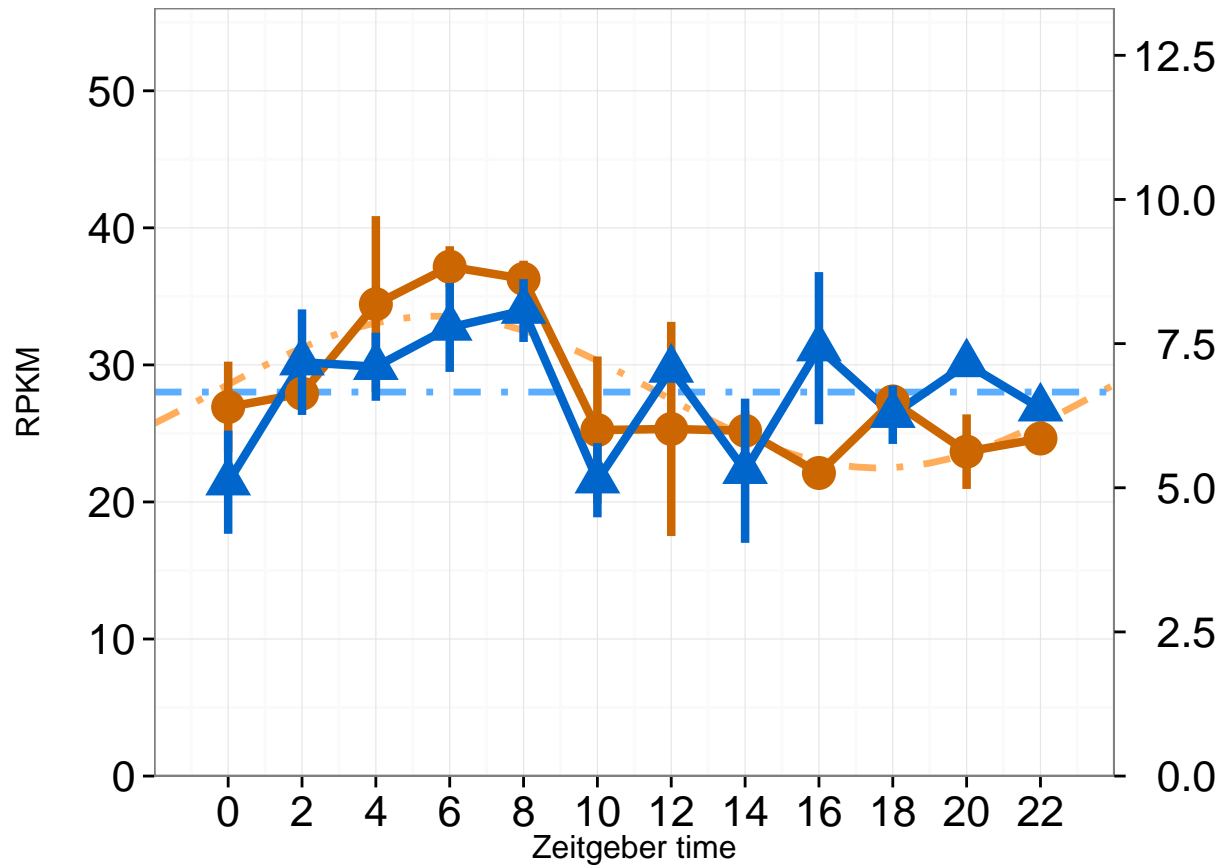

## Bok

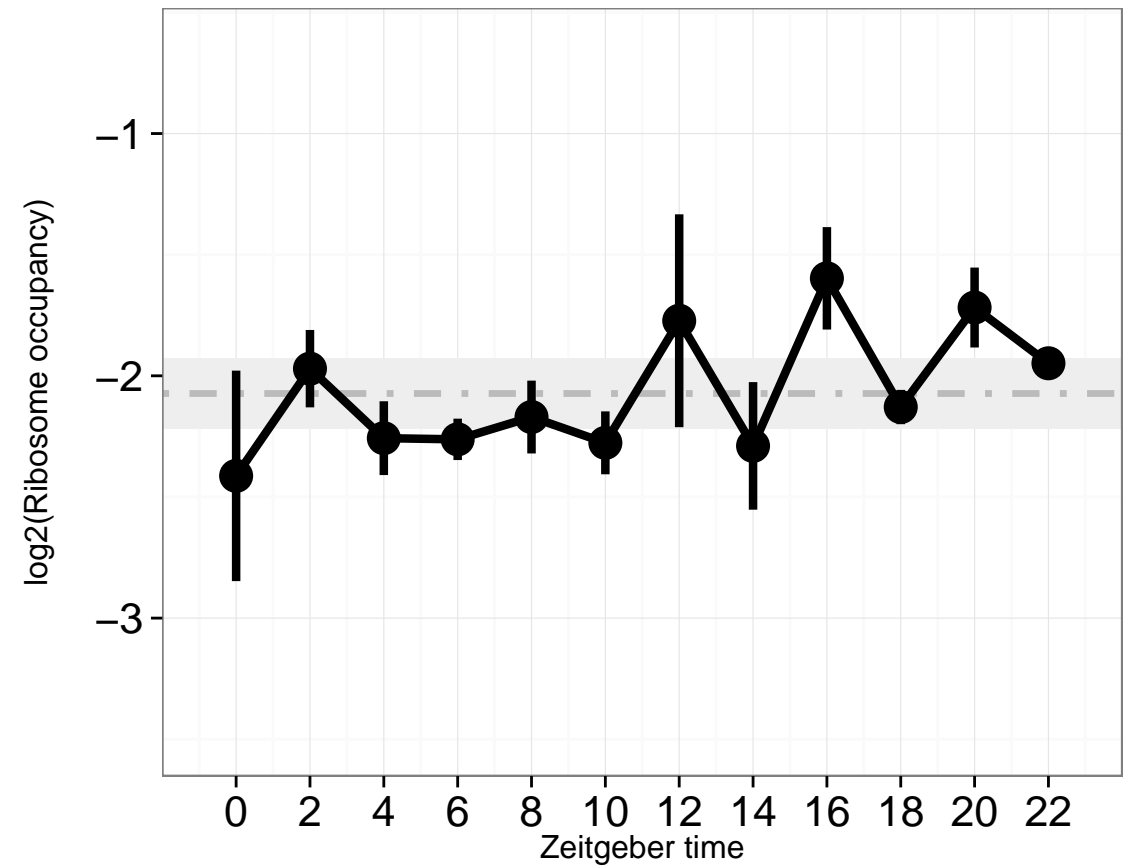

Supplement: Supplementary file 7050 [file 1]

# Myl12a

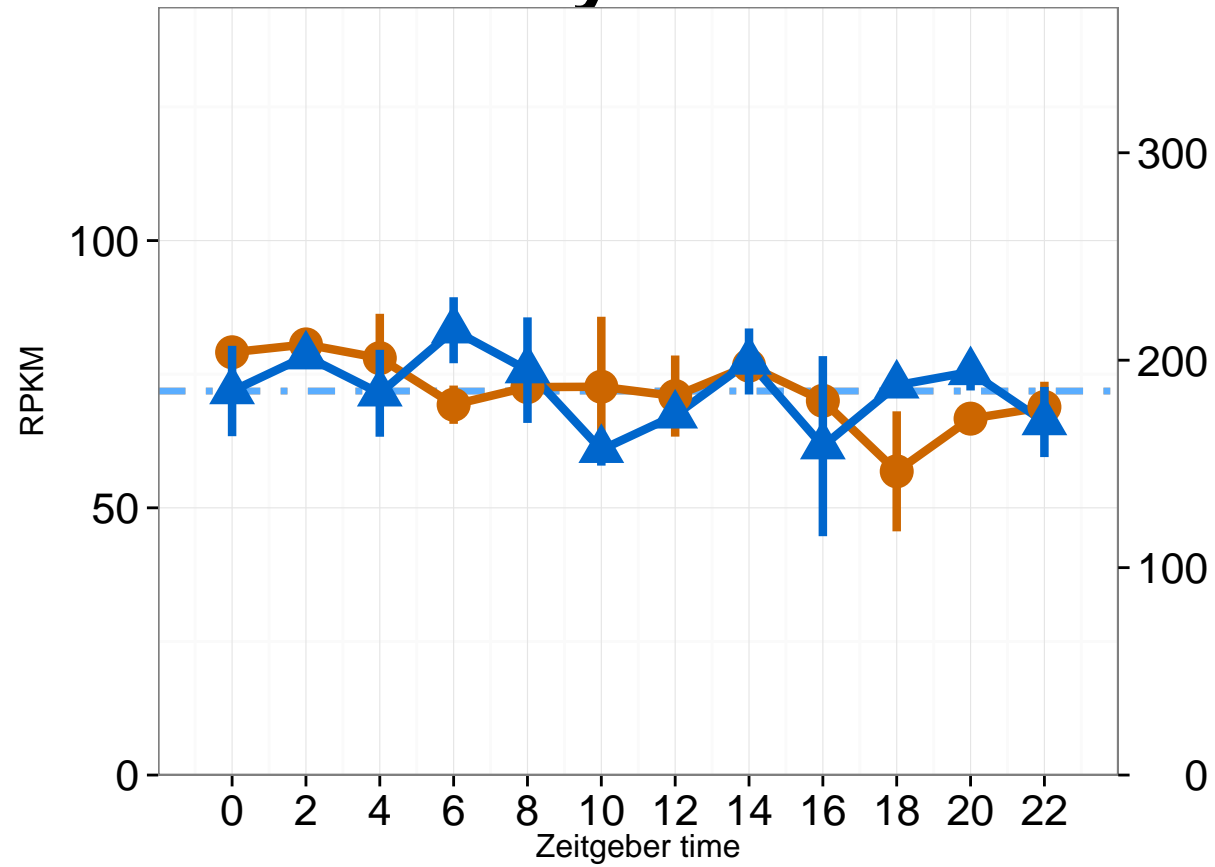

# Myl12a

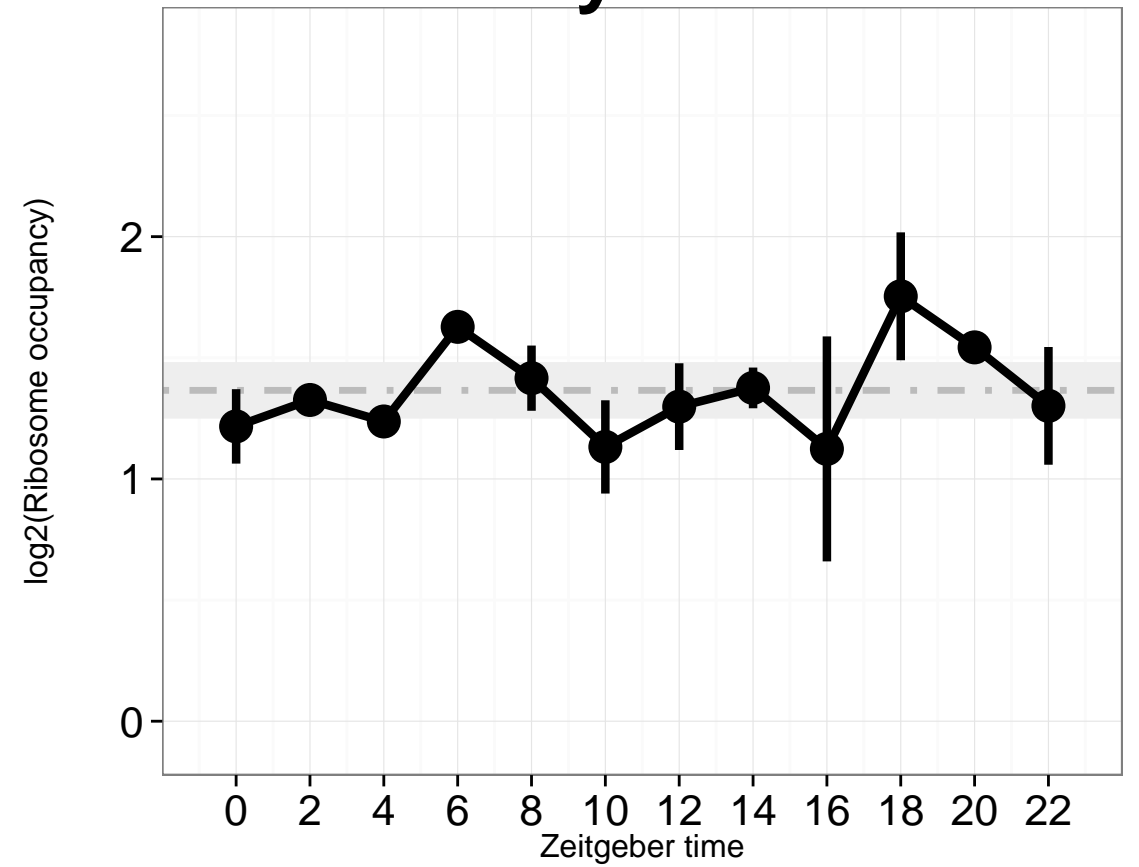

Supplement: Supplementary file 7051 [file 1]

## Lpin1

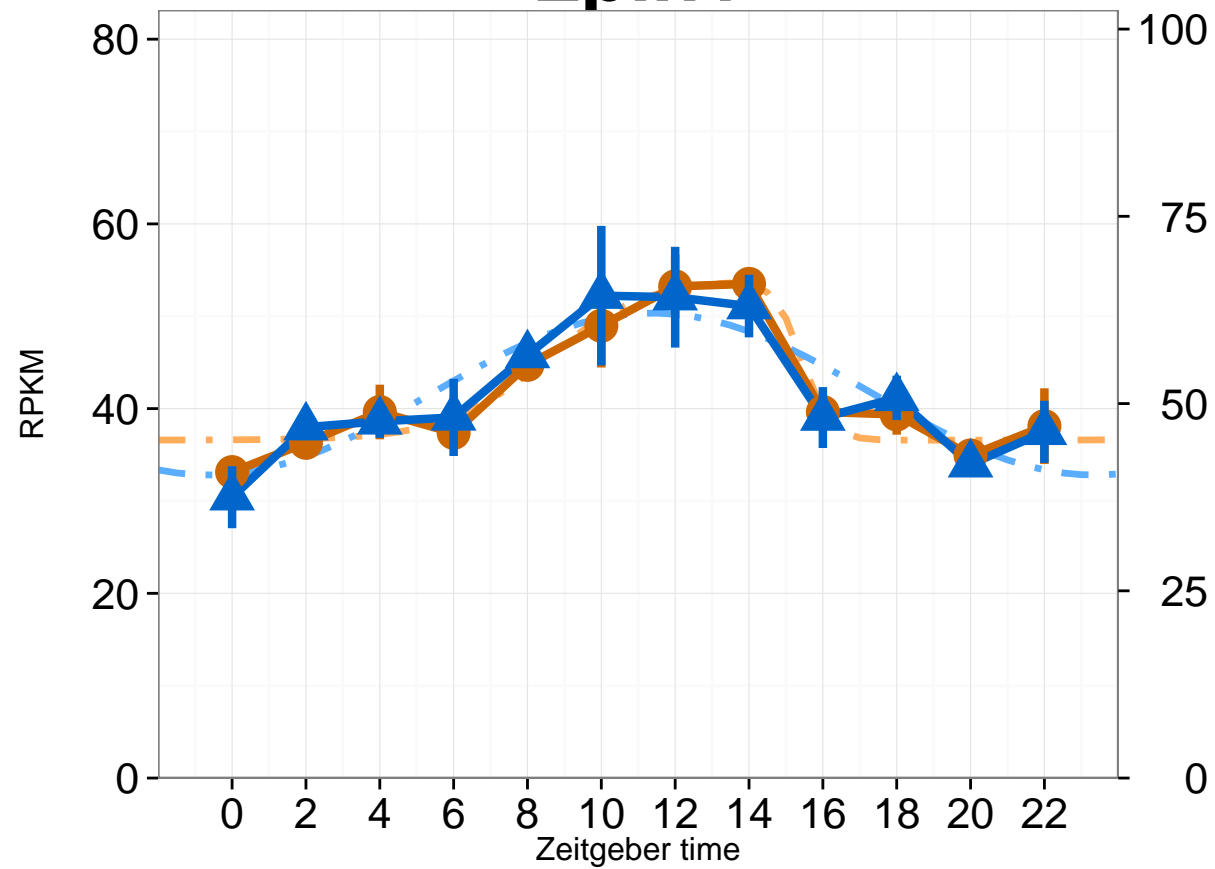

## Lpin1

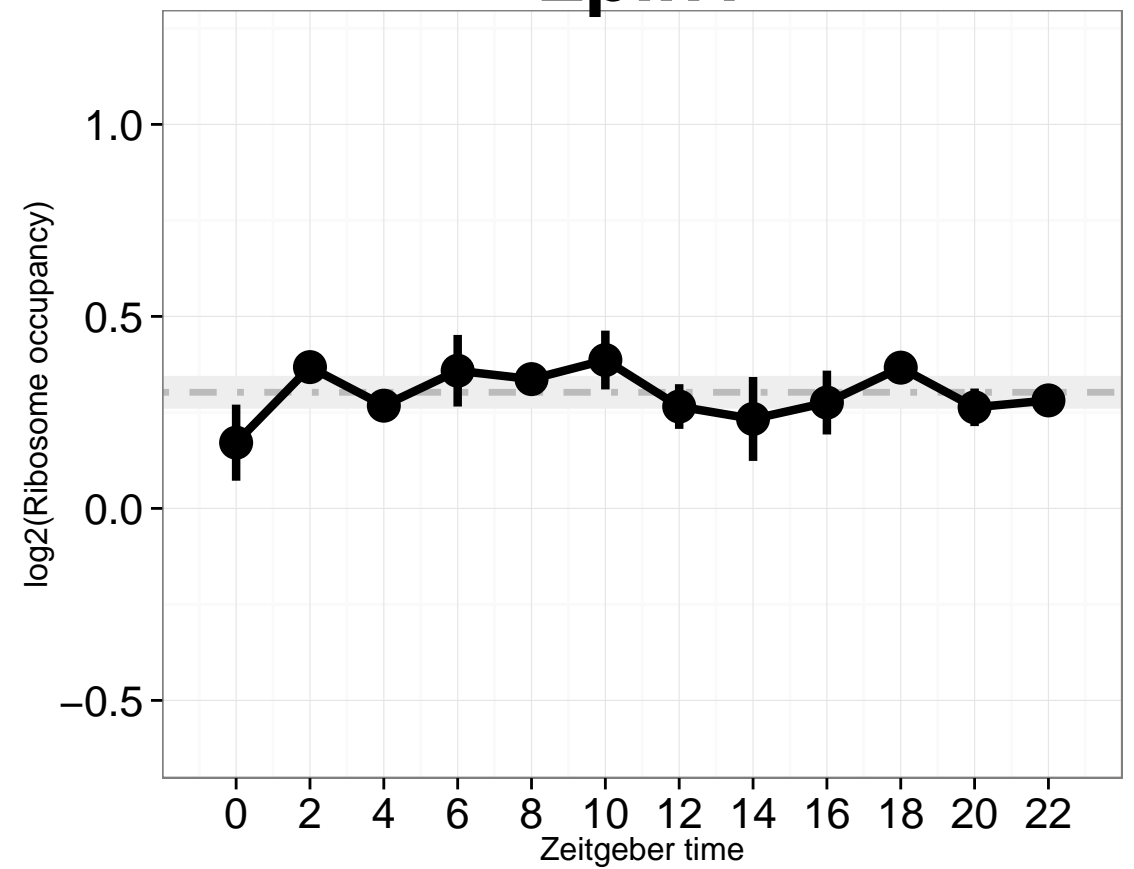

Supplement: Supplementary file 7052 [file 1]

# Lrrk1

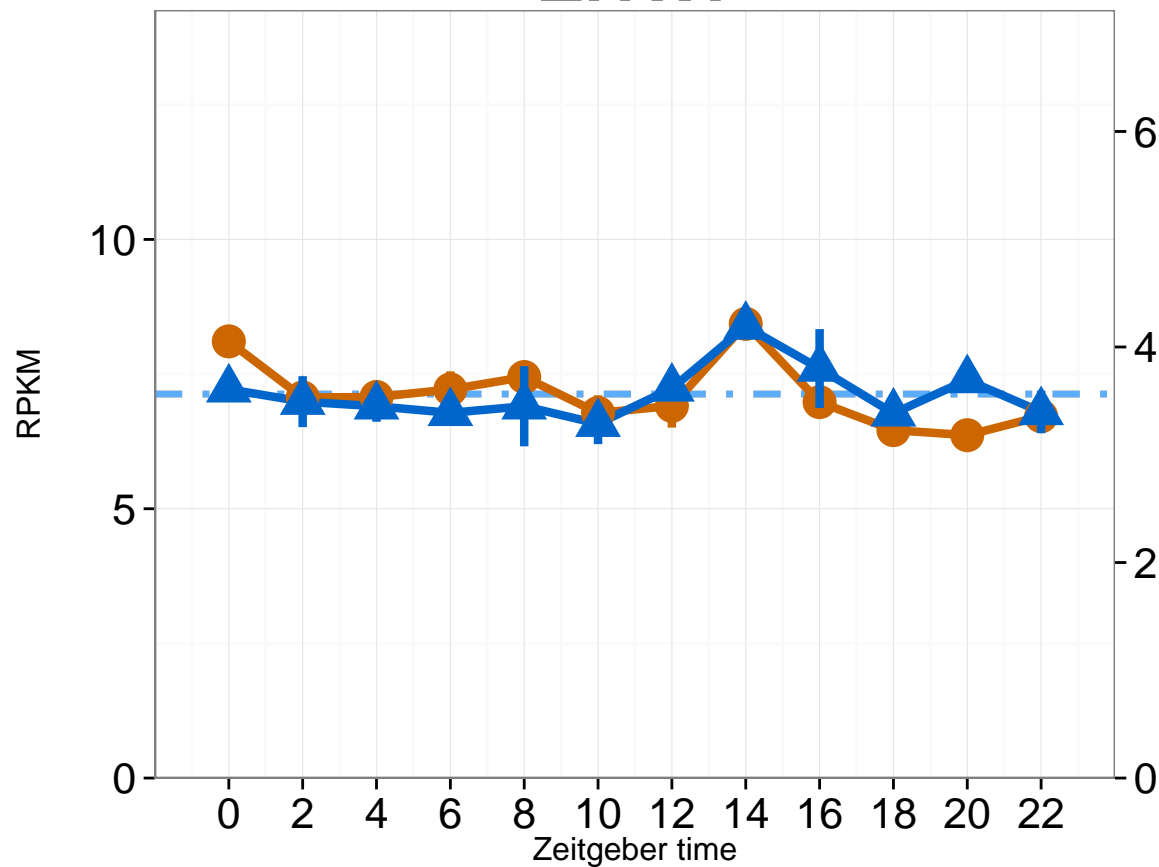

# Lrrk1

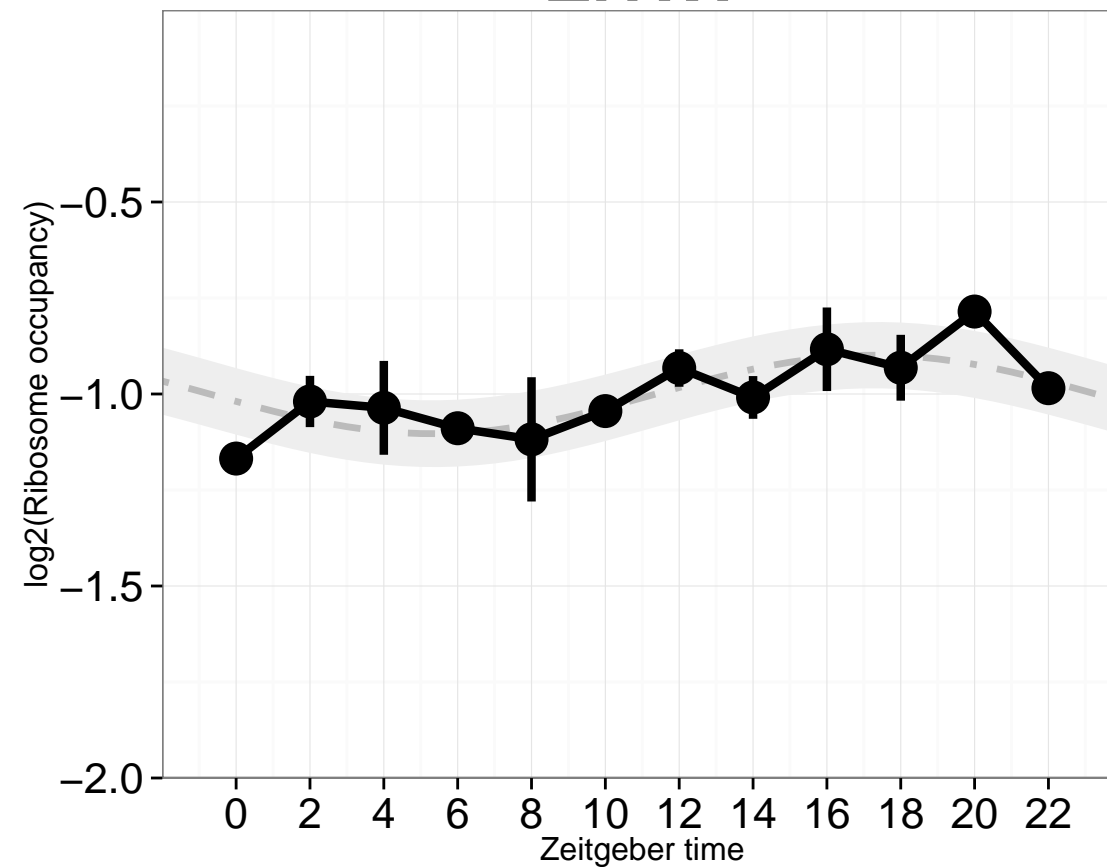

Supplement: Supplementary file 7053 [file 1]

## Lrrc1

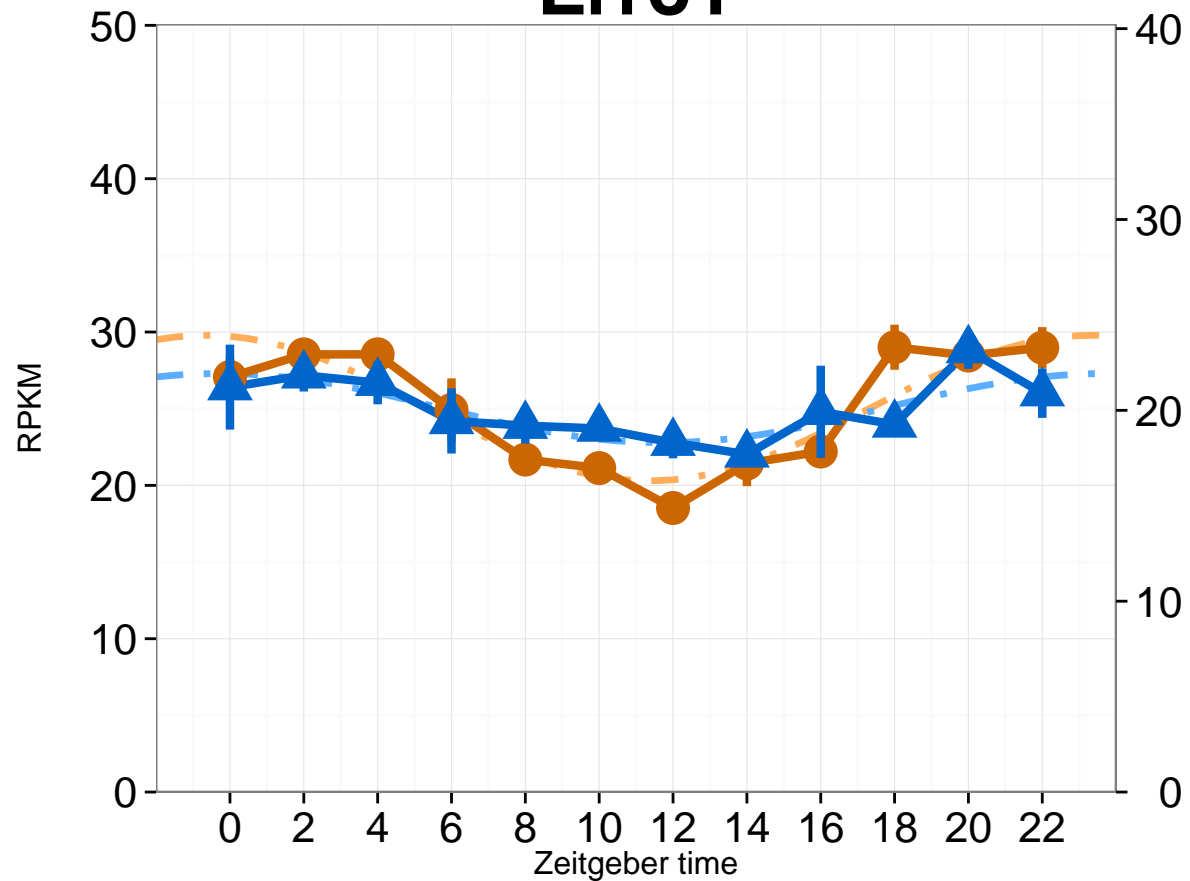

## Lrrc1

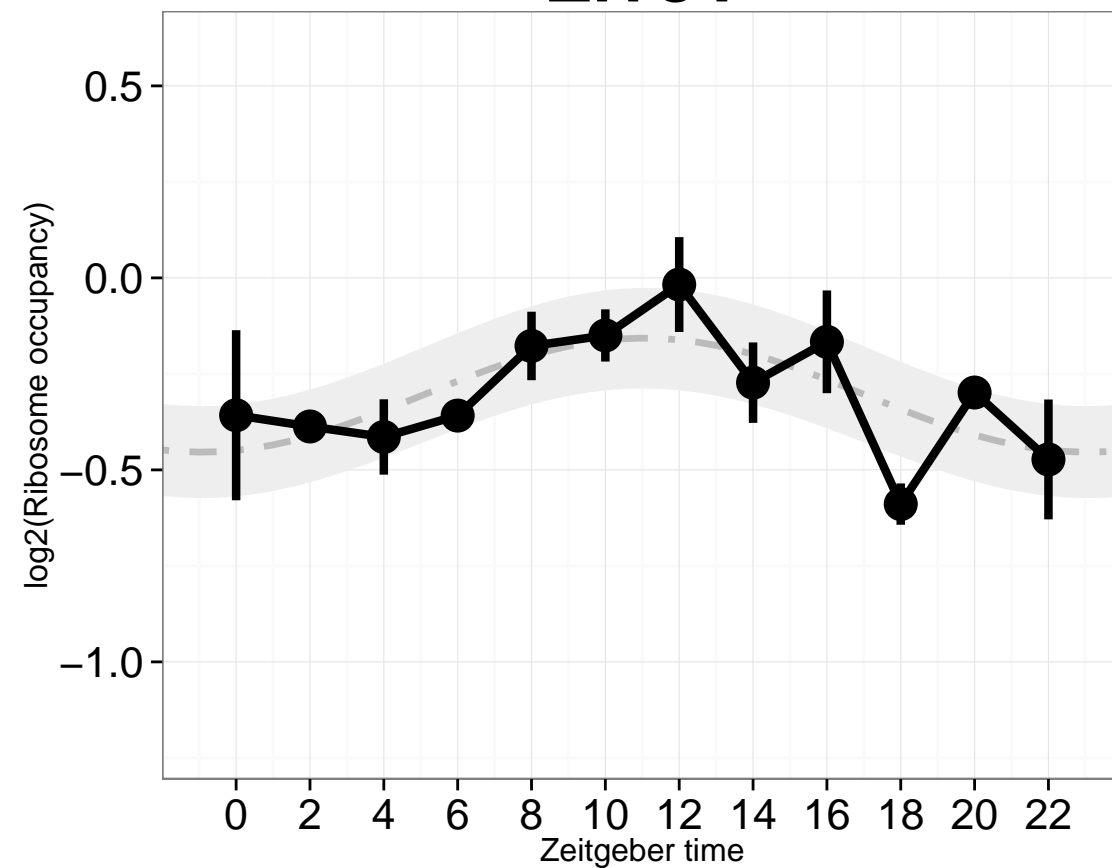

Supplement: Supplementary file 7054 [file 1]

# Rgp1

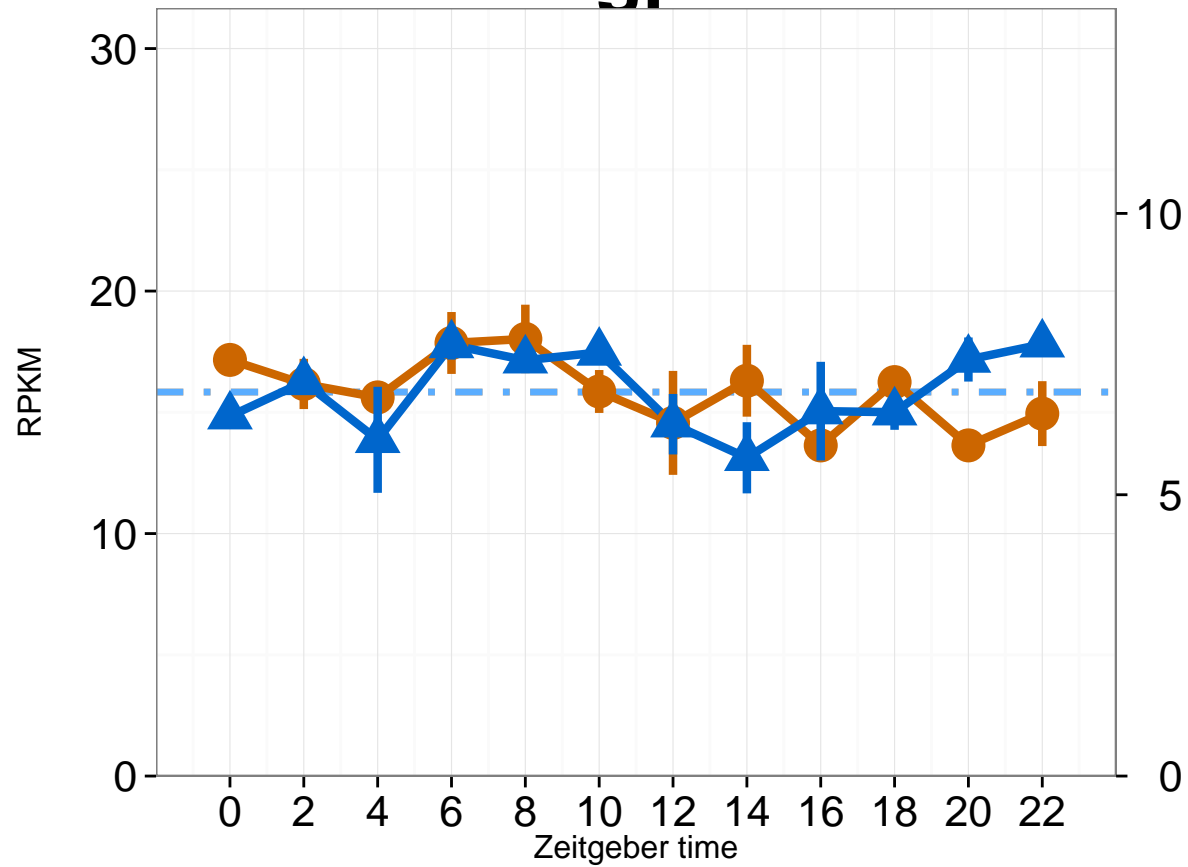

# Rgp1

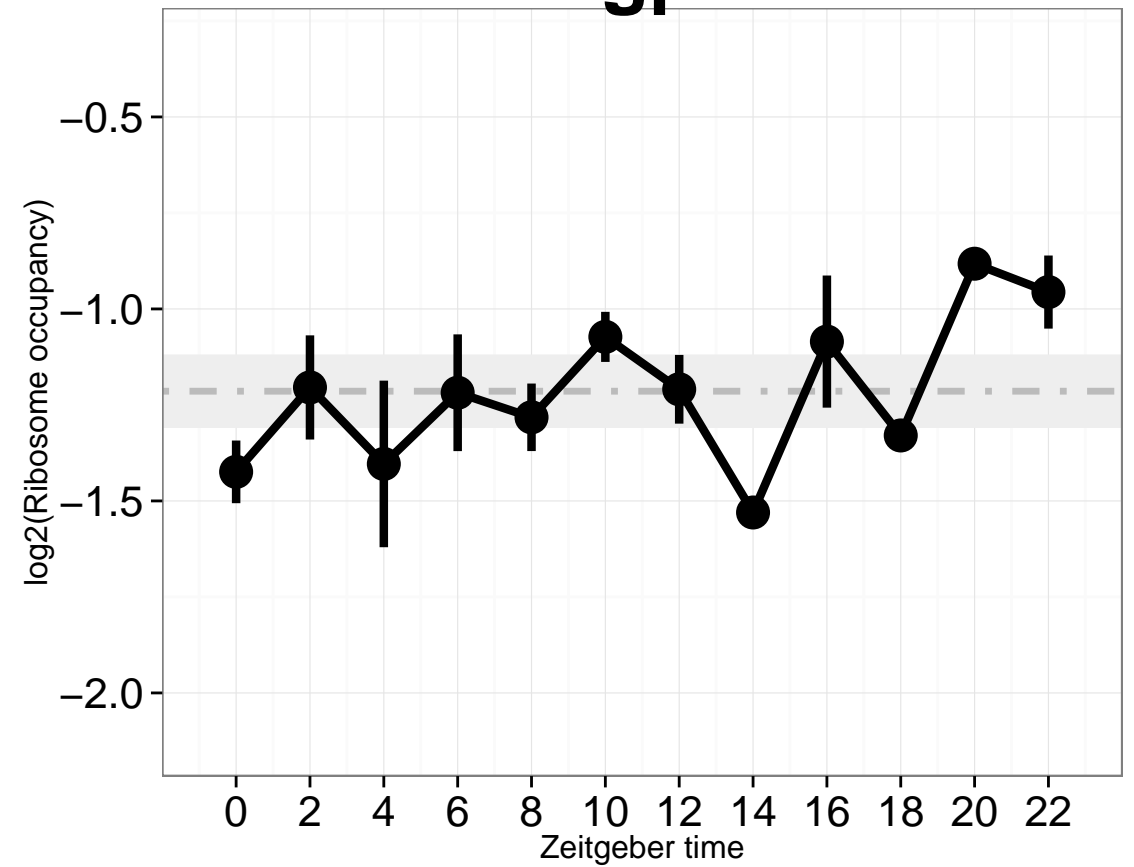

Supplement: Supplementary file 7055 [file 1]

# Pank4

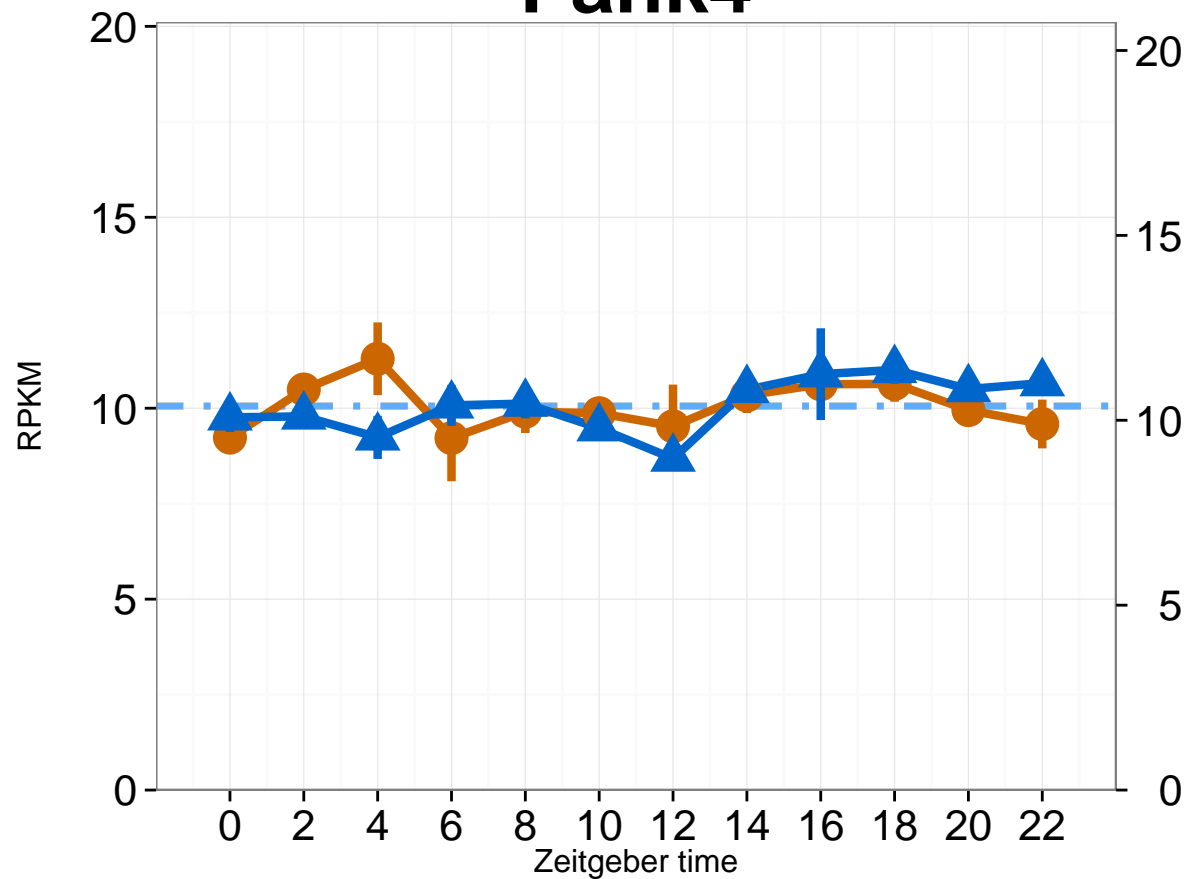

# Pank4

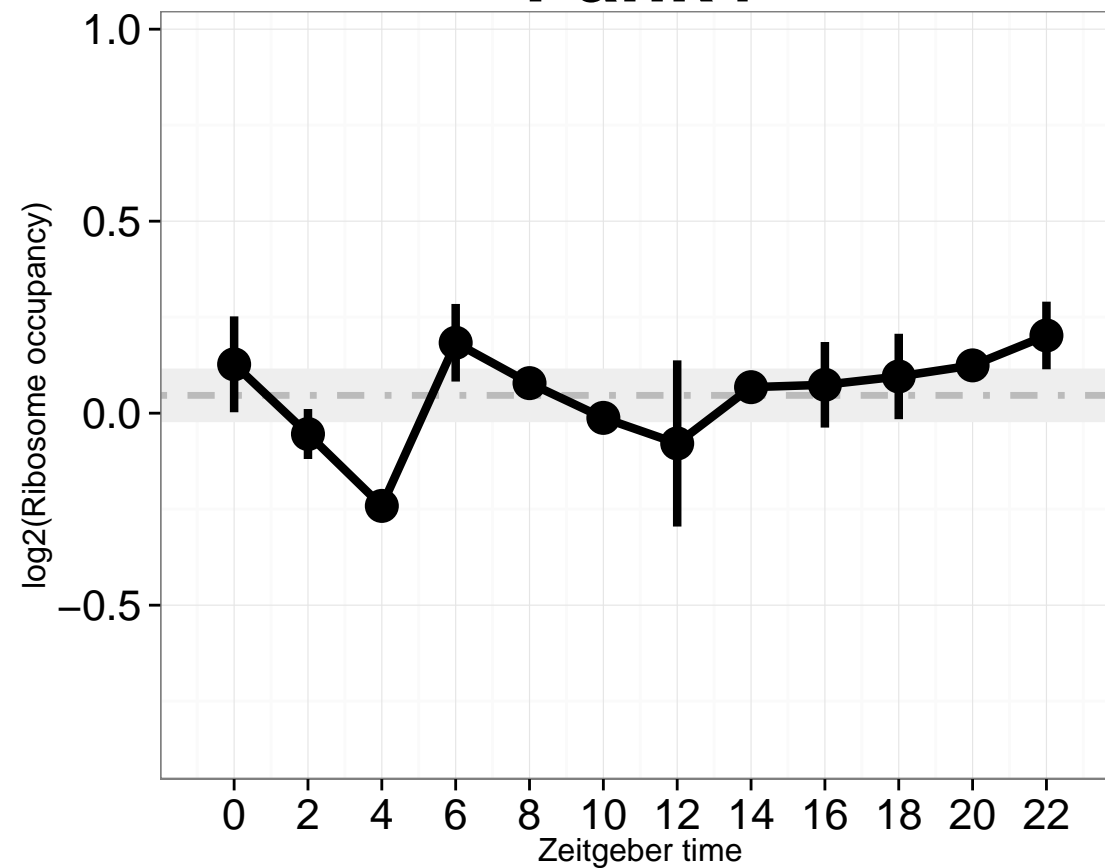

Supplement: Supplementary file 7056 [file 1]

## Alb

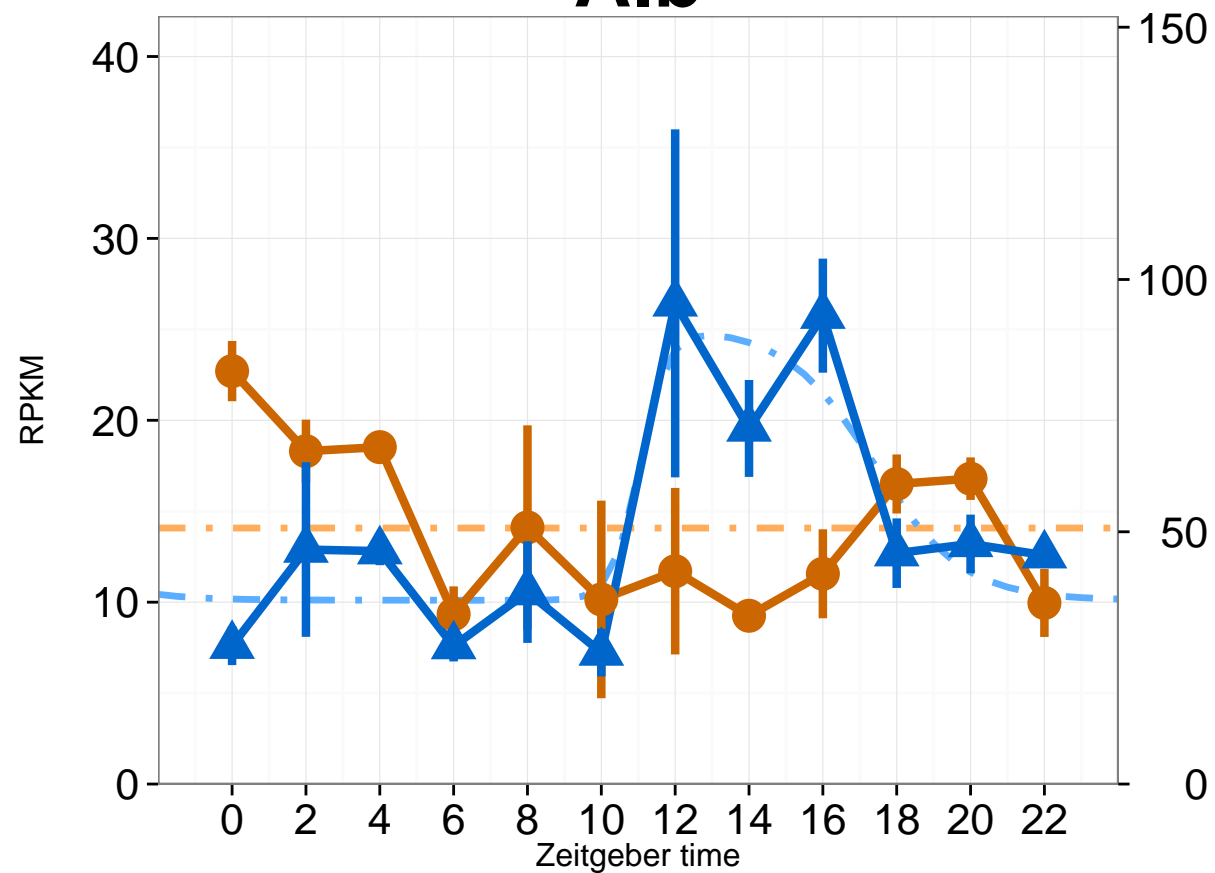

## Alb

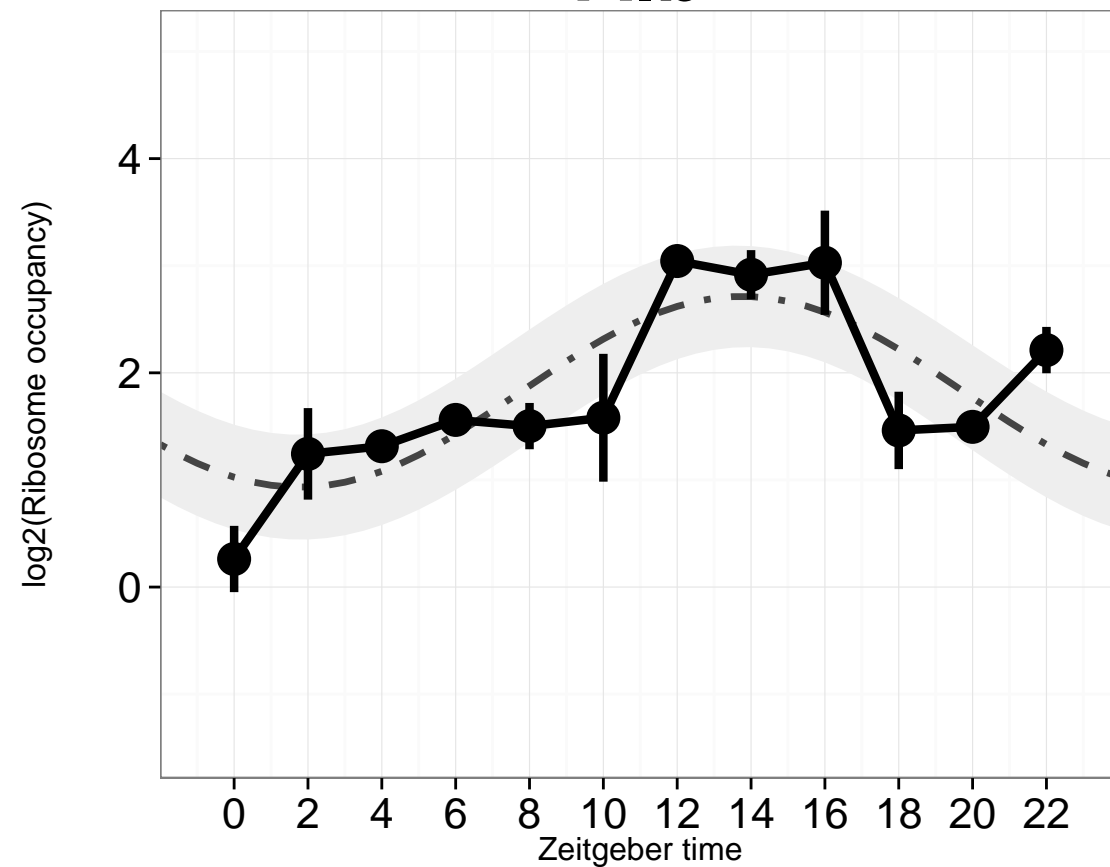

Supplement: Supplementary file 7057 [file 1]

# Mtf2

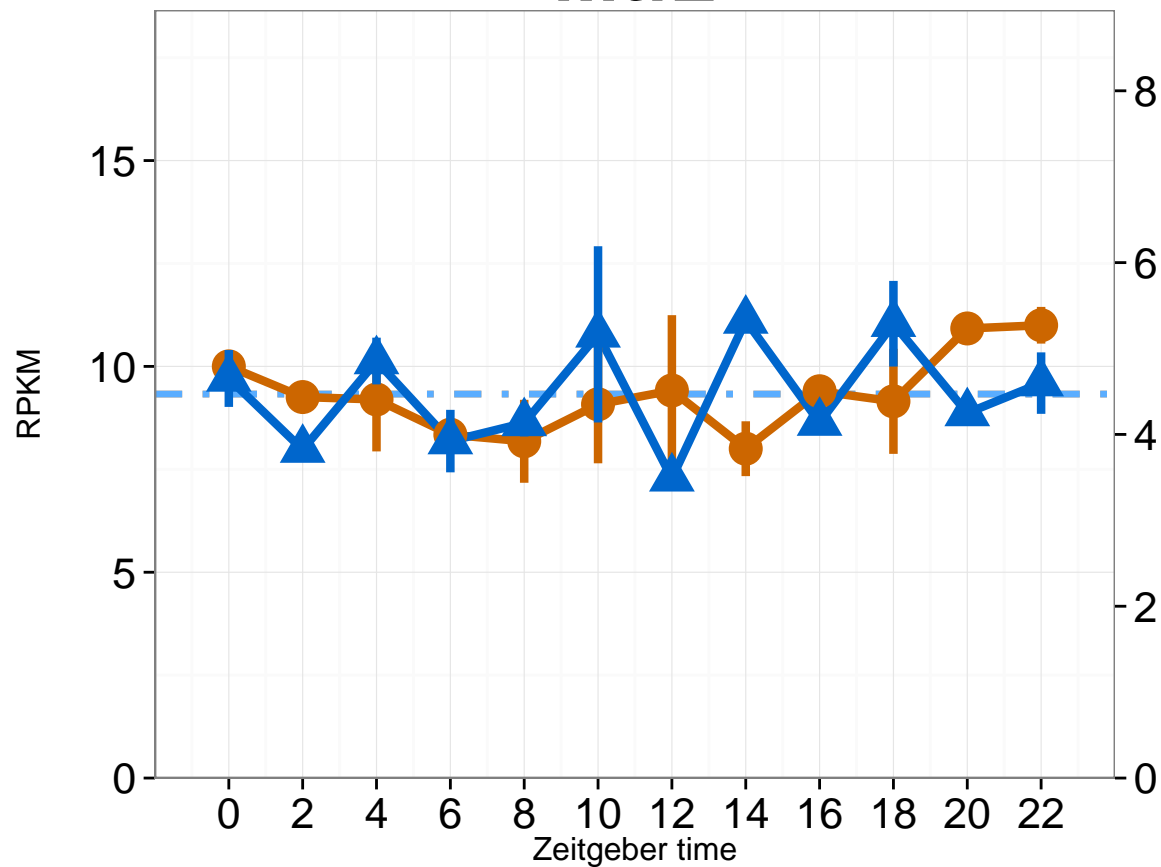

# Mtf2

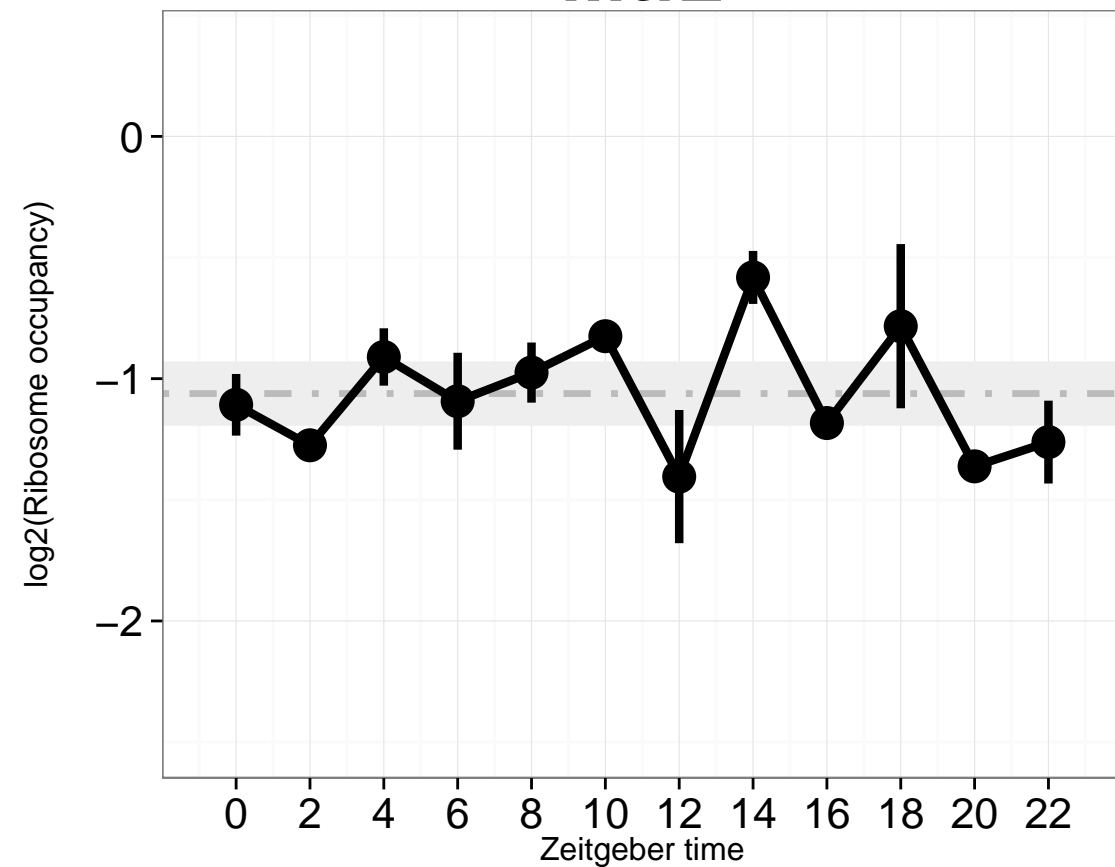

Supplement: Supplementary file 7058 [file 1]

# Csnk2b

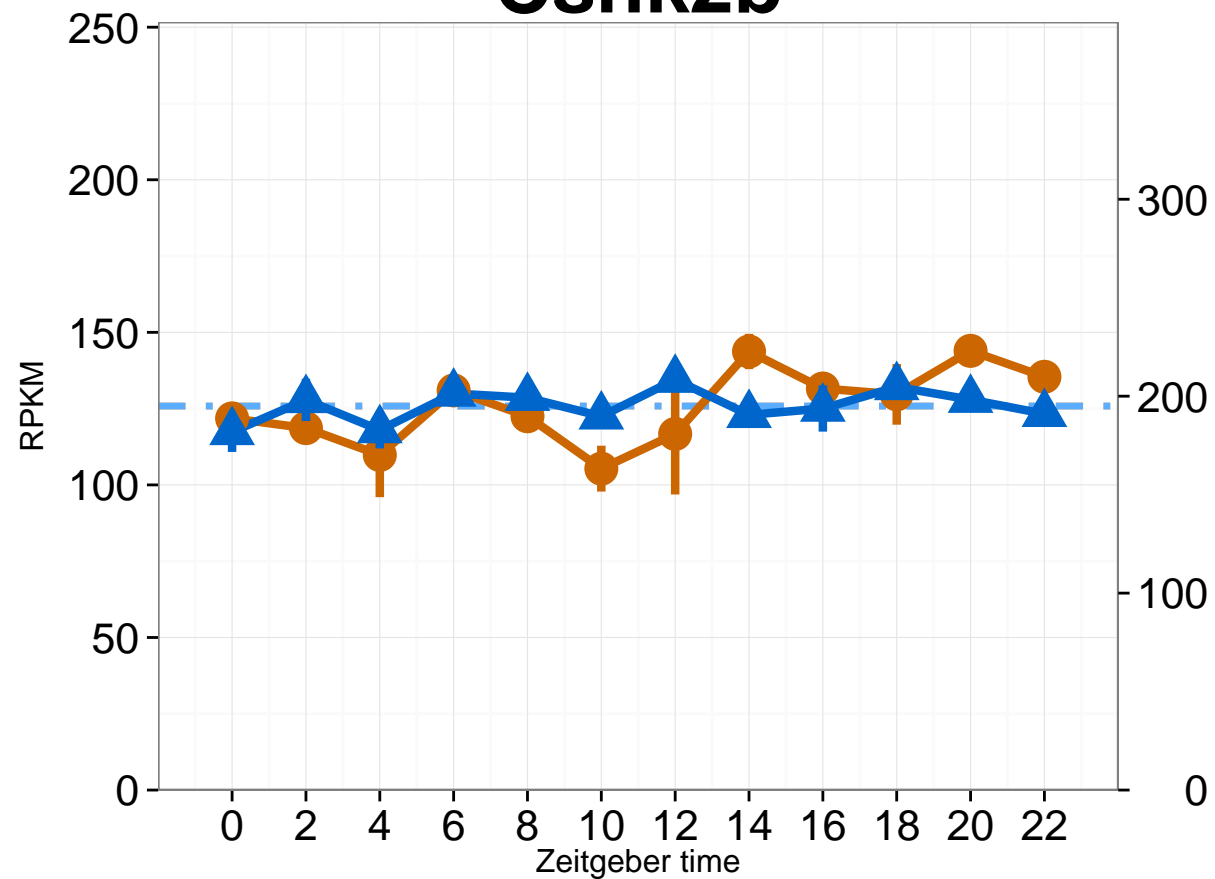

# Csnk2b

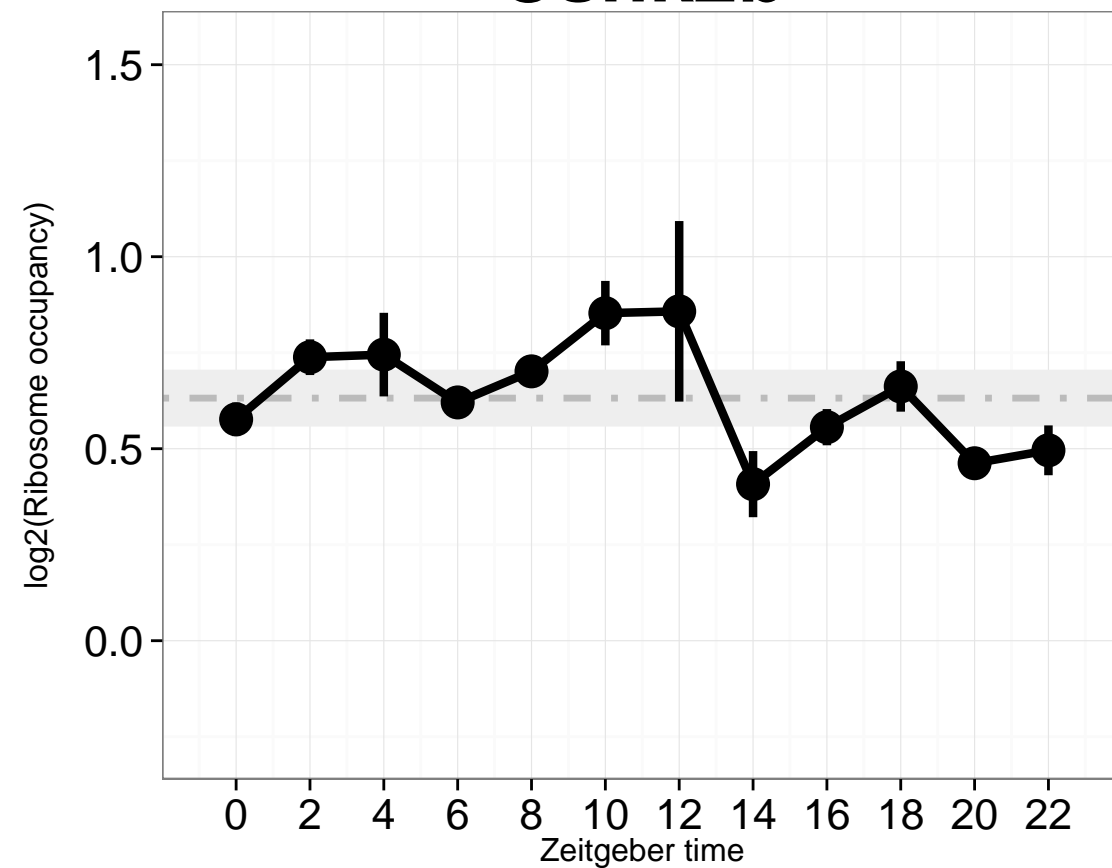

Supplement: Supplementary file 7059 [file 1]

# Rbm3

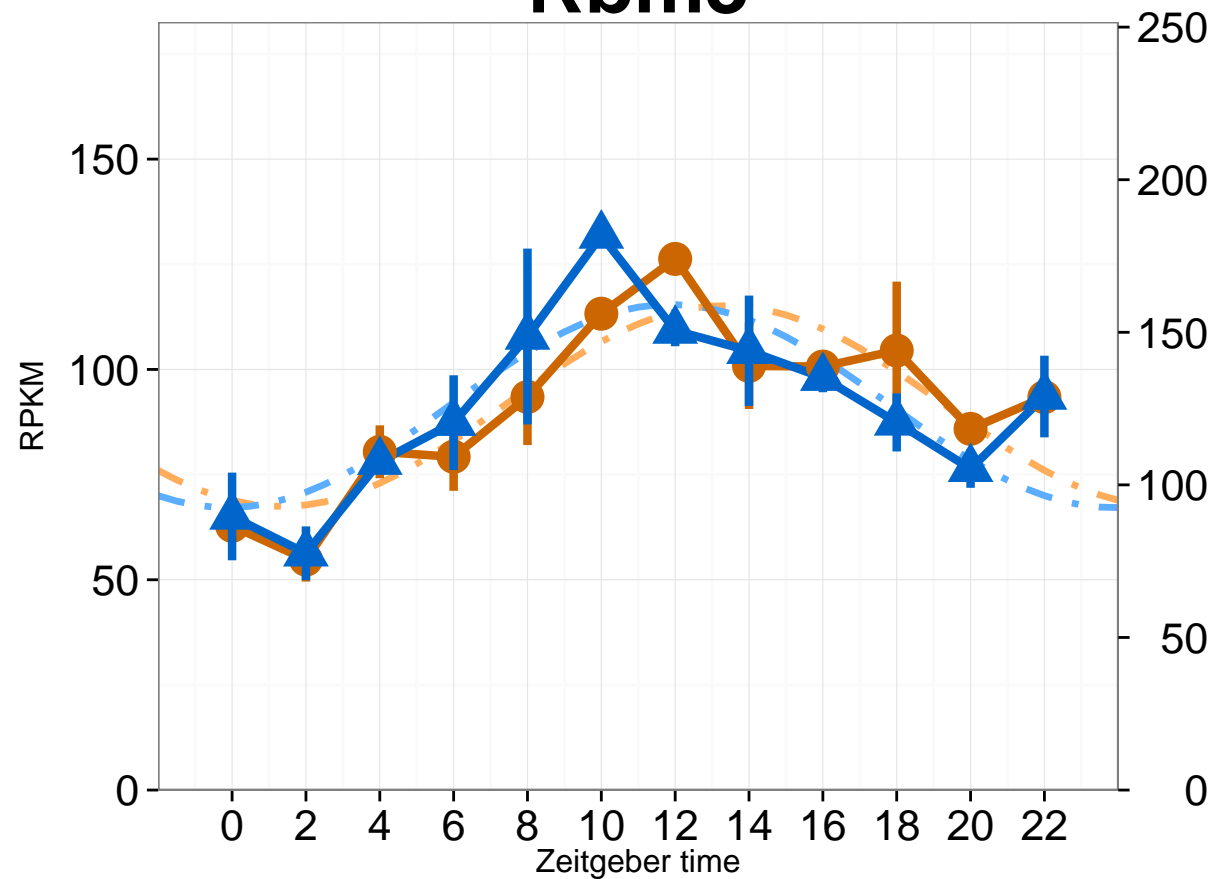

# Rbm3

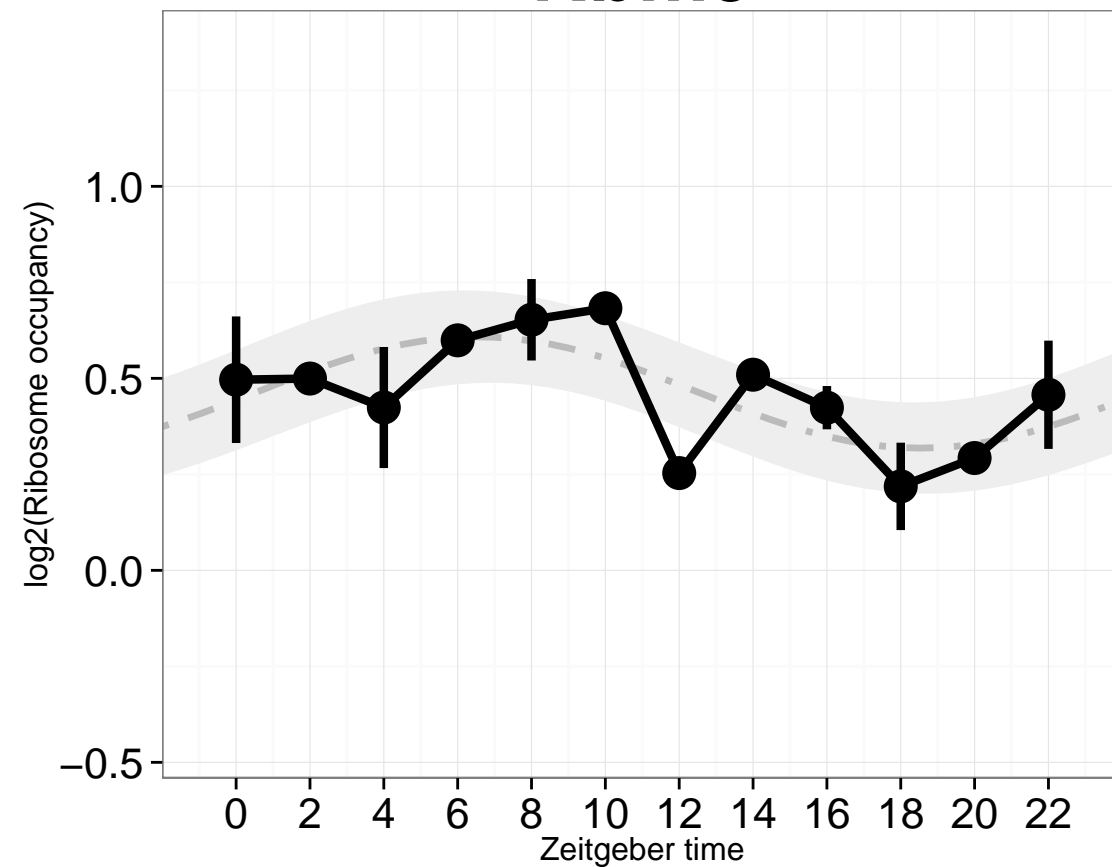

Supplement: Supplementary file 7060 [file 1]

# Msrb2

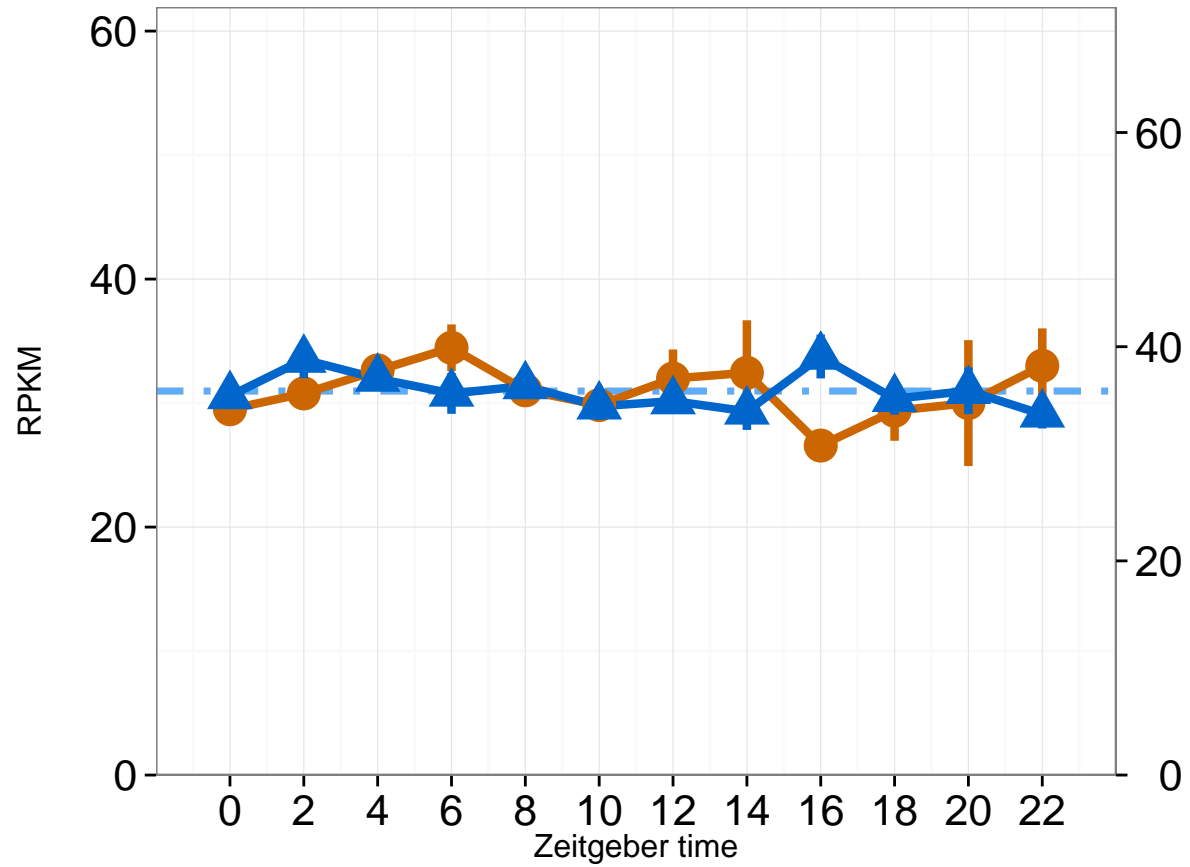

# Msrb2

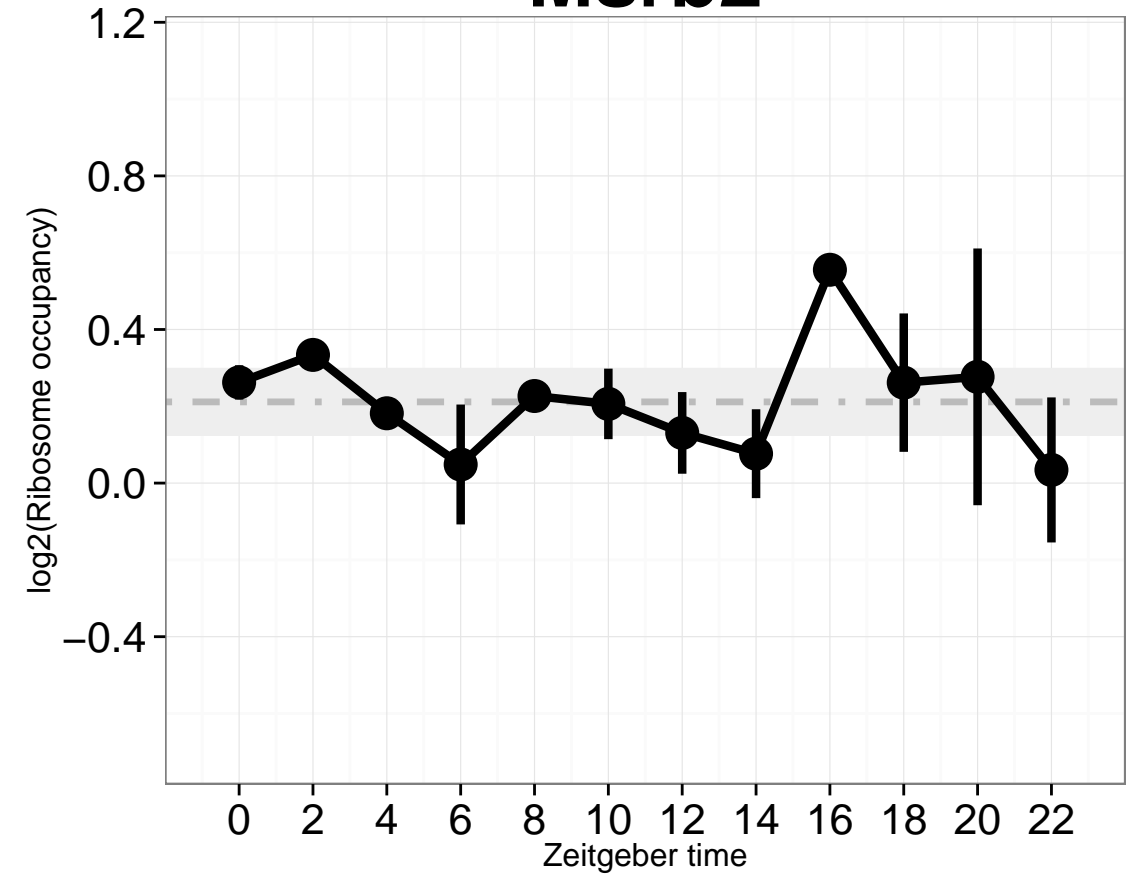

Supplement: Supplementary file 7061 [file 1]

## Zkscan17

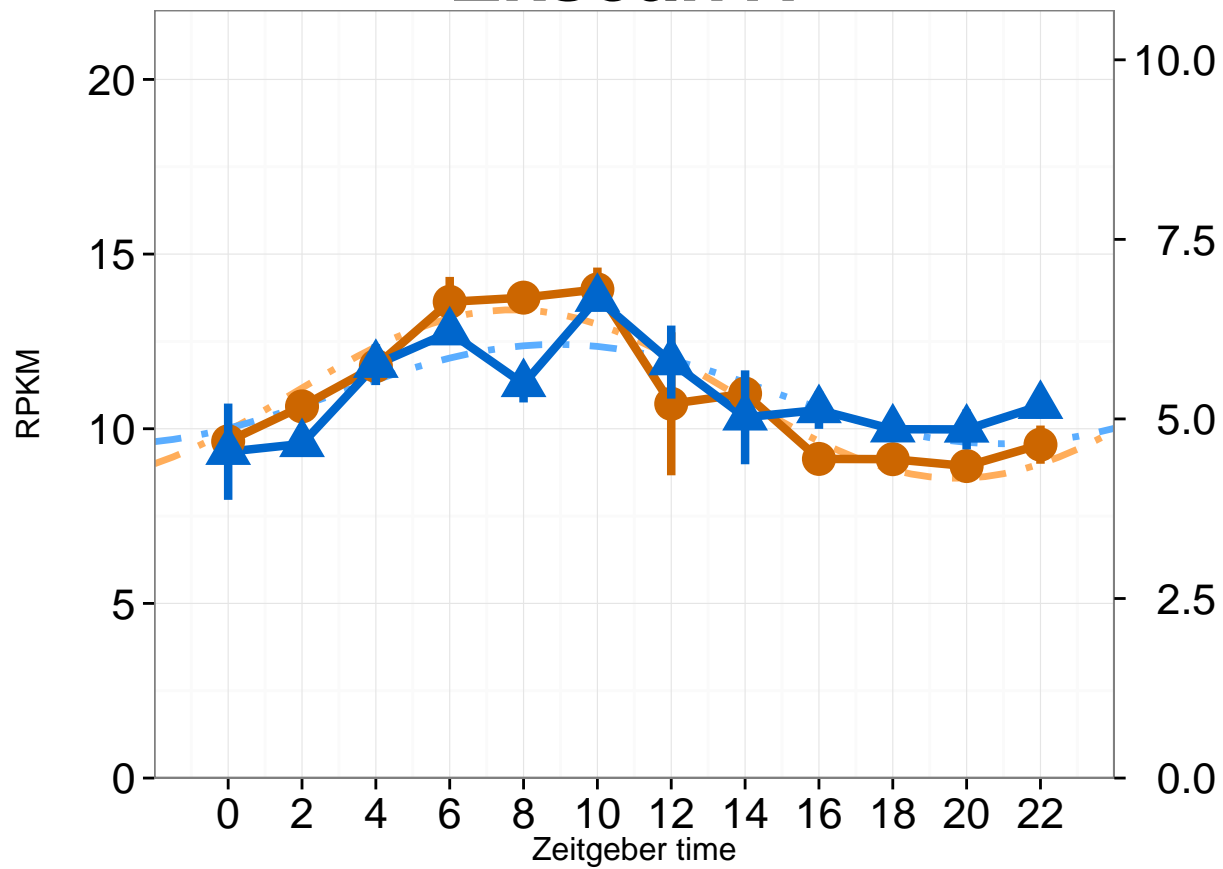

## Zkscan17

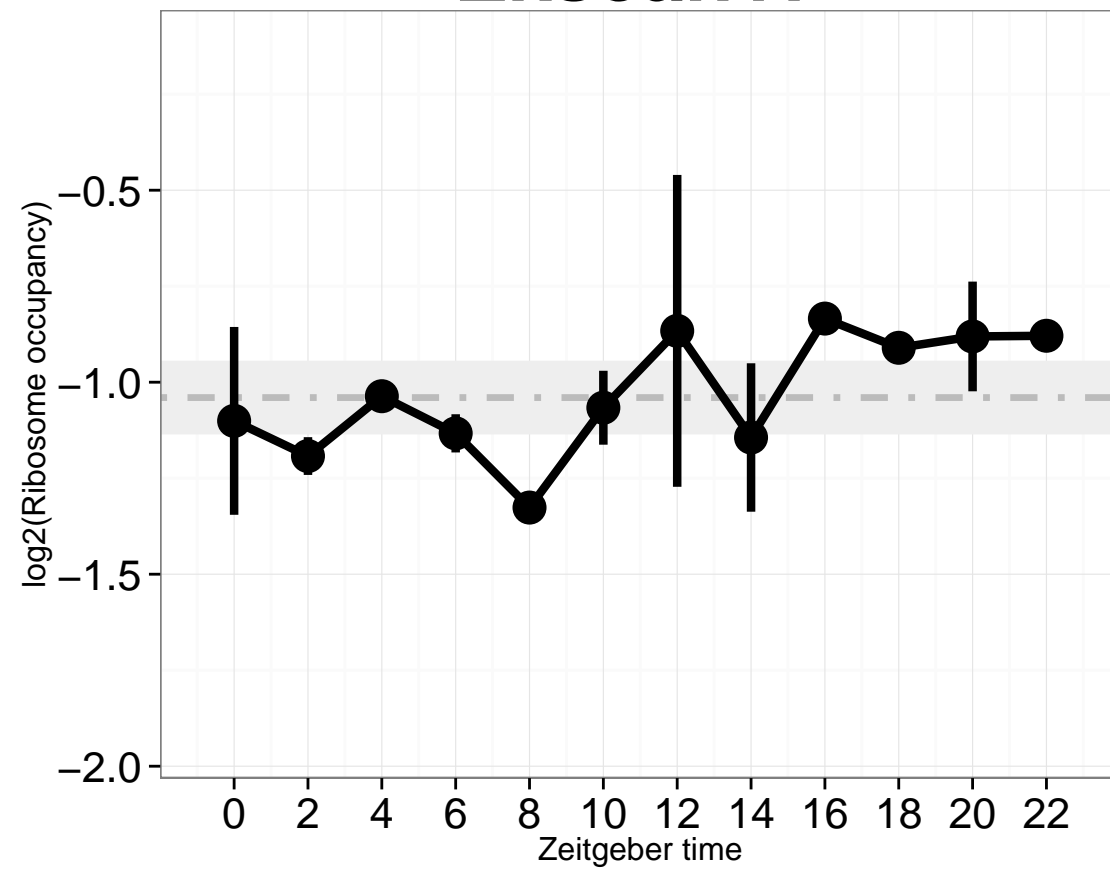

Supplement: Supplementary file 7062 [file 1]

## Gpx4

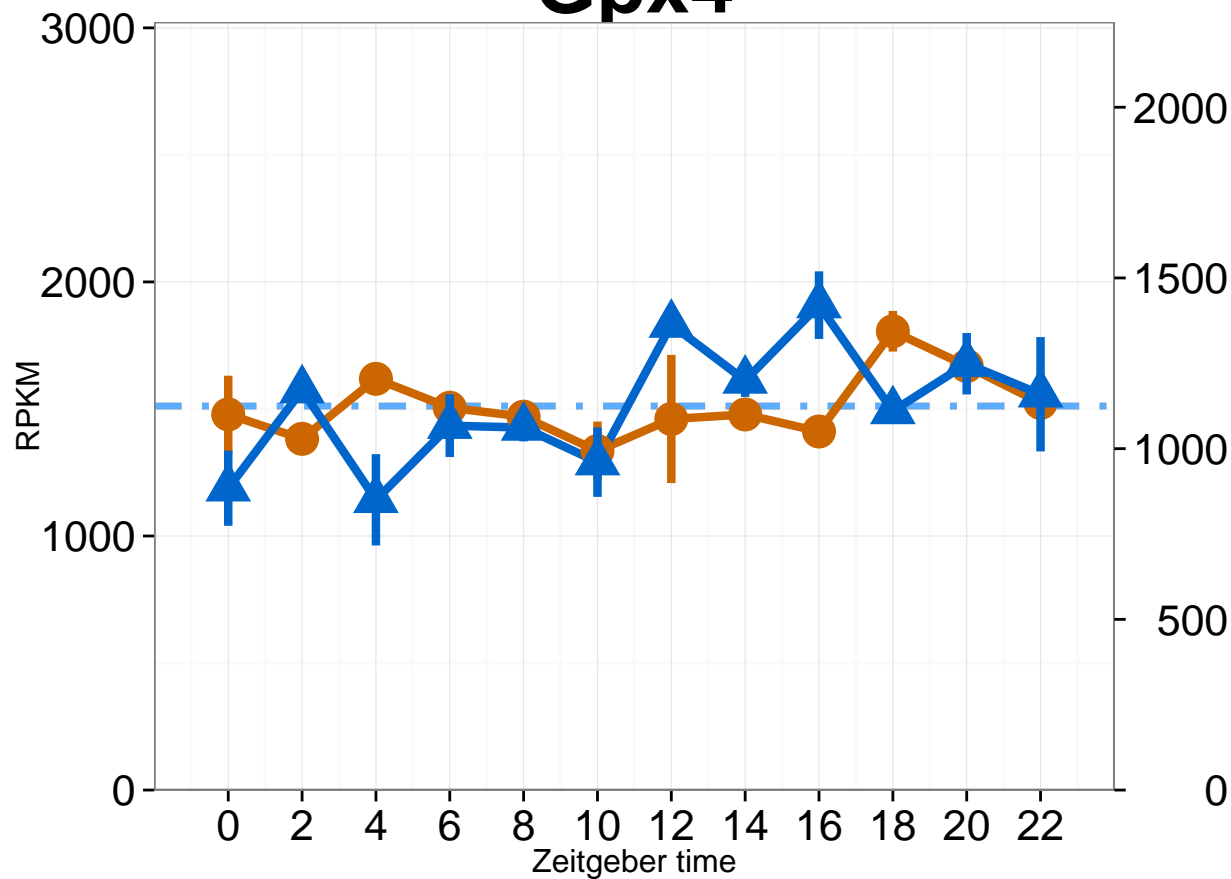

## Gpx4

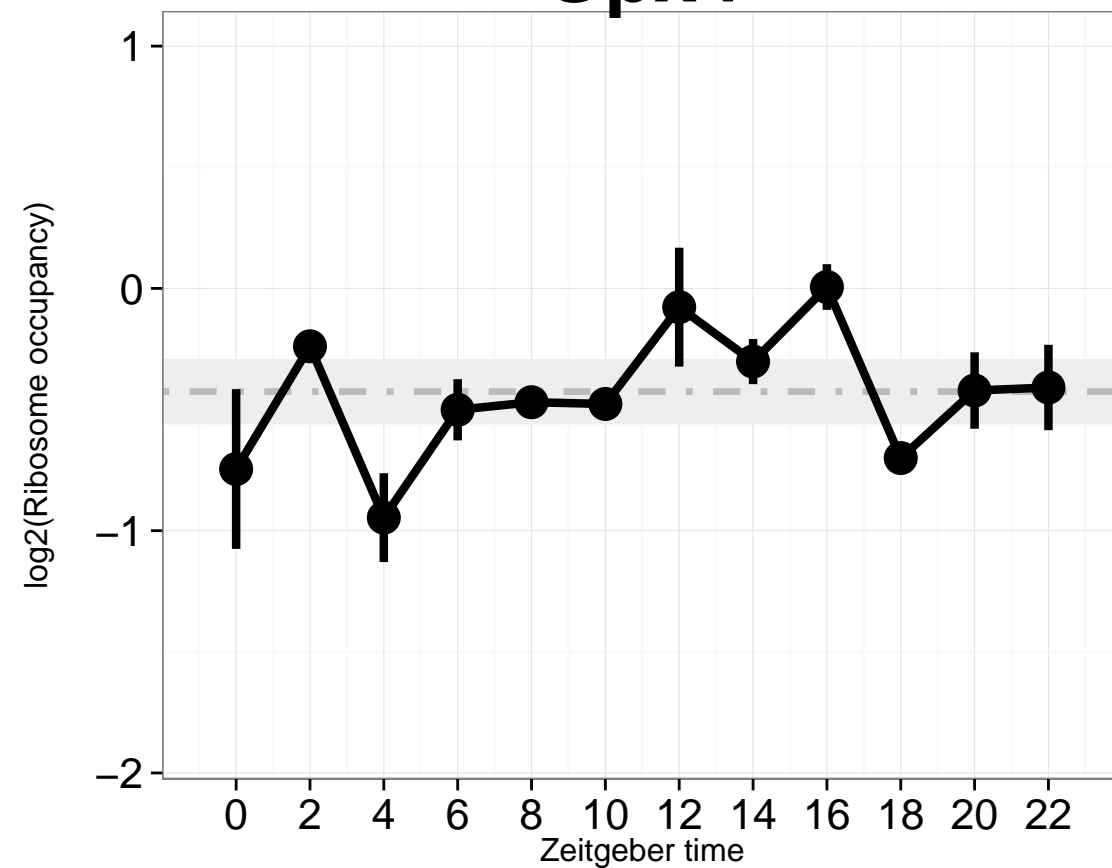

Supplement: Supplementary file 7063 [file 1]

# Akr1a1

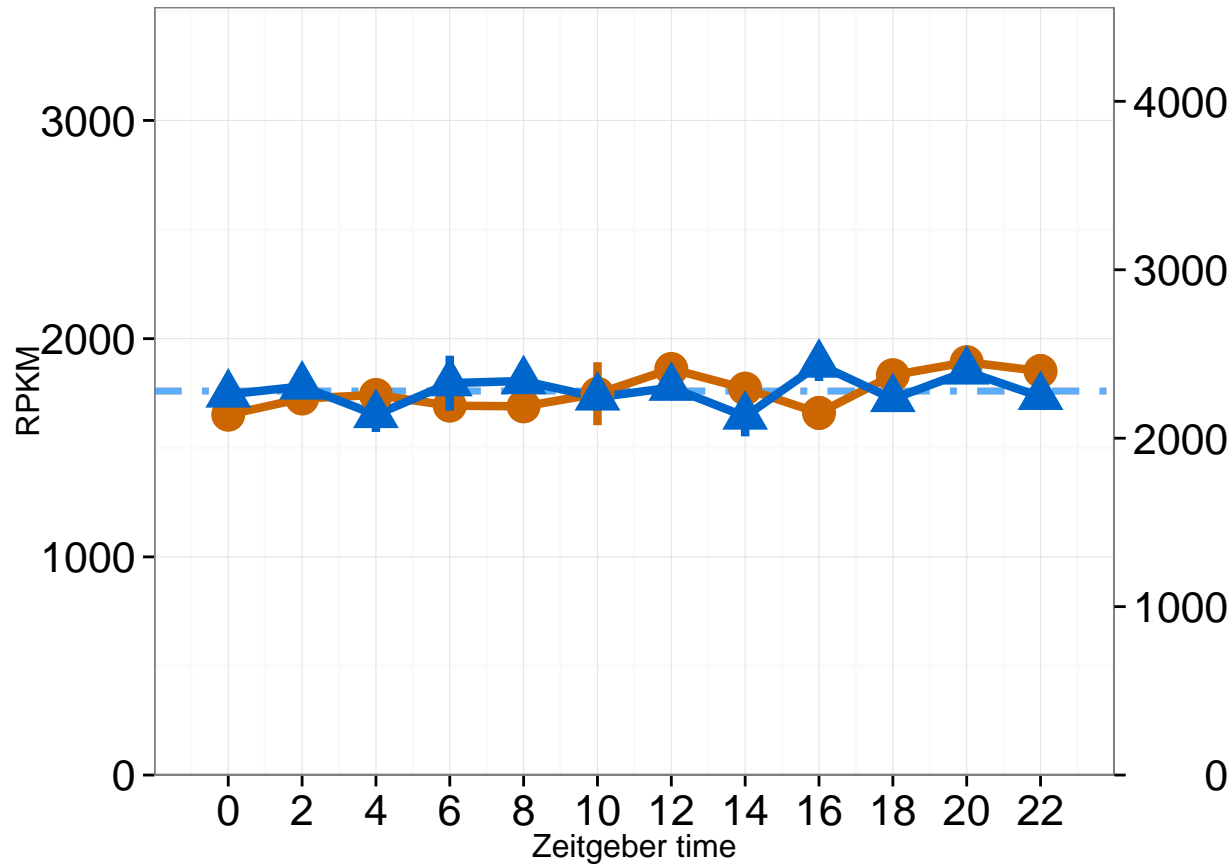

# Akr1a1

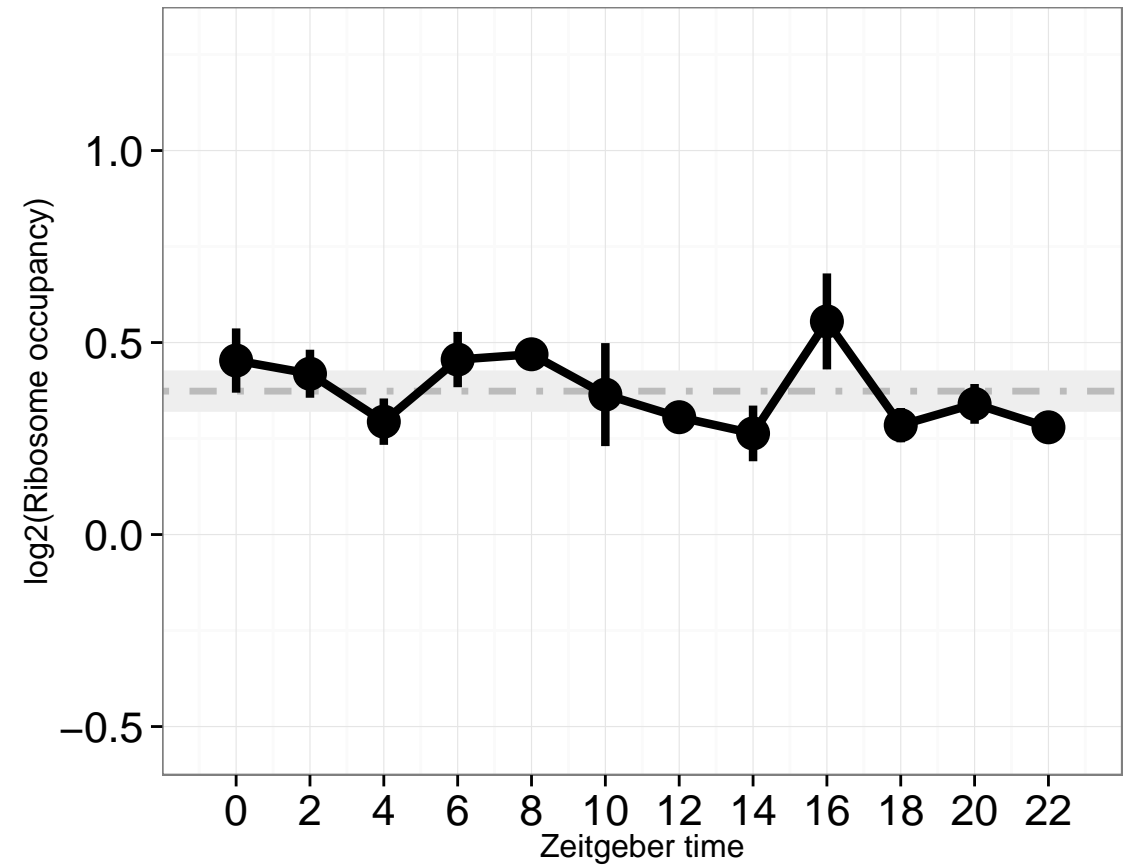

Supplement: Supplementary file 7064 [file 1]

# D16Ertd472e

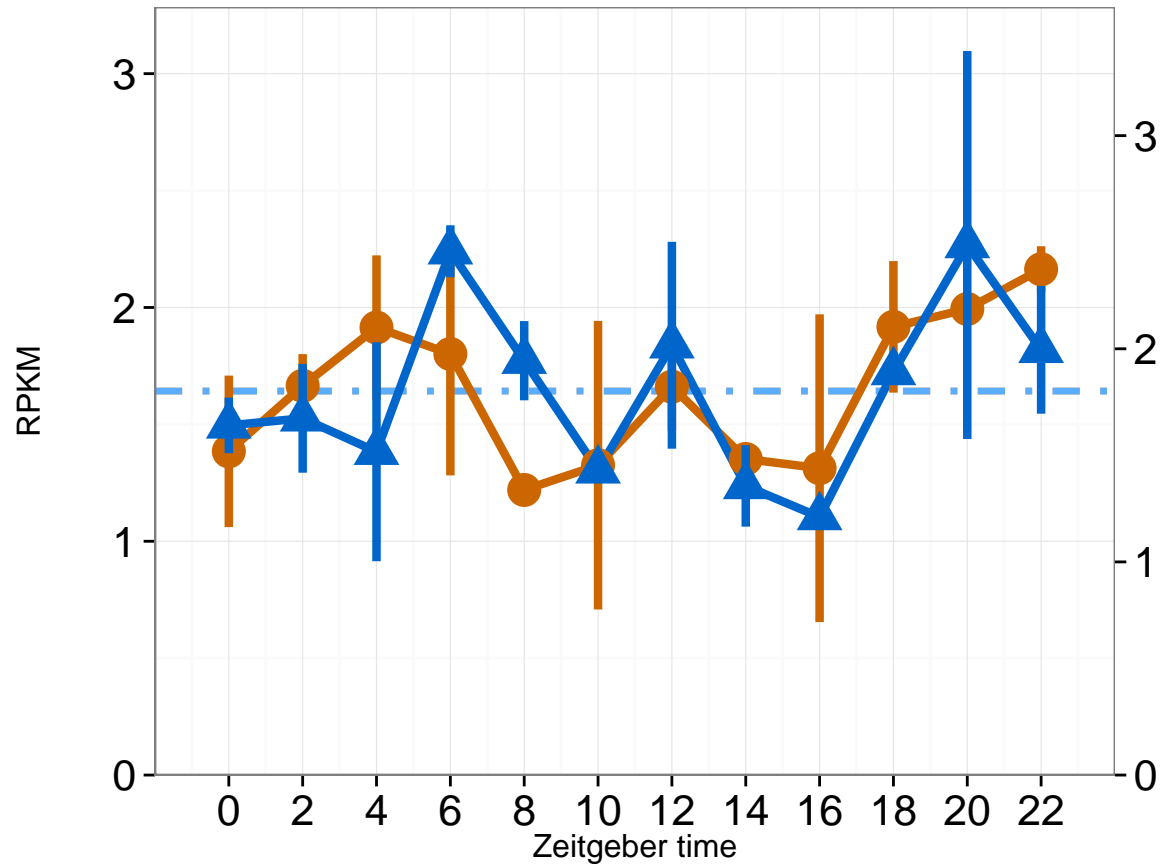

# D16Ertd472e

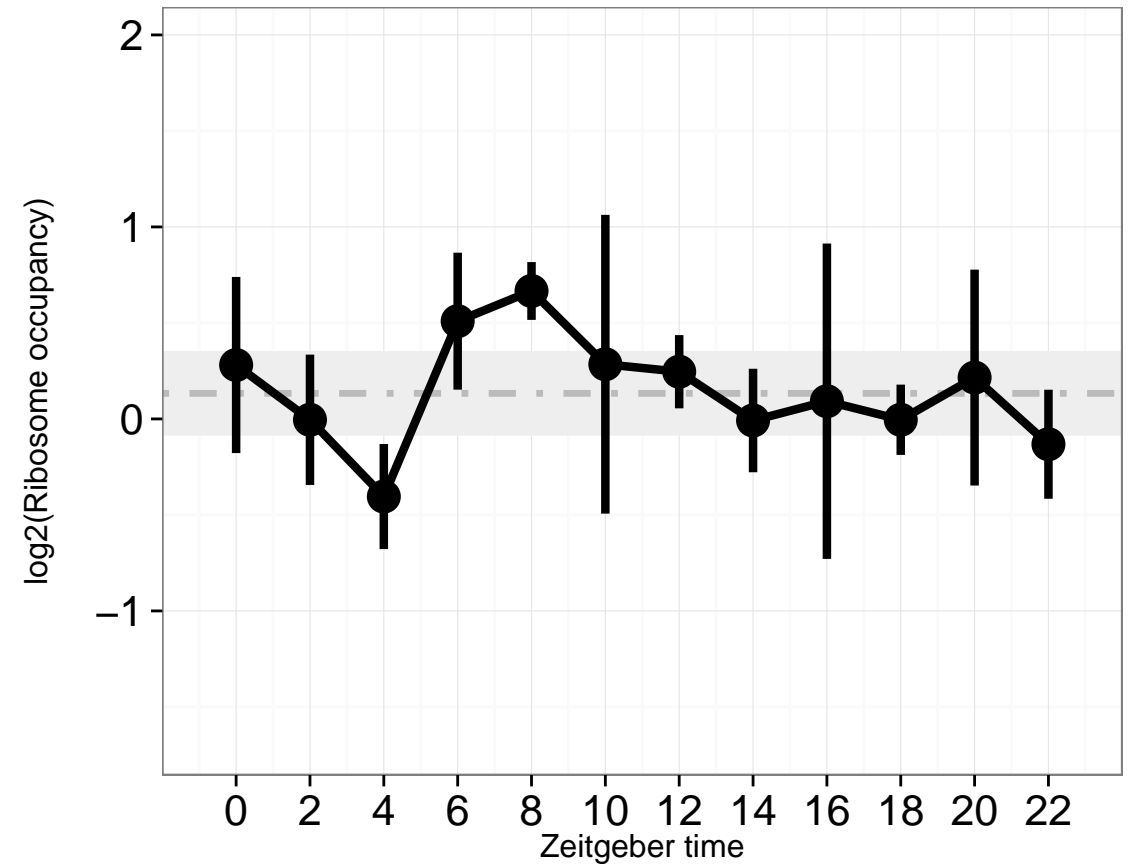

Supplement: Supplementary file 7065 [file 1]

## Oxr1

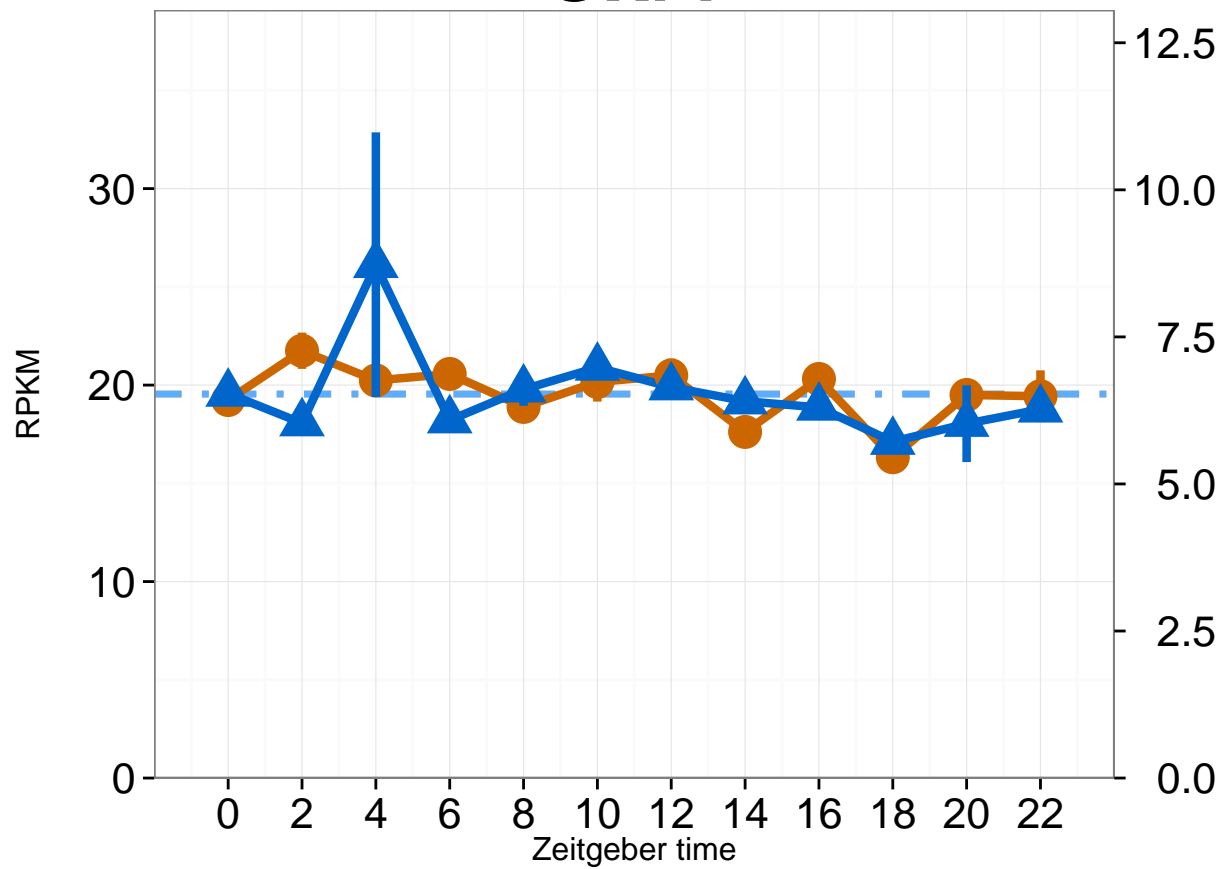

## Oxr1

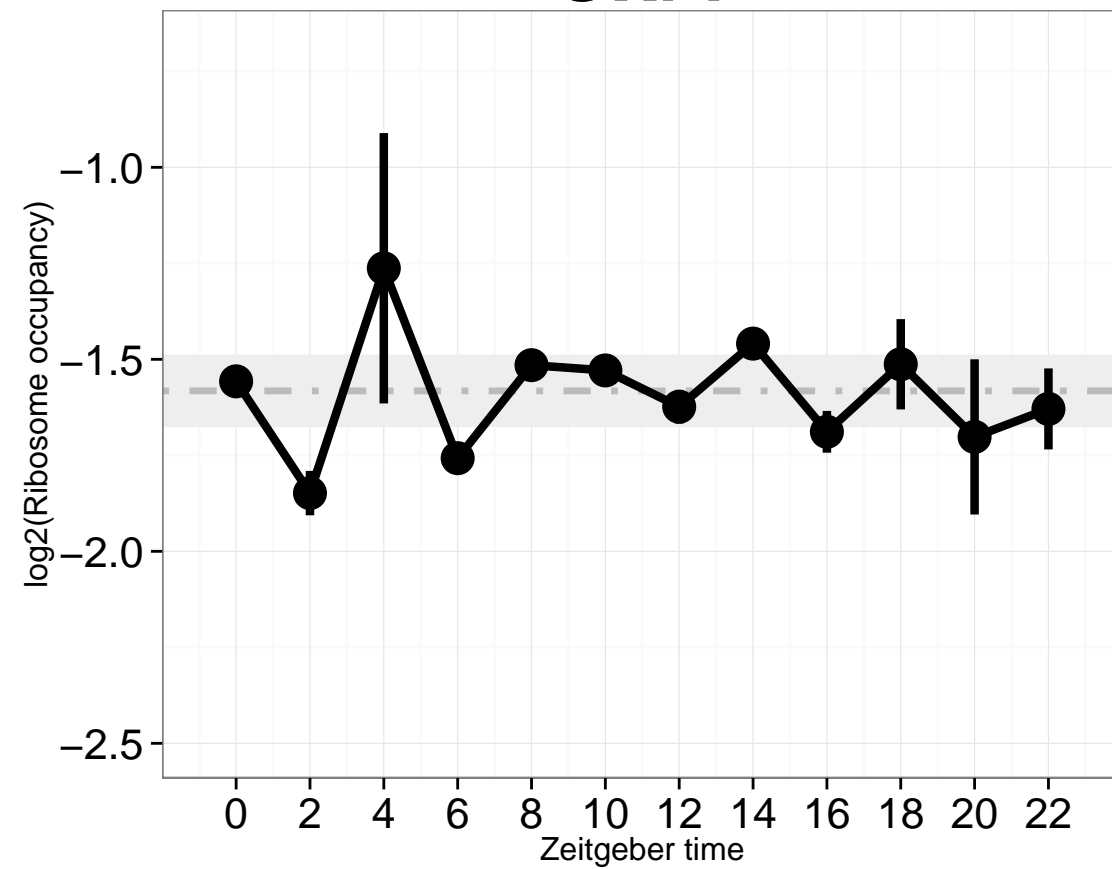

Supplement: Supplementary file 7066 [file 1]

# Mpzl1

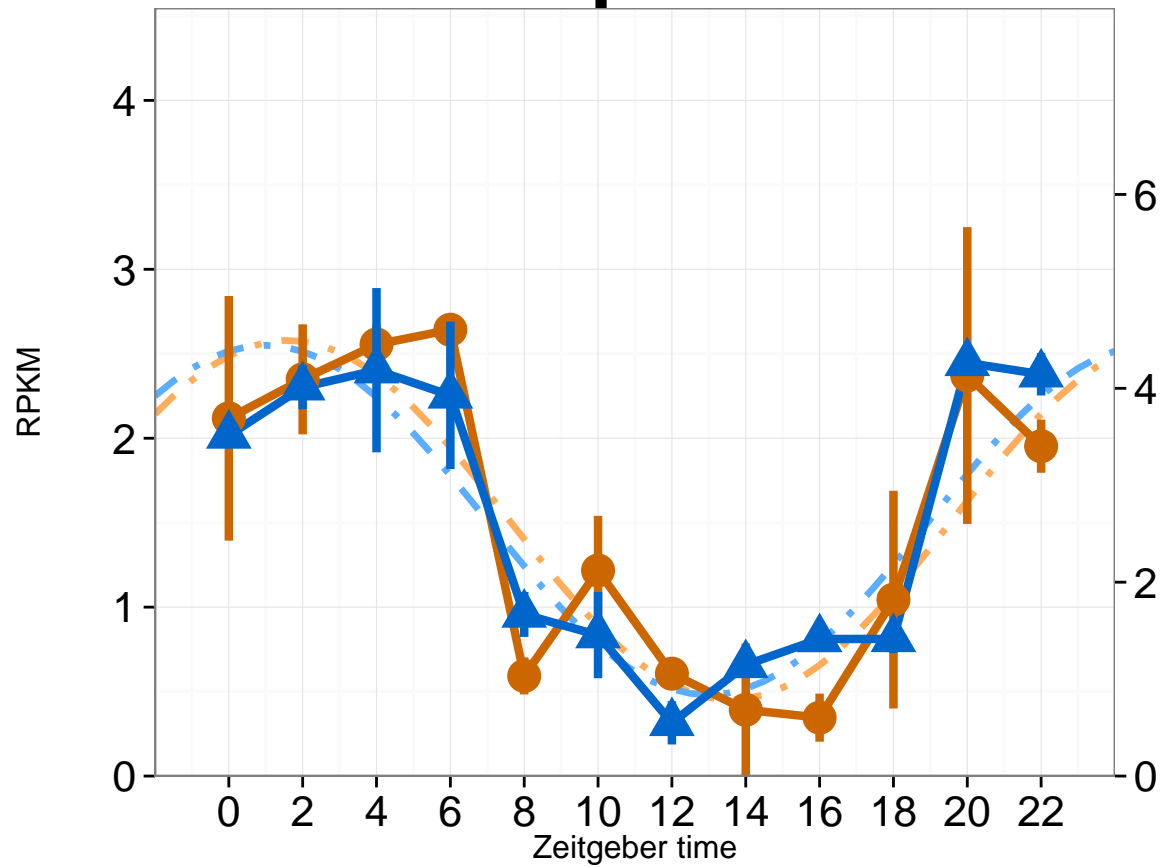

# Mpzl1

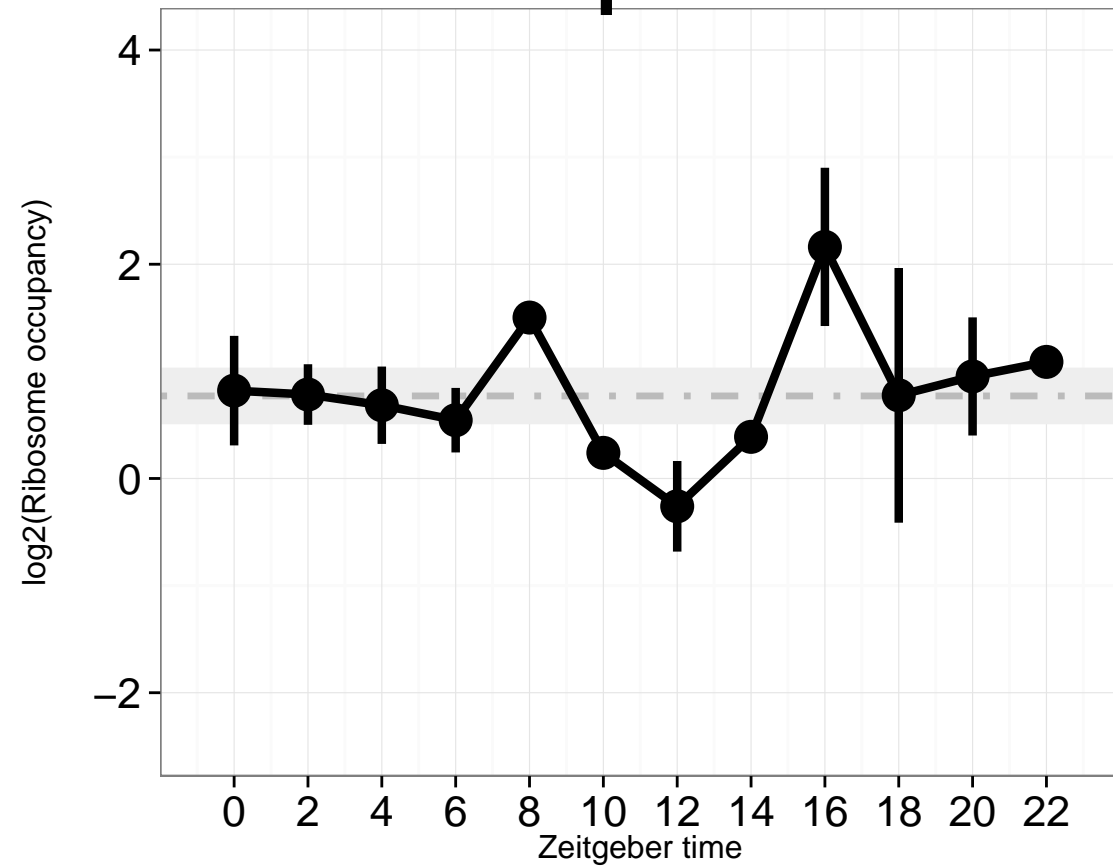

Supplement: Supplementary file 7067 [file 1]

# Zfp444

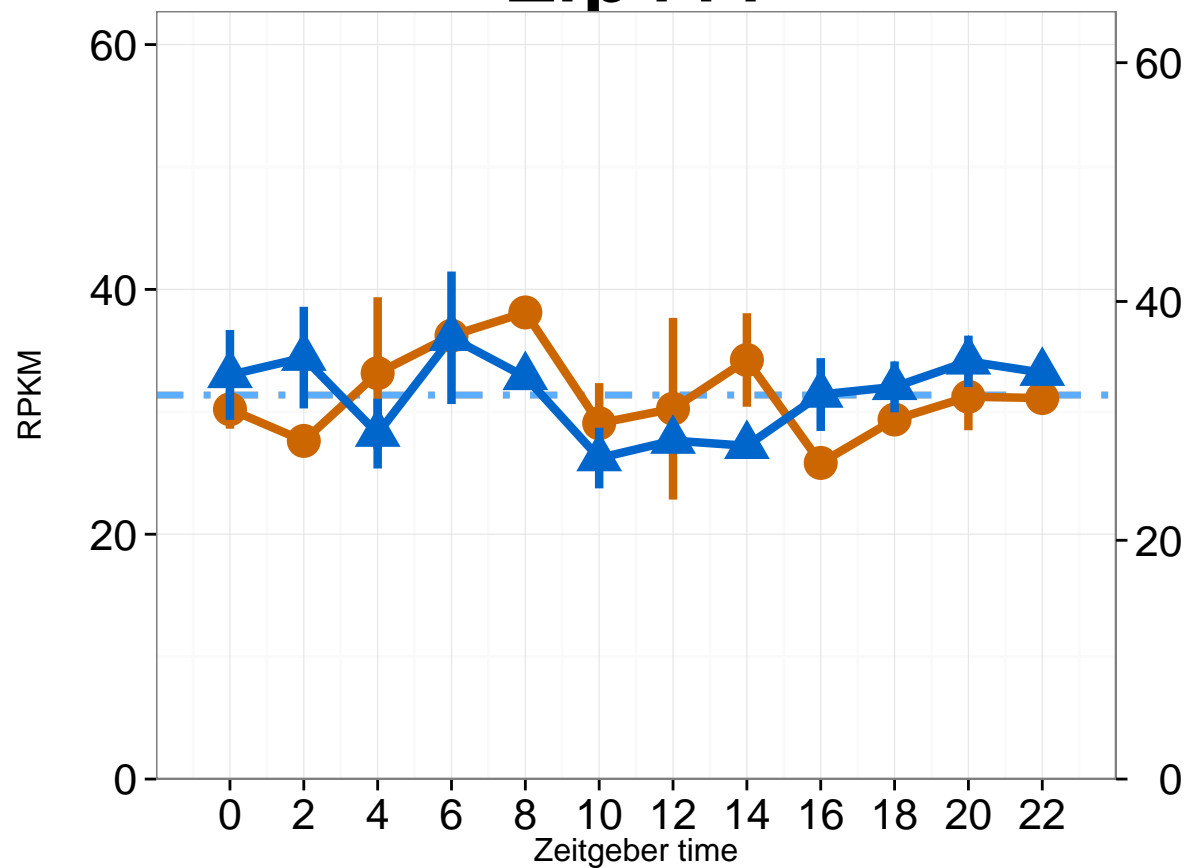

# Zfp444

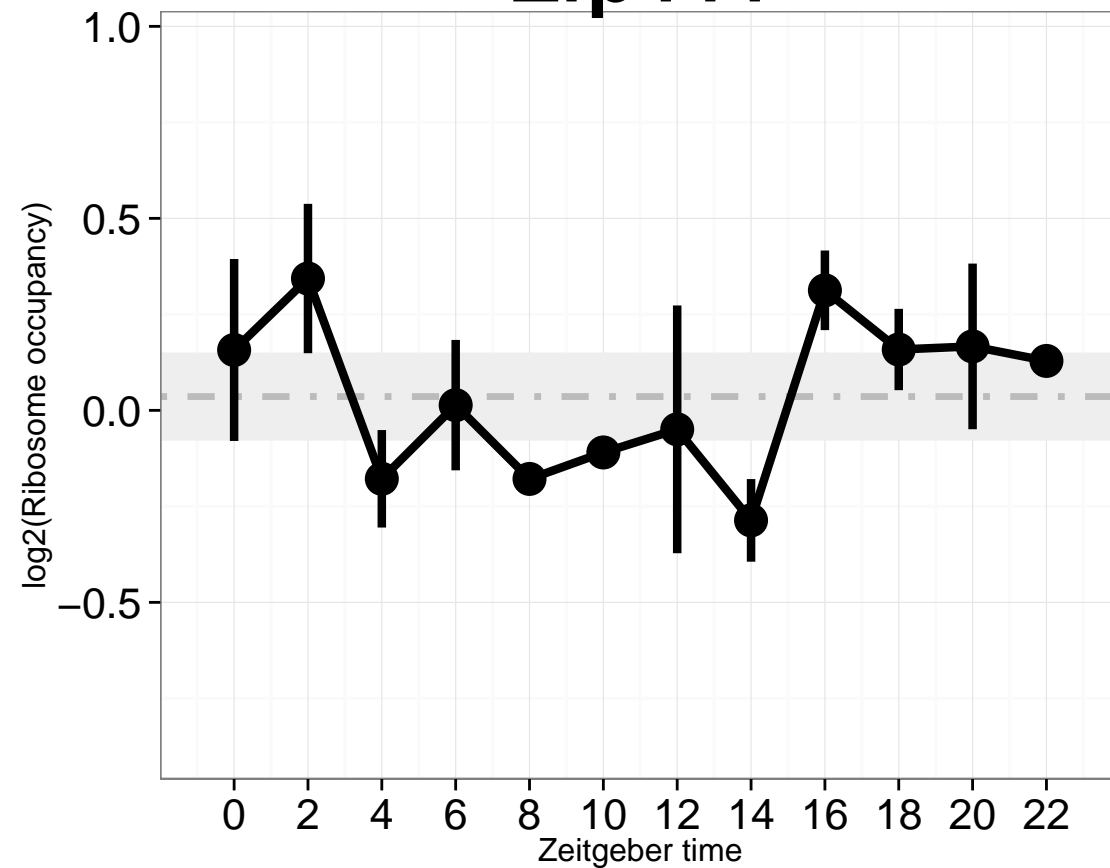

Supplement: Supplementary file 7068 [file 1]

# Sema4a

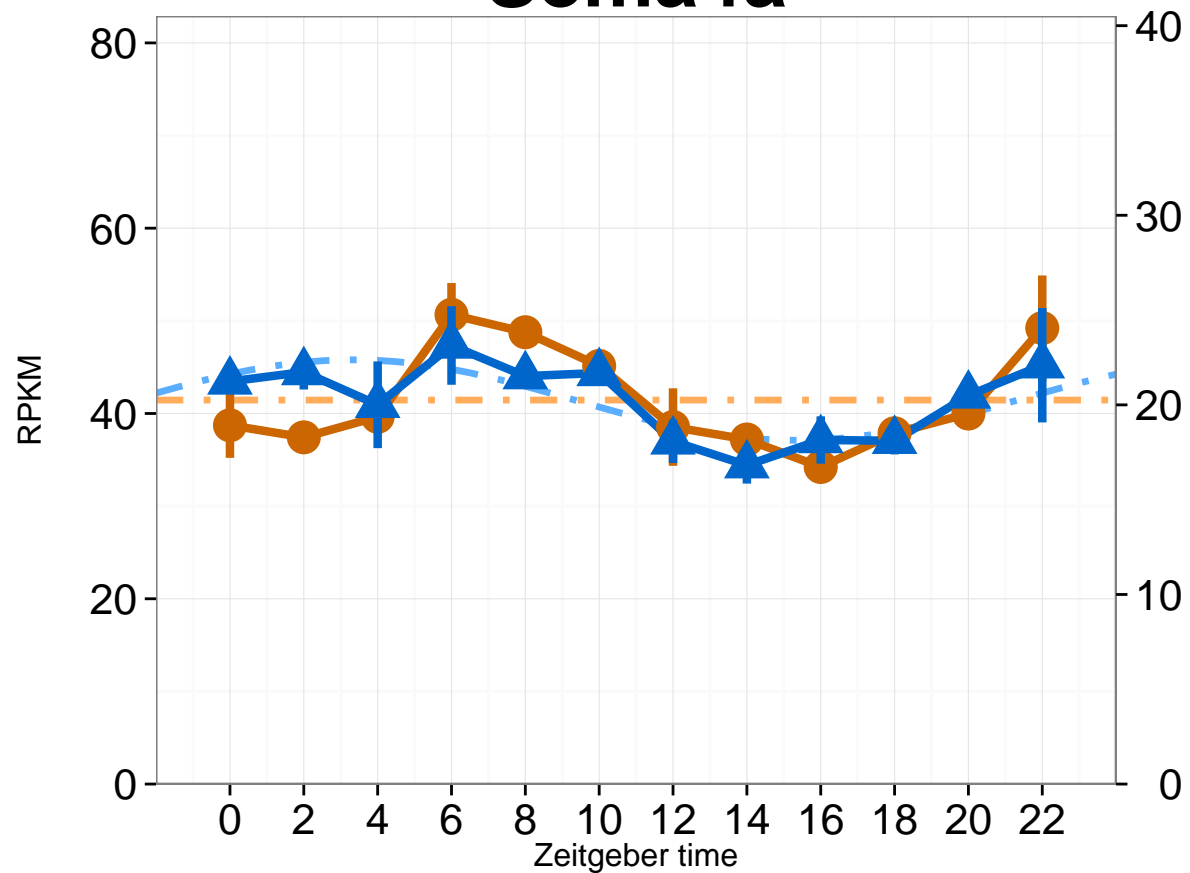

# Sema4a

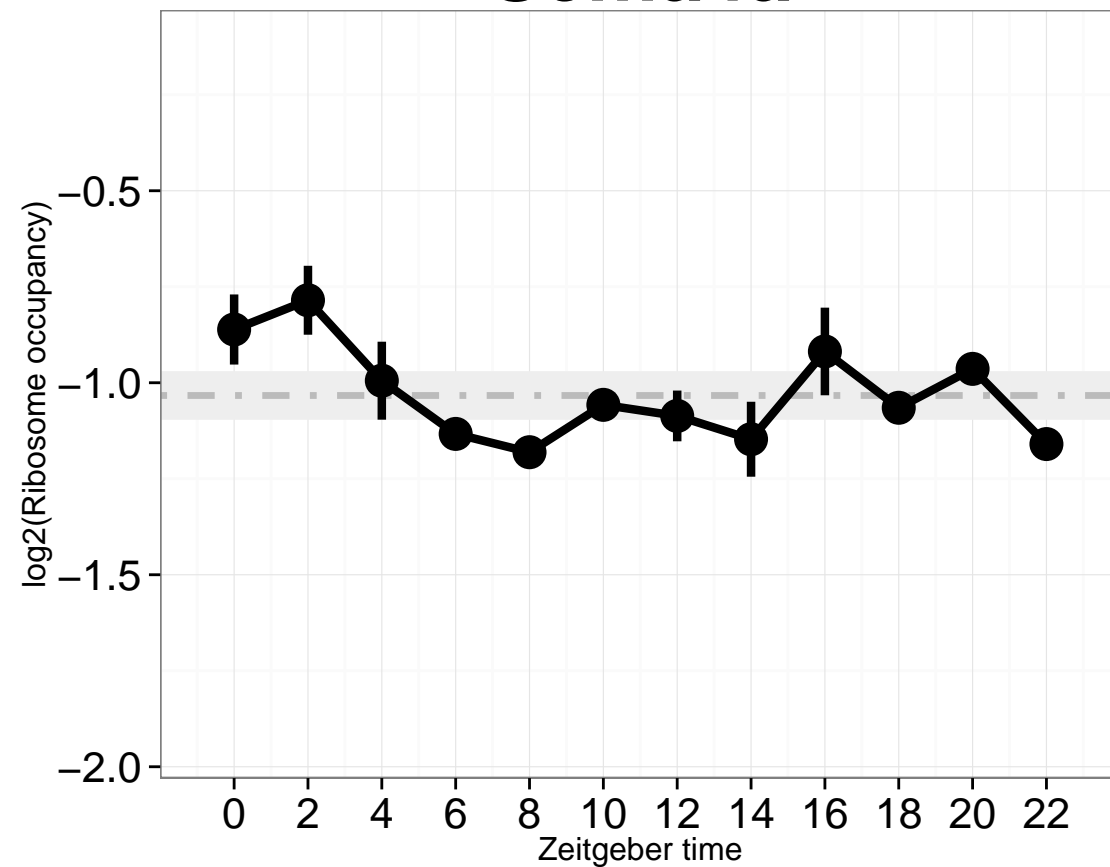

Supplement: Supplementary file 7069 [file 1]

## Mapk12

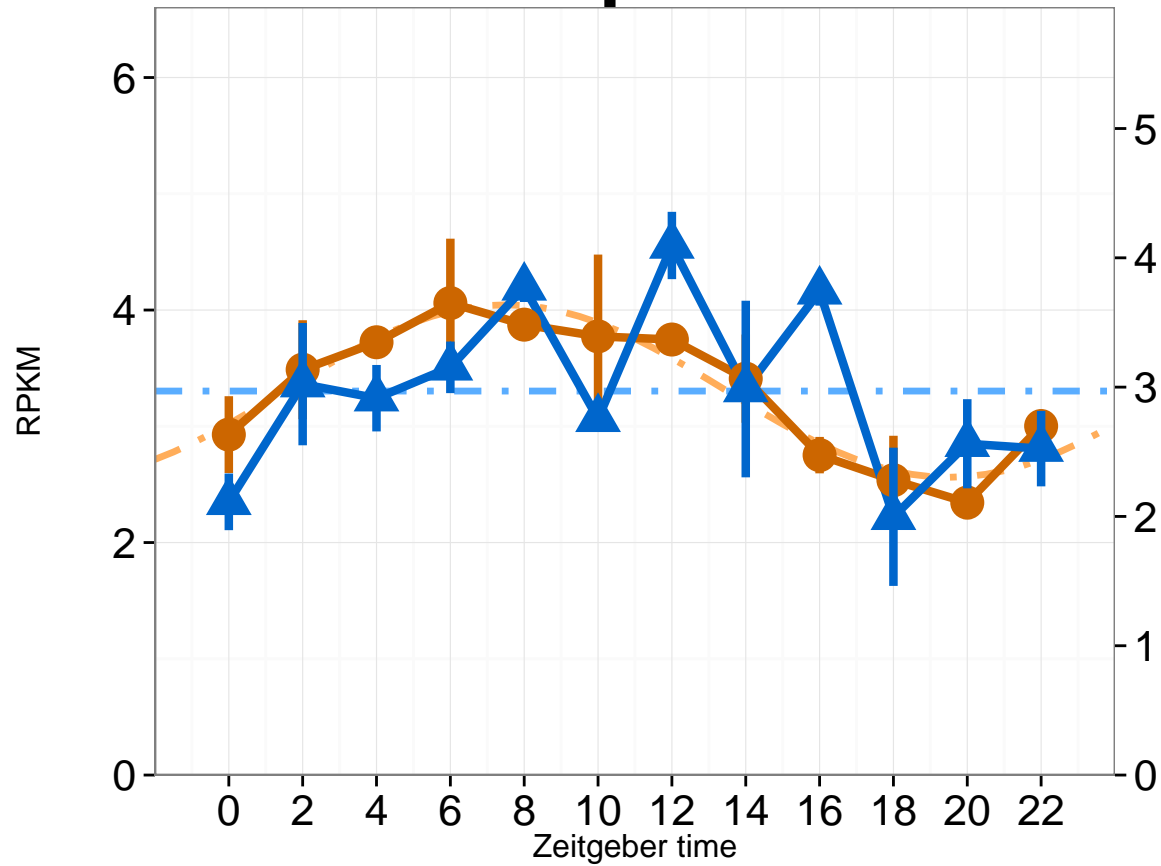

## Mapk12

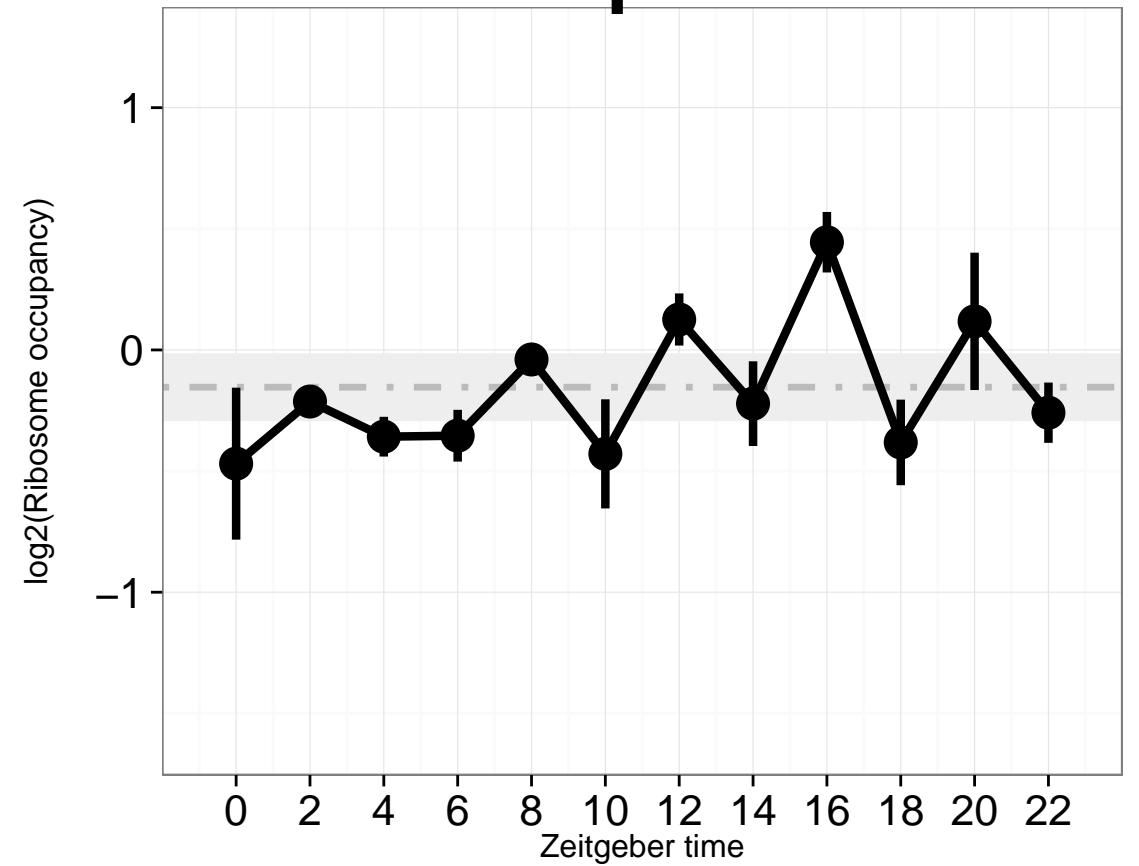

Supplement: Supplementary file 7070 [file 1]

## Nfil3

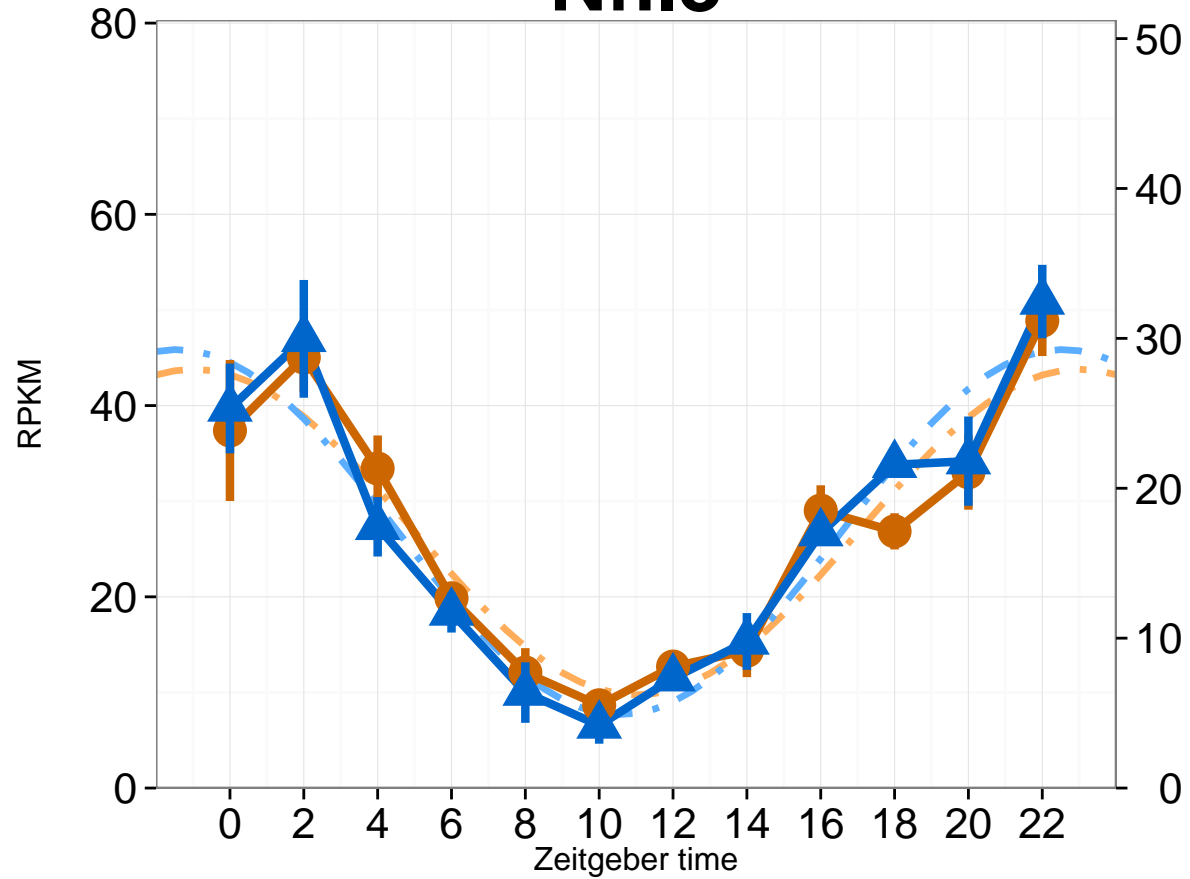

## Nfil3

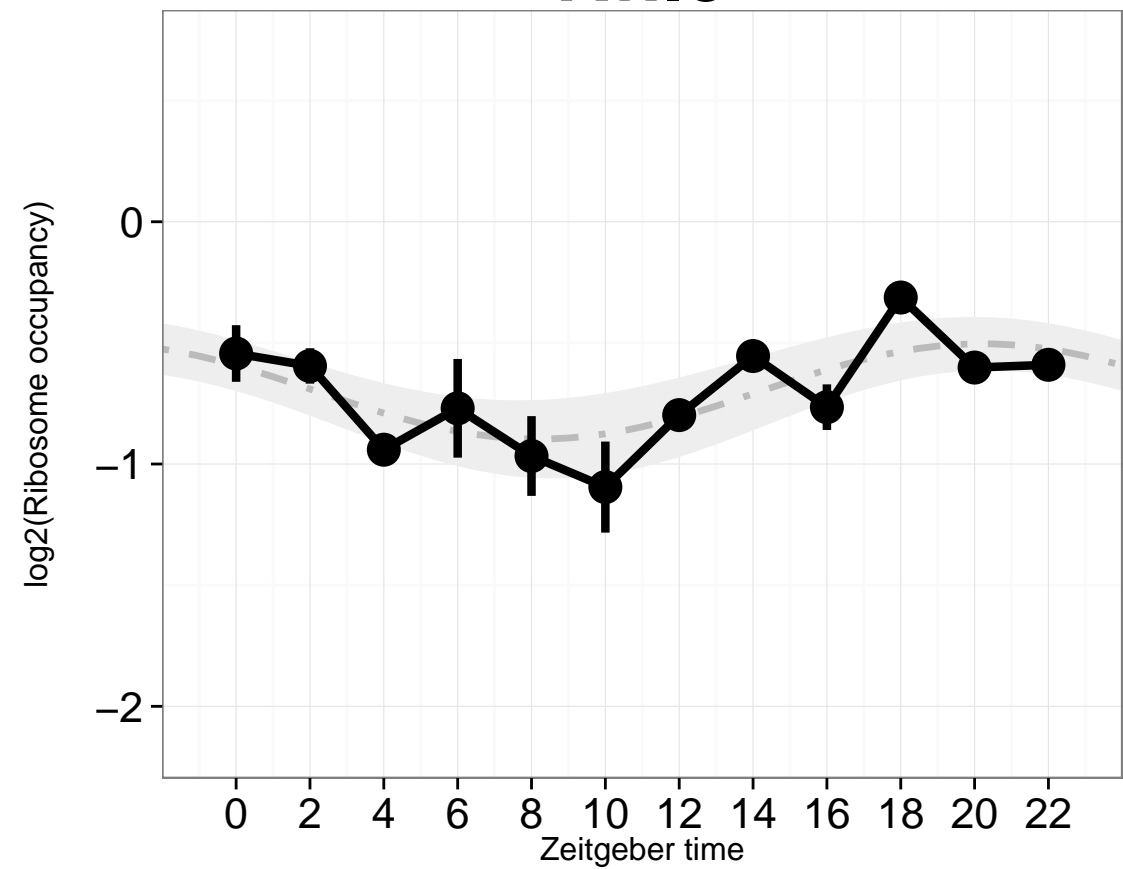

Supplement: Supplementary file 7071 [file 1]

## Zc3h4

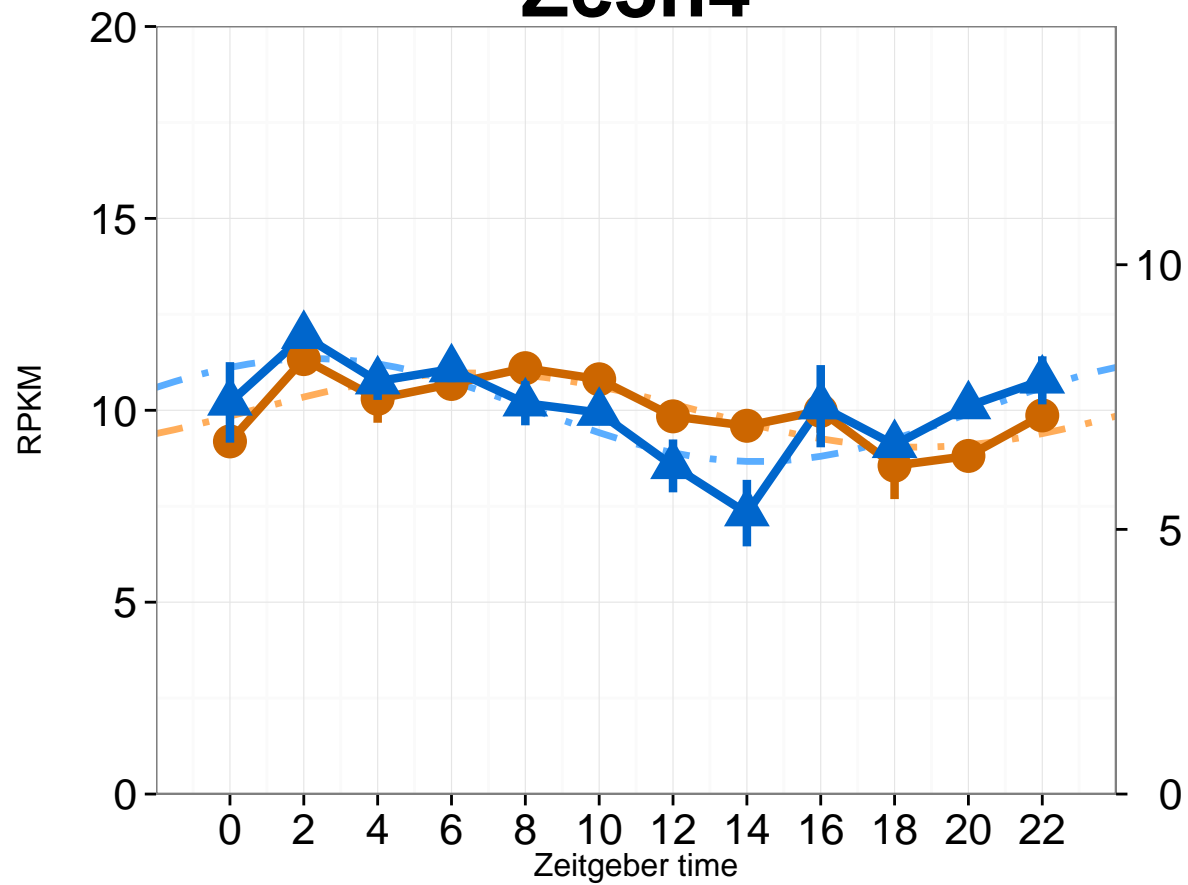

## Zc3h4

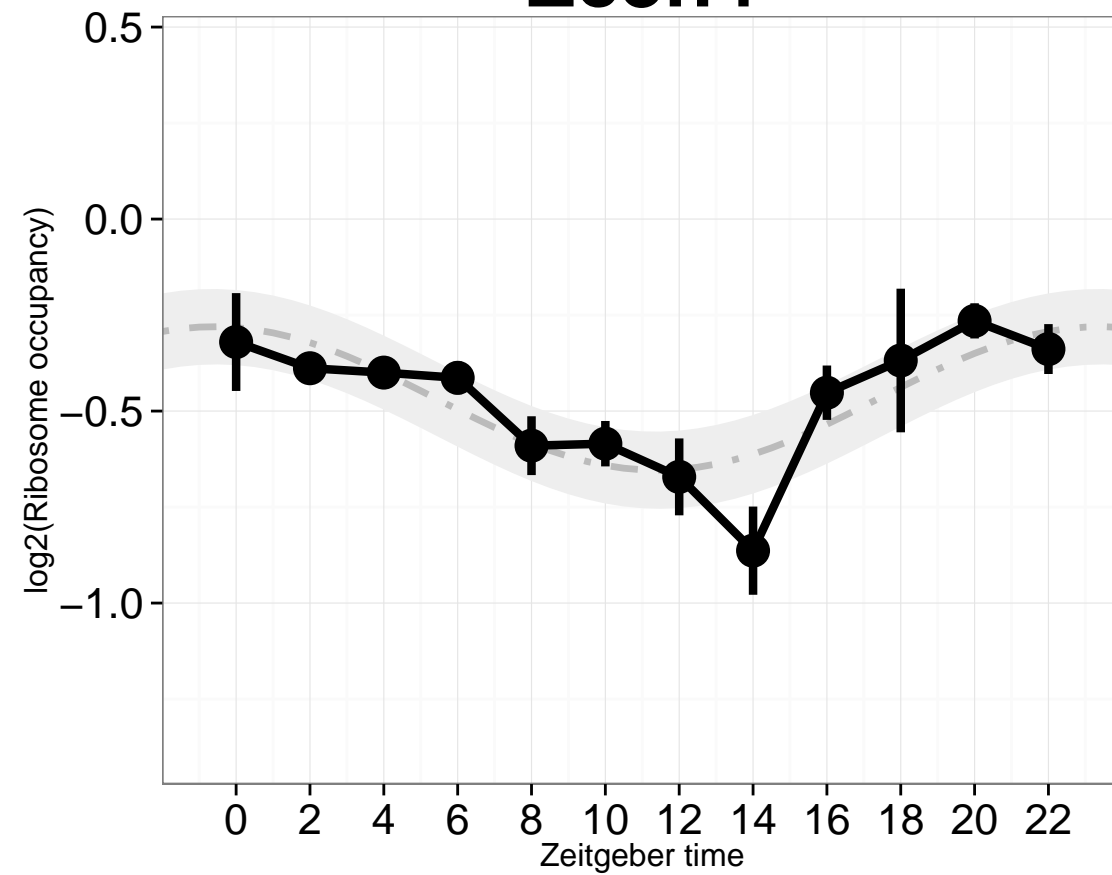

Supplement: Supplementary file 7072 [file 1]

## Dao

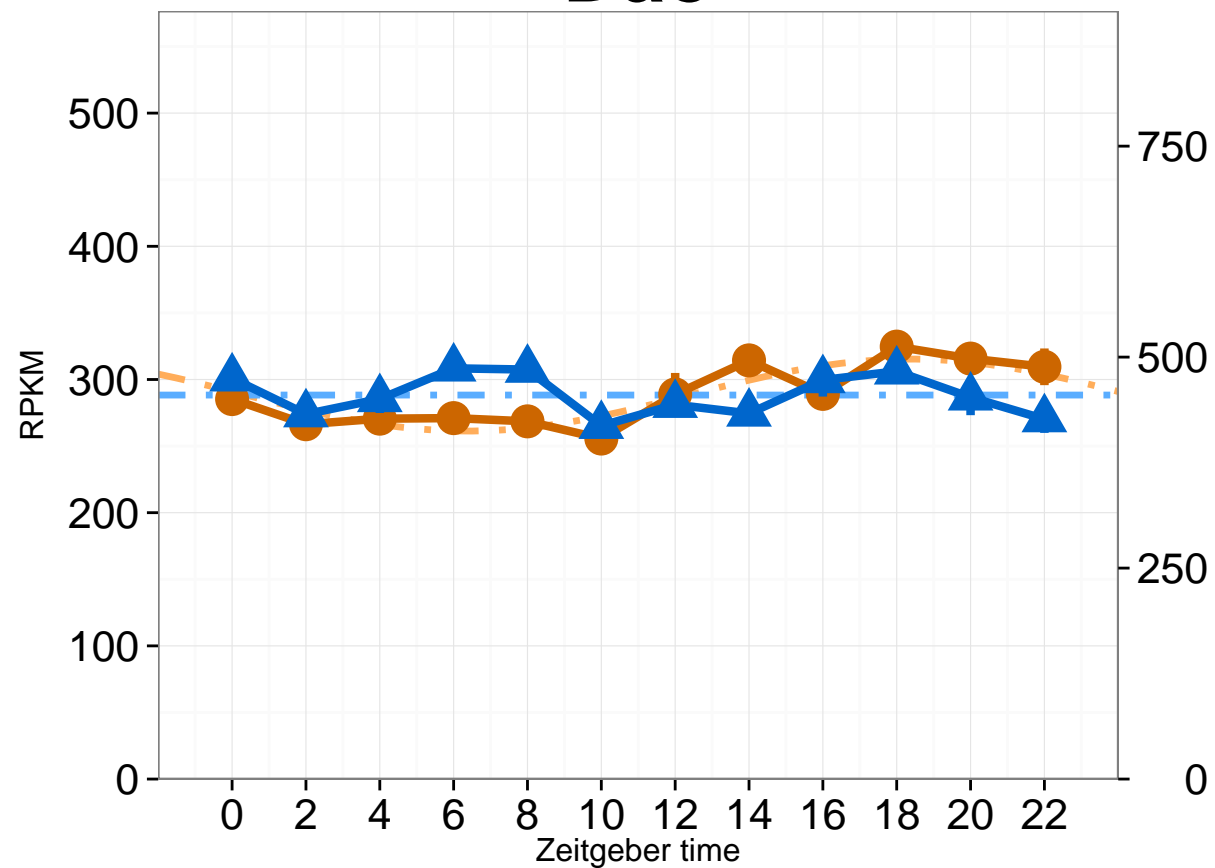

## Dao

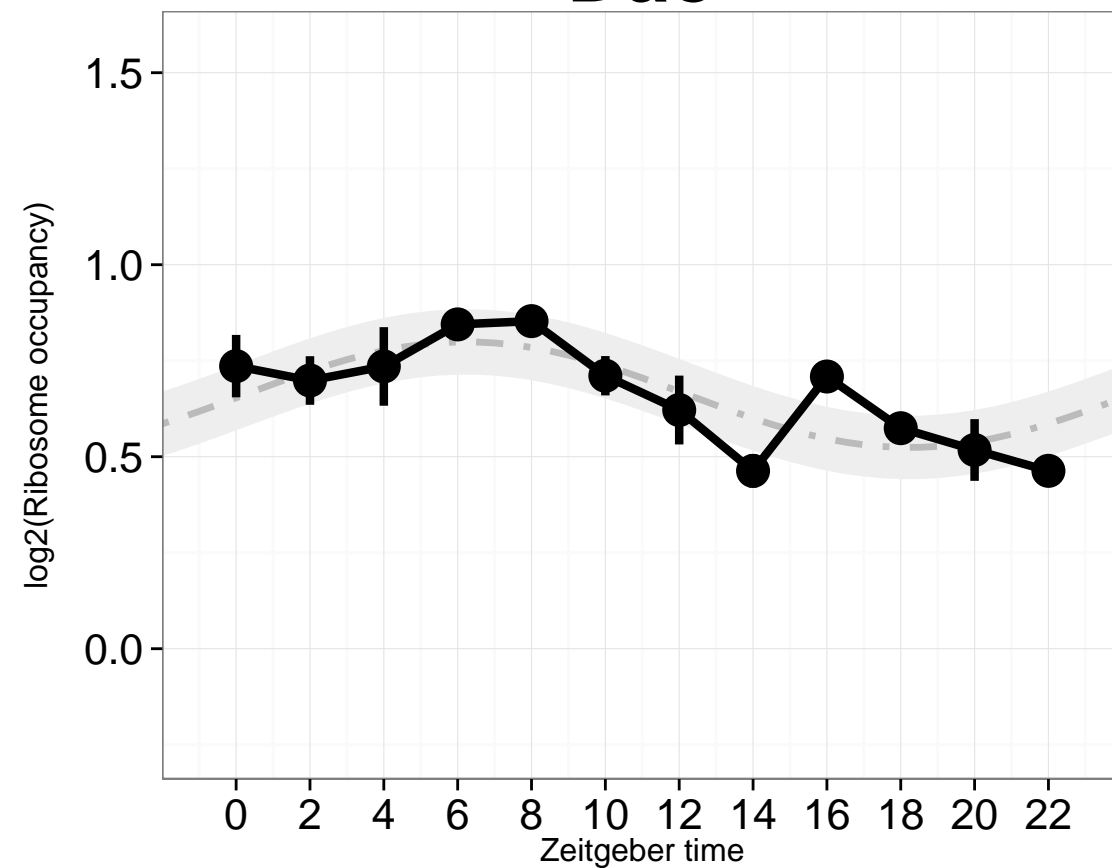

Supplement: Supplementary file 7073 [file 1]

# Ucp2

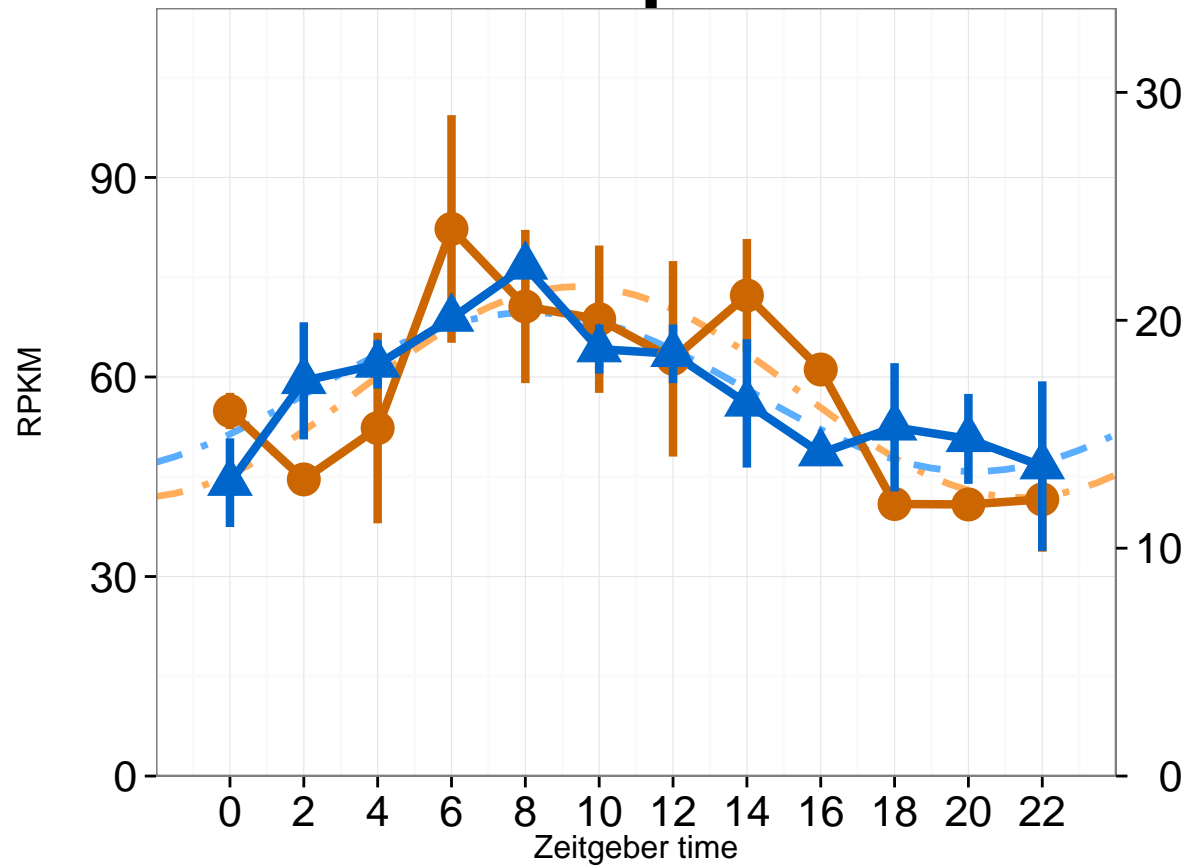

# Ucp2

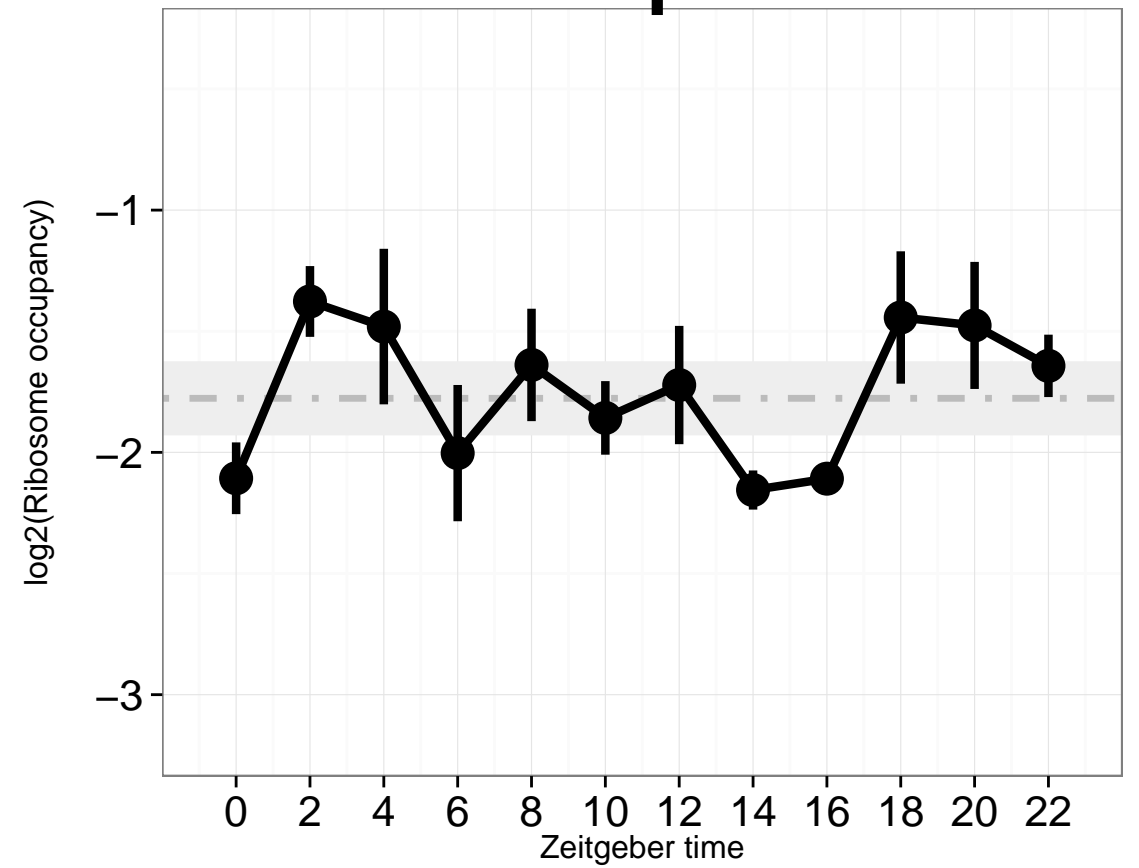

Supplement: Supplementary file 7074 [file 1]

## Pfdn5

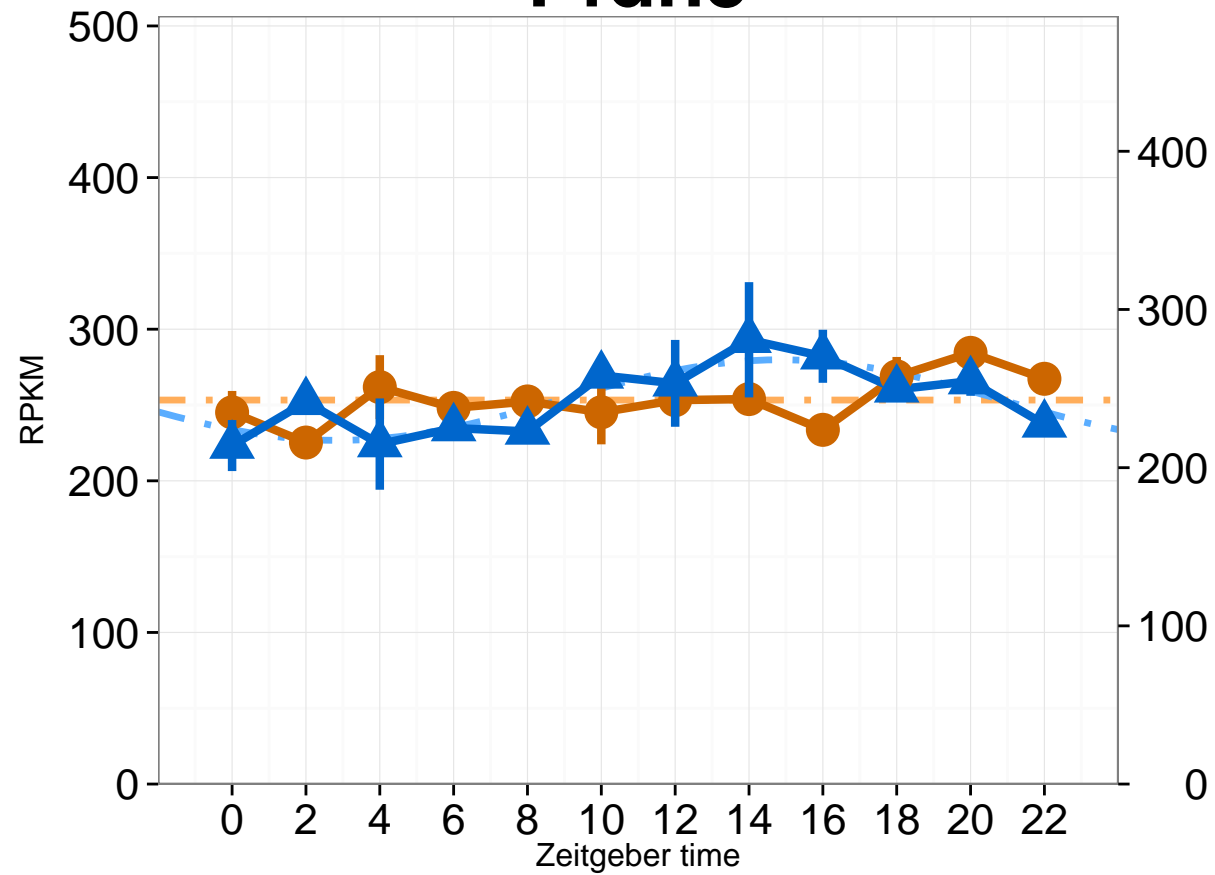

## Pfdn5

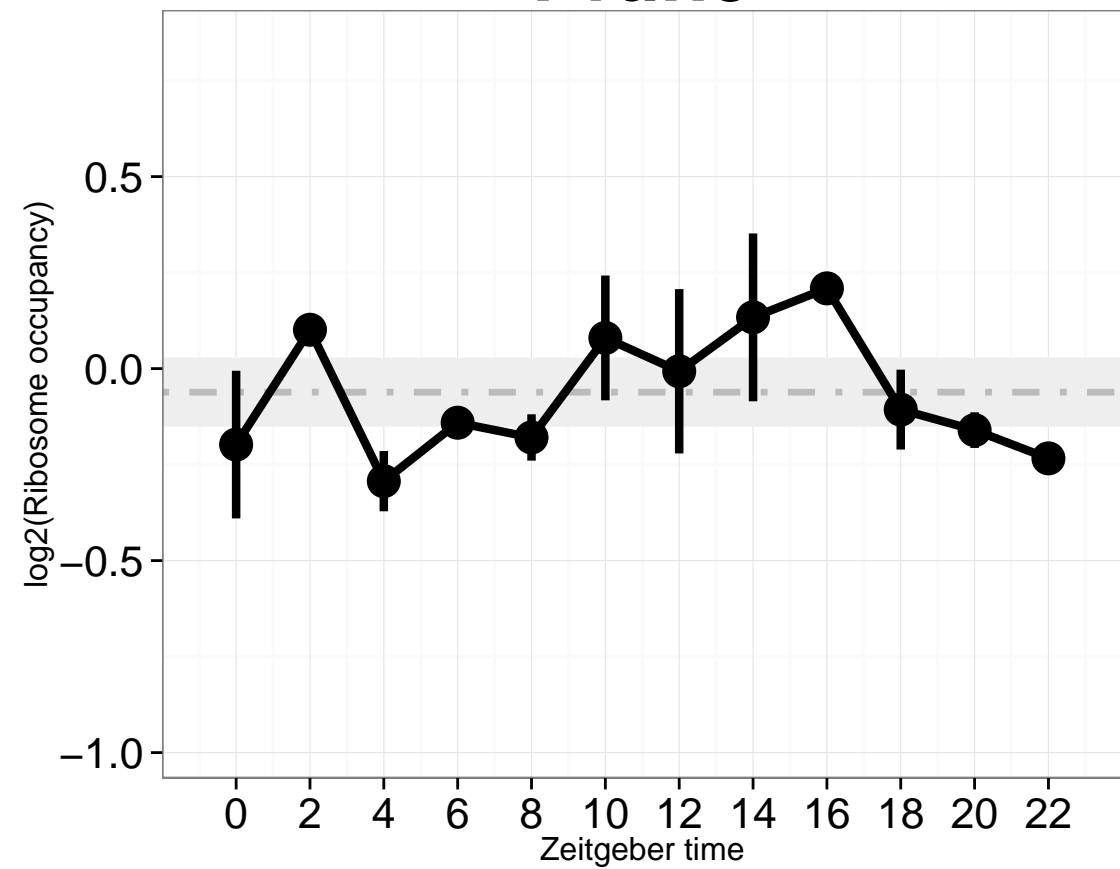

Supplement: Supplementary file 7075 [file 1]

# Txn14a

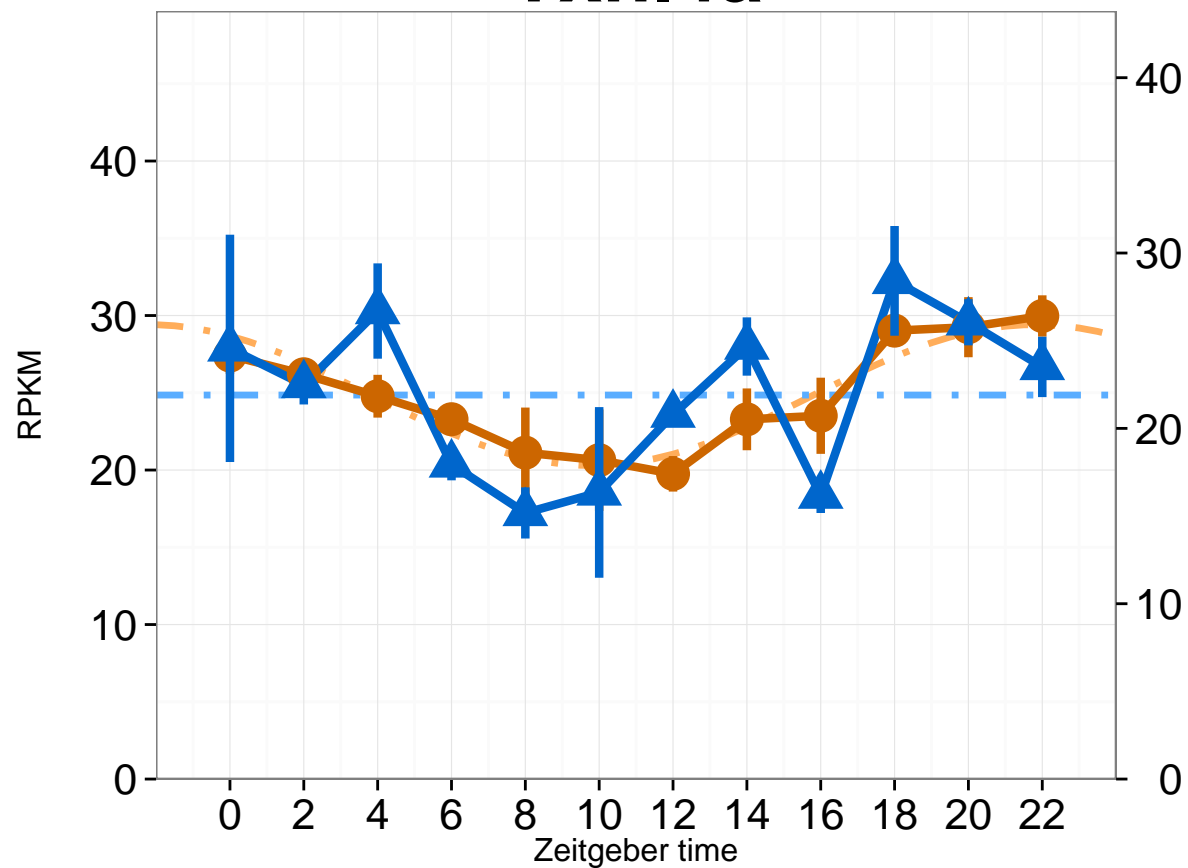

# Txn14a

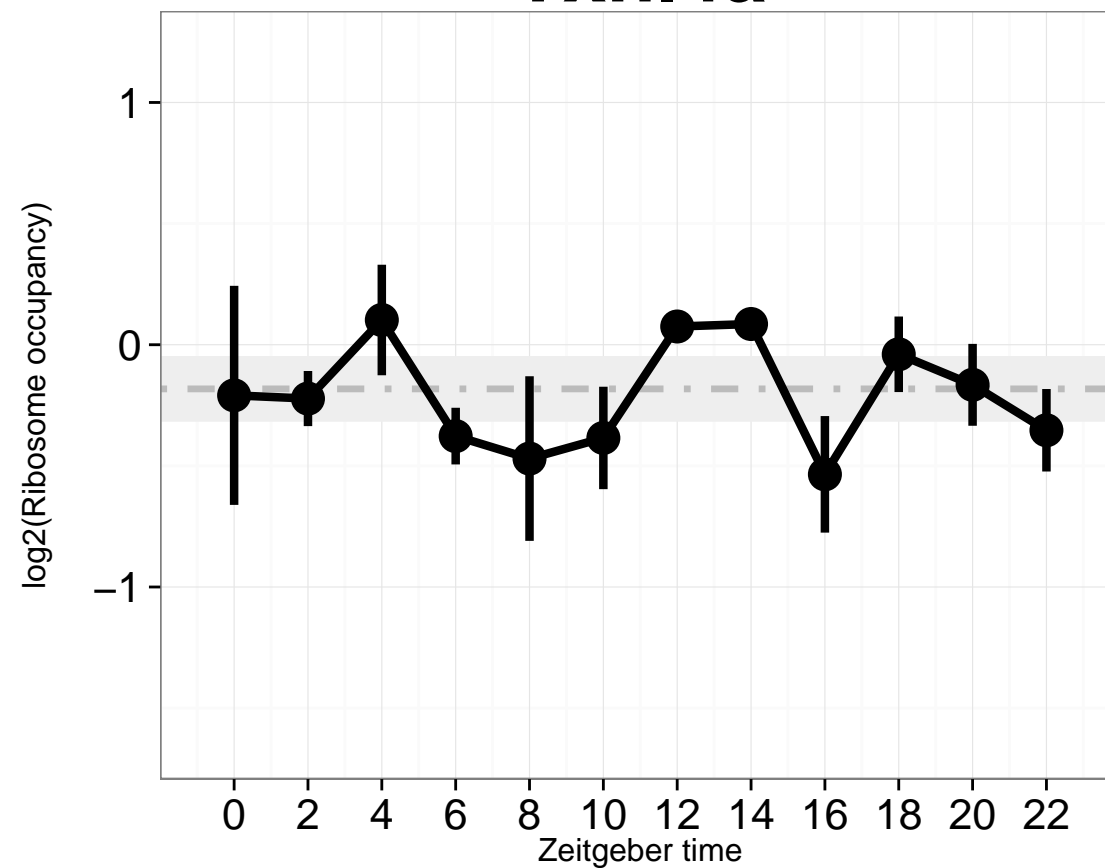

Supplement: Supplementary file 7076 [file 1]

## Slu7

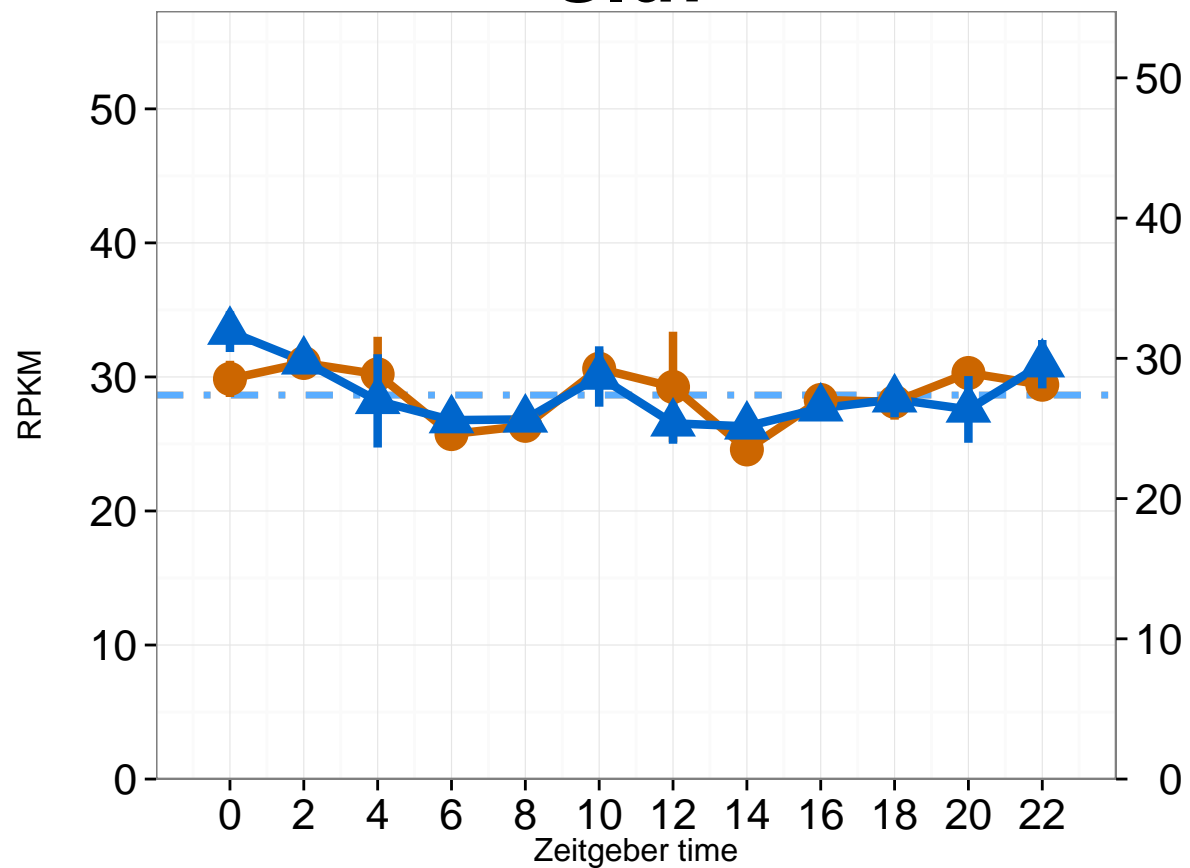

## Slu7

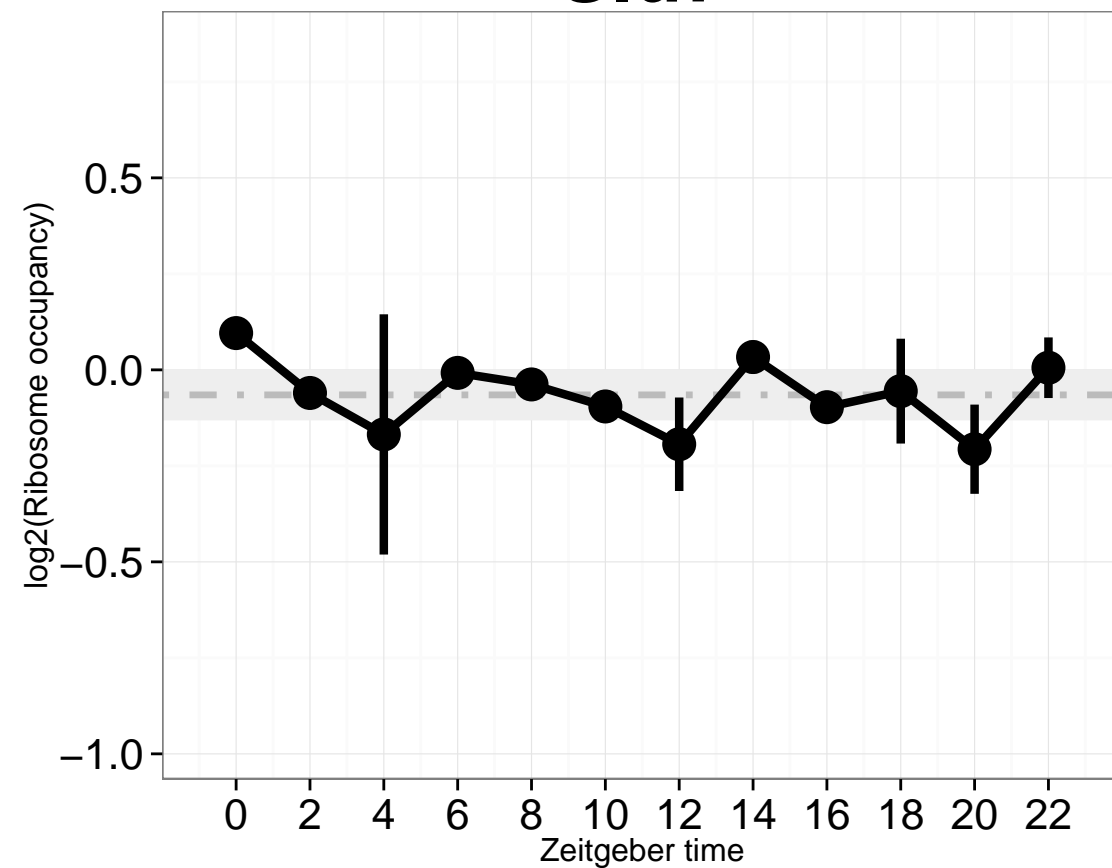

Supplement: Supplementary file 7077 [file 1]

## Gtpbp4

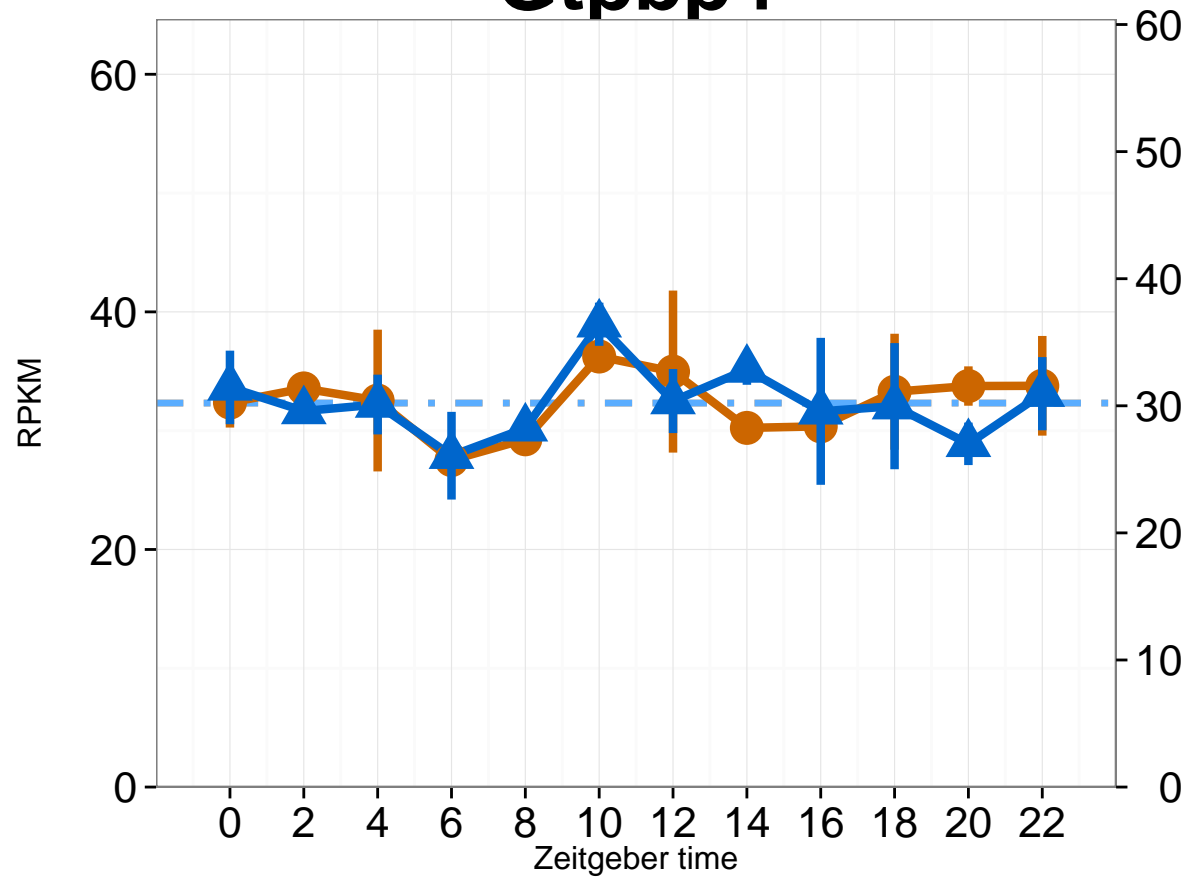

## Gtpbp4

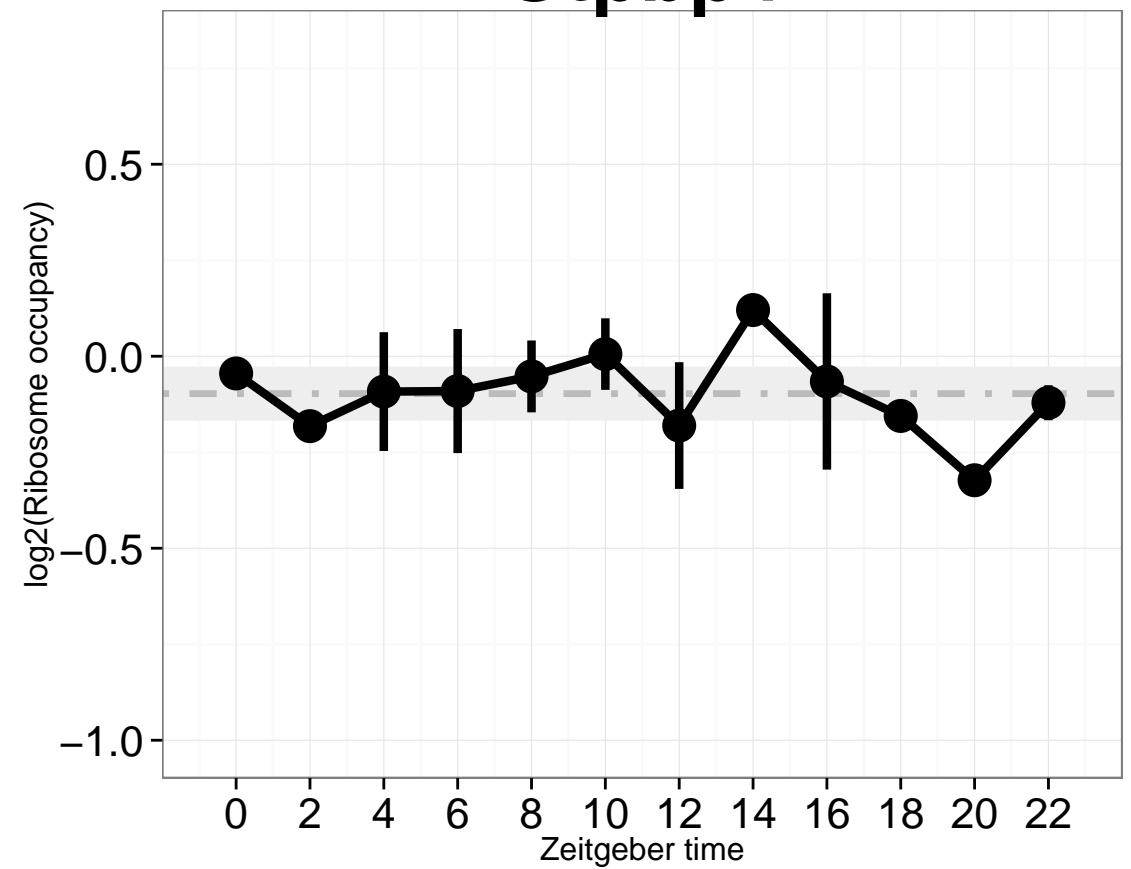

Supplement: Supplementary file 7078 [file 1]

# Cep128

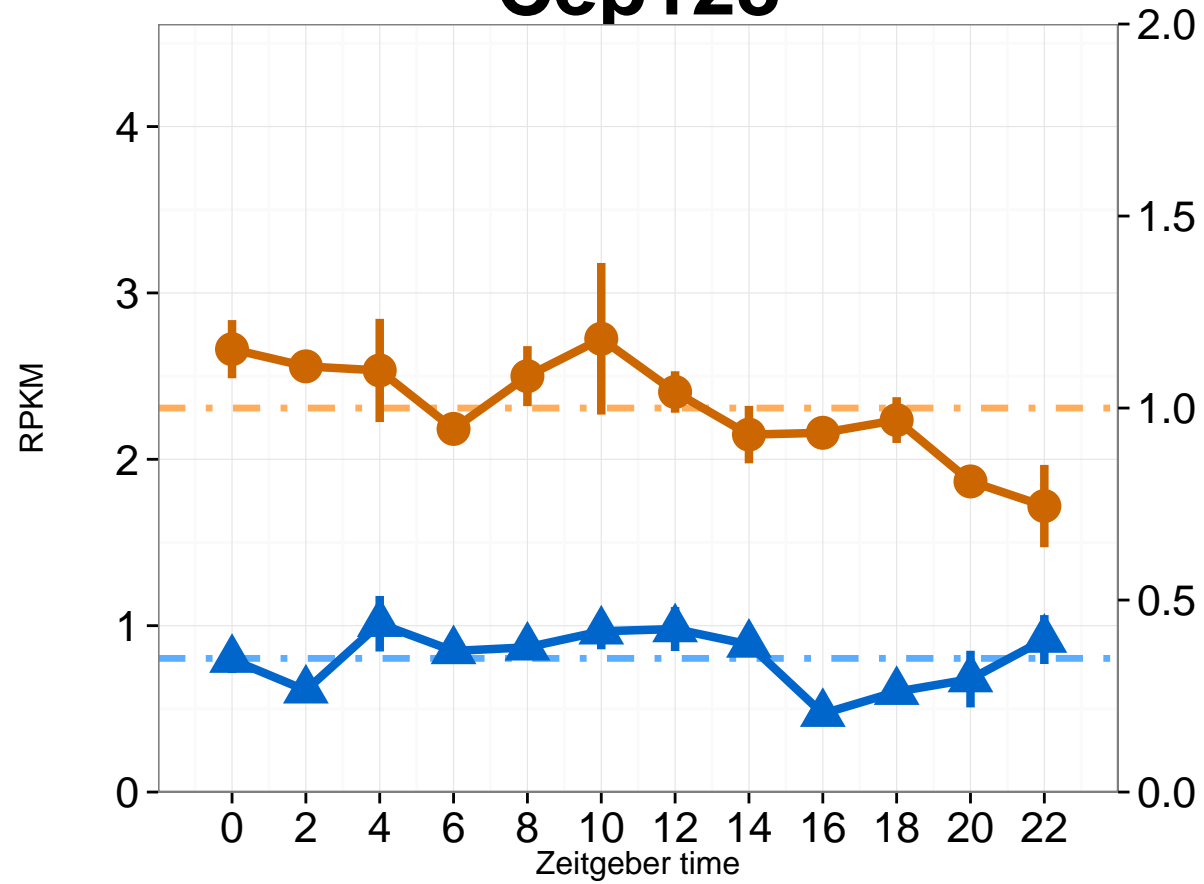

# Cep128

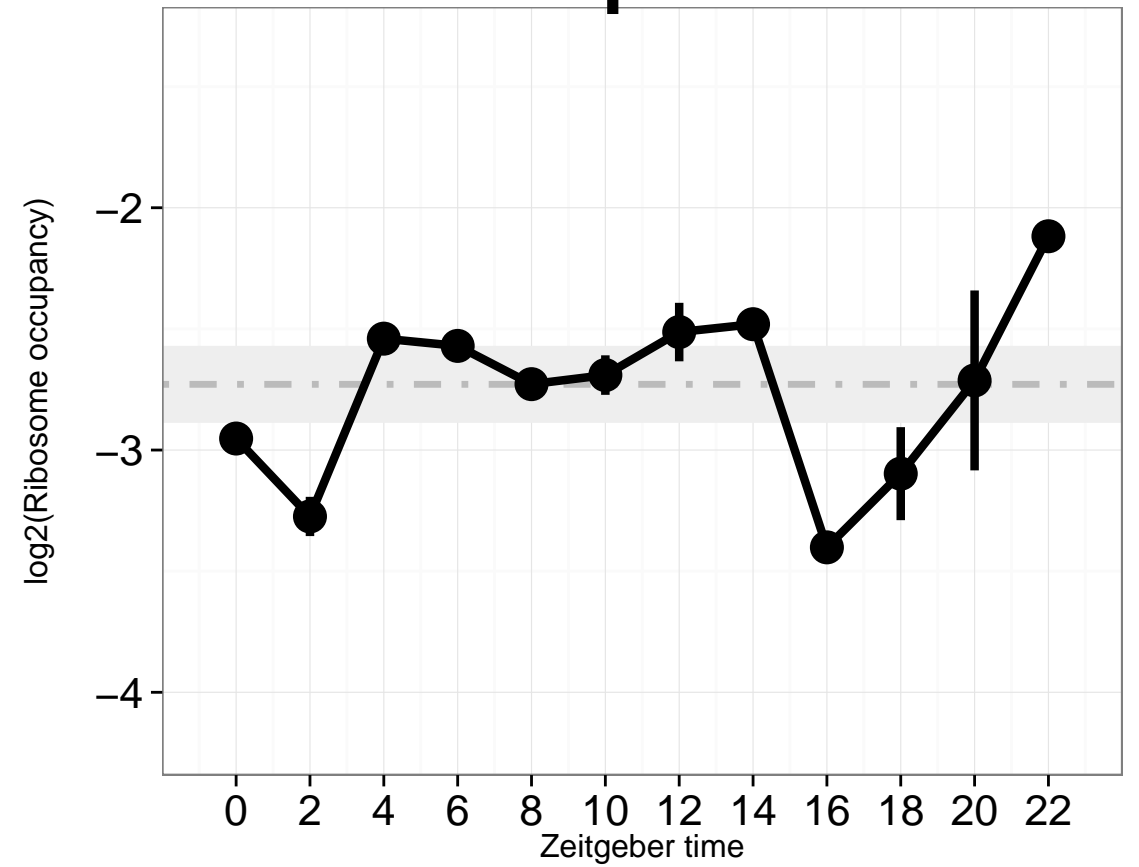

Supplement: Supplementary file 7079 [file 1]

# Polr2k

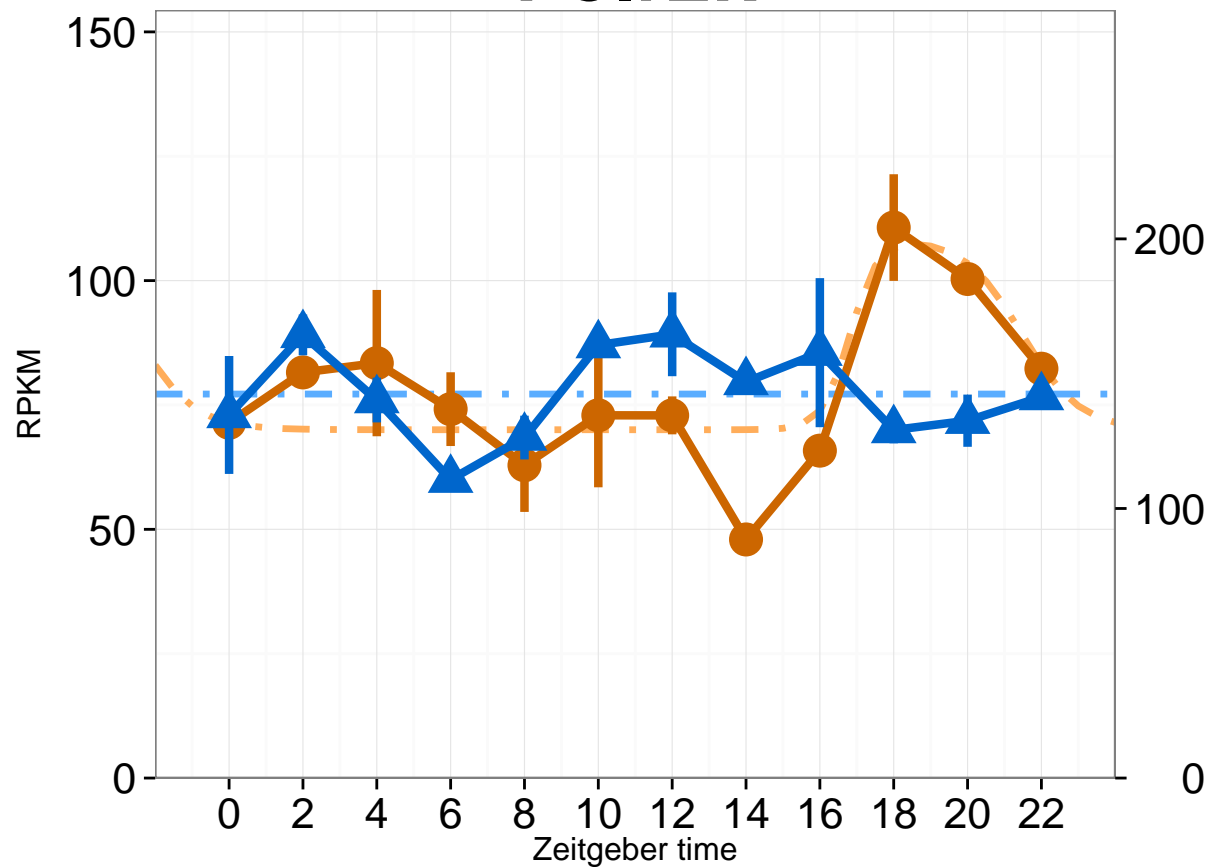

# Polr2k

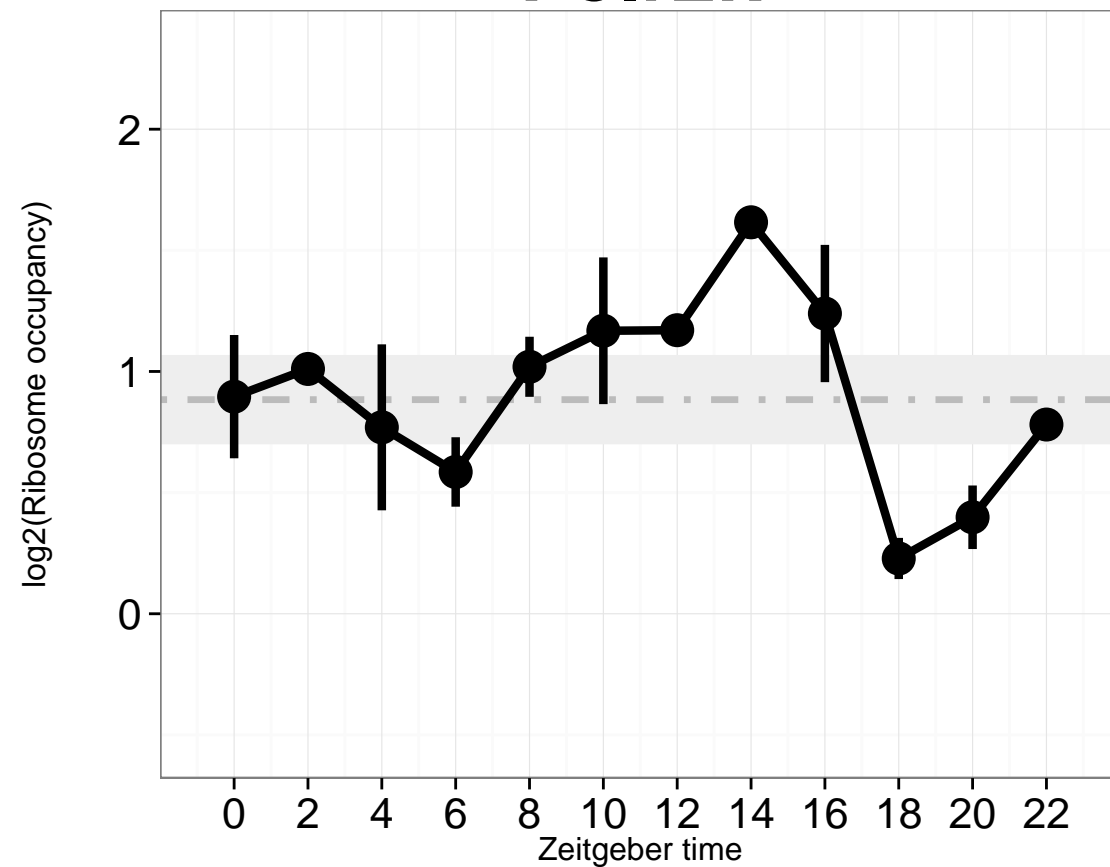

Supplement: Supplementary file 7080 [file 1]

# lqcb1

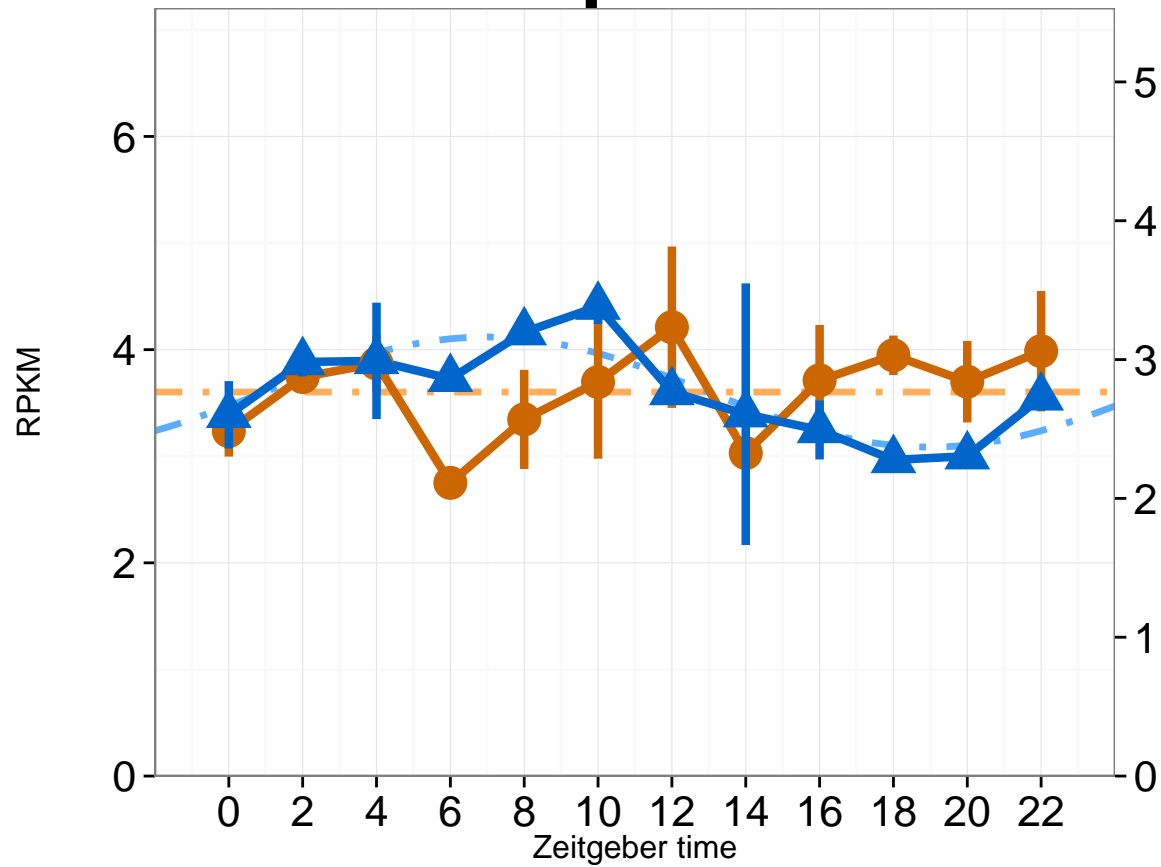

# lqcb1

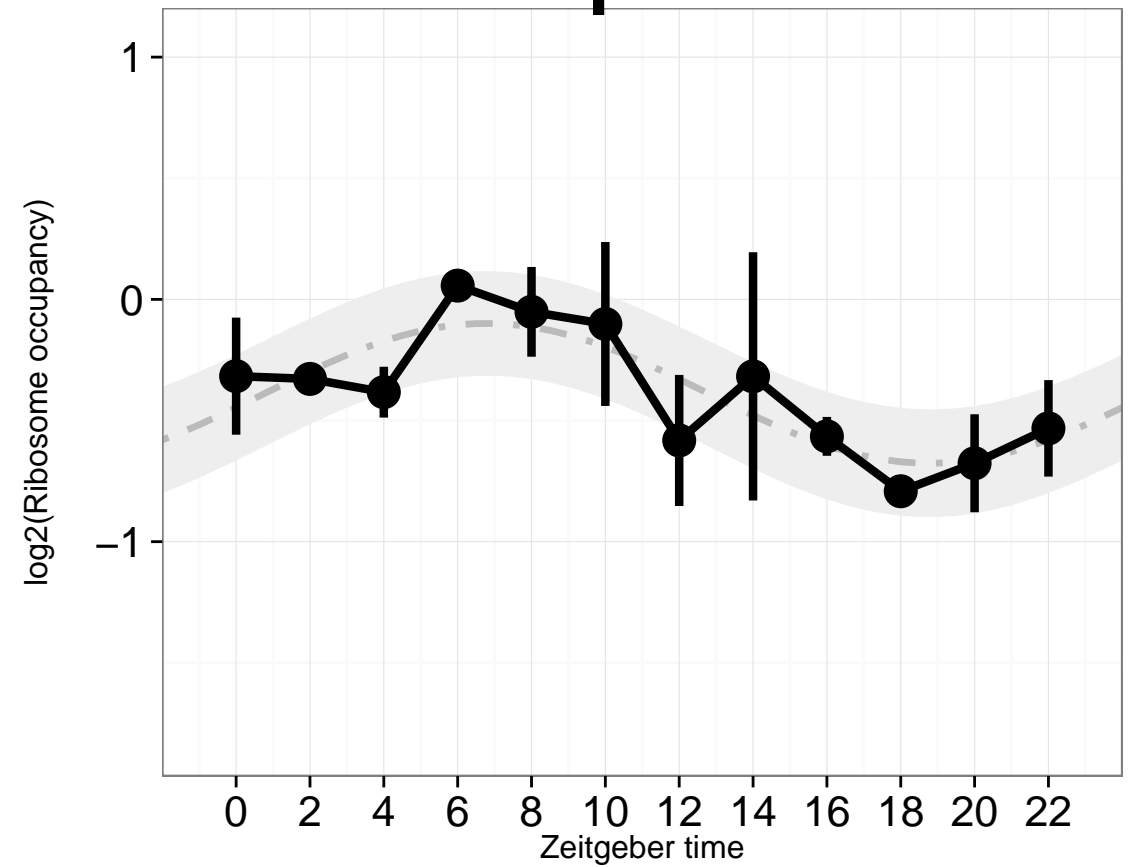

Supplement: Supplementary file 7081 [file 1]

## Hddc2

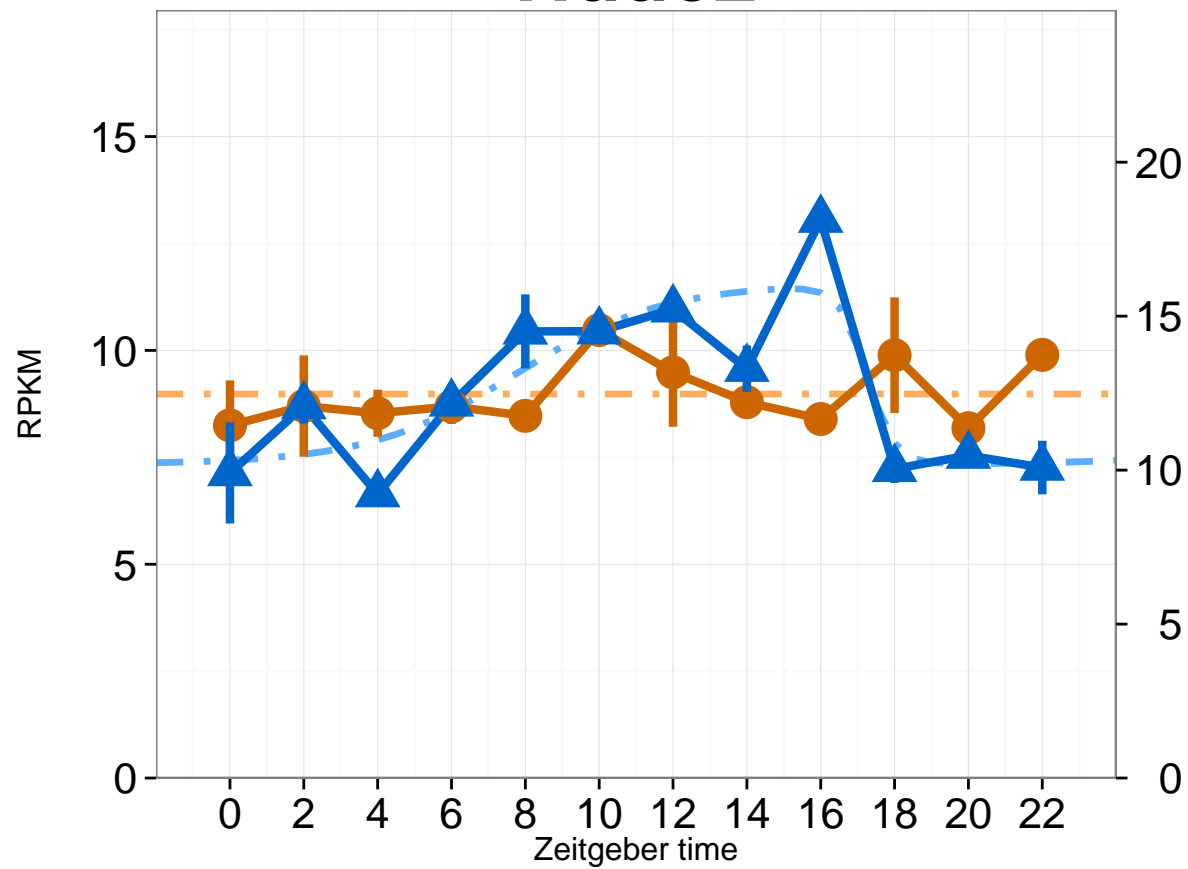

## Hddc2

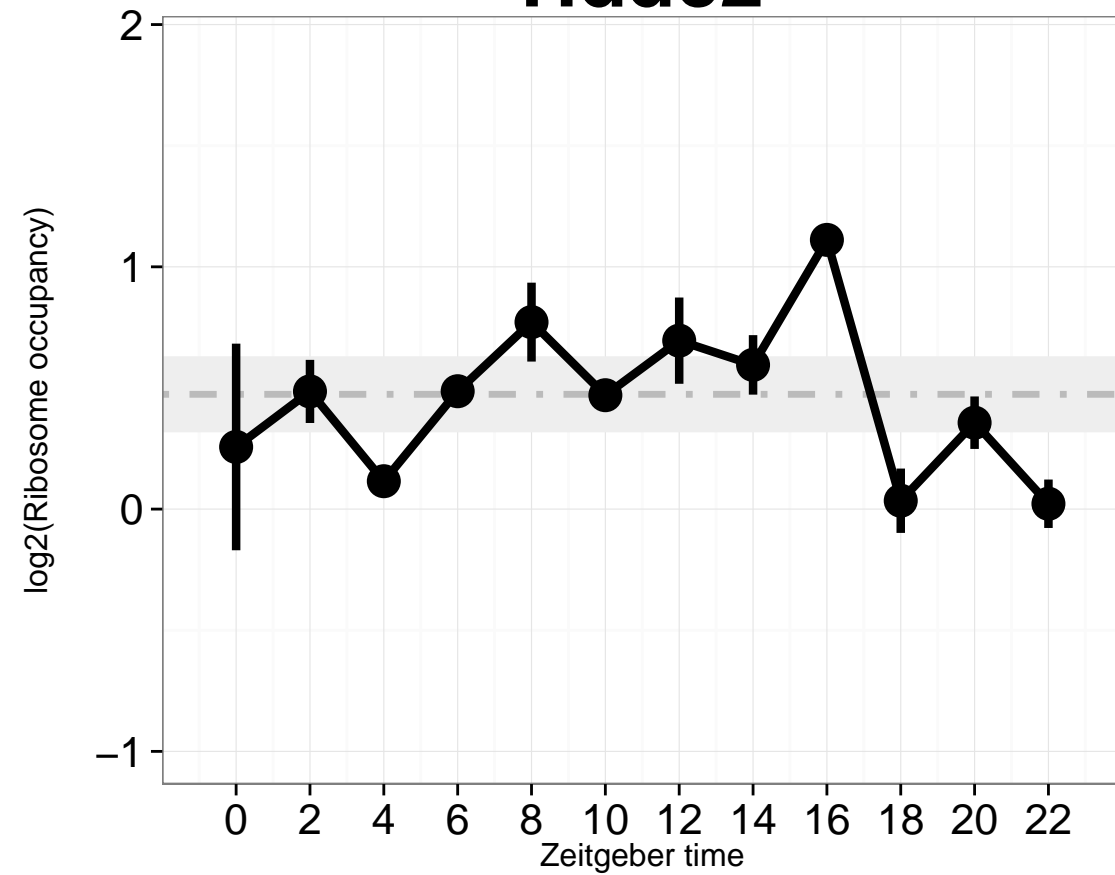

Supplement: Supplementary file 7082 [file 1]

## Grasp

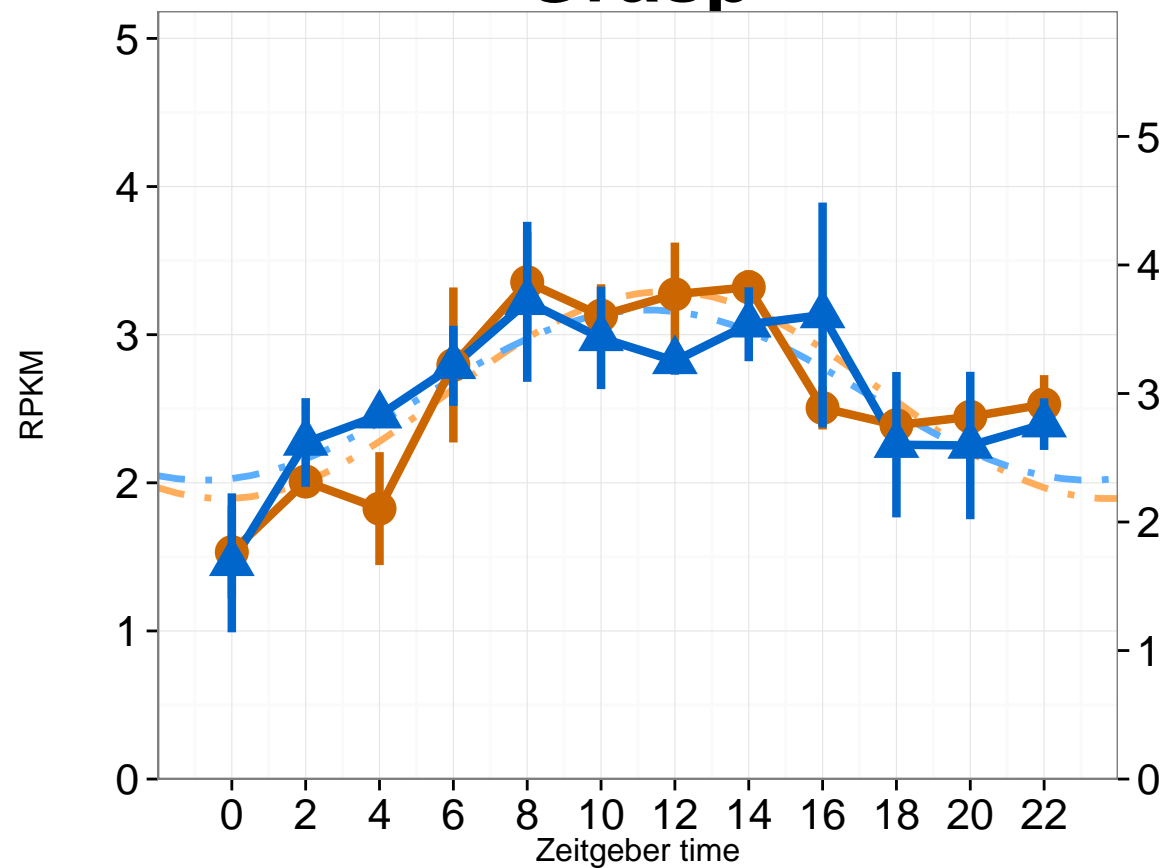

## Grasp

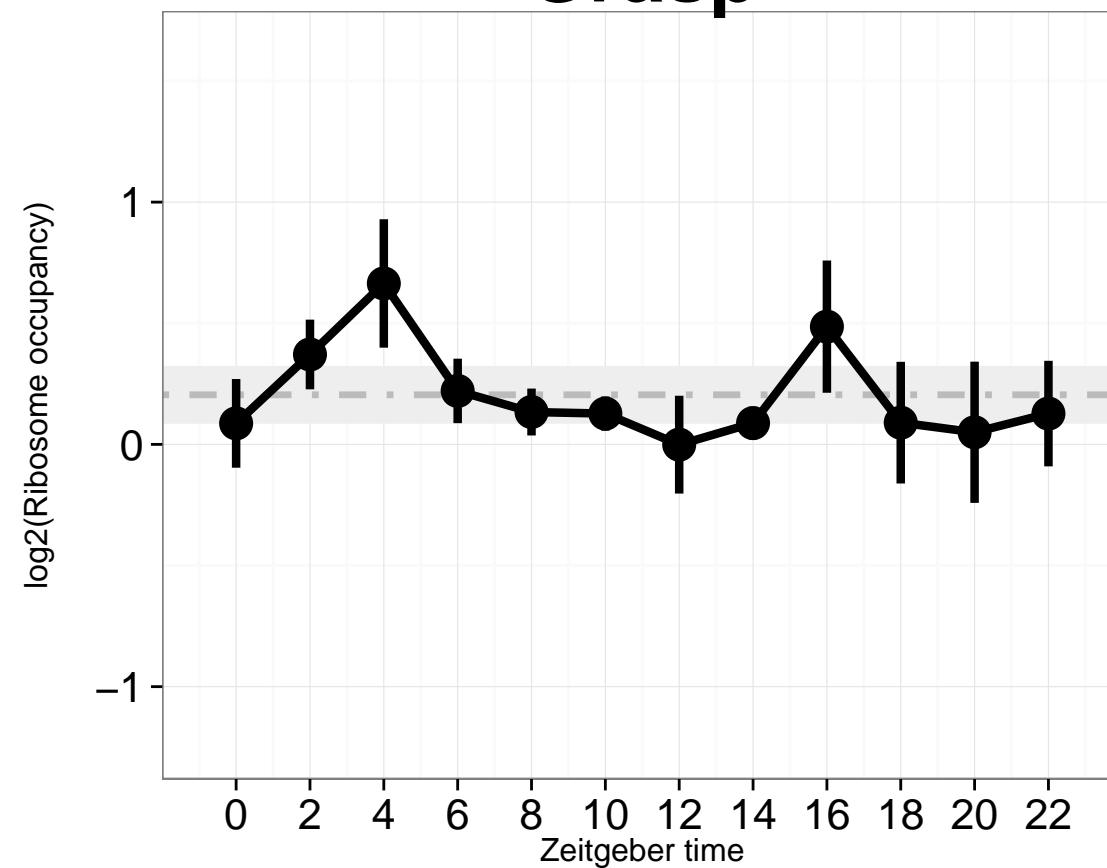

Supplement: Supplementary file 7083 [file 1]

# Rps4y2

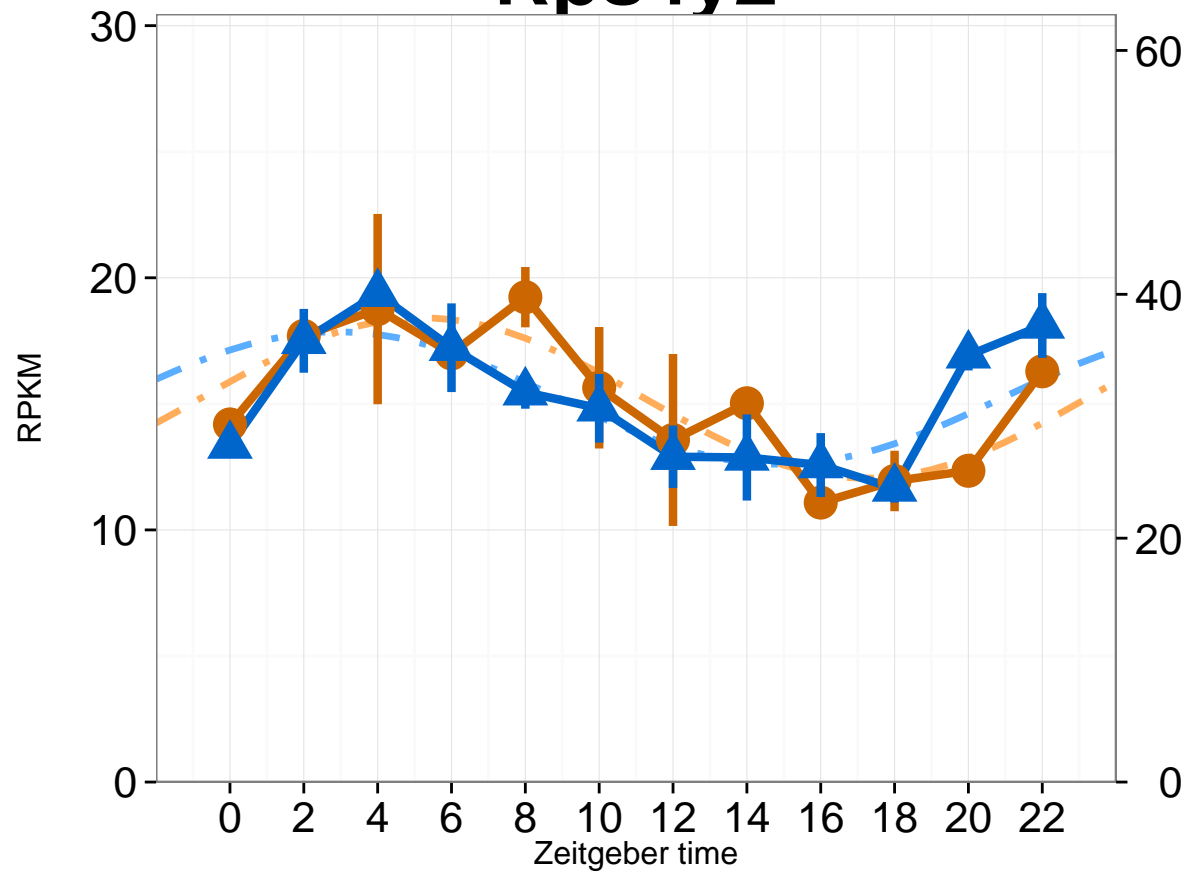

# Rps4y2

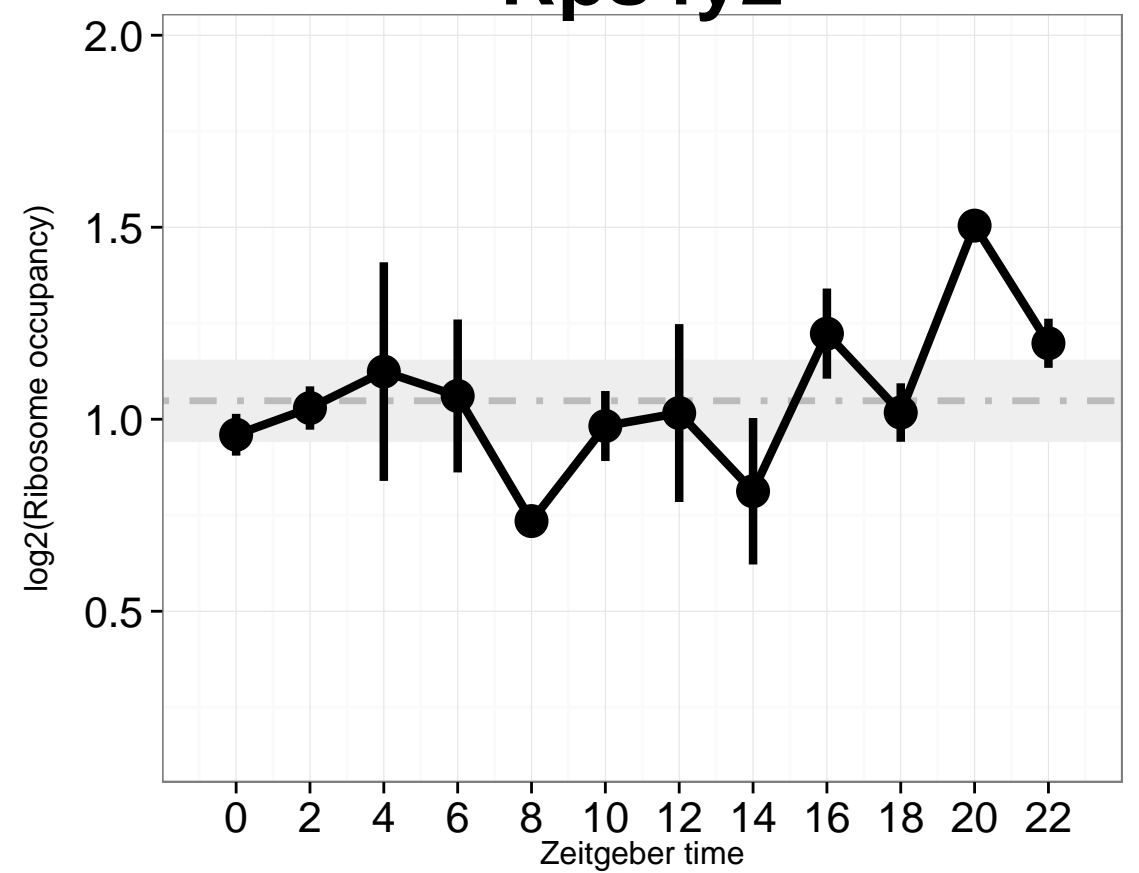

Supplement: Supplementary file 7084 [file 1]

## Dmxi2

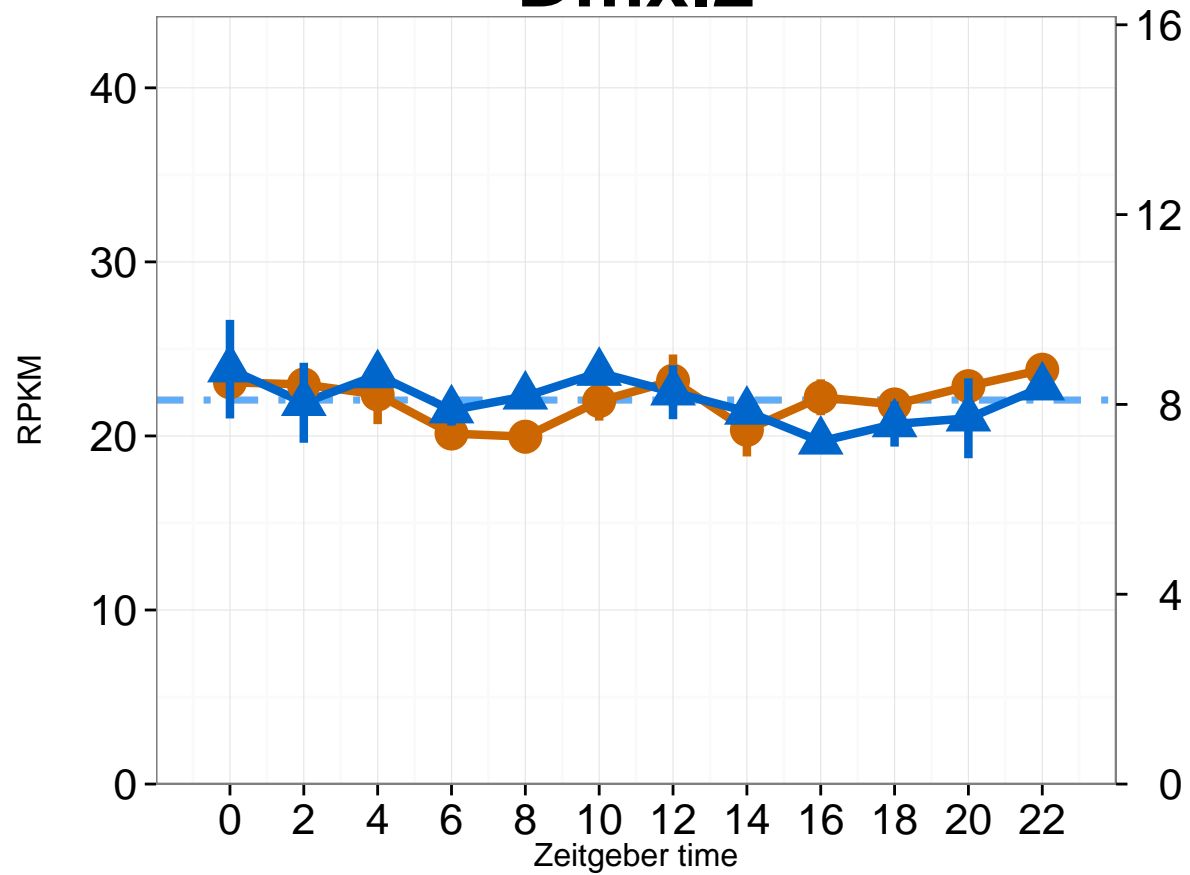

## Dmxi2

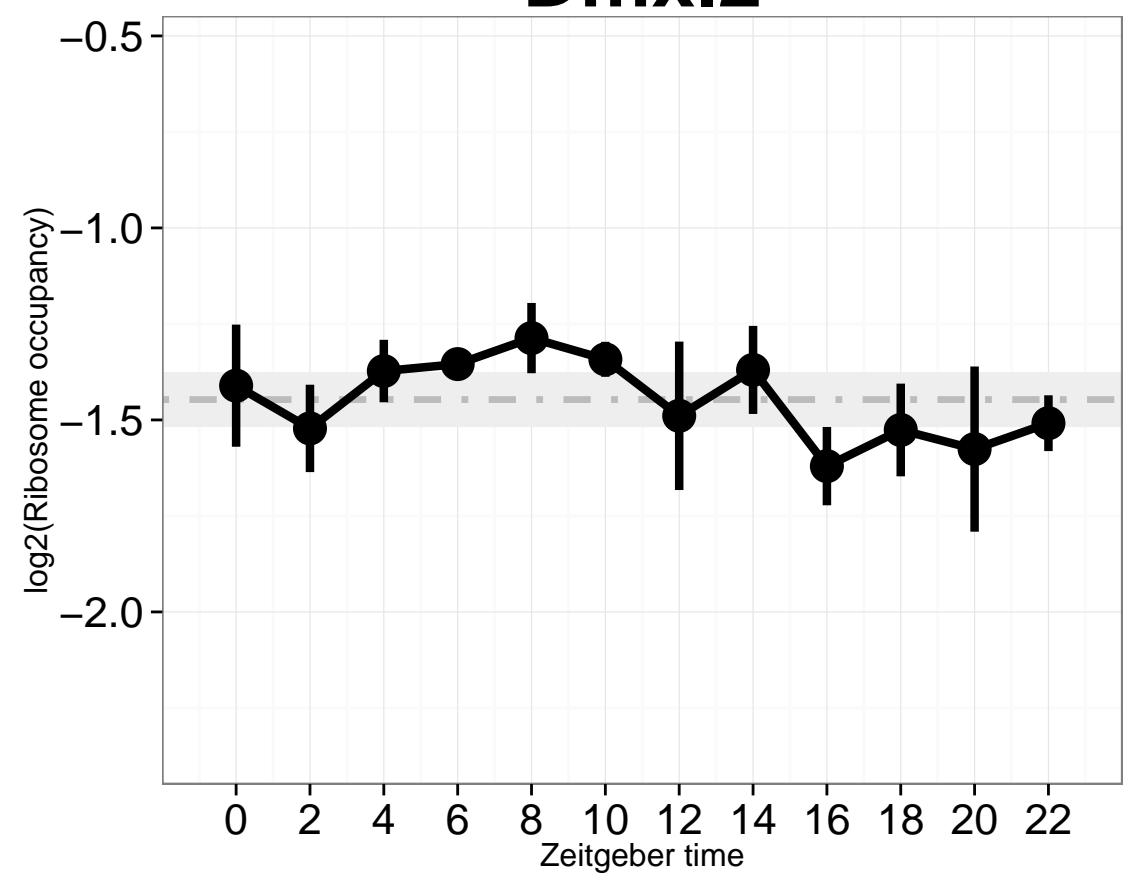

Supplement: Supplementary file 7085 [file 1]

**Havcr2 TR**

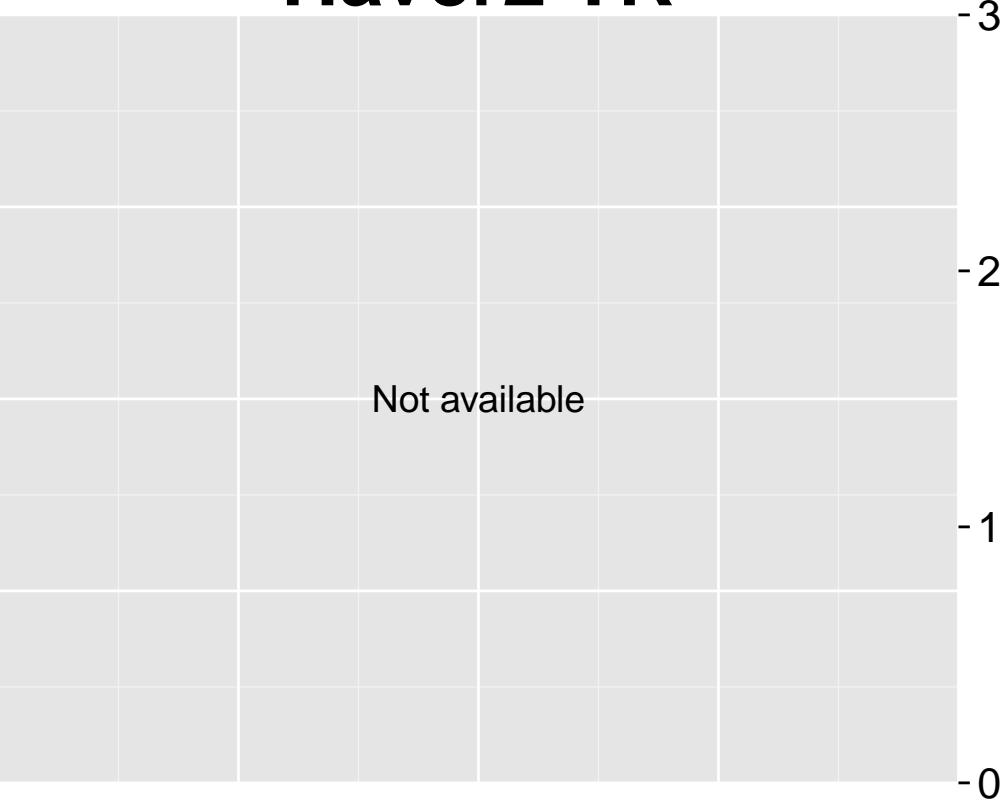

**Havcr2 log2(Ribosome occupancy**

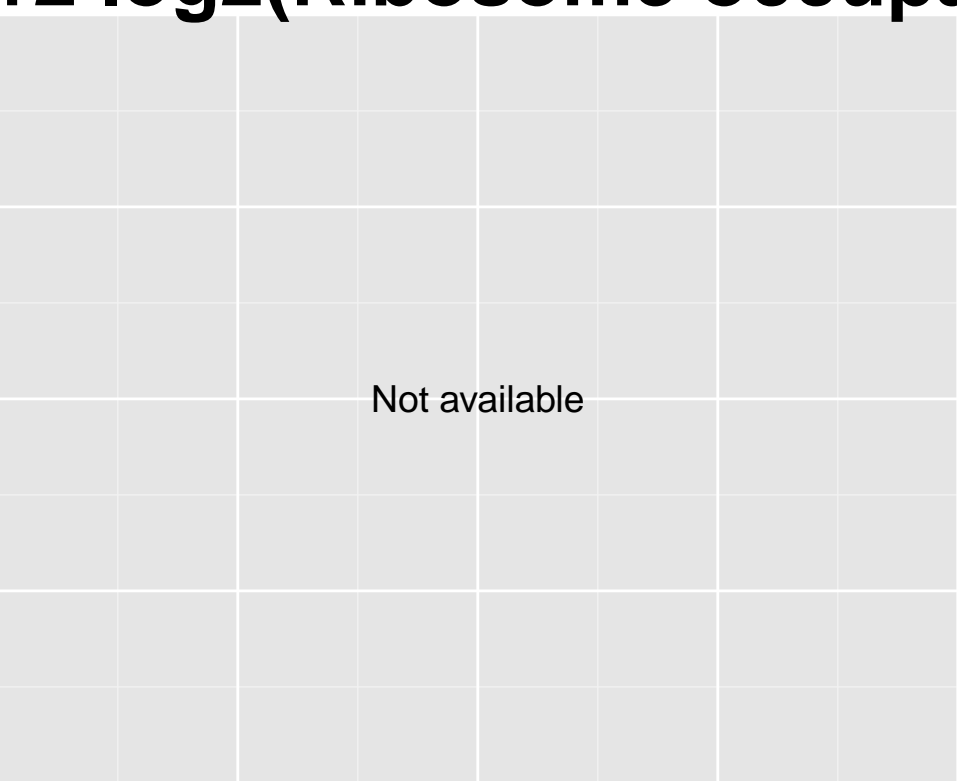

Supplement: Supplementary file 7086 [file 1]

## VgII4

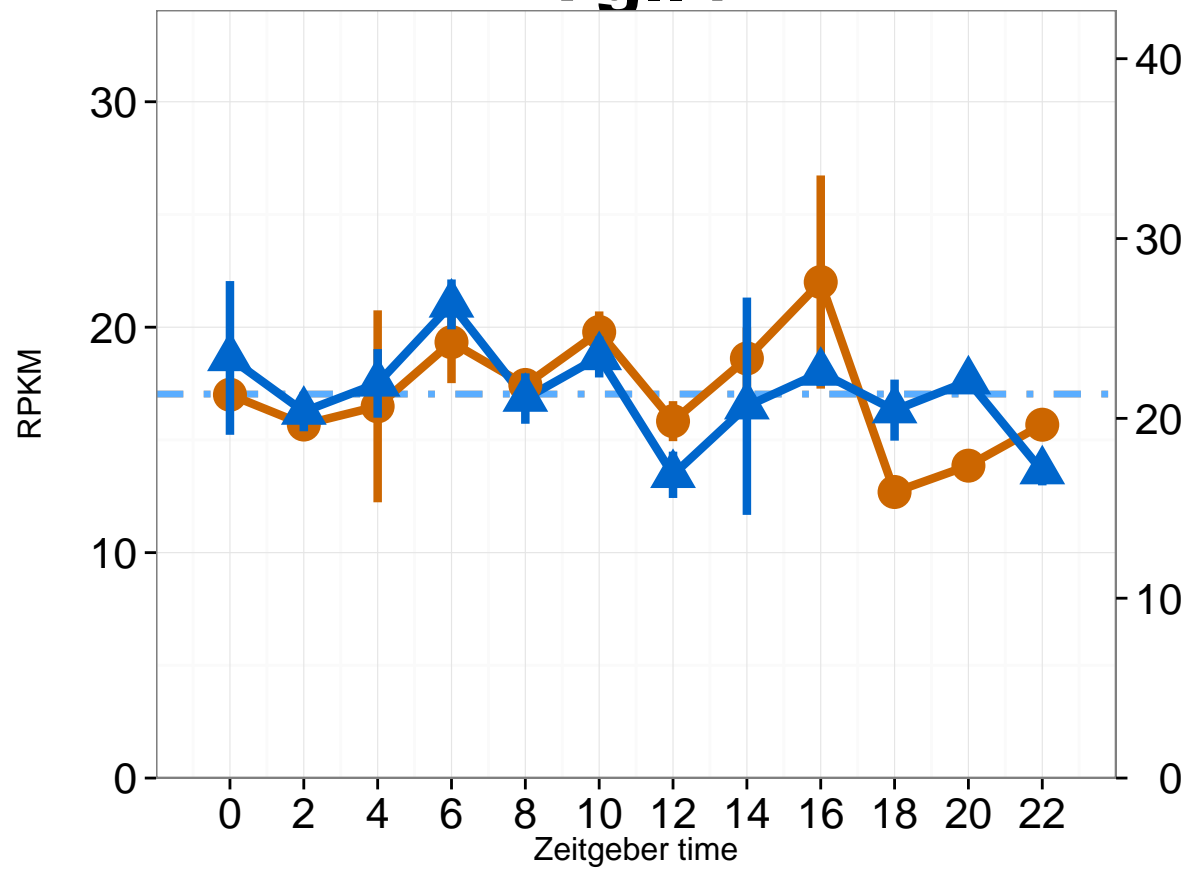

## VgII4

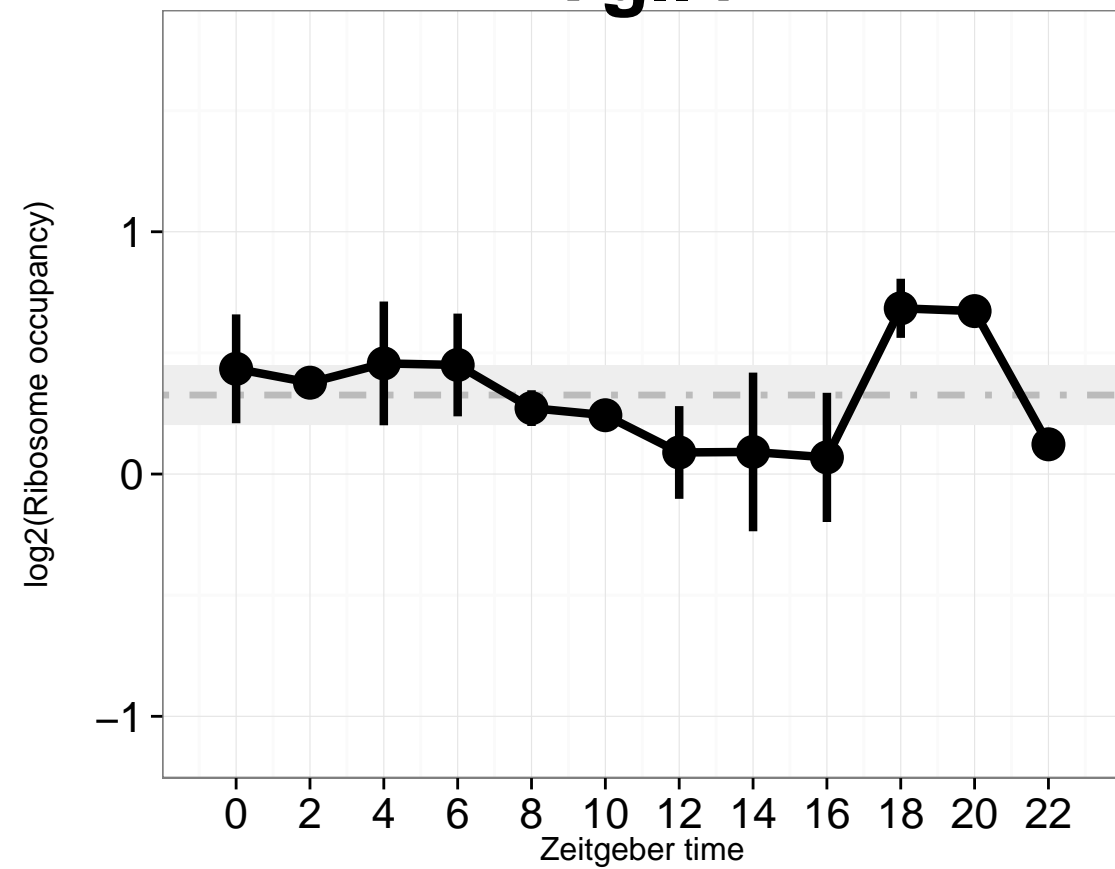

Supplement: Supplementary file 7087 [file 1]

# Tsc22d3

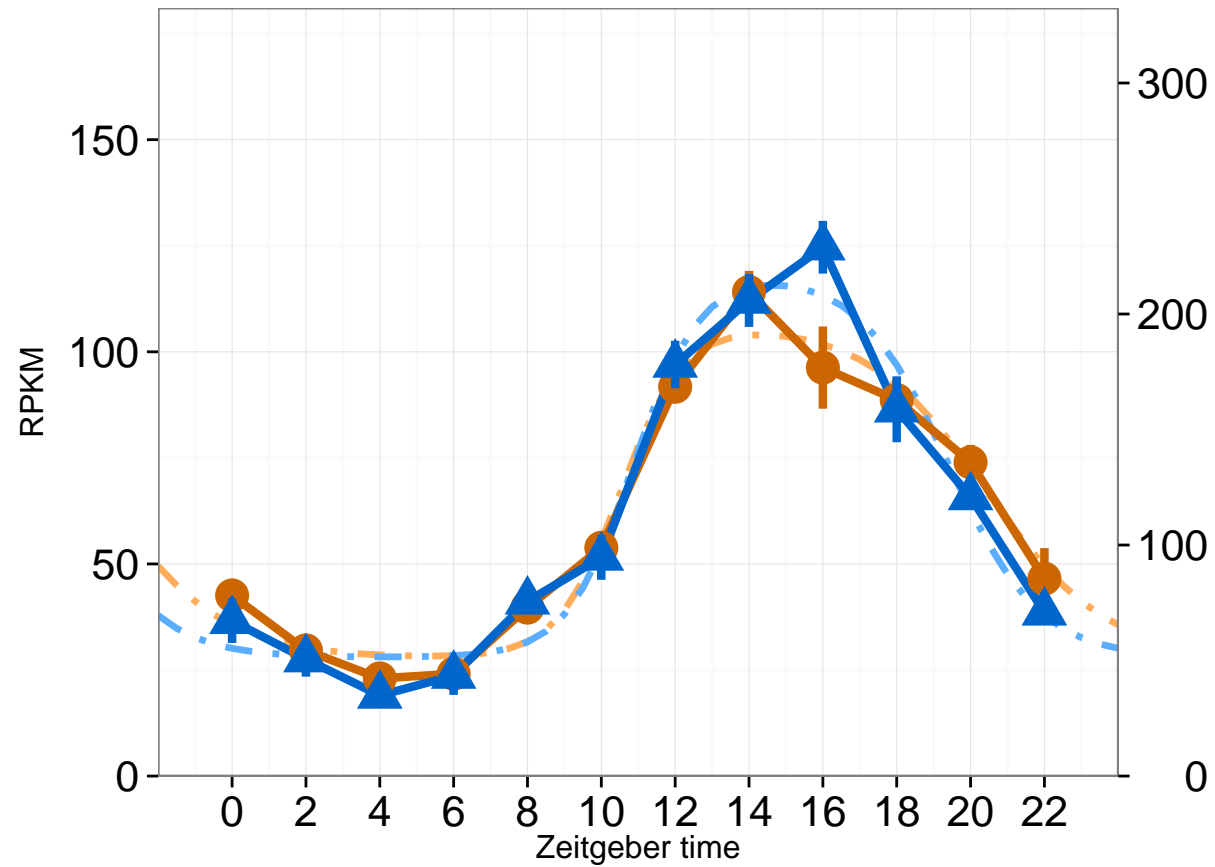

# Tsc22d3

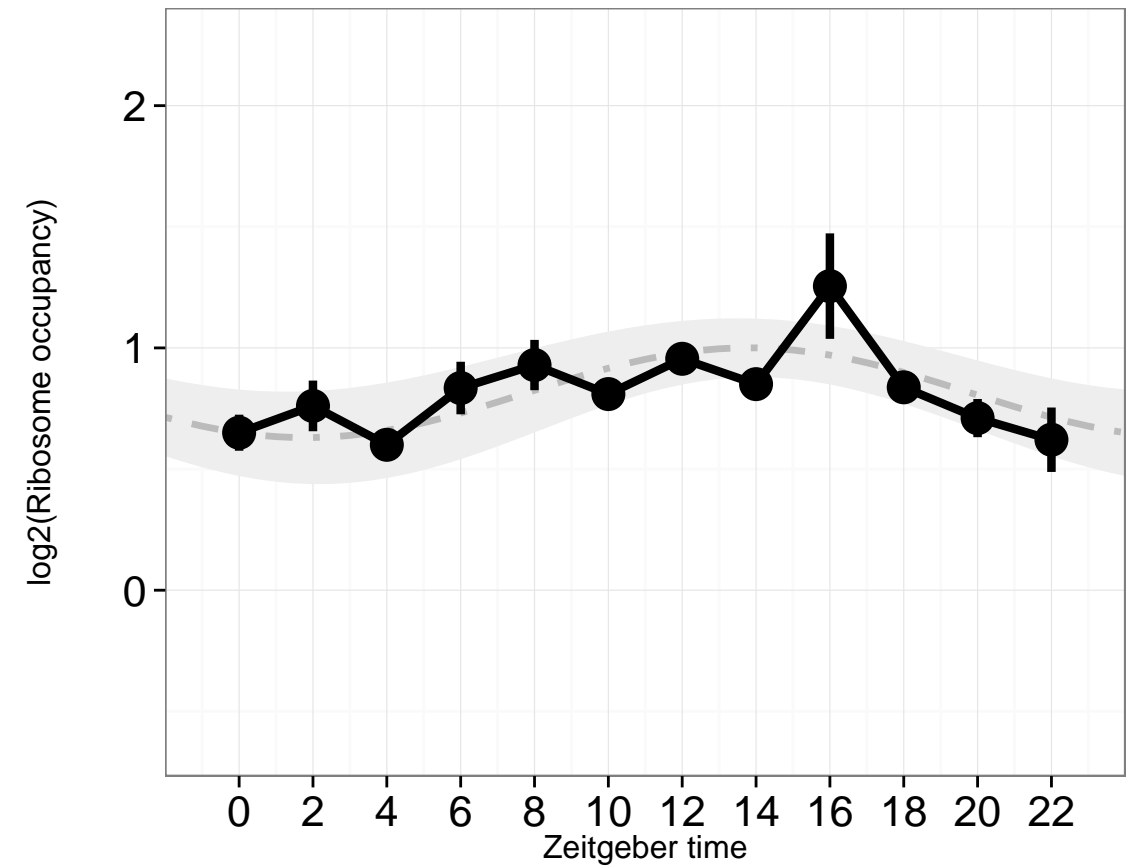

Supplement: Supplementary file 7088 [file 1]

# Fam46c

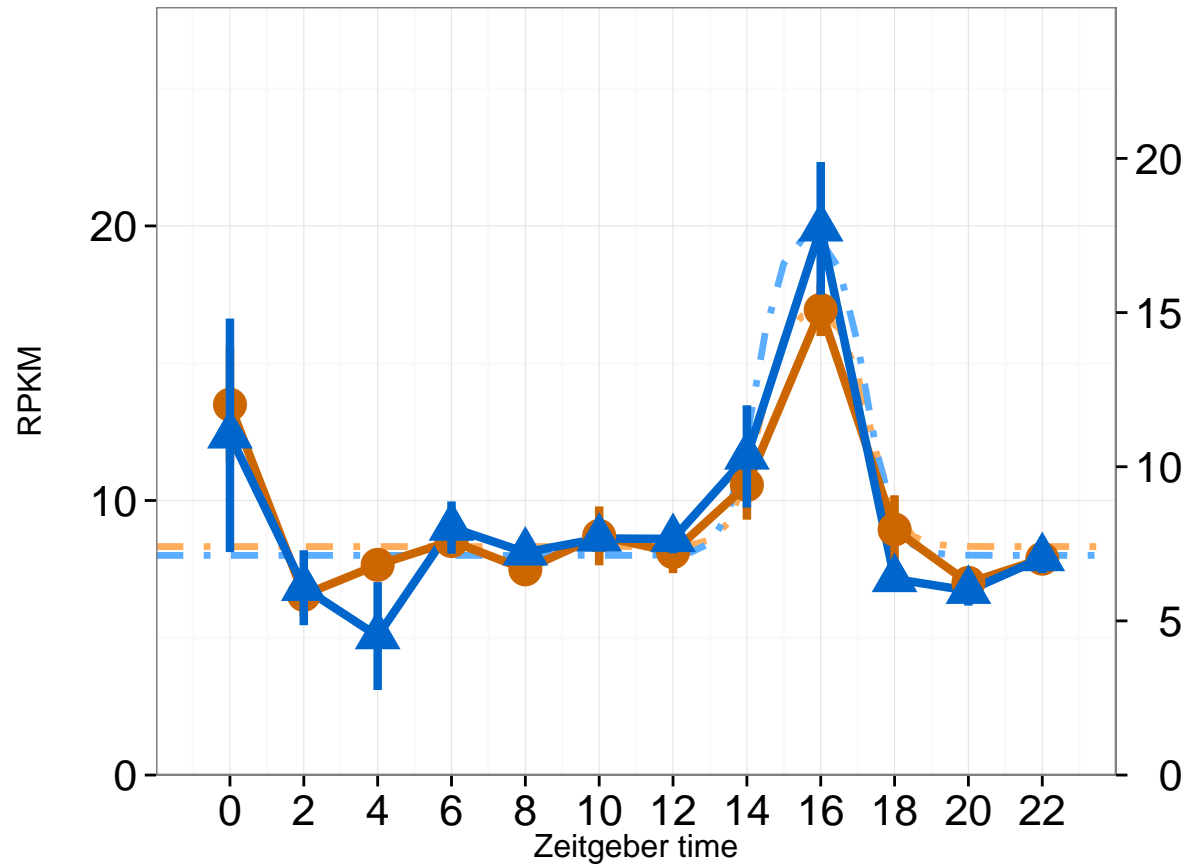

# Fam46c

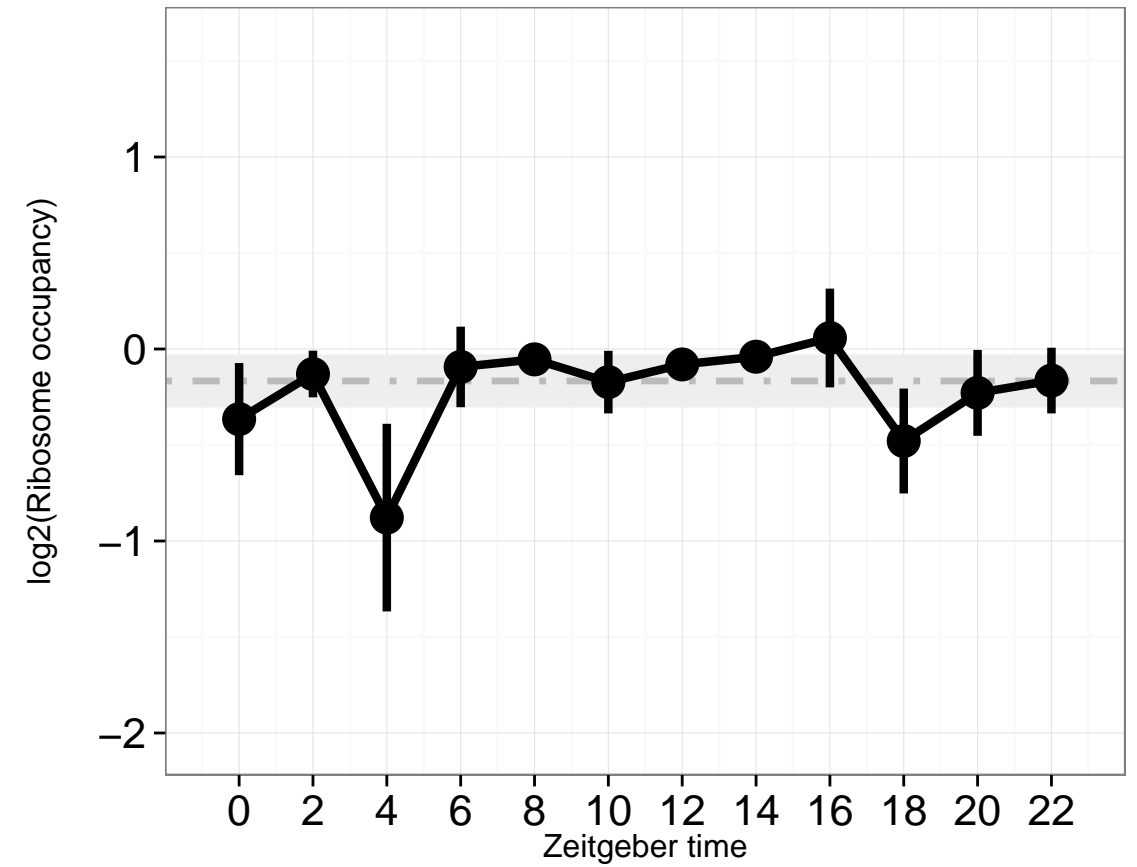

Supplement: Supplementary file 7089 [file 1]

# Siah1b

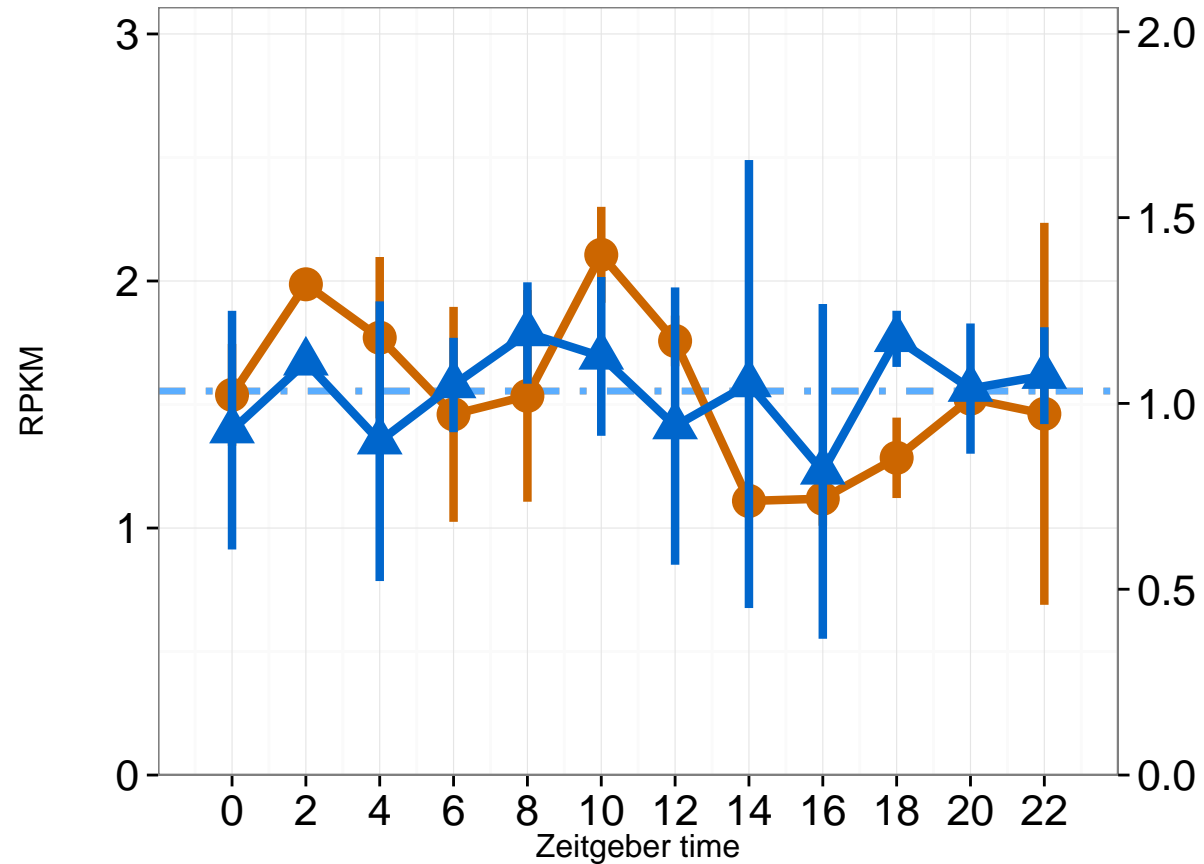

# Siah1b

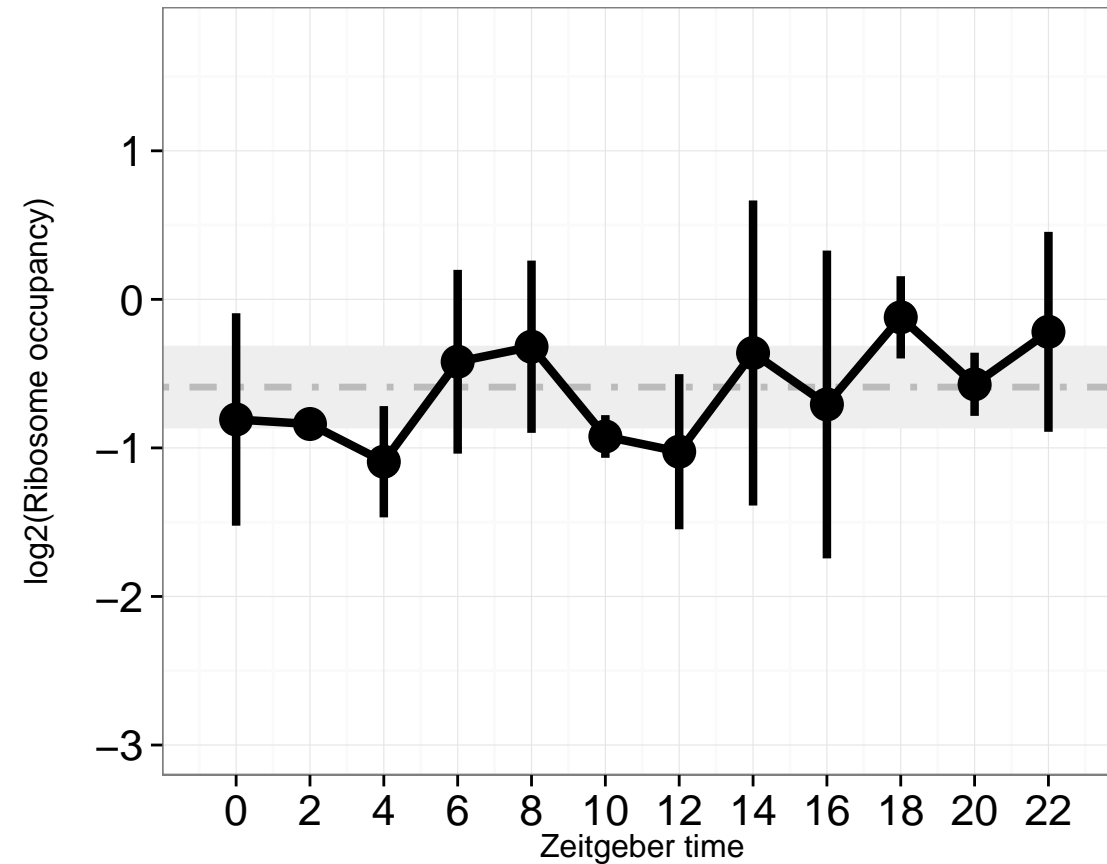

Supplement: Supplementary file 7090 [file 1]

# Gpr112

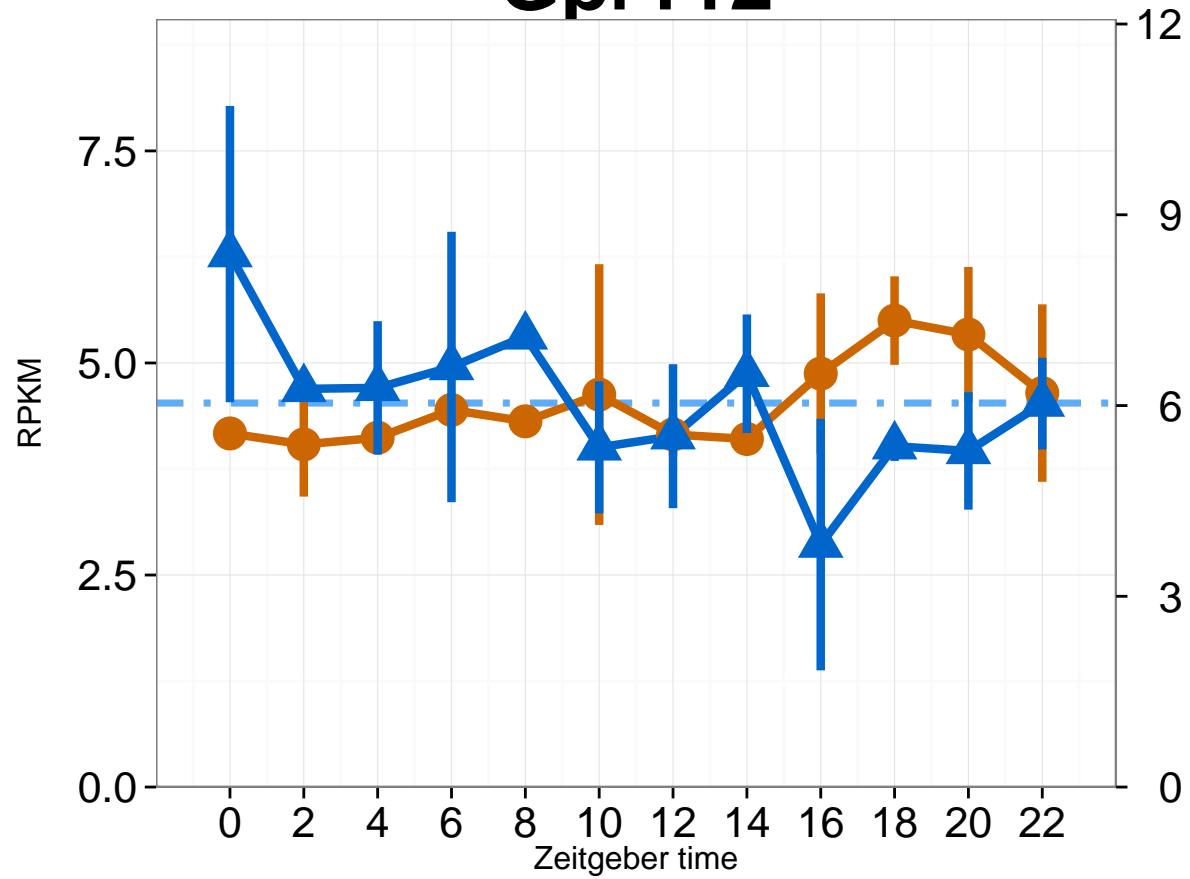

# Gpr112

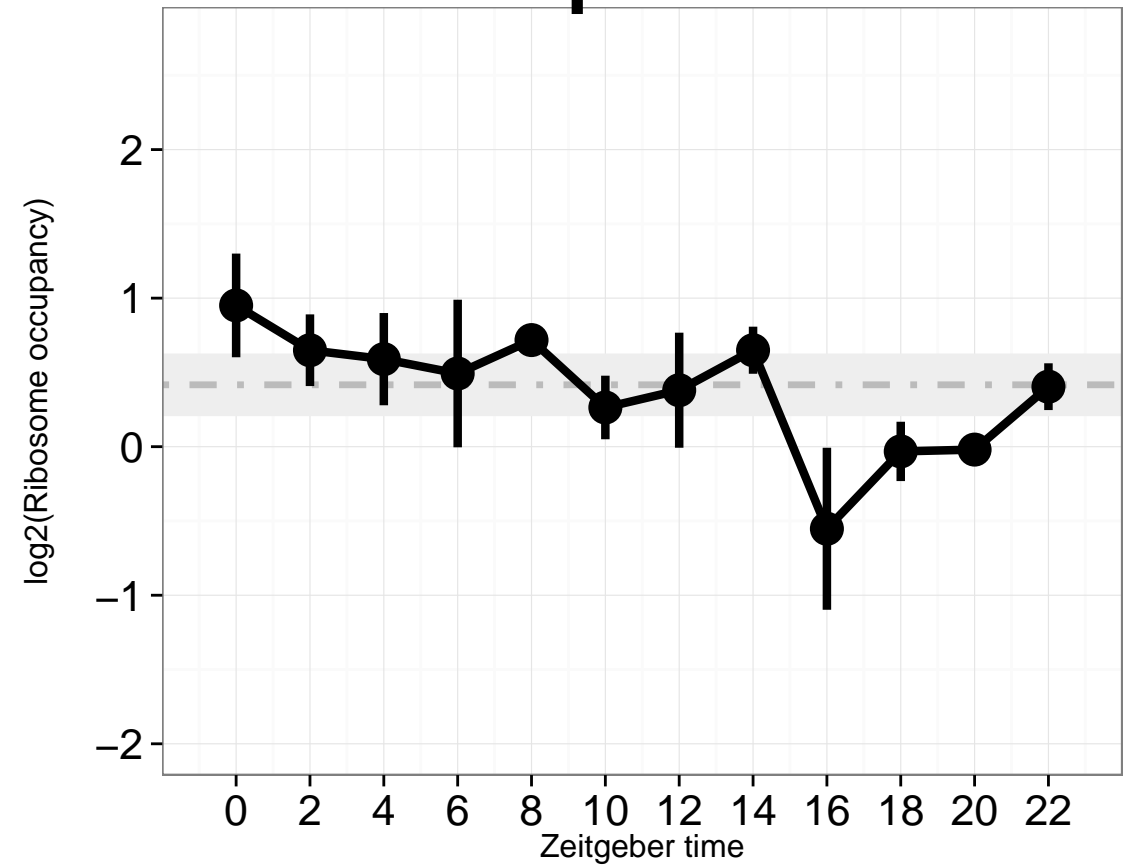

Supplement: Supplementary file 7091 [file 1]

## Aco2

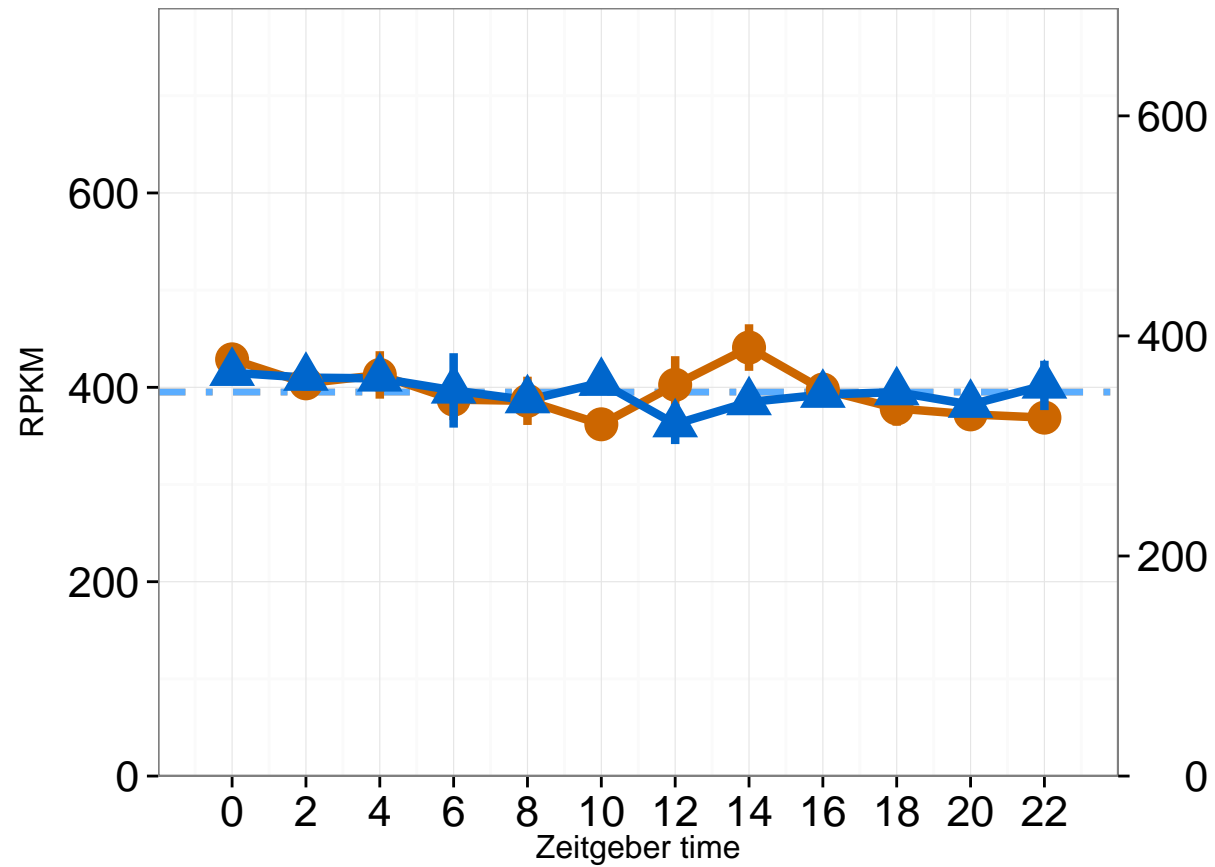

## Aco2

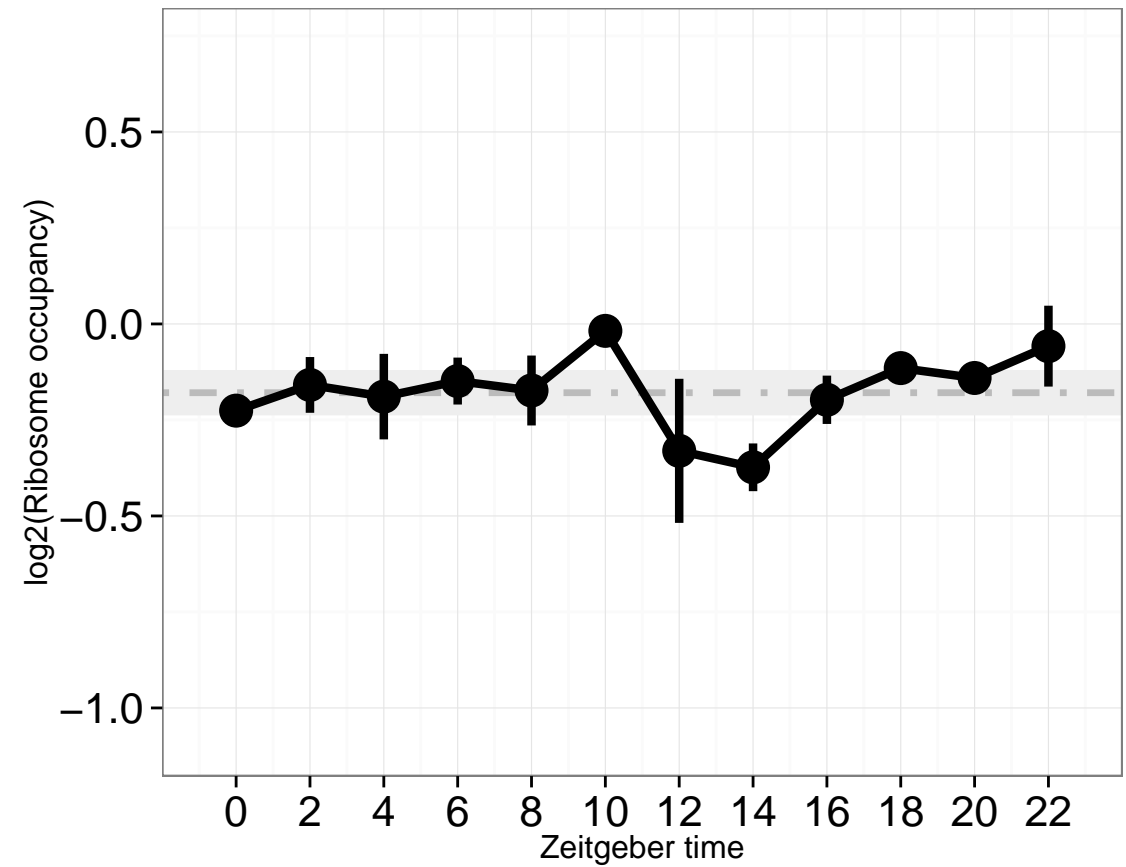

Supplement: Supplementary file 7092 [file 1]

## Etnk1

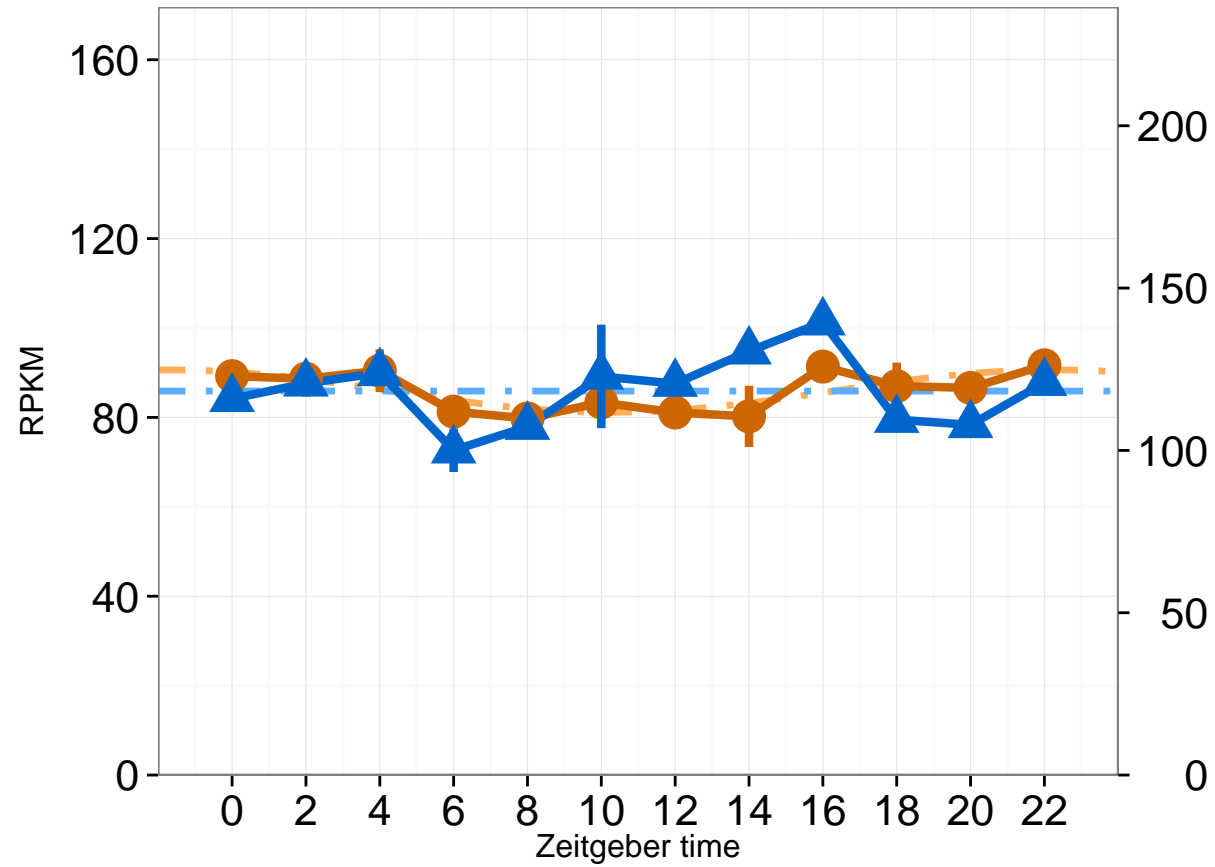

## Etnk1

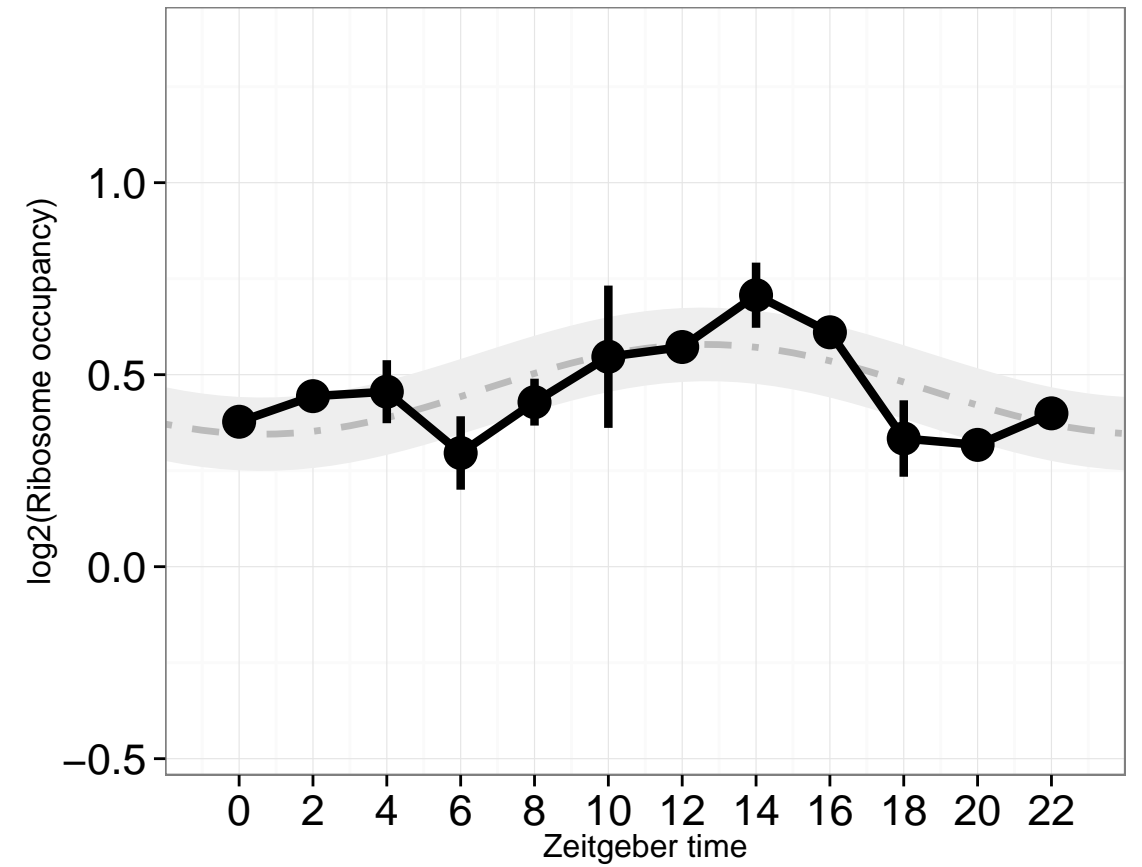

Supplement: Supplementary file 7093 [file 1]

## Pigl

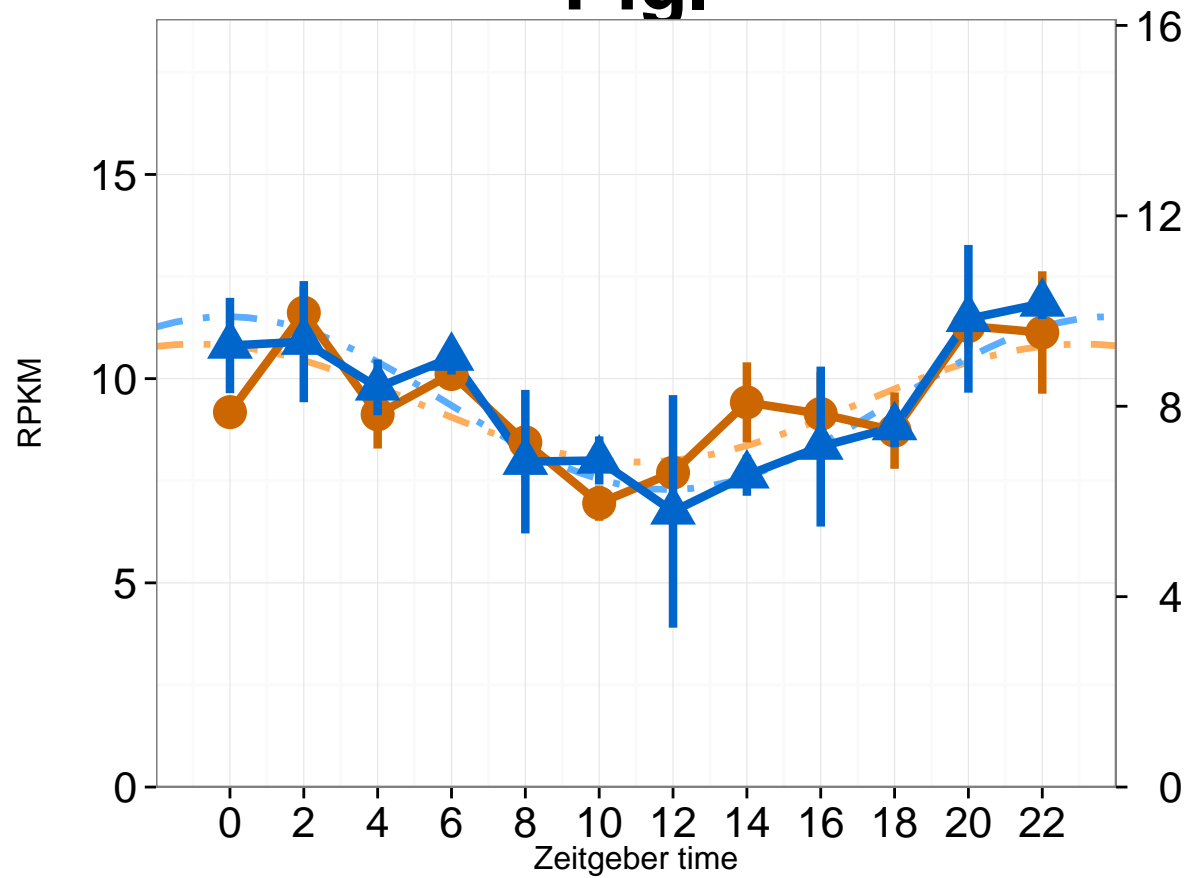

## Pigl

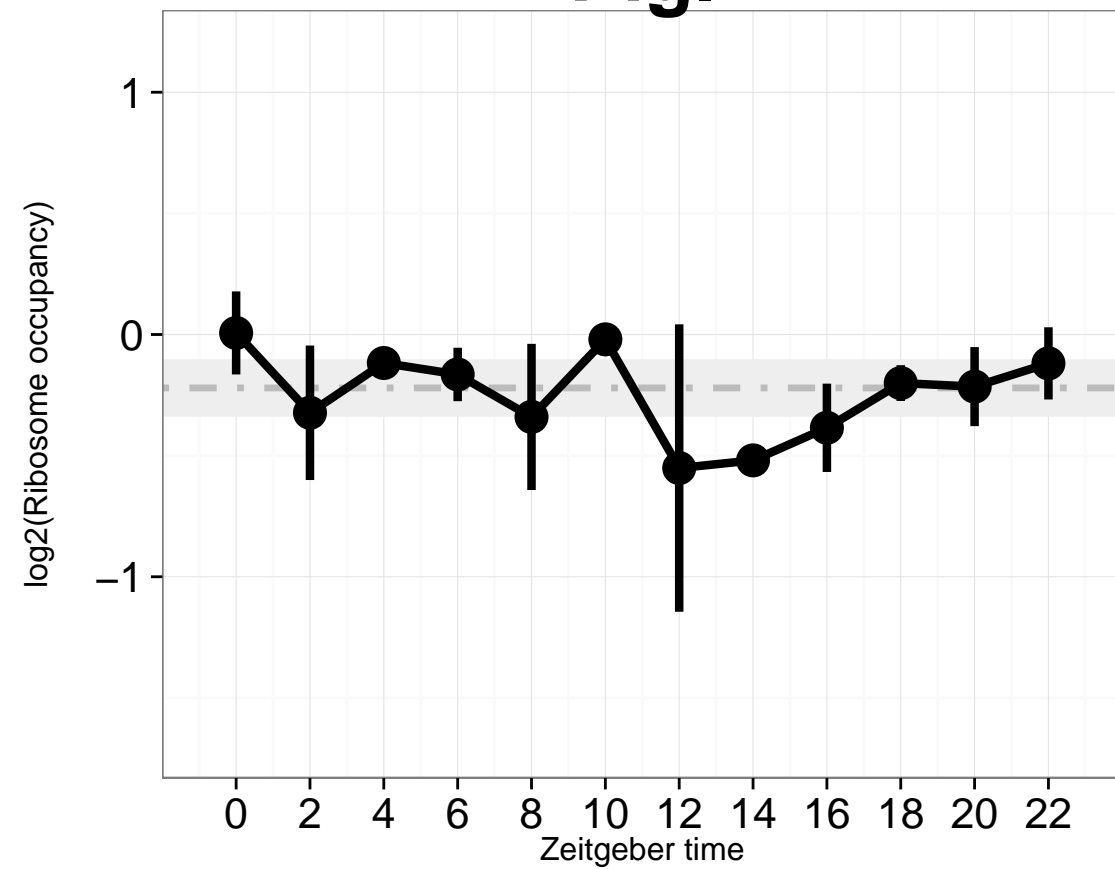

Supplement: Supplementary file 7094 [file 1]

## Crbn

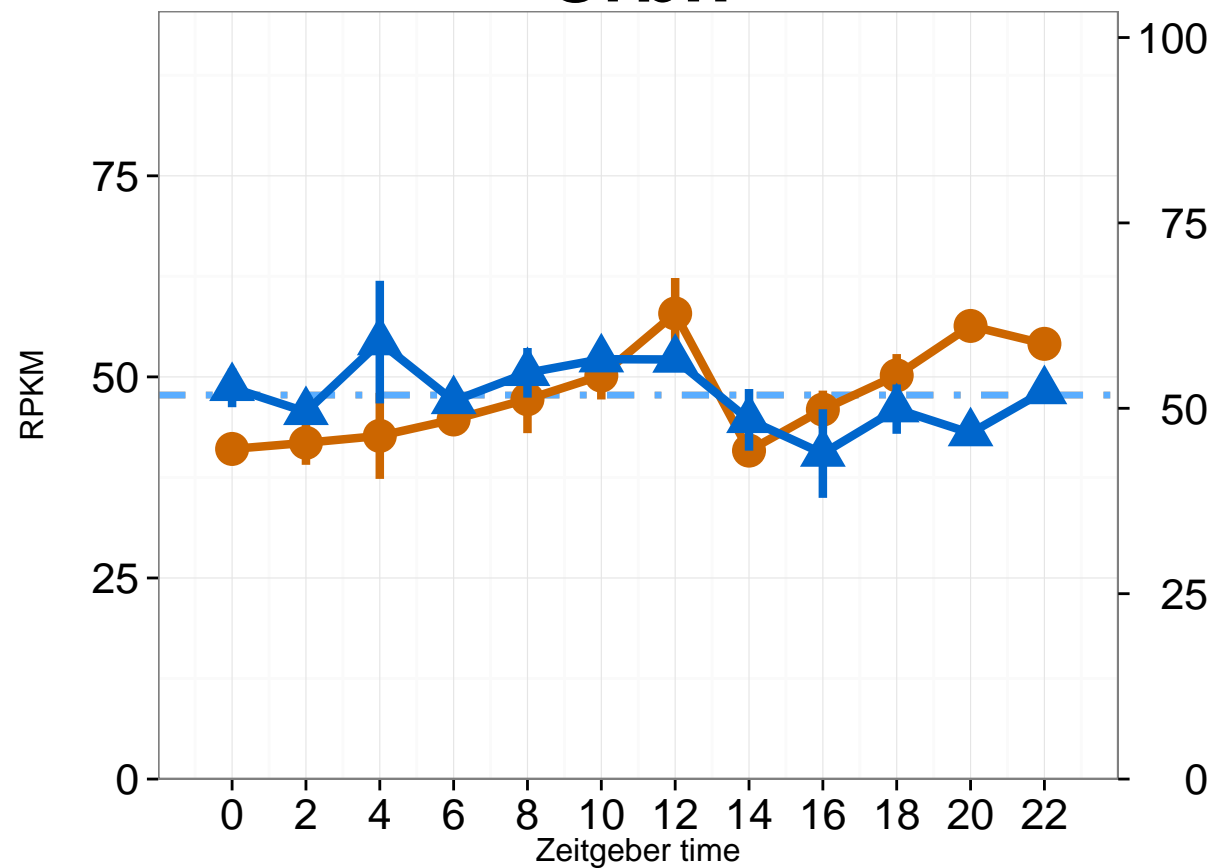

## Crbn

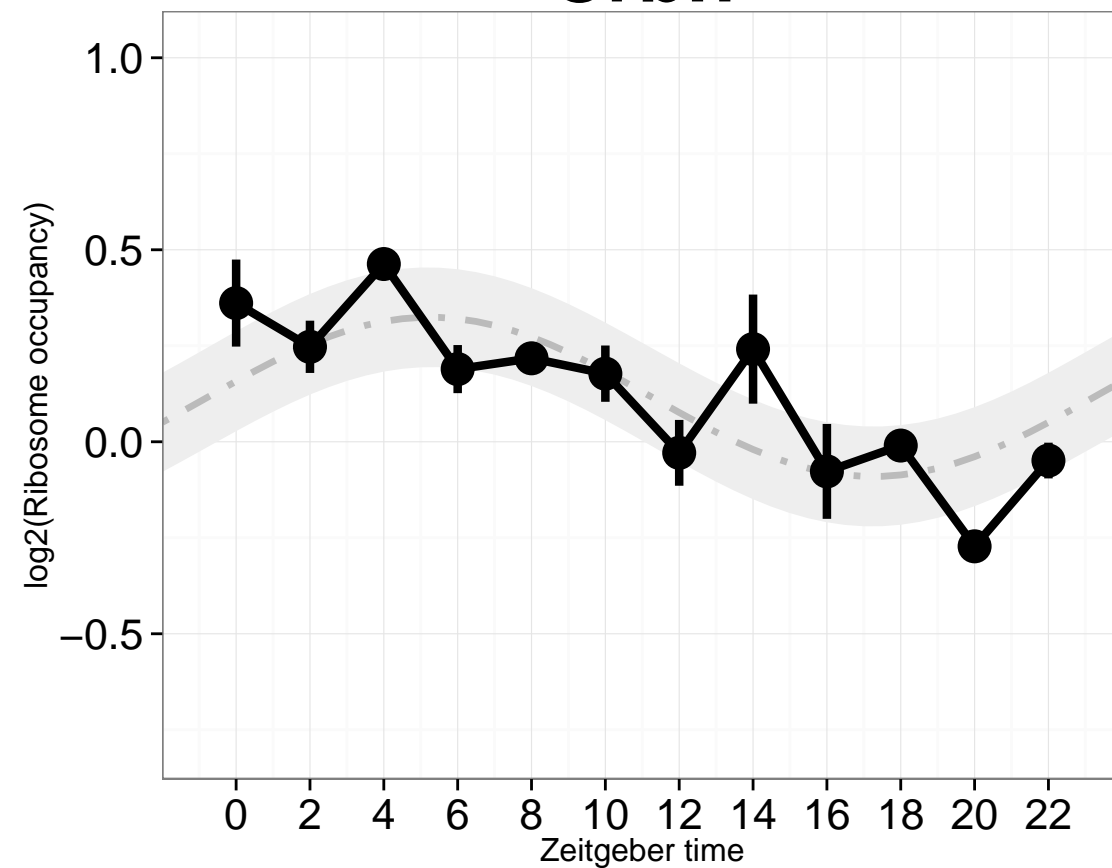

Supplement: Supplementary file 7095 [file 1]

# Atp12a

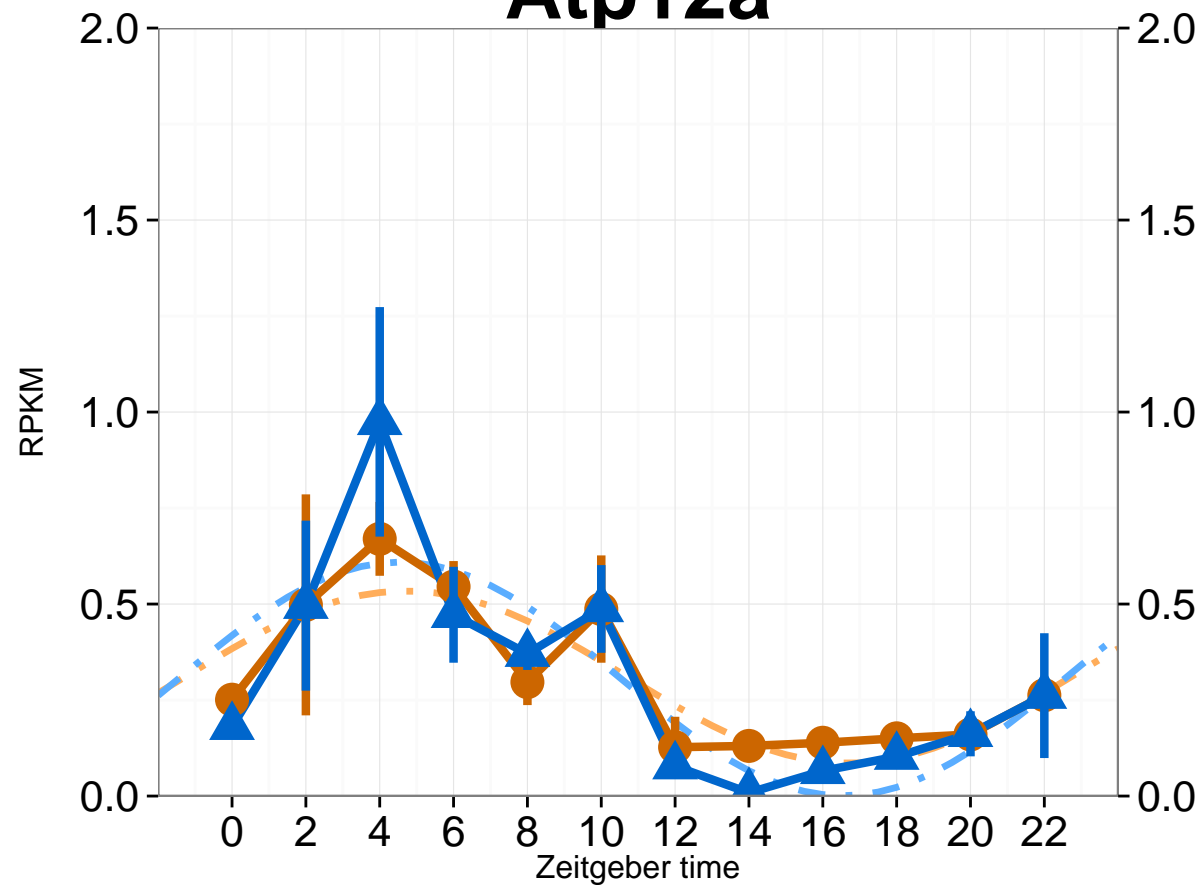

# Atp12a

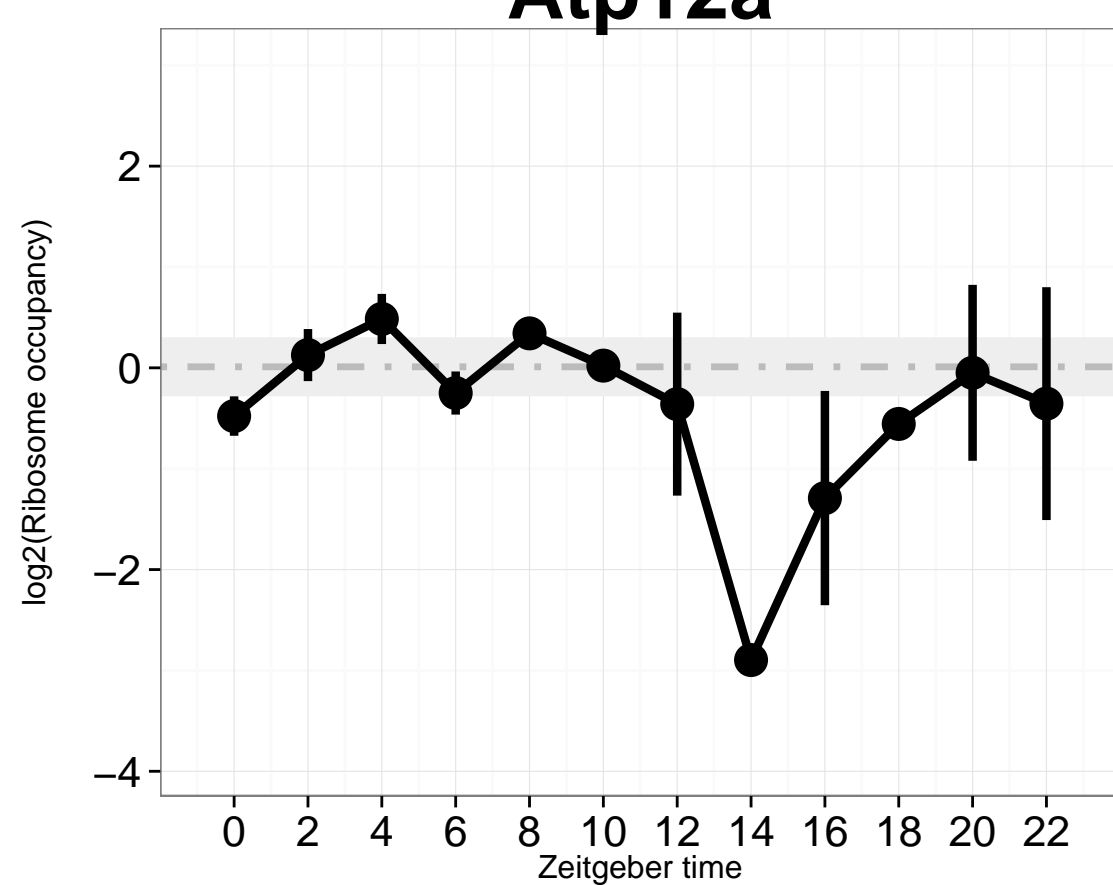

Supplement: Supplementary file 7096 [file 1]

## Ccdc68

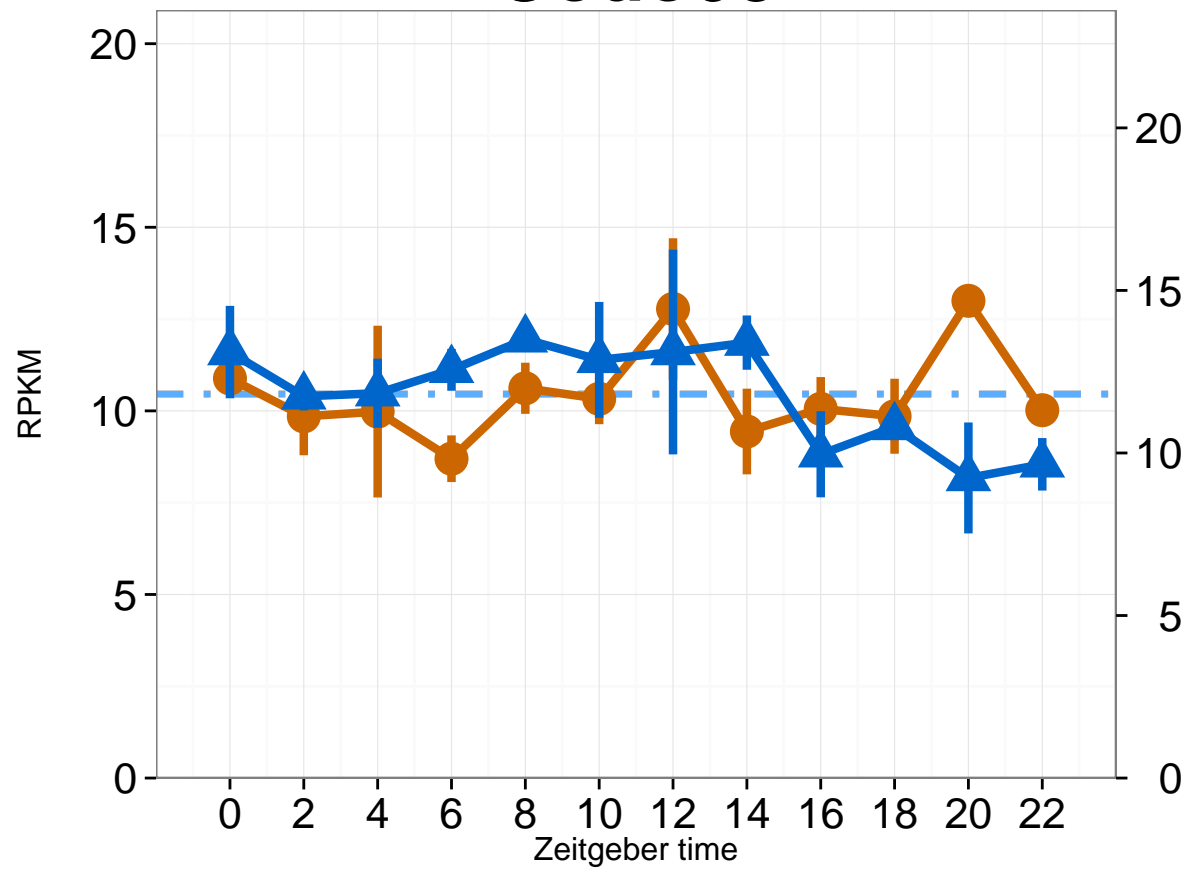

## Ccdc68

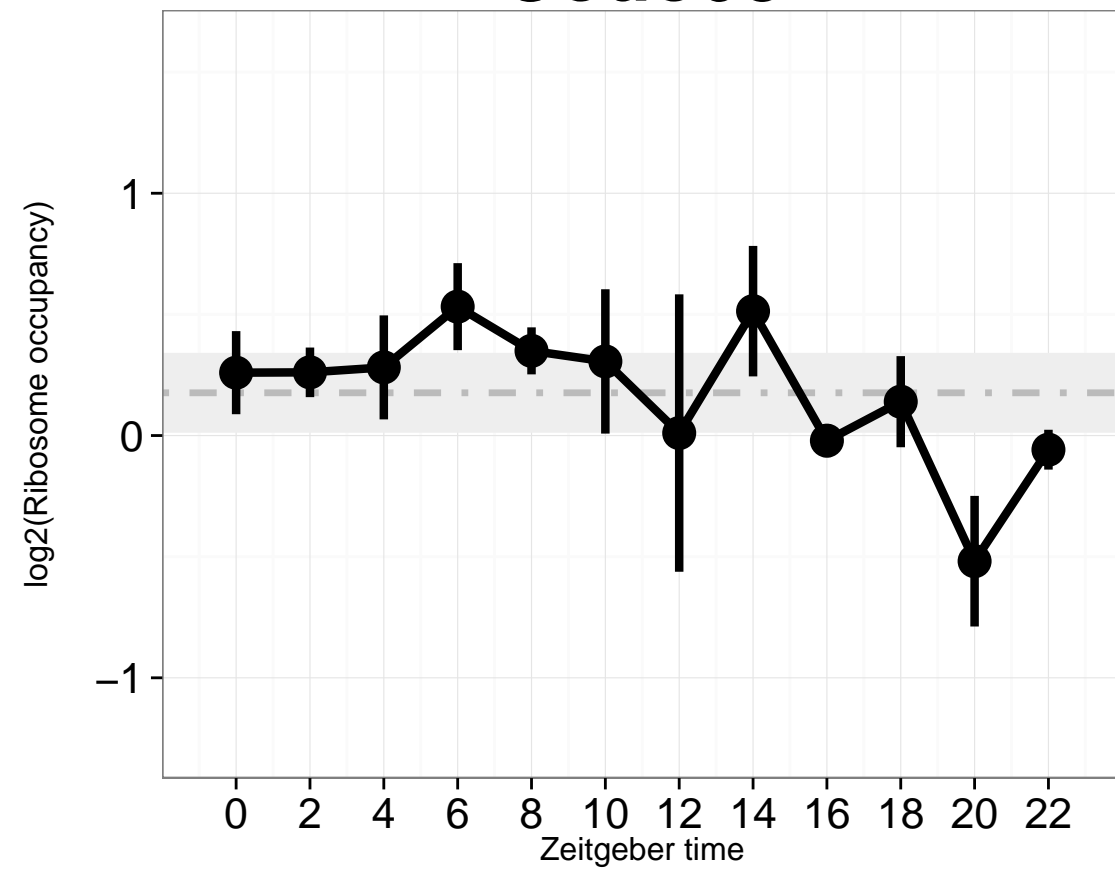

Supplement: Supplementary file 7097 [file 1]

# Amdhd1

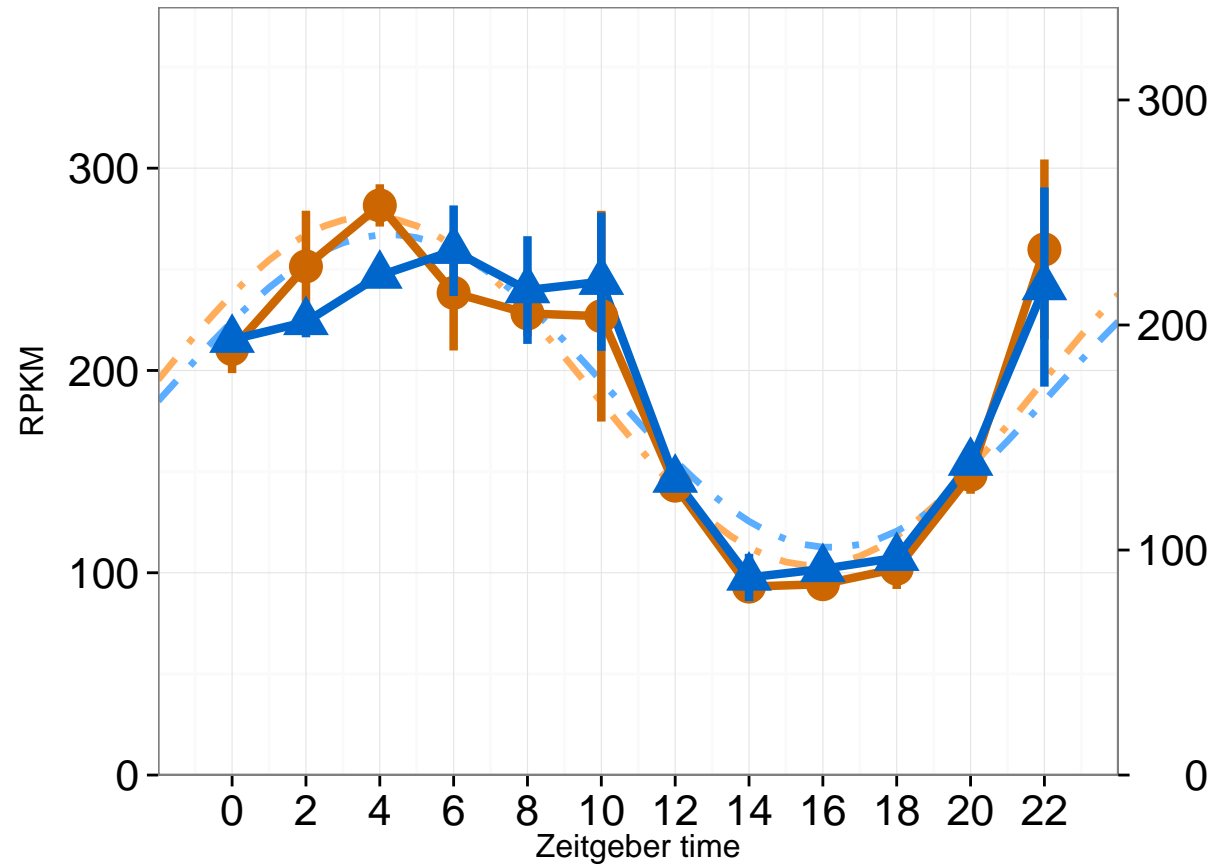

# Amdhd1

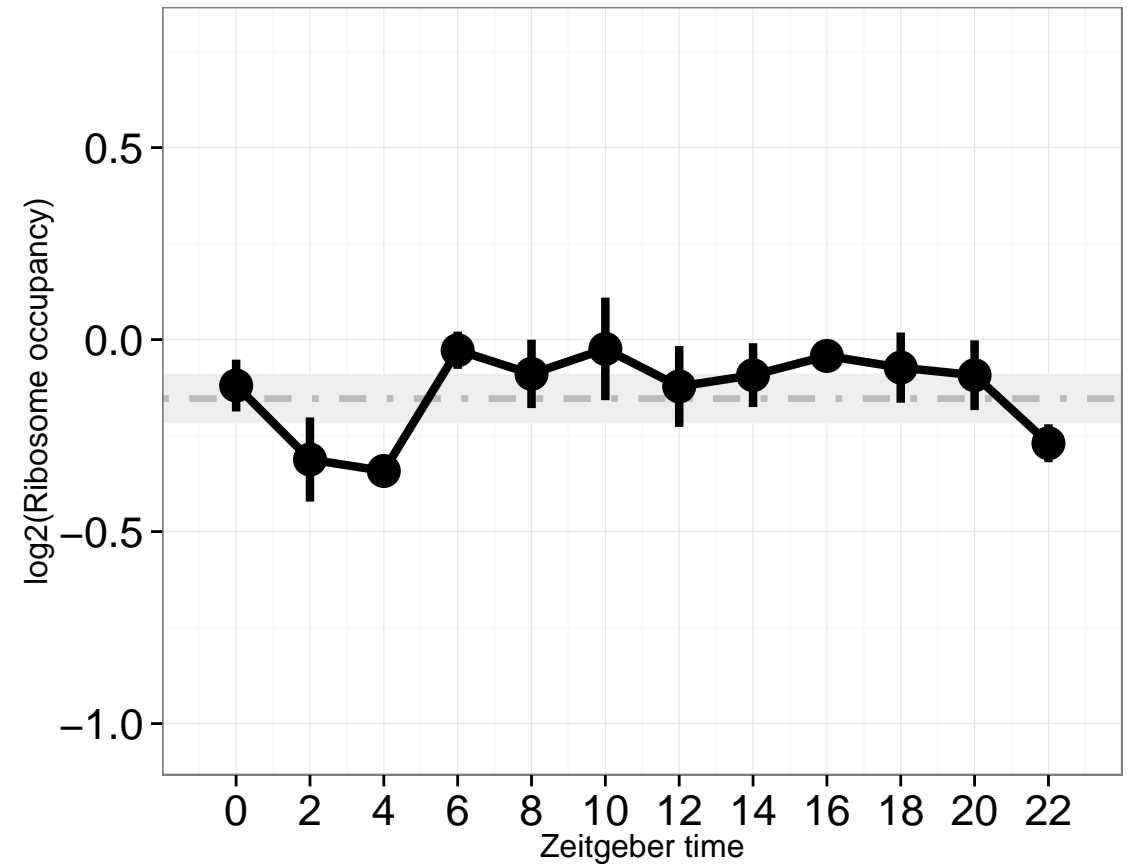

Supplement: Supplementary file 7098 [file 1]

# Slc25a3

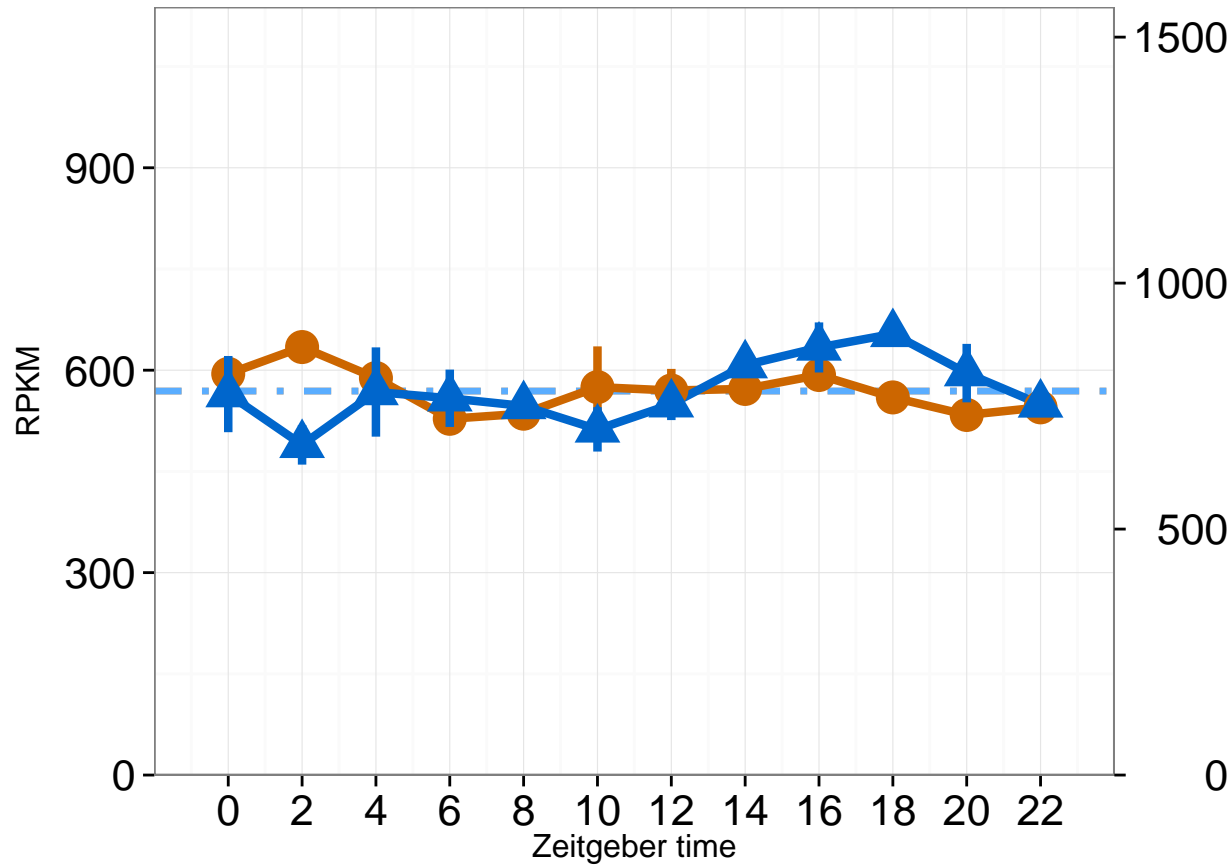

# Slc25a3

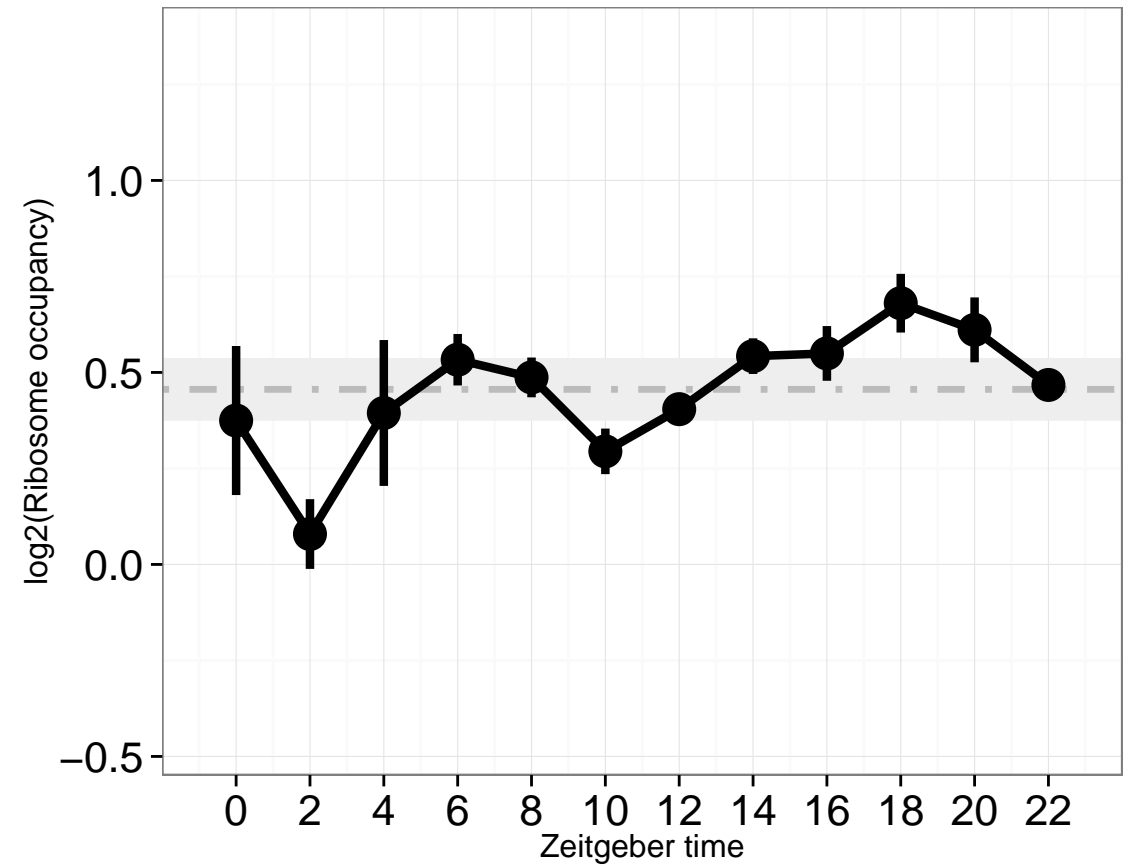

Supplement: Supplementary file 7099 [file 1]

## Rab3b

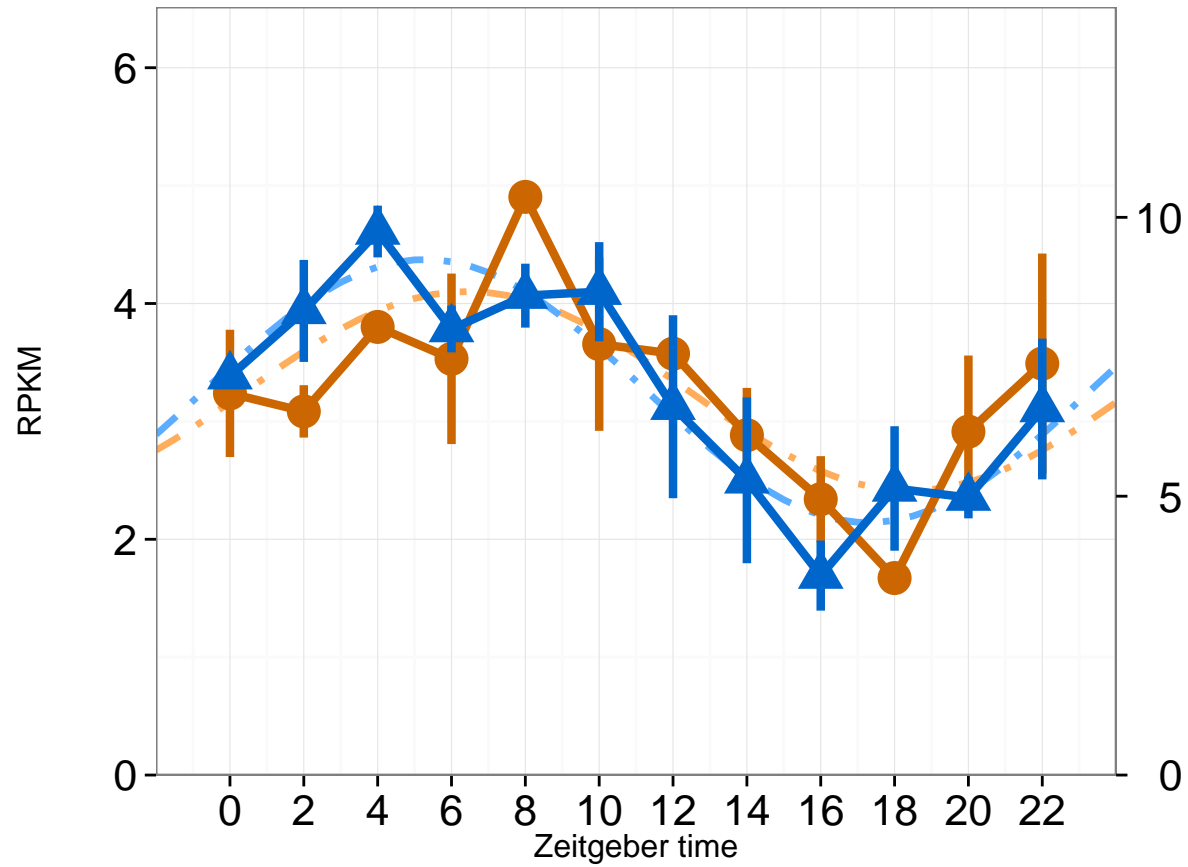

## Rab3b

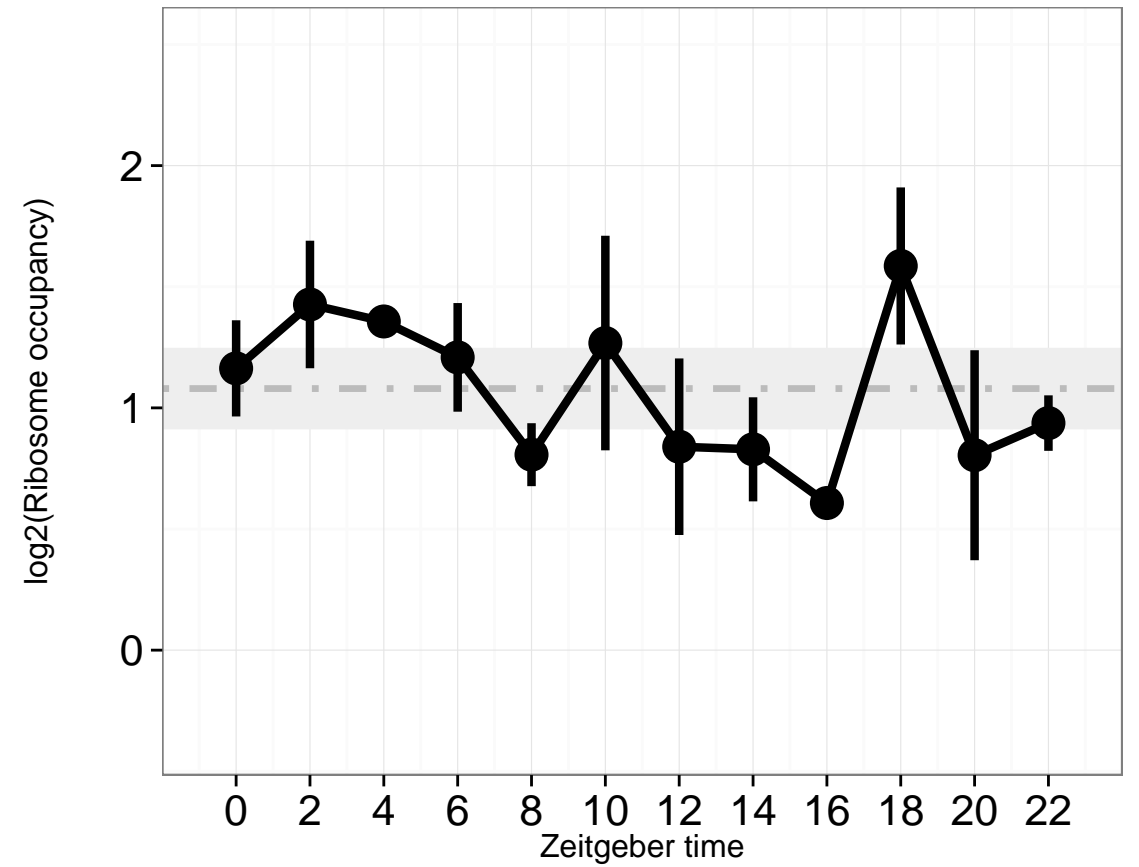

Supplement: Supplementary file 7100 [file 1]

## Chm

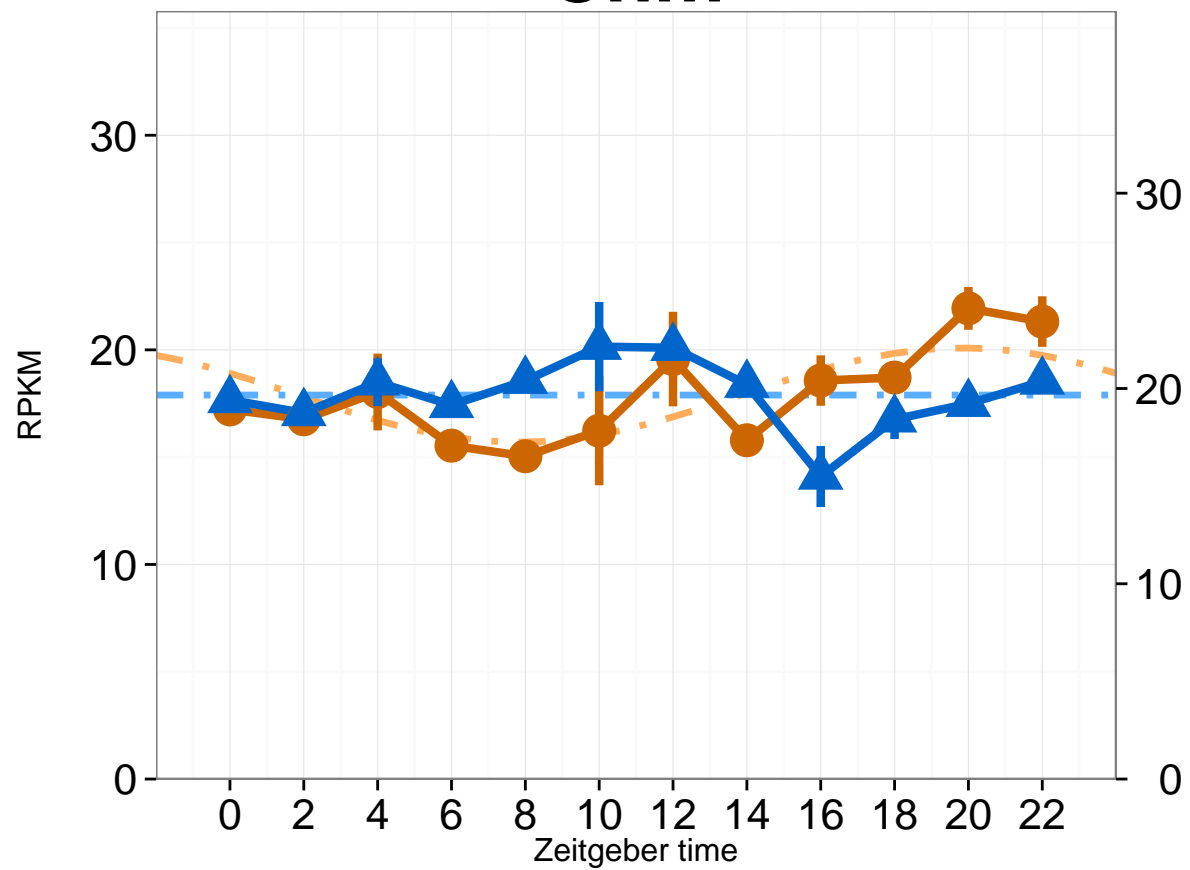

## Chm

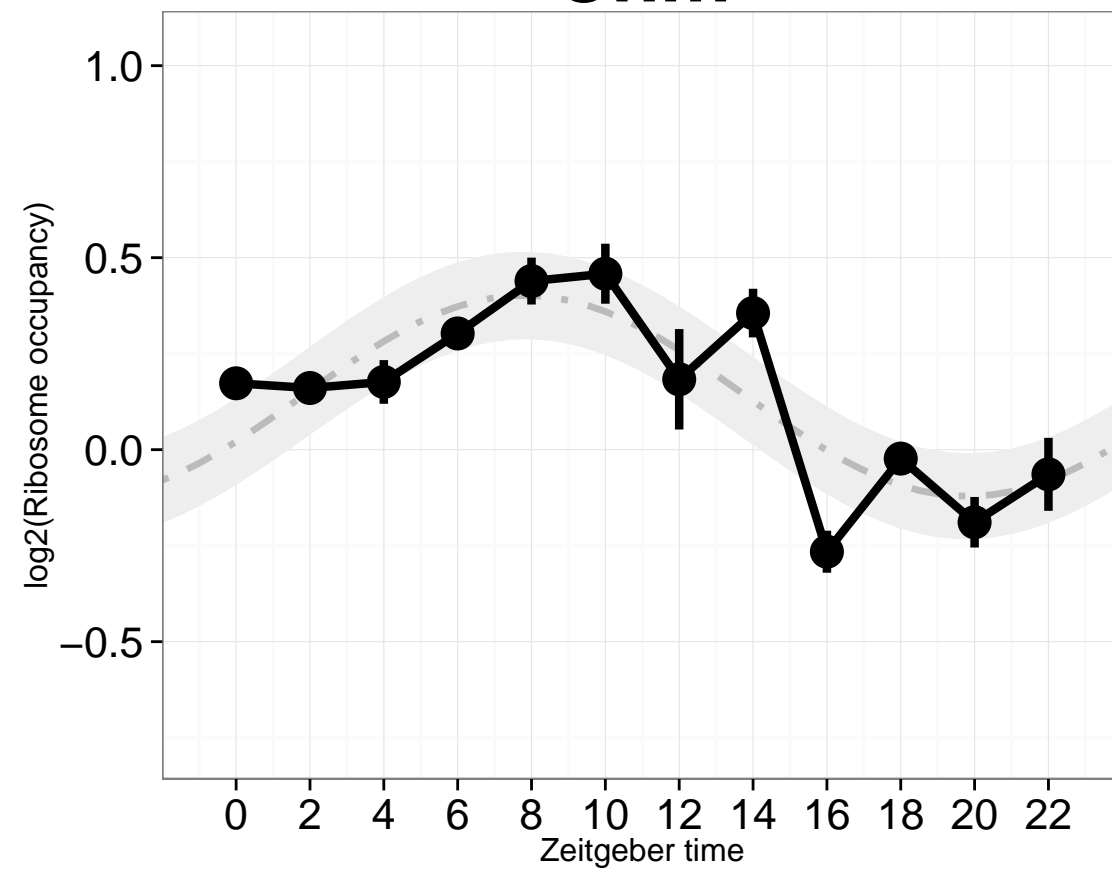

Supplement: Supplementary file 7101 [file 1]

# Gm6625

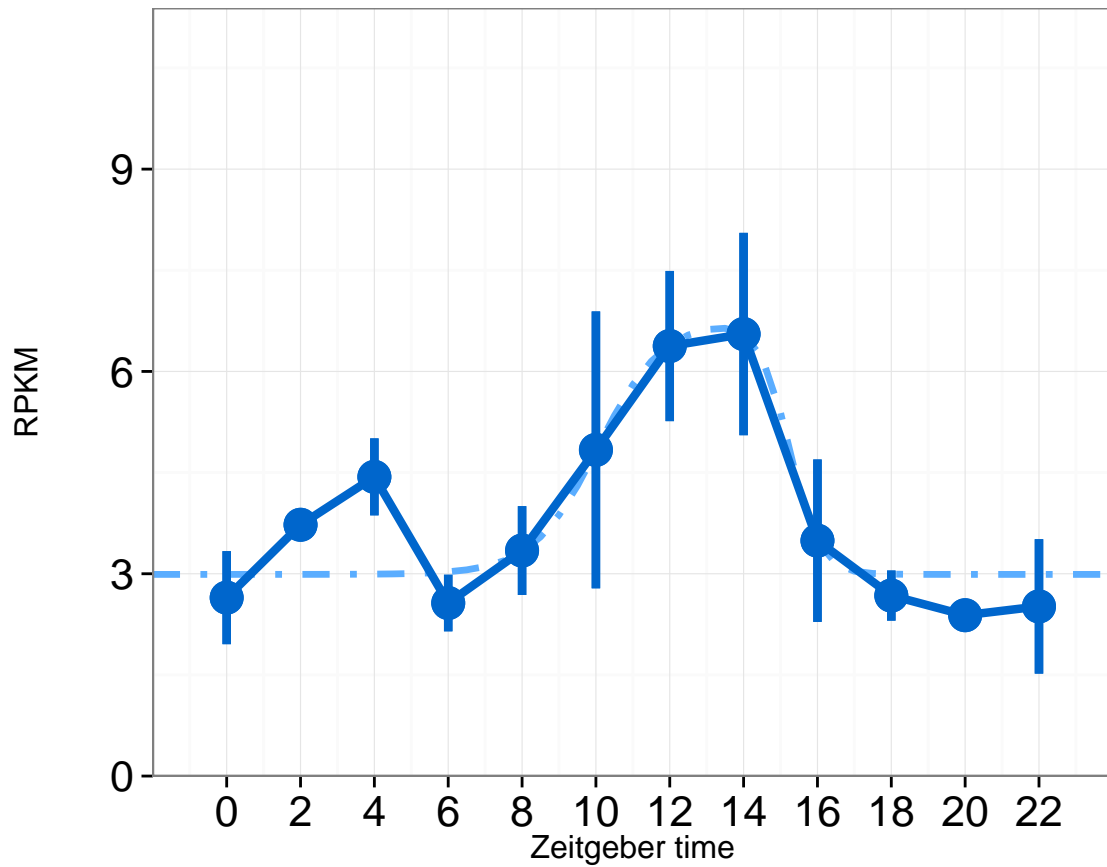

# Gm6625 log2(Ribosome occupanc

Supplement: Supplementary file 7102 [file 1]

# Dctn6

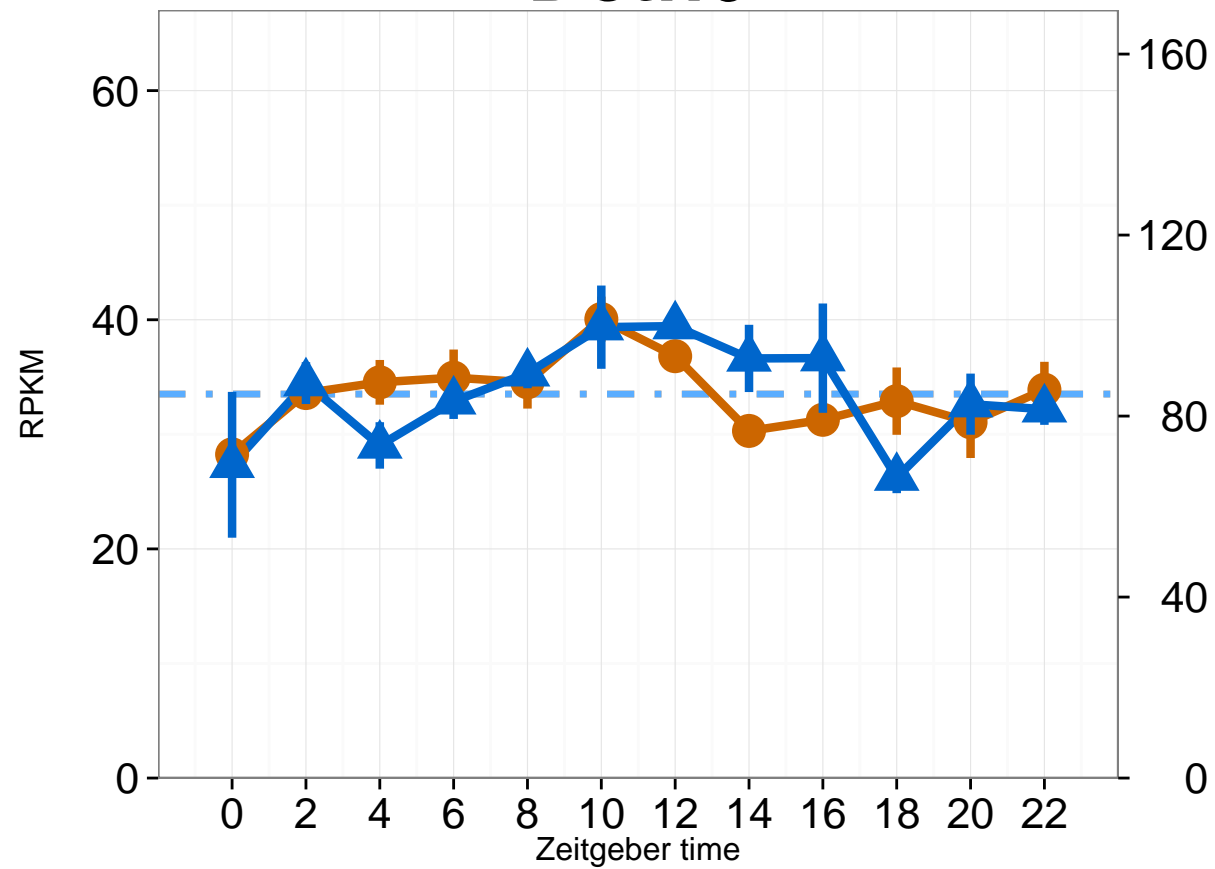

# Dctn6

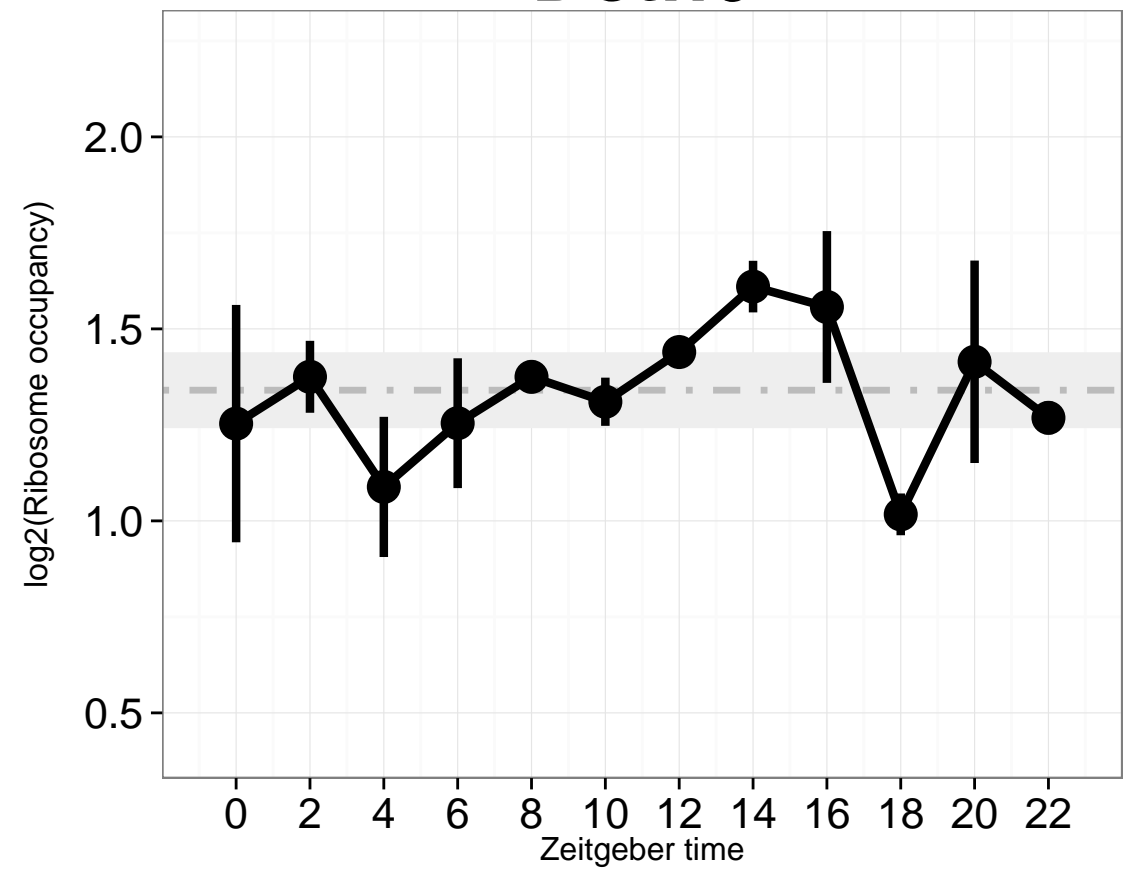

Supplement: Supplementary file 7103 [file 1]

# Ppt1

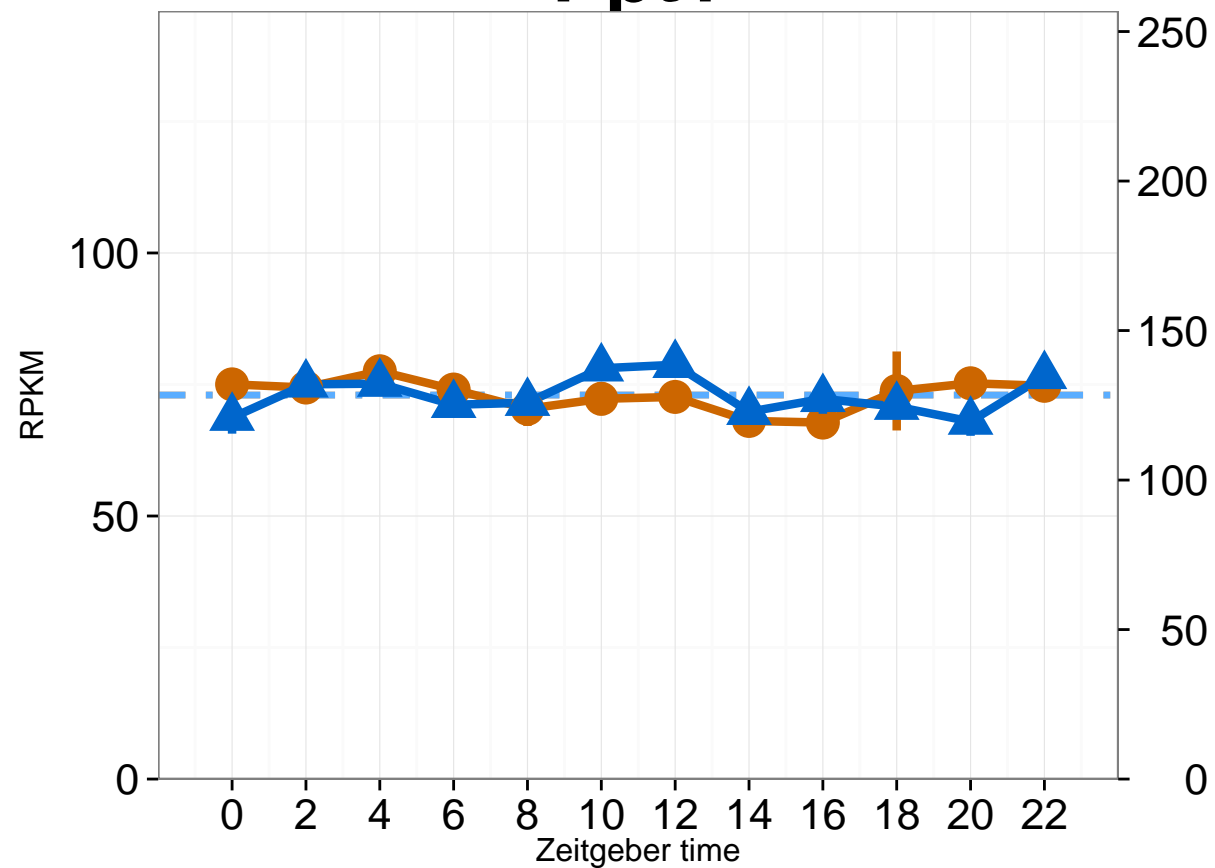

# Ppt1

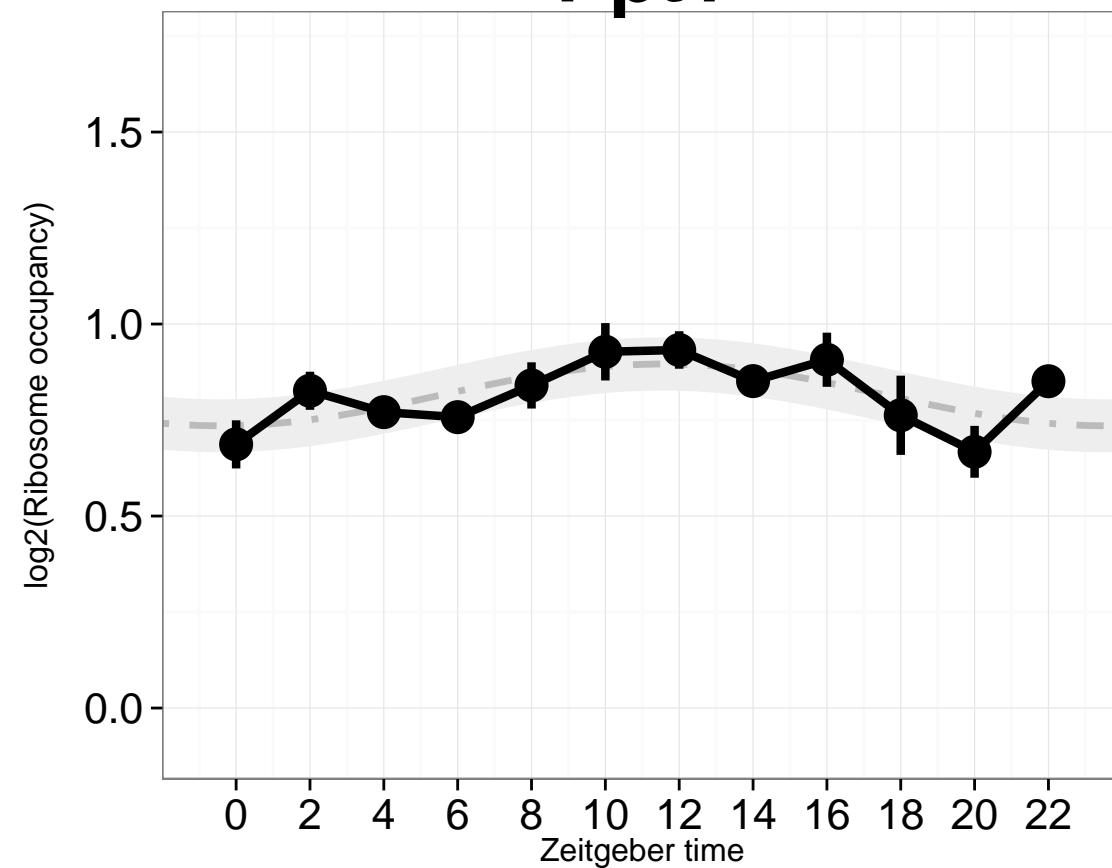

Supplement: Supplementary file 7104 [file 1]

## Sdk1

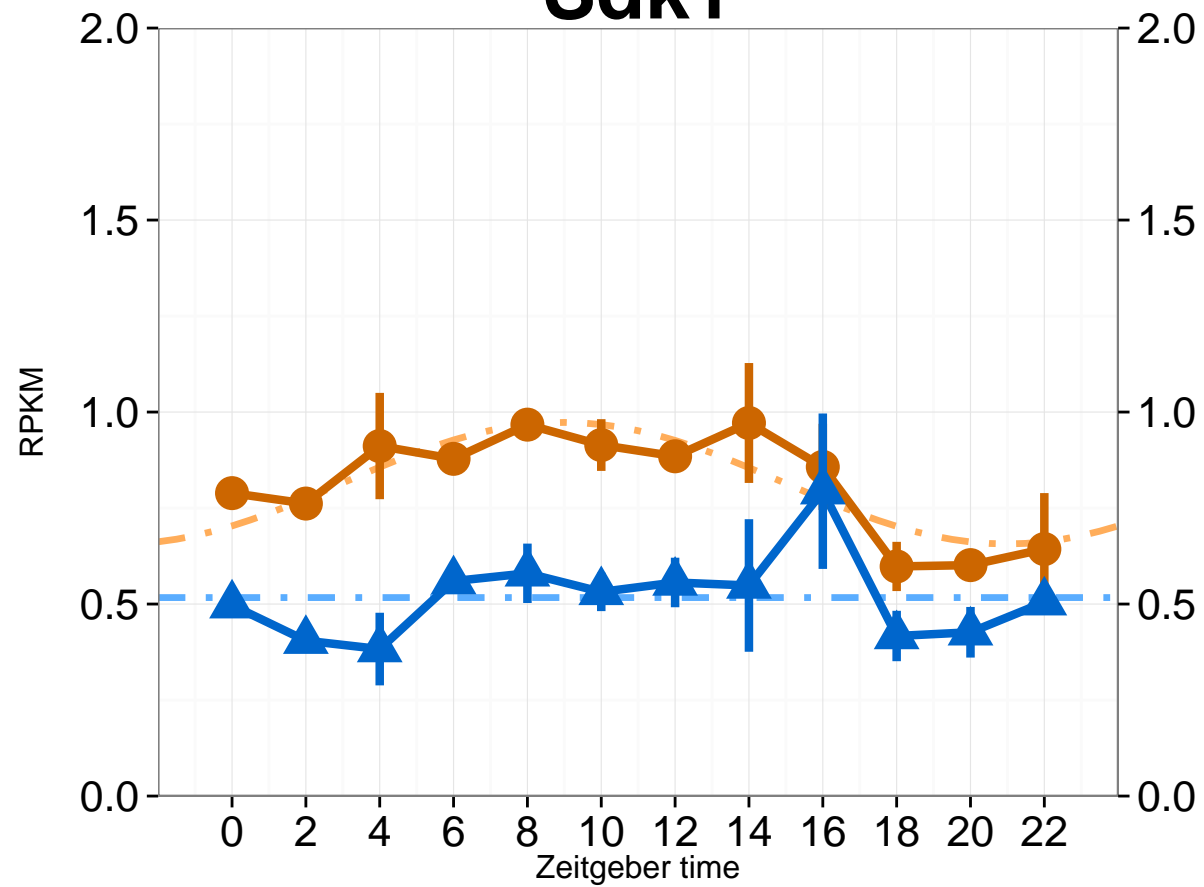

## Sdk1

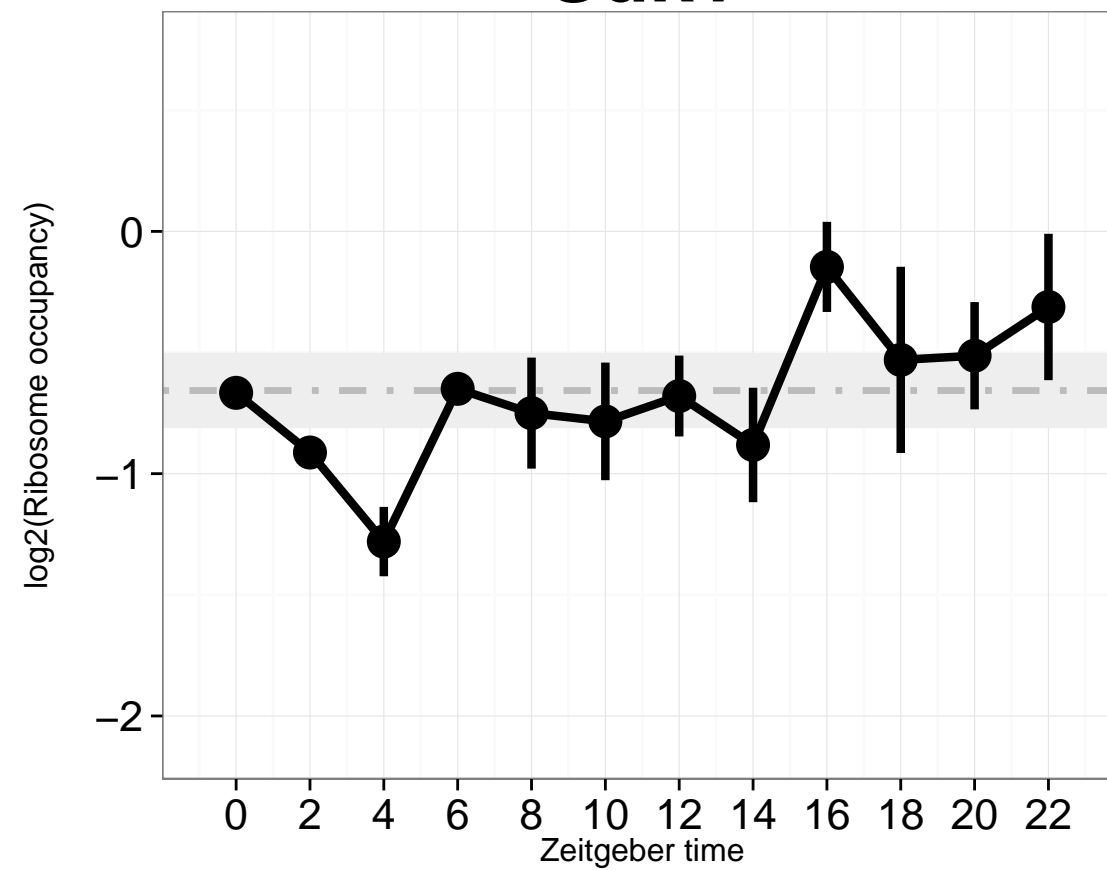

Supplement: Supplementary file 7105 [file 1]

# Sumo1

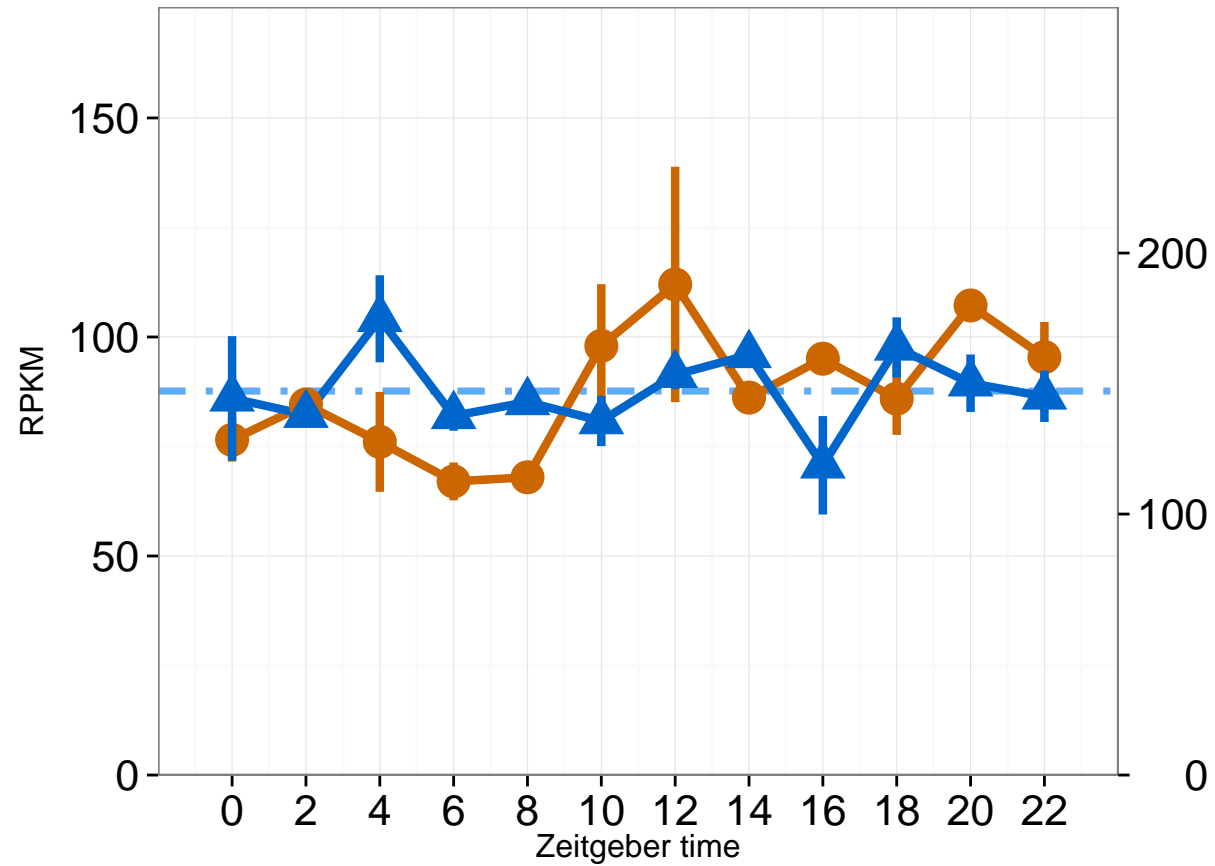

# Sumo1

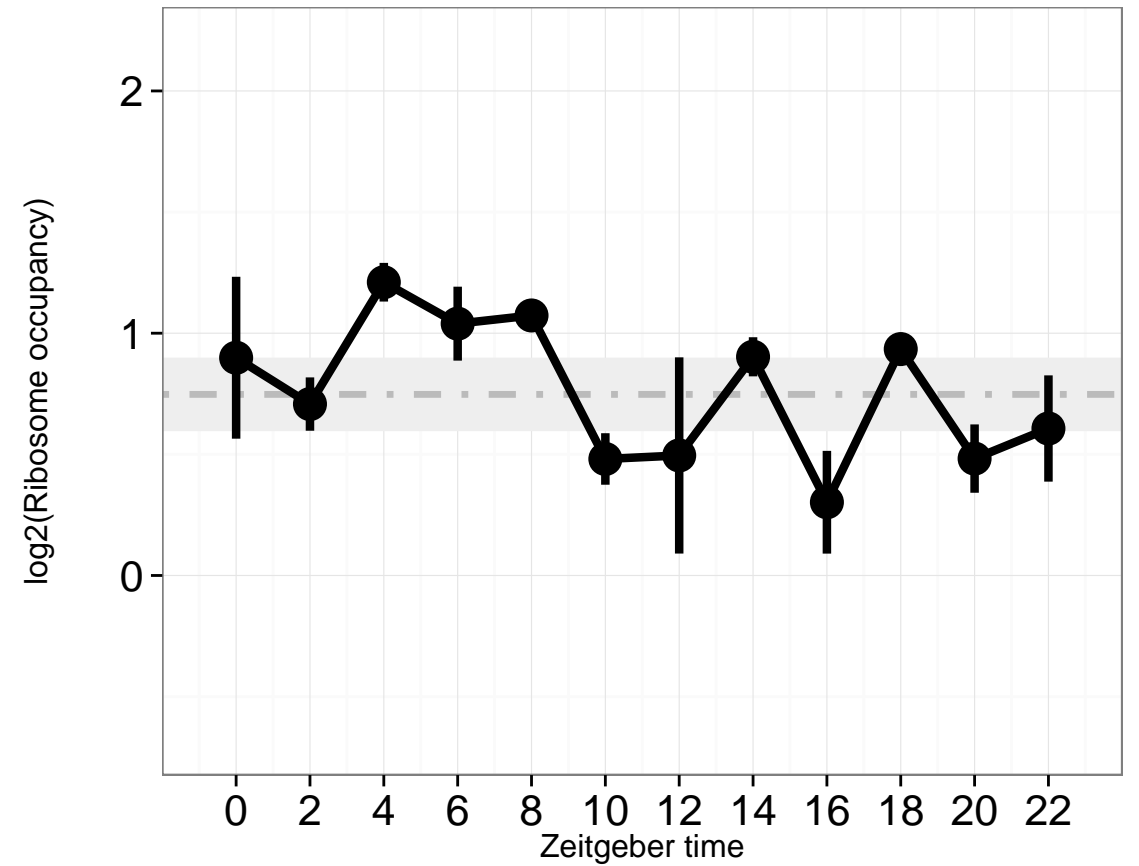

Supplement: Supplementary file 7106 [file 1]

## Anxa4

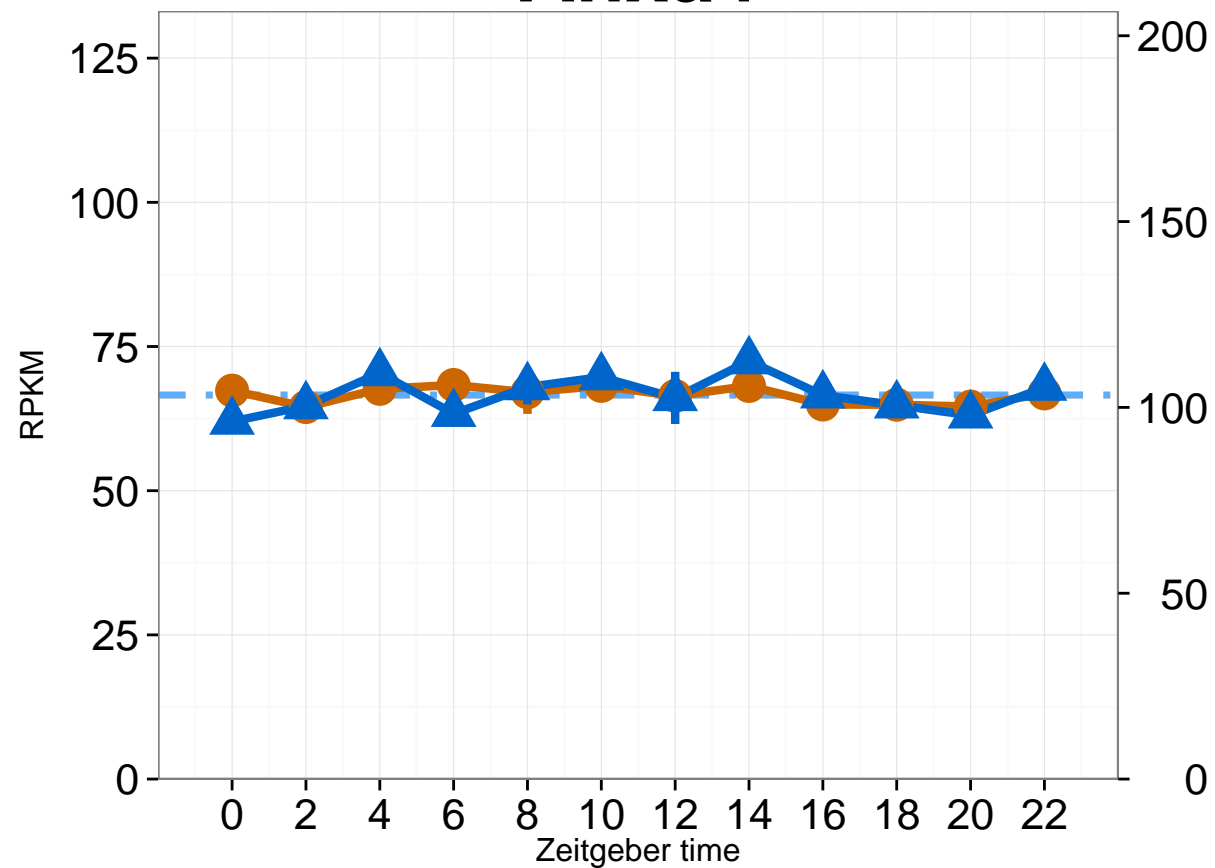

## Anxa4

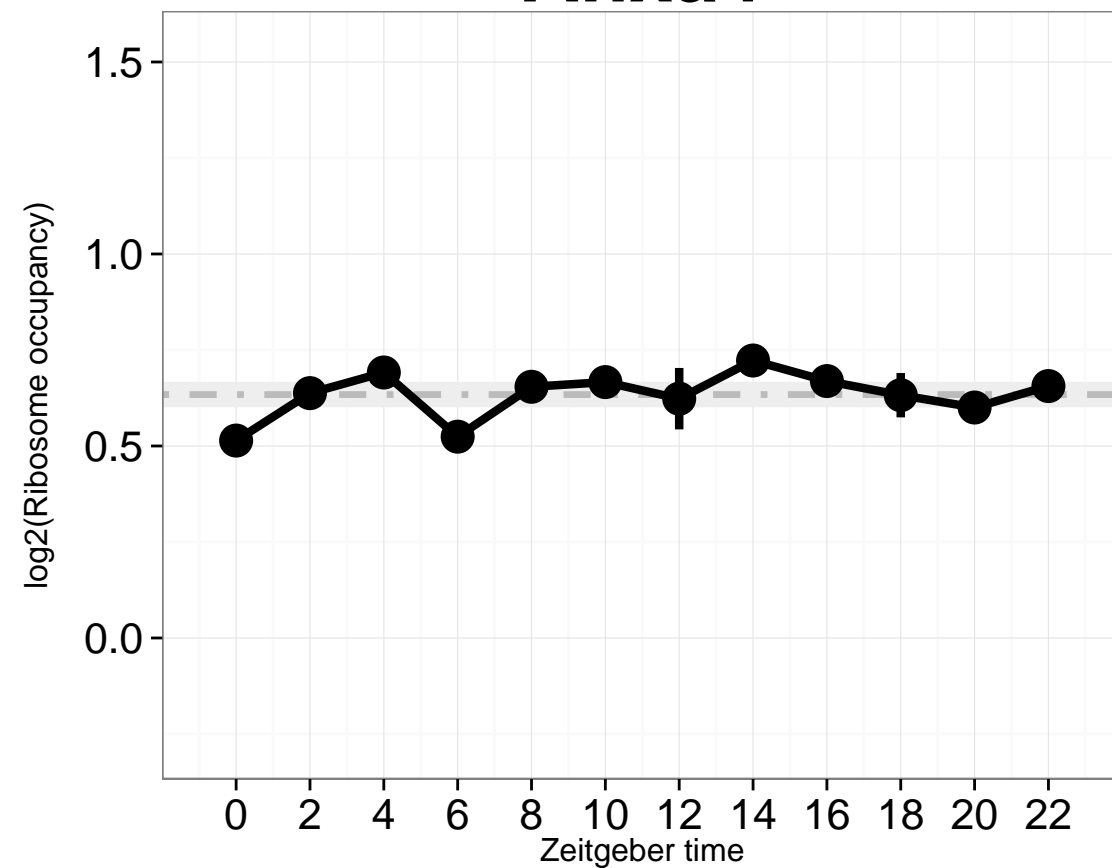

Supplement: Supplementary file 7107 [file 1]

## EmI1

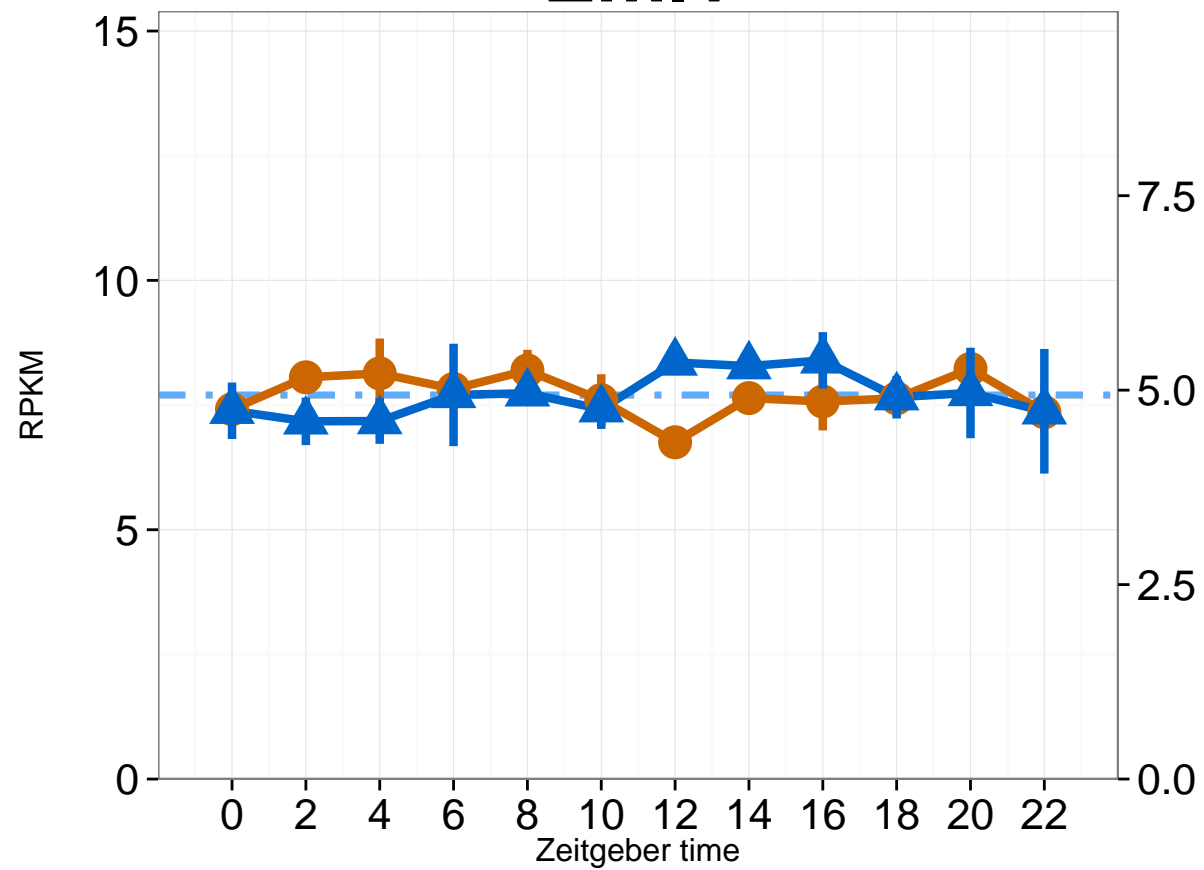

## EmI1

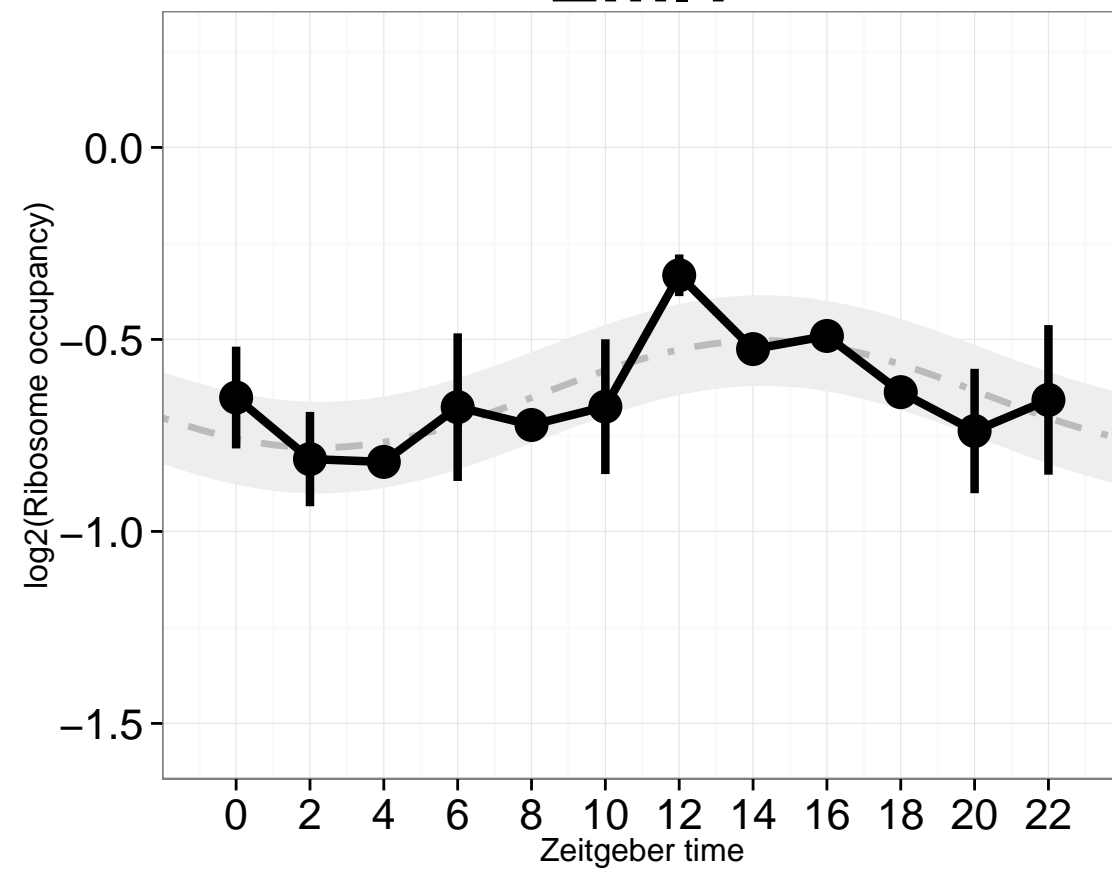

Supplement: Supplementary file 7108 [file 1]

## Pmvk

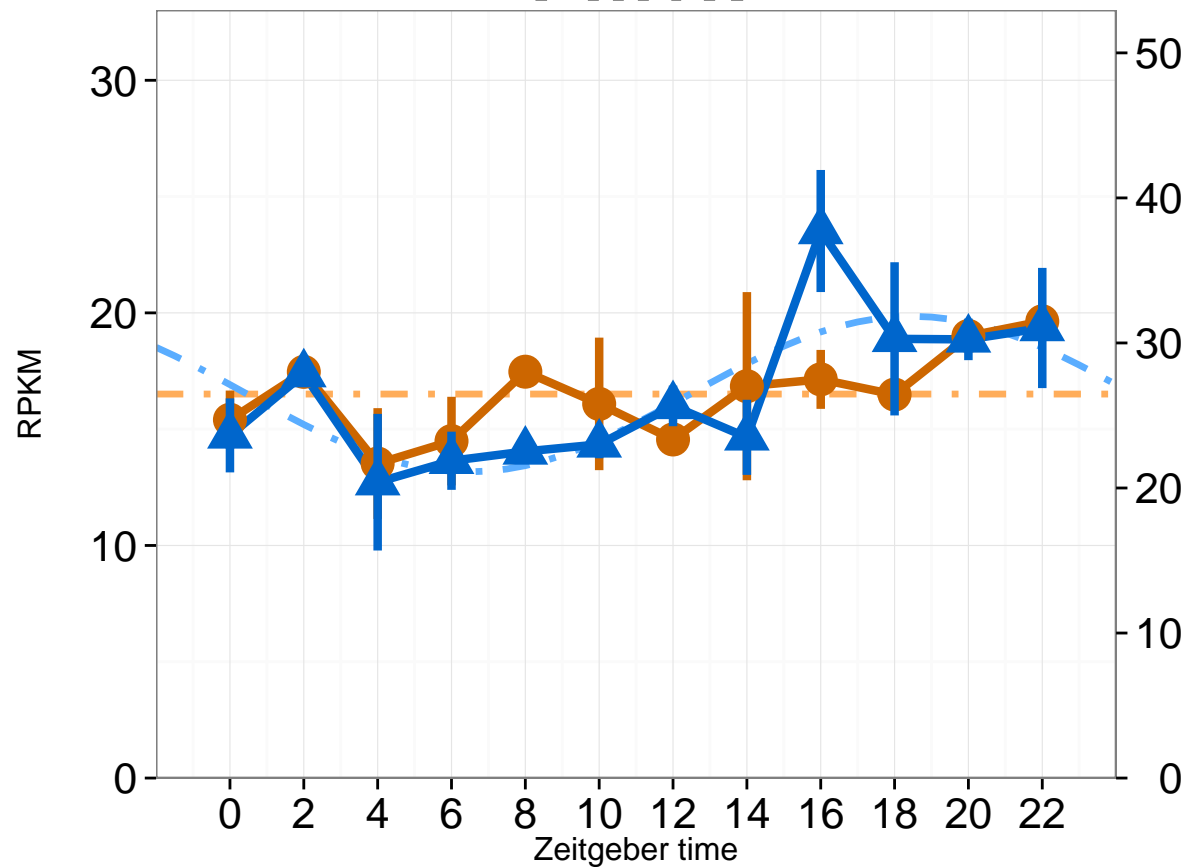

## Pmvk

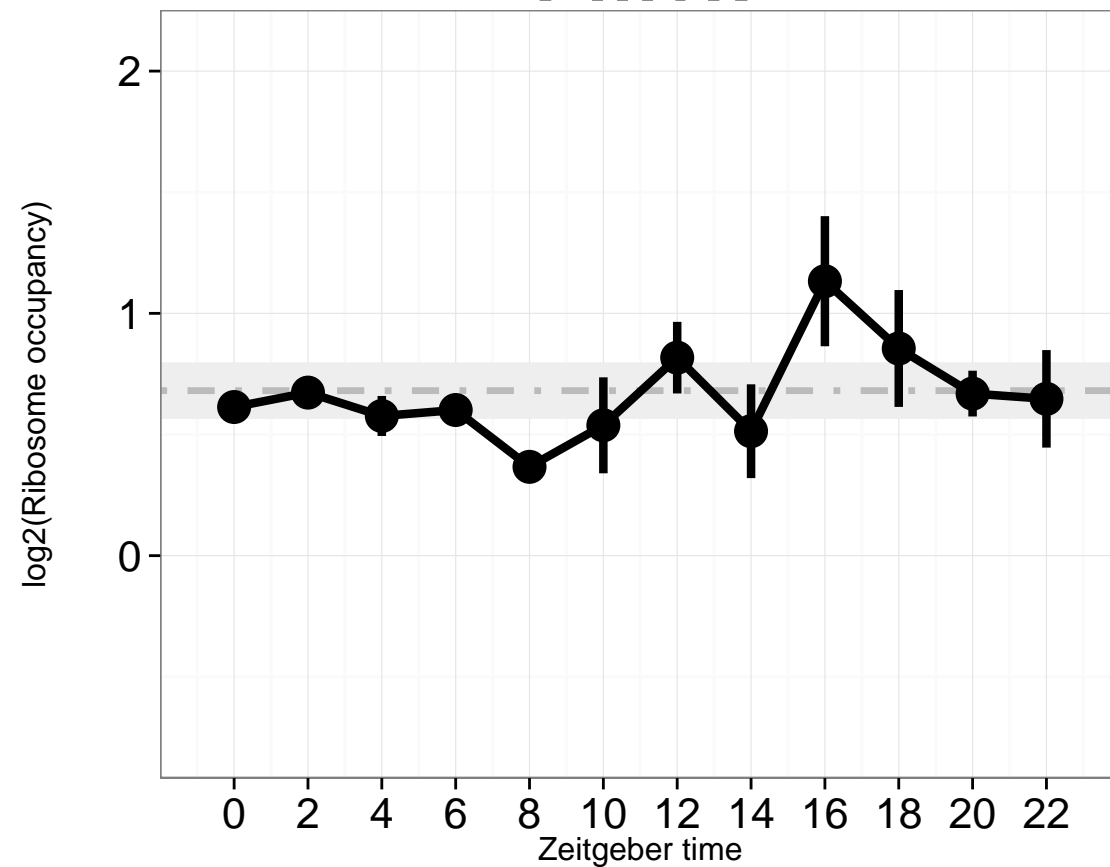

Supplement: Supplementary file 7109 [file 1]

# Dbf4

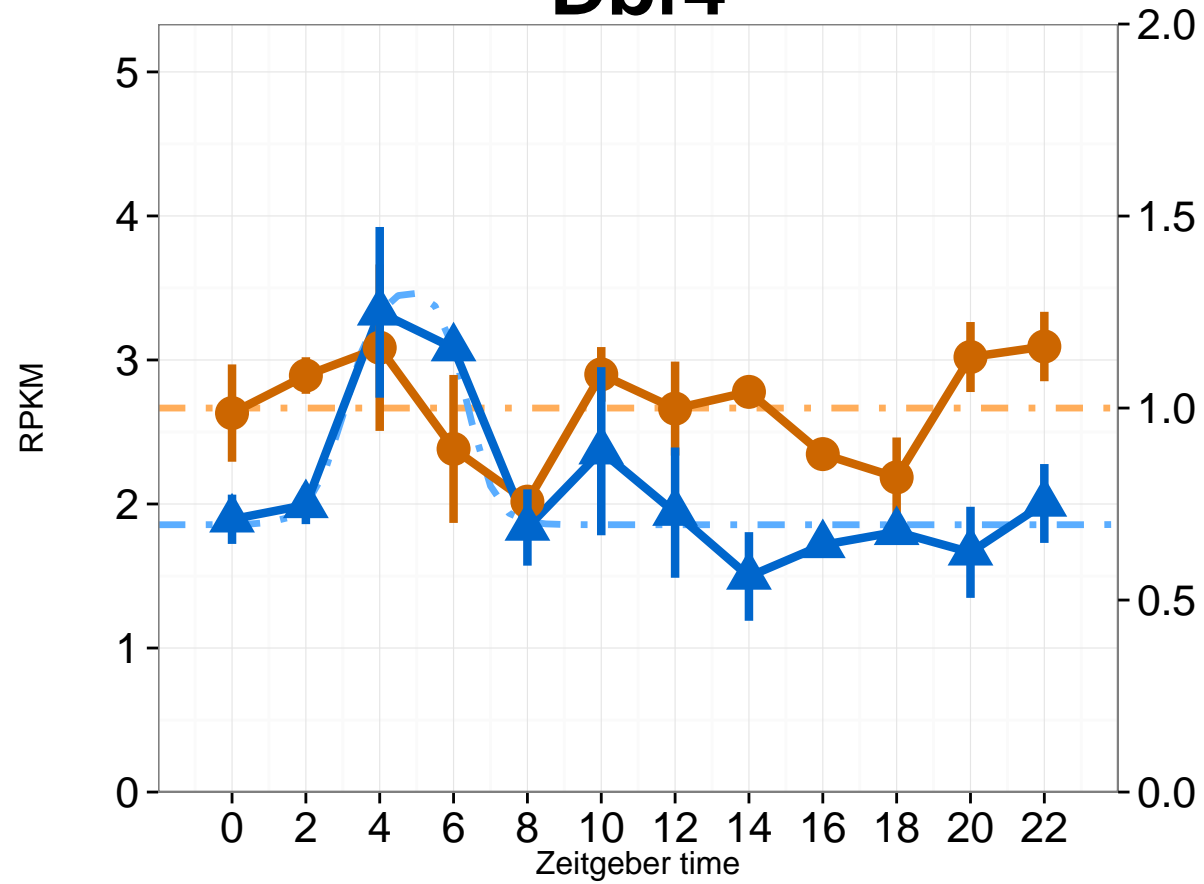

# Dbf4

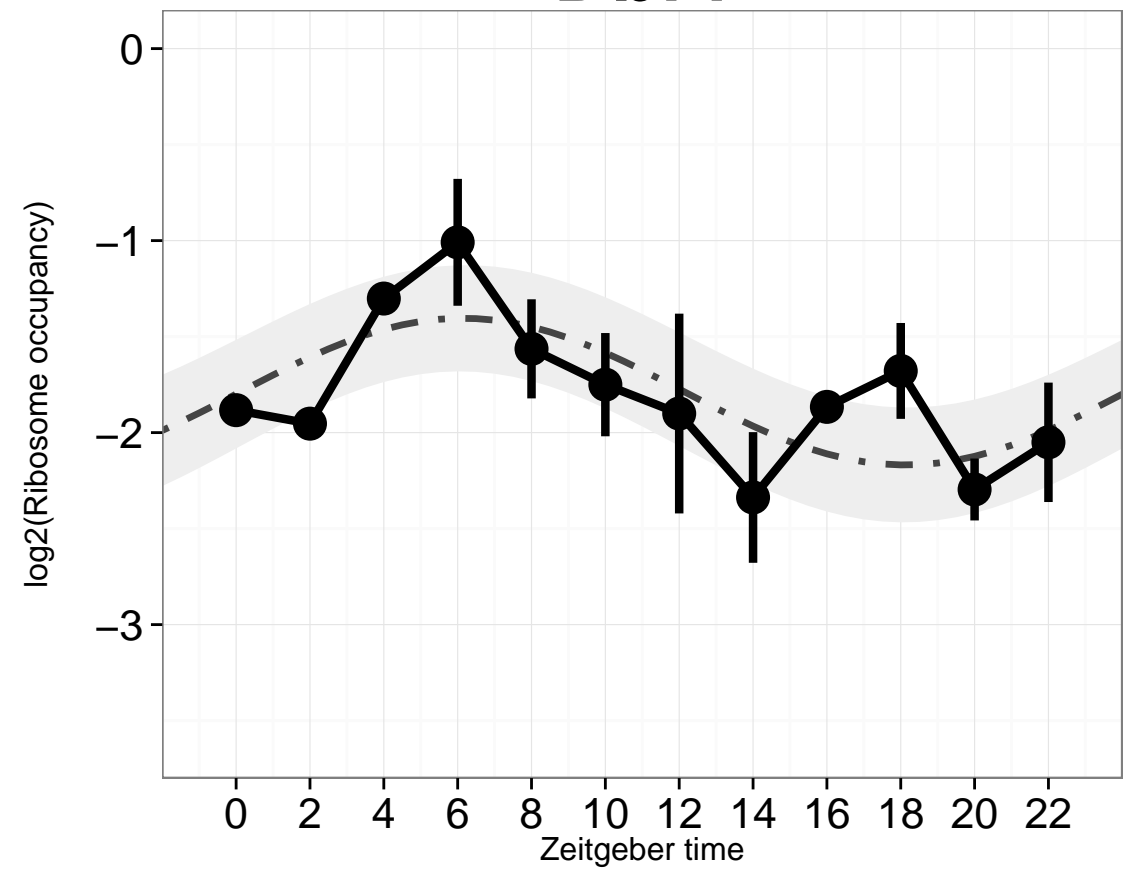

Supplement: Supplementary file 7110 [file 1]

# Trerf1

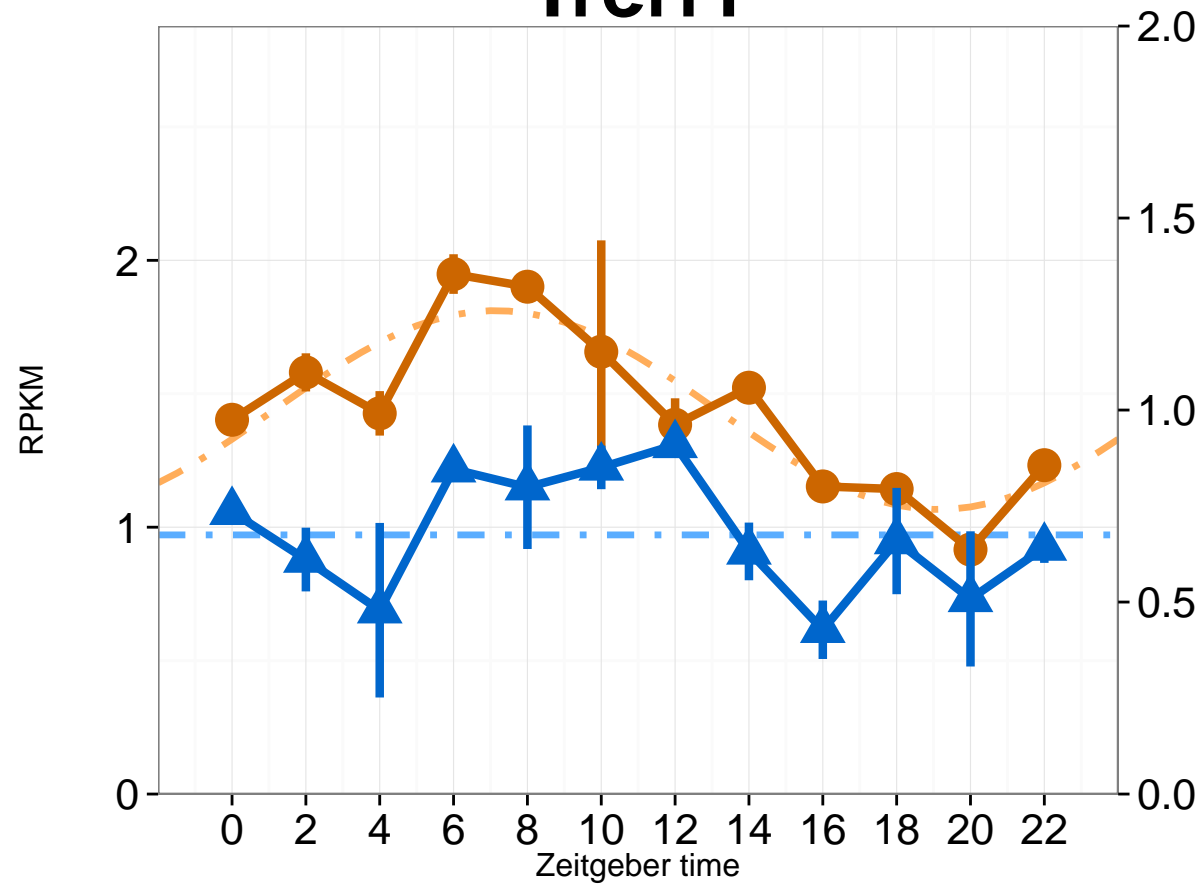

# Trerf1

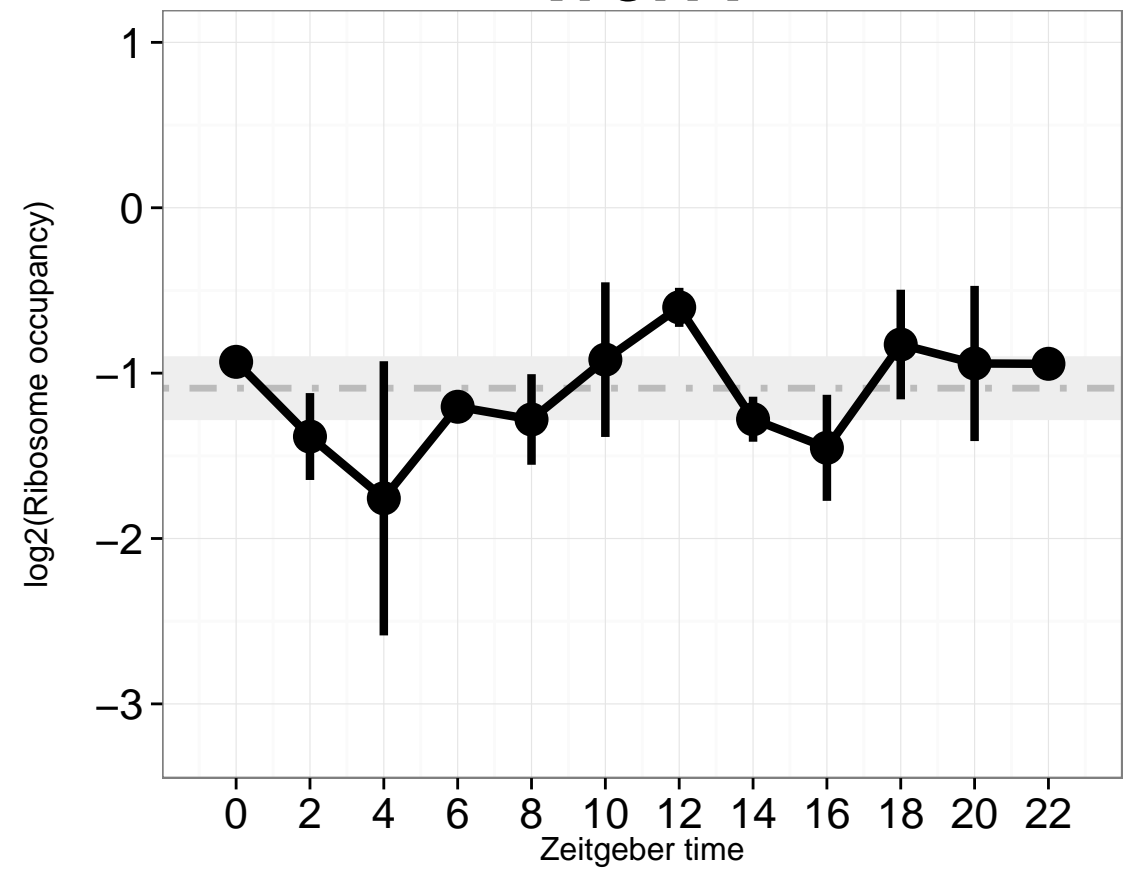

Supplement: Supplementary file 7111 [file 1]

## Tex9

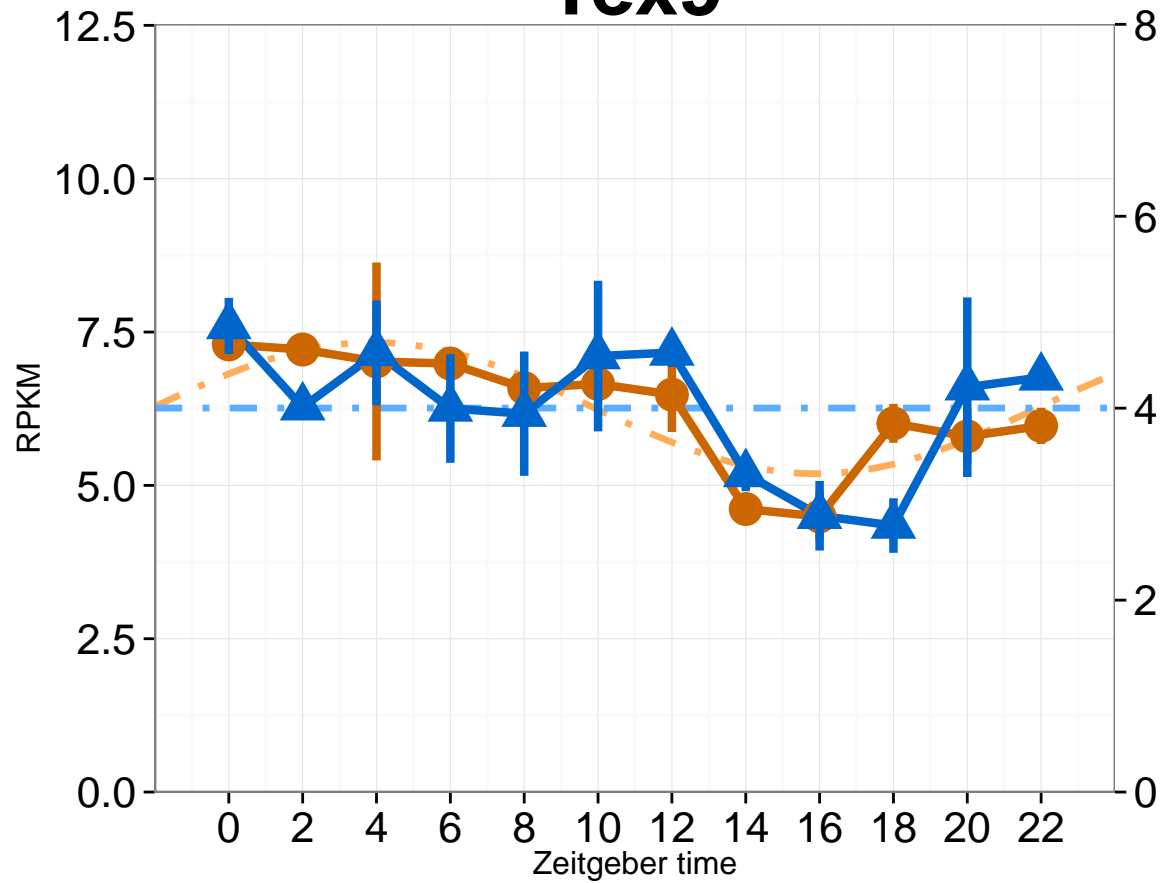

## Tex9

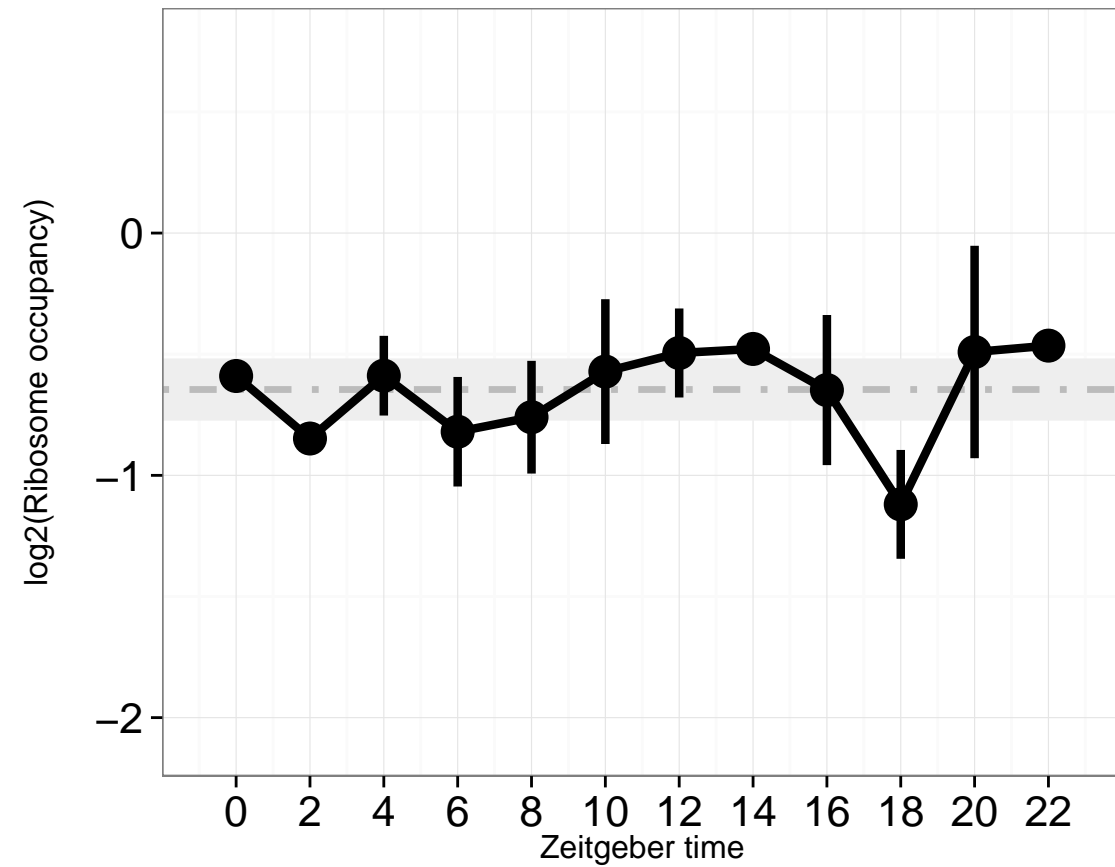

Supplement: Supplementary file 7112 [file 1]

# Zfp354c

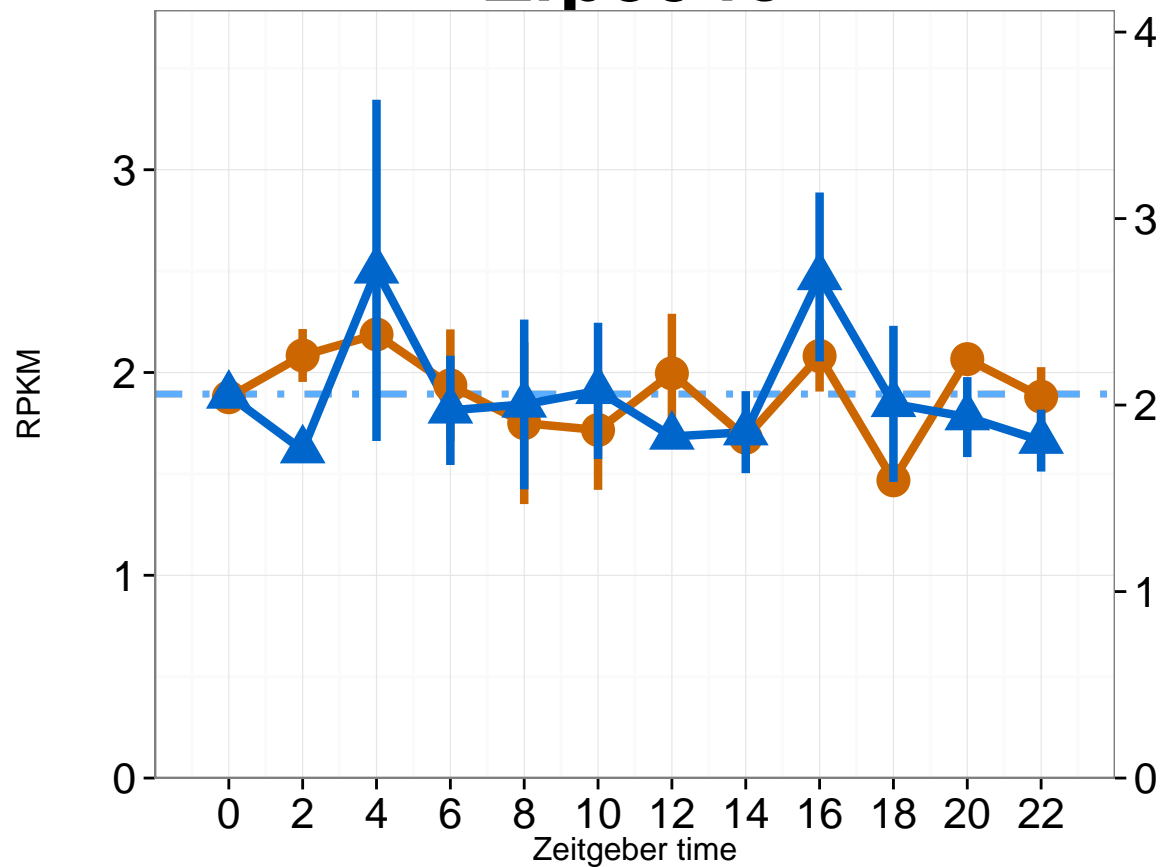

# Zfp354c

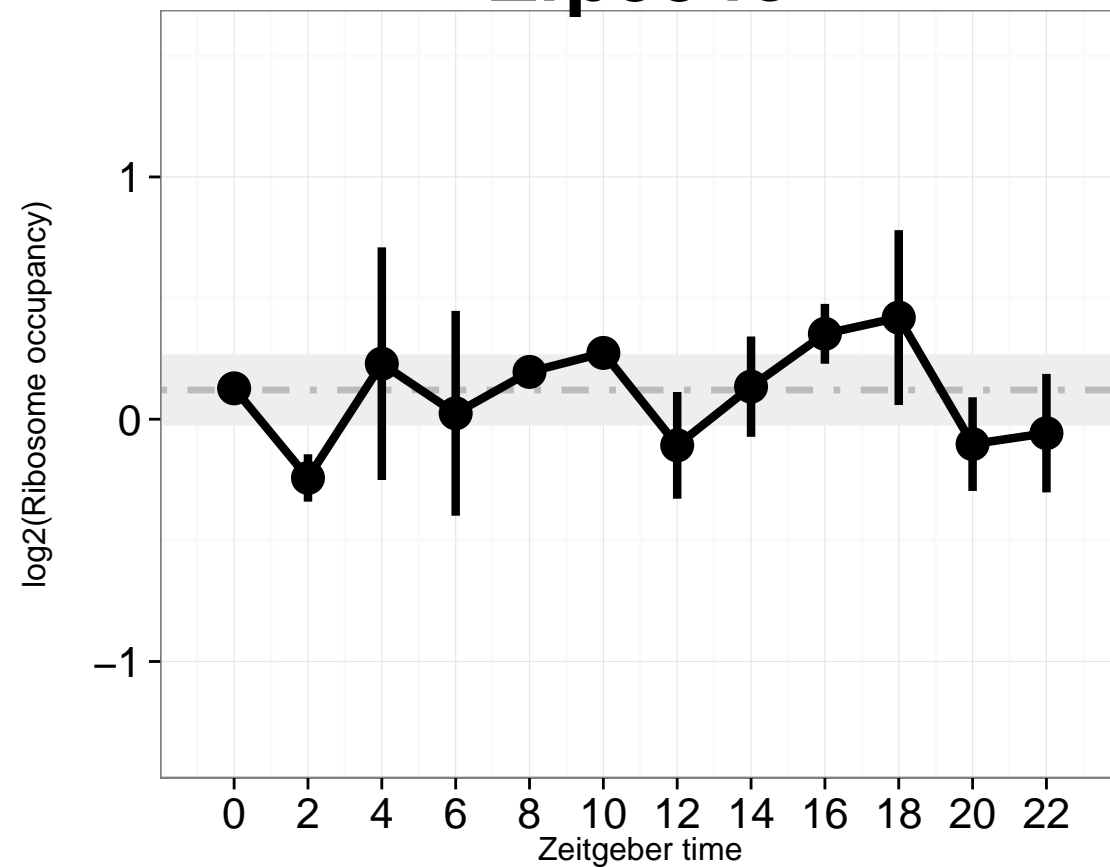

Supplement: Supplementary file 7113 [file 1]

# Ogfrl1

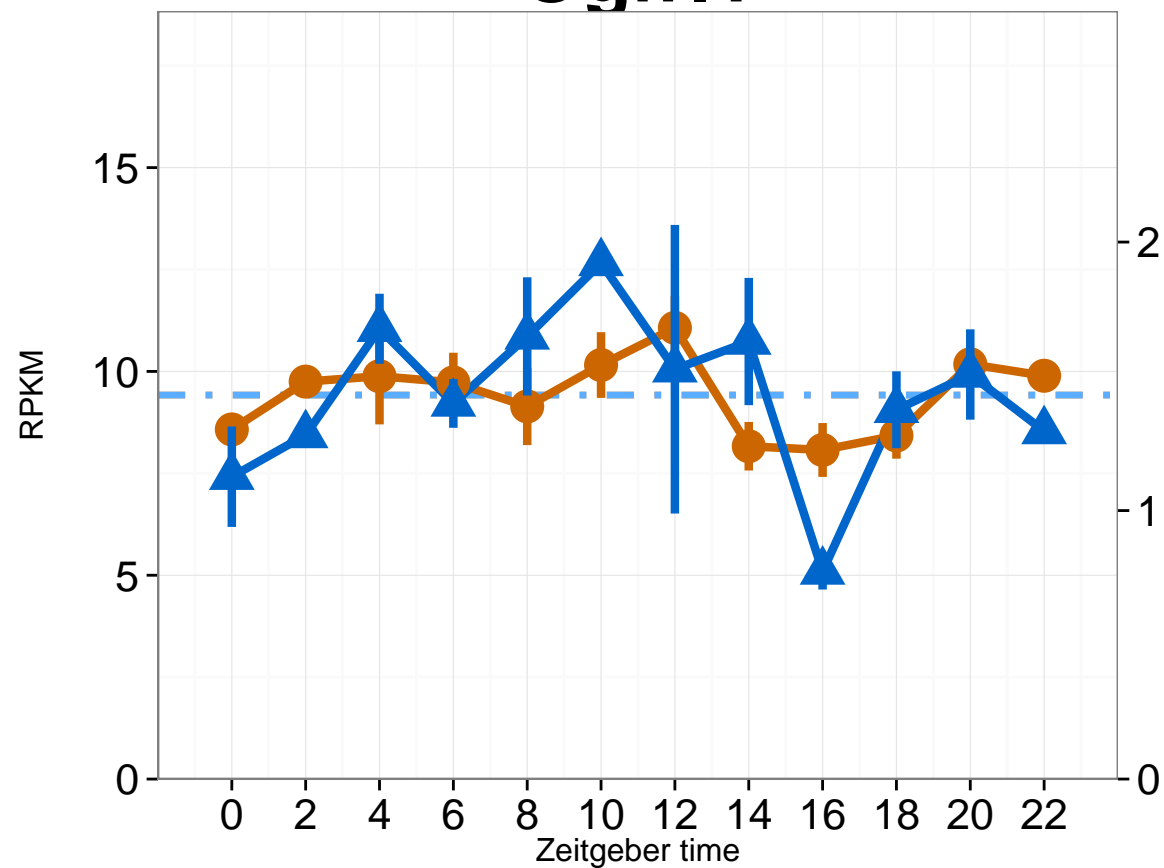

# Ogfrl1

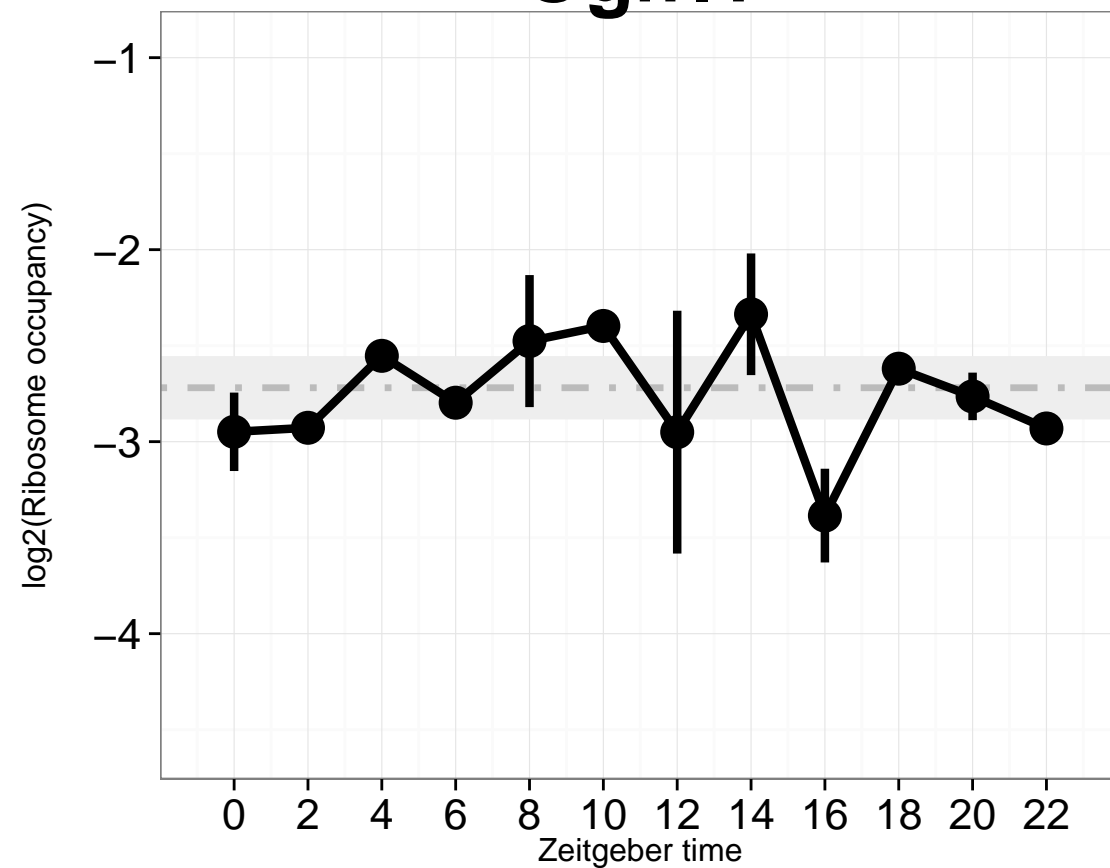

Supplement: Supplementary file 7114 [file 1]

# Fgfrl1

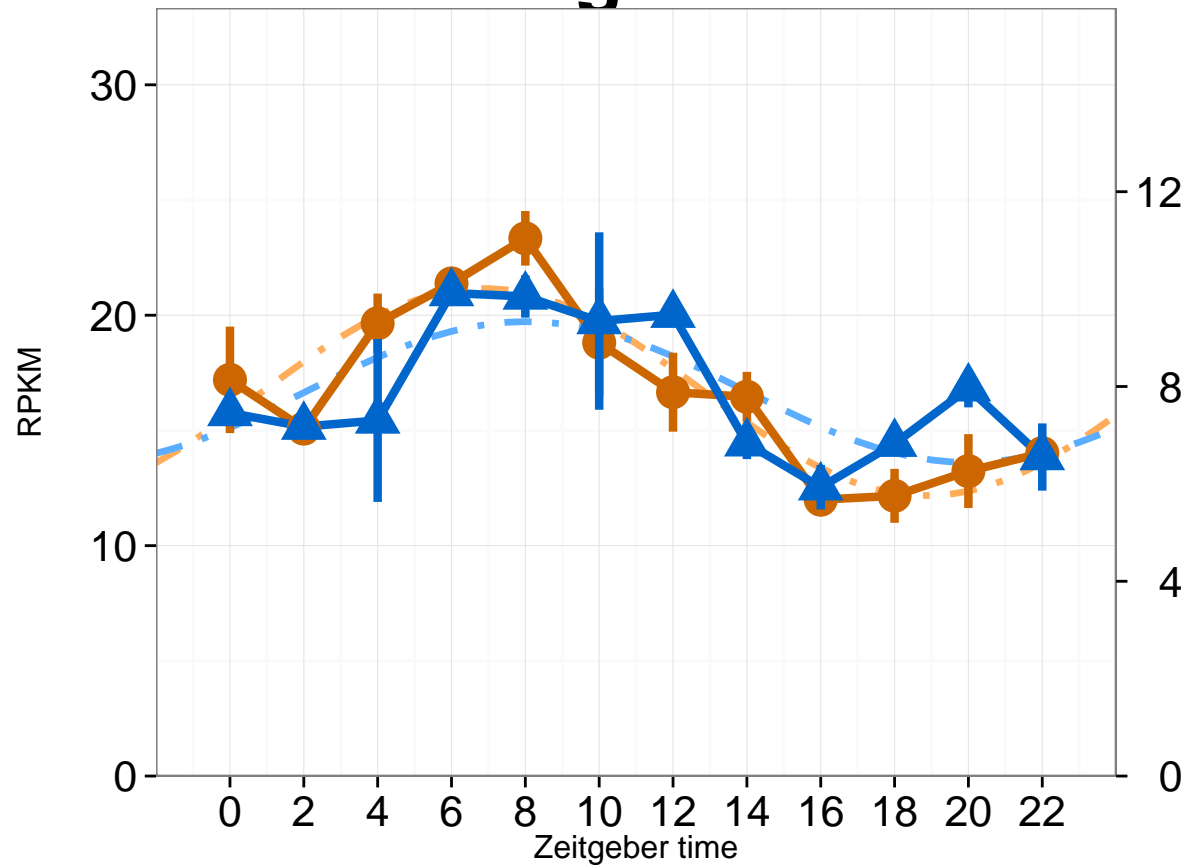

# Fgfrl1

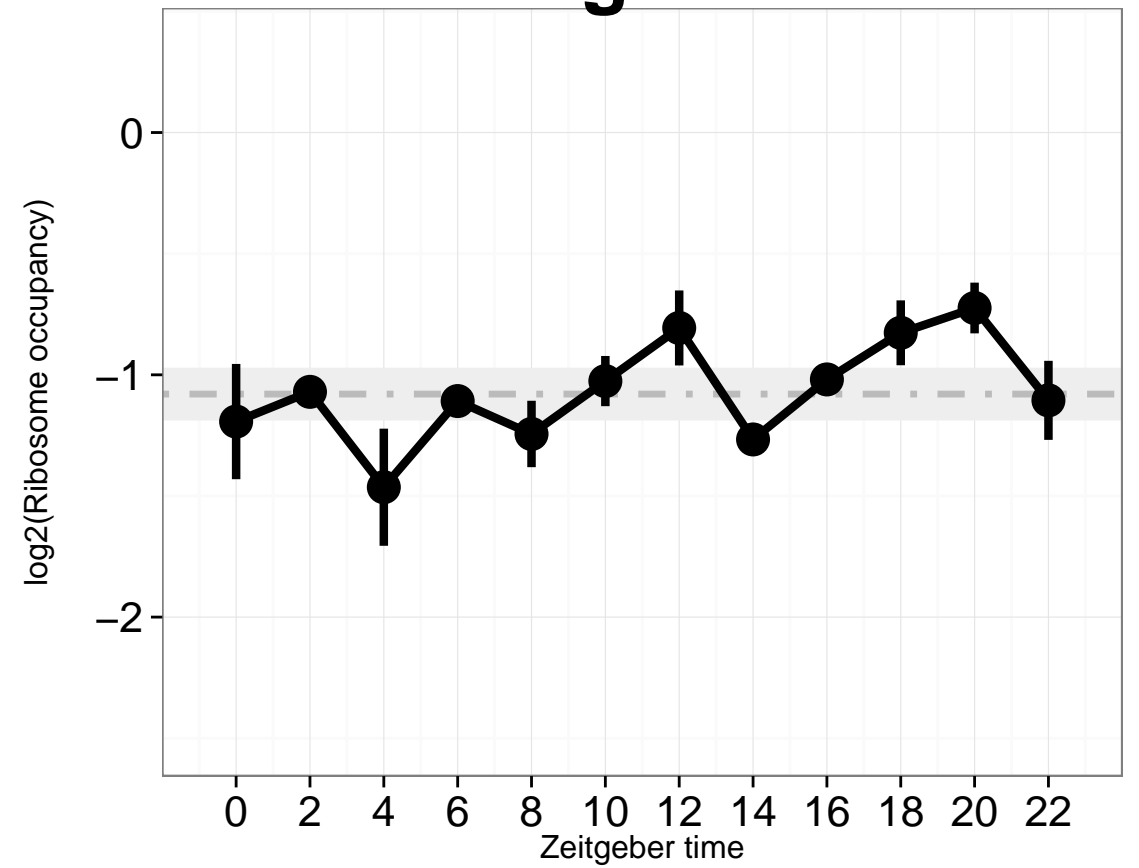

Supplement: Supplementary file 7115 [file 1]

## Gpx1

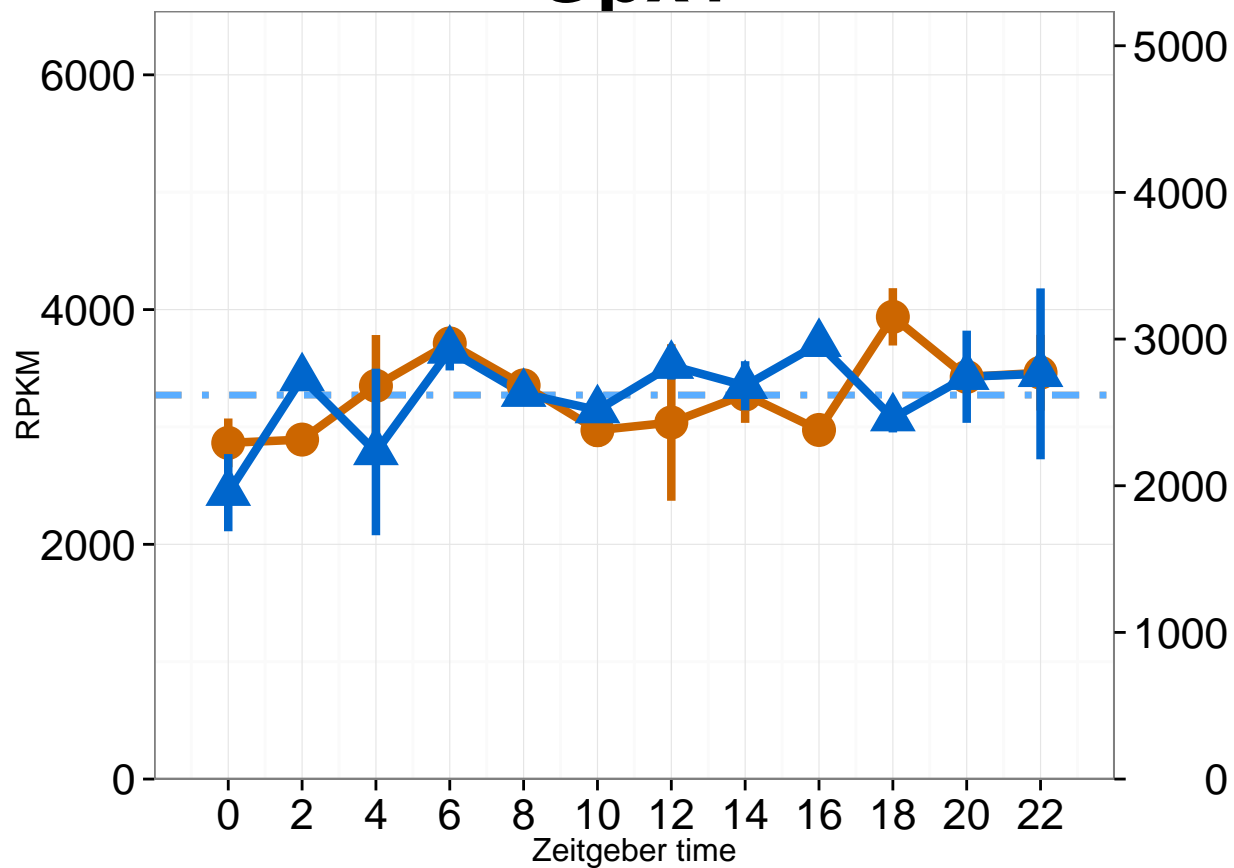

## Gpx1

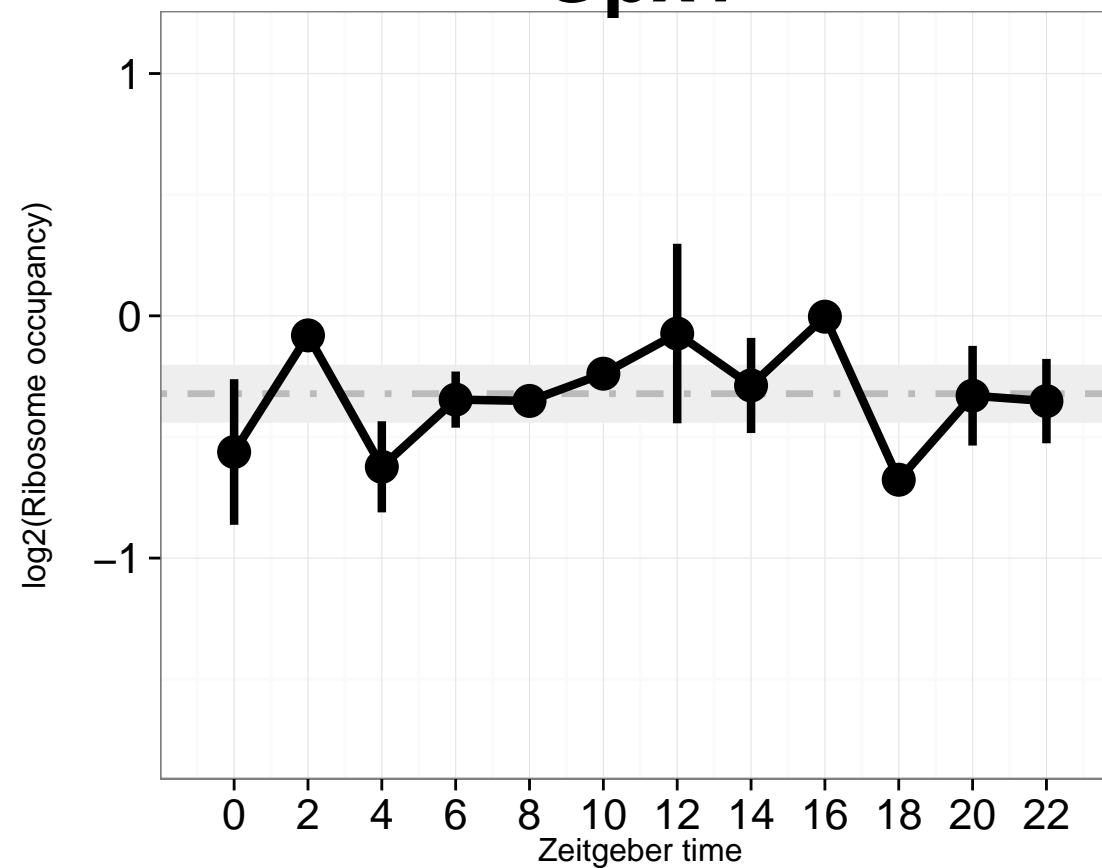

Supplement: Supplementary file 7116 [file 1]

# Trpt1

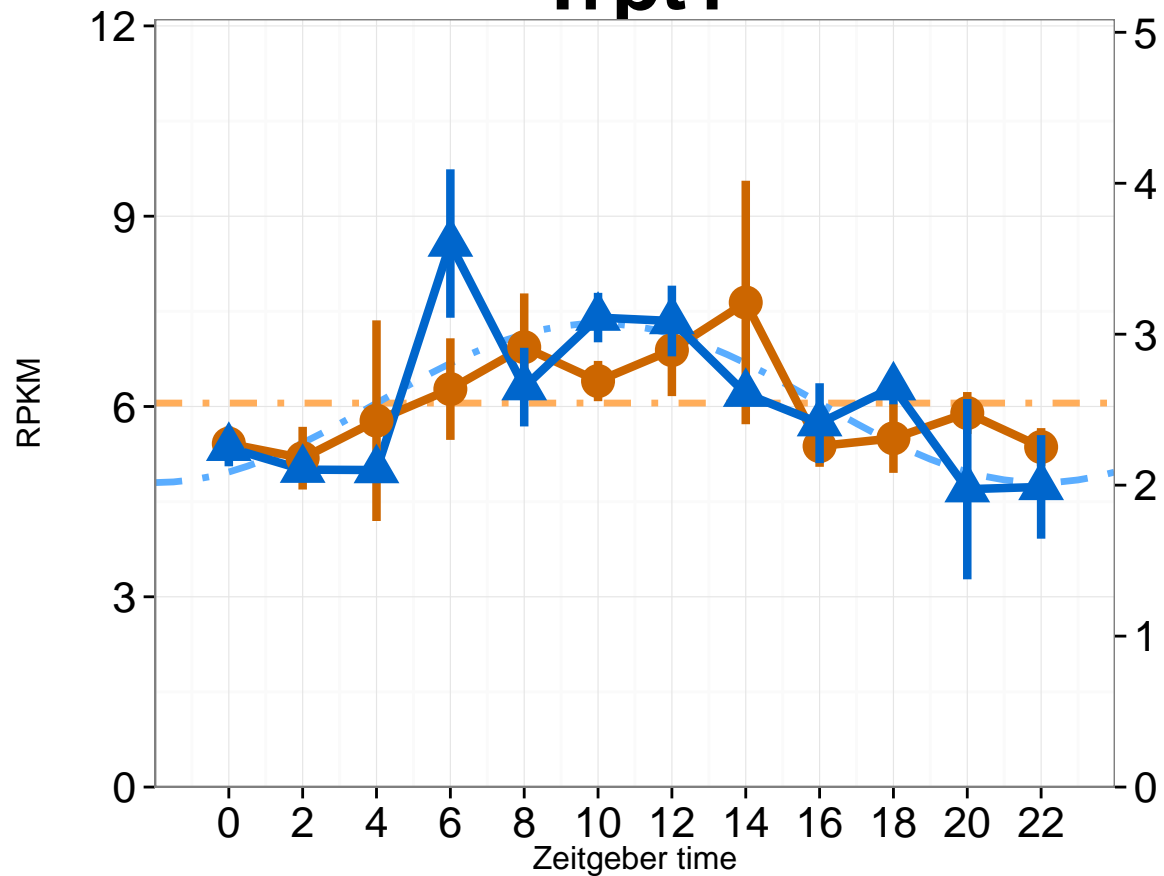

# Trpt1

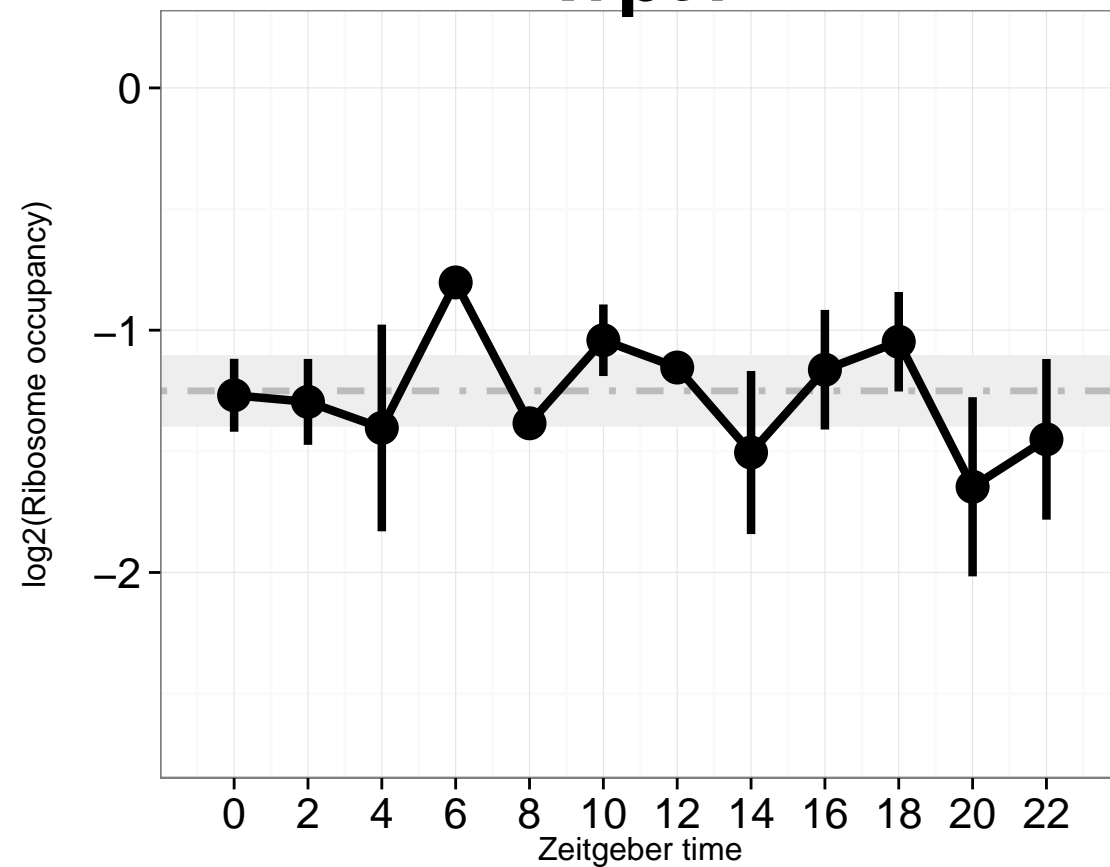

Supplement: Supplementary file 7117 [file 1]

# Tmem242

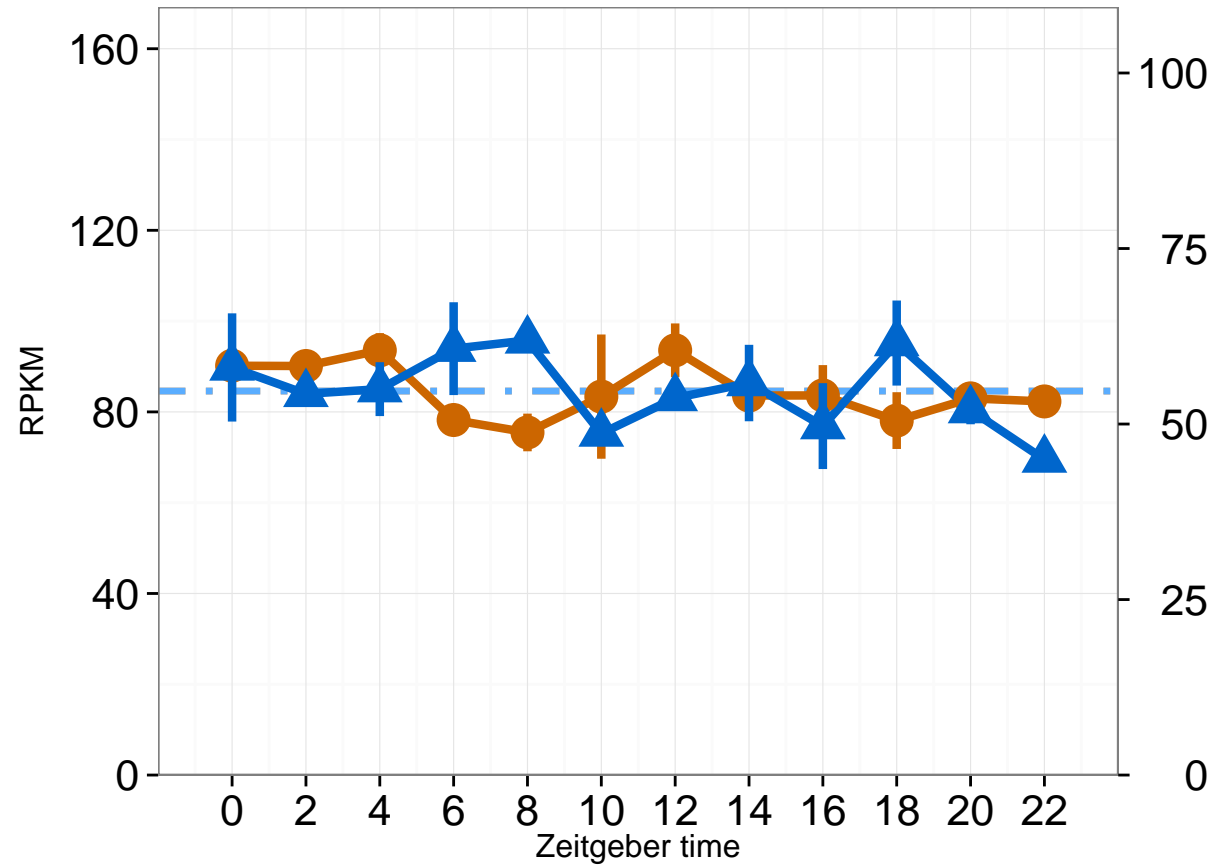

# Tmem242

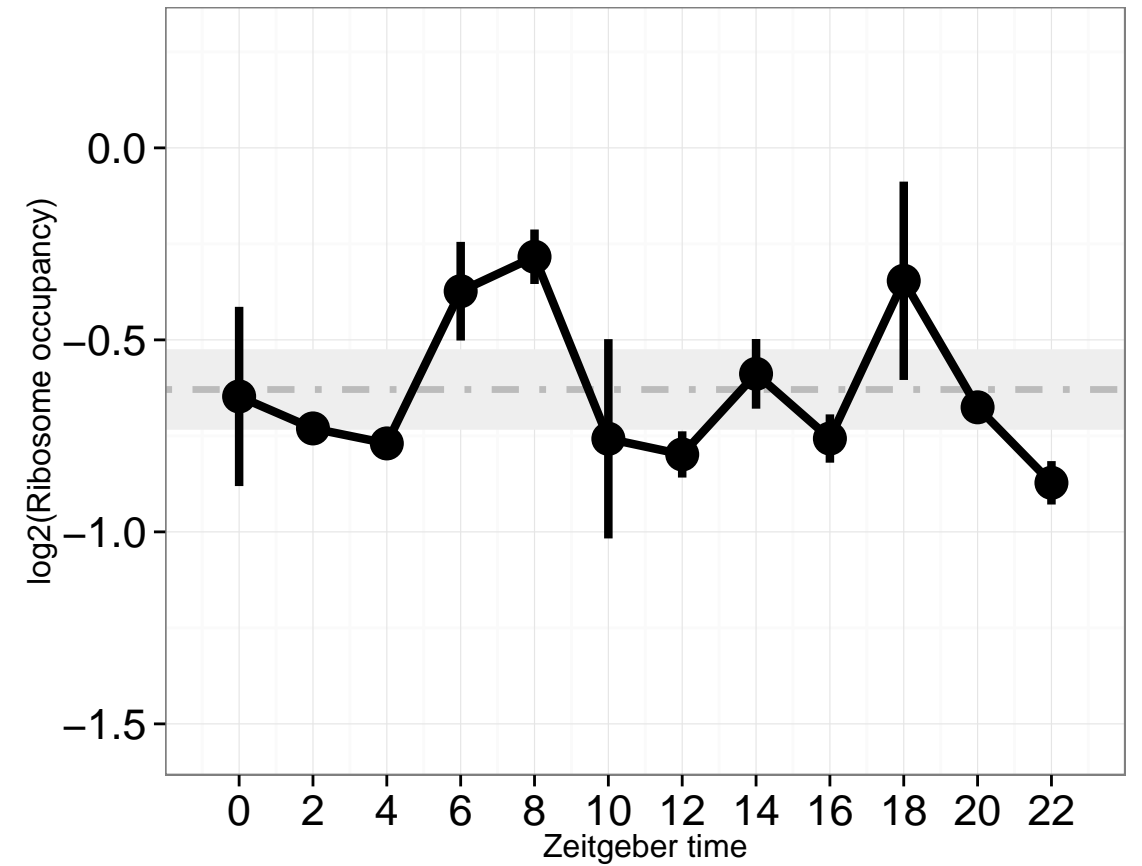

Supplement: Supplementary file 7118 [file 1]

## Dap

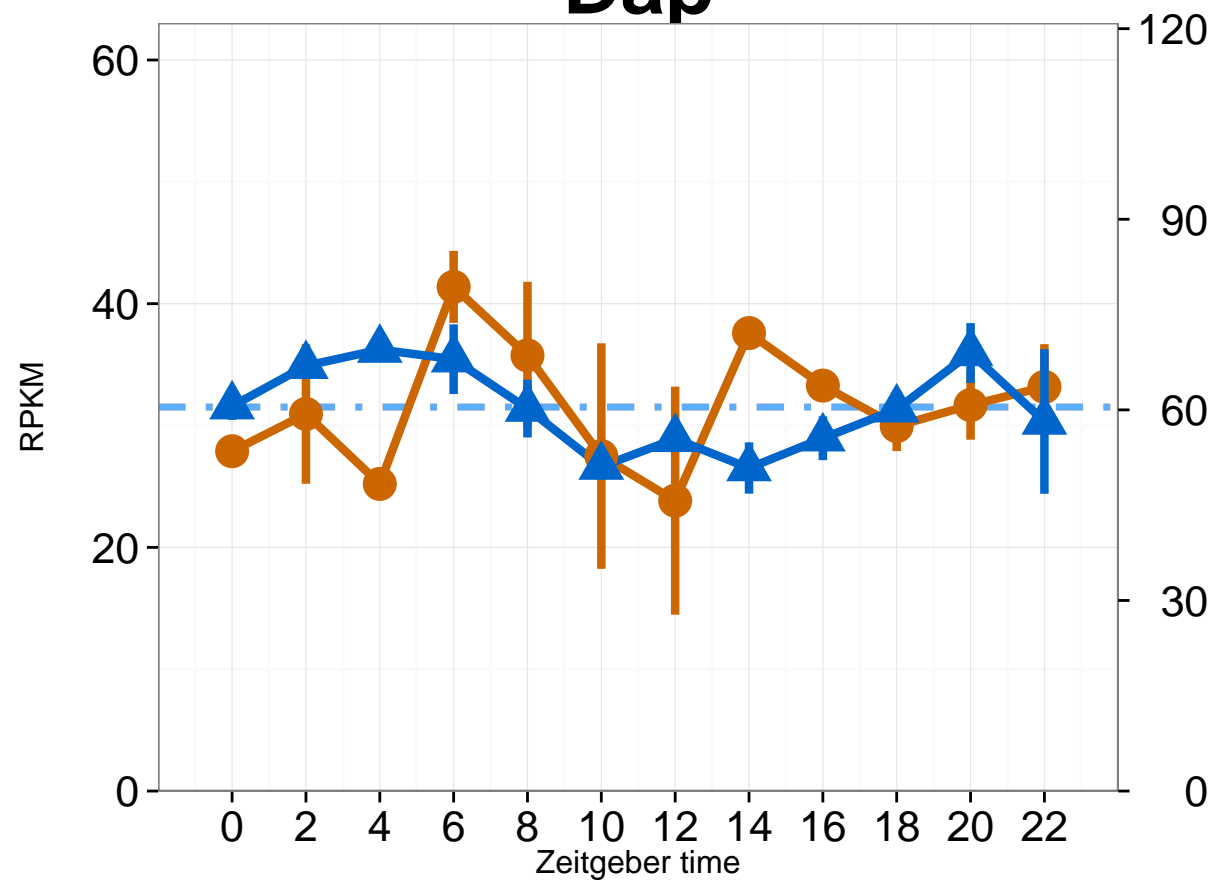

## Dap

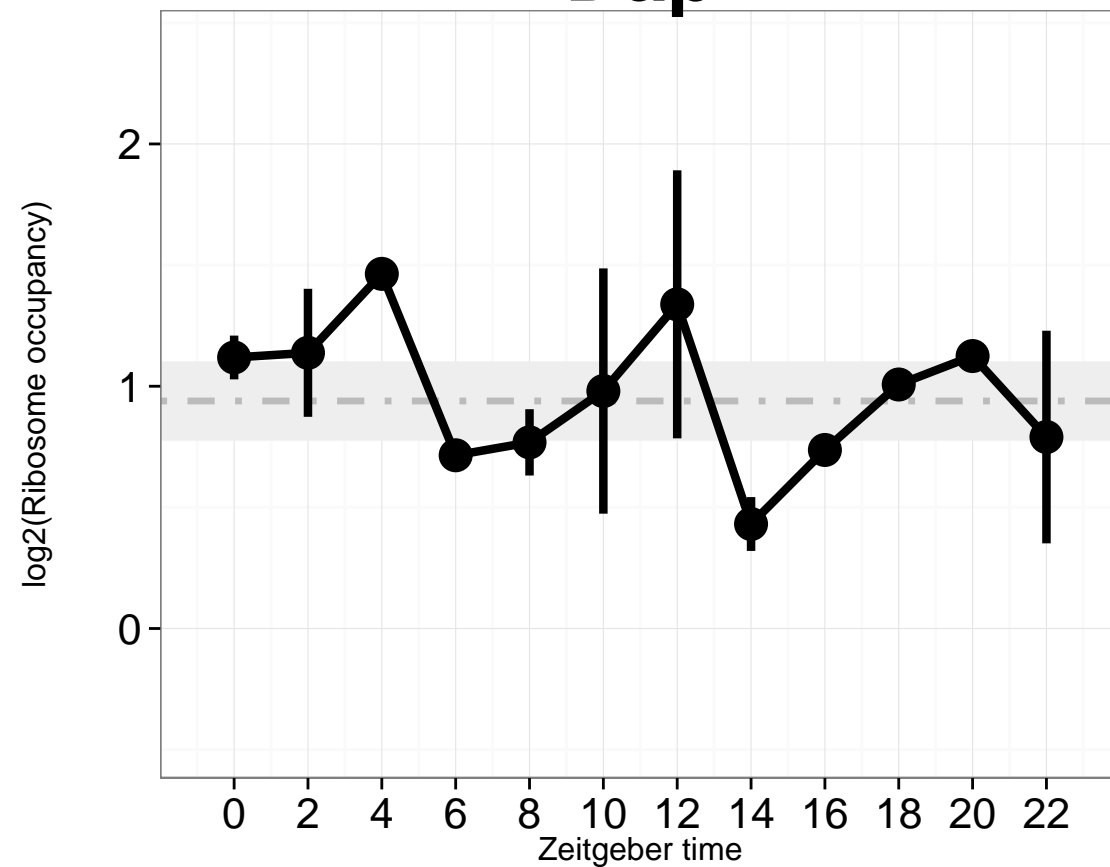

Supplement: Supplementary file 7119 [file 1]

## Slc5a3

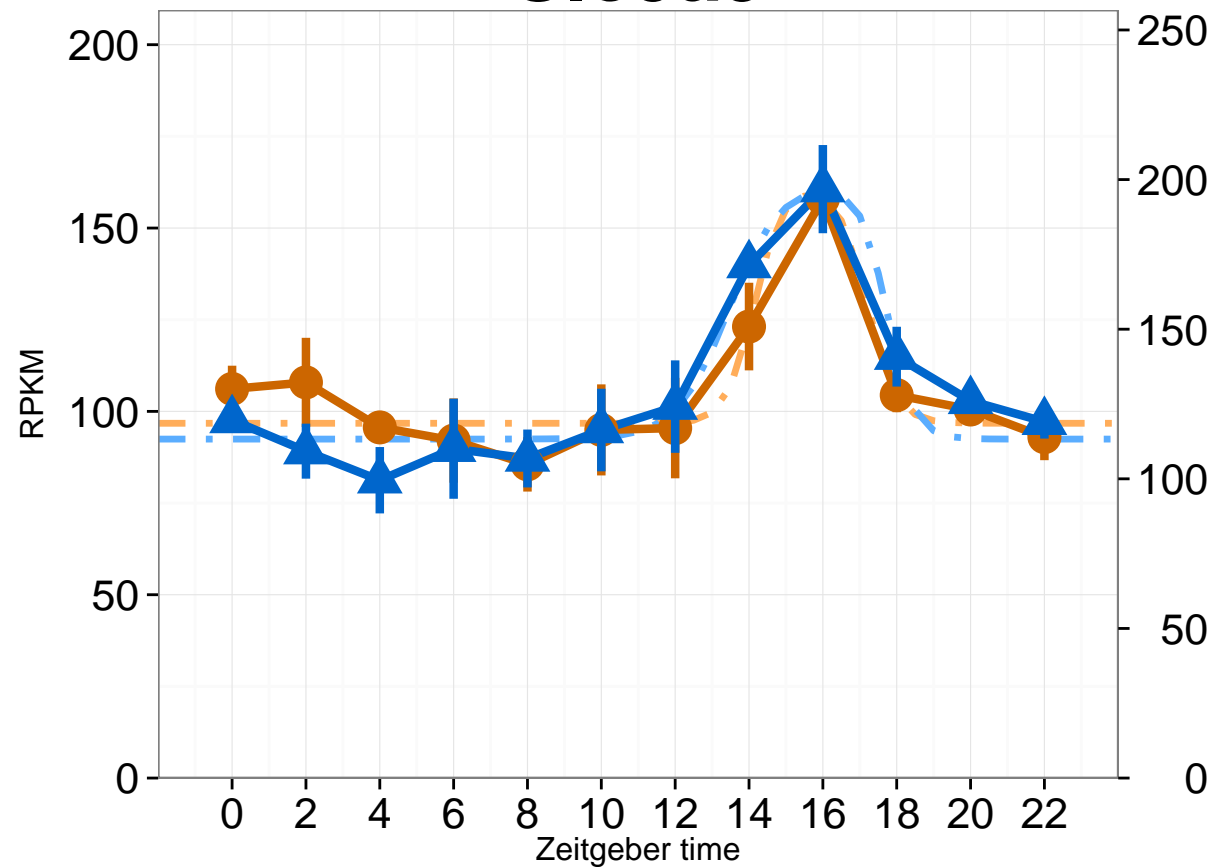

## Slc5a3

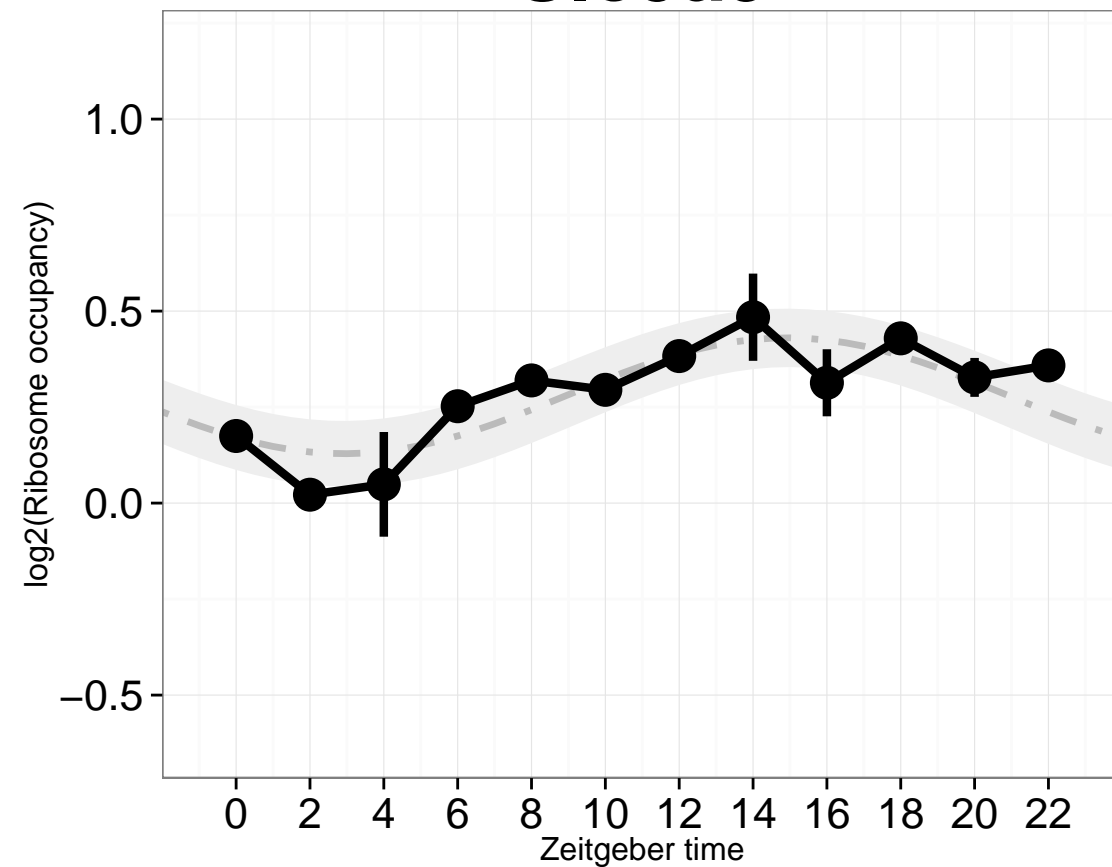

Supplement: Supplementary file 7120 [file 1]

**Sept6**

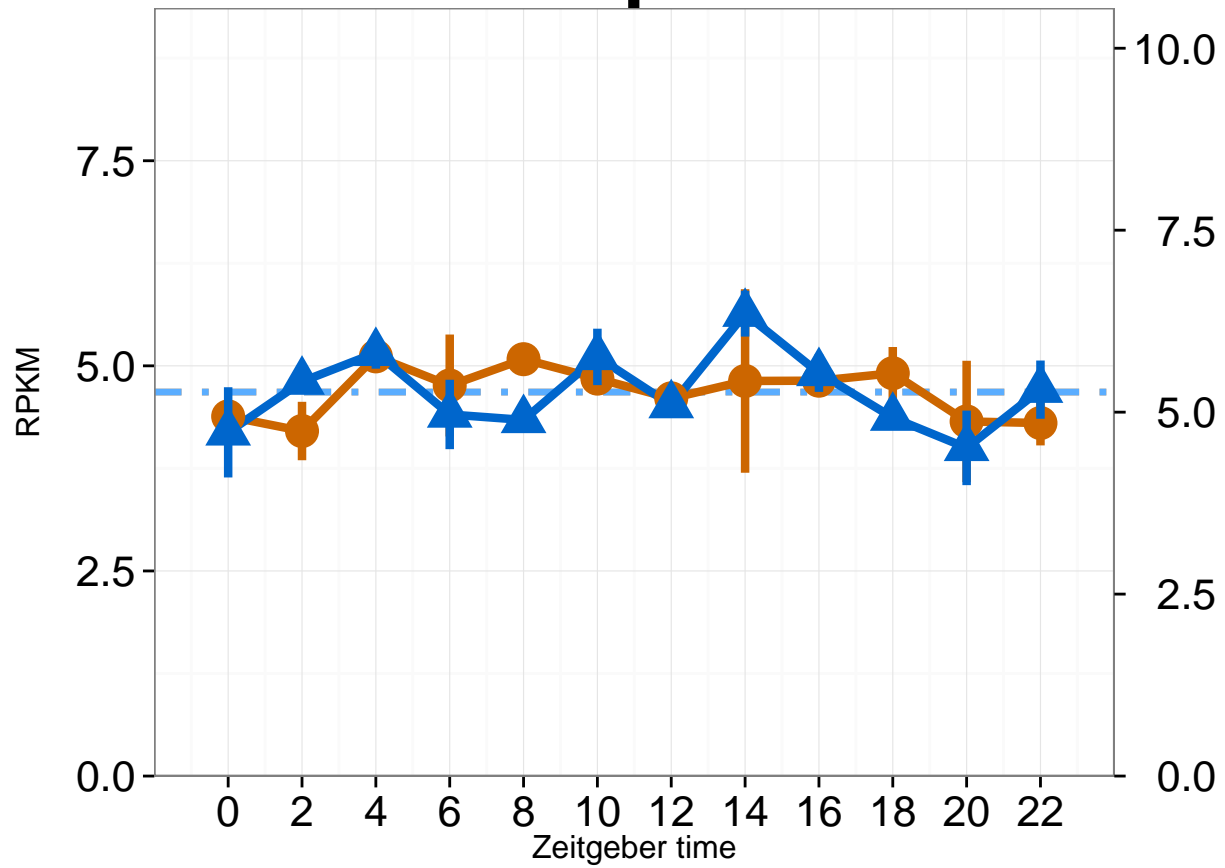

**Sept6**

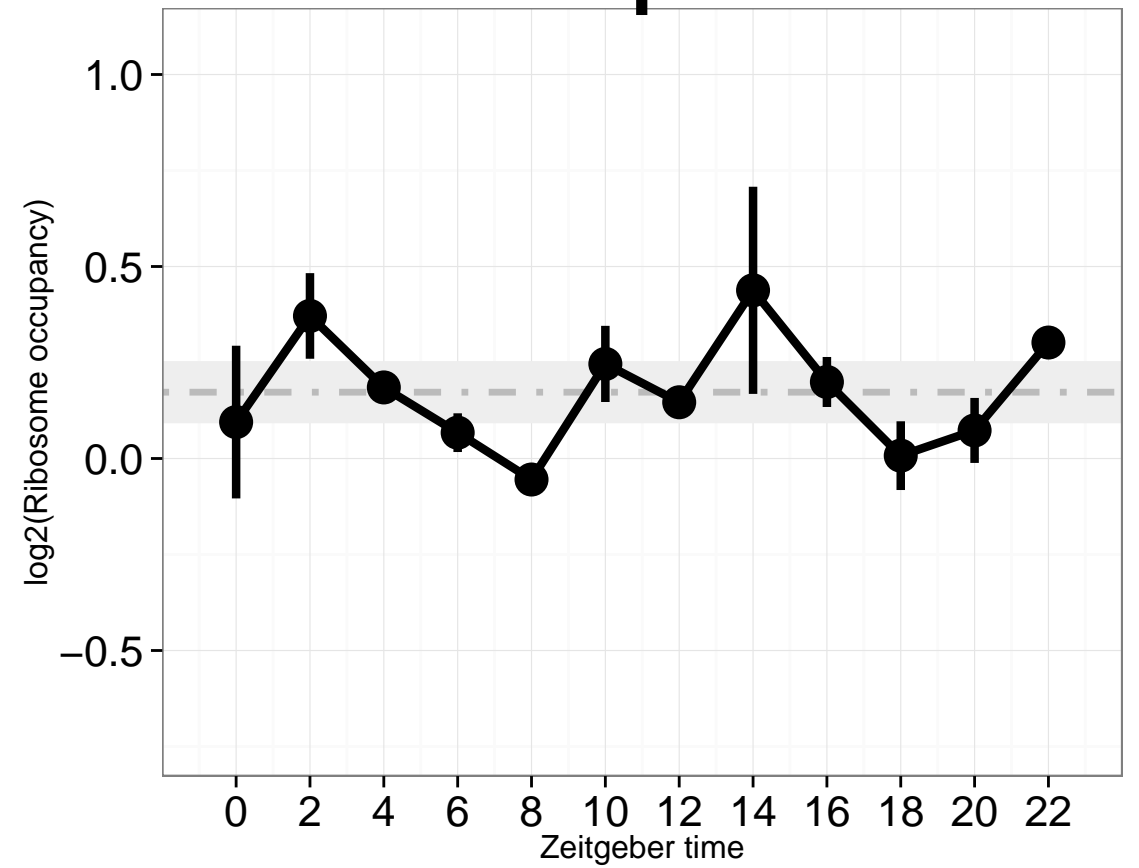

Supplement: Supplementary file 7121 [file 1]

# Metap1

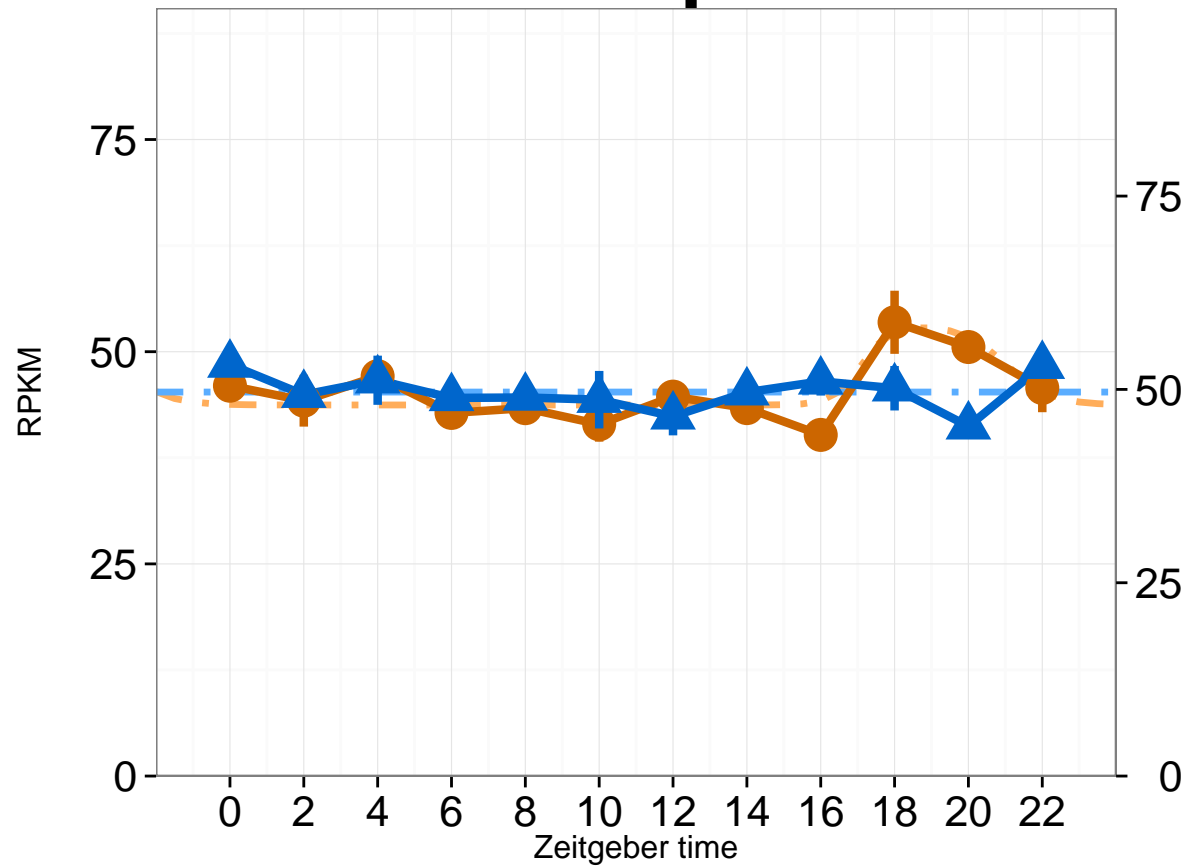

# Metap1

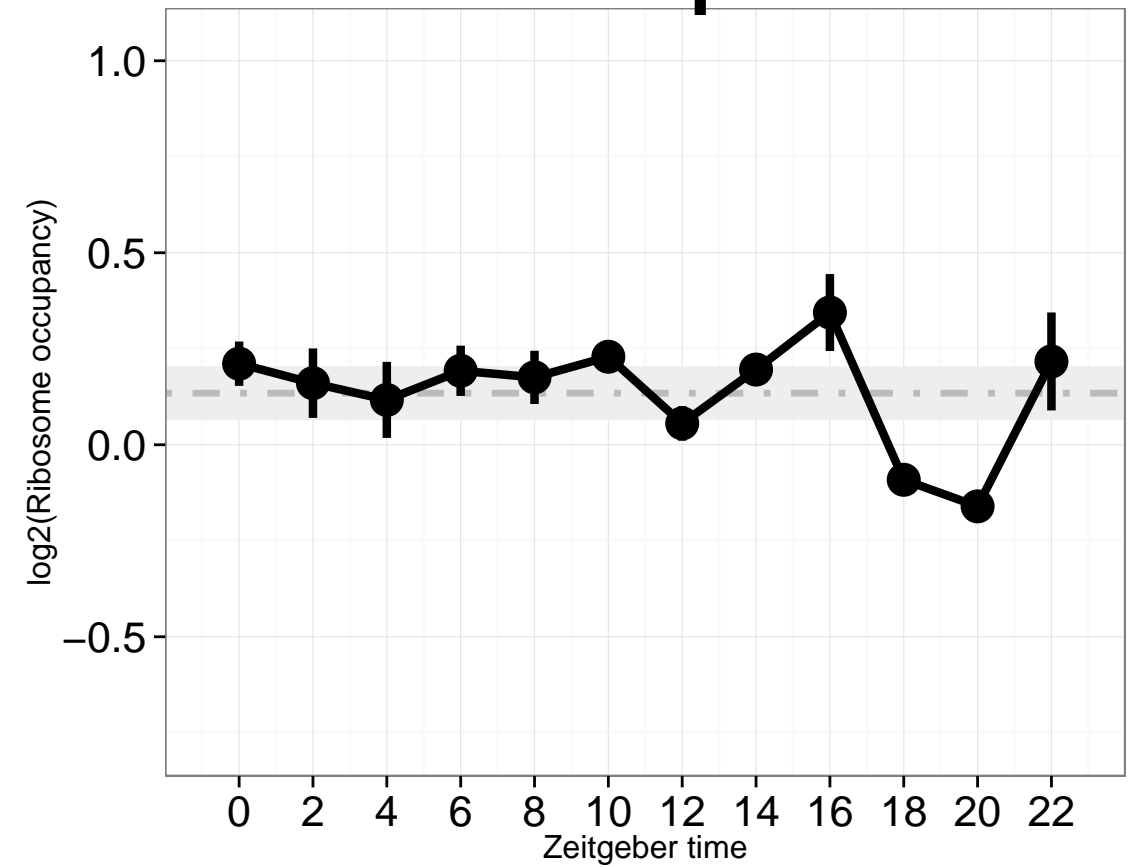

Supplement: Supplementary file 7122 [file 1]

# Btnl9

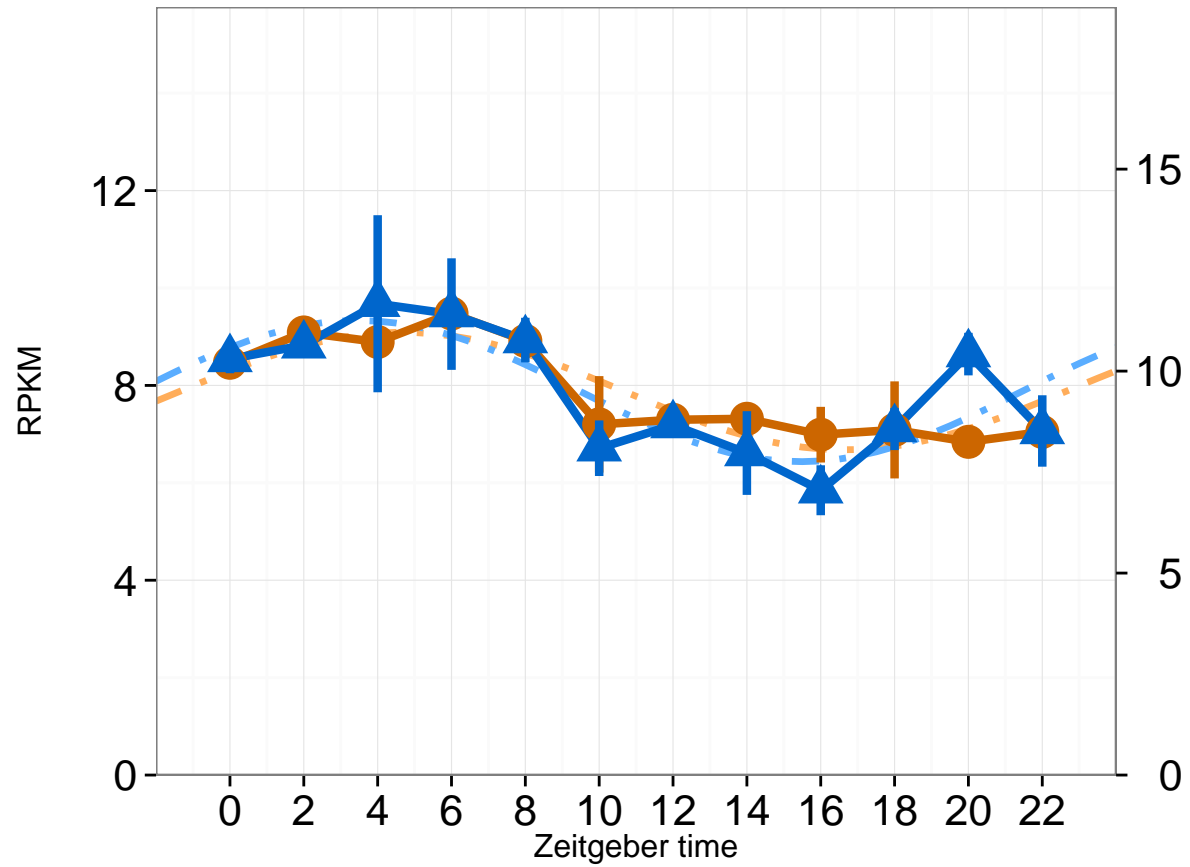

# Btnl9

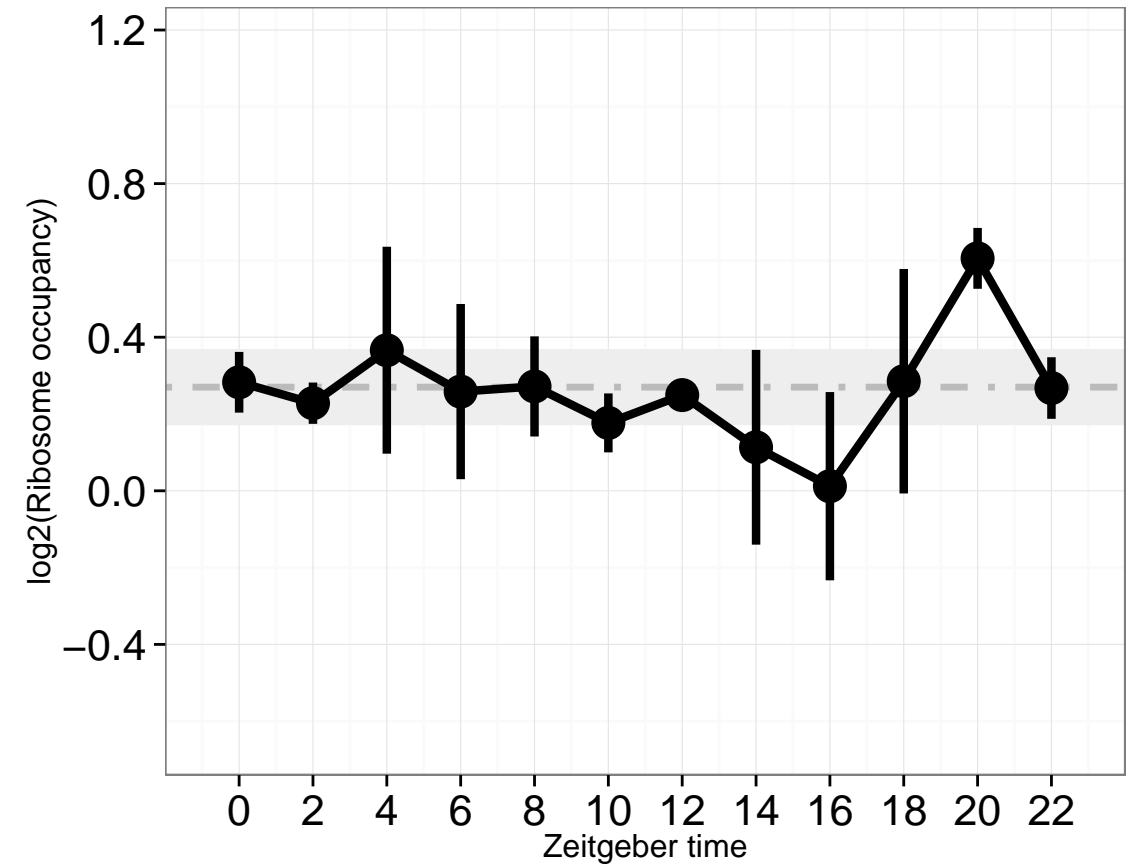

Supplement: Supplementary file 7123 [file 1]
