# Supplementary material (part 72 of 133)
Source: publisher figshare collection journal article supplement (https://springernature.figshare.com/articles/dataset/_/4903193)

# Mon1a

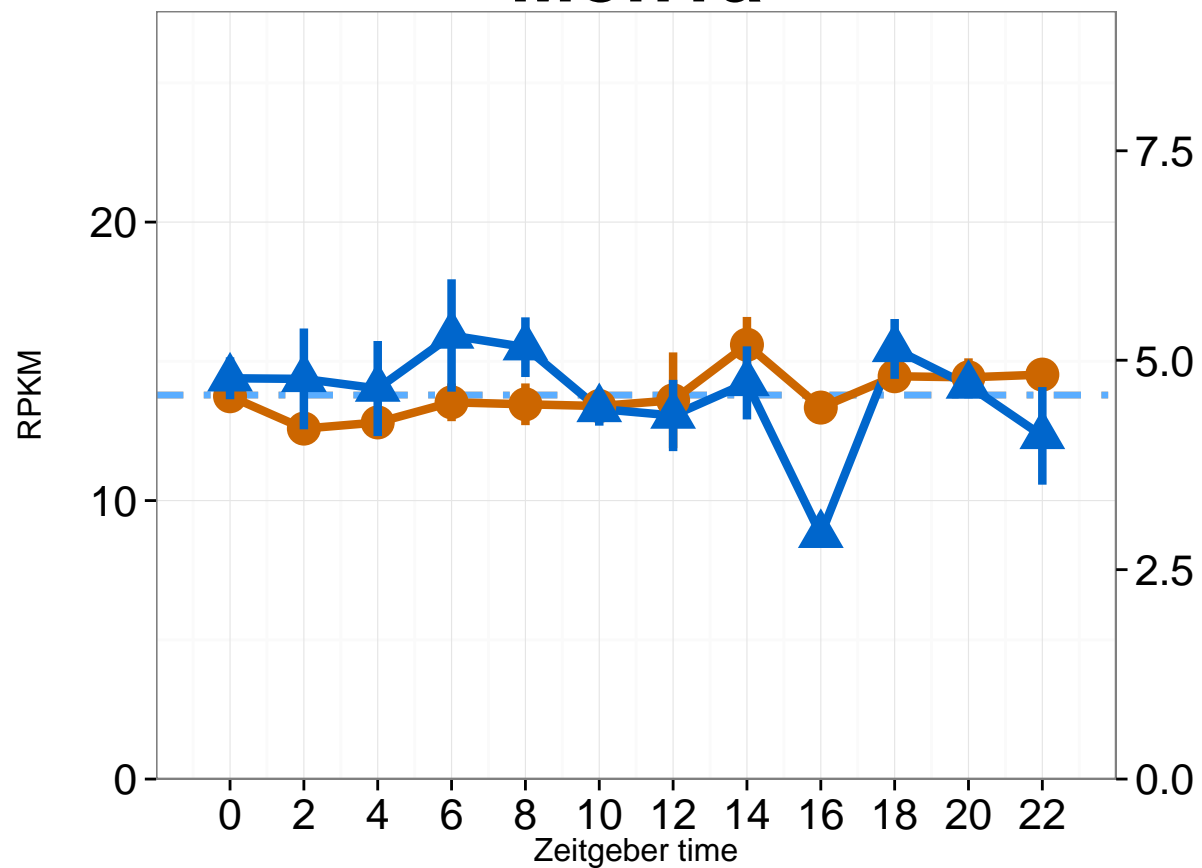

# Mon1a

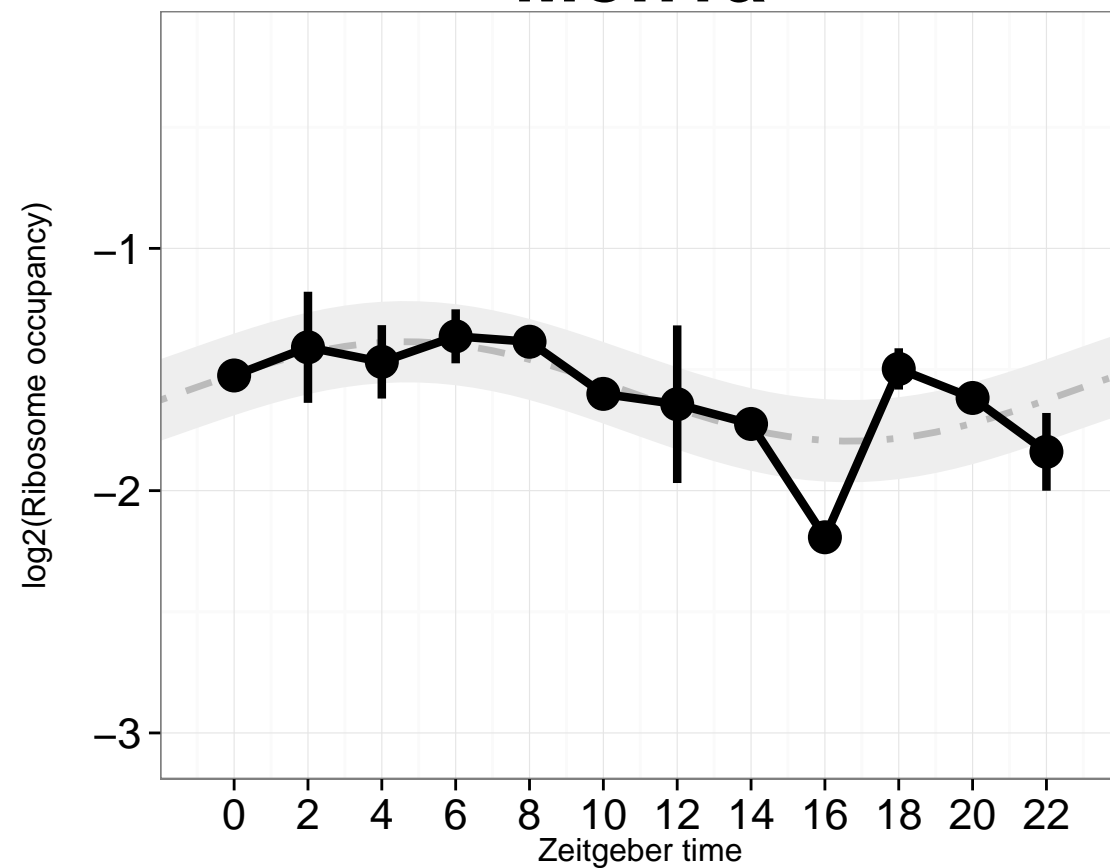

Supplement: Supplementary file 7124 [file 1]

## Ednrb

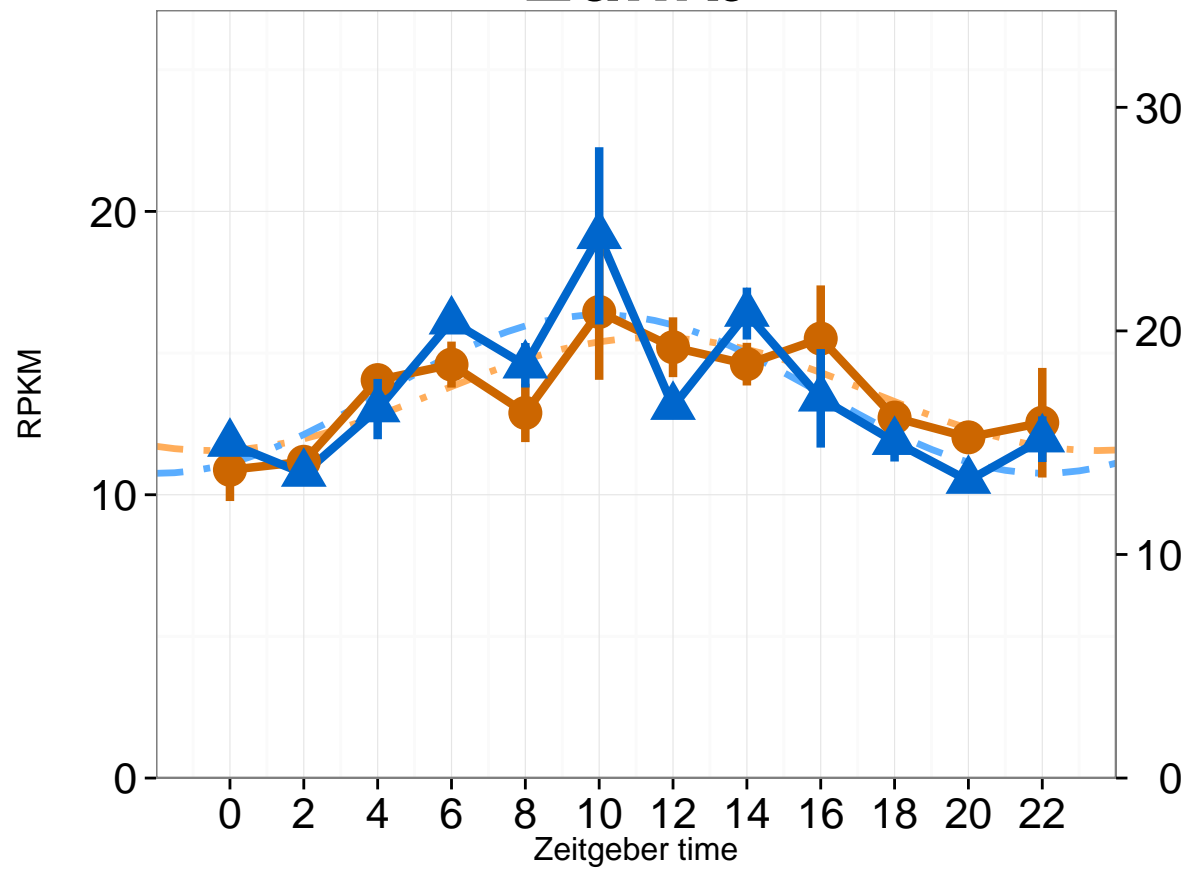

## Ednrb

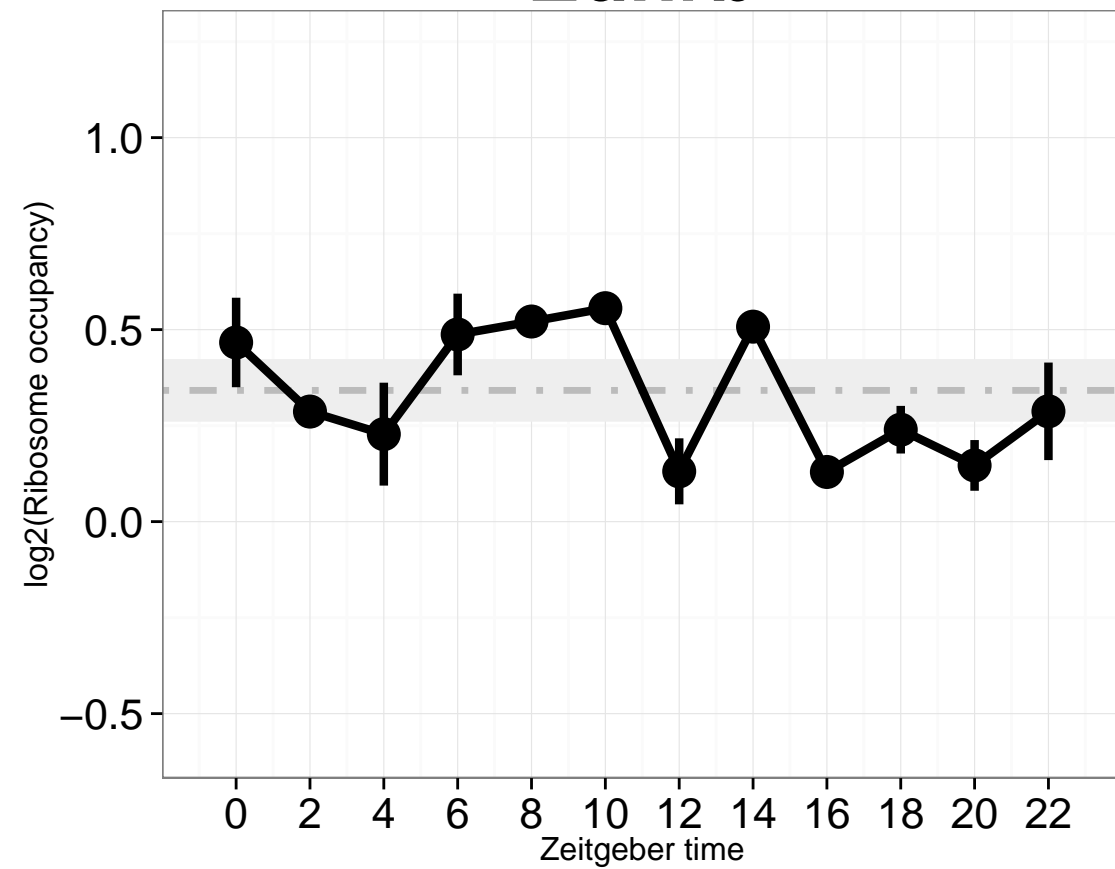

Supplement: Supplementary file 7125 [file 1]

# Pcdh8

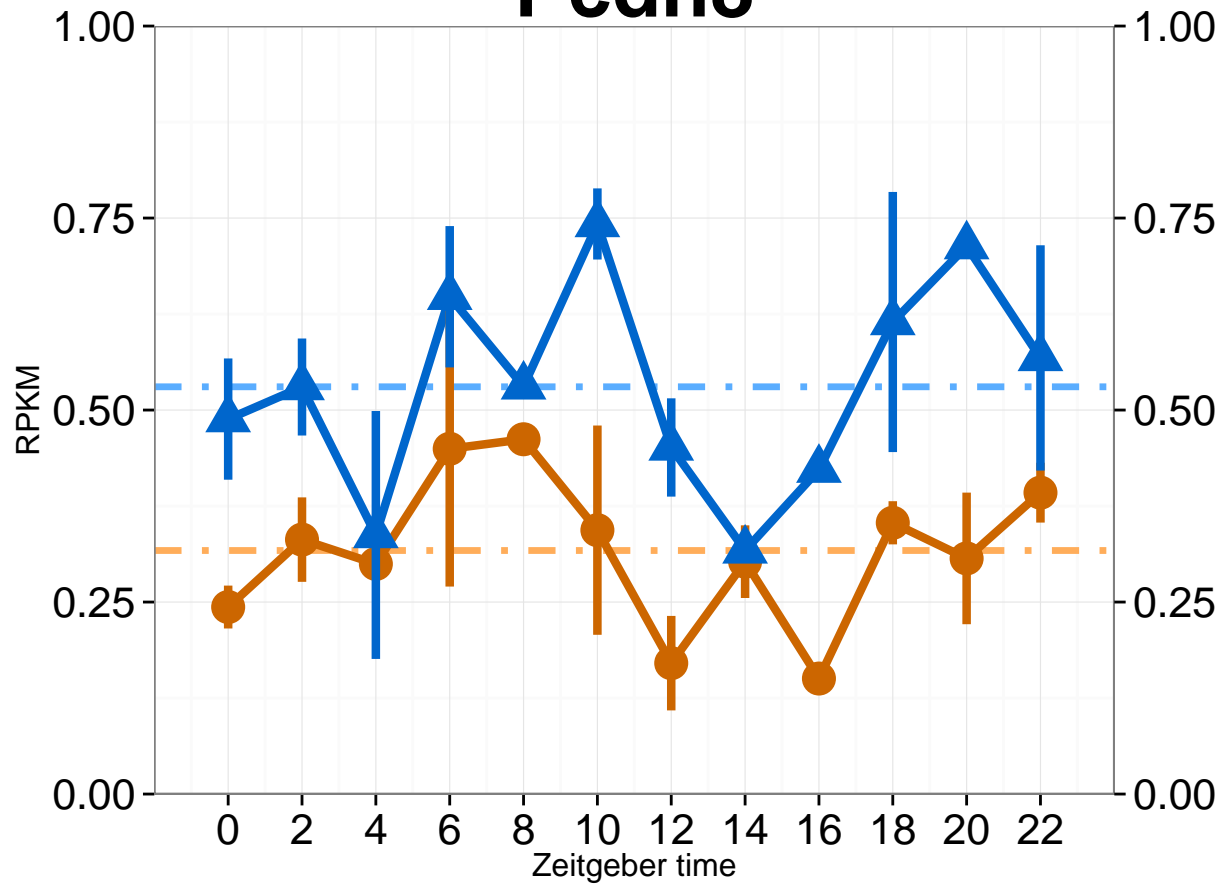

# Pcdh8

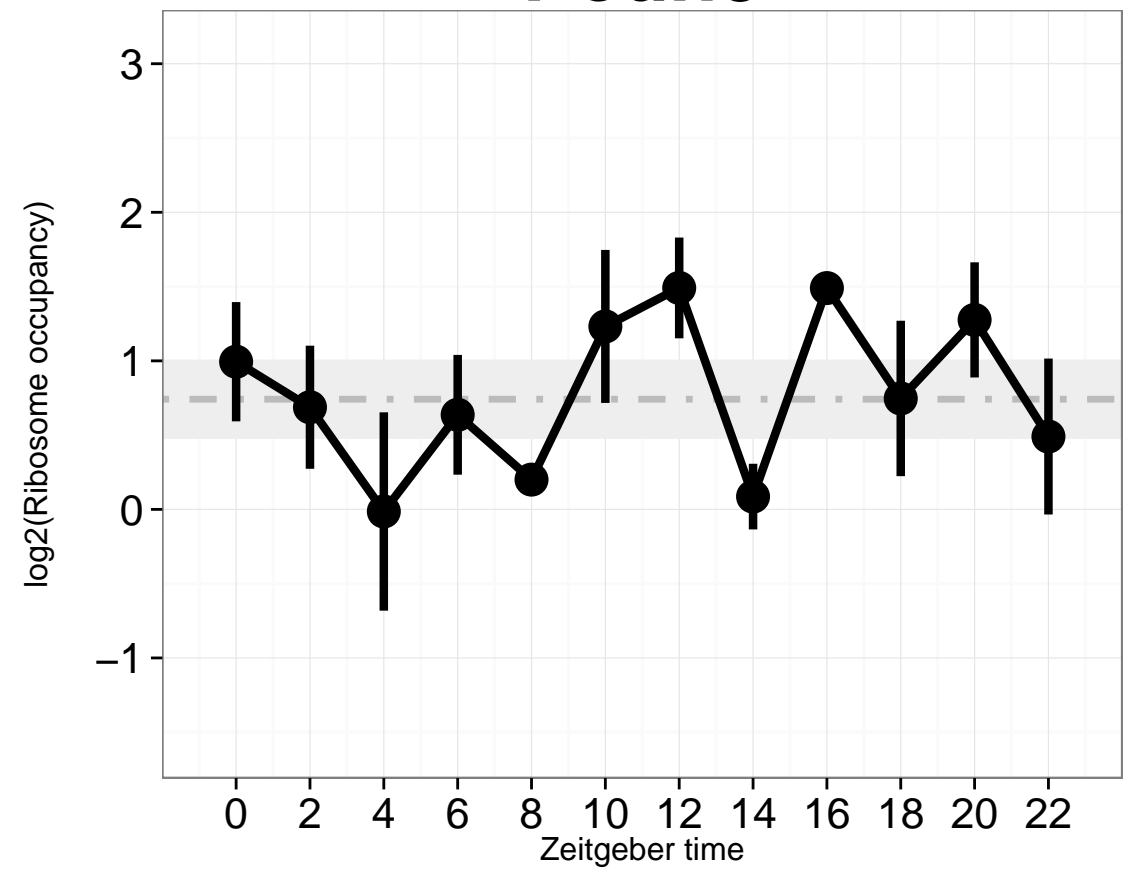

Supplement: Supplementary file 7126 [file 1]

## Rbpms

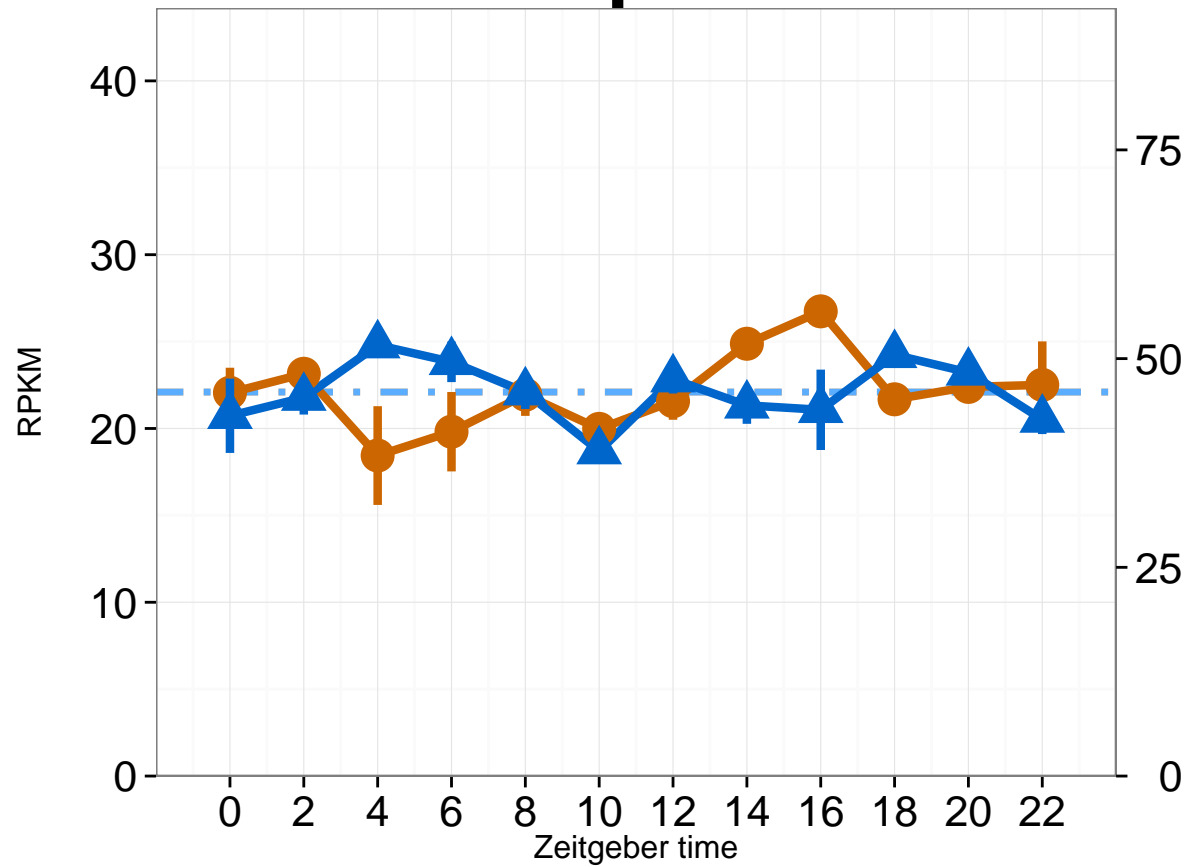

## Rbpms

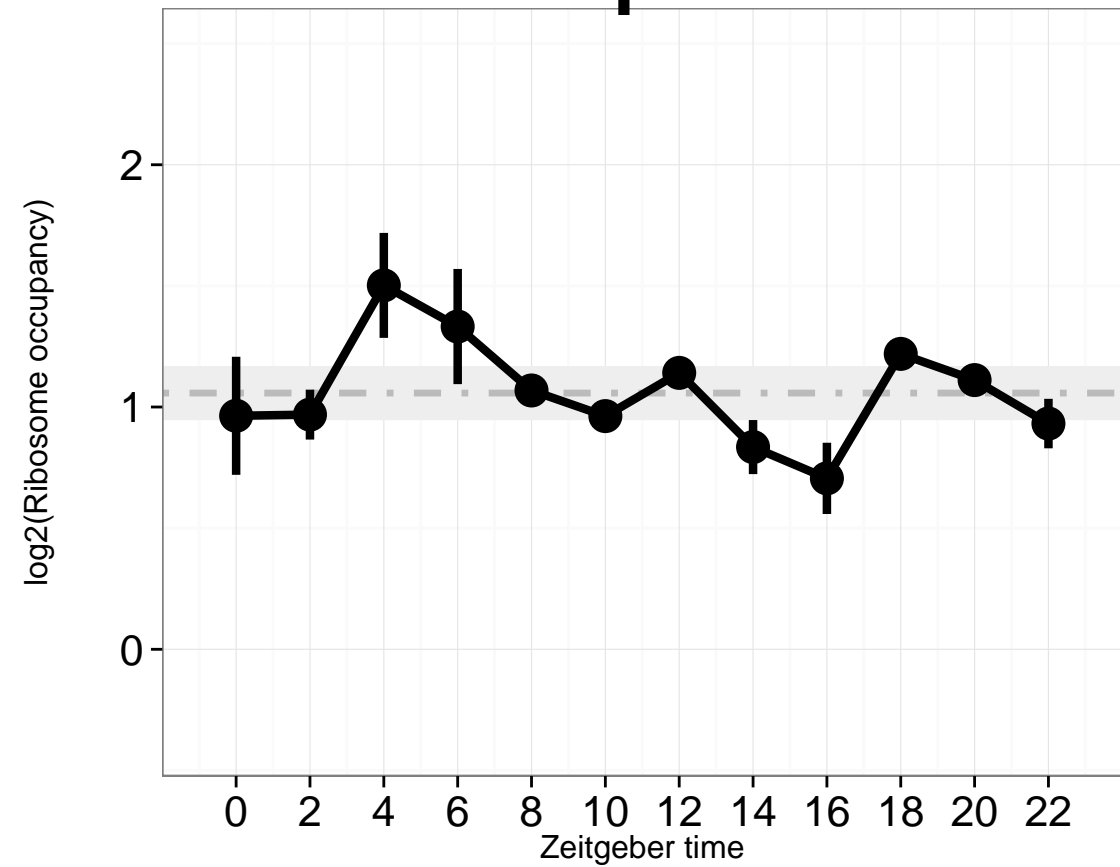

Supplement: Supplementary file 7127 [file 1]

## Esrrg

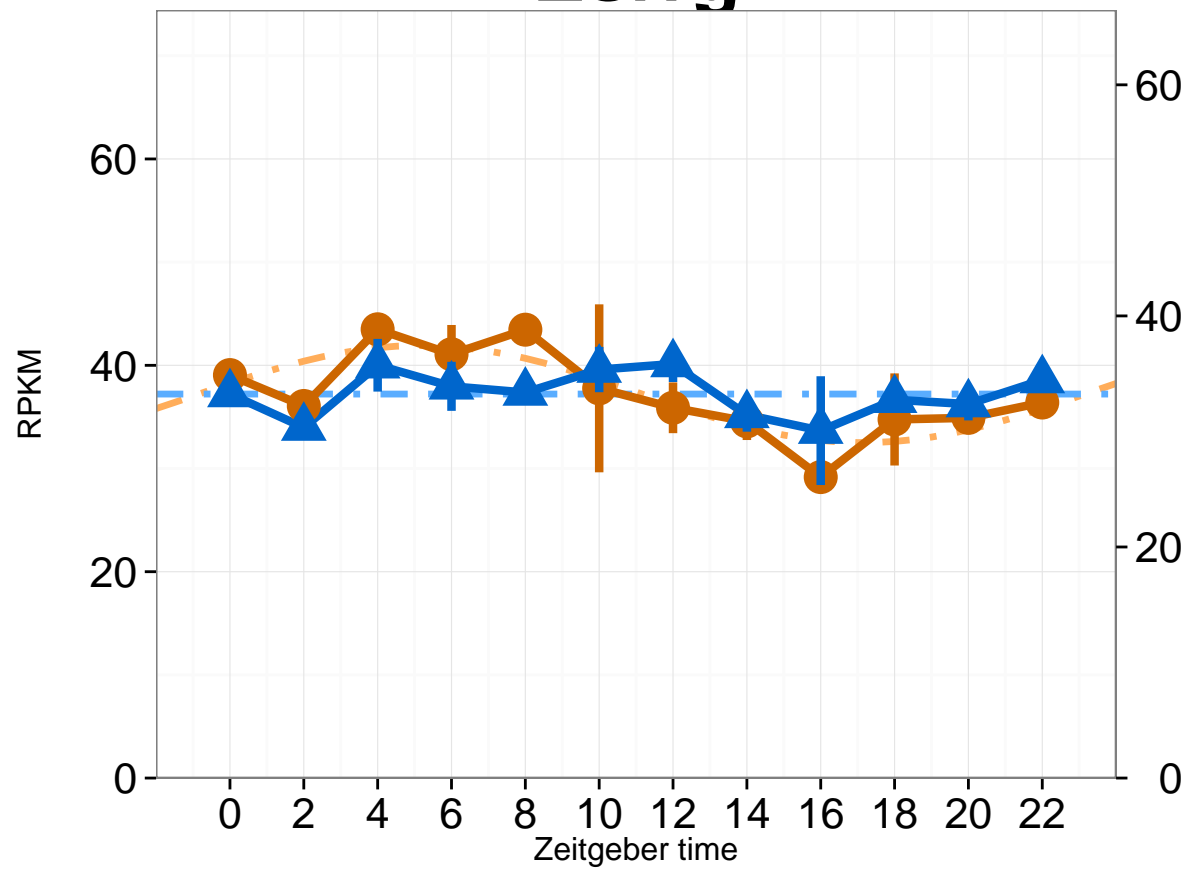

## Esrrg

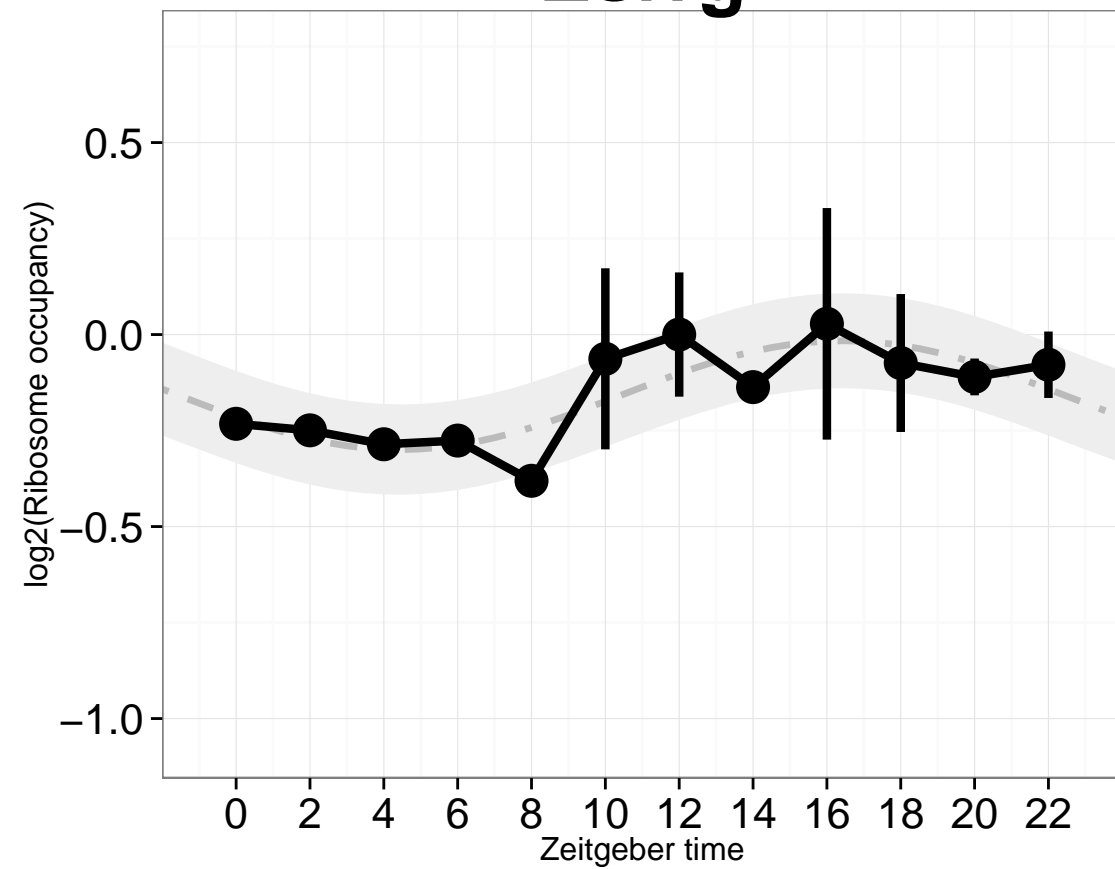

Supplement: Supplementary file 7128 [file 1]

# Mtmt1

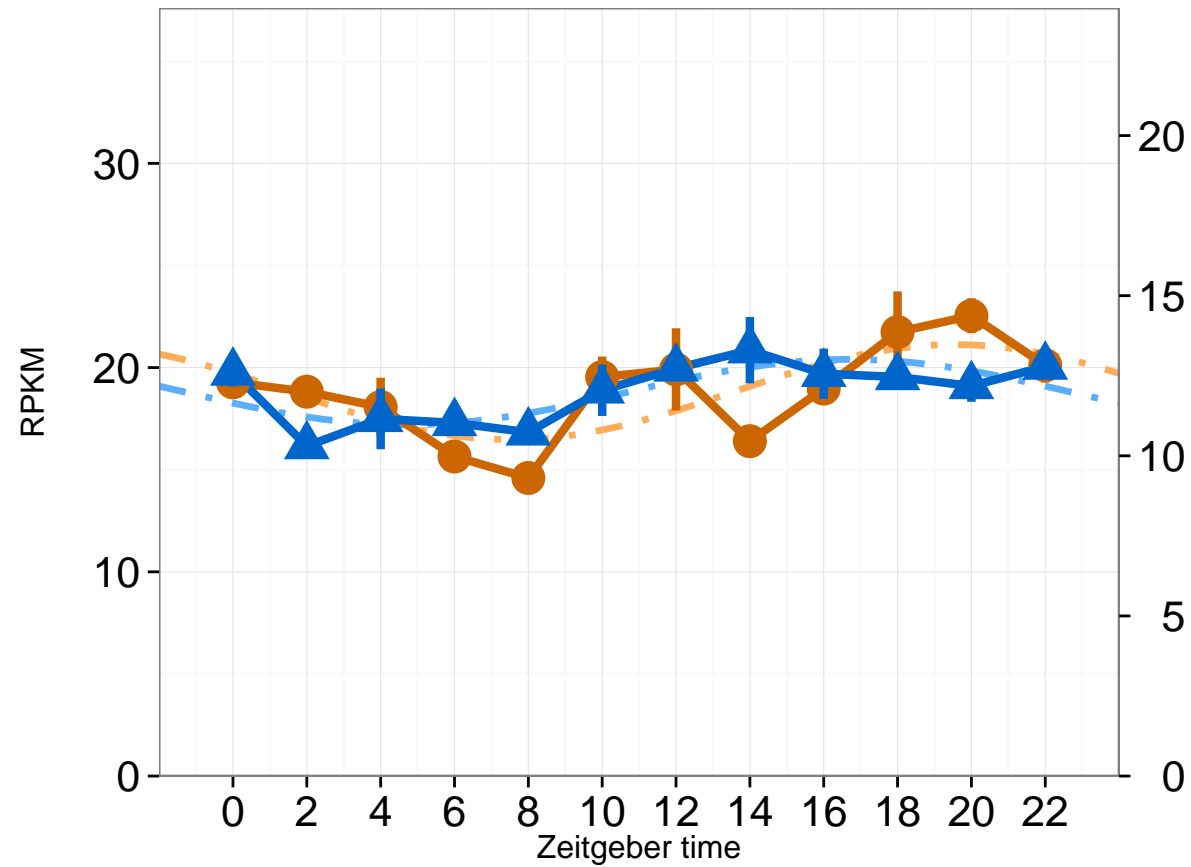

# Mtmt1

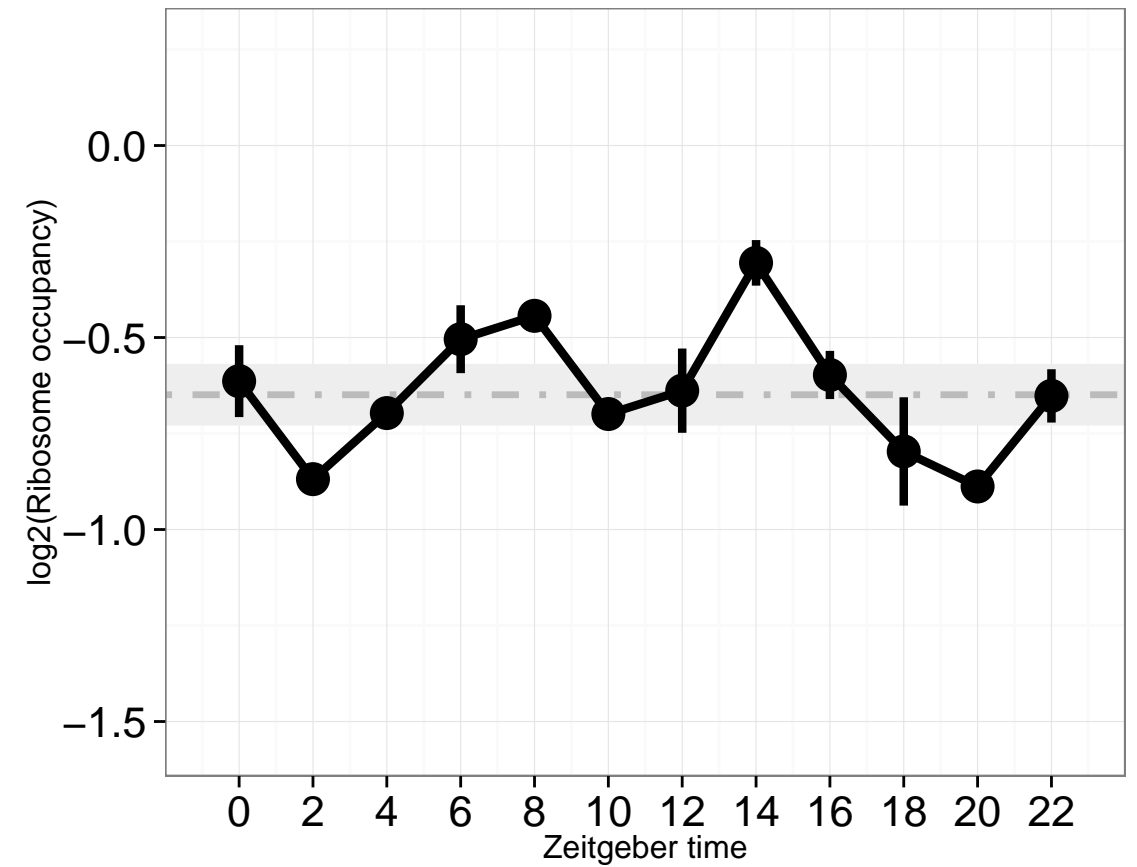

Supplement: Supplementary file 7129 [file 1]

# Zfyve19

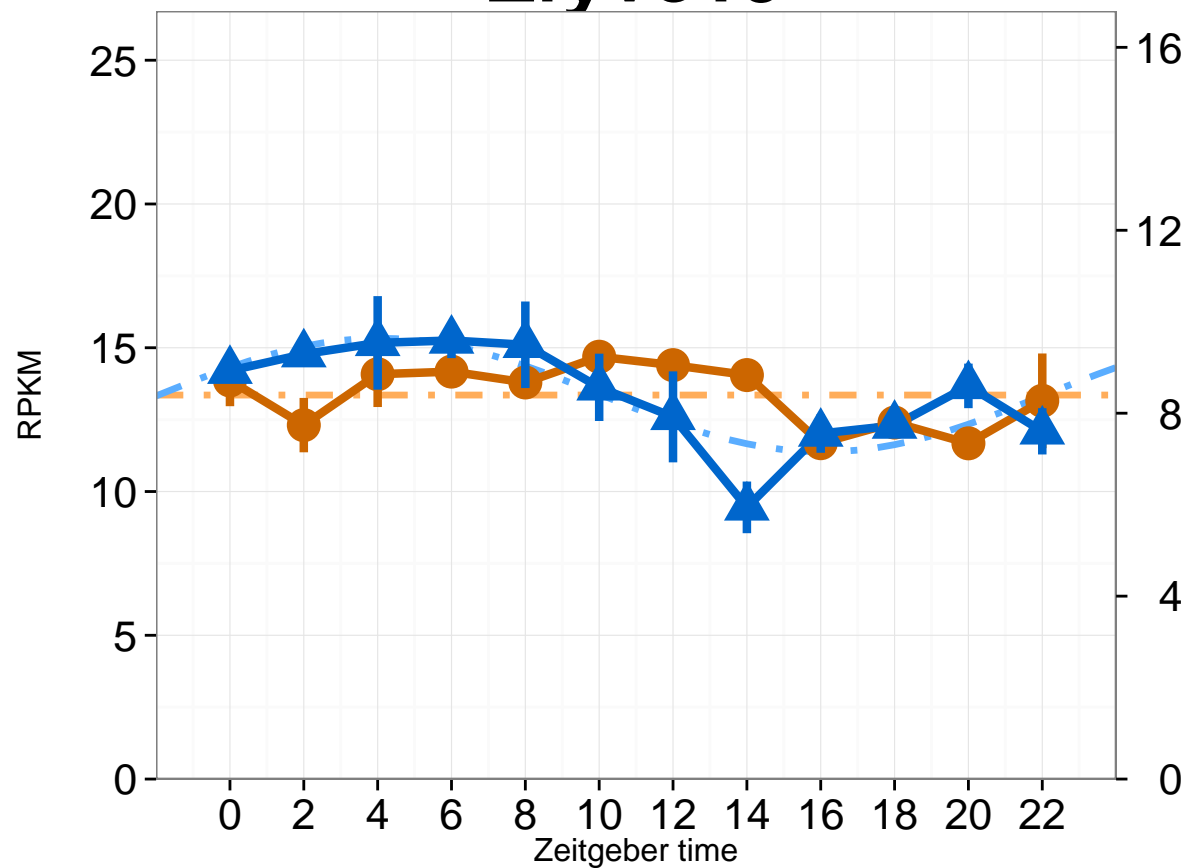

# Zfyve19

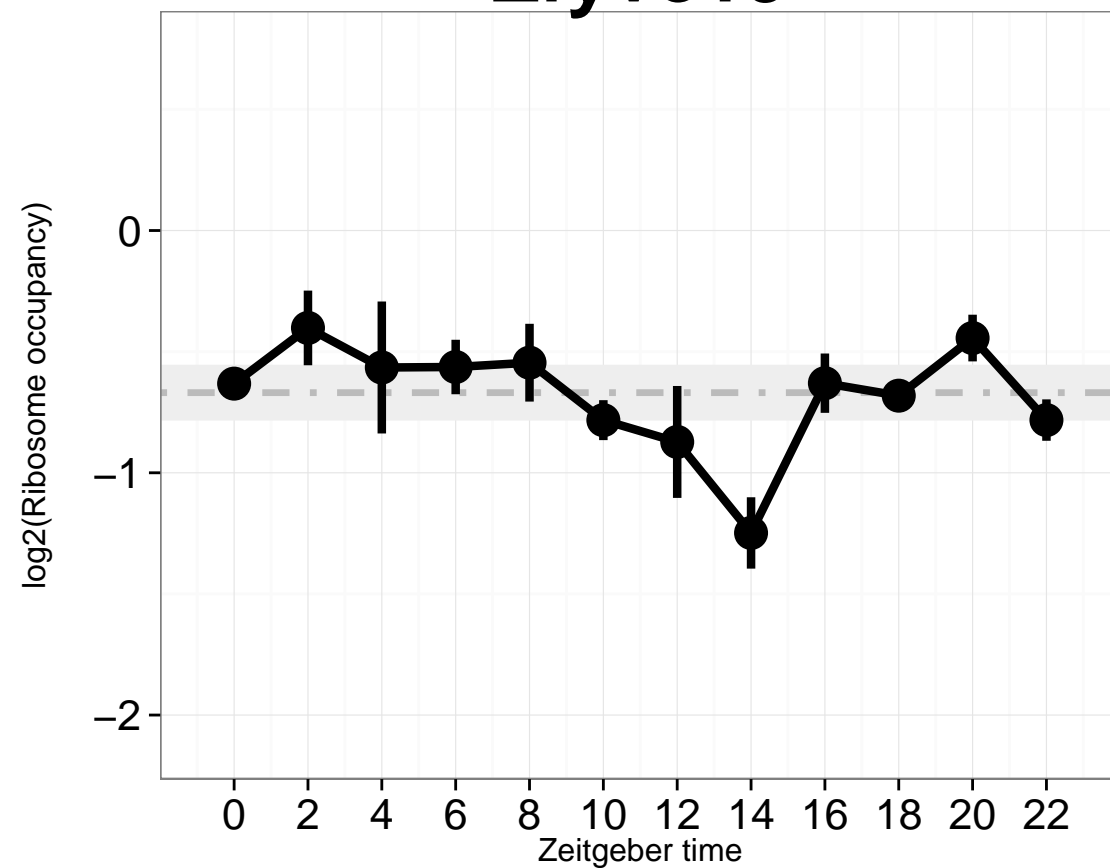

Supplement: Supplementary file 7130 [file 1]

# Nfam1

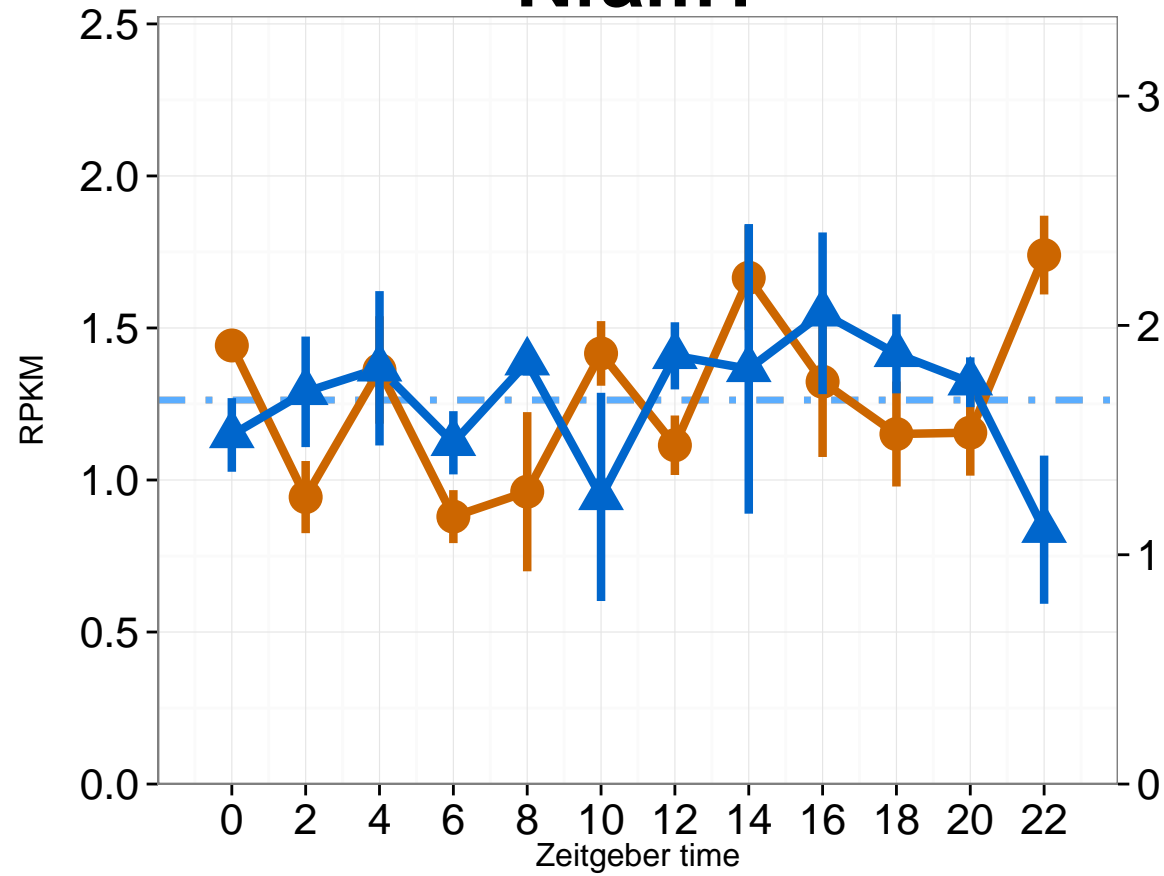

# Nfam1

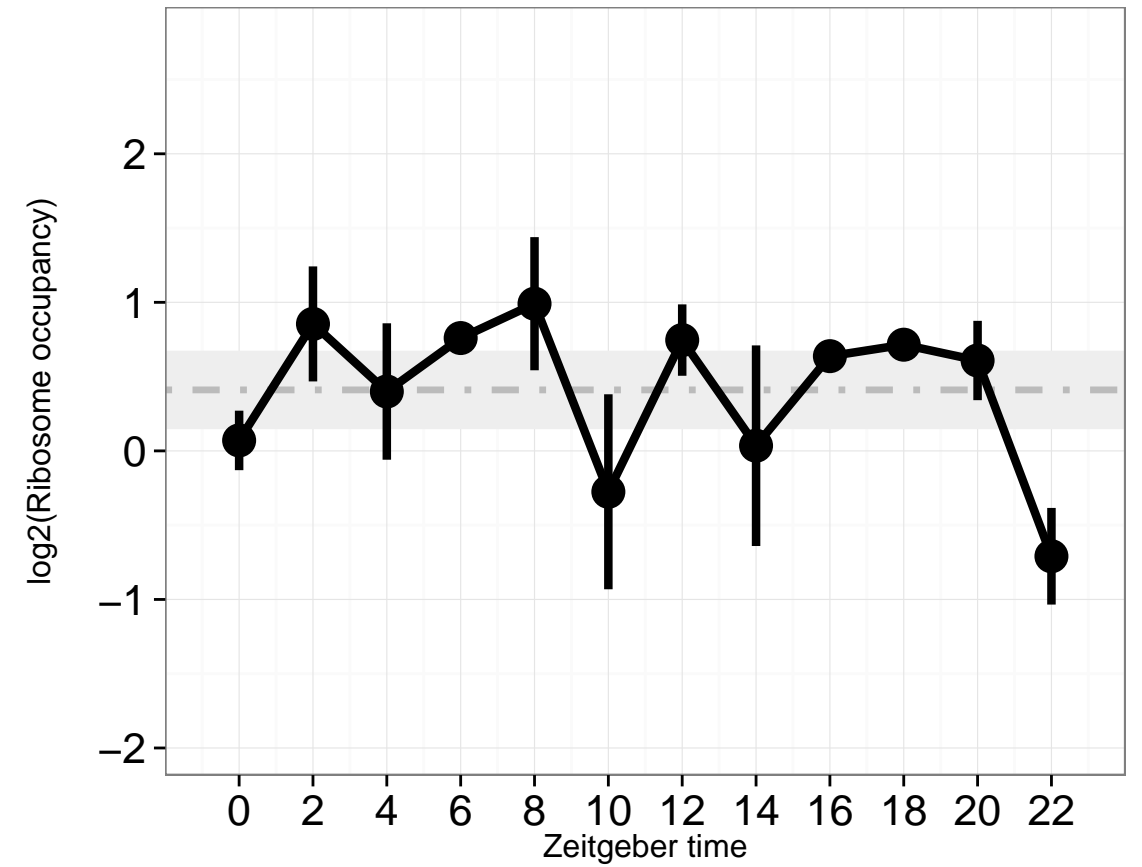

Supplement: Supplementary file 7131 [file 1]

## Slc38a3

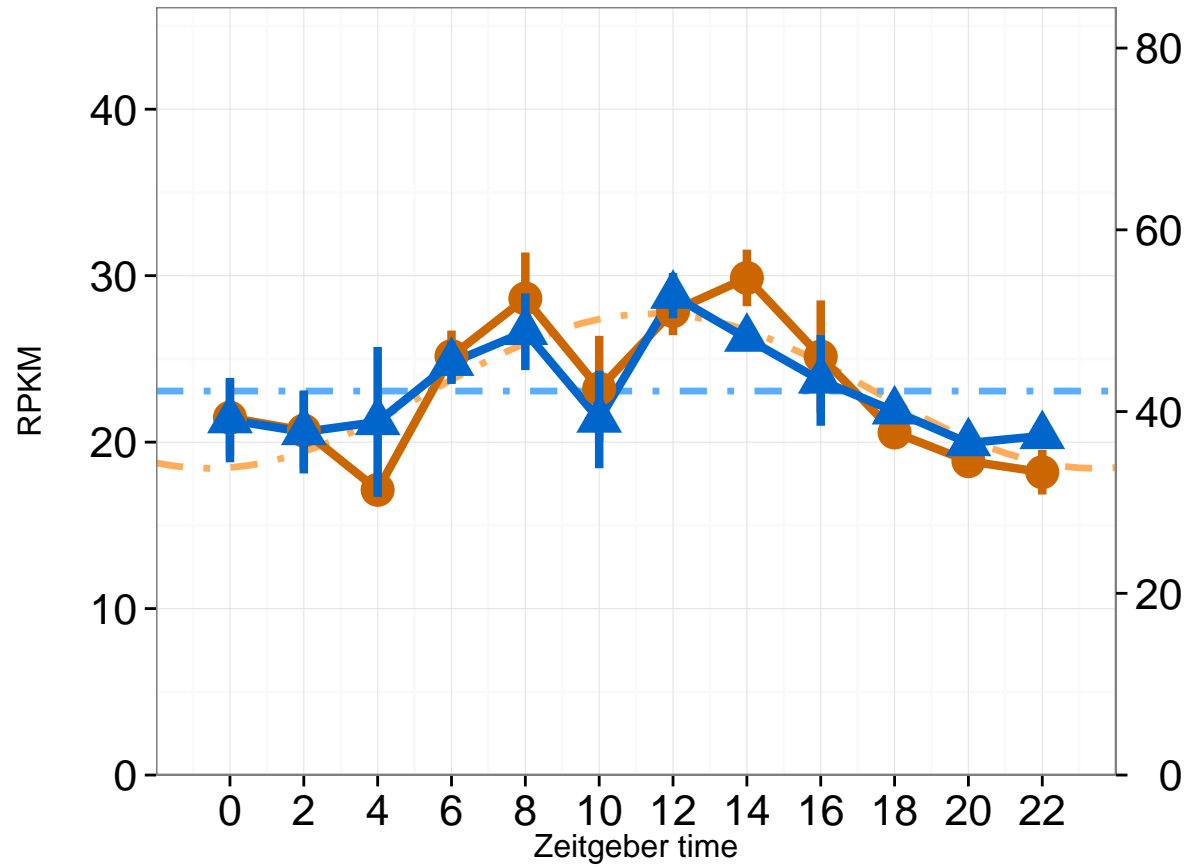

## Slc38a3

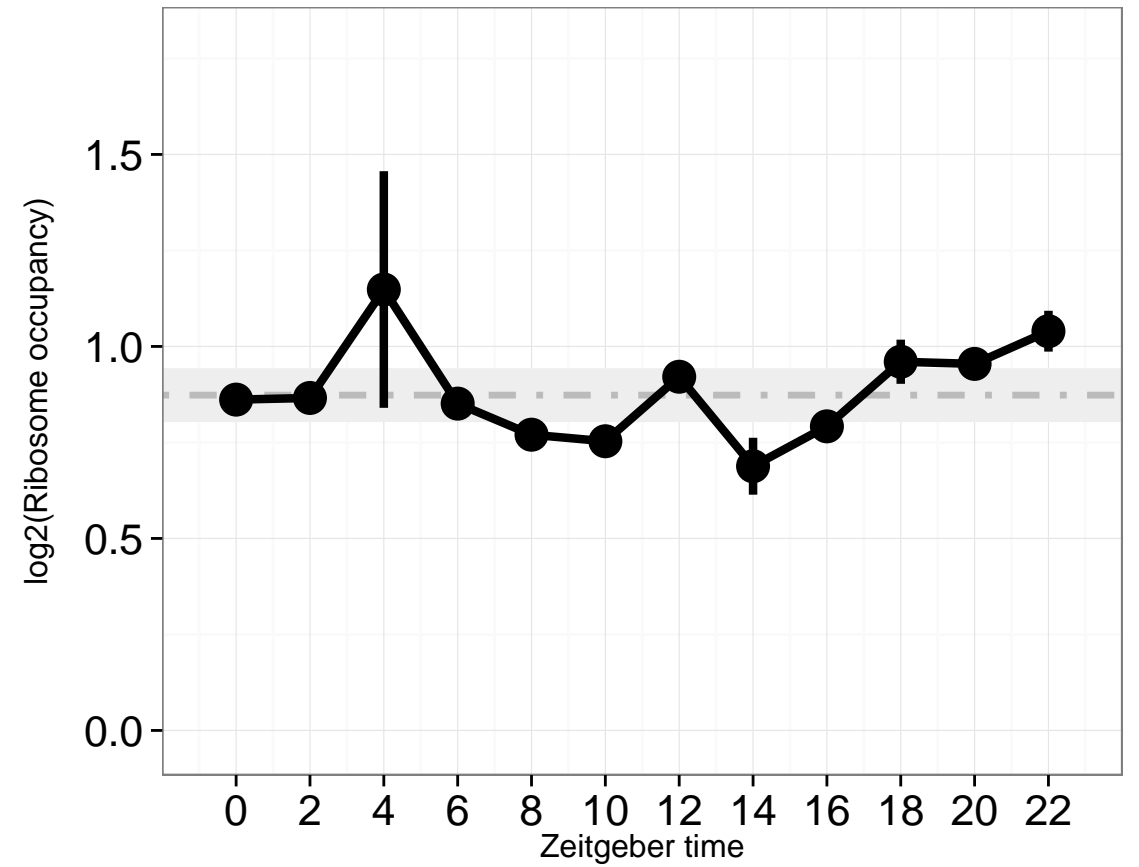

Supplement: Supplementary file 7132 [file 1]

## Ntf3

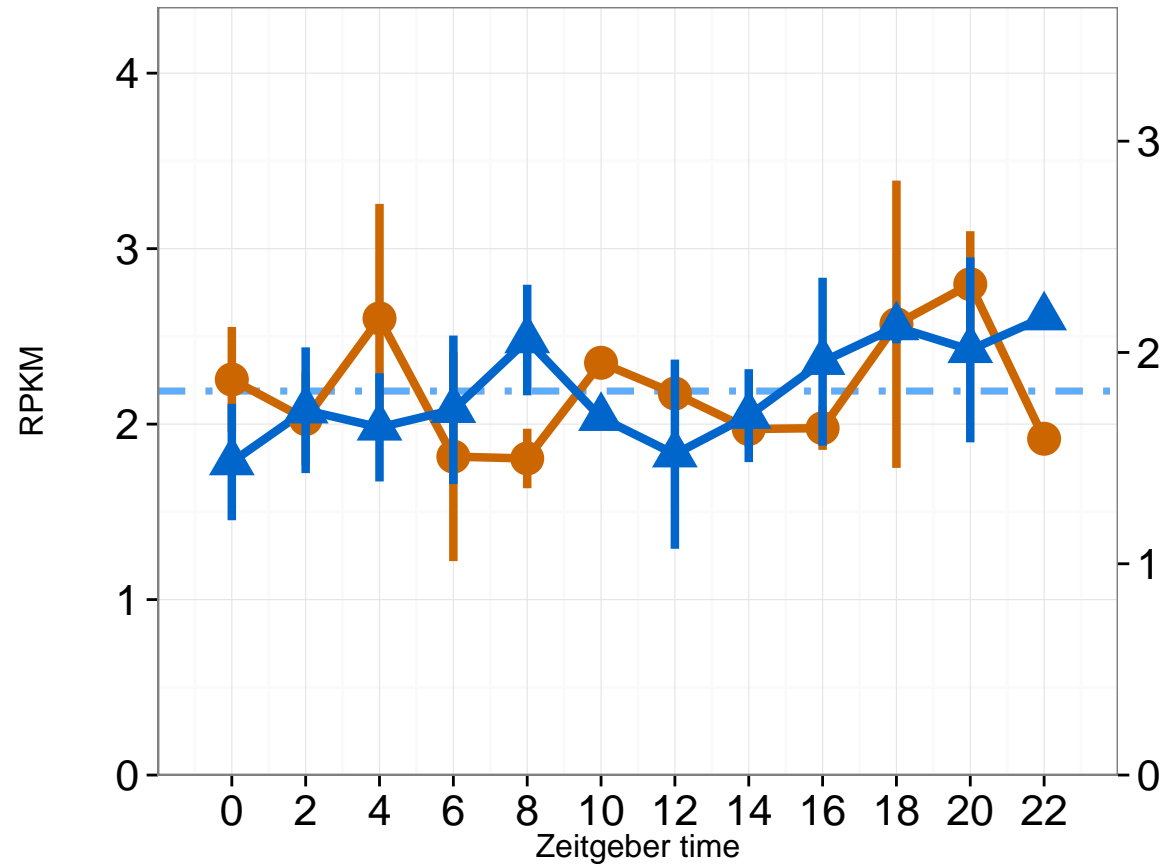

## Ntf3

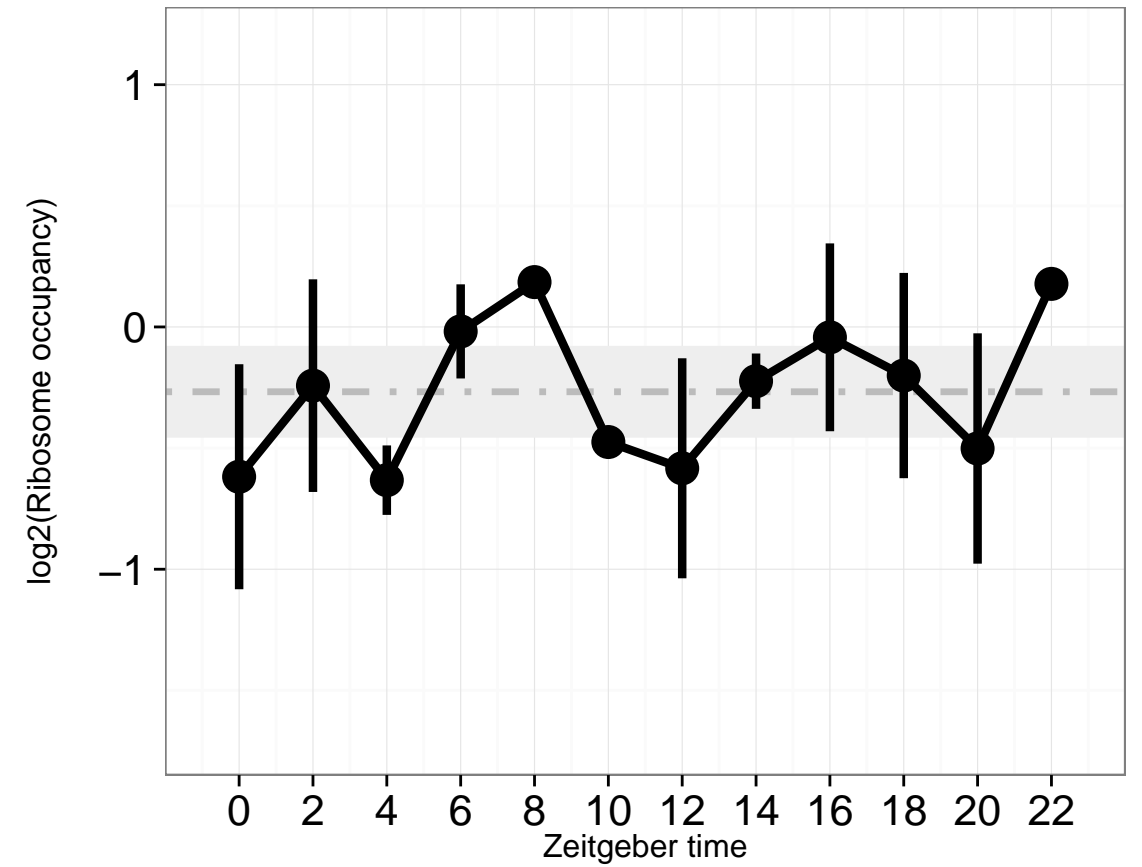

Supplement: Supplementary file 7133 [file 1]

# Glt8d2

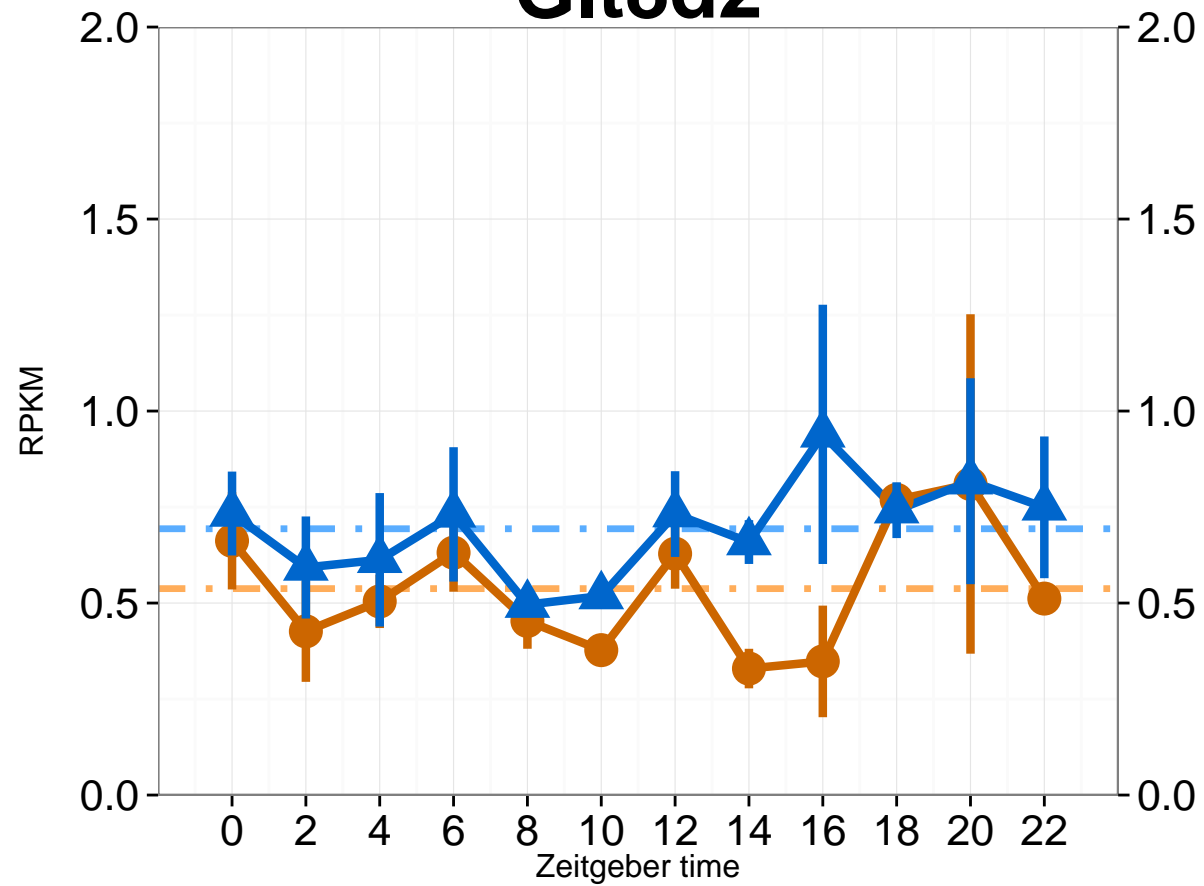

# Glt8d2

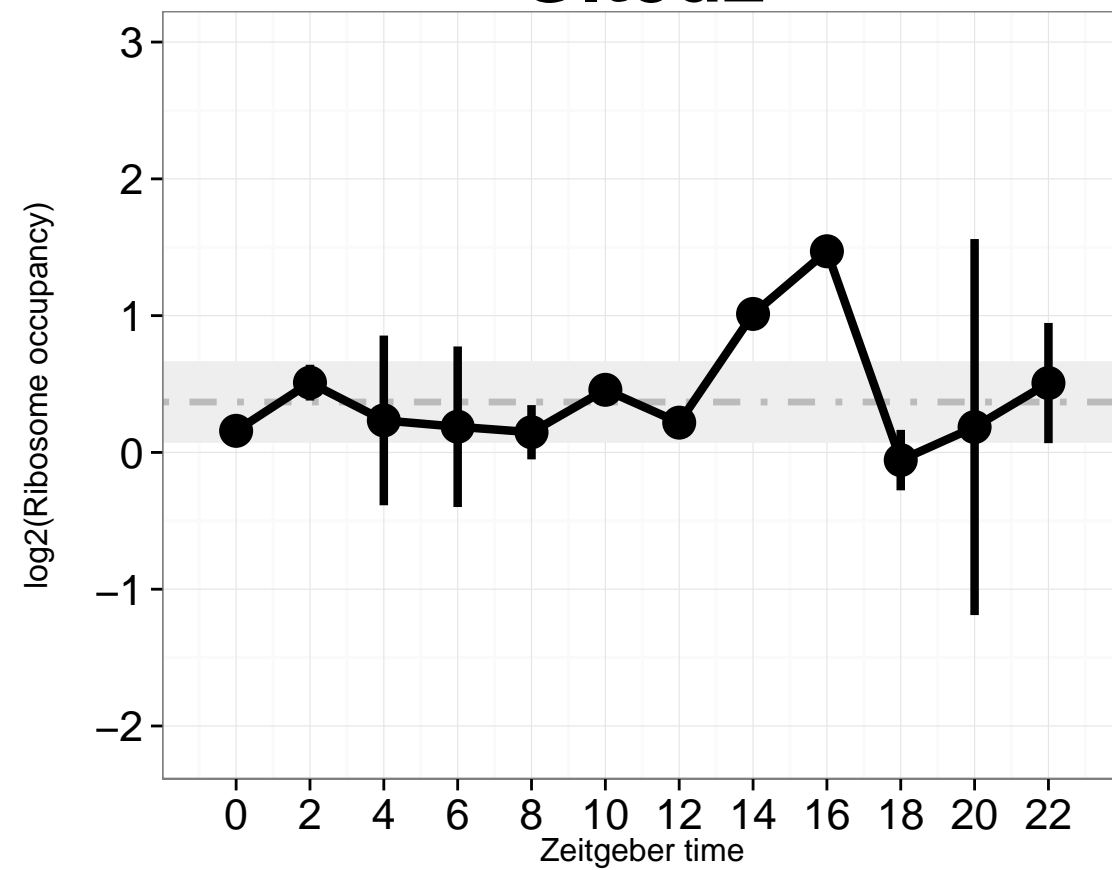

Supplement: Supplementary file 7134 [file 1]

# Fbxw5

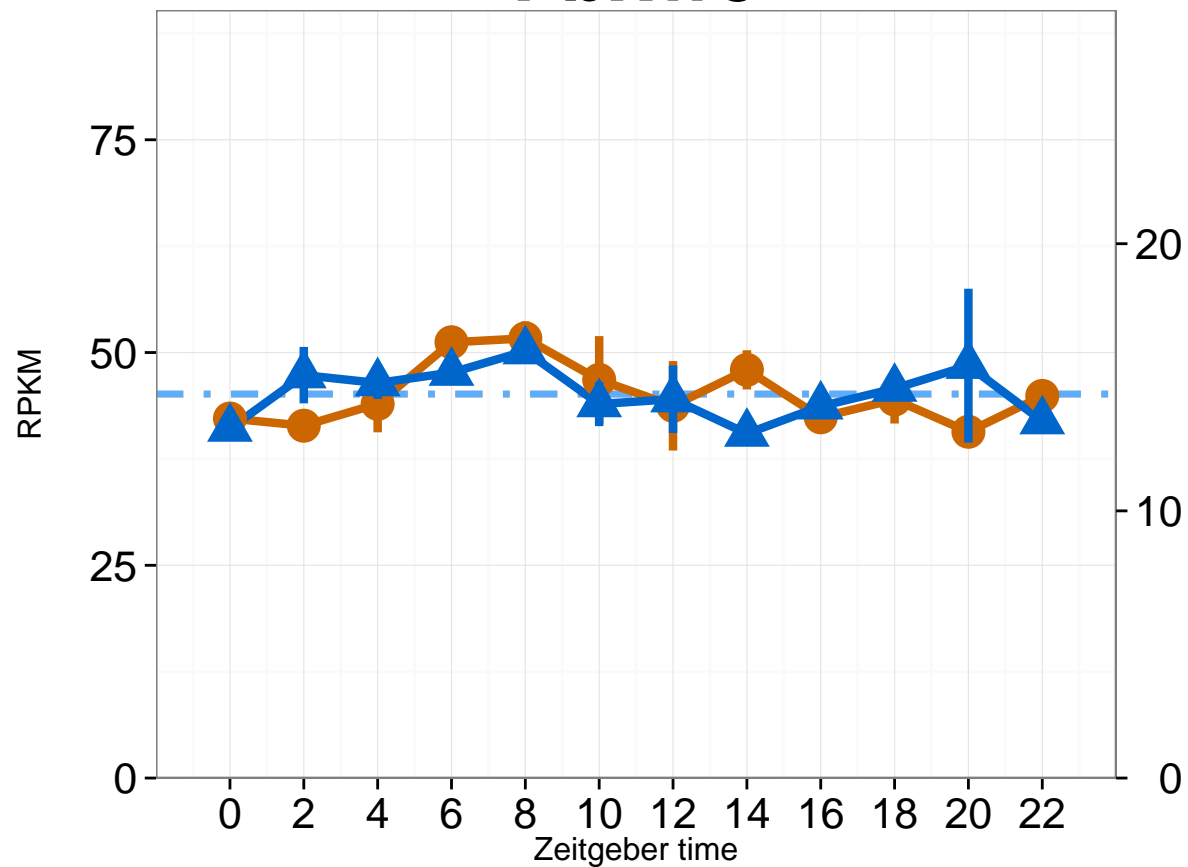

# Fbxw5

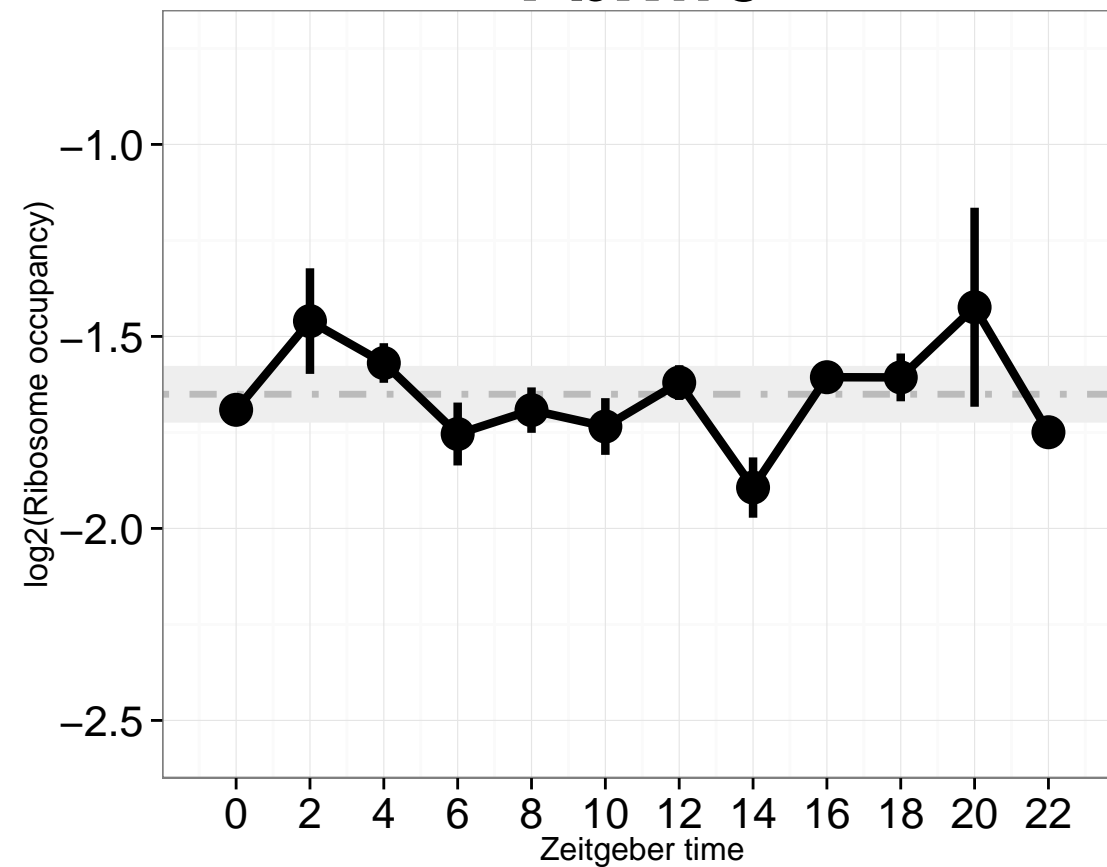

Supplement: Supplementary file 7135 [file 1]

## Ano10

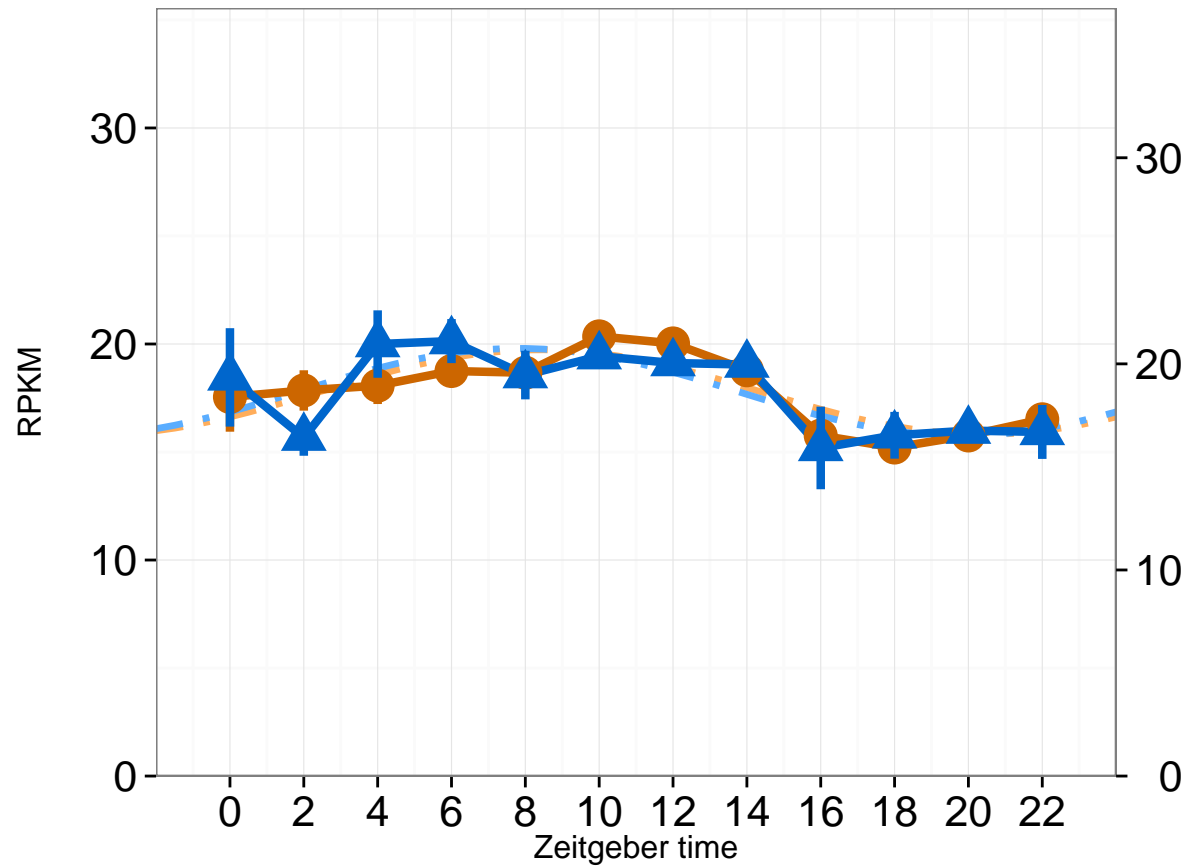

## Ano10

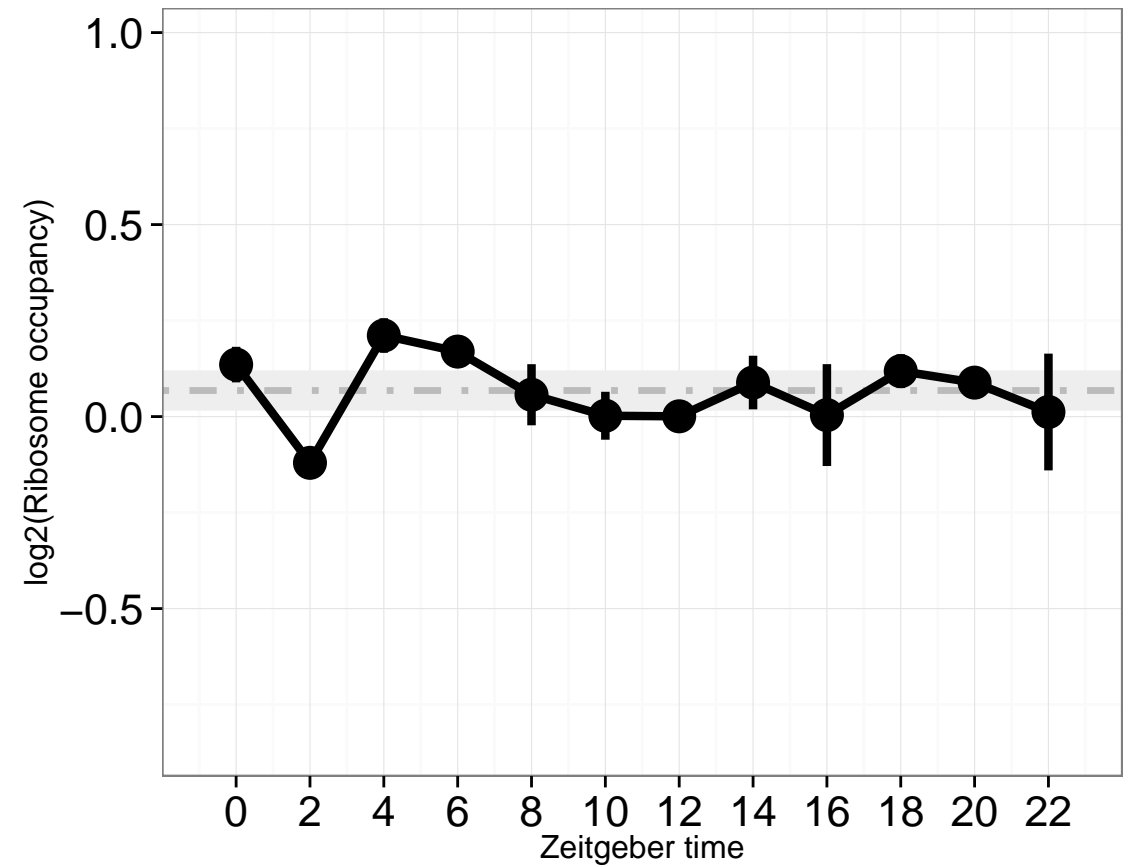

Supplement: Supplementary file 7136 [file 1]

## Wdr60

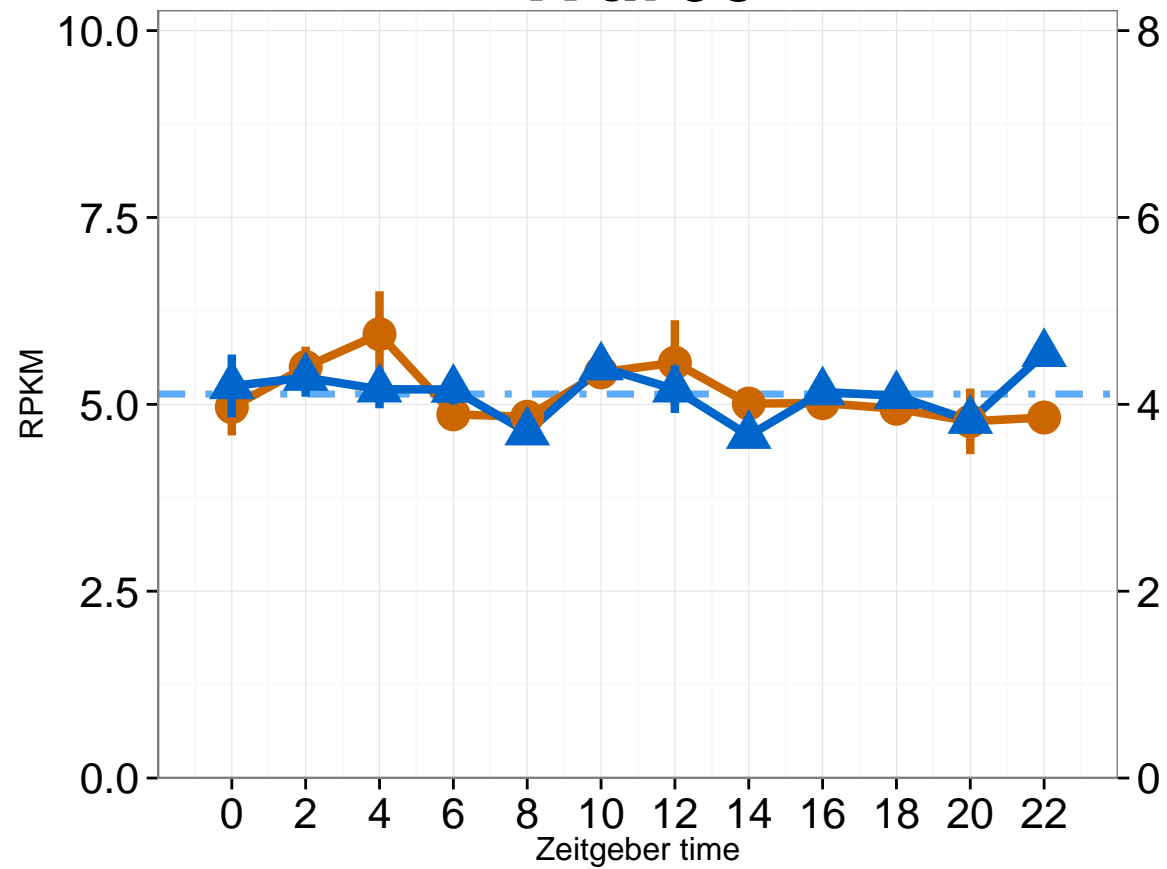

## Wdr60

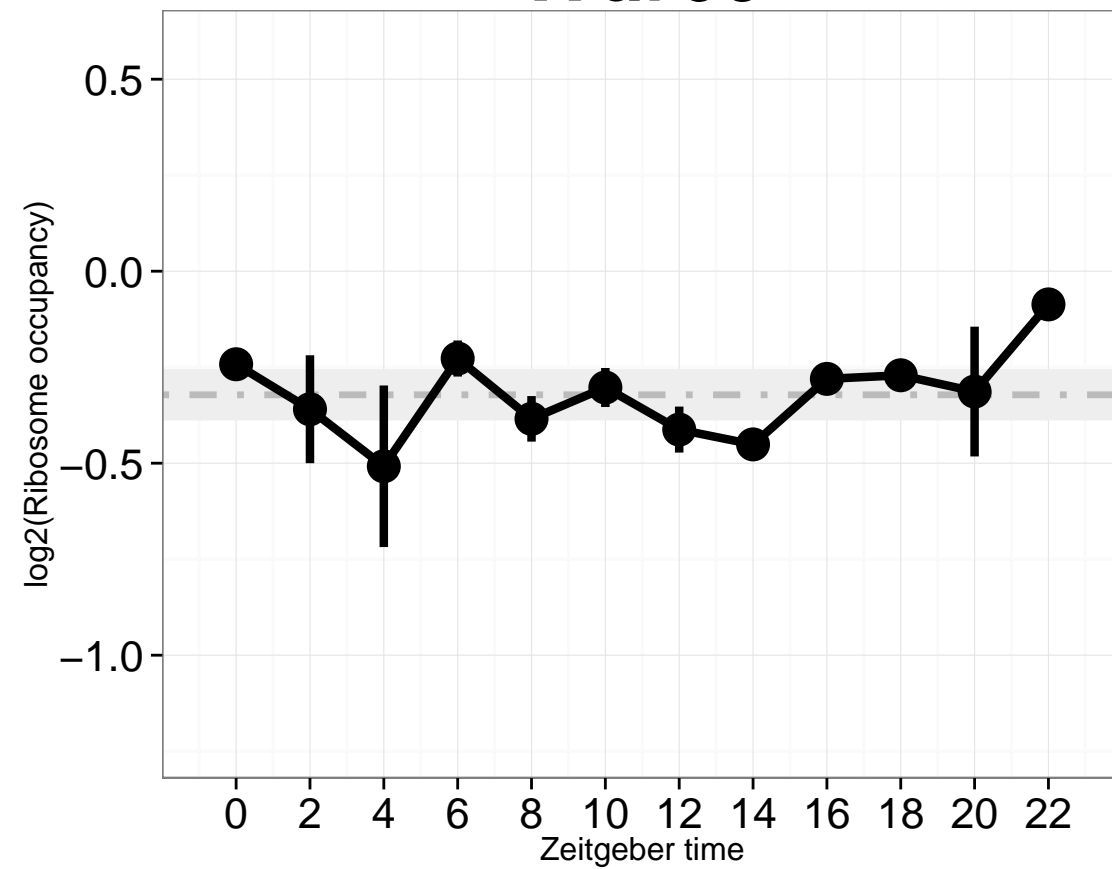

Supplement: Supplementary file 7137 [file 1]

## Ankrd45

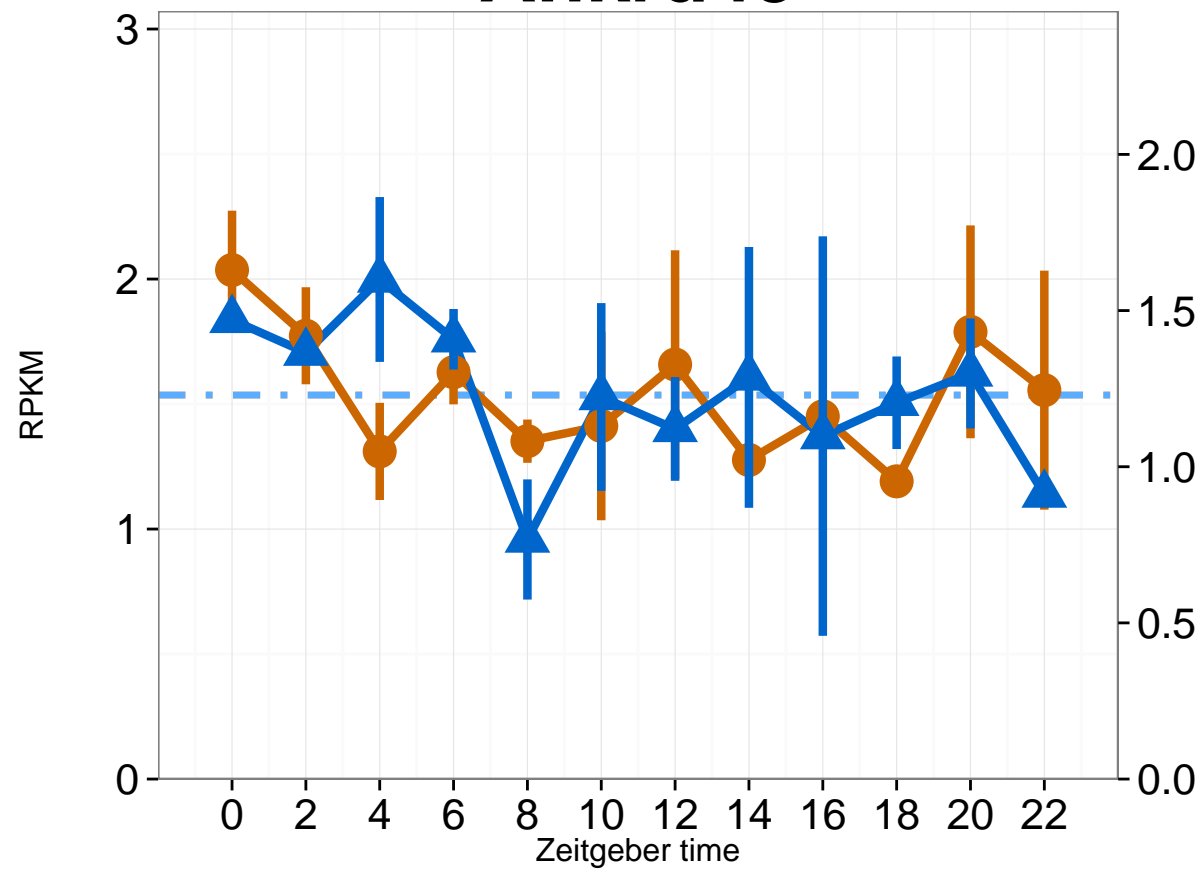

## Ankrd45

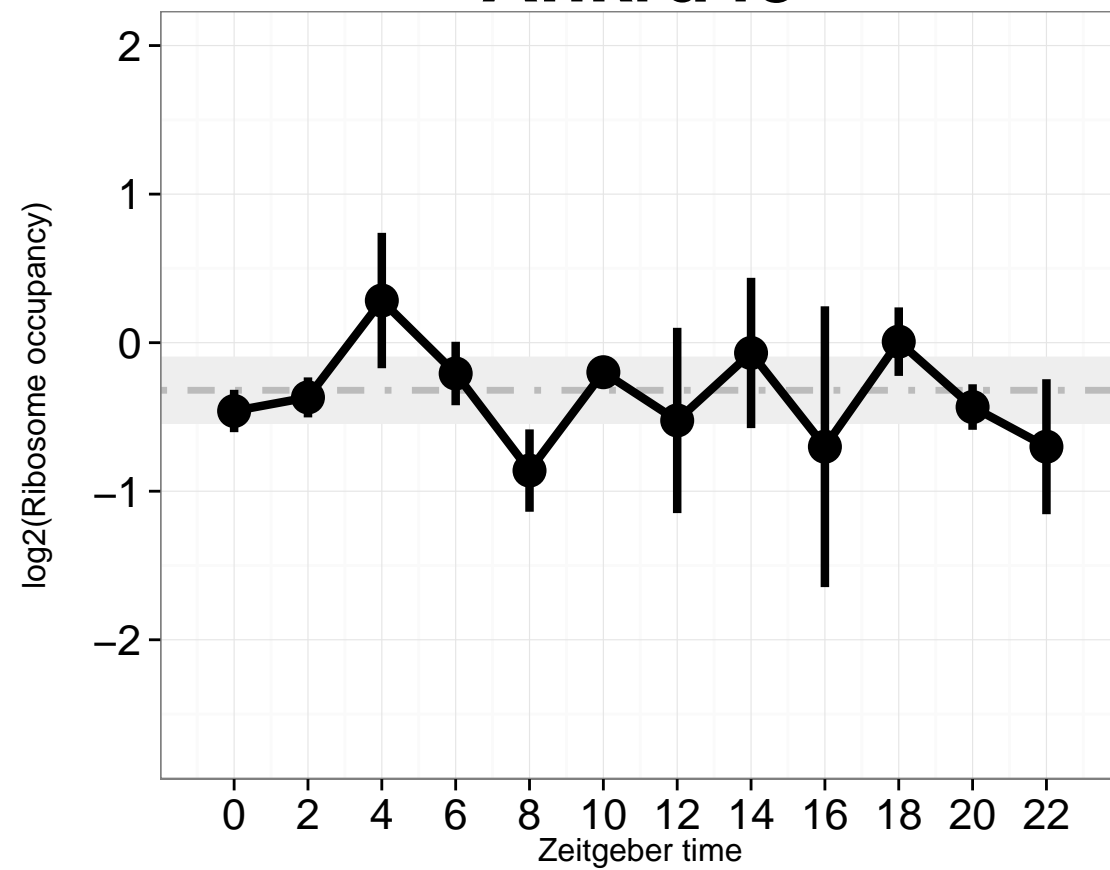

Supplement: Supplementary file 7138 [file 1]

## Nap1I5

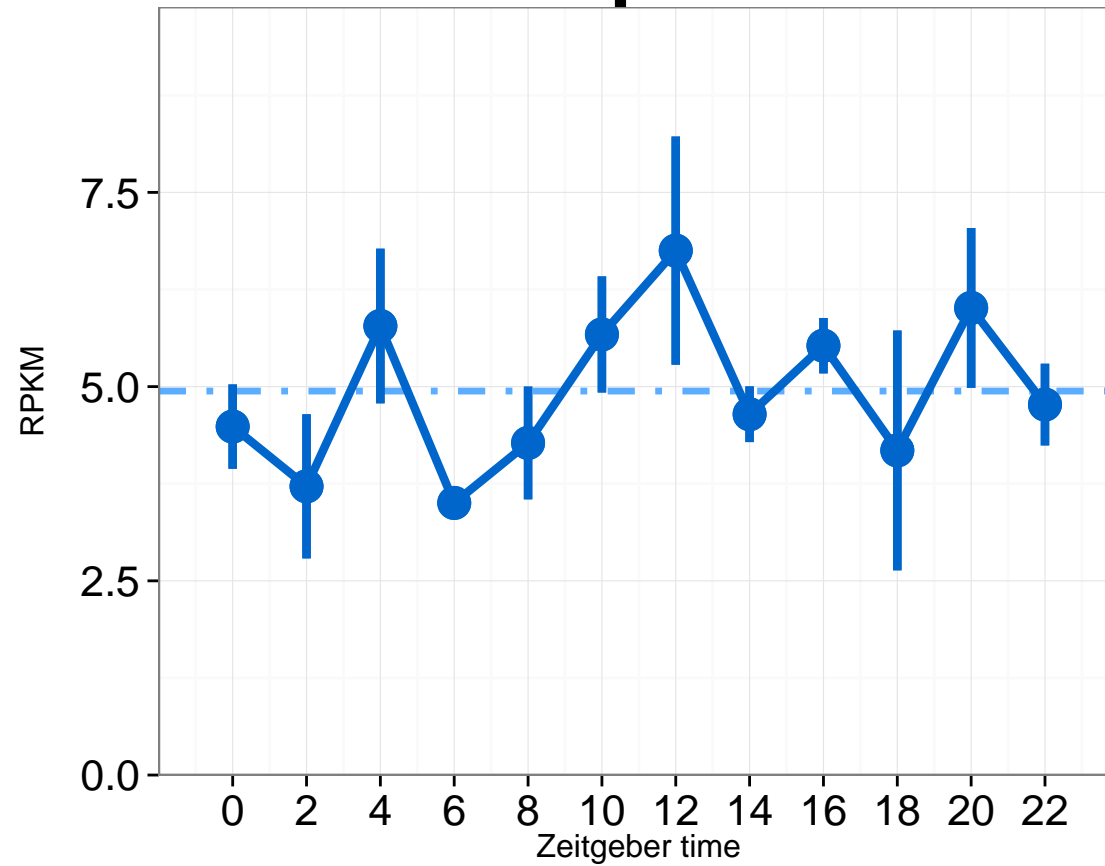

## Nap1I5 log2(Ribosome occupancy

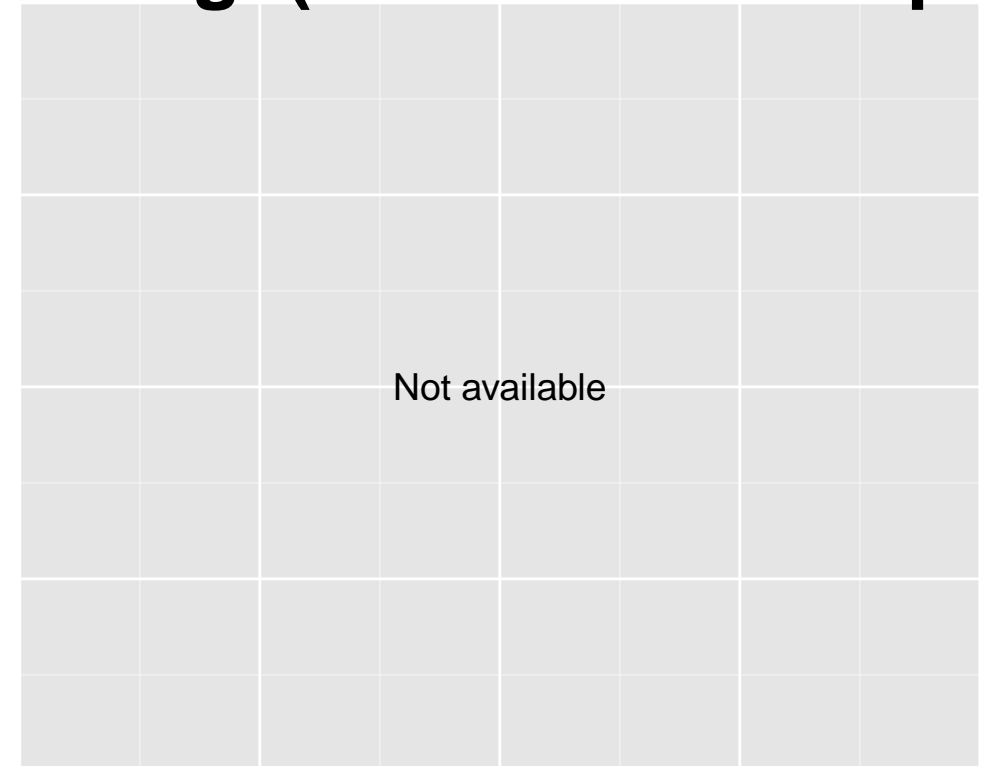

Supplement: Supplementary file 7139 [file 1]

## Filip1l

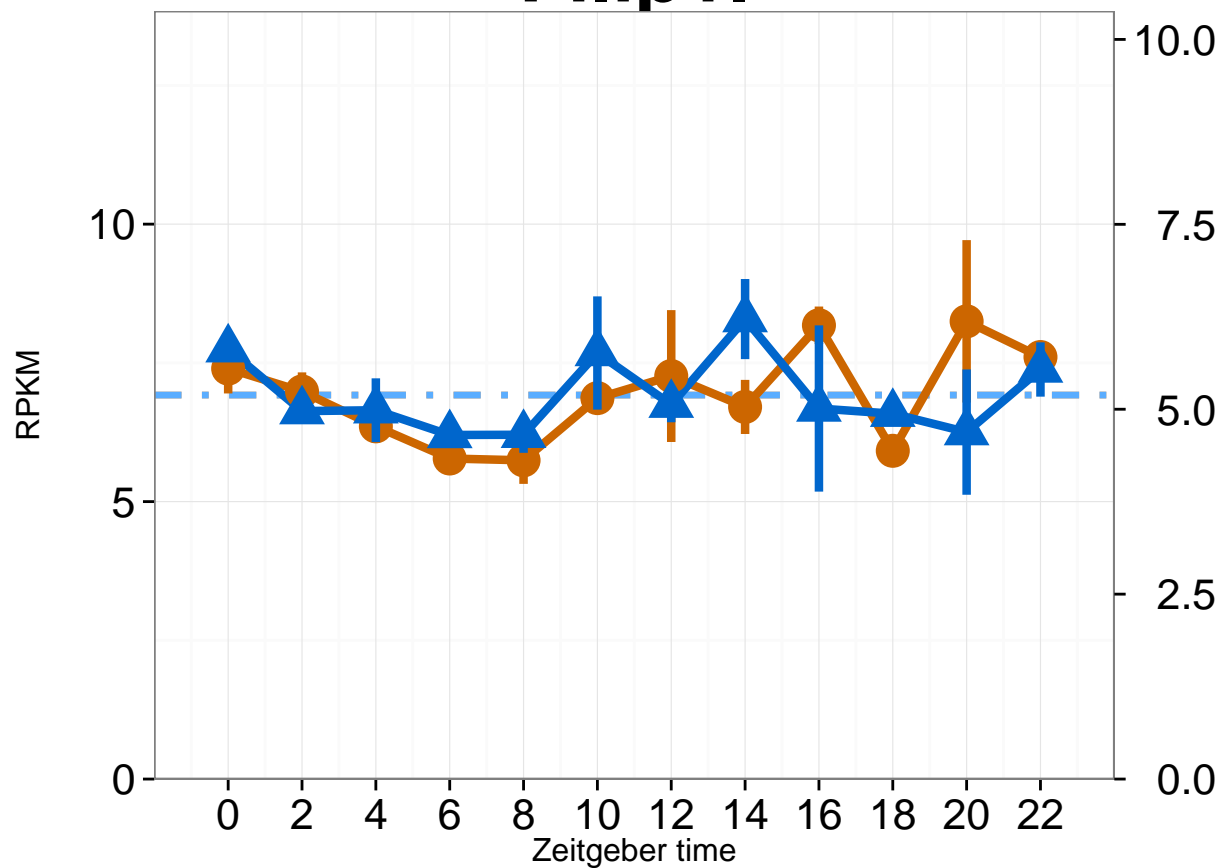

## Filip1l

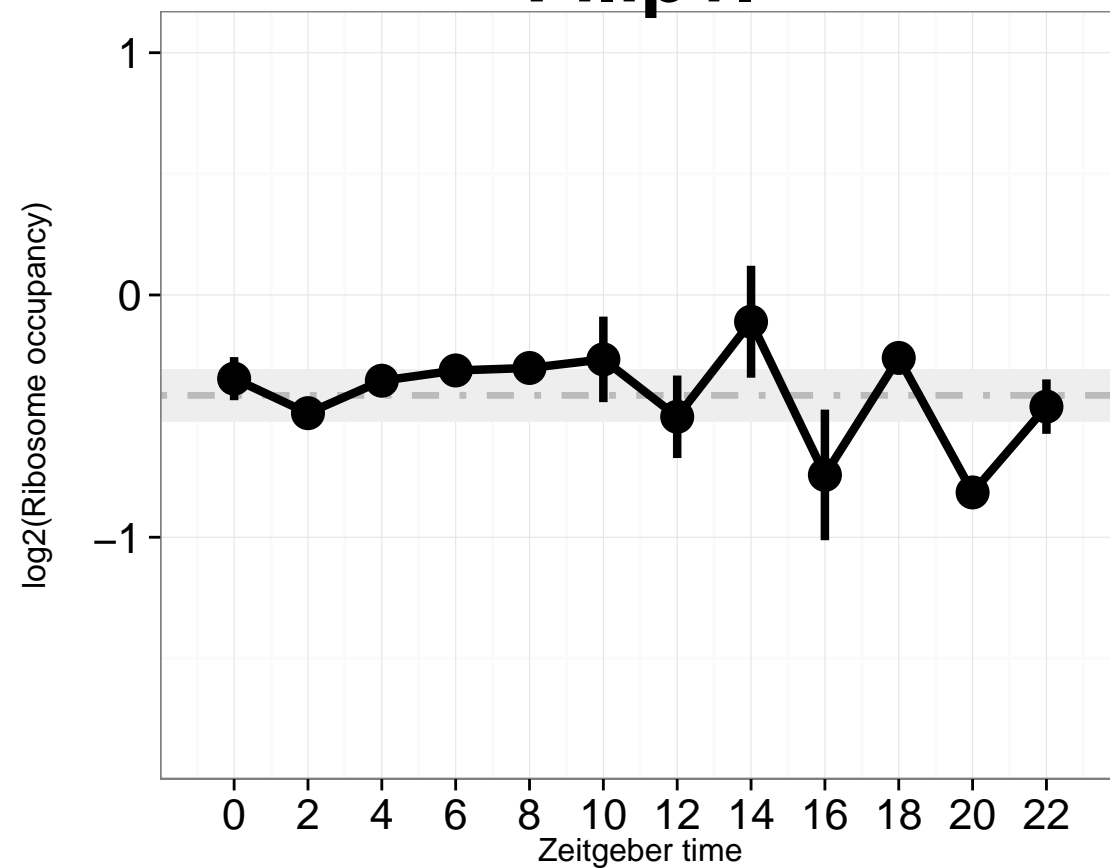

Supplement: Supplementary file 7140 [file 1]

## Golph3l

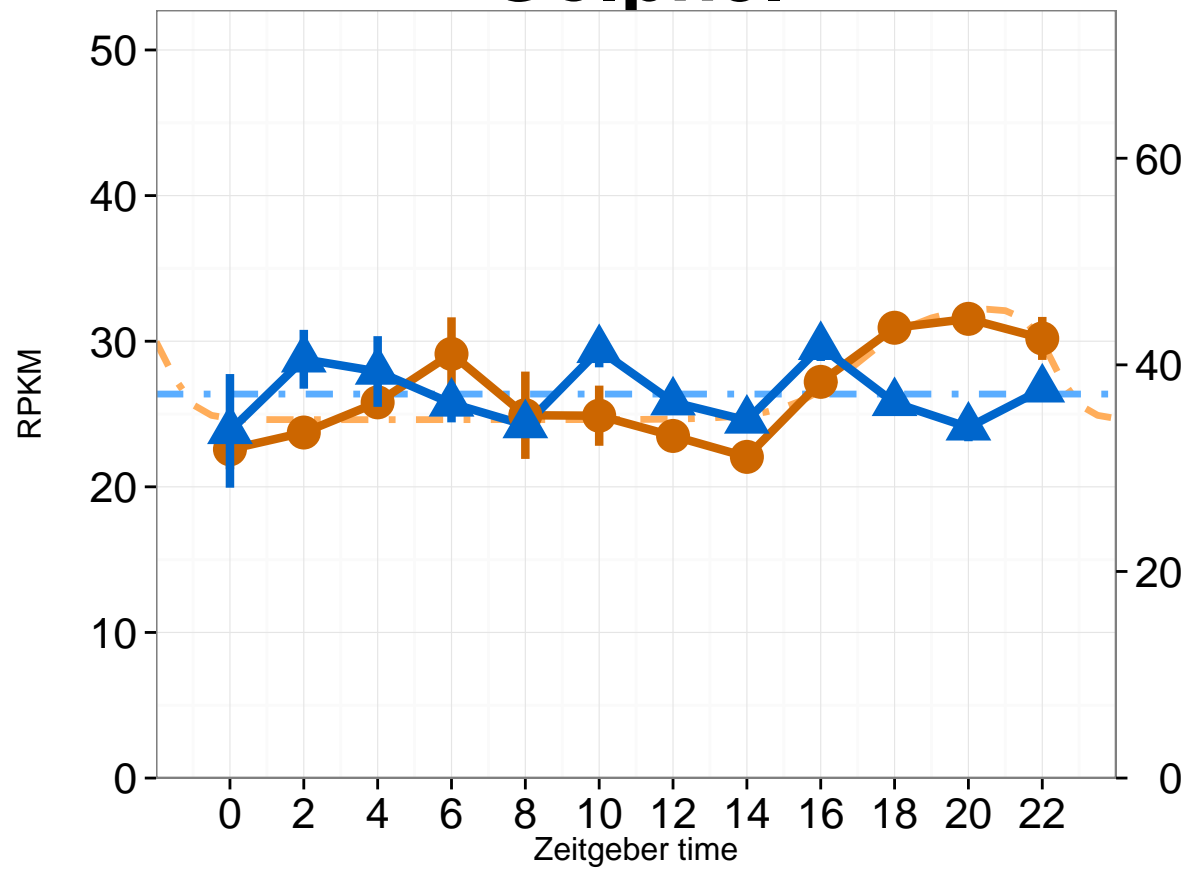

## Golph3l

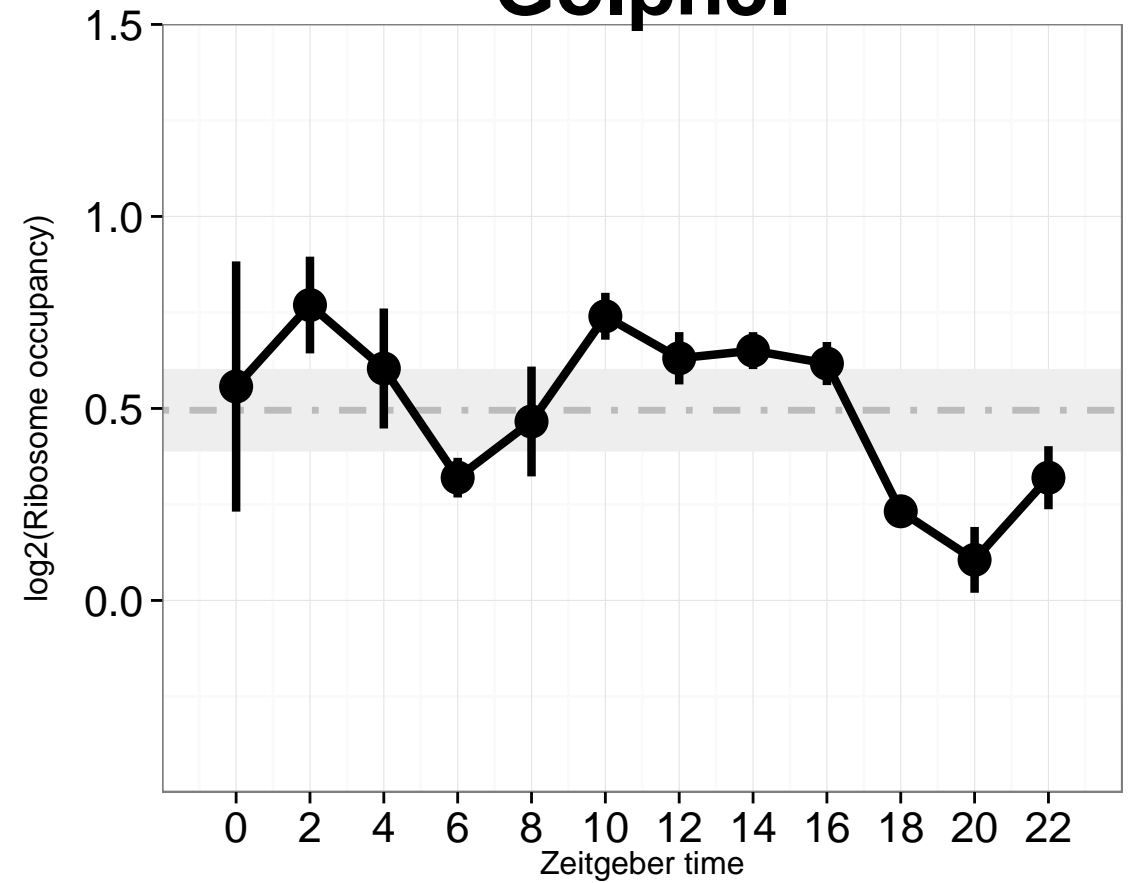

Supplement: Supplementary file 7141 [file 1]

## Hmgb3

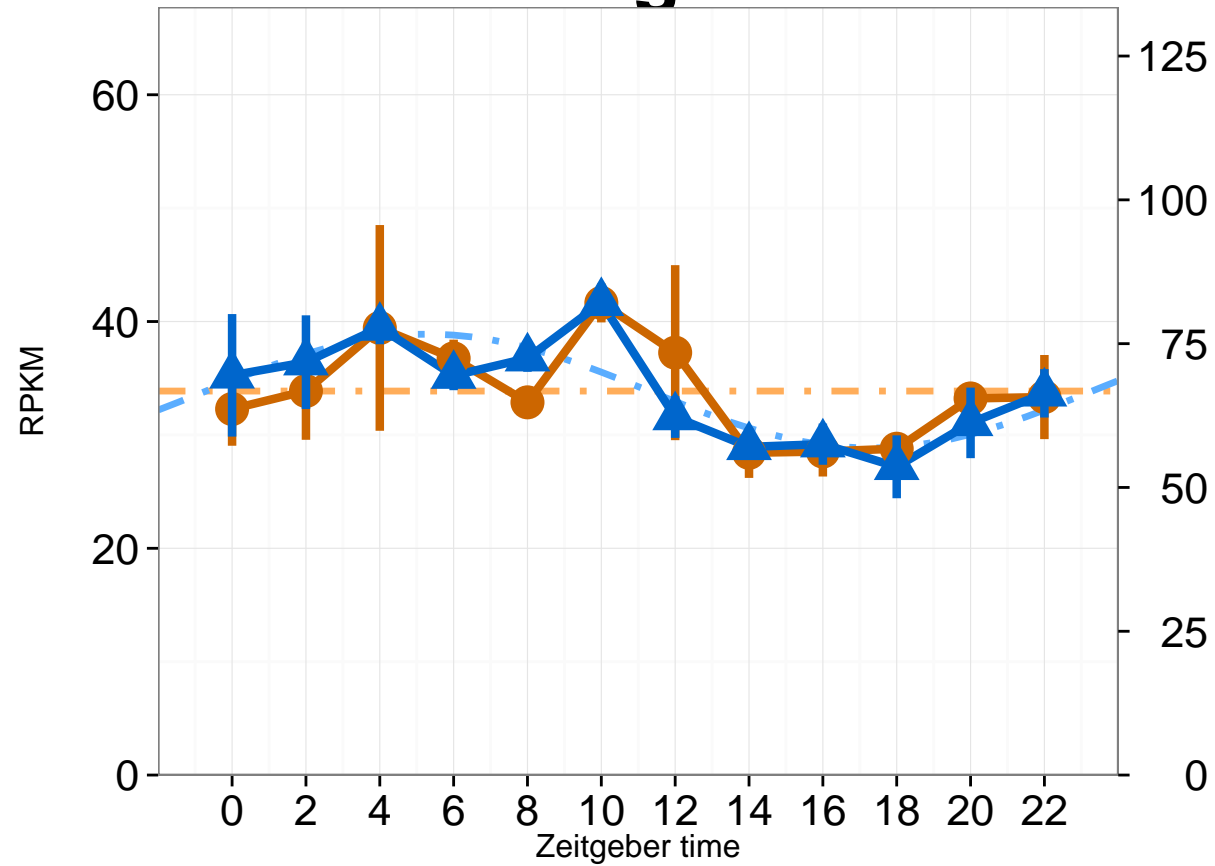

## Hmgb3

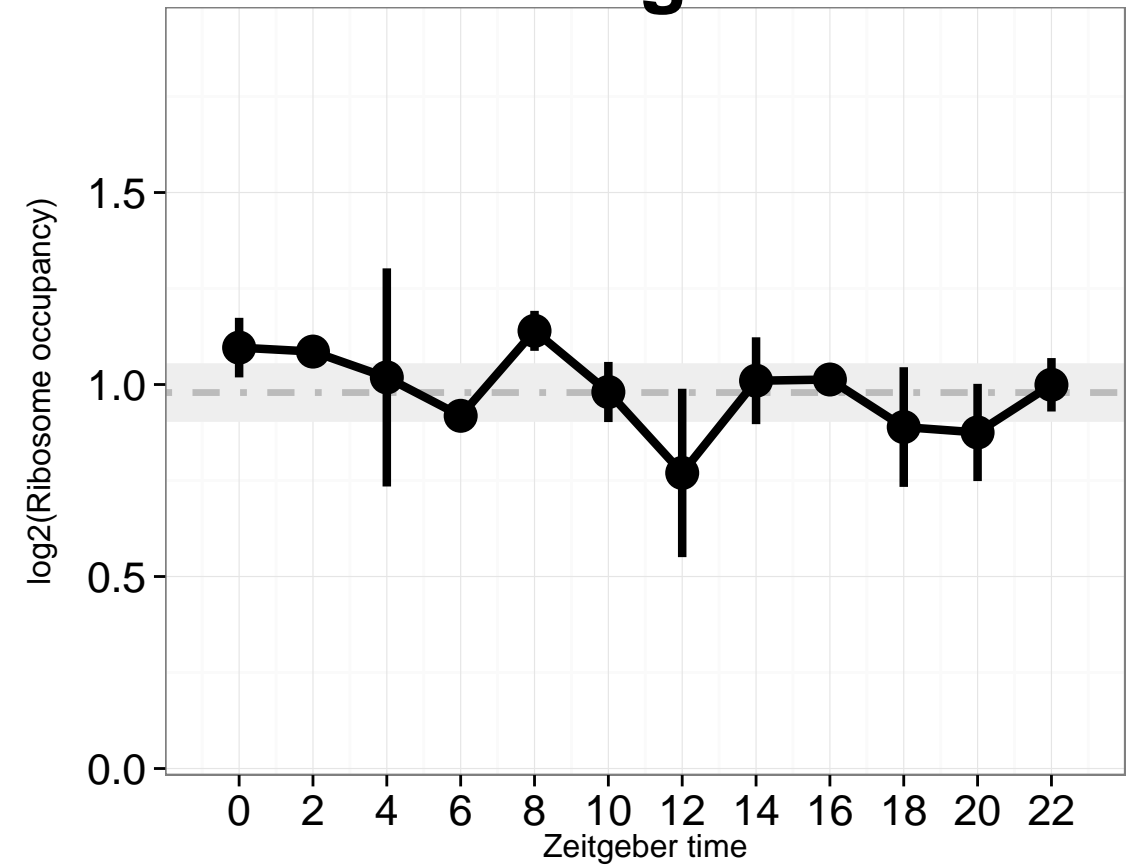

Supplement: Supplementary file 7142 [file 1]

# Gpm6a

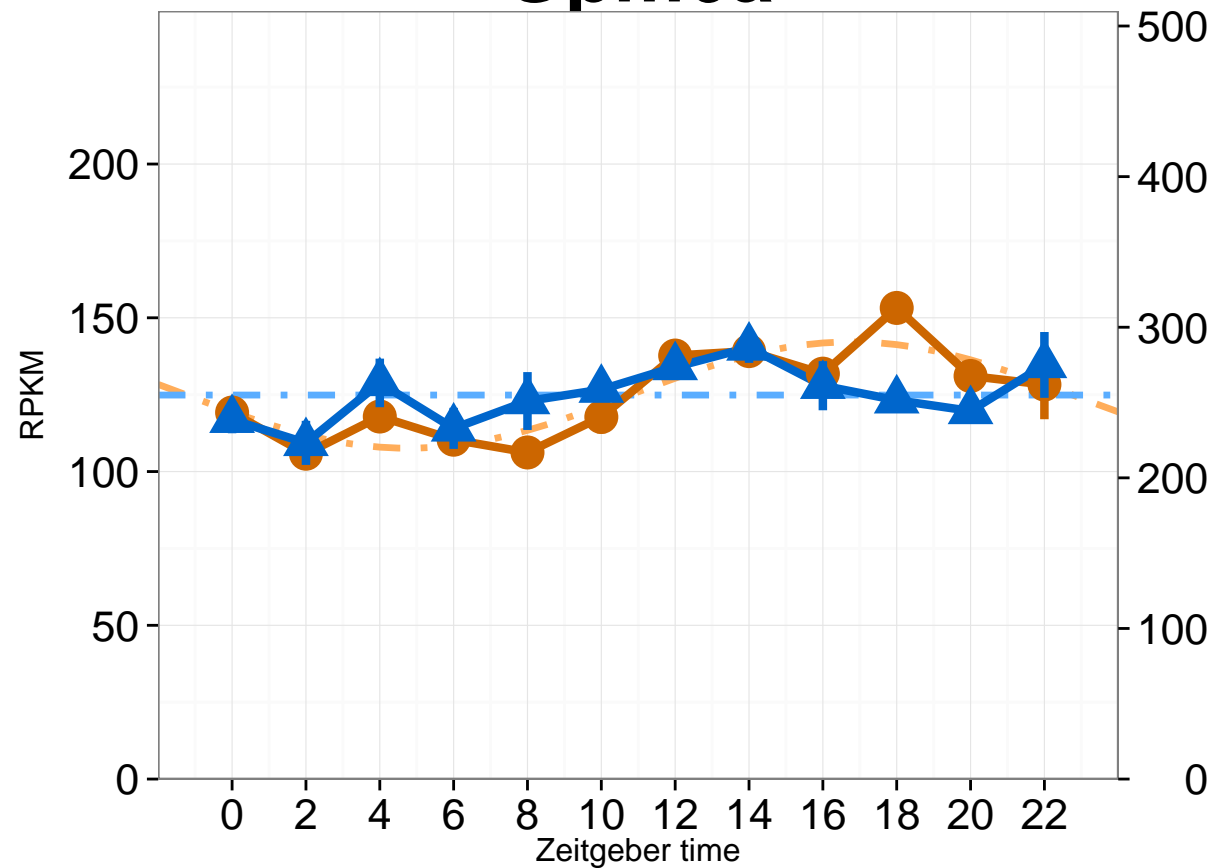

# Gpm6a

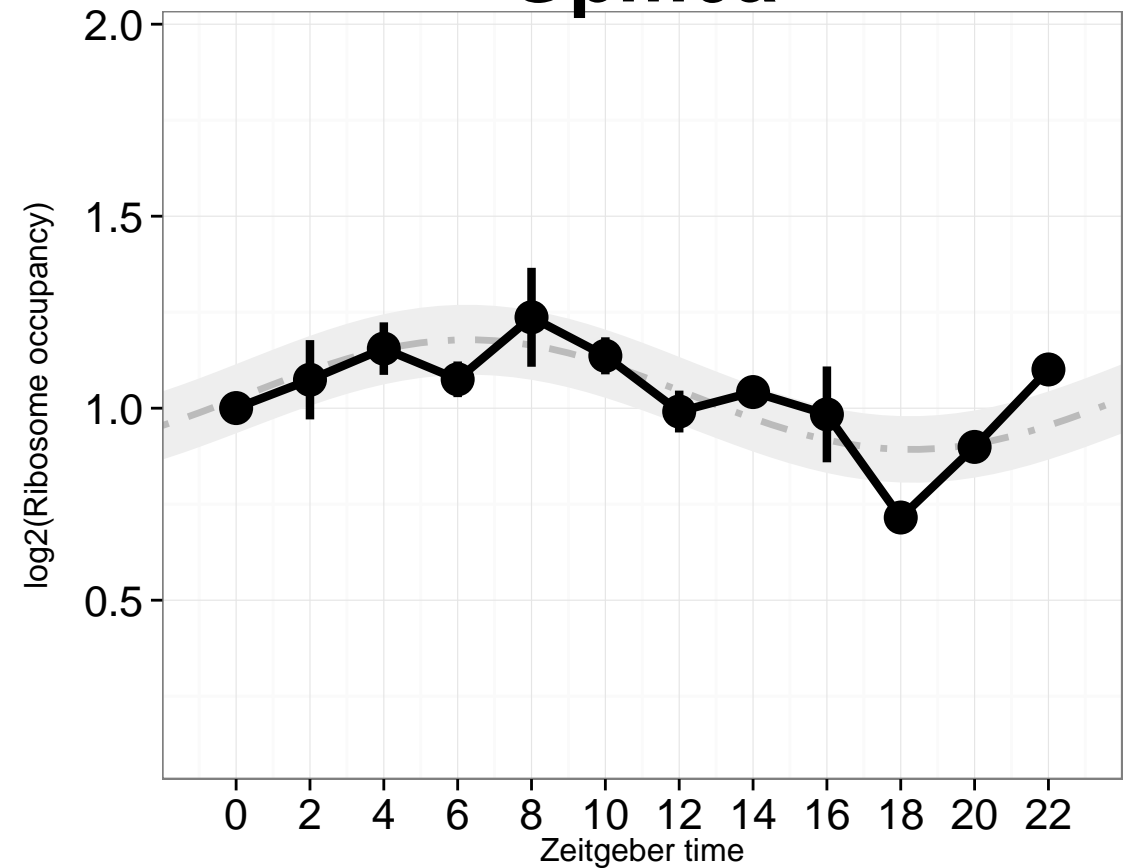

Supplement: Supplementary file 7143 [file 1]

Scamp5

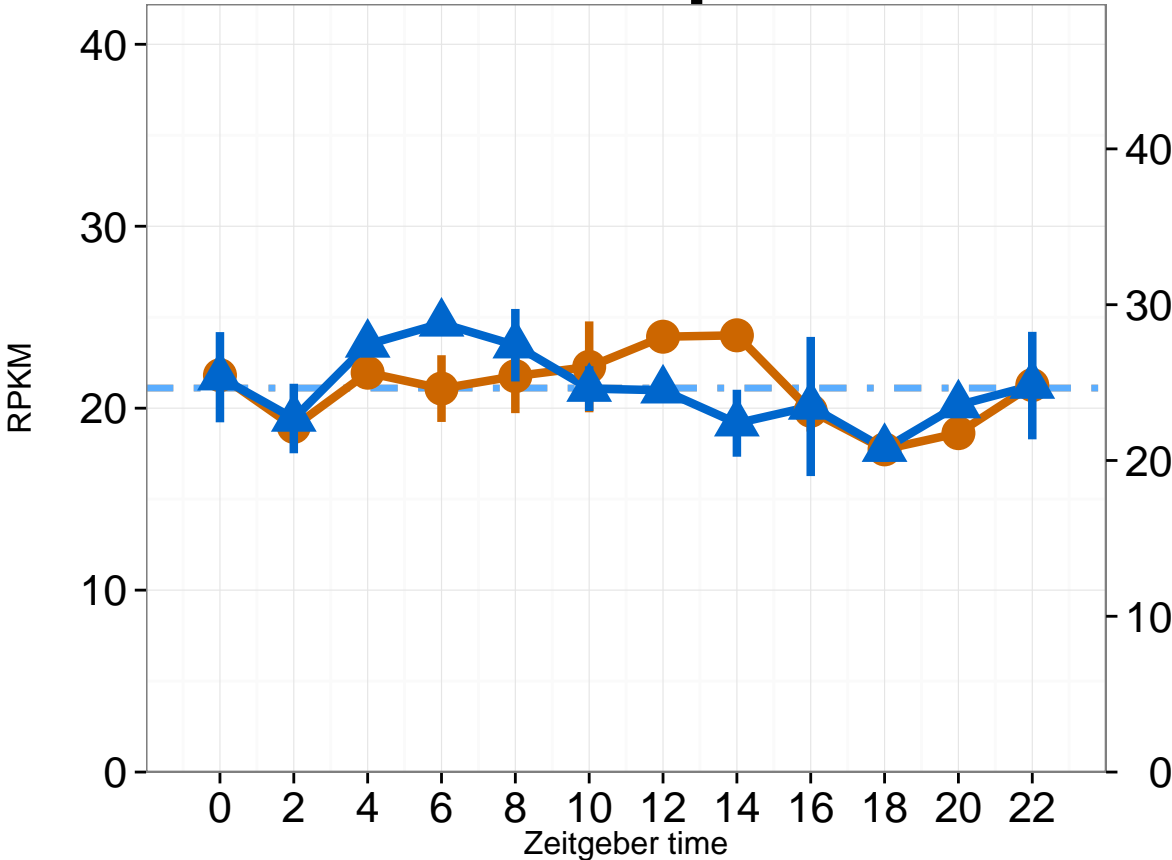

Scamp5

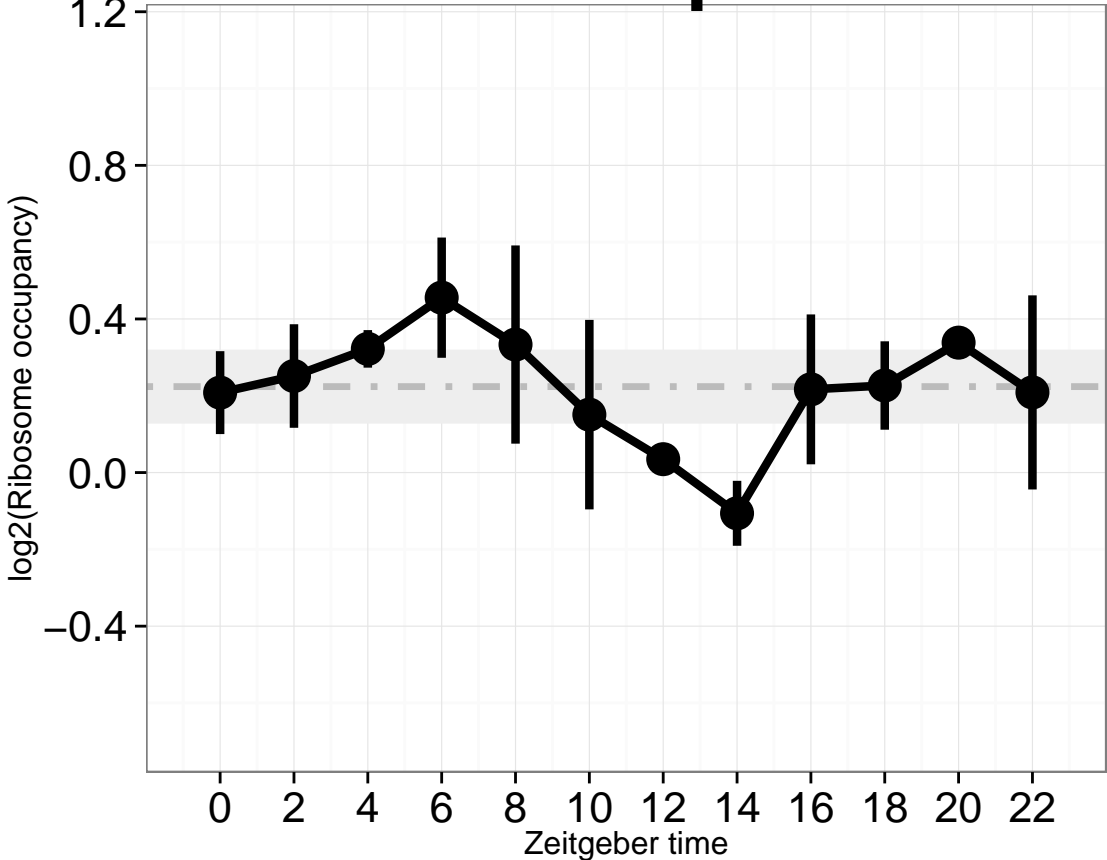

Supplement: Supplementary file 7144 [file 1]

## Med22

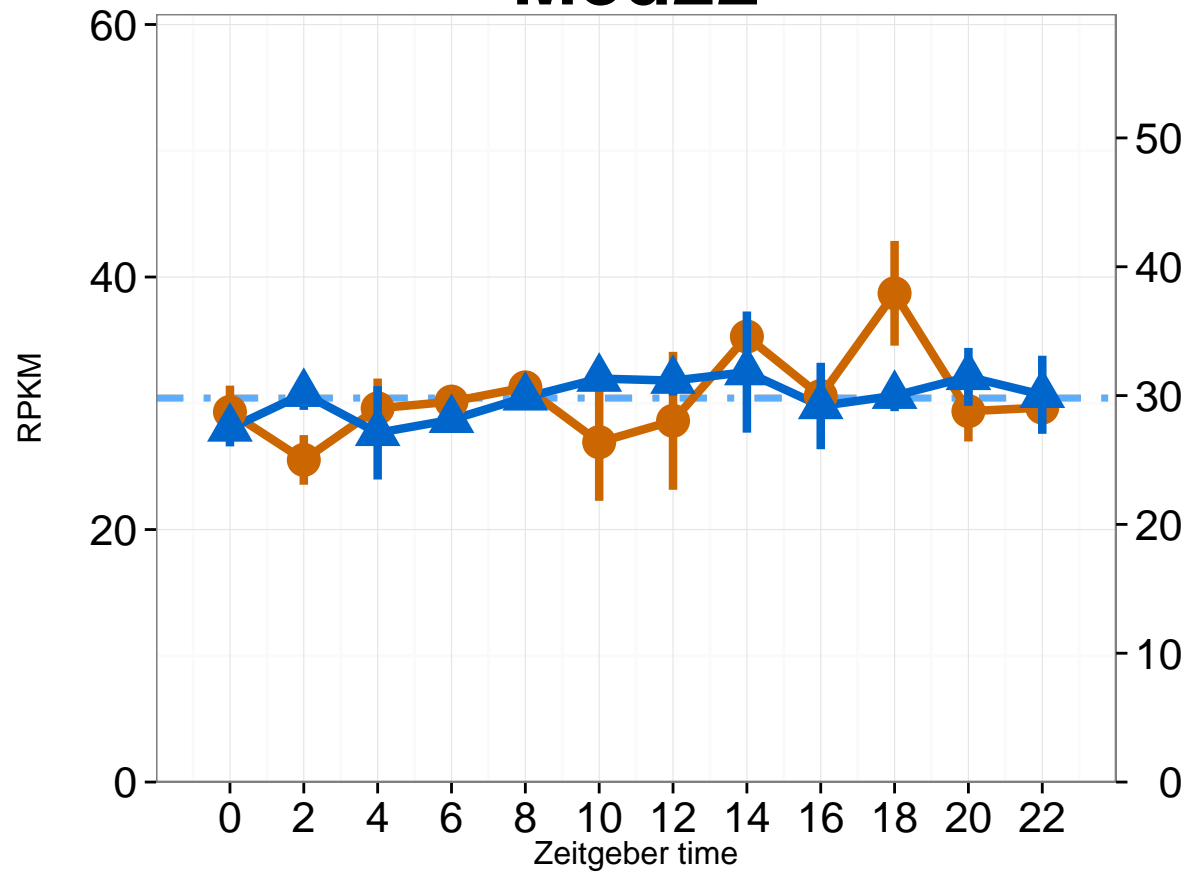

## Med22

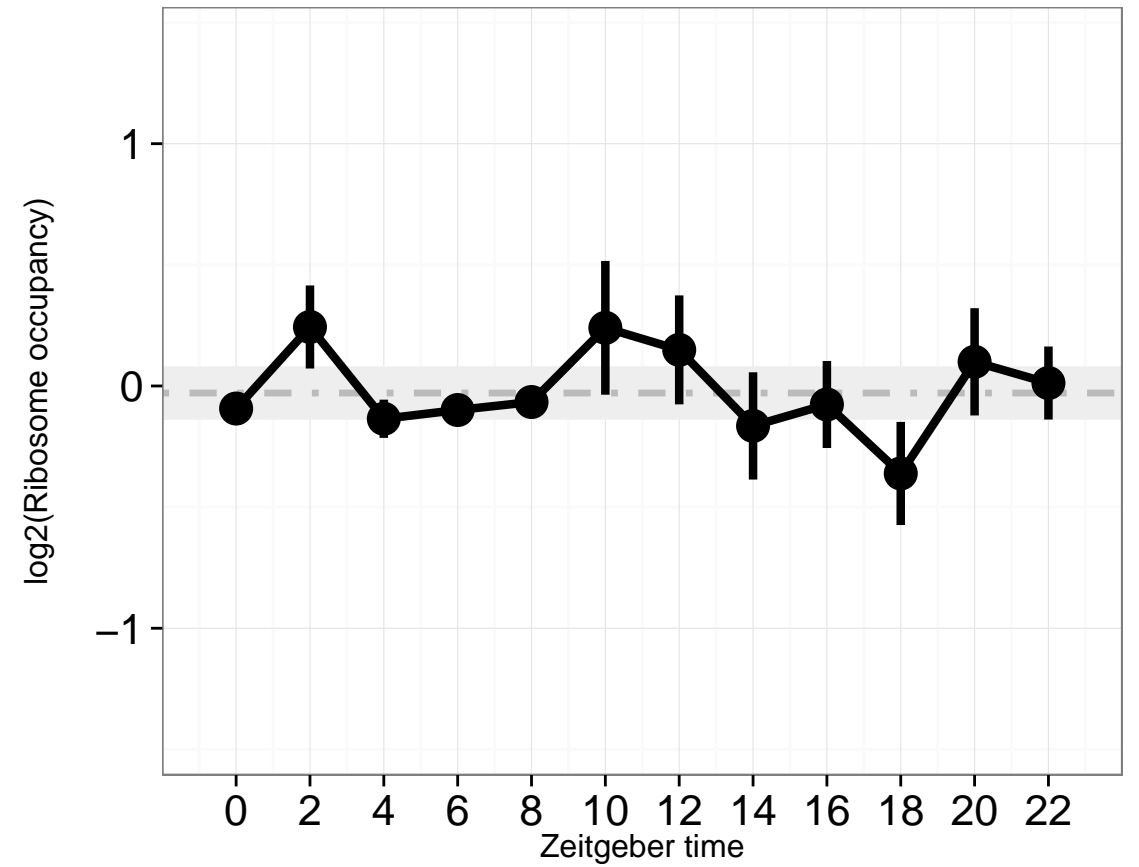

Supplement: Supplementary file 7145 [file 1]

## Plp2

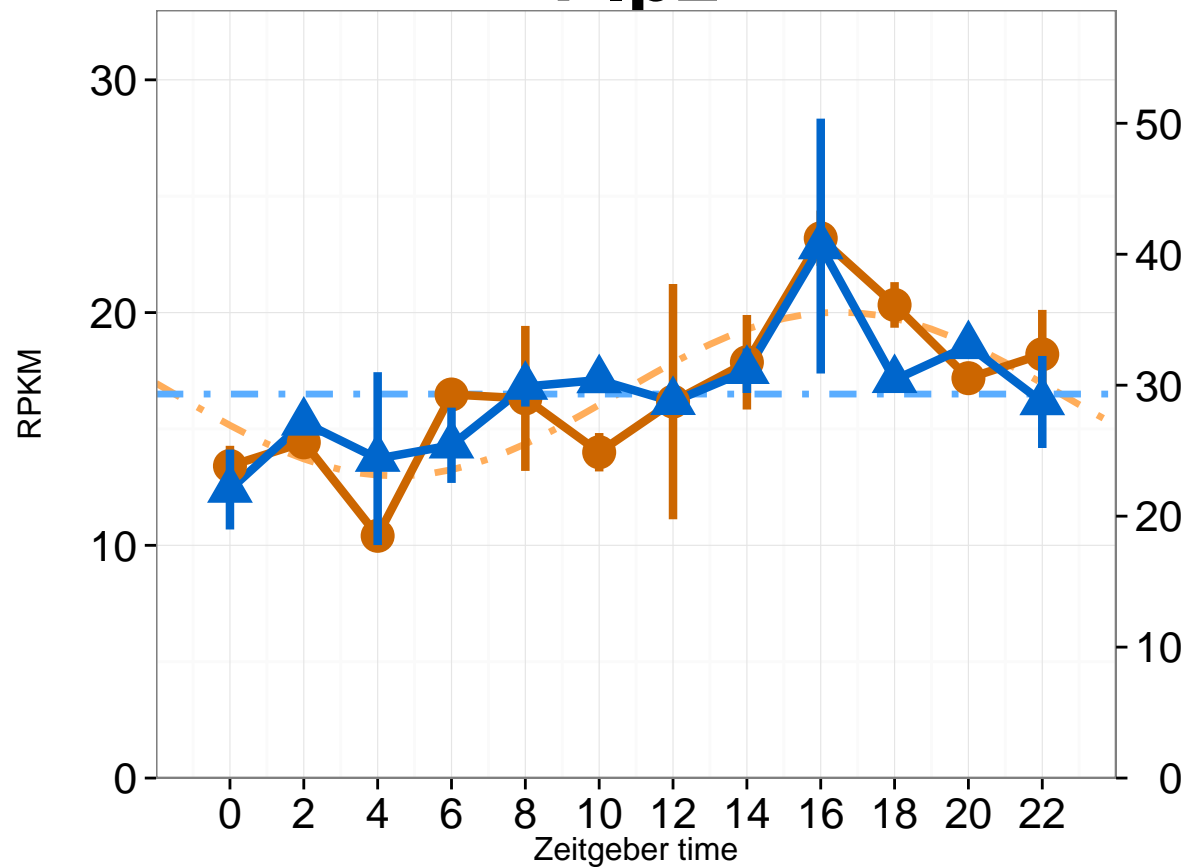

## Plp2

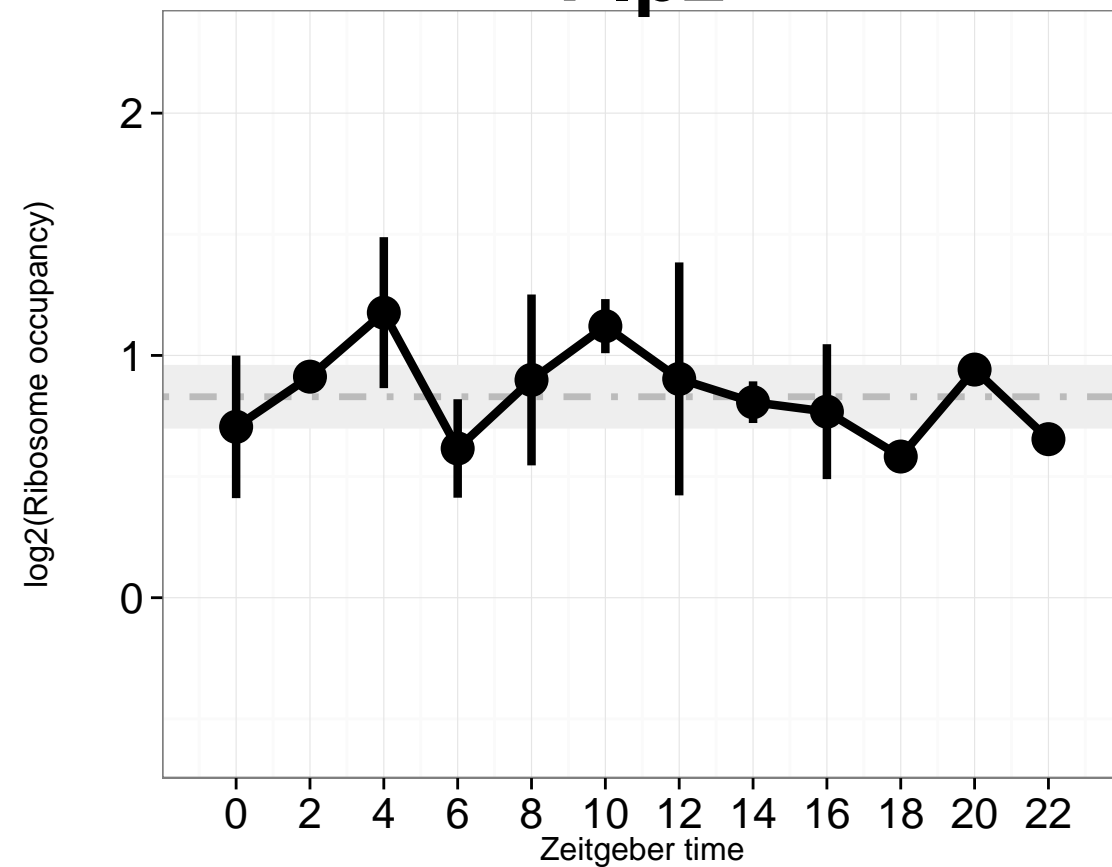

Supplement: Supplementary file 7146 [file 1]

## Syt15 TR

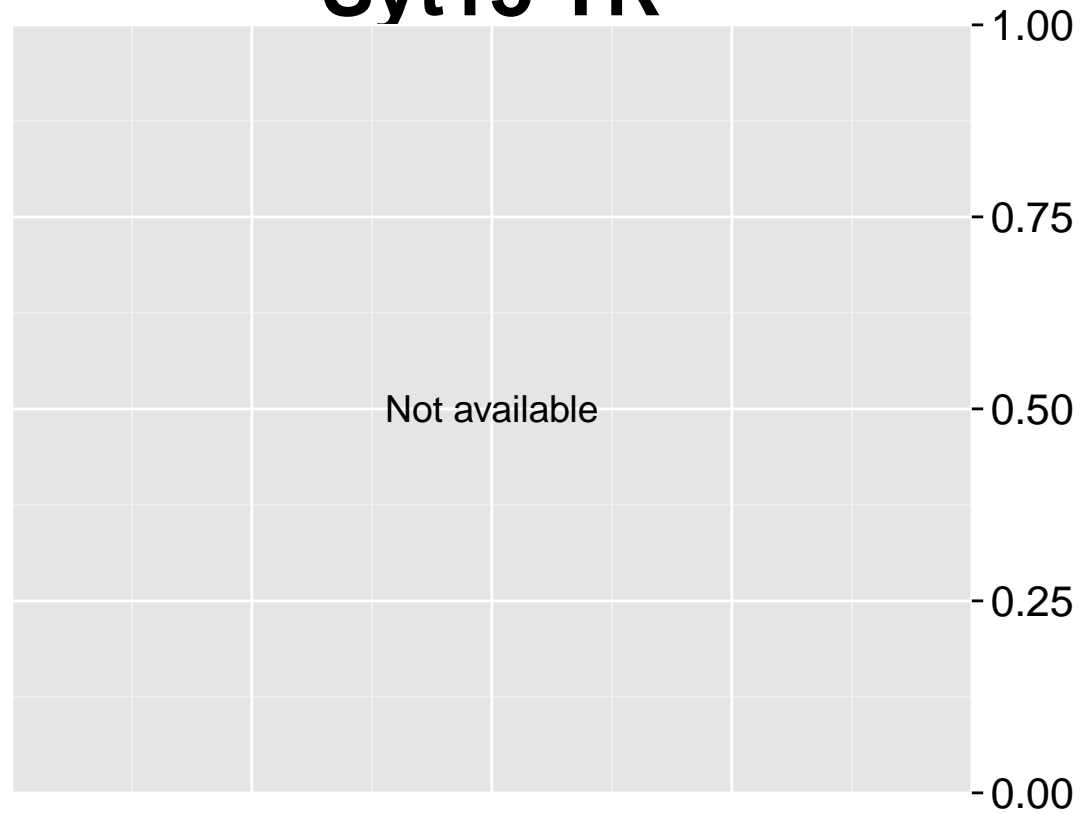

## Syt15 log2(Ribosome occupancy)

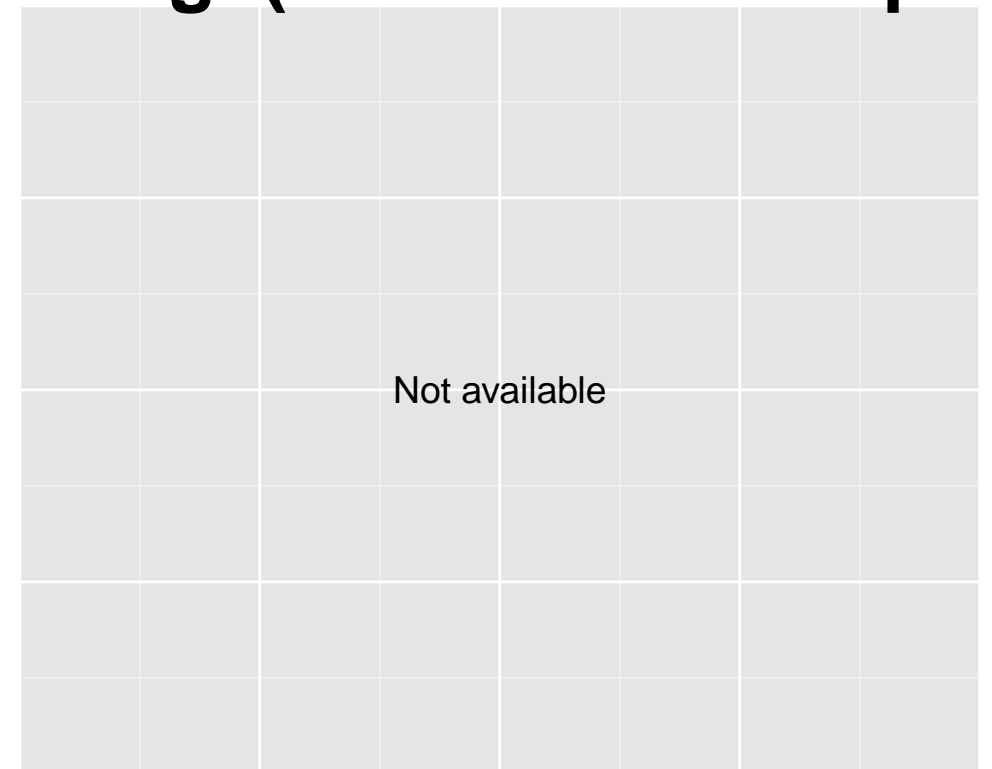

Supplement: Supplementary file 7147 [file 1]

# Ppp1r1a

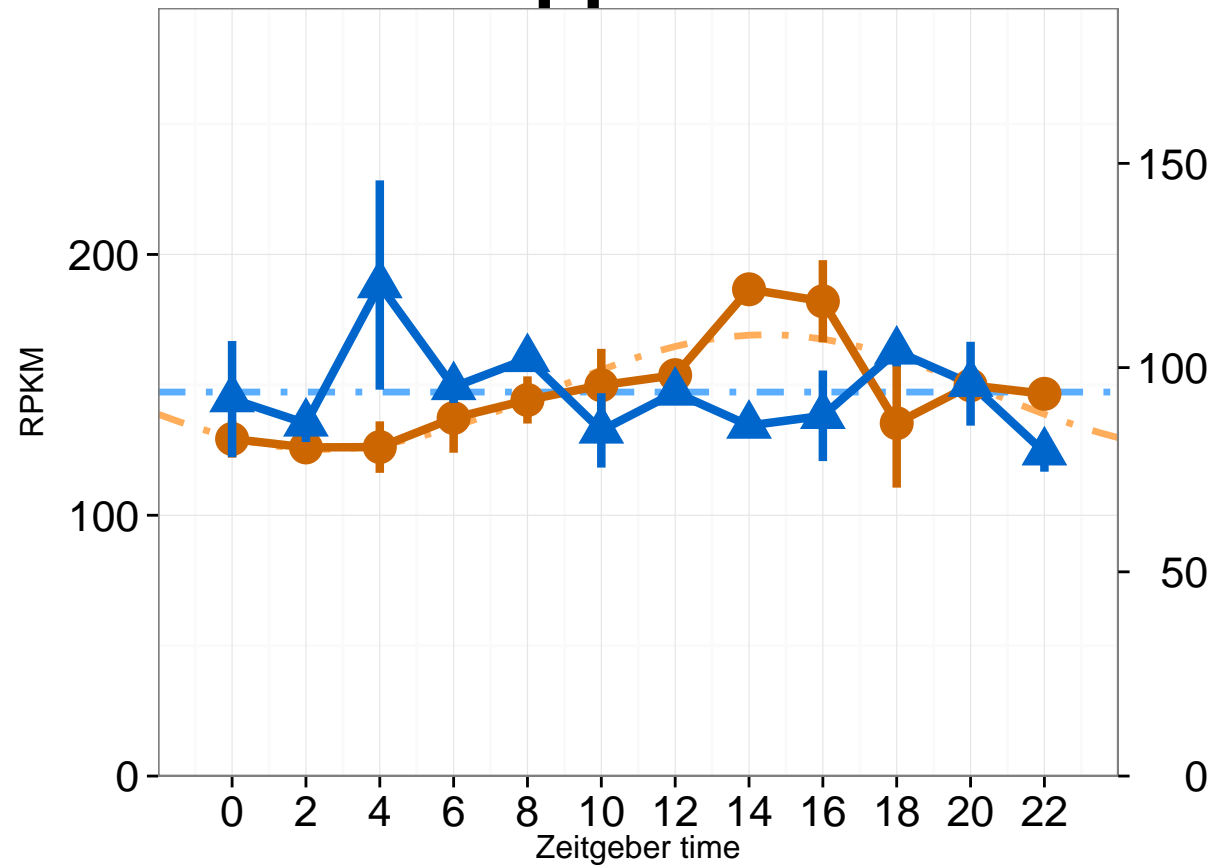

# Ppp1r1a

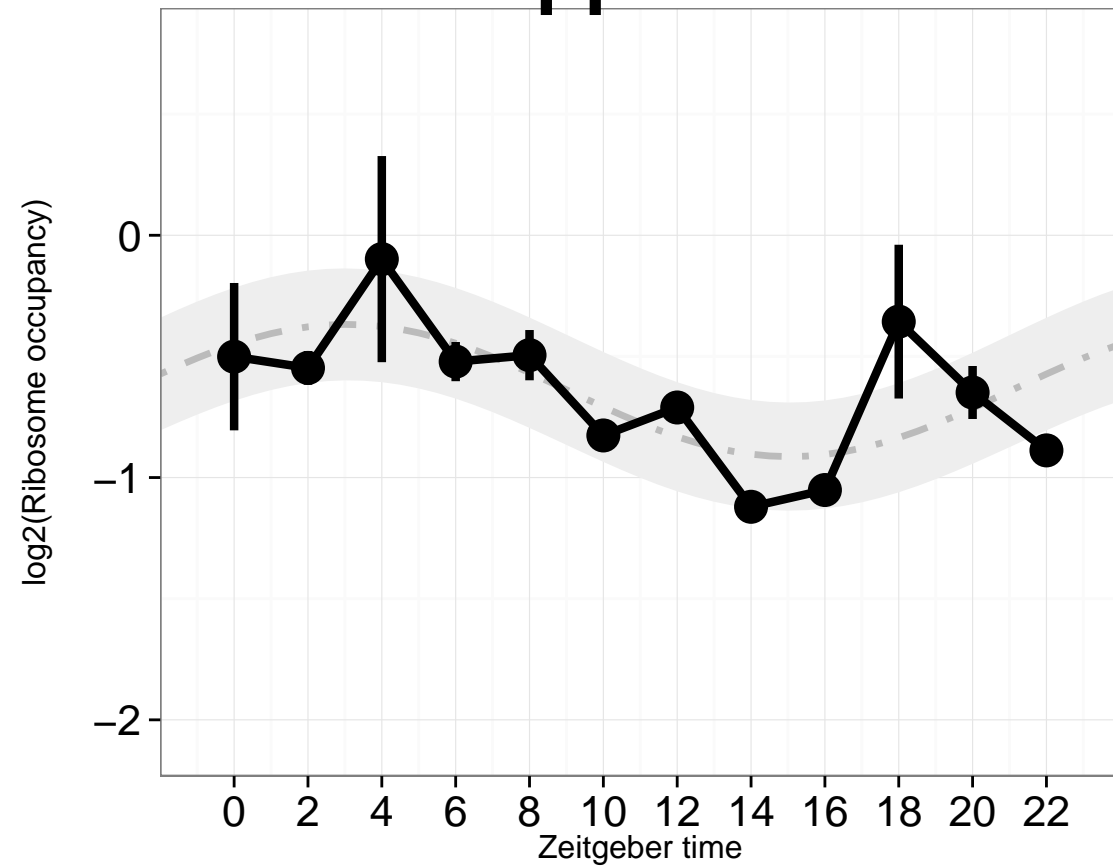

Supplement: Supplementary file 7148 [file 1]

## Mafg

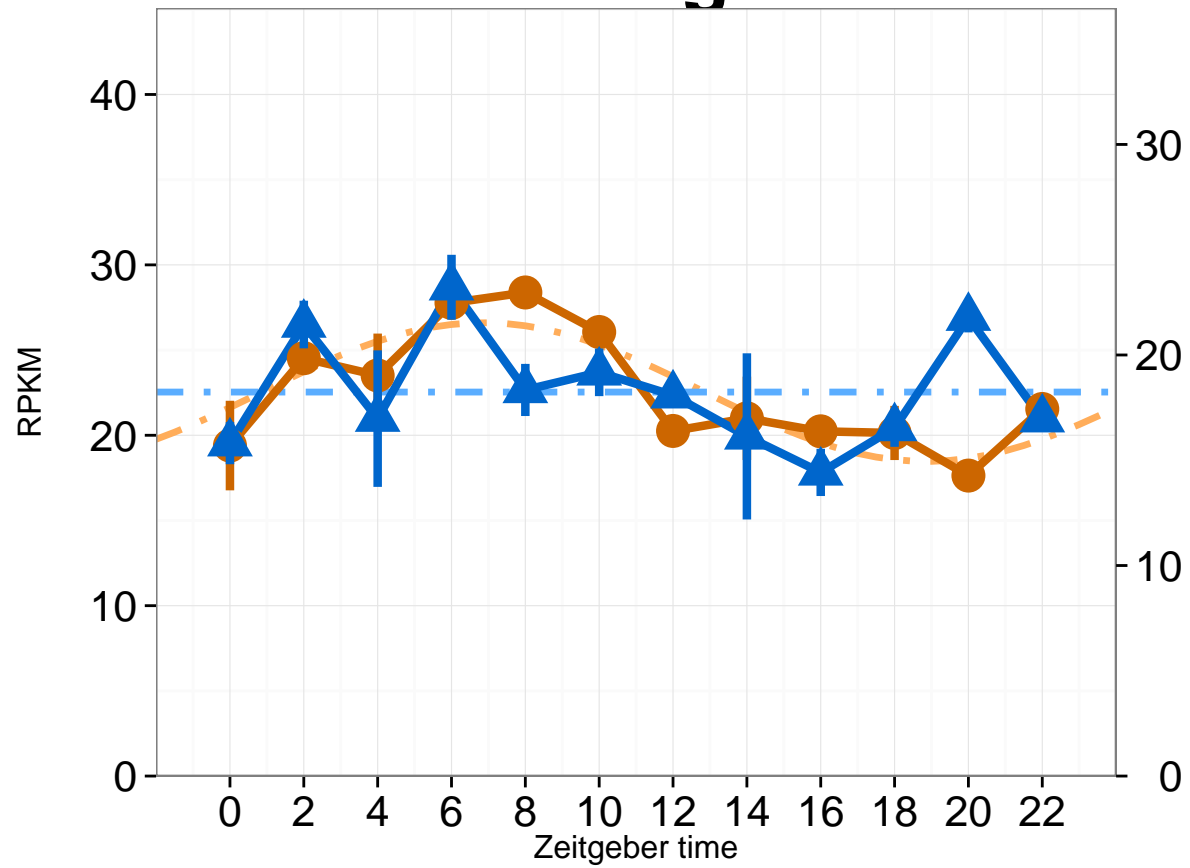

## Mafg

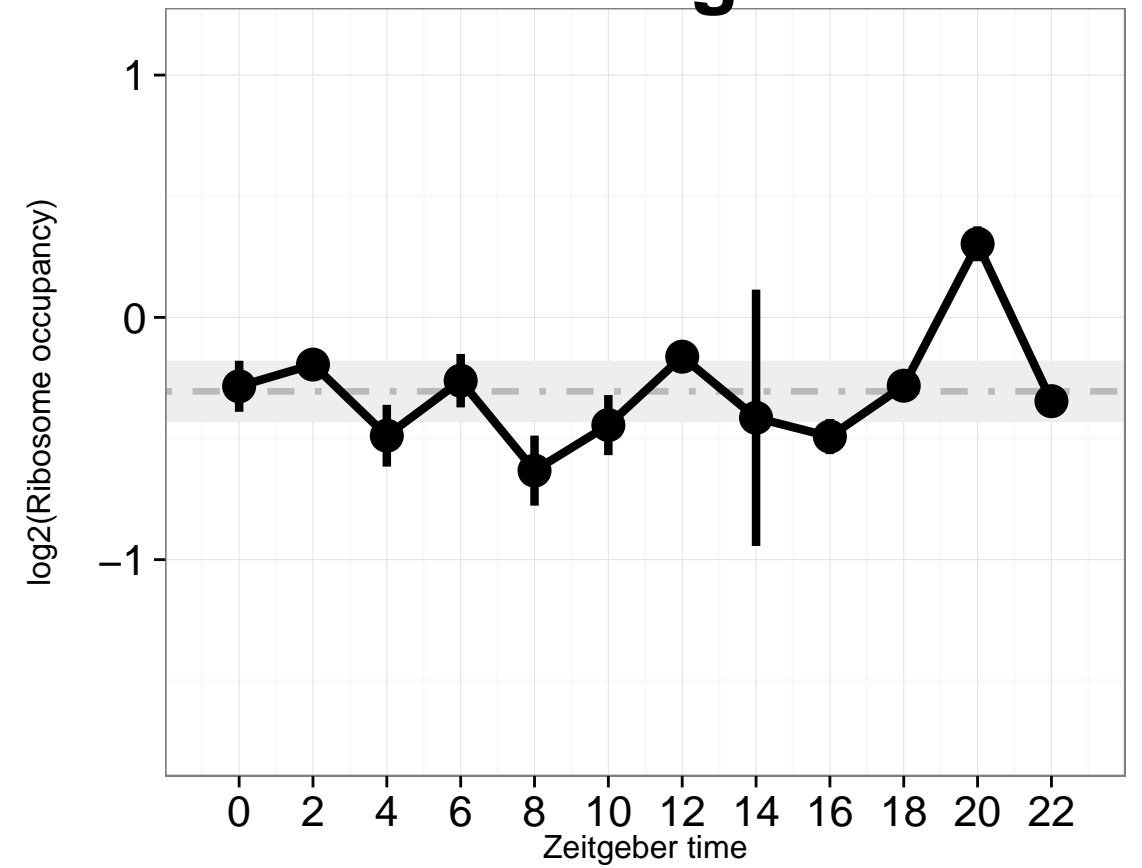

Supplement: Supplementary file 7149 [file 1]

# Qpctl

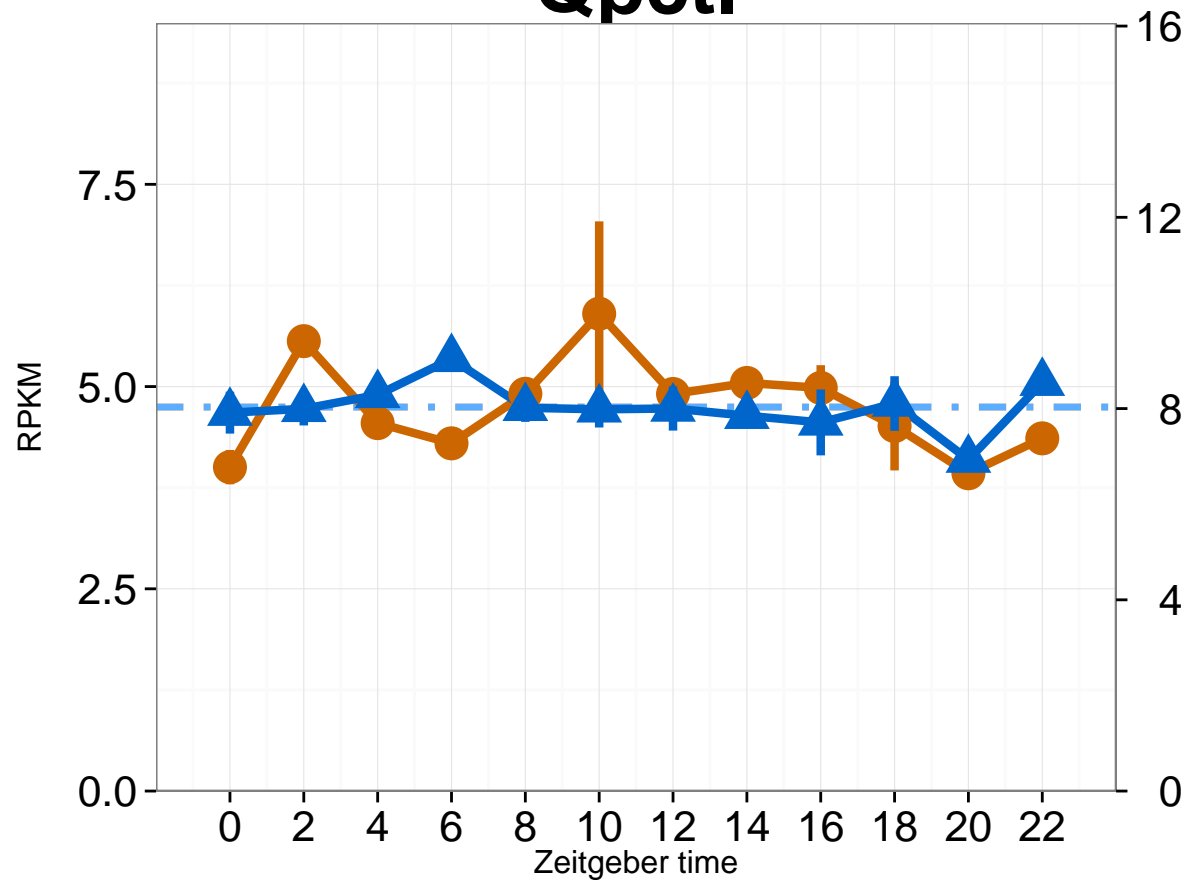

# Qpctl

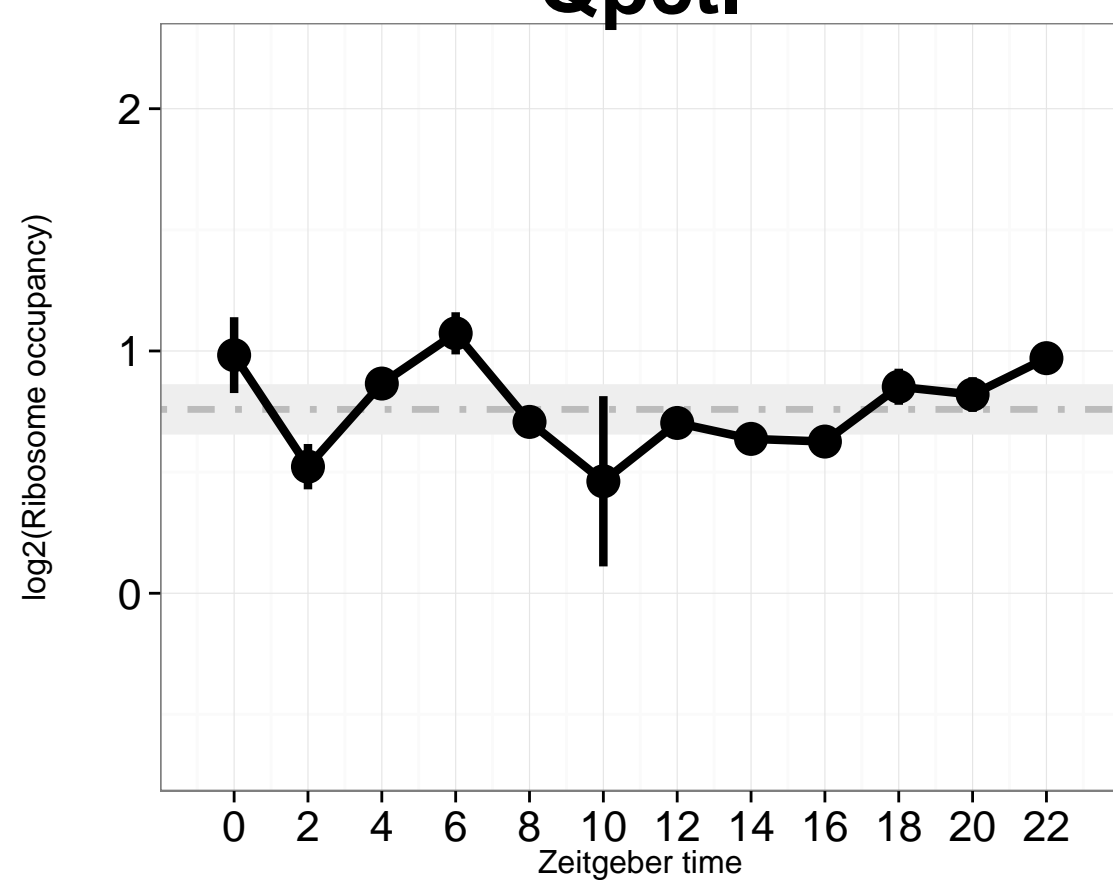

Supplement: Supplementary file 7150 [file 1]

# Rsu1

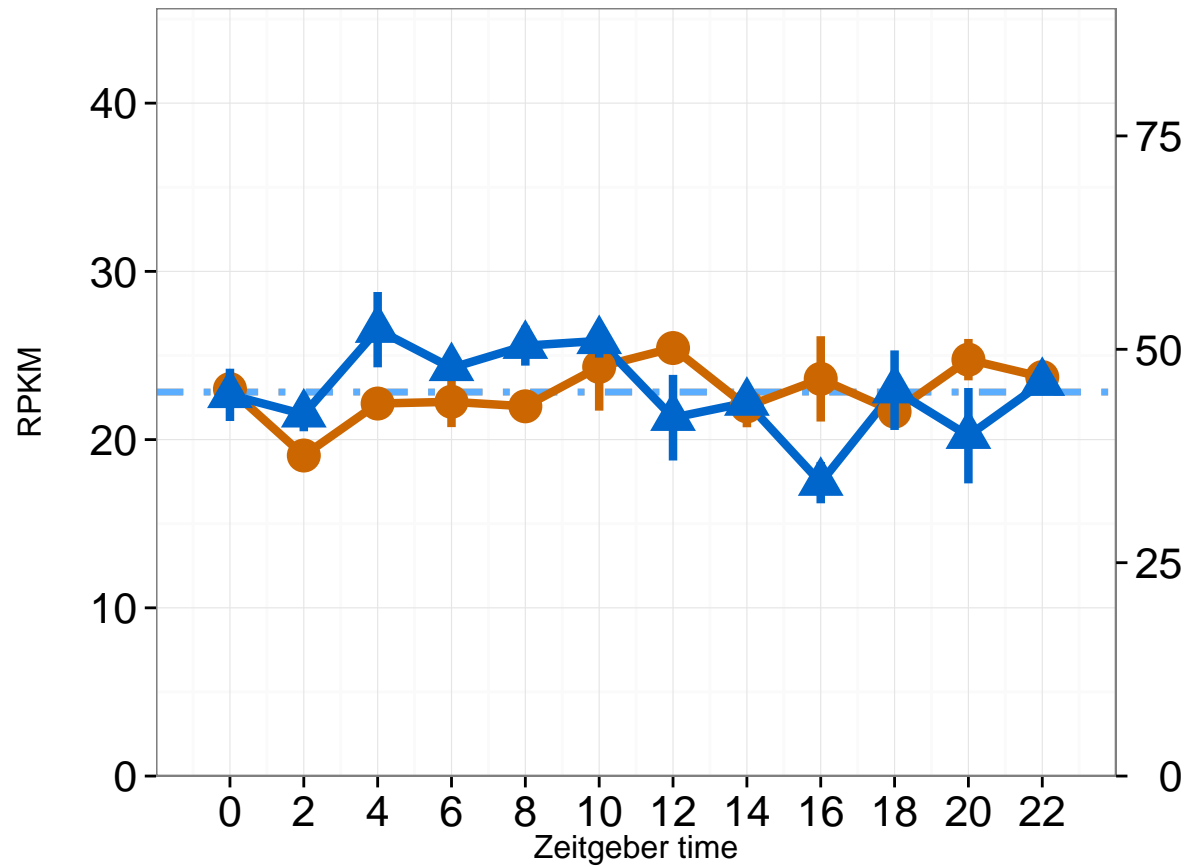

# Rsu1

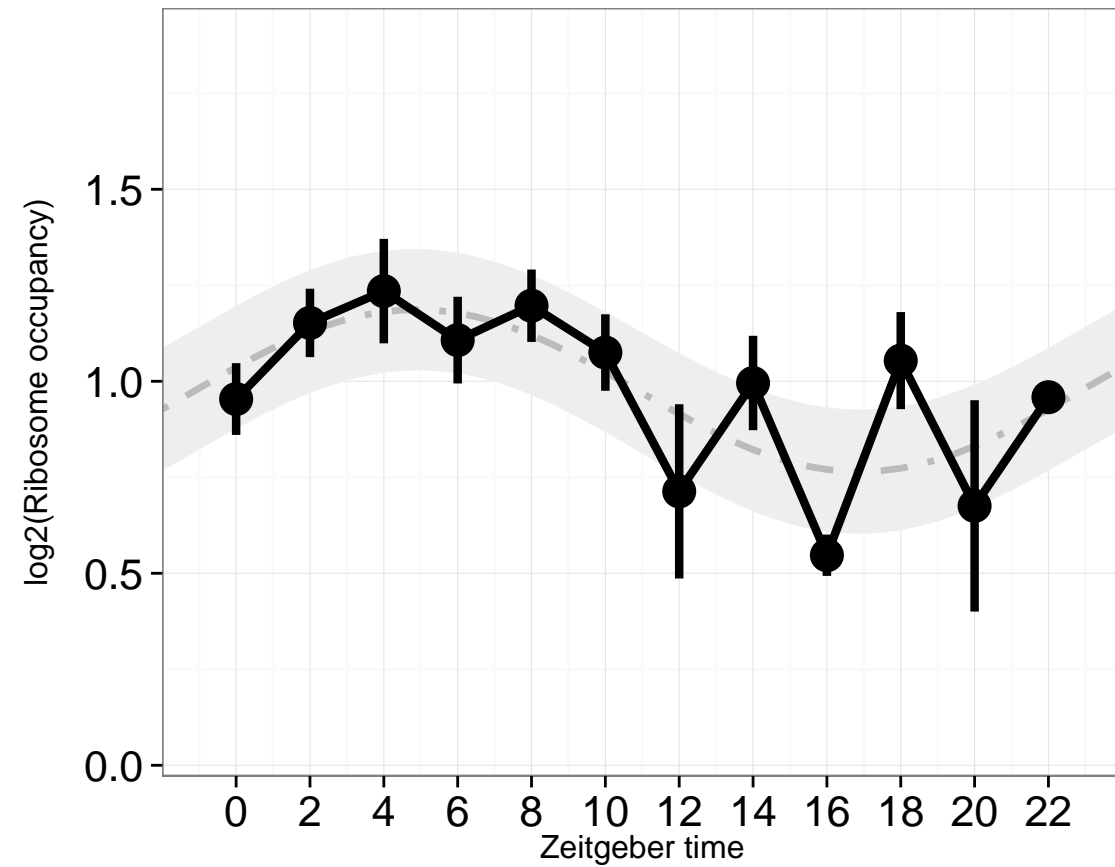

Supplement: Supplementary file 7151 [file 1]

## Gm21887

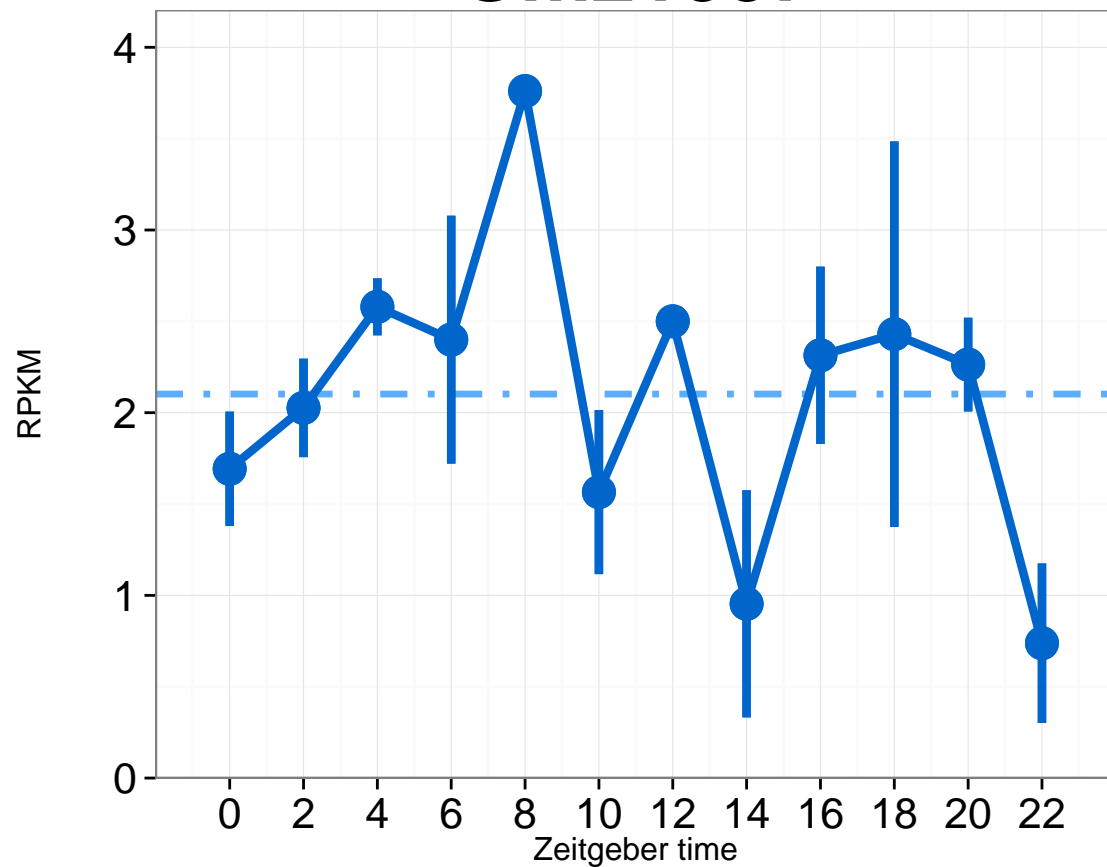

## Gm21887 log2(Ribosome occupanc

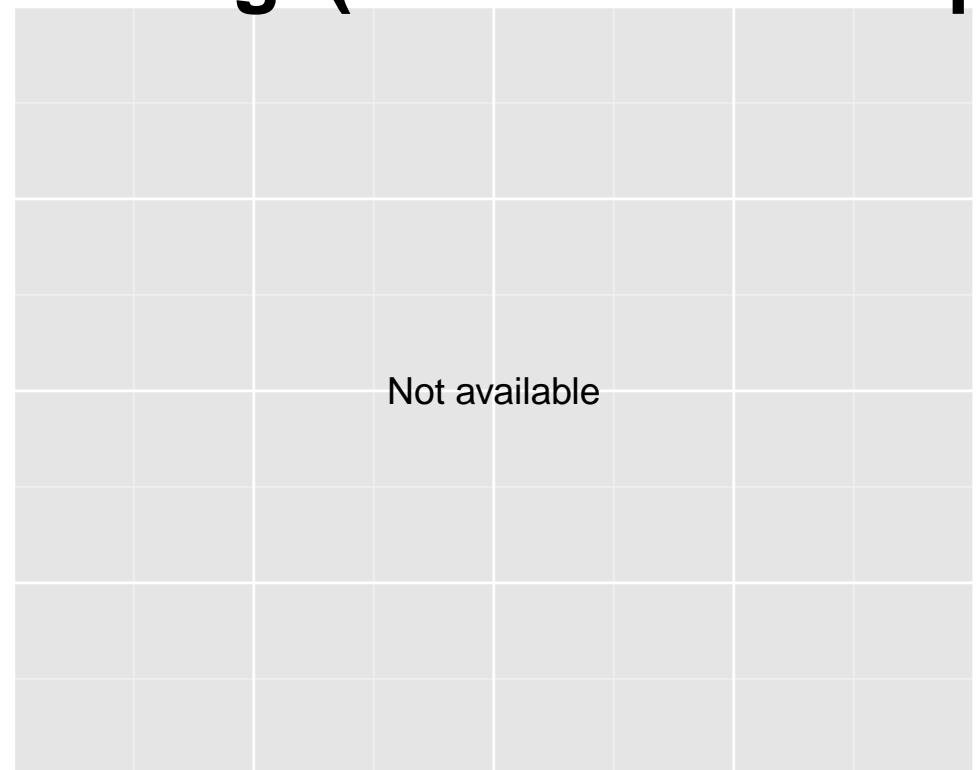

Supplement: Supplementary file 7152 [file 1]

## Cdc73

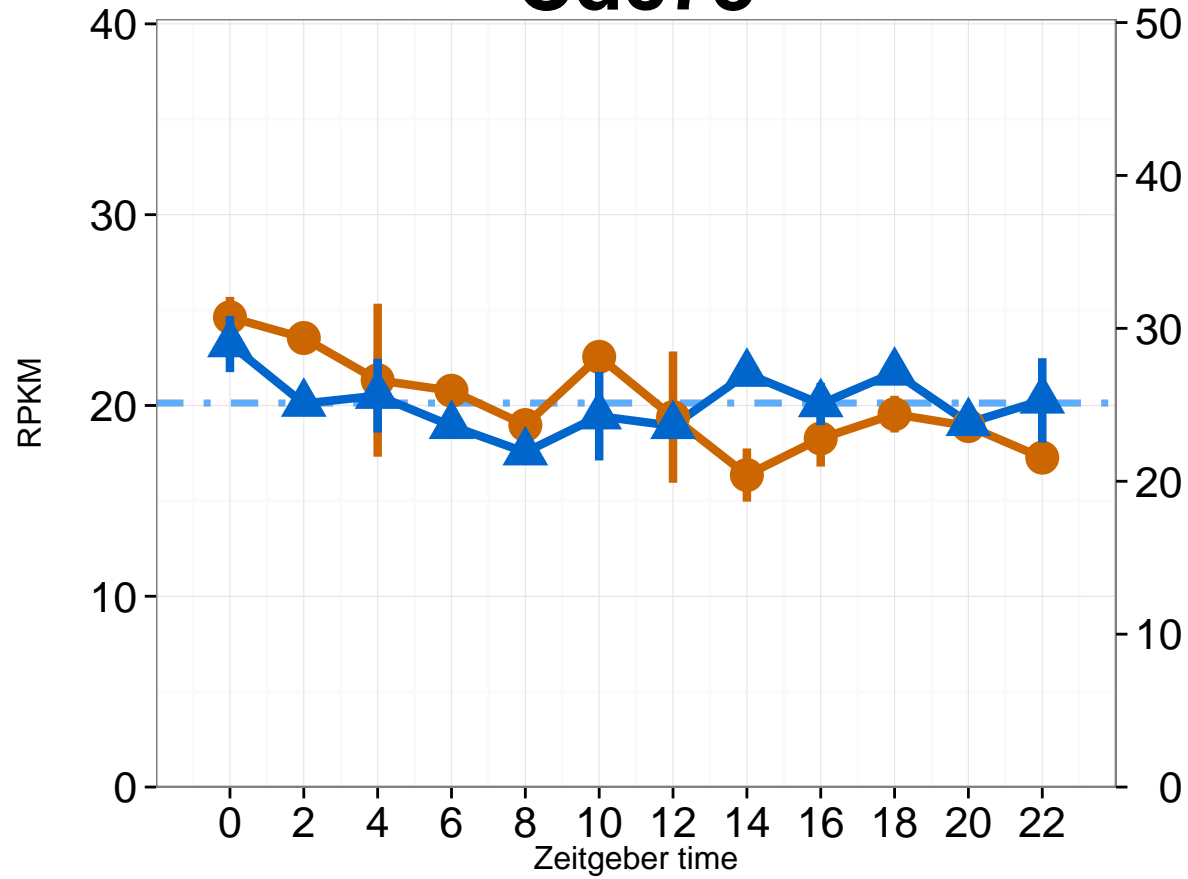

## Cdc73

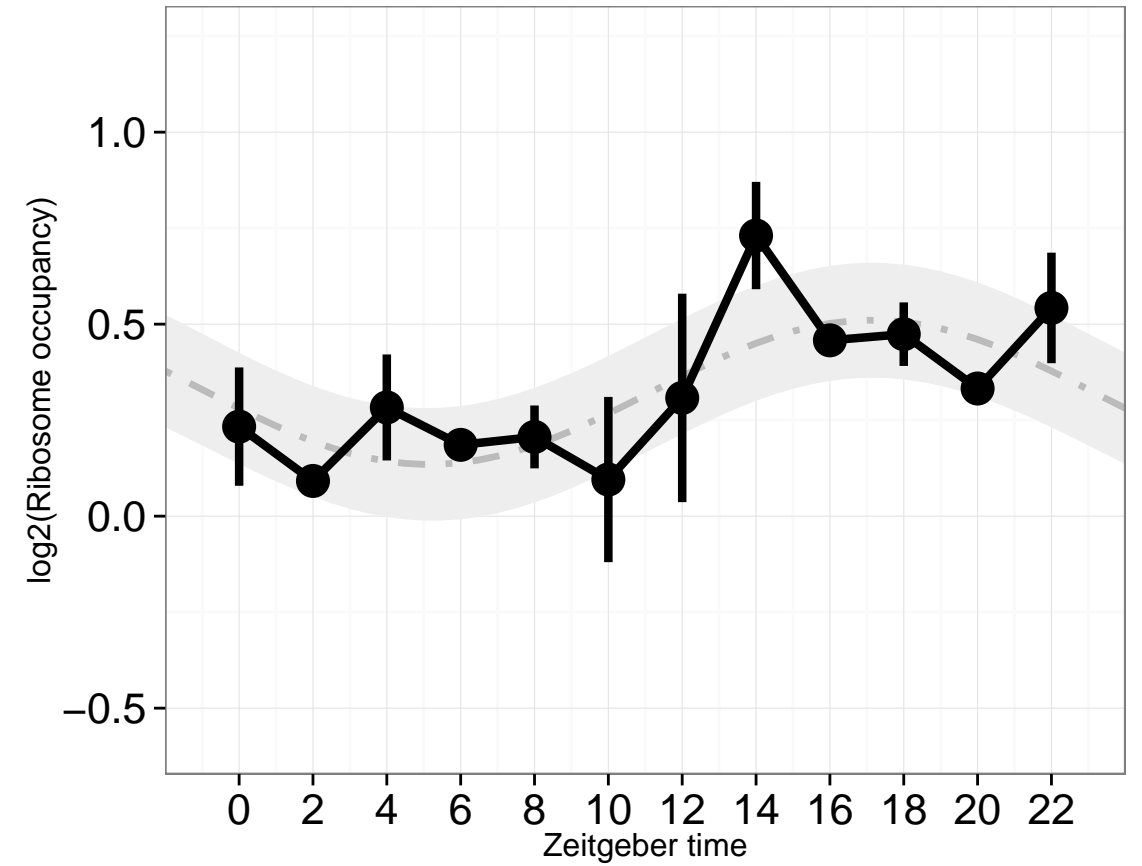

Supplement: Supplementary file 7153 [file 1]

## Acaca

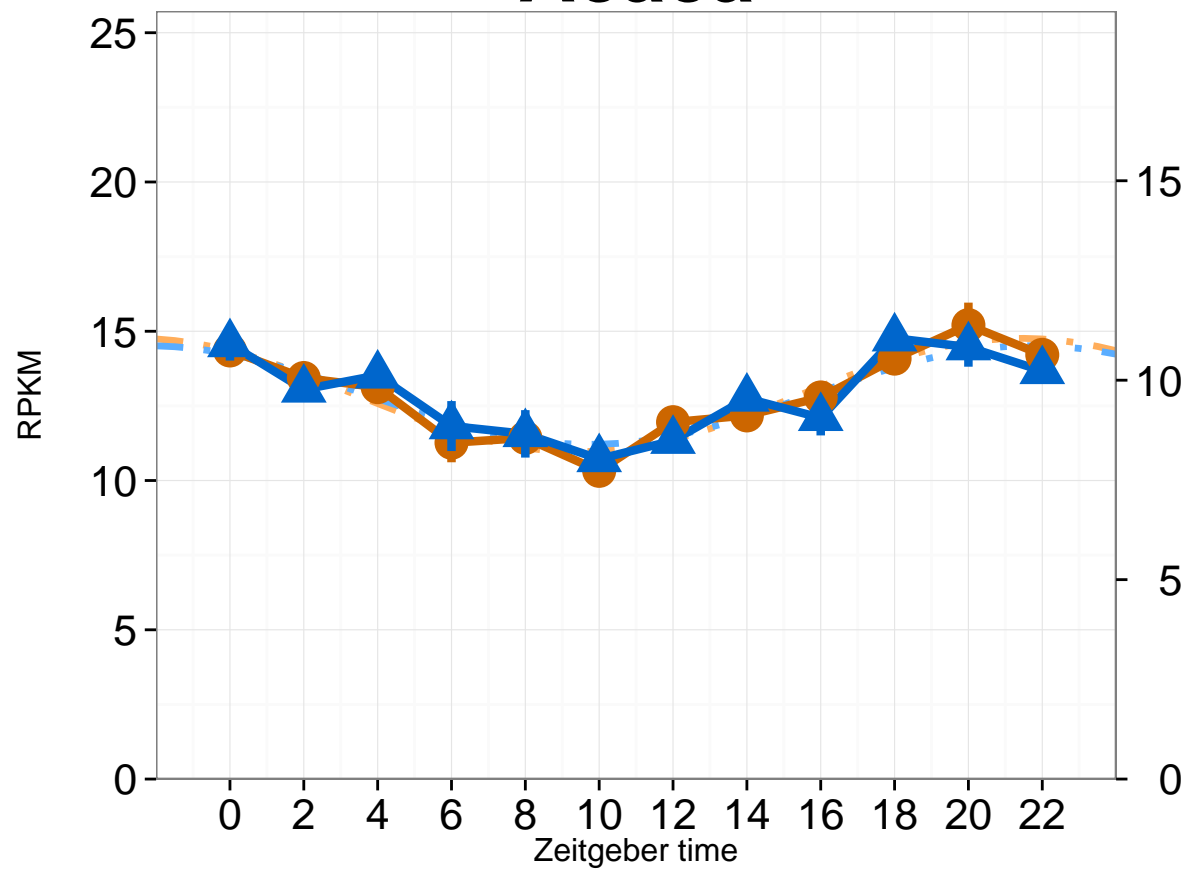

## Acaca

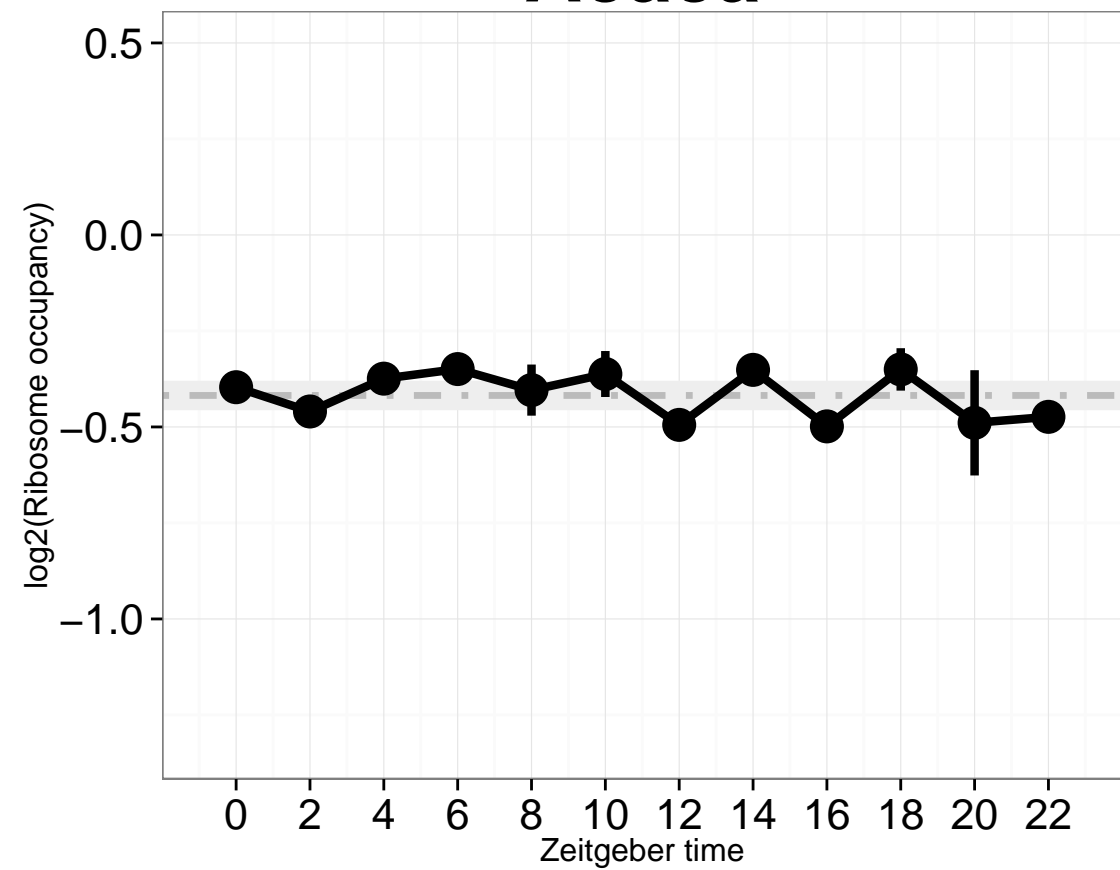

Supplement: Supplementary file 7154 [file 1]

# Knop1

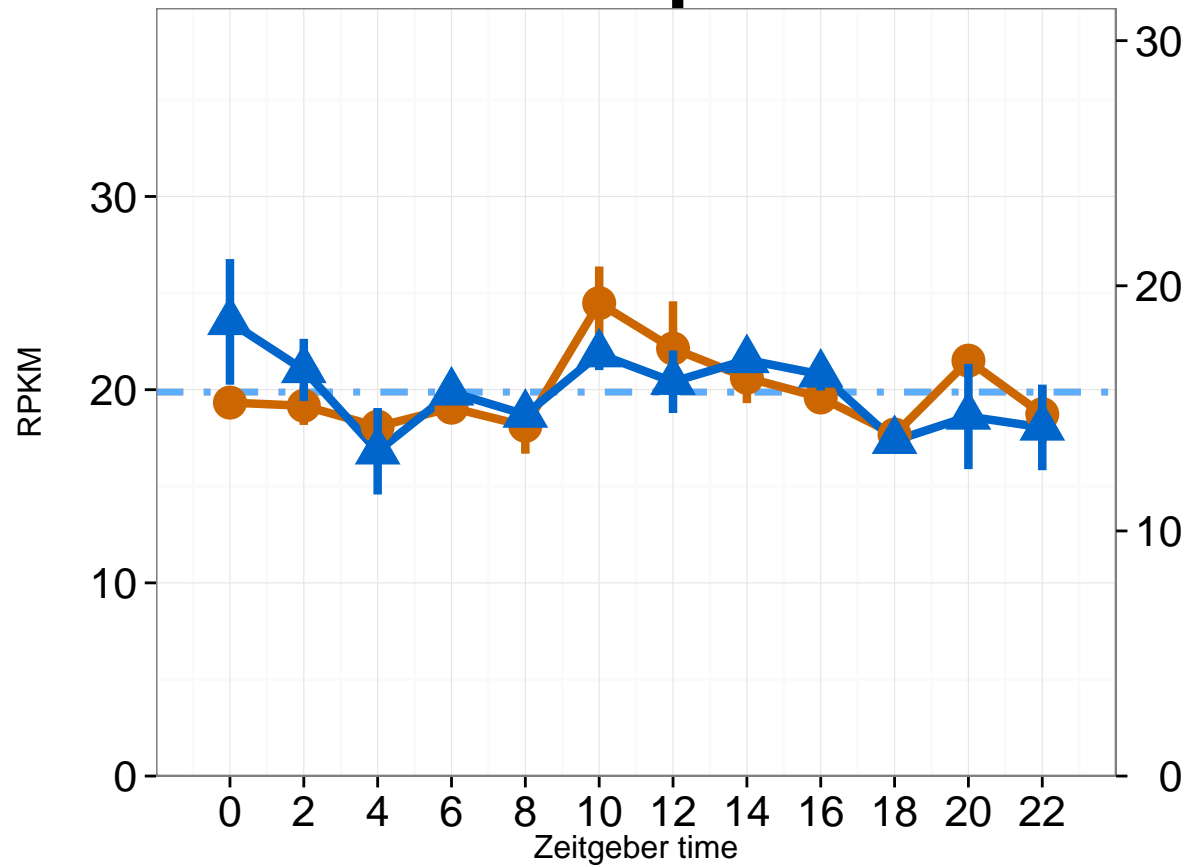

# Knop1

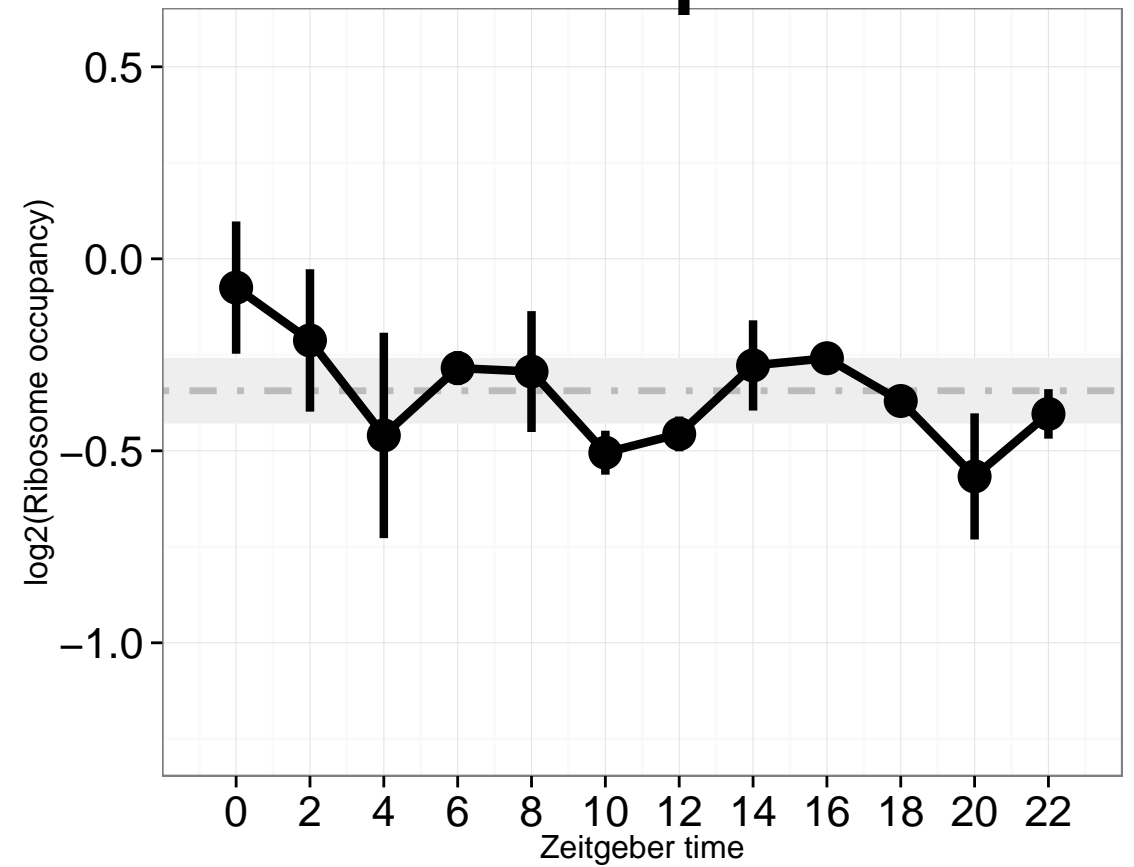

Supplement: Supplementary file 7155 [file 1]

## Polr1c

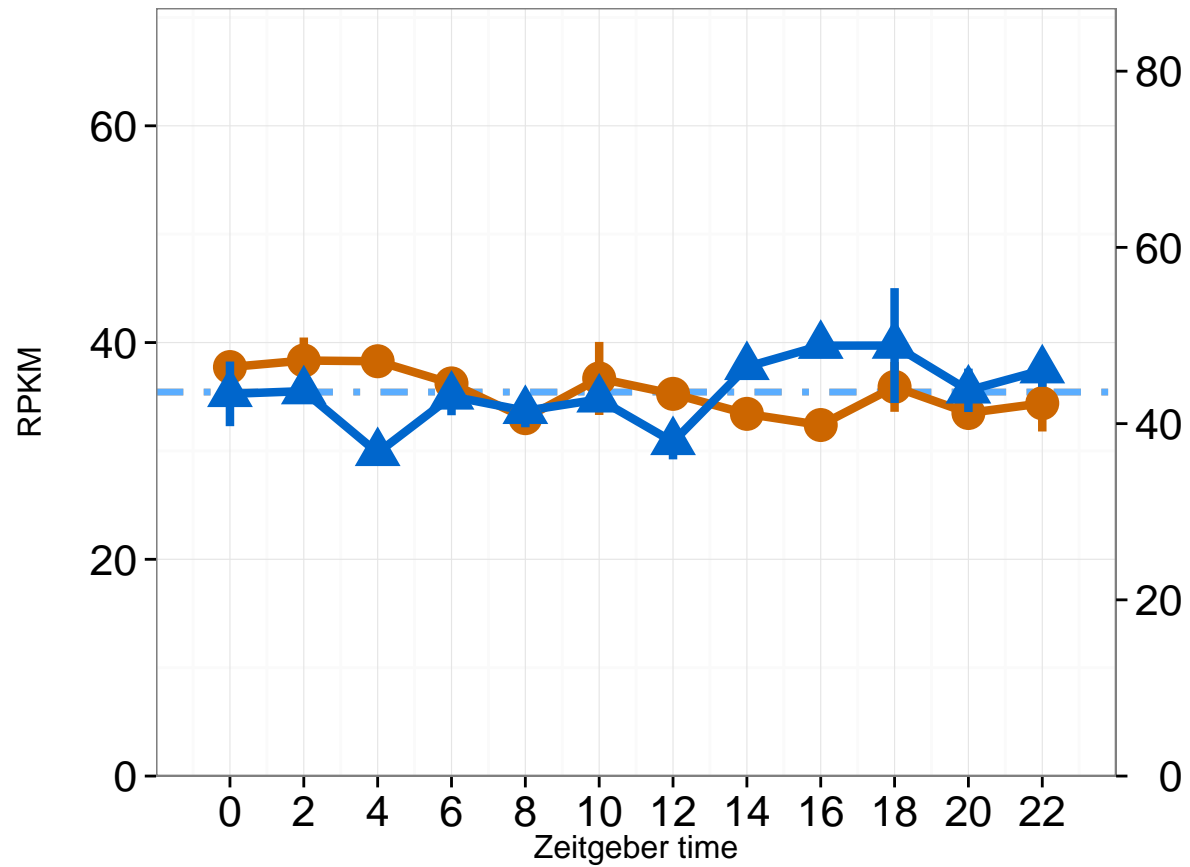

## Polr1c

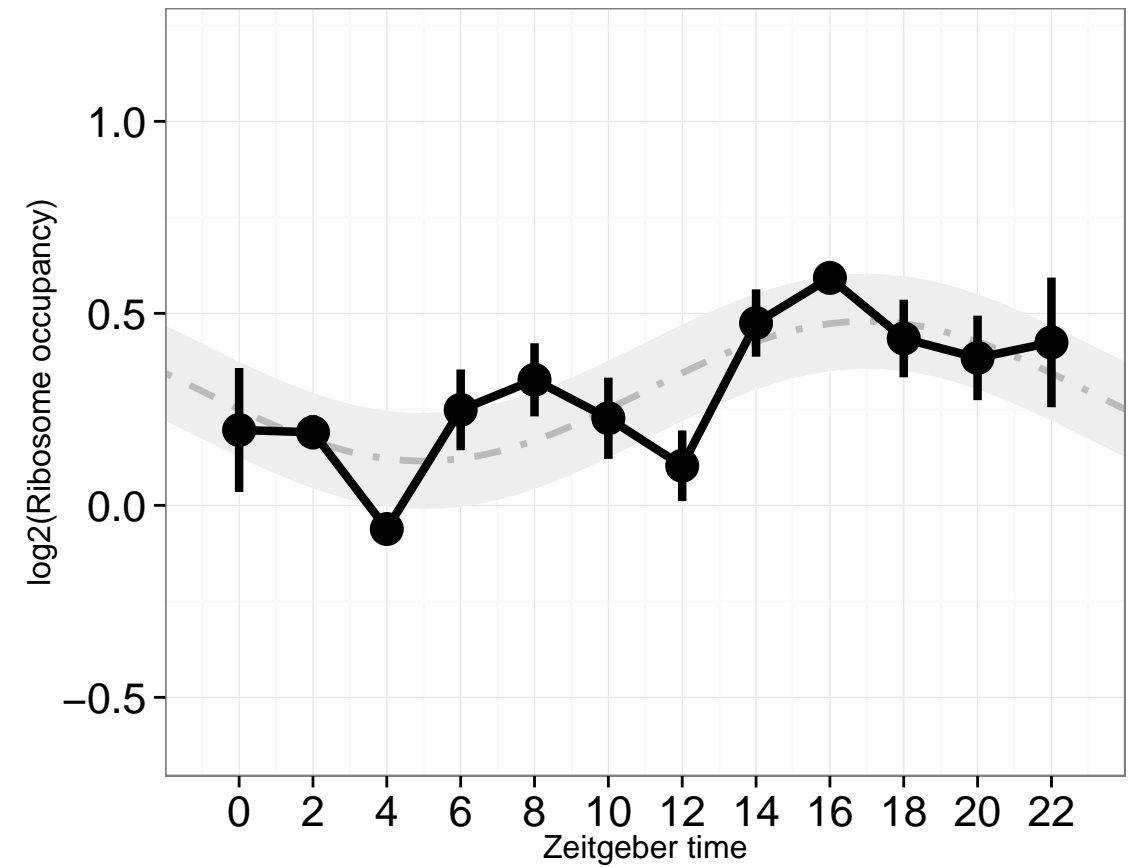

Supplement: Supplementary file 7156 [file 1]

## Fmr1

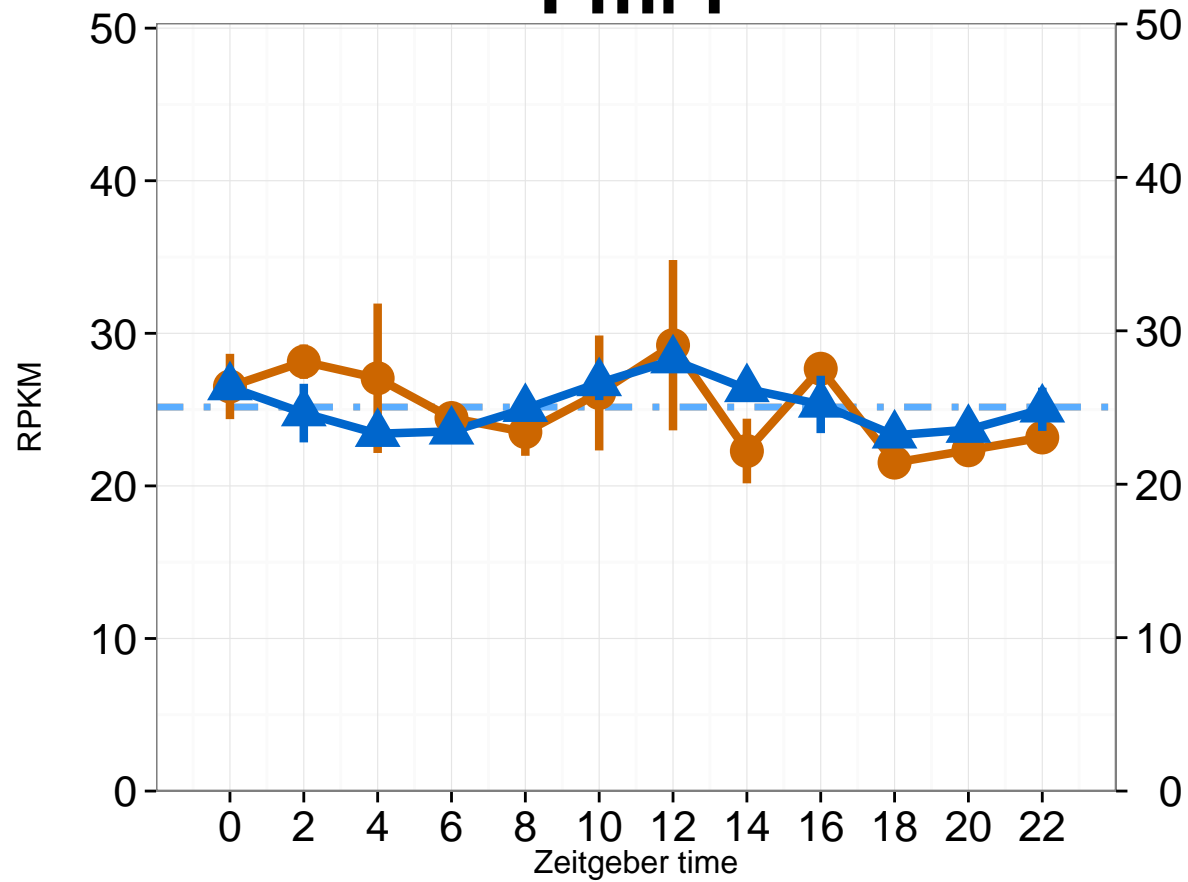

## Fmr1

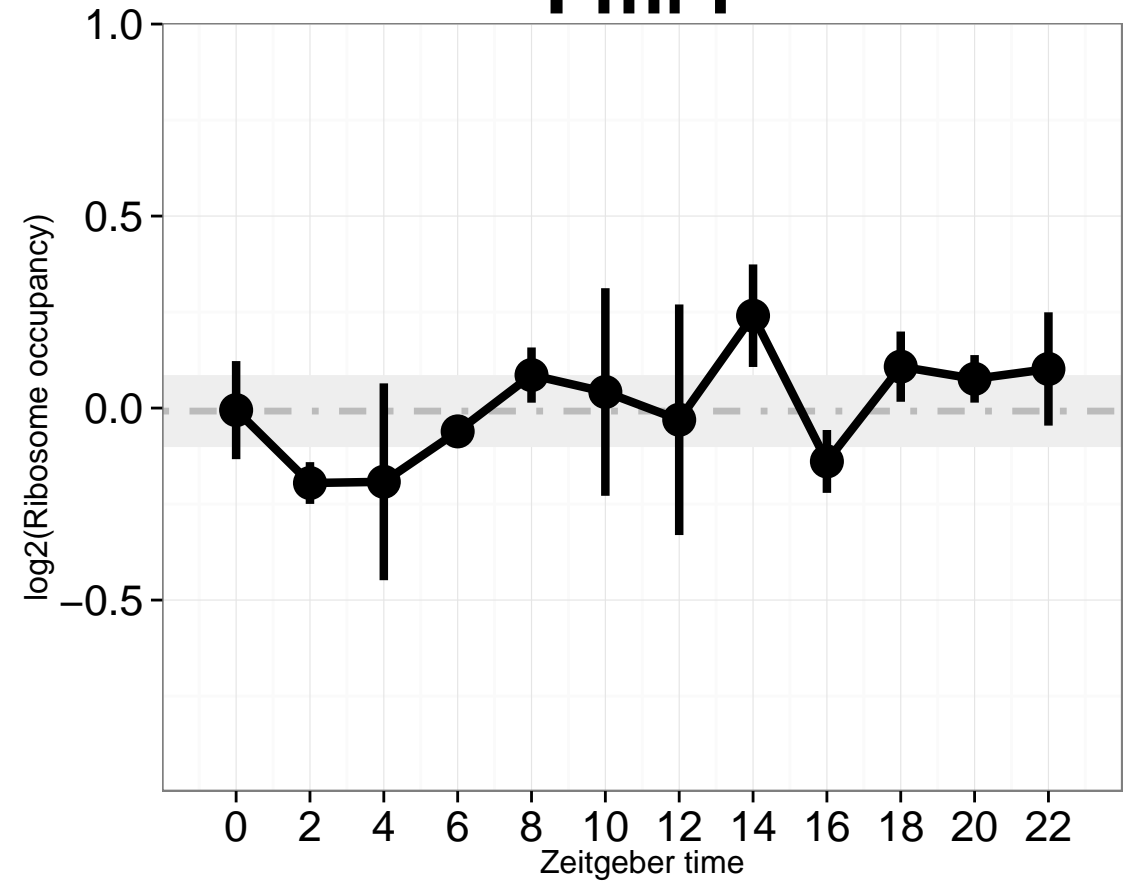

Supplement: Supplementary file 7157 [file 1]

## Gpalpp1

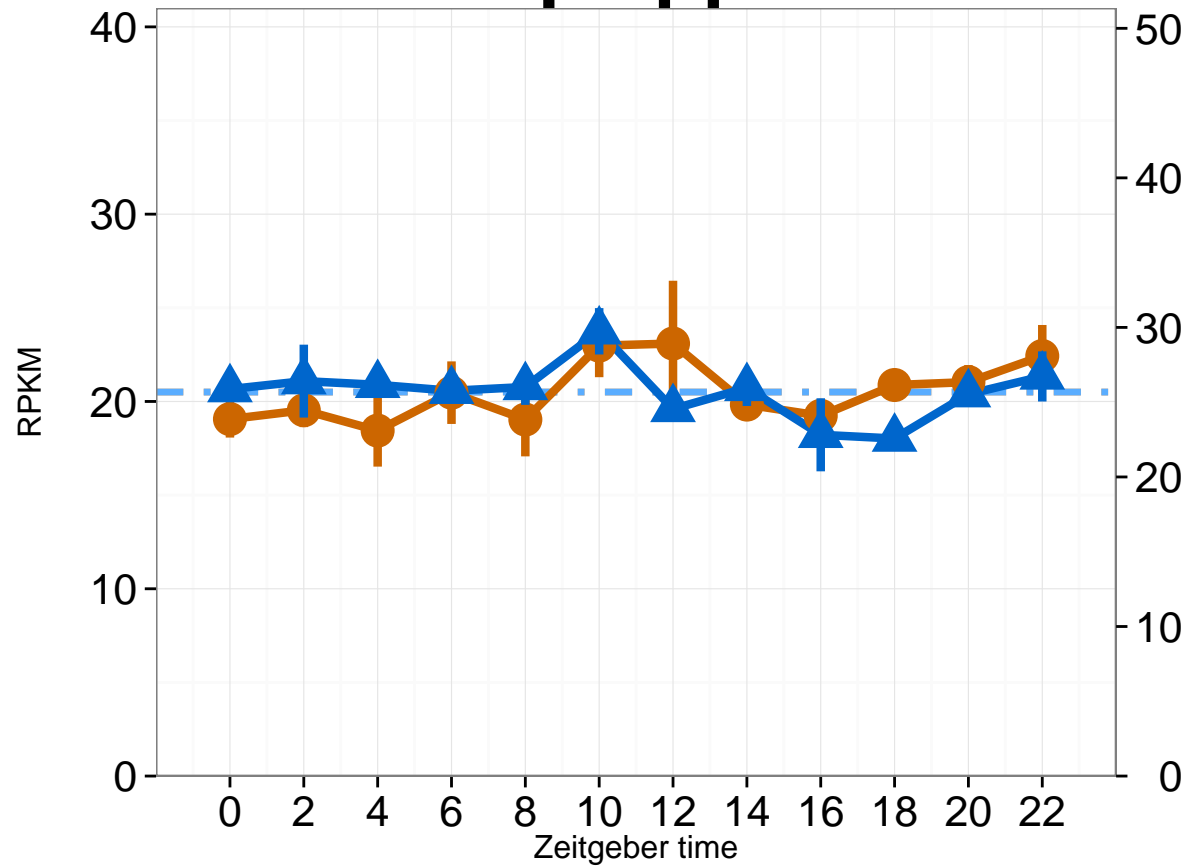

## Gpalpp1

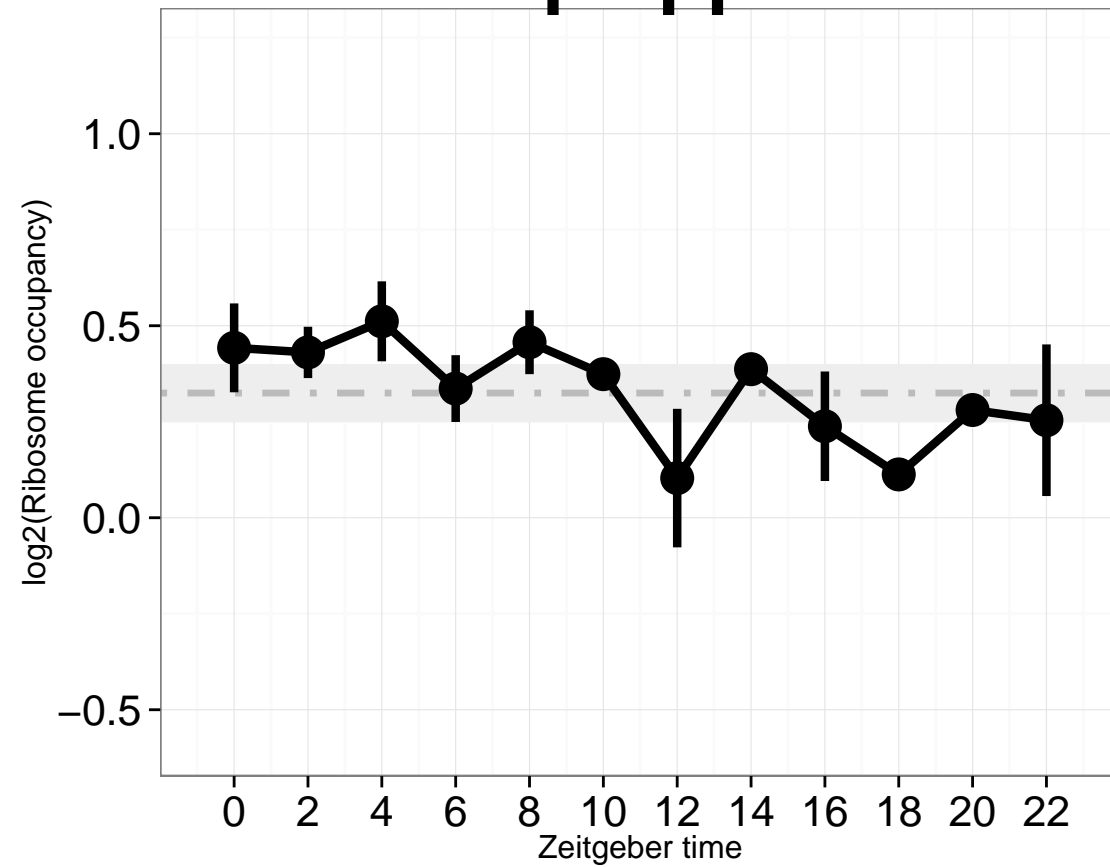

Supplement: Supplementary file 7158 [file 1]

# lfrd2

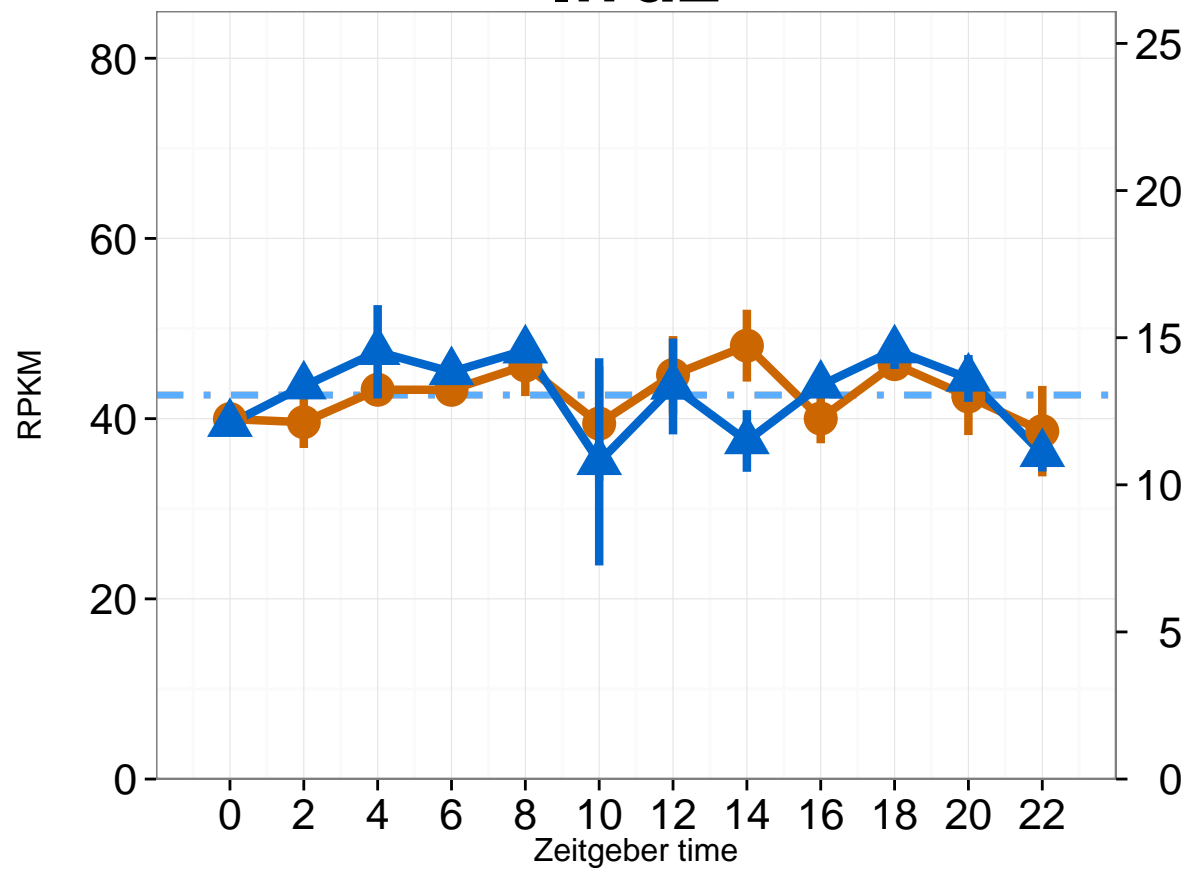

# lfrd2

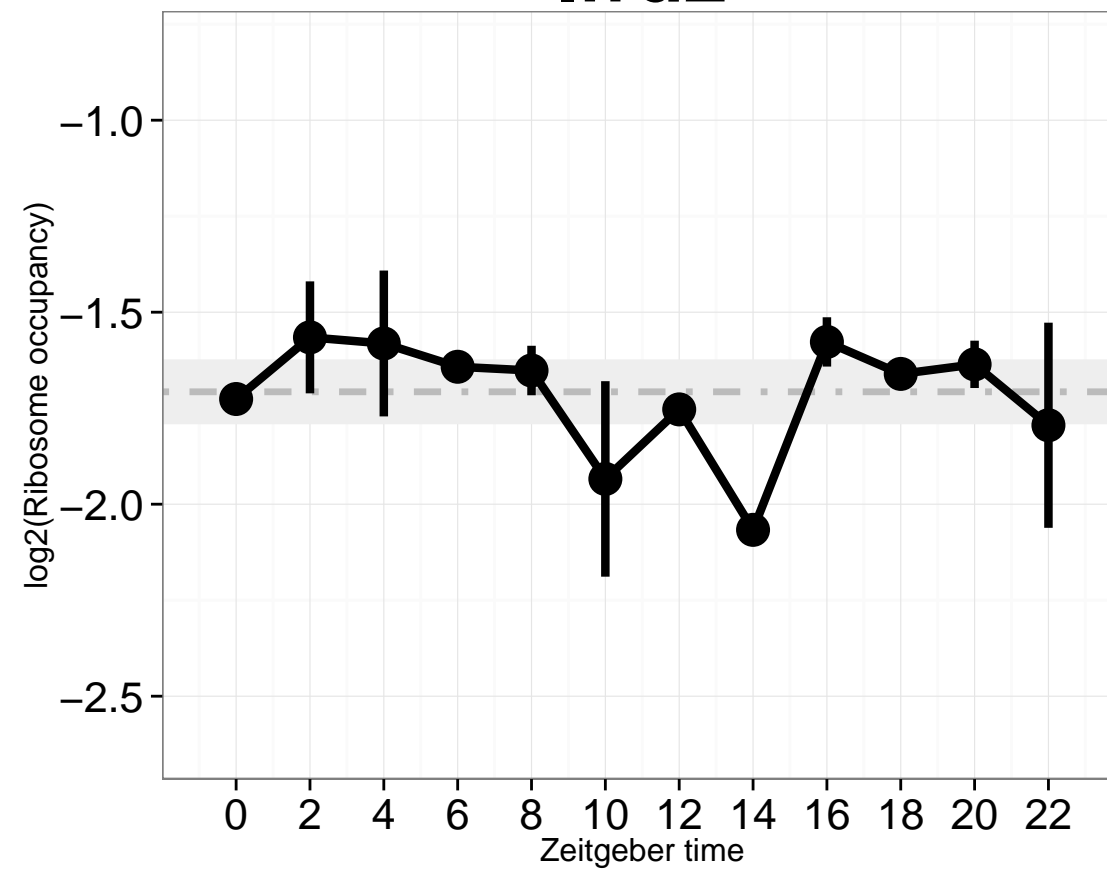

Supplement: Supplementary file 7159 [file 1]

# Letm2

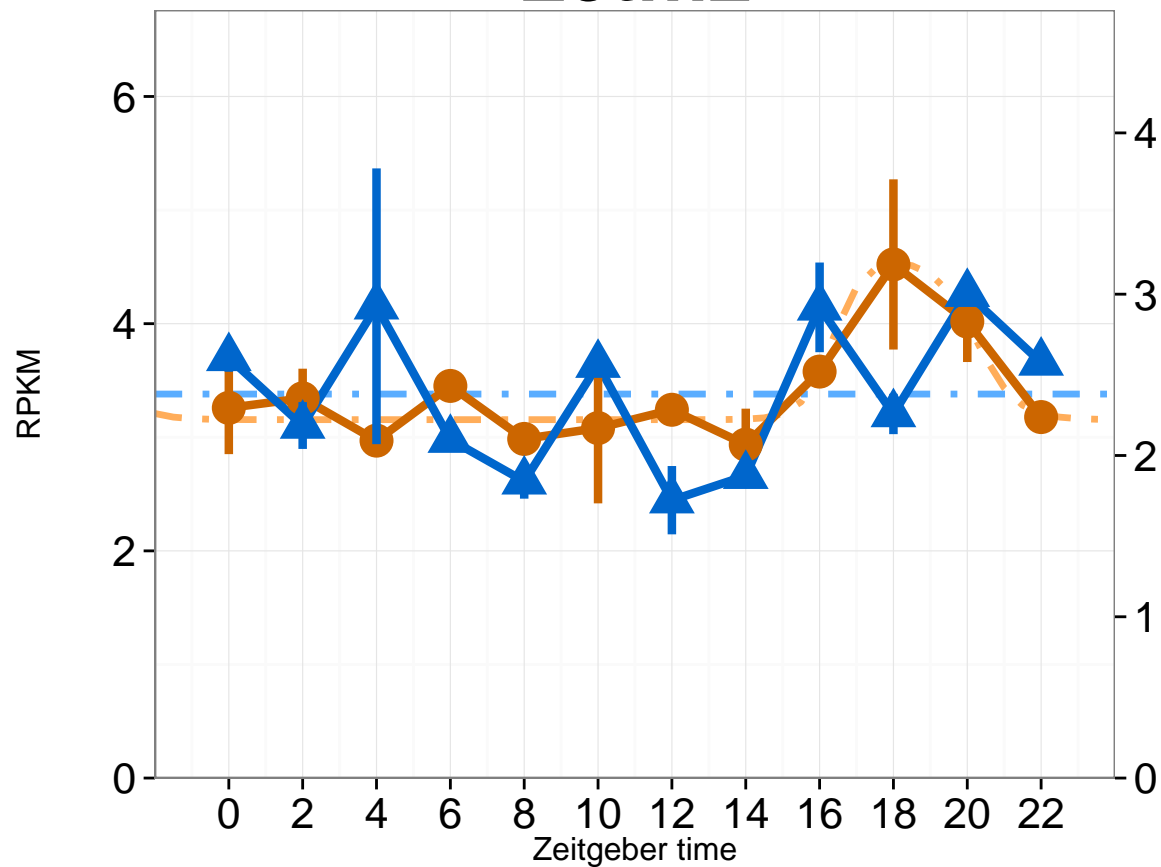

# Letm2

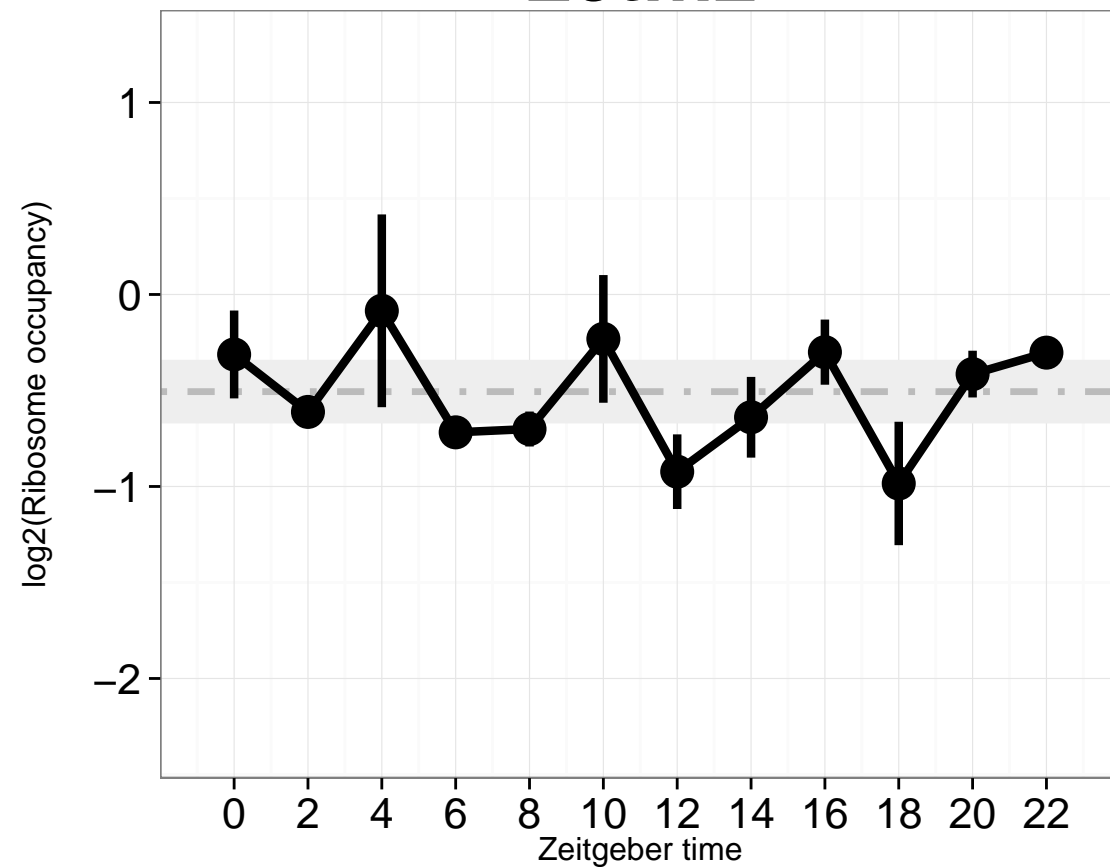

Supplement: Supplementary file 7160 [file 1]

## 2810428I15Rik

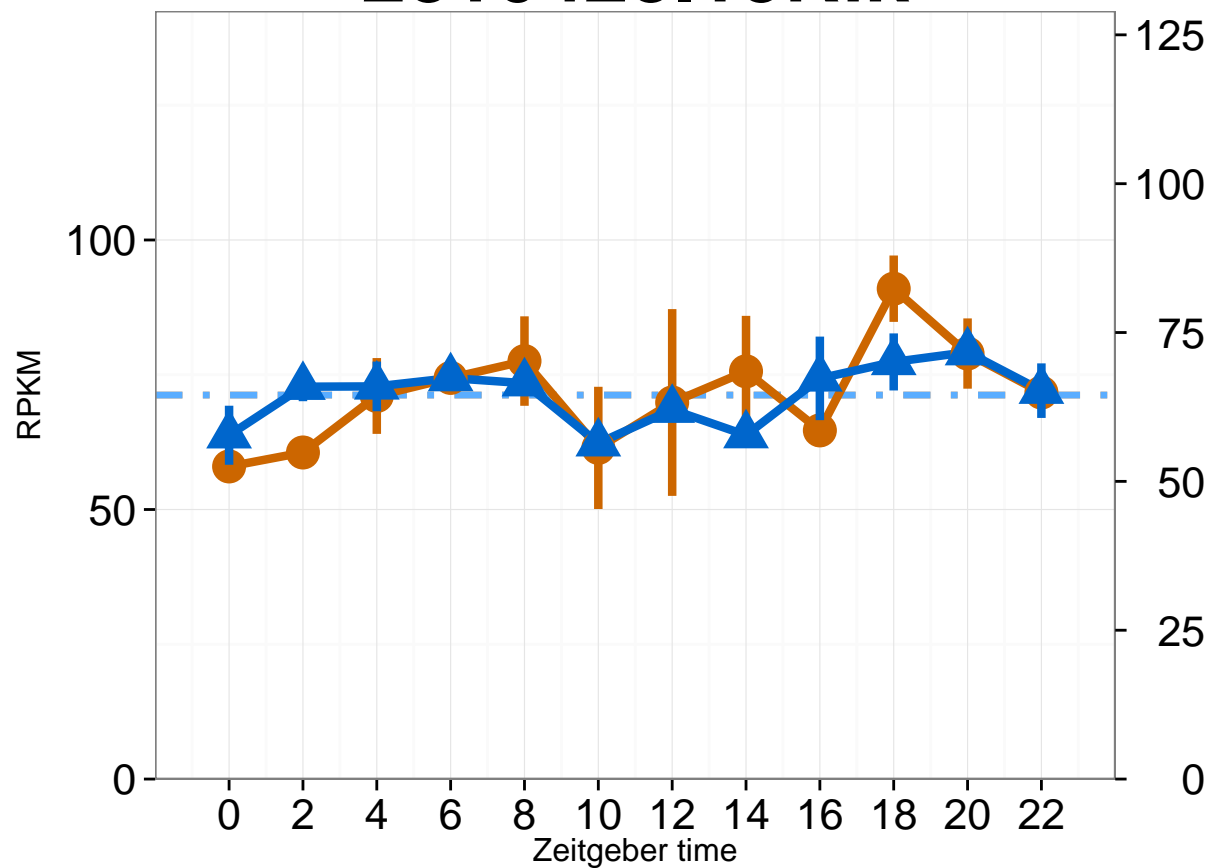

## 2810428I15Rik

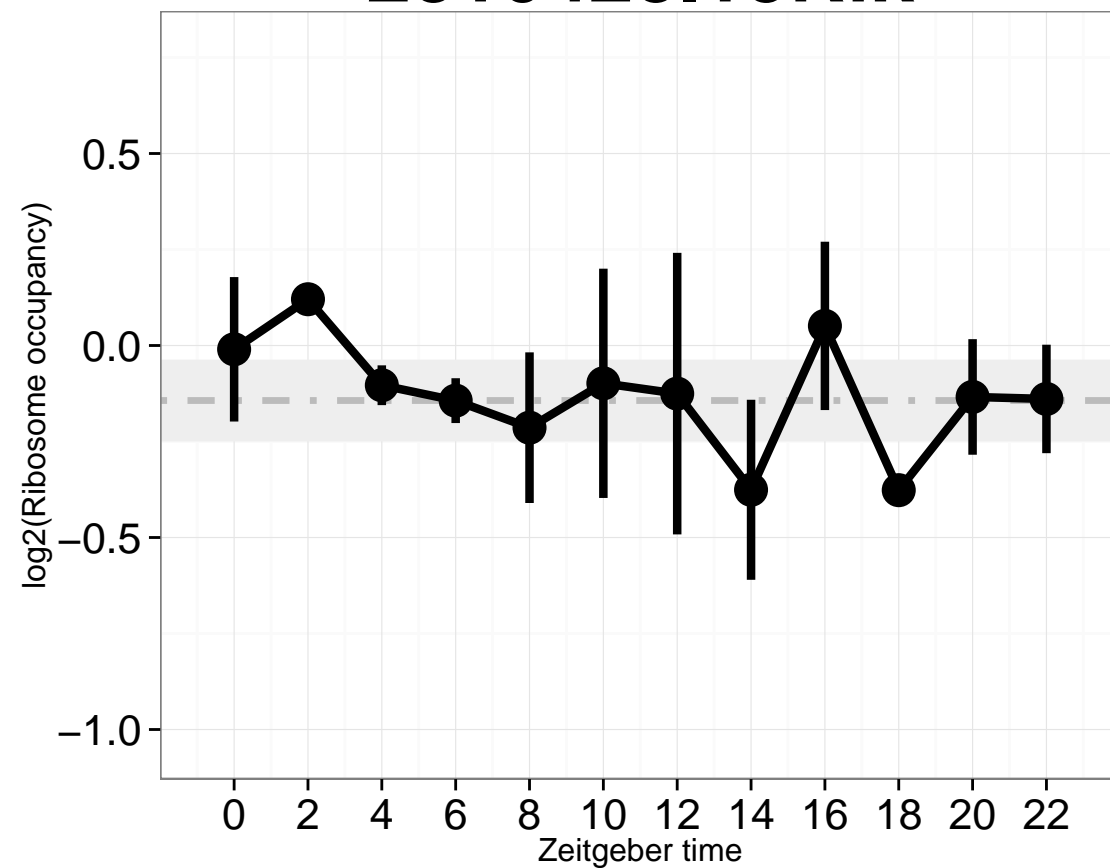

Supplement: Supplementary file 7161 [file 1]

## Fbxl15

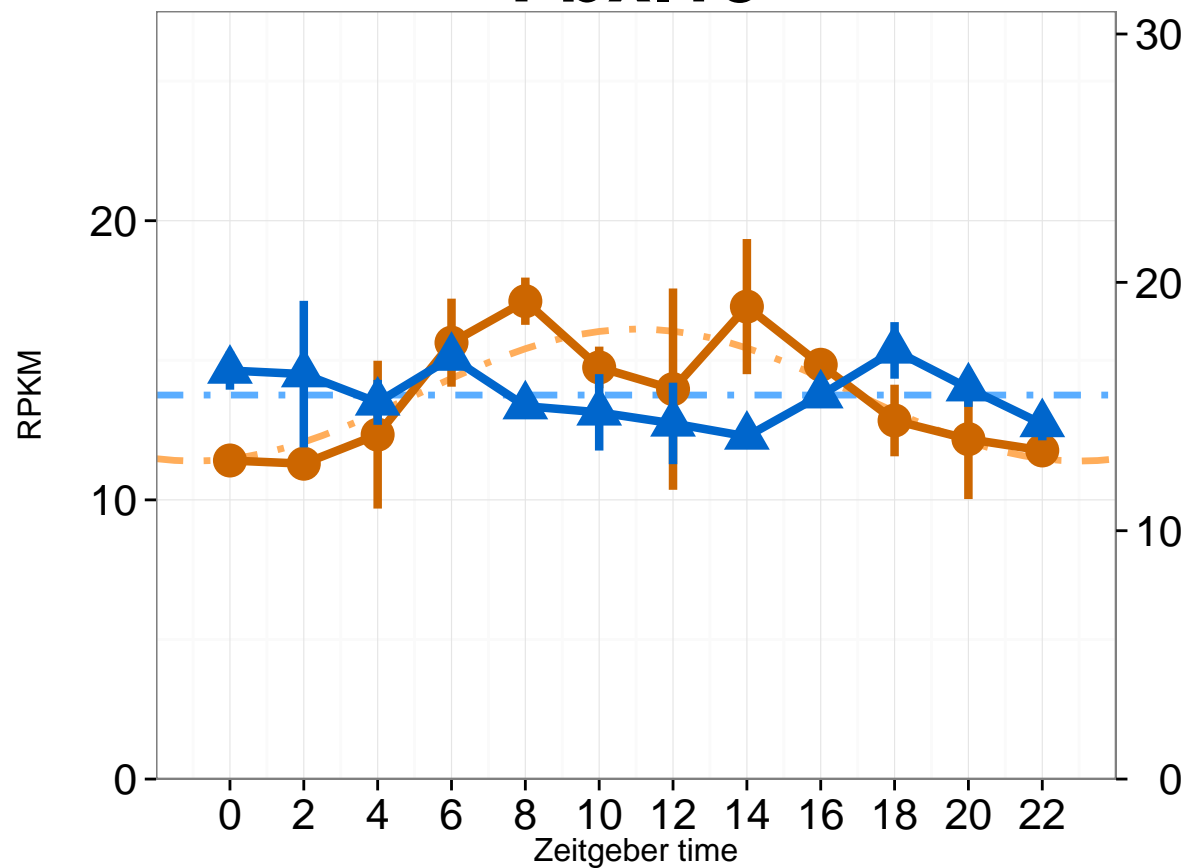

## Fbxl15

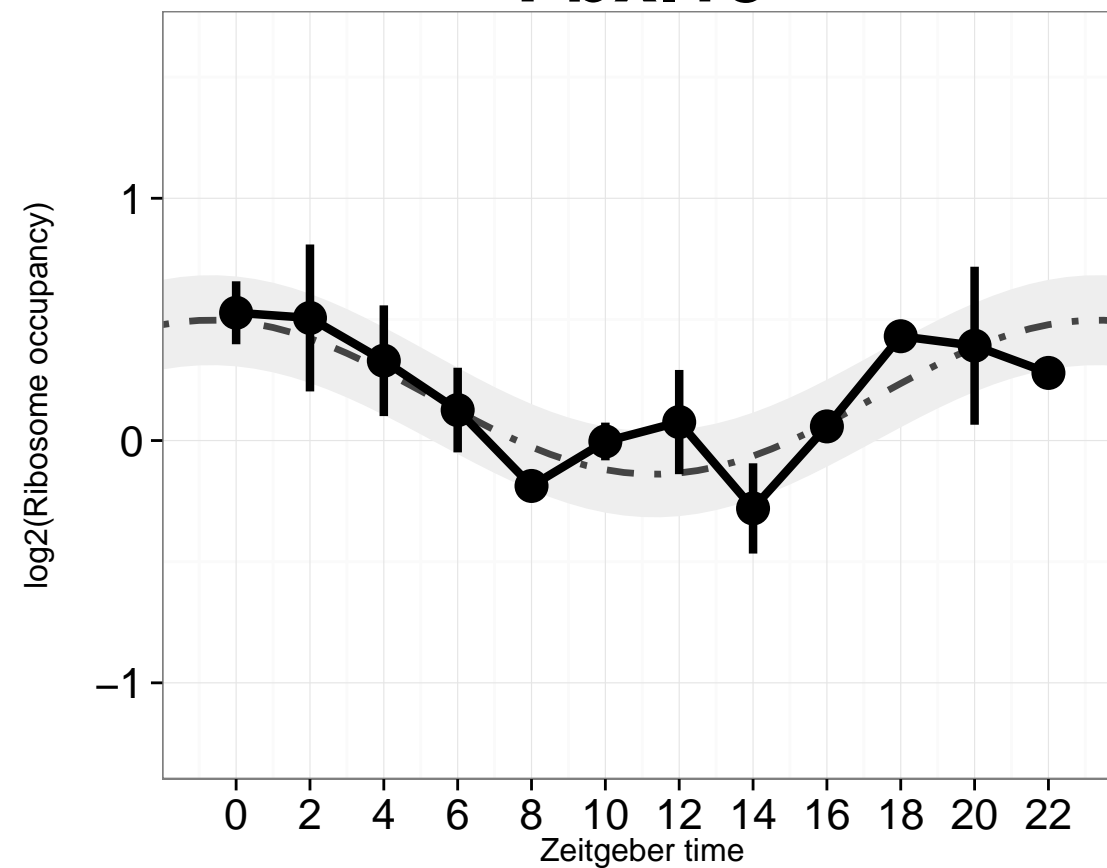

Supplement: Supplementary file 7162 [file 1]

# Cenpv

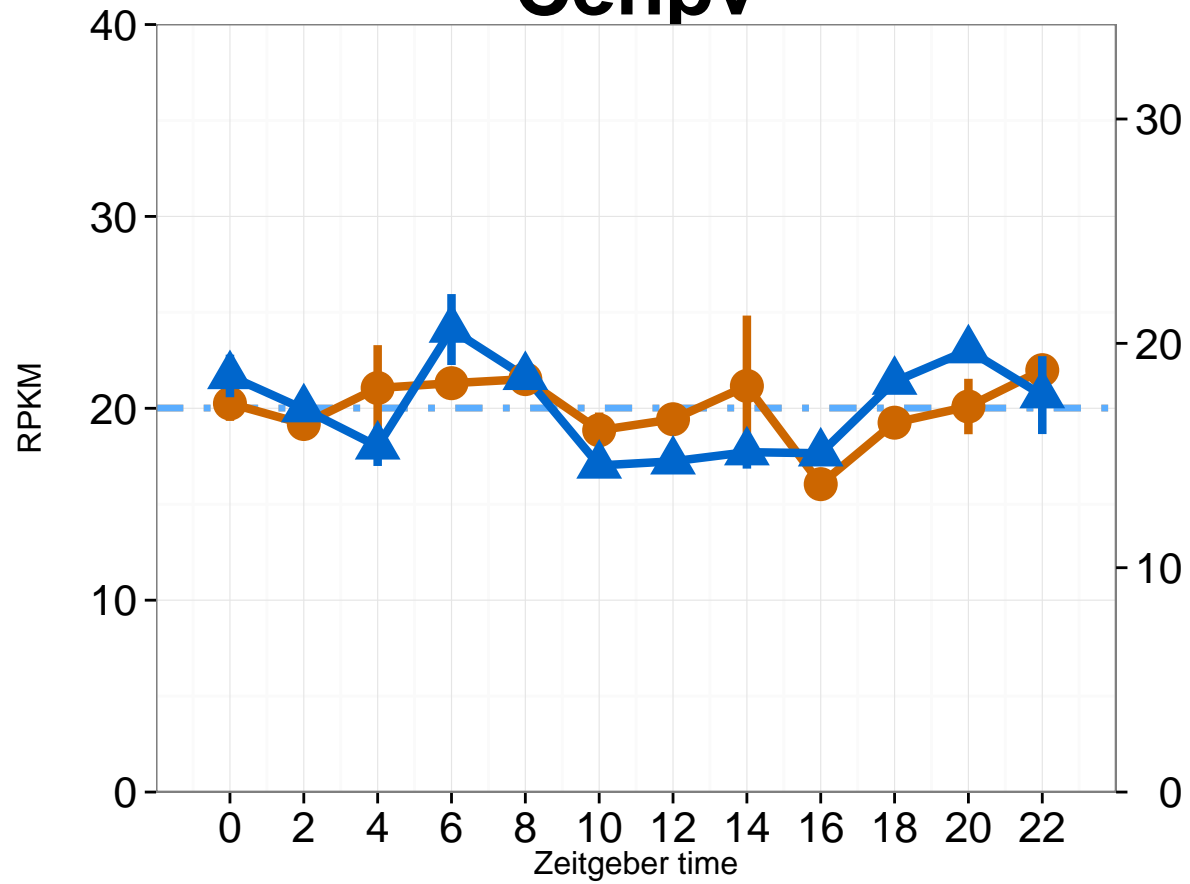

# Cenpv

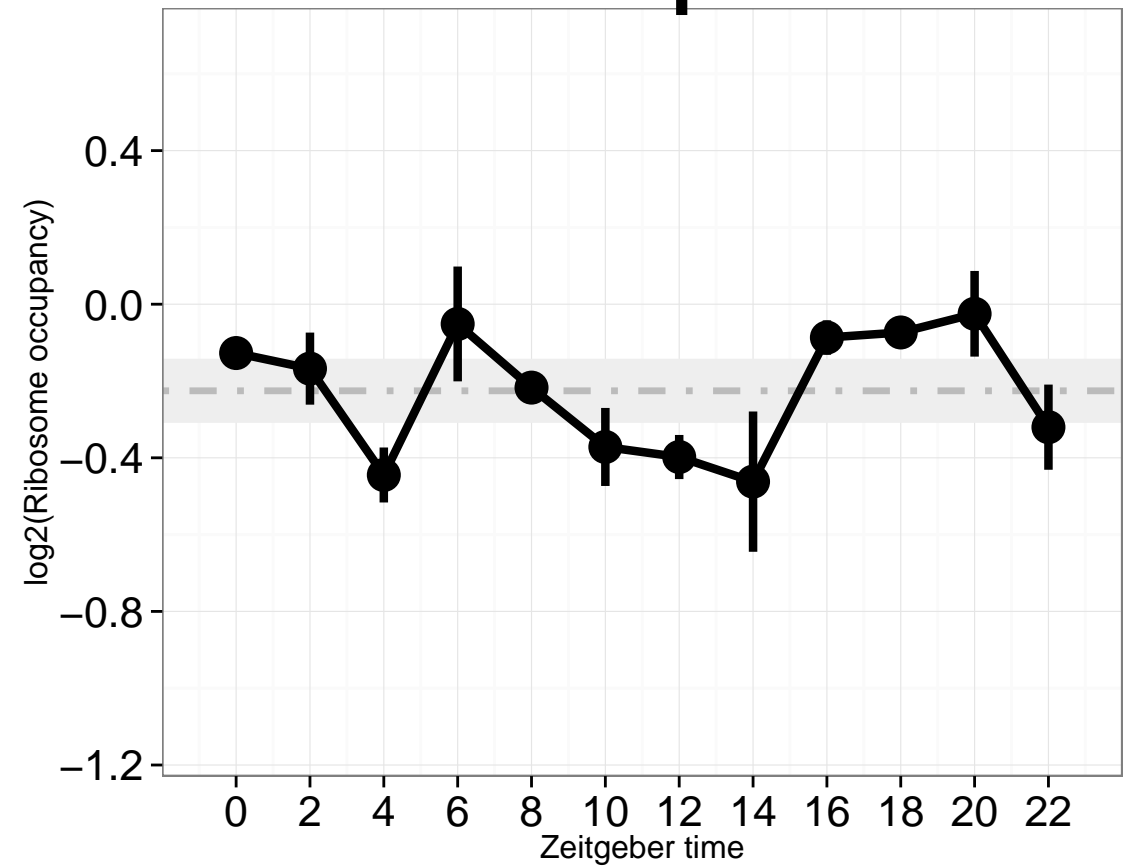

Supplement: Supplementary file 7163 [file 1]

# Trub1

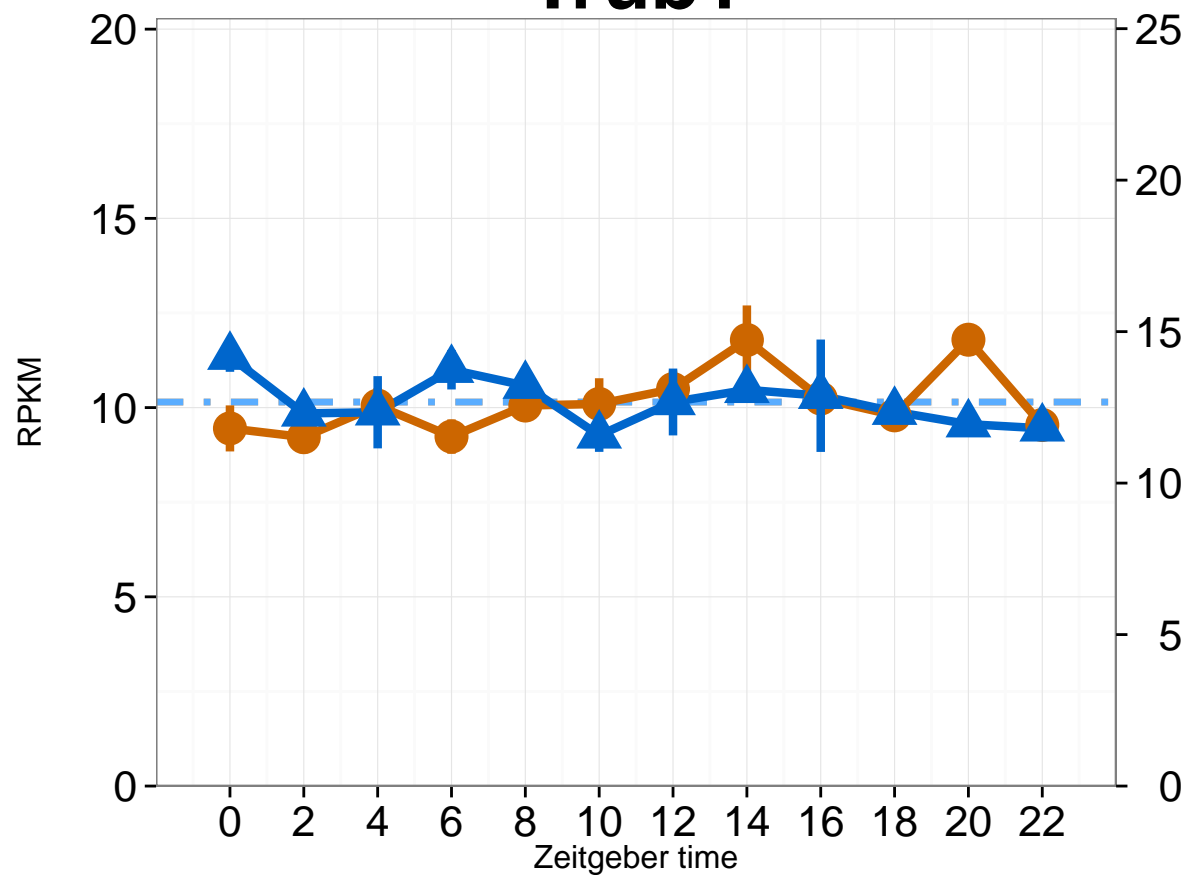

# Trub1

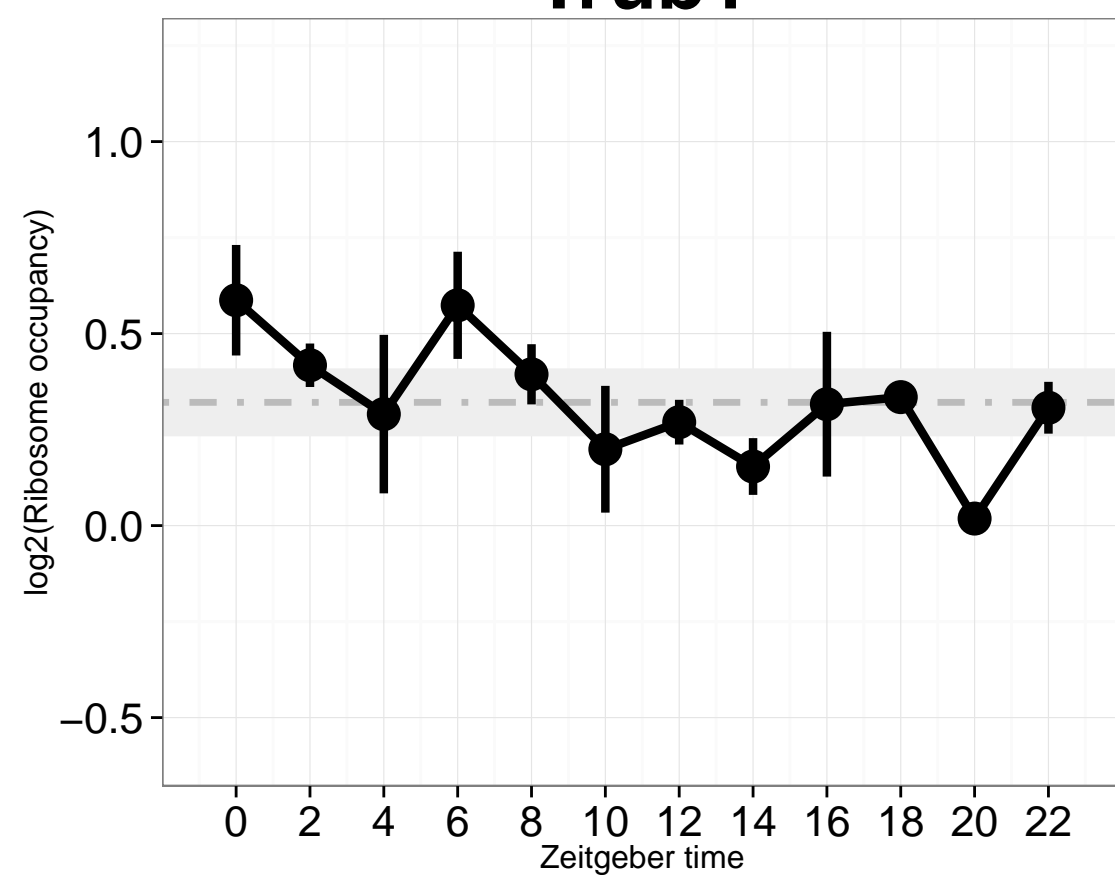

Supplement: Supplementary file 7164 [file 1]

## Cxxc1

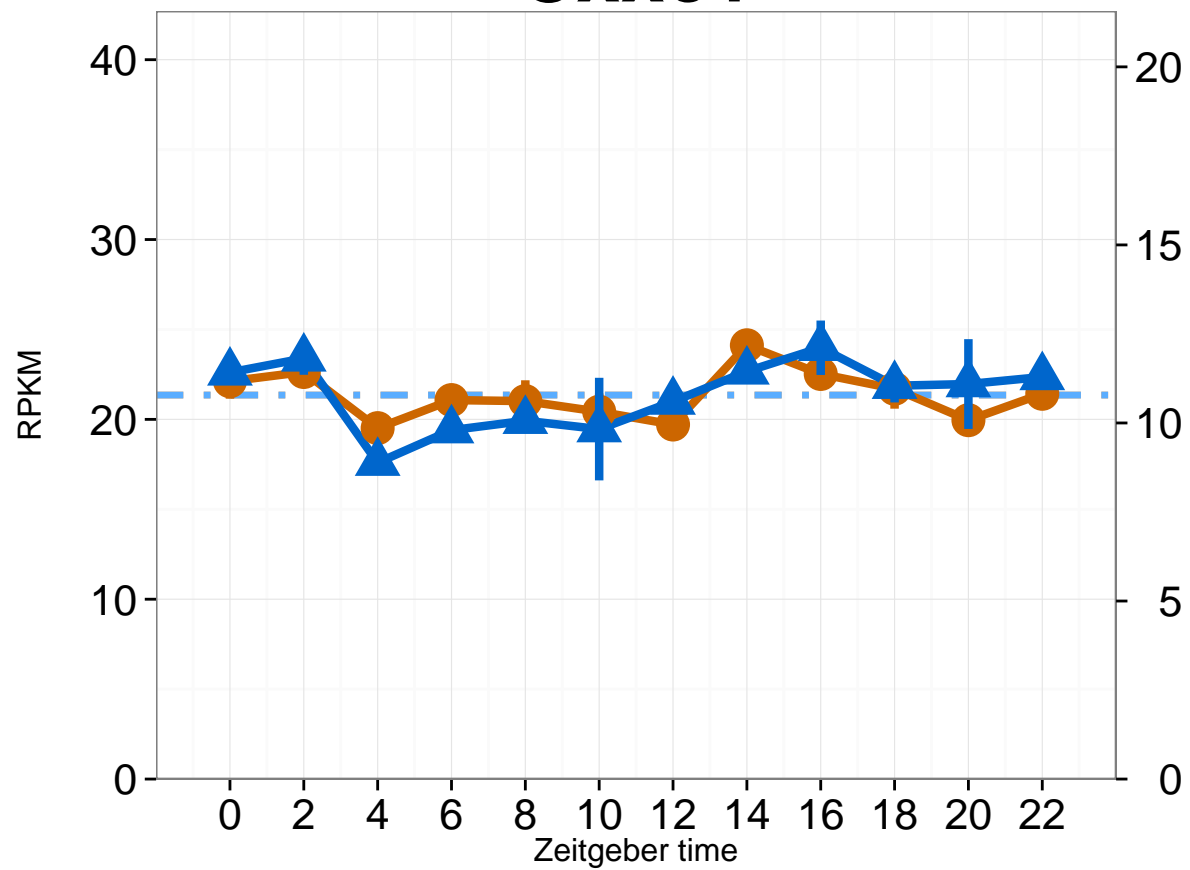

## Cxxc1

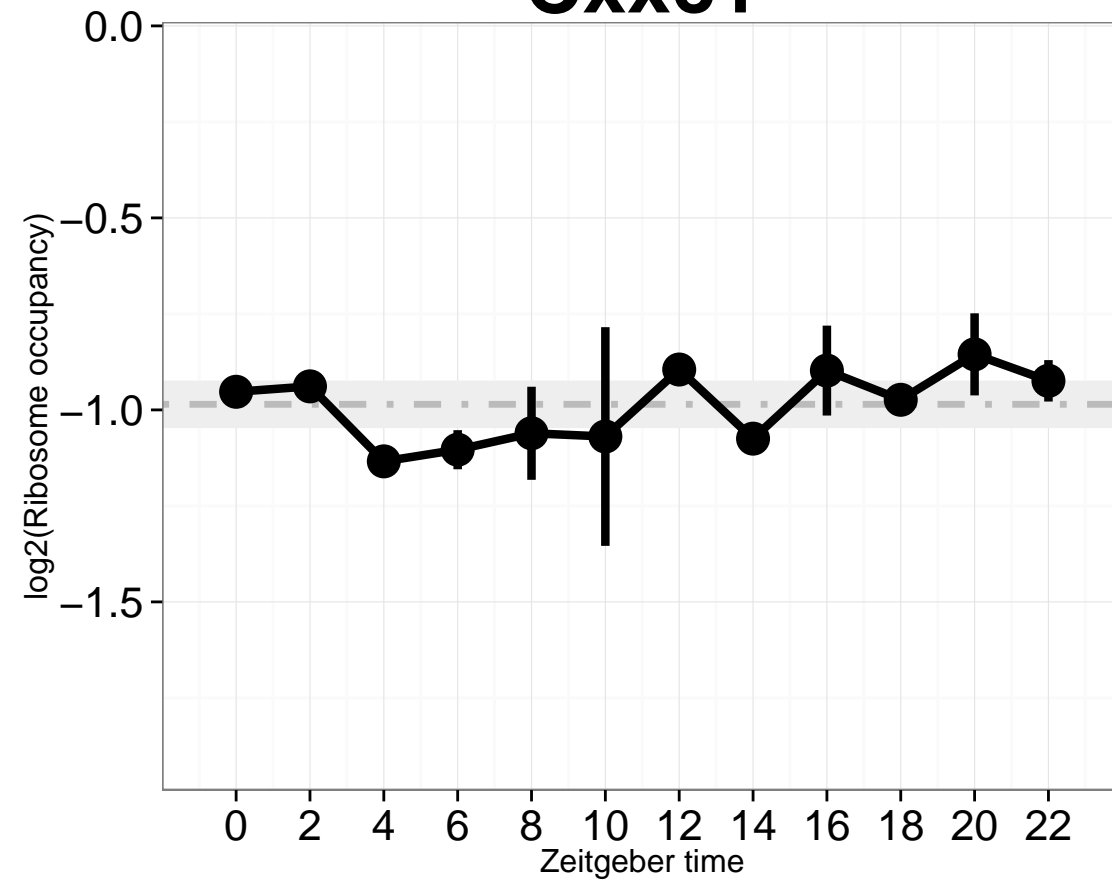

Supplement: Supplementary file 7165 [file 1]

## Arhgap32

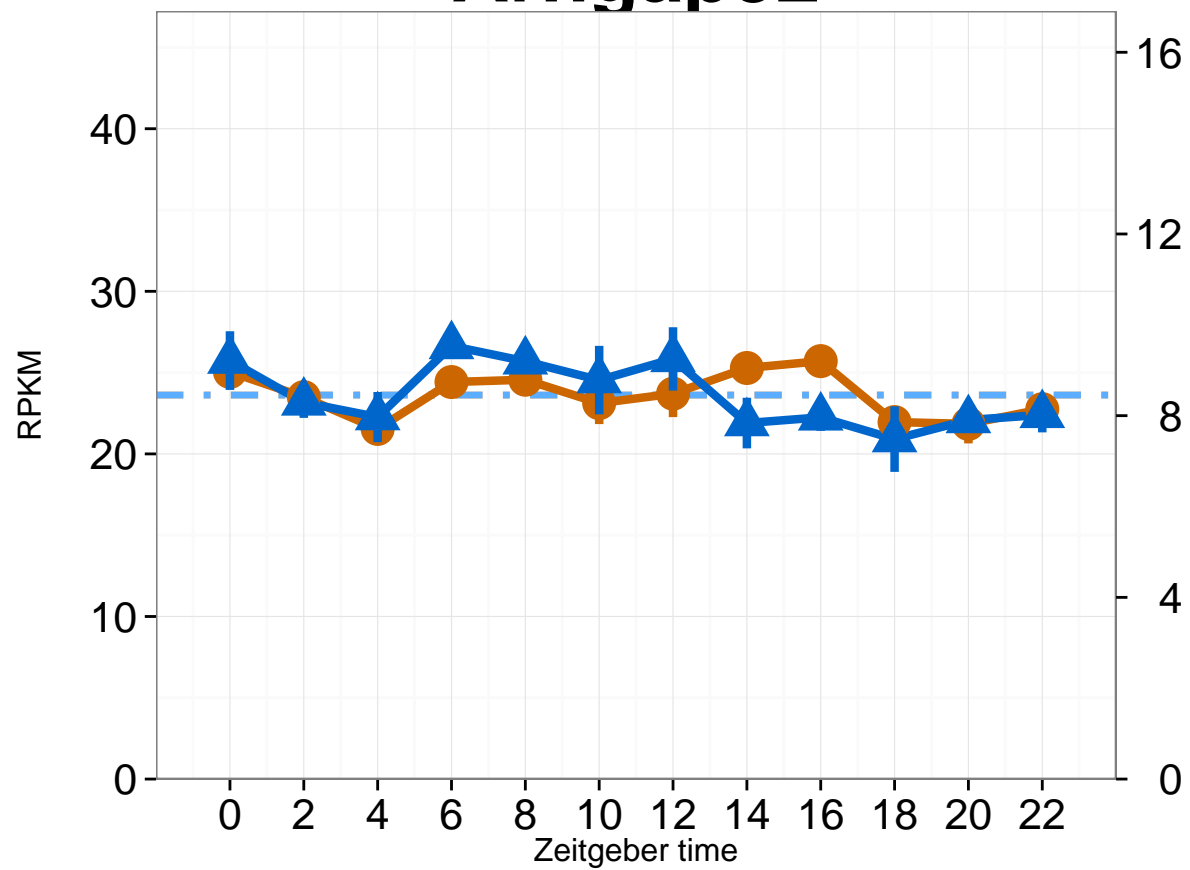

## Arhgap32

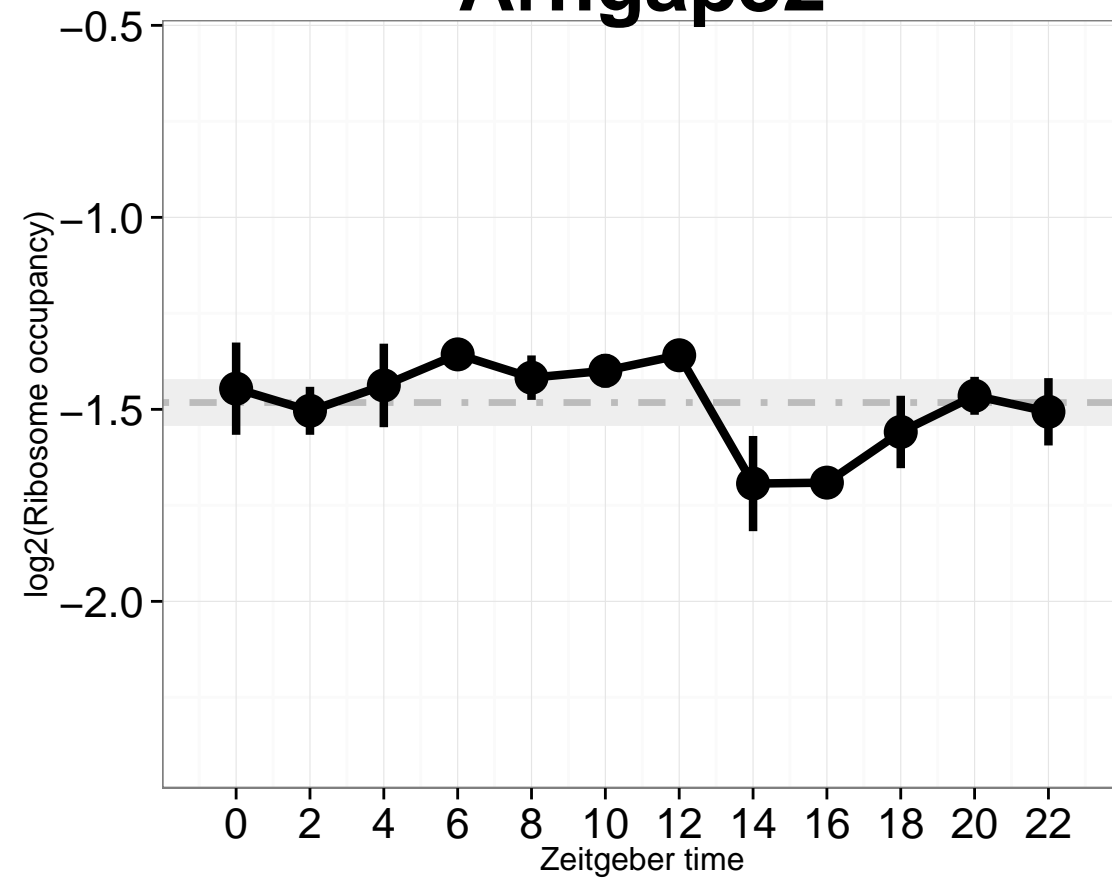

Supplement: Supplementary file 7166 [file 1]

## Nod2

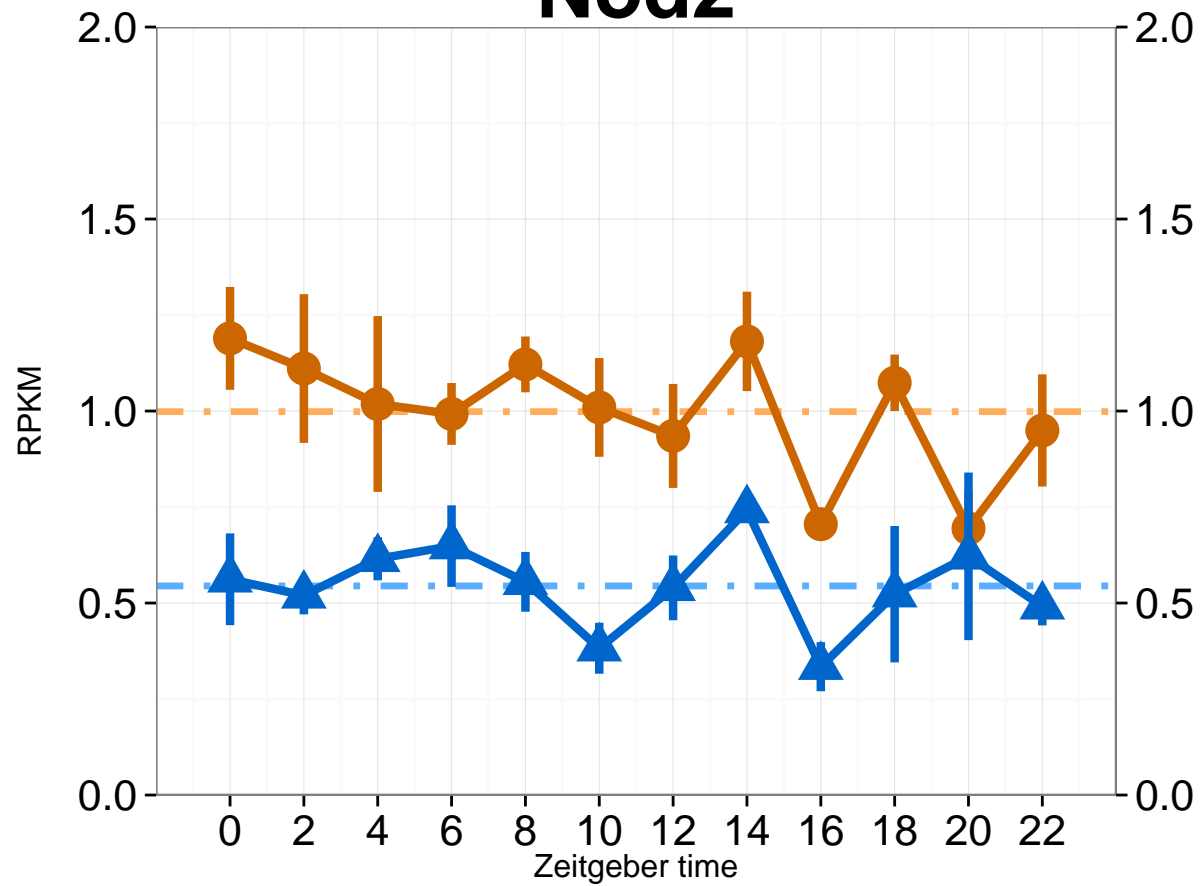

## Nod2

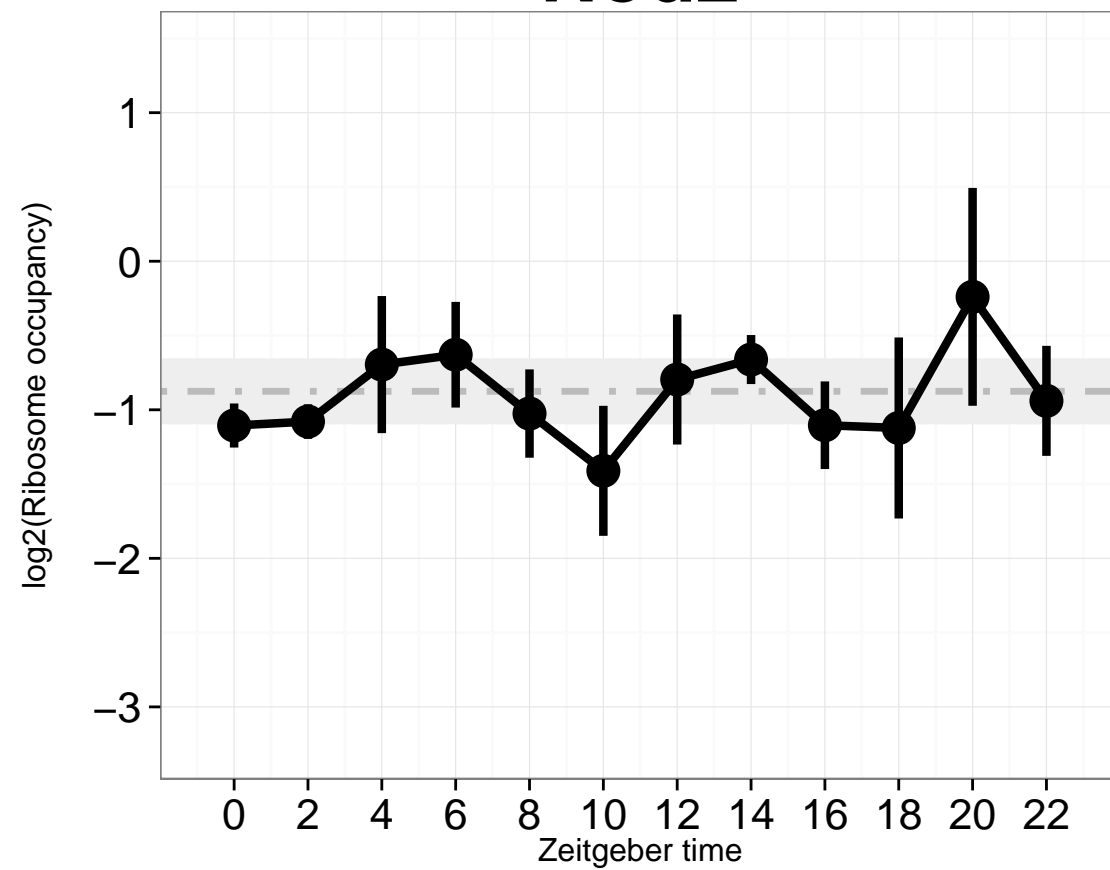

Supplement: Supplementary file 7167 [file 1]

# Lsm14a

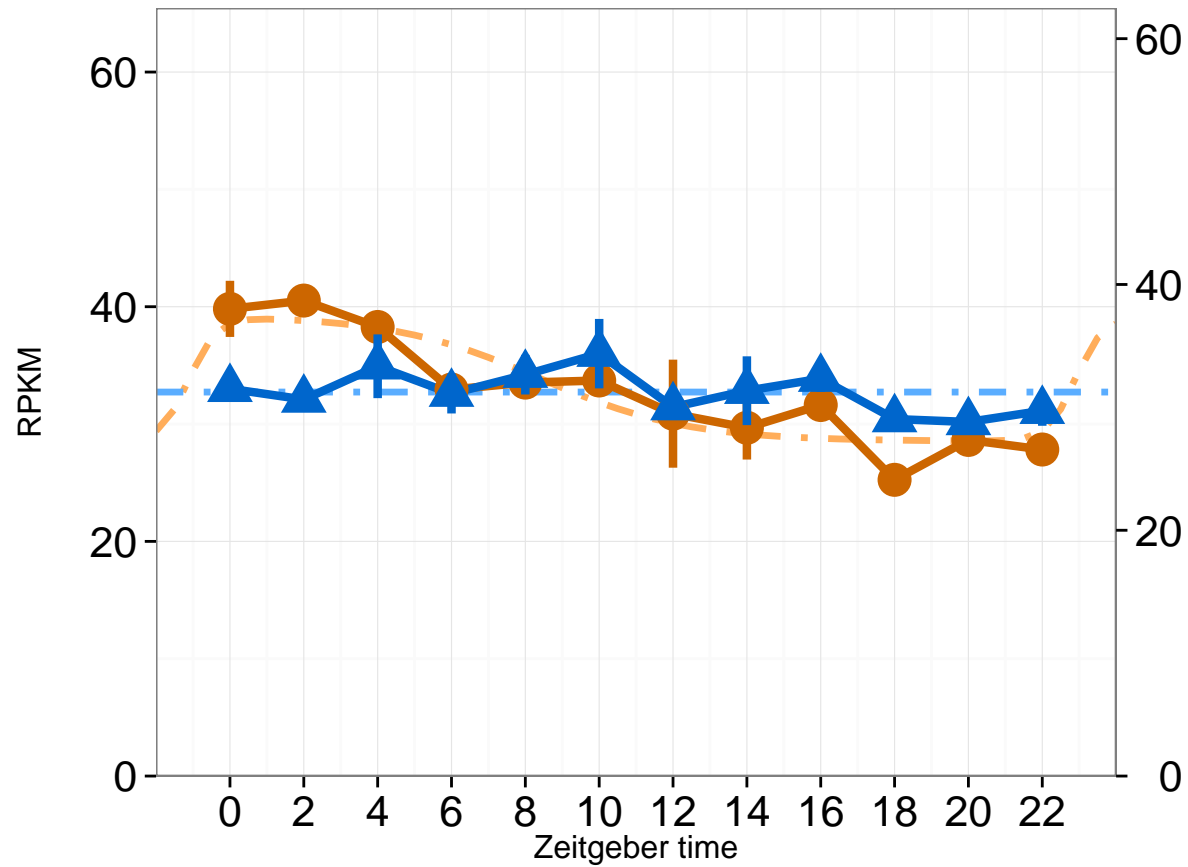

# Lsm14a

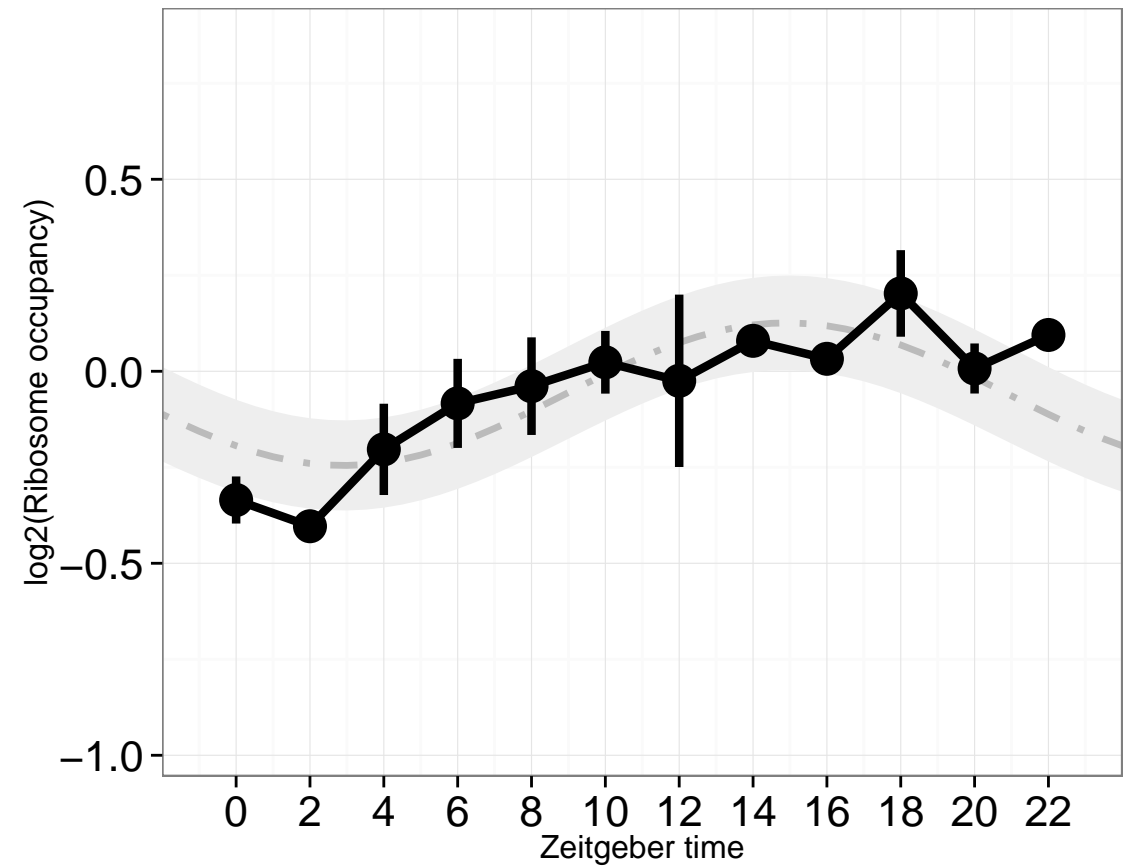

Supplement: Supplementary file 7168 [file 1]

## Pemt

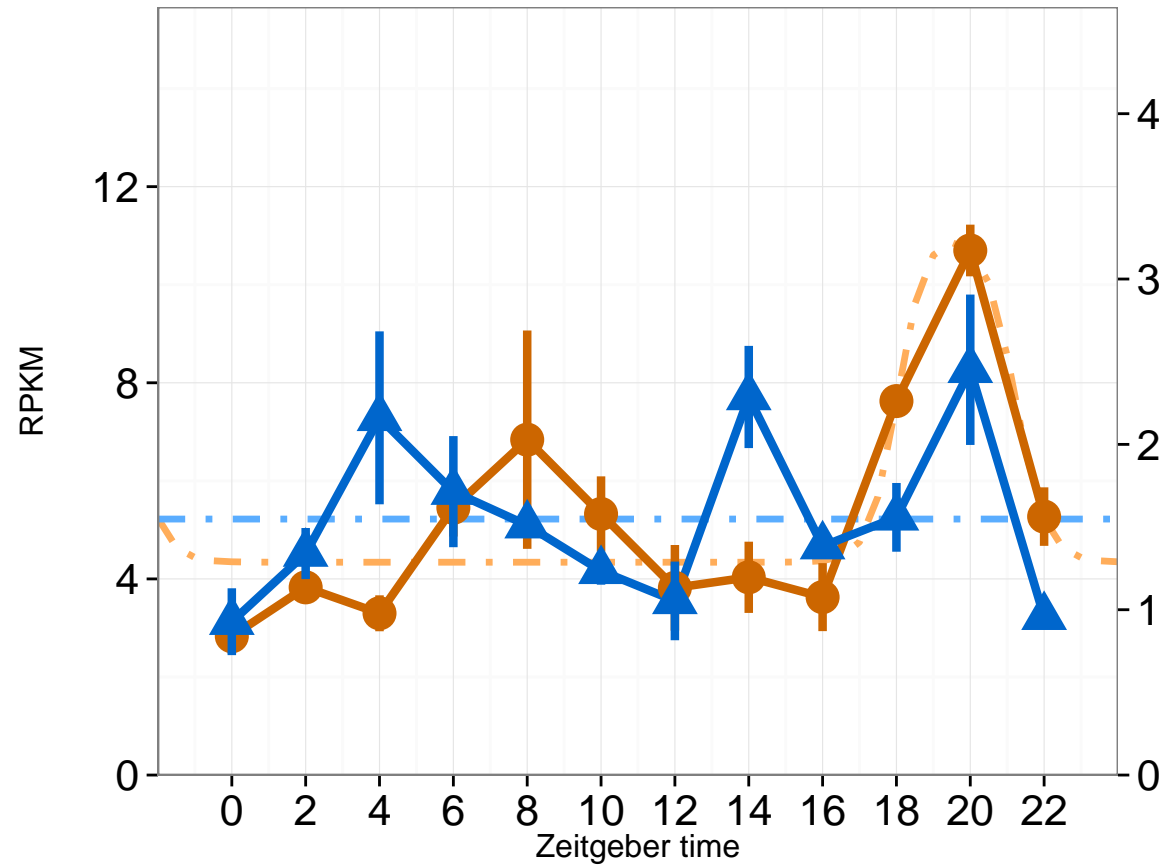

## Pemt

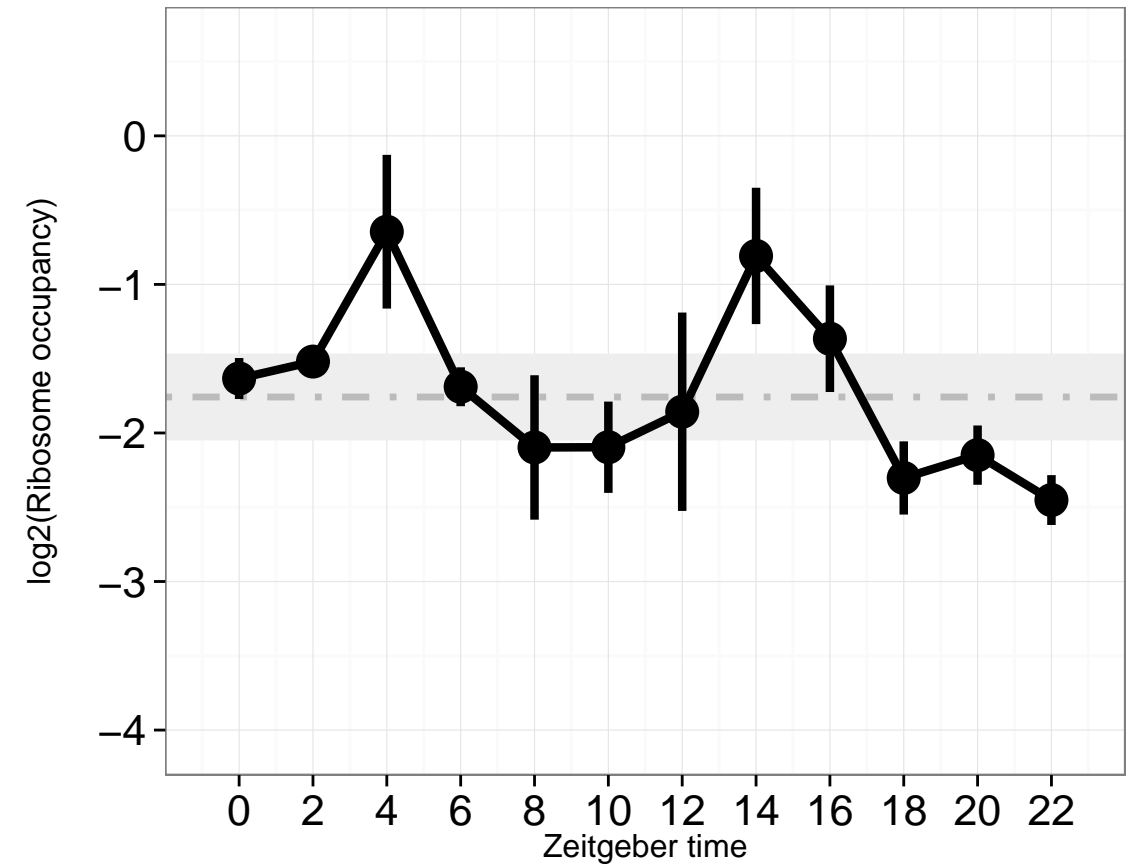

Supplement: Supplementary file 7169 [file 1]

## Irf6

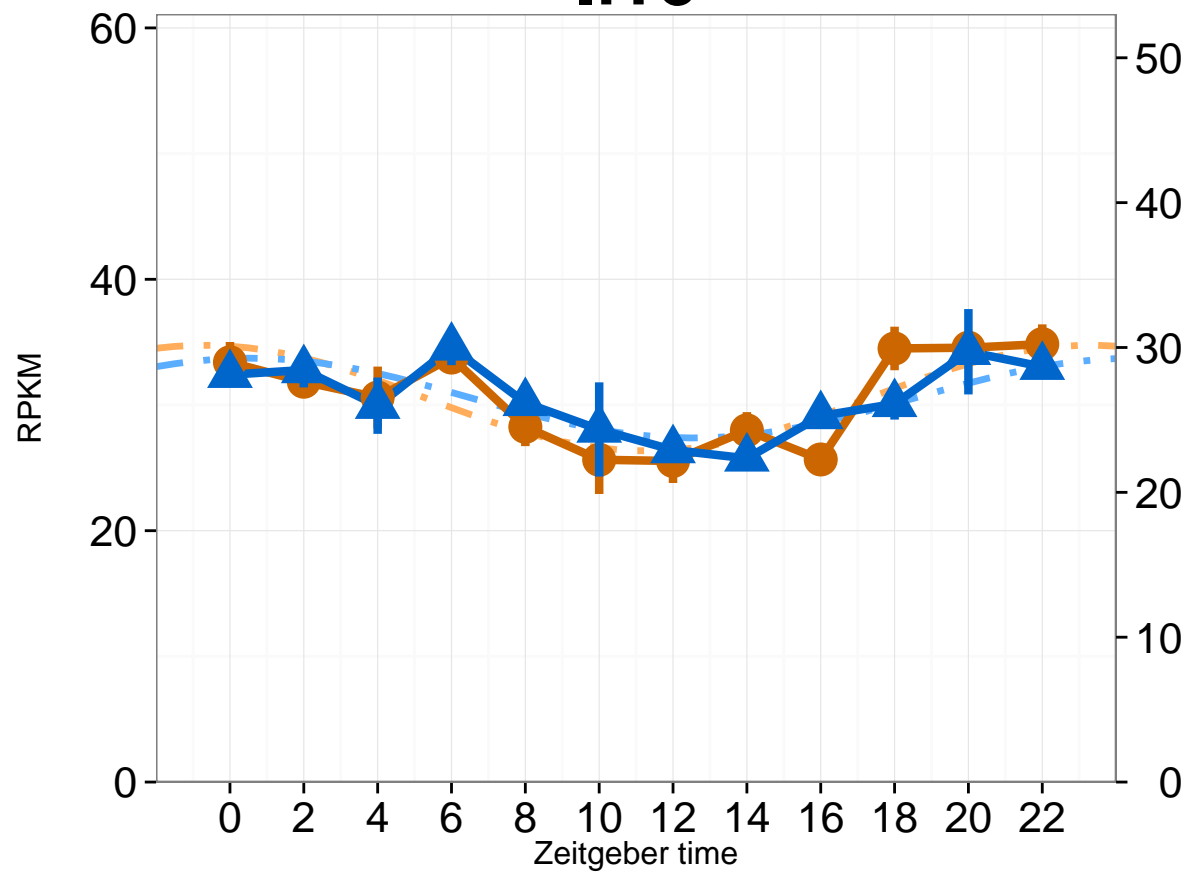

## Irf6

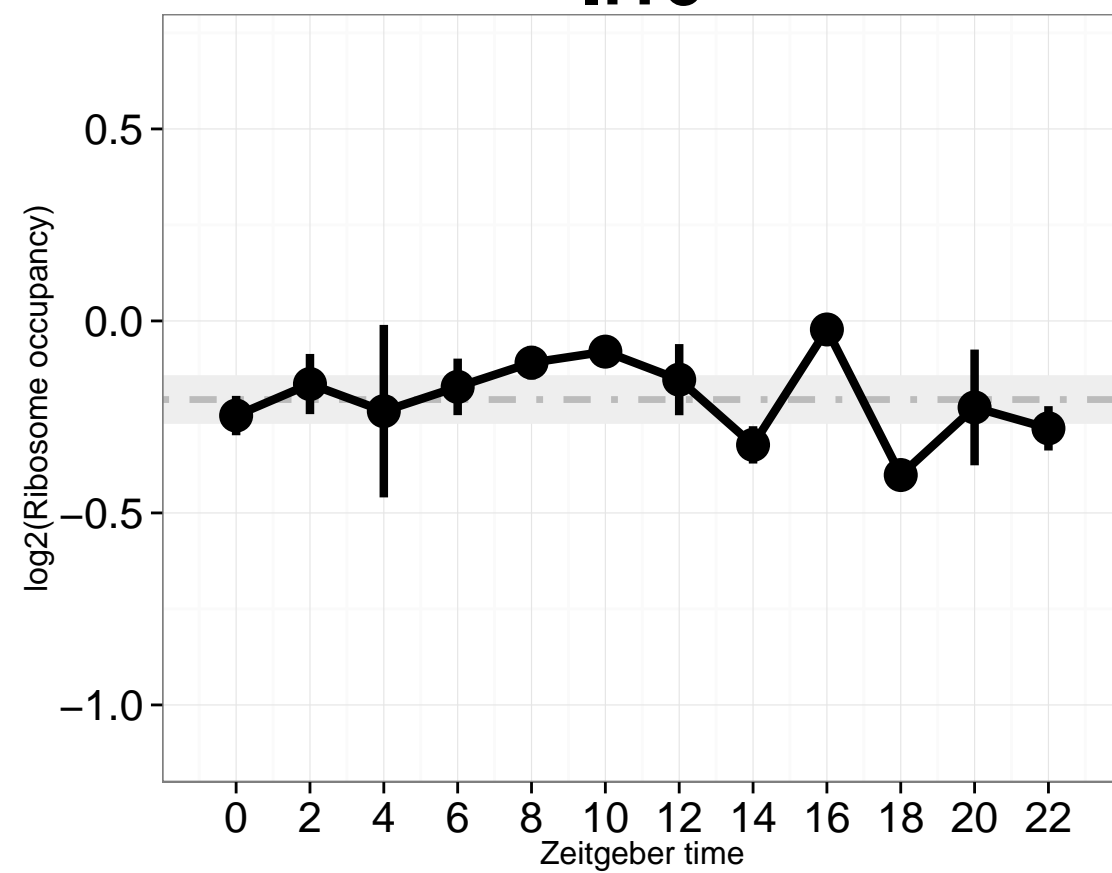

Supplement: Supplementary file 7170 [file 1]

## Hcfc2

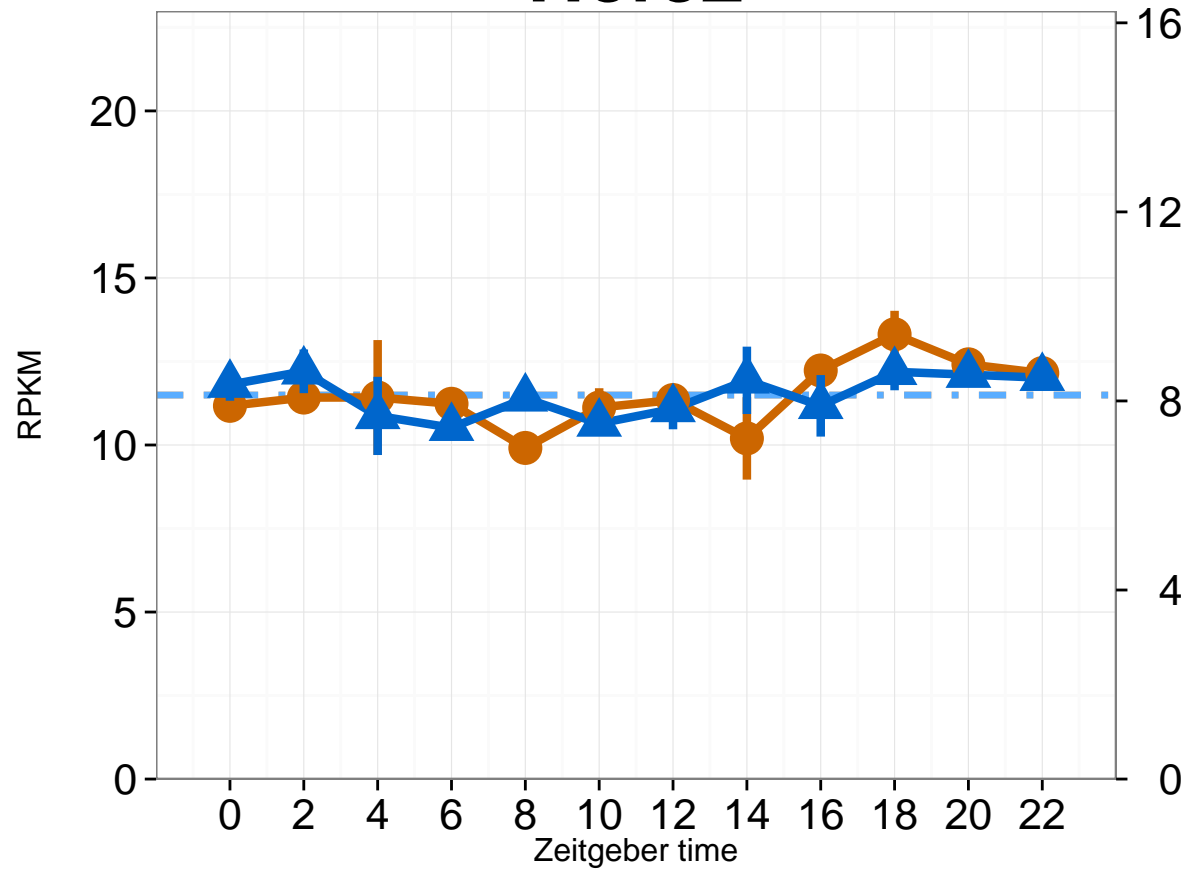

## Hcfc2

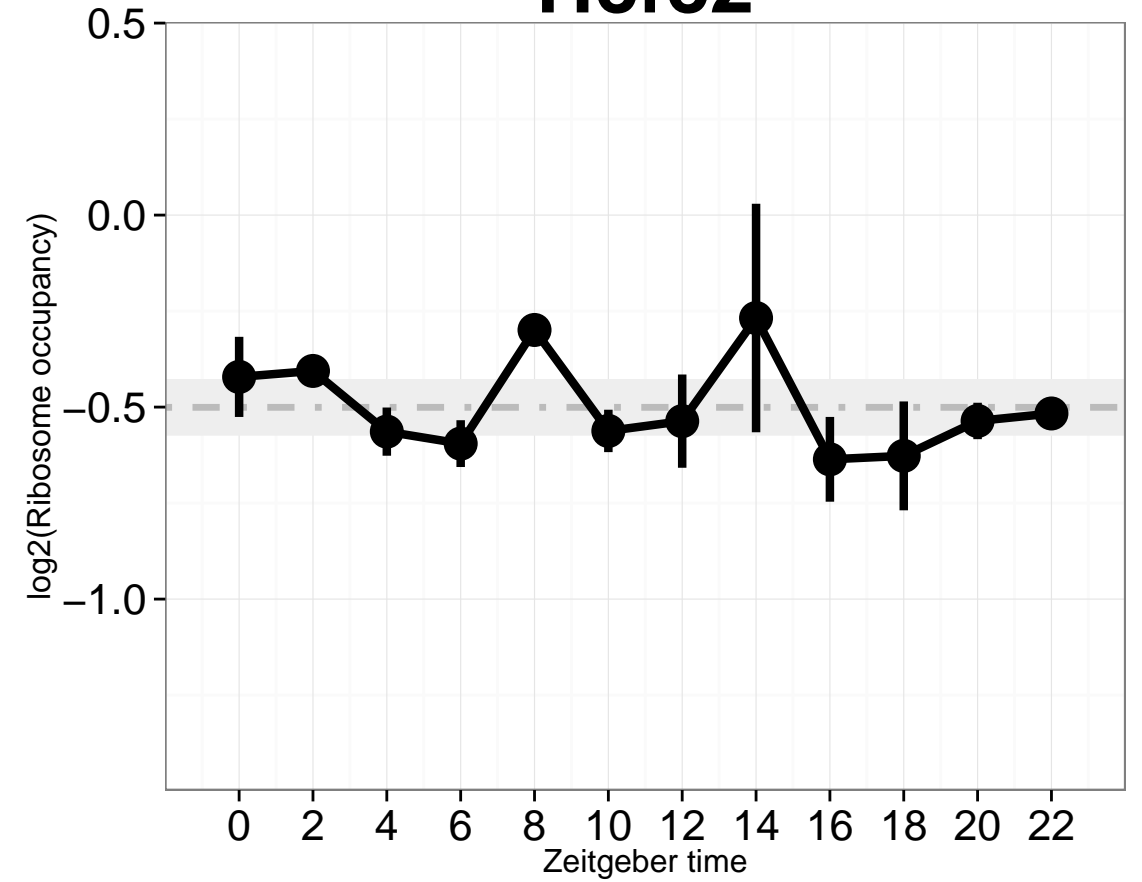

Supplement: Supplementary file 7171 [file 1]

# Ptger4

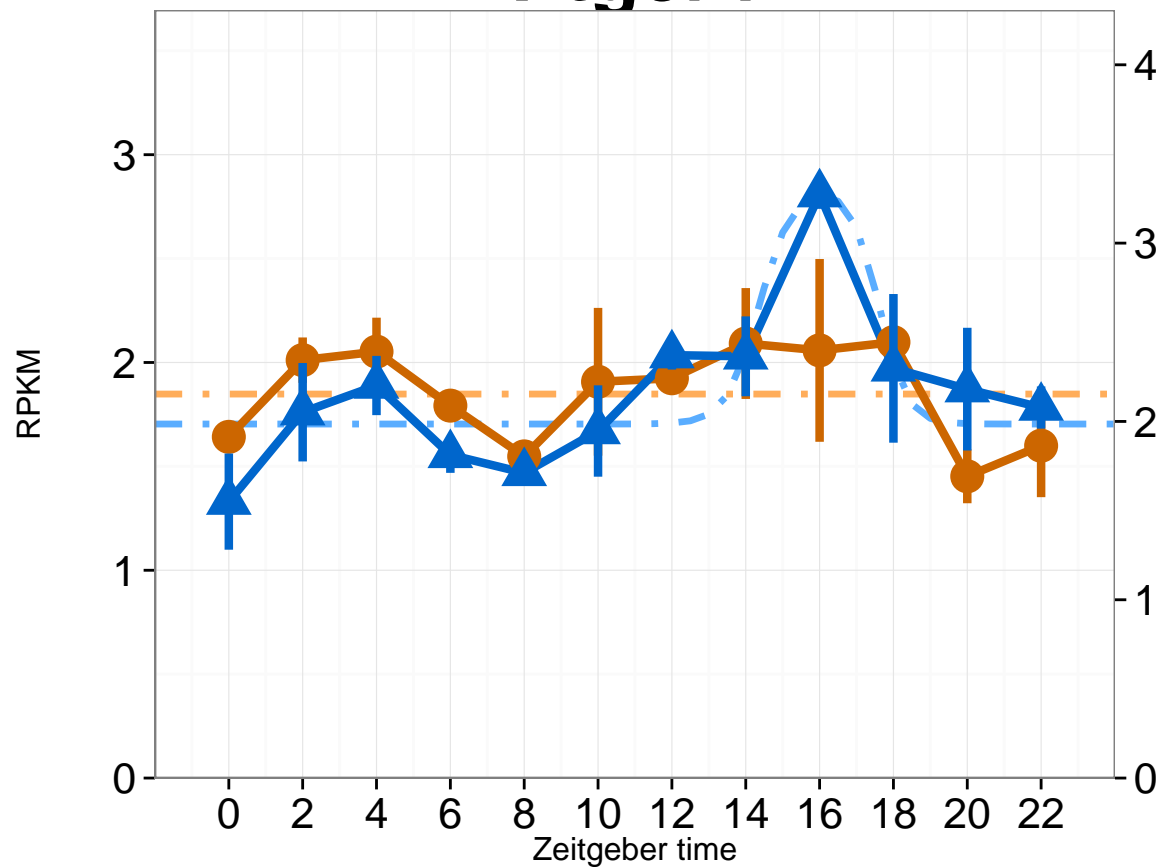

# Ptger4

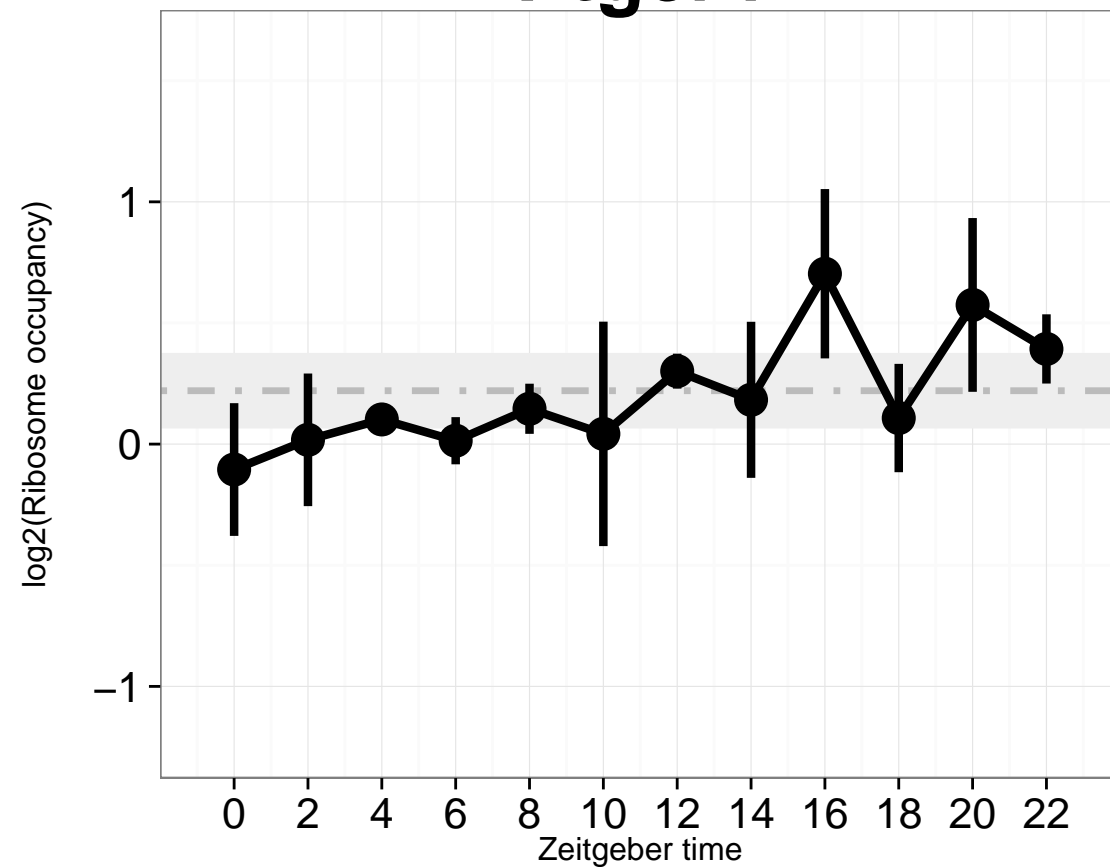

Supplement: Supplementary file 7172 [file 1]

# Zmat1

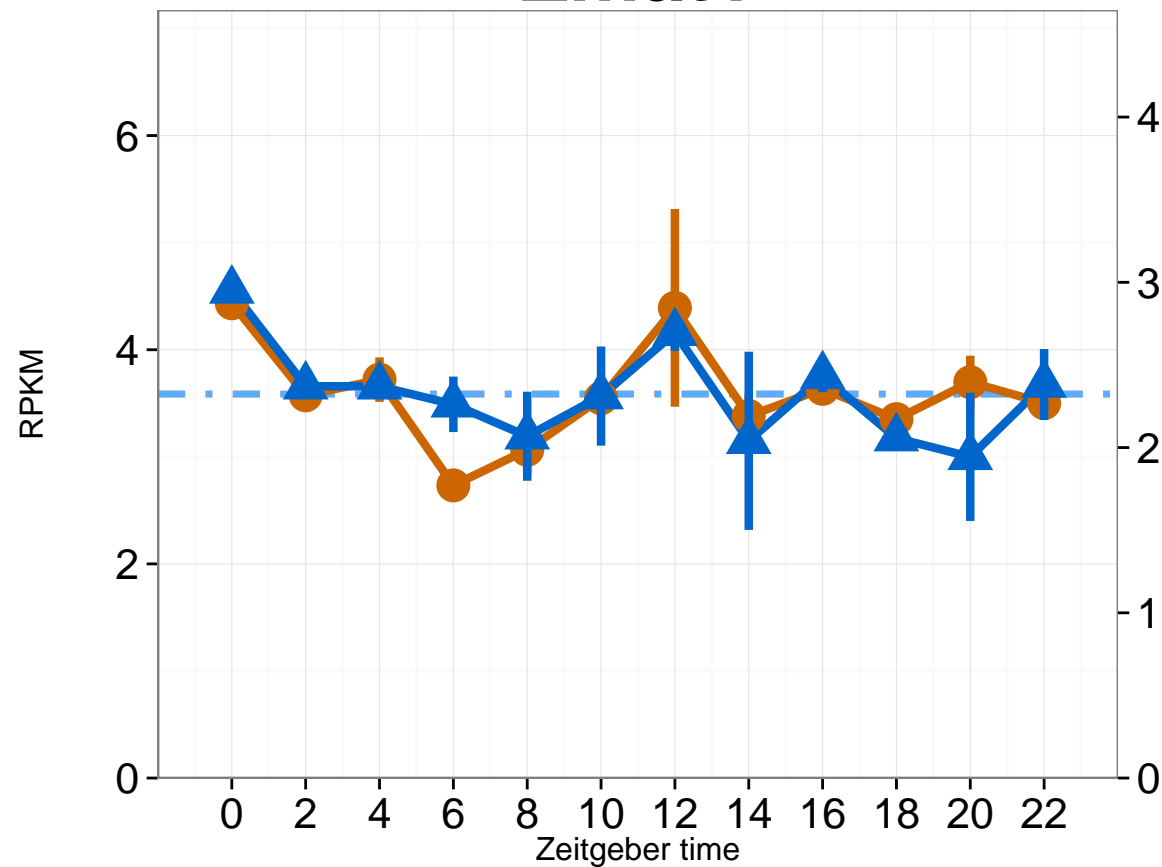

# Zmat1

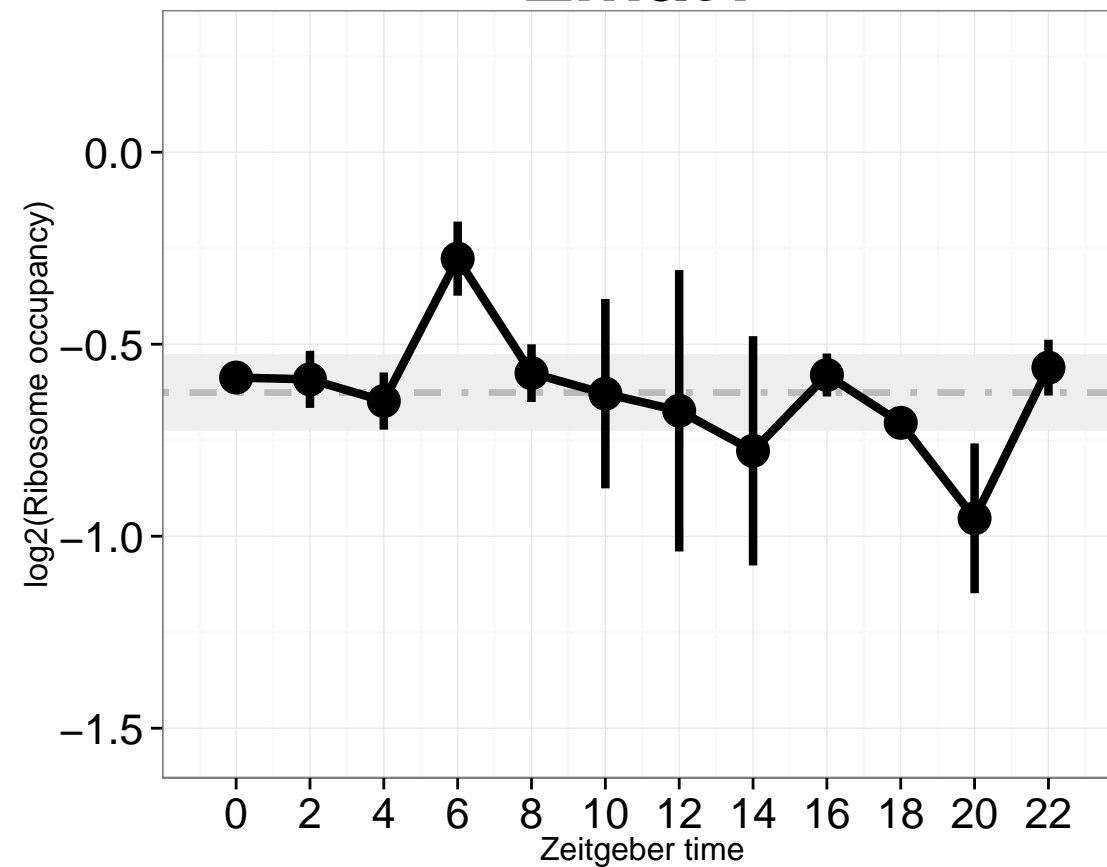

Supplement: Supplementary file 7173 [file 1]

# Ankrd46

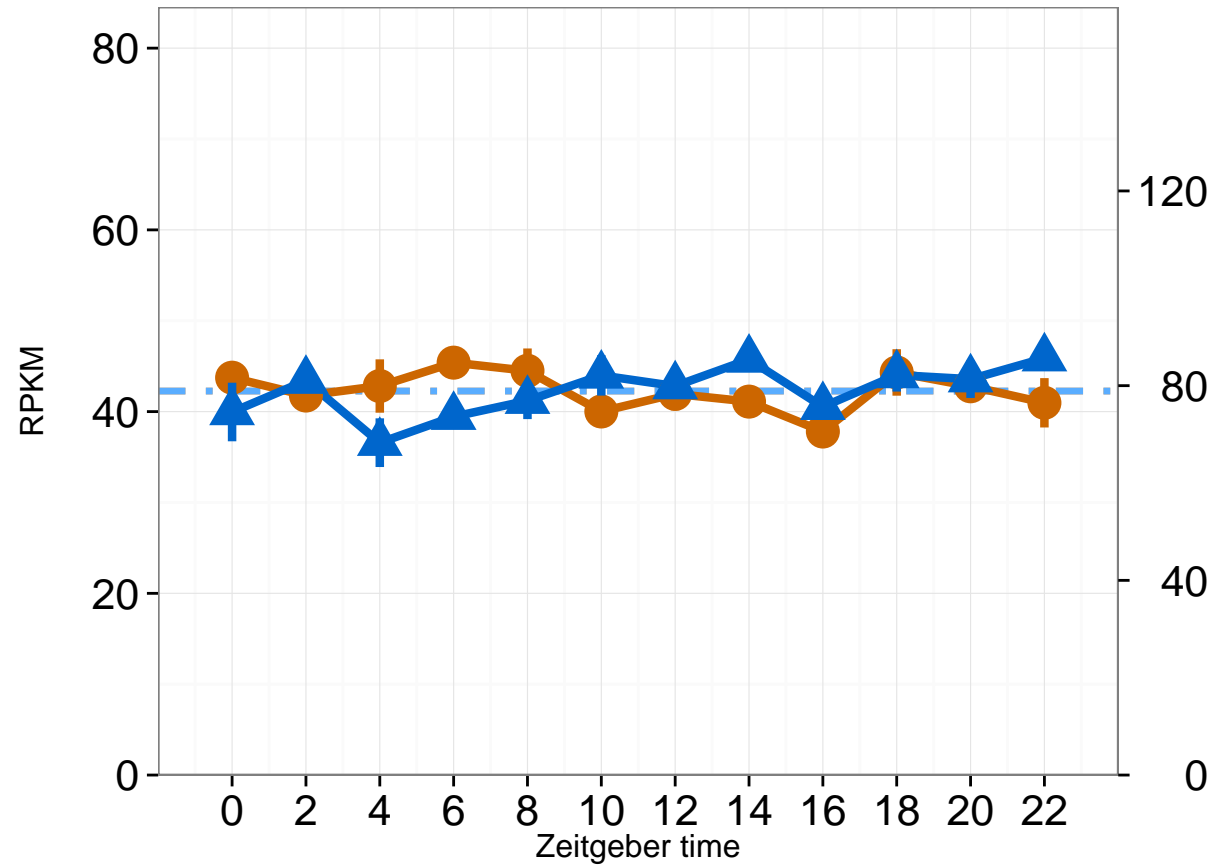

# Ankrd46

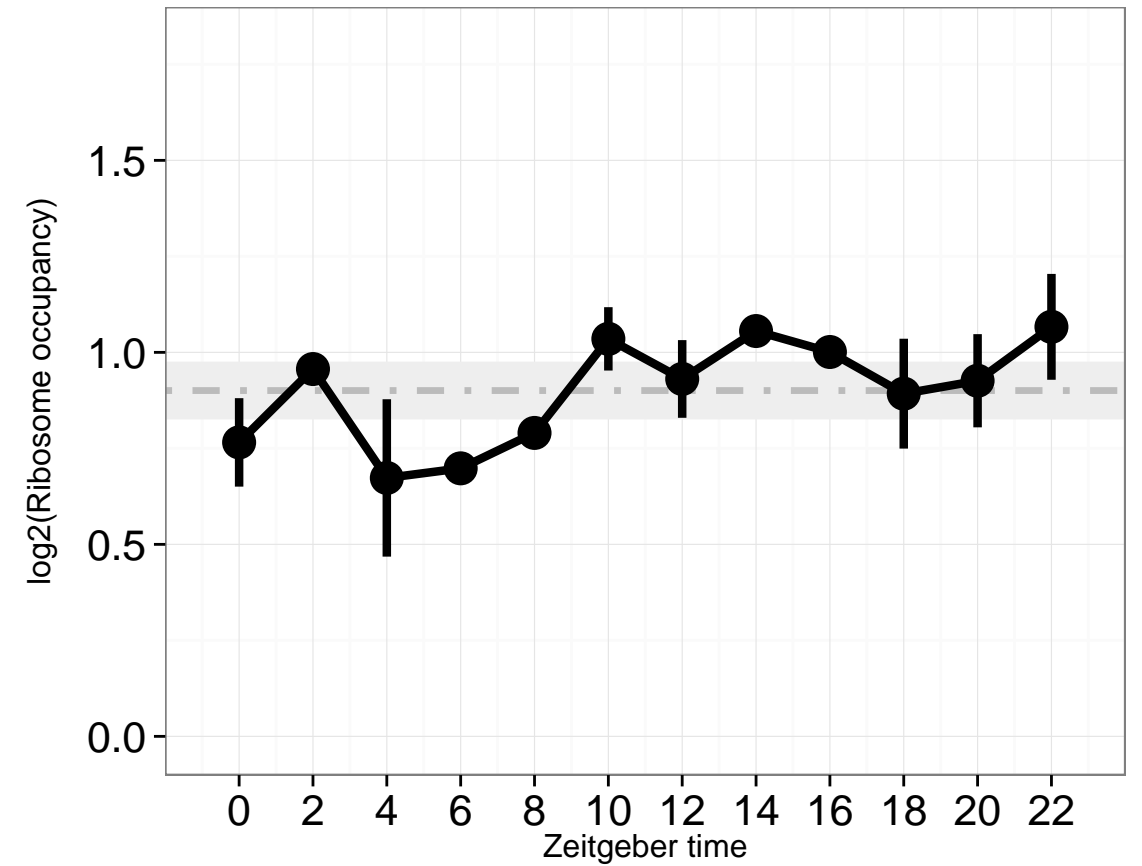

Supplement: Supplementary file 7174 [file 1]

# Sppl2a

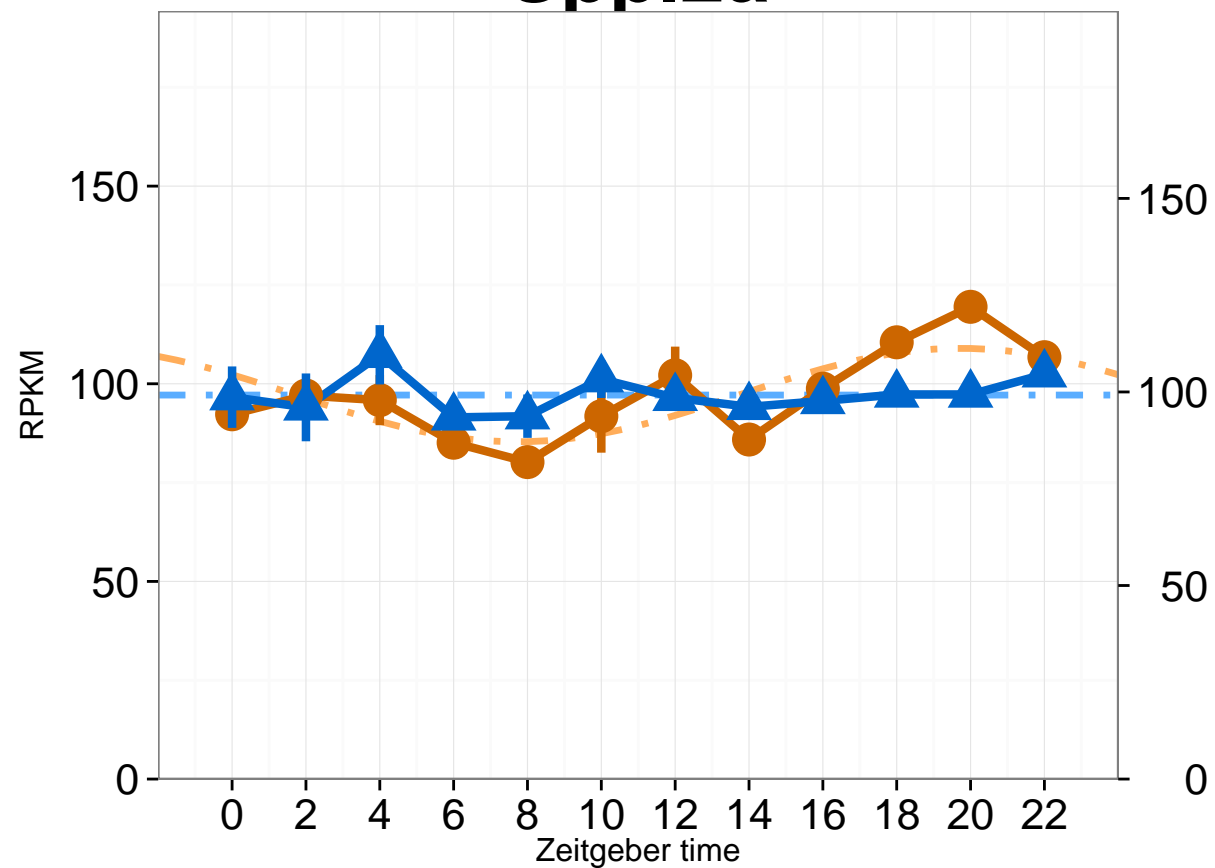

# Sppl2a

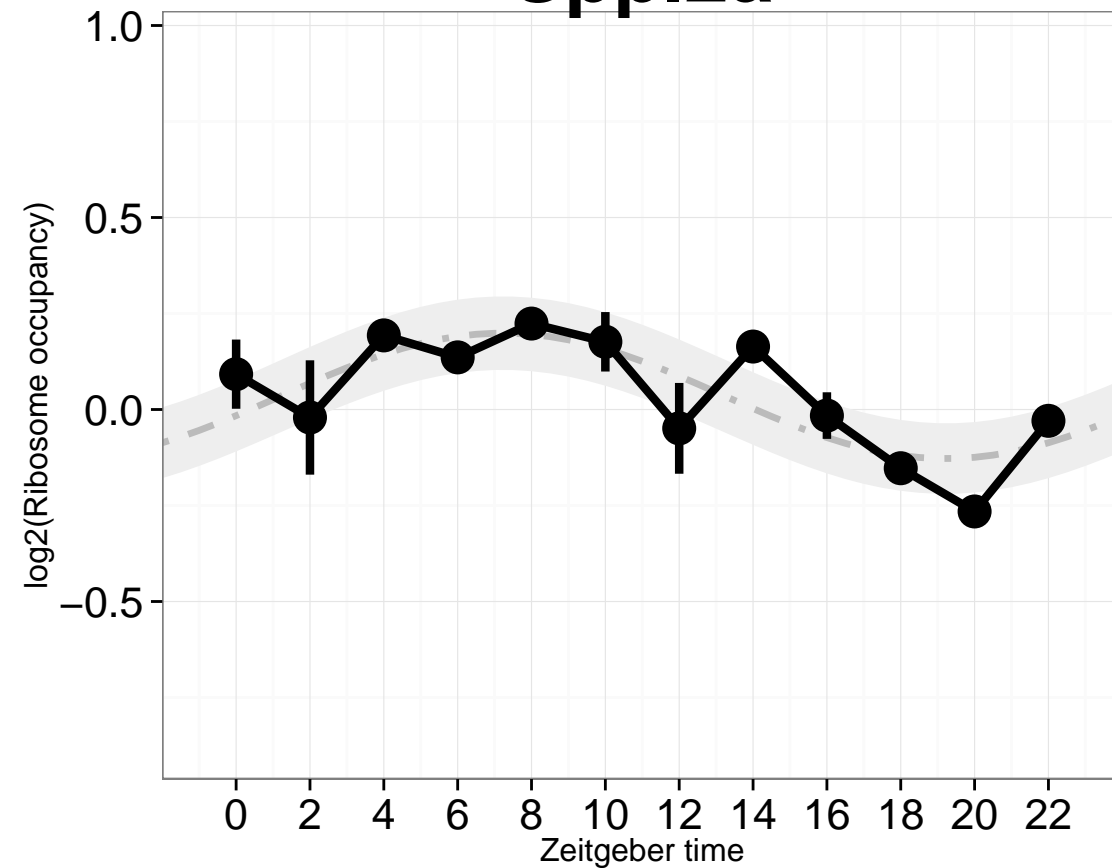

Supplement: Supplementary file 7175 [file 1]

# Impg2

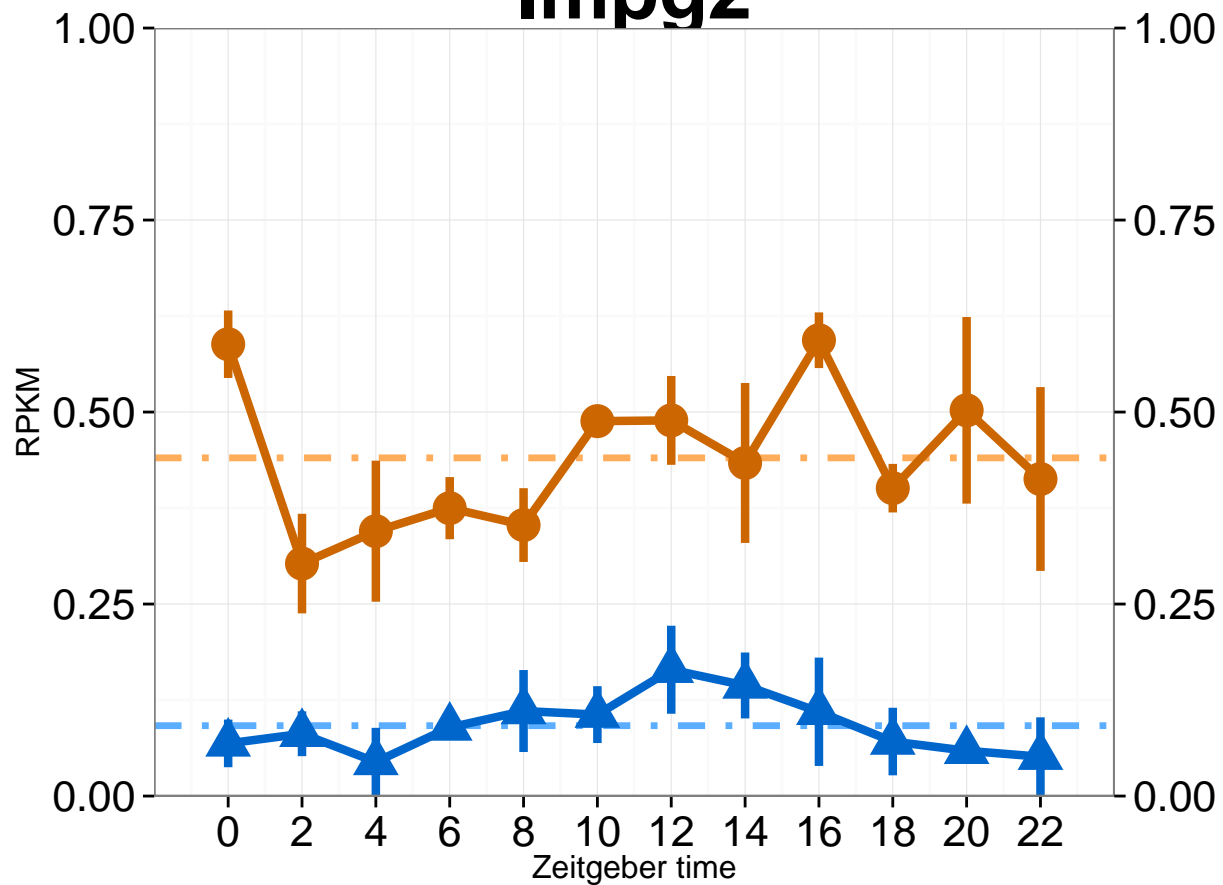

# Impg2

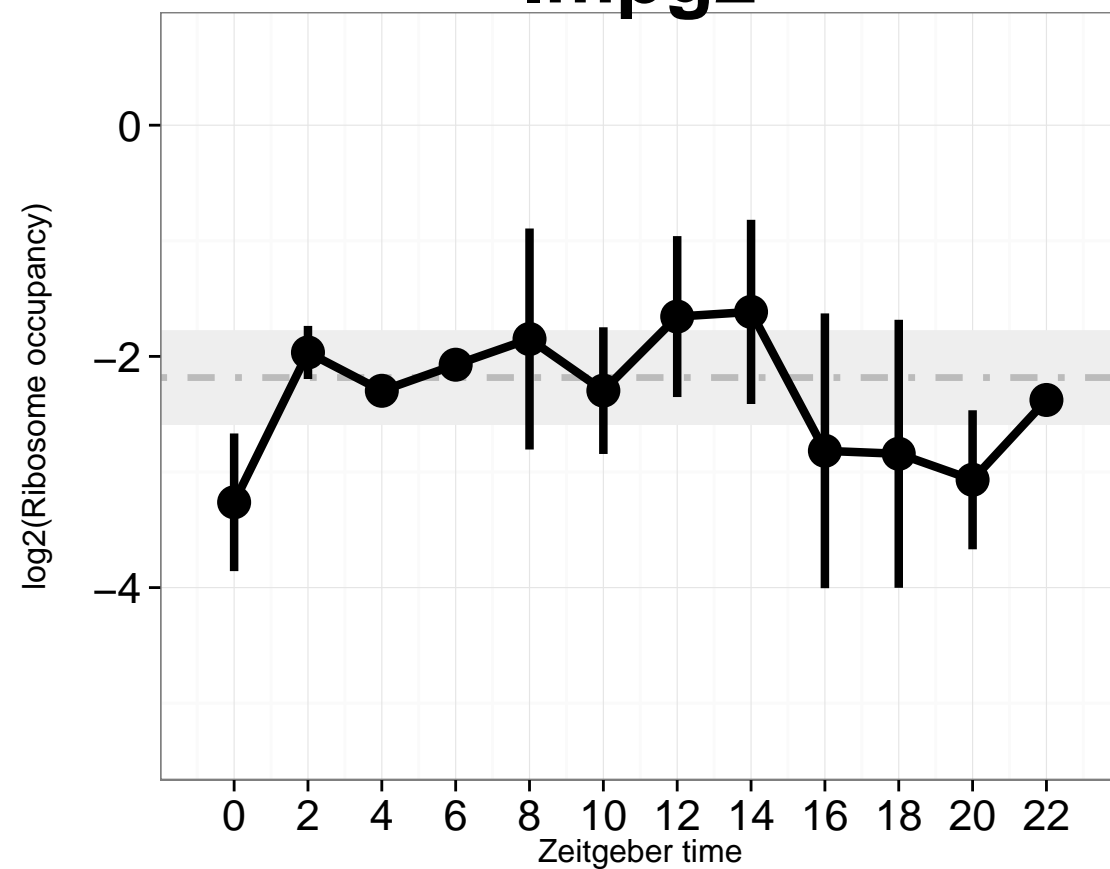

Supplement: Supplementary file 7176 [file 1]

## Casp4

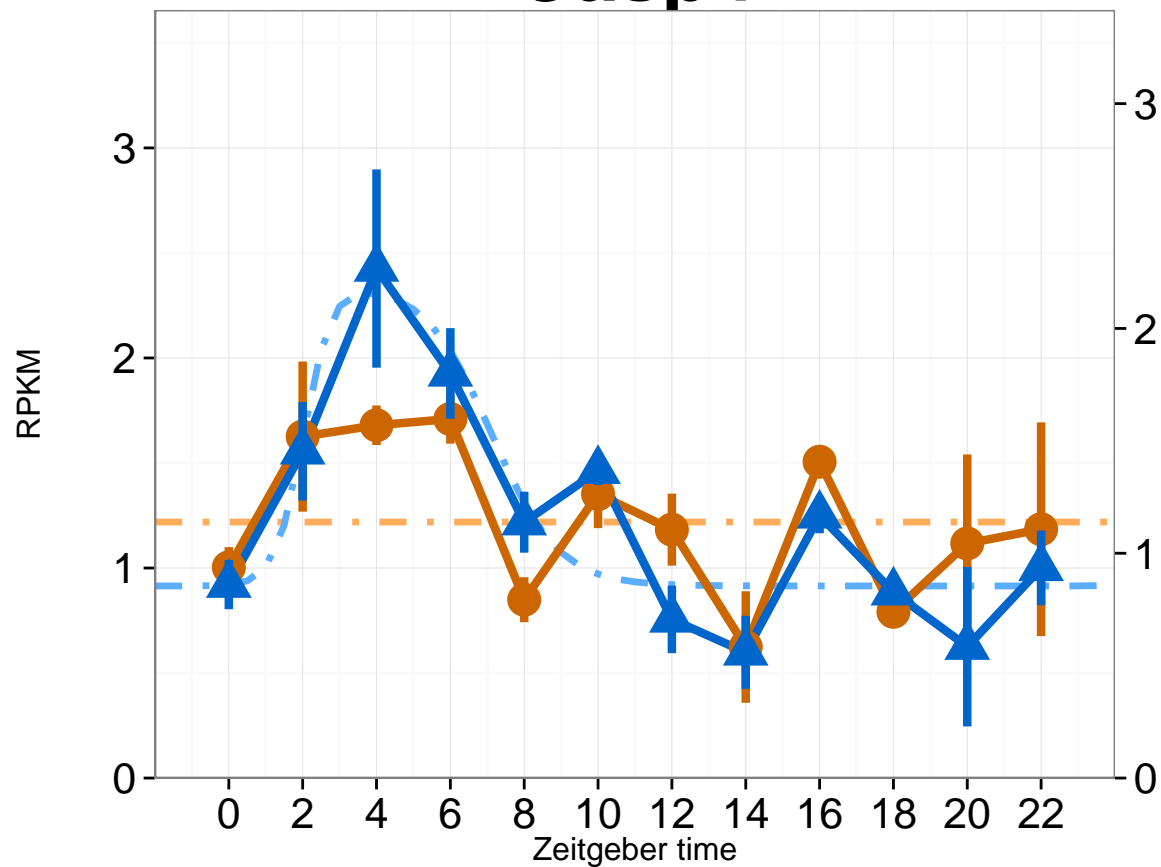

## Casp4

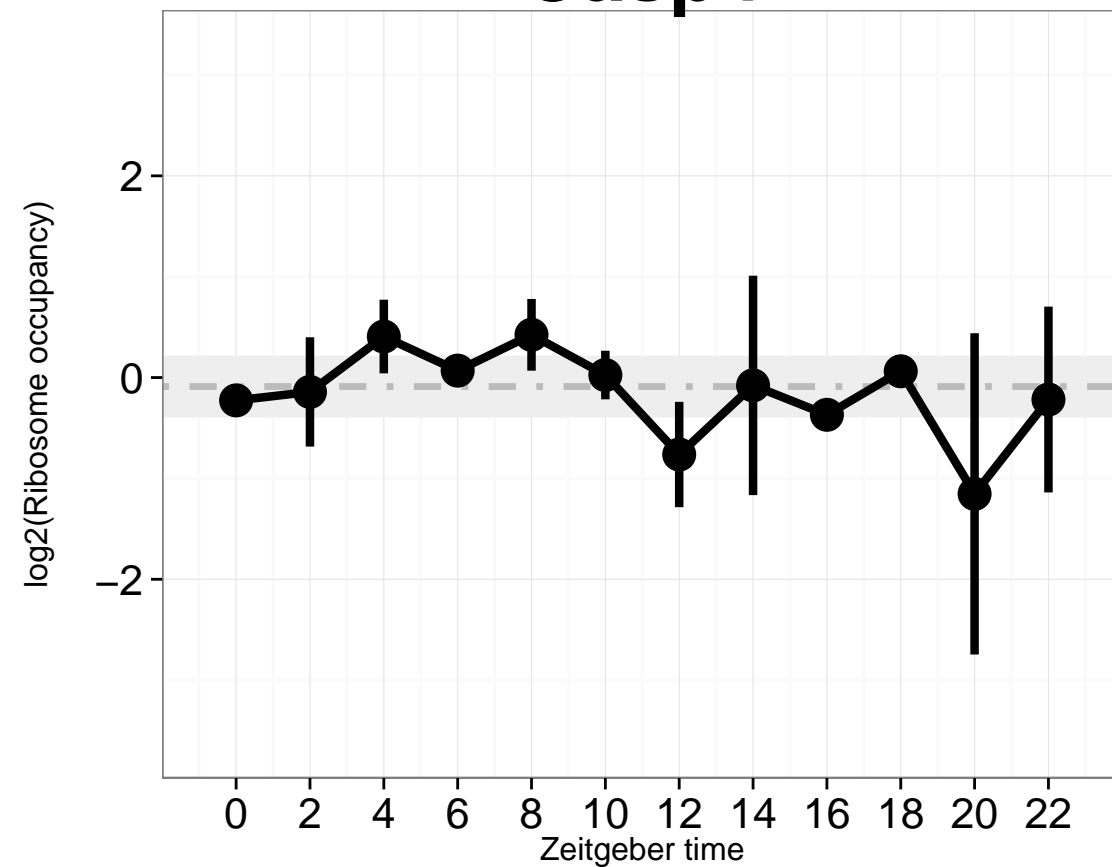

Supplement: Supplementary file 7177 [file 1]

# Ythdc2

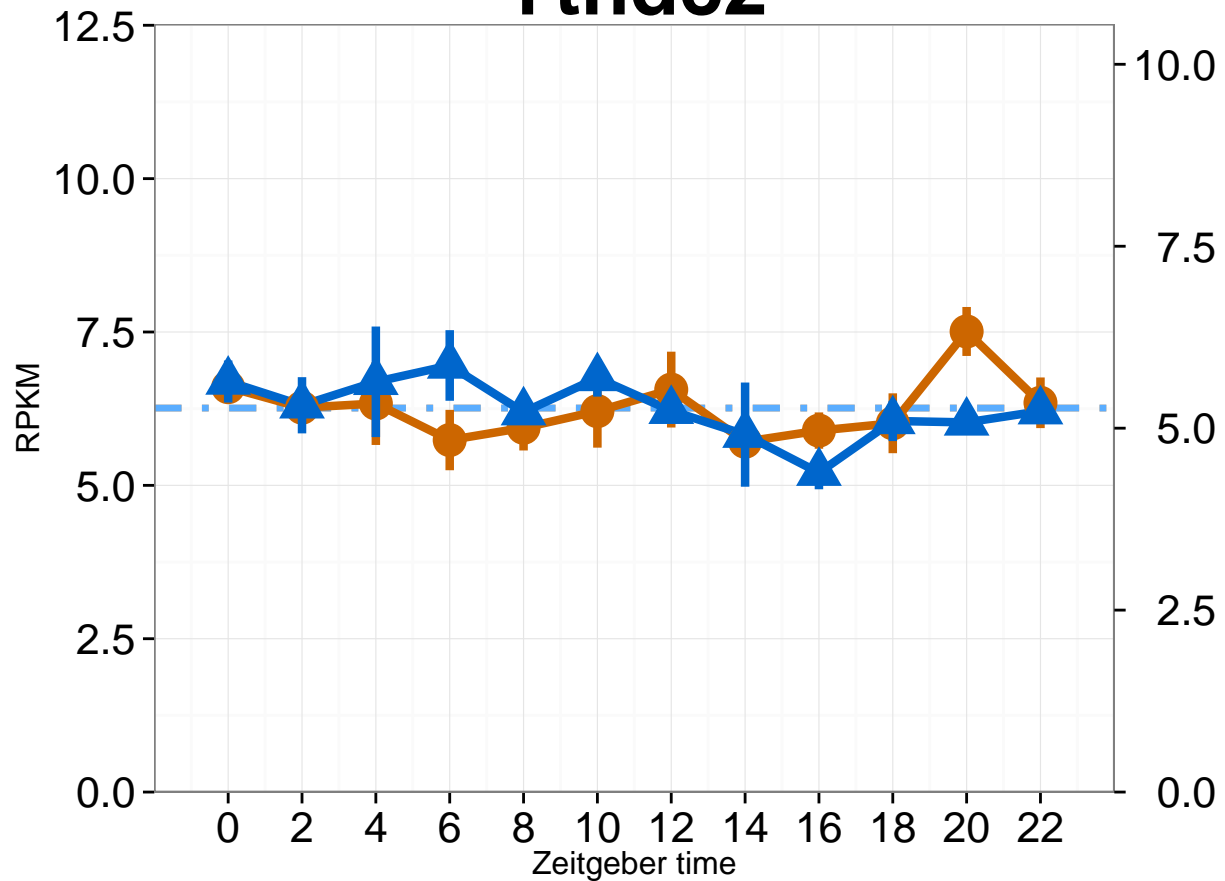

# Ythdc2

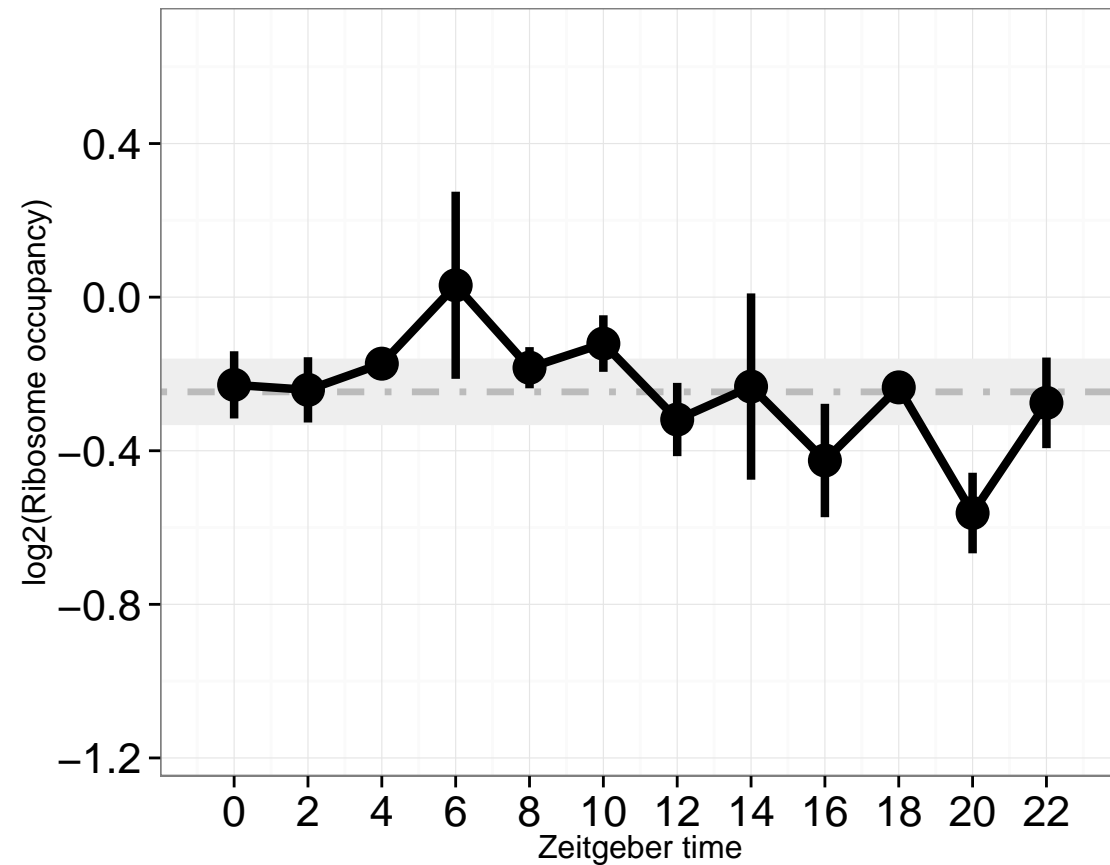

Supplement: Supplementary file 7178 [file 1]

# BC026590

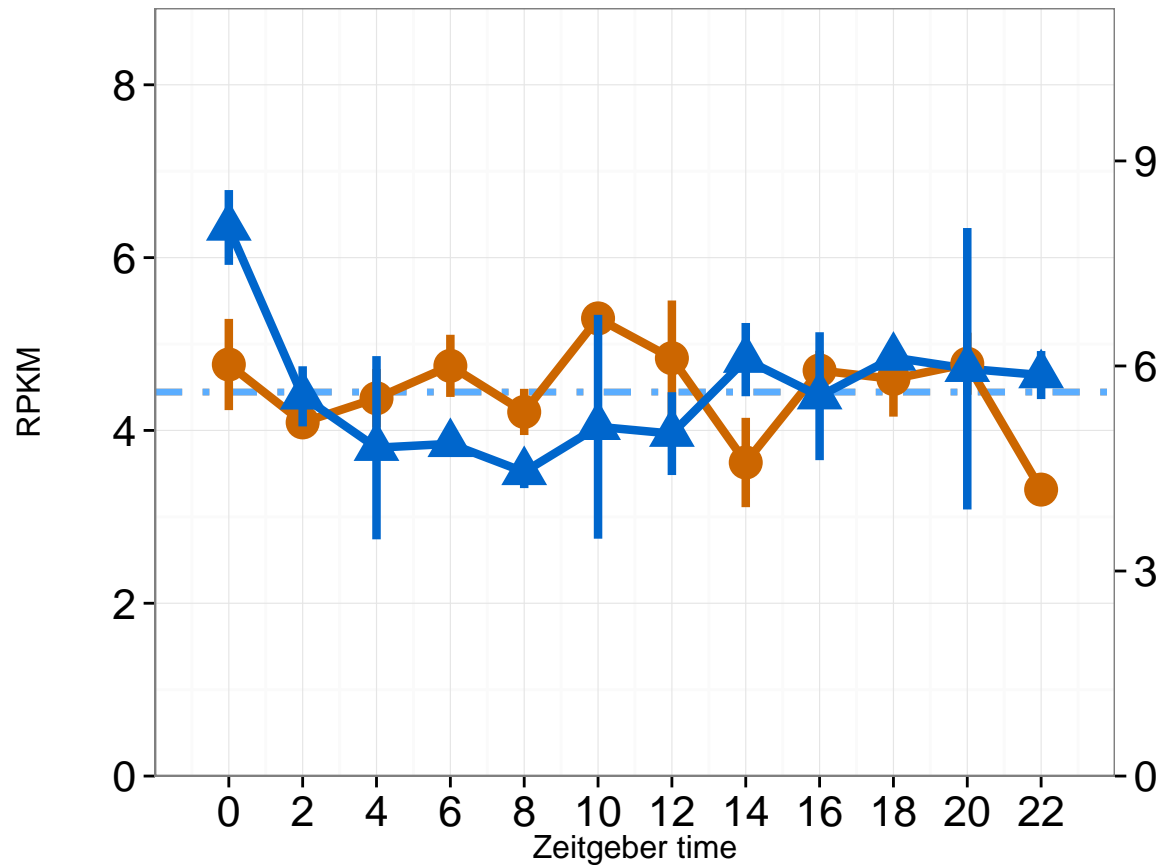

# BC026590

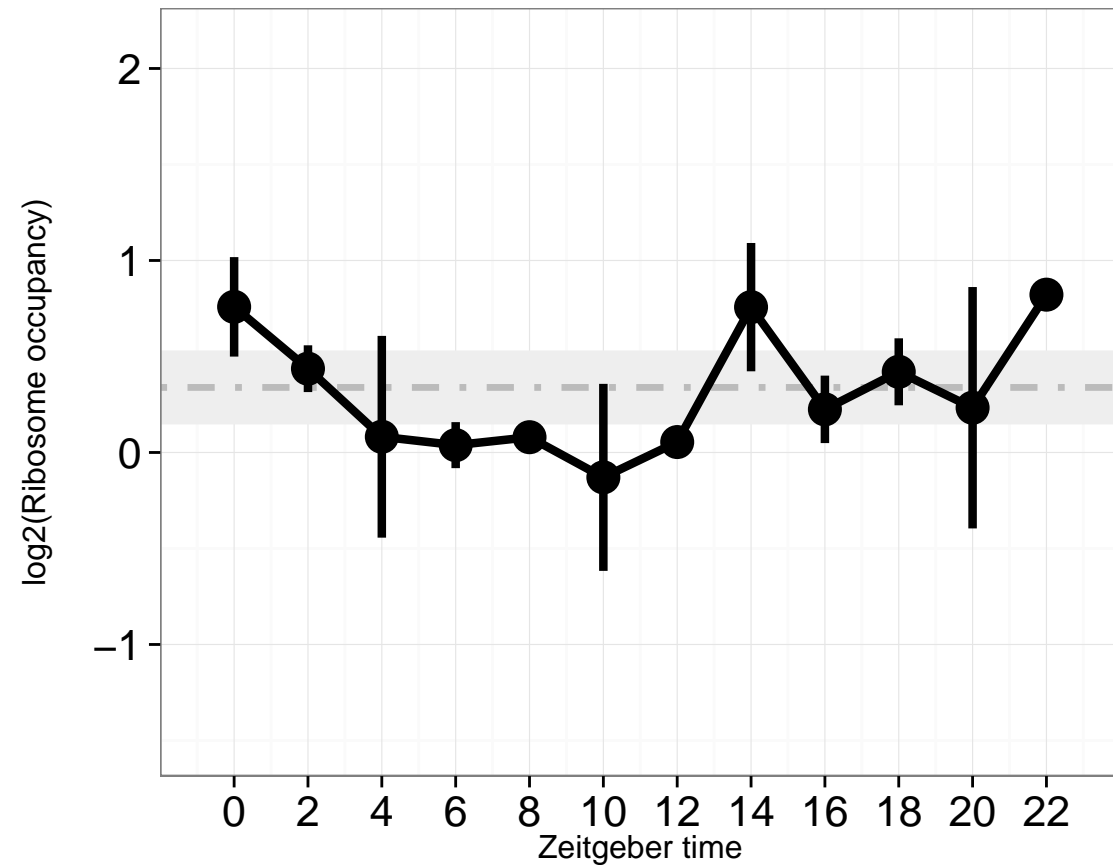

Supplement: Supplementary file 7179 [file 1]

## Gm3604

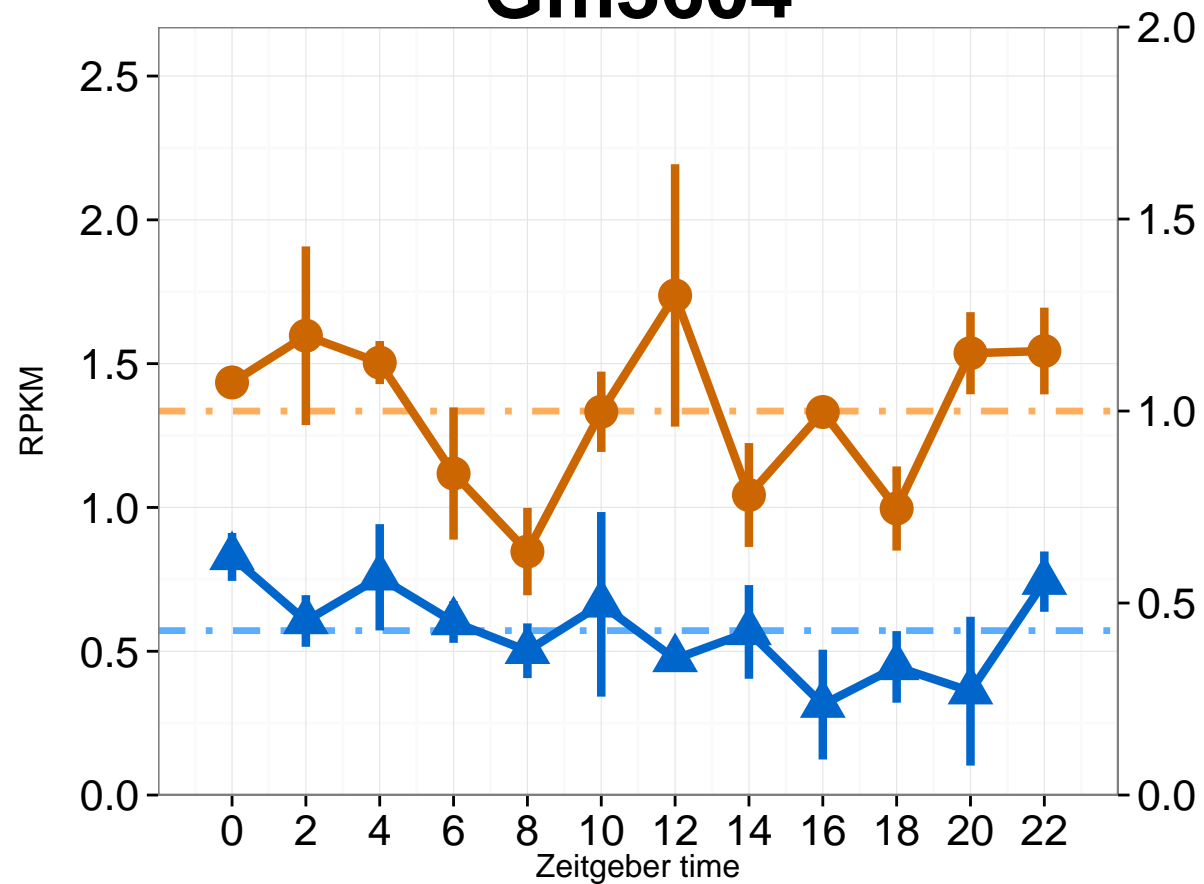

## Gm3604

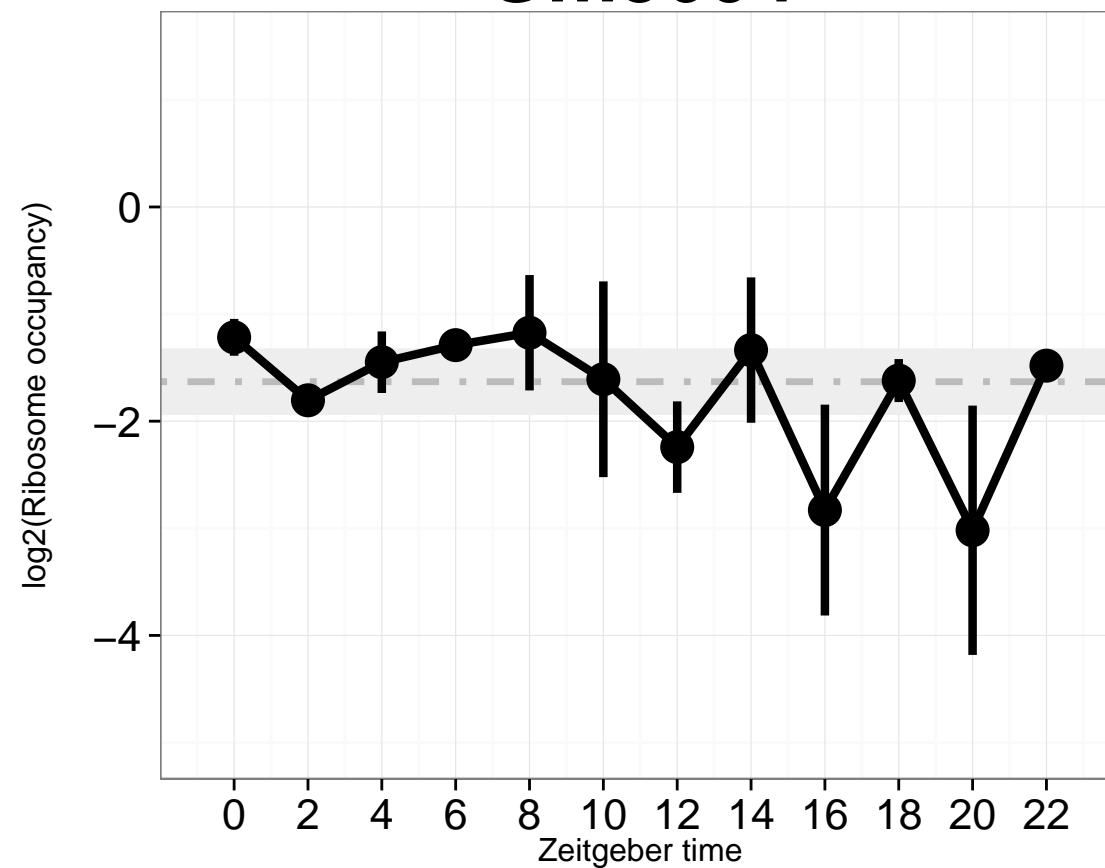

Supplement: Supplementary file 7180 [file 1]

## Ngrn

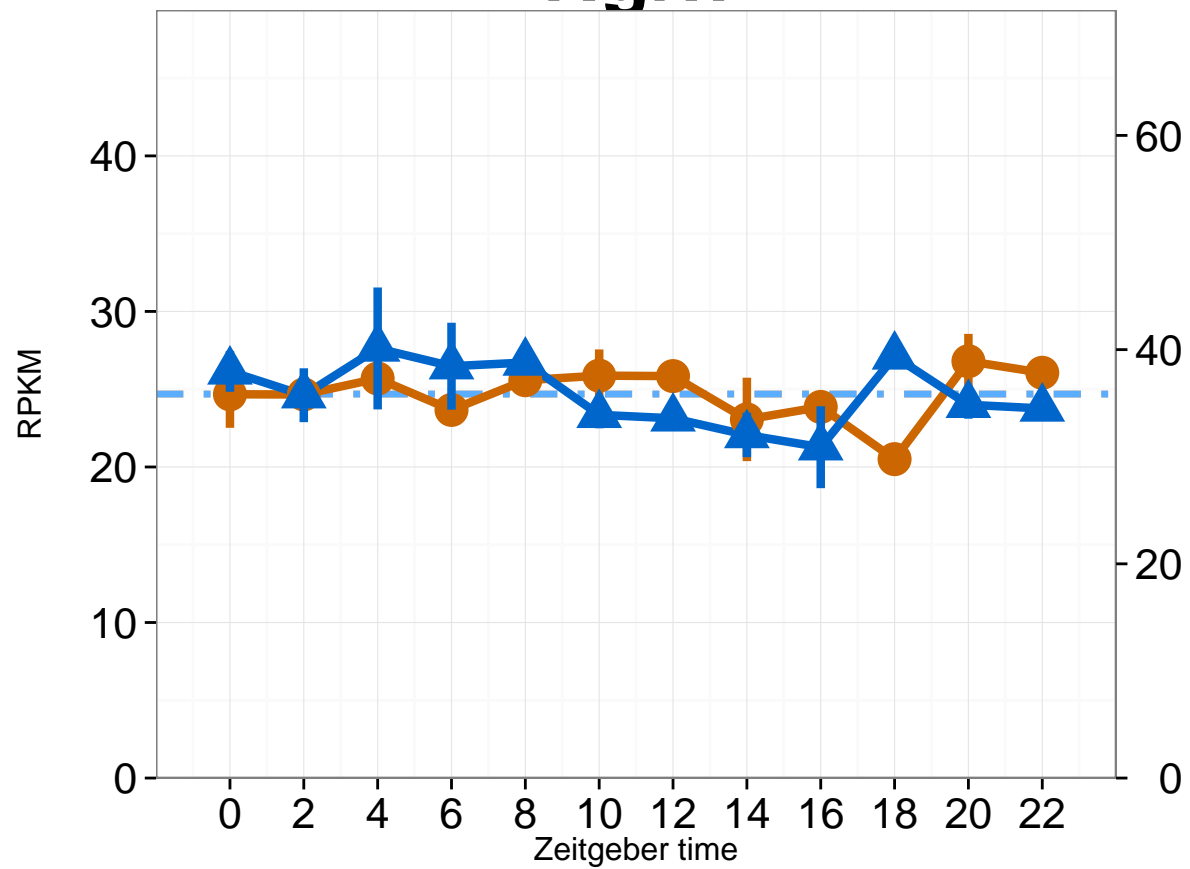

## Ngrn

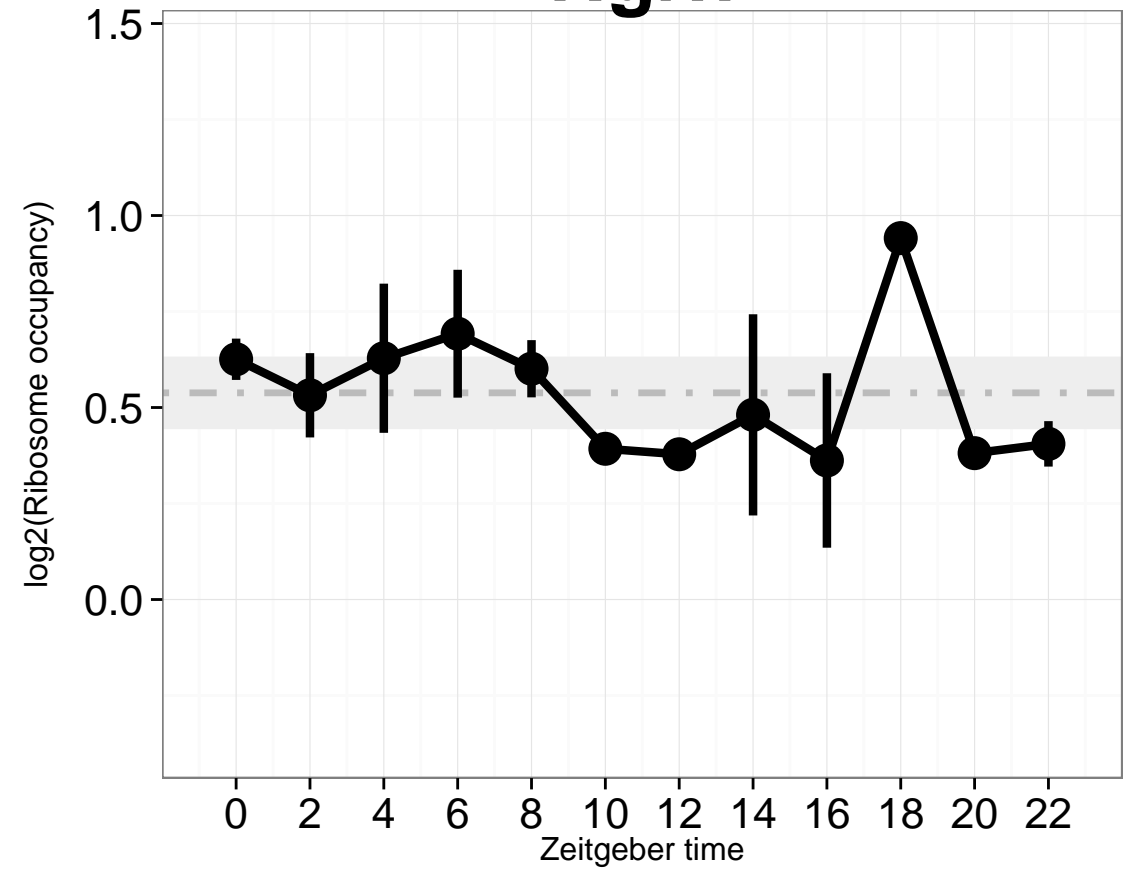

Supplement: Supplementary file 7181 [file 1]

# Plod1

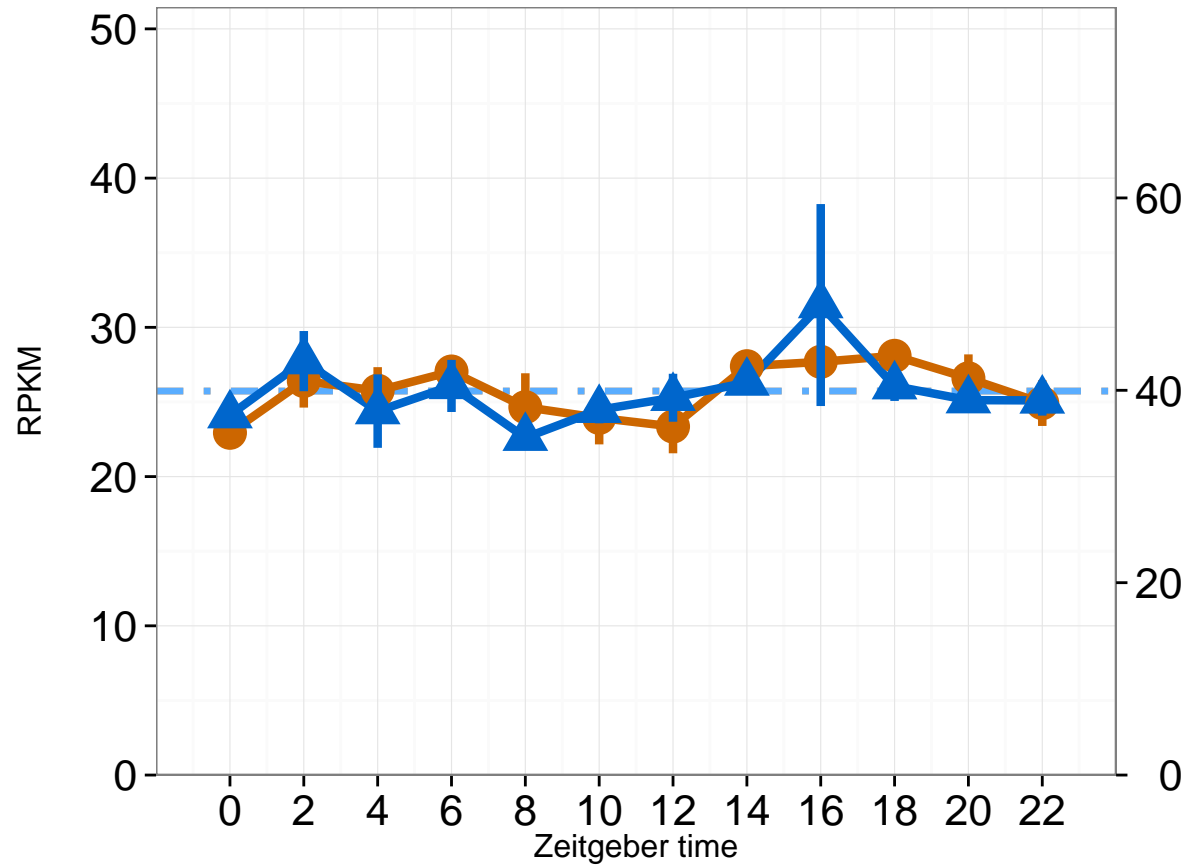

# Plod1

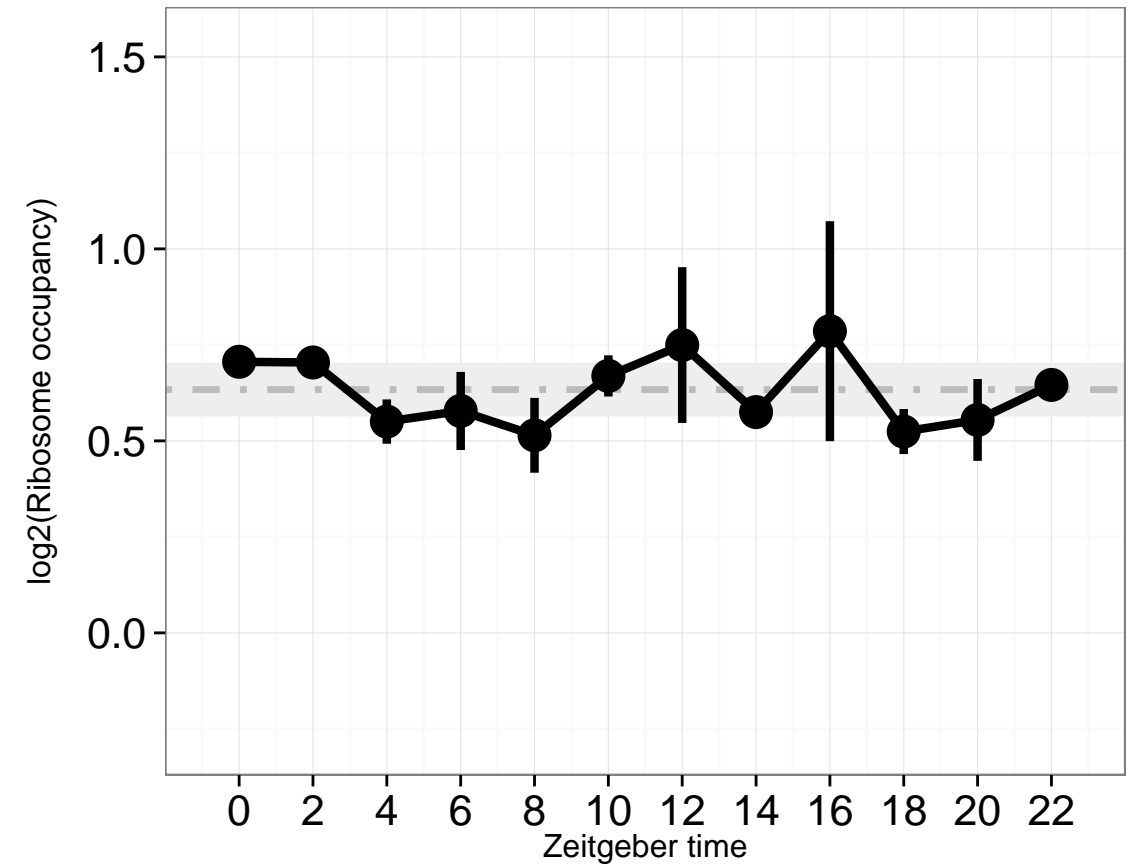

Supplement: Supplementary file 7182 [file 1]

# Slain1

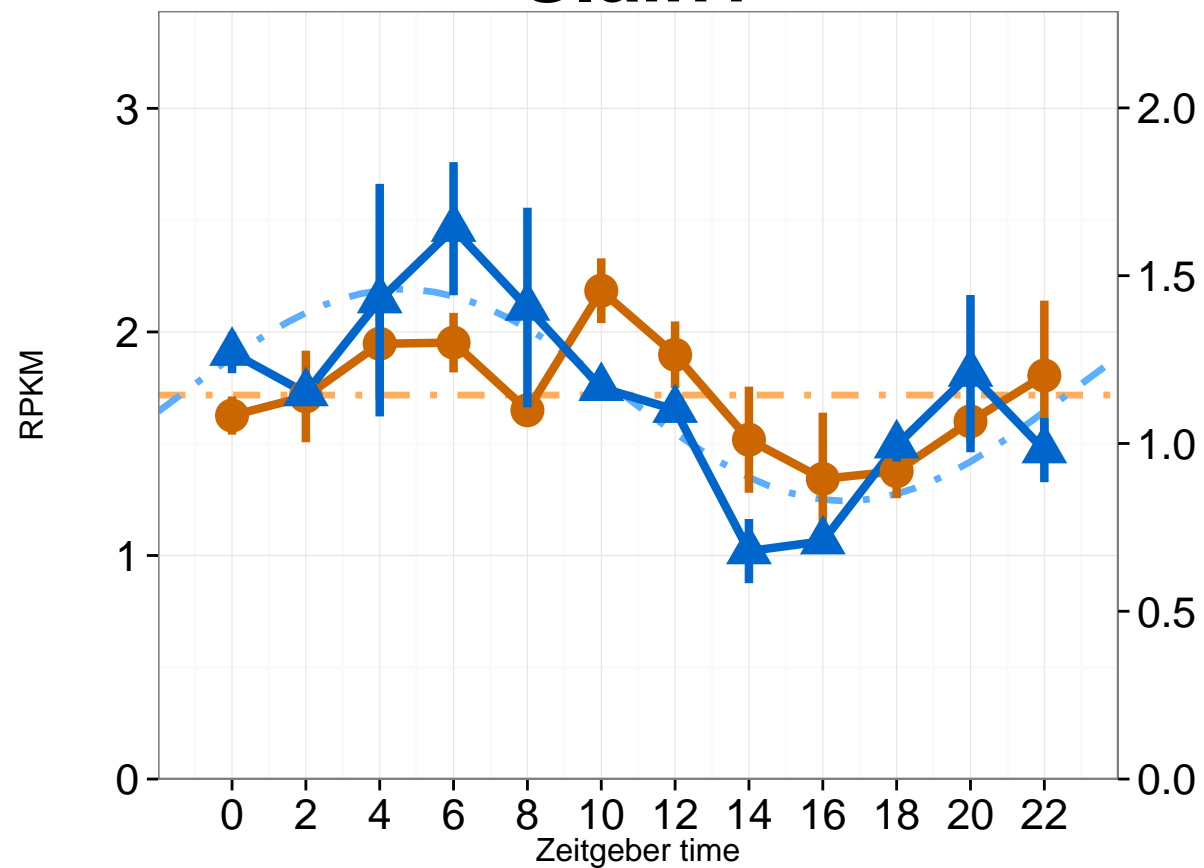

# Slain1

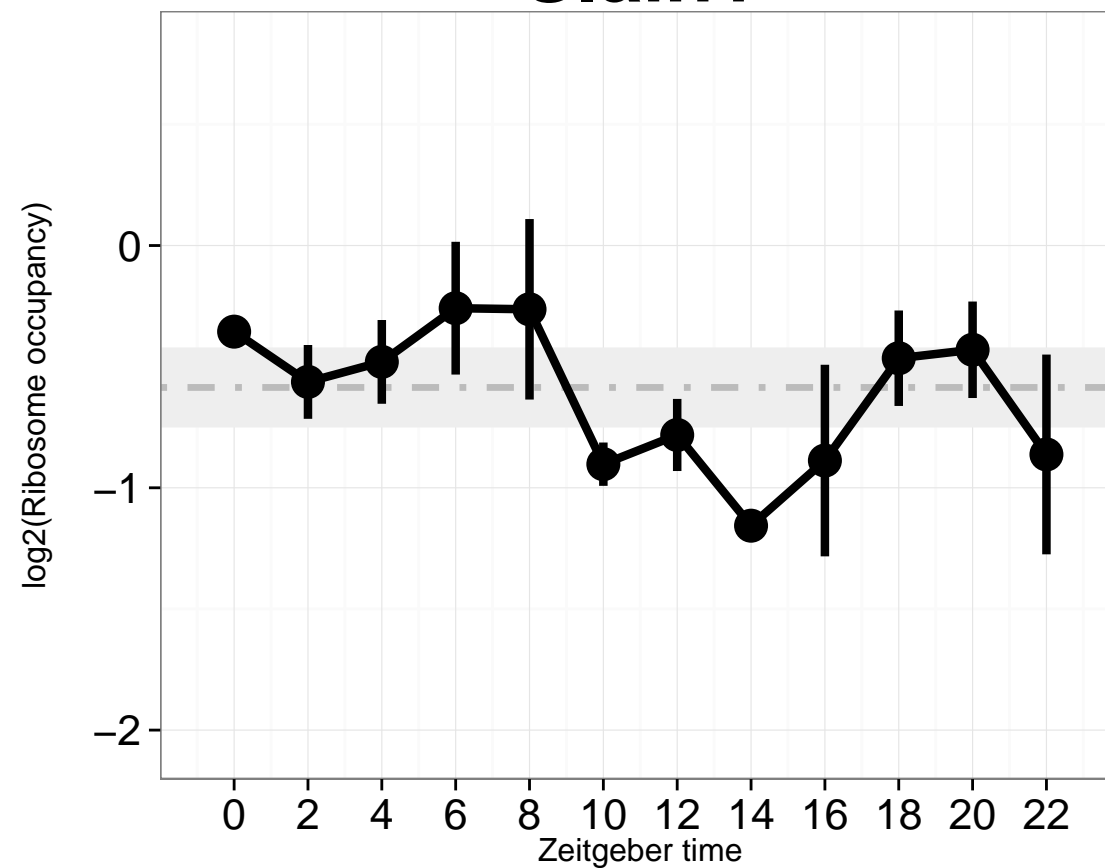

Supplement: Supplementary file 7183 [file 1]

# Mapkbp1

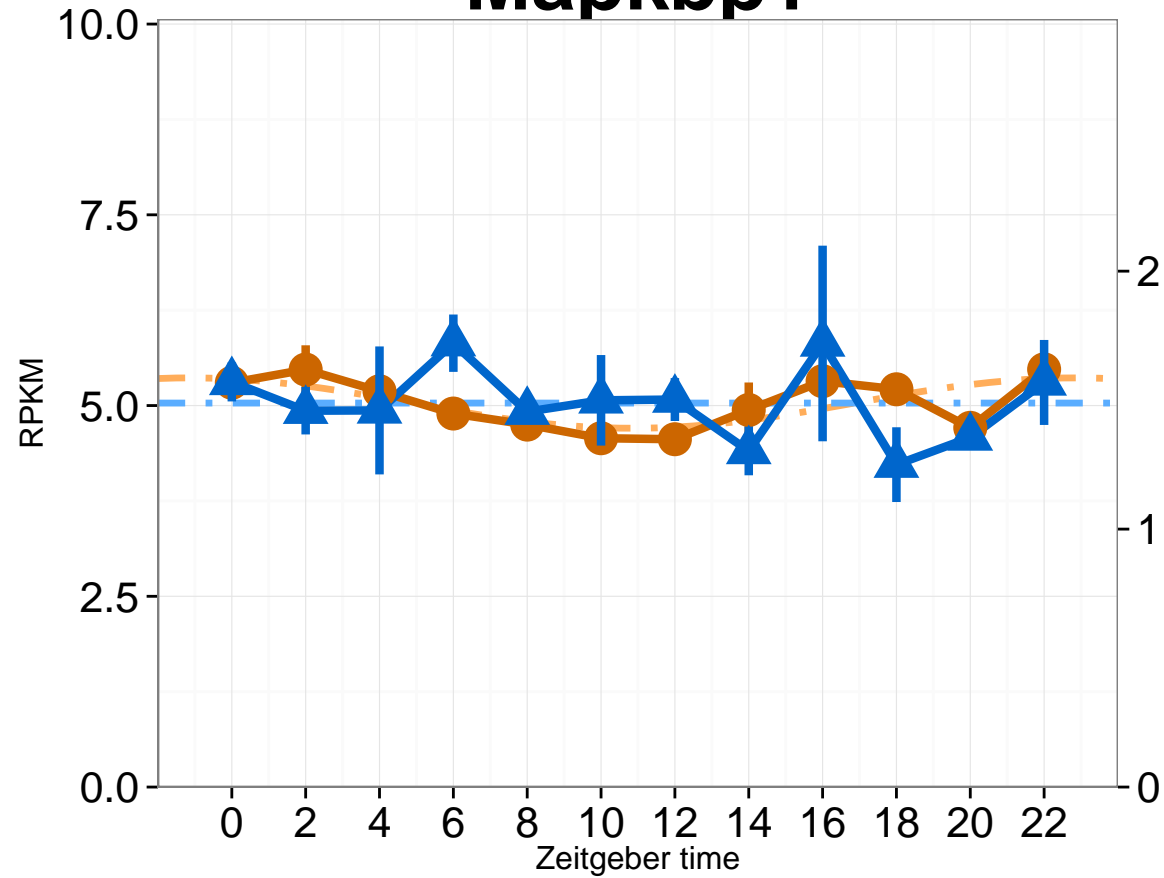

# Mapkbp1

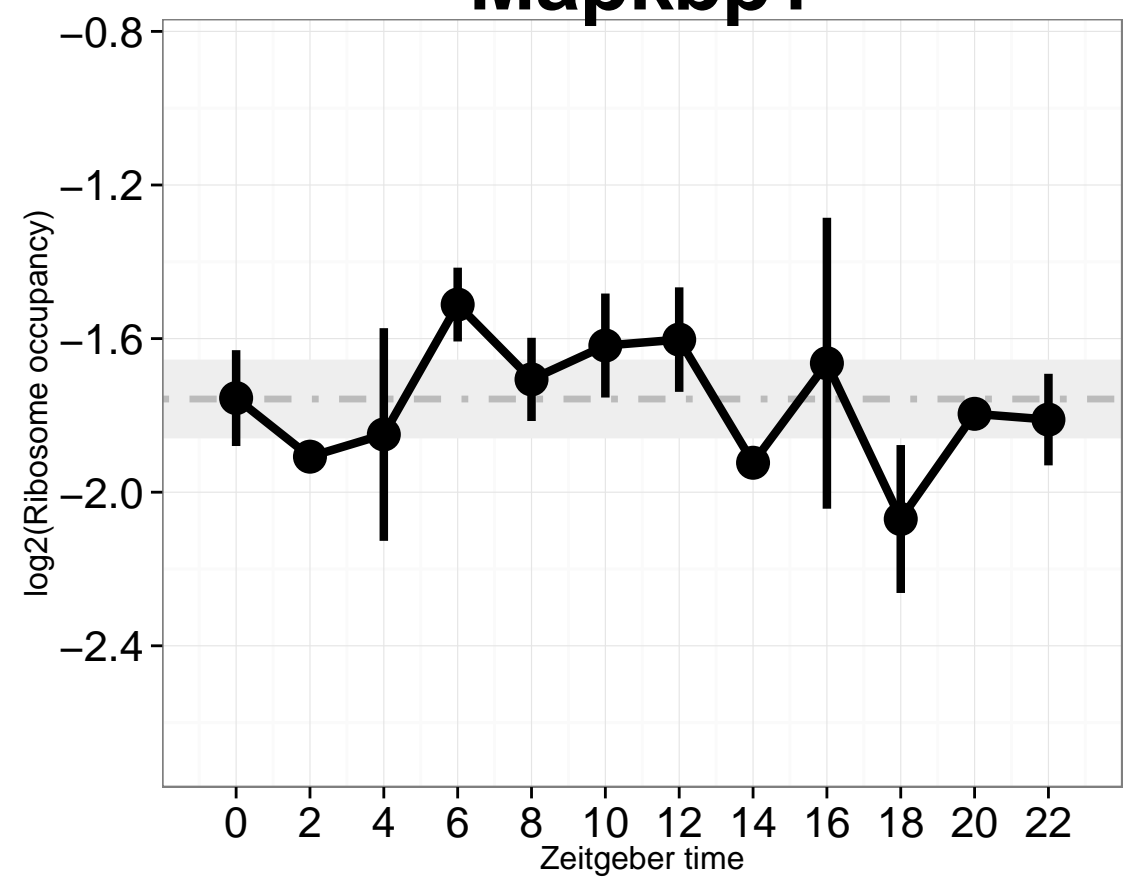

Supplement: Supplementary file 7184 [file 1]

# Gpr146

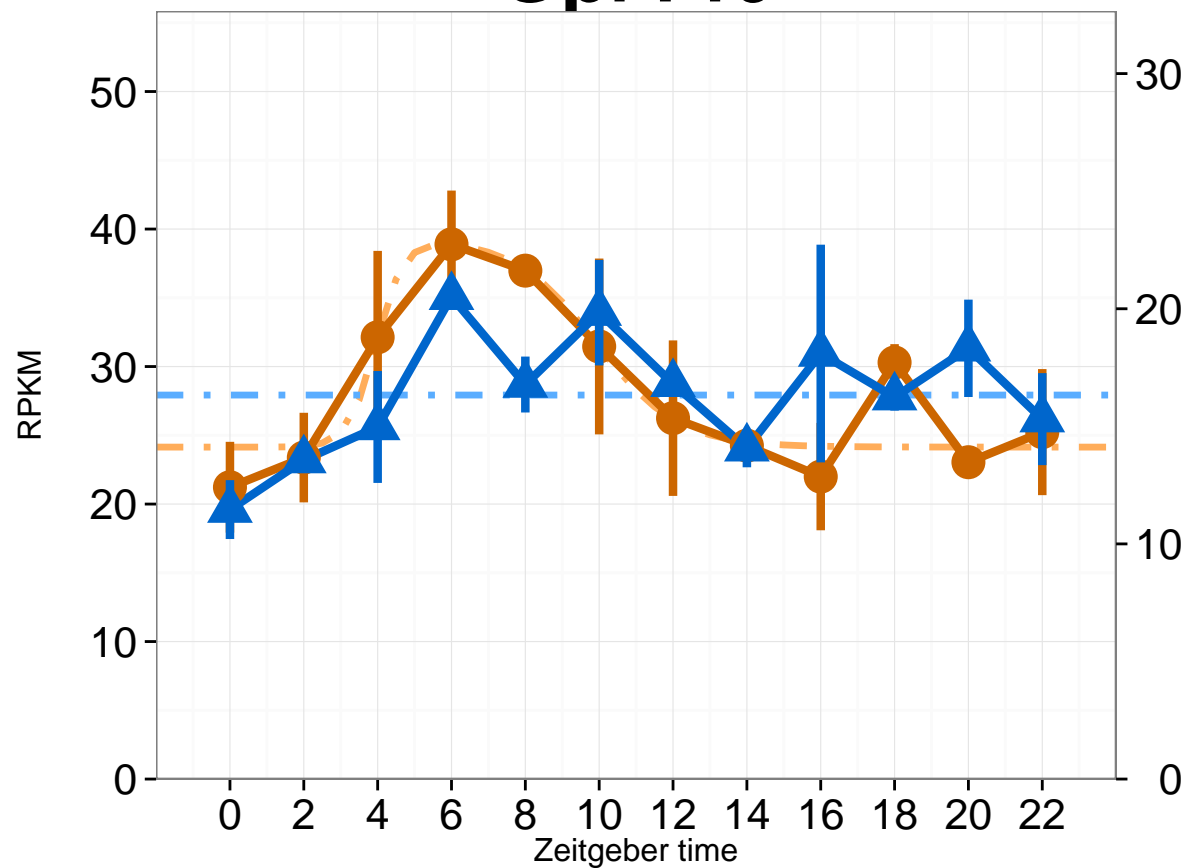

# Gpr146

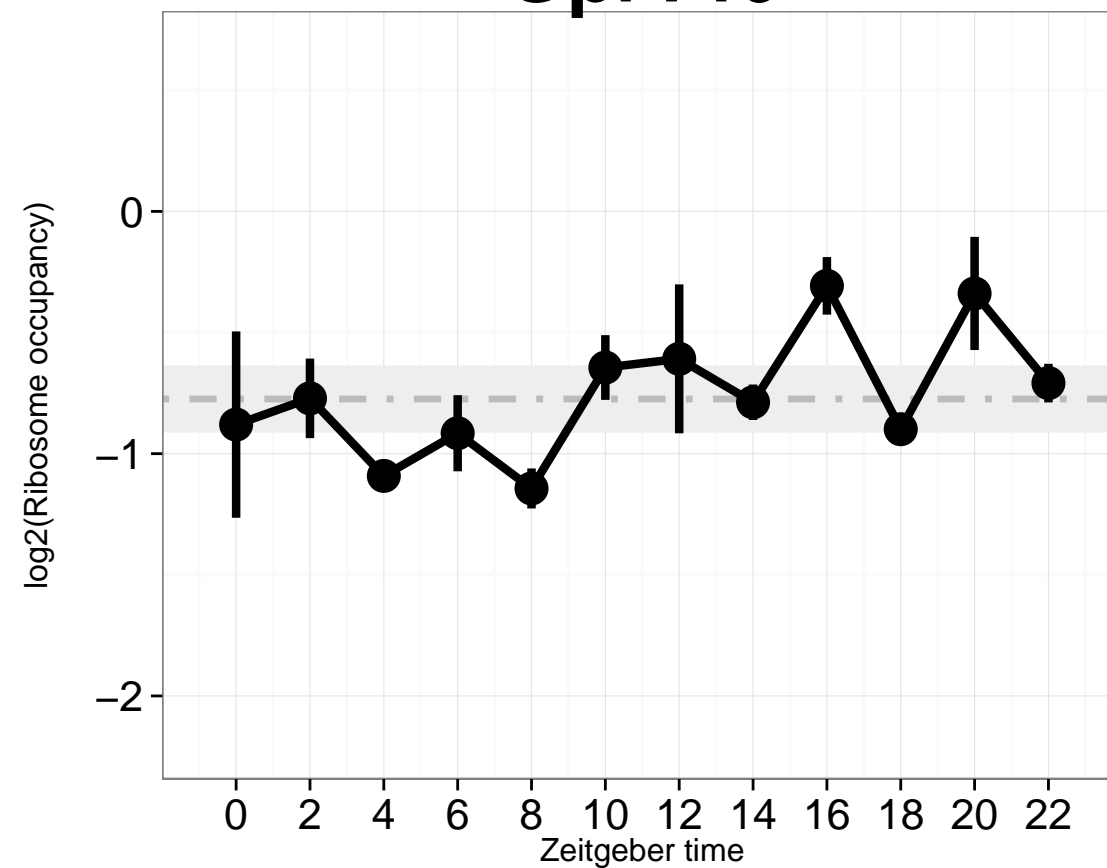

Supplement: Supplementary file 7185 [file 1]

## Mdm2

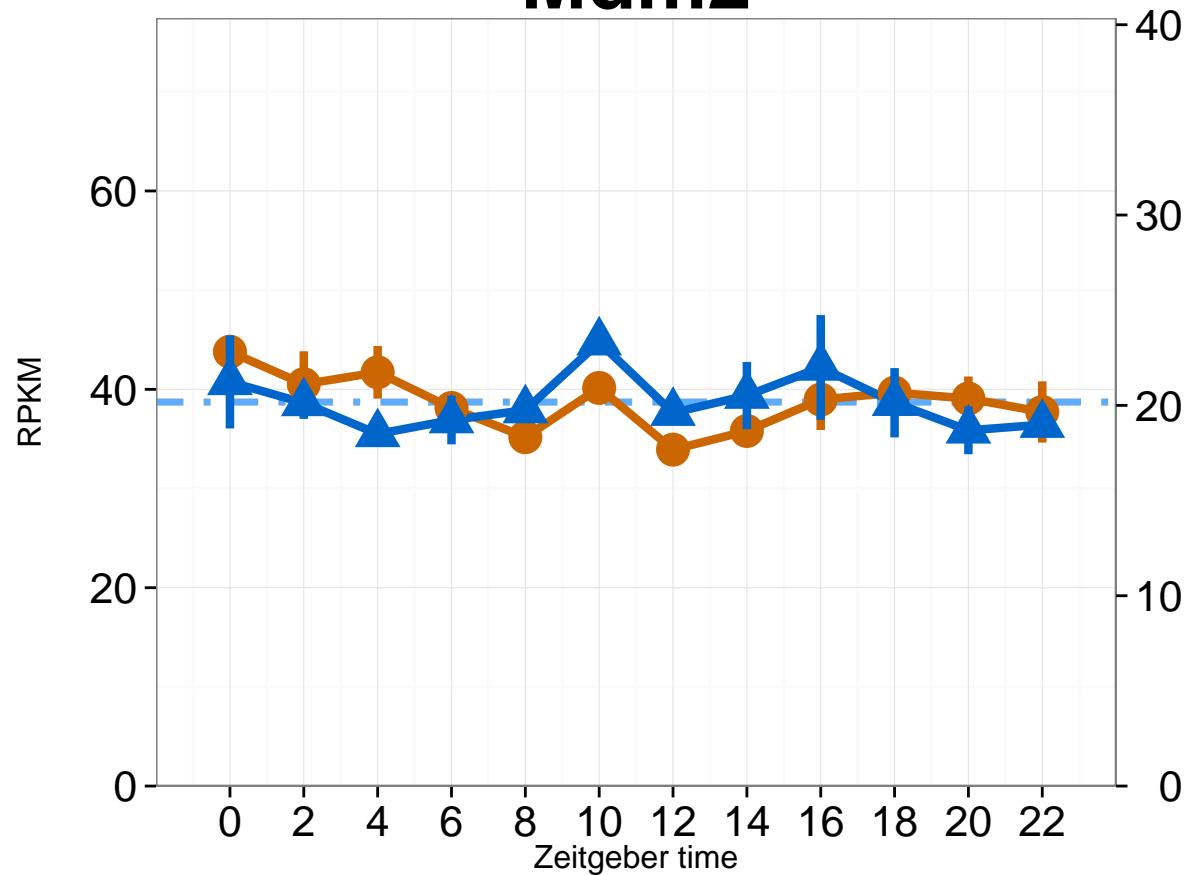

## Mdm2

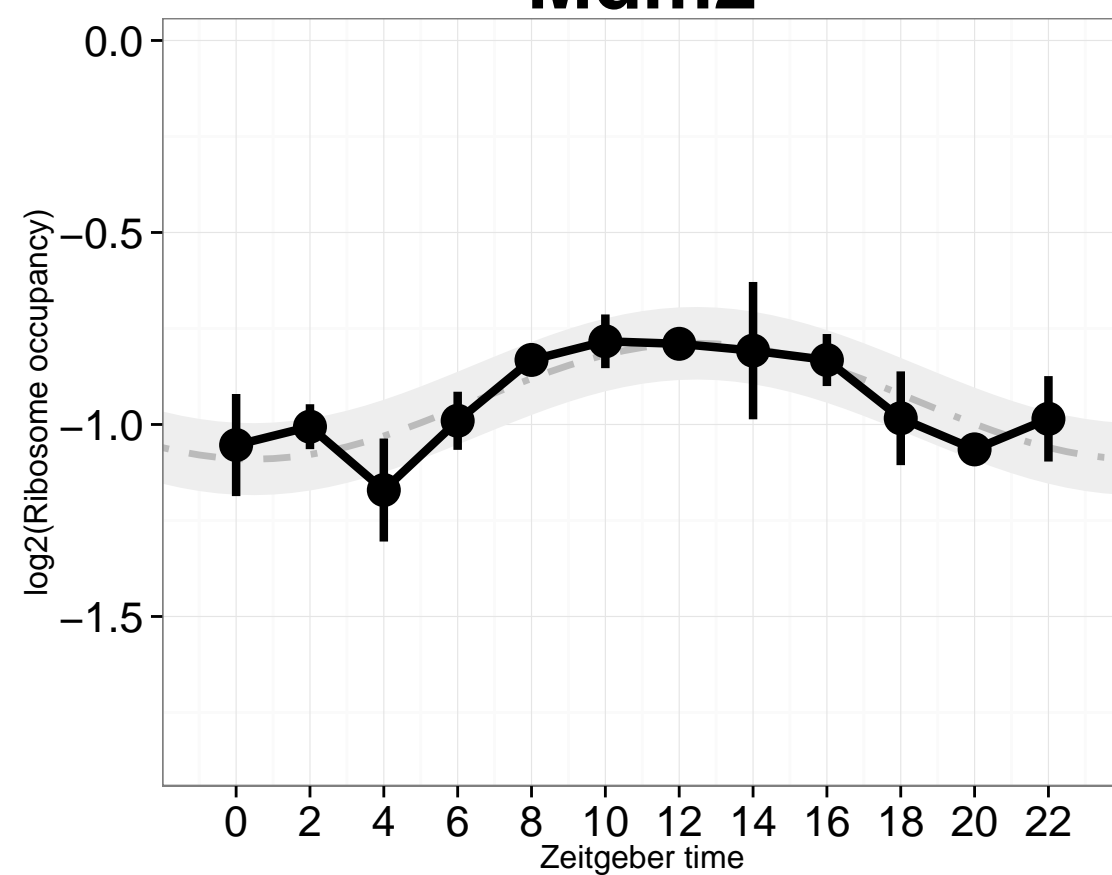

Supplement: Supplementary file 7186 [file 1]

## Aldh1b1

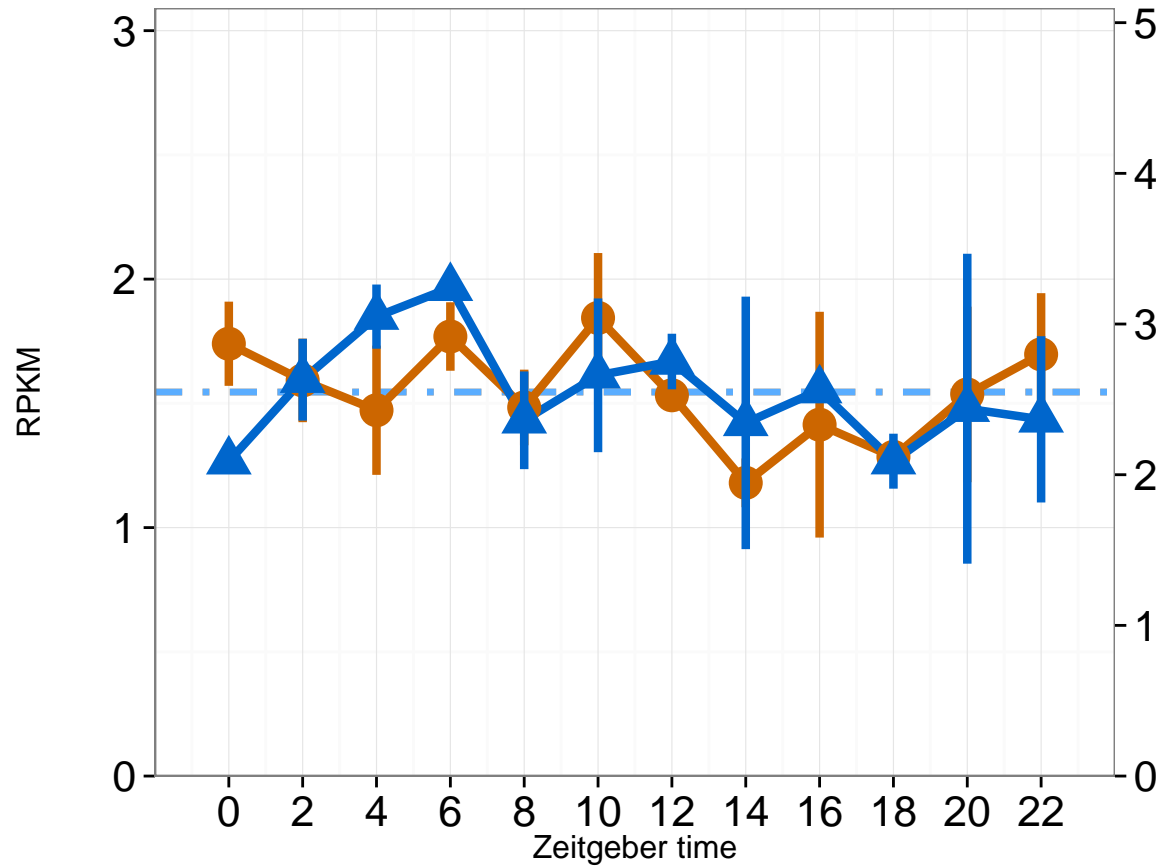

## Aldh1b1

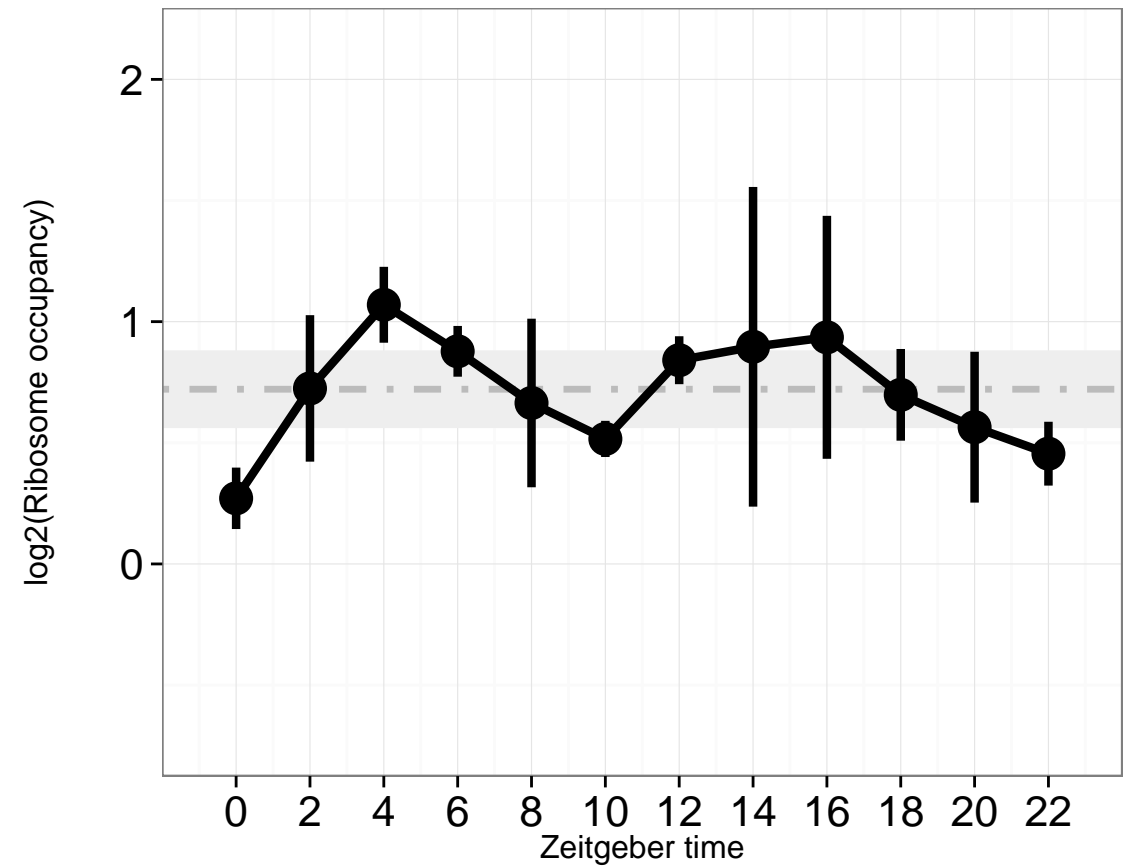

Supplement: Supplementary file 7187 [file 1]

# Slc8b1

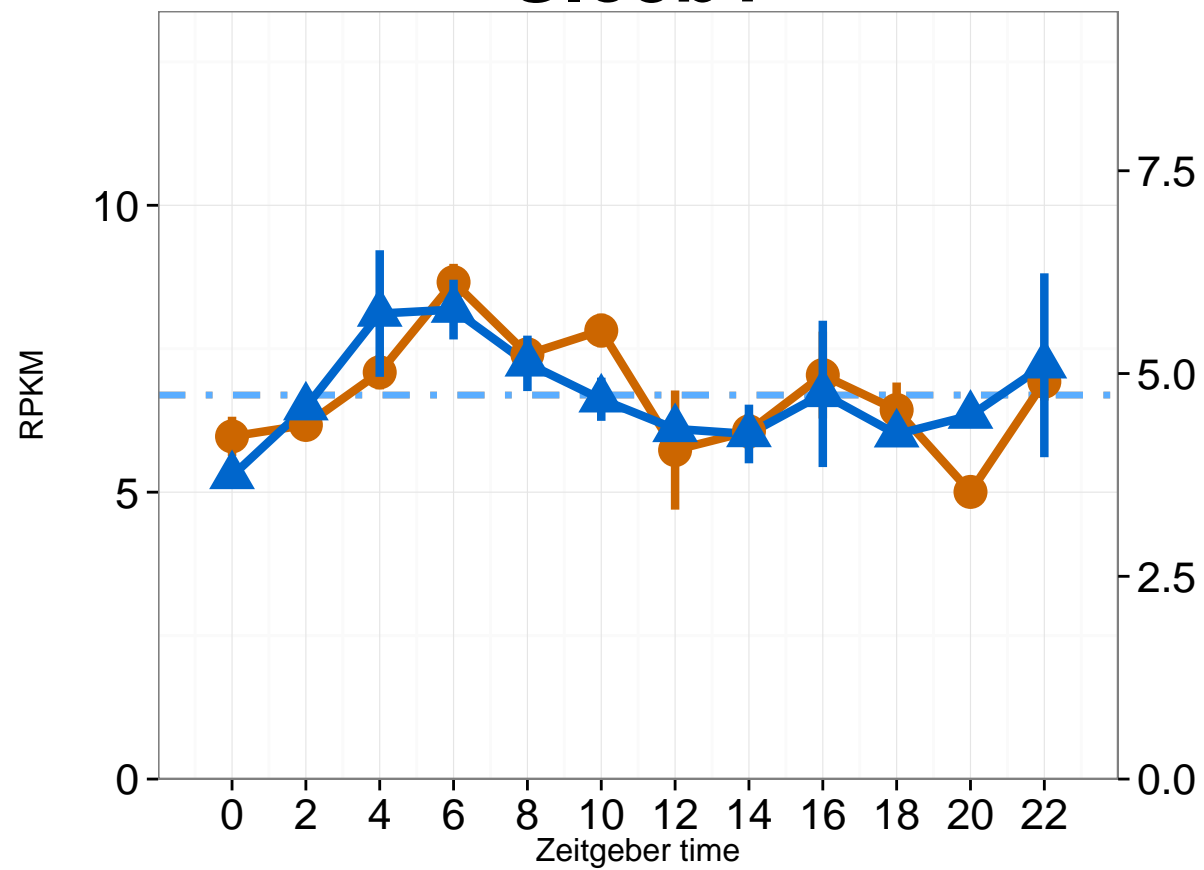

# Slc8b1

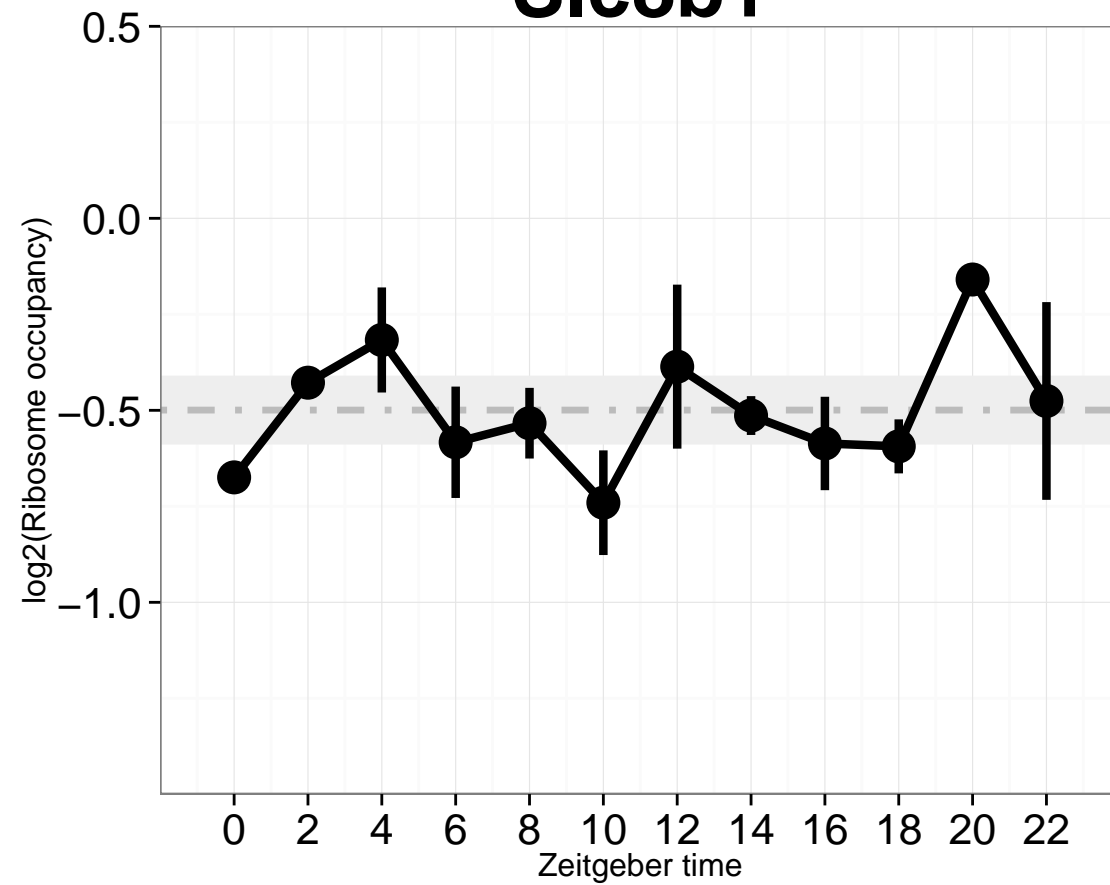

Supplement: Supplementary file 7188 [file 1]

## Parvb

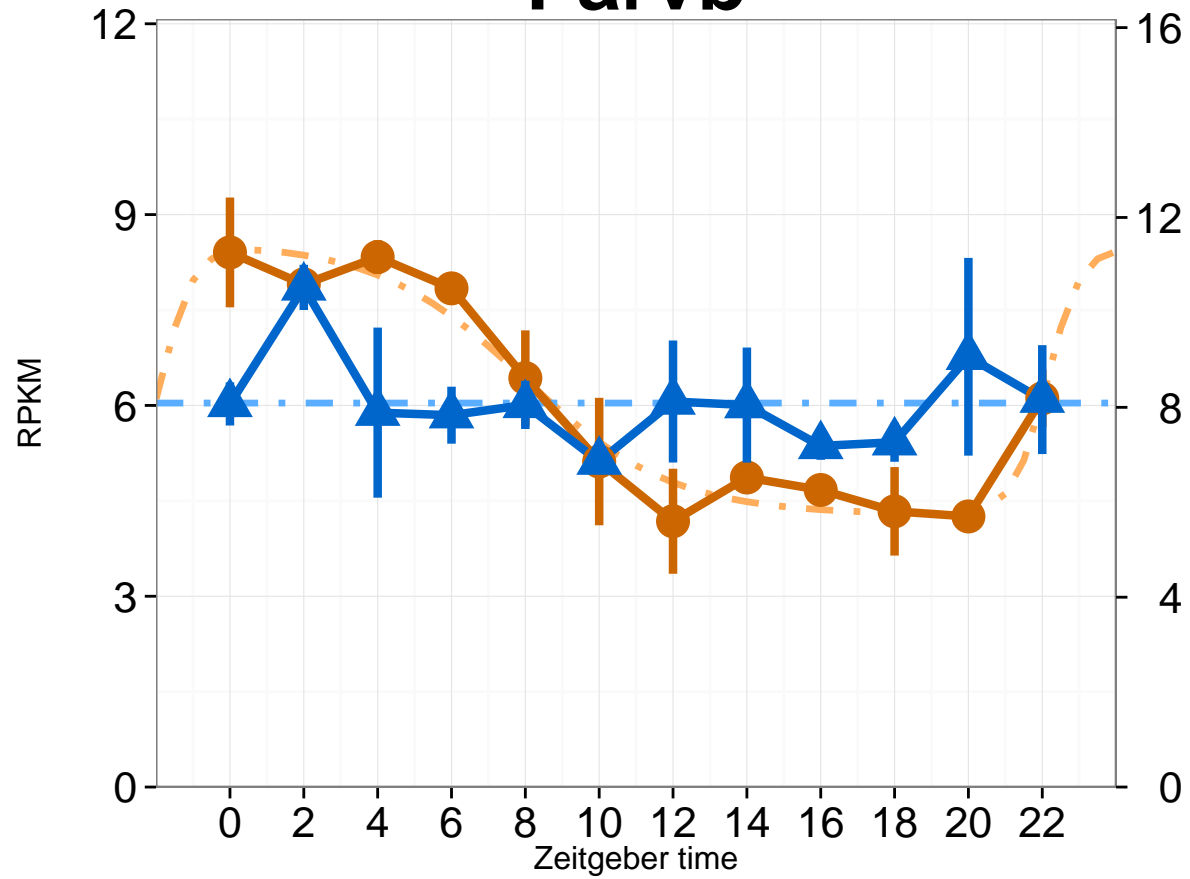

## Parvb

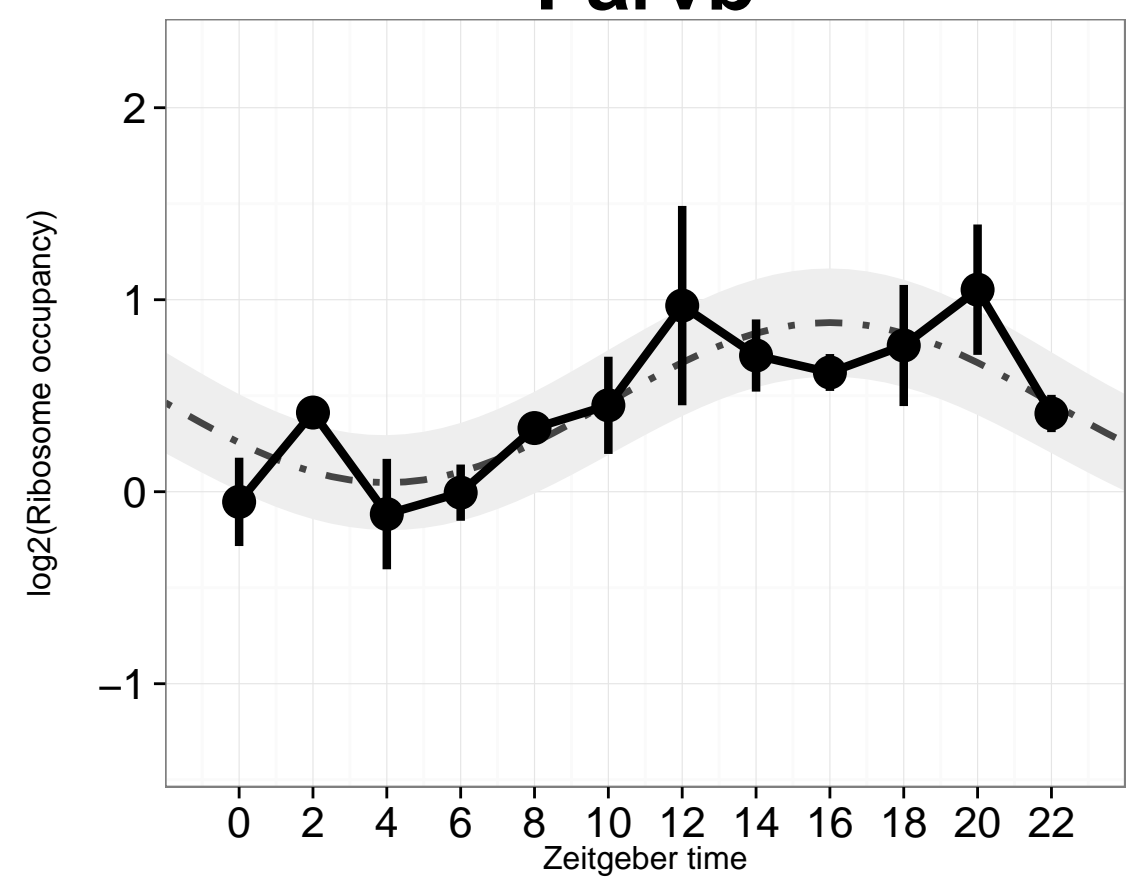

Supplement: Supplementary file 7189 [file 1]

# Lrpap1

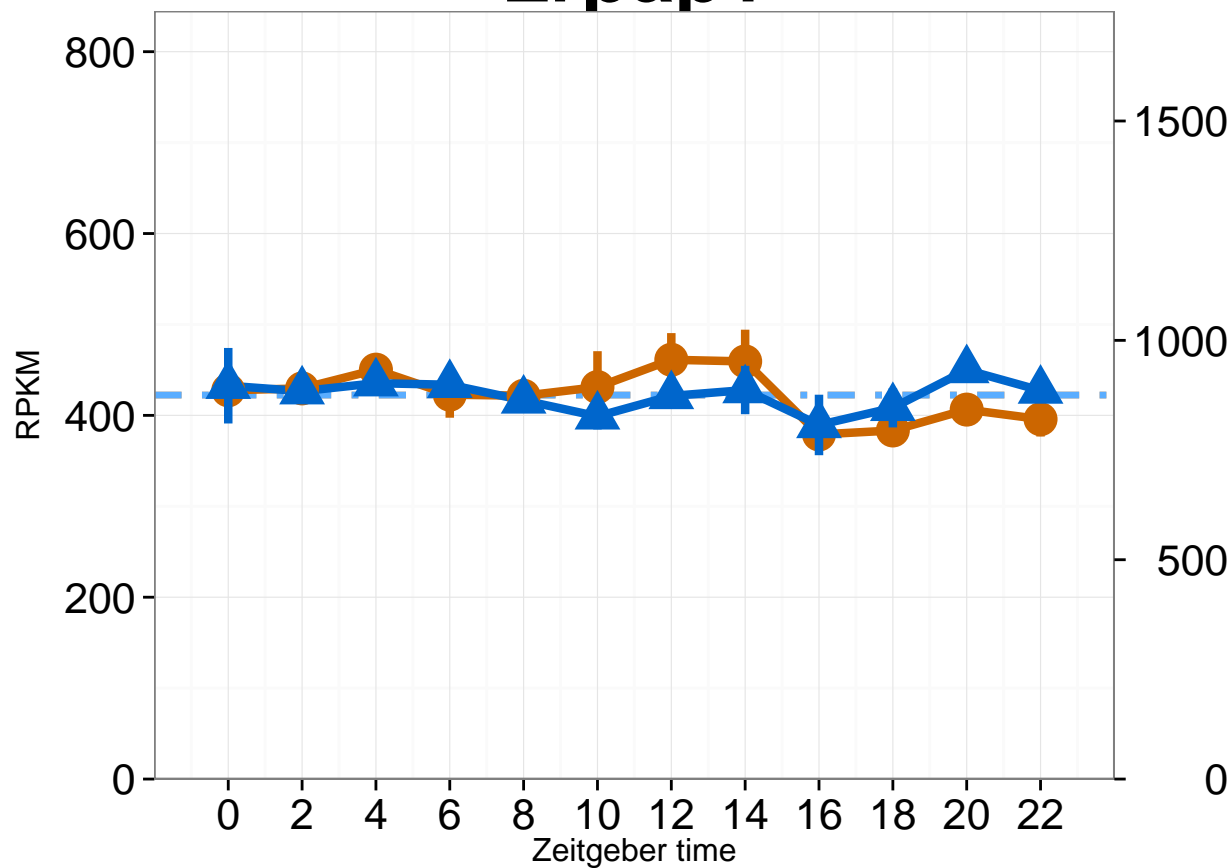

# Lrpap1

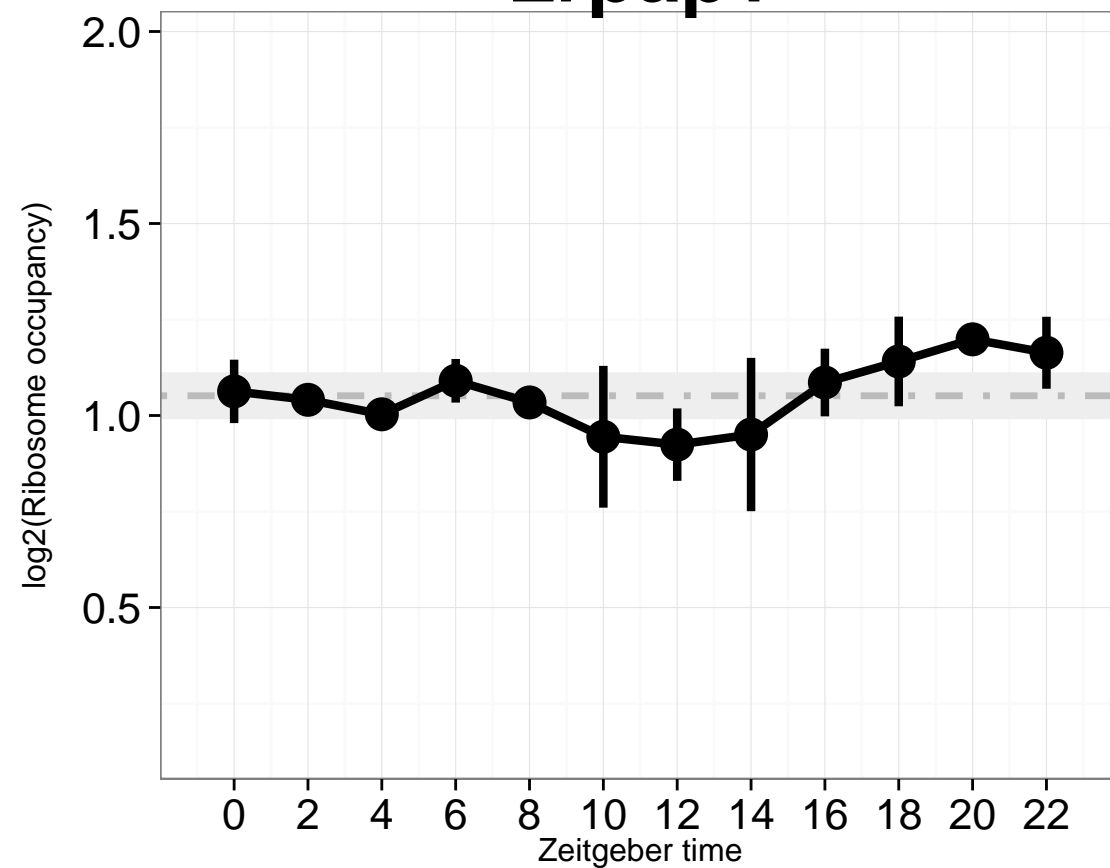

Supplement: Supplementary file 7190 [file 1]

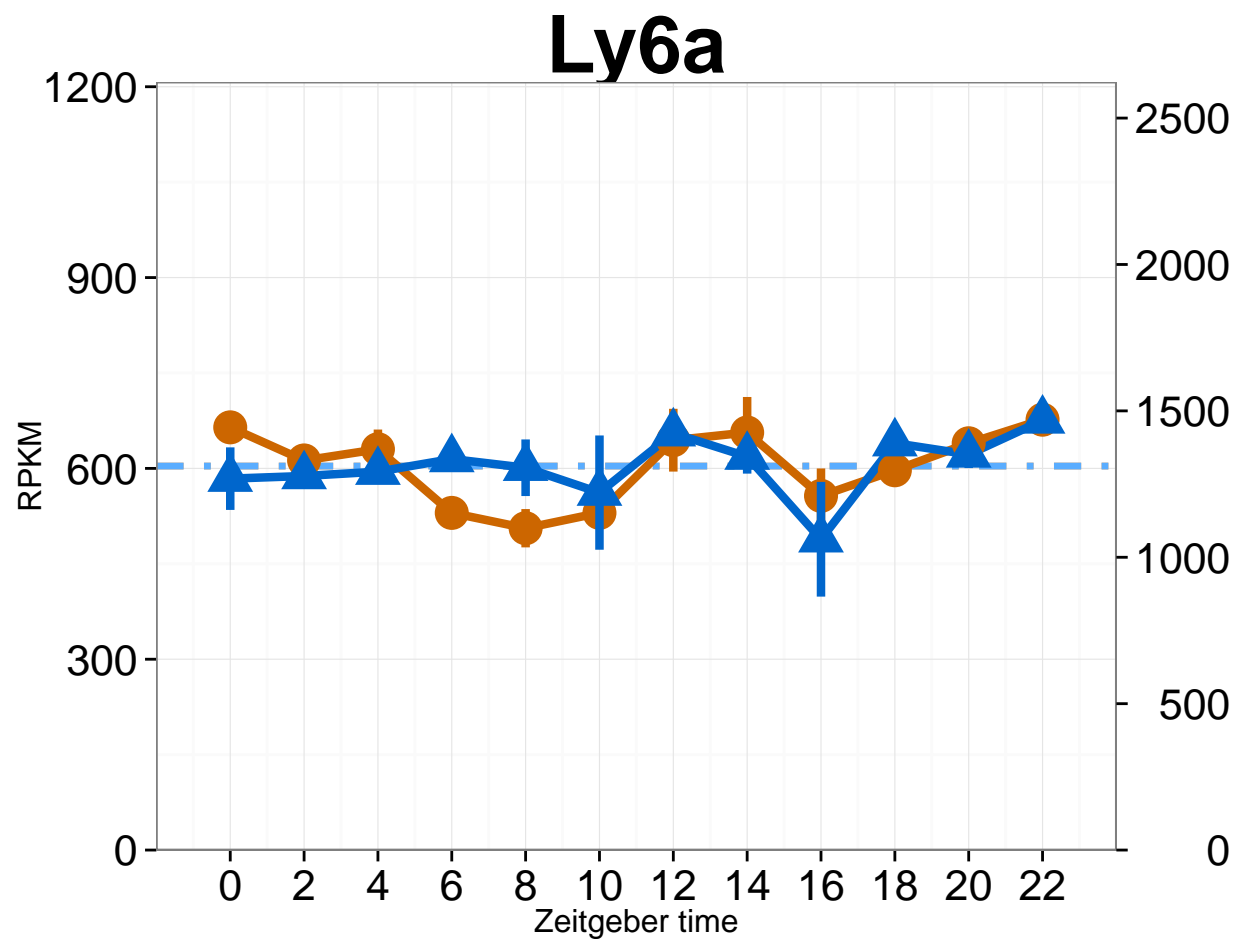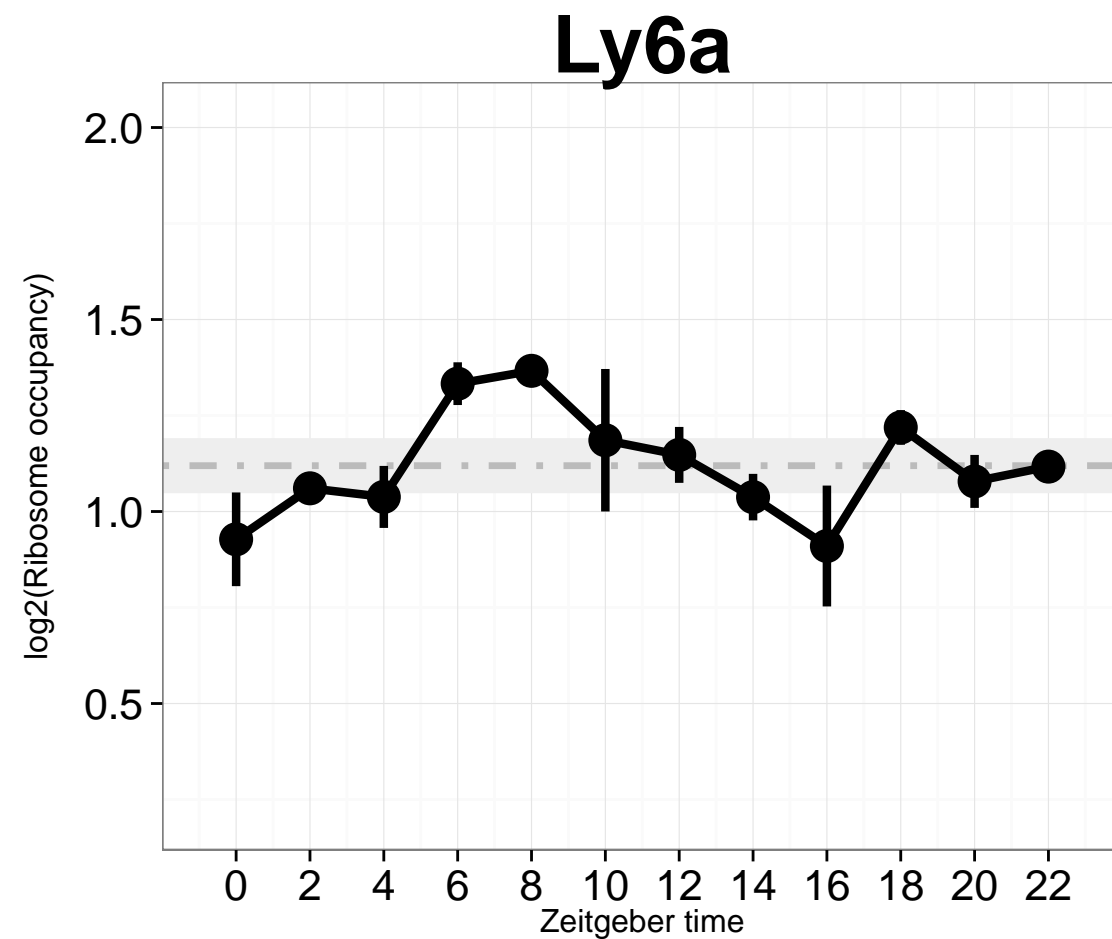

Supplement: Supplementary file 7191 [file 1]

# Cep68

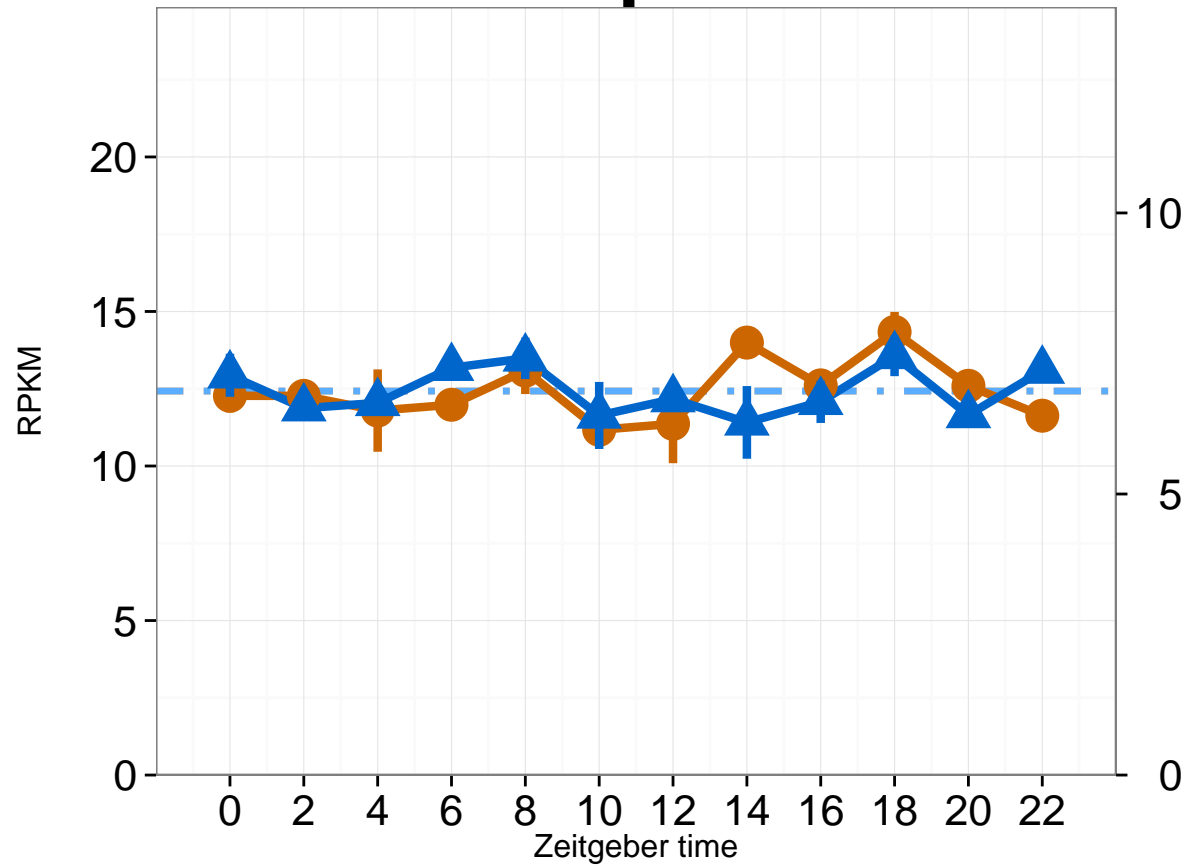

# Cep68

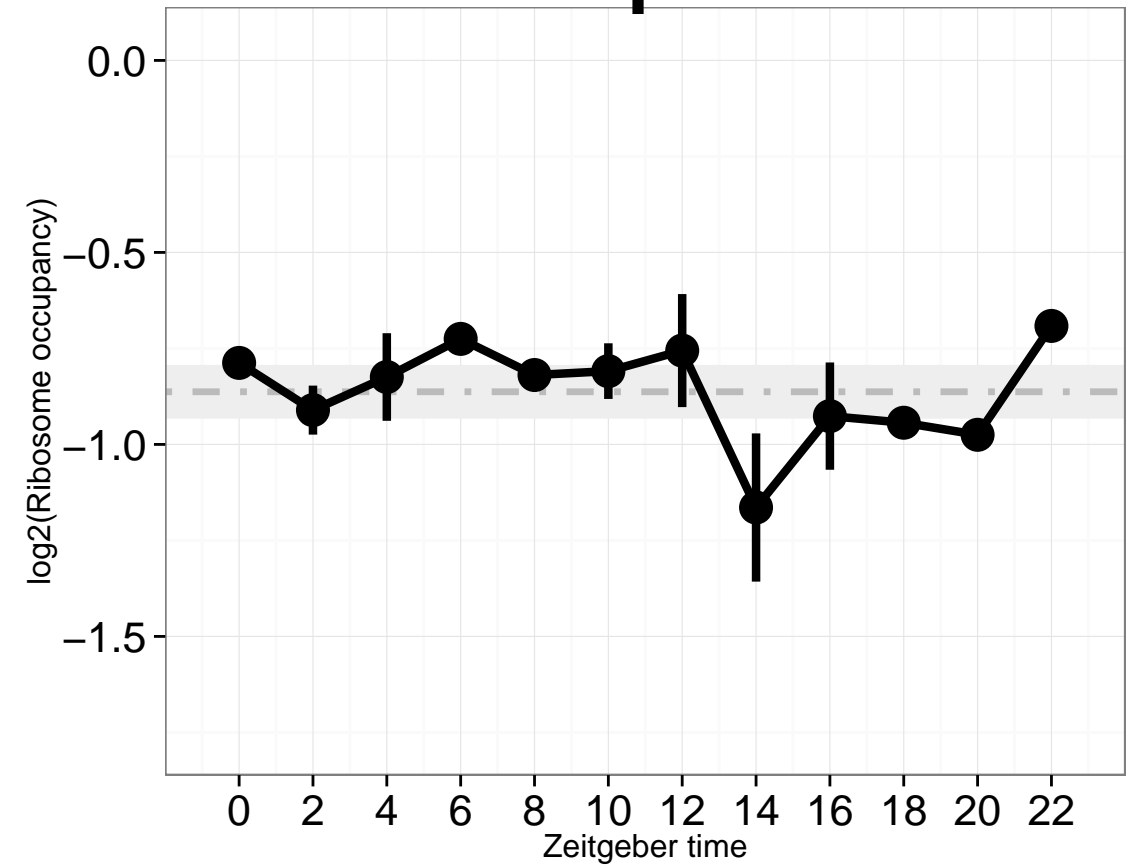

Supplement: Supplementary file 7192 [file 1]

# Dsn1

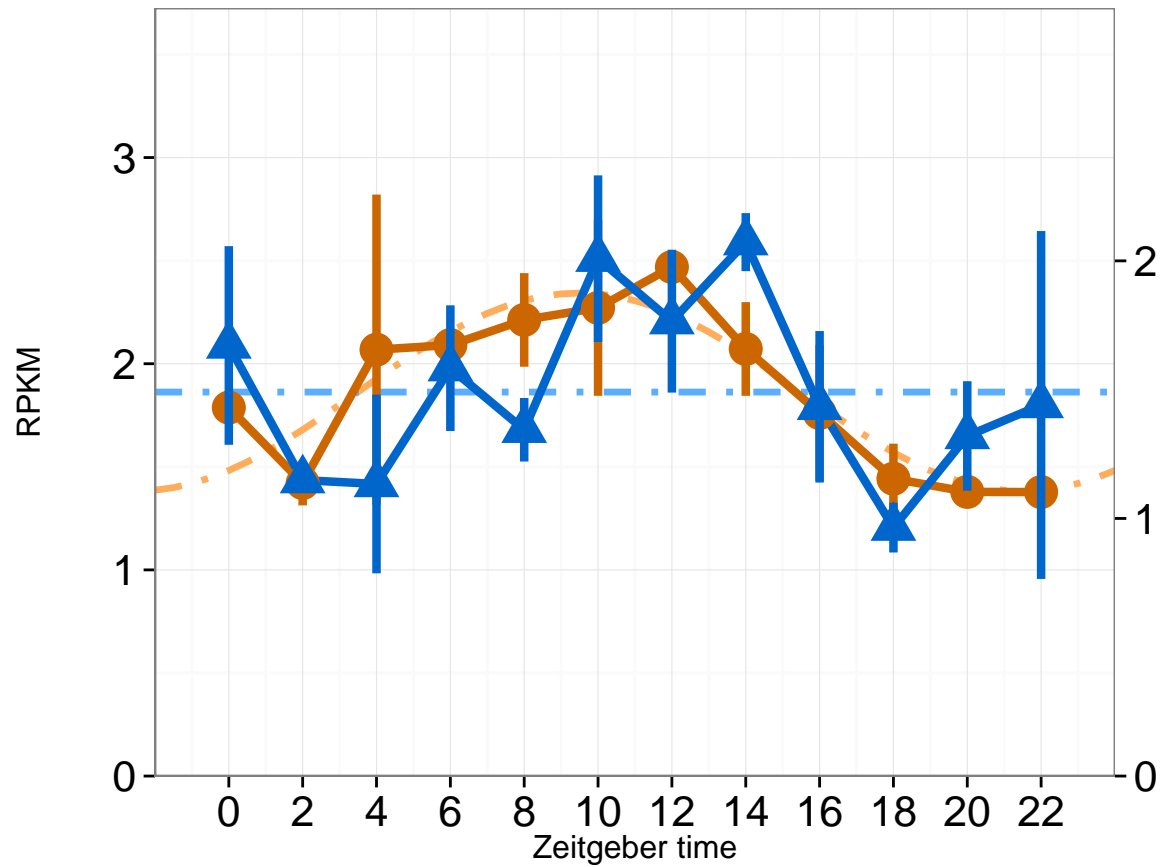

# Dsn1

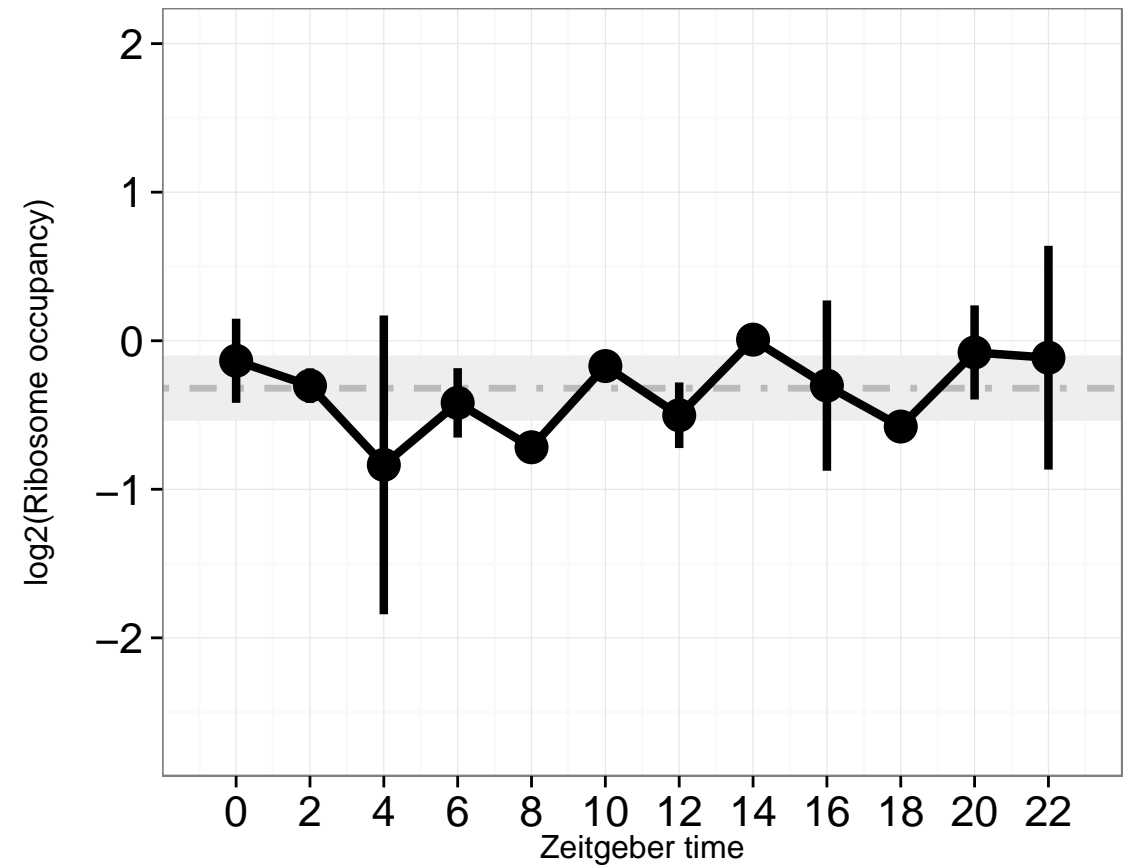

Supplement: Supplementary file 7193 [file 1]

## Gtf3c5

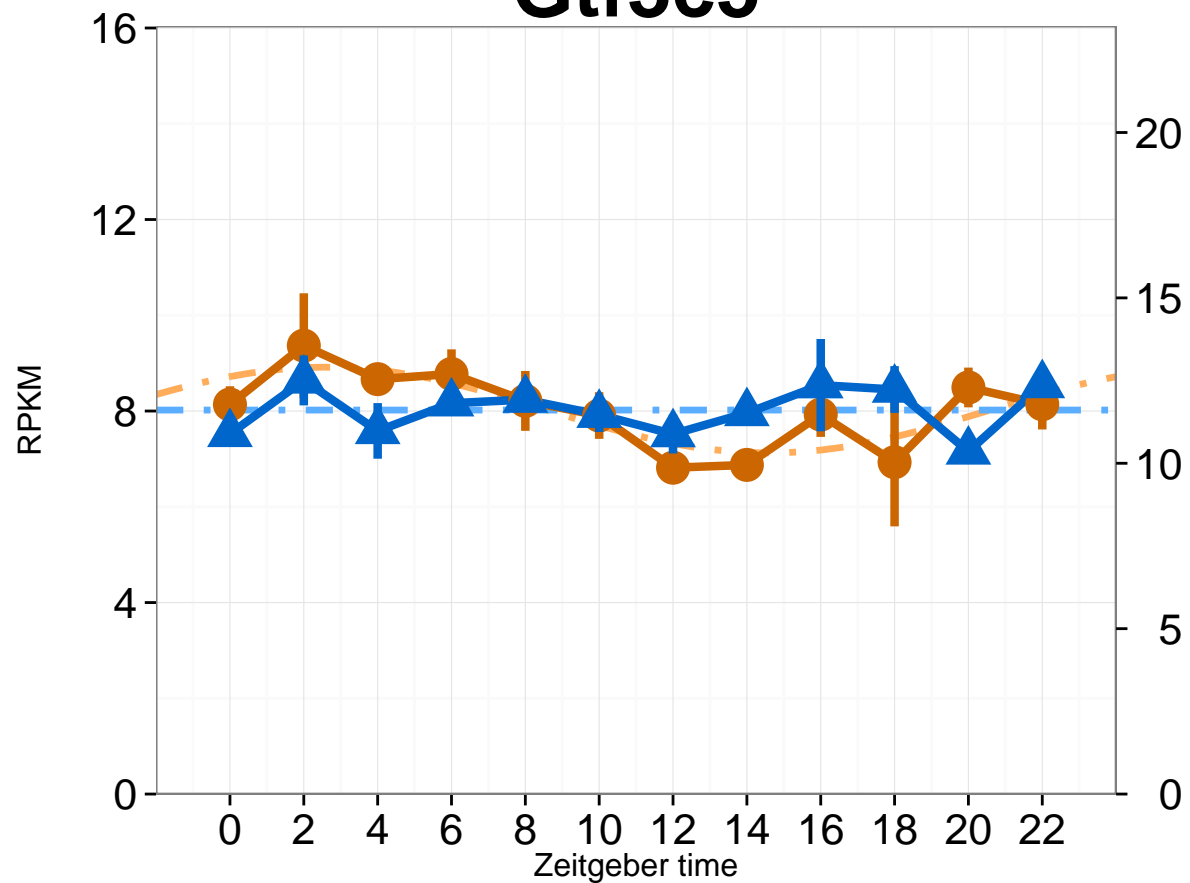

## Gtf3c5

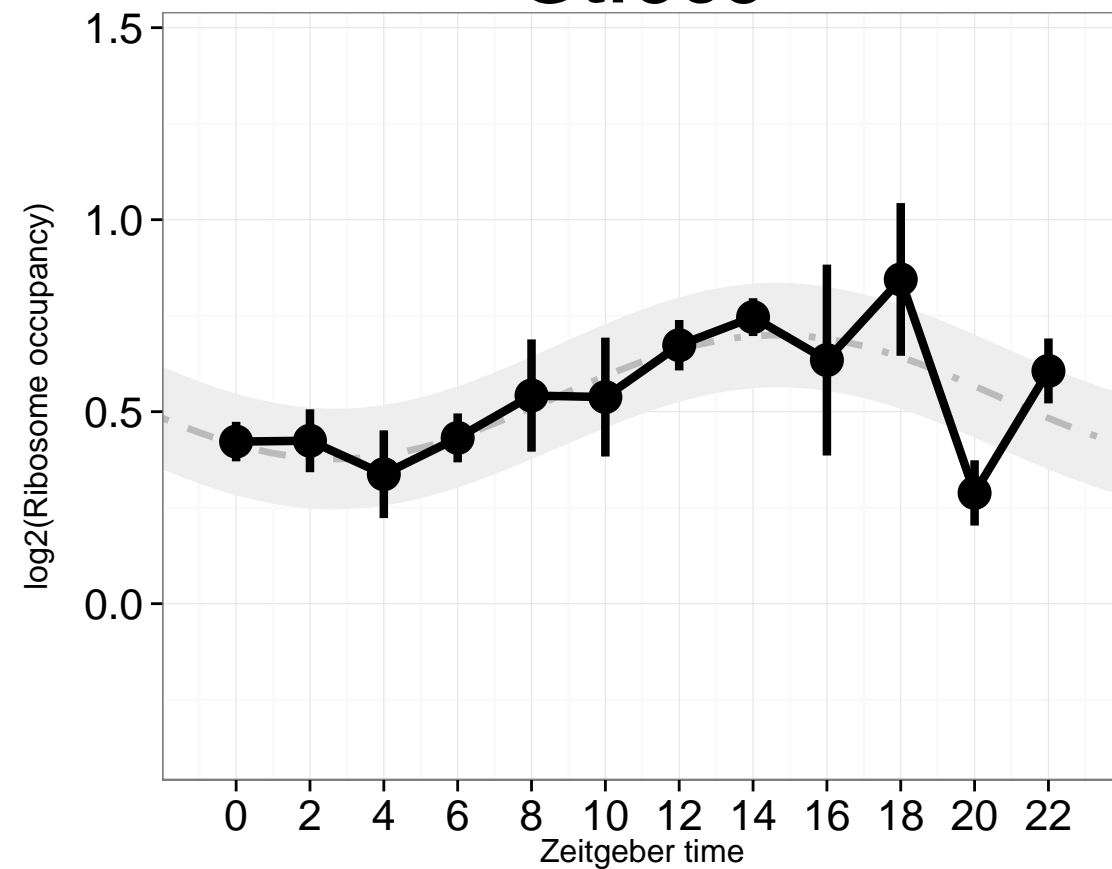

Supplement: Supplementary file 7194 [file 1]

## Llg12

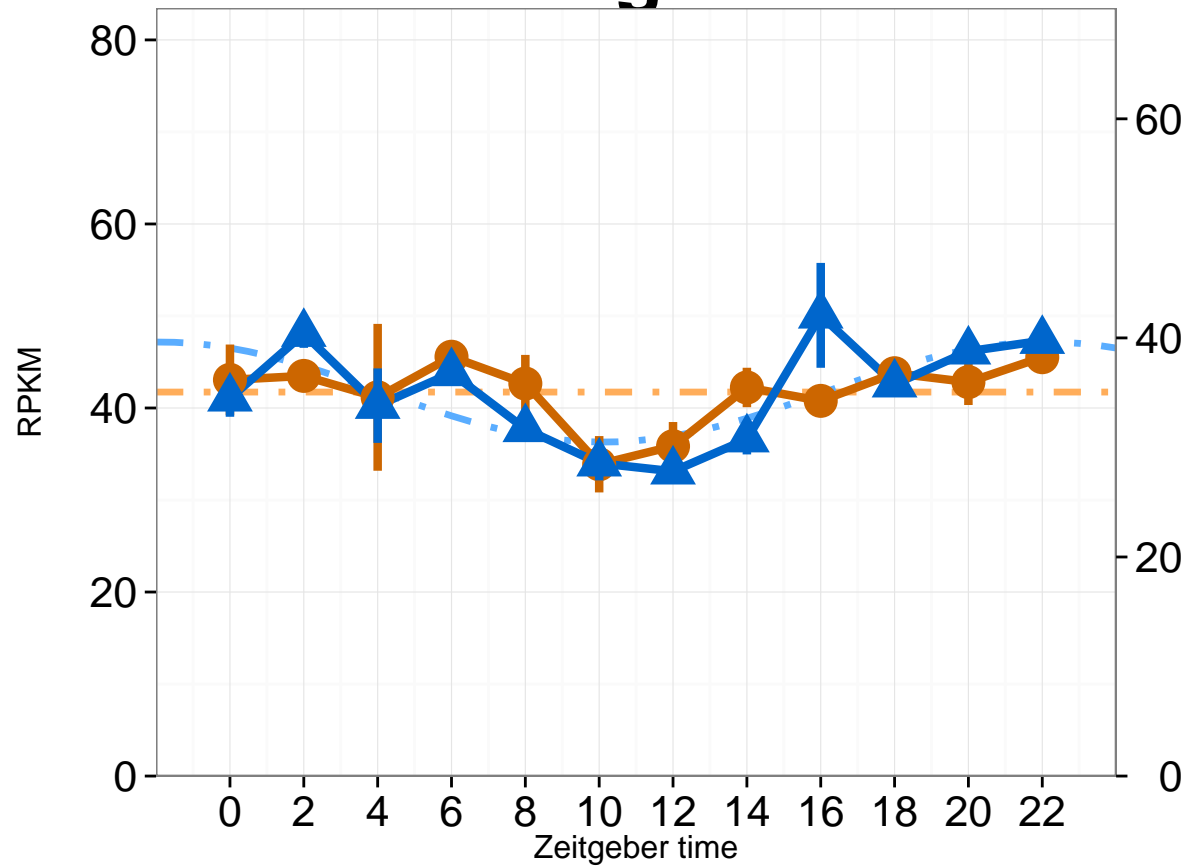

## Llg12

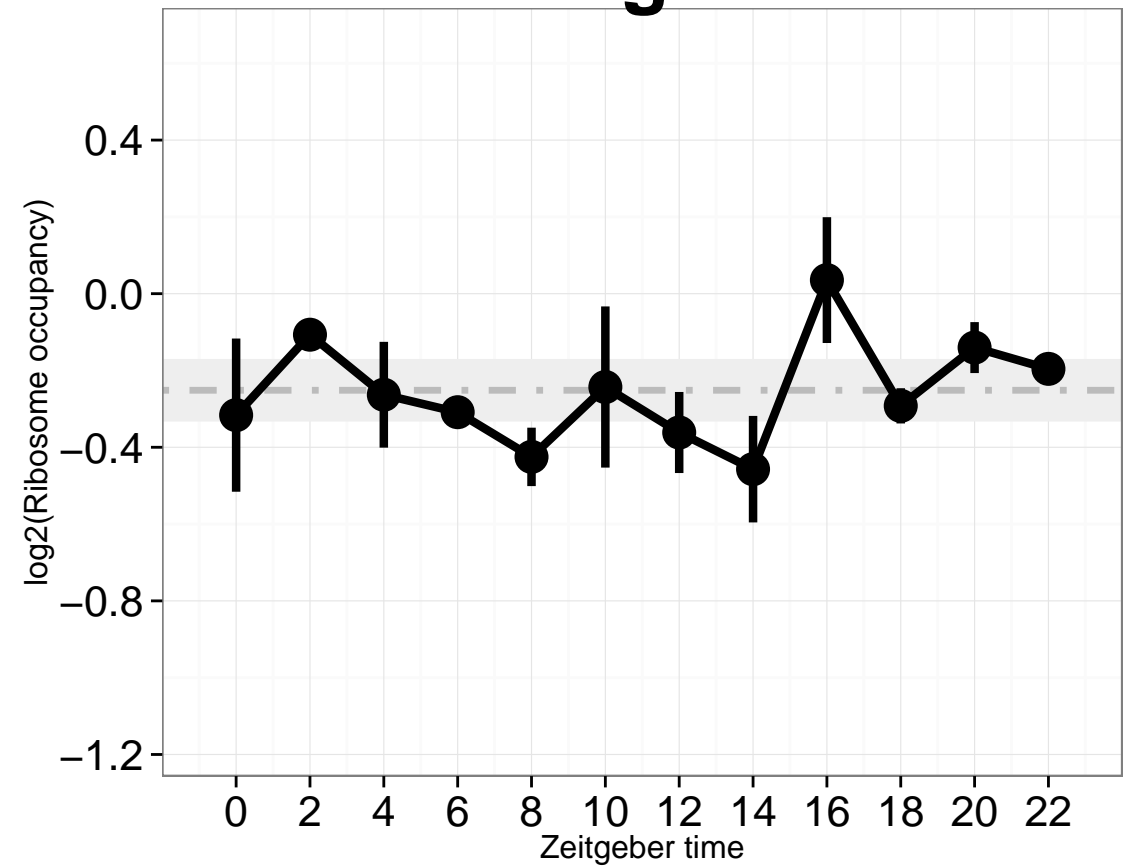

Supplement: Supplementary file 7195 [file 1]

# Zfp277

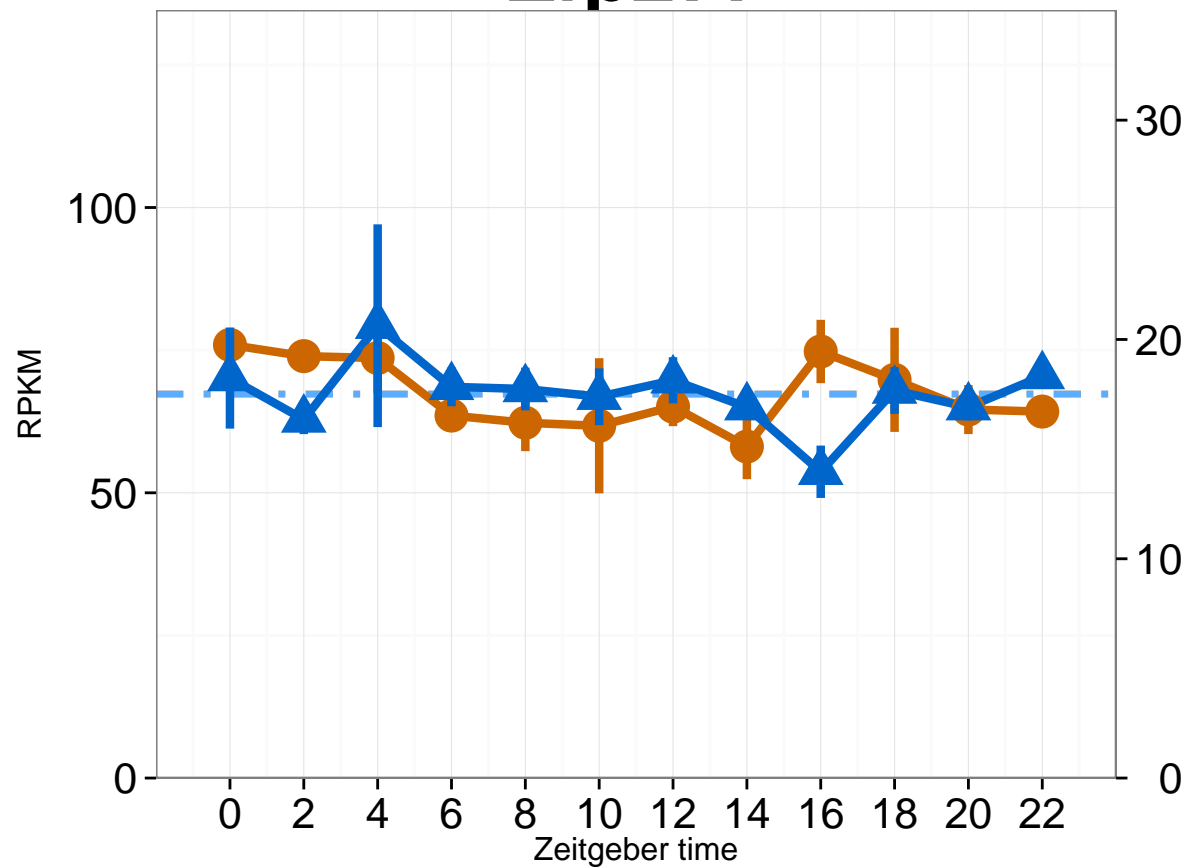

# Zfp277

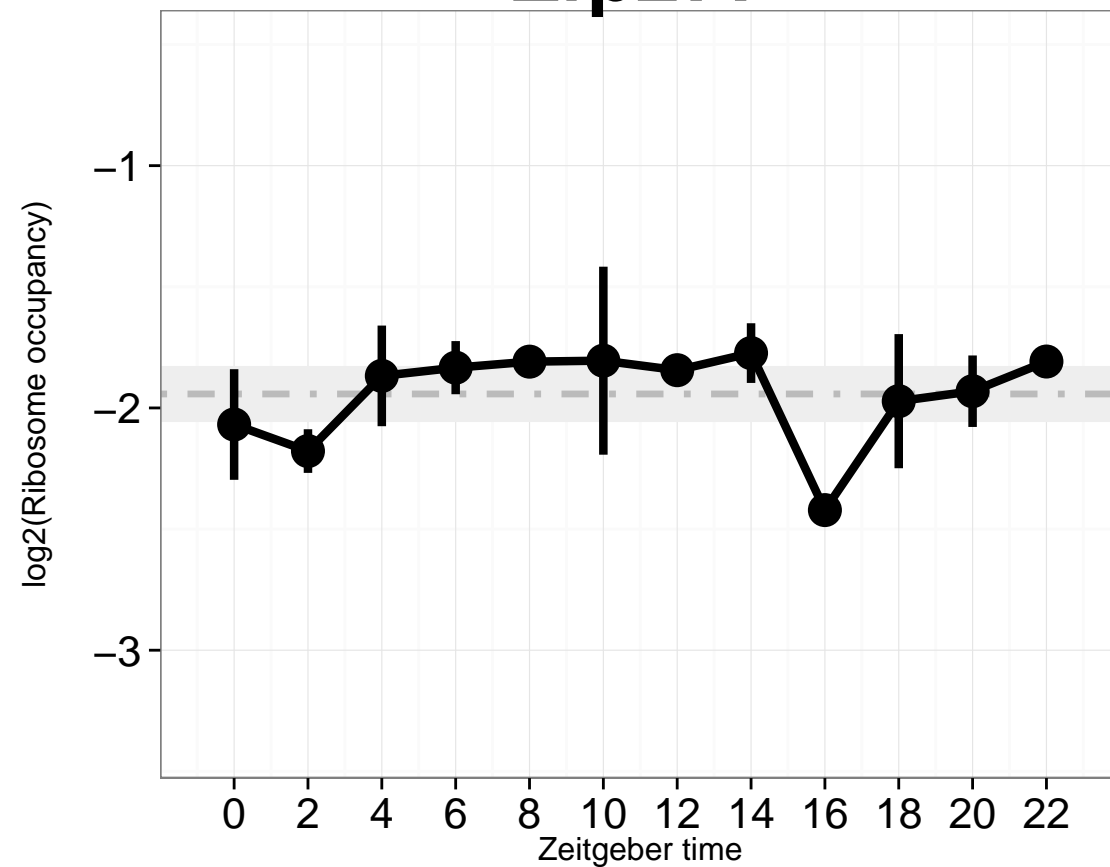

Supplement: Supplementary file 7196 [file 1]

## Tbc1d14

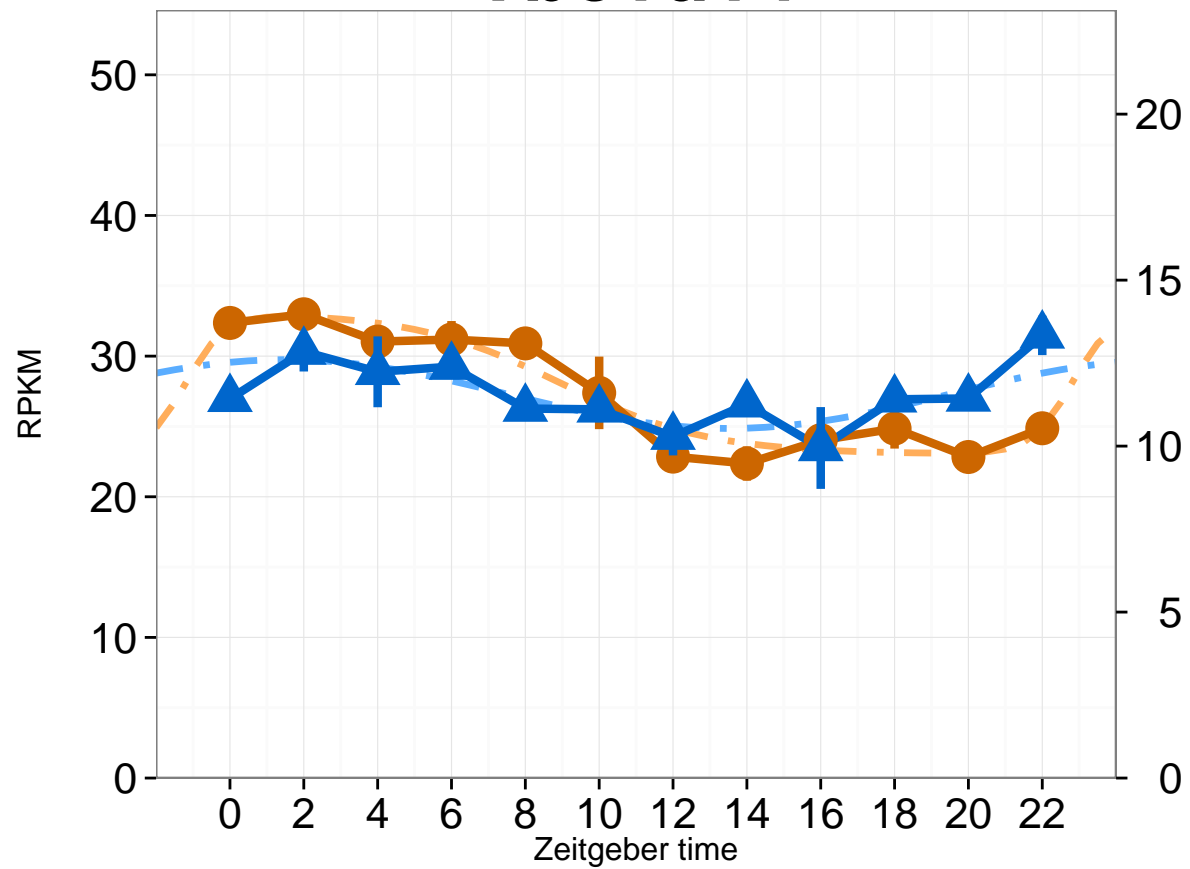

## Tbc1d14

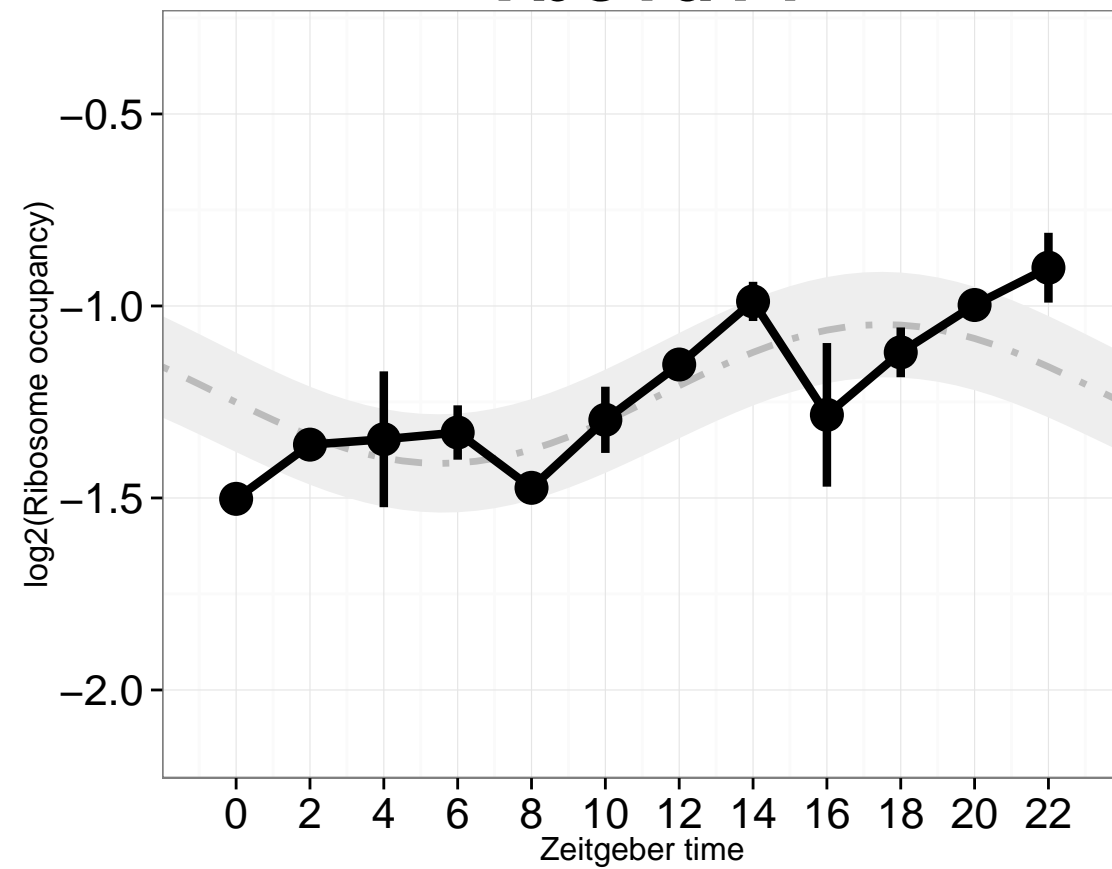

Supplement: Supplementary file 7197 [file 1]

## Sbspon

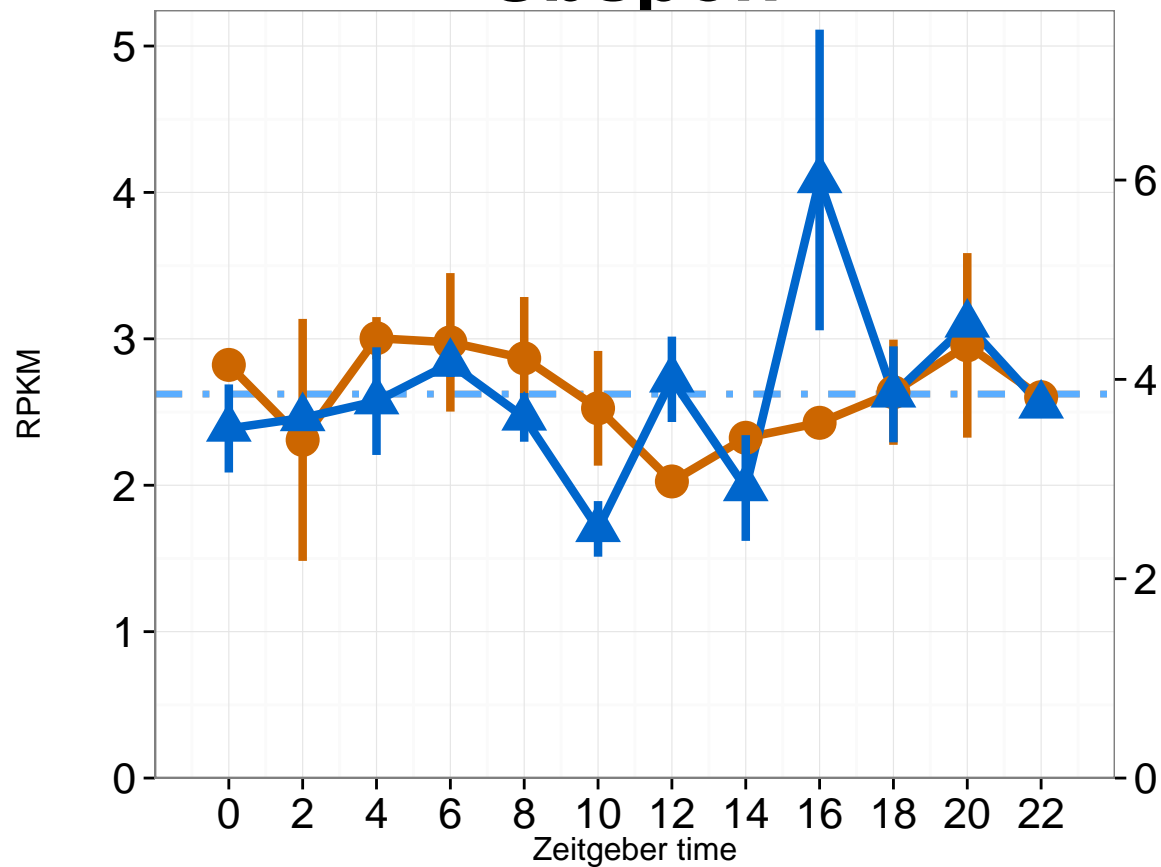

## Sbspon

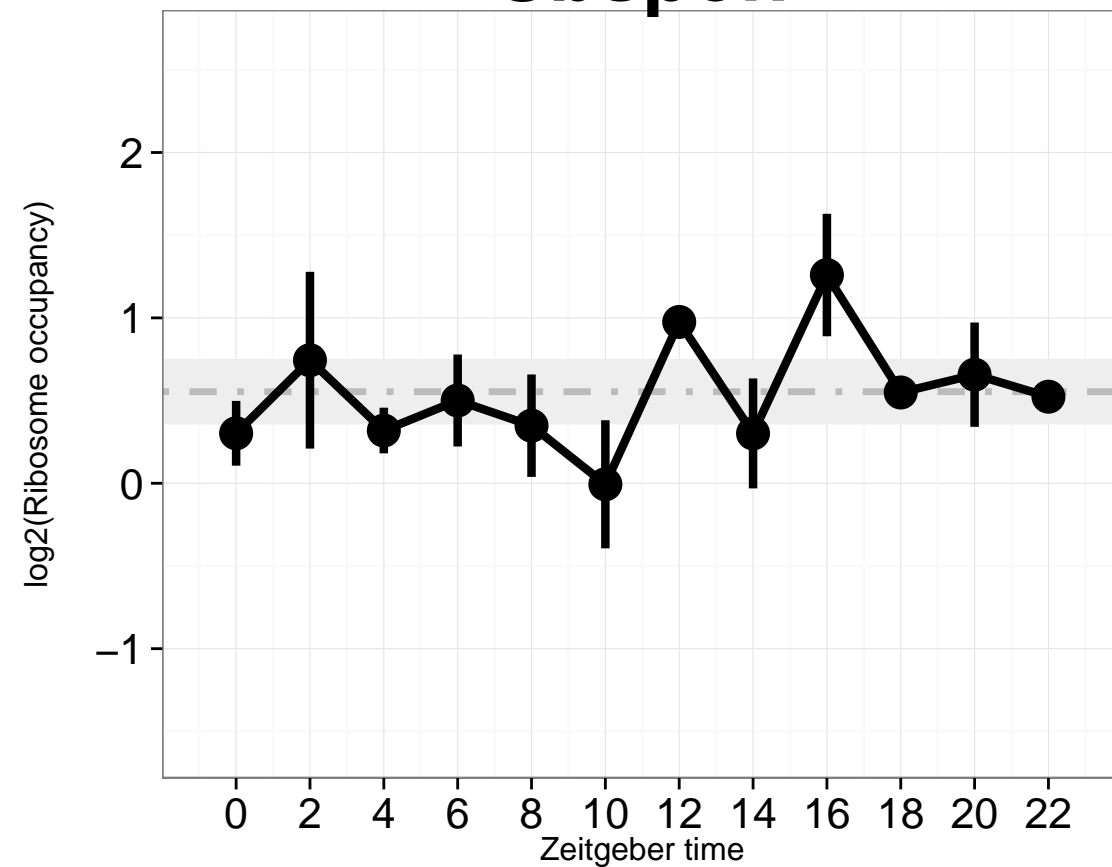

Supplement: Supplementary file 7198 [file 1]

# 4930539E08Rik

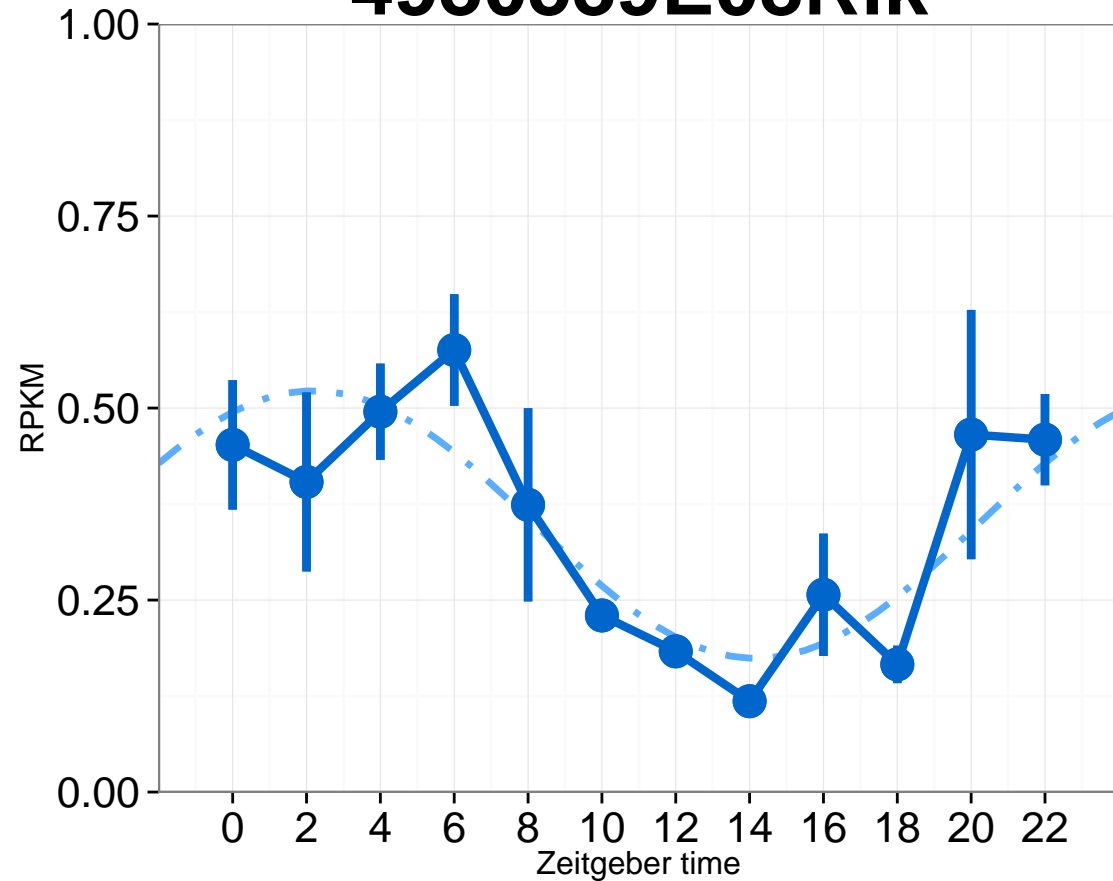

# 4930539E08Rik log2(Ribosome occup

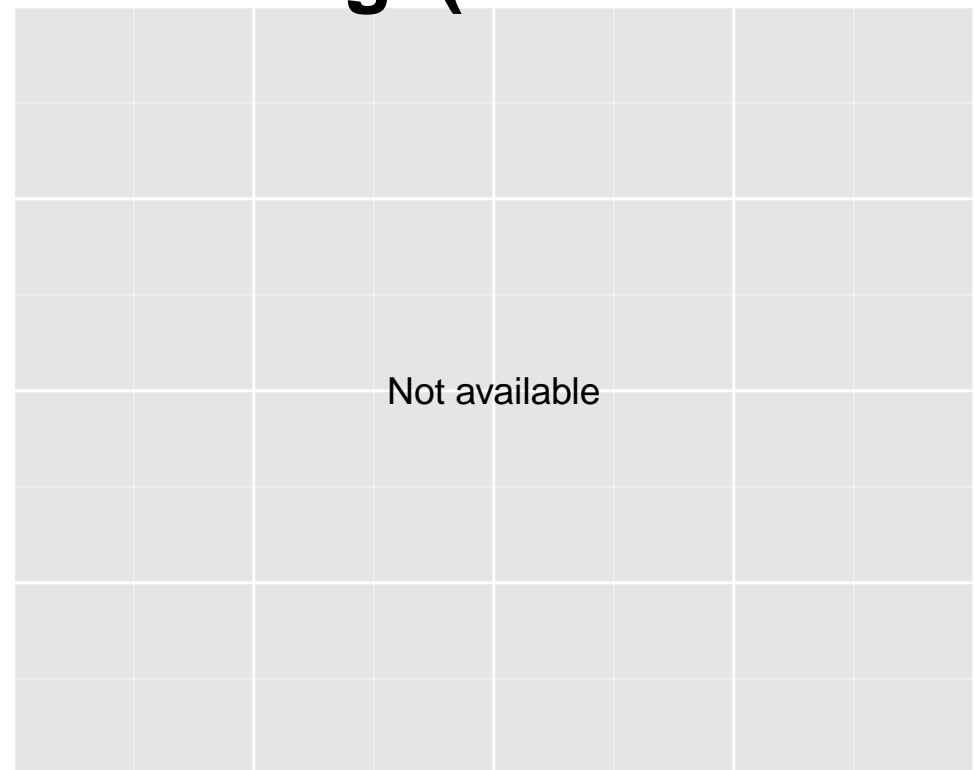

Supplement: Supplementary file 7199 [file 1]

# Cyp2a5

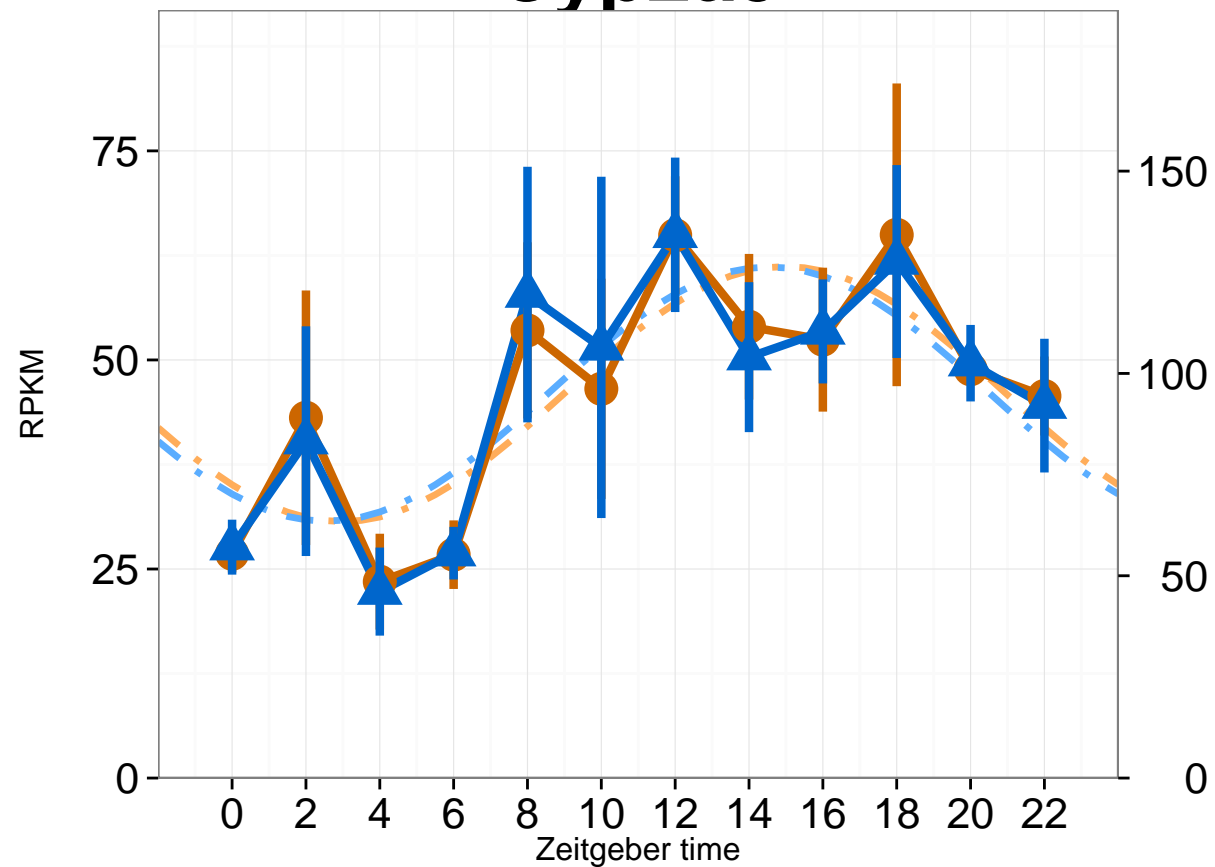

# Cyp2a5

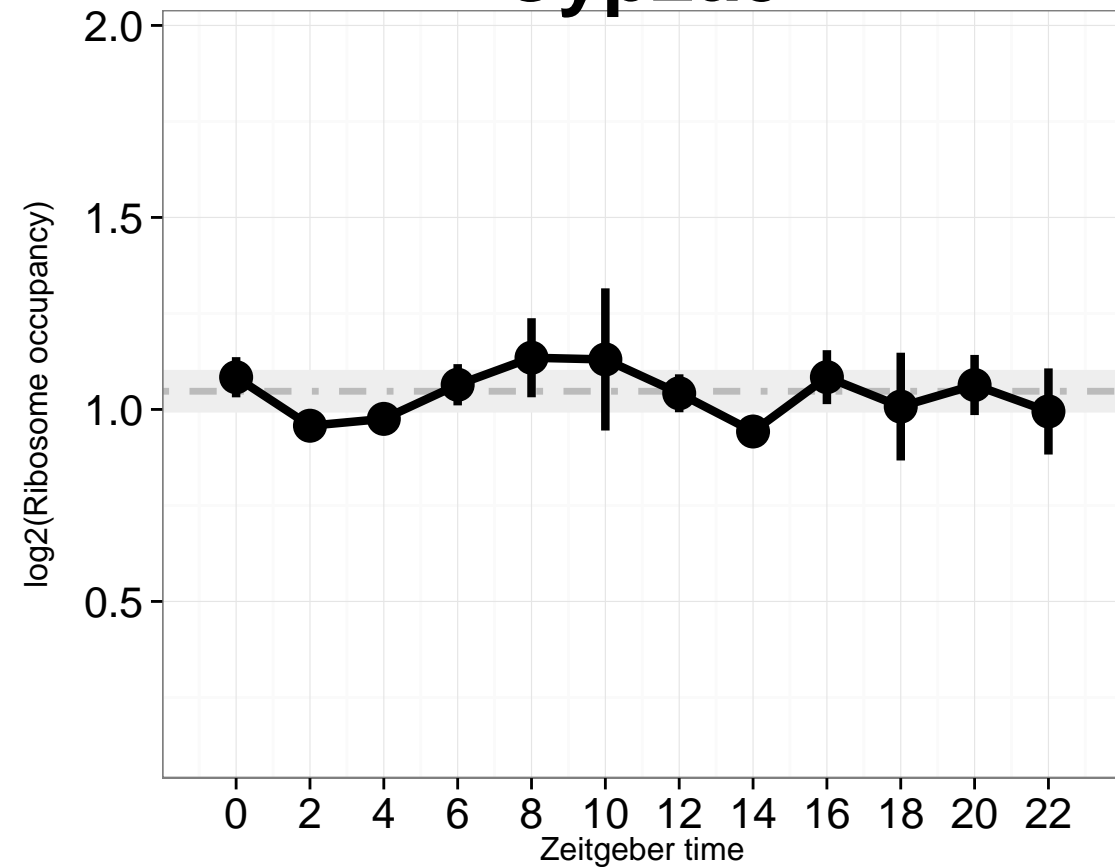

Supplement: Supplementary file 7200 [file 1]

# Cops7b

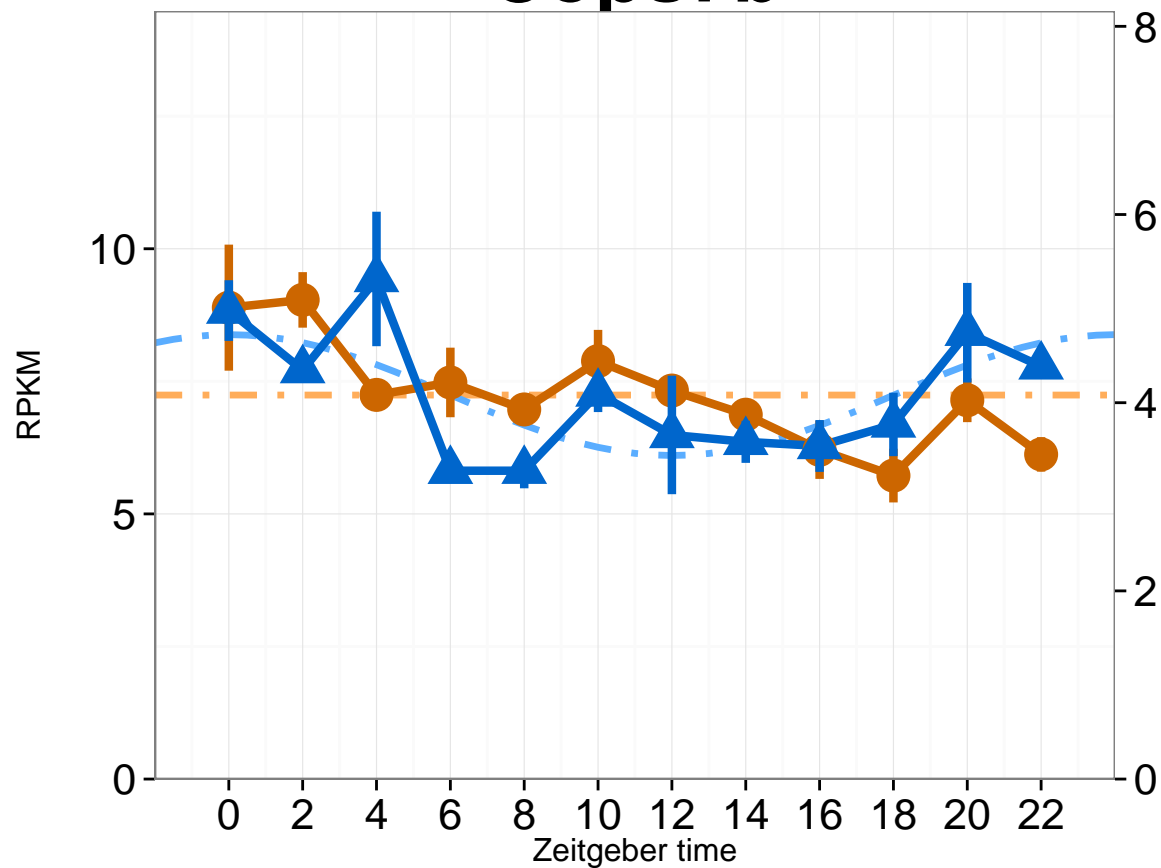

# Cops7b

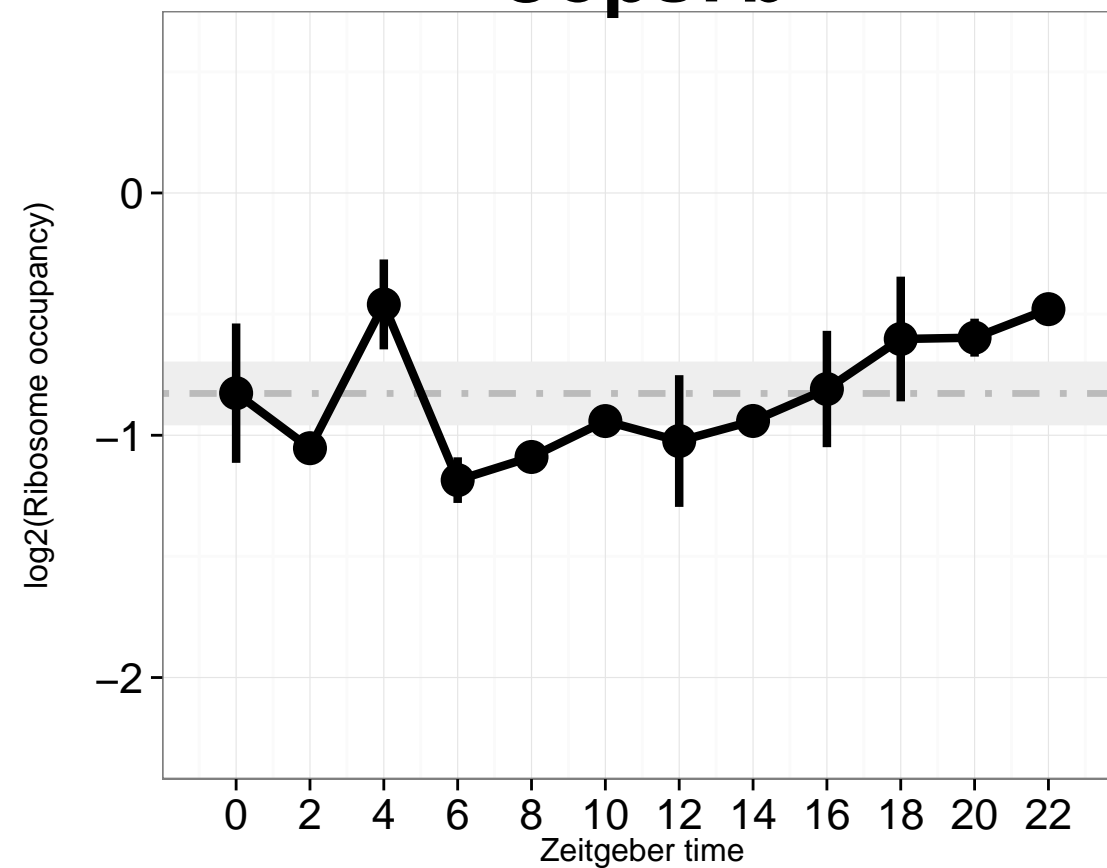

Supplement: Supplementary file 7201 [file 1]

## Thoc2

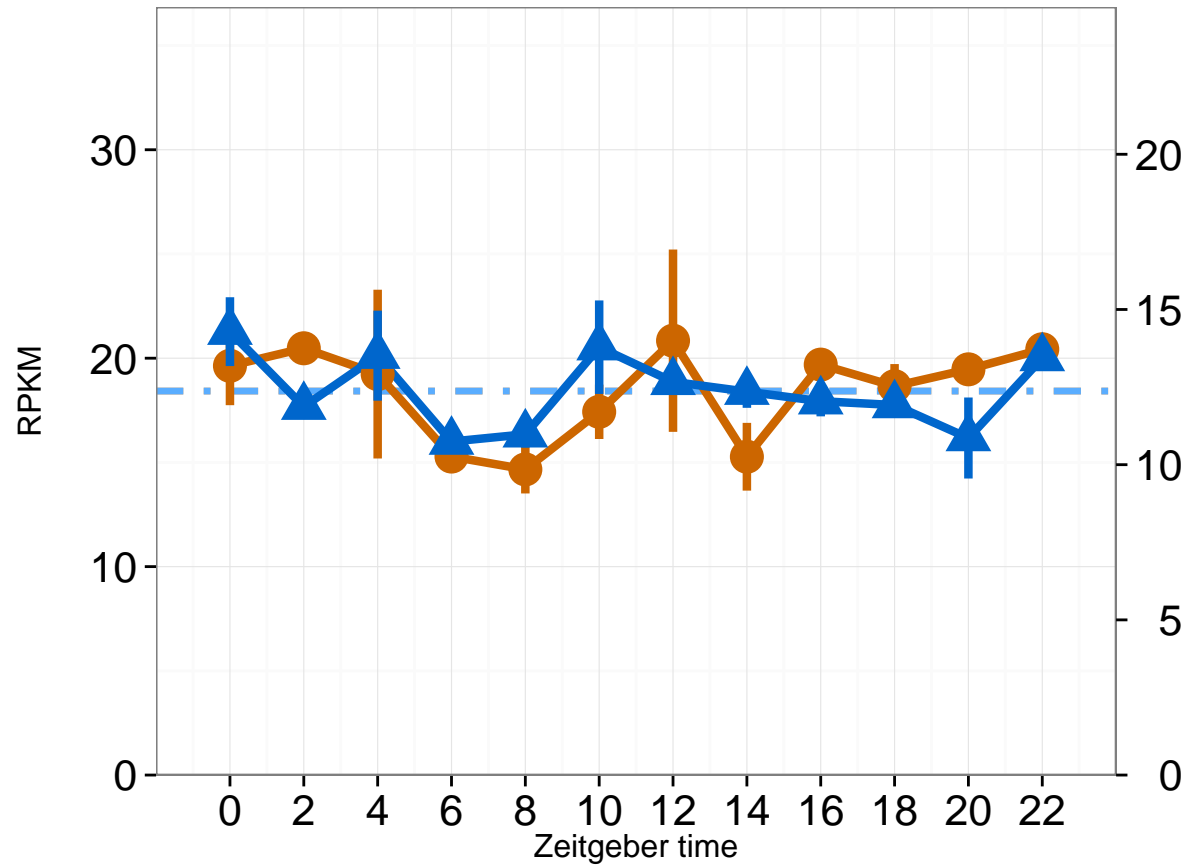

## Thoc2

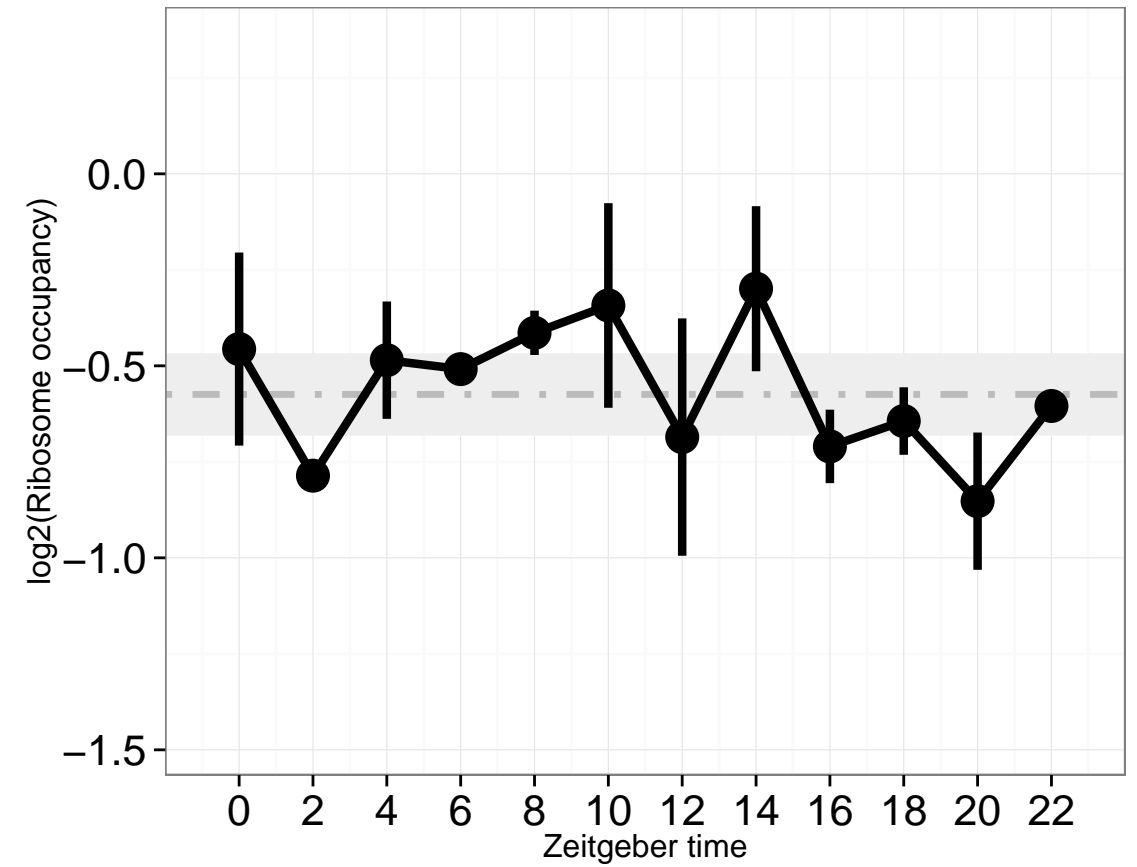

Supplement: Supplementary file 7202 [file 1]

## Zfp511

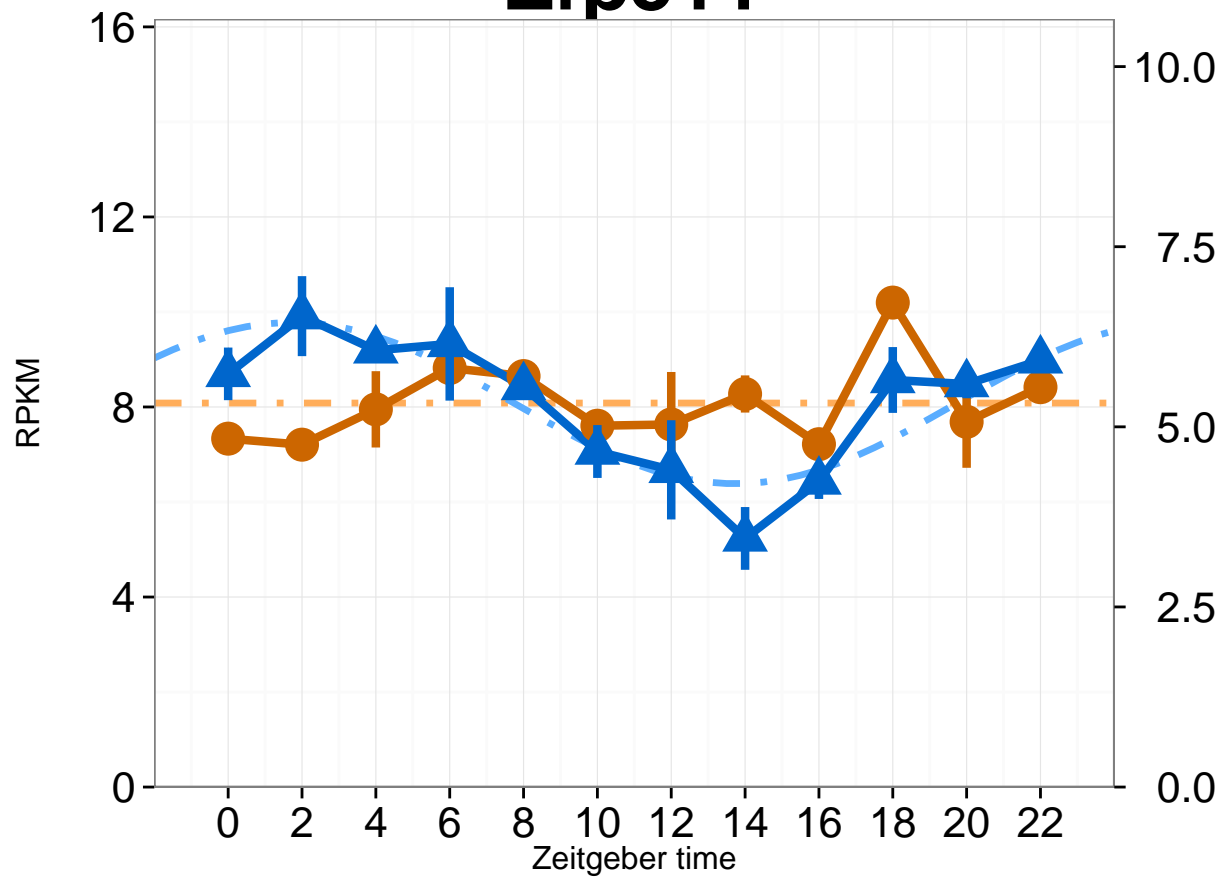

## Zfp511

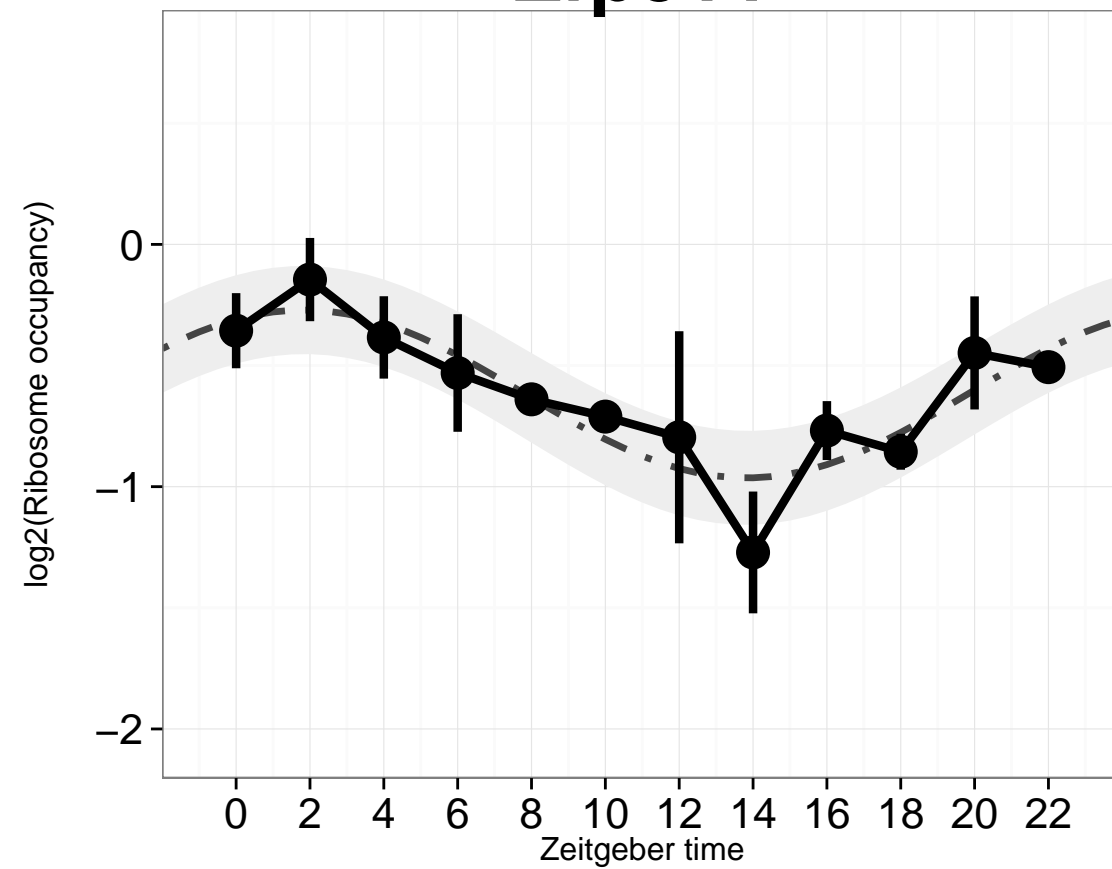

Supplement: Supplementary file 7203 [file 1]

# 6330408A02Rik

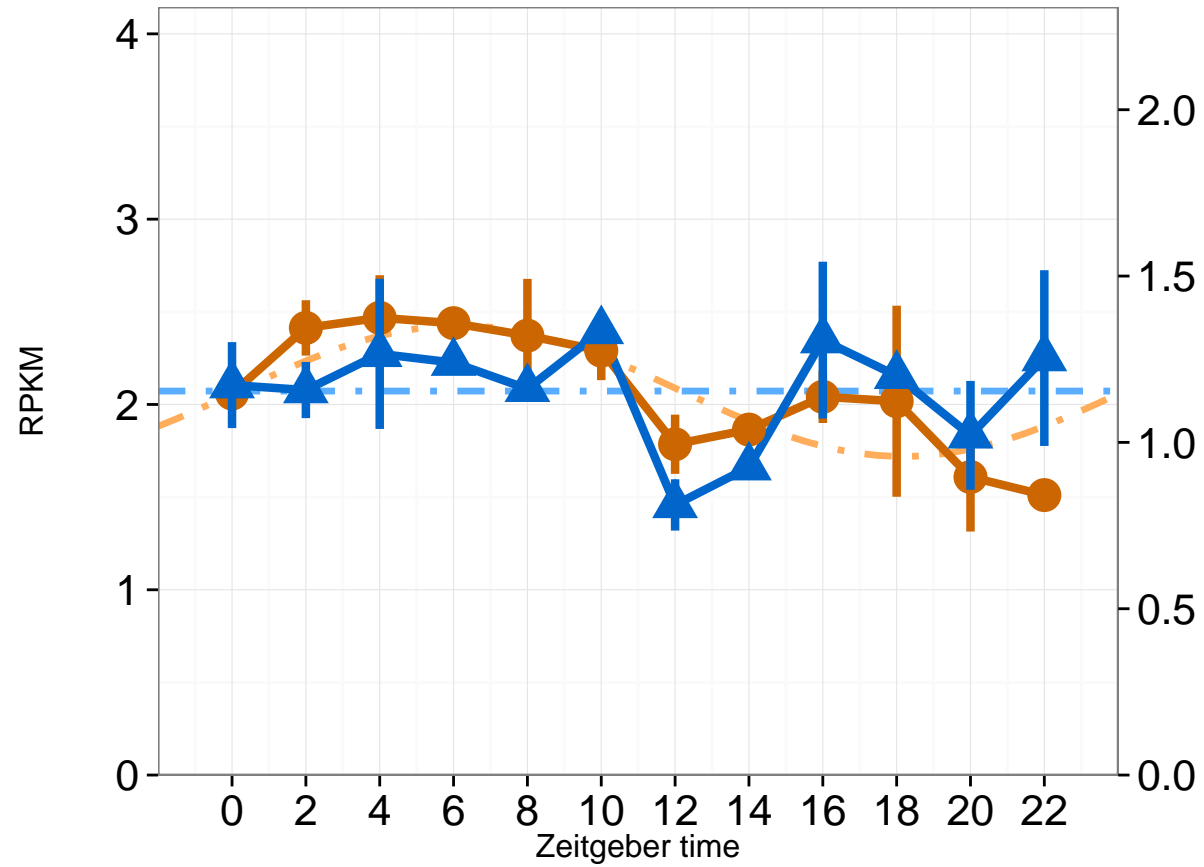

# 6330408A02Rik

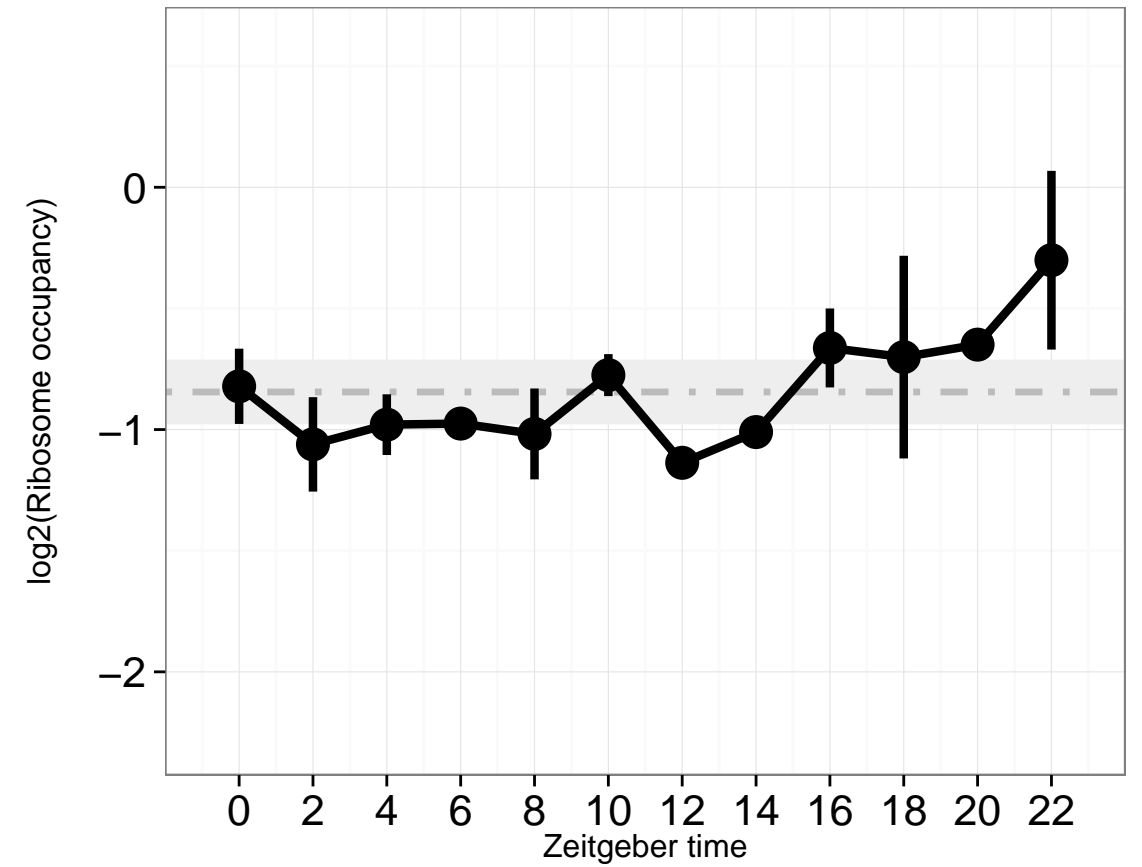

Supplement: Supplementary file 7204 [file 1]

## Senp2

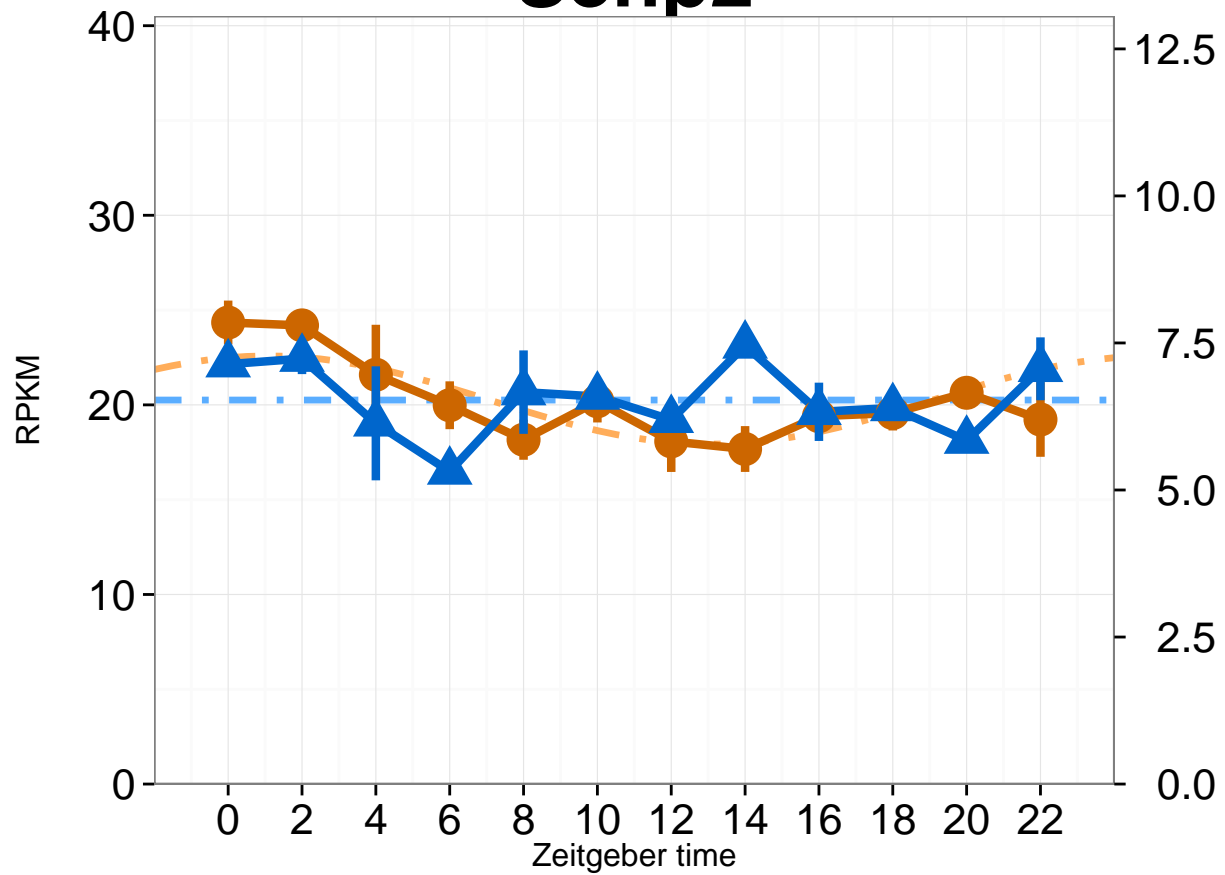

## Senp2

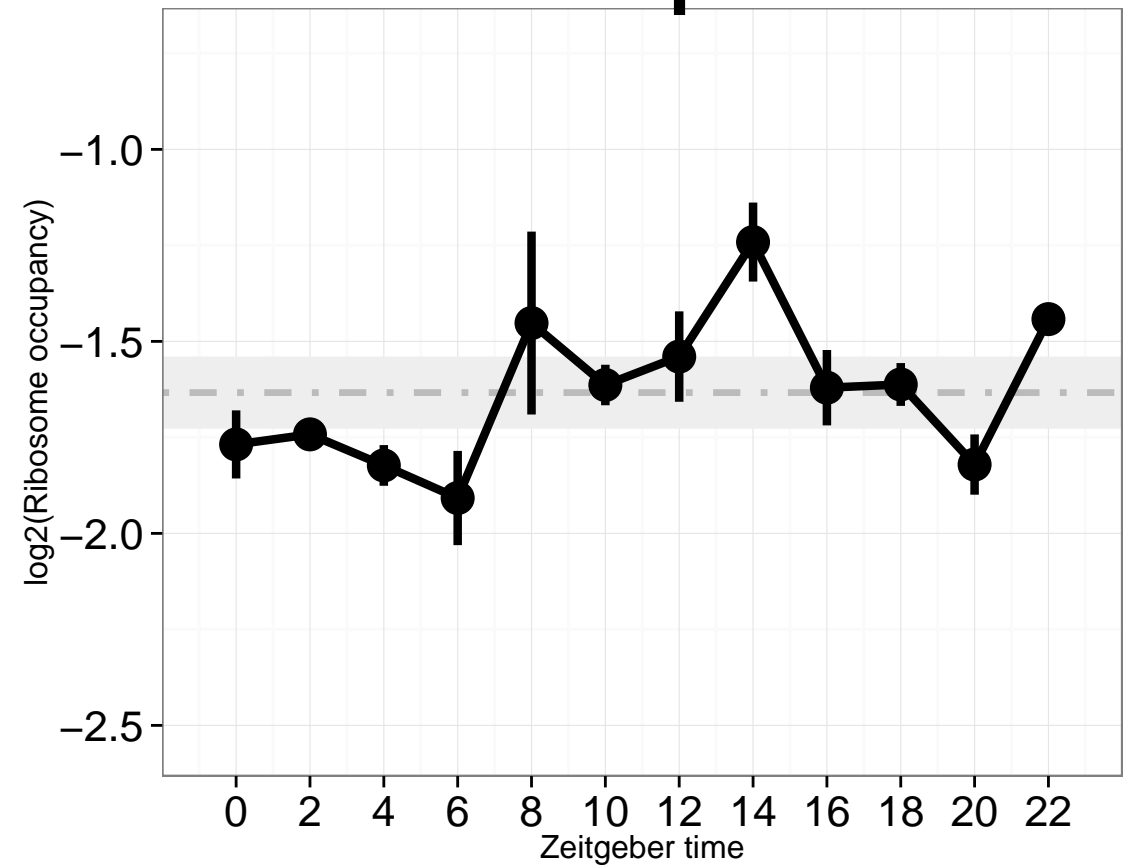

Supplement: Supplementary file 7205 [file 1]

## Chd1l

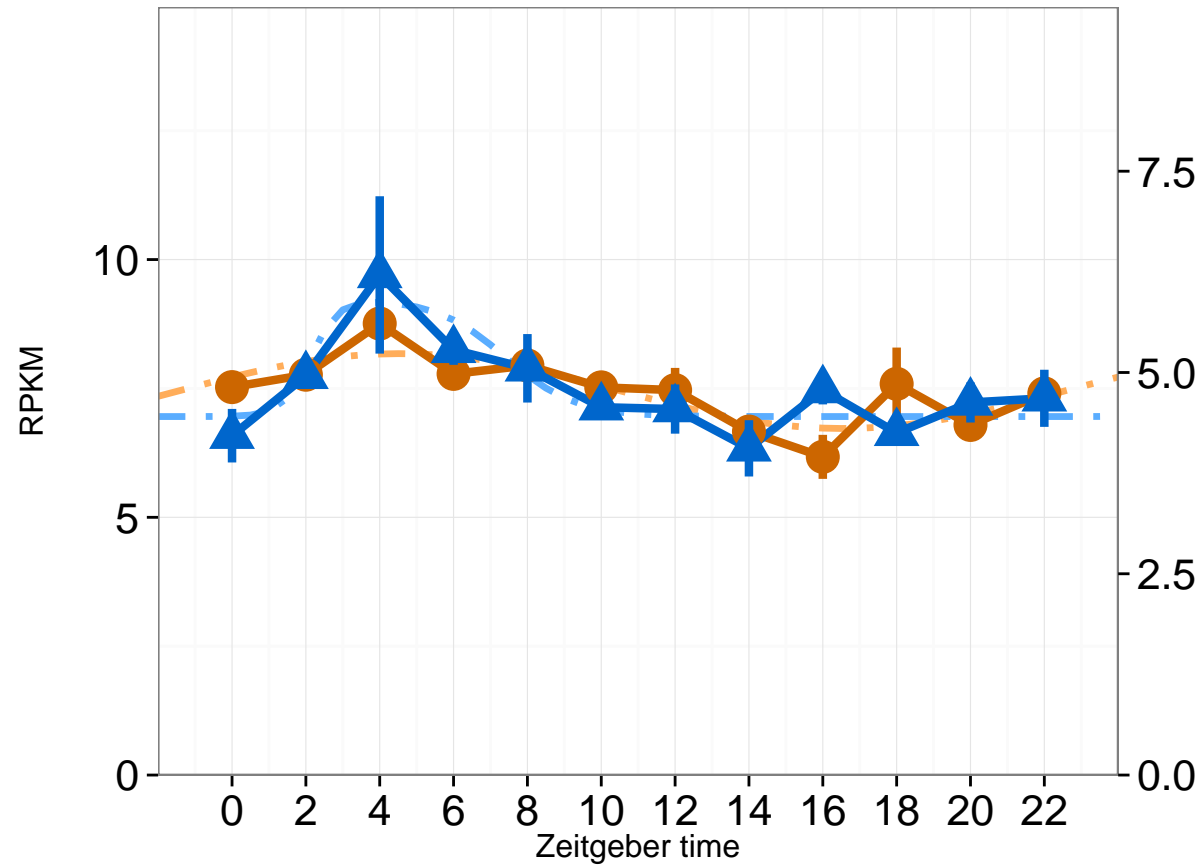

## Chd1l

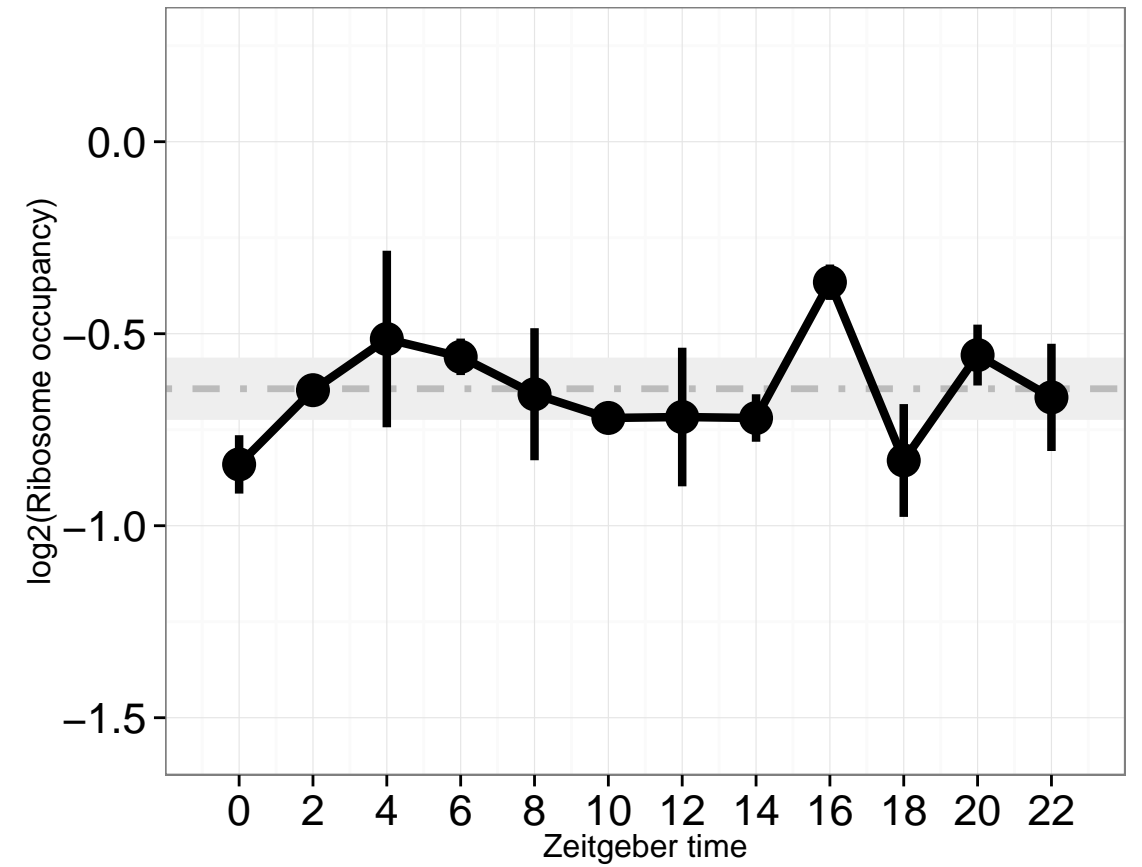

Supplement: Supplementary file 7206 [file 1]

**Gc**

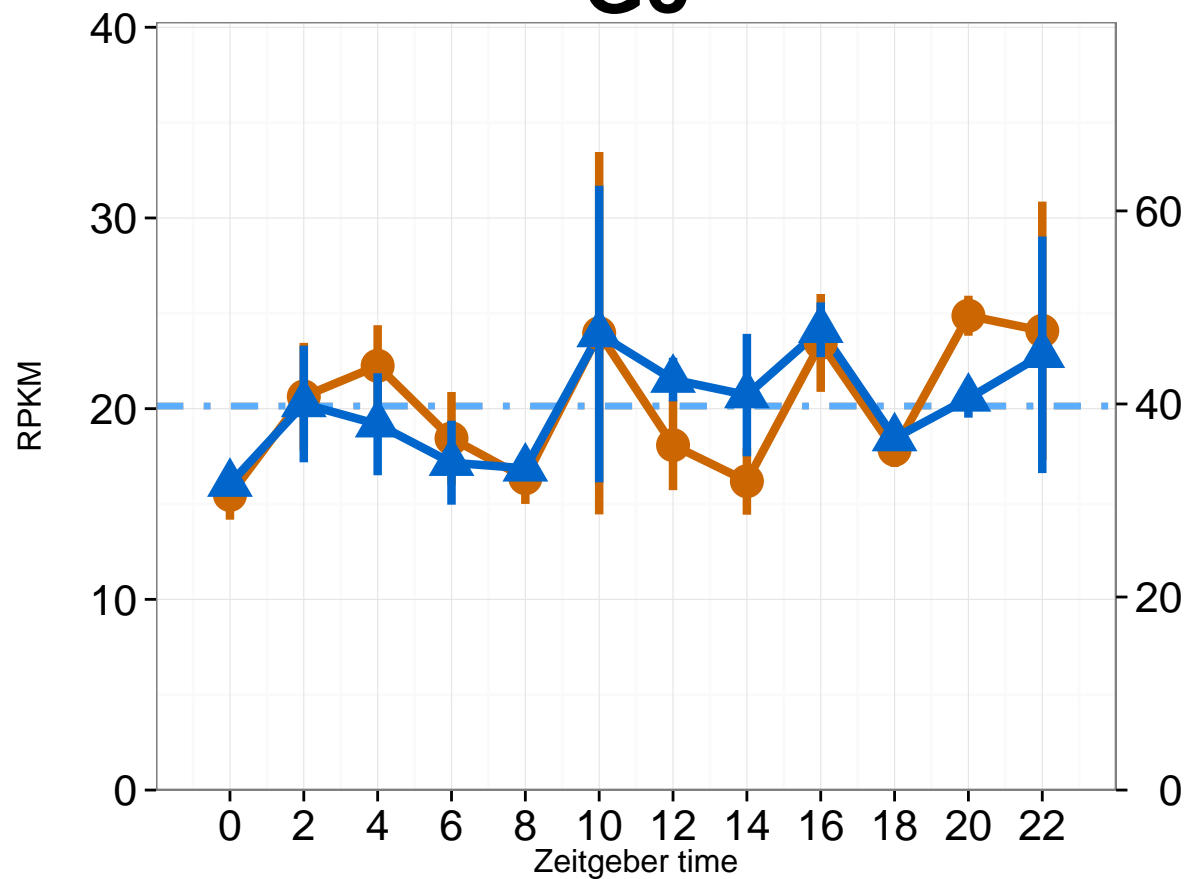

**Gc**

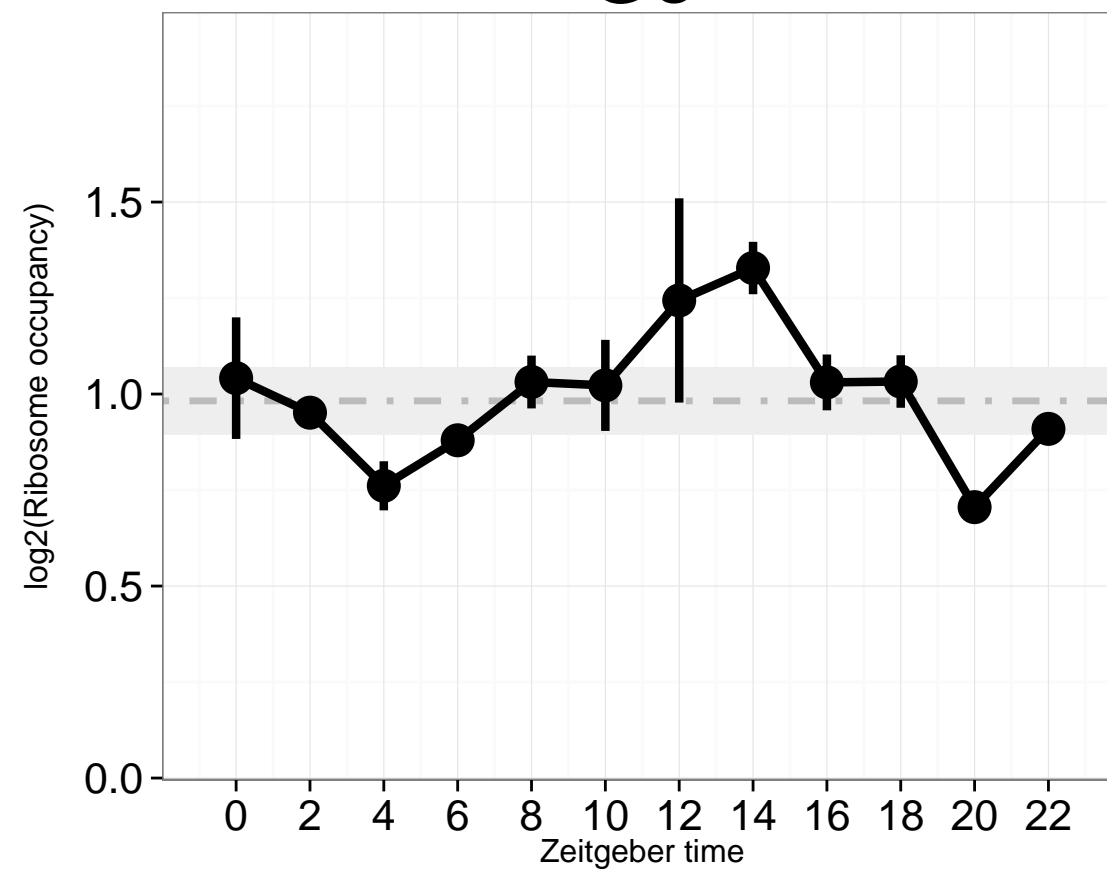

Supplement: Supplementary file 7207 [file 1]

## Nek6

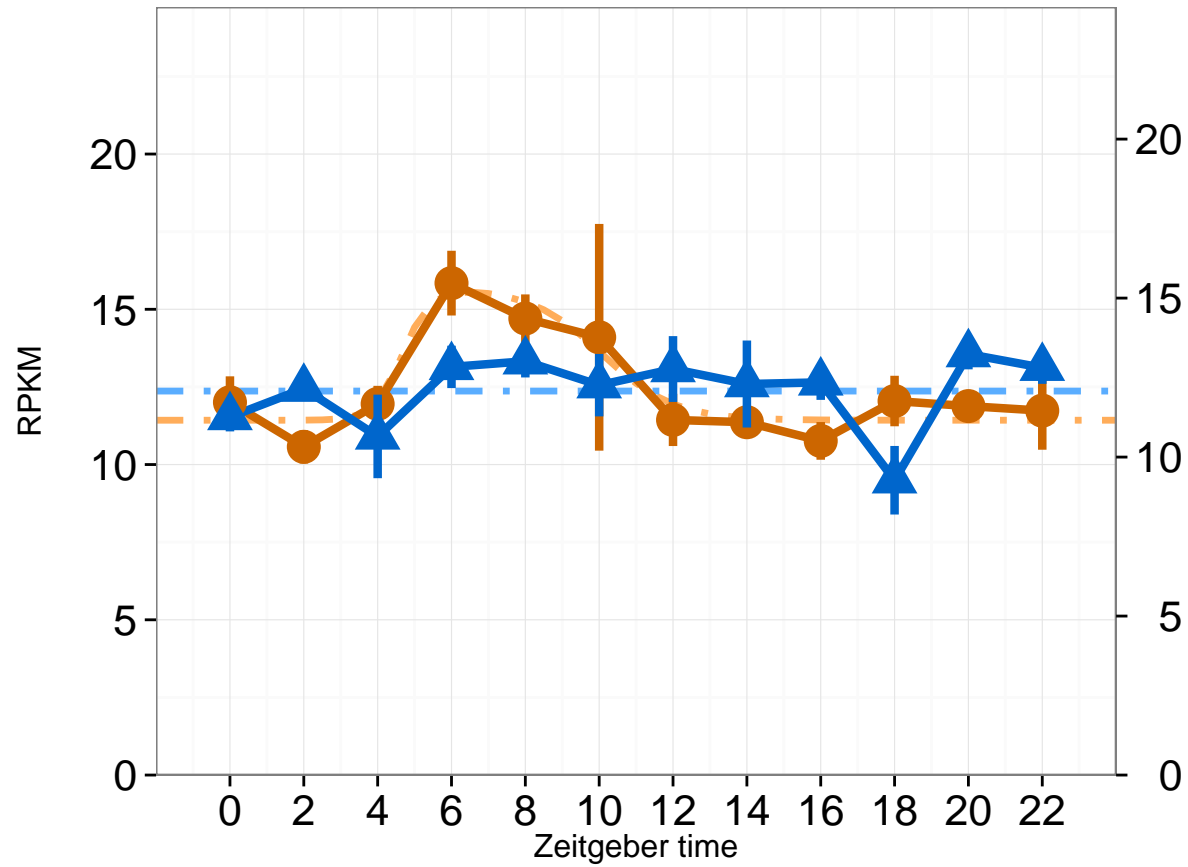

## Nek6

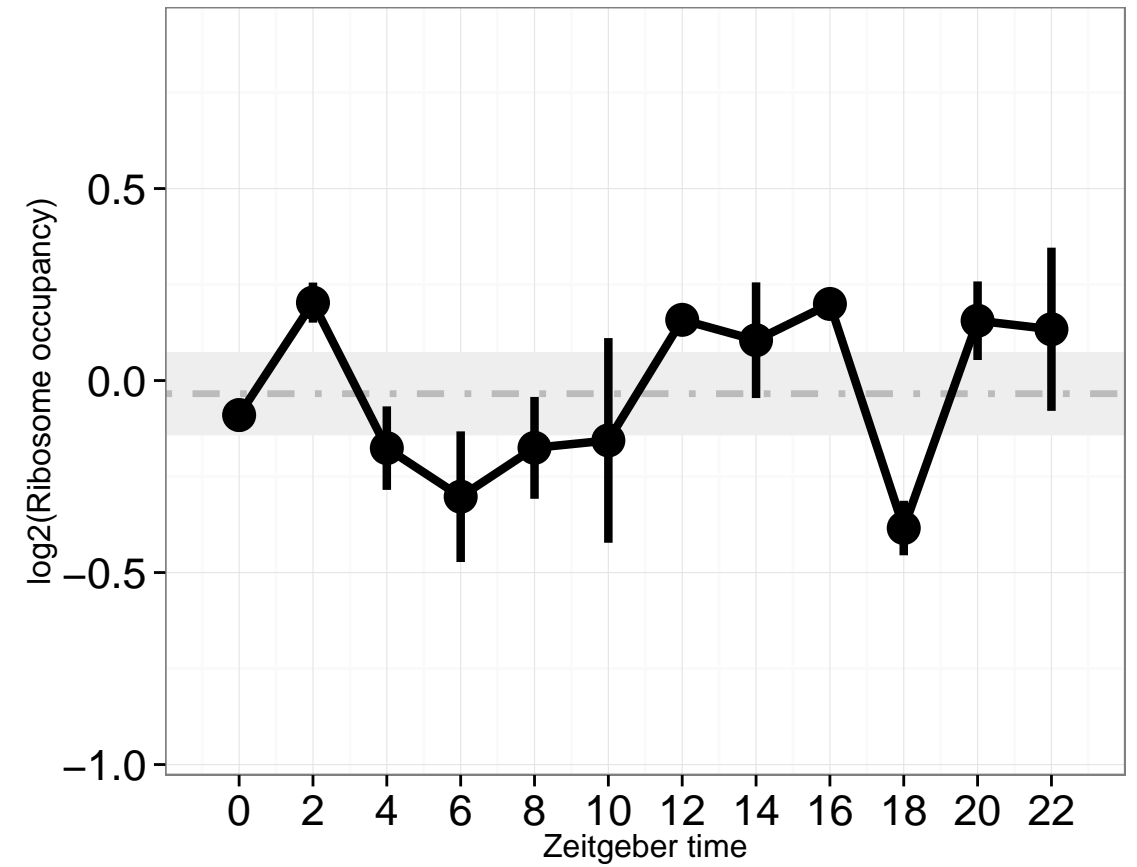

Supplement: Supplementary file 7208 [file 1]

## Hoxd11

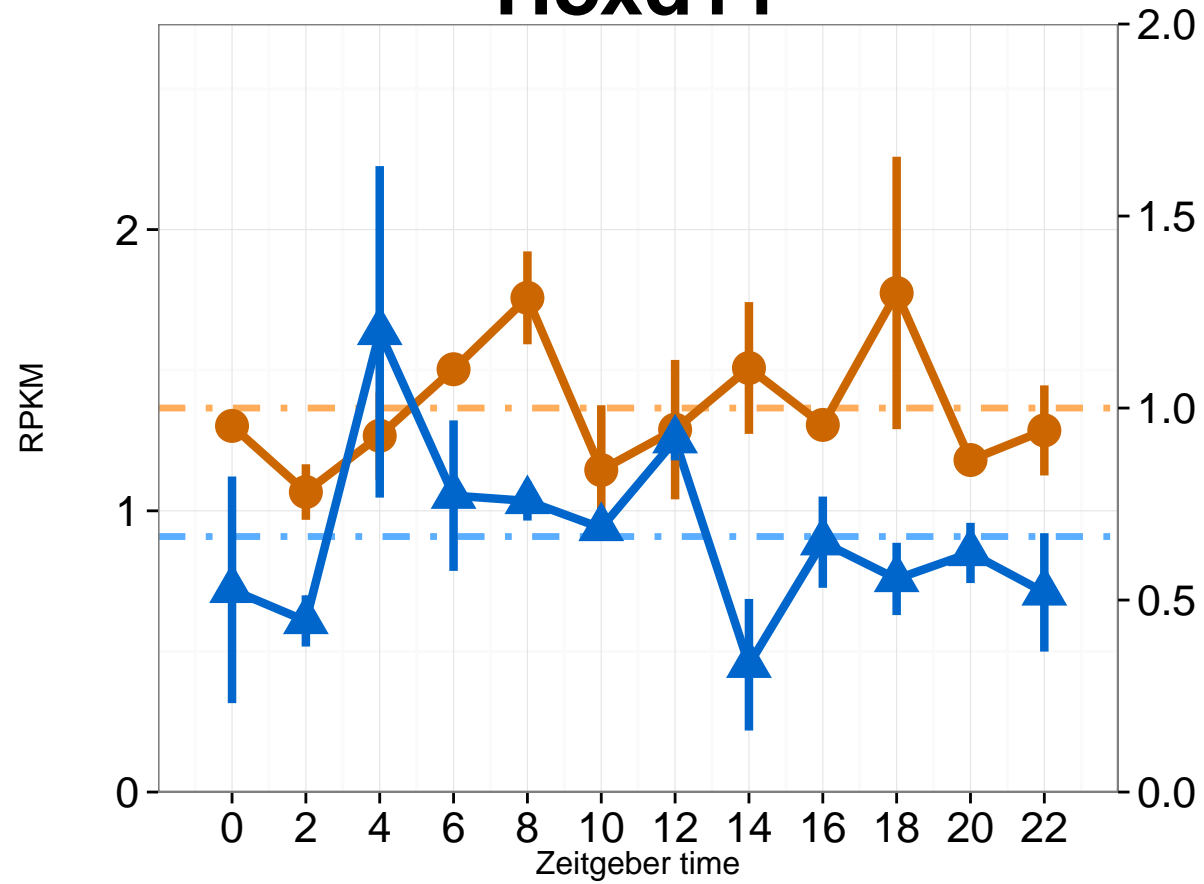

## Hoxd11

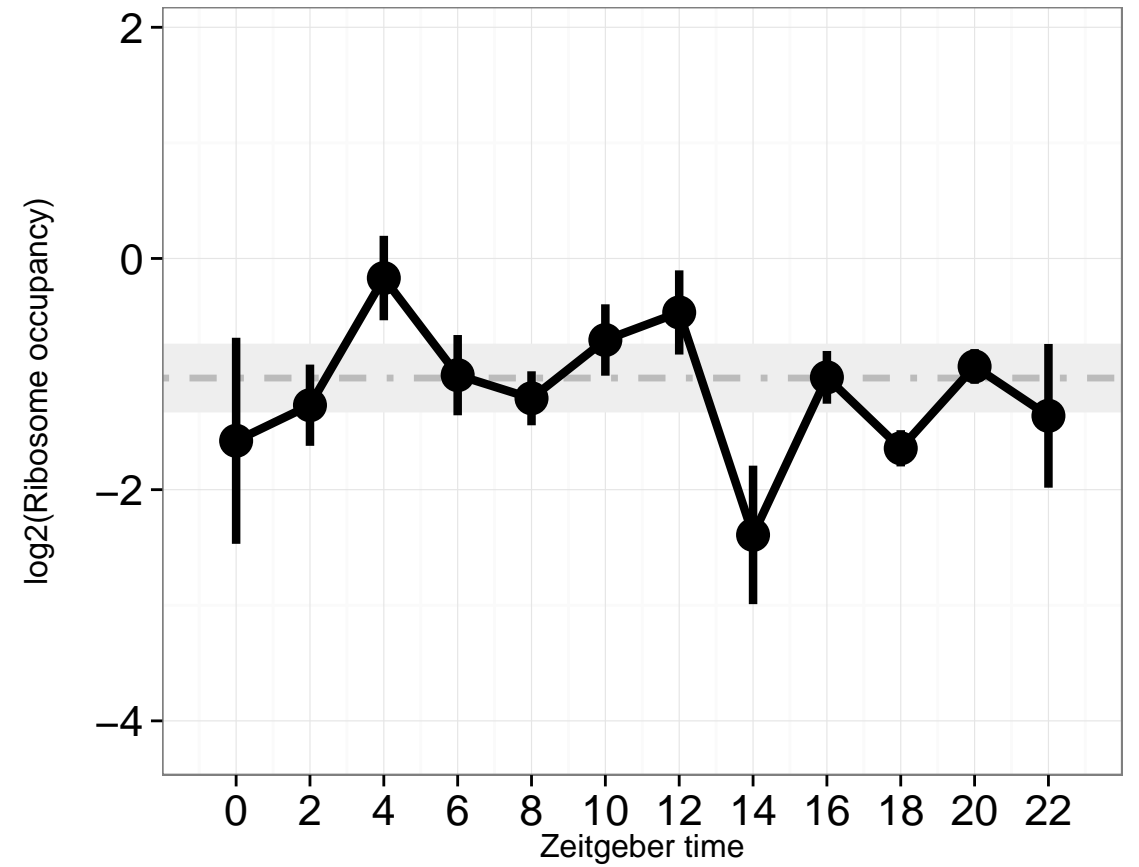

Supplement: Supplementary file 7209 [file 1]

# Edn1

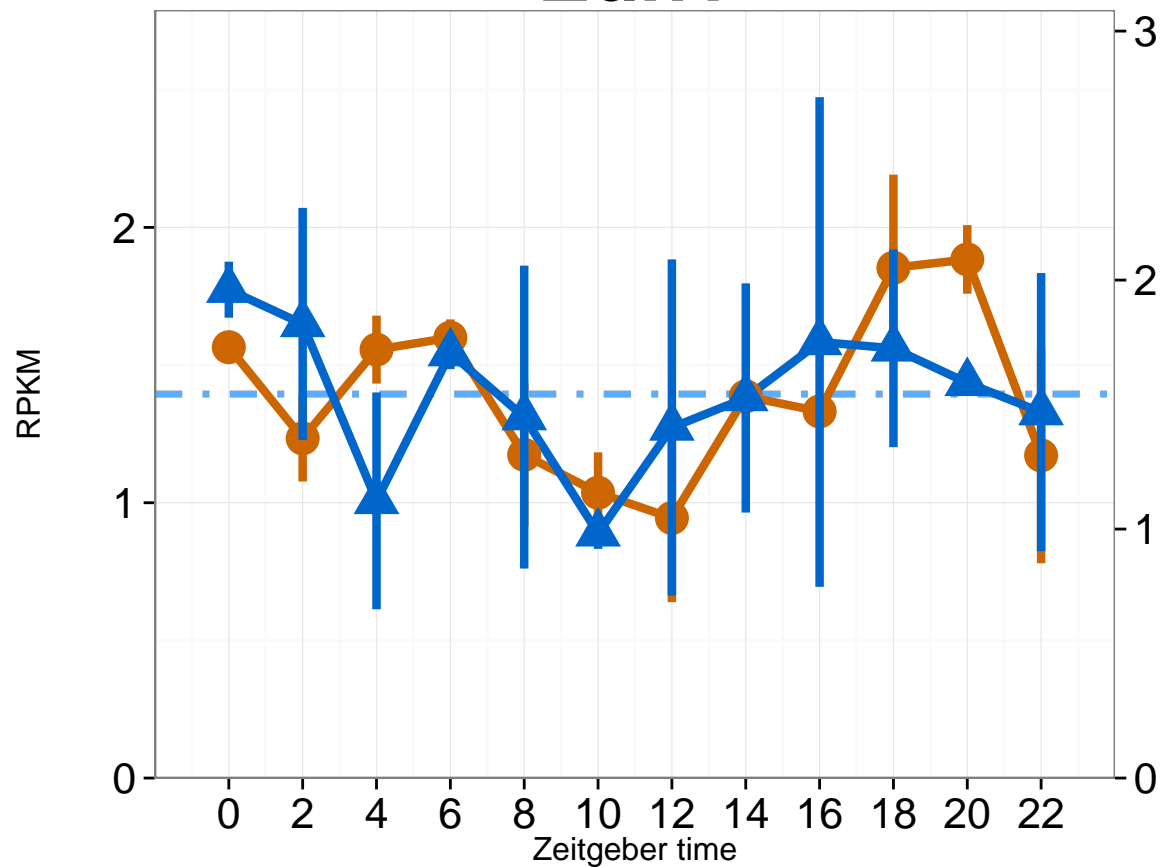

# Edn1

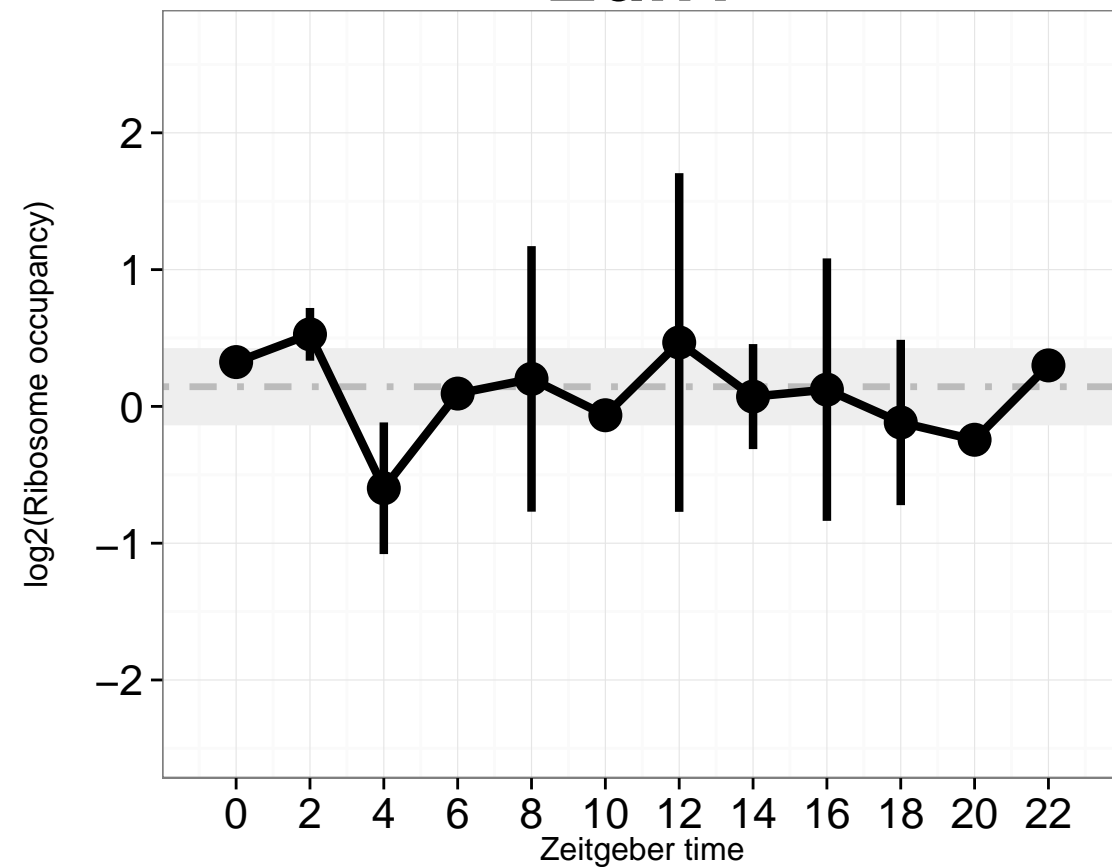

Supplement: Supplementary file 7210 [file 1]

## Sf3a2

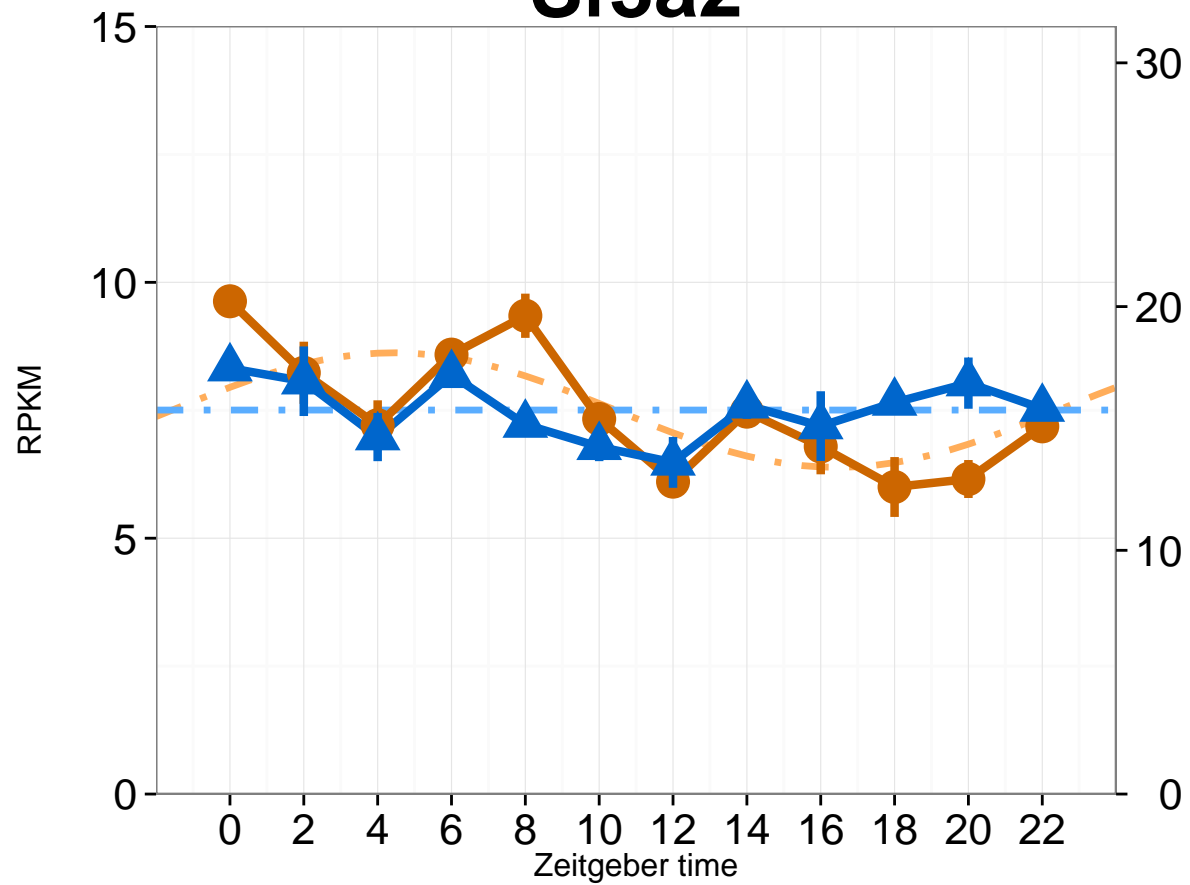

## Sf3a2

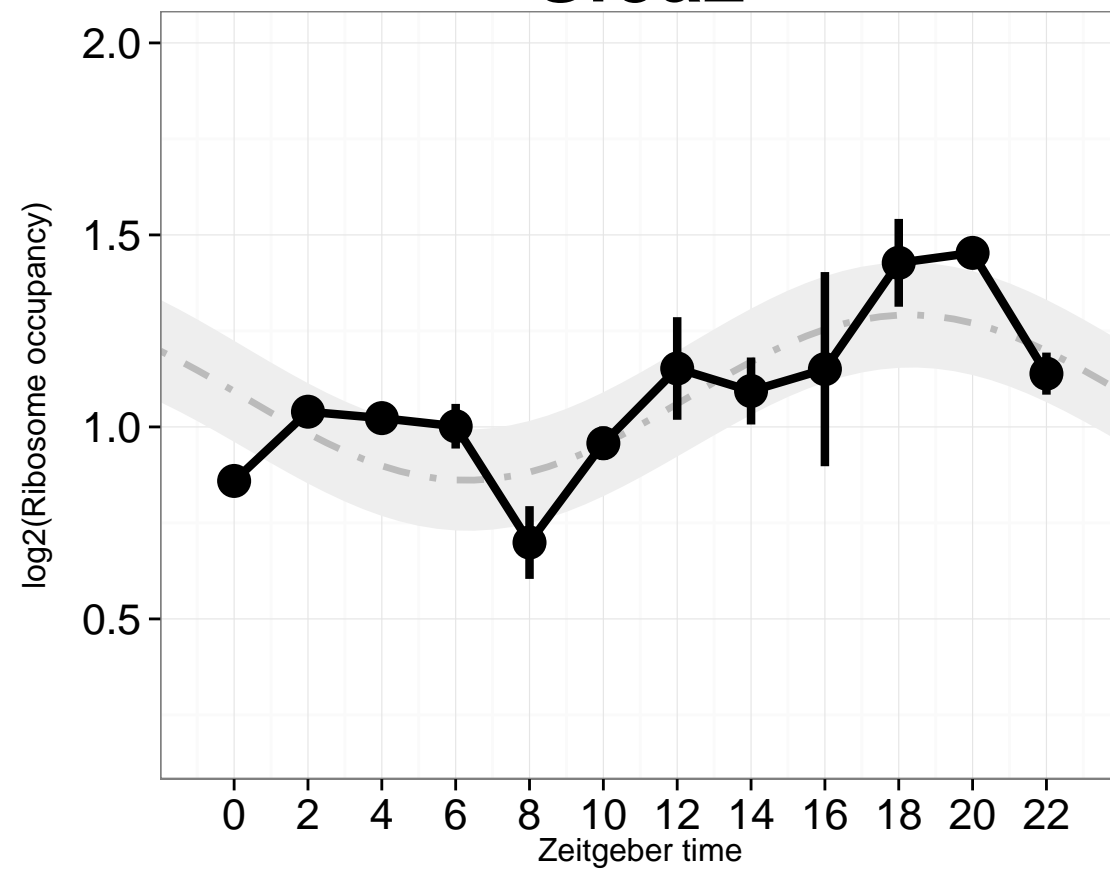

Supplement: Supplementary file 7211 [file 1]

## Phf17

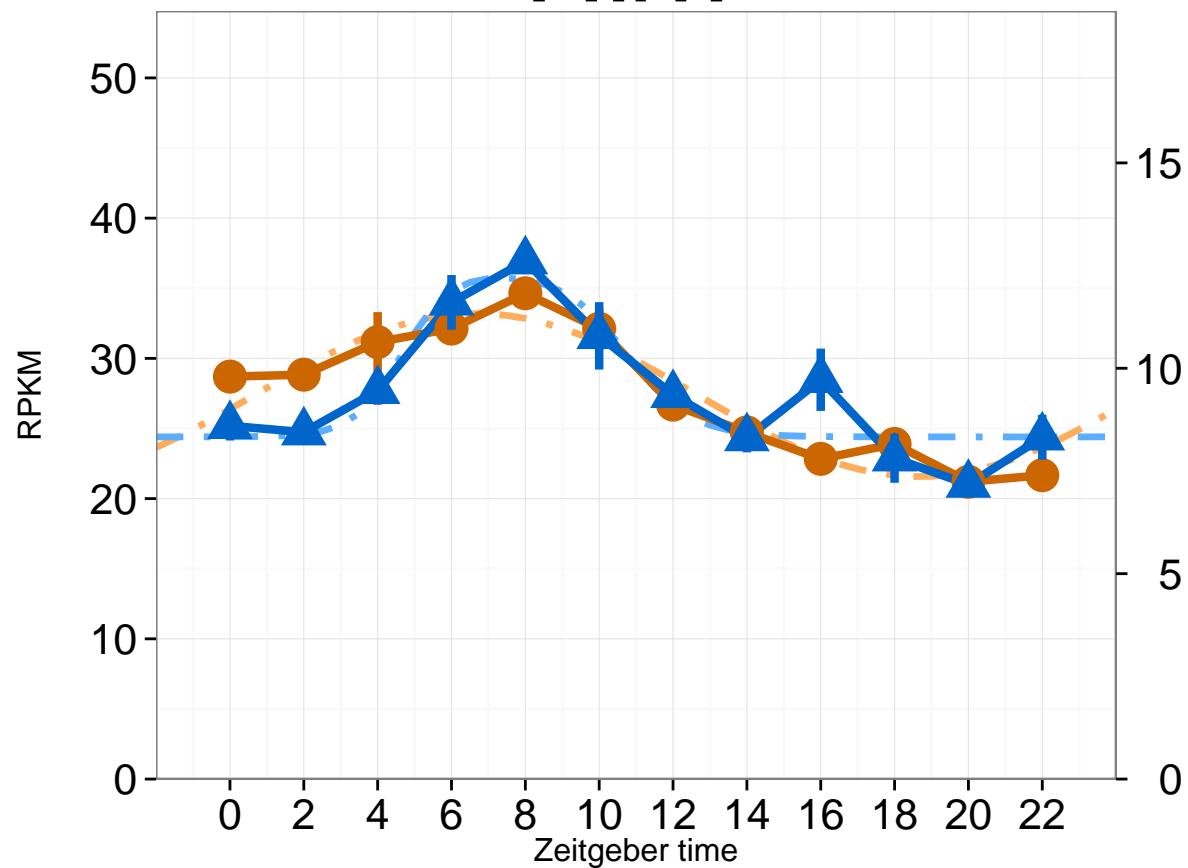

## Phf17

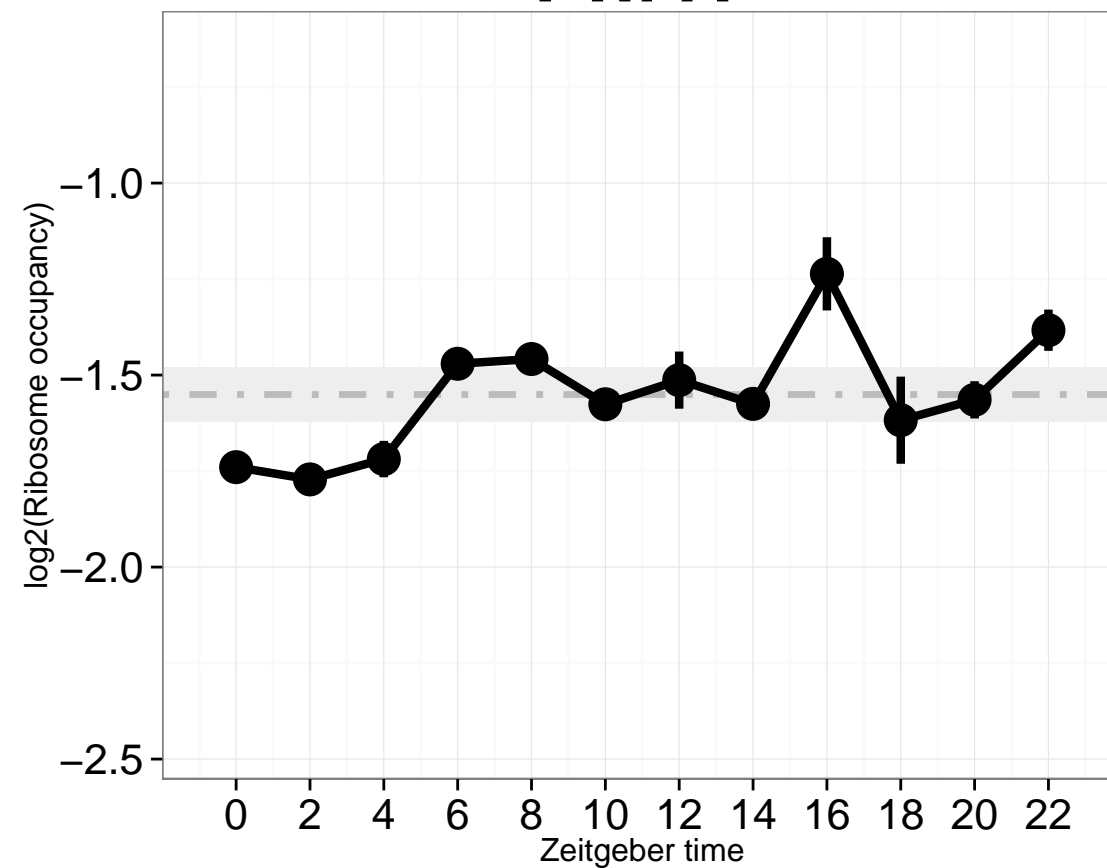

Supplement: Supplementary file 7212 [file 1]

## Ak1

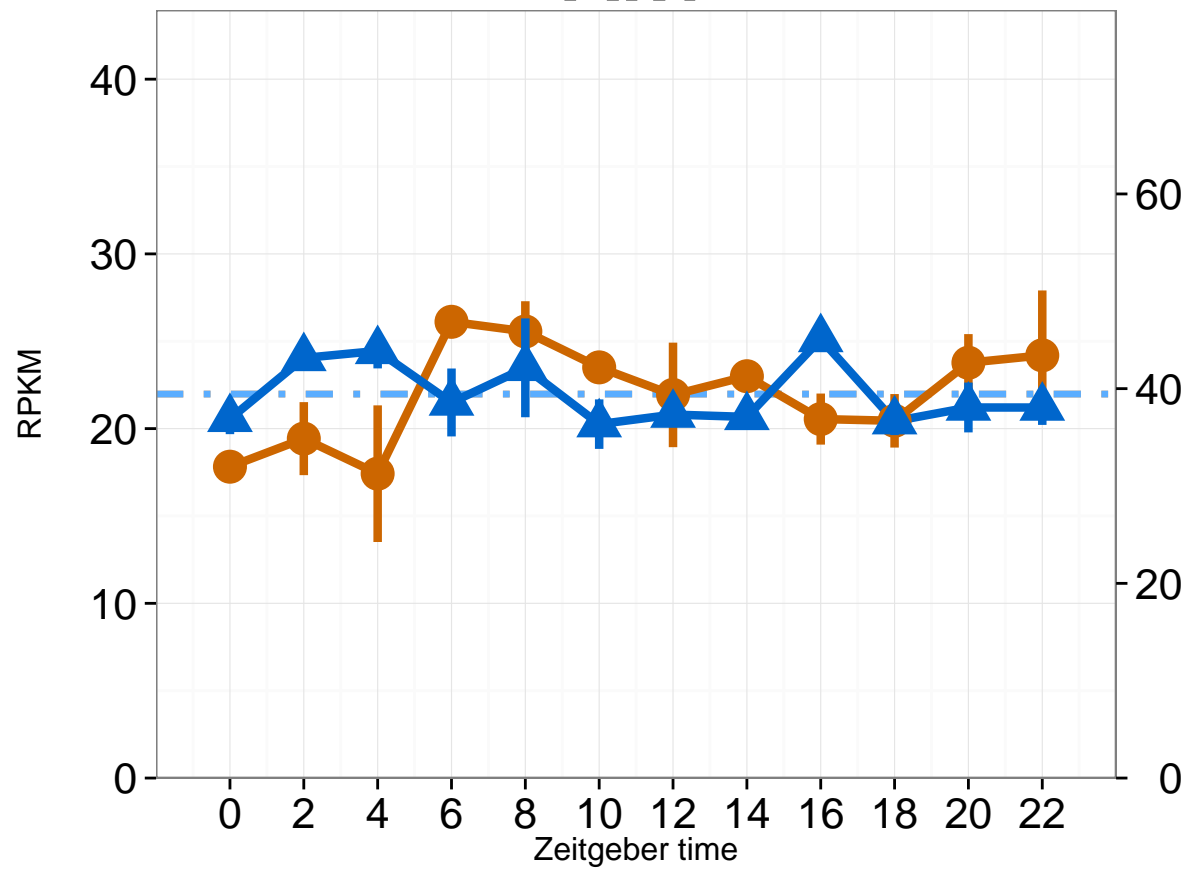

## Ak1

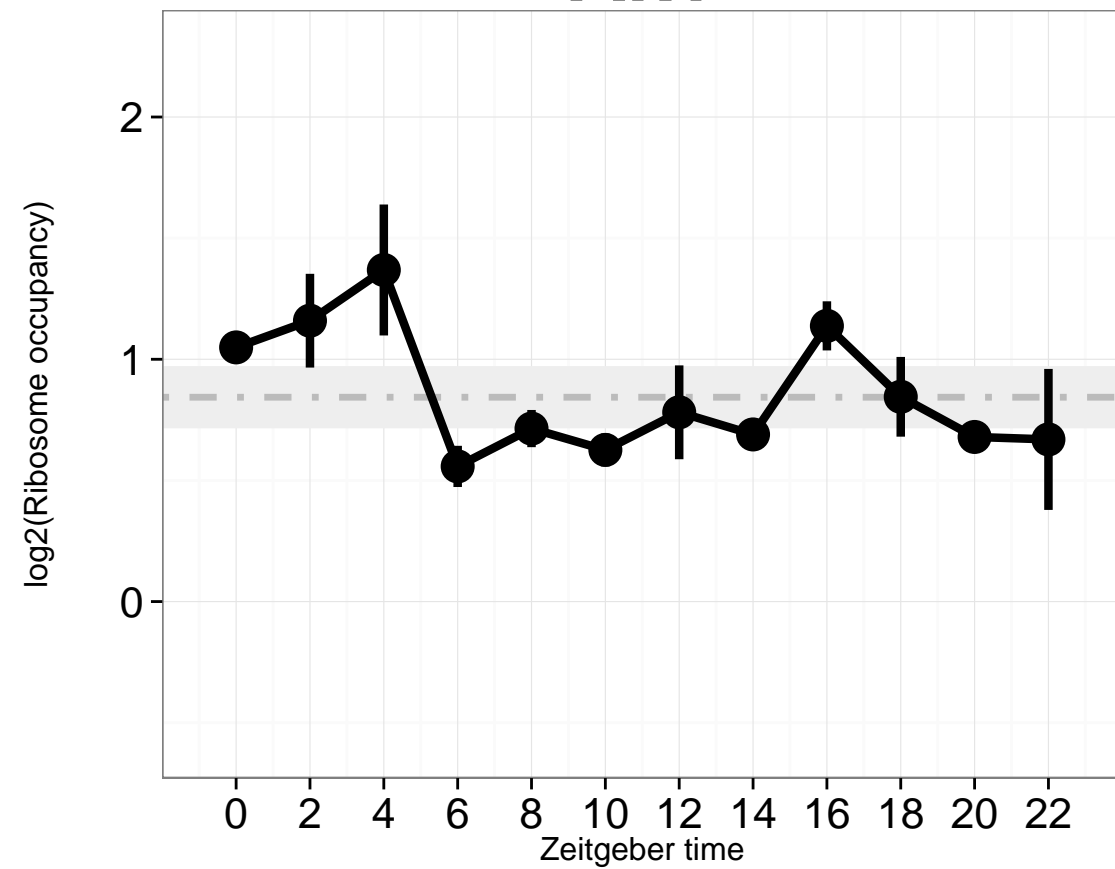

Supplement: Supplementary file 7213 [file 1]

## Spsb2

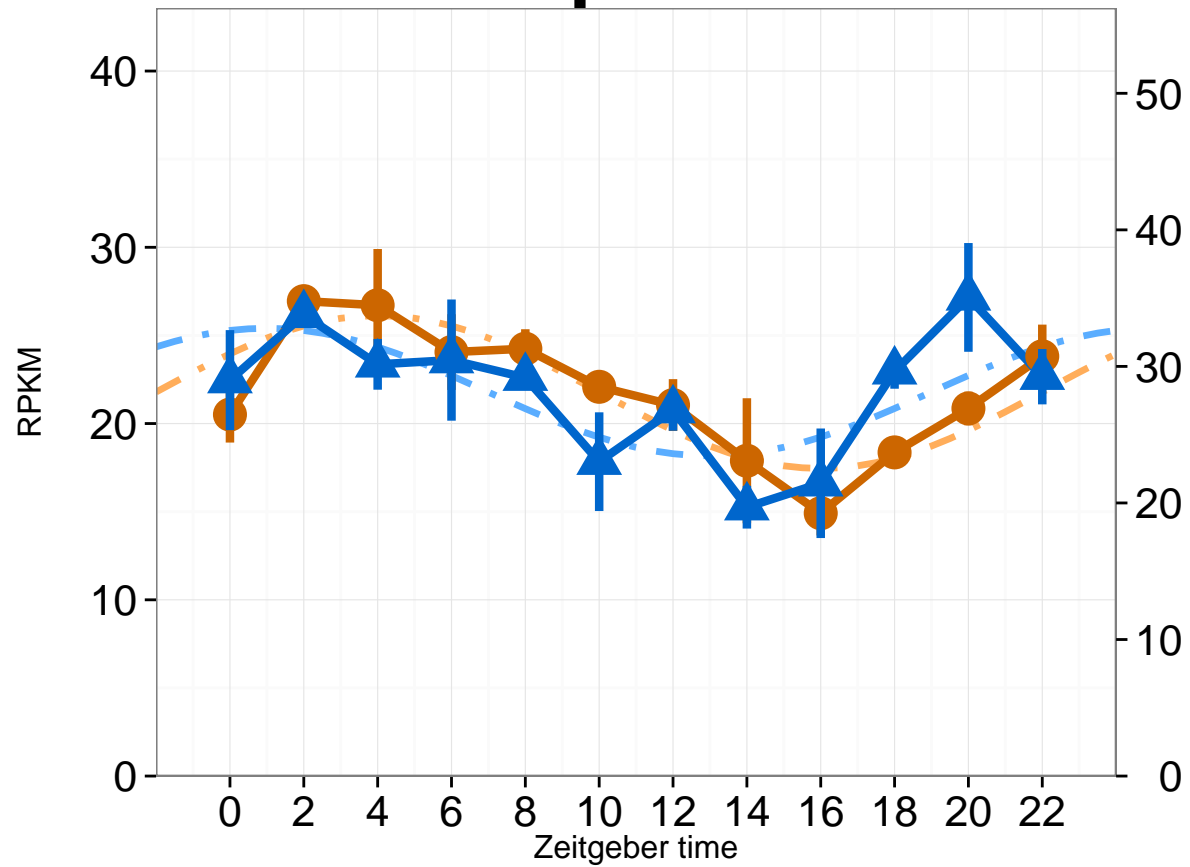

## Spsb2

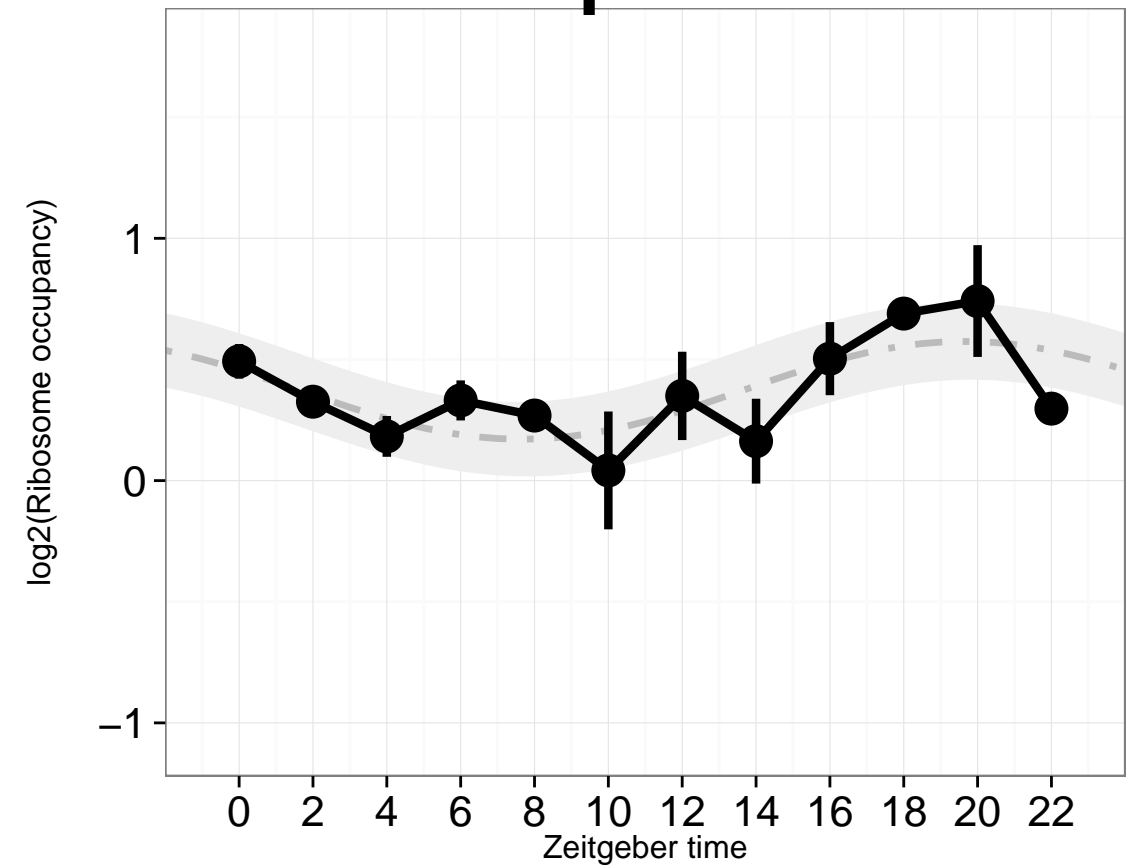

Supplement: Supplementary file 7214 [file 1]

## Hsd17b10

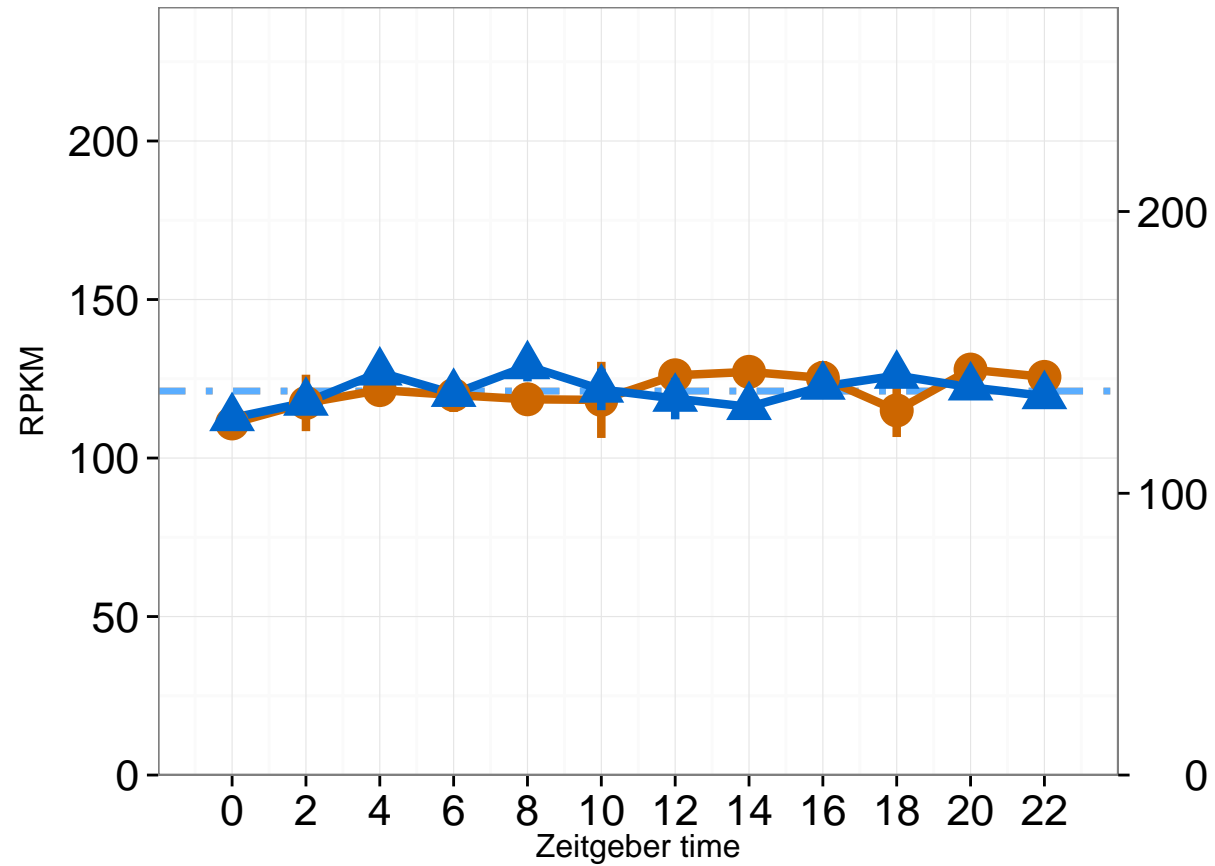

## Hsd17b10

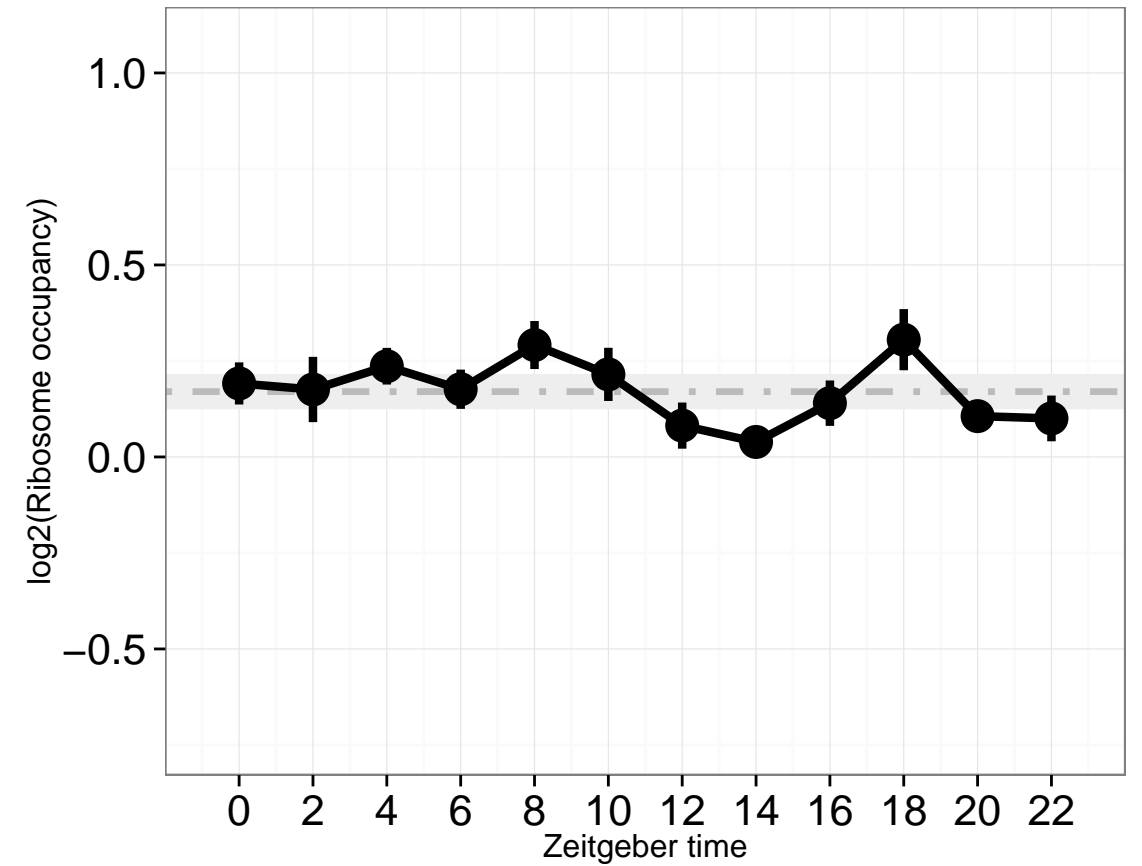

Supplement: Supplementary file 7215 [file 1]

## C2cd3

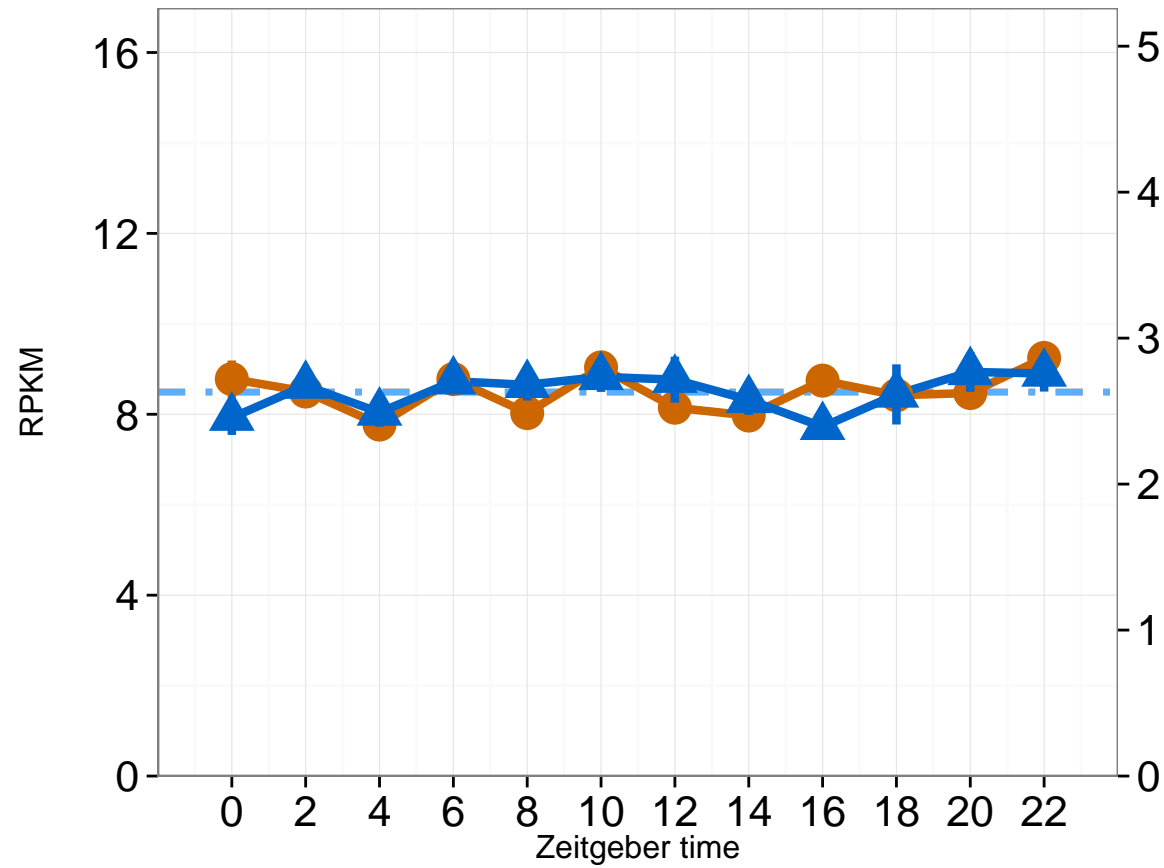

## C2cd3

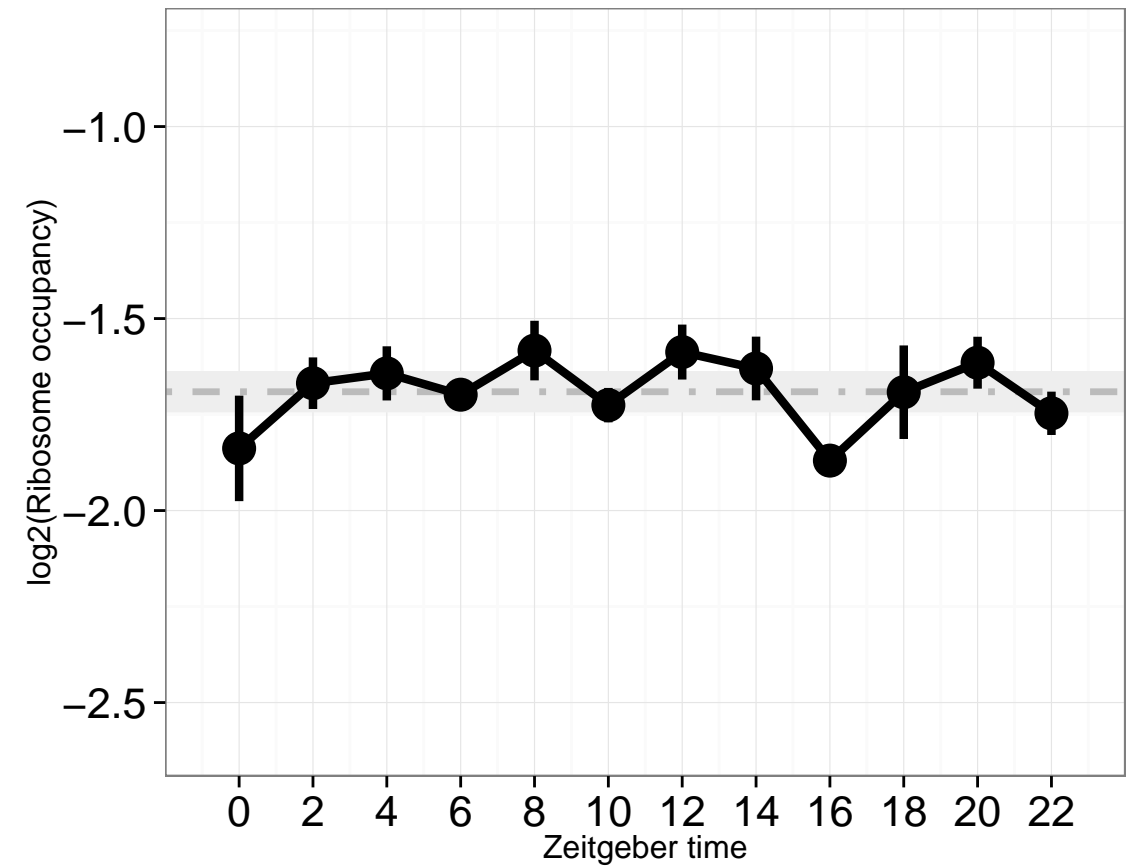

Supplement: Supplementary file 7216 [file 1]

## Phf12

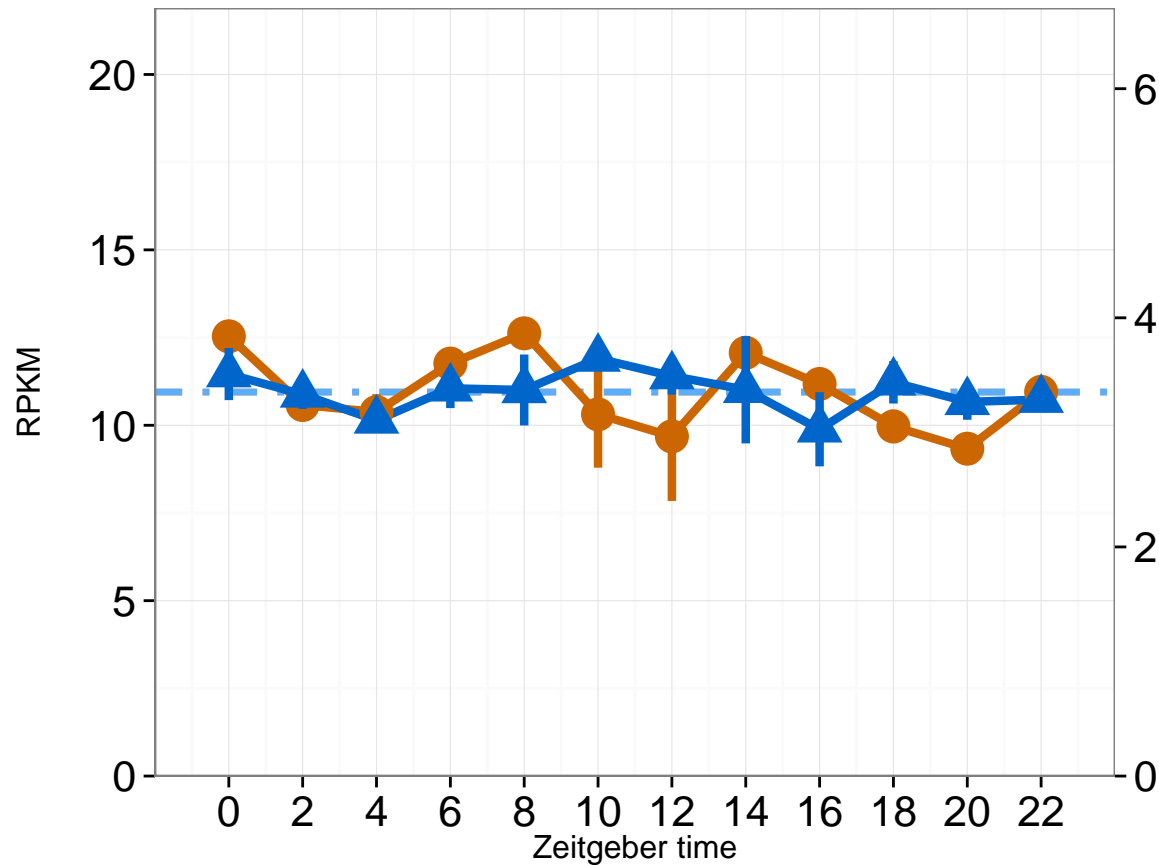

## Phf12

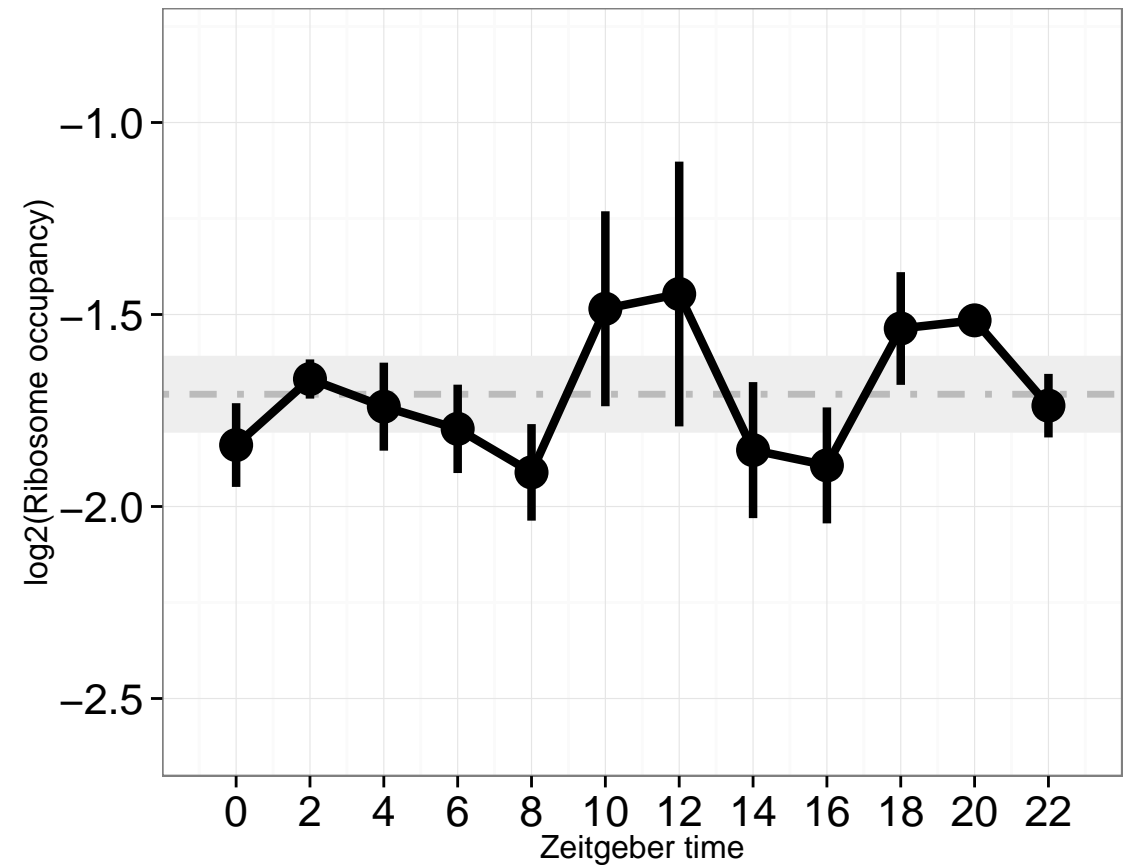

Supplement: Supplementary file 7217 [file 1]

# Pds5b

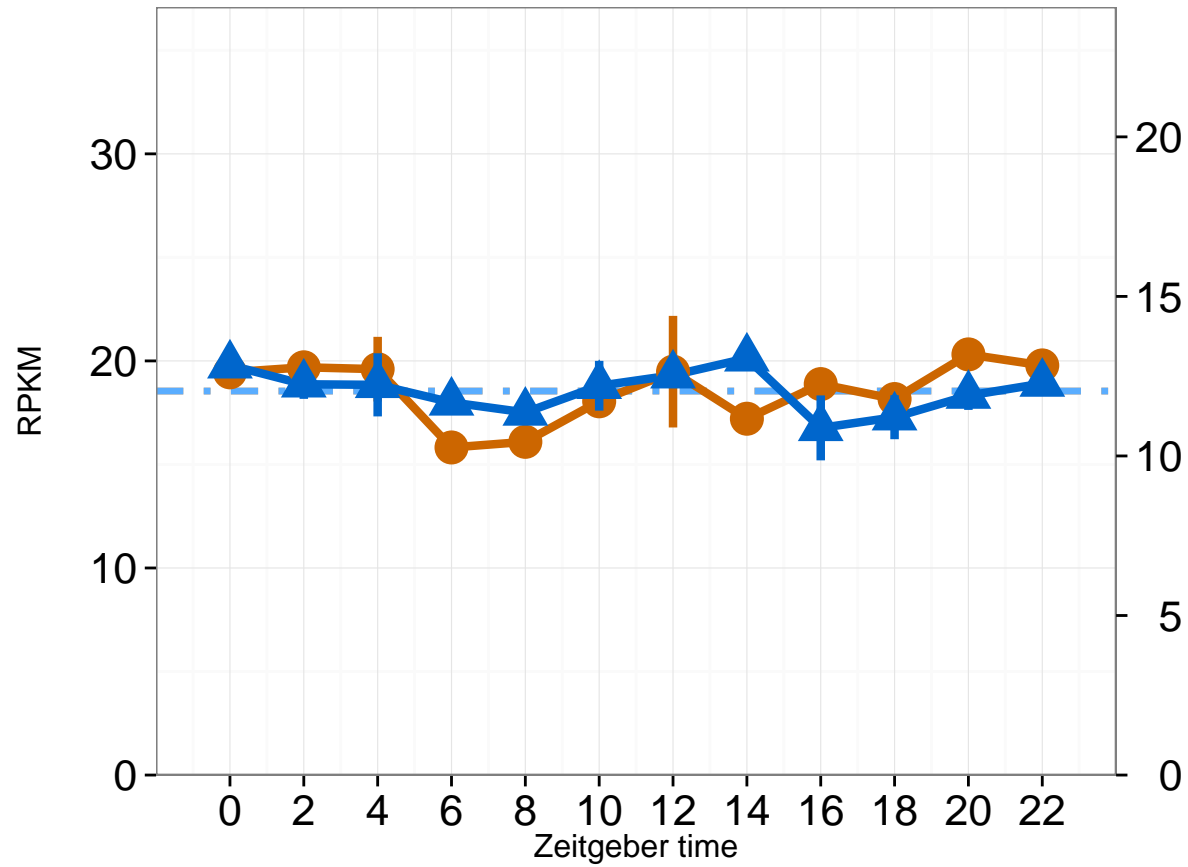

# Pds5b

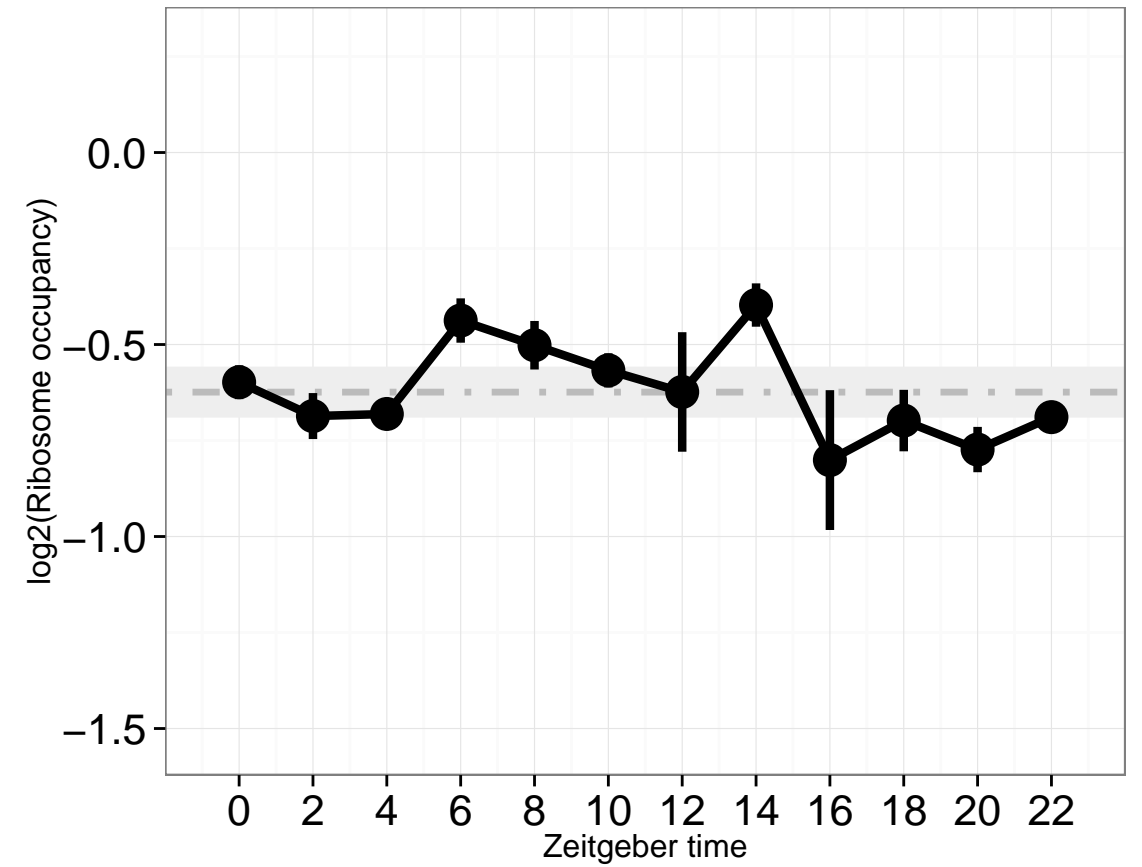

Supplement: Supplementary file 7218 [file 1]

## Lrp11

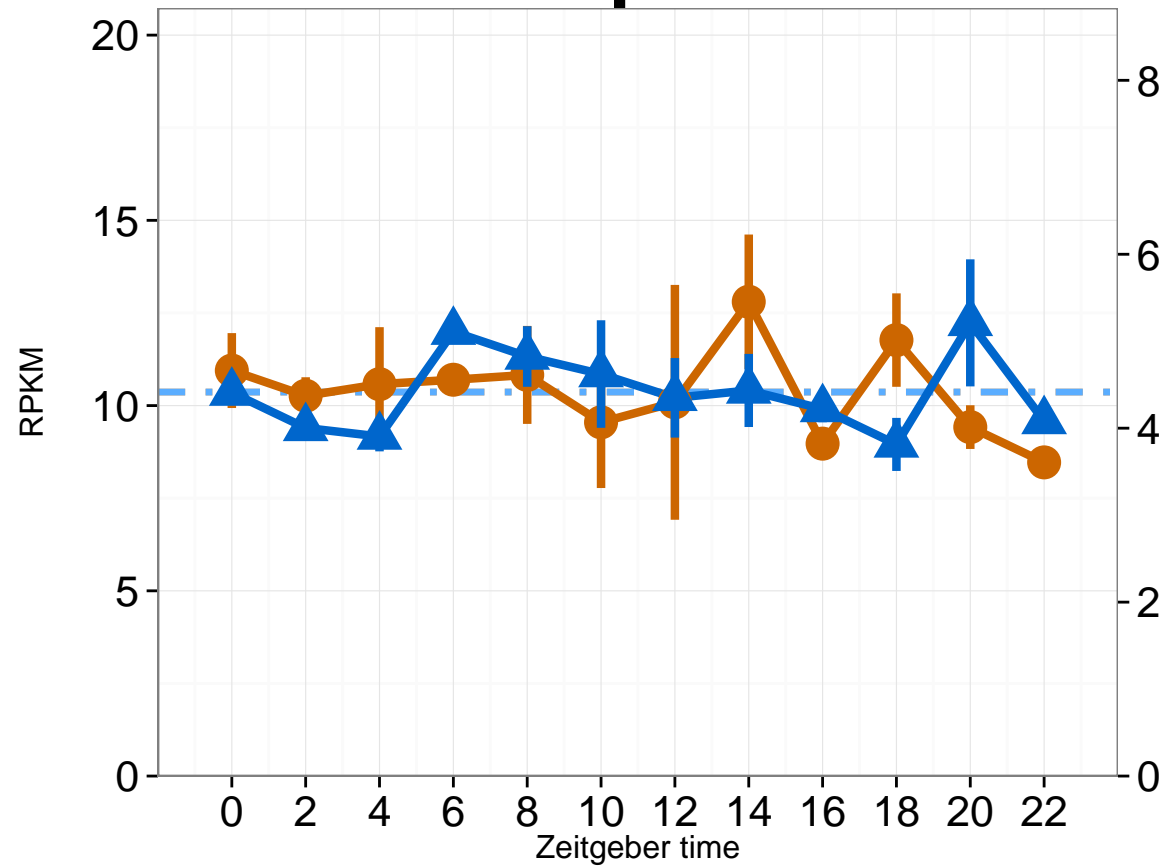

## Lrp11

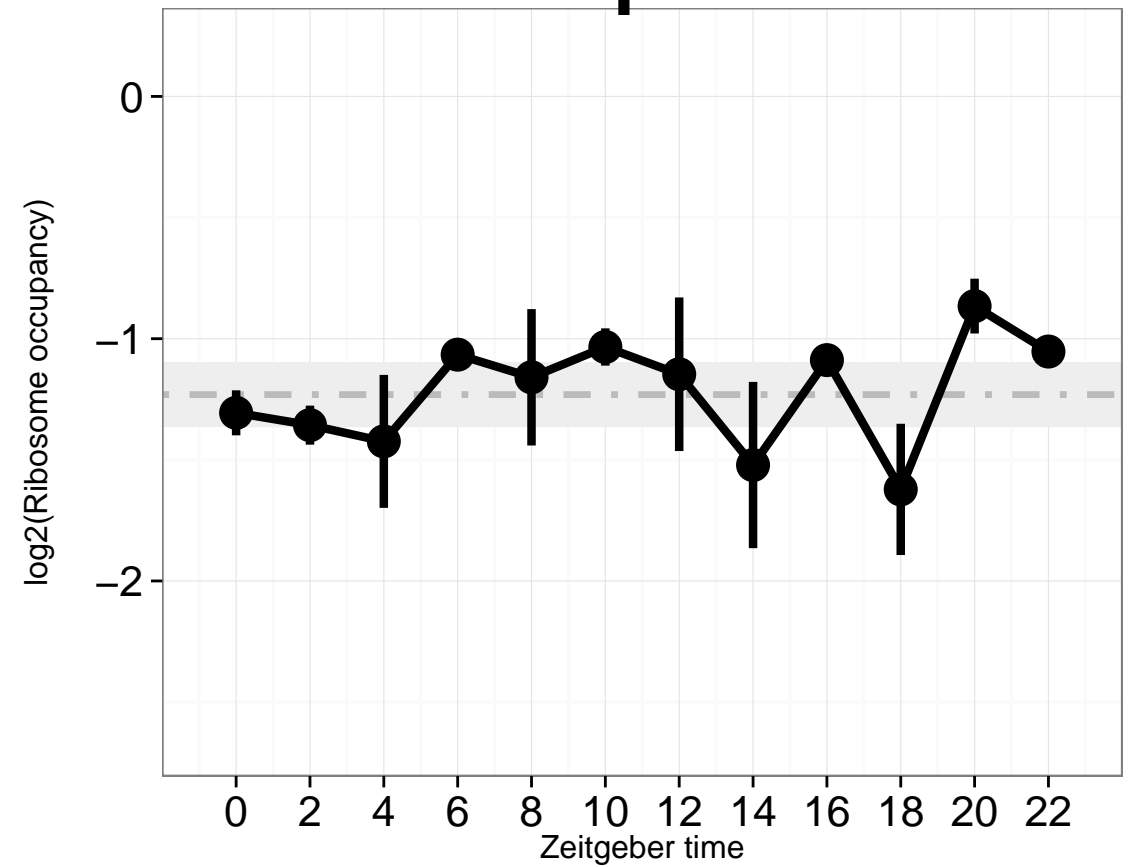

Supplement: Supplementary file 7219 [file 1]

# Pnpla2

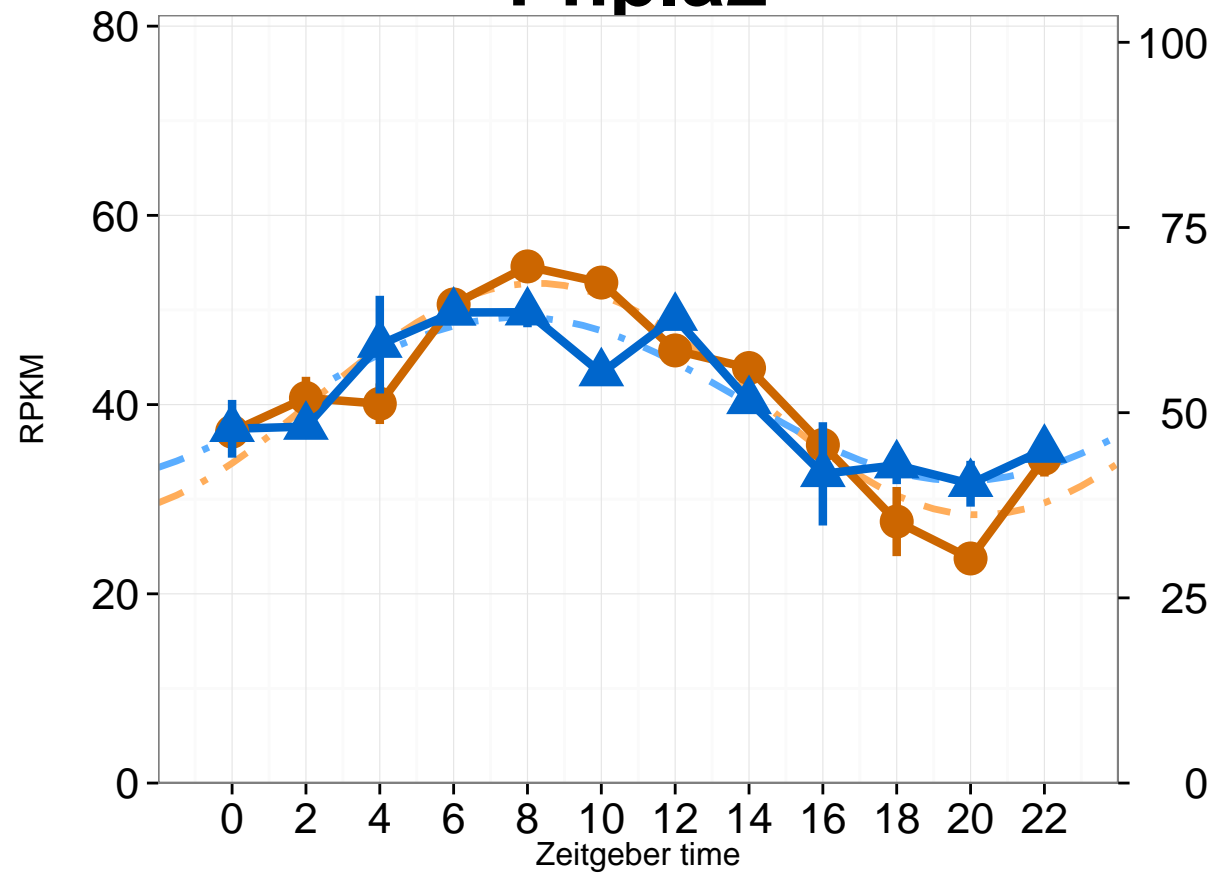

# Pnpla2

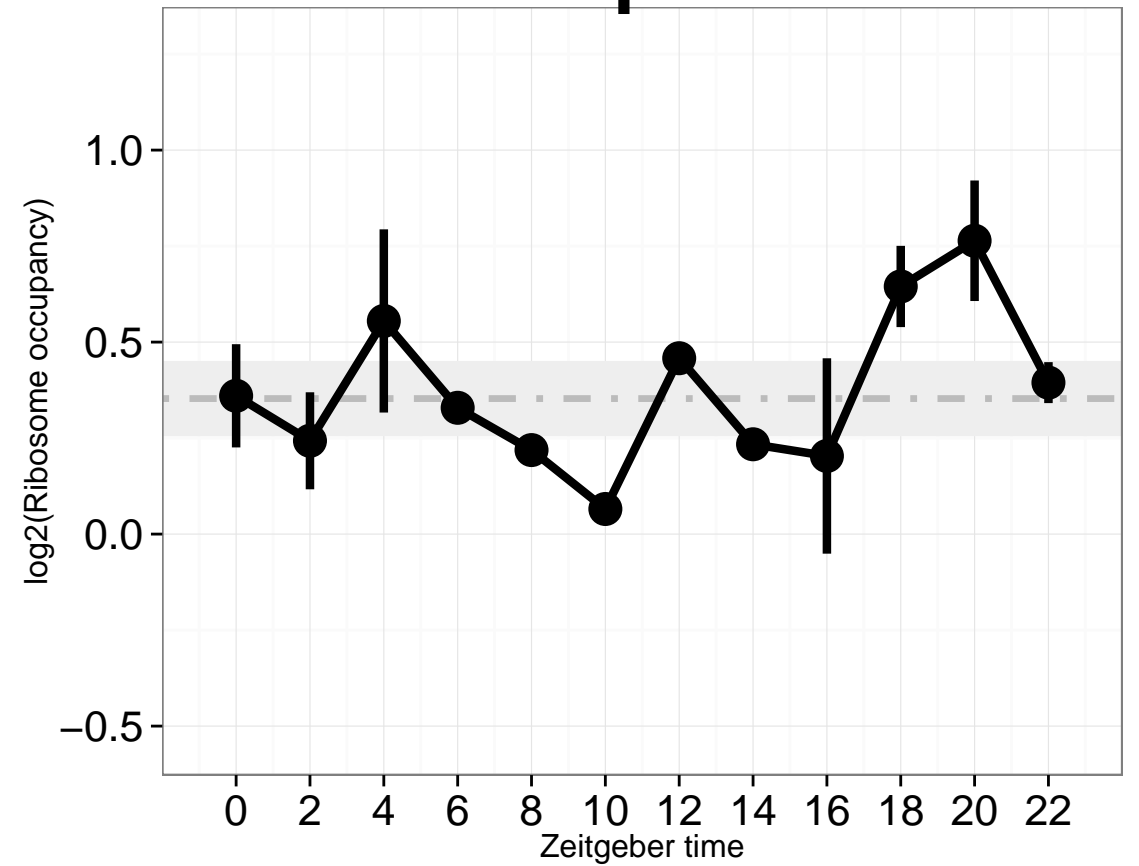

Supplement: Supplementary file 7220 [file 1]

## AI607873

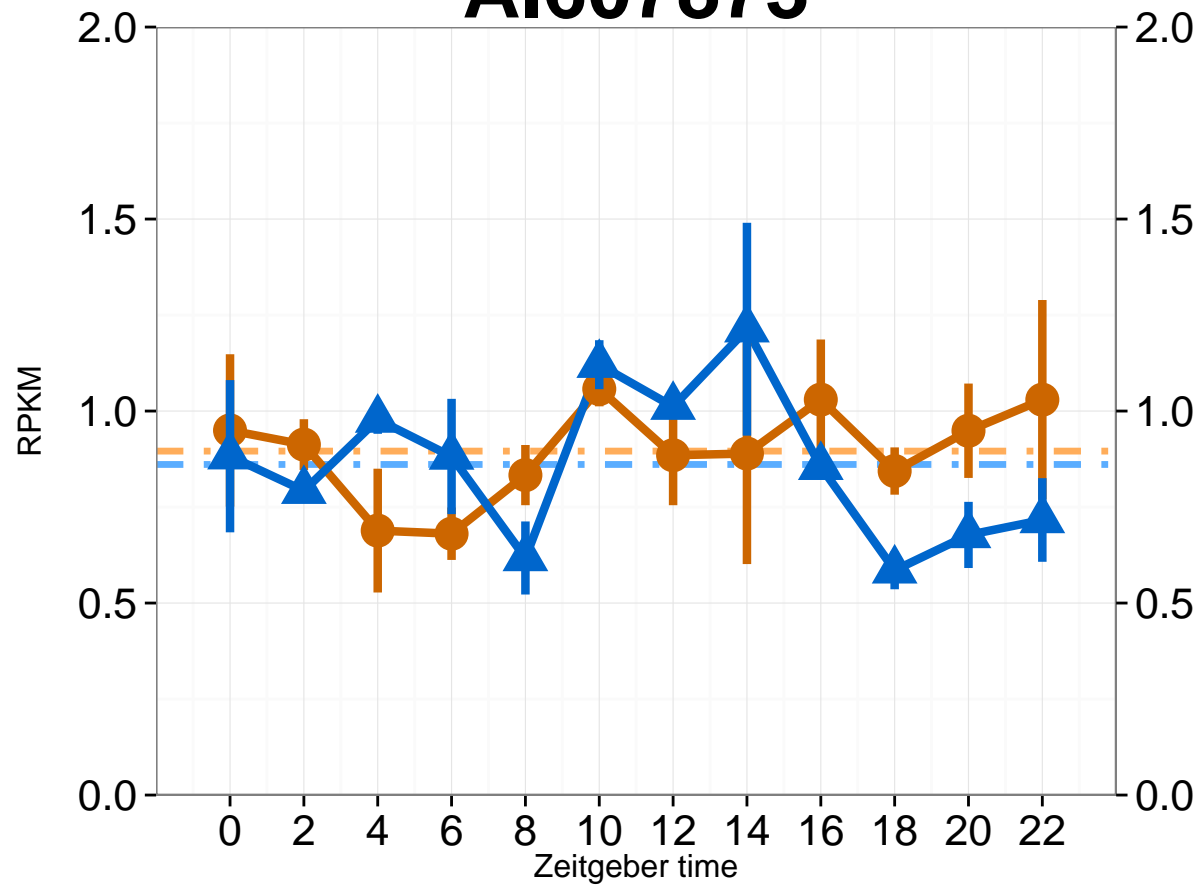

## AI607873

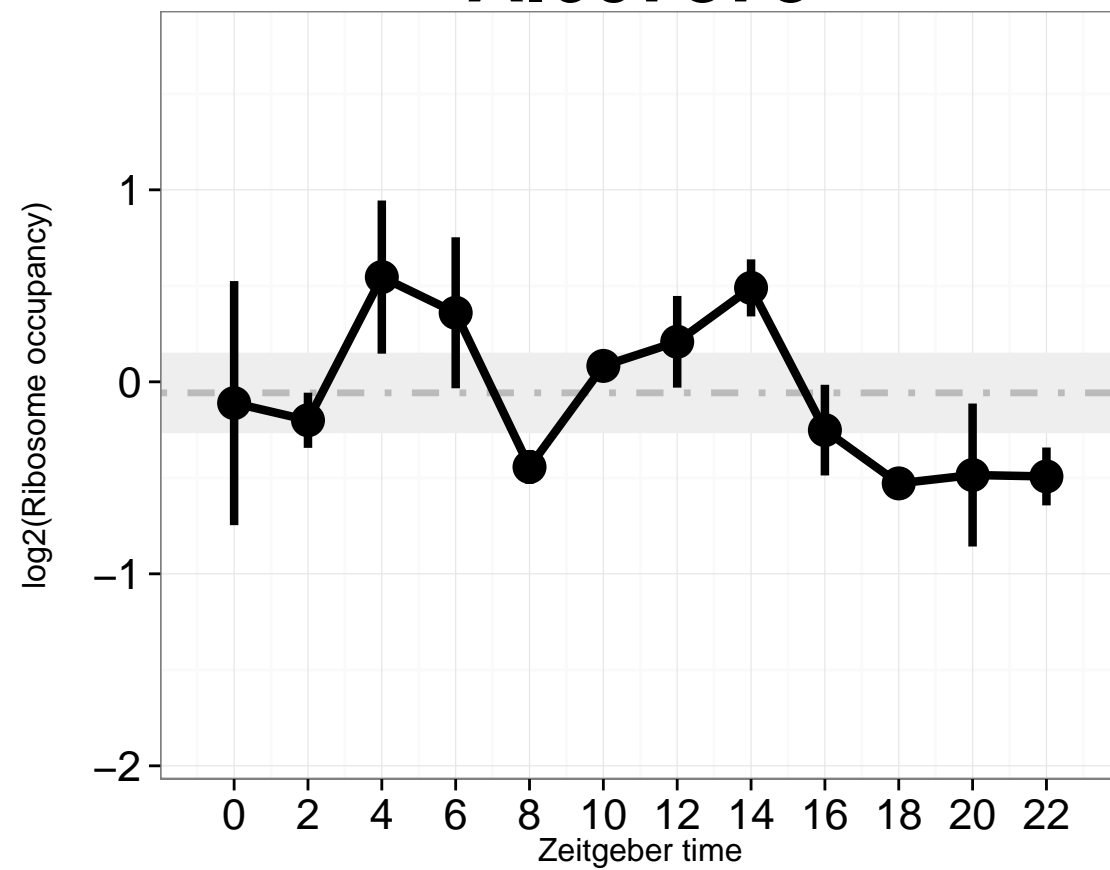

Supplement: Supplementary file 7221 [file 1]

## Purg

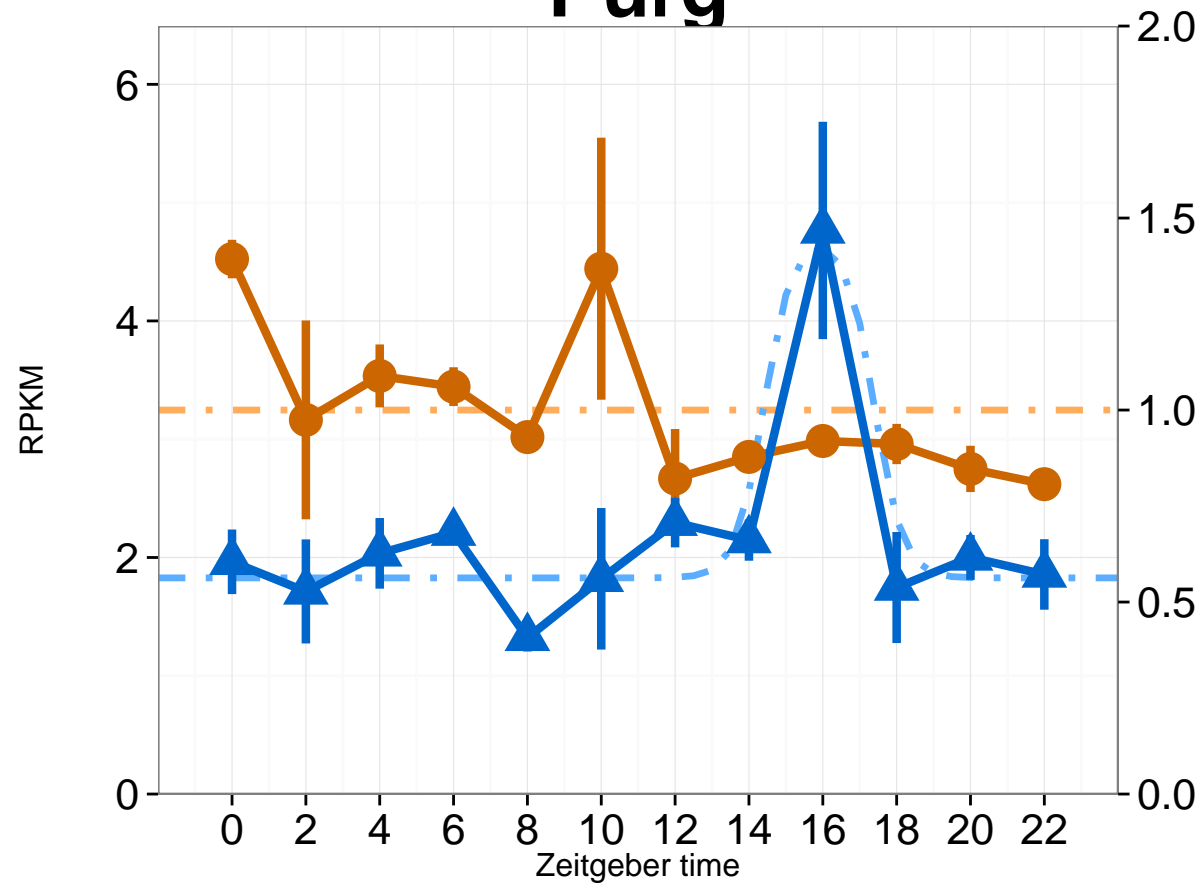

## Purg

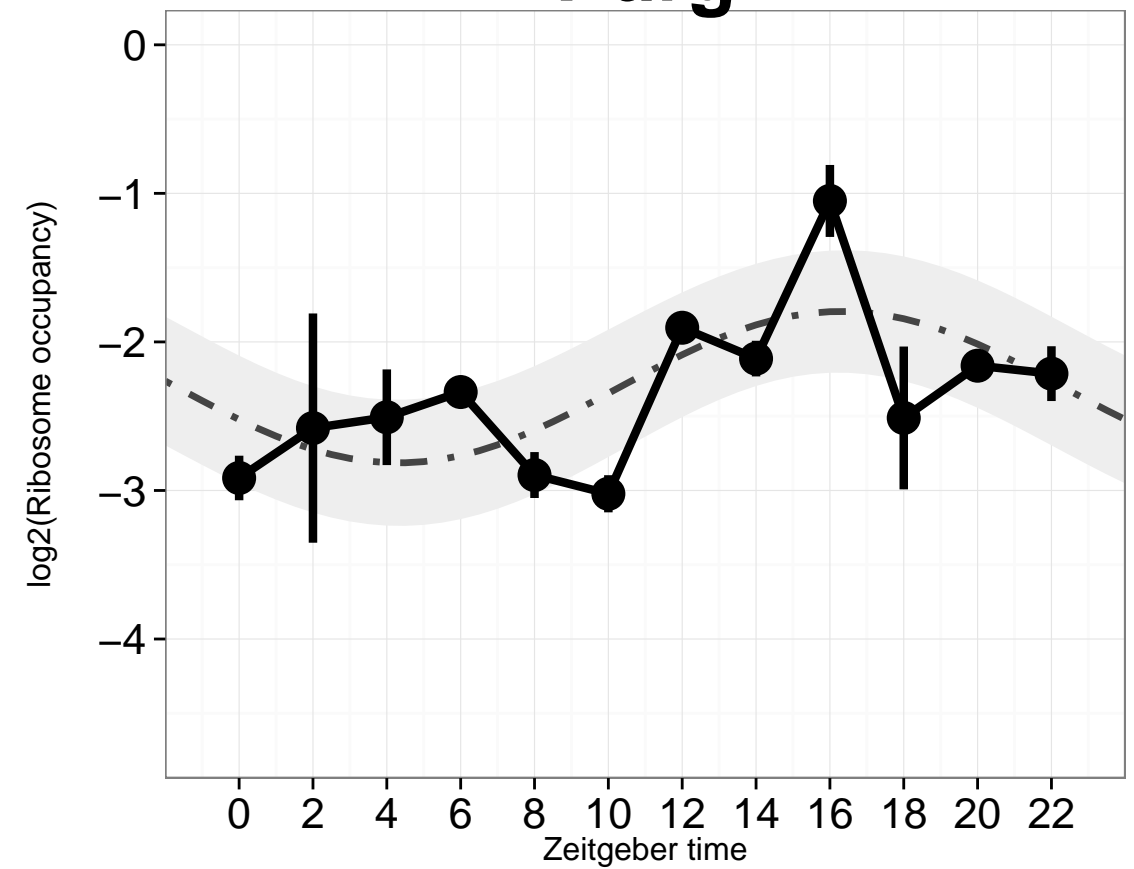

Supplement: Supplementary file 7222 [file 1]

## Btrc

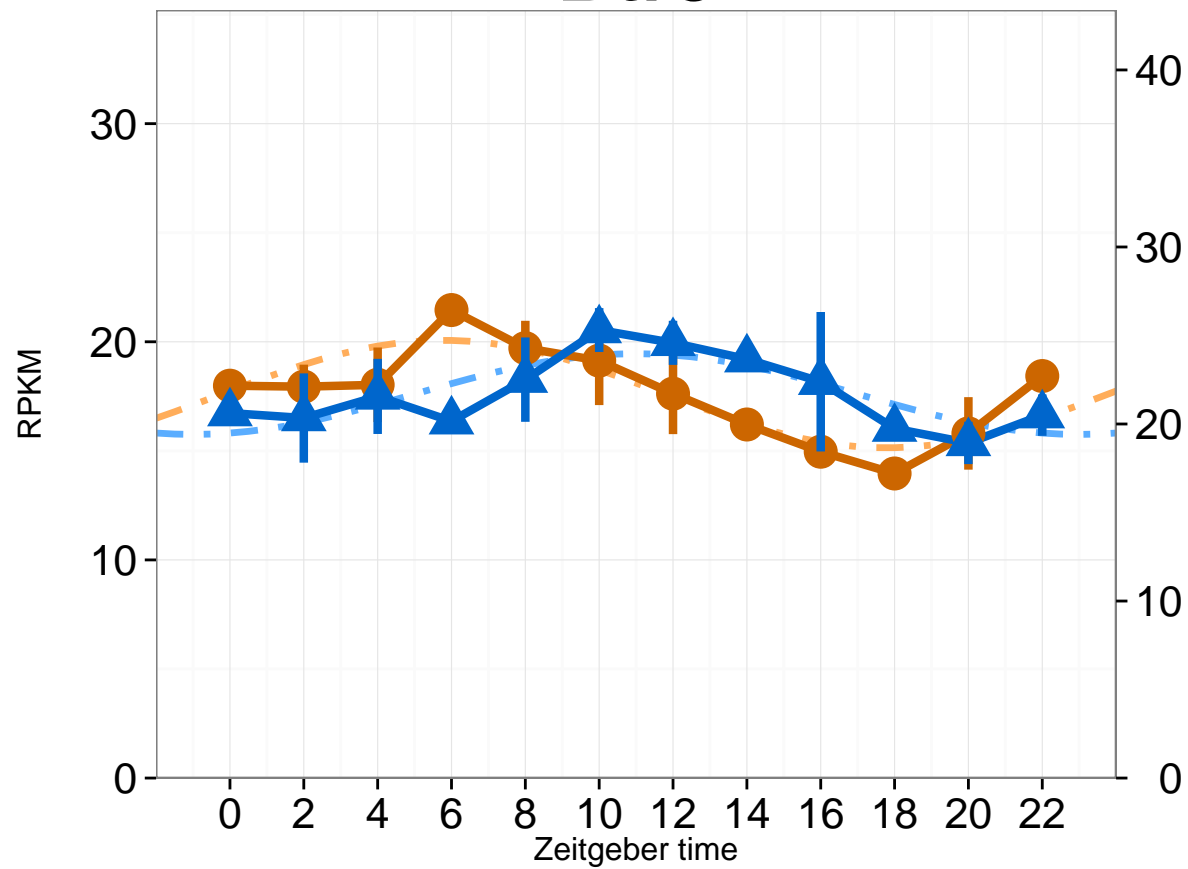

## Btrc

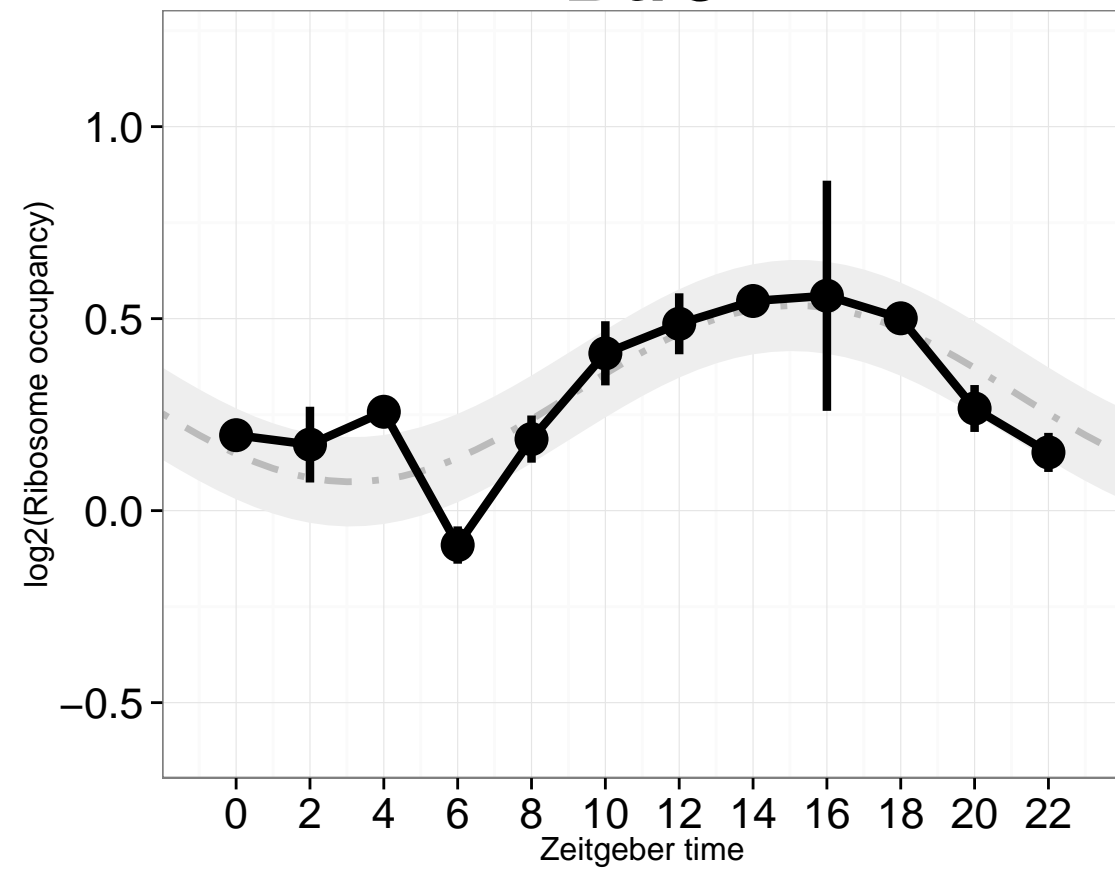

Supplement: Supplementary file 7223 [file 1]
