# Supplementary material (part 73 of 133)
Source: publisher figshare collection journal article supplement (https://springernature.figshare.com/articles/dataset/_/4903193)

# Dusp11

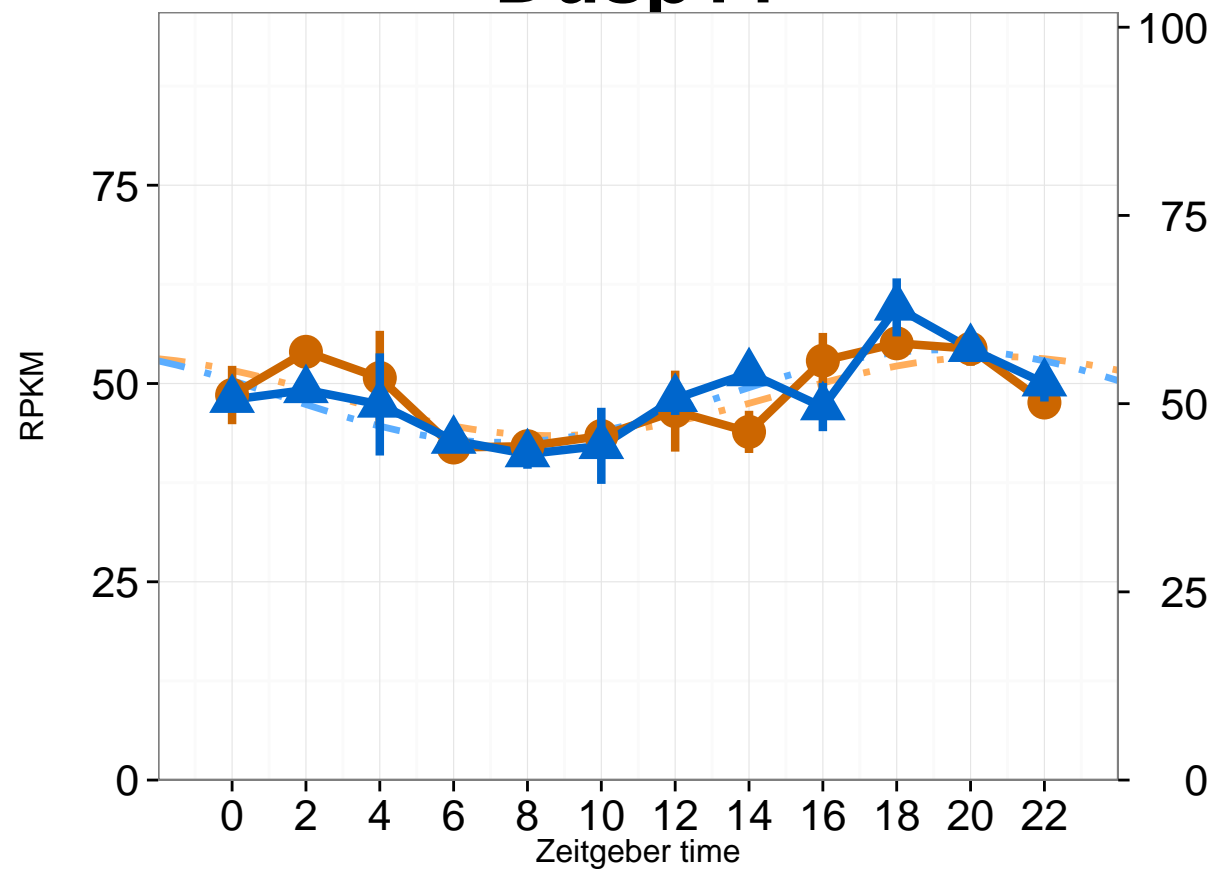

# Dusp11

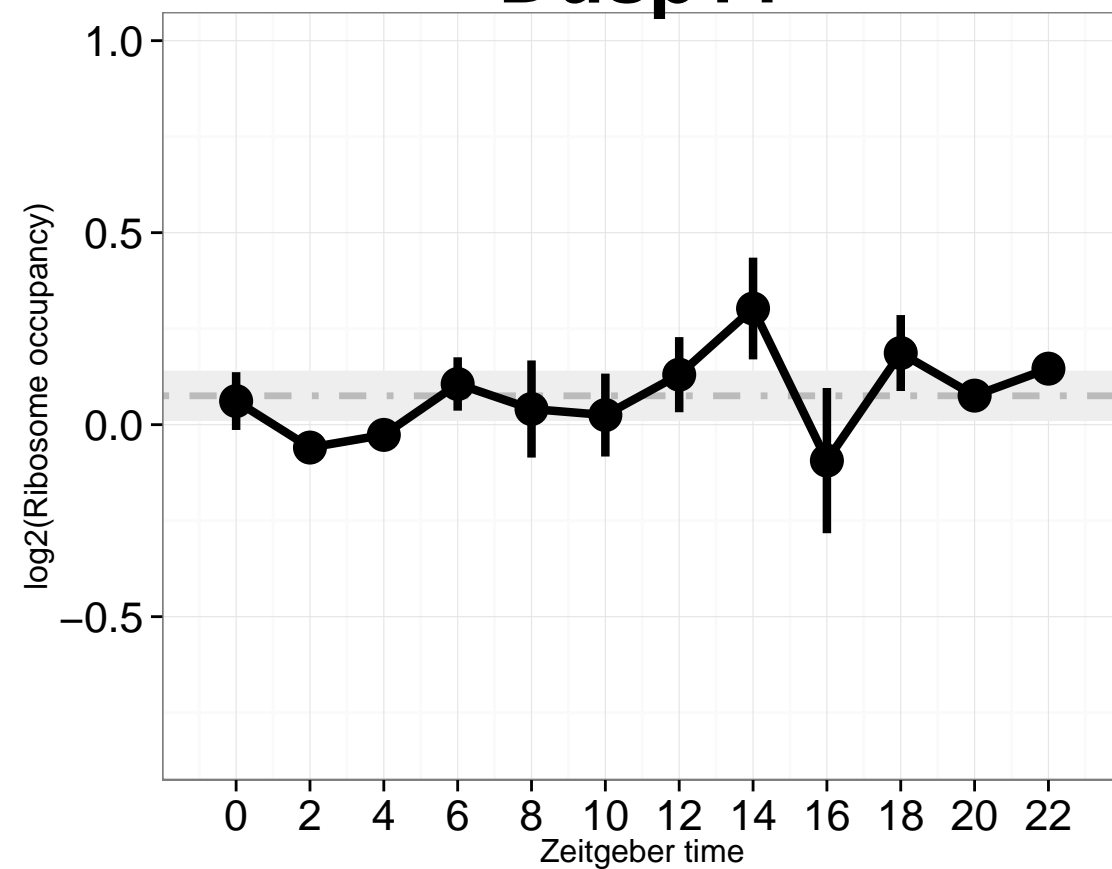

Supplement: Supplementary file 7224 [file 1]

## Bri3

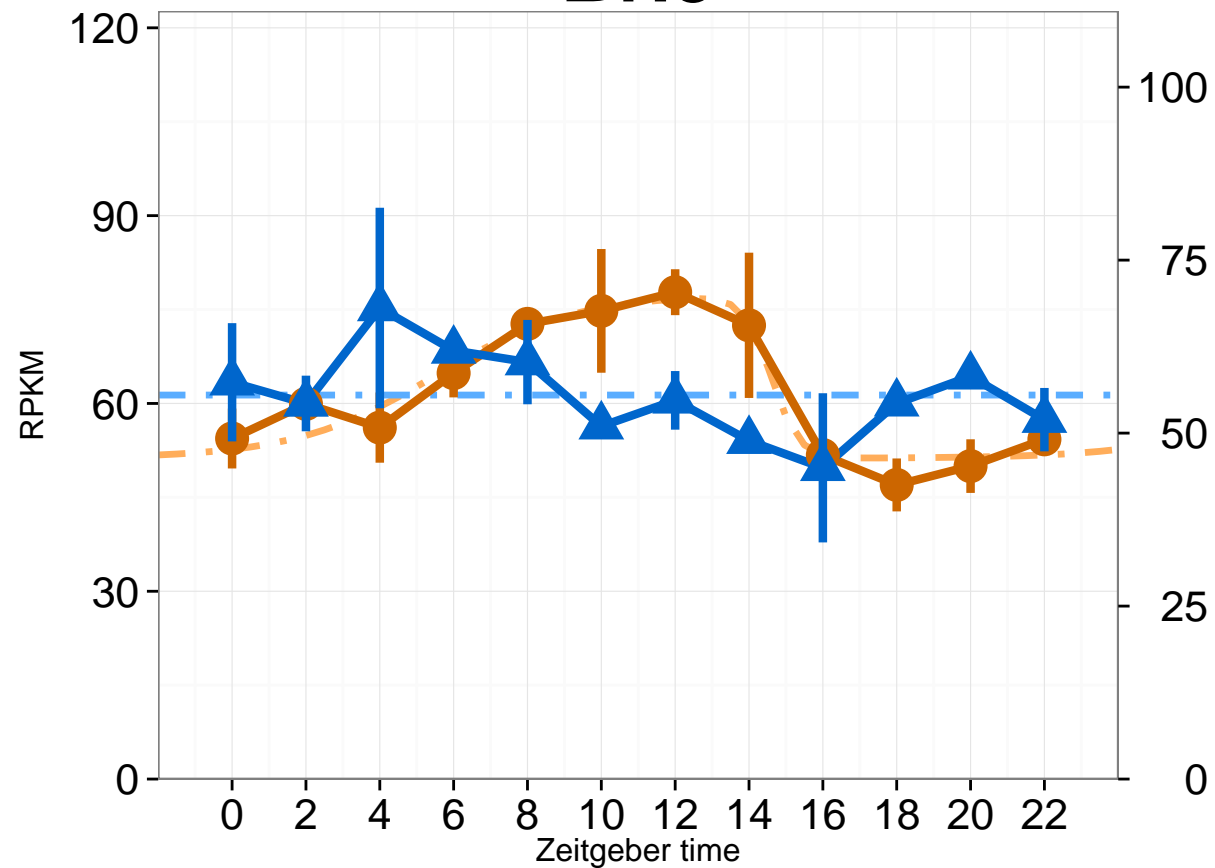

## Bri3

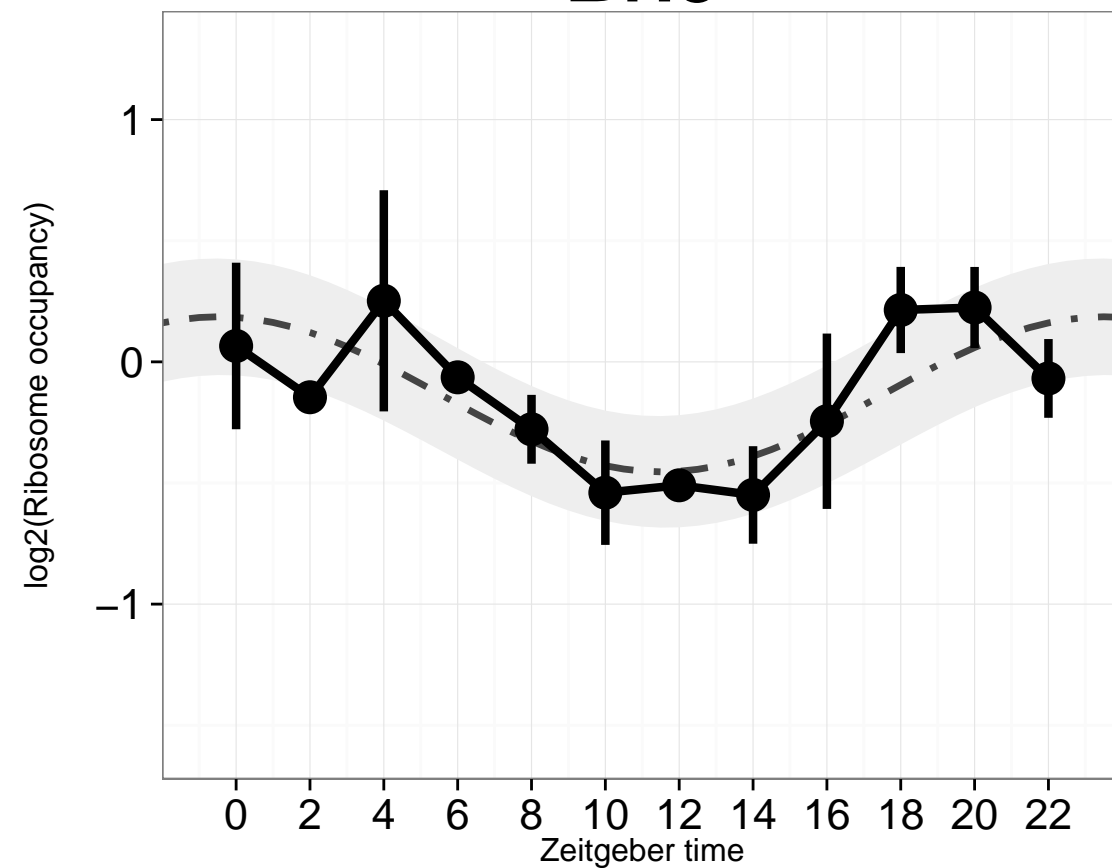

Supplement: Supplementary file 7225 [file 1]

# Serpina1a

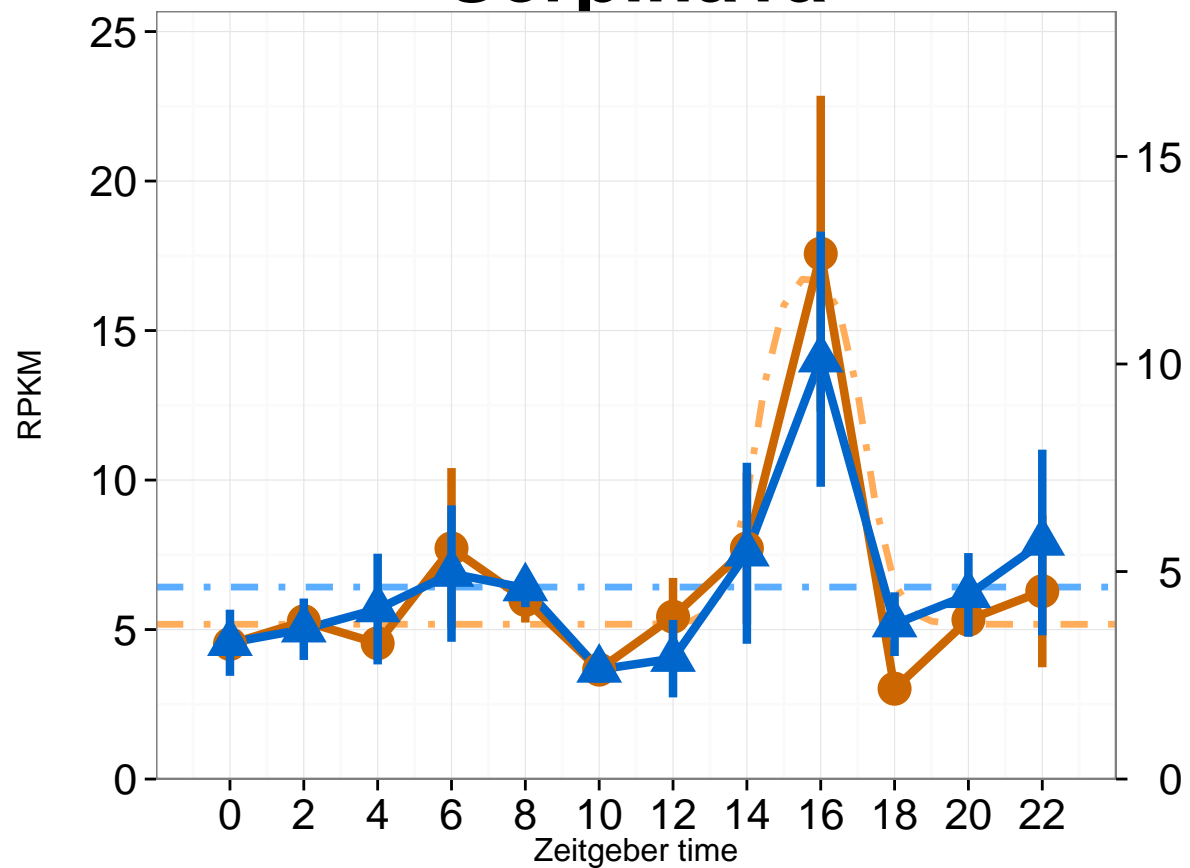

# Serpina1a

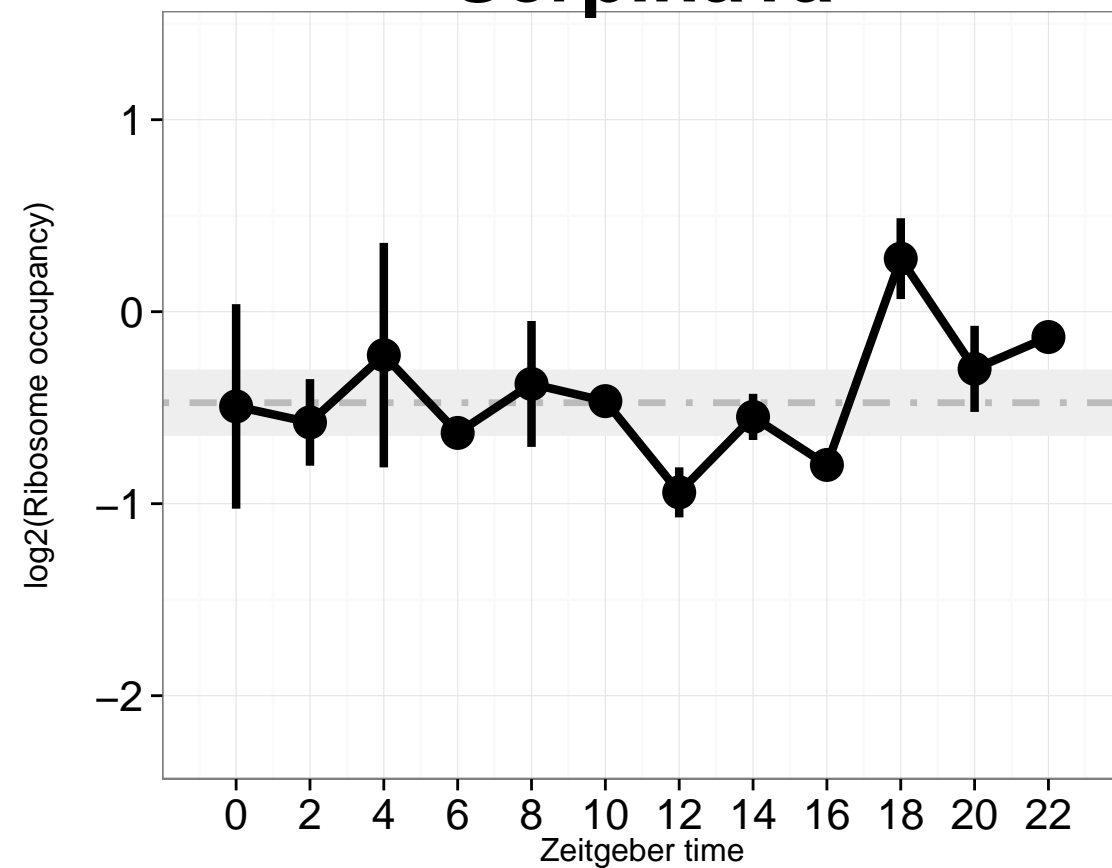

Supplement: Supplementary file 7226 [file 1]

## Hiat1

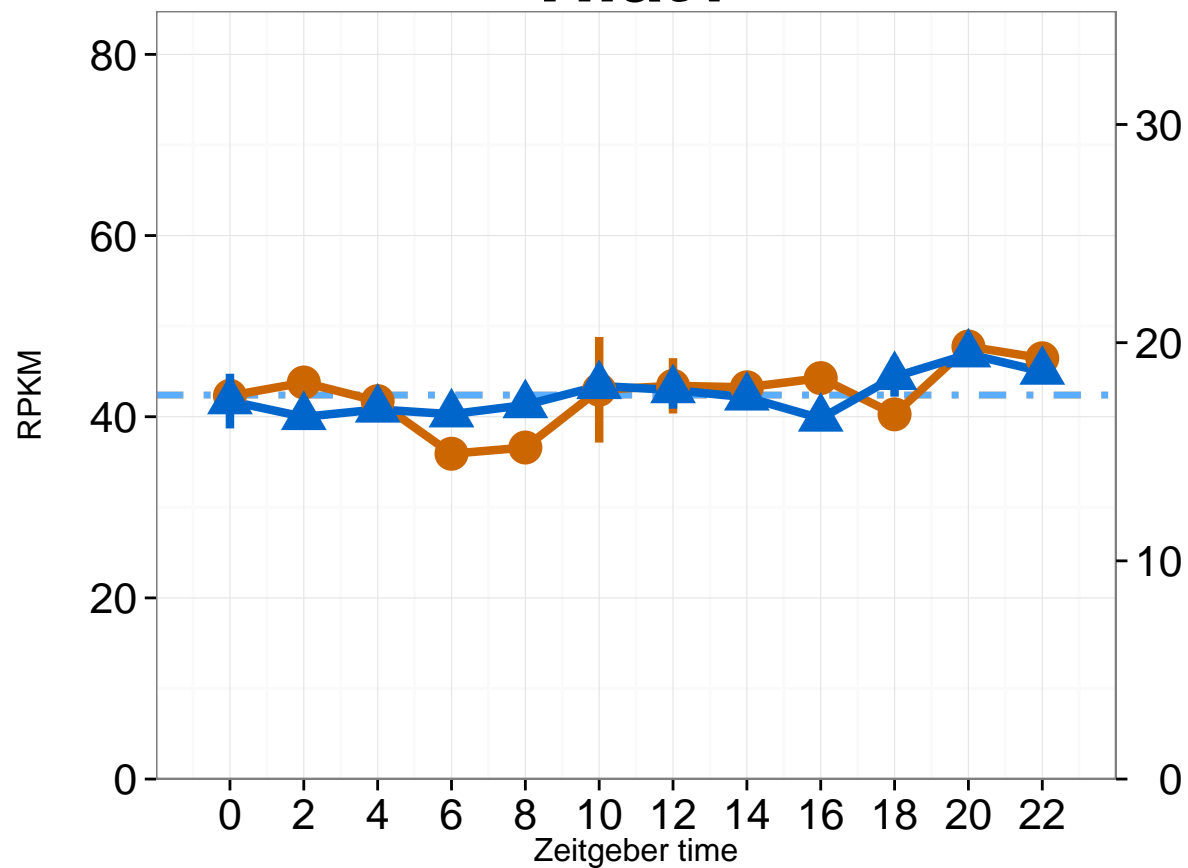

## Hiat1

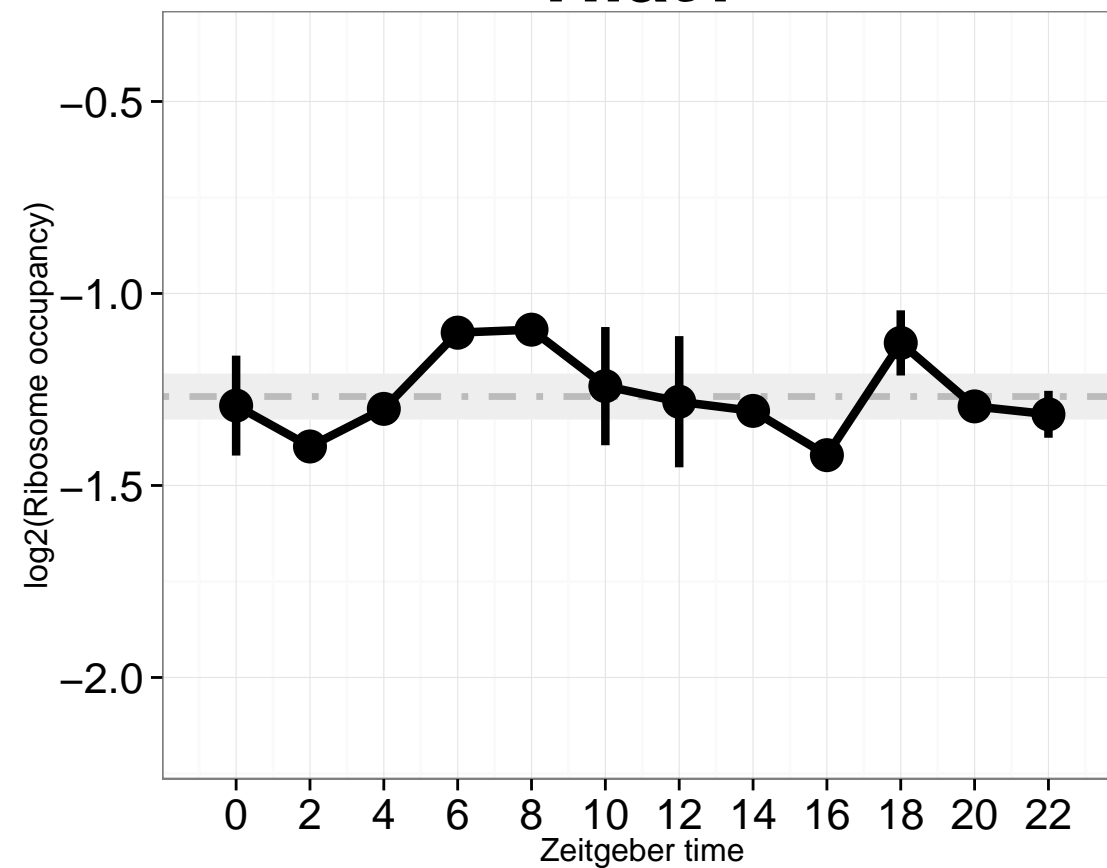

Supplement: Supplementary file 7227 [file 1]

# mt-Co2

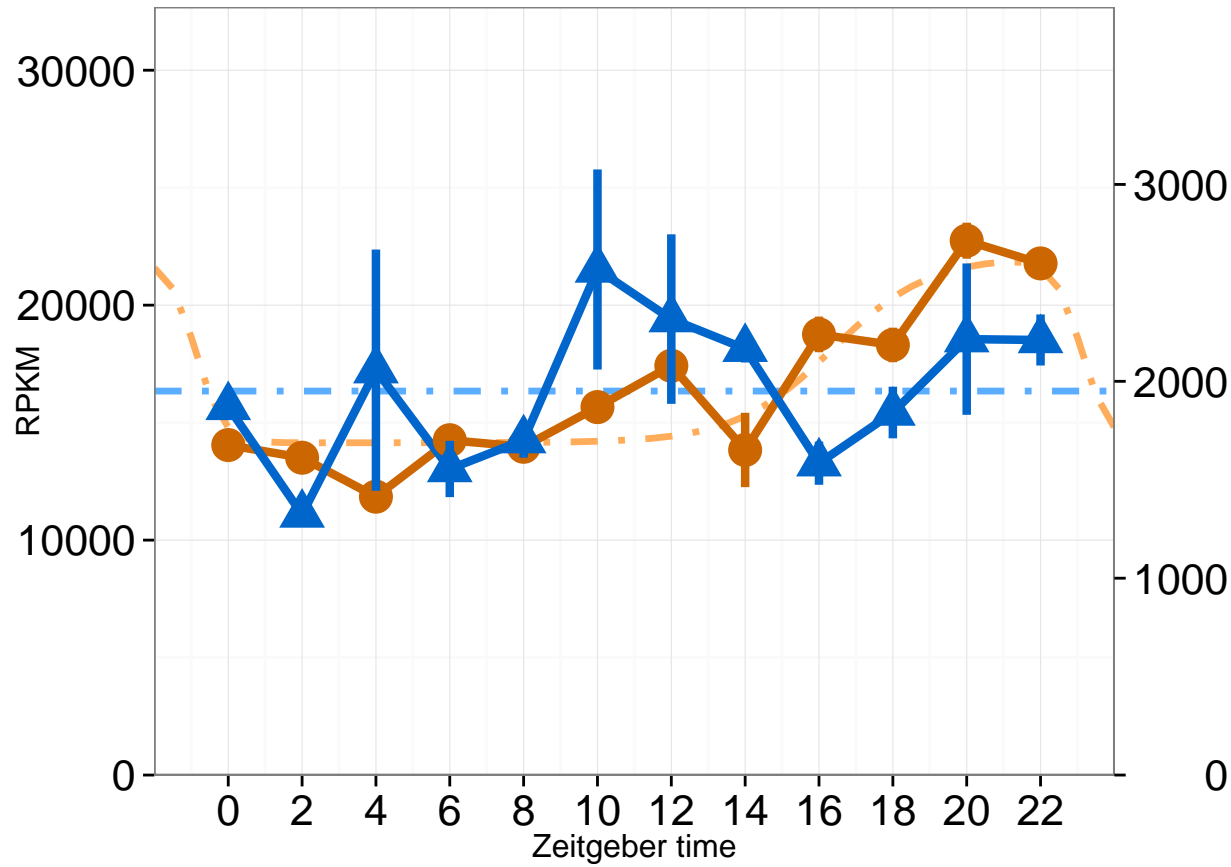

# mt-Co2

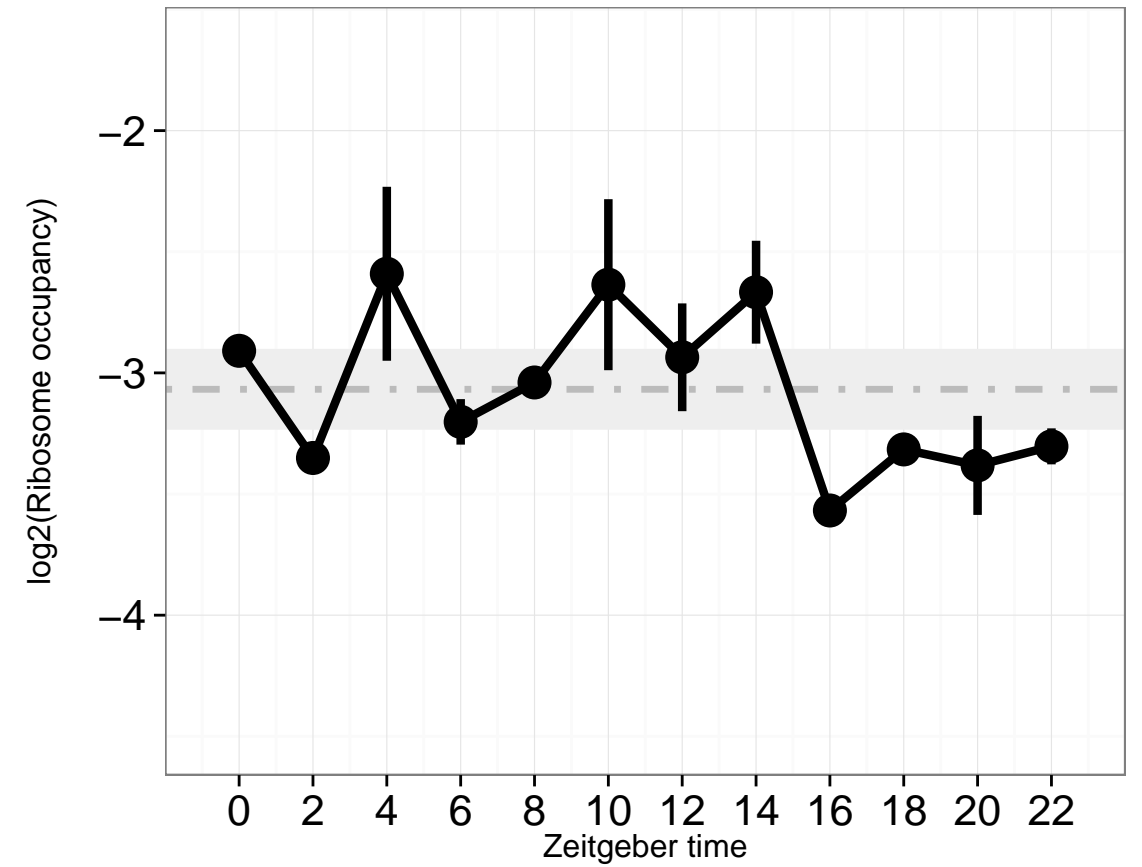

Supplement: Supplementary file 7228 [file 1]

# Cggbp1

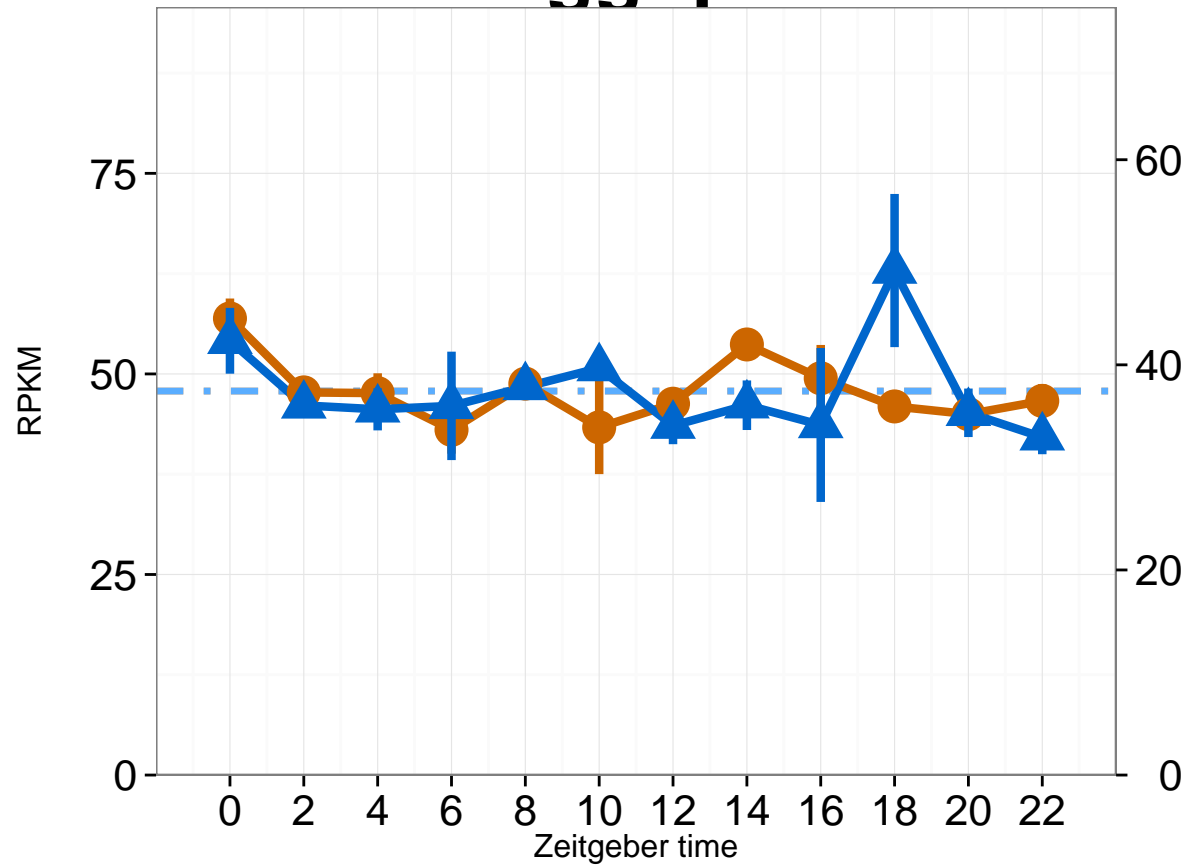

# Cggbp1

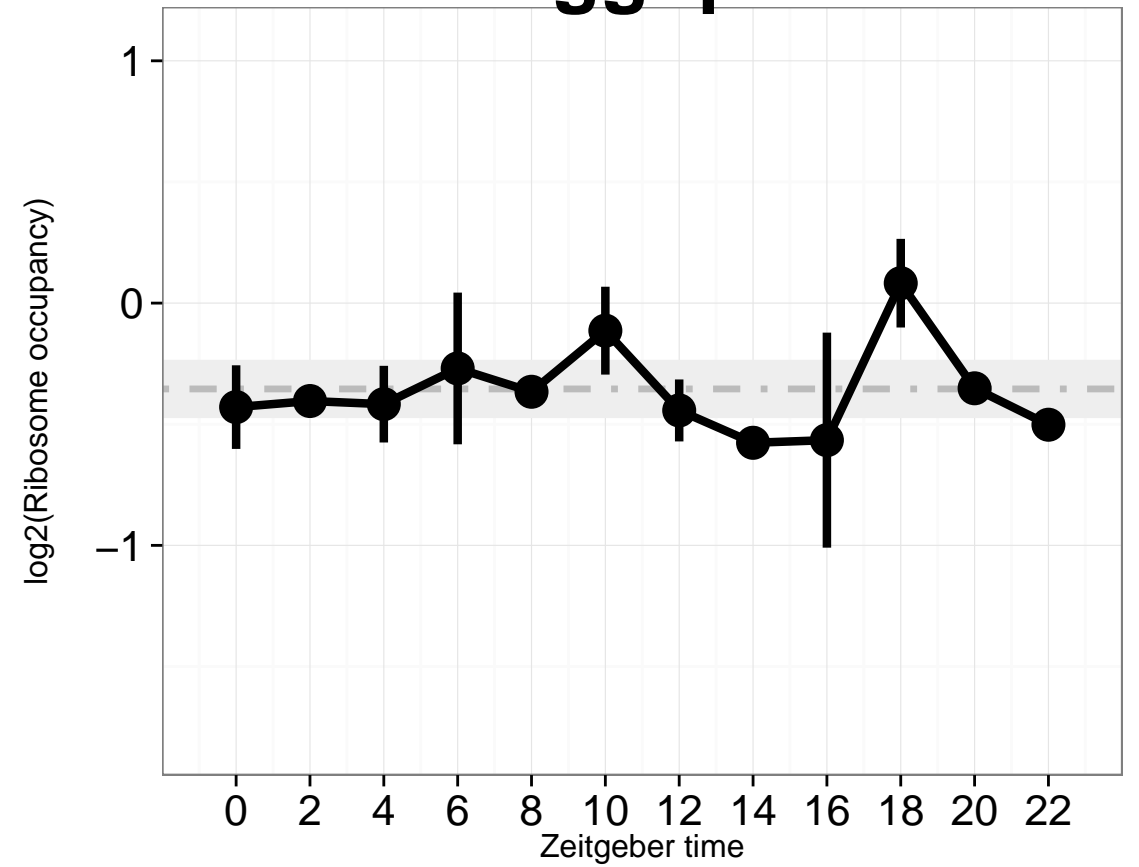

Supplement: Supplementary file 7229 [file 1]

# Scrn2

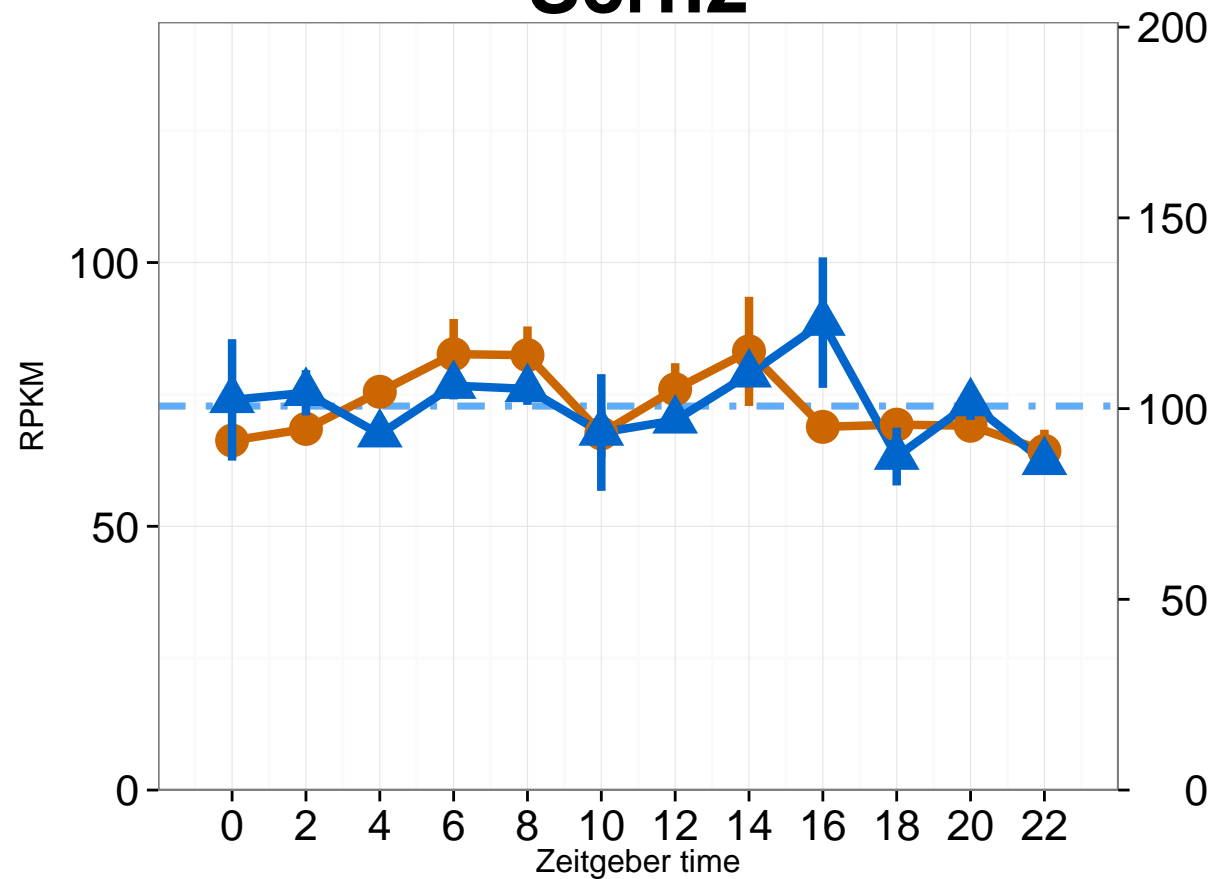

# Scrn2

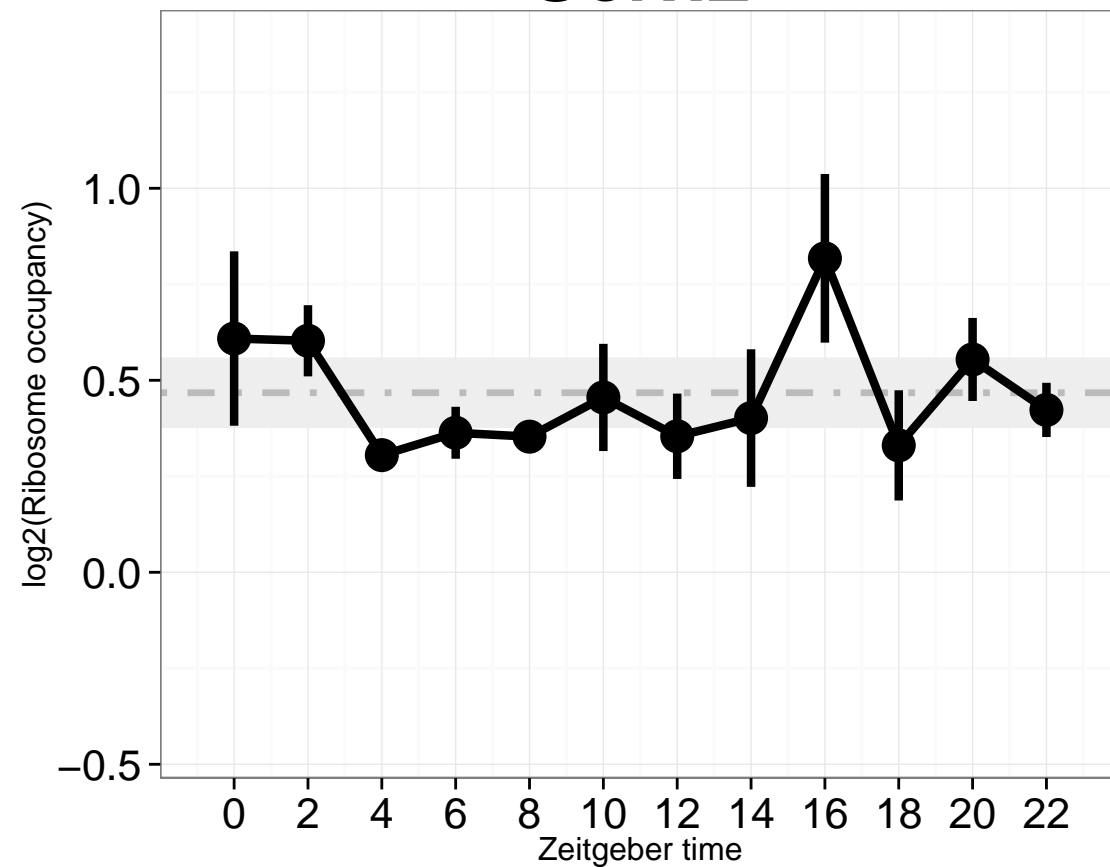

Supplement: Supplementary file 7230 [file 1]

## Emc4

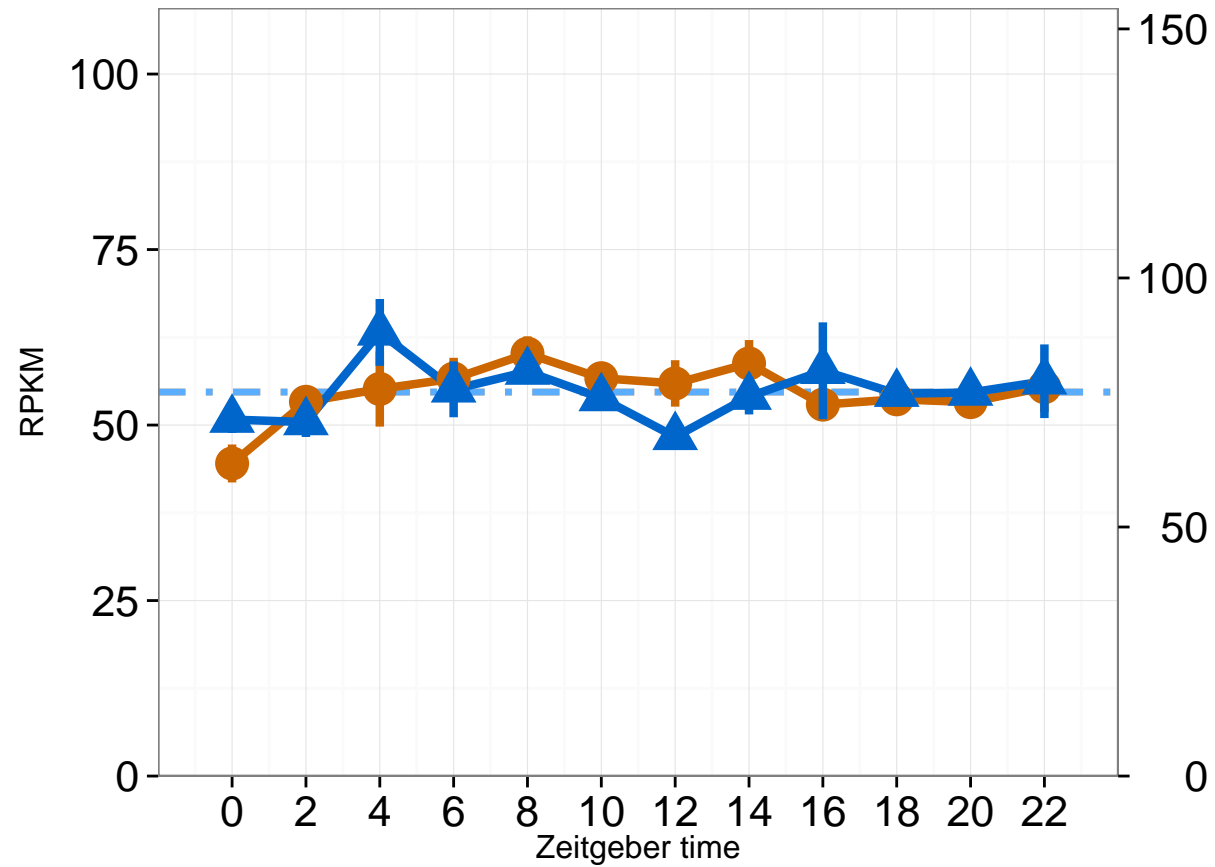

## Emc4

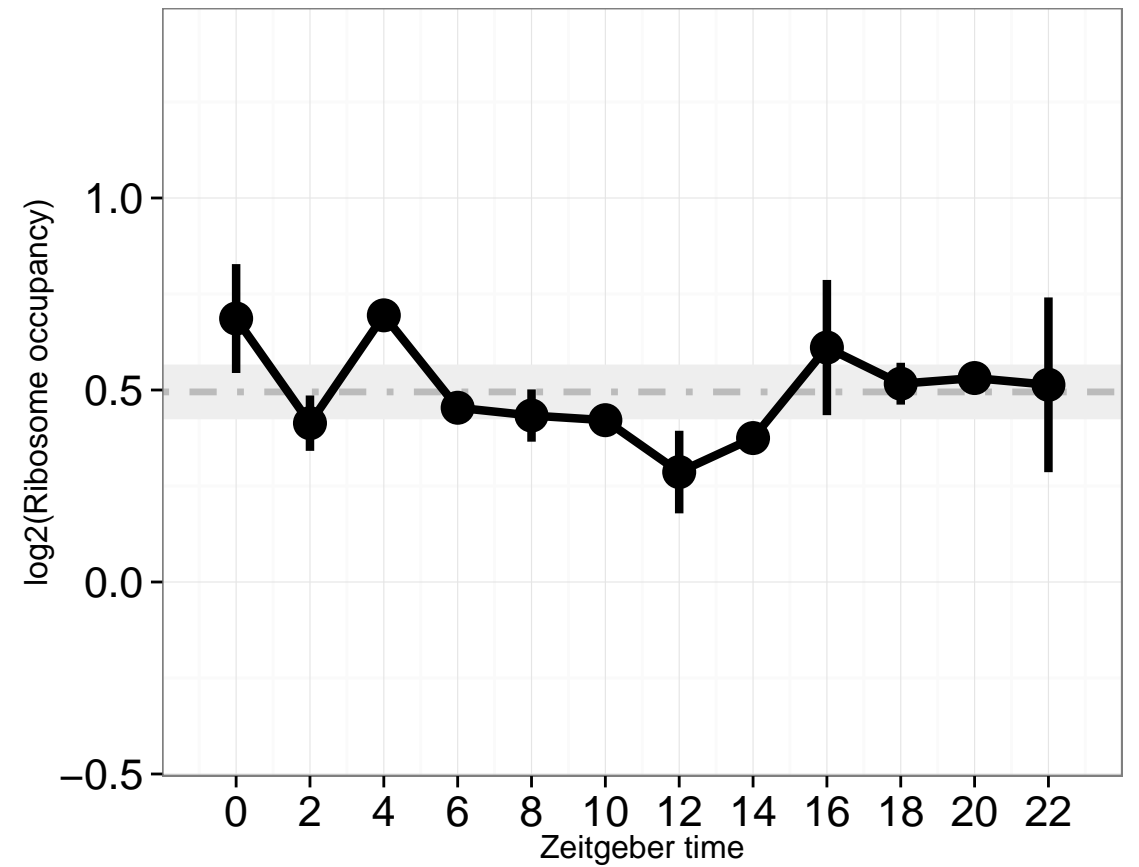

Supplement: Supplementary file 7231 [file 1]

## Cd151

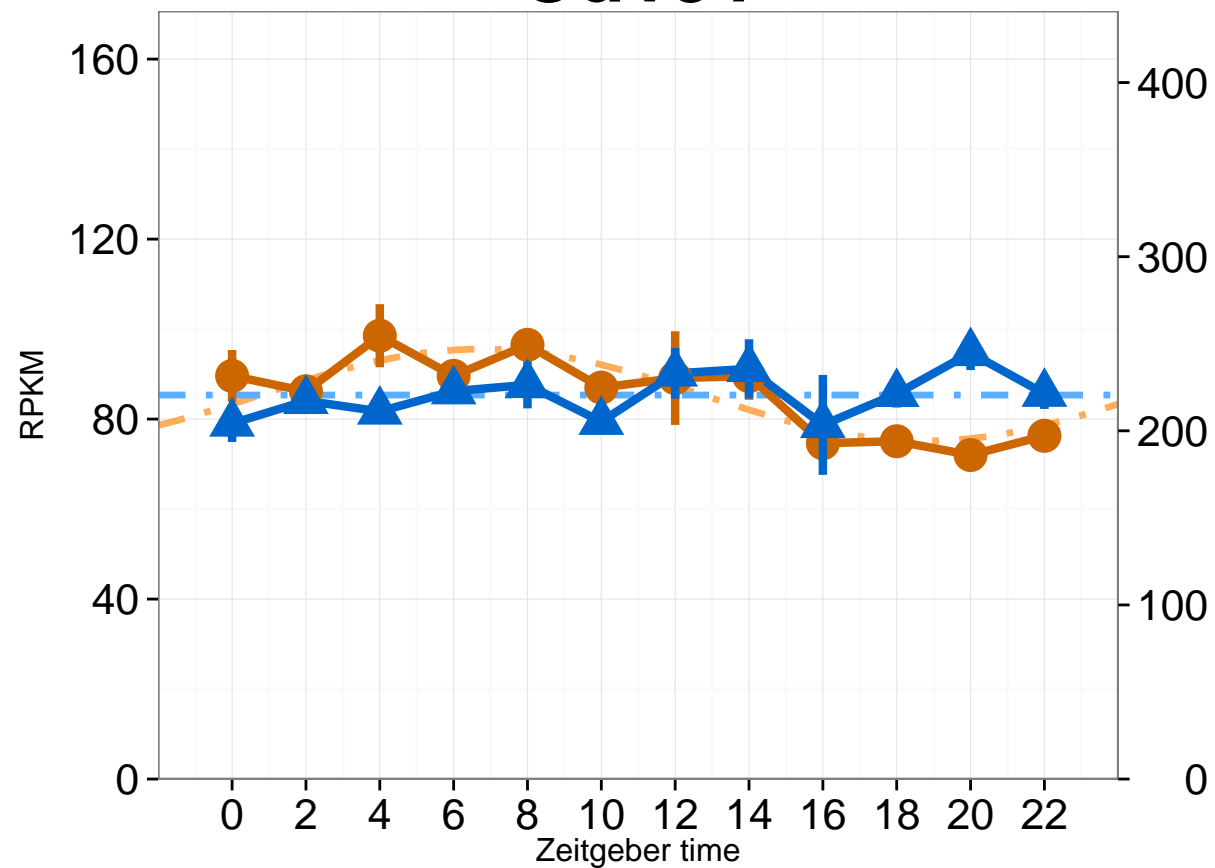

## Cd151

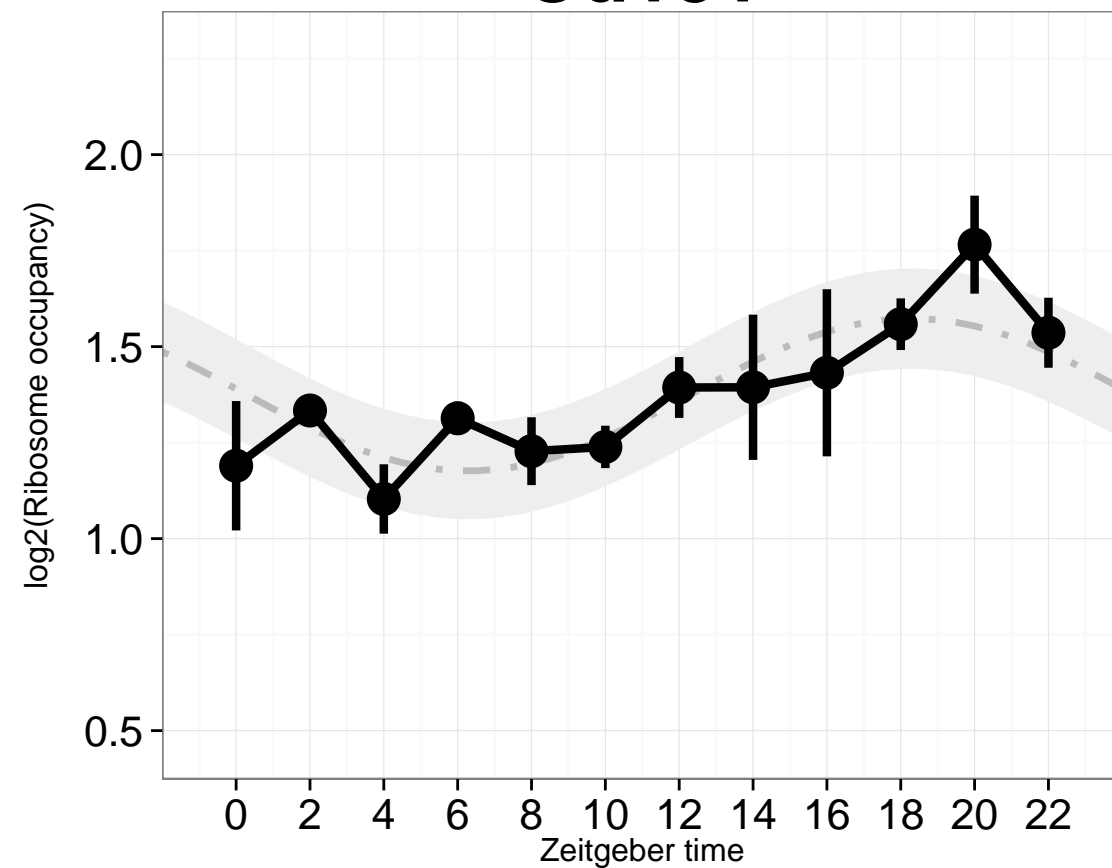

Supplement: Supplementary file 7232 [file 1]

## Mitd1

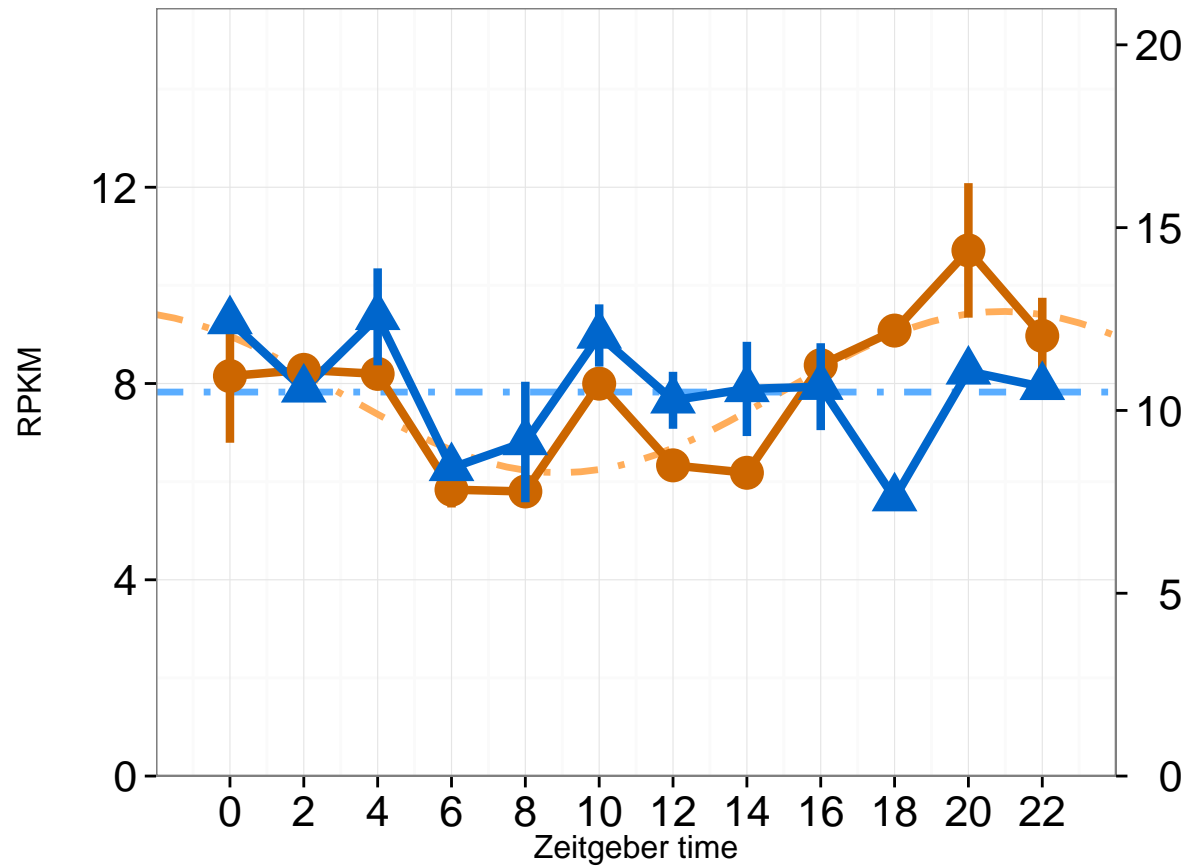

## Mitd1

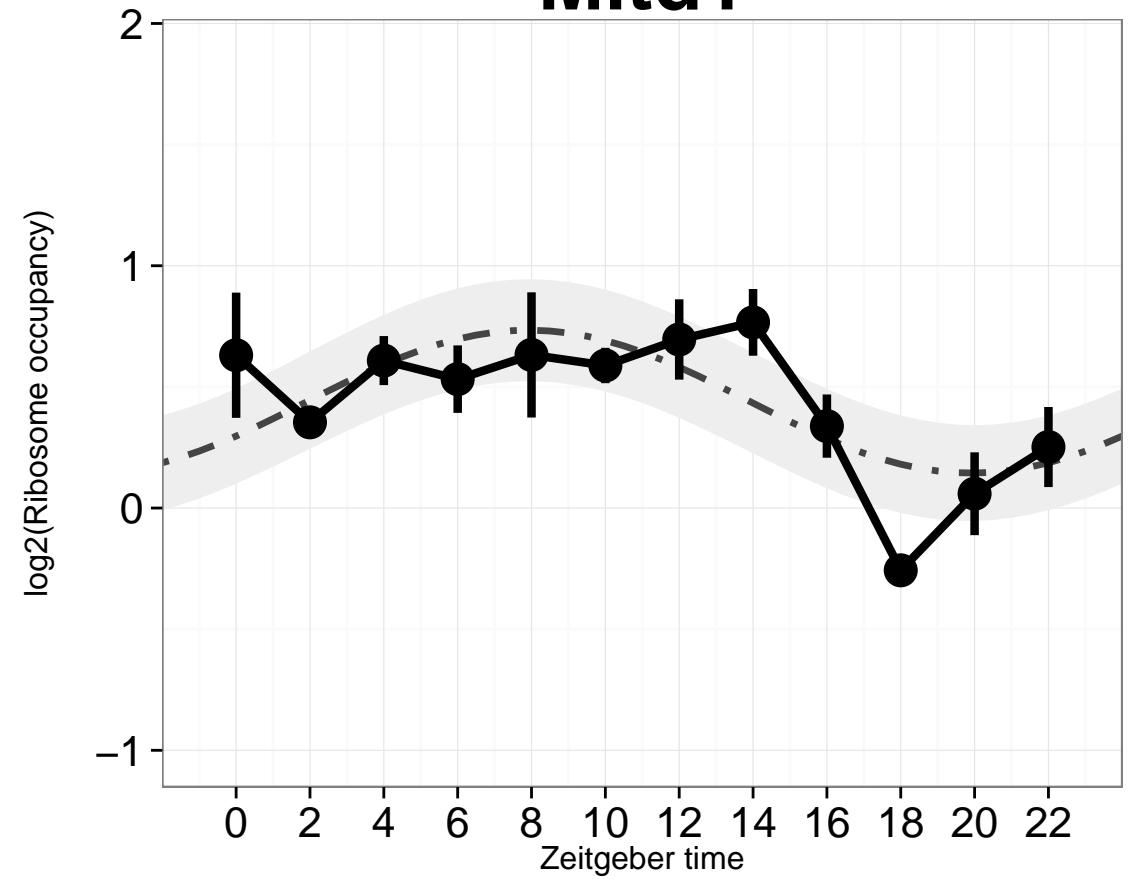

Supplement: Supplementary file 7233 [file 1]

# Wdr33

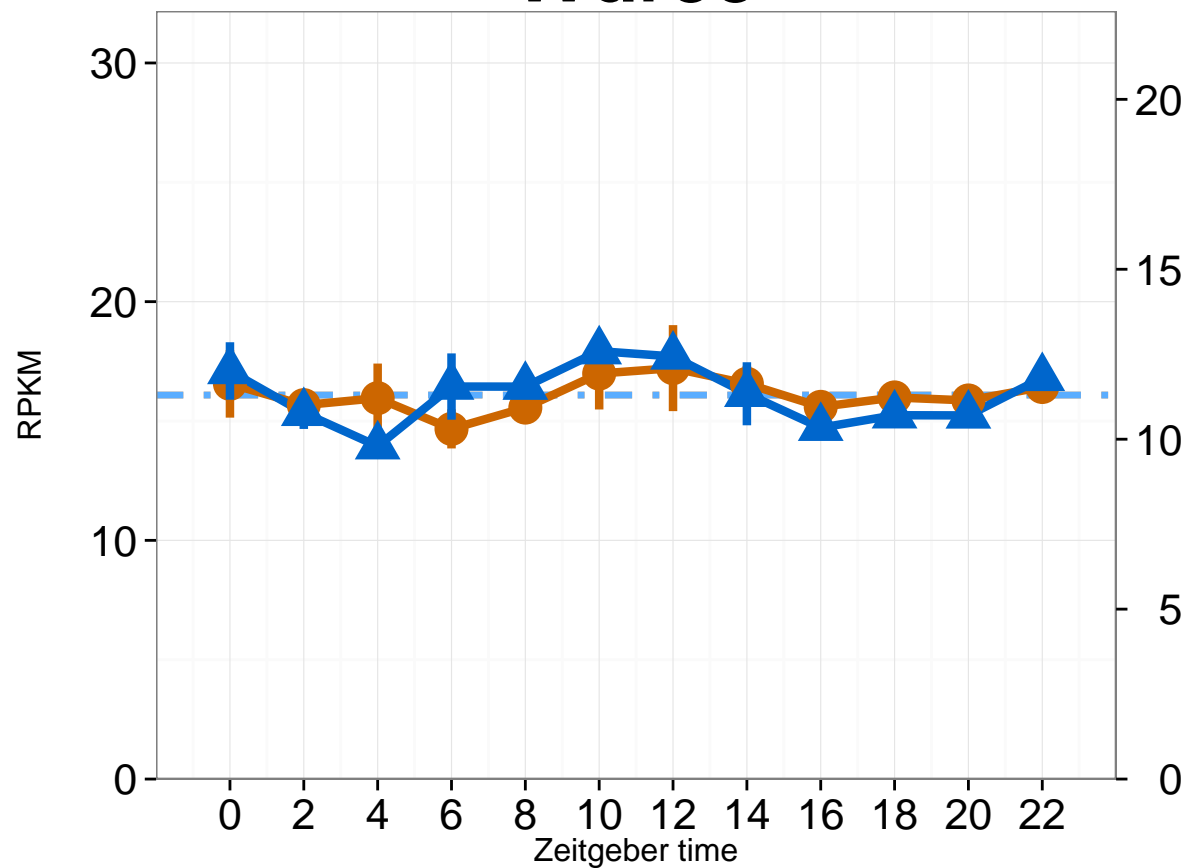

# Wdr33

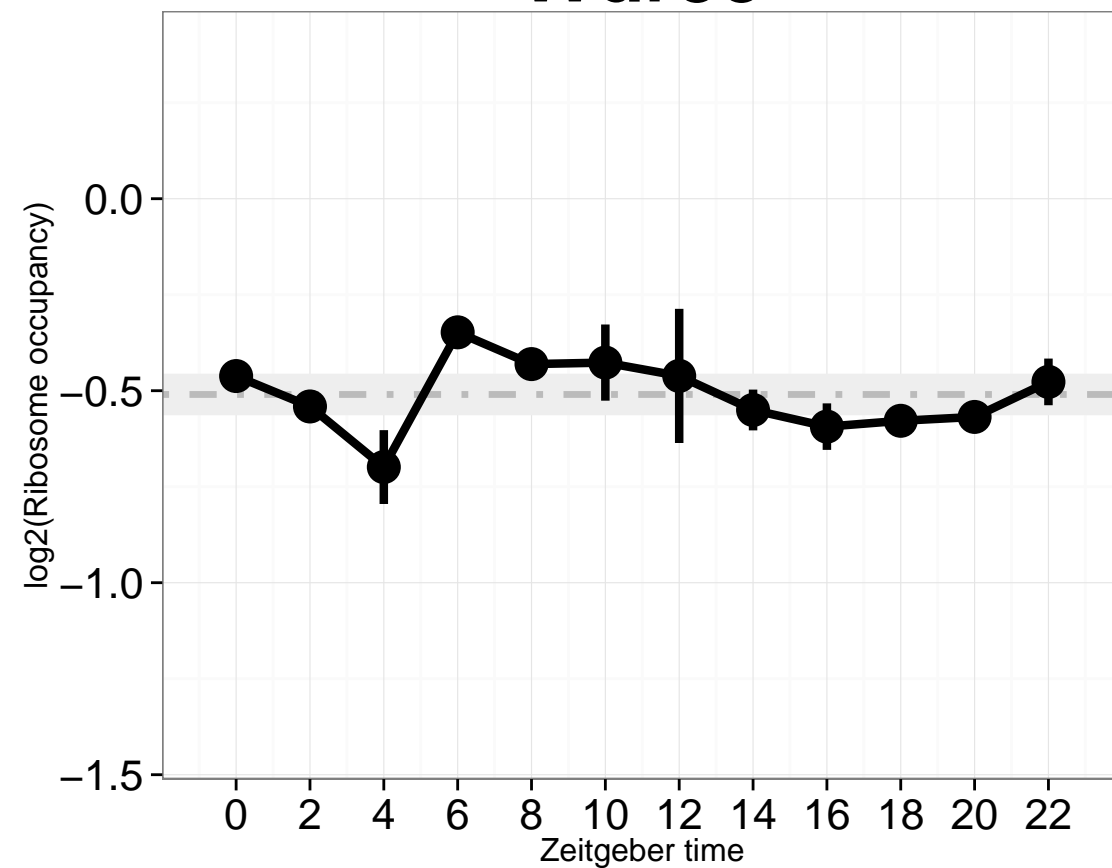

Supplement: Supplementary file 7234 [file 1]

## Polr2e

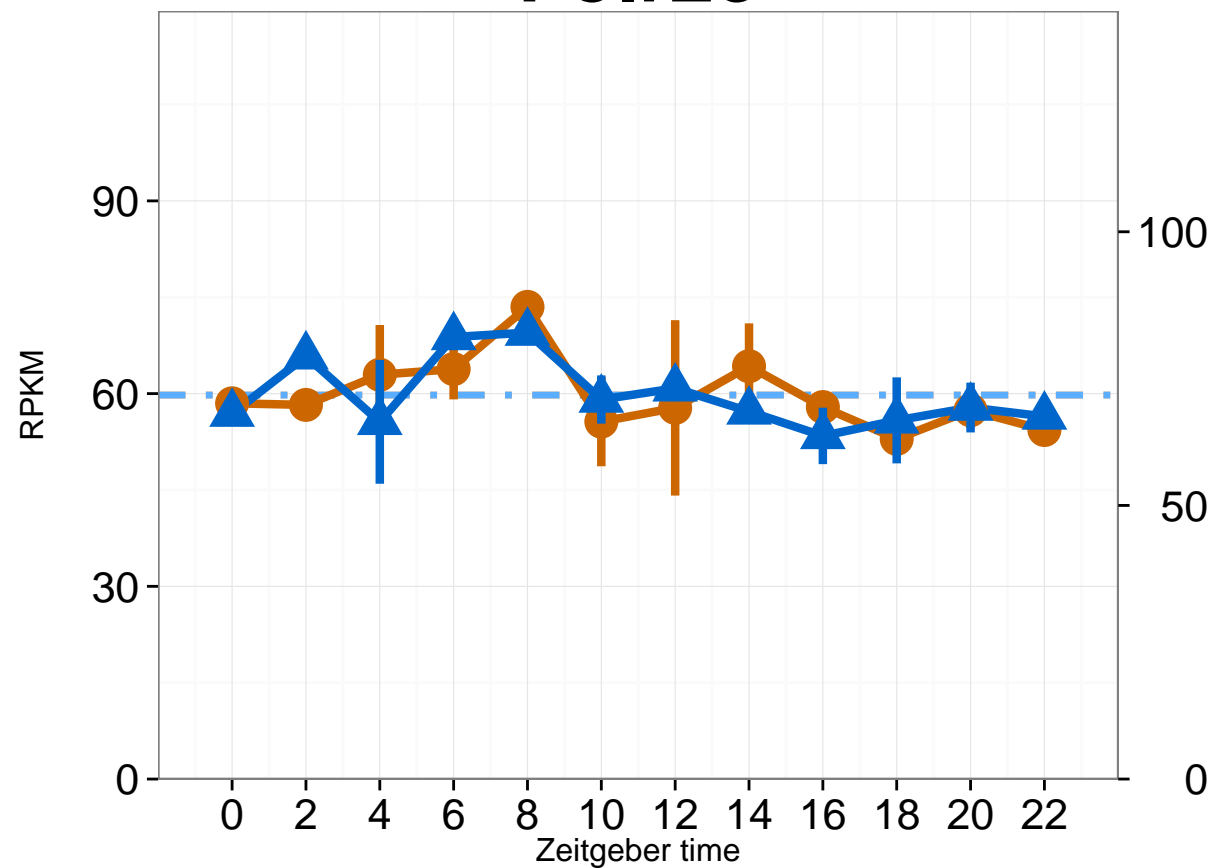

## Polr2e

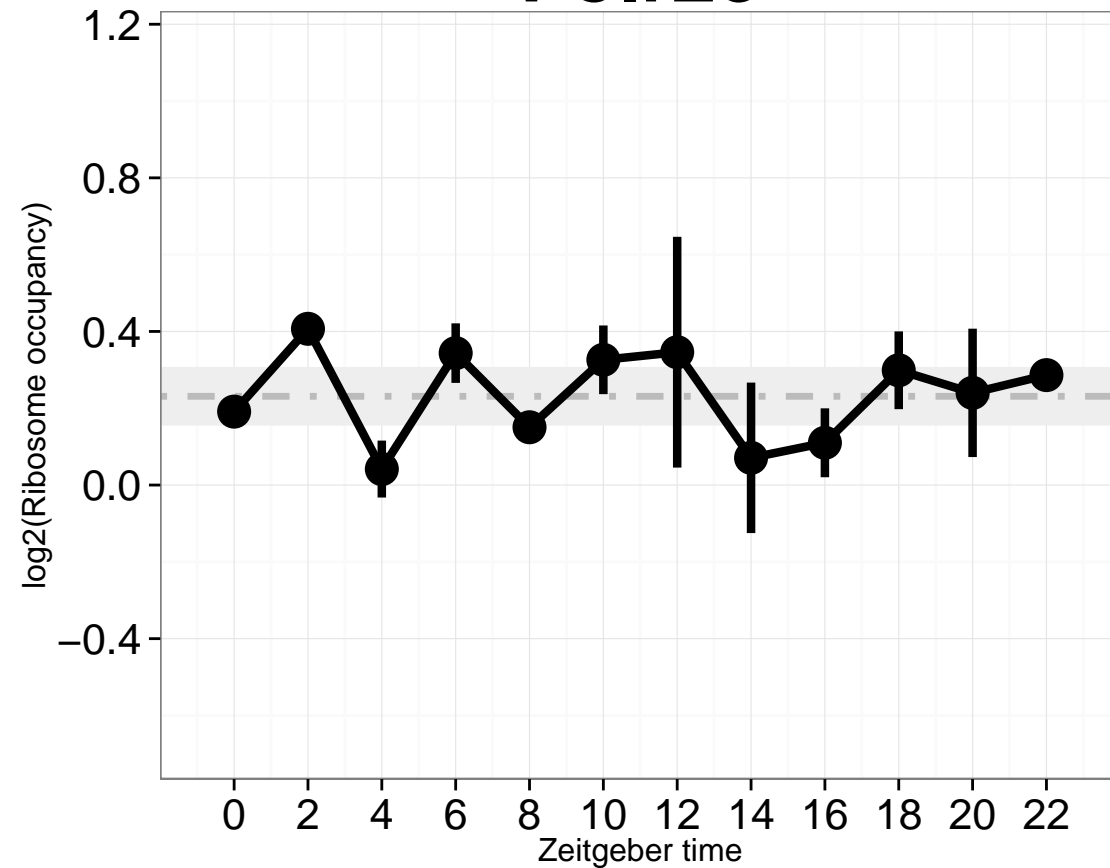

Supplement: Supplementary file 7235 [file 1]

**Armcx6**

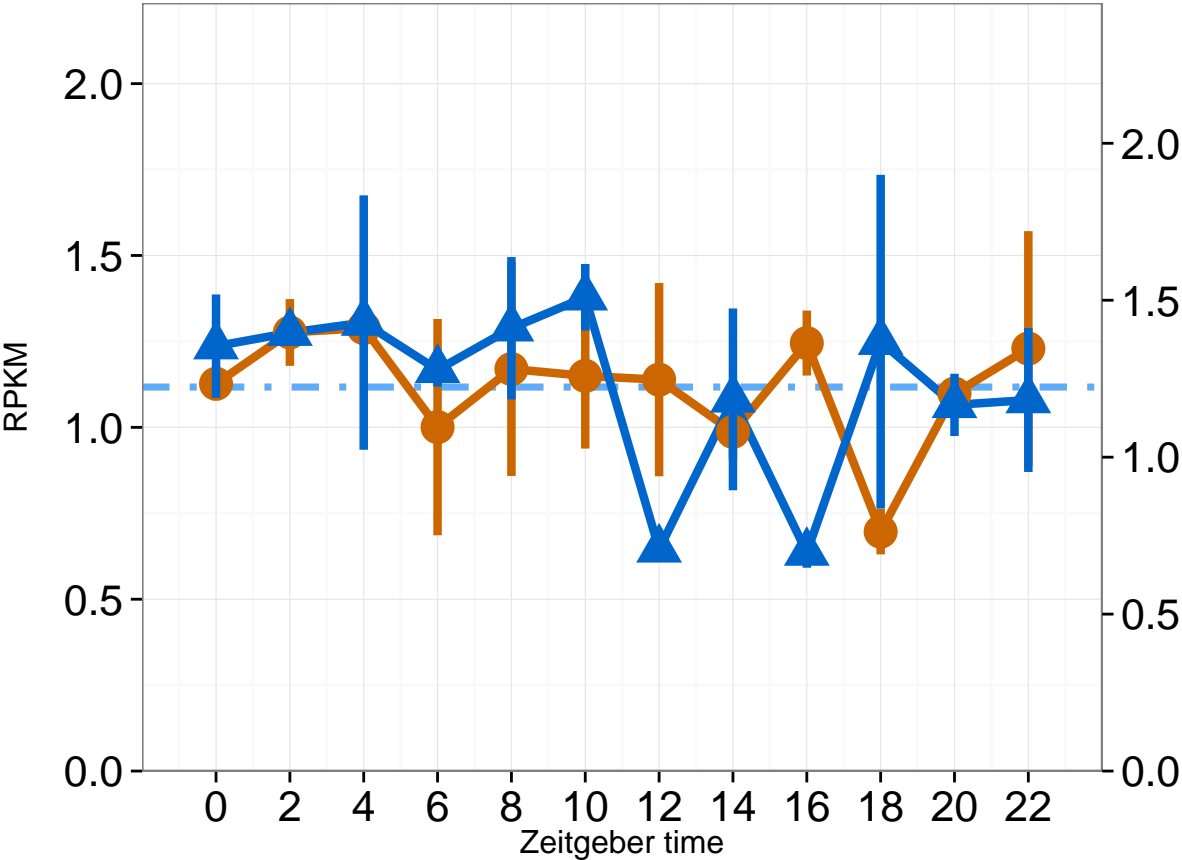

**Armcx6**

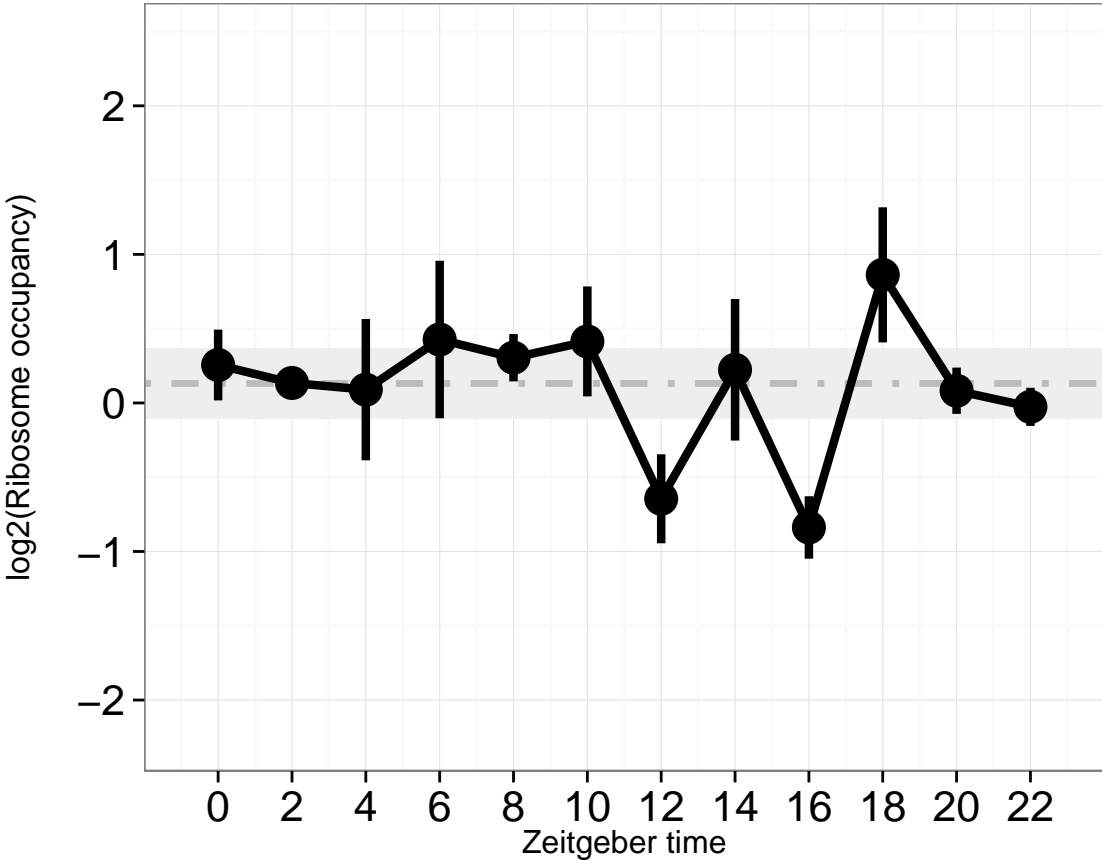

Supplement: Supplementary file 7236 [file 1]

# Ociad1

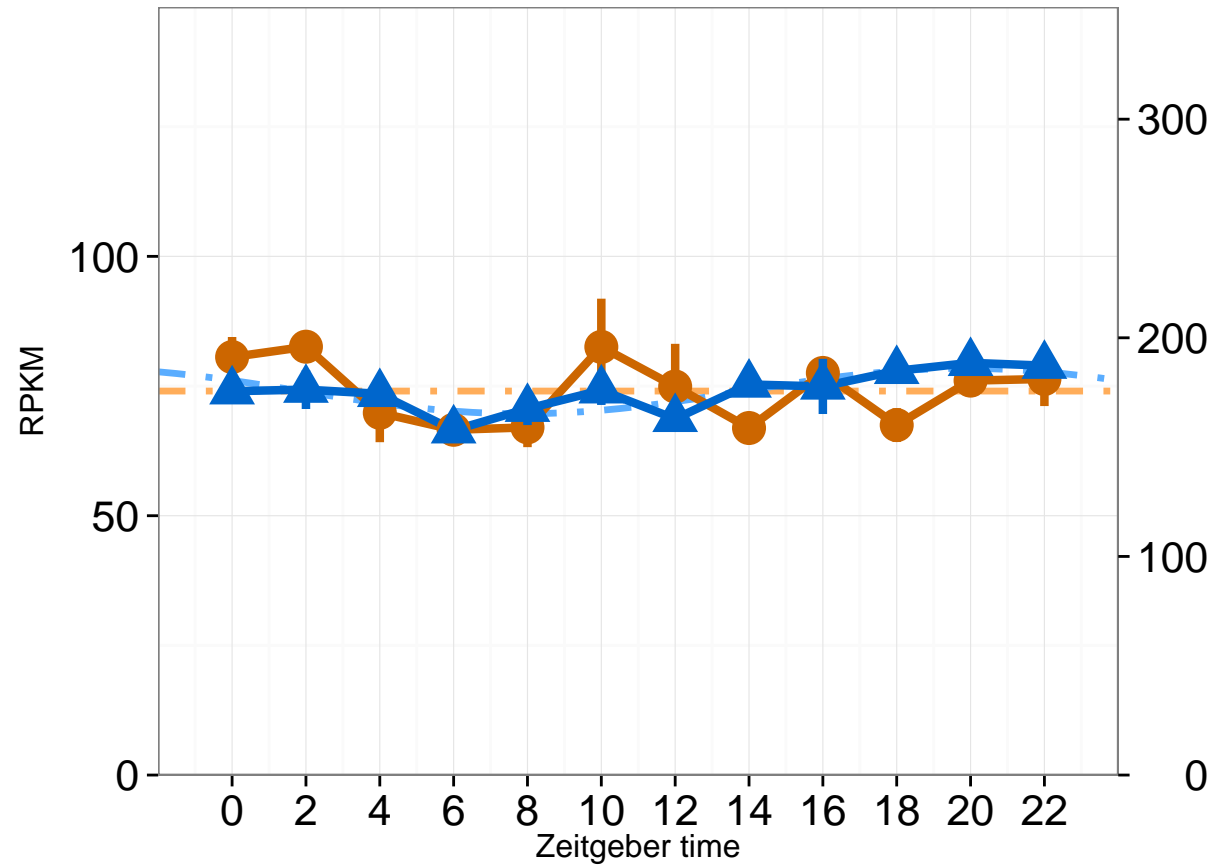

# Ociad1

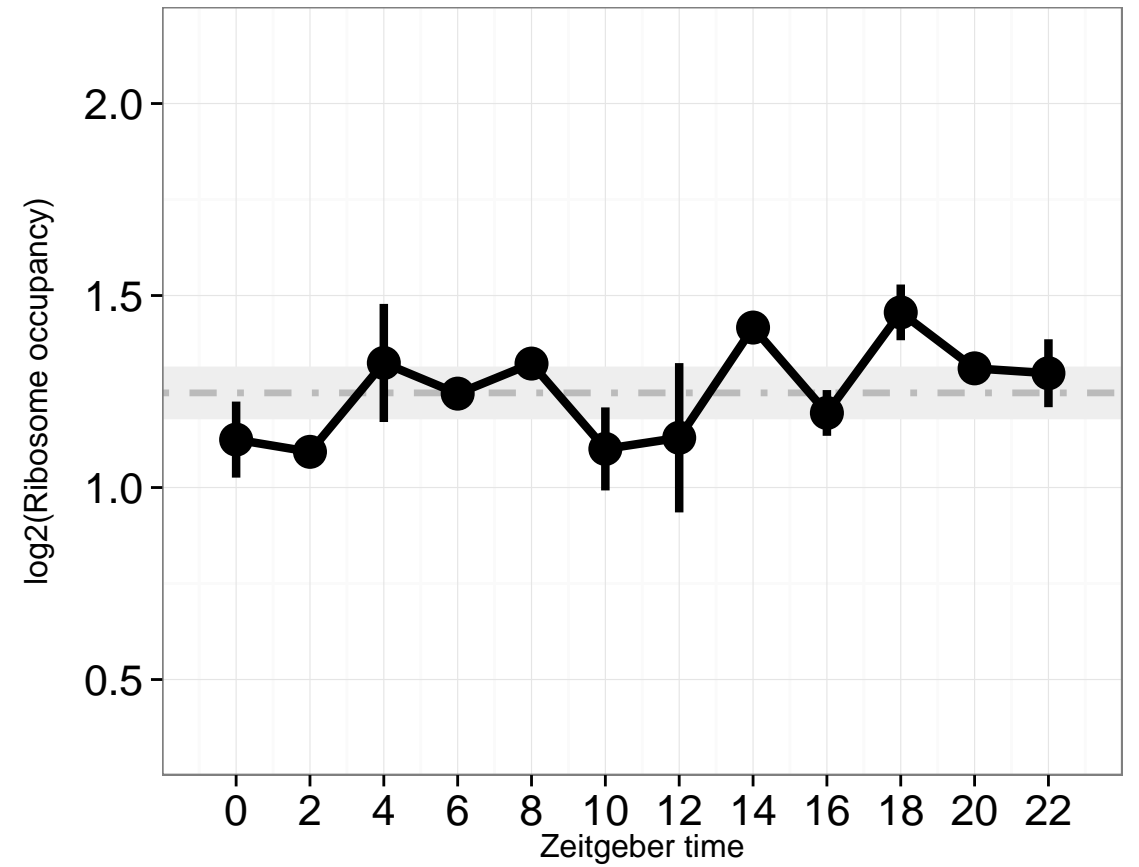

Supplement: Supplementary file 7237 [file 1]

# Atxn7l1

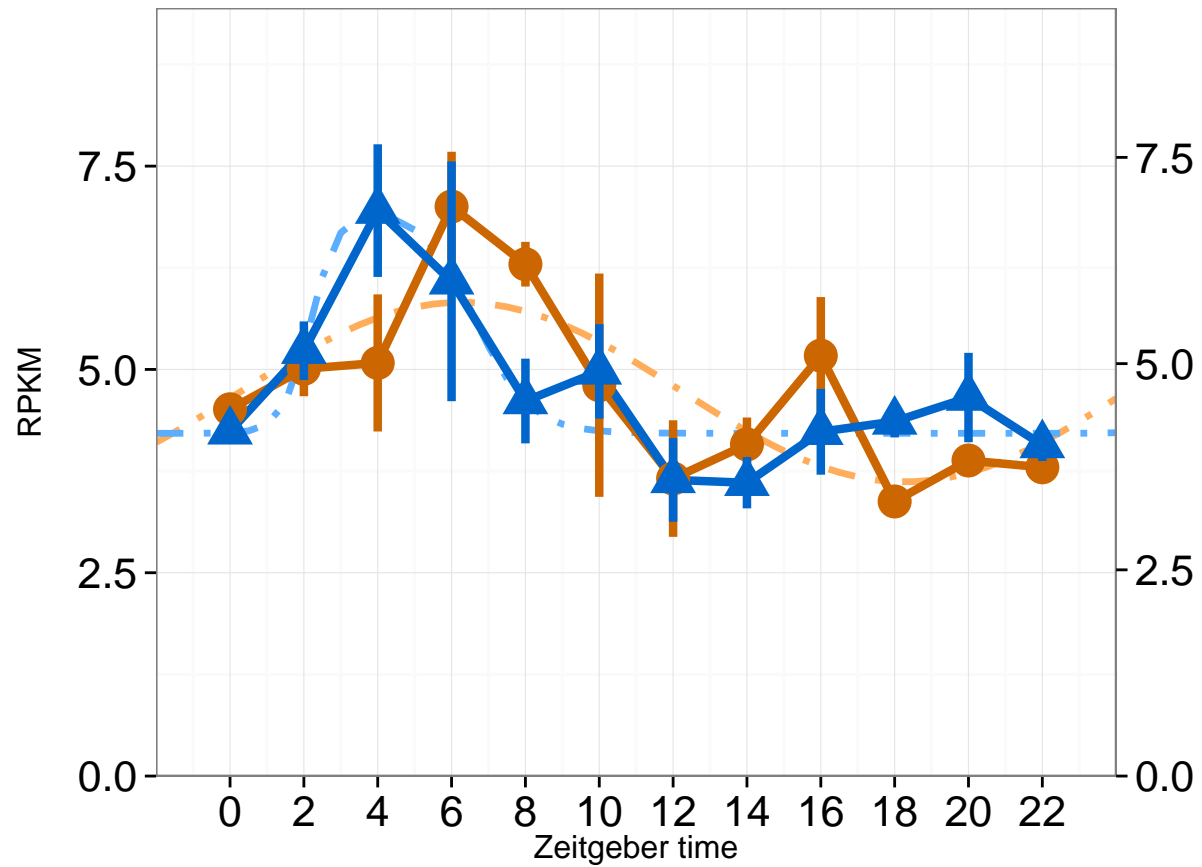

# Atxn7l1

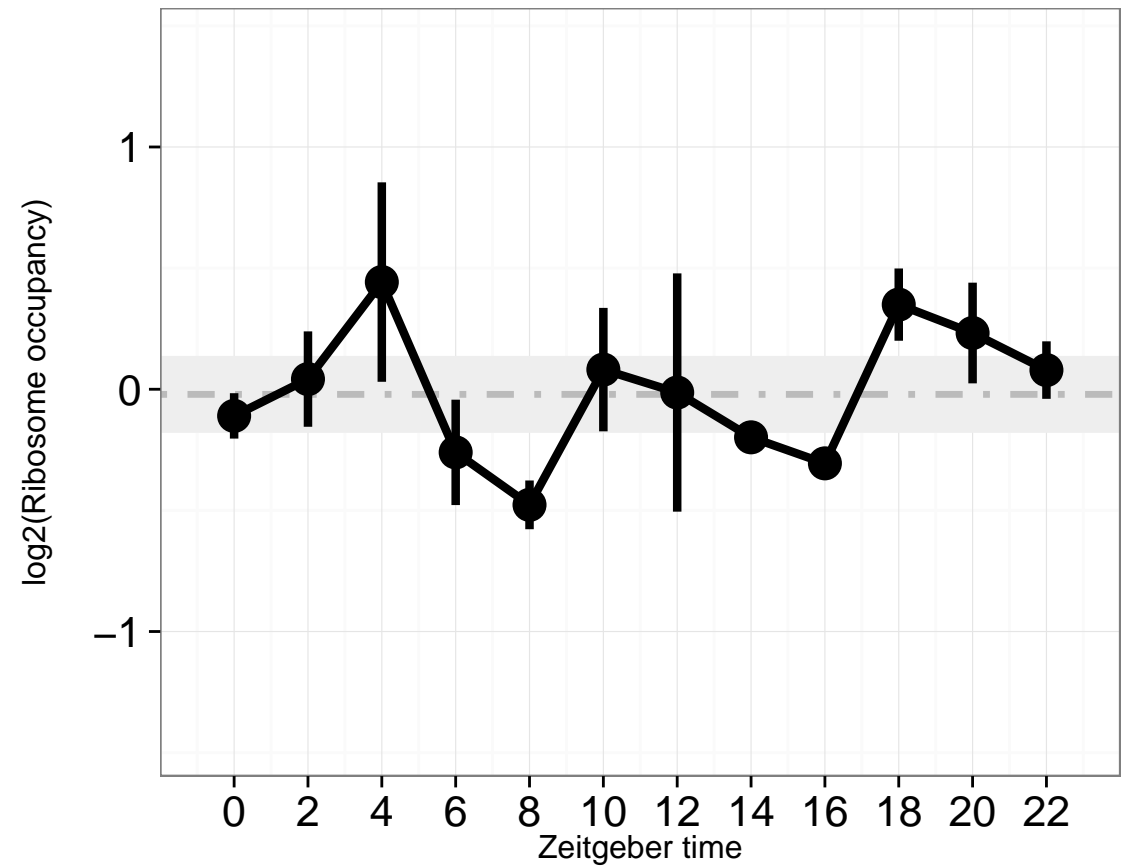

Supplement: Supplementary file 7238 [file 1]

## Magee1

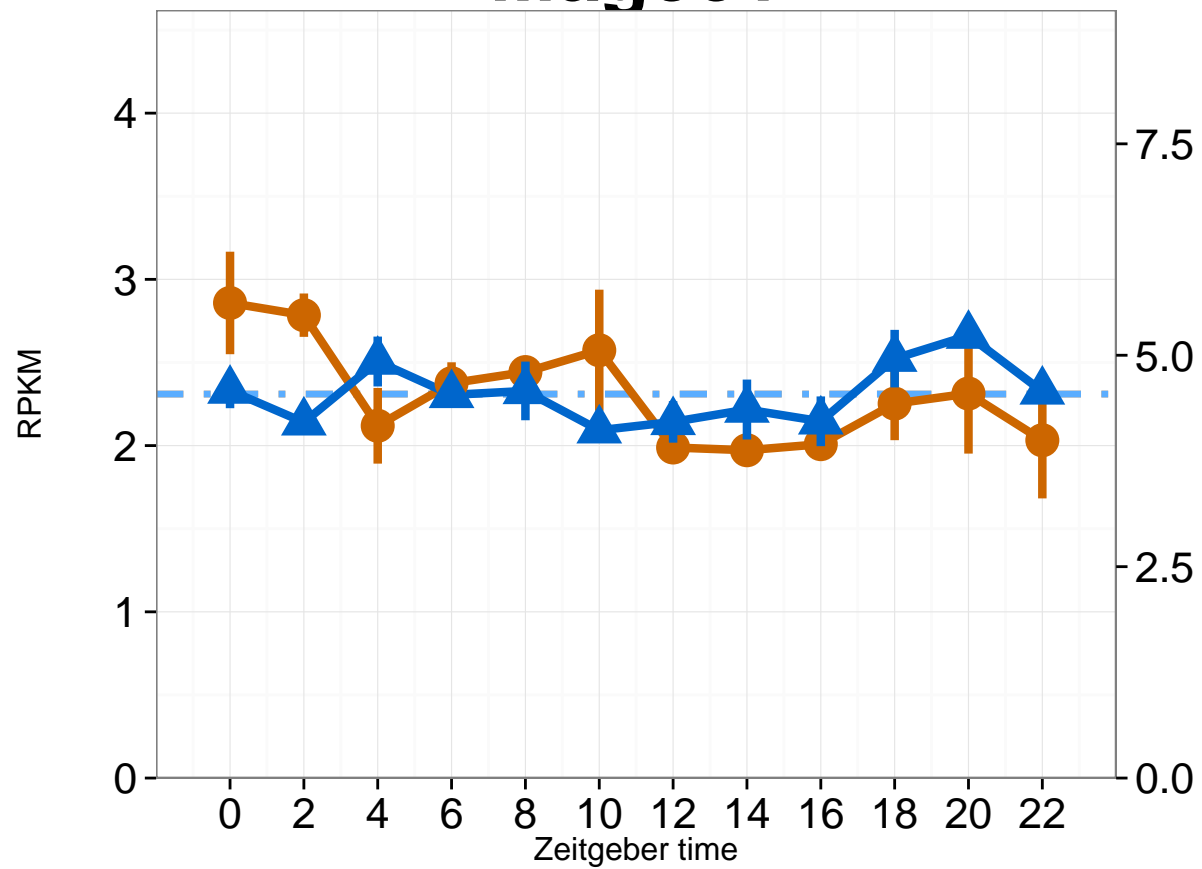

## Magee1

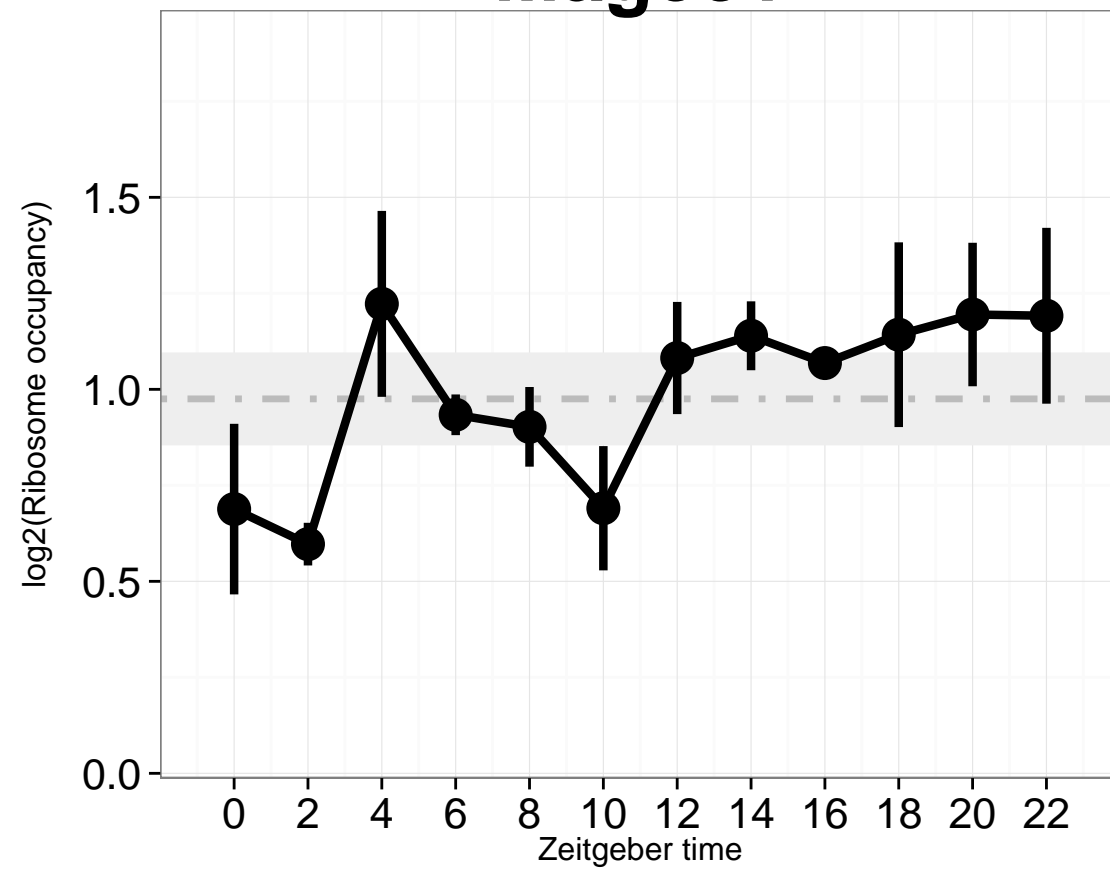

Supplement: Supplementary file 7239 [file 1]

# Calcoco1

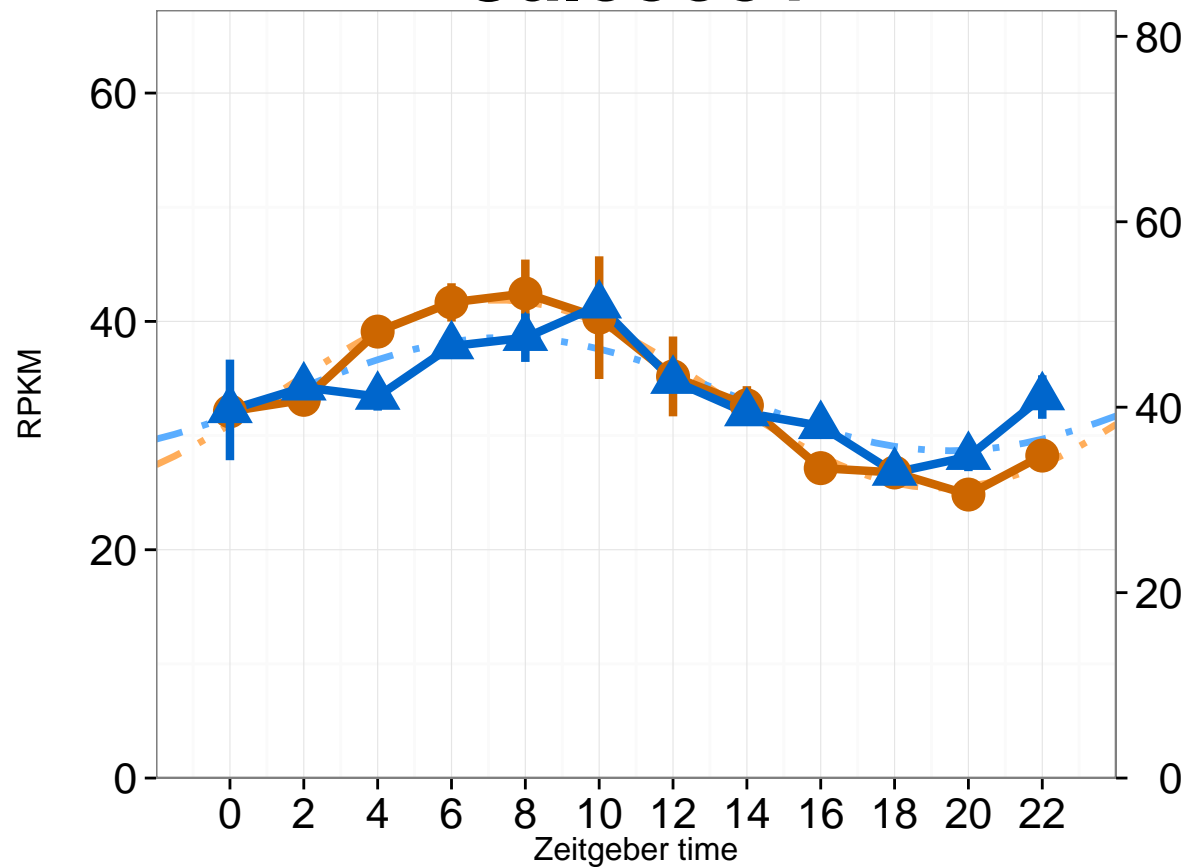

# Calcoco1

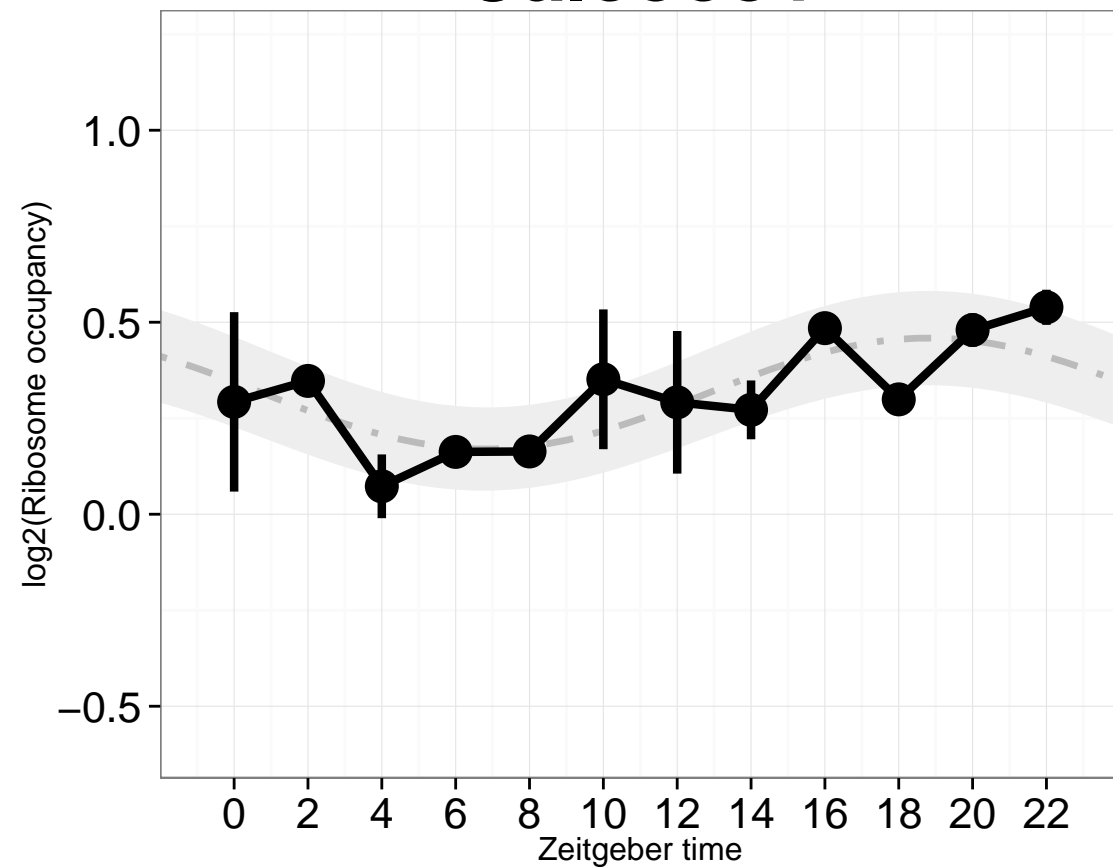

Supplement: Supplementary file 7240 [file 1]

# Hspa4

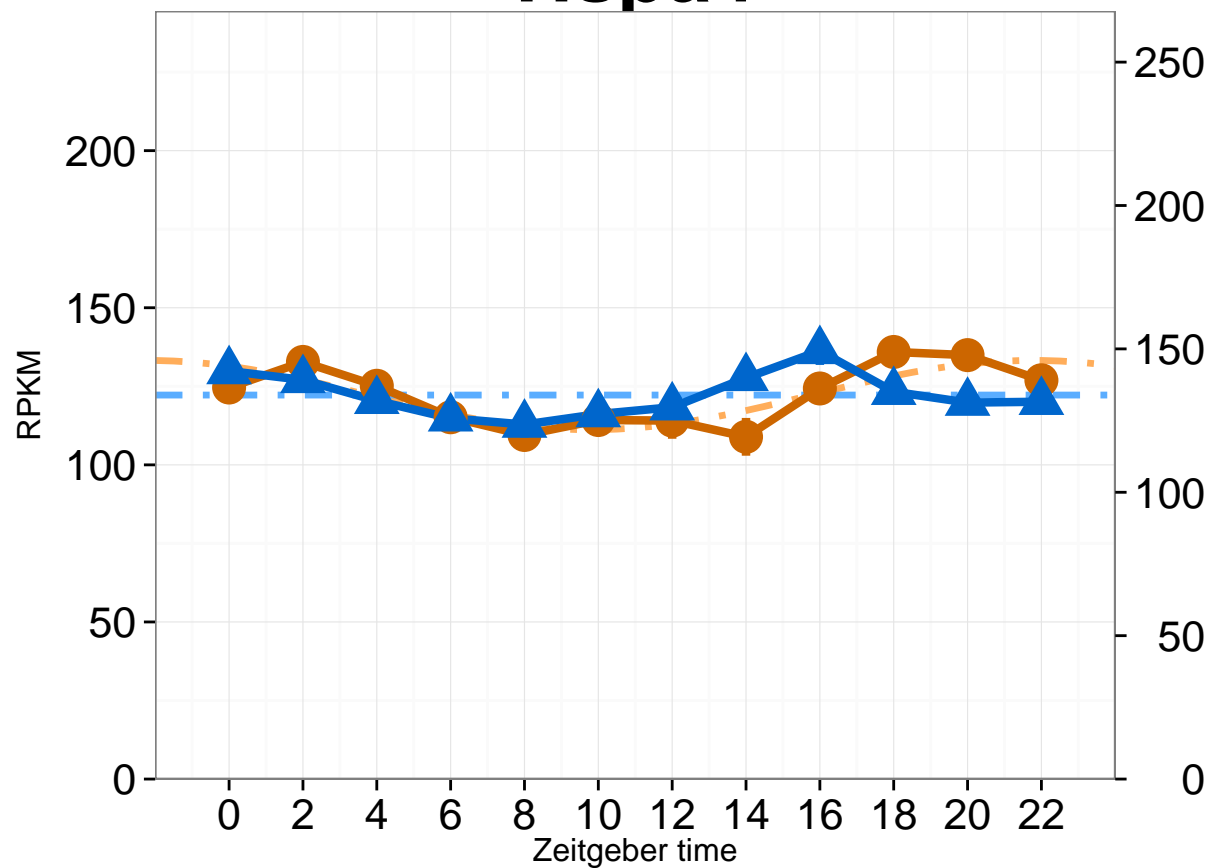

# Hspa4

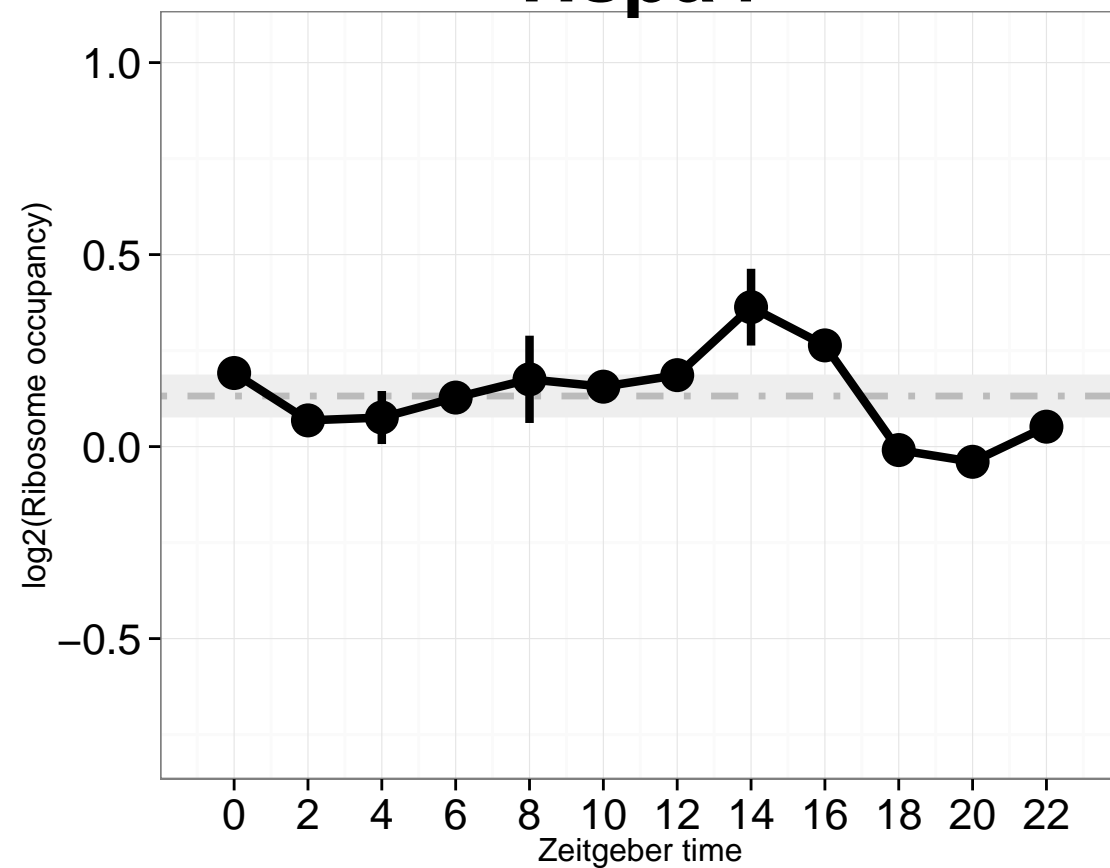

Supplement: Supplementary file 7241 [file 1]

## Gm7102

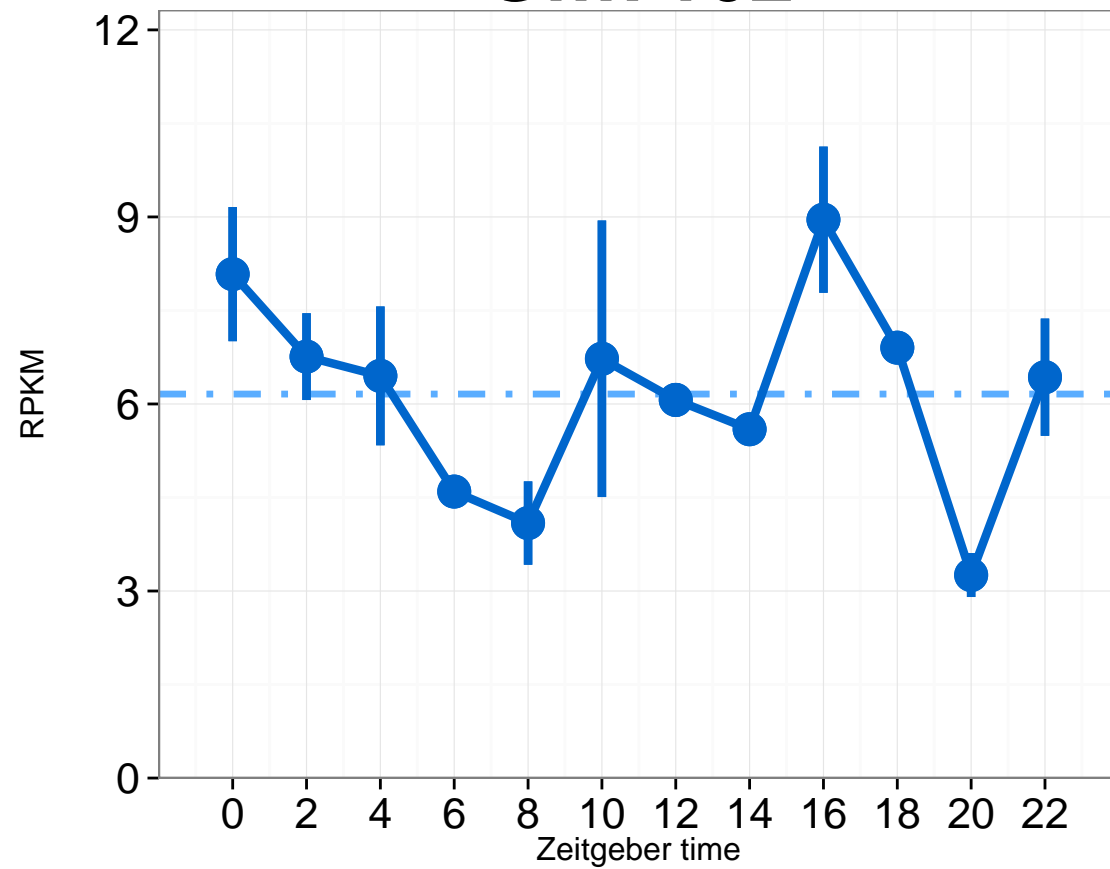

## Gm7102 log2(Ribosome occupanc

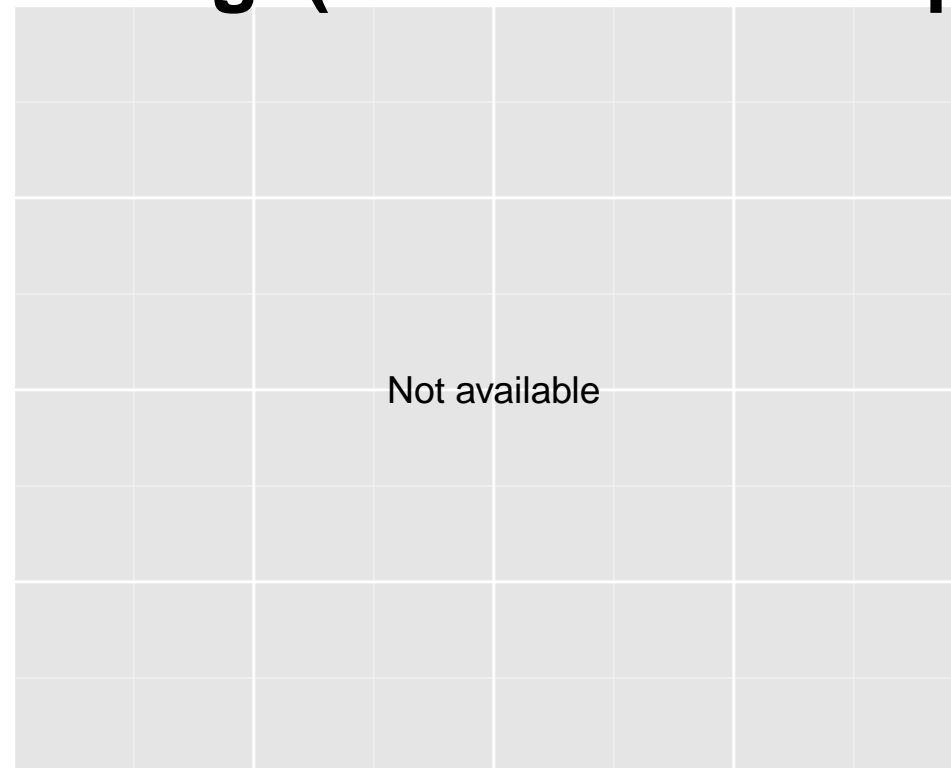

Supplement: Supplementary file 7242 [file 1]

# Tinf2

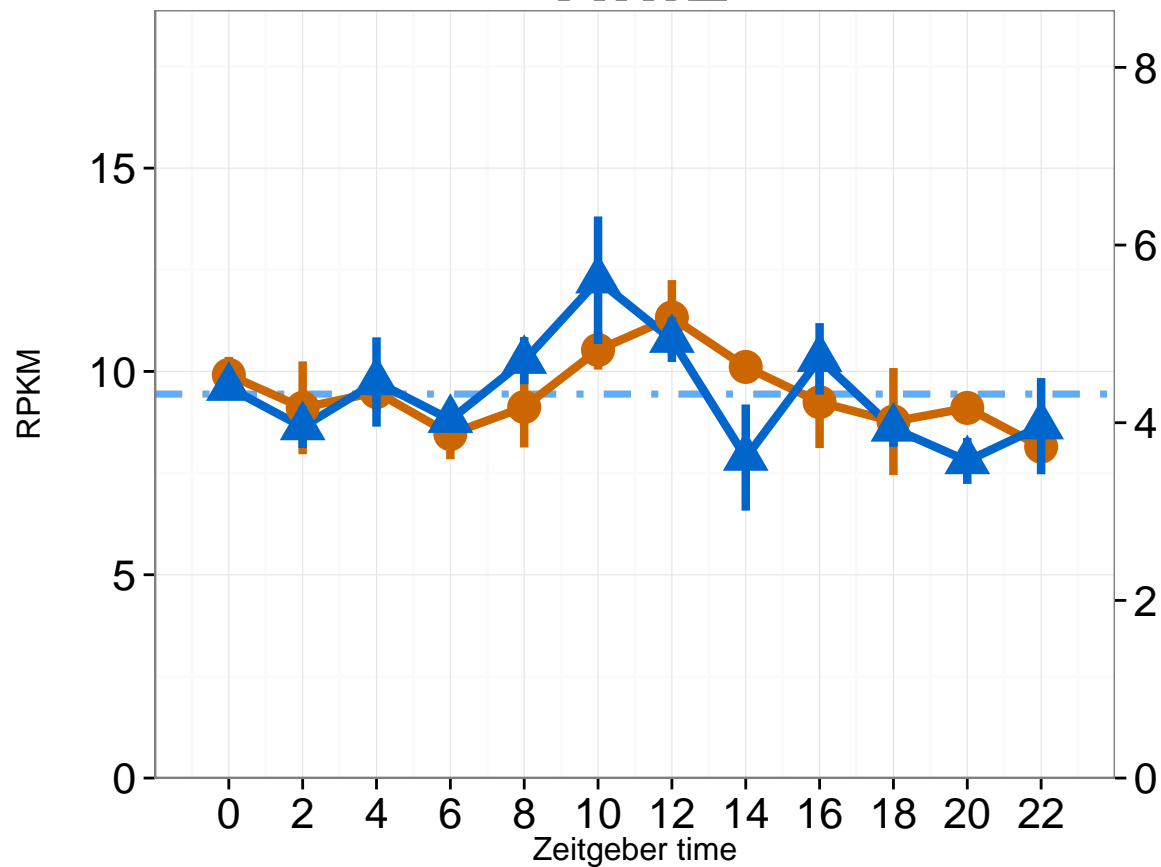

# Tinf2

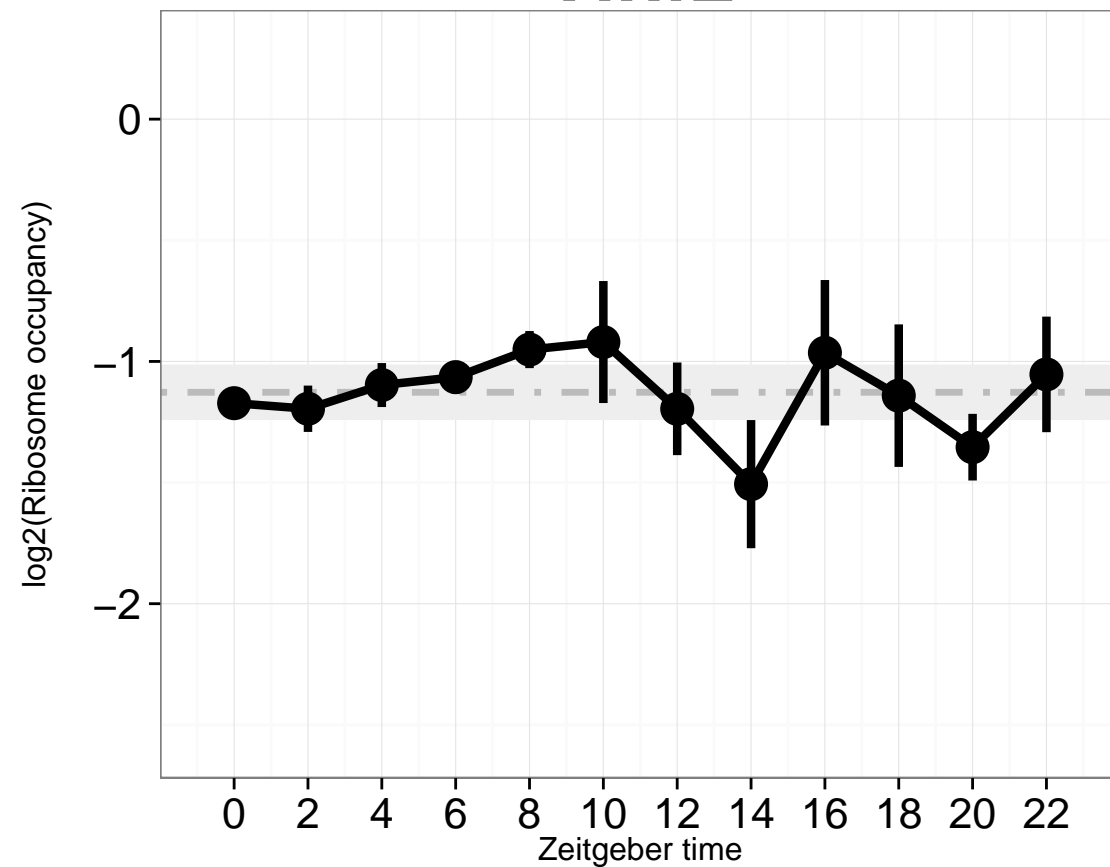

Supplement: Supplementary file 7243 [file 1]

## Plscr2

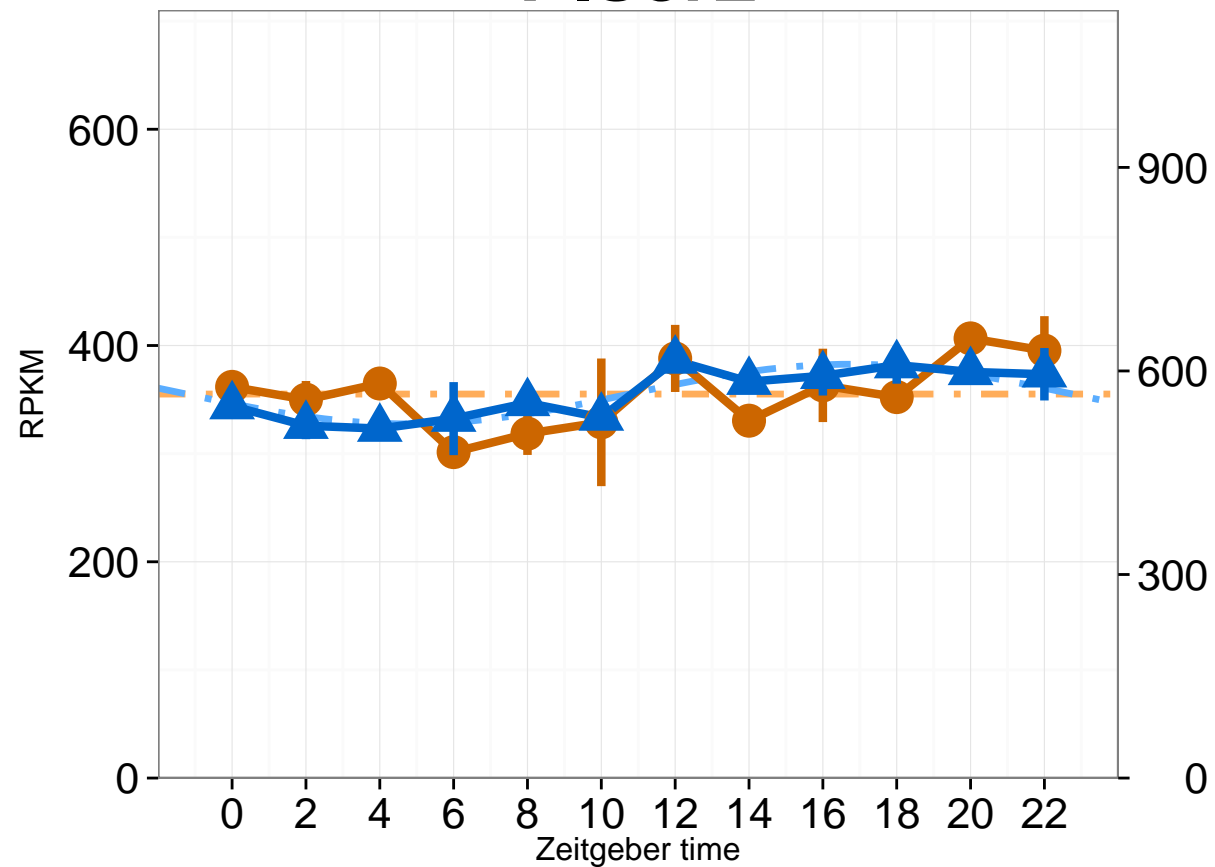

## Plscr2

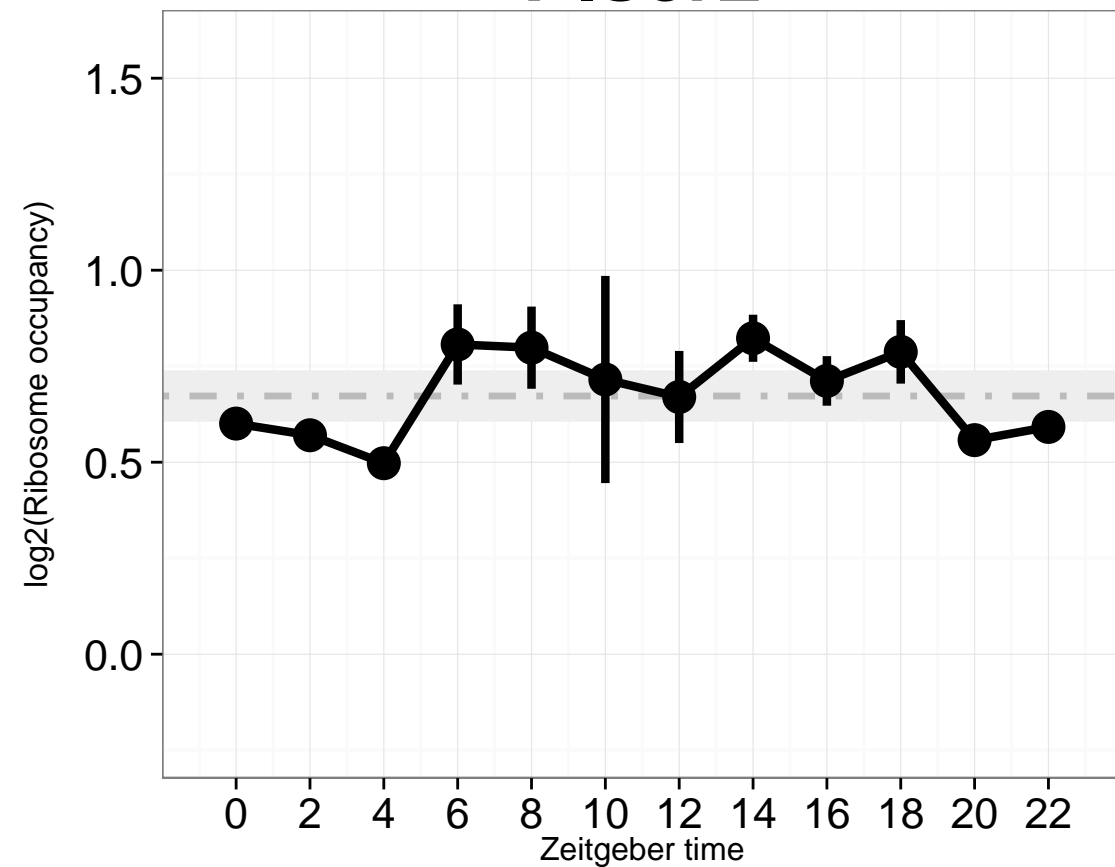

Supplement: Supplementary file 7244 [file 1]

## Hif1an

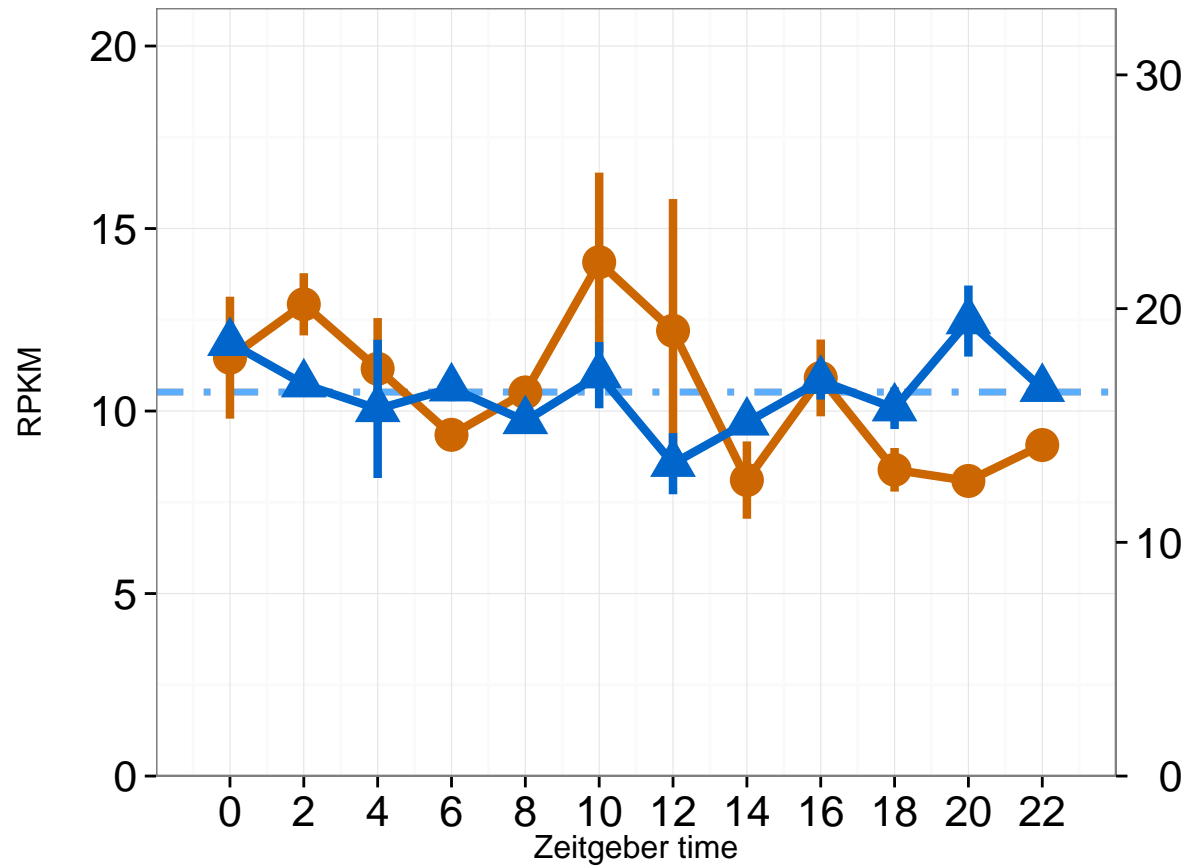

## Hif1an

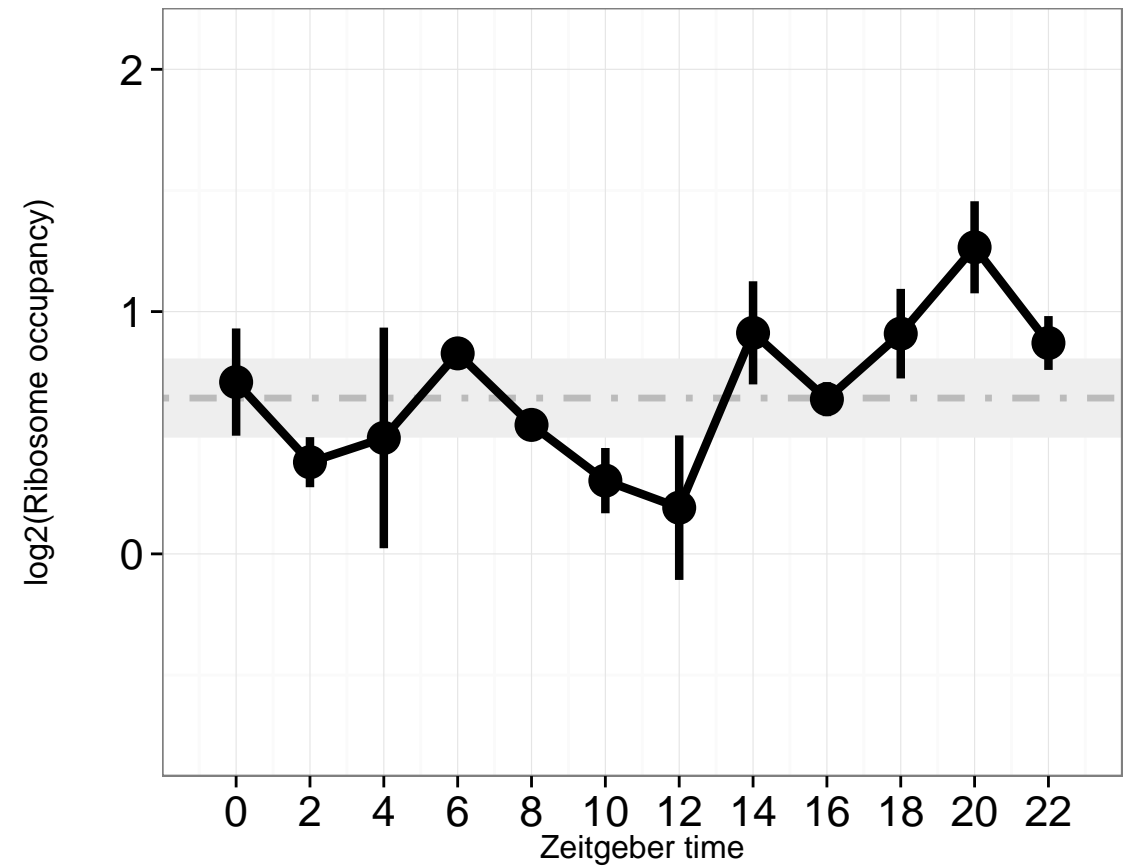

Supplement: Supplementary file 7245 [file 1]

## Pfdn4

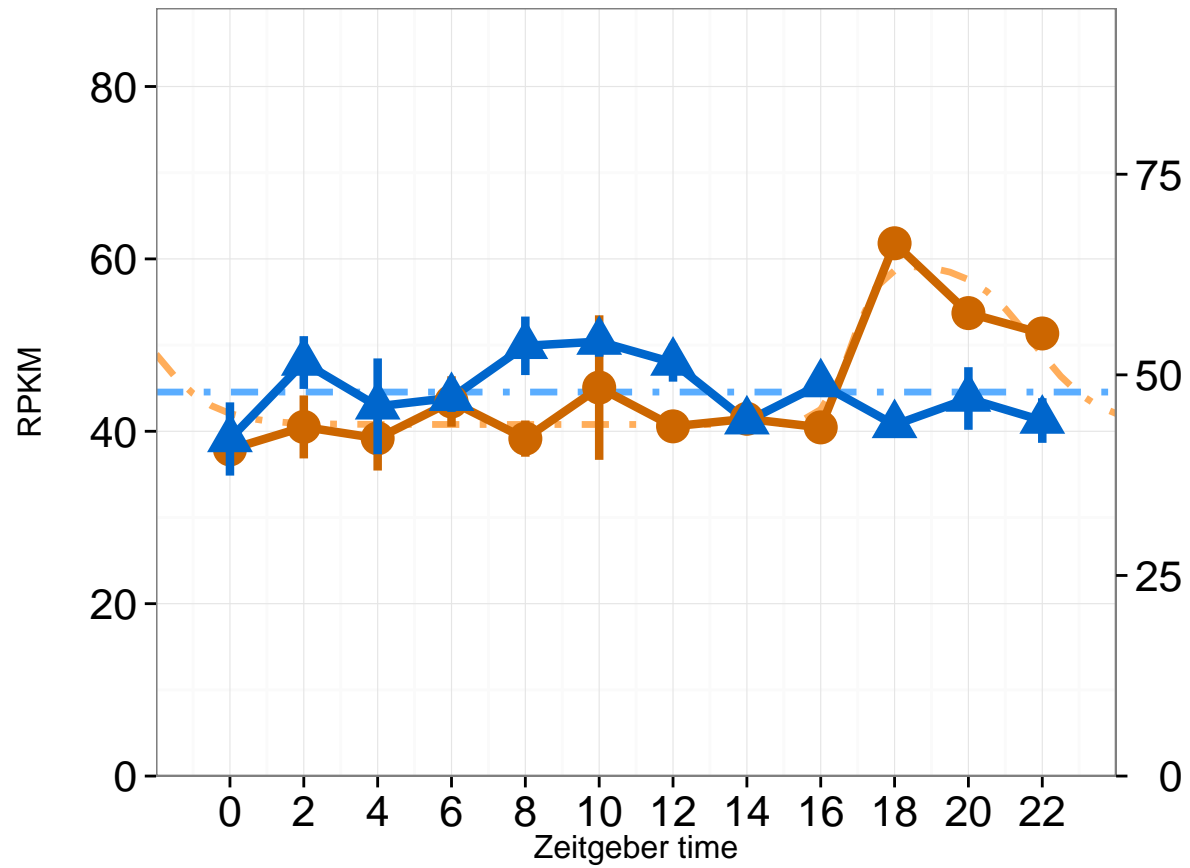

## Pfdn4

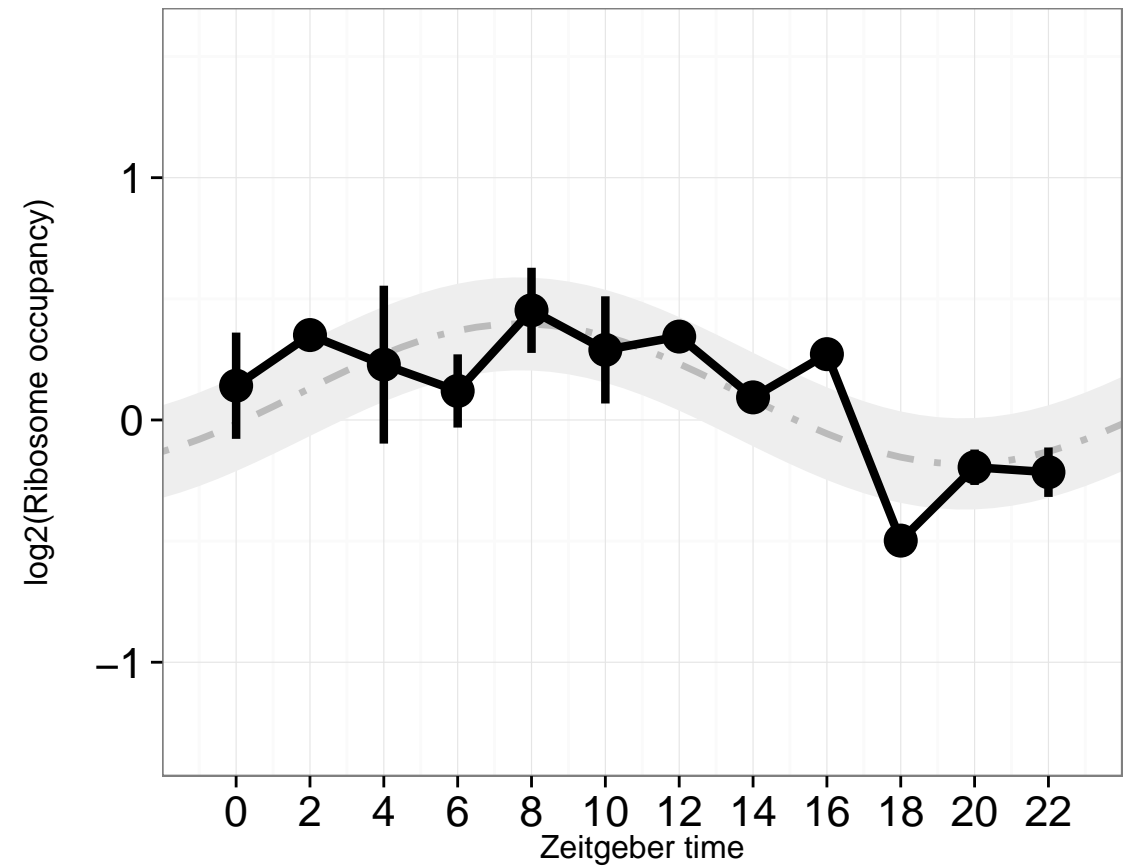

Supplement: Supplementary file 7246 [file 1]

## RbmX

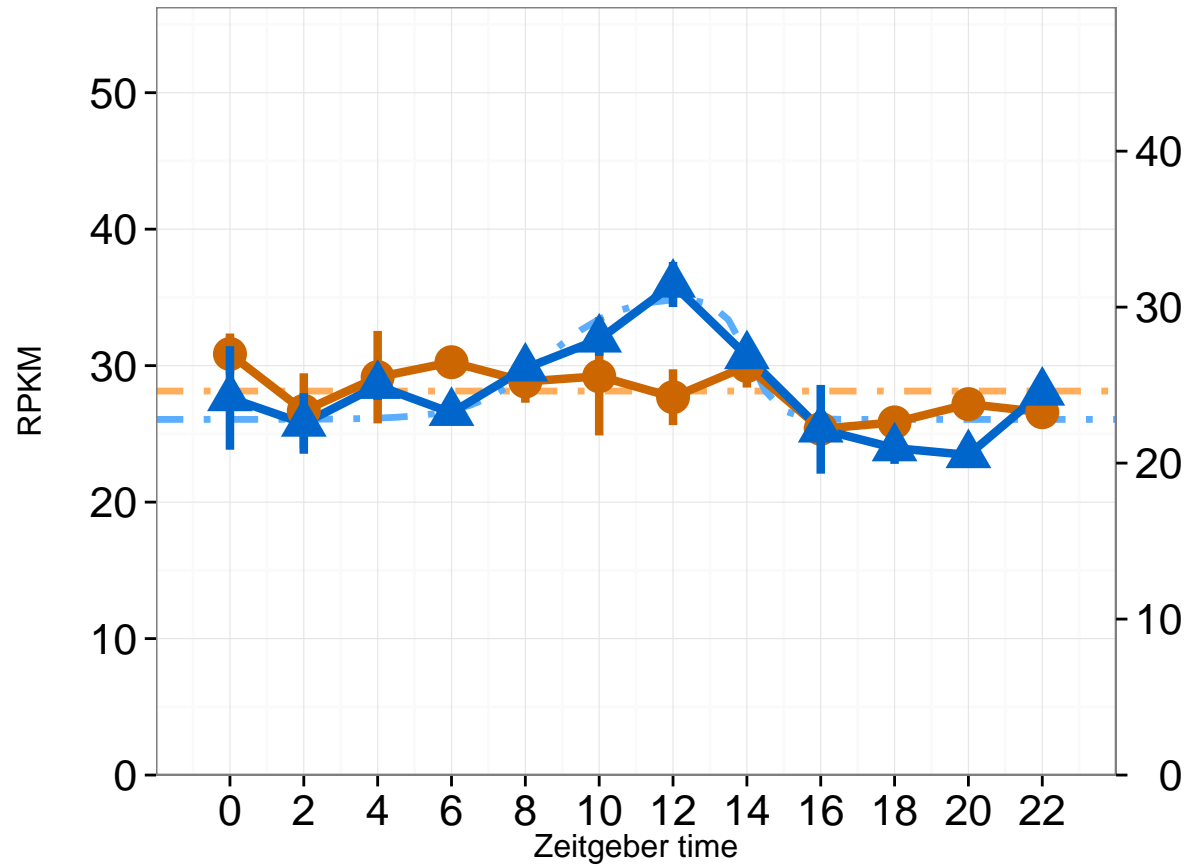

## RbmX

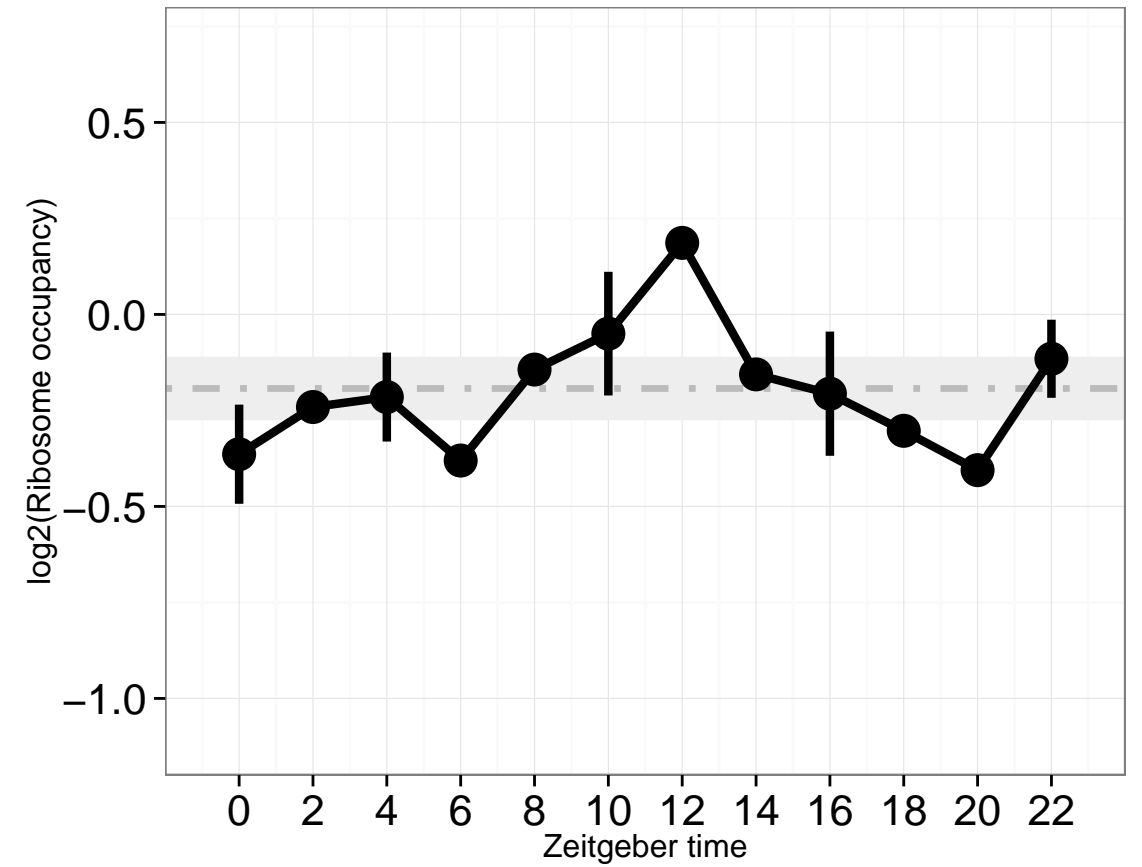

Supplement: Supplementary file 7247 [file 1]

# Actr3

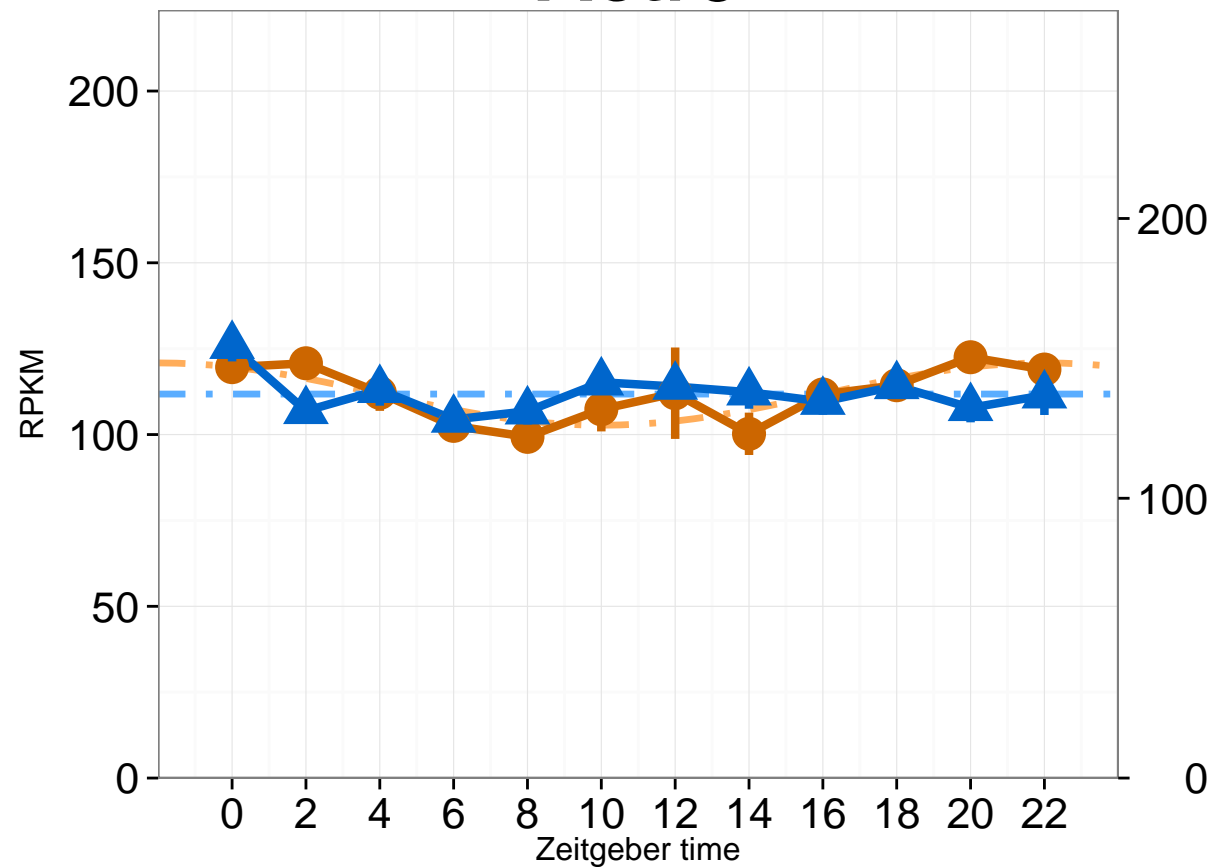

# Actr3

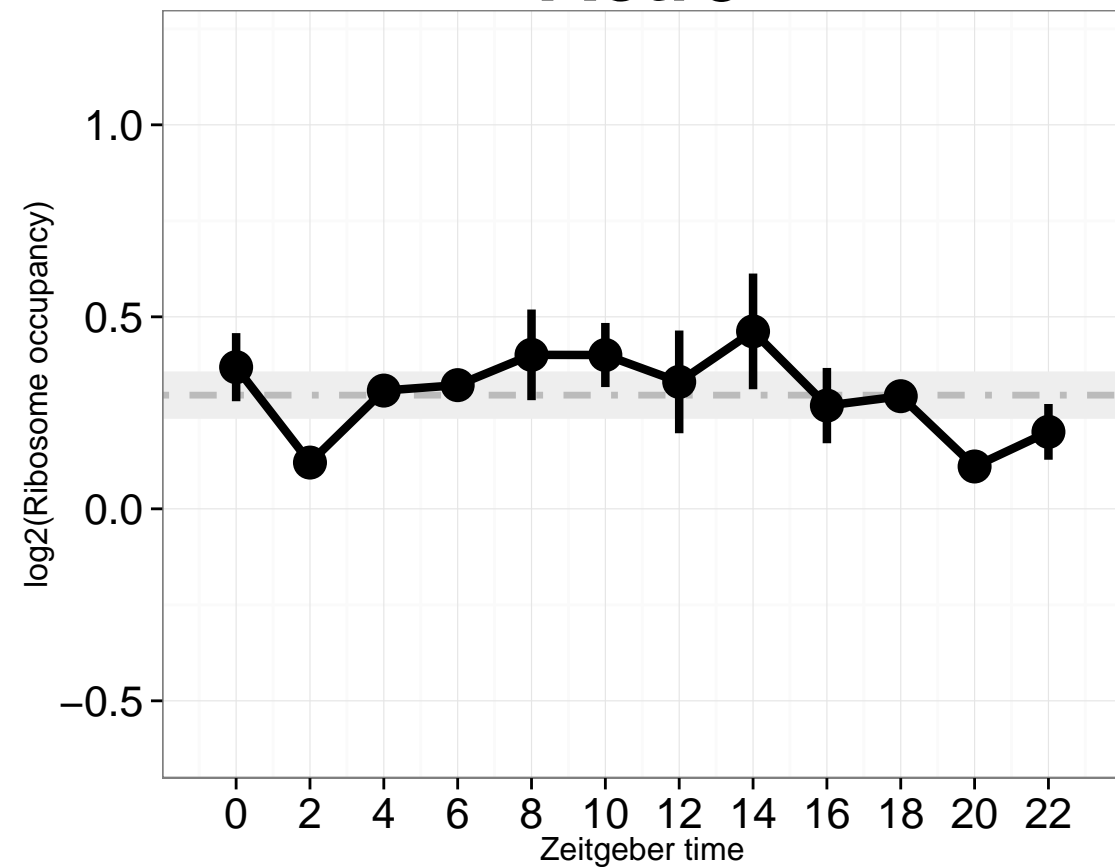

Supplement: Supplementary file 7248 [file 1]

## Dgka

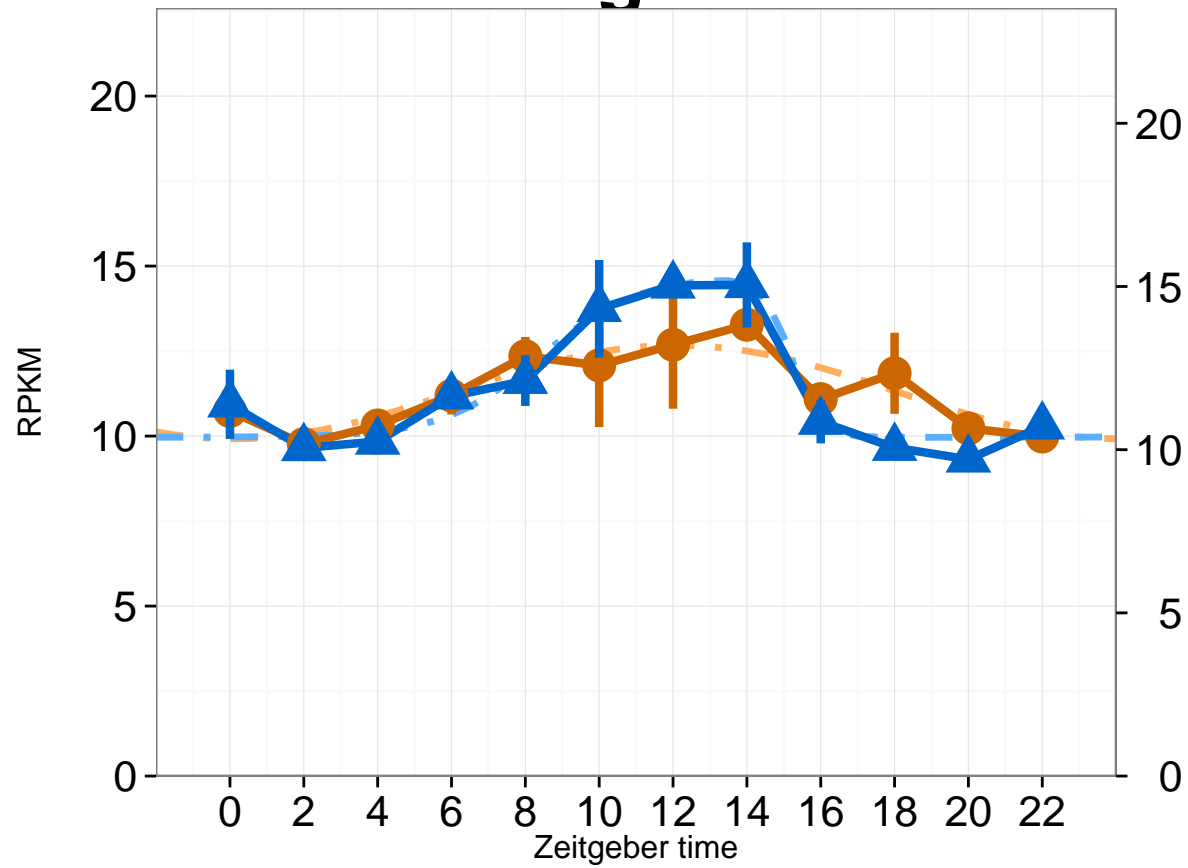

## Dgka

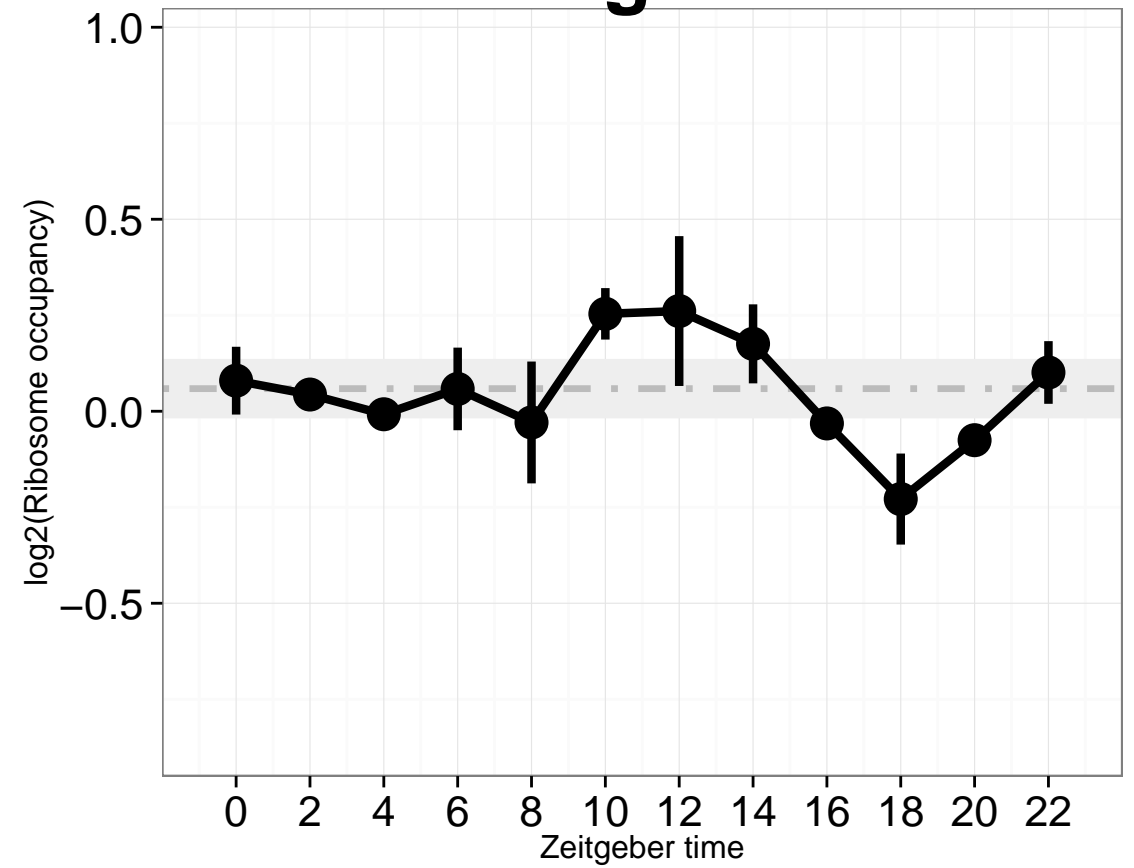

Supplement: Supplementary file 7249 [file 1]

## Gbp8

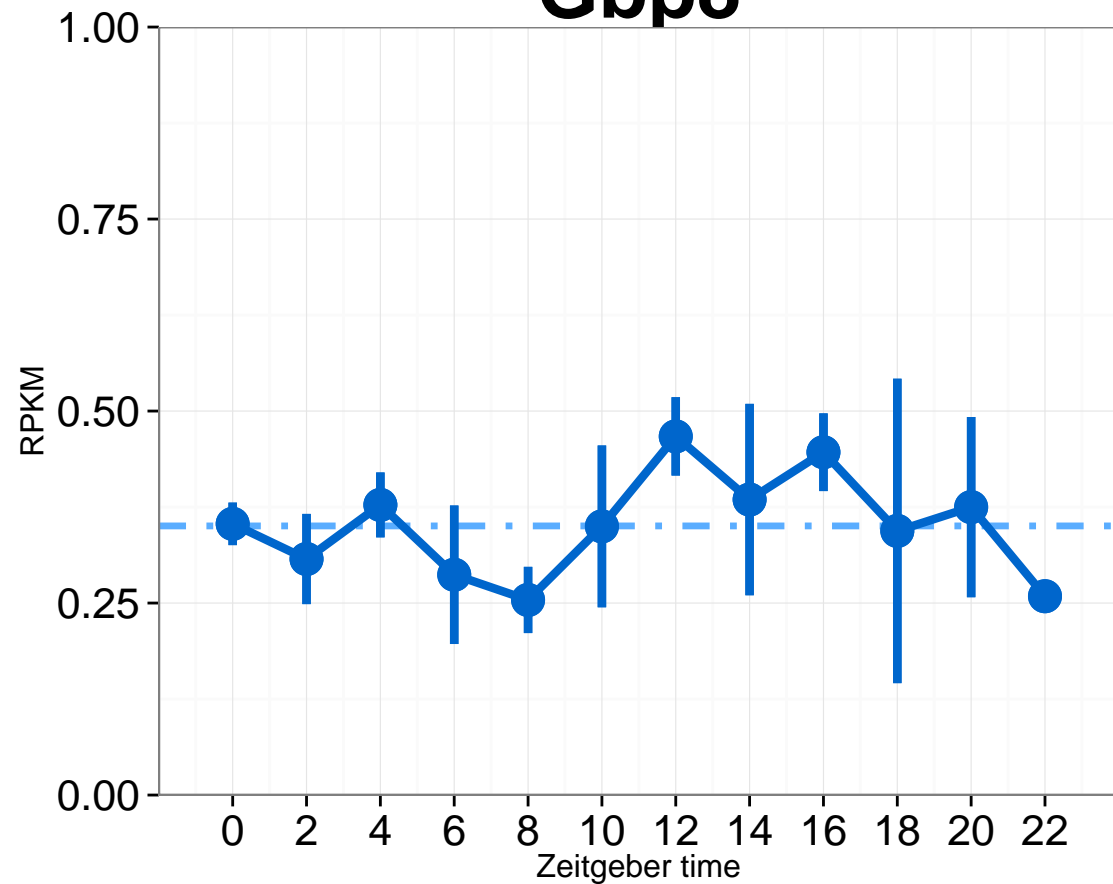

## Gbp8 log2(Ribosome occupancy)

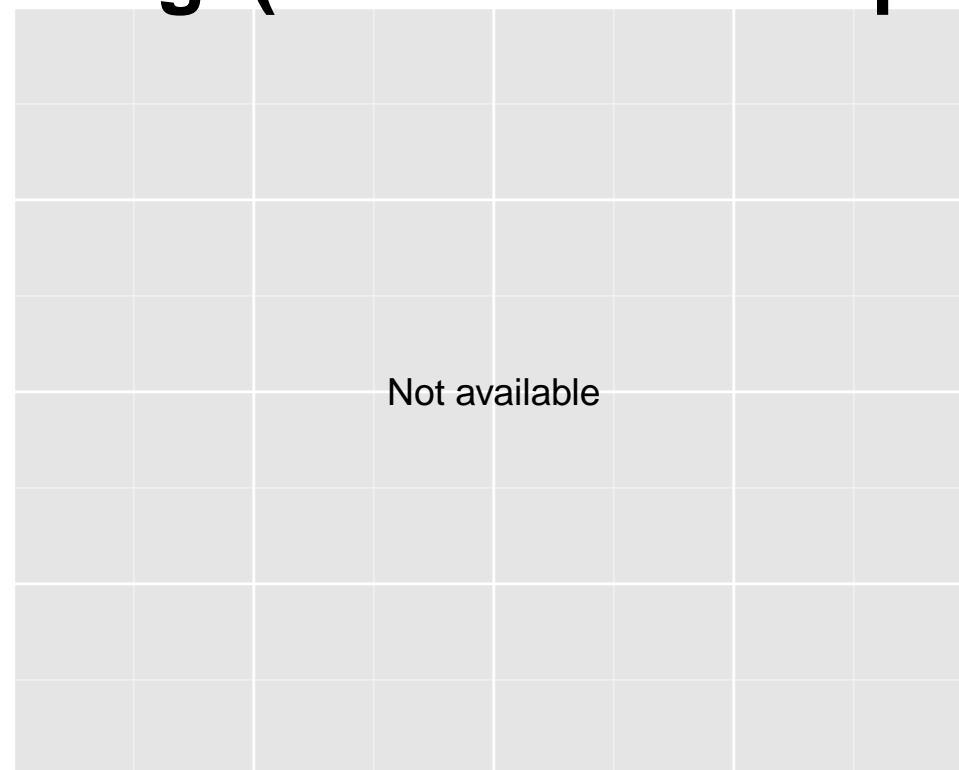

Supplement: Supplementary file 7250 [file 1]

# Serpine1

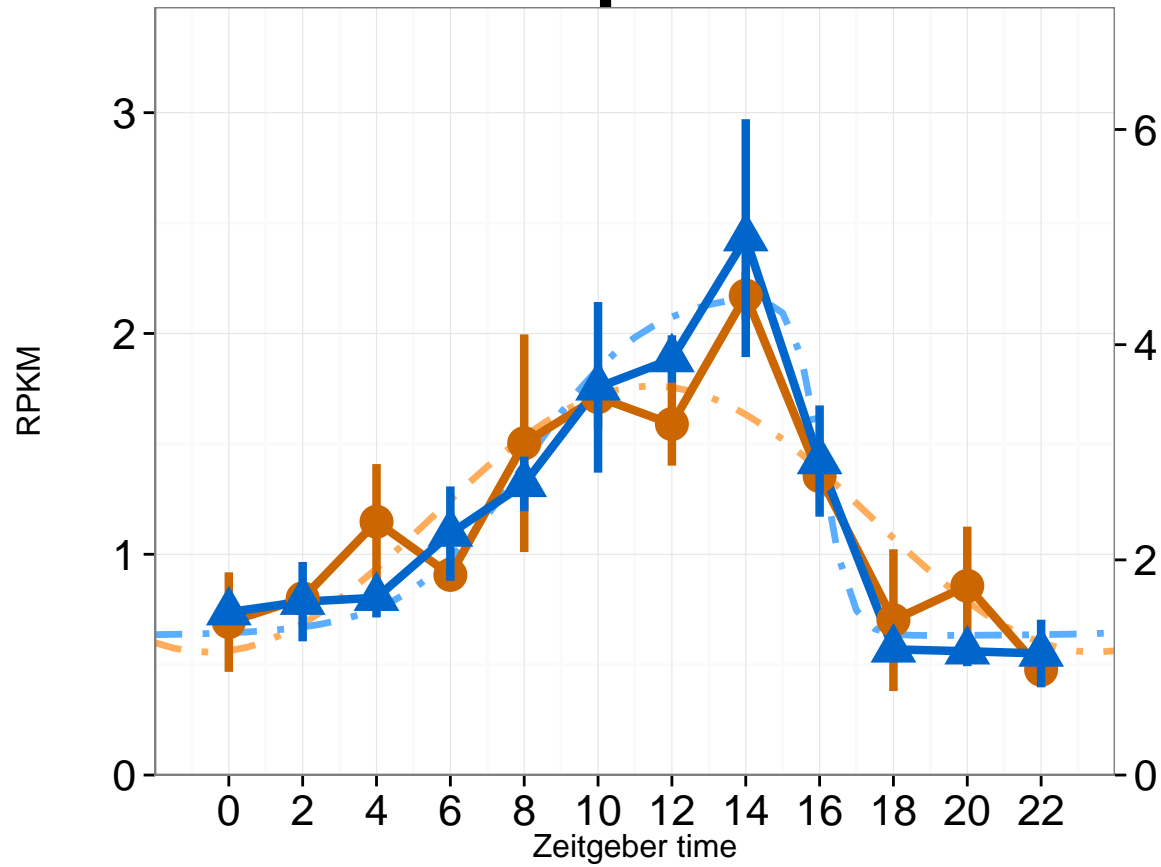

# Serpine1

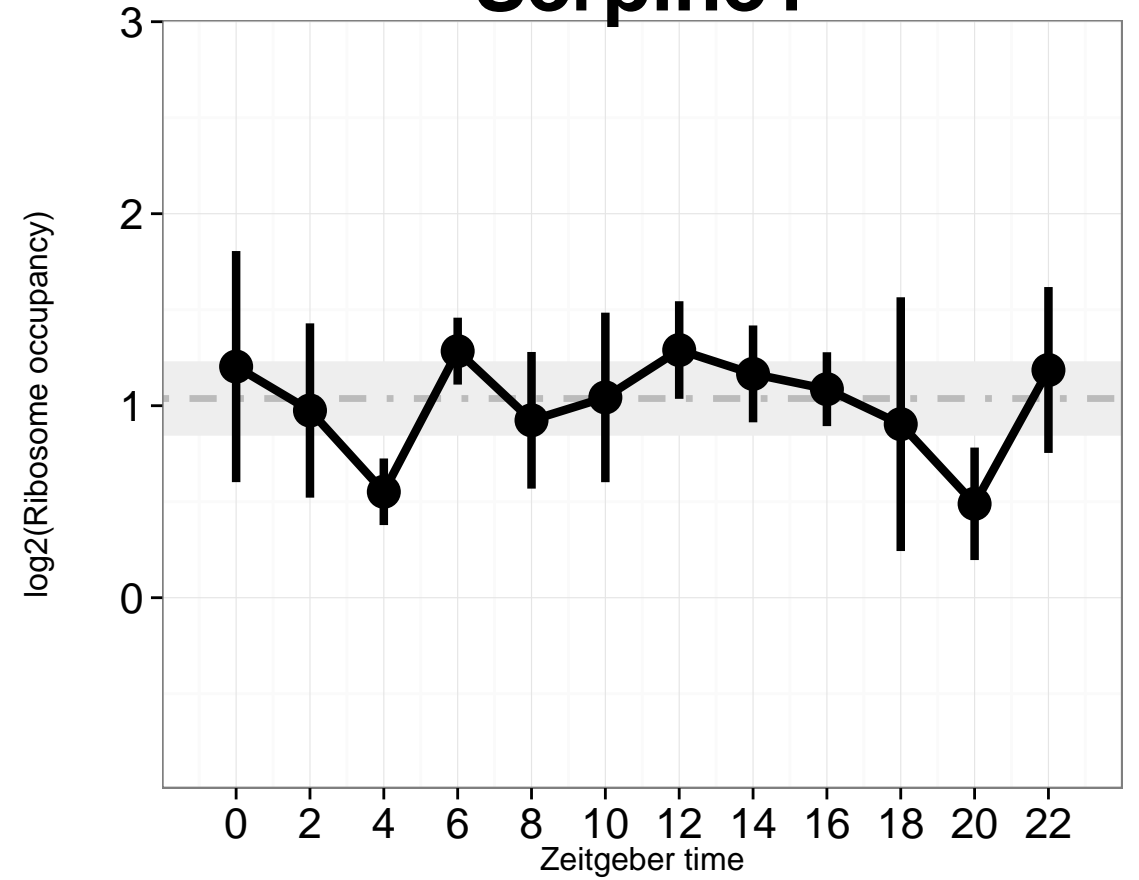

Supplement: Supplementary file 7251 [file 1]

# Tasp1

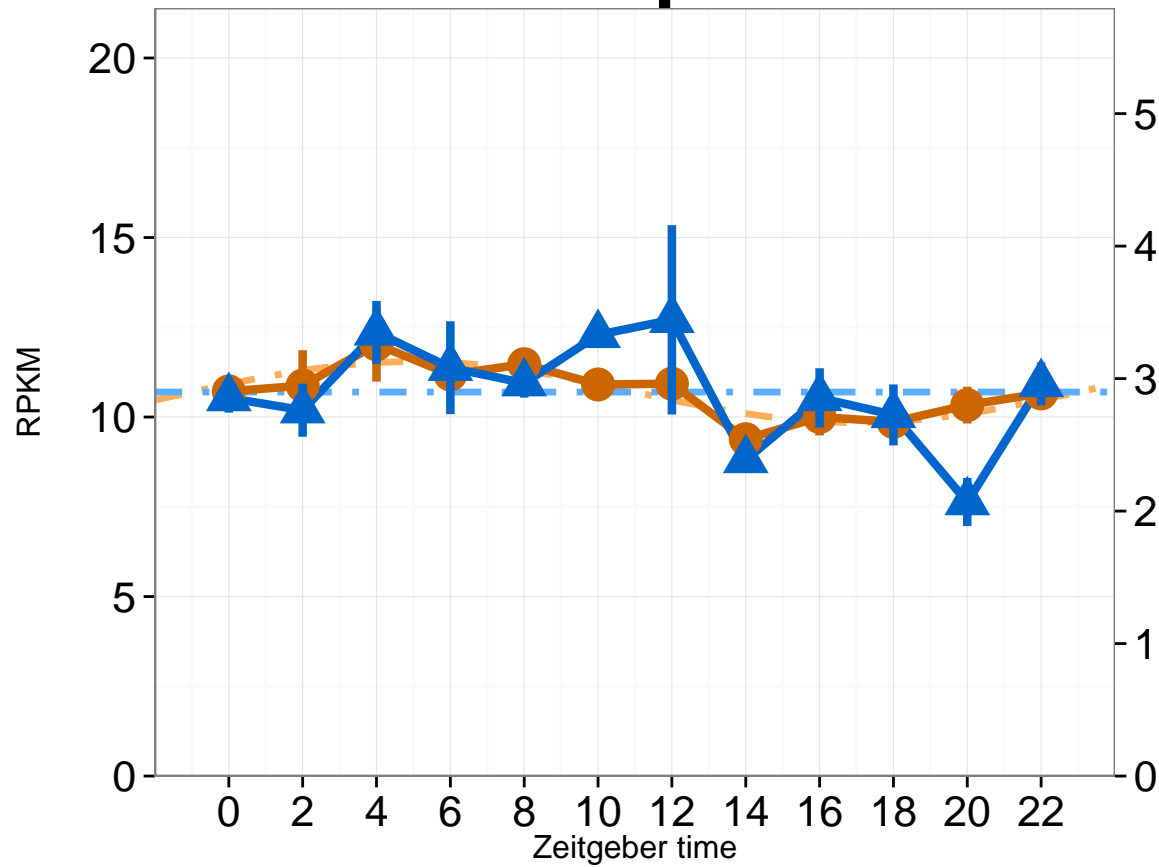

# Tasp1

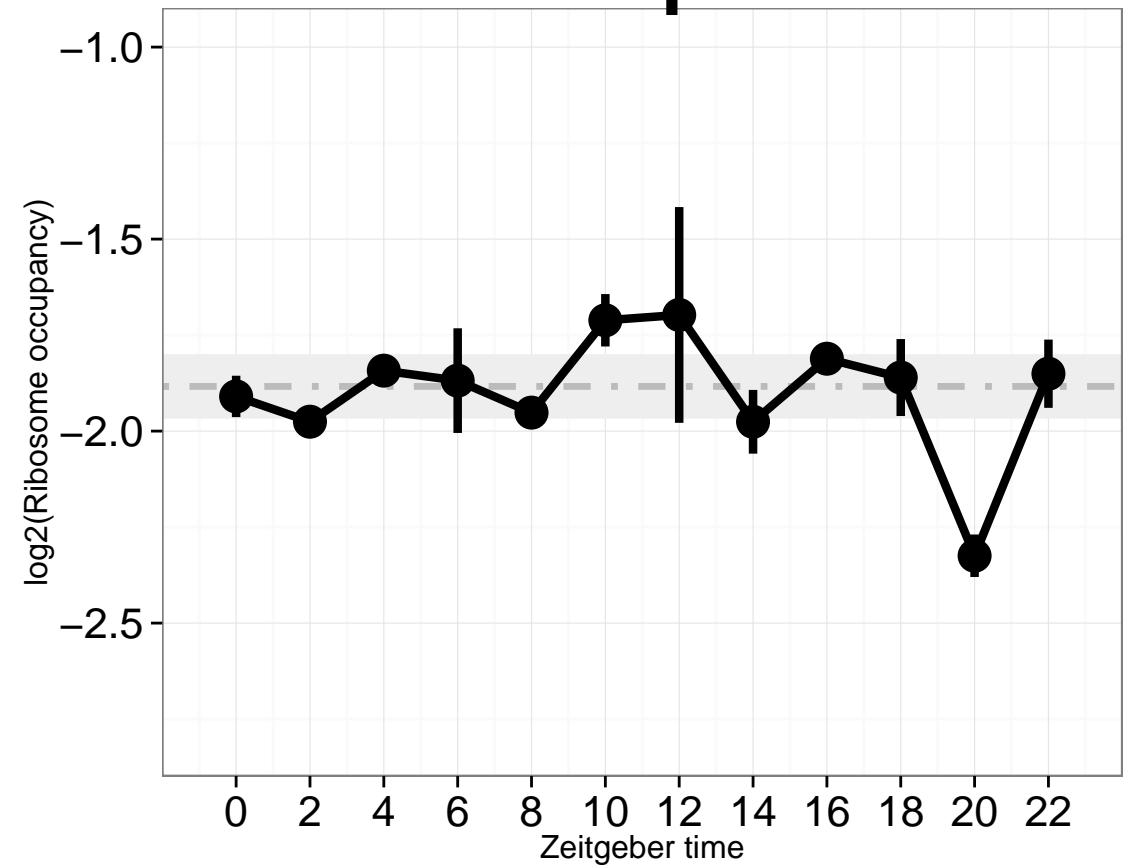

Supplement: Supplementary file 7252 [file 1]

# Gstm2

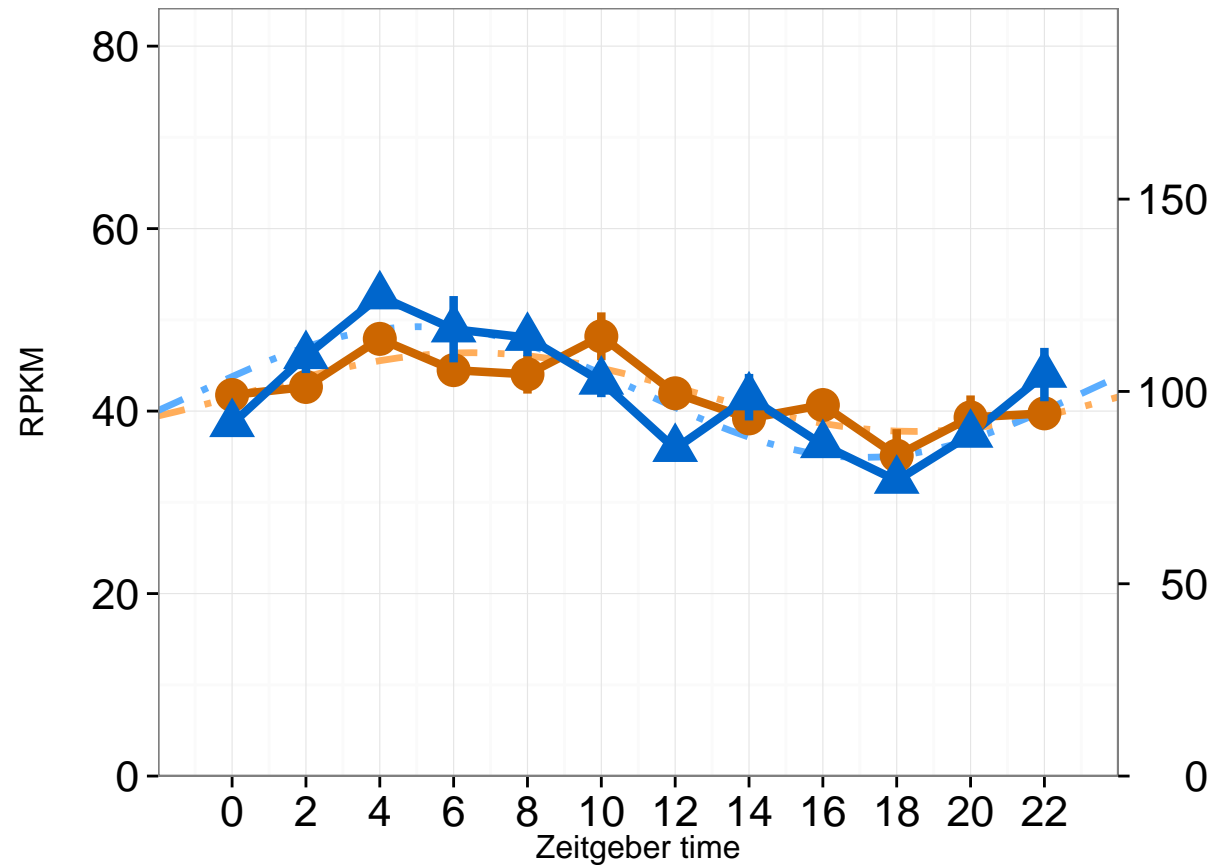

# Gstm2

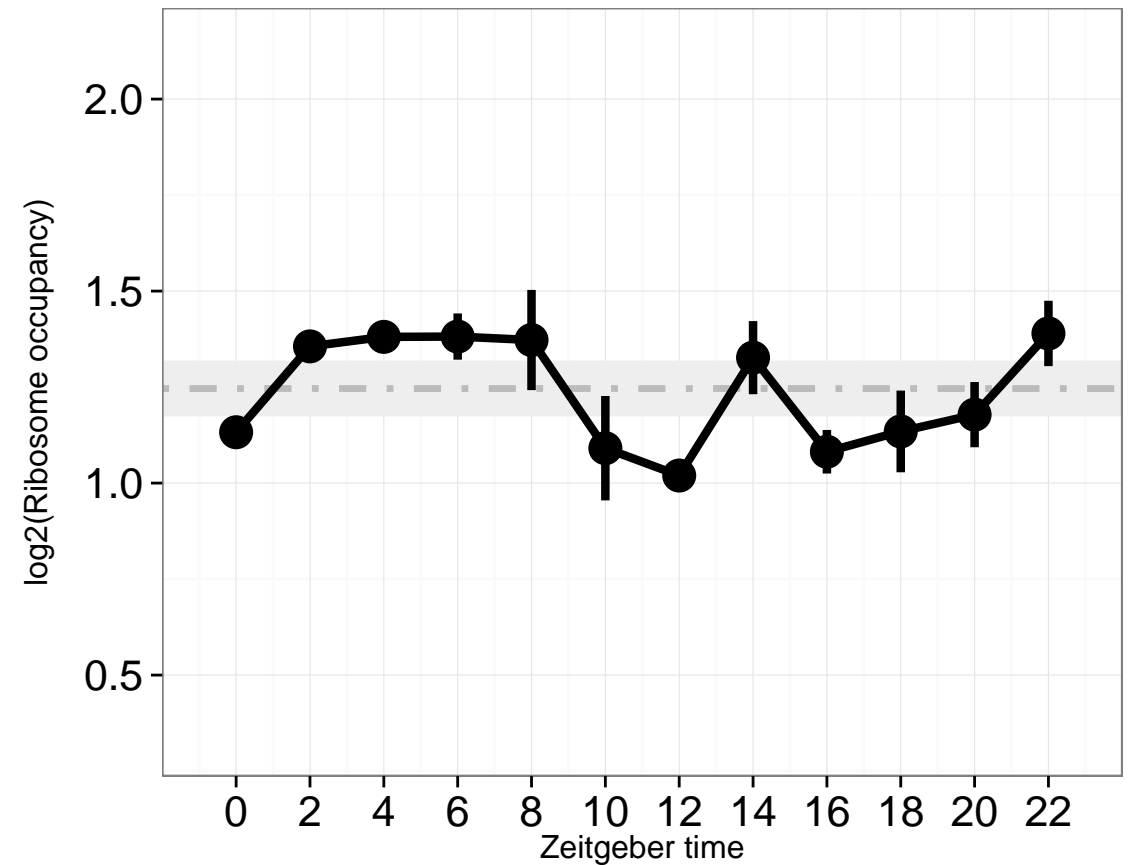

Supplement: Supplementary file 7253 [file 1]

## Rab2b

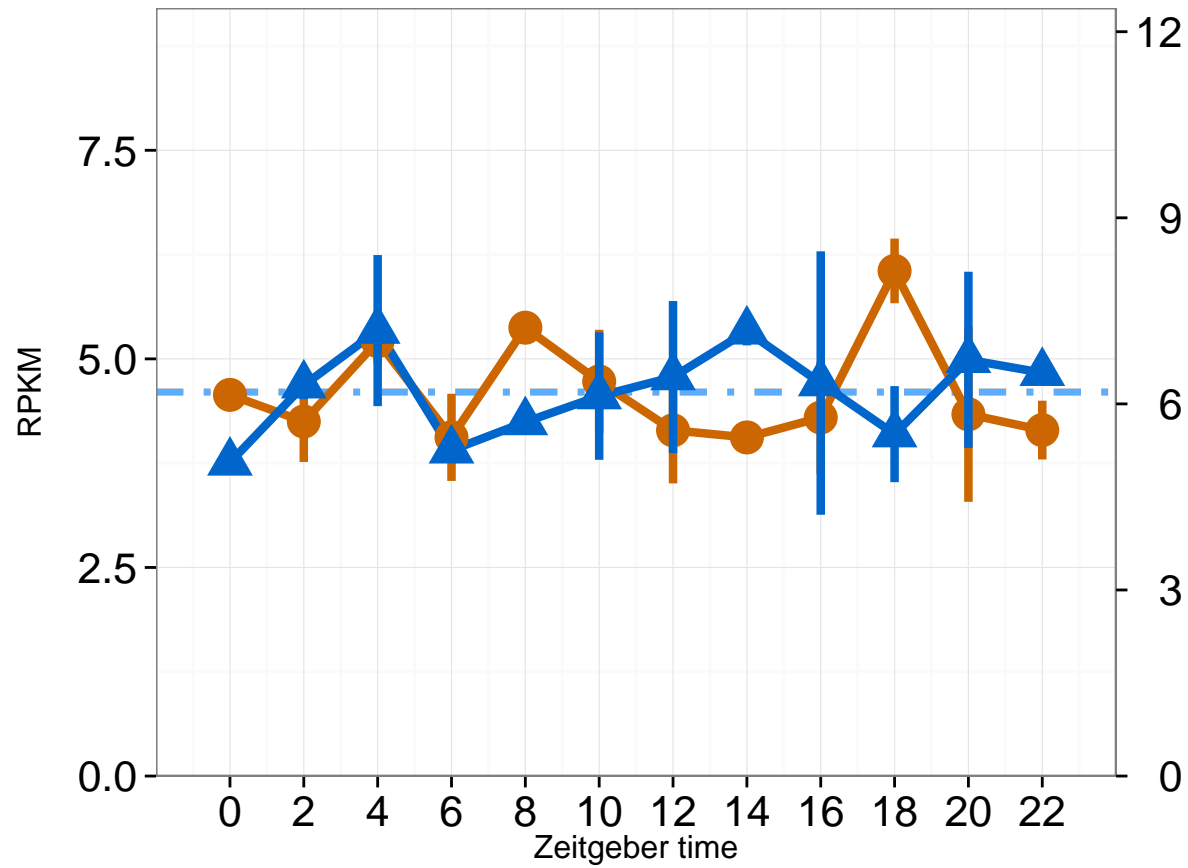

## Rab2b

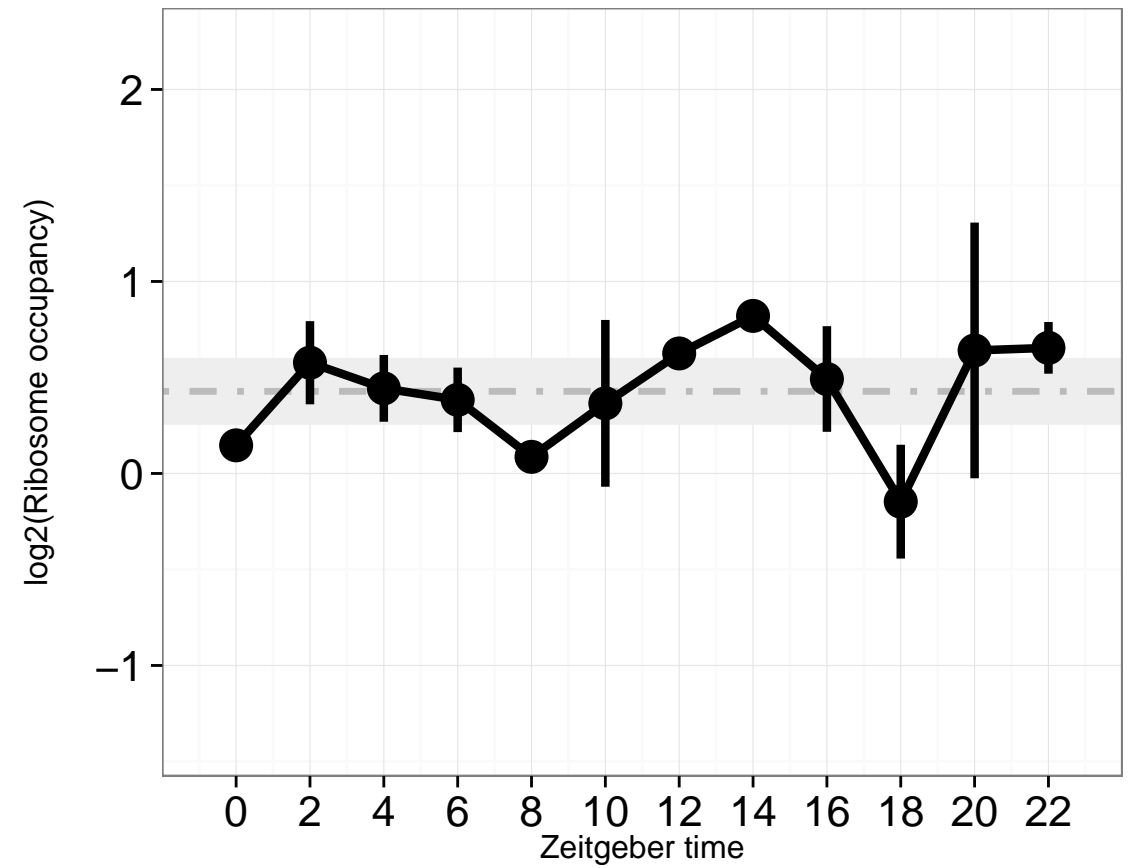

Supplement: Supplementary file 7254 [file 1]

# Pla2g4a

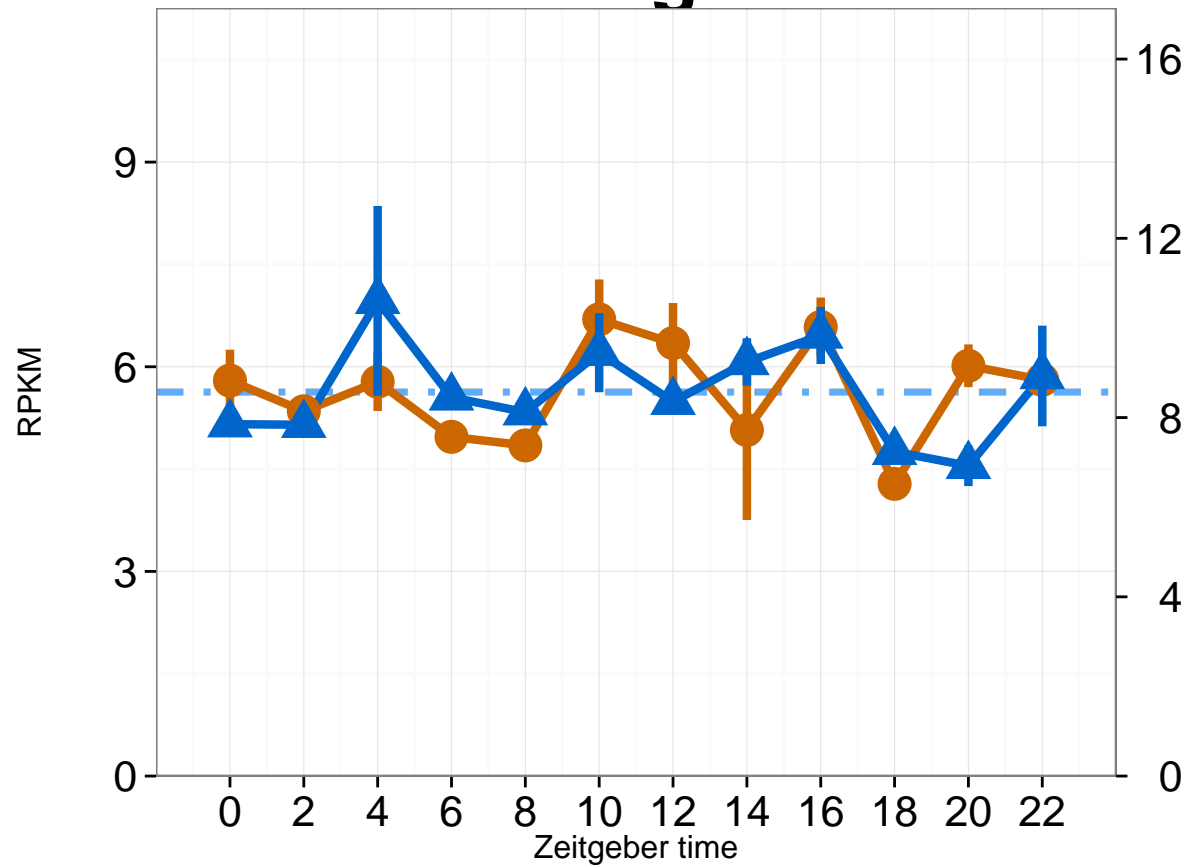

# Pla2g4a

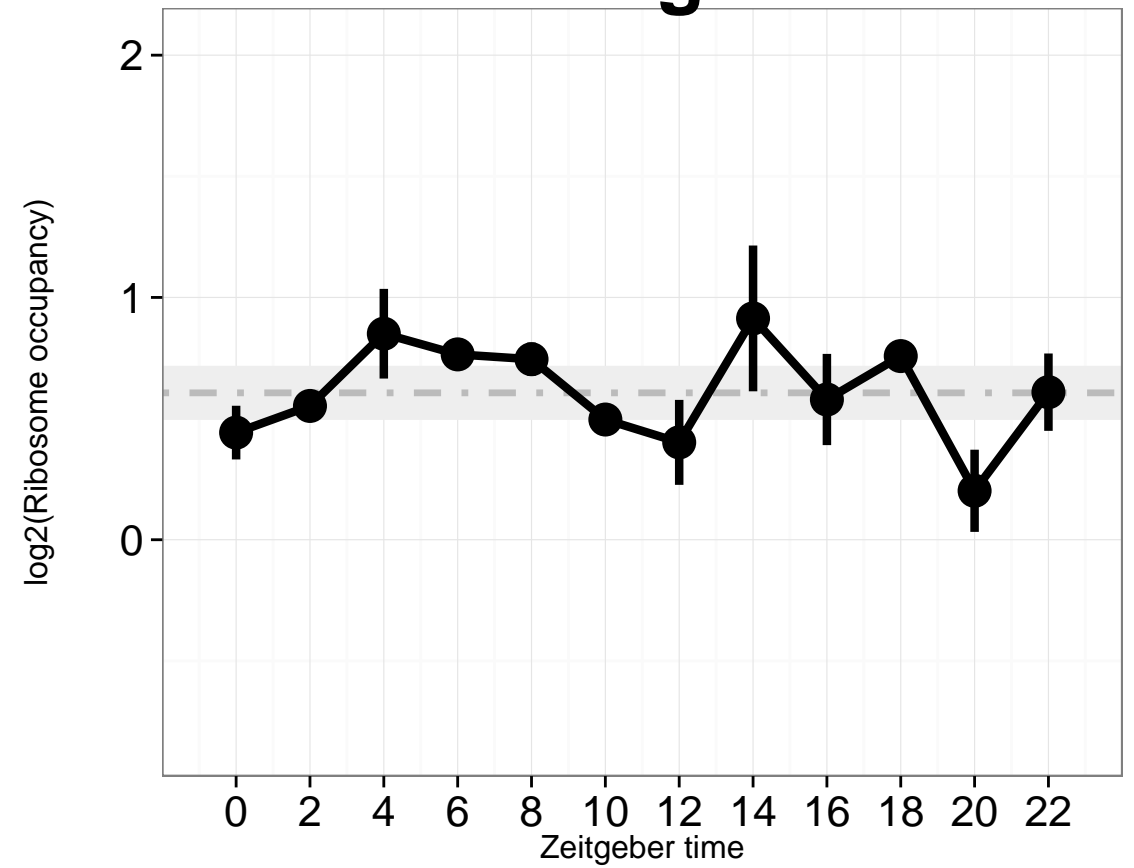

Supplement: Supplementary file 7255 [file 1]

## Ube2c

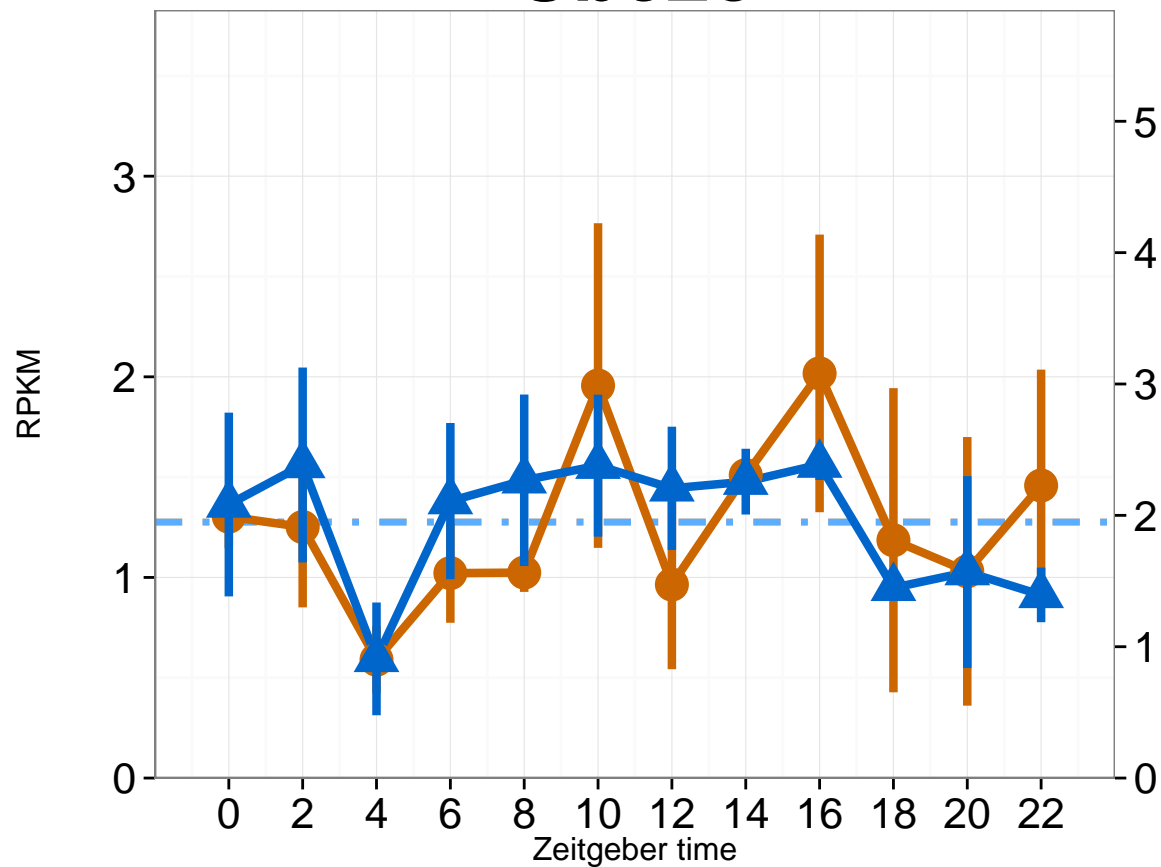

## Ube2c

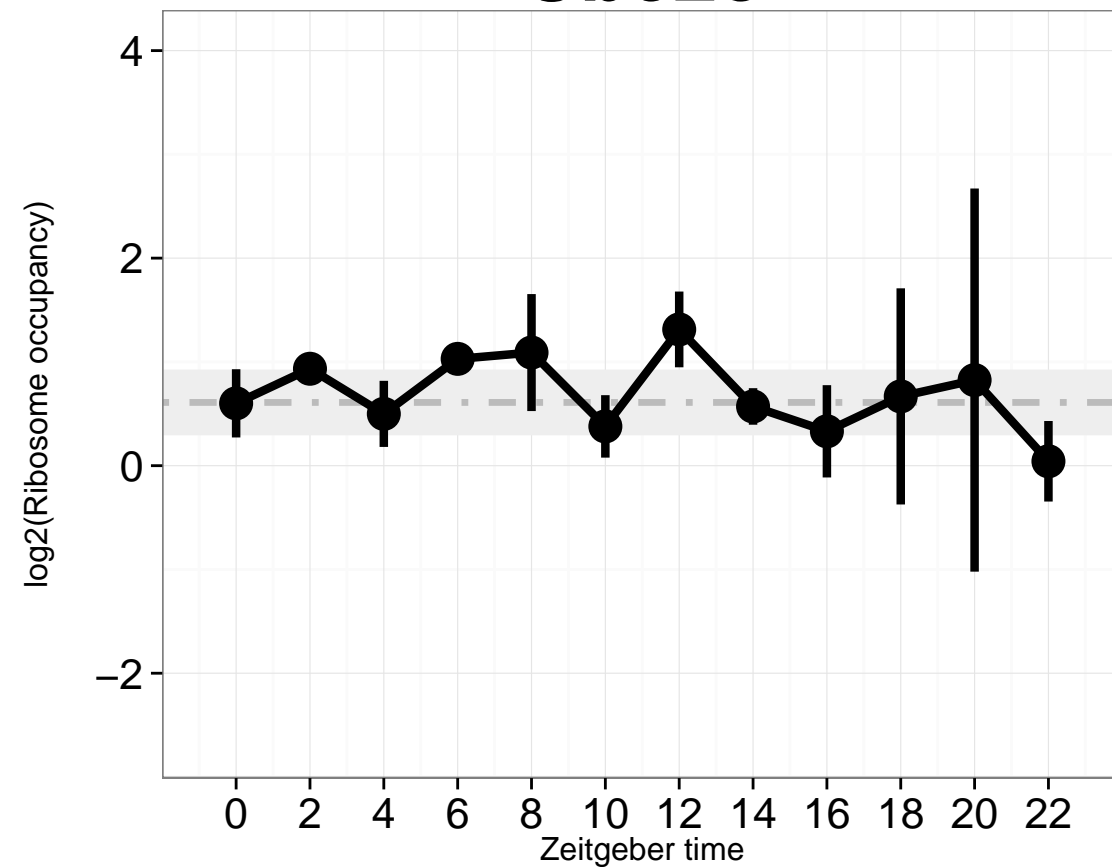

Supplement: Supplementary file 7256 [file 1]

## Ank2

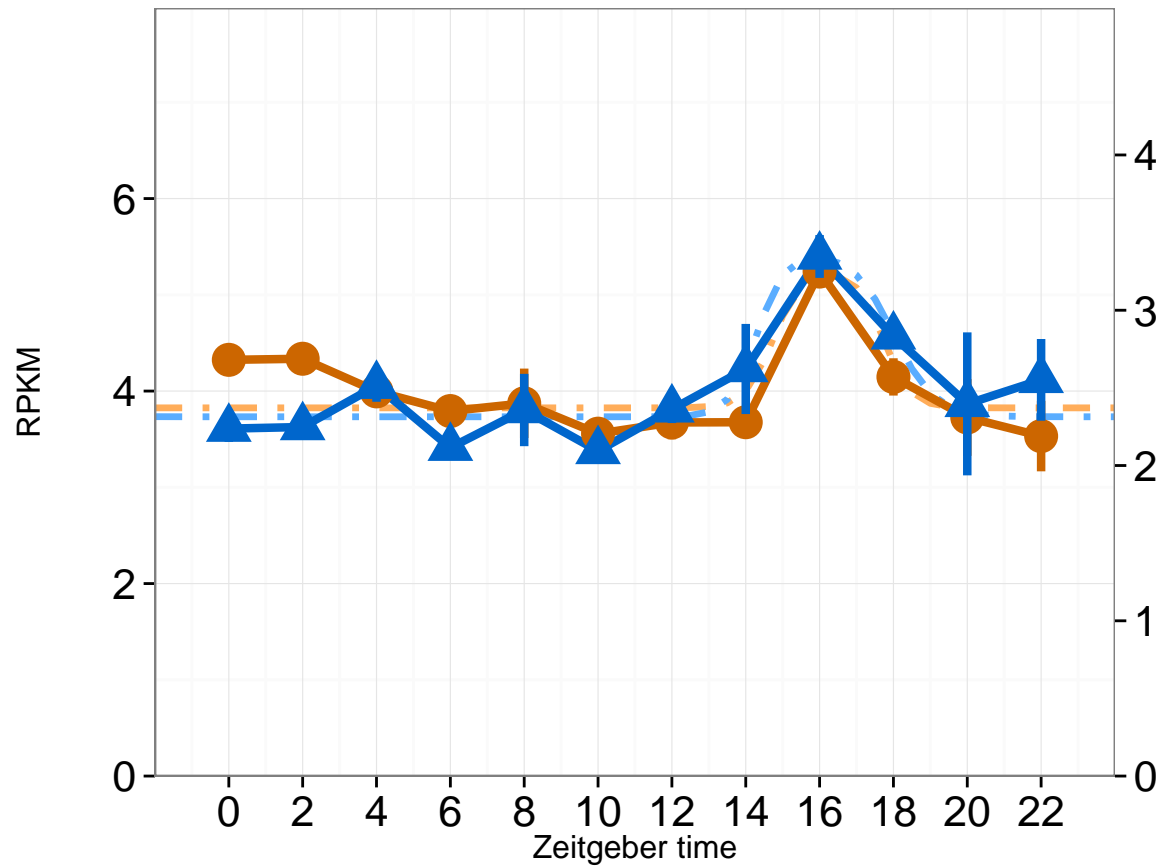

## Ank2

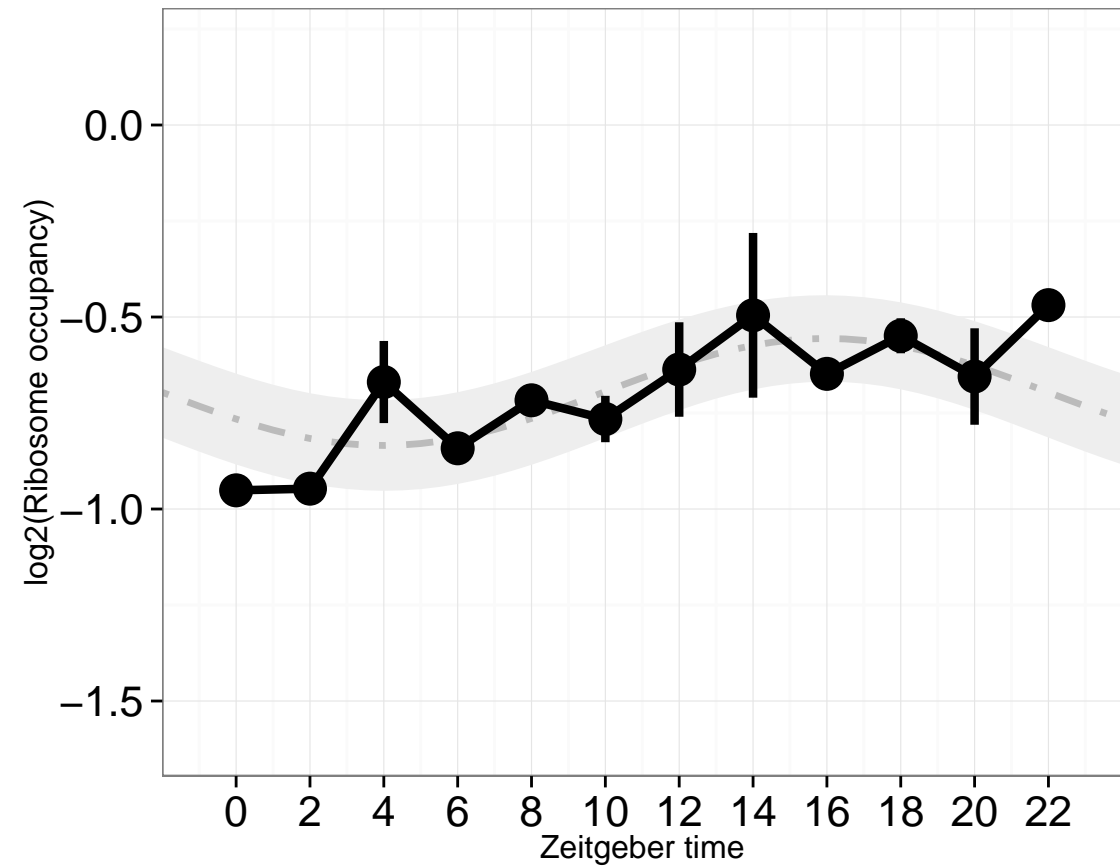

Supplement: Supplementary file 7257 [file 1]

## Aplp2

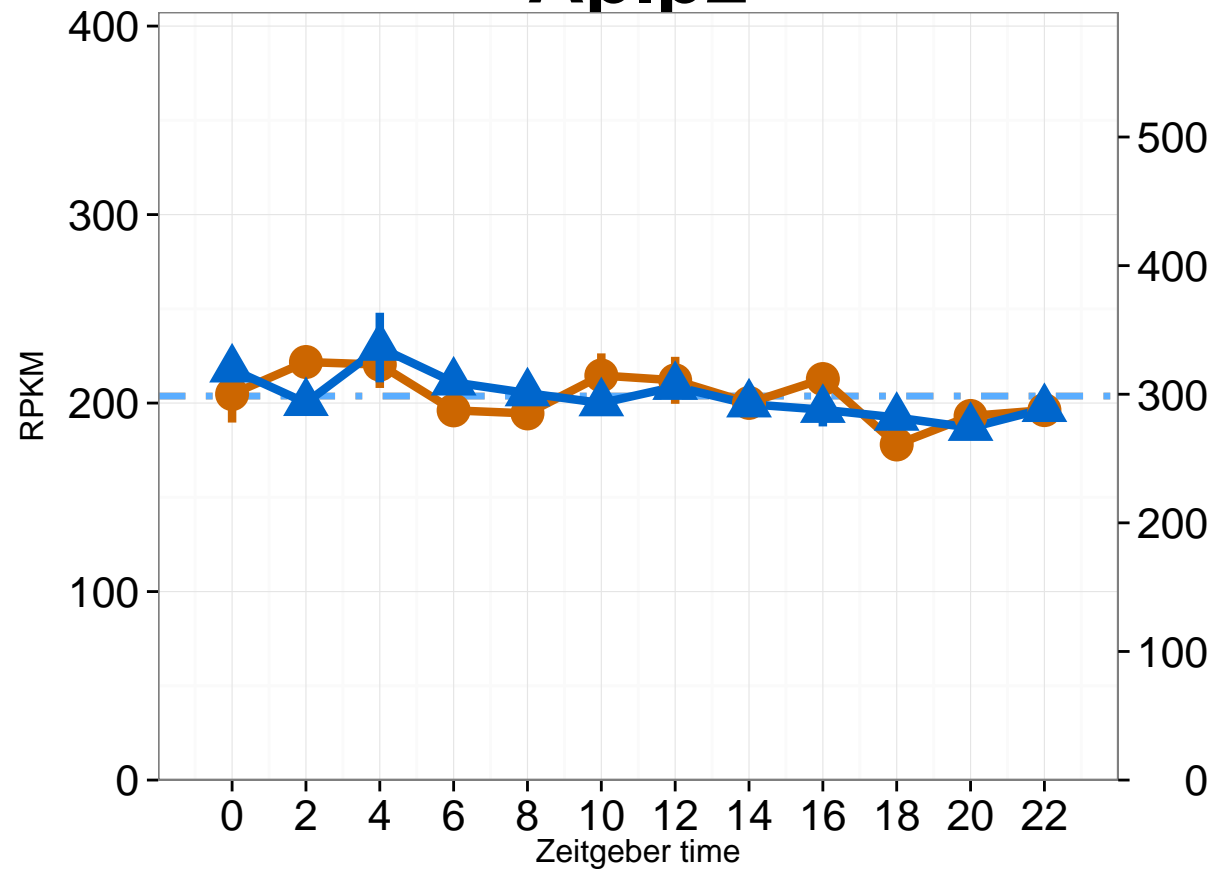

## Aplp2

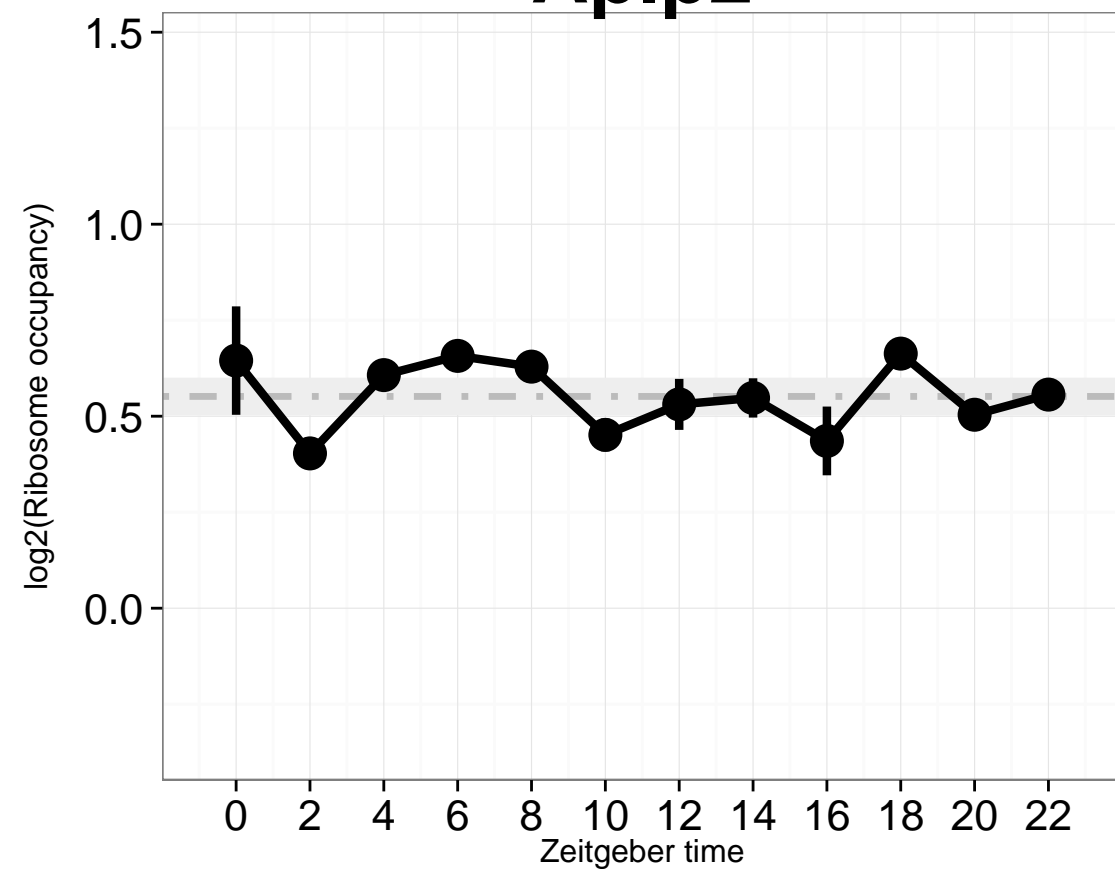

Supplement: Supplementary file 7258 [file 1]

# Chst2

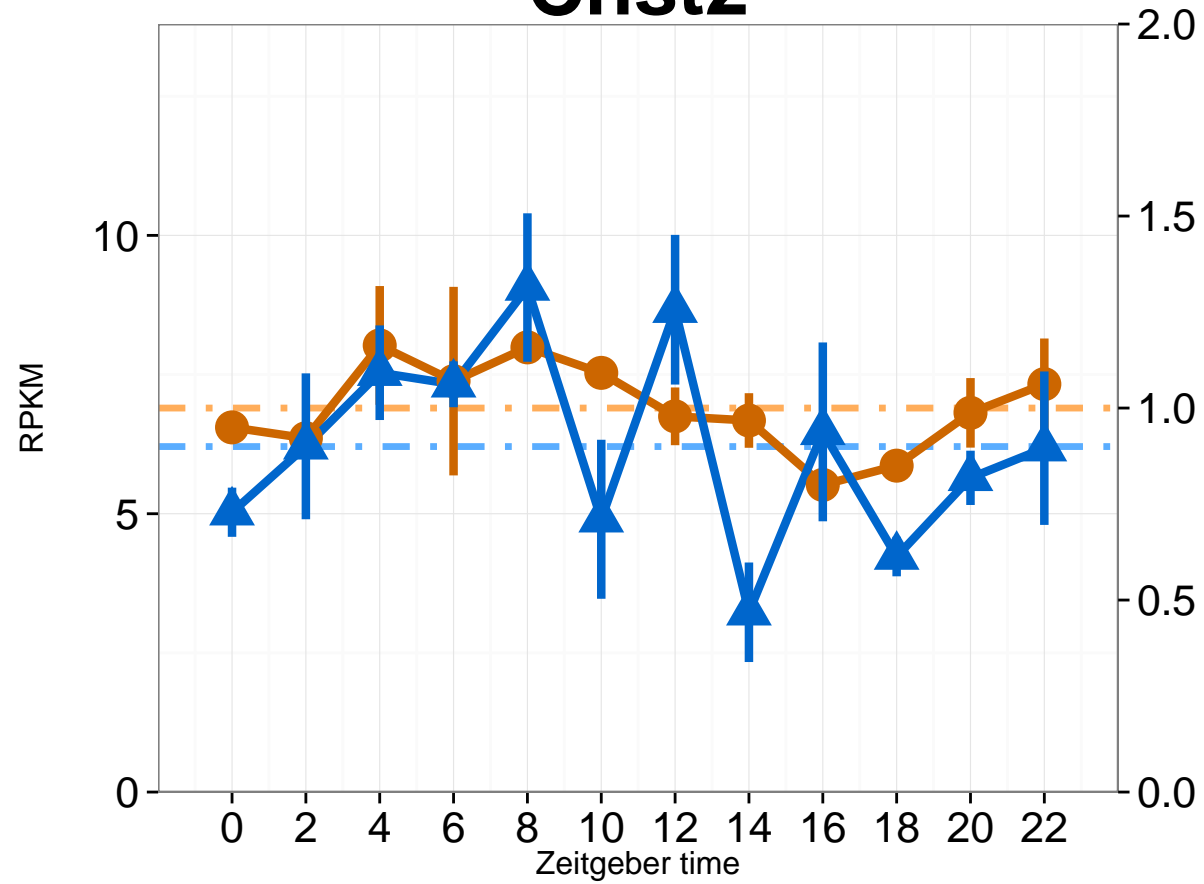

# Chst2

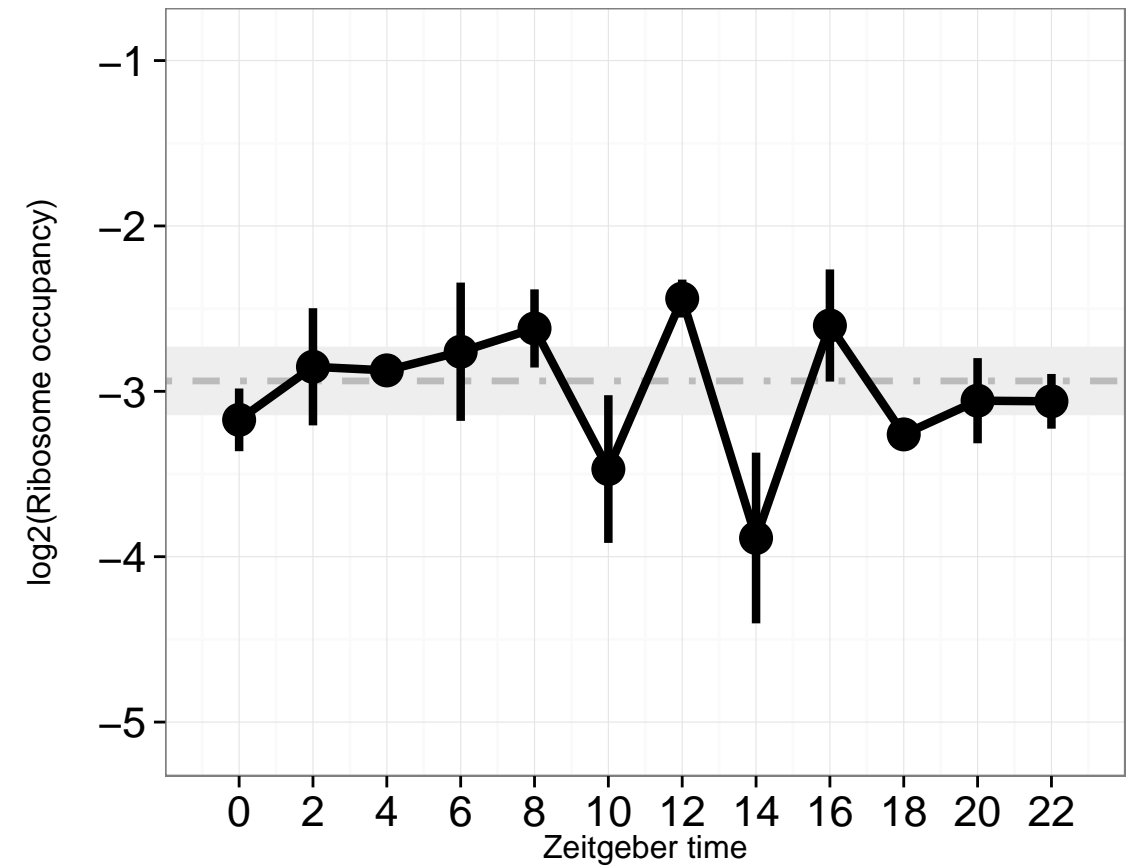

Supplement: Supplementary file 7259 [file 1]

## Susd4

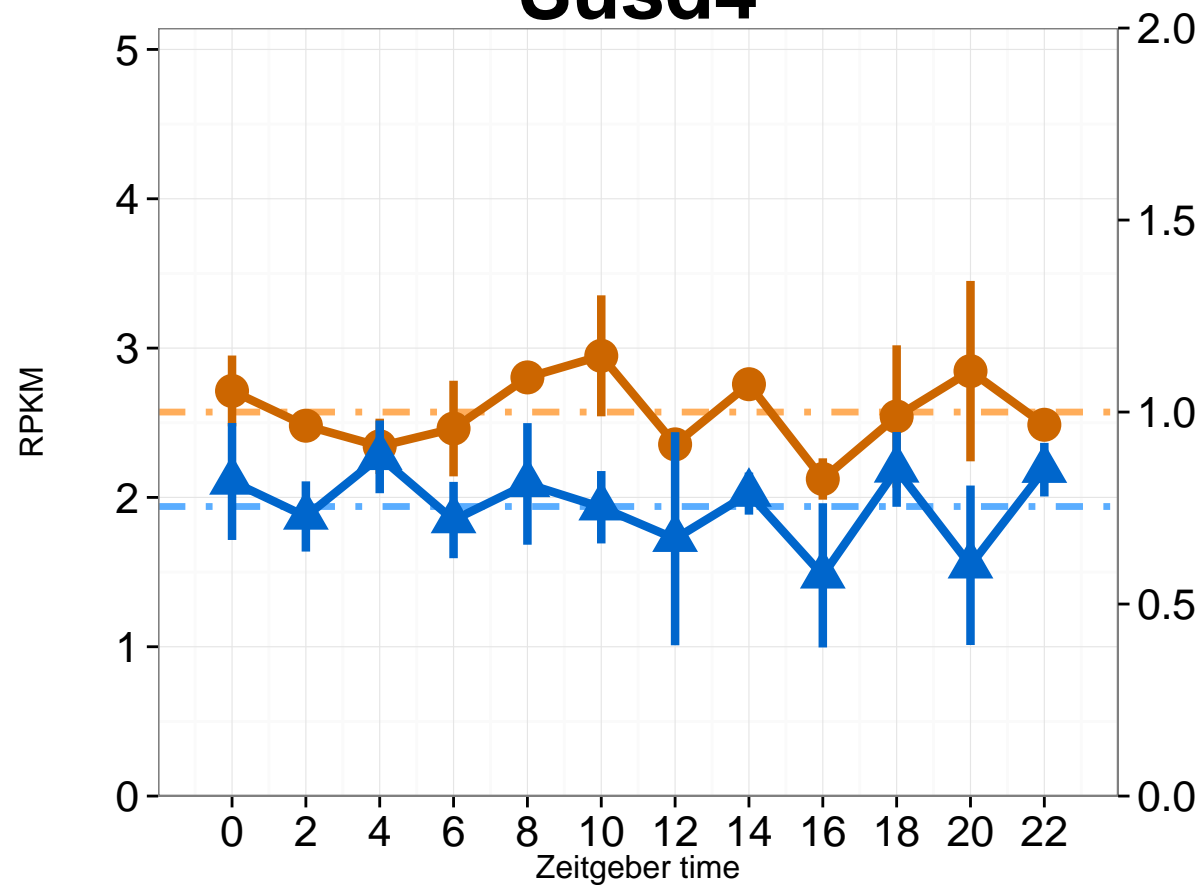

## Susd4

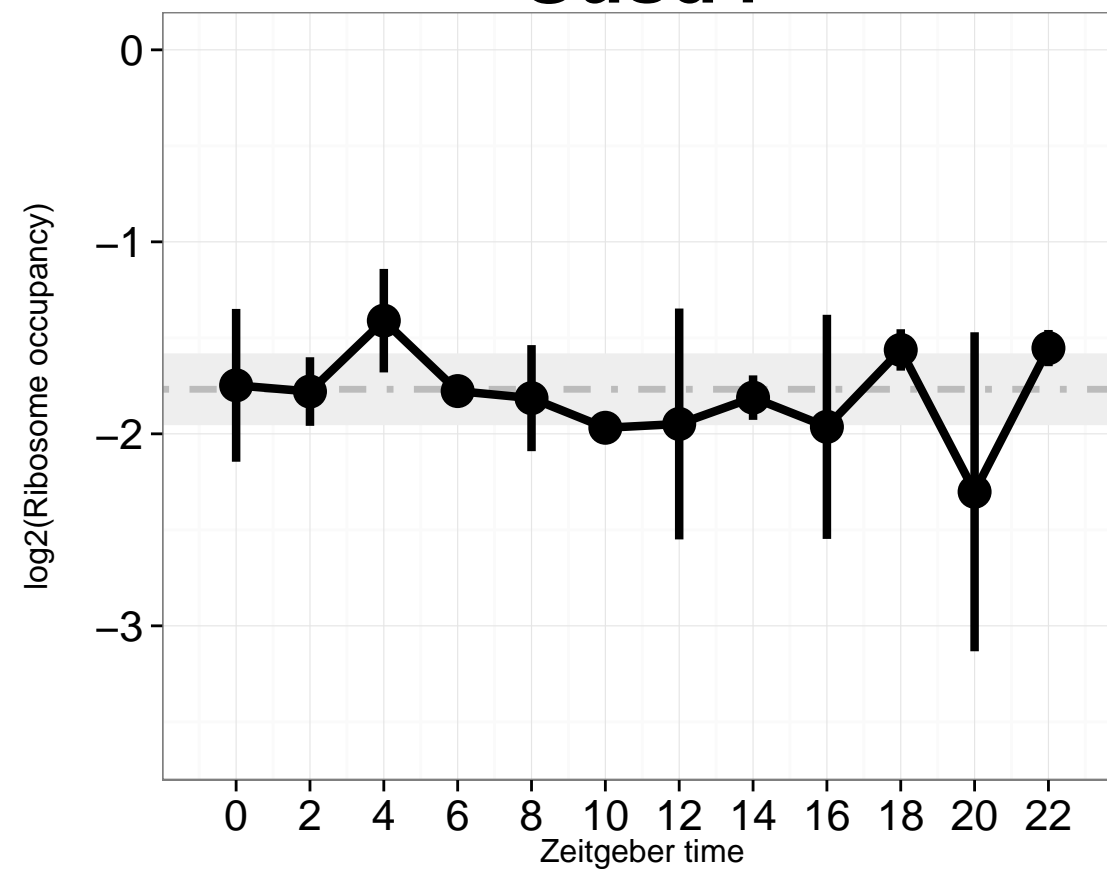

Supplement: Supplementary file 7260 [file 1]

Zmynd8

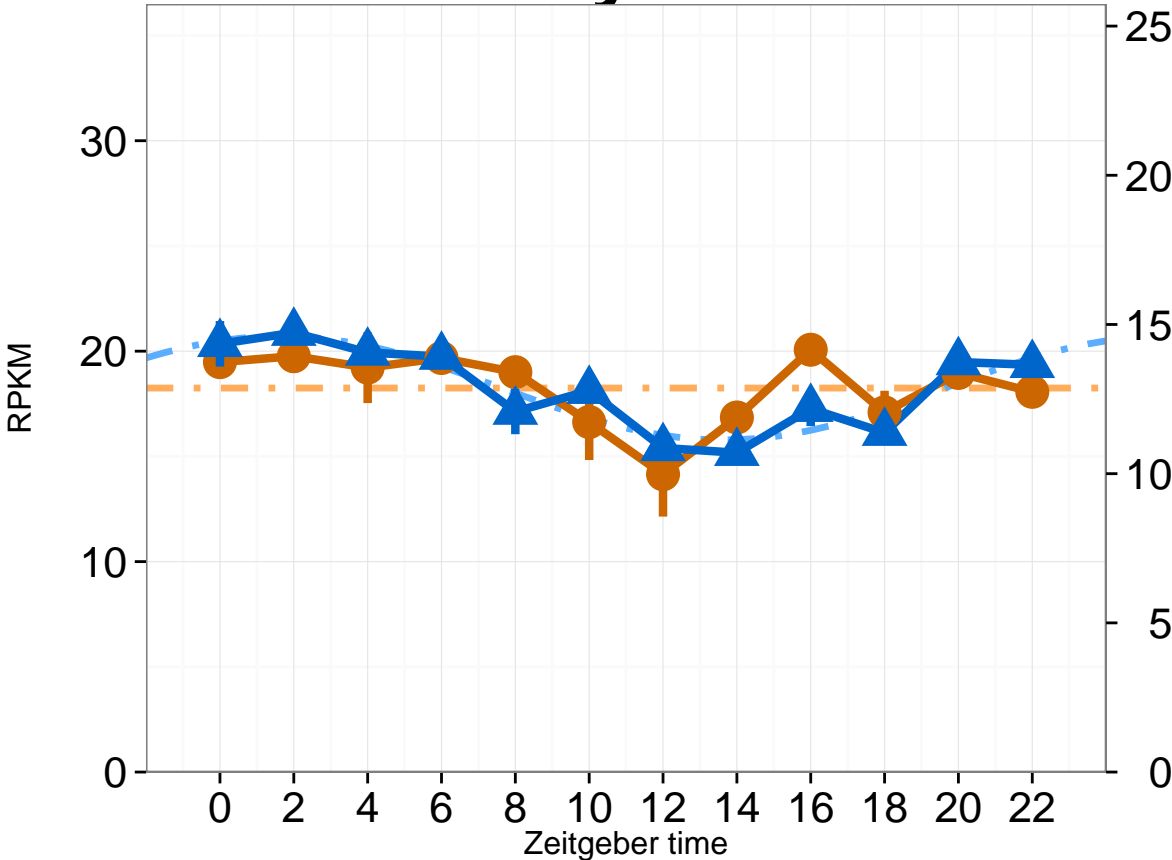

Zmynd8

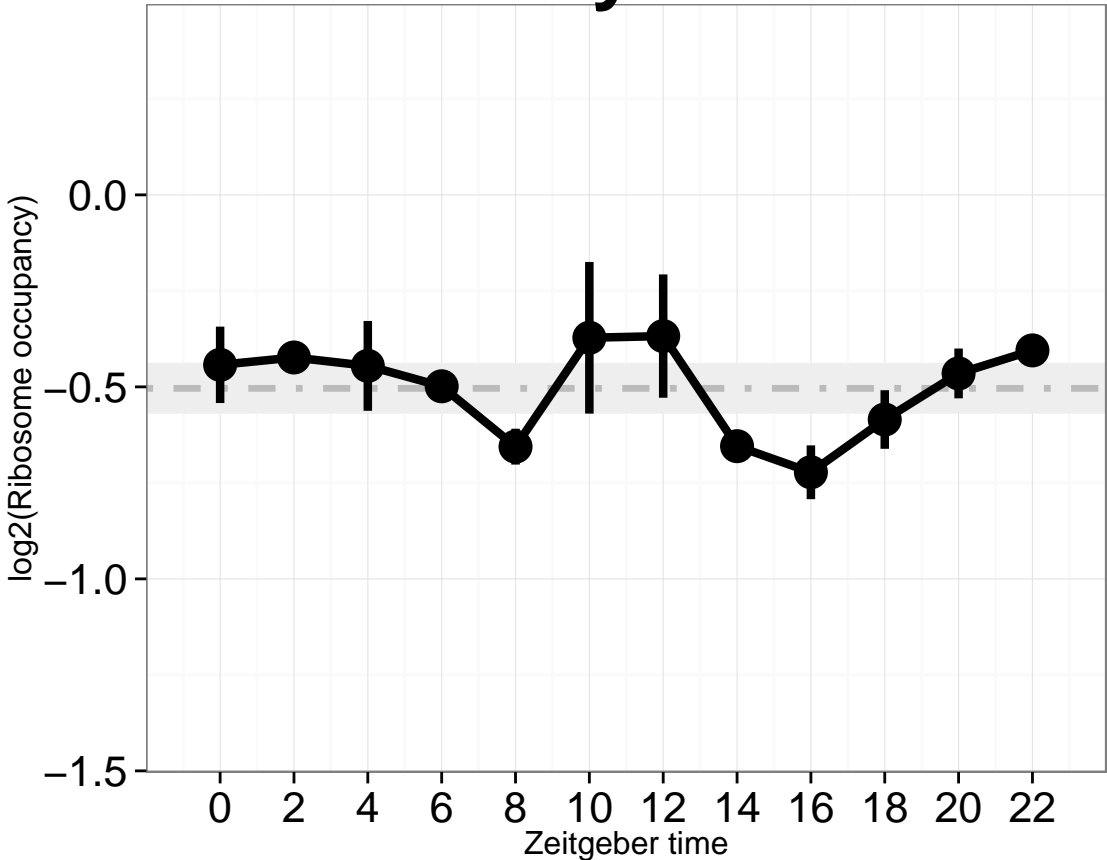

Supplement: Supplementary file 7261 [file 1]

# Als2cr12

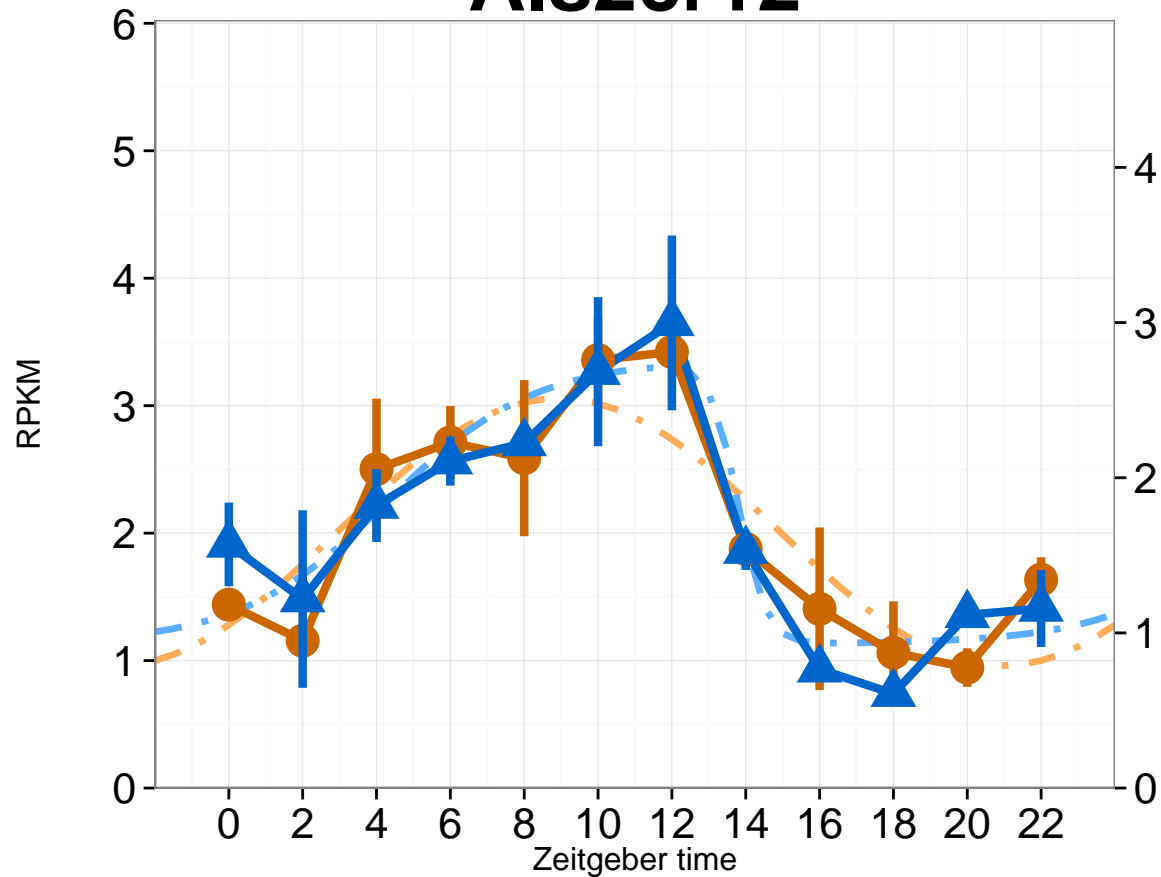

# Als2cr12

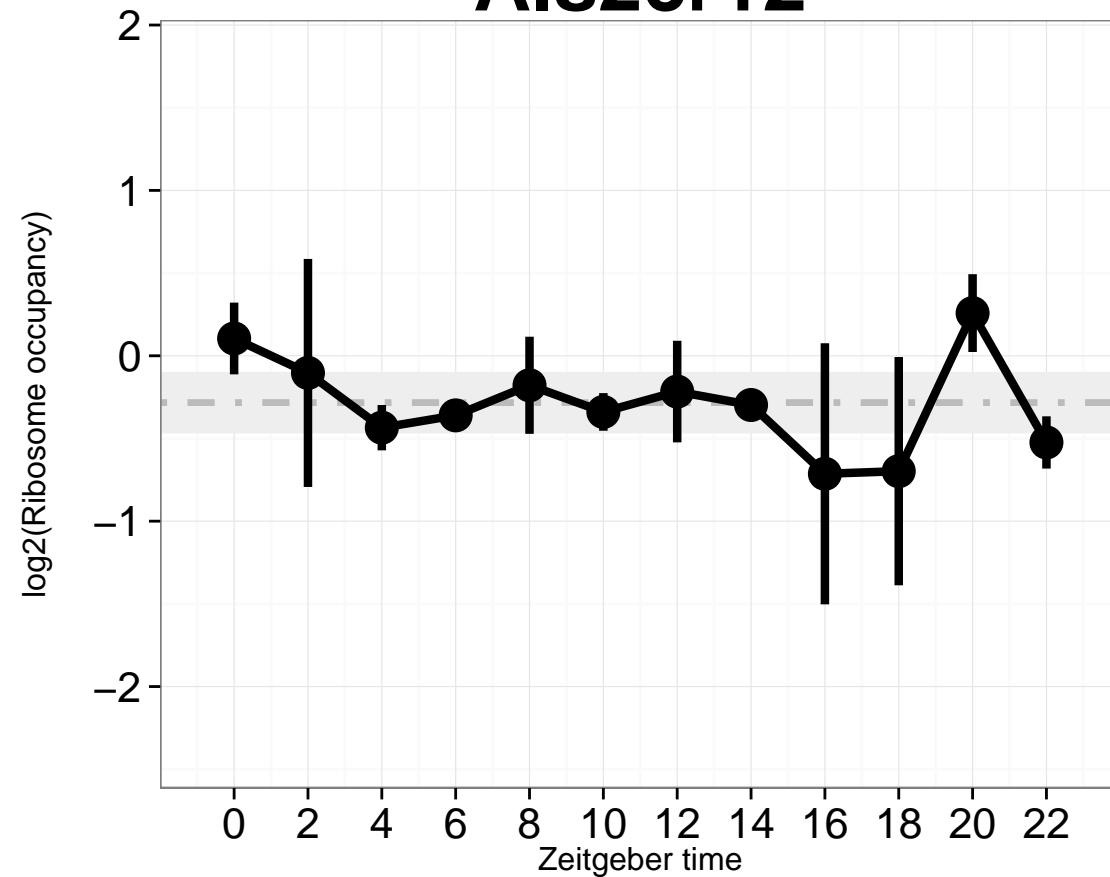

Supplement: Supplementary file 7262 [file 1]

## Plcg1

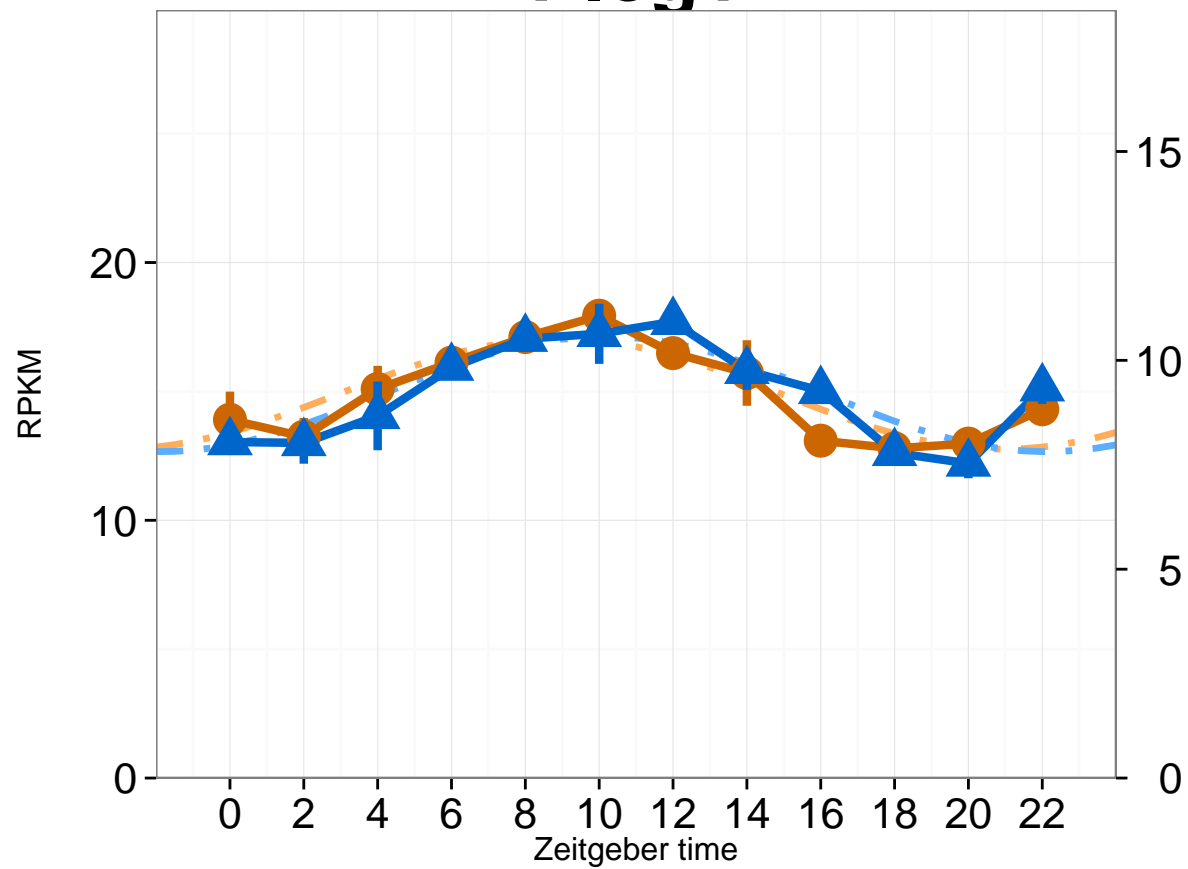

## Plcg1

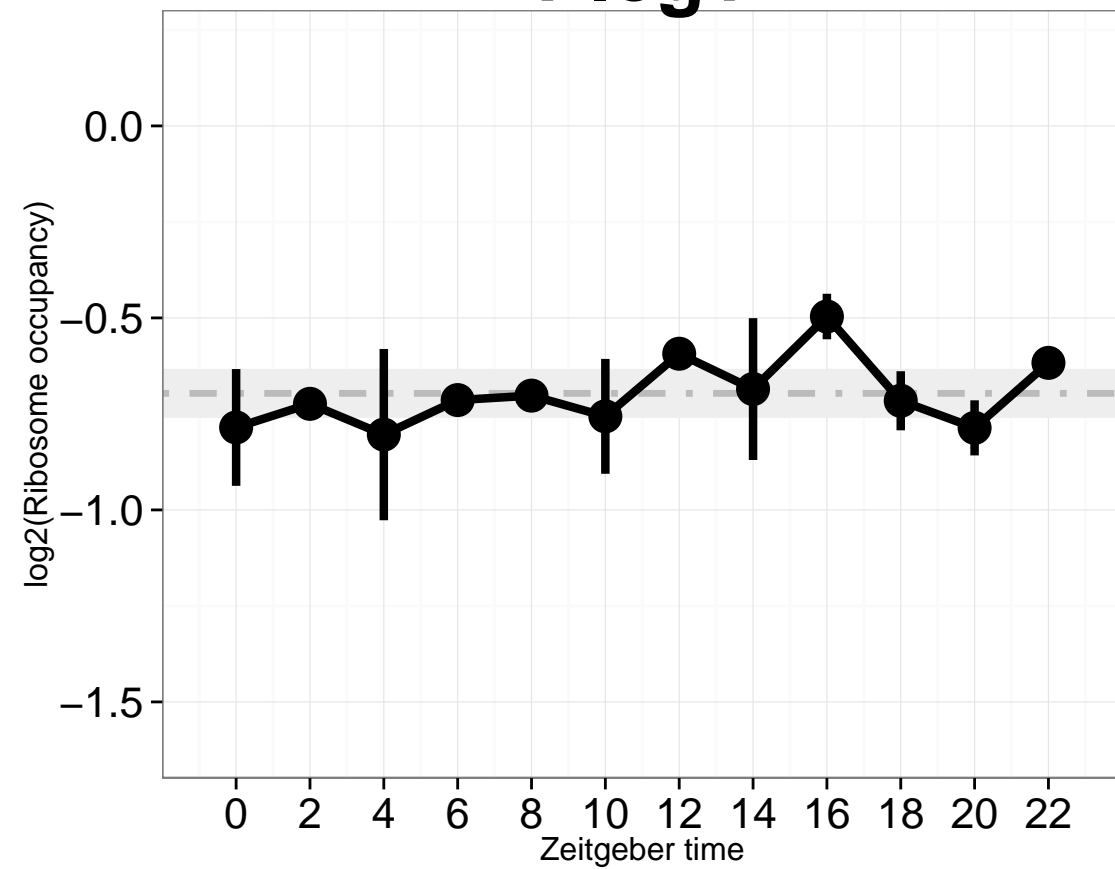

Supplement: Supplementary file 7263 [file 1]

## Zc3hav1

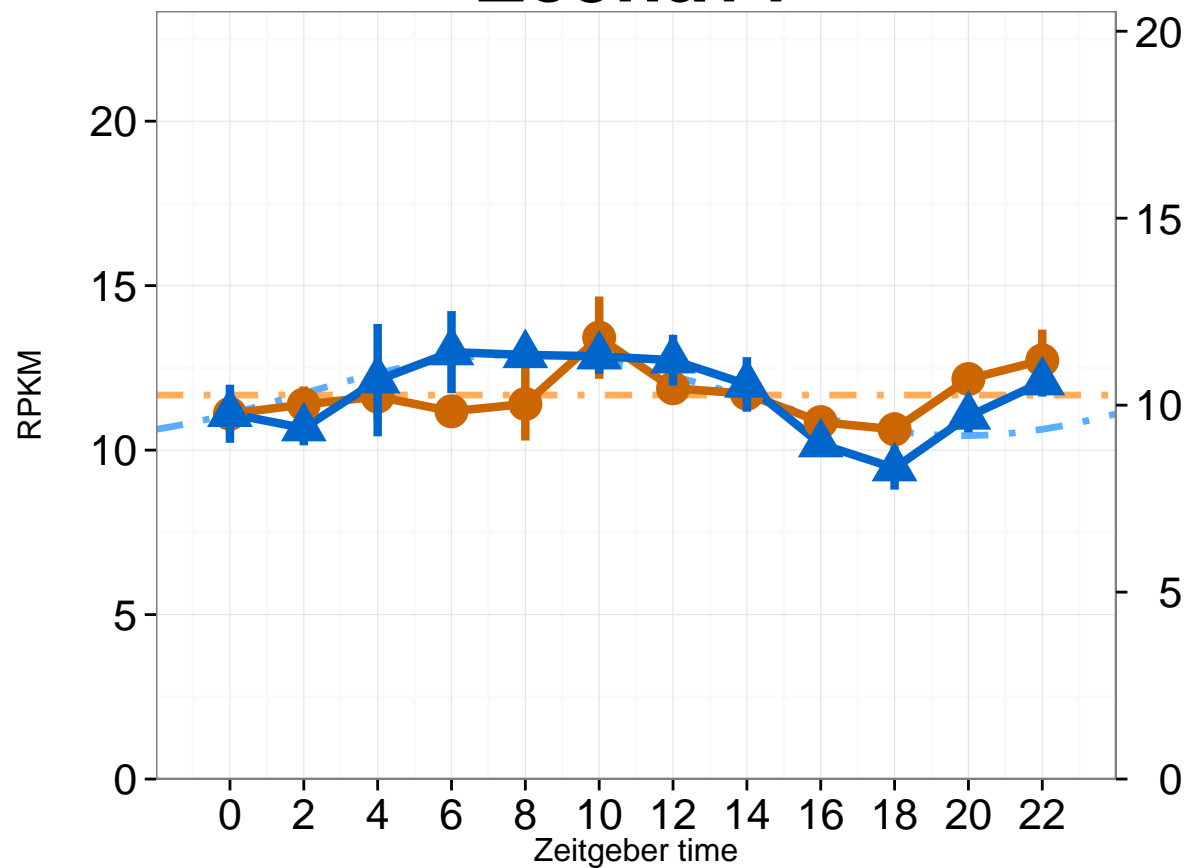

## Zc3hav1

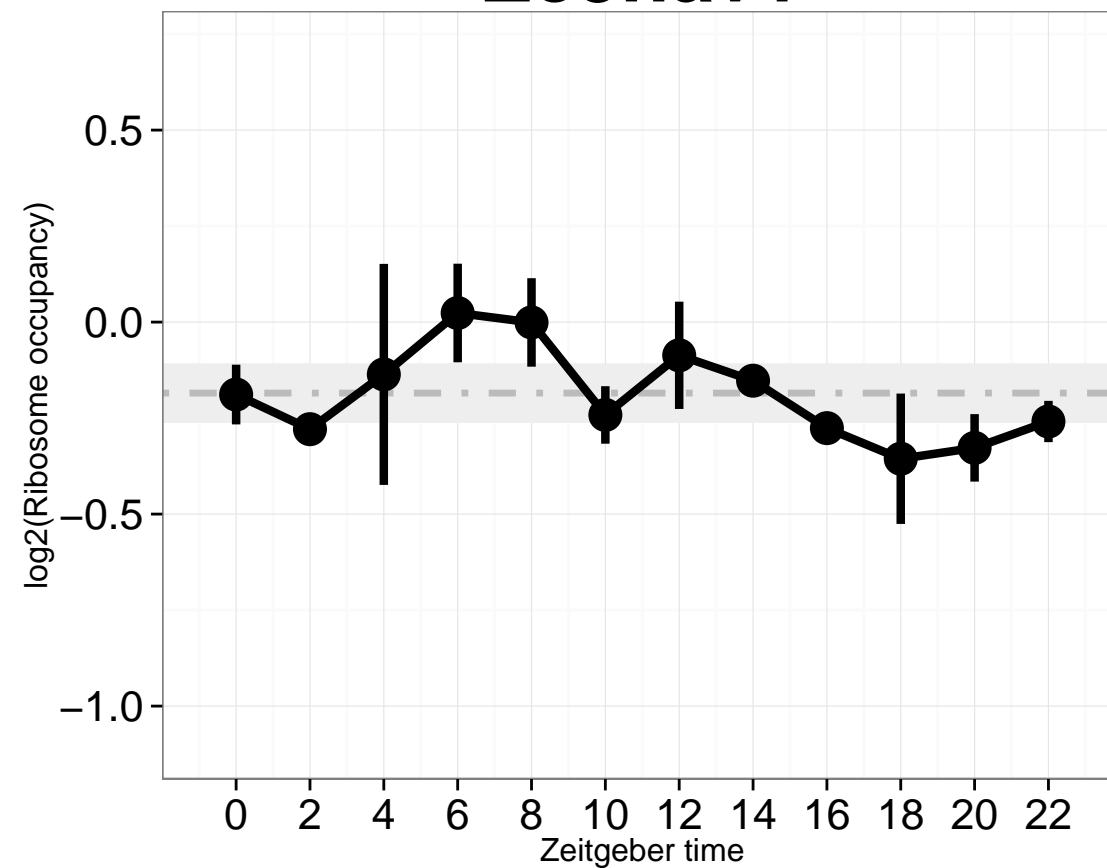

Supplement: Supplementary file 7264 [file 1]

## Khнын

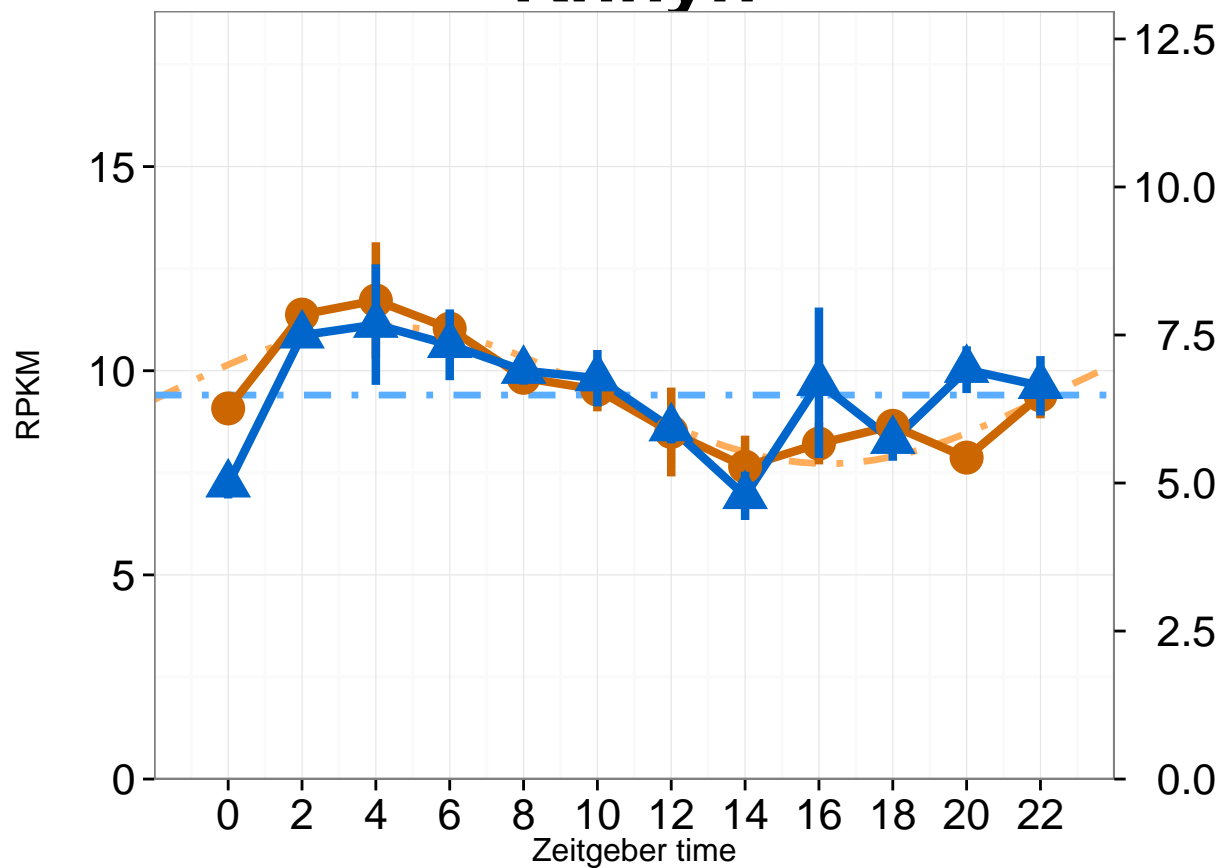

## Khнын

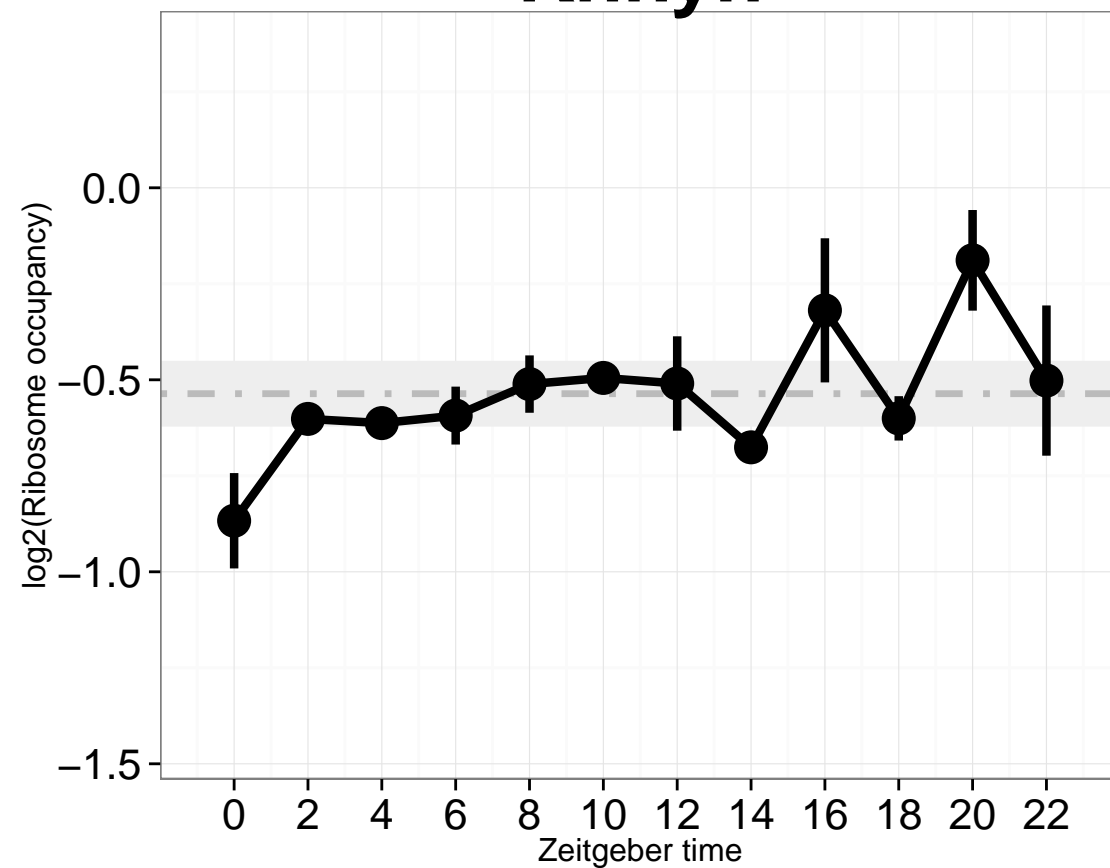

Supplement: Supplementary file 7265 [file 1]

## Ctsc

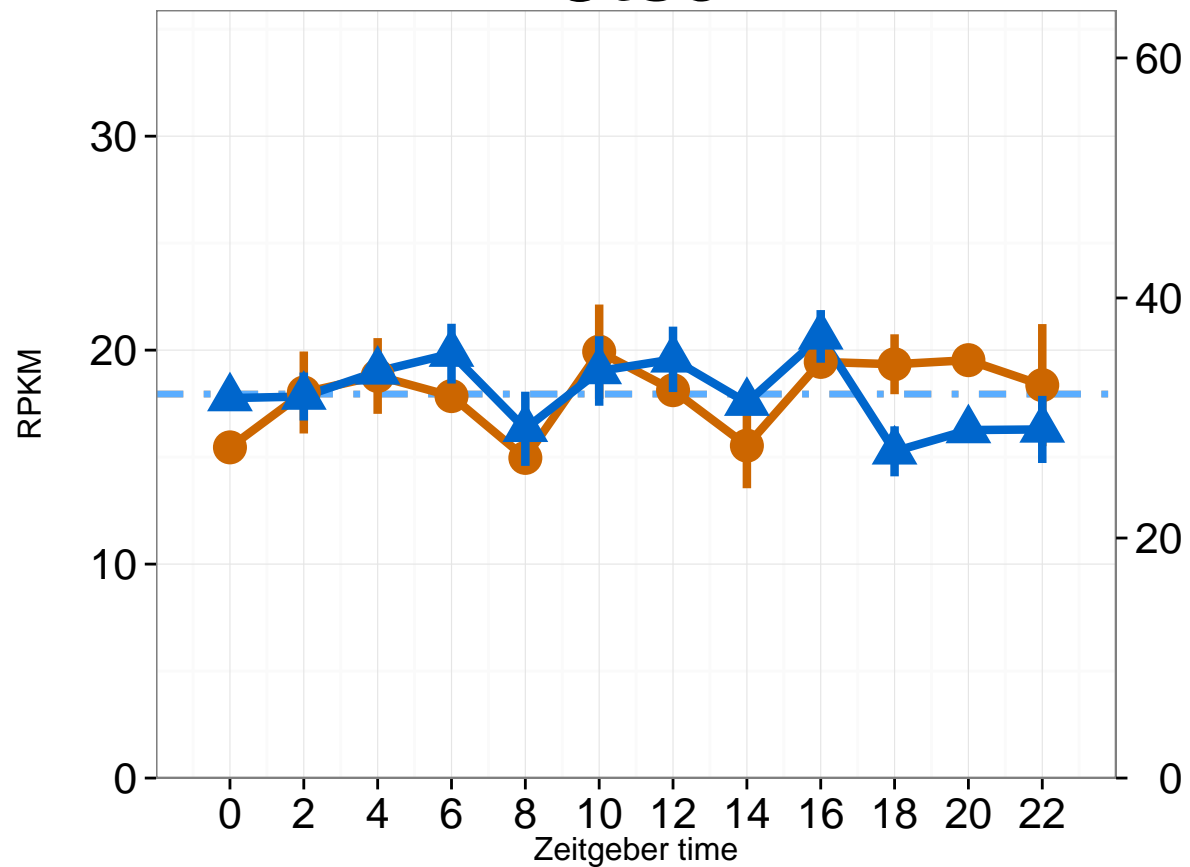

## Ctsc

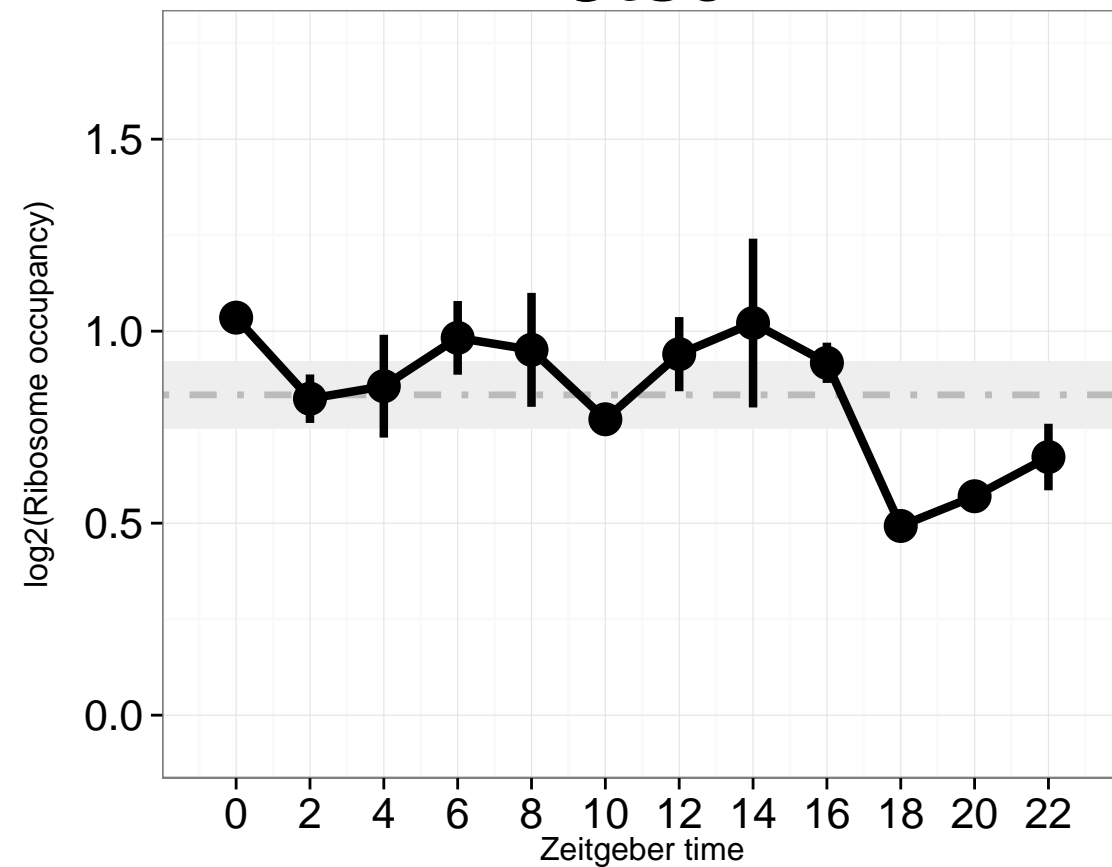

Supplement: Supplementary file 7266 [file 1]

# Mt2

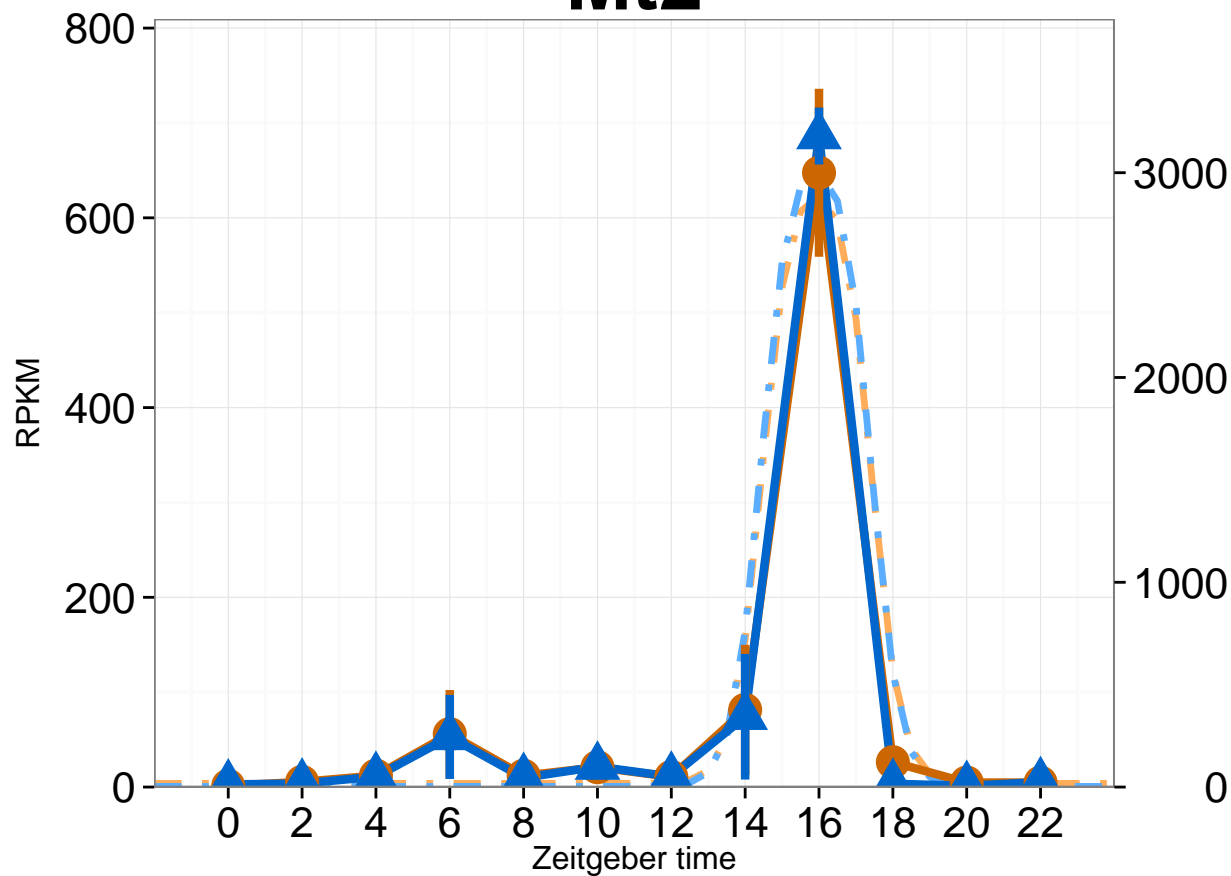

# Mt2

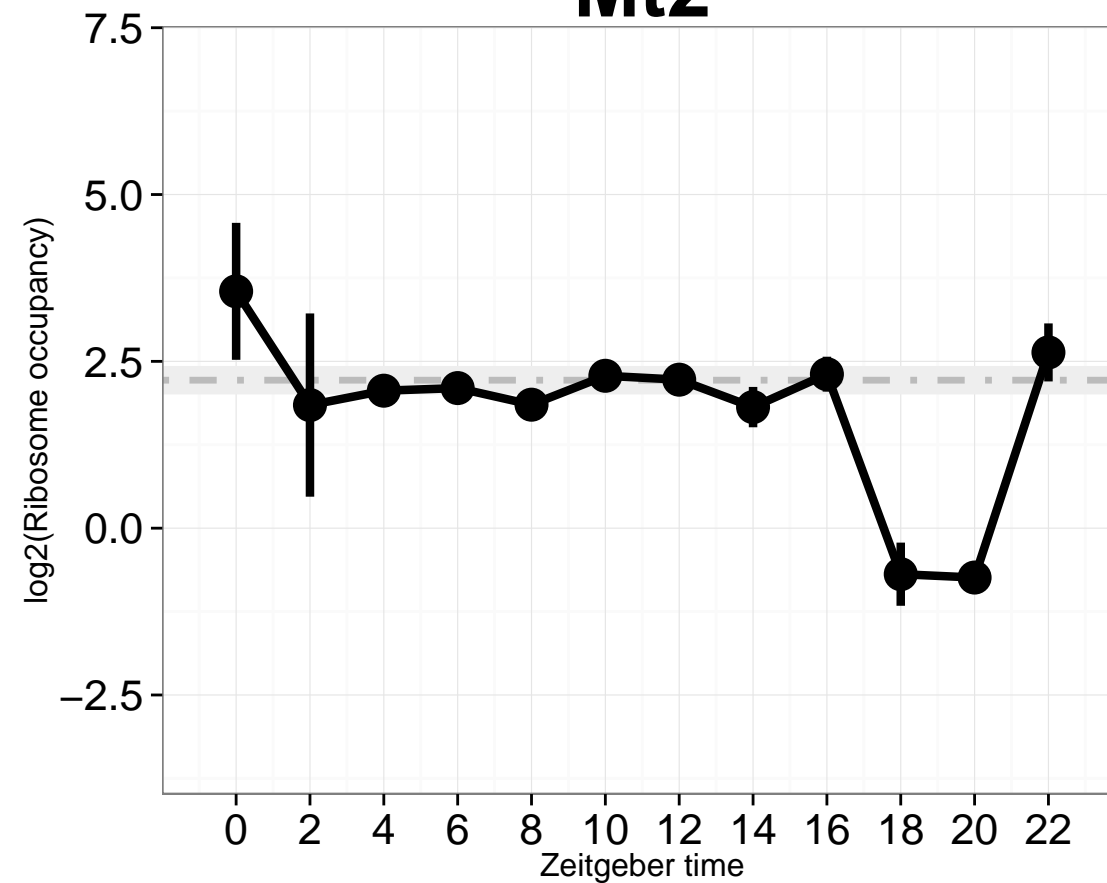

Supplement: Supplementary file 7267 [file 1]

## Arc

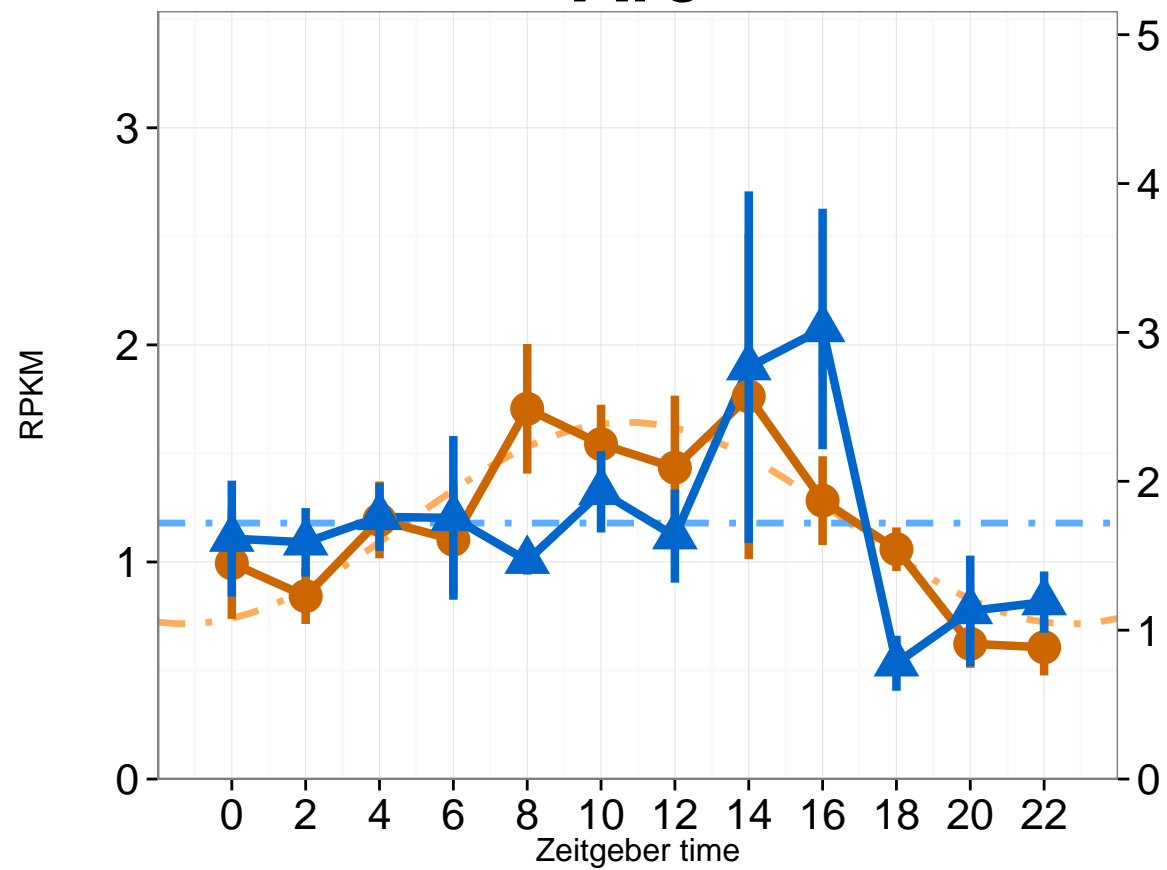

## Arc

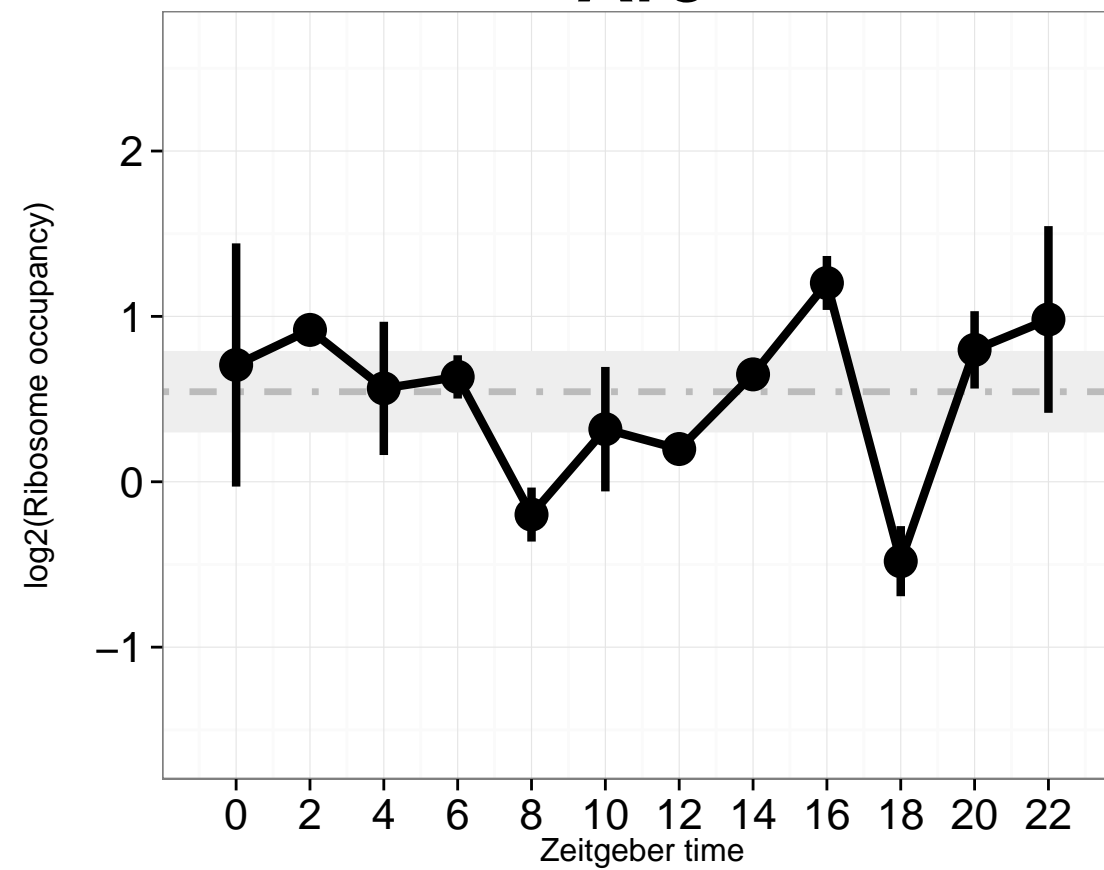

Supplement: Supplementary file 7268 [file 1]

## Jup

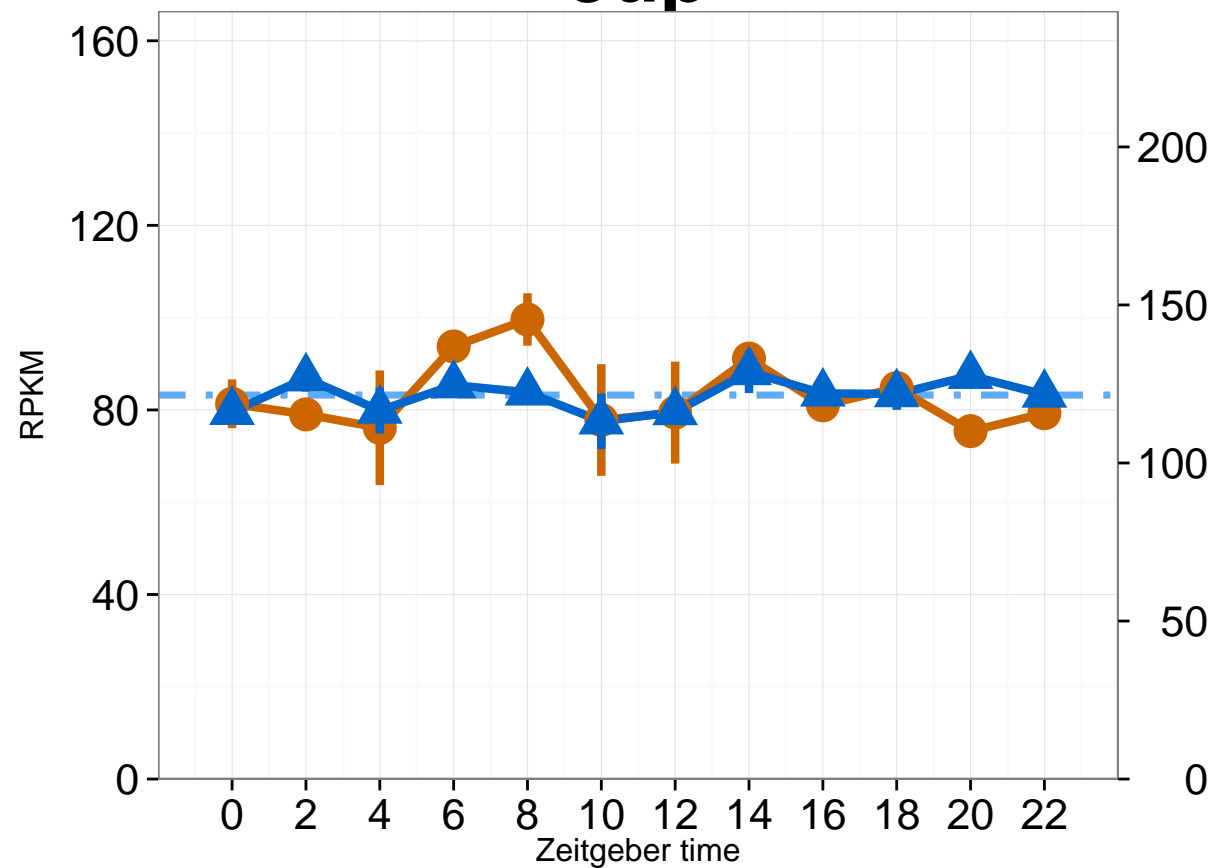

## Jup

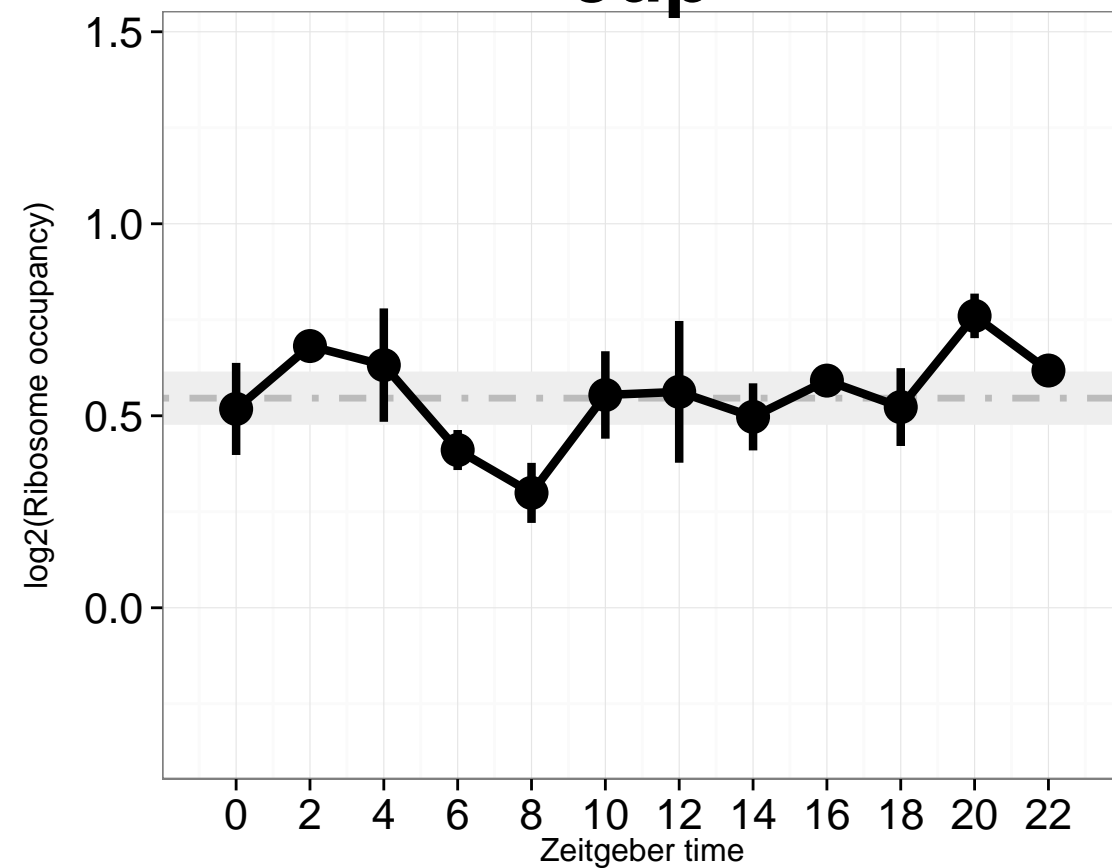

Supplement: Supplementary file 7269 [file 1]

## KIhl28

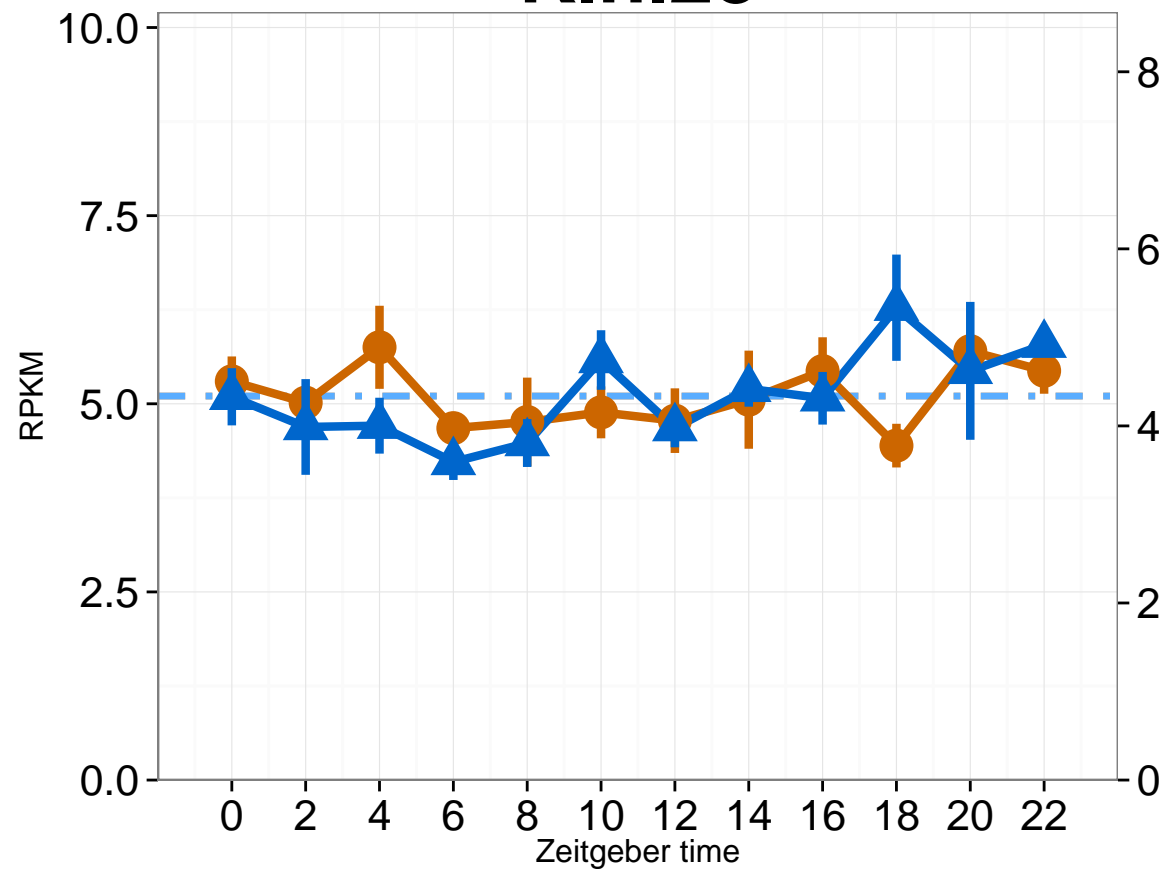

## KIhl28

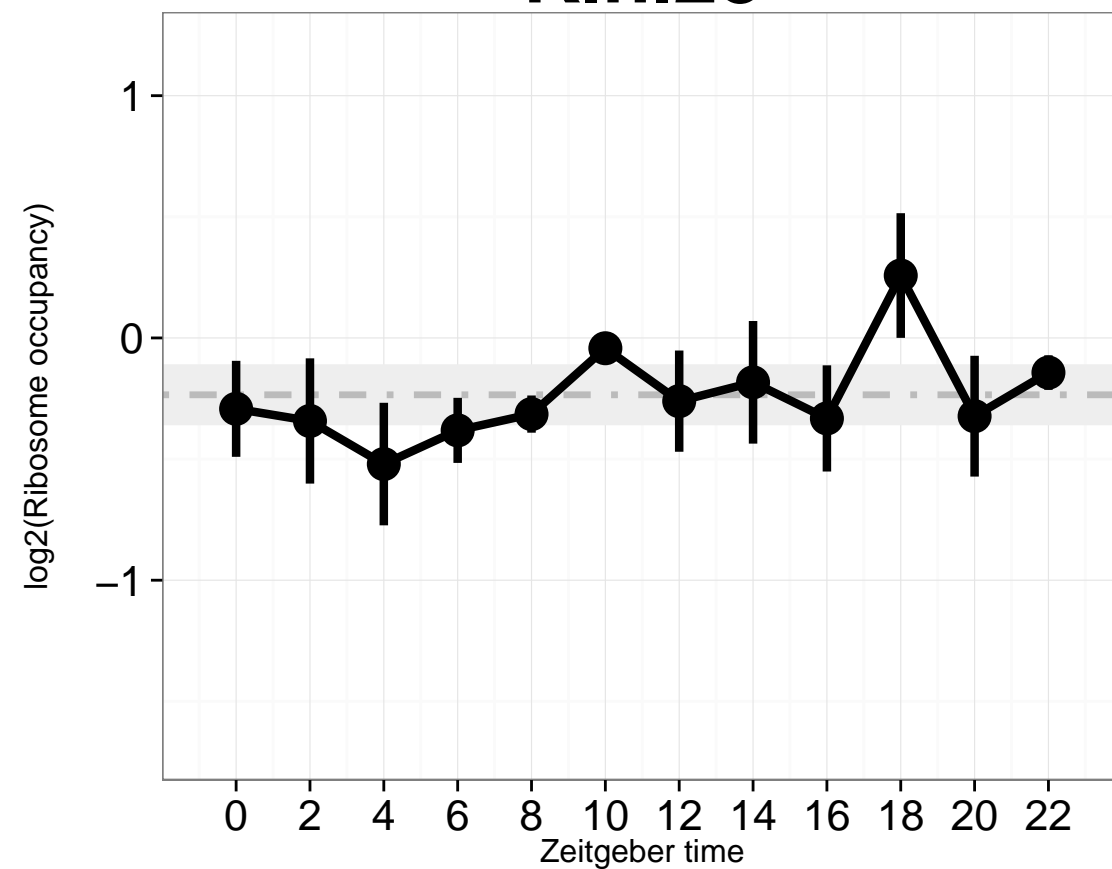

Supplement: Supplementary file 7270 [file 1]

# Map7

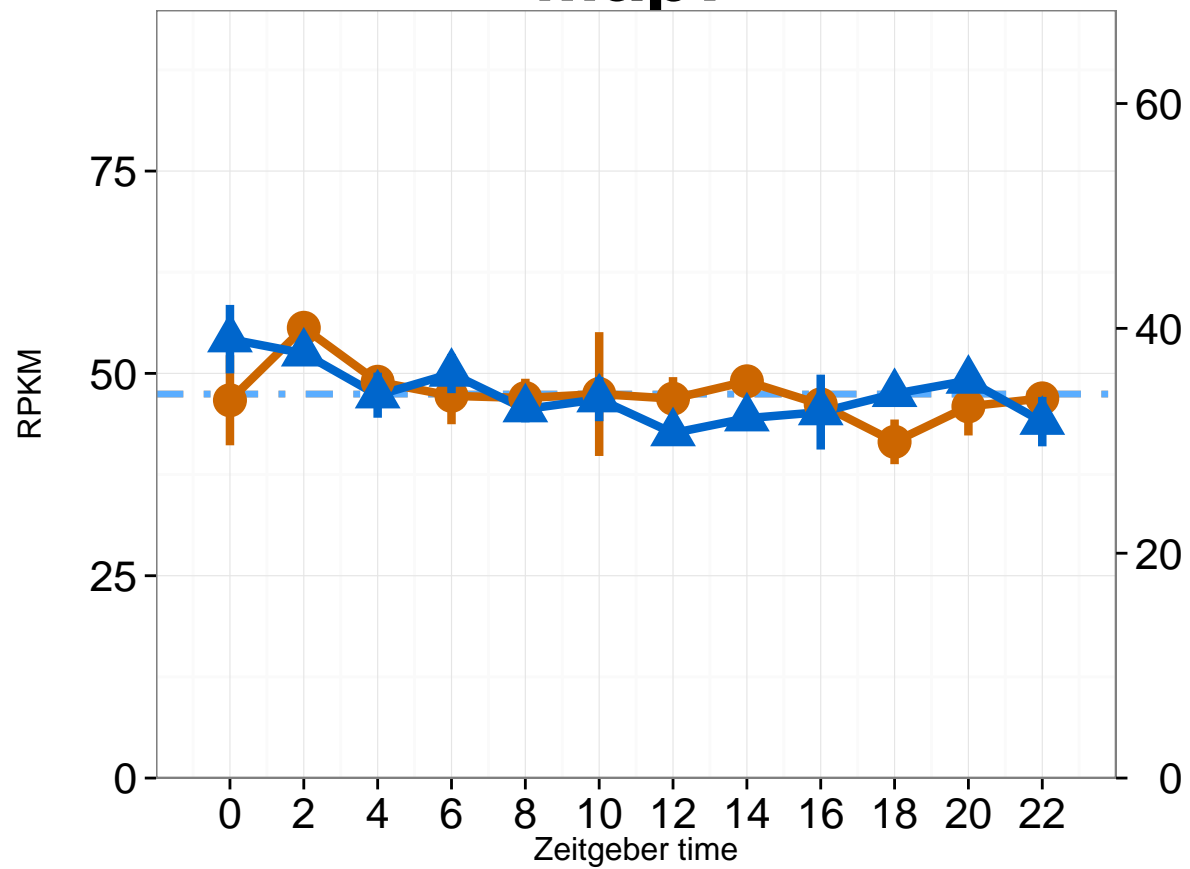

# Map7

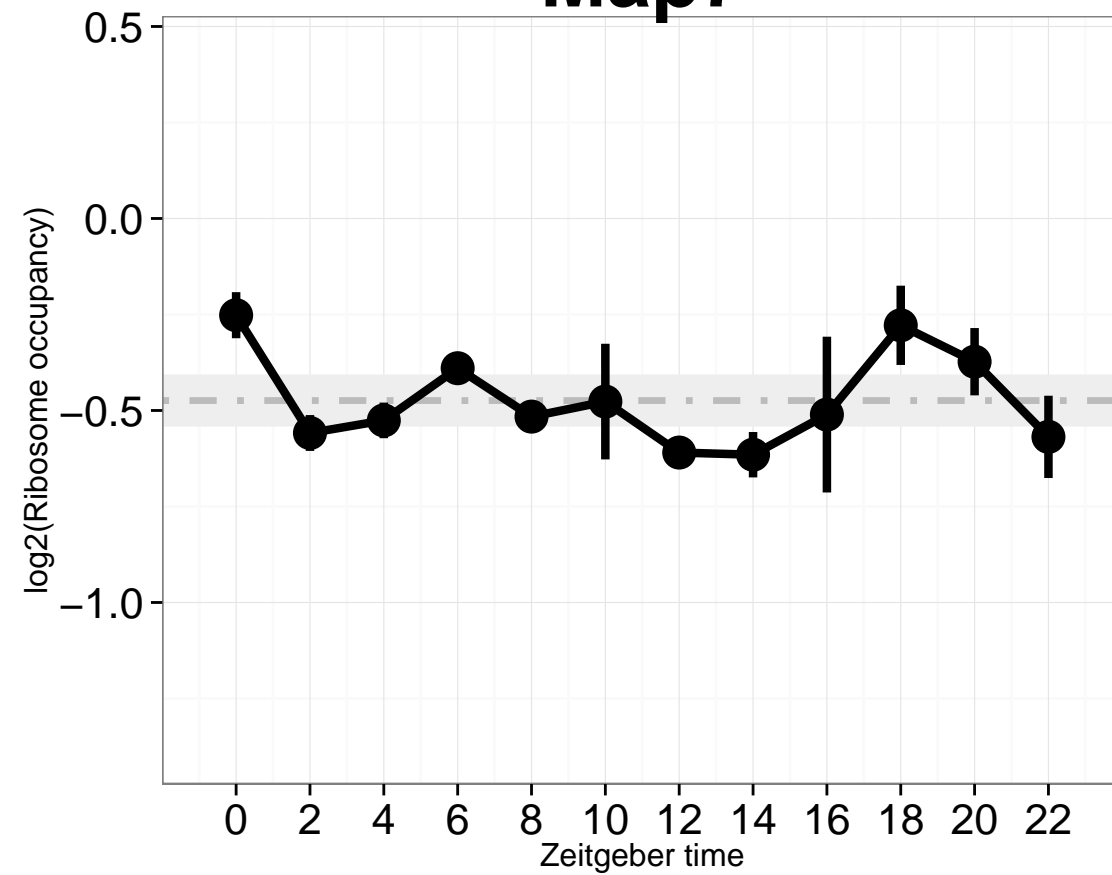

Supplement: Supplementary file 7271 [file 1]

## Btf3l4

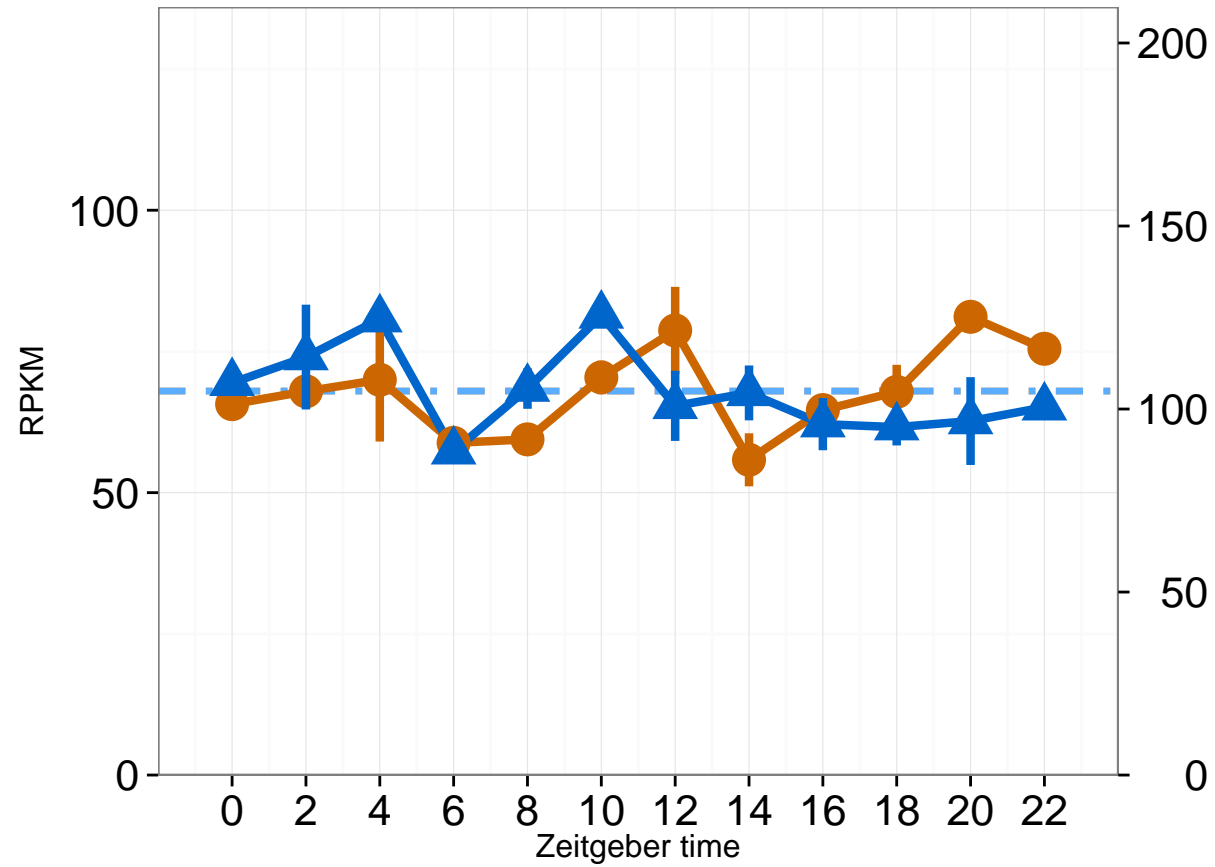

## Btf3l4

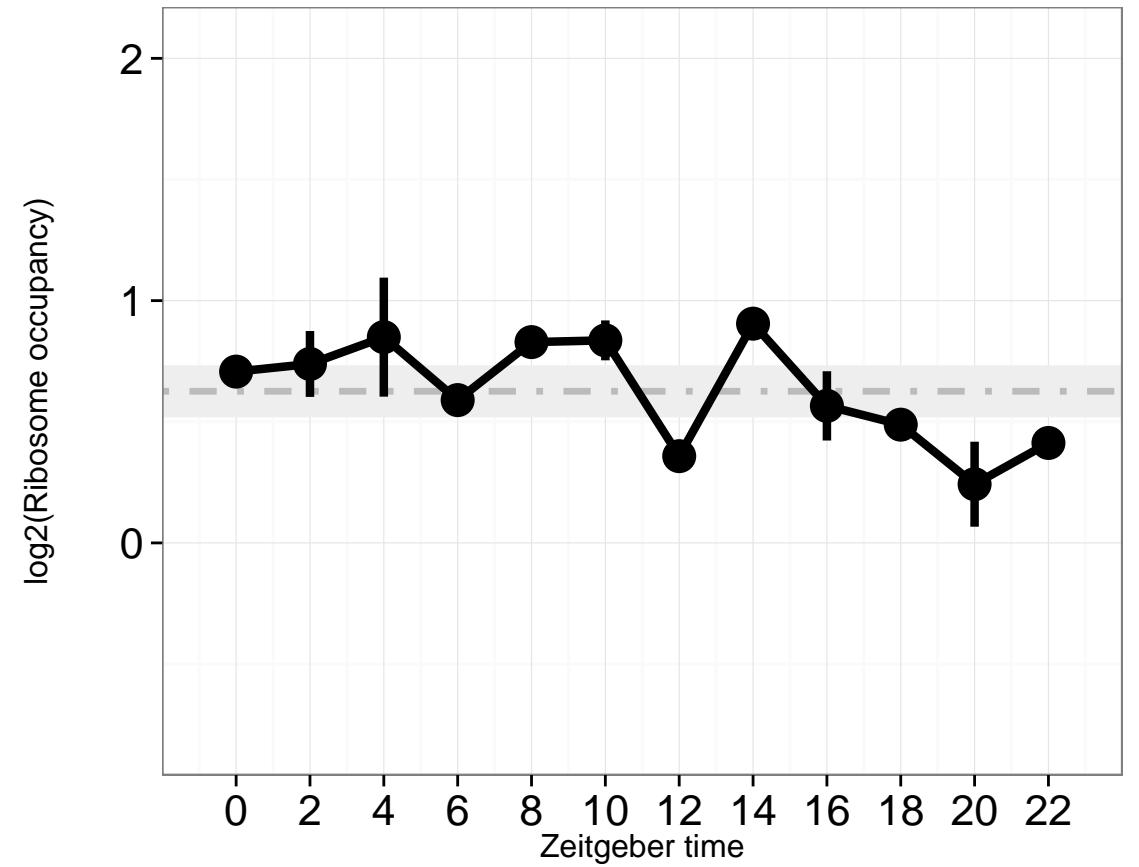

Supplement: Supplementary file 7272 [file 1]

# Dnase1I3

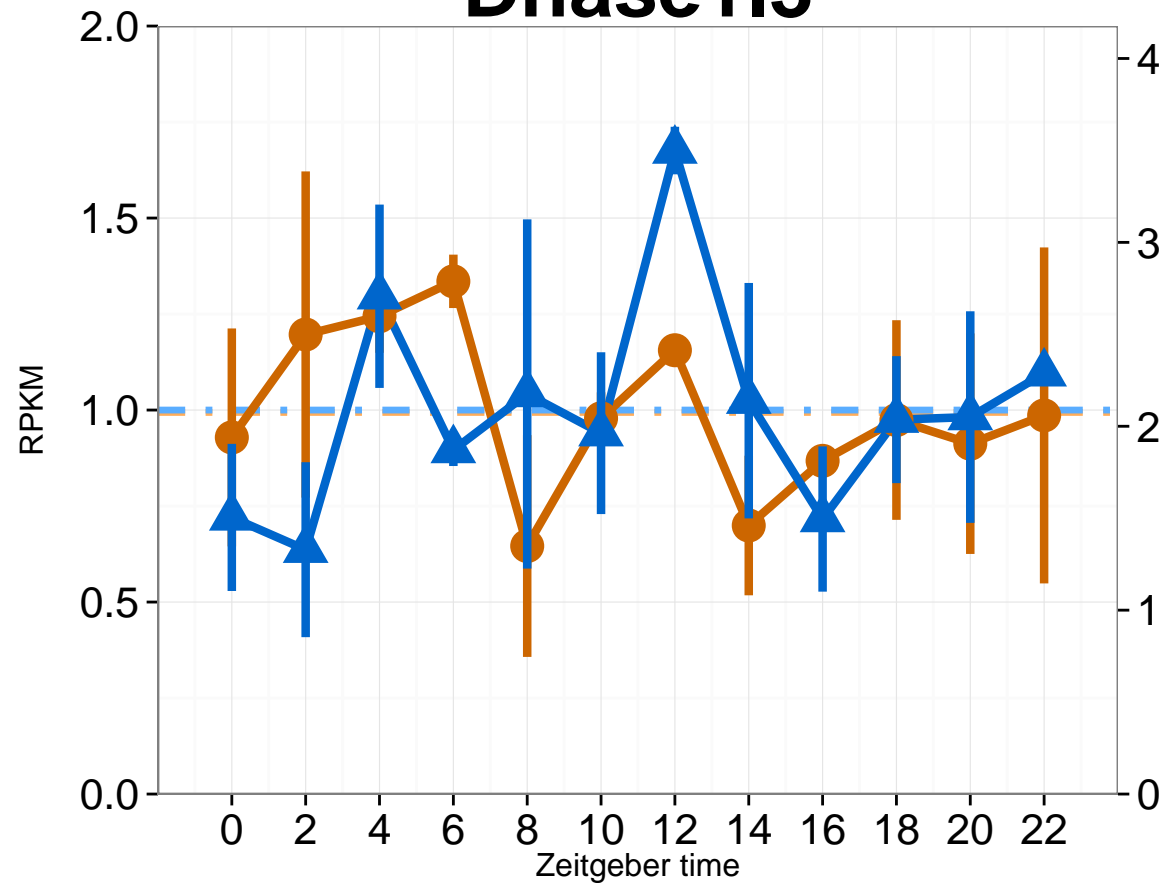

# Dnase1I3

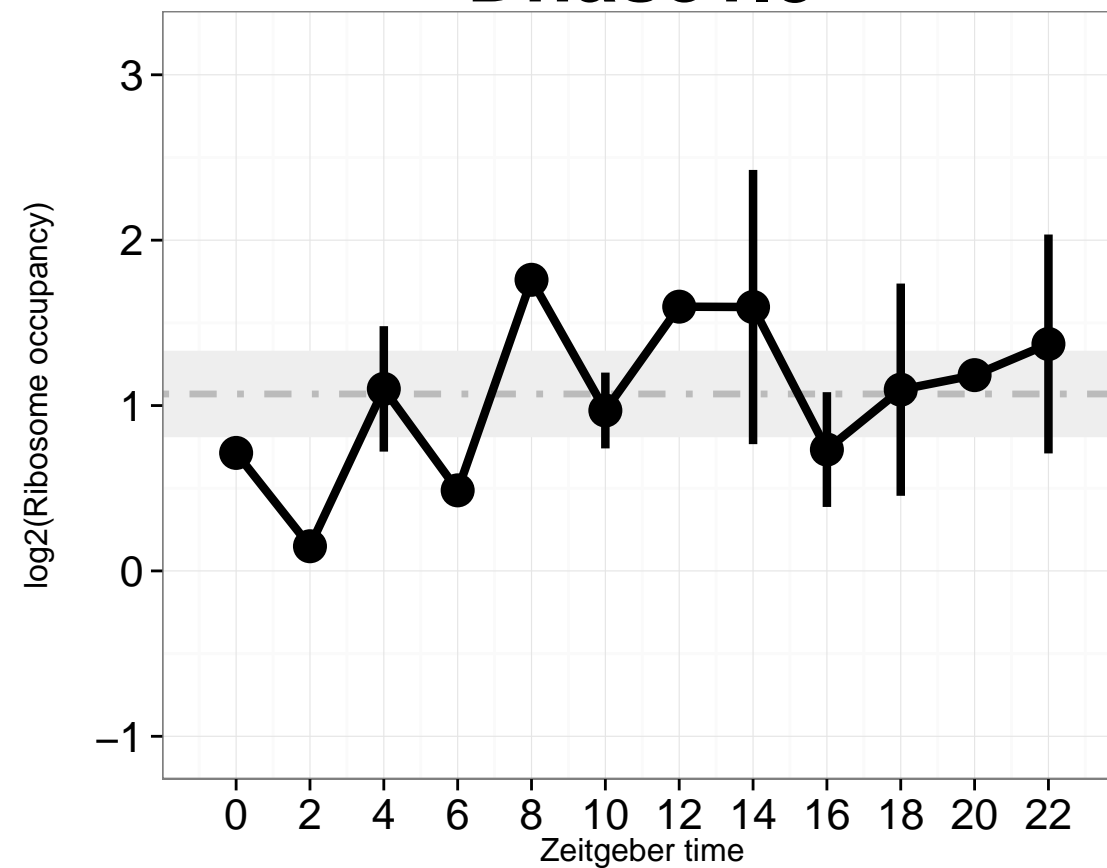

Supplement: Supplementary file 7273 [file 1]

# Tead1

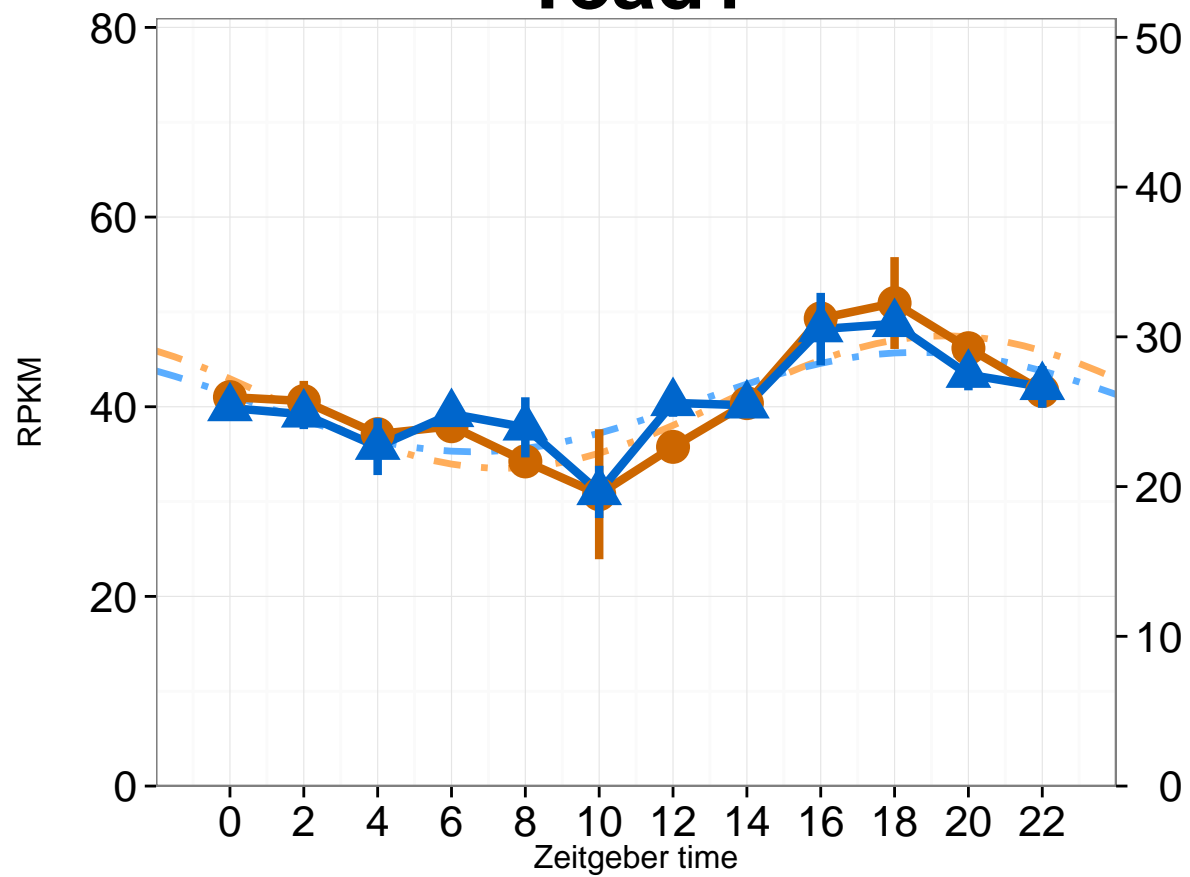

# Tead1

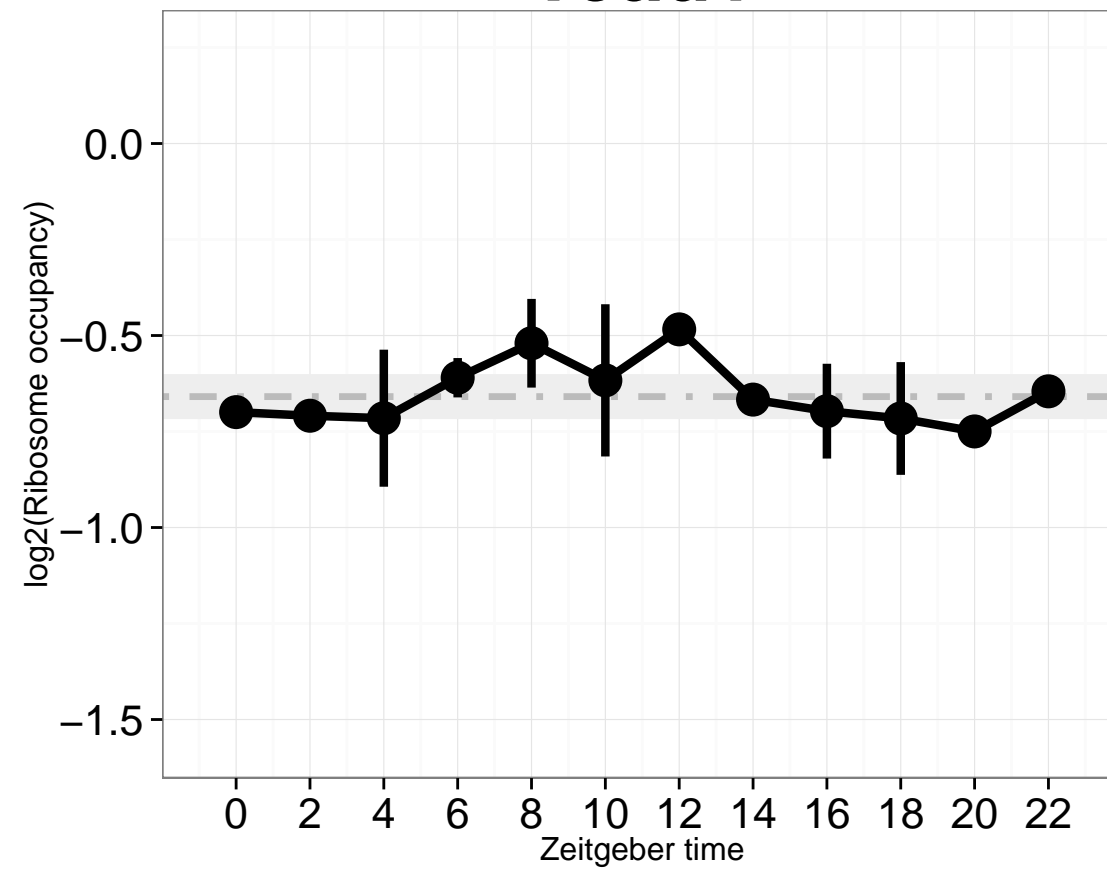

Supplement: Supplementary file 7274 [file 1]

# Itpripl1

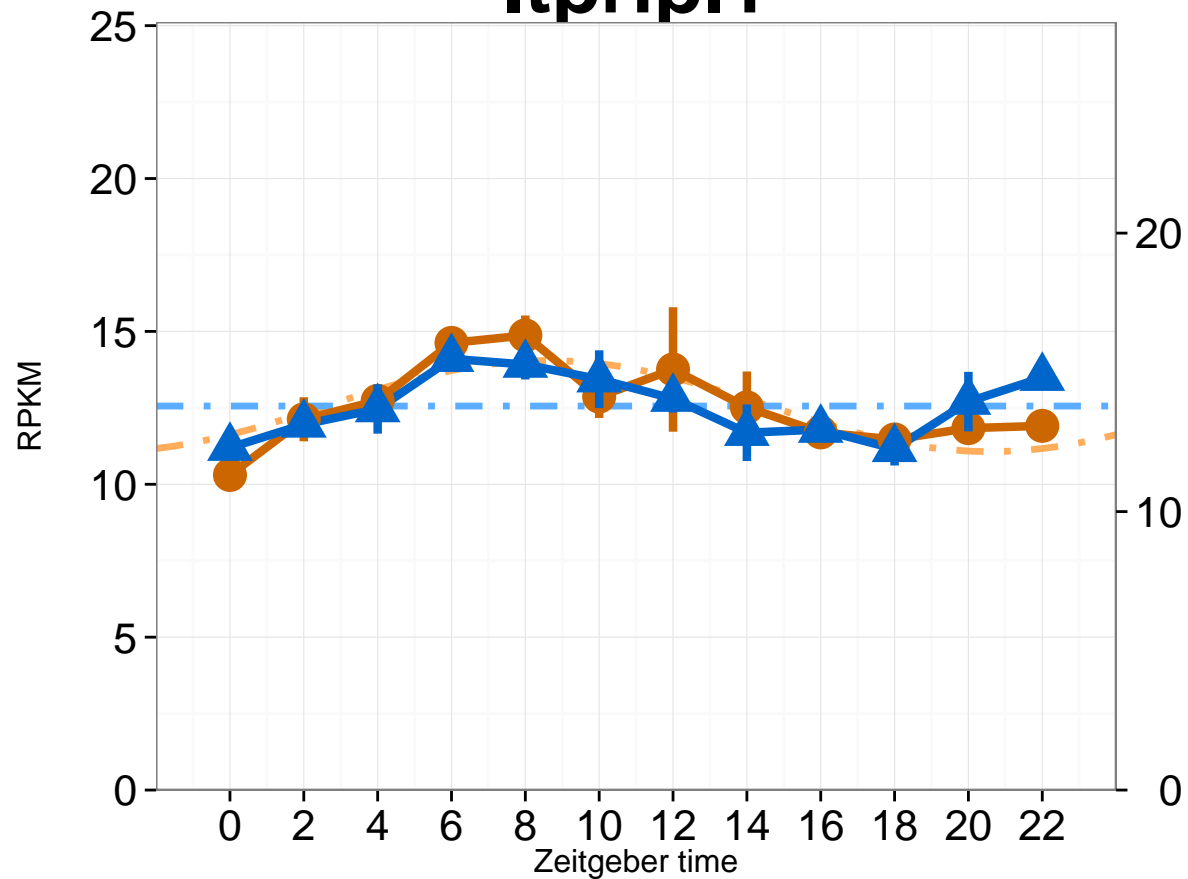

# Itpripl1

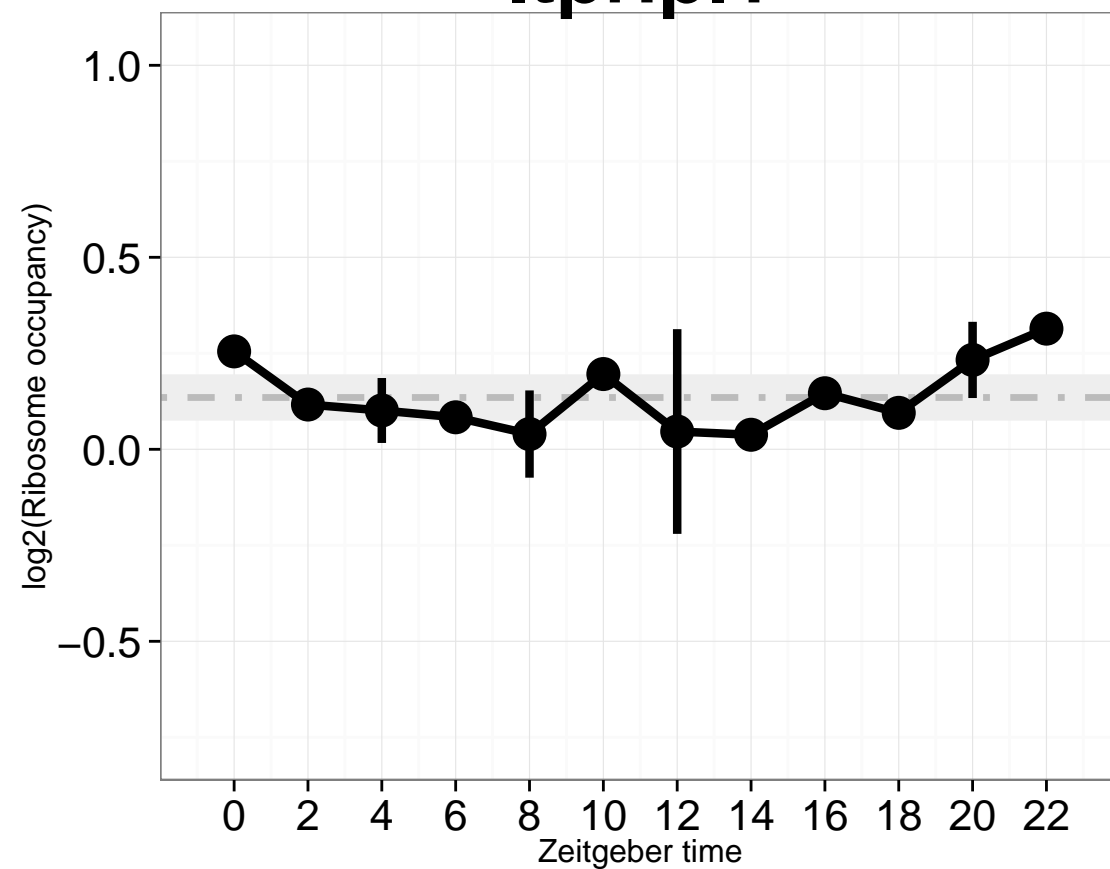

Supplement: Supplementary file 7275 [file 1]

# Rnf125

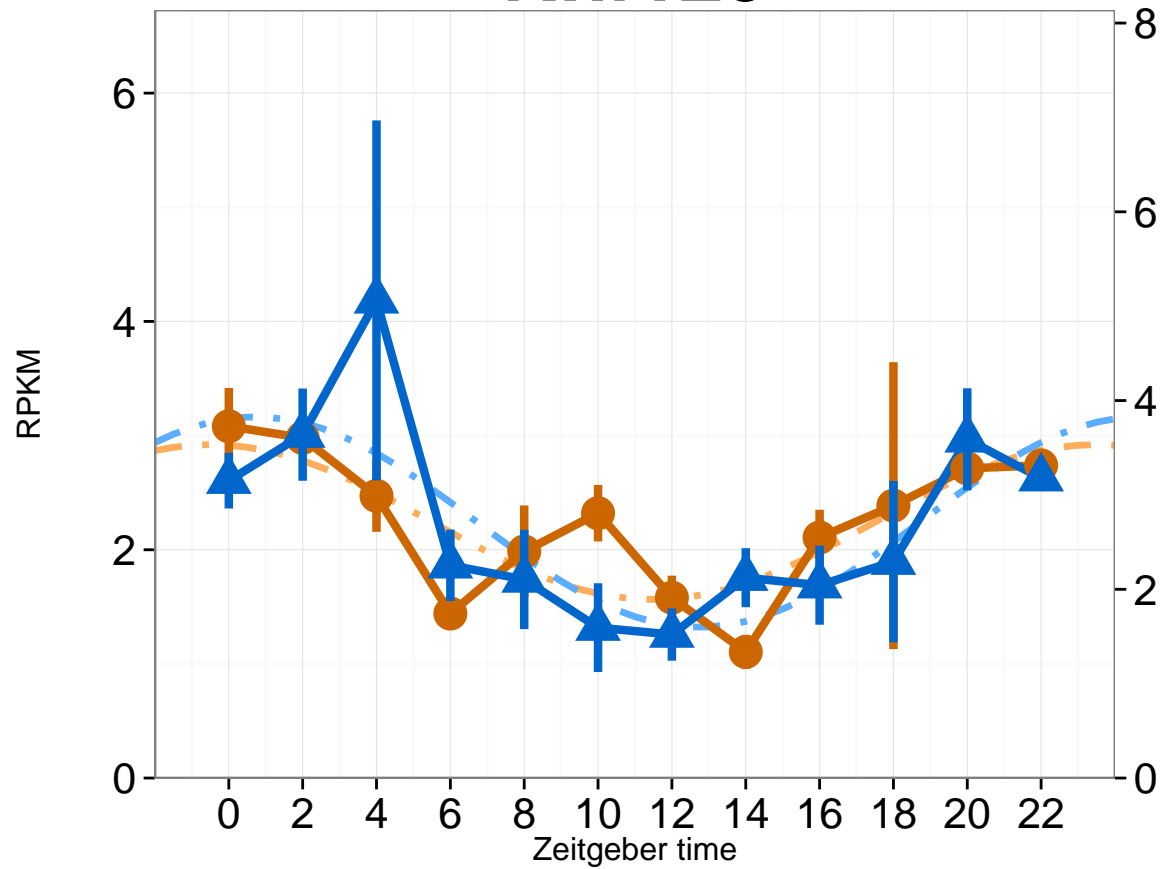

# Rnf125

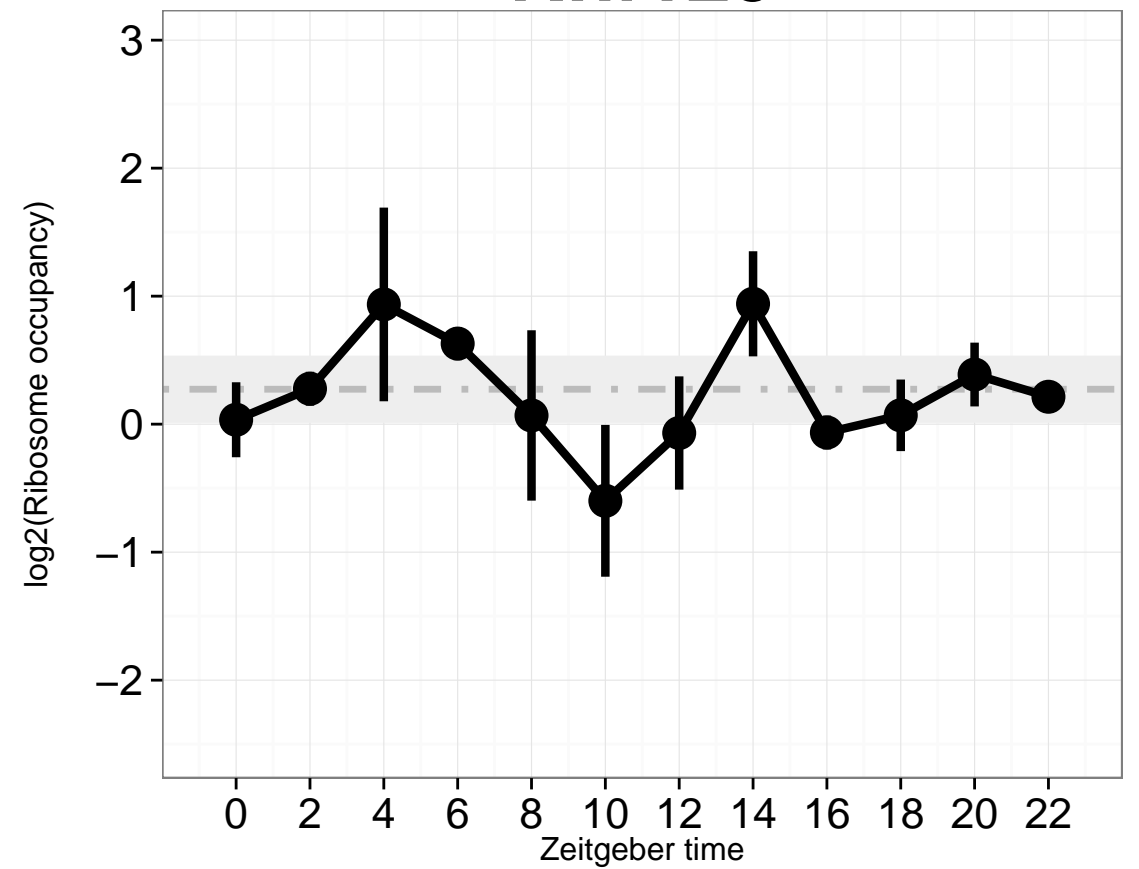

Supplement: Supplementary file 7276 [file 1]

# Pcdhb22

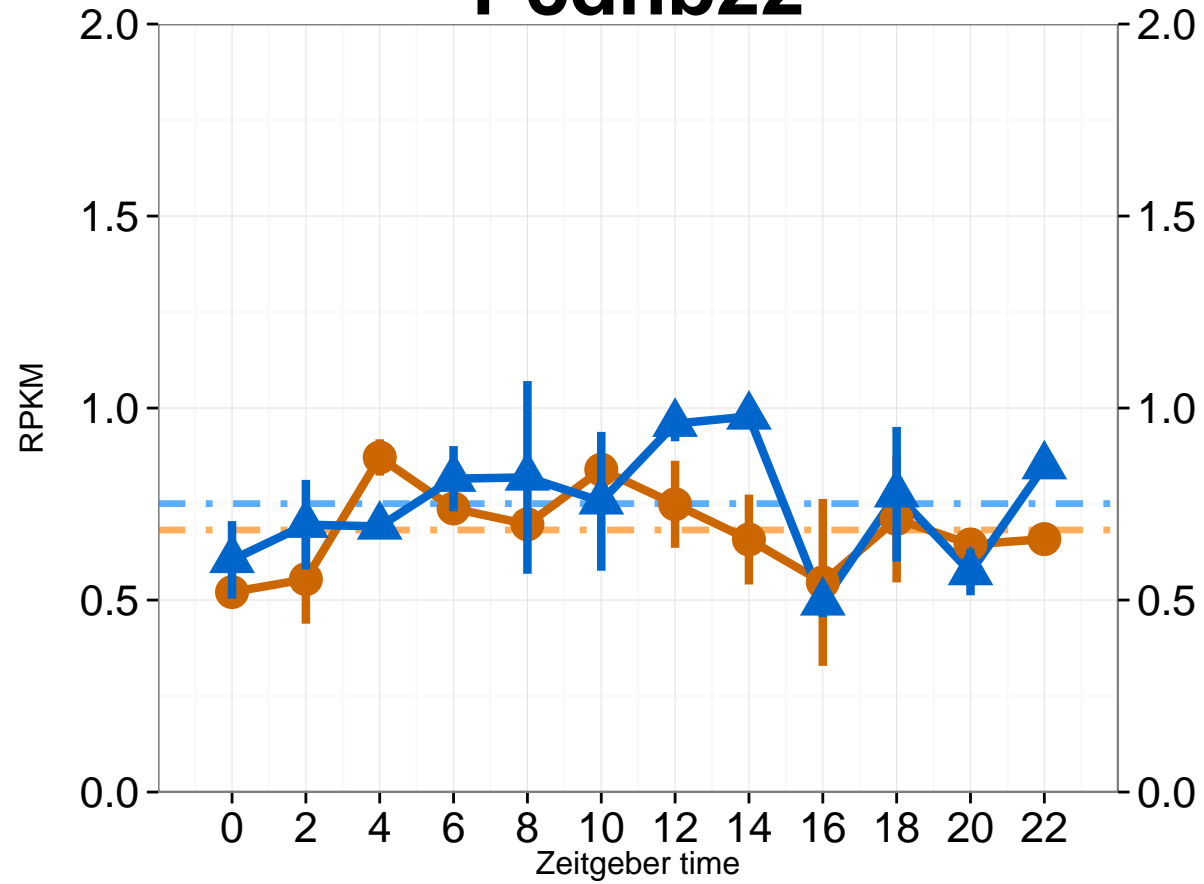

# Pcdhb22

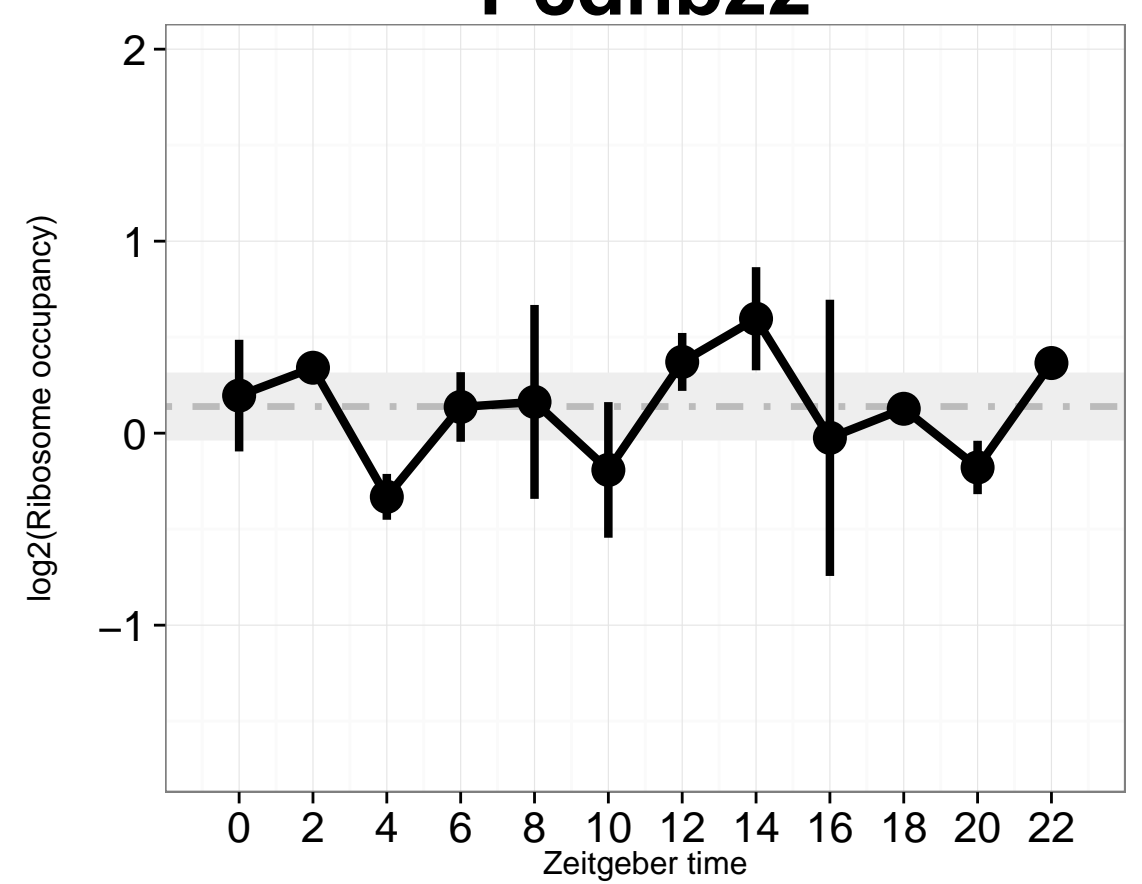

Supplement: Supplementary file 7277 [file 1]

## Zfand4

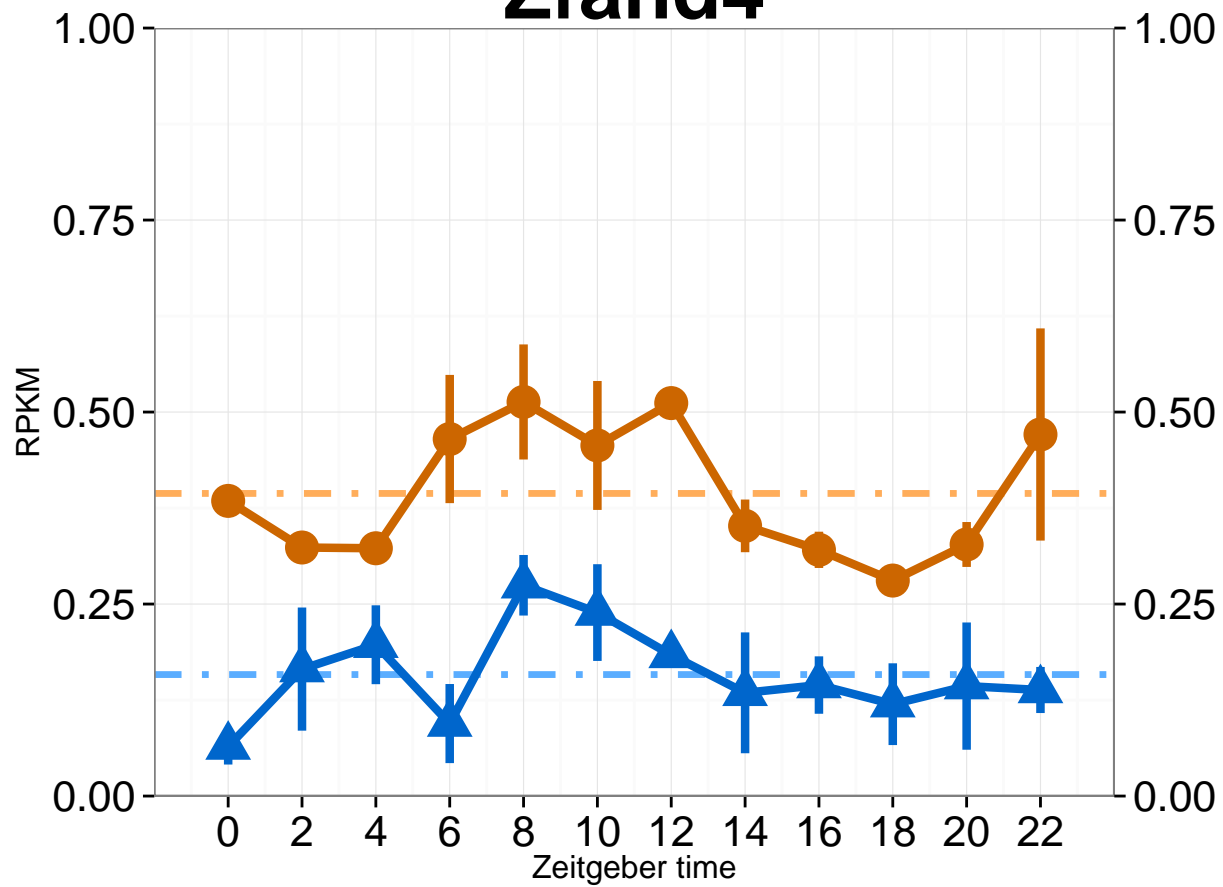

## Zfand4

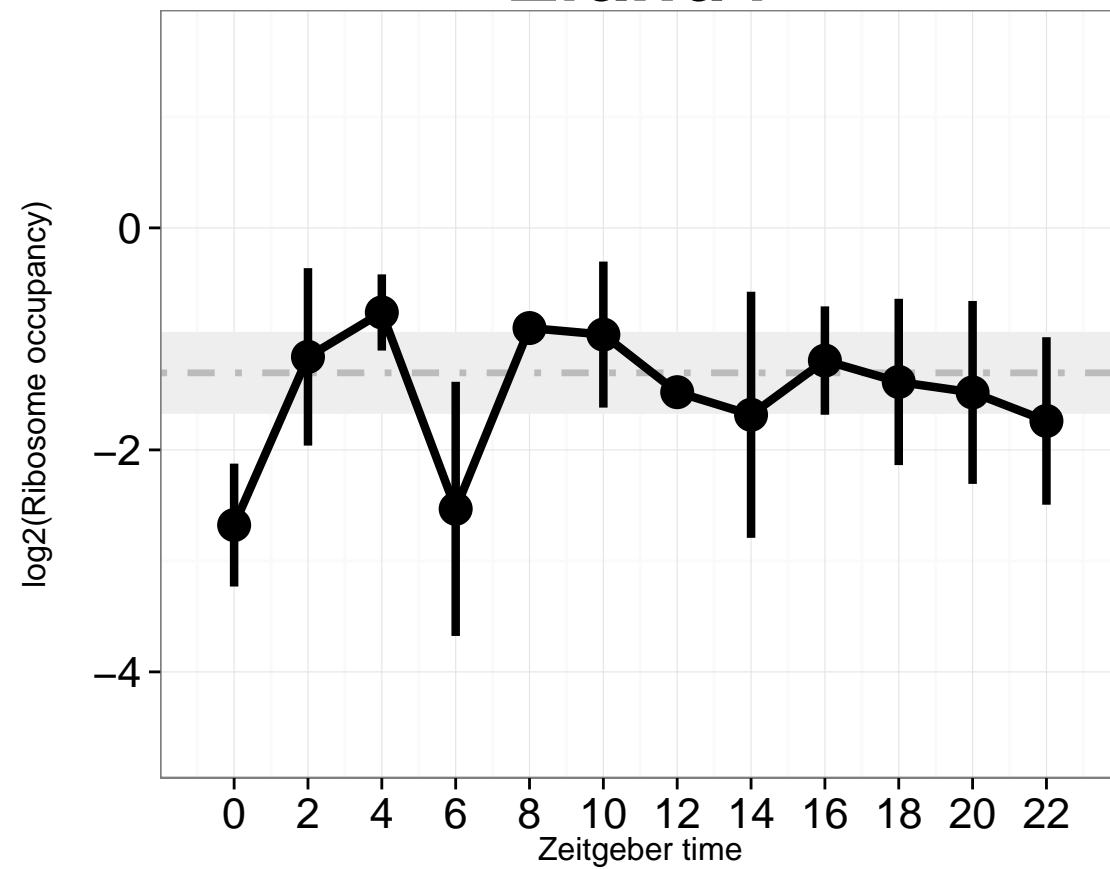

Supplement: Supplementary file 7278 [file 1]

## Hecw2

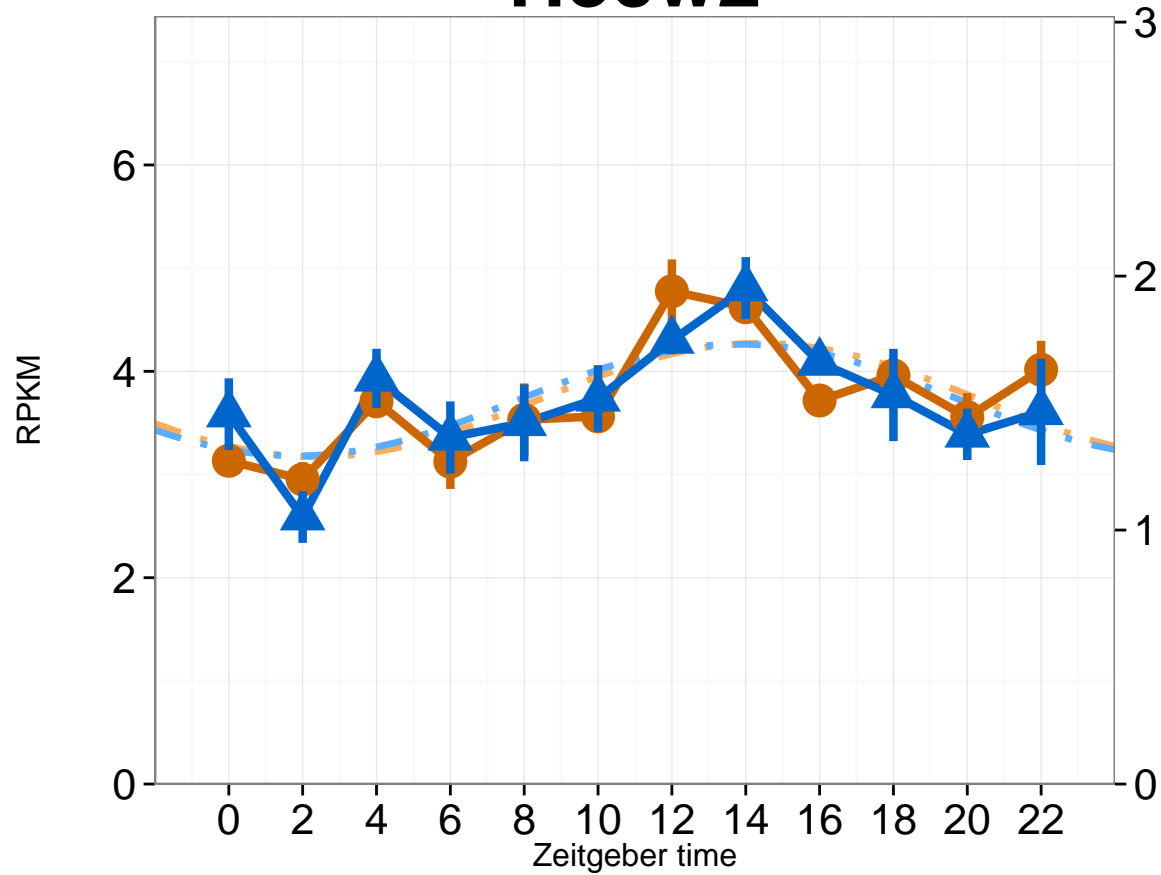

## Hecw2

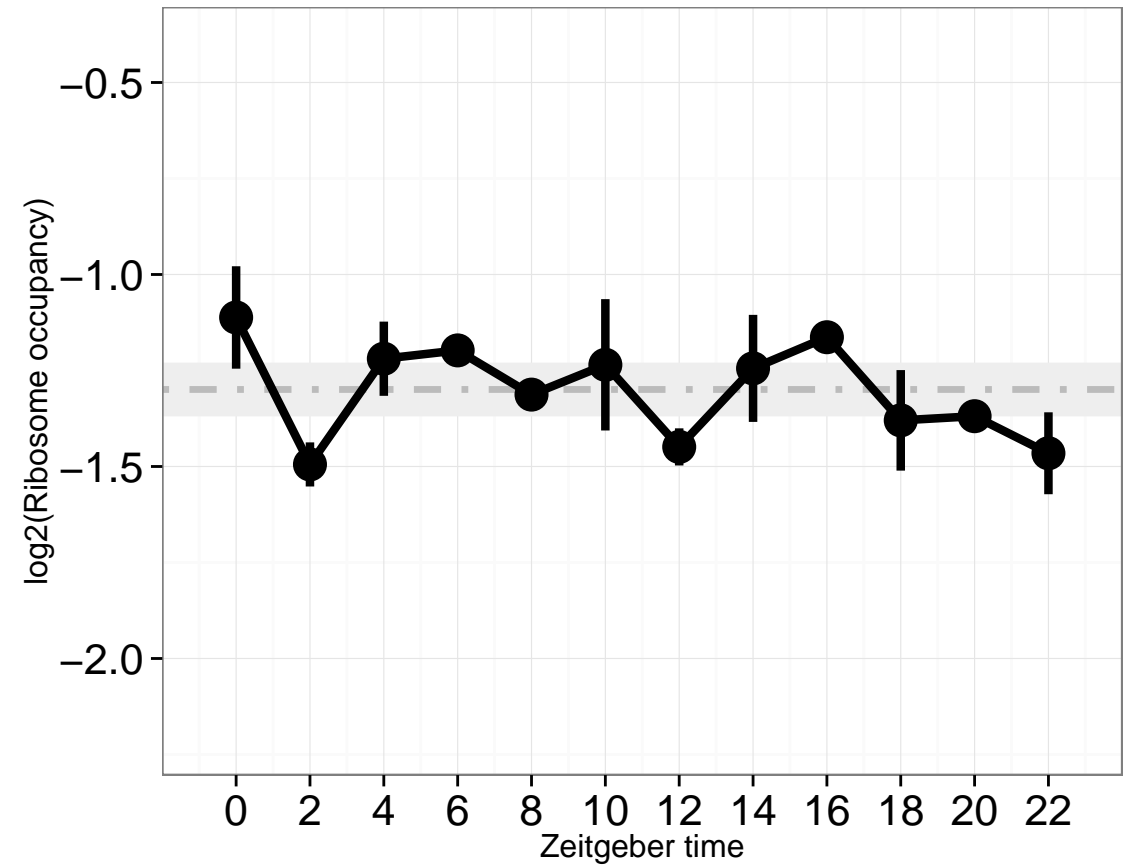

Supplement: Supplementary file 7279 [file 1]

## Emx1

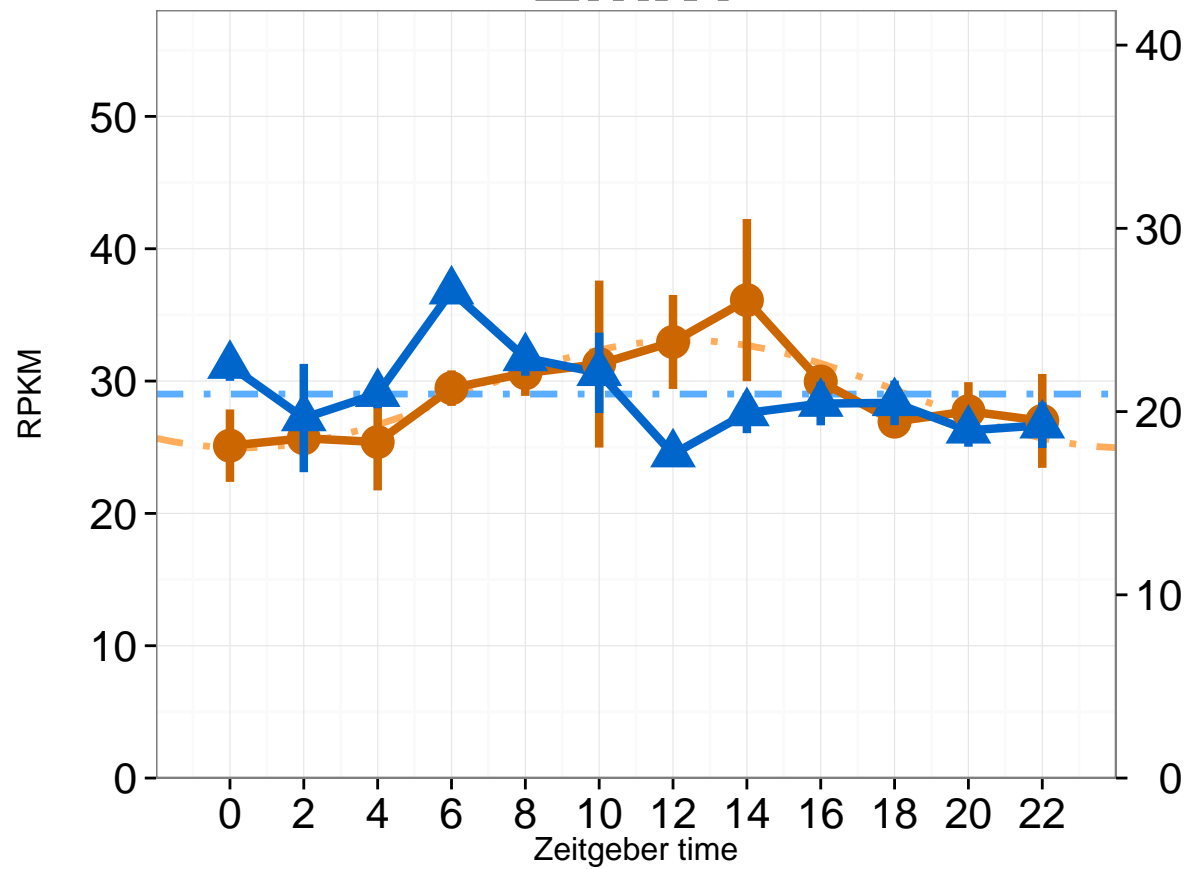

## Emx1

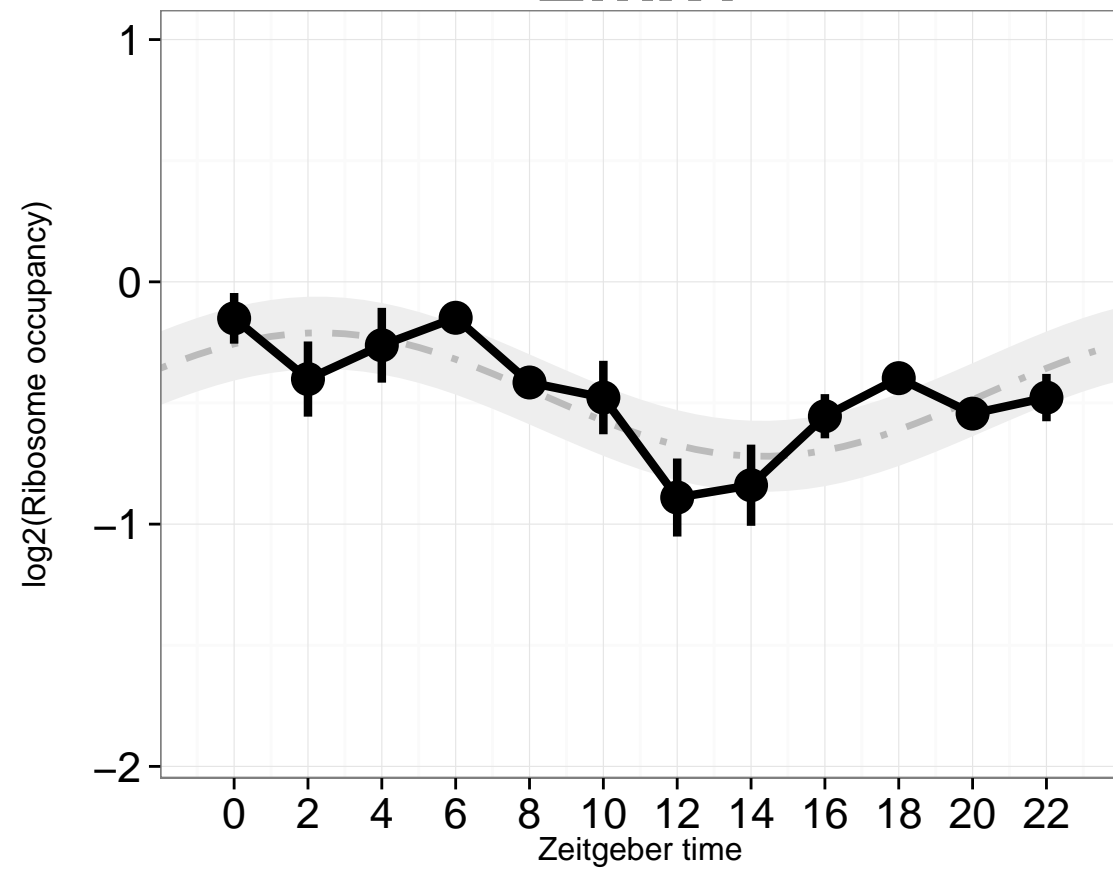

Supplement: Supplementary file 7280 [file 1]

## Phactr2

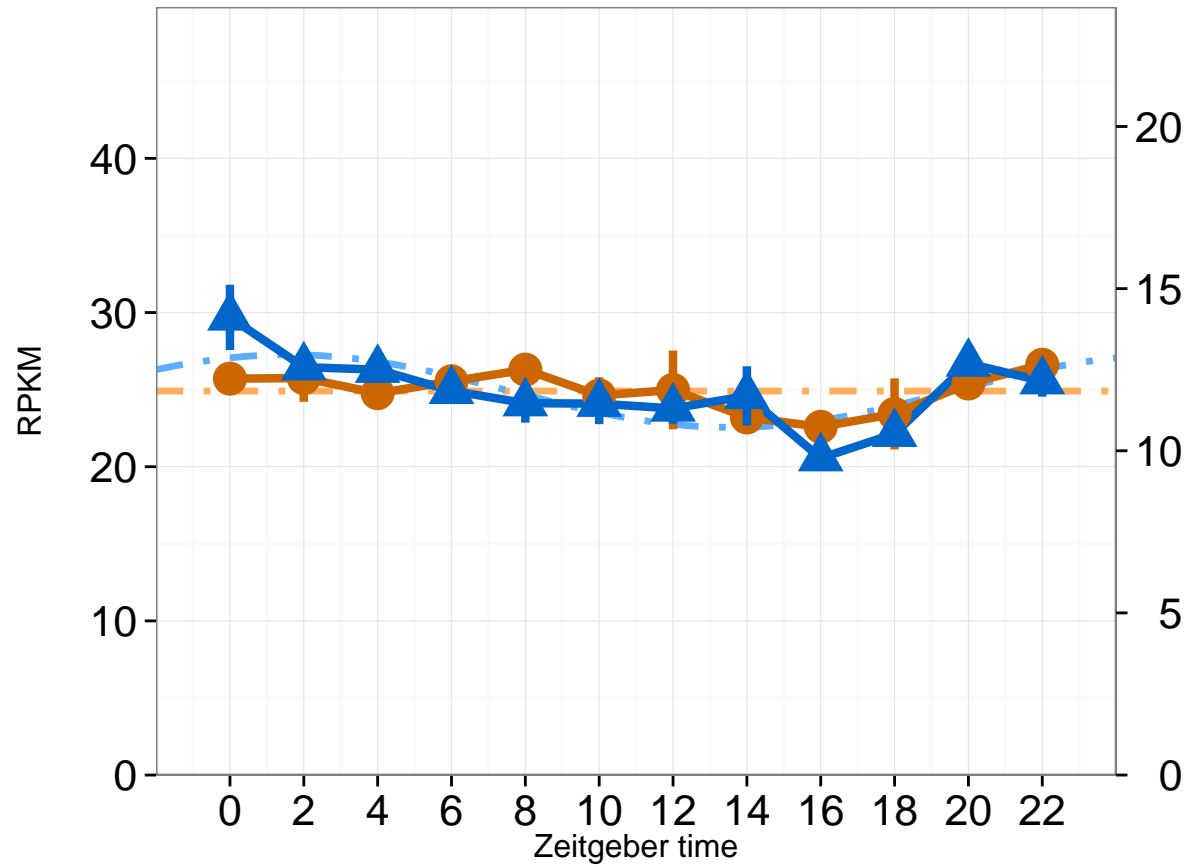

## Phactr2

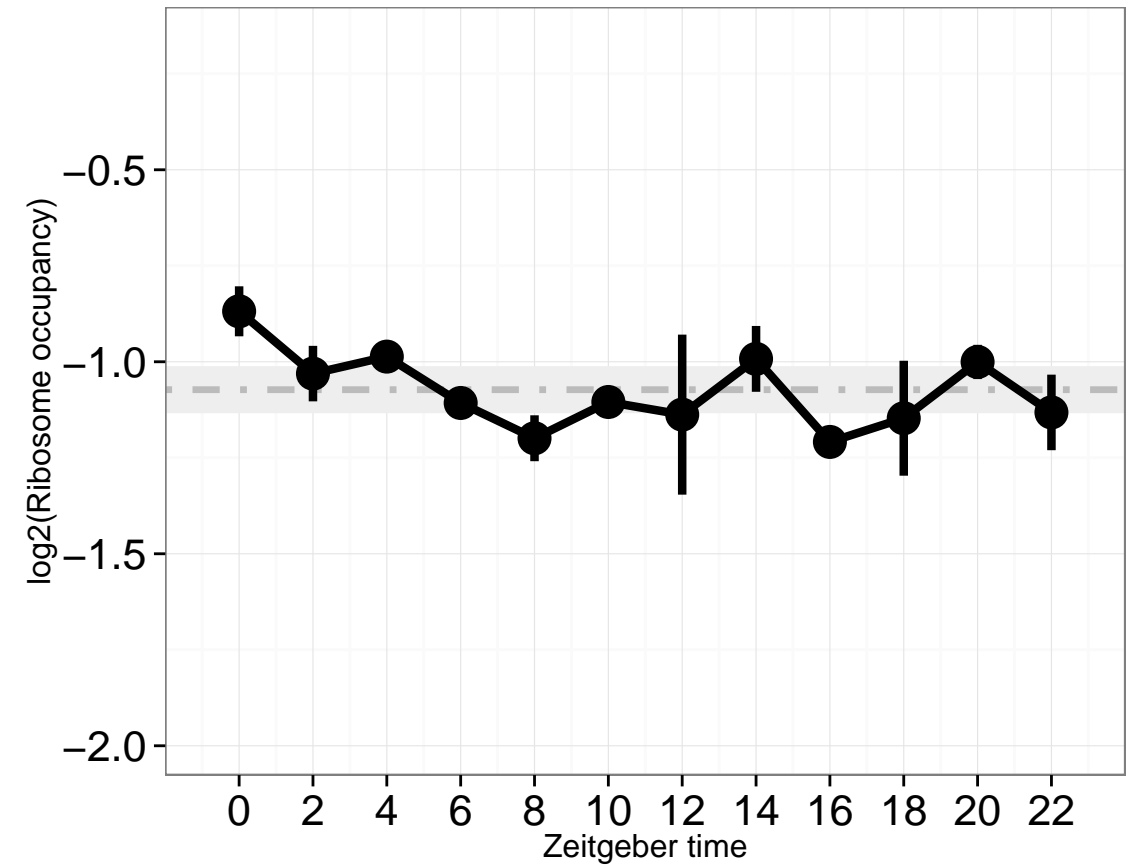

Supplement: Supplementary file 7281 [file 1]

## Gm21967

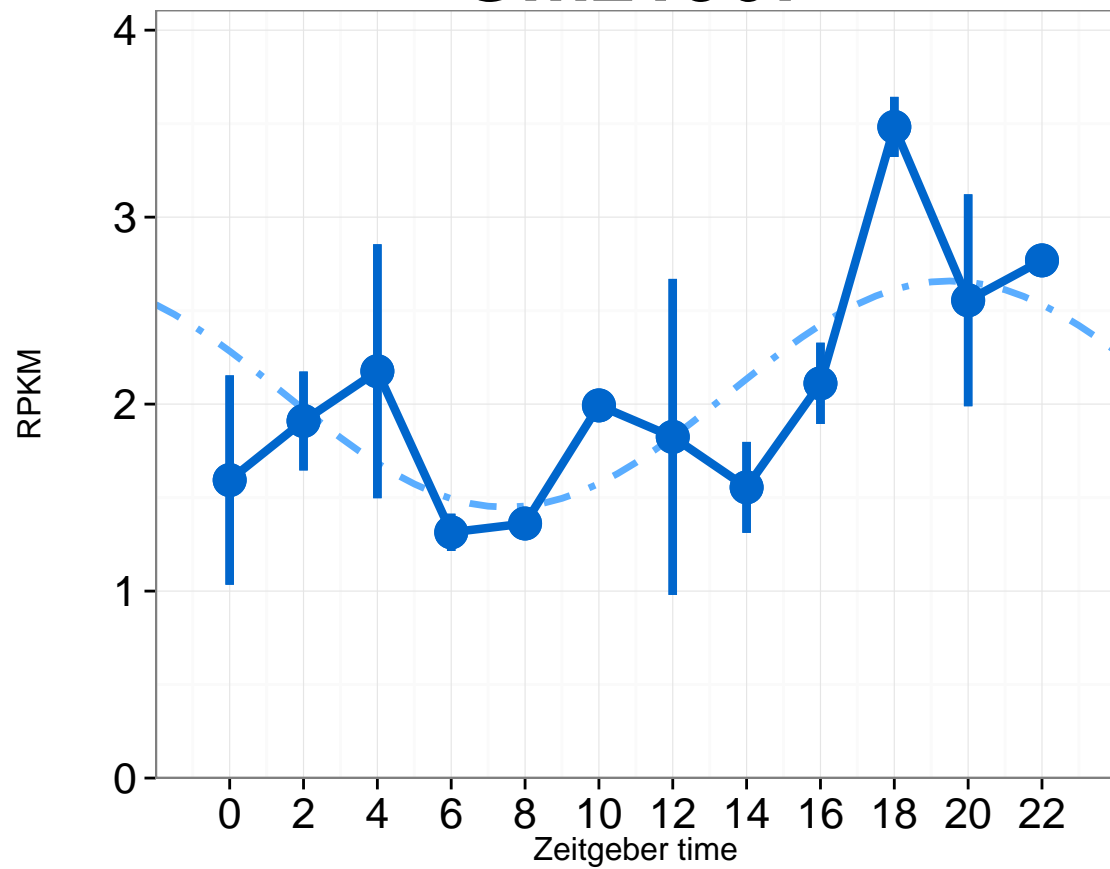

## Gm21967 log<sub>2</sub>(Ribosome occupancy)

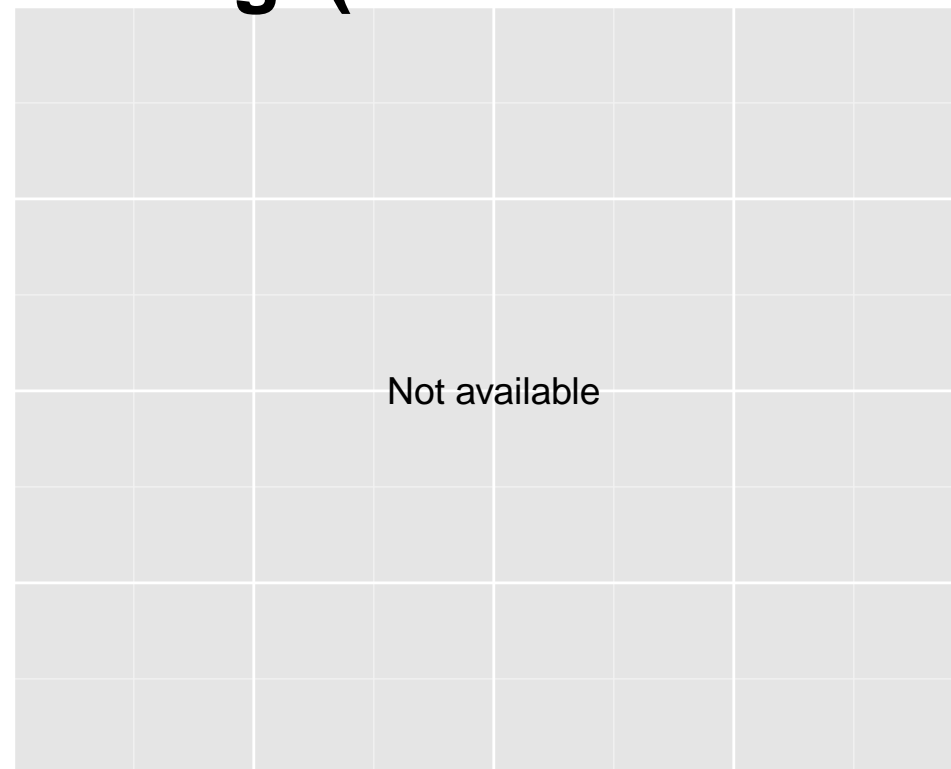

Supplement: Supplementary file 7282 [file 1]

# Wdsub1

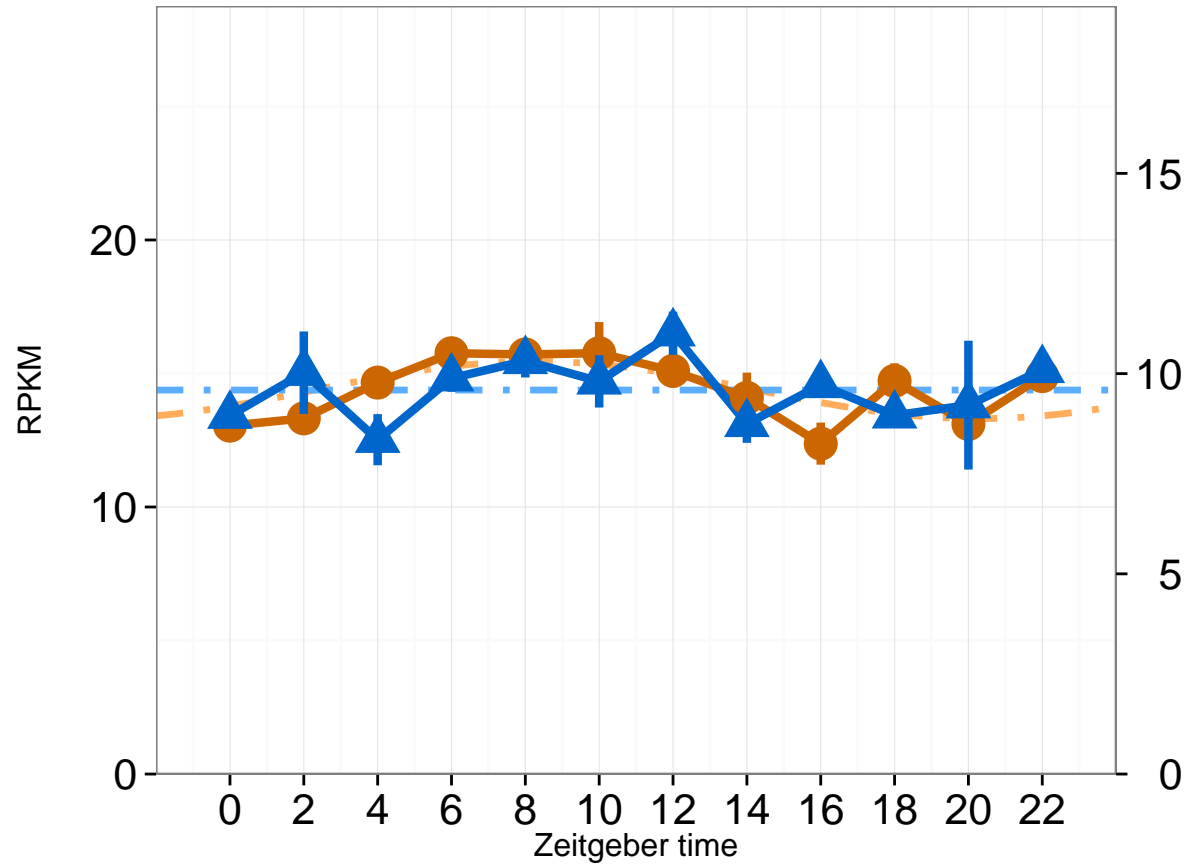

# Wdsub1

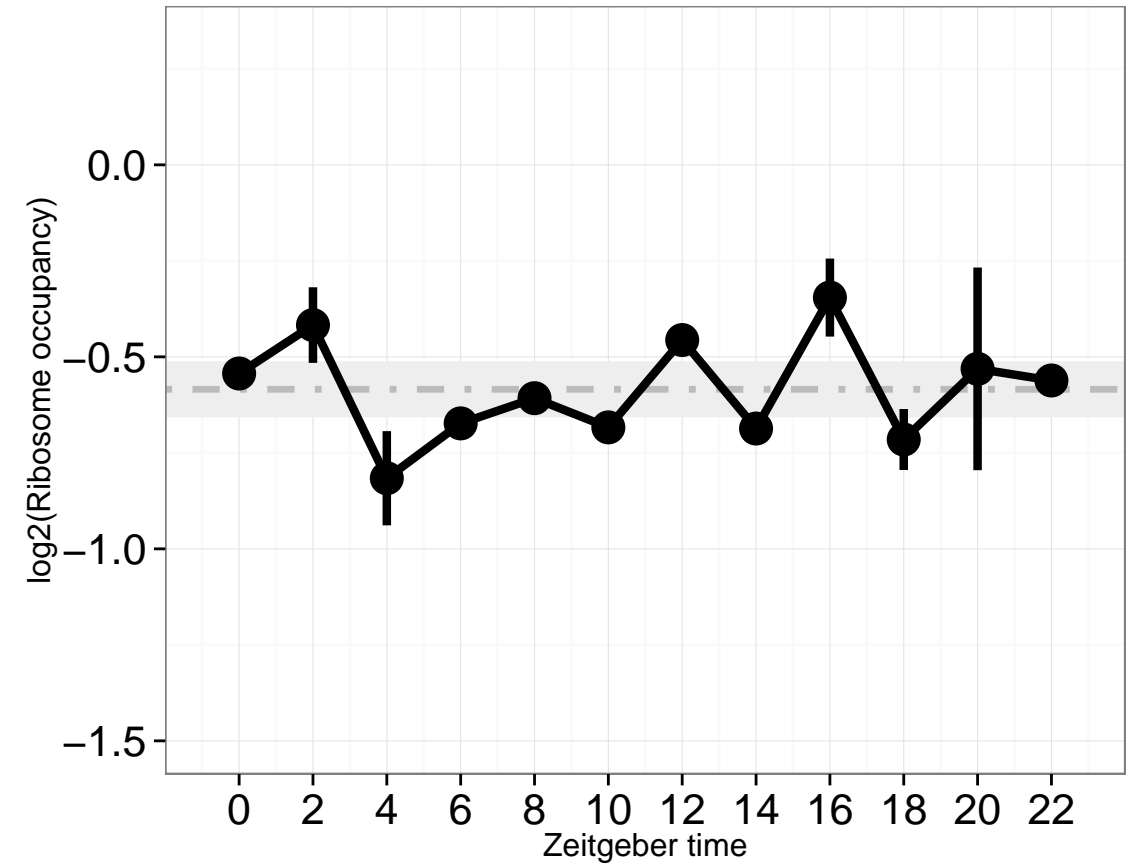

Supplement: Supplementary file 7283 [file 1]

## Smtn

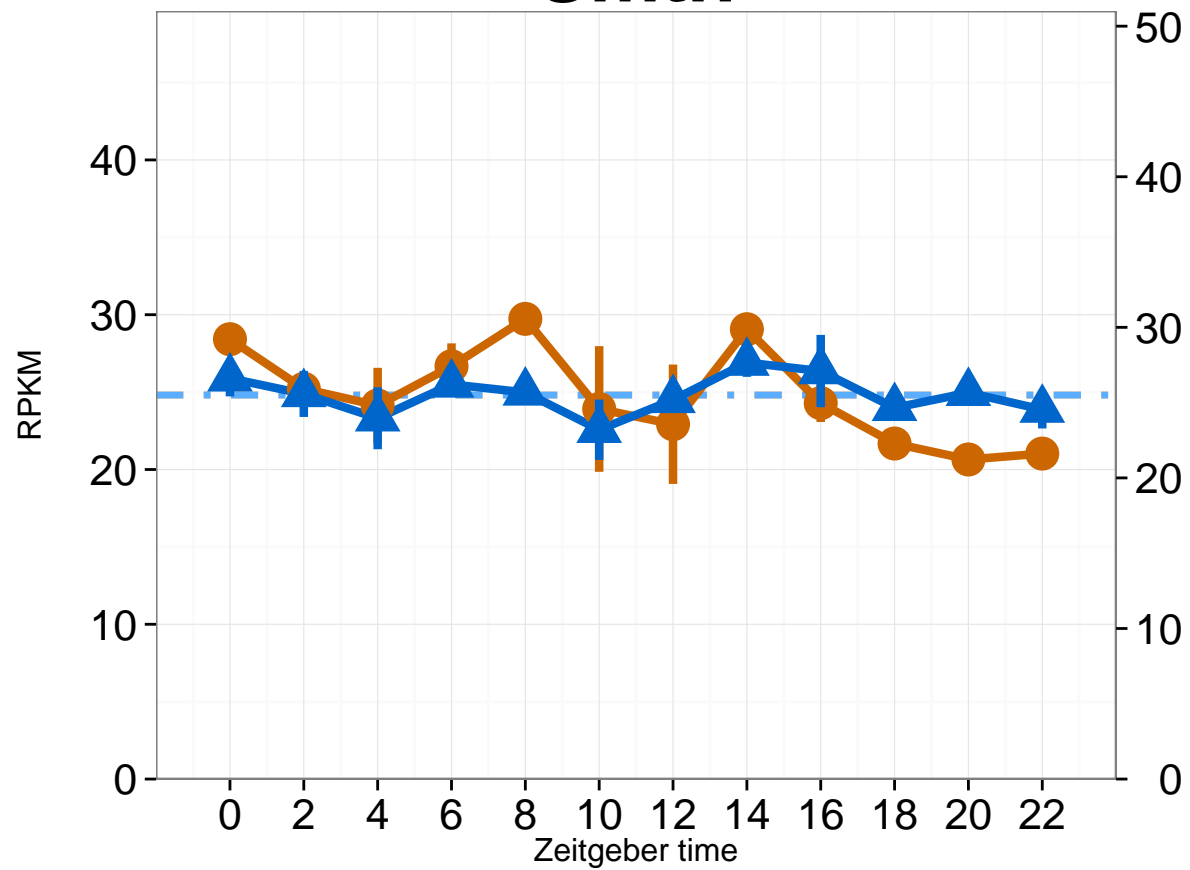

## Smtn

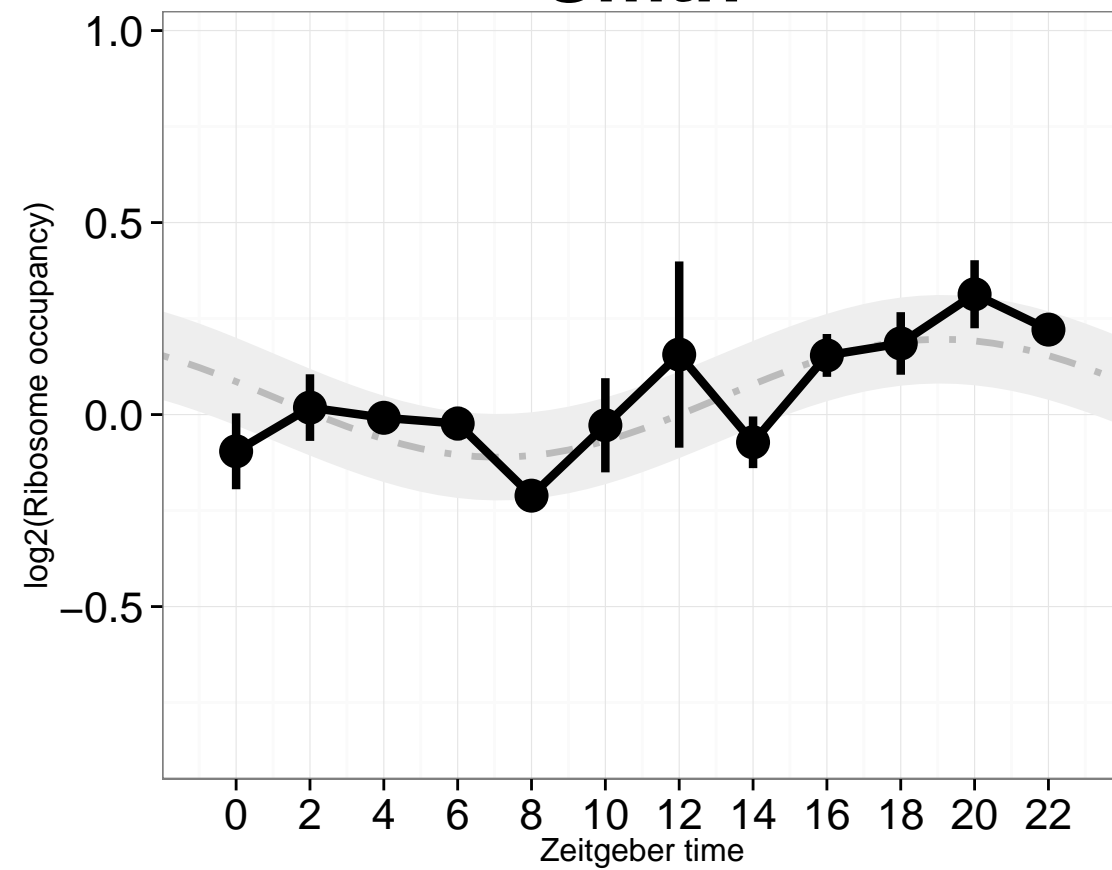

Supplement: Supplementary file 7284 [file 1]

# Clic6

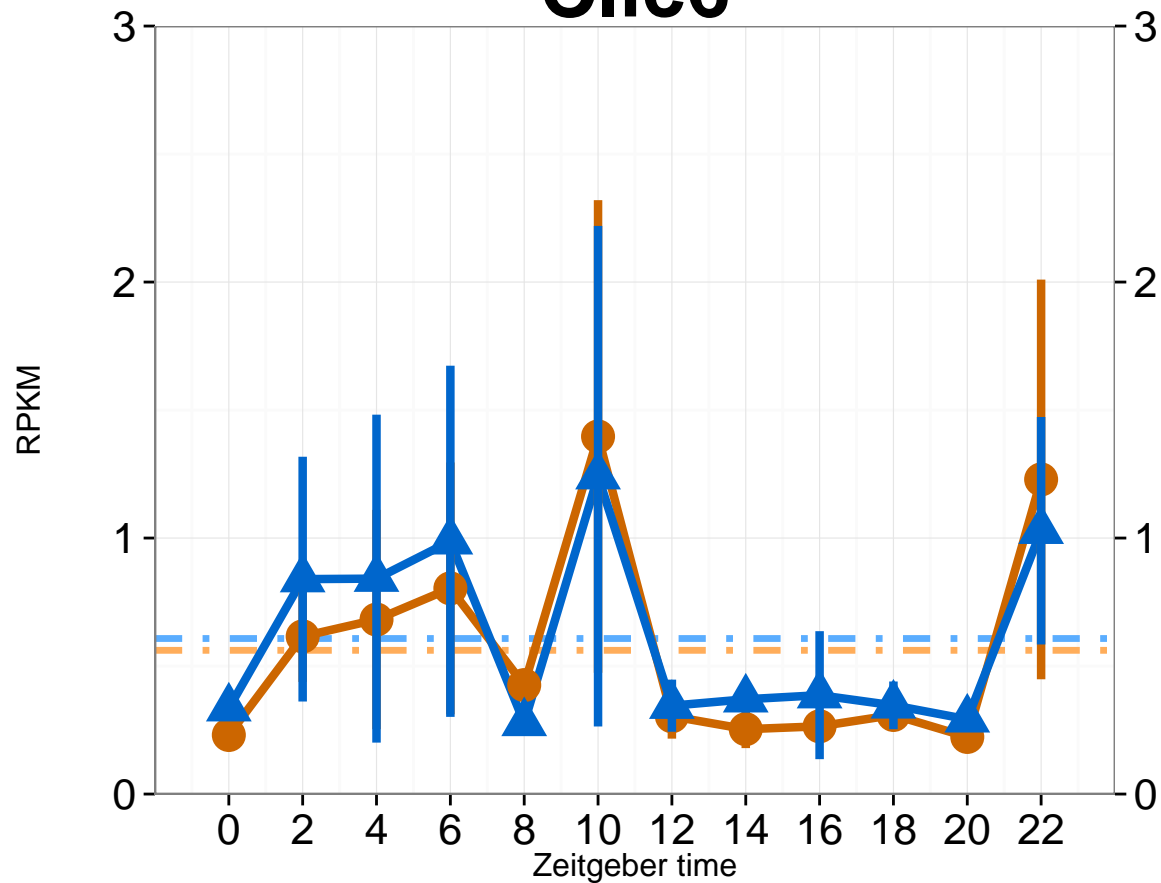

# Clic6

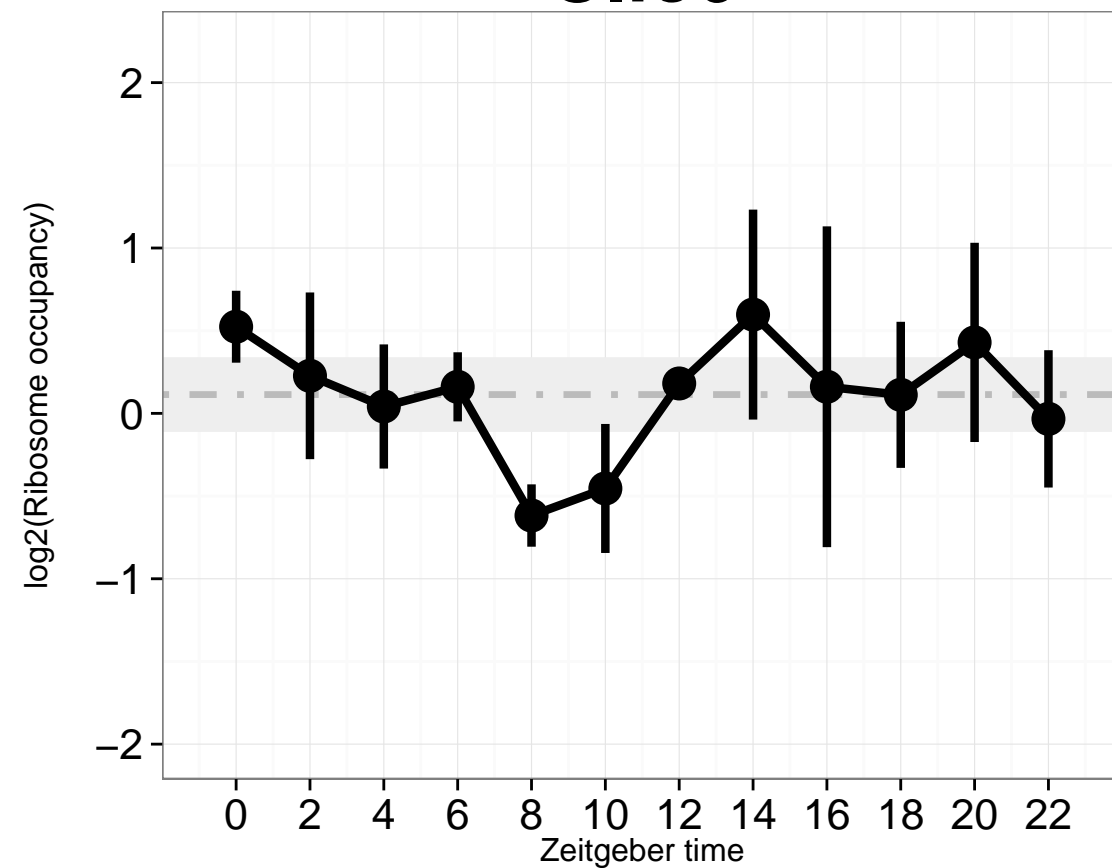

Supplement: Supplementary file 7285 [file 1]

## Xkr6

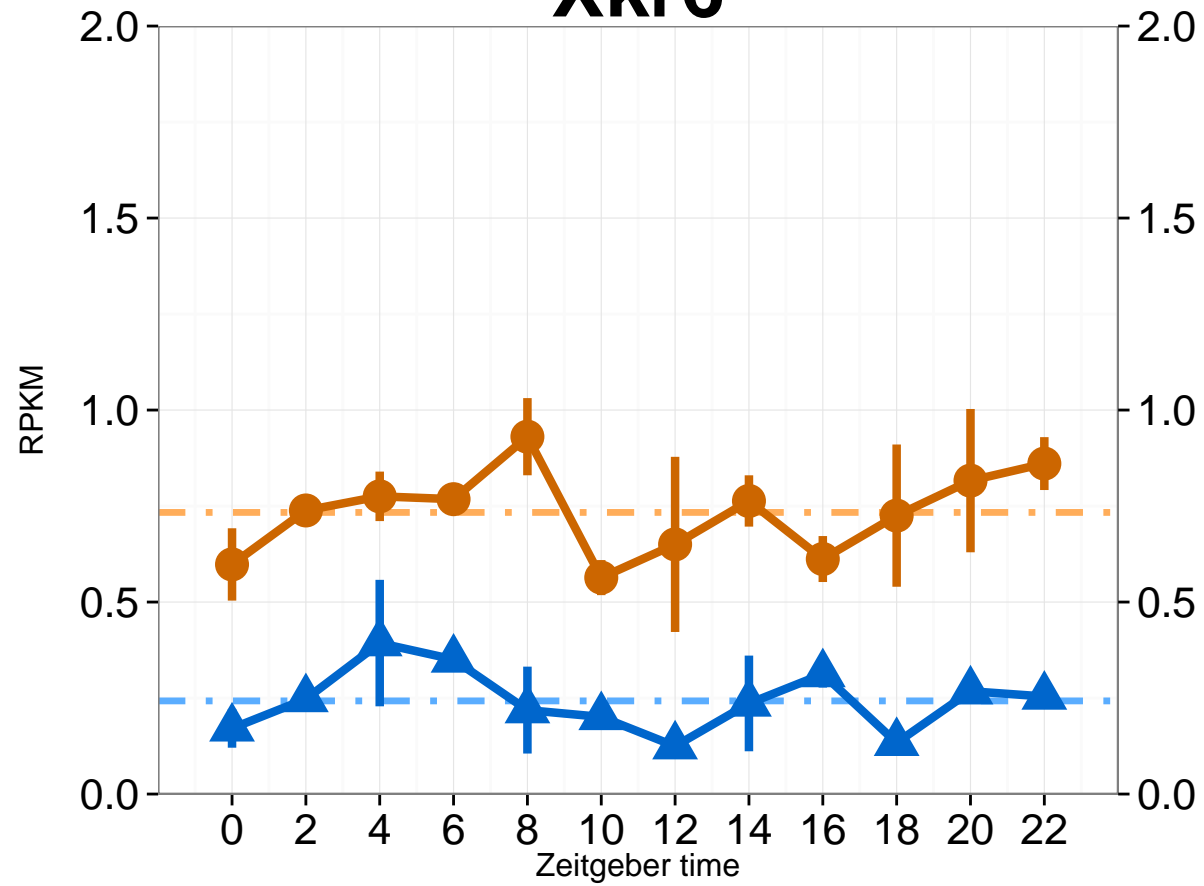

## Xkr6

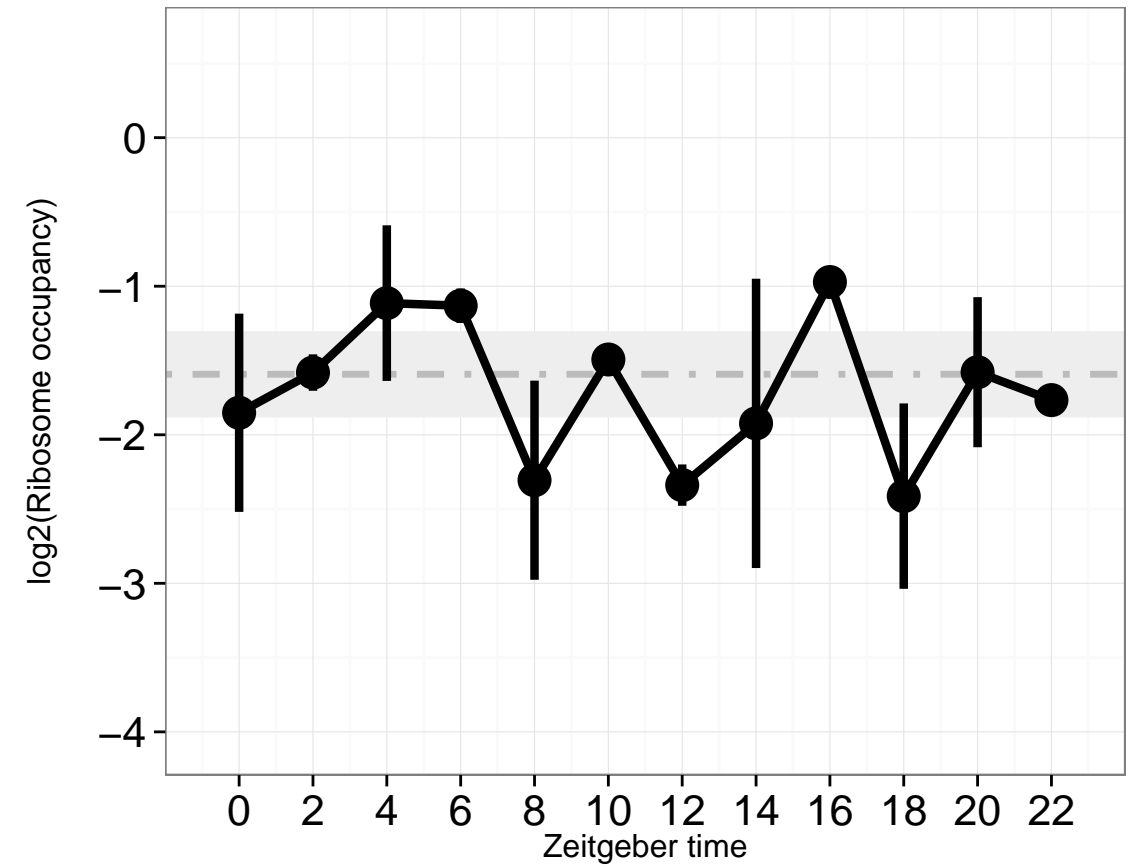

Supplement: Supplementary file 7286 [file 1]

## Fars2

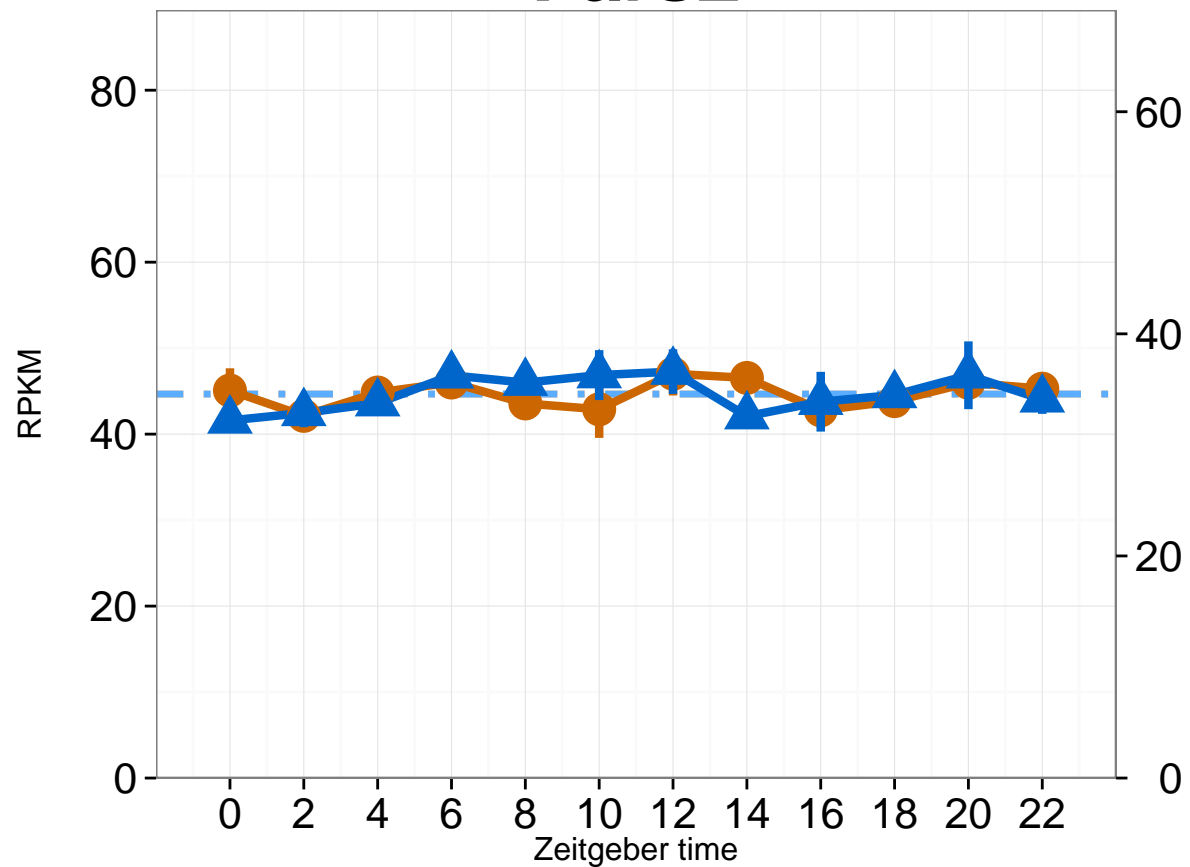

## Fars2

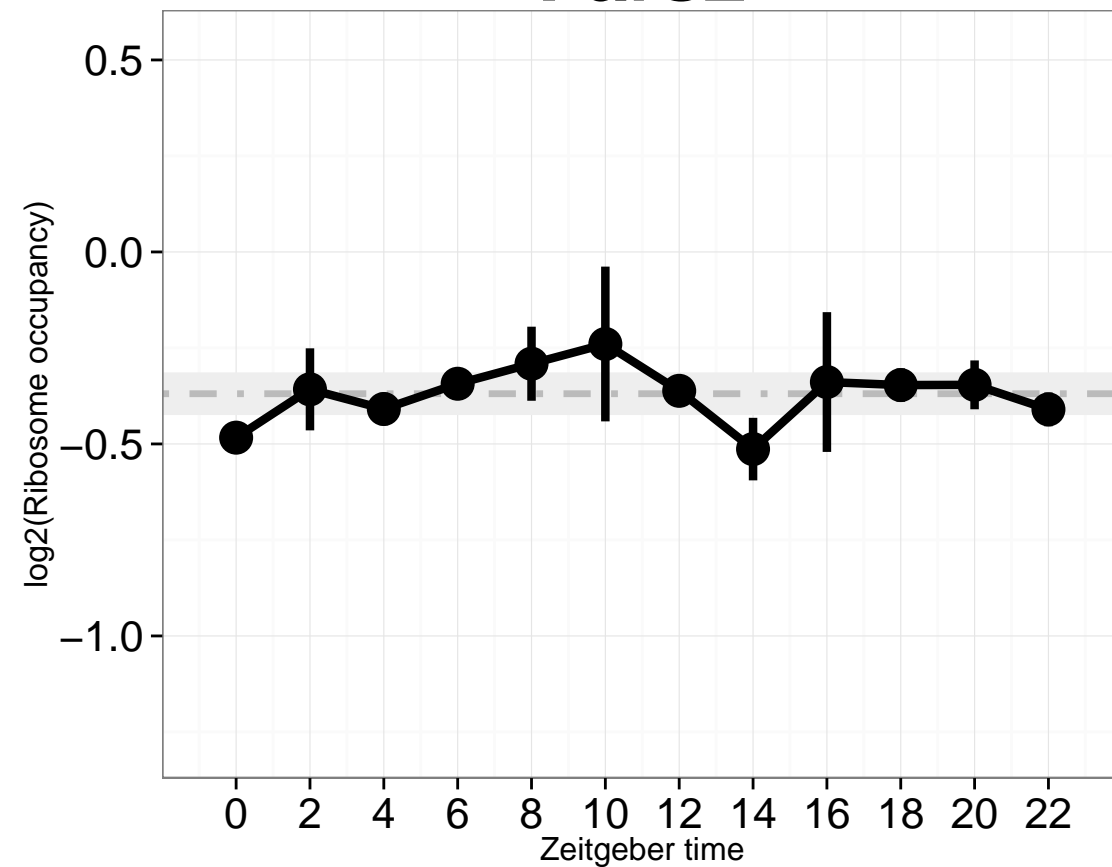

Supplement: Supplementary file 7287 [file 1]

# Egln1

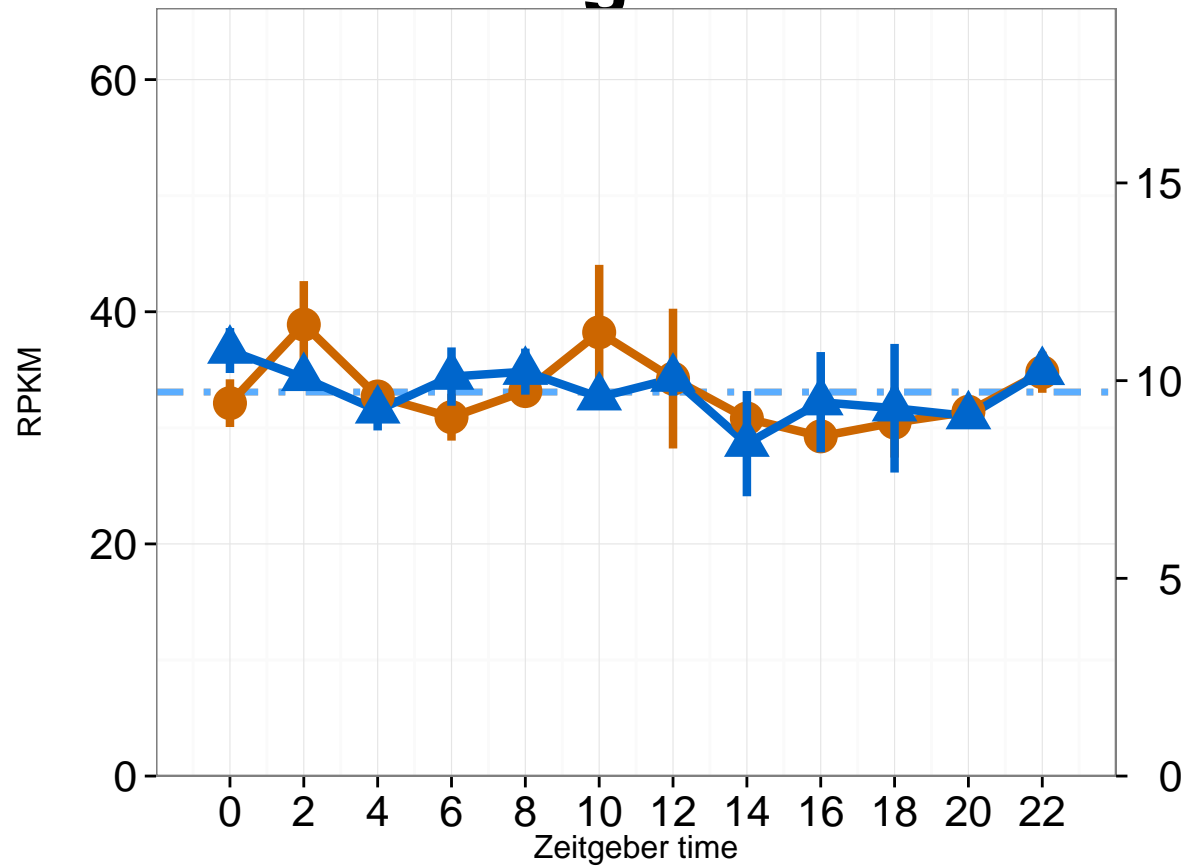

# Egln1

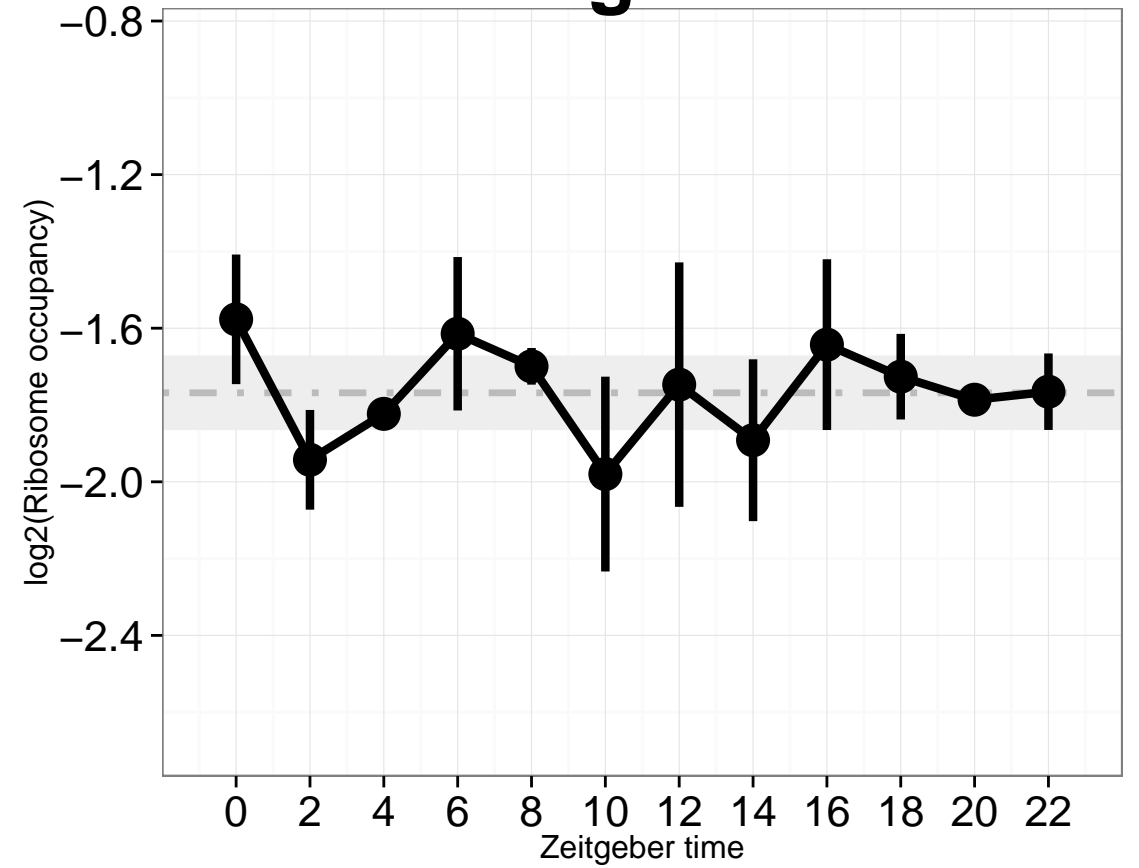

Supplement: Supplementary file 7288 [file 1]

## Snx9

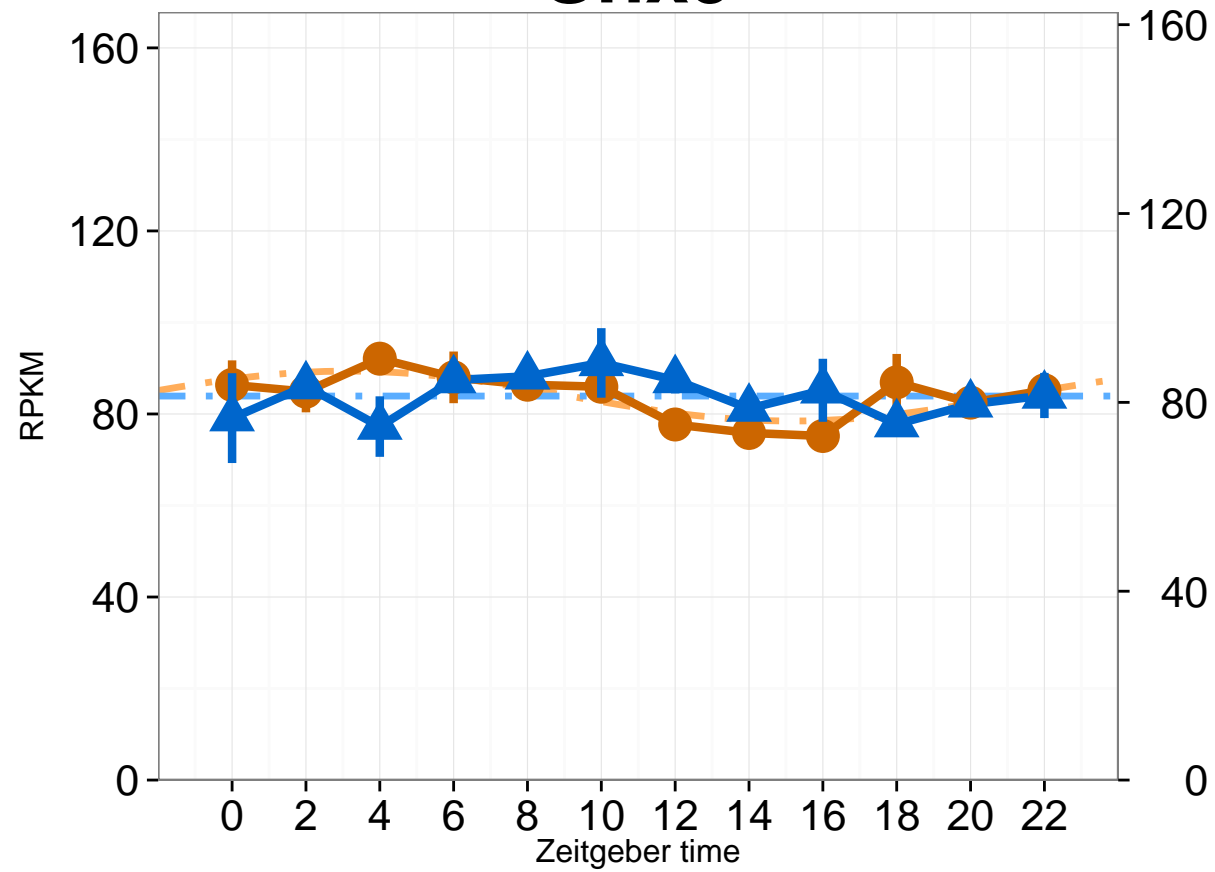

## Snx9

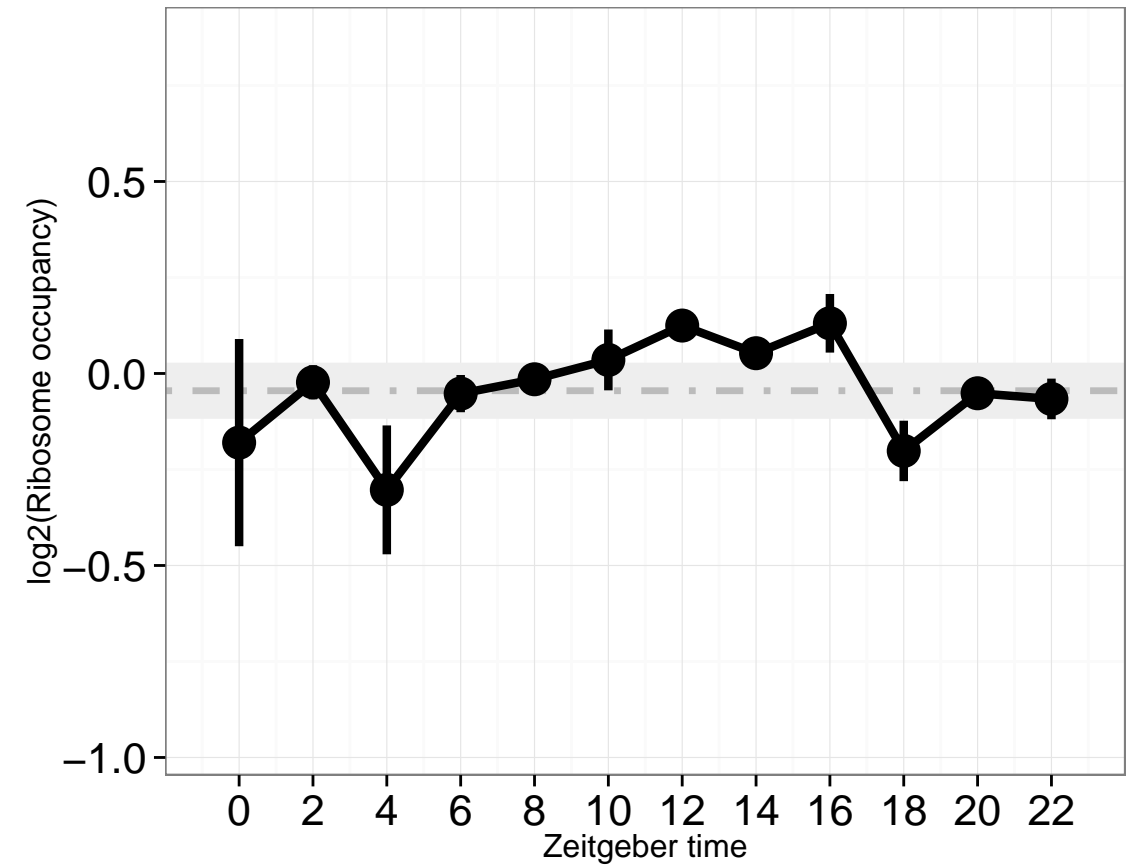

Supplement: Supplementary file 7289 [file 1]

# Utp14a

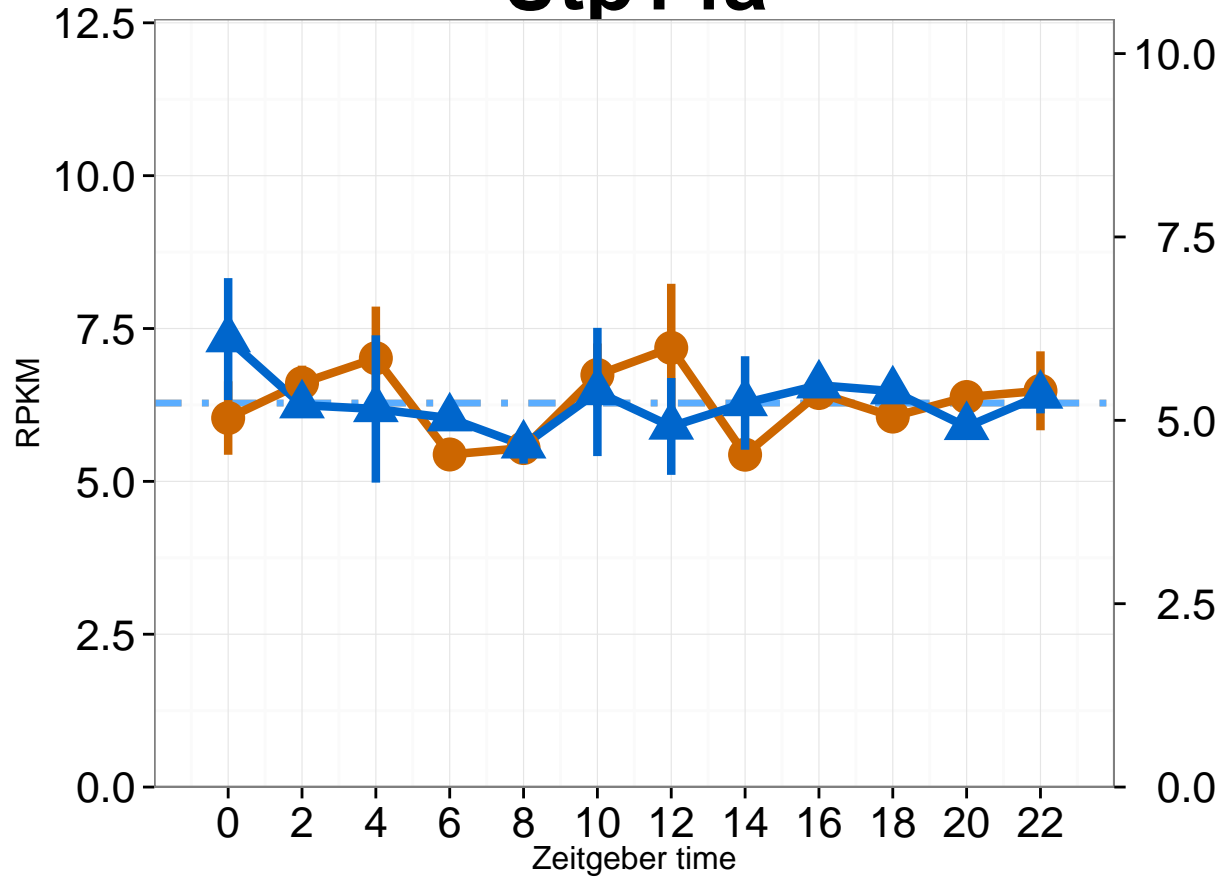

# Utp14a

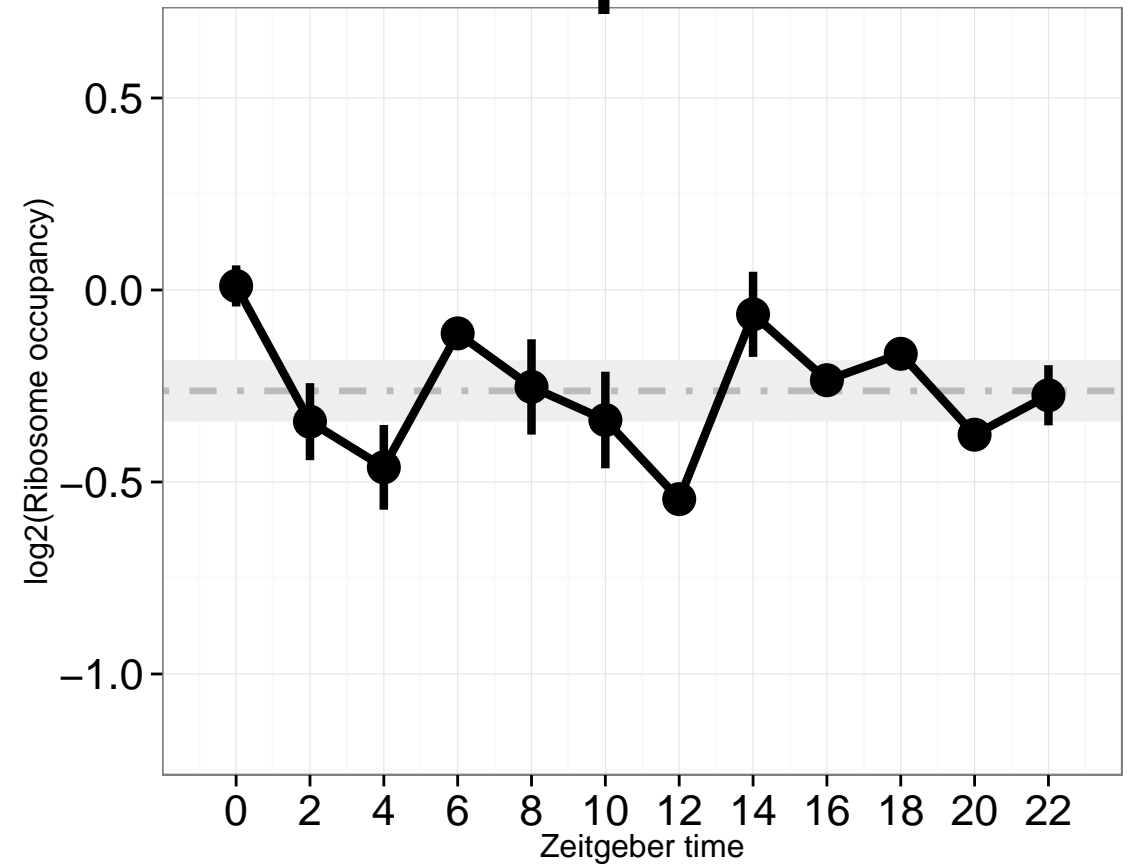

Supplement: Supplementary file 7290 [file 1]

# Sec23a

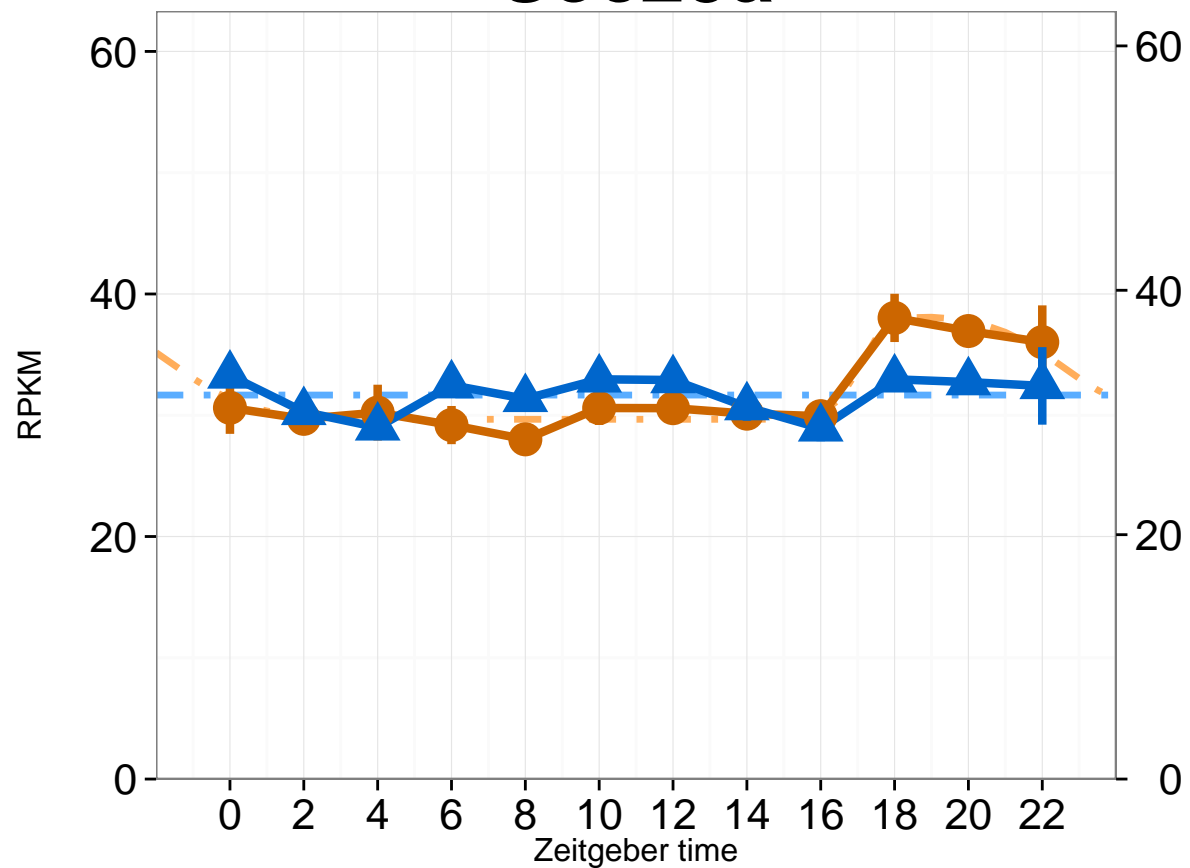

# Sec23a

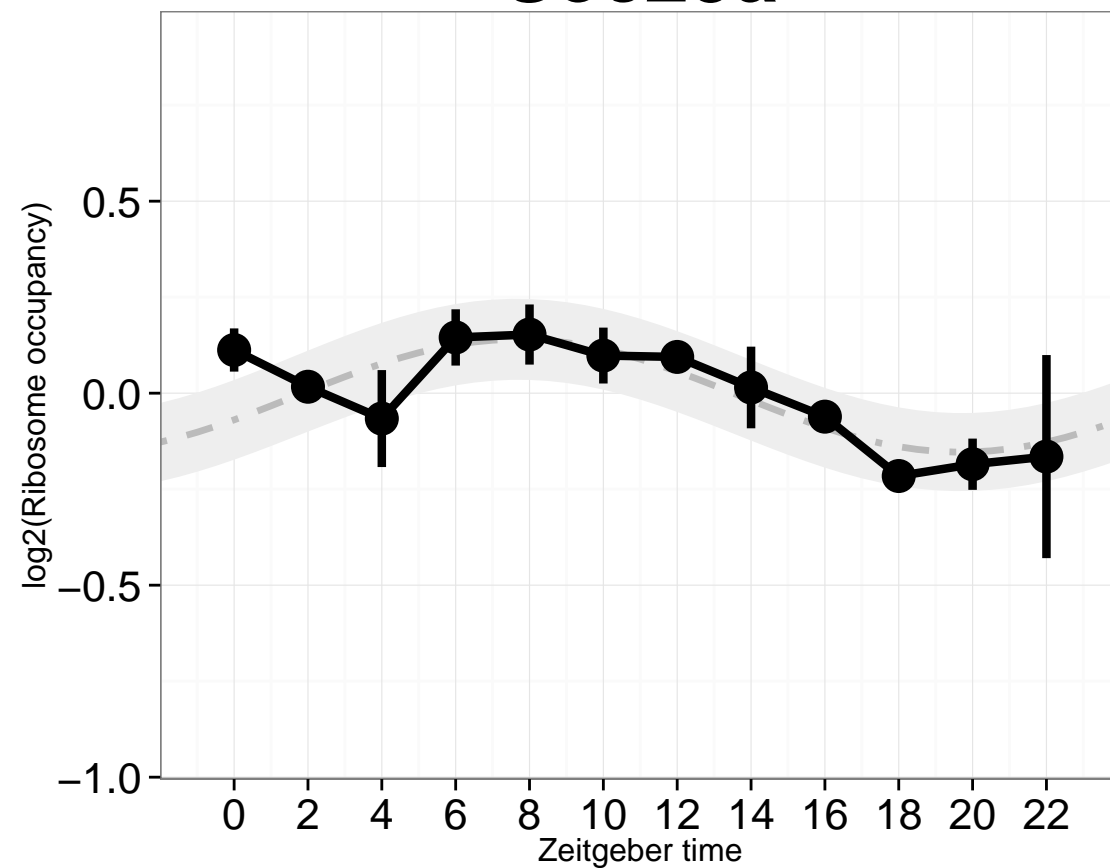

Supplement: Supplementary file 7291 [file 1]

## Cd48

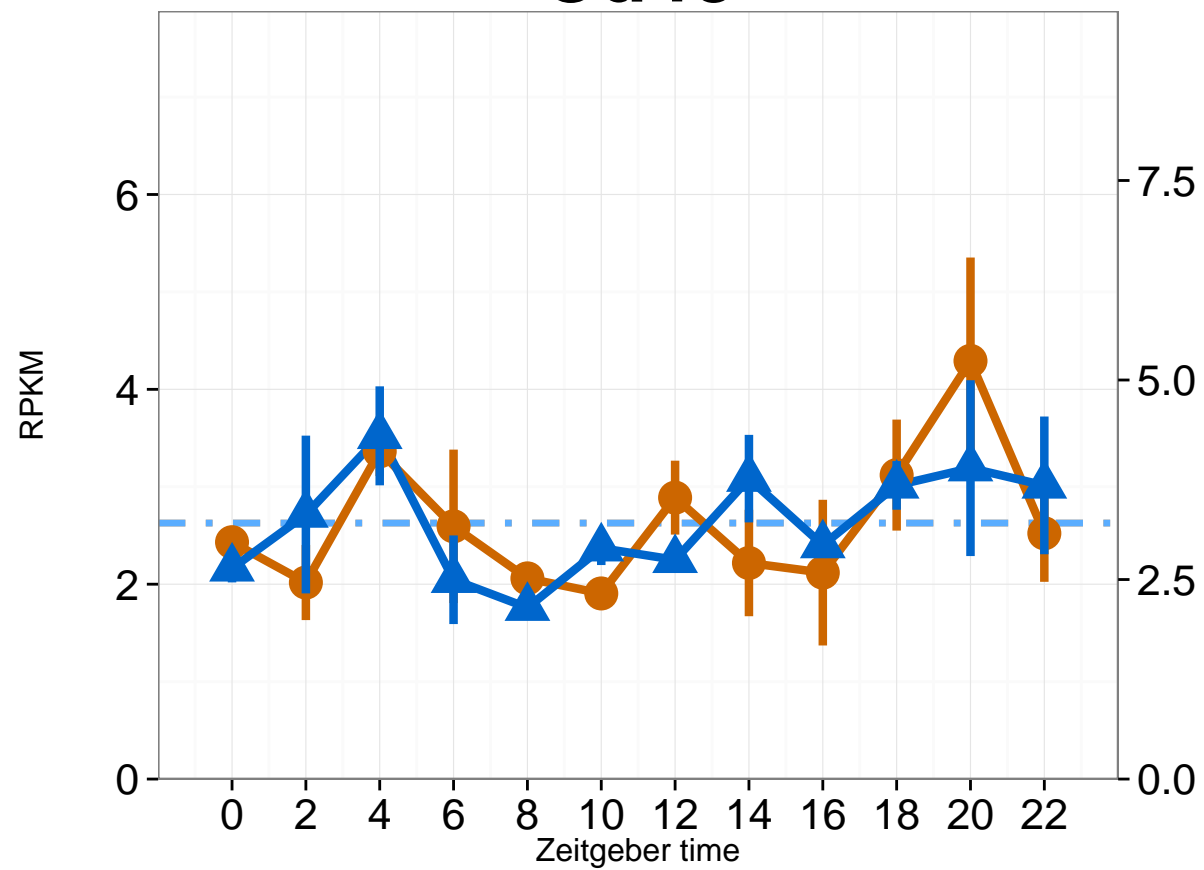

## Cd48

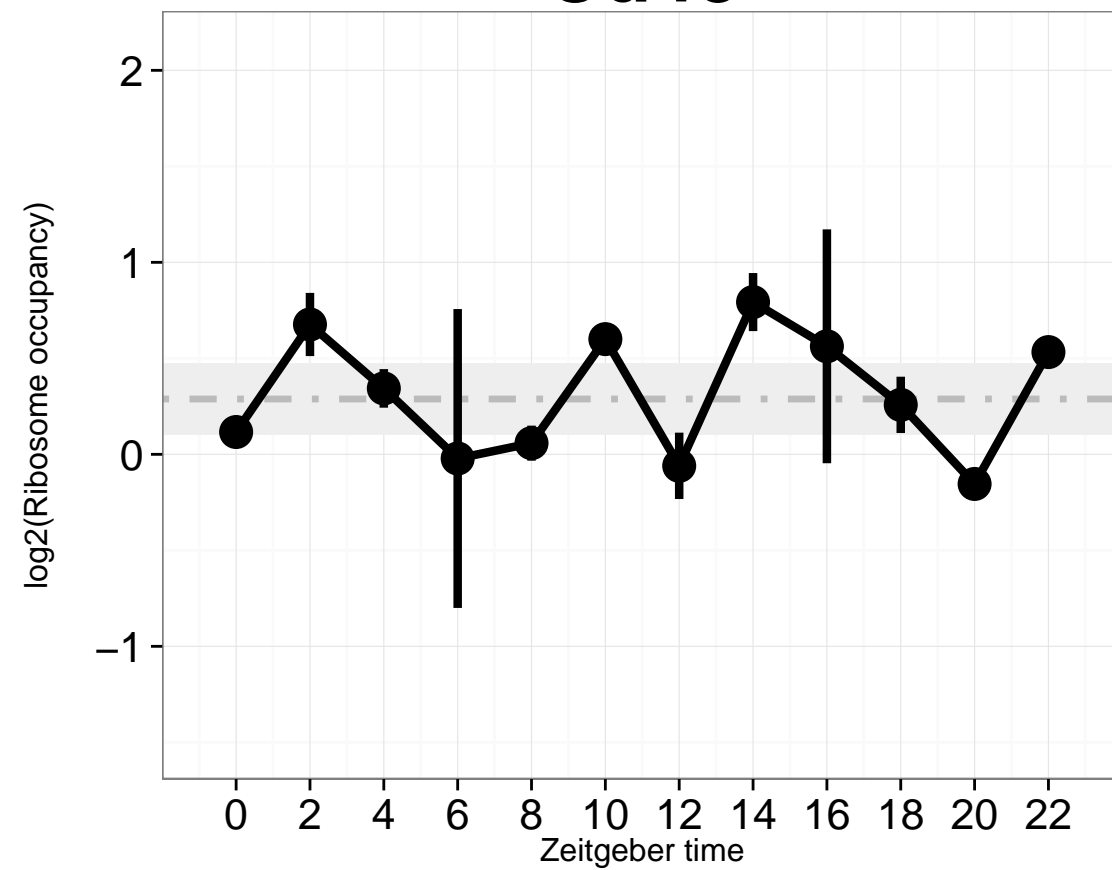

Supplement: Supplementary file 7292 [file 1]

## Armc7

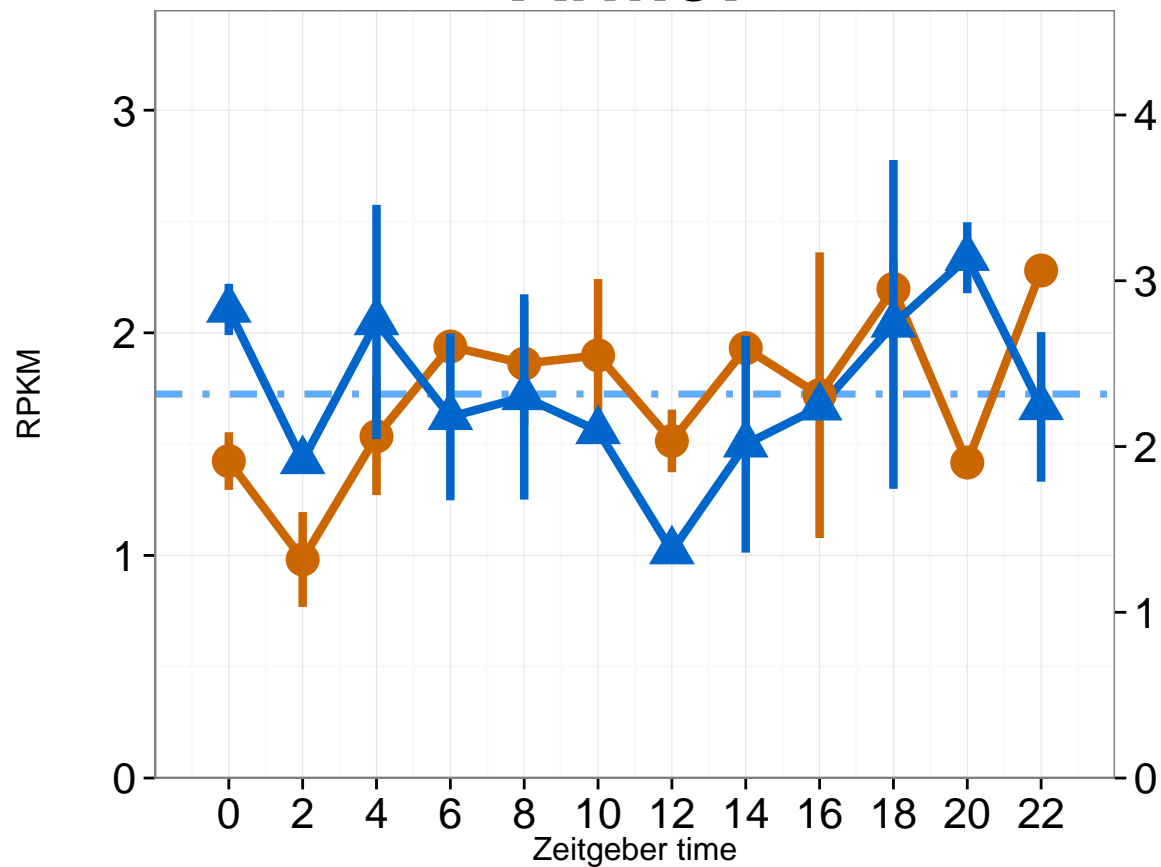

## Armc7

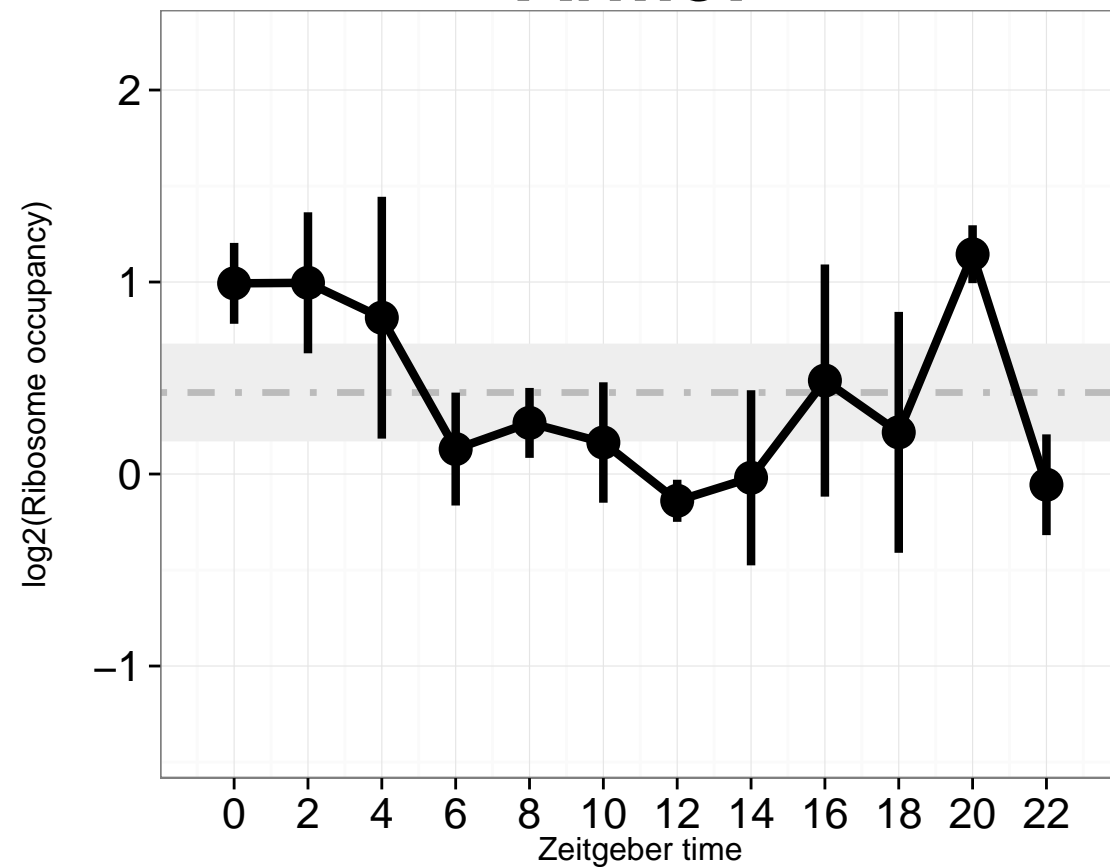

Supplement: Supplementary file 7293 [file 1]

## Rhbdd3

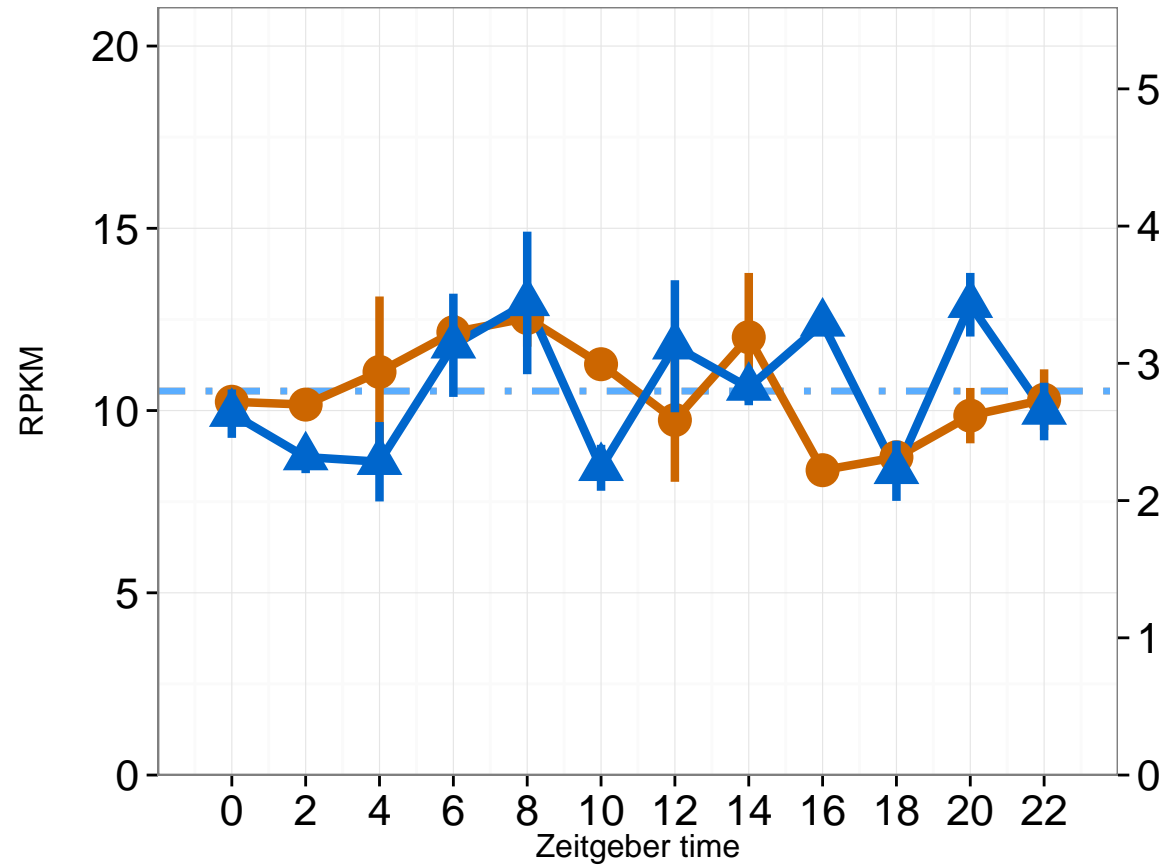

## Rhbdd3

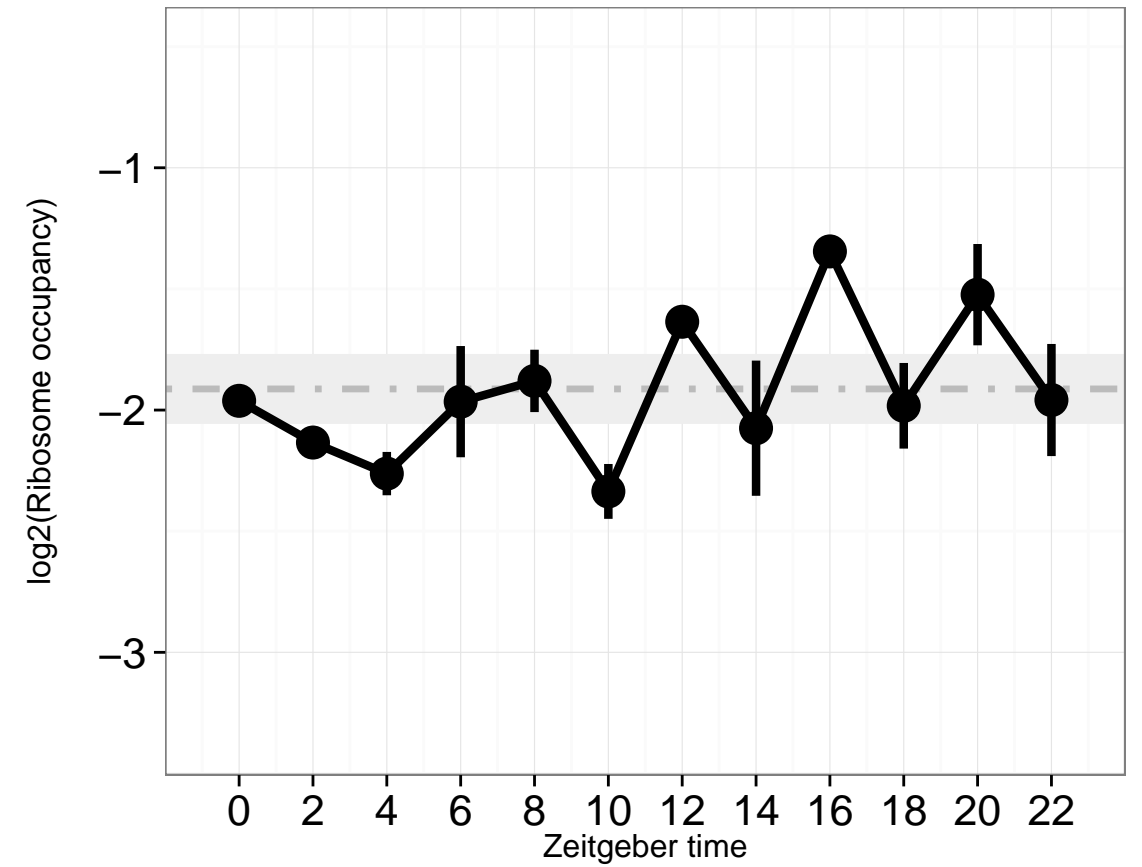

Supplement: Supplementary file 7294 [file 1]

## Cyfip2

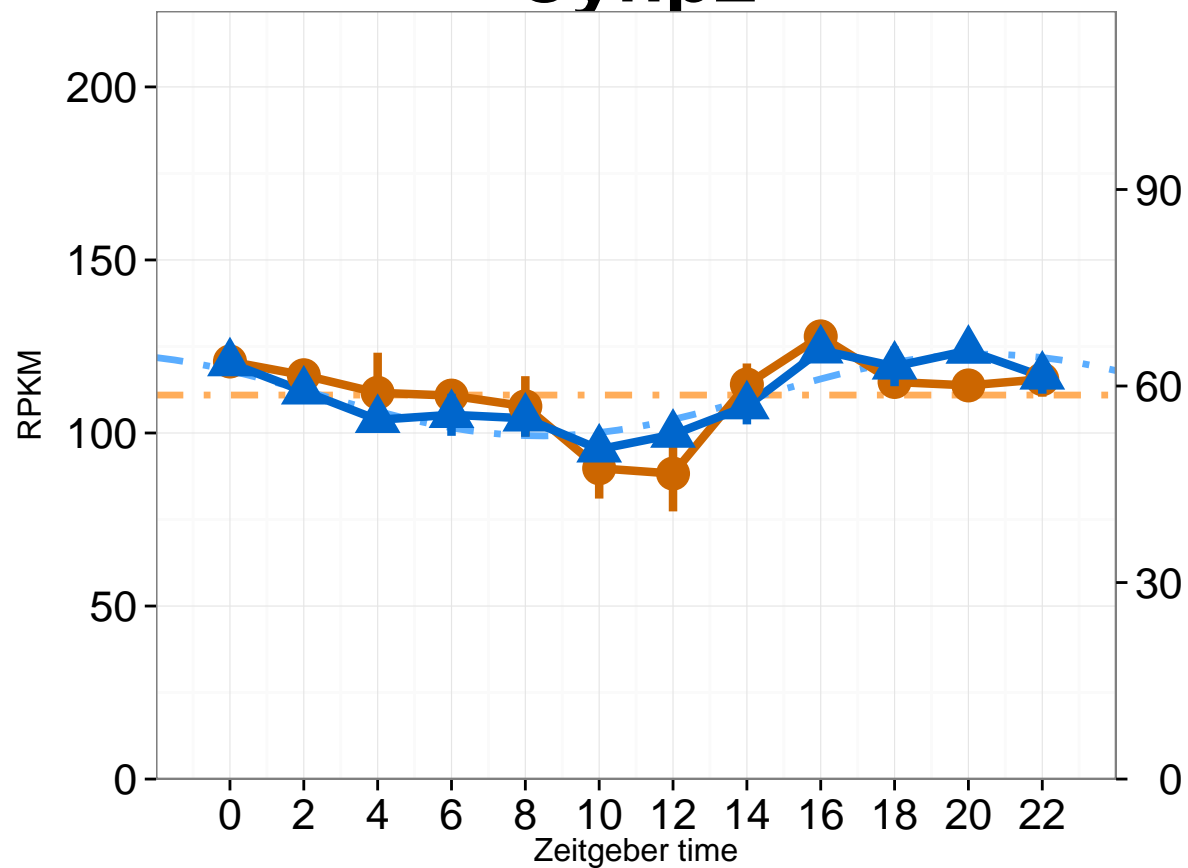

## Cyfip2

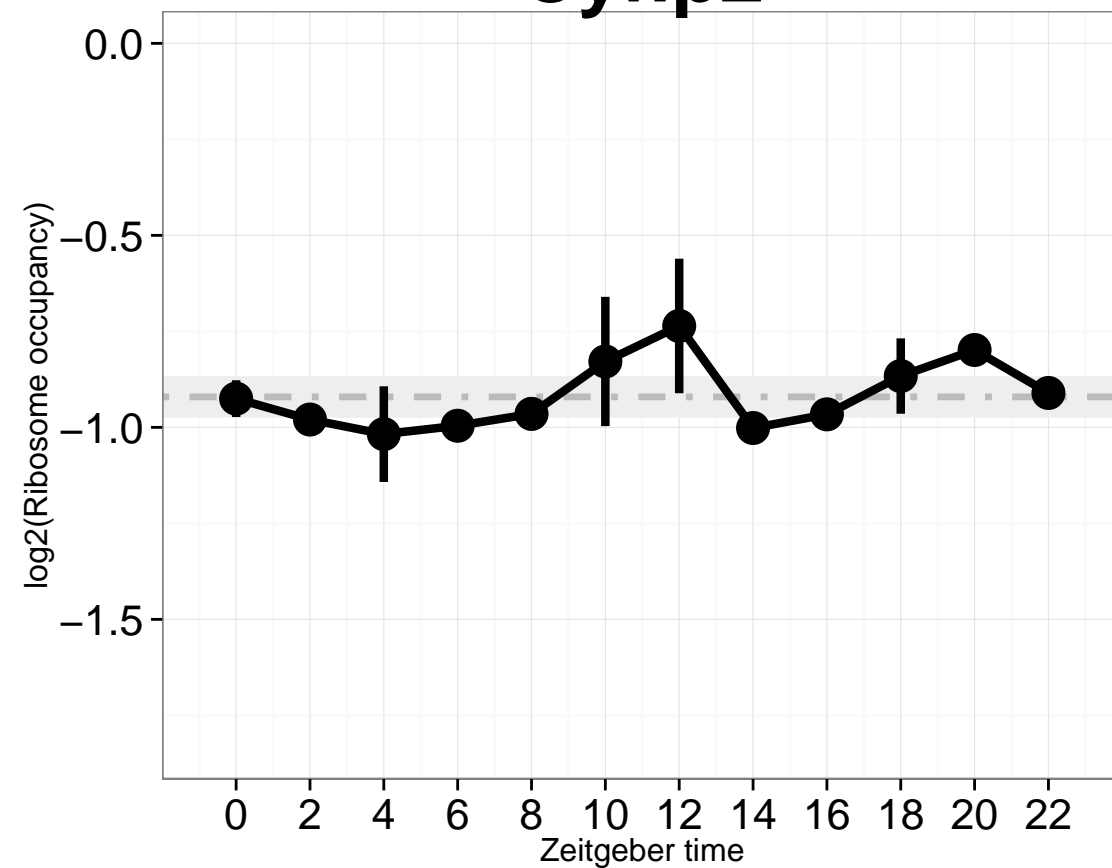

Supplement: Supplementary file 7295 [file 1]

# Zyx

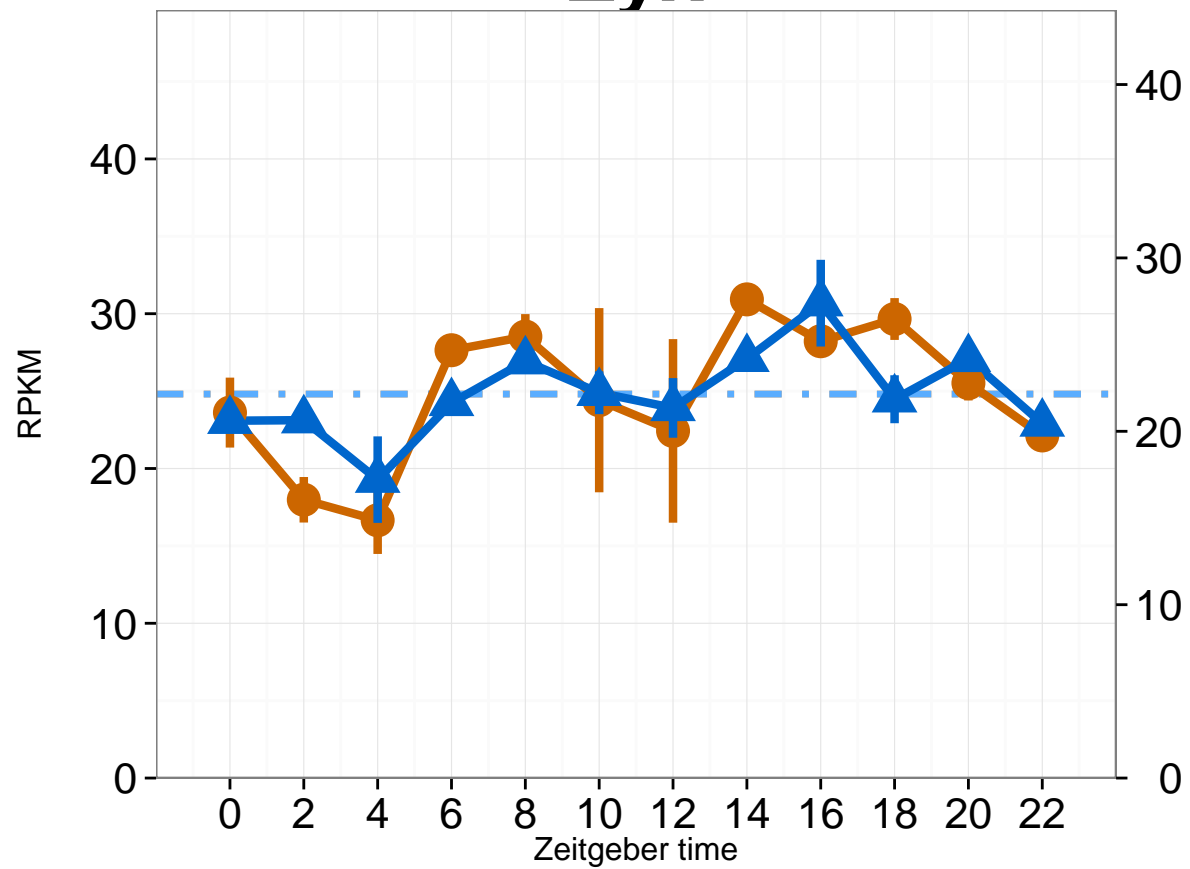

# Zyx

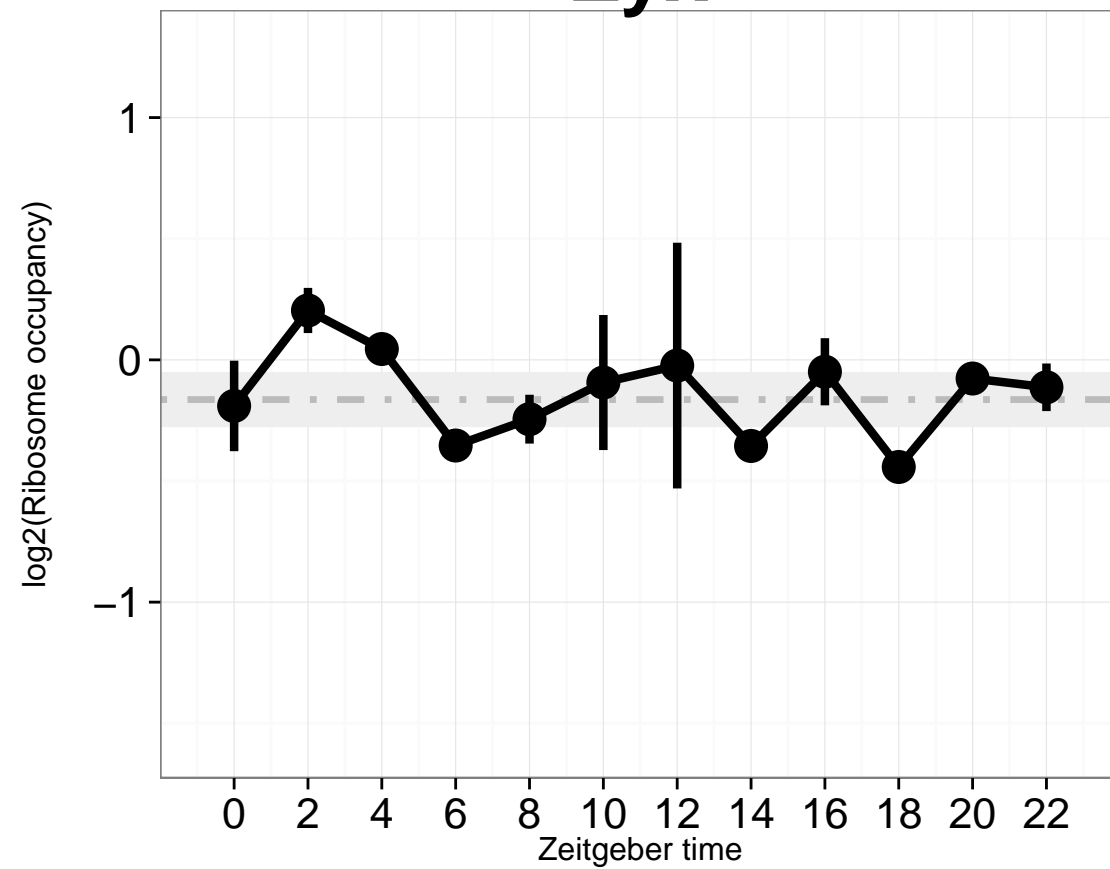

Supplement: Supplementary file 7296 [file 1]

# Ncl

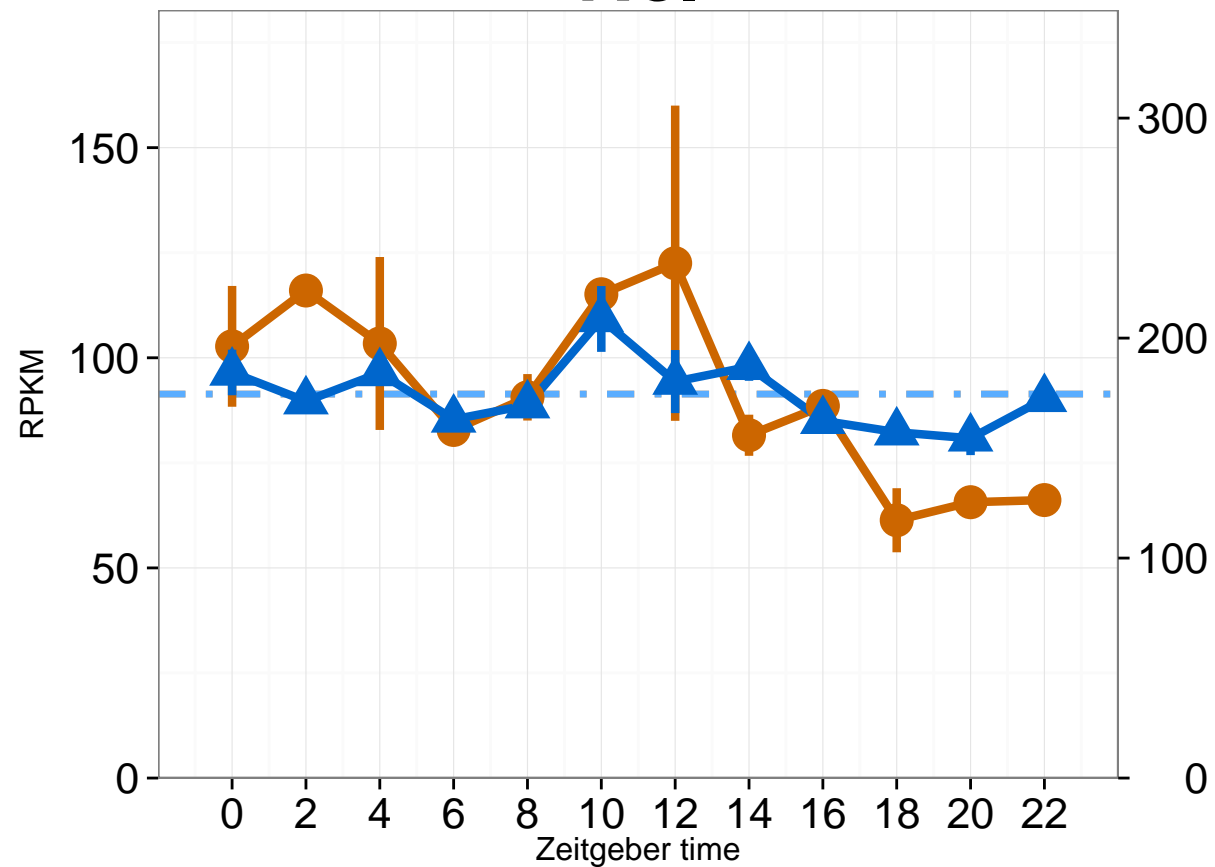

# Ncl

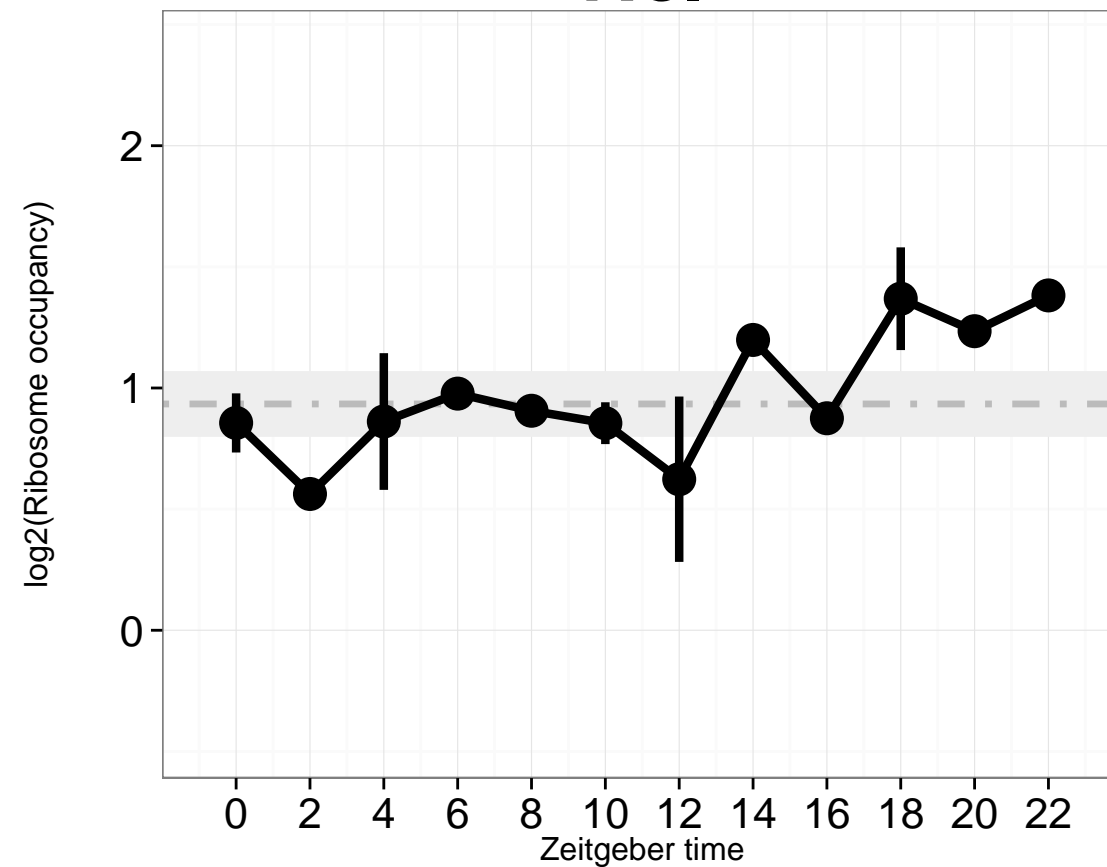

Supplement: Supplementary file 7297 [file 1]

## Mettl14

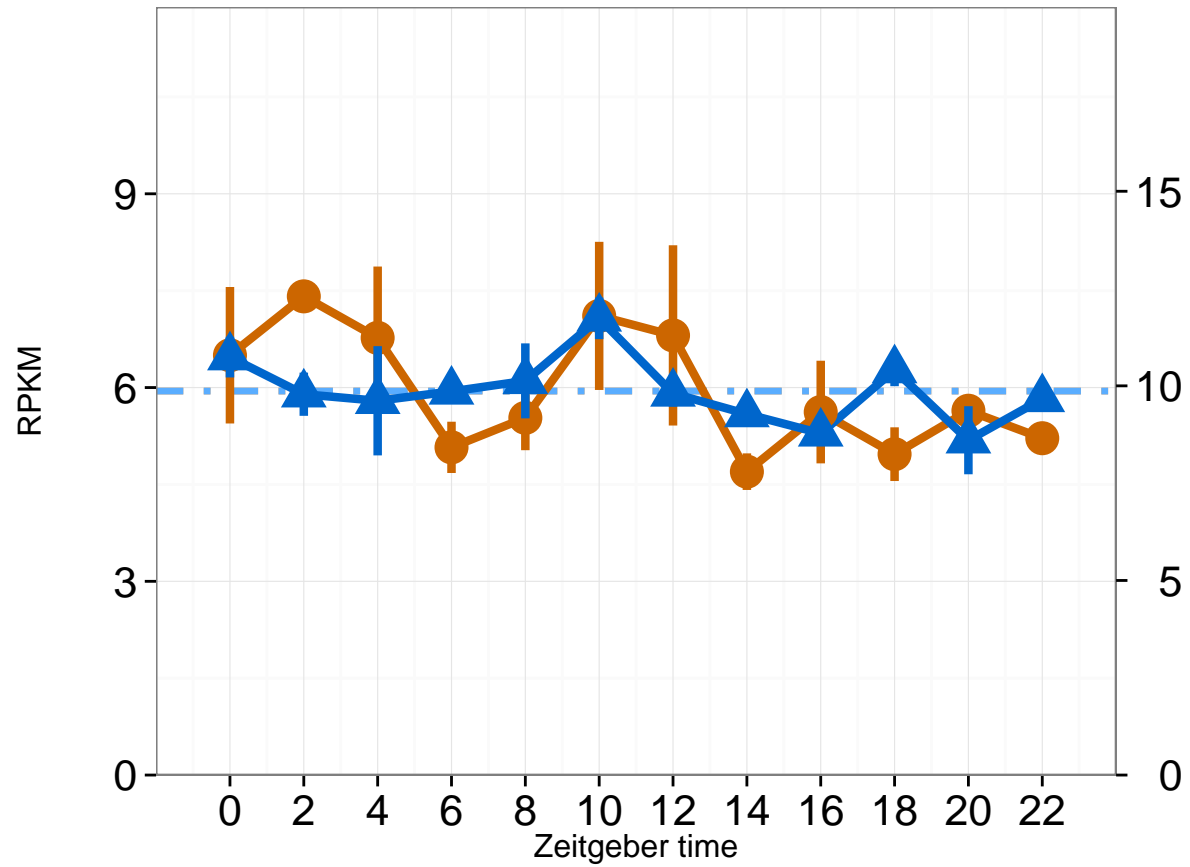

## Mettl14

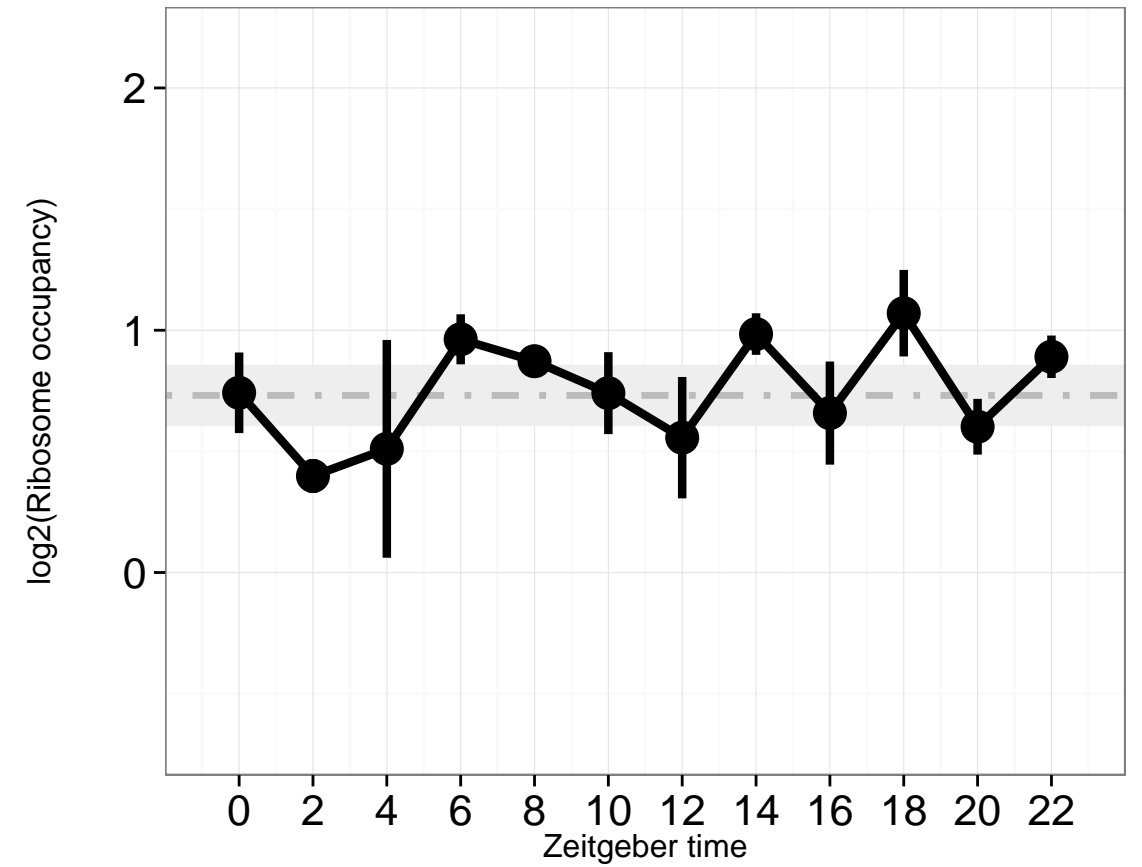

Supplement: Supplementary file 7298 [file 1]

# Adat1

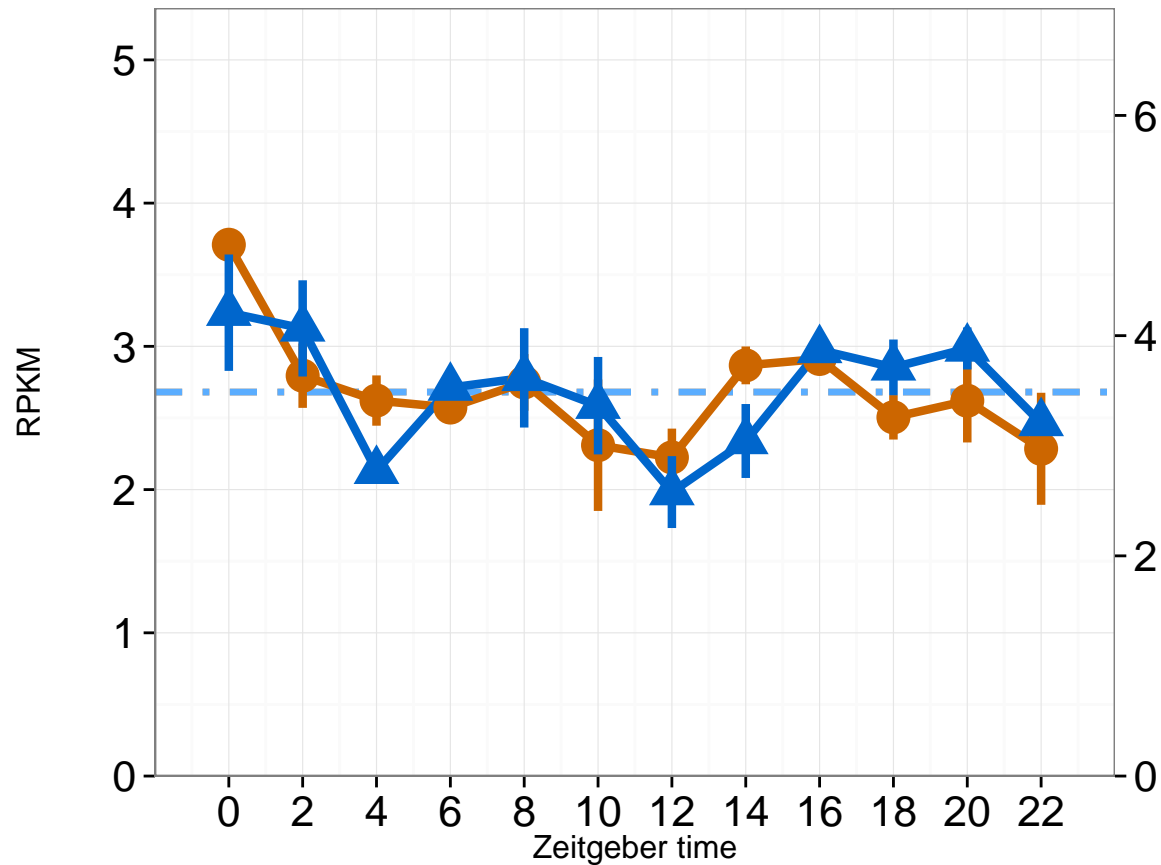

# Adat1

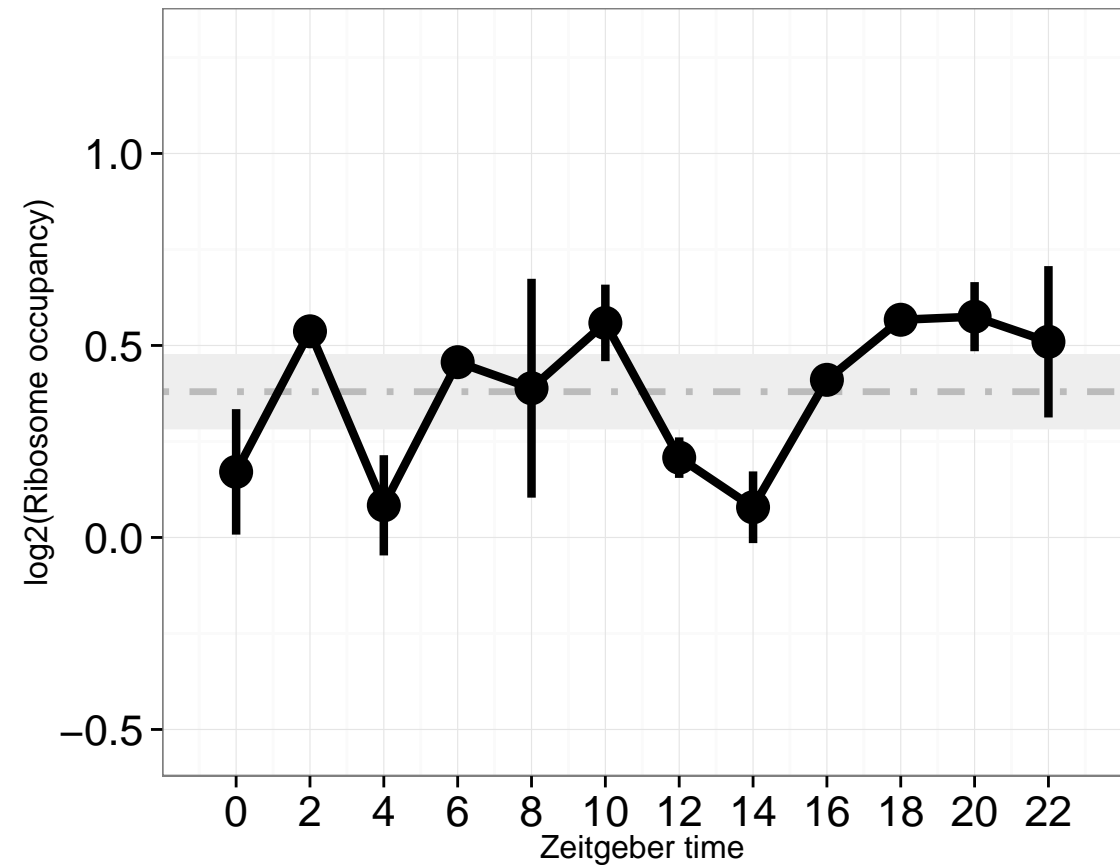

Supplement: Supplementary file 7299 [file 1]

## Dio1

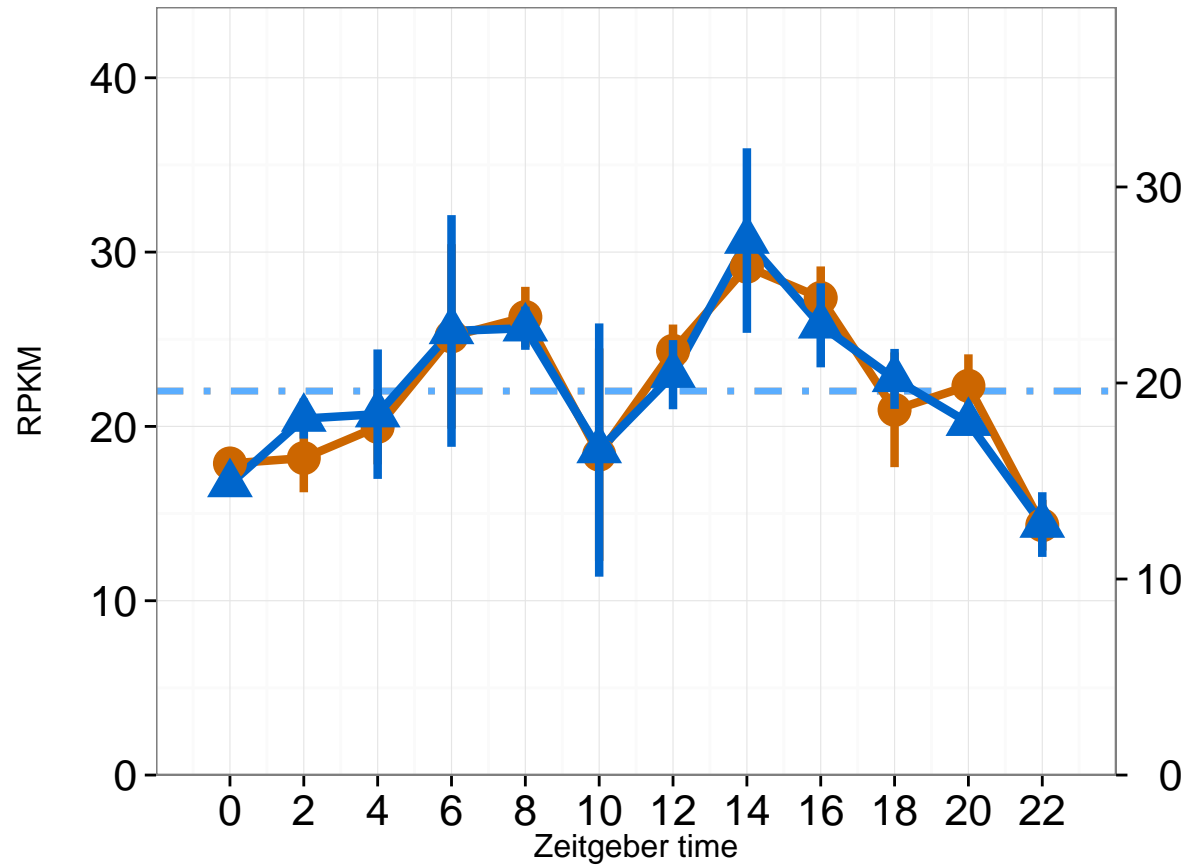

## Dio1

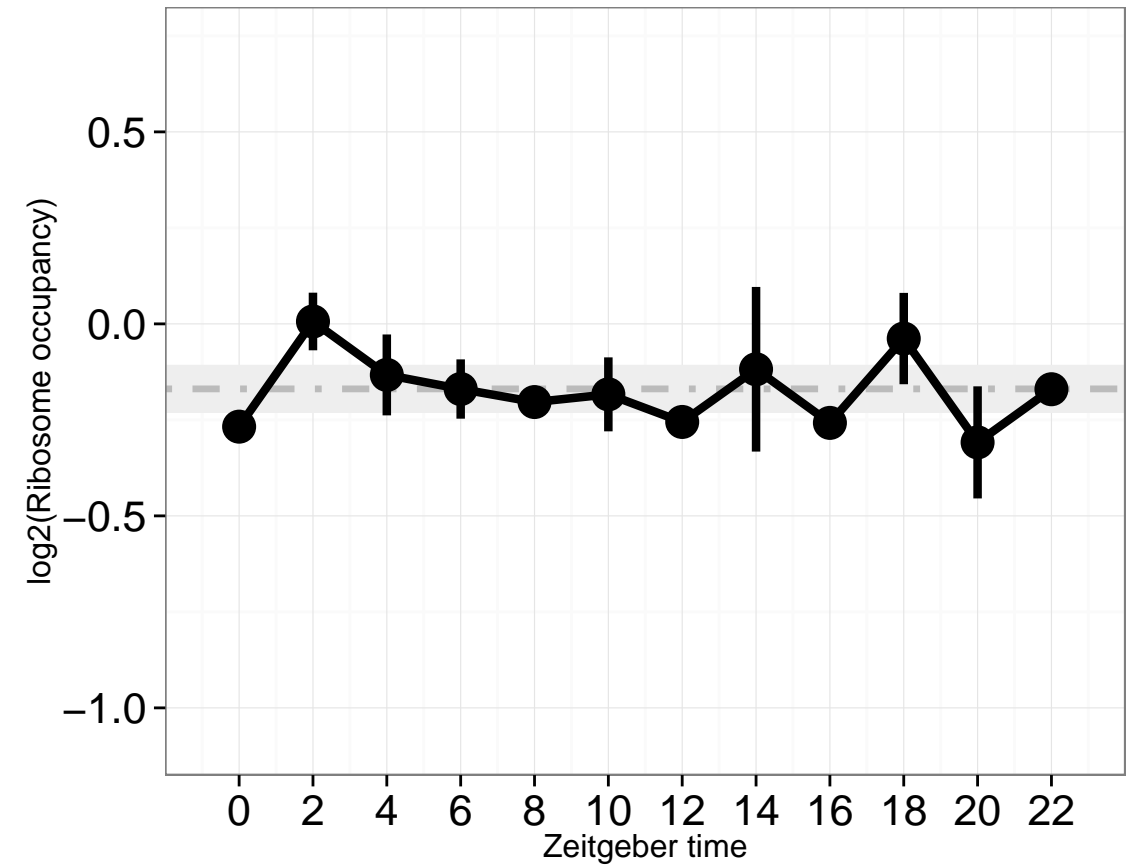

Supplement: Supplementary file 7300 [file 1]

# Arhgap18

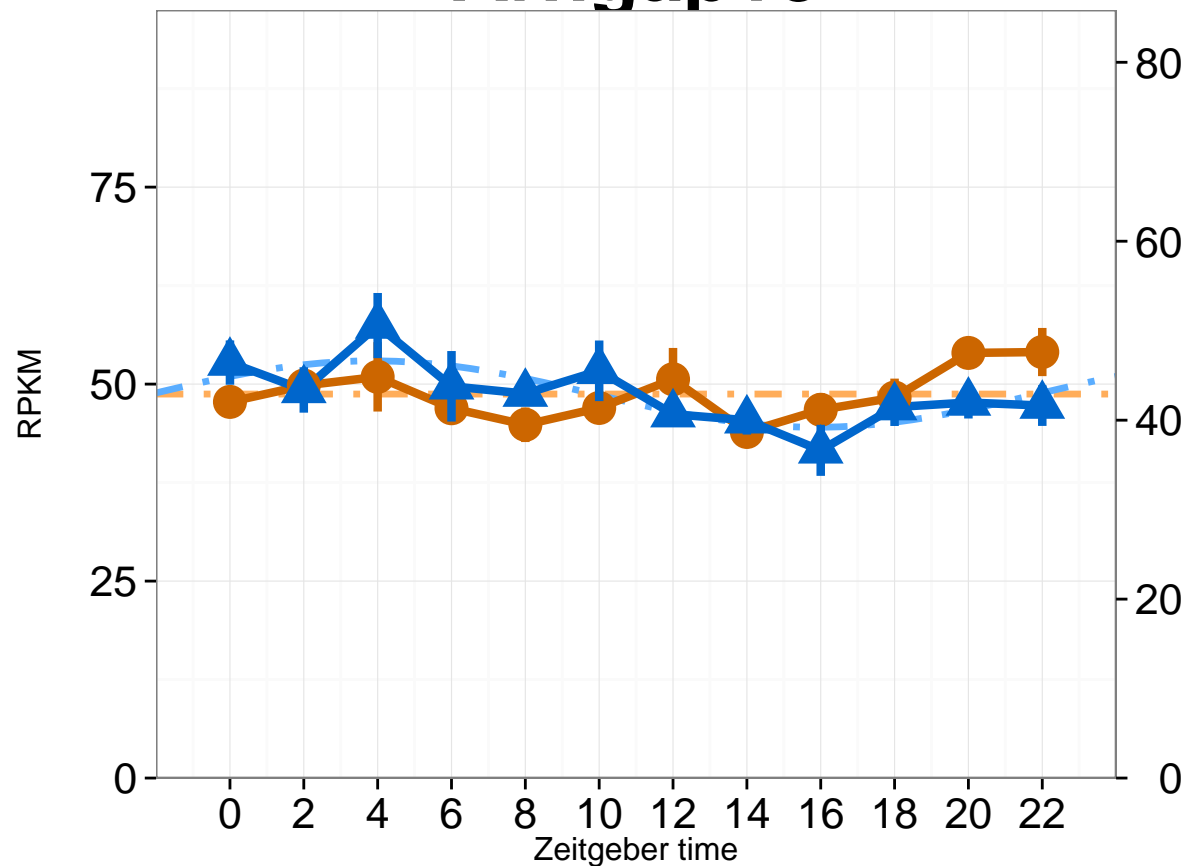

# Arhgap18

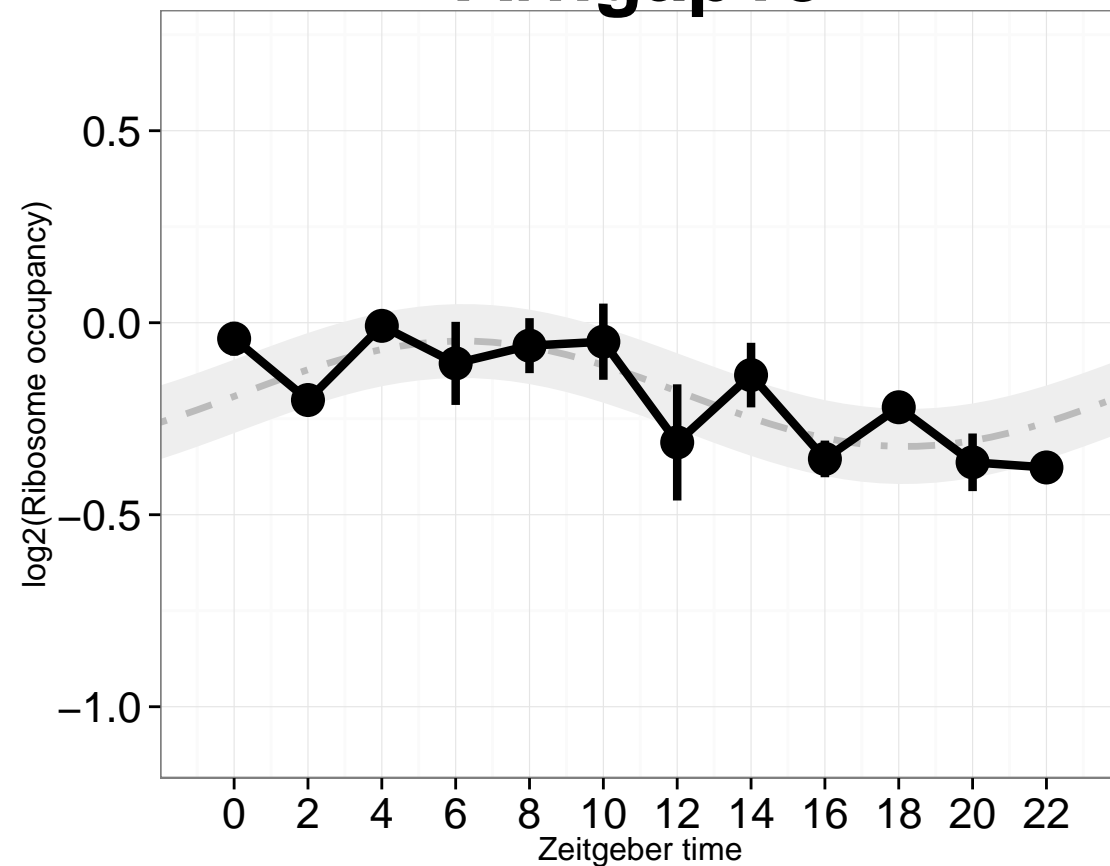

Supplement: Supplementary file 7301 [file 1]

## Yipf1

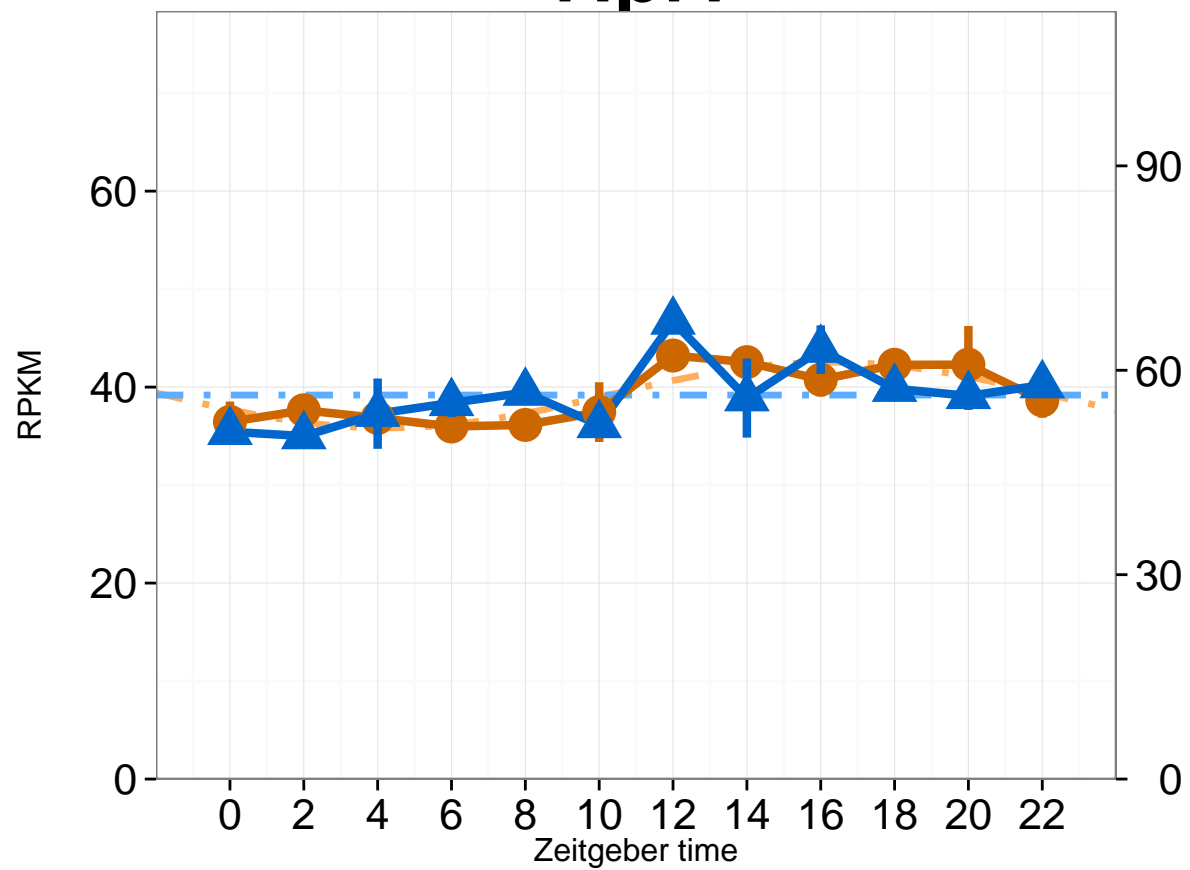

## Yipf1

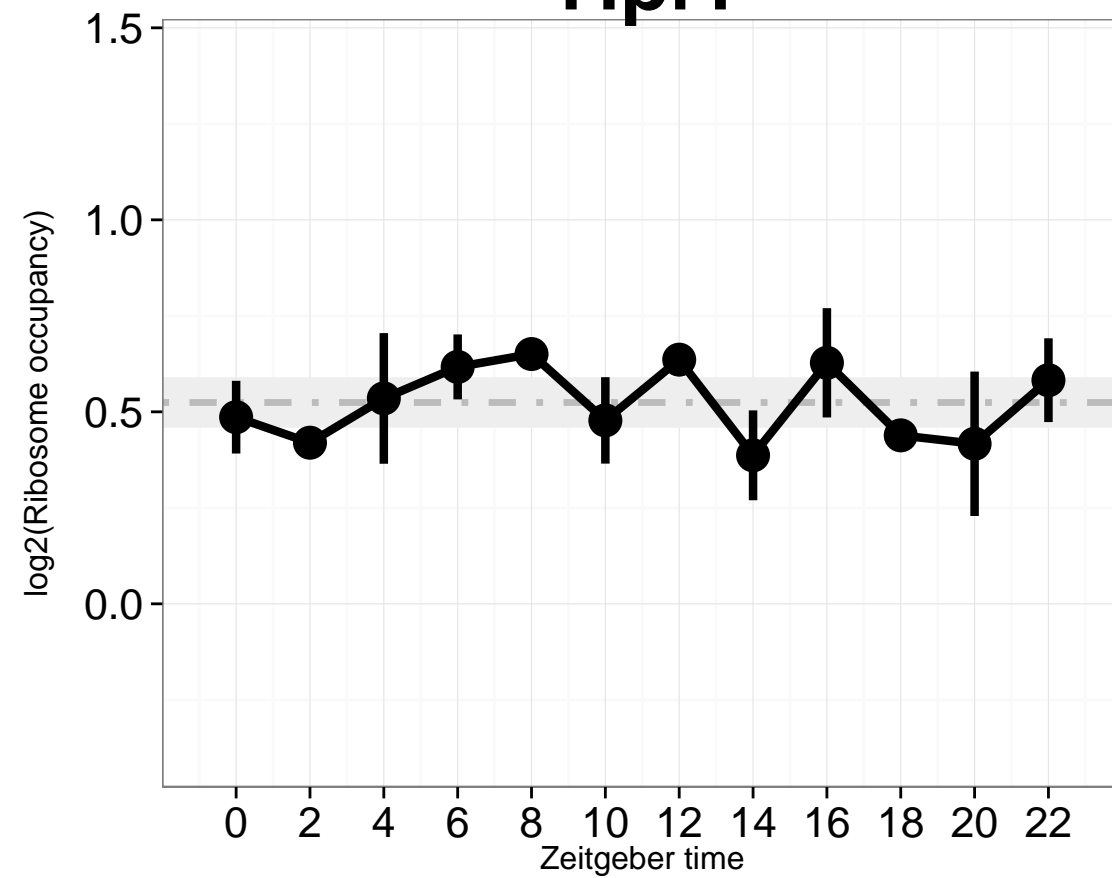

Supplement: Supplementary file 7302 [file 1]

# Mrpl27

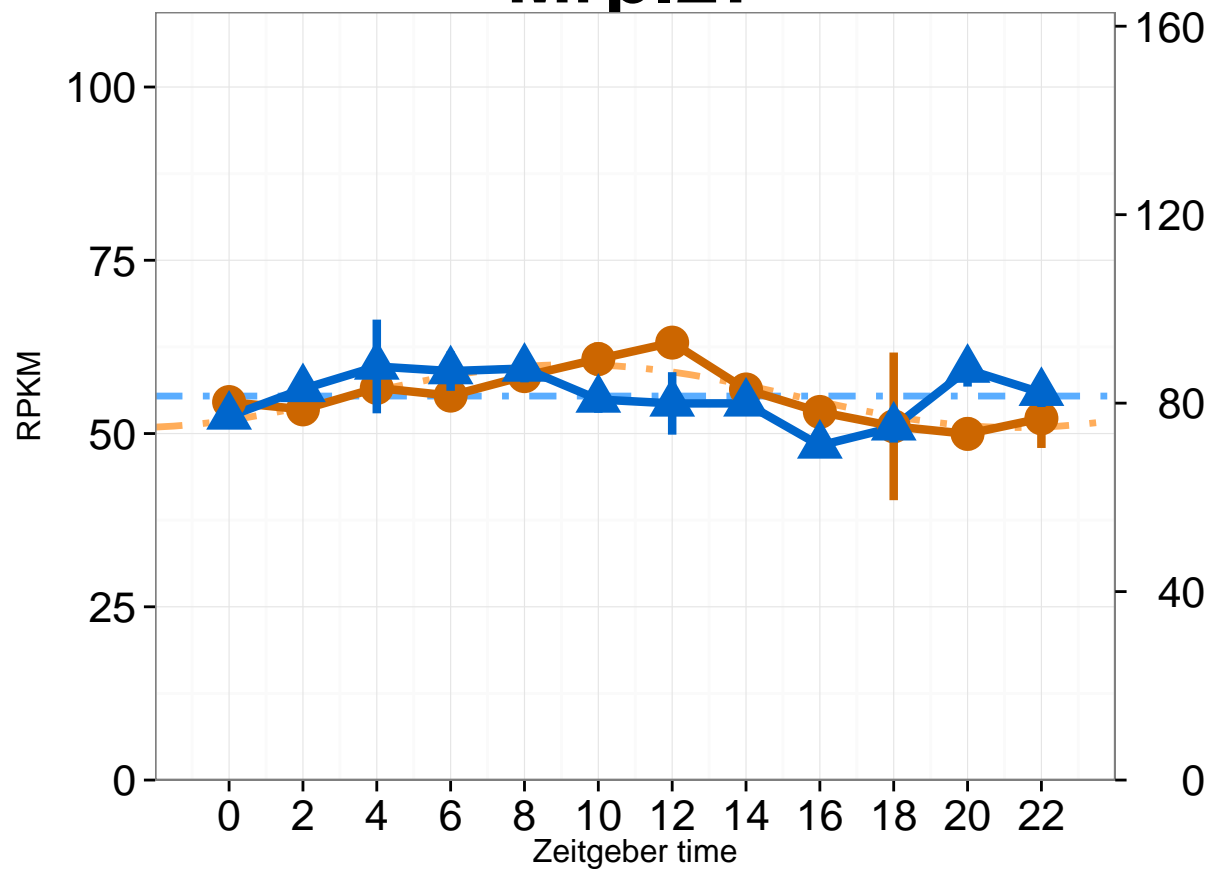

# Mrpl27

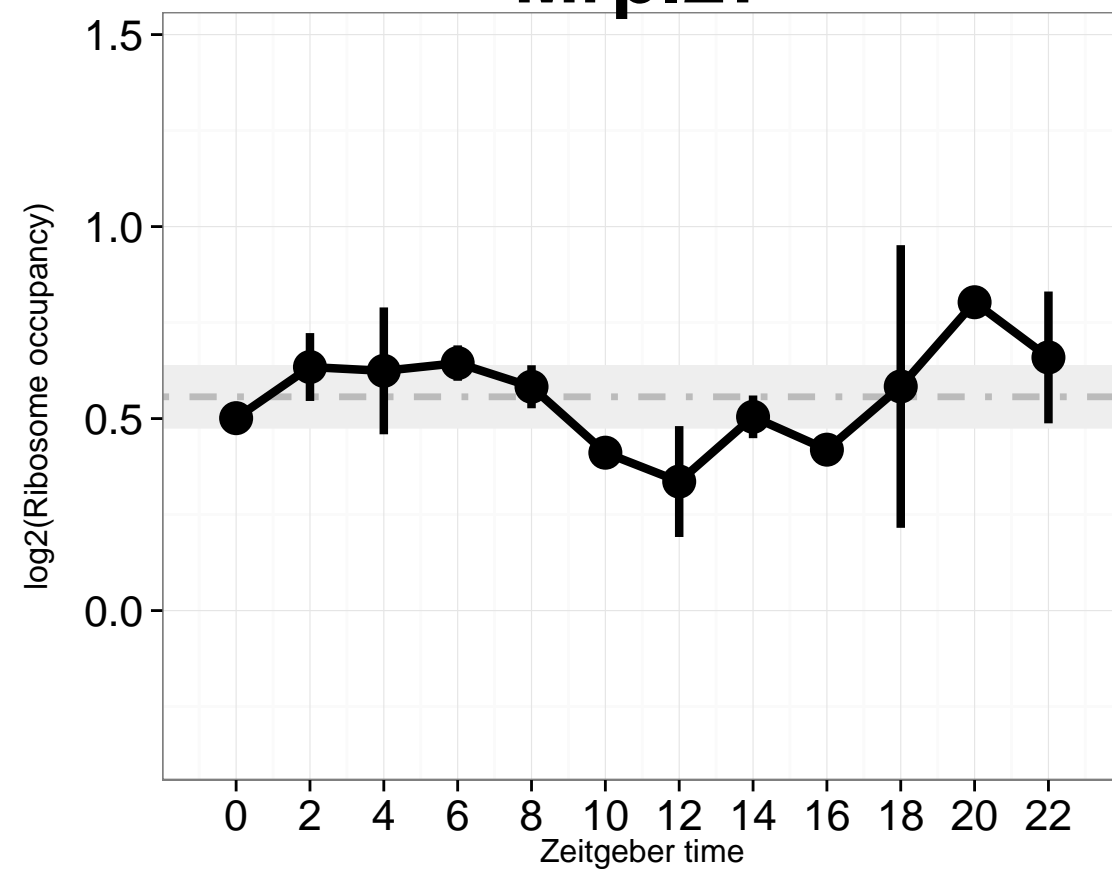

Supplement: Supplementary file 7303 [file 1]

## Tapbp

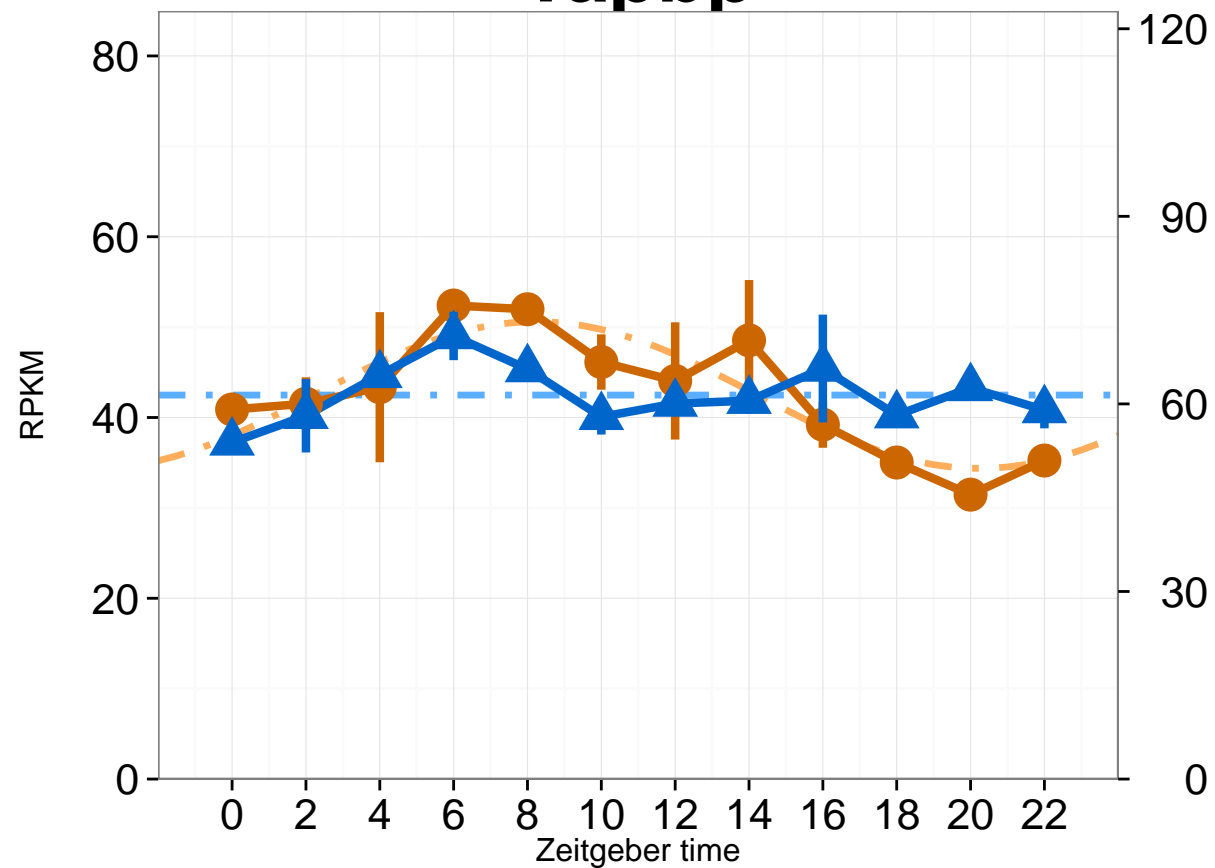

## Tapbp

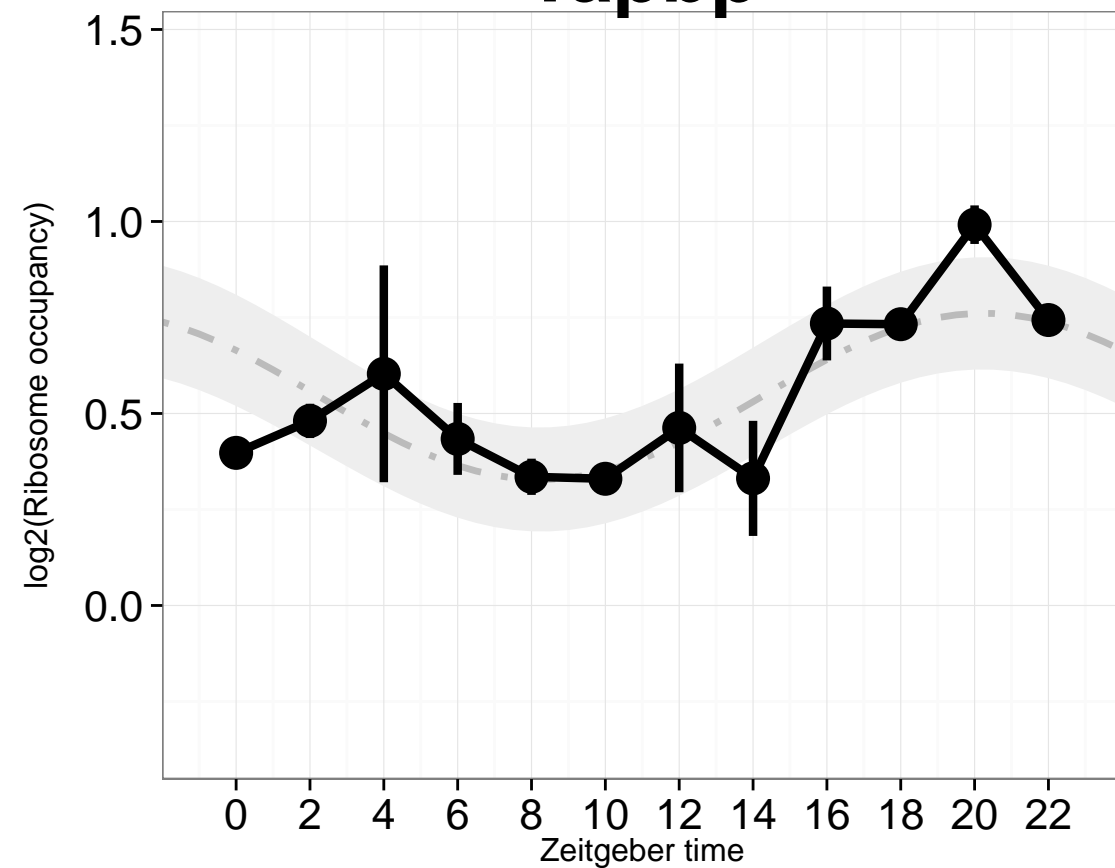

Supplement: Supplementary file 7304 [file 1]

## Irf5

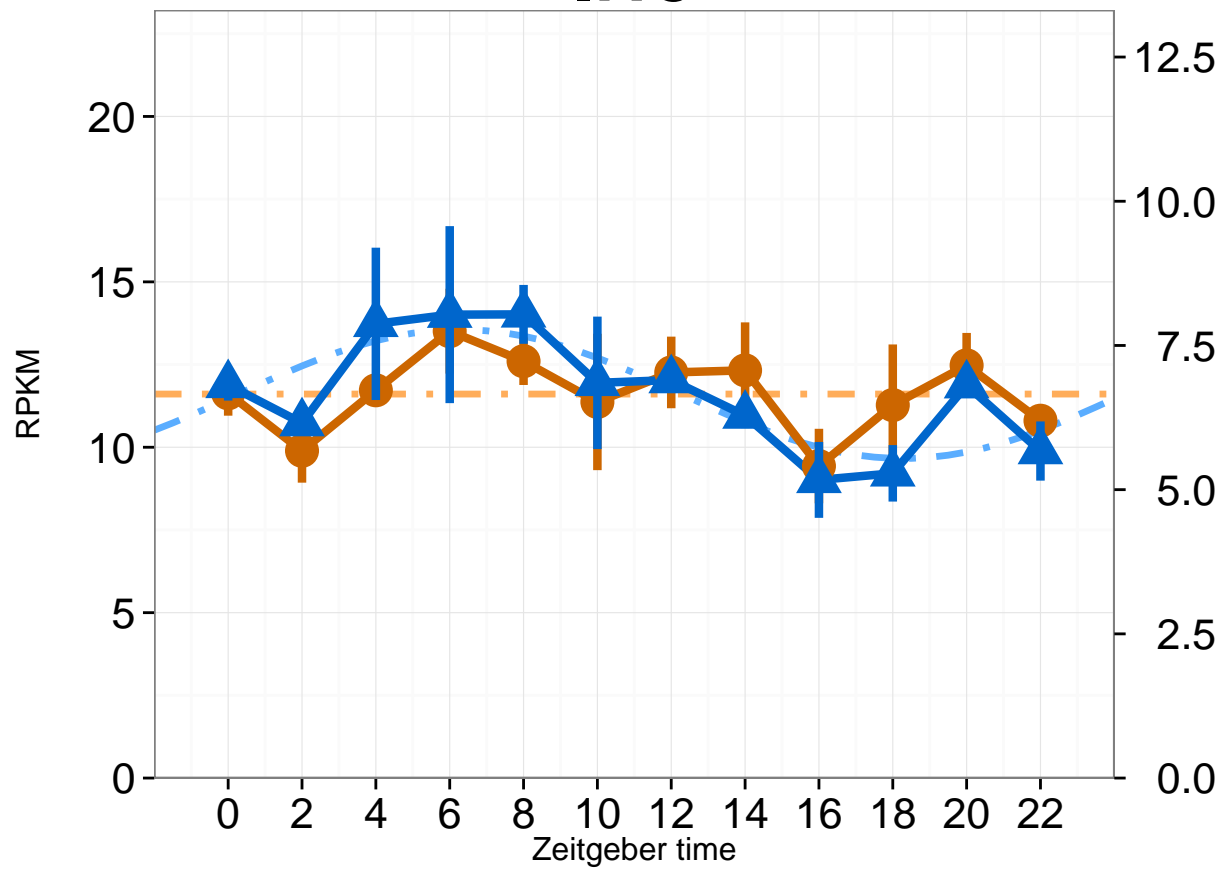

## Irf5

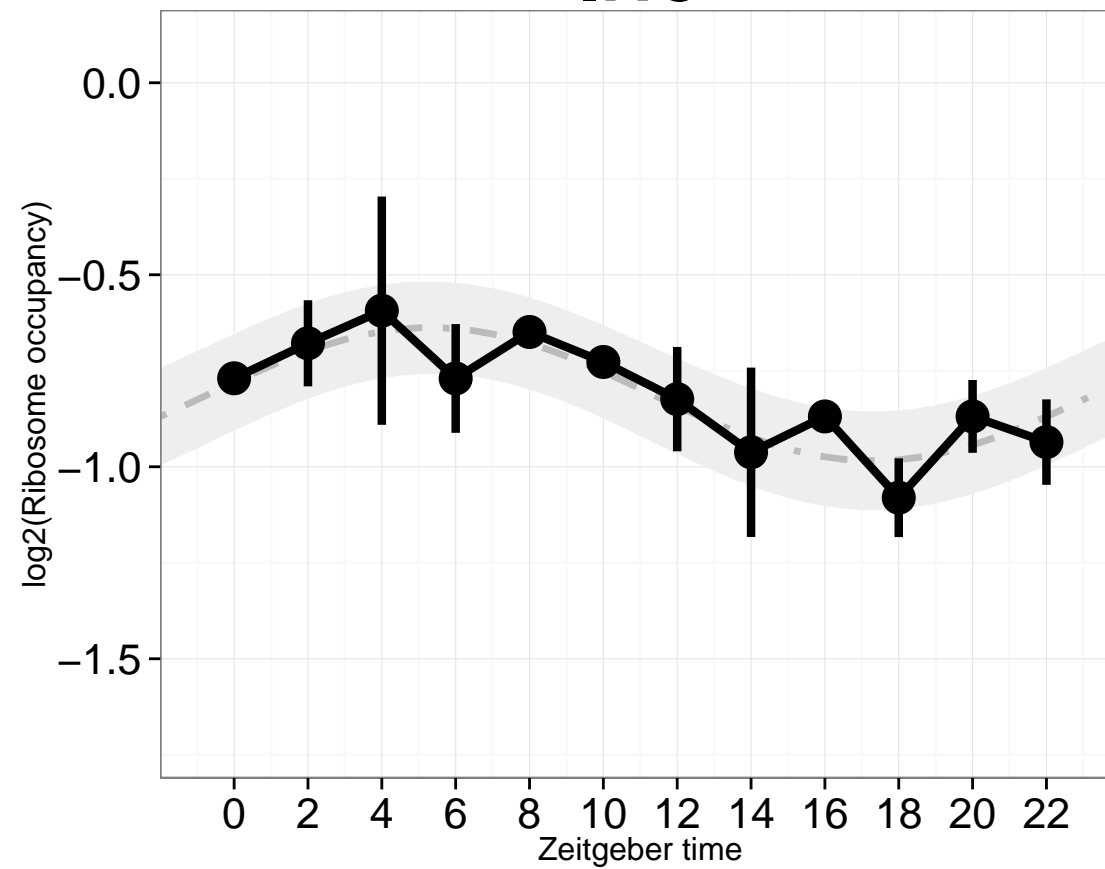

Supplement: Supplementary file 7305 [file 1]

## Cldn1

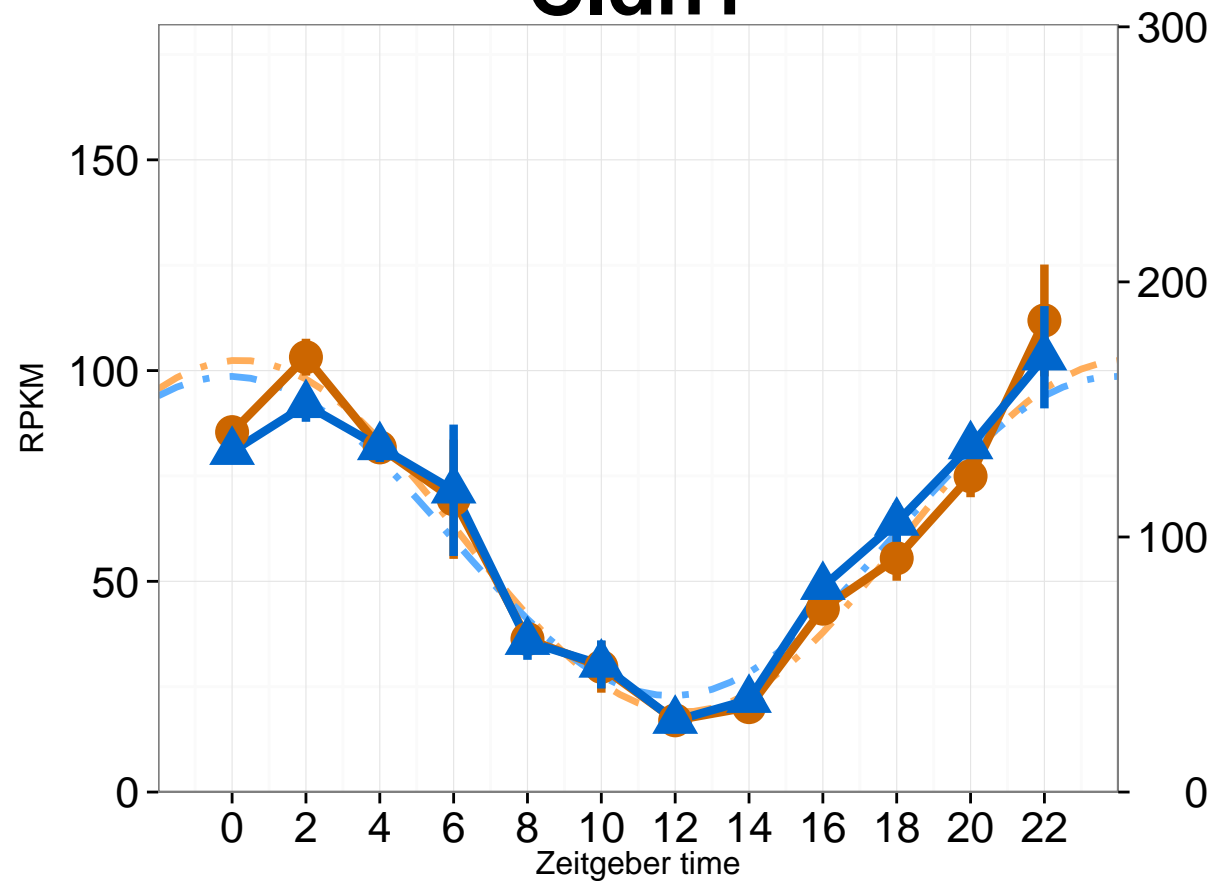

## Cldn1

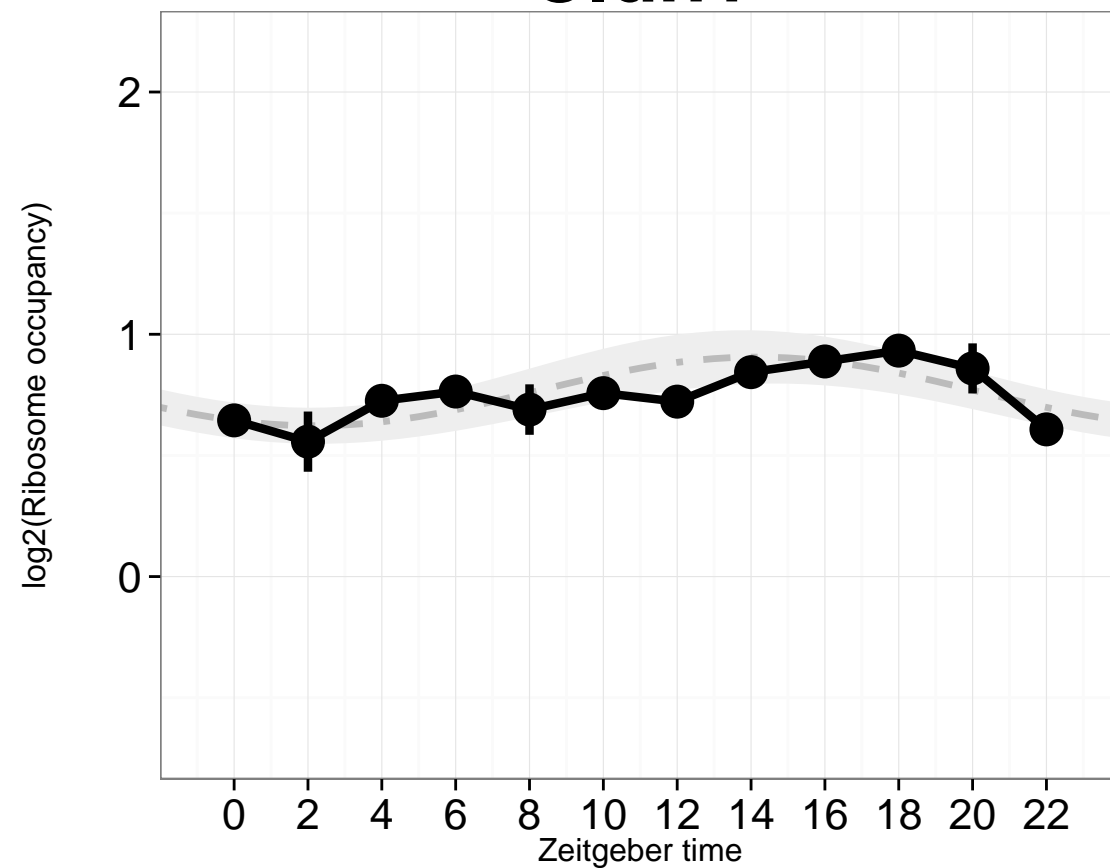

Supplement: Supplementary file 7306 [file 1]

# Inpp5d

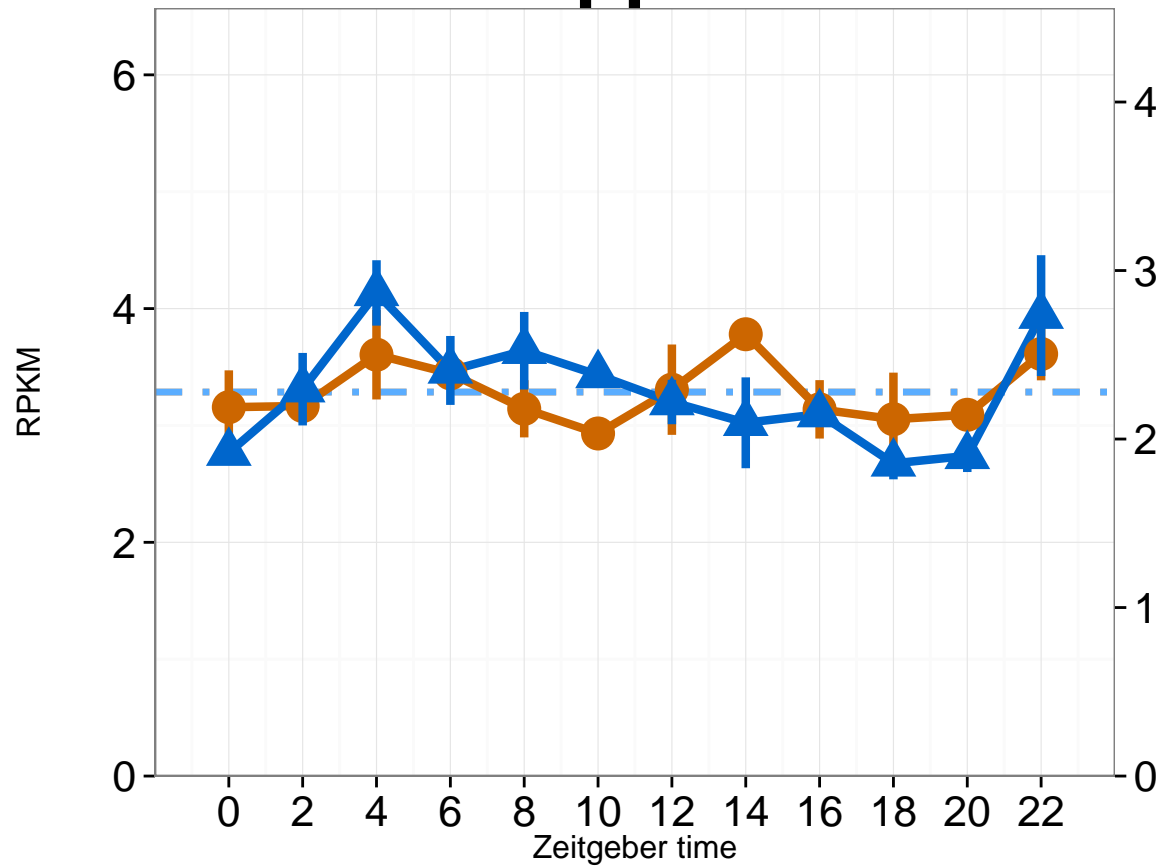

# Inpp5d

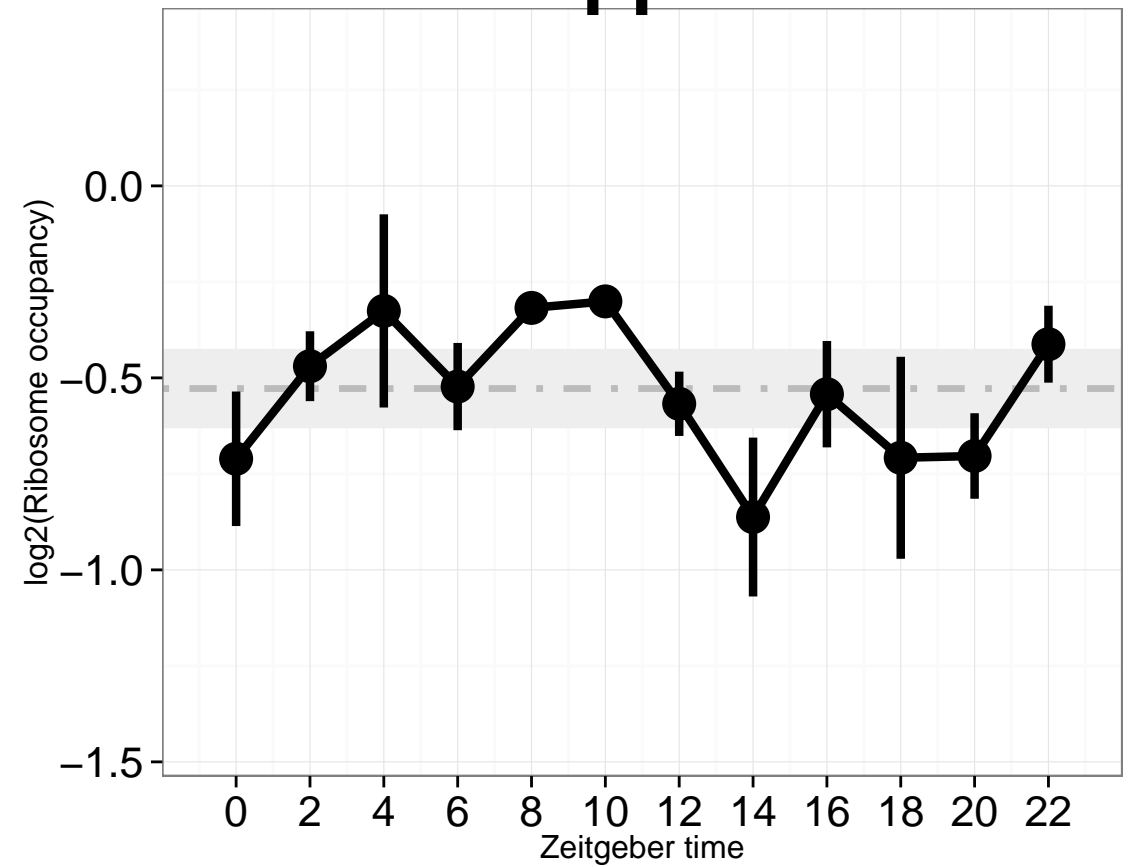

Supplement: Supplementary file 7307 [file 1]

# Kcnb1

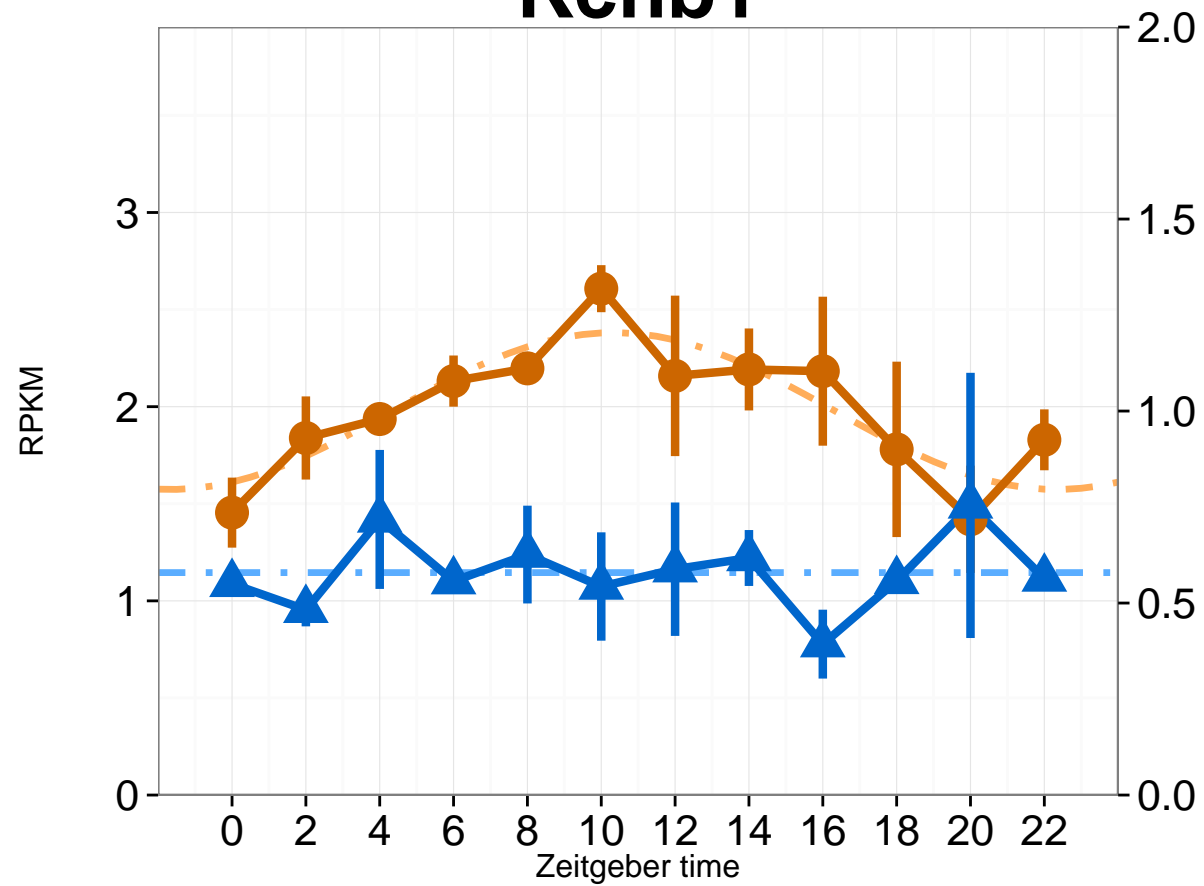

# Kcnb1

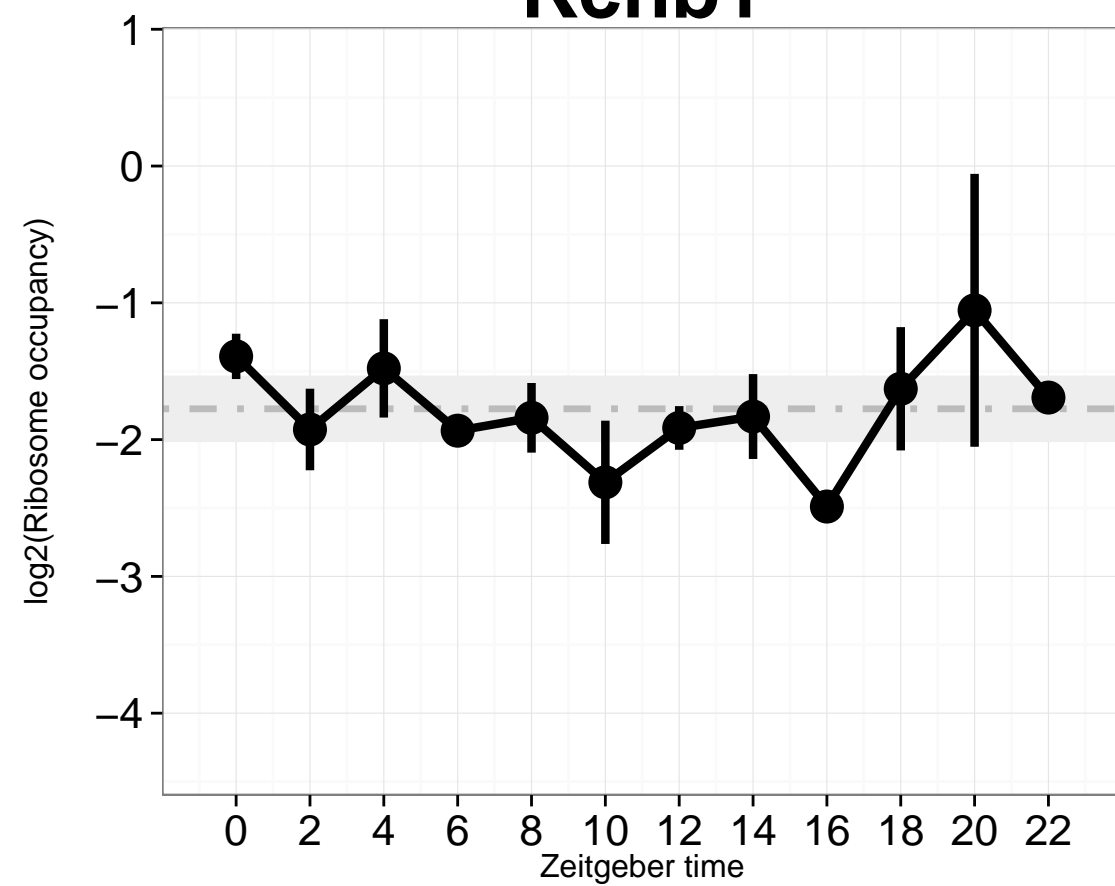

Supplement: Supplementary file 7308 [file 1]

# Olfr1033

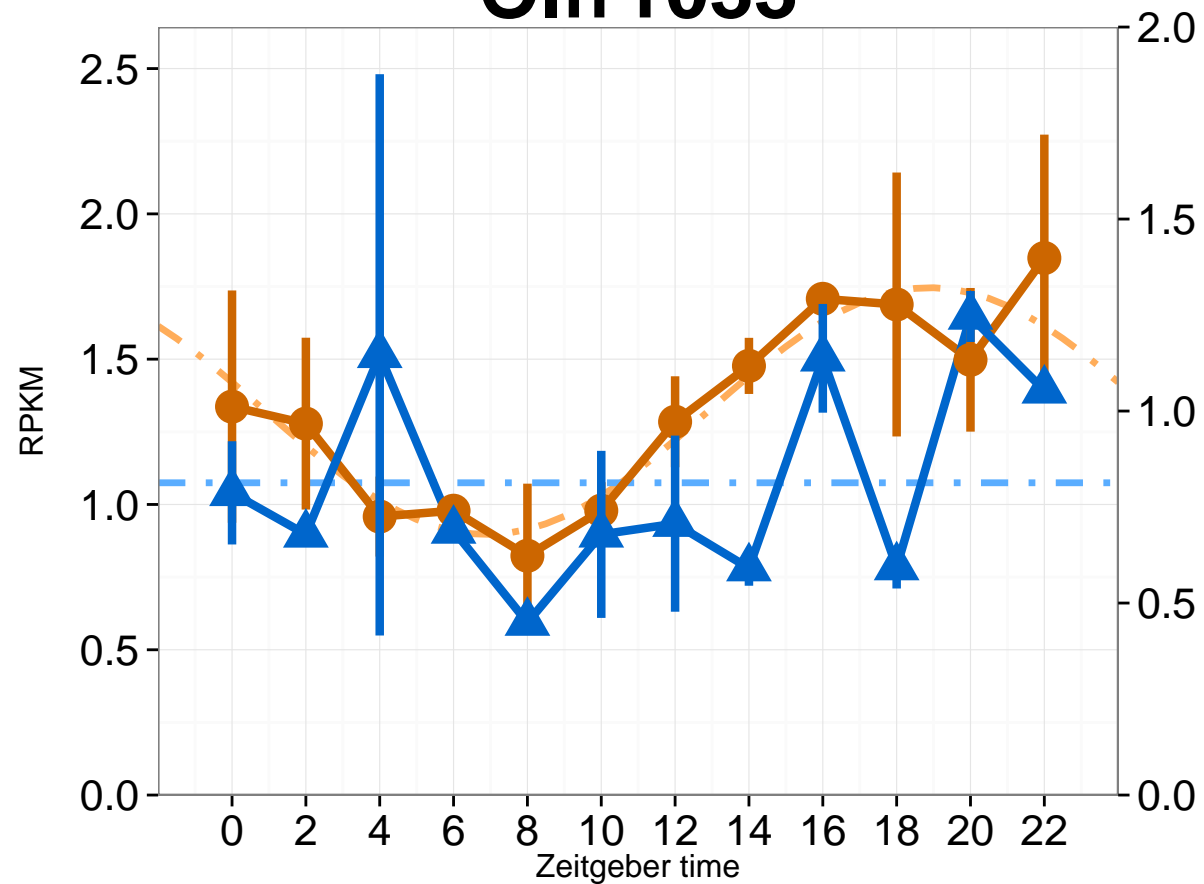

# Olfr1033

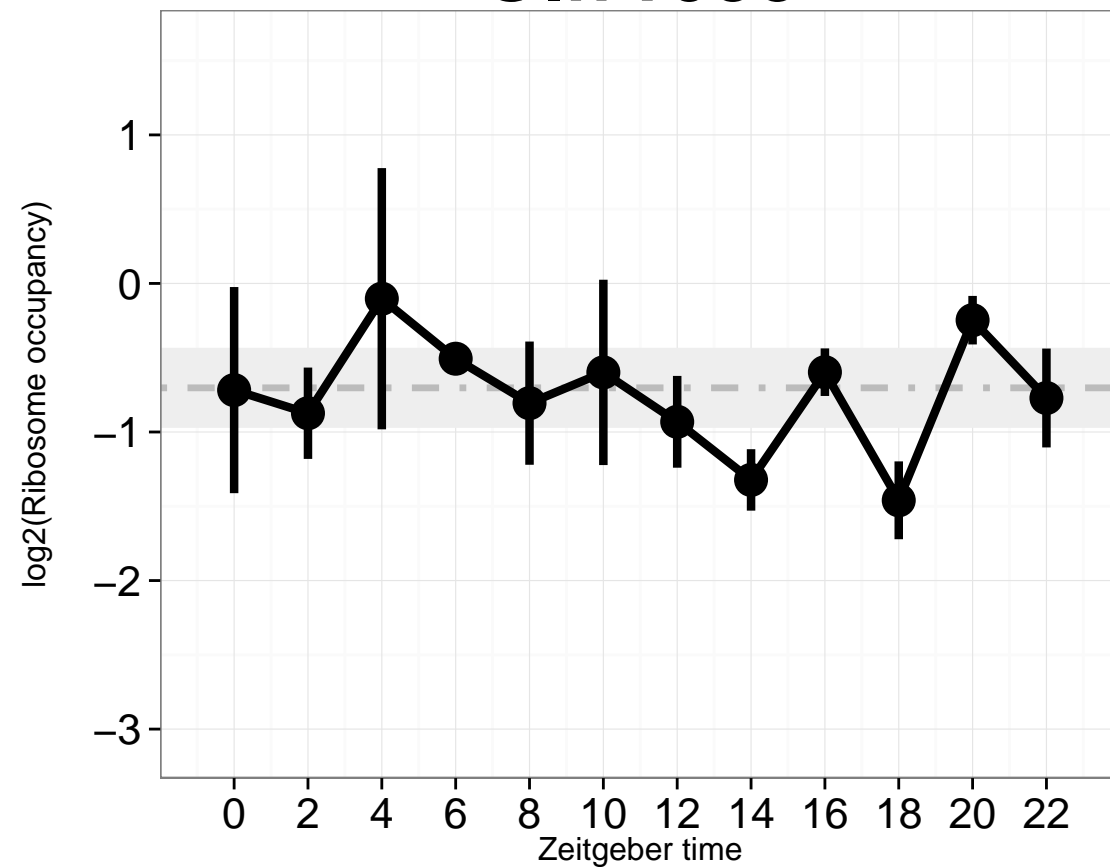

Supplement: Supplementary file 7309 [file 1]

## Fggy

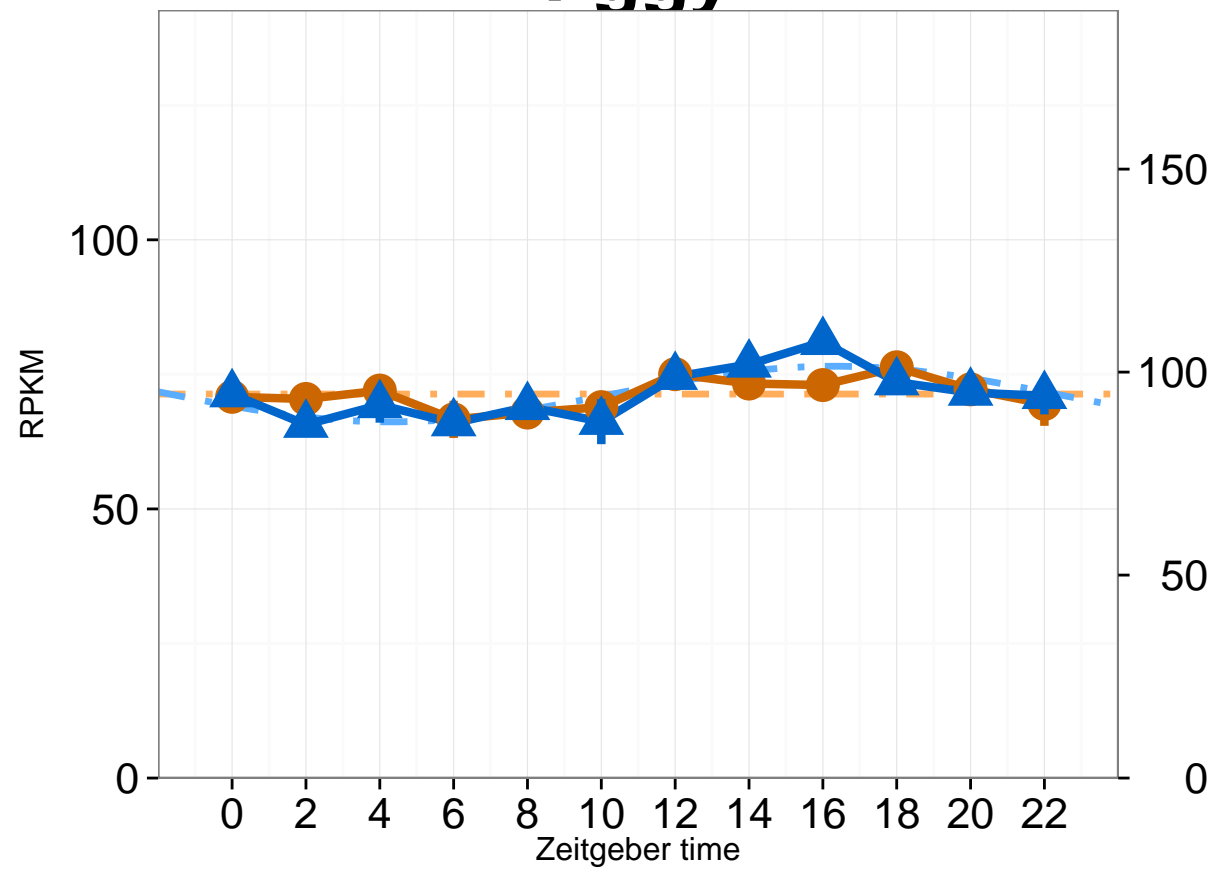

## Fggy

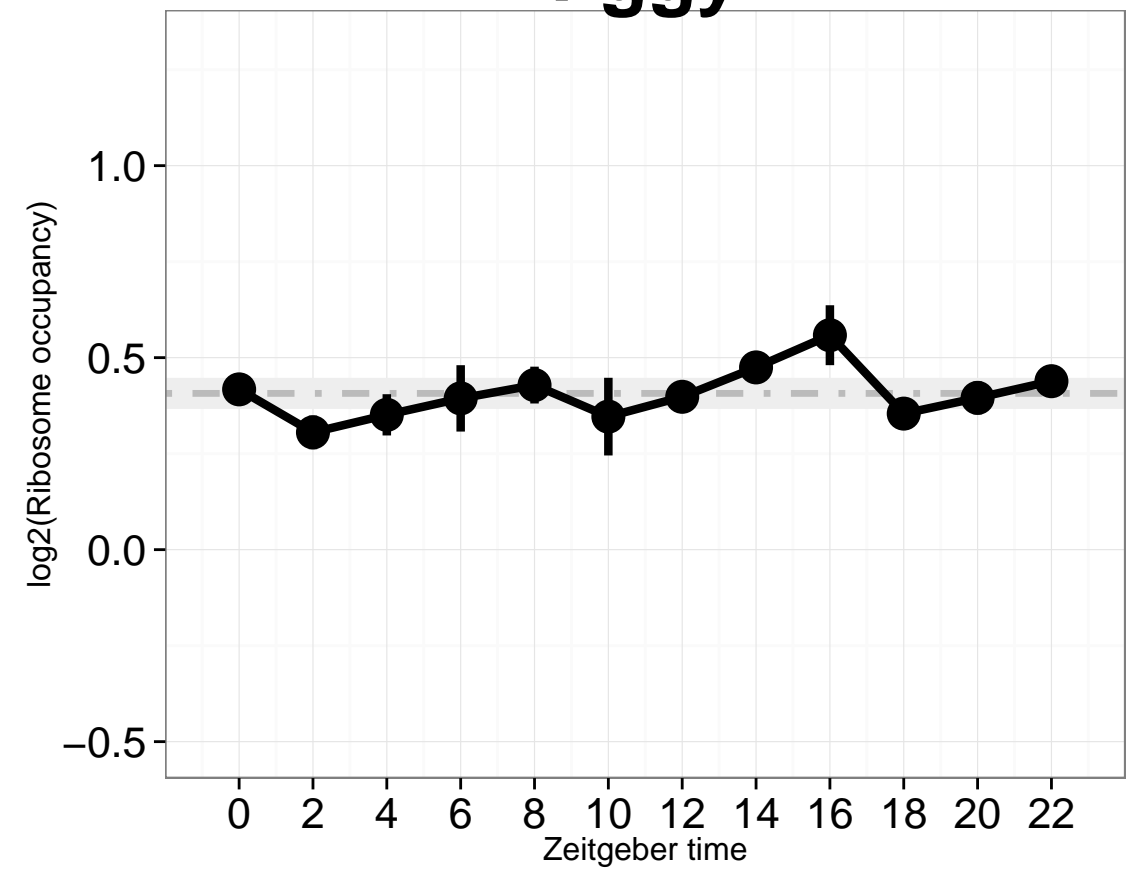

Supplement: Supplementary file 7310 [file 1]

## Nedd4

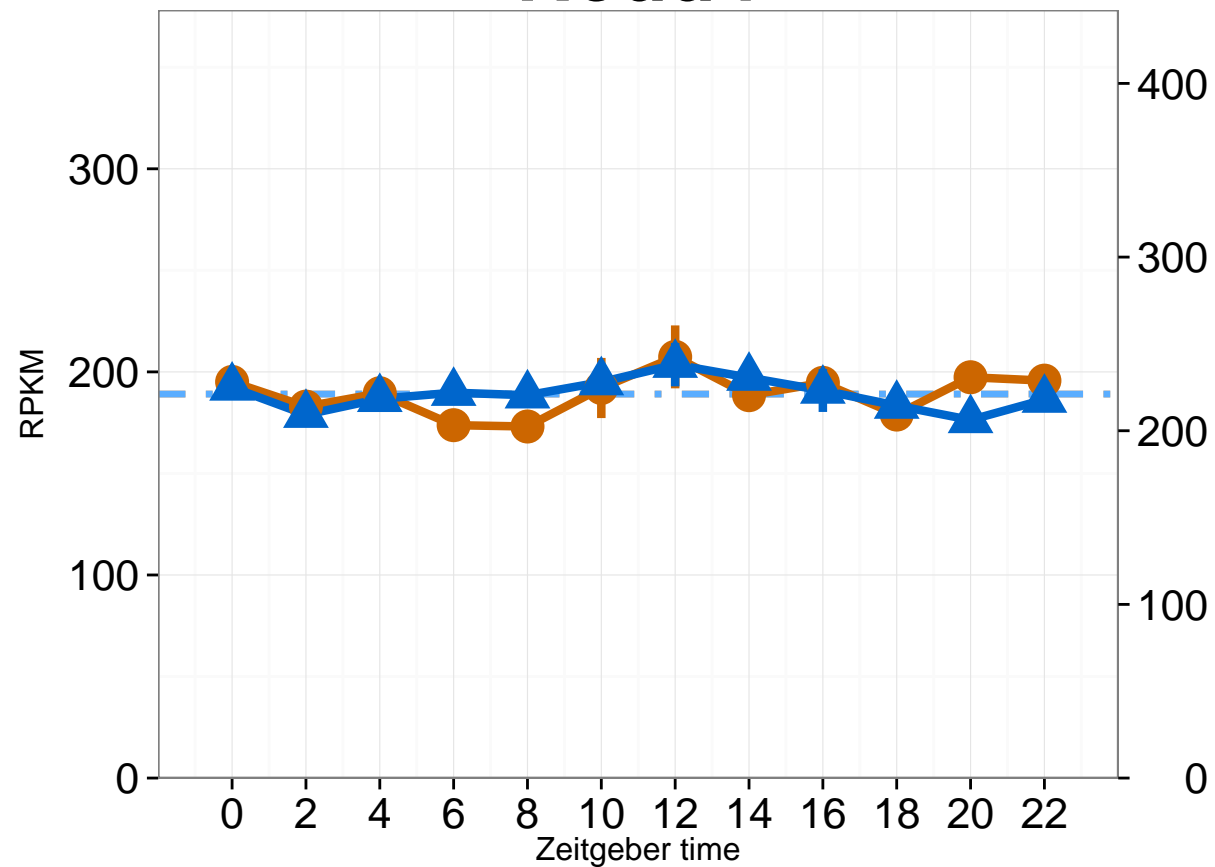

## Nedd4

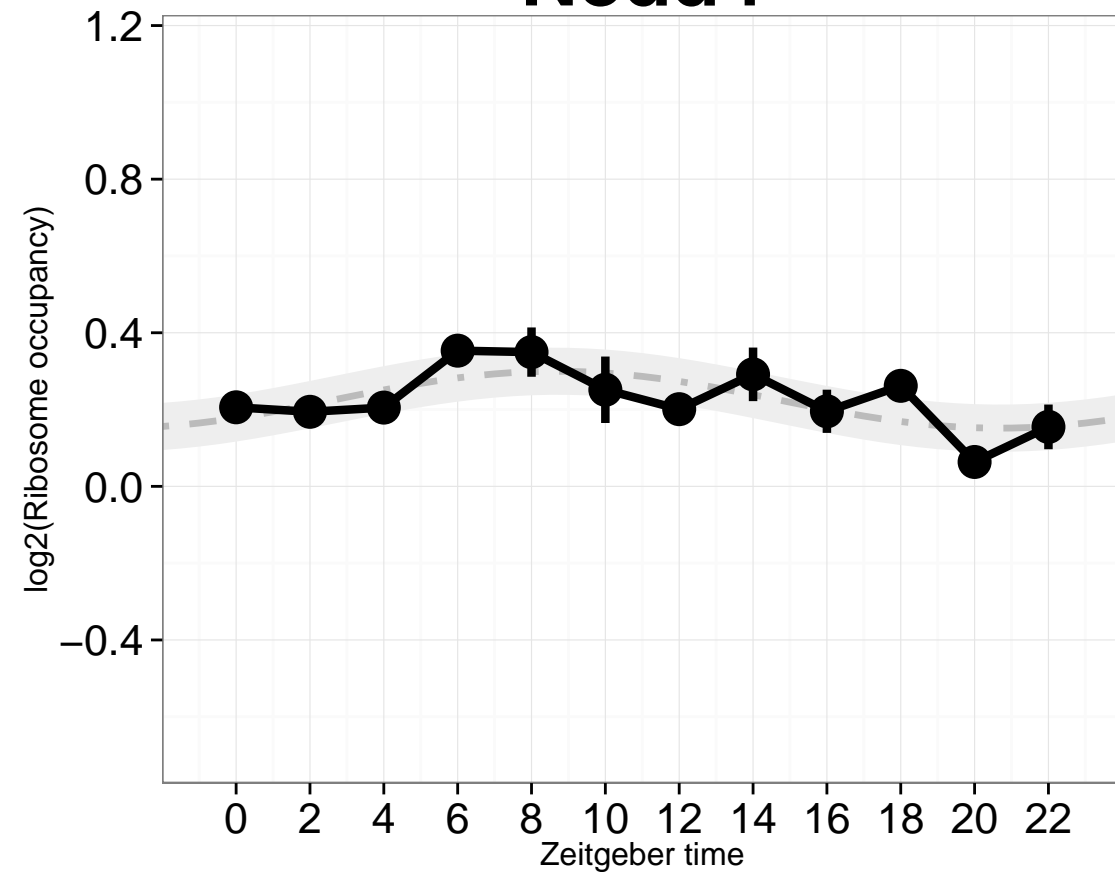

Supplement: Supplementary file 7311 [file 1]

# Robo2

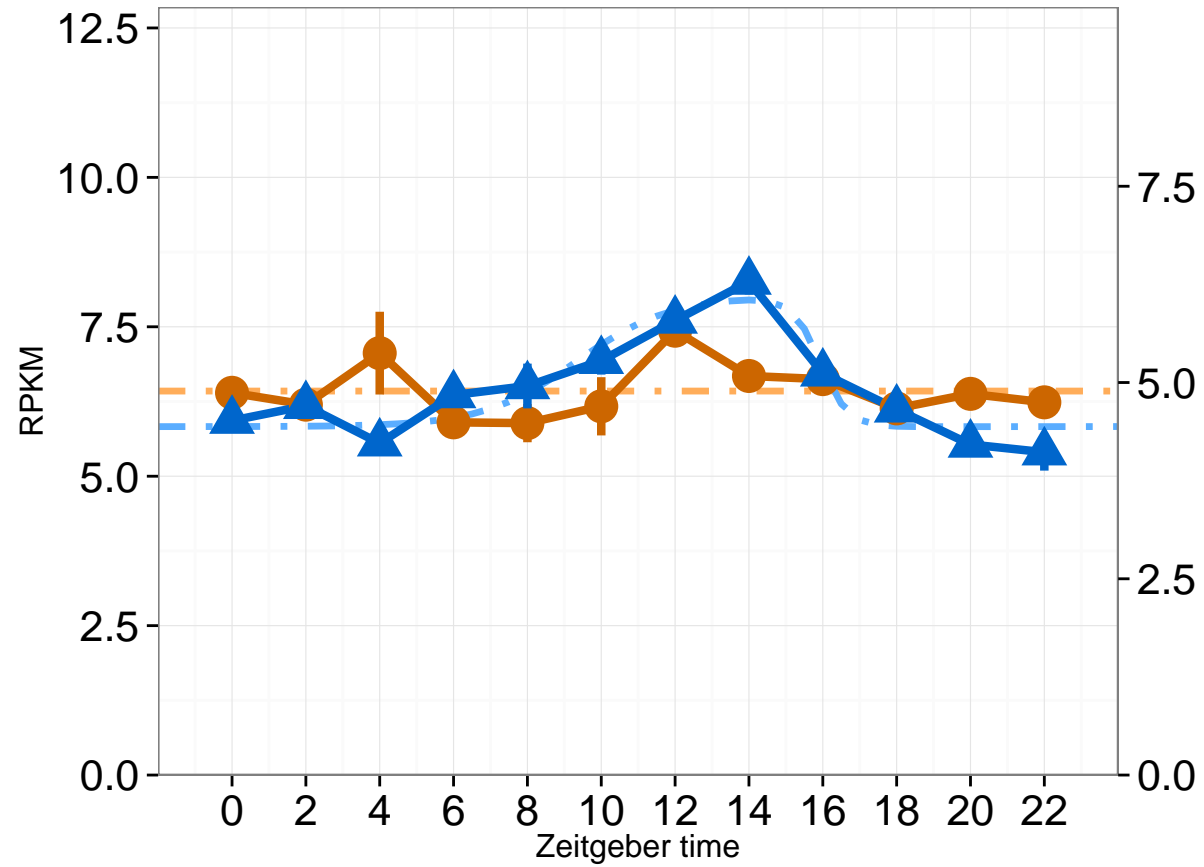

# Robo2

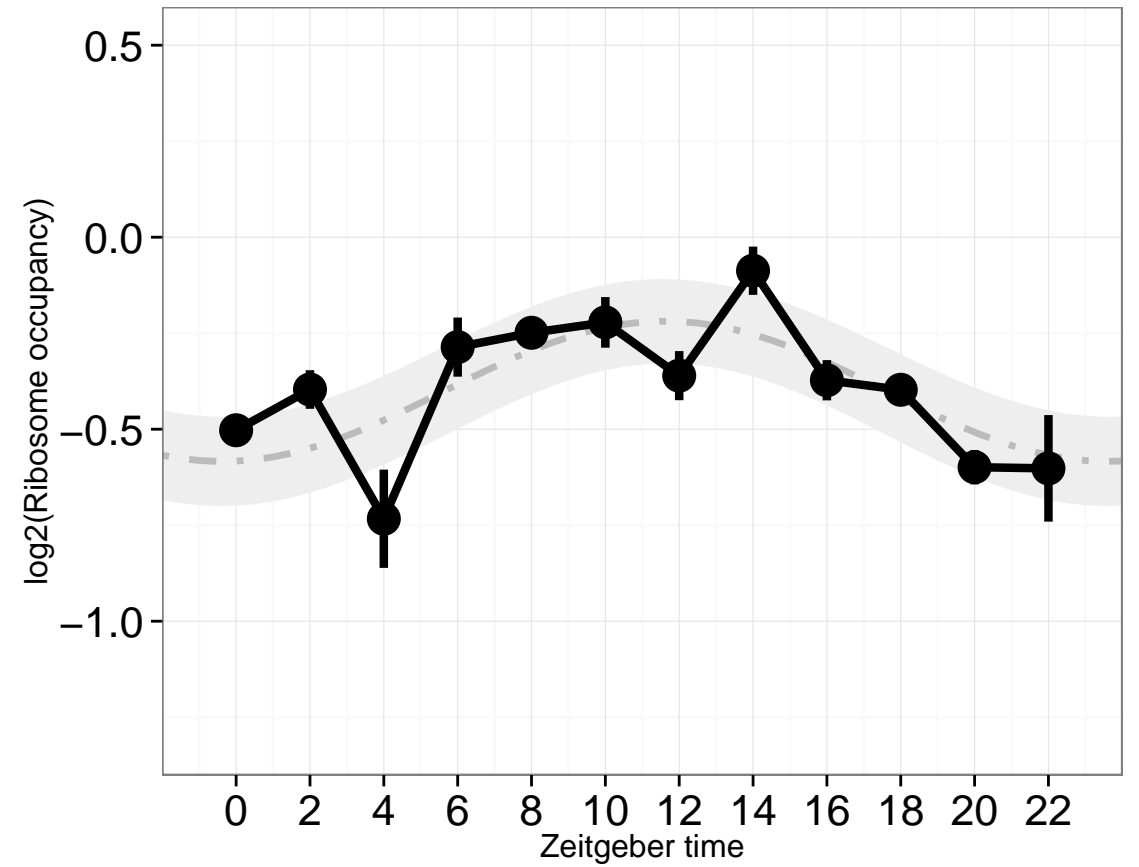

Supplement: Supplementary file 7312 [file 1]

## Ubxn2b

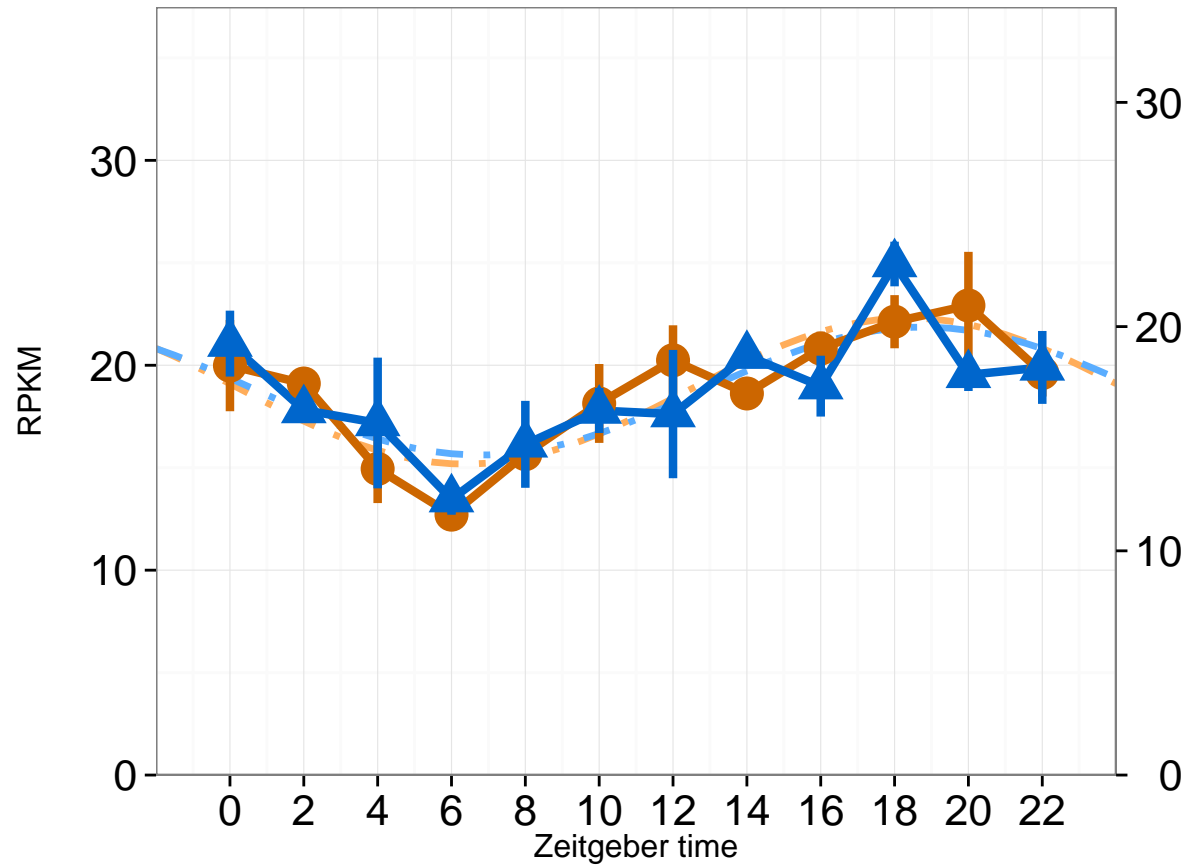

## Ubxn2b

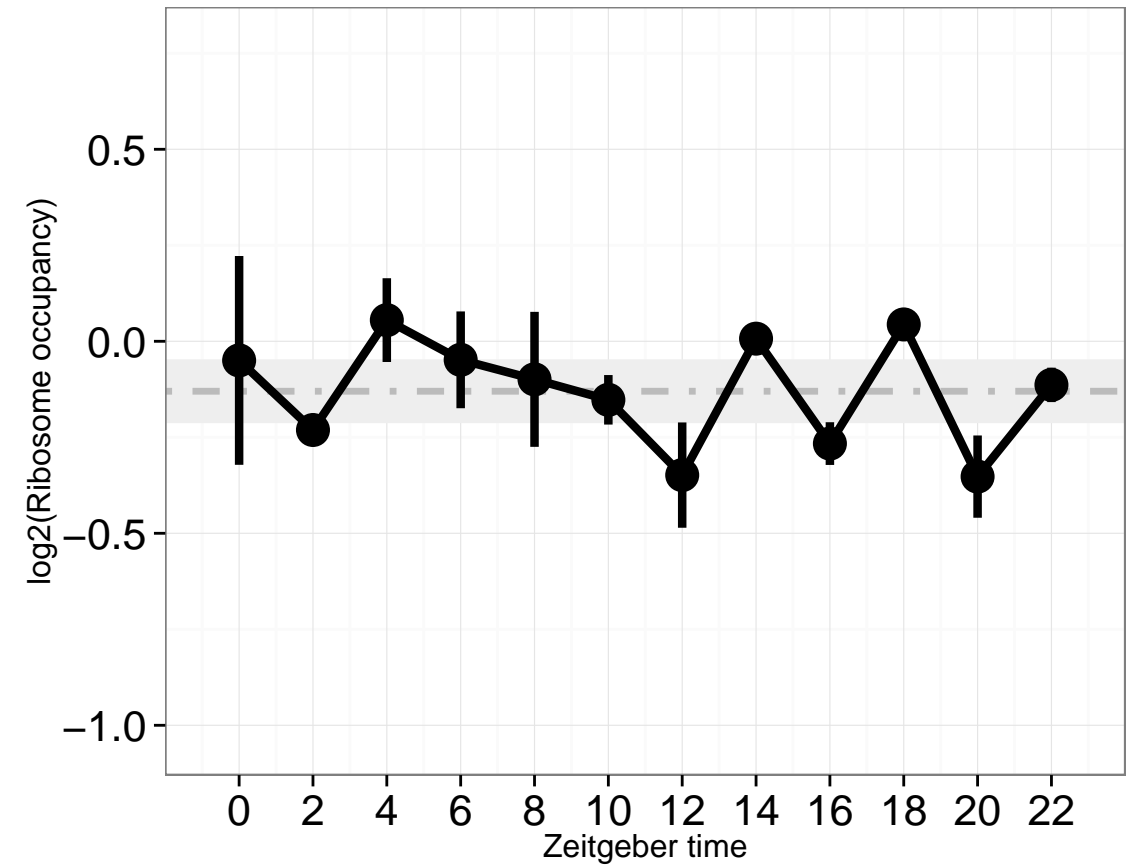

Supplement: Supplementary file 7313 [file 1]

# Lpcat2

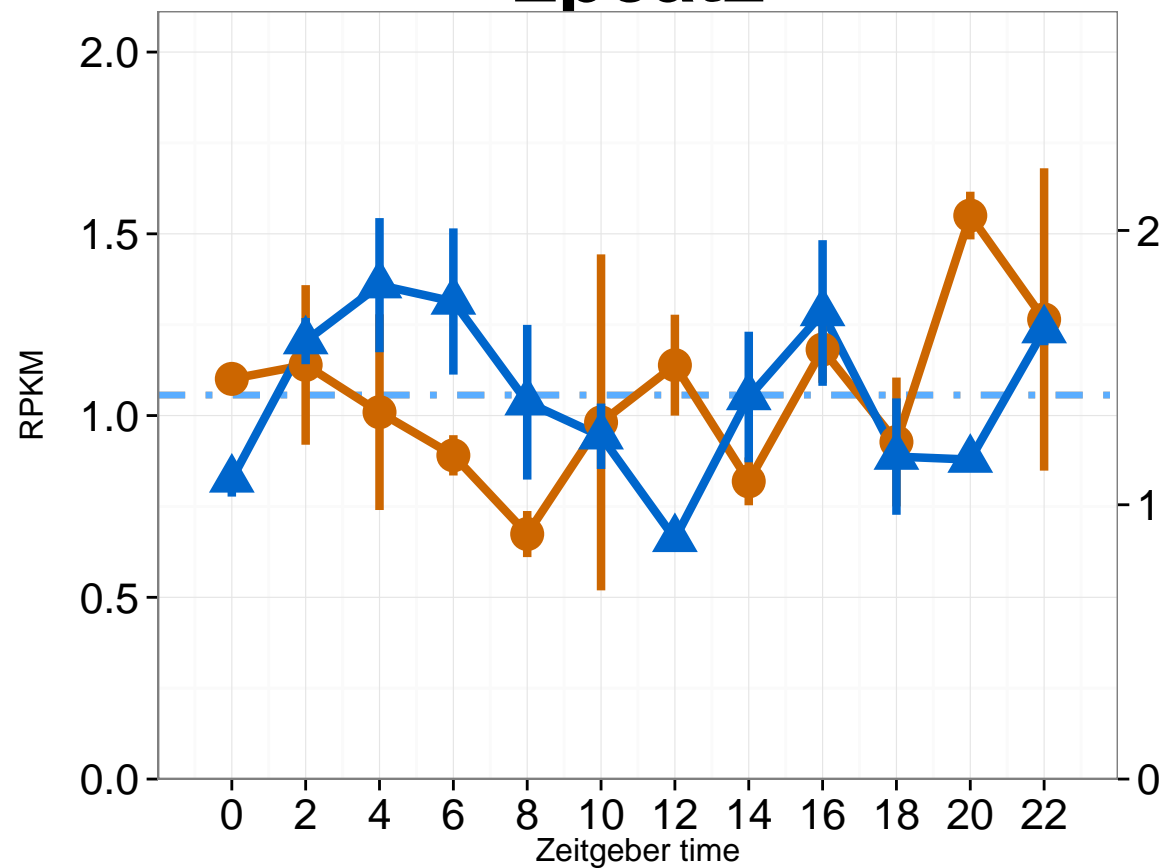

# Lpcat2

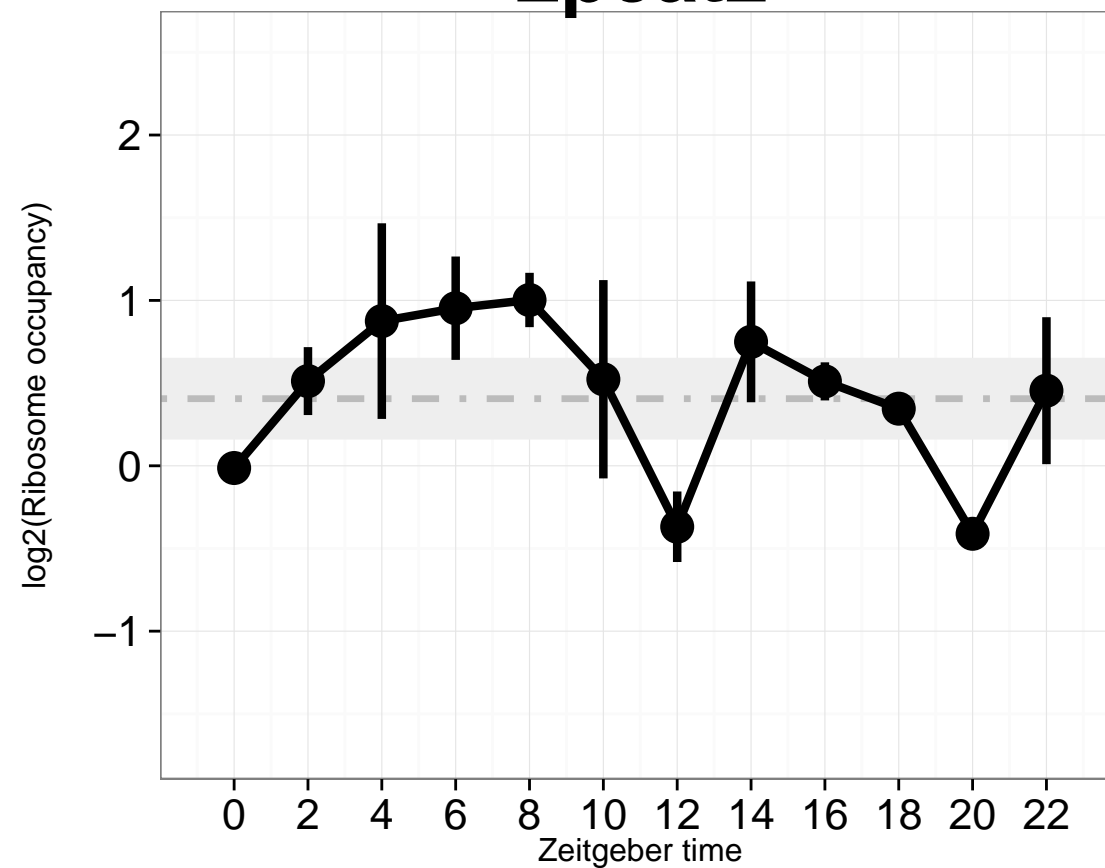

Supplement: Supplementary file 7314 [file 1]

## Shroom4

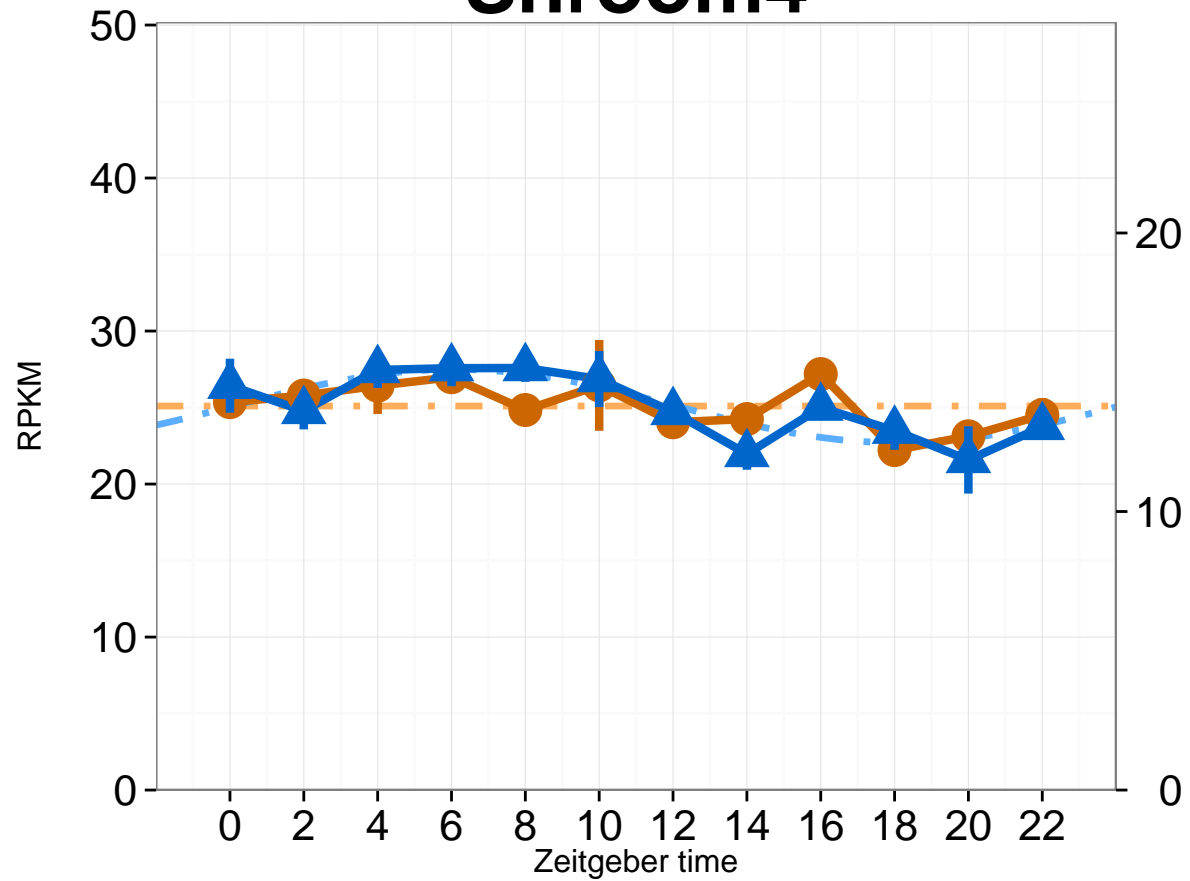

## Shroom4

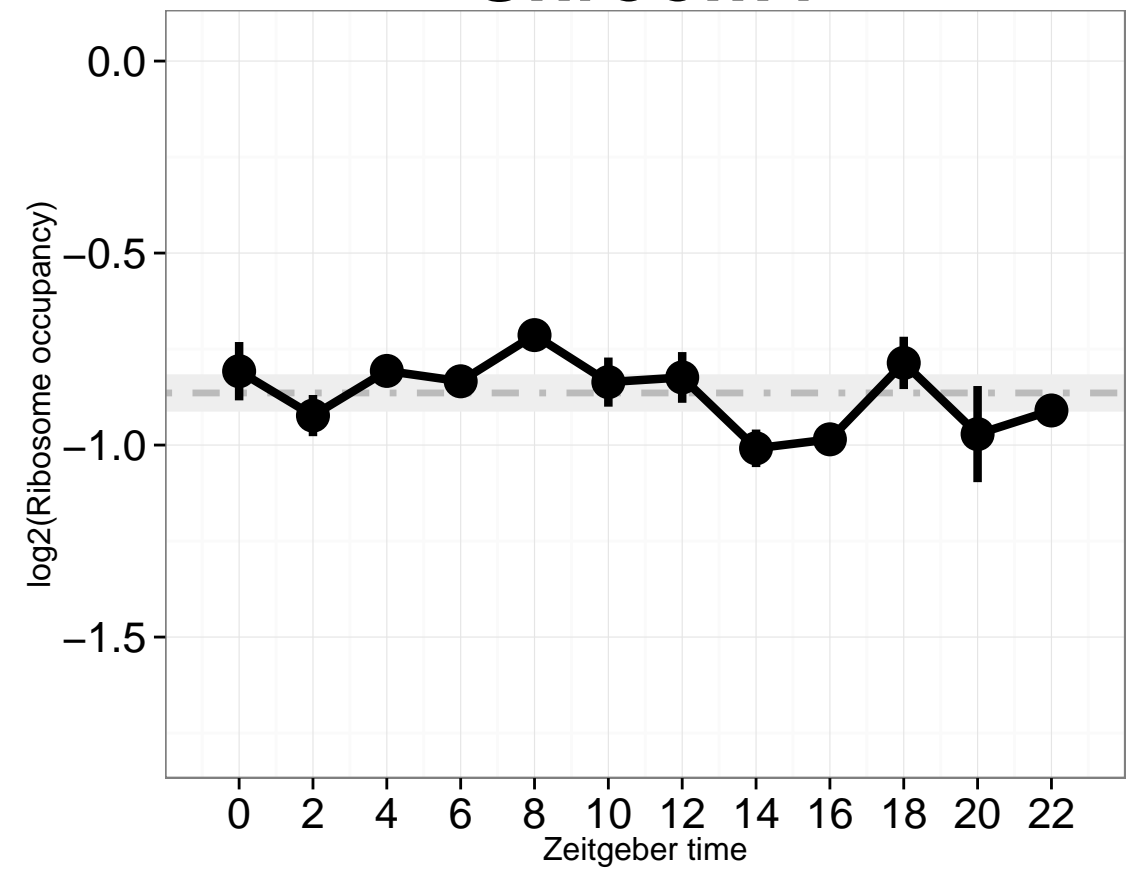

Supplement: Supplementary file 7315 [file 1]

## Ears2

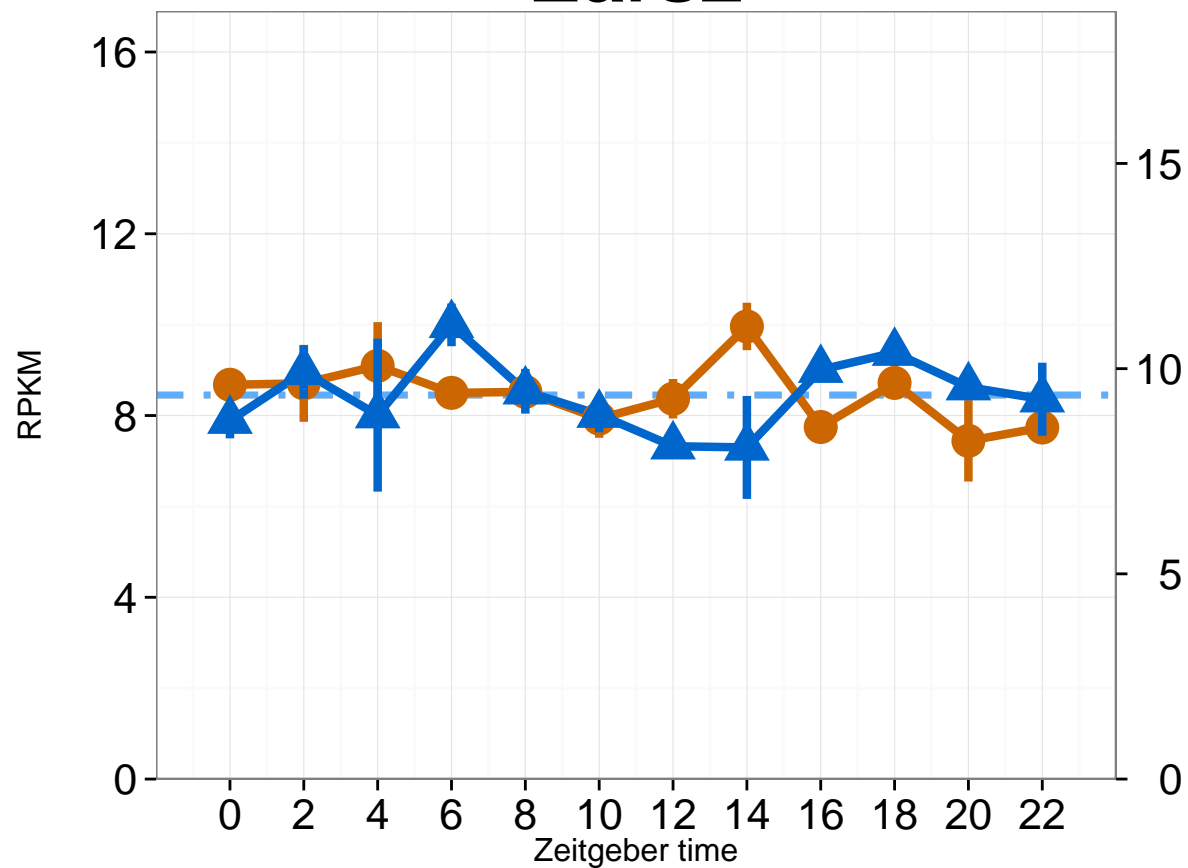

## Ears2

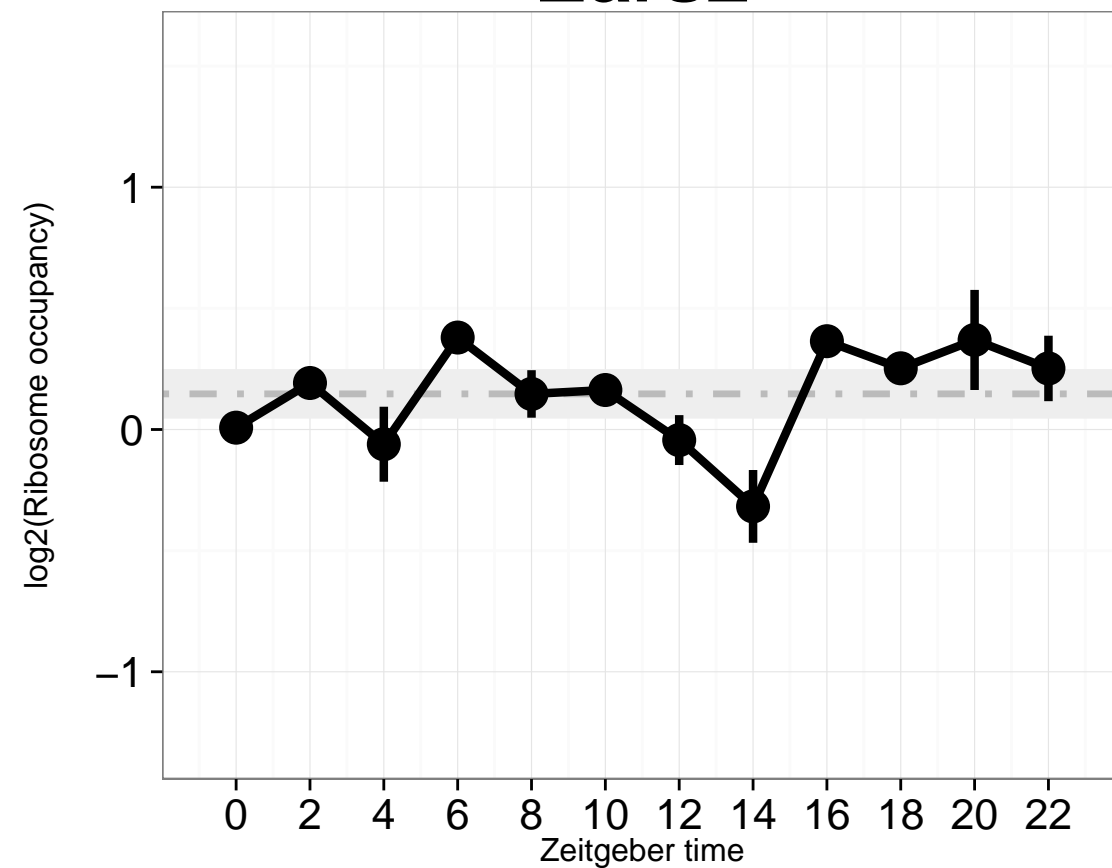

Supplement: Supplementary file 7316 [file 1]

## Sgk2

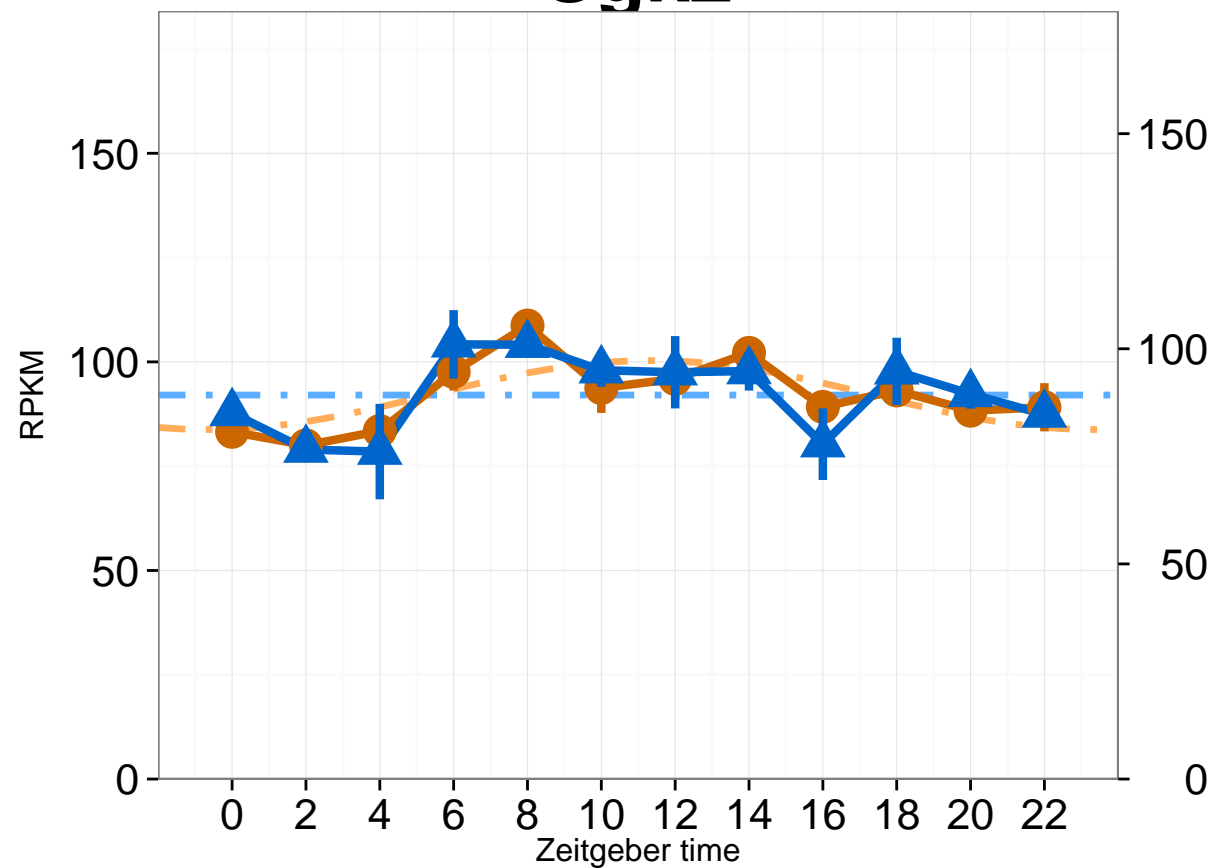

## Sgk2

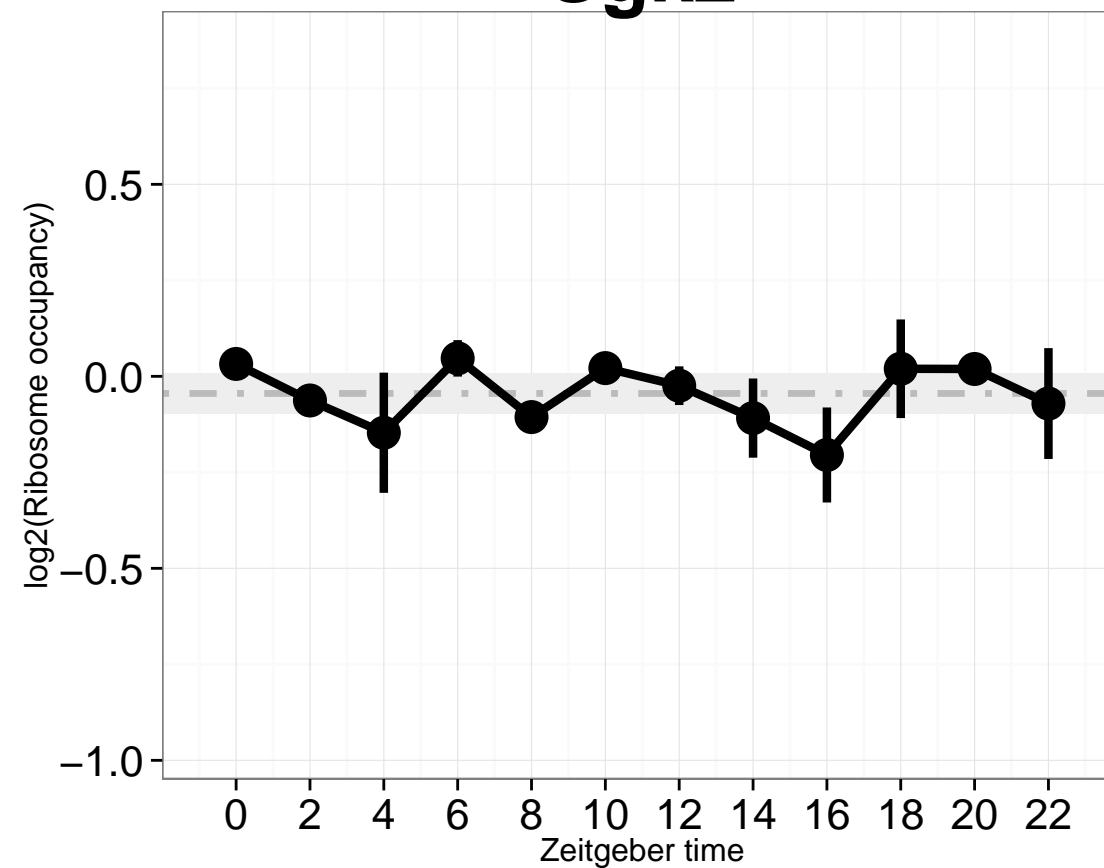

Supplement: Supplementary file 7317 [file 1]

## 2210011C24Rik

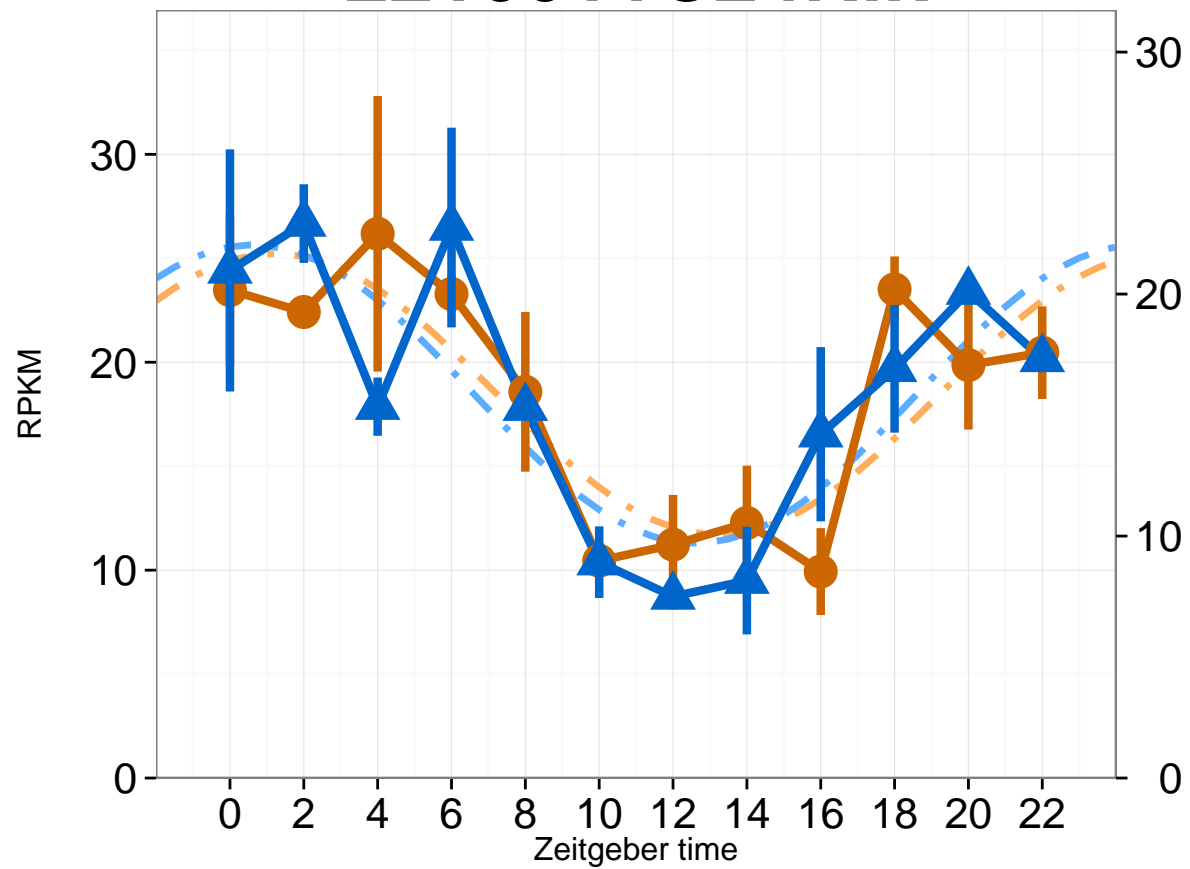

## 2210011C24Rik

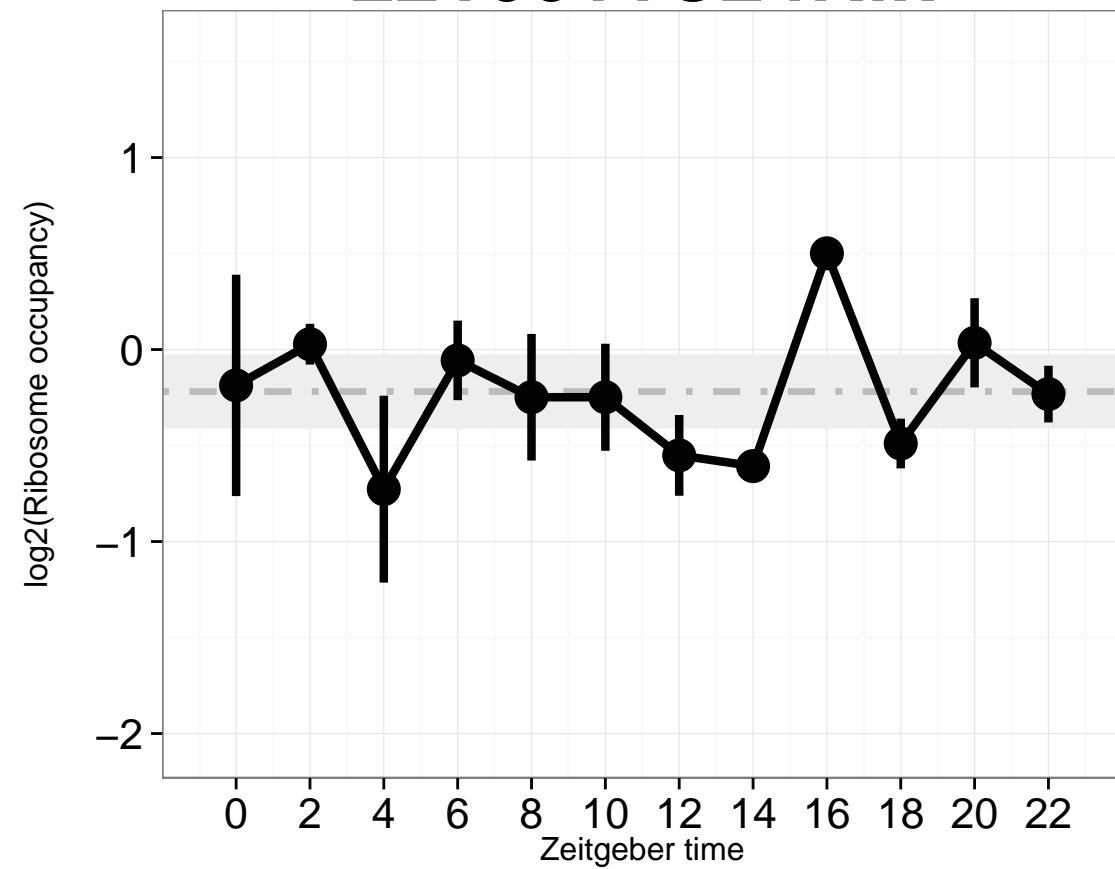

Supplement: Supplementary file 7318 [file 1]

# Trim47

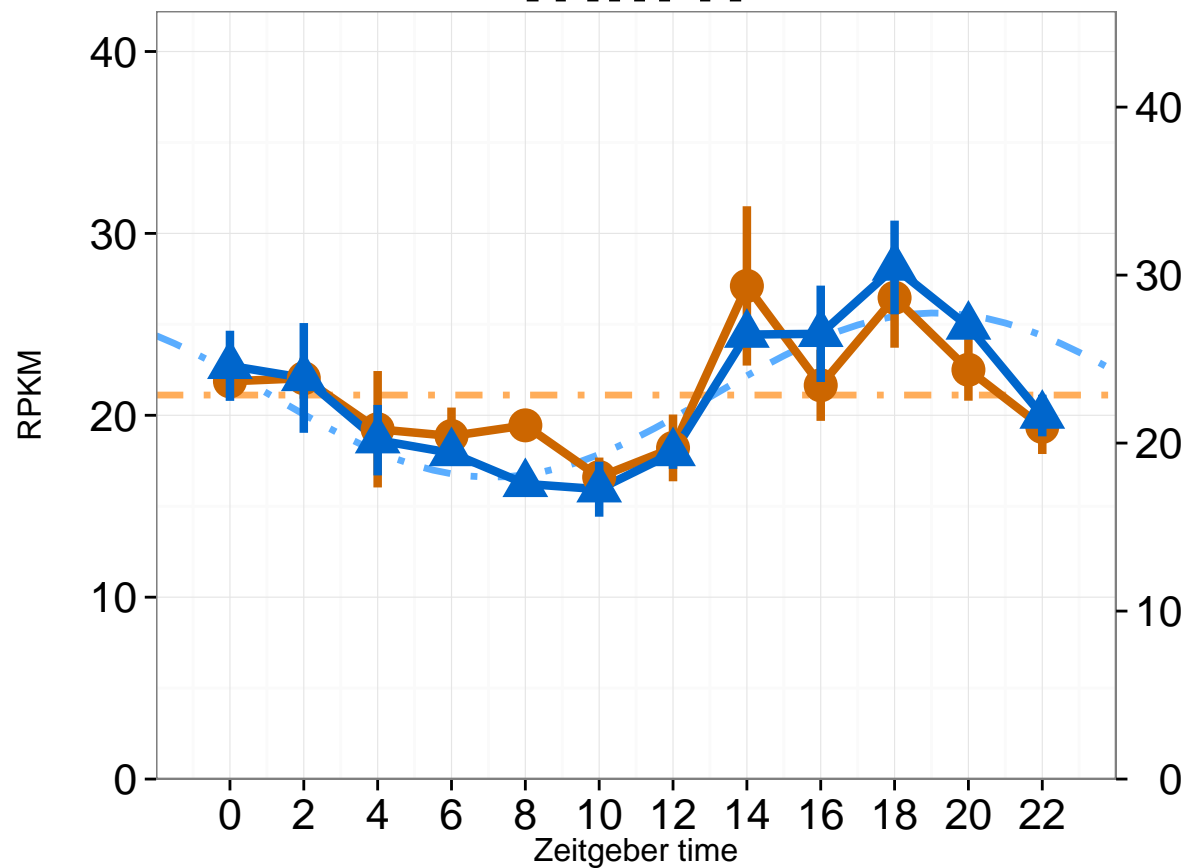

# Trim47

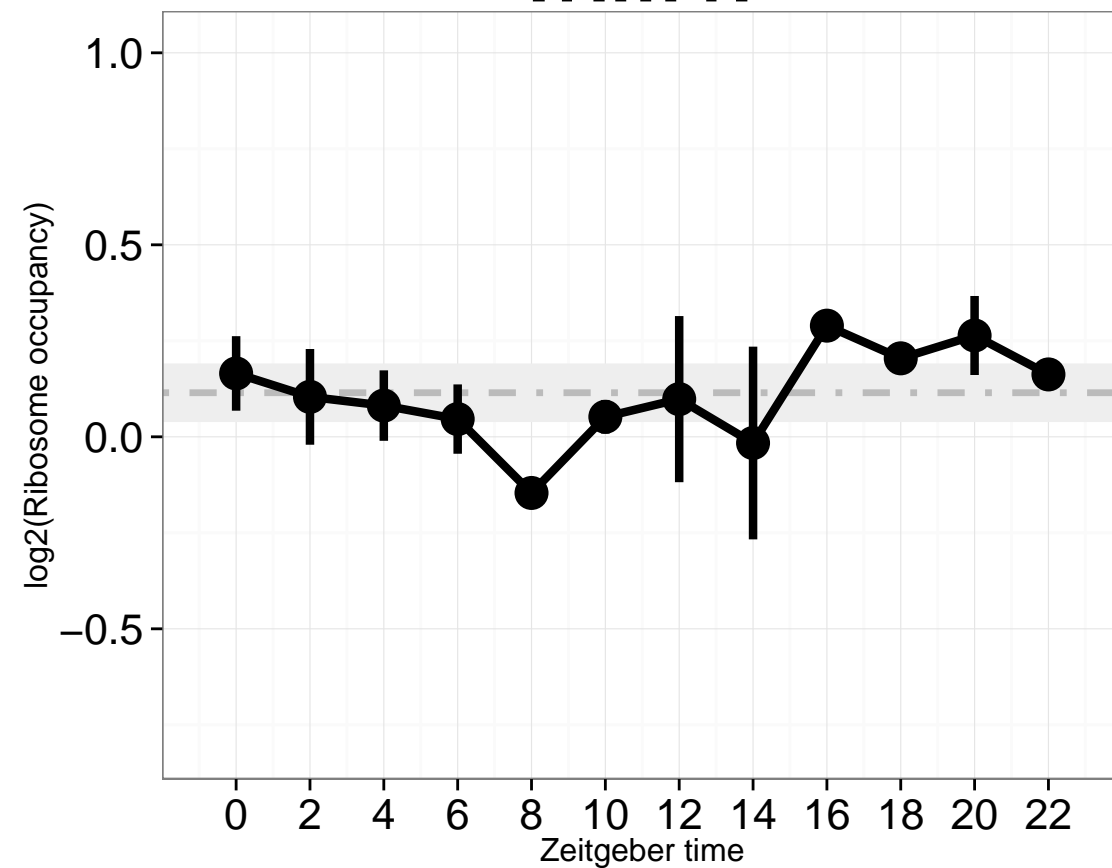

Supplement: Supplementary file 7319 [file 1]

## Arhgap17

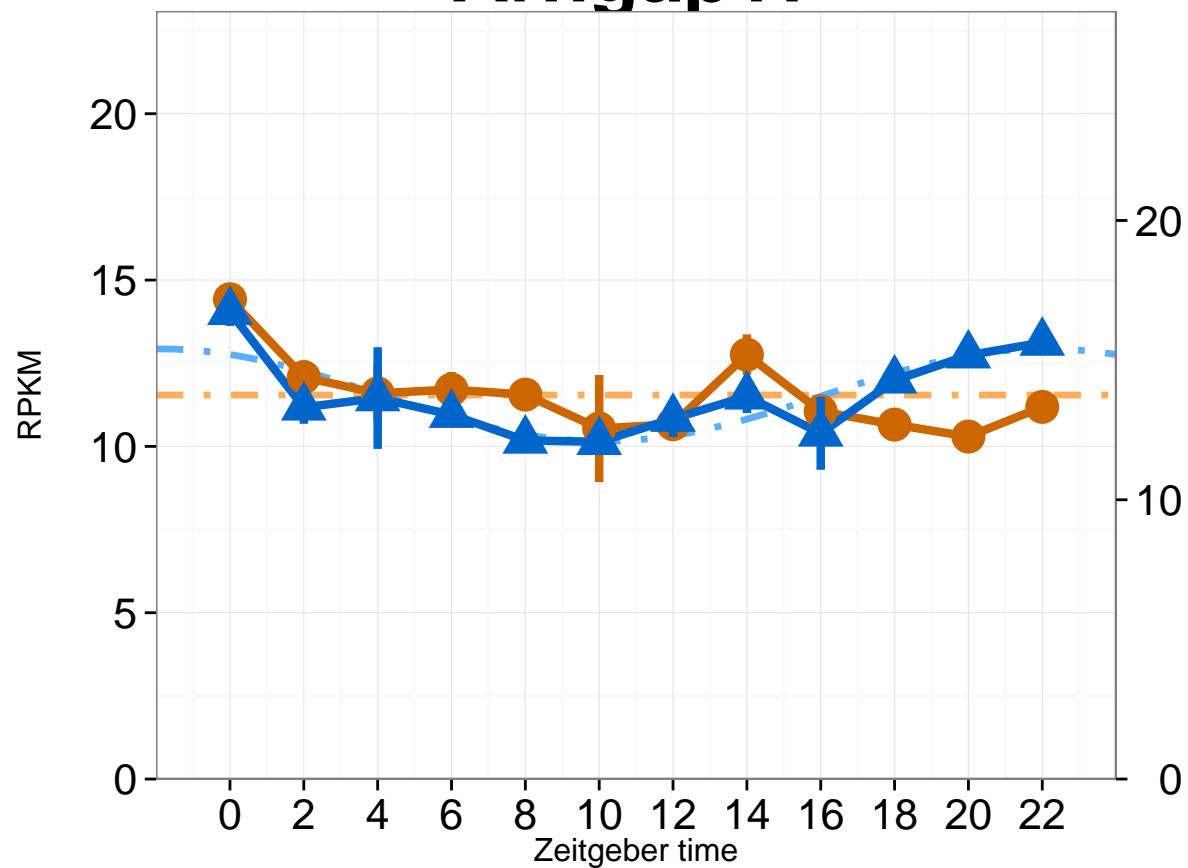

## Arhgap17

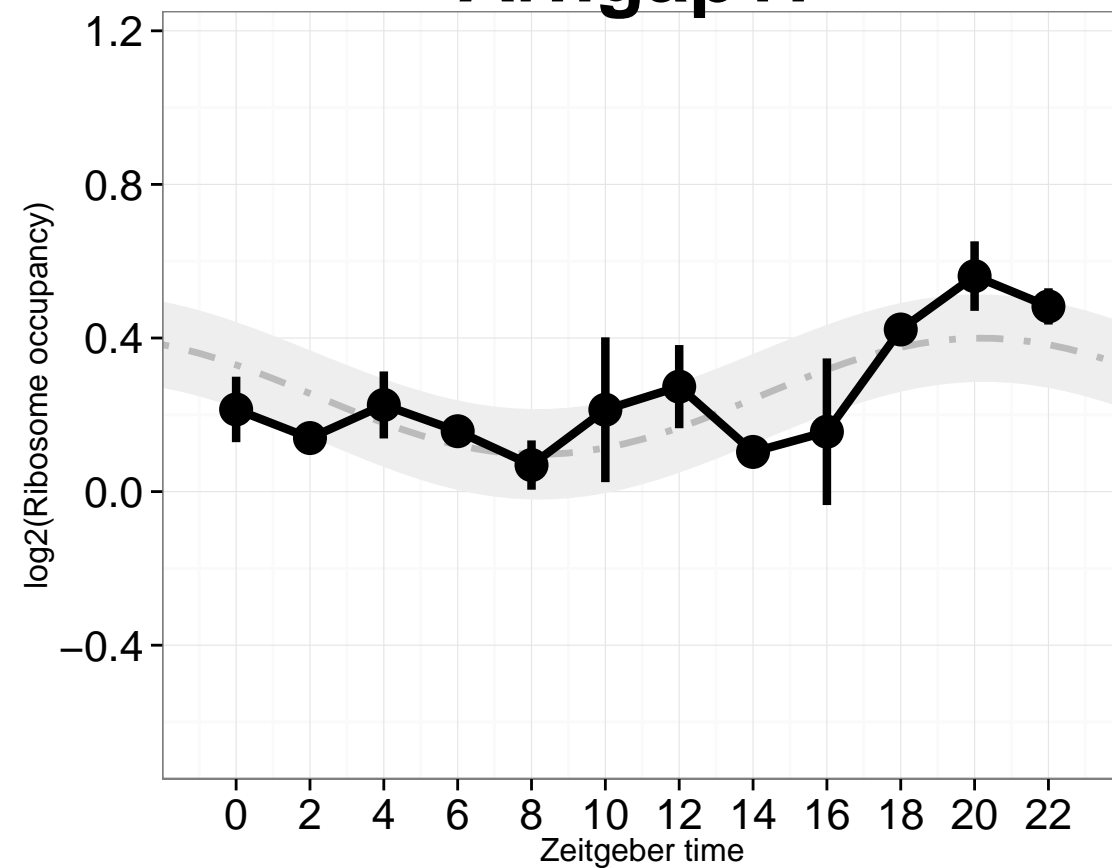

Supplement: Supplementary file 7320 [file 1]

## Hs2st1

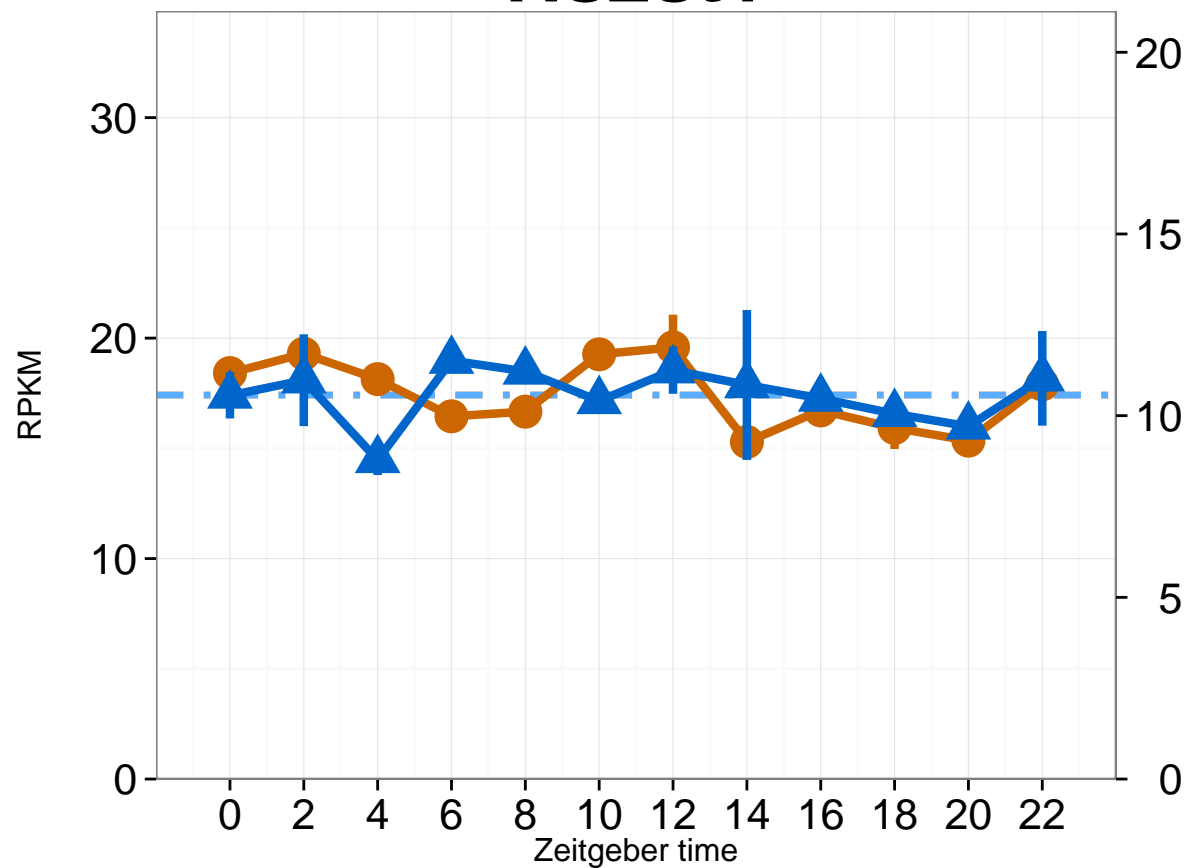

## Hs2st1

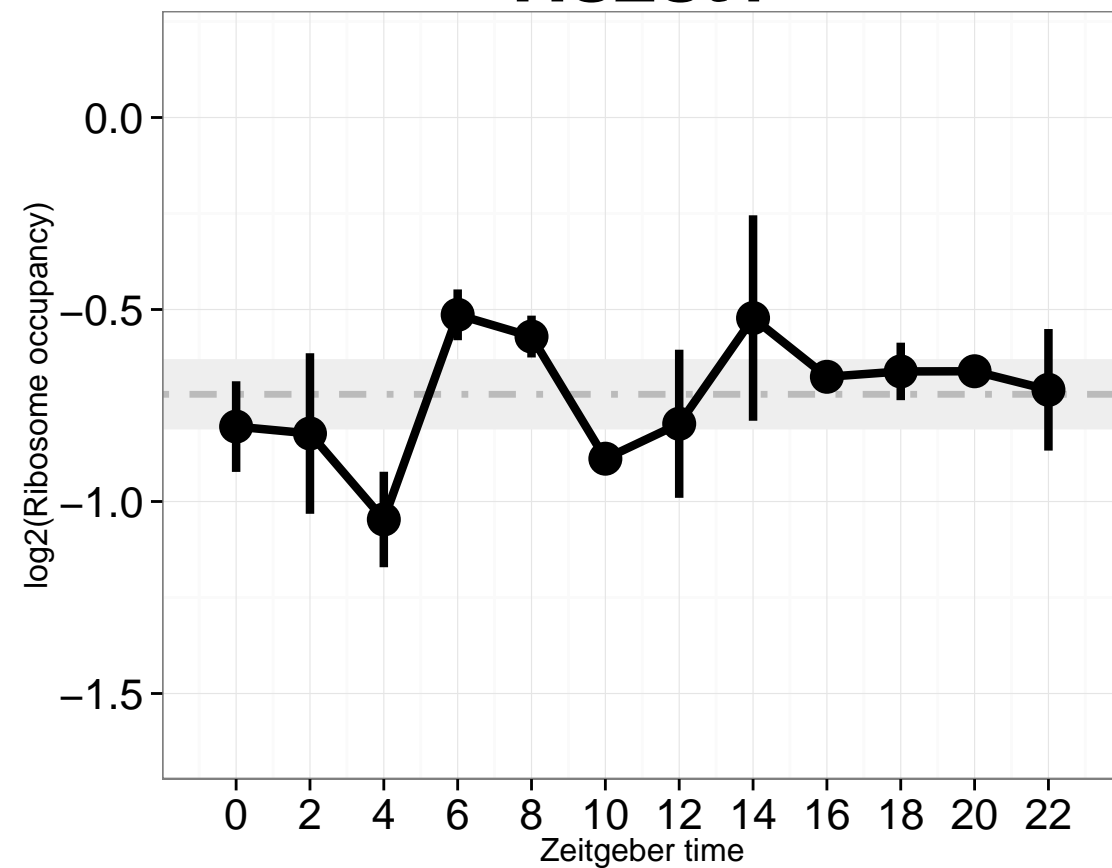

Supplement: Supplementary file 7321 [file 1]

# Gpr183

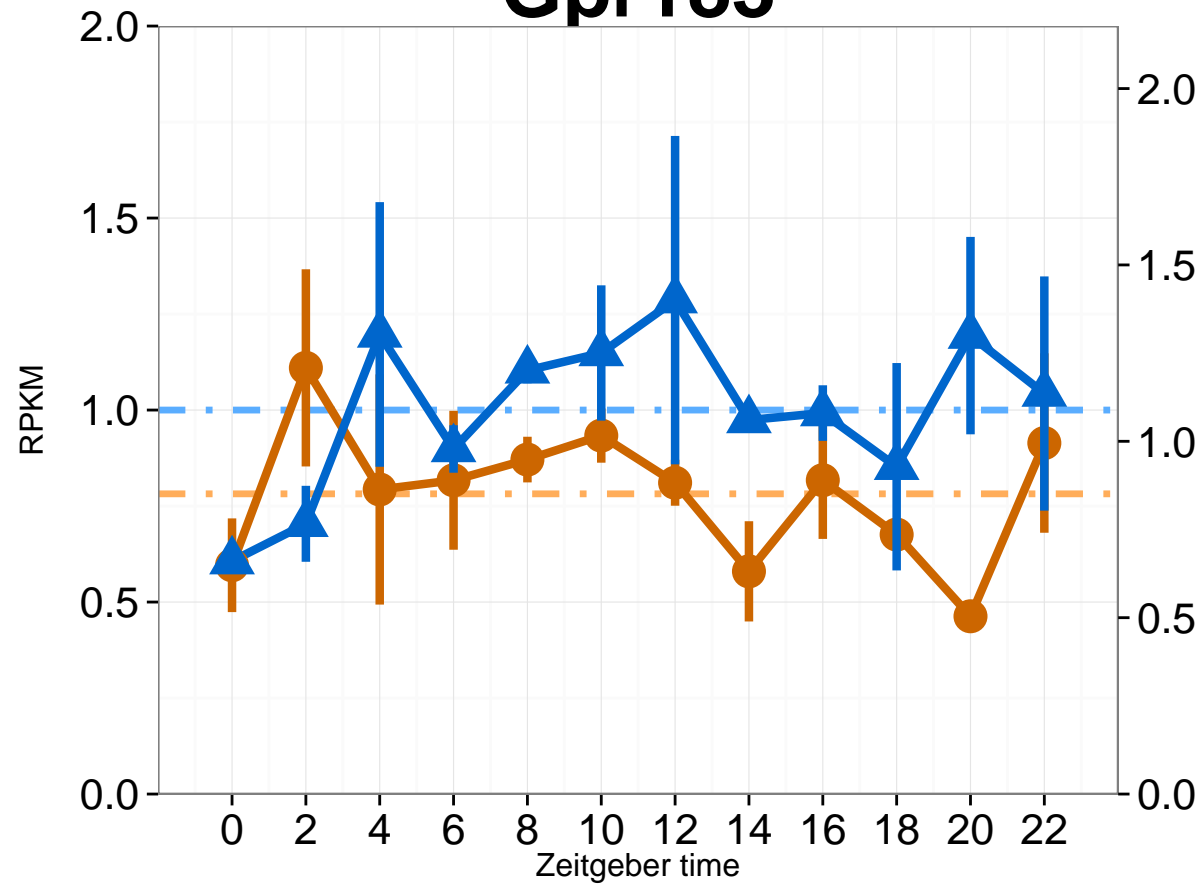

# Gpr183

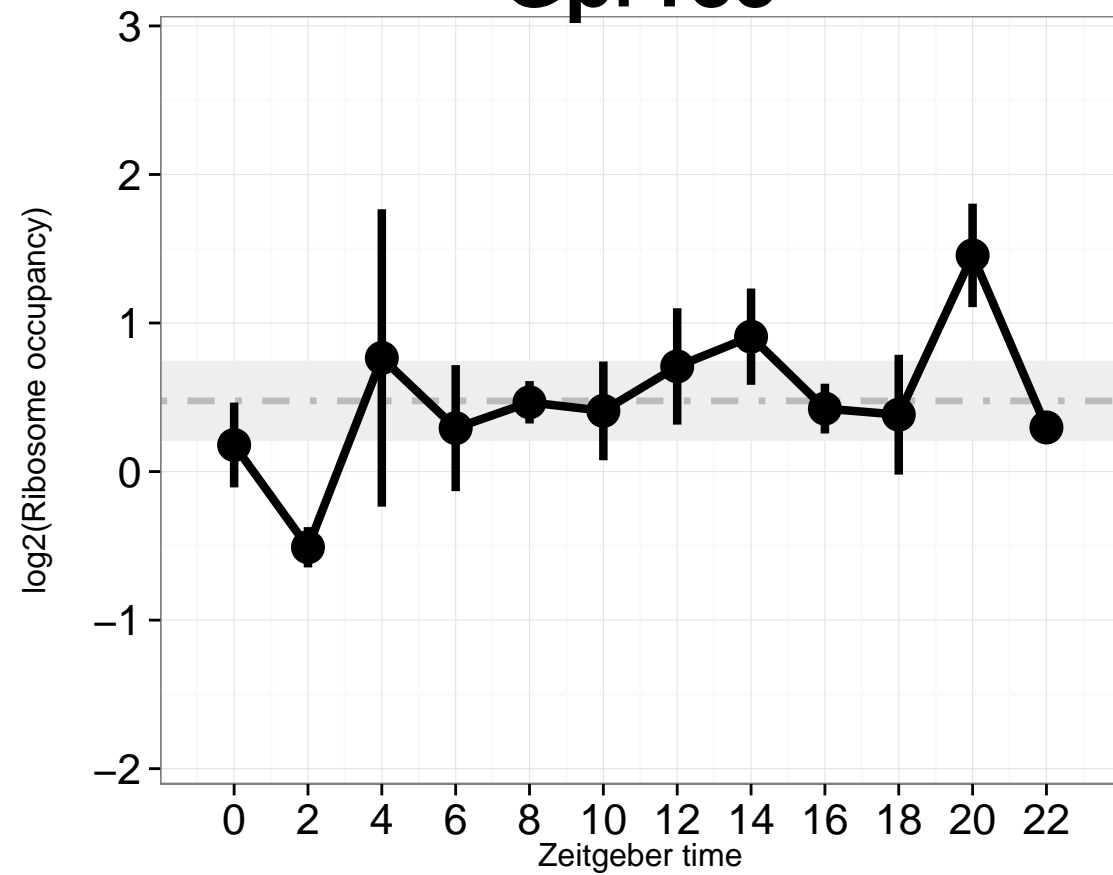

Supplement: Supplementary file 7322 [file 1]

## Ddx42

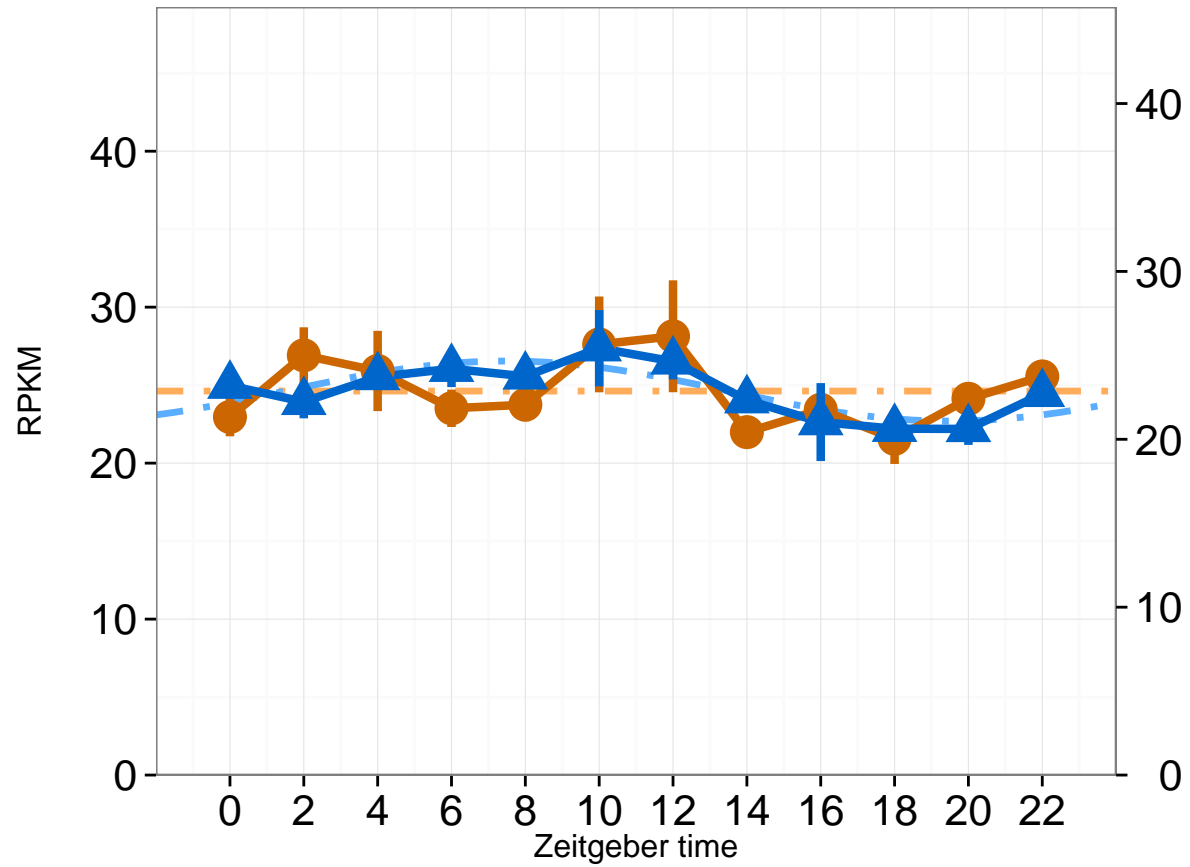

## Ddx42

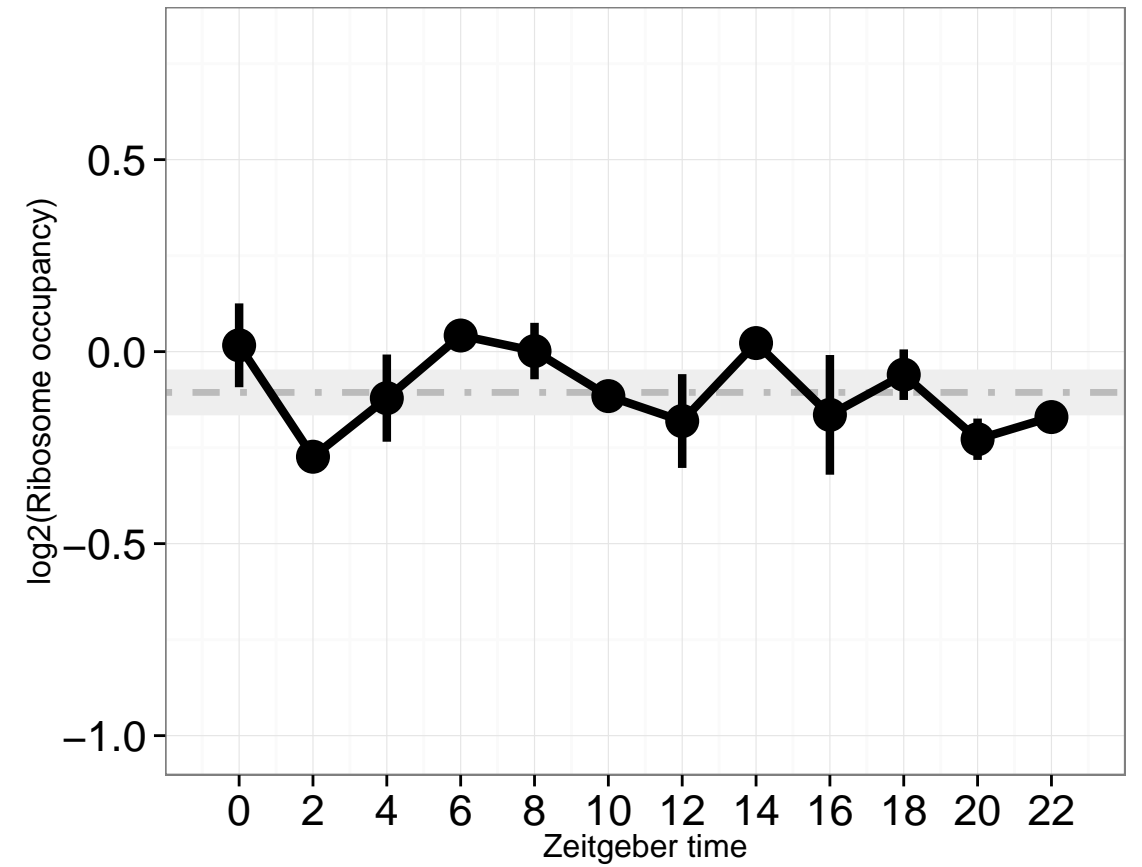

Supplement: Supplementary file 7323 [file 1]
