# Supplementary material (part 74 of 133)
Source: publisher figshare collection journal article supplement (https://springernature.figshare.com/articles/dataset/_/4903193)

# Phf21a

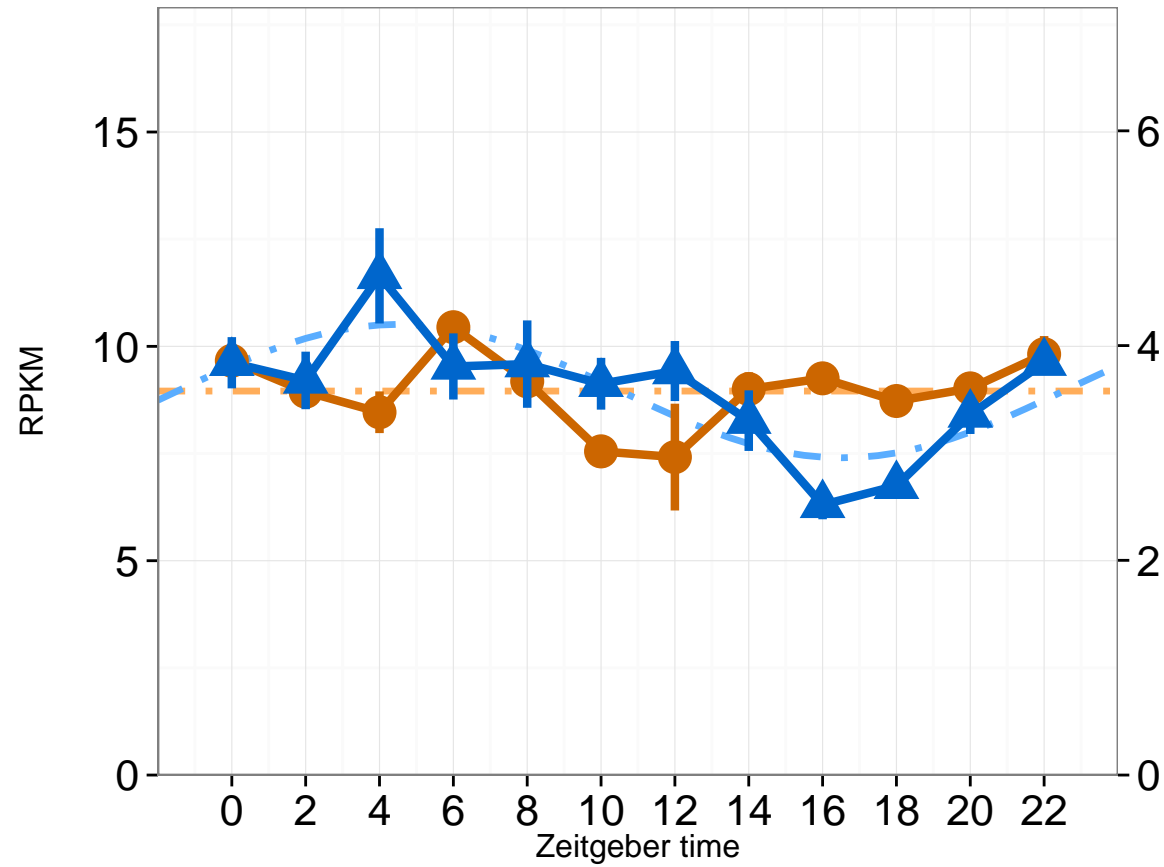

# Phf21a

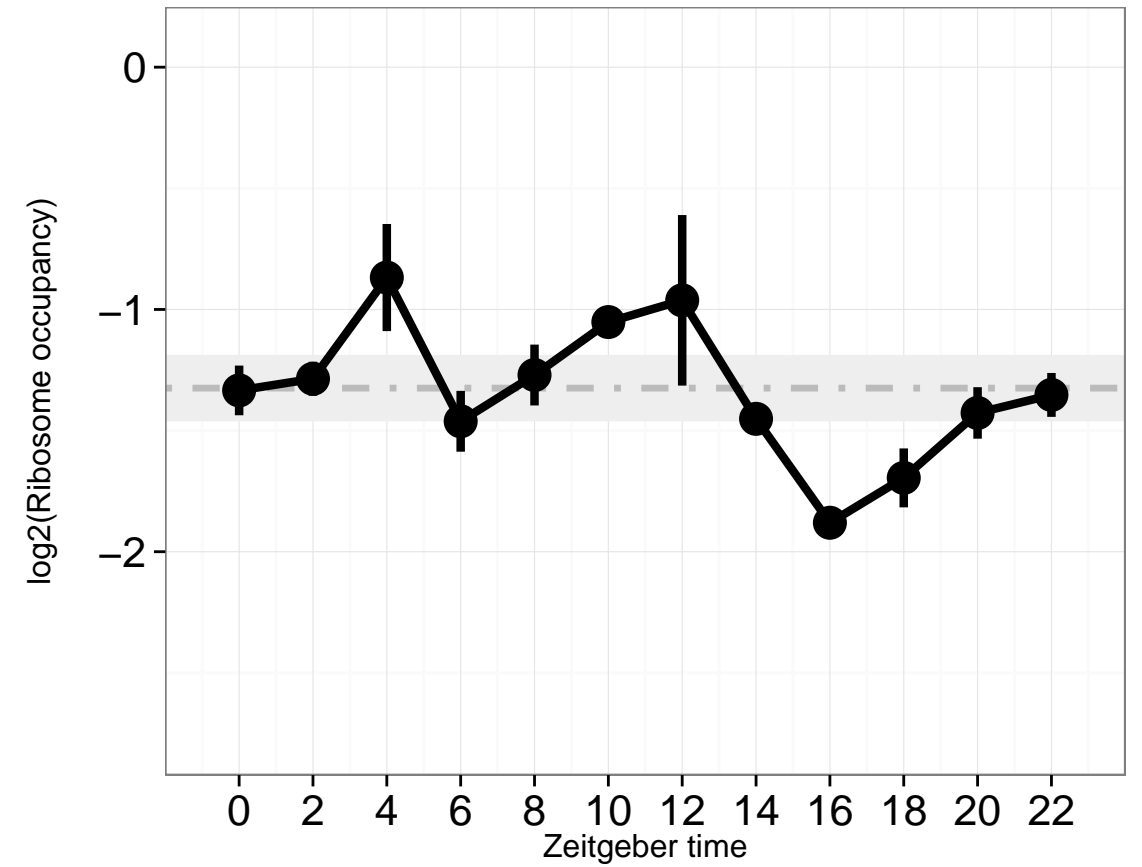

Supplement: Supplementary file 7324 [file 1]

# R3hcc1

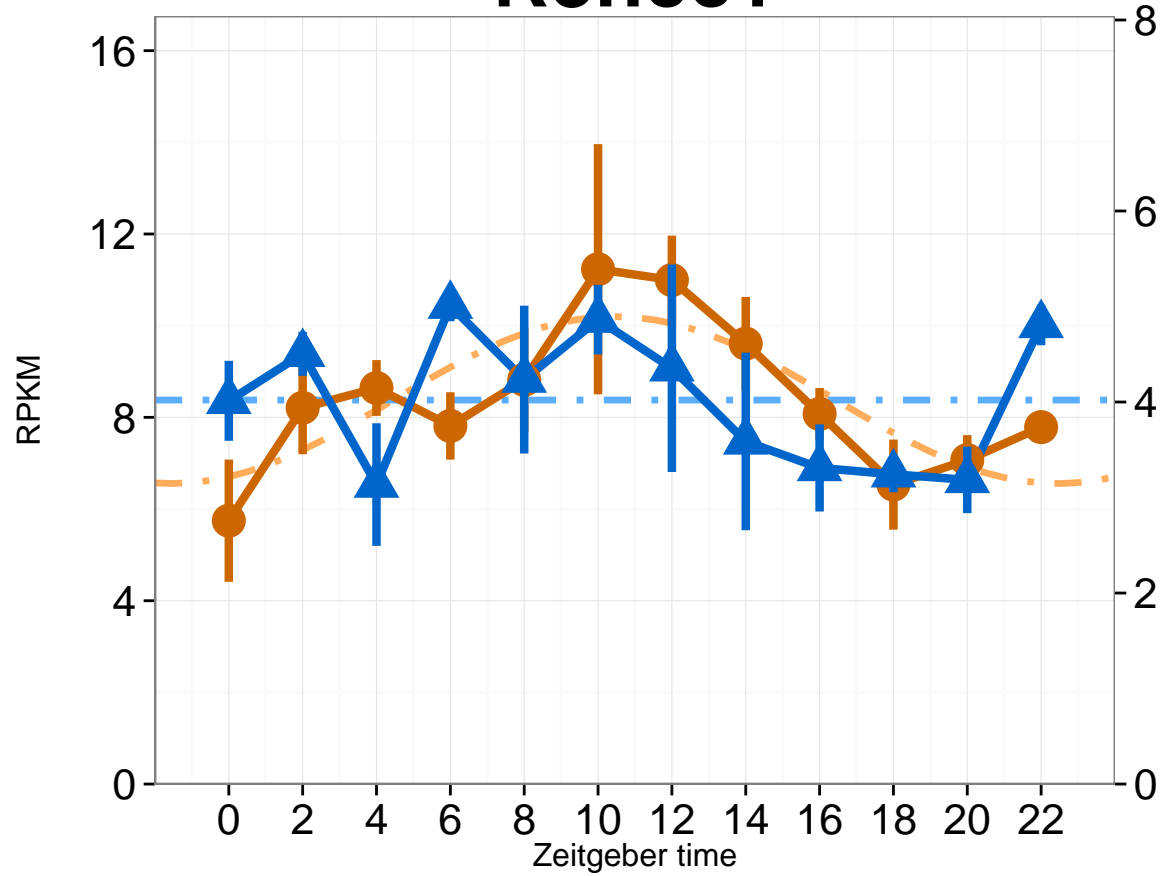

# R3hcc1

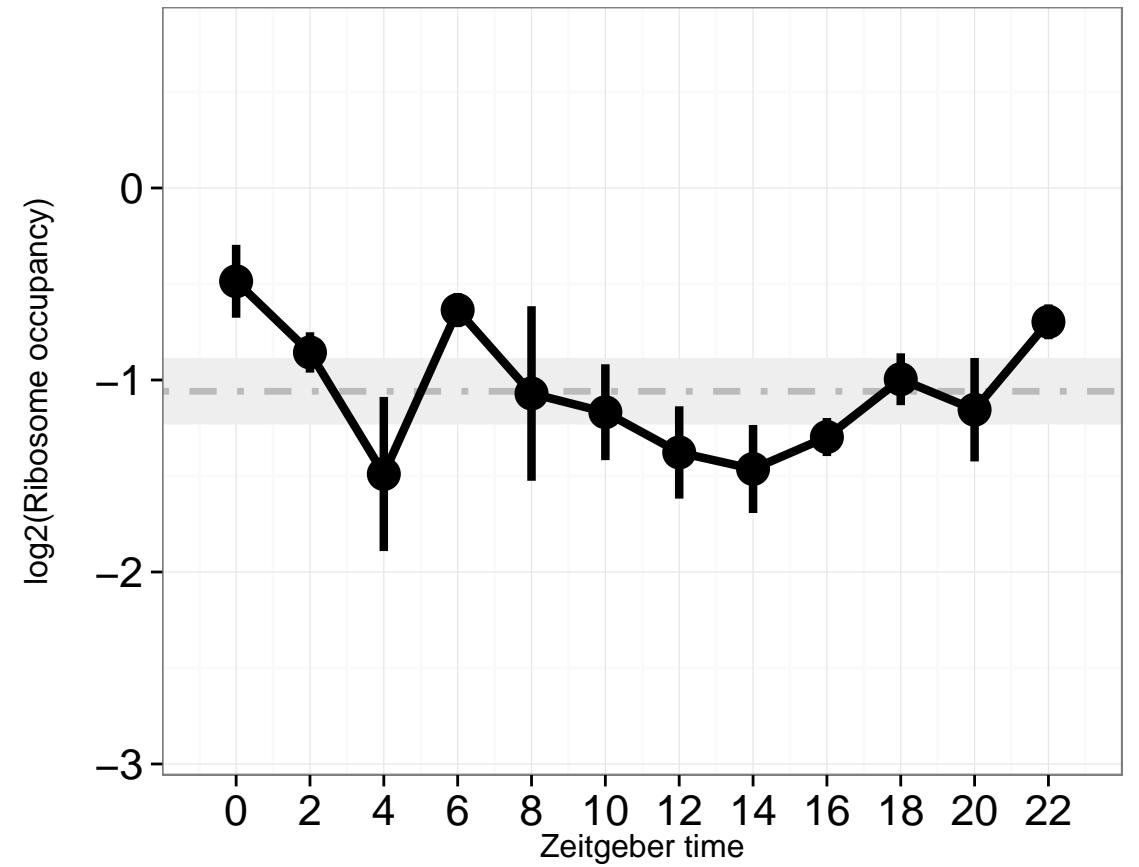

Supplement: Supplementary file 7325 [file 1]

## Kptn

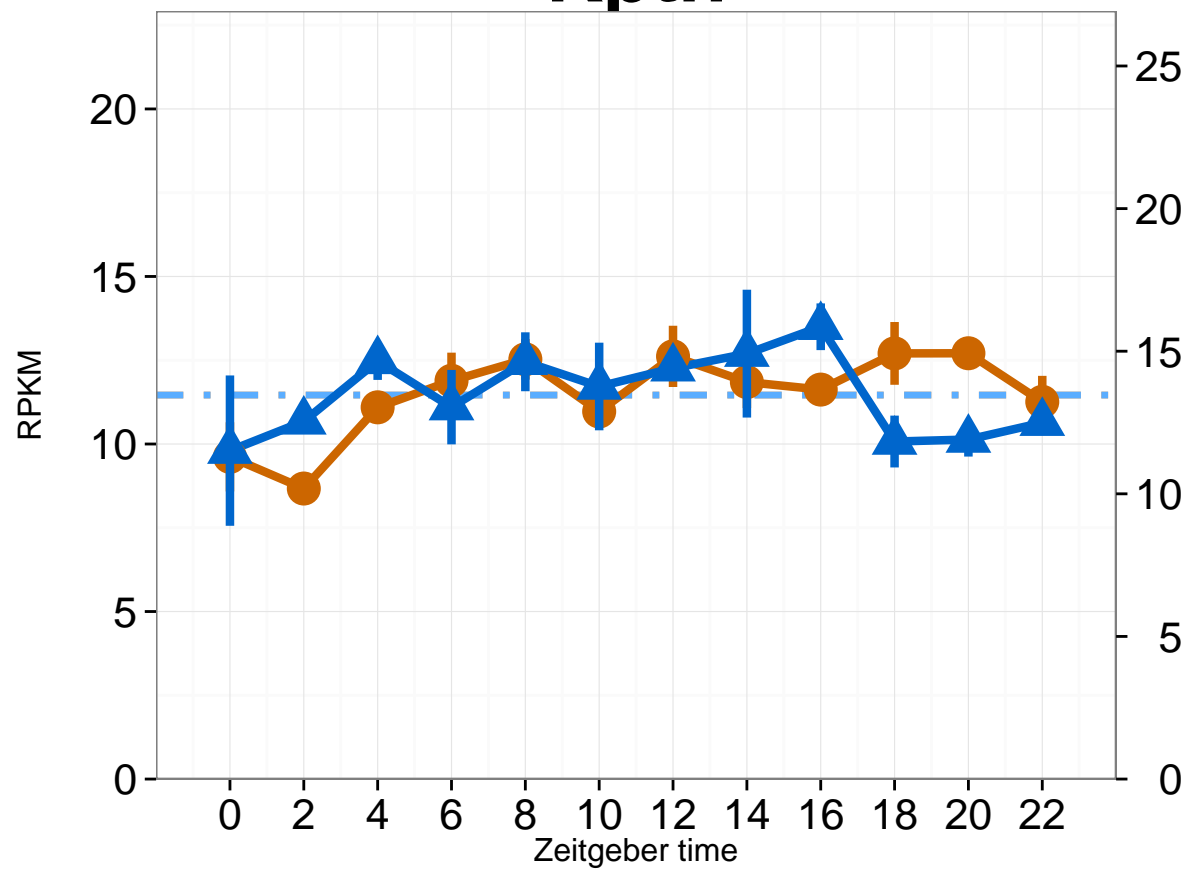

## Kptn

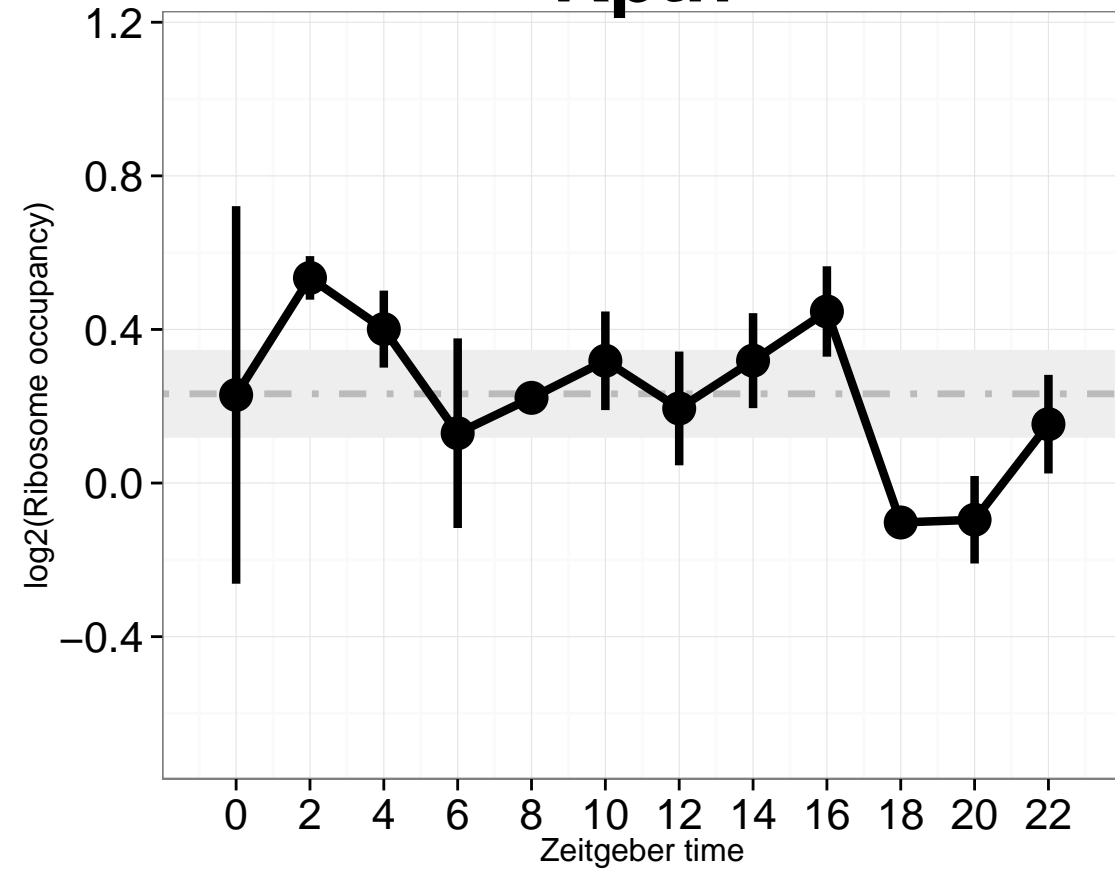

Supplement: Supplementary file 7326 [file 1]

# Csrnp1

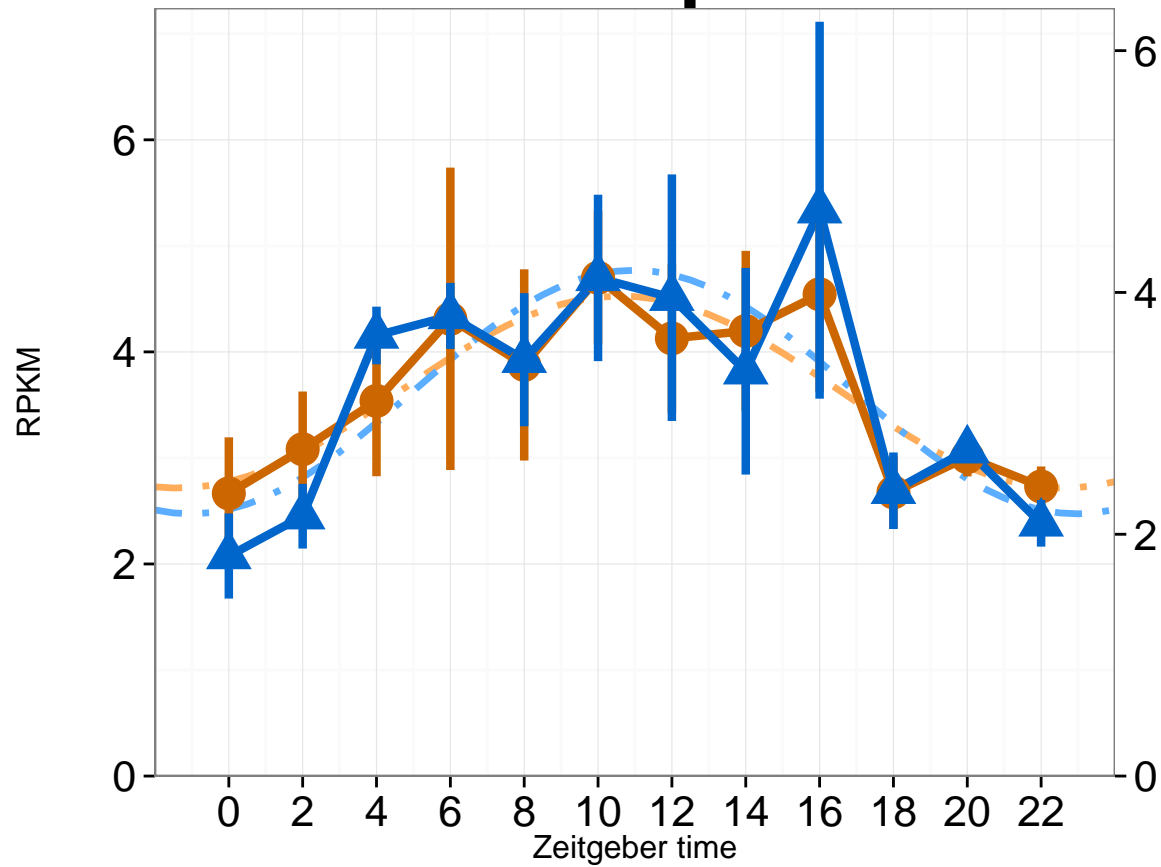

# Csrnp1

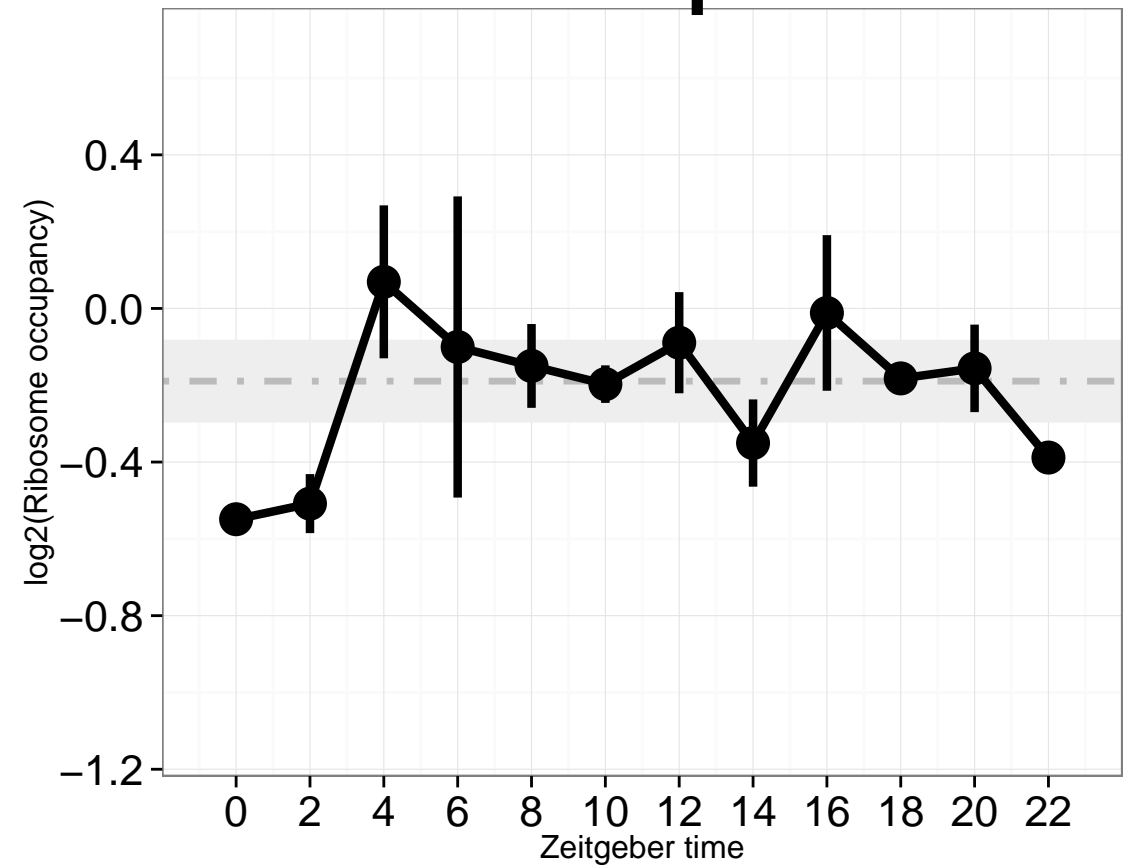

Supplement: Supplementary file 7327 [file 1]

# Clns1a

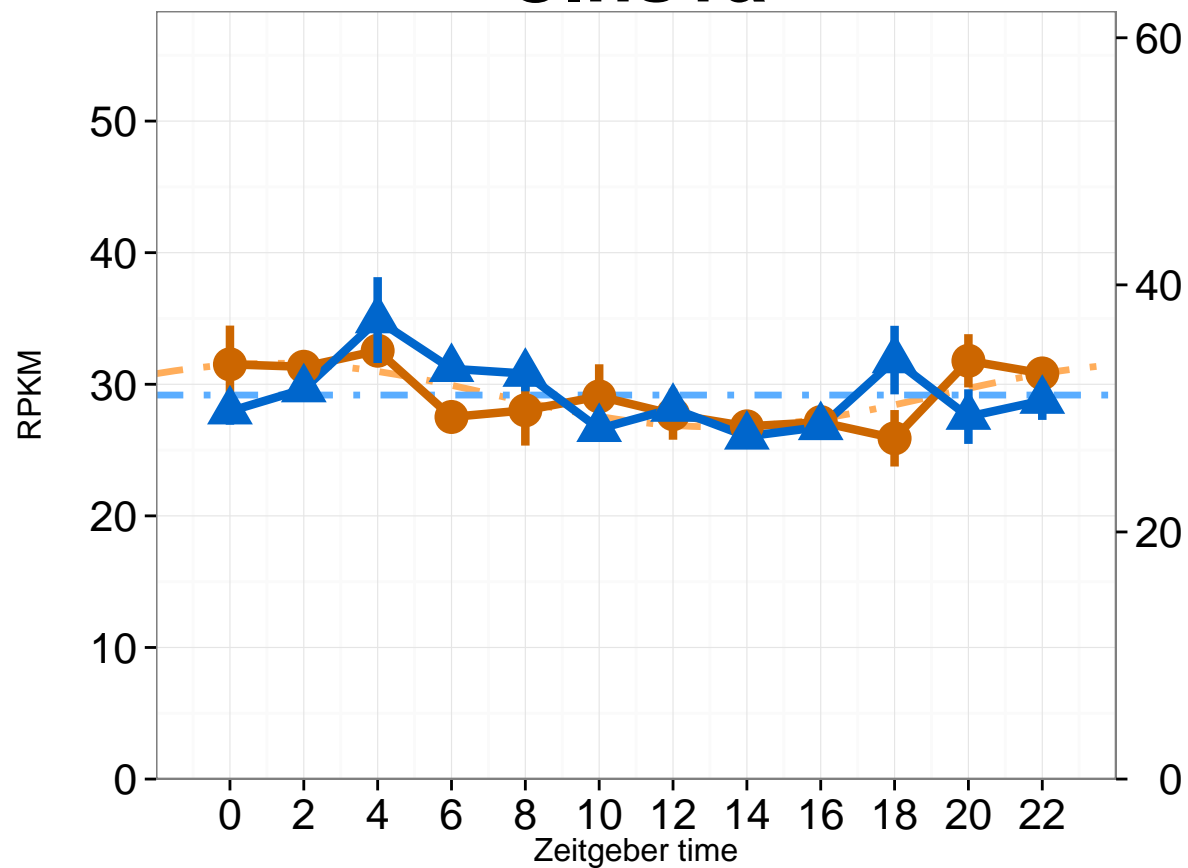

# Clns1a

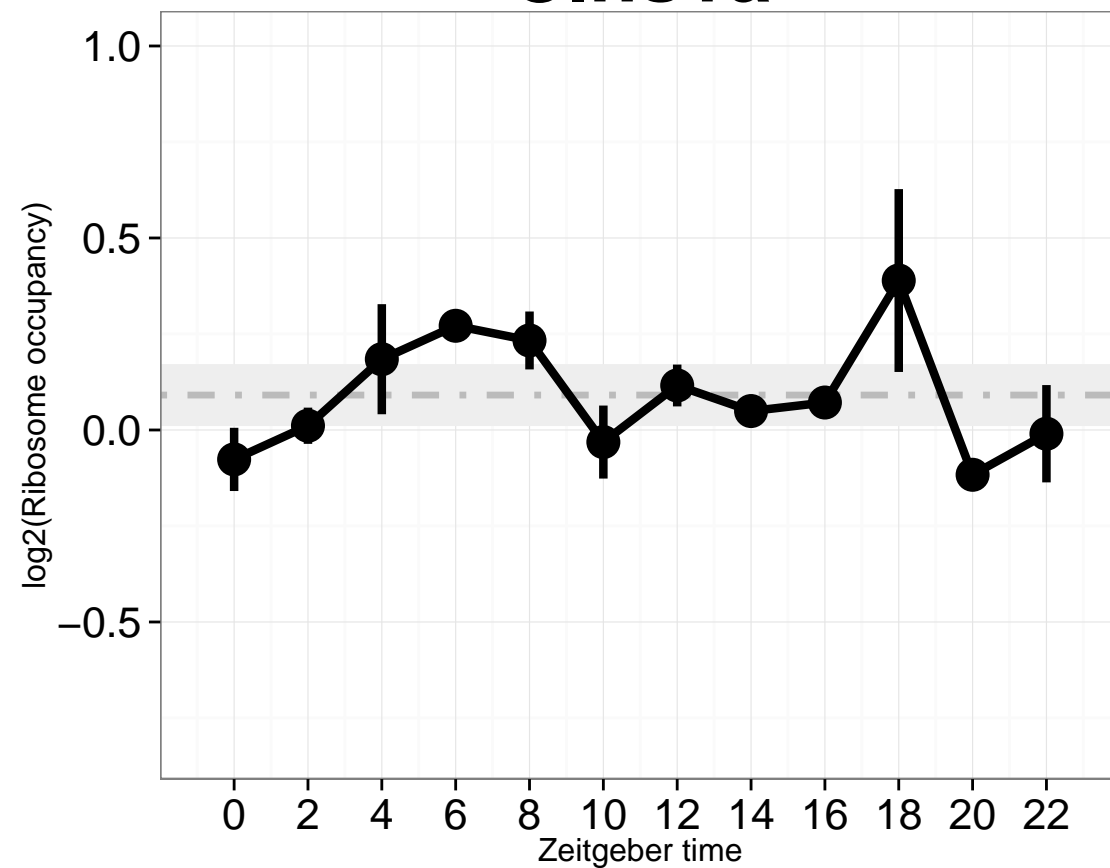

Supplement: Supplementary file 7328 [file 1]

# Zfp91

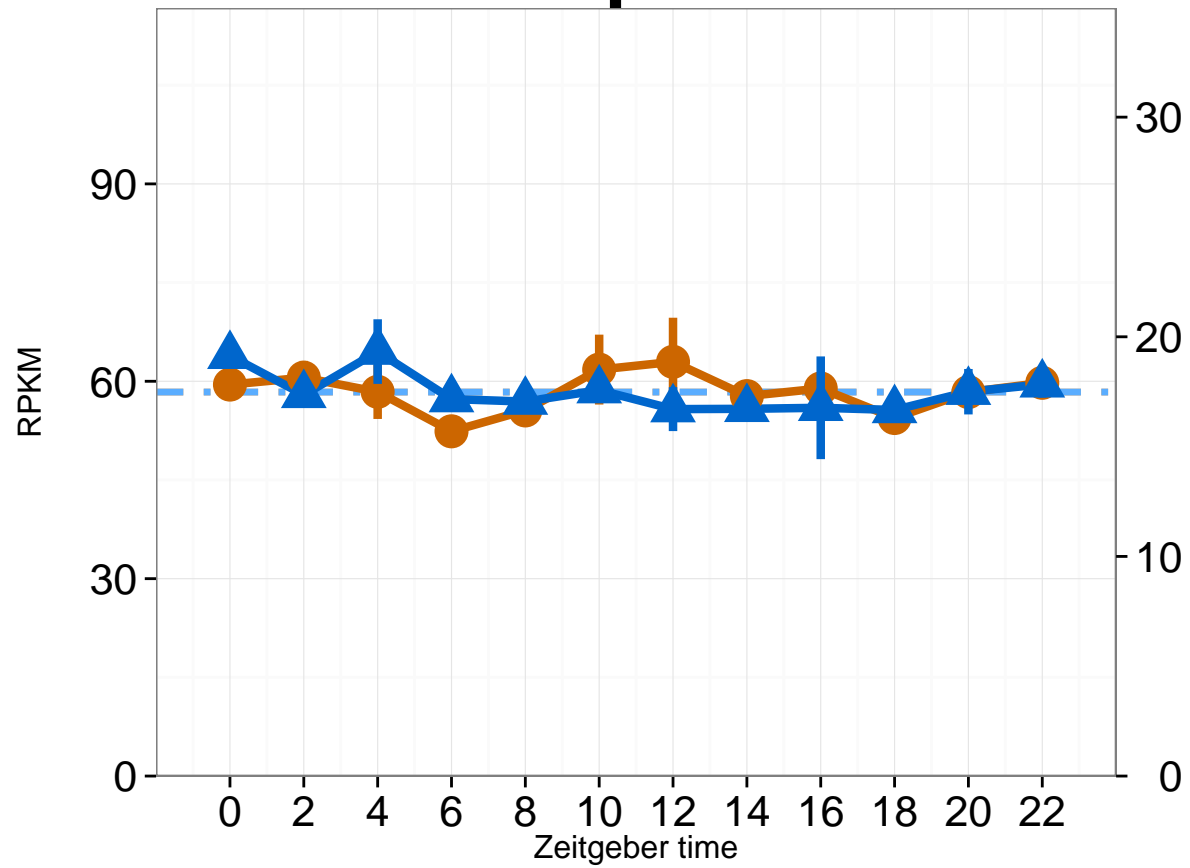

# Zfp91

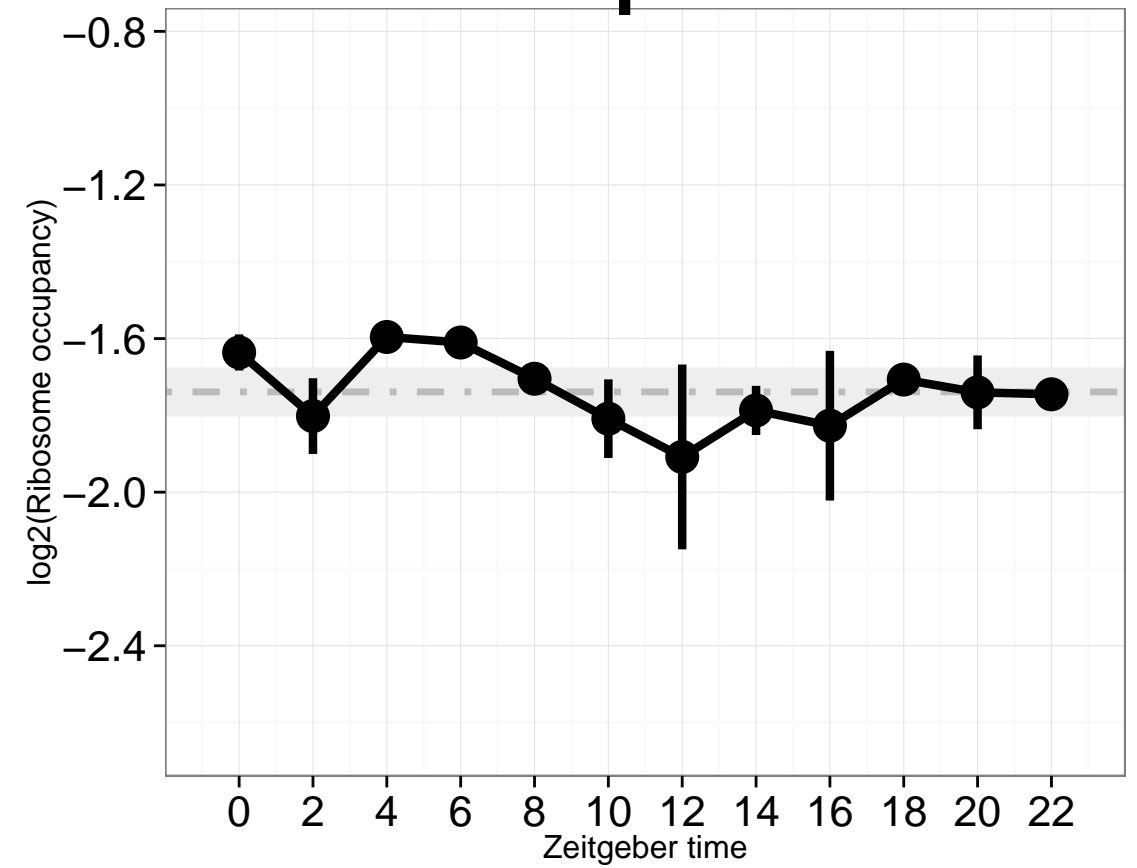

Supplement: Supplementary file 7329 [file 1]

**2310007B03Rik**

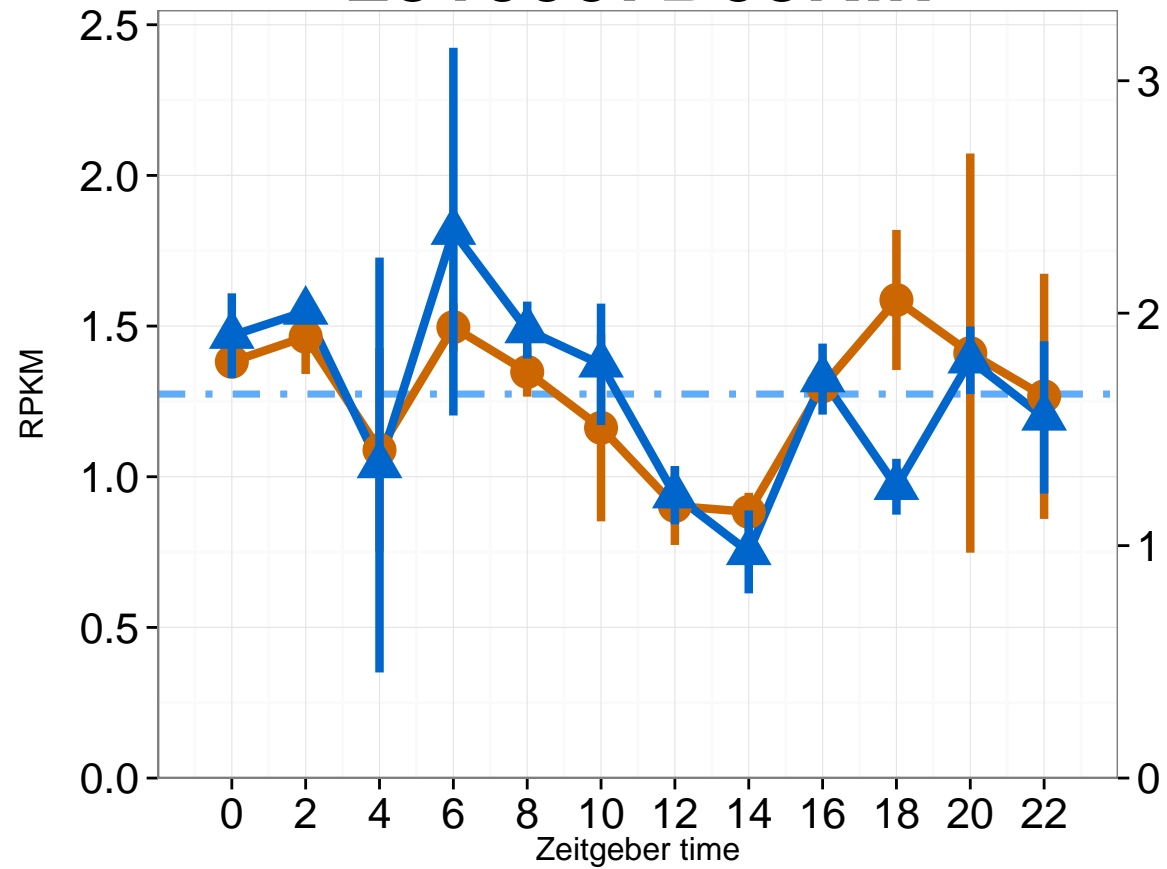

**2310007B03Rik**

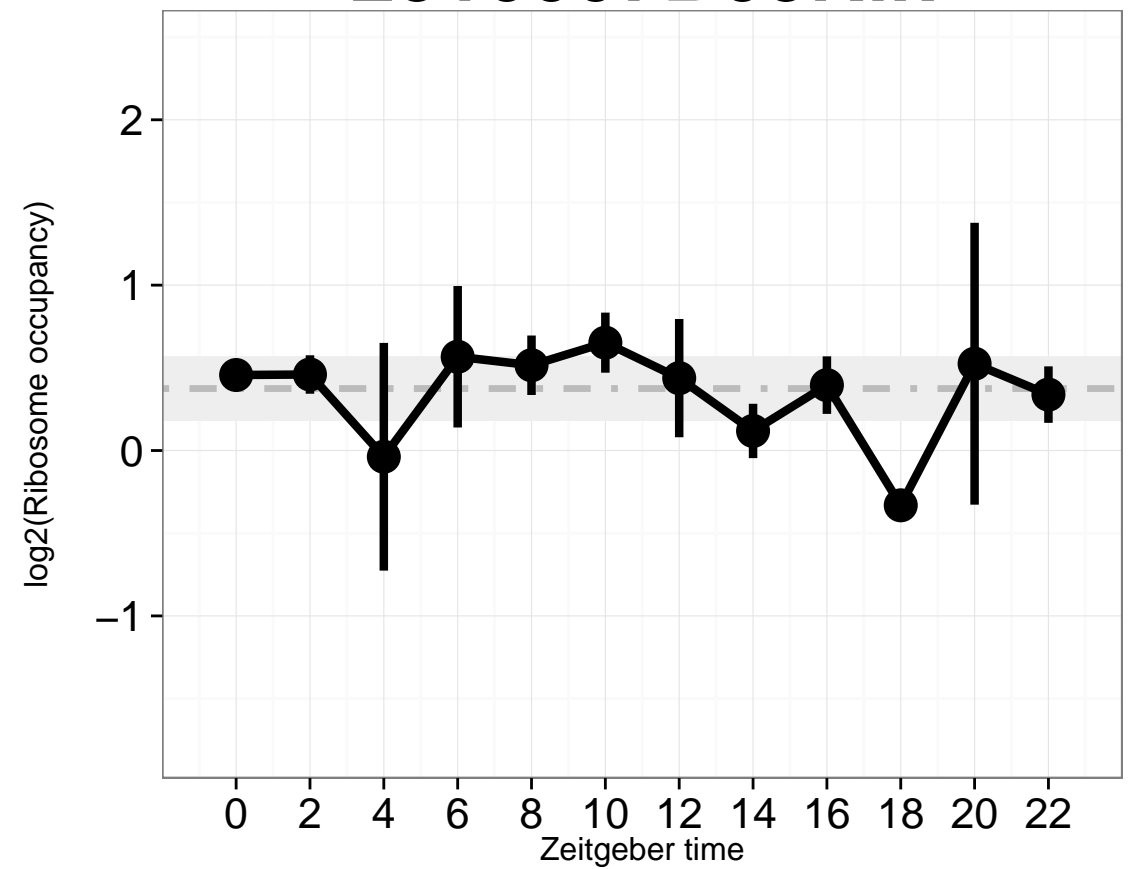

Supplement: Supplementary file 7330 [file 1]

## lfi44

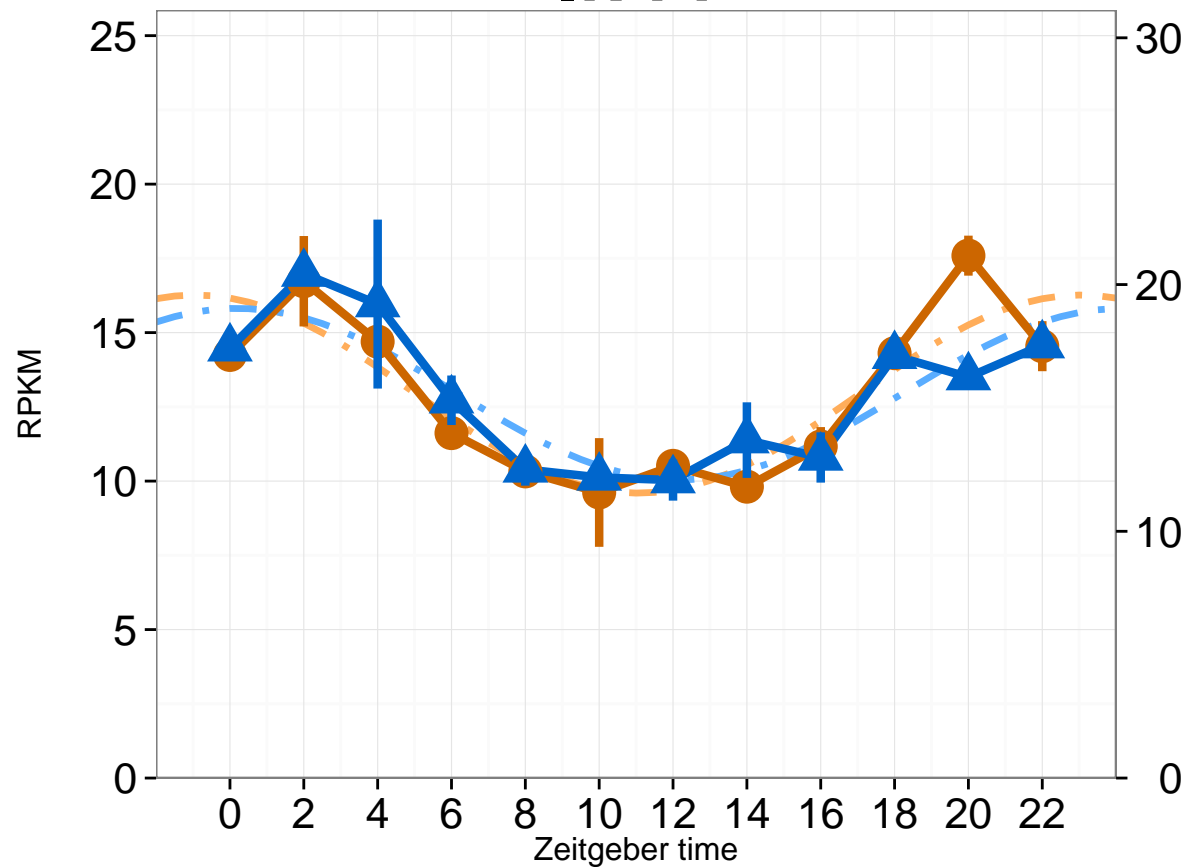

## lfi44

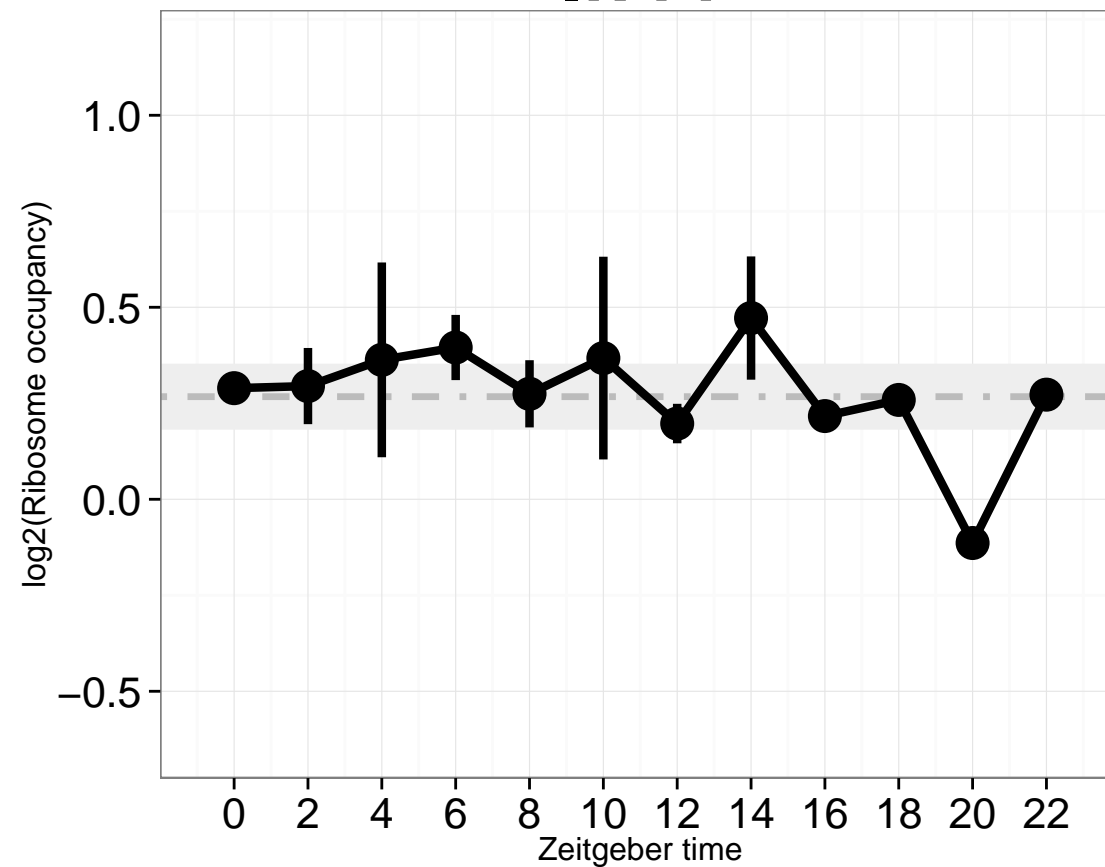

Supplement: Supplementary file 7331 [file 1]

## Bre

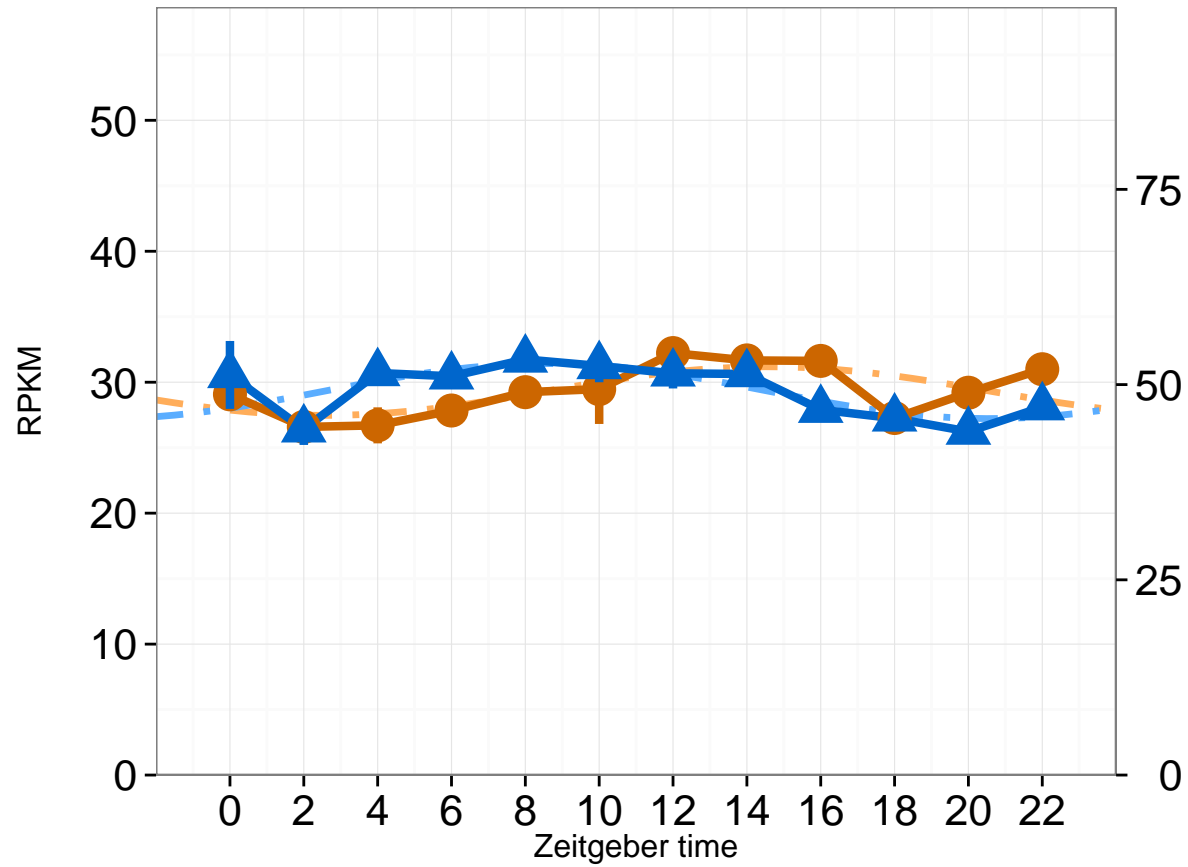

## Bre

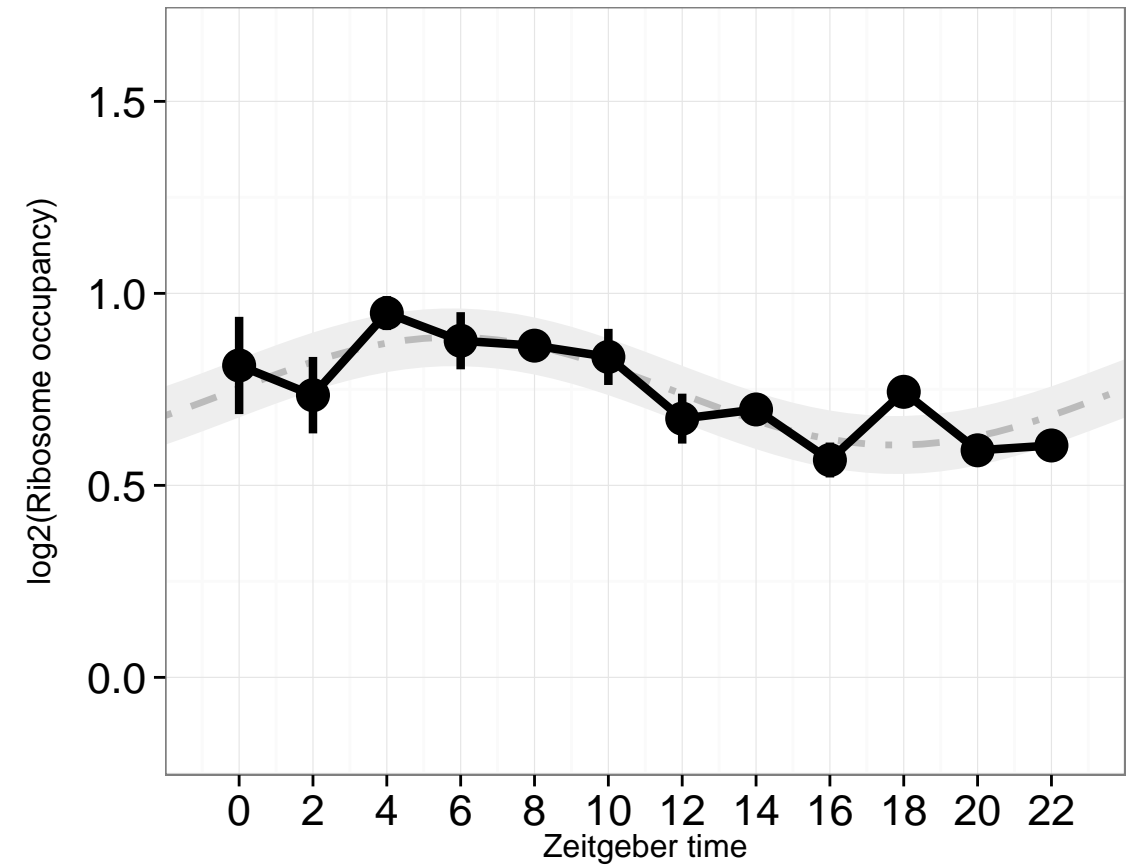

Supplement: Supplementary file 7332 [file 1]

# Nr1h4

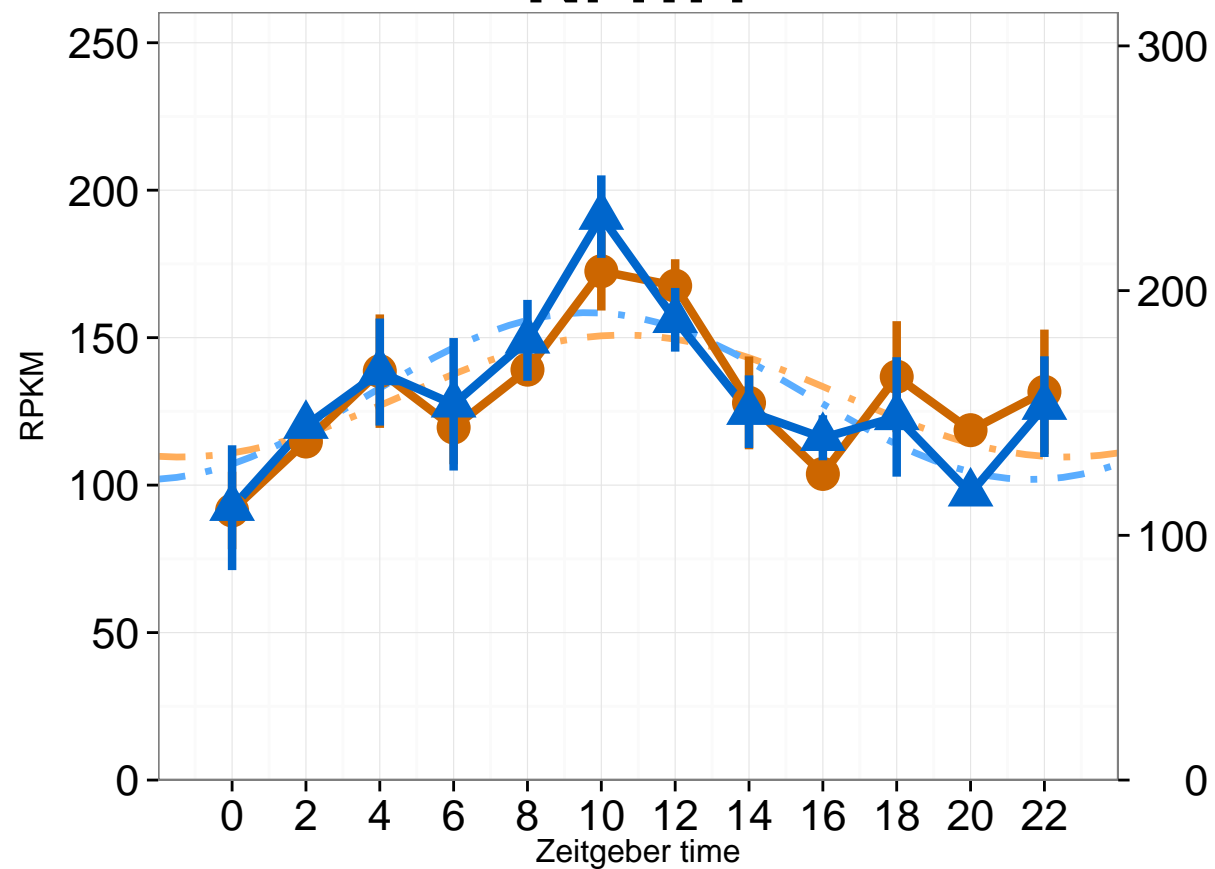

# Nr1h4

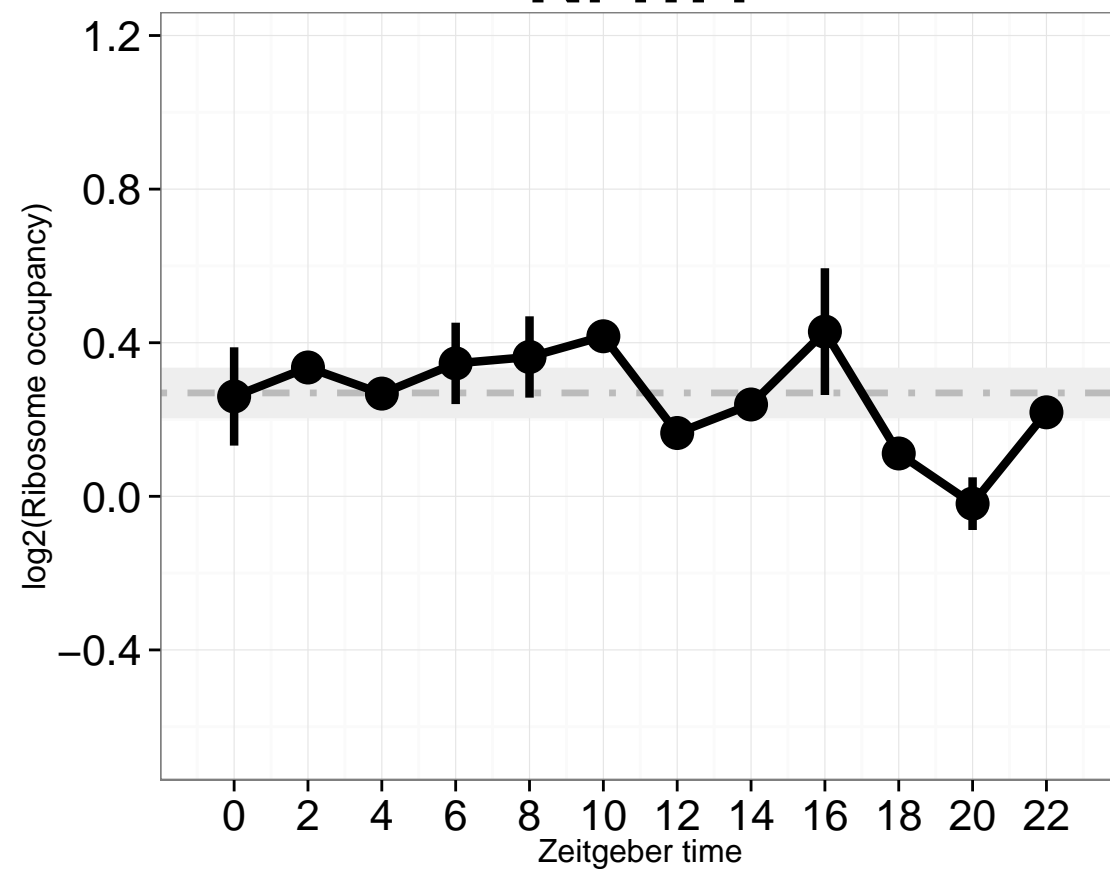

Supplement: Supplementary file 7333 [file 1]

## Ptk7

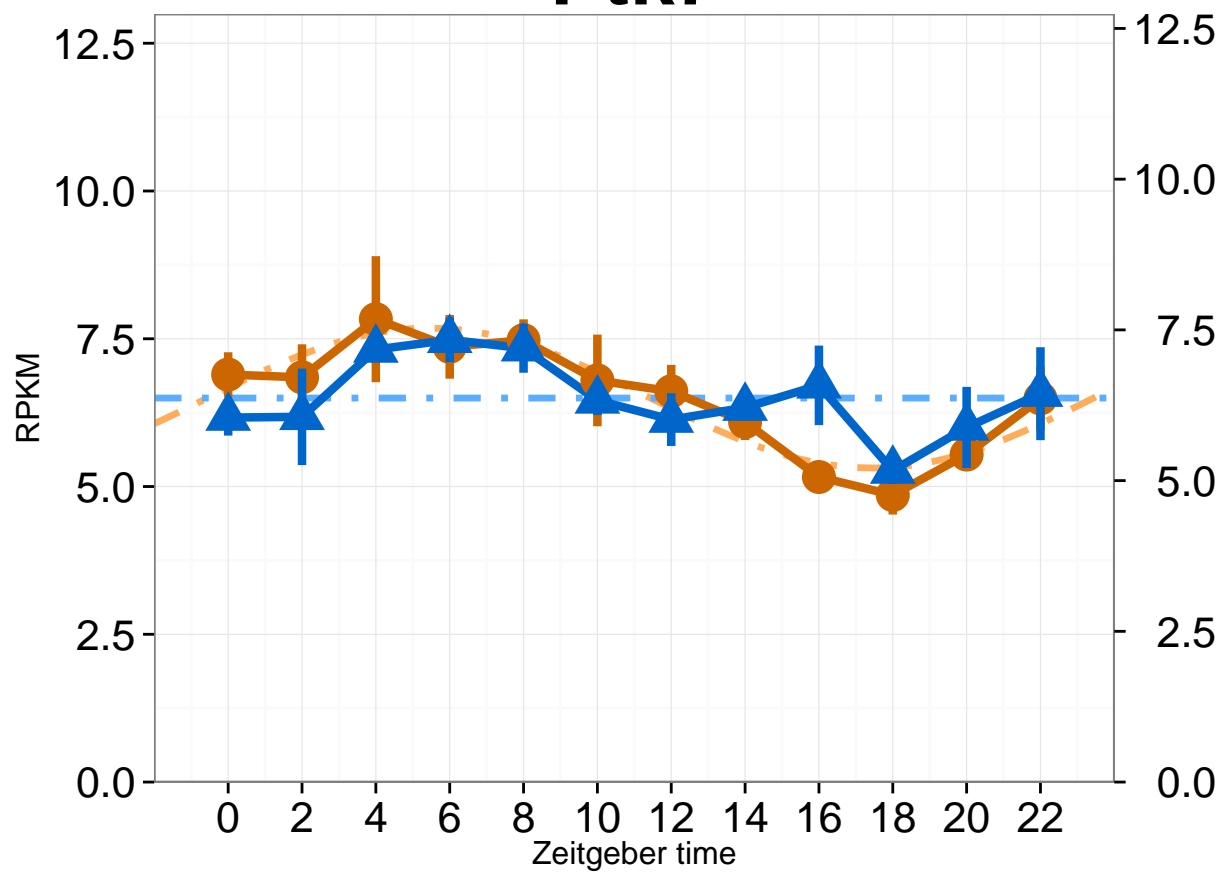

## Ptk7

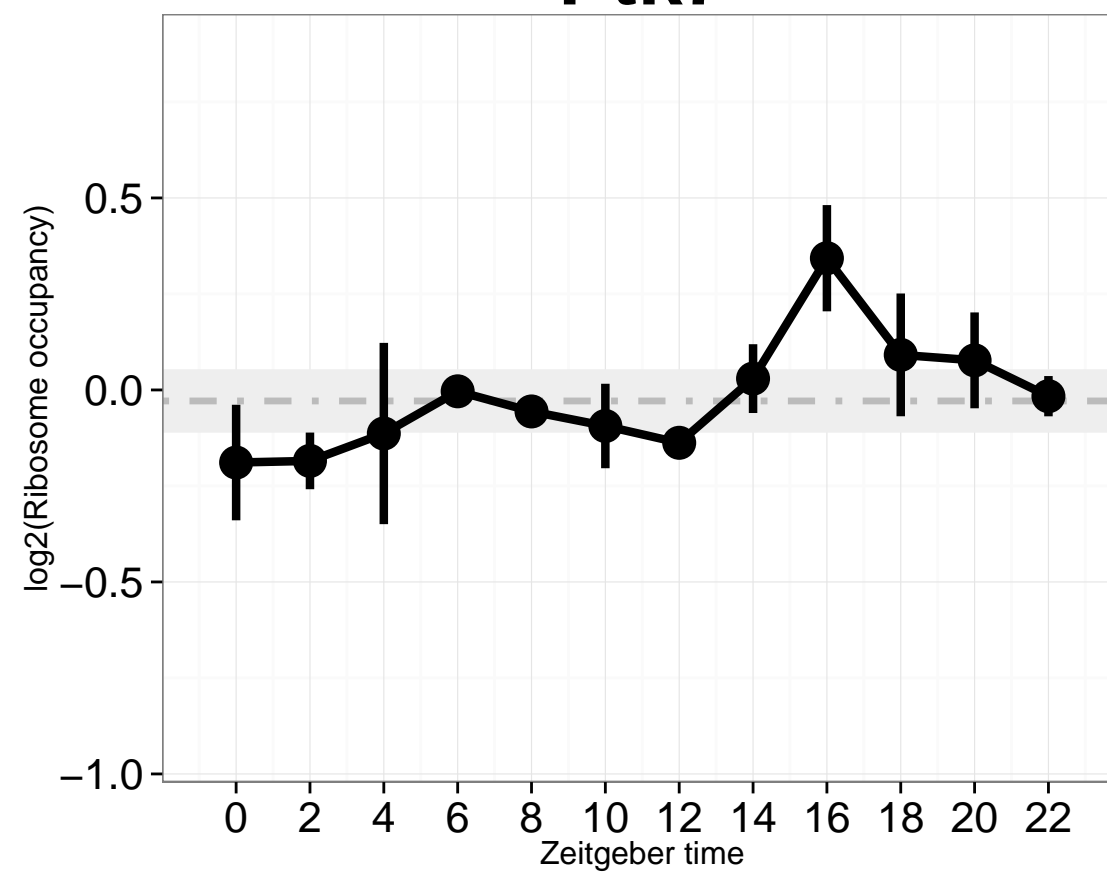

Supplement: Supplementary file 7334 [file 1]

# Efna1

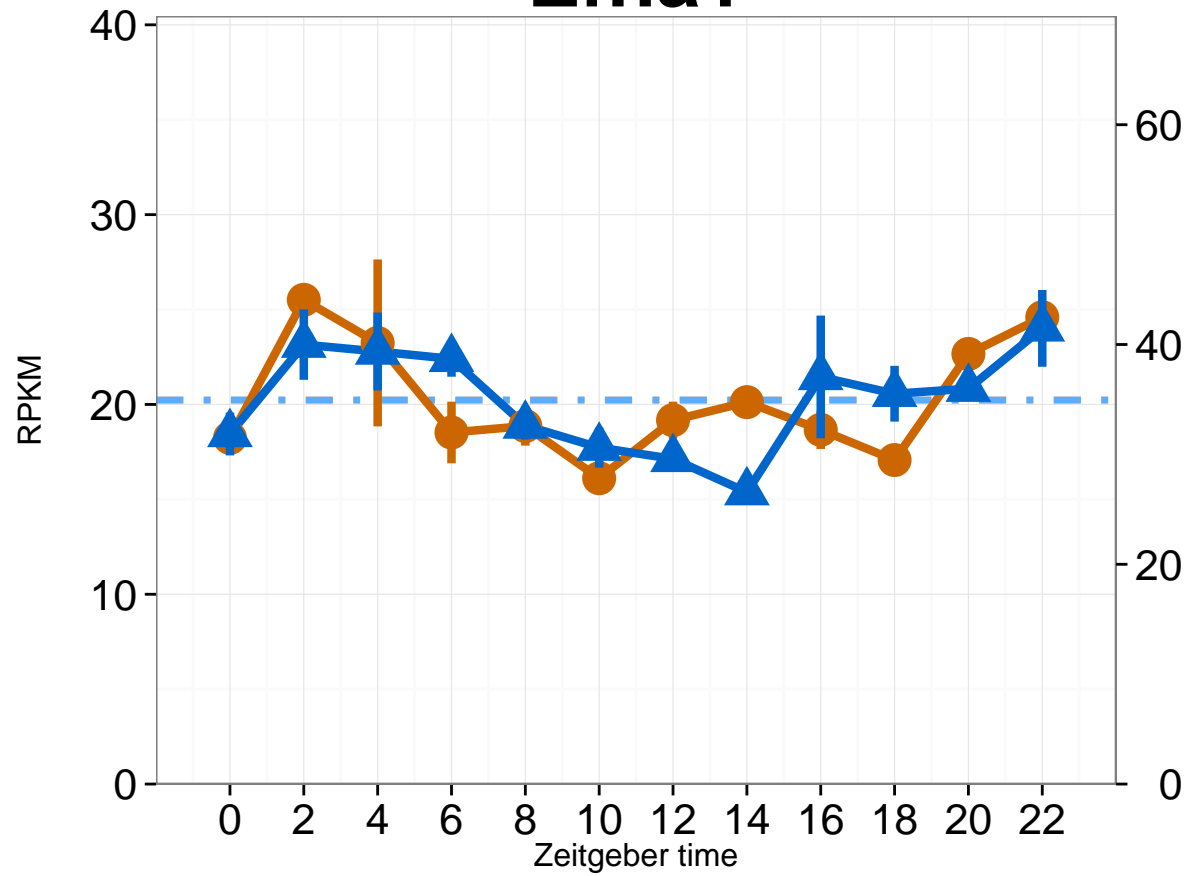

# Efna1

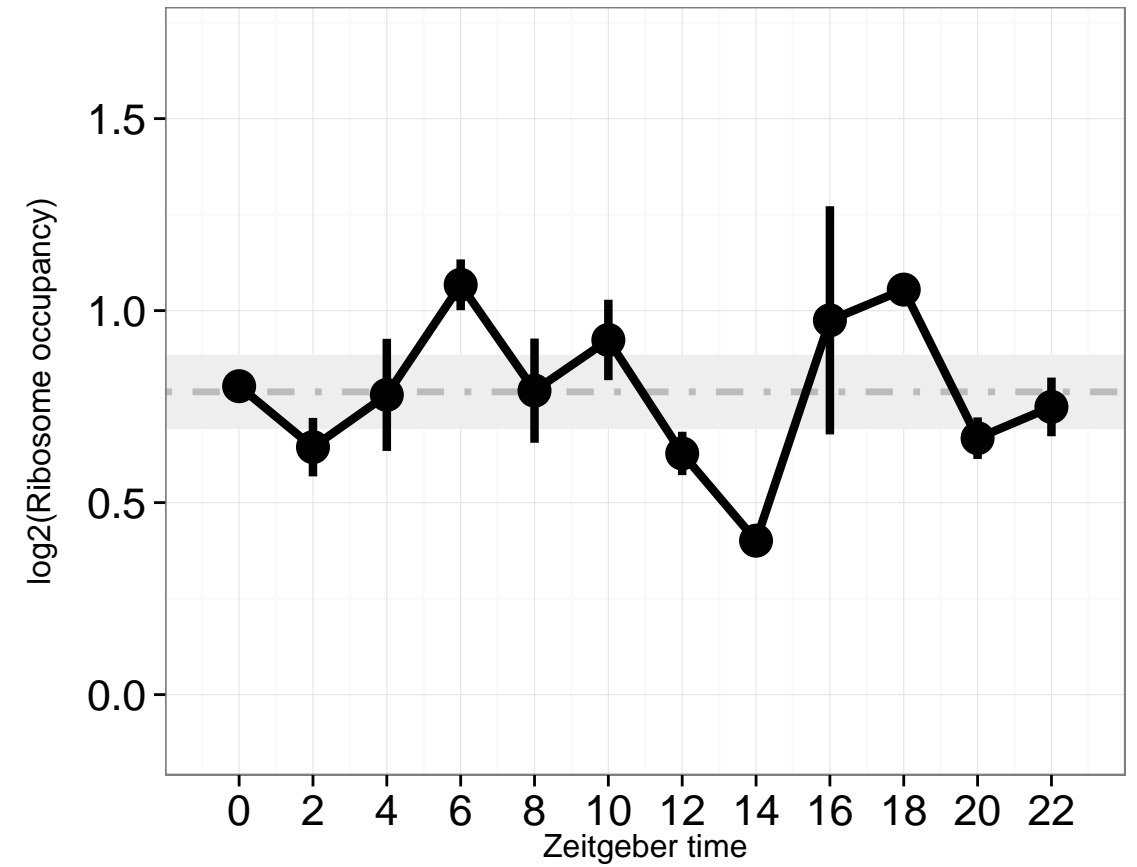

Supplement: Supplementary file 7335 [file 1]

# Kng1

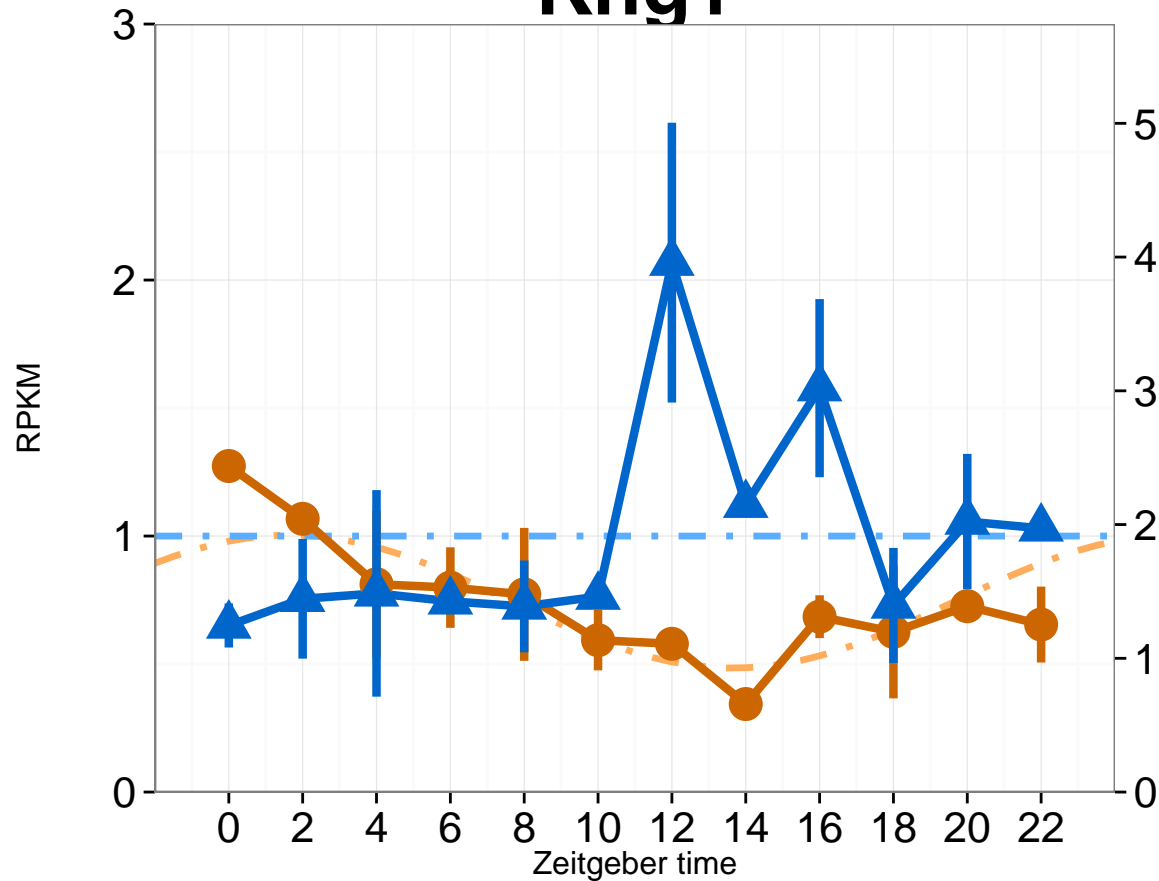

# Kng1

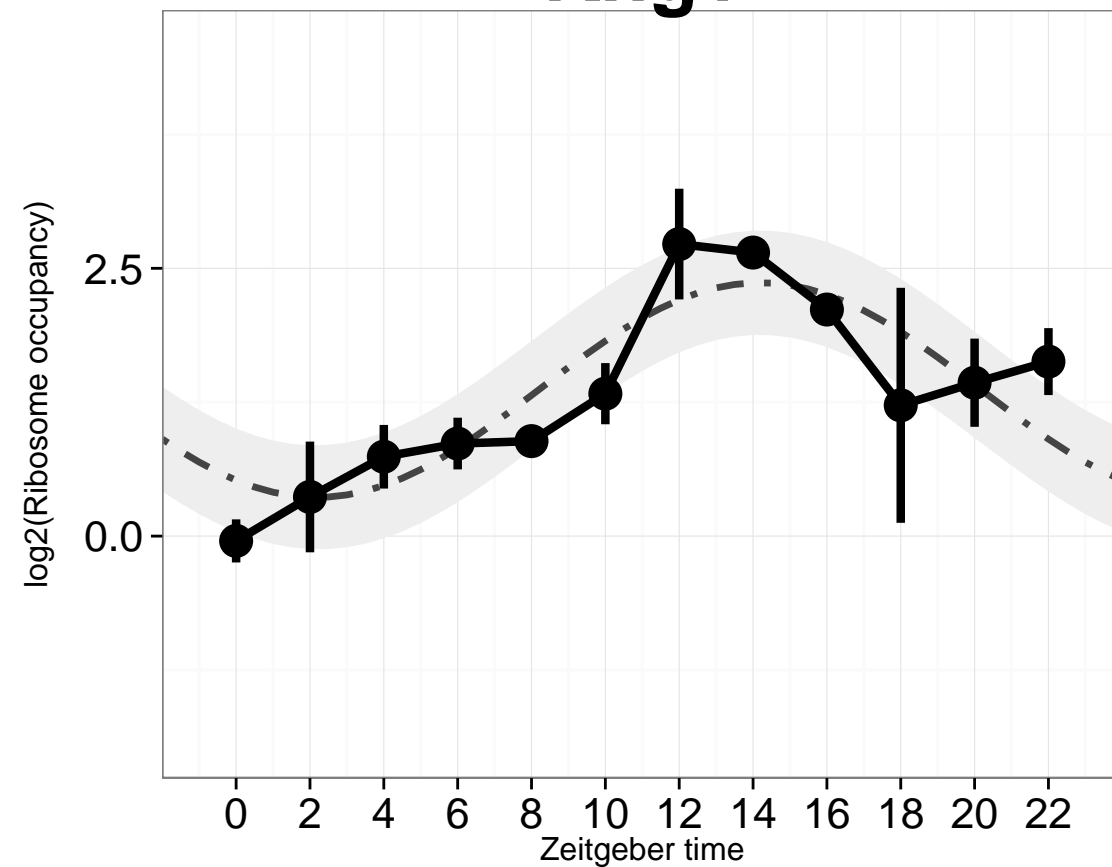

Supplement: Supplementary file 7336 [file 1]

## Amdhd1

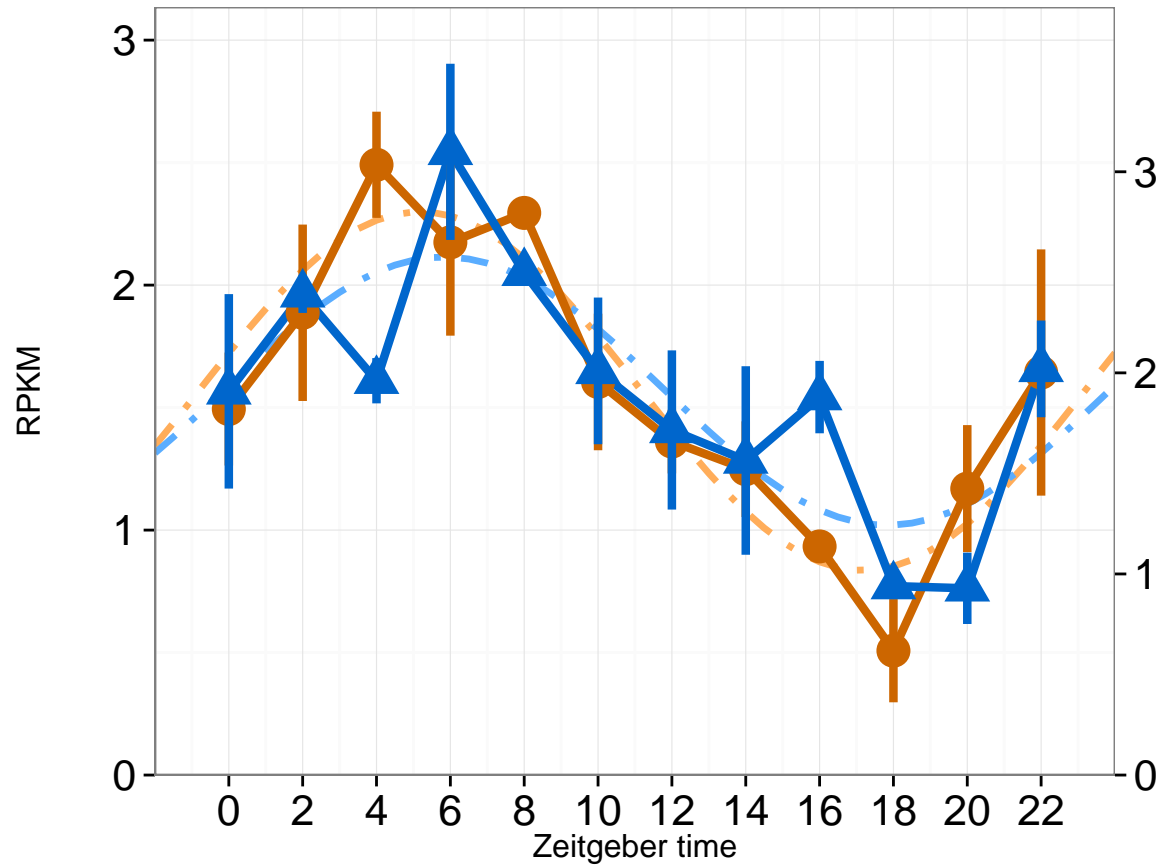

## Amdhd1

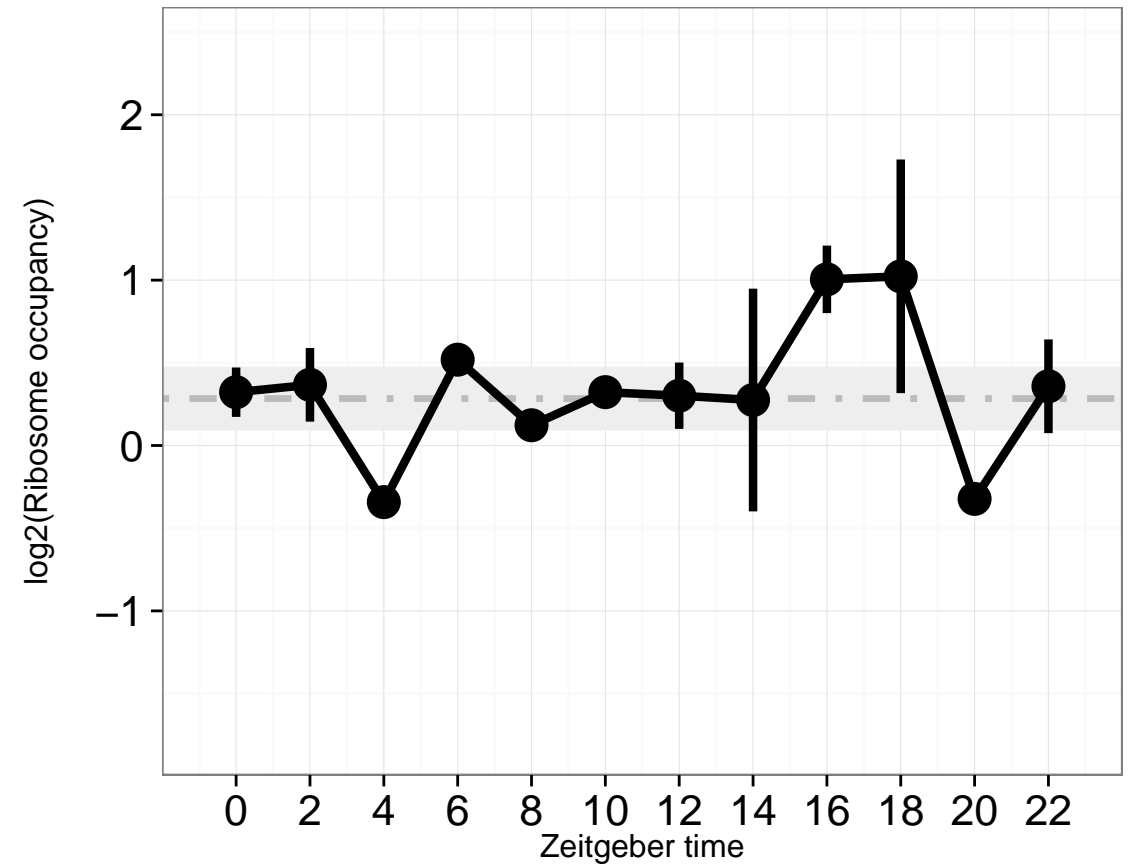

Supplement: Supplementary file 7337 [file 1]

## Safb

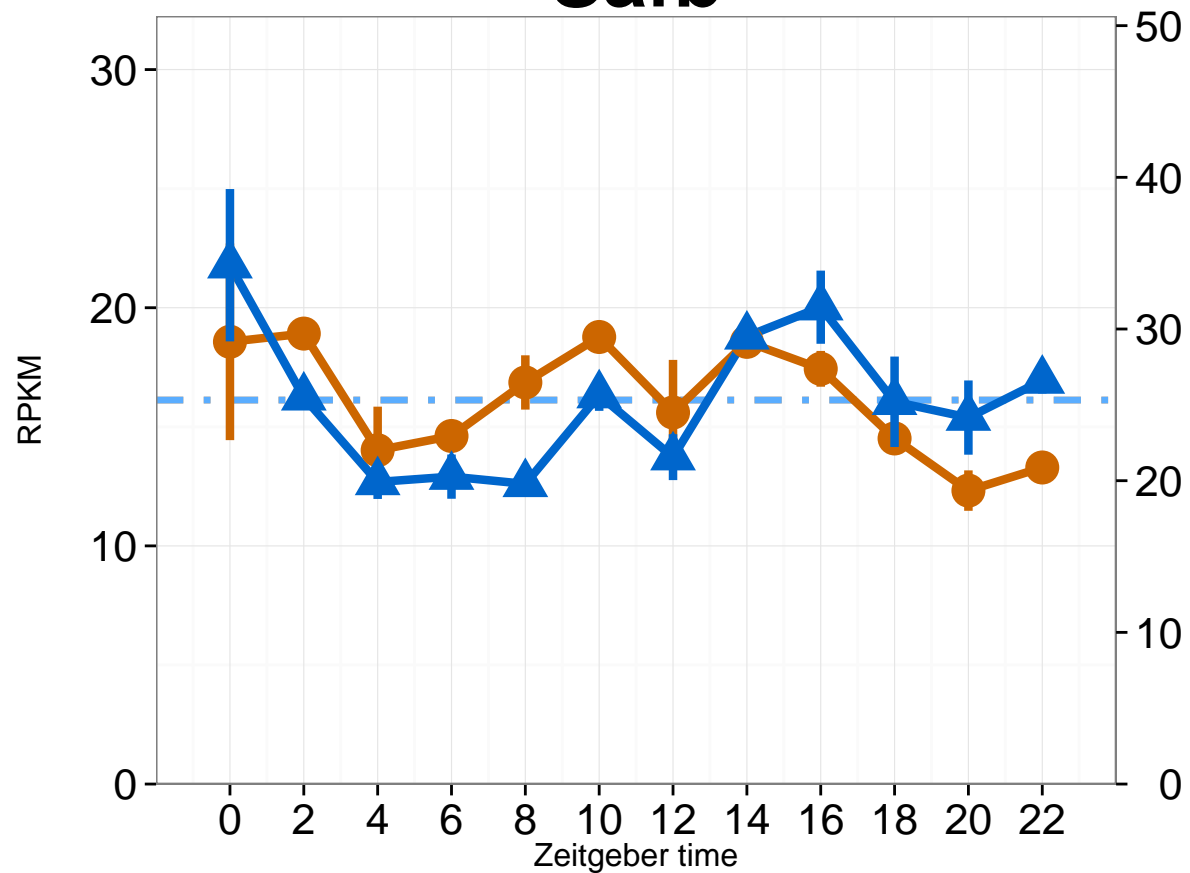

## Safb

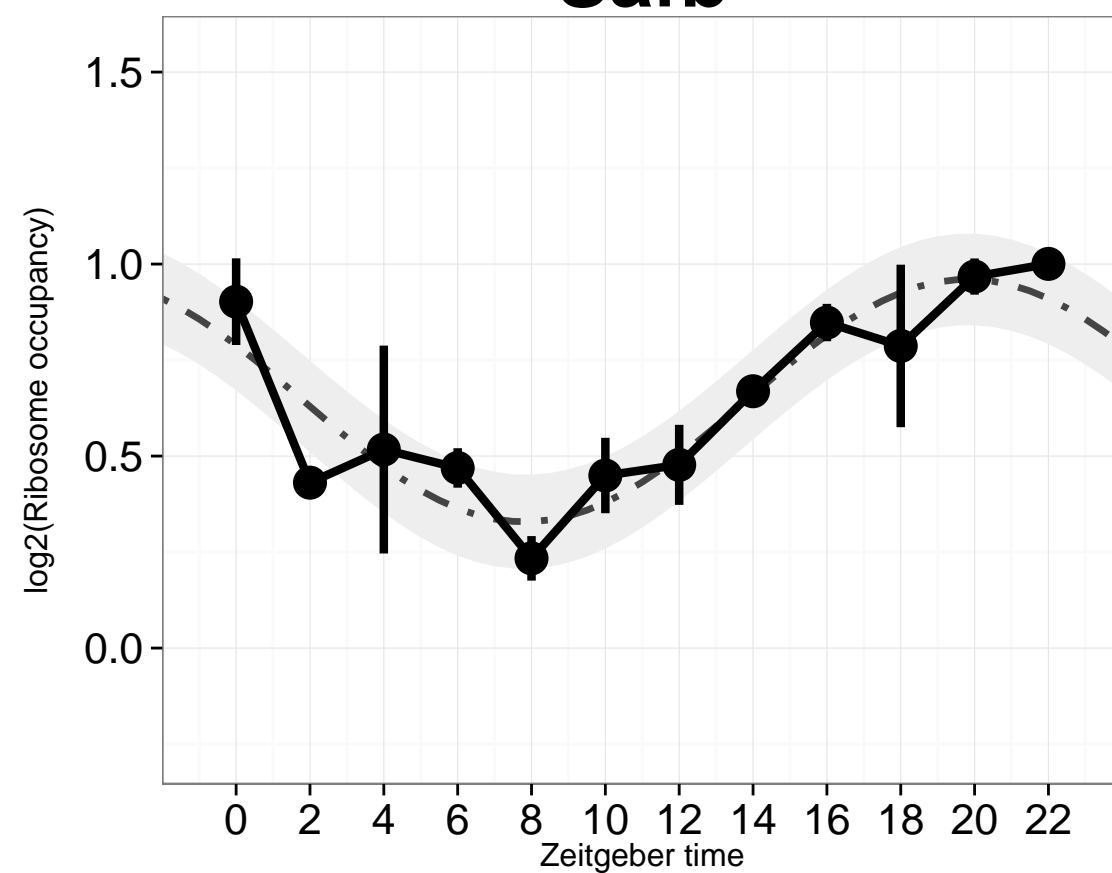

Supplement: Supplementary file 7338 [file 1]

# Churc1

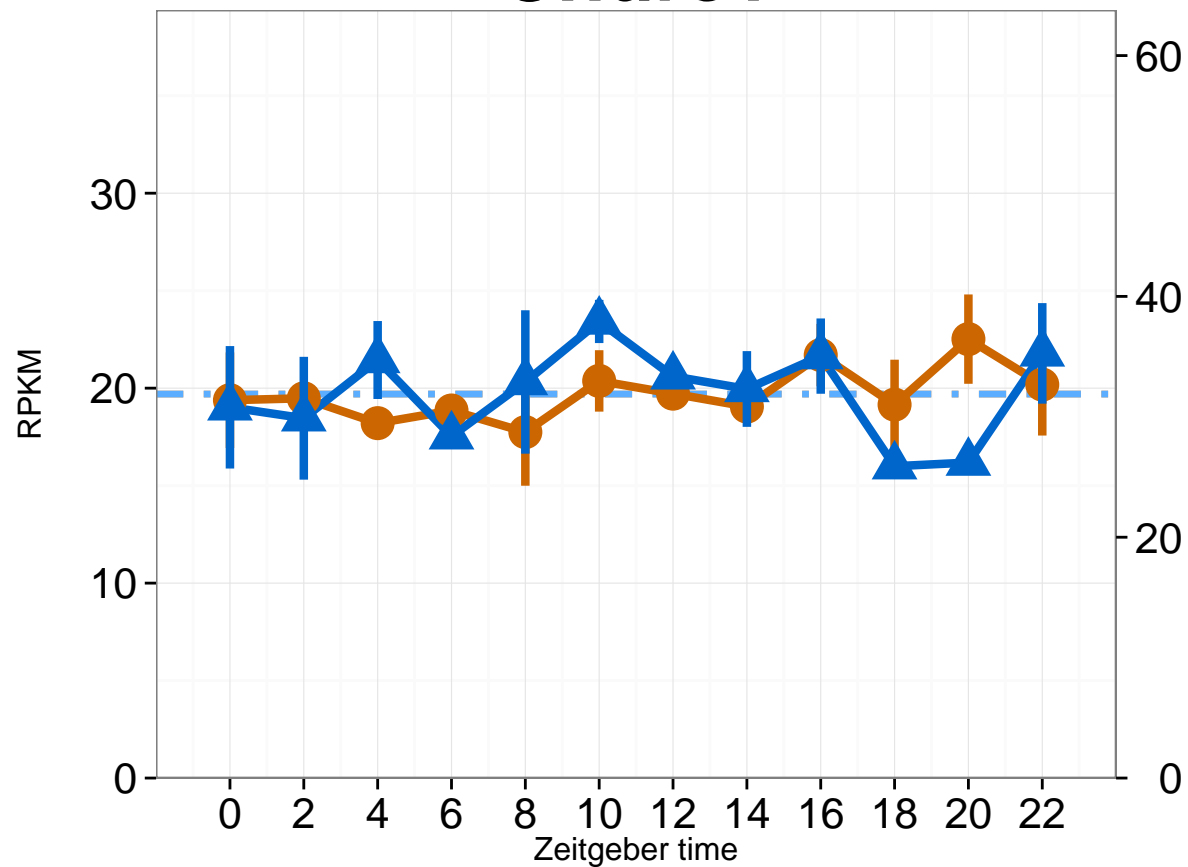

# Churc1

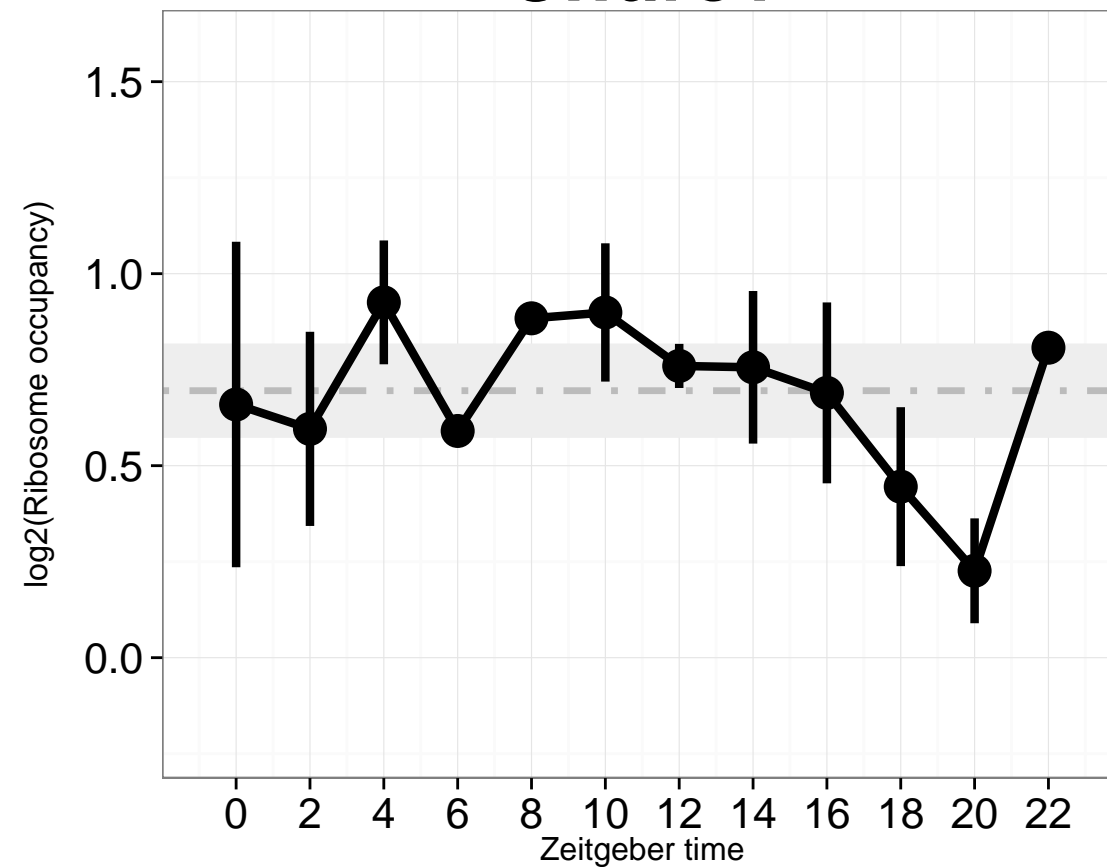

Supplement: Supplementary file 7339 [file 1]

## Selm

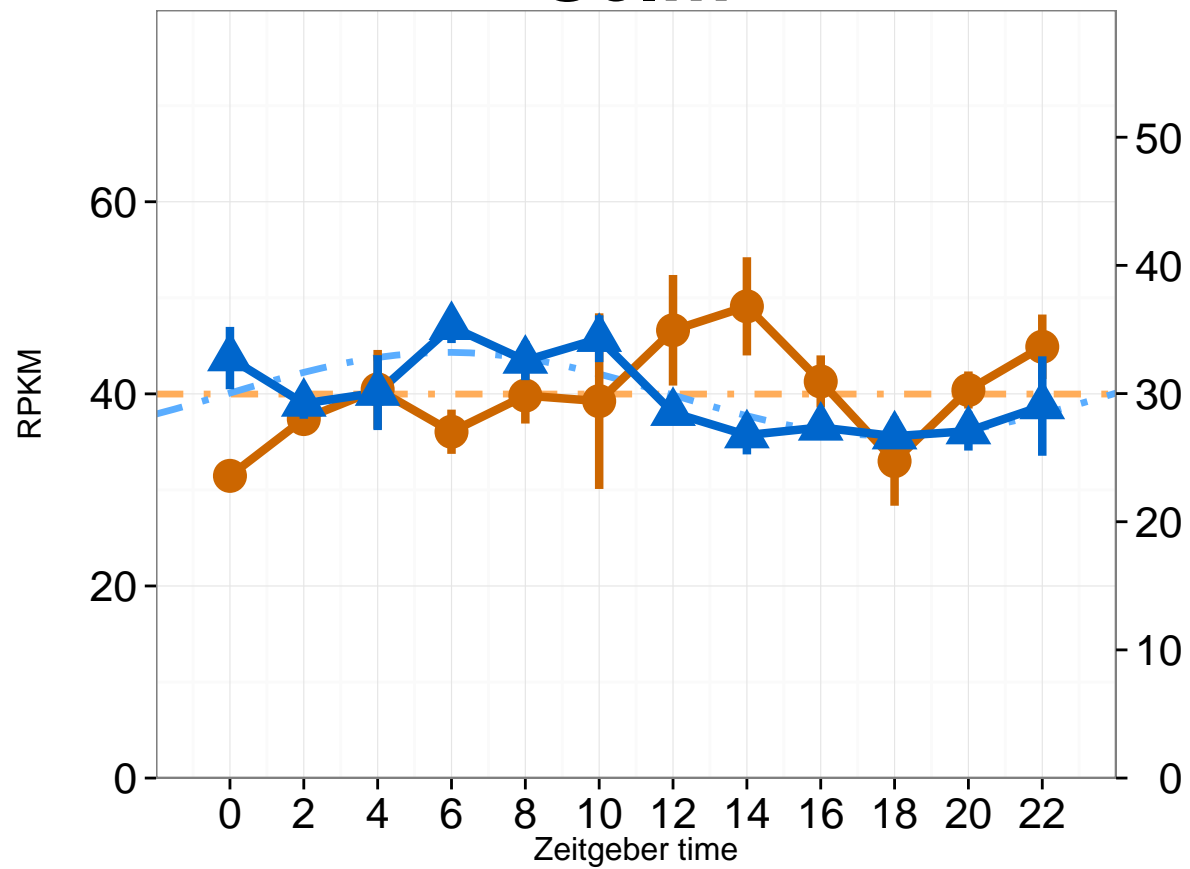

## Selm

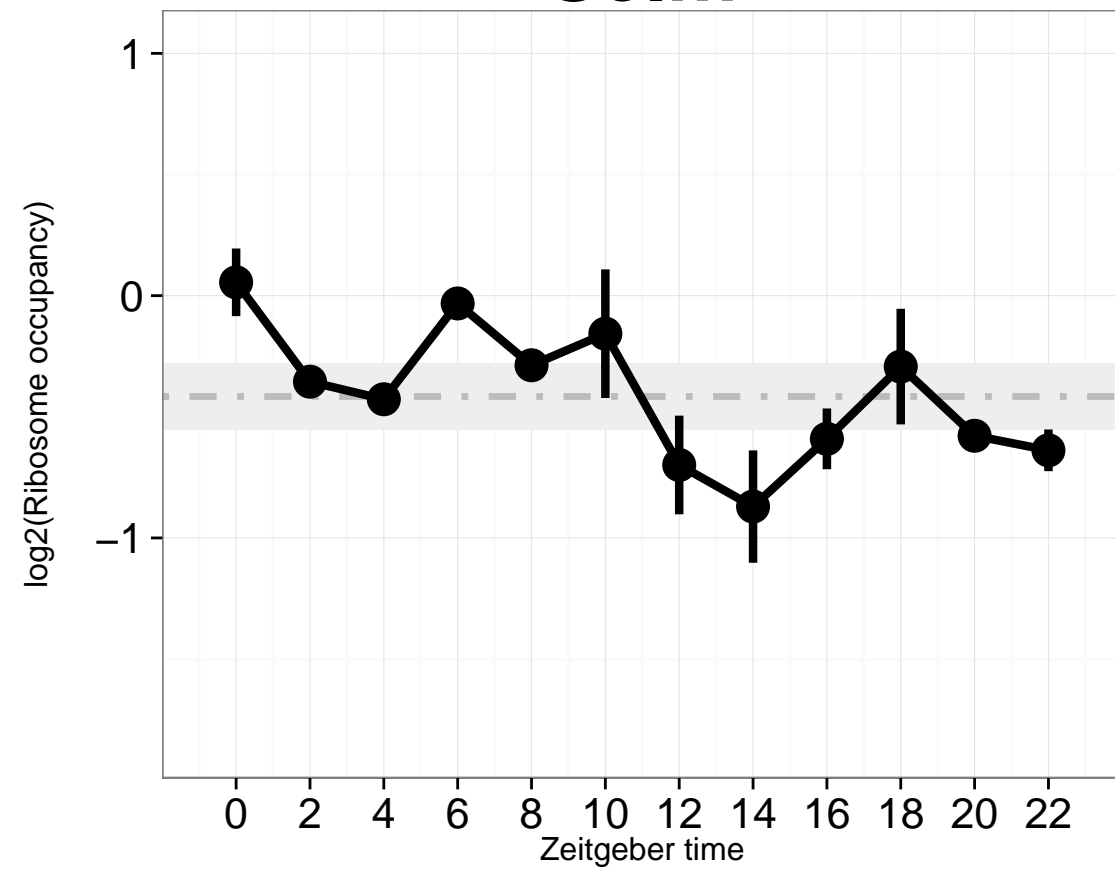

Supplement: Supplementary file 7340 [file 1]

## Rmnd5b

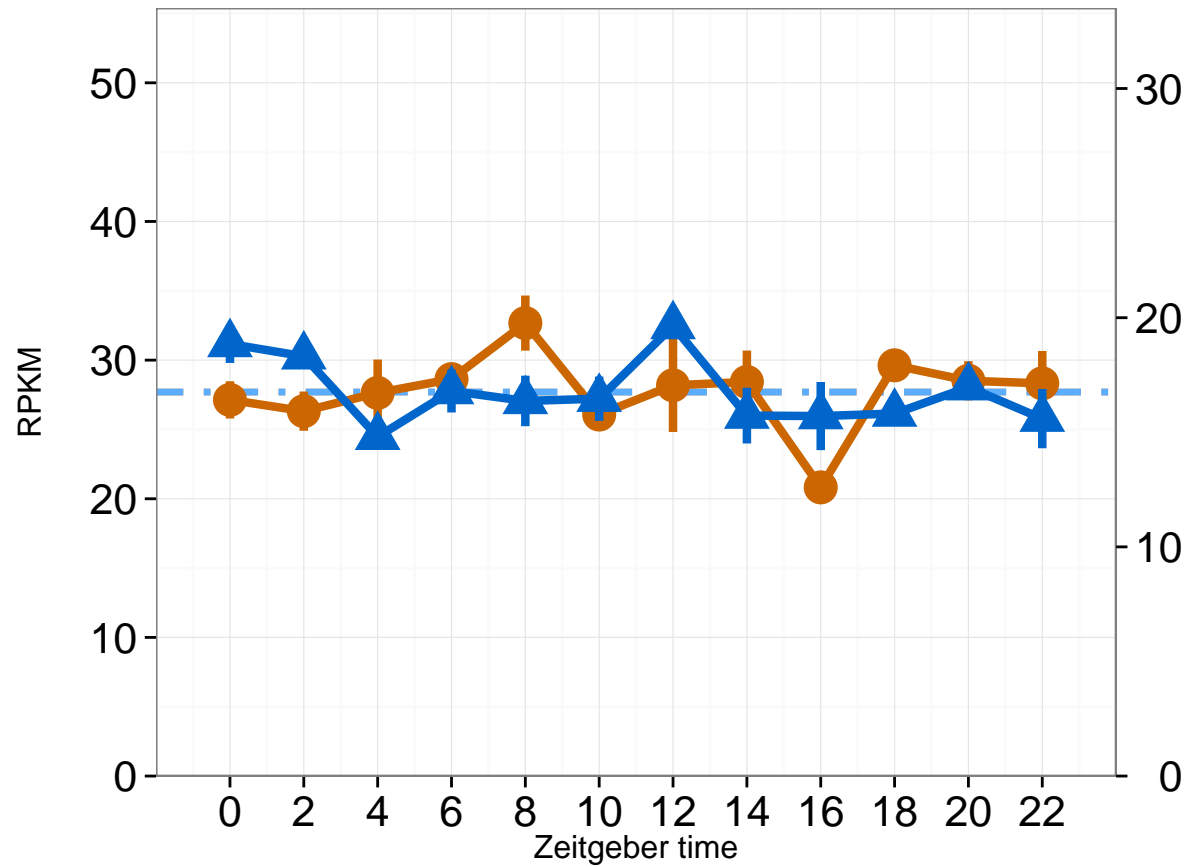

## Rmnd5b

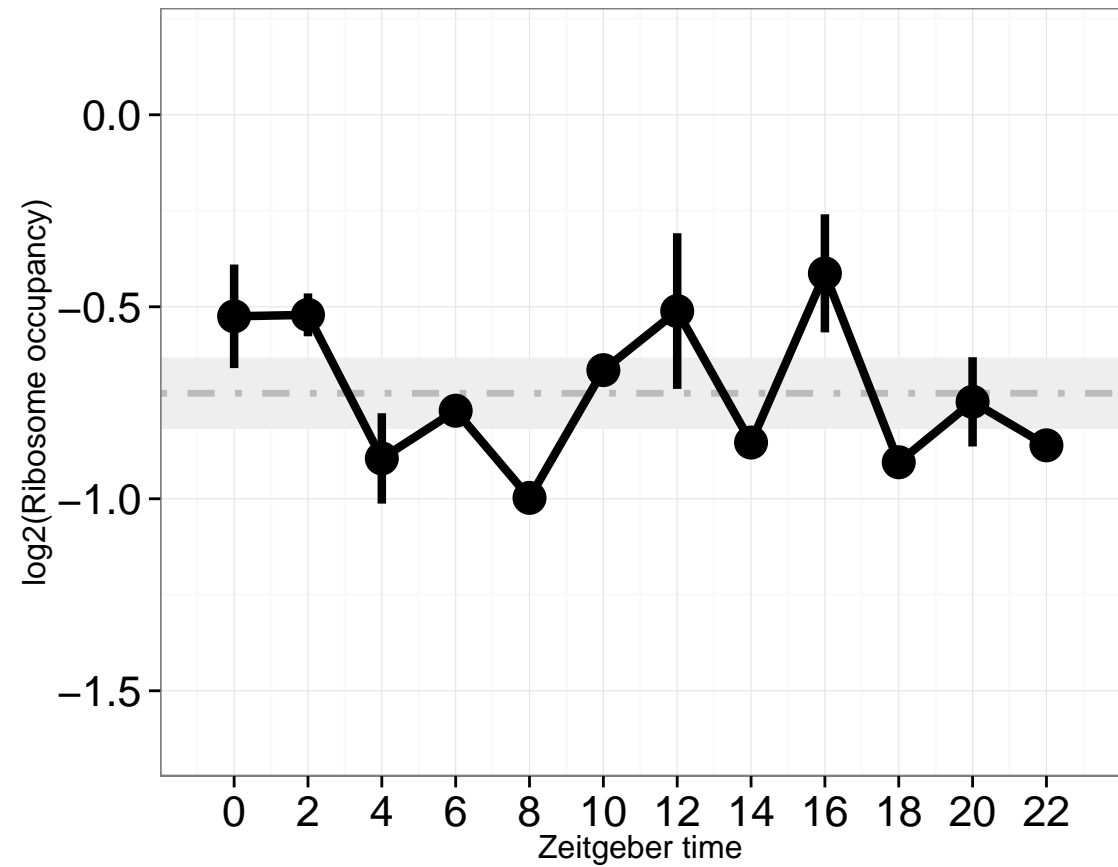

Supplement: Supplementary file 7341 [file 1]

## Thbs1

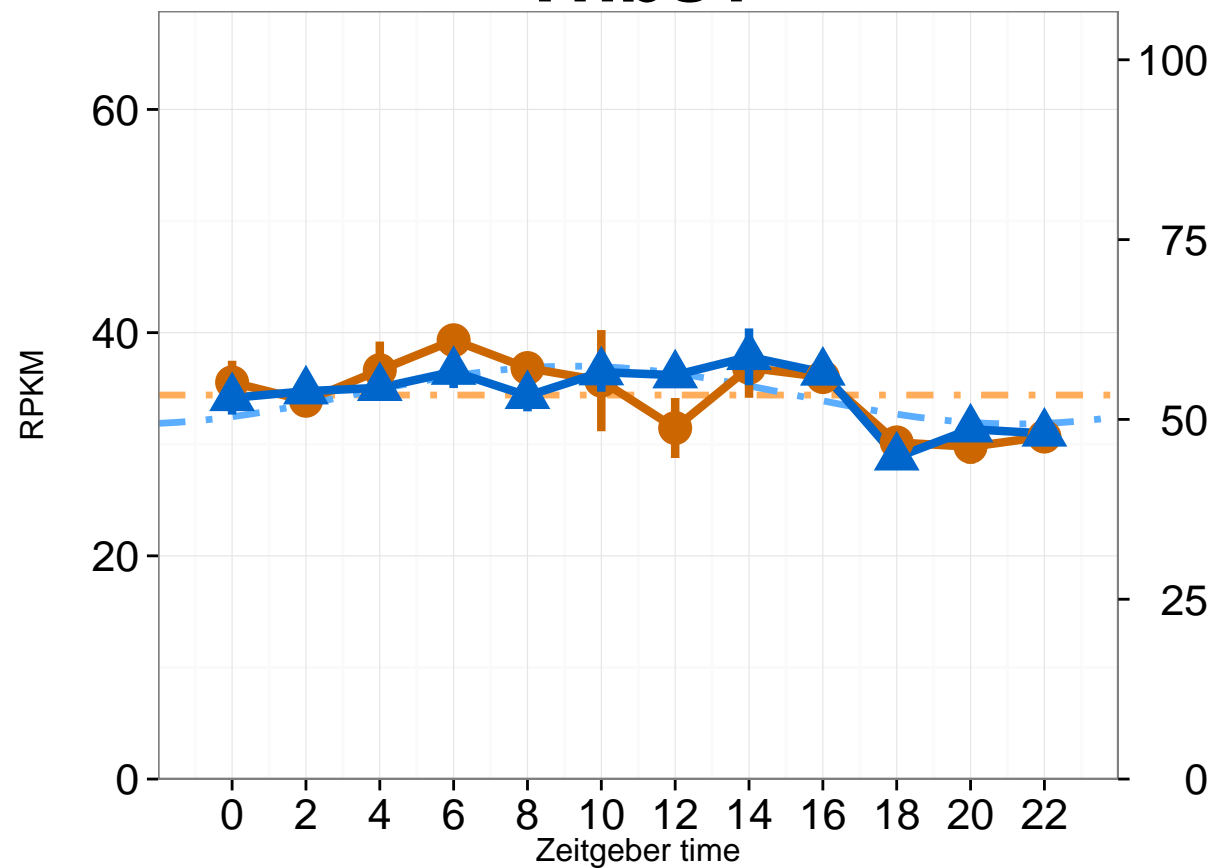

## Thbs1

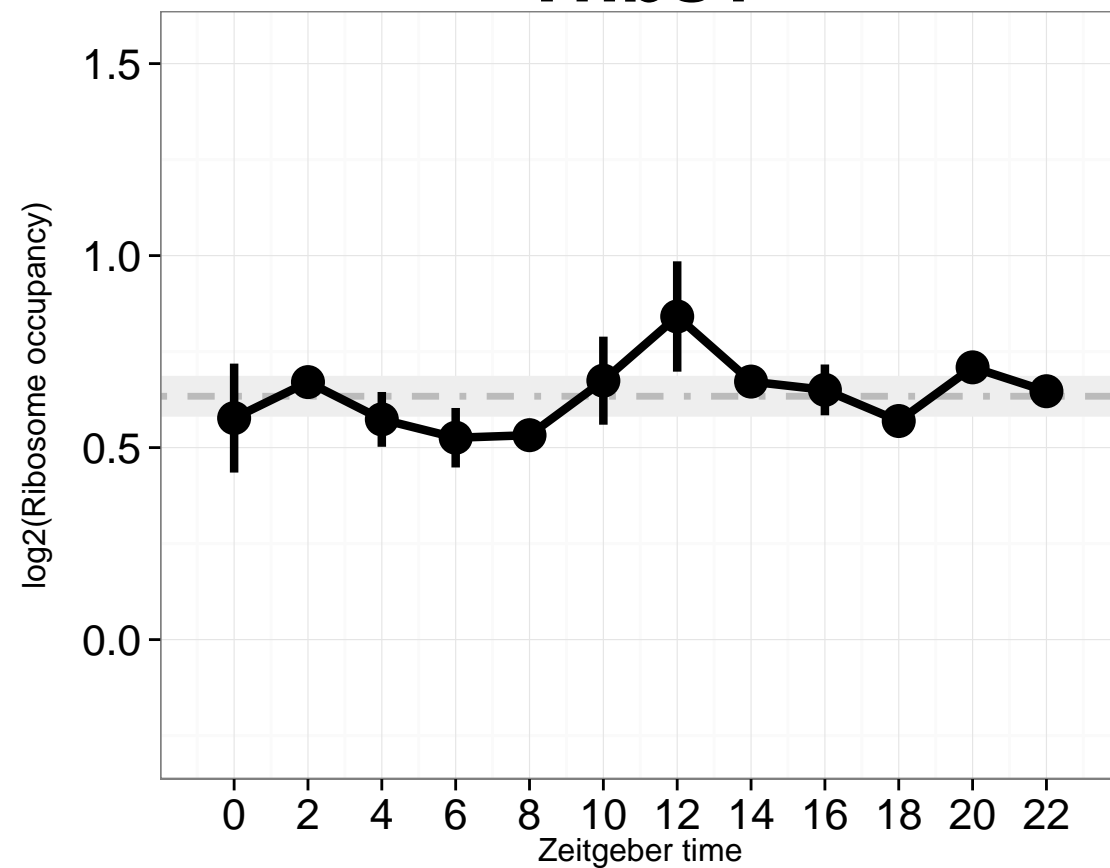

Supplement: Supplementary file 7342 [file 1]

# Layn

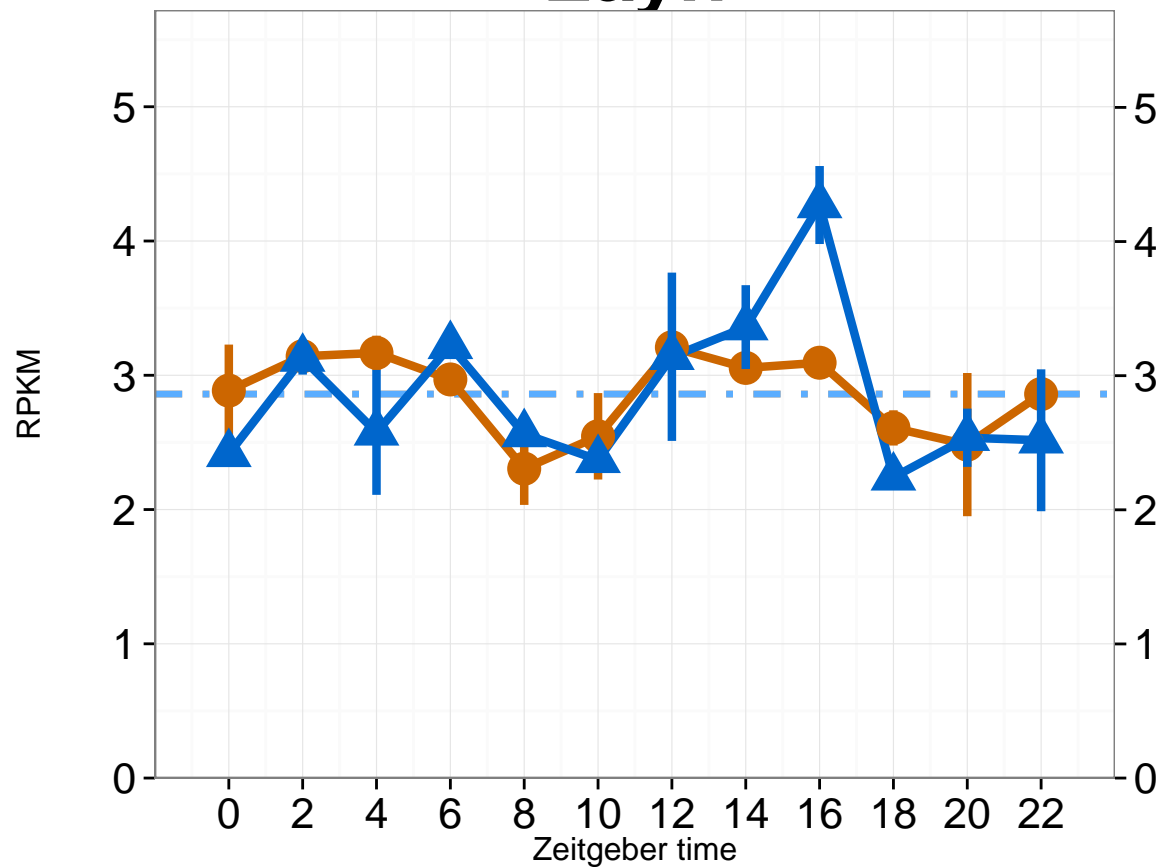

# Layn

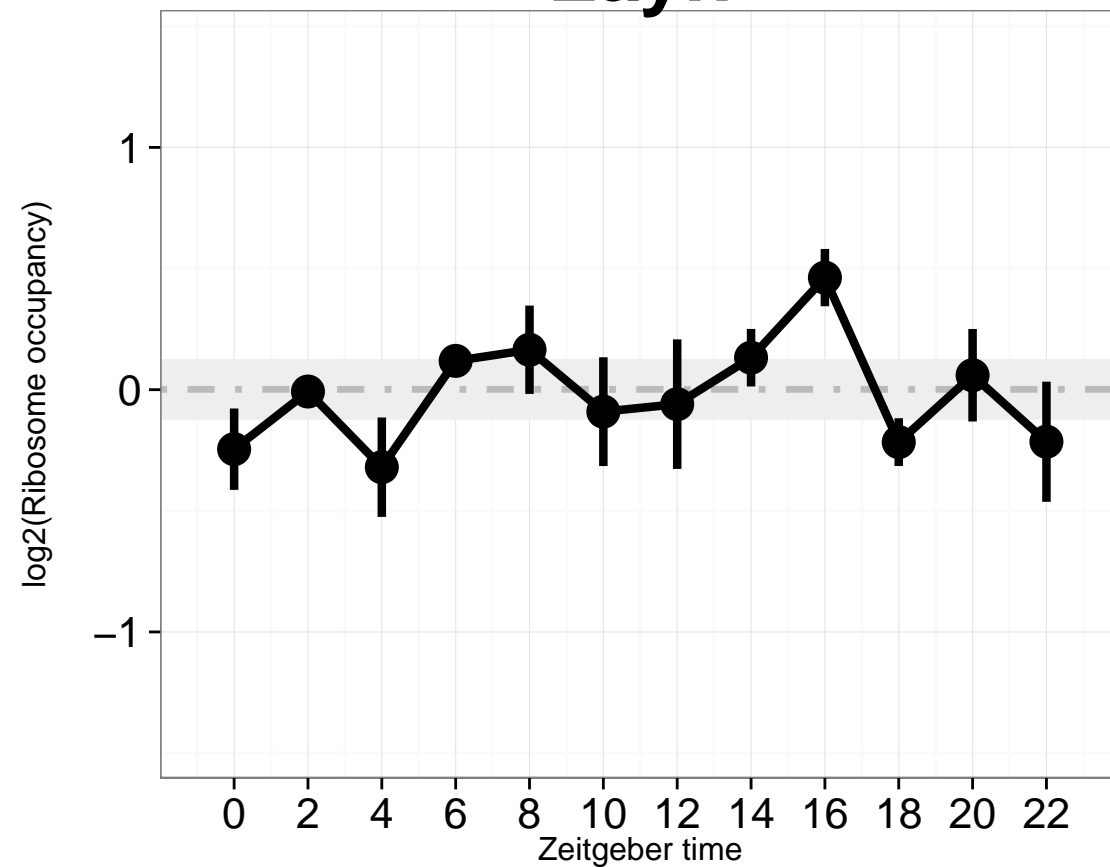

Supplement: Supplementary file 7343 [file 1]

## Hopx

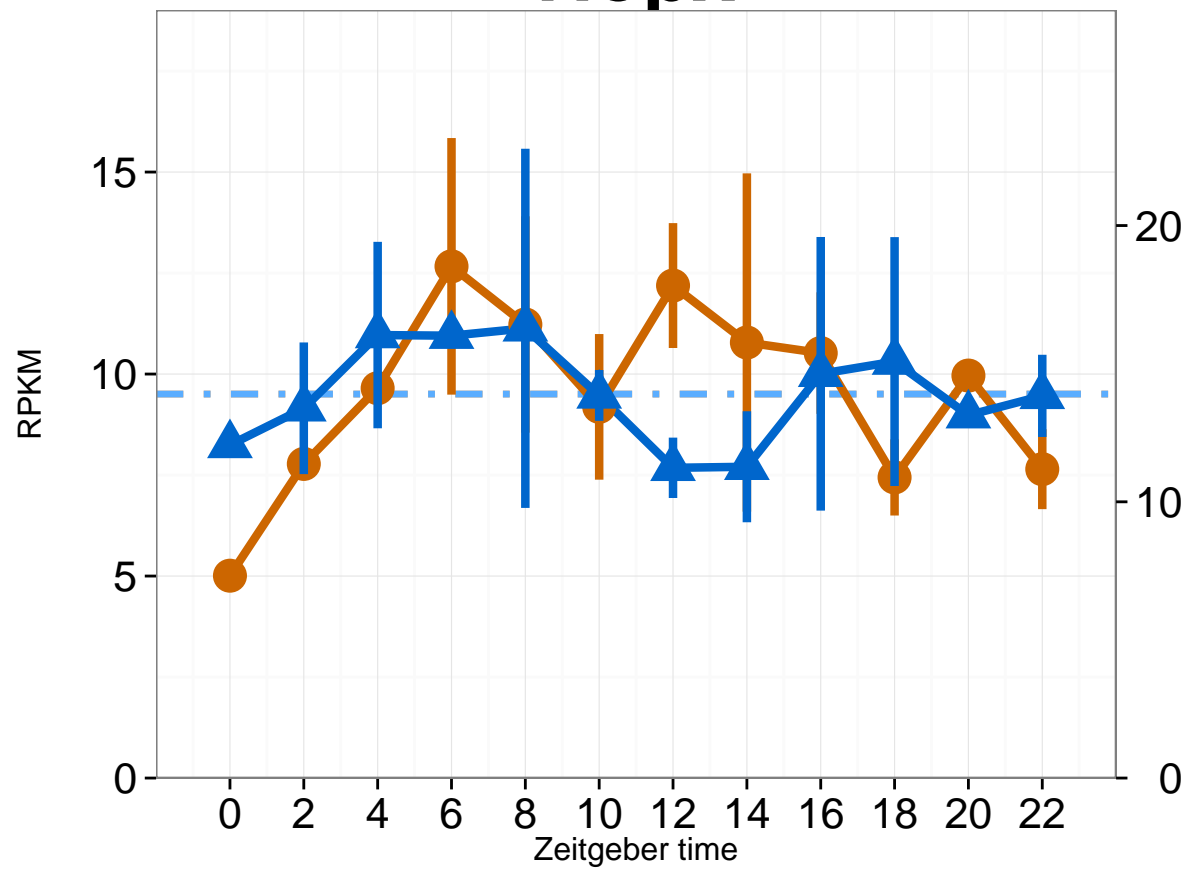

## Hopx

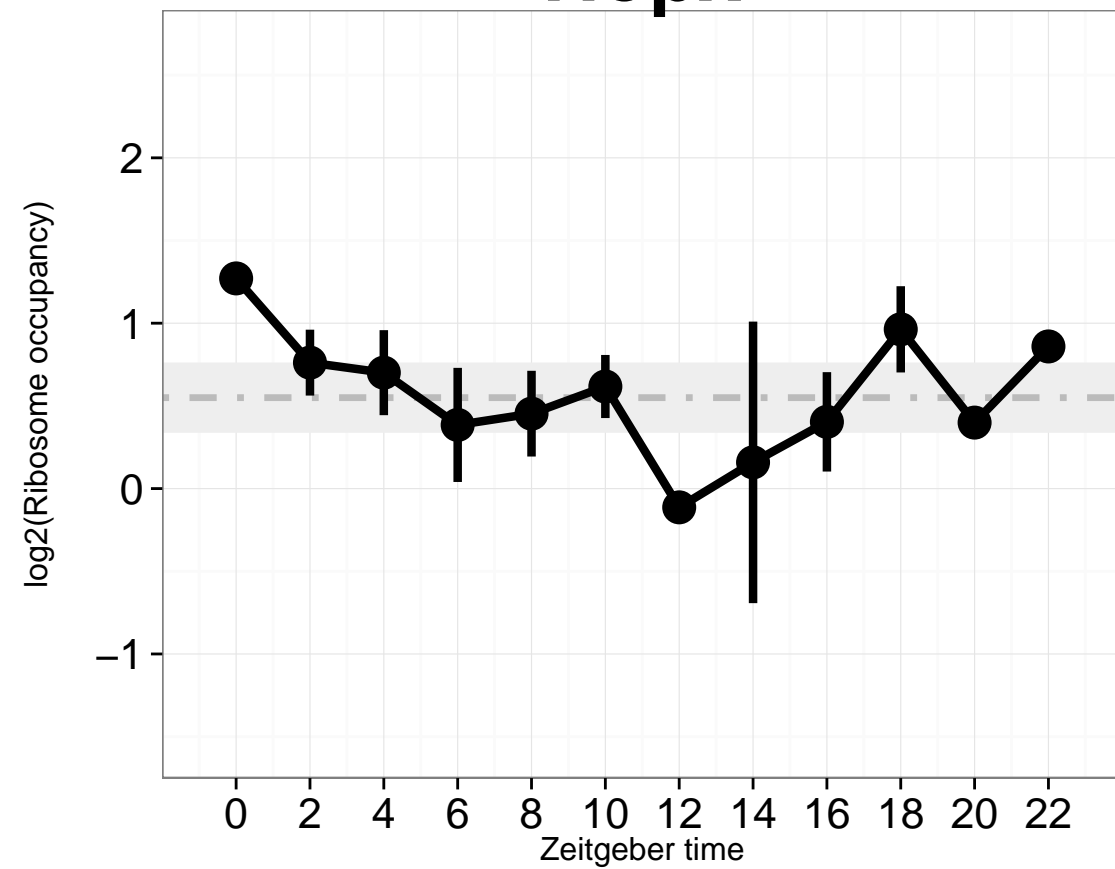

Supplement: Supplementary file 7344 [file 1]

# Rfx2

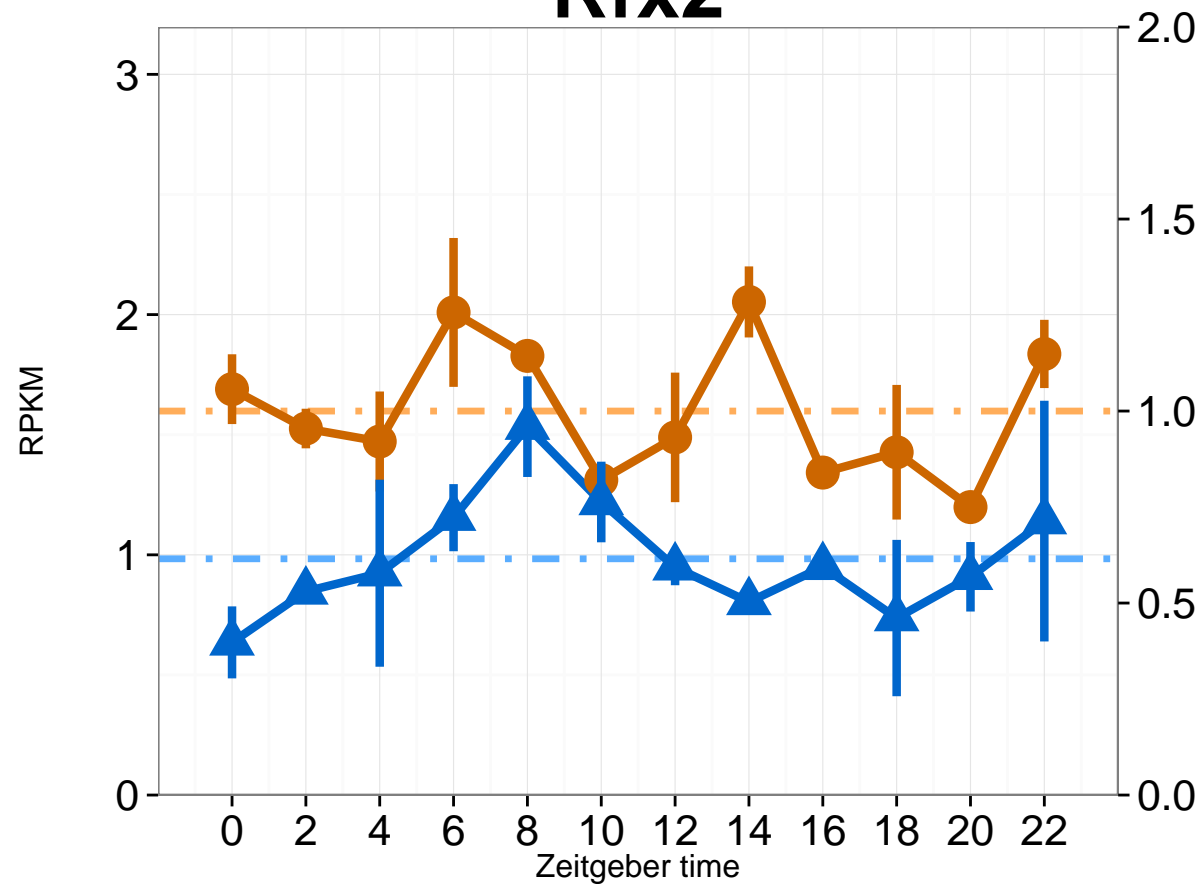

# Rfx2

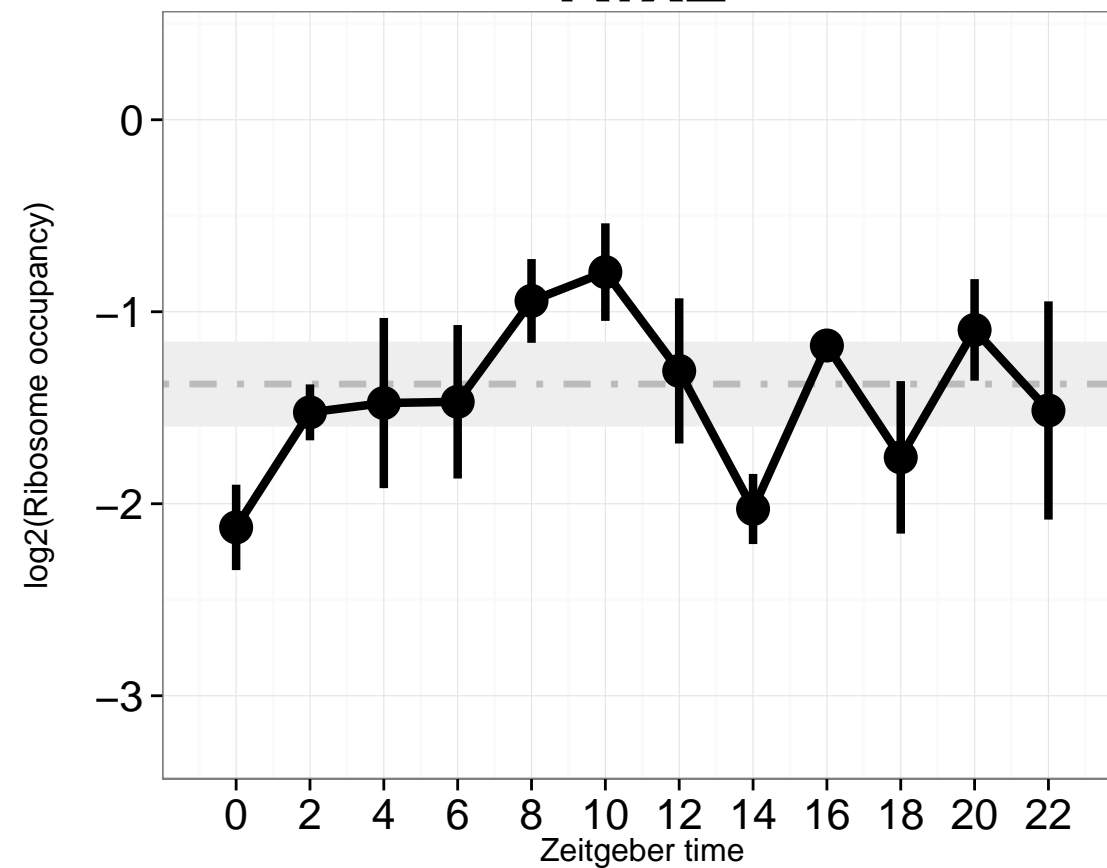

Supplement: Supplementary file 7345 [file 1]

## Insl6

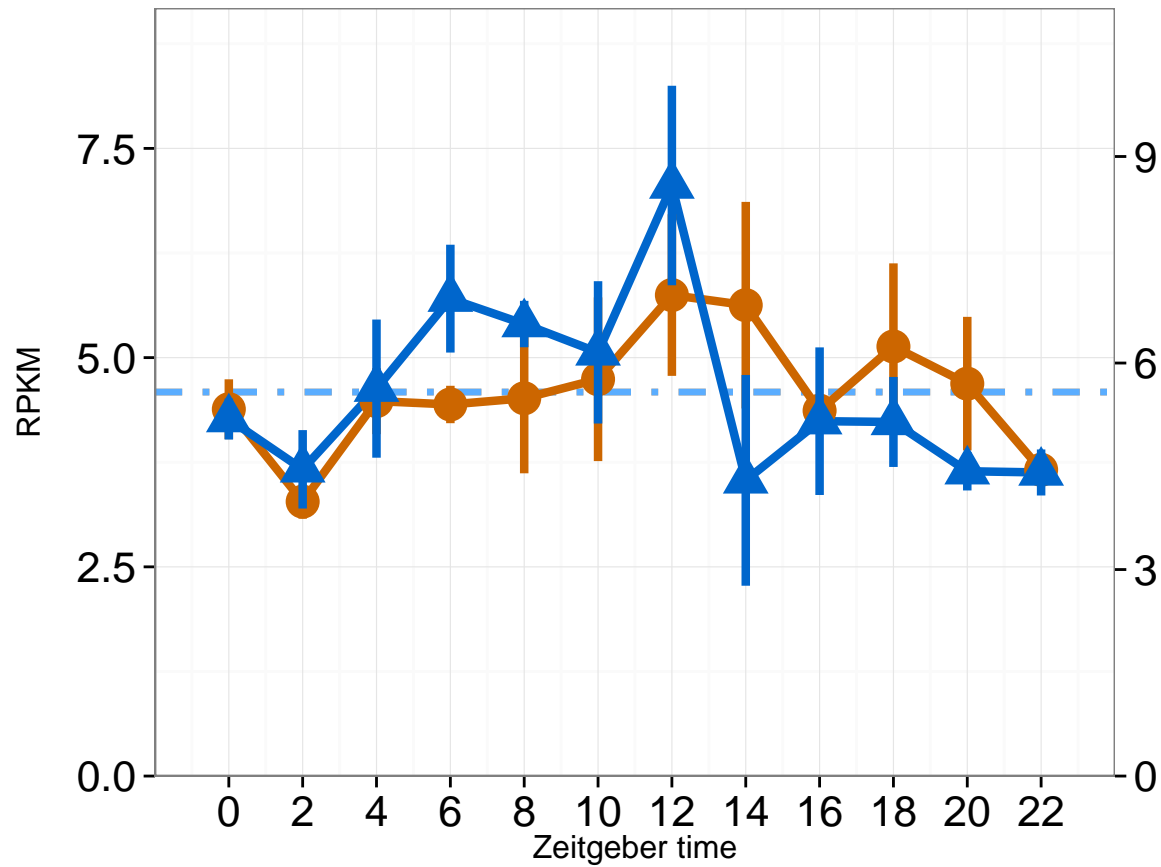

## Insl6

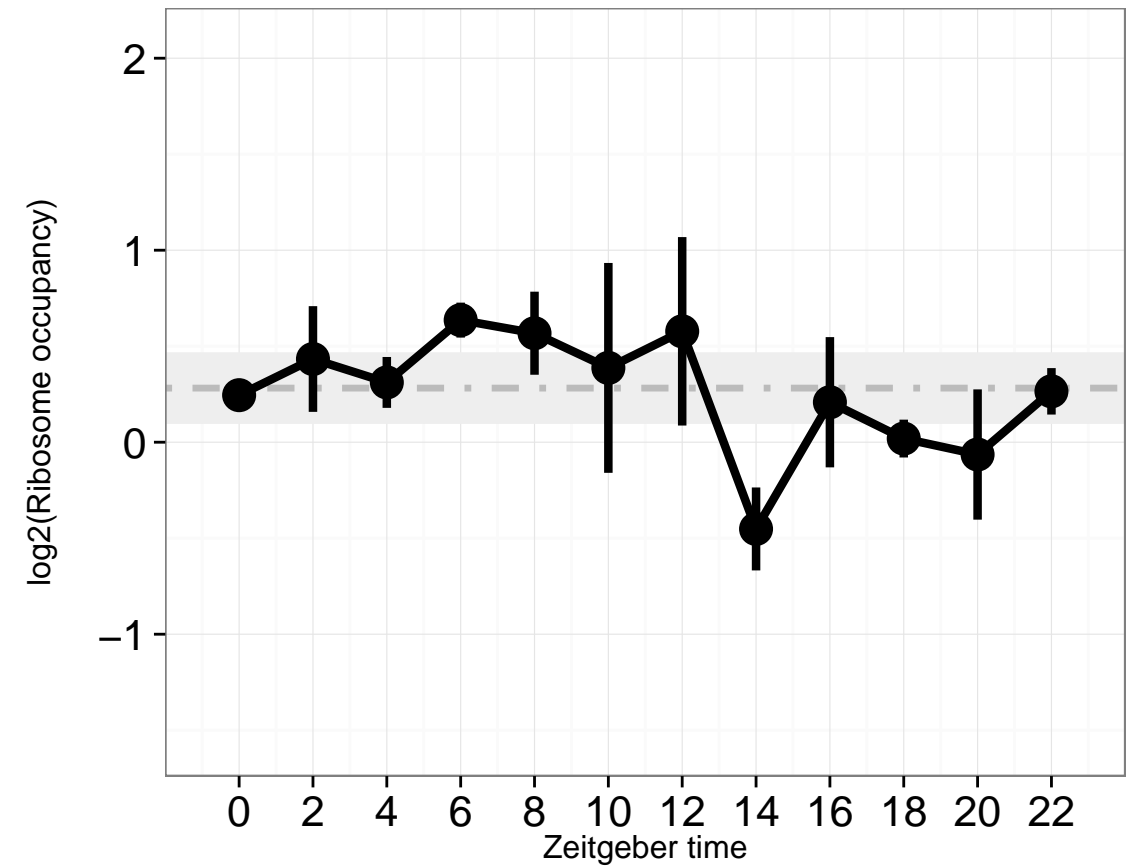

Supplement: Supplementary file 7346 [file 1]

# Fam211b

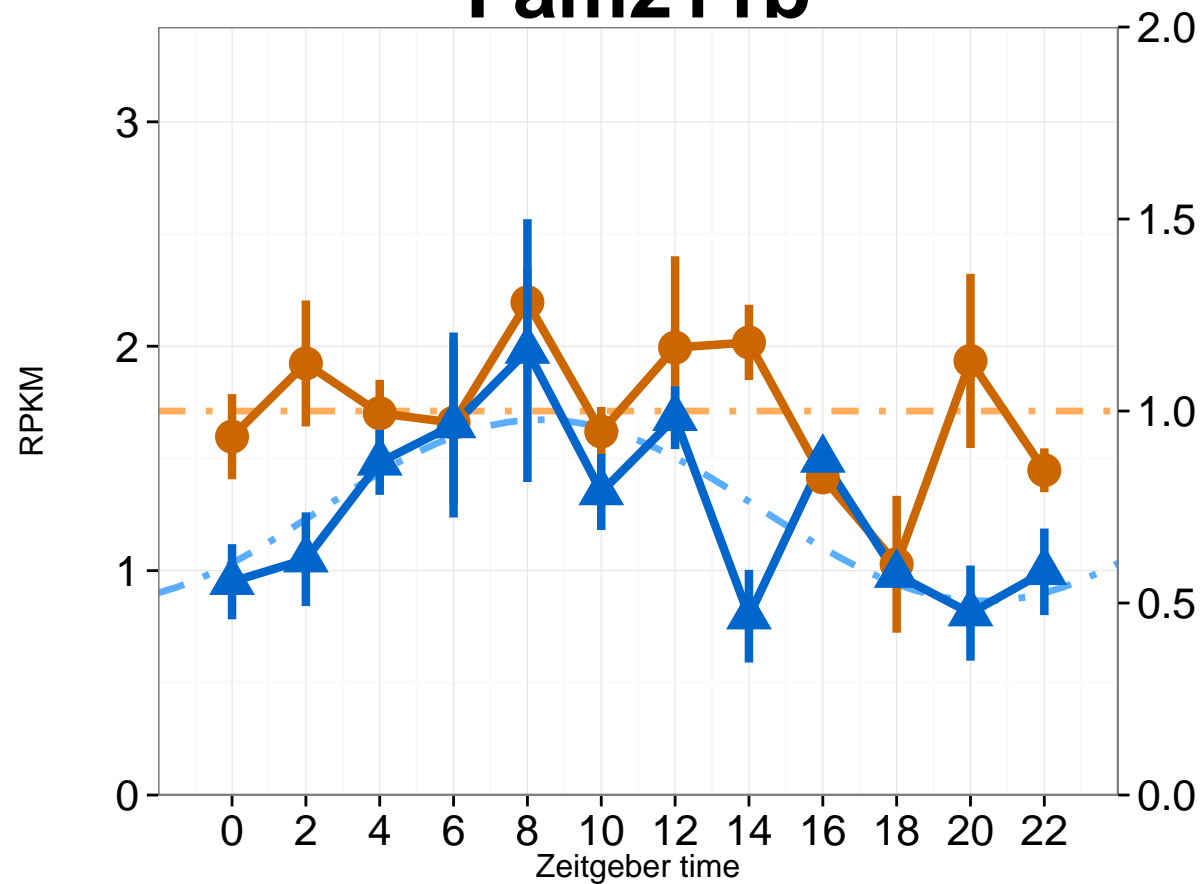

# Fam211b

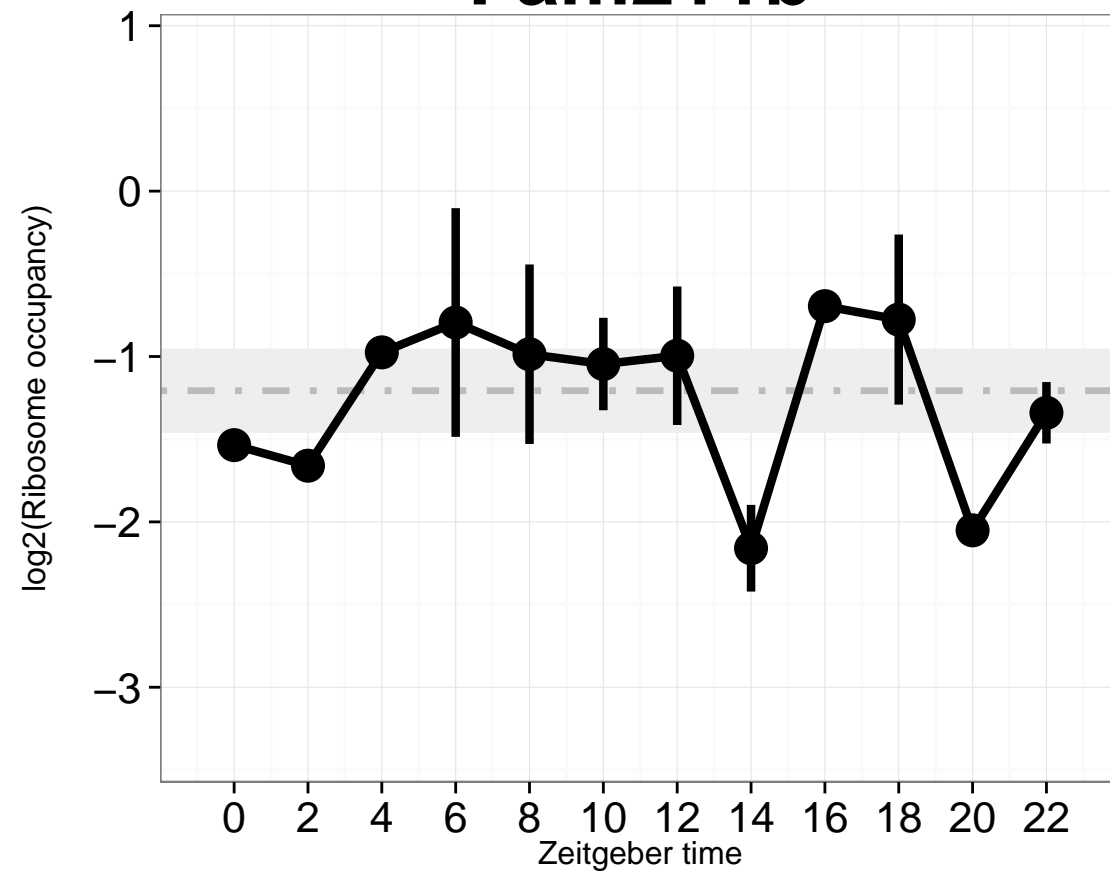

Supplement: Supplementary file 7347 [file 1]

# Lipt1

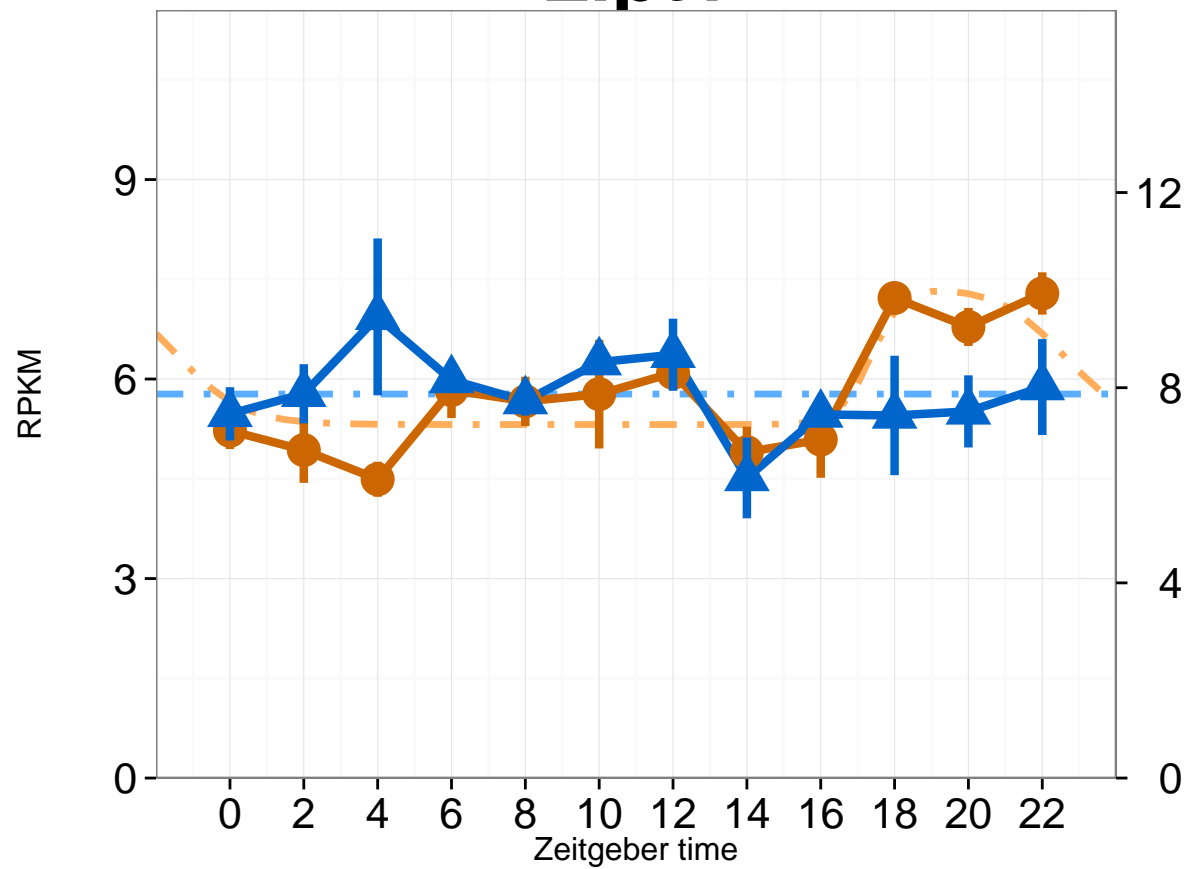

# Lipt1

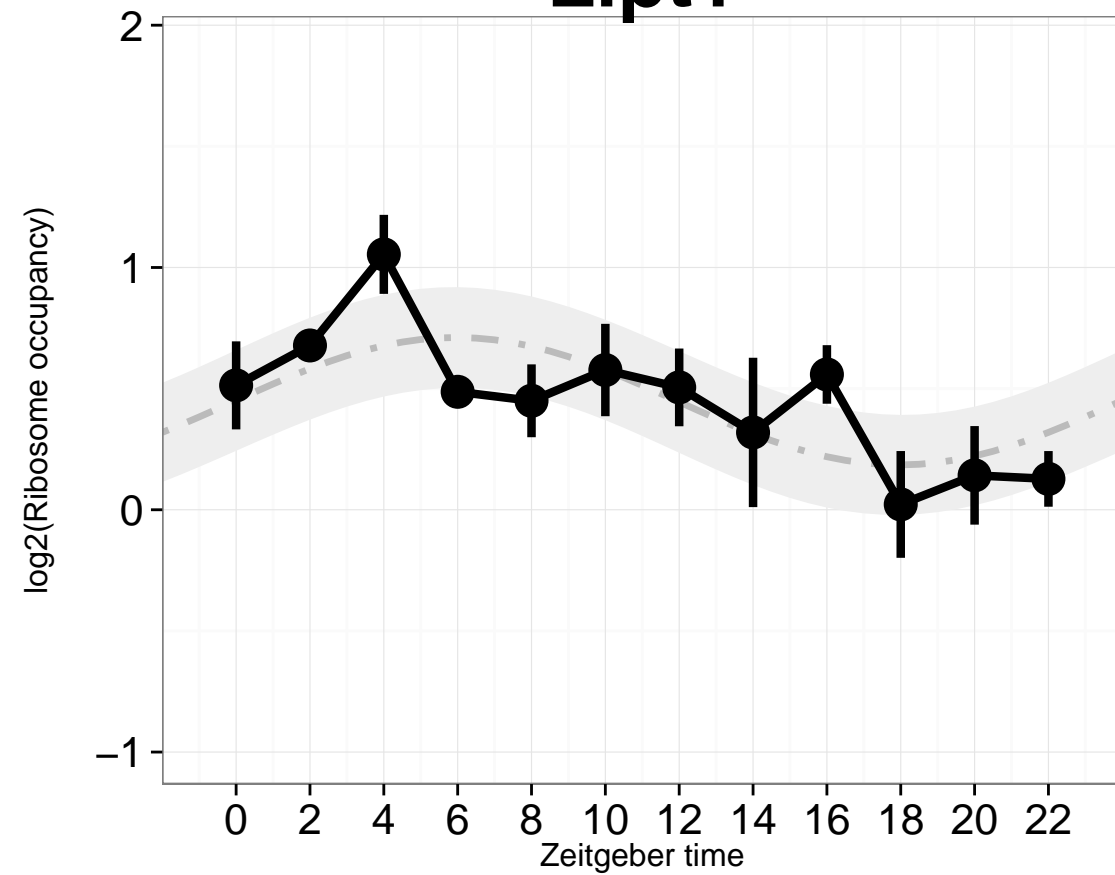

Supplement: Supplementary file 7348 [file 1]

**Rabac1**

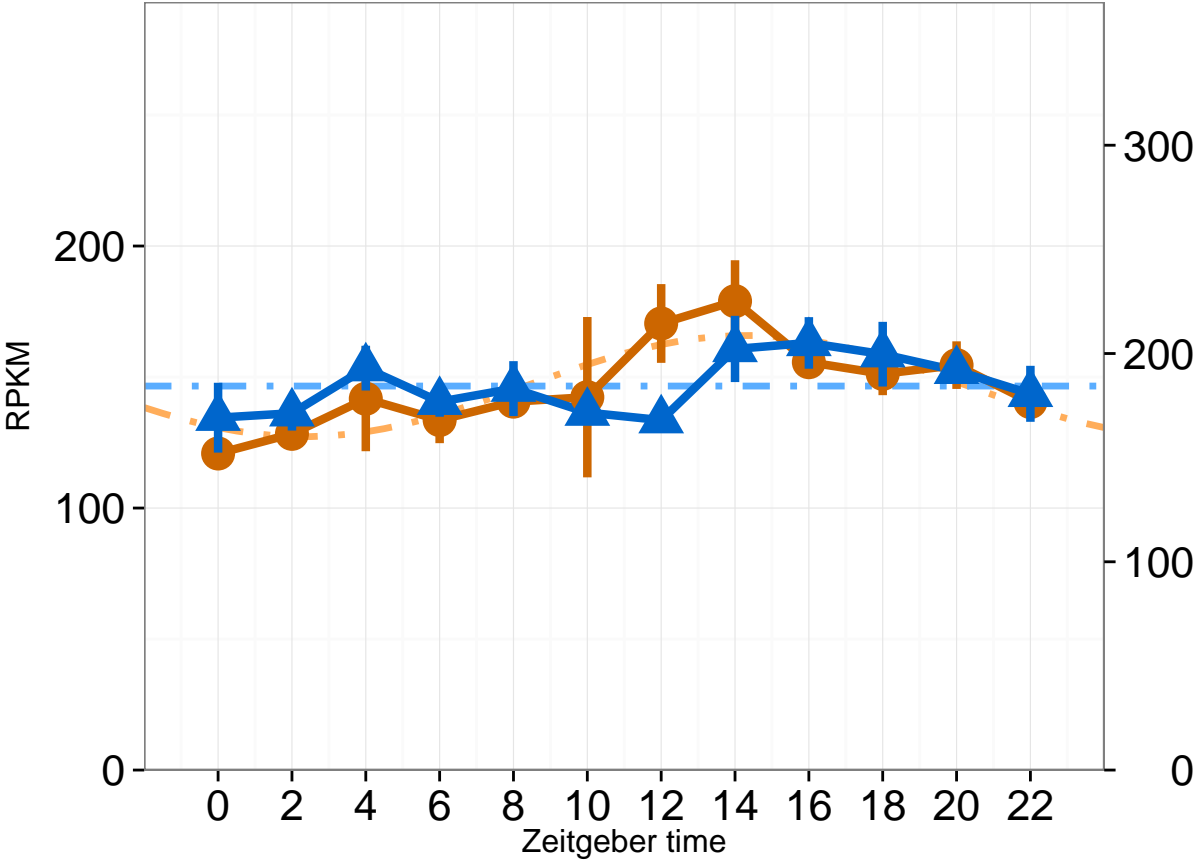

**Rabac1**

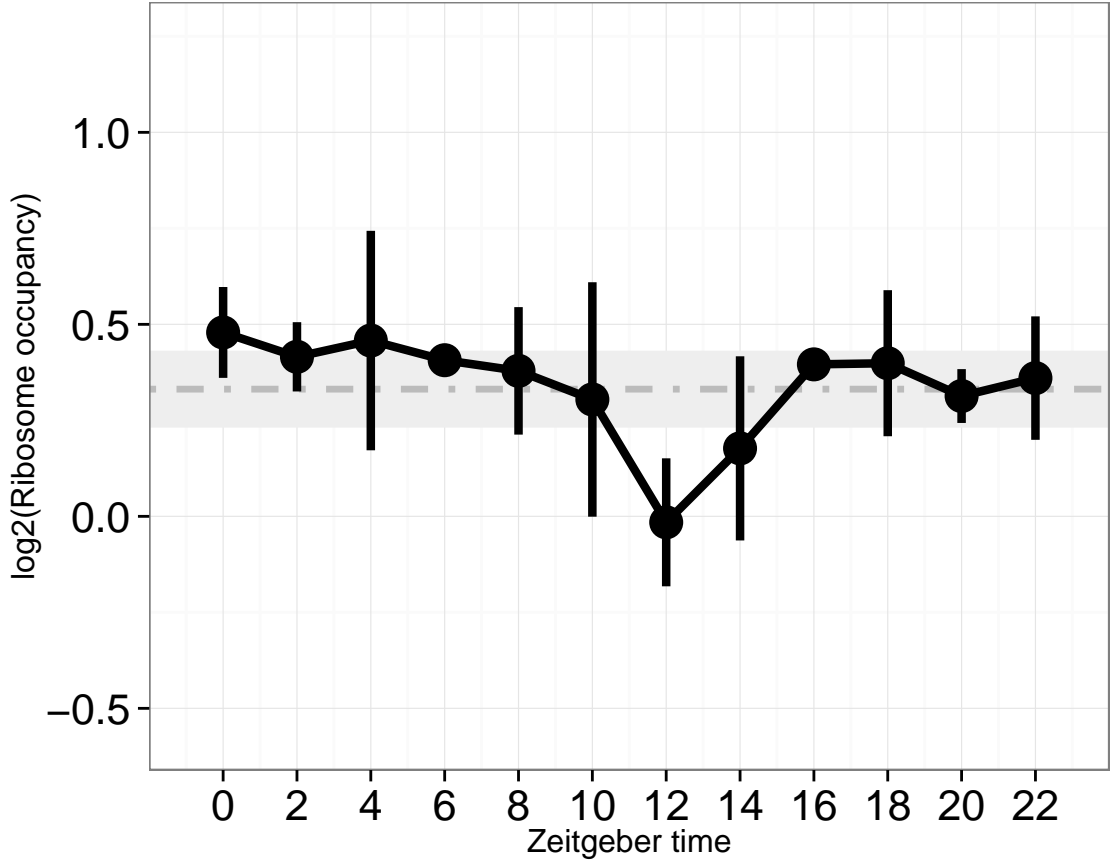

Supplement: Supplementary file 7349 [file 1]

# Mansc1

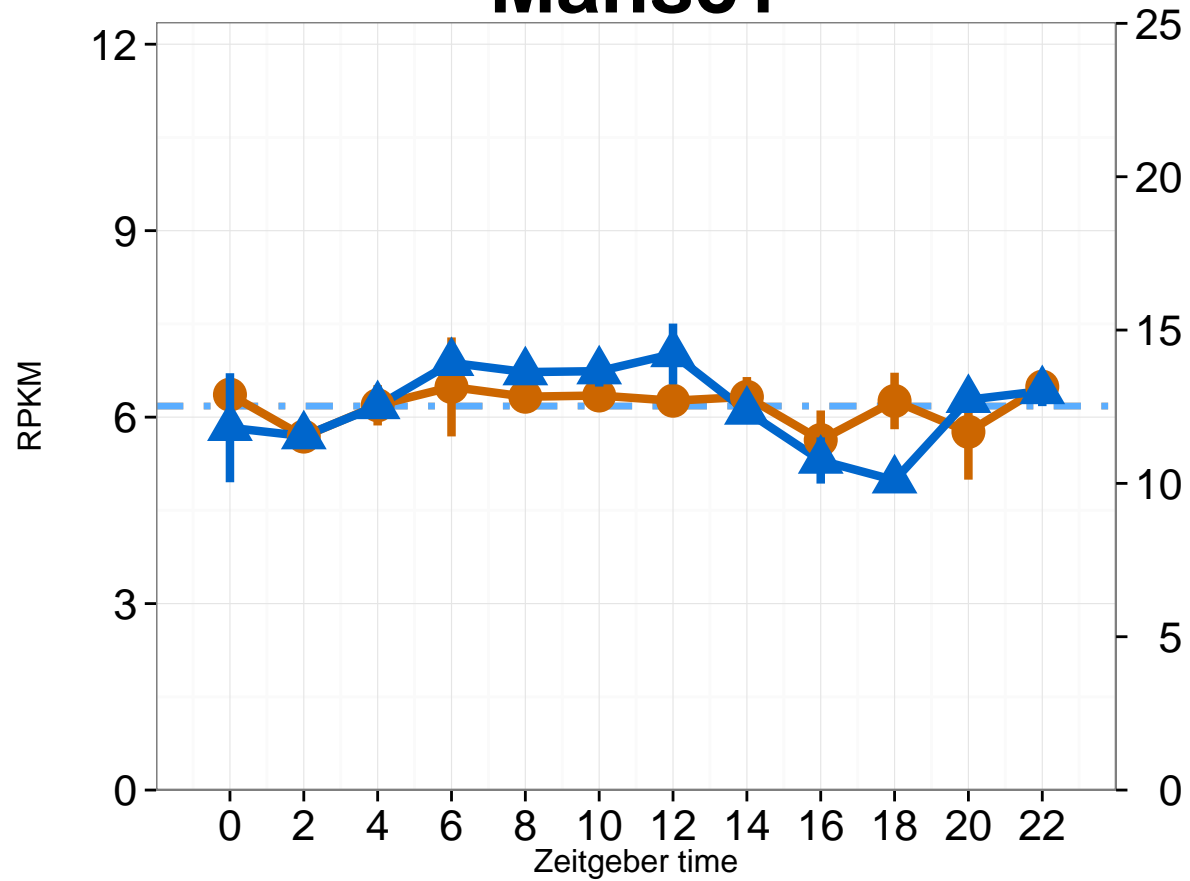

# Mansc1

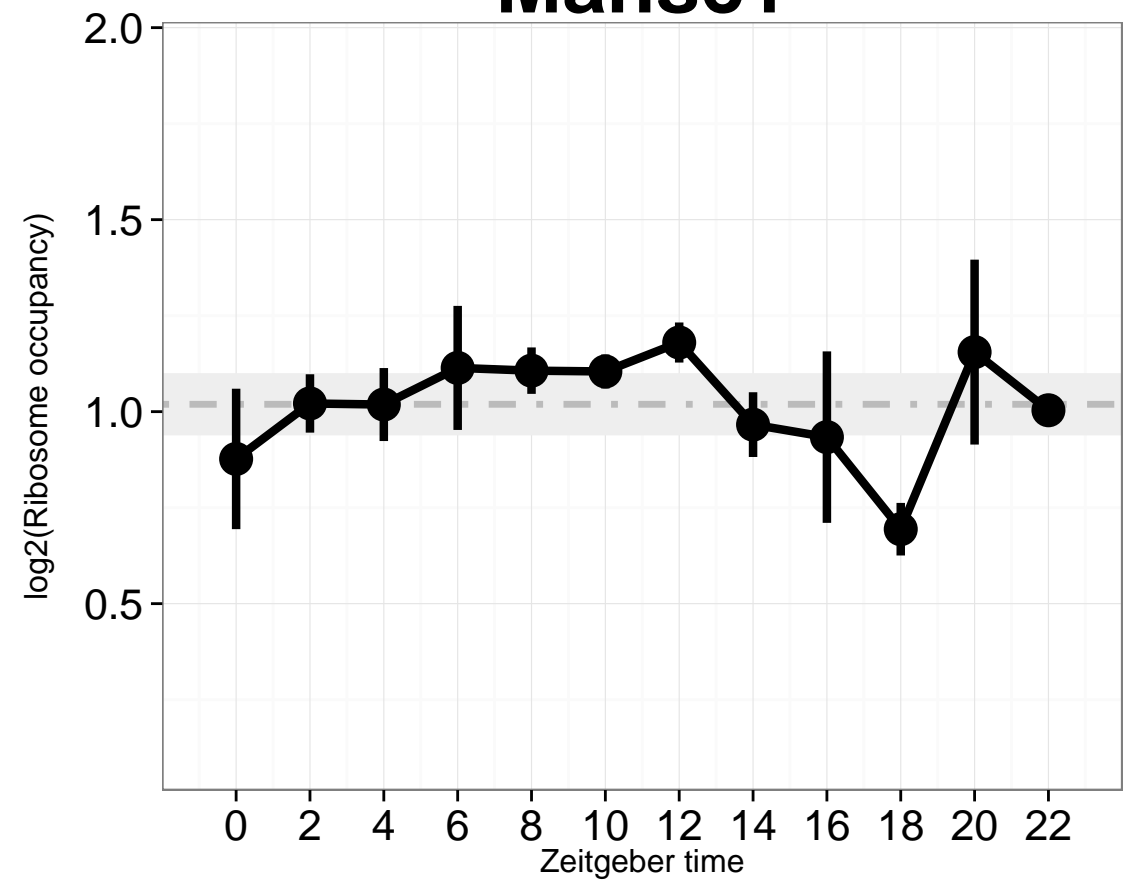

Supplement: Supplementary file 7350 [file 1]

## Elf1

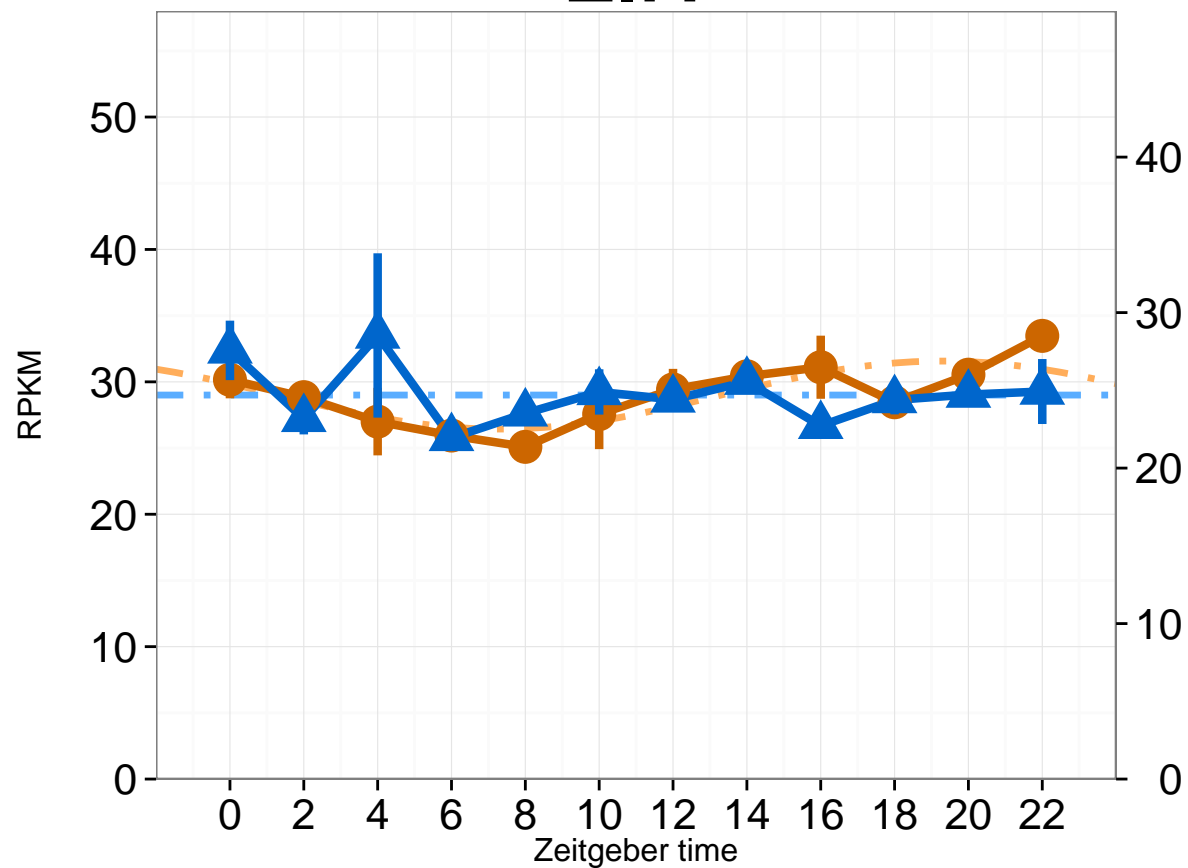

## Elf1

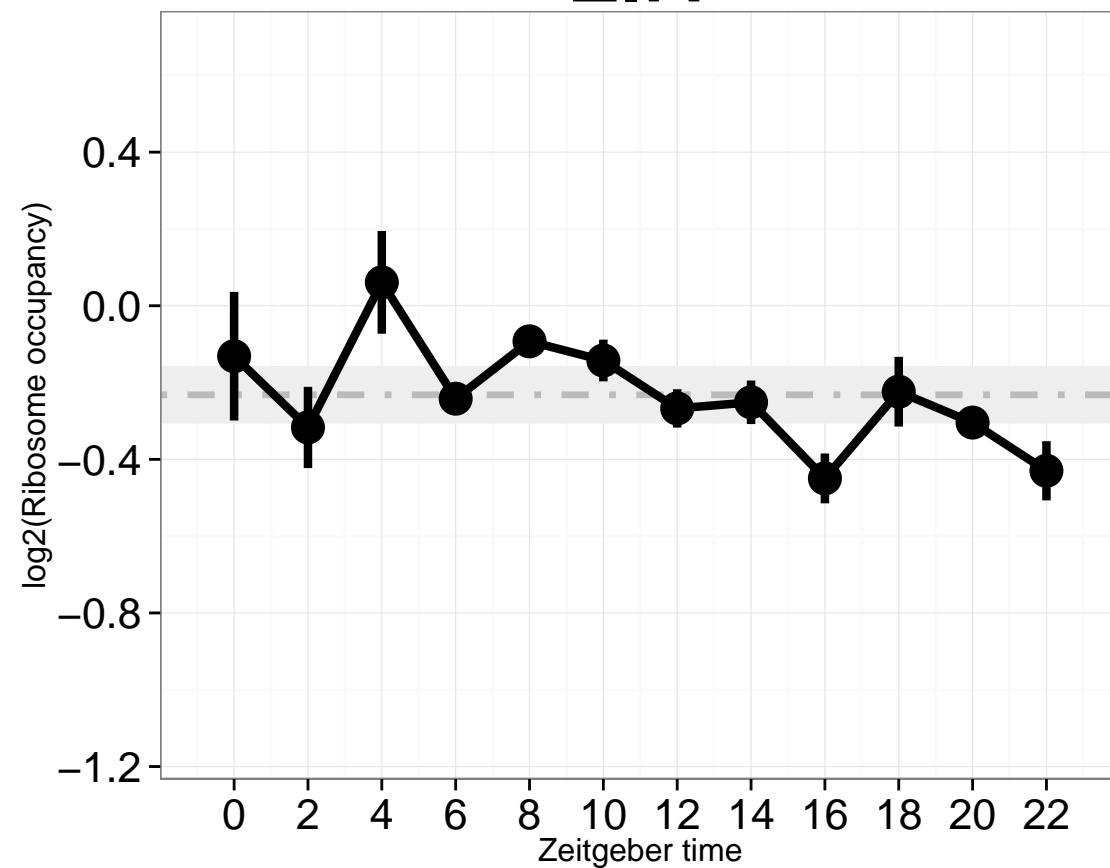

Supplement: Supplementary file 7351 [file 1]

**Foxa1 TR**

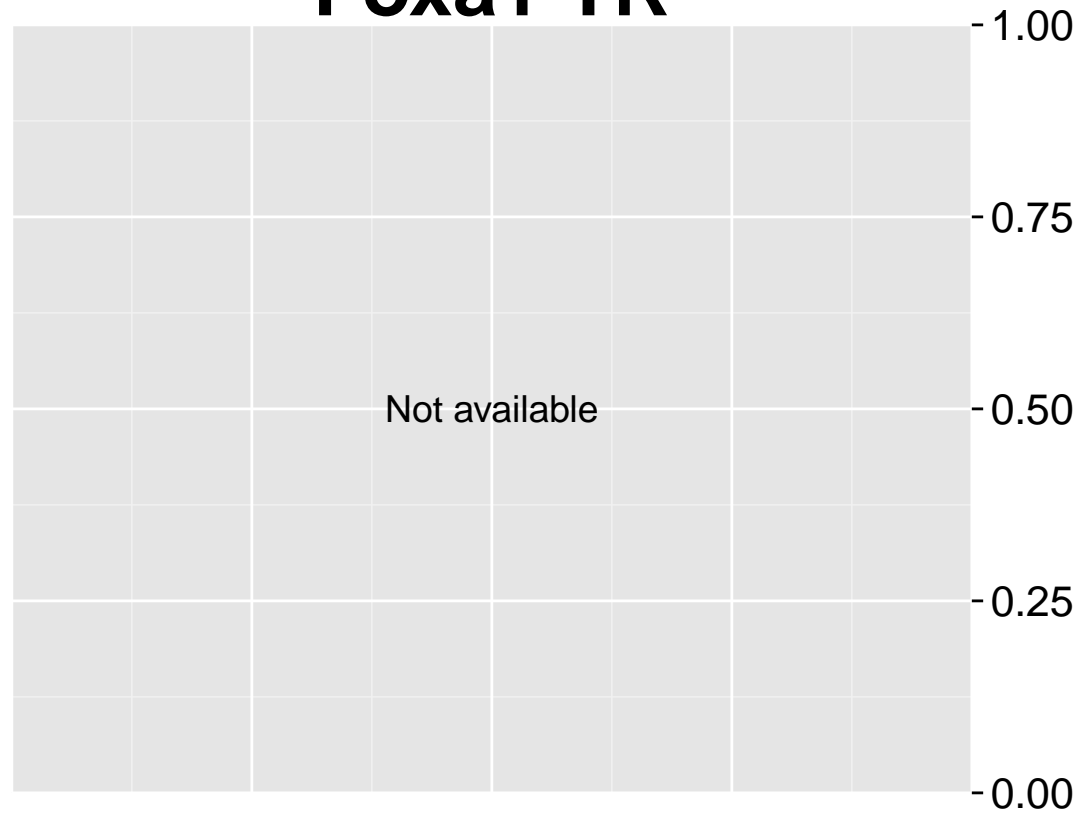

**Foxa1 log2(Ribosome occupancy**

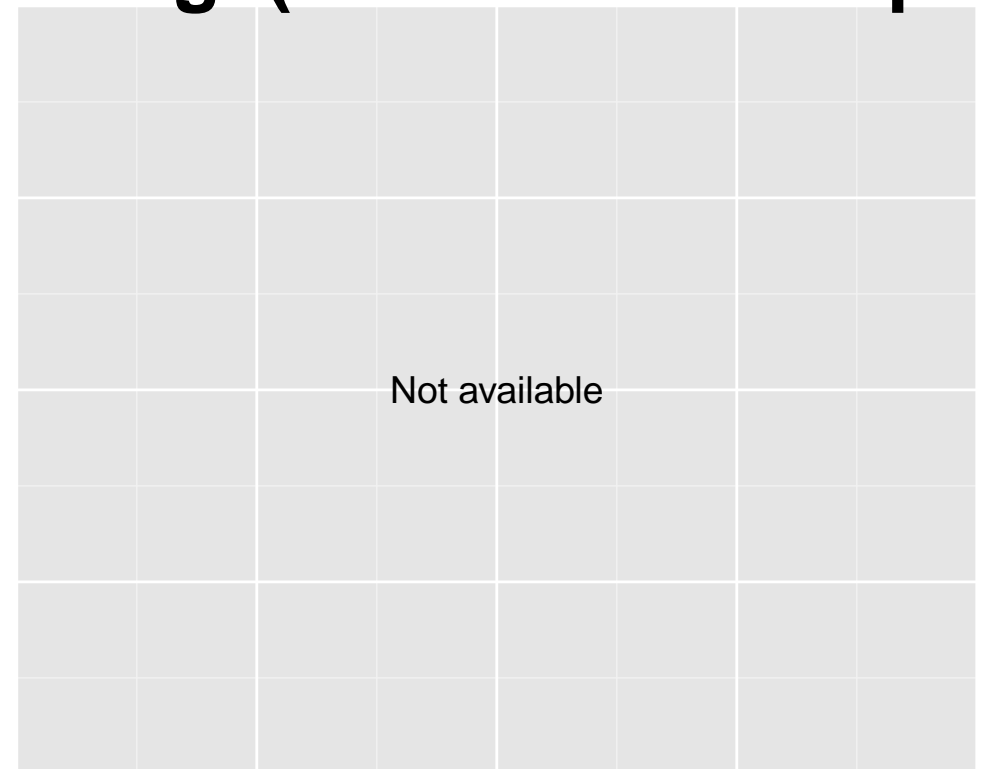

Supplement: Supplementary file 7352 [file 1]

# Dcaf12l1

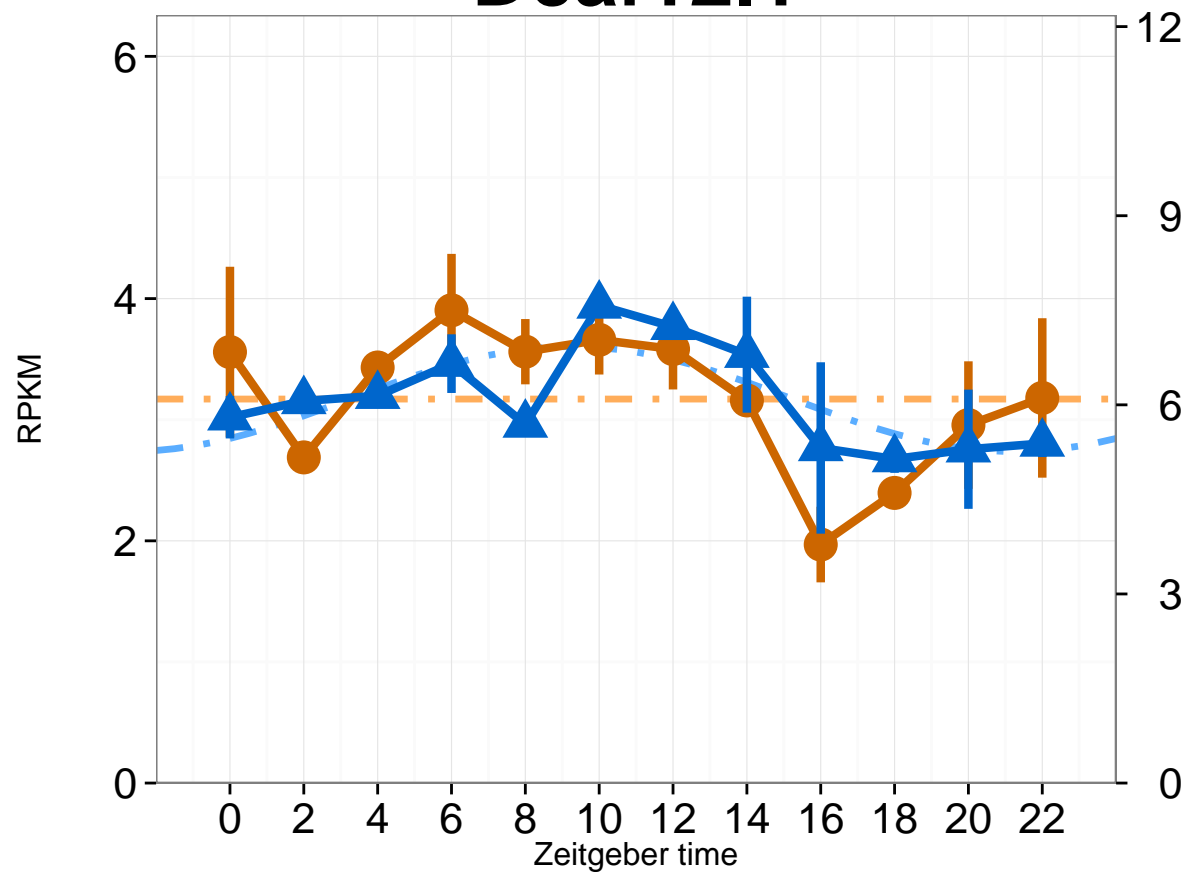

# Dcaf12l1

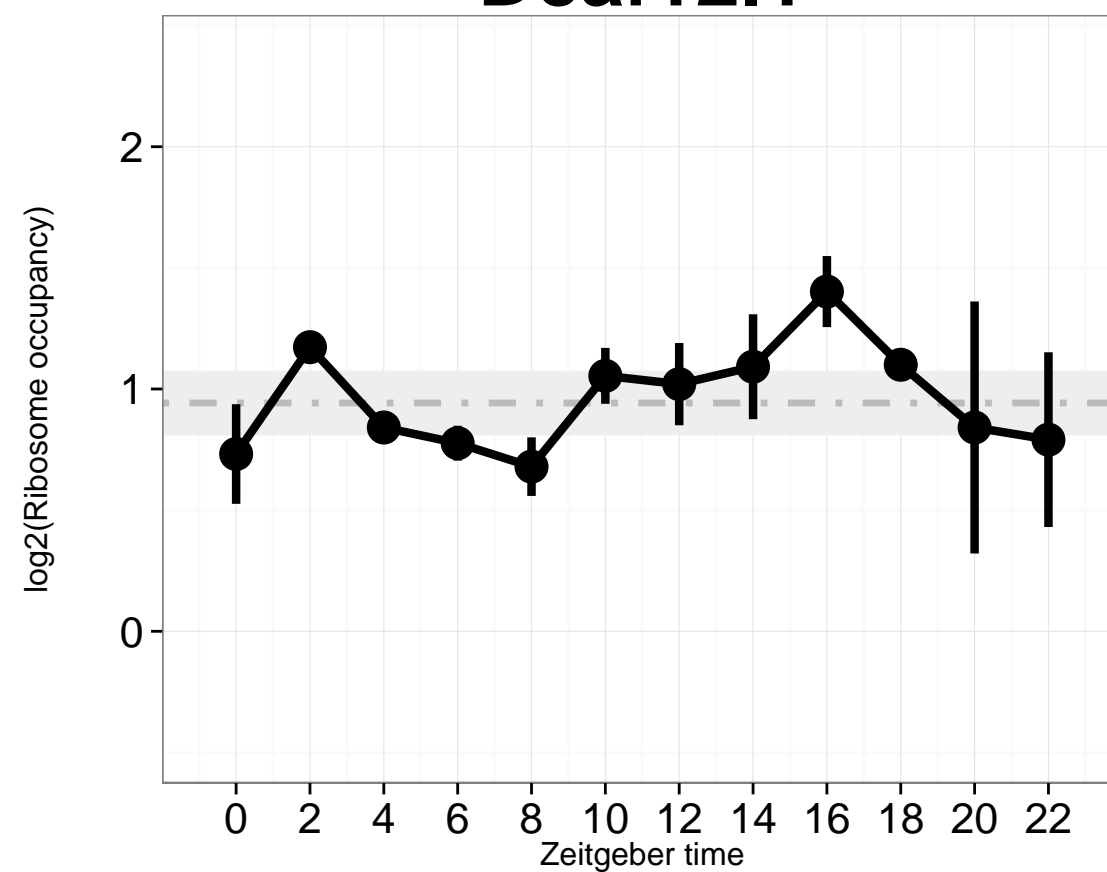

Supplement: Supplementary file 7353 [file 1]

# MIh1

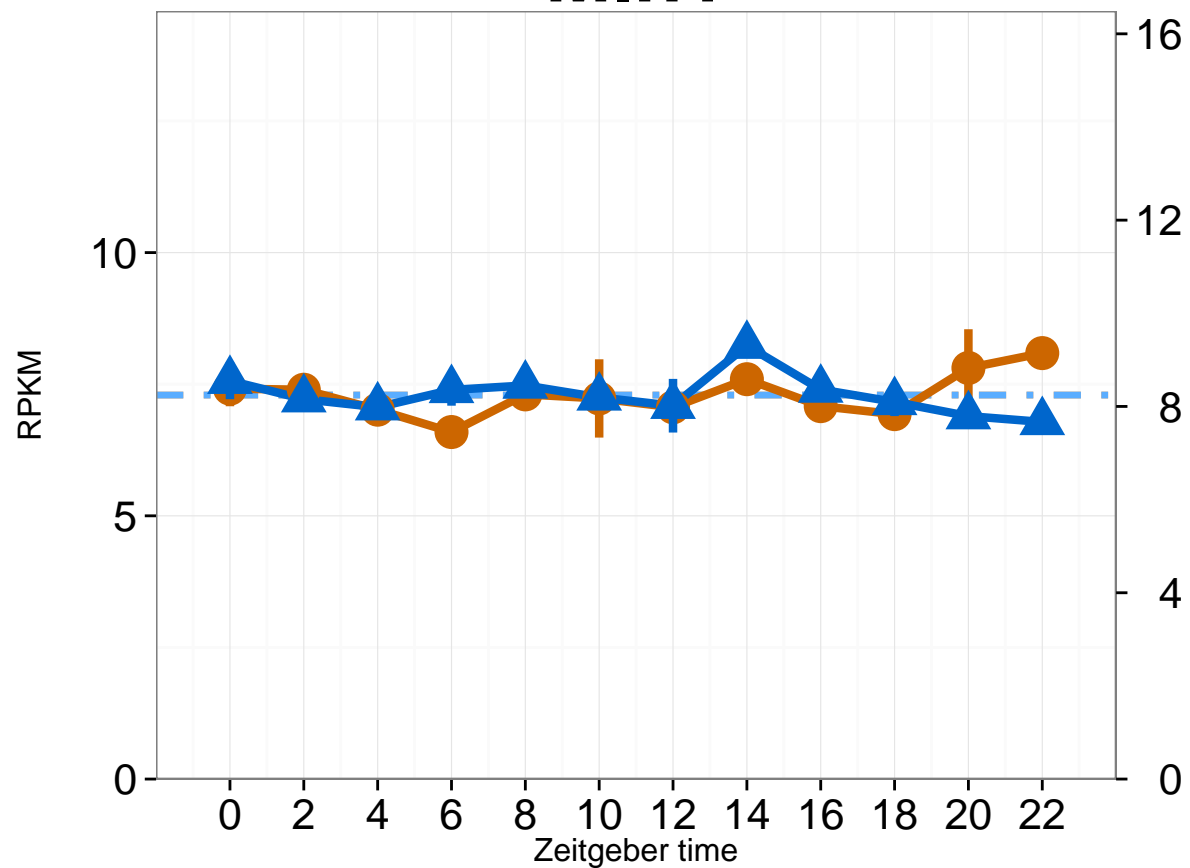

# MIh1

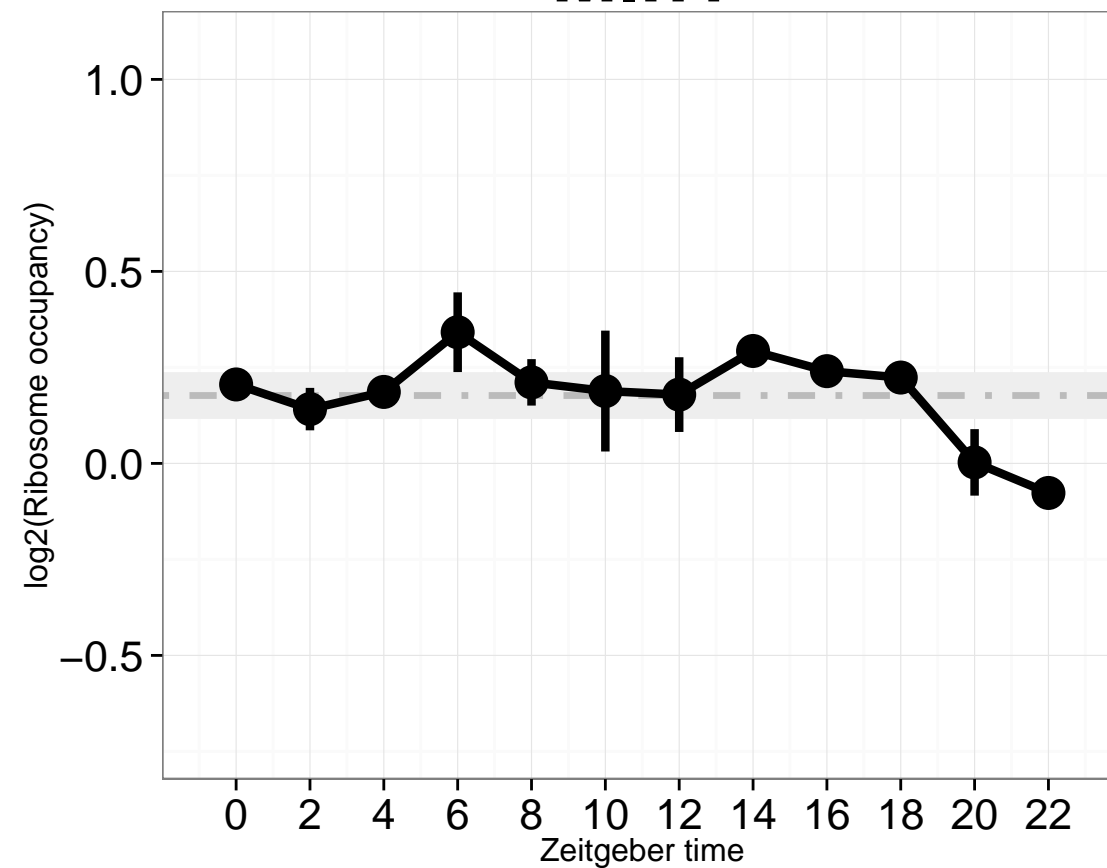

Supplement: Supplementary file 7354 [file 1]

## Manbal

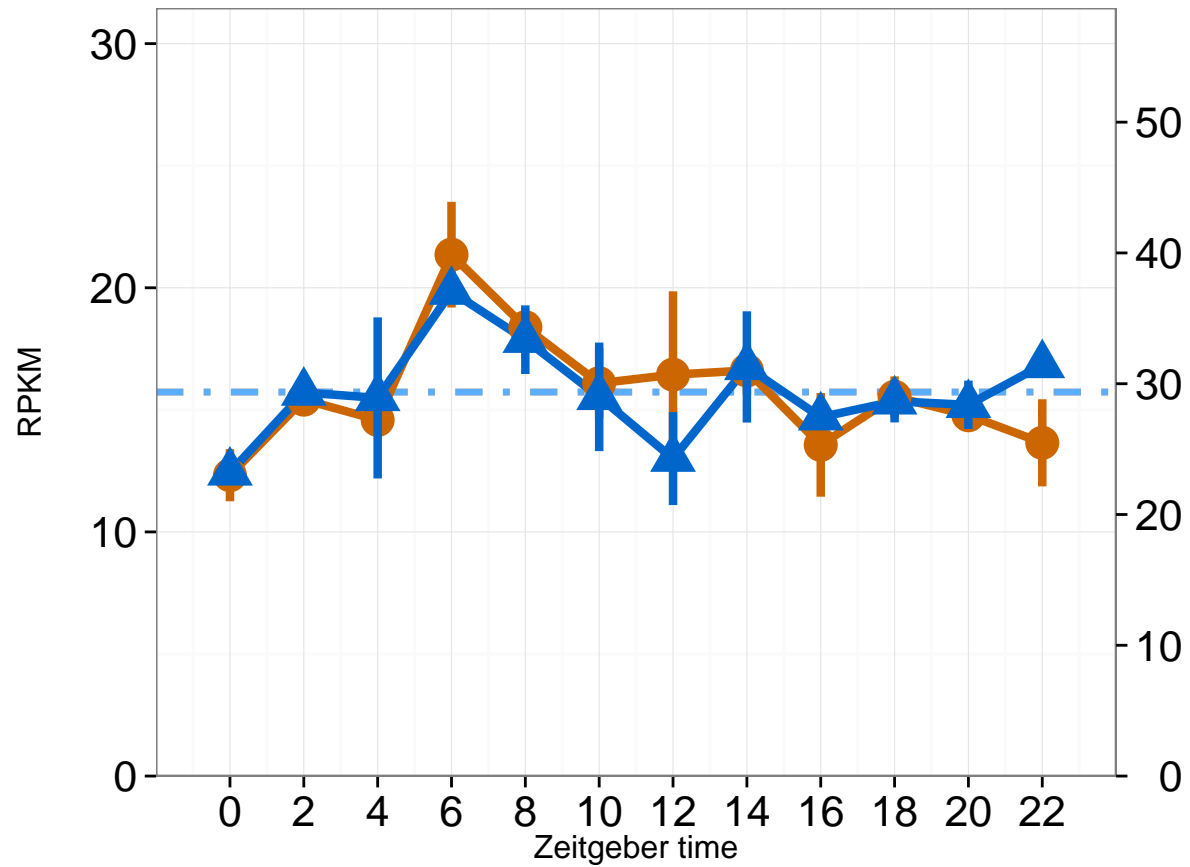

## Manbal

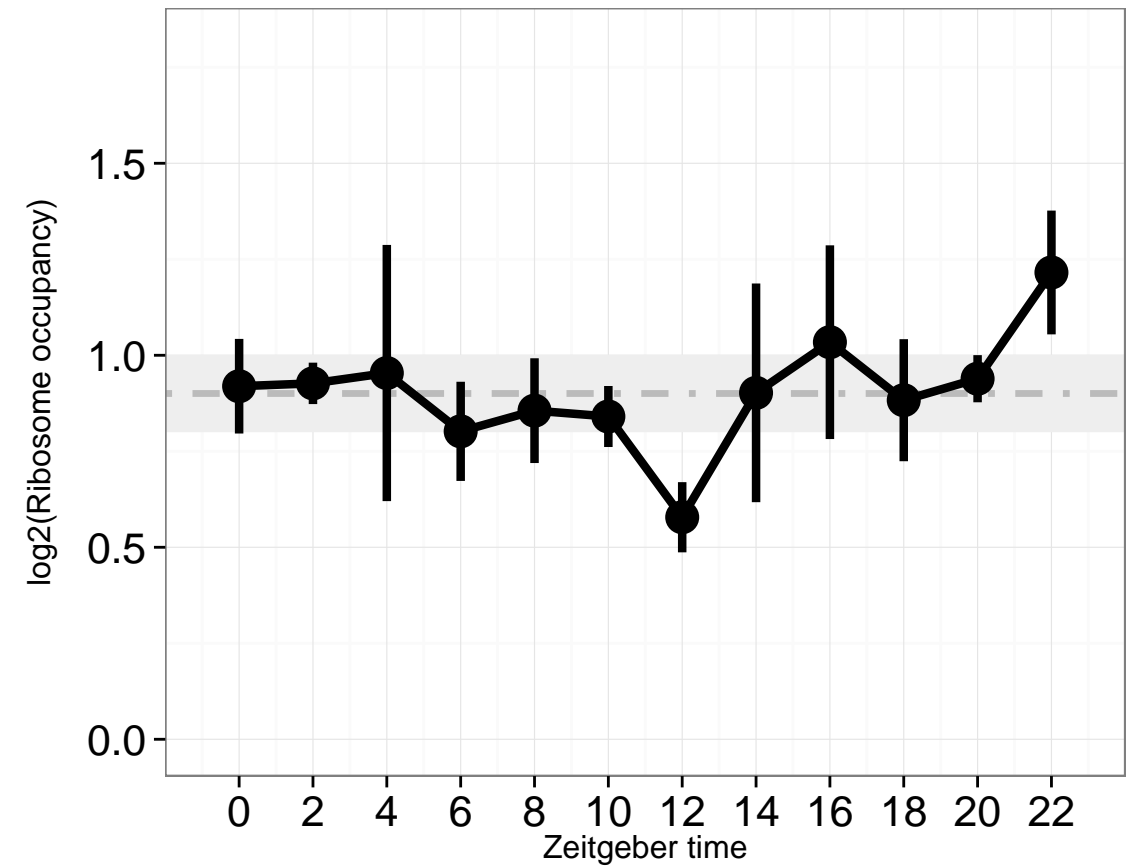

Supplement: Supplementary file 7355 [file 1]

# Mrps14

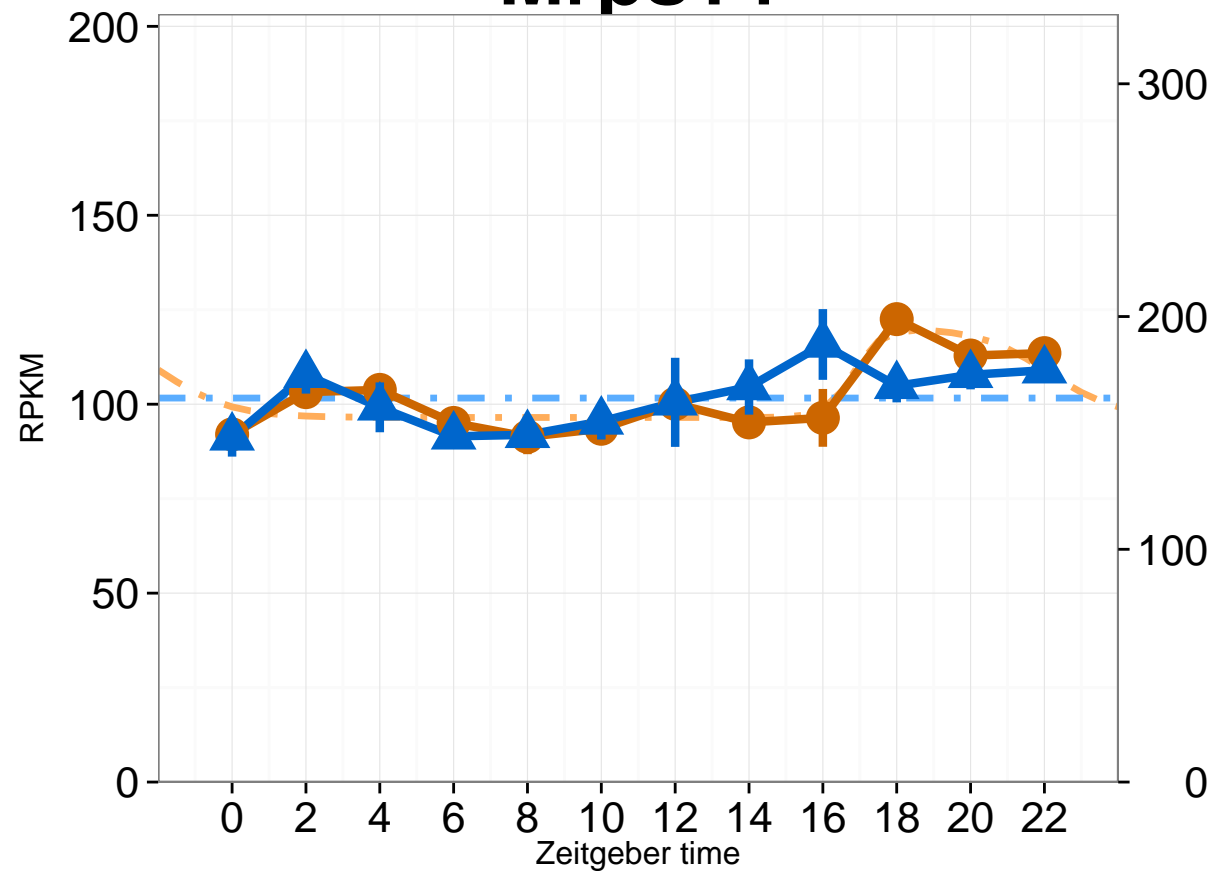

# Mrps14

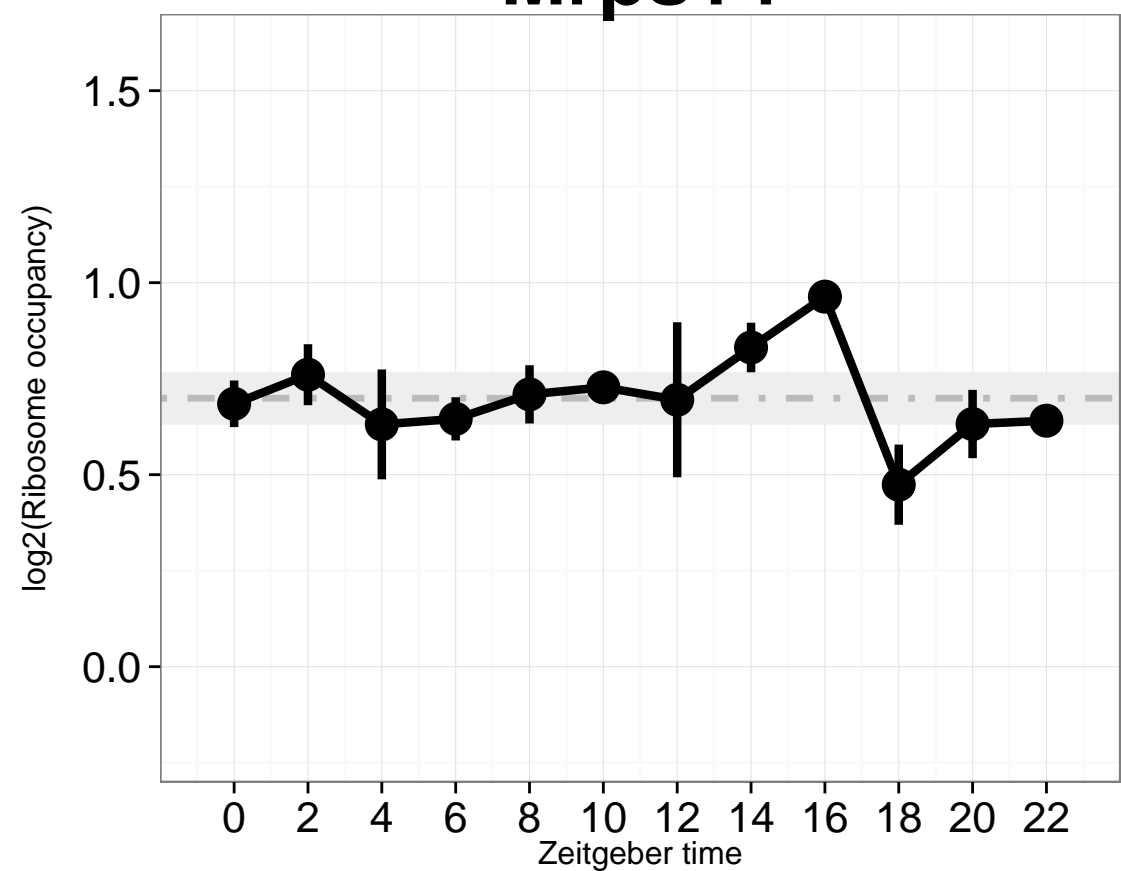

Supplement: Supplementary file 7356 [file 1]

# Tada3

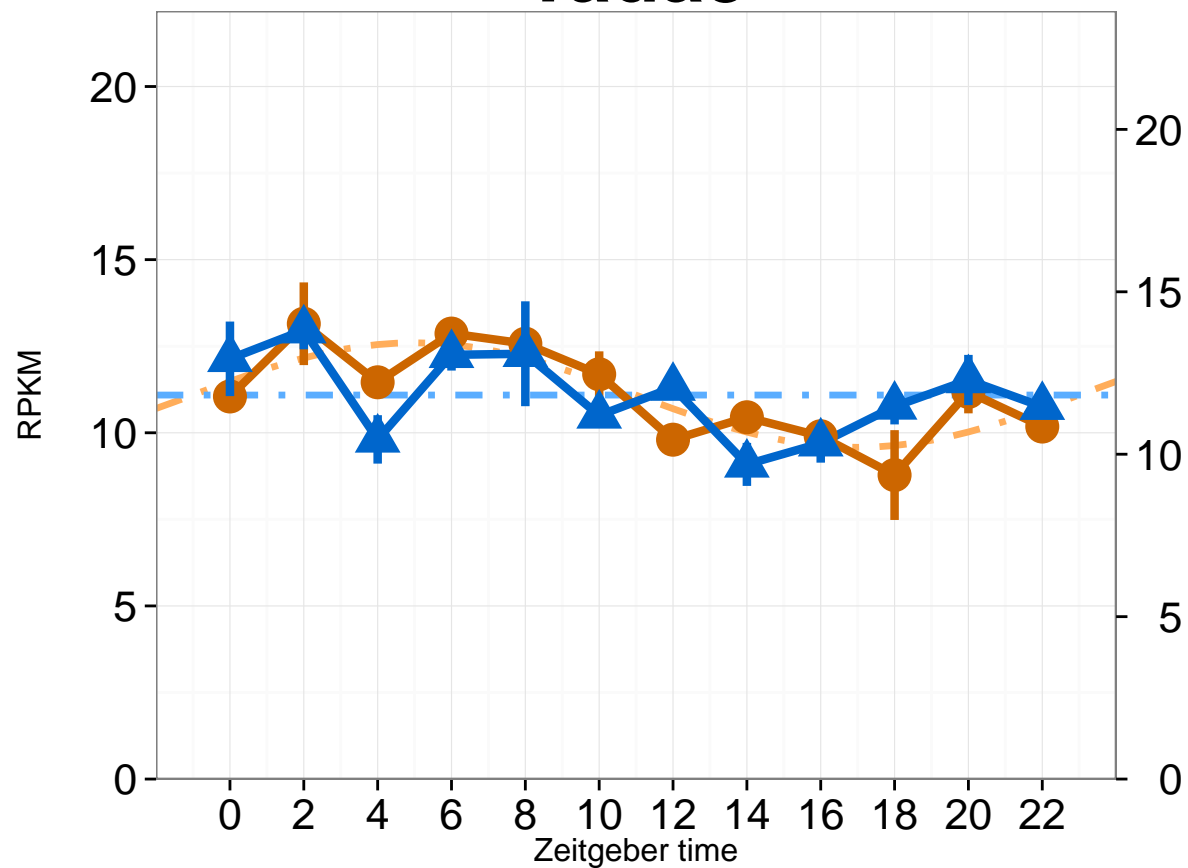

# Tada3

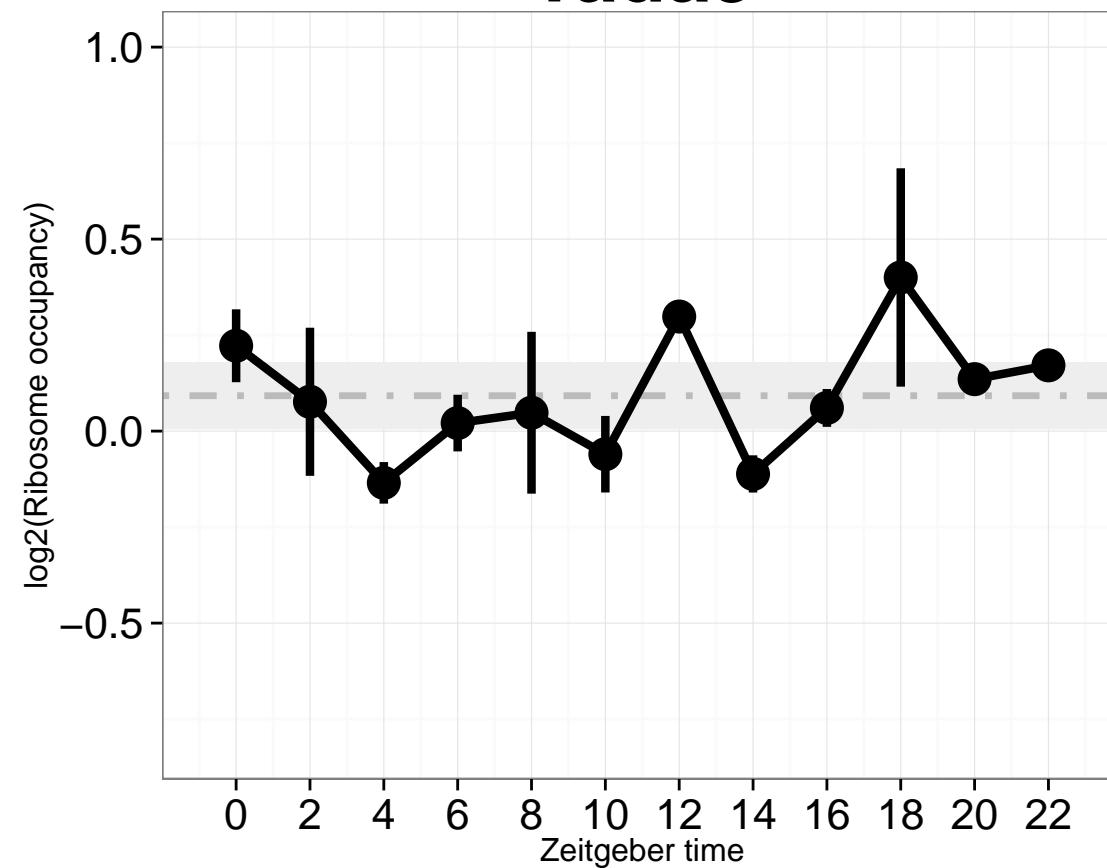

Supplement: Supplementary file 7357 [file 1]

## Arsq

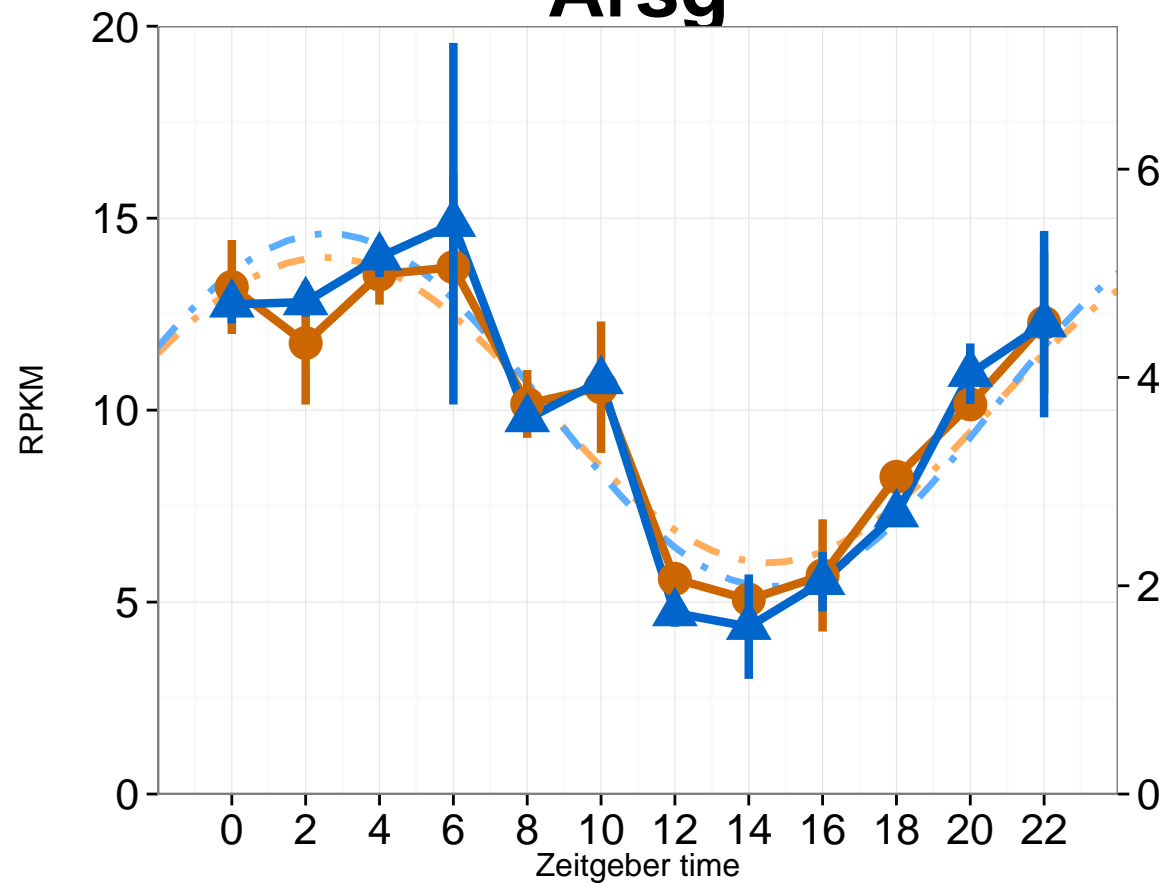

## Arsq

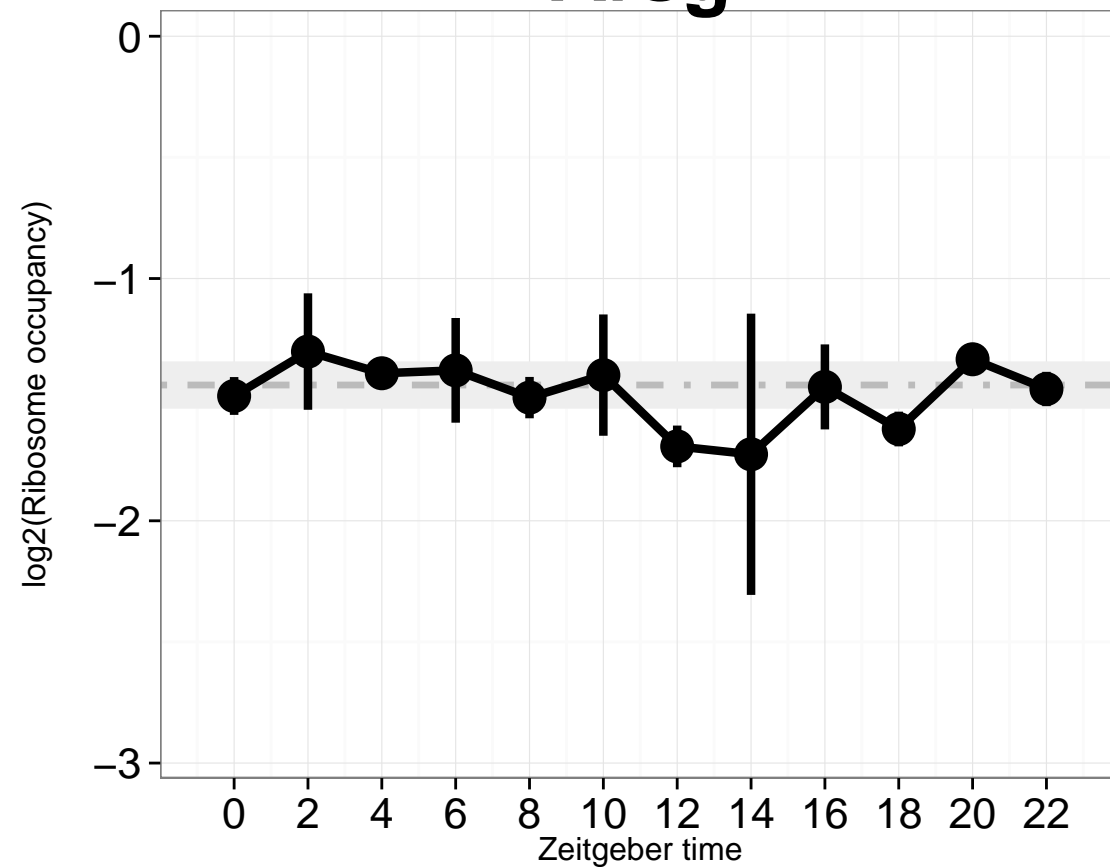

Supplement: Supplementary file 7358 [file 1]

# Pyhin1

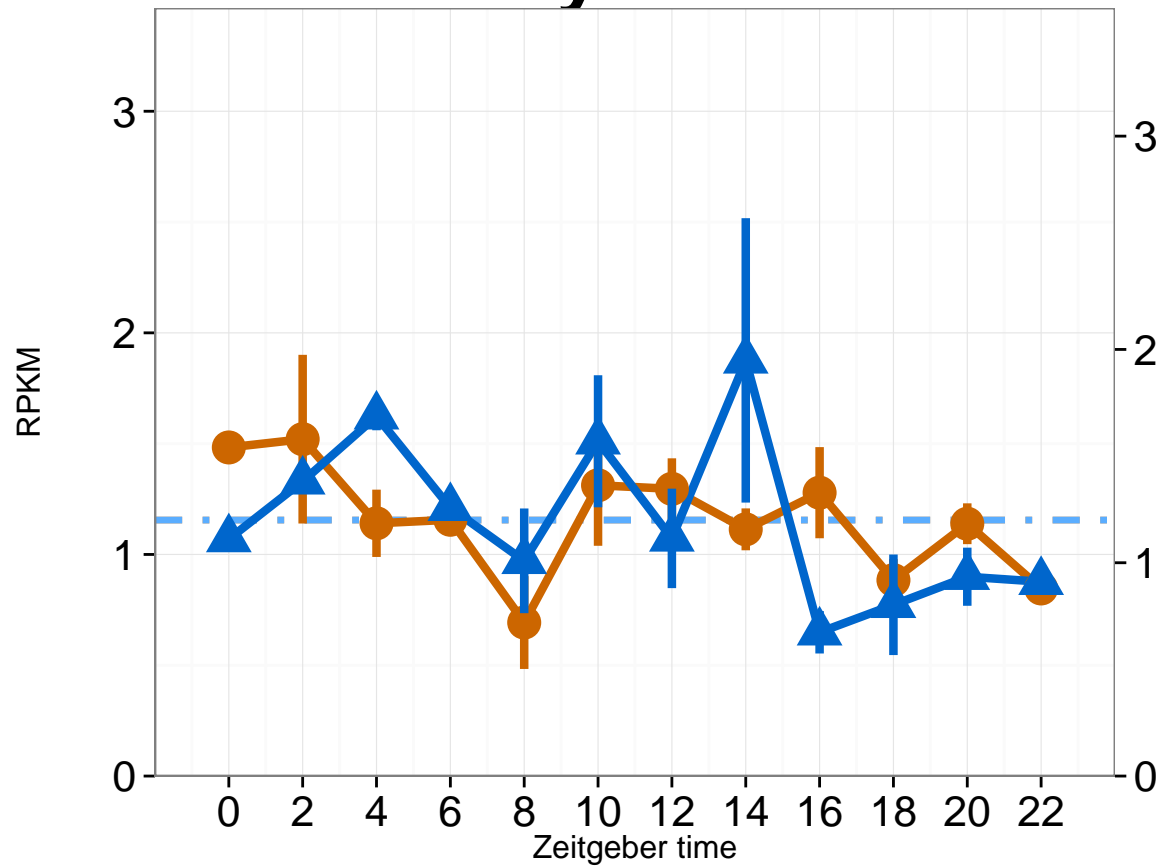

# Pyhin1

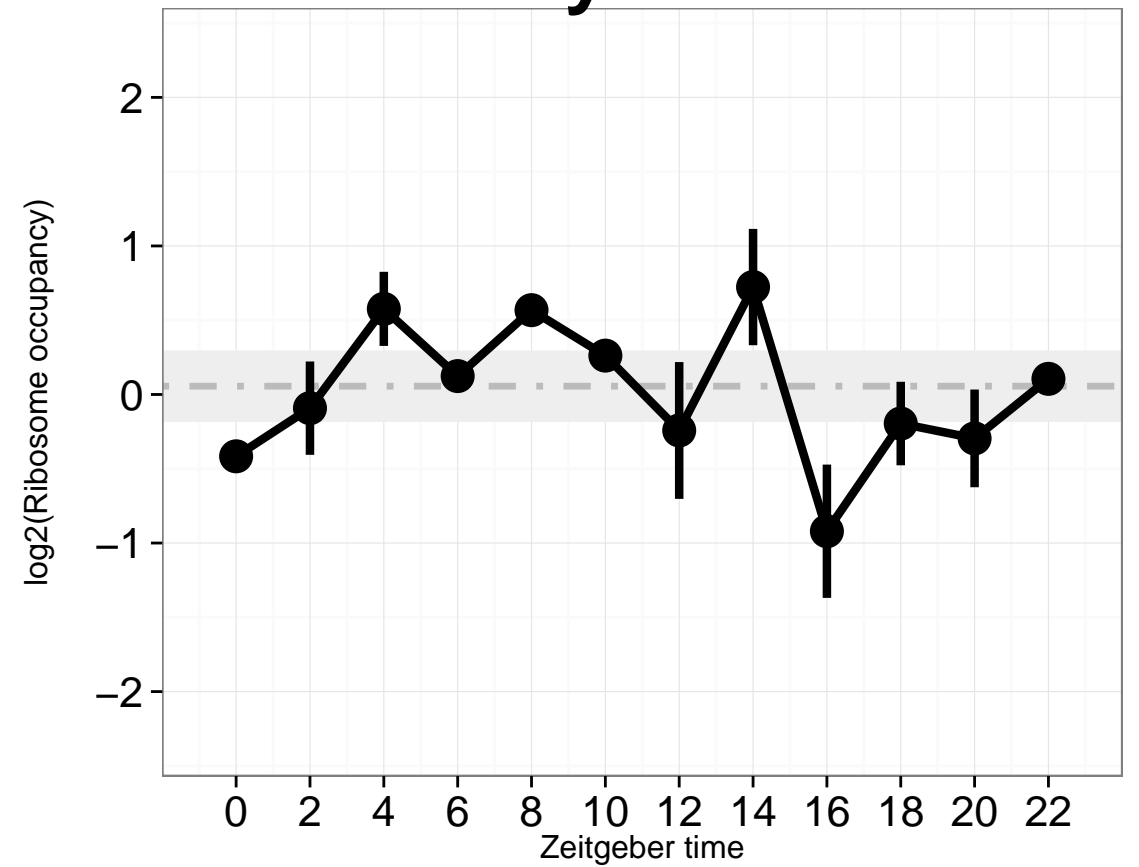

Supplement: Supplementary file 7359 [file 1]

# Srsf10

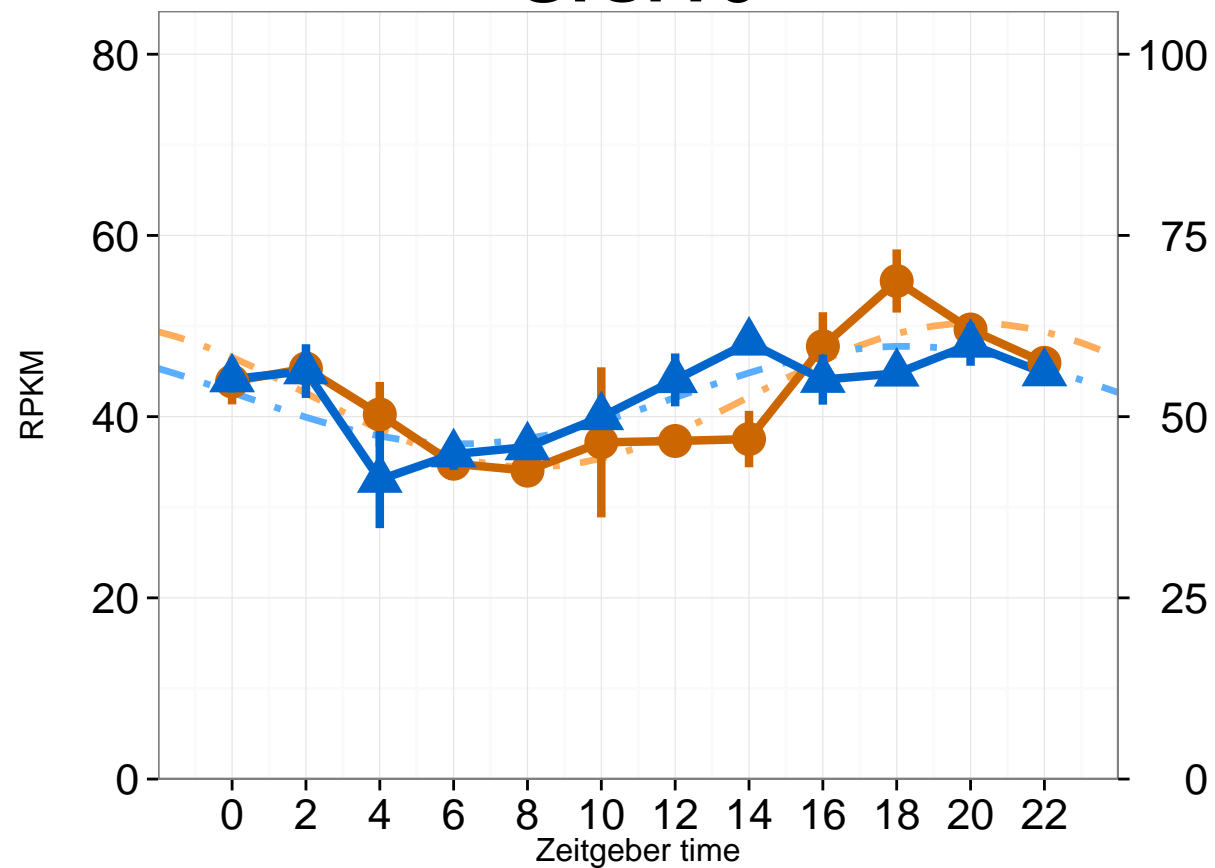

# Srsf10

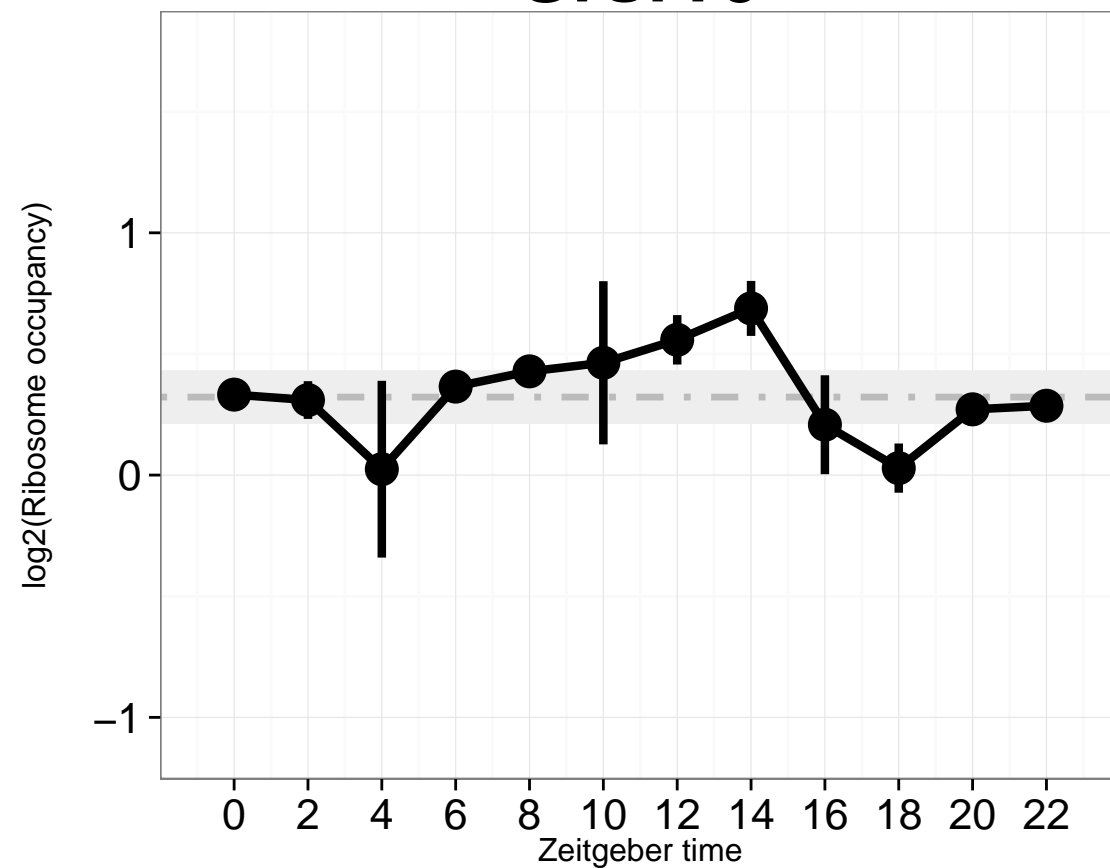

Supplement: Supplementary file 7360 [file 1]

## Slc18b1

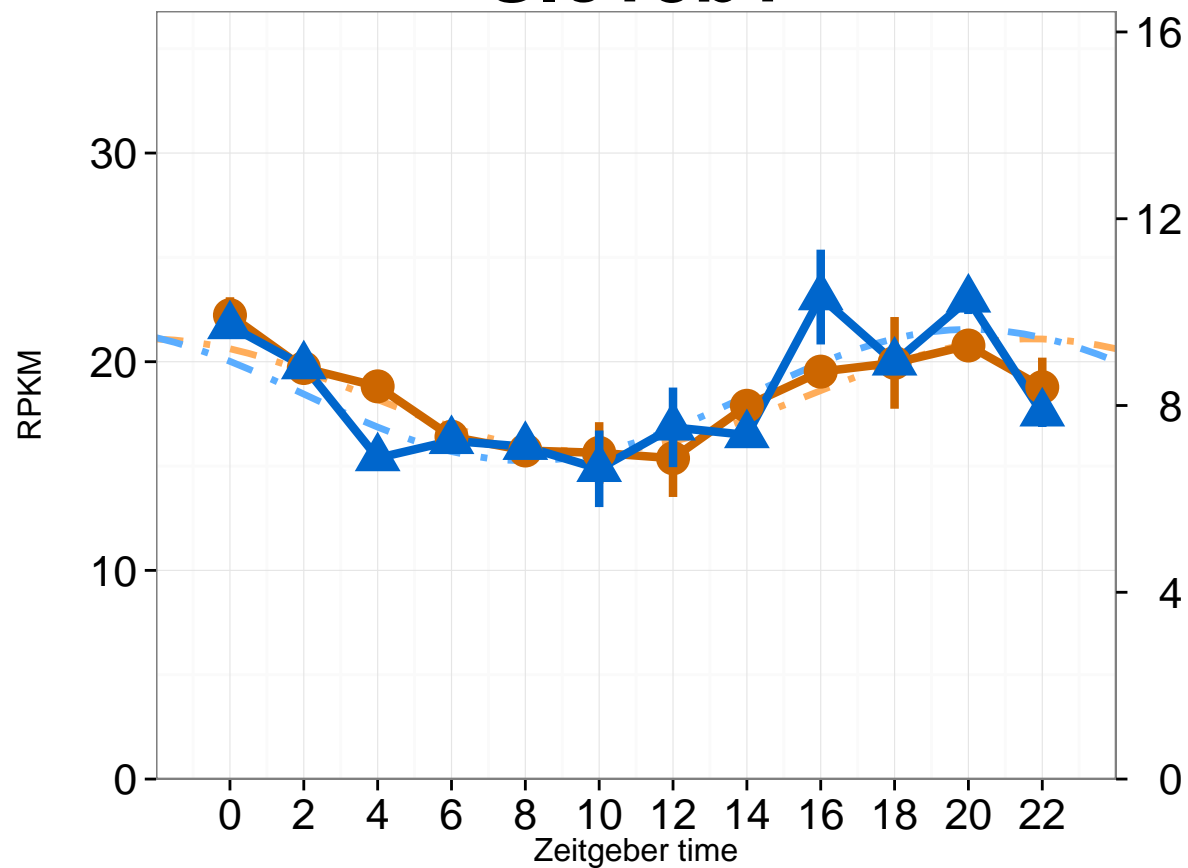

## Slc18b1

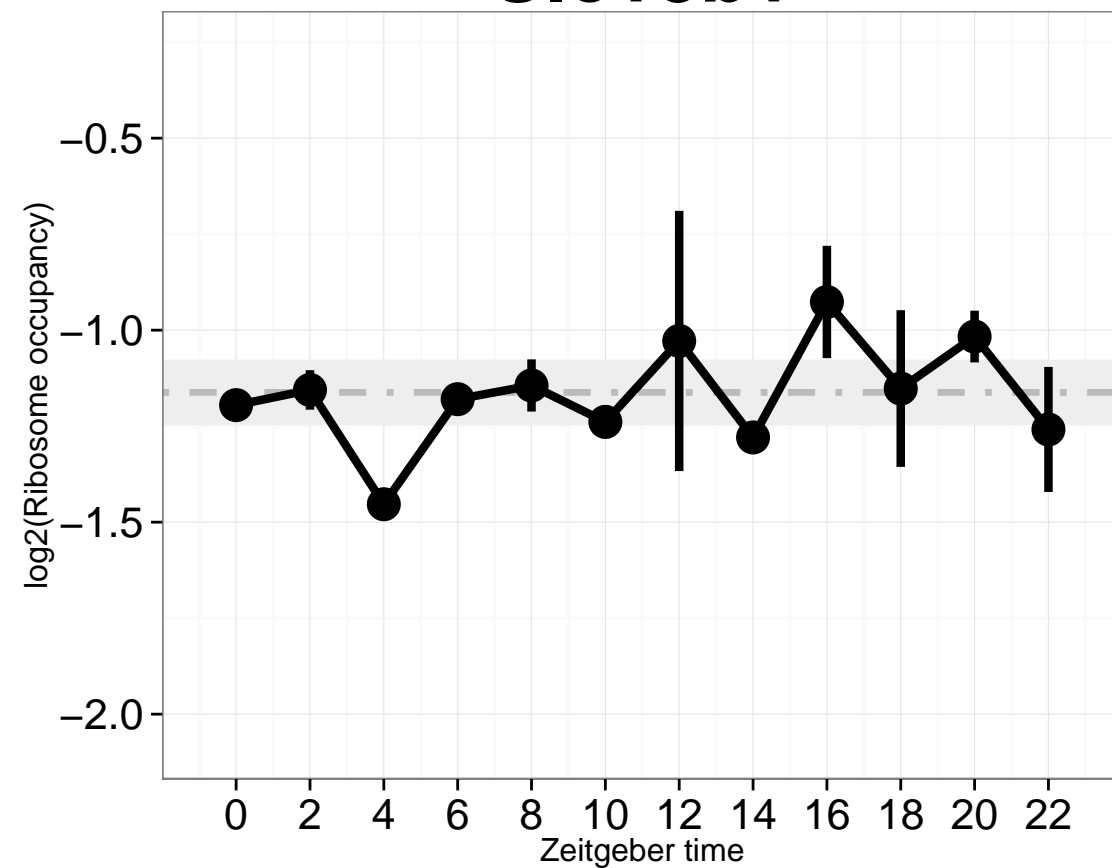

Supplement: Supplementary file 7361 [file 1]

# Itga9

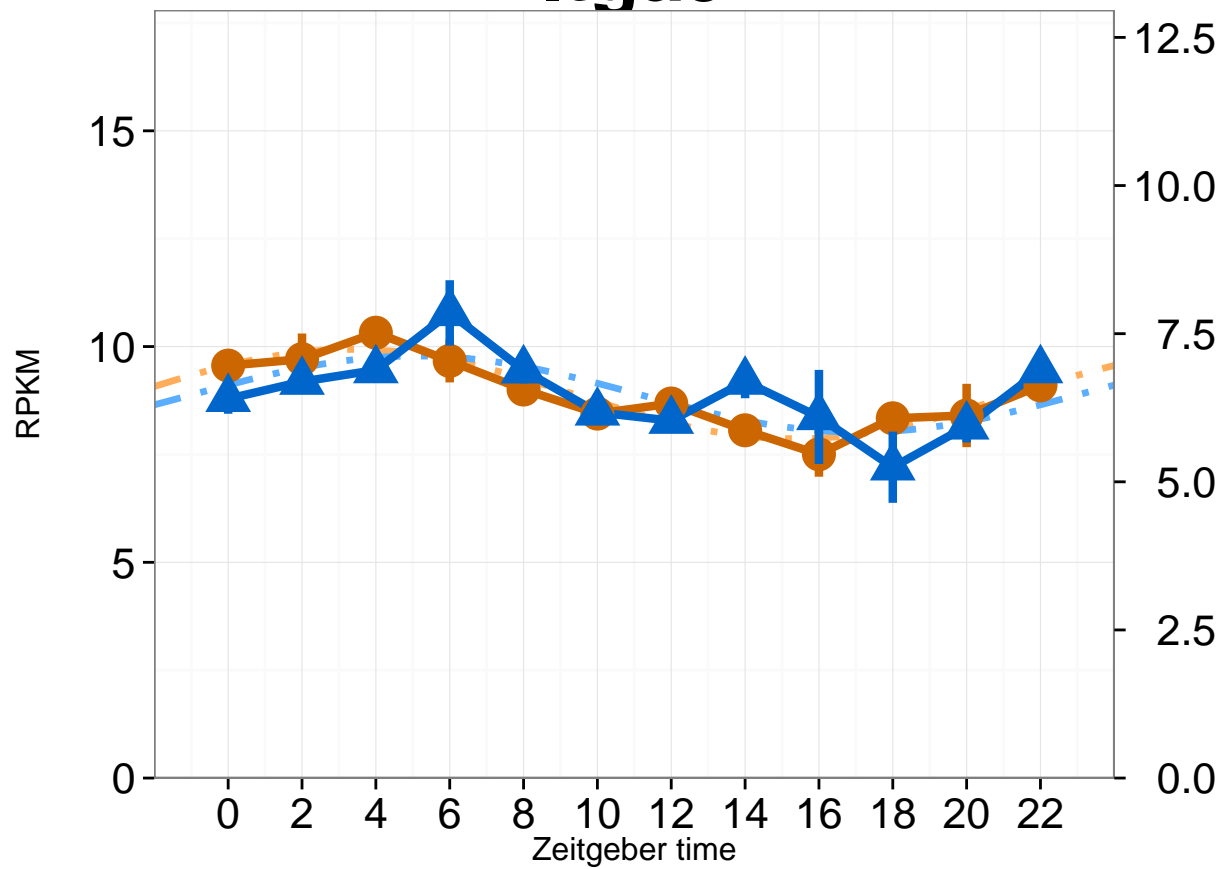

# Itga9

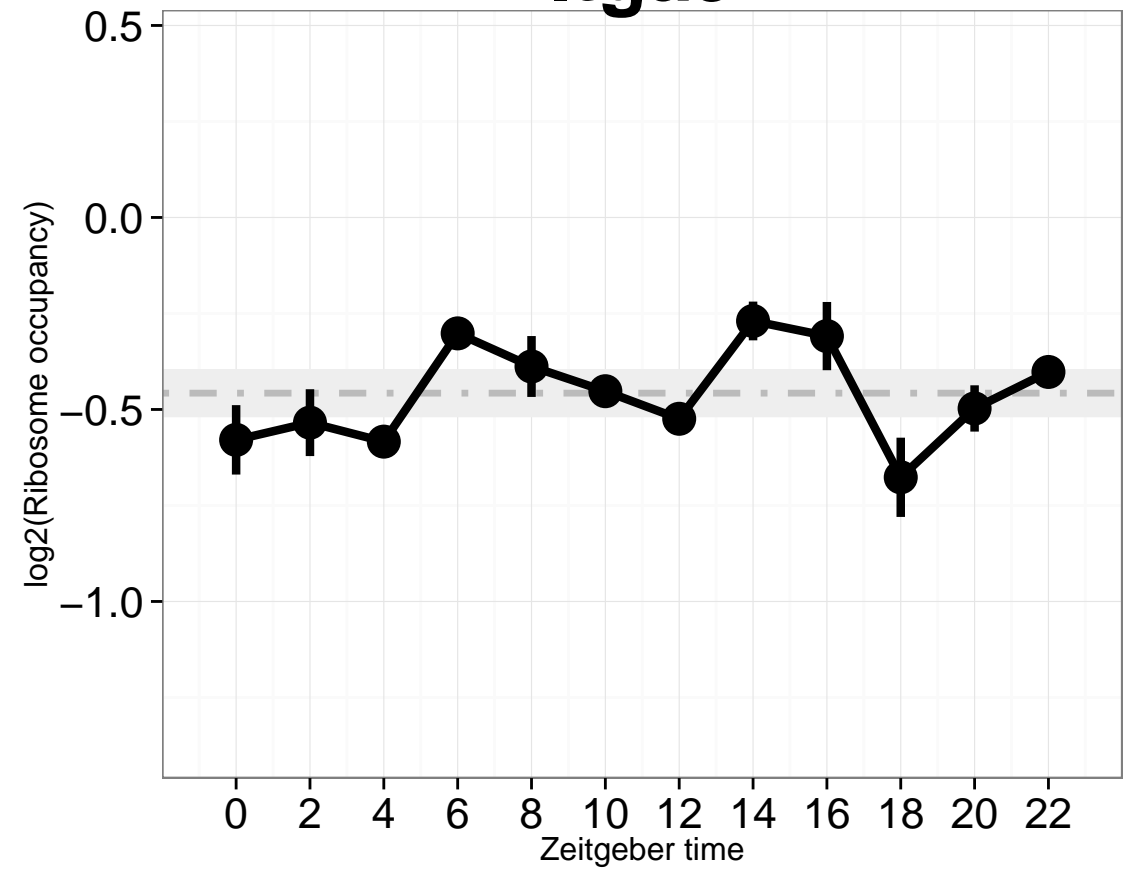

Supplement: Supplementary file 7362 [file 1]

## Chmp4c

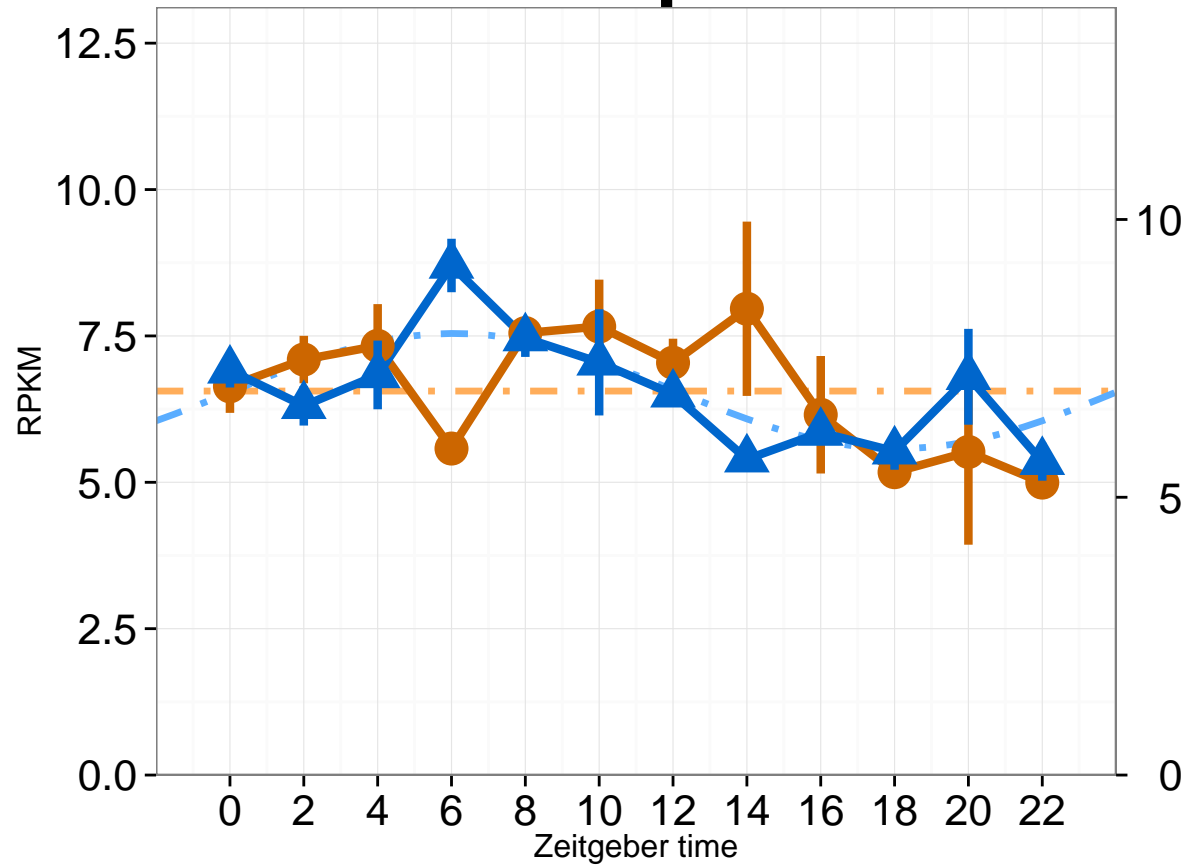

## Chmp4c

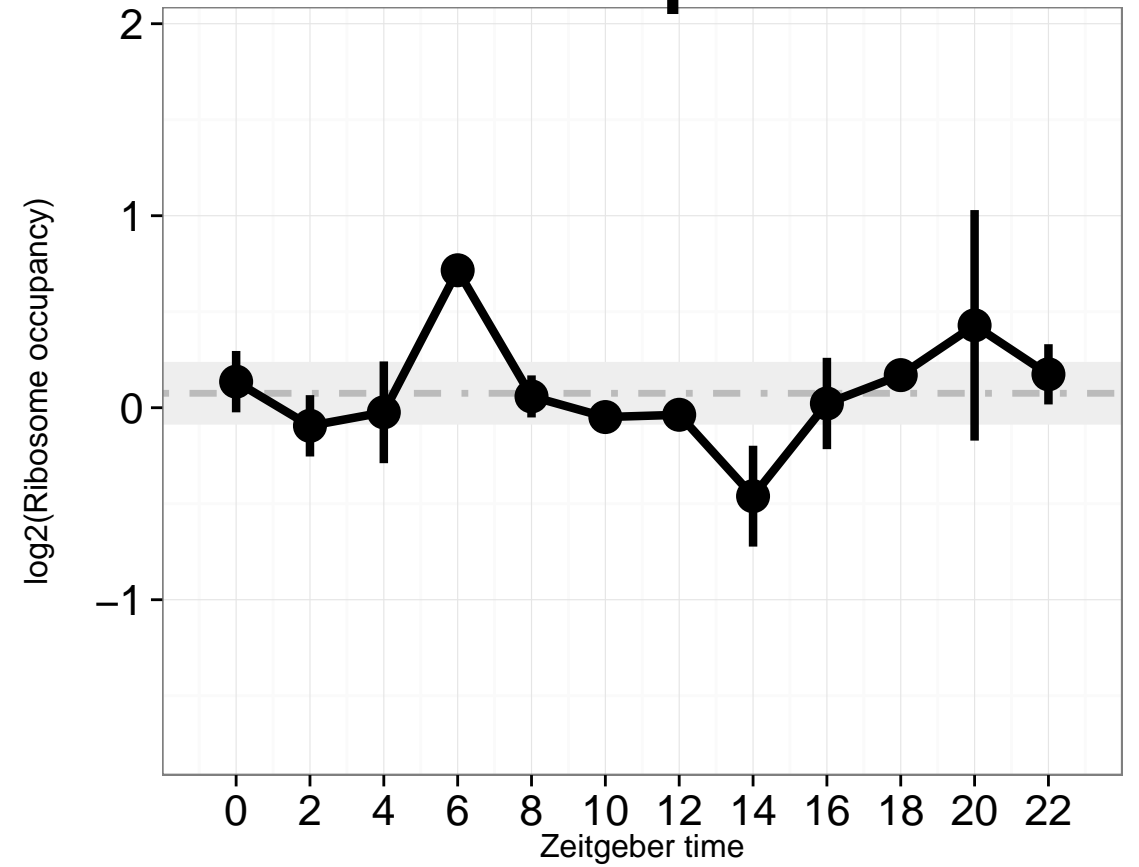

Supplement: Supplementary file 7363 [file 1]

## Wibg

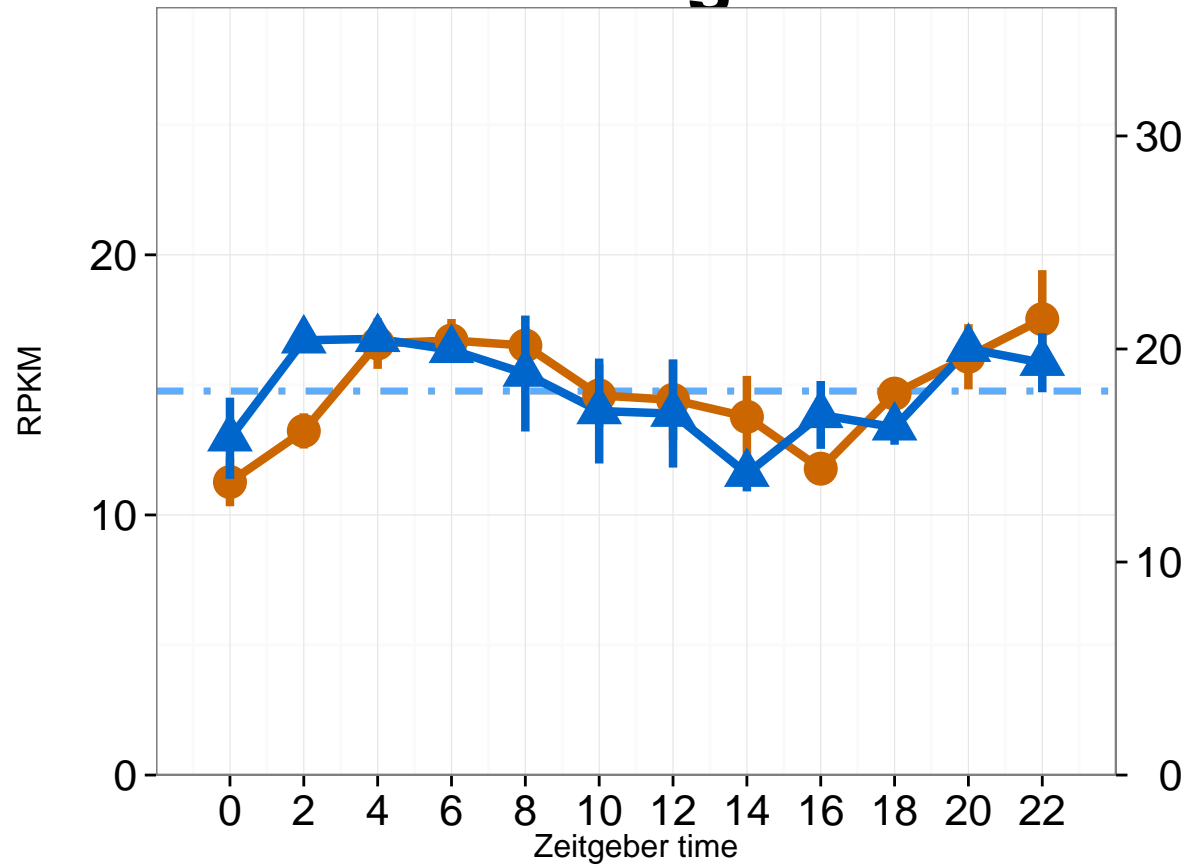

## Wibg

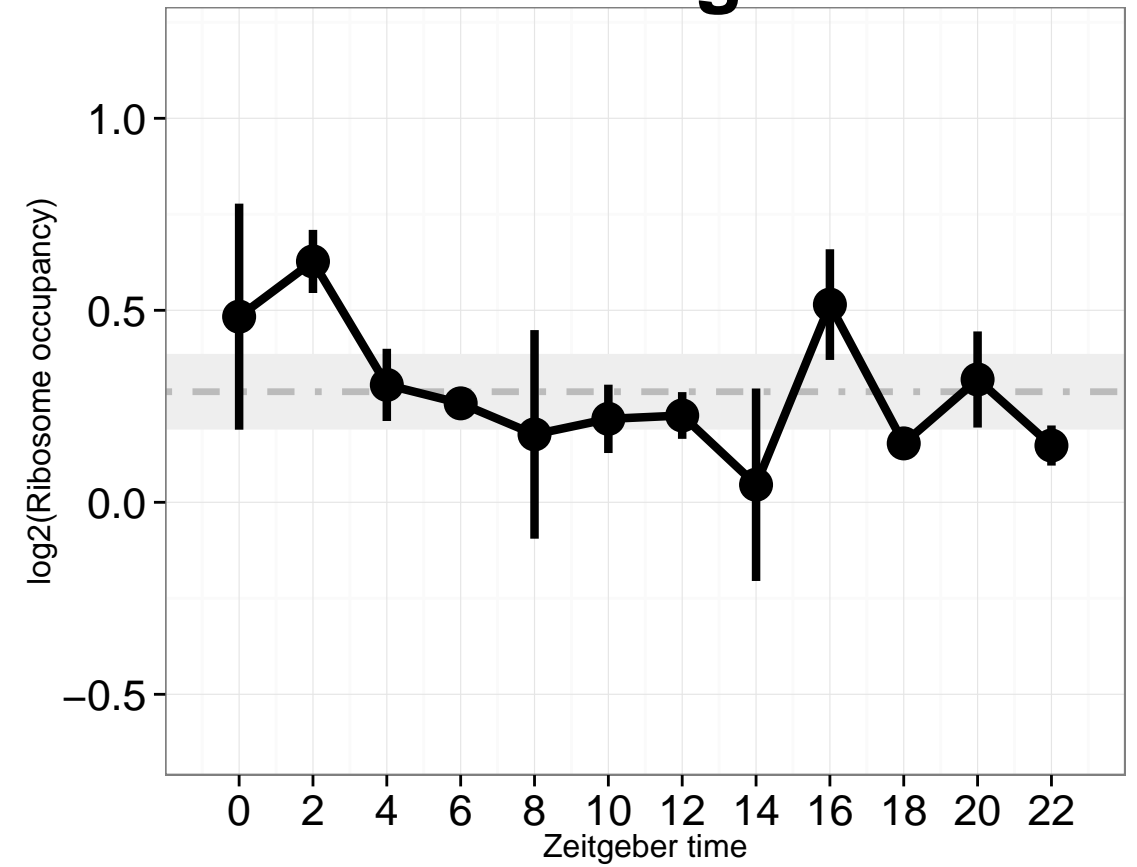

Supplement: Supplementary file 7364 [file 1]

# Asap1

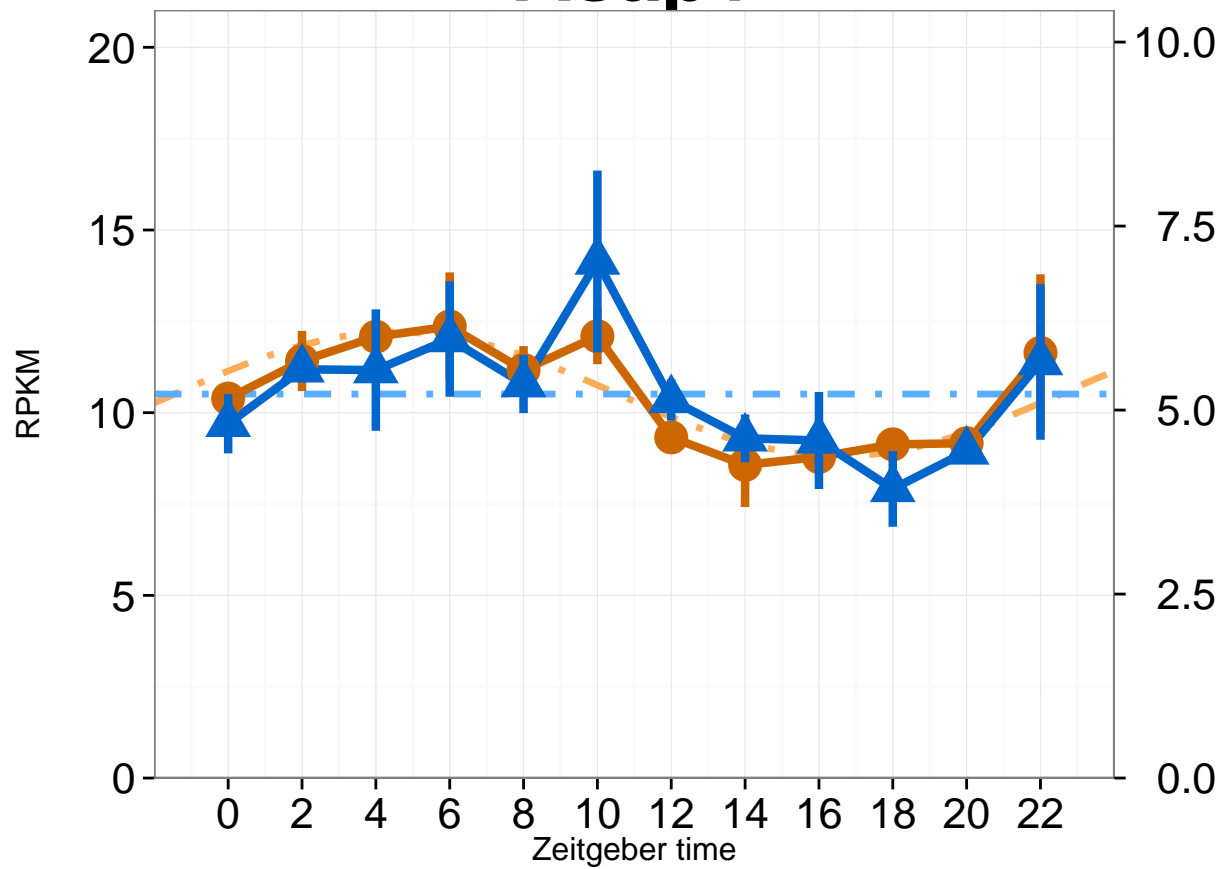

# Asap1

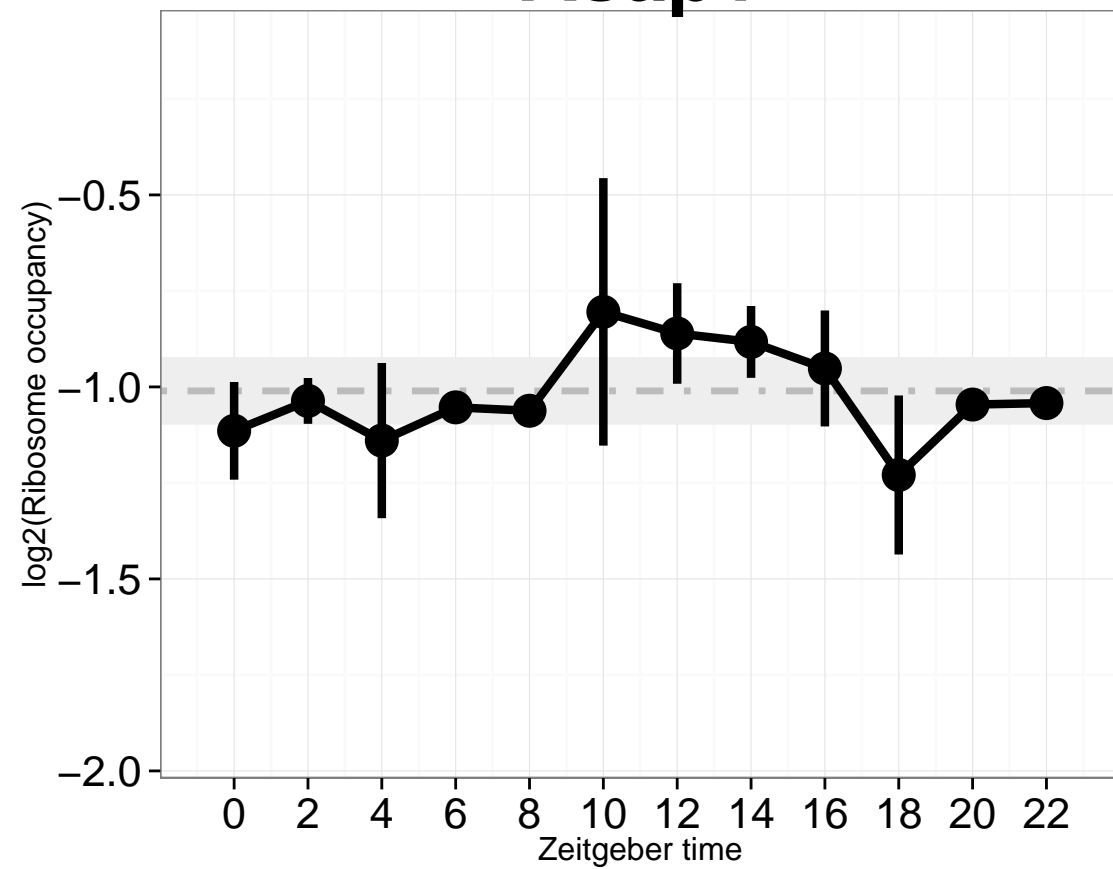

Supplement: Supplementary file 7365 [file 1]

## Golga5

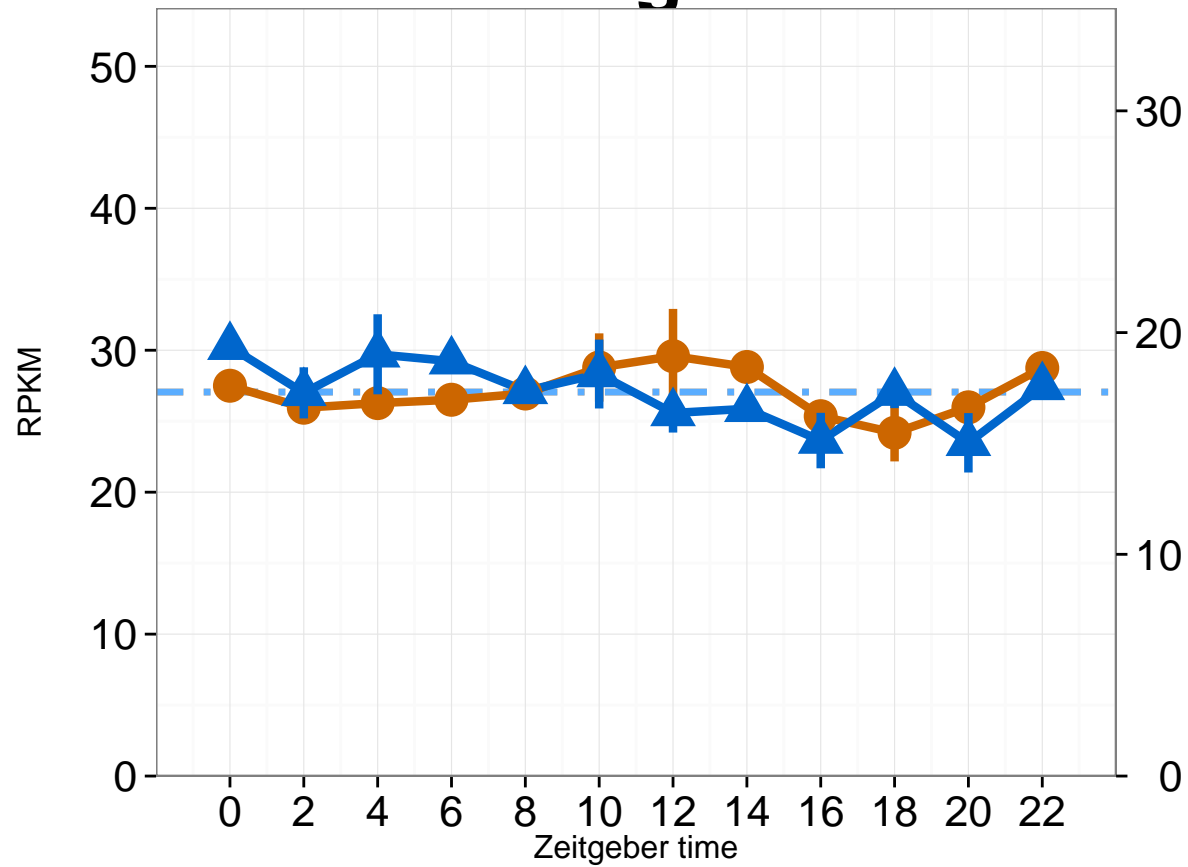

## Golga5

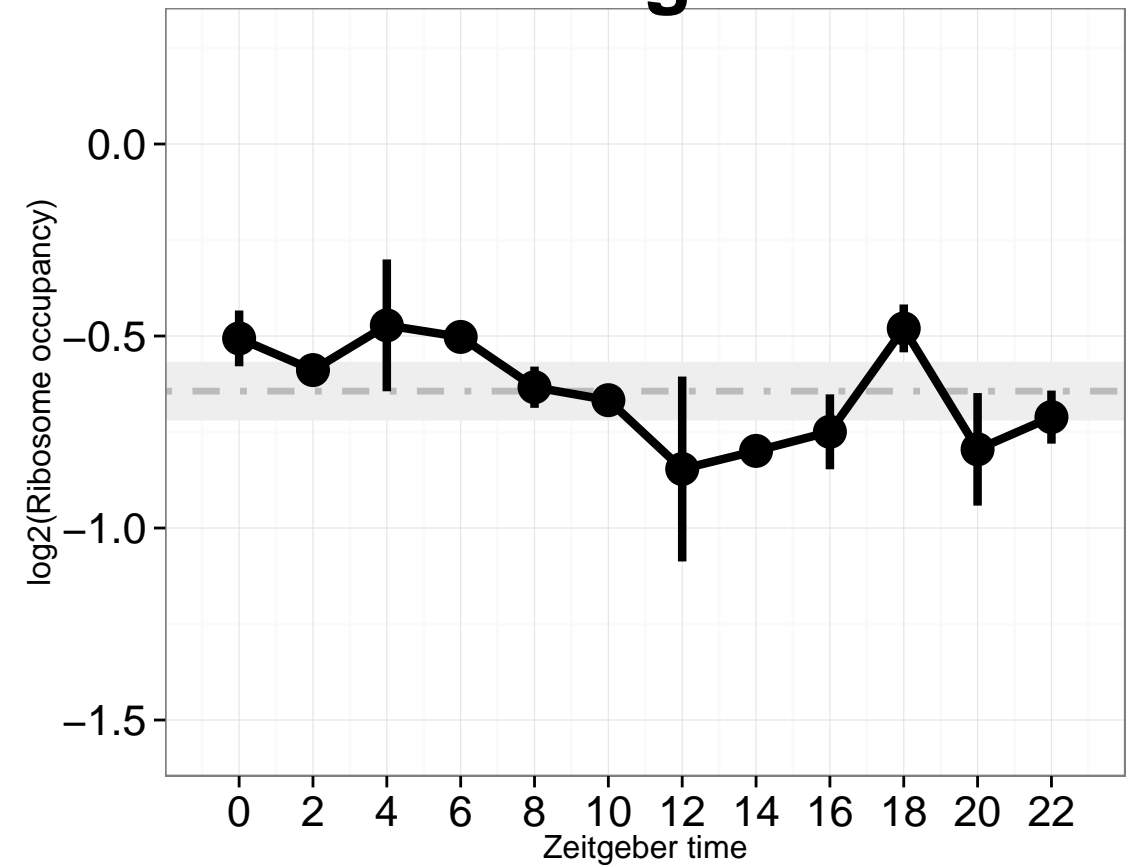

Supplement: Supplementary file 7366 [file 1]

# March5

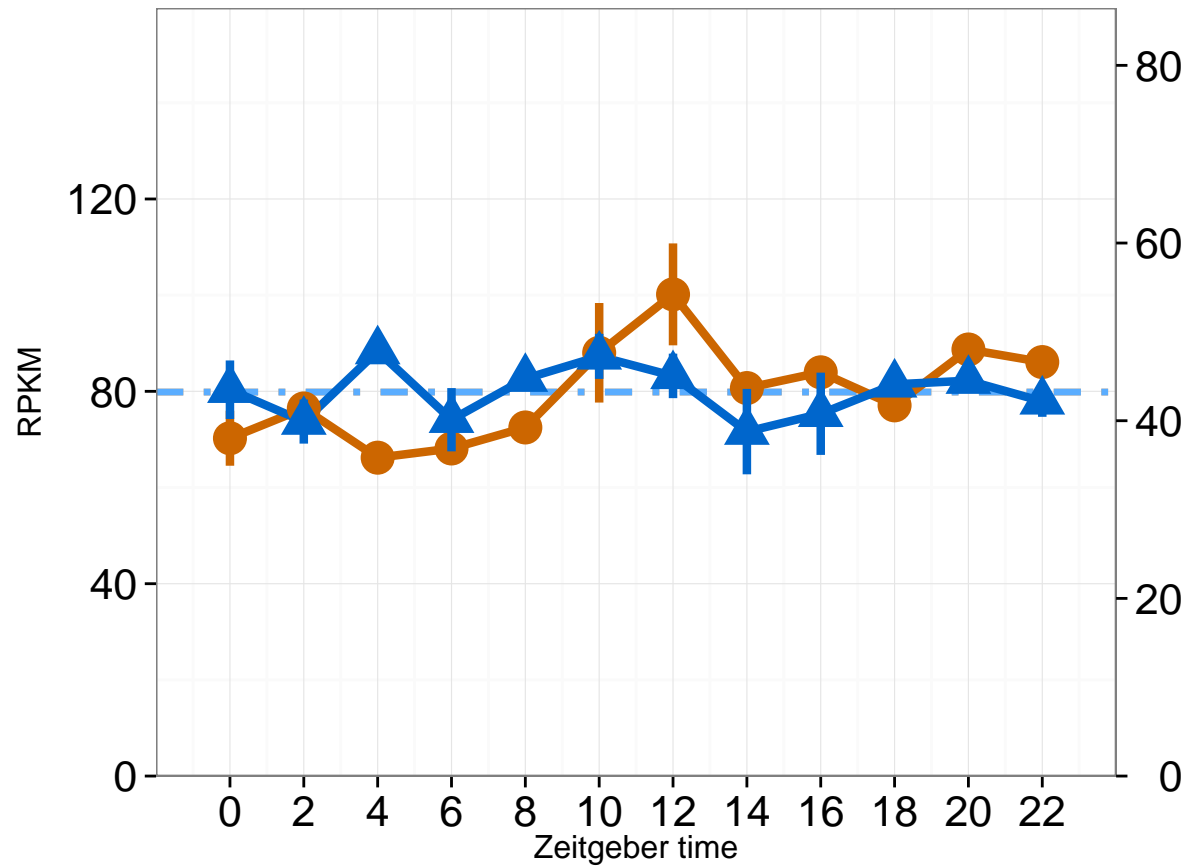

# March5

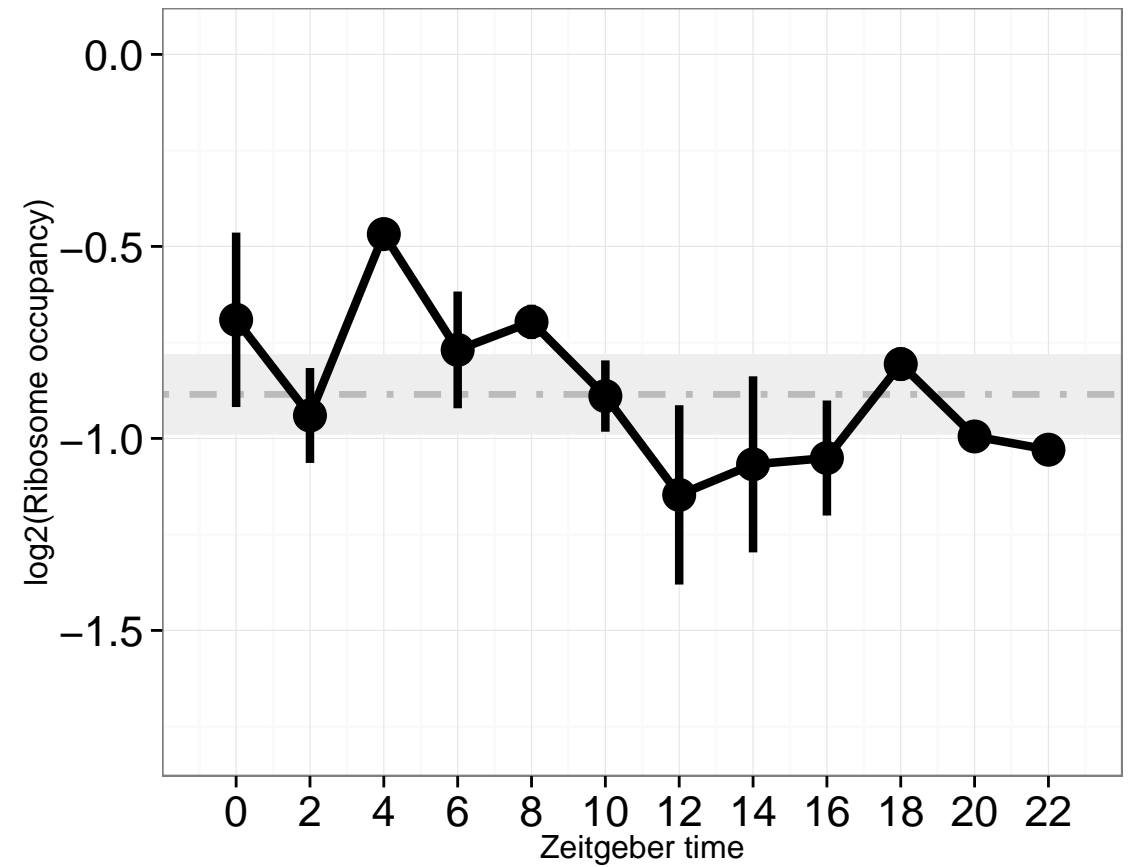

Supplement: Supplementary file 7367 [file 1]

# Eif2d

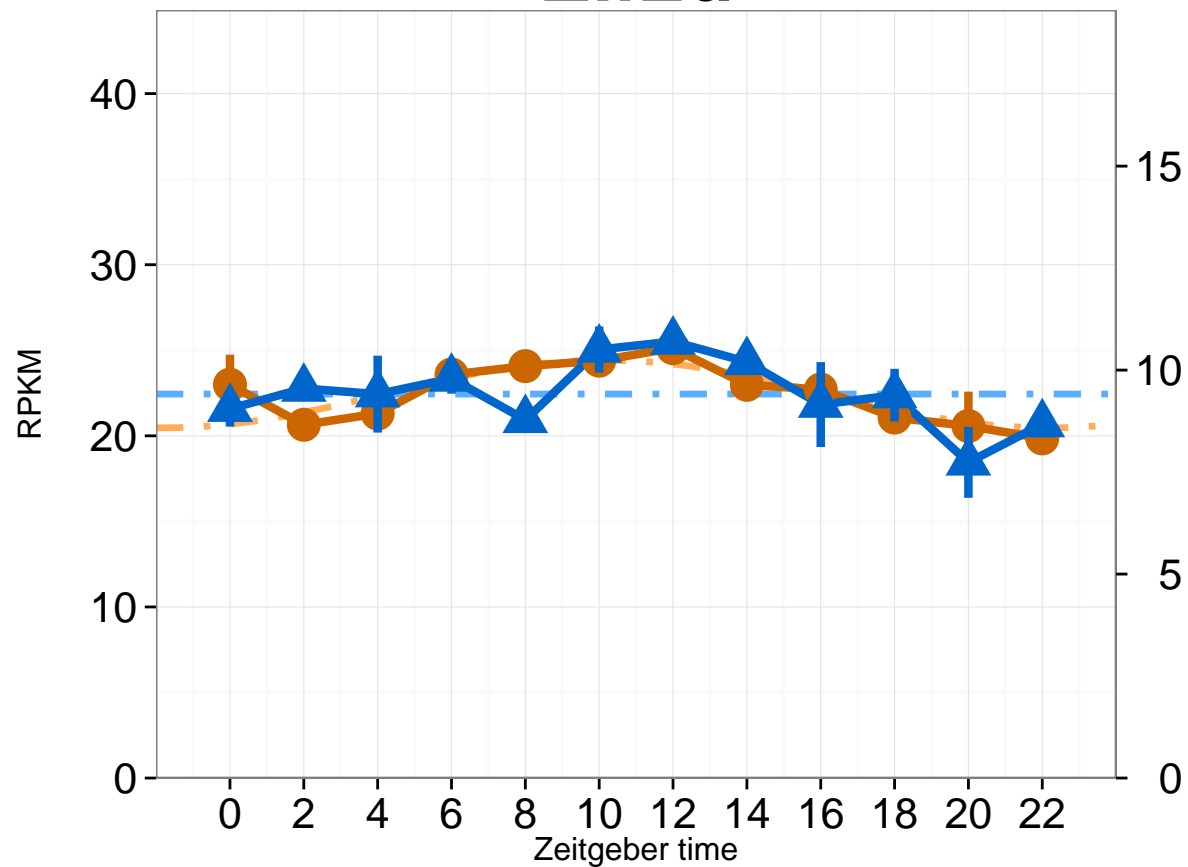

# Eif2d

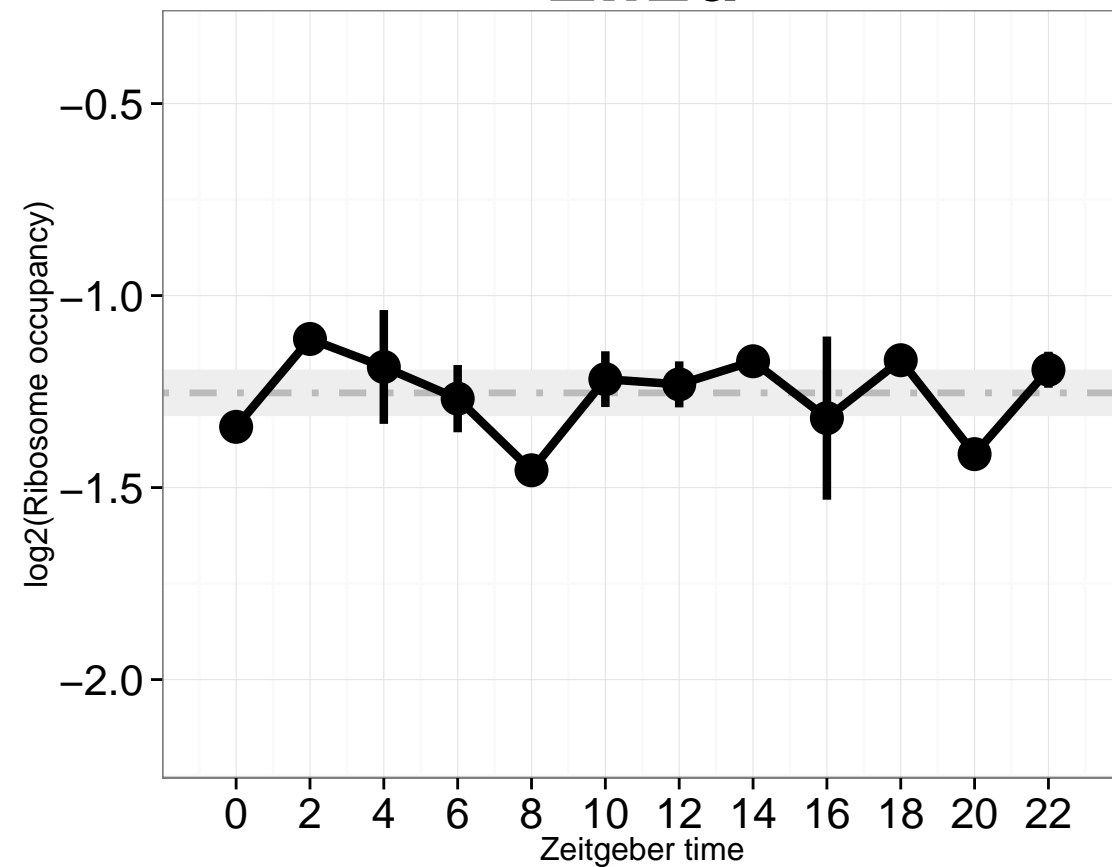

Supplement: Supplementary file 7368 [file 1]

## Arid4b

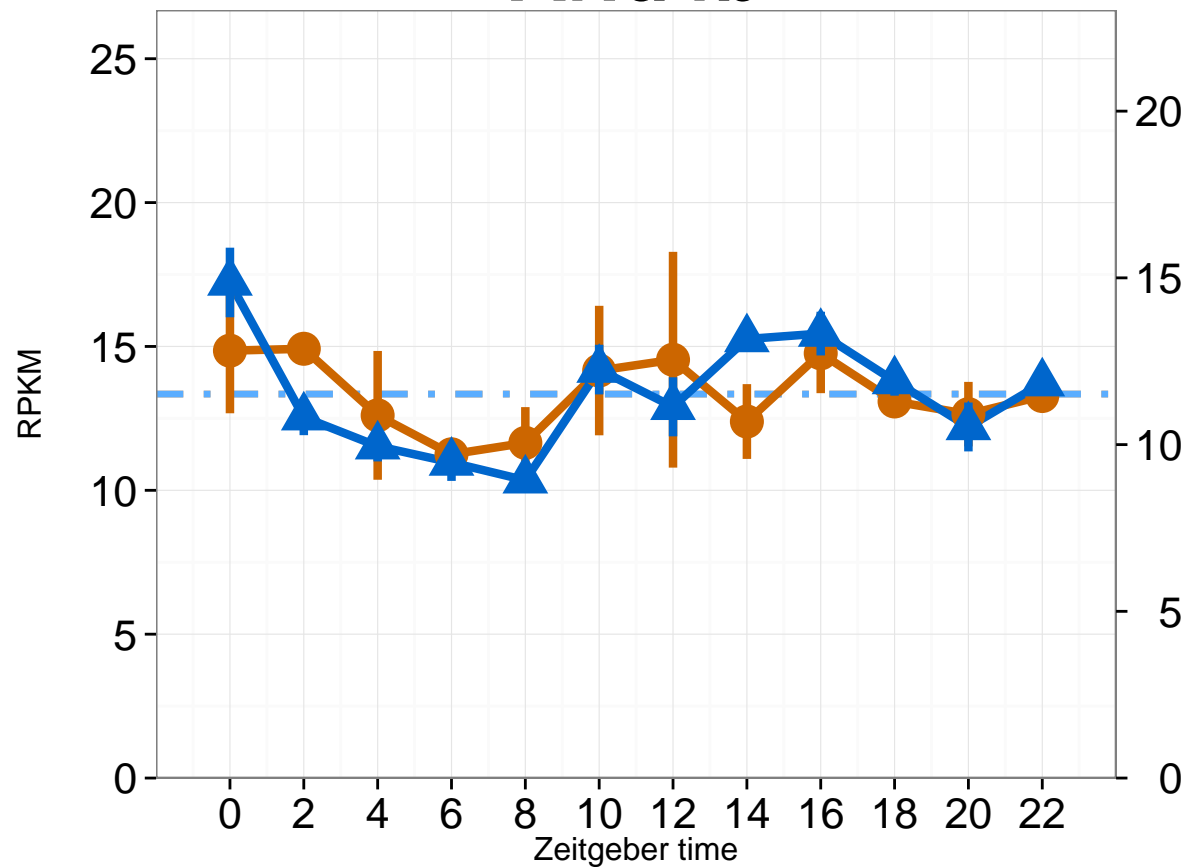

## Arid4b

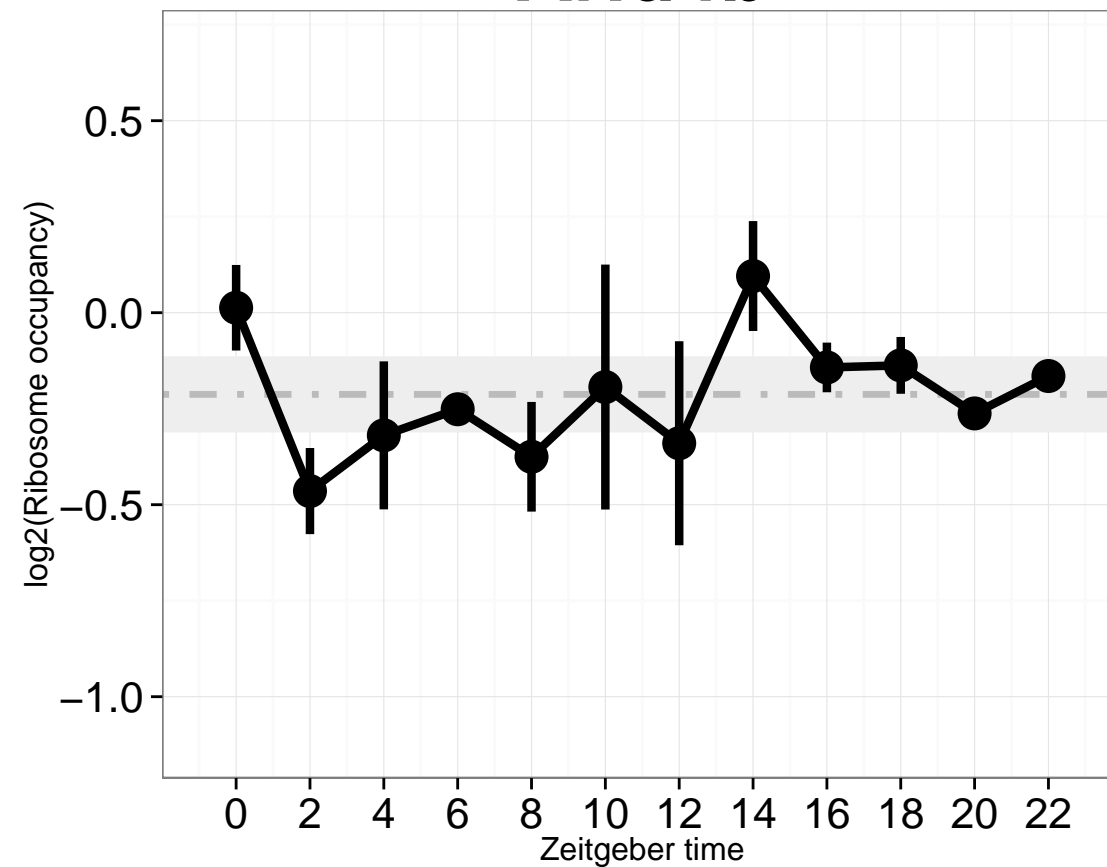

Supplement: Supplementary file 7369 [file 1]

## Actr2

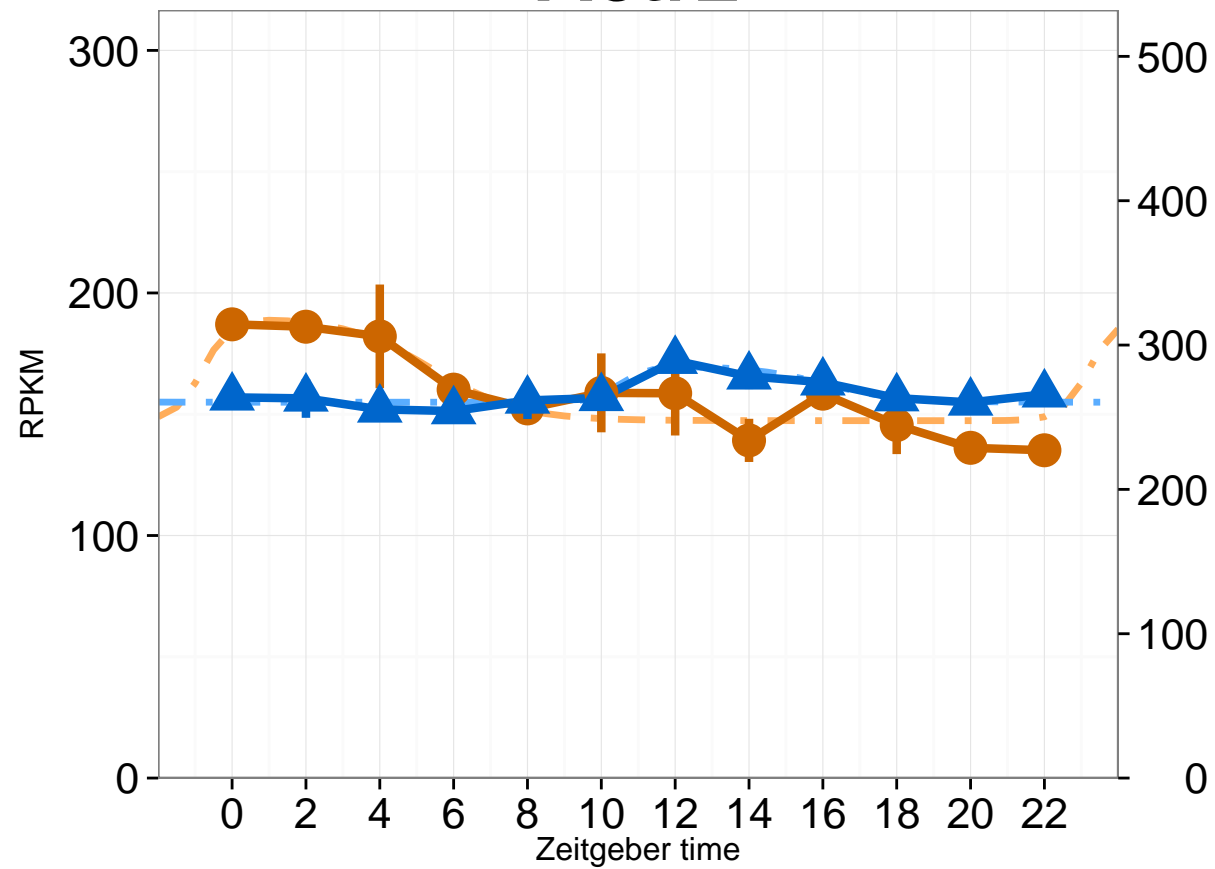

## Actr2

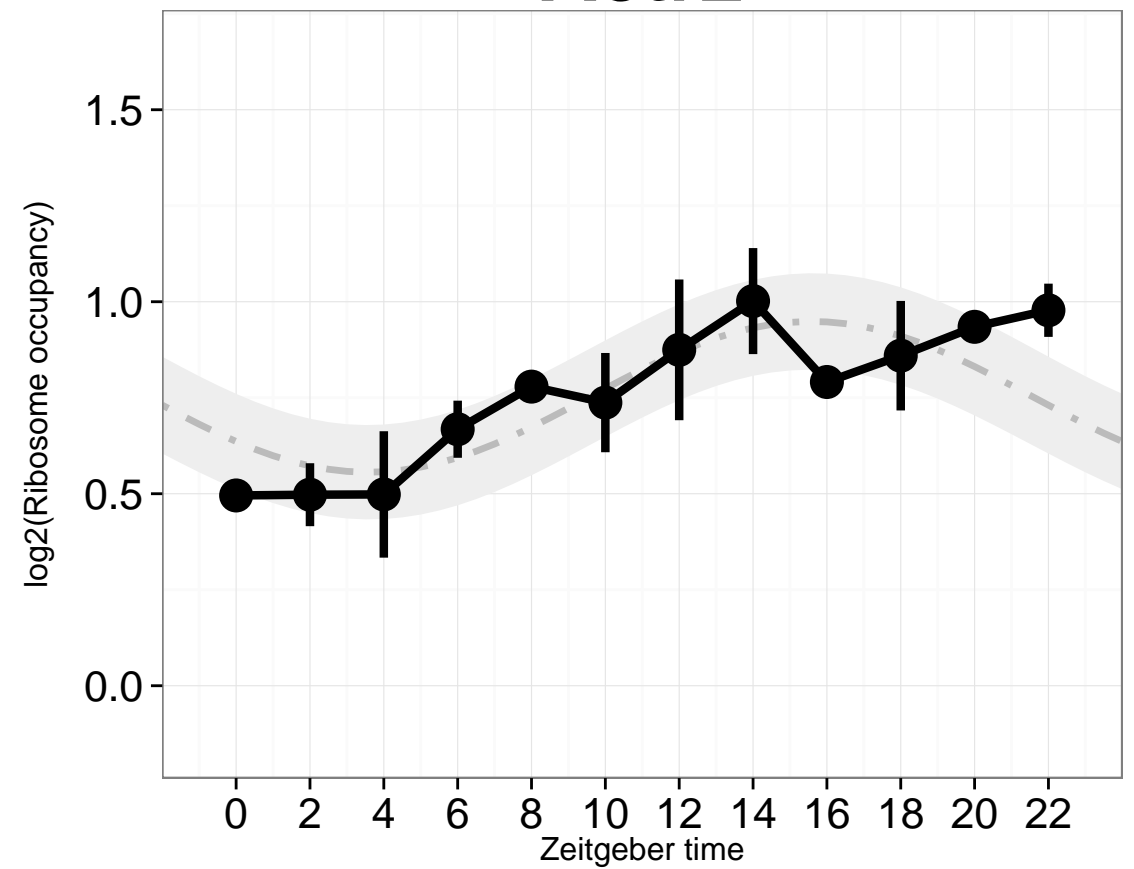

Supplement: Supplementary file 7370 [file 1]

# Pcm1

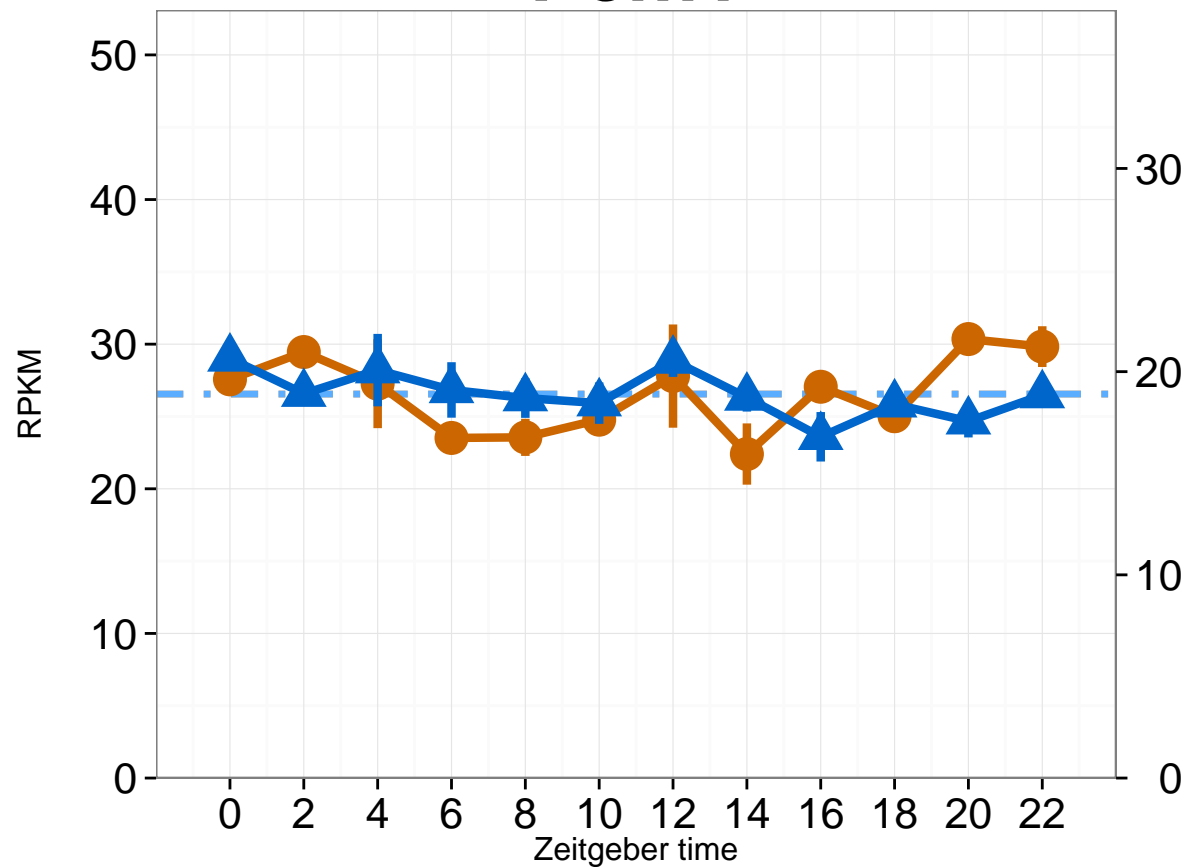

# Pcm1

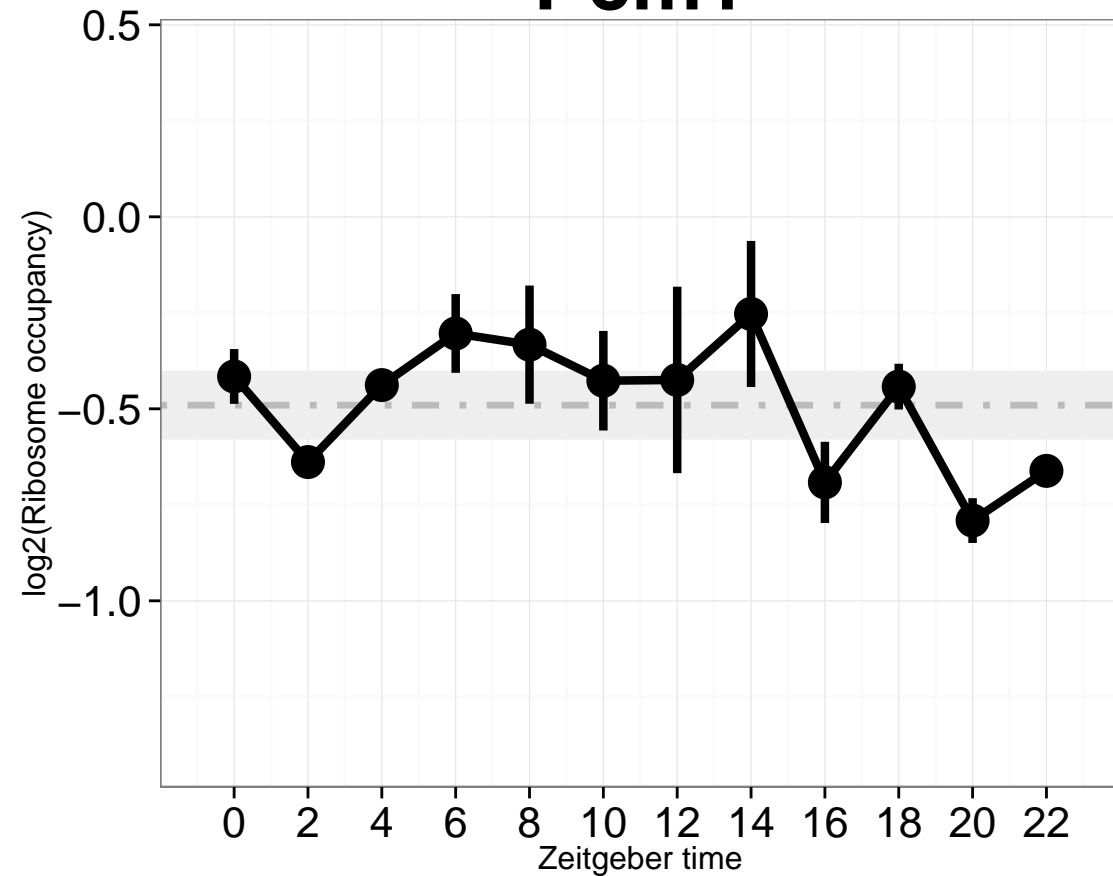

Supplement: Supplementary file 7371 [file 1]

## Pxdn

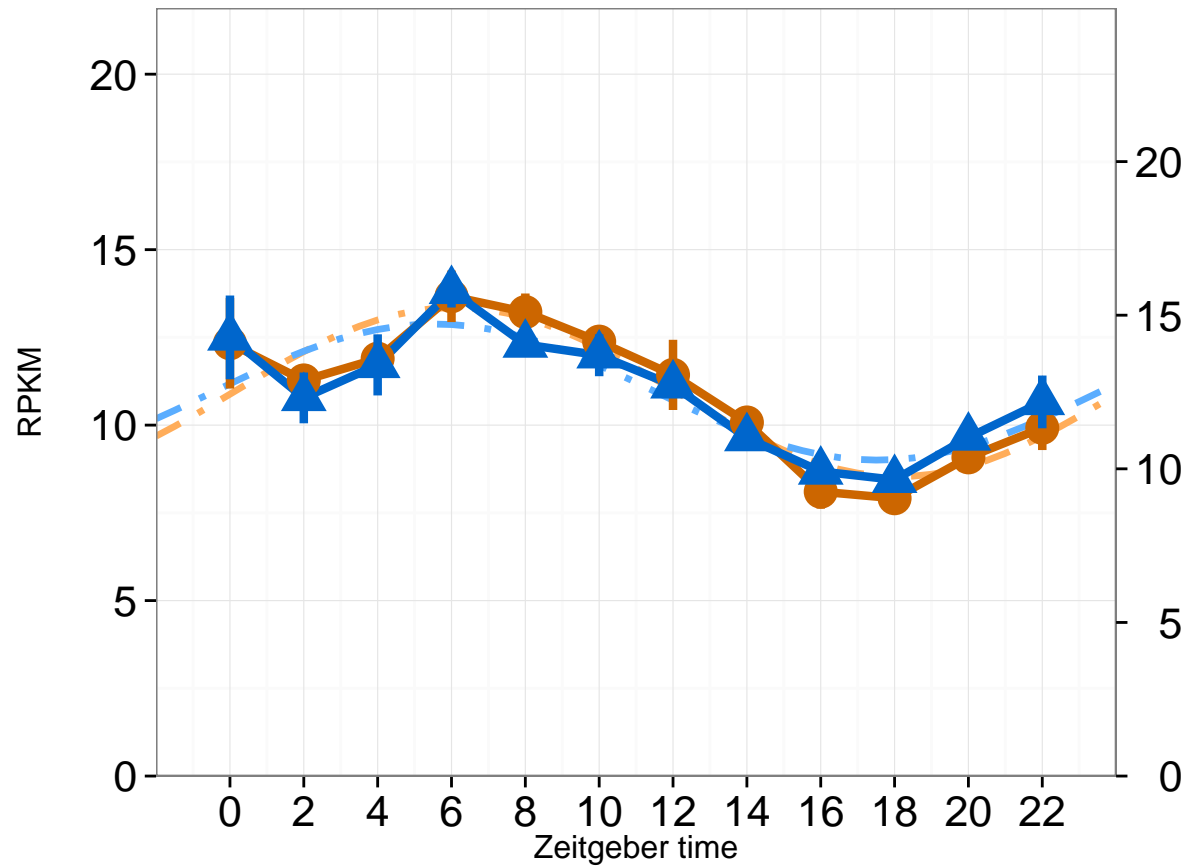

## Pxdn

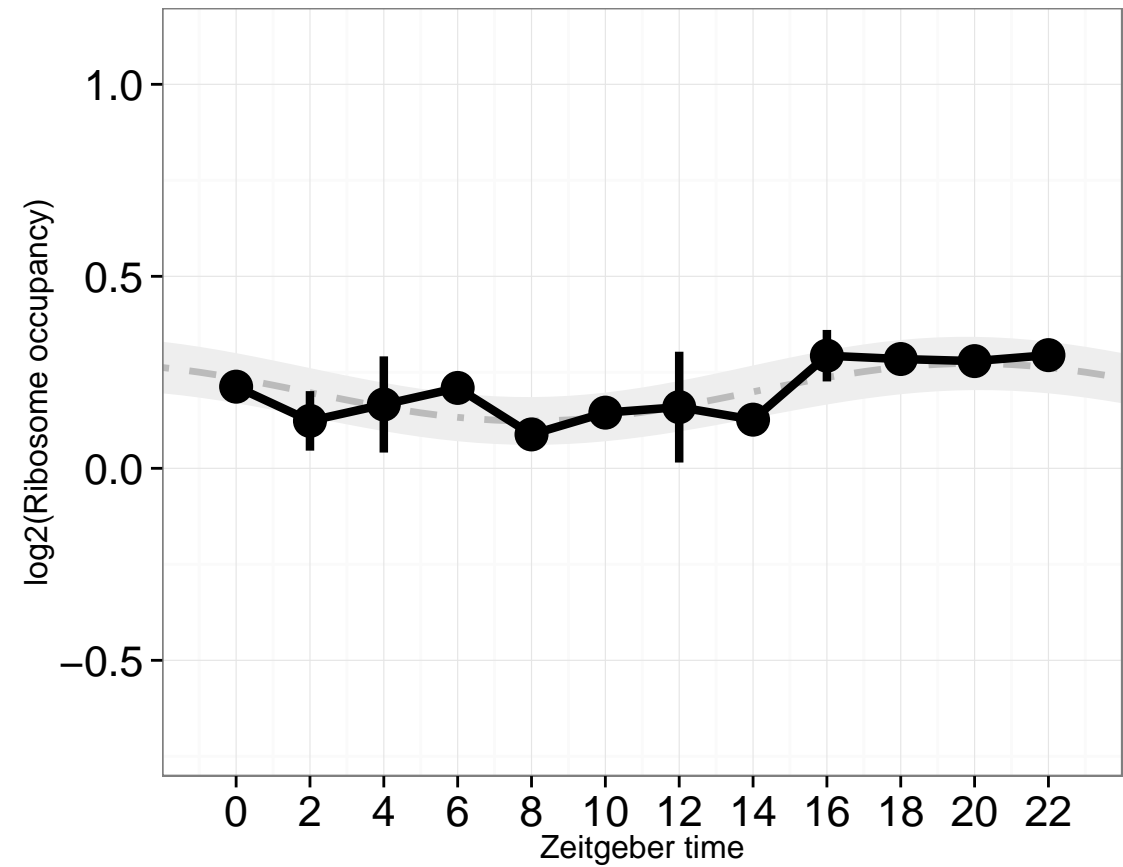

Supplement: Supplementary file 7372 [file 1]

## Prps2

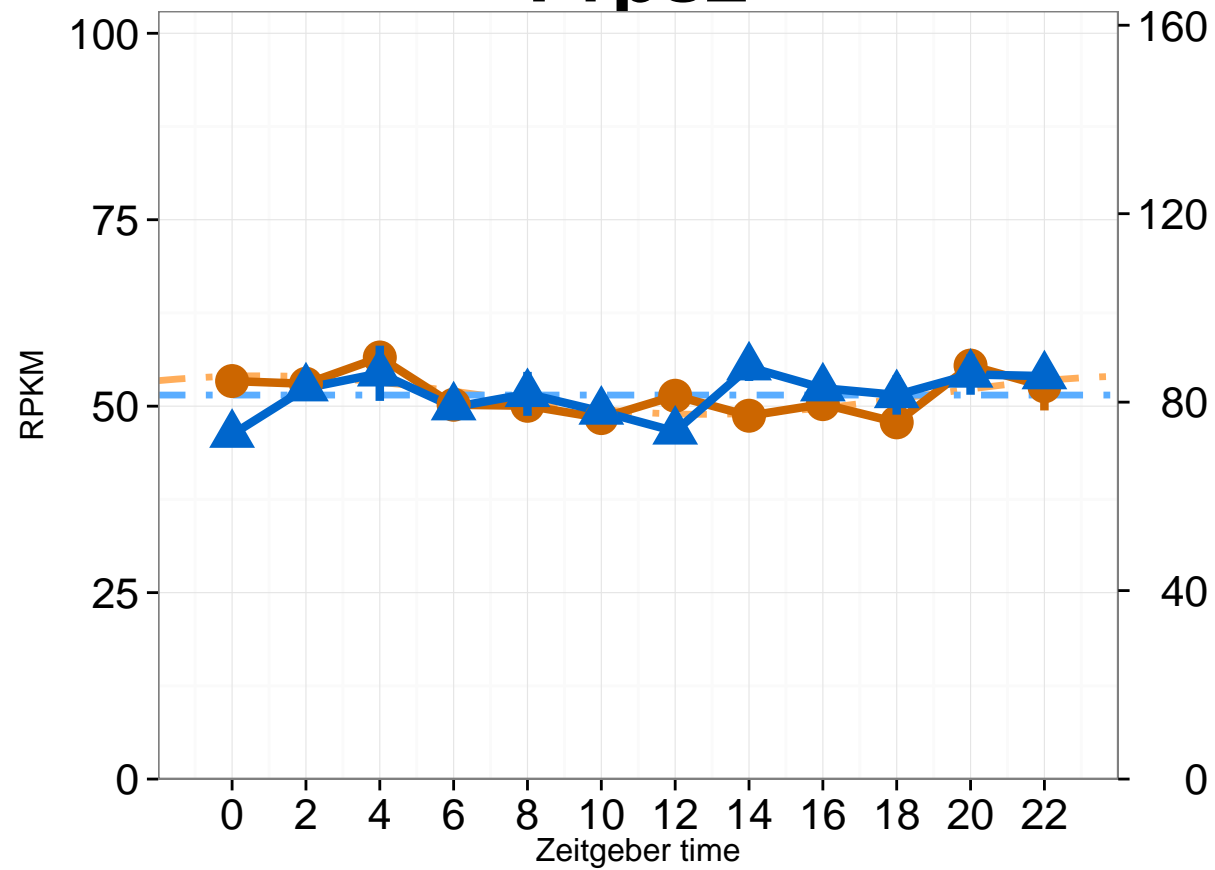

## Prps2

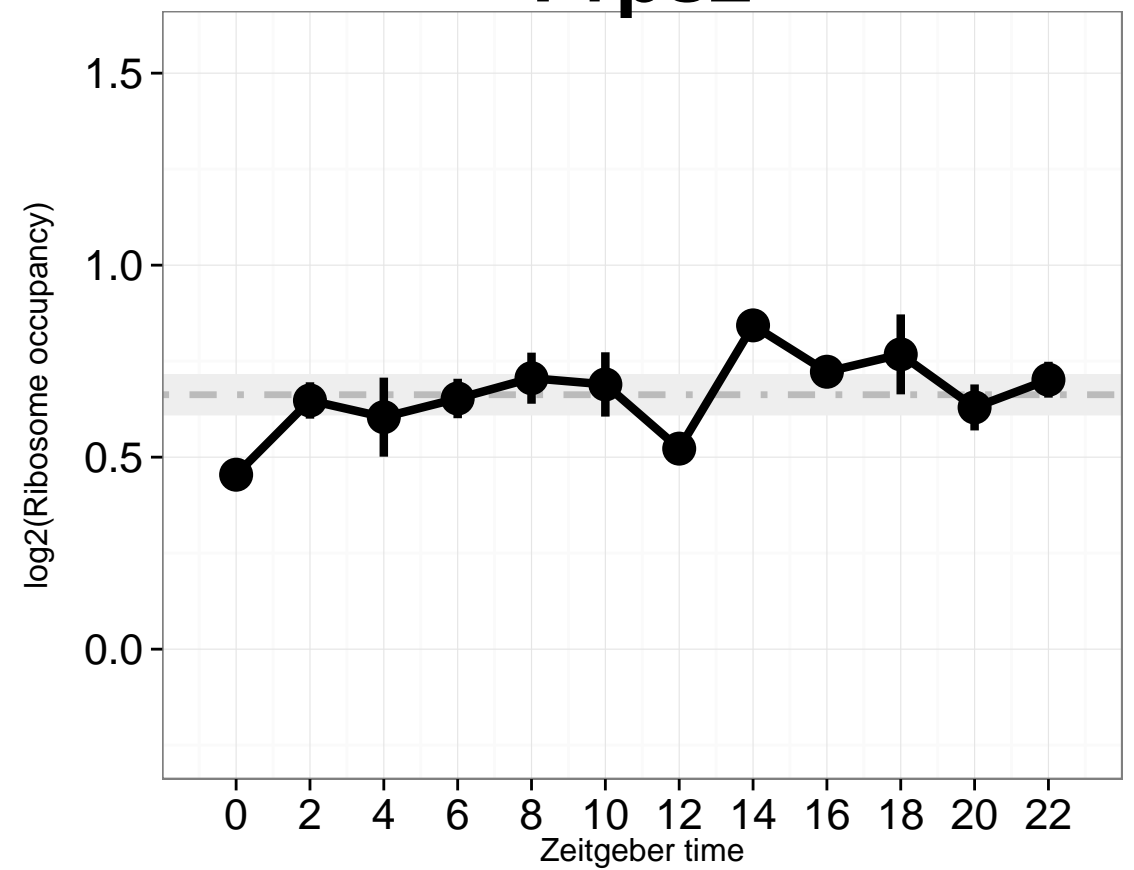

Supplement: Supplementary file 7373 [file 1]

## Cfp

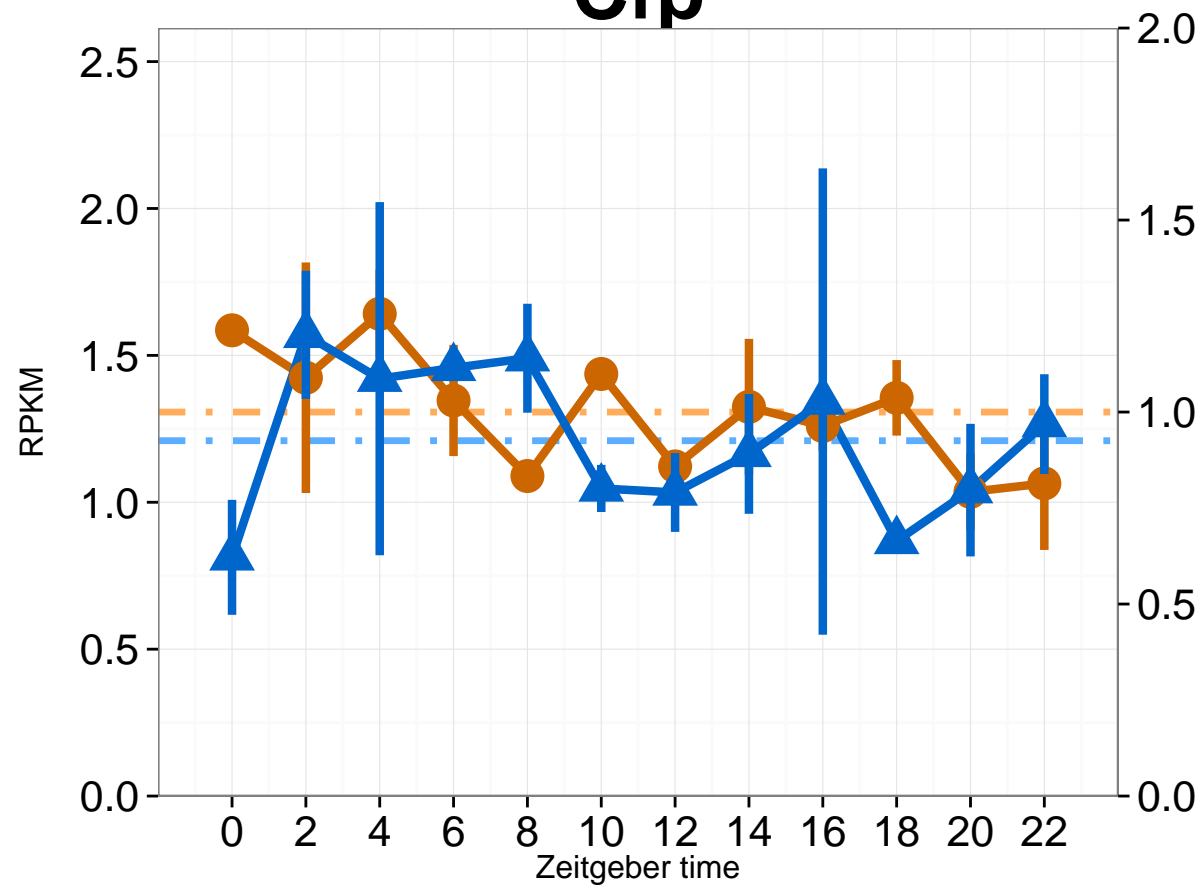

## Cfp

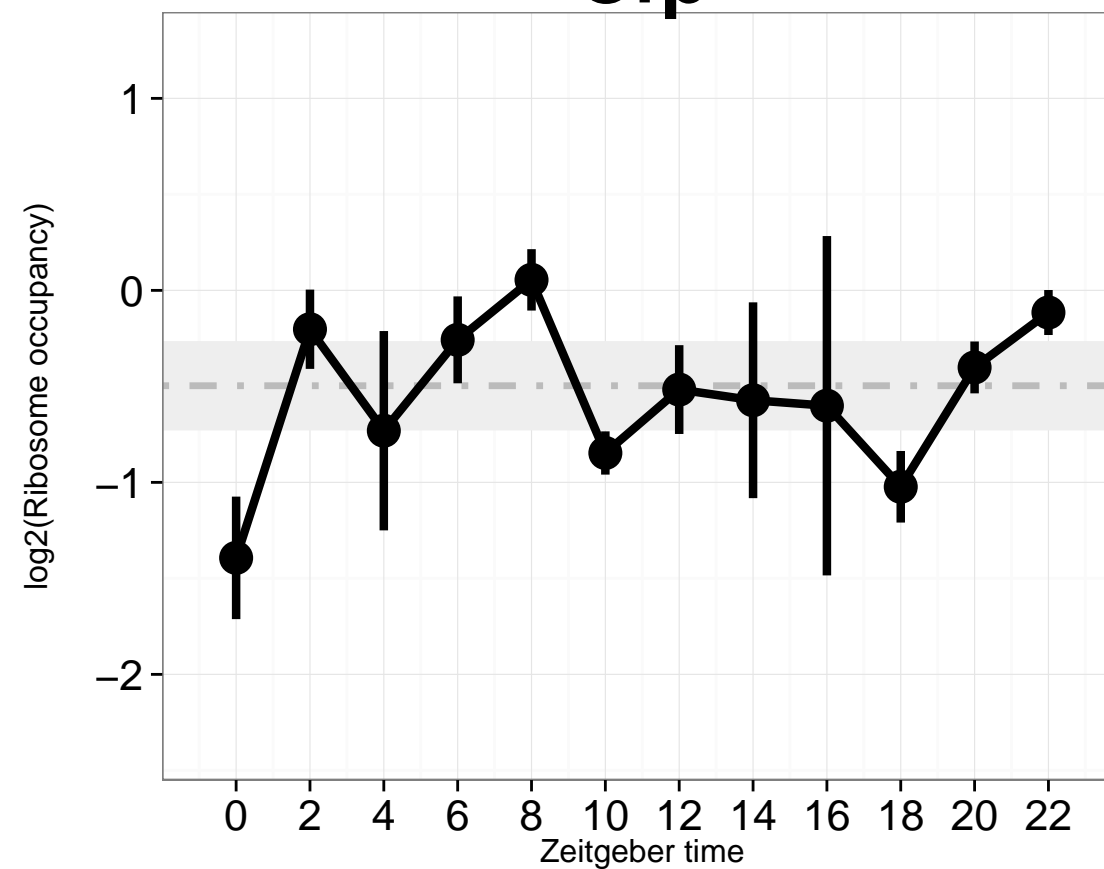

Supplement: Supplementary file 7374 [file 1]

## Tcea1

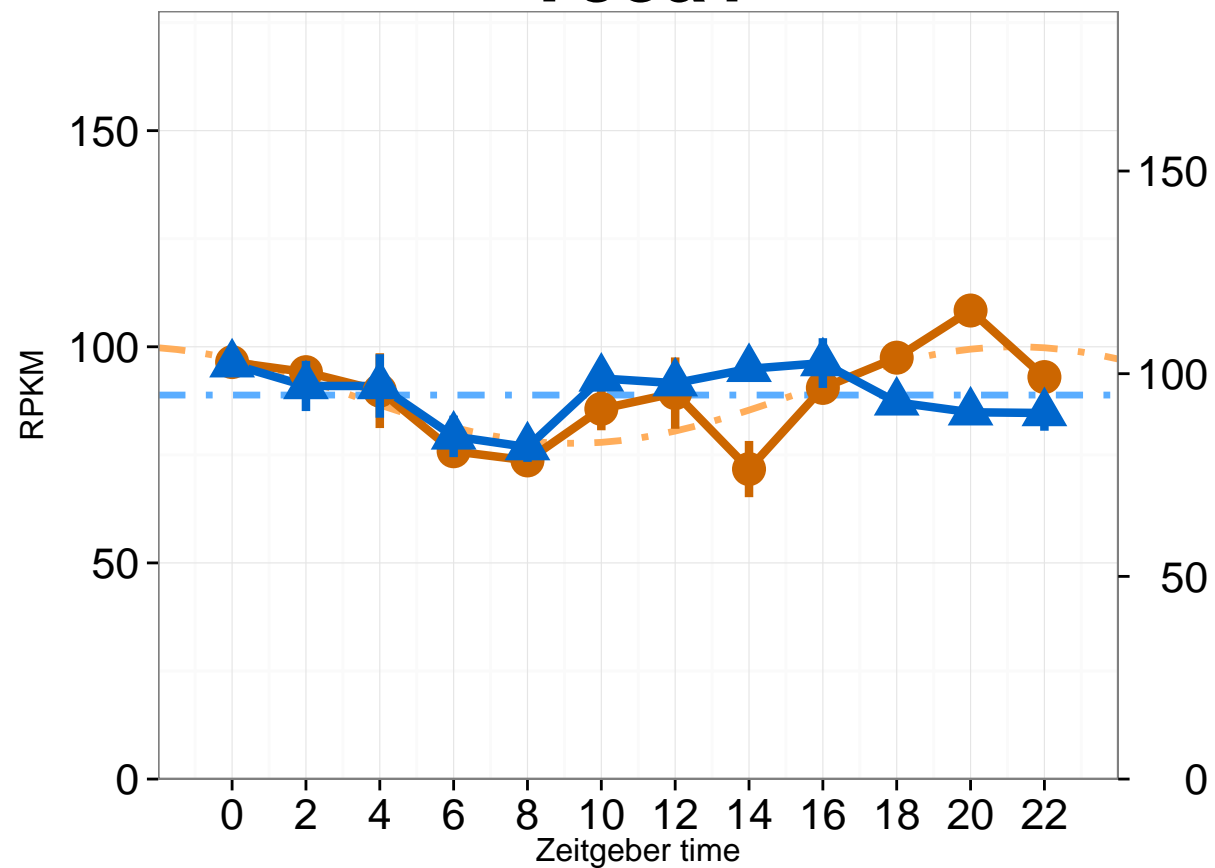

## Tcea1

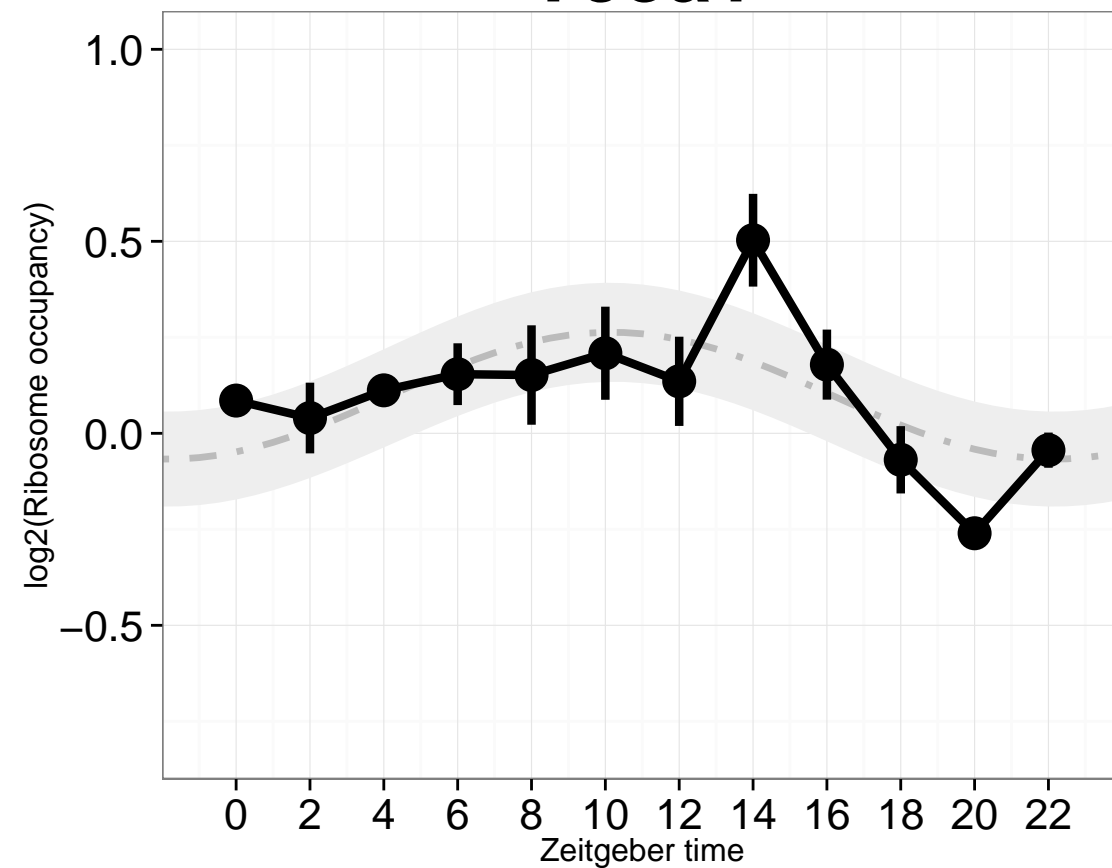

Supplement: Supplementary file 7375 [file 1]

# Trappc8

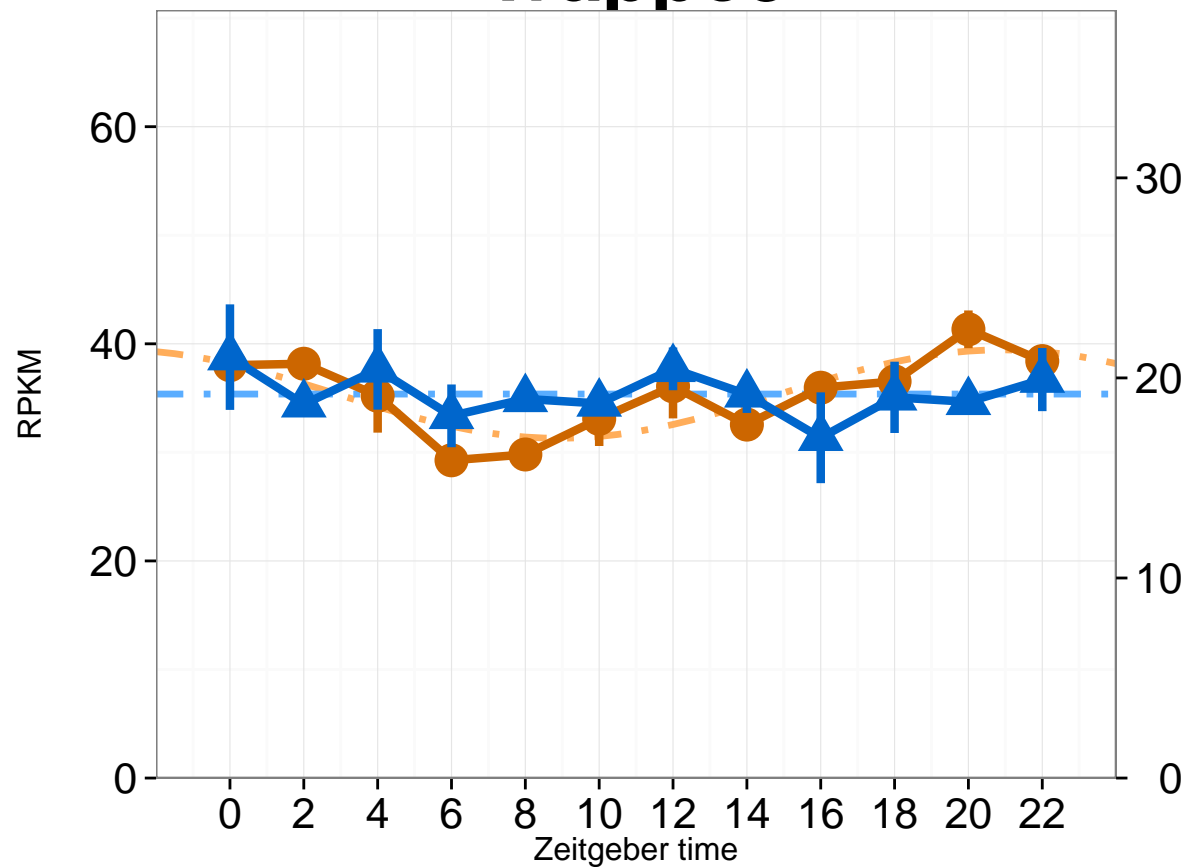

# Trappc8

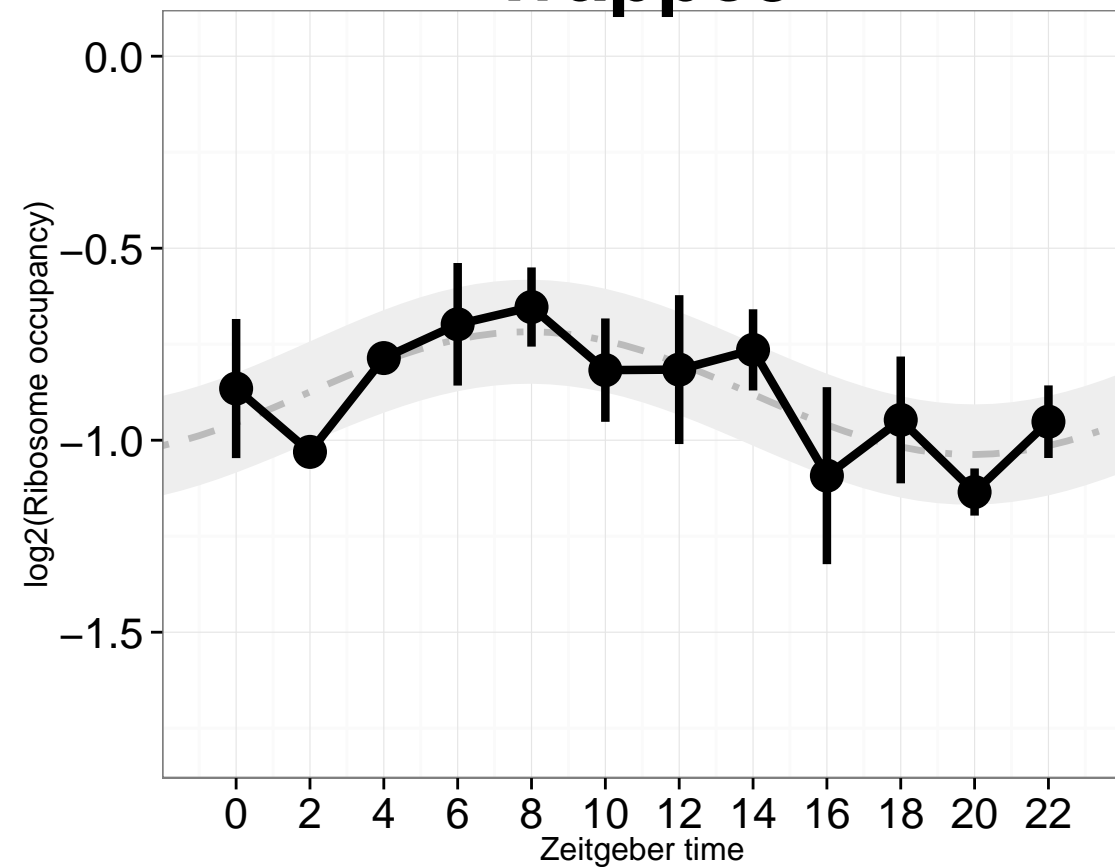

Supplement: Supplementary file 7376 [file 1]

# Asap2

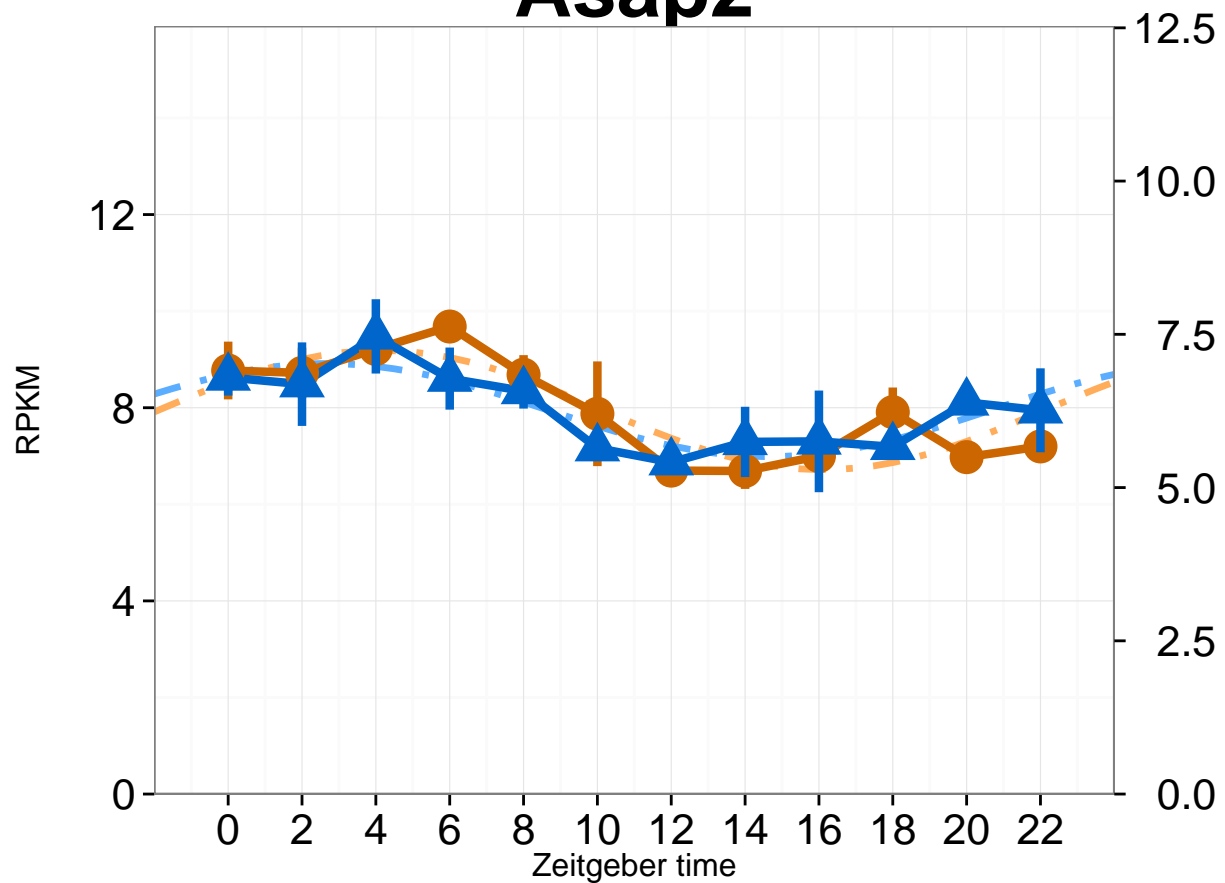

# Asap2

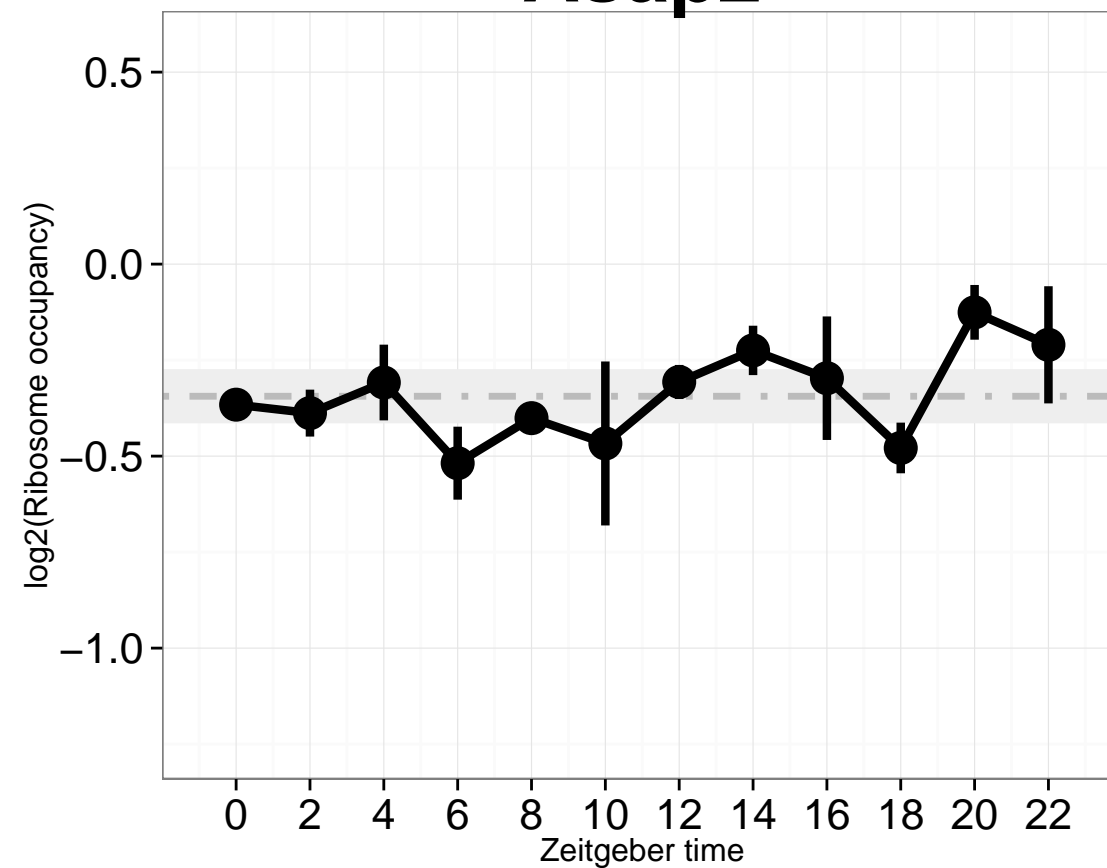

Supplement: Supplementary file 7377 [file 1]

## Sema3f

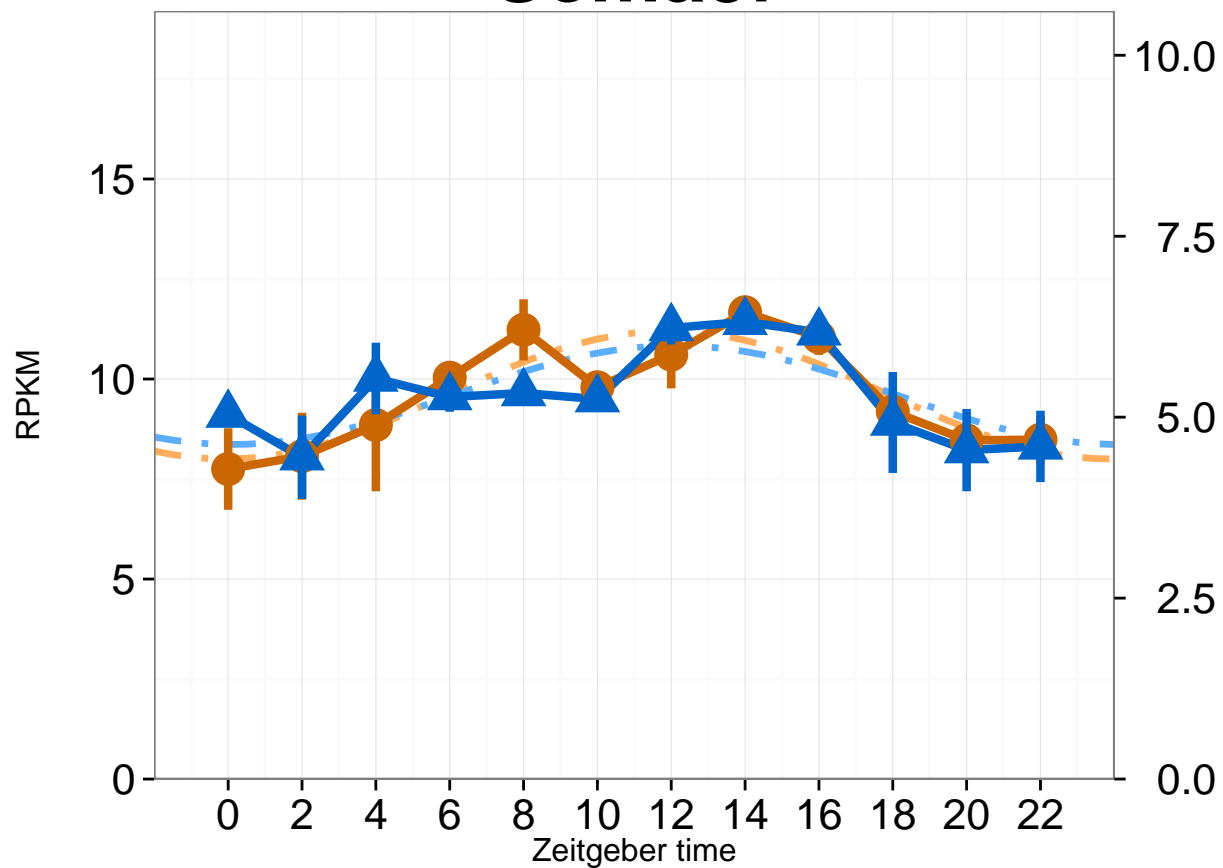

## Sema3f

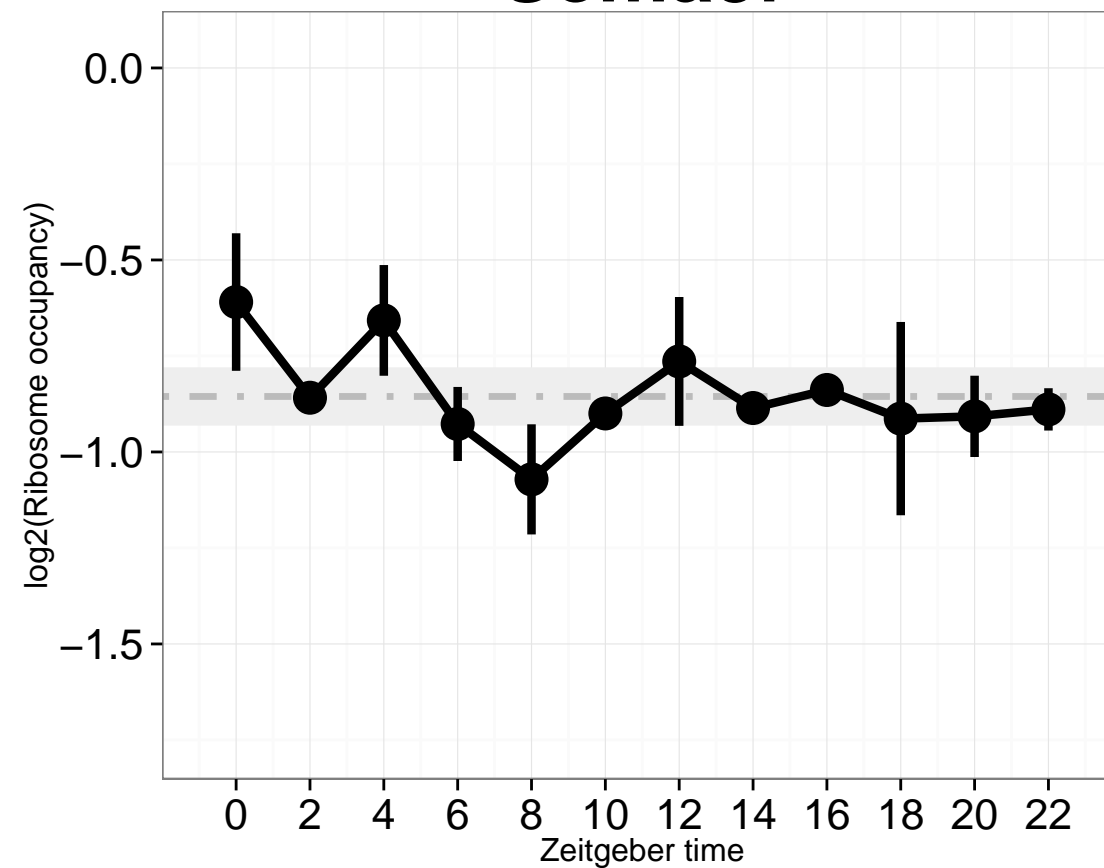

Supplement: Supplementary file 7378 [file 1]

## Dad1

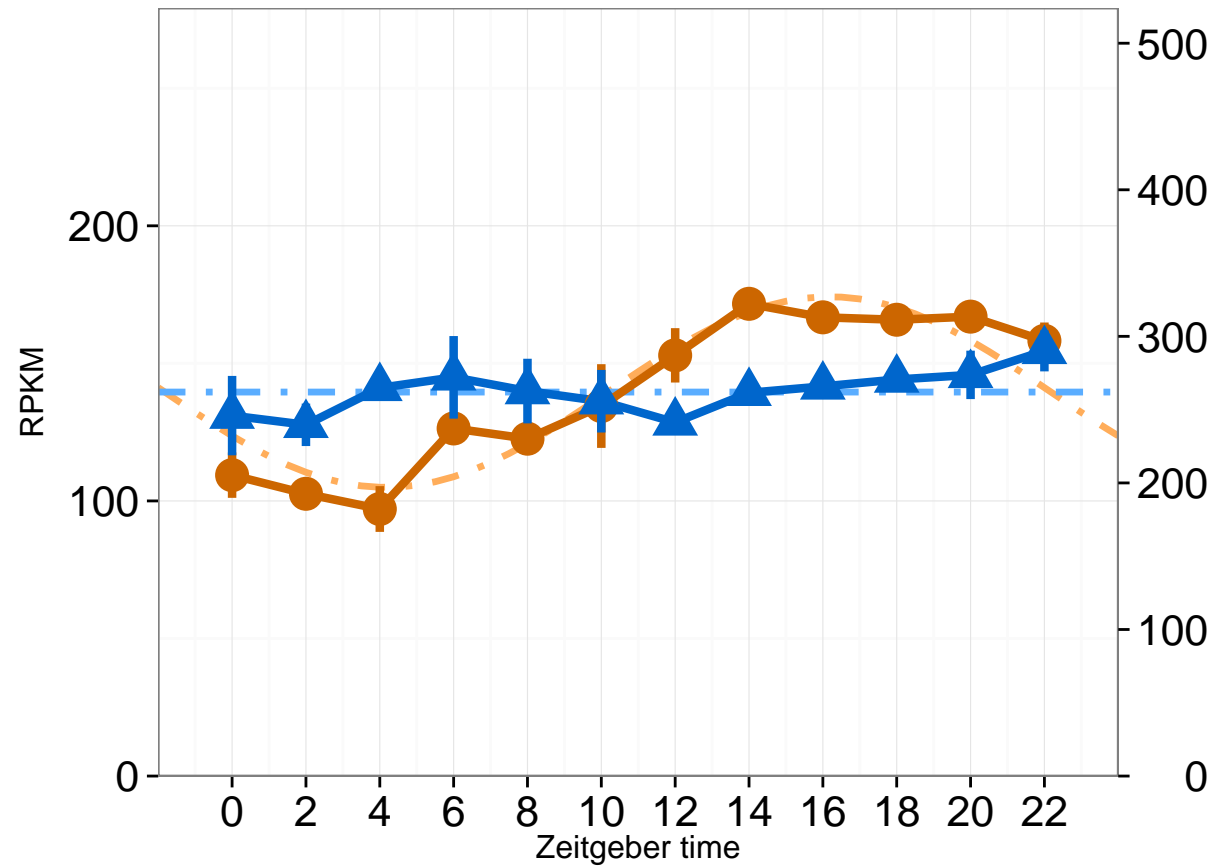

## Dad1

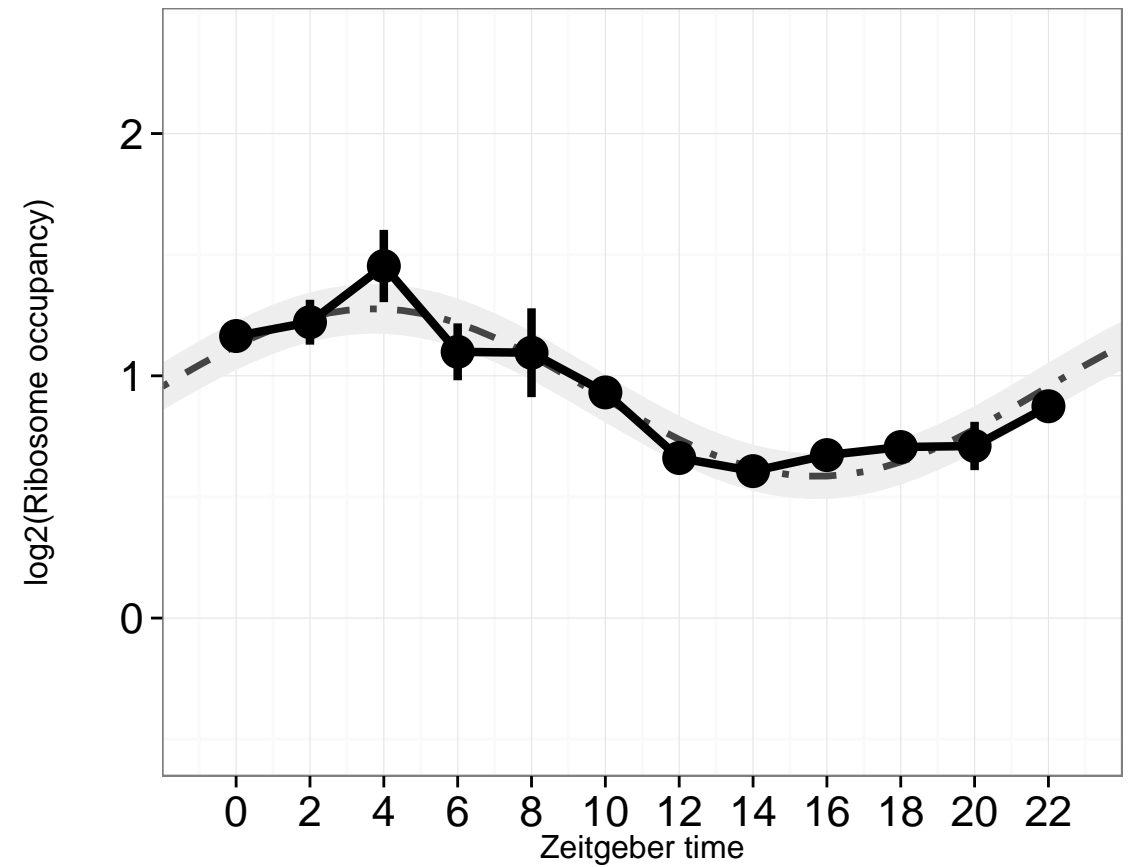

Supplement: Supplementary file 7379 [file 1]

# Mpg

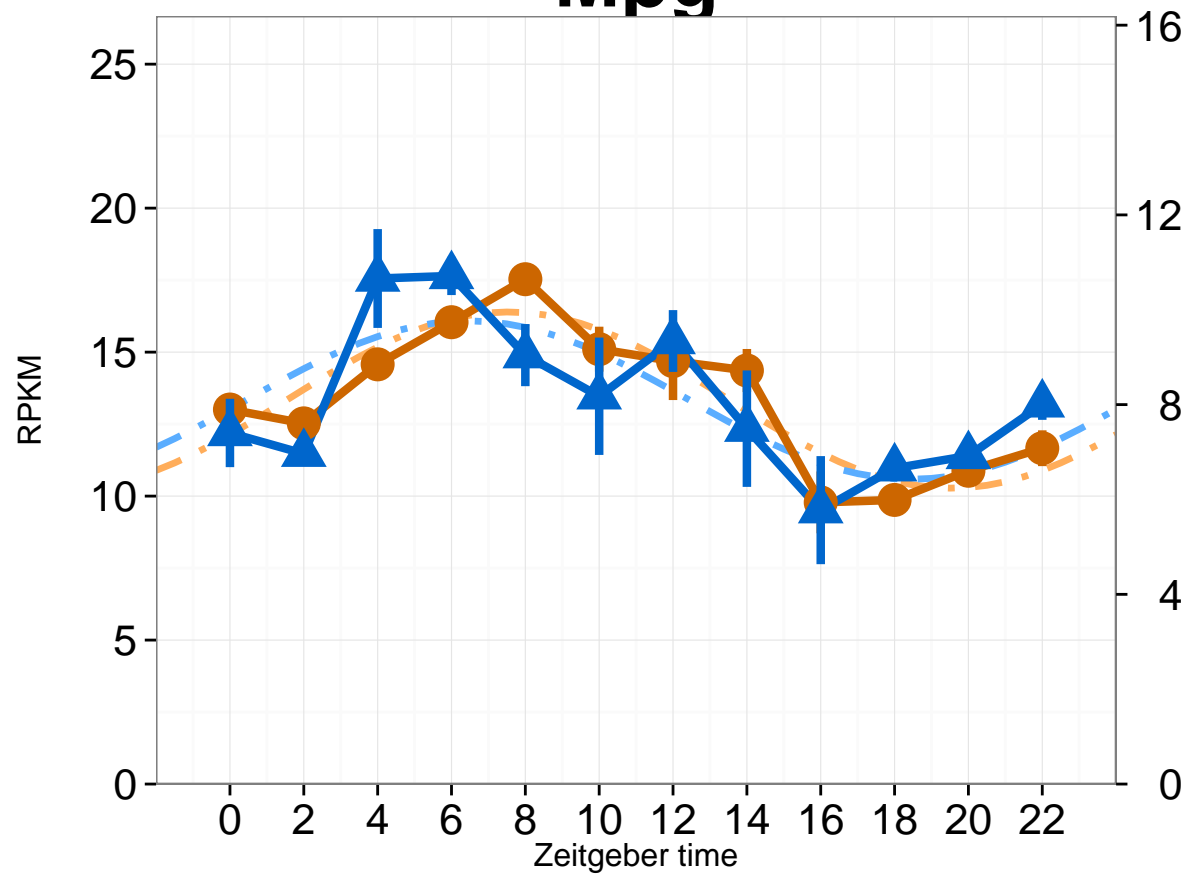

# Mpg

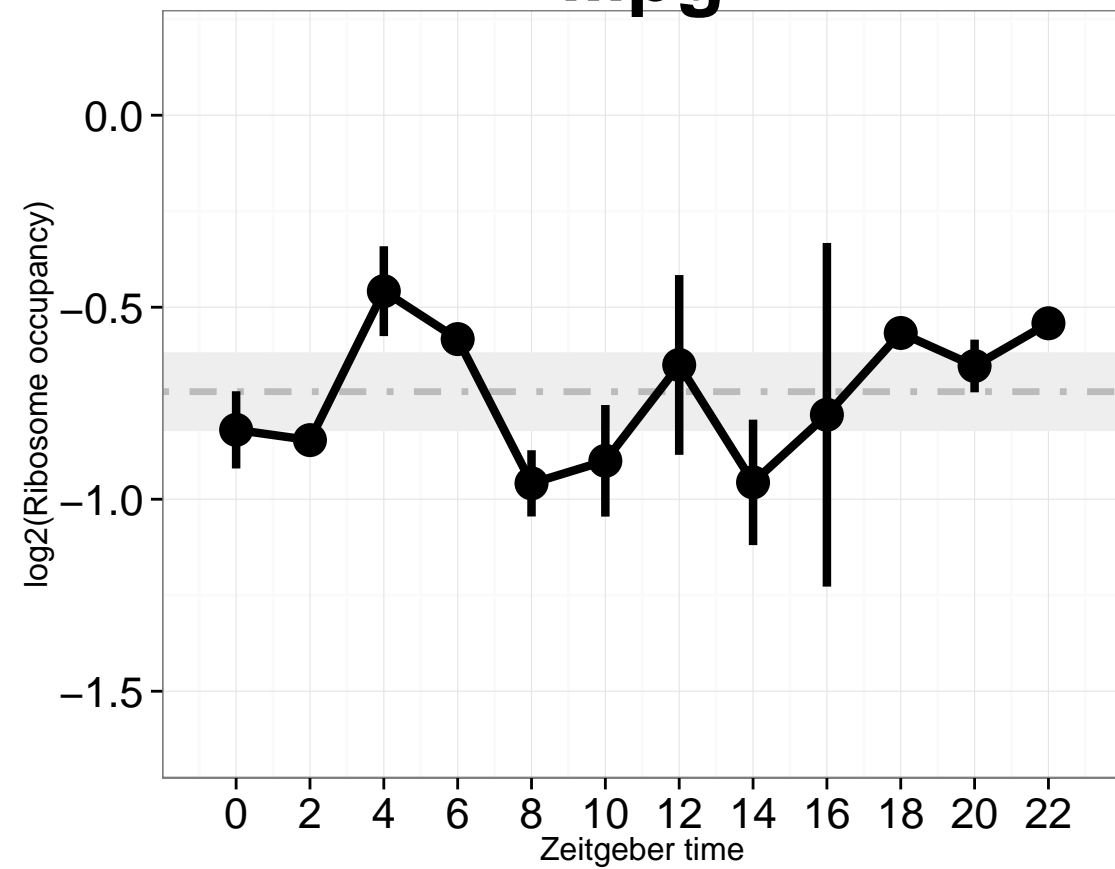

Supplement: Supplementary file 7380 [file 1]

## Zfp62

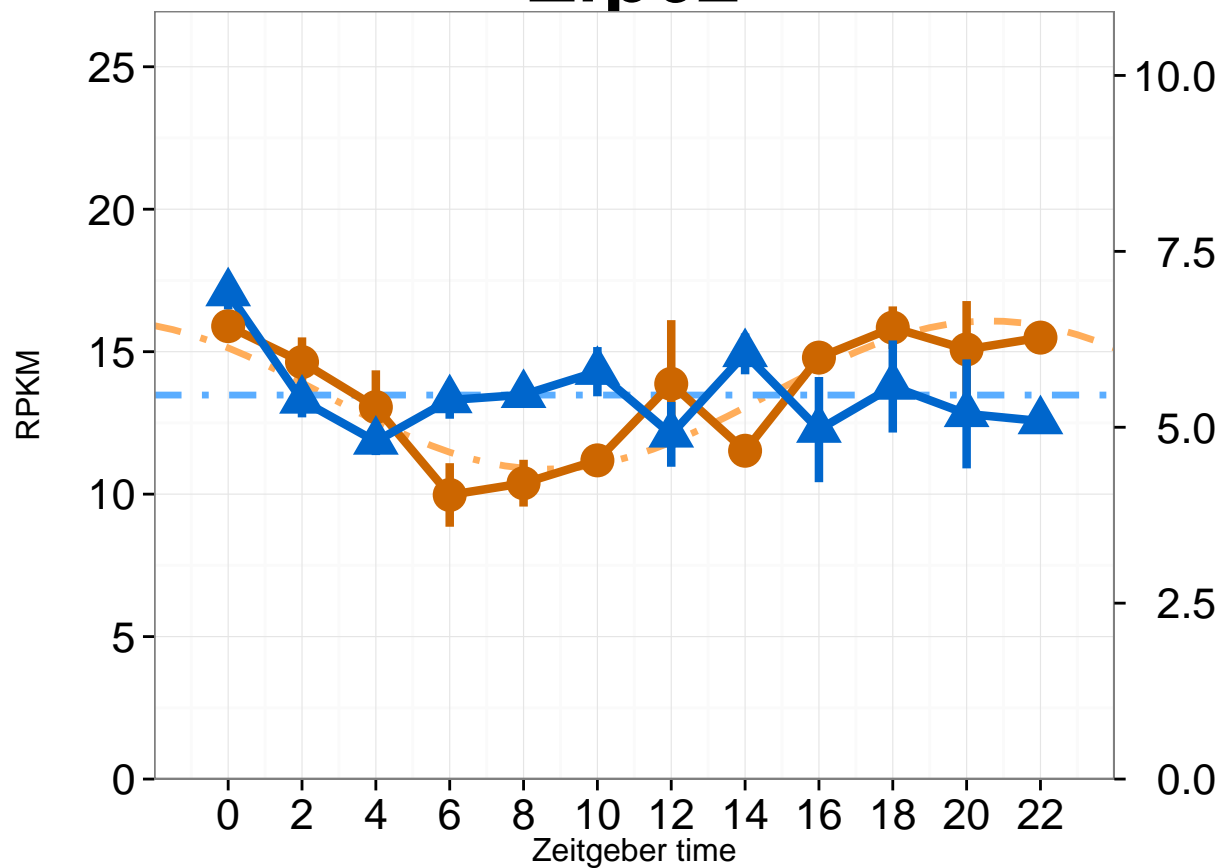

## Zfp62

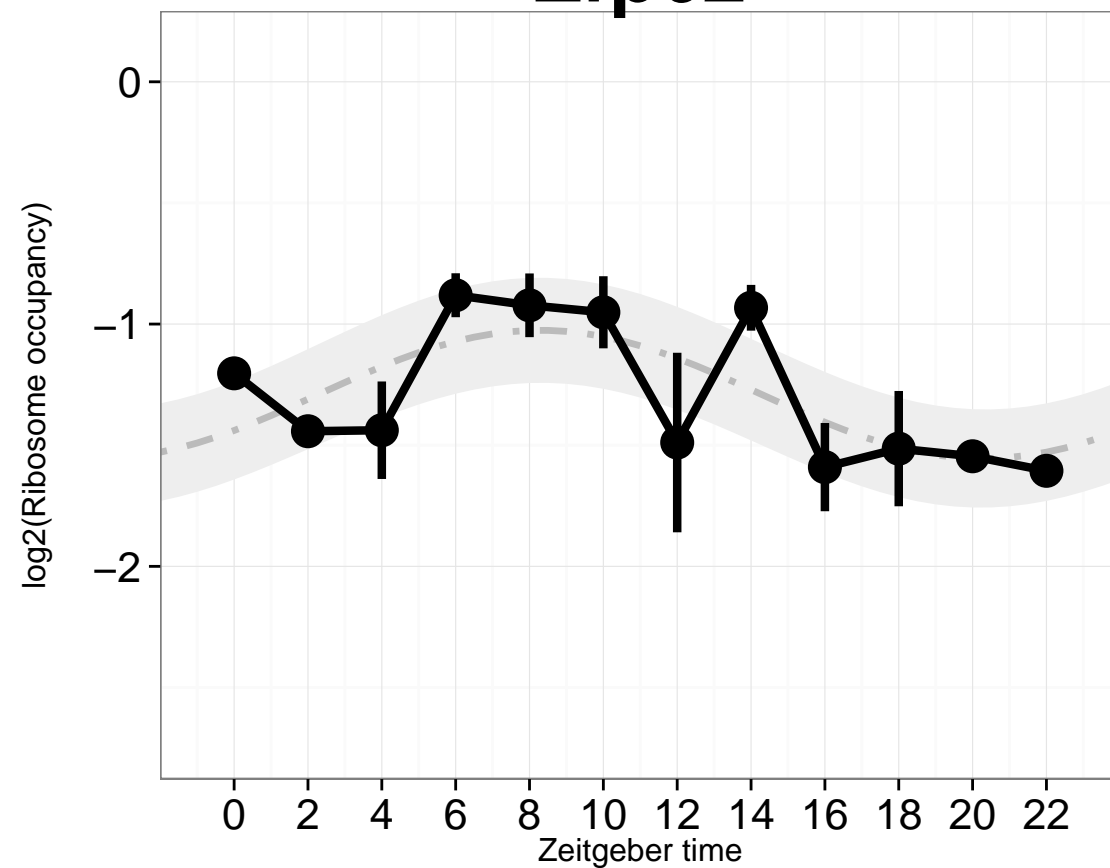

Supplement: Supplementary file 7381 [file 1]

## Ccser2

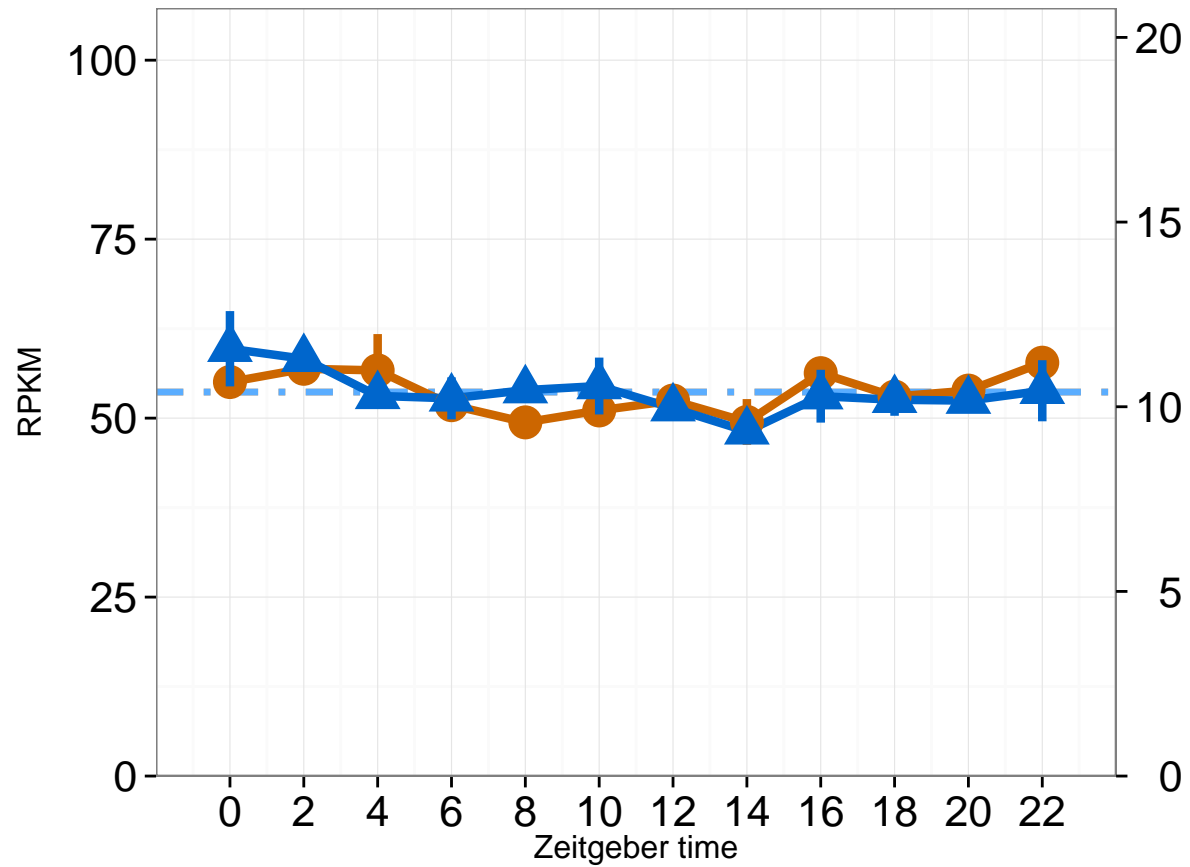

## Ccser2

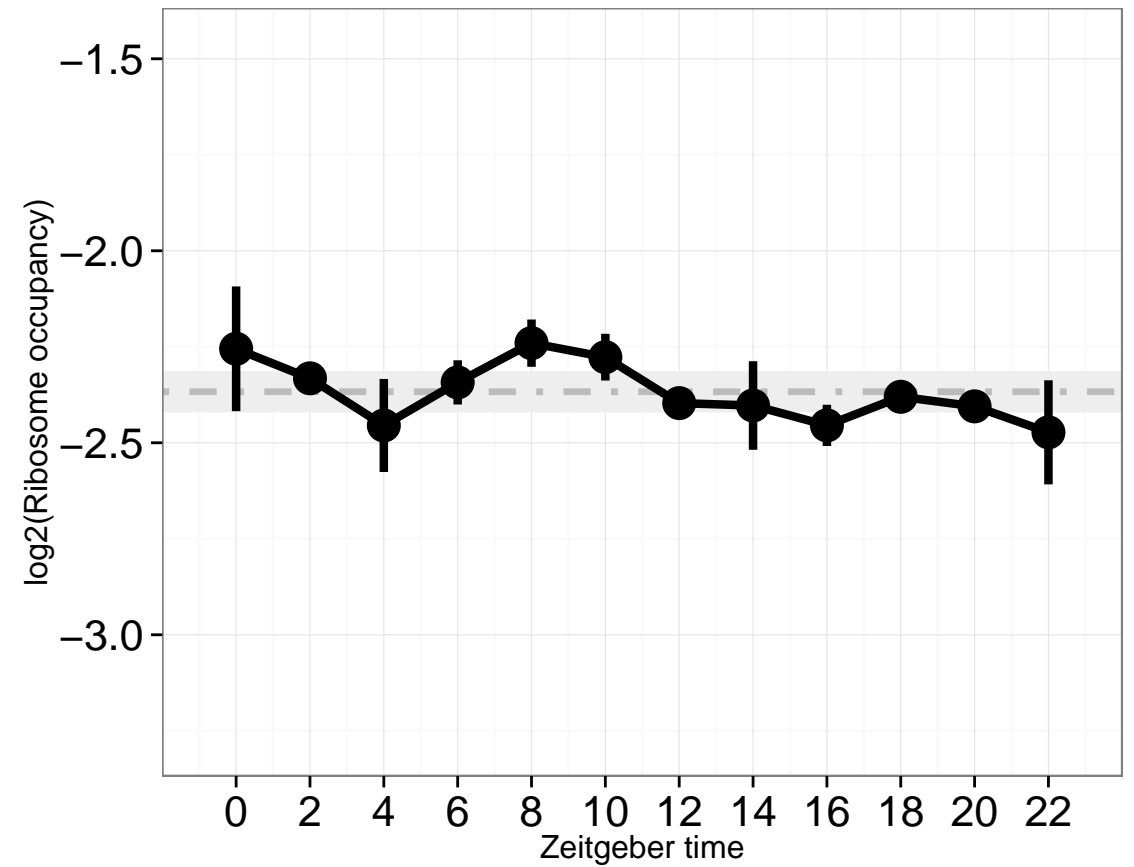

Supplement: Supplementary file 7382 [file 1]

# Slc12a5

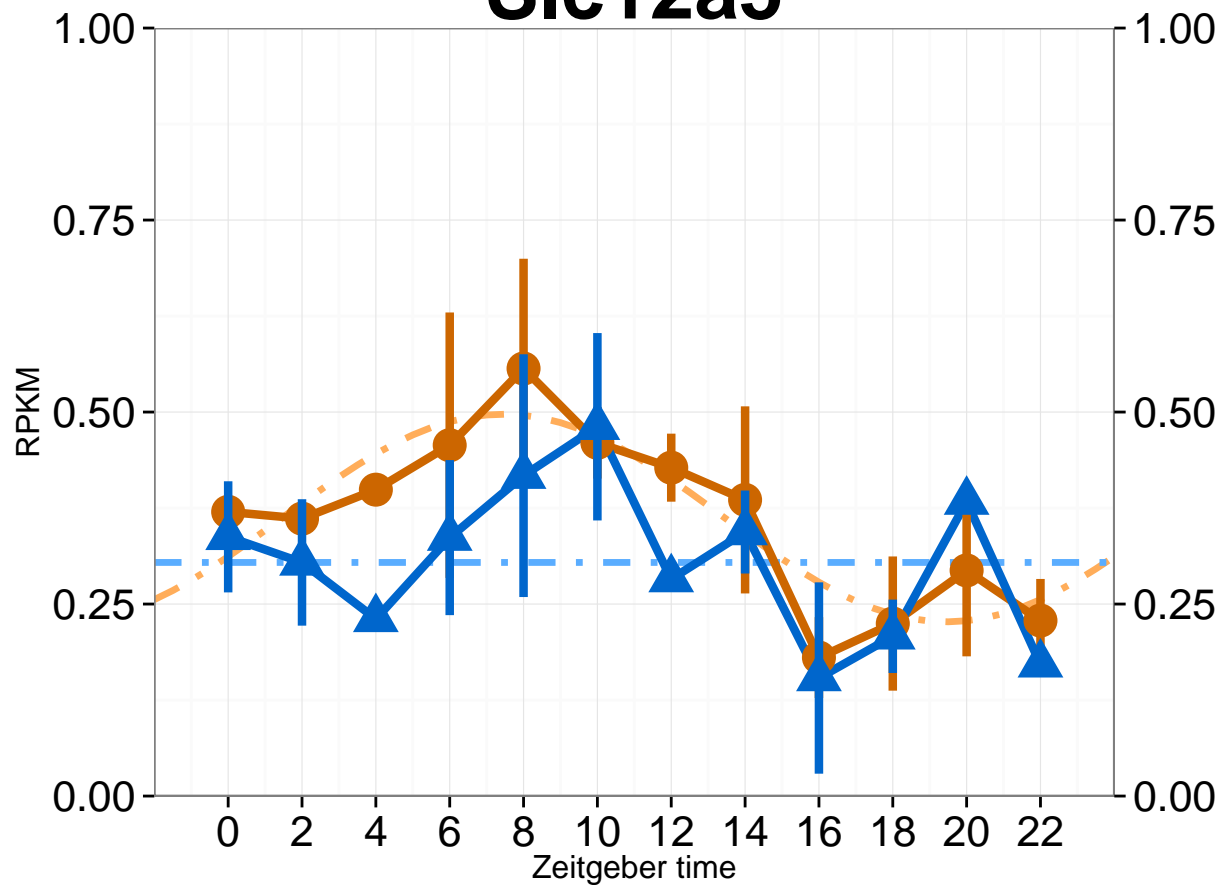

# Slc12a5

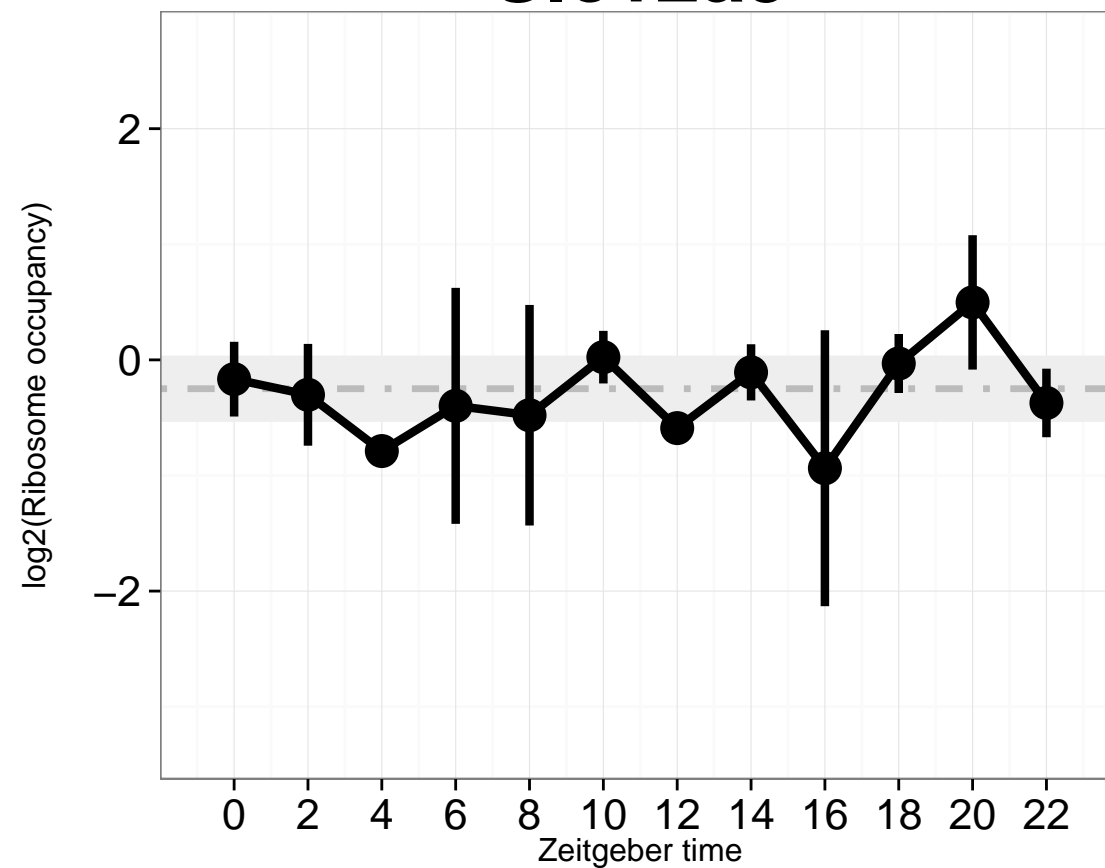

Supplement: Supplementary file 7383 [file 1]

# Serpina1e

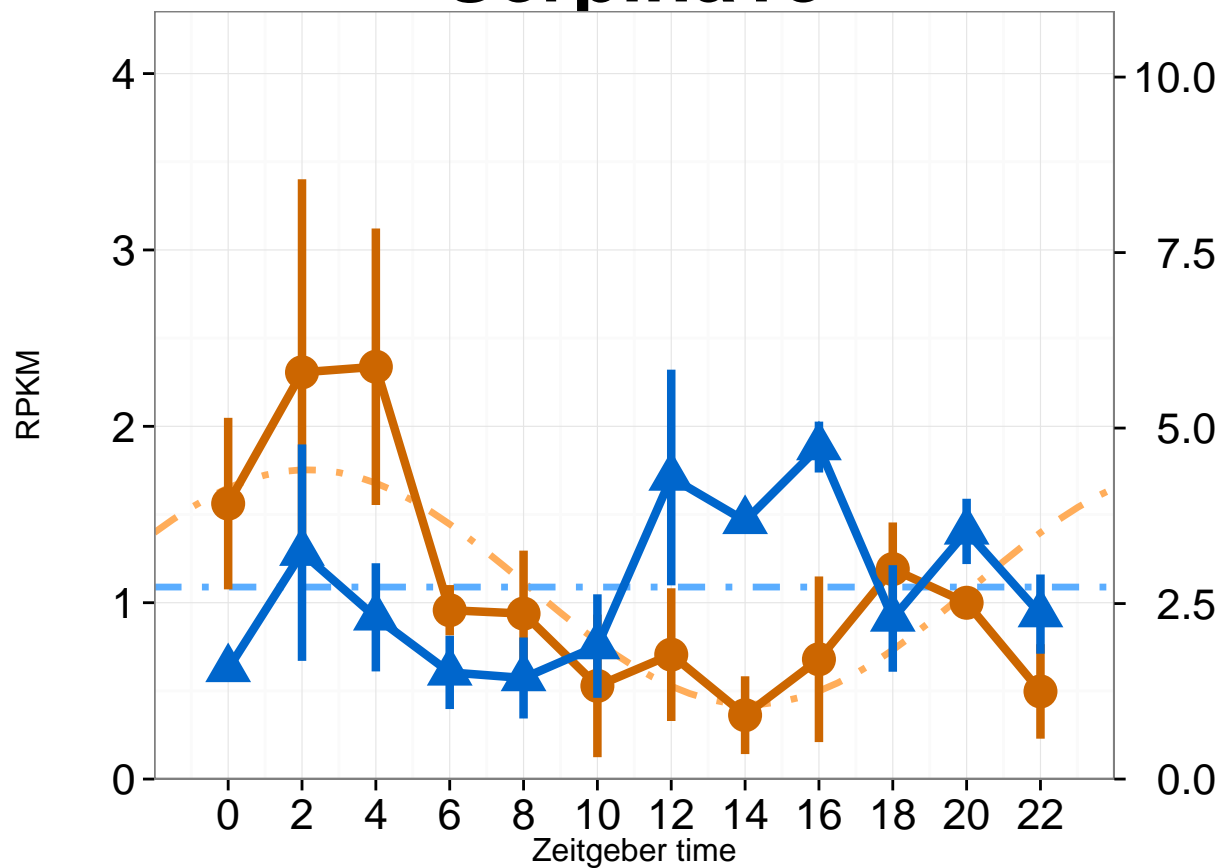

# Serpina1e

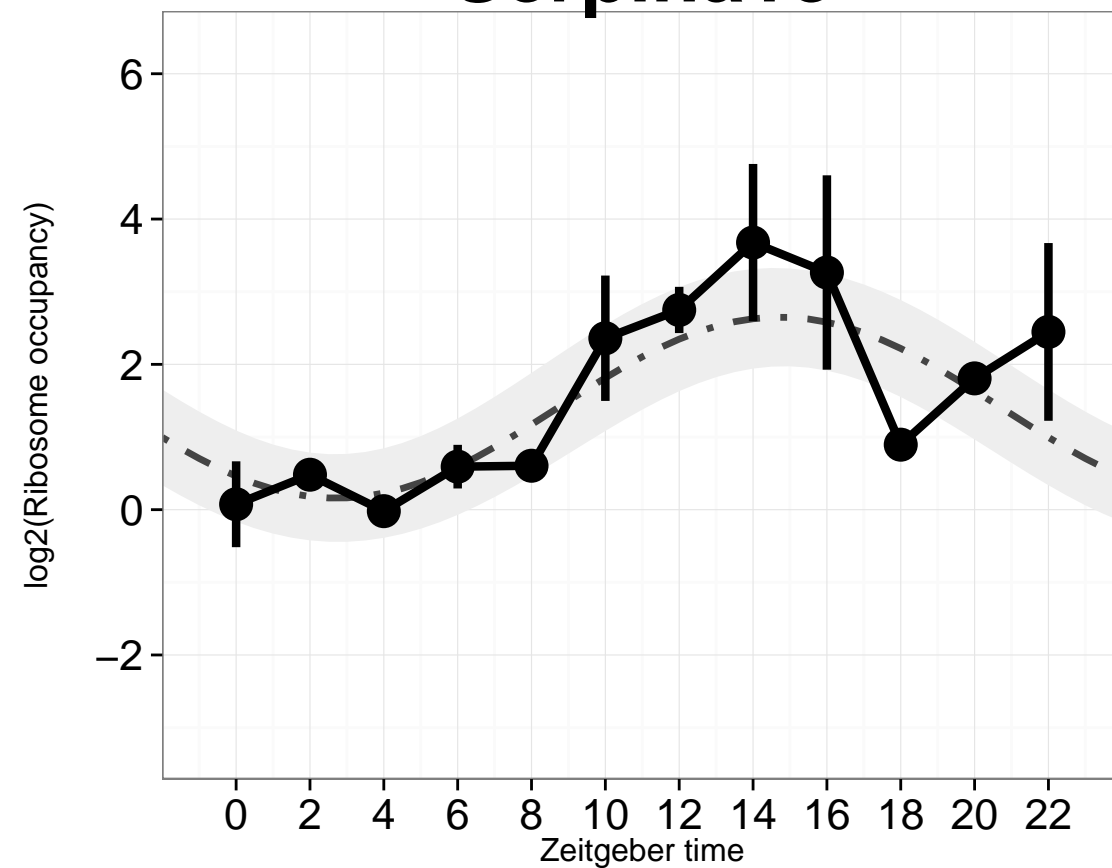

Supplement: Supplementary file 7384 [file 1]

## Appl2

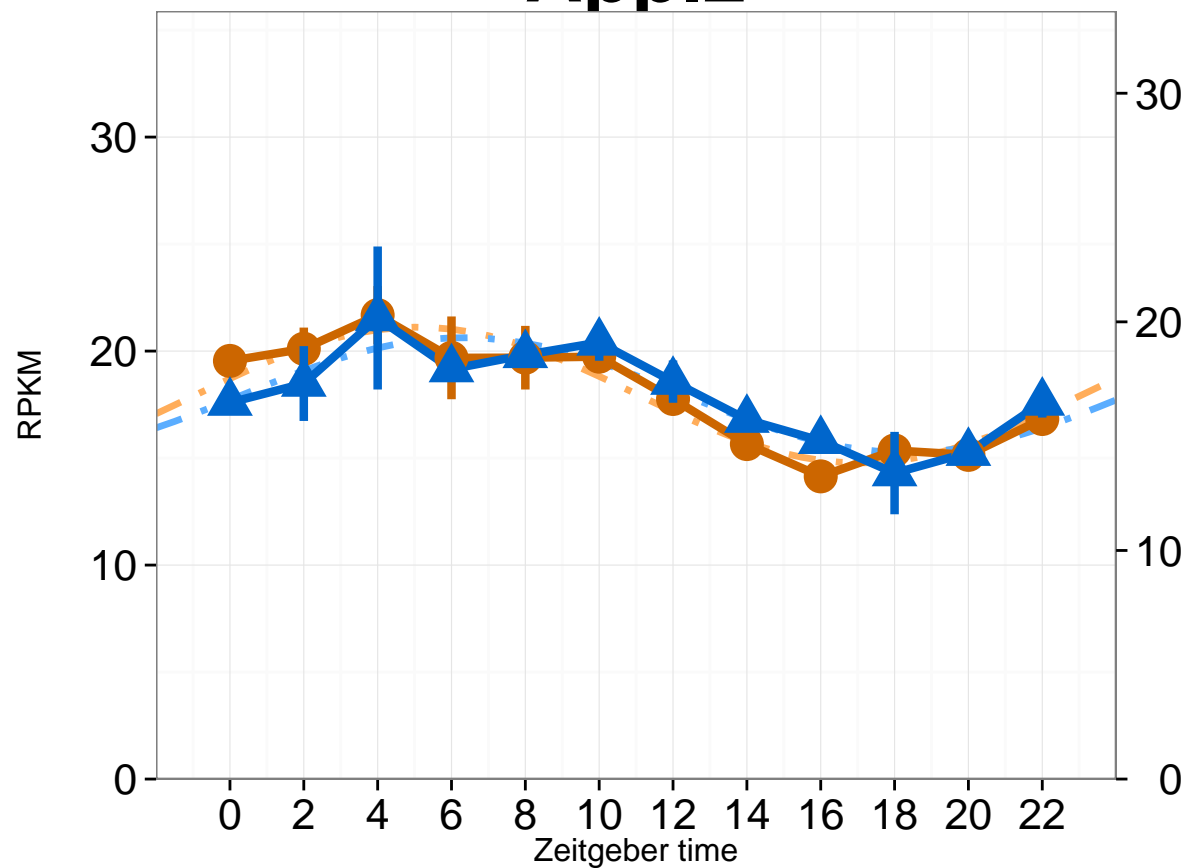

## Appl2

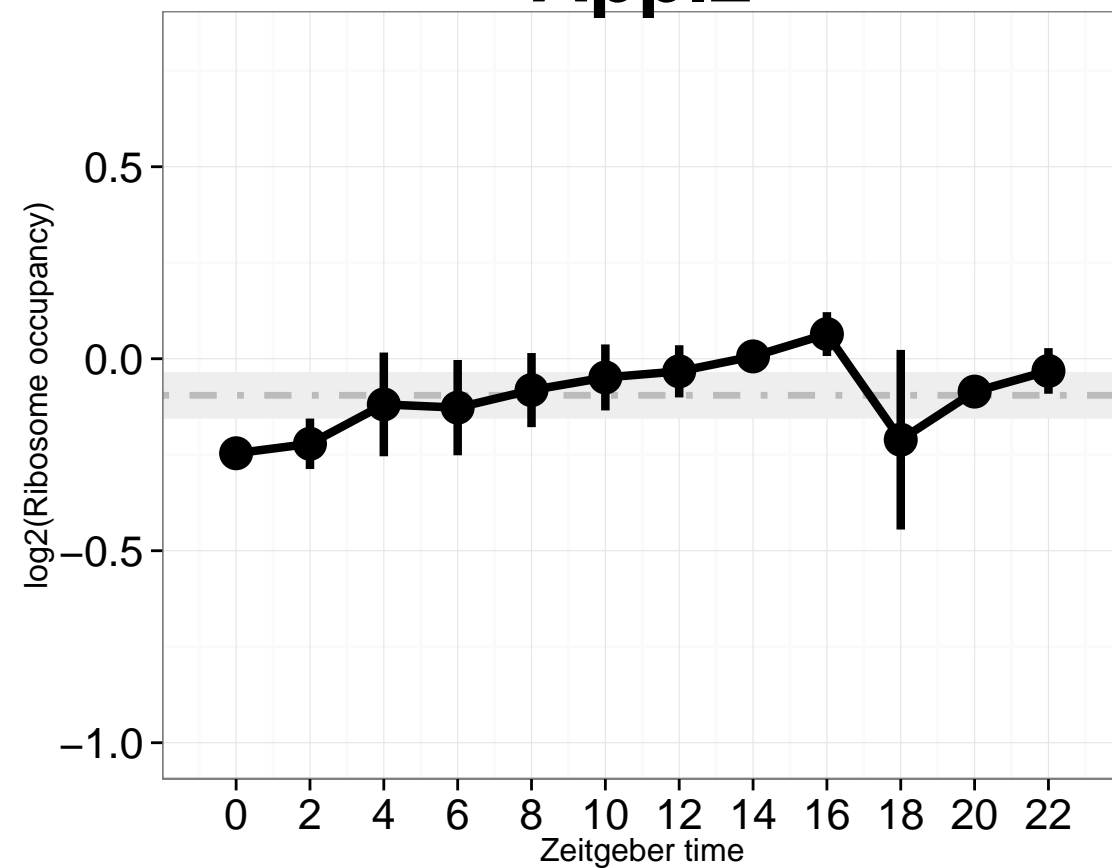

Supplement: Supplementary file 7385 [file 1]

## Mfn1

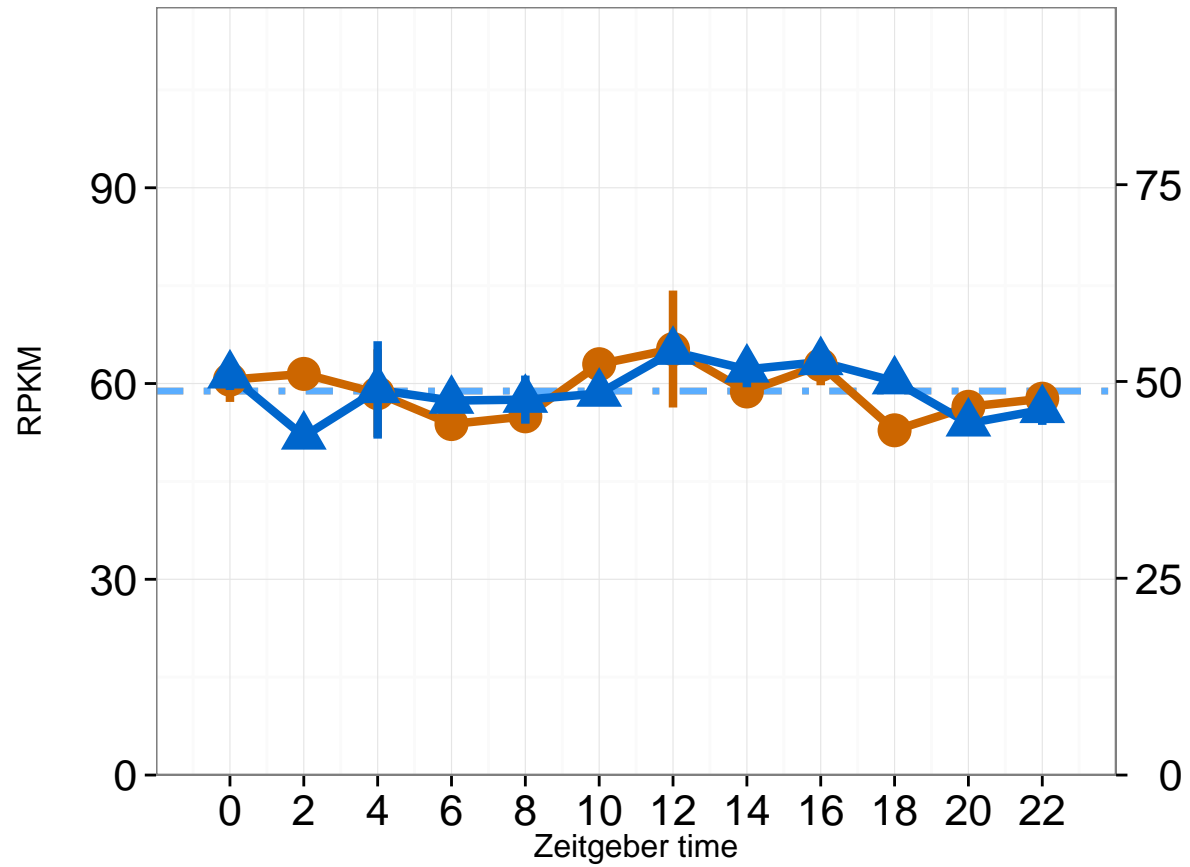

## Mfn1

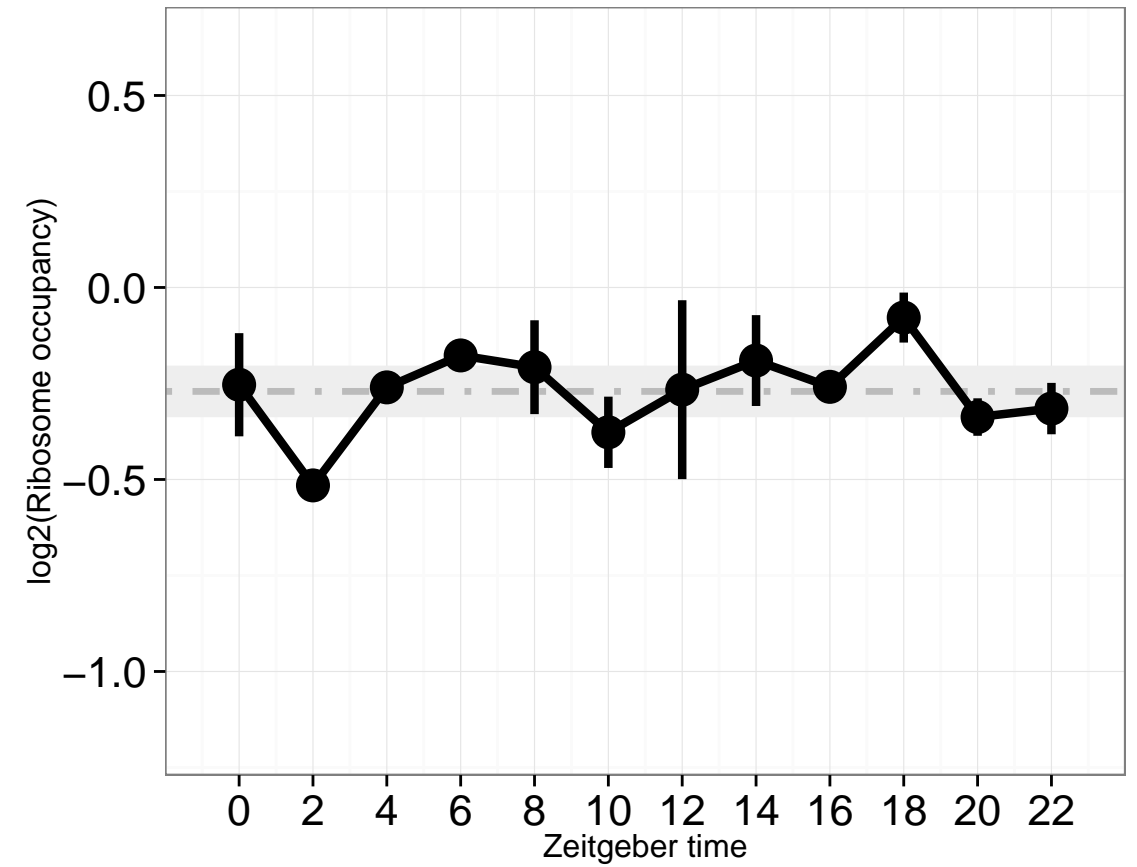

Supplement: Supplementary file 7386 [file 1]

## Mkl1

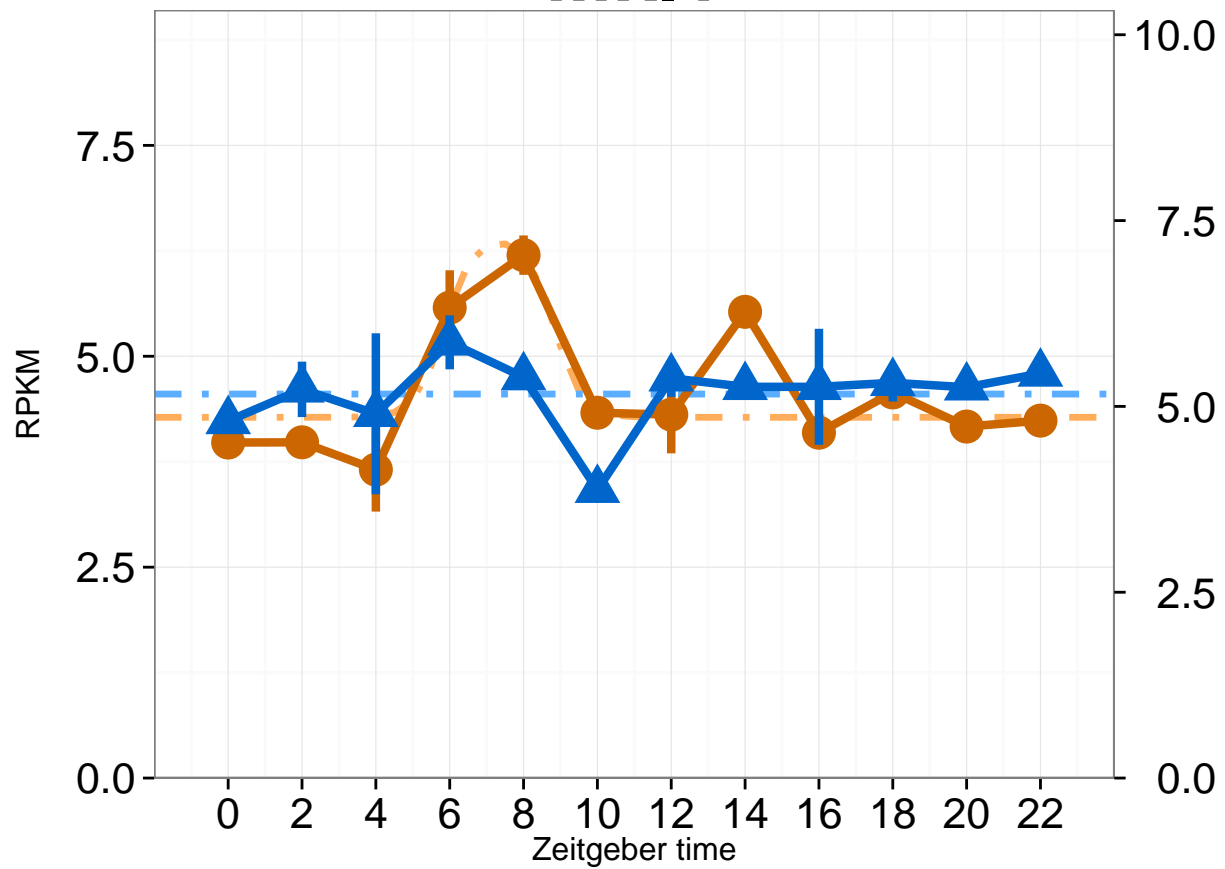

## Mkl1

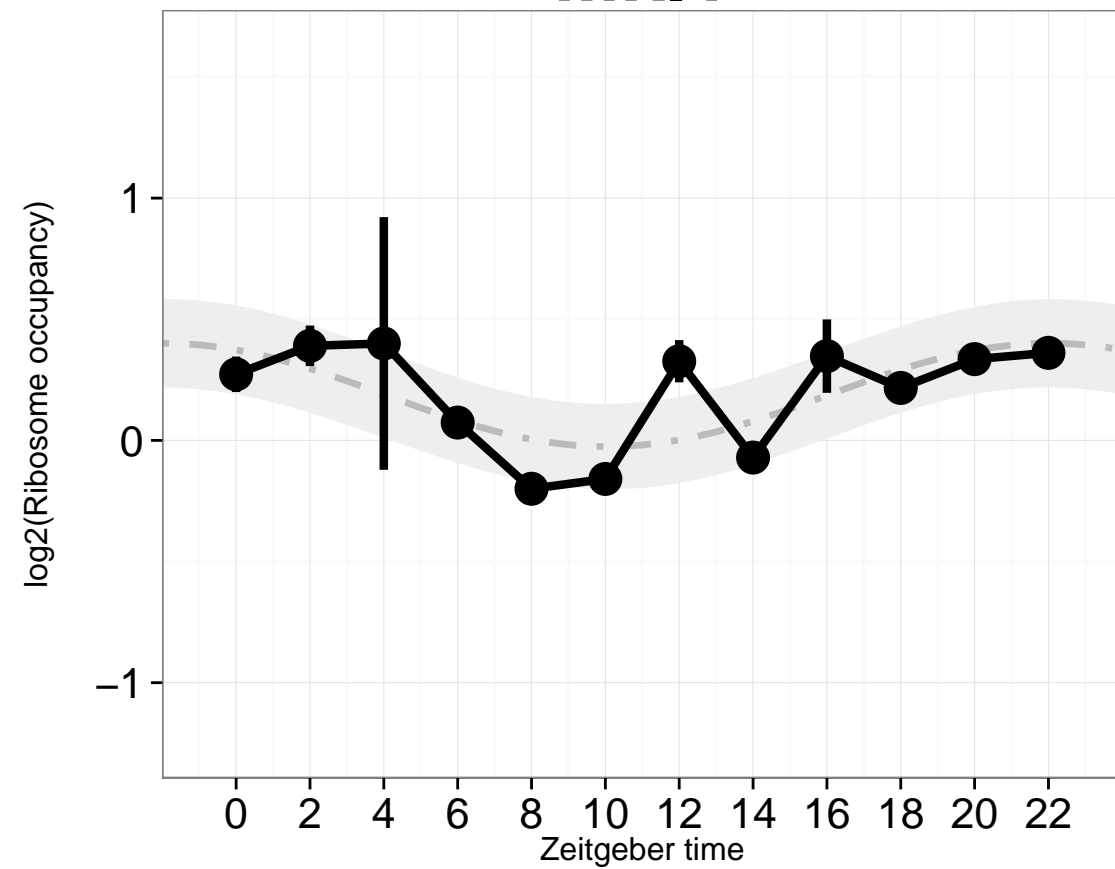

Supplement: Supplementary file 7387 [file 1]

# H2-M3

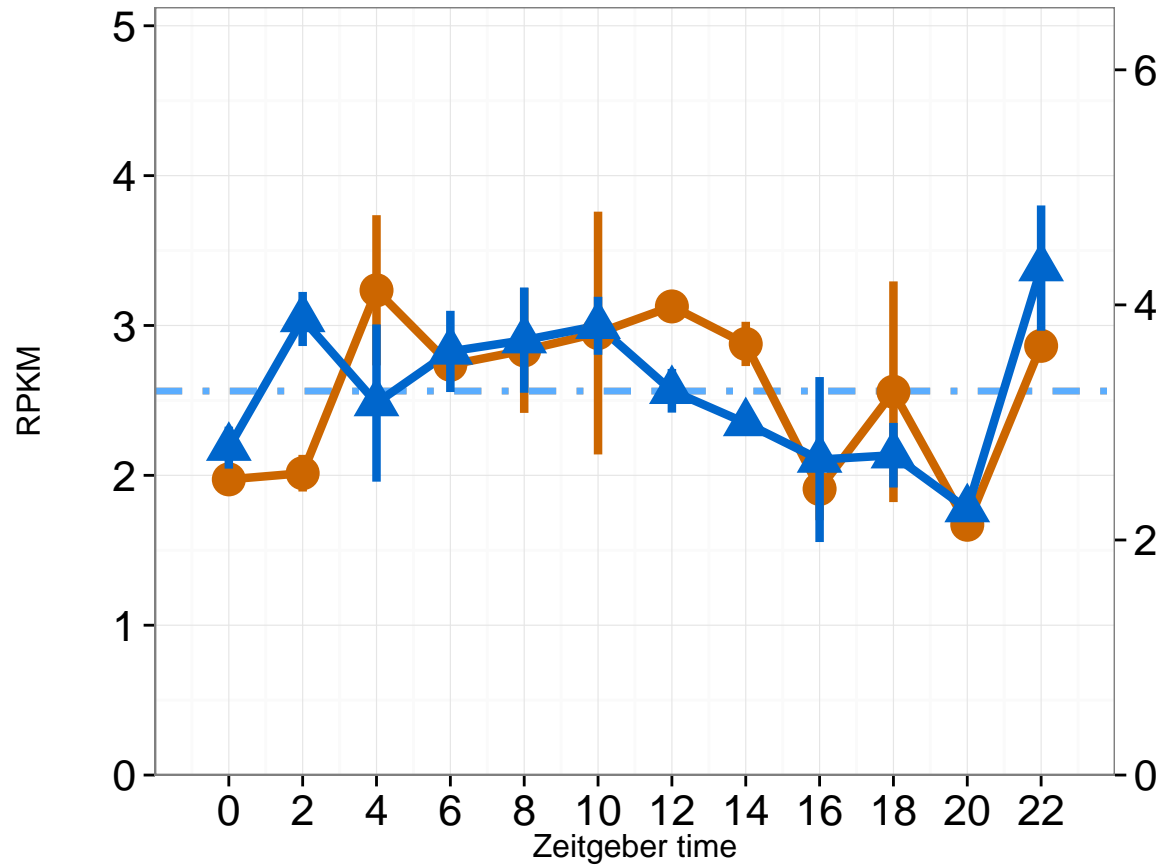

# H2-M3

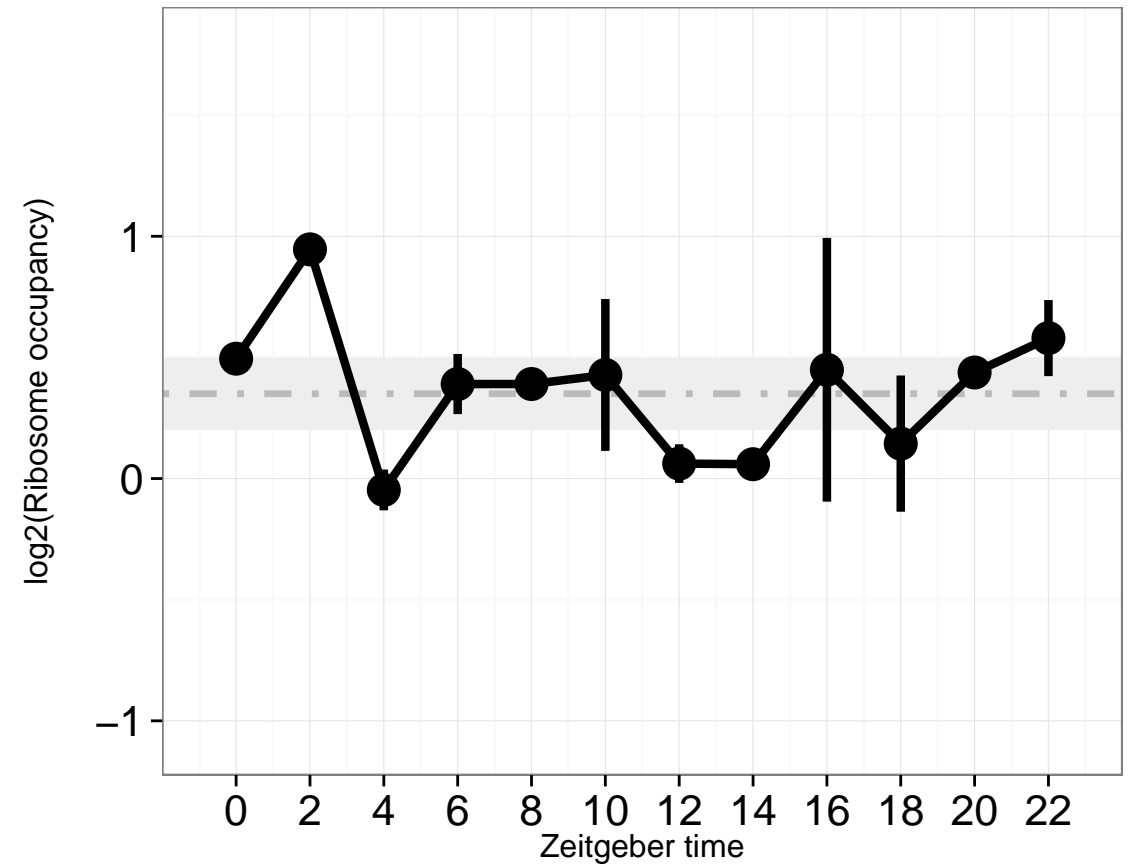

Supplement: Supplementary file 7388 [file 1]

# Stx4a

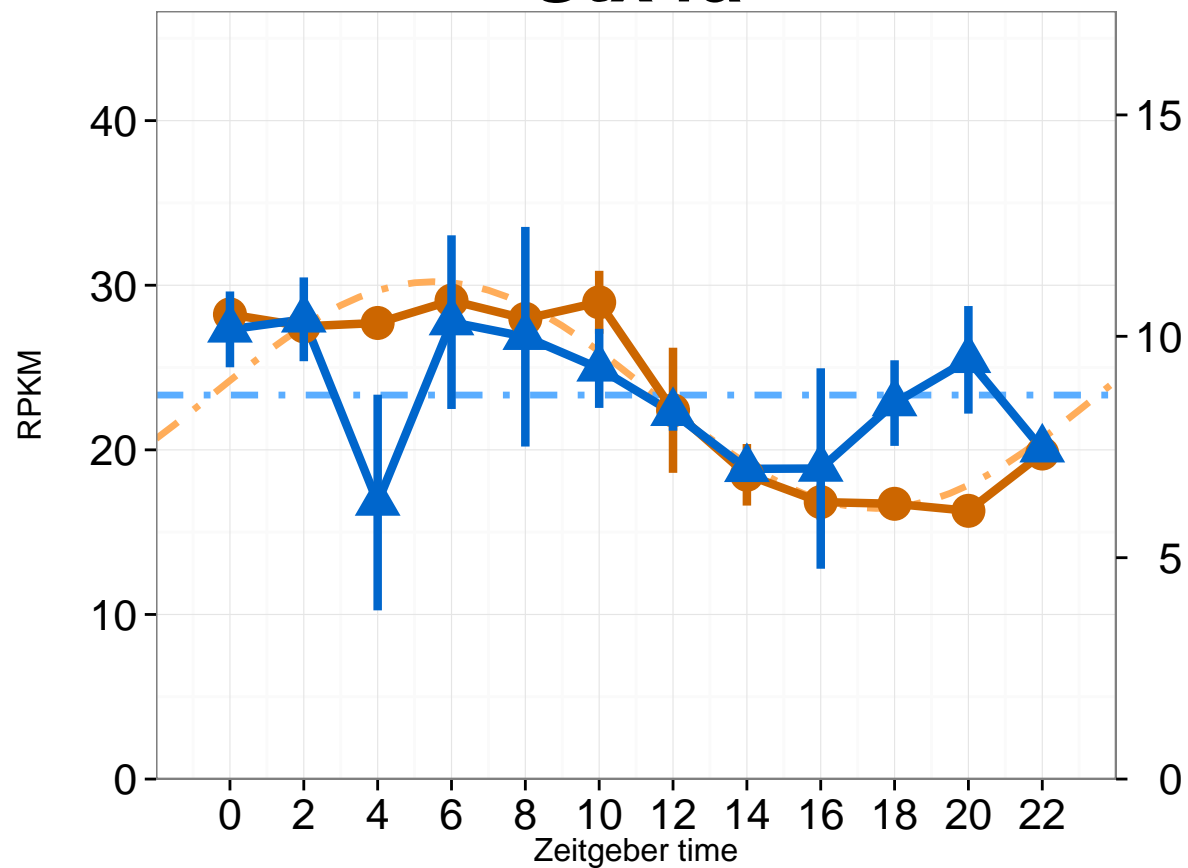

# Stx4a

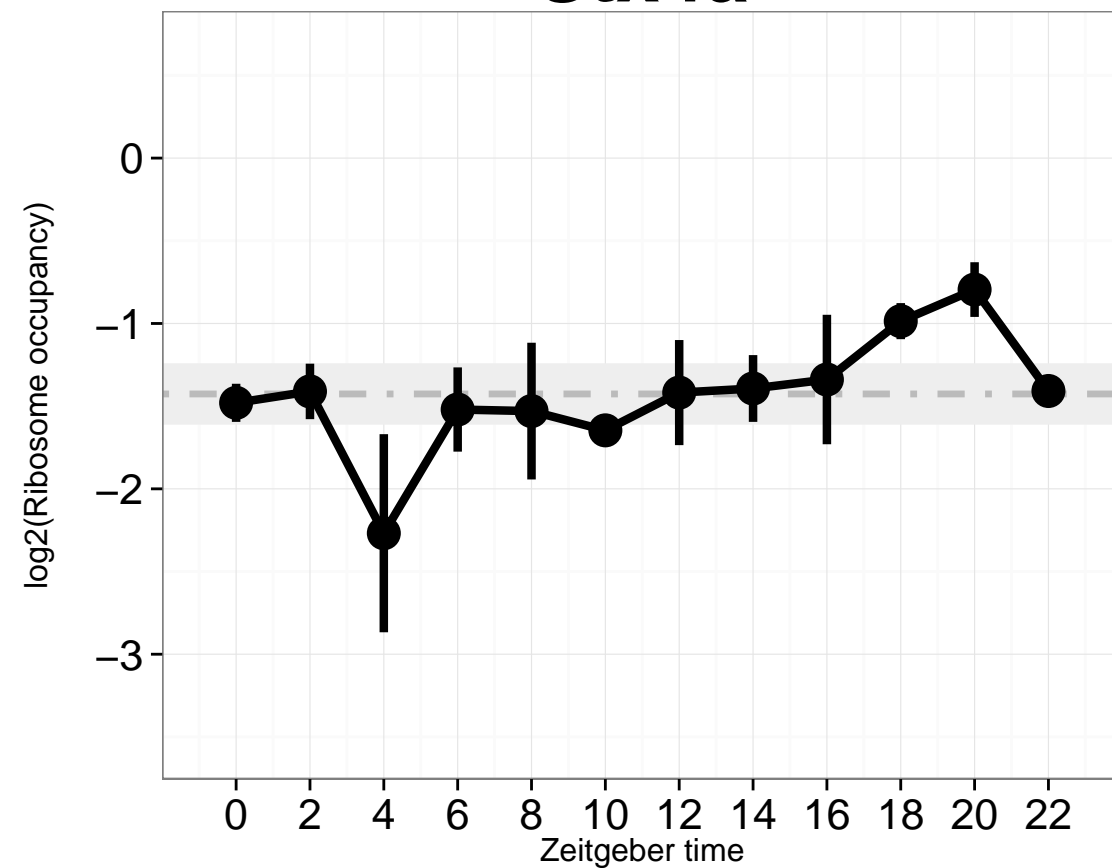

Supplement: Supplementary file 7389 [file 1]

## Nhs12

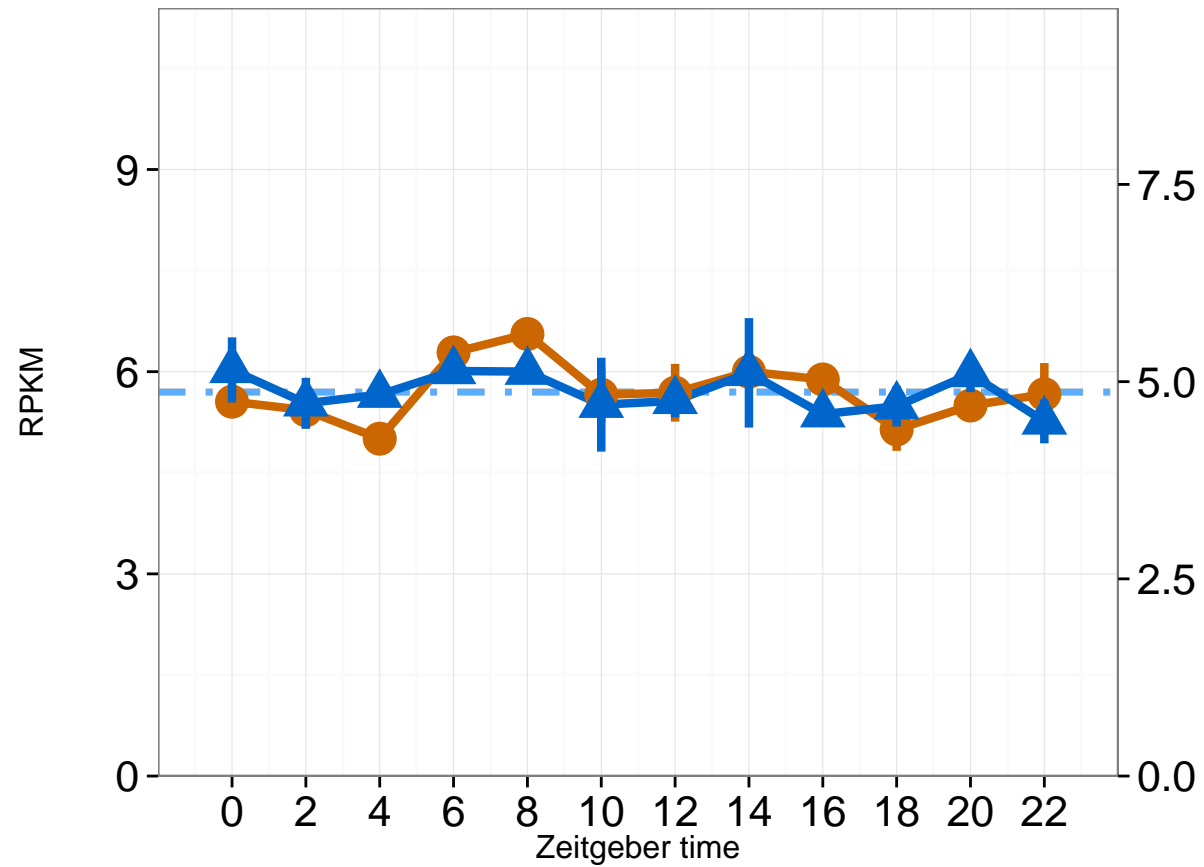

## Nhs12

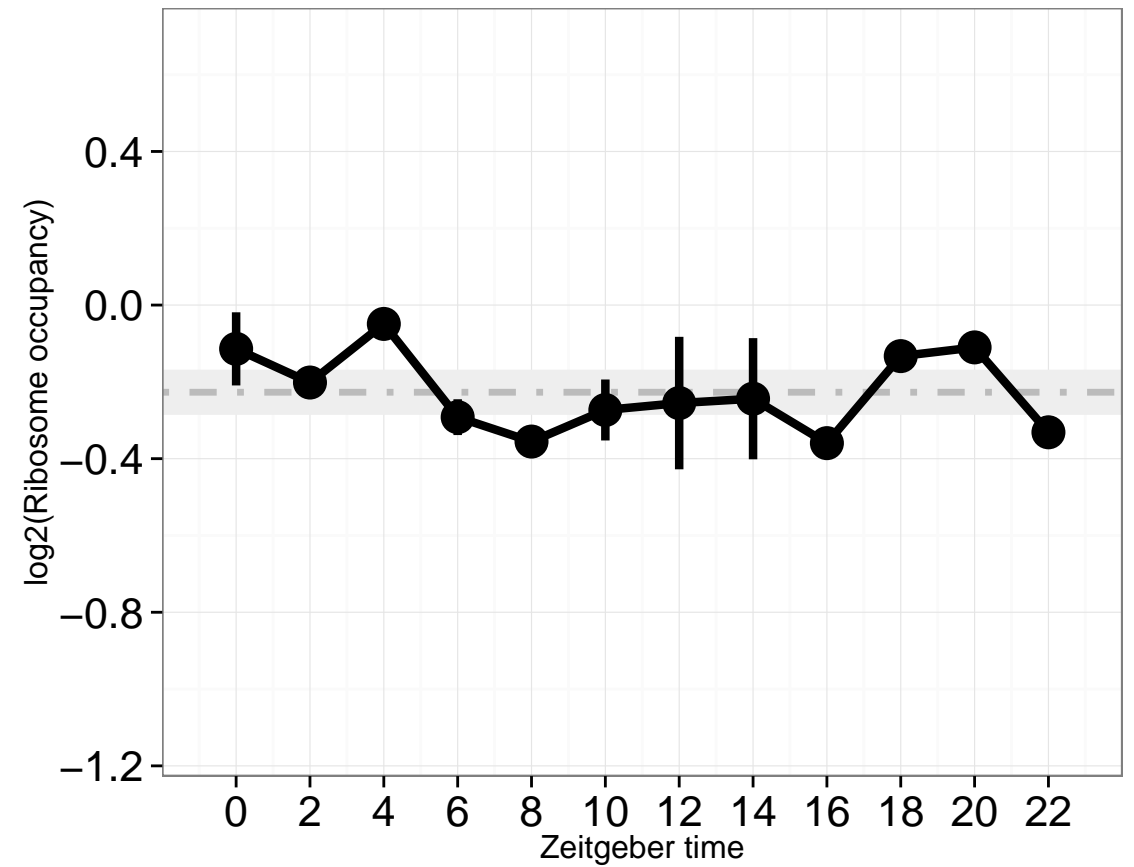

Supplement: Supplementary file 7390 [file 1]

# Id2

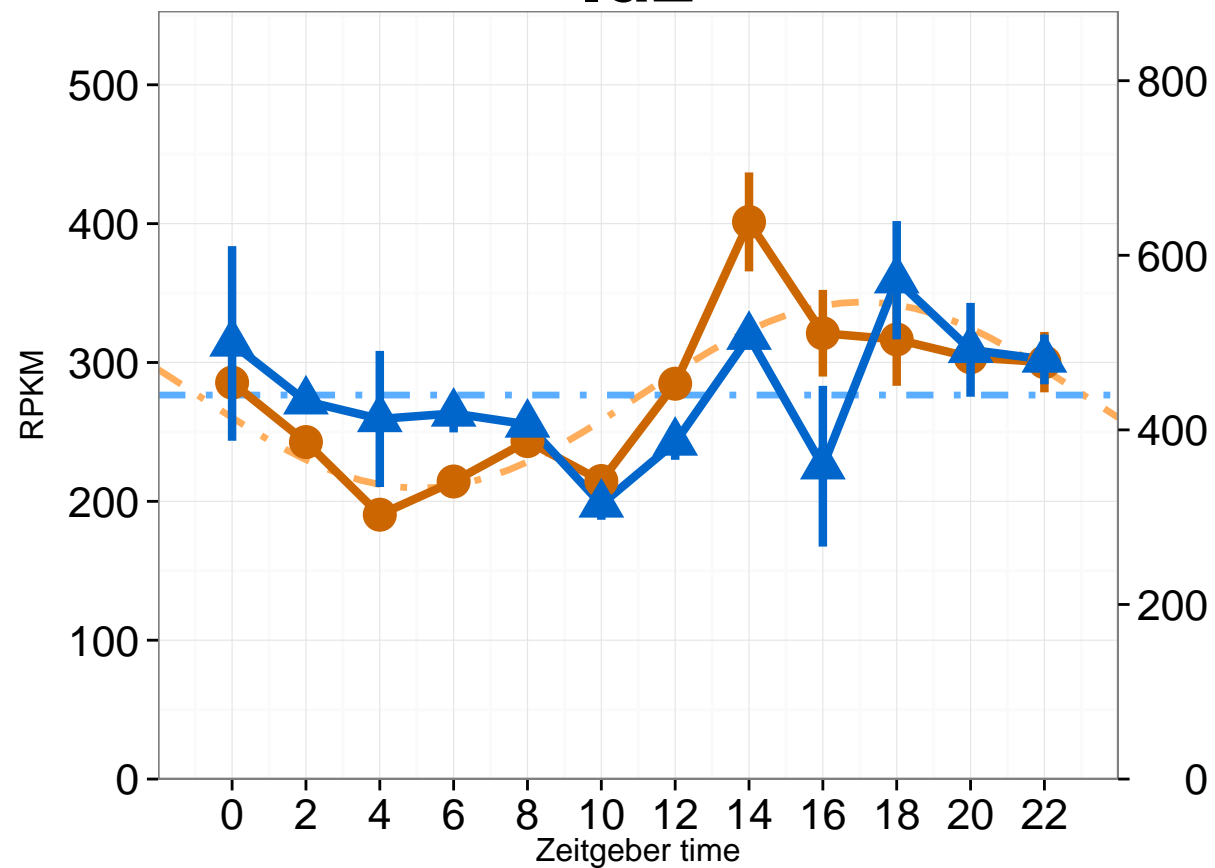

# Id2

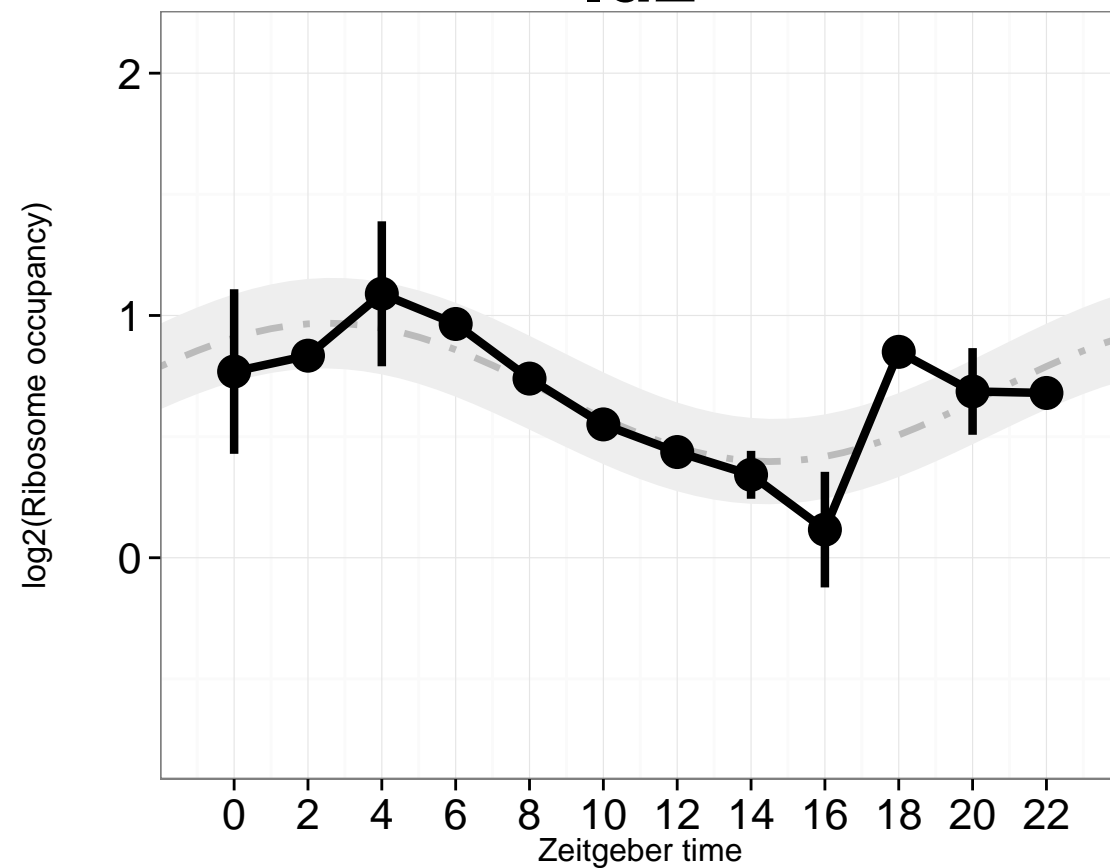

Supplement: Supplementary file 7391 [file 1]

## Kcna3

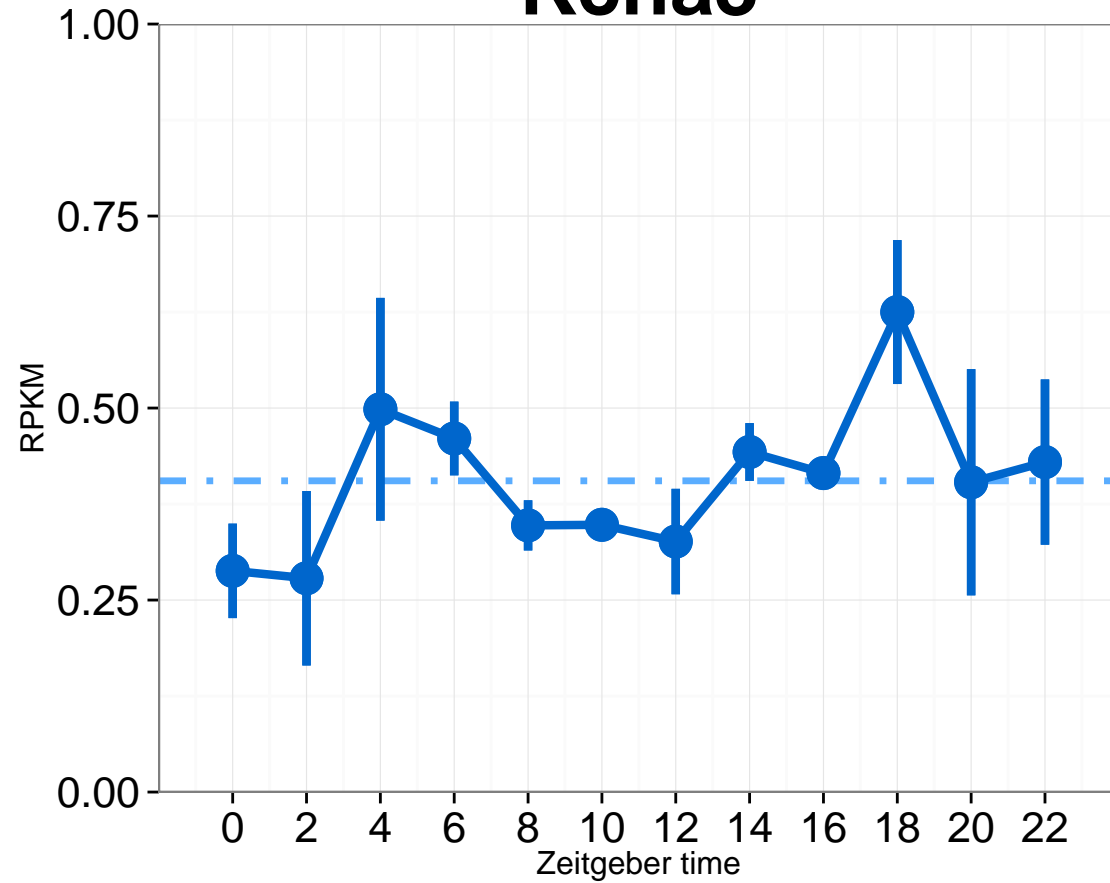

## Kcna3 log2(Ribosome occupancy

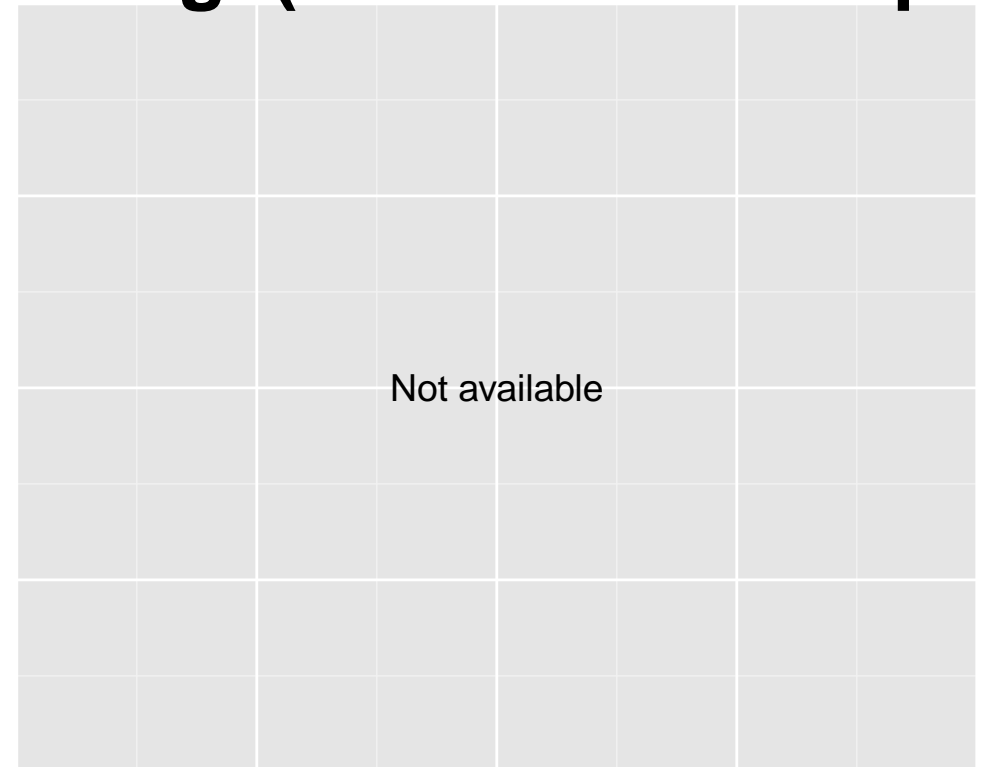

Supplement: Supplementary file 7392 [file 1]

# Slco1a6

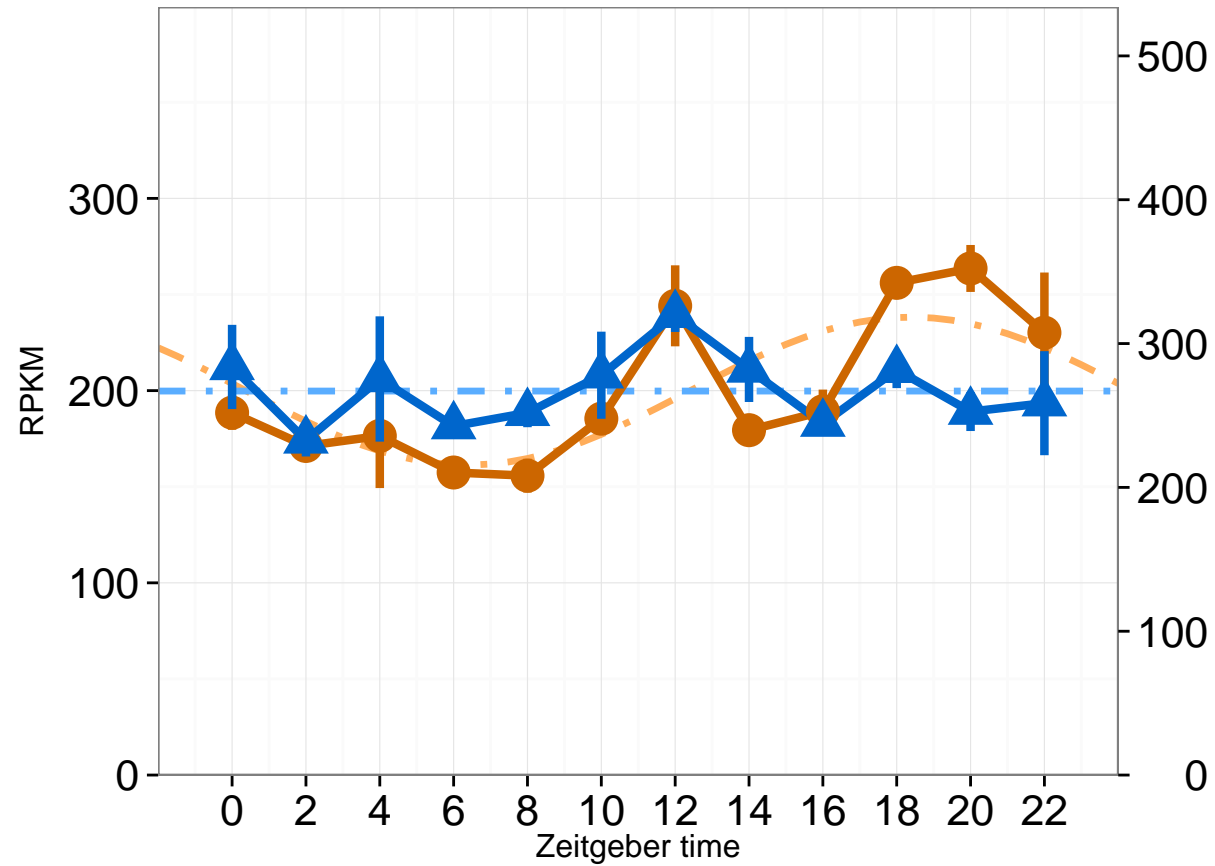

# Slco1a6

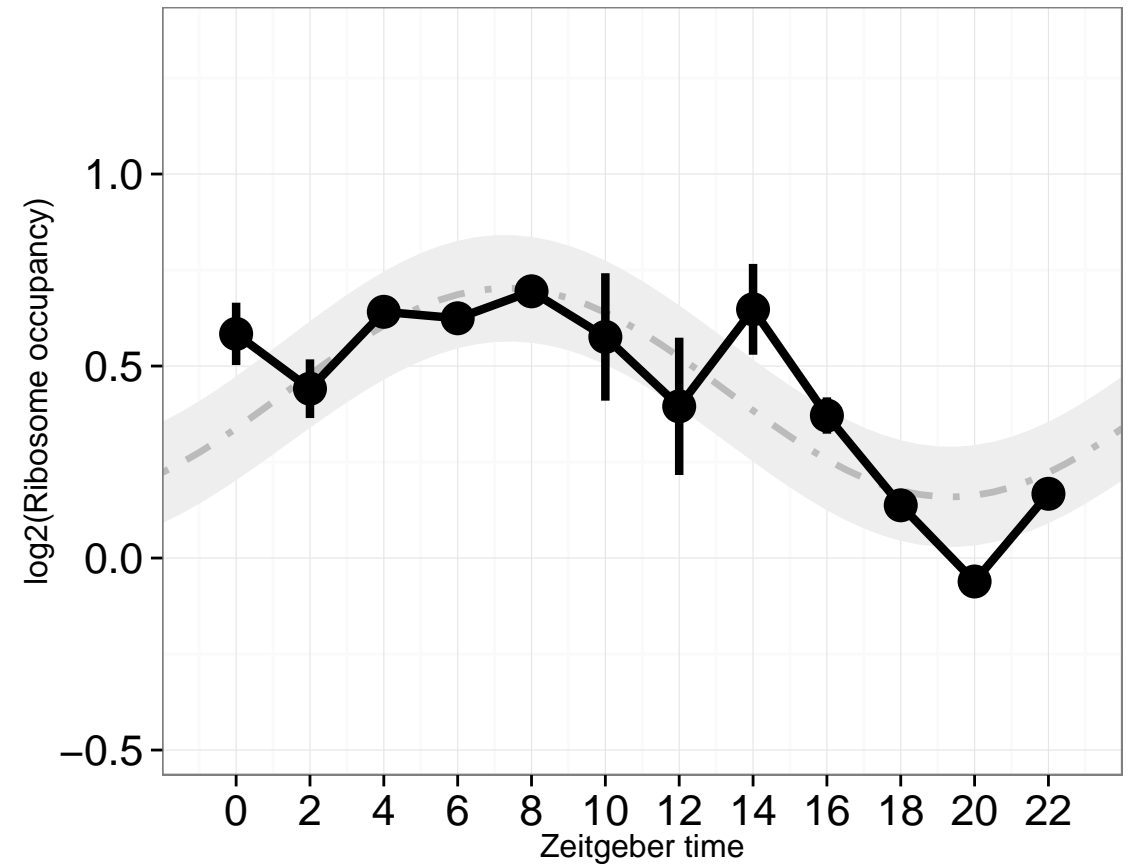

Supplement: Supplementary file 7393 [file 1]

# Mpp2

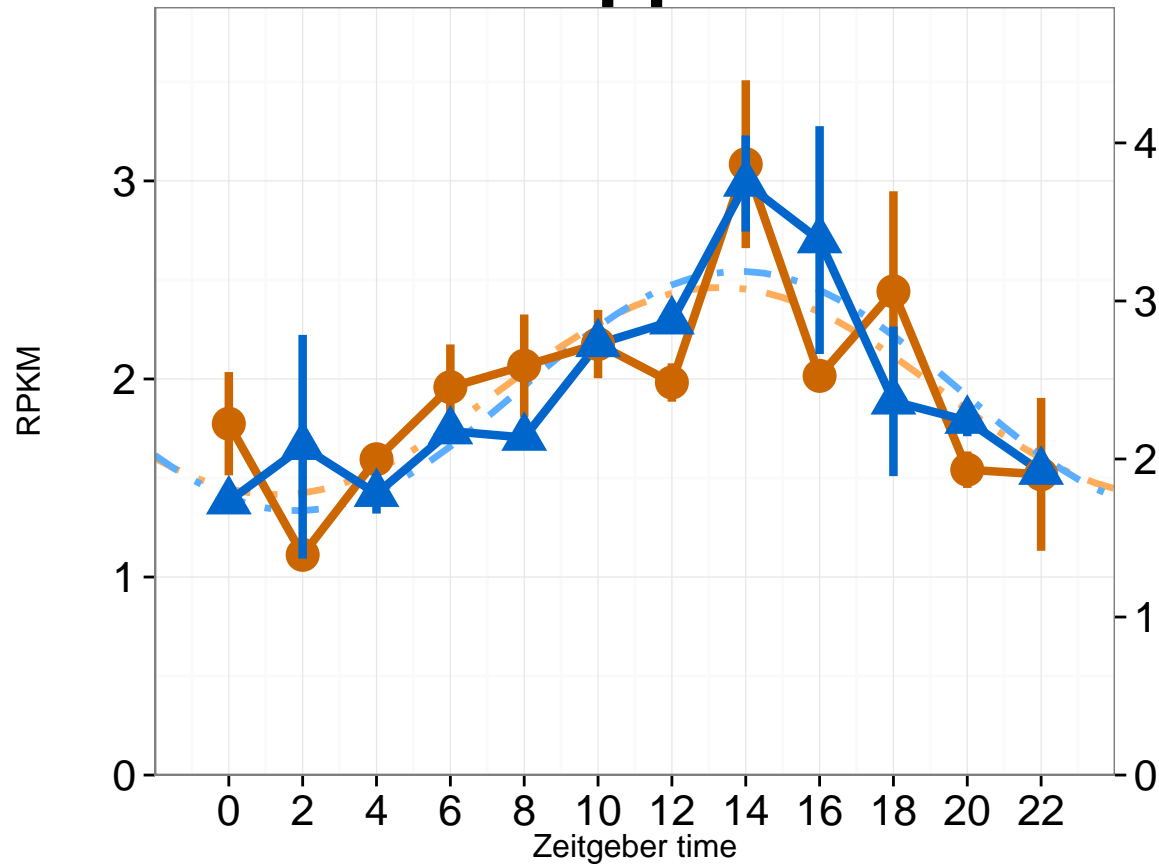

# Mpp2

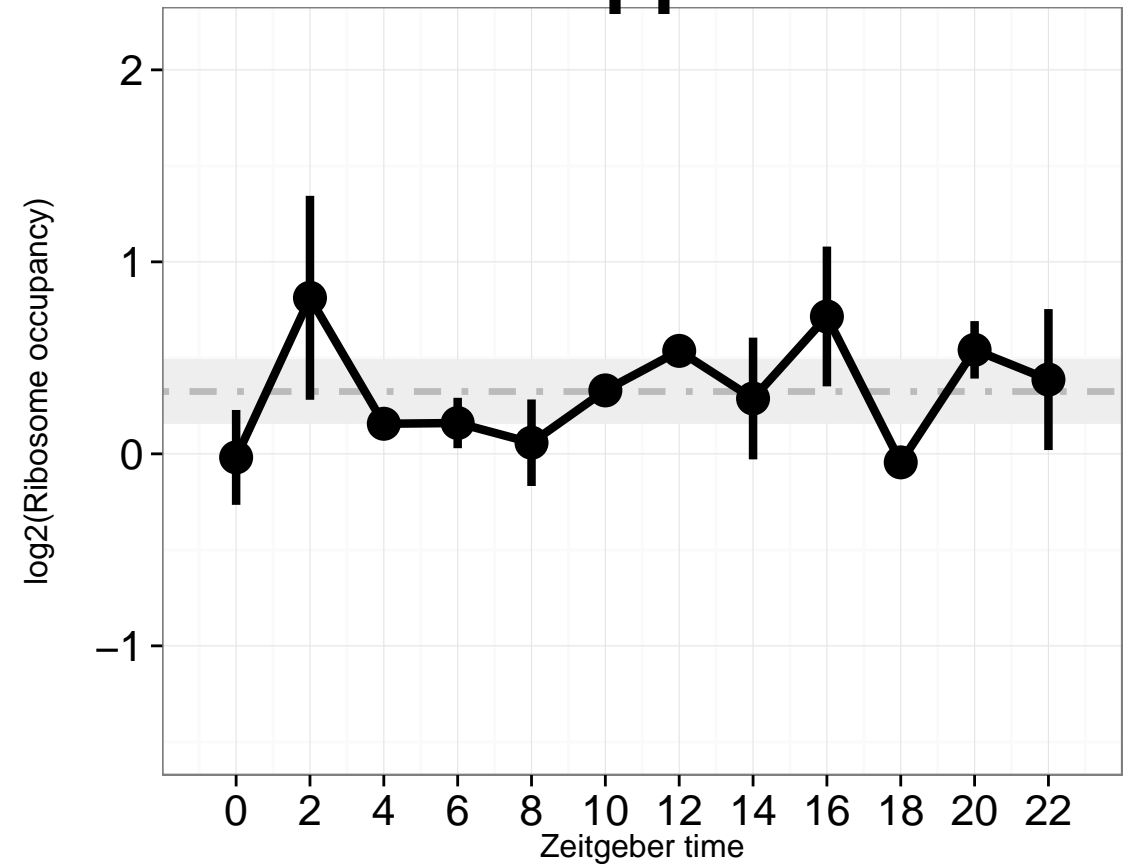

Supplement: Supplementary file 7394 [file 1]

## Cldn8

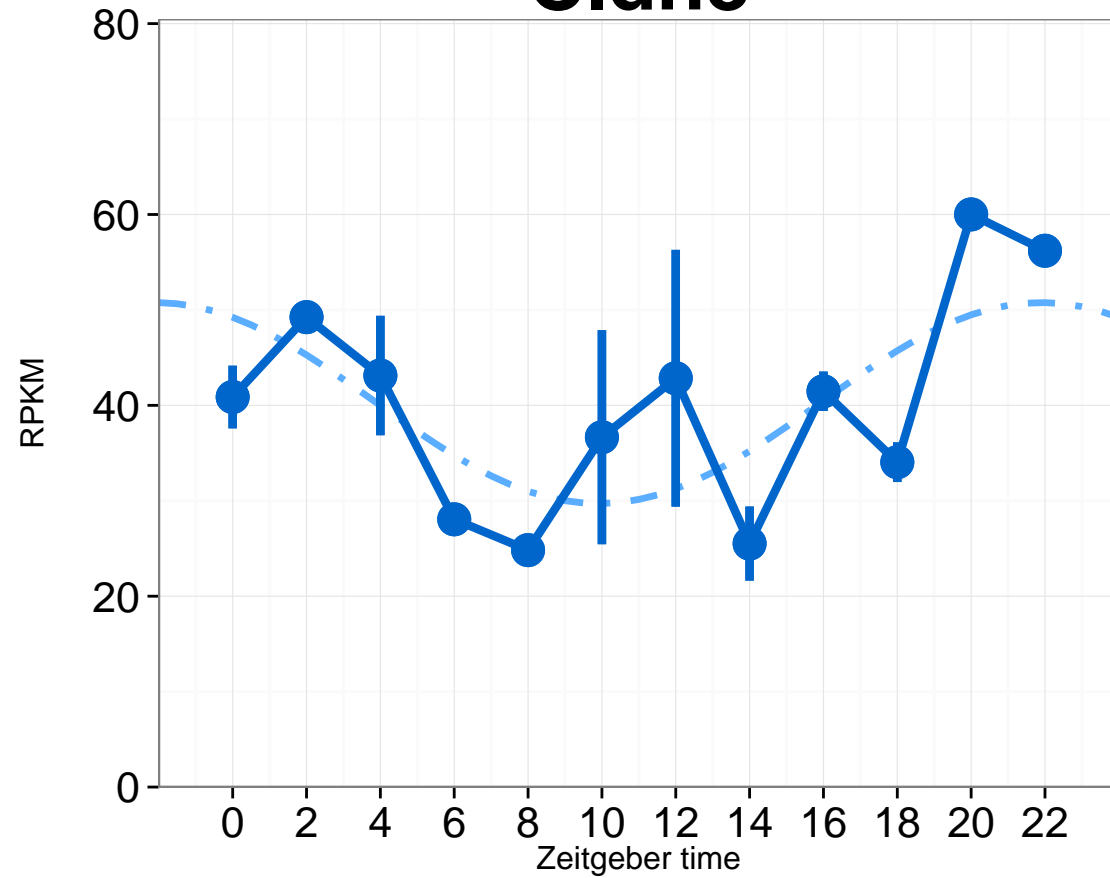

## Cldn8 log2(Ribosome occupancy

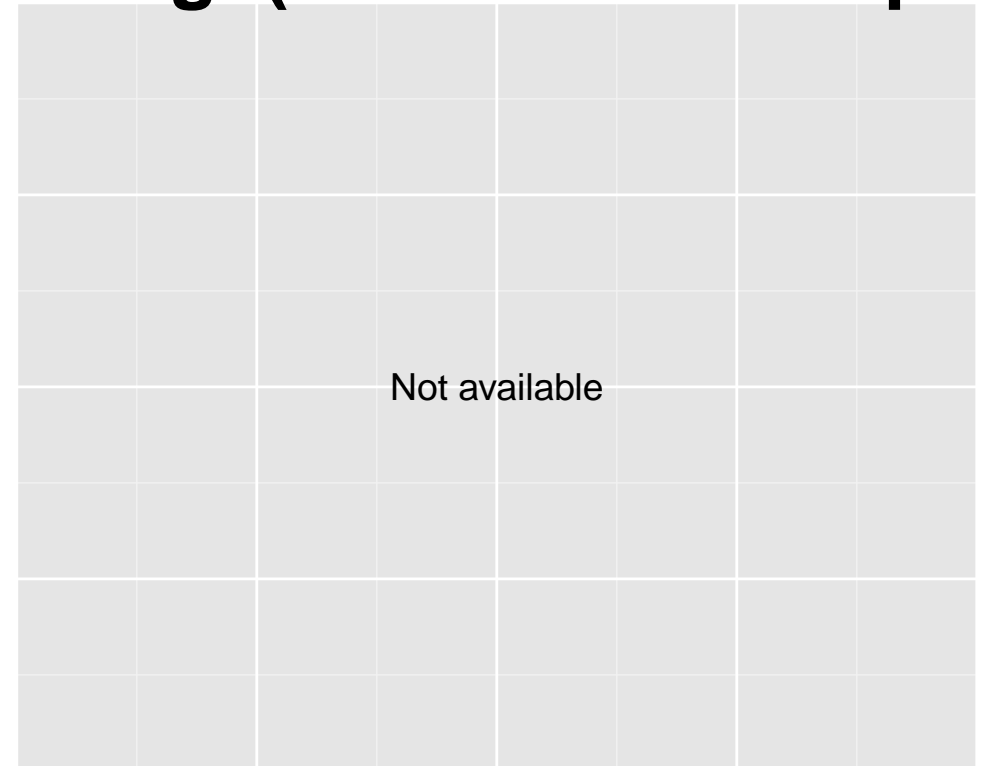

Supplement: Supplementary file 7395 [file 1]

## Myrf

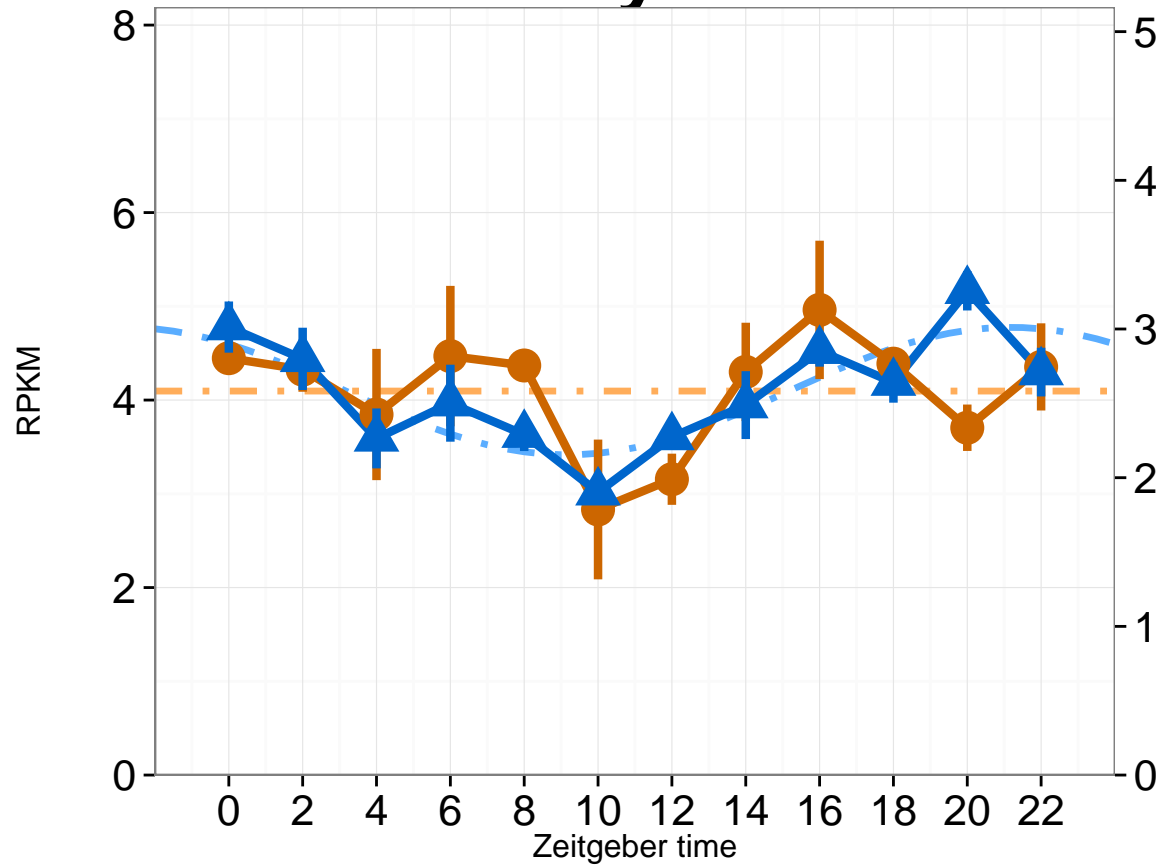

## Myrf

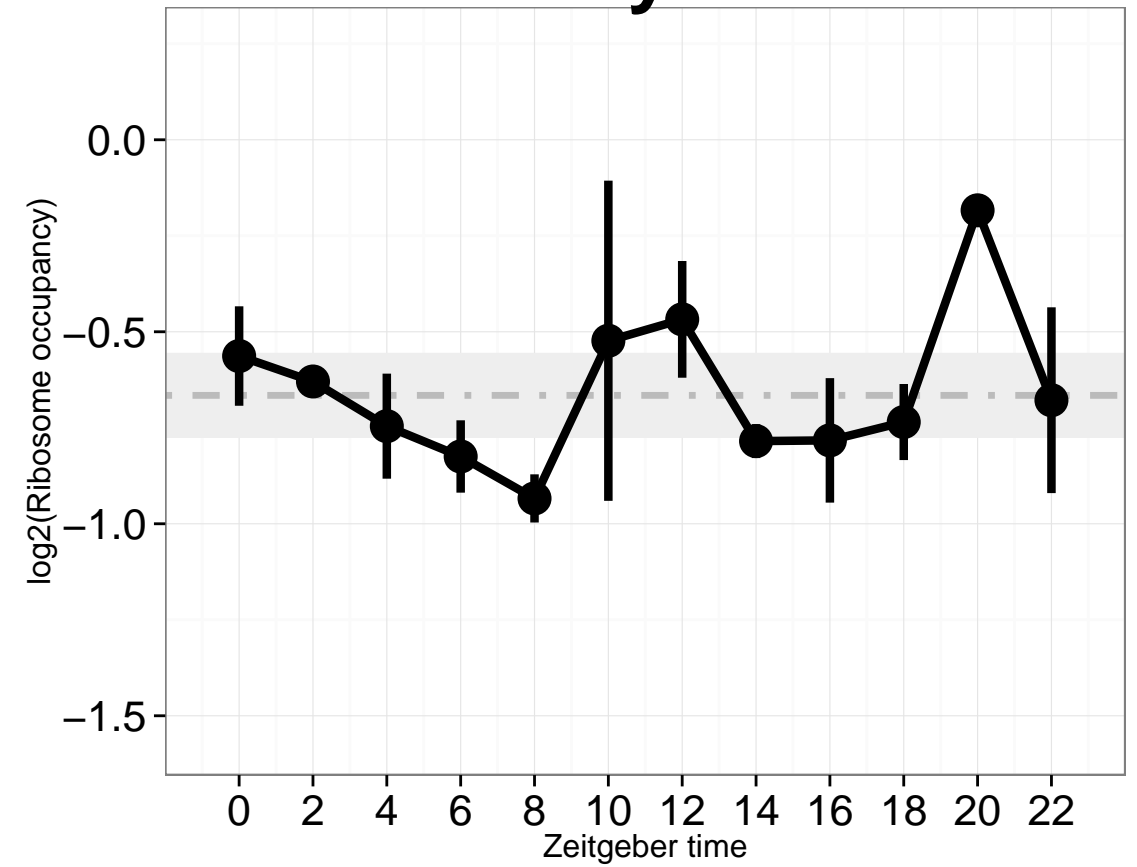

Supplement: Supplementary file 7396 [file 1]

## Slc9a8

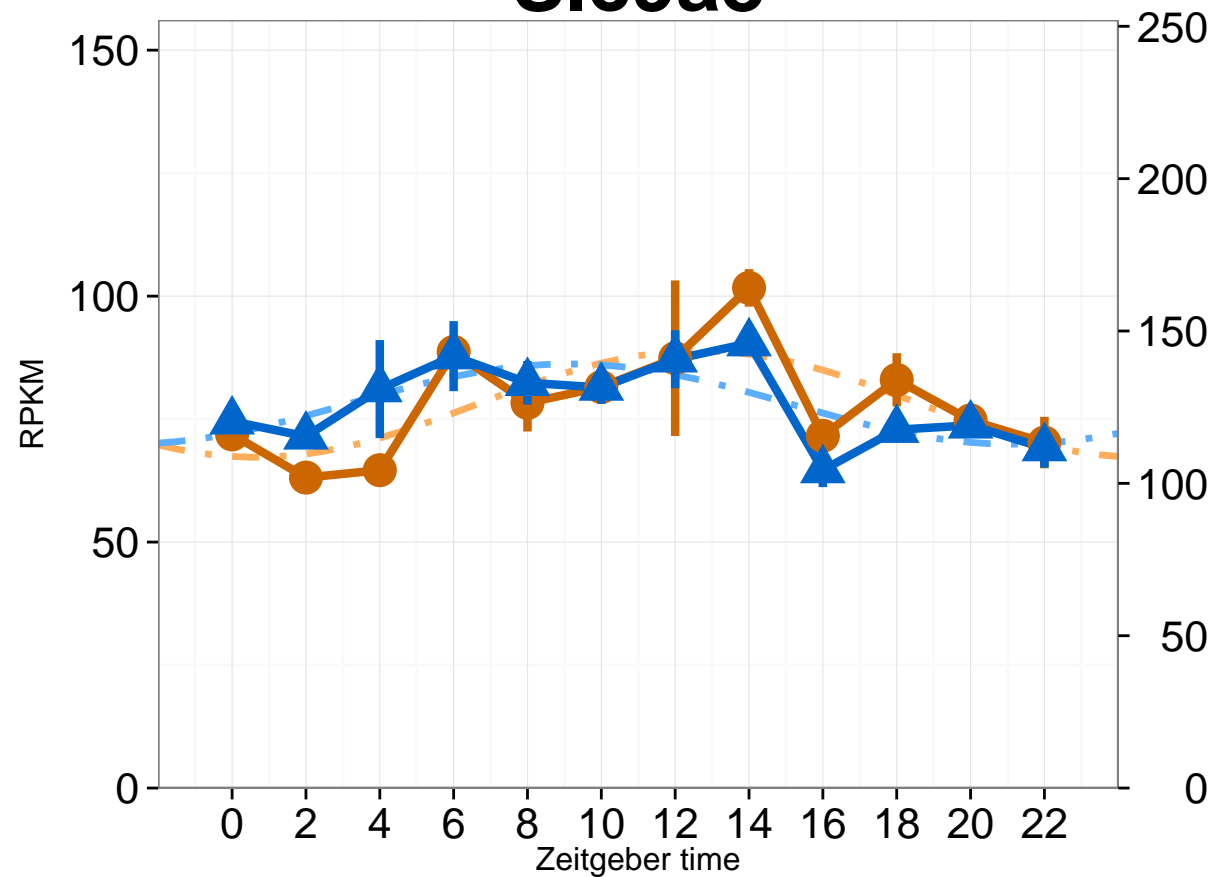

## Slc9a8

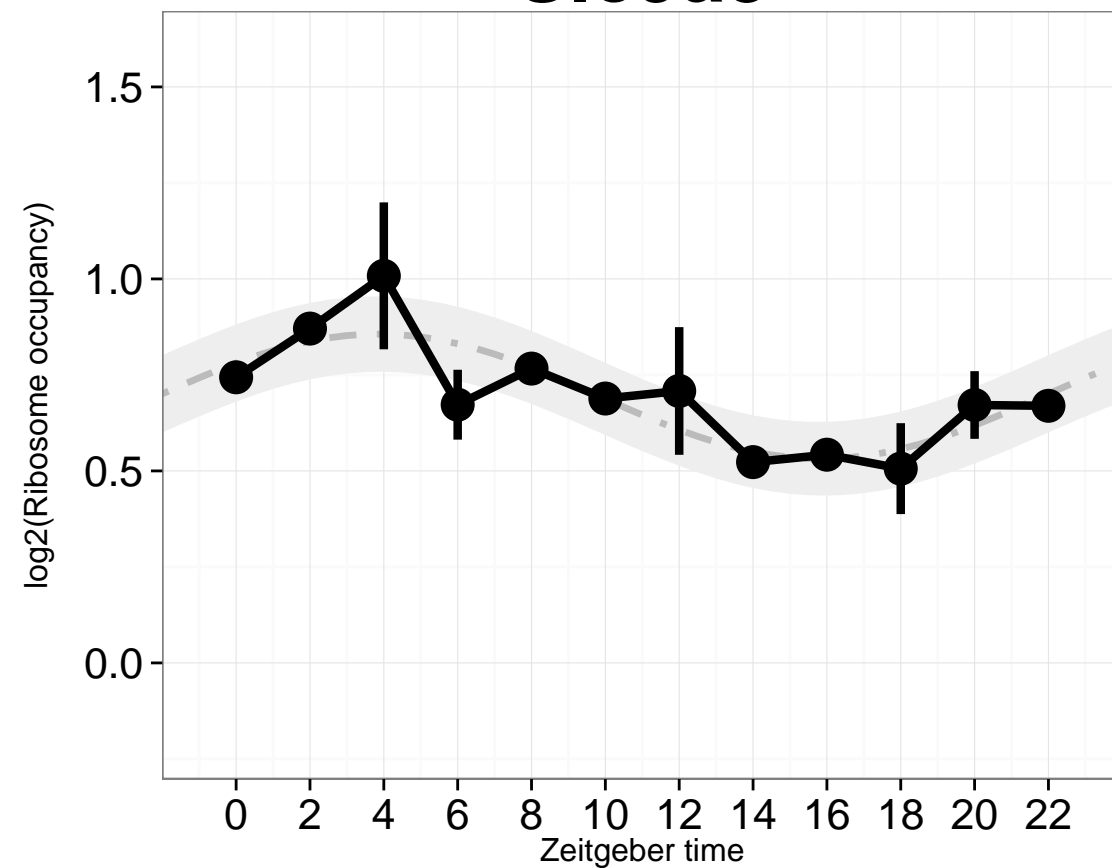

Supplement: Supplementary file 7397 [file 1]

## Lrba

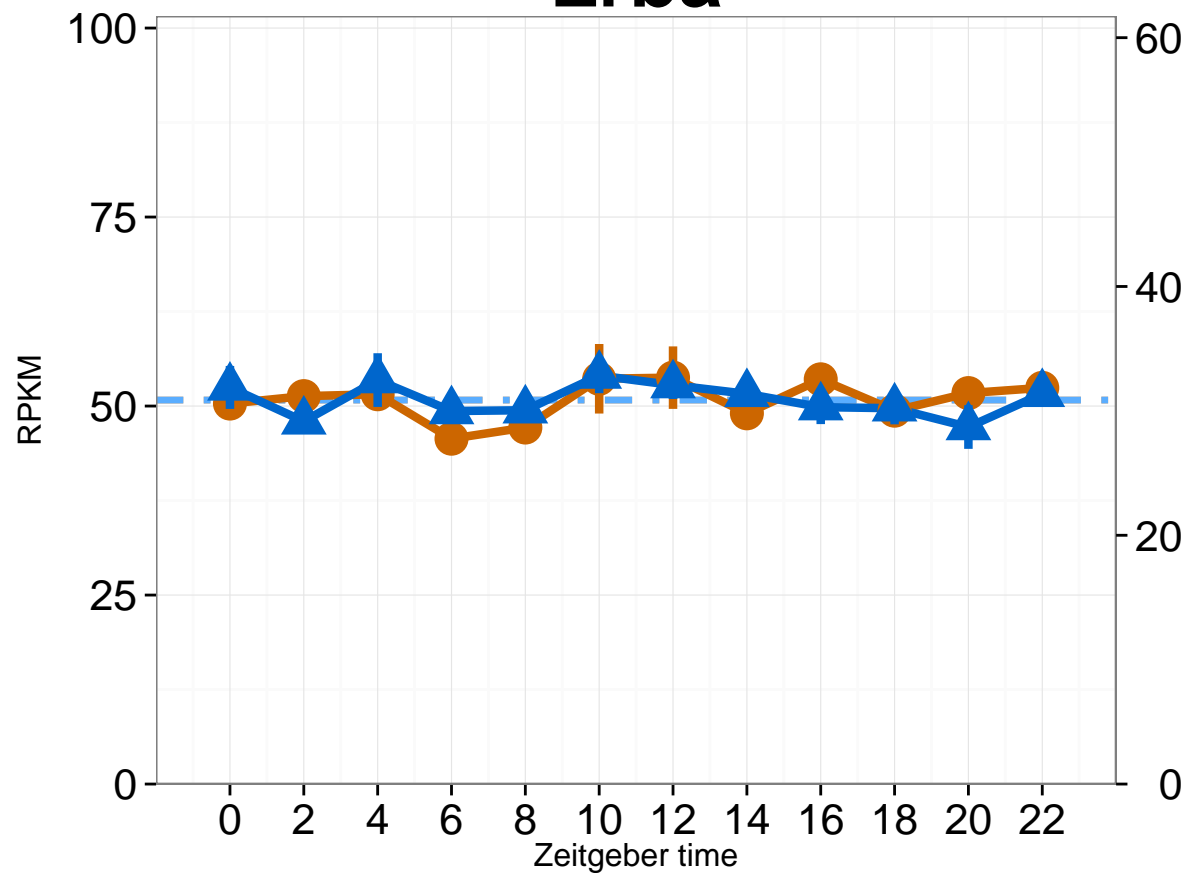

## Lrba

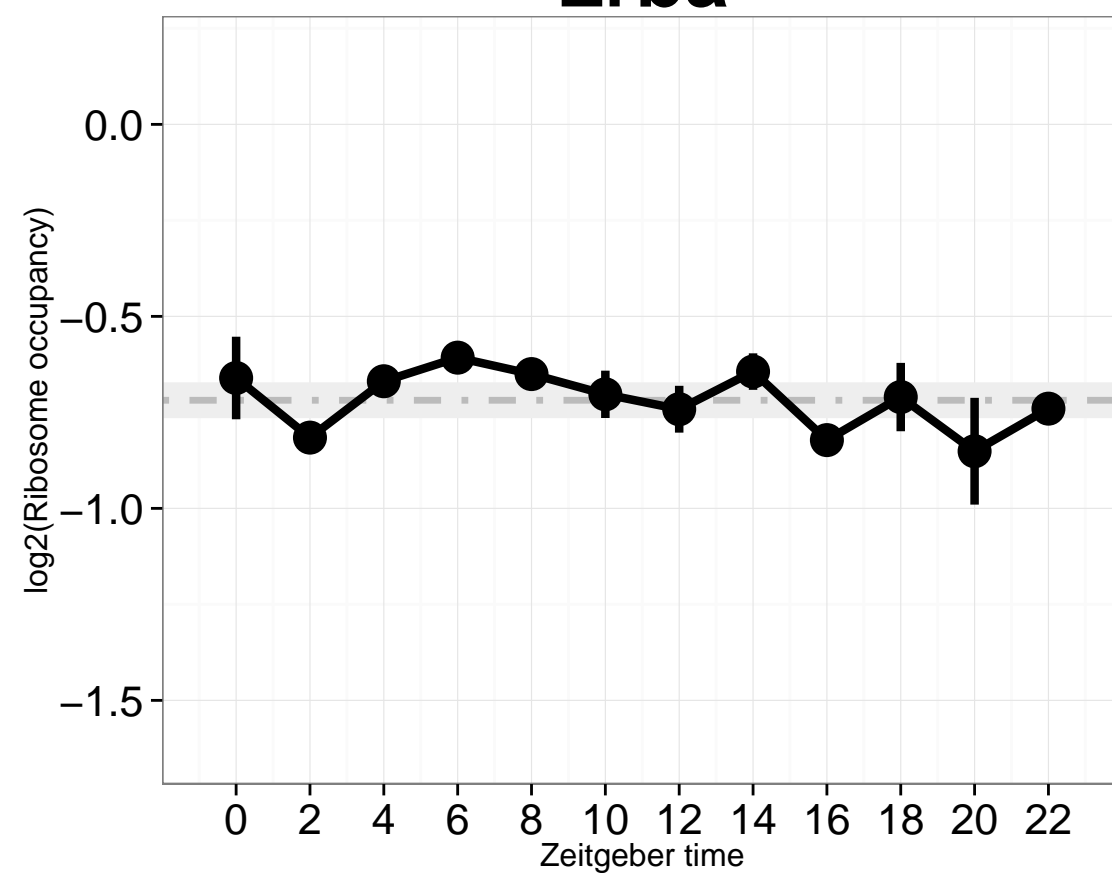

Supplement: Supplementary file 7398 [file 1]

## Exosc10

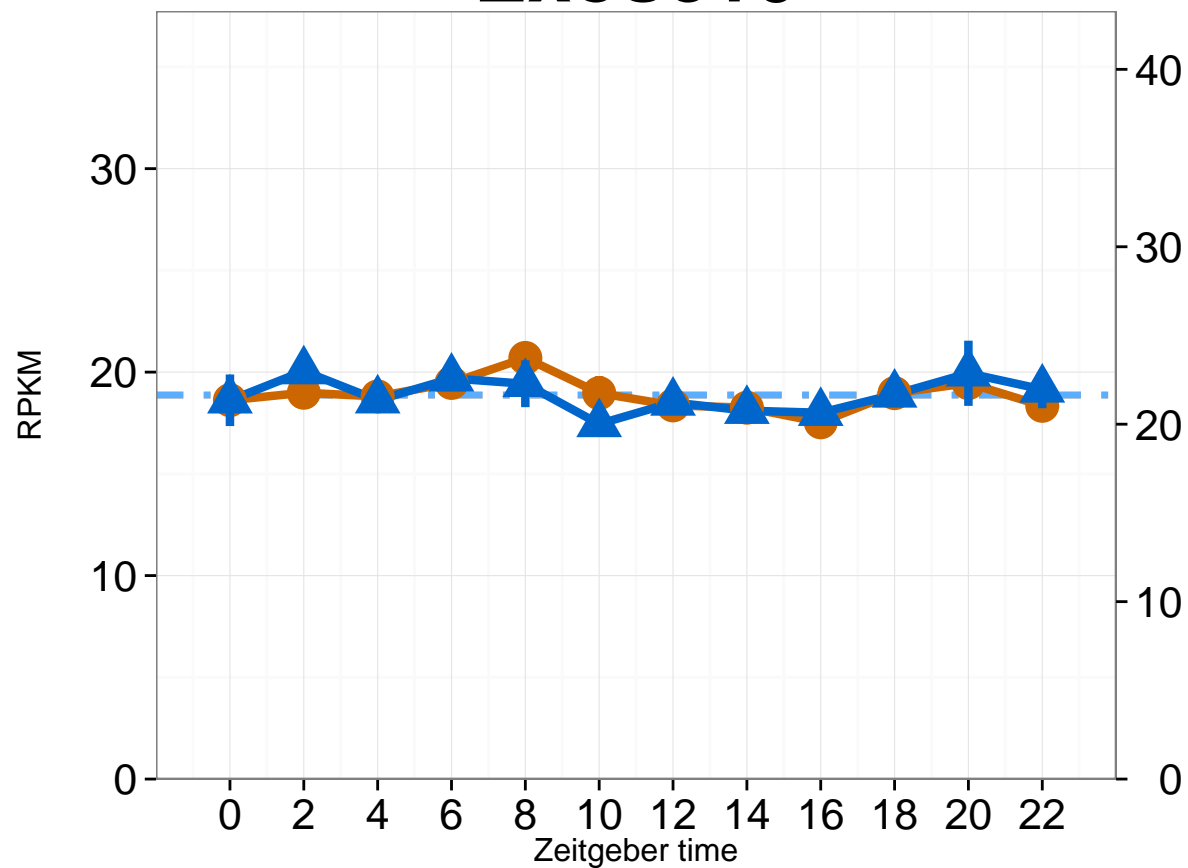

## Exosc10

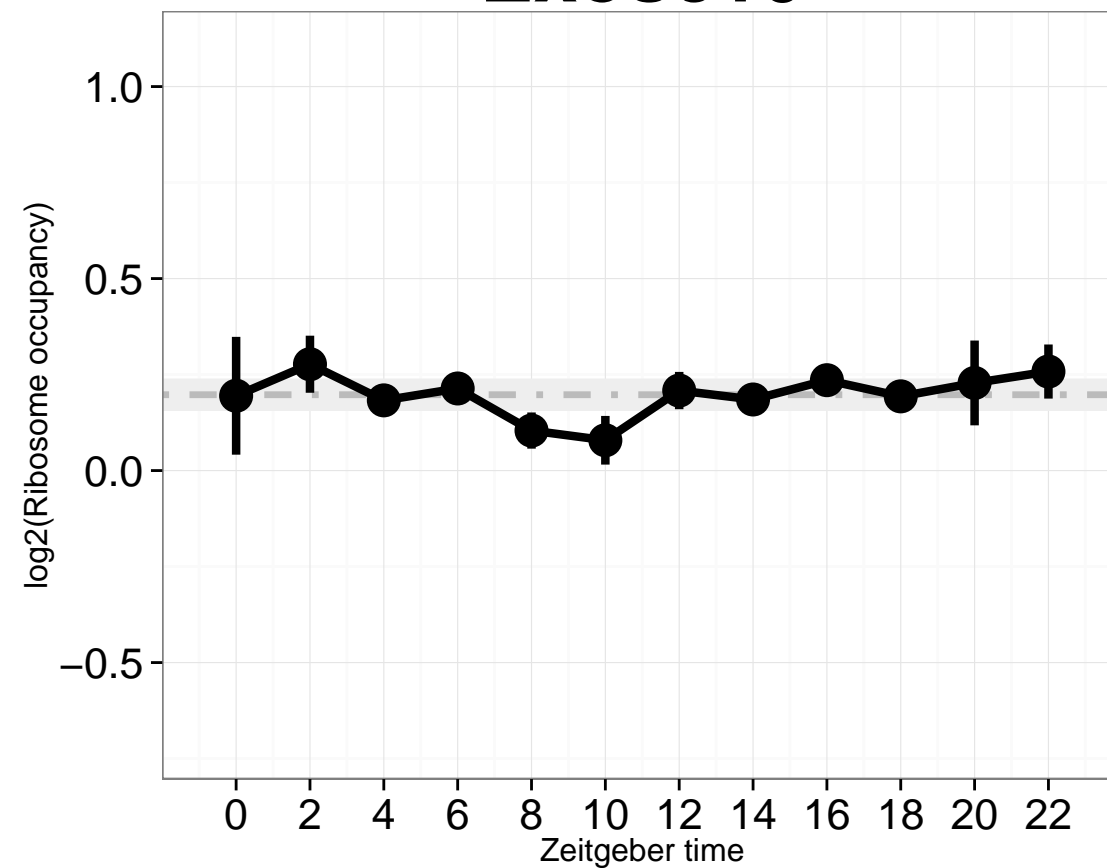

Supplement: Supplementary file 7399 [file 1]

## Bbs2

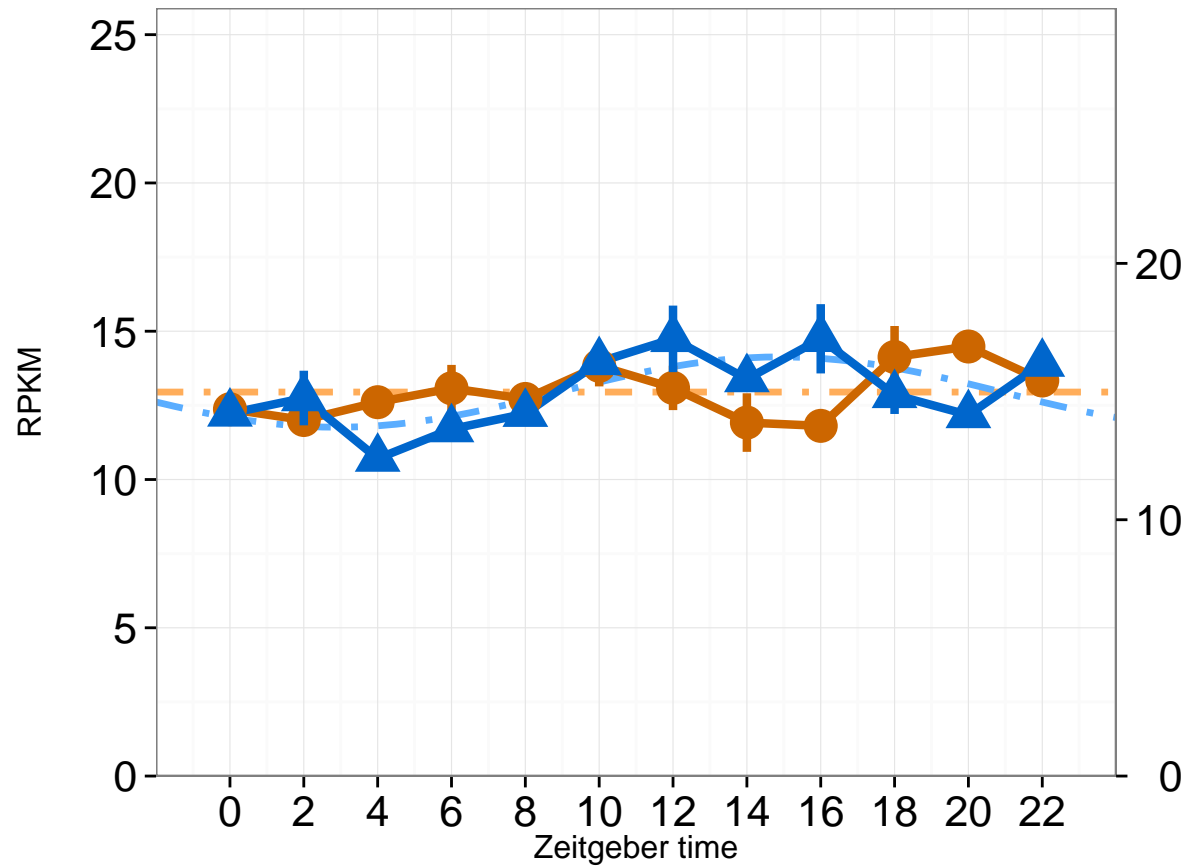

## Bbs2

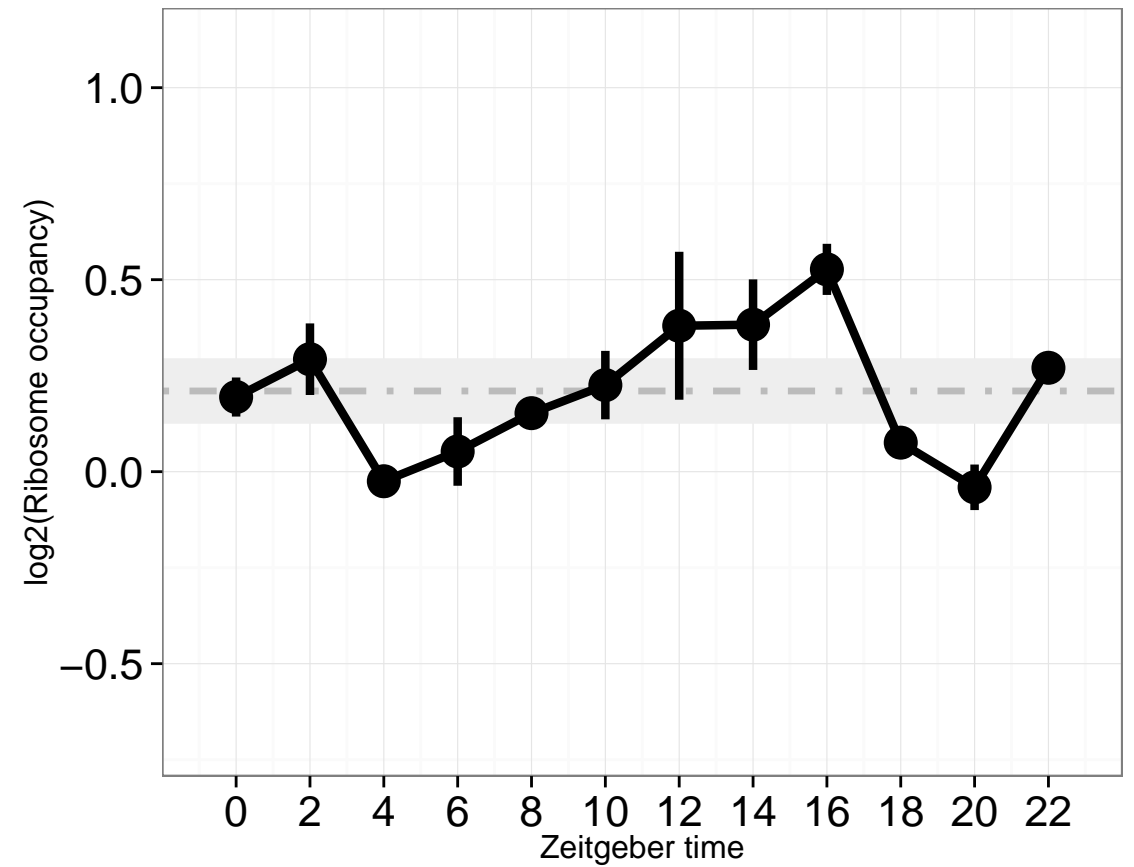

Supplement: Supplementary file 7400 [file 1]

# Cnr2

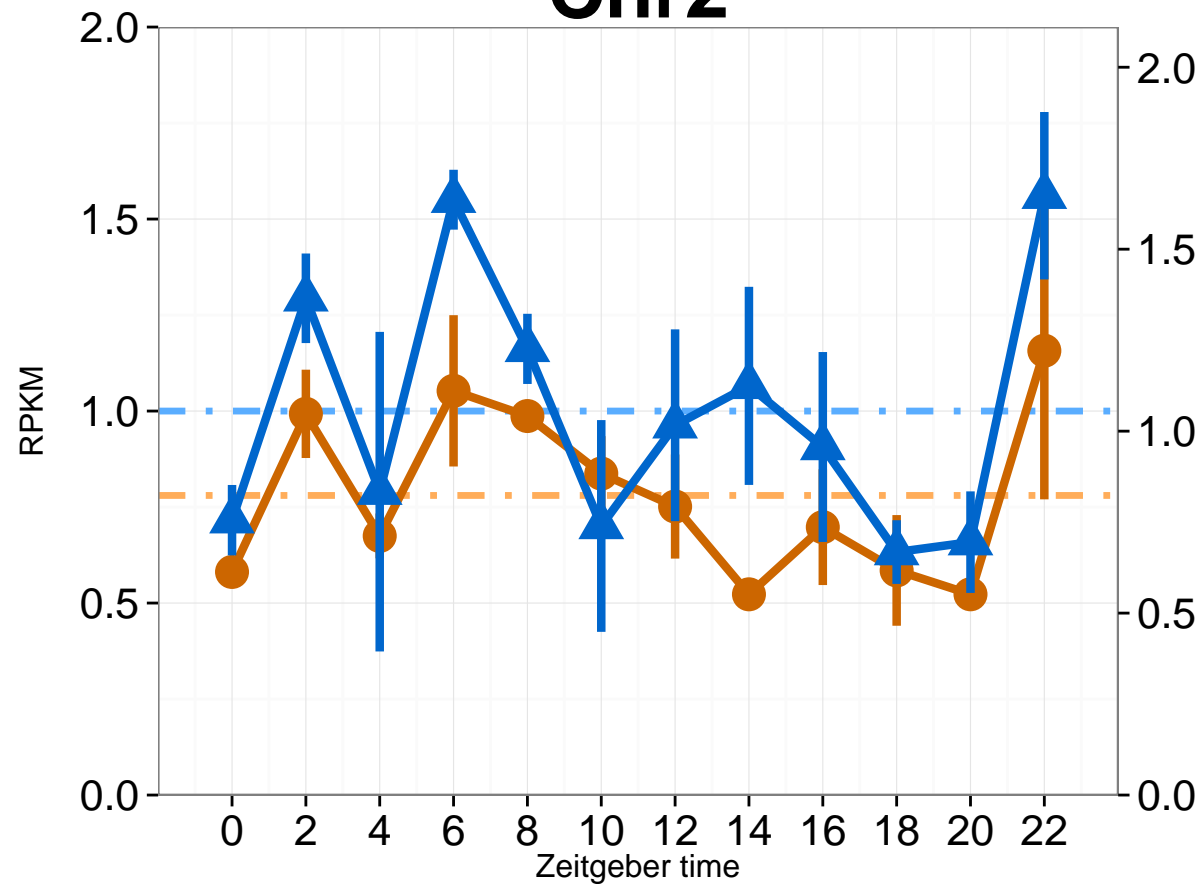

# Cnr2

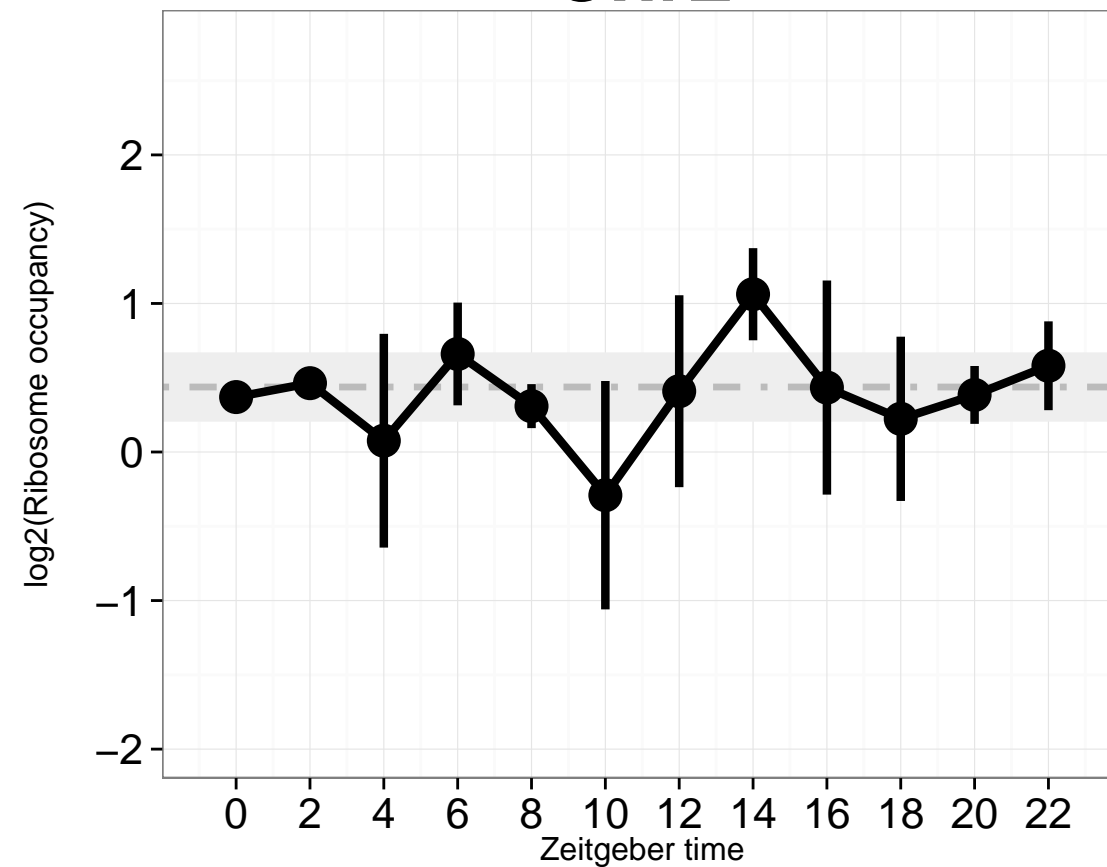

Supplement: Supplementary file 7401 [file 1]

# Rcn3

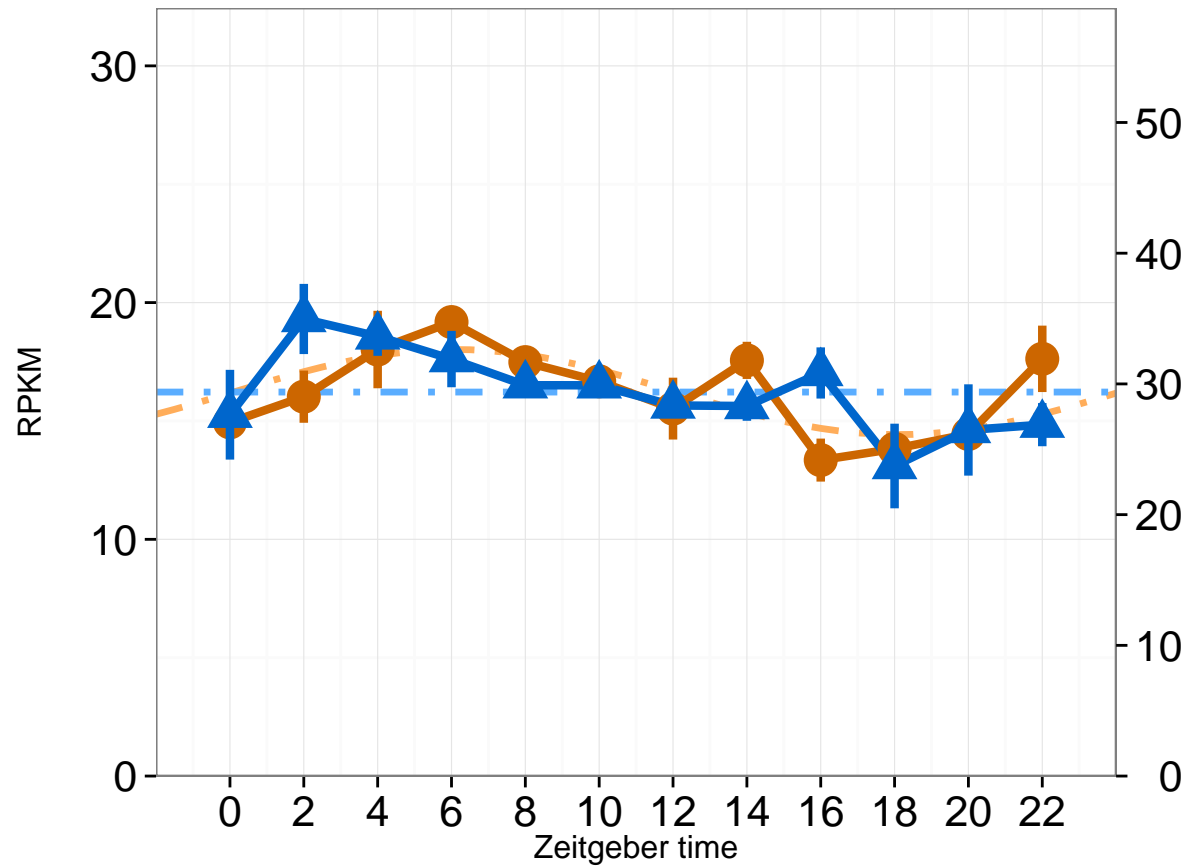

# Rcn3

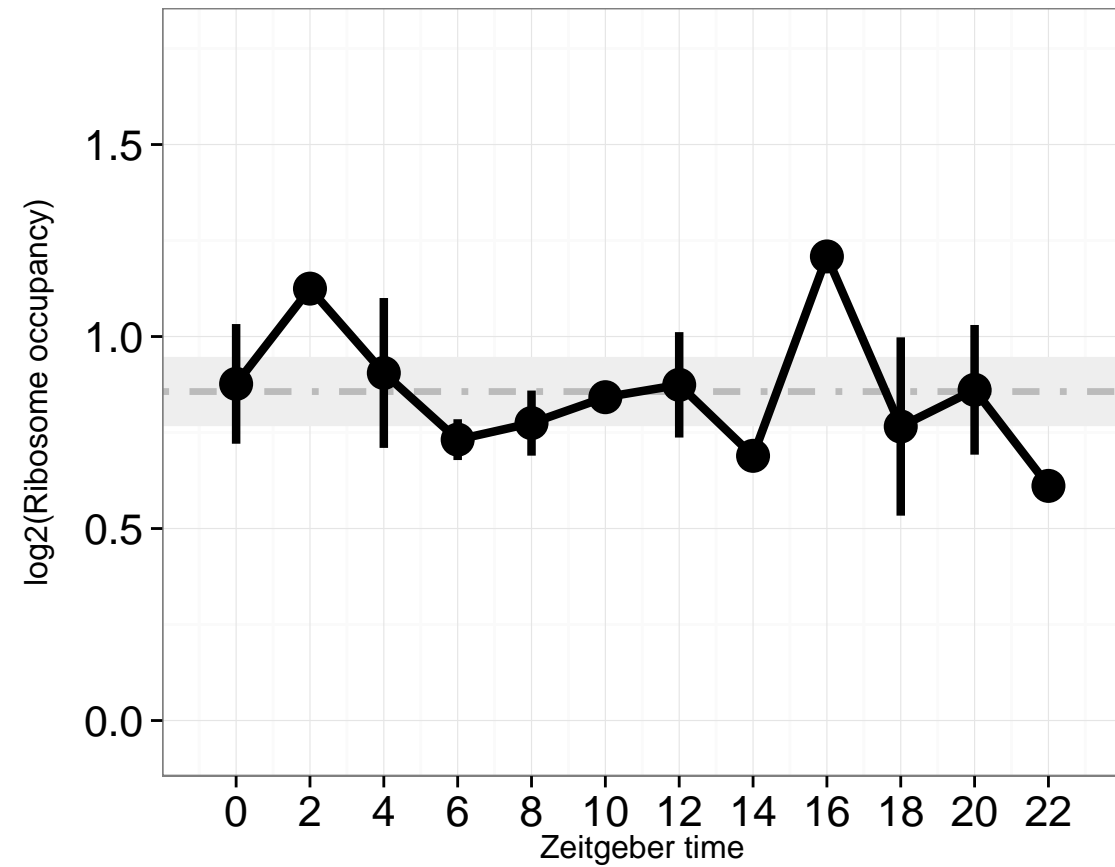

Supplement: Supplementary file 7402 [file 1]

## Ebf1

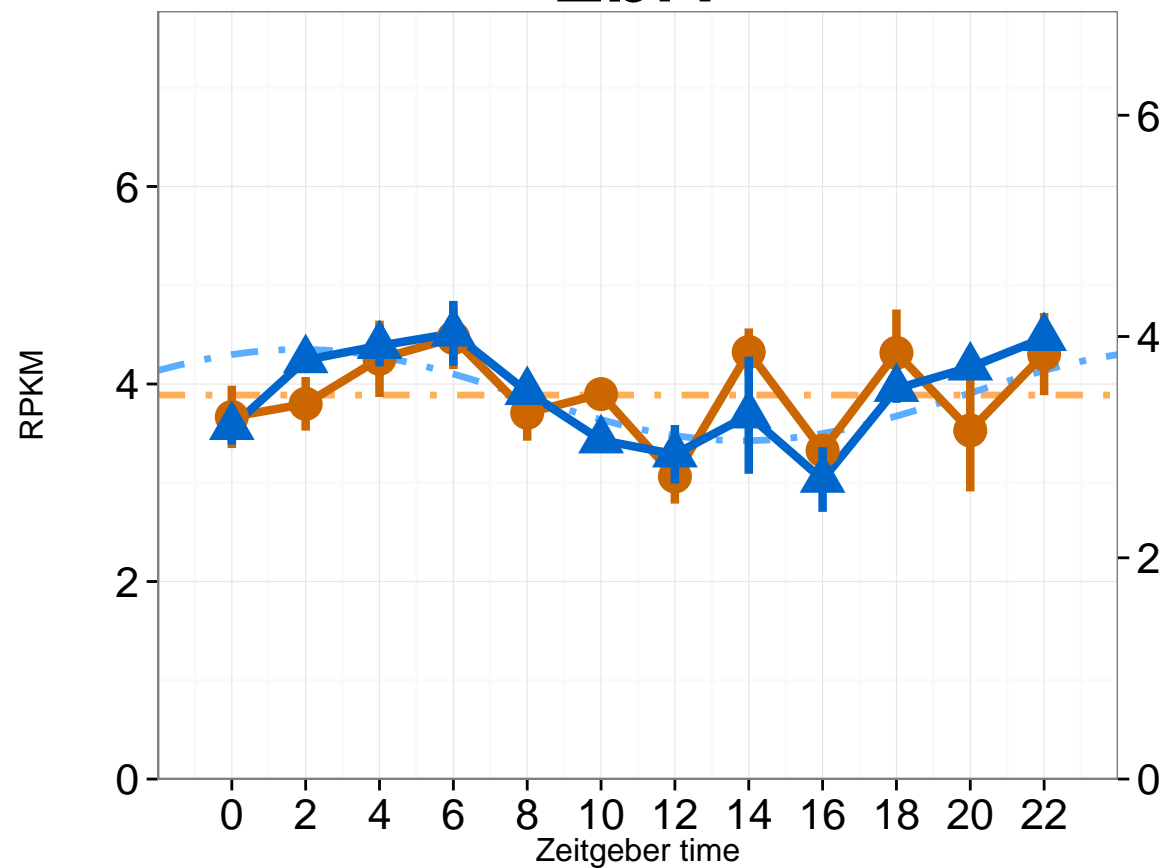

## Ebf1

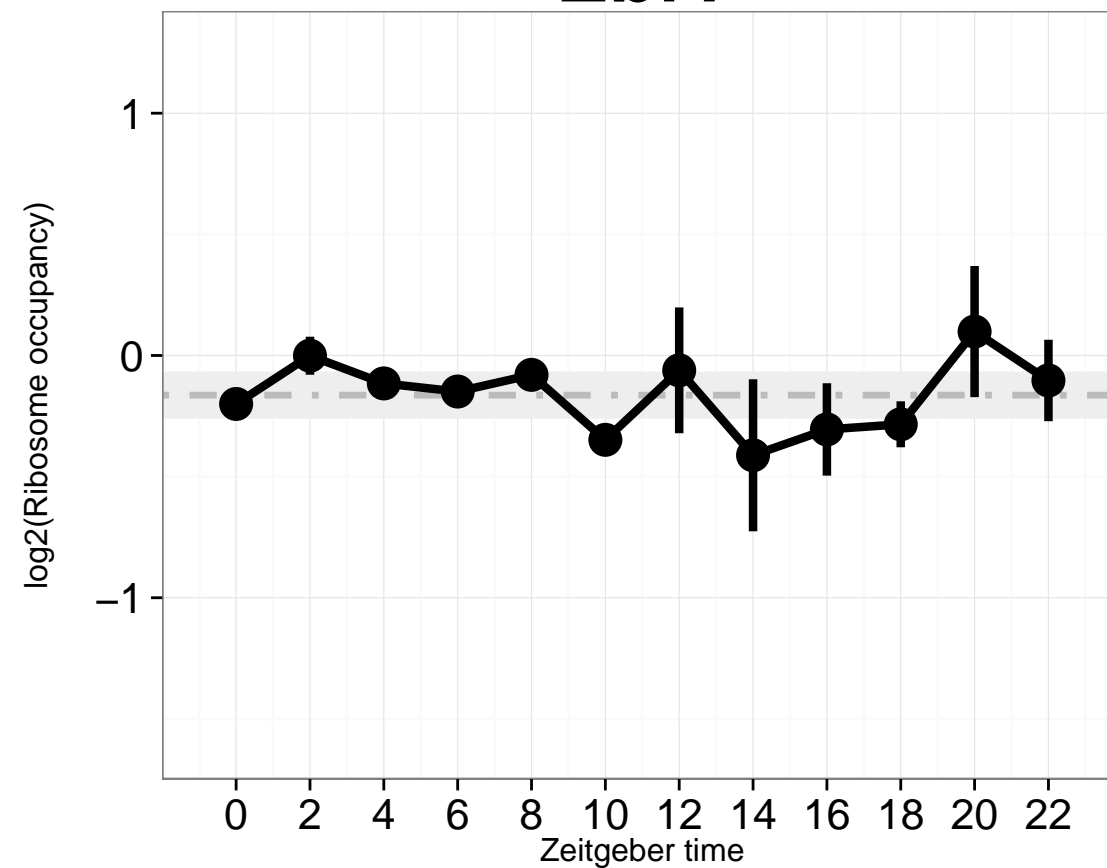

Supplement: Supplementary file 7403 [file 1]

# Stx7

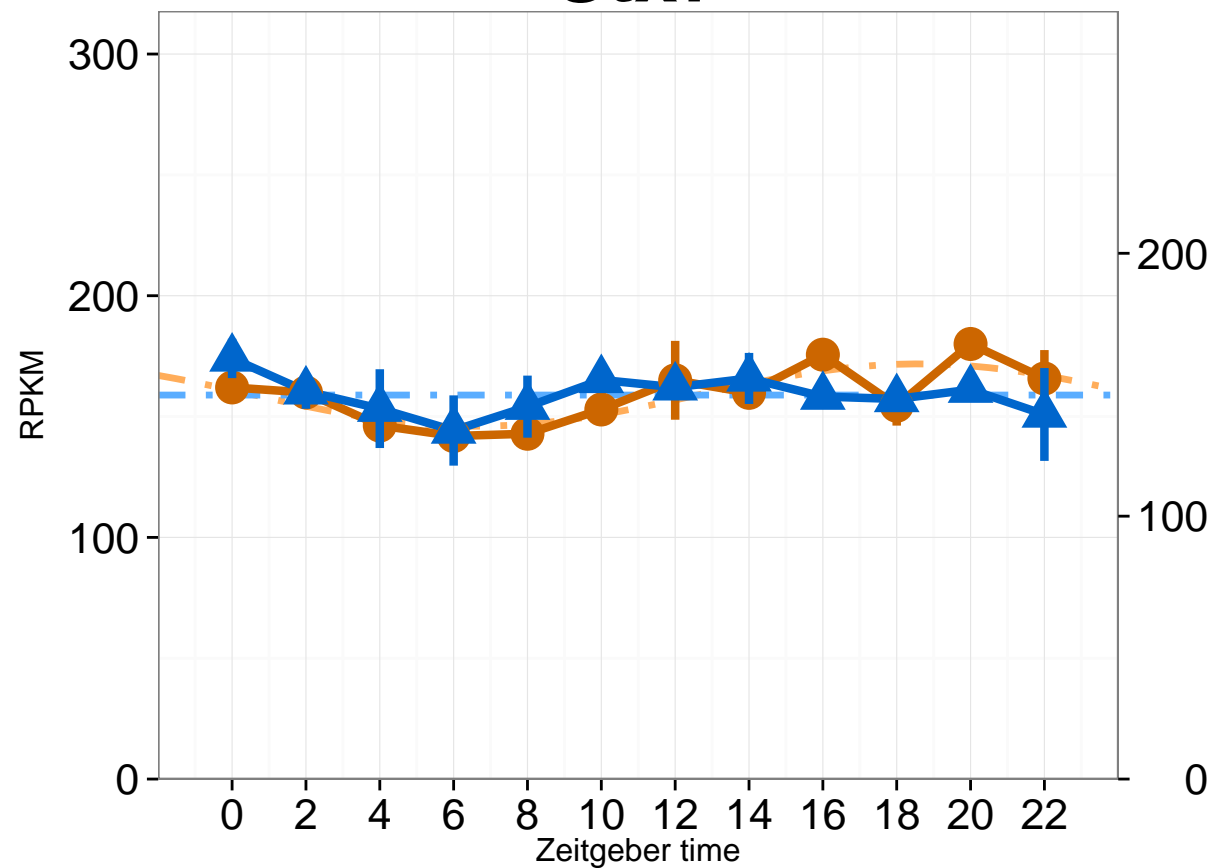

# Stx7

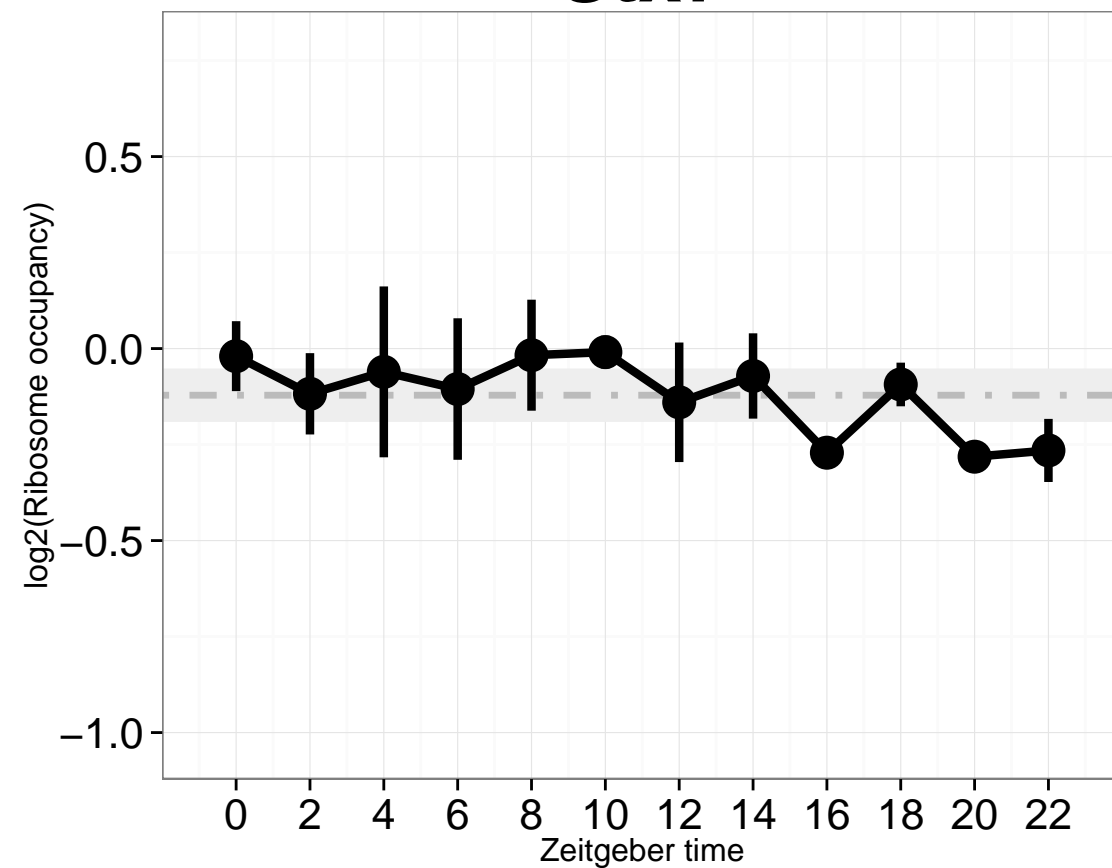

Supplement: Supplementary file 7404 [file 1]

# Grin3b

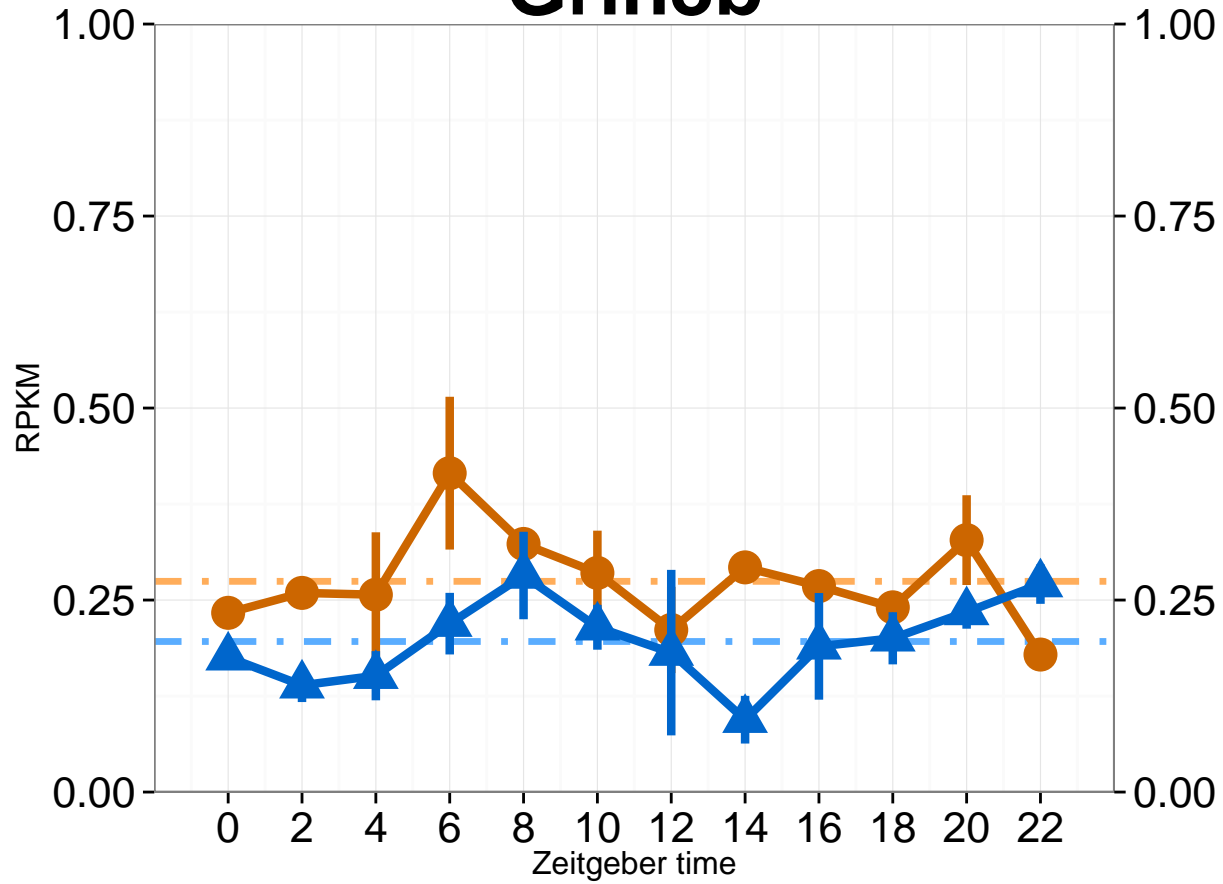

# Grin3b

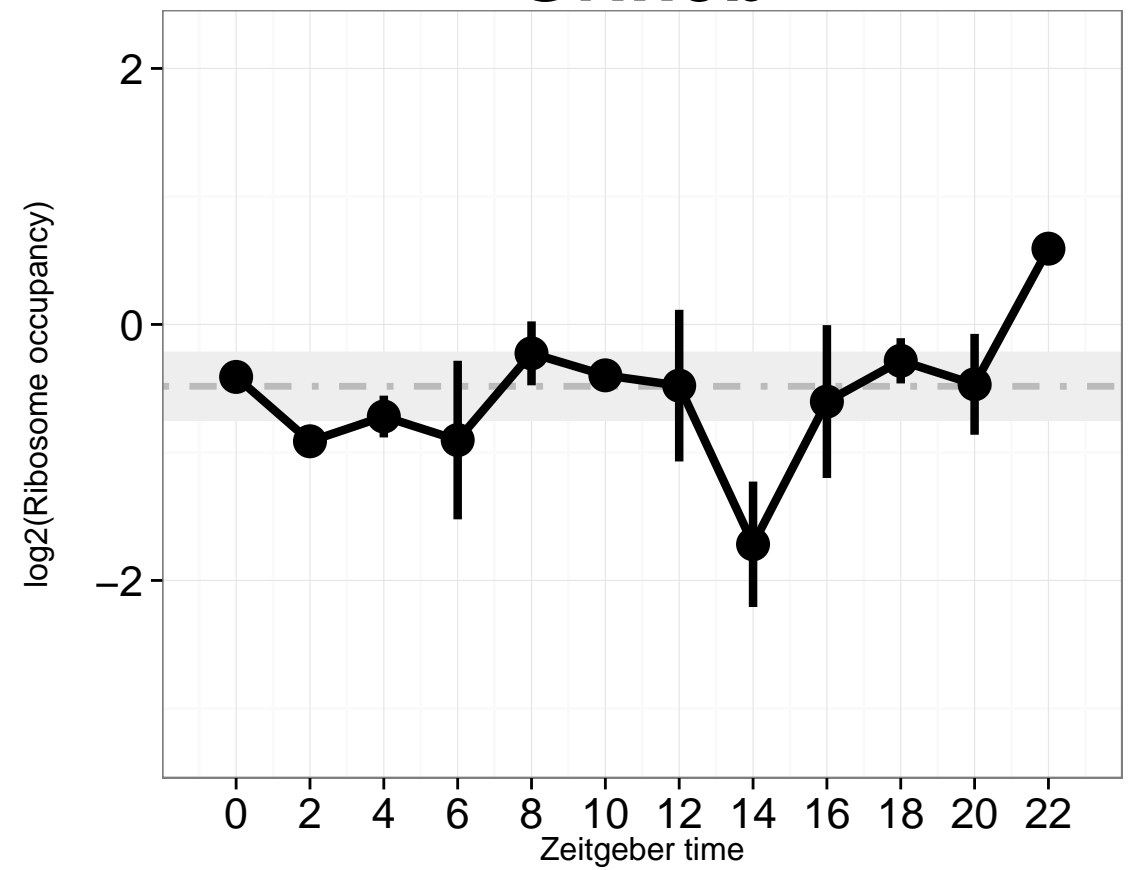

Supplement: Supplementary file 7405 [file 1]

# Ints6

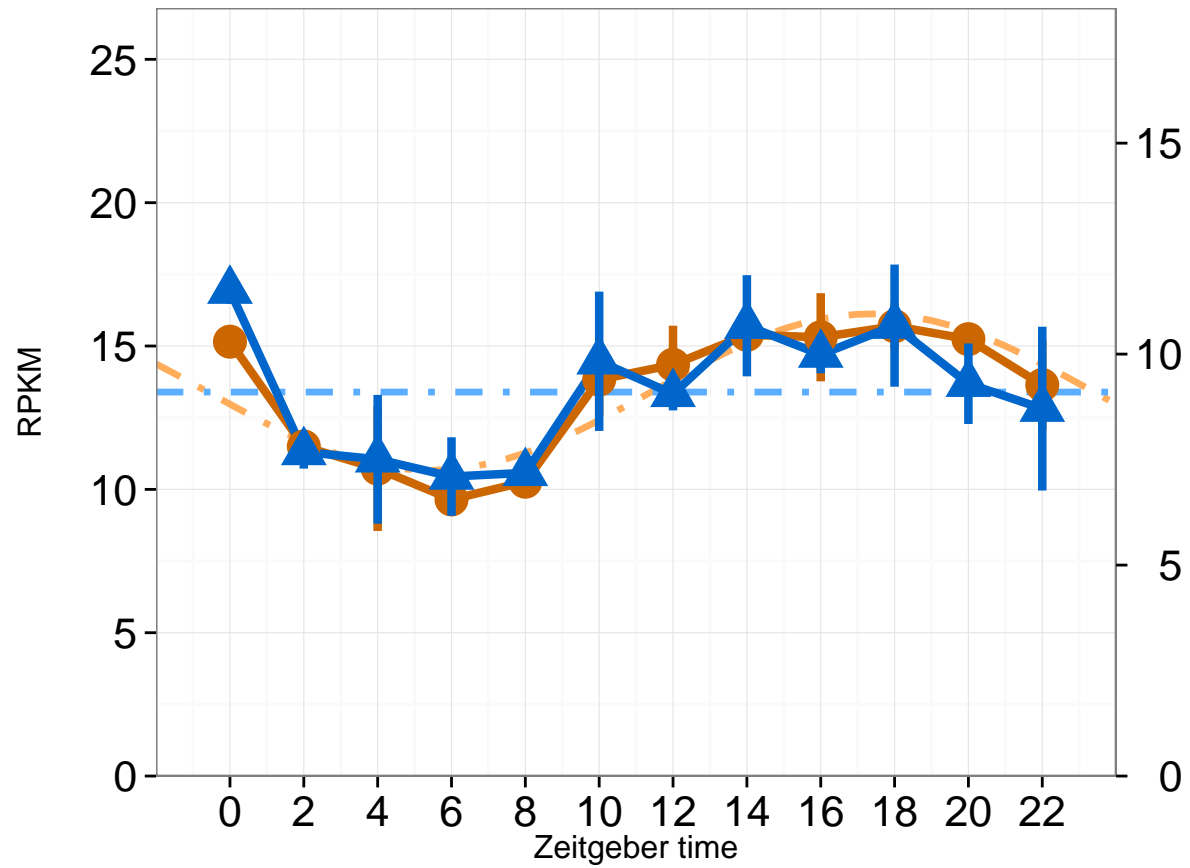

# Ints6

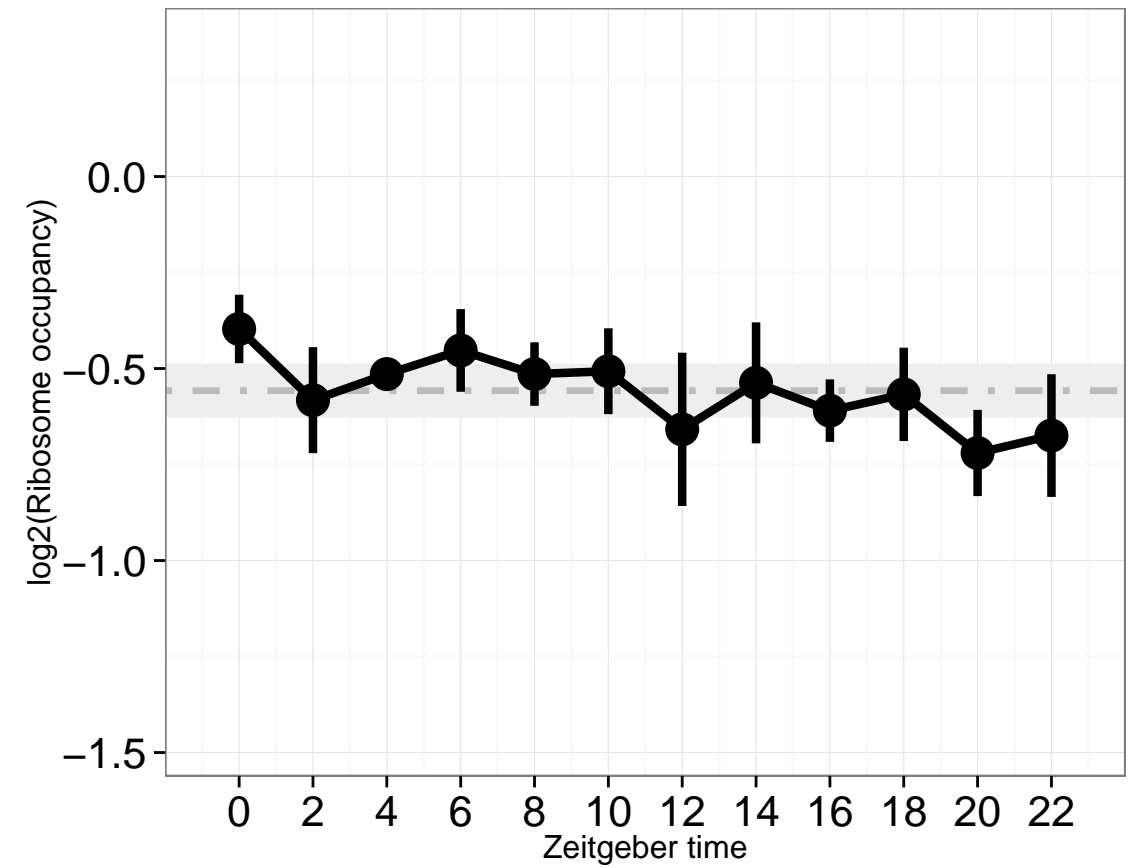

Supplement: Supplementary file 7406 [file 1]

## Fads6

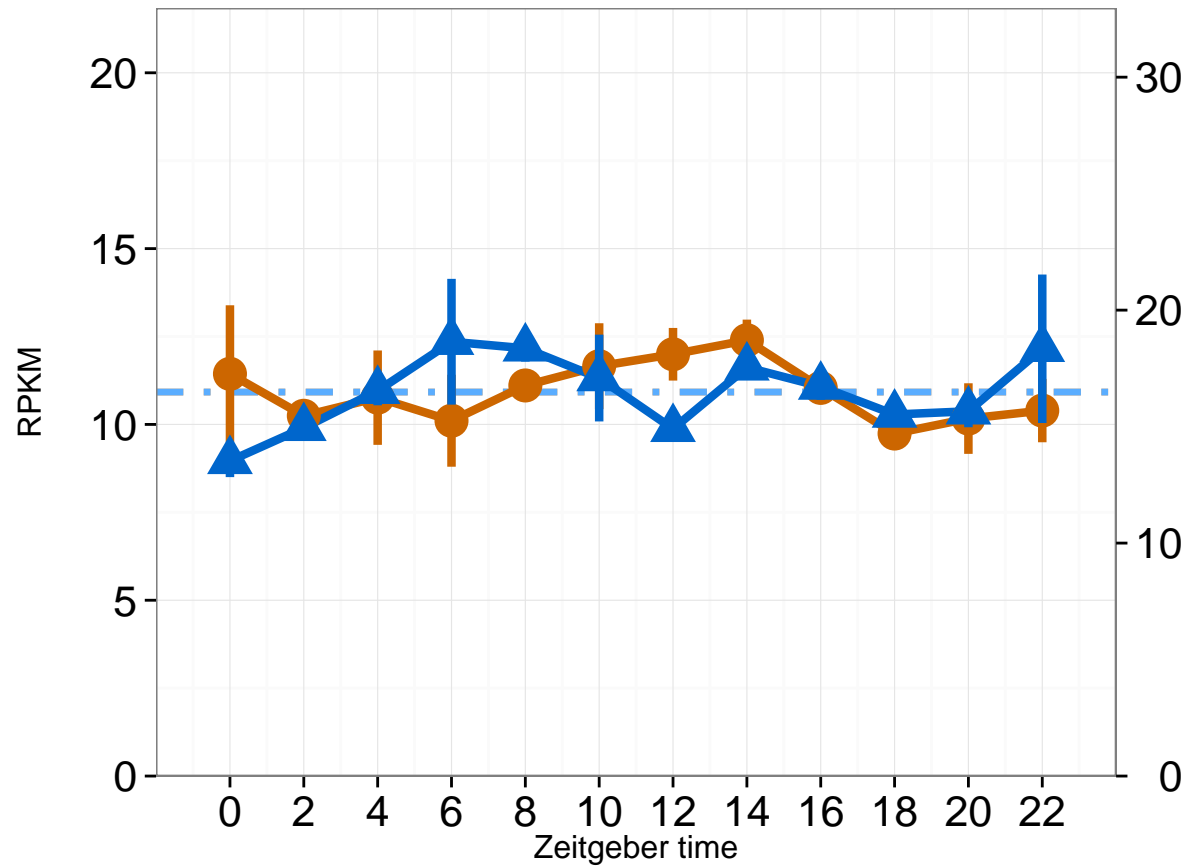

## Fads6

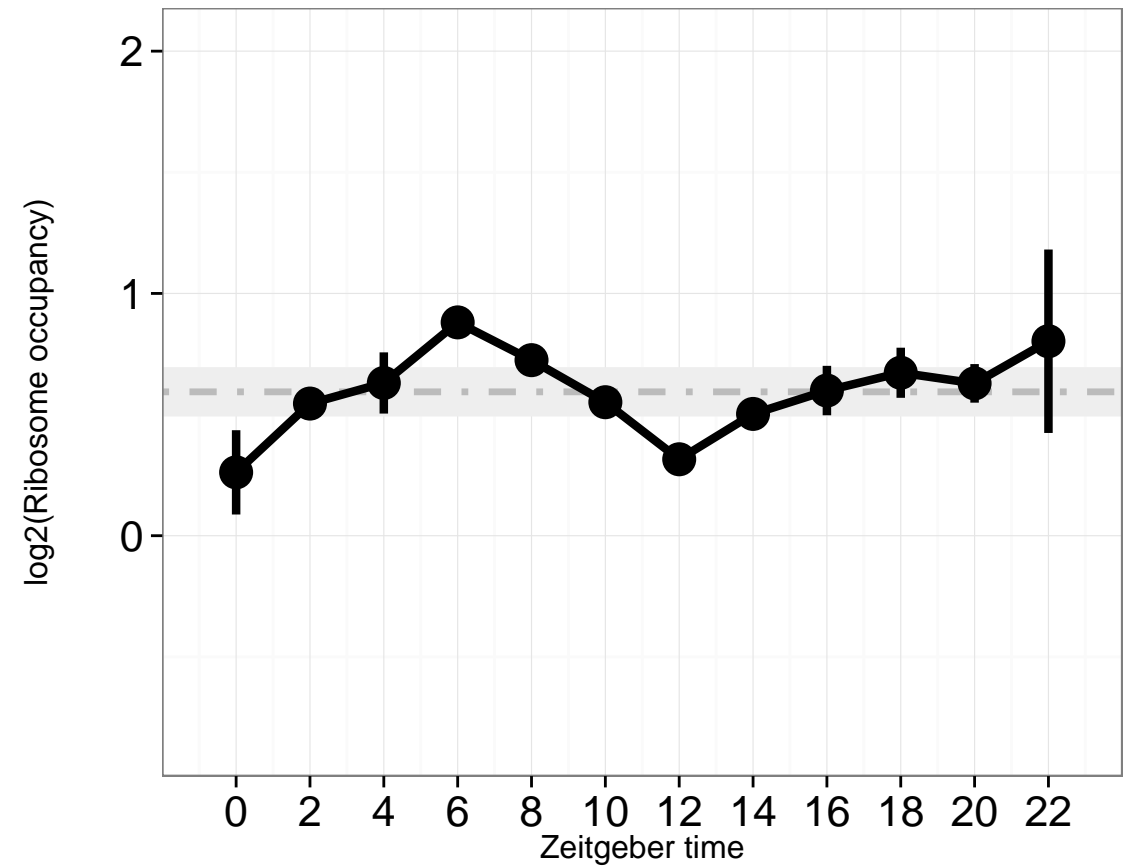

Supplement: Supplementary file 7407 [file 1]

## Kifc2

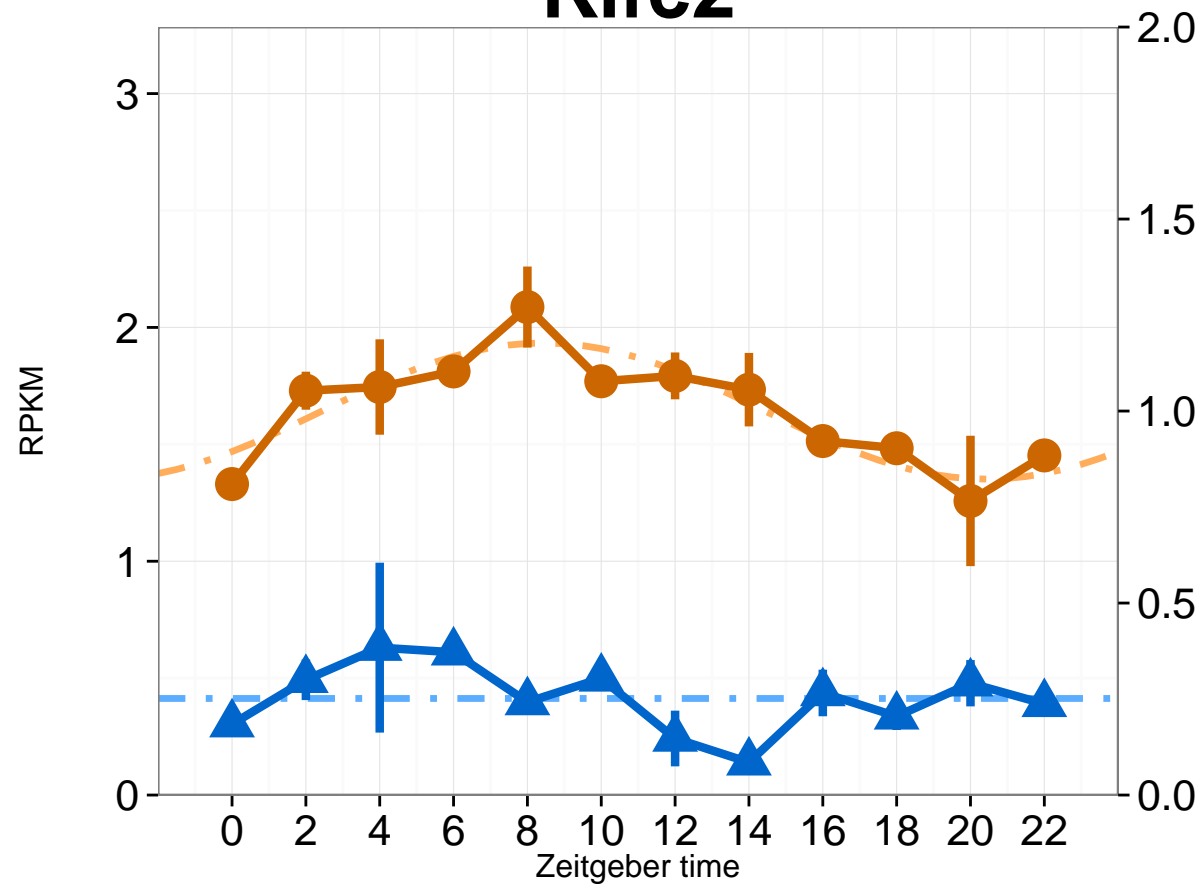

## Kifc2

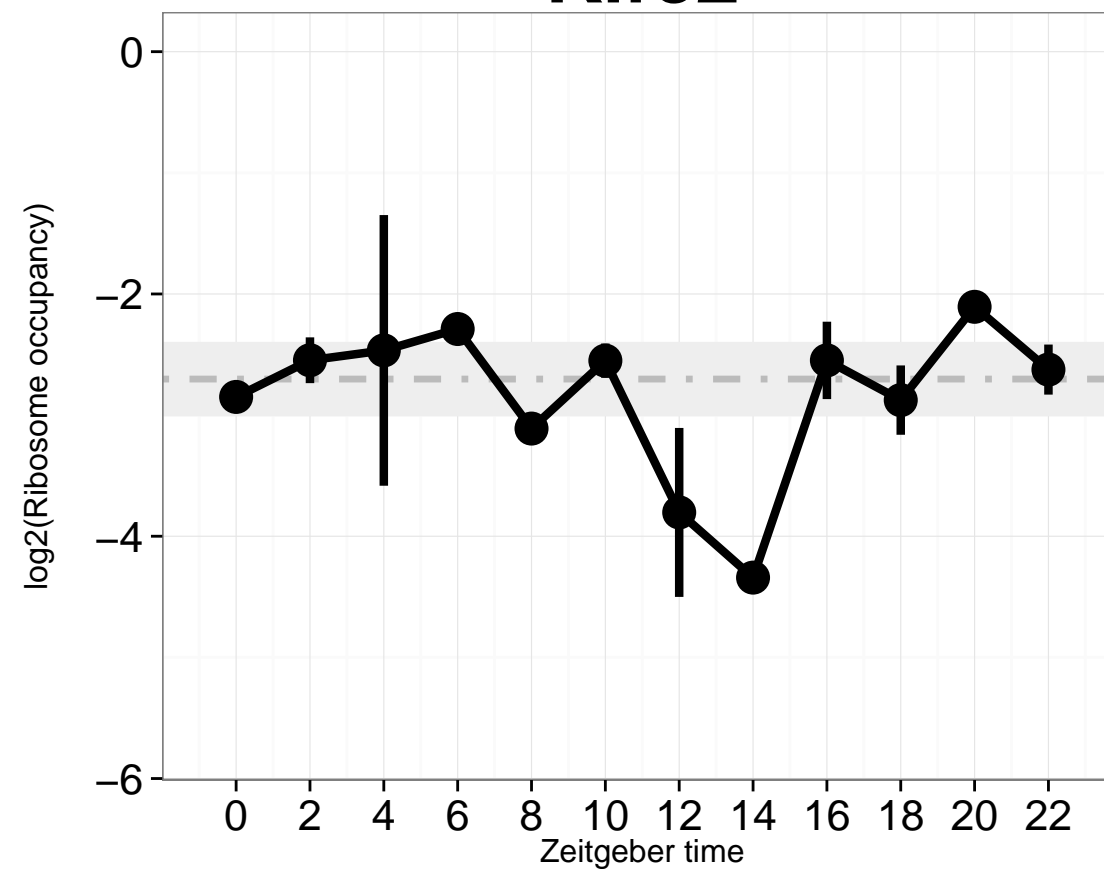

Supplement: Supplementary file 7408 [file 1]

## Hmox1

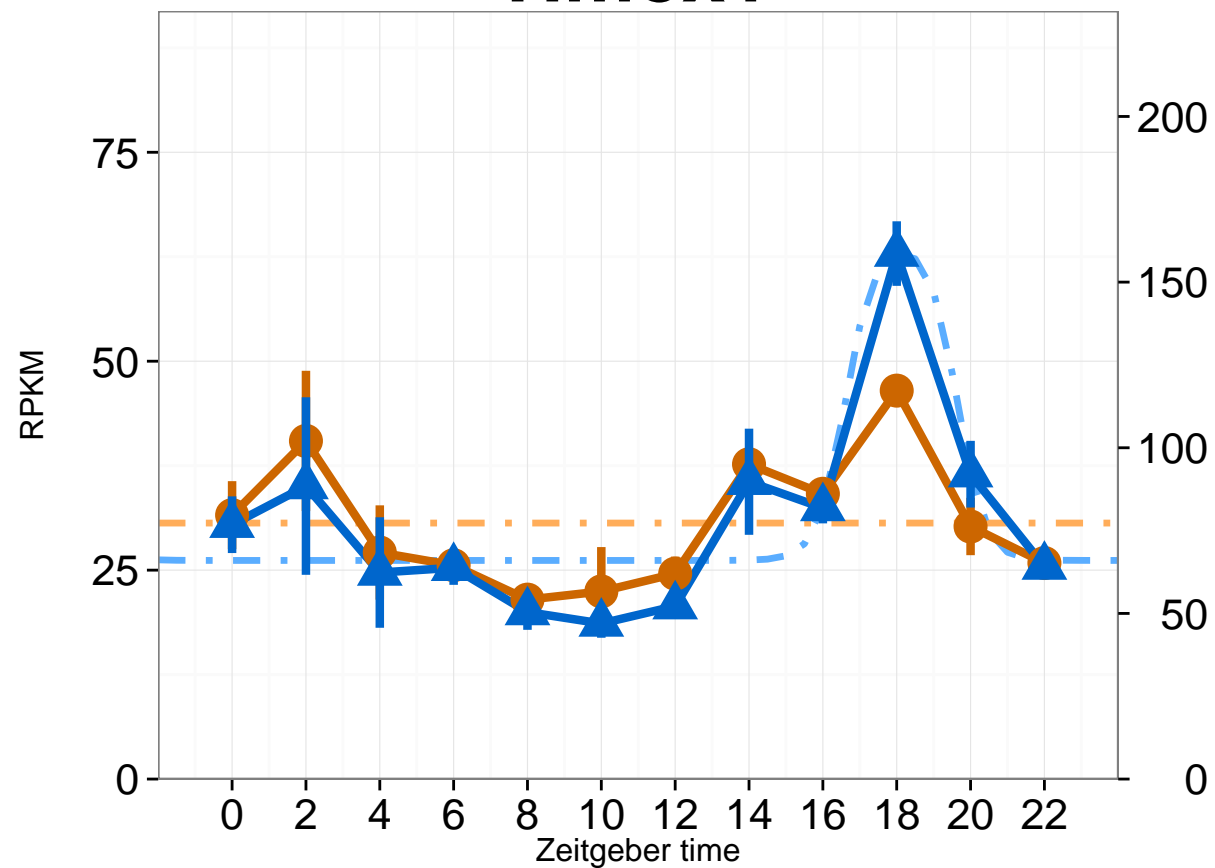

## Hmox1

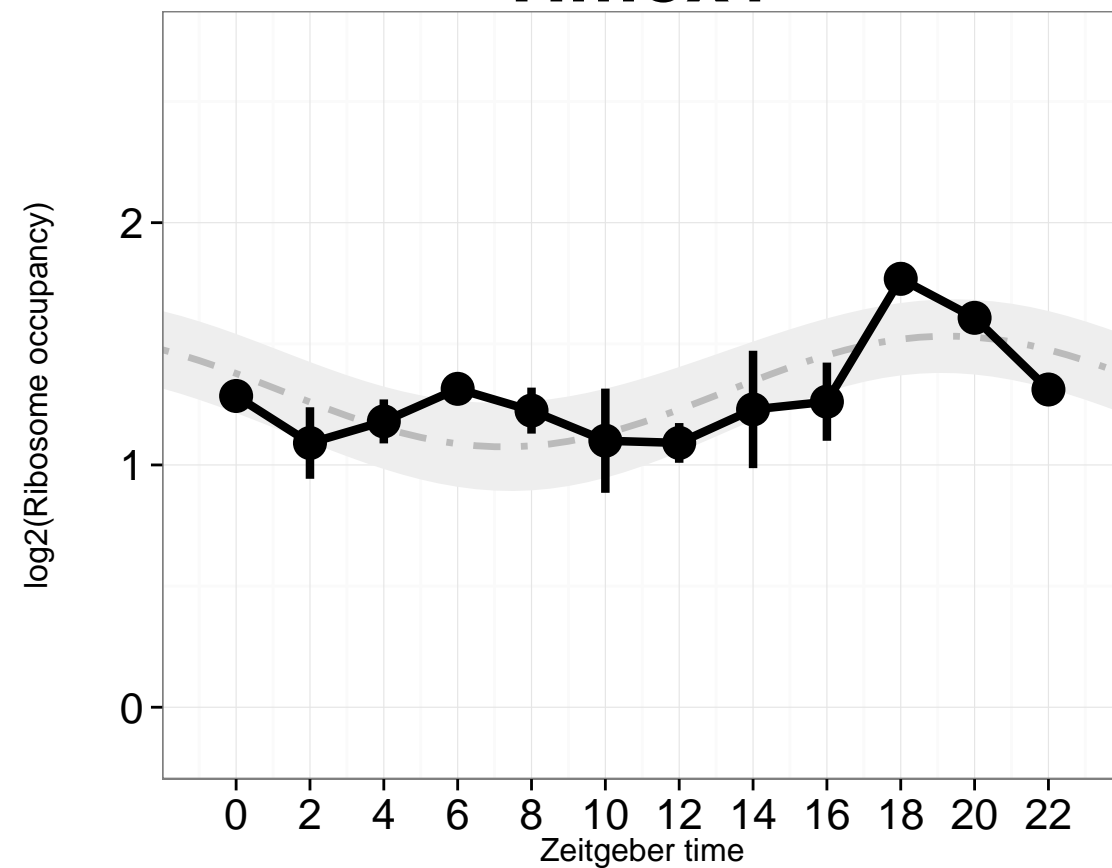

Supplement: Supplementary file 7409 [file 1]

# Clptm1l

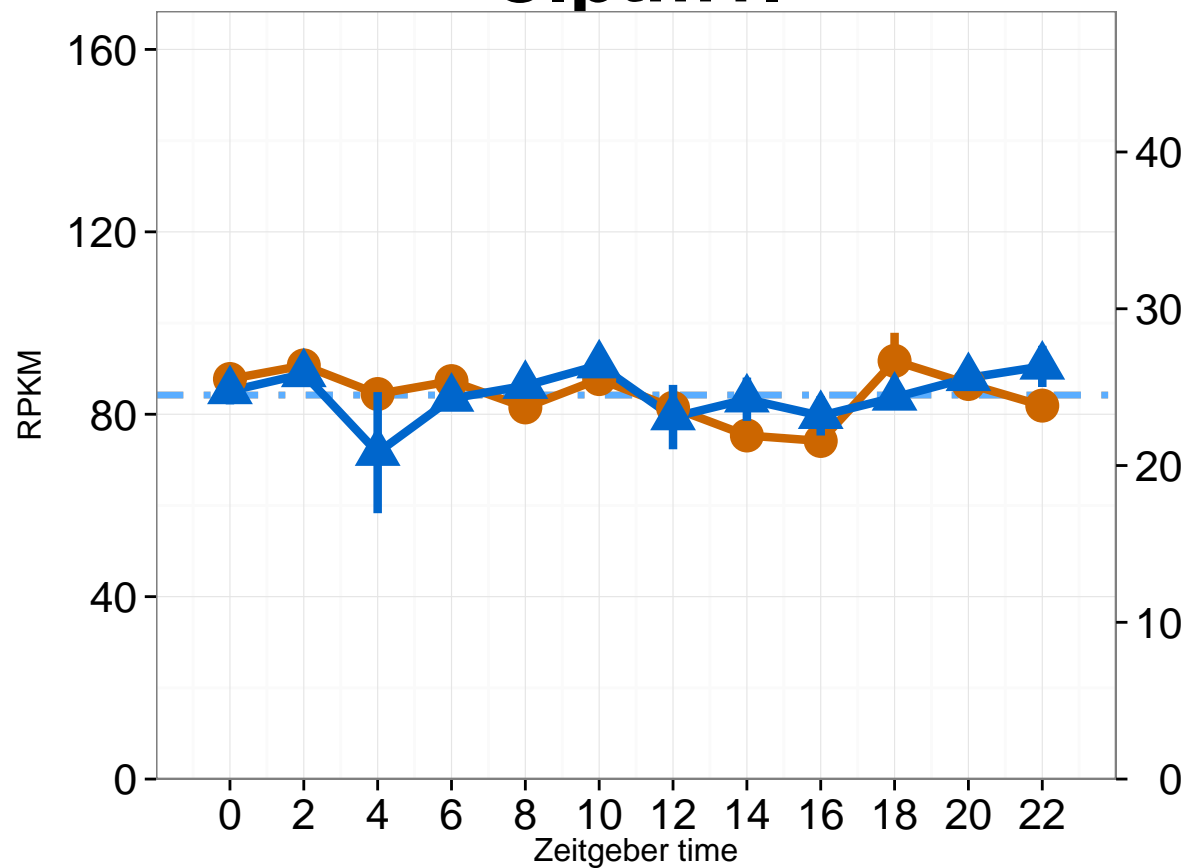

# Clptm1l

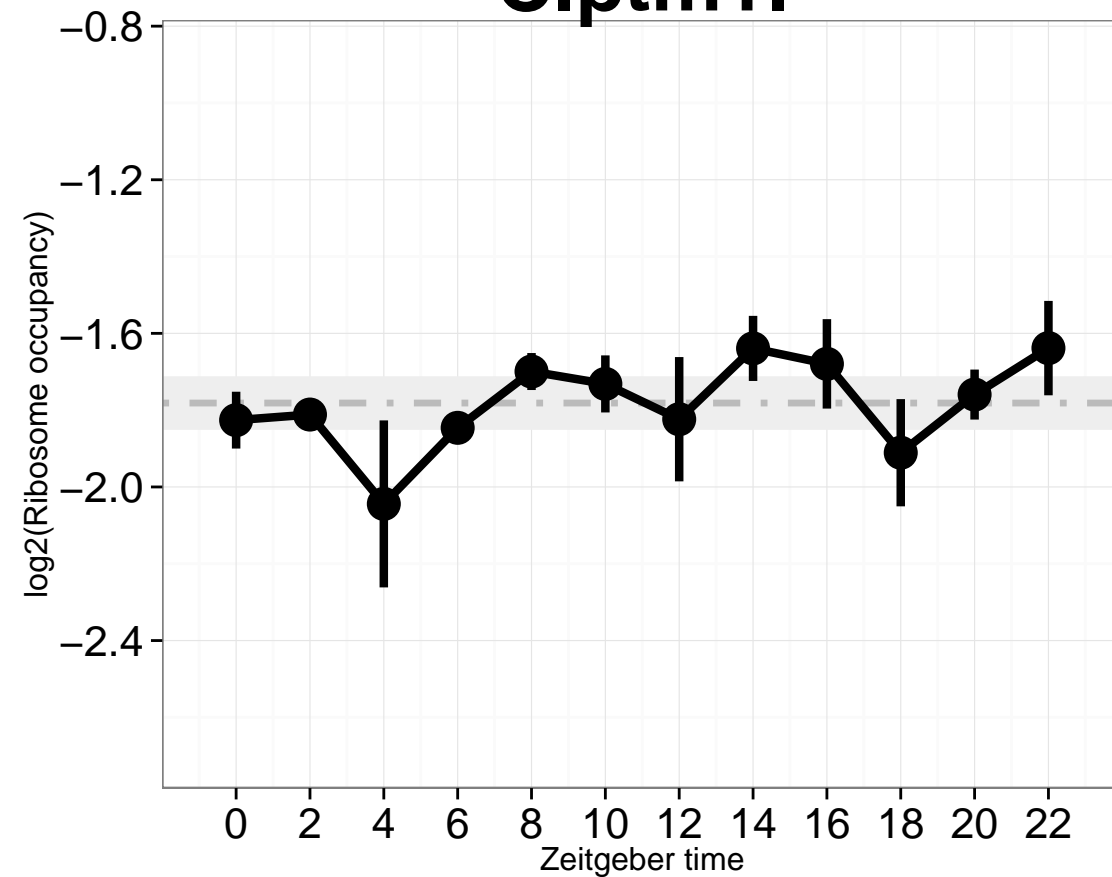

Supplement: Supplementary file 7410 [file 1]

## Arhgef4

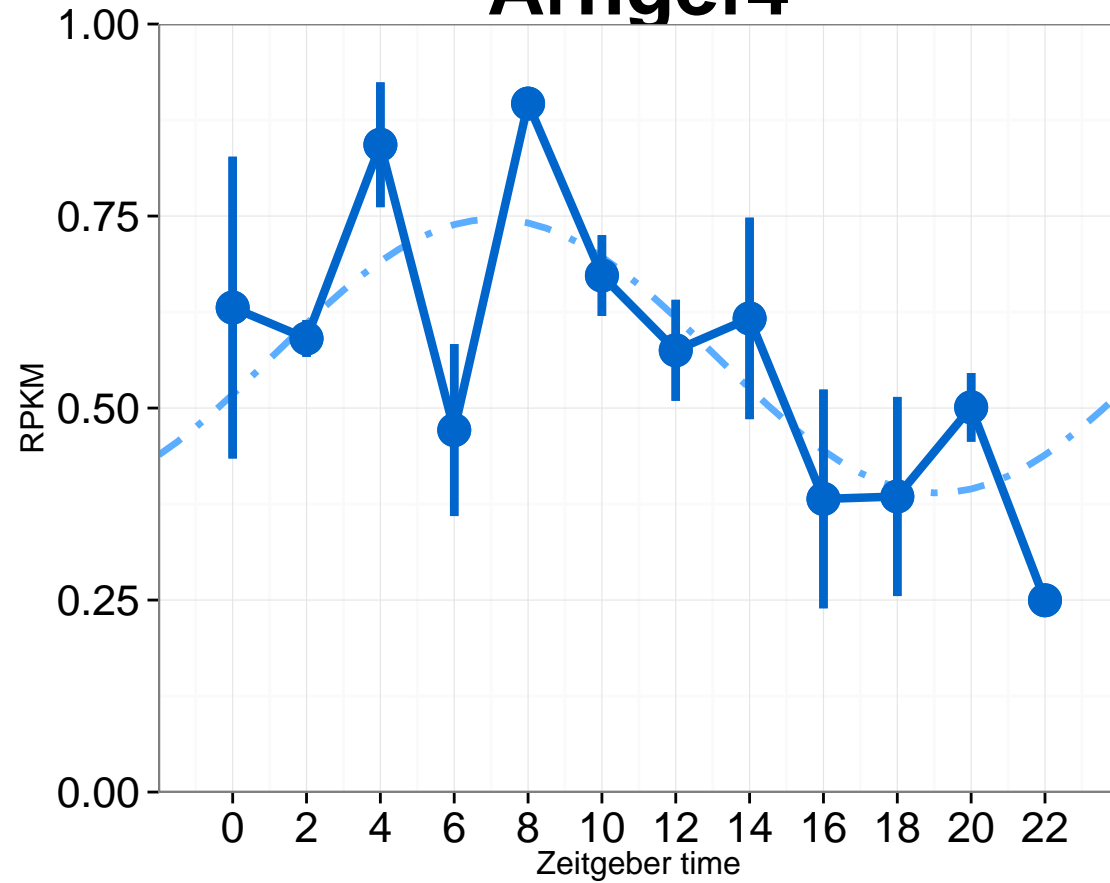

## Arhgef4 log2(Ribosome occupancy)

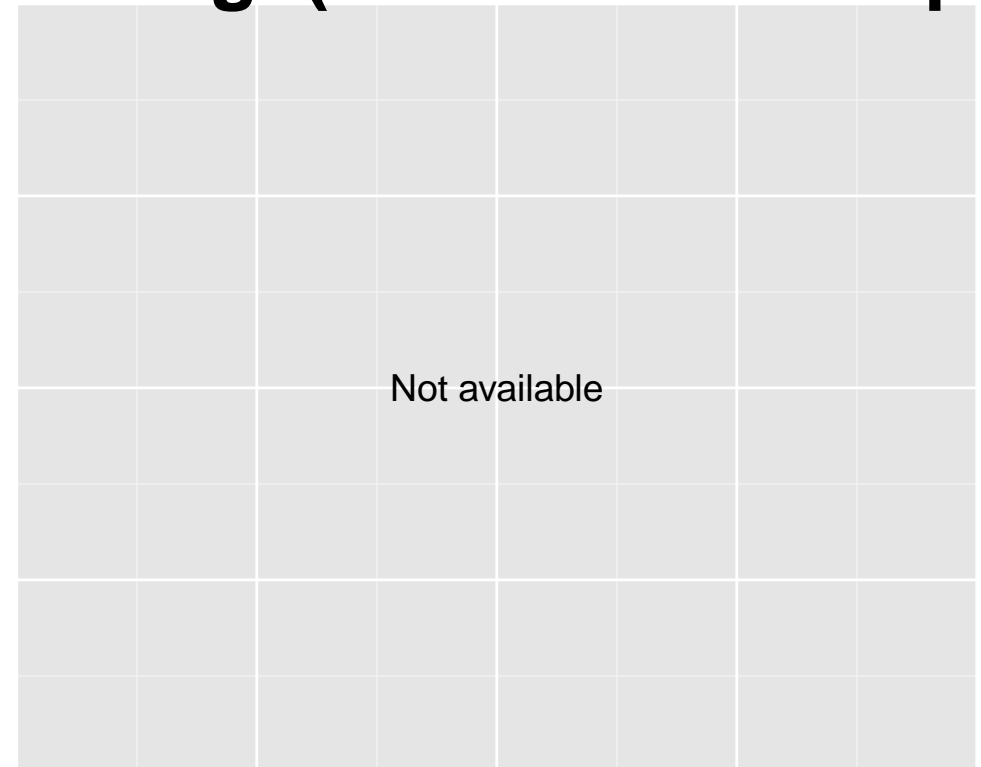

Supplement: Supplementary file 7411 [file 1]

## Emc9

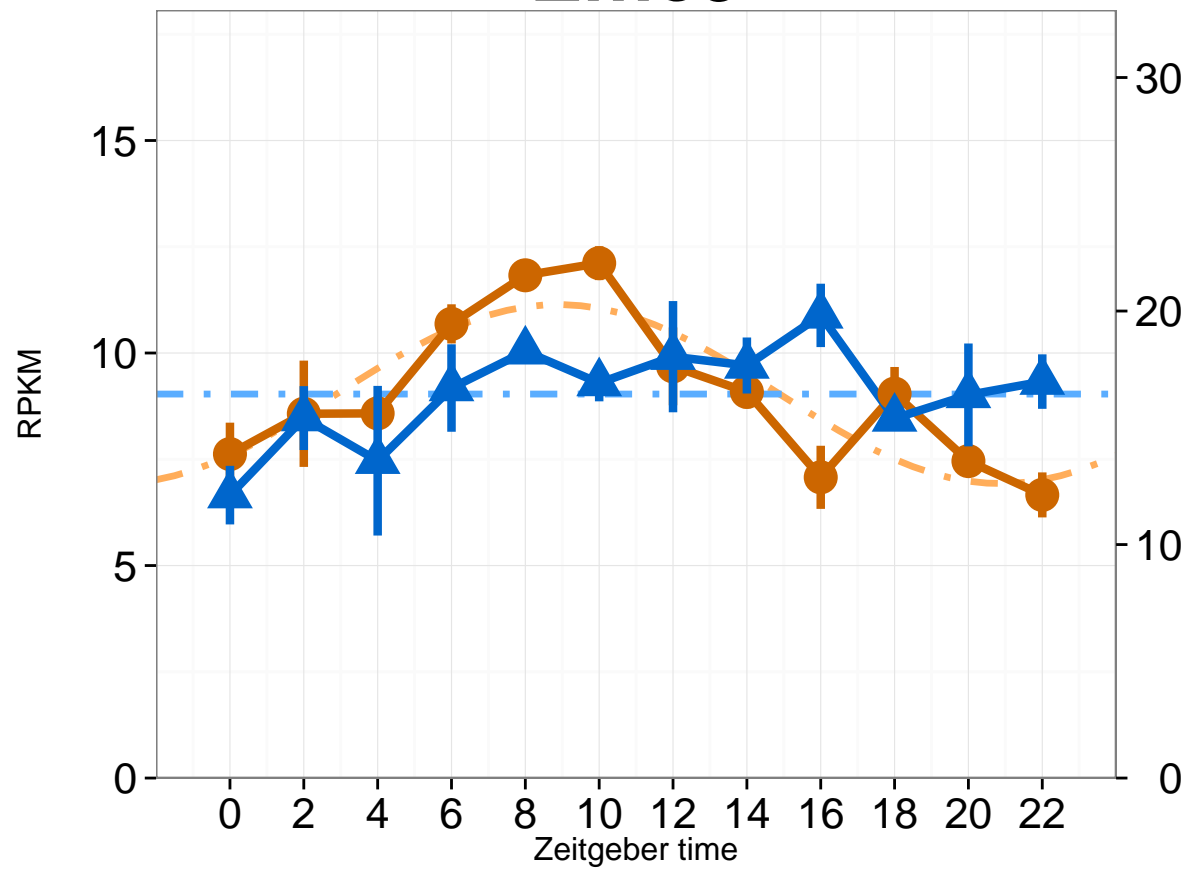

## Emc9

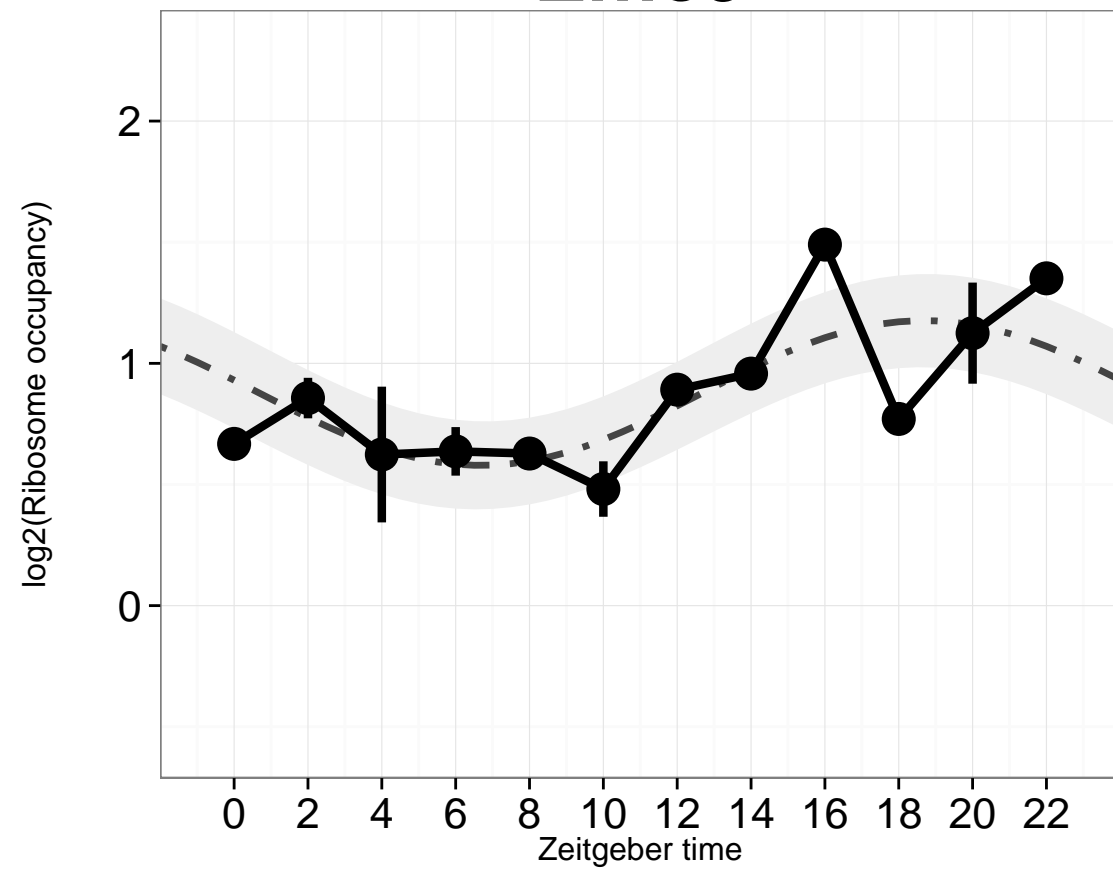

Supplement: Supplementary file 7412 [file 1]

## Ago3

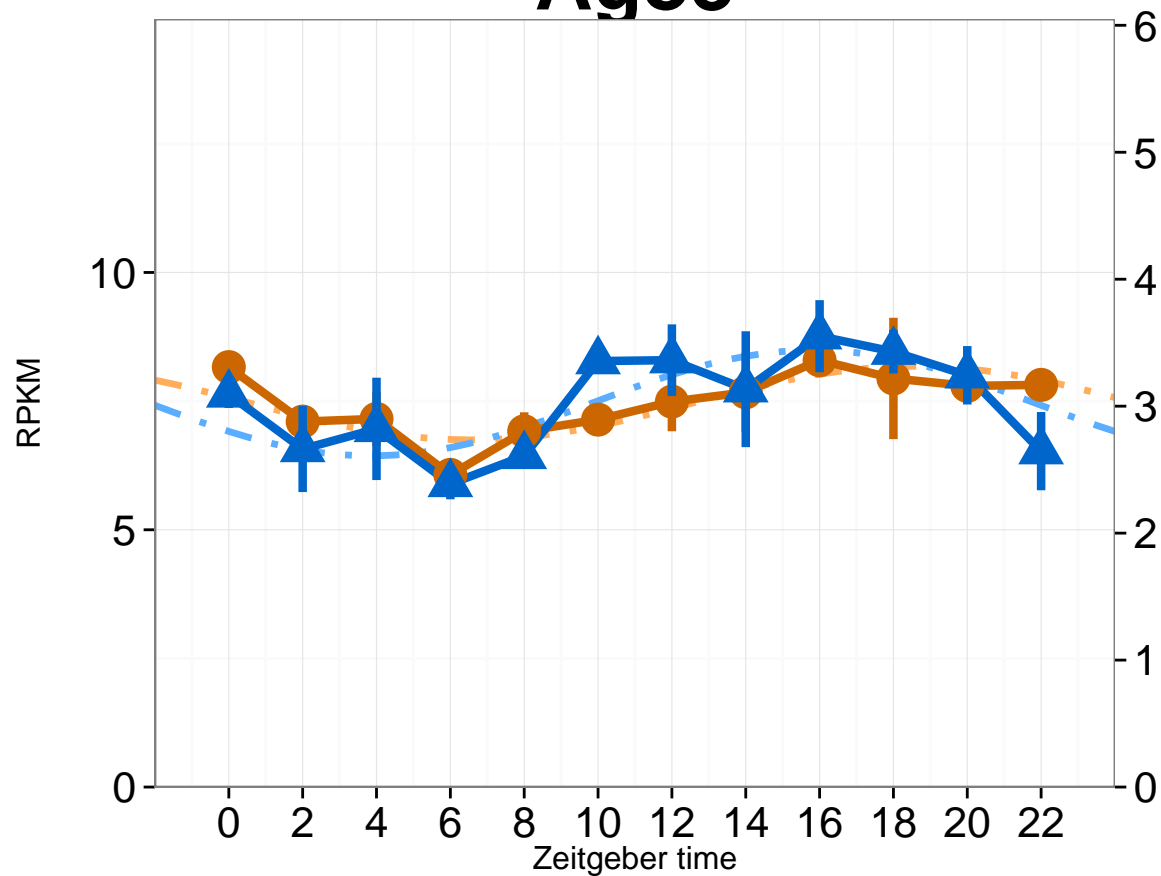

## Ago3

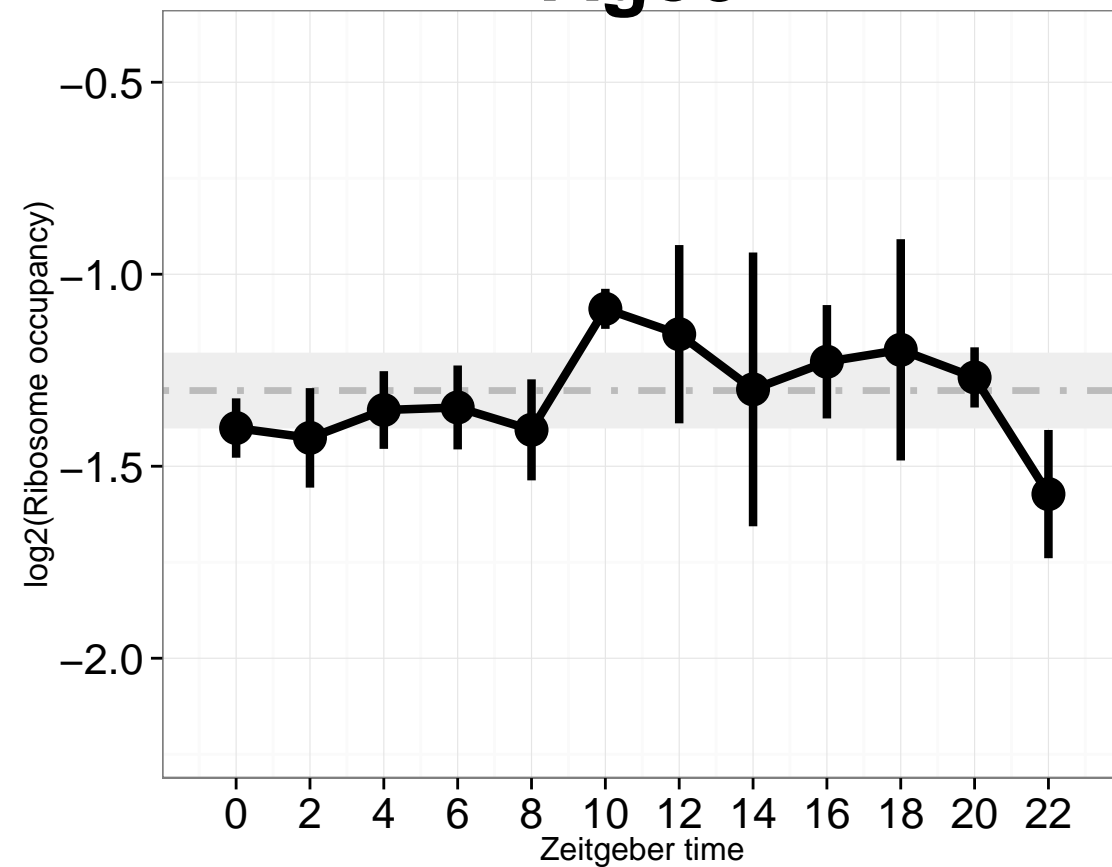

Supplement: Supplementary file 7413 [file 1]

# Csnk1e

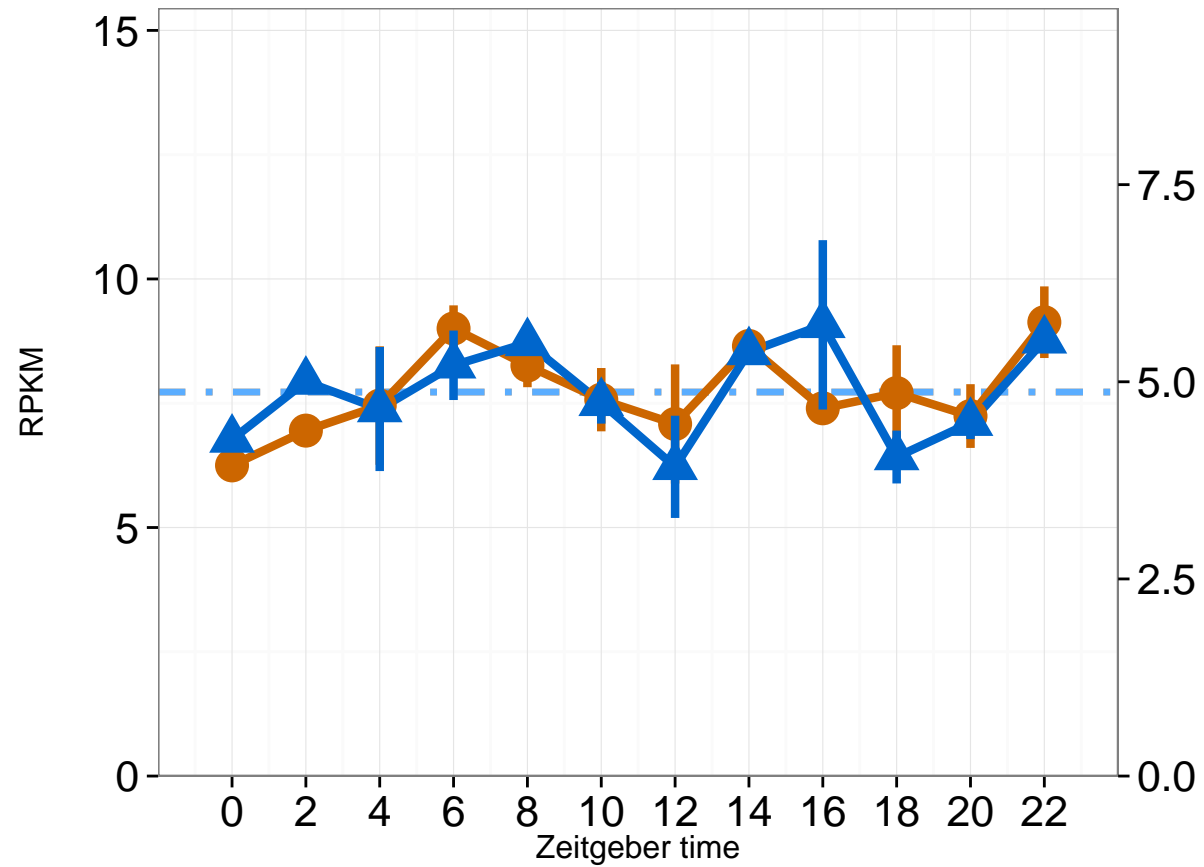

# Csnk1e

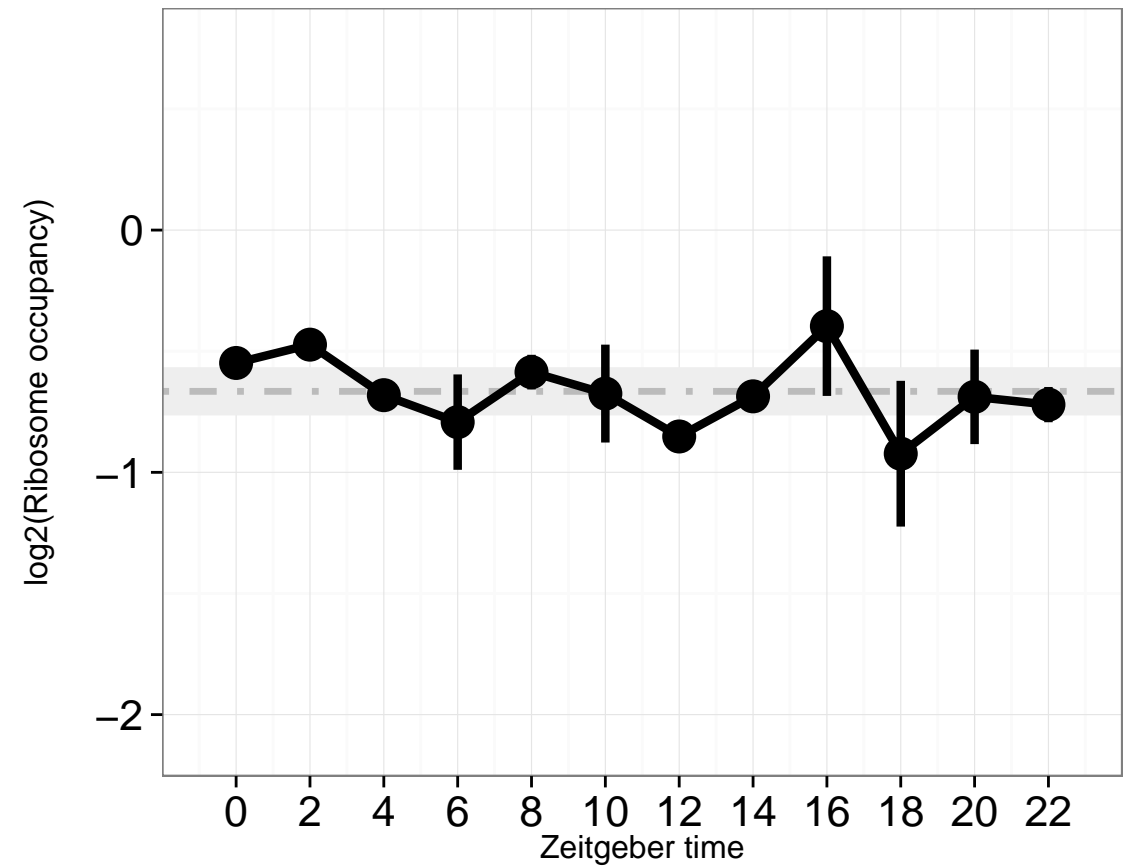

Supplement: Supplementary file 7414 [file 1]

# Gtf2f1

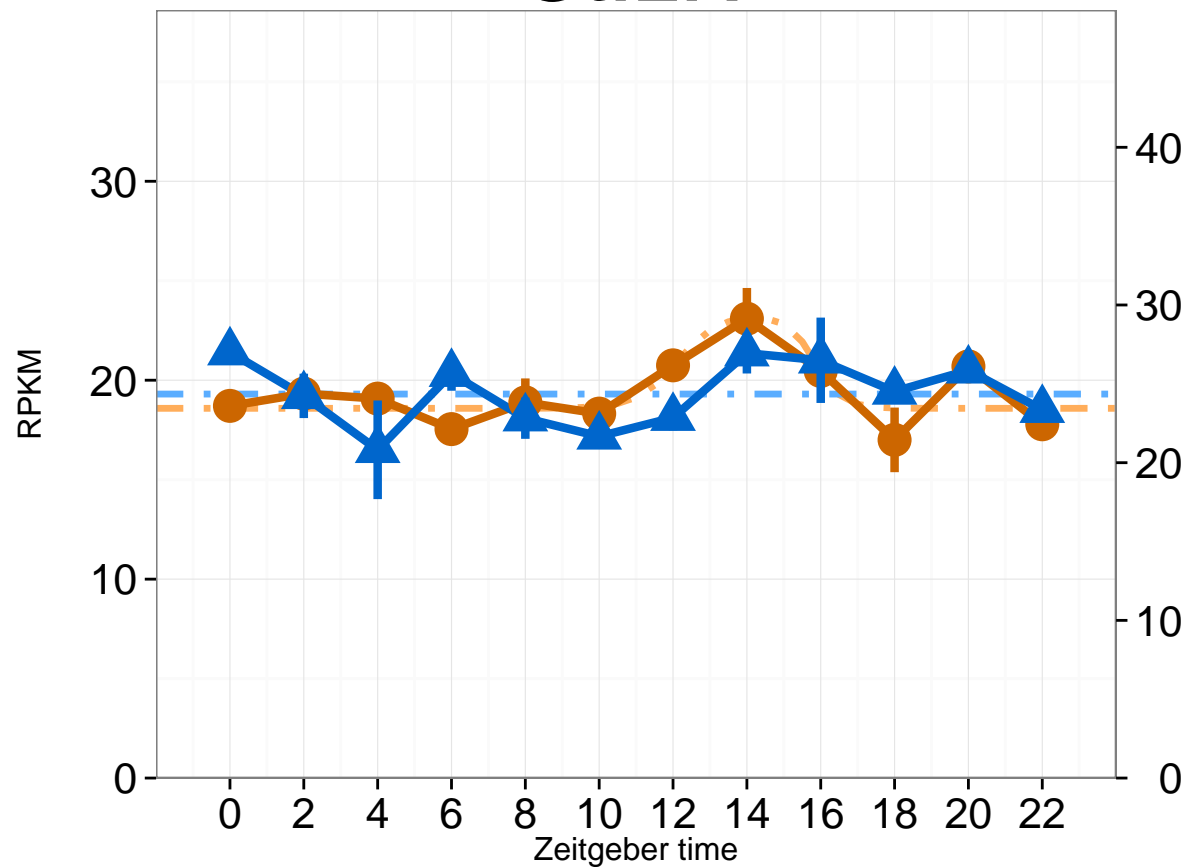

# Gtf2f1

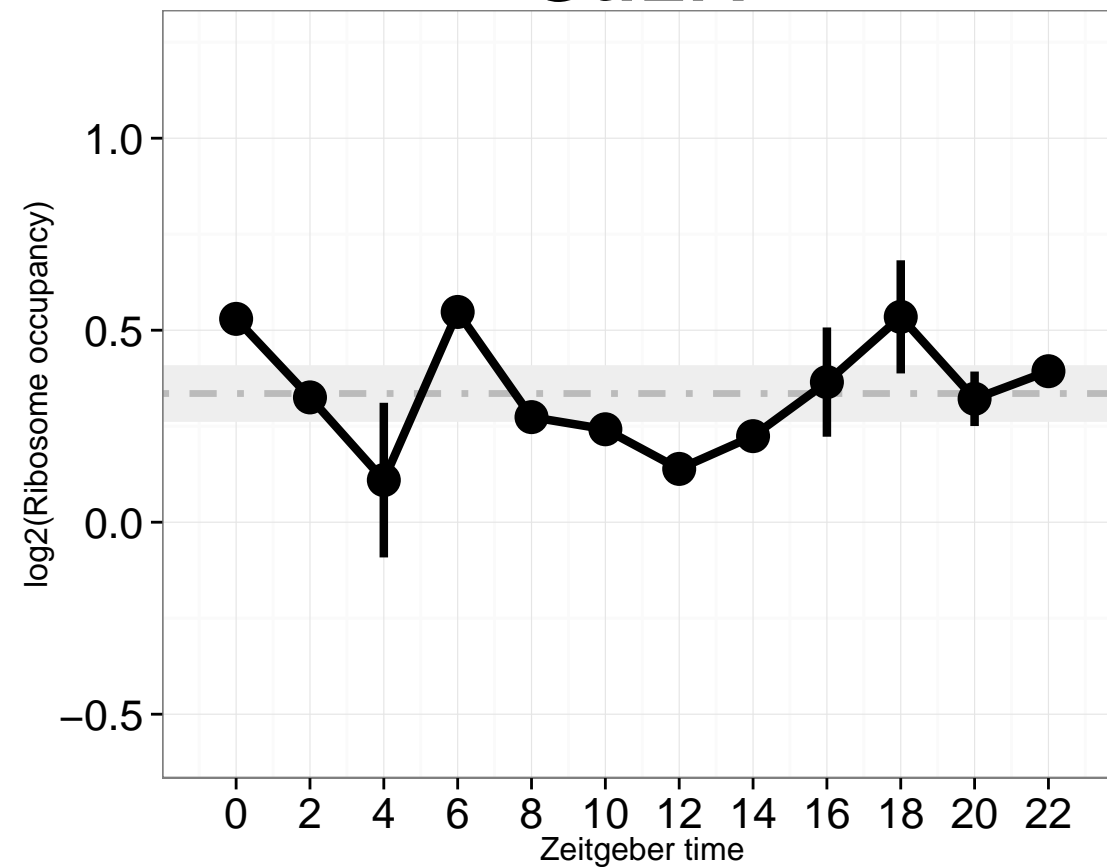

Supplement: Supplementary file 7415 [file 1]

## Ufc1

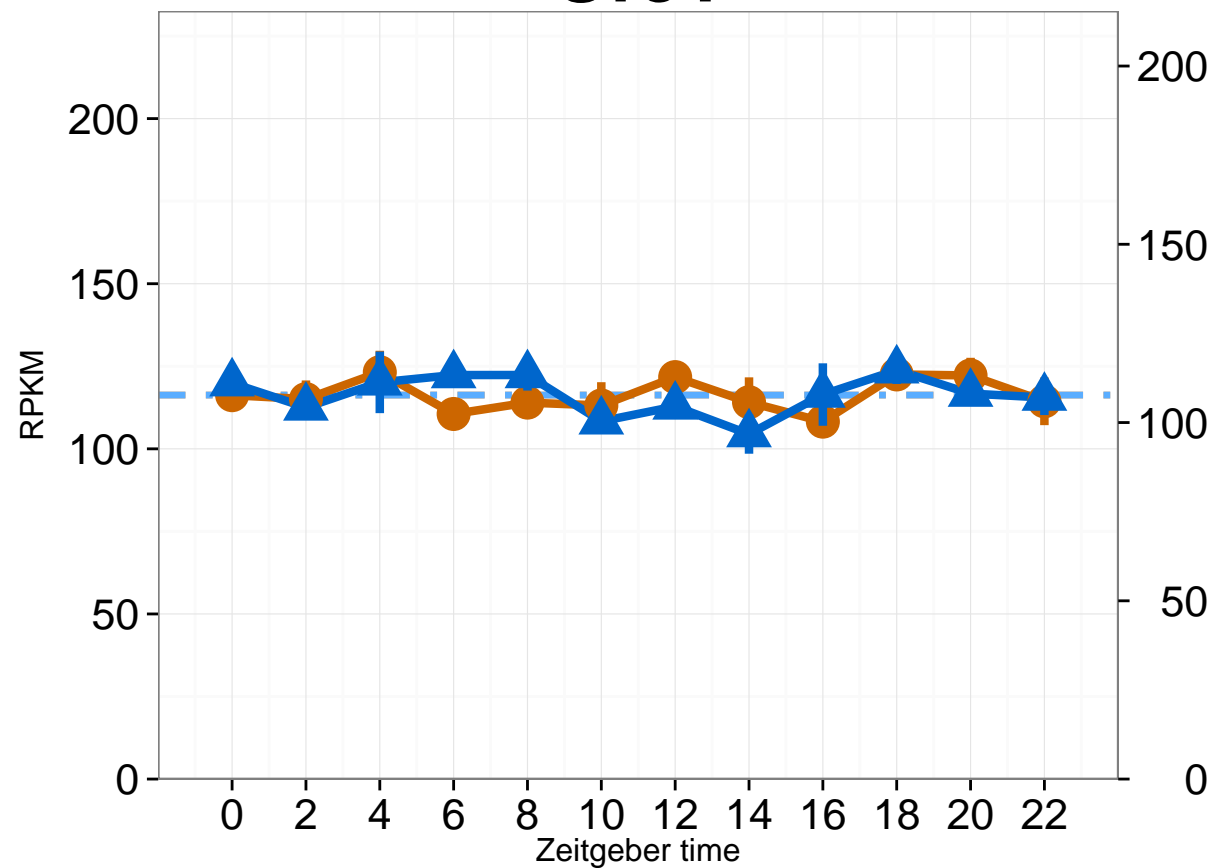

## Ufc1

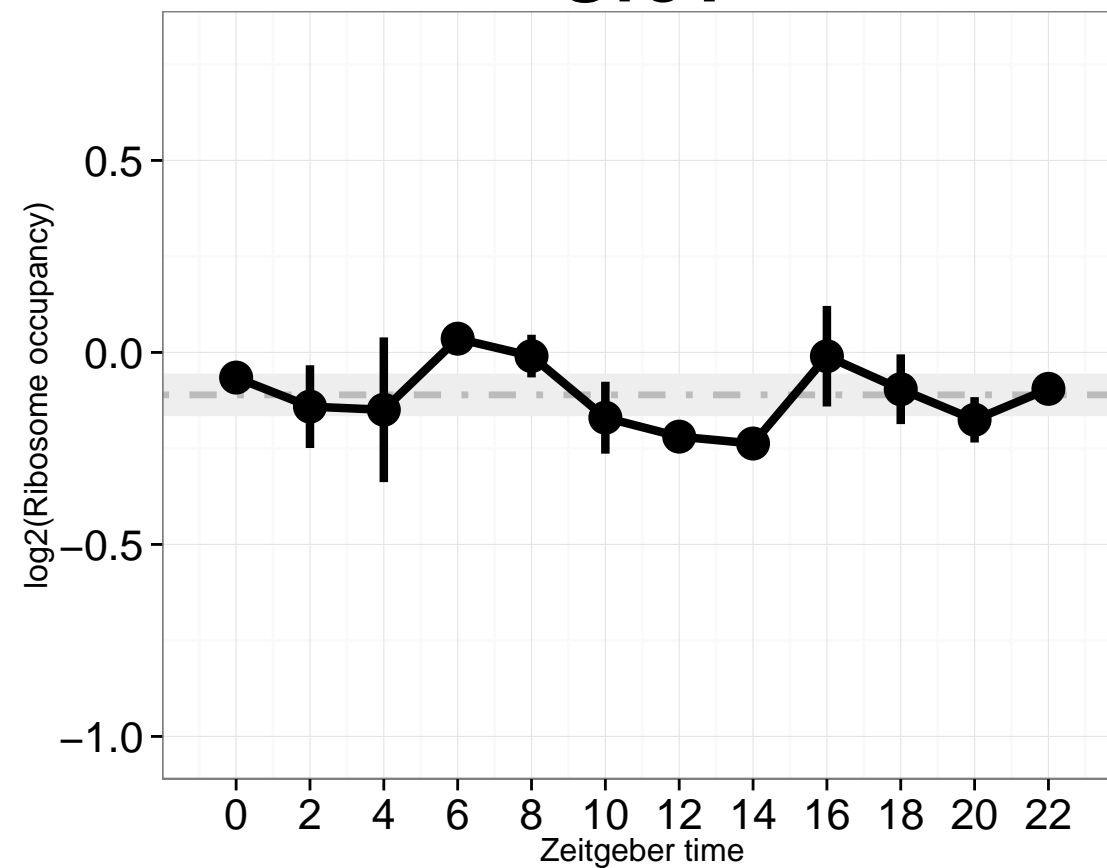

Supplement: Supplementary file 7416 [file 1]

## Amotl2

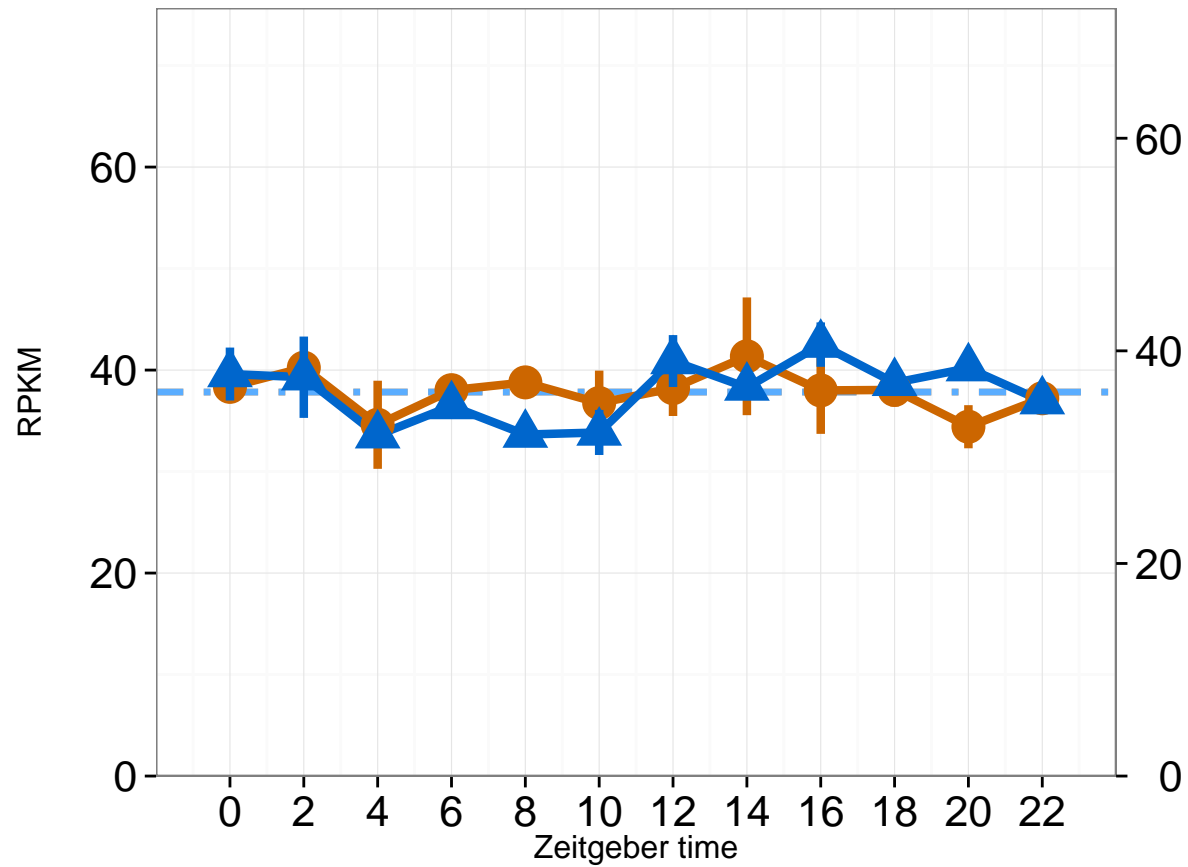

## Amotl2

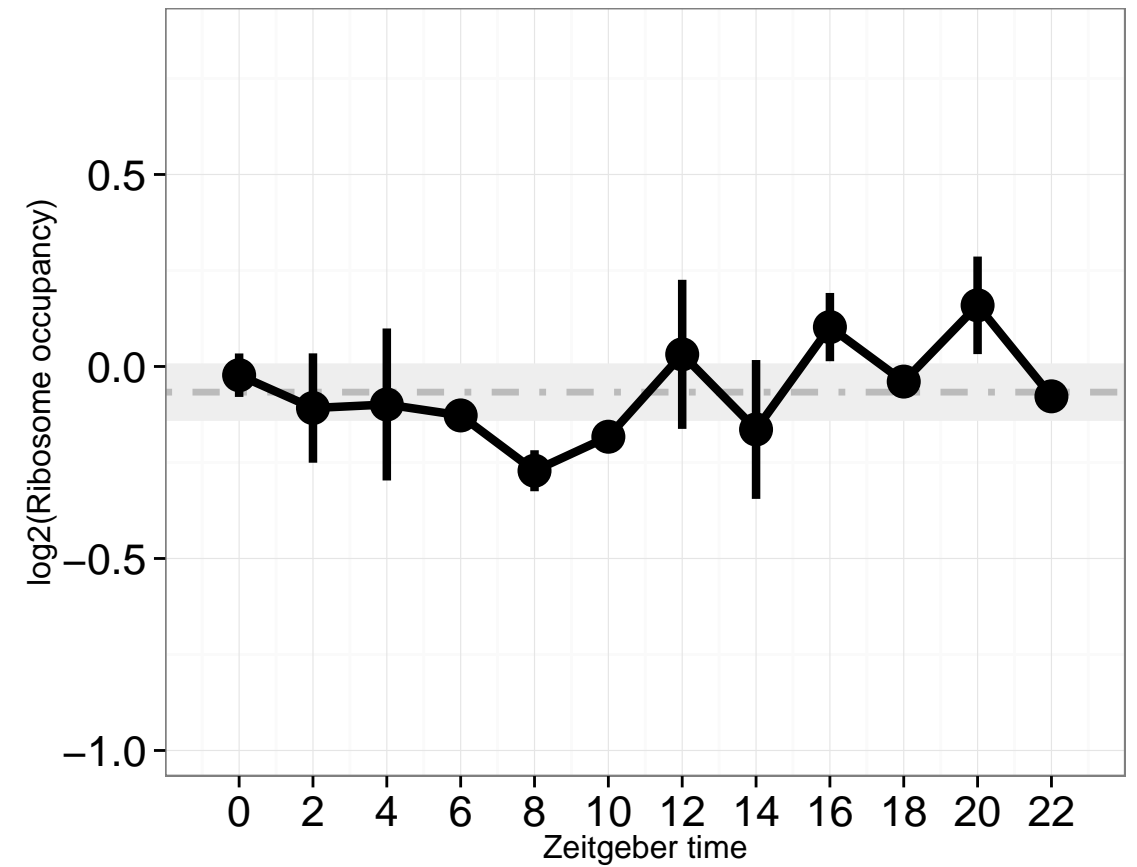

Supplement: Supplementary file 7417 [file 1]

## Abr

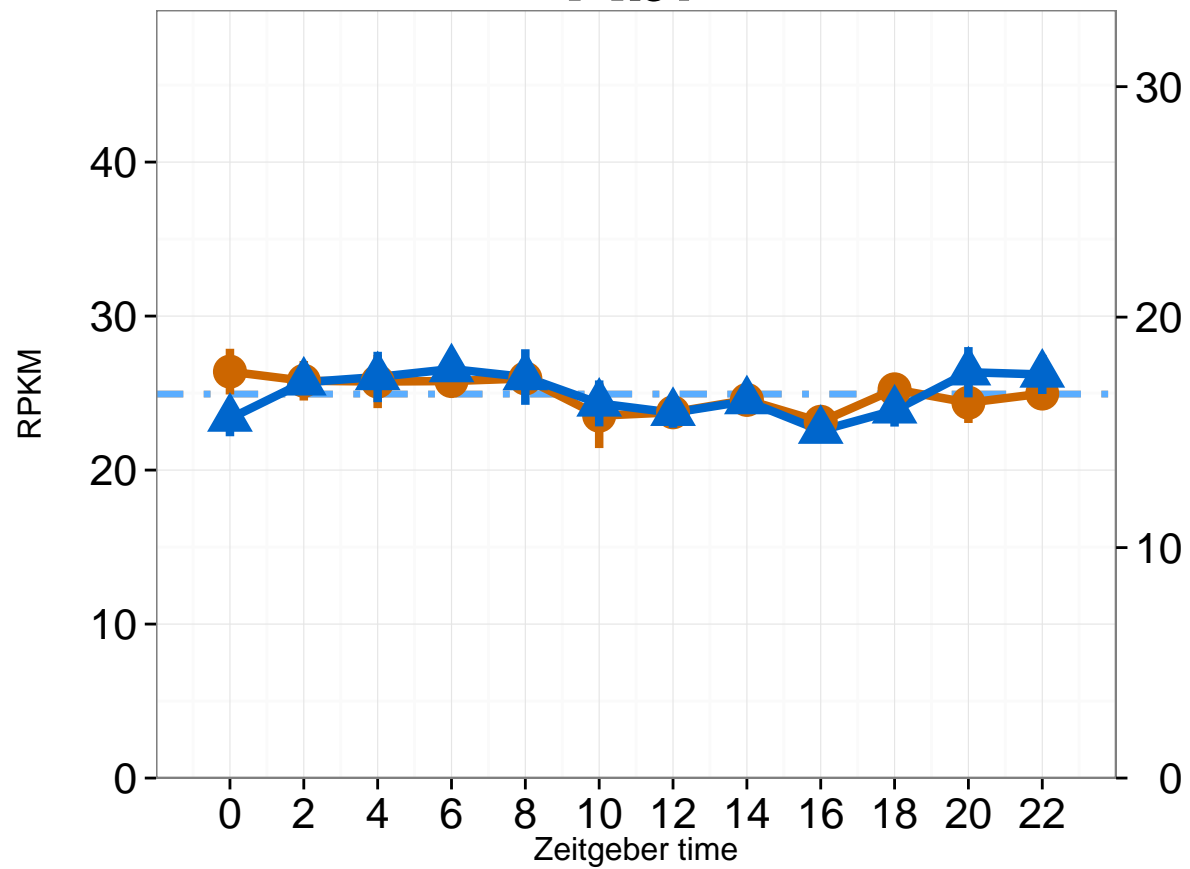

## Abr

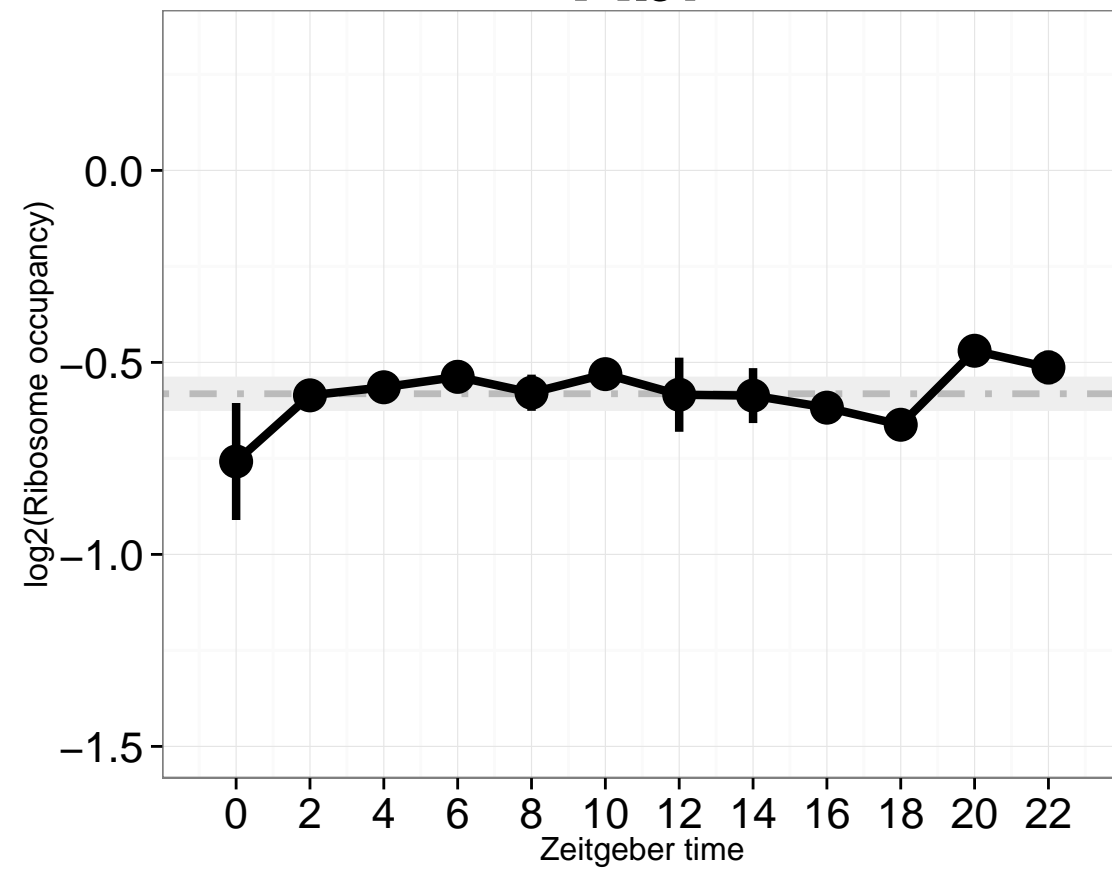

Supplement: Supplementary file 7418 [file 1]

## Polr3a

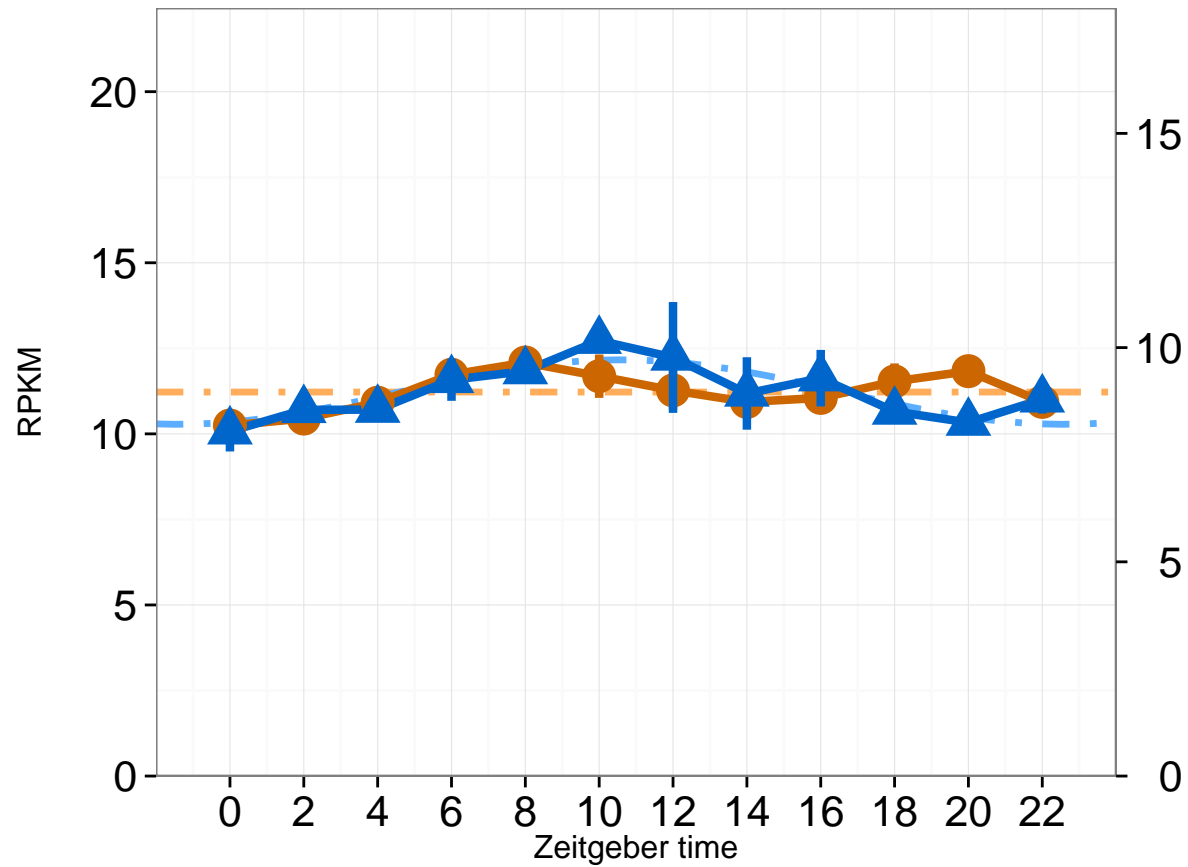

## Polr3a

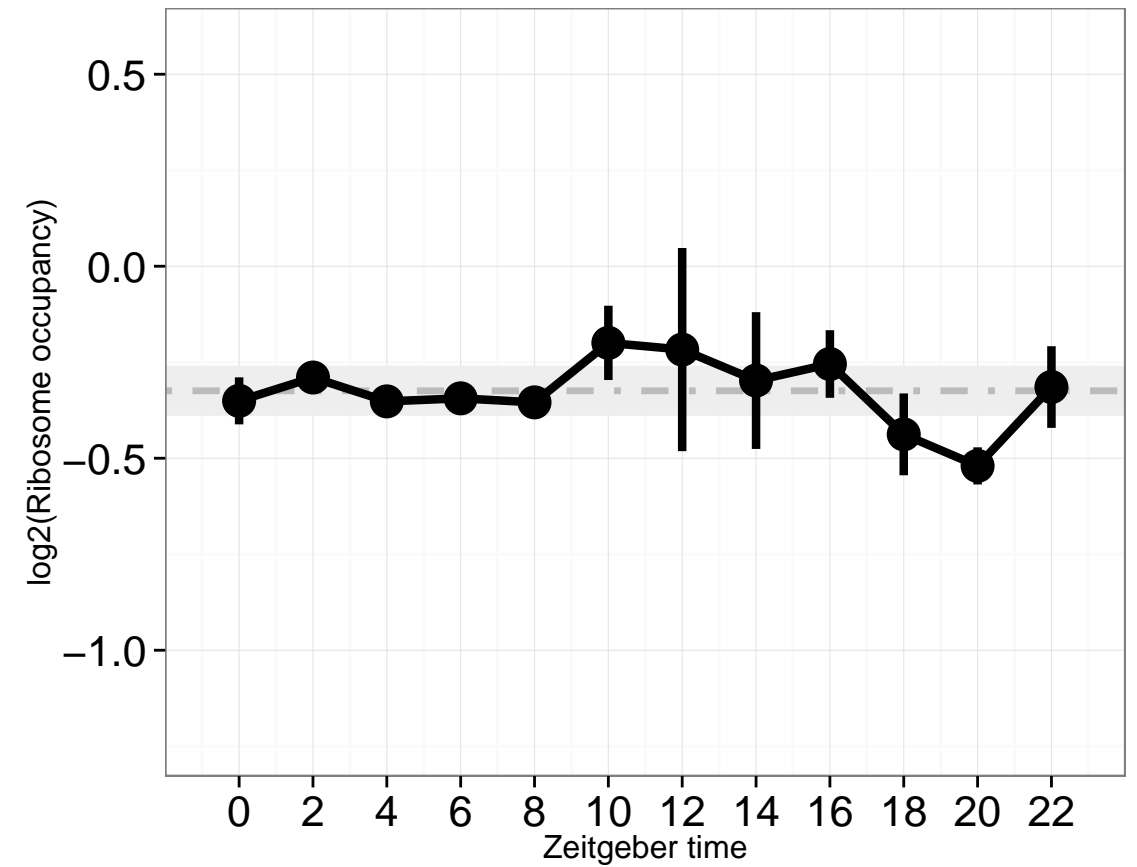

Supplement: Supplementary file 7419 [file 1]

## Crat

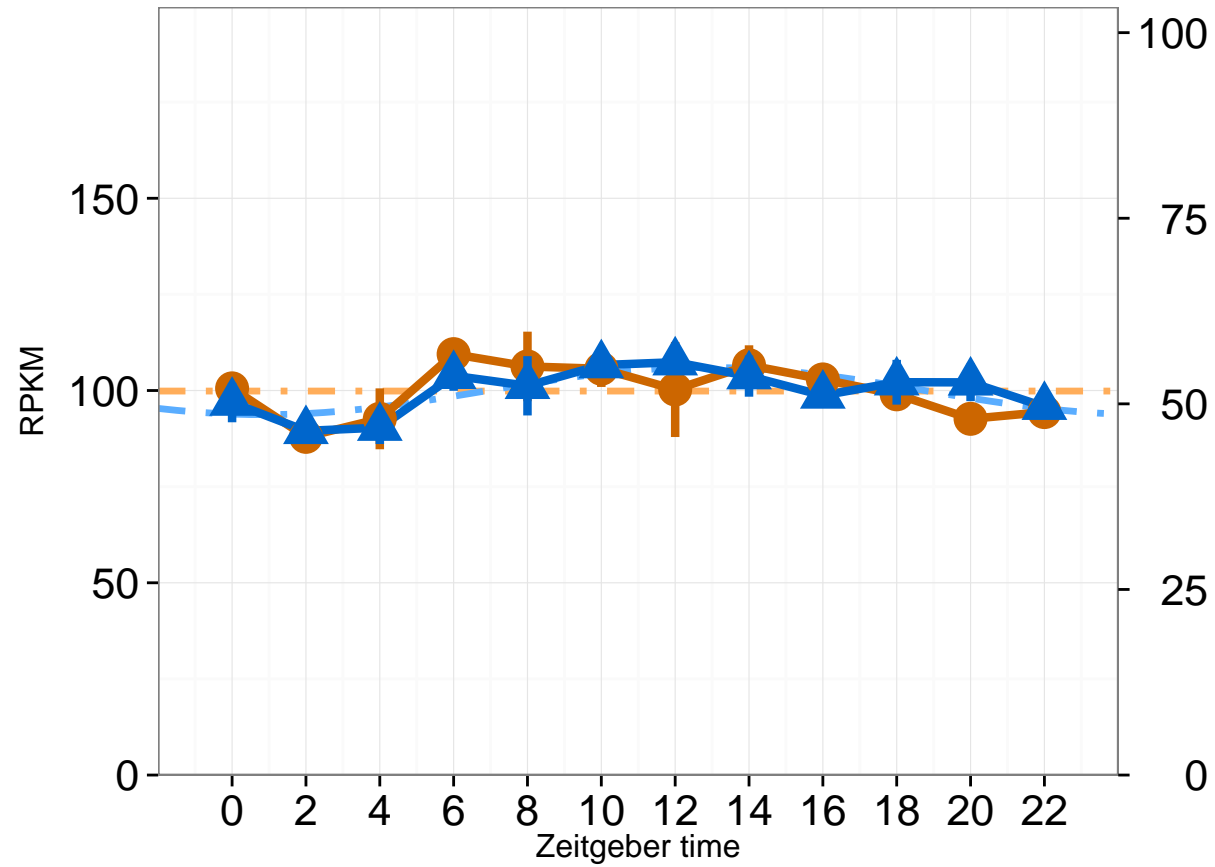

## Crat

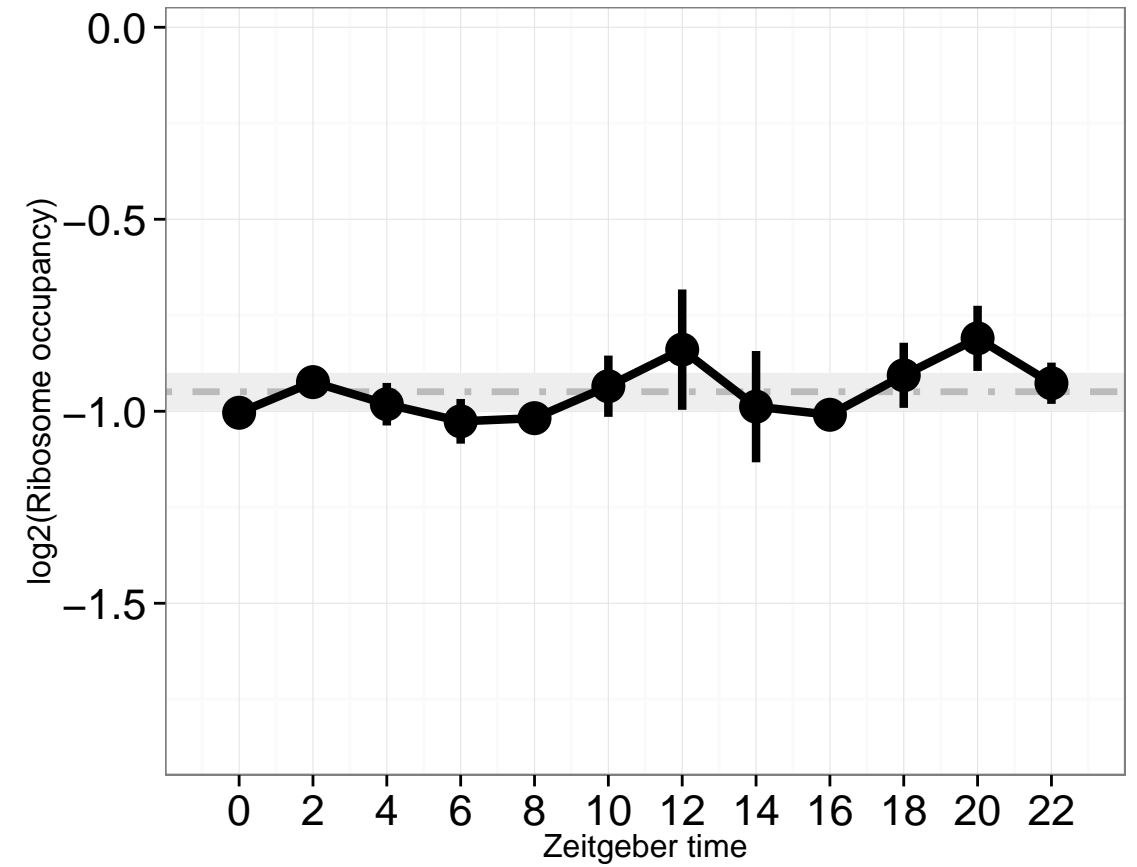

Supplement: Supplementary file 7420 [file 1]

# Rpap2

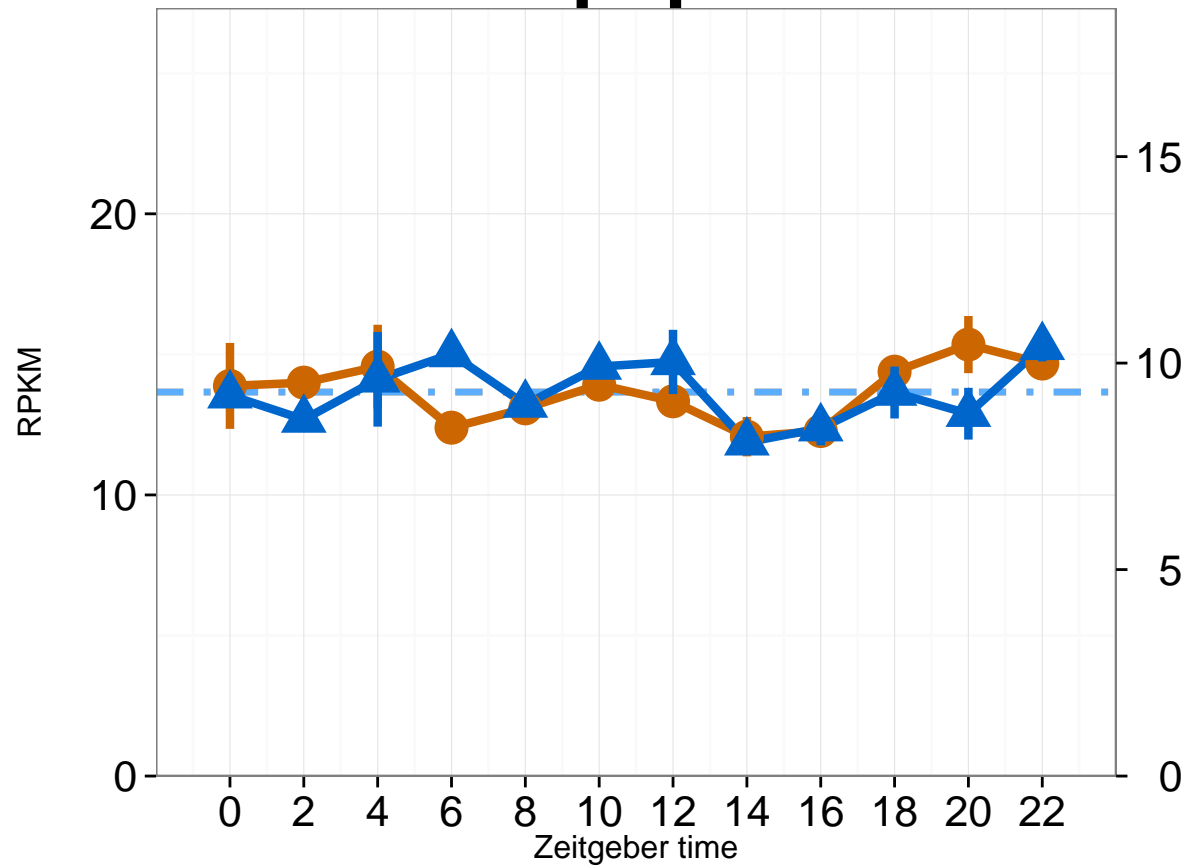

# Rpap2

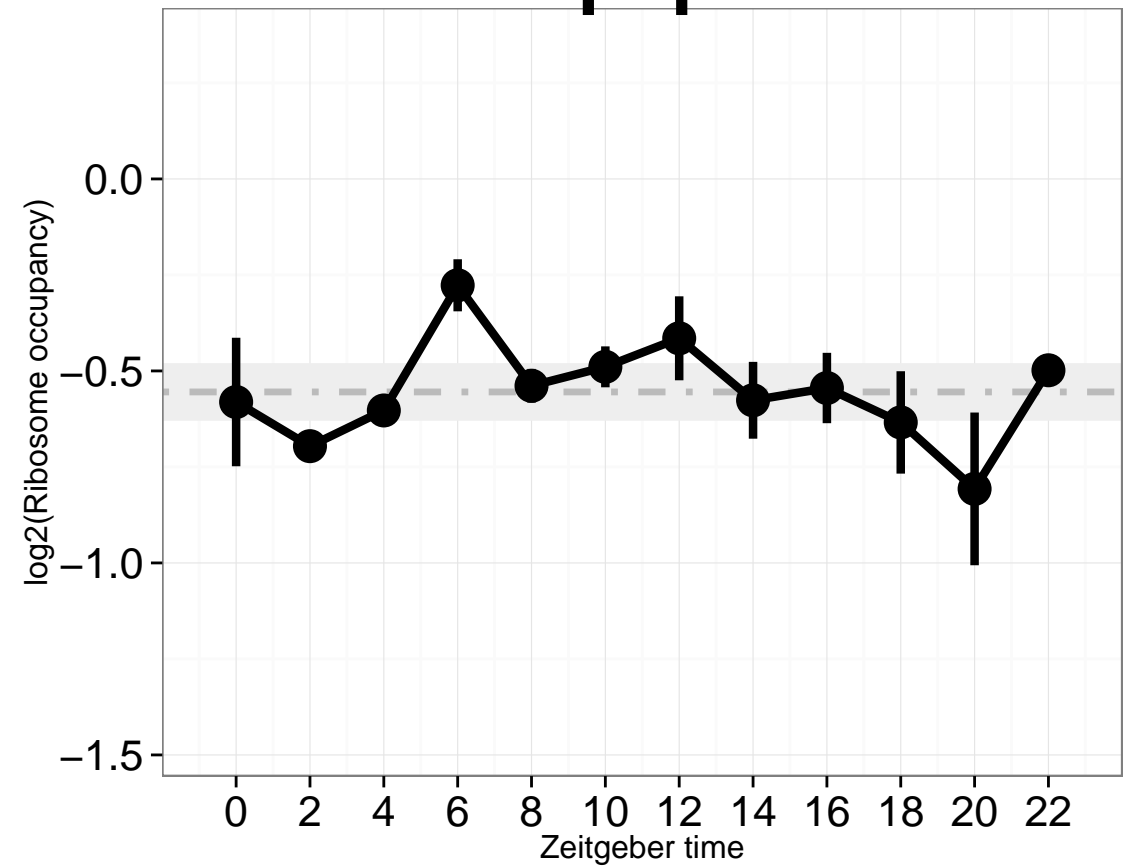

Supplement: Supplementary file 7421 [file 1]

# EII

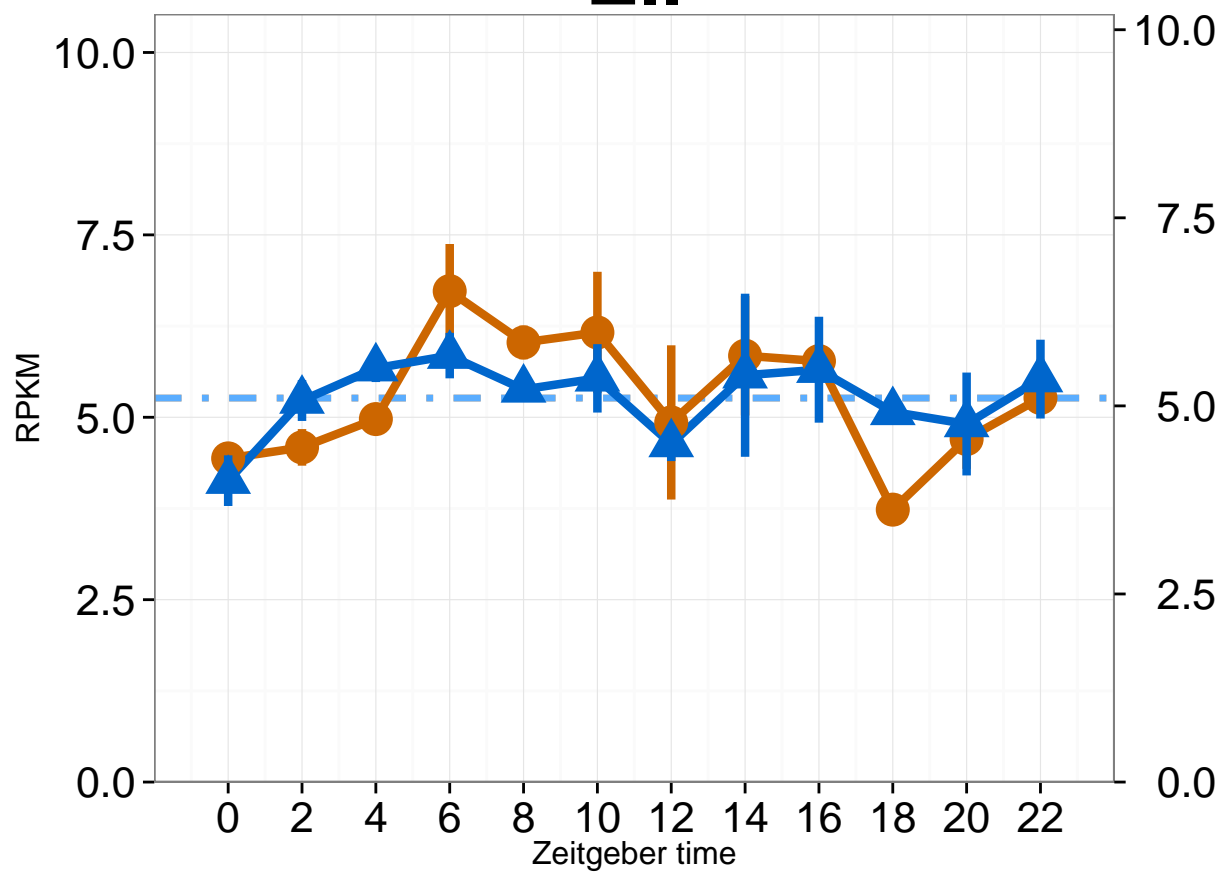

# EI

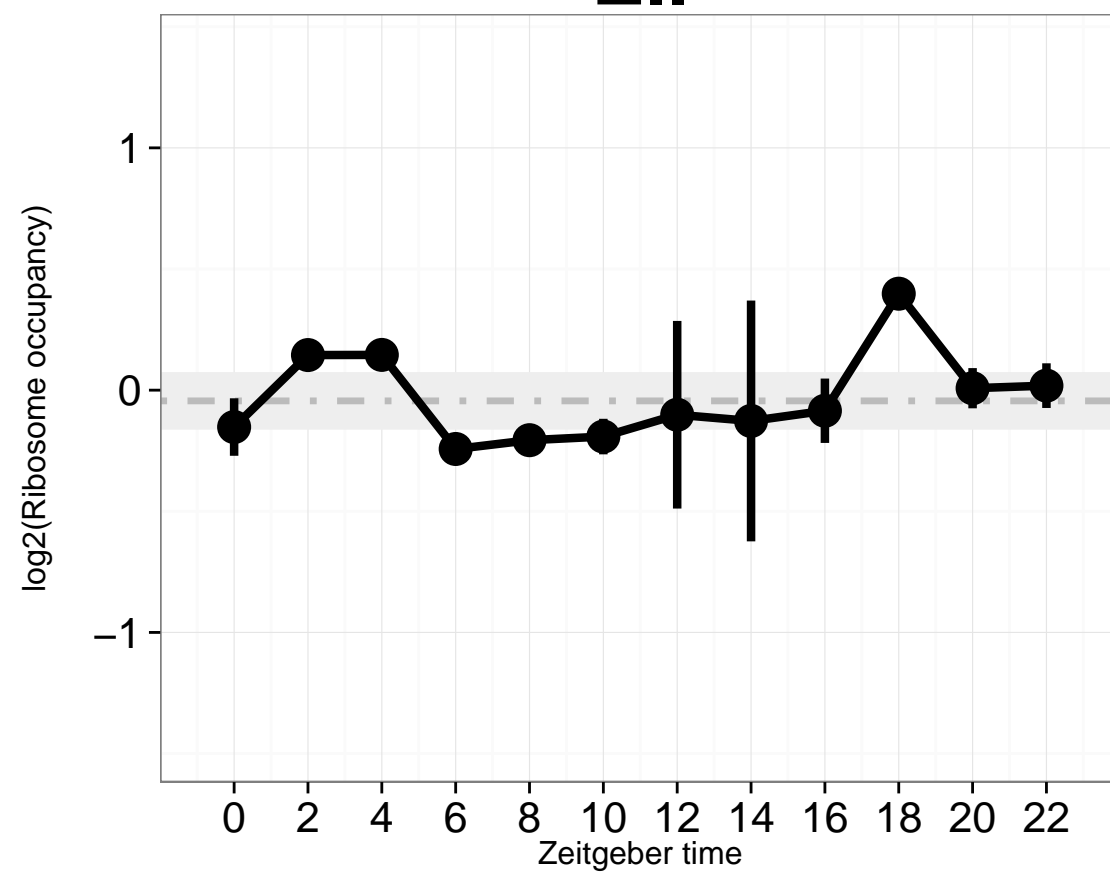

Supplement: Supplementary file 7422 [file 1]

## Padi2

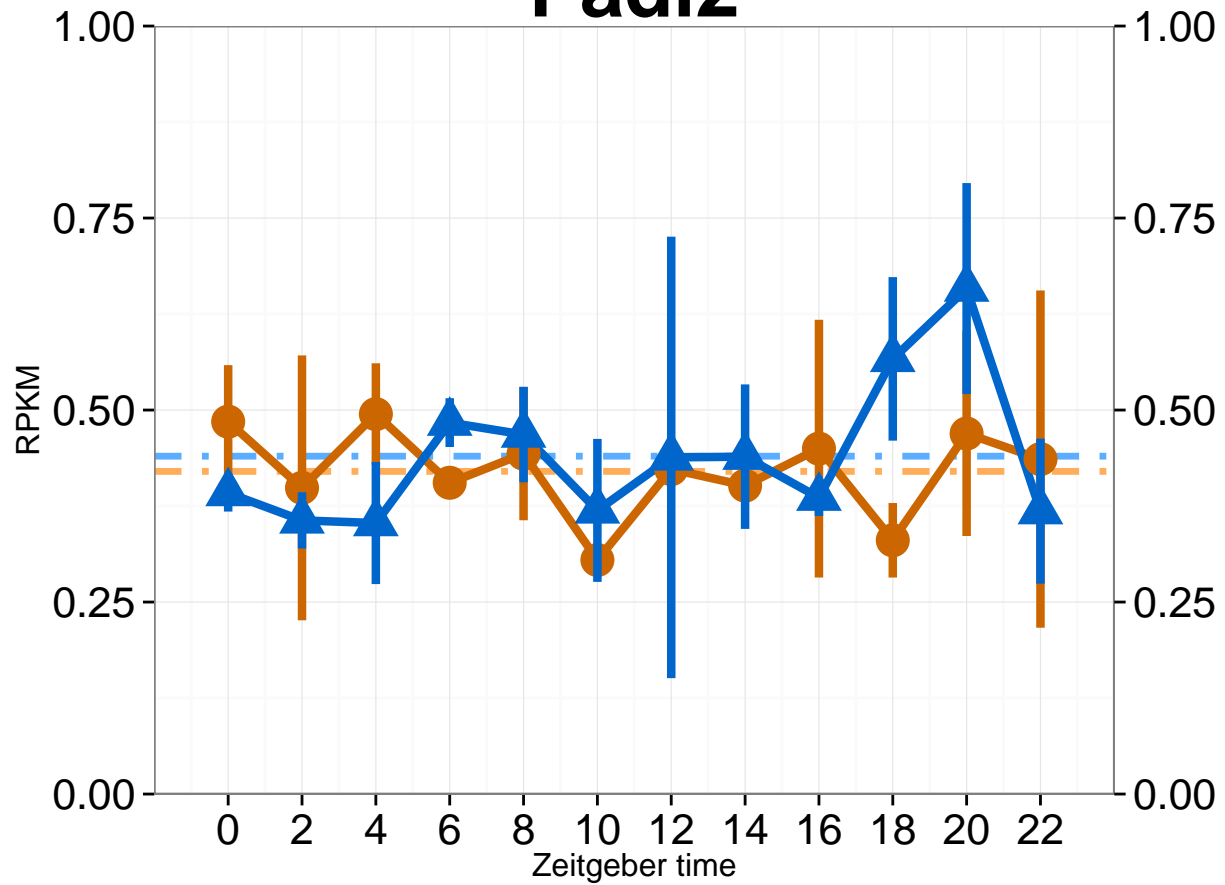

## Padi2

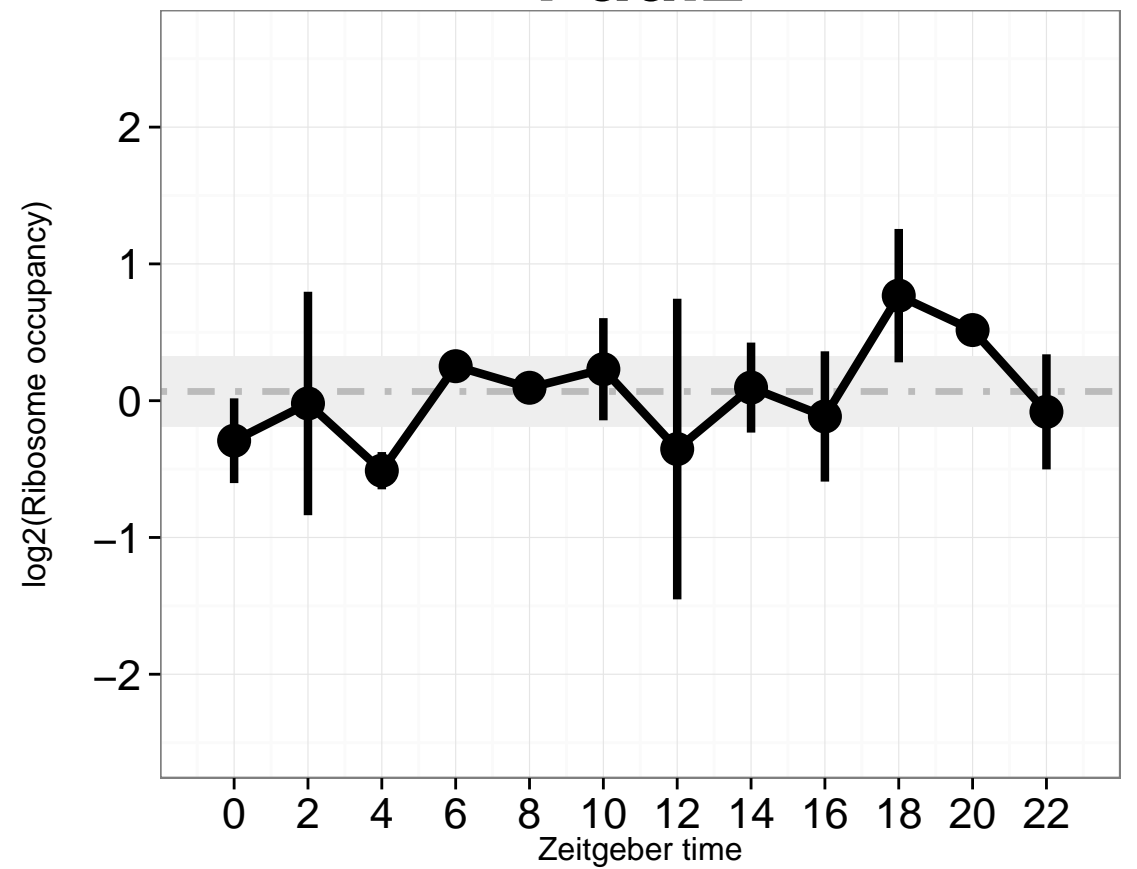

Supplement: Supplementary file 7423 [file 1]
