# Supplementary material (part 75 of 133)
Source: publisher figshare collection journal article supplement (https://springernature.figshare.com/articles/dataset/_/4903193)

# Tm6sf2

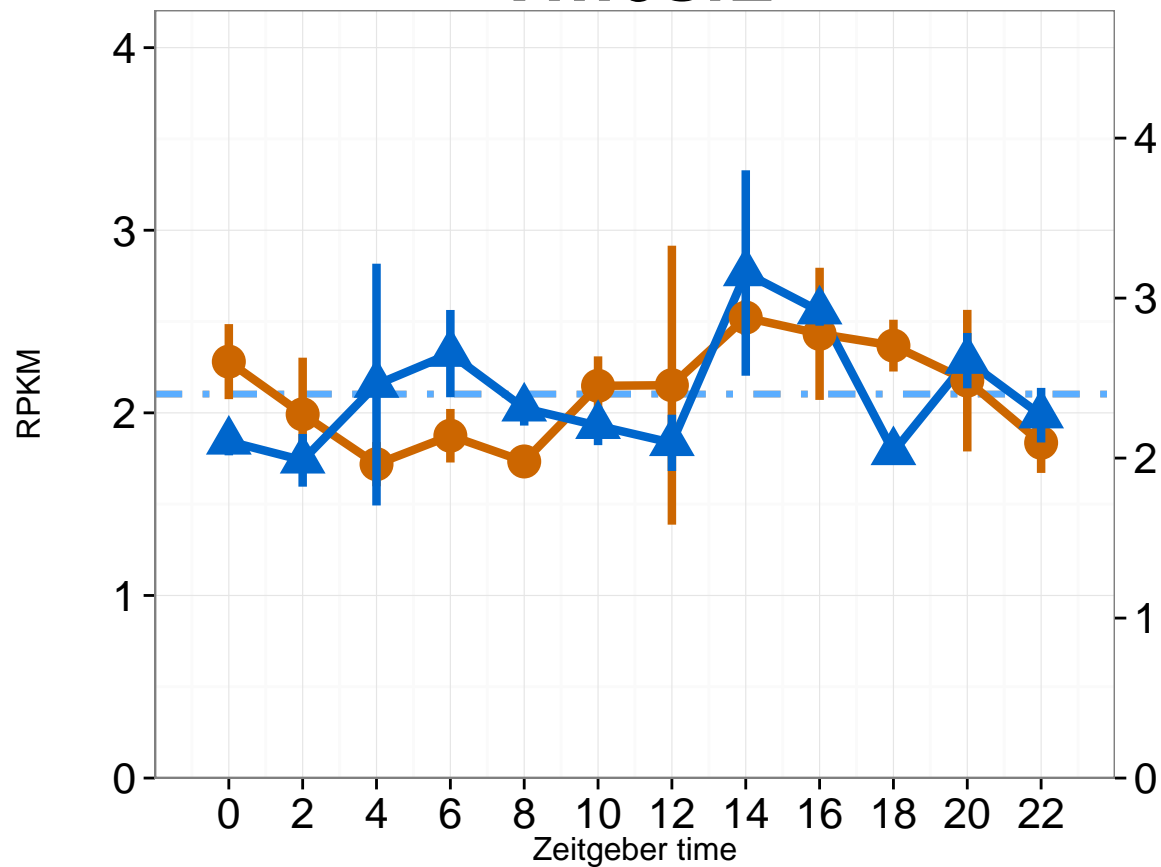

# Tm6sf2

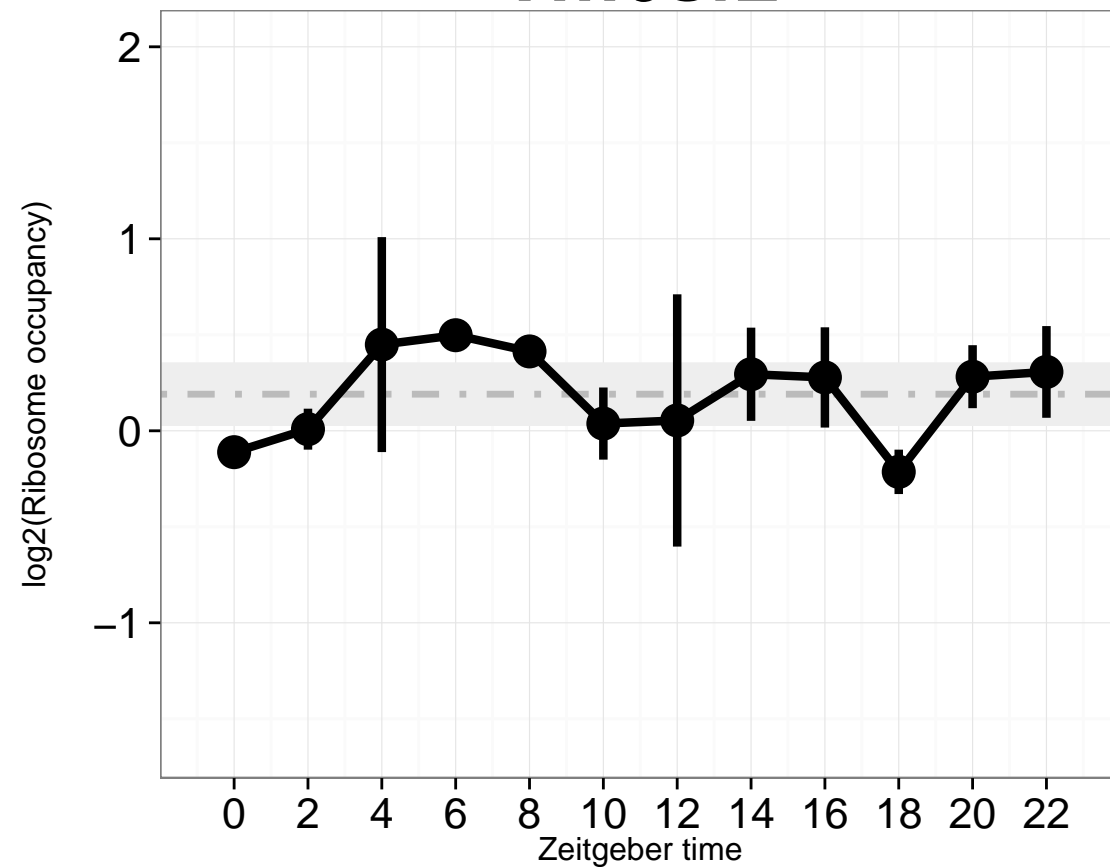

Supplement: Supplementary file 7424 [file 1]

## Cbx1

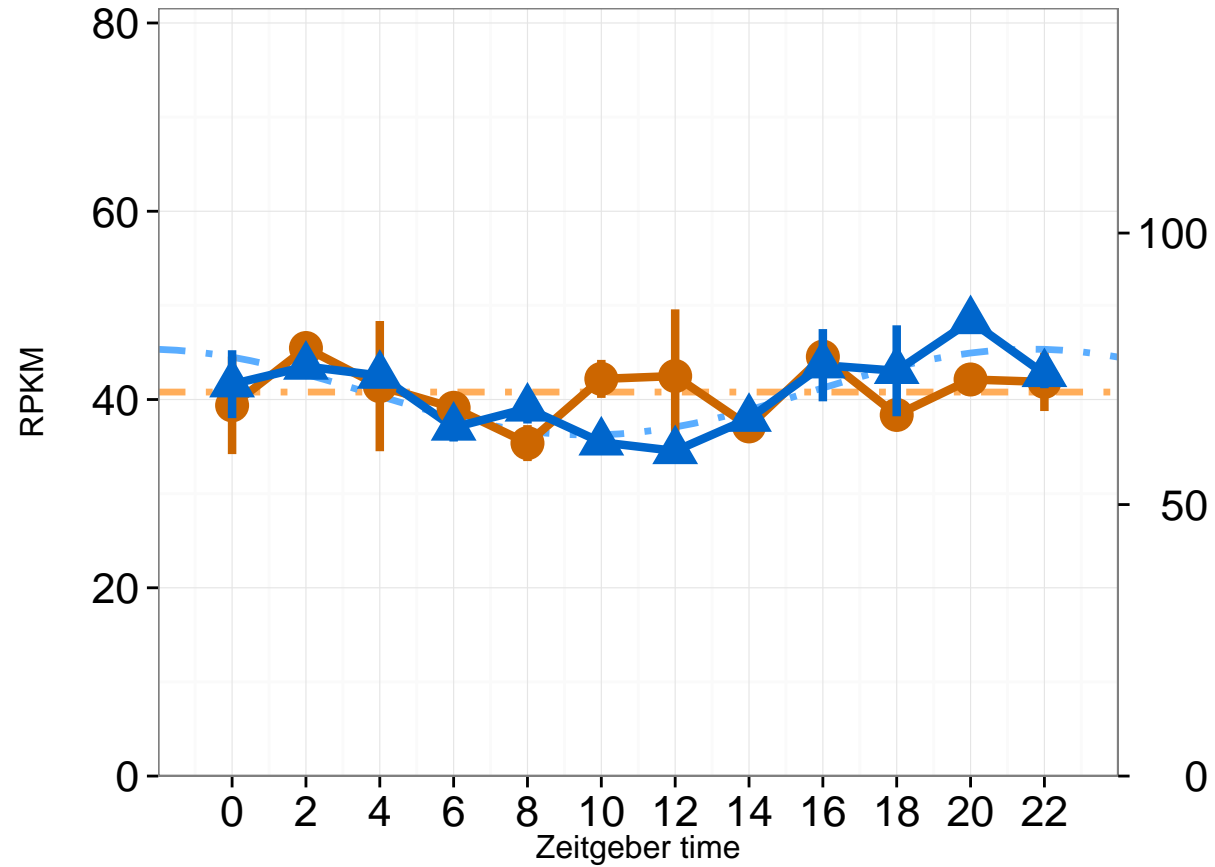

## Cbx1

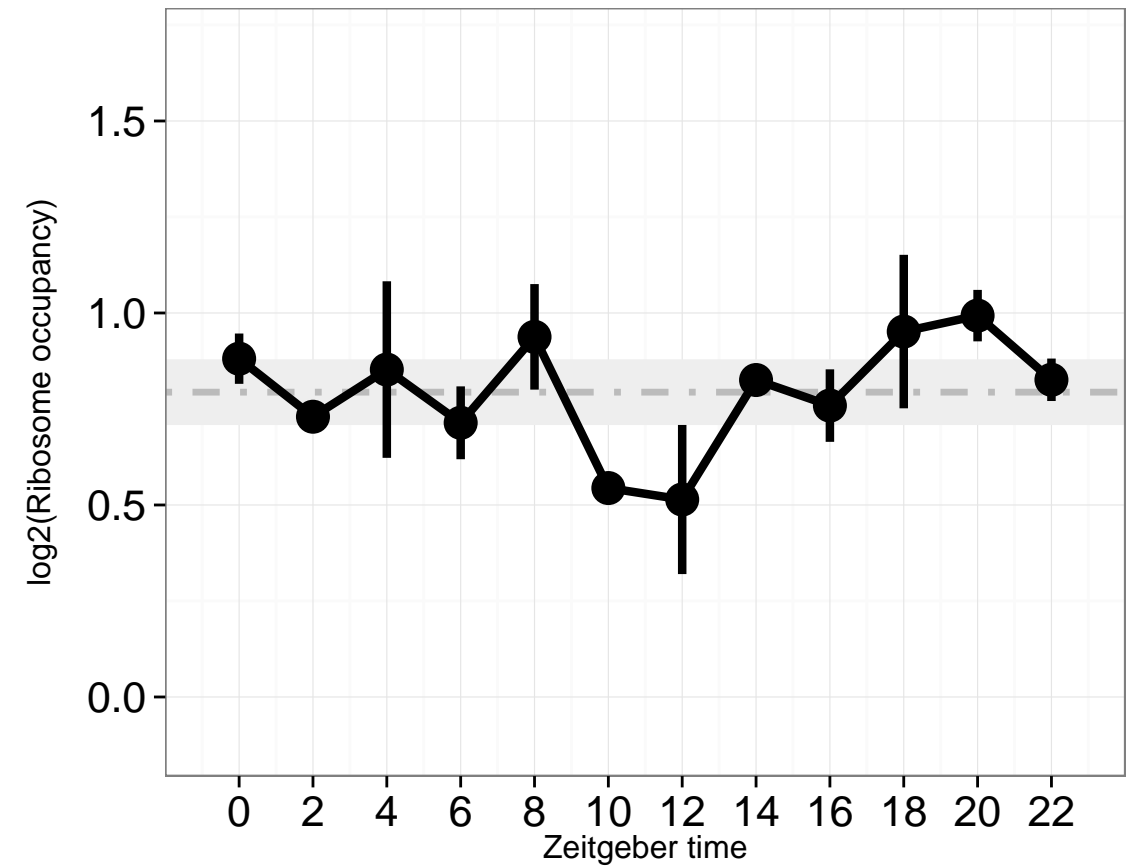

Supplement: Supplementary file 7425 [file 1]

## Ahnak

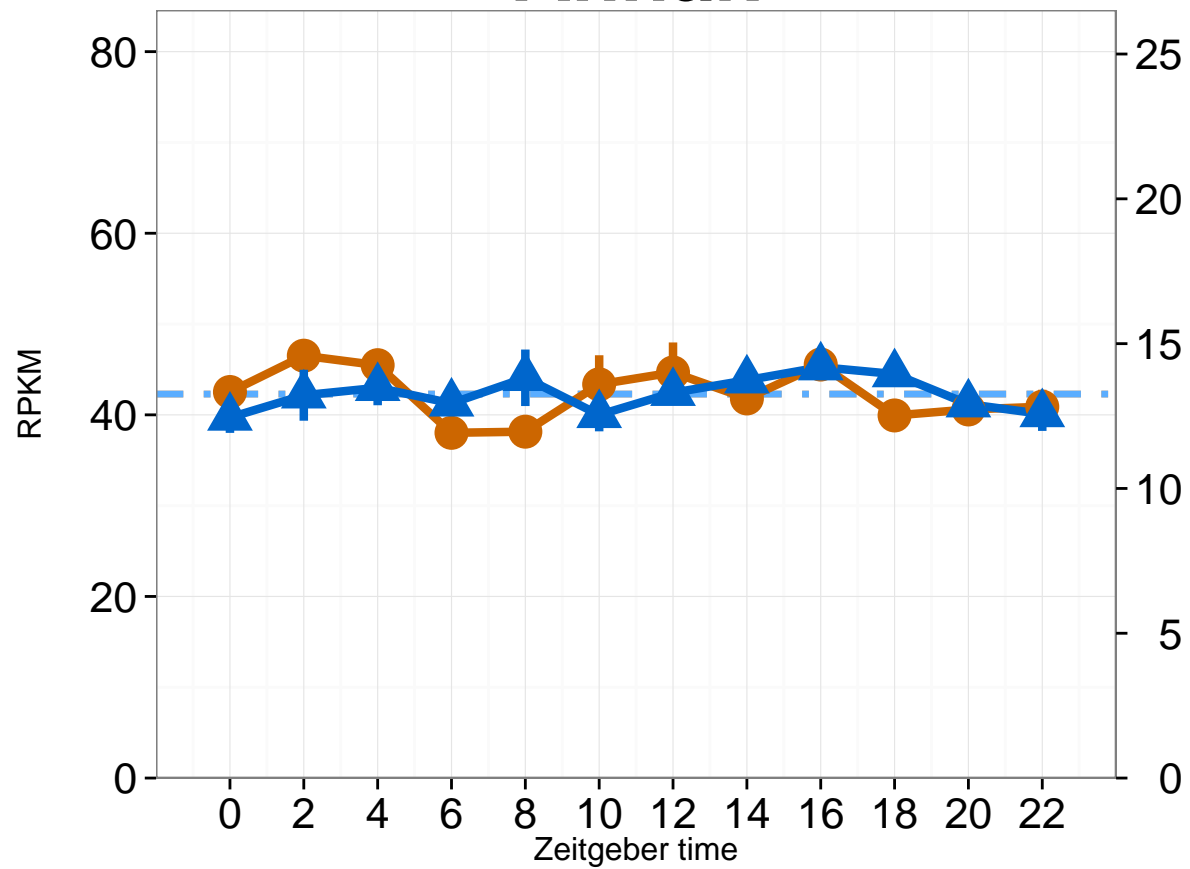

## Ahnak

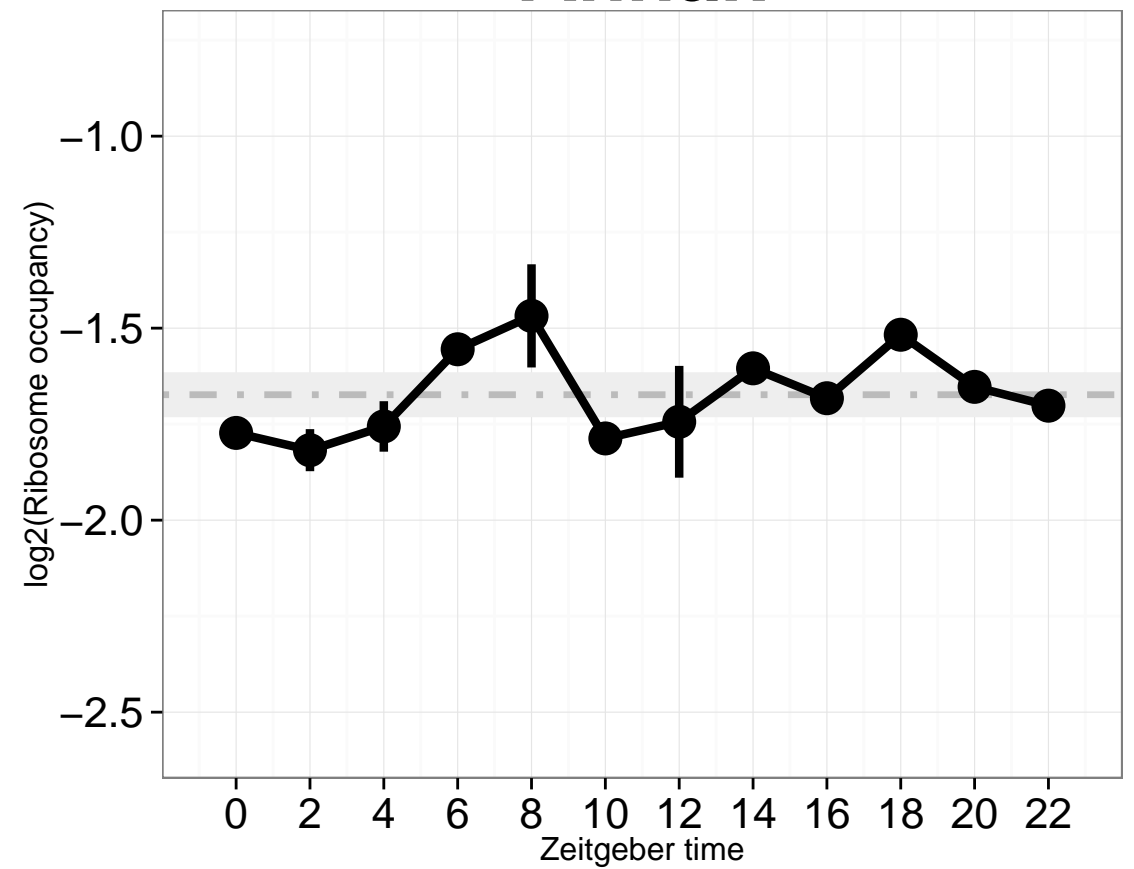

Supplement: Supplementary file 7426 [file 1]

# Itga6

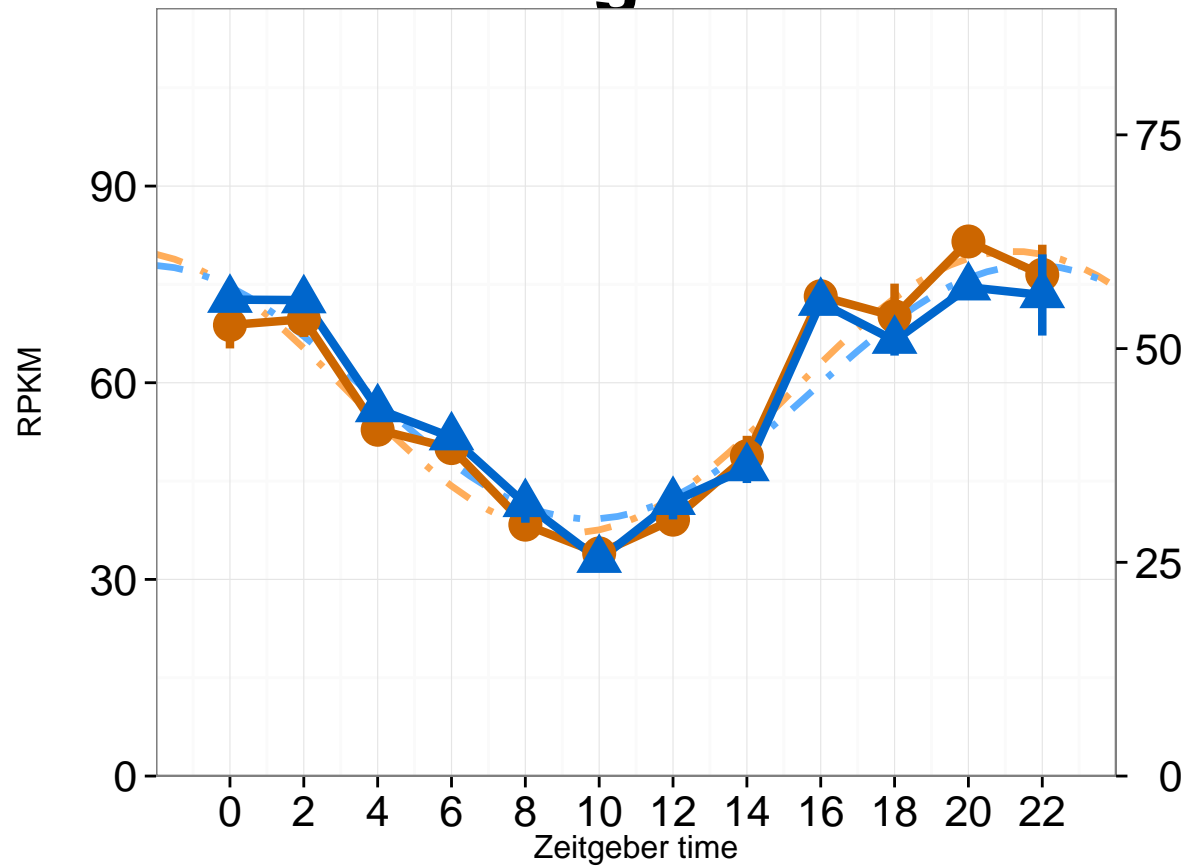

# Itga6

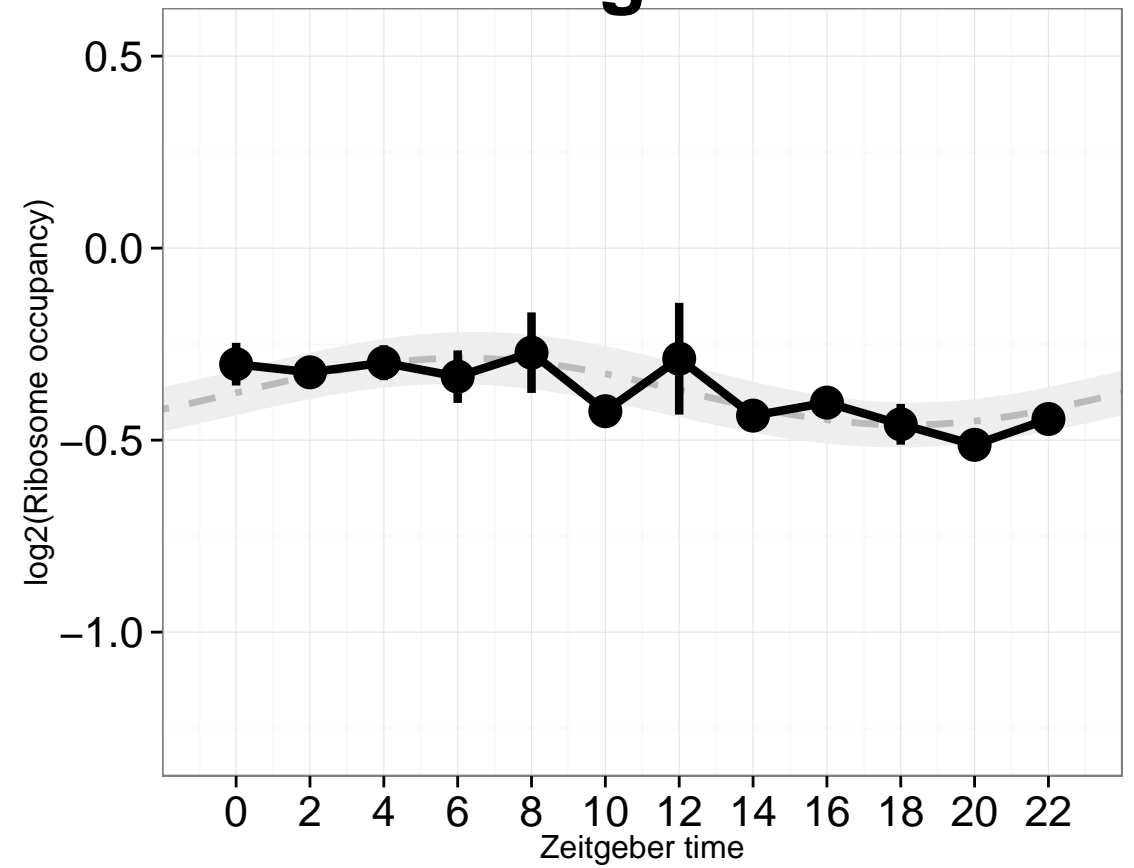

Supplement: Supplementary file 7427 [file 1]

# Rslcan18

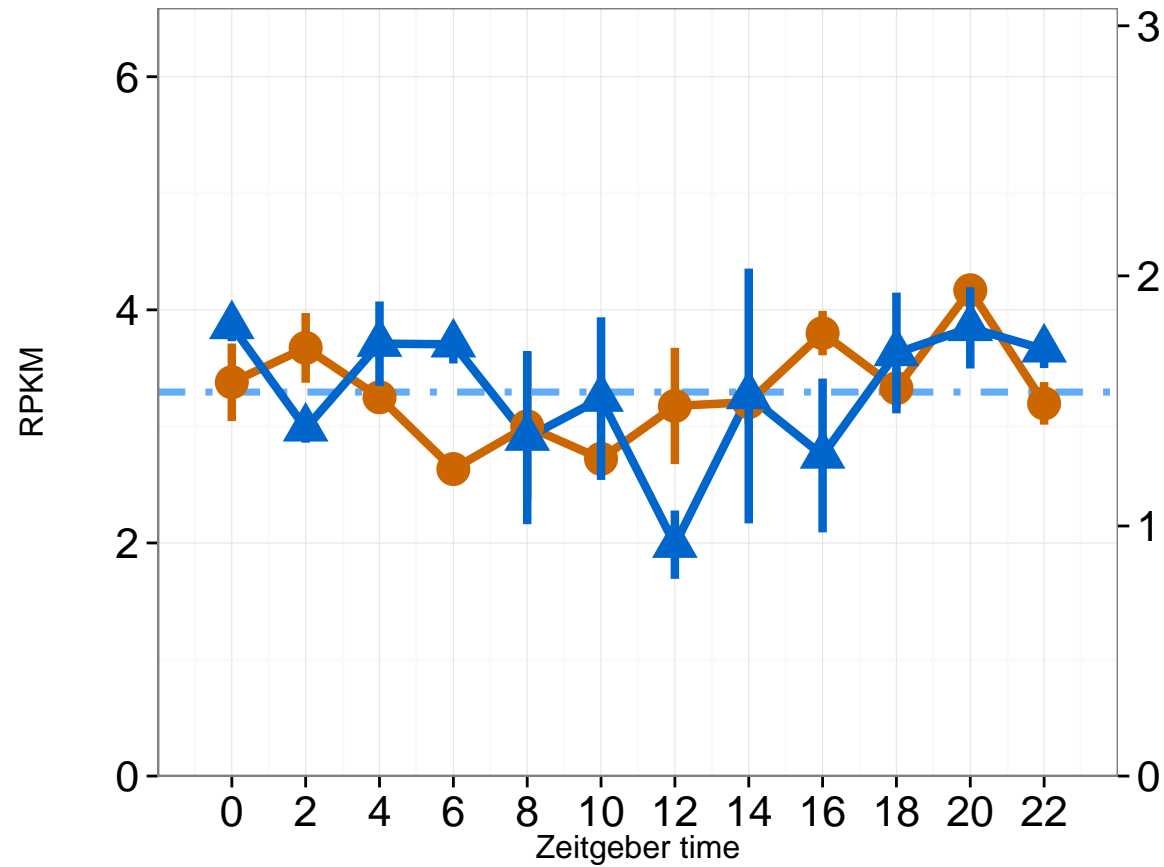

# Rslcan18

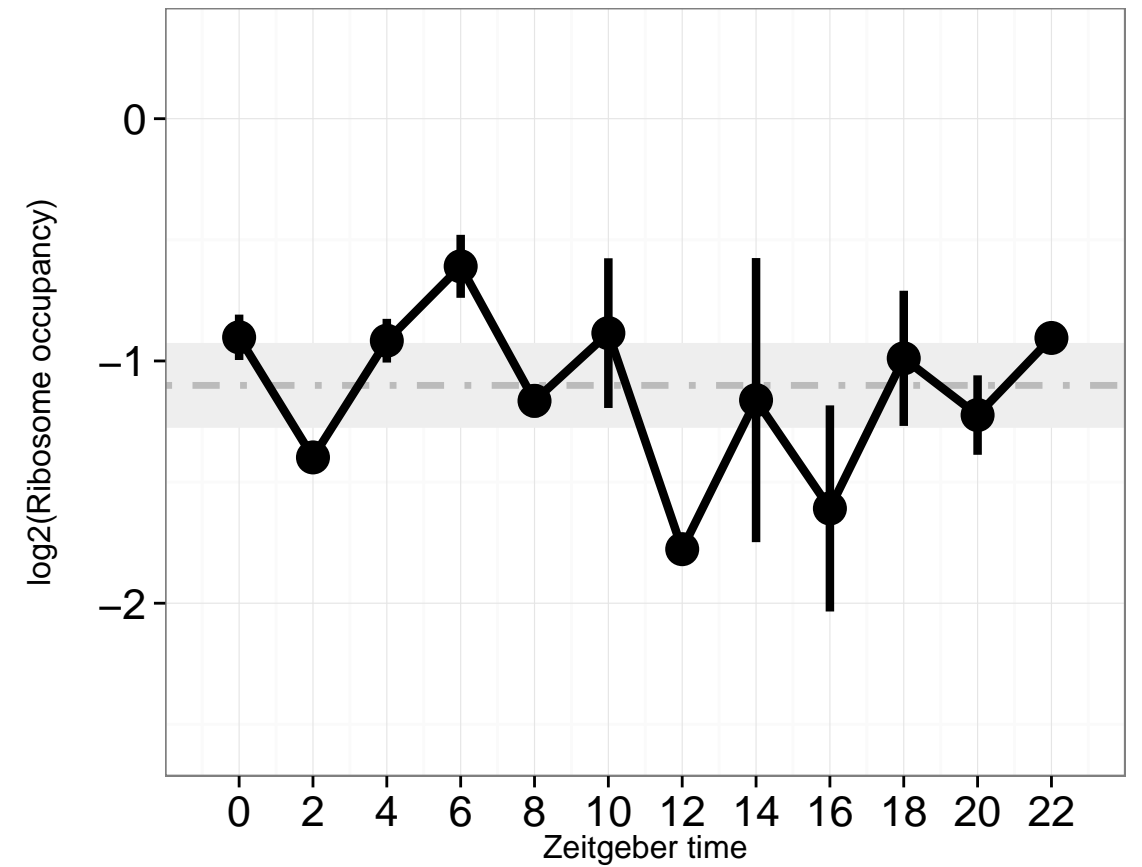

Supplement: Supplementary file 7428 [file 1]

# Ints12

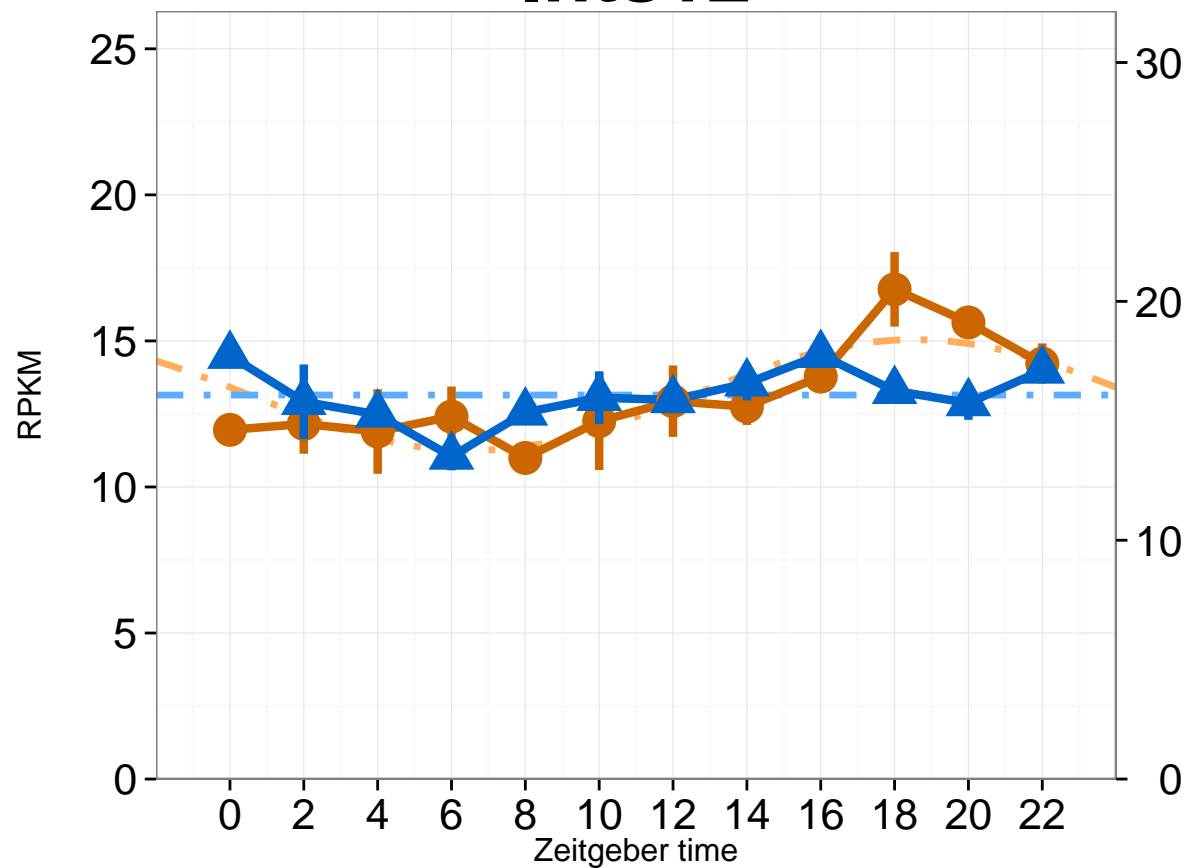

# Ints12

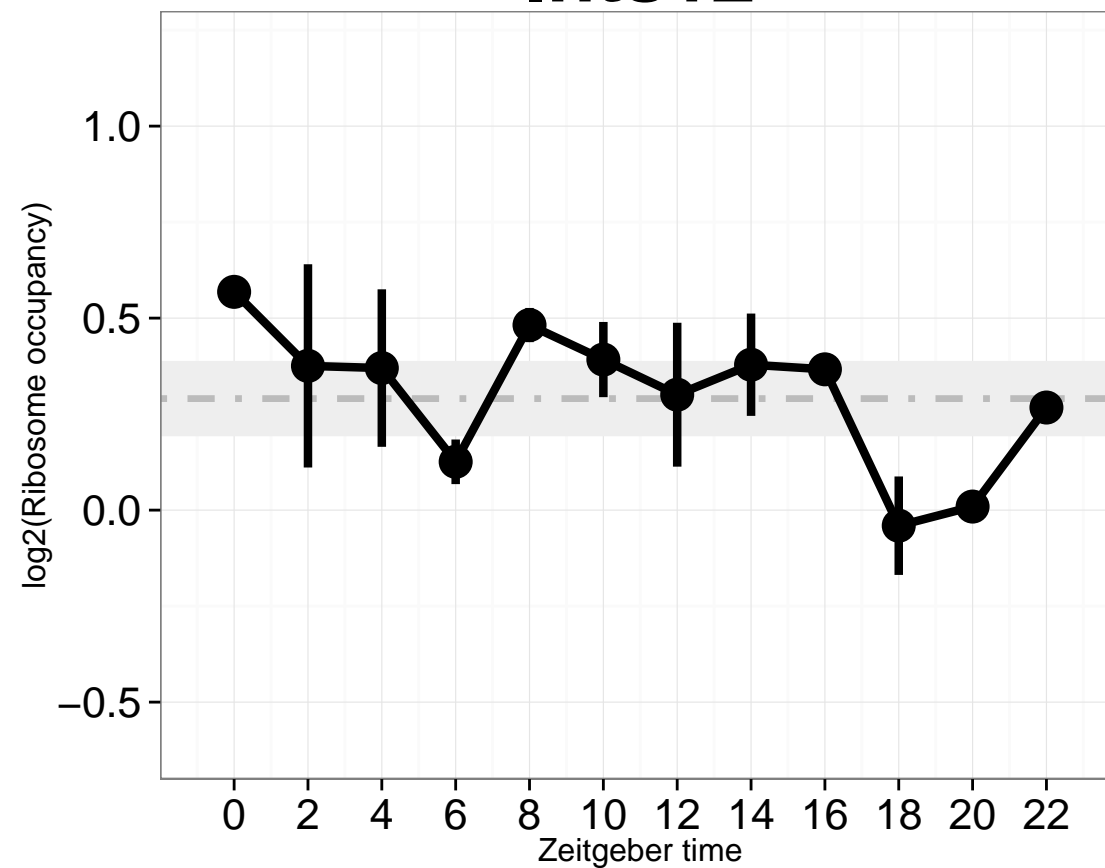

Supplement: Supplementary file 7429 [file 1]

# Ttc8

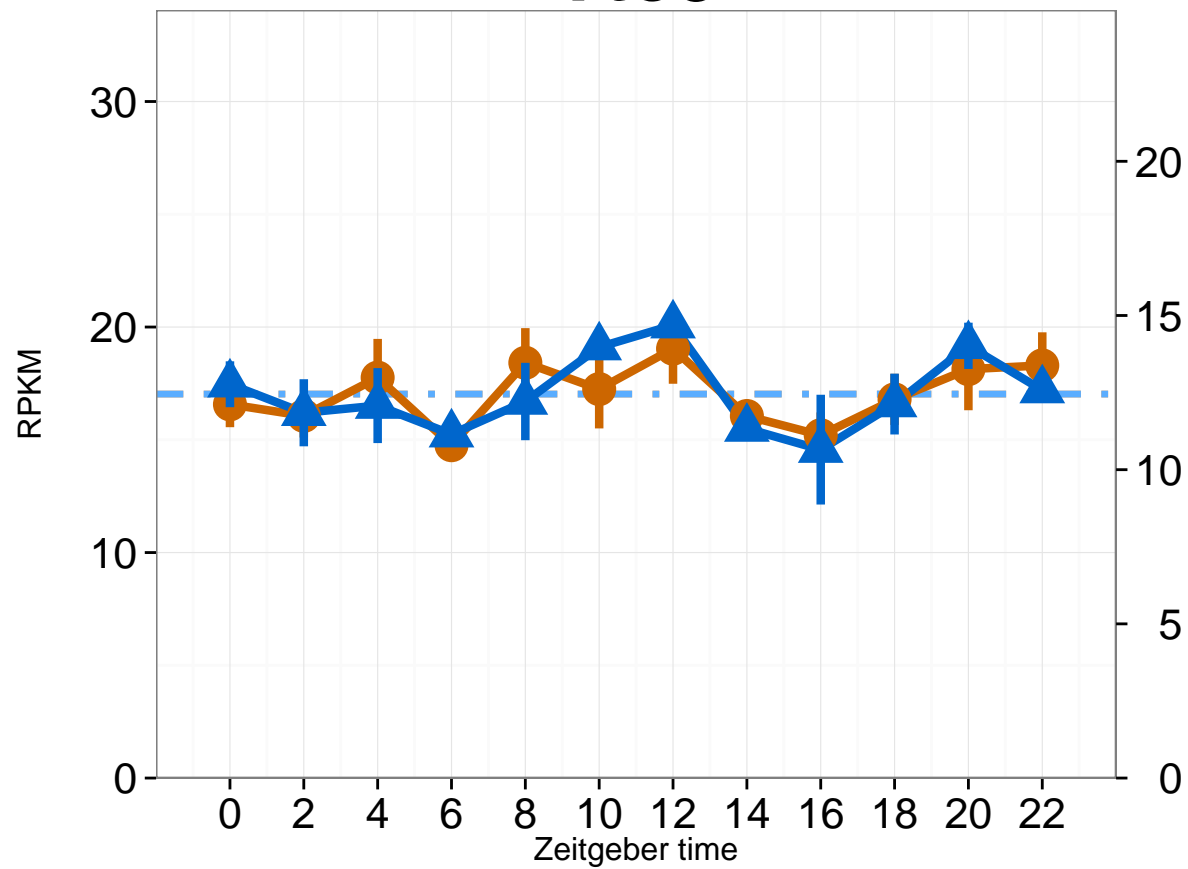

# Ttc8

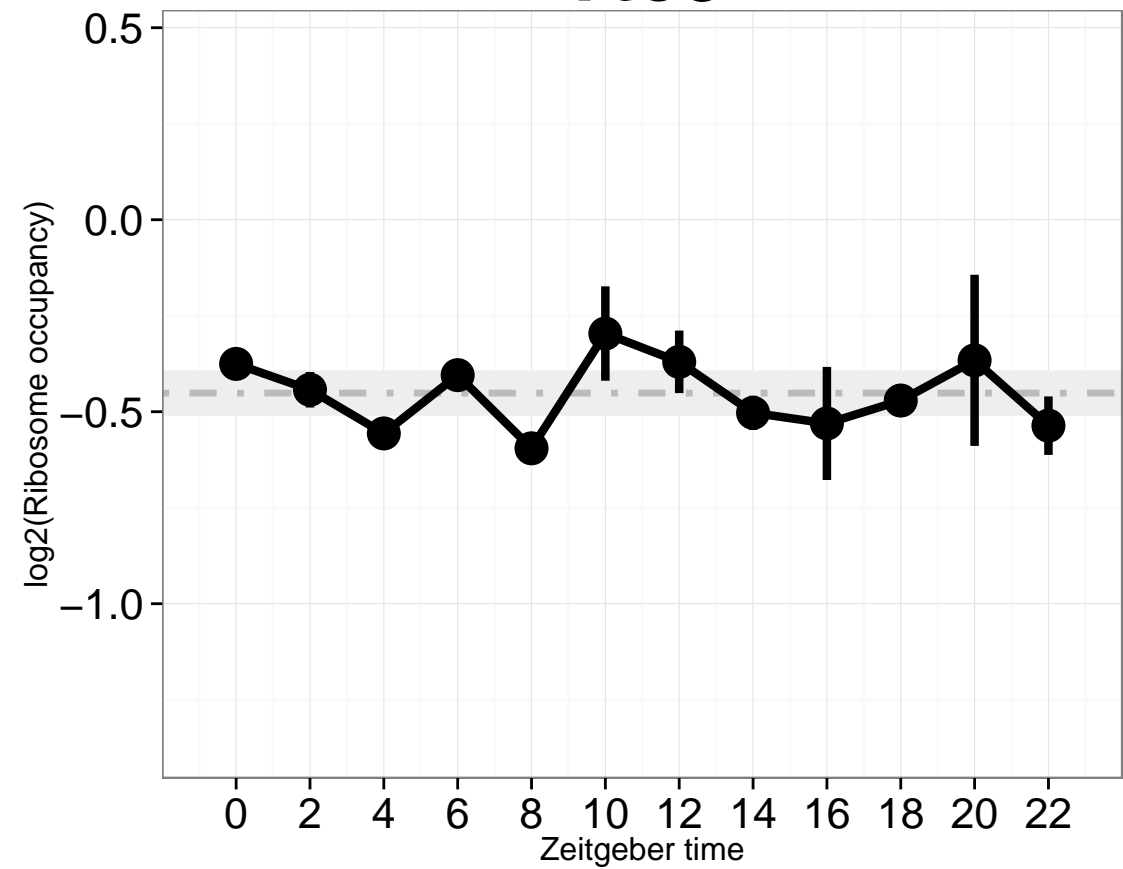

Supplement: Supplementary file 7430 [file 1]

## Ech1

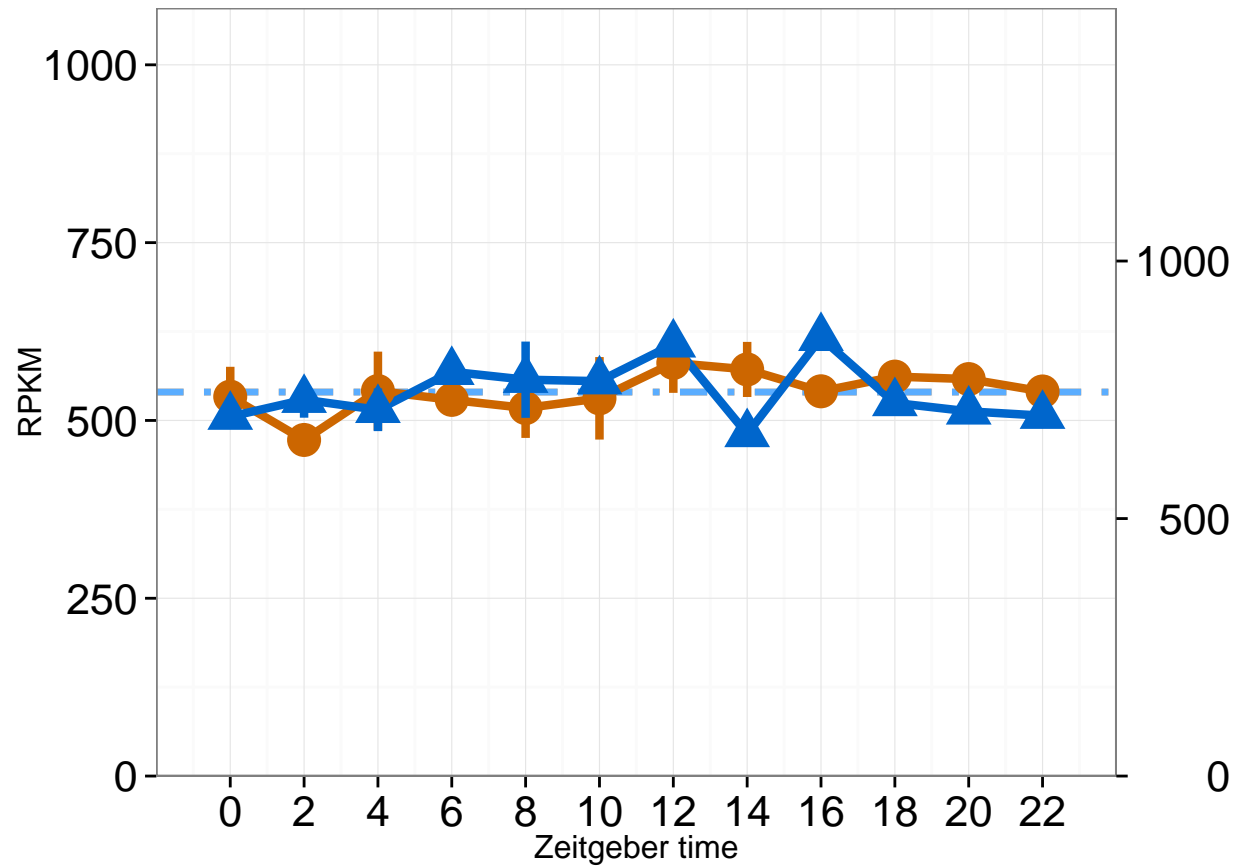

## Ech1

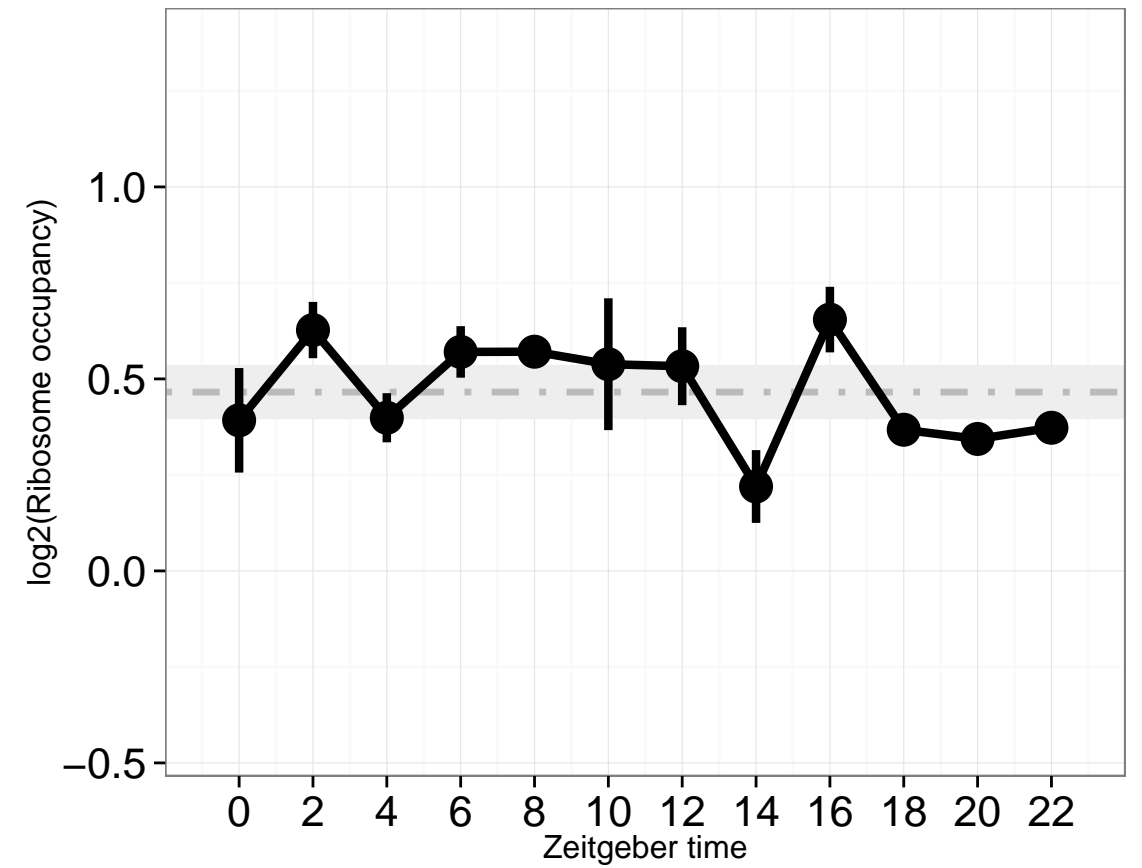

Supplement: Supplementary file 7431 [file 1]

## Egf

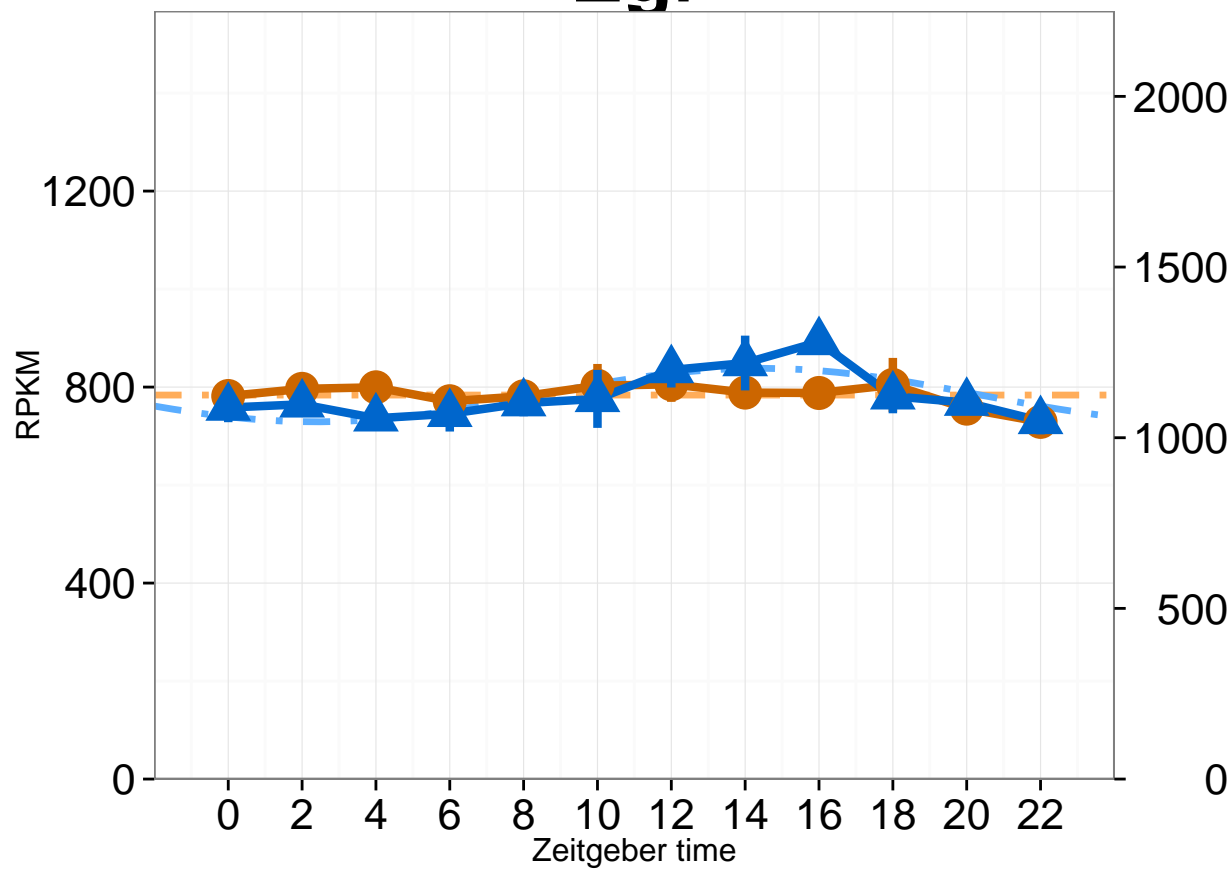

## Egf

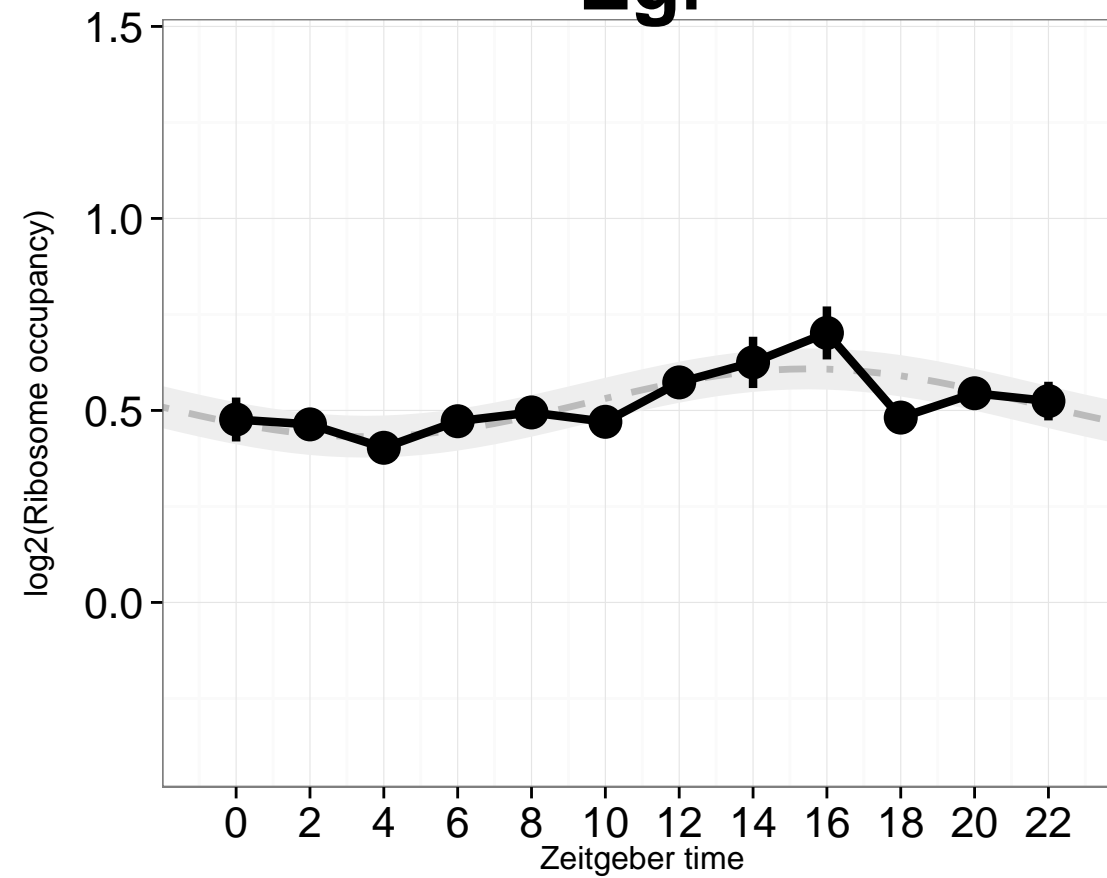

Supplement: Supplementary file 7432 [file 1]

## Ing3

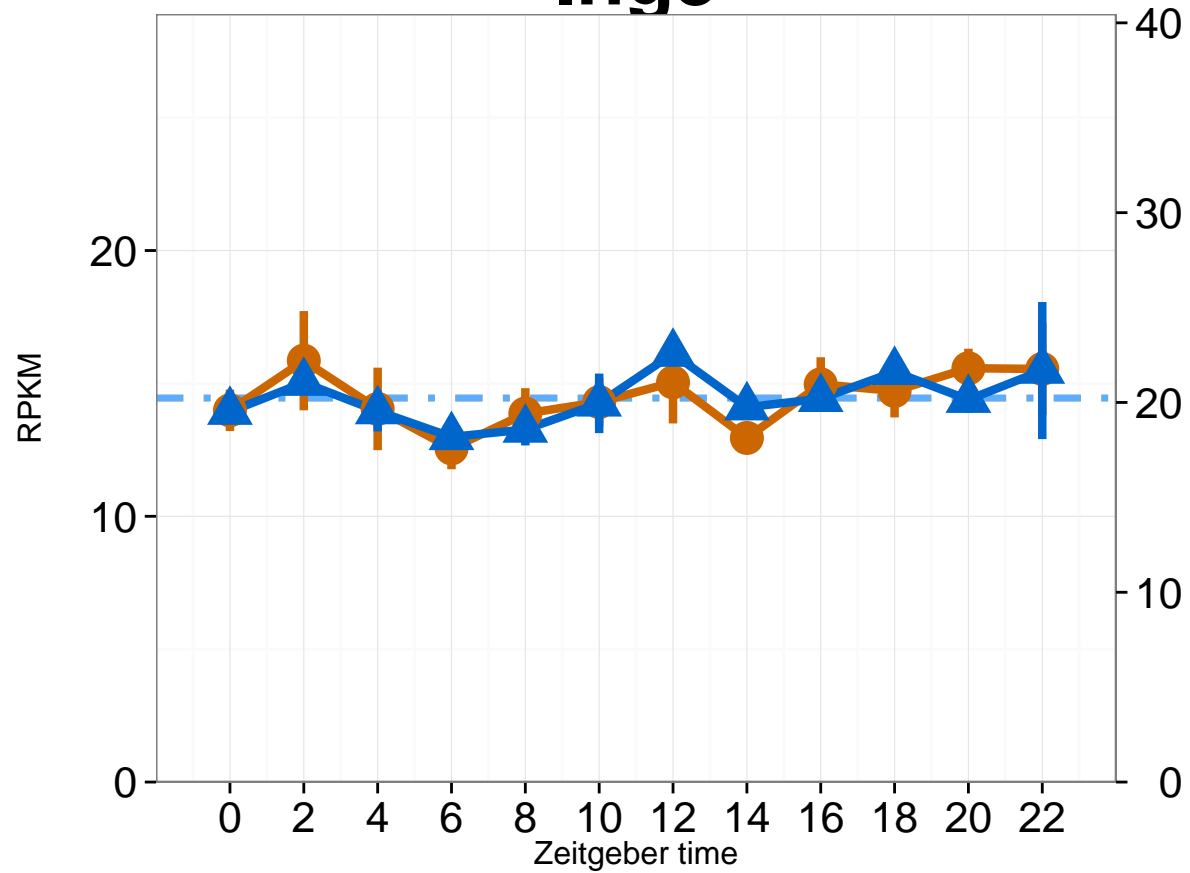

## Ing3

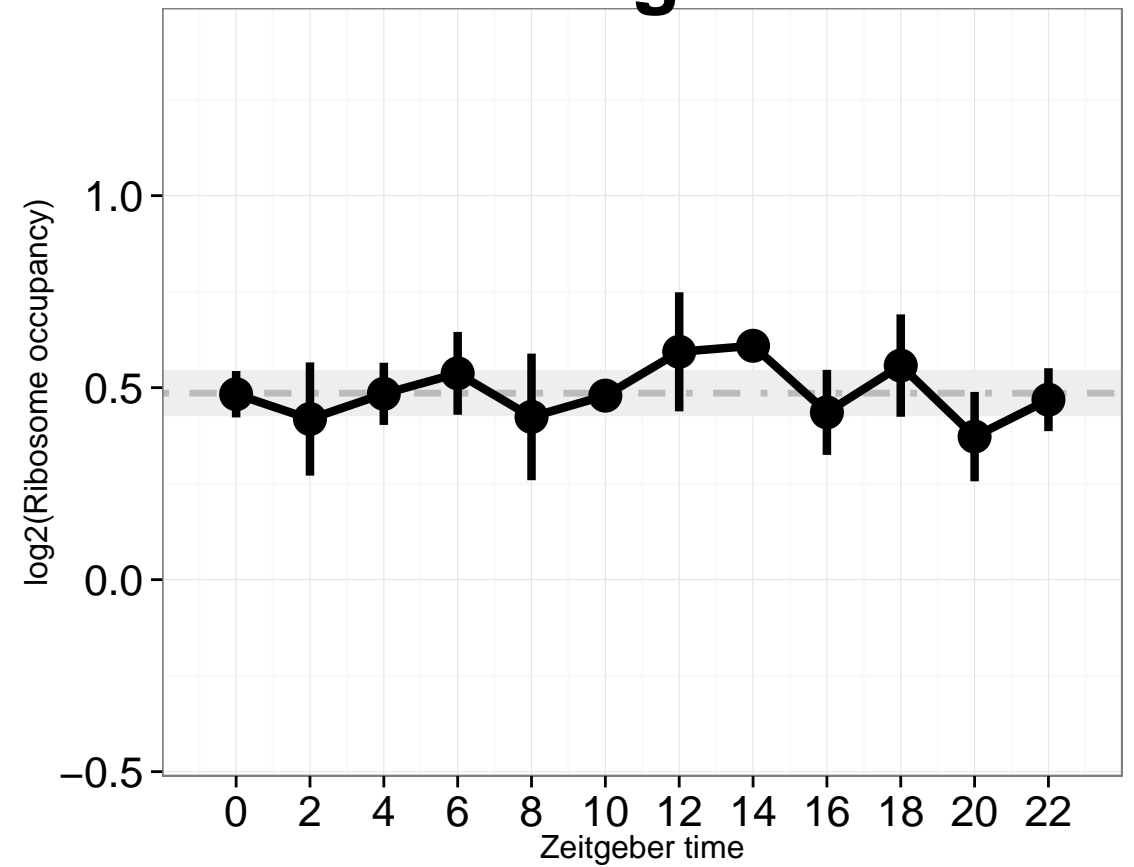

Supplement: Supplementary file 7433 [file 1]

## Vhl

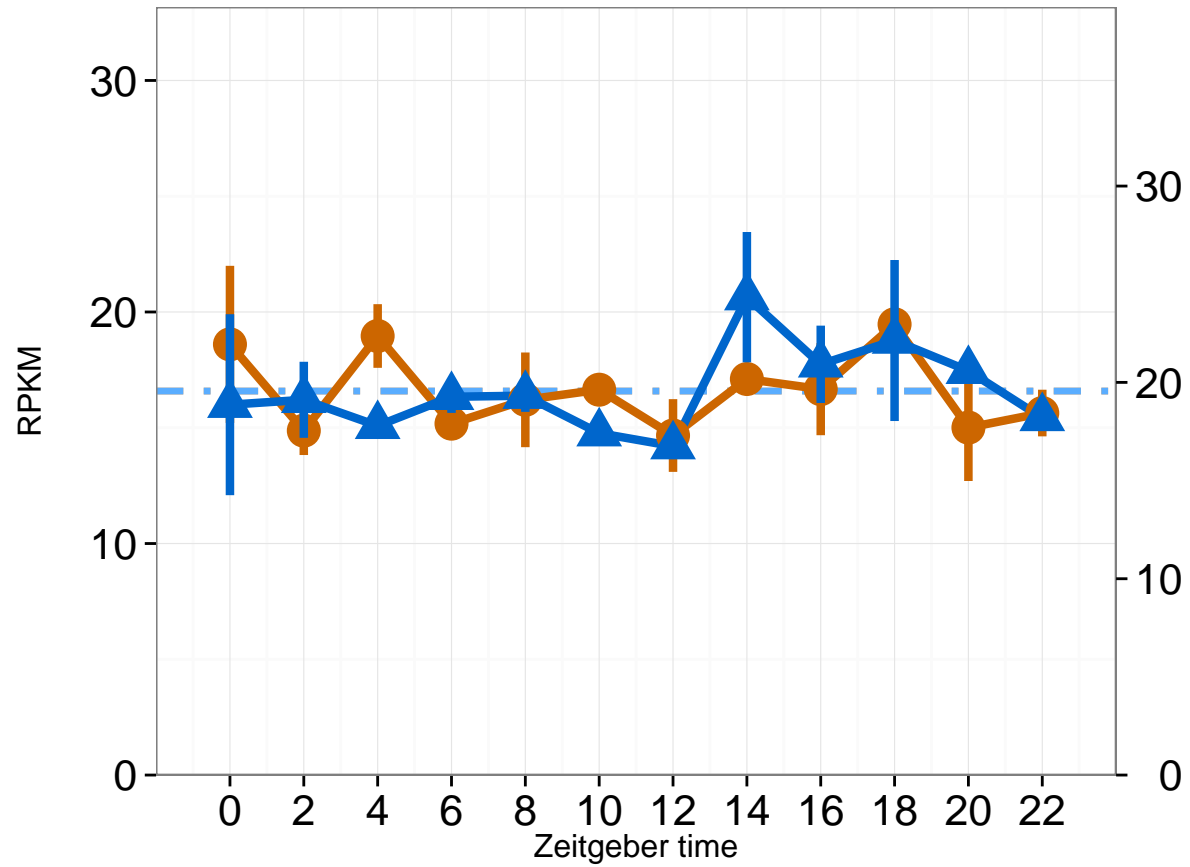

## Vhl

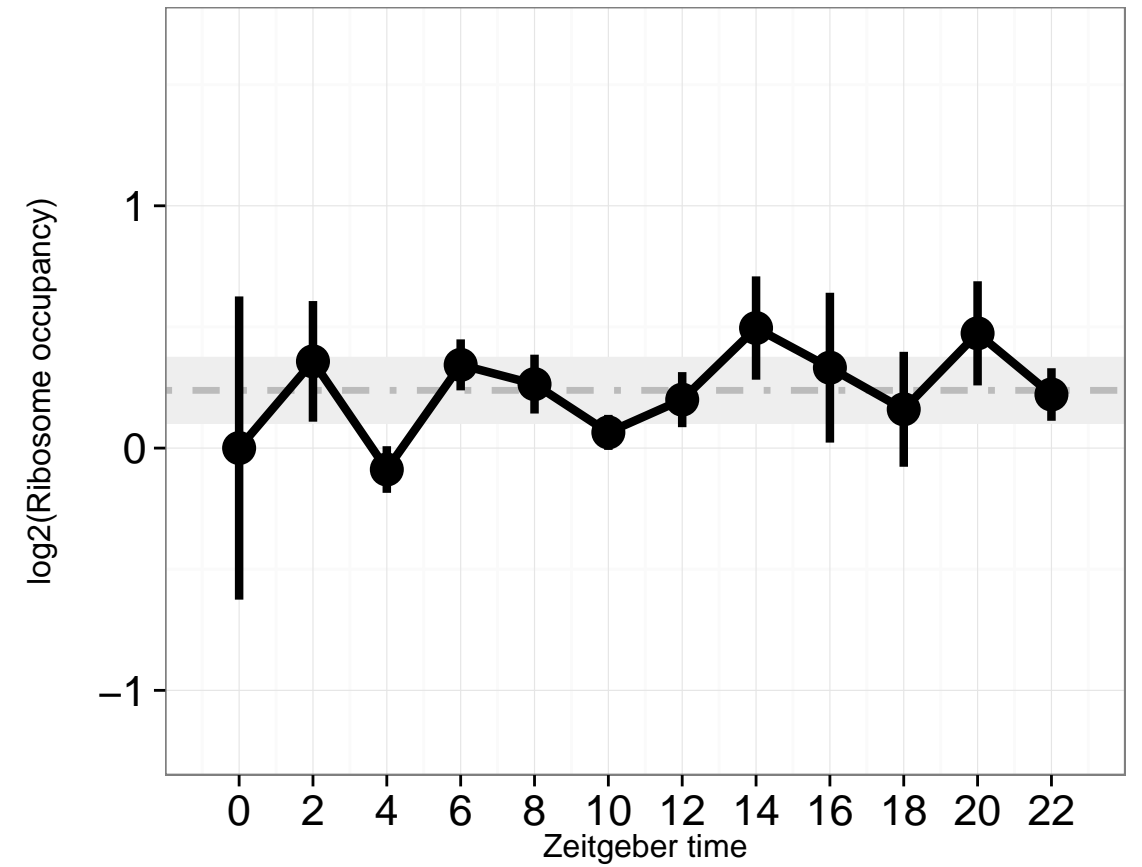

Supplement: Supplementary file 7434 [file 1]

# 1810019J16Rik

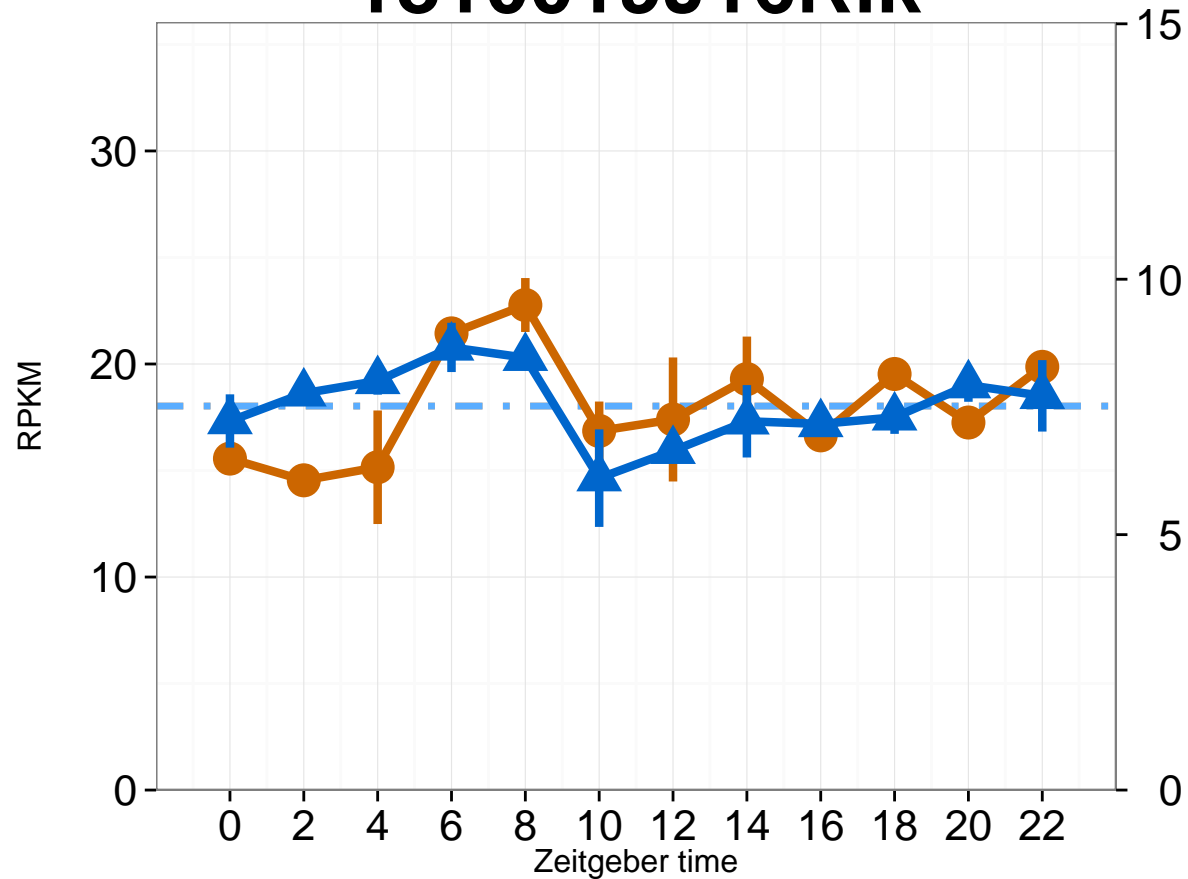

# 1810019J16Rik

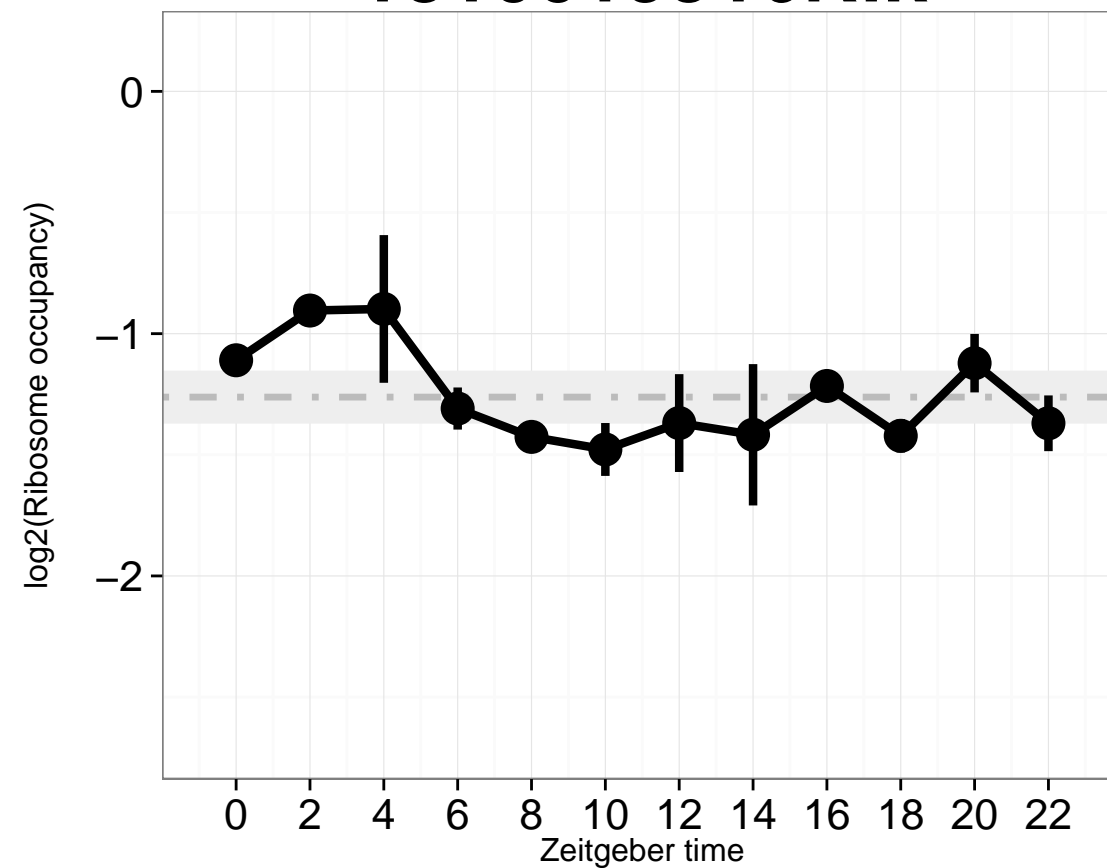

Supplement: Supplementary file 7435 [file 1]

## Enpp6

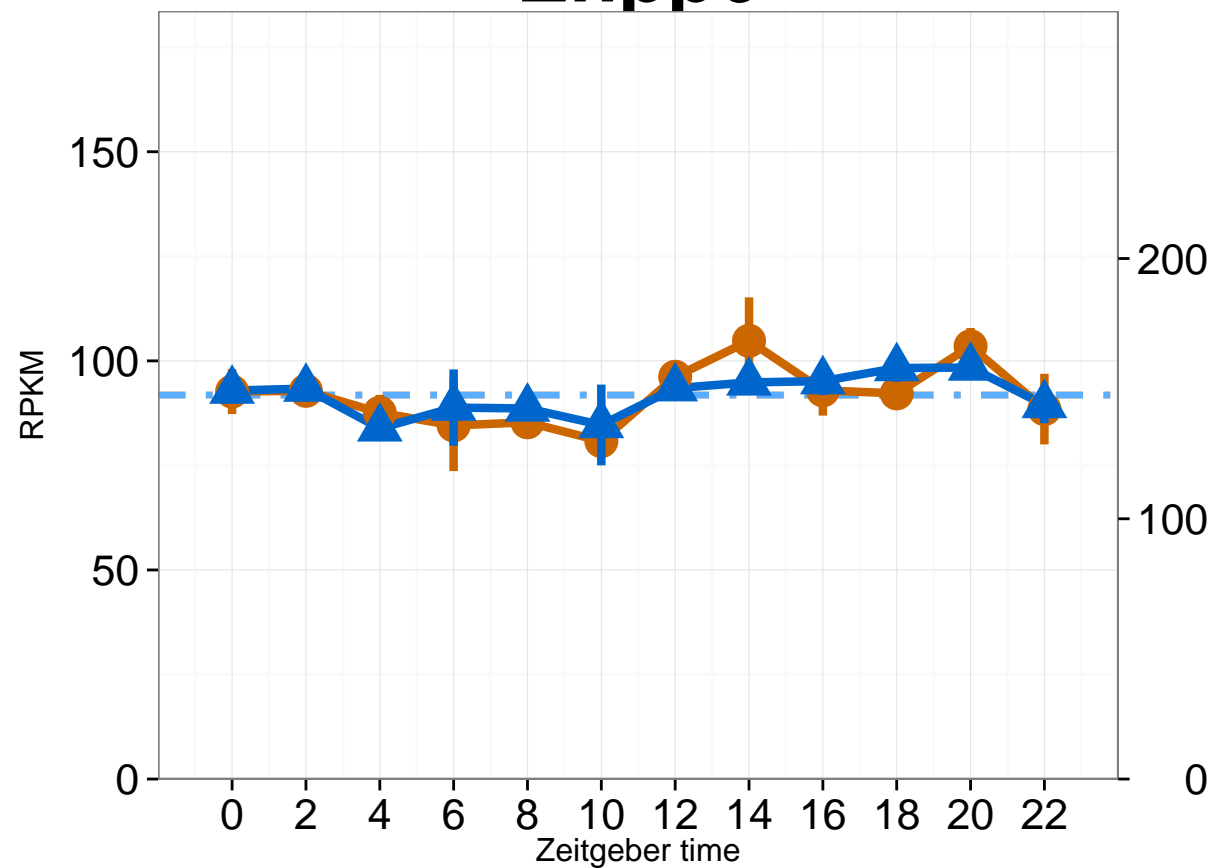

## Enpp6

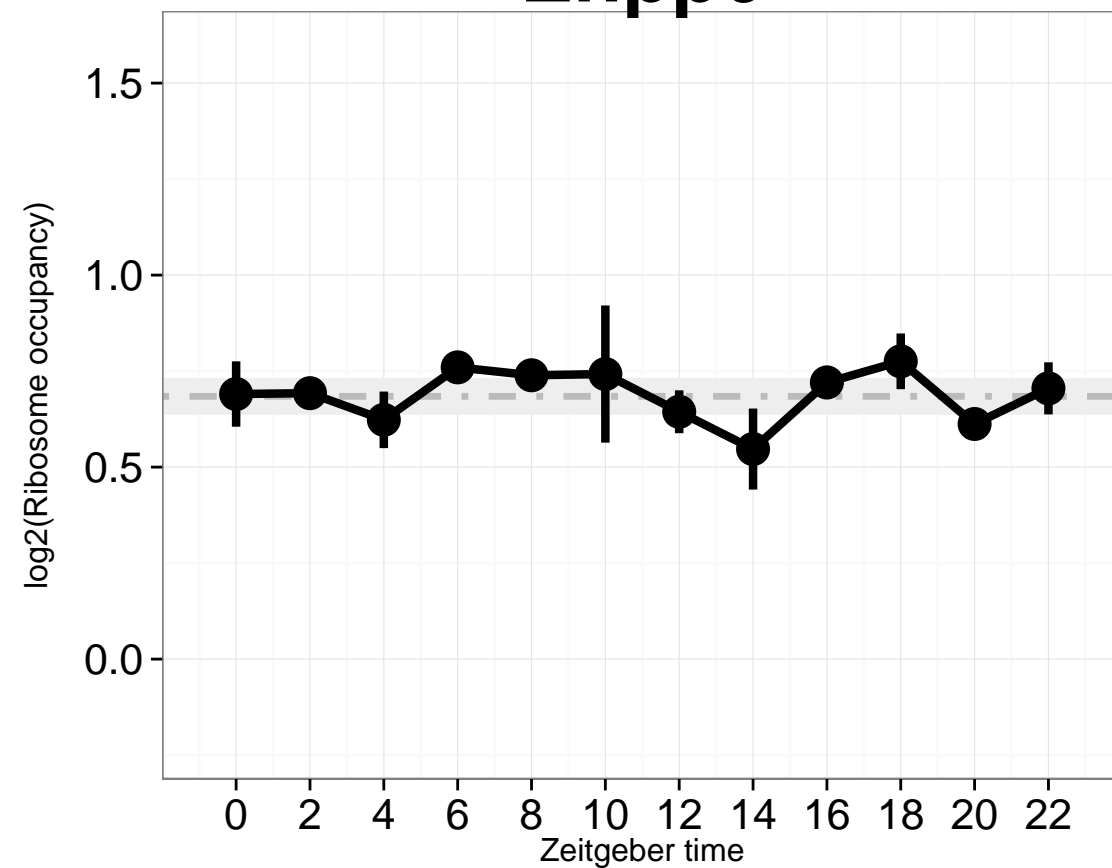

Supplement: Supplementary file 7436 [file 1]

## Rab36

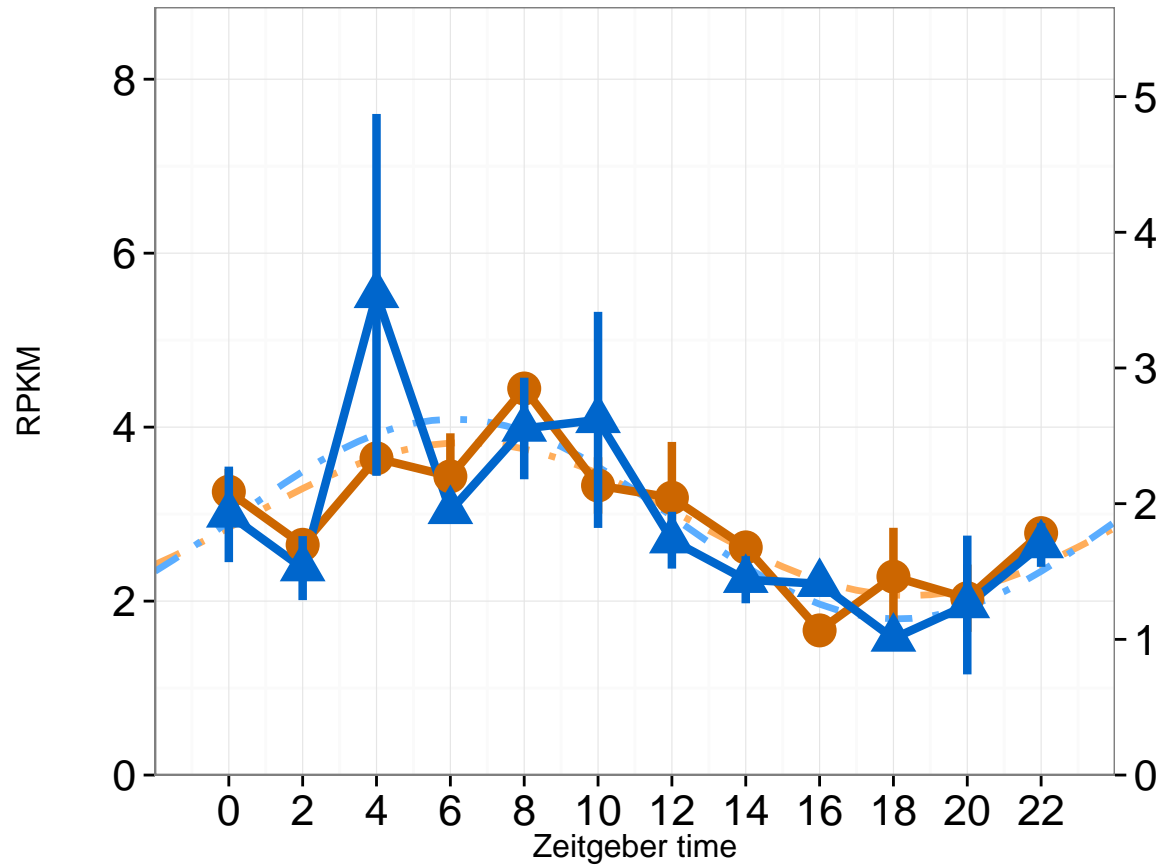

## Rab36

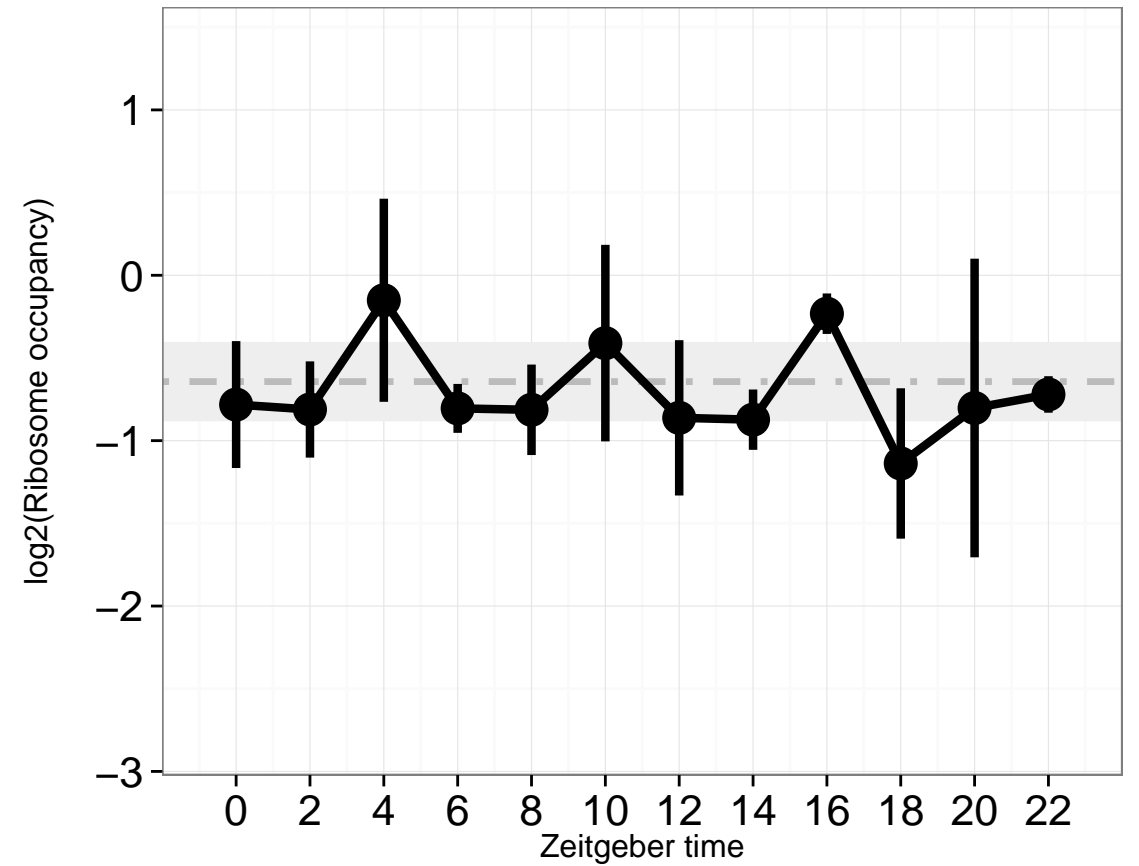

Supplement: Supplementary file 7437 [file 1]

# Ccng2

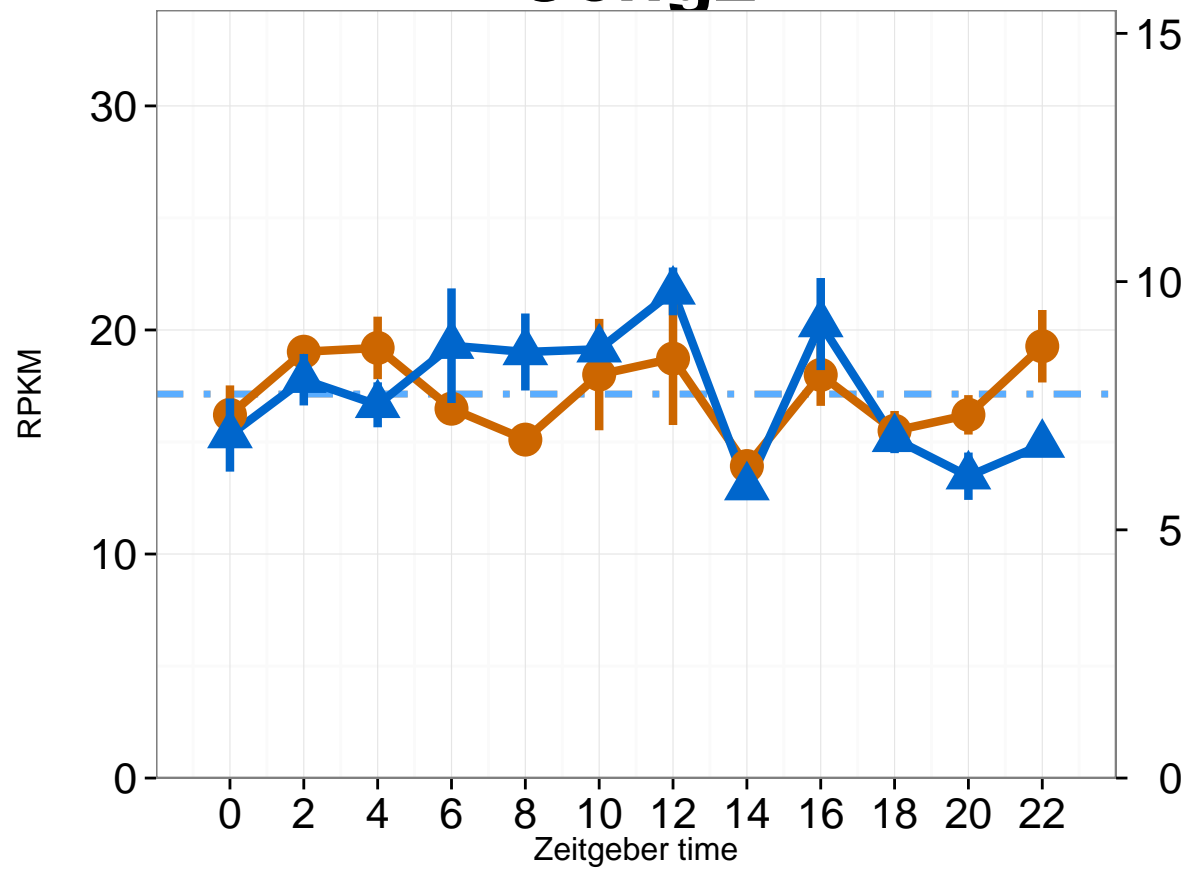

# Ccng2

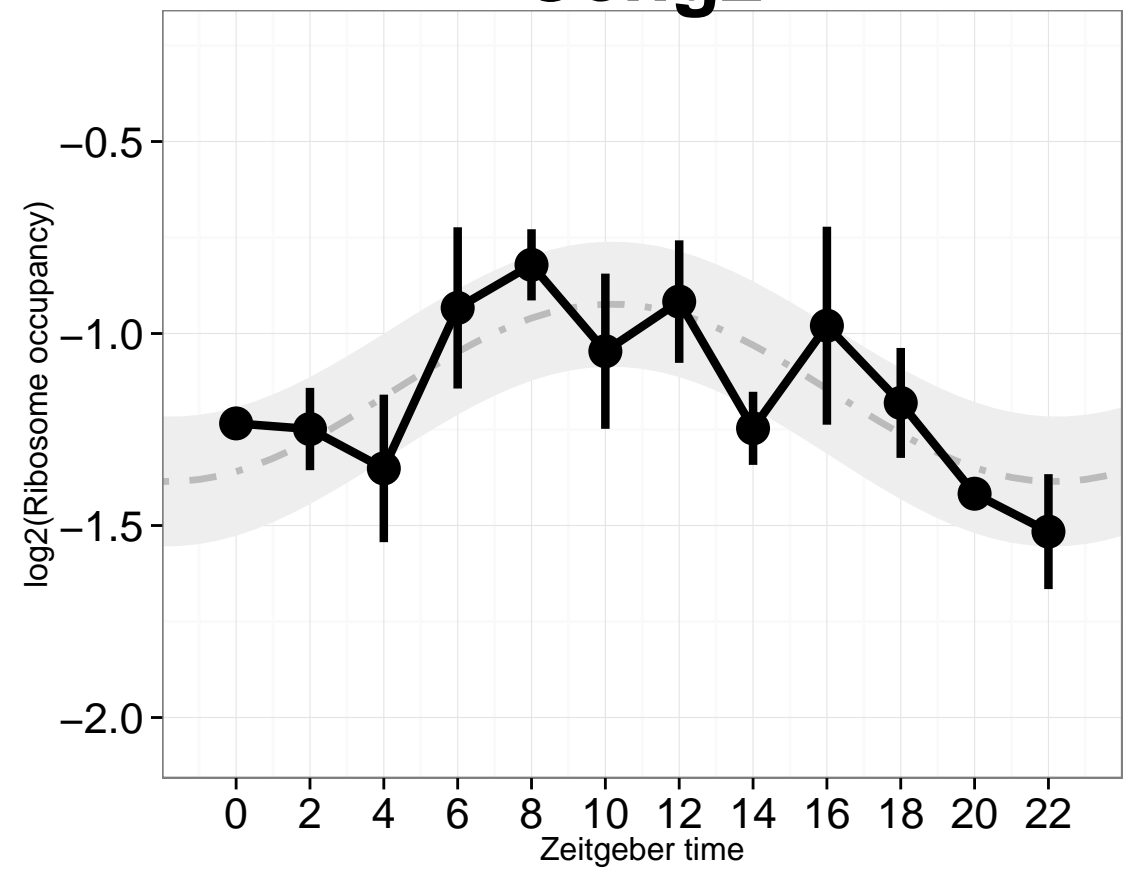

Supplement: Supplementary file 7438 [file 1]

## Prkch

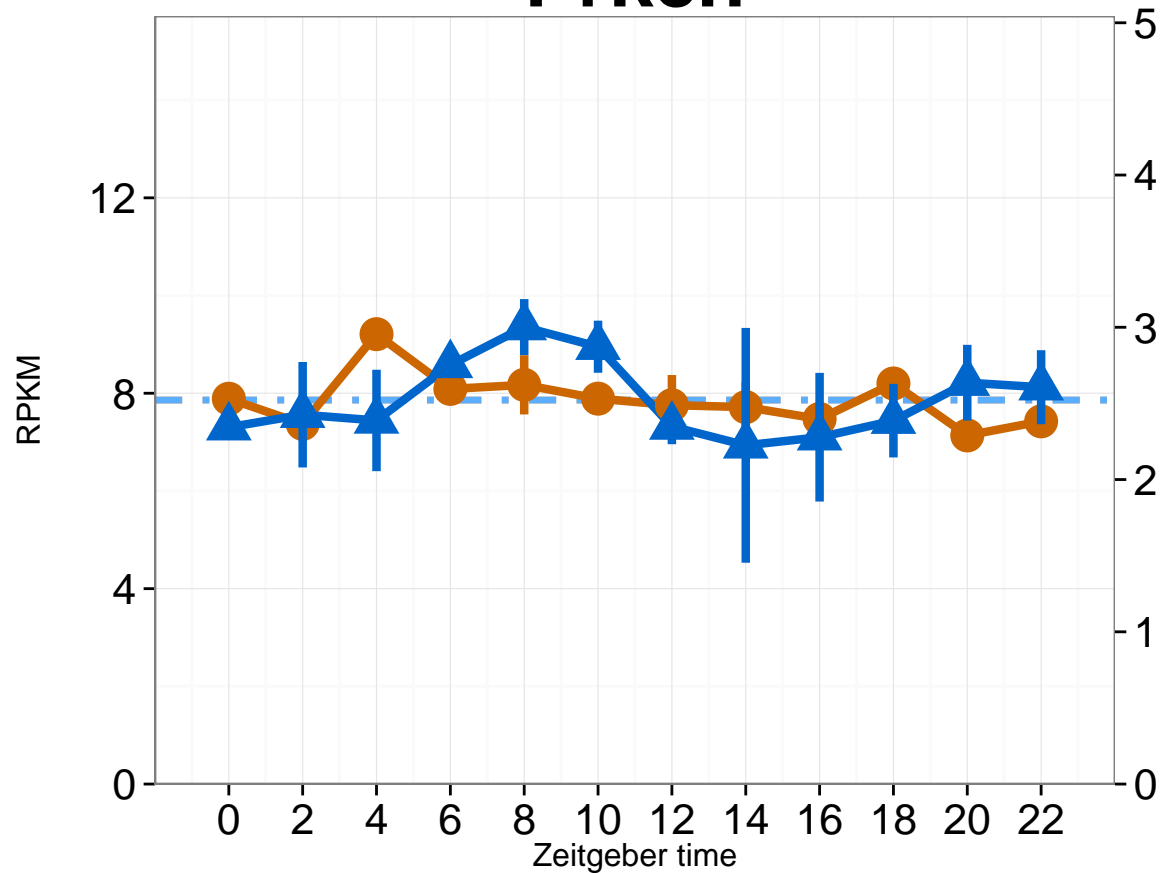

## Prkch

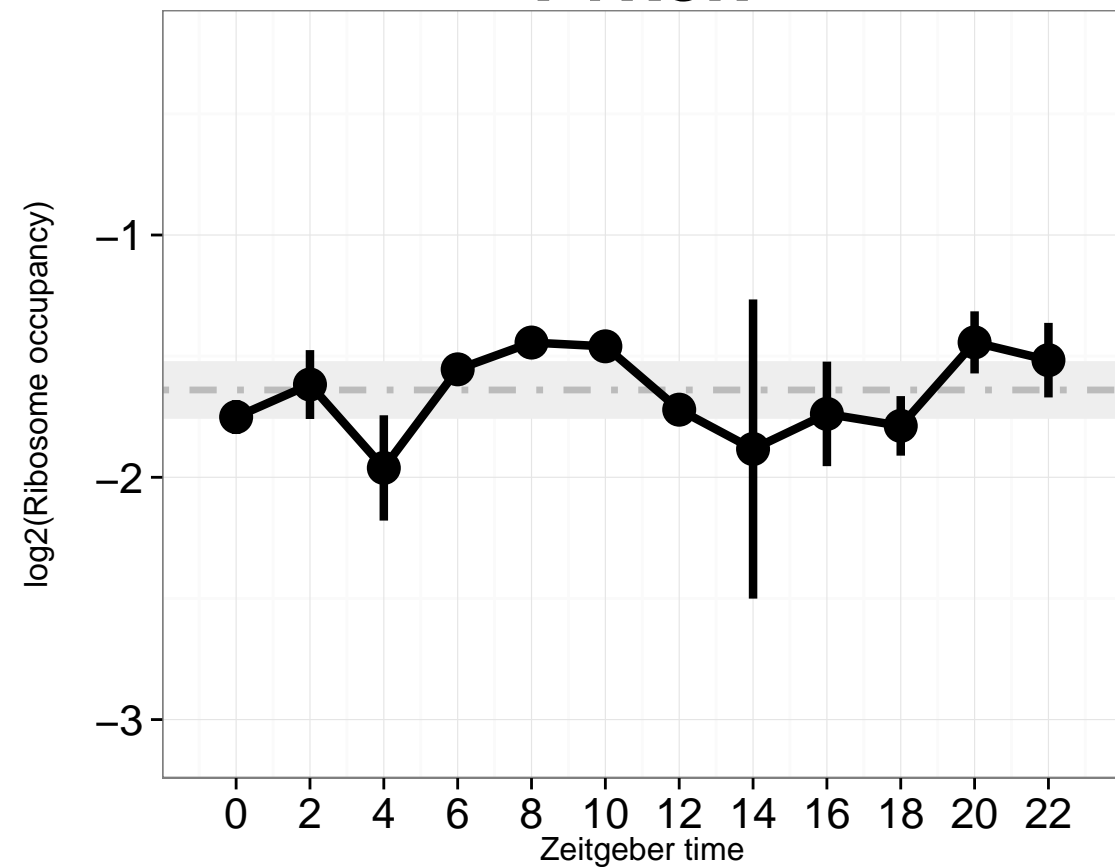

Supplement: Supplementary file 7439 [file 1]

# Tm7sf2

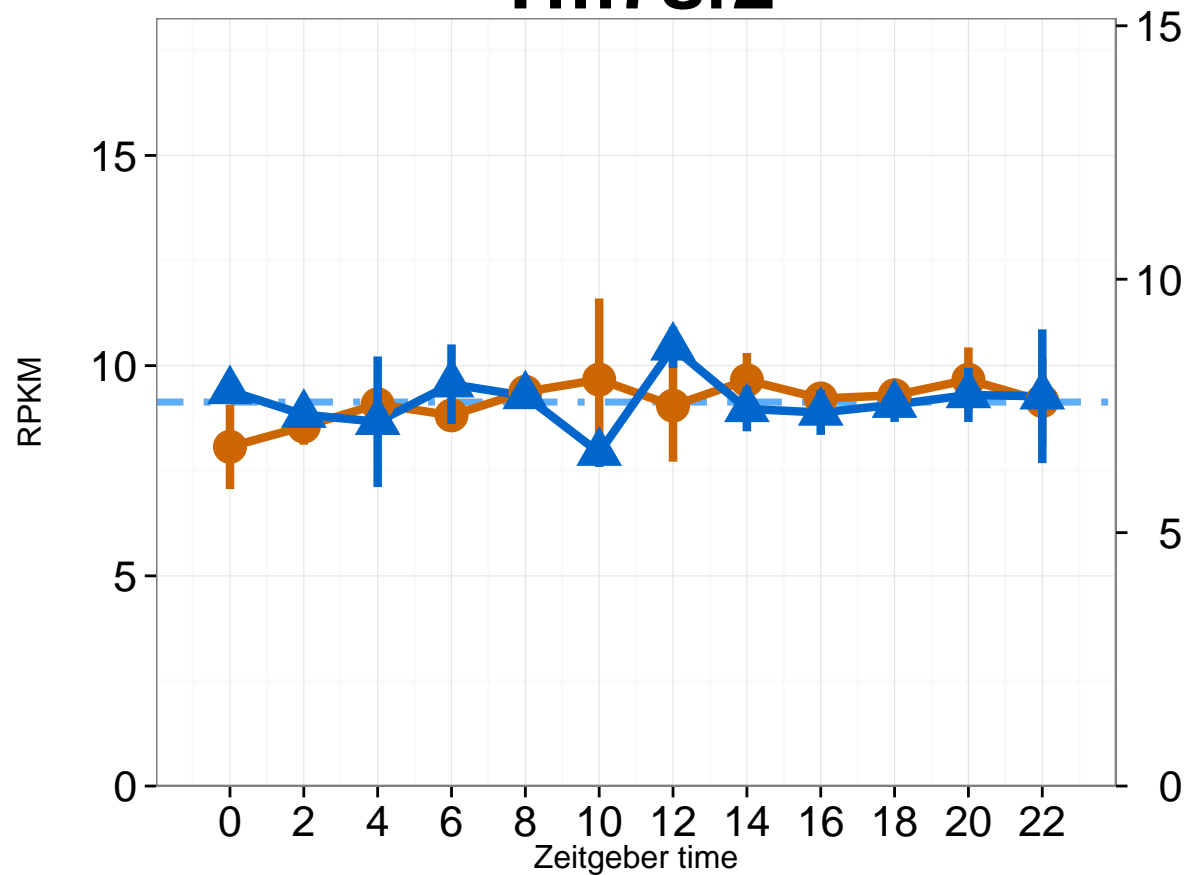

# Tm7sf2

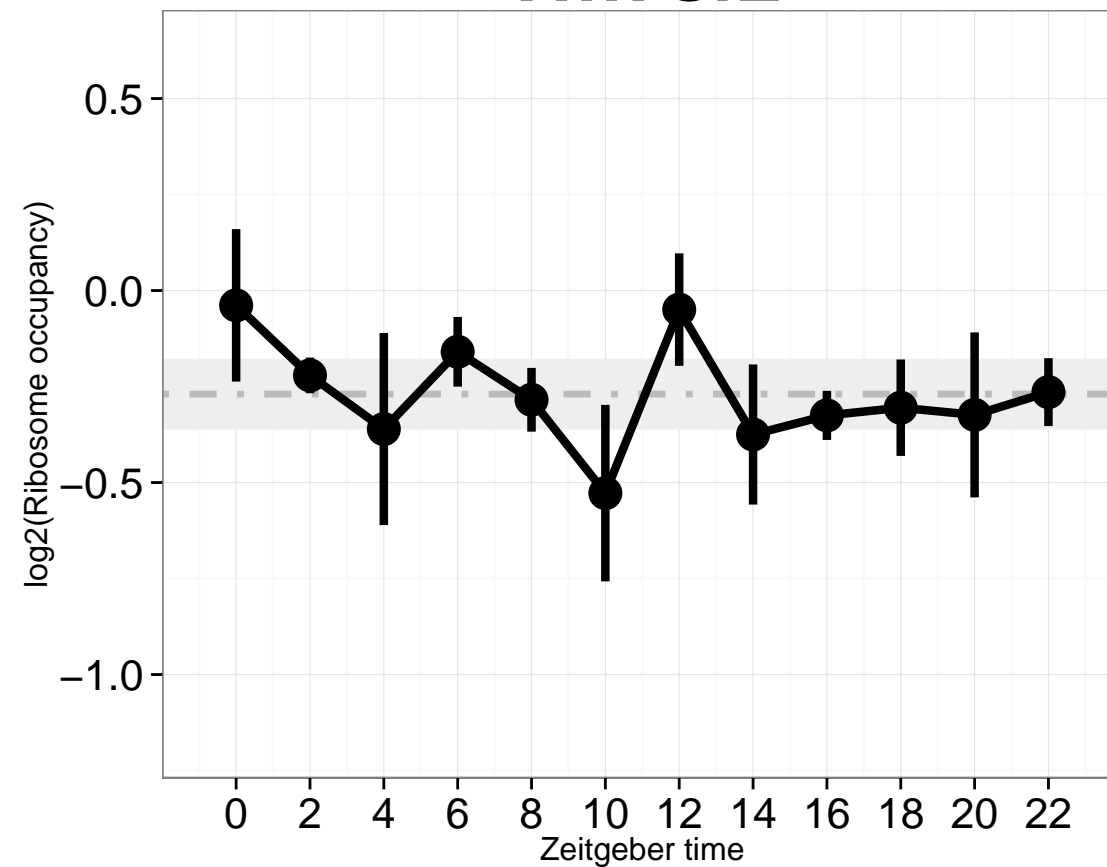

Supplement: Supplementary file 7440 [file 1]

## Gm4450

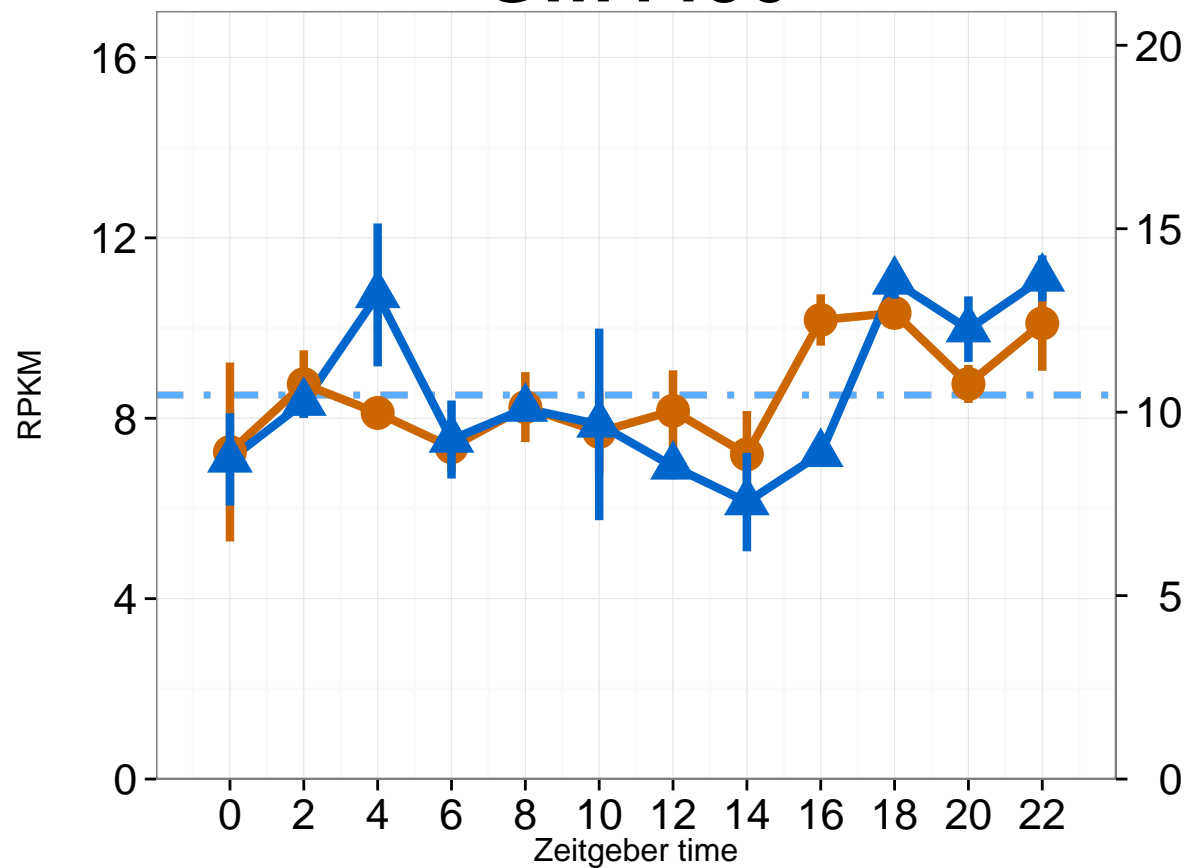

## Gm4450

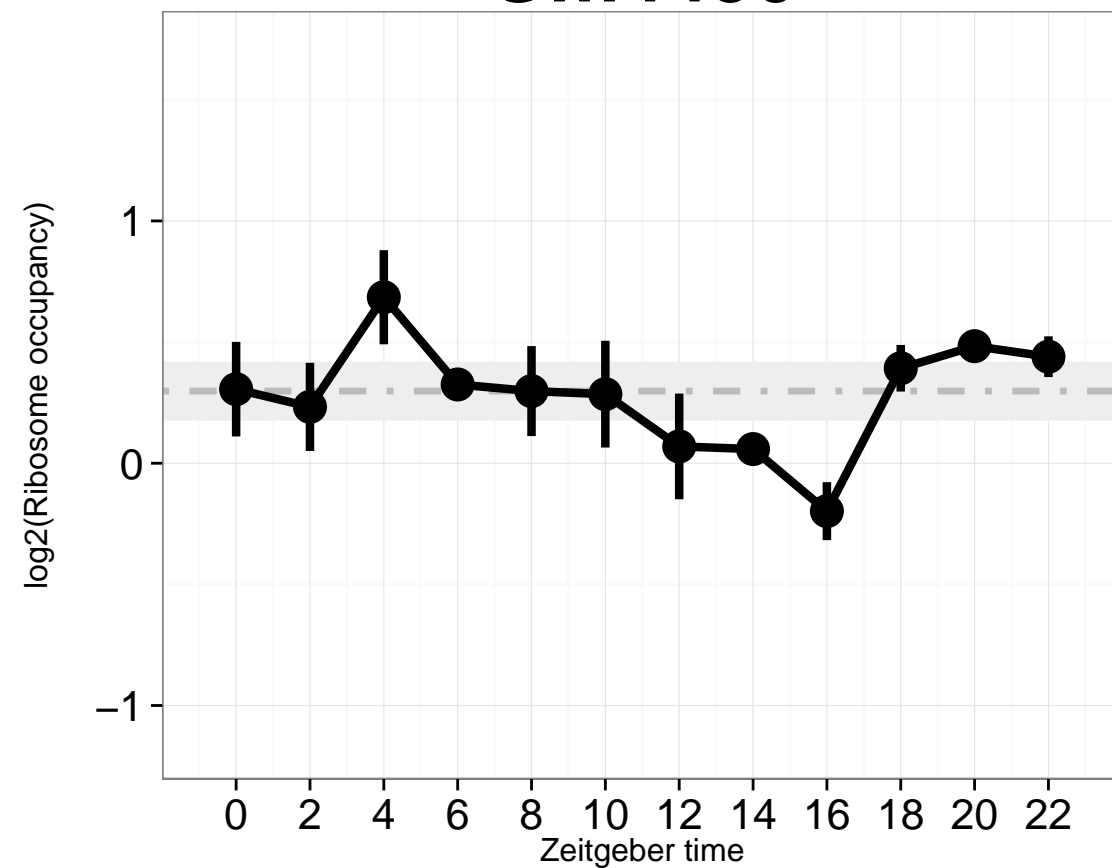

Supplement: Supplementary file 7441 [file 1]

# Alk

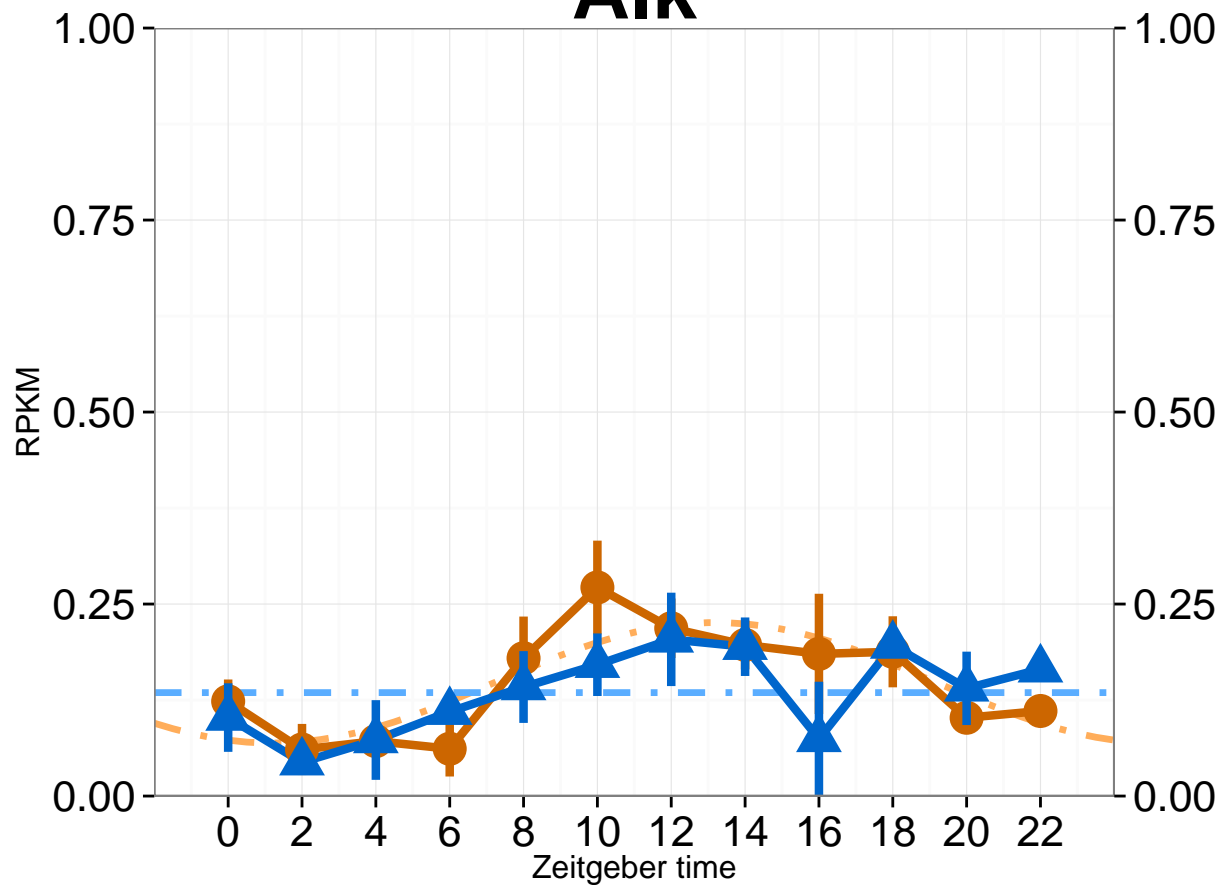

# Alk

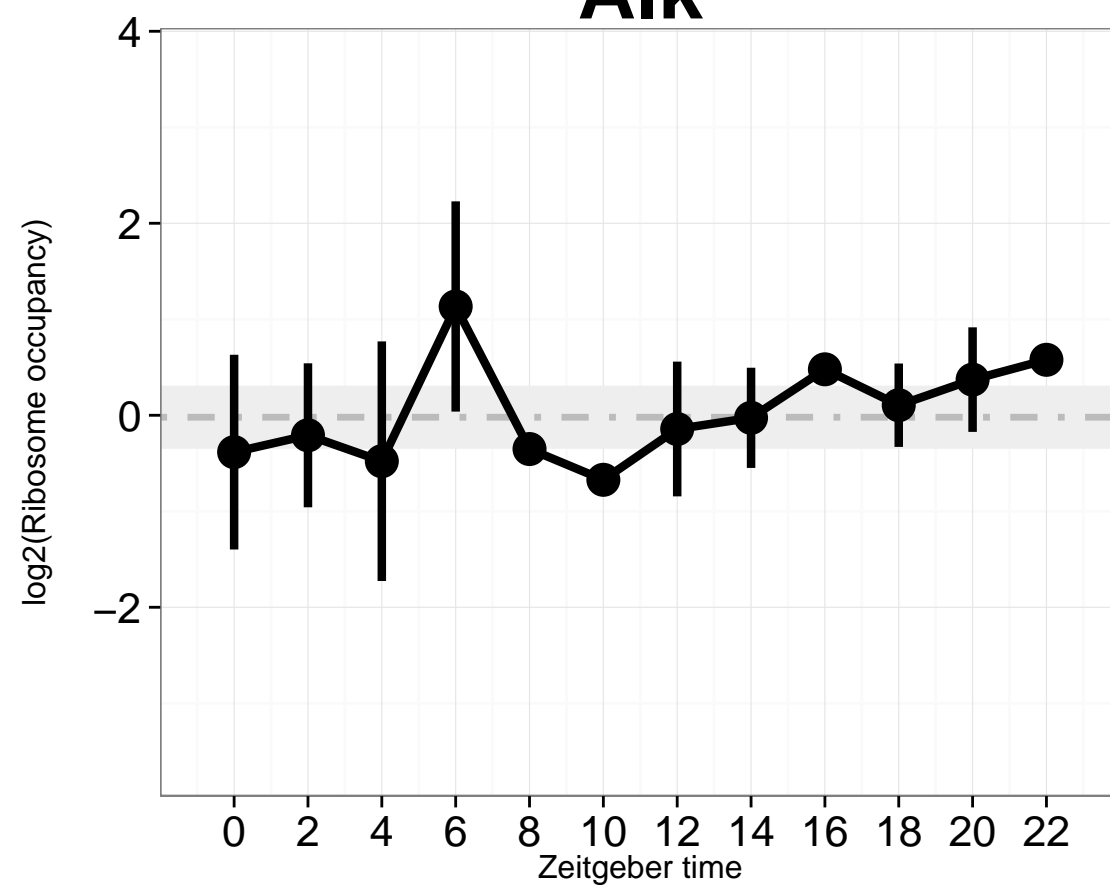

Supplement: Supplementary file 7442 [file 1]

# MyI9

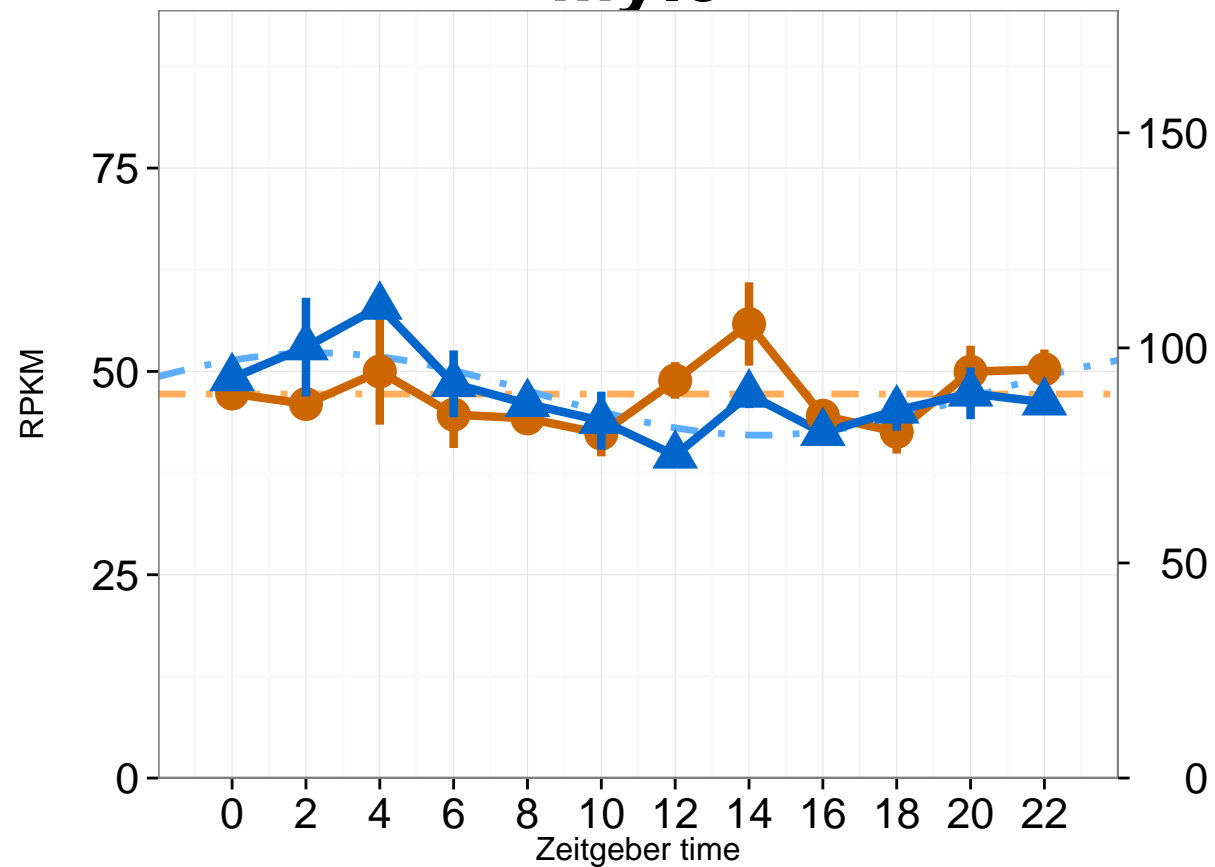

# MyI9

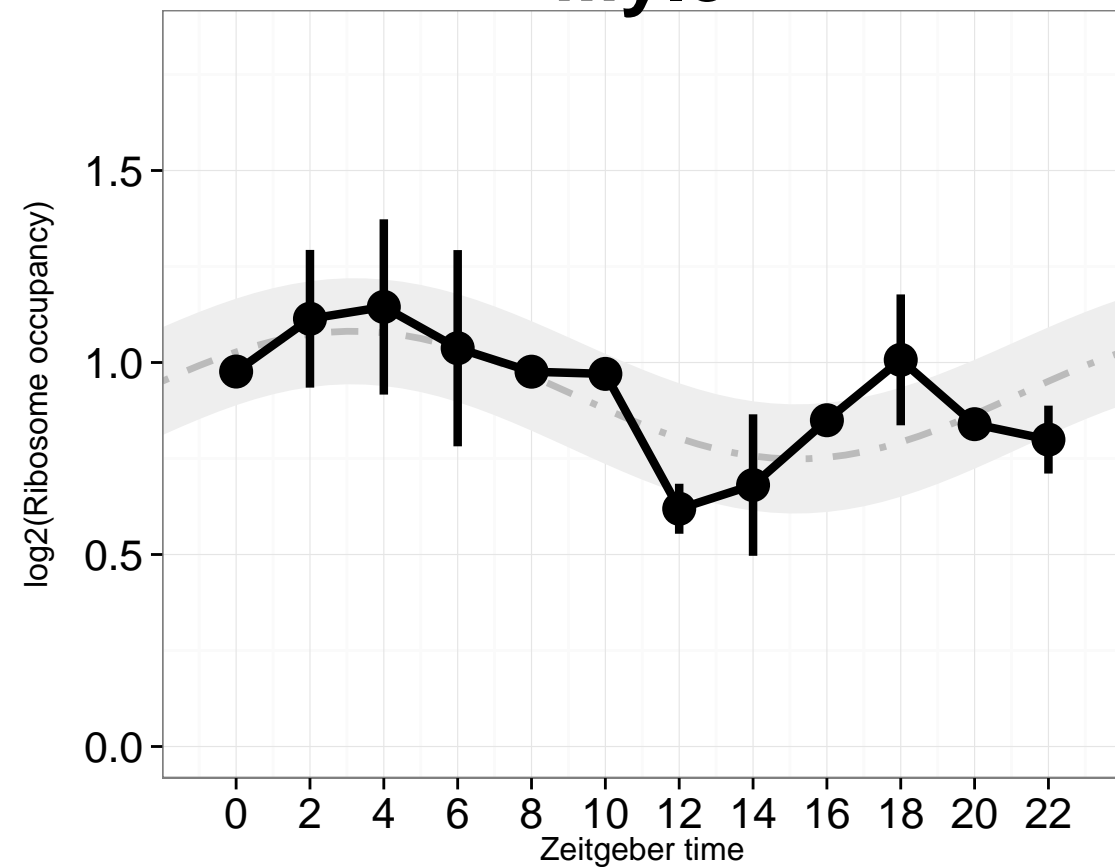

Supplement: Supplementary file 7443 [file 1]

# 9030617O03Rik

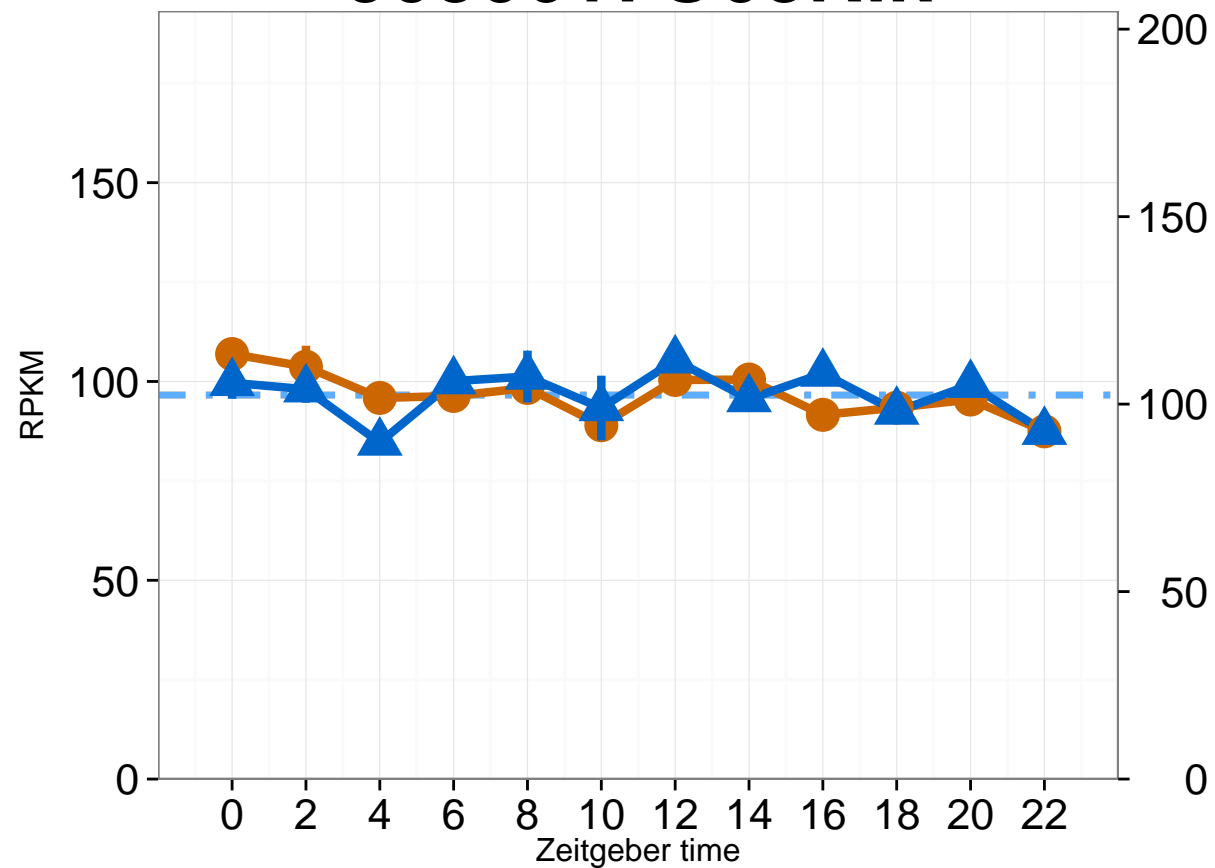

# 9030617O03Rik

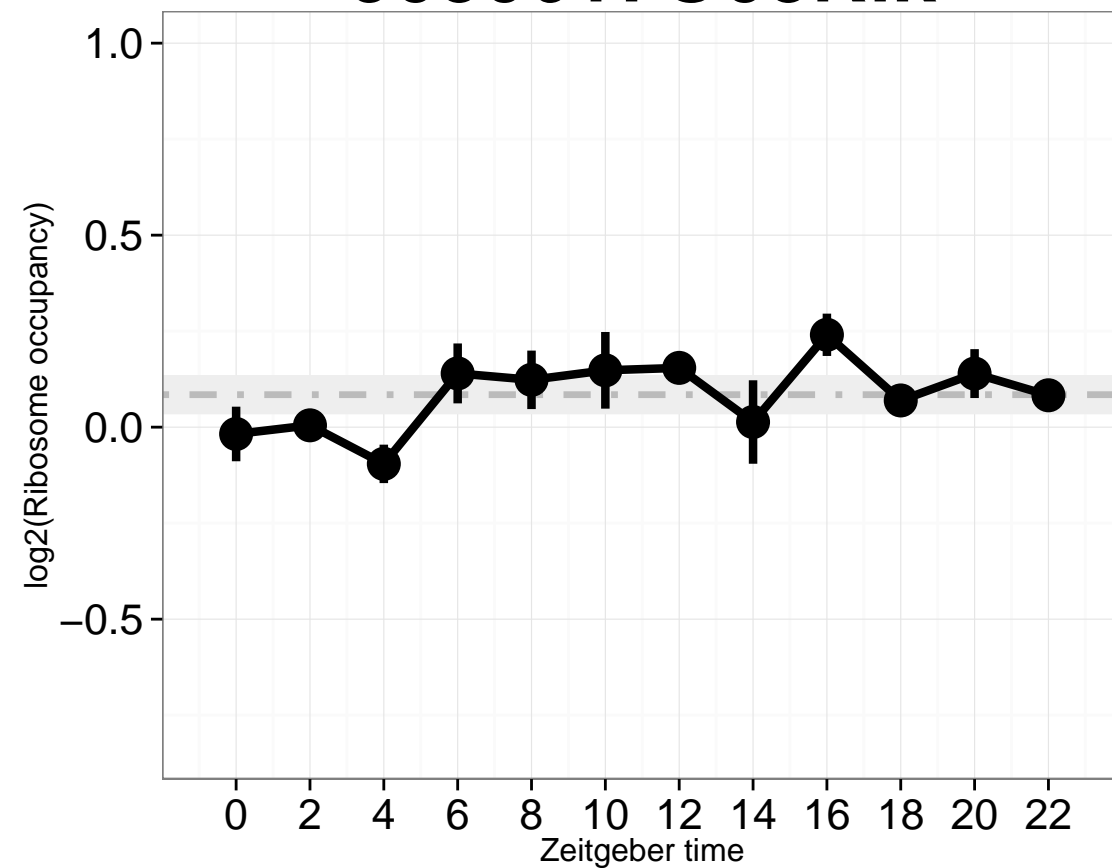

Supplement: Supplementary file 7444 [file 1]

## Vim

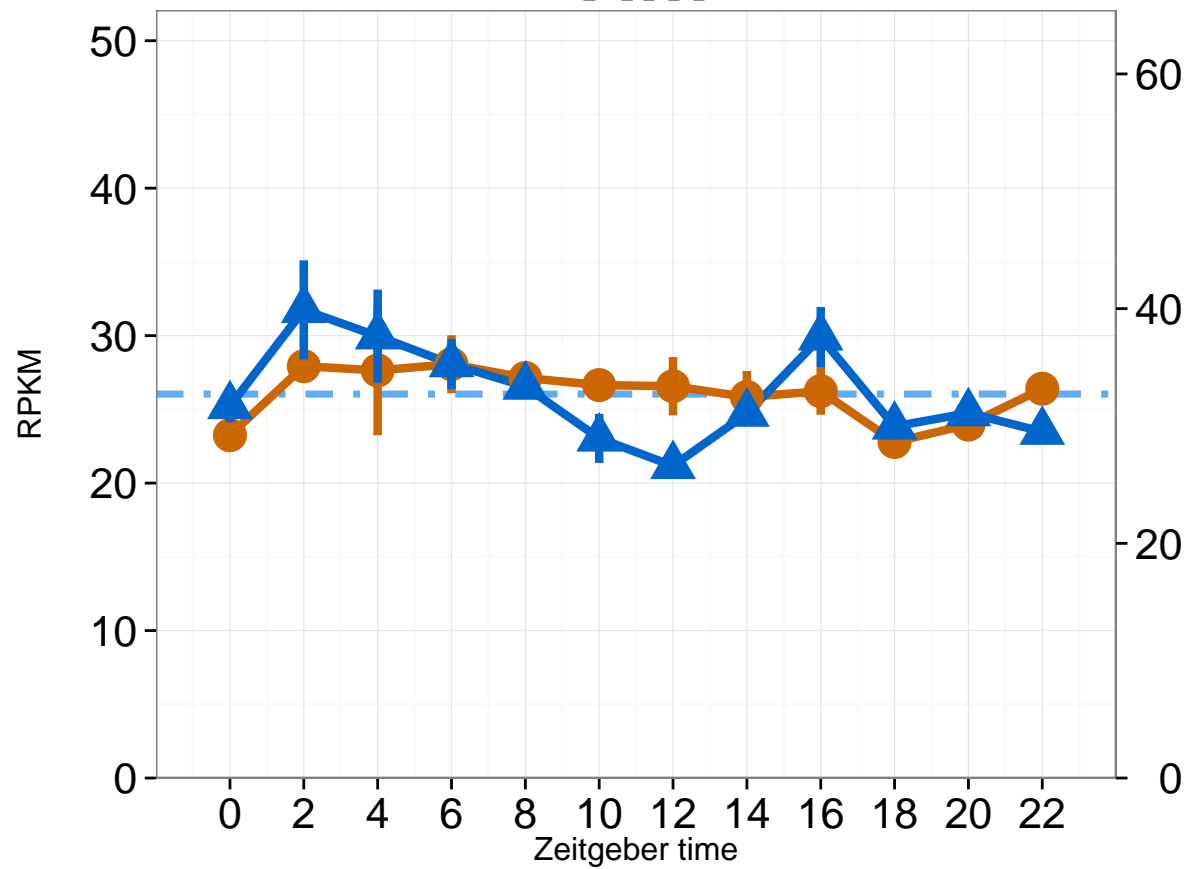

## Vim

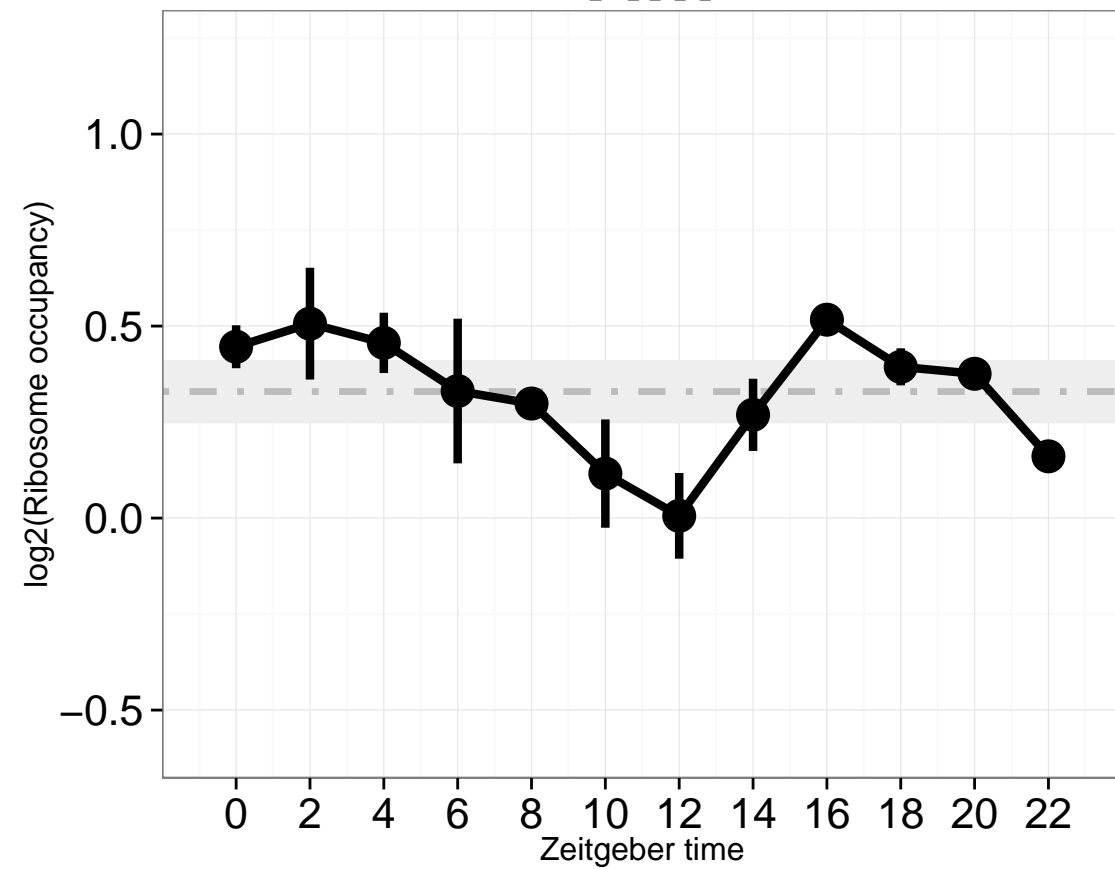

Supplement: Supplementary file 7445 [file 1]

## Surf2

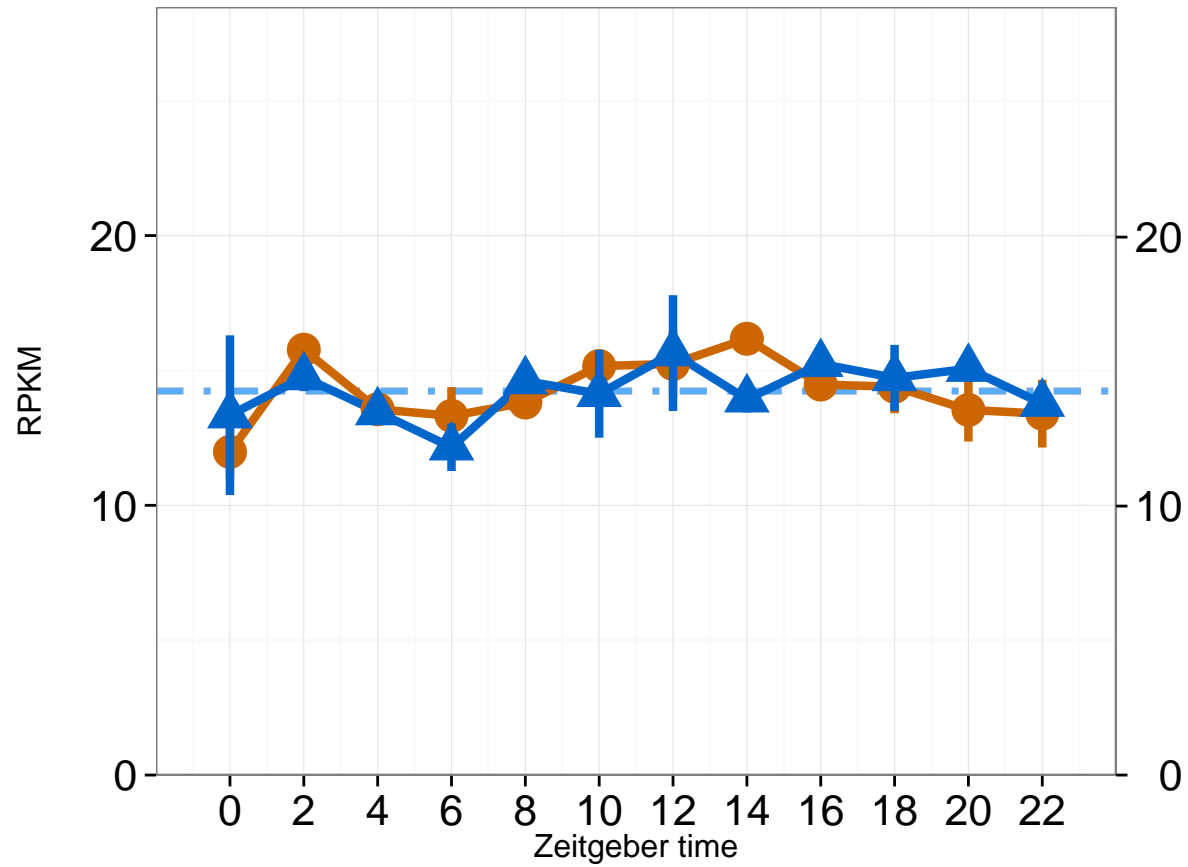

## Surf2

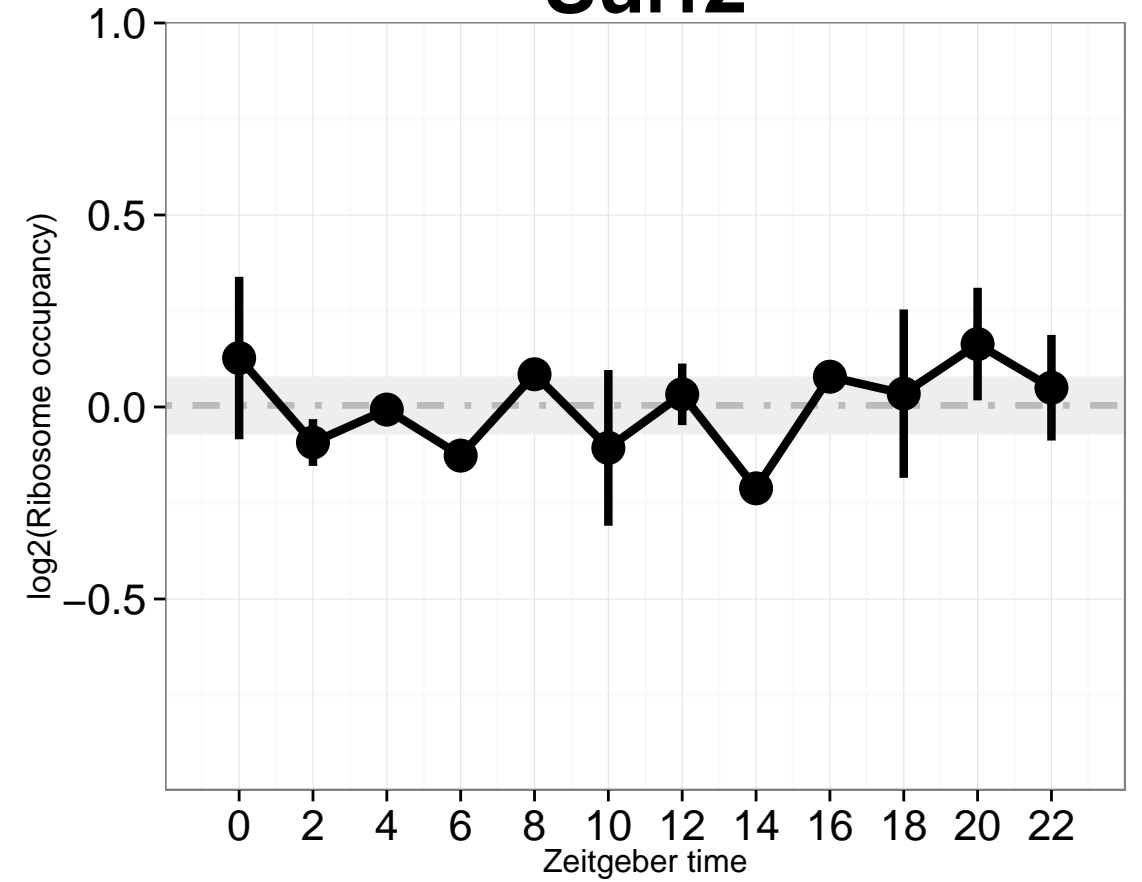

Supplement: Supplementary file 7446 [file 1]

# Pou2f2

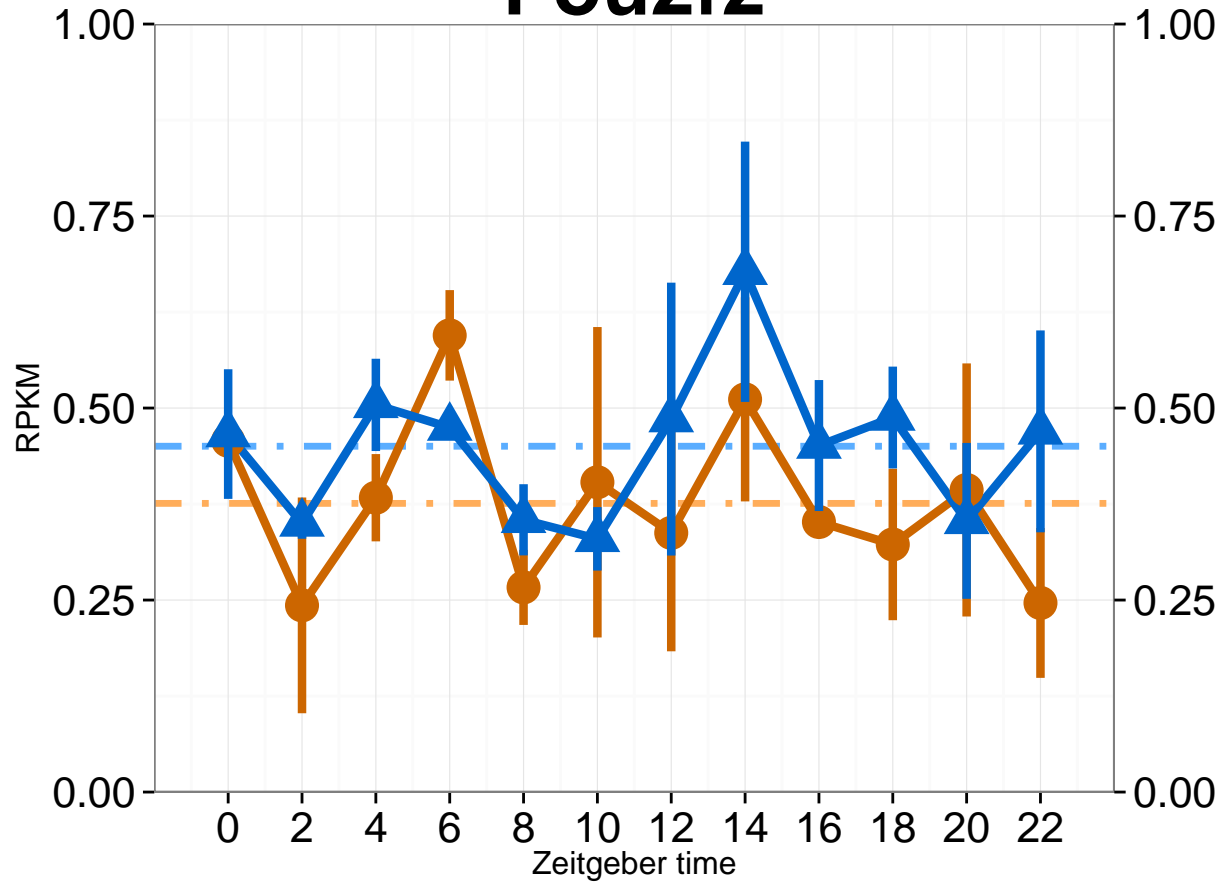

# Pou2f2

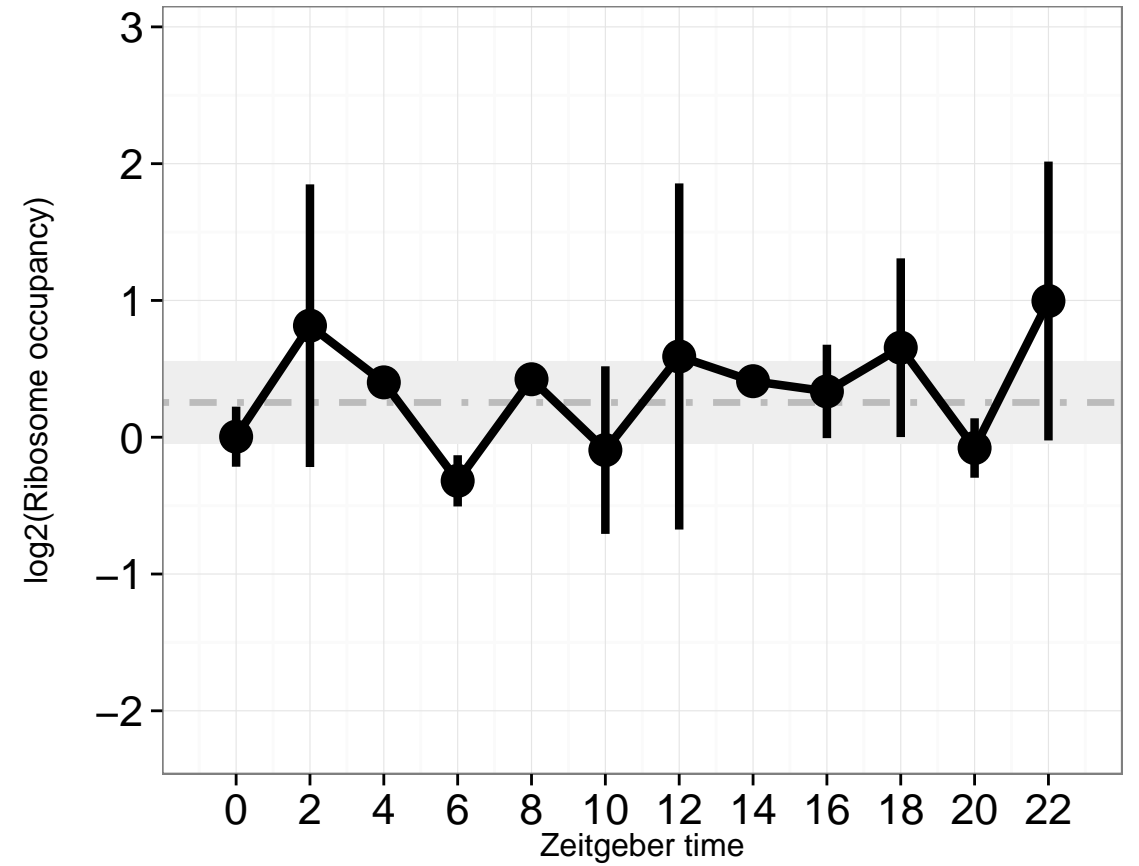

Supplement: Supplementary file 7447 [file 1]

# Milk

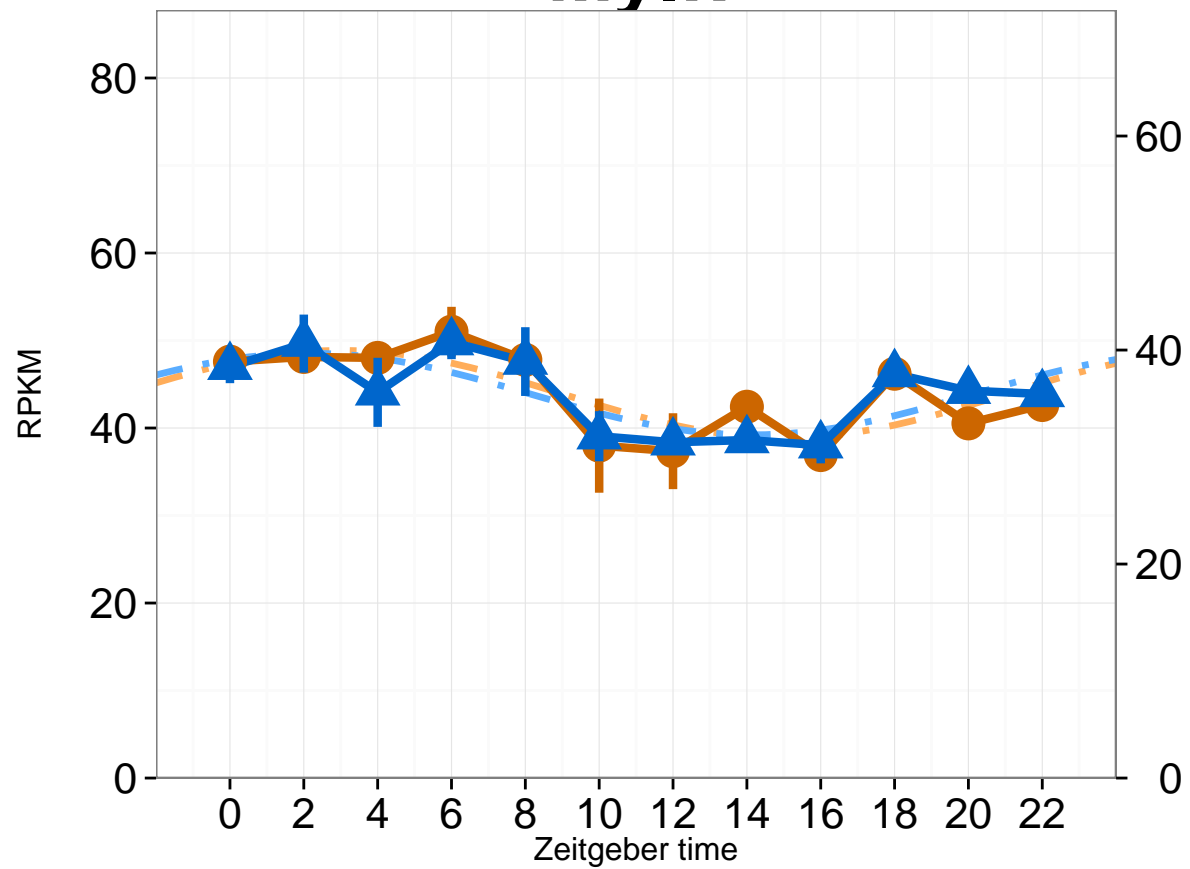

# Milk

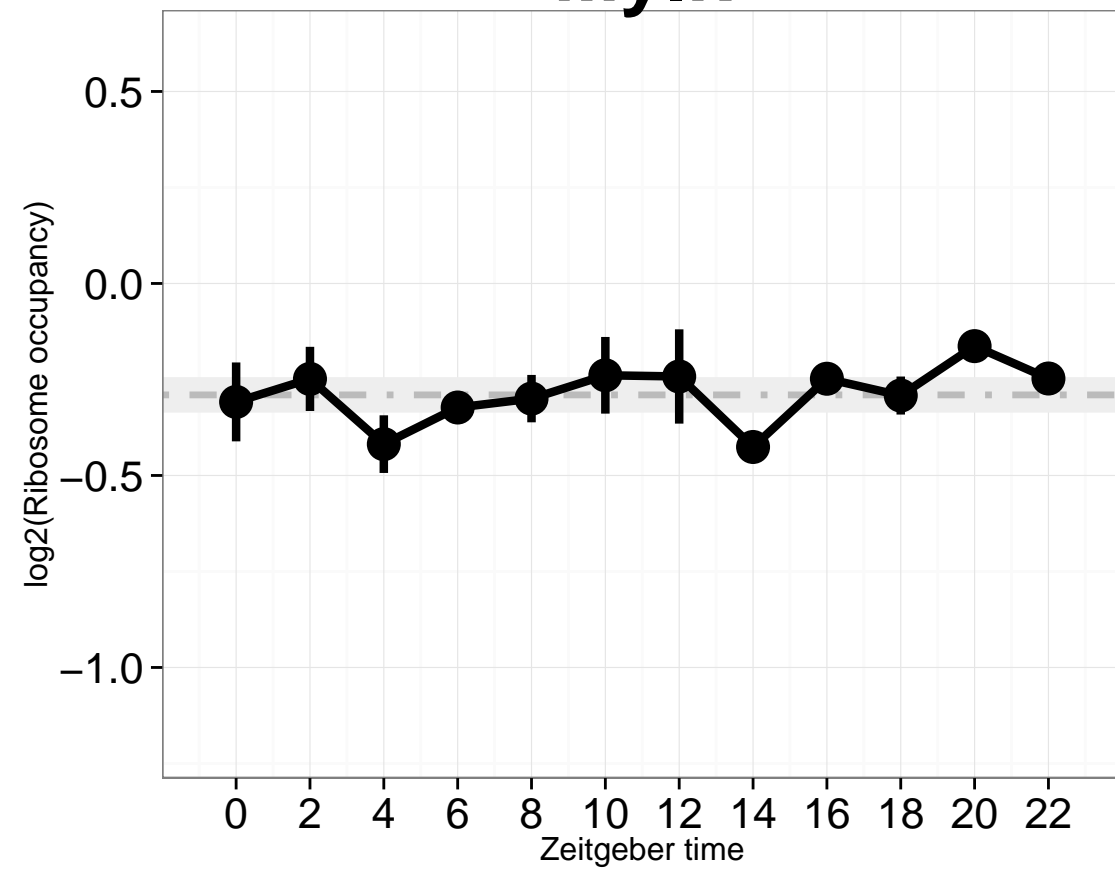

Supplement: Supplementary file 7448 [file 1]

# Dlg4

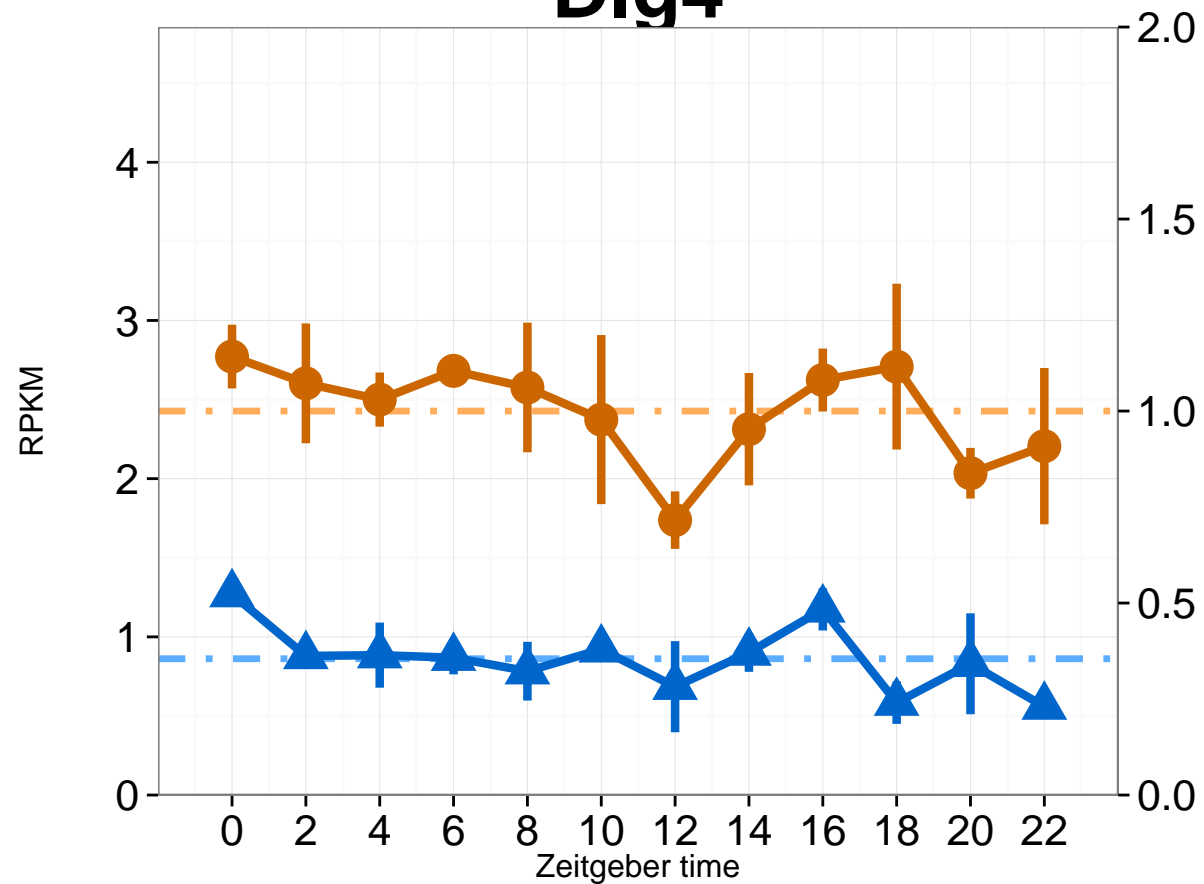

# Dlg4

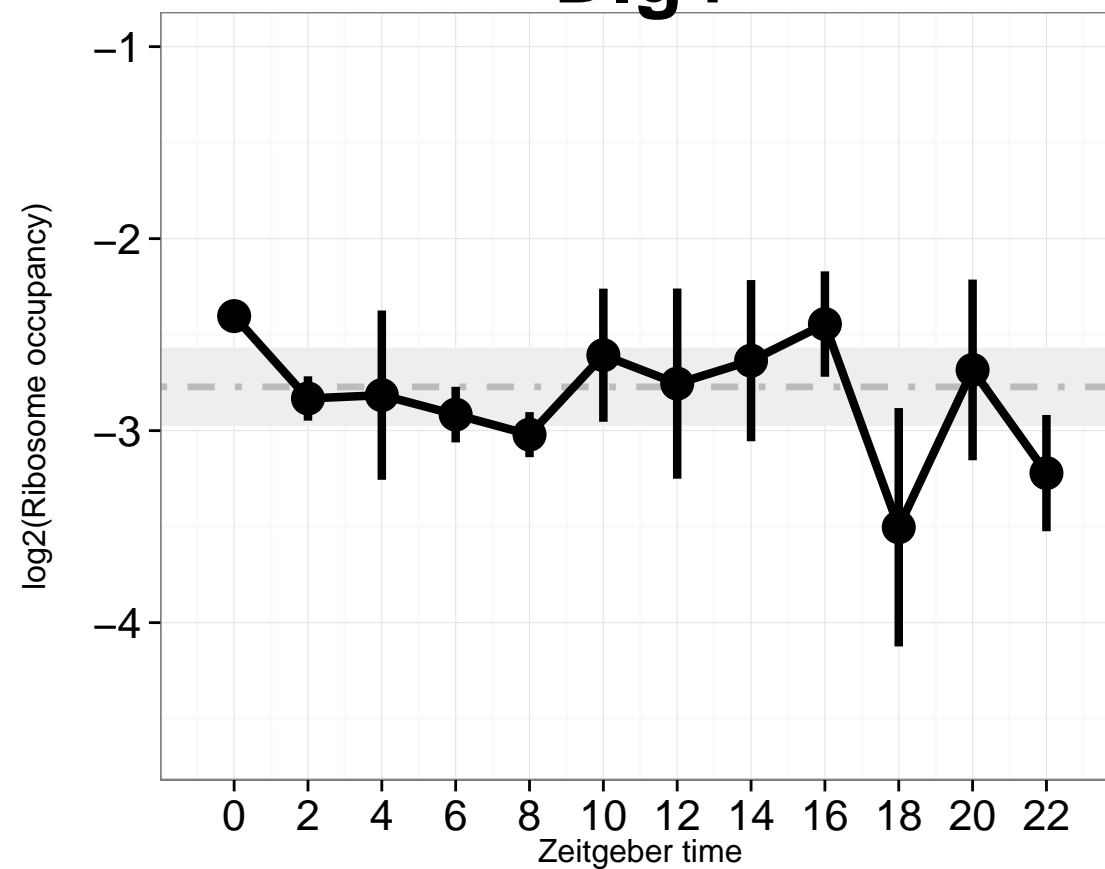

Supplement: Supplementary file 7449 [file 1]

## Irf9

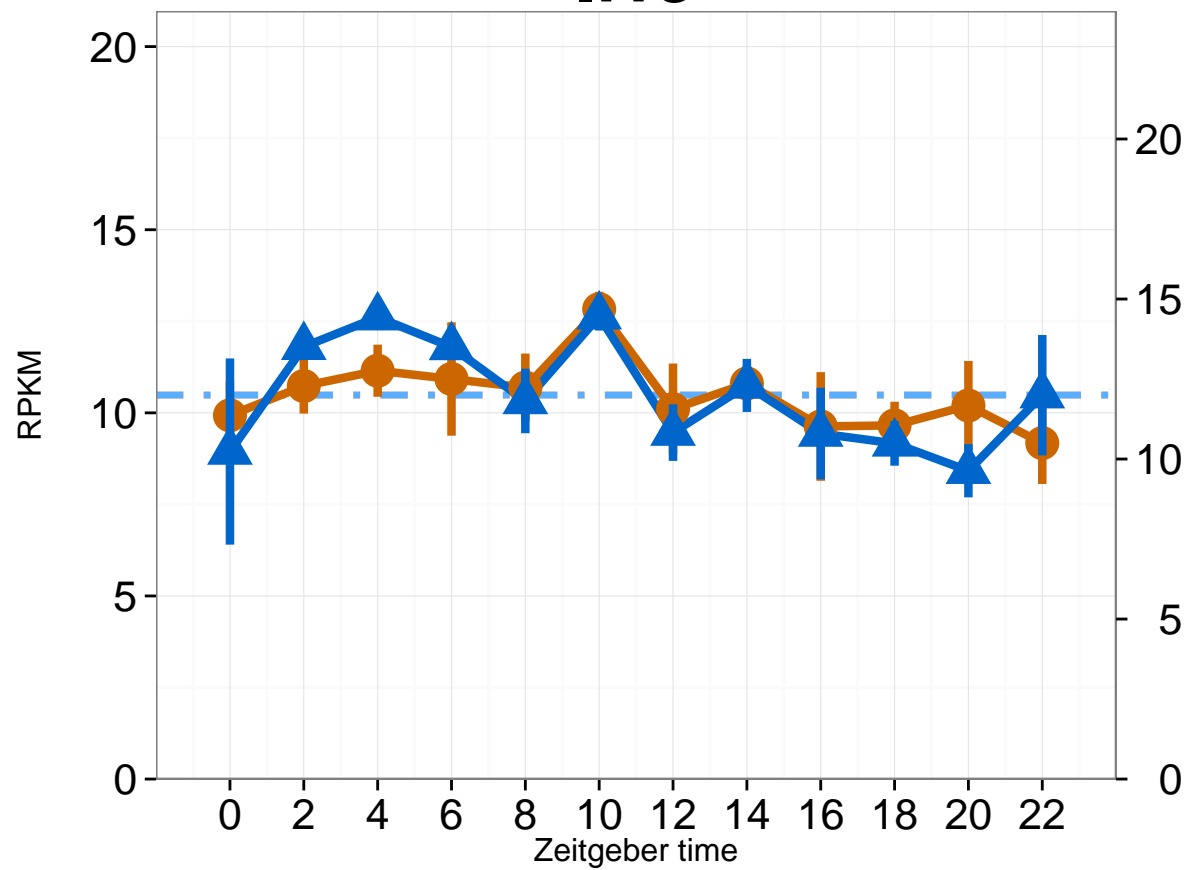

## Irf9

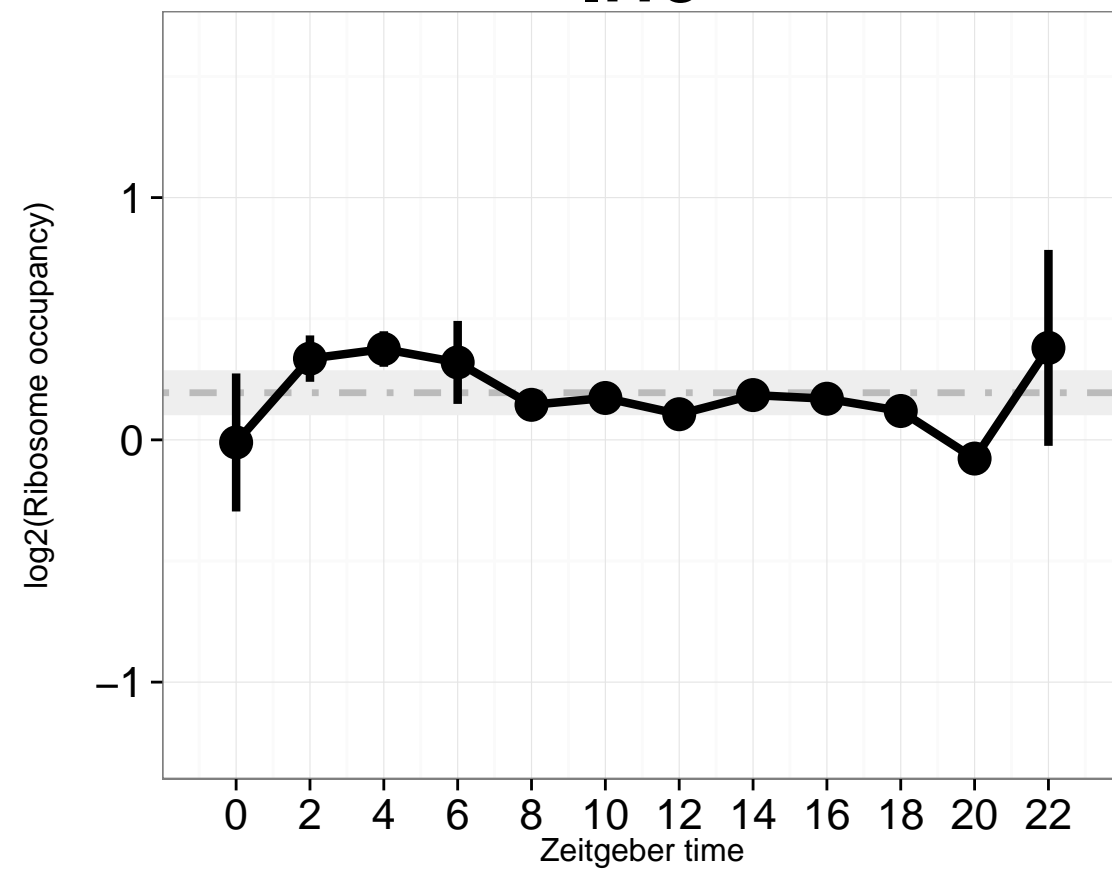

Supplement: Supplementary file 7450 [file 1]

## Wdr1

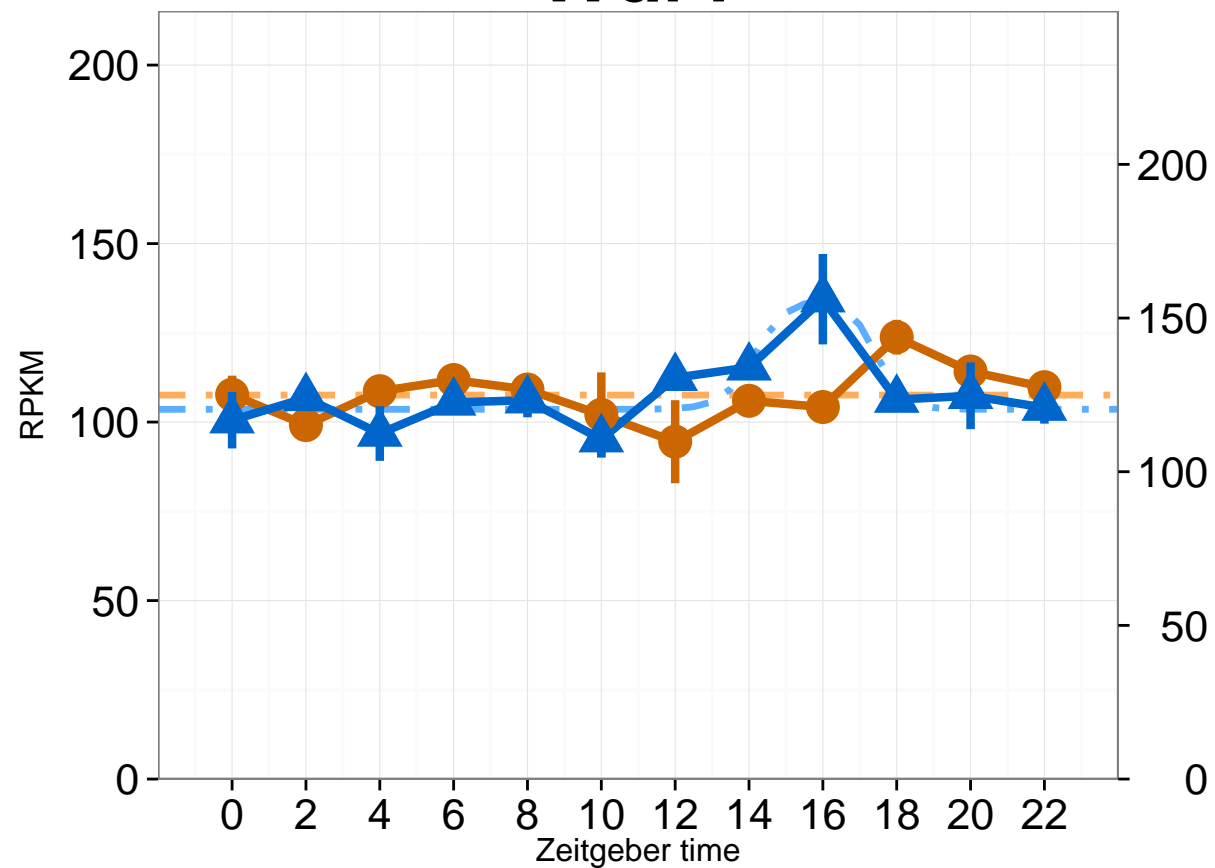

## Wdr1

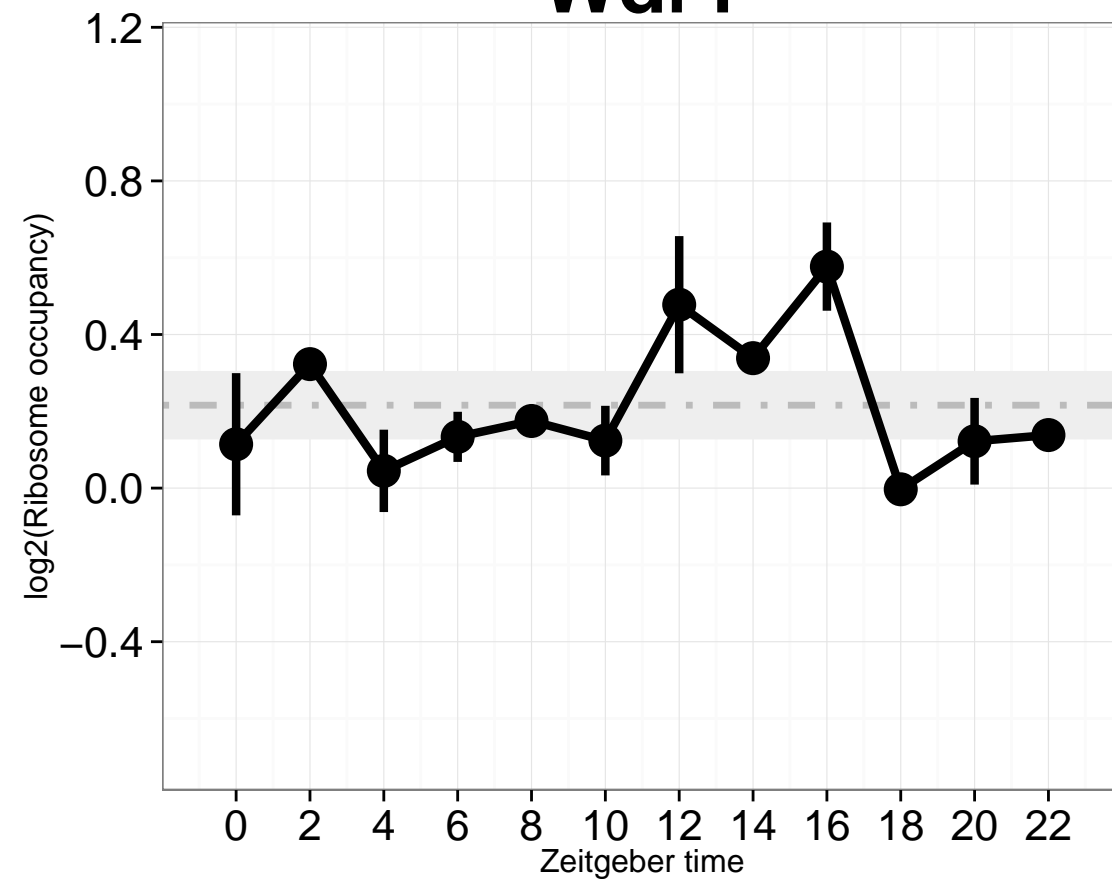

Supplement: Supplementary file 7451 [file 1]

## Uggt1

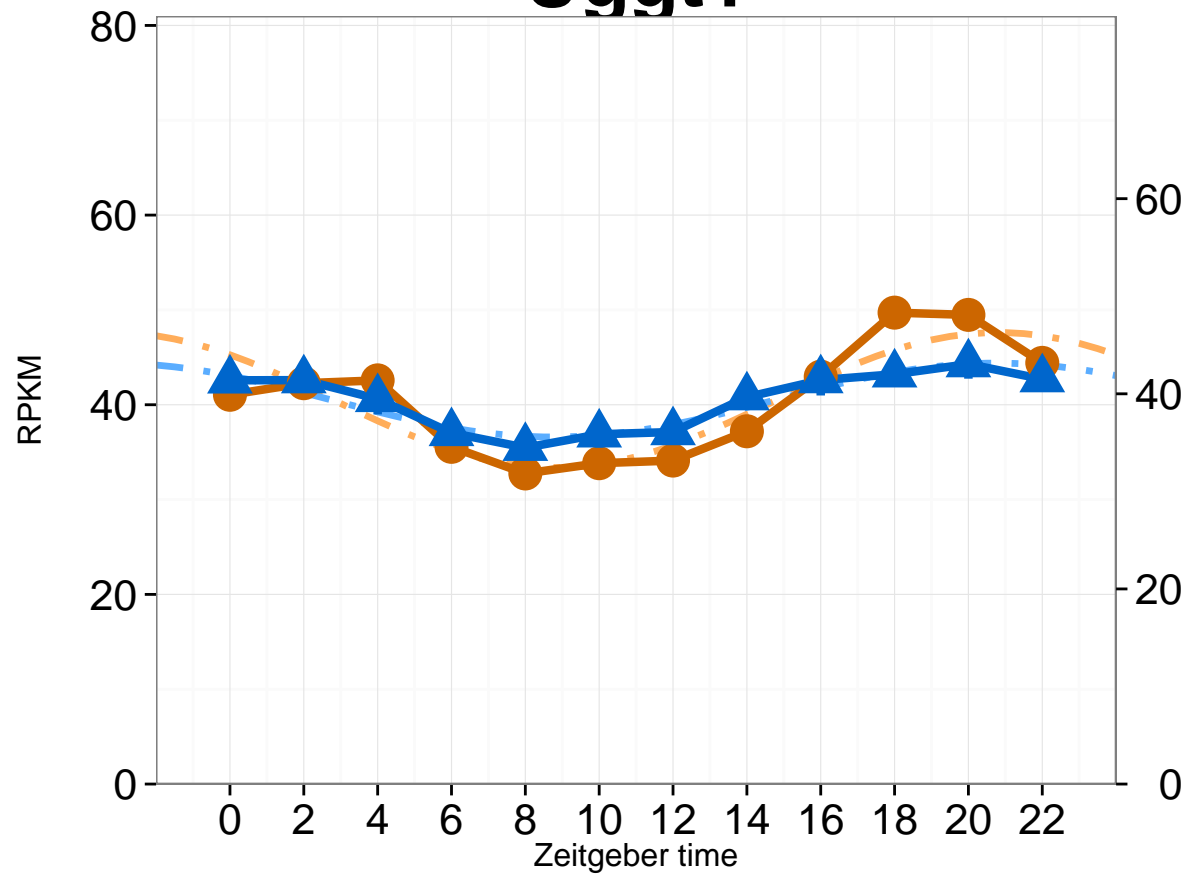

## Uggt1

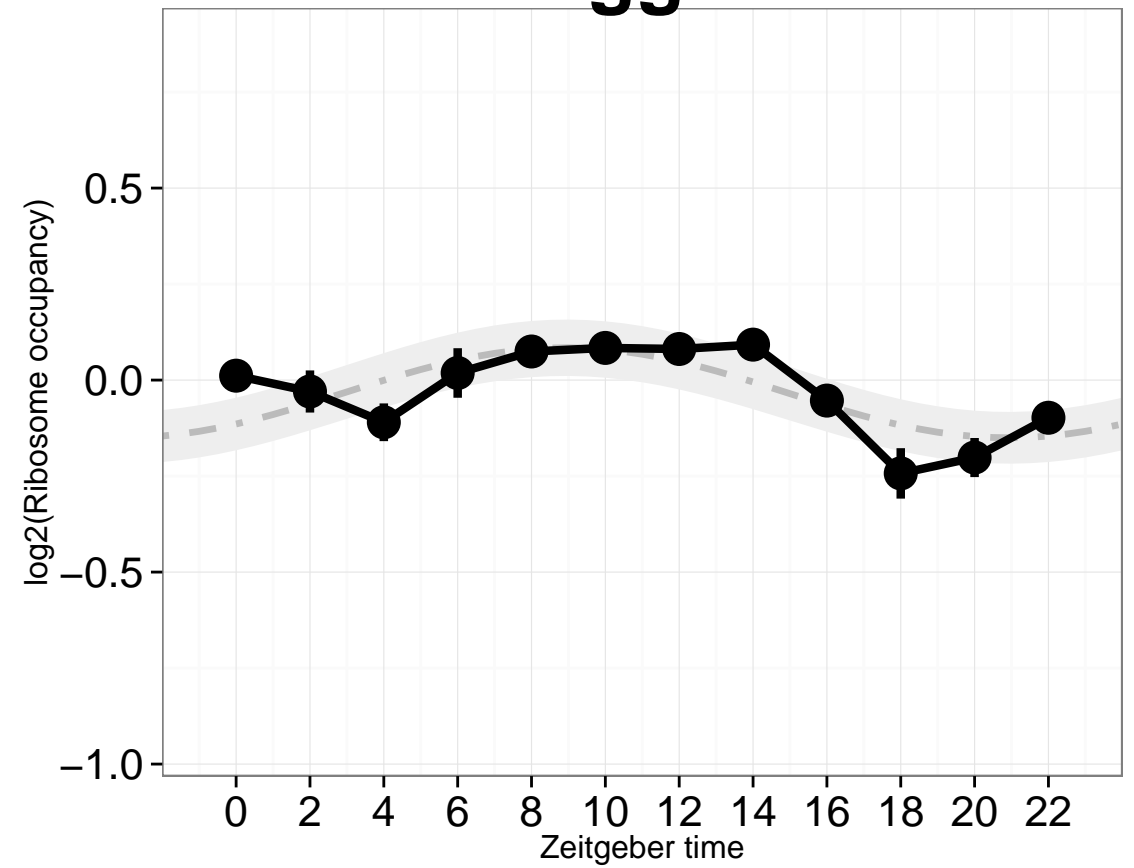

Supplement: Supplementary file 7452 [file 1]

# Map7d1

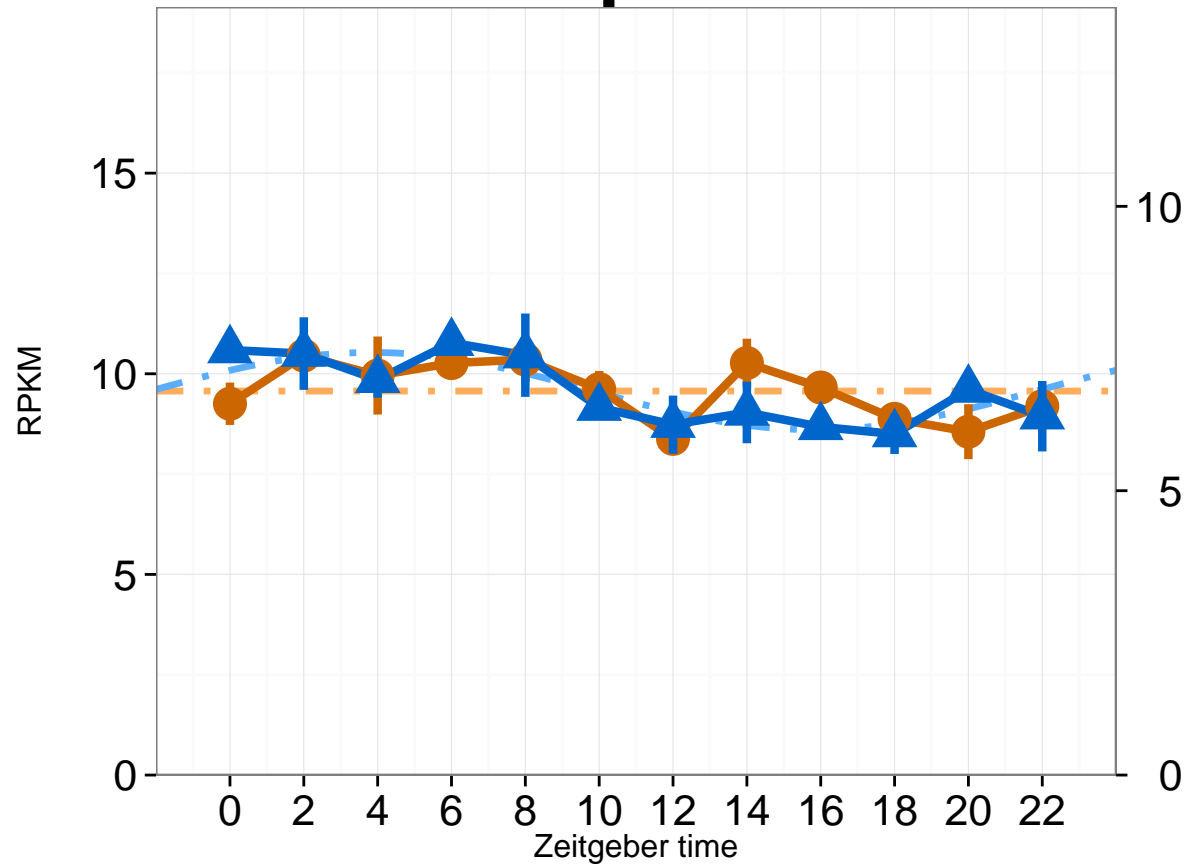

# Map7d1

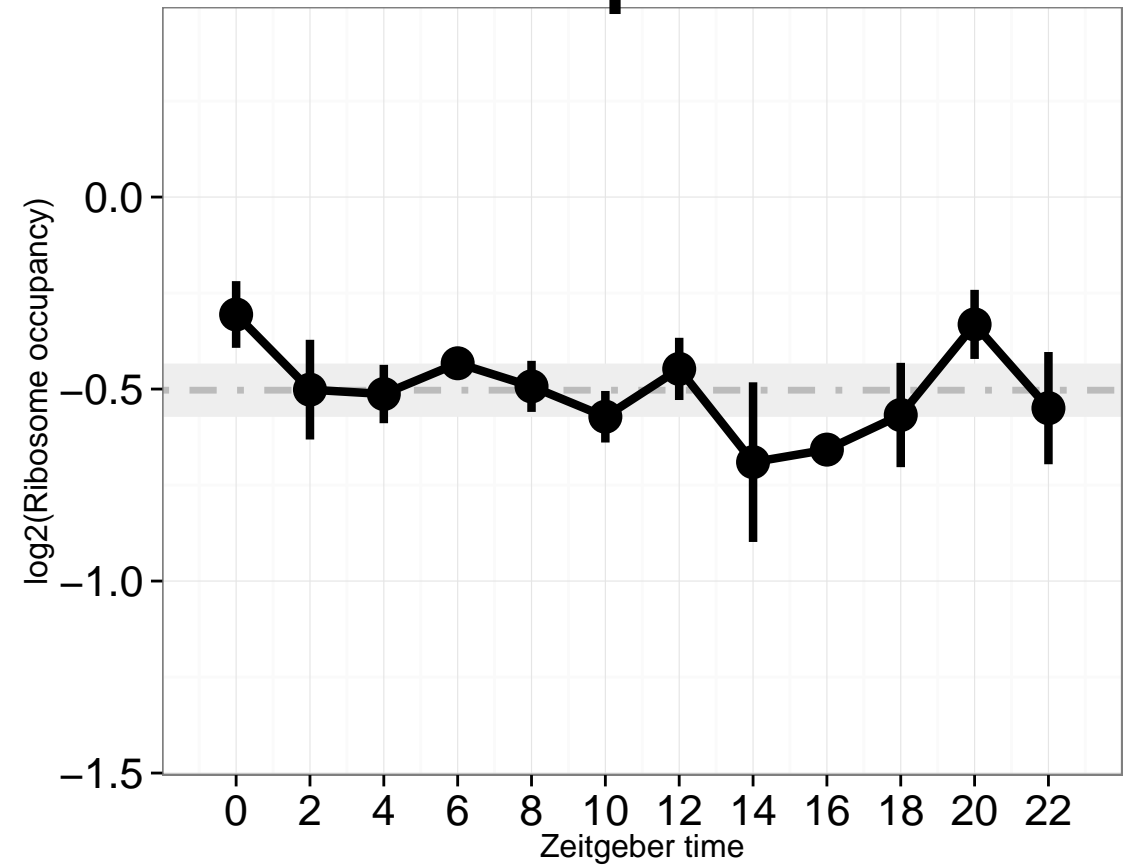

Supplement: Supplementary file 7453 [file 1]

## Tspan5

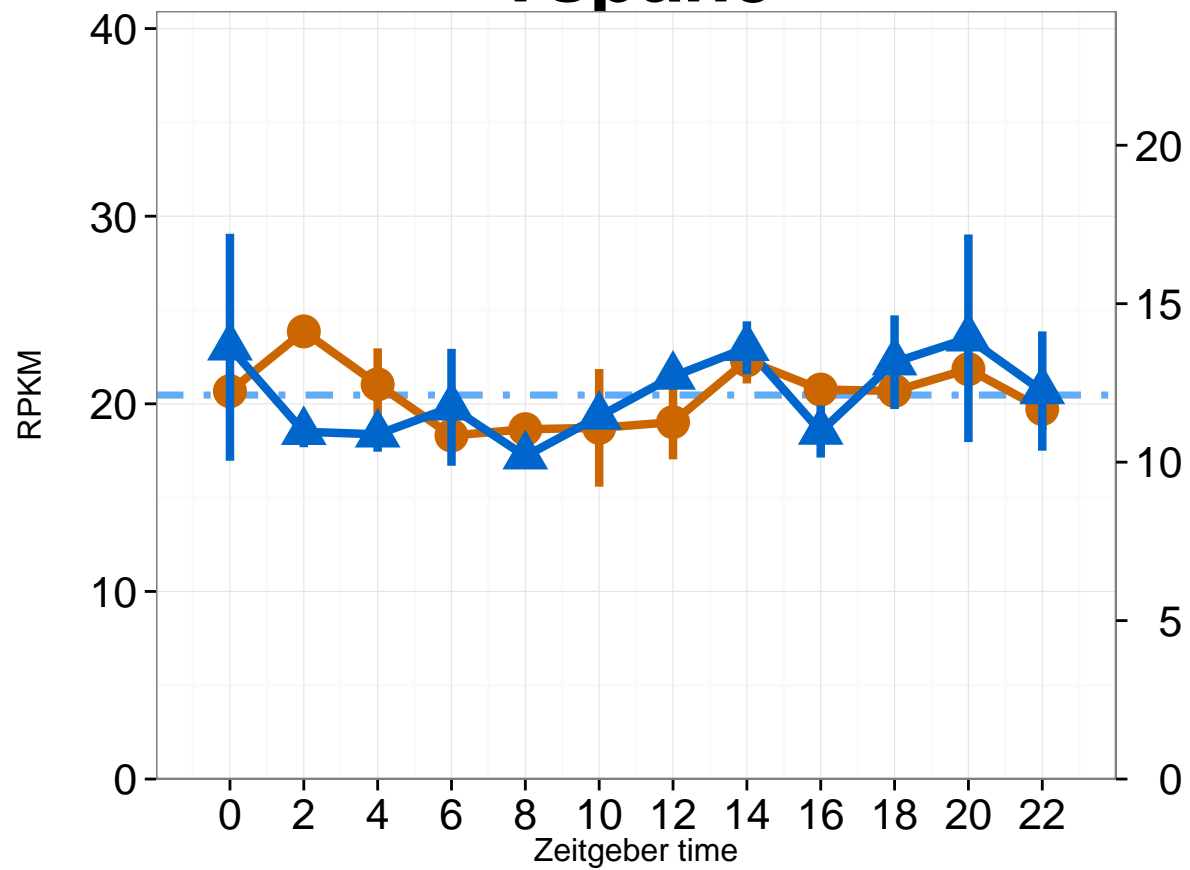

## Tspan5

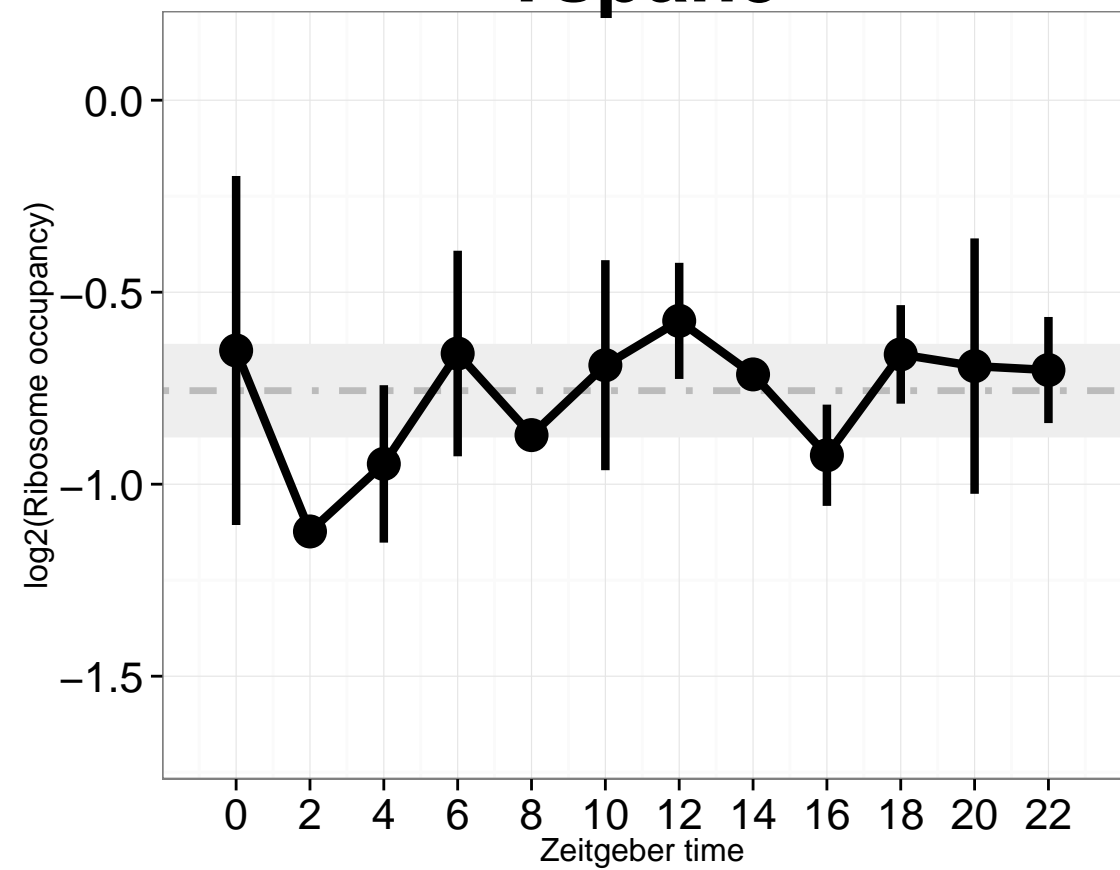

Supplement: Supplementary file 7454 [file 1]

## Rplp2

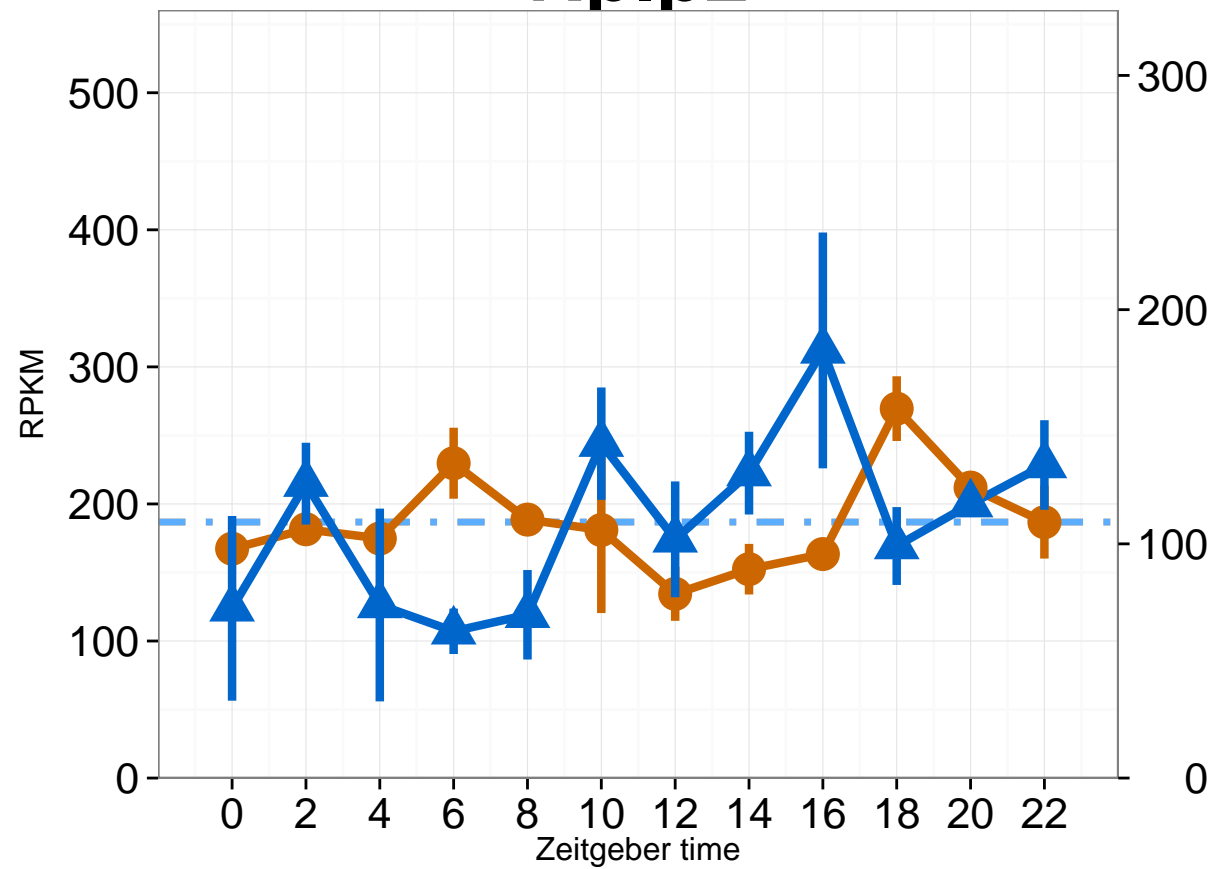

## Rplp2

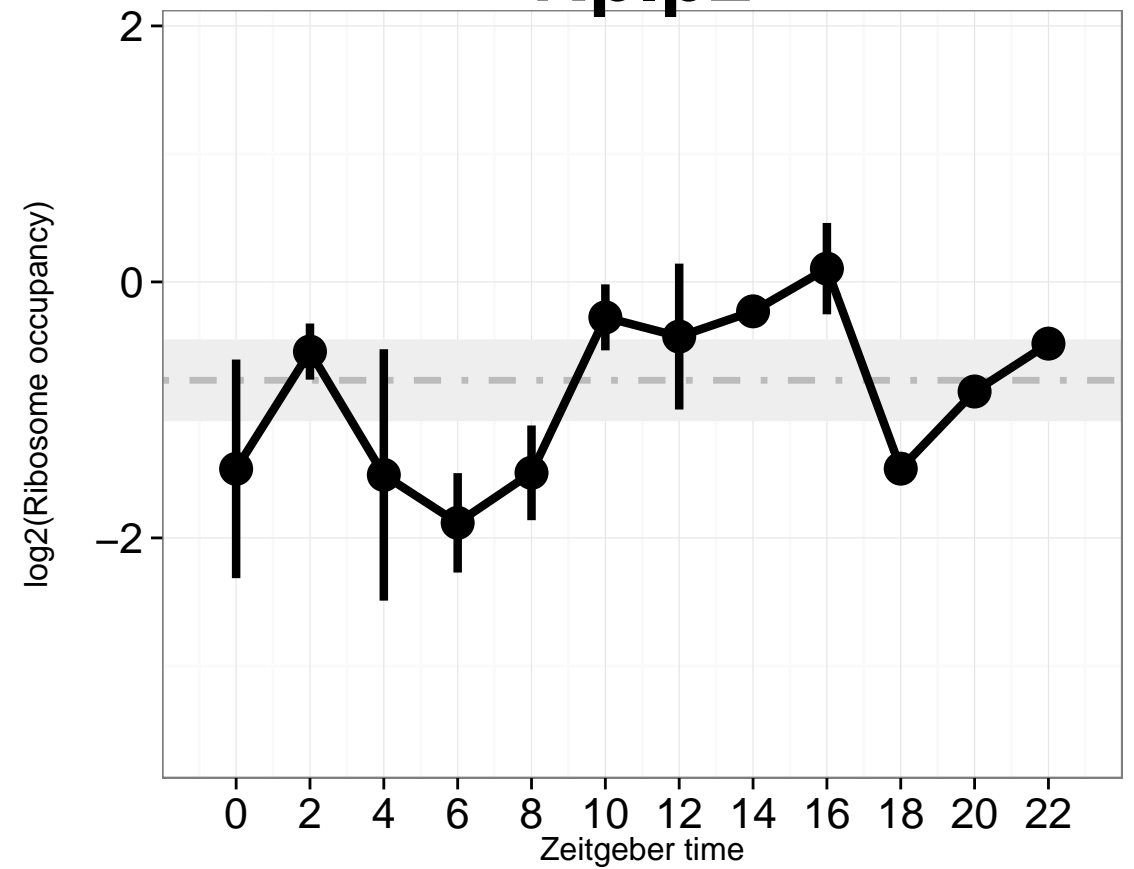

Supplement: Supplementary file 7455 [file 1]

# Fam222a

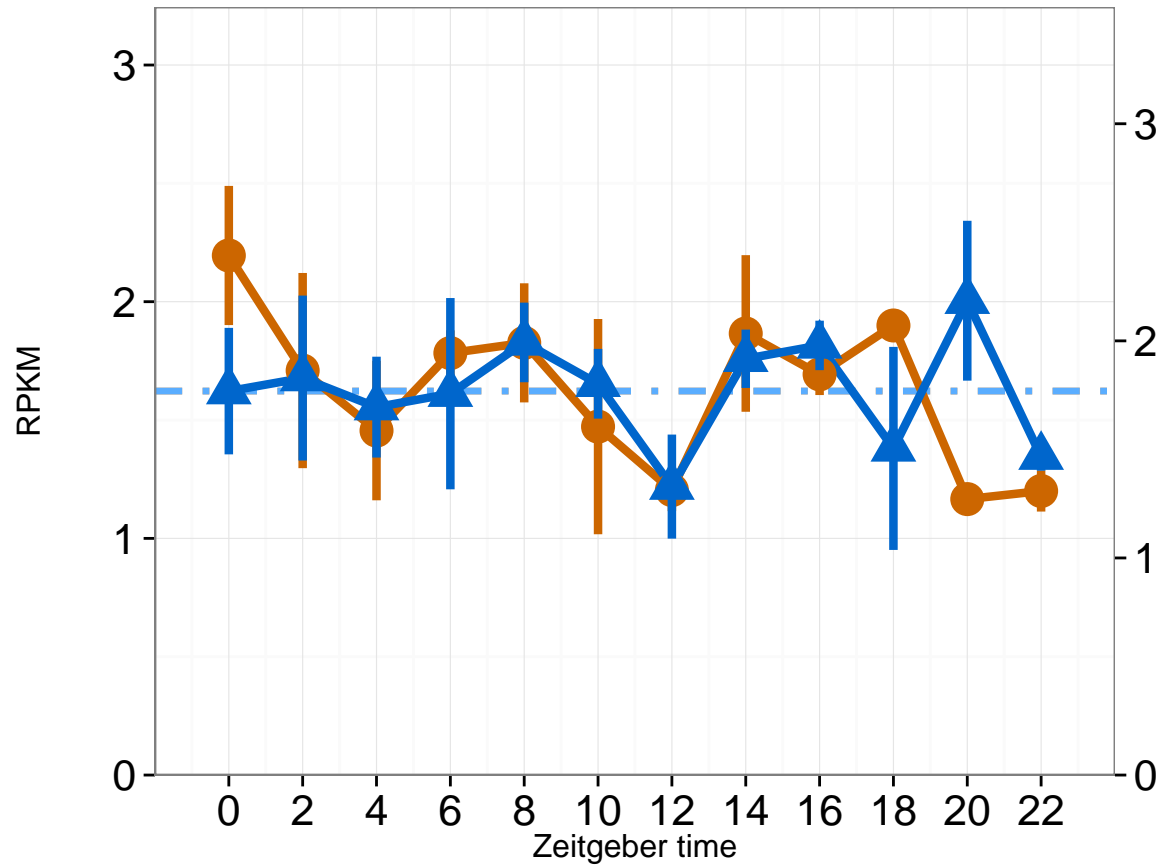

# Fam222a

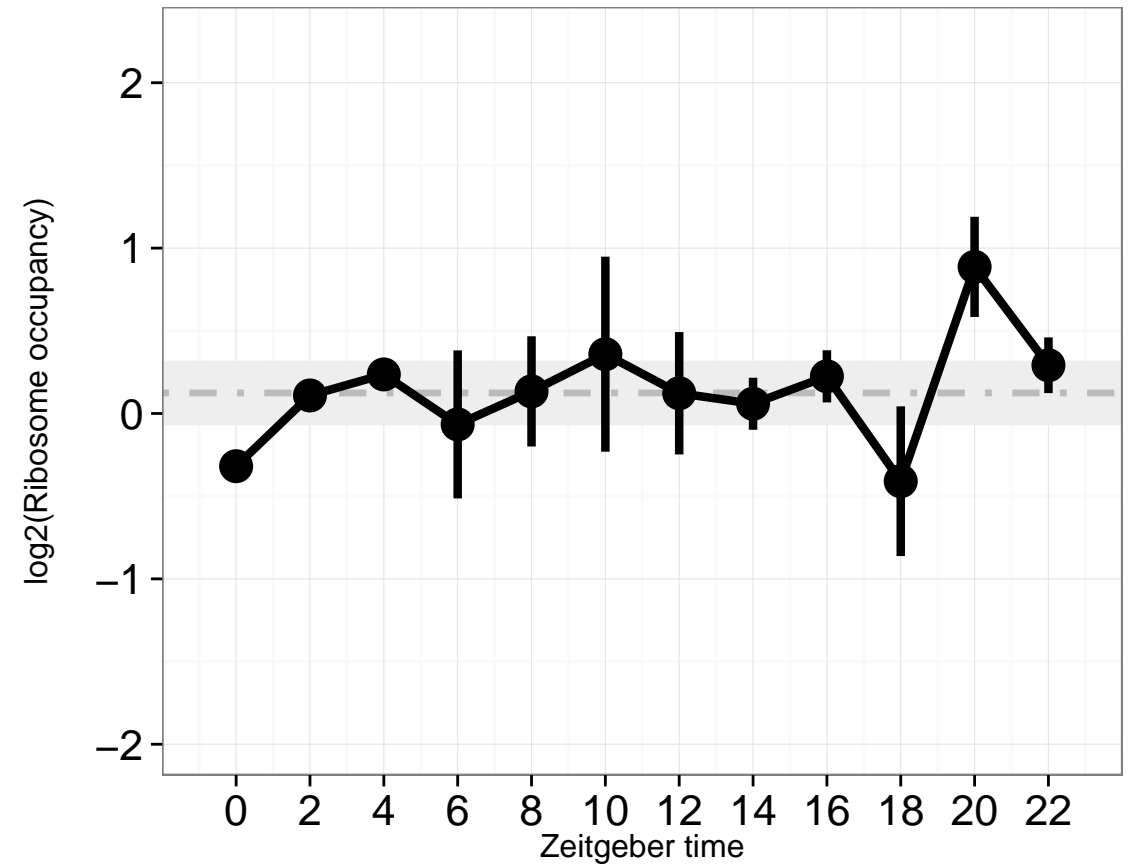

Supplement: Supplementary file 7456 [file 1]

# Stim1

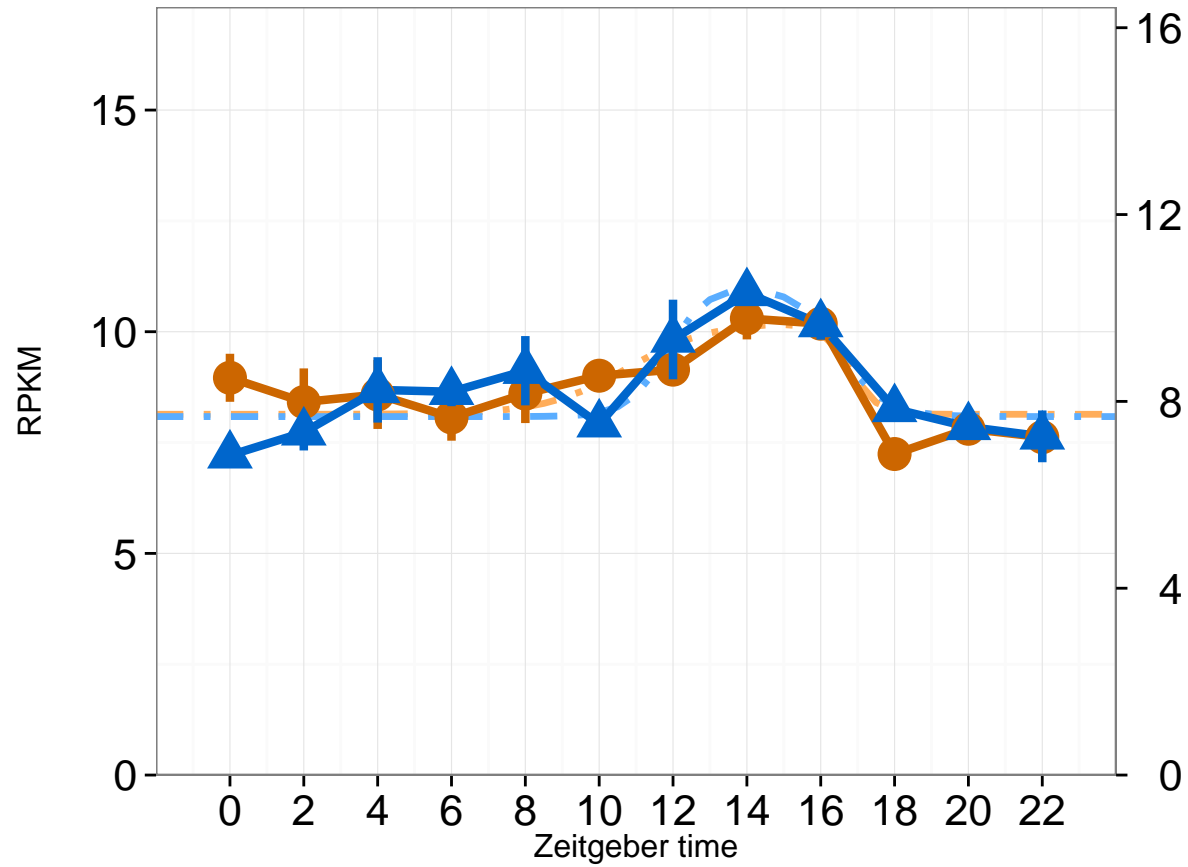

# Stim1

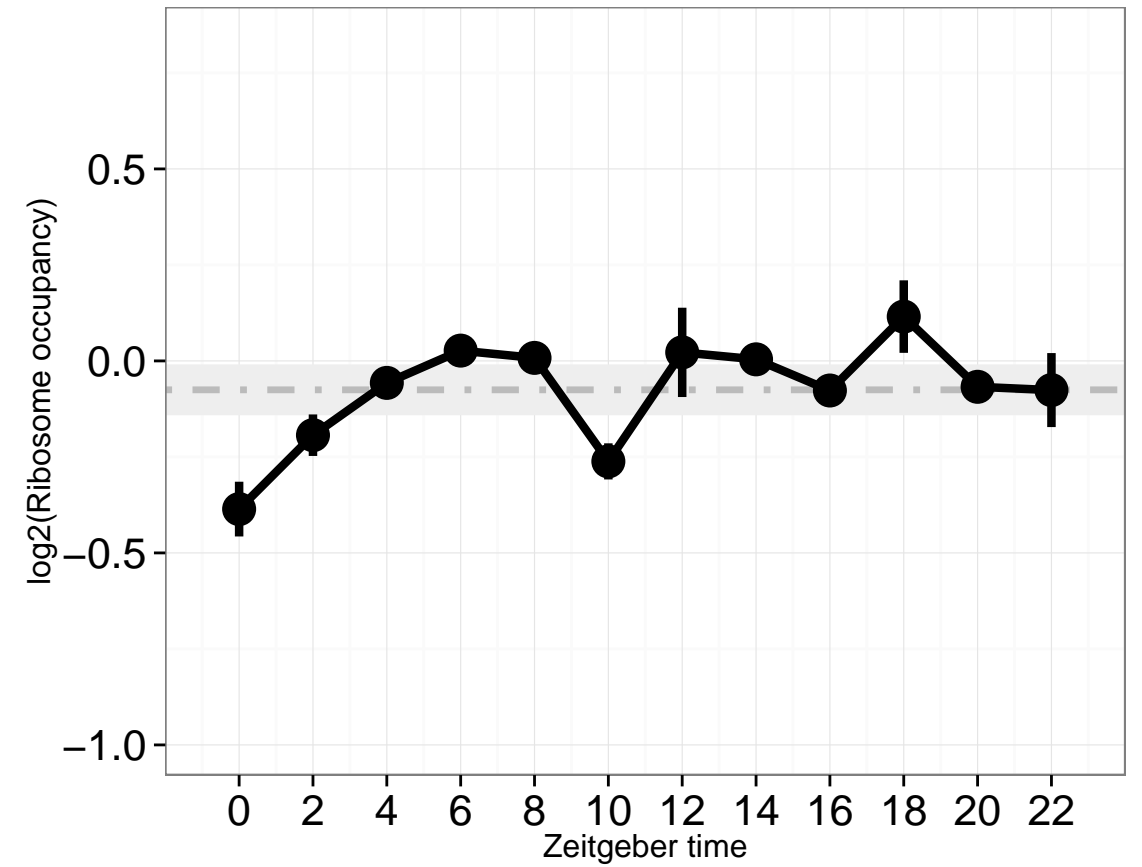

Supplement: Supplementary file 7457 [file 1]

# Snrnp27

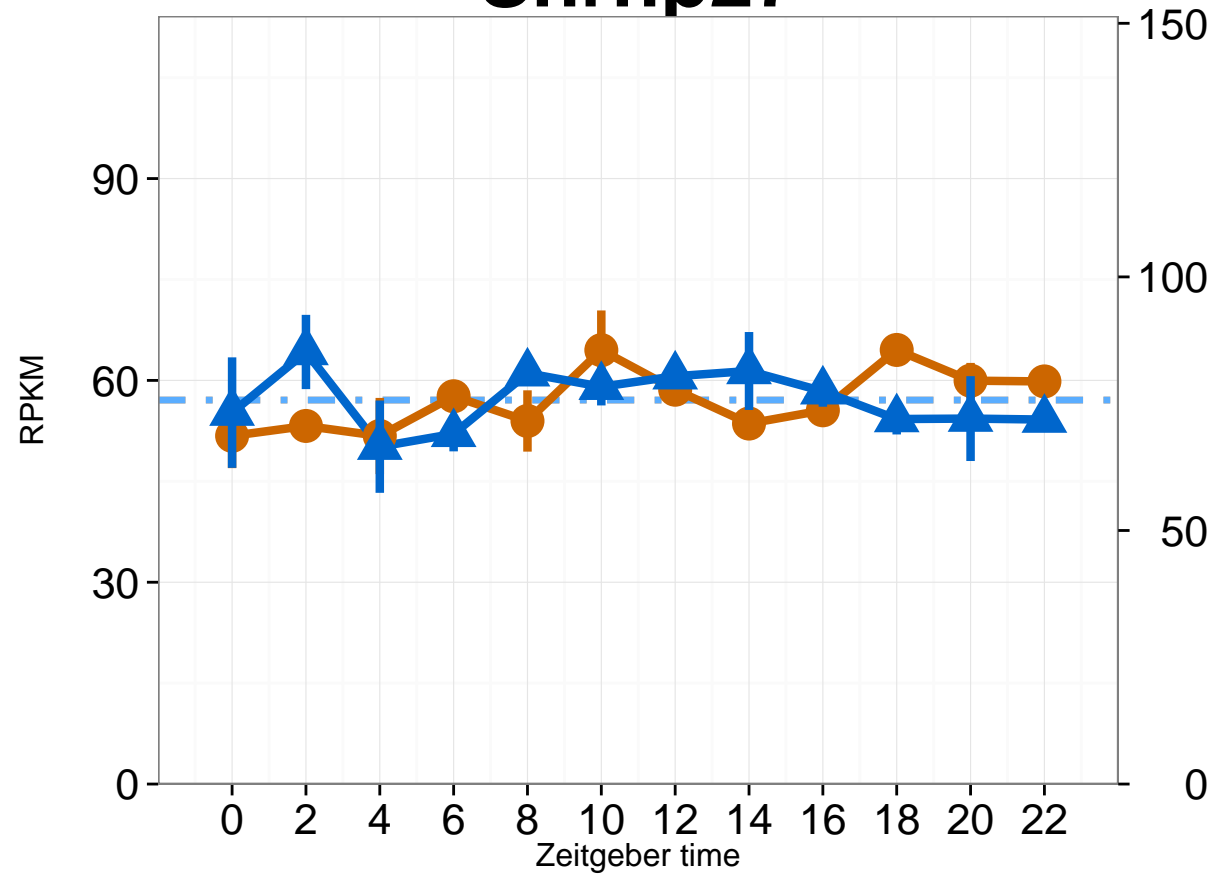

# Snrnp27

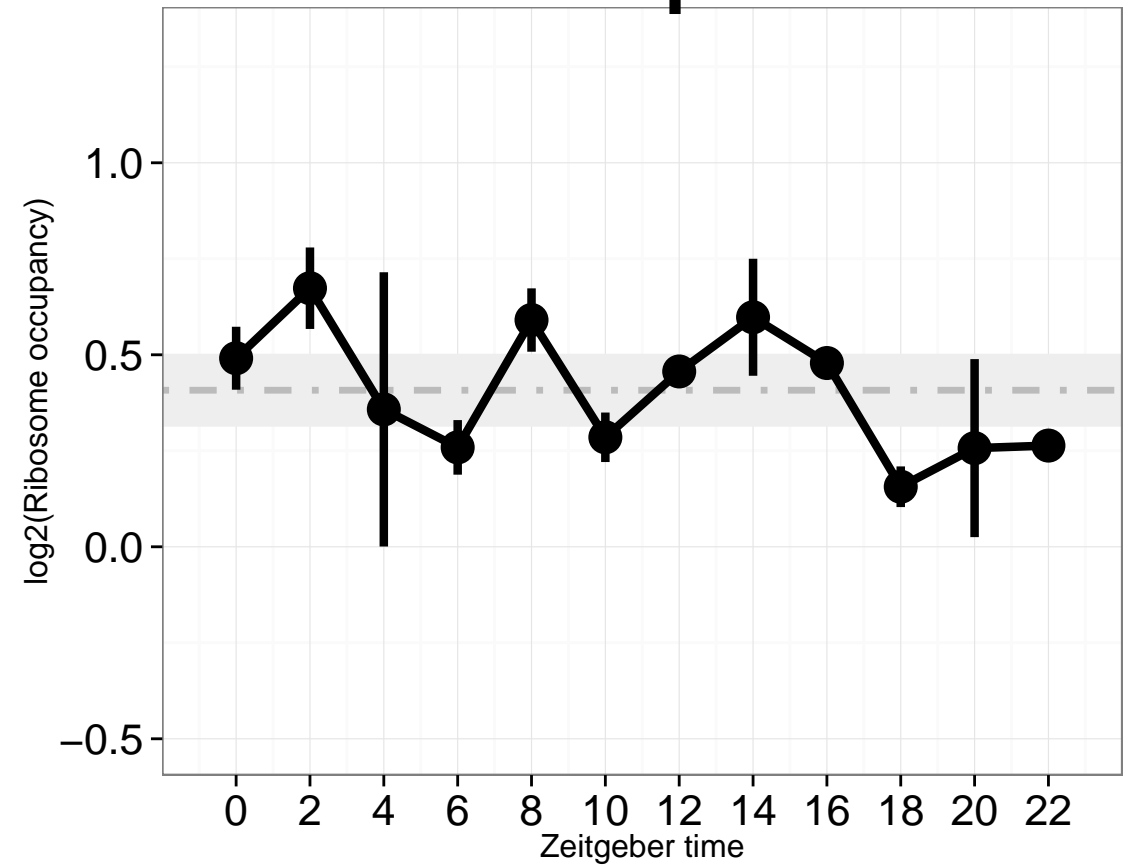

Supplement: Supplementary file 7458 [file 1]

## Gys2

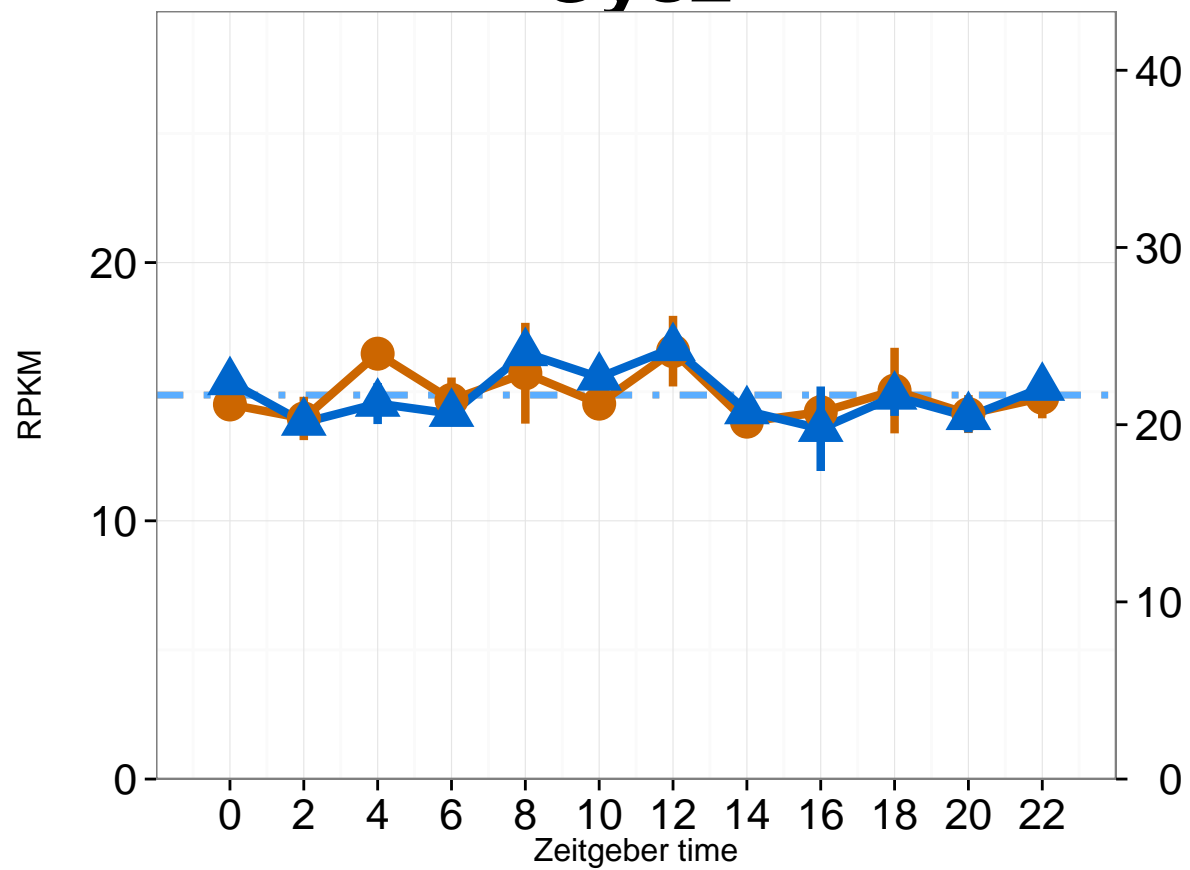

## Gys2

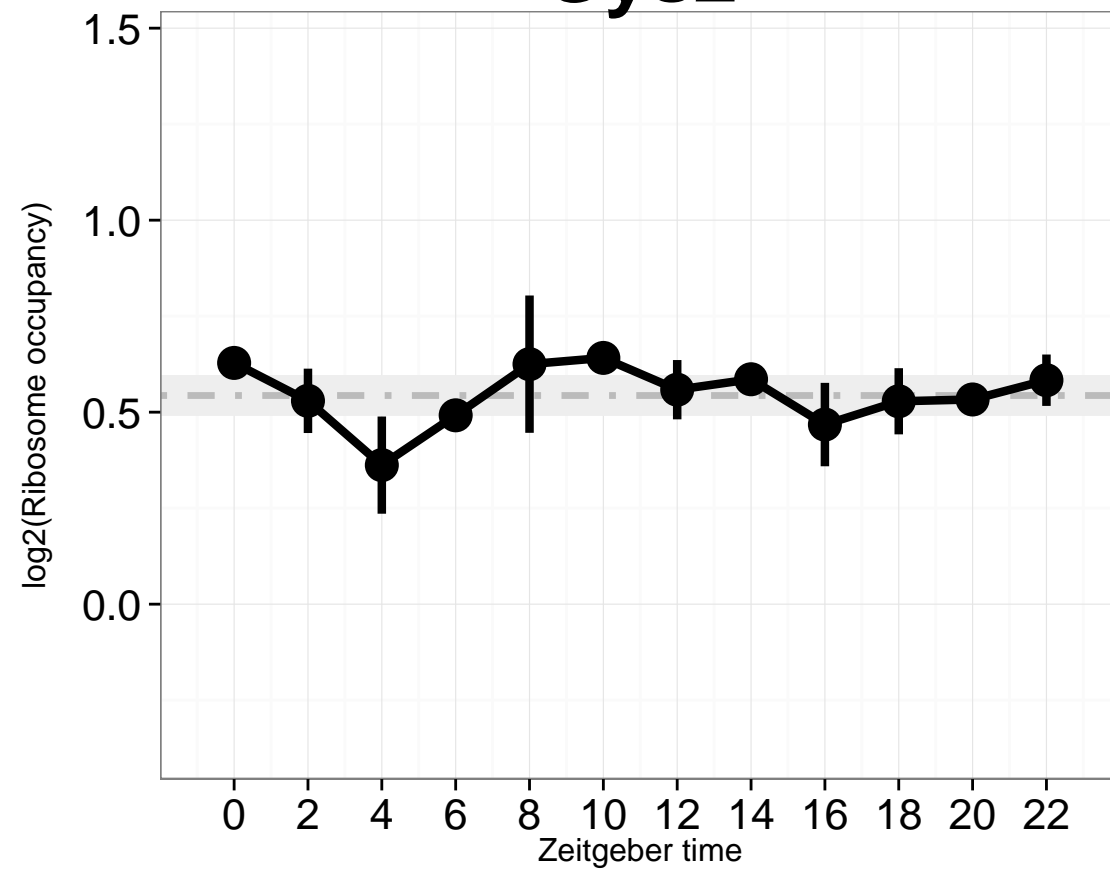

Supplement: Supplementary file 7459 [file 1]

# Pcdhb19

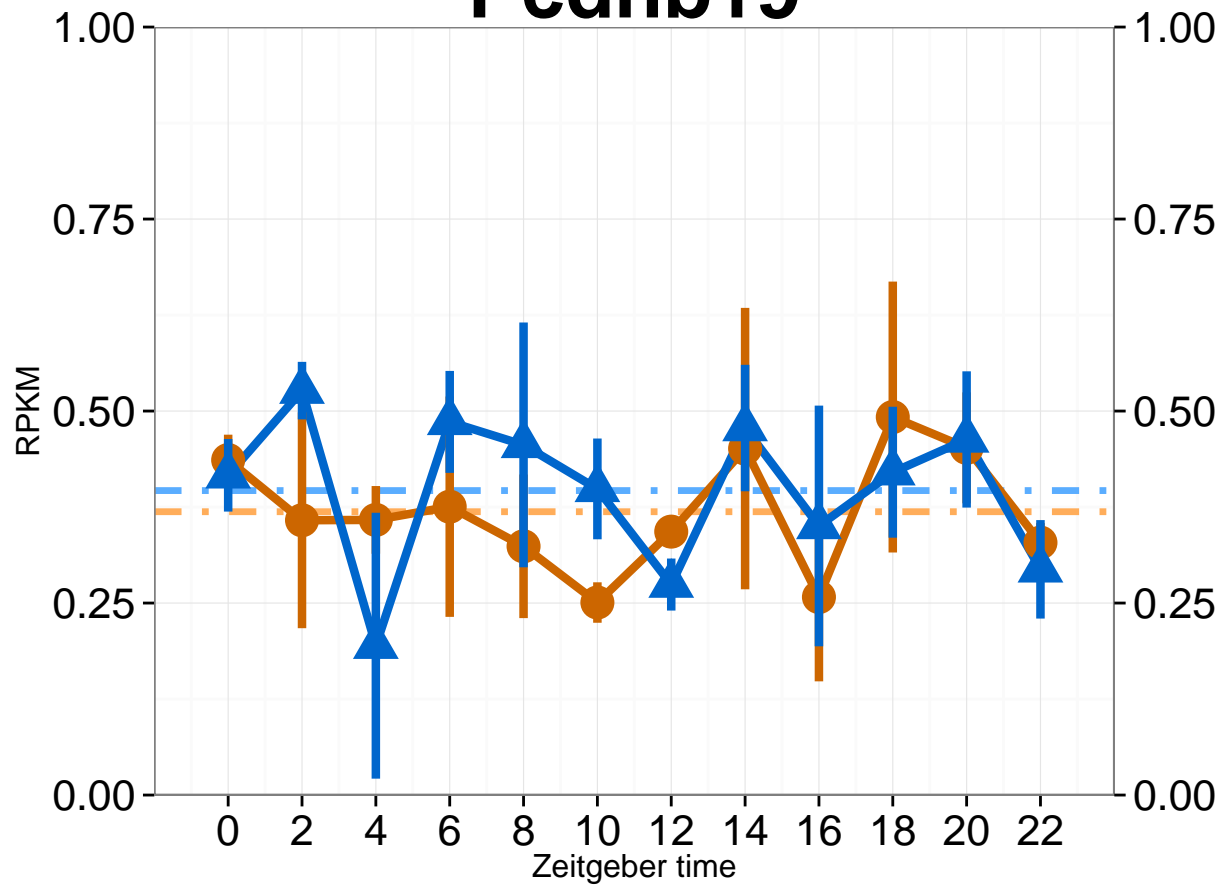

# Pcdhb19

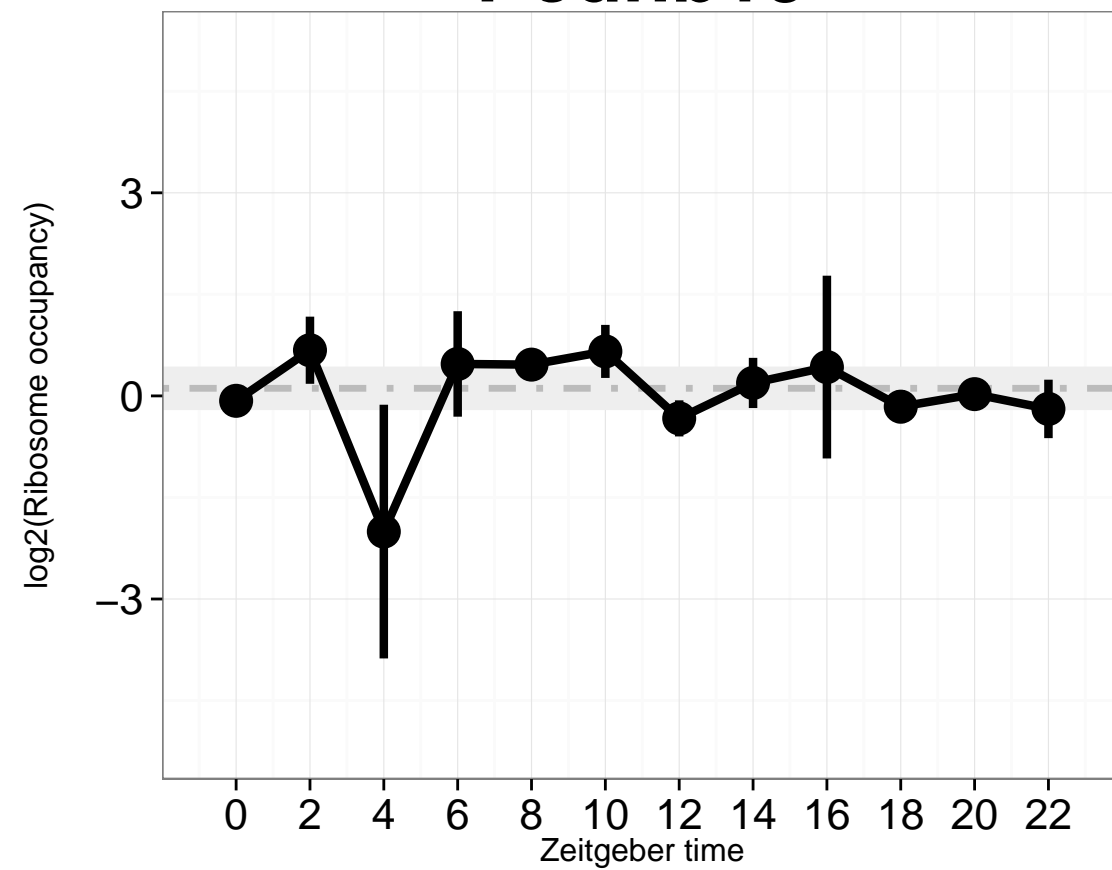

Supplement: Supplementary file 7460 [file 1]

## Hgd

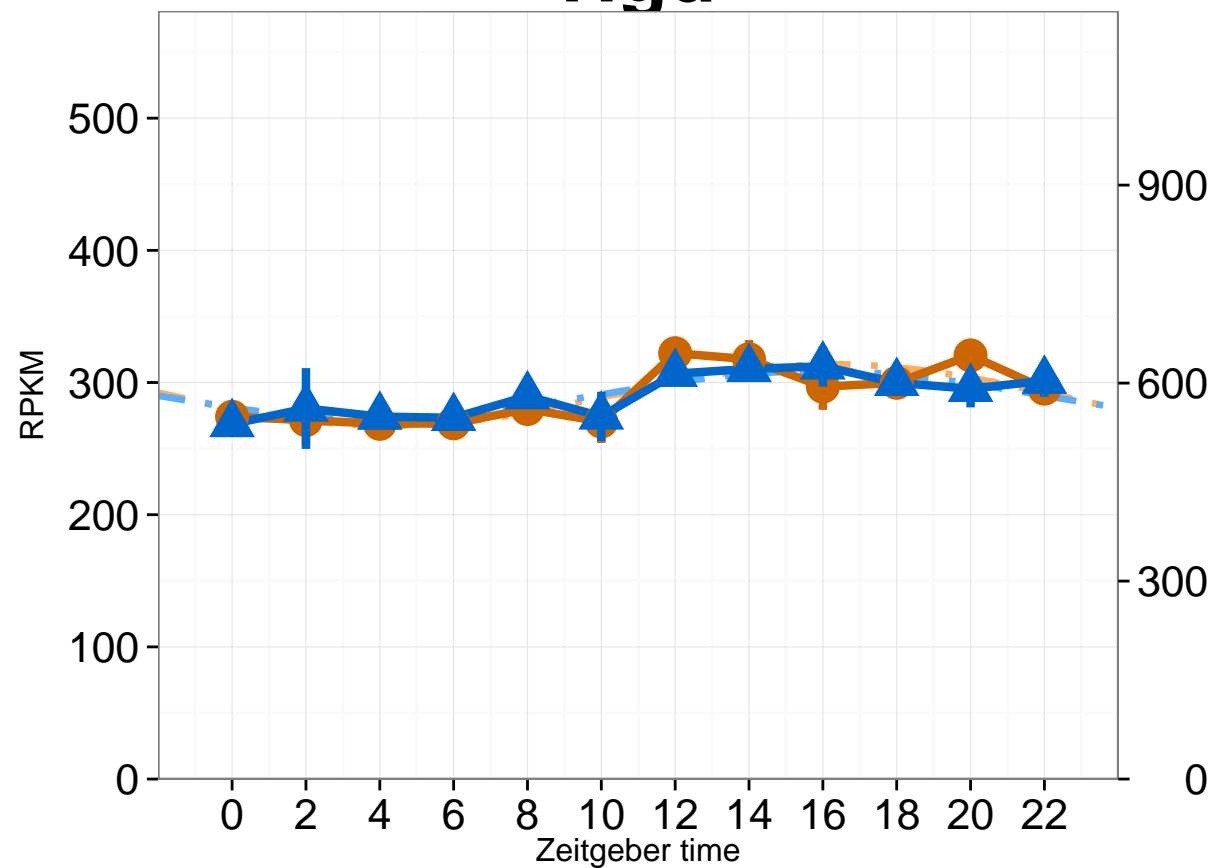

## Hgd

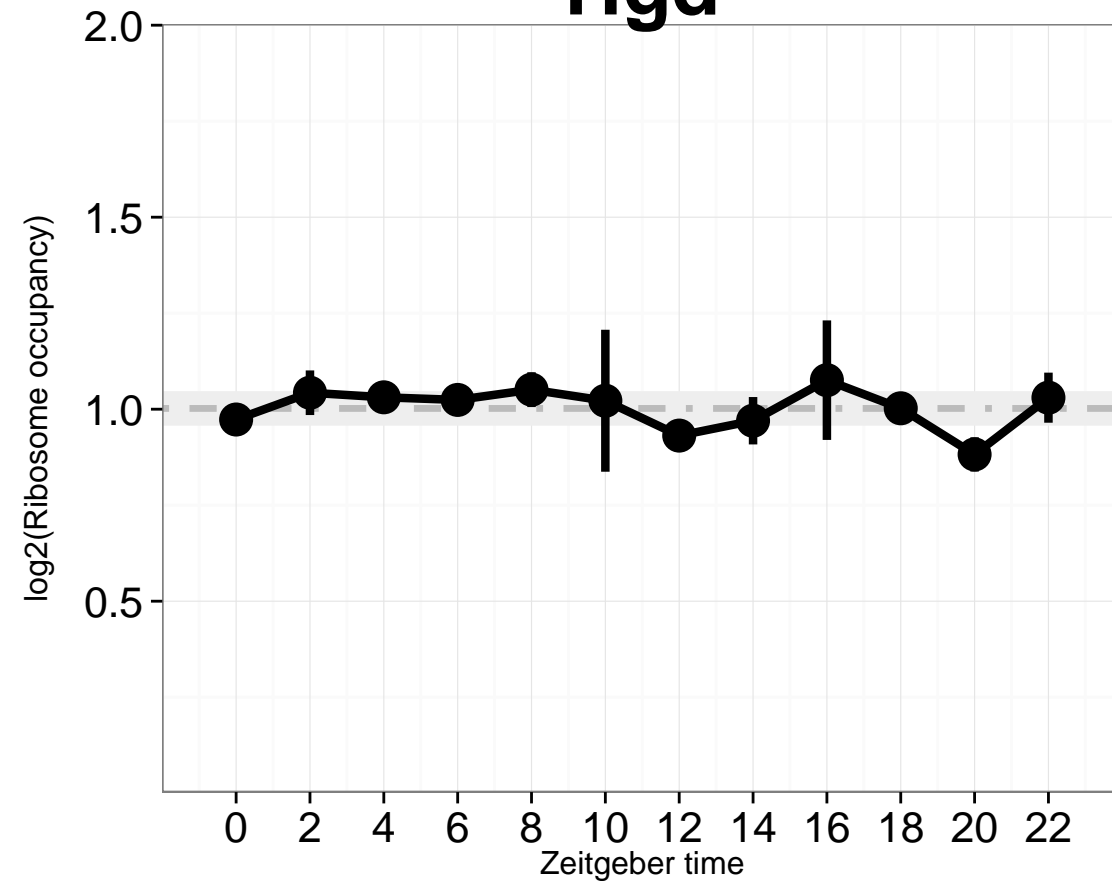

Supplement: Supplementary file 7461 [file 1]

## Pklr

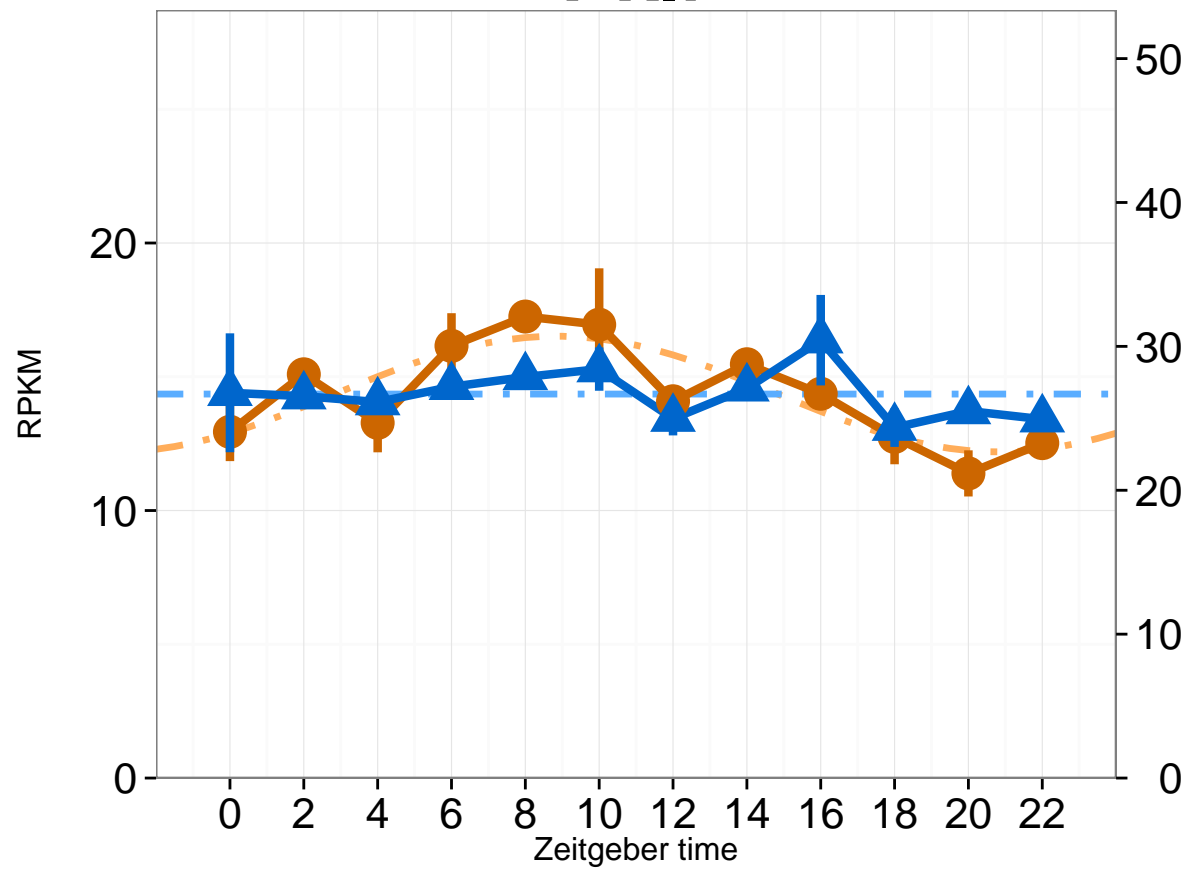

## Pklr

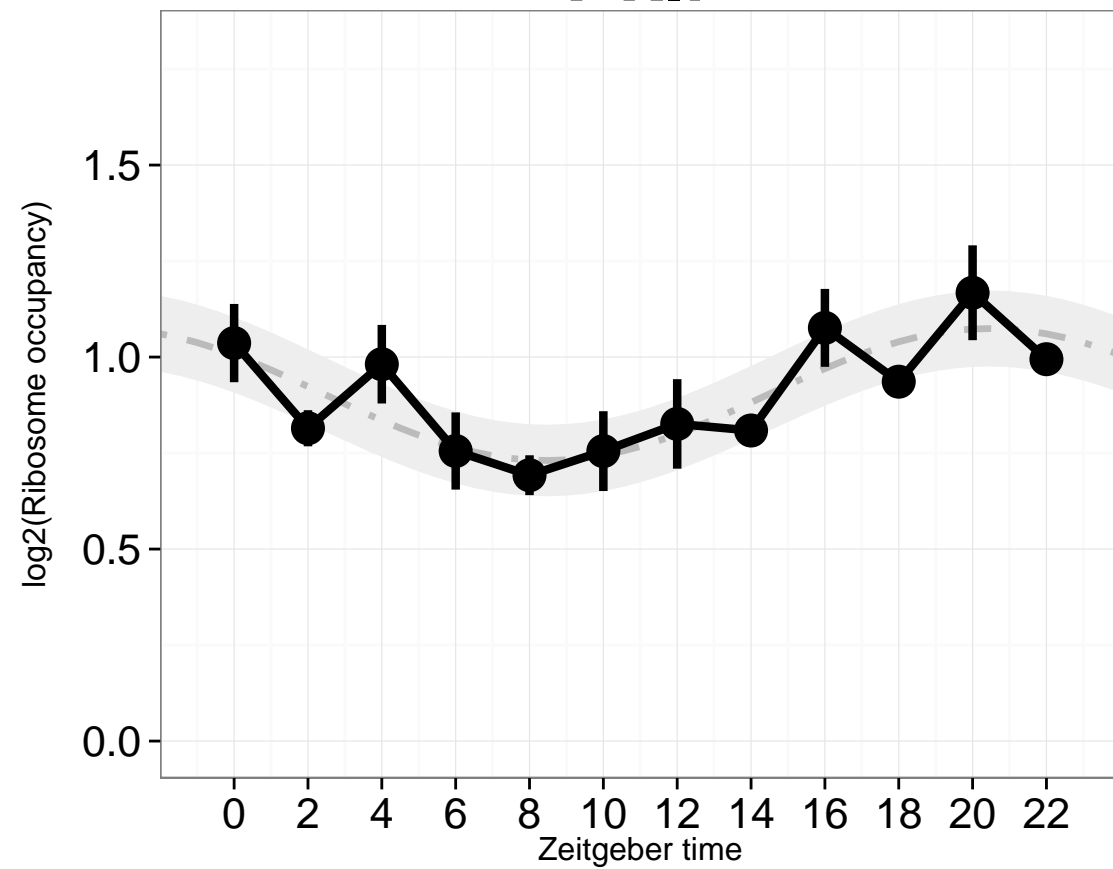

Supplement: Supplementary file 7462 [file 1]

## Klf13

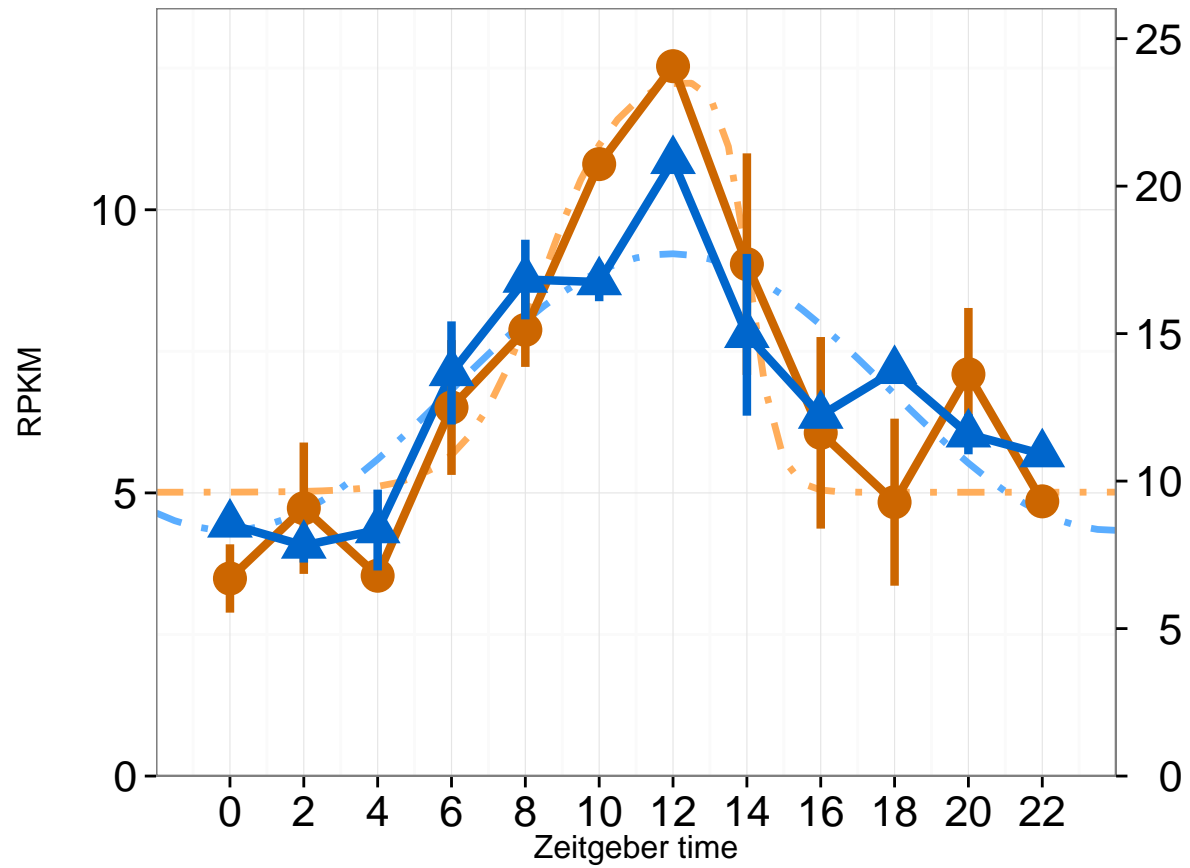

## Klf13

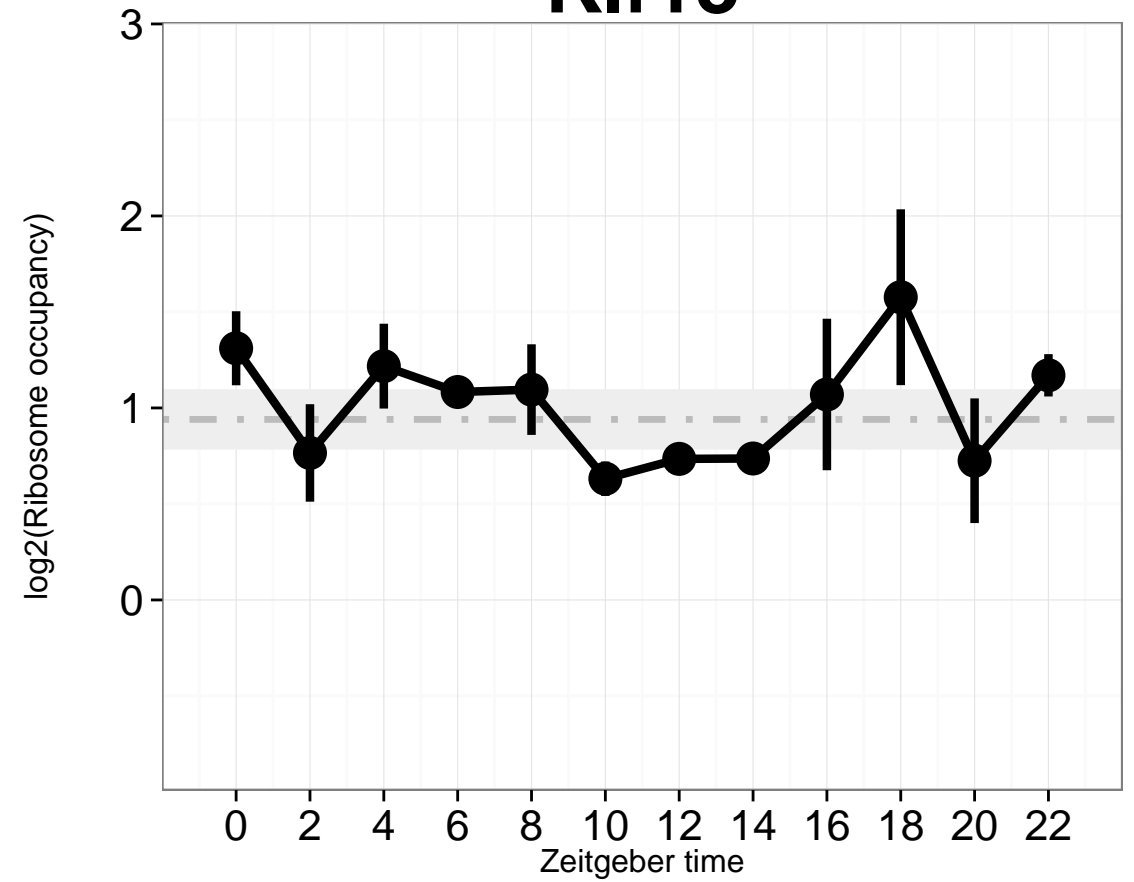

Supplement: Supplementary file 7463 [file 1]

# Commd7

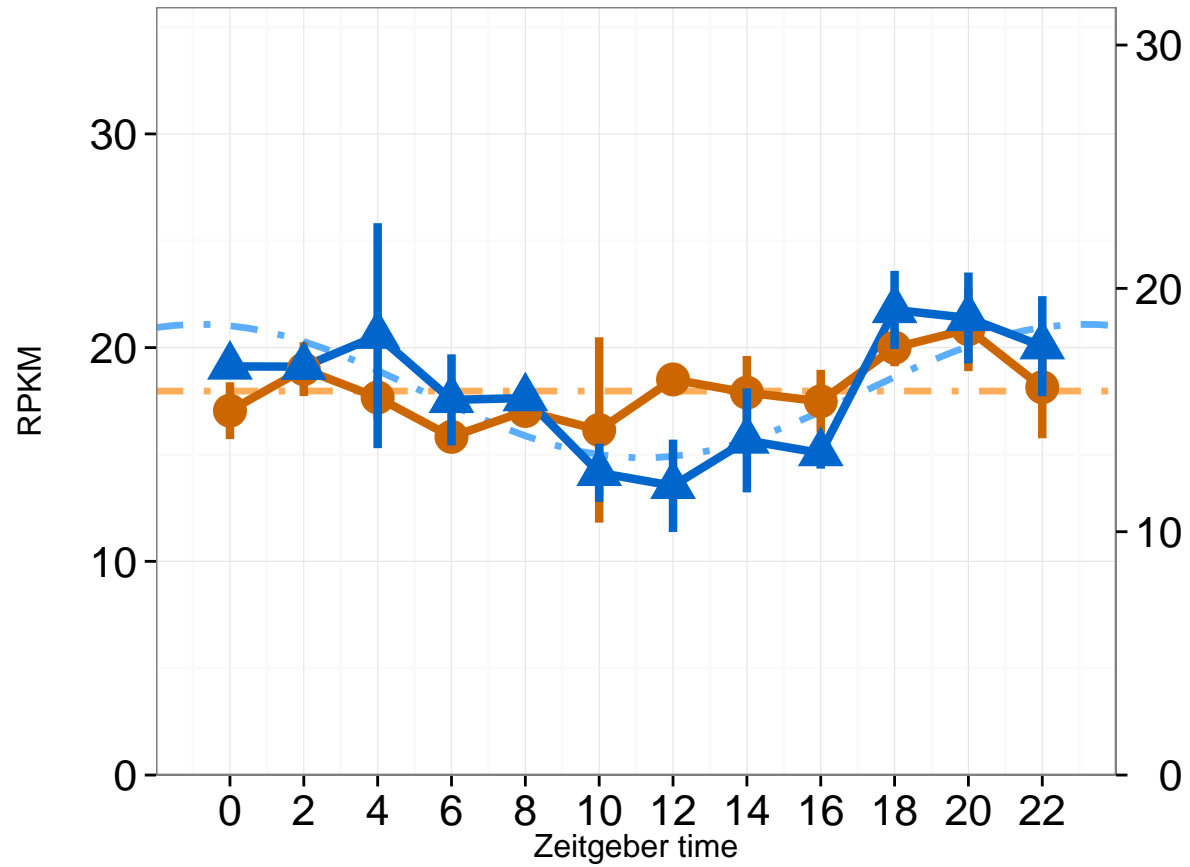

# Commd7

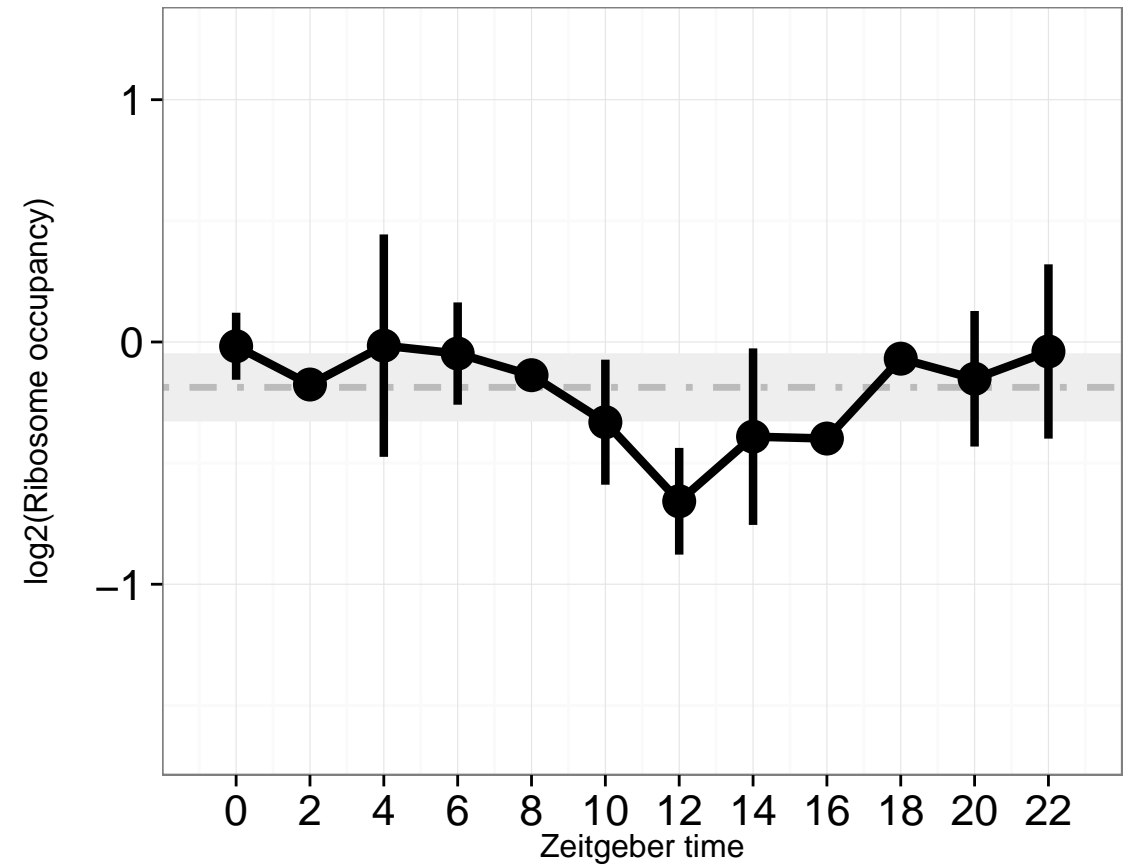

Supplement: Supplementary file 7464 [file 1]

## Ctnna1

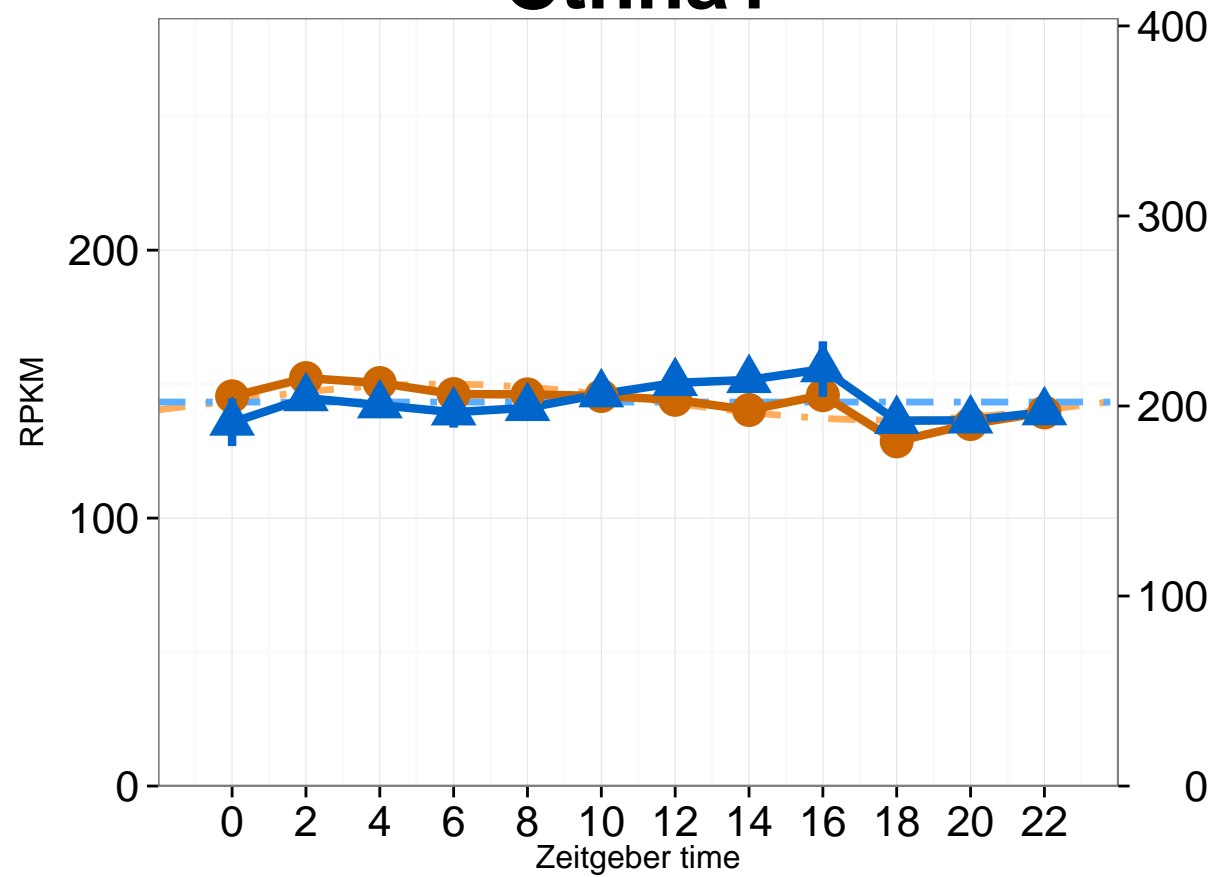

## Ctnna1

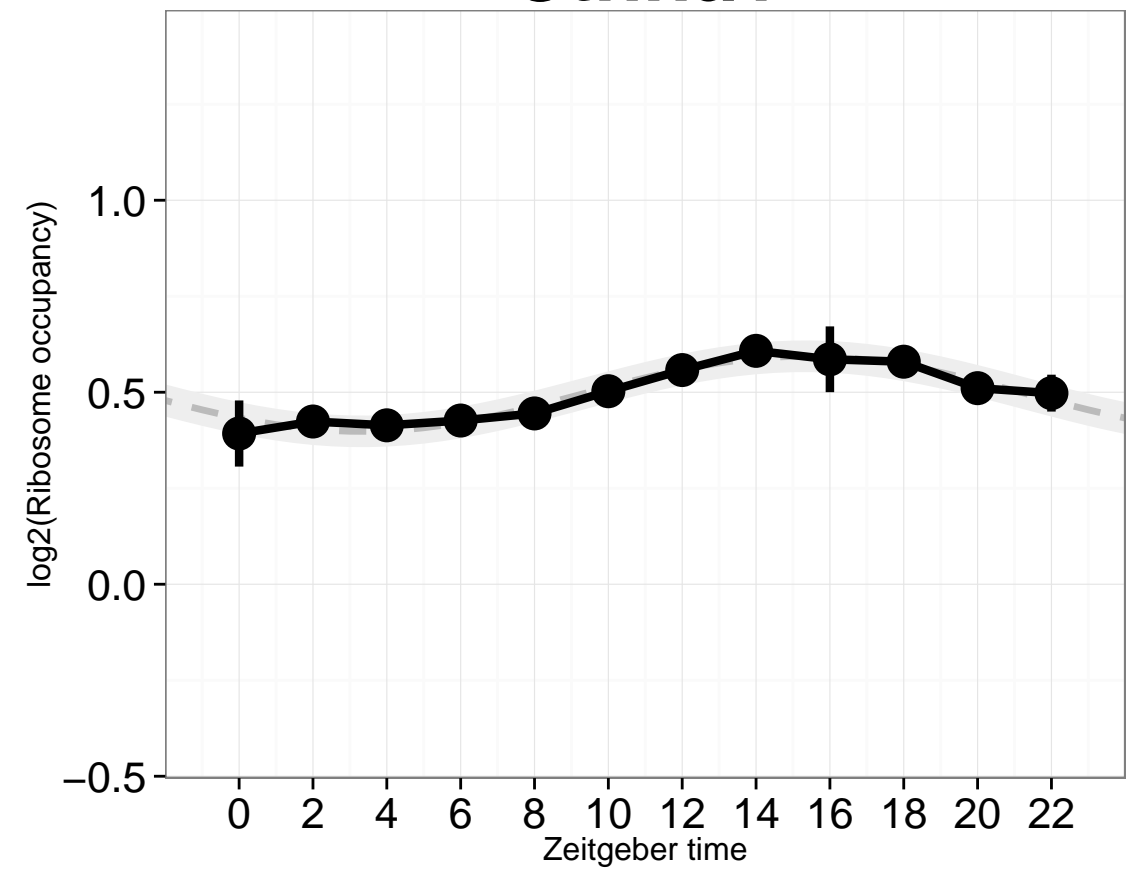

Supplement: Supplementary file 7465 [file 1]

## Senp7

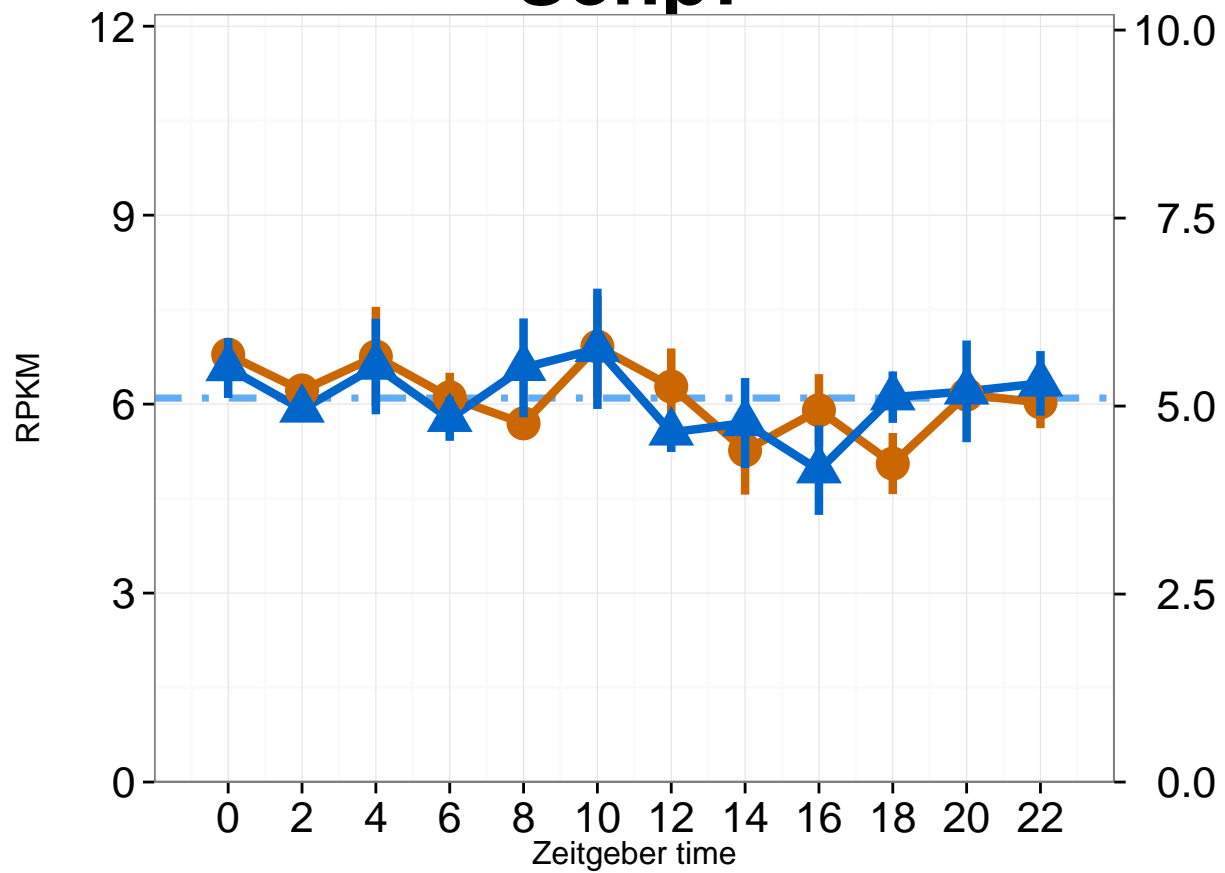

## Senp7

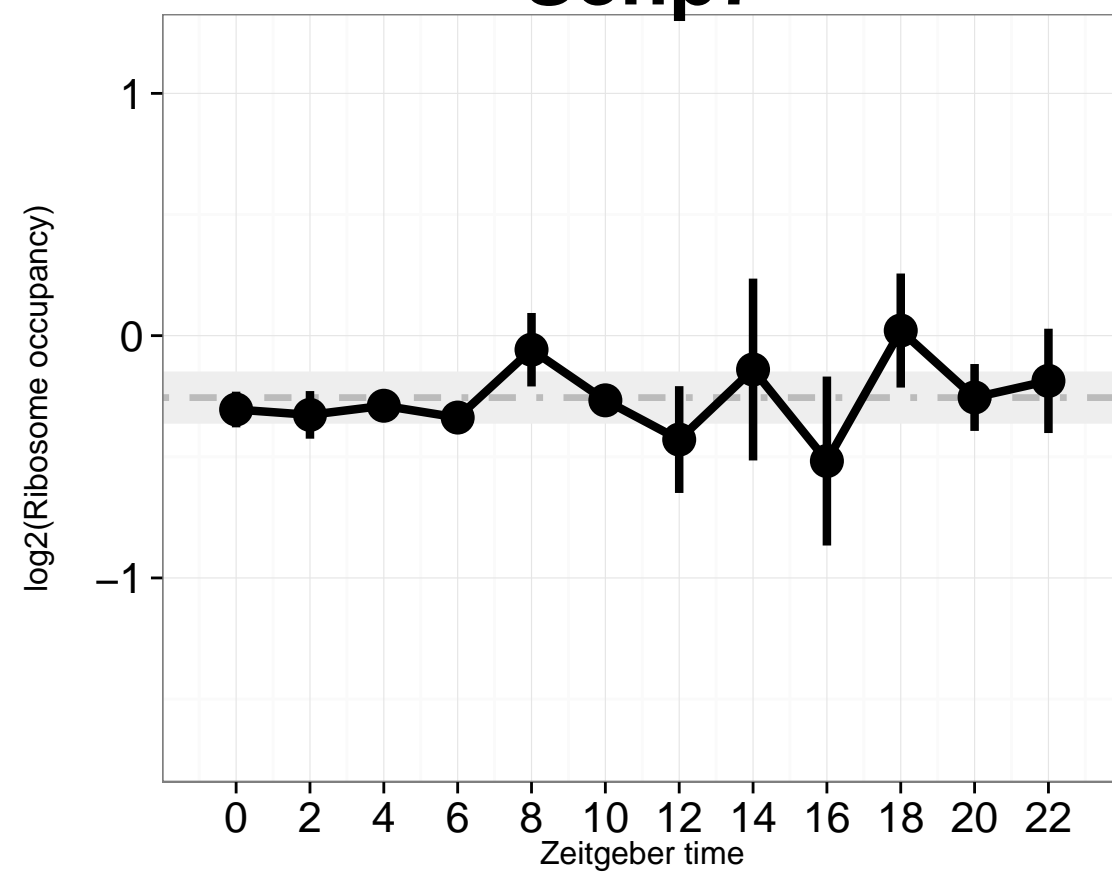

Supplement: Supplementary file 7466 [file 1]

# Sept2

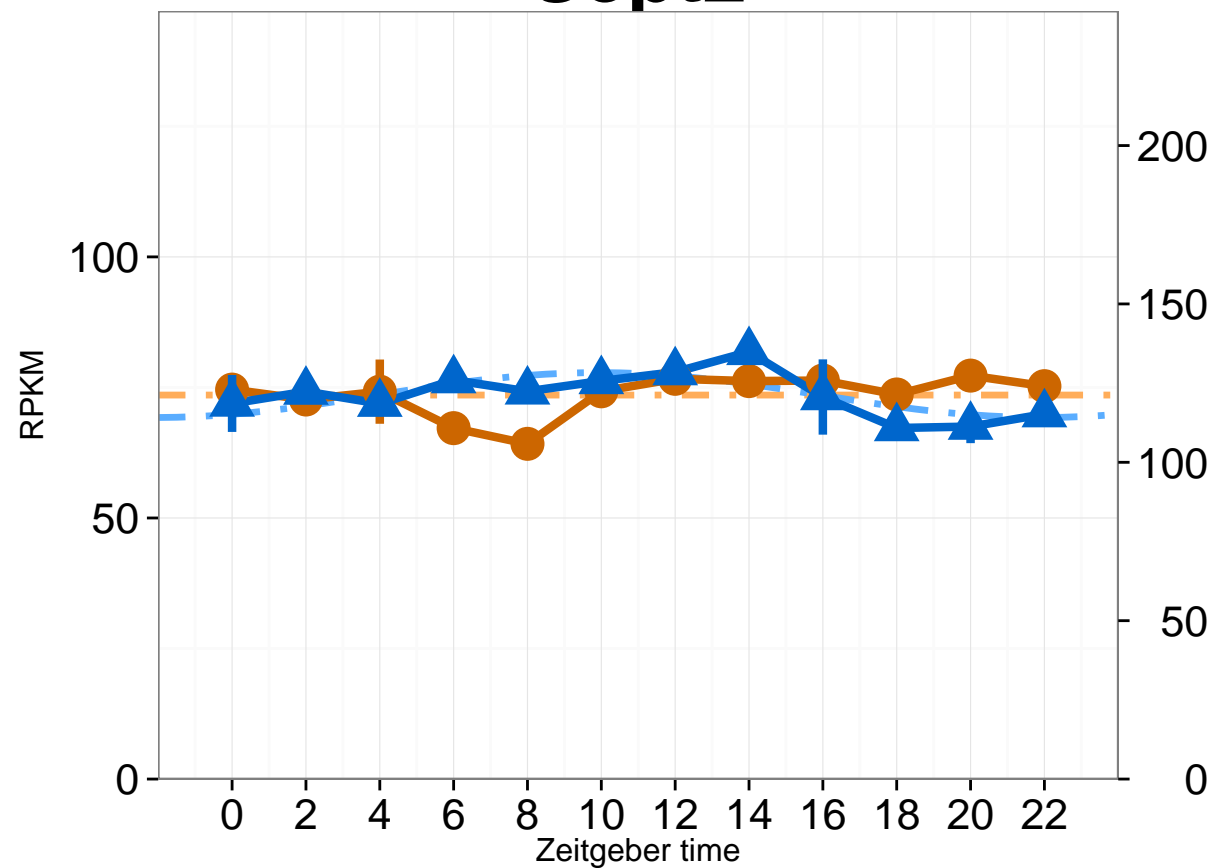

# Sept2

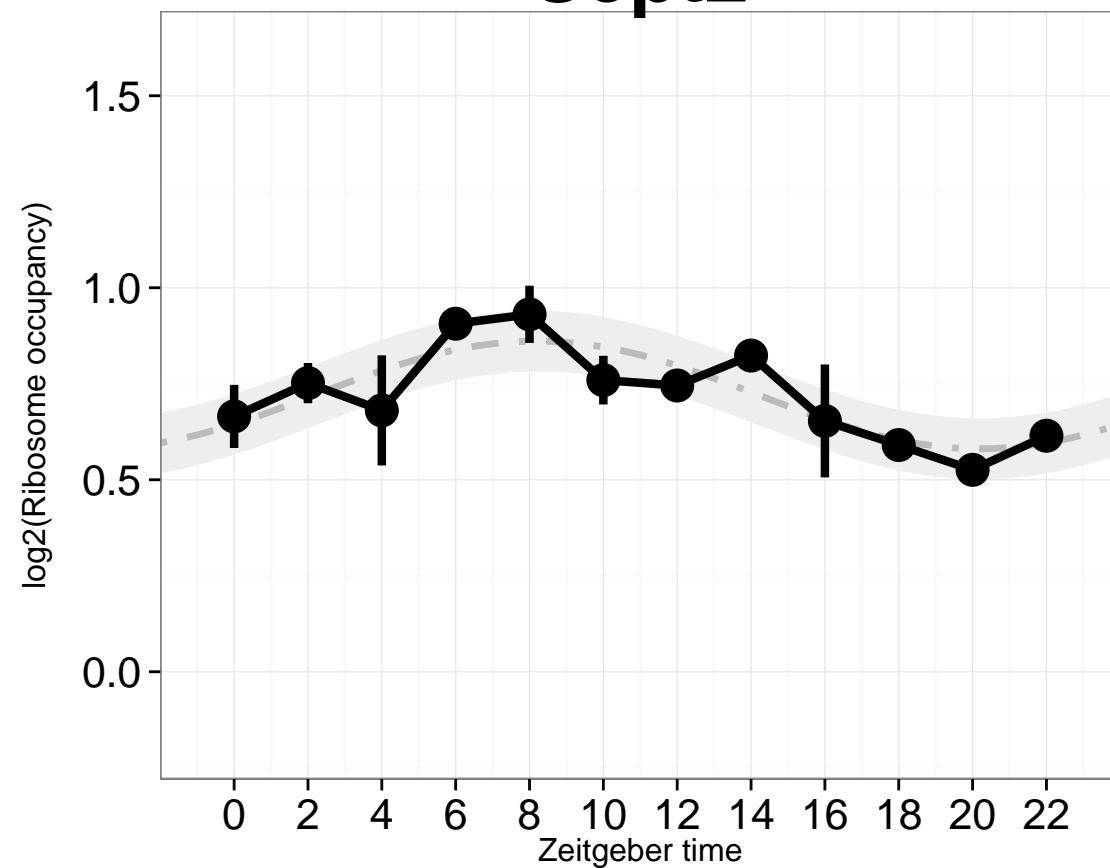

Supplement: Supplementary file 7467 [file 1]

## Wdr3

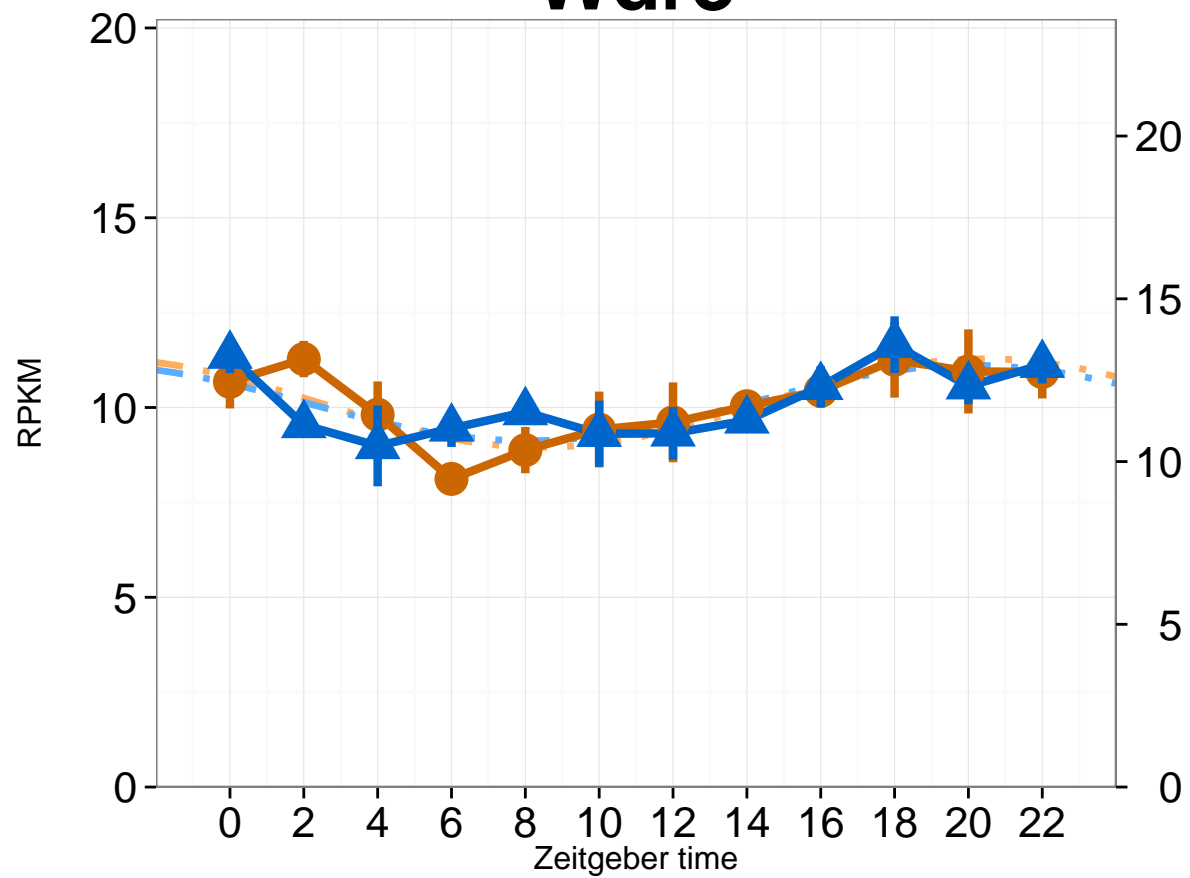

## Wdr3

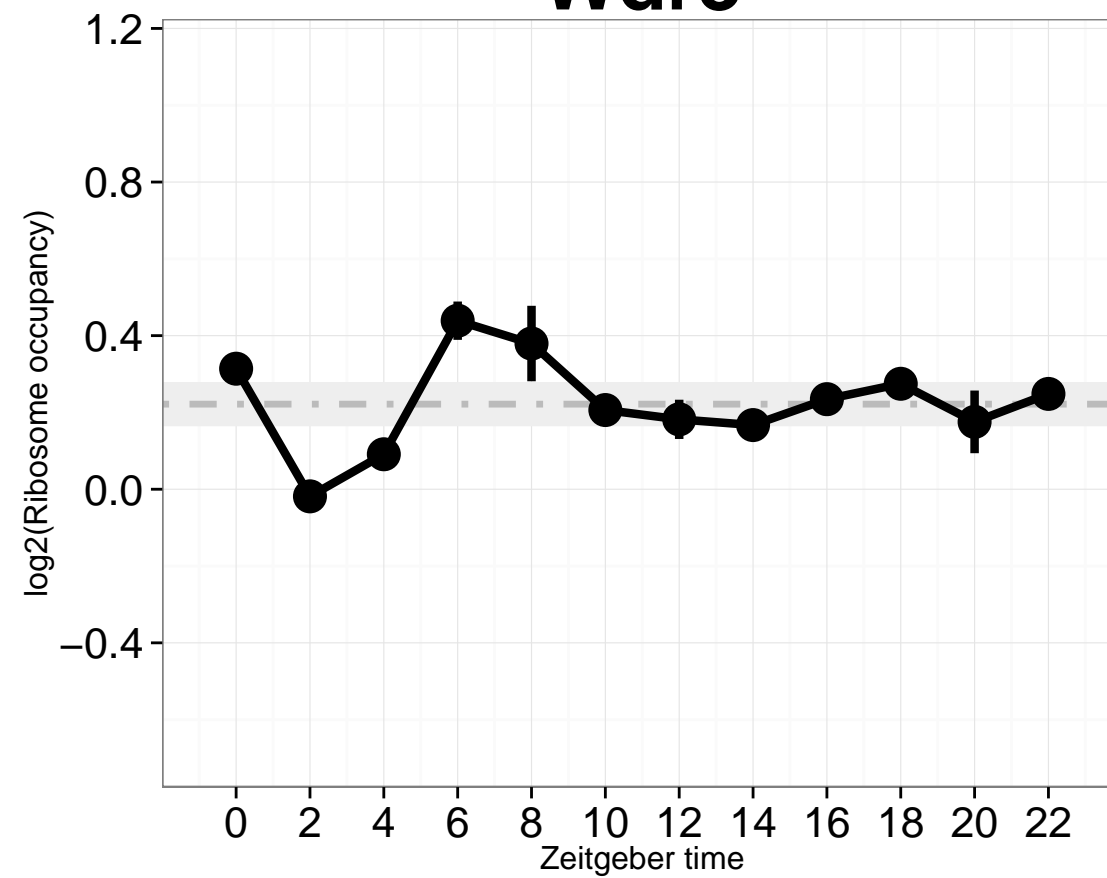

Supplement: Supplementary file 7468 [file 1]

# Ppm1d

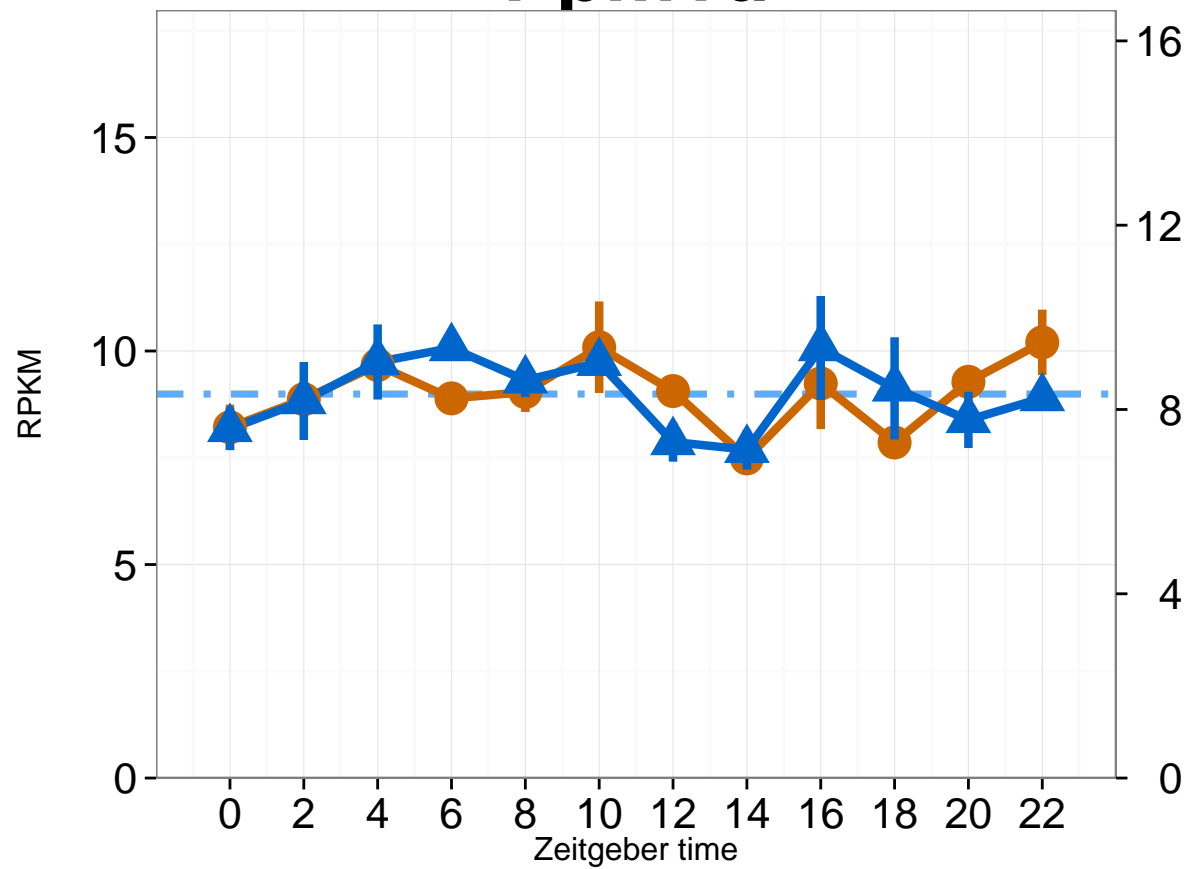

# Ppm1d

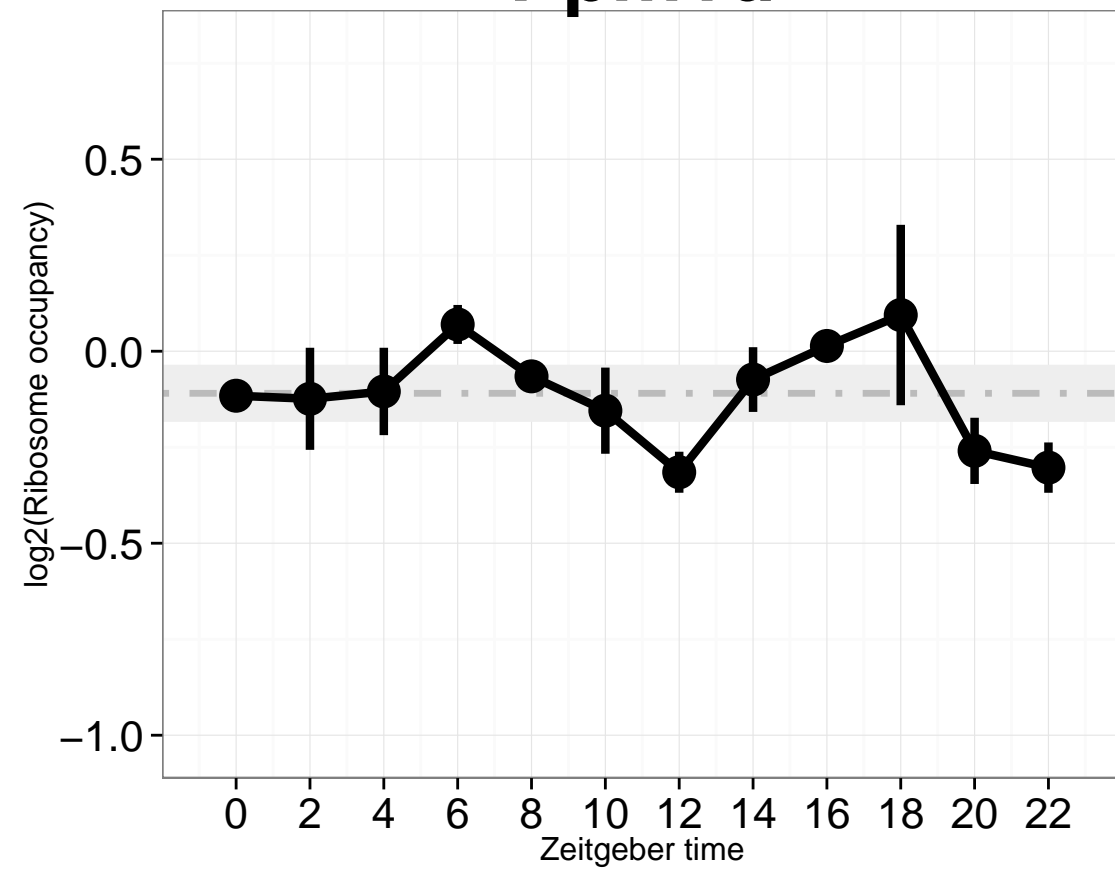

Supplement: Supplementary file 7469 [file 1]

## Syne3

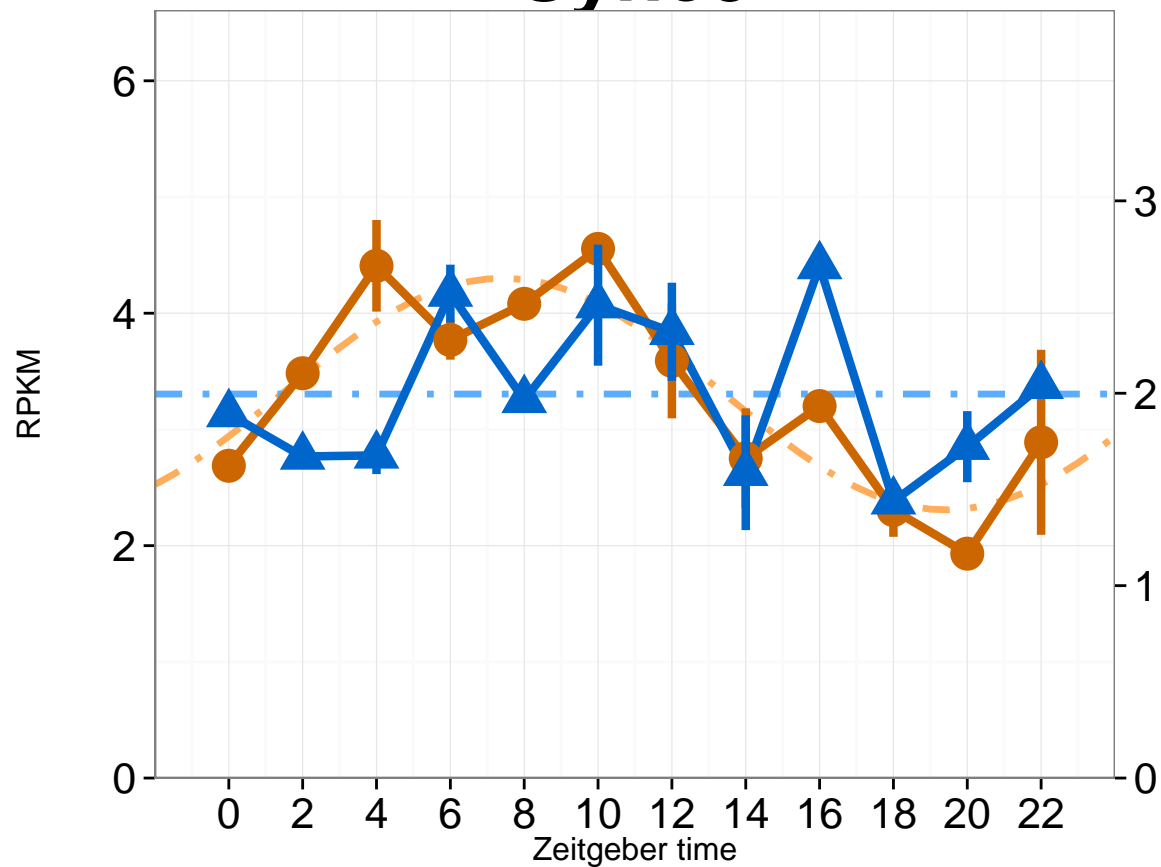

## Syne3

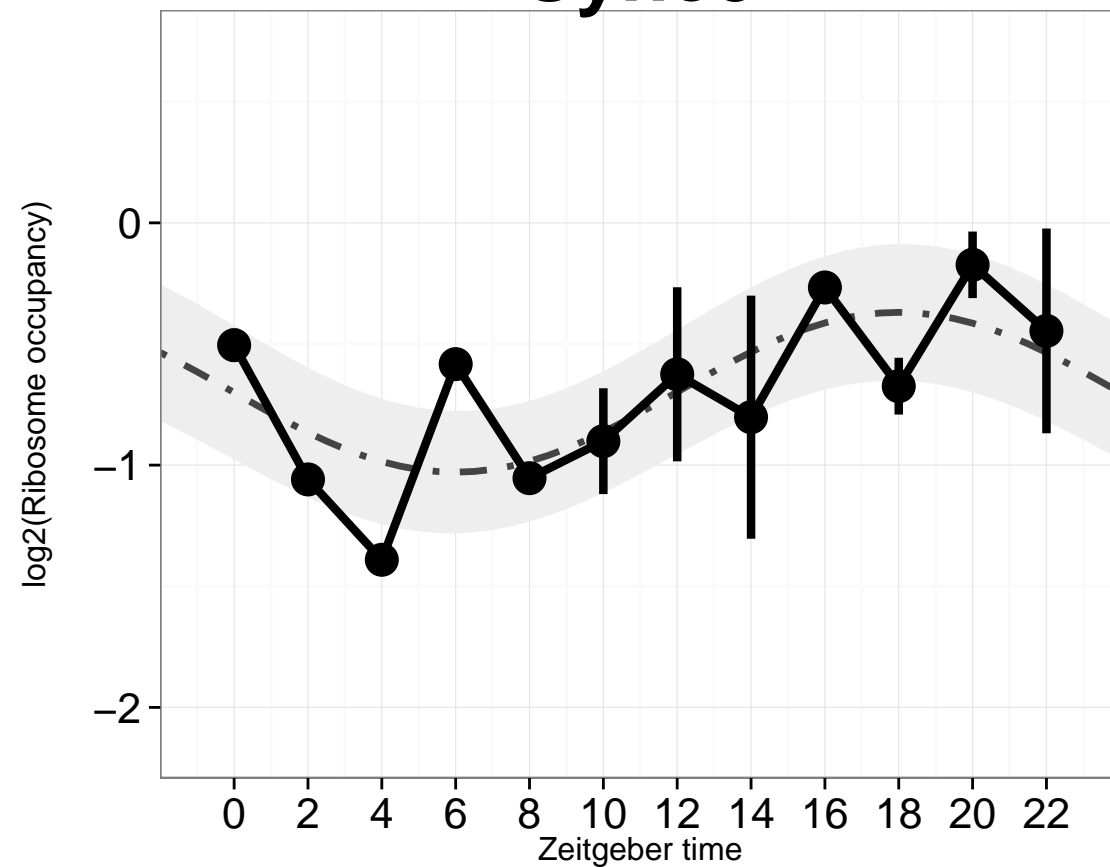

Supplement: Supplementary file 7470 [file 1]

## Ank3

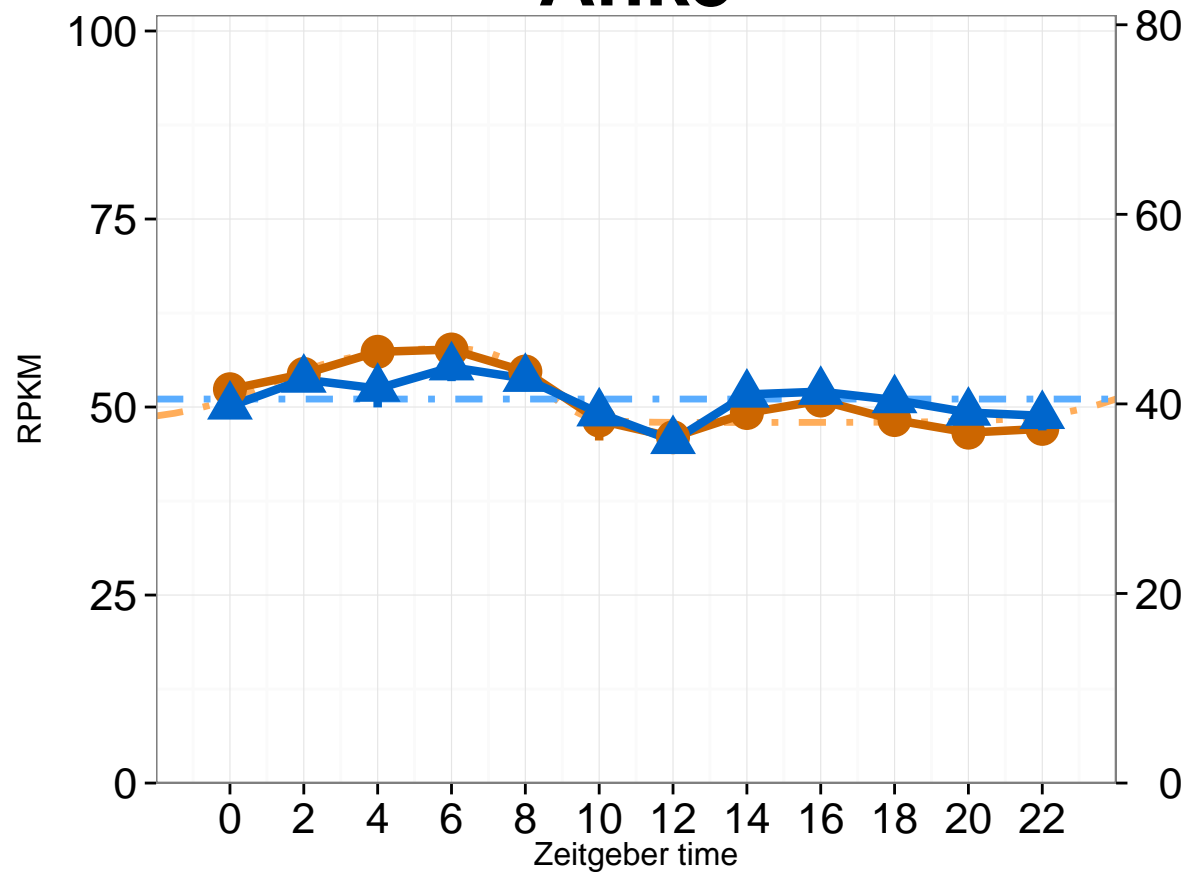

## Ank3

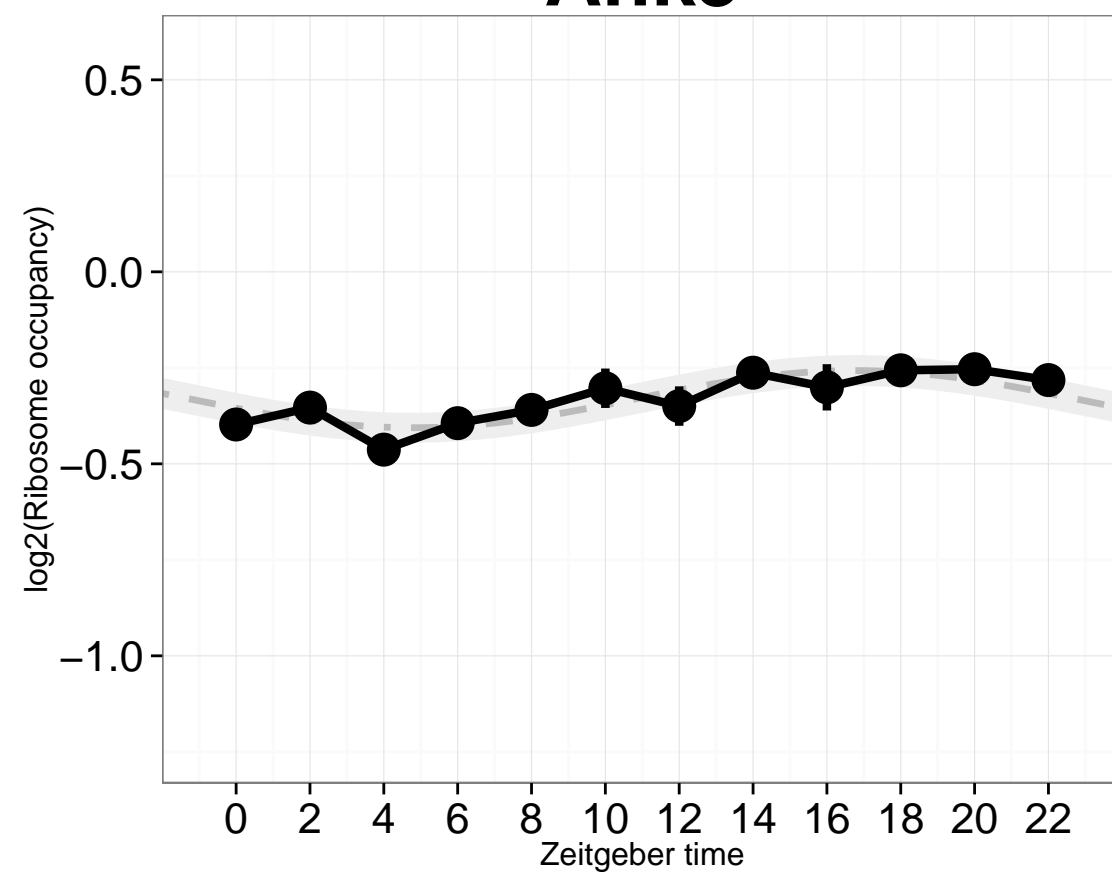

Supplement: Supplementary file 7471 [file 1]

# Tmem150c

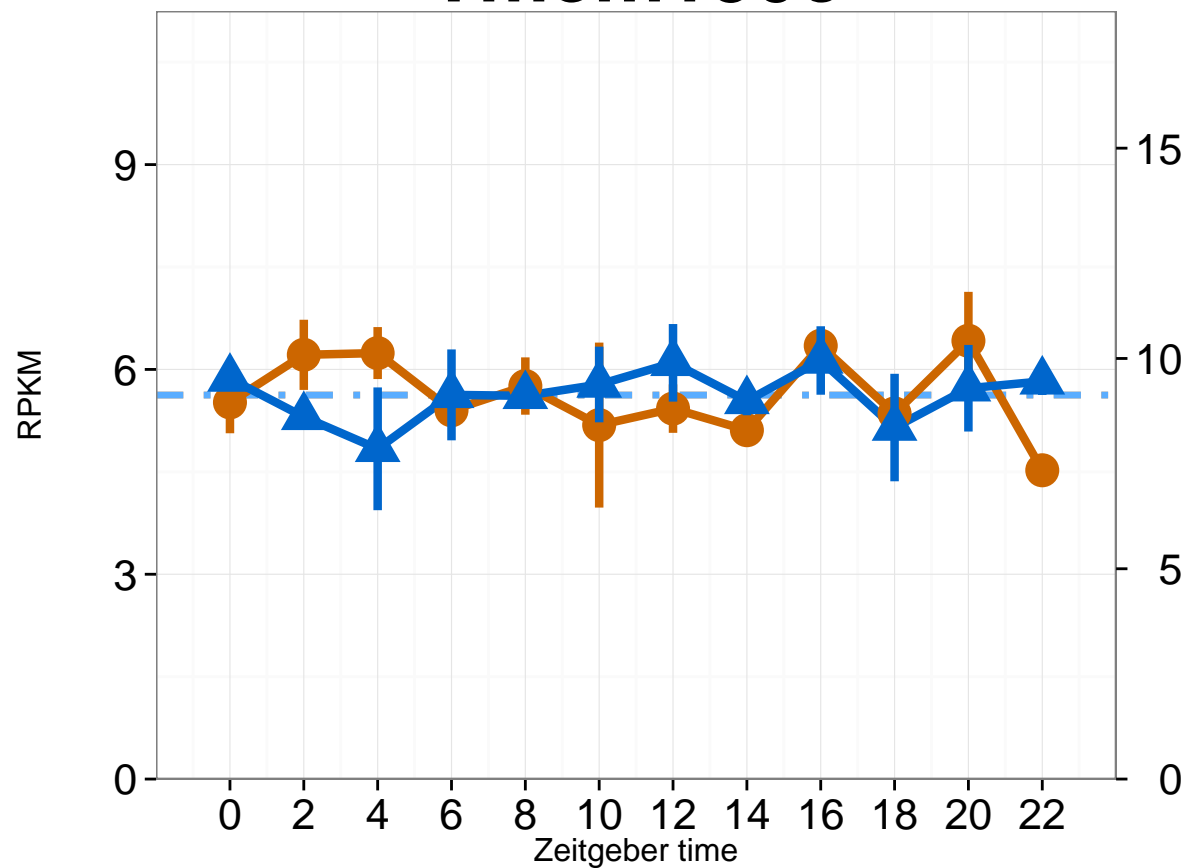

# Tmem150c

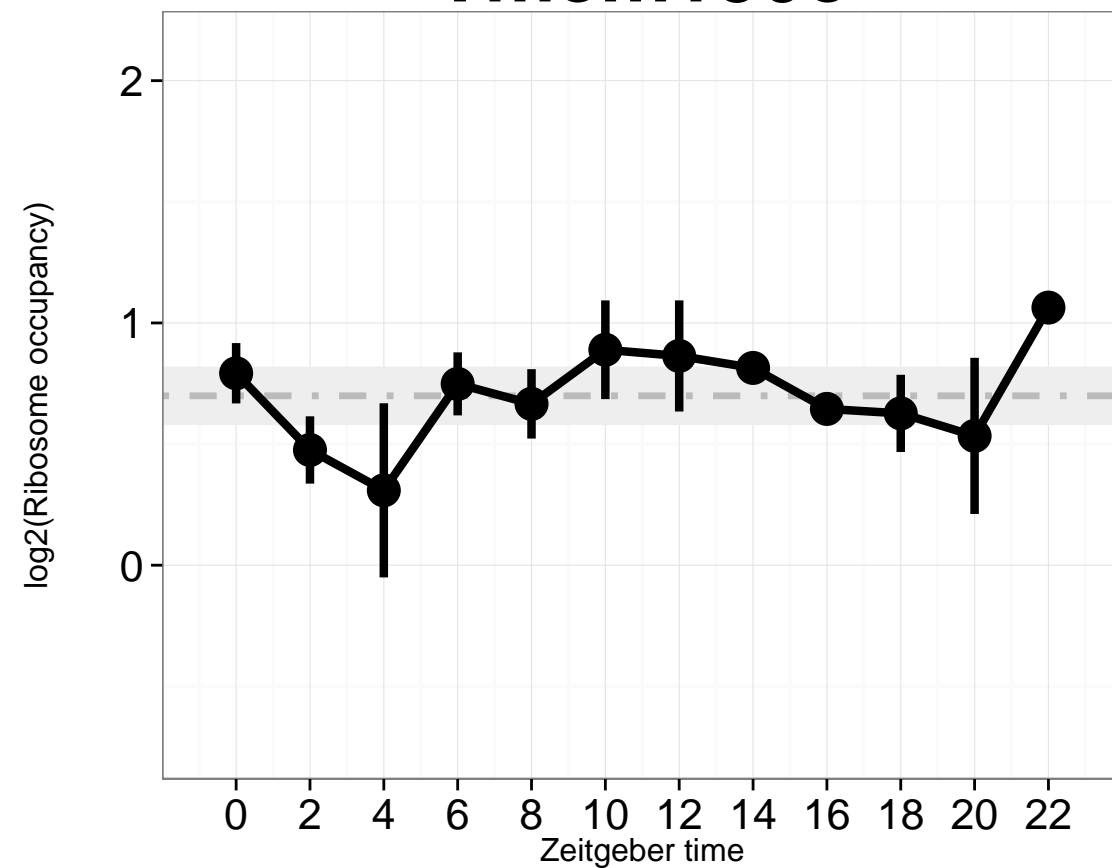

Supplement: Supplementary file 7472 [file 1]

## Spop

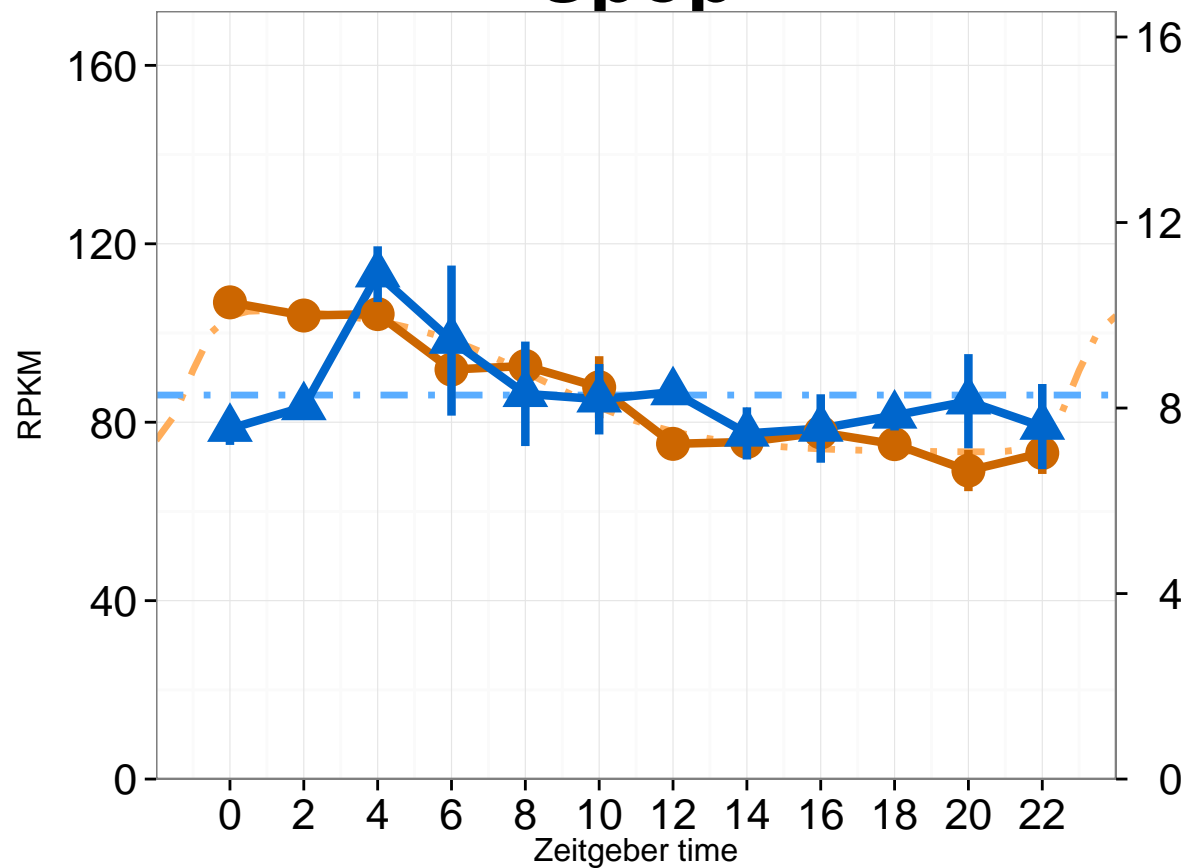

## Spop

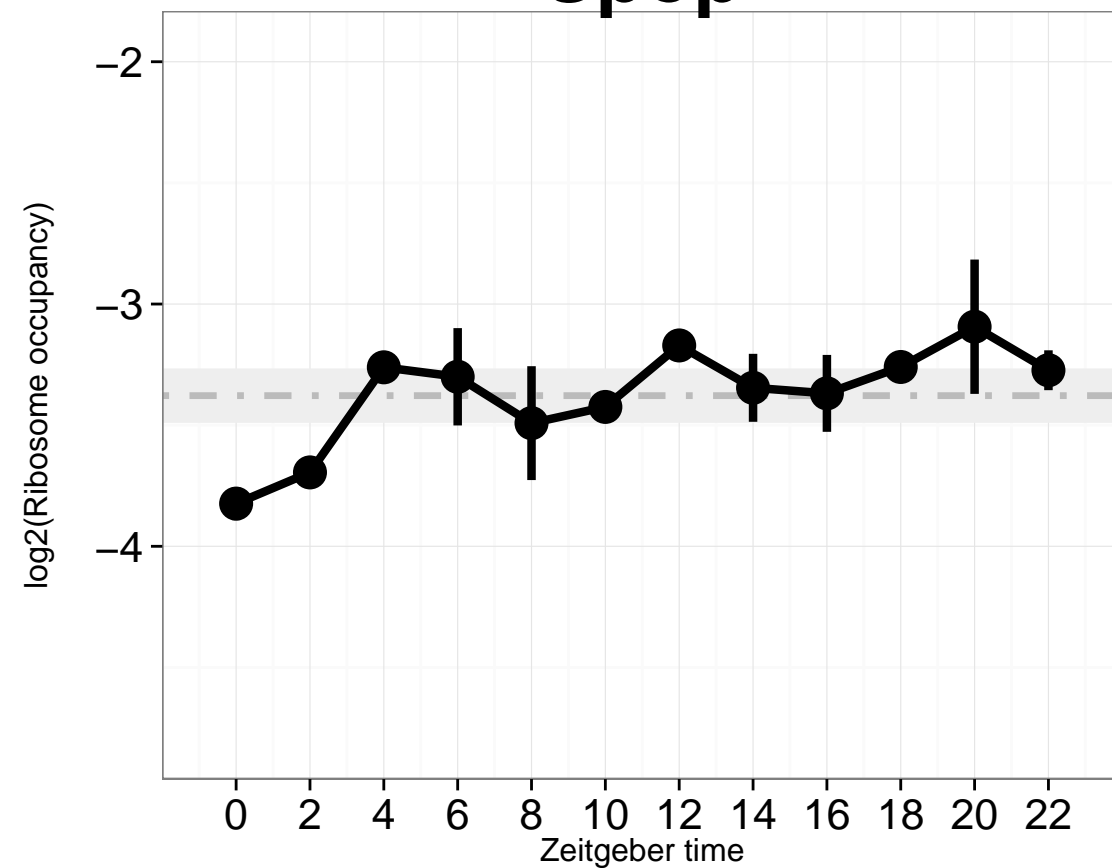

Supplement: Supplementary file 7473 [file 1]

# Tmem200b

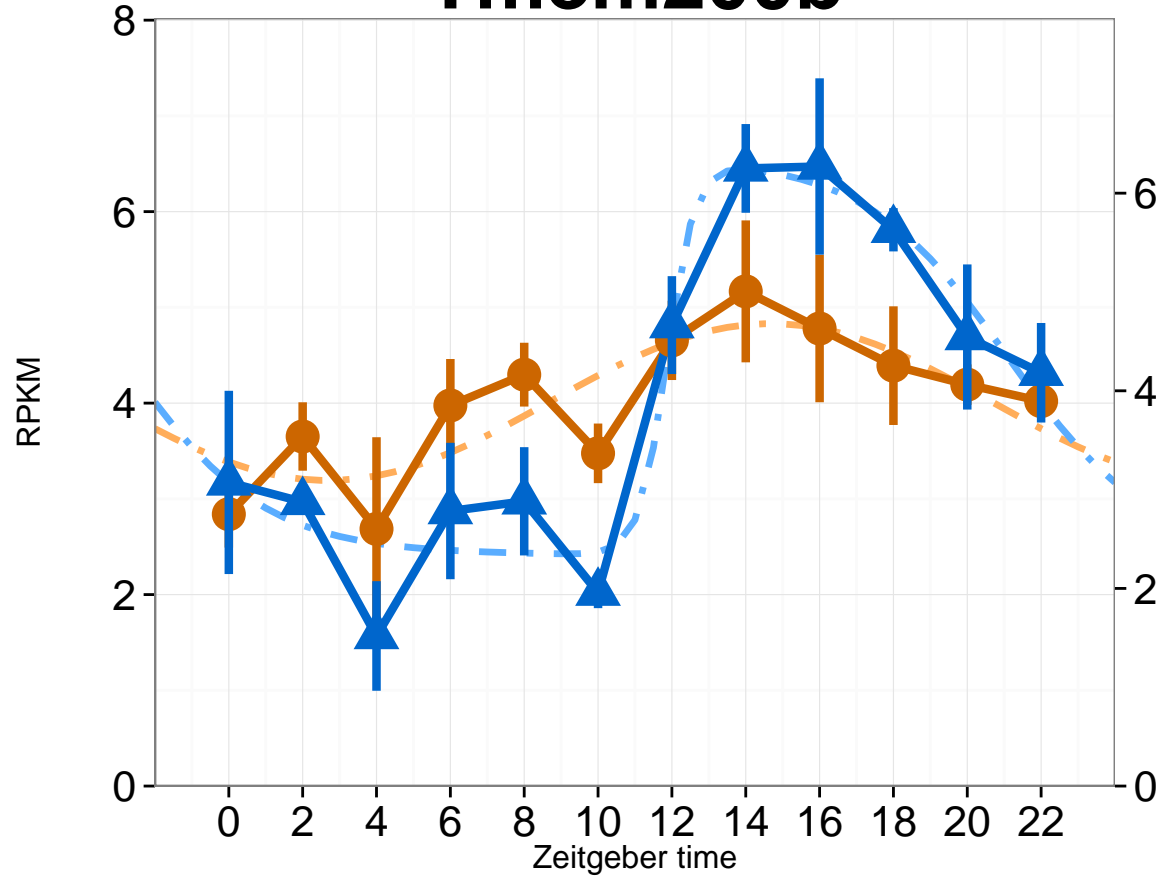

# Tmem200b

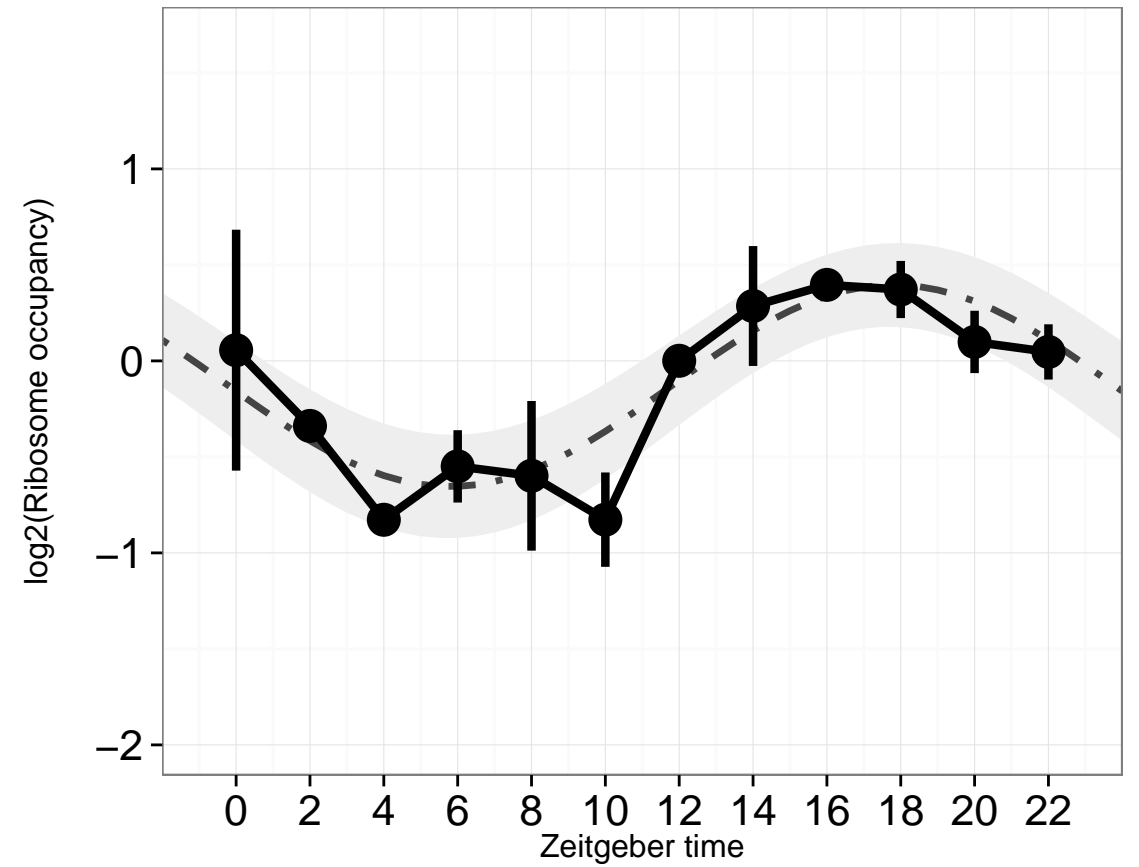

Supplement: Supplementary file 7474 [file 1]

## Wdr36

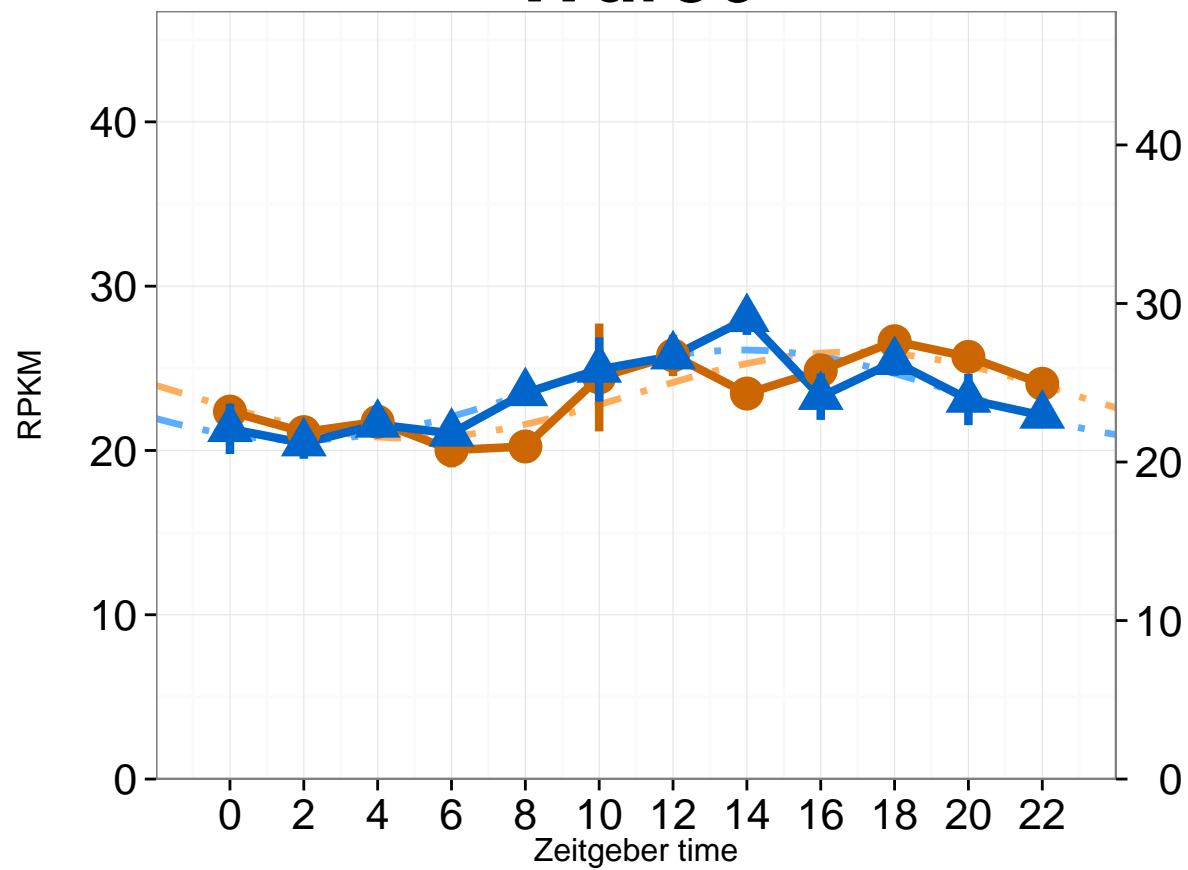

## Wdr36

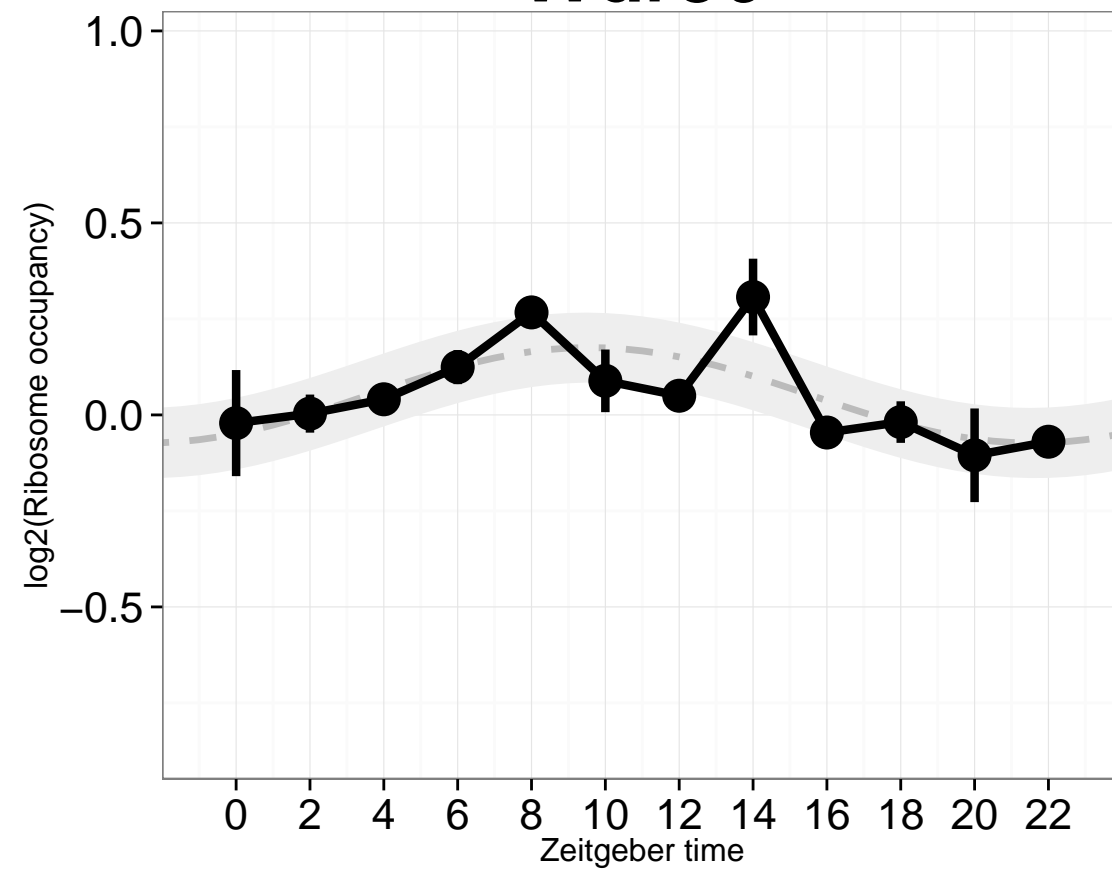

Supplement: Supplementary file 7475 [file 1]

## Tlr9

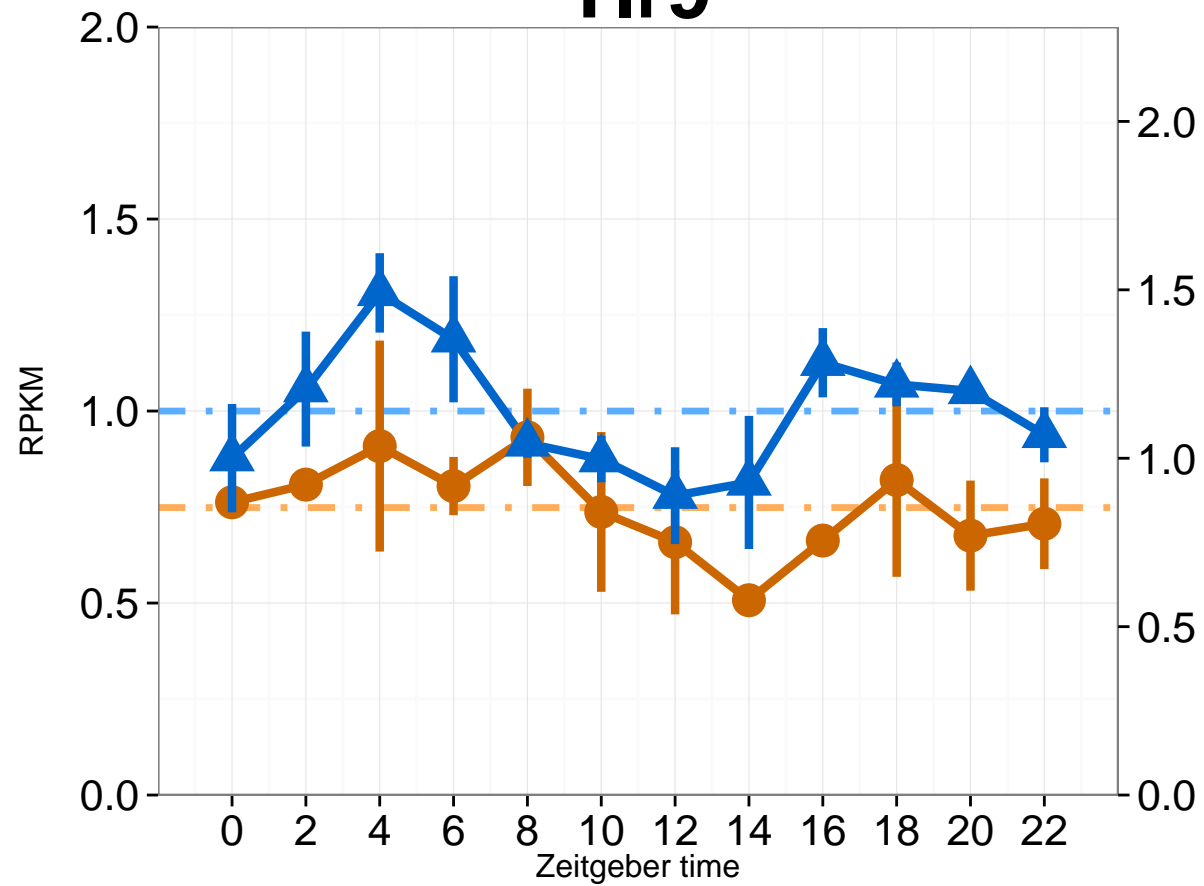

## Tlr9

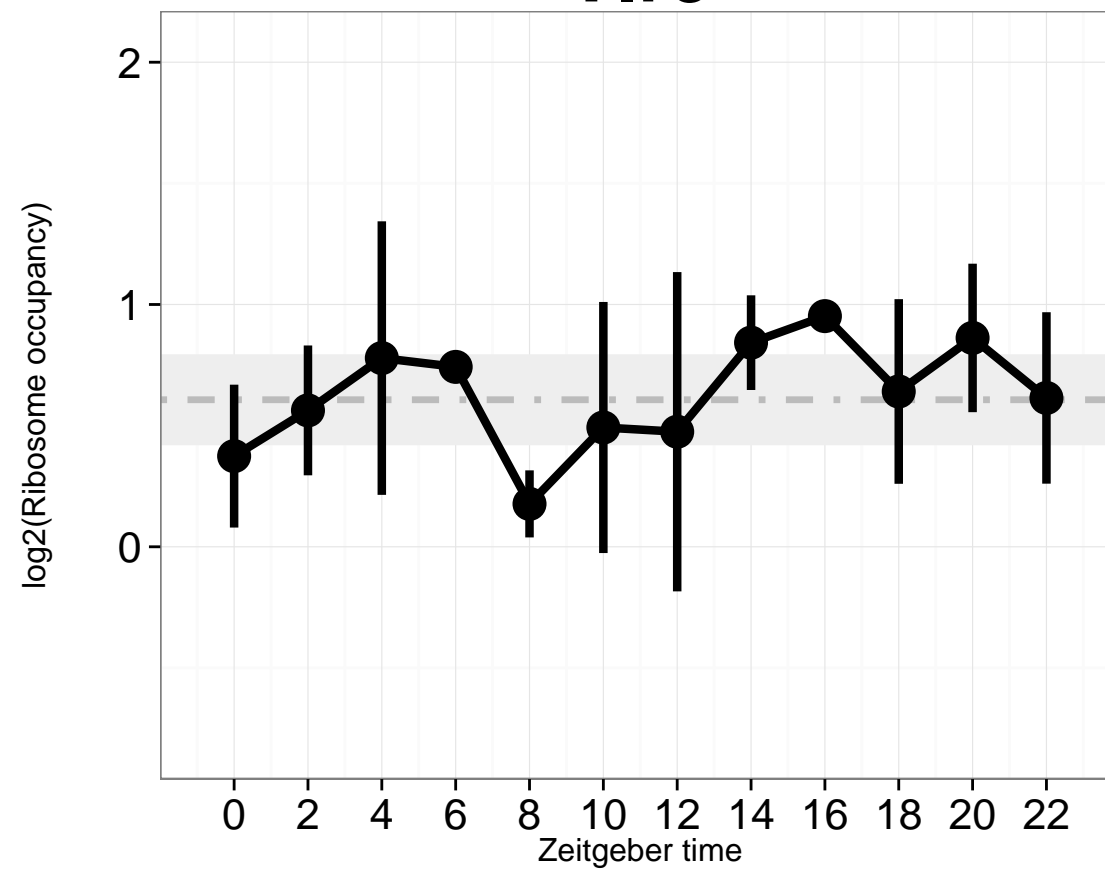

Supplement: Supplementary file 7476 [file 1]

# Ndufa9

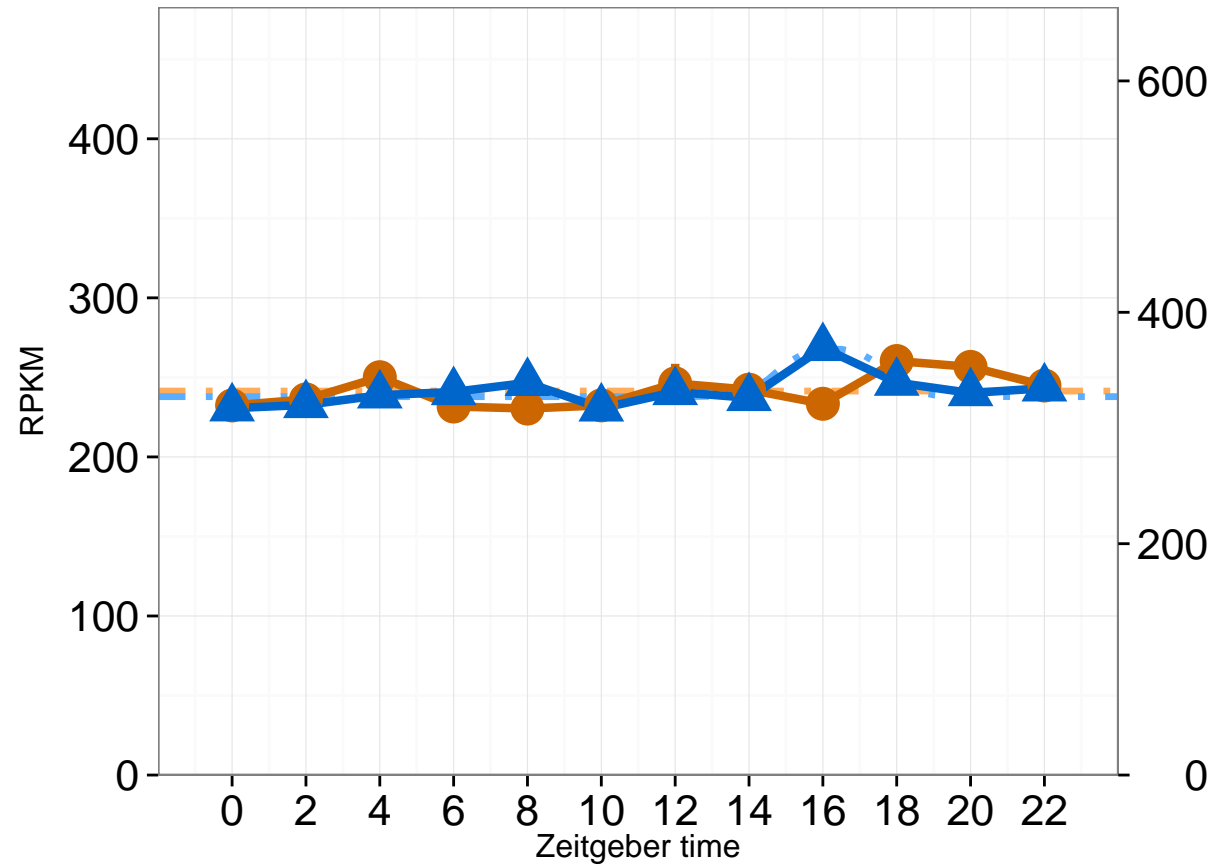

# Ndufa9

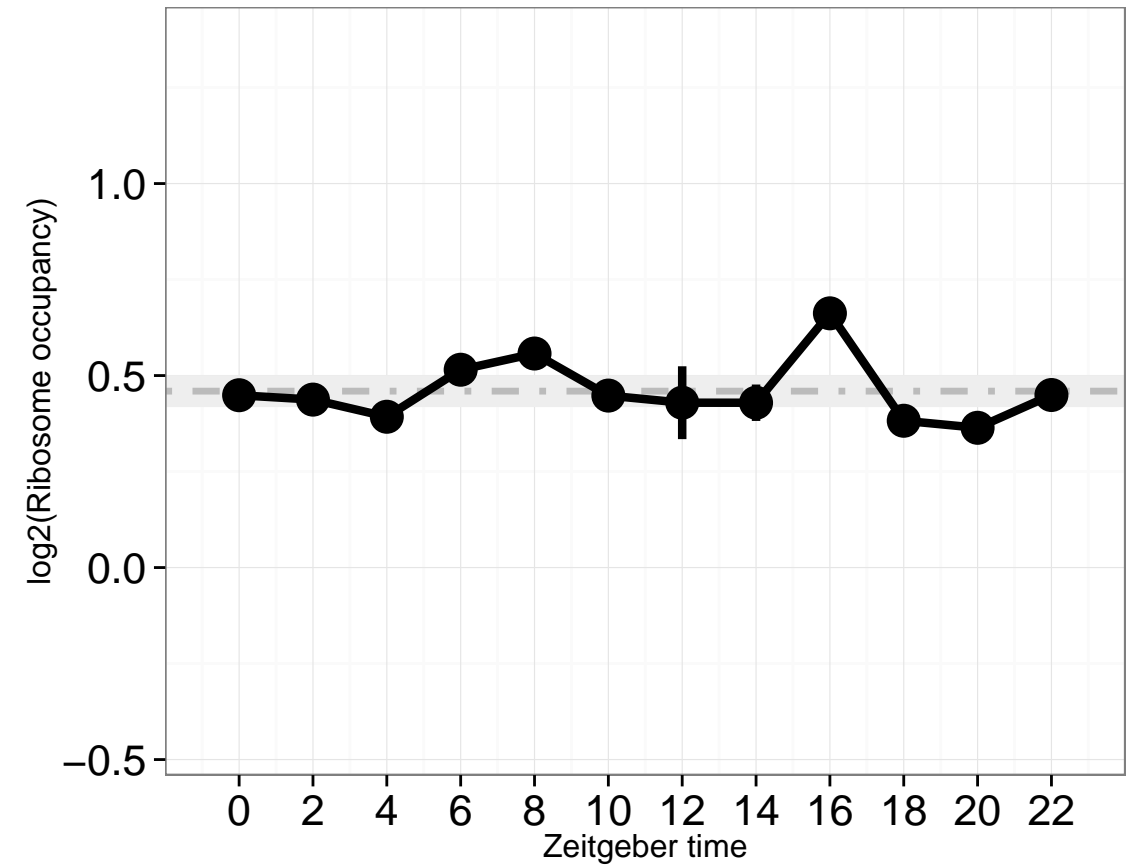

Supplement: Supplementary file 7477 [file 1]

# Gpr132

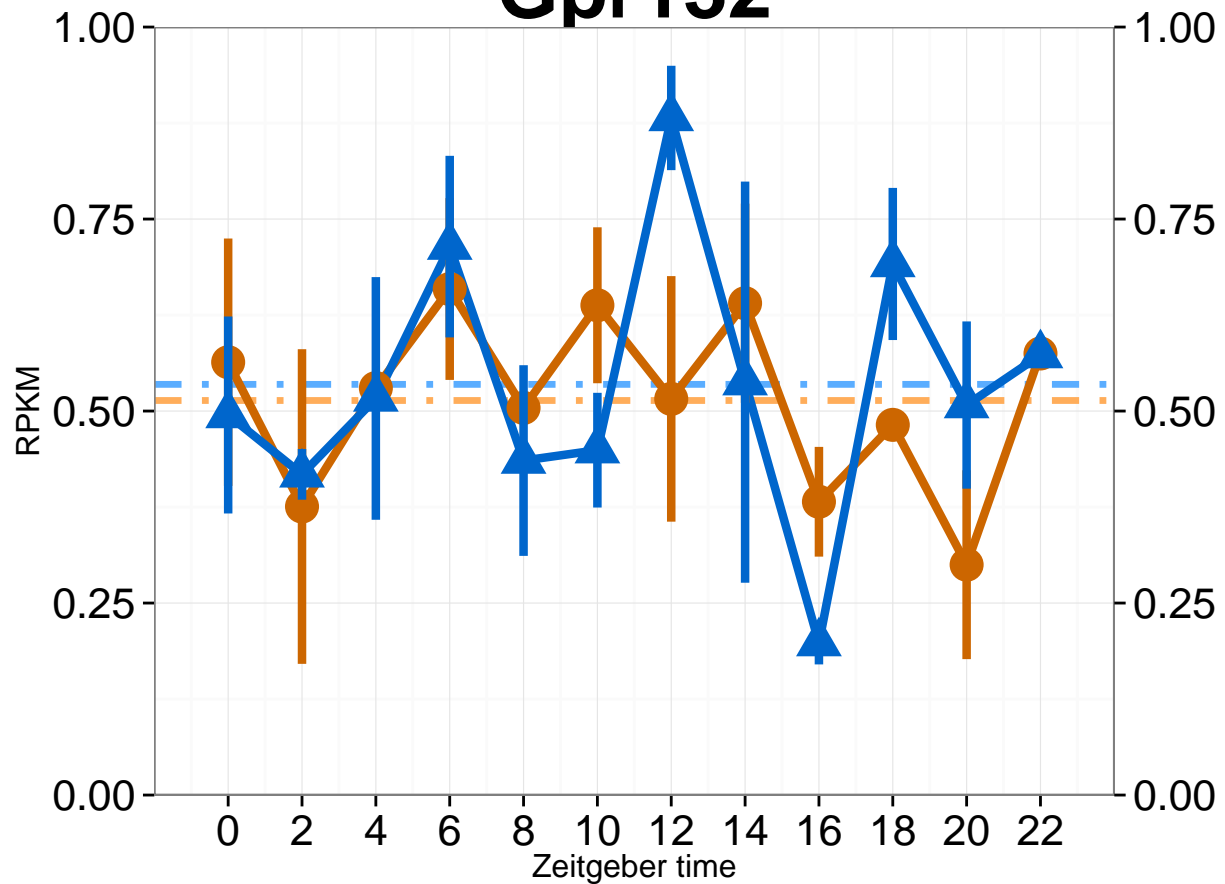

# Gpr132

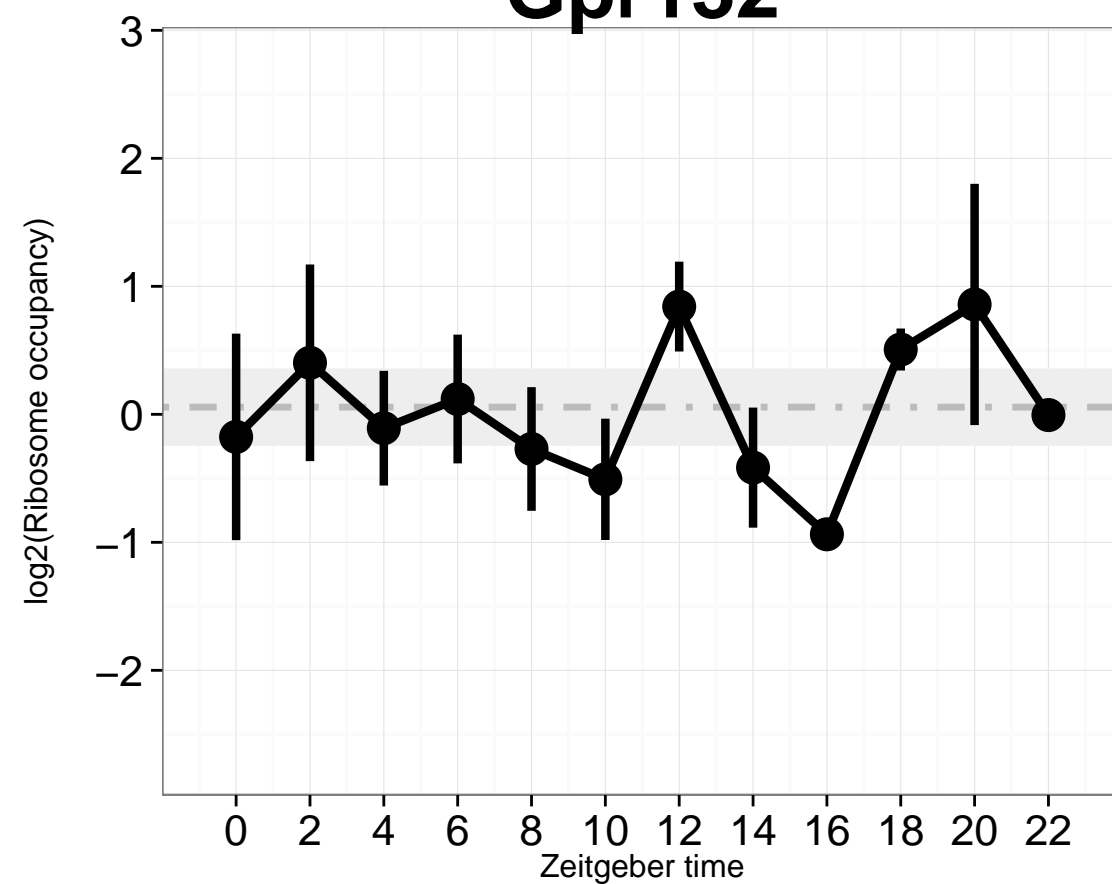

Supplement: Supplementary file 7478 [file 1]

# Ppp1r13b

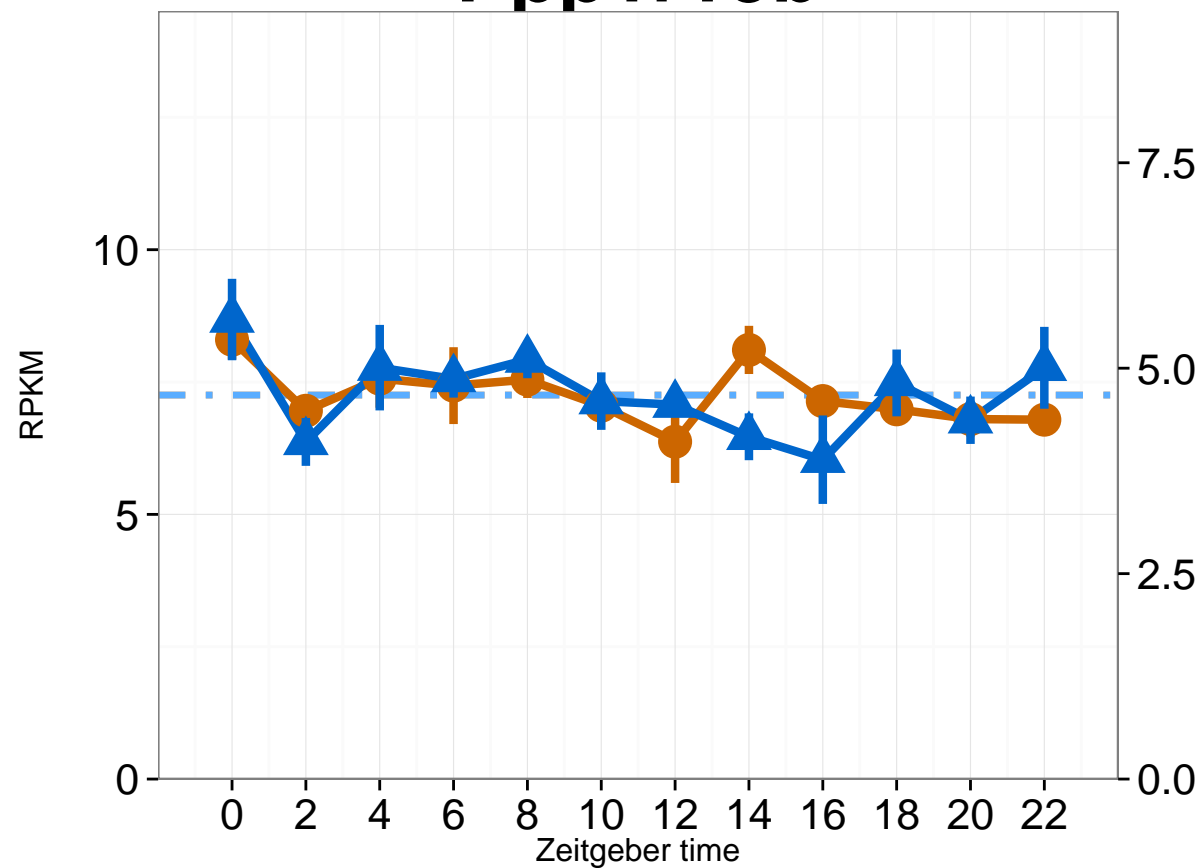

# Ppp1r13b

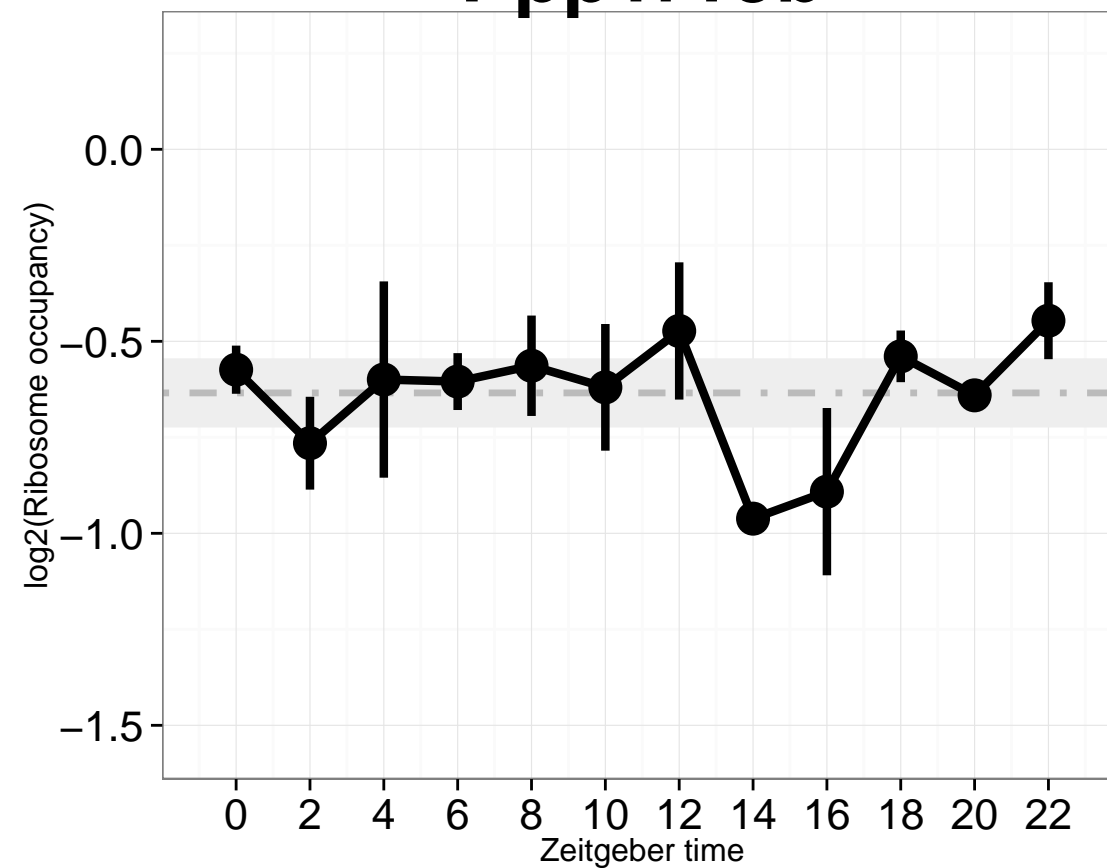

Supplement: Supplementary file 7479 [file 1]

# Rnf19a

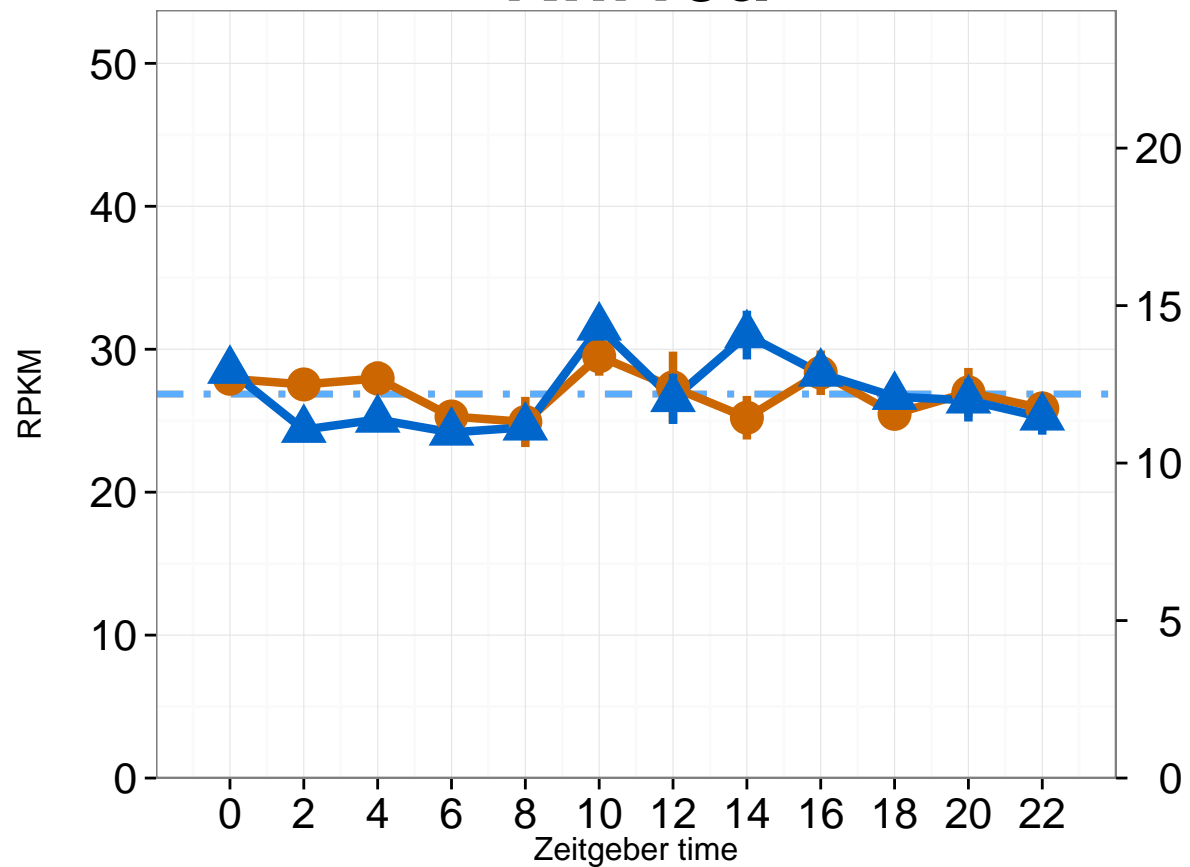

# Rnf19a

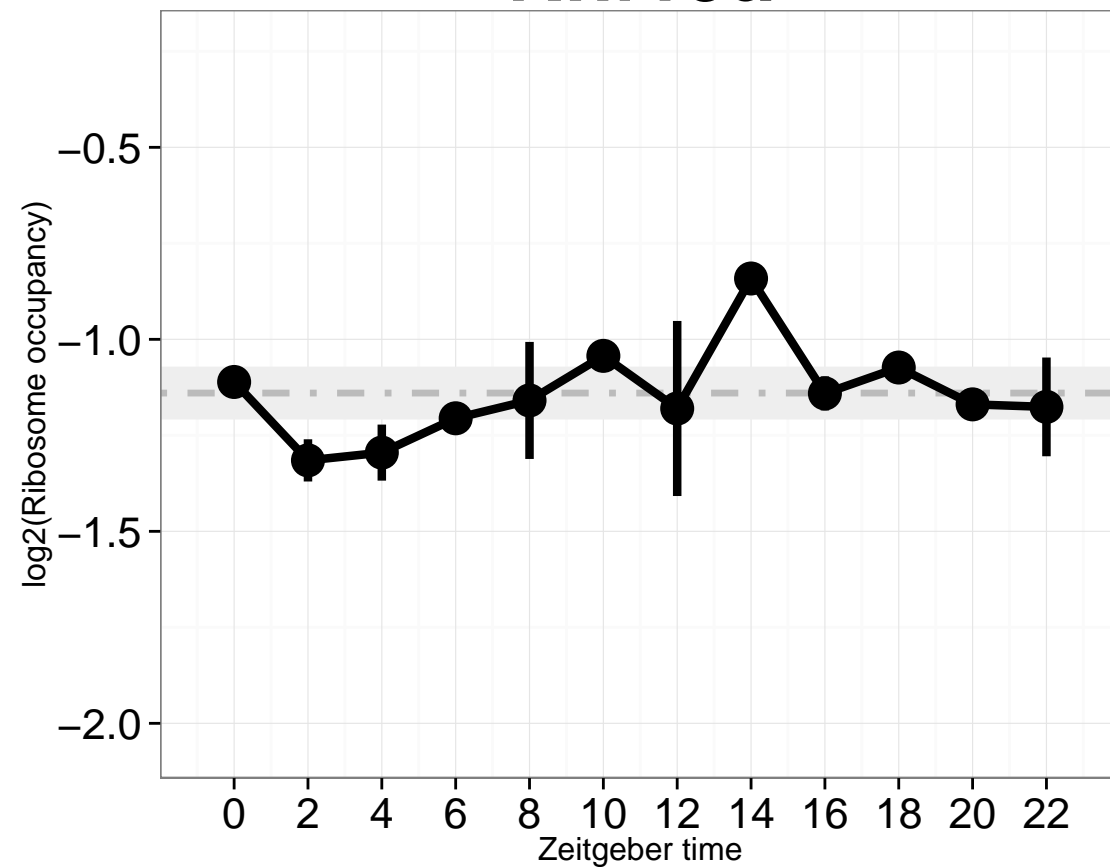

Supplement: Supplementary file 7480 [file 1]

# Igsf11

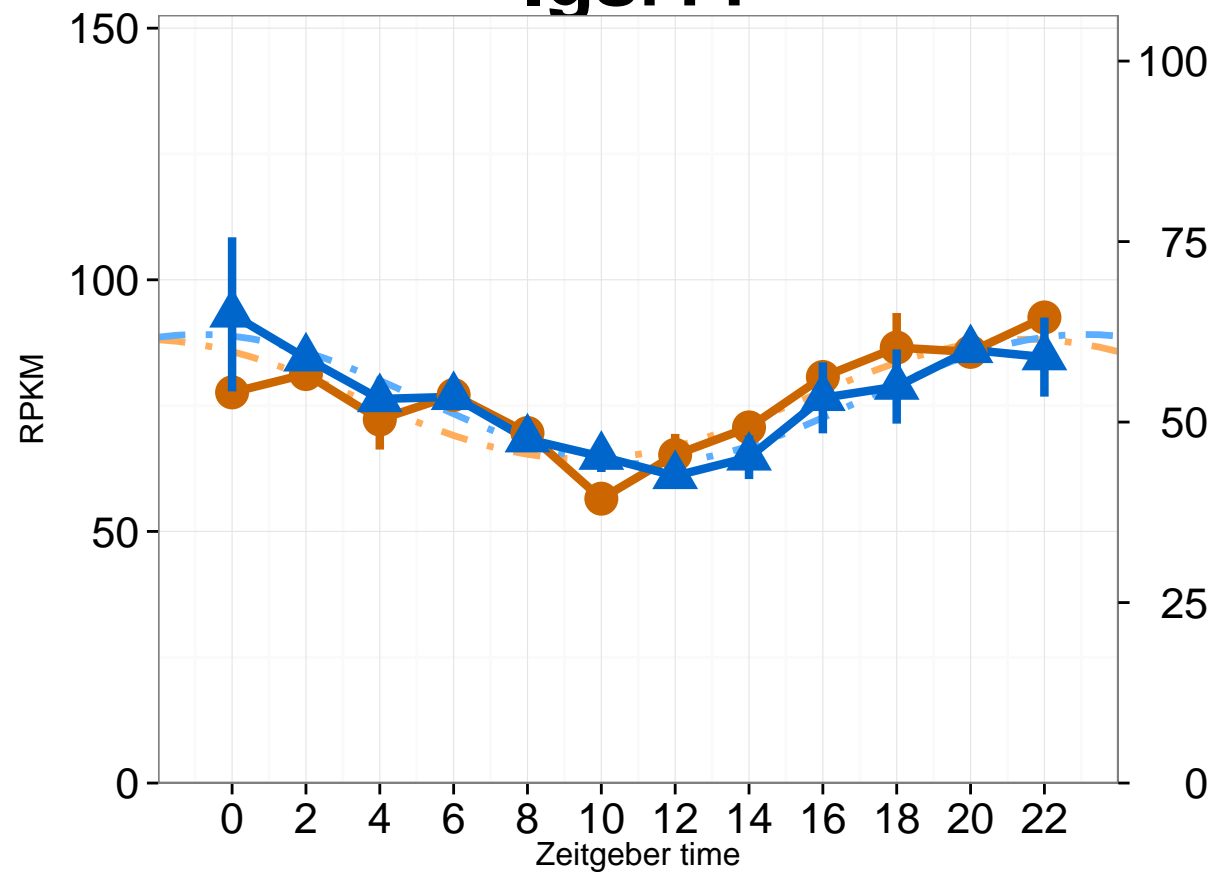

# Igsf11

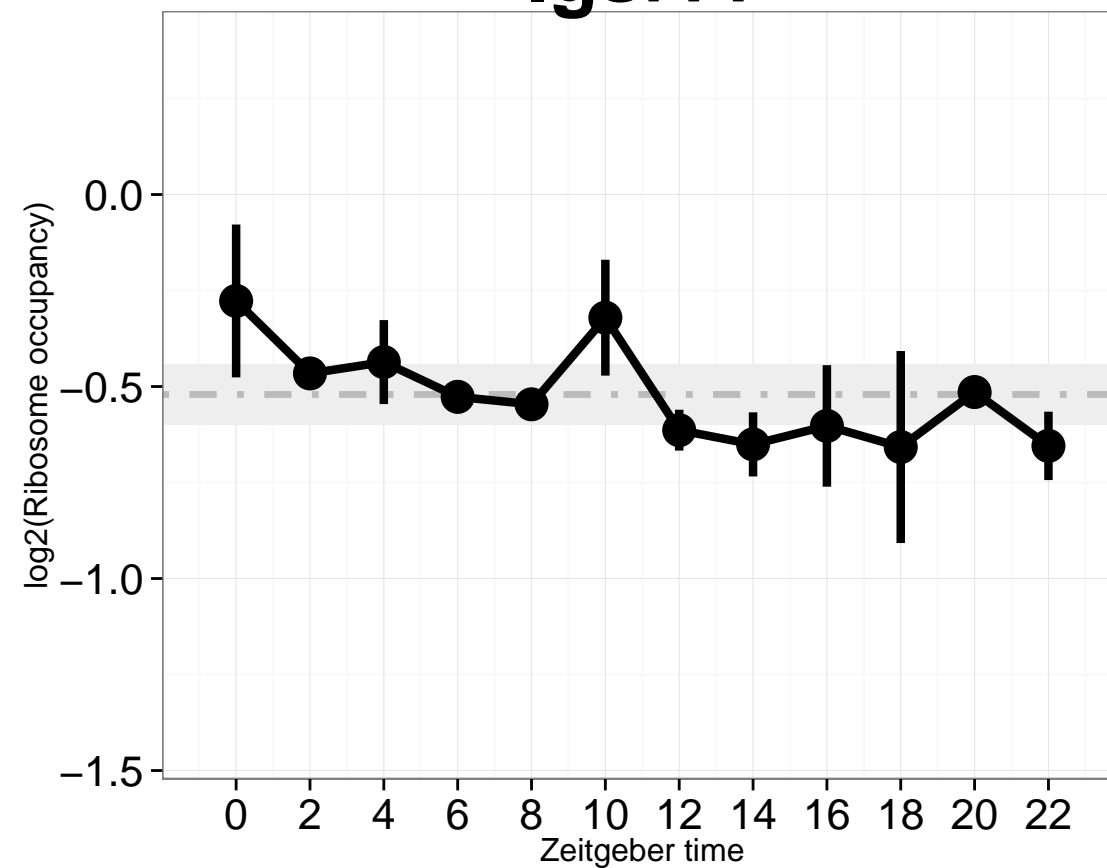

Supplement: Supplementary file 7481 [file 1]

# Zfp433

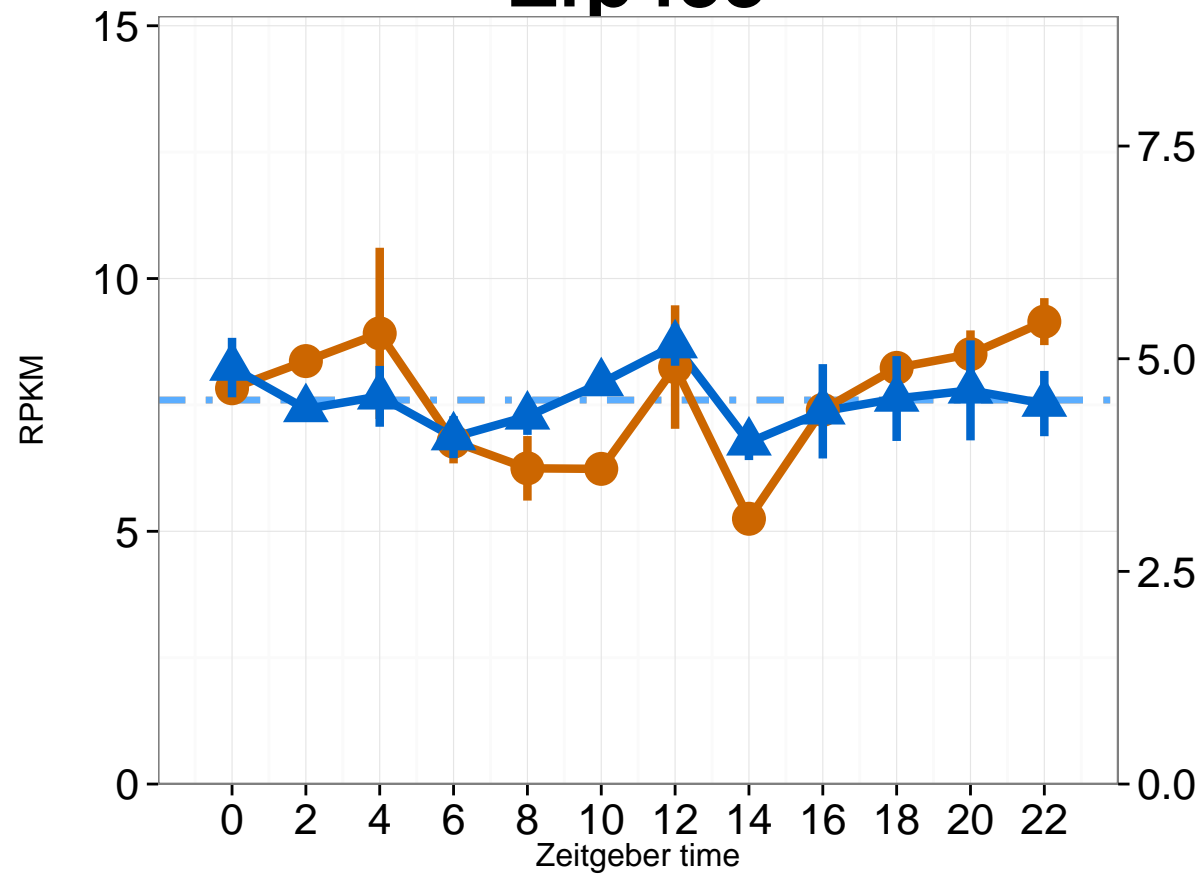

# Zfp433

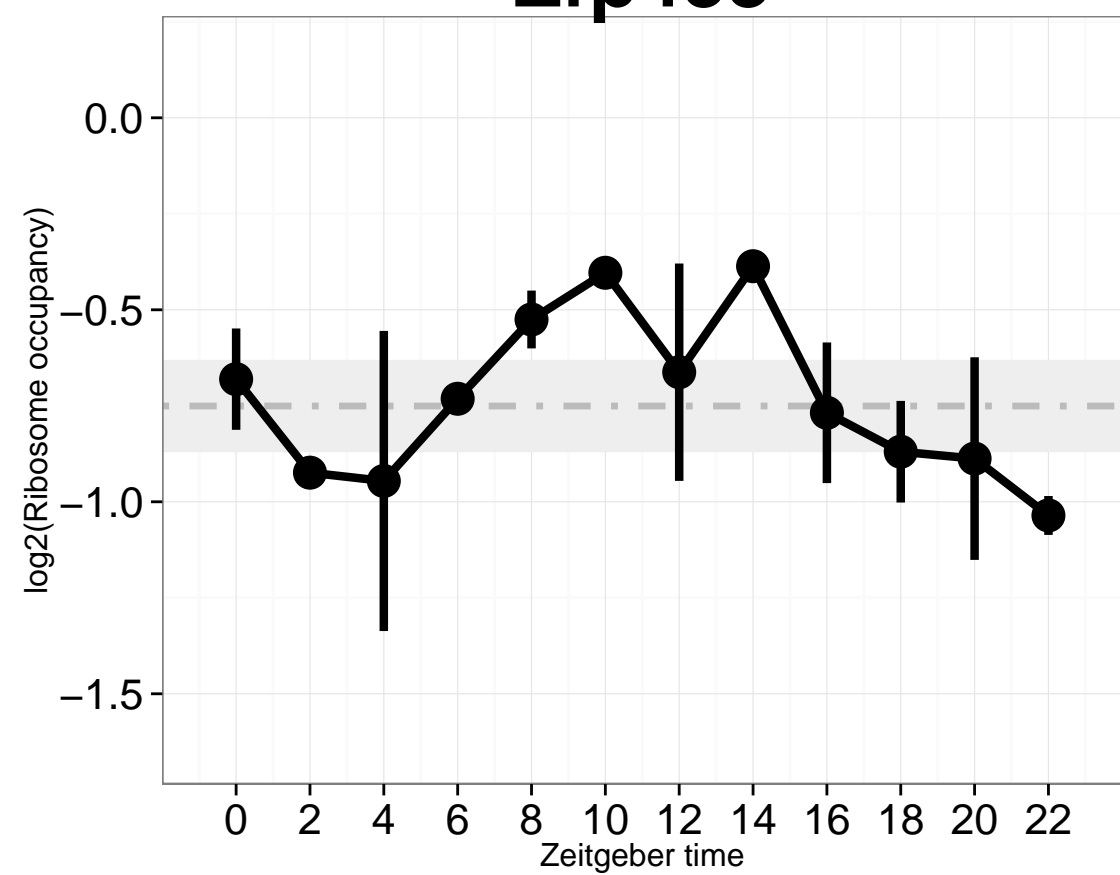

Supplement: Supplementary file 7482 [file 1]

## Cds1

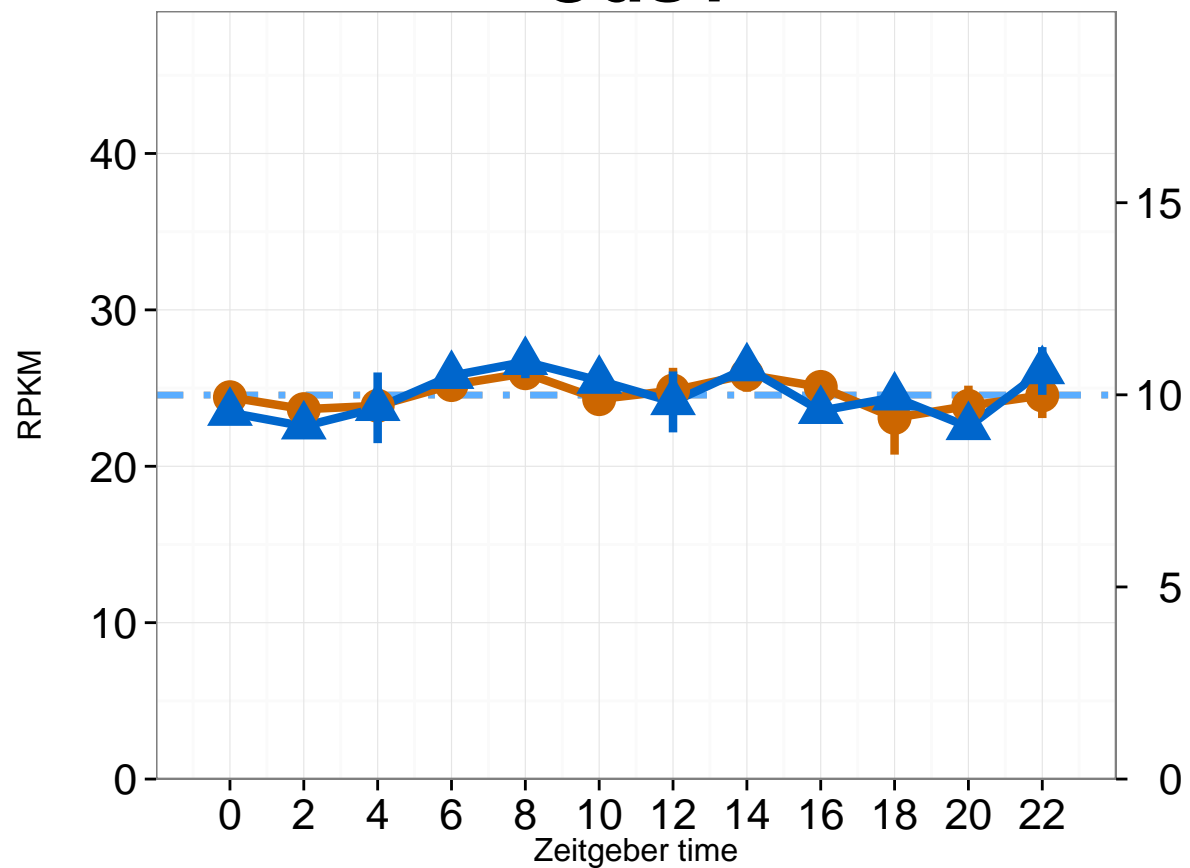

## Cds1

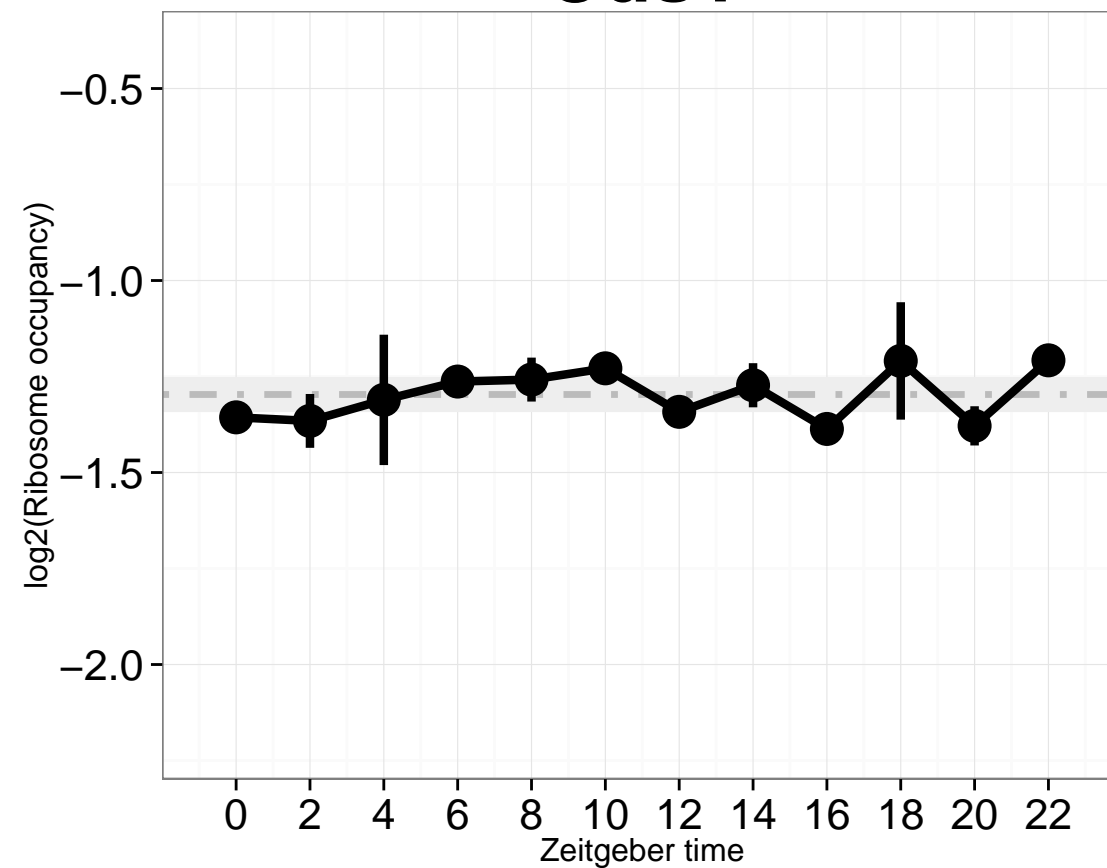

Supplement: Supplementary file 7483 [file 1]

## Arl4c

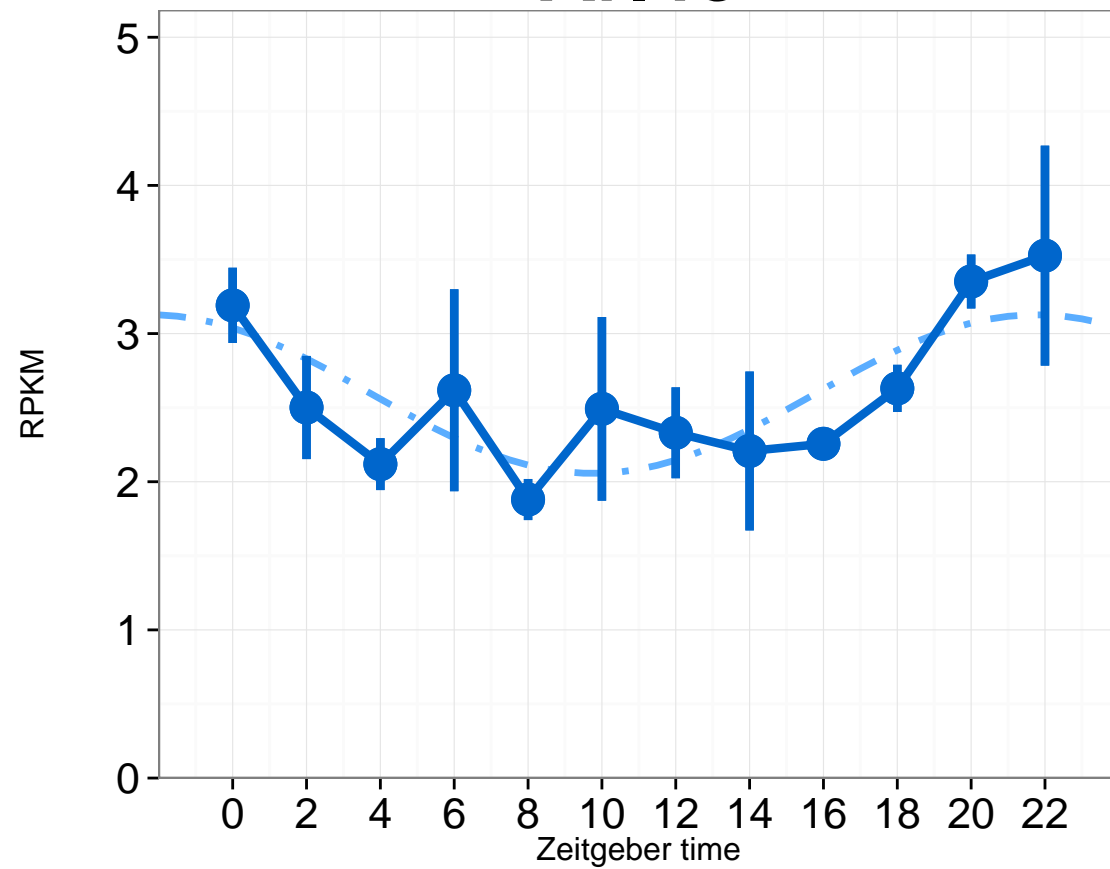

## Arl4c log2(Ribosome occupancy)

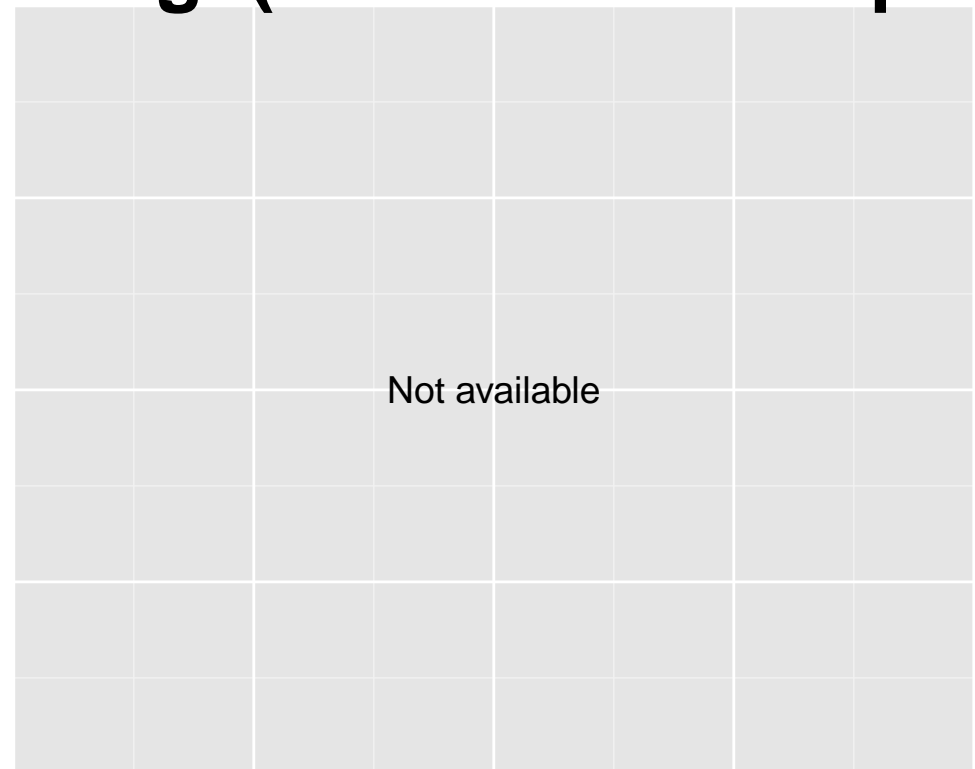

Supplement: Supplementary file 7484 [file 1]

## Mrps28

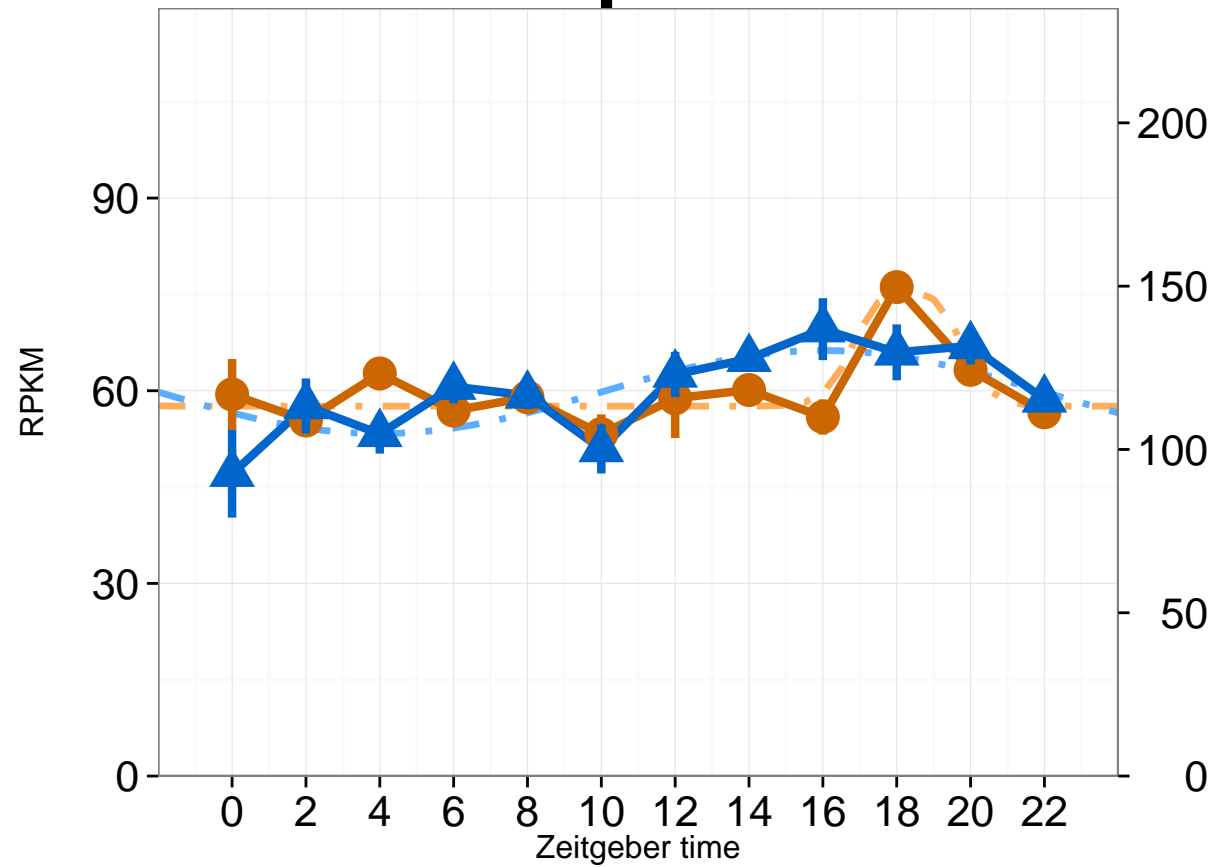

## Mrps28

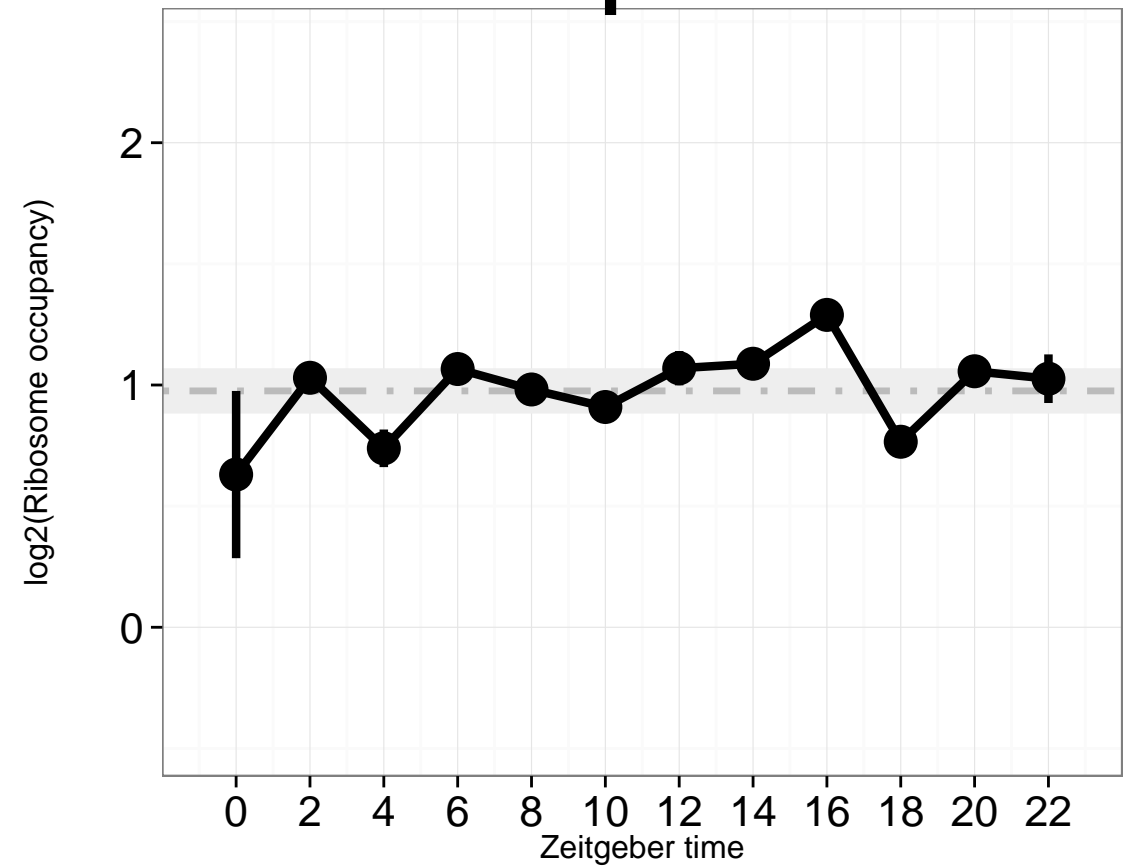

Supplement: Supplementary file 7485 [file 1]

## Pikfyve

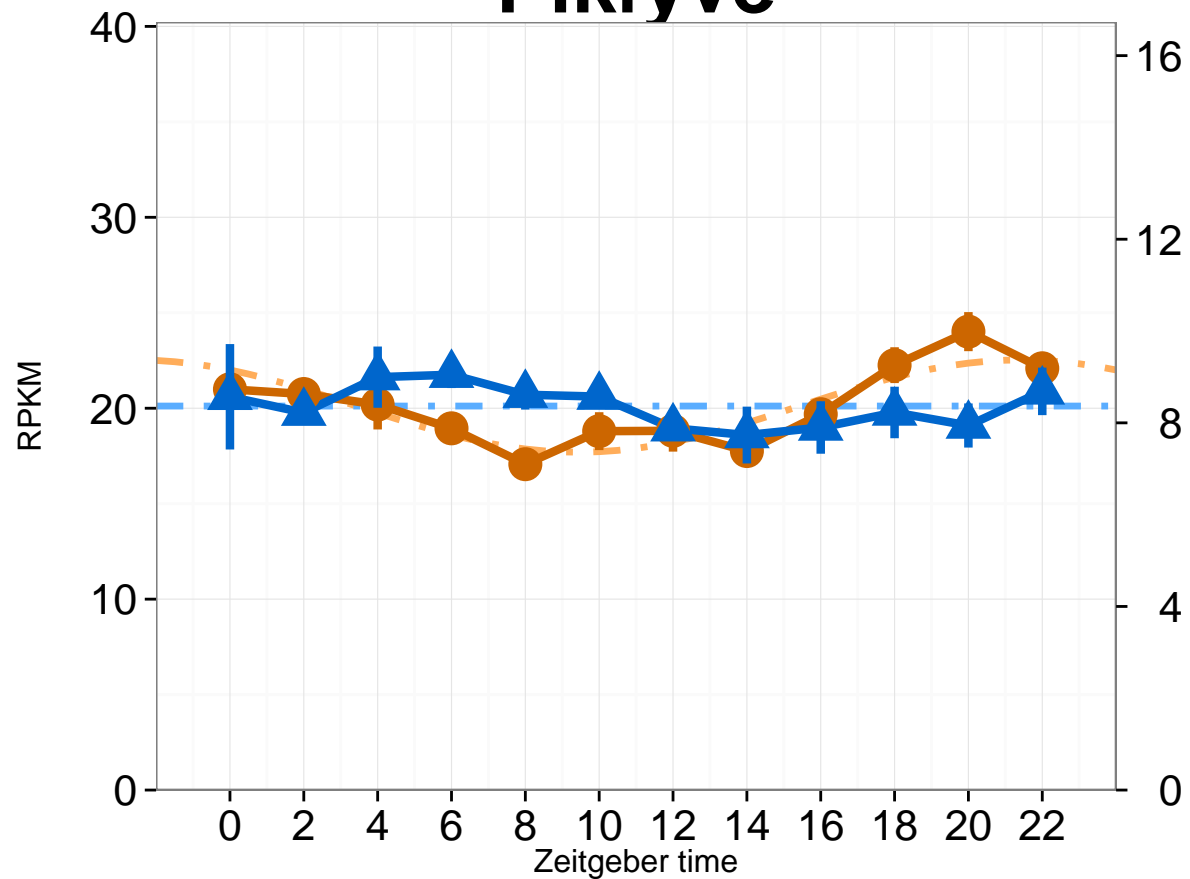

## Pikfyve

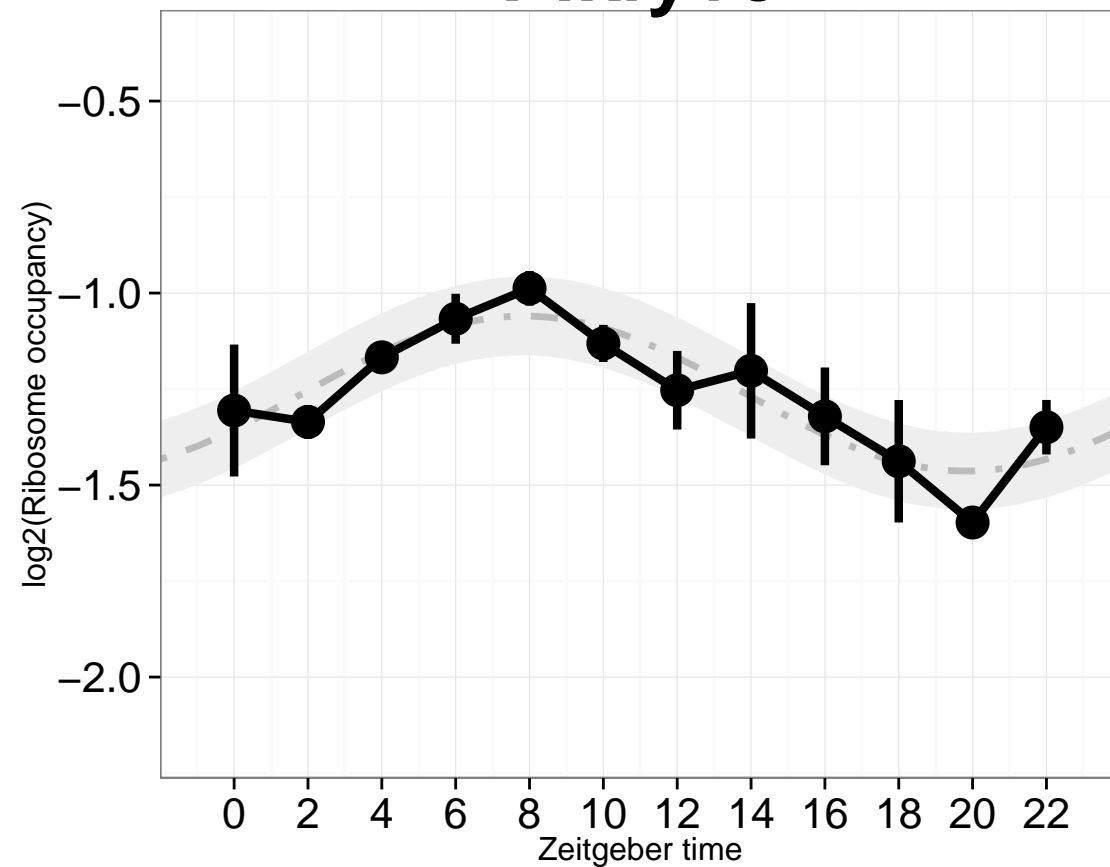

Supplement: Supplementary file 7486 [file 1]

## Mapk14

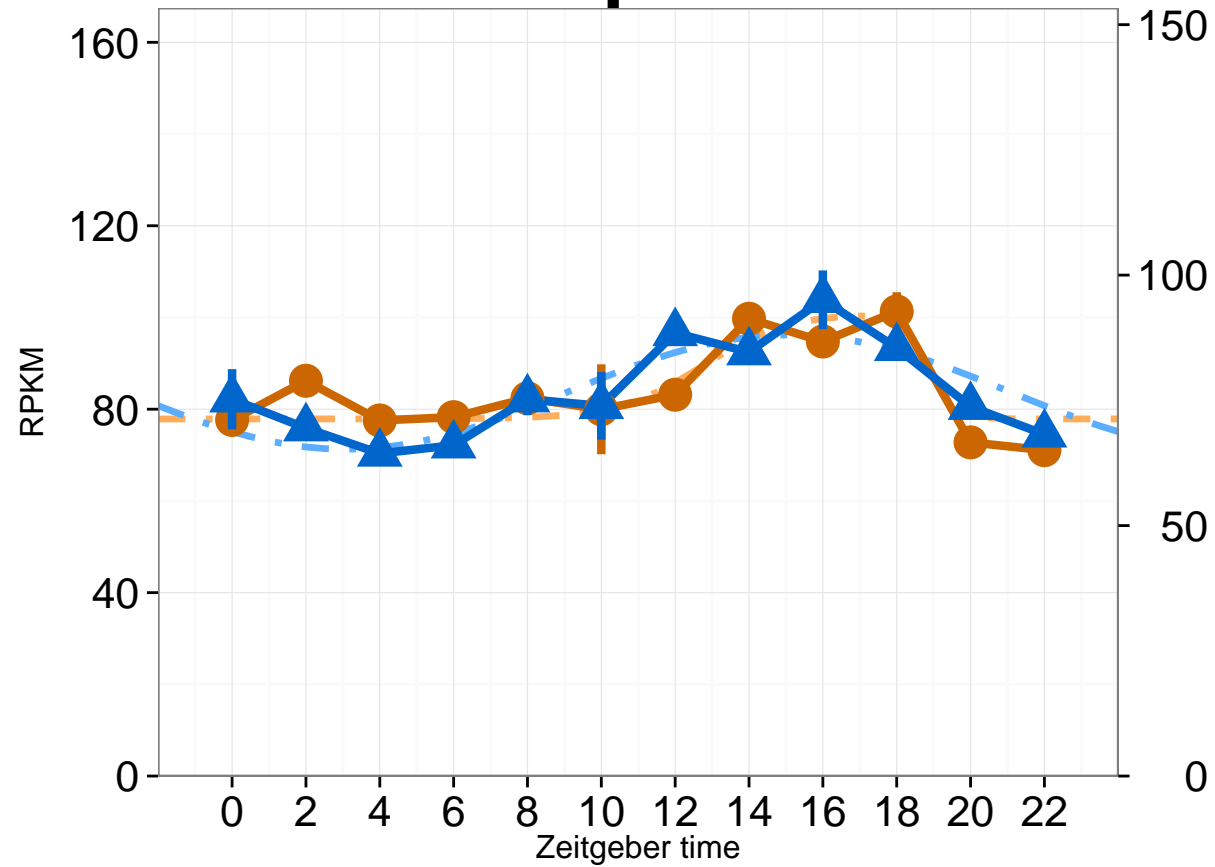

## Mapk14

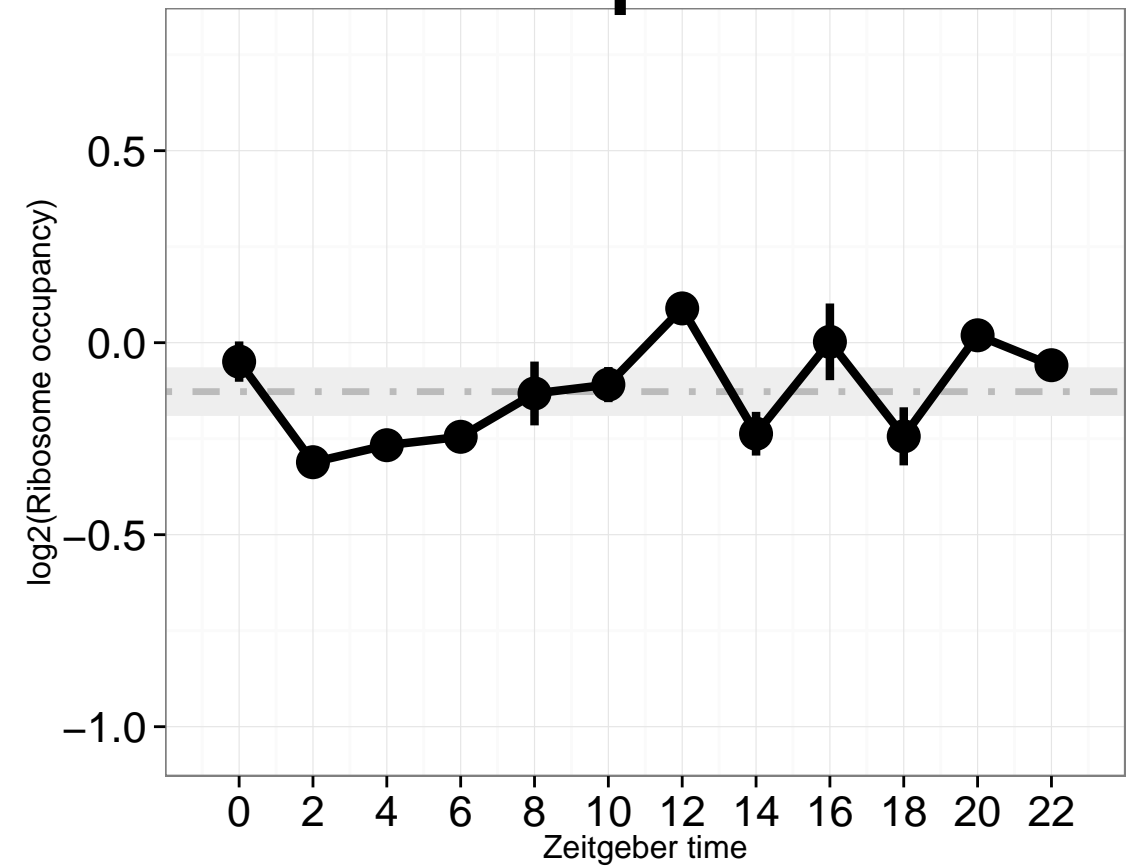

Supplement: Supplementary file 7487 [file 1]

# Tspan4

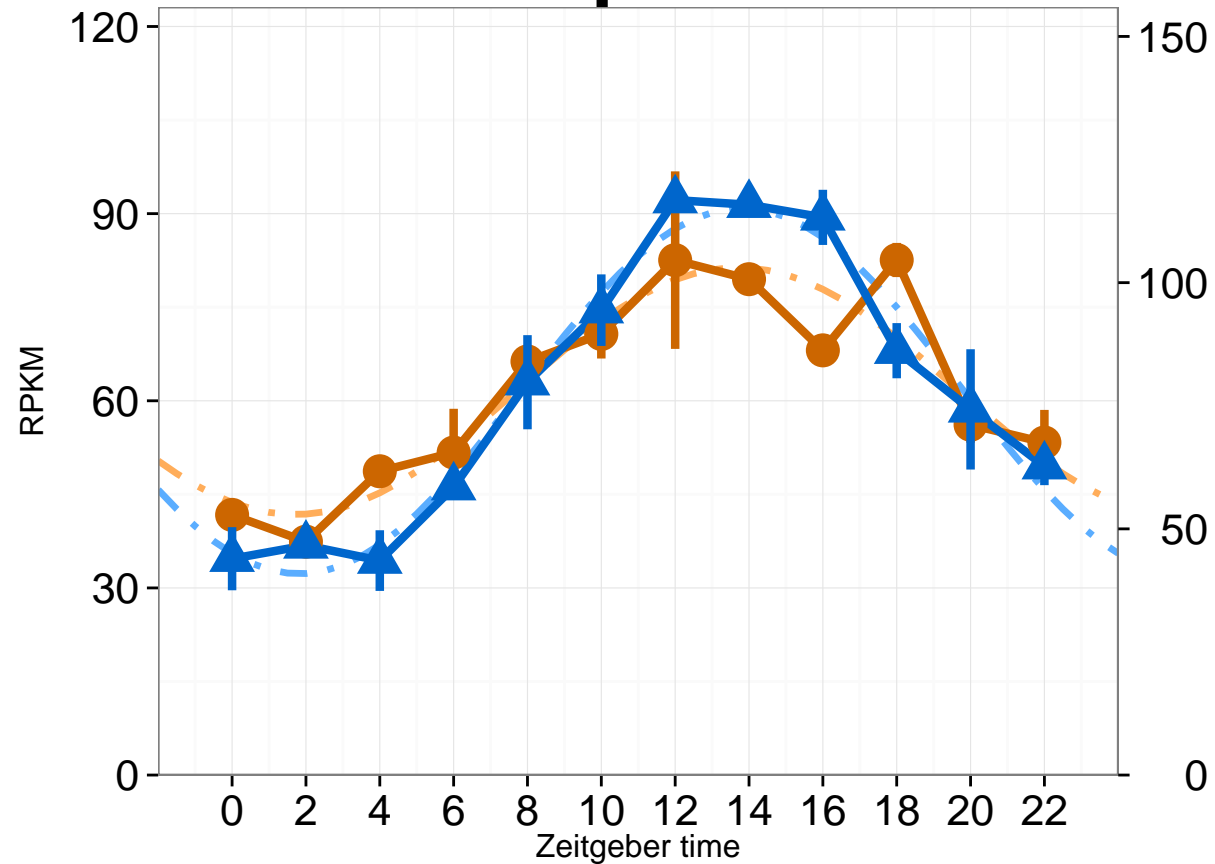

# Tspan4

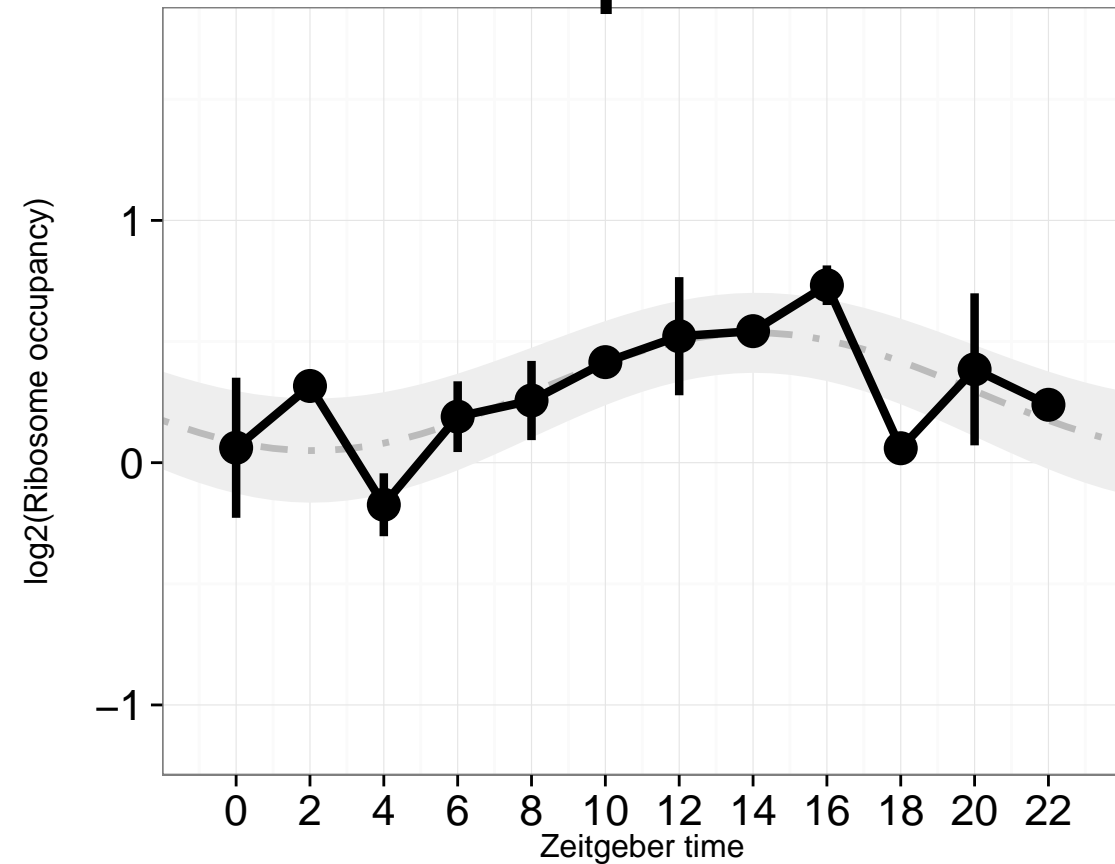

Supplement: Supplementary file 7488 [file 1]

## Gtf2h1

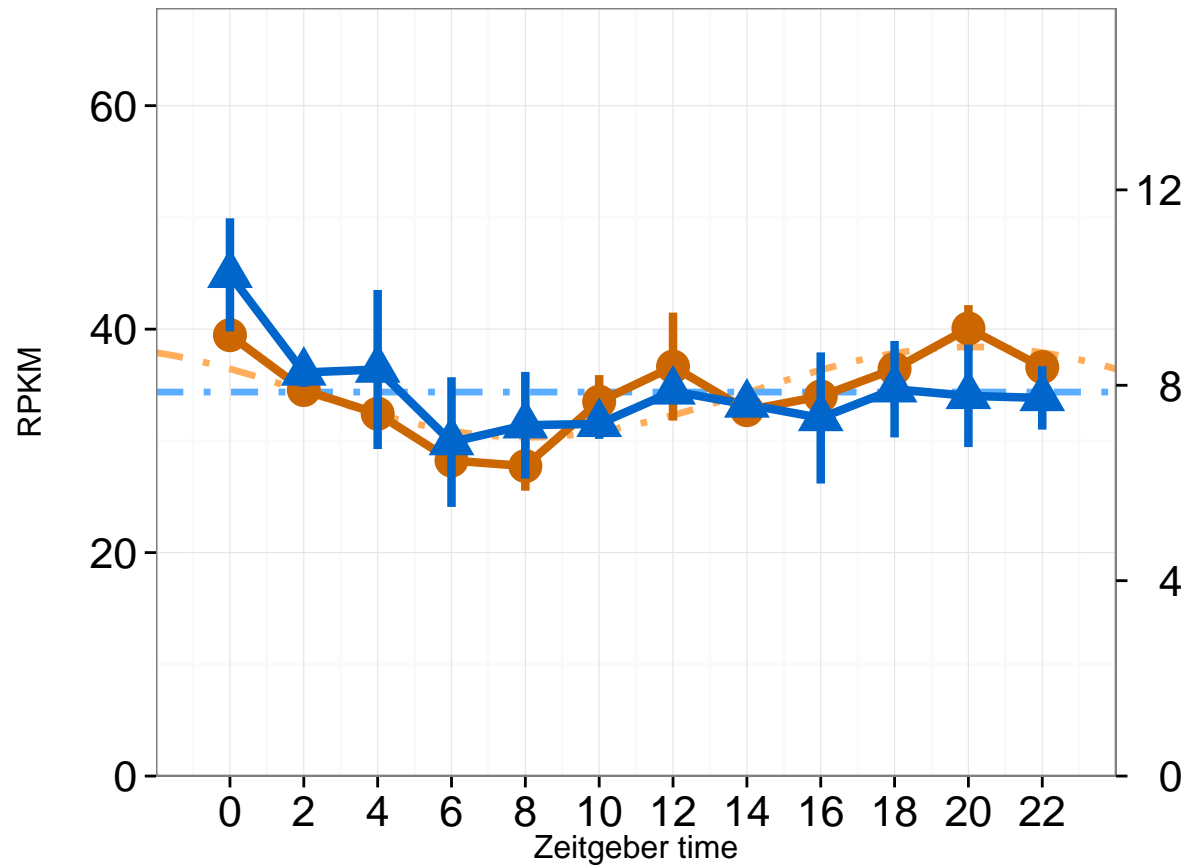

## Gtf2h1

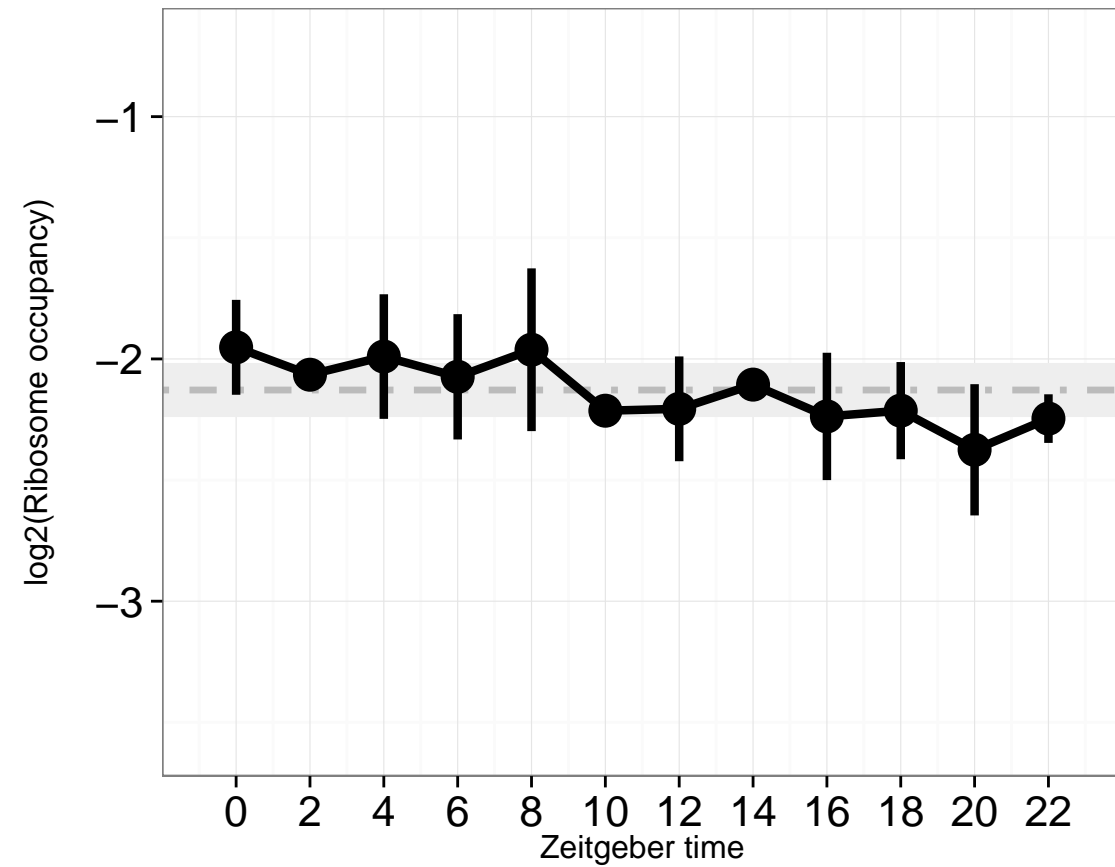

Supplement: Supplementary file 7489 [file 1]

## Msl2

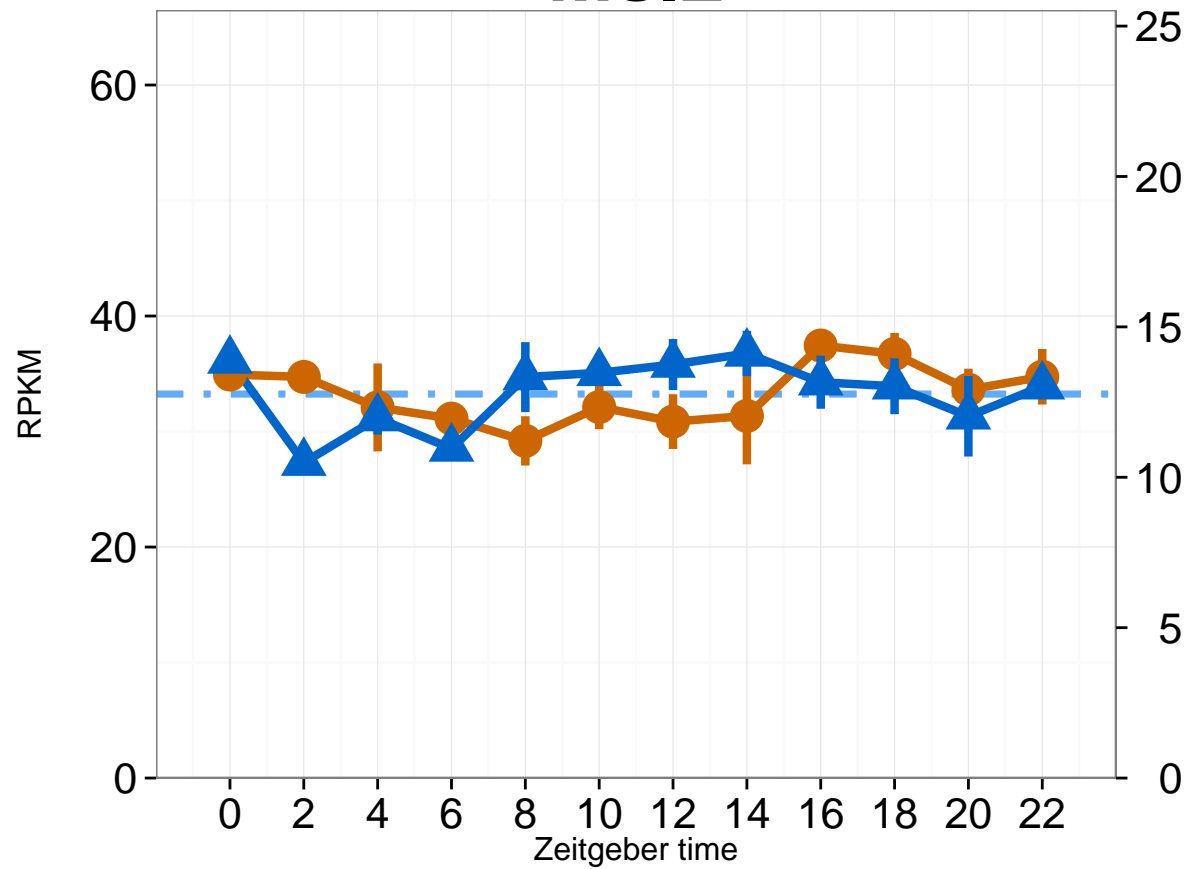

## Msl2

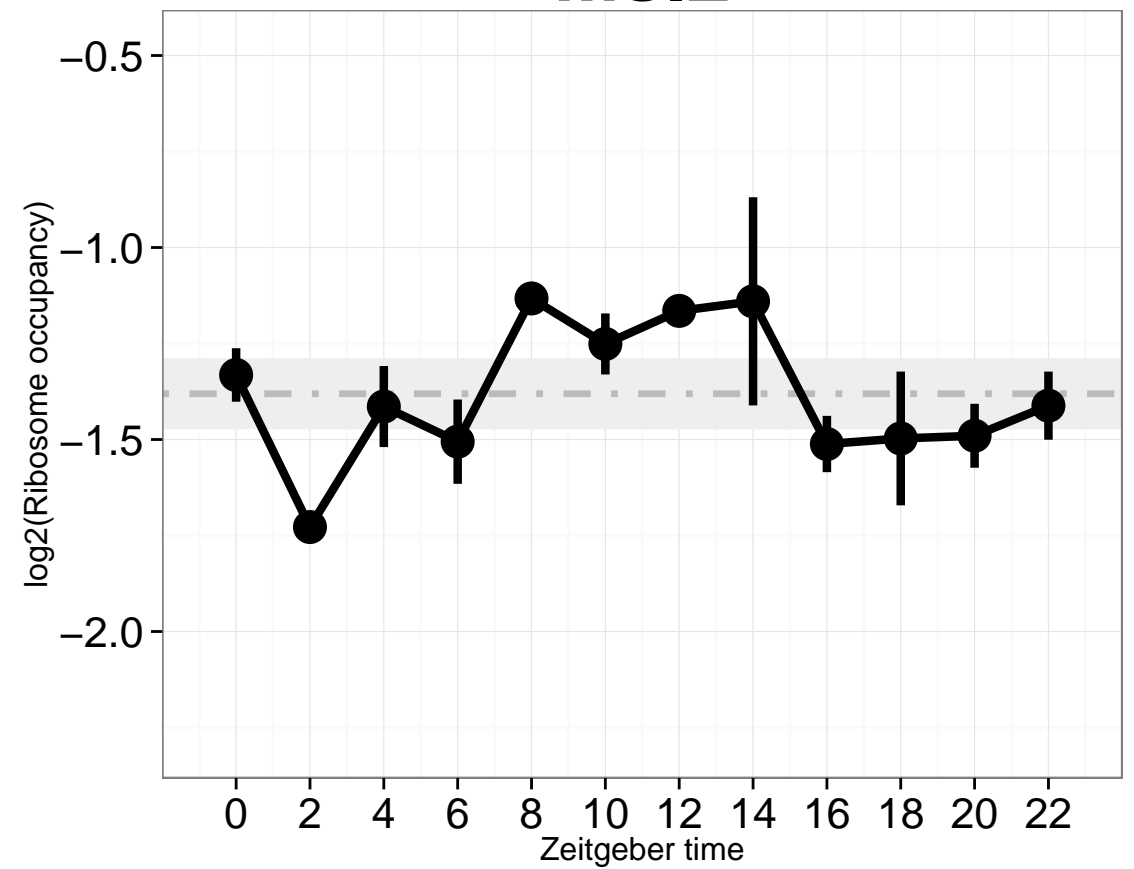

Supplement: Supplementary file 7490 [file 1]

## Ermard

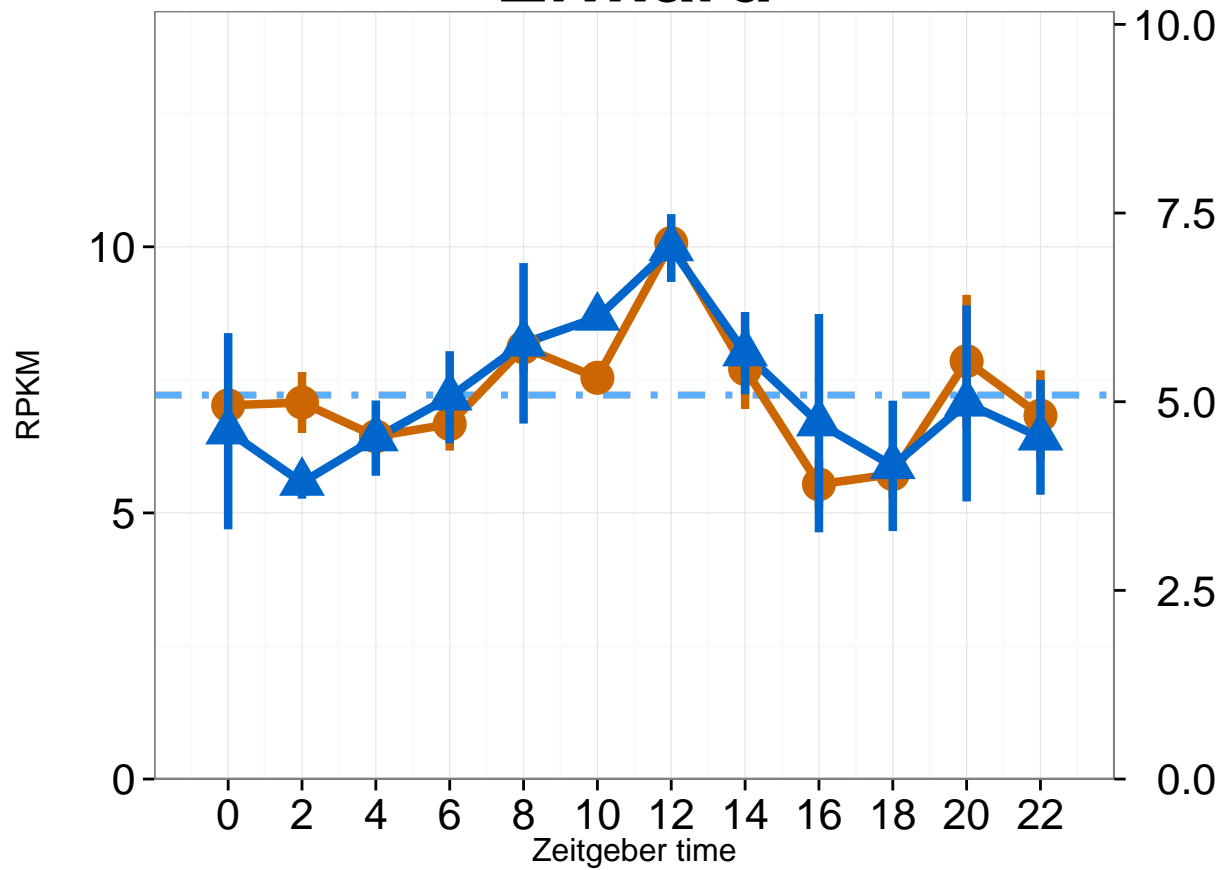

## Ermard

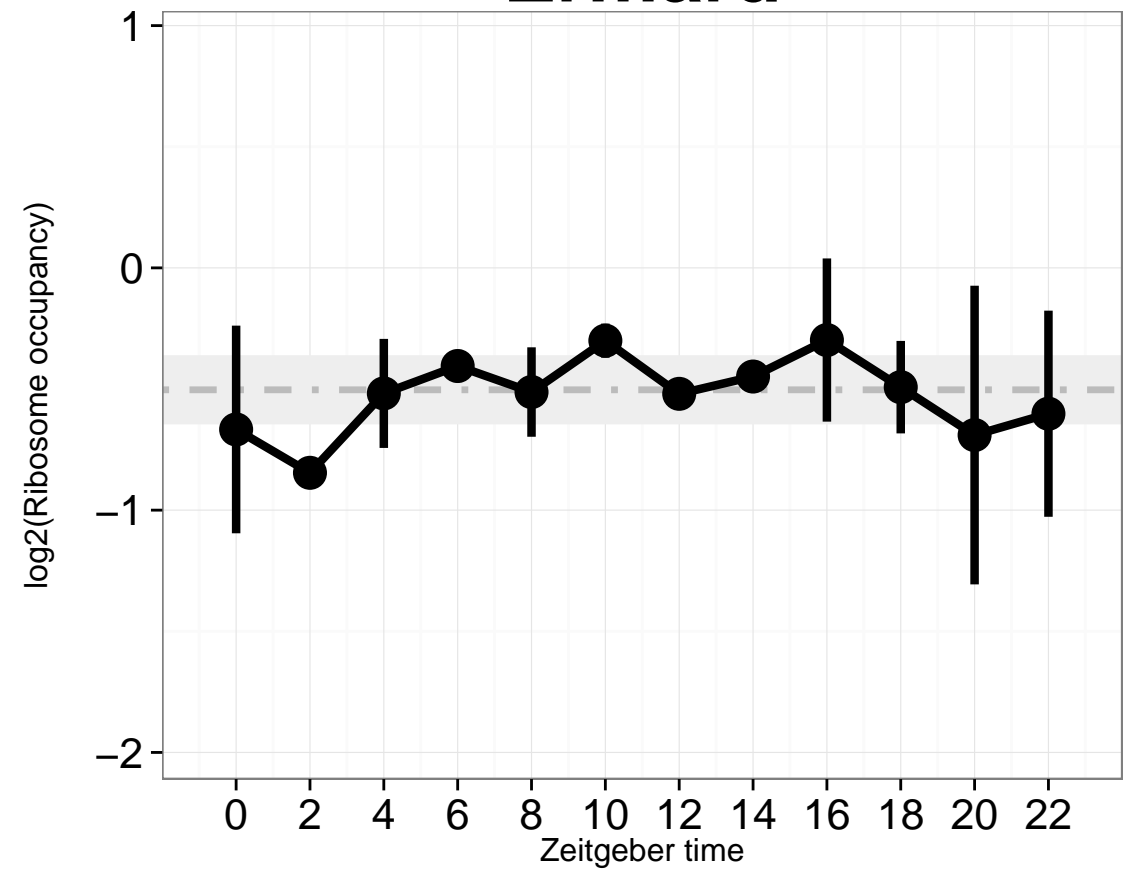

Supplement: Supplementary file 7491 [file 1]

## Srxn1

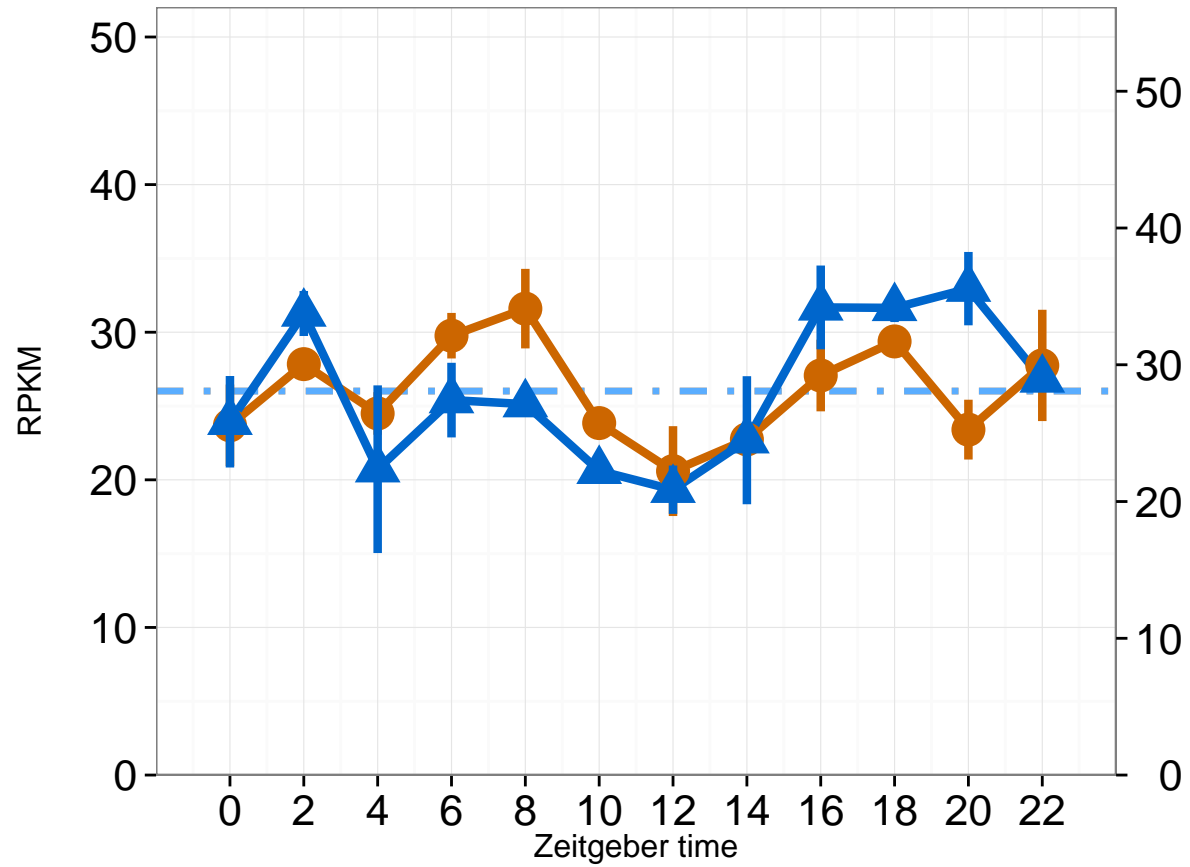

## Srxn1

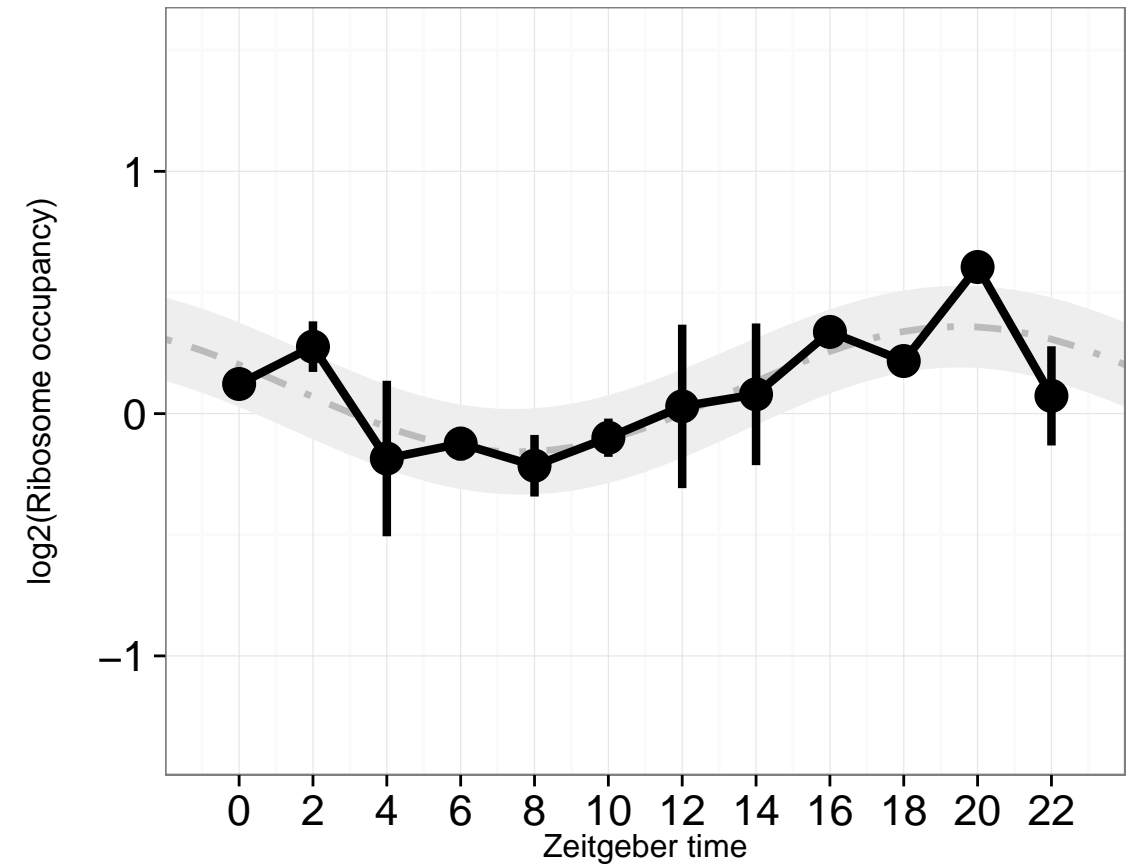

Supplement: Supplementary file 7492 [file 1]

## Nedd8

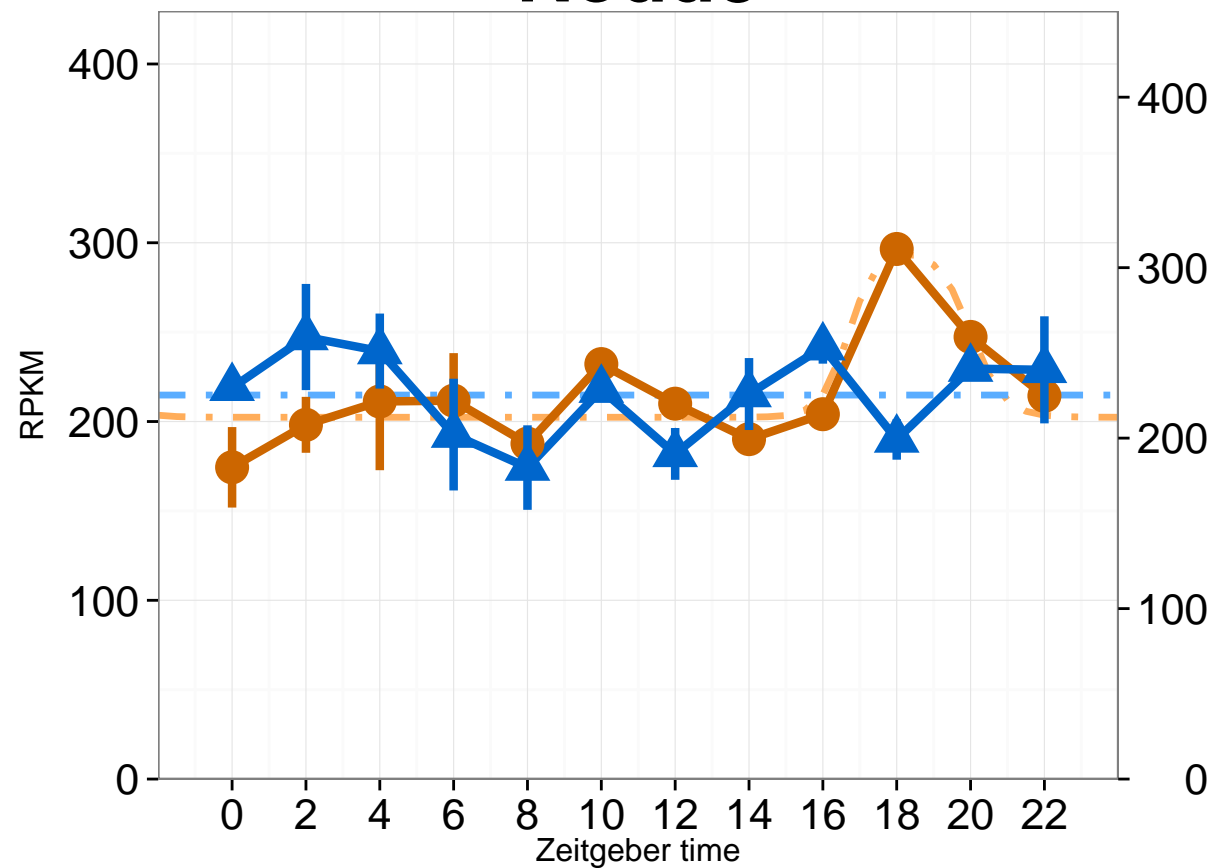

## Nedd8

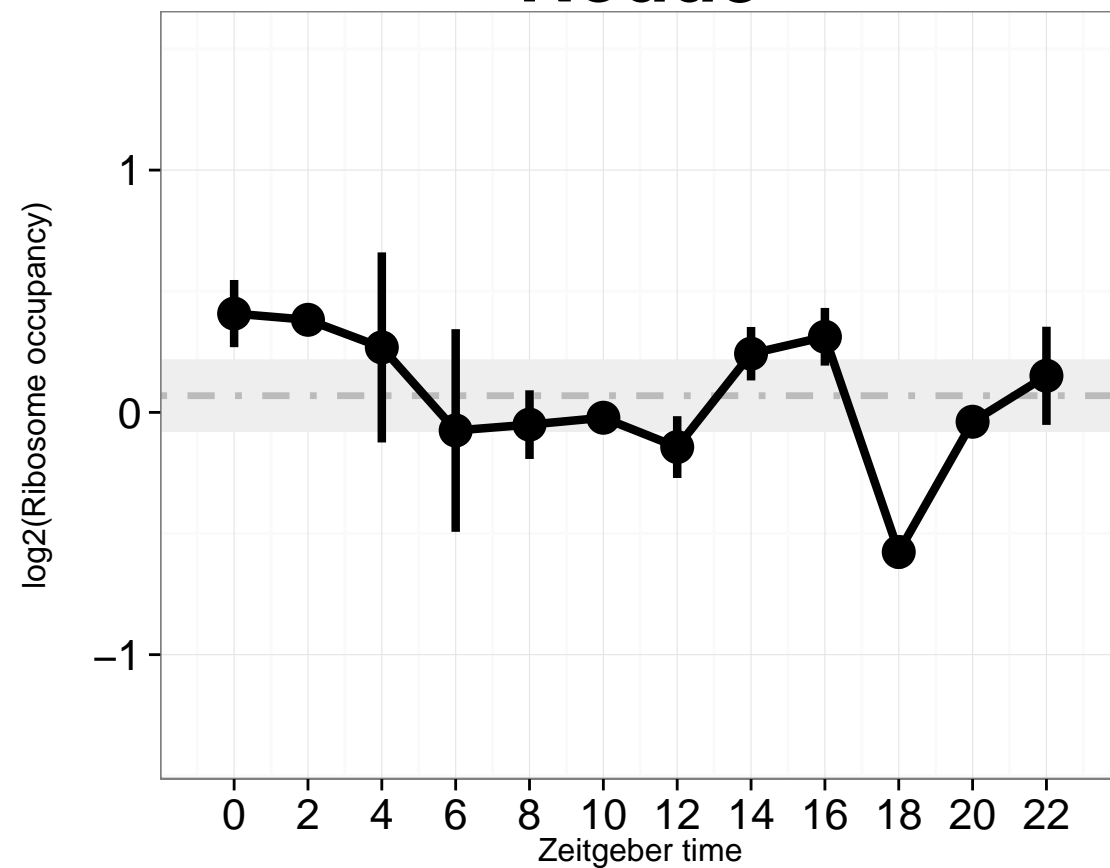

Supplement: Supplementary file 7493 [file 1]

**Itk TR**

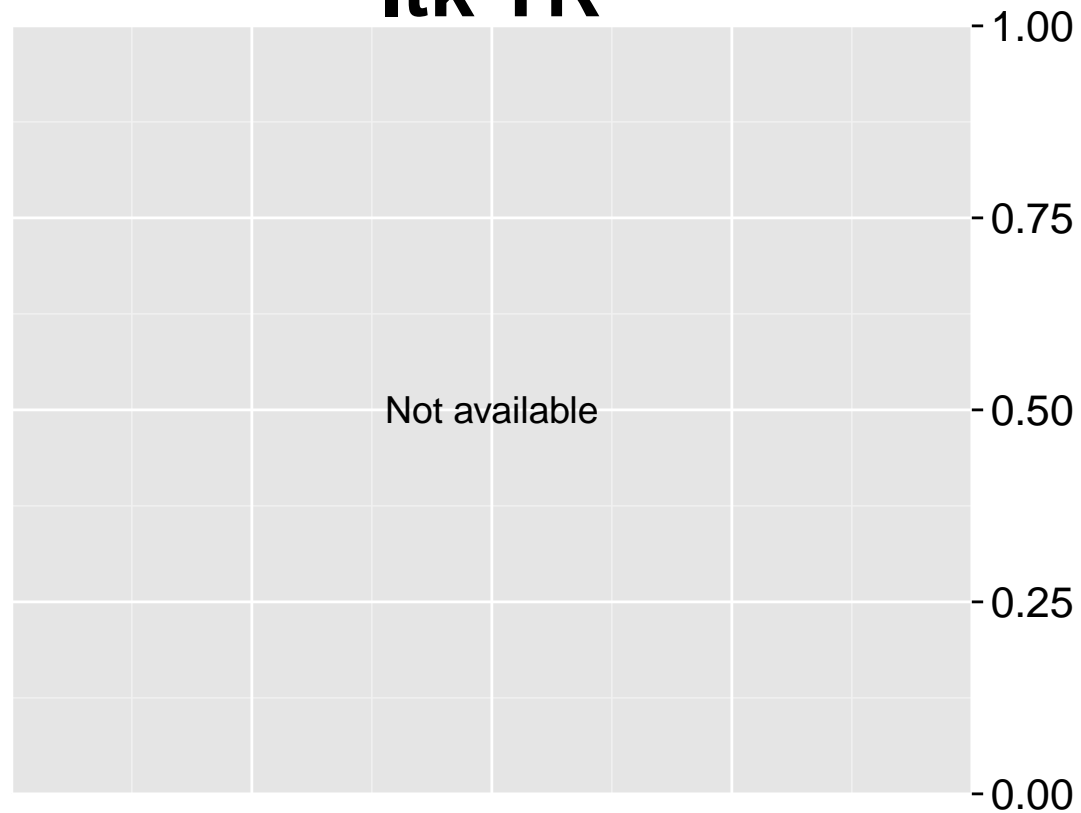

**Itk log2(Ribosome occupancy)**

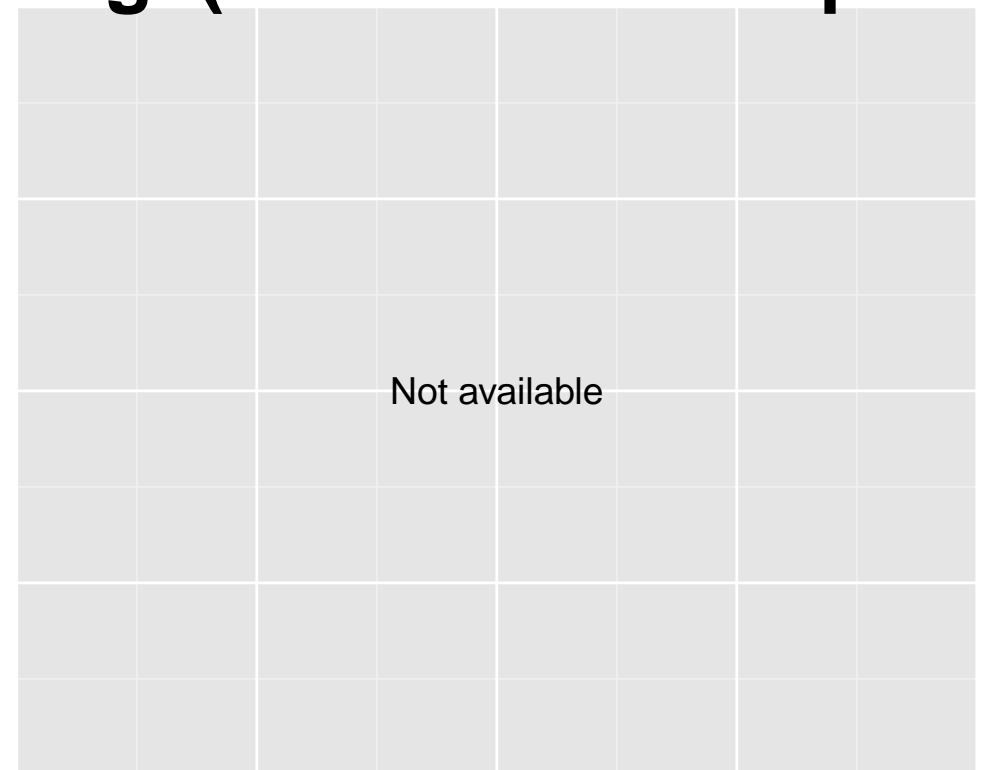

Supplement: Supplementary file 7494 [file 1]

# Slc13a1

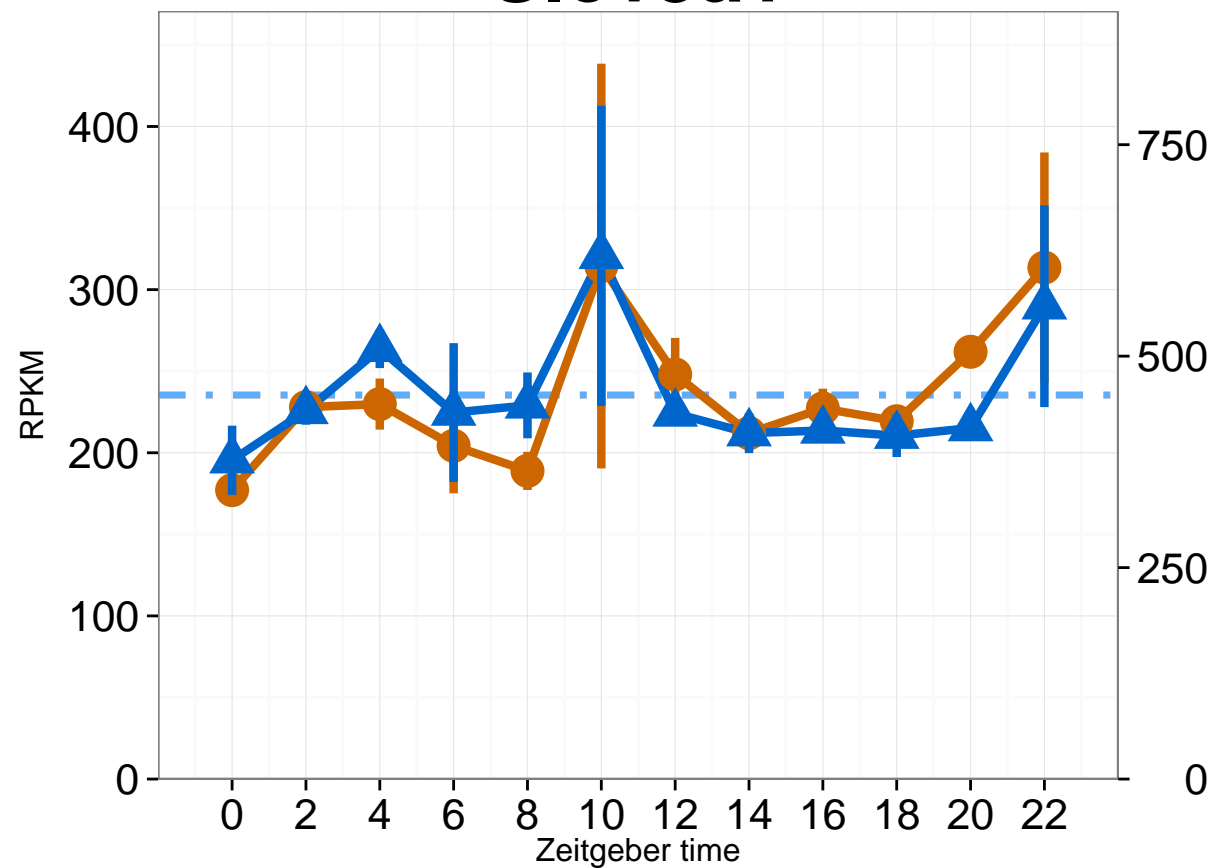

# Slc13a1

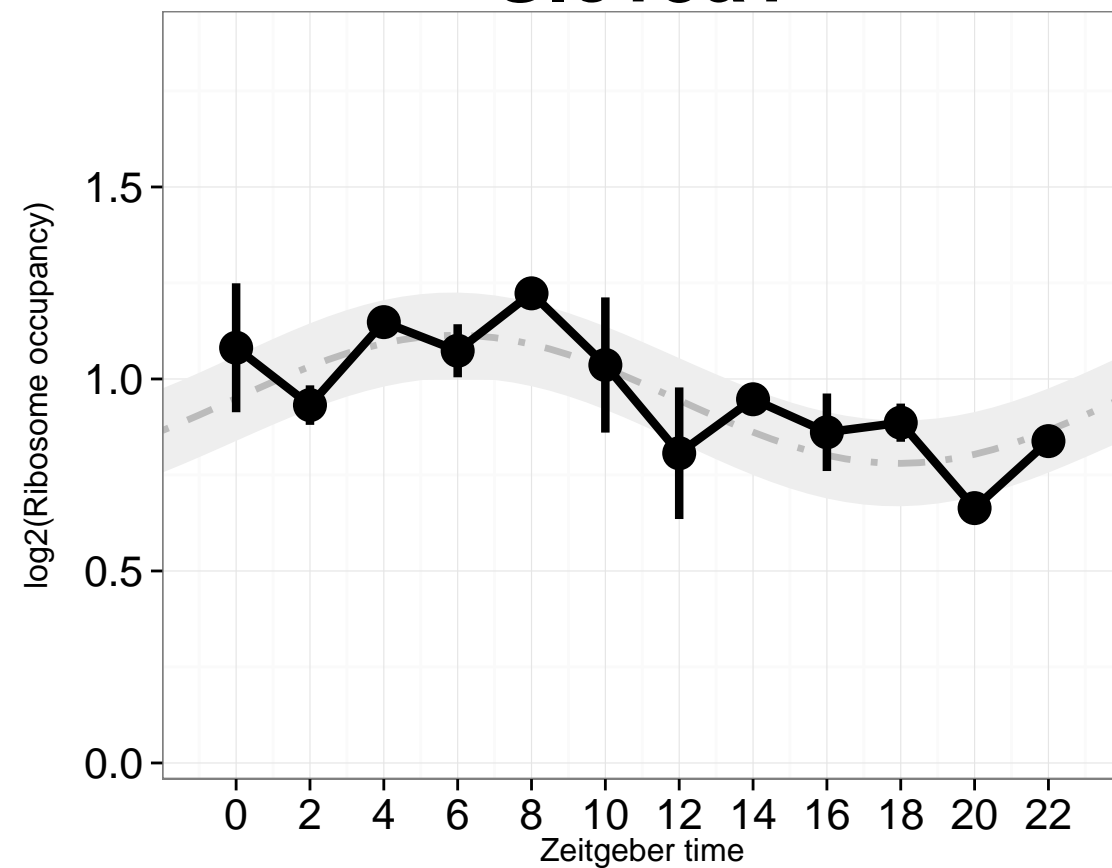

Supplement: Supplementary file 7495 [file 1]

## Ikbke

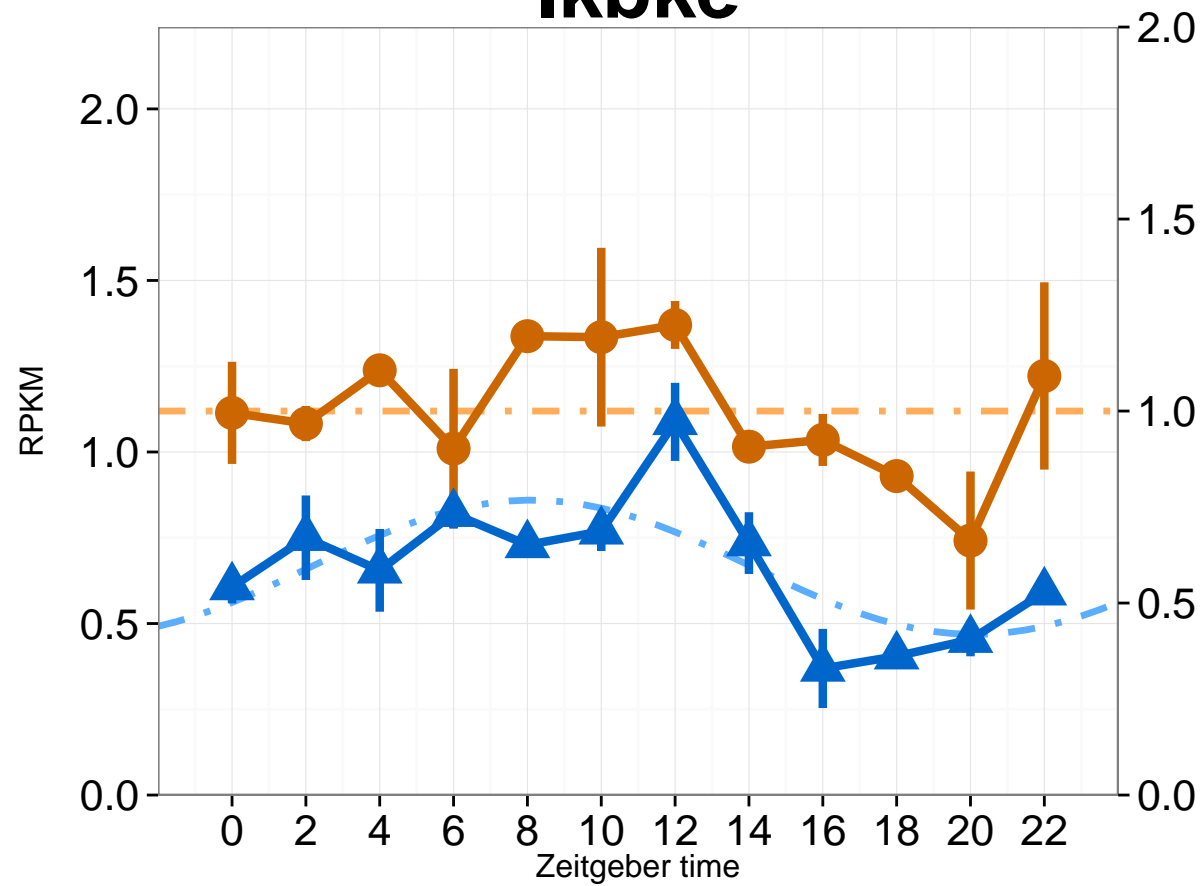

## Ikbke

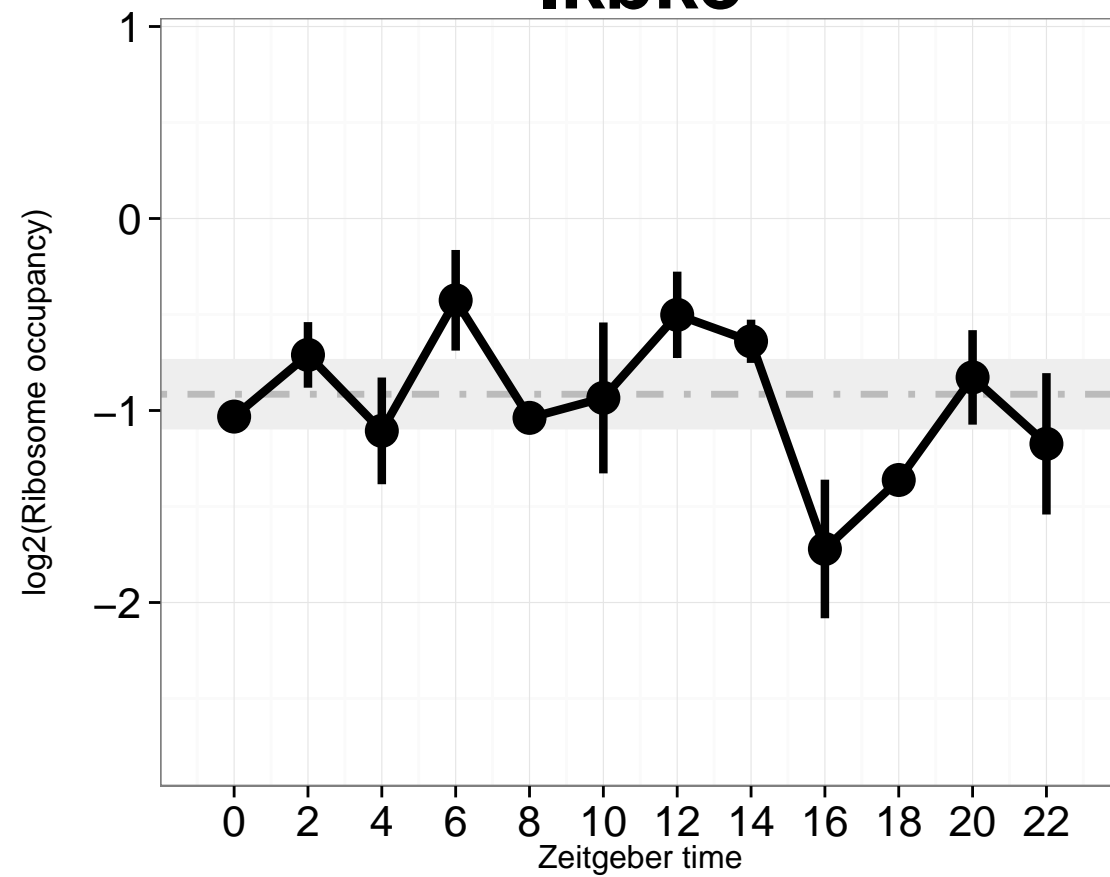

Supplement: Supplementary file 7496 [file 1]

# Slc25a5

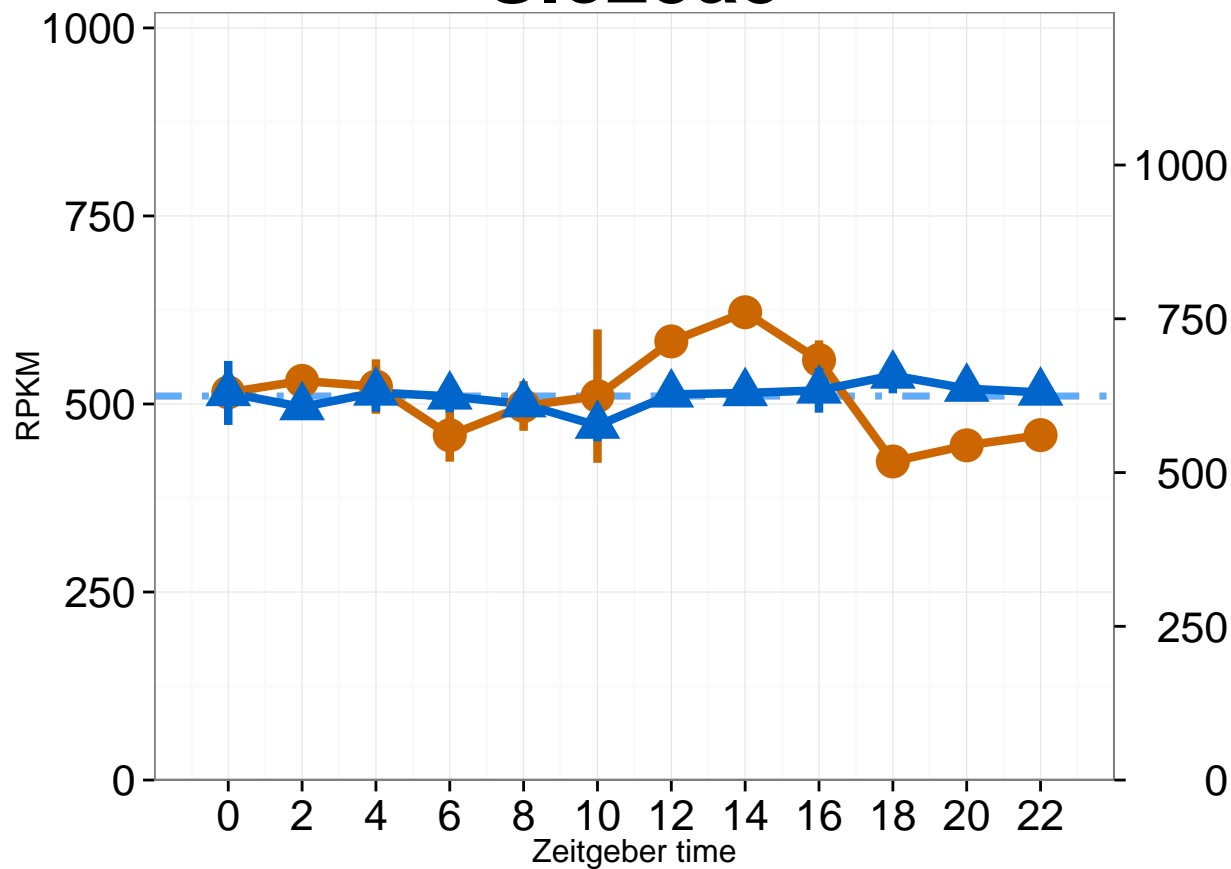

# Slc25a5

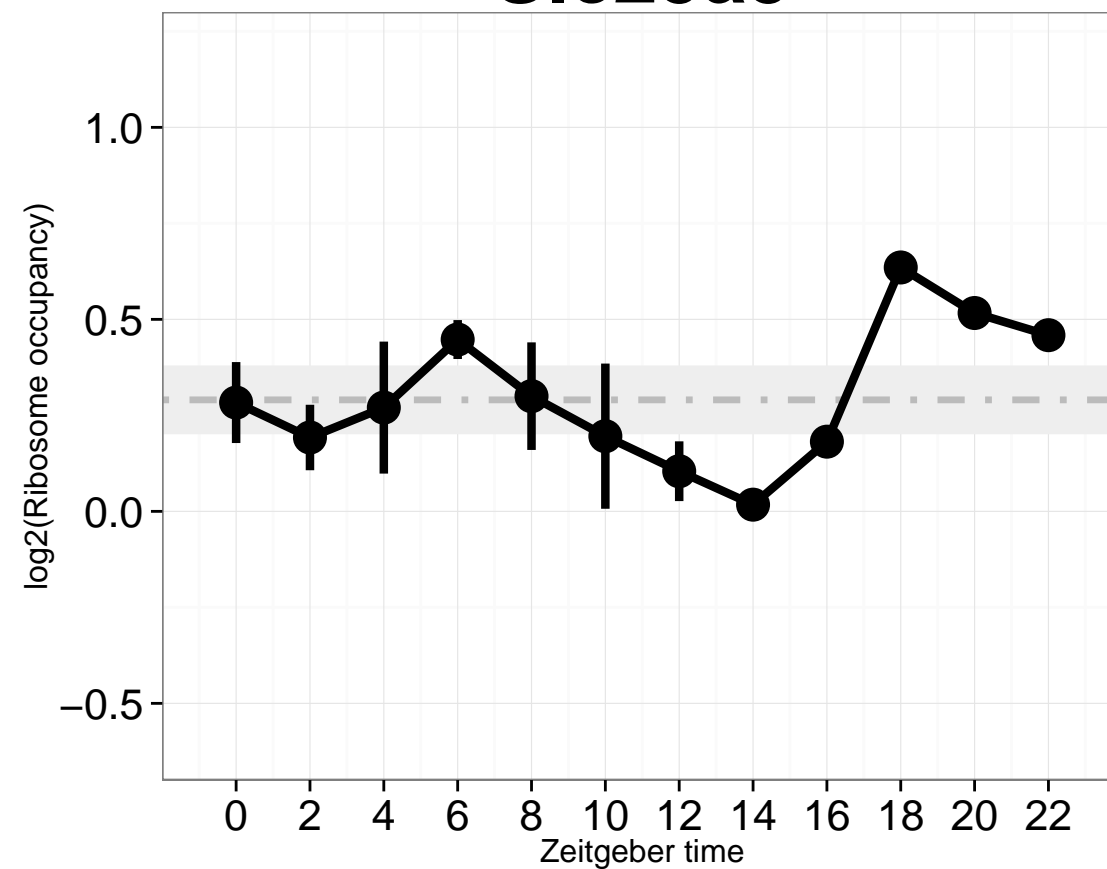

Supplement: Supplementary file 7497 [file 1]

# Trim32

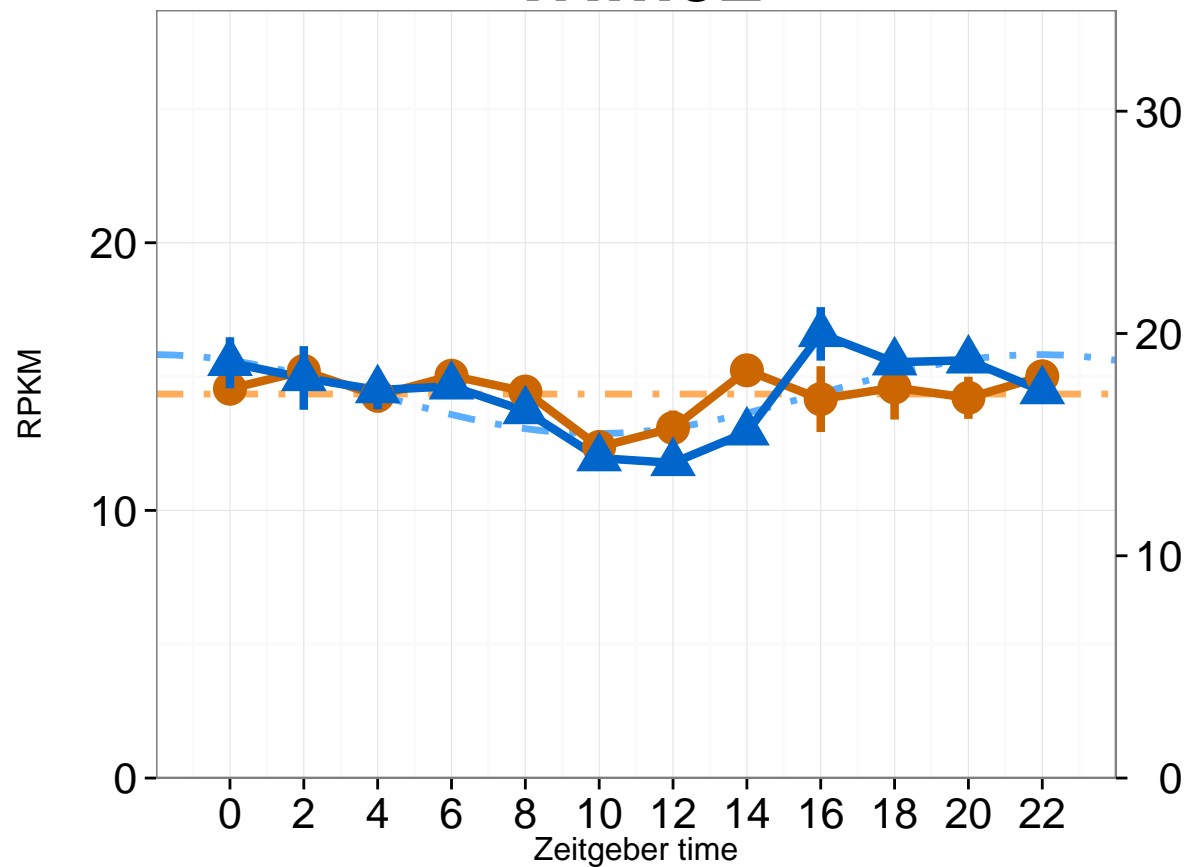

# Trim32

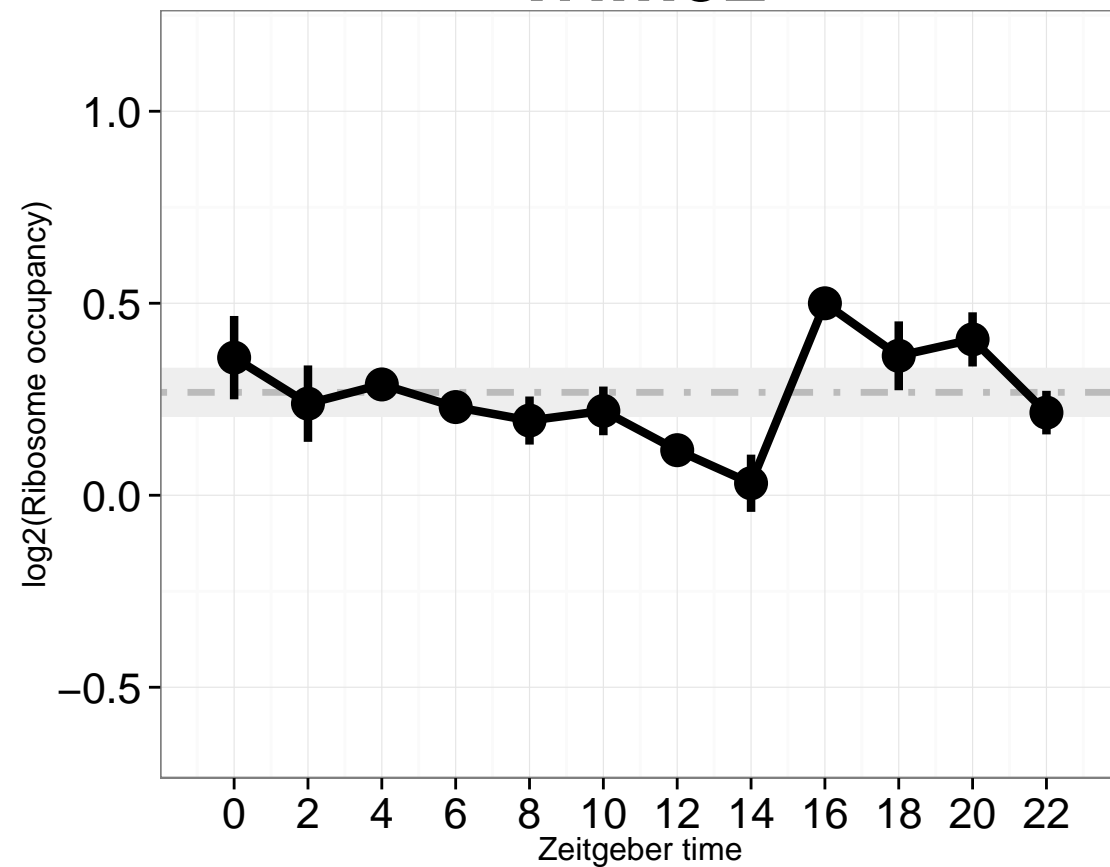

Supplement: Supplementary file 7498 [file 1]

## Paics

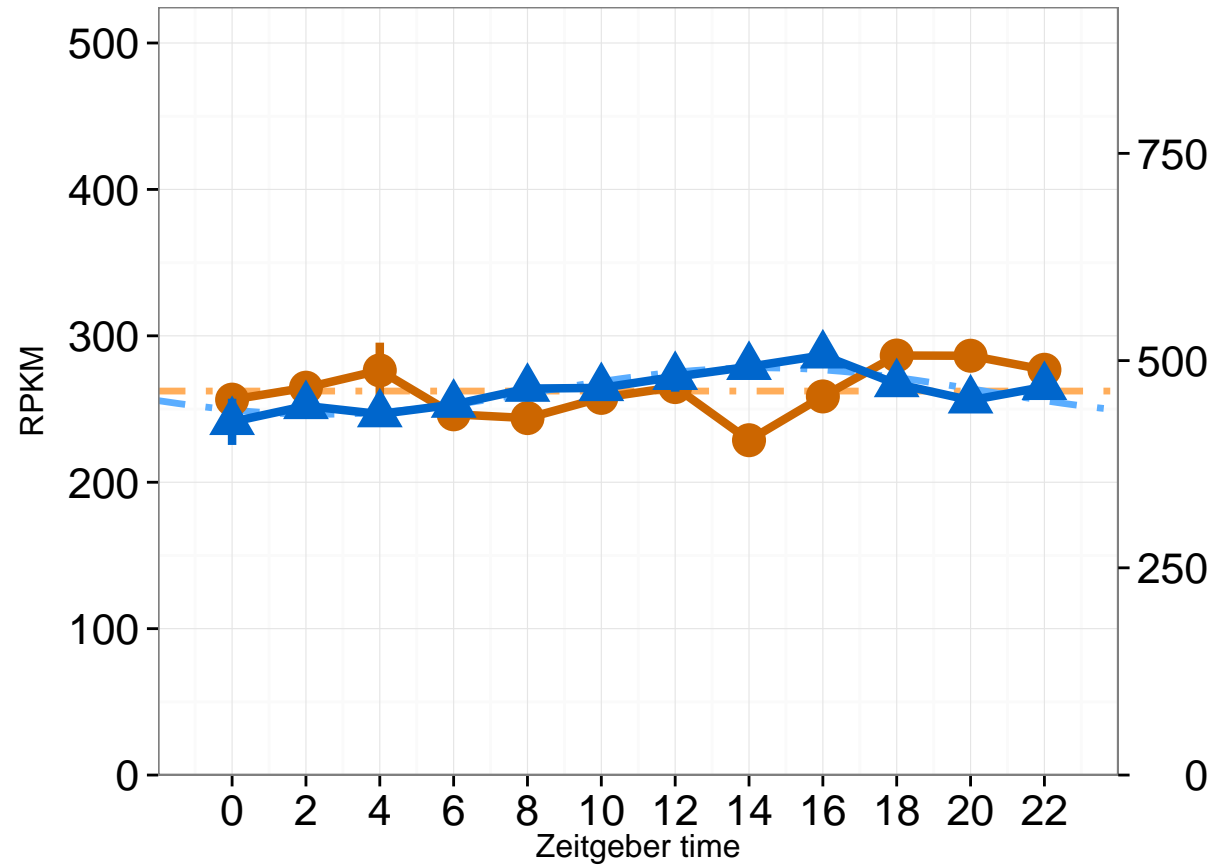

## Paics

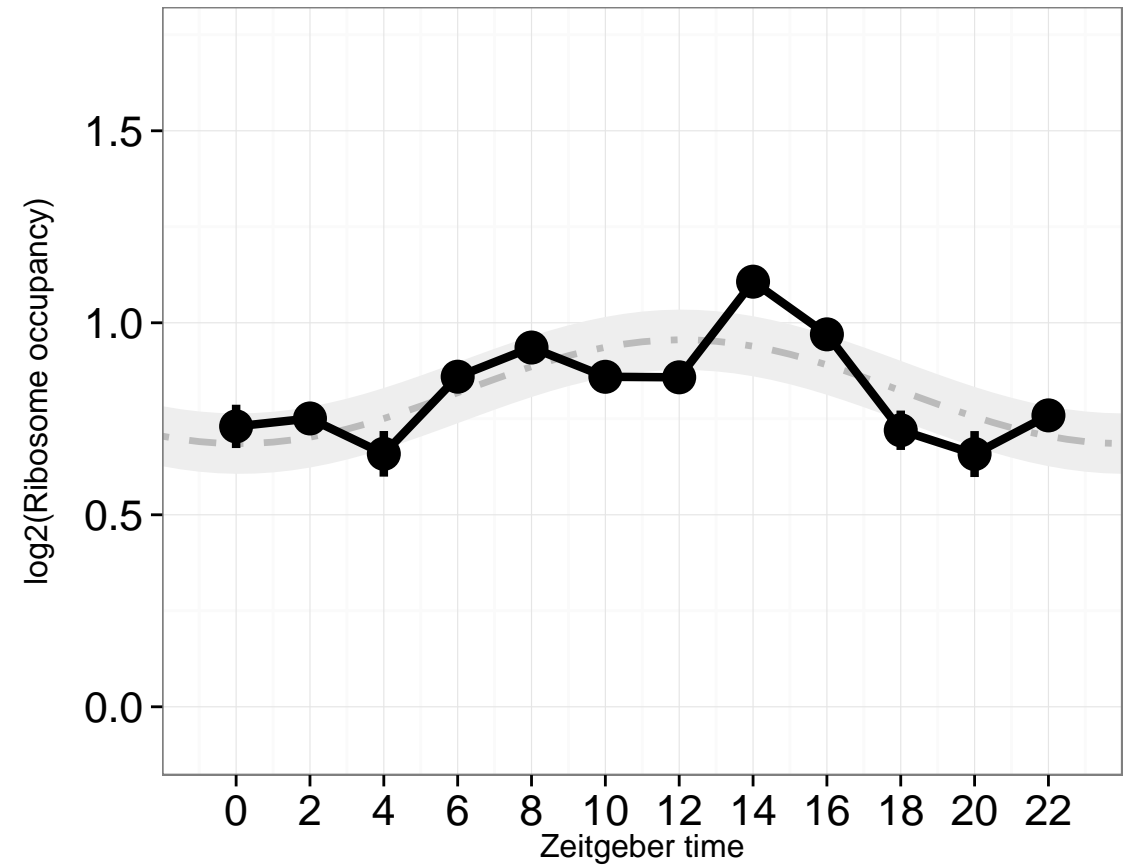

Supplement: Supplementary file 7499 [file 1]

# Zfp668

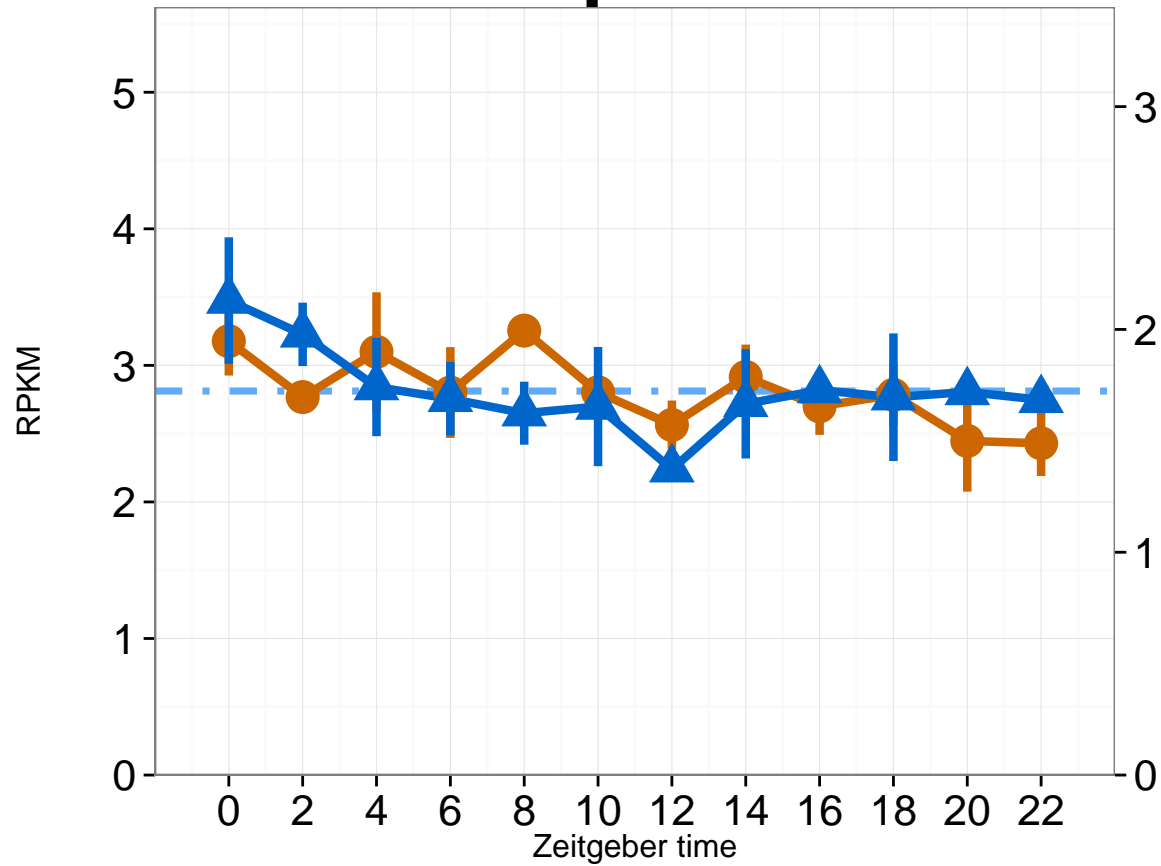

# Zfp668

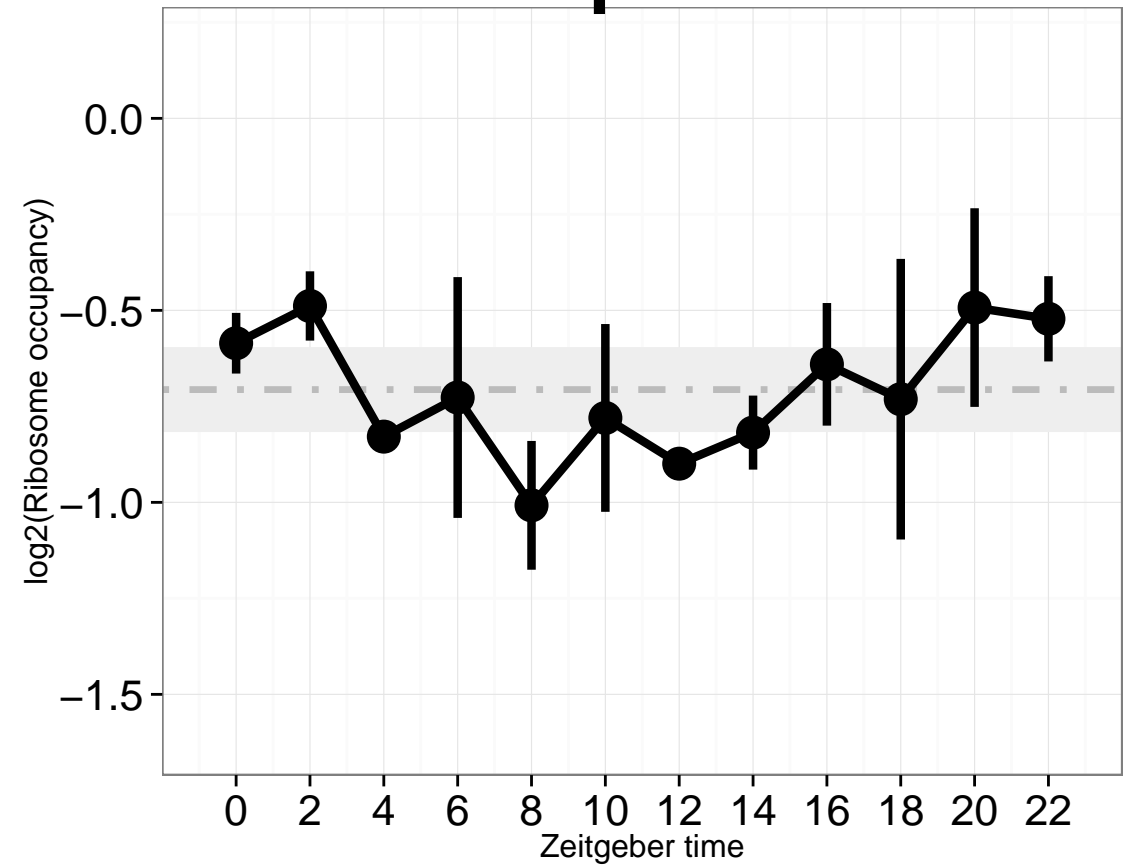

Supplement: Supplementary file 7500 [file 1]

# Sqstm1

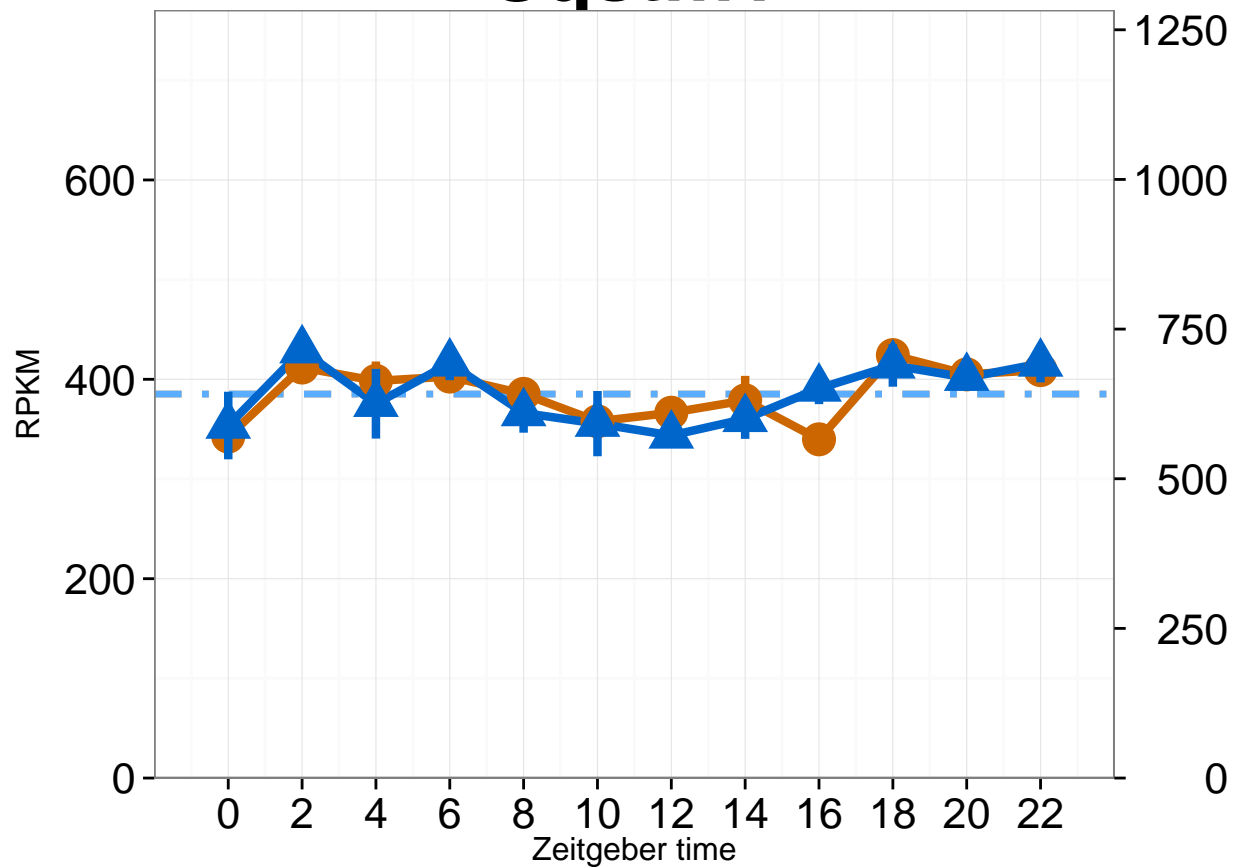

# Sqstm1

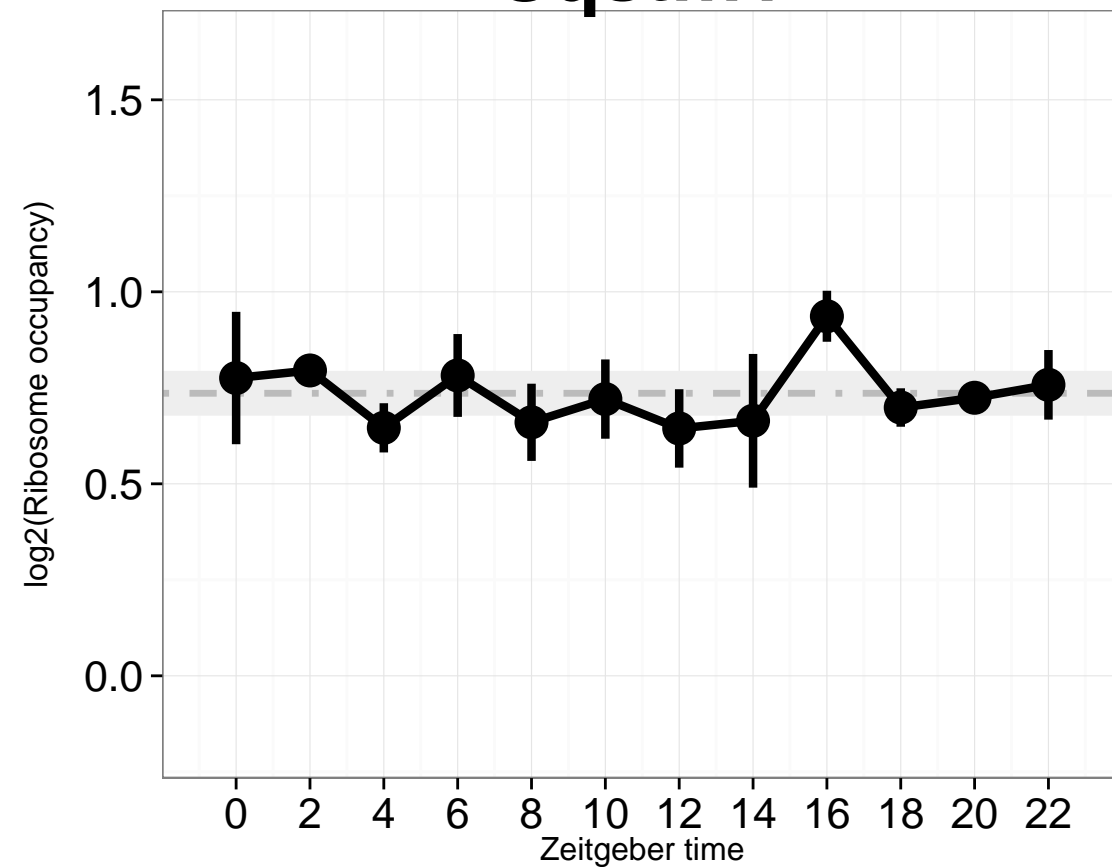

Supplement: Supplementary file 7501 [file 1]

# Sult1a1

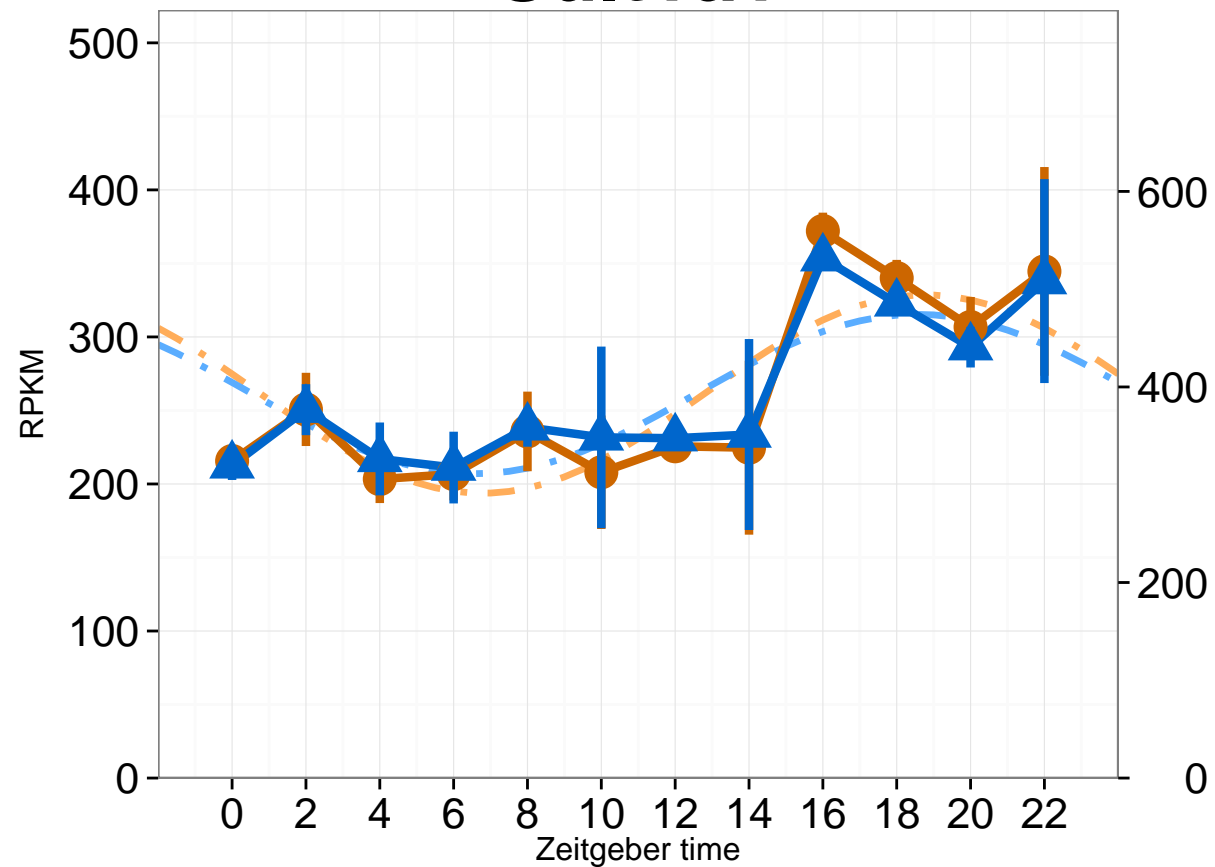

# Sult1a1

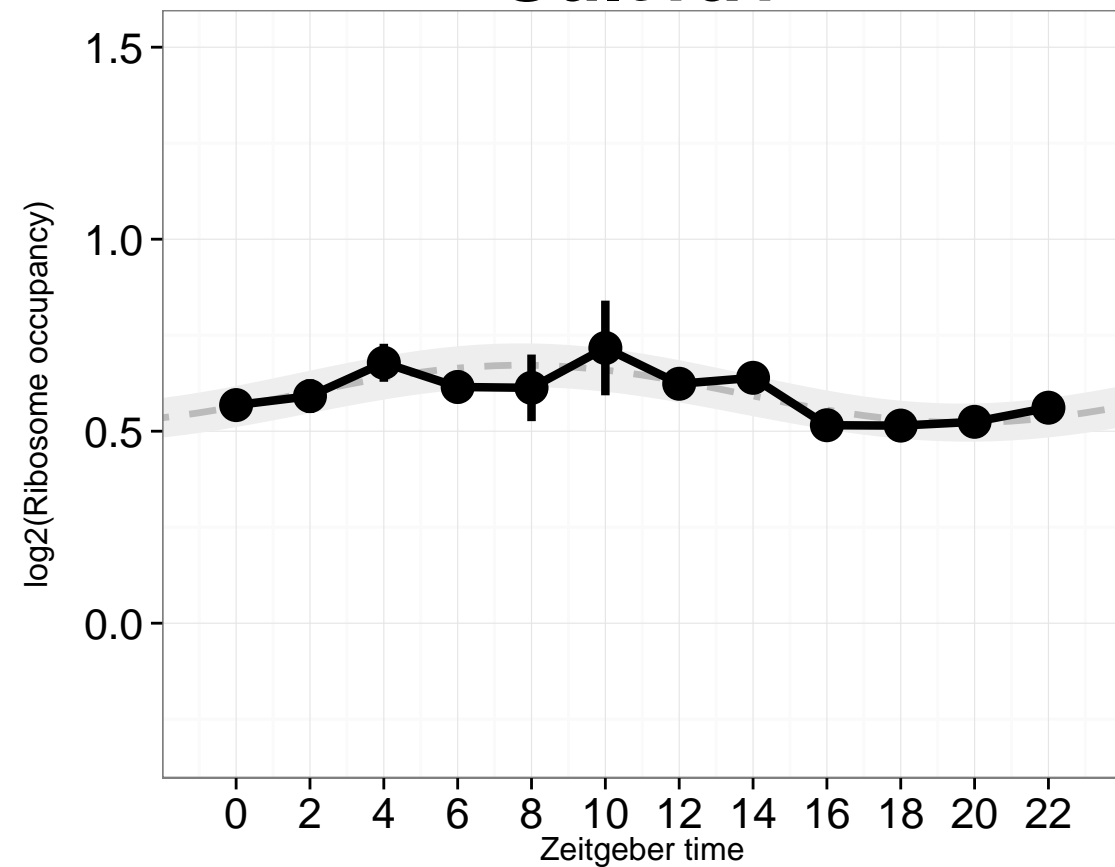

Supplement: Supplementary file 7502 [file 1]

# Tmem205

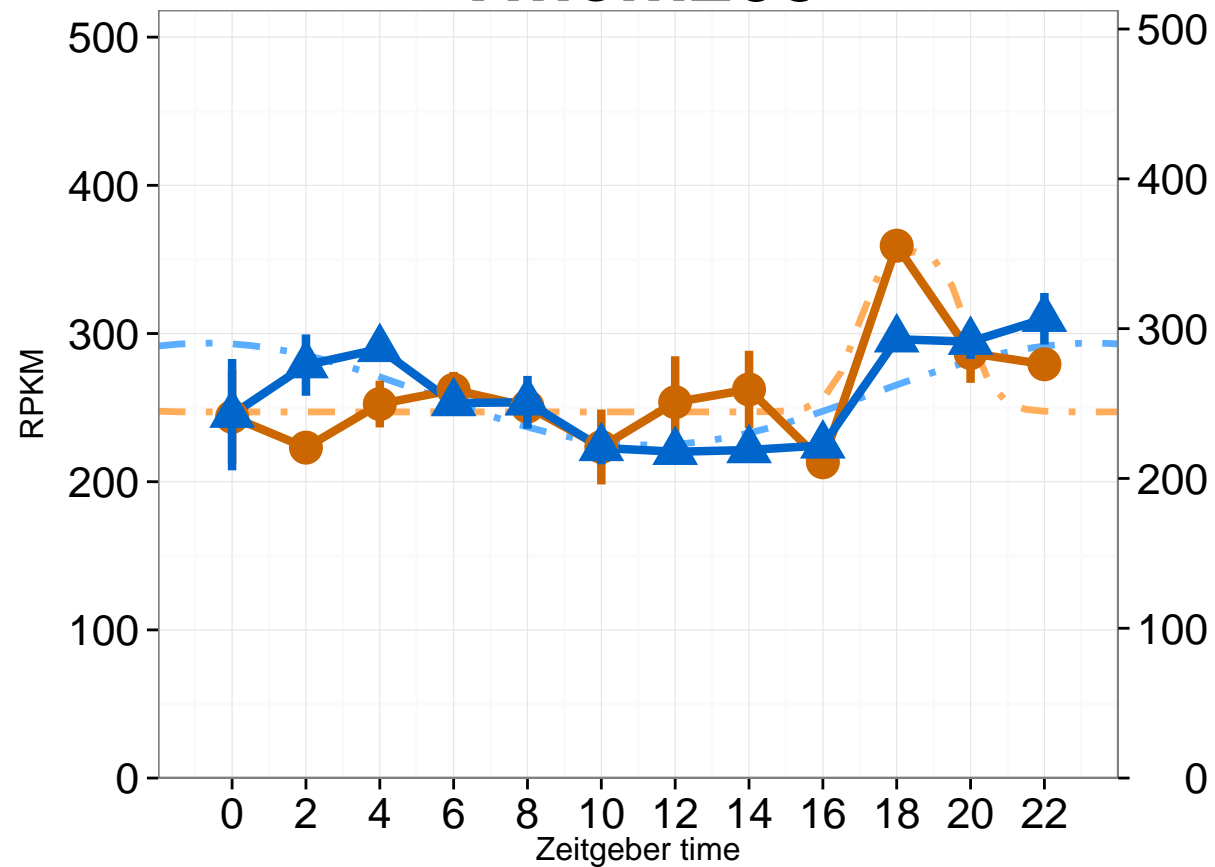

# Tmem205

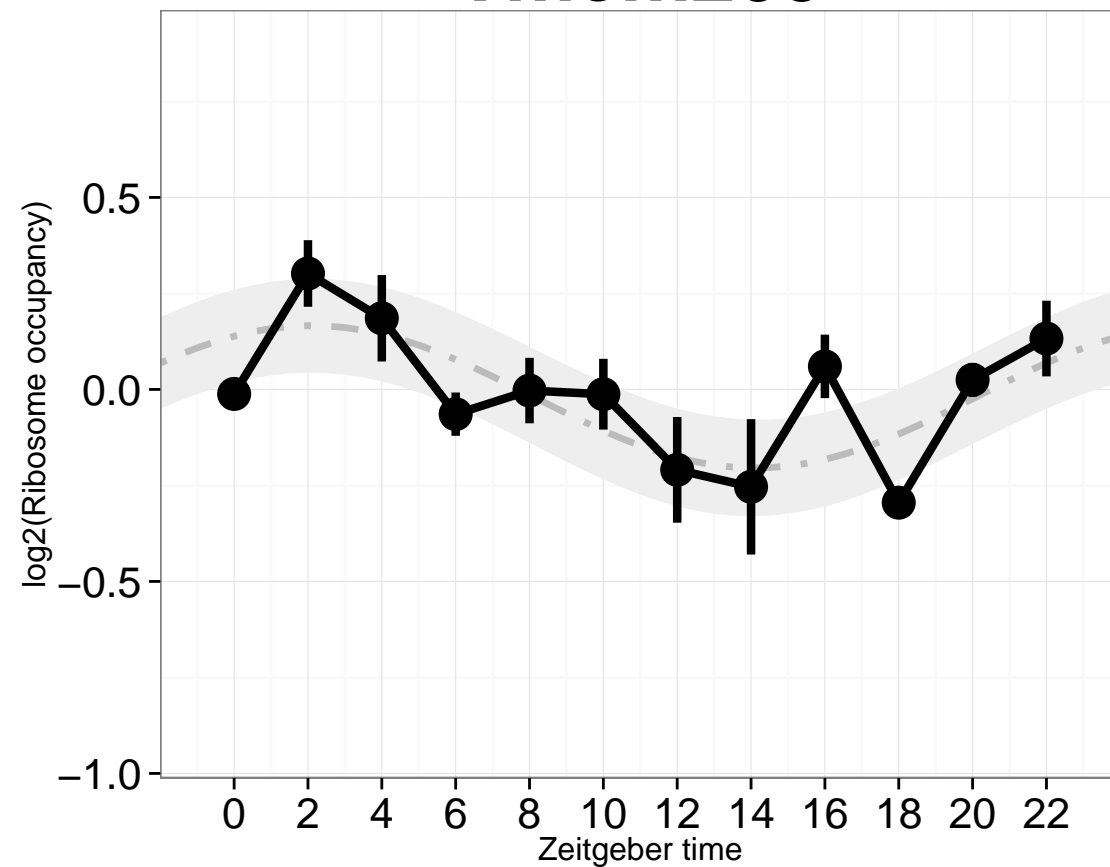

Supplement: Supplementary file 7503 [file 1]

## Hexb

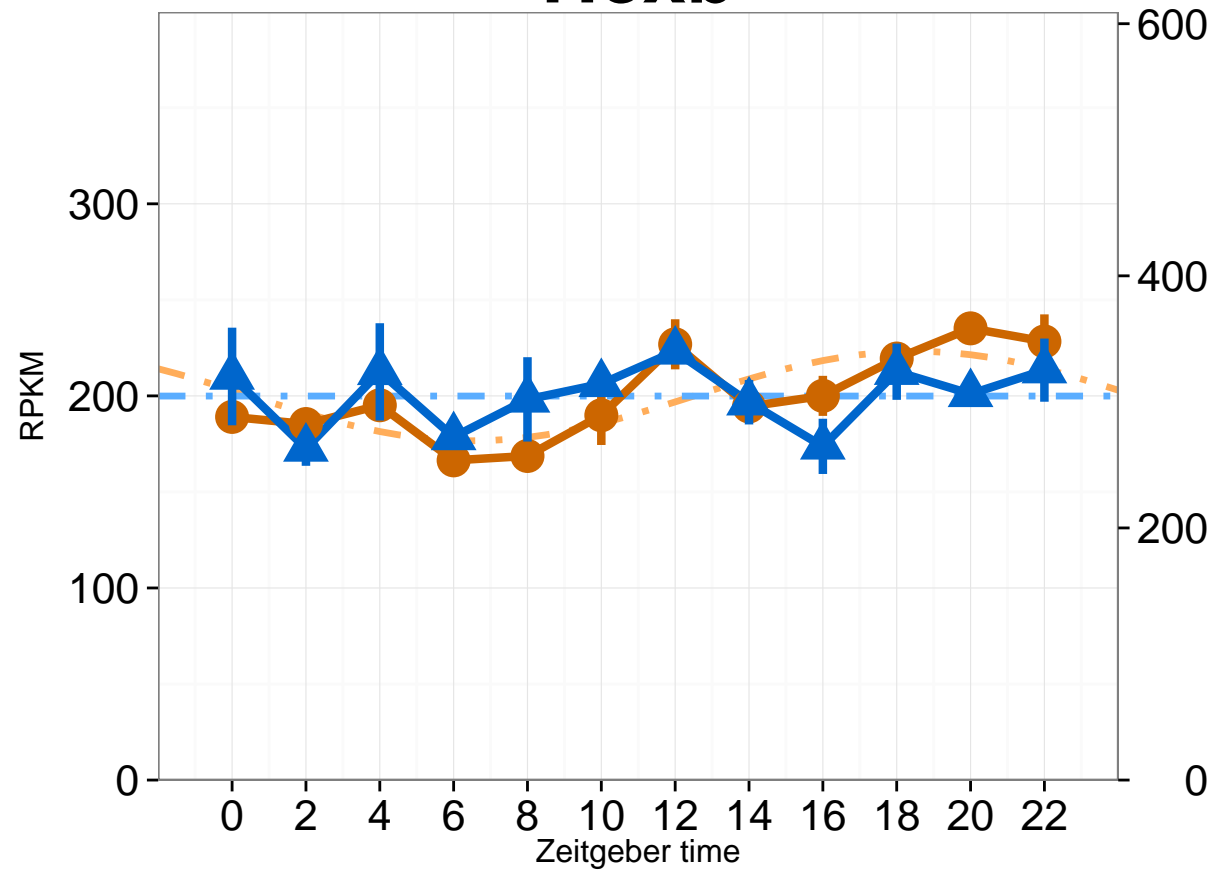

## Hexb

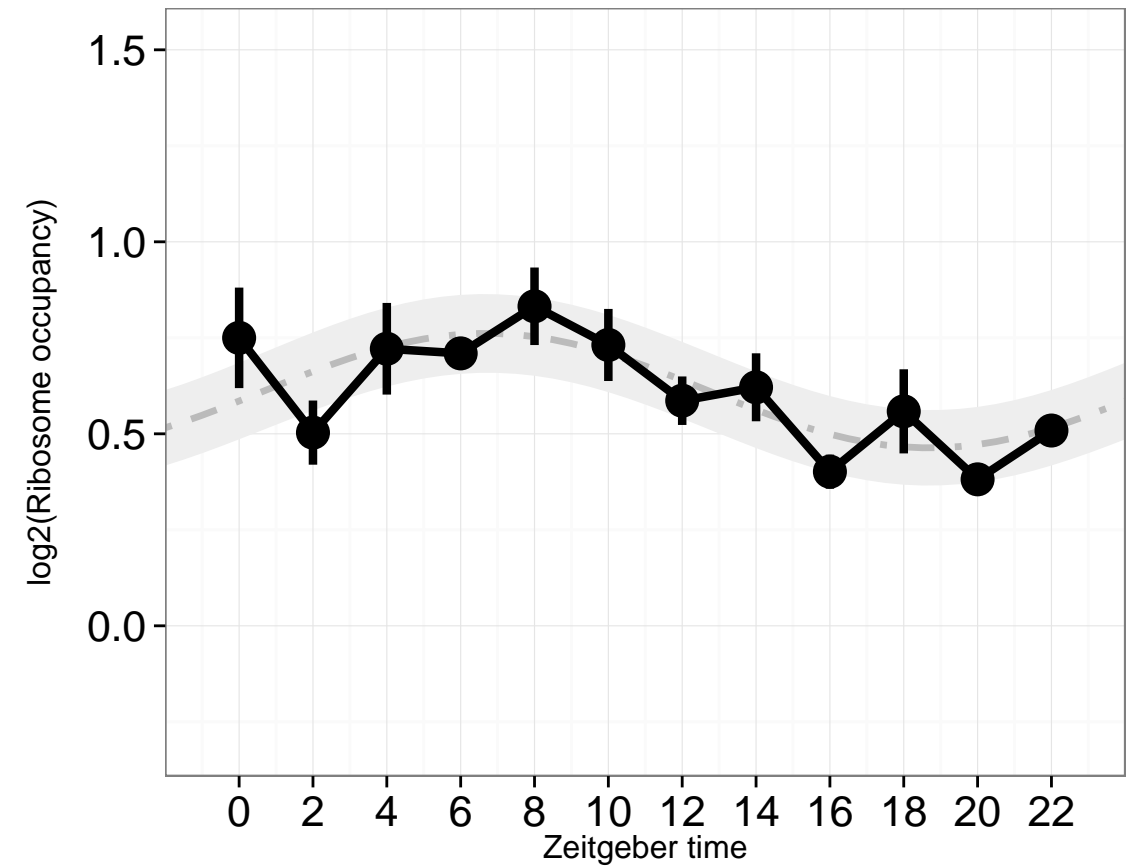

Supplement: Supplementary file 7504 [file 1]

## Glce

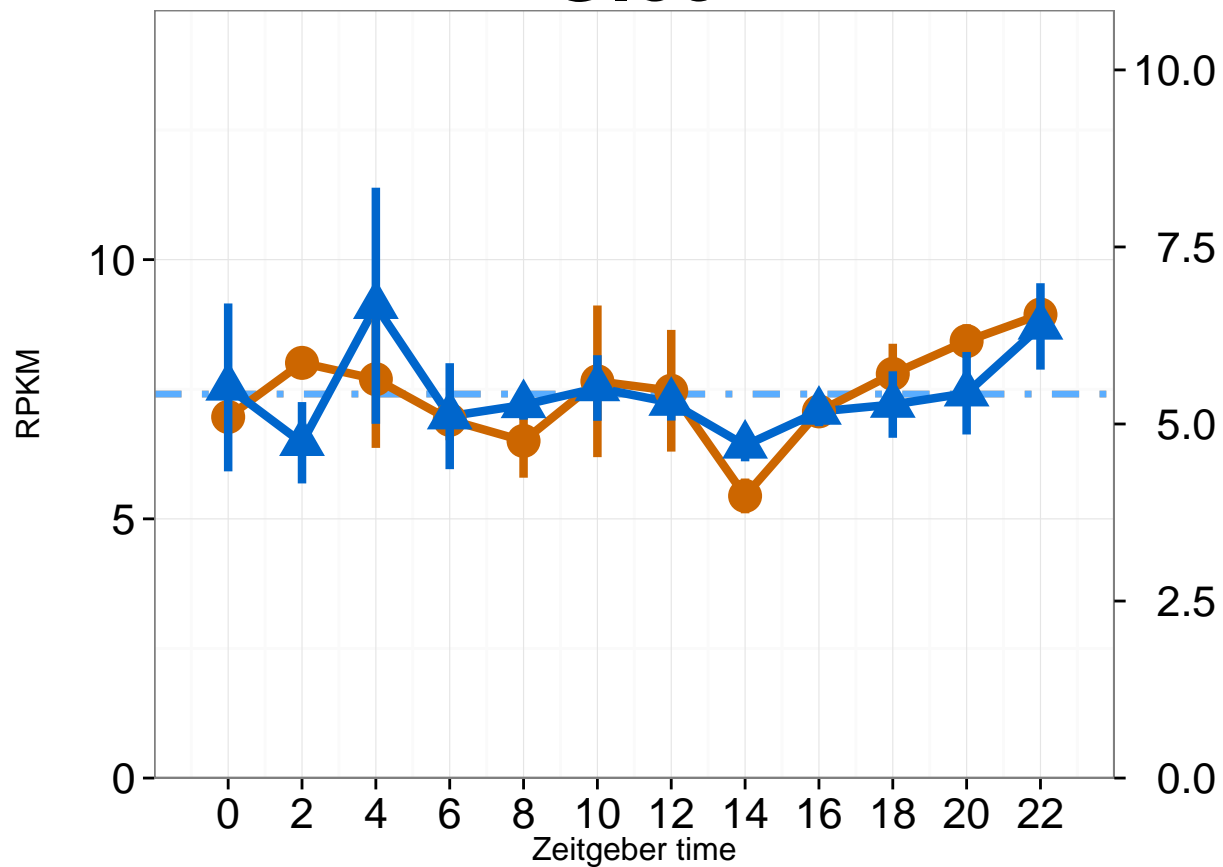

## Glce

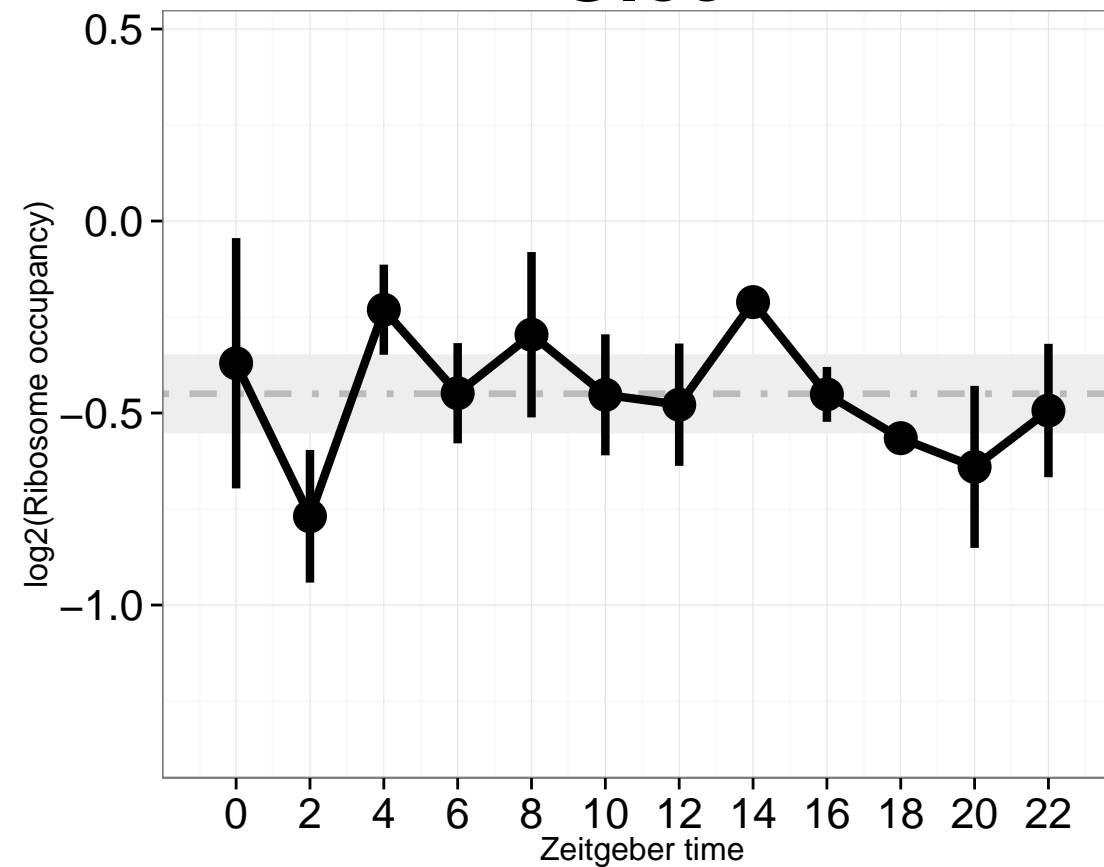

Supplement: Supplementary file 7505 [file 1]

## Lrrc58

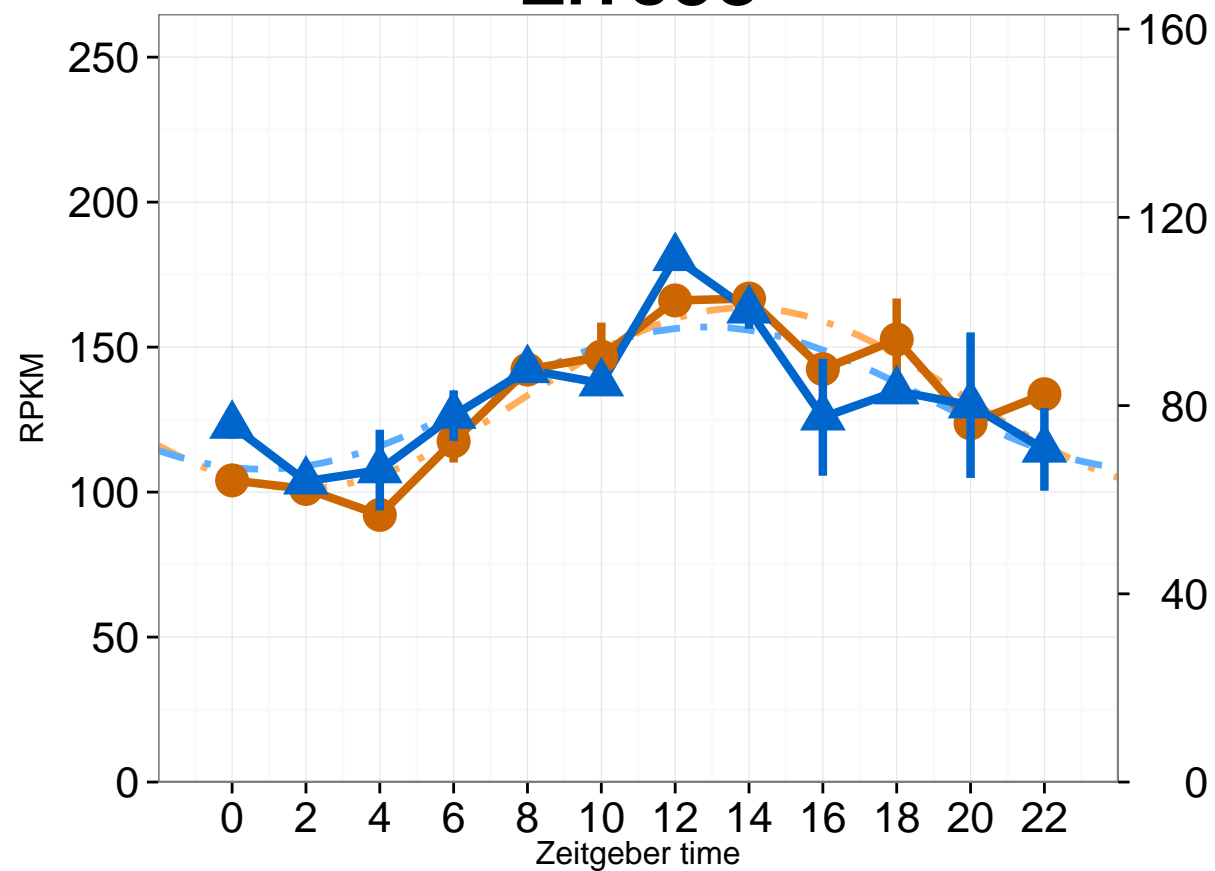

## Lrrc58

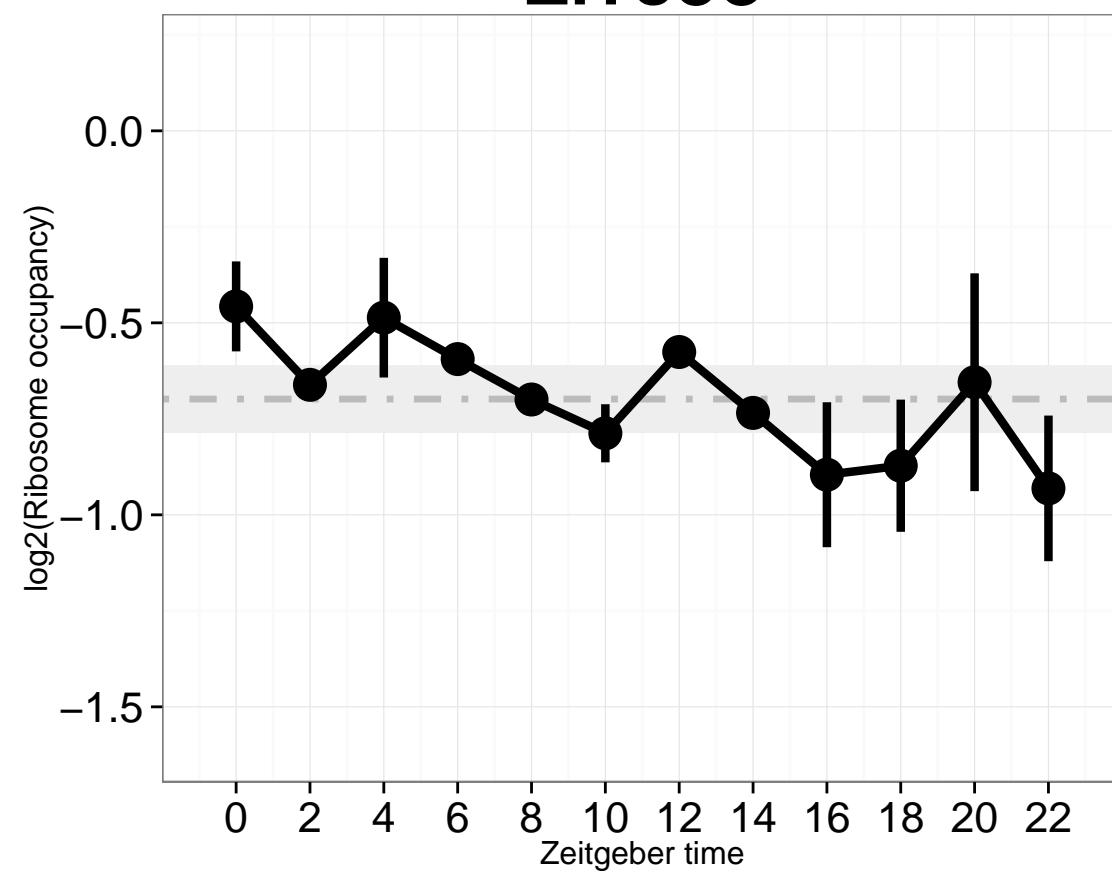

Supplement: Supplementary file 7506 [file 1]

# P4ha1

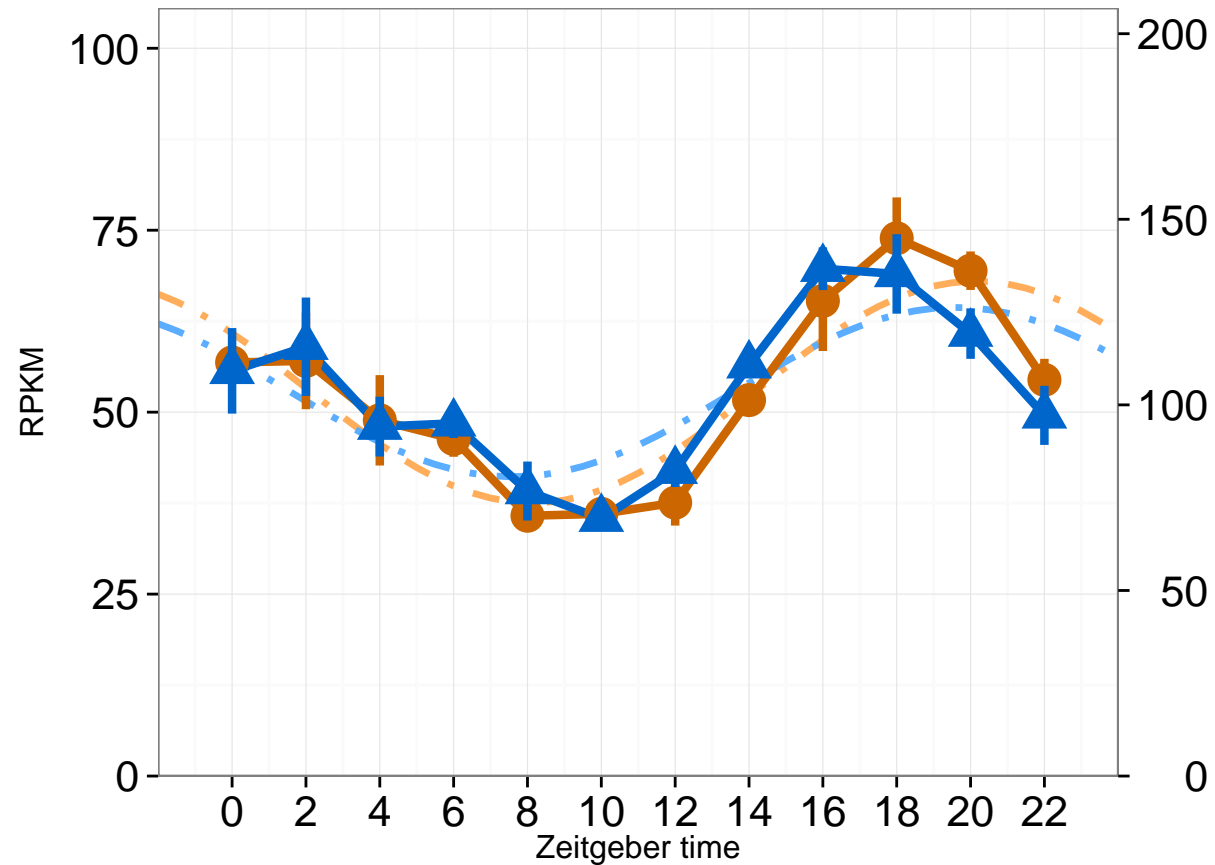

# P4ha1

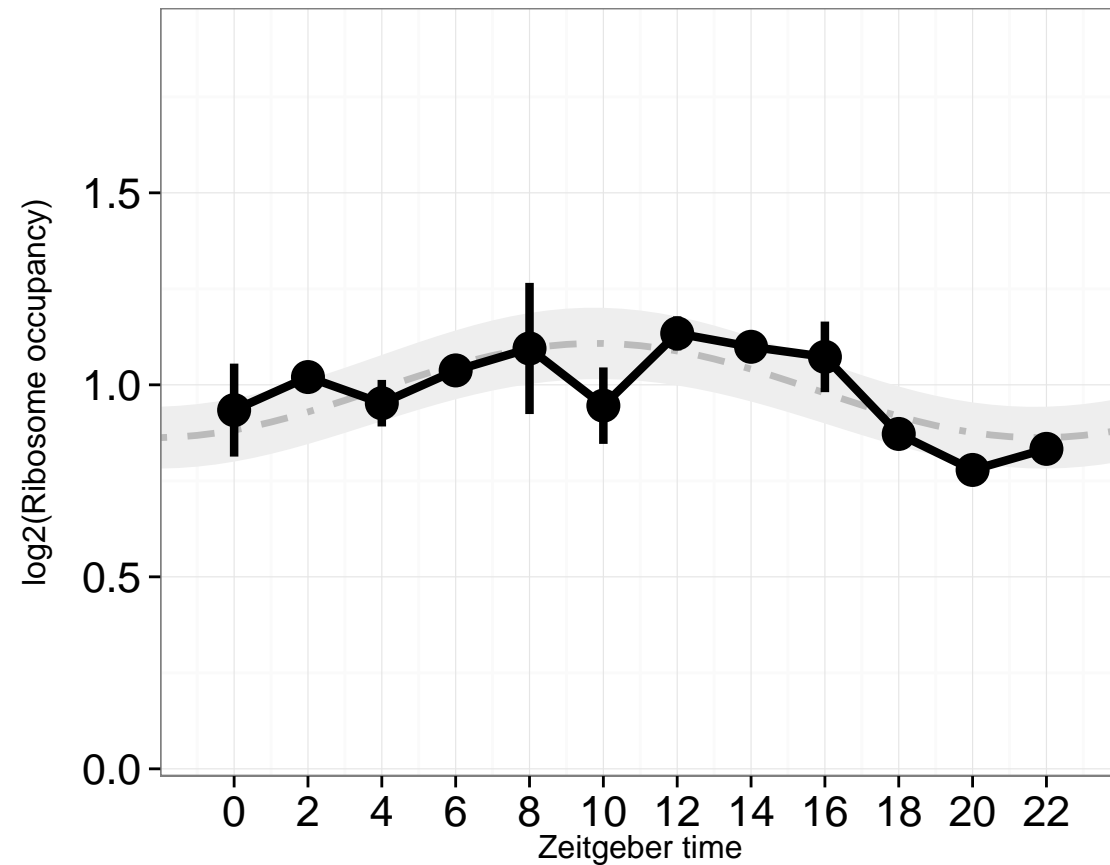

Supplement: Supplementary file 7507 [file 1]

## Dvl2

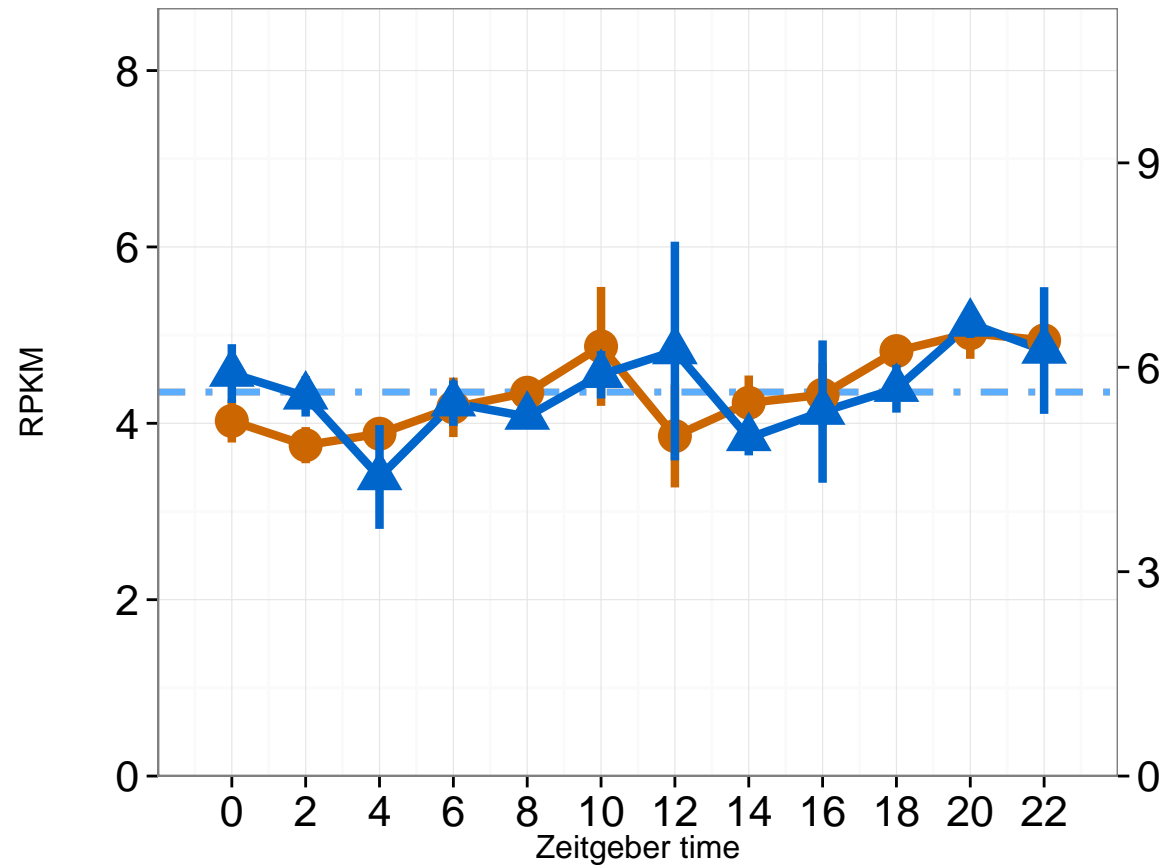

## Dvl2

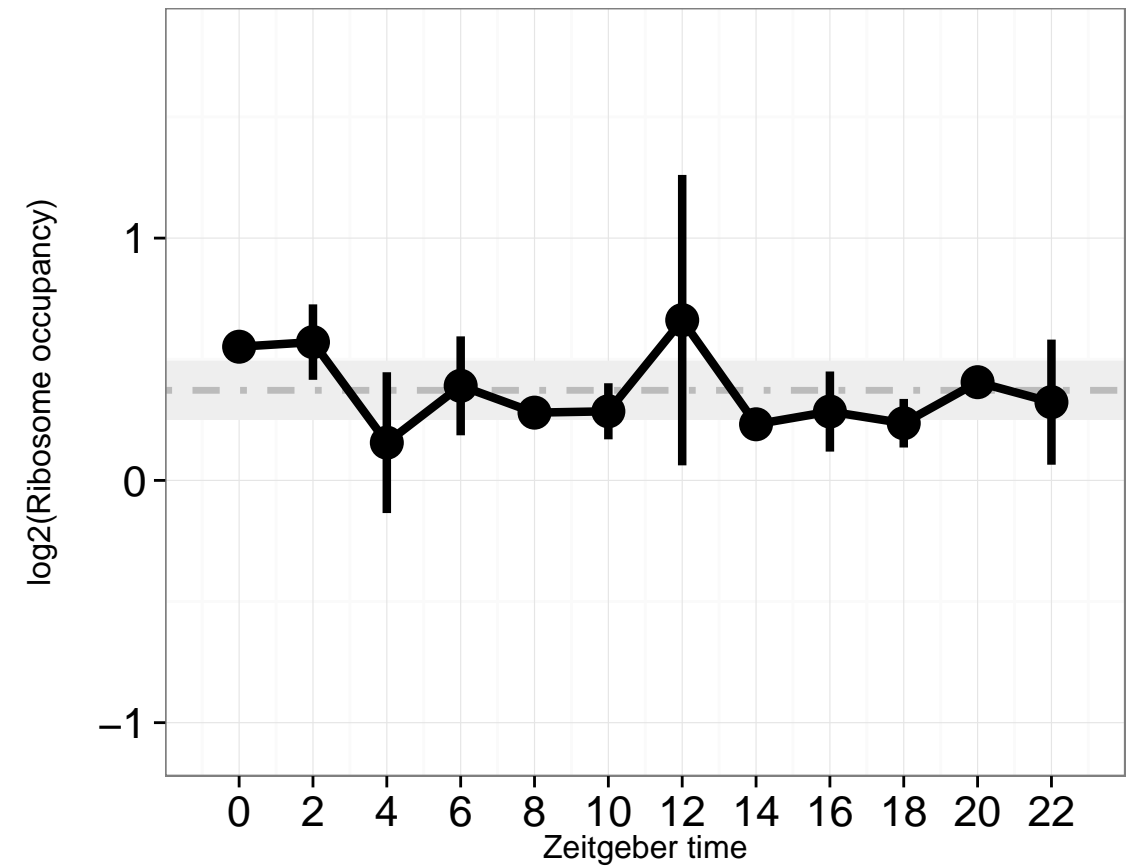

Supplement: Supplementary file 7508 [file 1]

# C1galt1

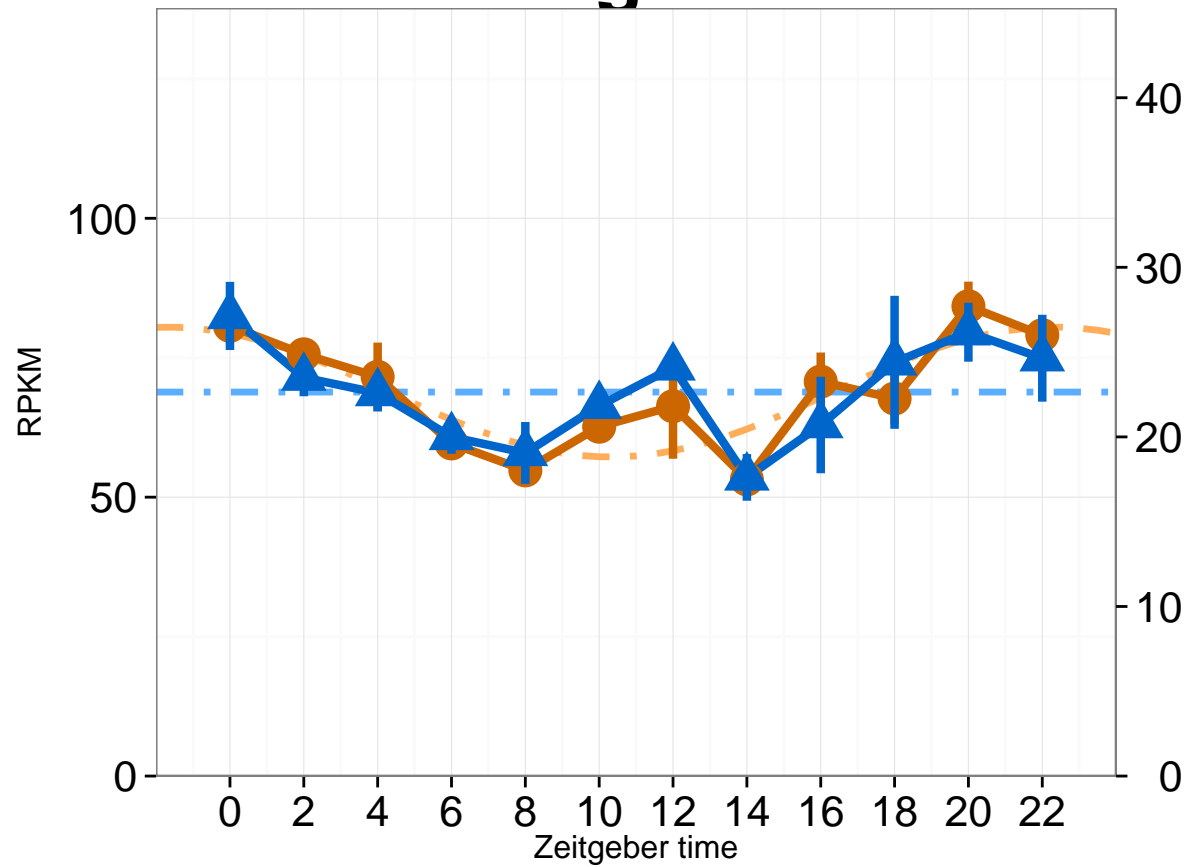

# C1galt1

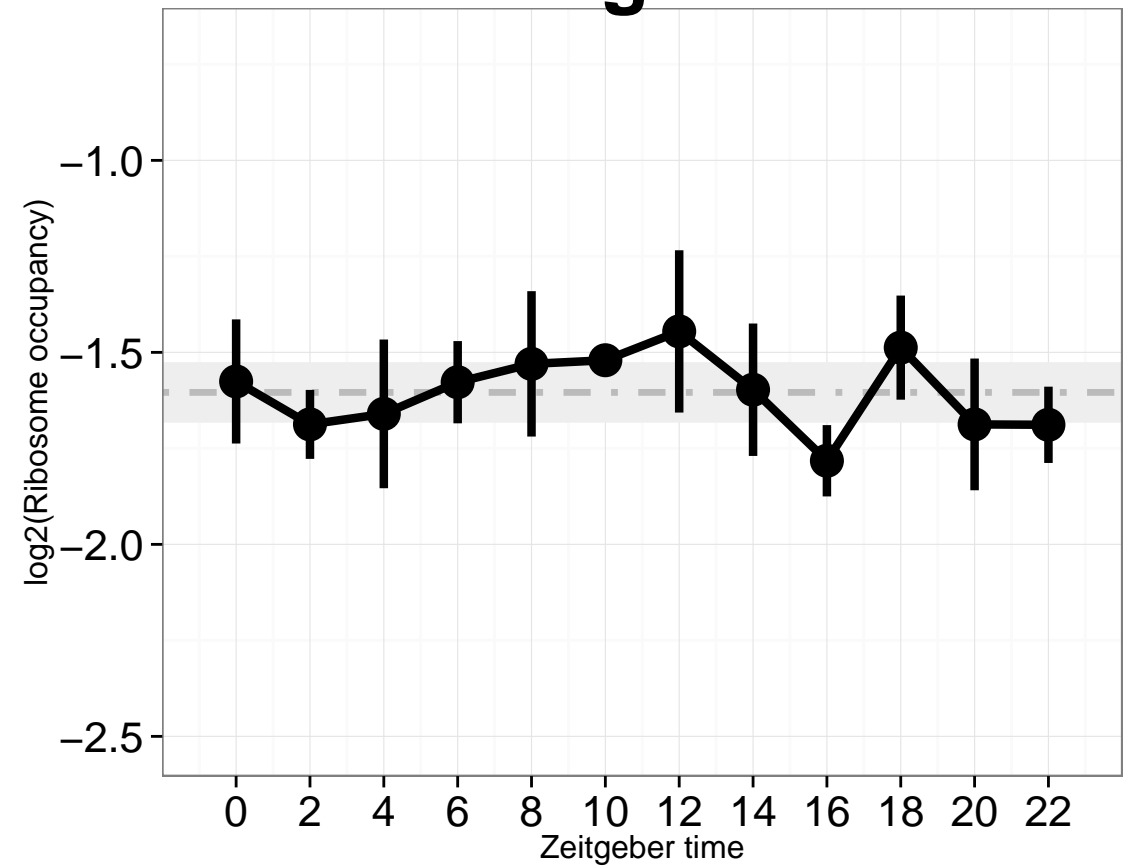

Supplement: Supplementary file 7509 [file 1]

# Dnajc8

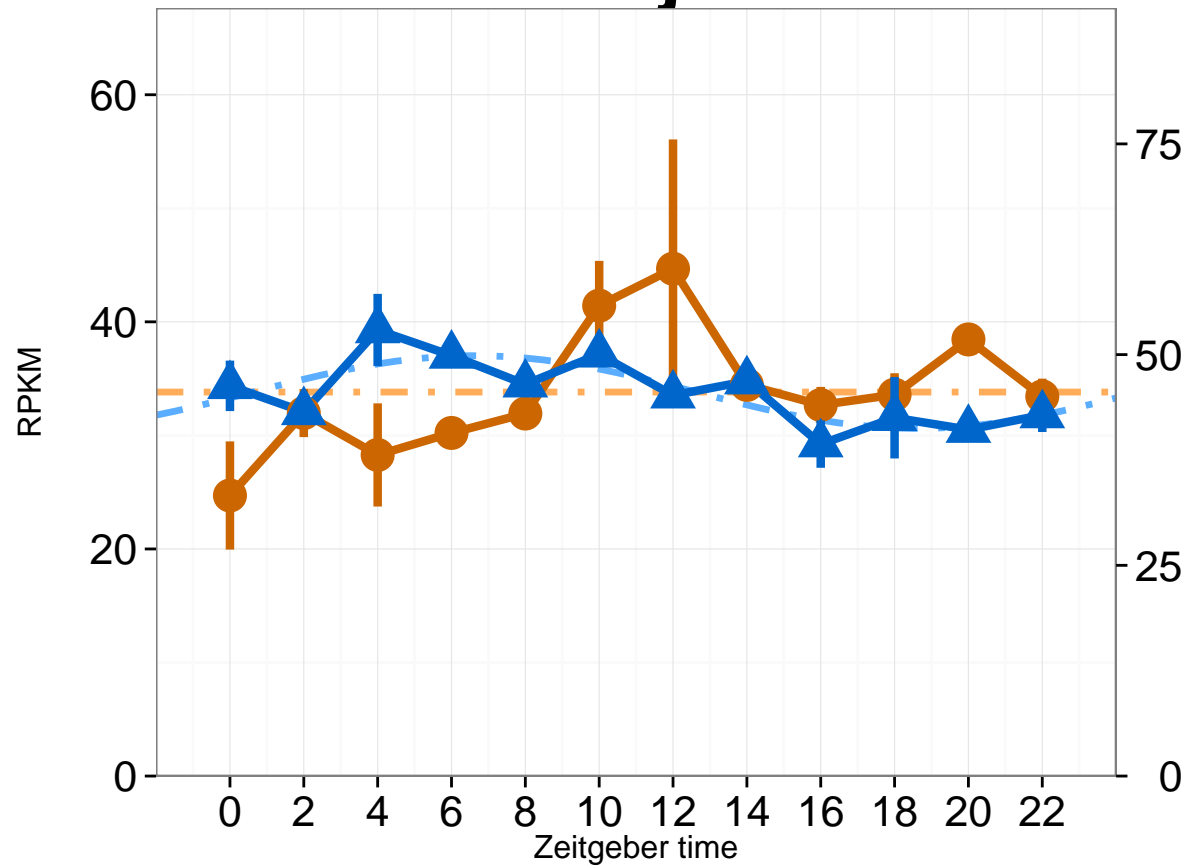

# Dnajc8

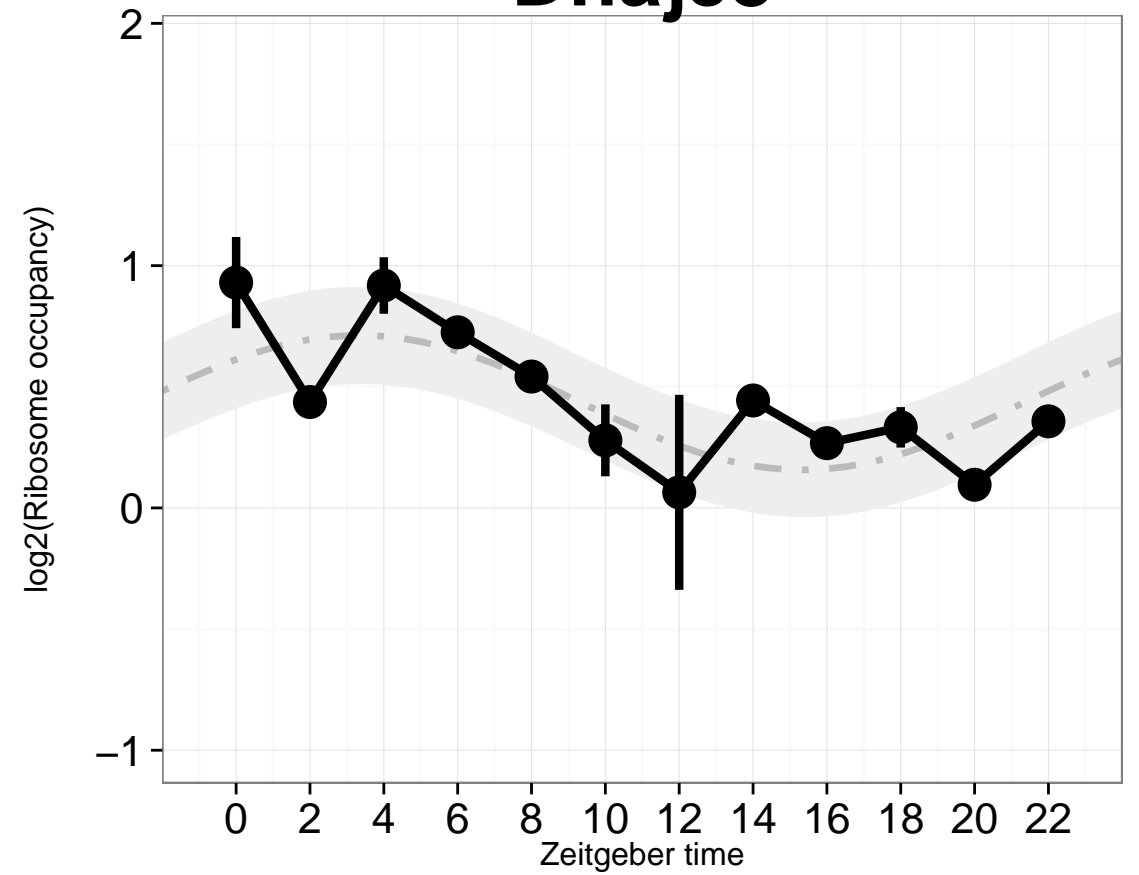

Supplement: Supplementary file 7510 [file 1]

## Tardbp

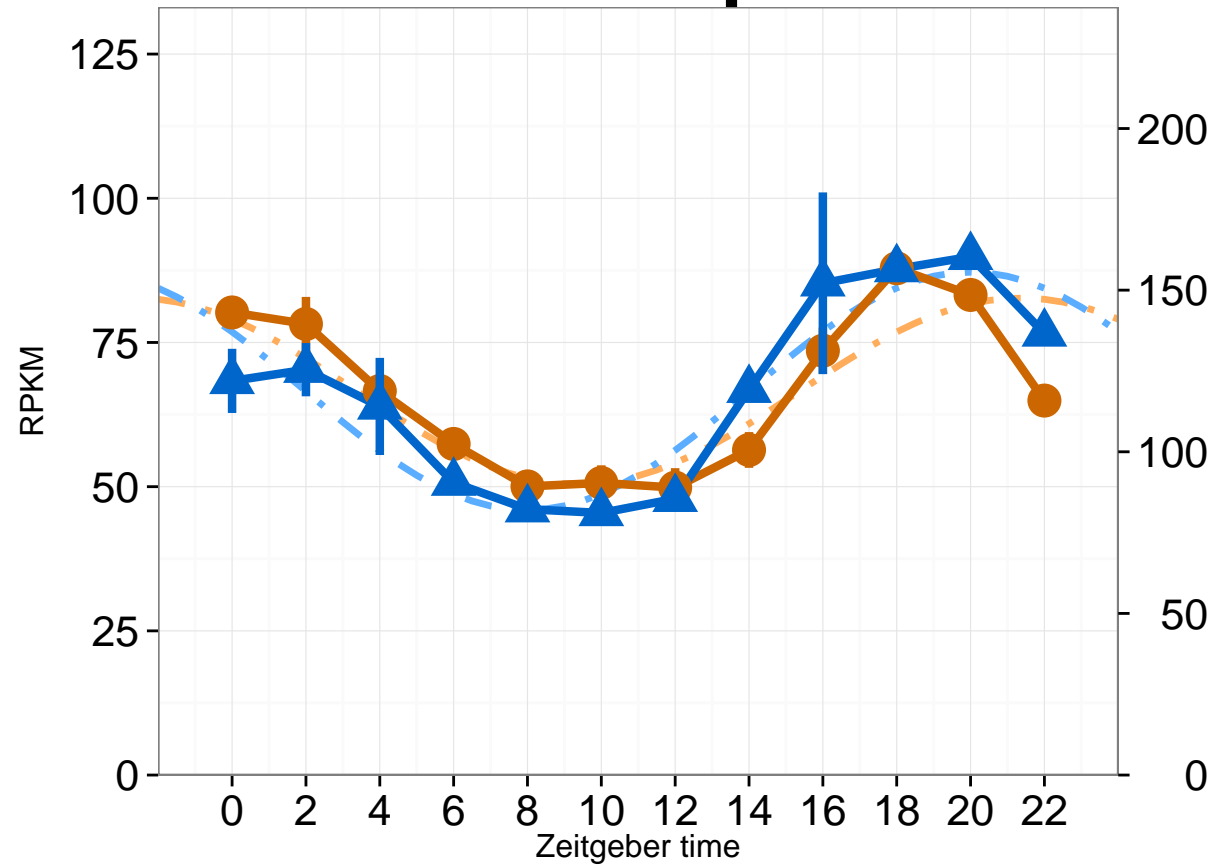

## Tardbp

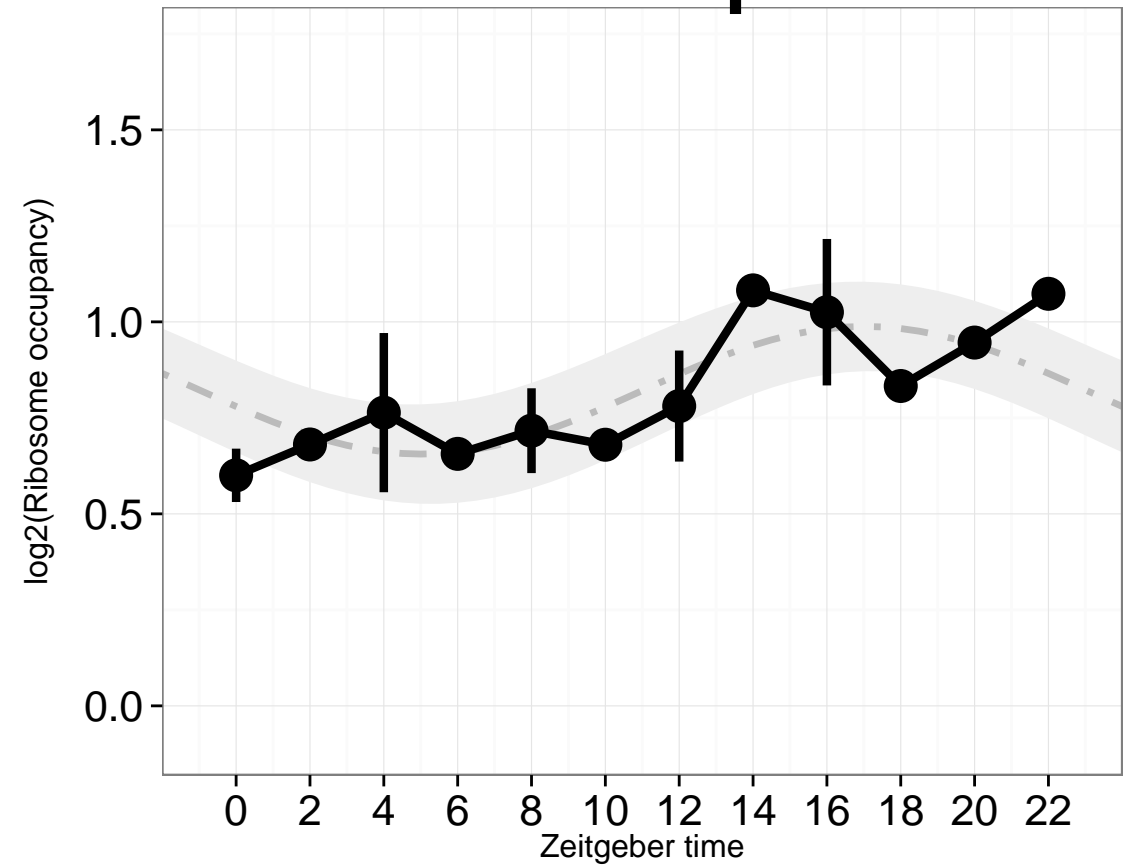

Supplement: Supplementary file 7511 [file 1]

# Vipr1

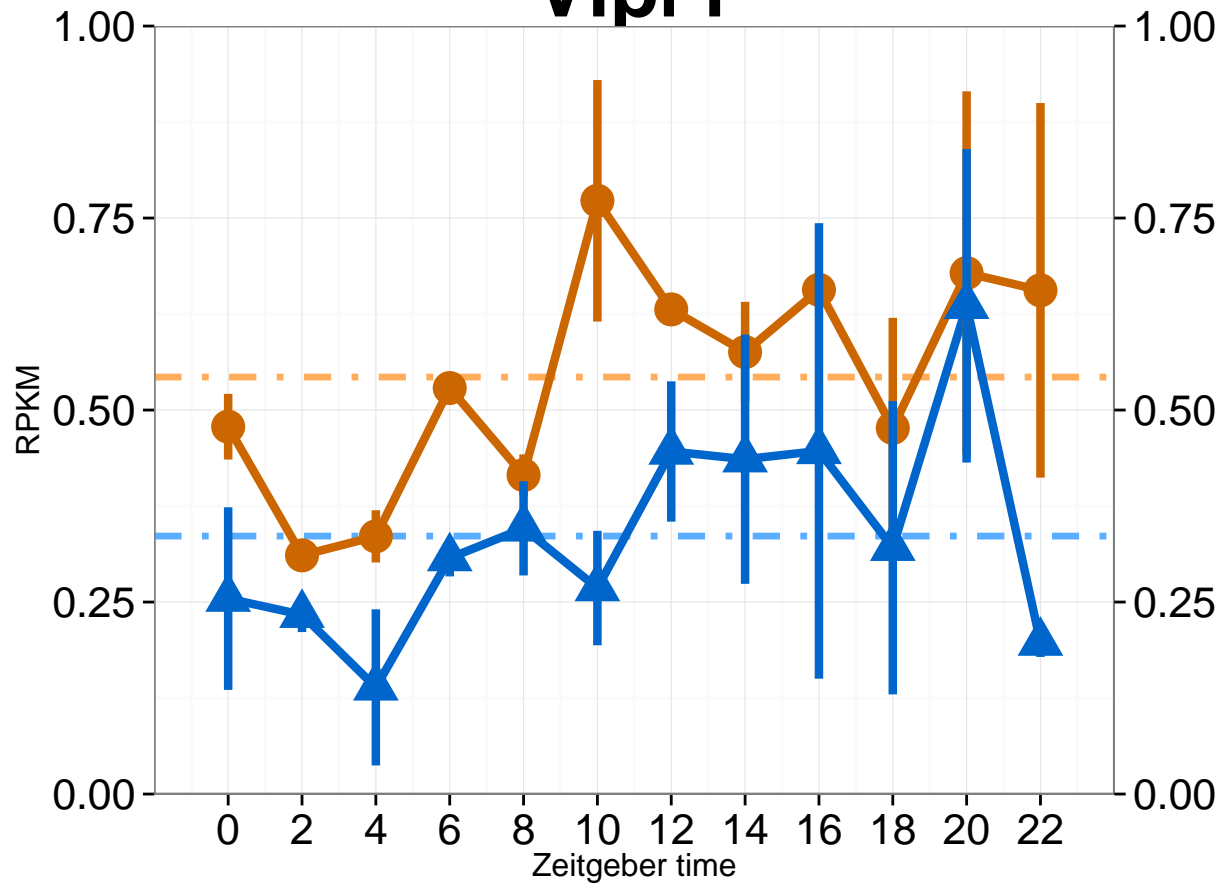

# Vipr1

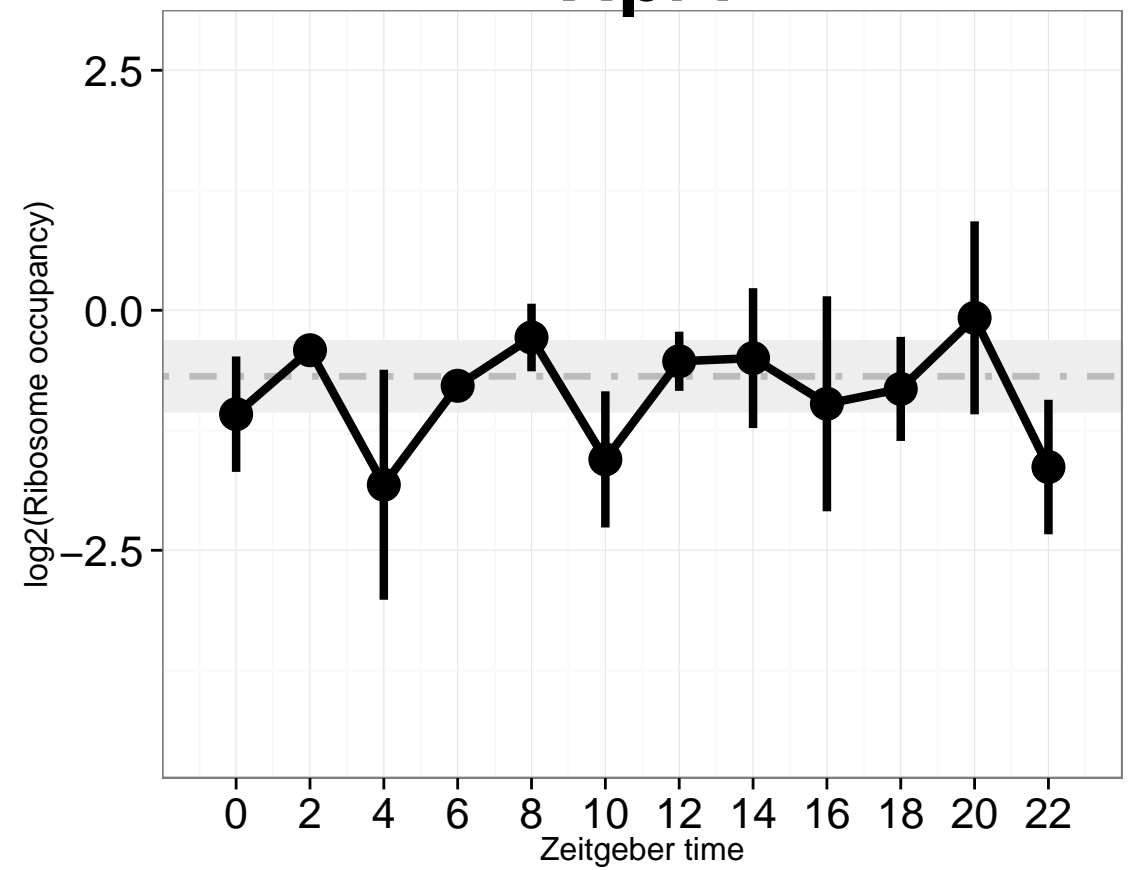

Supplement: Supplementary file 7512 [file 1]

# Minos1

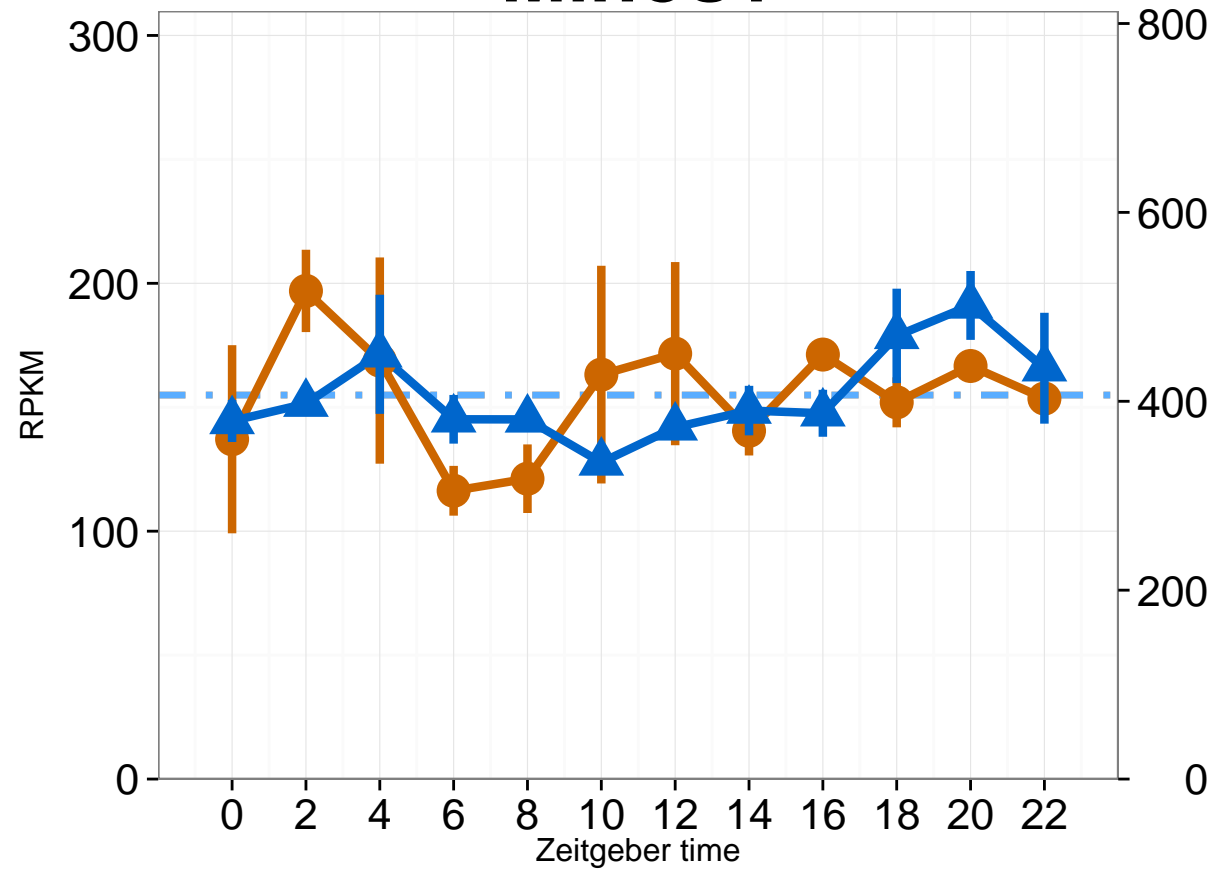

# Minos1

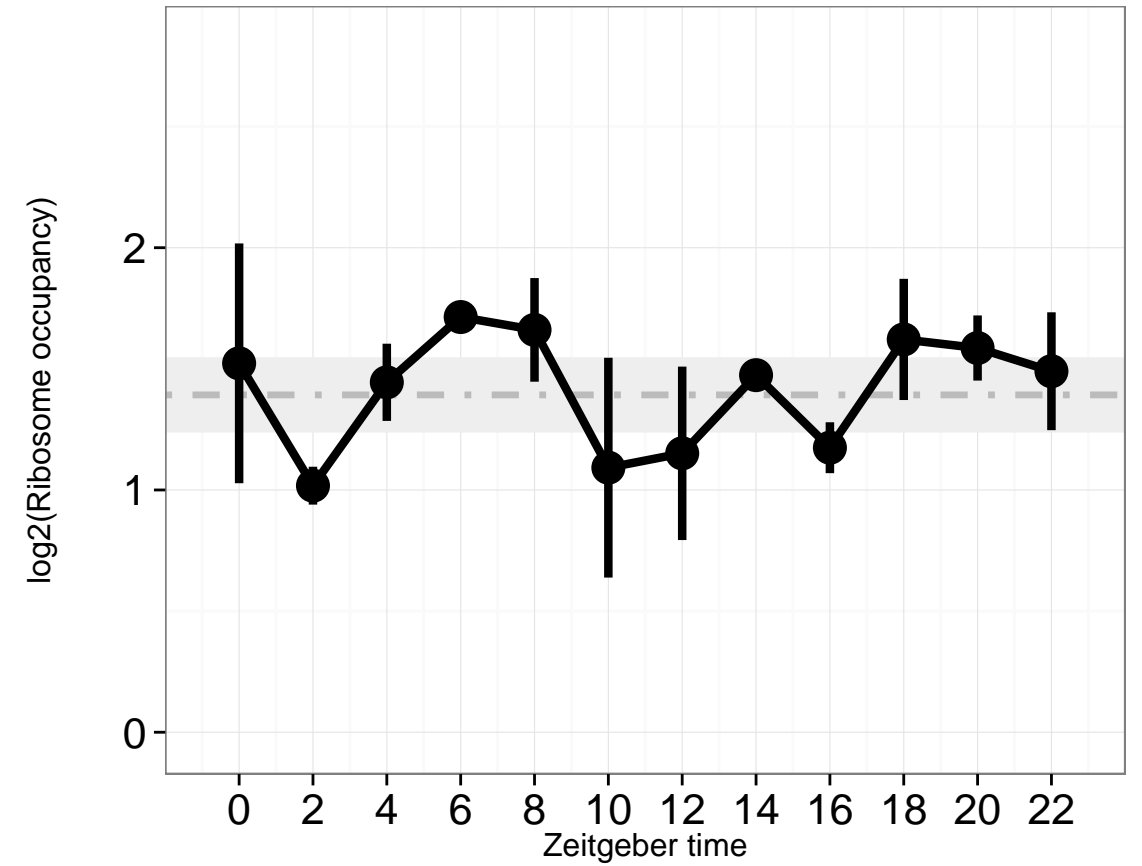

Supplement: Supplementary file 7513 [file 1]

## Glmn

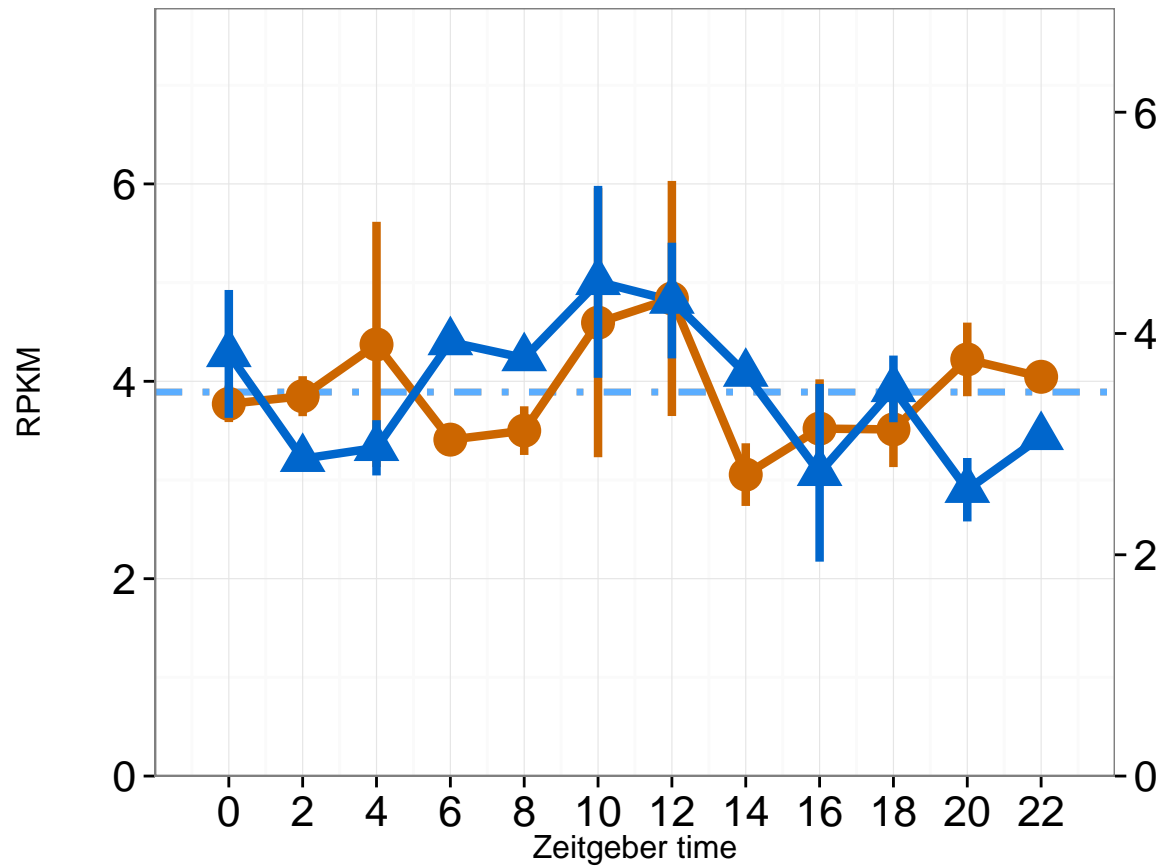

## Glmn

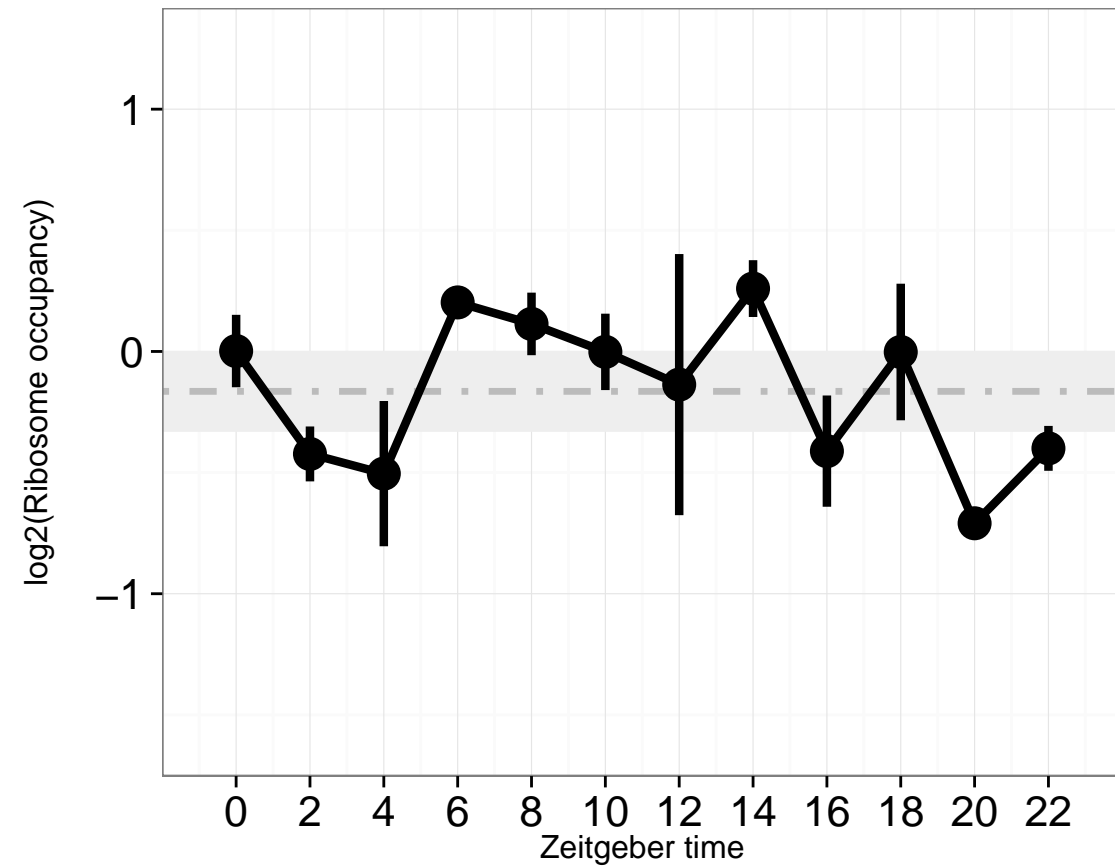

Supplement: Supplementary file 7514 [file 1]

# Stip1

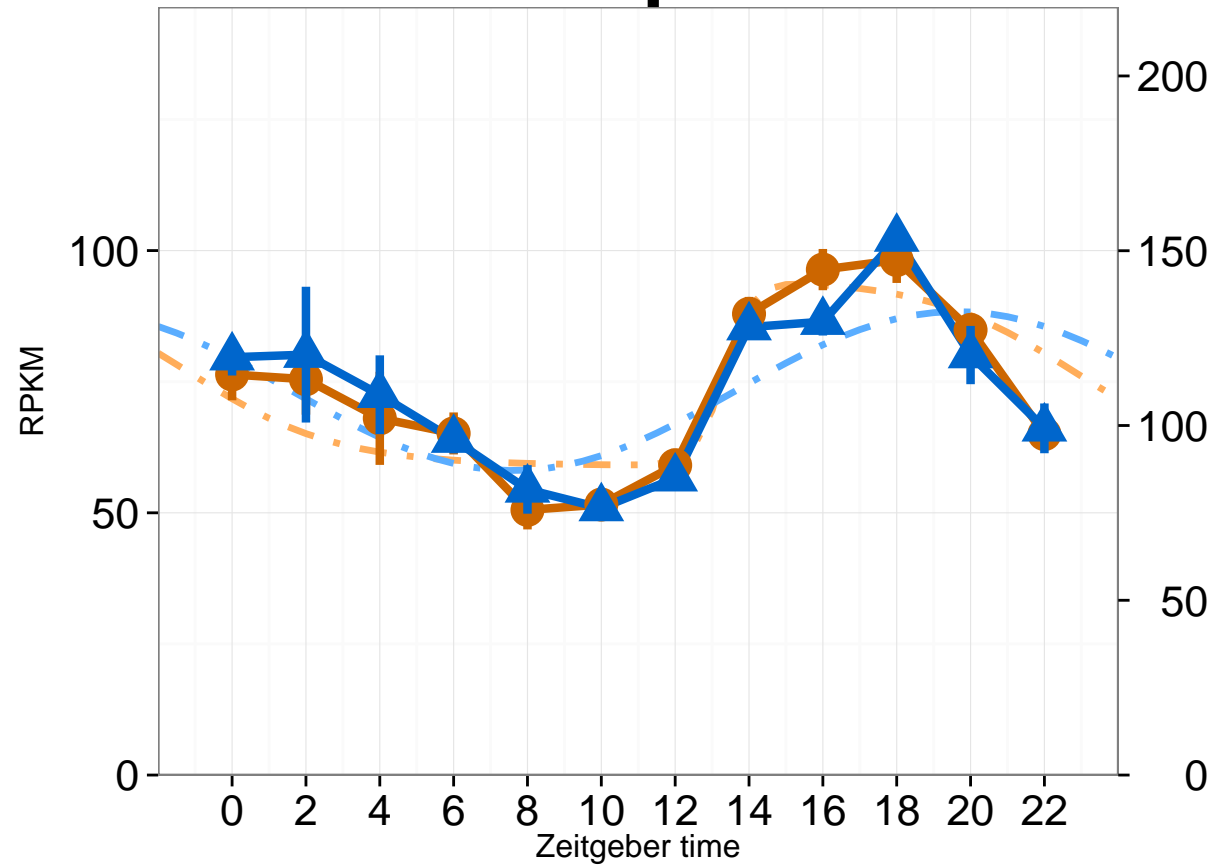

# Stip1

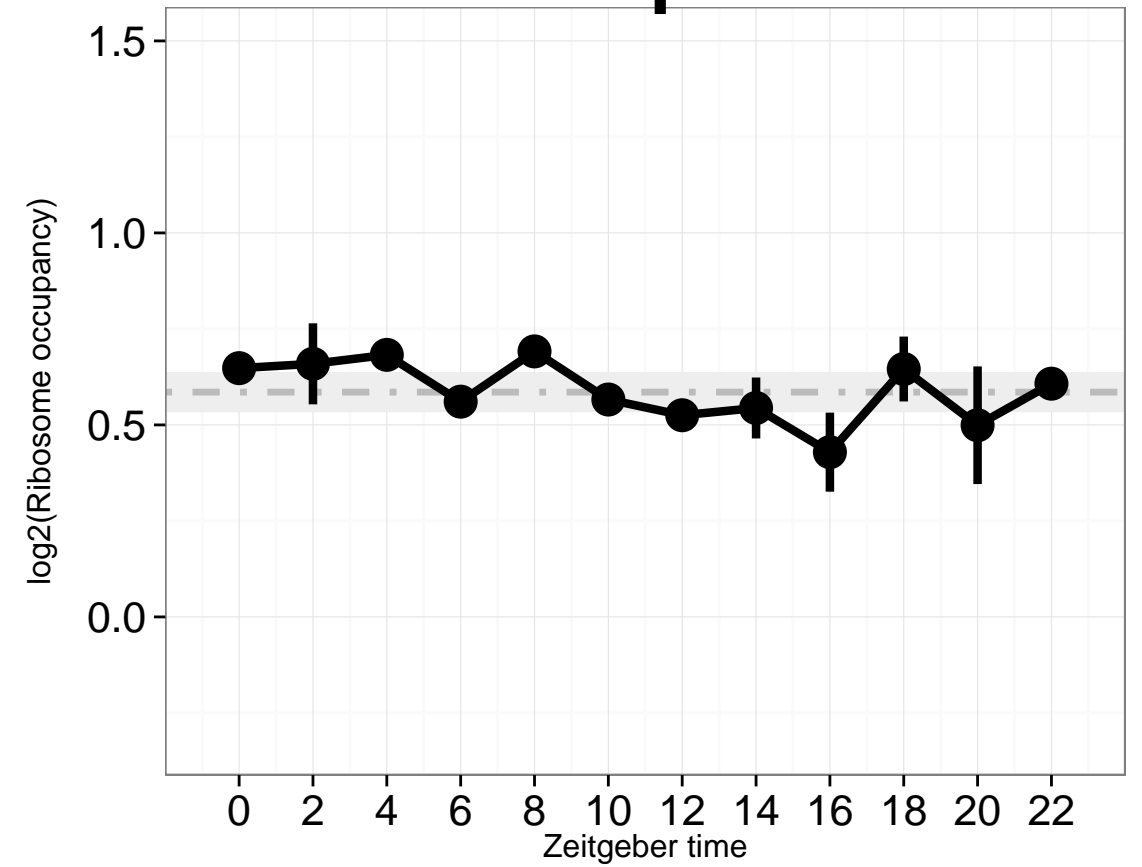

Supplement: Supplementary file 7515 [file 1]

## AB099516

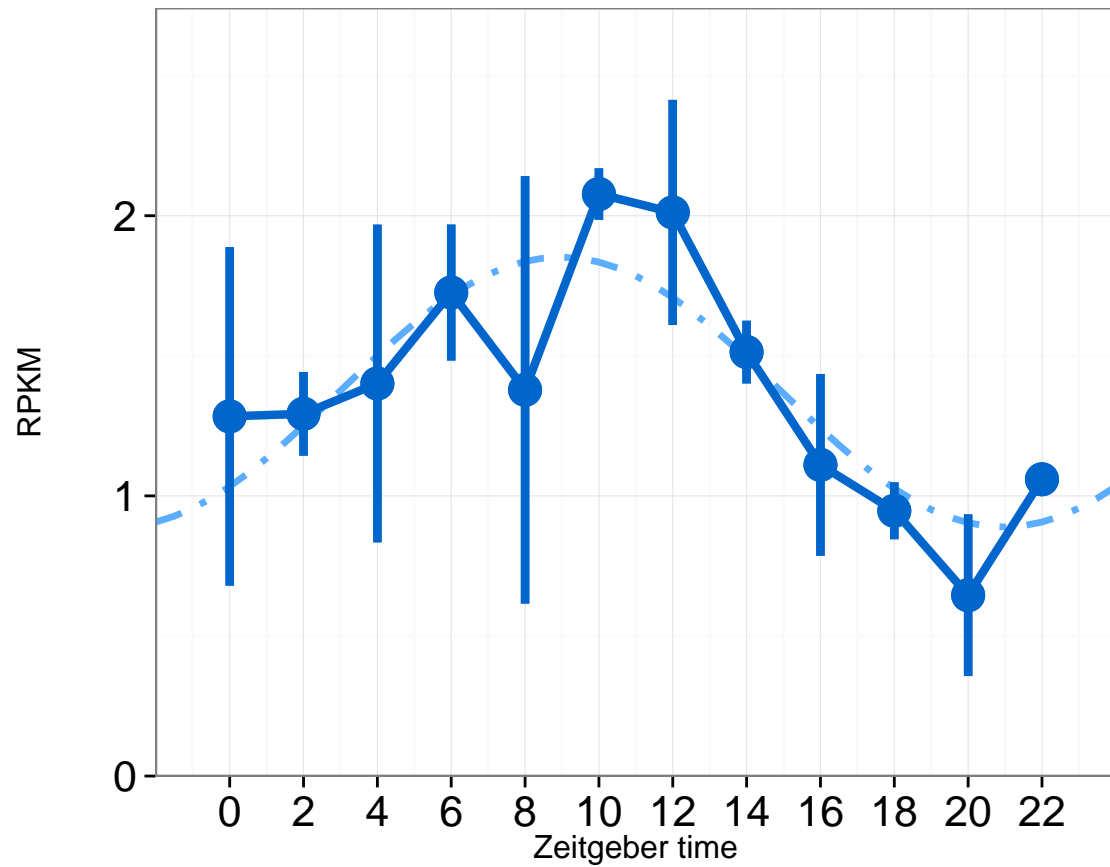

## AB099516 log2(Ribosome occupancy)

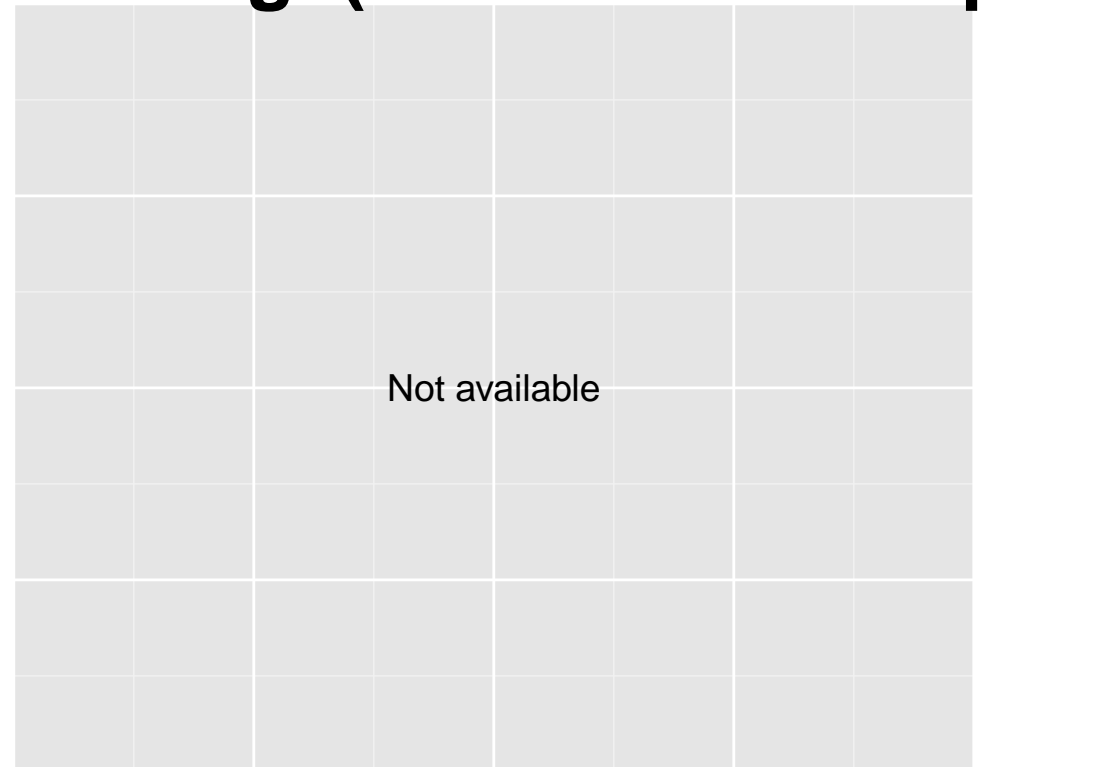

Supplement: Supplementary file 7516 [file 1]

# Hist1h2bh

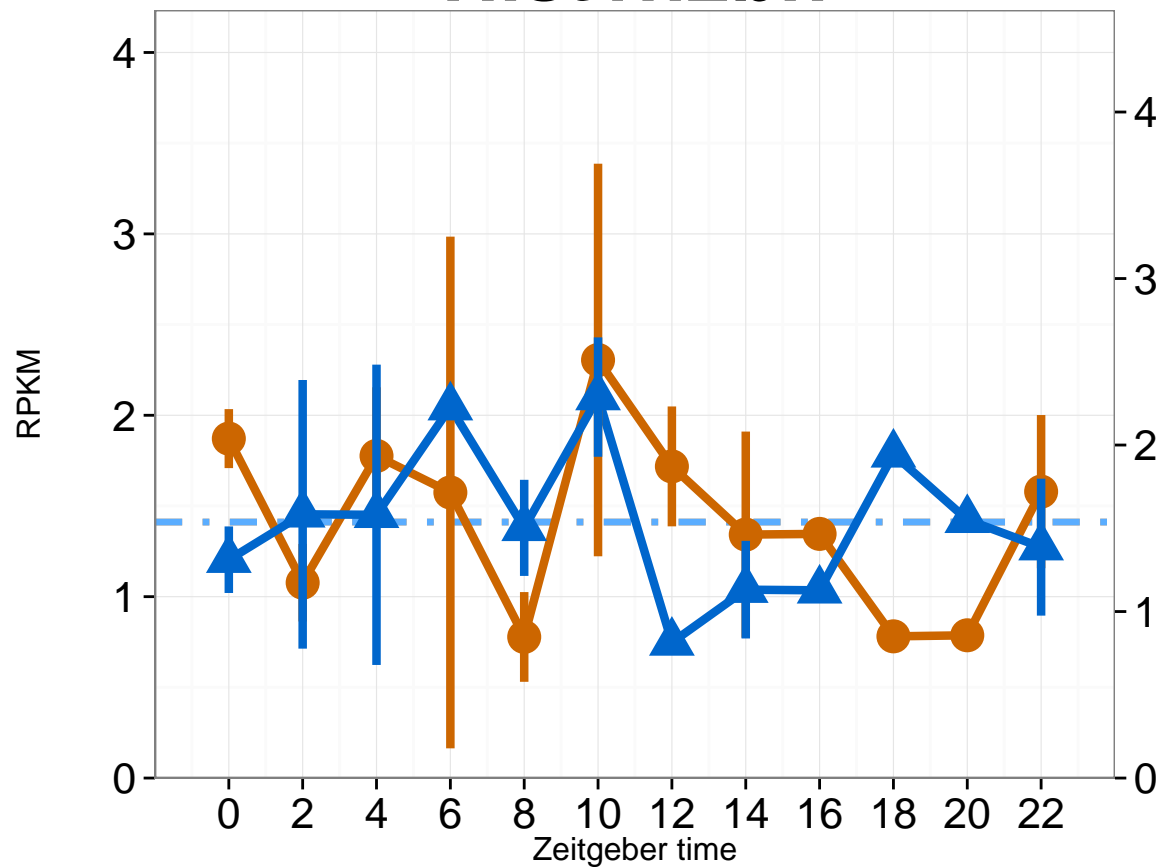

# Hist1h2bh

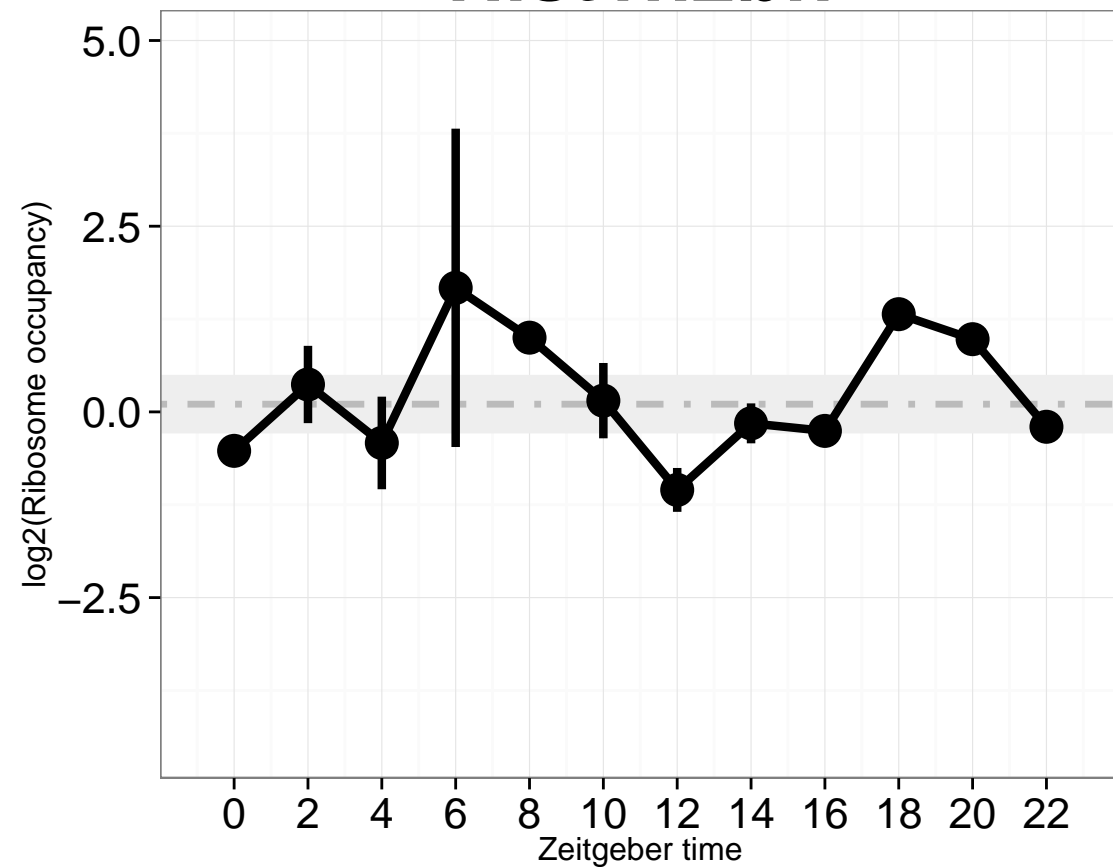

Supplement: Supplementary file 7517 [file 1]

## Ube2z

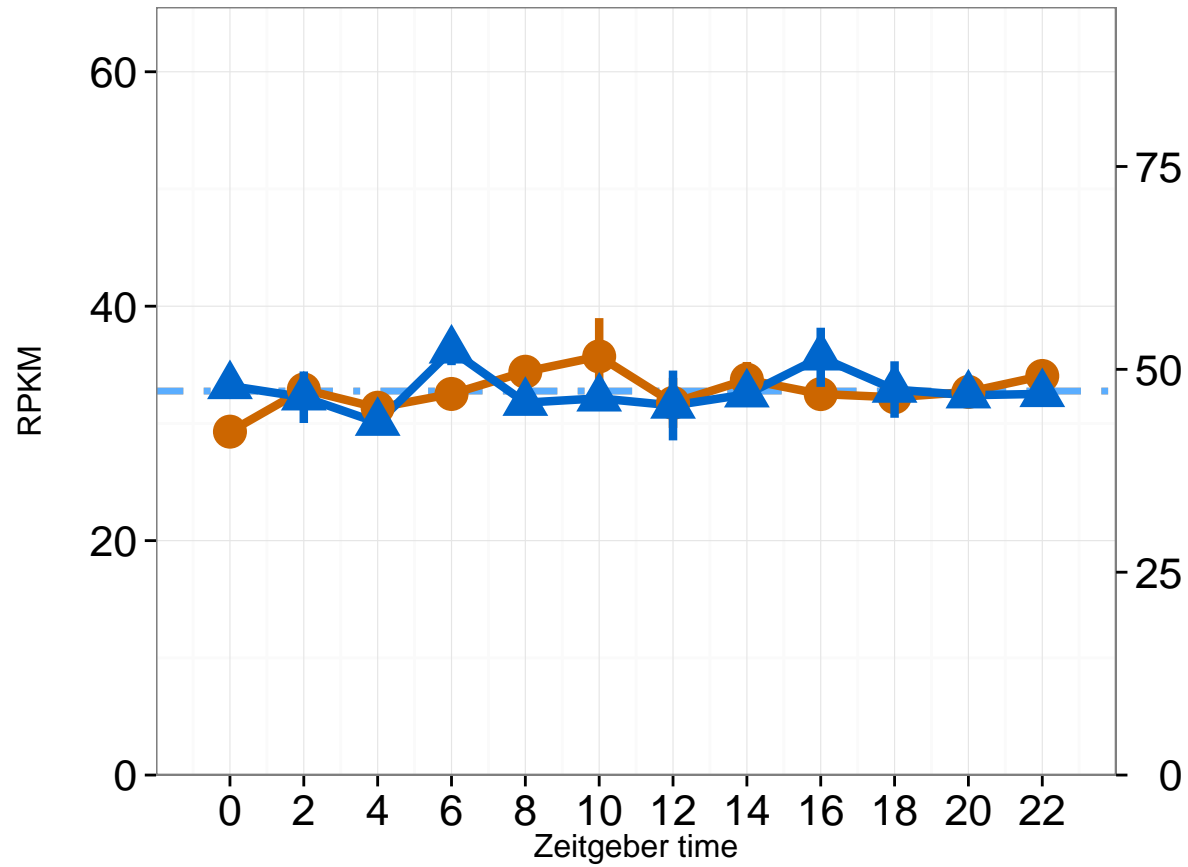

## Ube2z

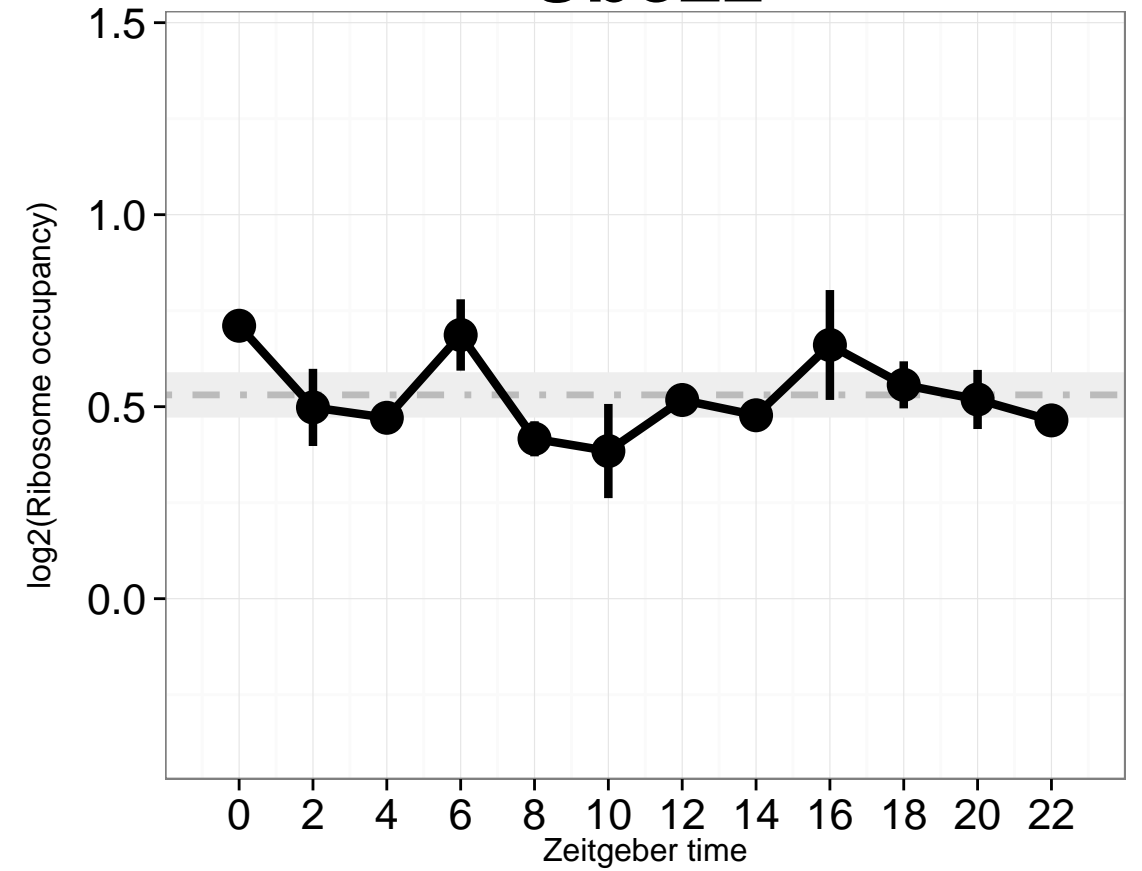

Supplement: Supplementary file 7518 [file 1]

## Mis12

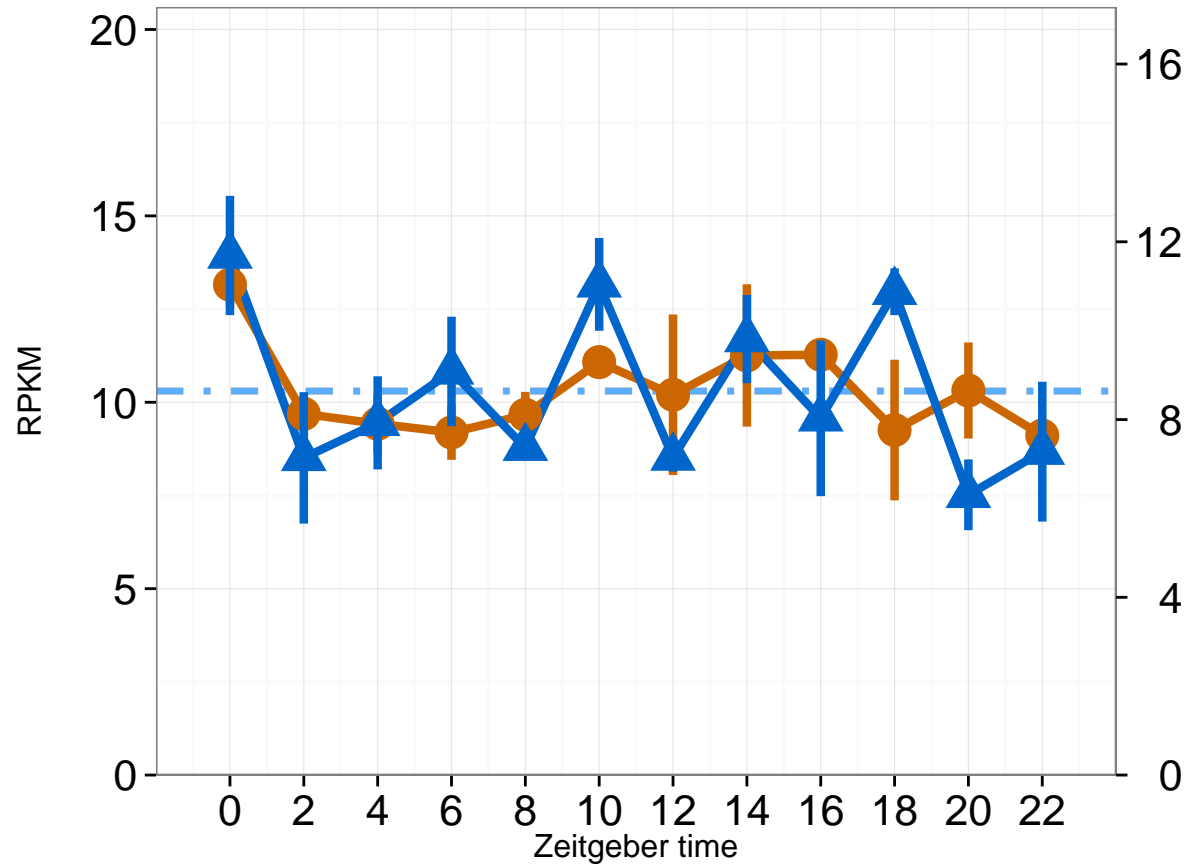

## Mis12

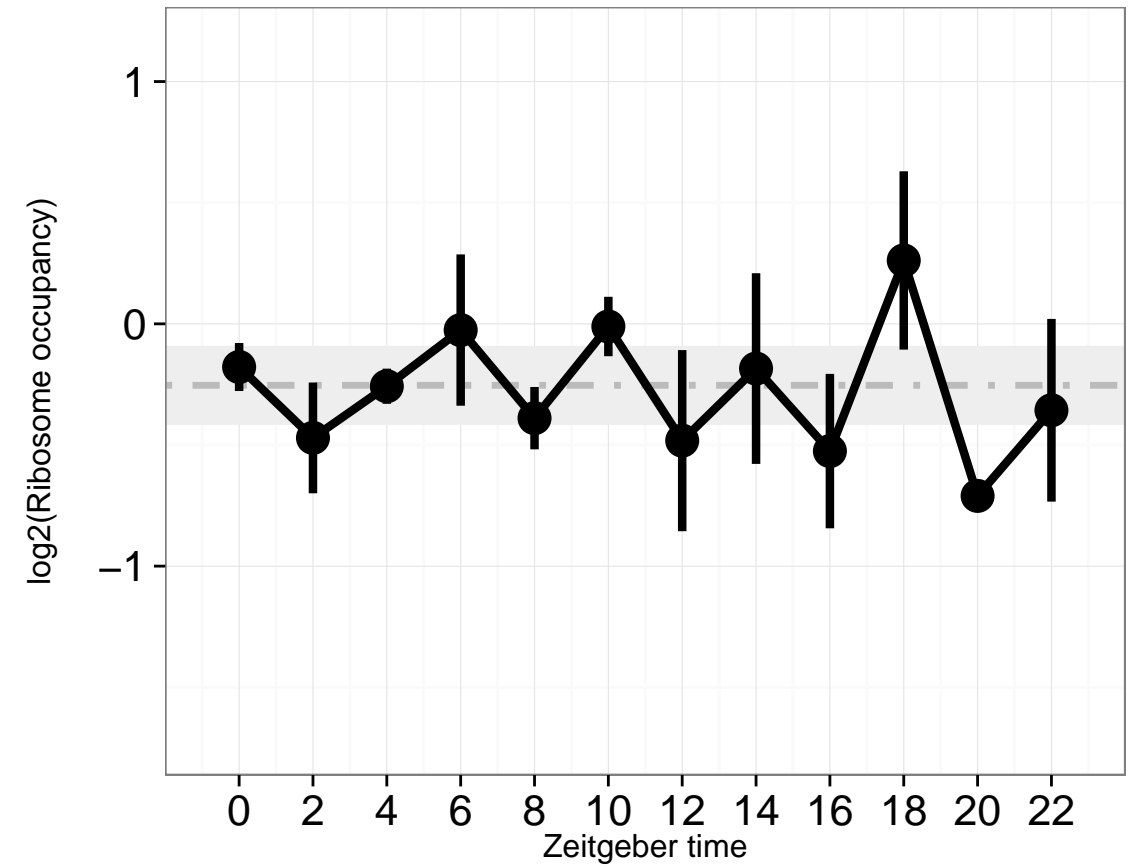

Supplement: Supplementary file 7519 [file 1]

# Leng8

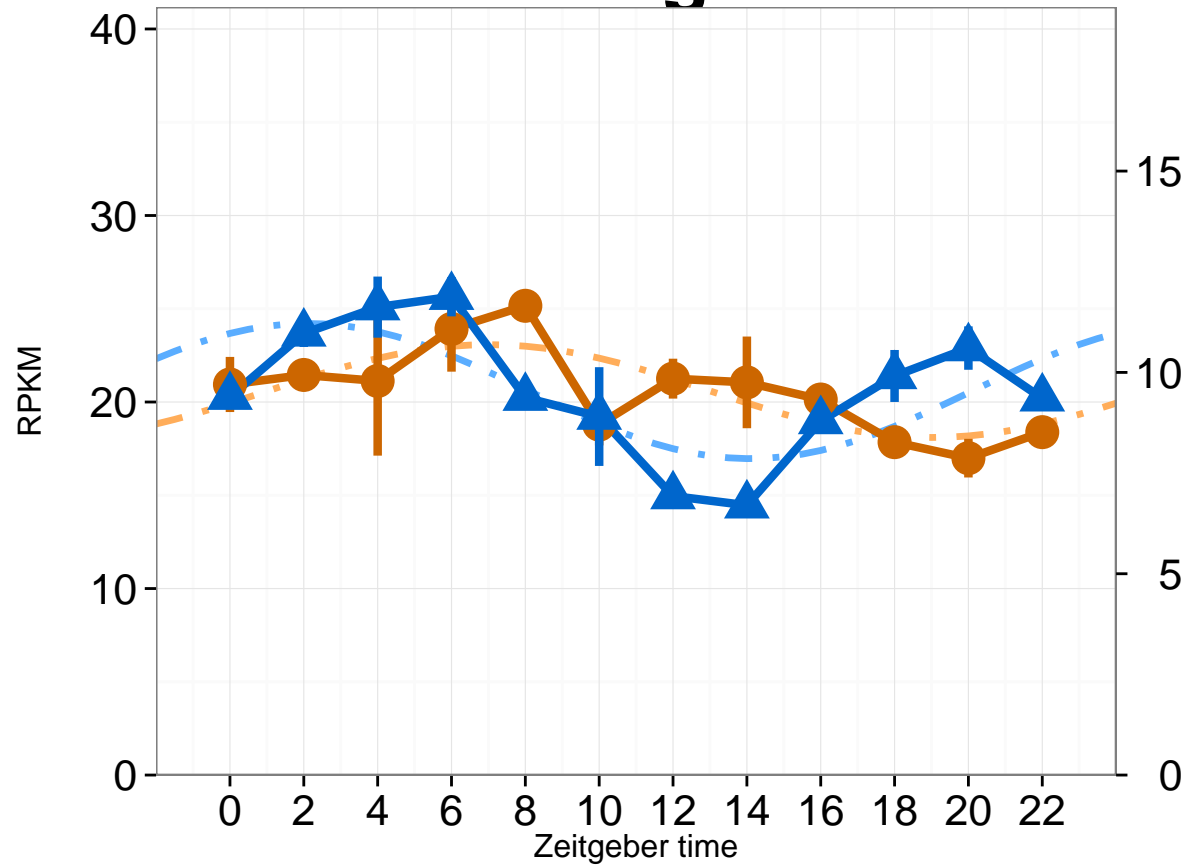

# Leng8

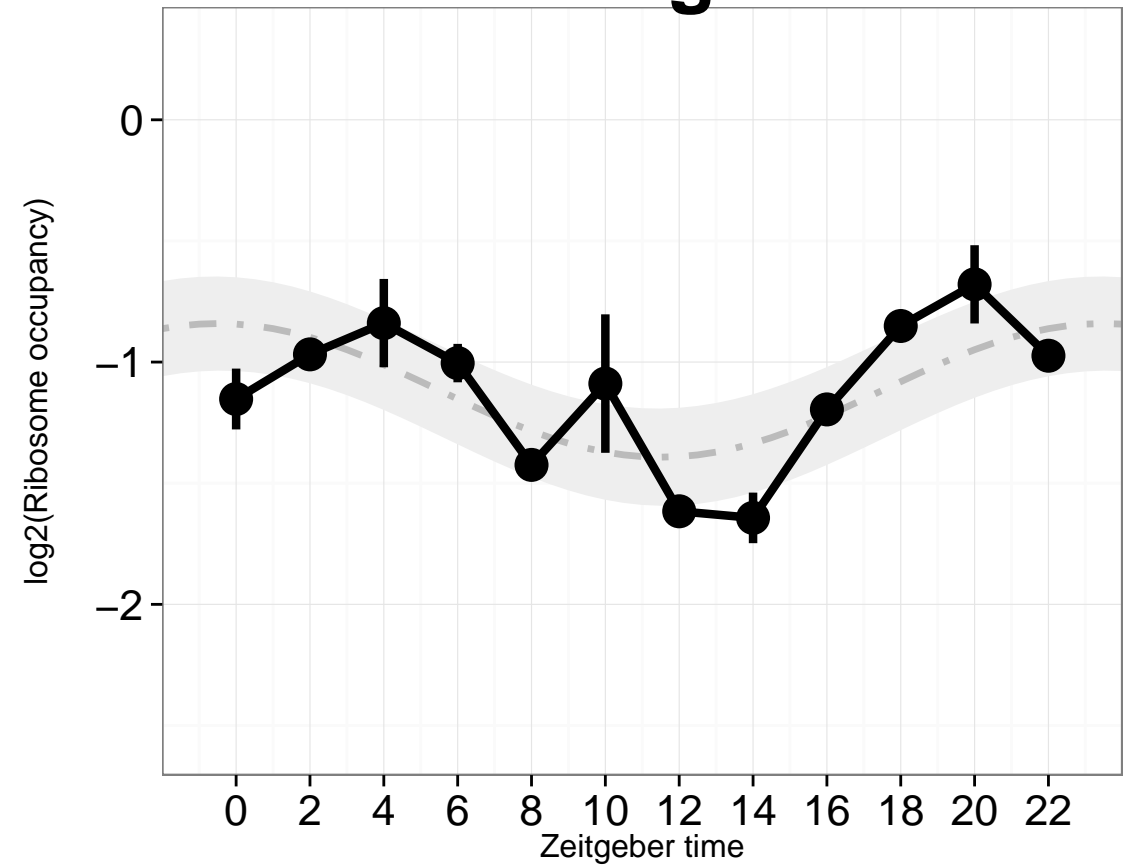

Supplement: Supplementary file 7520 [file 1]

## Ncapd3

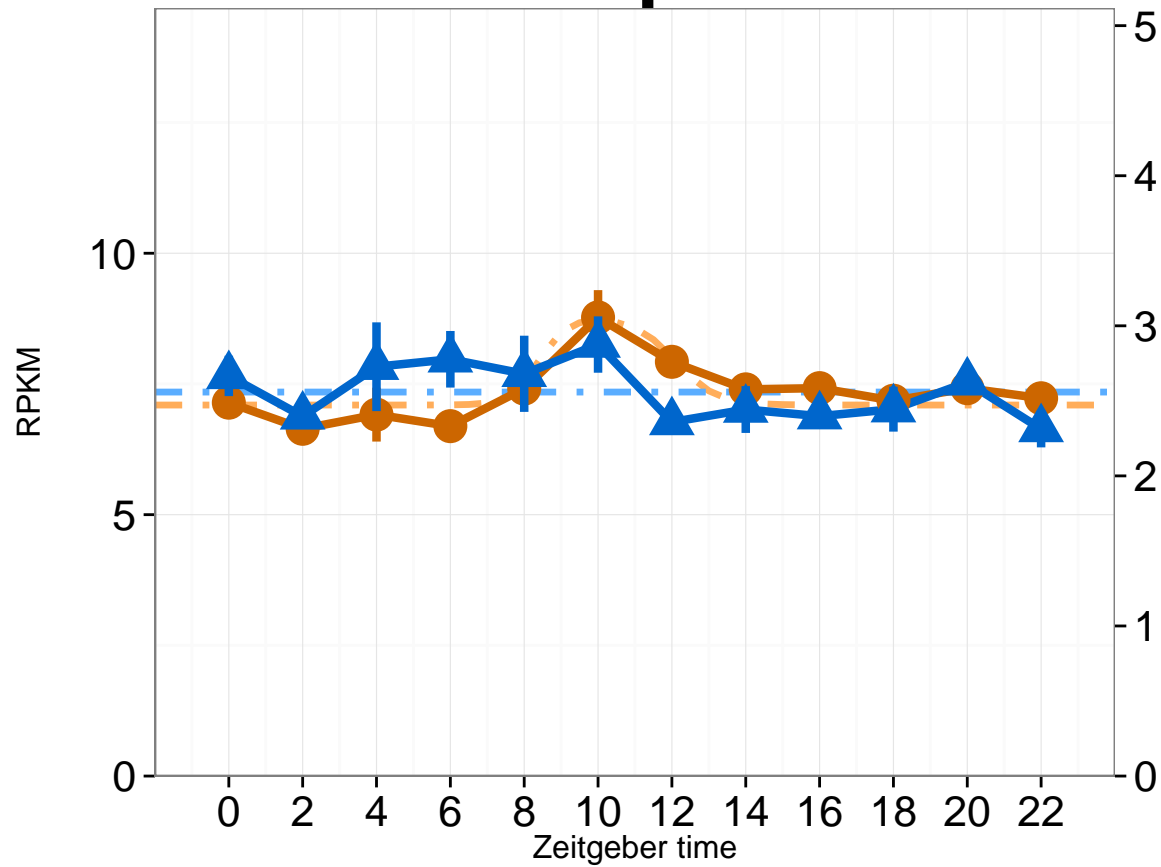

## Ncapd3

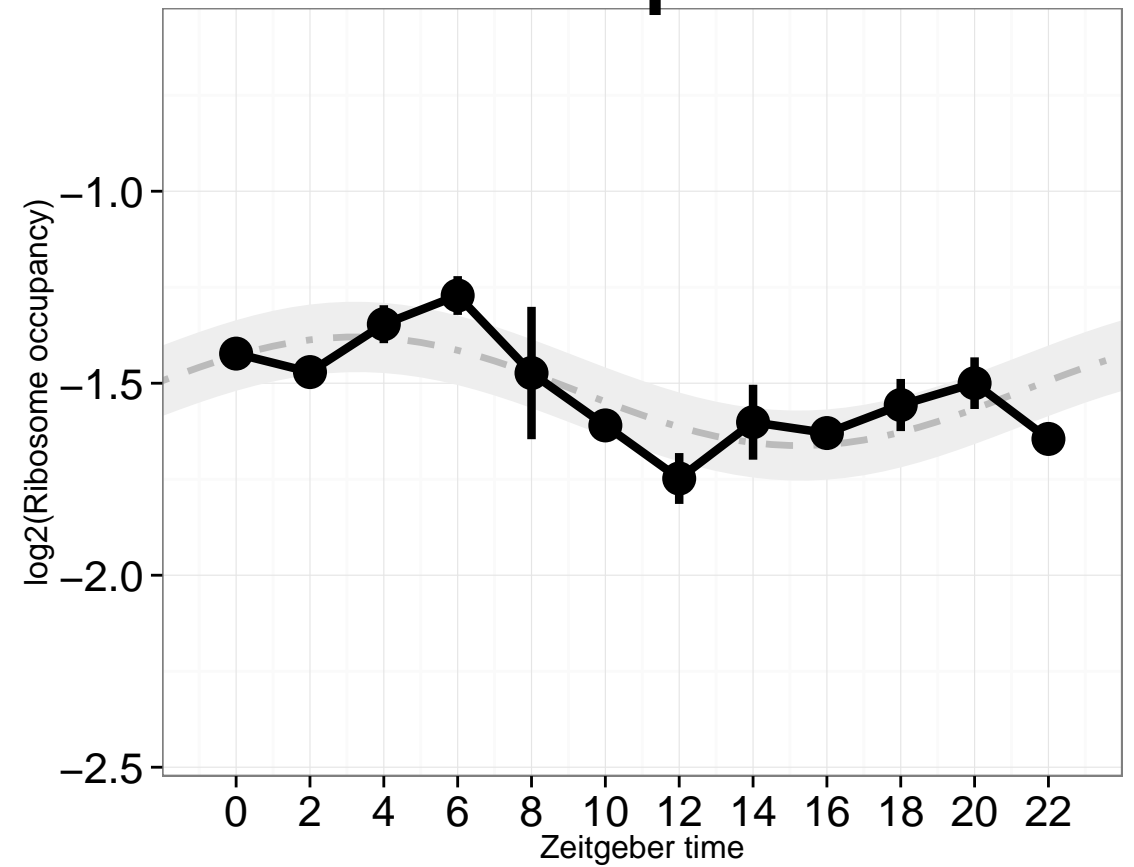

Supplement: Supplementary file 7521 [file 1]

## Fat4

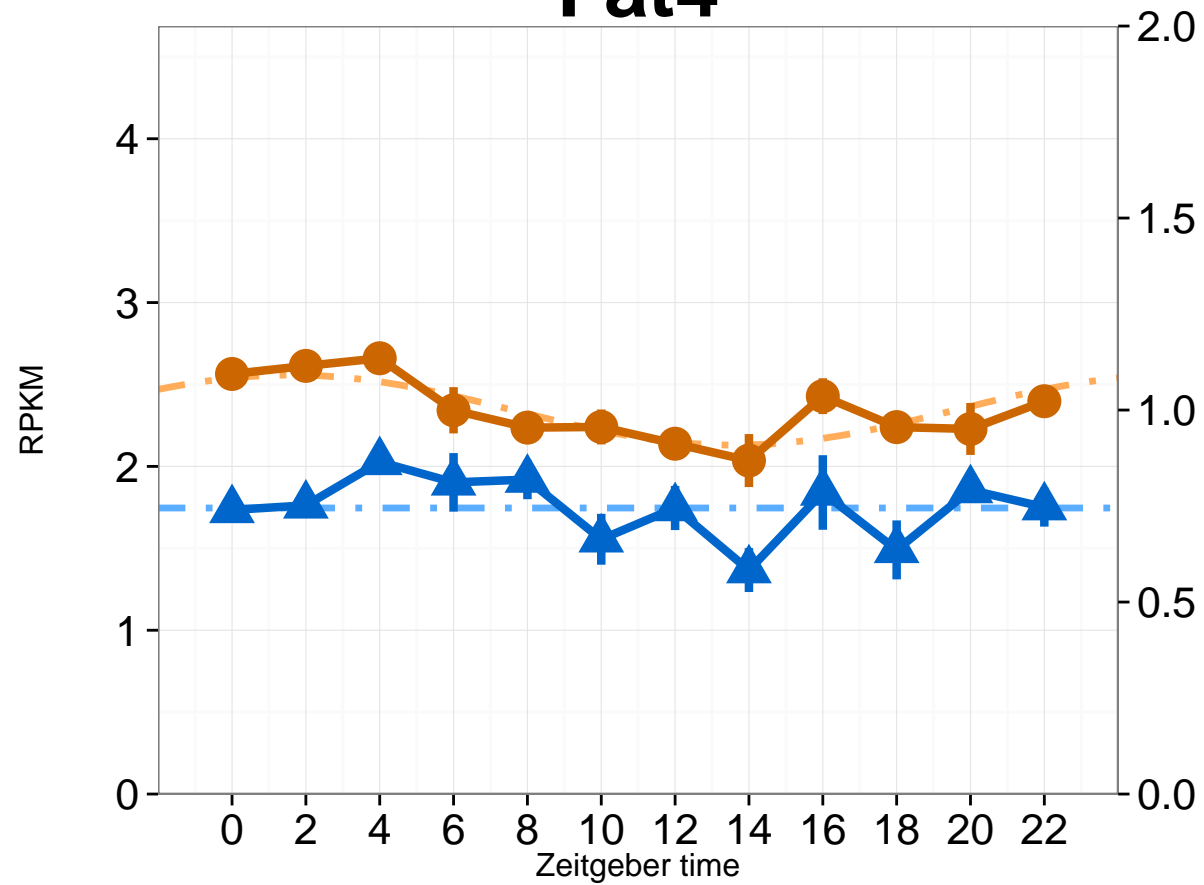

## Fat4

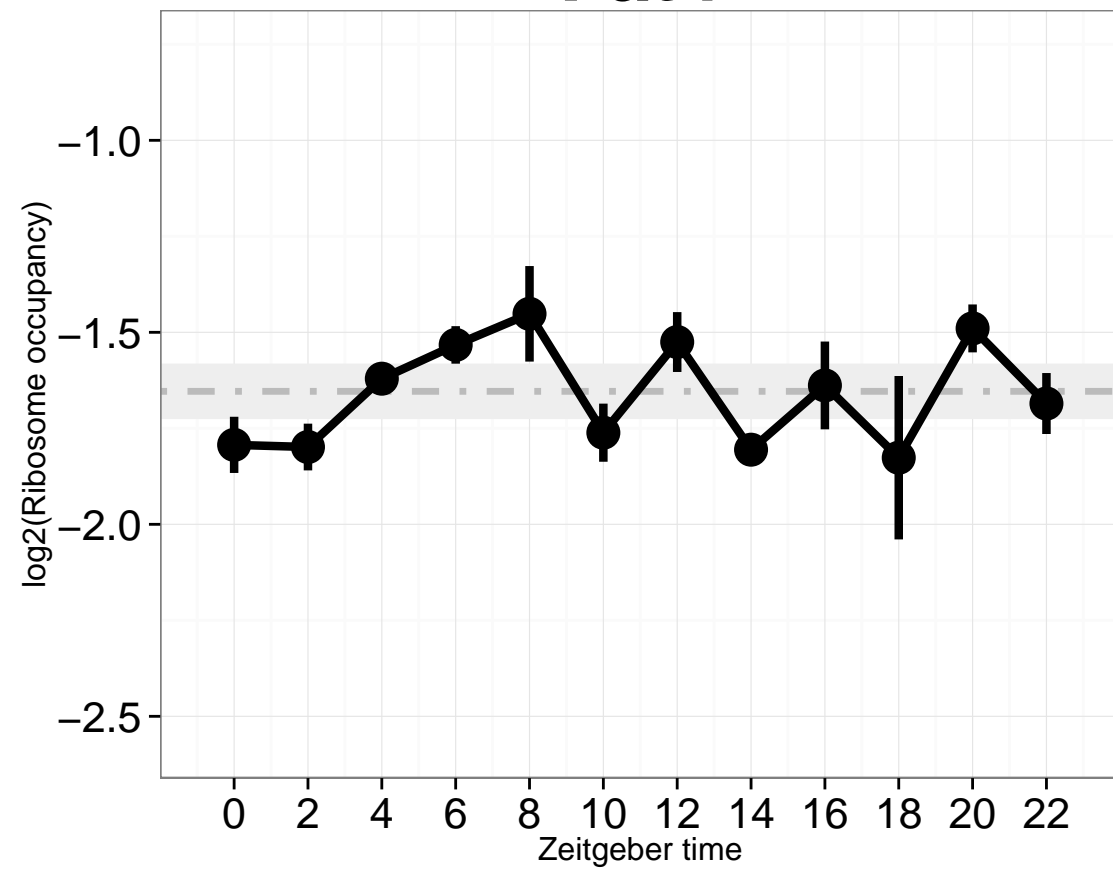

Supplement: Supplementary file 7522 [file 1]

# Ung

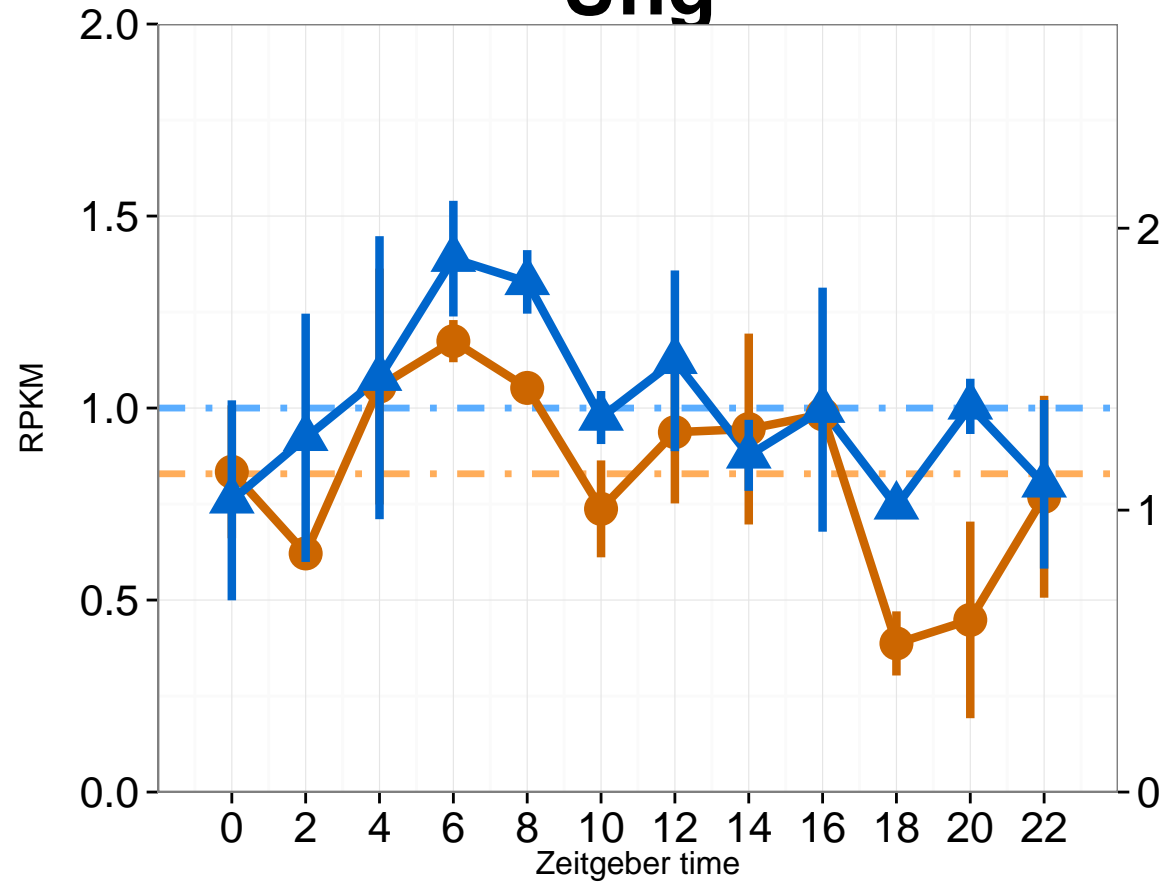

# Ung

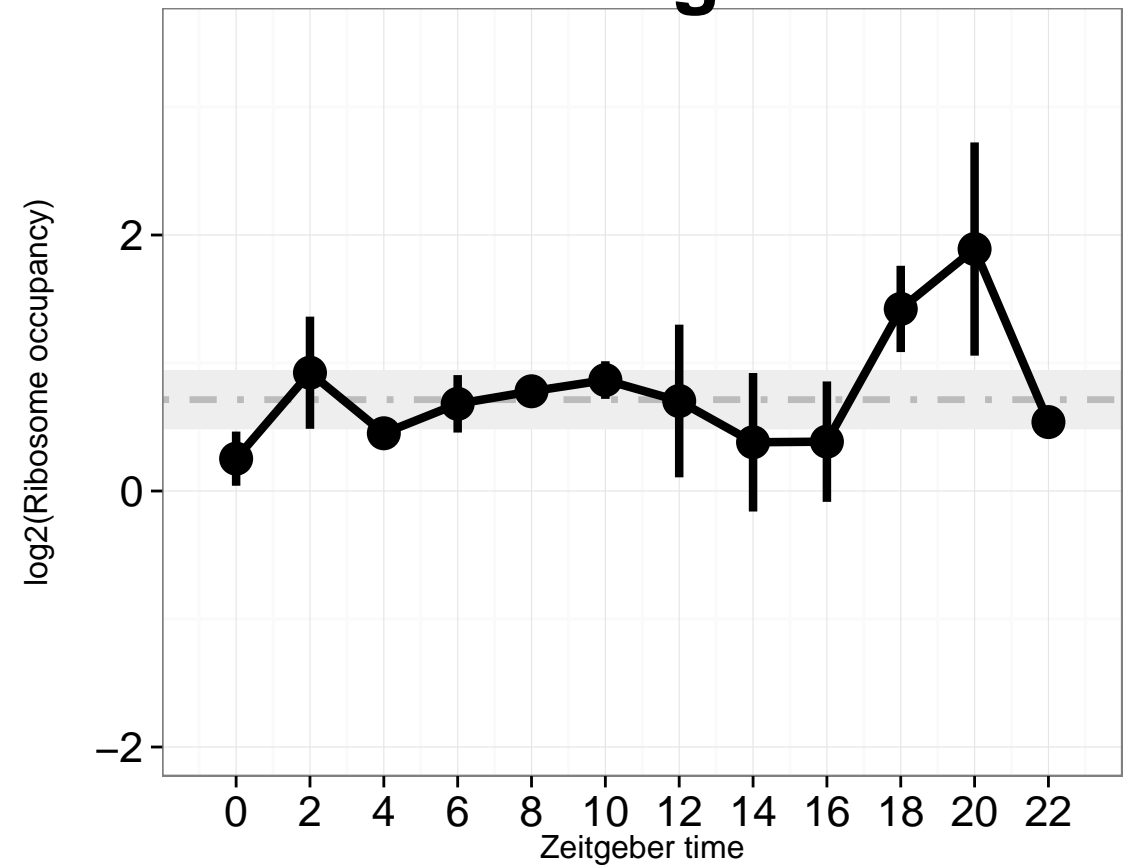

Supplement: Supplementary file 7523 [file 1]
