# Supplementary material (part 76 of 133)
Source: publisher figshare collection journal article supplement (https://springernature.figshare.com/articles/dataset/_/4903193)

# 4930502E18Rik

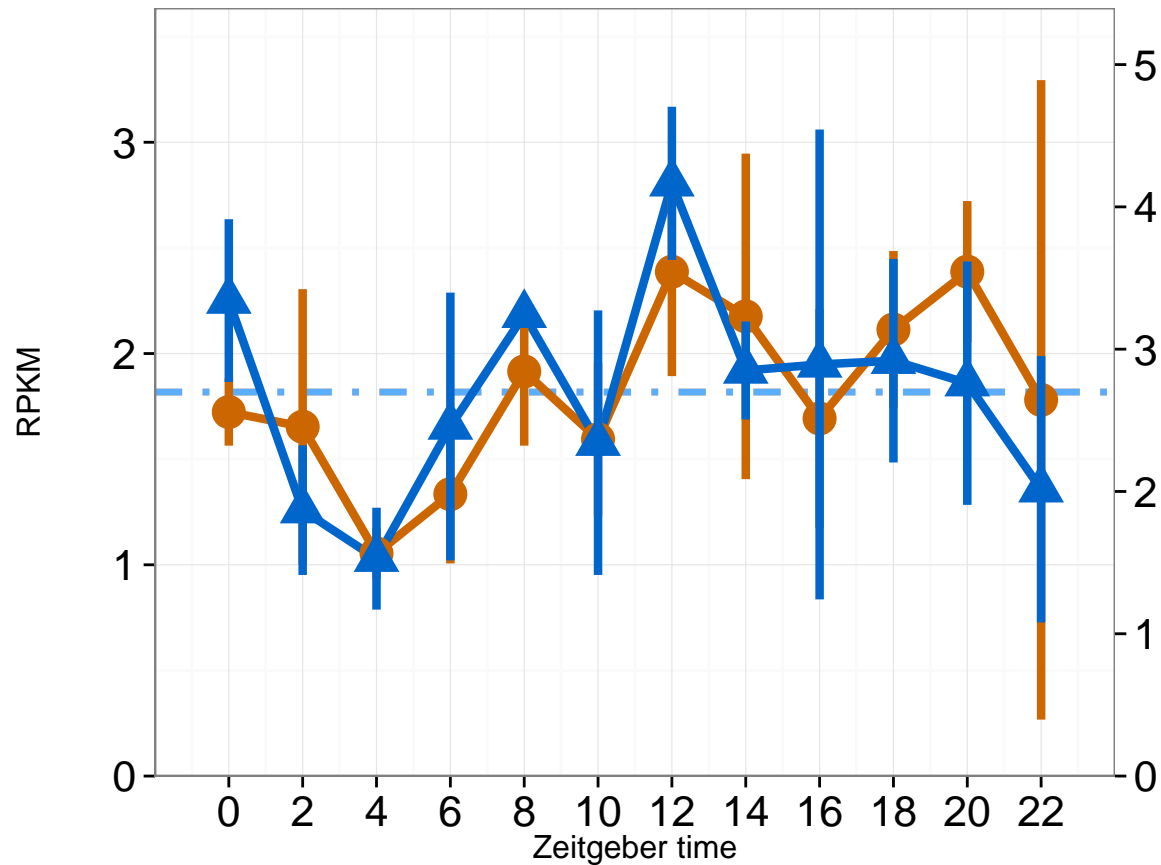

# 4930502E18Rik

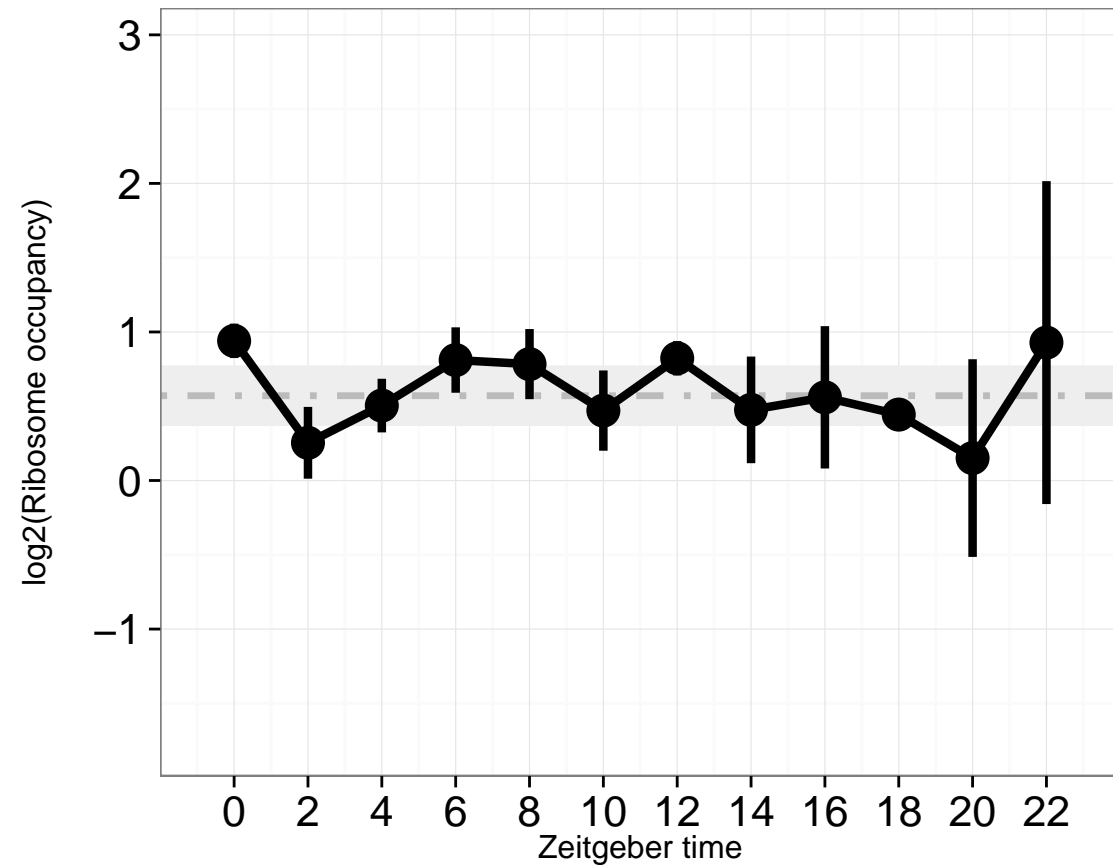

Supplement: Supplementary file 7524 [file 1]

# Trim68

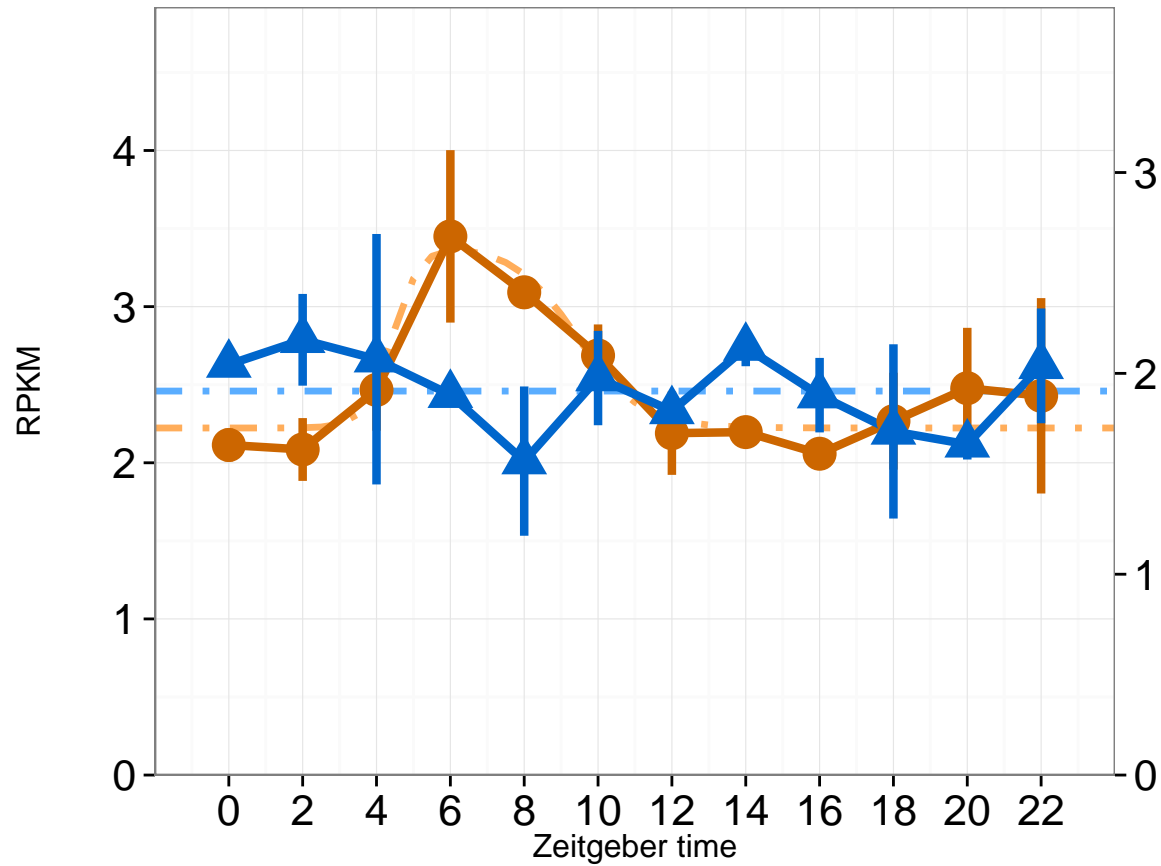

# Trim68

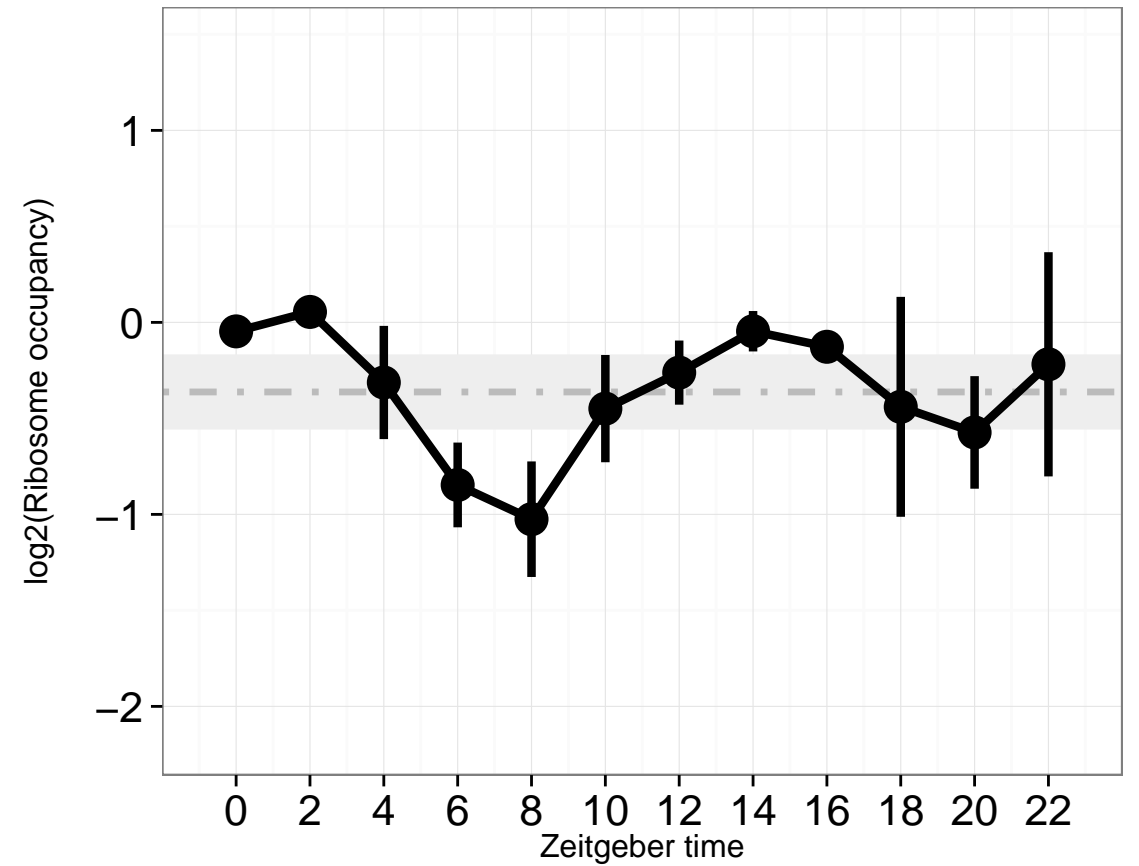

Supplement: Supplementary file 7525 [file 1]

# Ptbp1

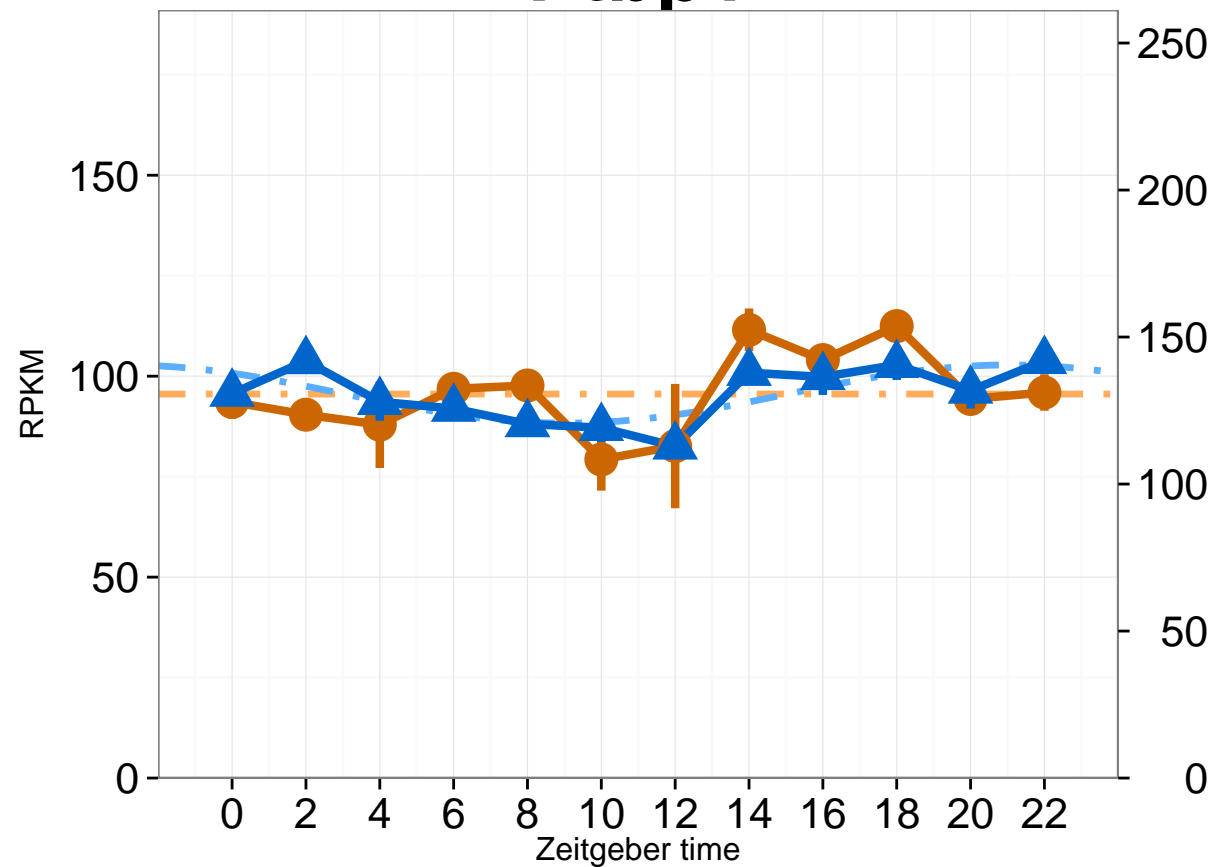

# Ptbp1

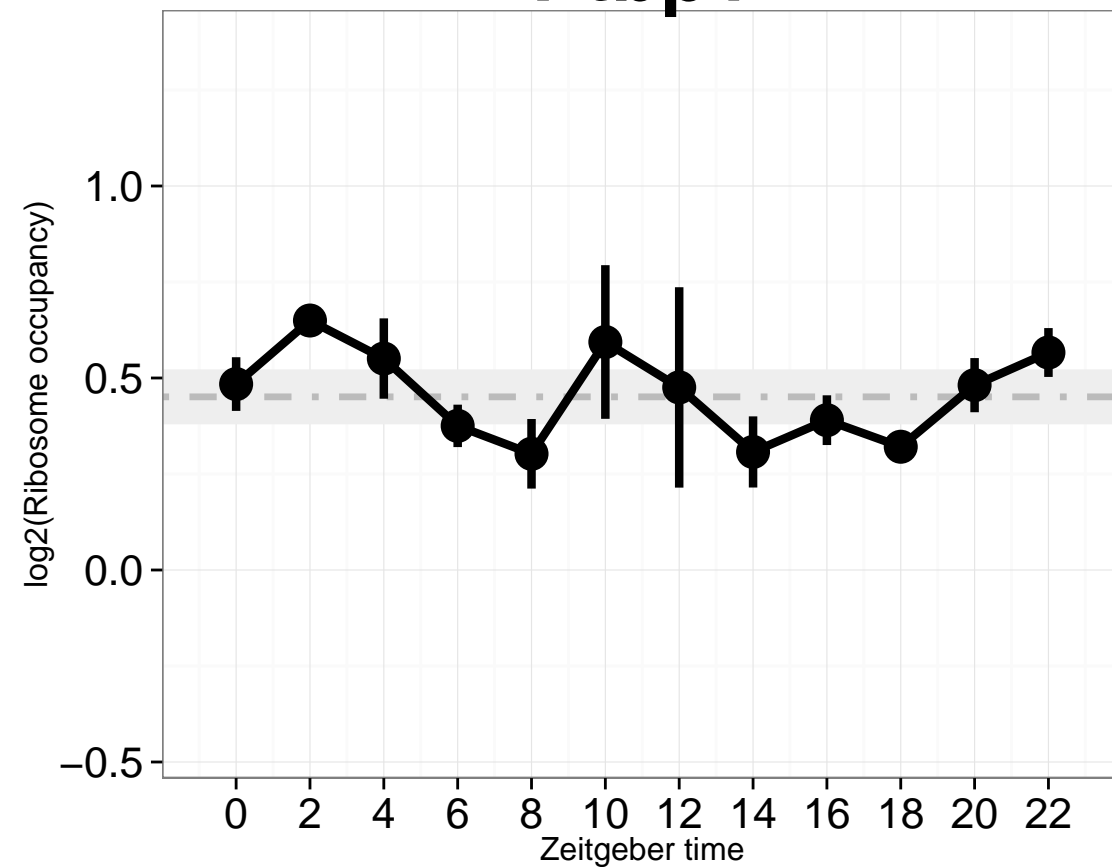

Supplement: Supplementary file 7526 [file 1]

# Tnfaip8l2

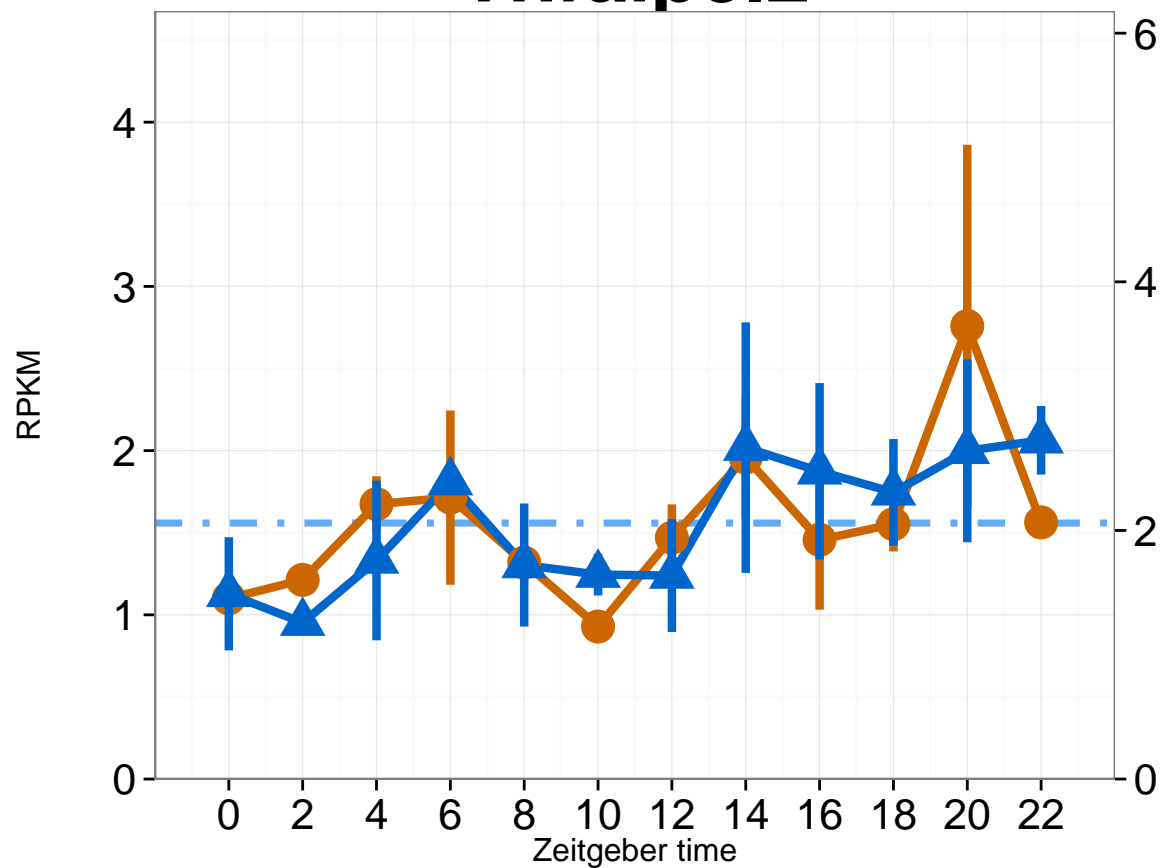

# Tnfaip8l2

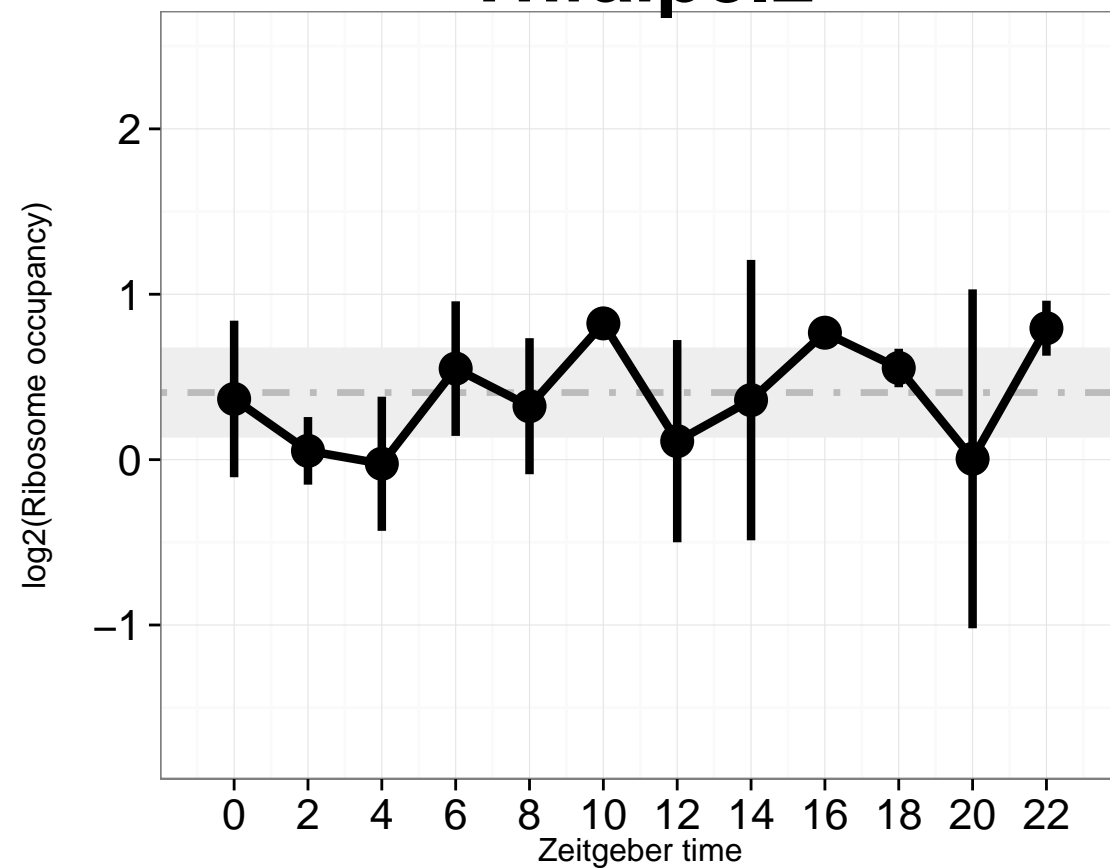

Supplement: Supplementary file 7527 [file 1]

# Ppap2a

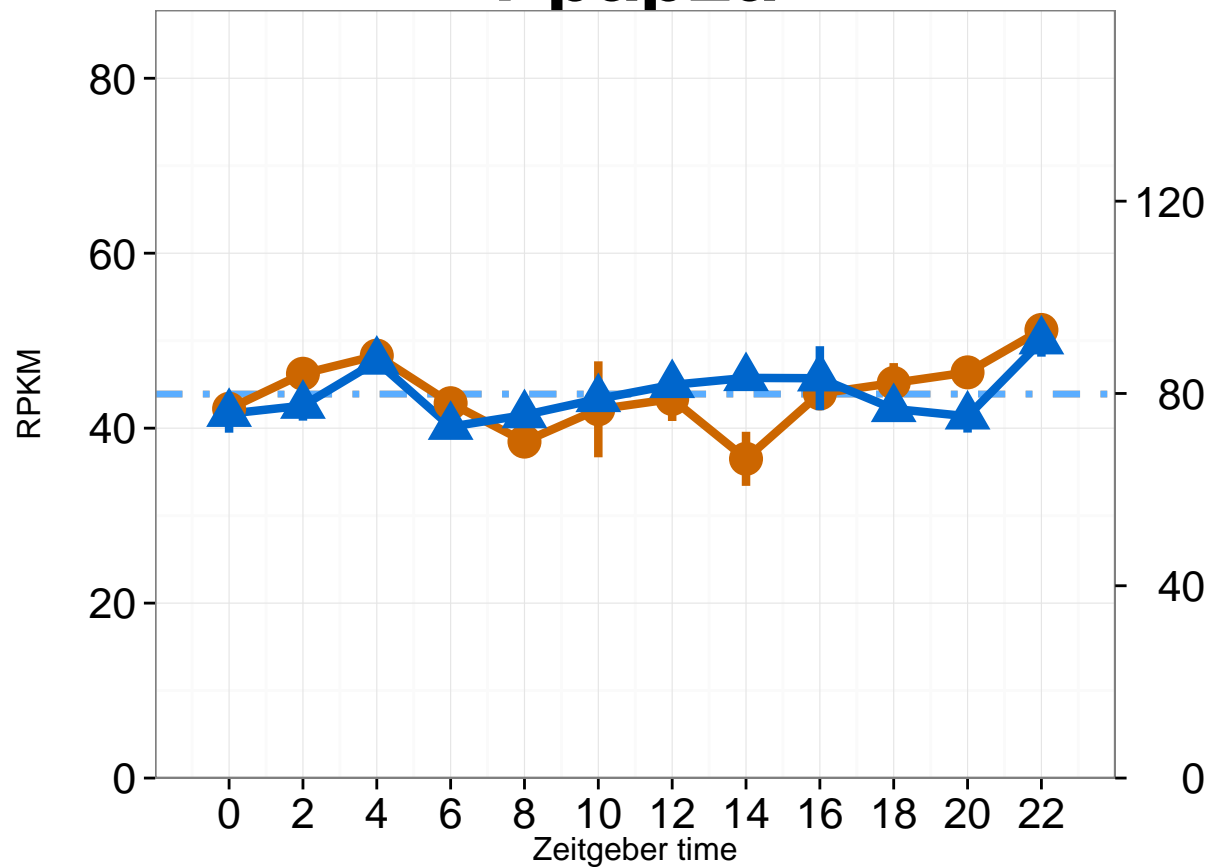

# Ppap2a

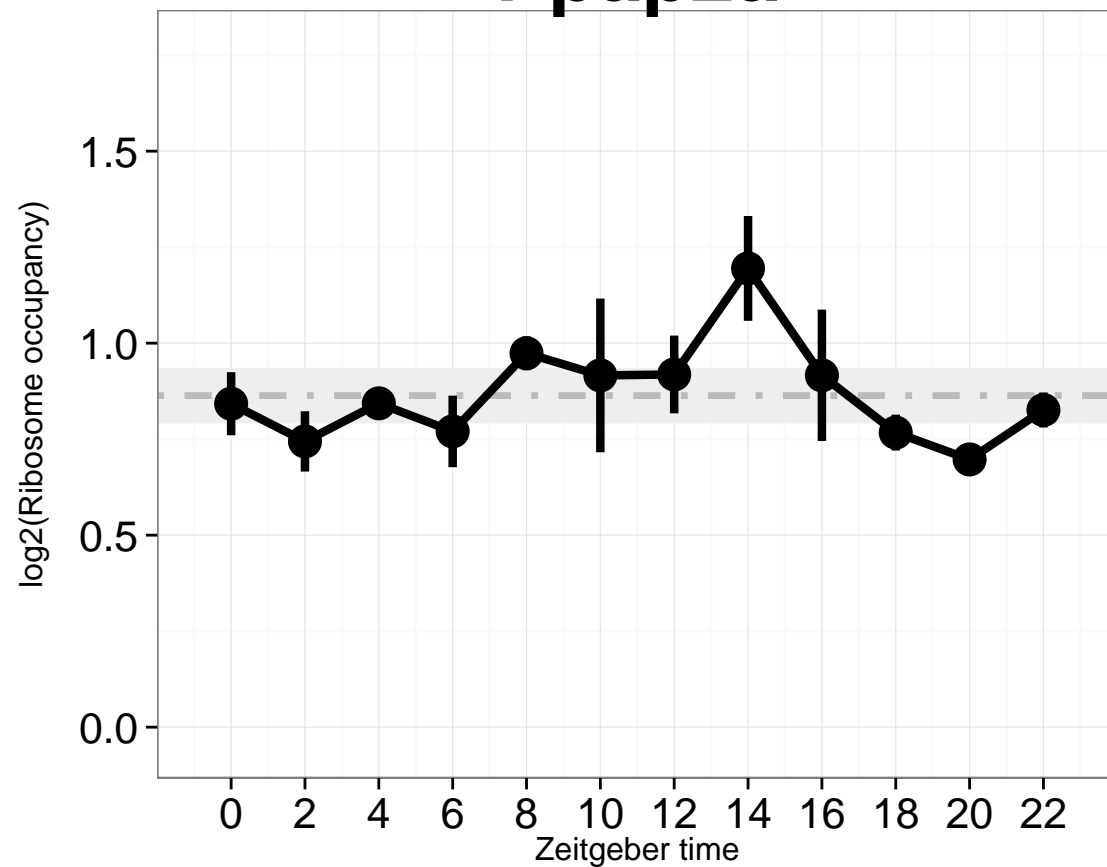

Supplement: Supplementary file 7528 [file 1]

## Cers4

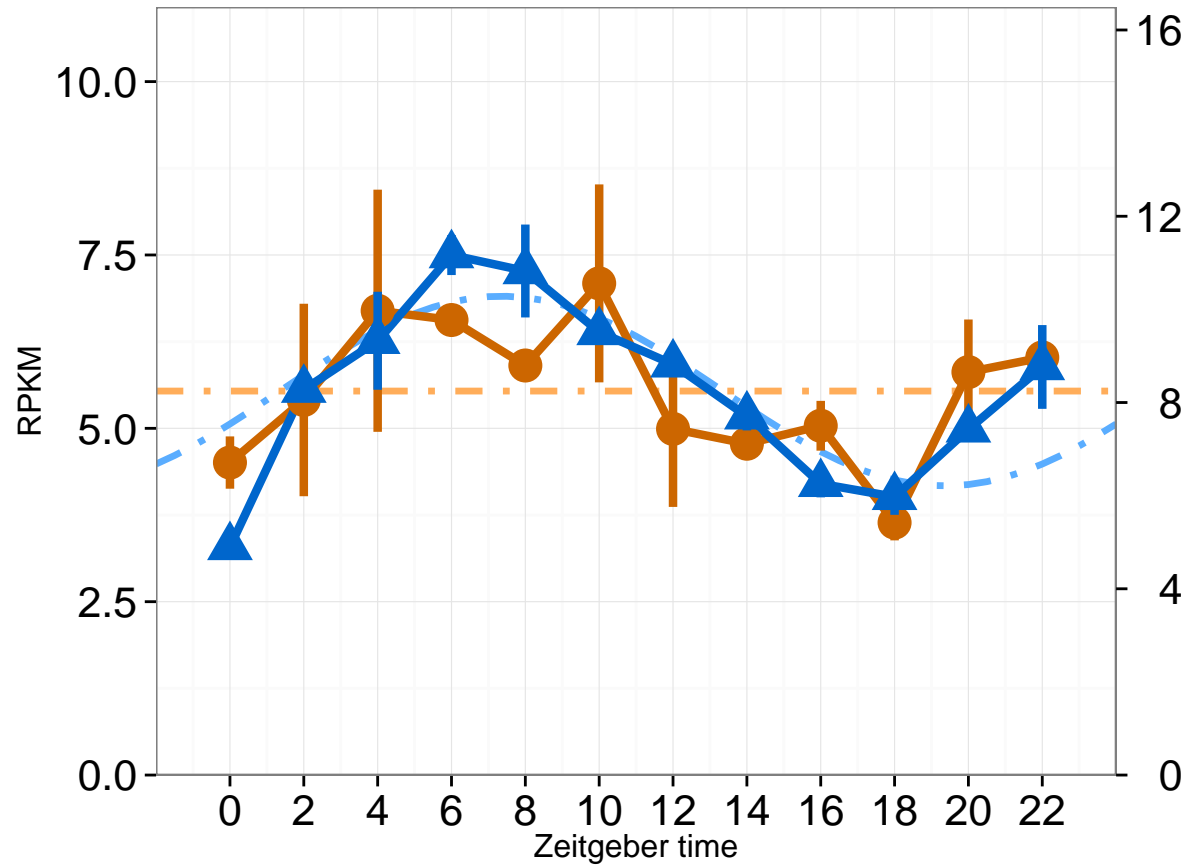

## Cers4

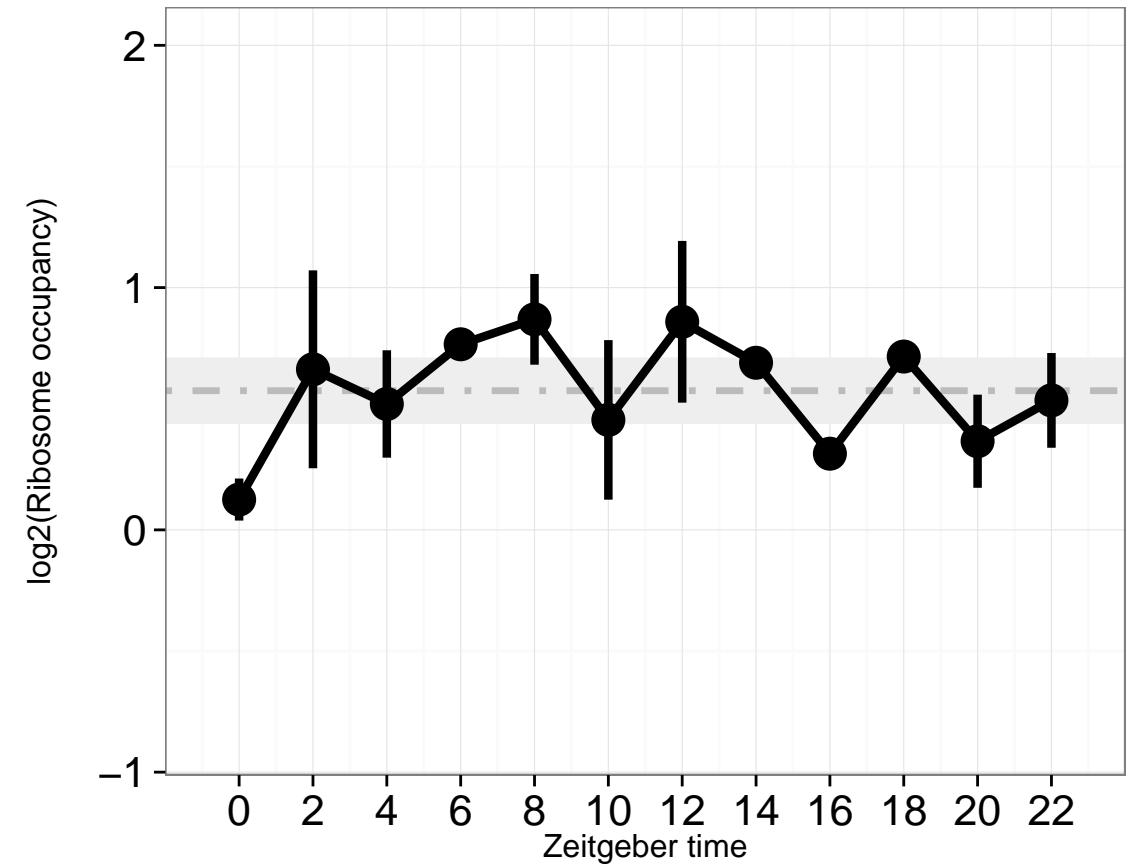

Supplement: Supplementary file 7529 [file 1]

## Med11

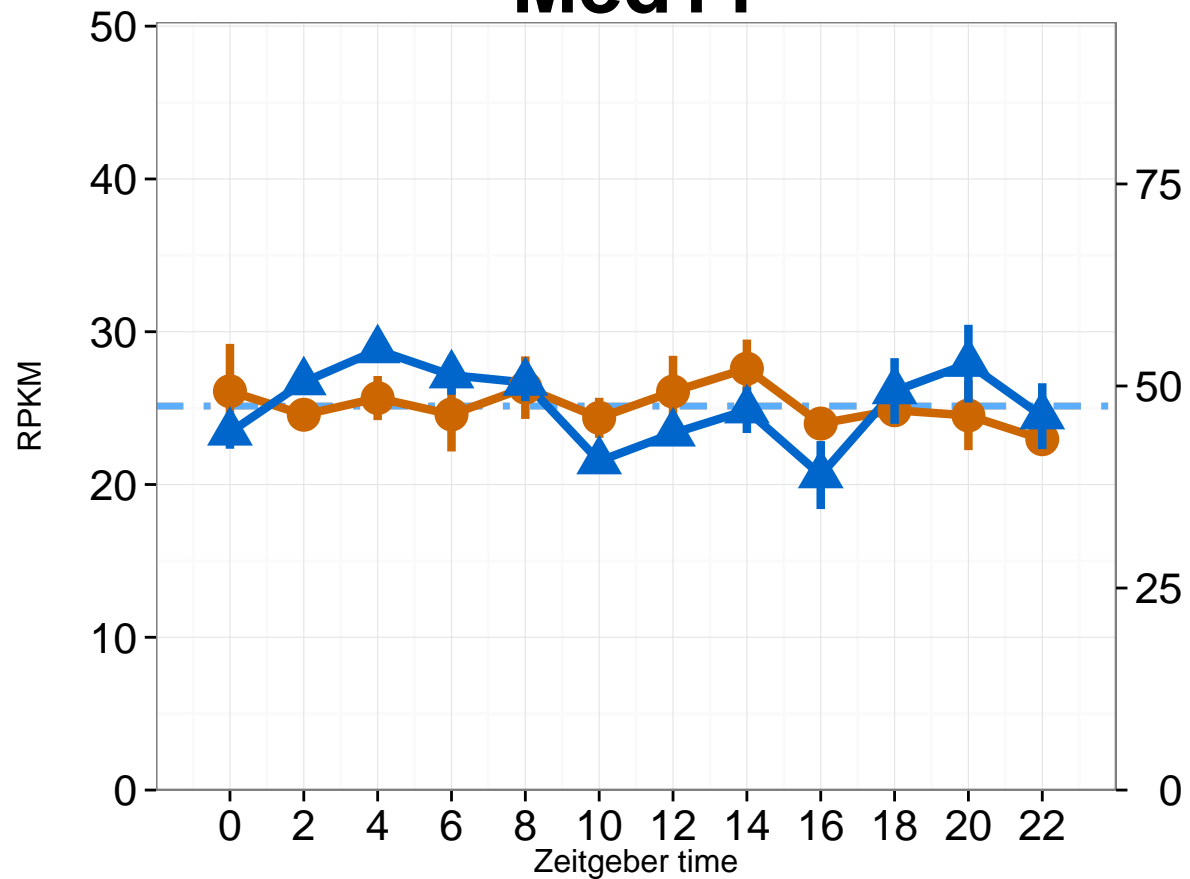

## Med11

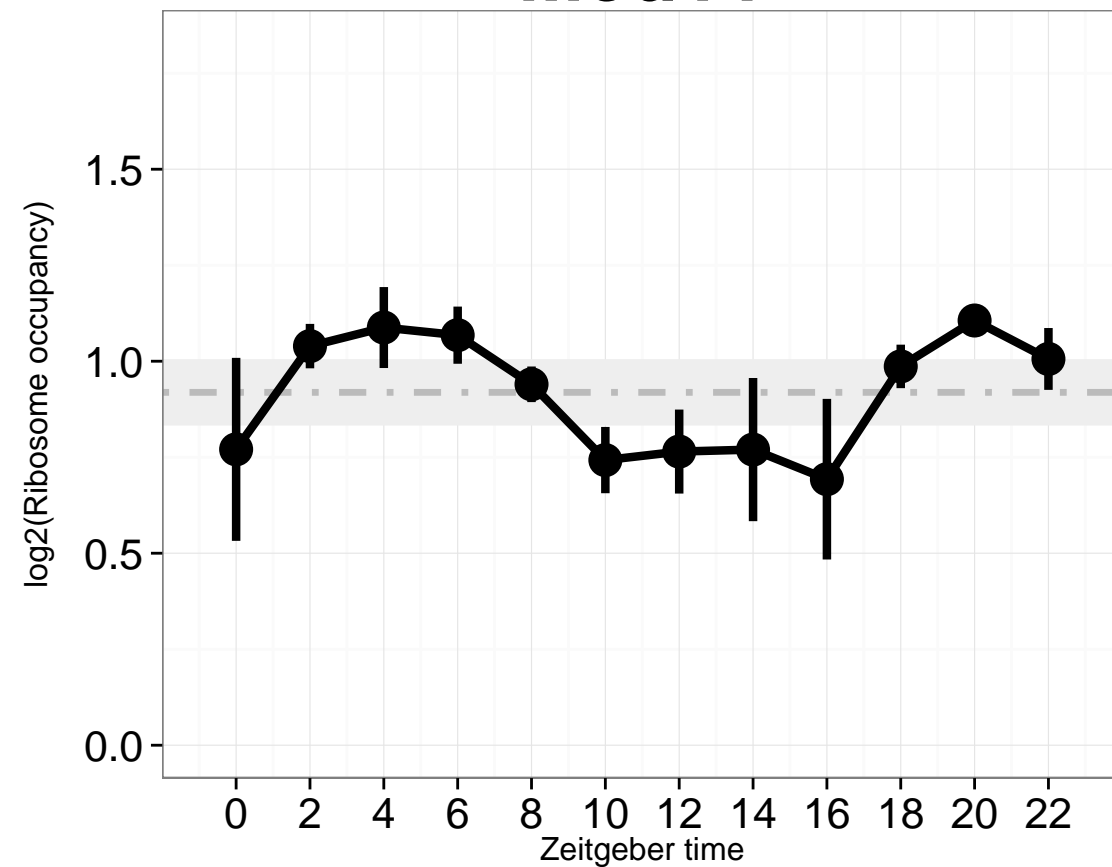

Supplement: Supplementary file 7530 [file 1]

**Babam1**

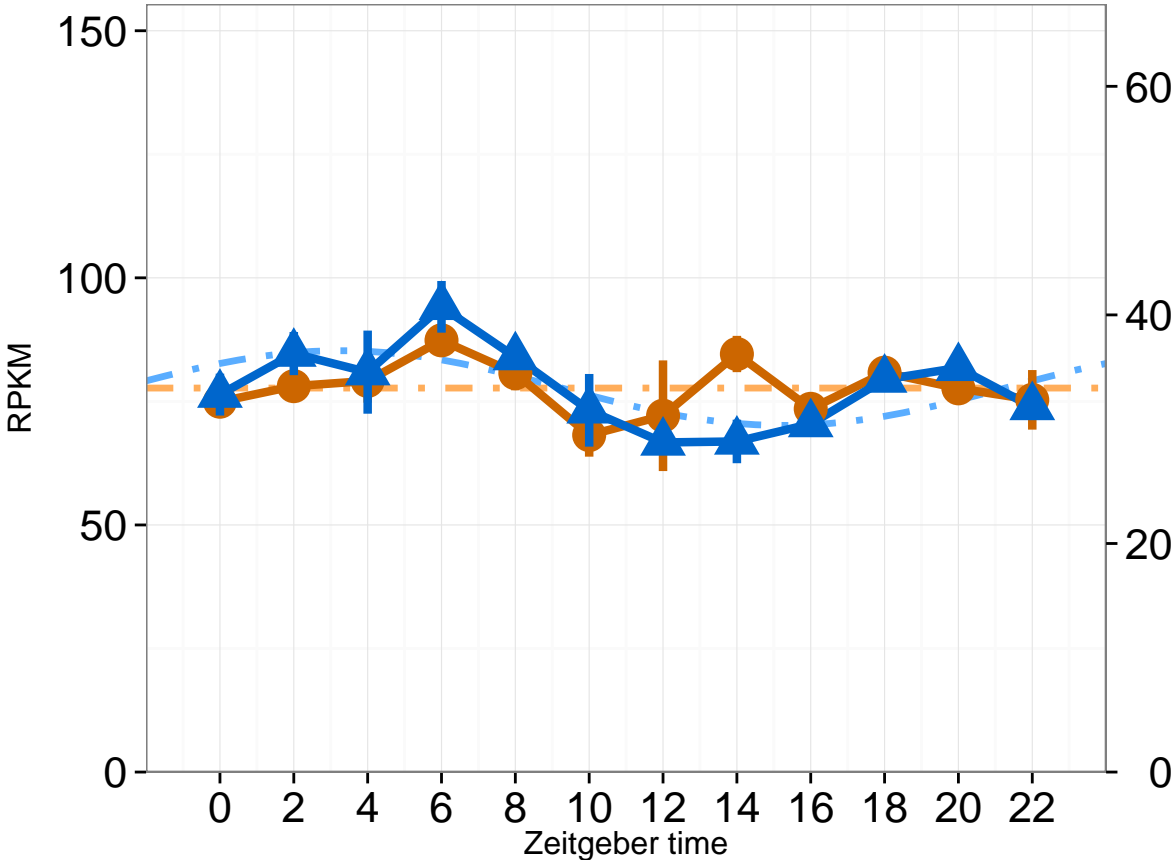

**Babam1**

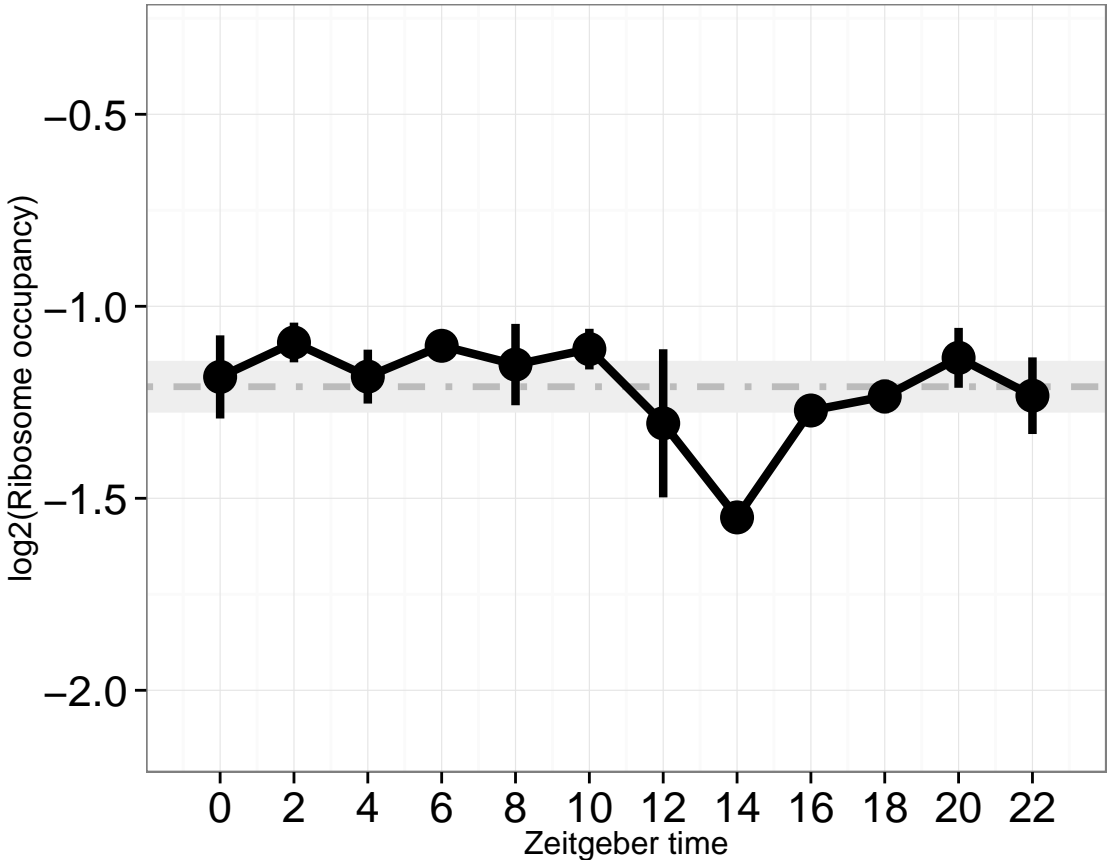

Supplement: Supplementary file 7532 [file 1]

# Atp6v1c1

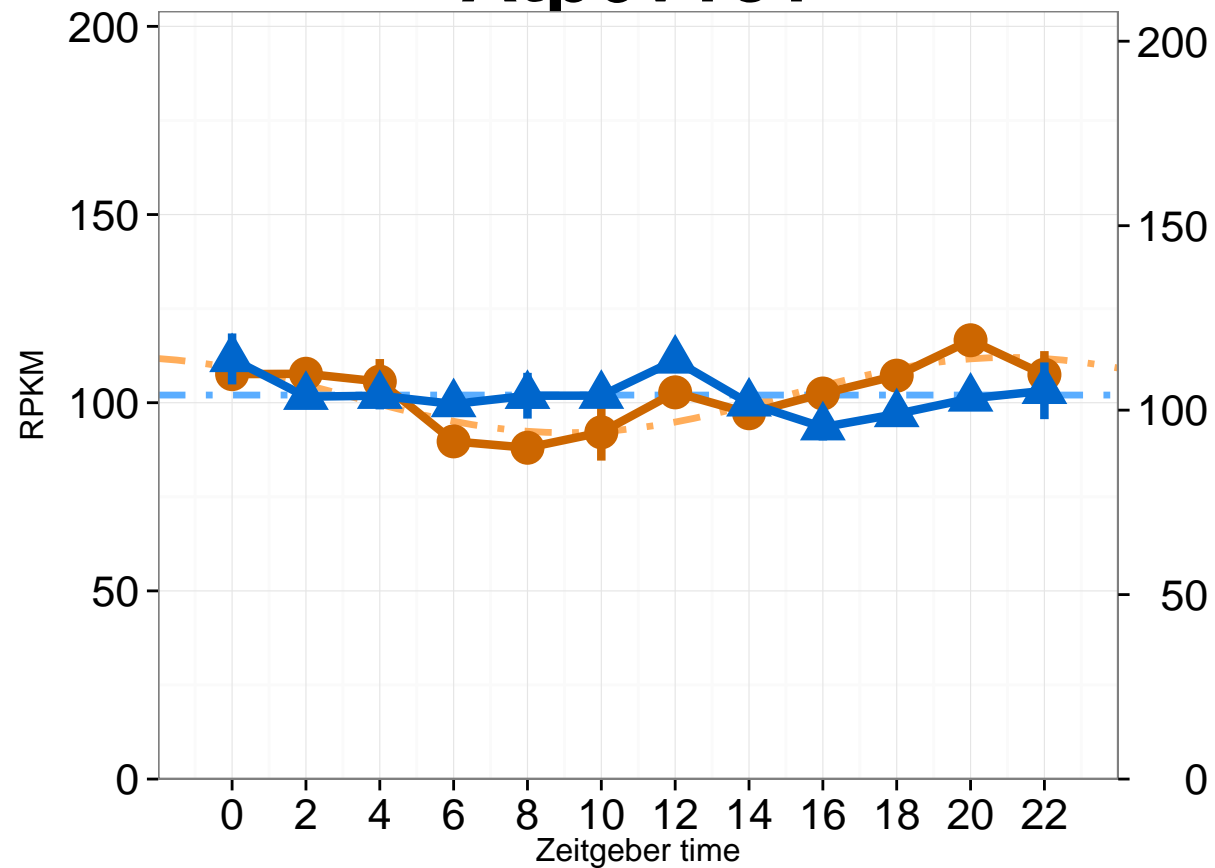

# Atp6v1c1

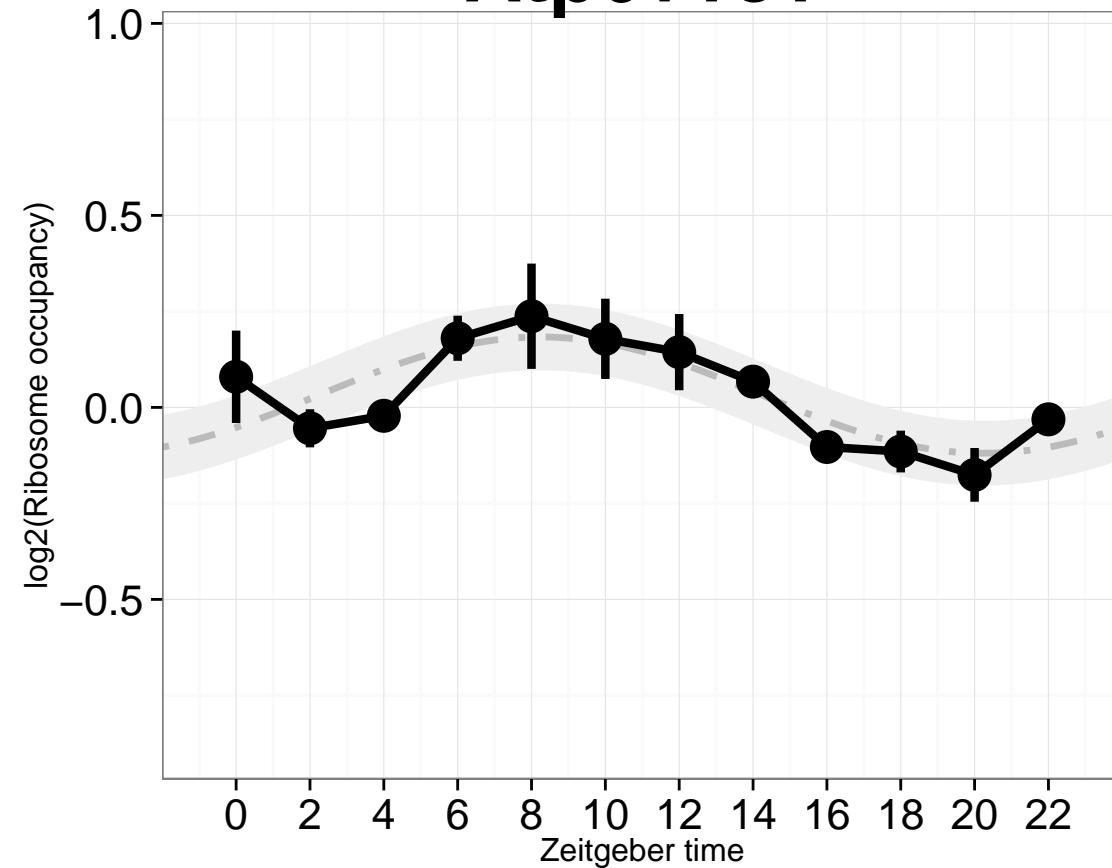

Supplement: Supplementary file 7533 [file 1]

## Crif3

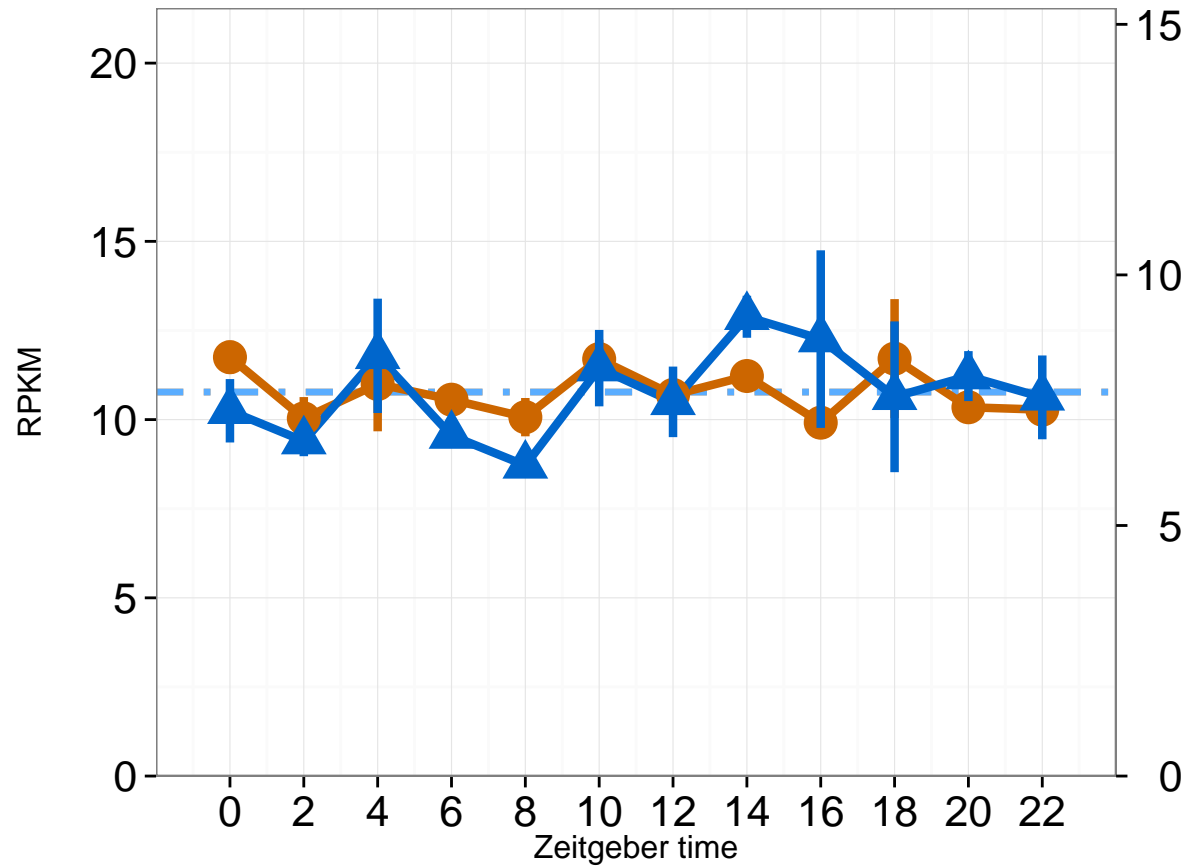

## Crif3

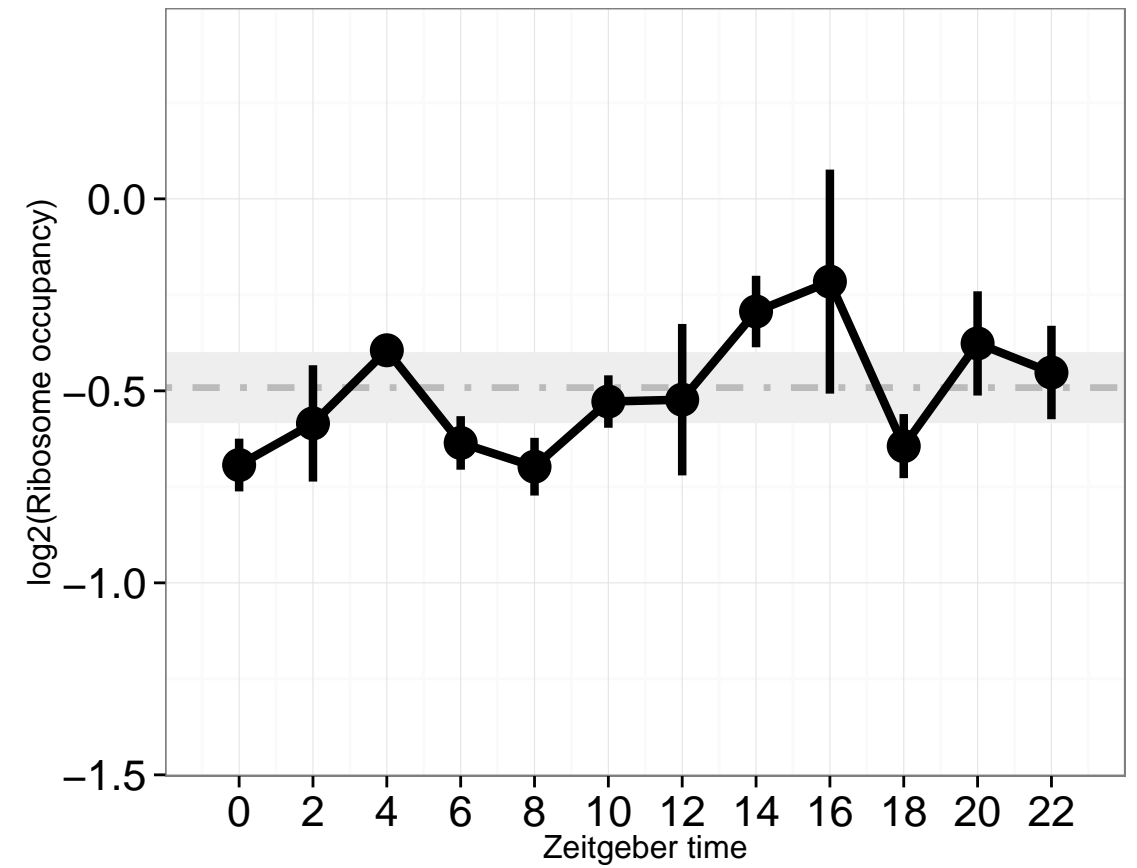

Supplement: Supplementary file 7534 [file 1]

## Tspan7

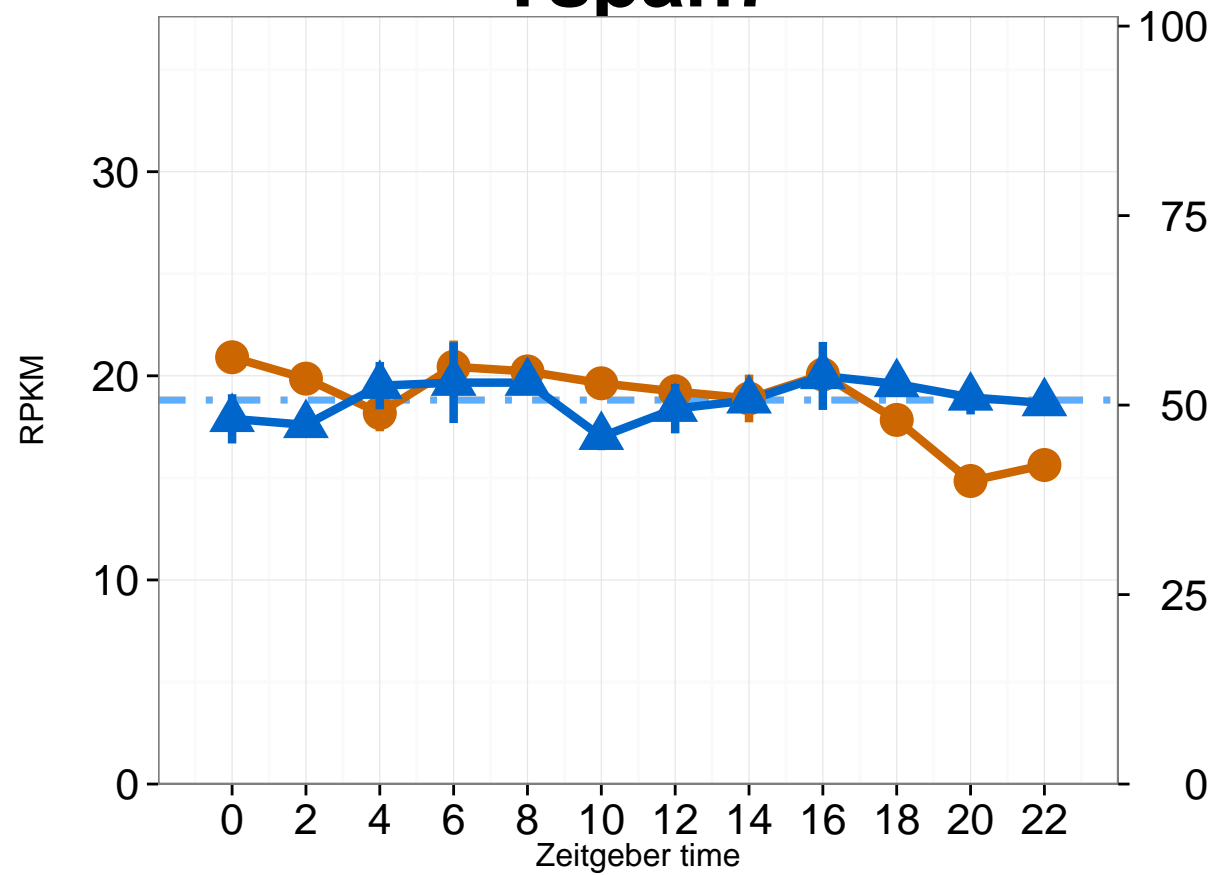

## Tspan7

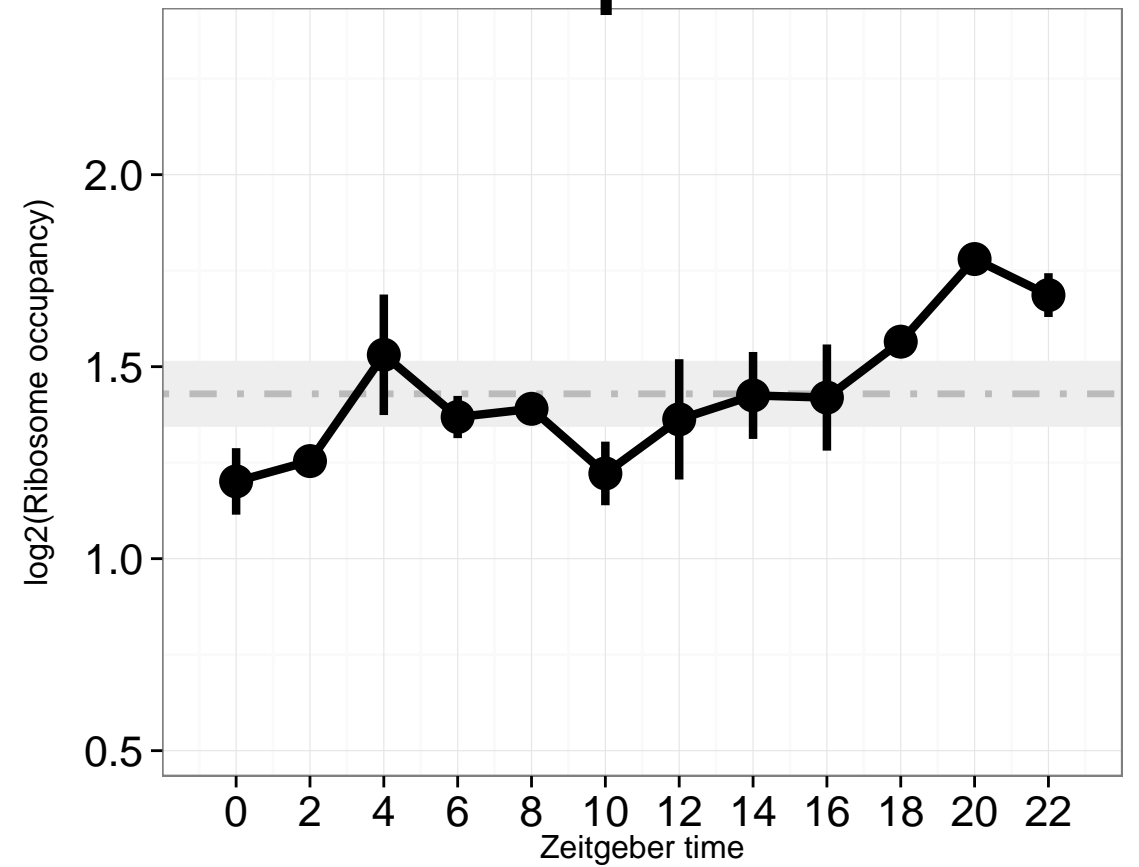

Supplement: Supplementary file 7535 [file 1]

# Lsm14b

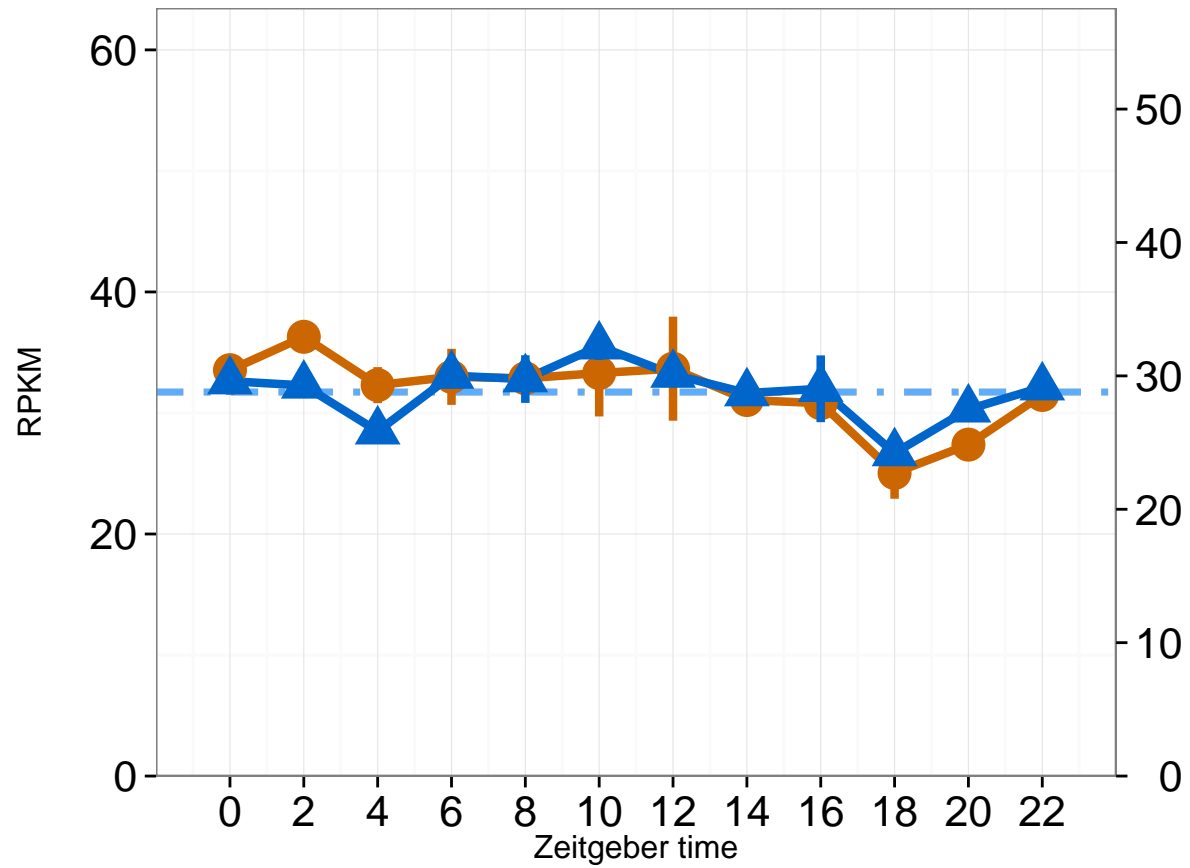

# Lsm14b

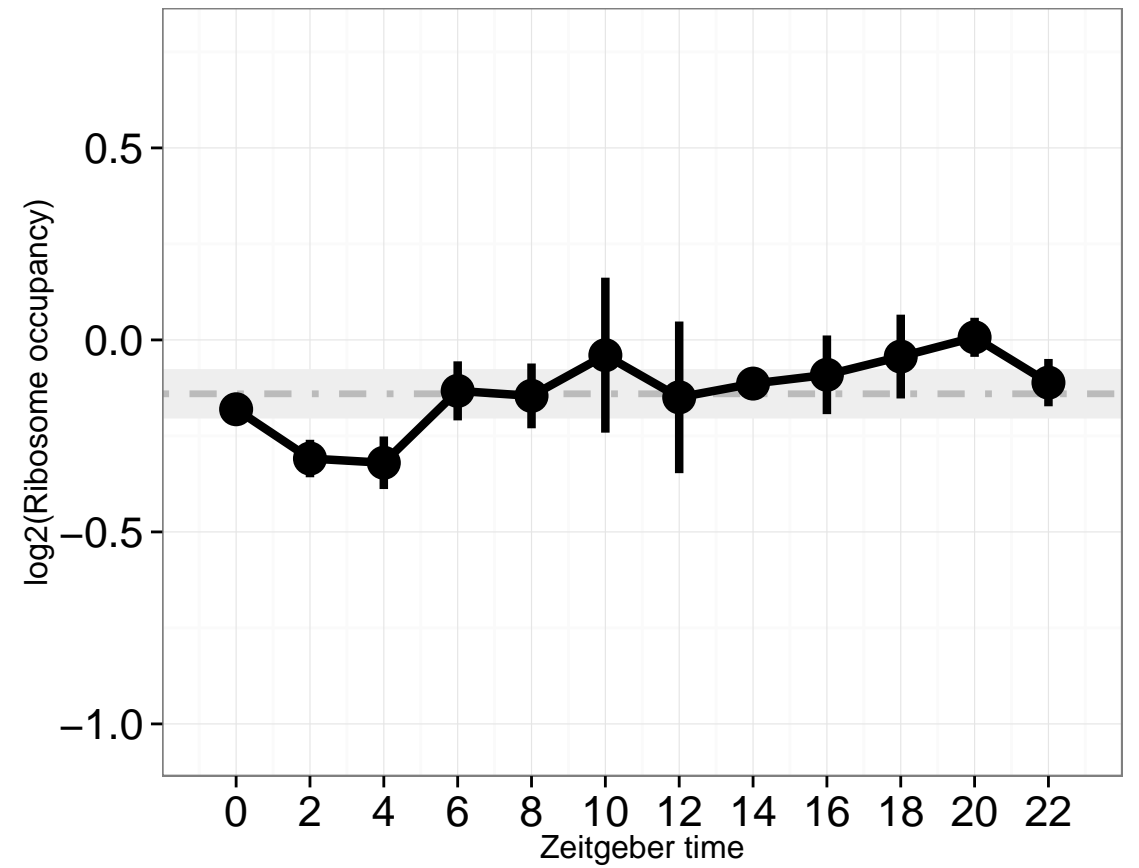

Supplement: Supplementary file 7536 [file 1]

# Slc19a2

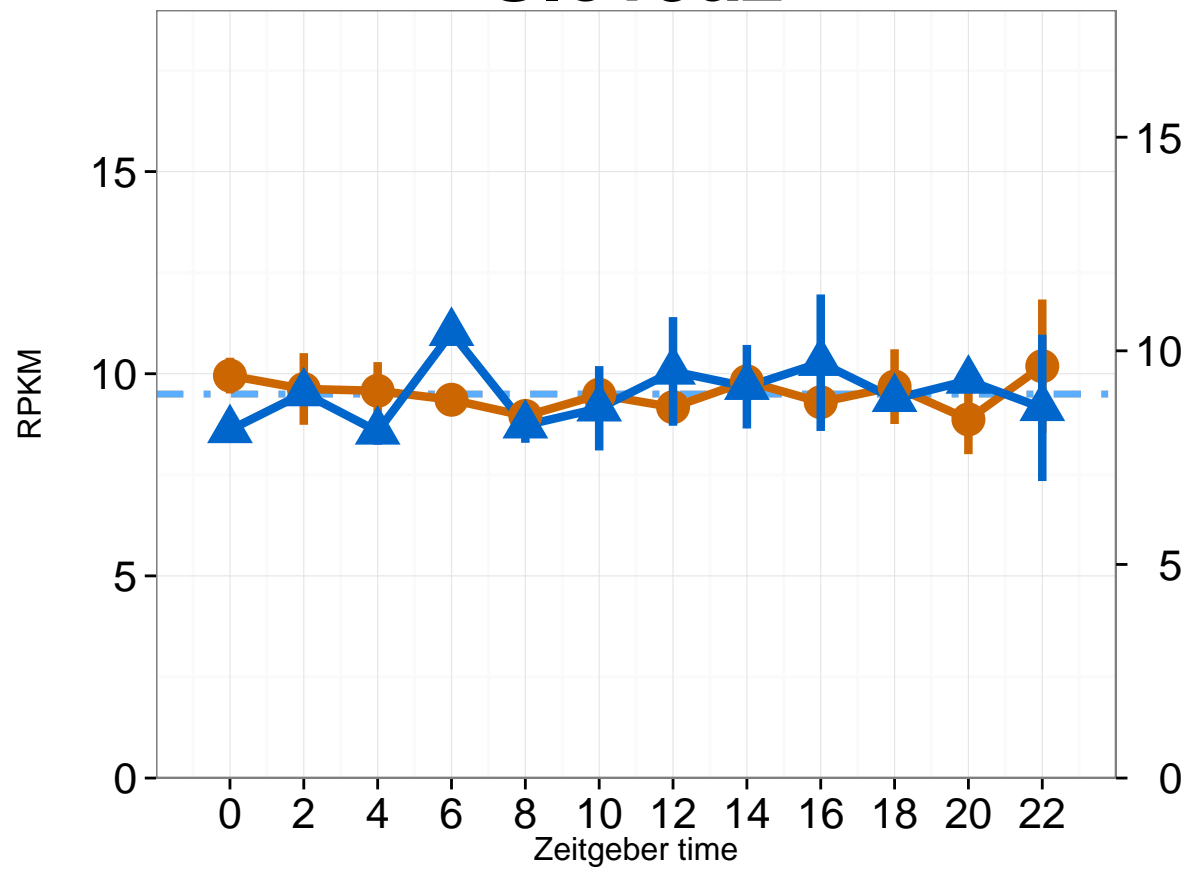

# Slc19a2

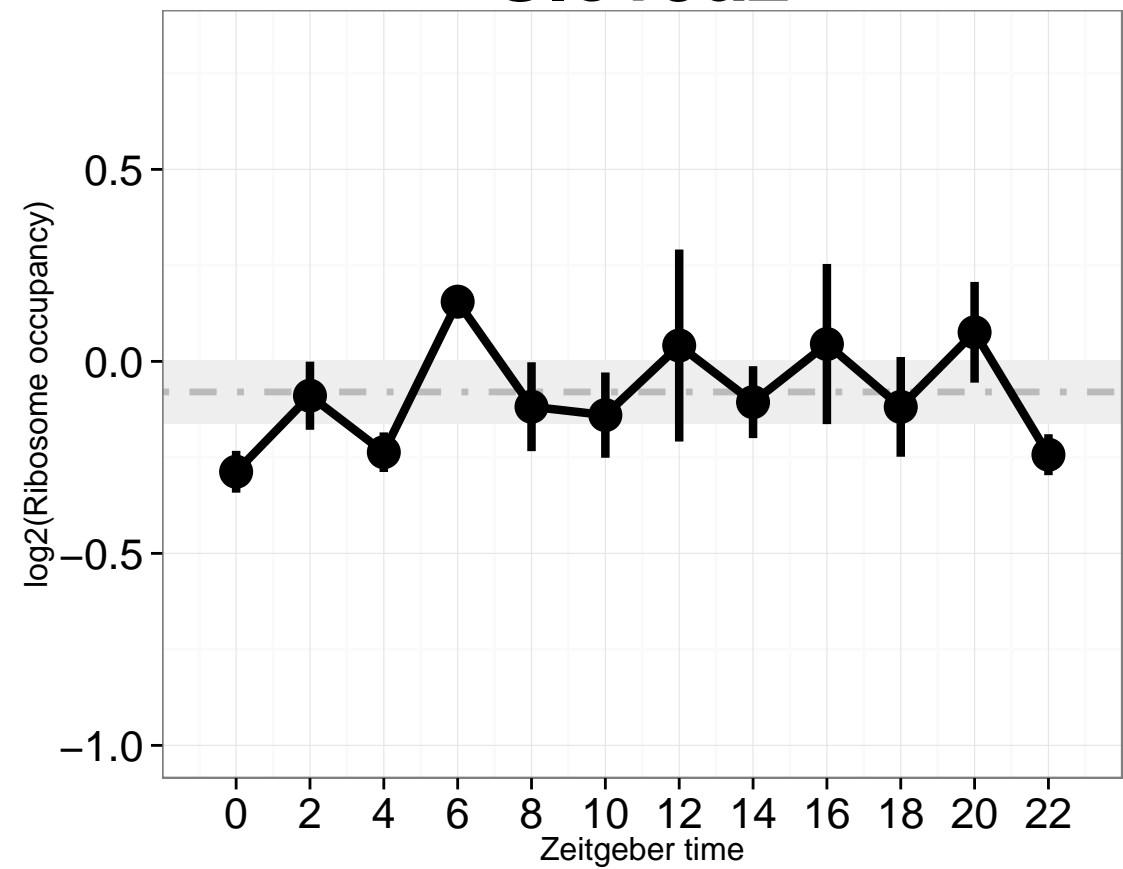

Supplement: Supplementary file 7537 [file 1]

## Nqo1

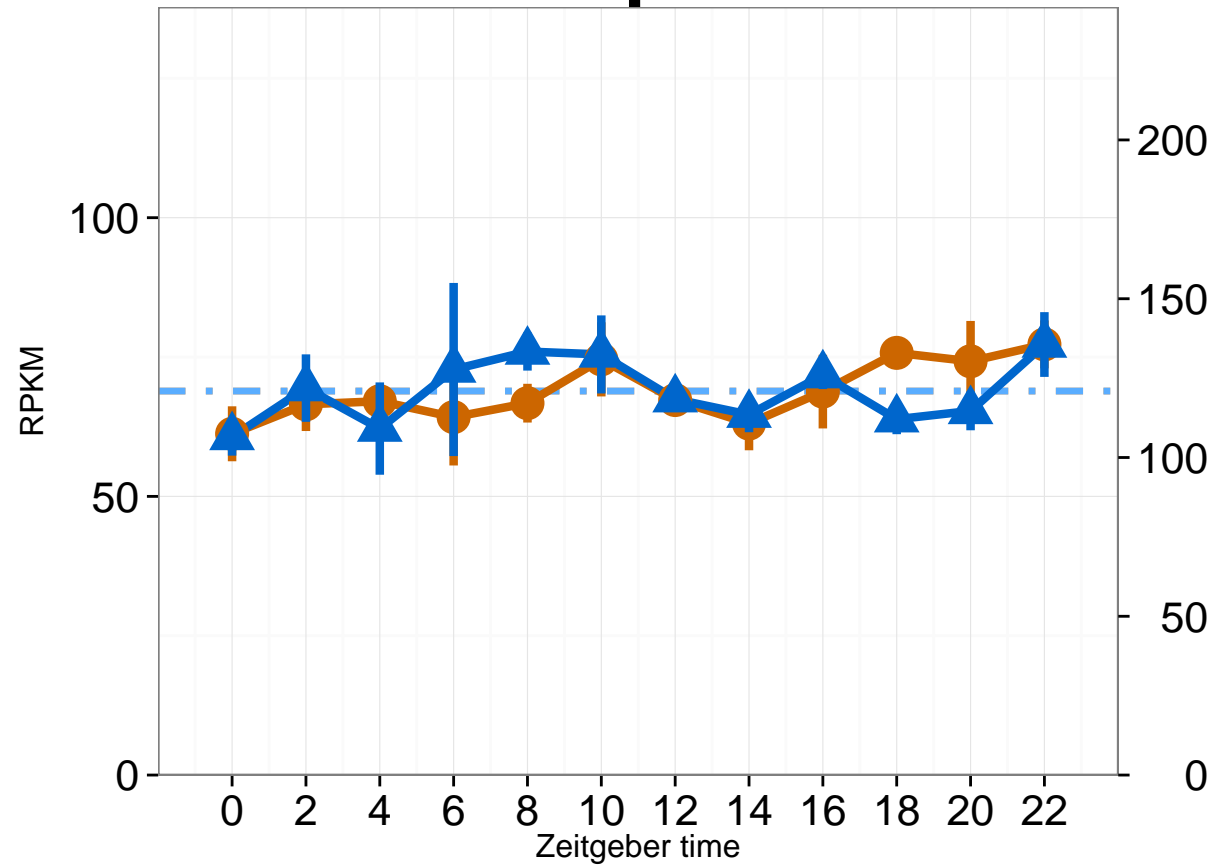

## Nqo1

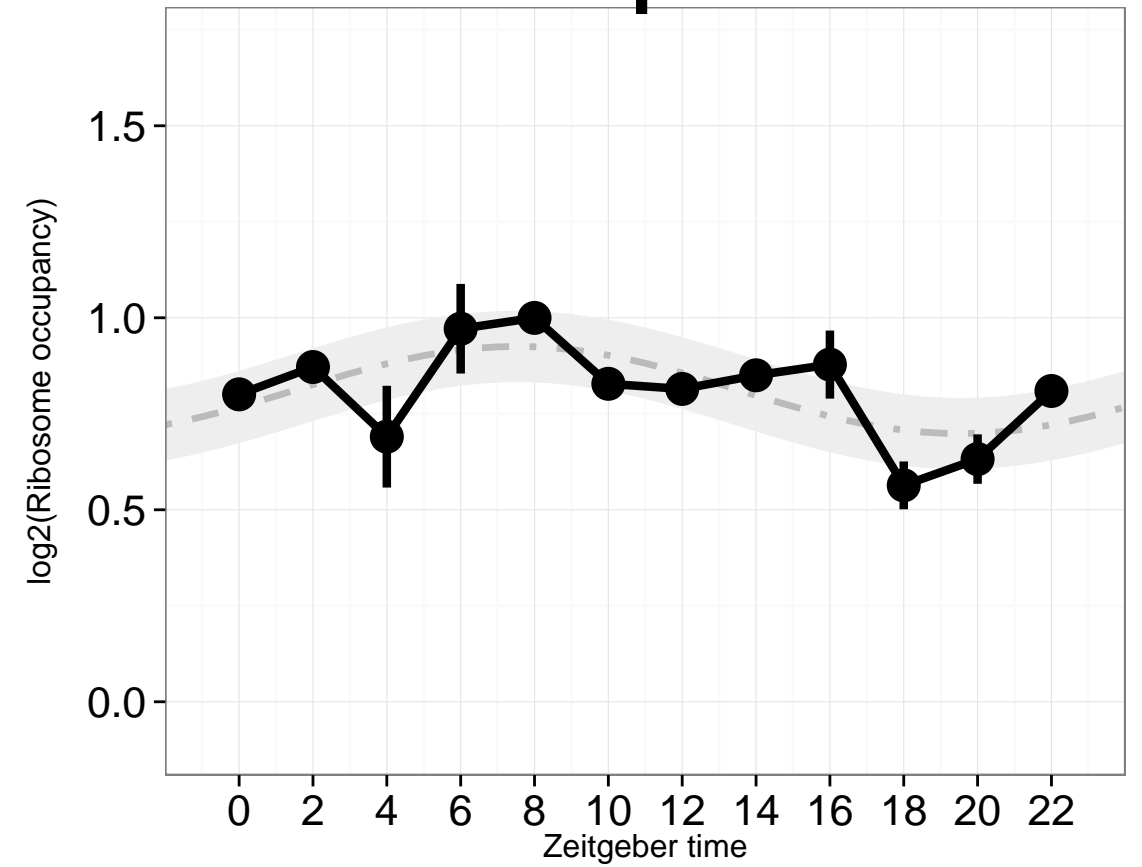

Supplement: Supplementary file 7538 [file 1]

## Dpm2

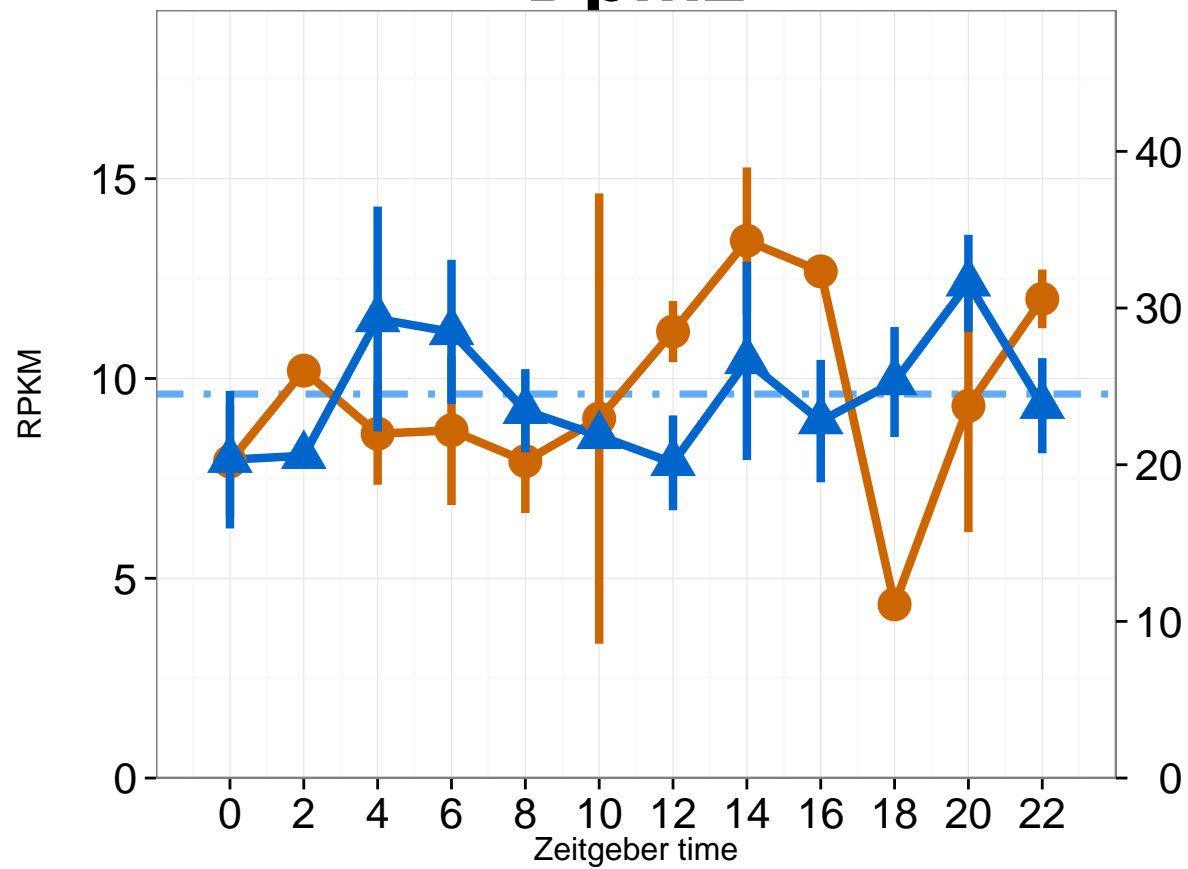

## Dpm2

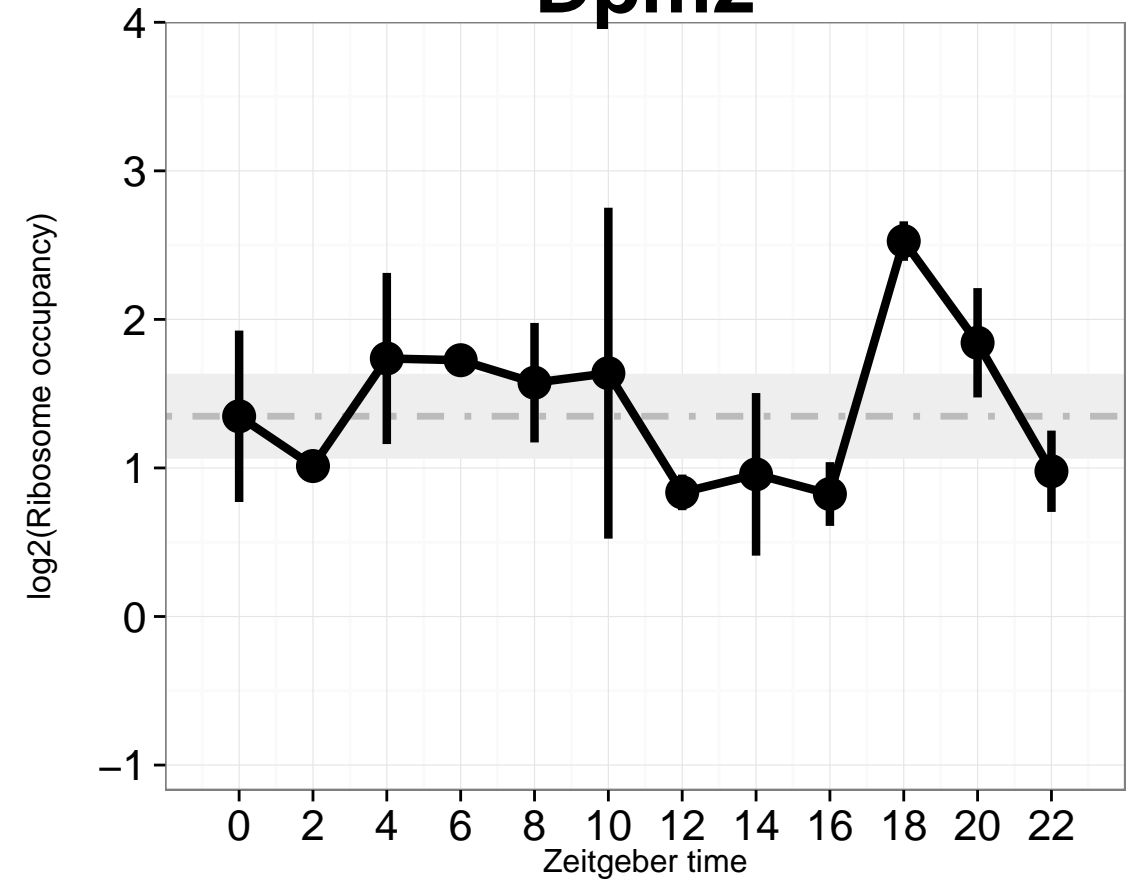

Supplement: Supplementary file 7539 [file 1]

## Pnn

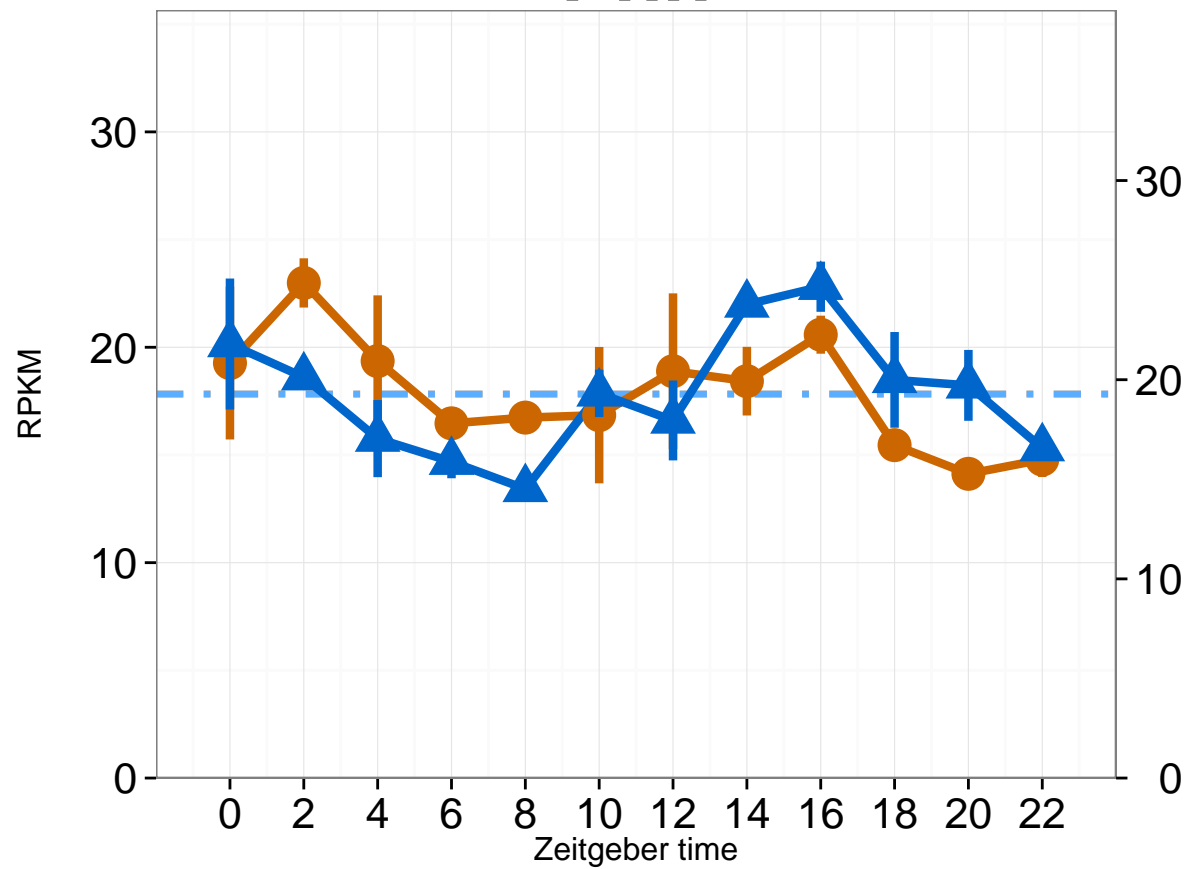

## Pnn

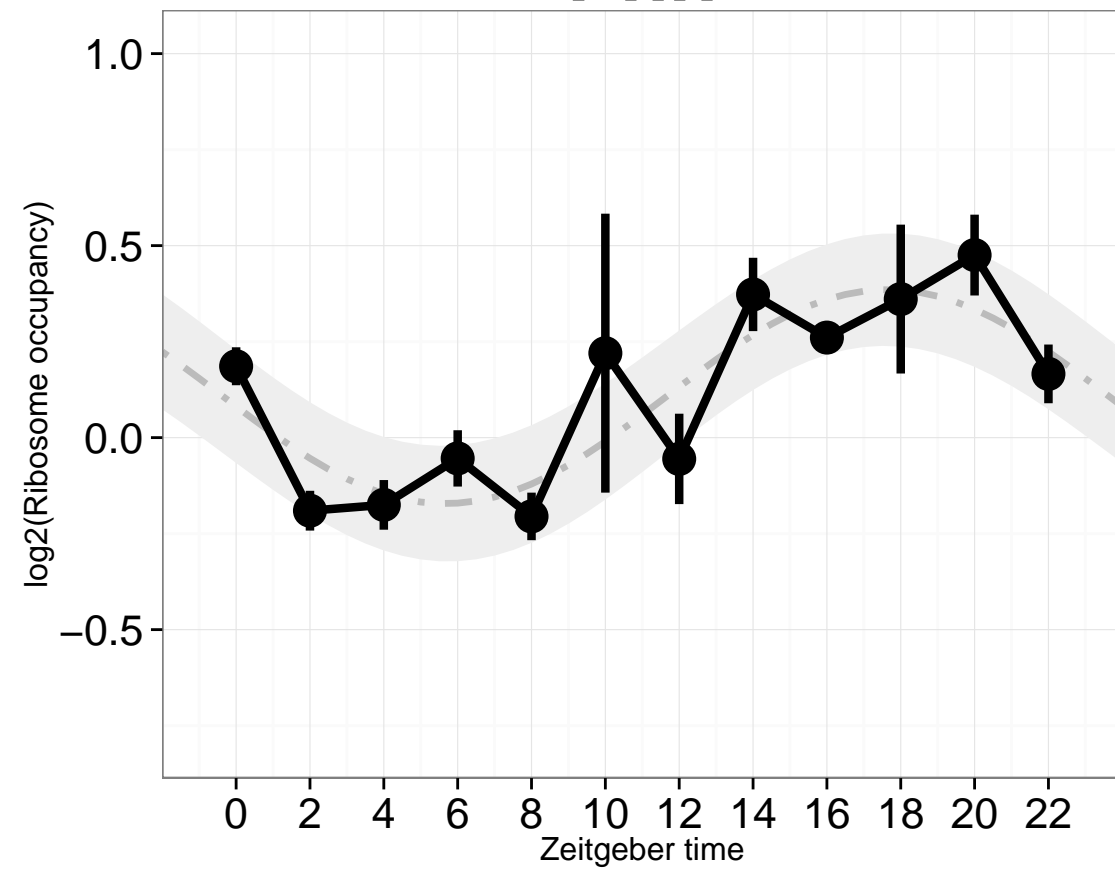

Supplement: Supplementary file 7540 [file 1]

## Cd164

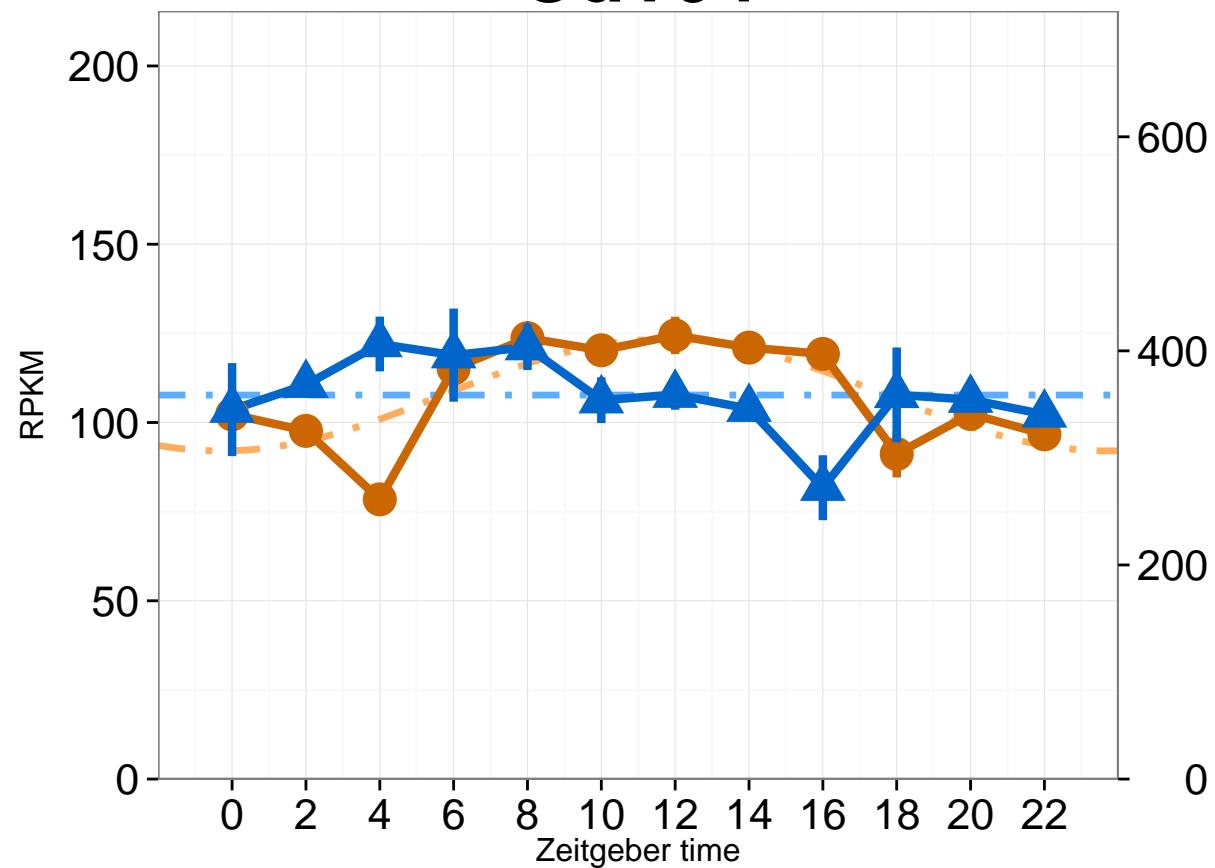

## Cd164

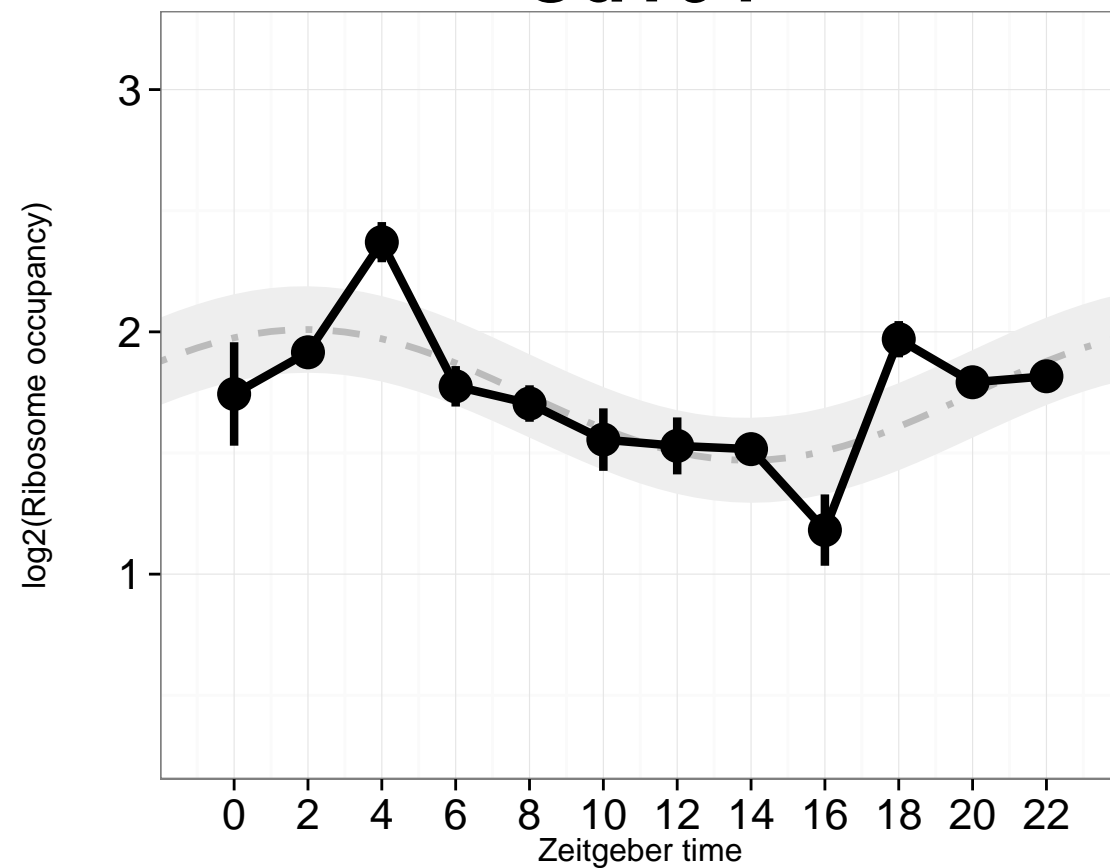

Supplement: Supplementary file 7541 [file 1]

## Lrrc32

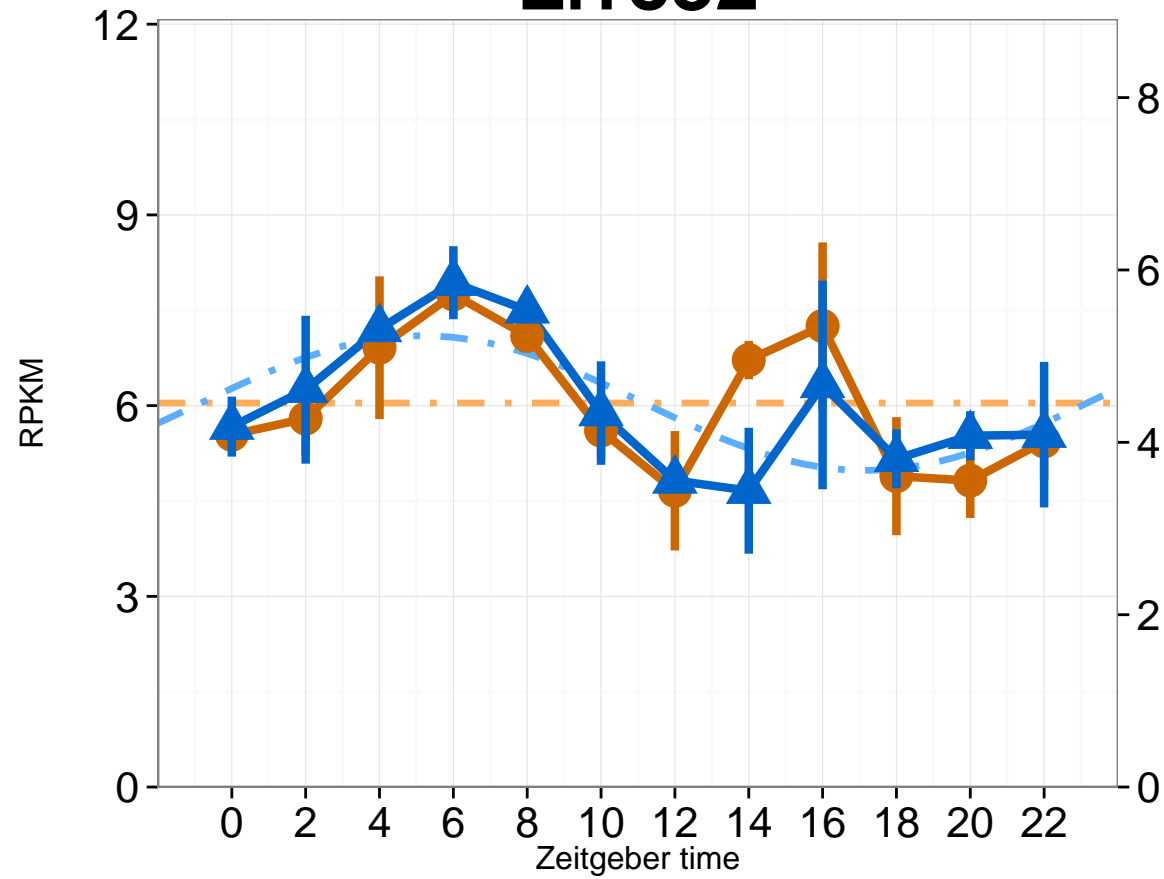

## Lrrc32

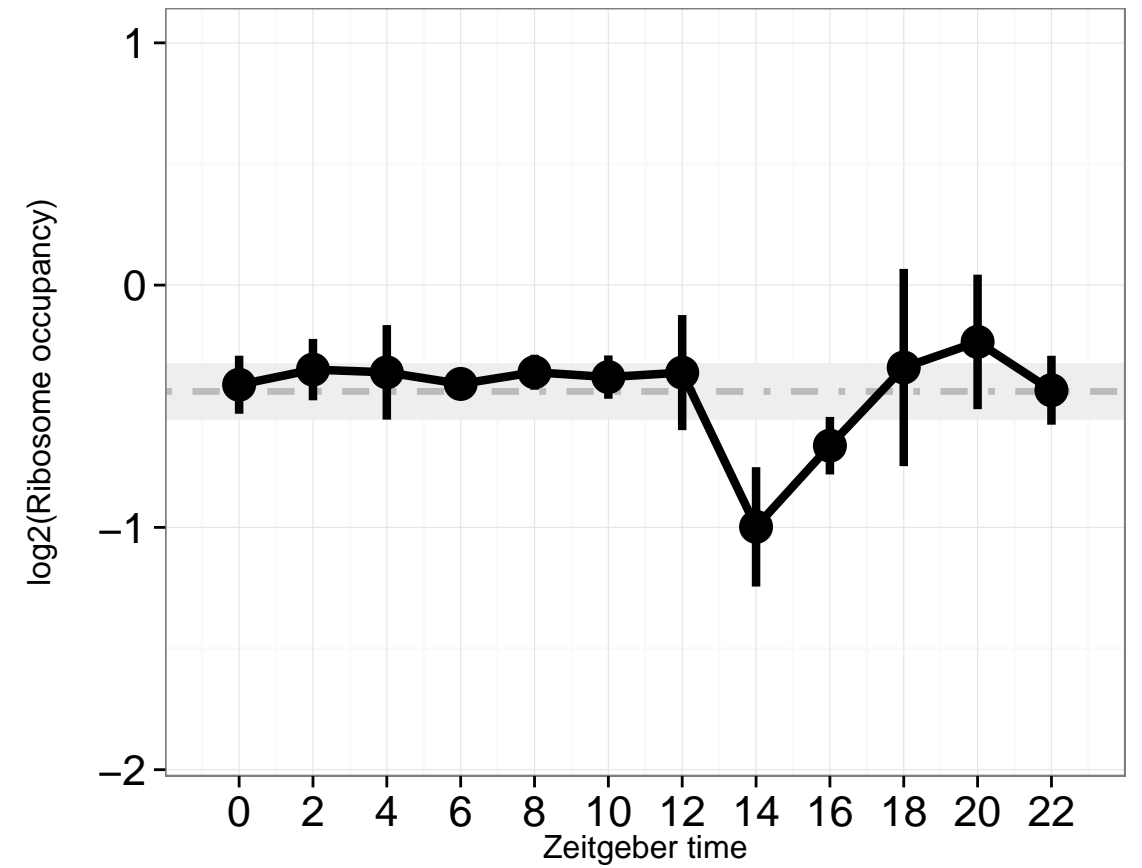

Supplement: Supplementary file 7542 [file 1]

## Tap1

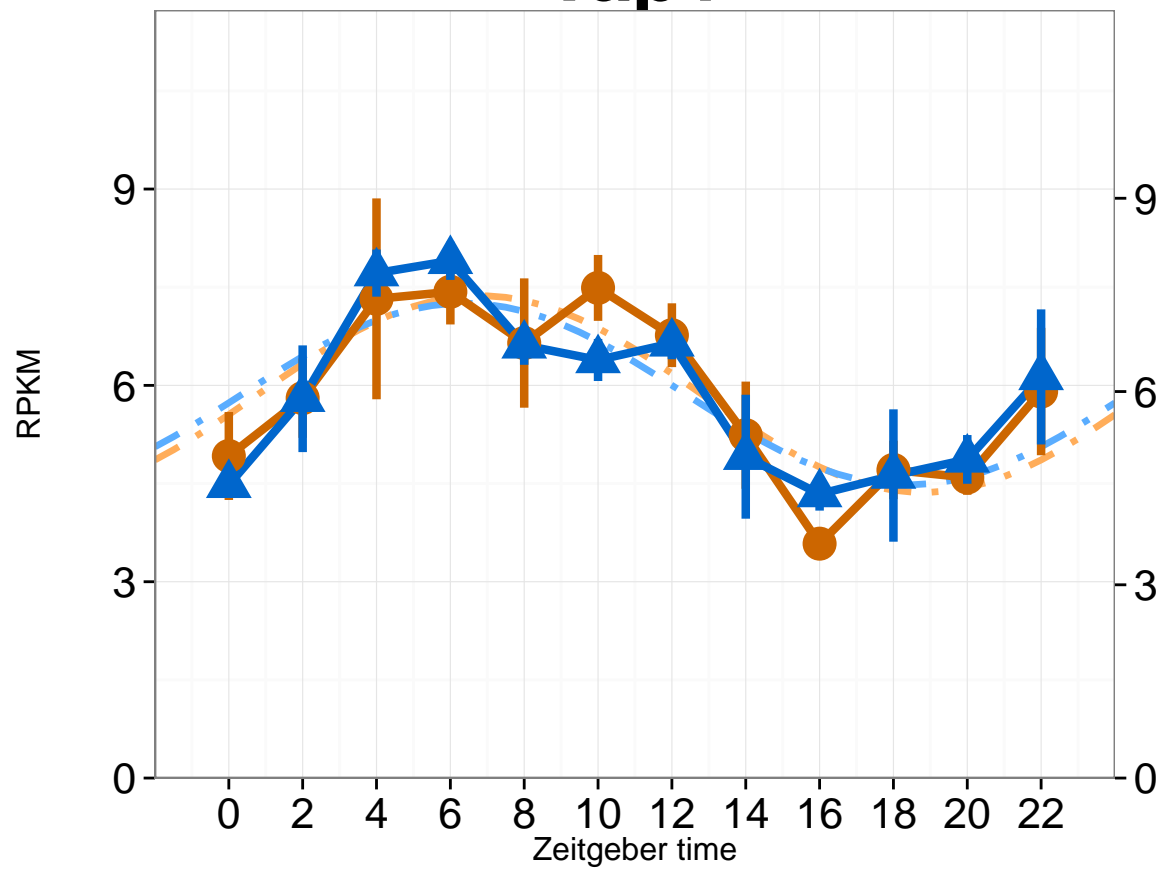

## Tap1

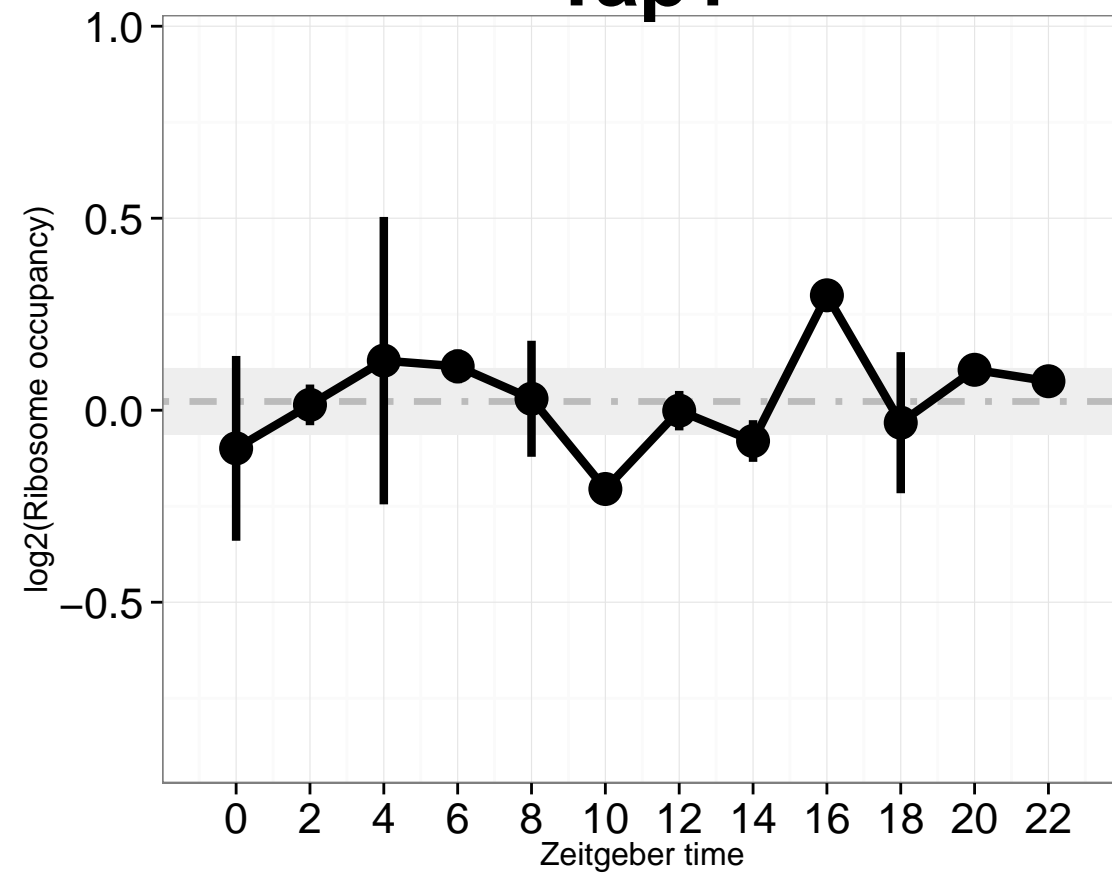

Supplement: Supplementary file 7543 [file 1]

## Mkln1

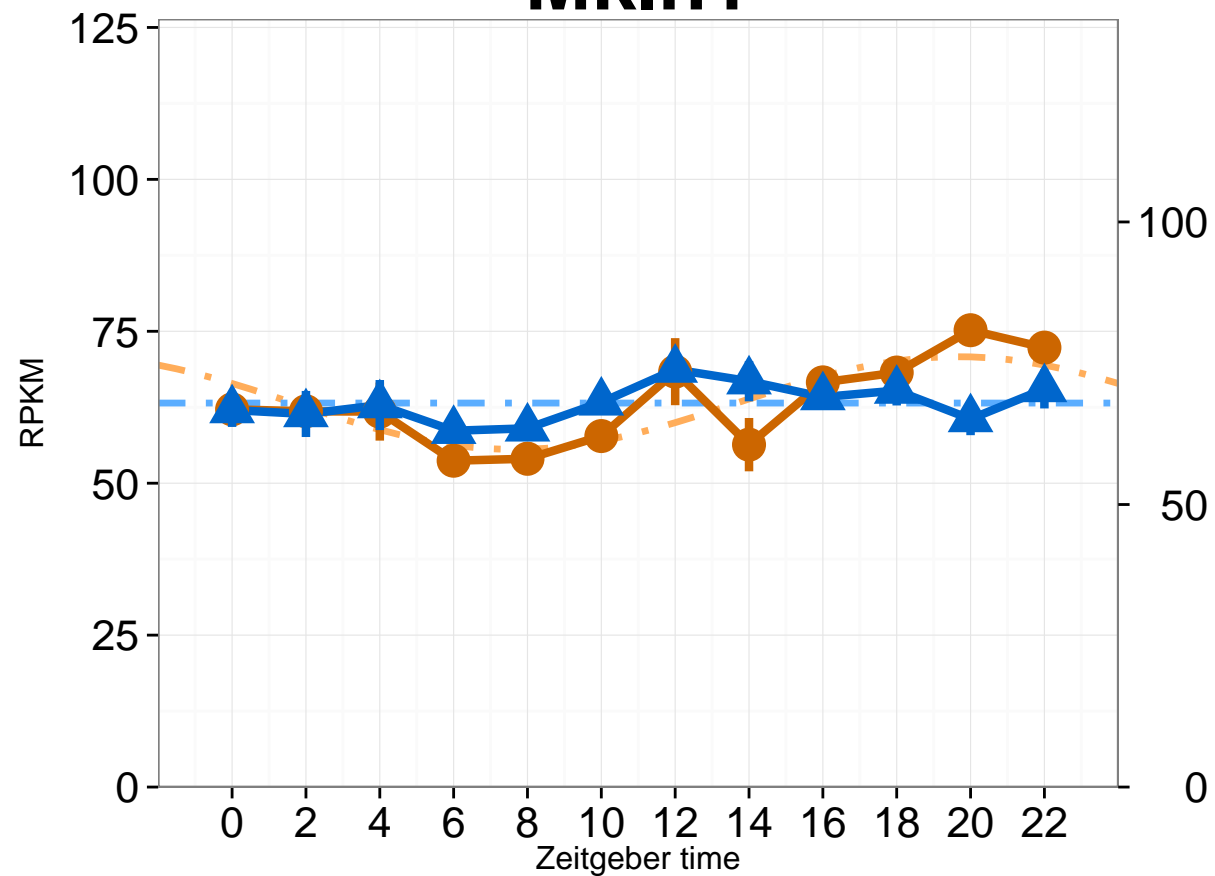

## Mkln1

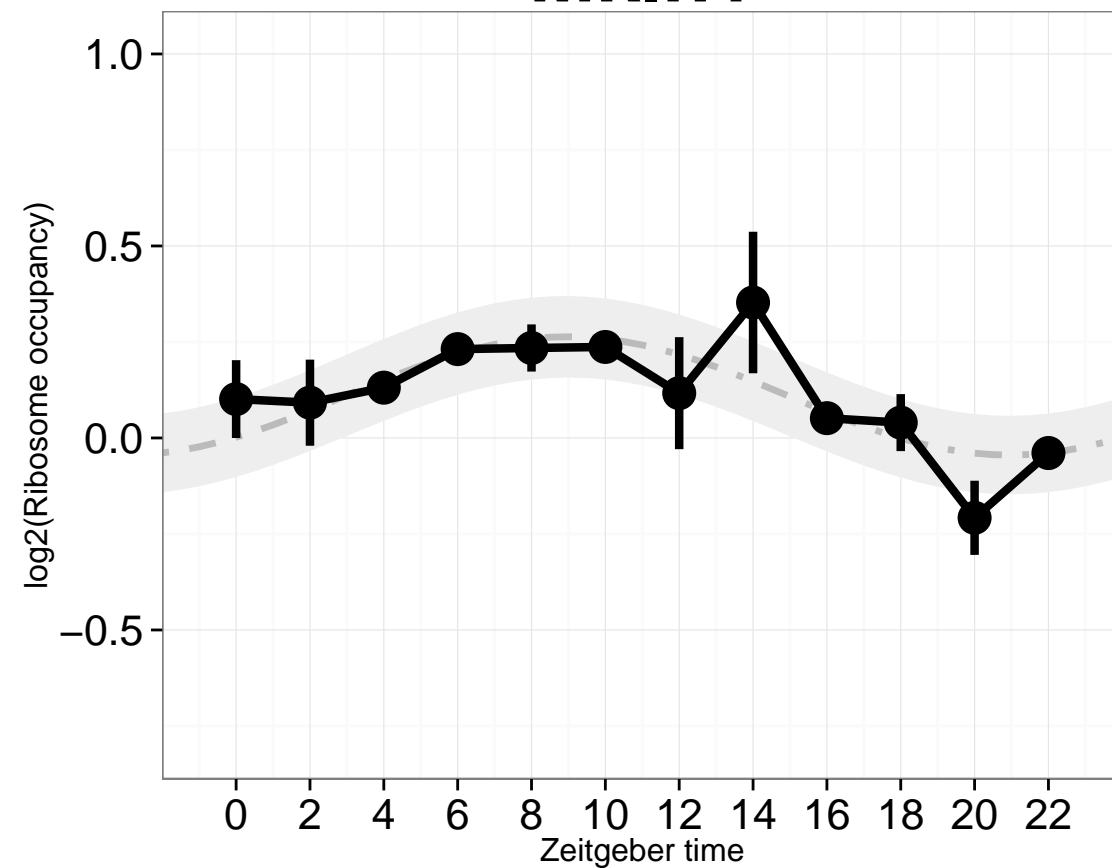

Supplement: Supplementary file 7544 [file 1]

# Zkscan4

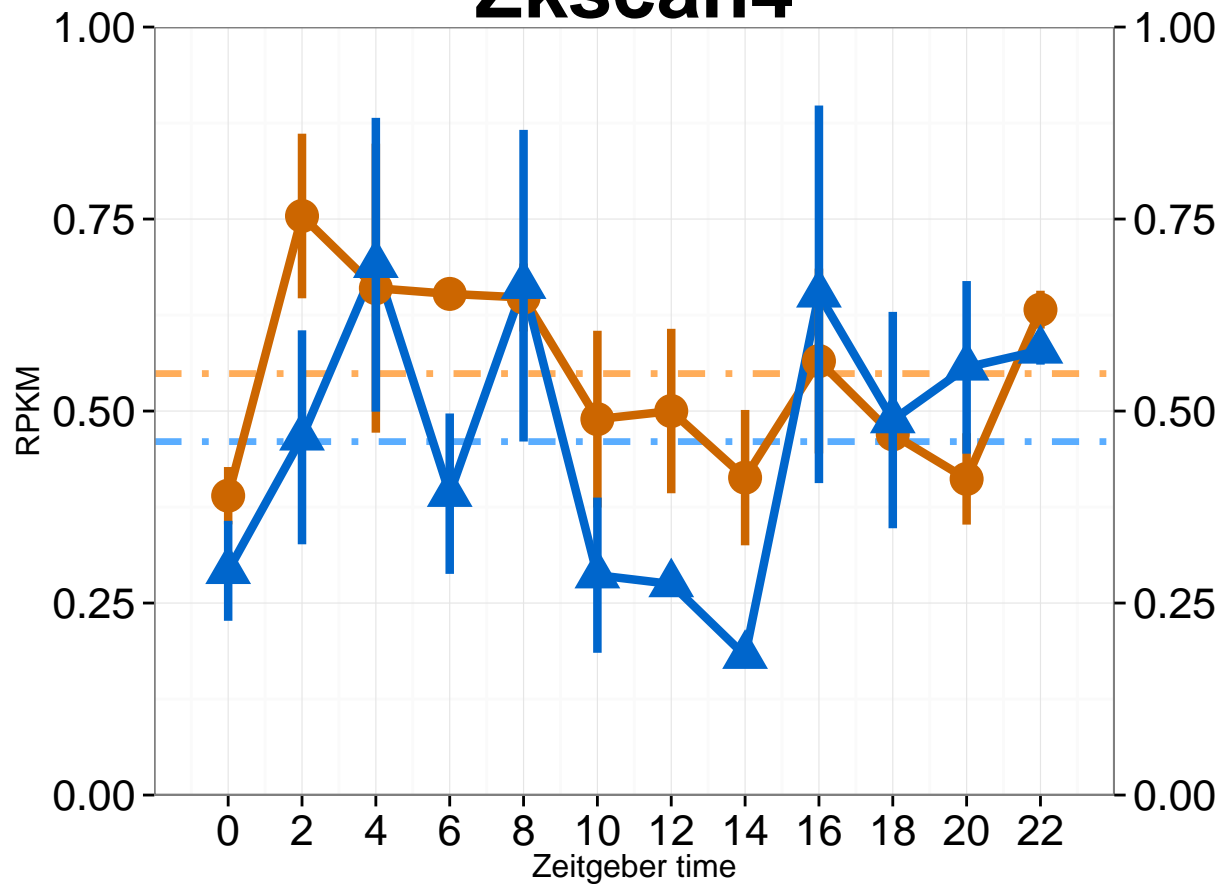

# Zkscan4

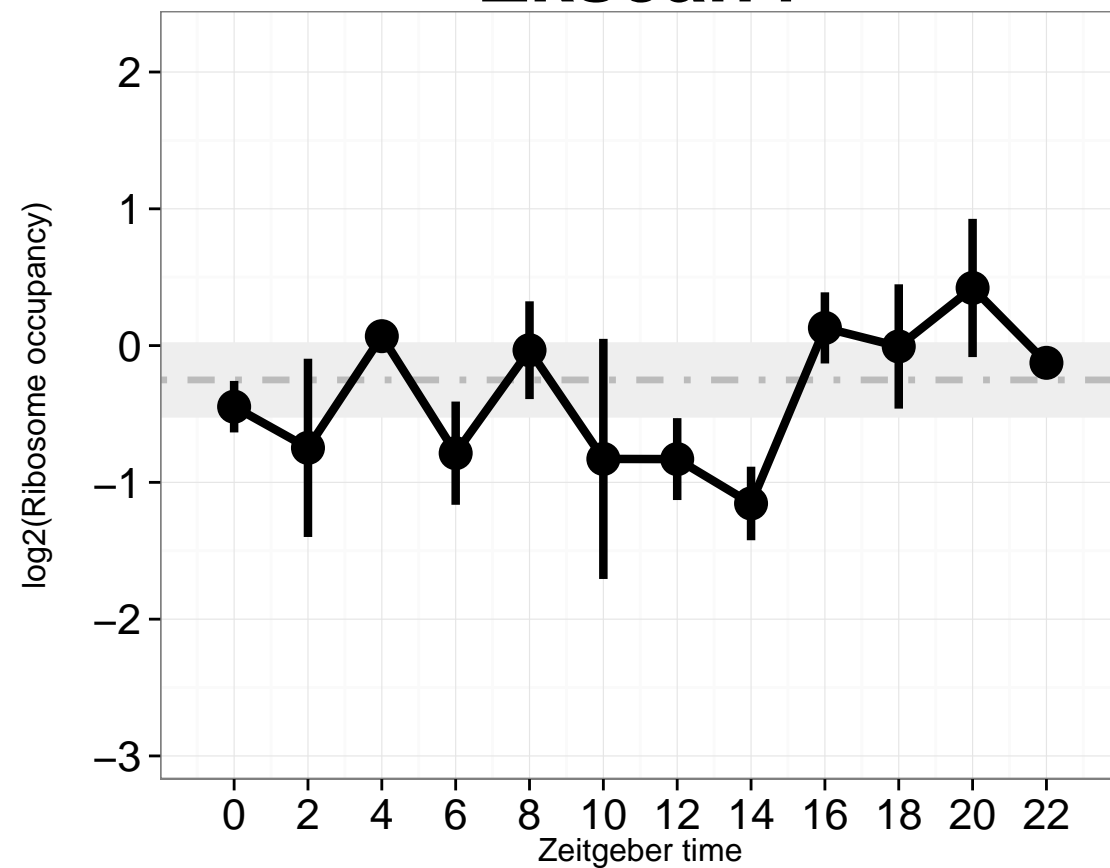

Supplement: Supplementary file 7545 [file 1]

## Chka

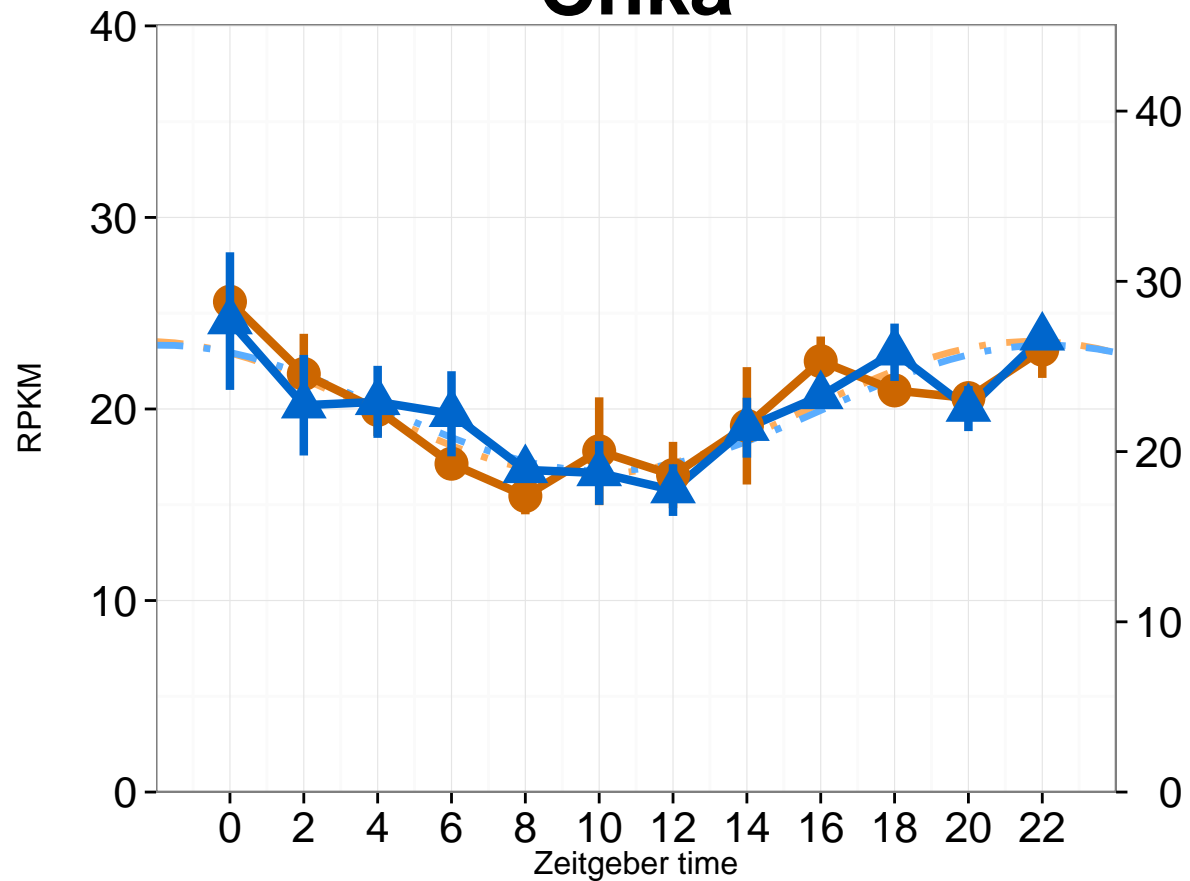

## Chka

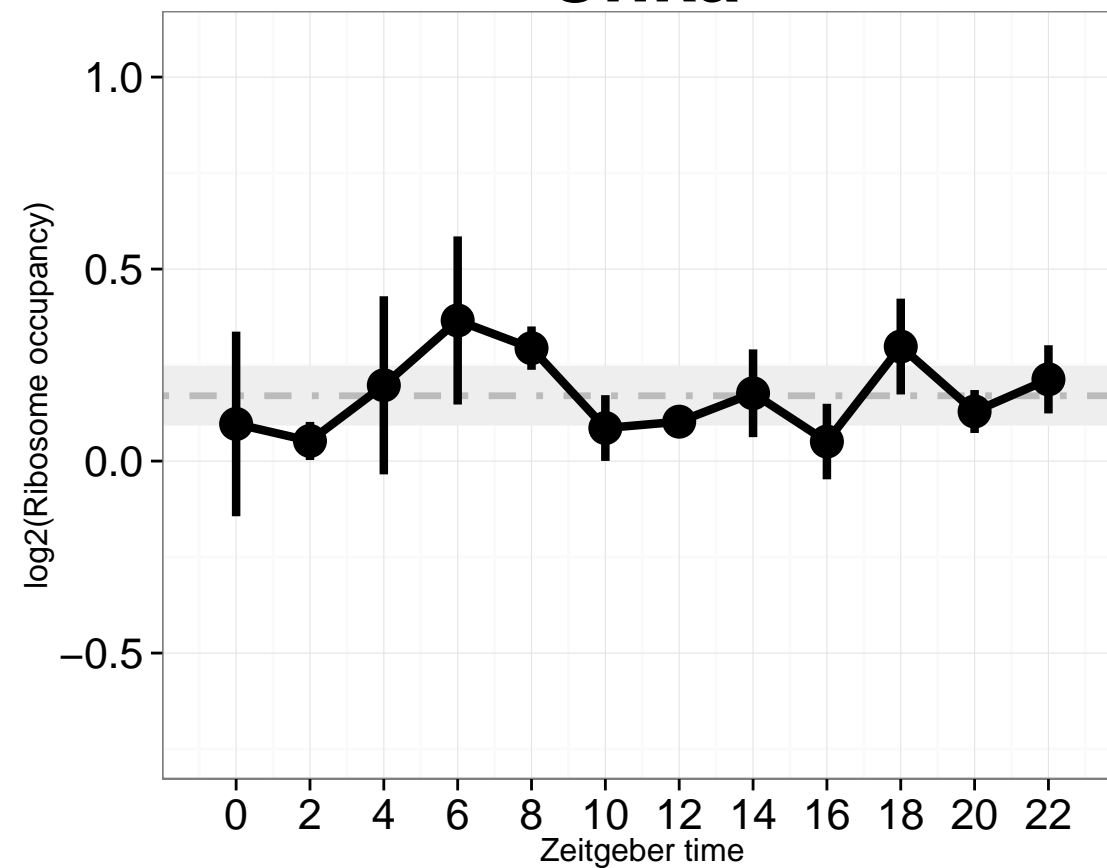

Supplement: Supplementary file 7546 [file 1]

## Prepl

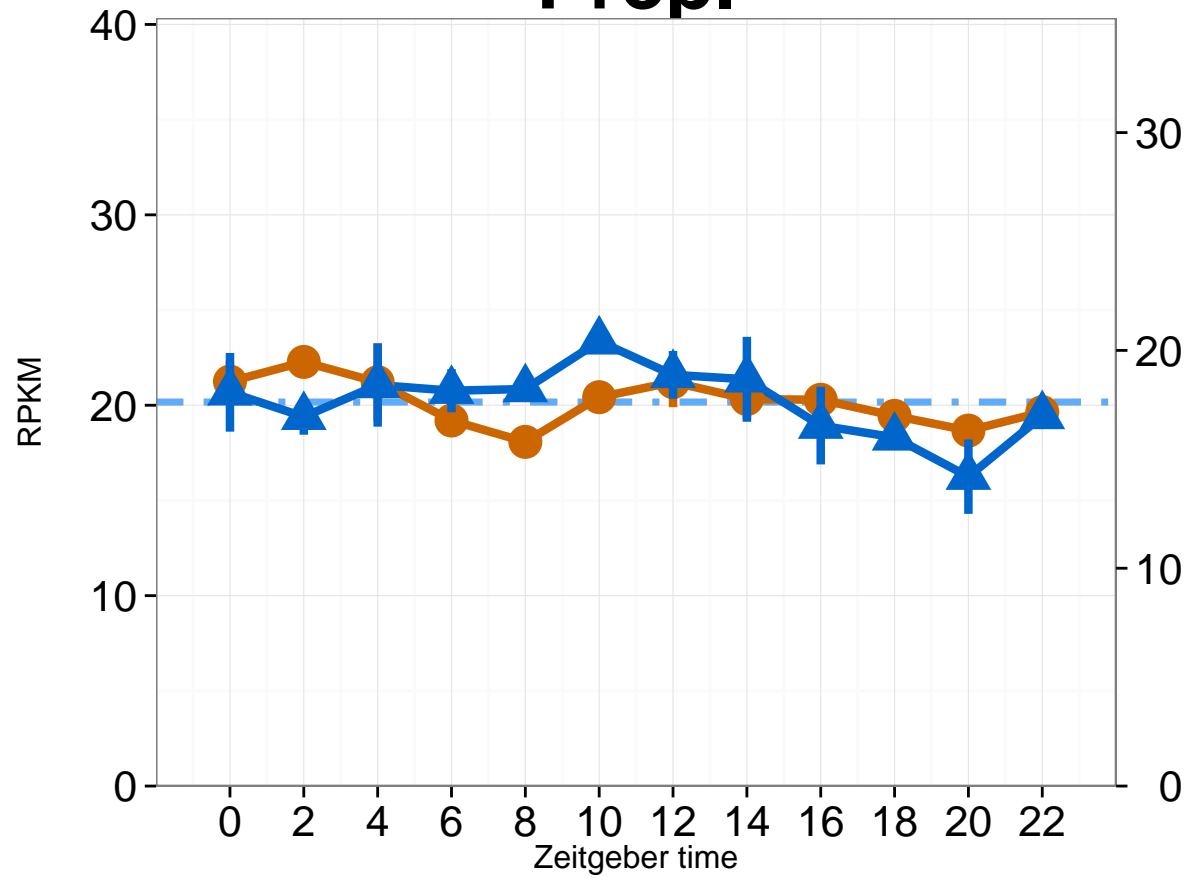

## Prepl

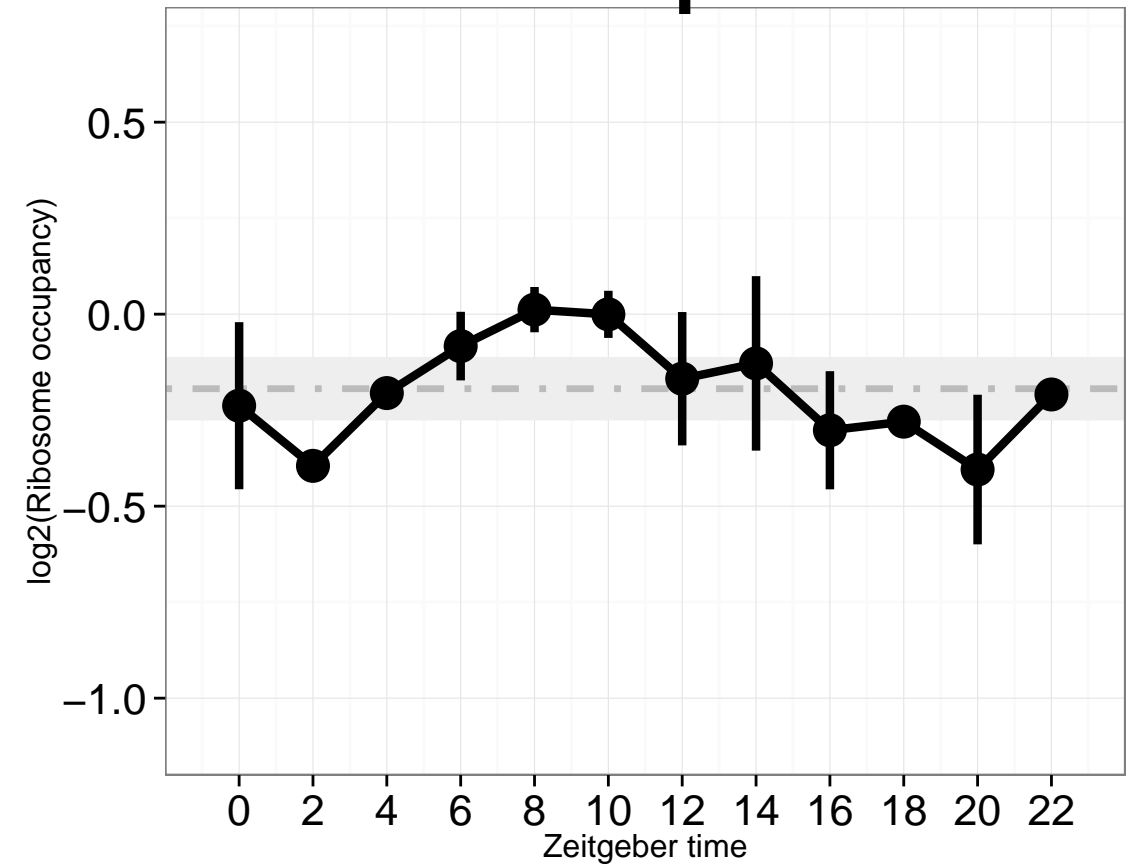

Supplement: Supplementary file 7547 [file 1]

# Fam84a

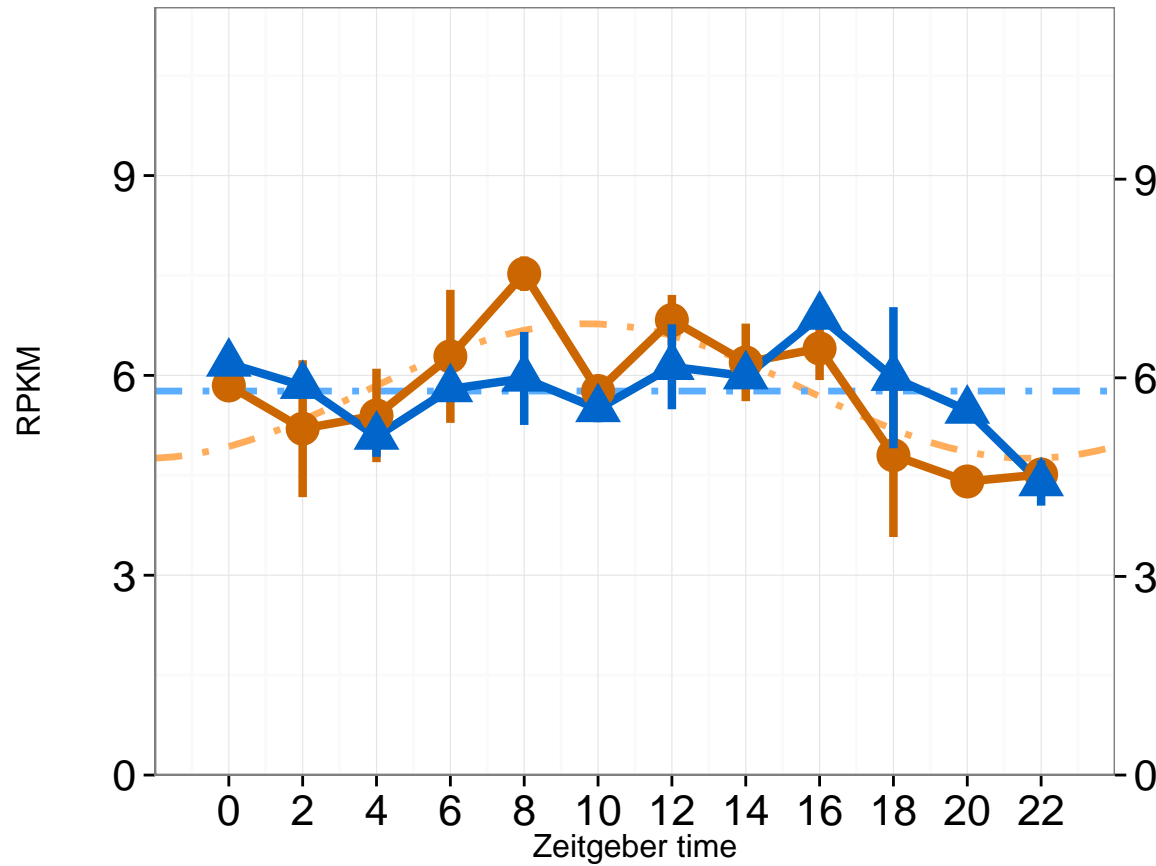

# Fam84a

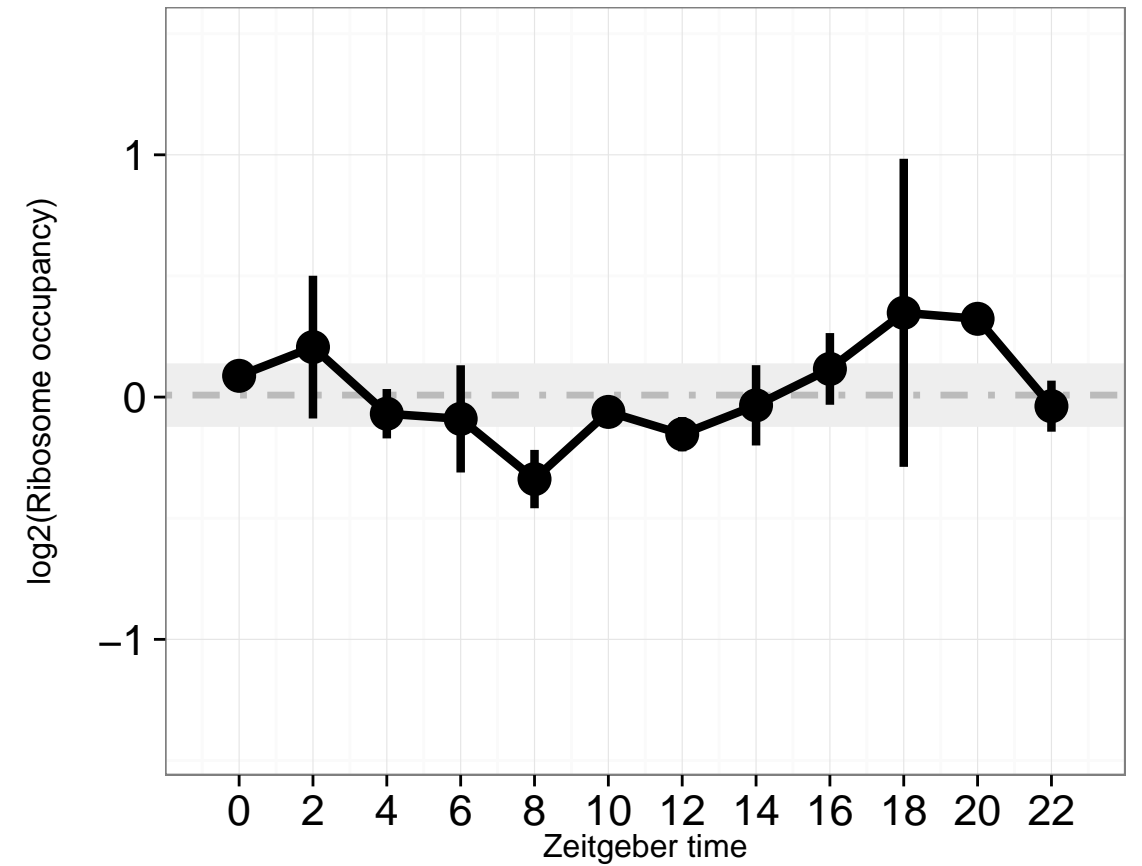

Supplement: Supplementary file 7548 [file 1]

## Gmpr2

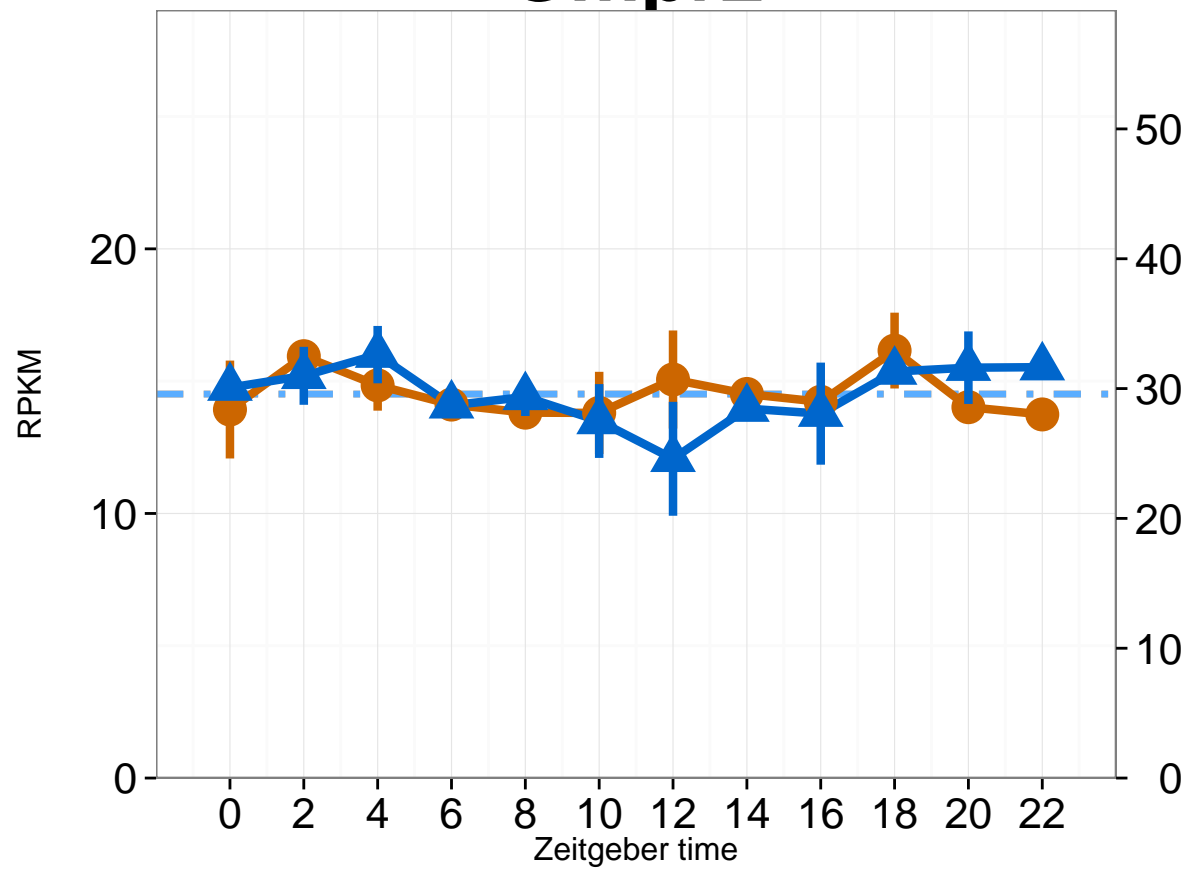

## Gmpr2

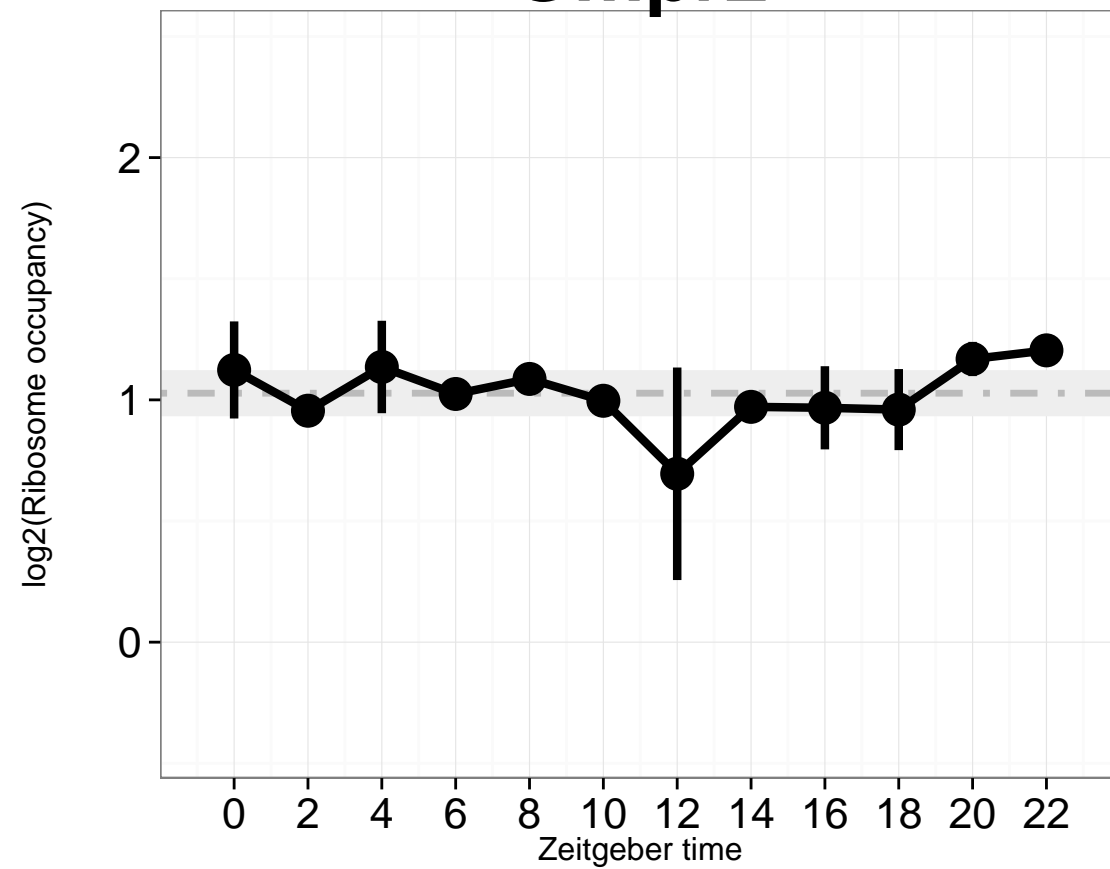

Supplement: Supplementary file 7549 [file 1]

## Phrf1

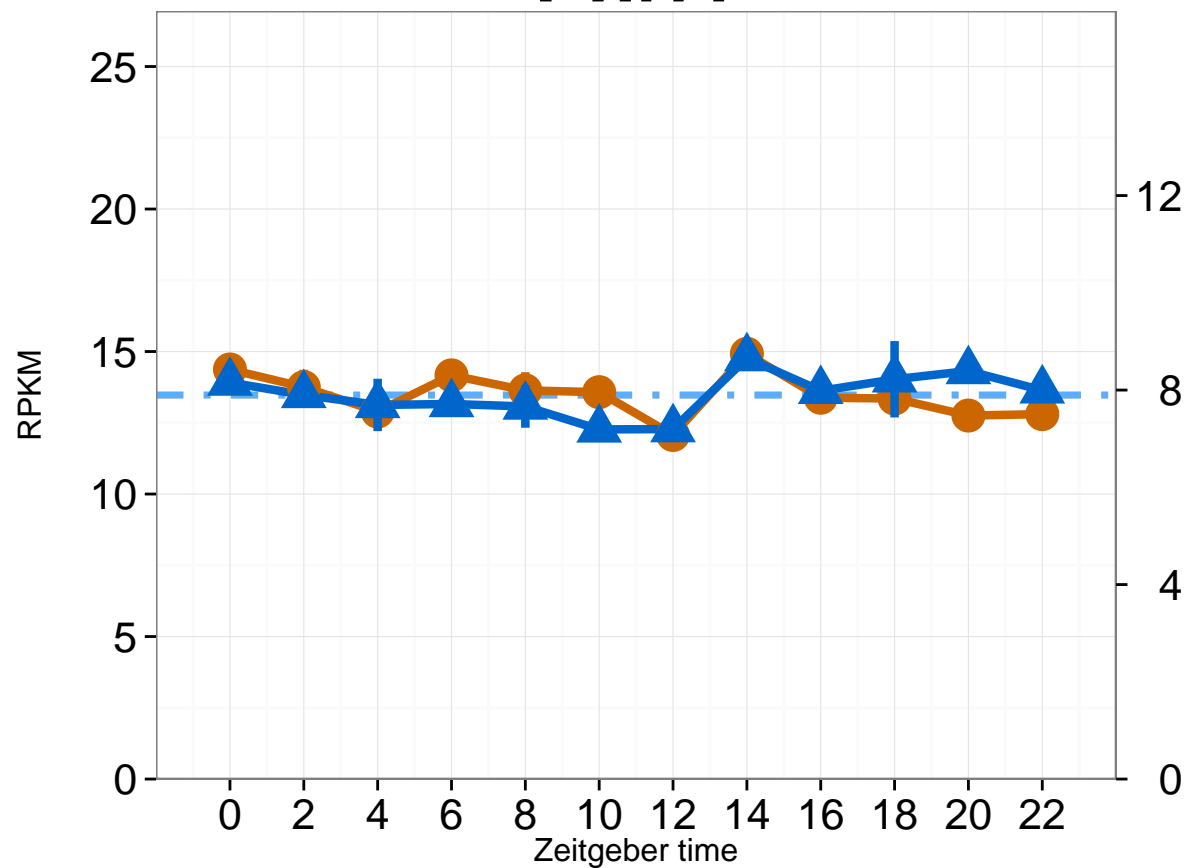

## Phrf1

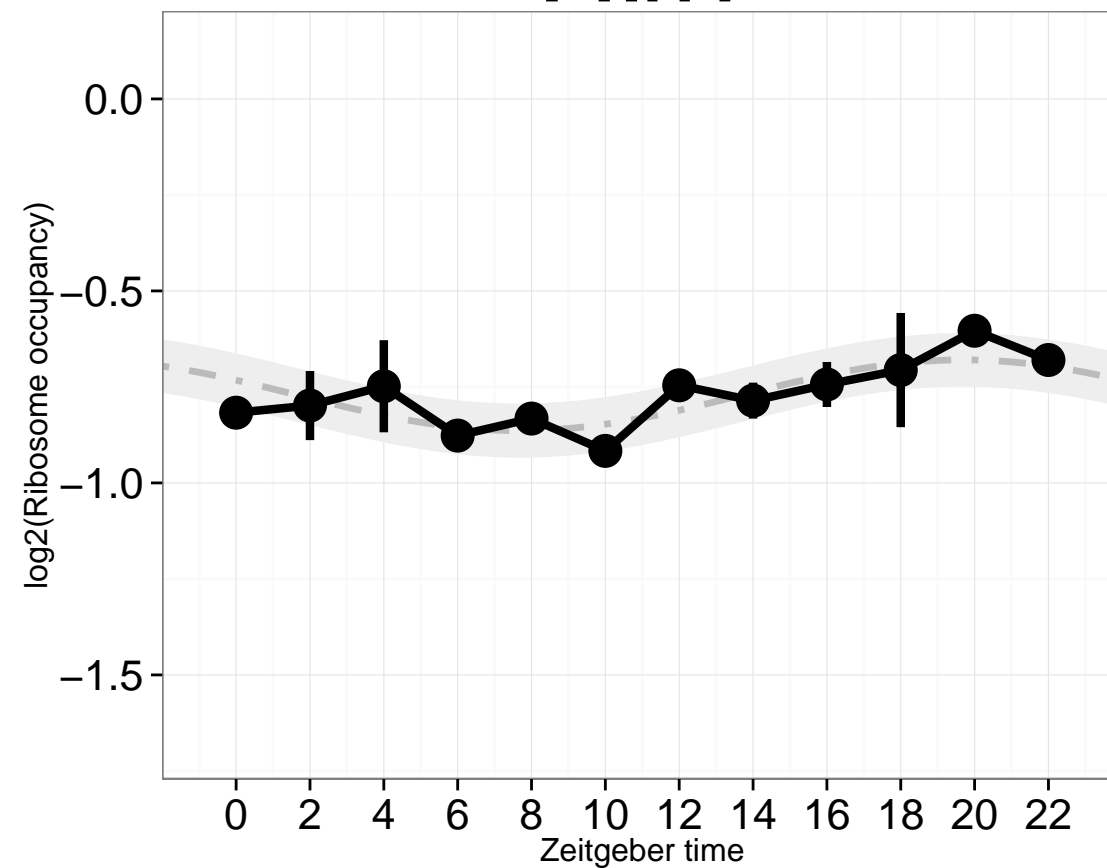

Supplement: Supplementary file 7550 [file 1]

# Sac3d1

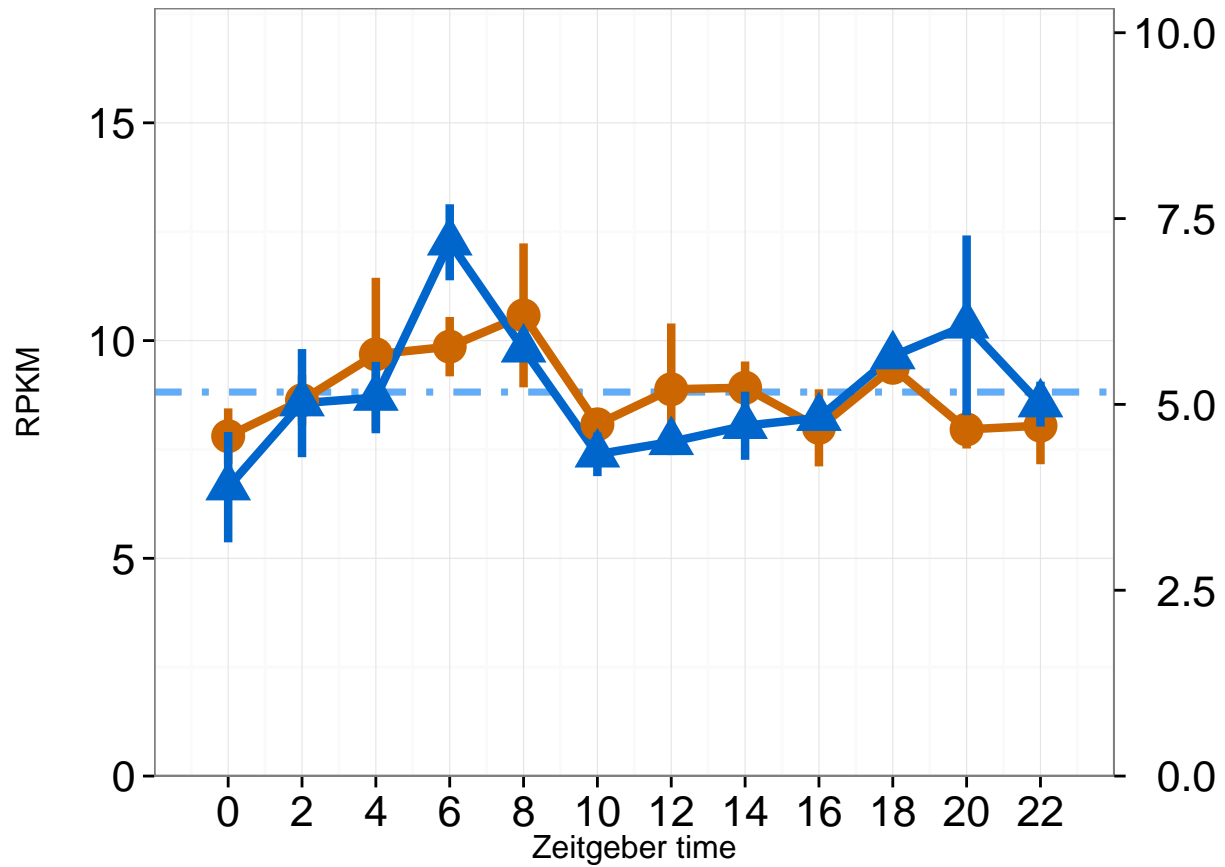

# Sac3d1

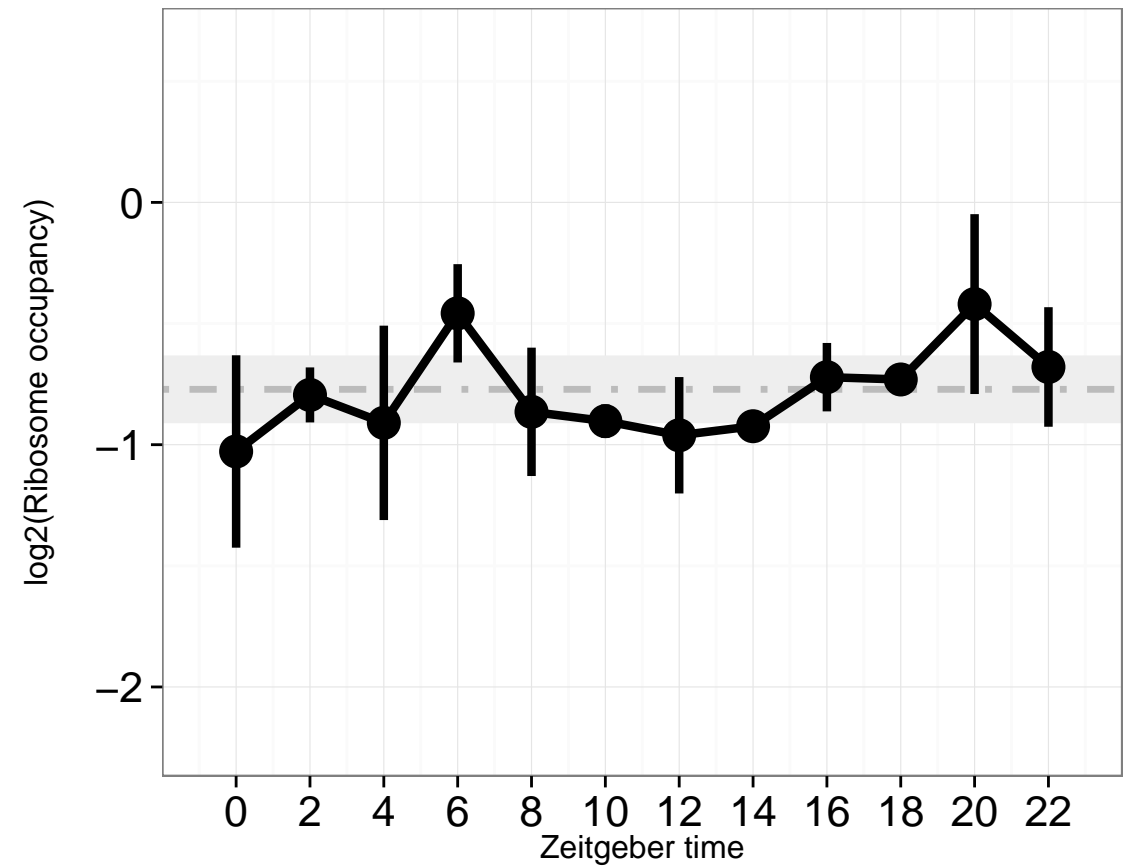

Supplement: Supplementary file 7551 [file 1]

# F2

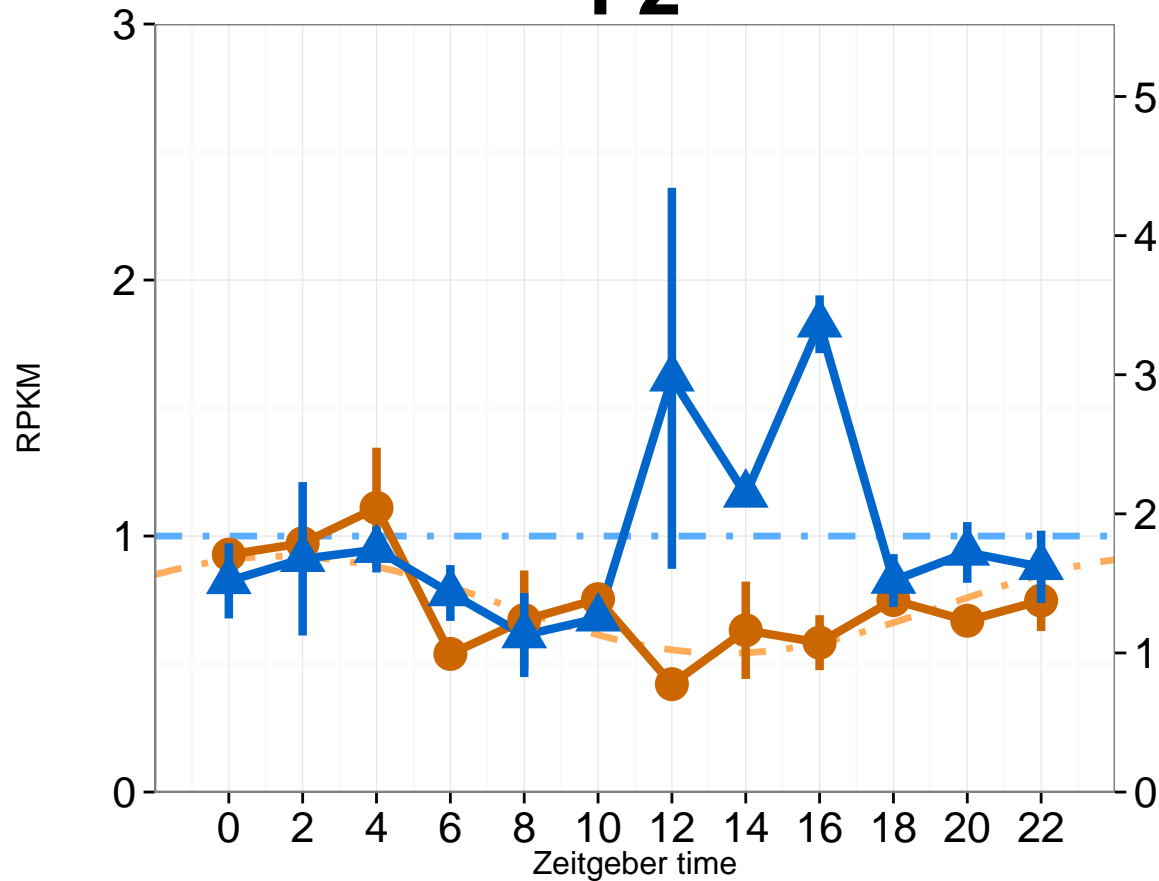

# F2

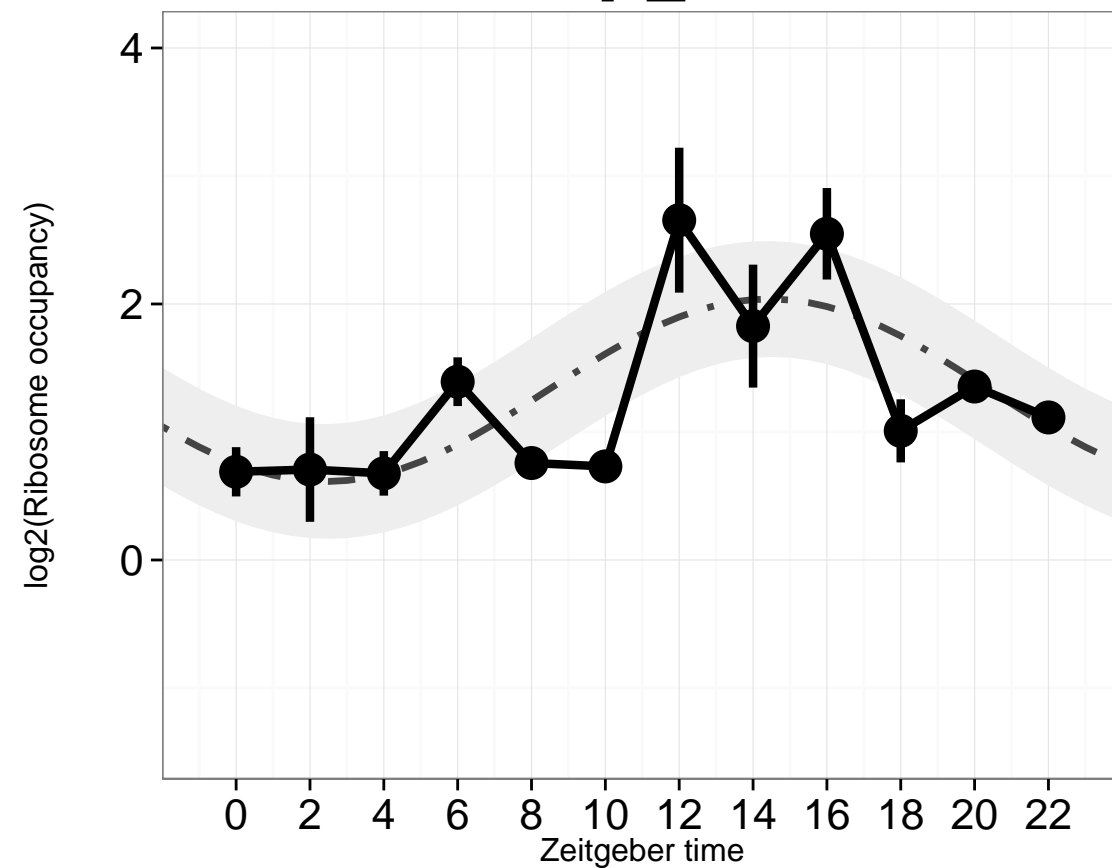

Supplement: Supplementary file 7552 [file 1]

# Edf1

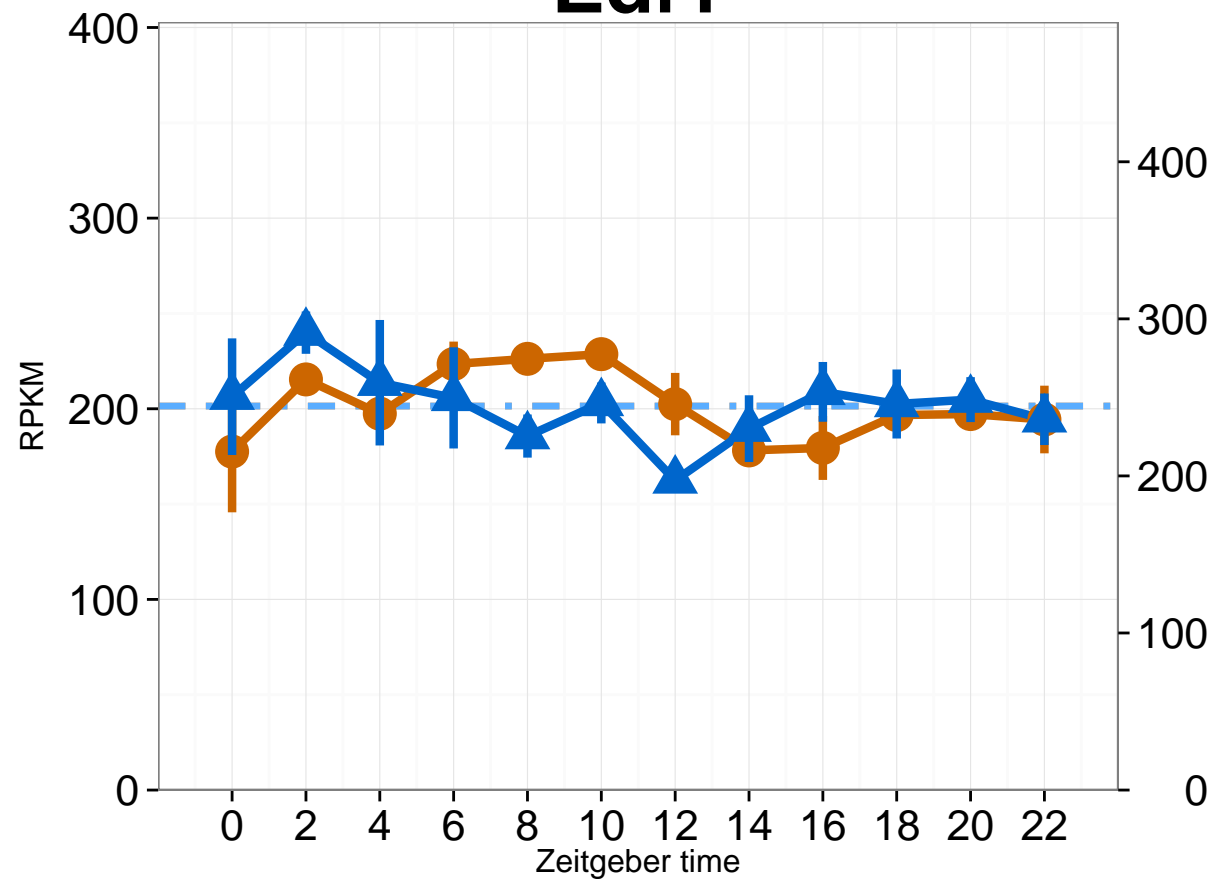

# Edf1

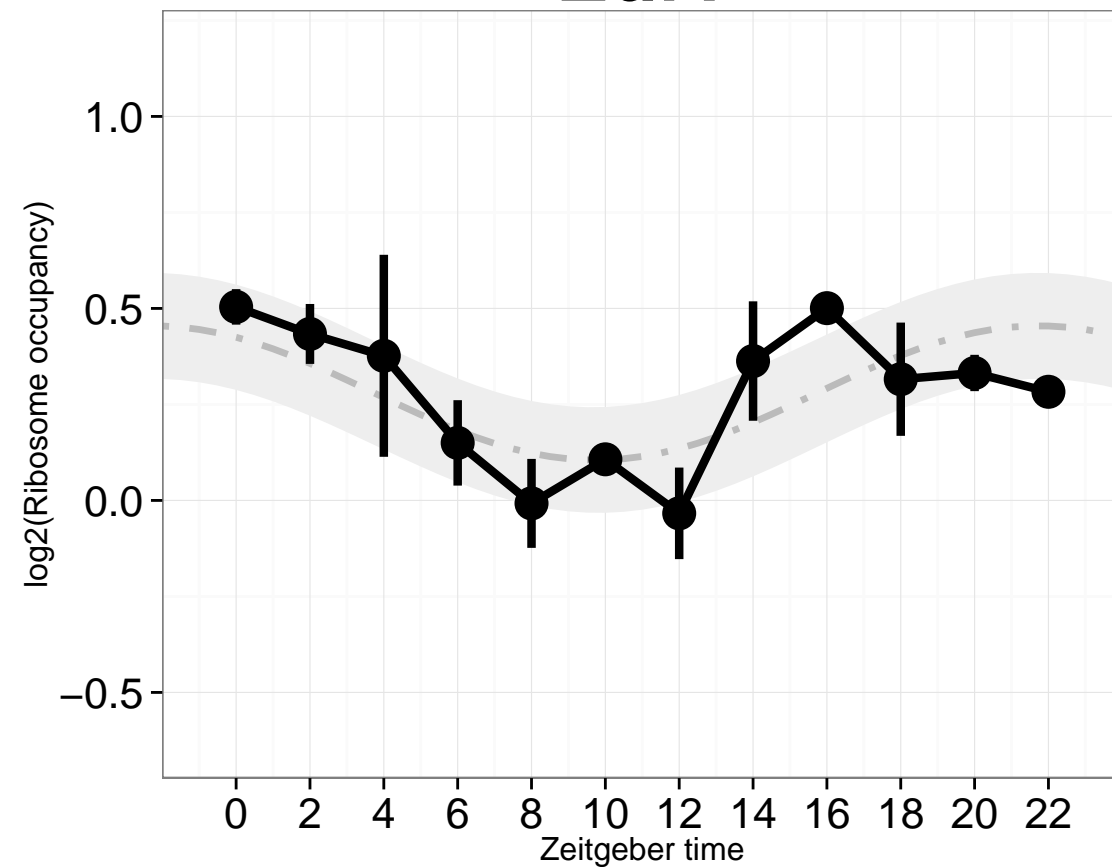

Supplement: Supplementary file 7553 [file 1]

# Yme1l1

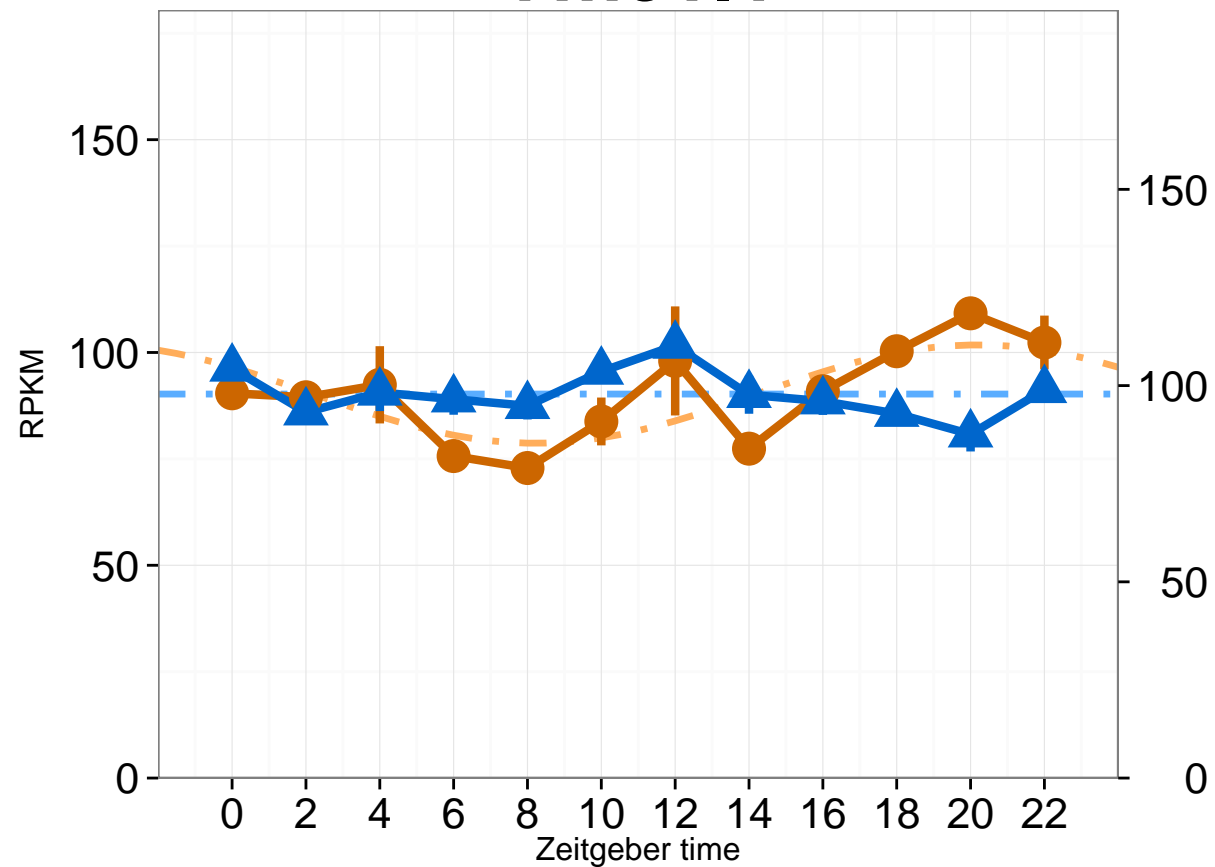

# Yme1l1

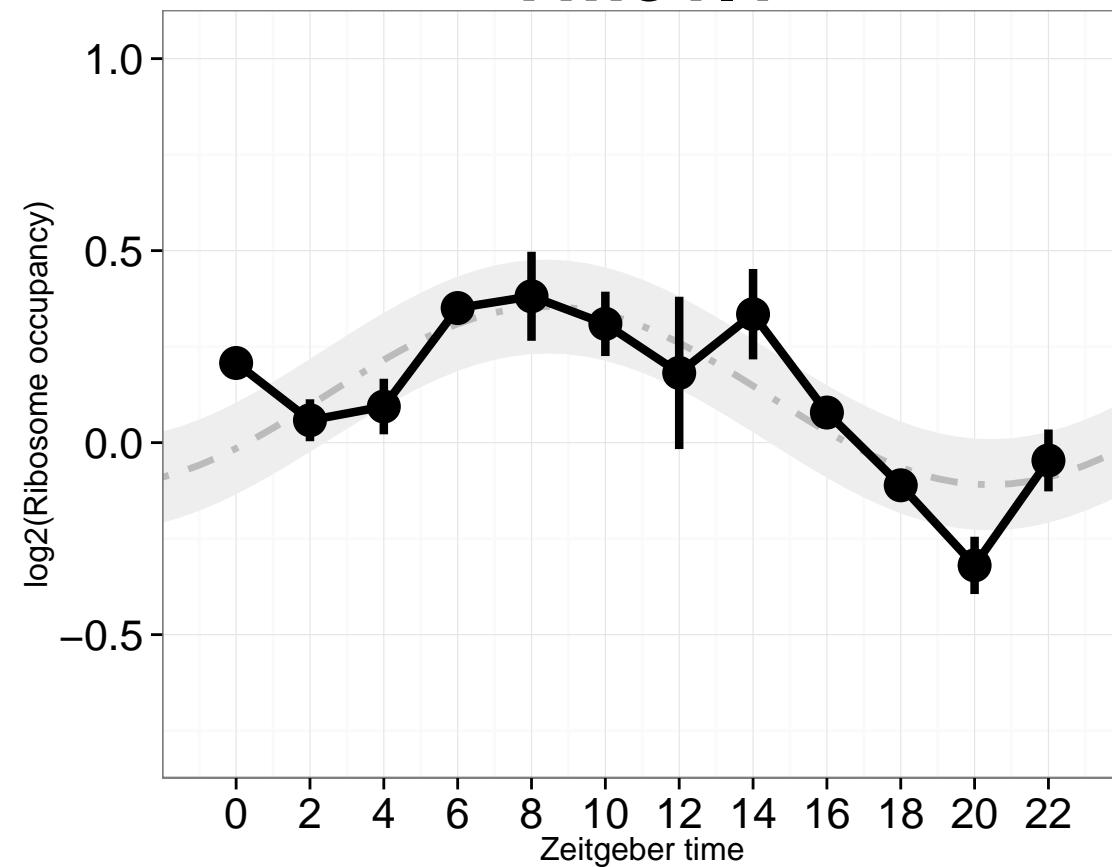

Supplement: Supplementary file 7554 [file 1]

# C030006K11Rik

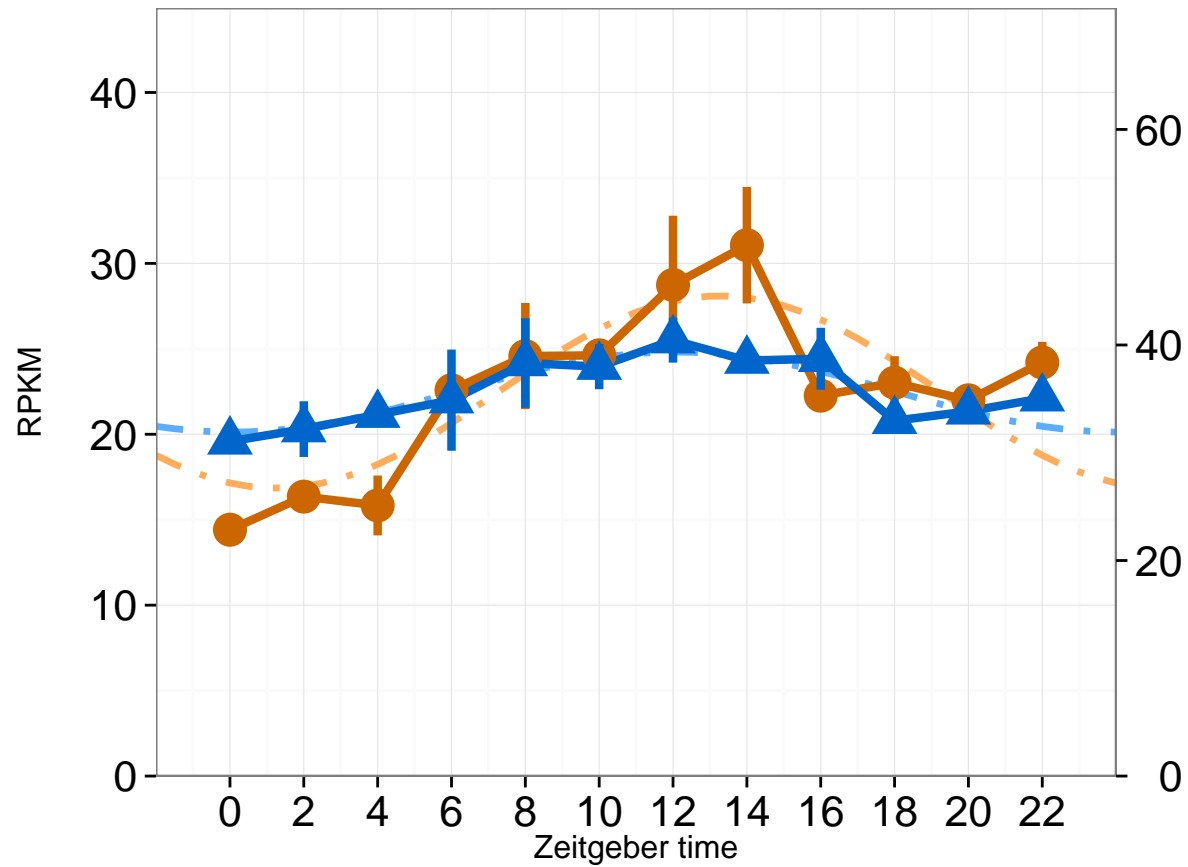

# C030006K11Rik

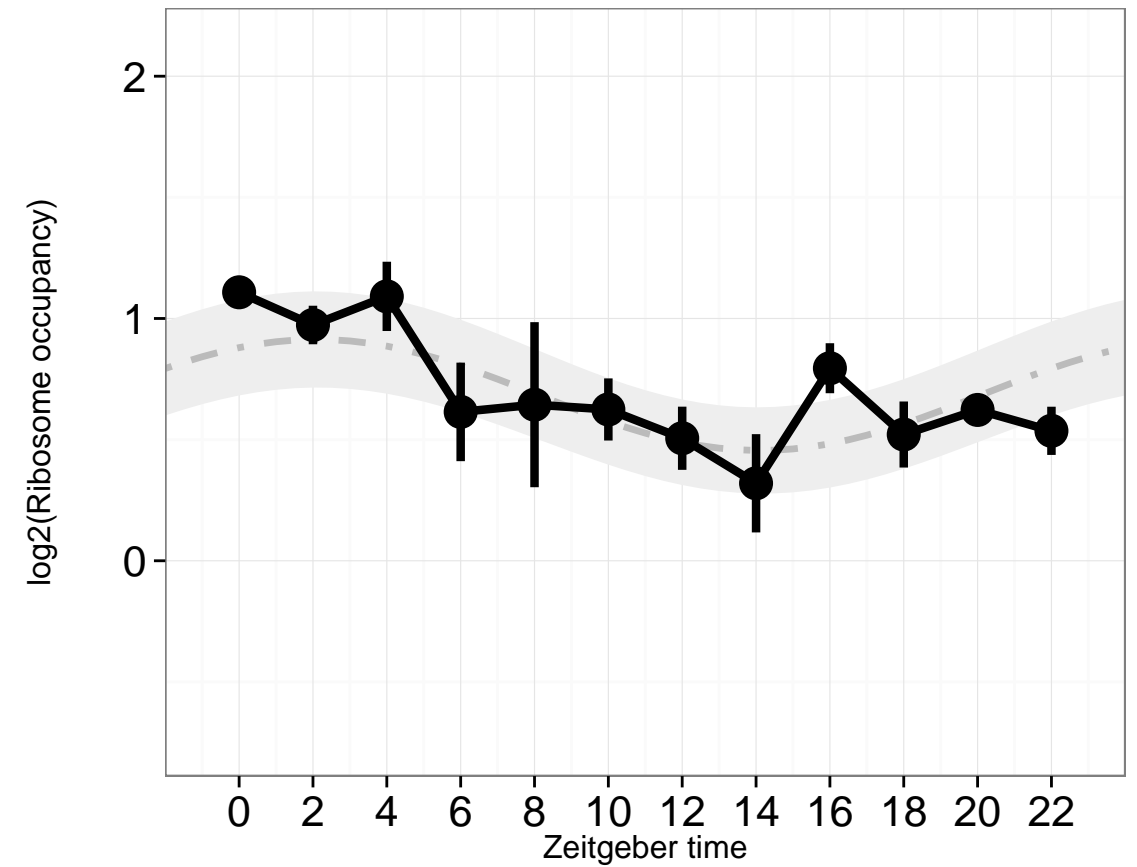

Supplement: Supplementary file 7555 [file 1]

## Orc4

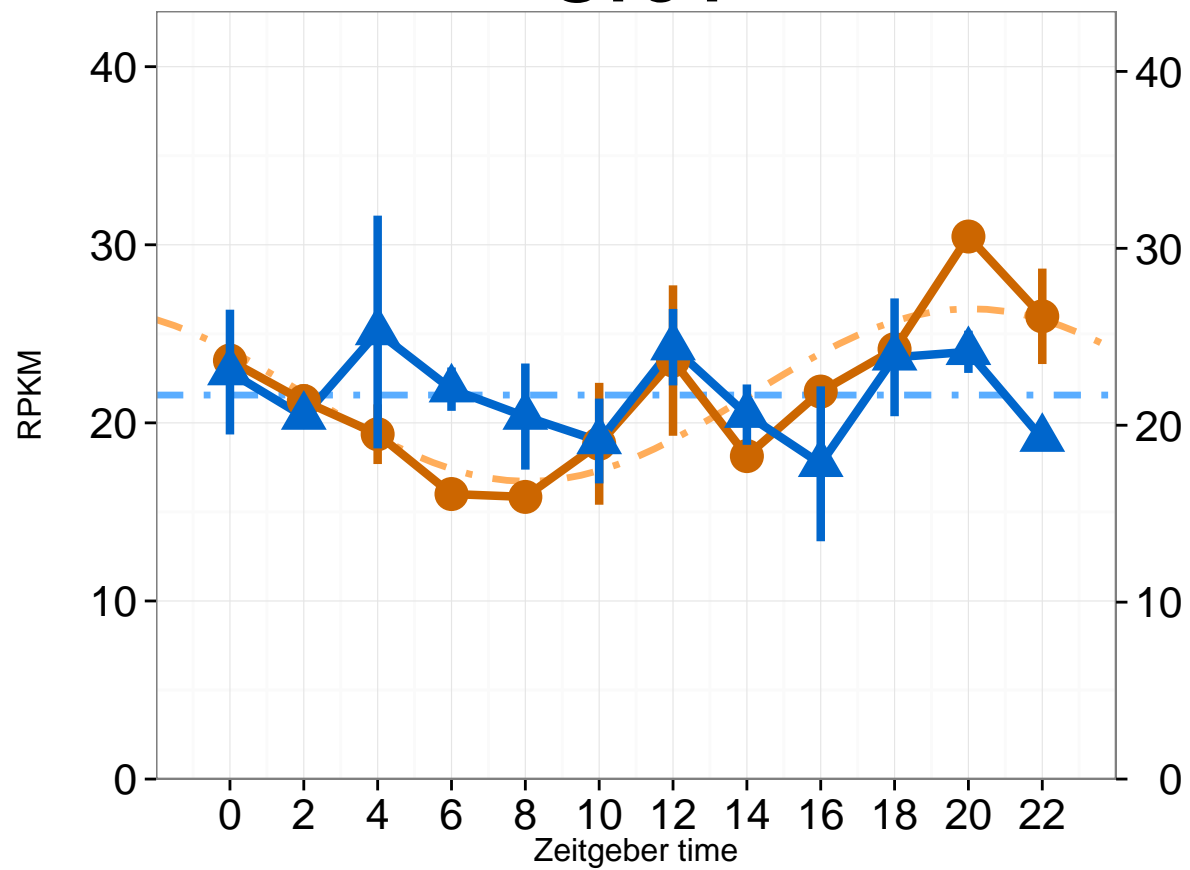

## Orc4

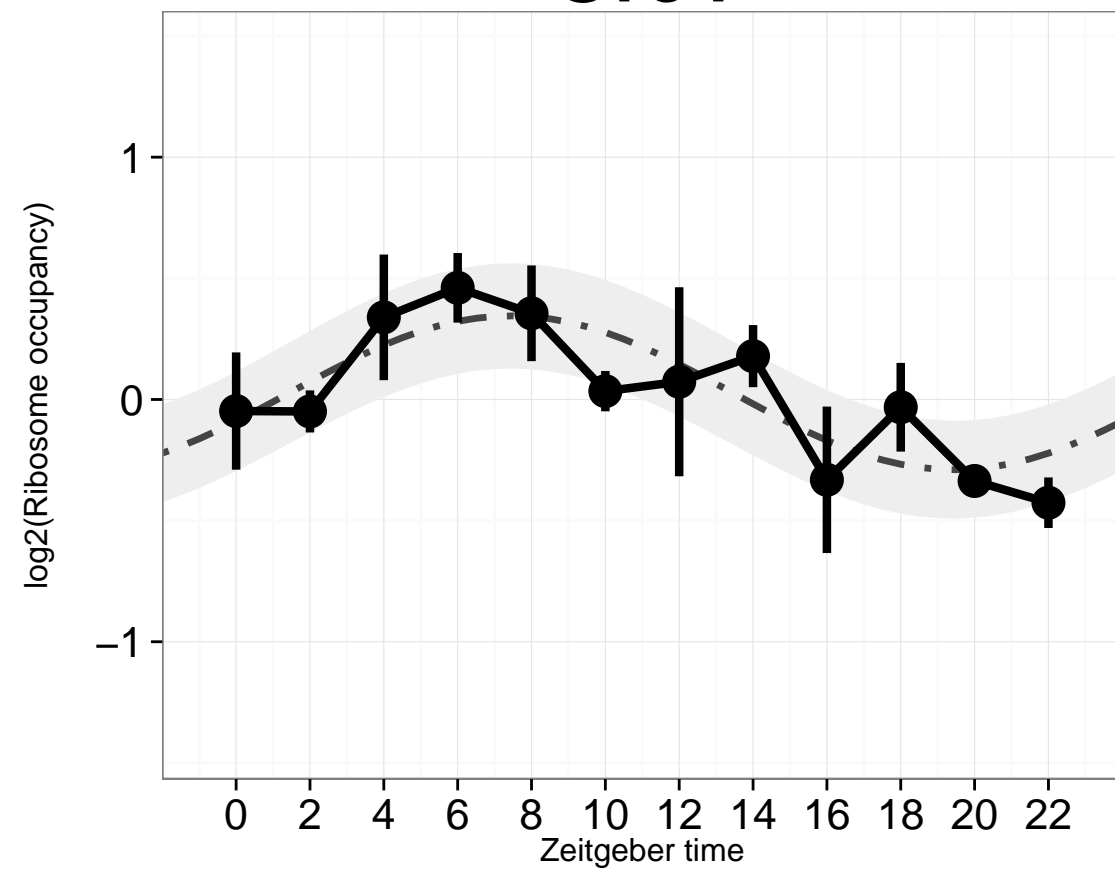

Supplement: Supplementary file 7556 [file 1]

## Mafb

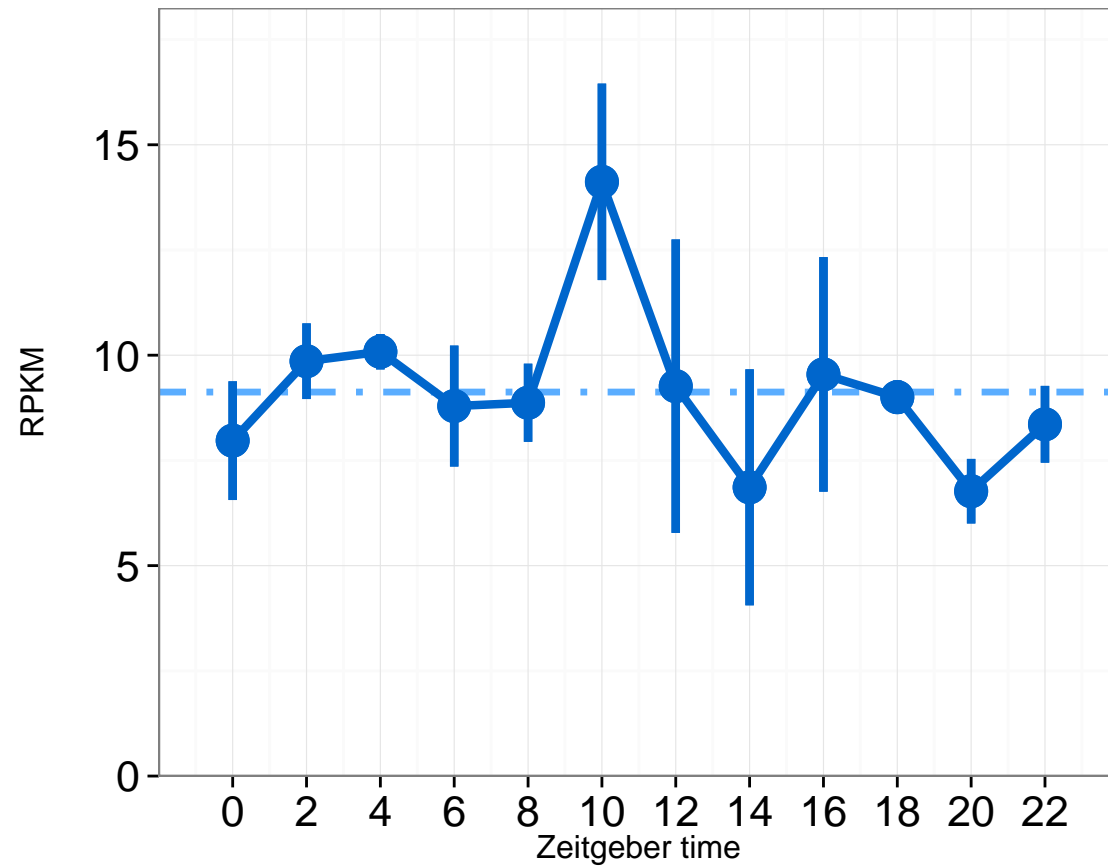

## Mafb log2(Ribosome occupancy)

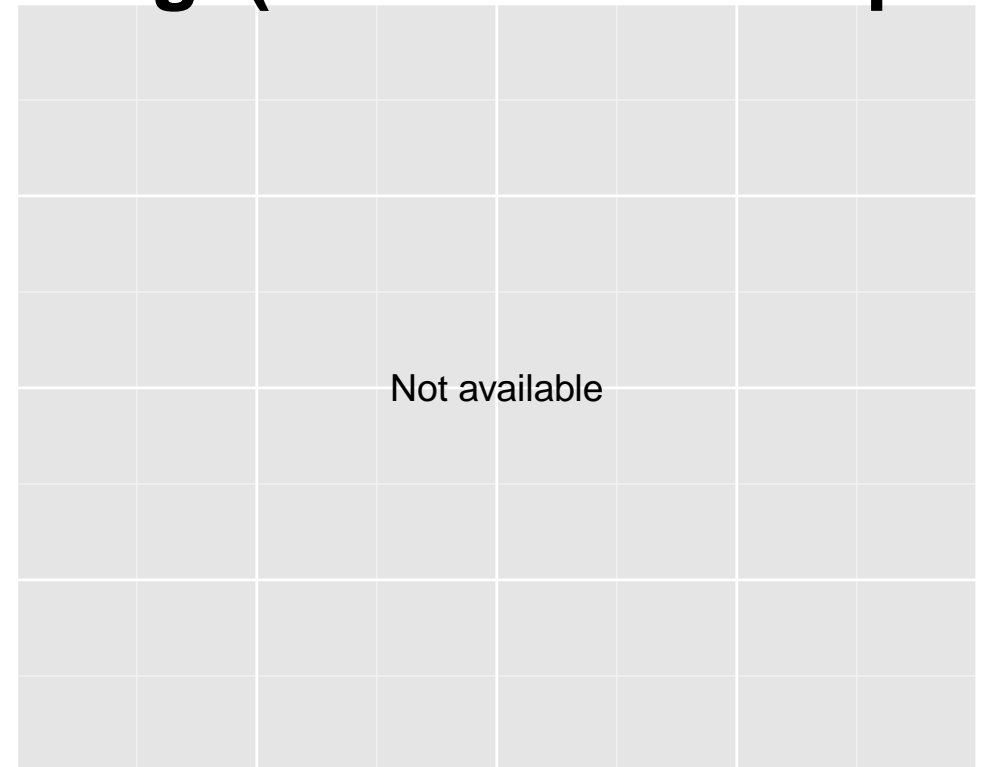

Supplement: Supplementary file 7557 [file 1]

## Tceanc2

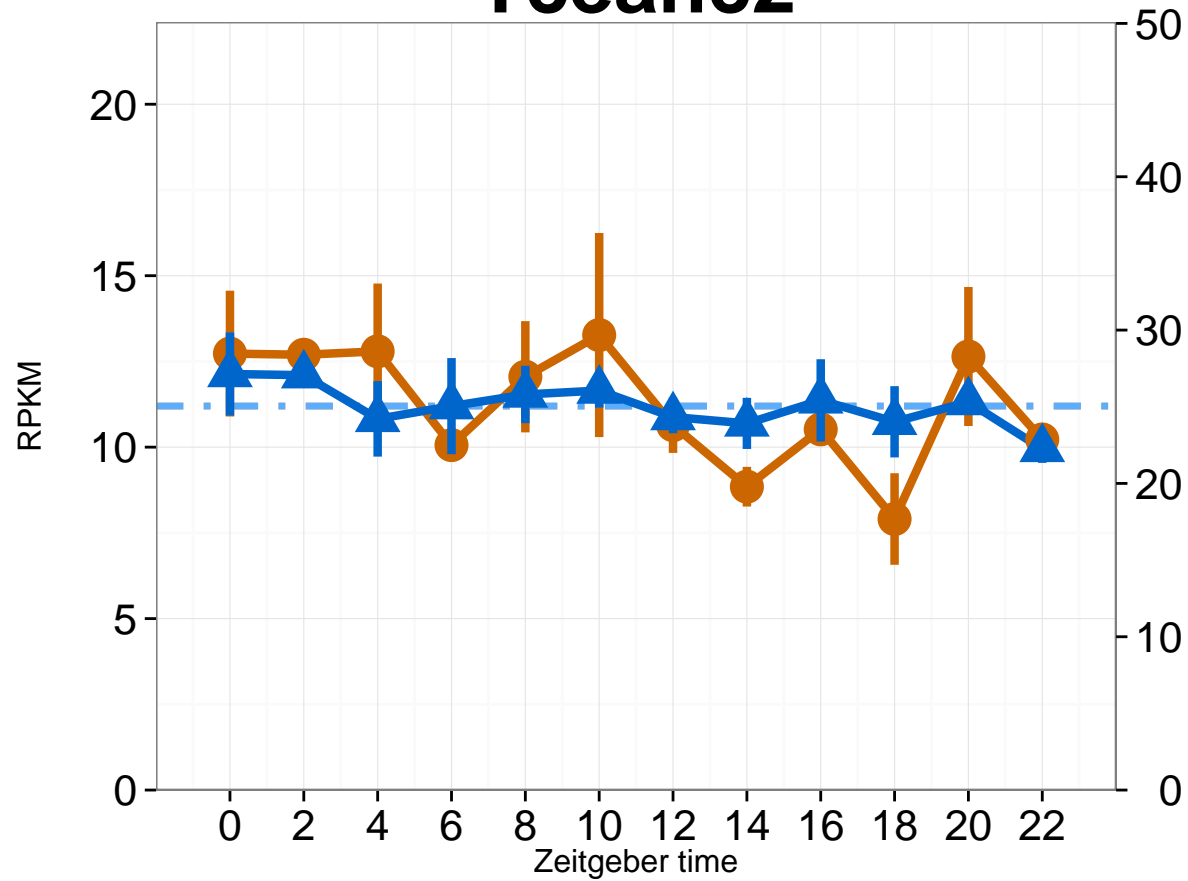

## Tceanc2

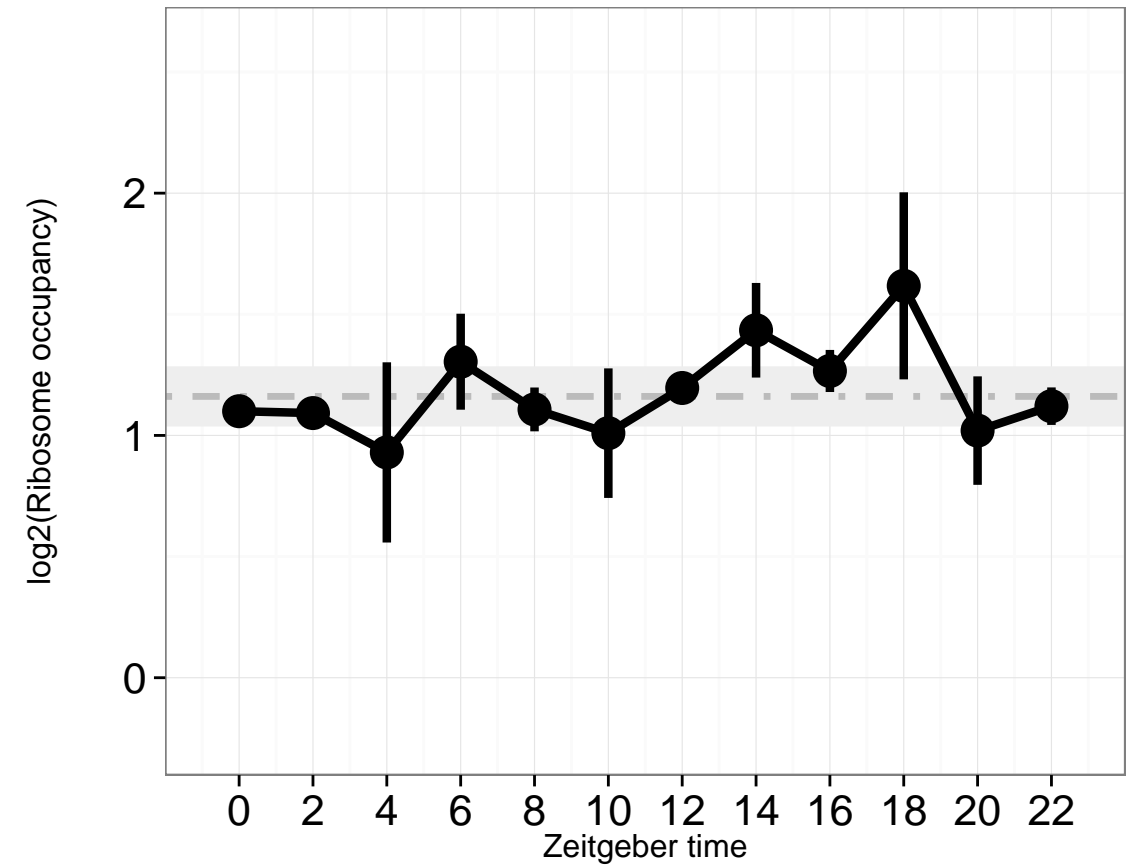

Supplement: Supplementary file 7558 [file 1]

# Gpsm2

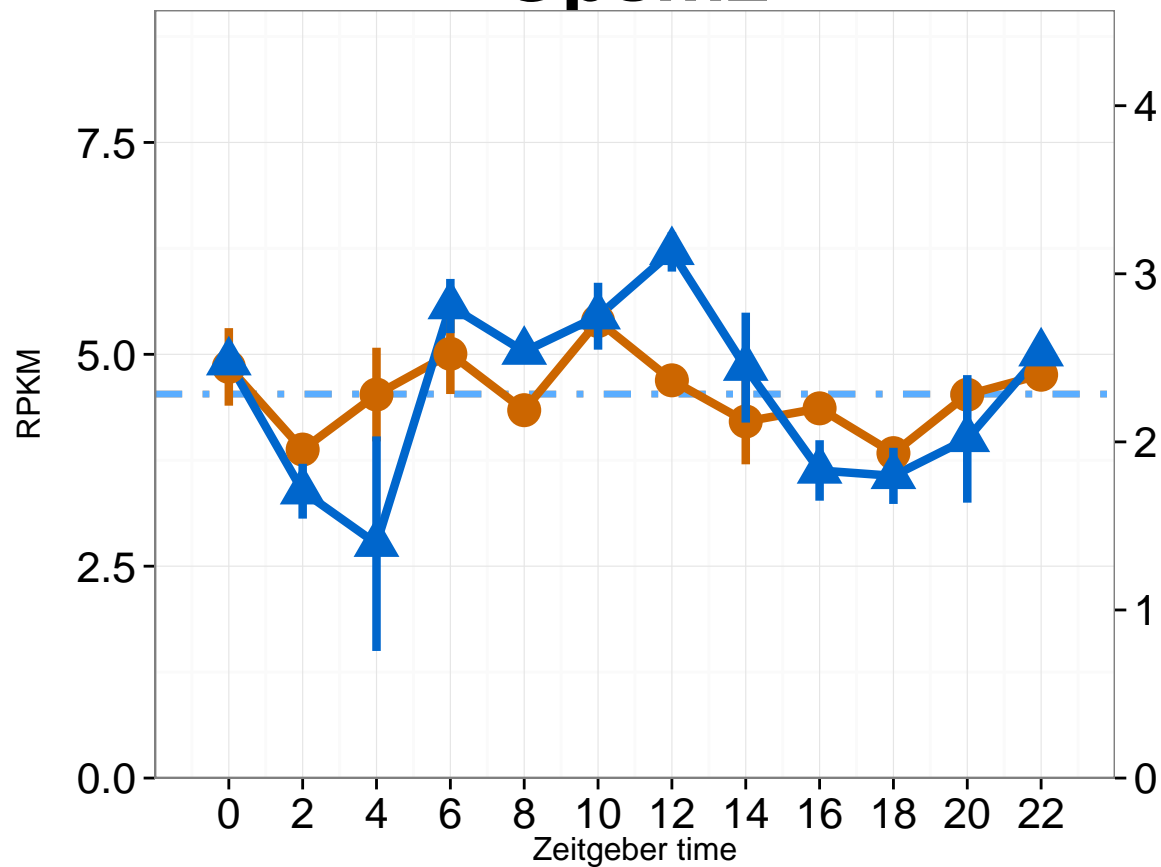

# Gpsm2

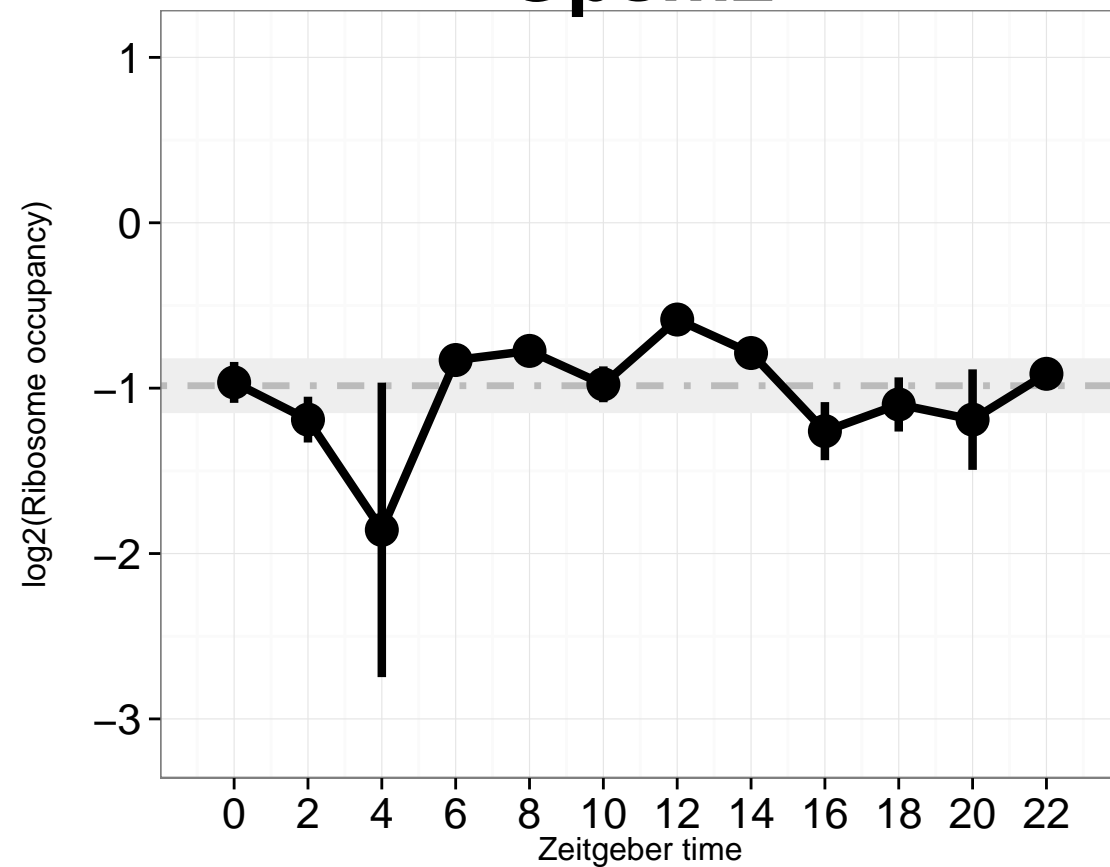

Supplement: Supplementary file 7559 [file 1]

## Coq3

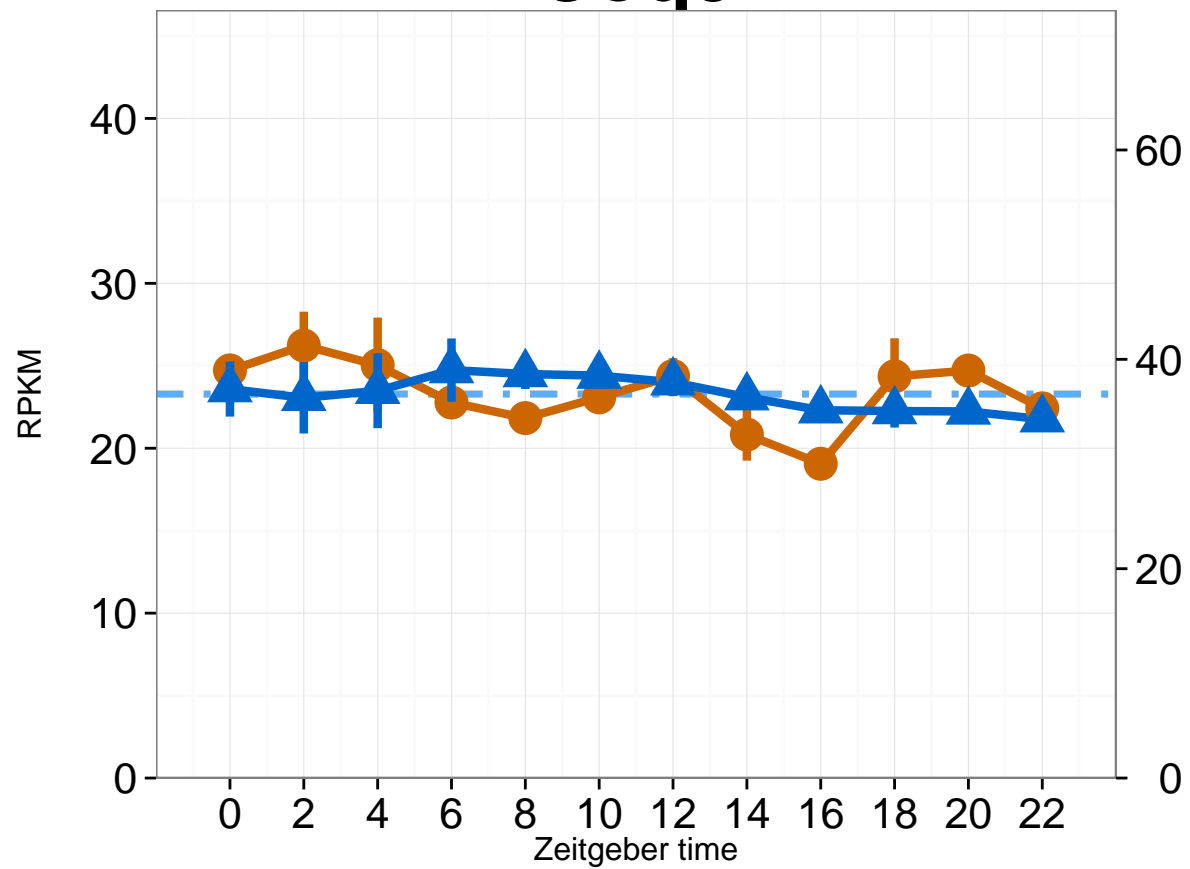

## Coq3

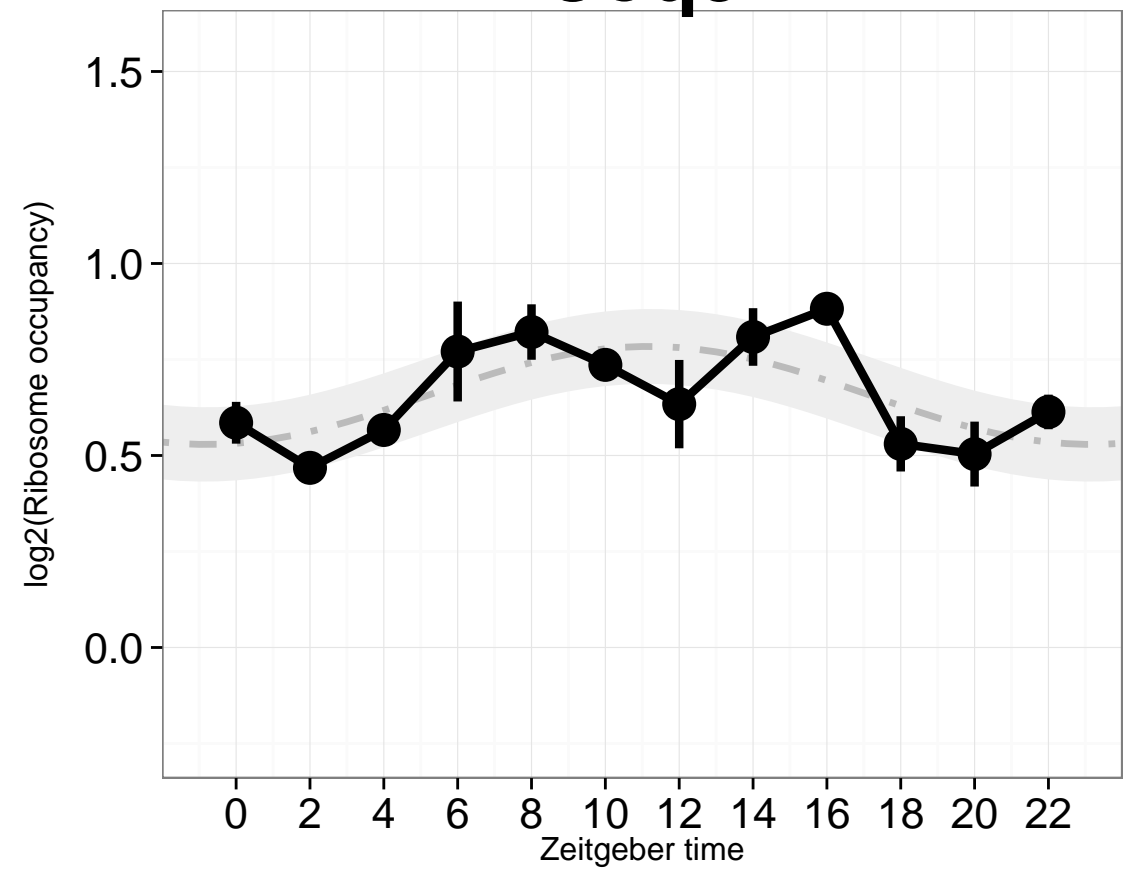

Supplement: Supplementary file 7560 [file 1]

## Socs4

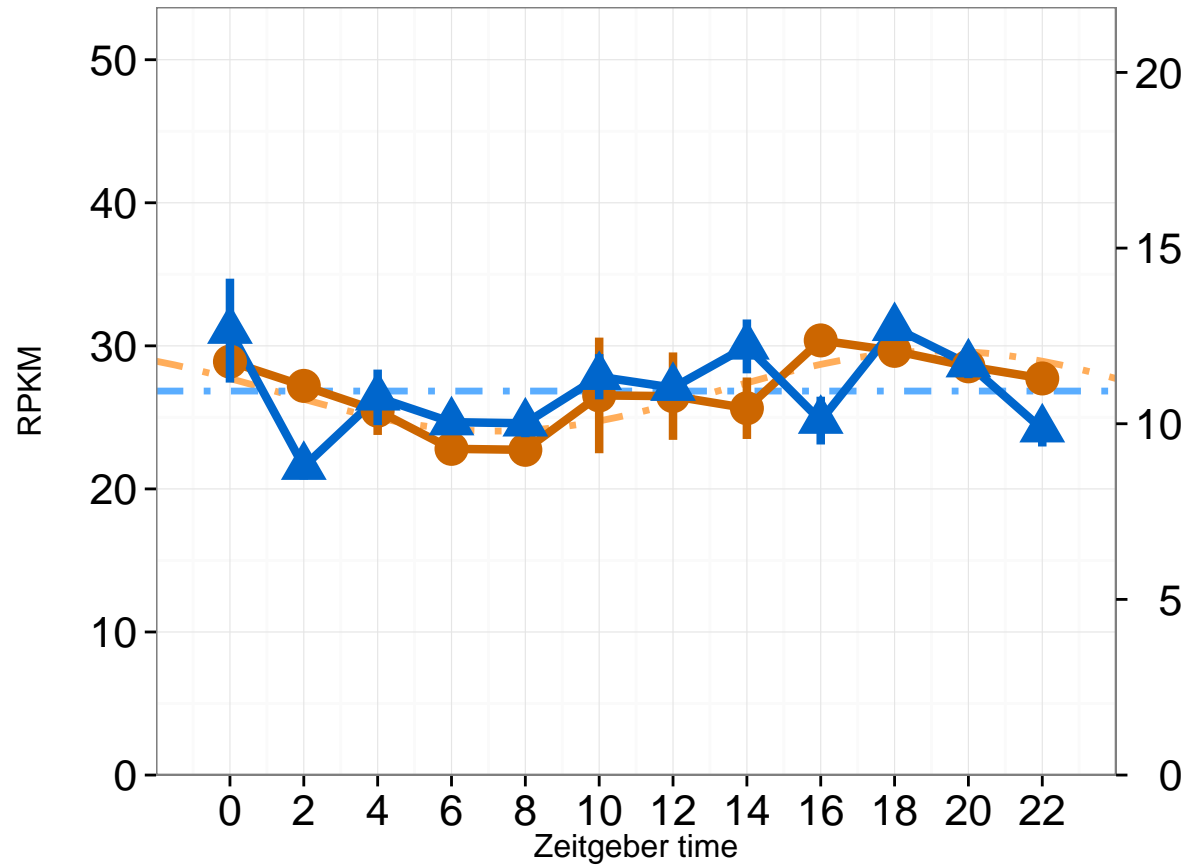

## Socs4

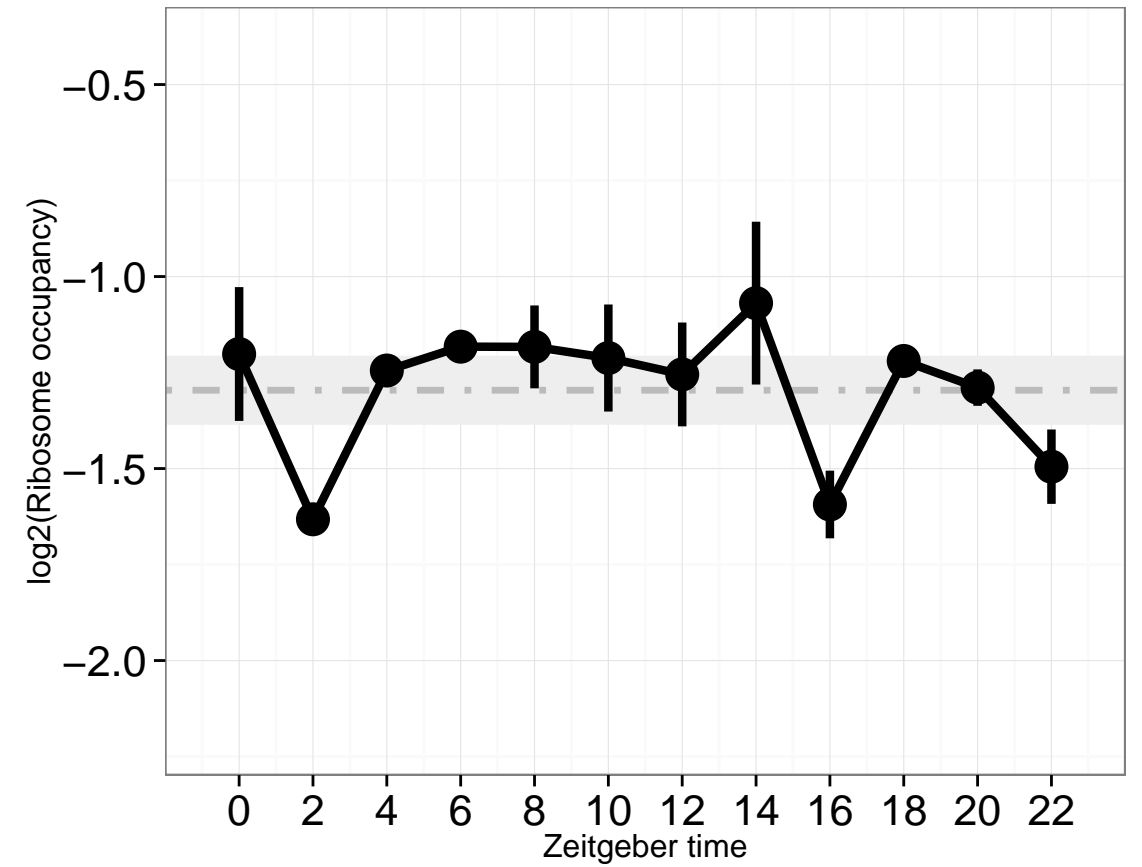

Supplement: Supplementary file 7561 [file 1]

## Ache

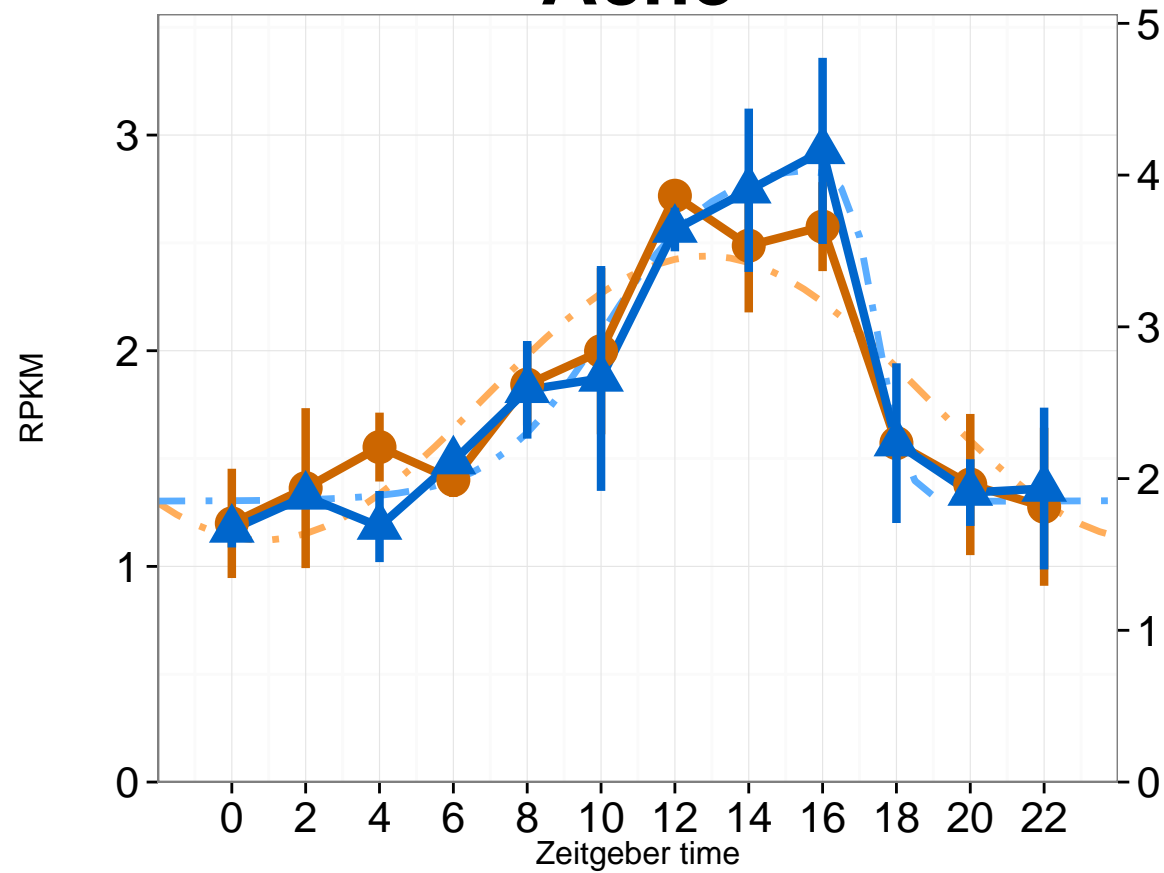

## Ache

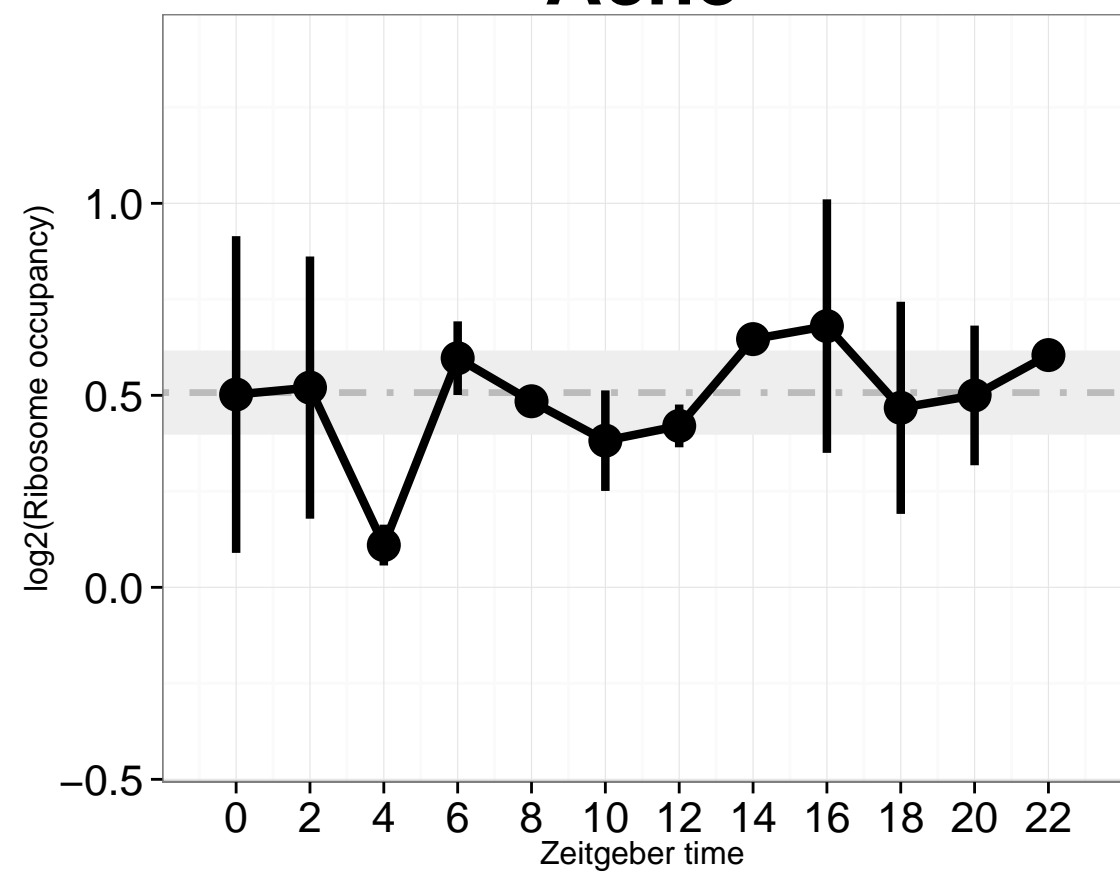

Supplement: Supplementary file 7562 [file 1]

# St8sia1

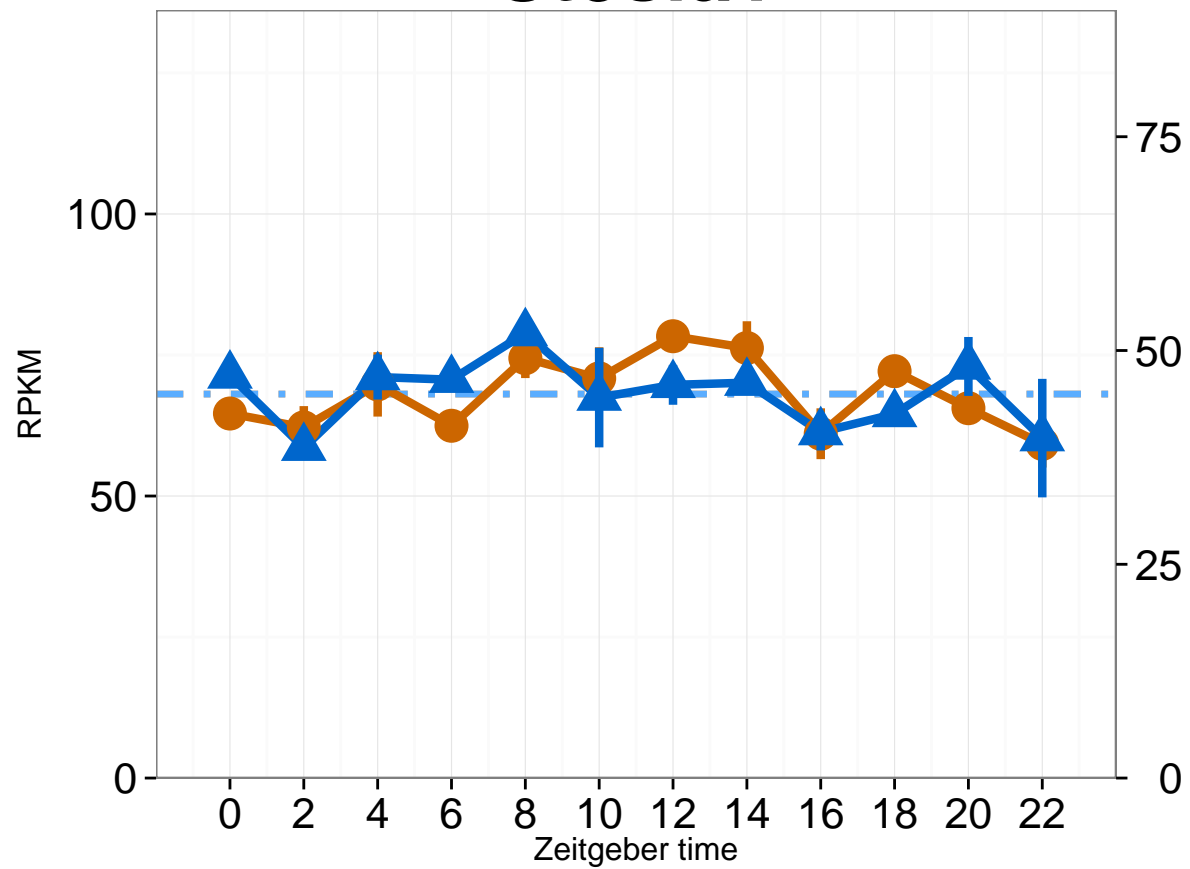

# St8sia1

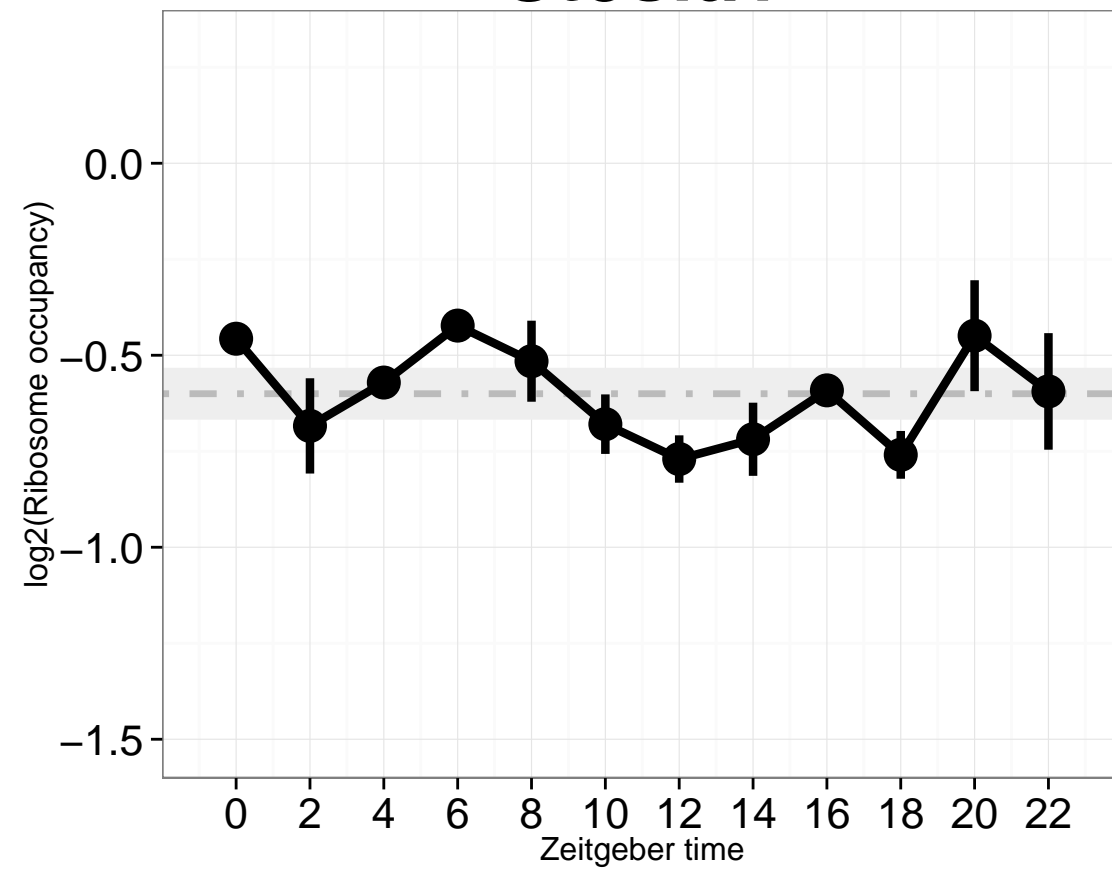

Supplement: Supplementary file 7563 [file 1]

## Cib2

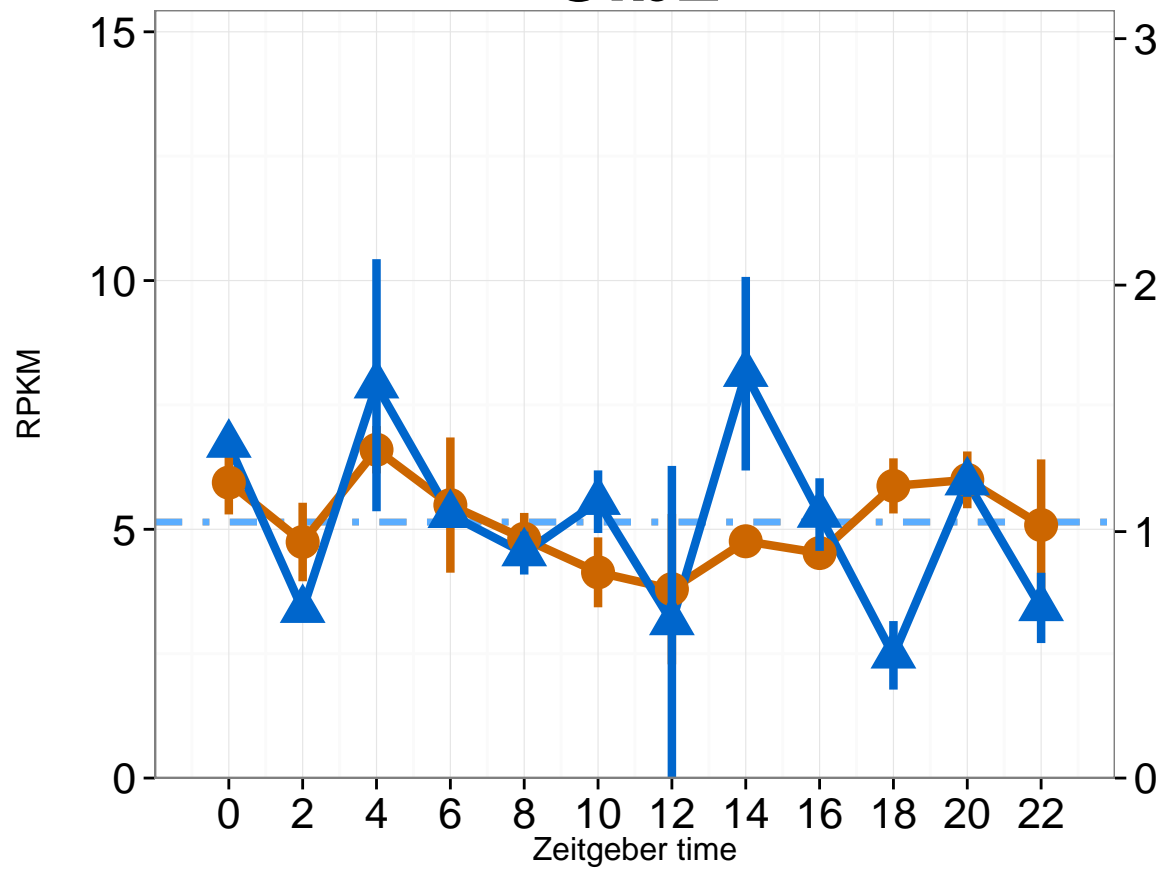

## Cib2

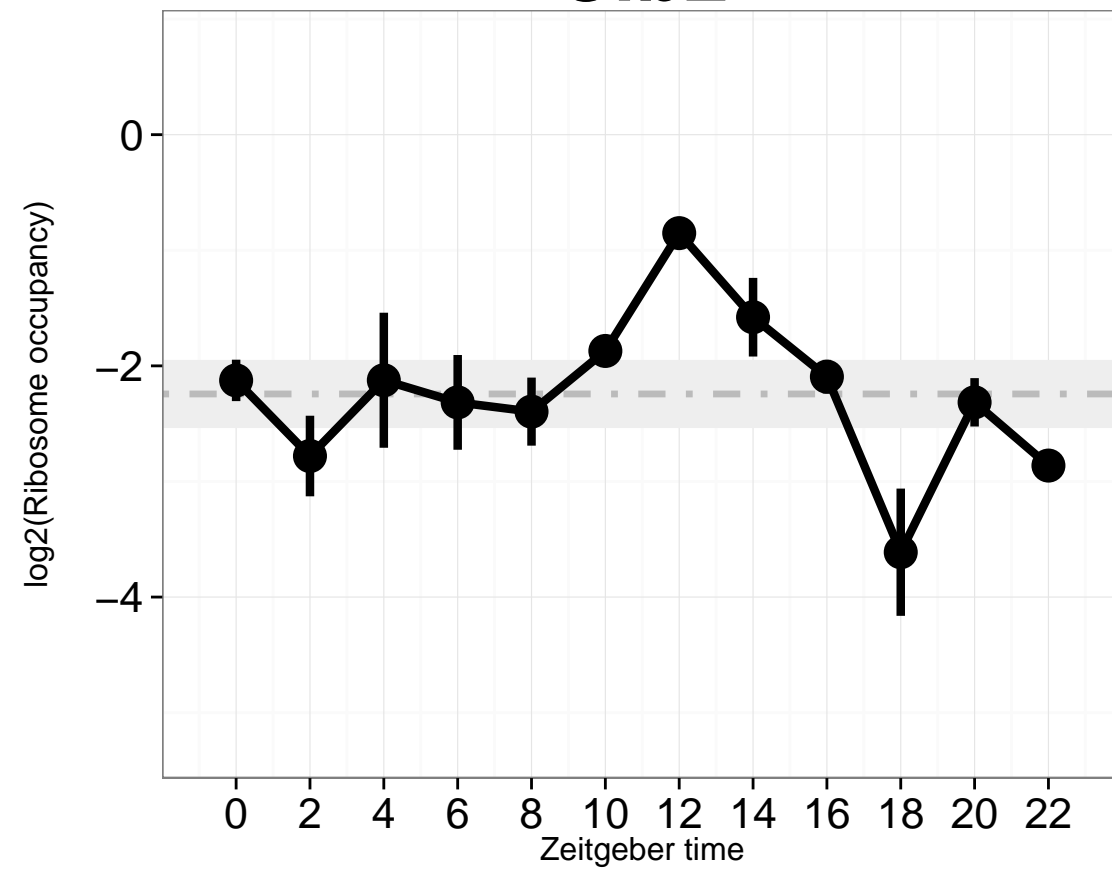

Supplement: Supplementary file 7564 [file 1]

# Epm2aip1

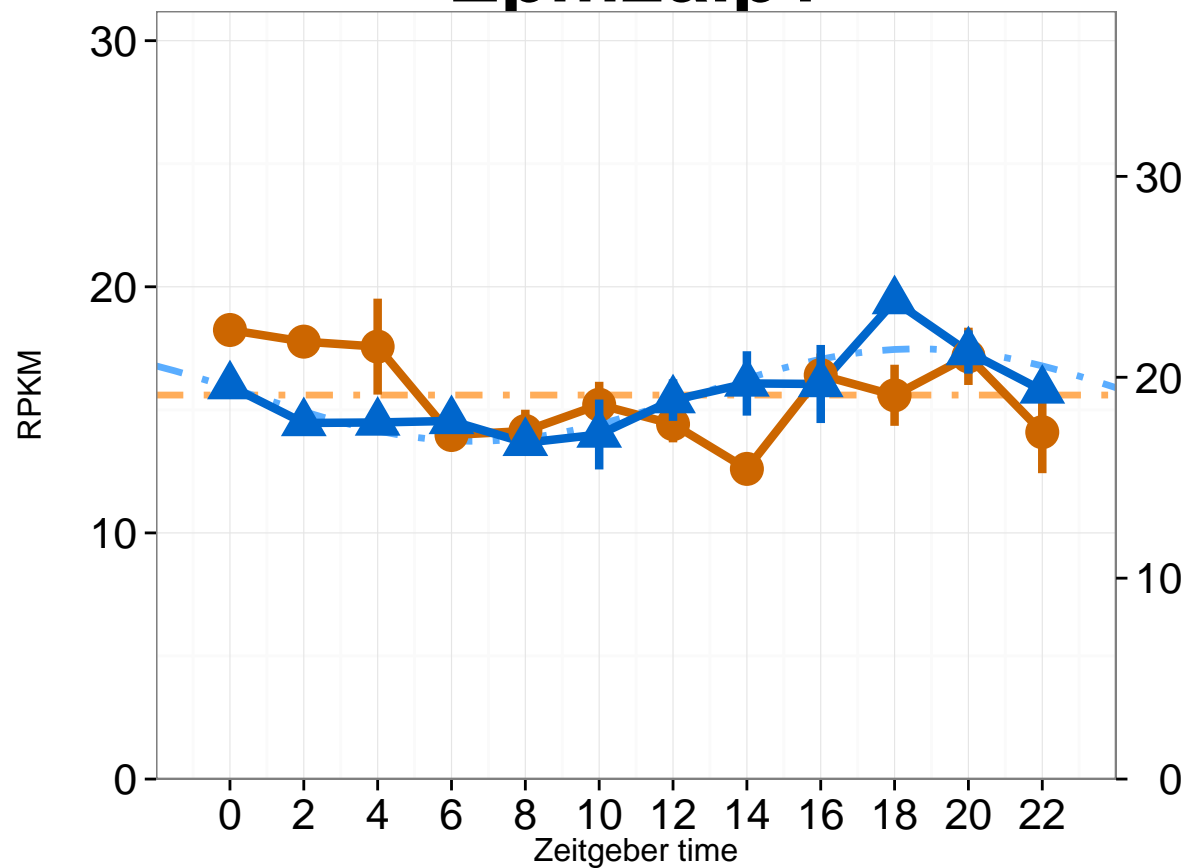

# Epm2aip1

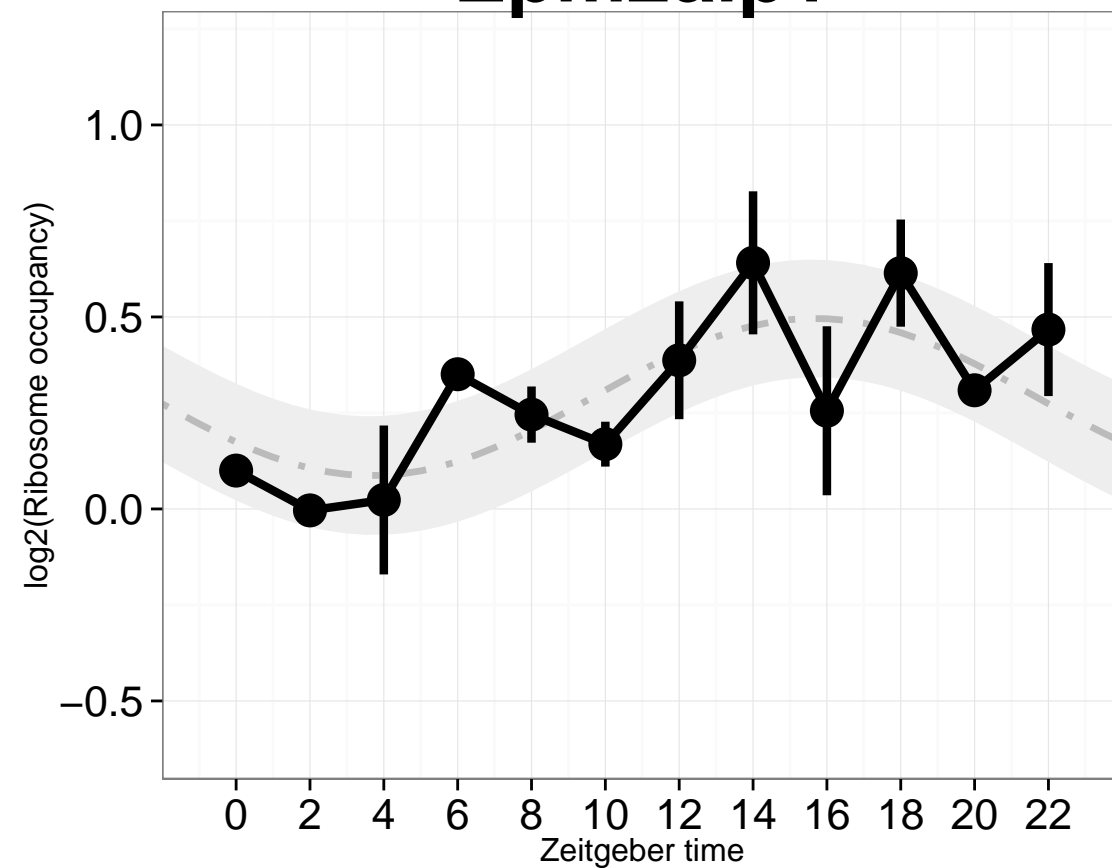

Supplement: Supplementary file 7565 [file 1]

## Chsy3

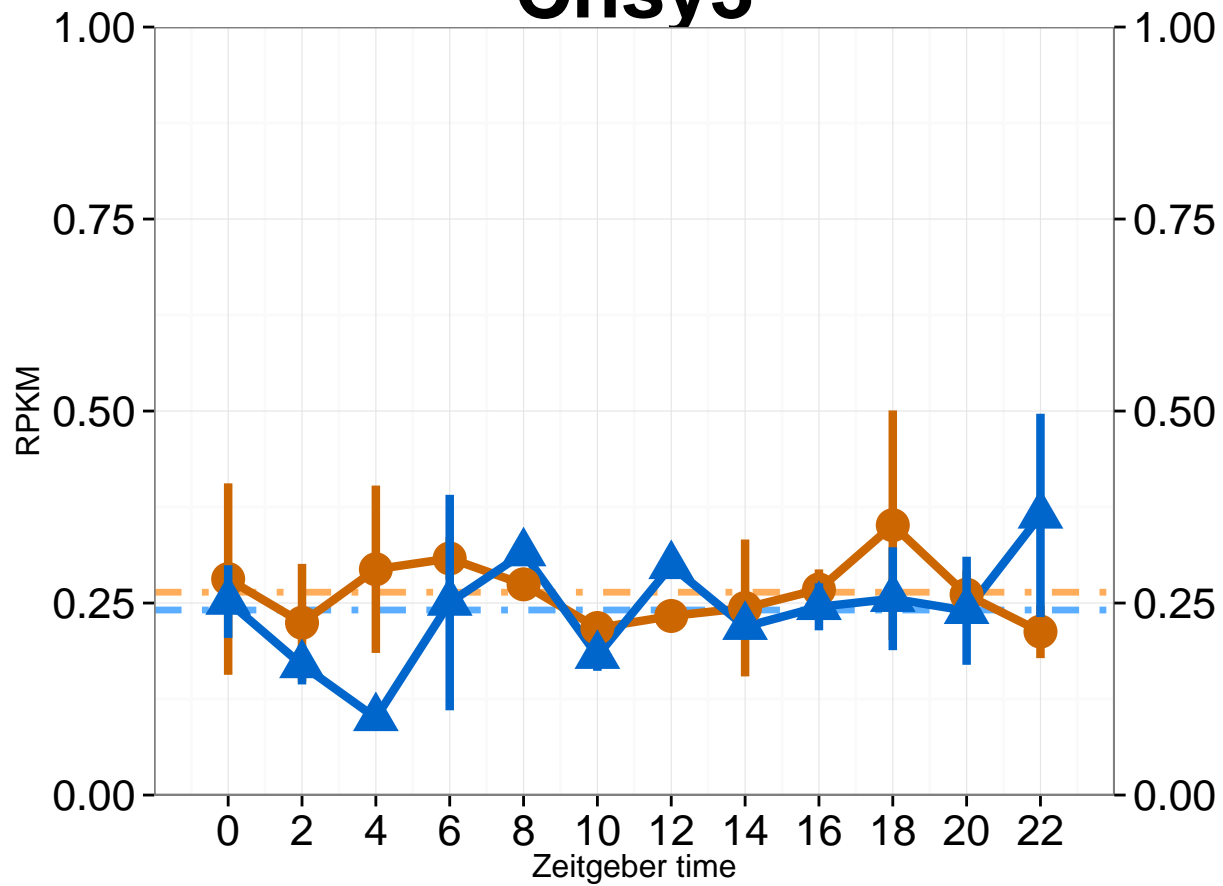

## Chsy3

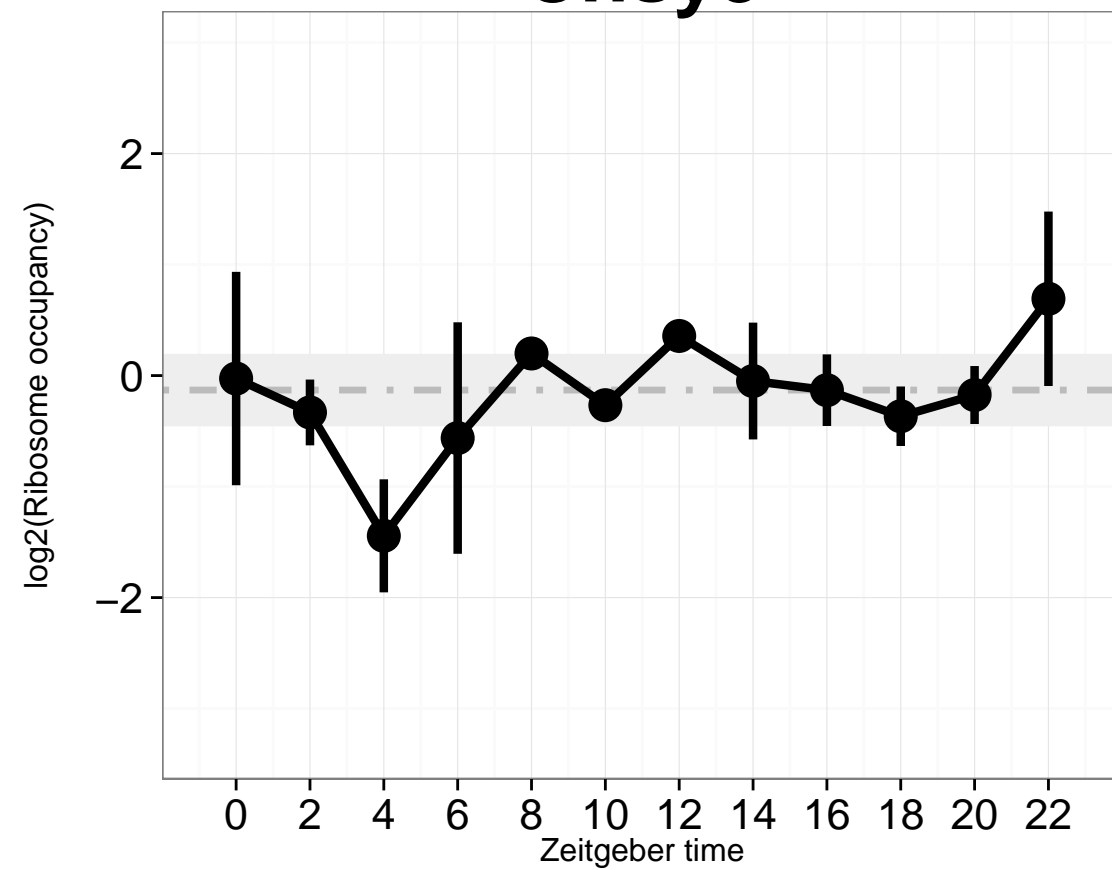

Supplement: Supplementary file 7566 [file 1]

## Ect2

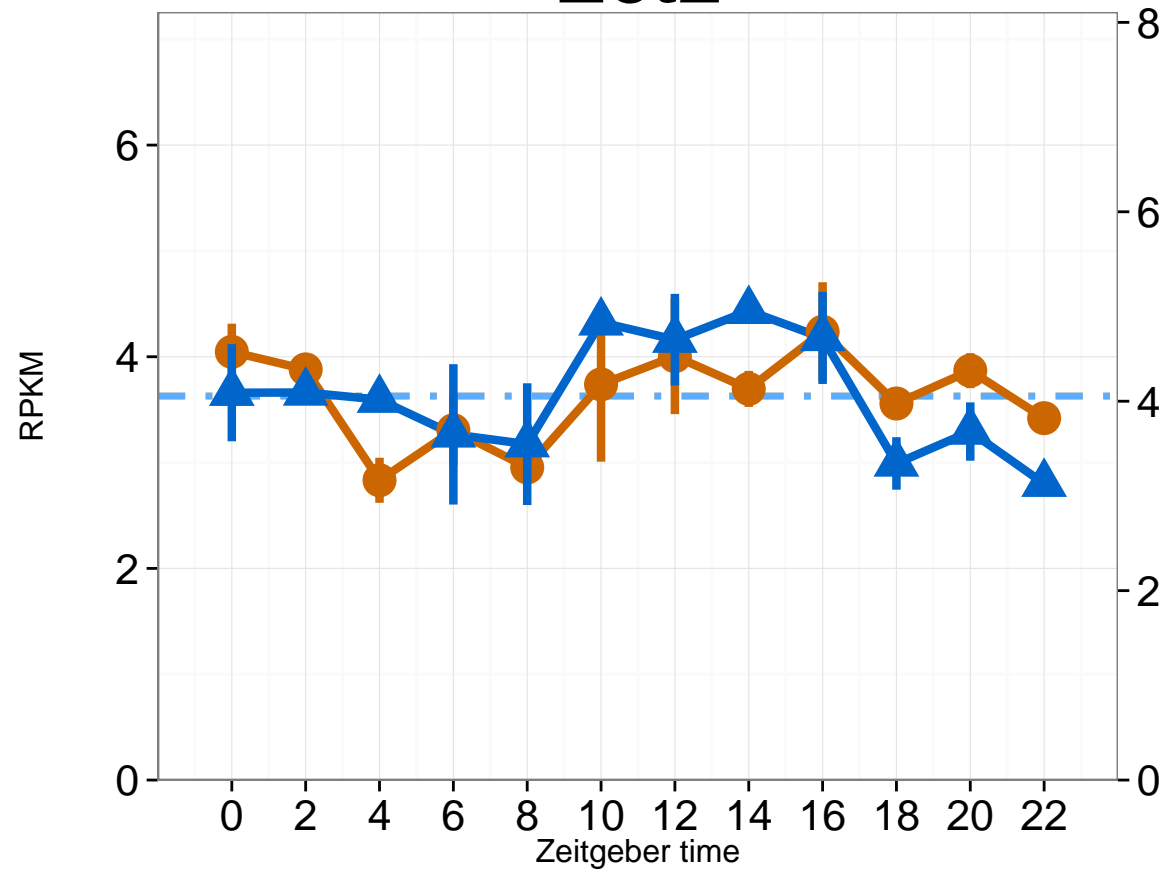

## Ect2

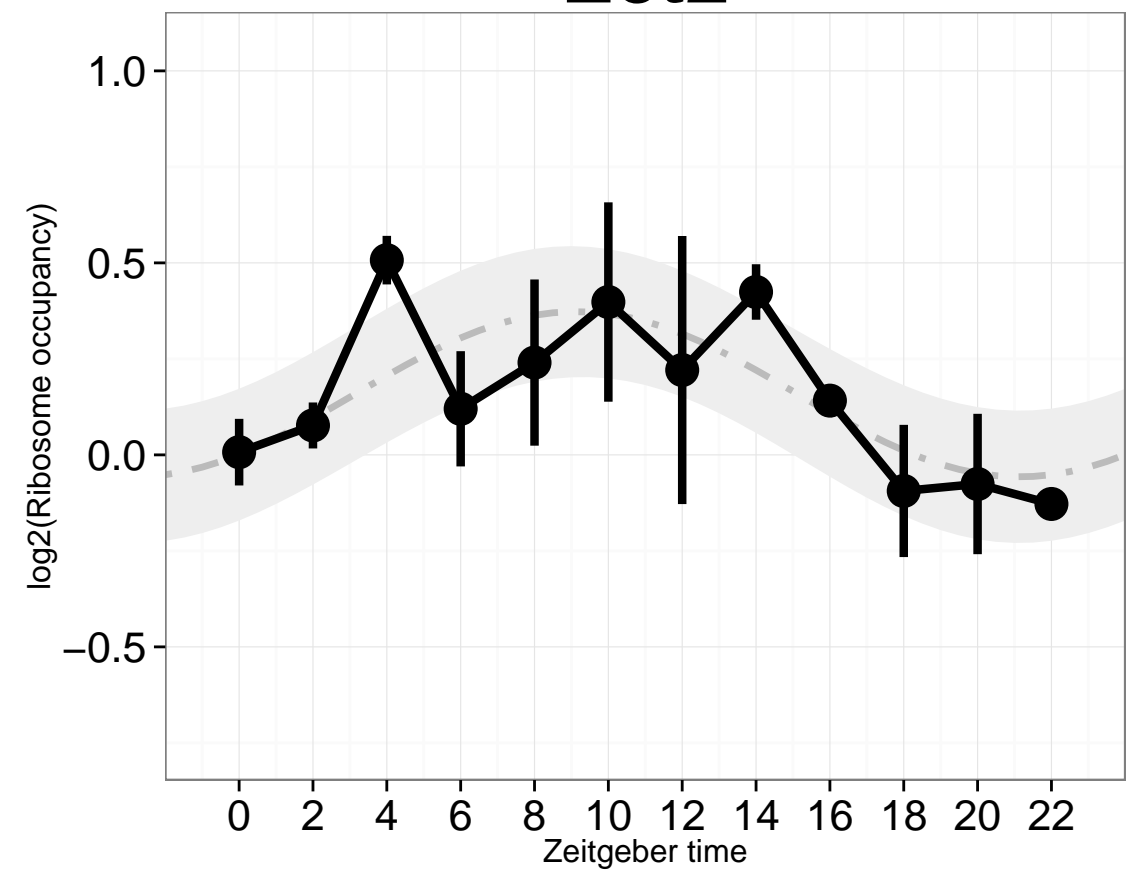

Supplement: Supplementary file 7567 [file 1]

# Fam3c

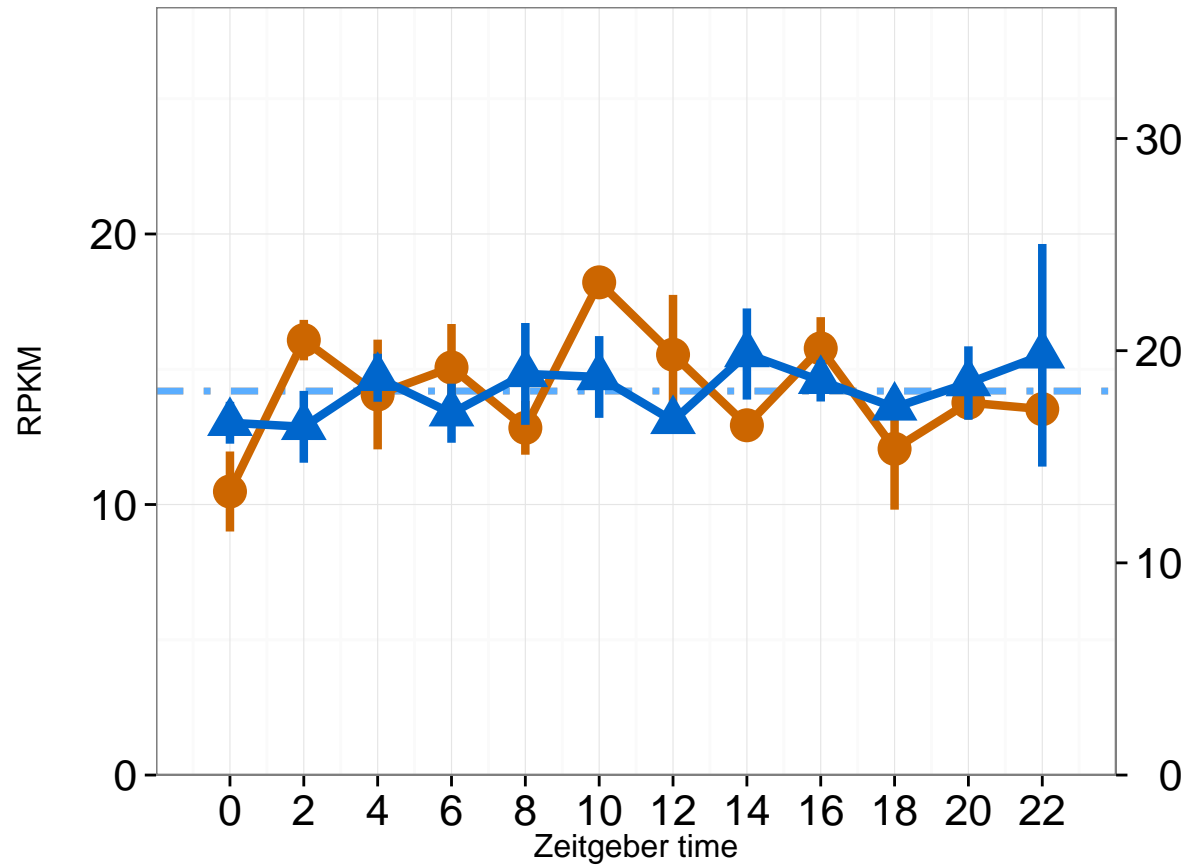

# Fam3c

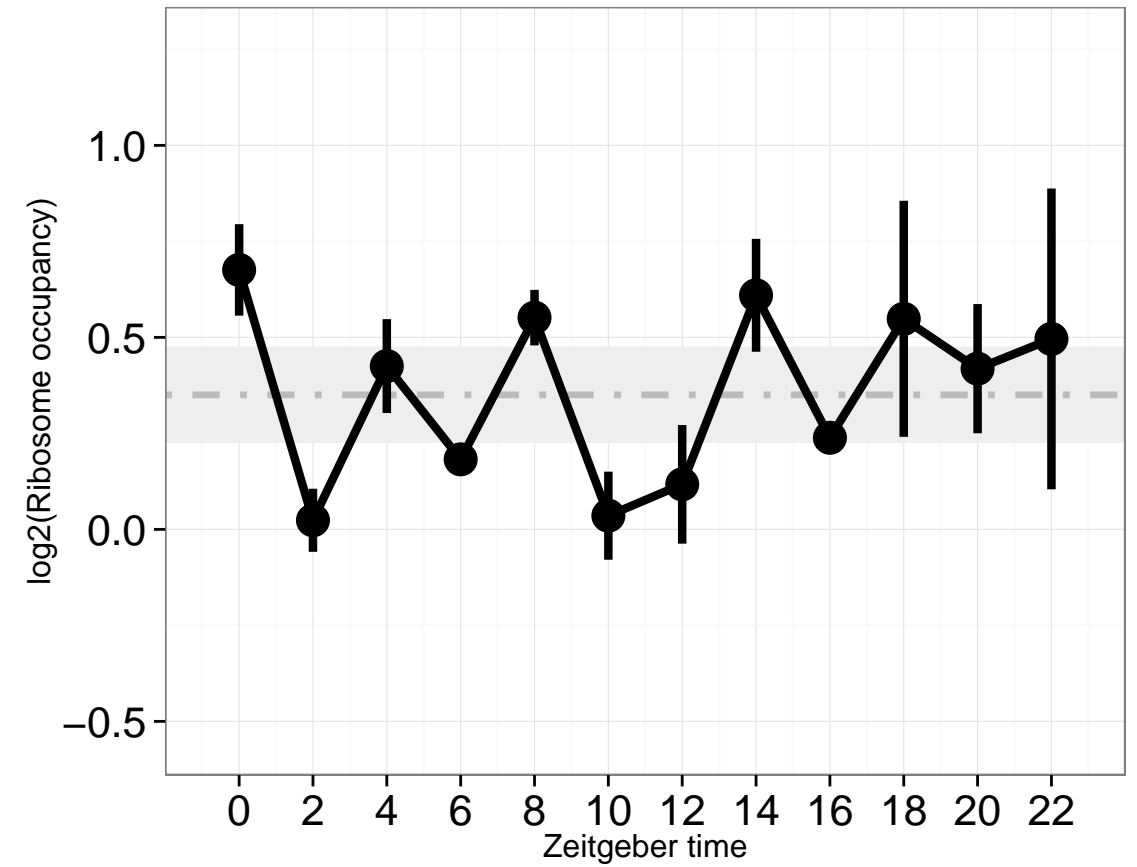

Supplement: Supplementary file 7568 [file 1]

# Rpl32

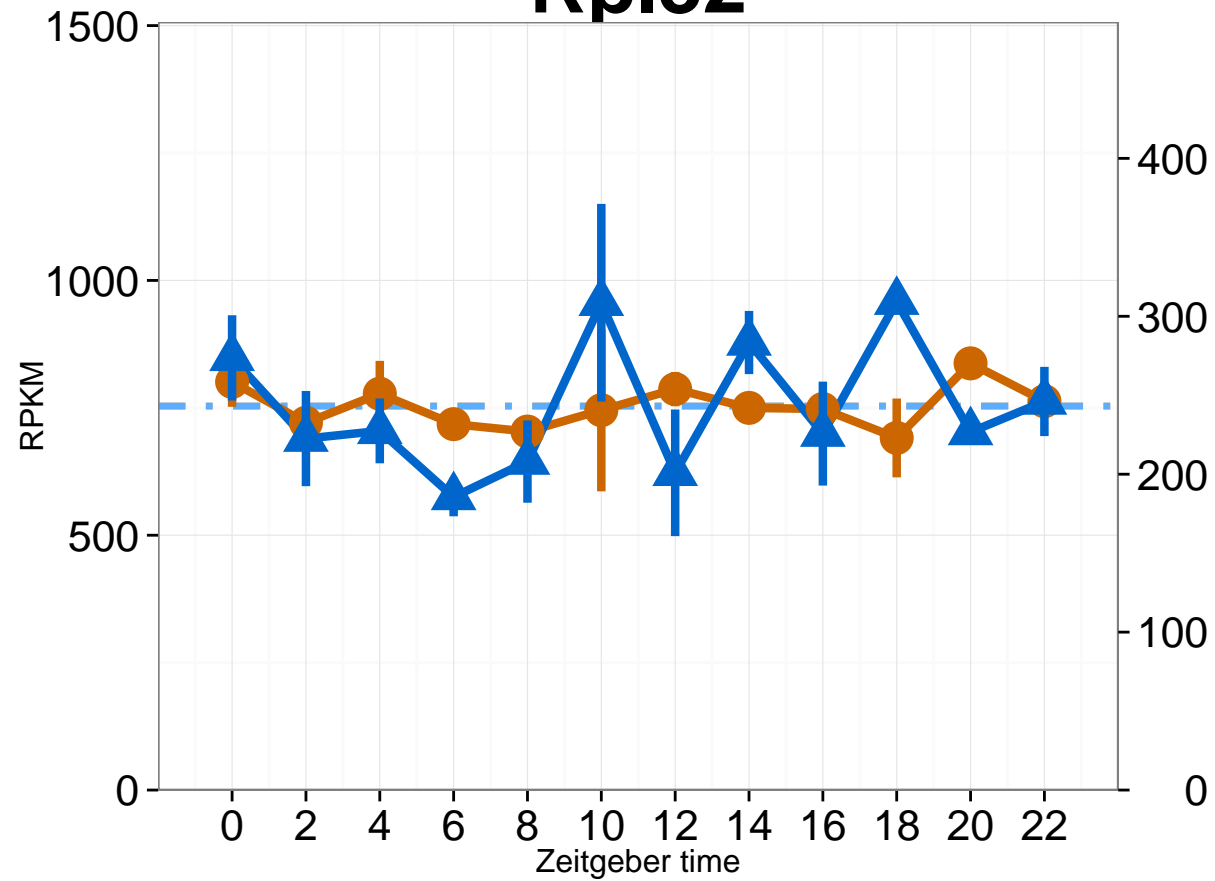

# Rpl32

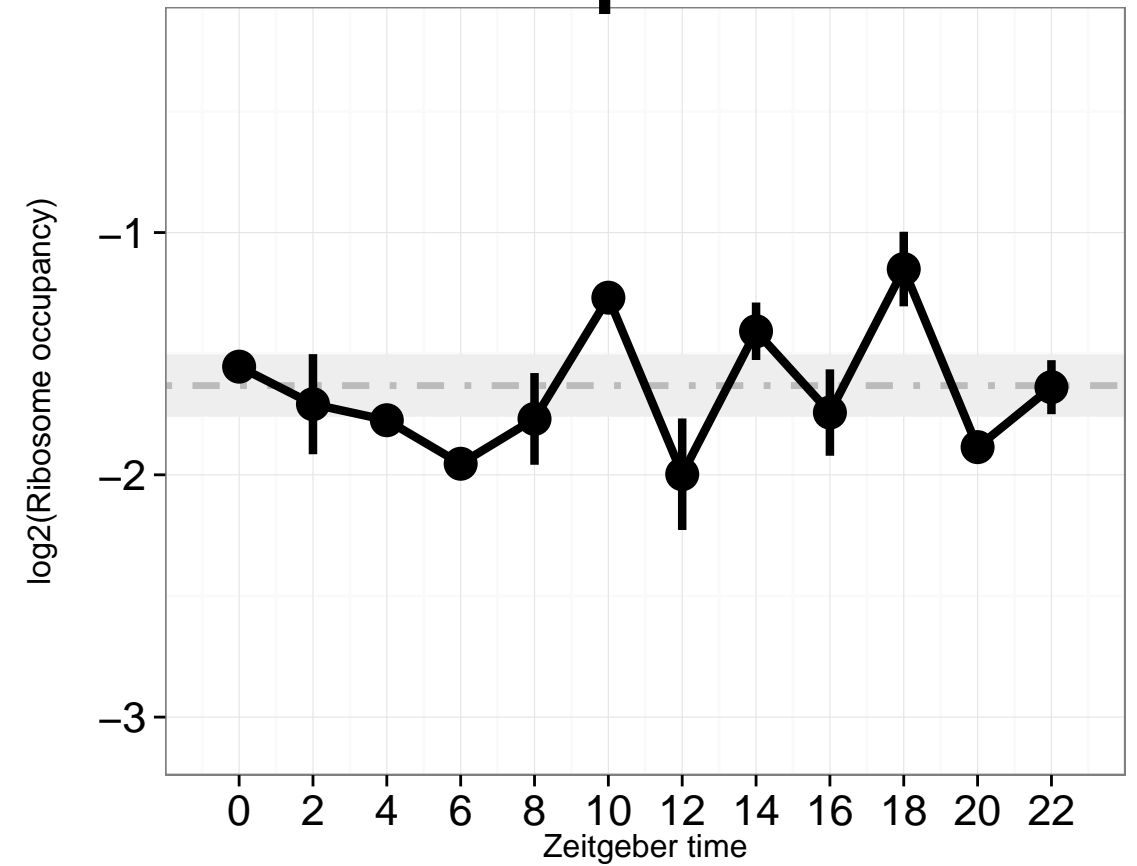

Supplement: Supplementary file 7569 [file 1]

# Rps5

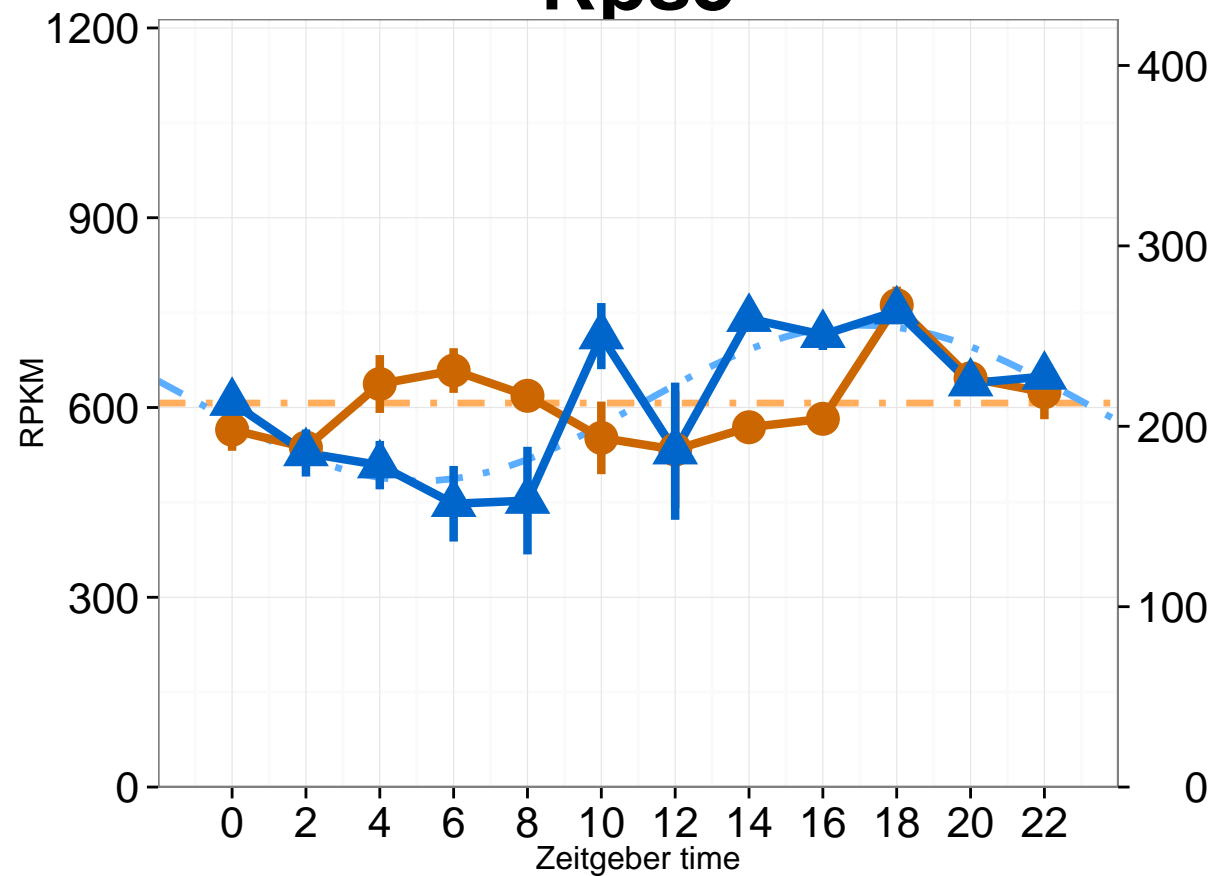

# Rps5

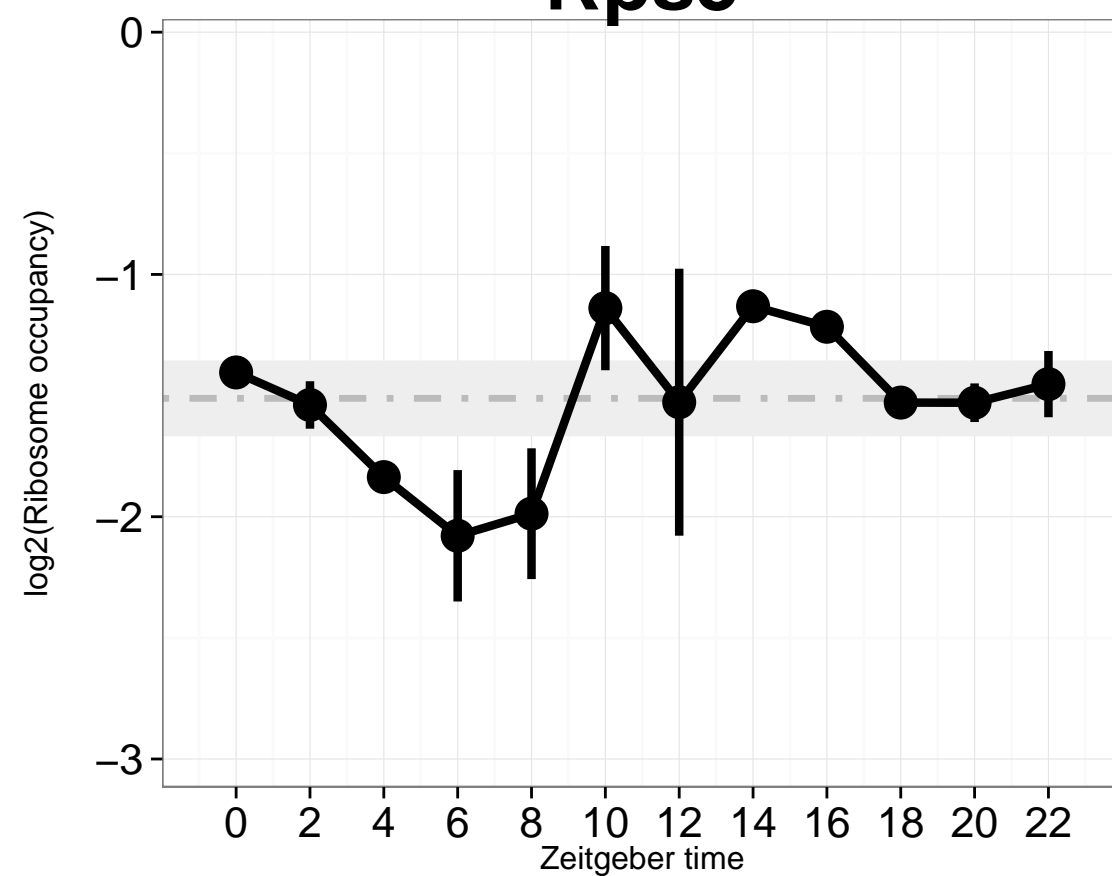

Supplement: Supplementary file 7570 [file 1]

# Pet100

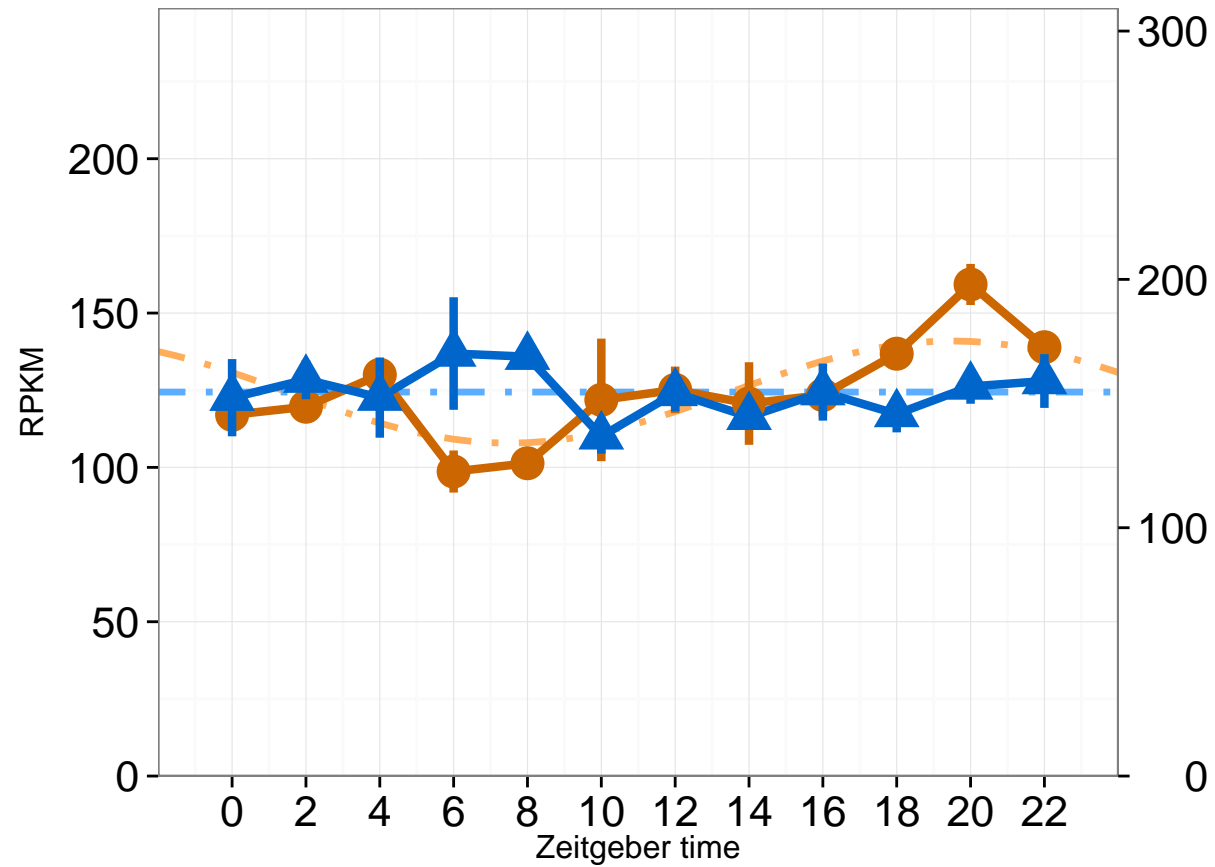

# Pet100

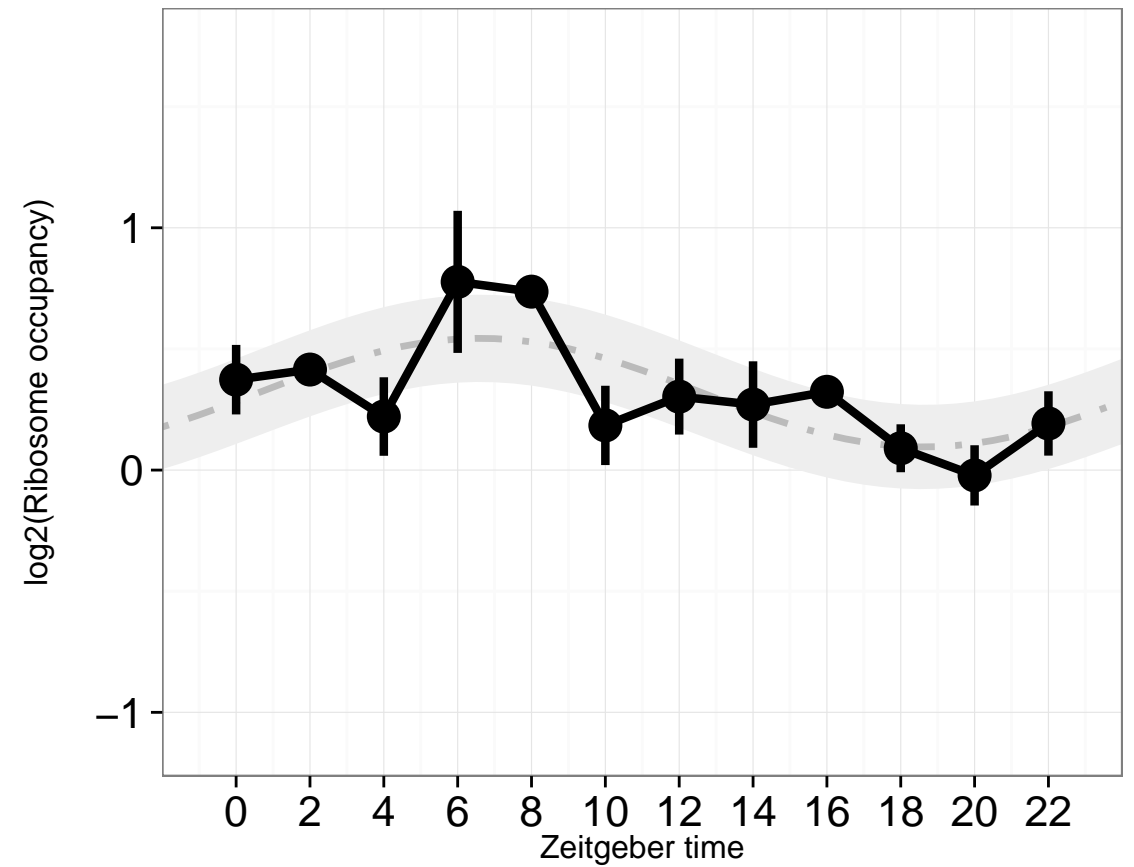

Supplement: Supplementary file 7571 [file 1]

# Hgs

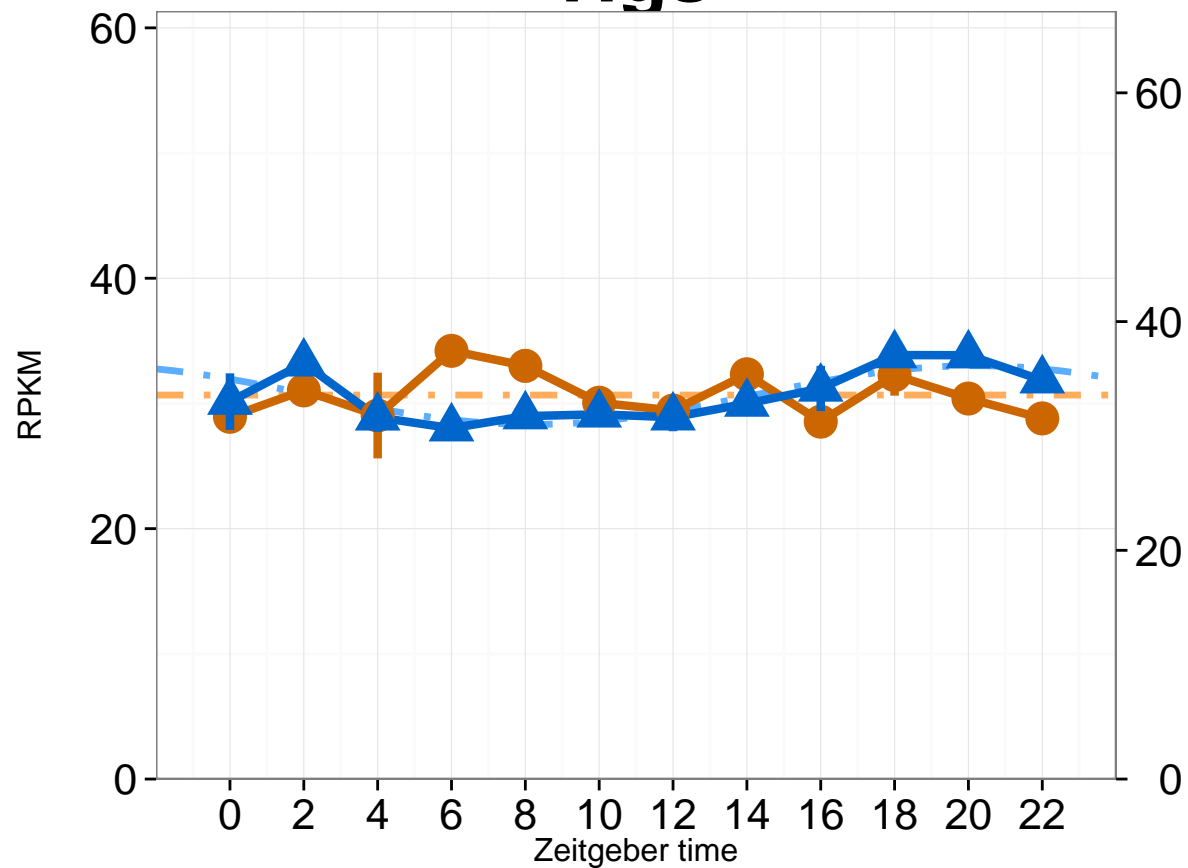

# Hgs

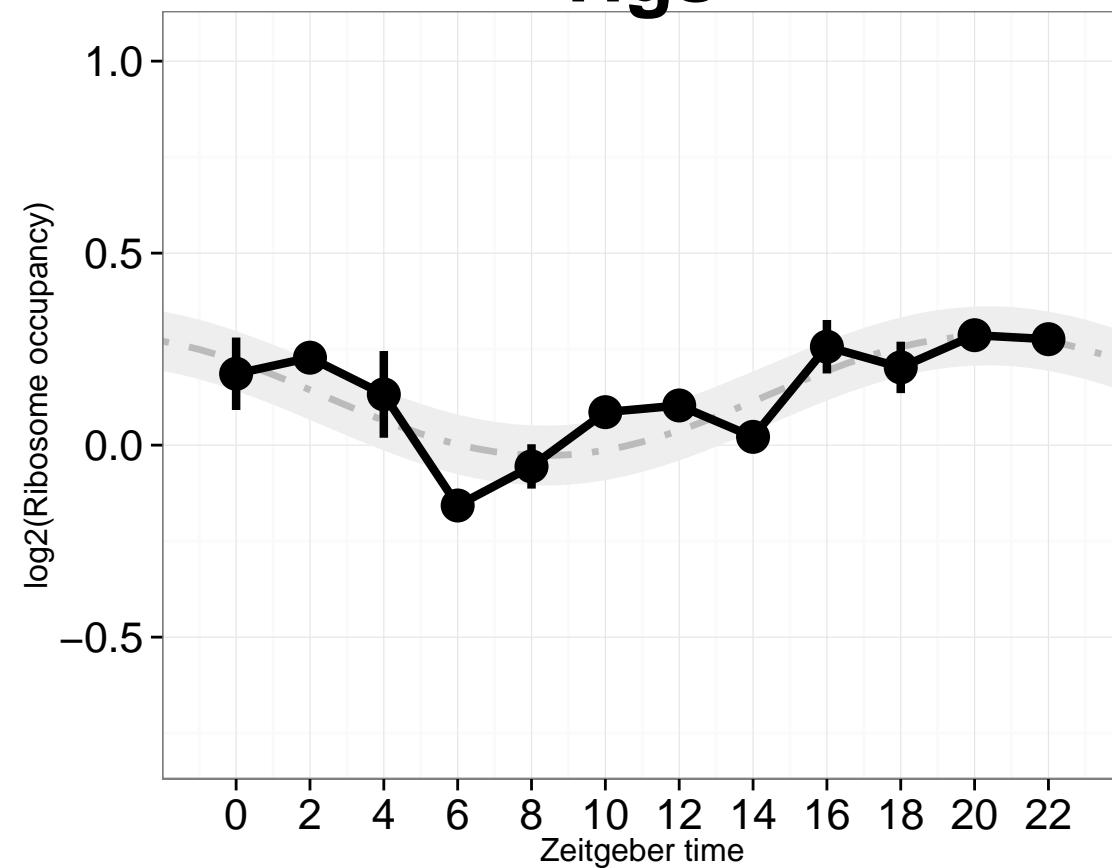

Supplement: Supplementary file 7572 [file 1]

# Micu3

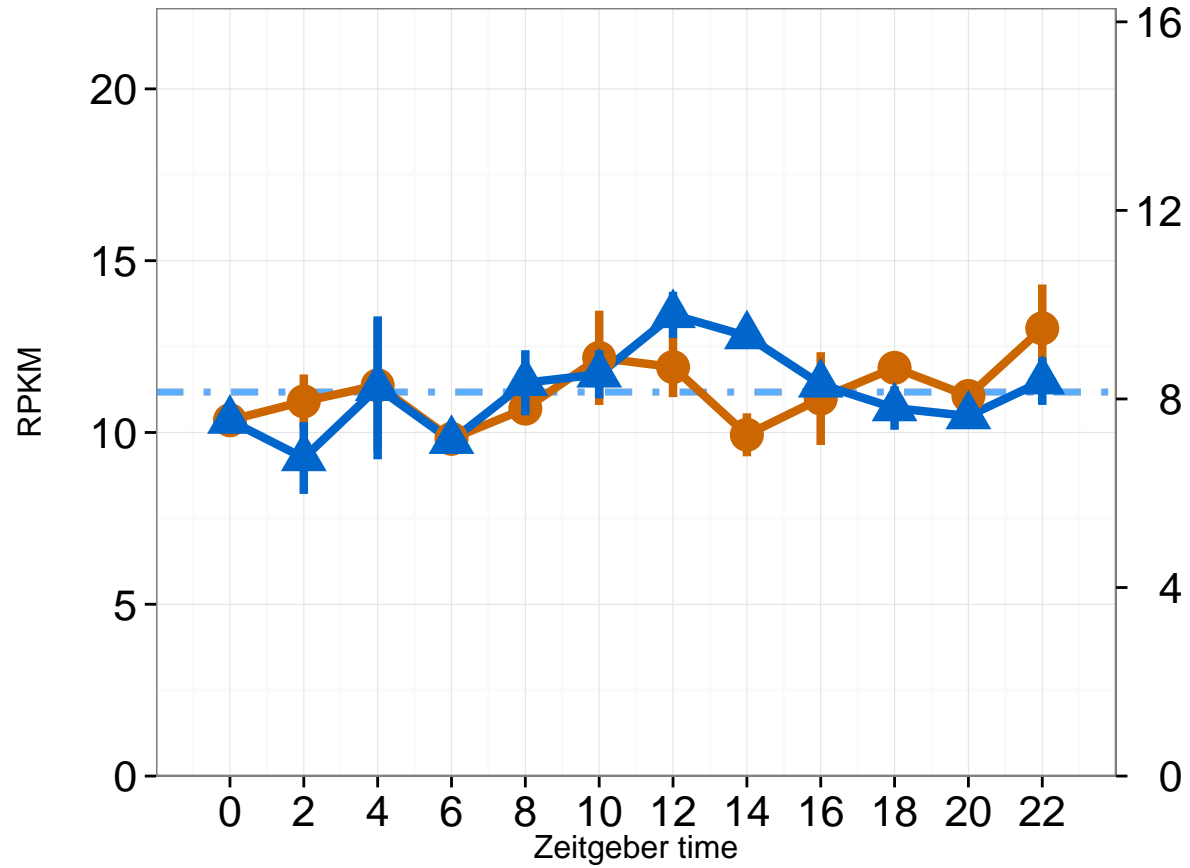

# Micu3

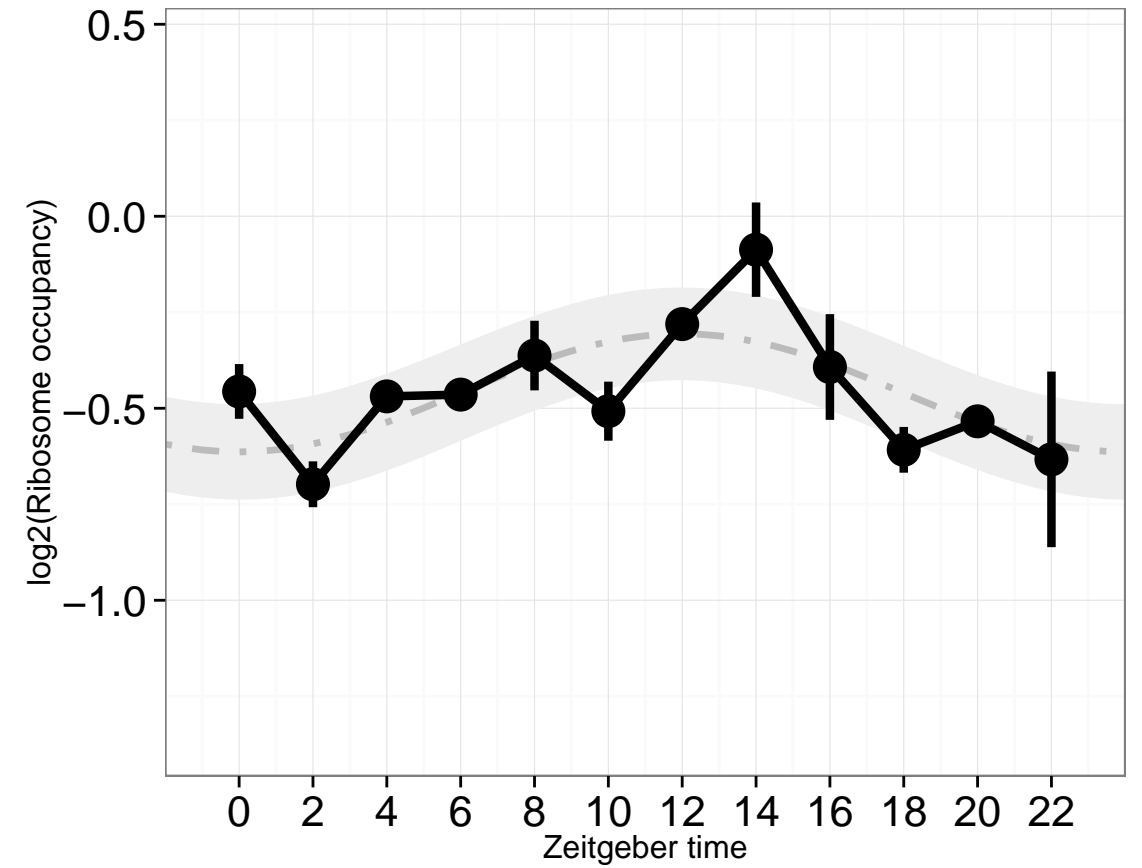

Supplement: Supplementary file 7573 [file 1]

## Wfdc2

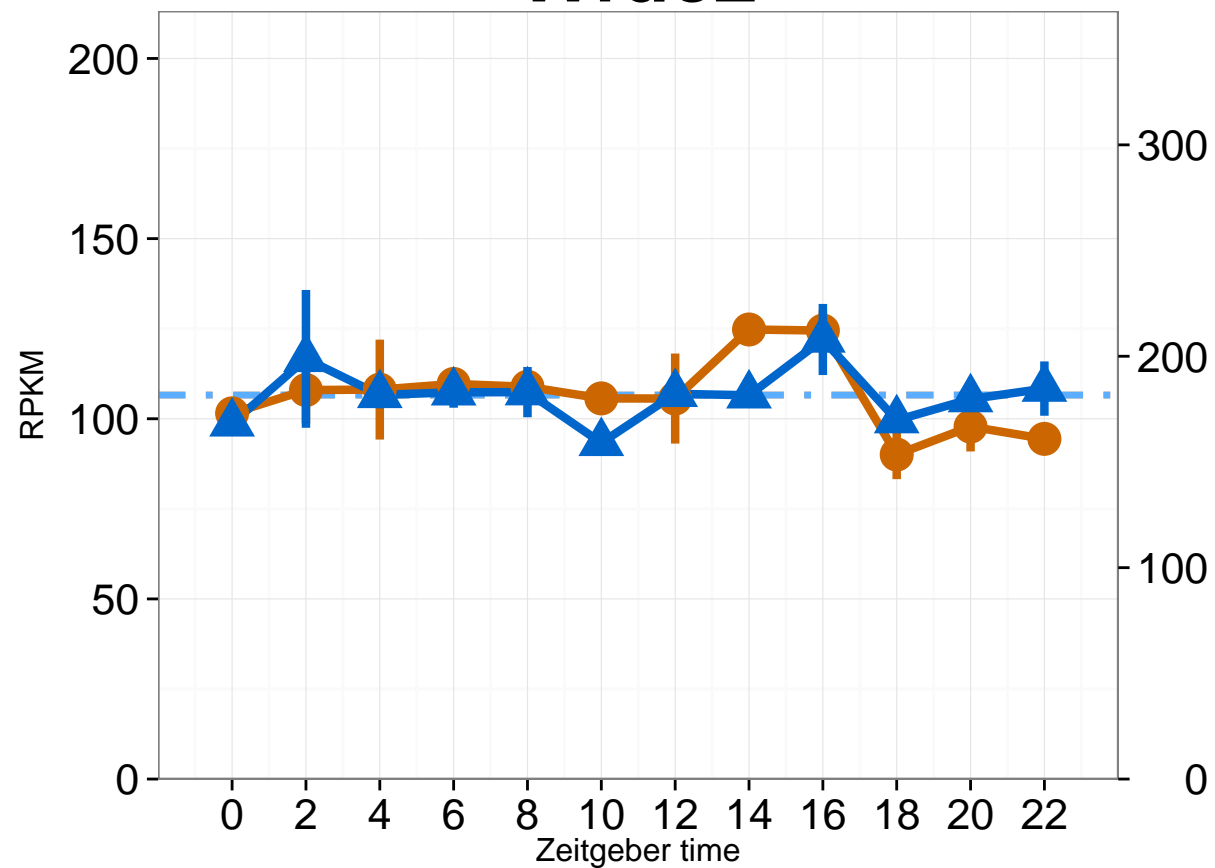

## Wfdc2

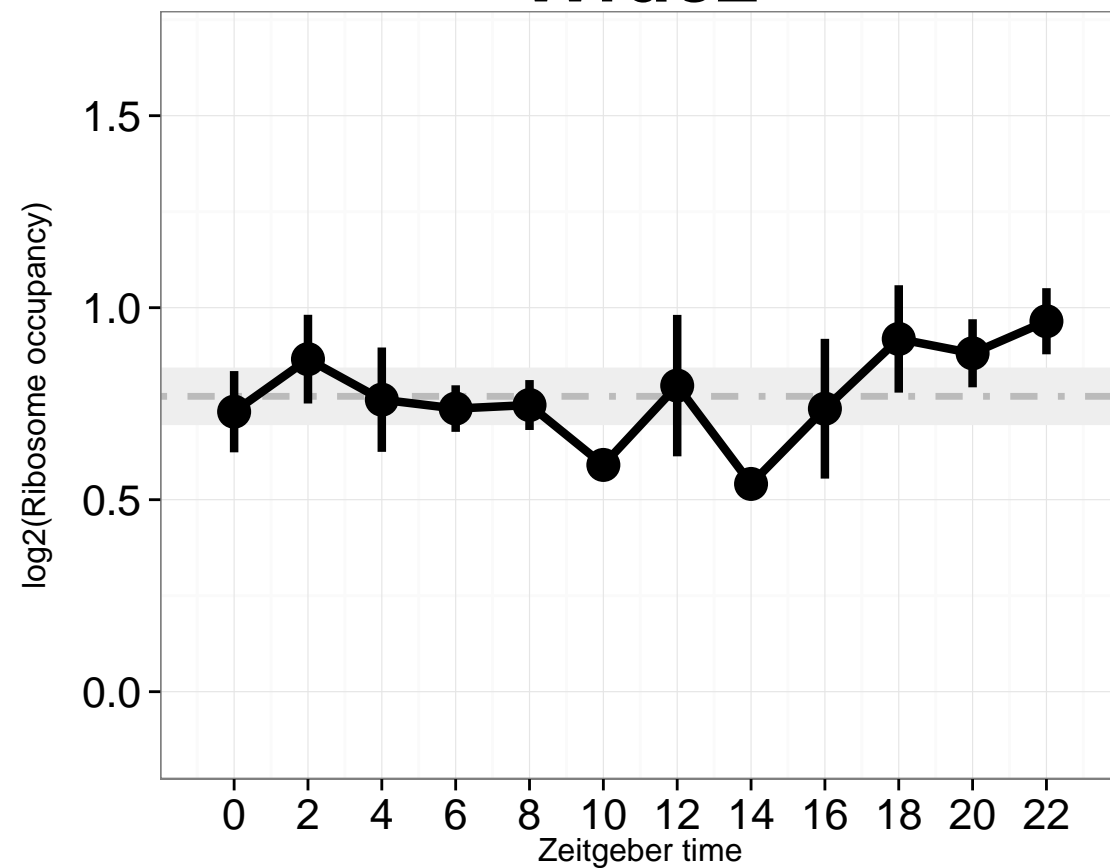

Supplement: Supplementary file 7574 [file 1]

## Mmadhc

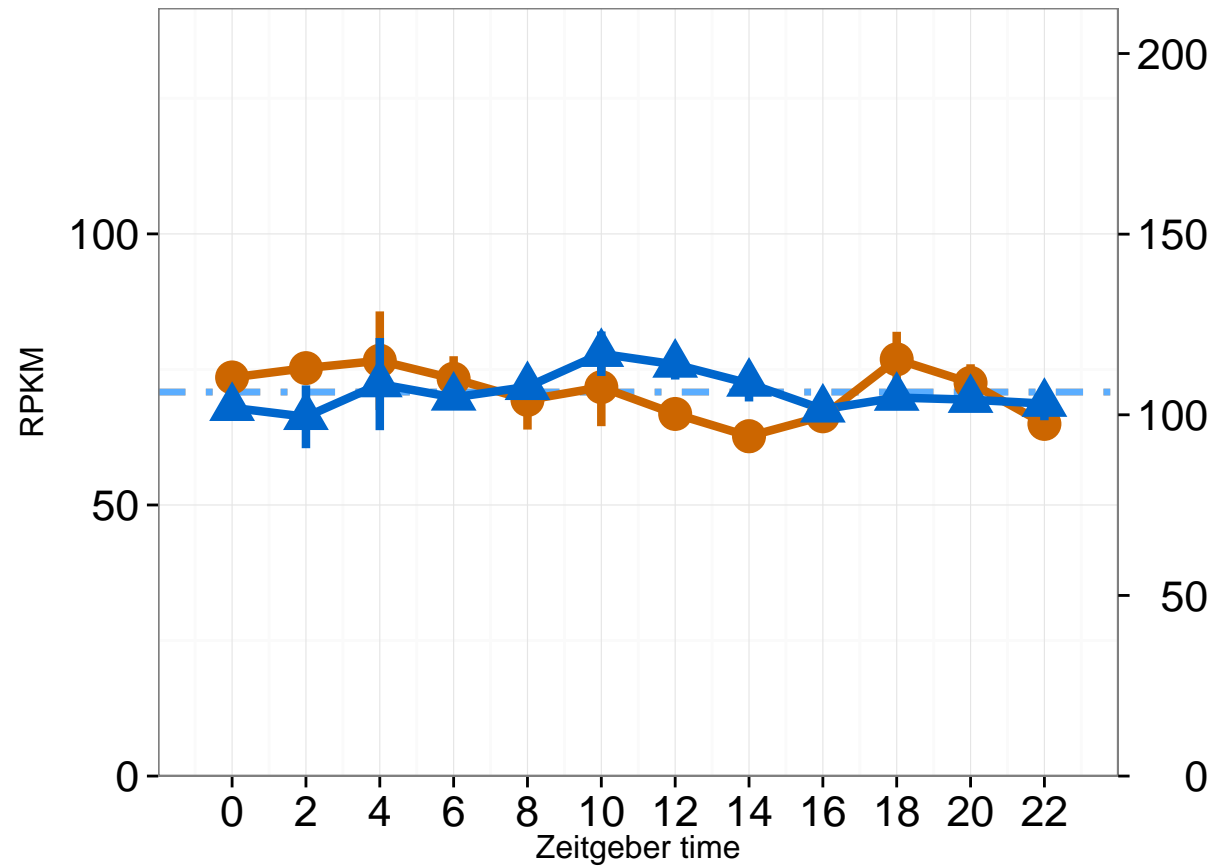

## Mmadhc

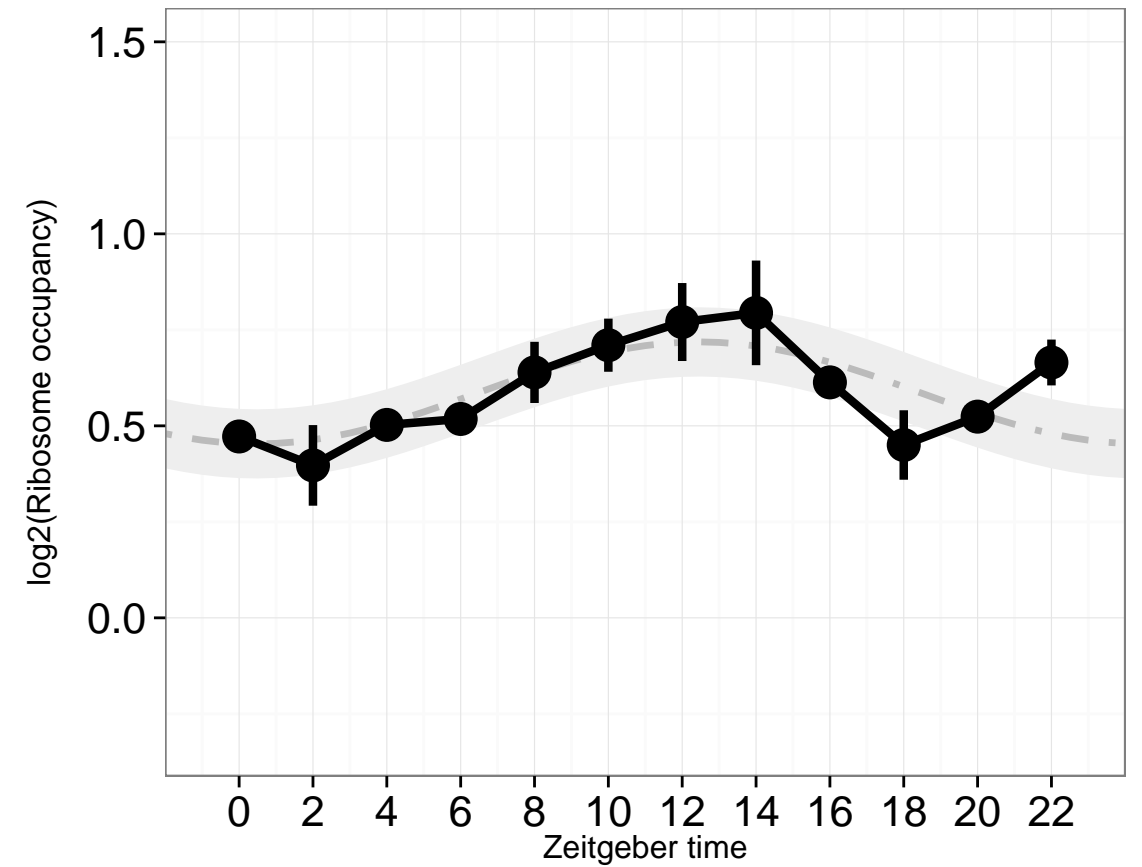

Supplement: Supplementary file 7575 [file 1]

# Atp5f1

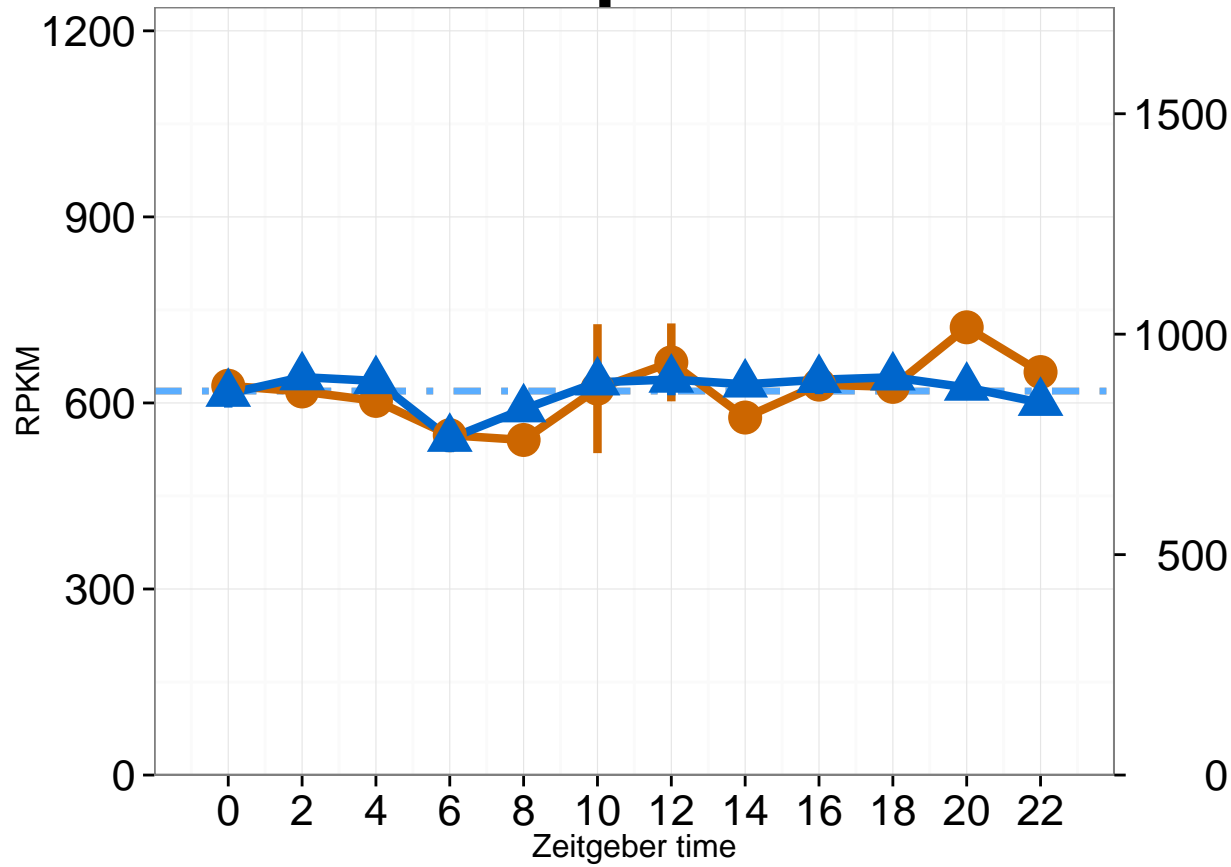

# Atp5f1

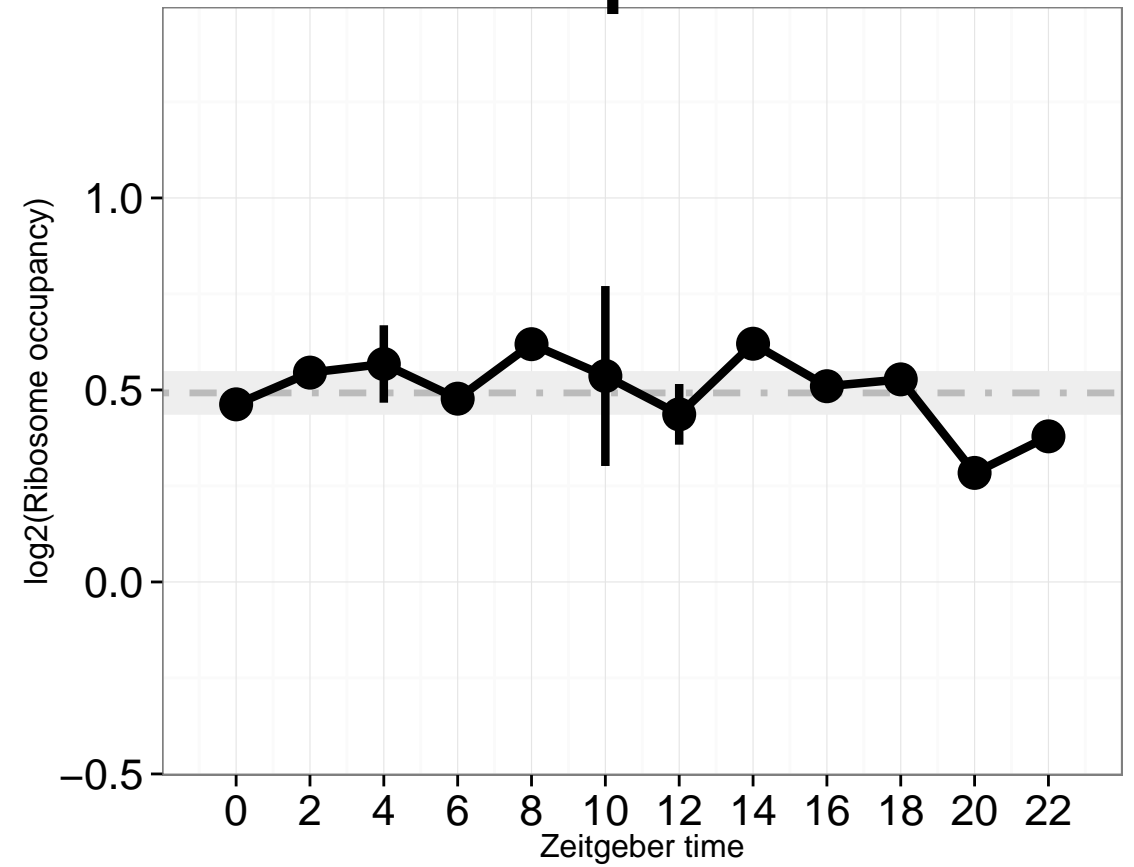

Supplement: Supplementary file 7576 [file 1]

## Stard5

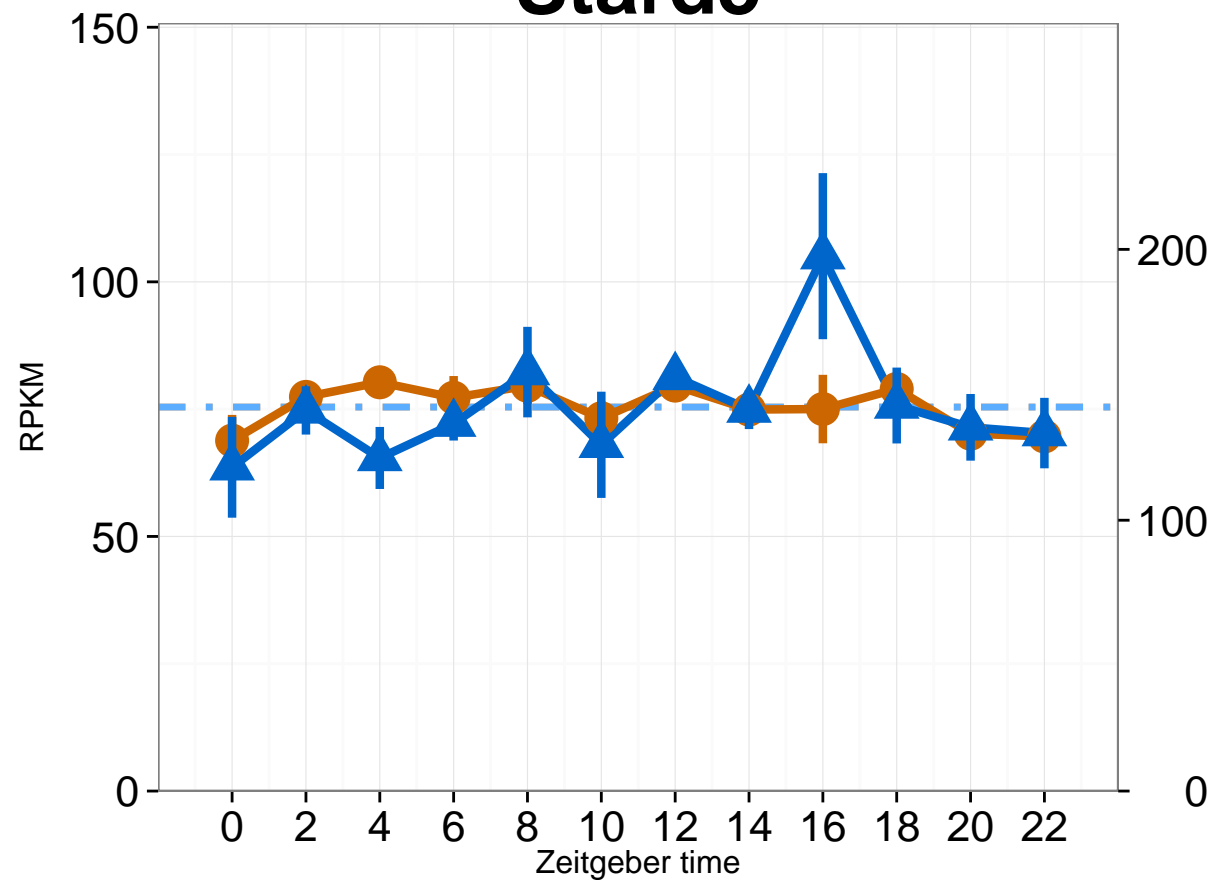

## Stard5

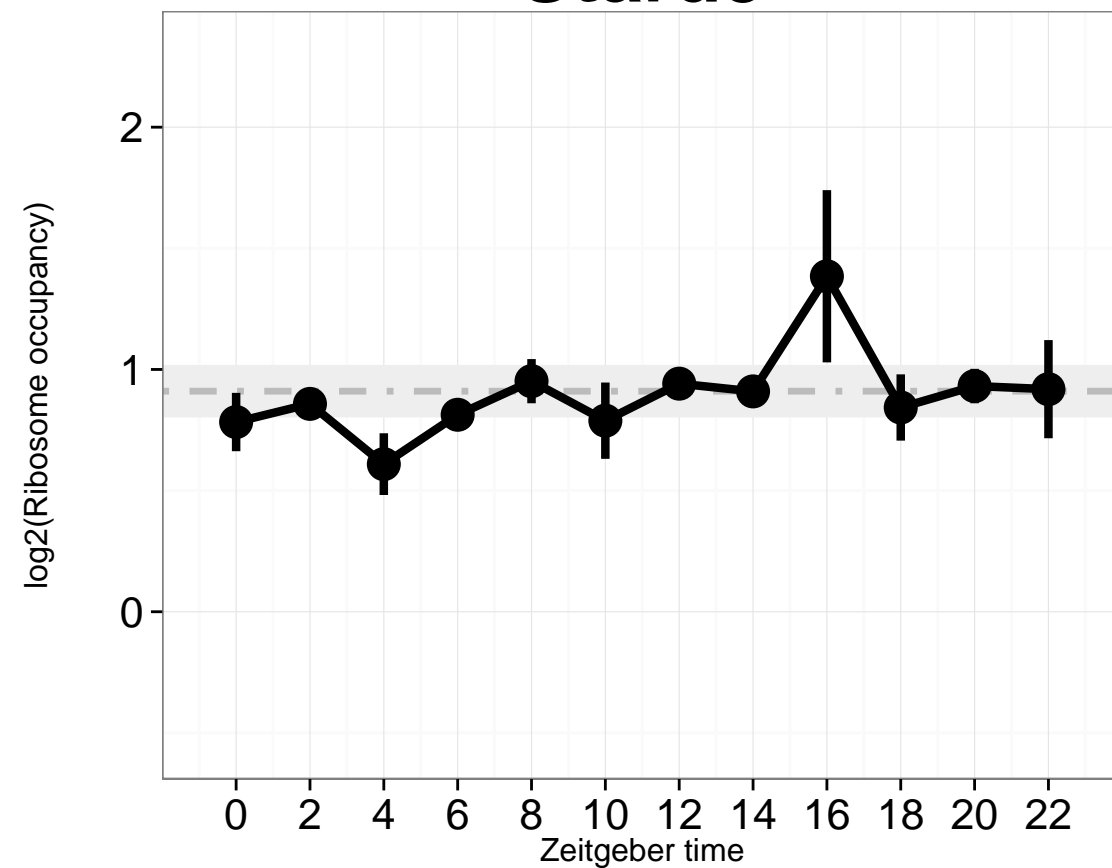

Supplement: Supplementary file 7577 [file 1]

# Fam105a

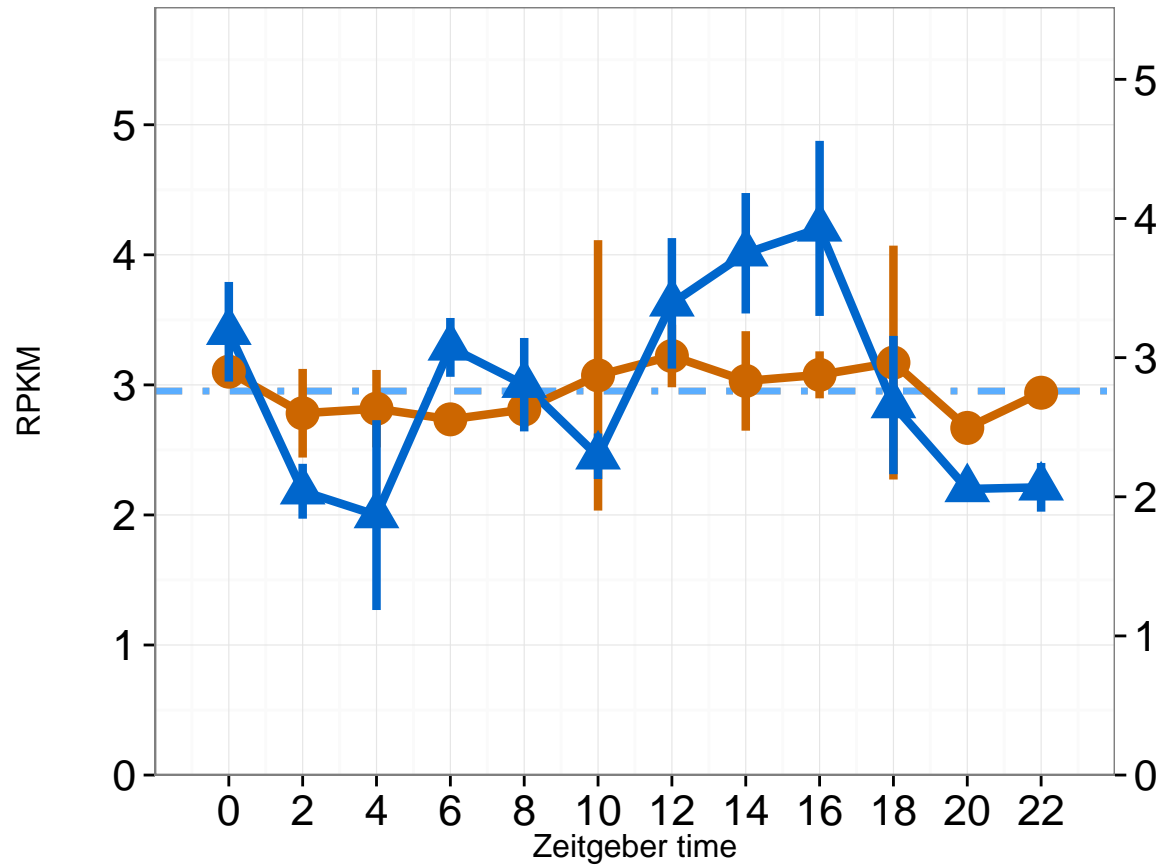

# Fam105a

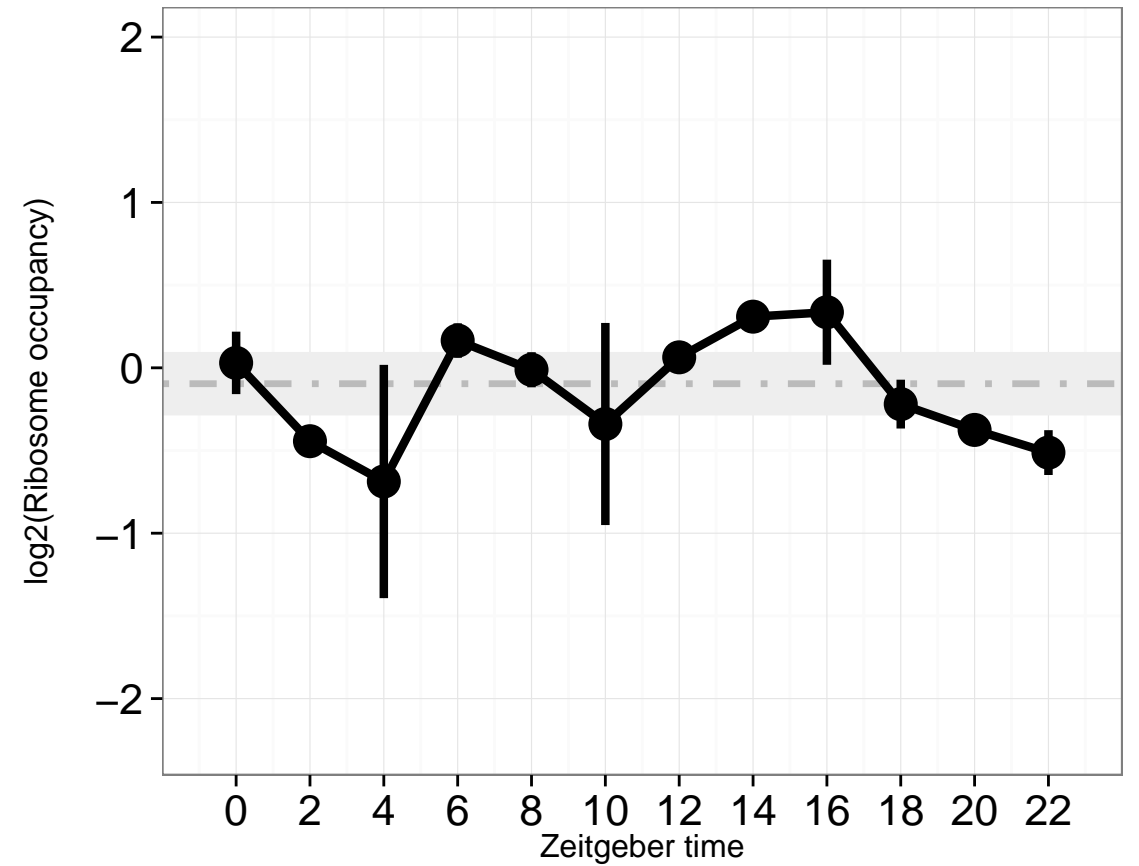

Supplement: Supplementary file 7578 [file 1]

## Ccdc51

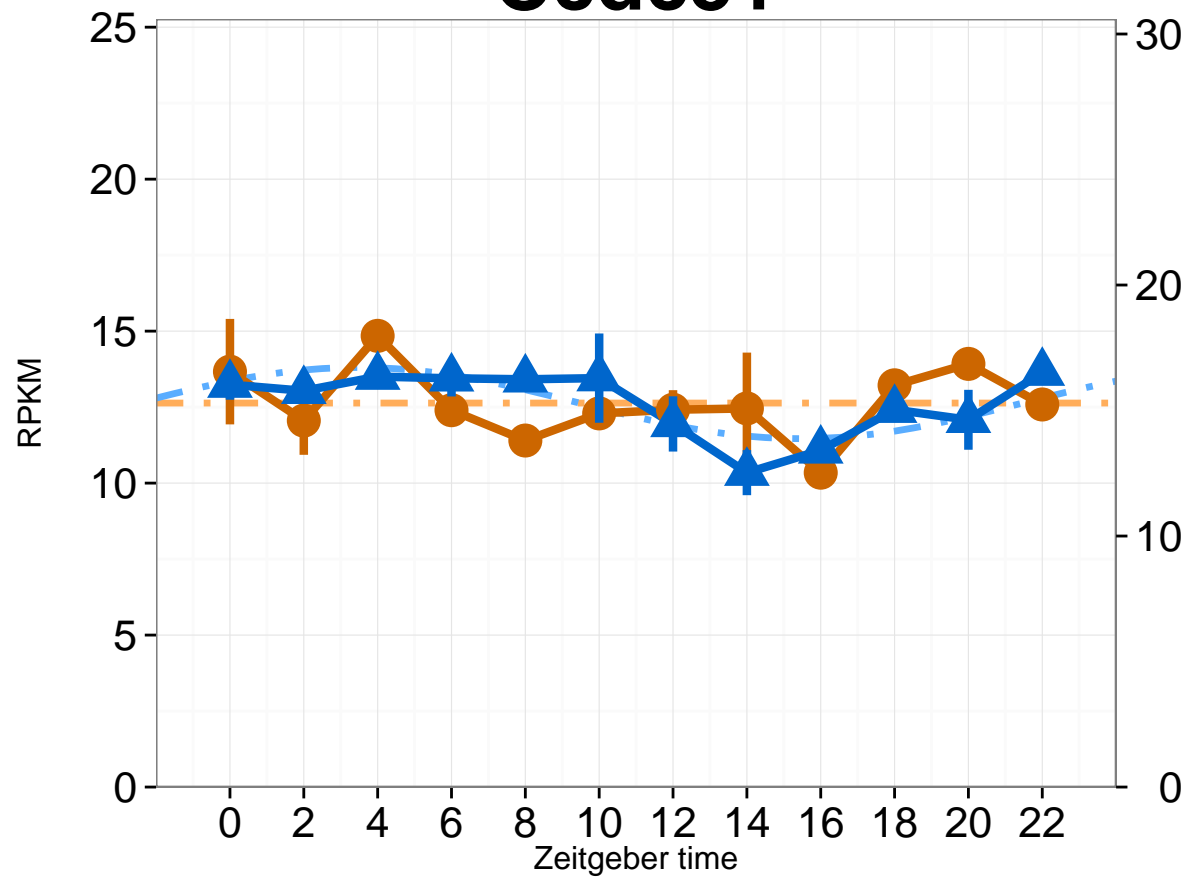

## Ccdc51

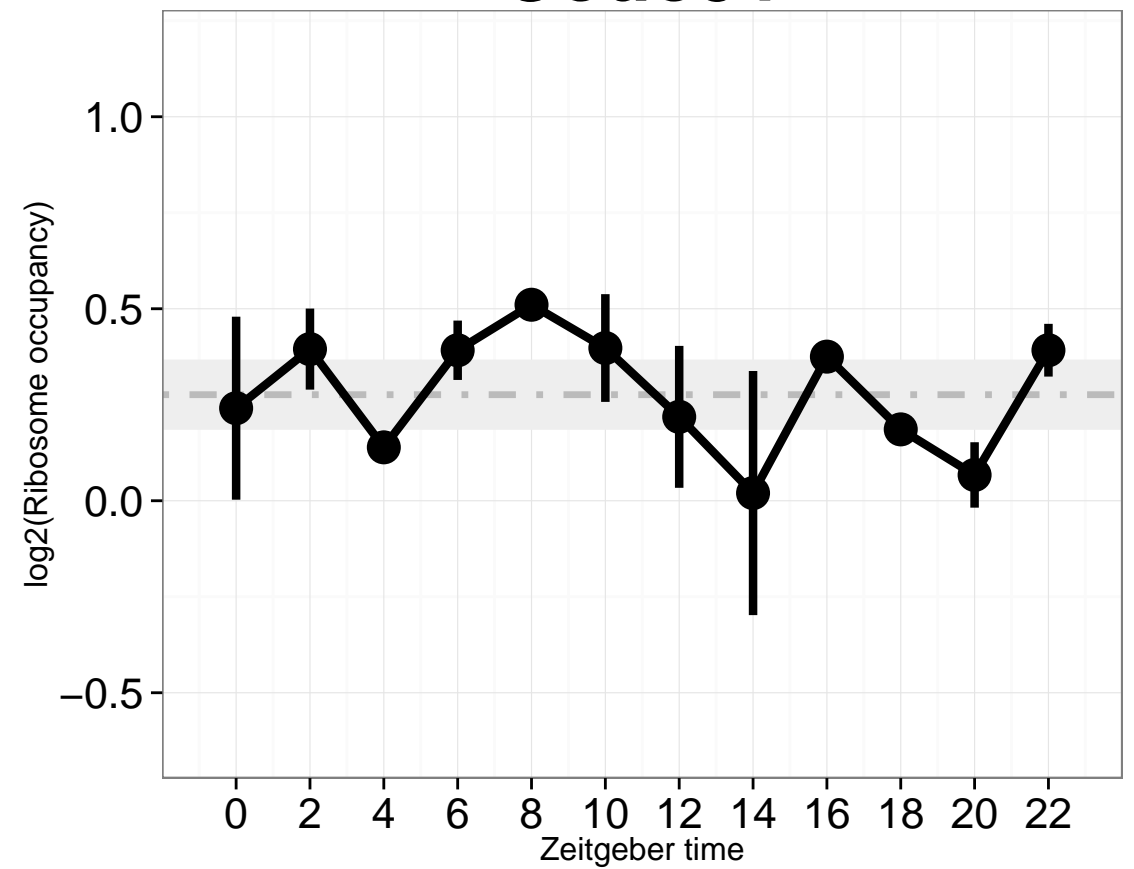

Supplement: Supplementary file 7579 [file 1]

## Unc45b

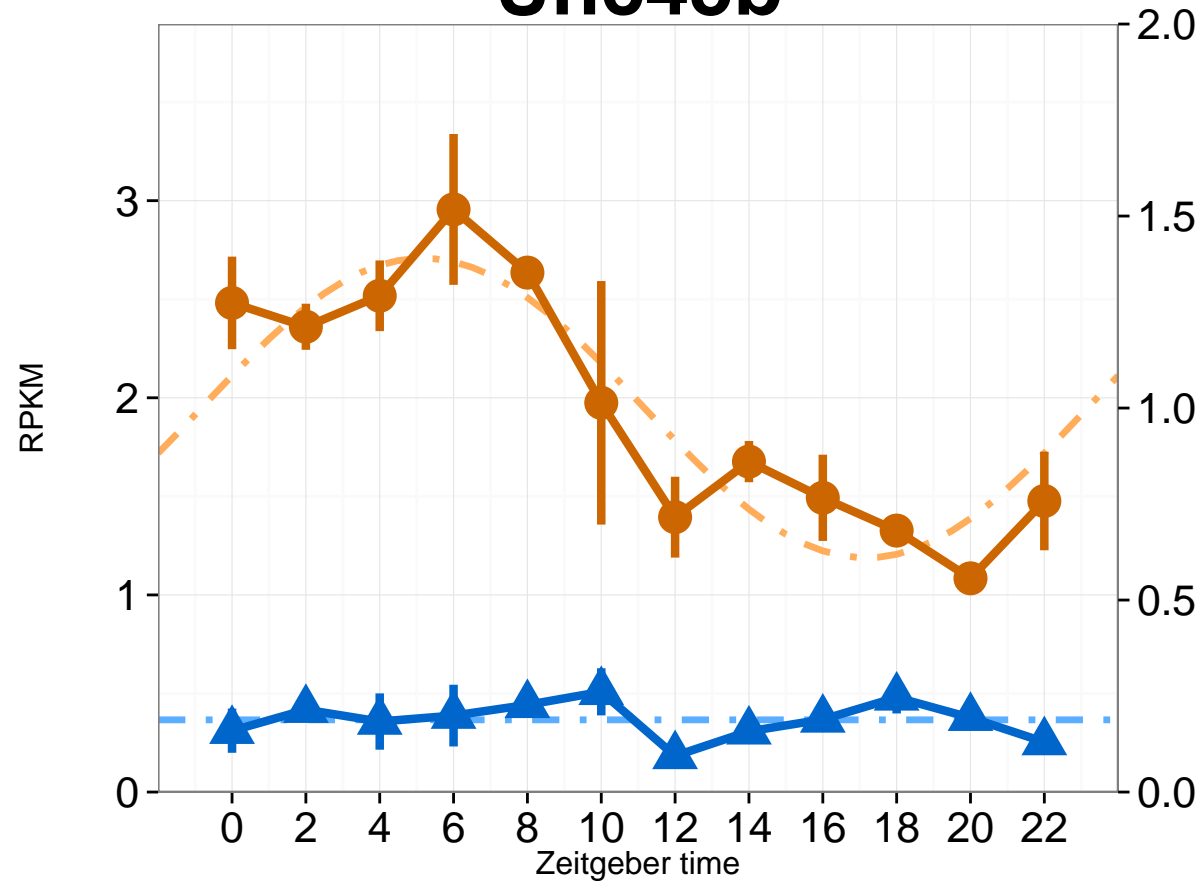

## Unc45b

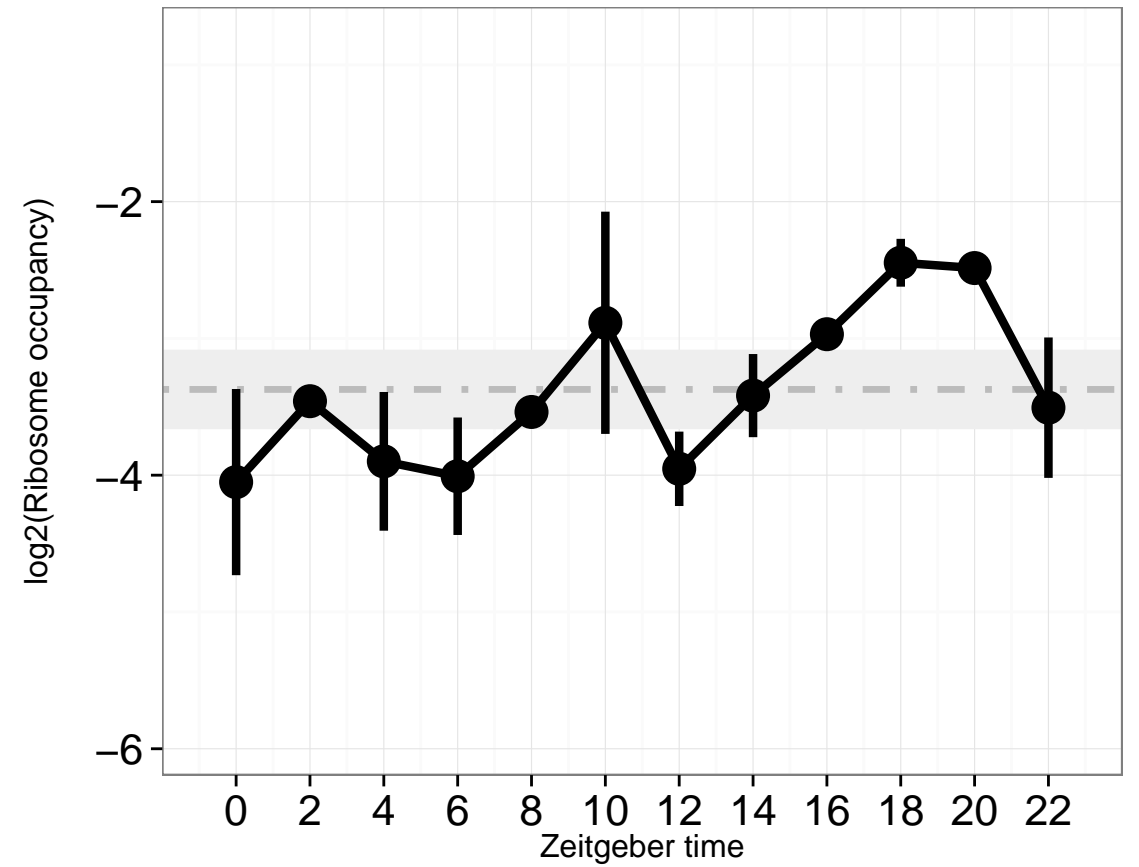

Supplement: Supplementary file 7580 [file 1]

## Papd5

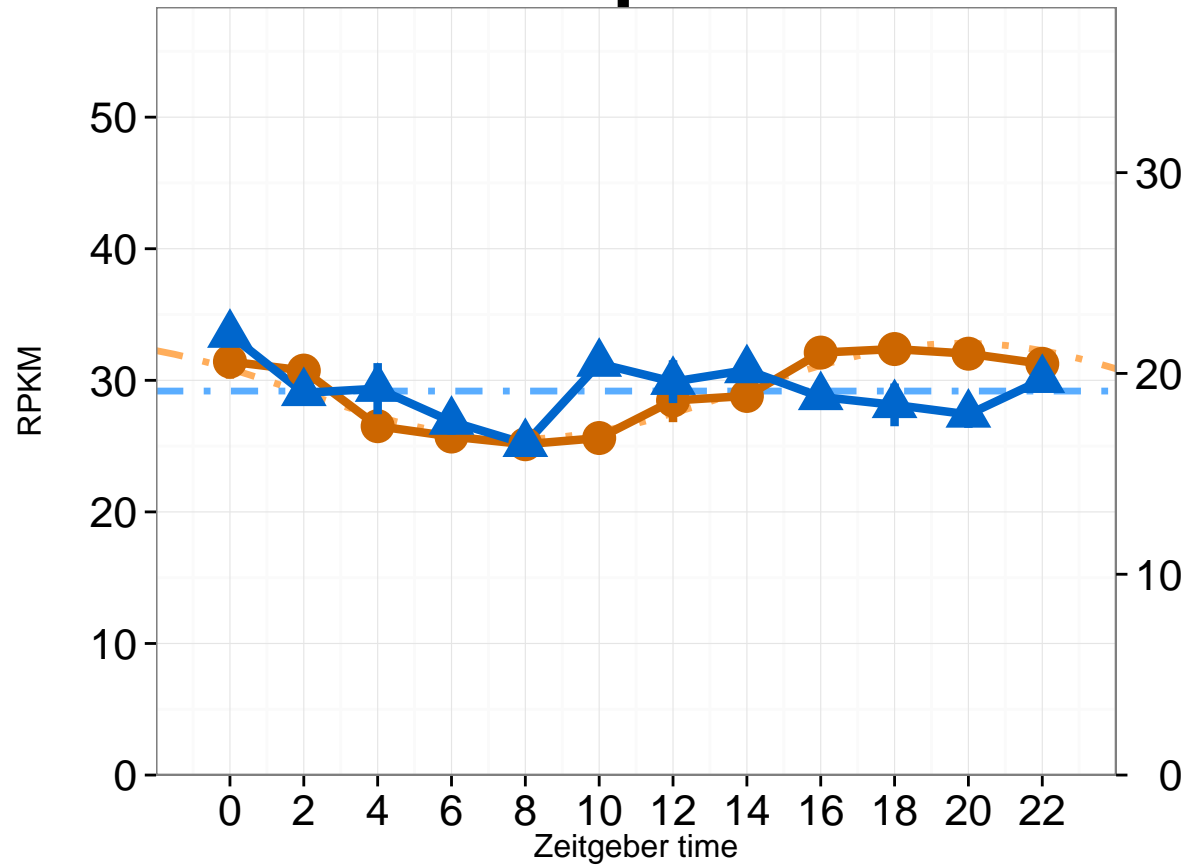

## Papd5

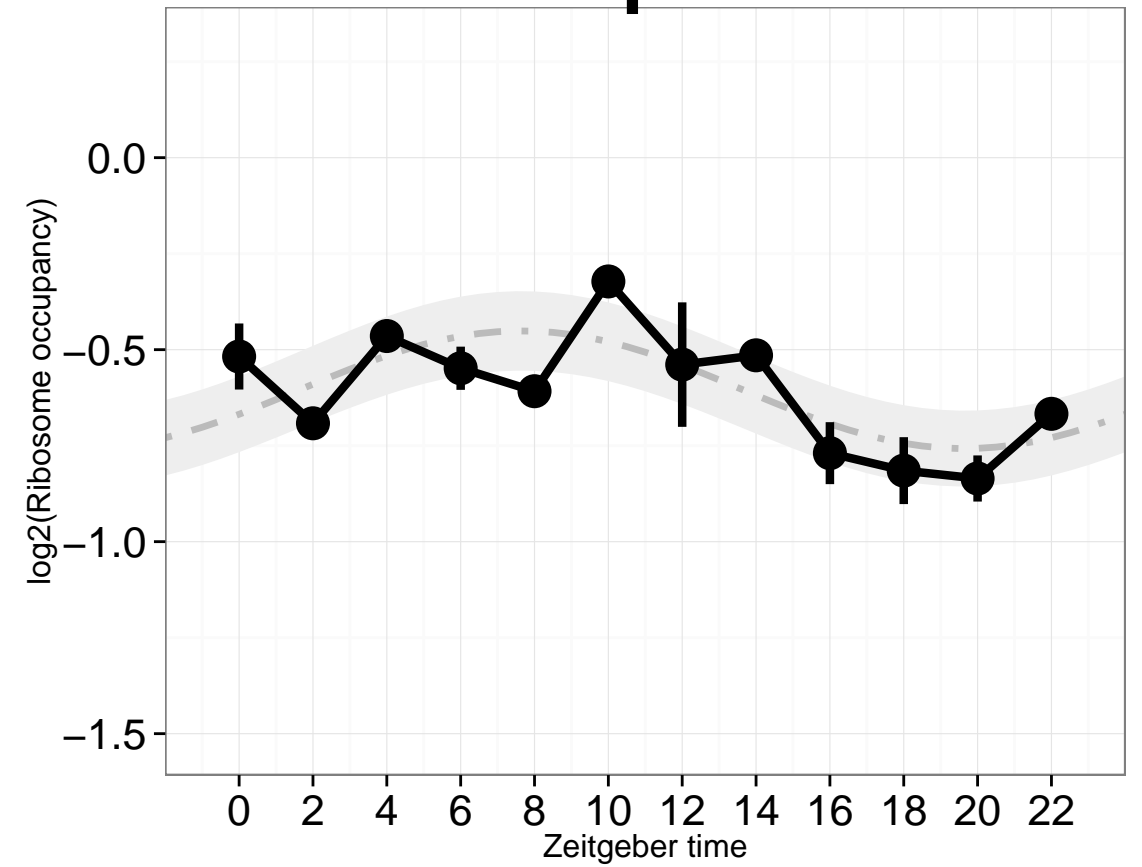

Supplement: Supplementary file 7581 [file 1]

## ErbB3

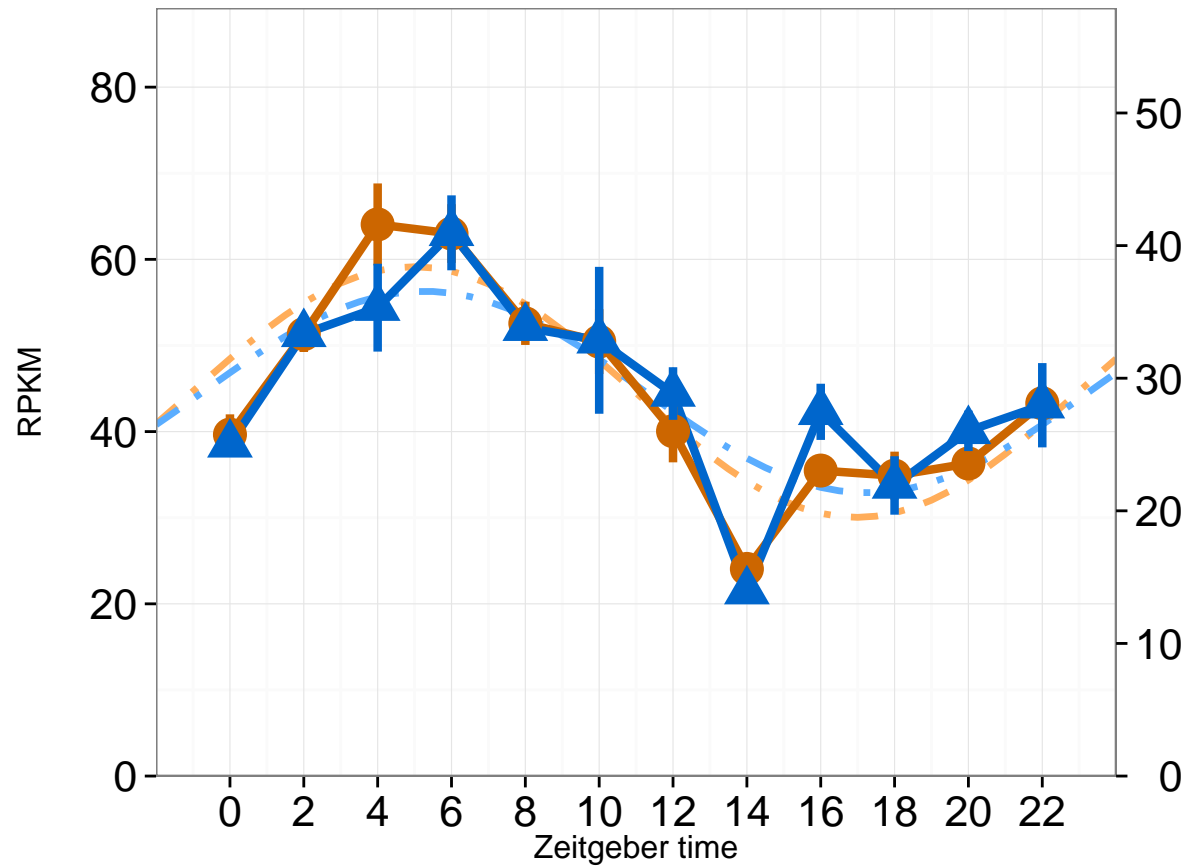

## ErbB3

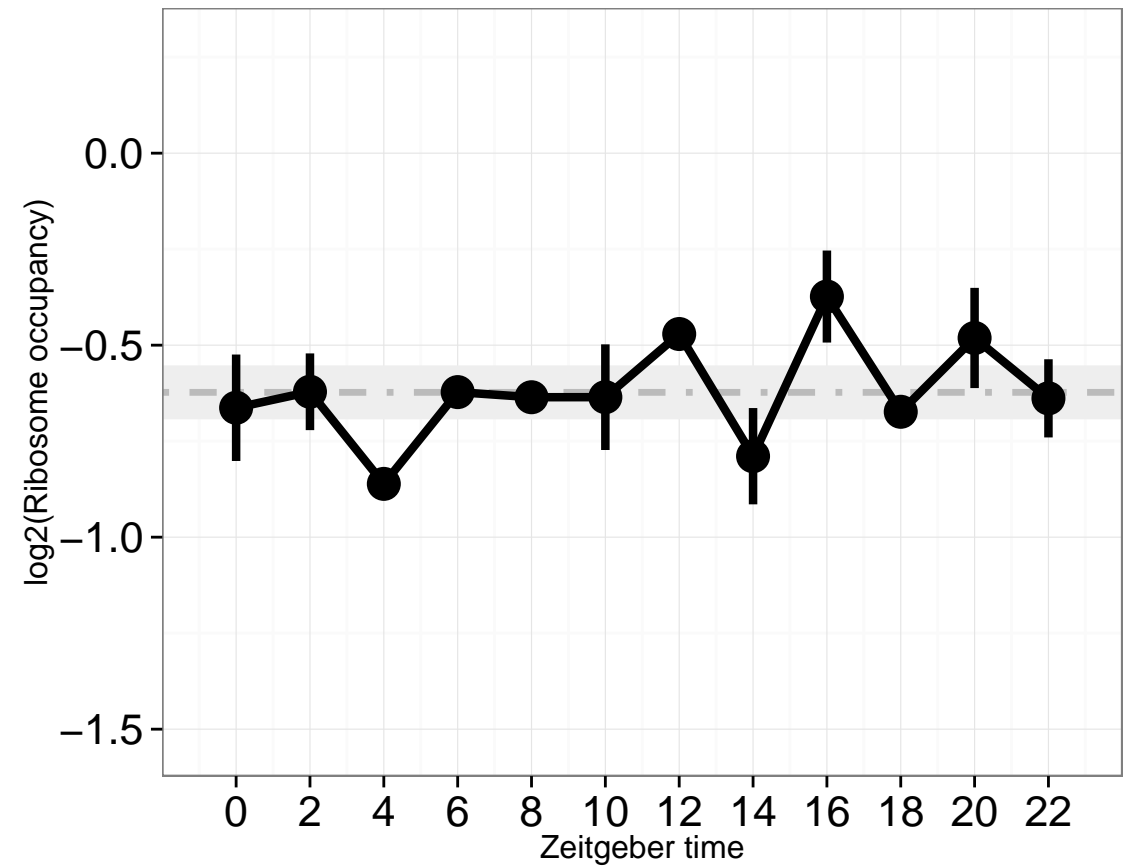

Supplement: Supplementary file 7582 [file 1]

## Angel2

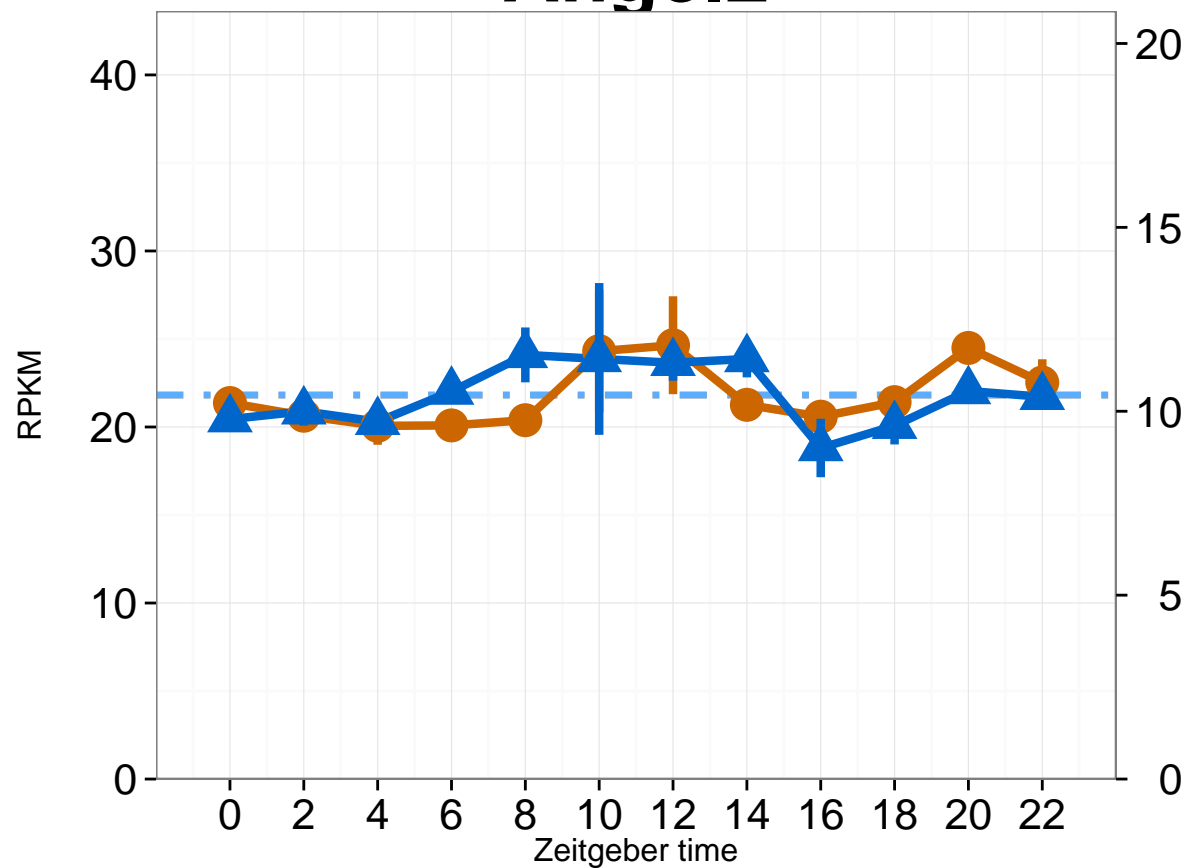

## Angel2

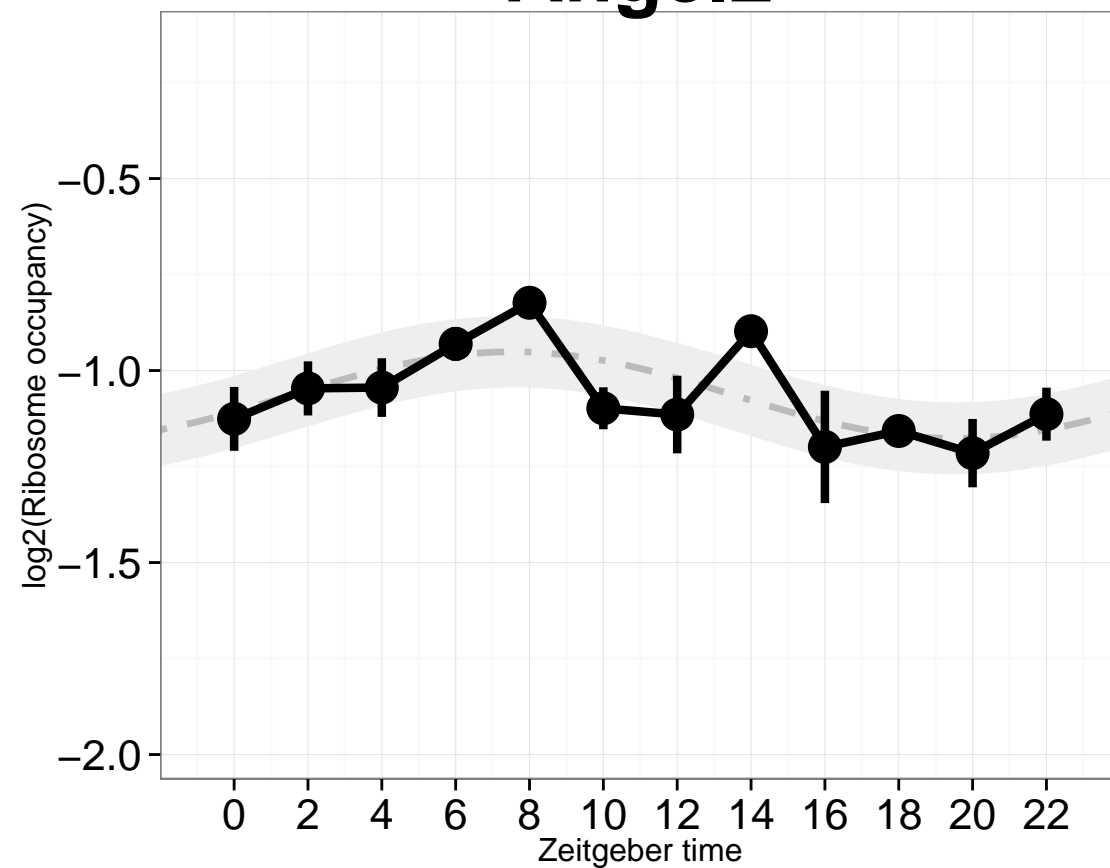

Supplement: Supplementary file 7583 [file 1]

## Mthfd1l

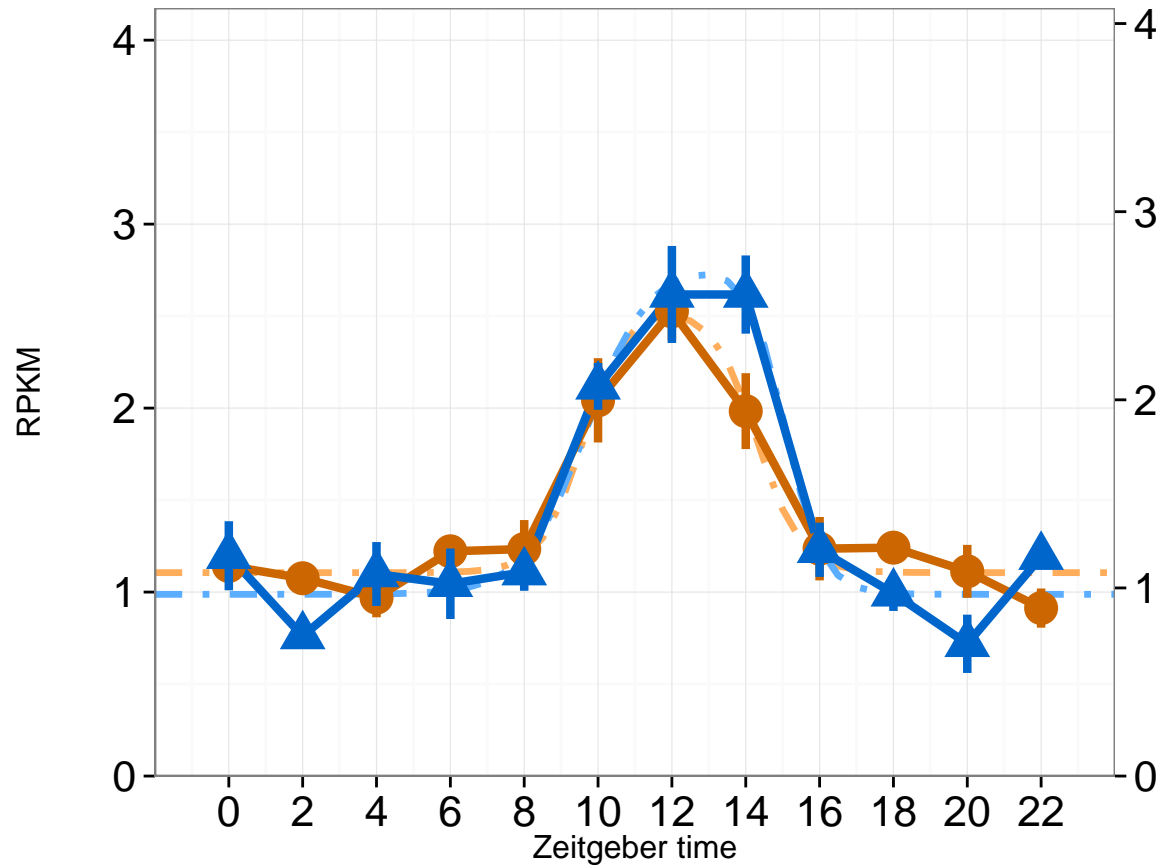

## Mthfd1l

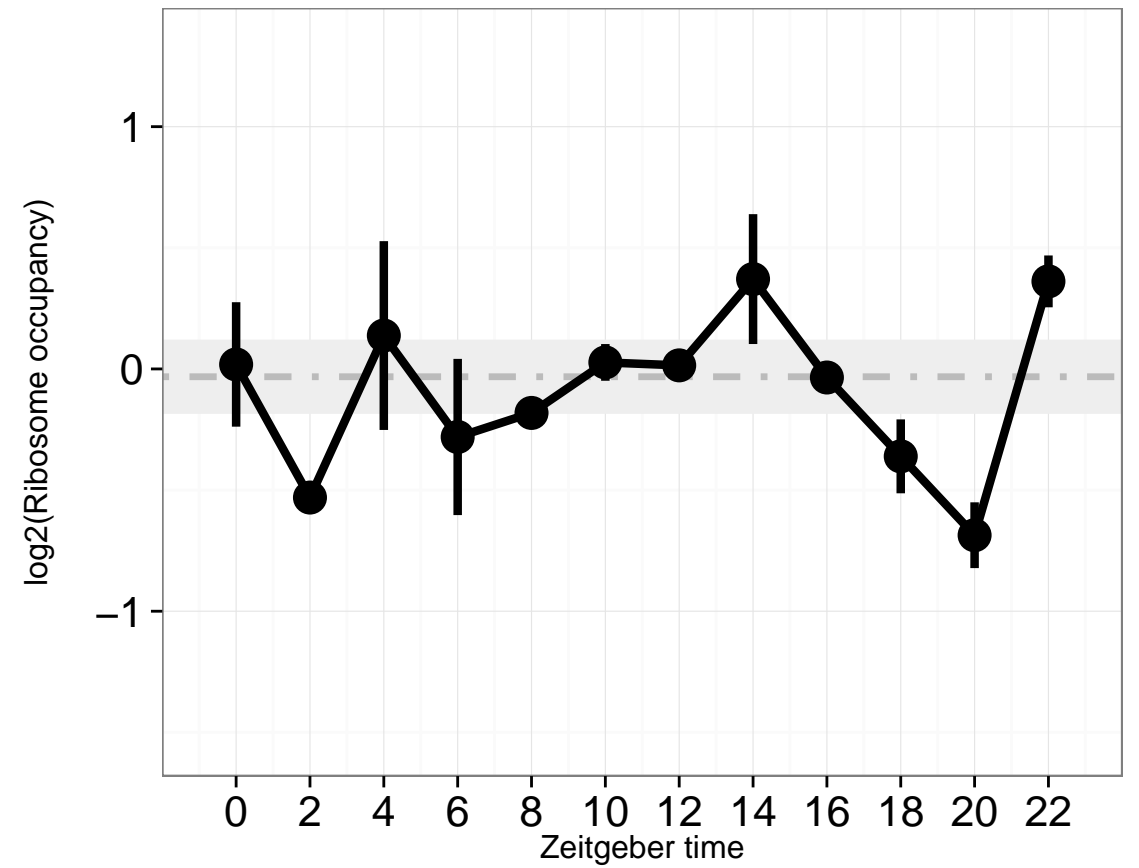

Supplement: Supplementary file 7584 [file 1]

## Piezo2

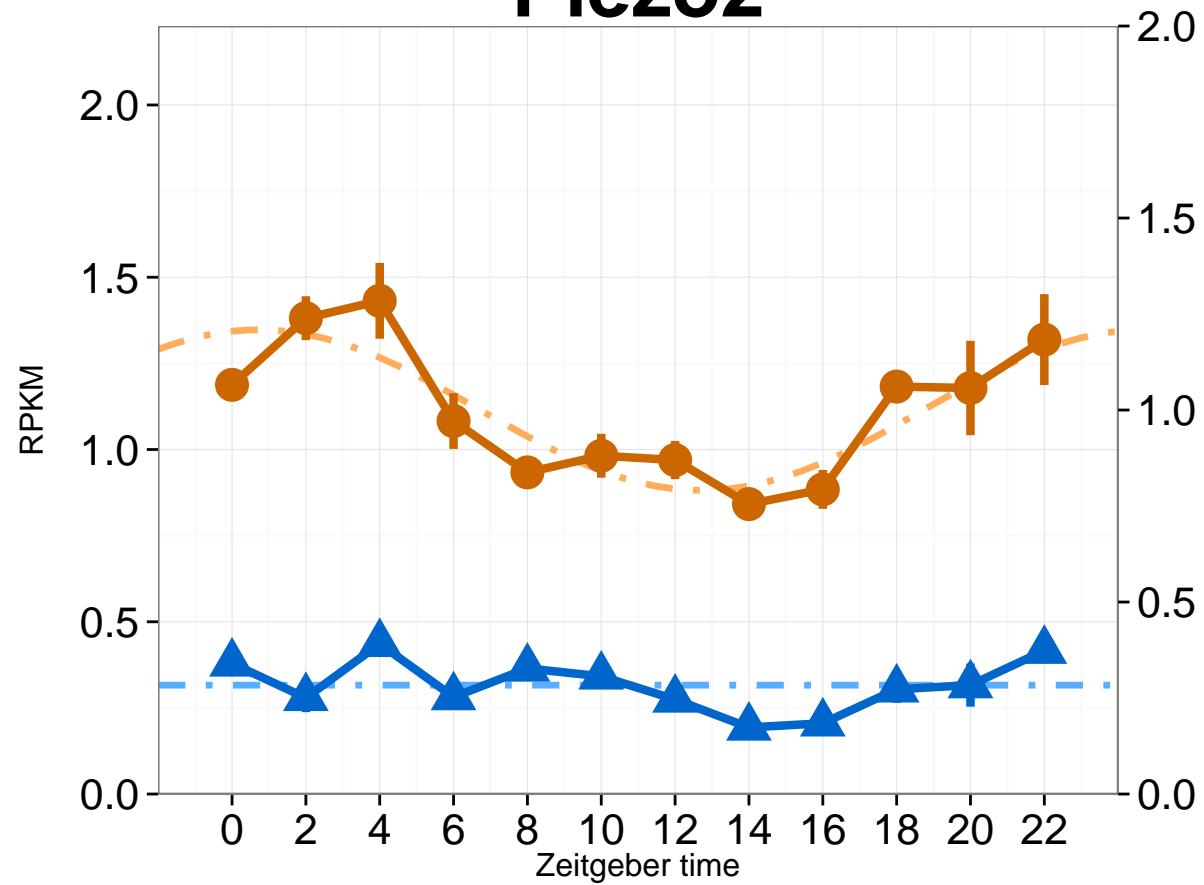

## Piezo2

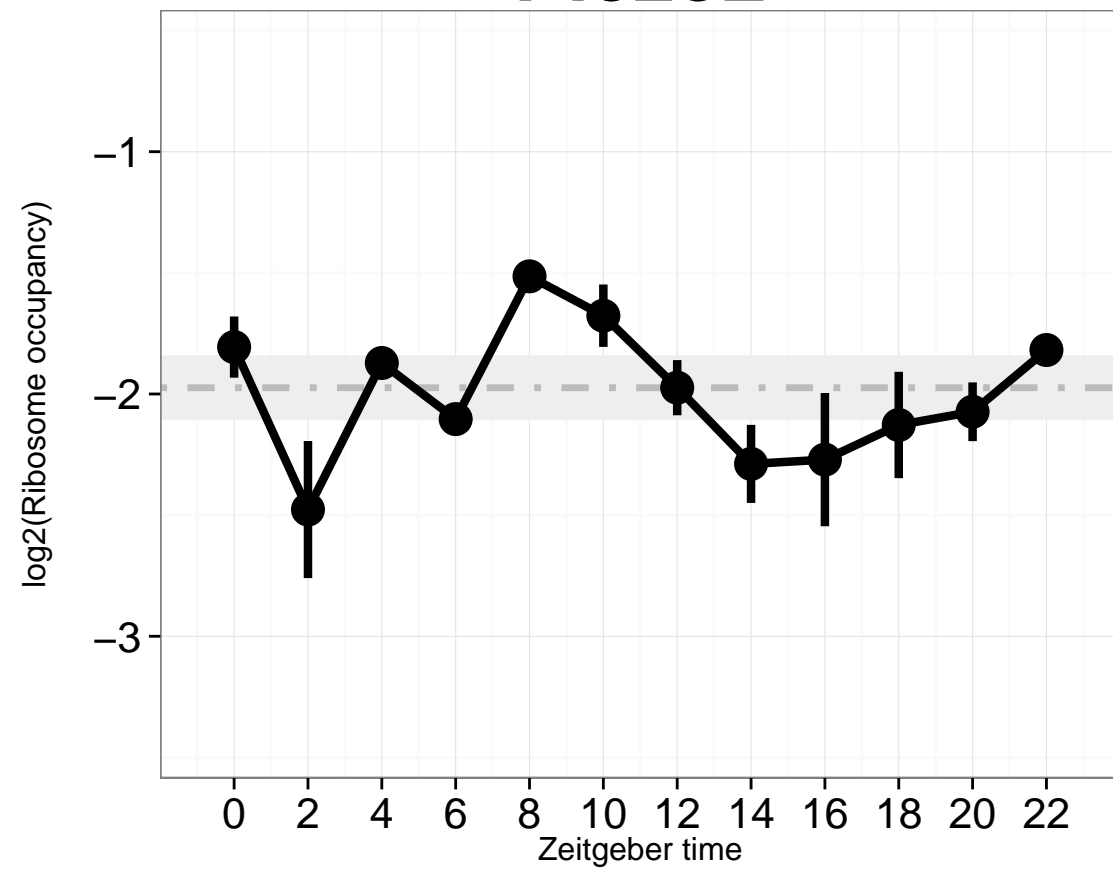

Supplement: Supplementary file 7585 [file 1]

# AI314180

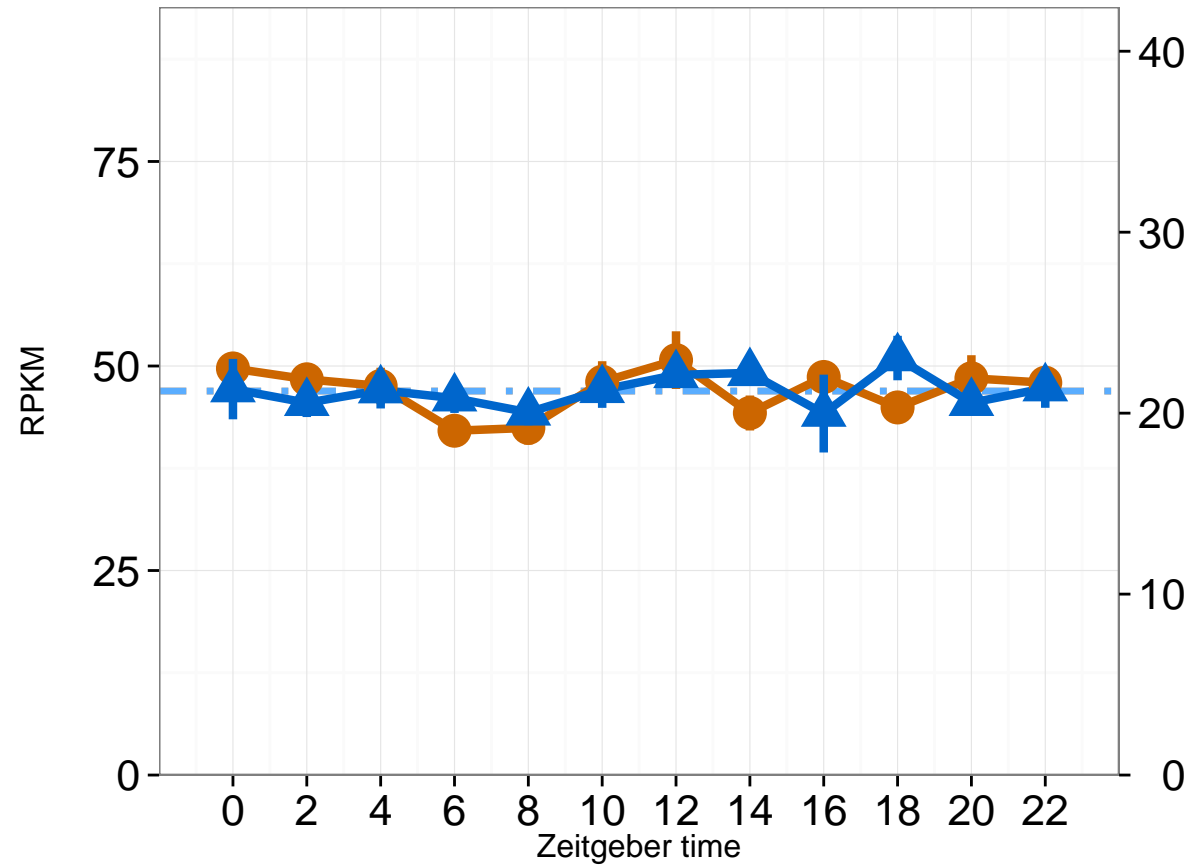

# AI314180

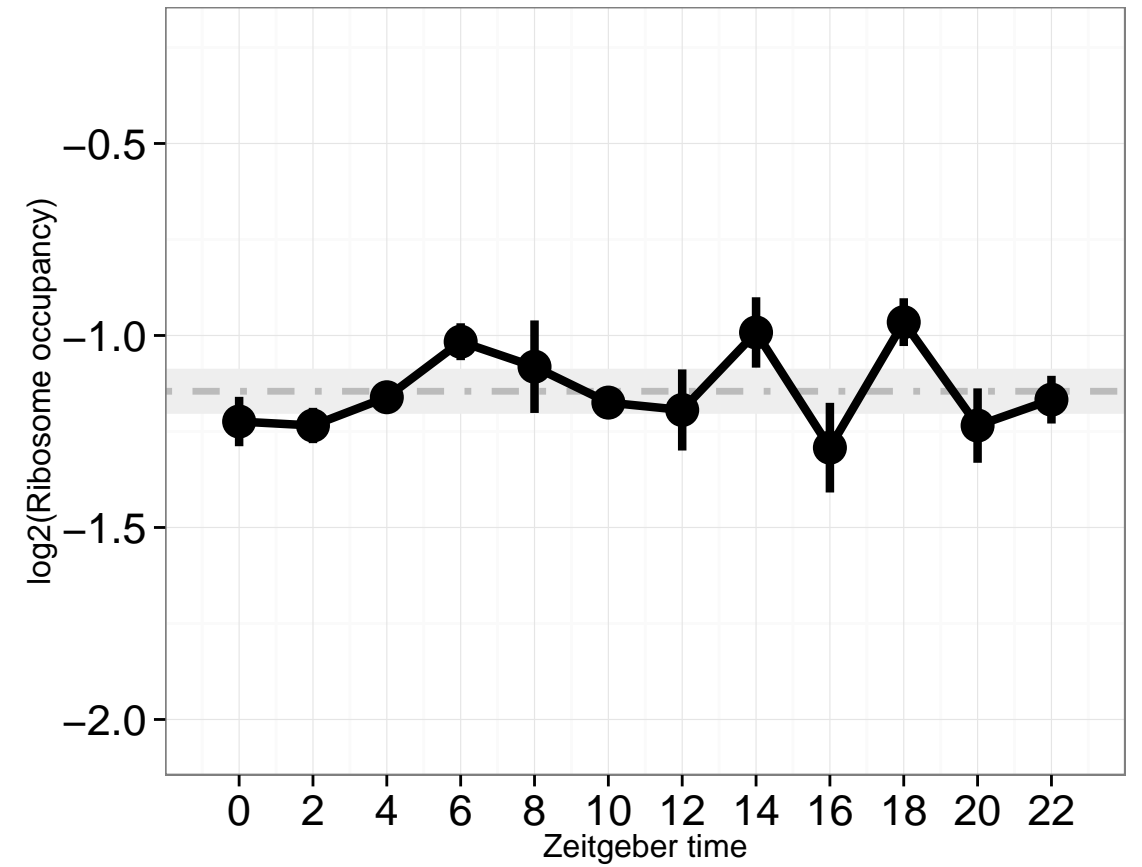

Supplement: Supplementary file 7586 [file 1]

# Rsl24d1

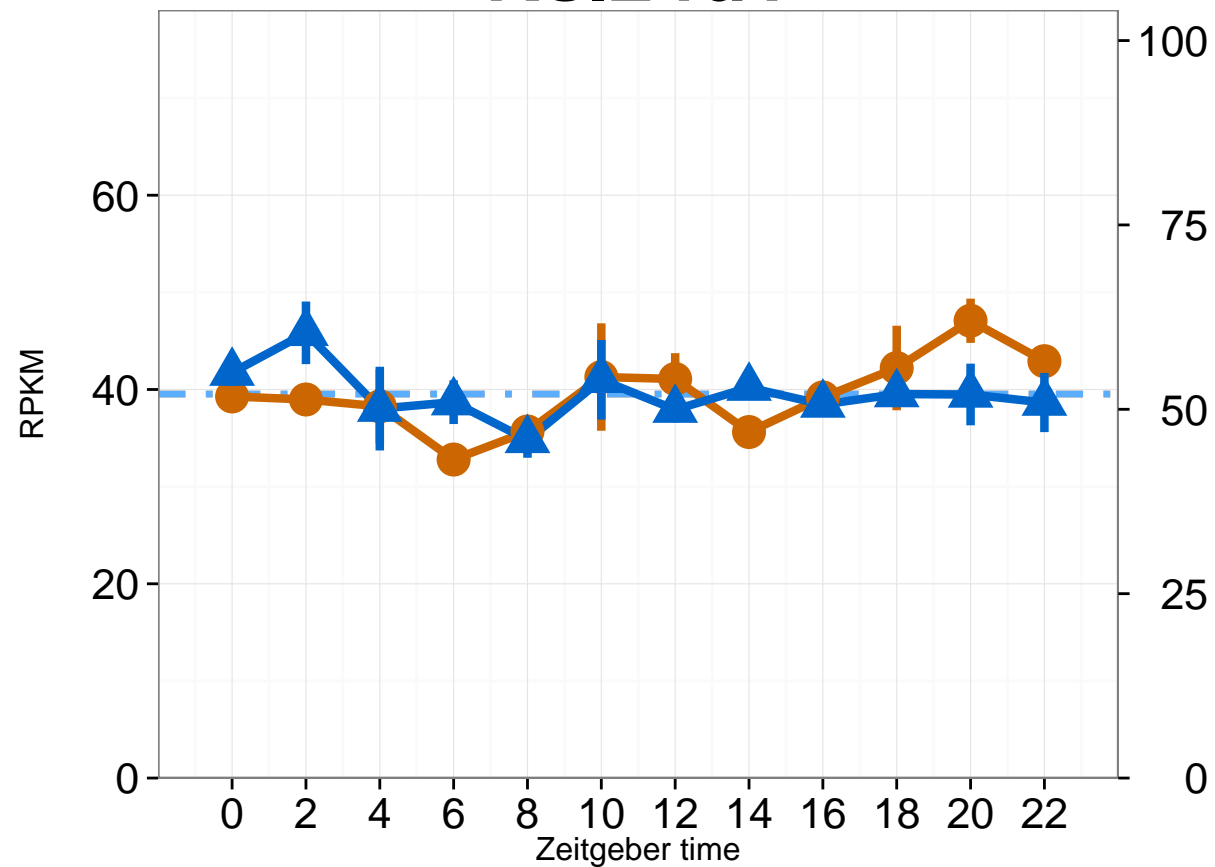

# Rsl24d1

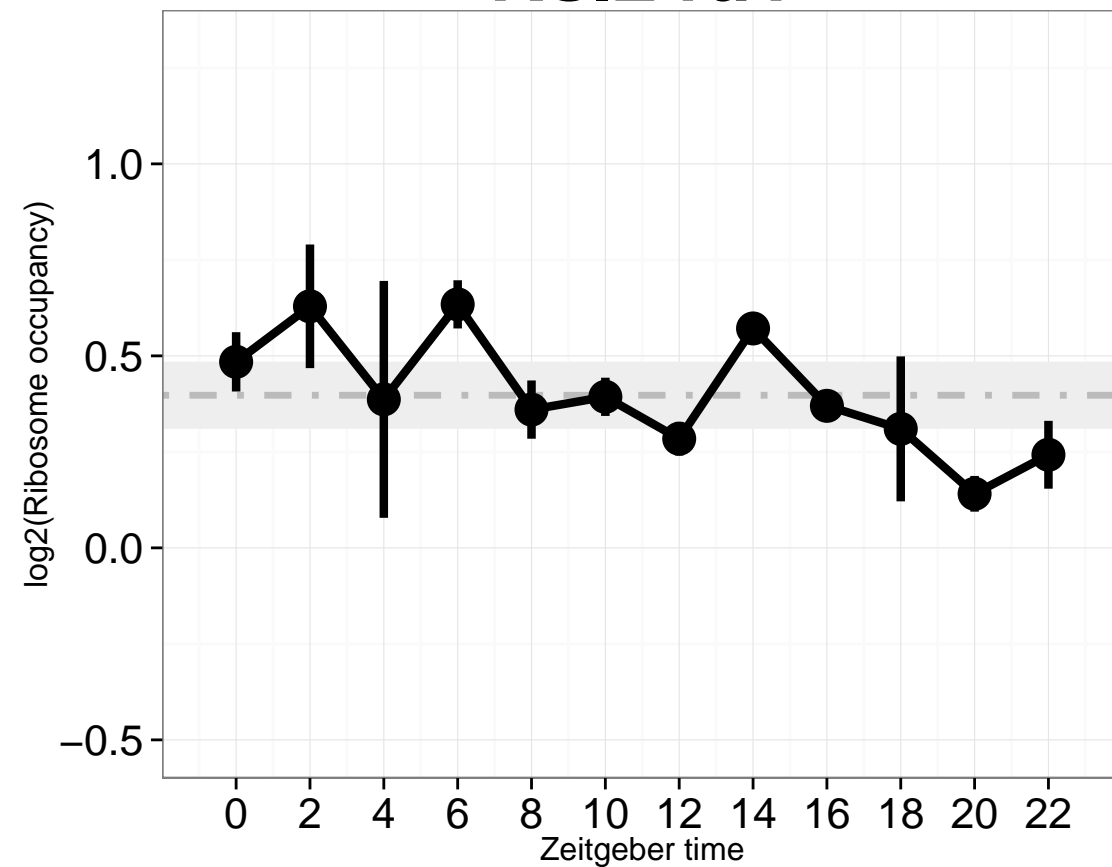

Supplement: Supplementary file 7587 [file 1]

# Tuba1b

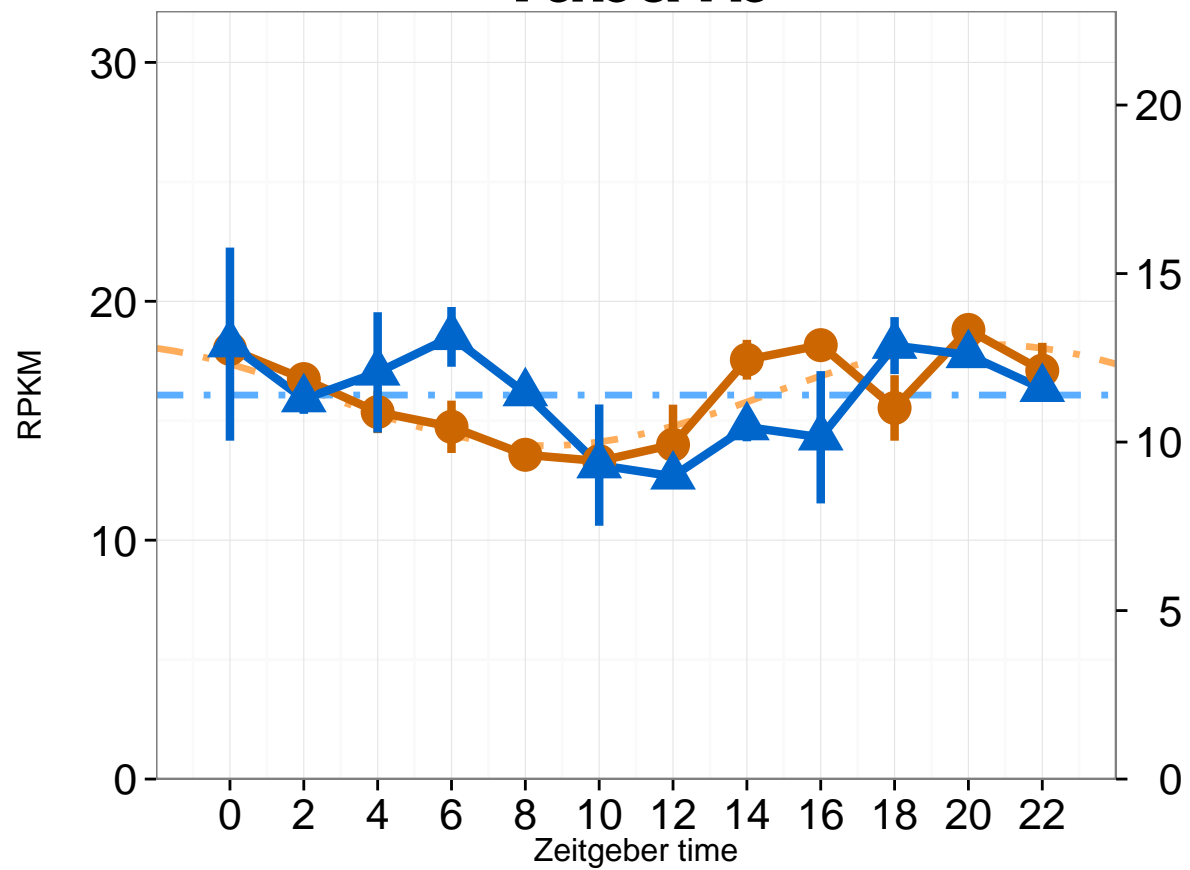

# Tuba1b

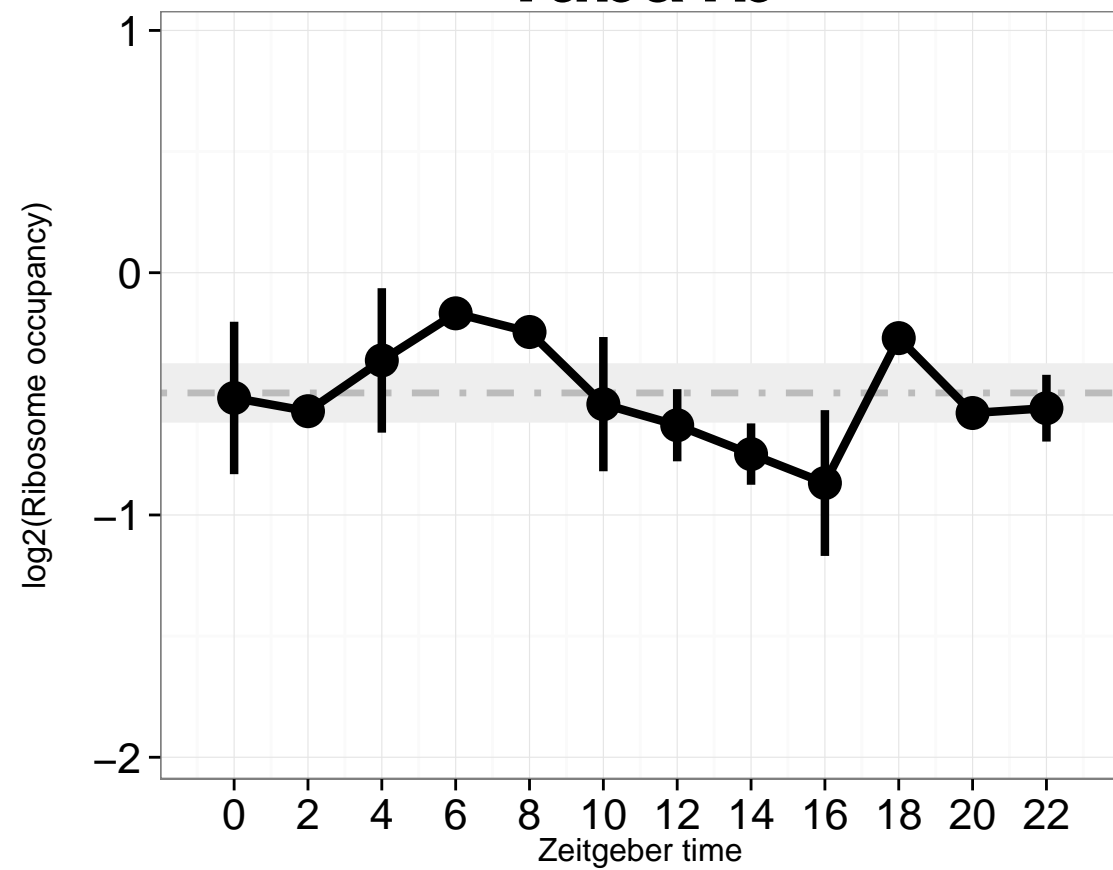

Supplement: Supplementary file 7588 [file 1]

## Ywhab

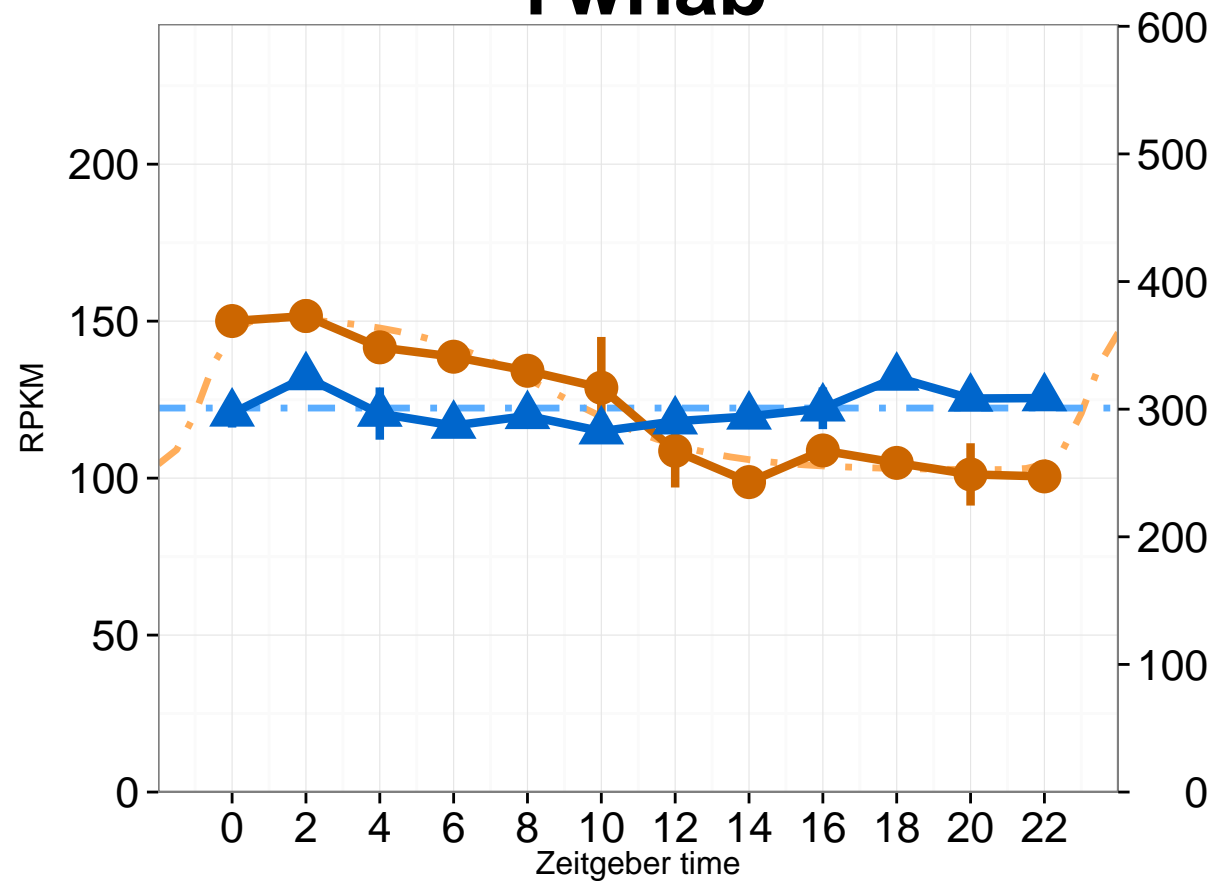

## Ywhab

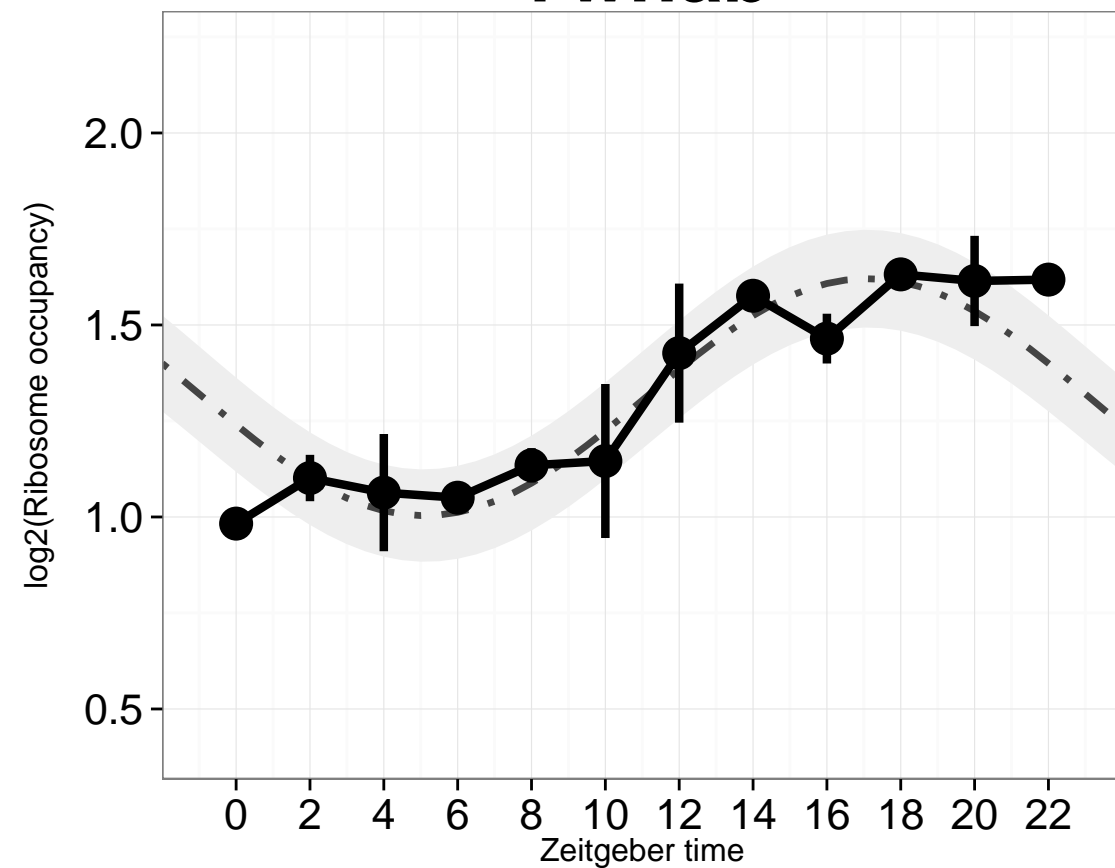

Supplement: Supplementary file 7589 [file 1]

## Arap2

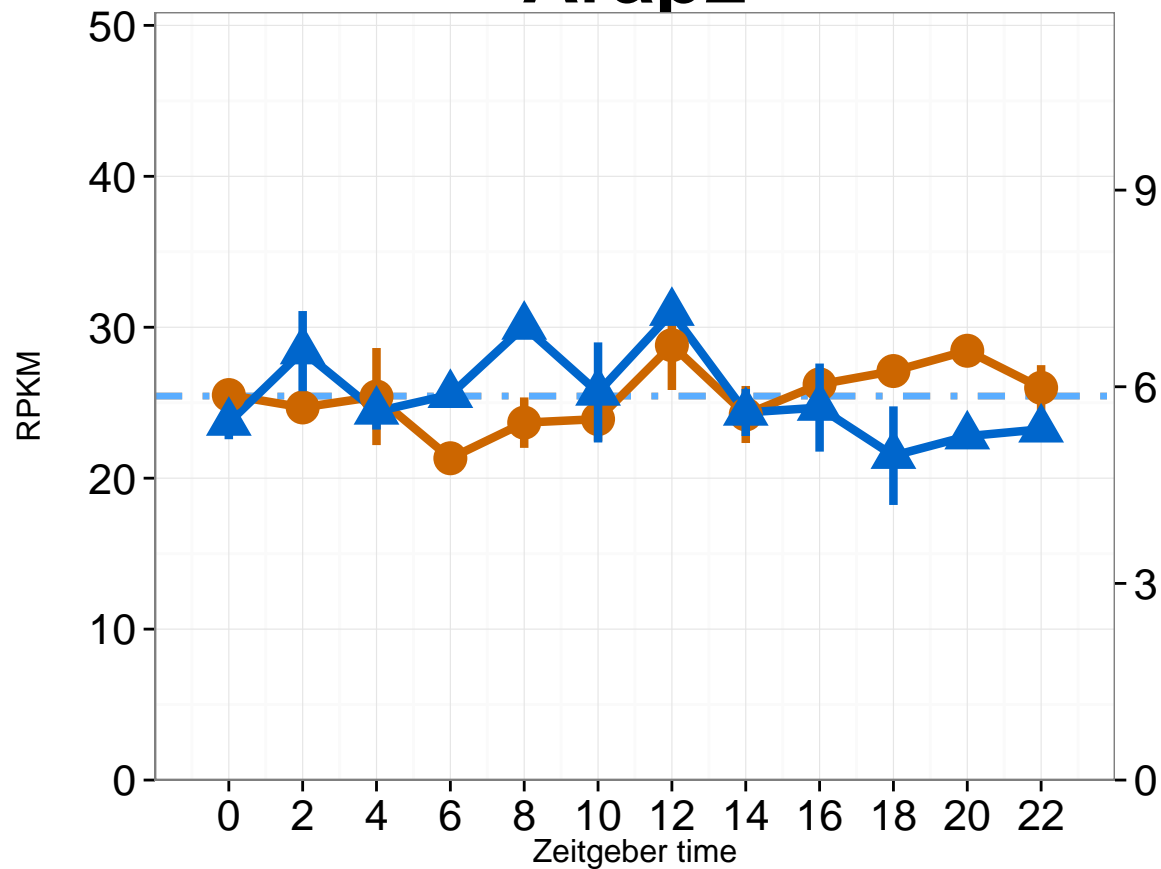

## Arap2

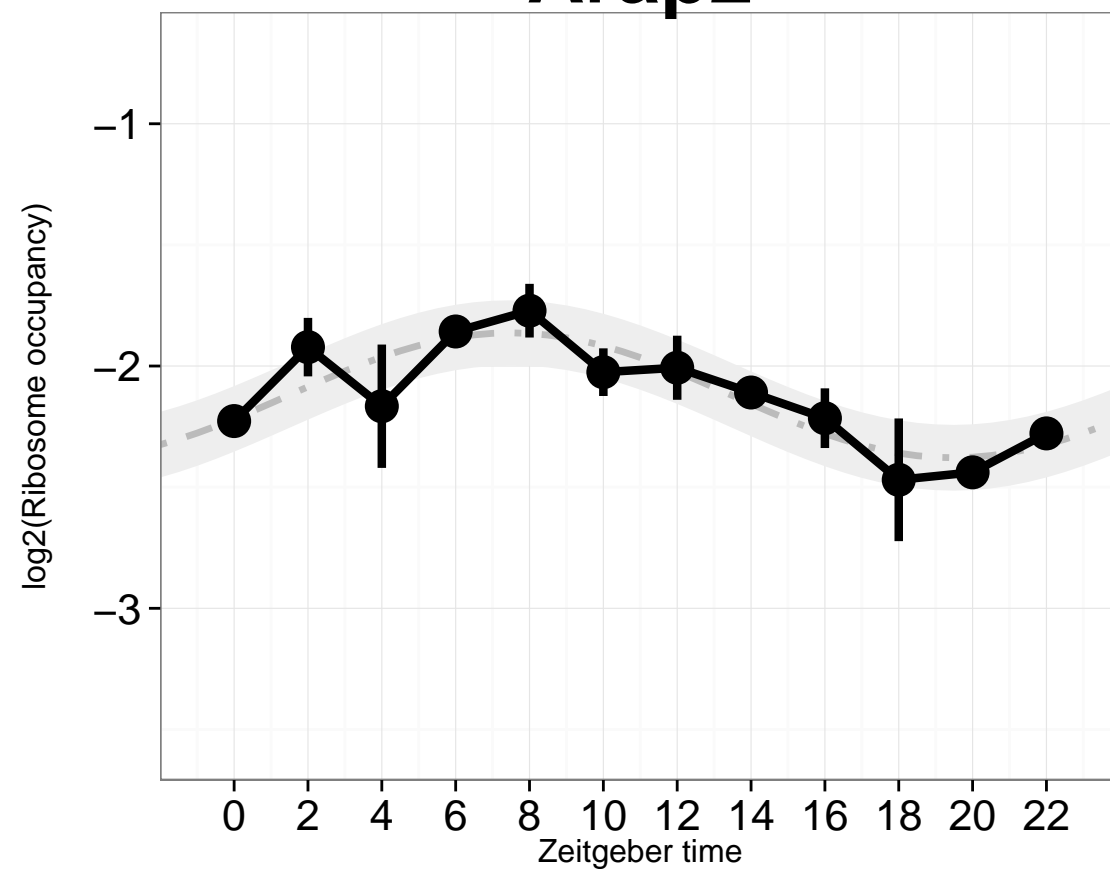

Supplement: Supplementary file 7590 [file 1]

## Nsun5

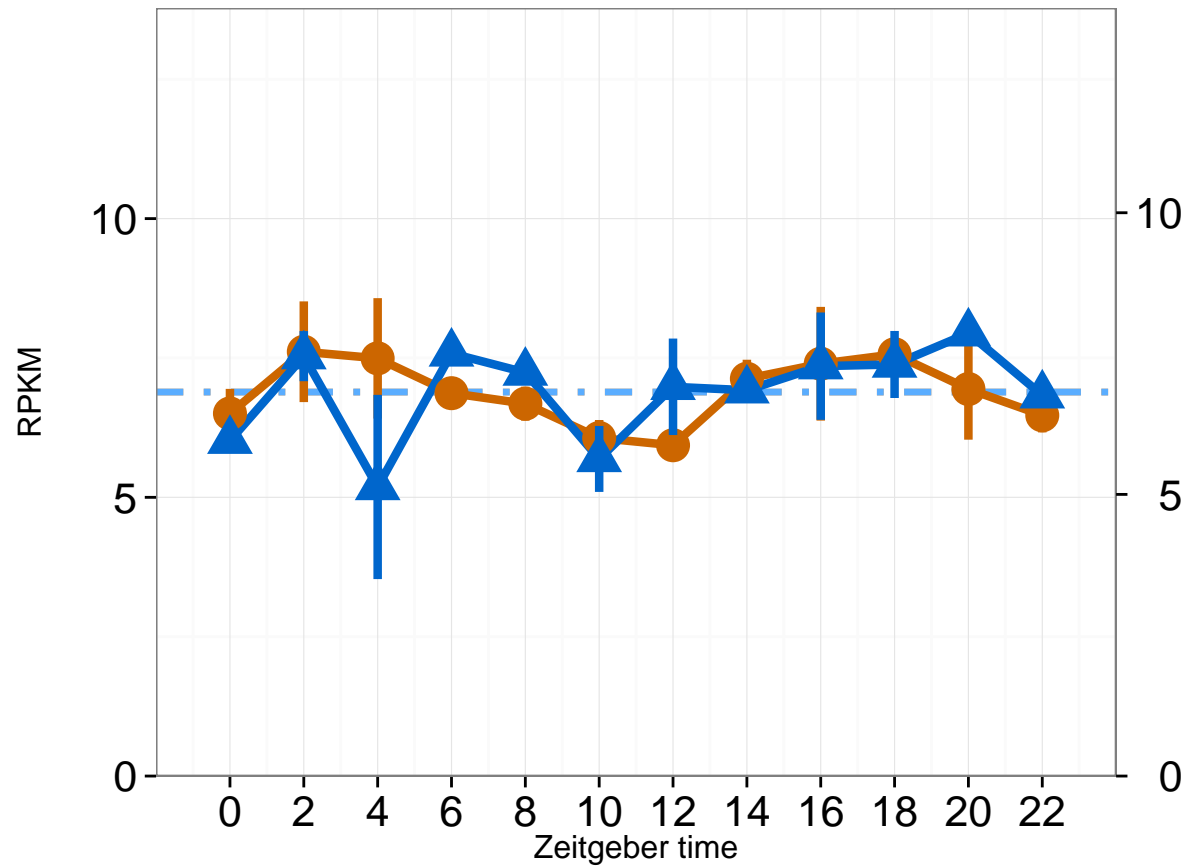

## Nsun5

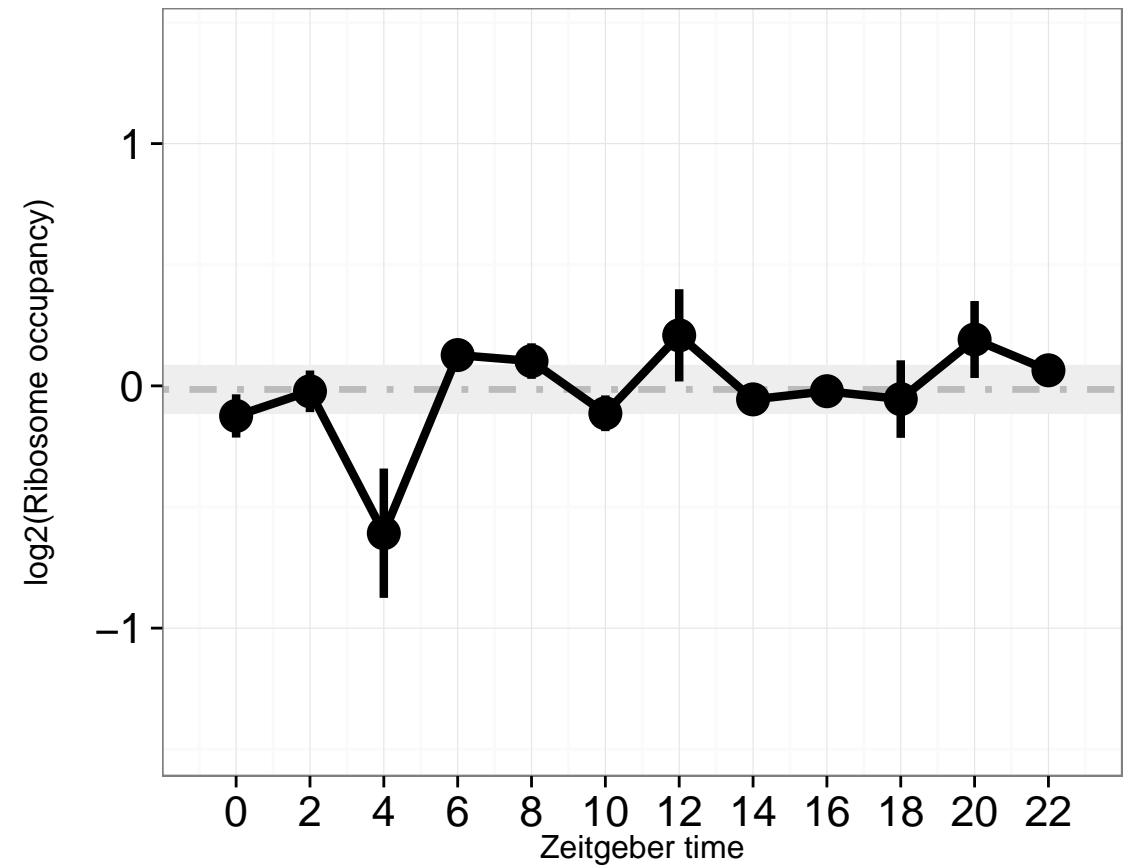

Supplement: Supplementary file 7591 [file 1]

## Hnf4g

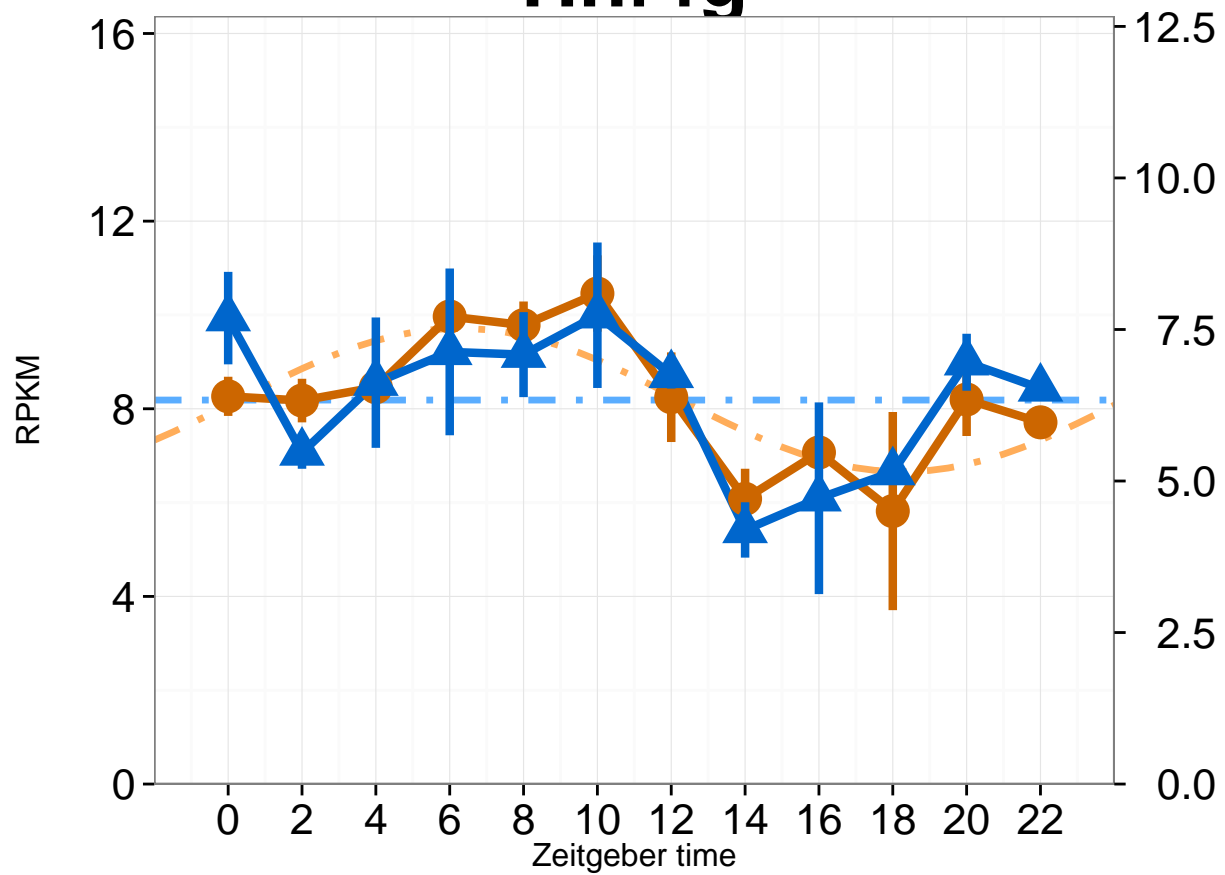

## Hnf4g

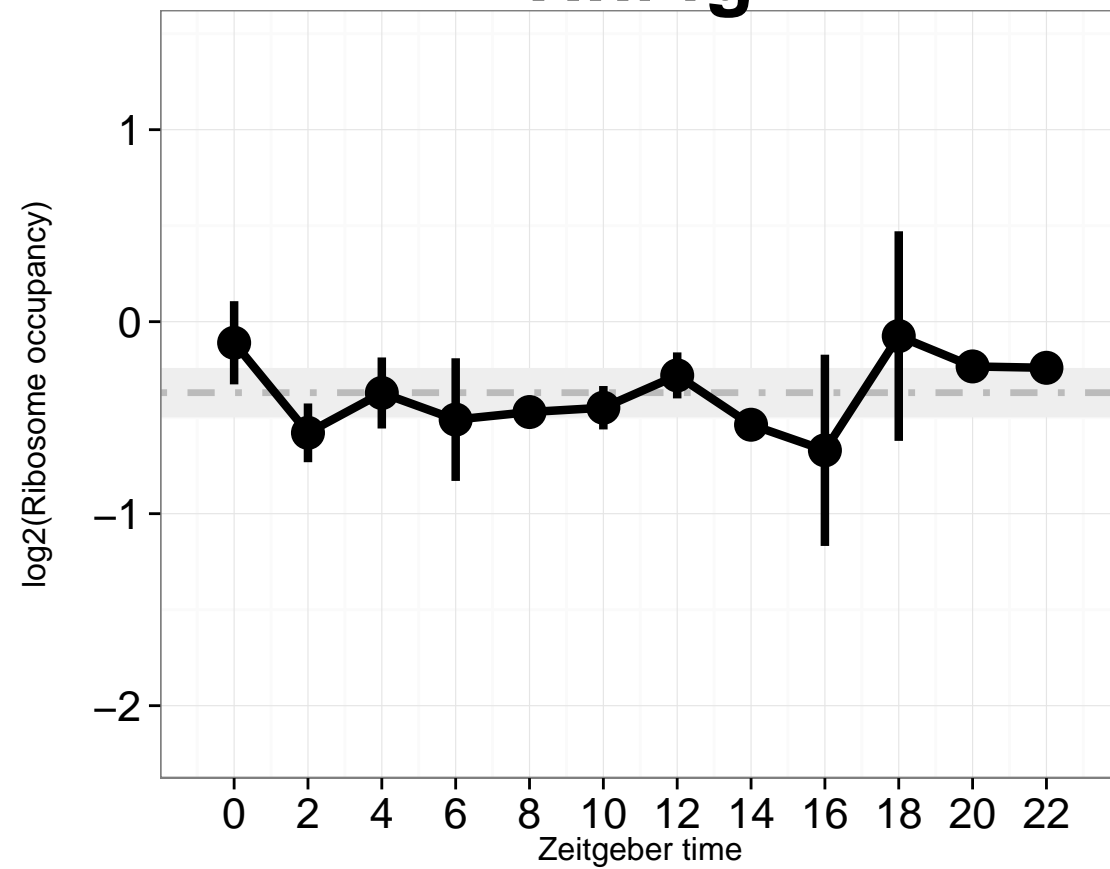

Supplement: Supplementary file 7592 [file 1]

## Shisa5

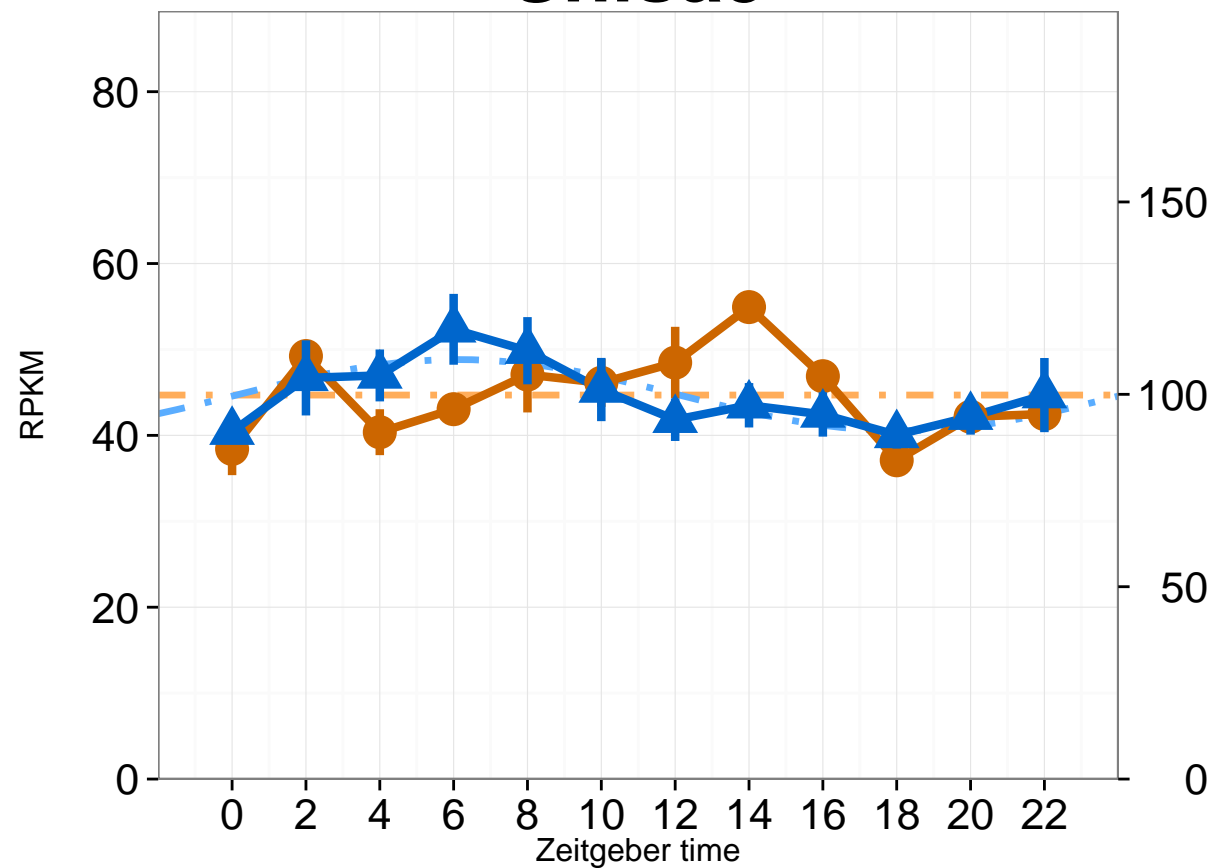

## Shisa5

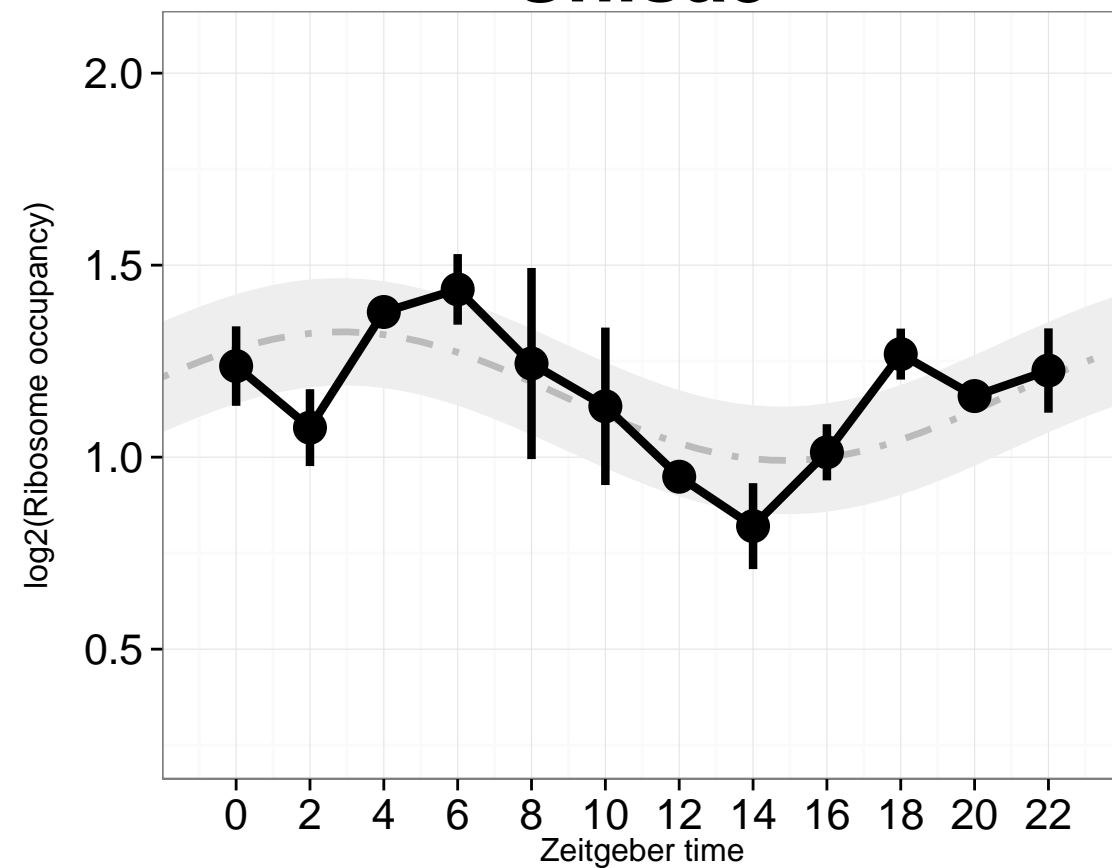

Supplement: Supplementary file 7593 [file 1]

# Prkag3

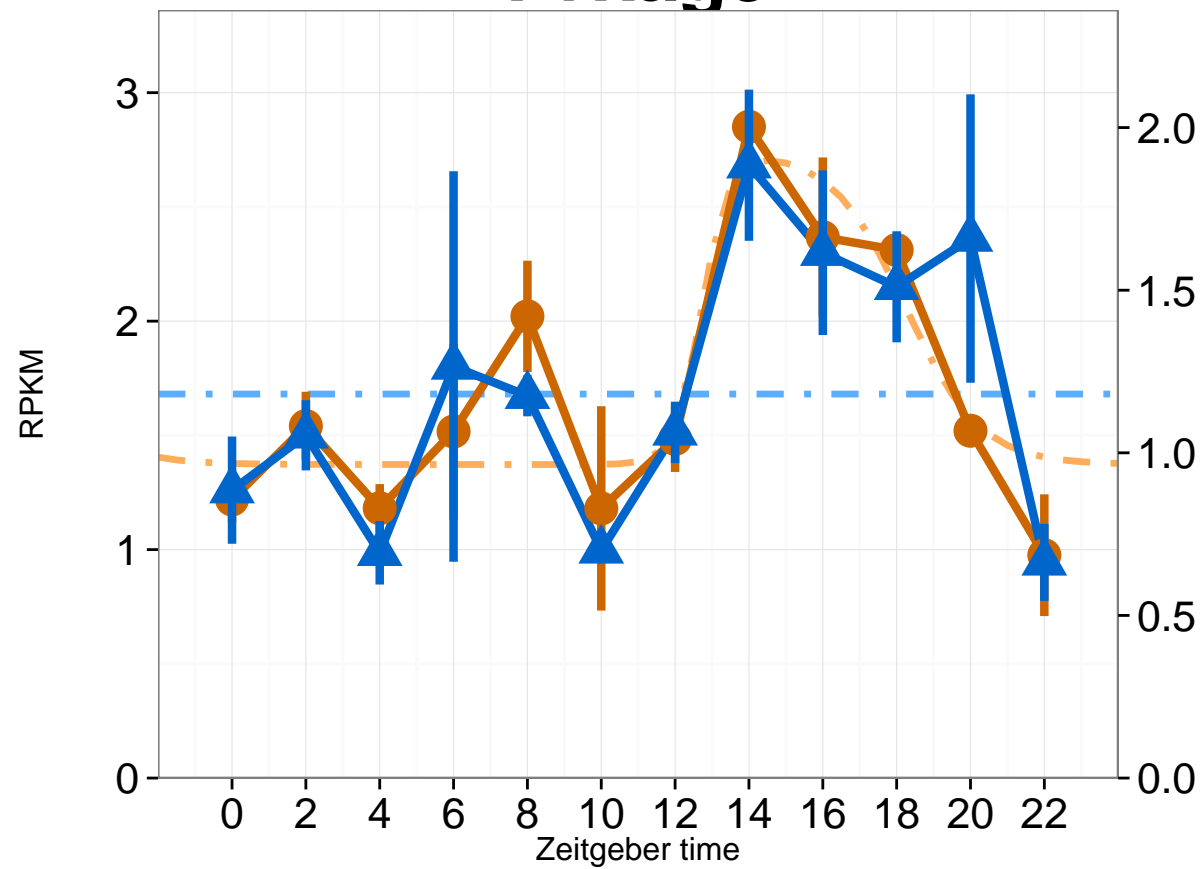

# Prkag3

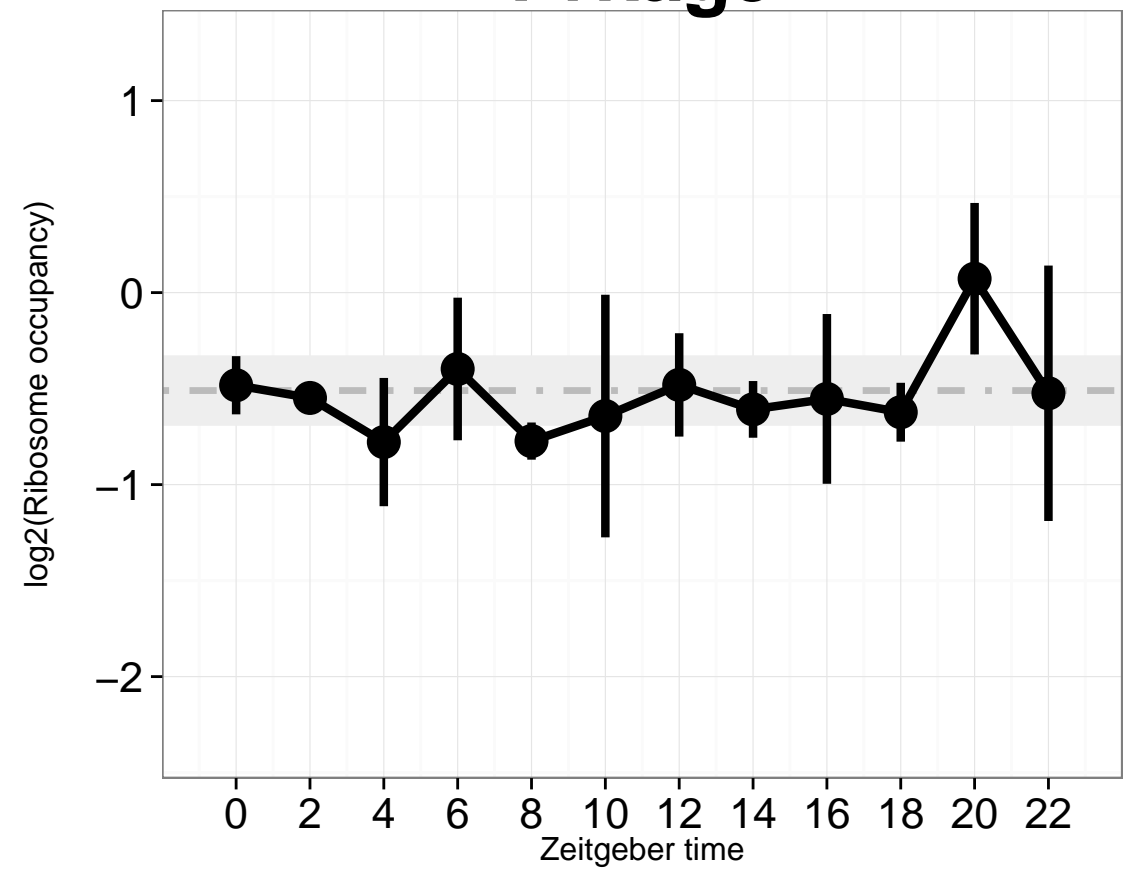

Supplement: Supplementary file 7594 [file 1]

# Zbtb41

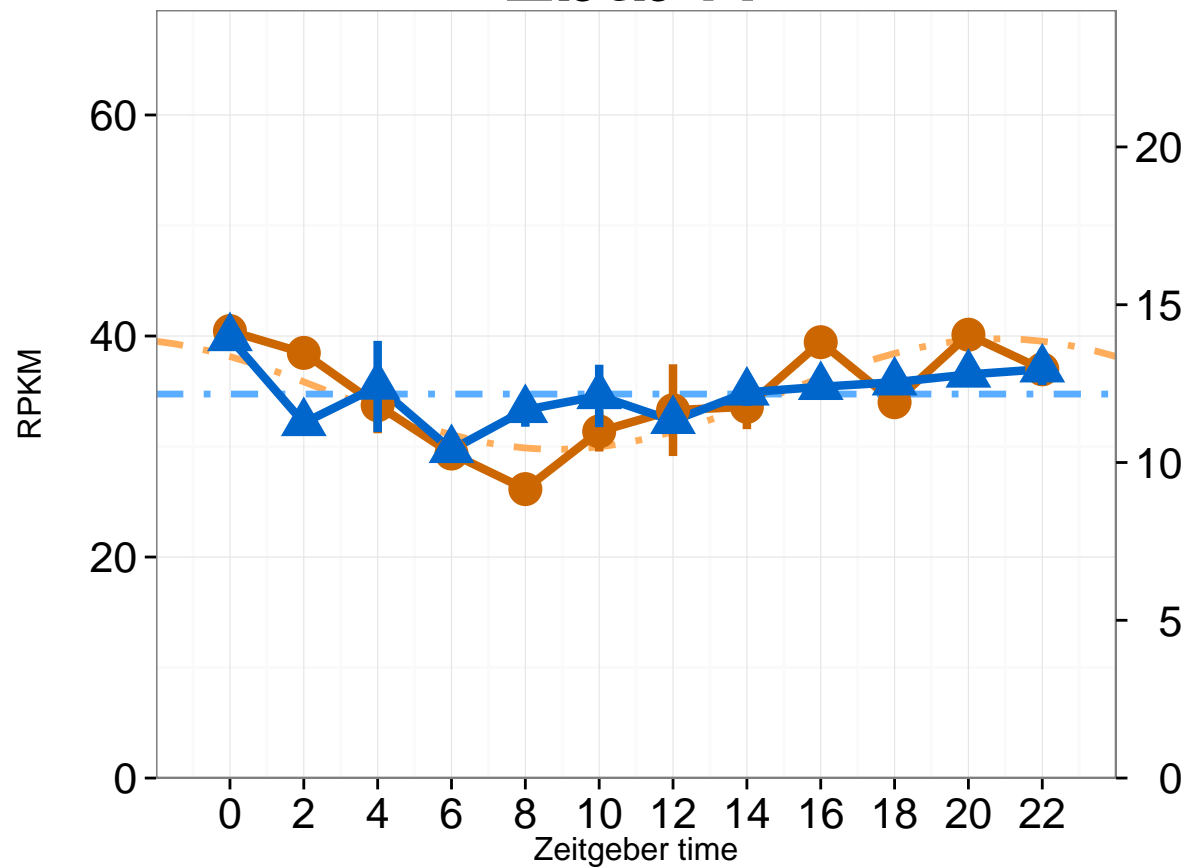

# Zbtb41

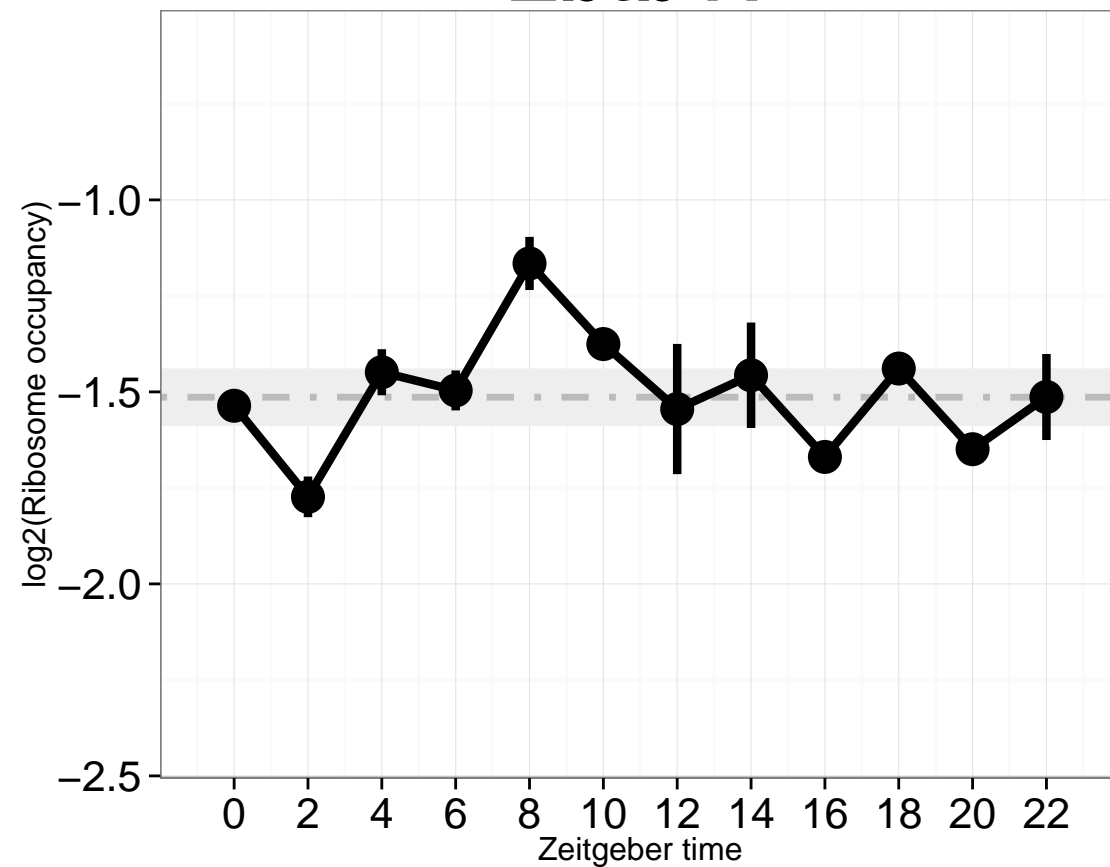

Supplement: Supplementary file 7595 [file 1]

## ler5

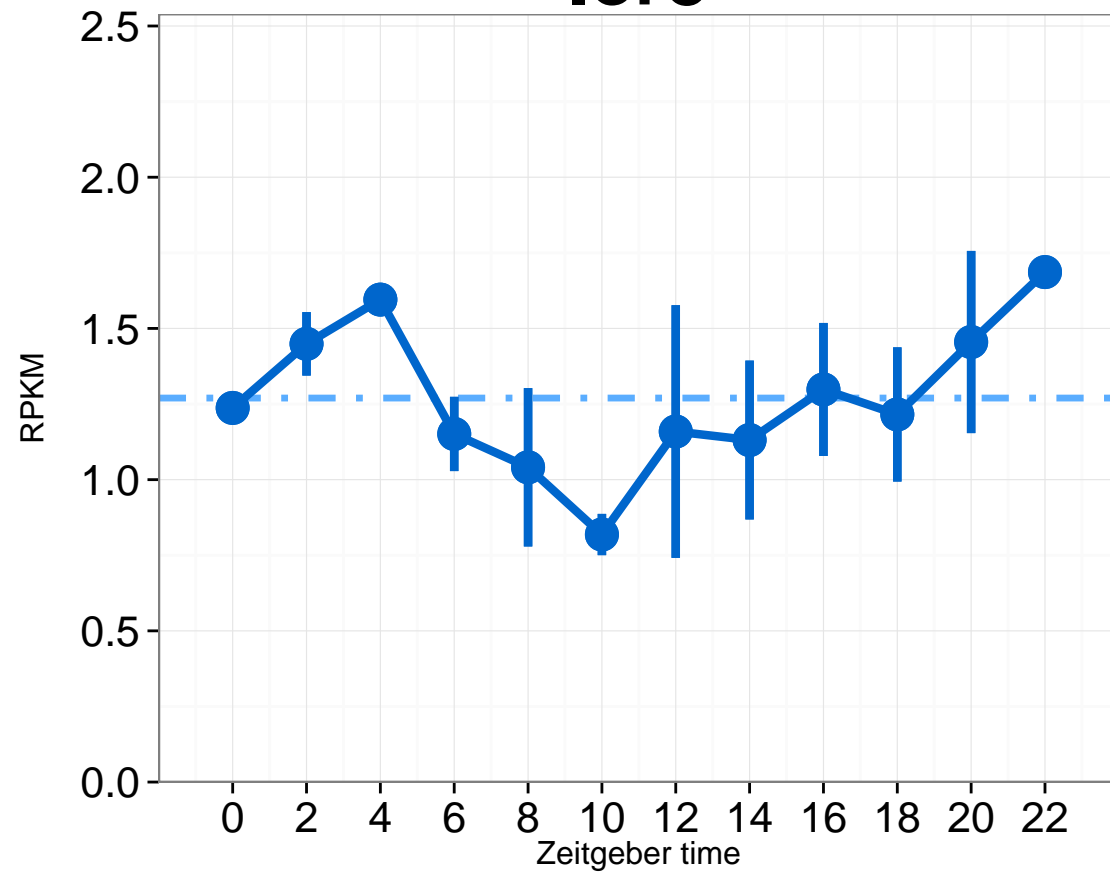

## ler5 log2(Ribosome occupancy)

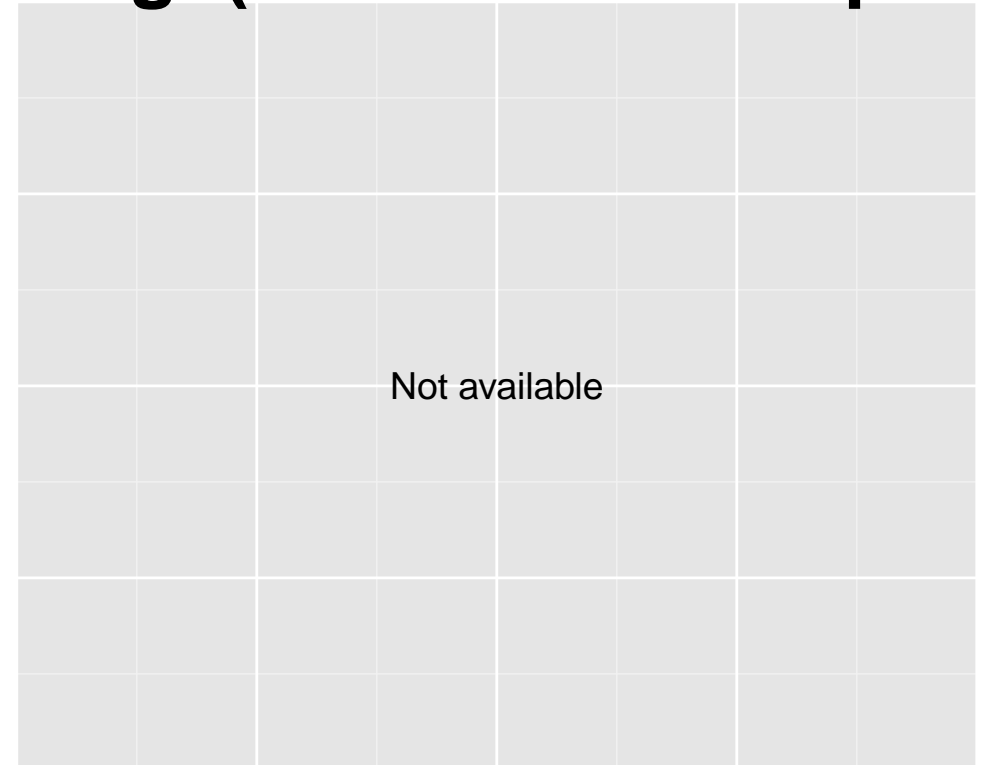

Supplement: Supplementary file 7596 [file 1]

## Ccdc85c

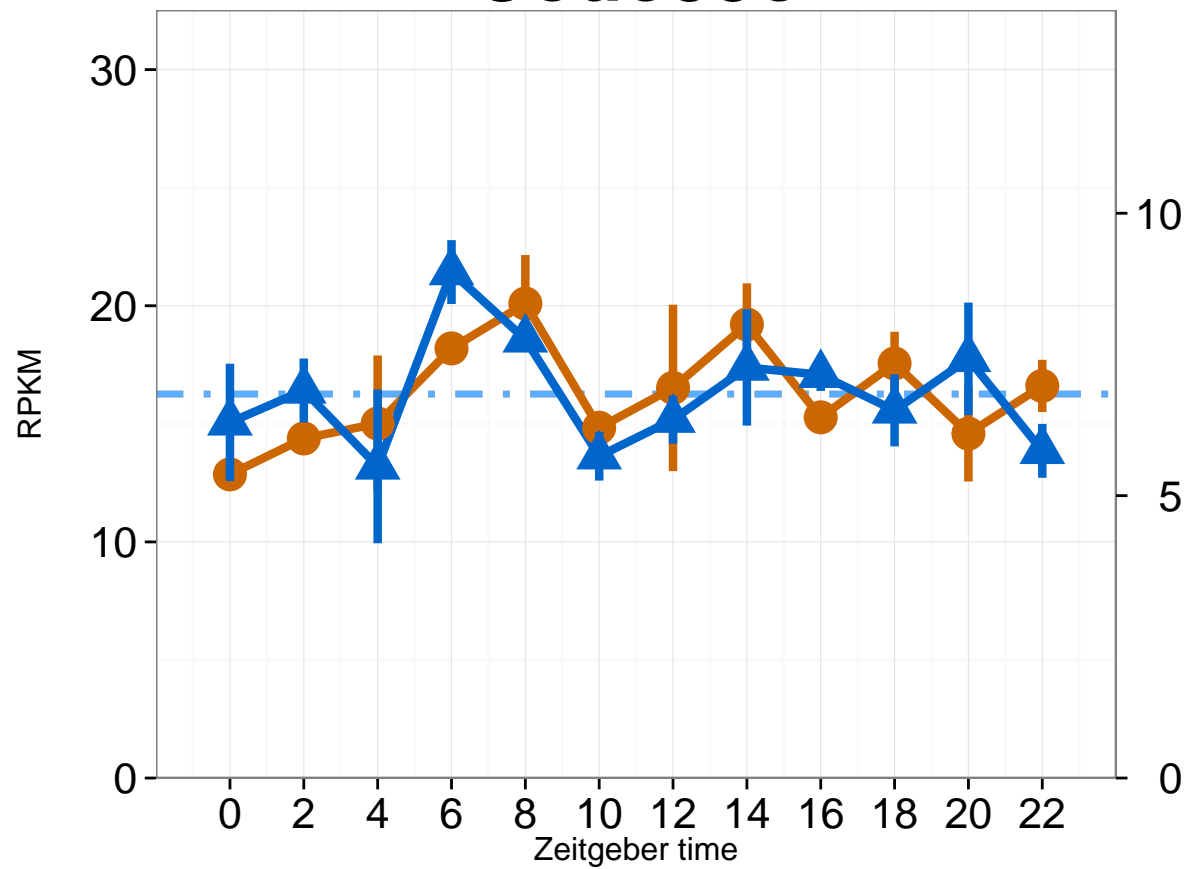

## Ccdc85c

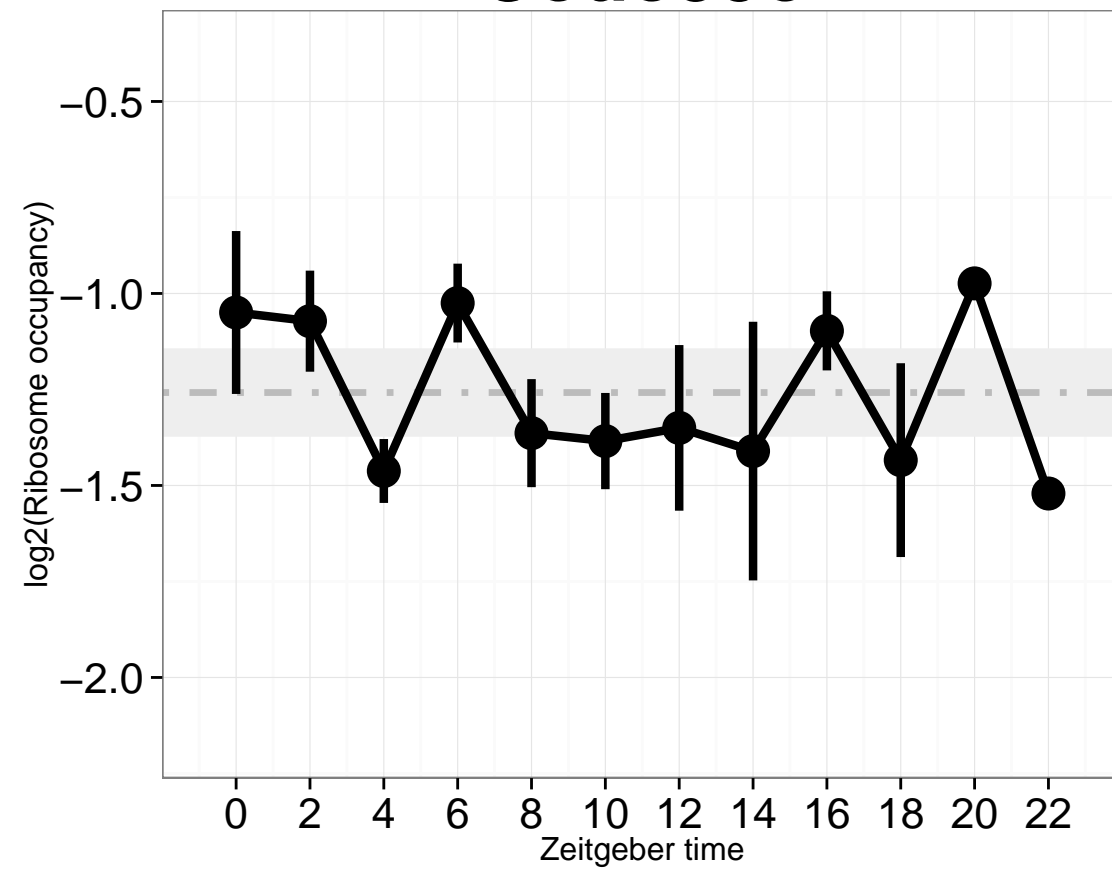

Supplement: Supplementary file 7597 [file 1]

# Mis18a

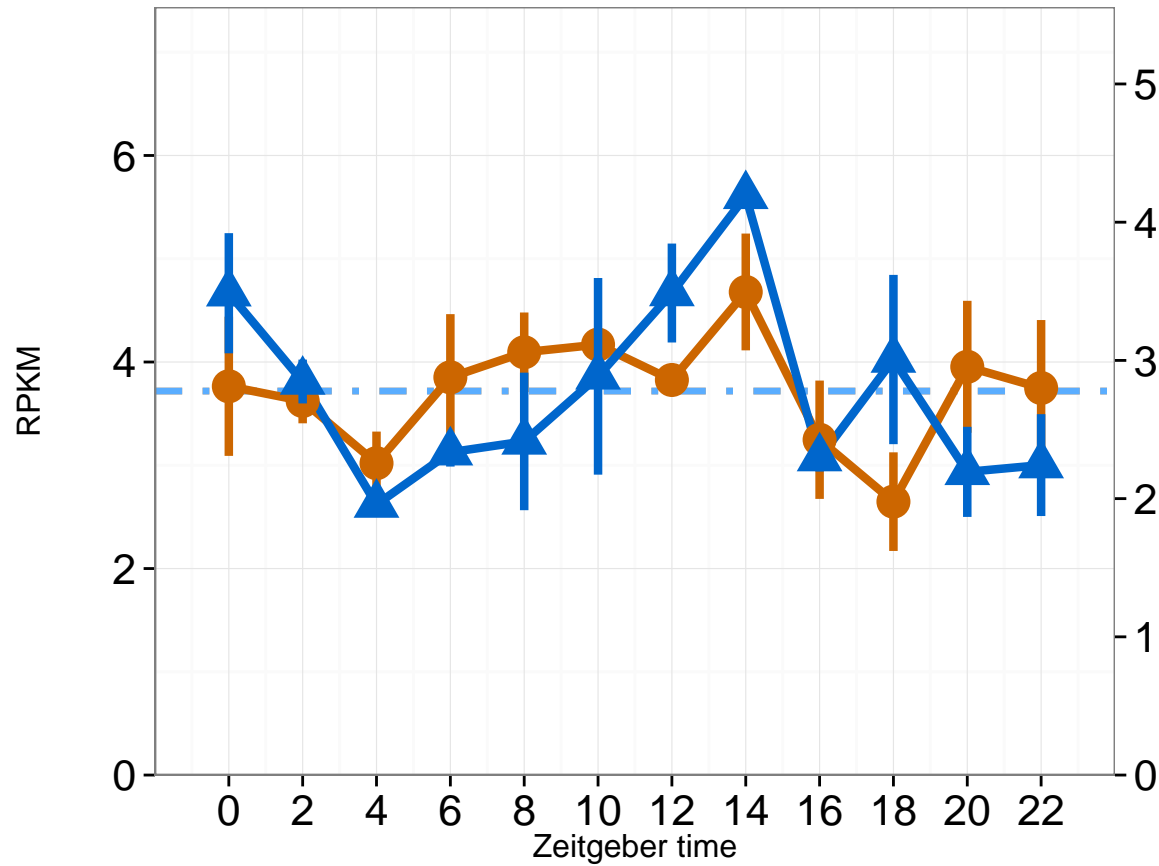

# Mis18a

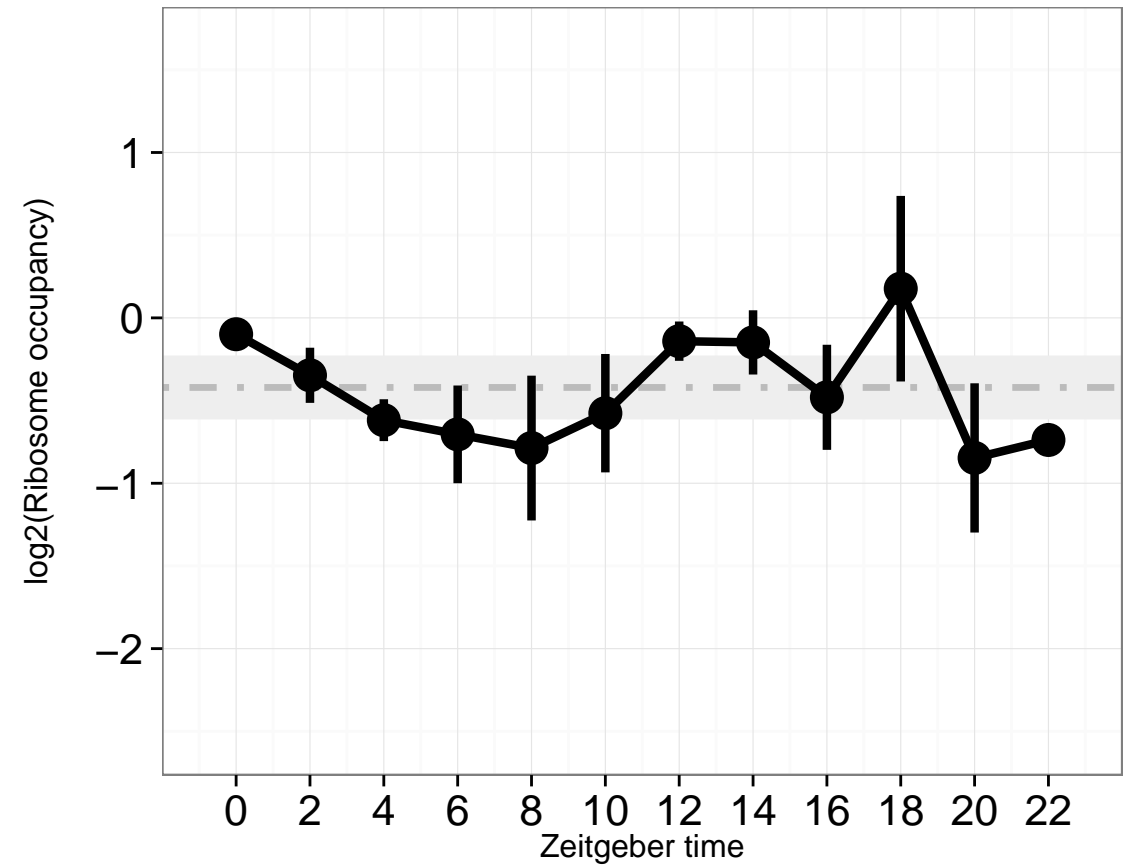

Supplement: Supplementary file 7598 [file 1]

# Rdm1

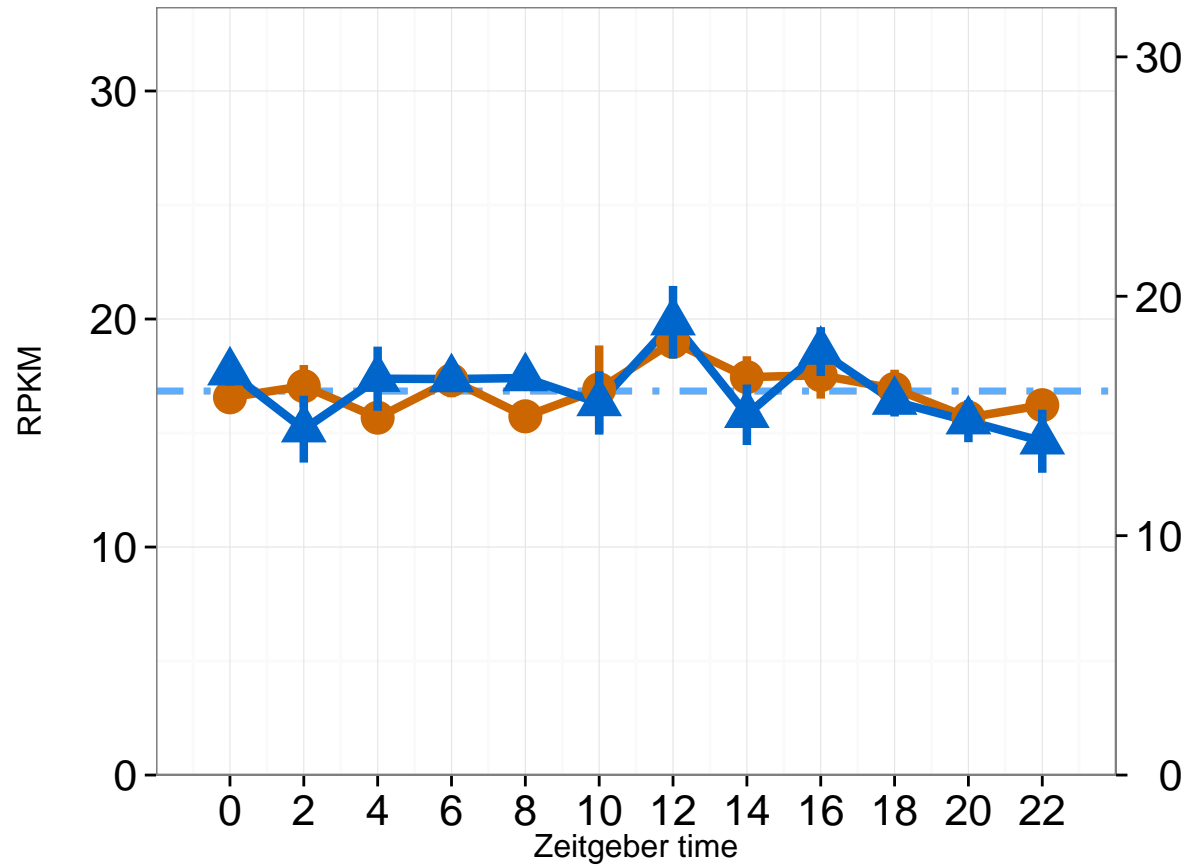

# Rdm1

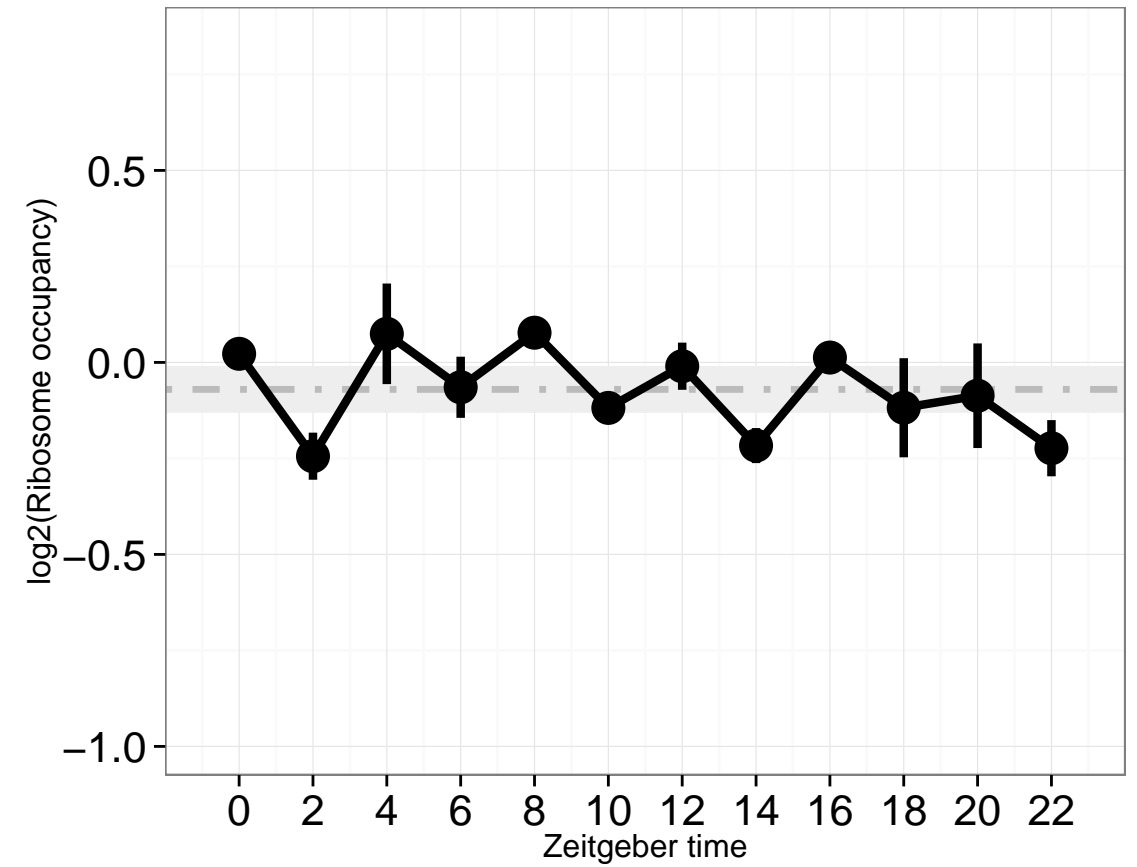

Supplement: Supplementary file 7599 [file 1]

# Top1

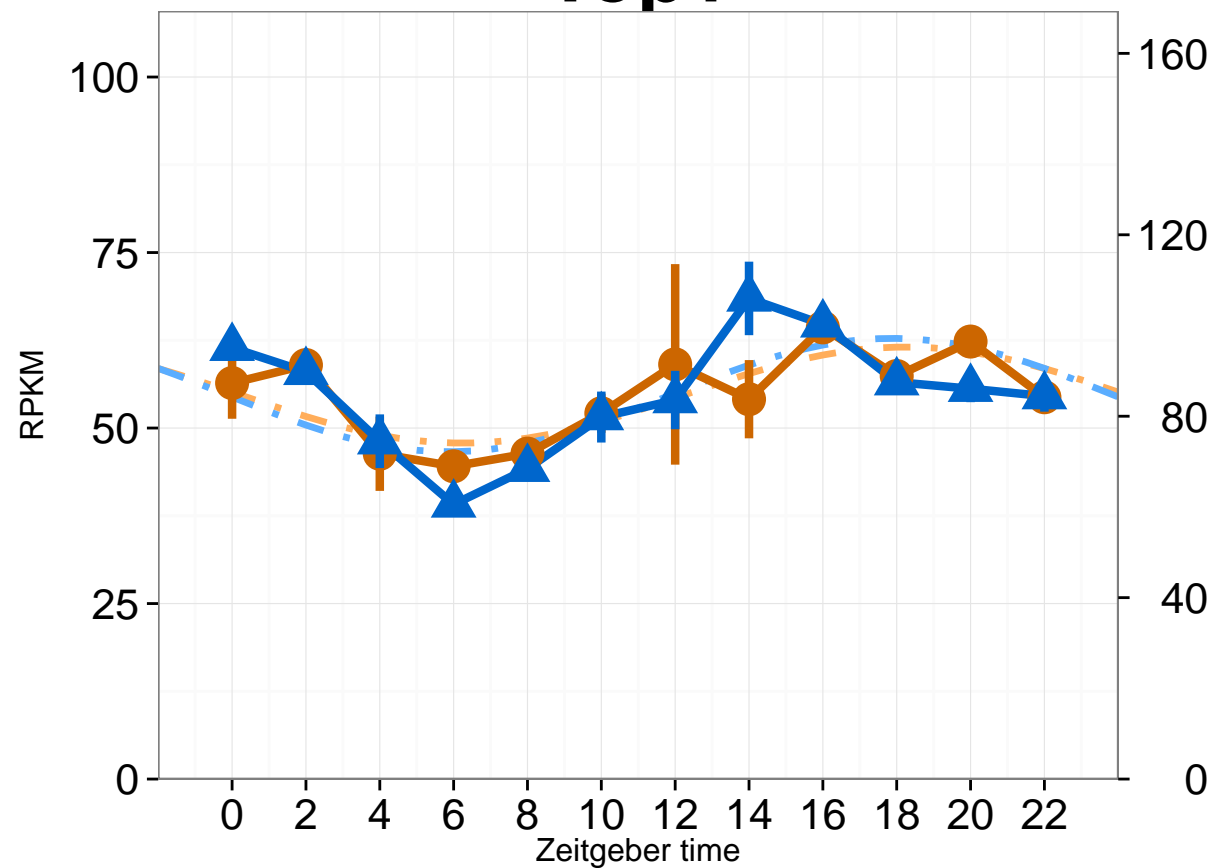

# Top1

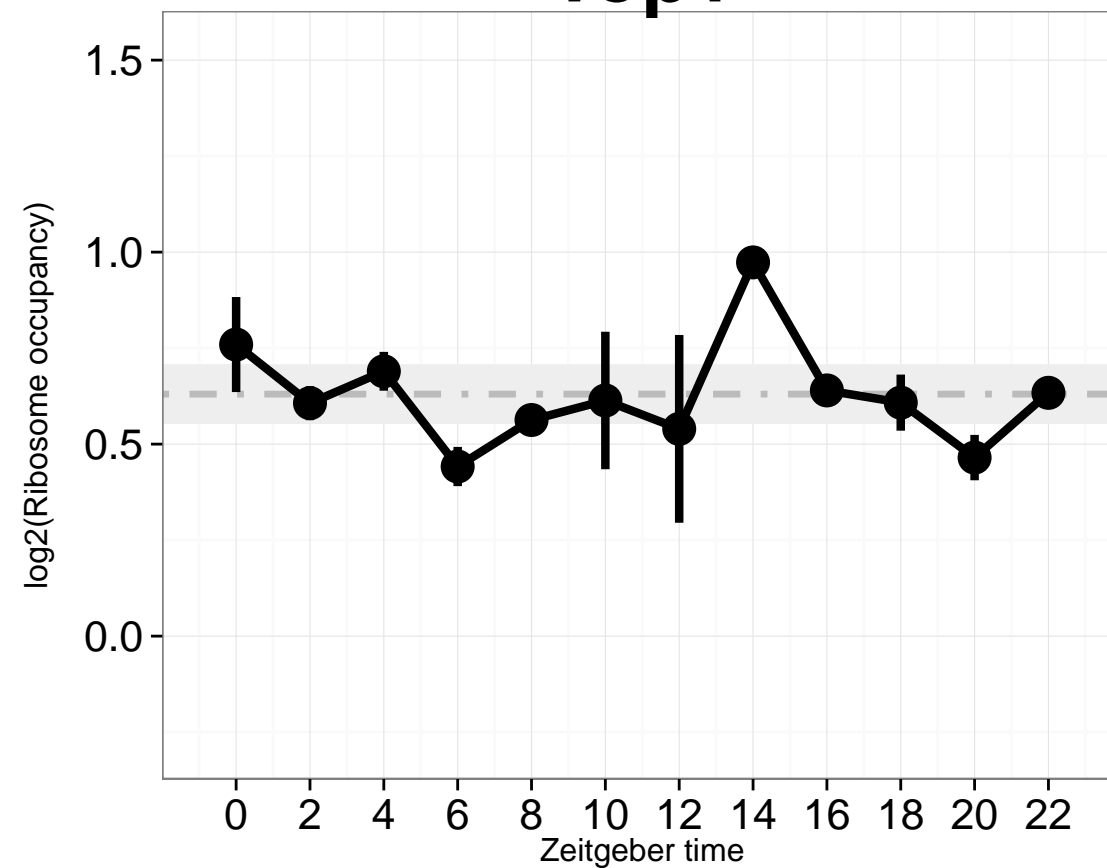

Supplement: Supplementary file 7600 [file 1]

## Triqk

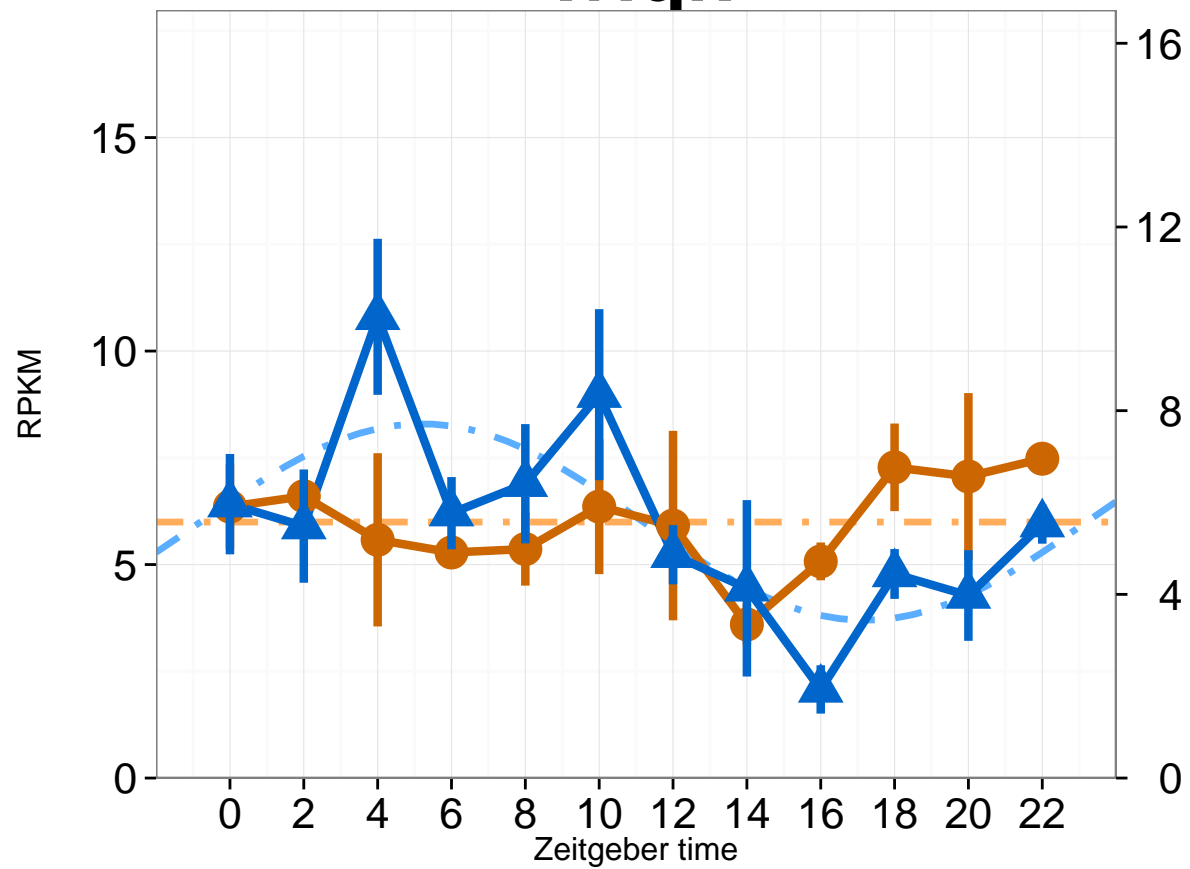

## Triqk

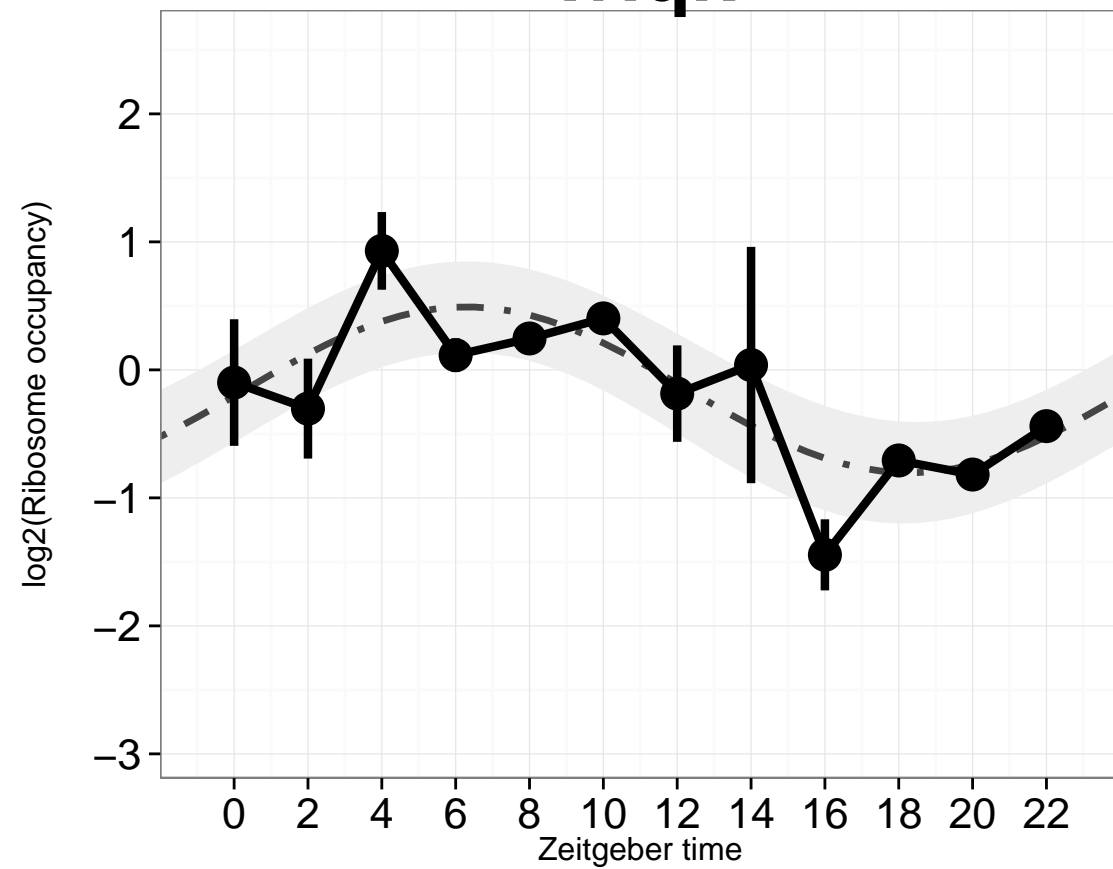

Supplement: Supplementary file 7601 [file 1]

## Col6a1

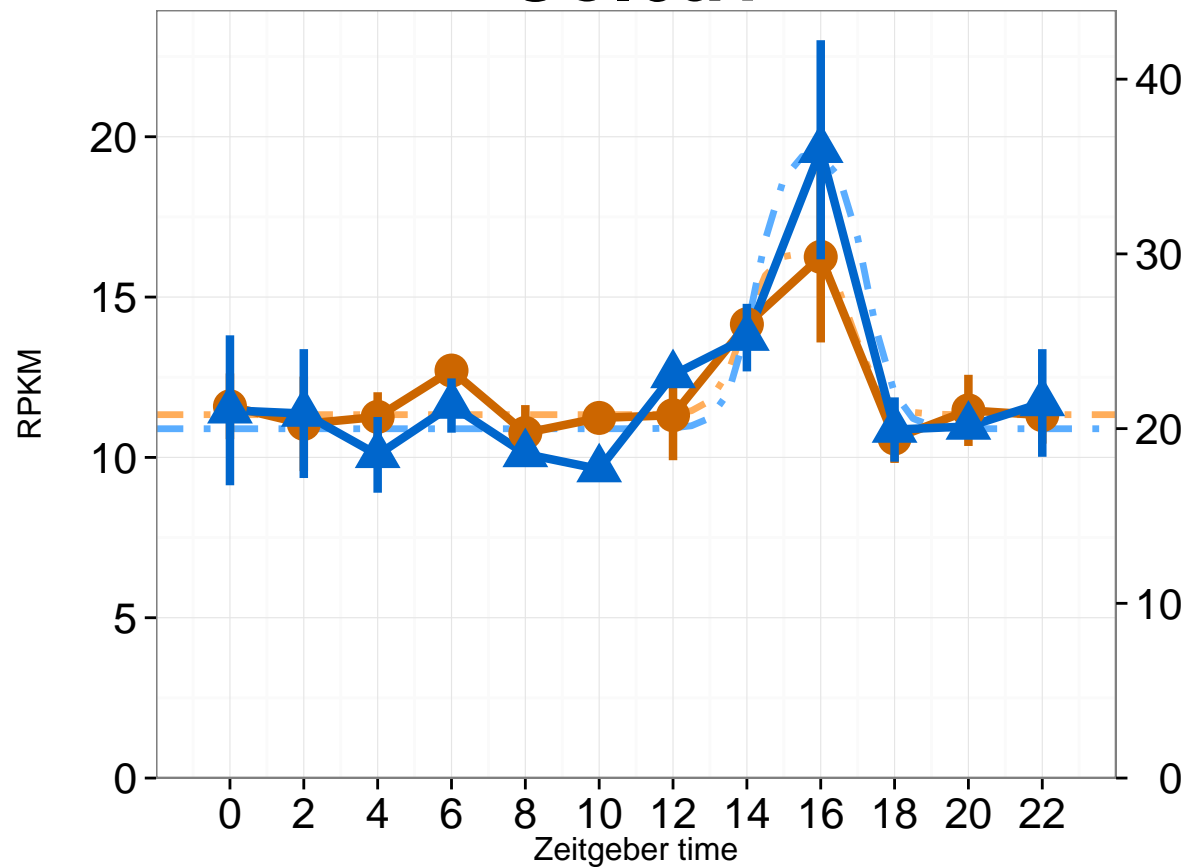

## Col6a1

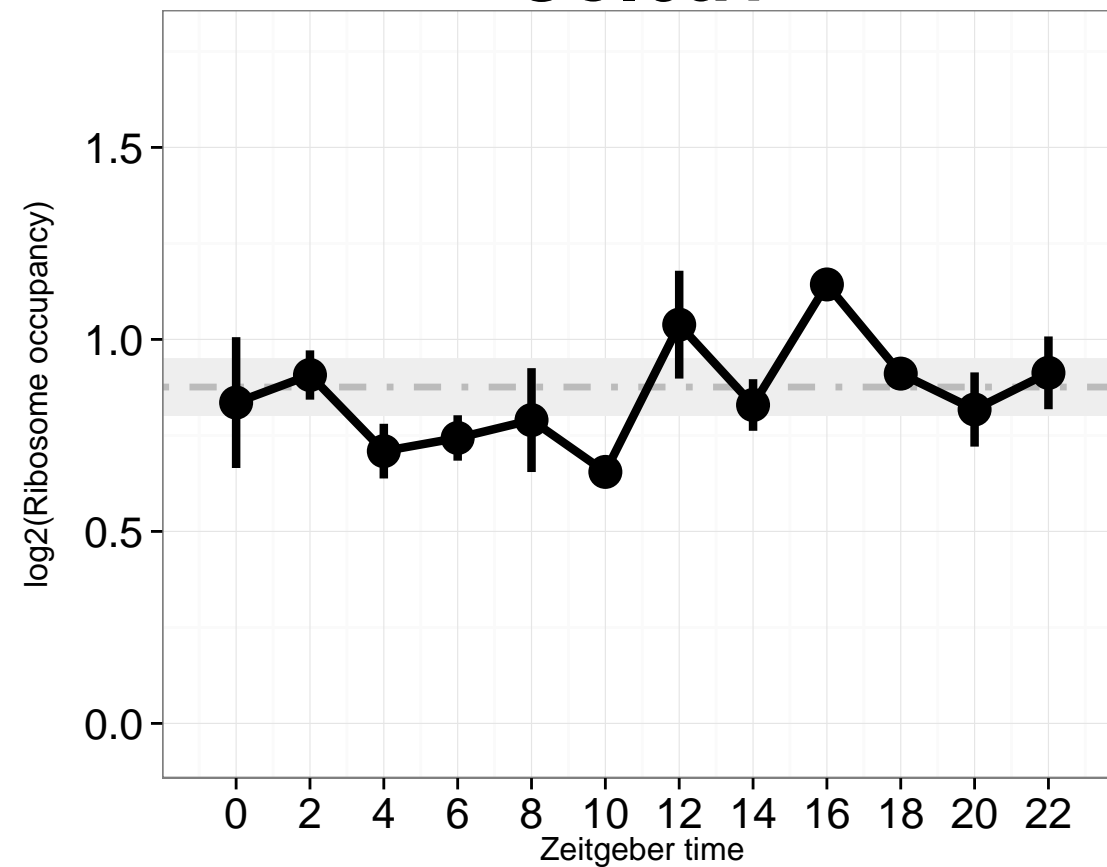

Supplement: Supplementary file 7602 [file 1]

# Tmem141

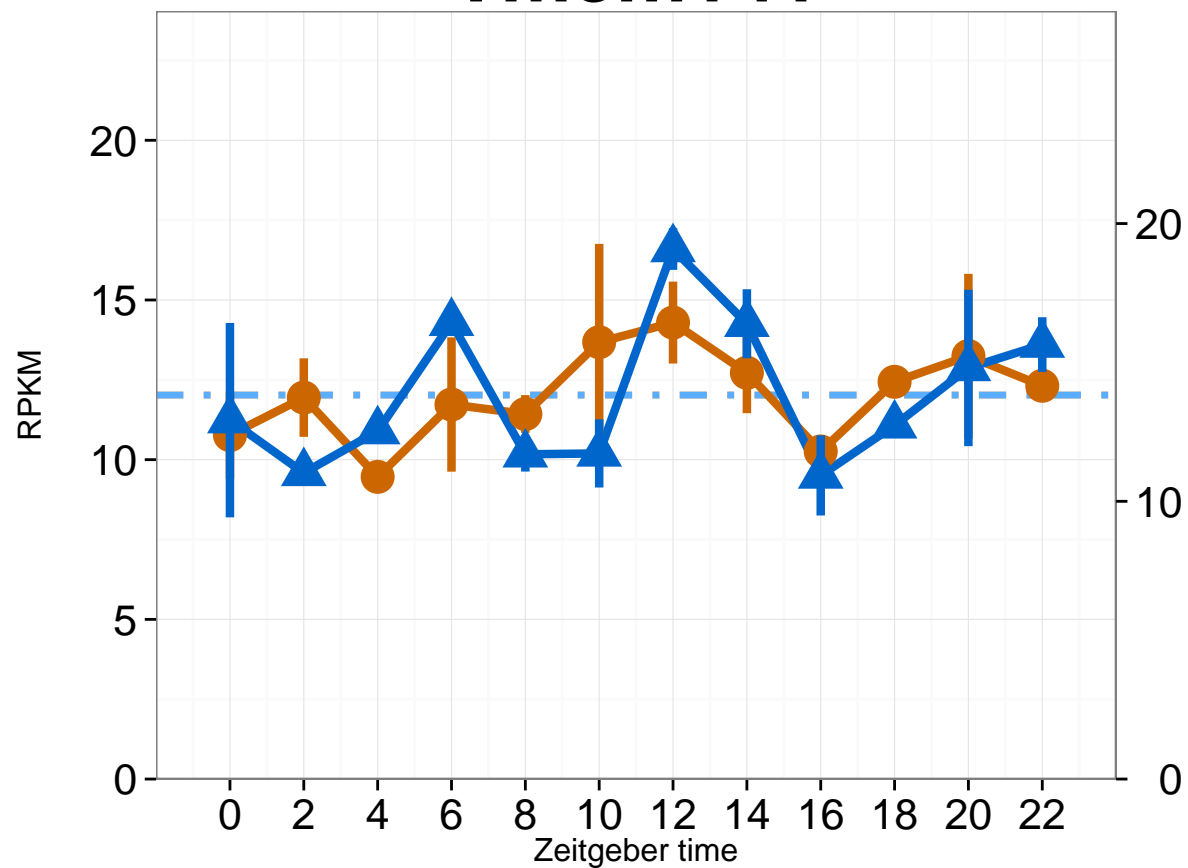

# Tmem141

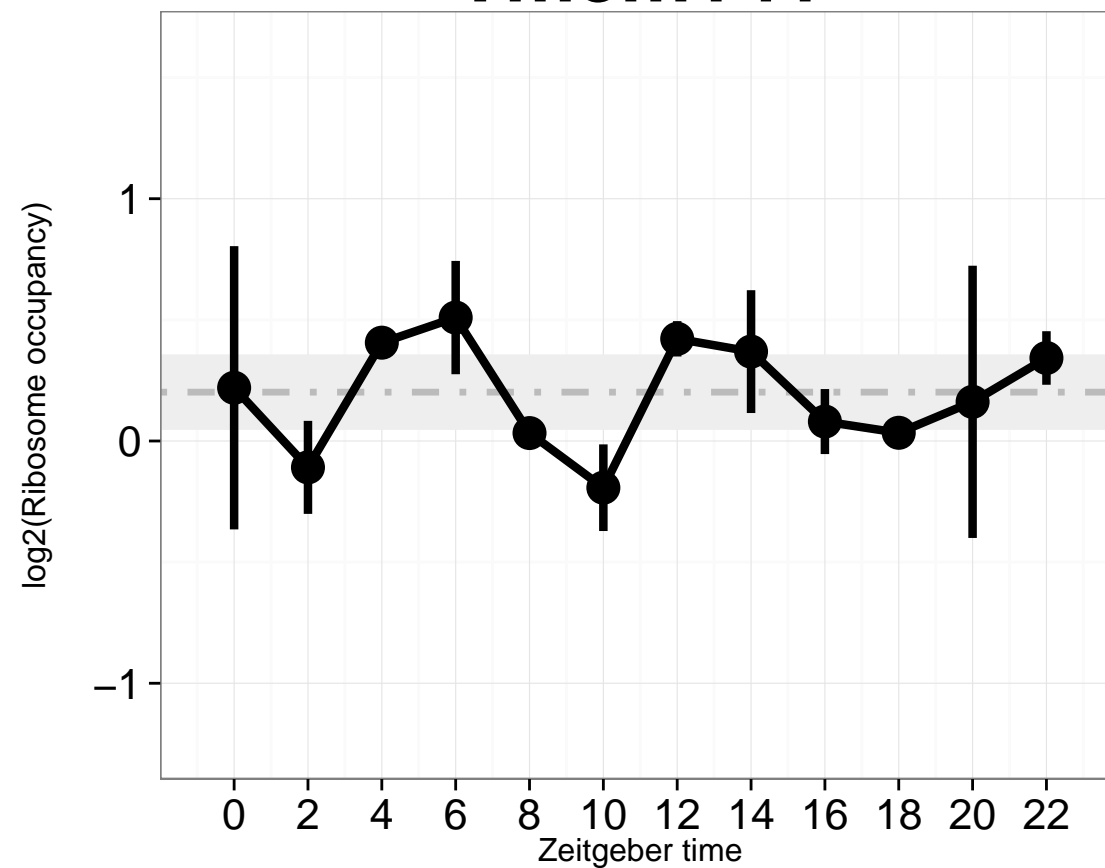

Supplement: Supplementary file 7603 [file 1]

## Edem3

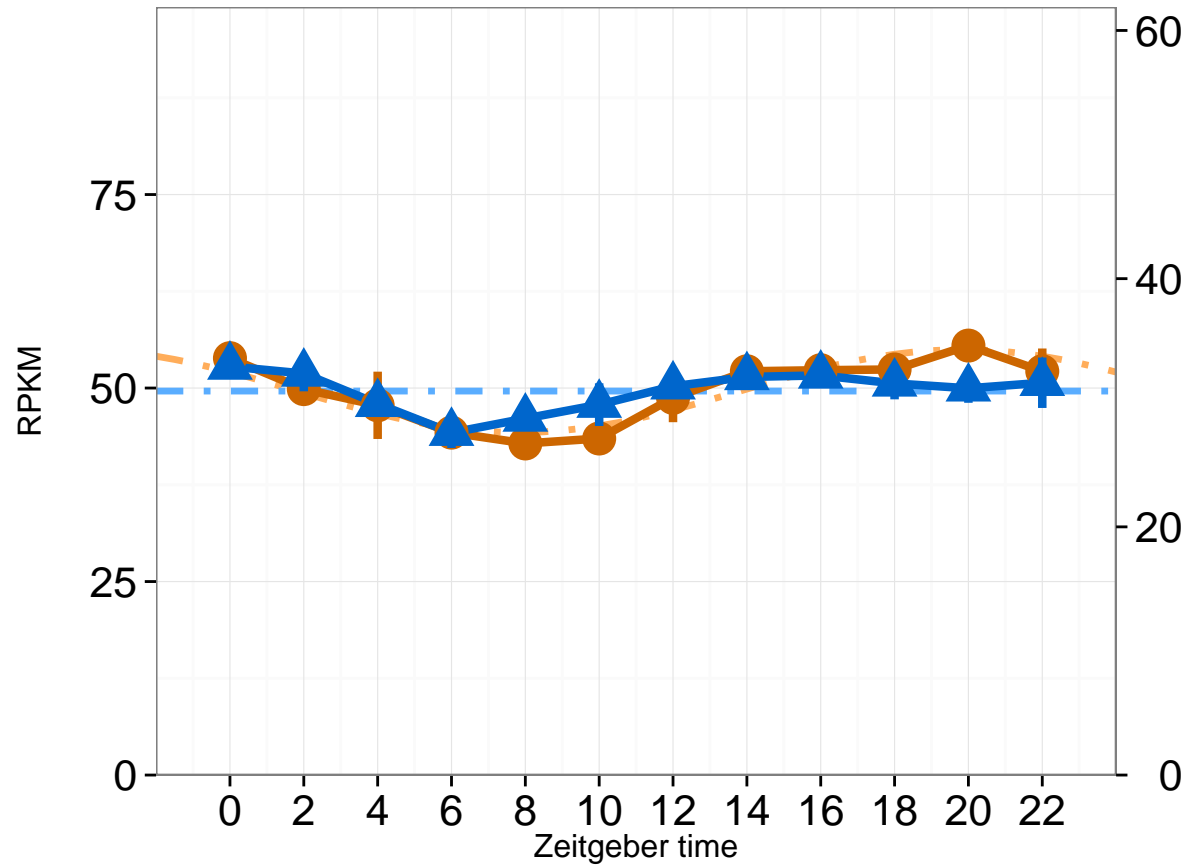

## Edem3

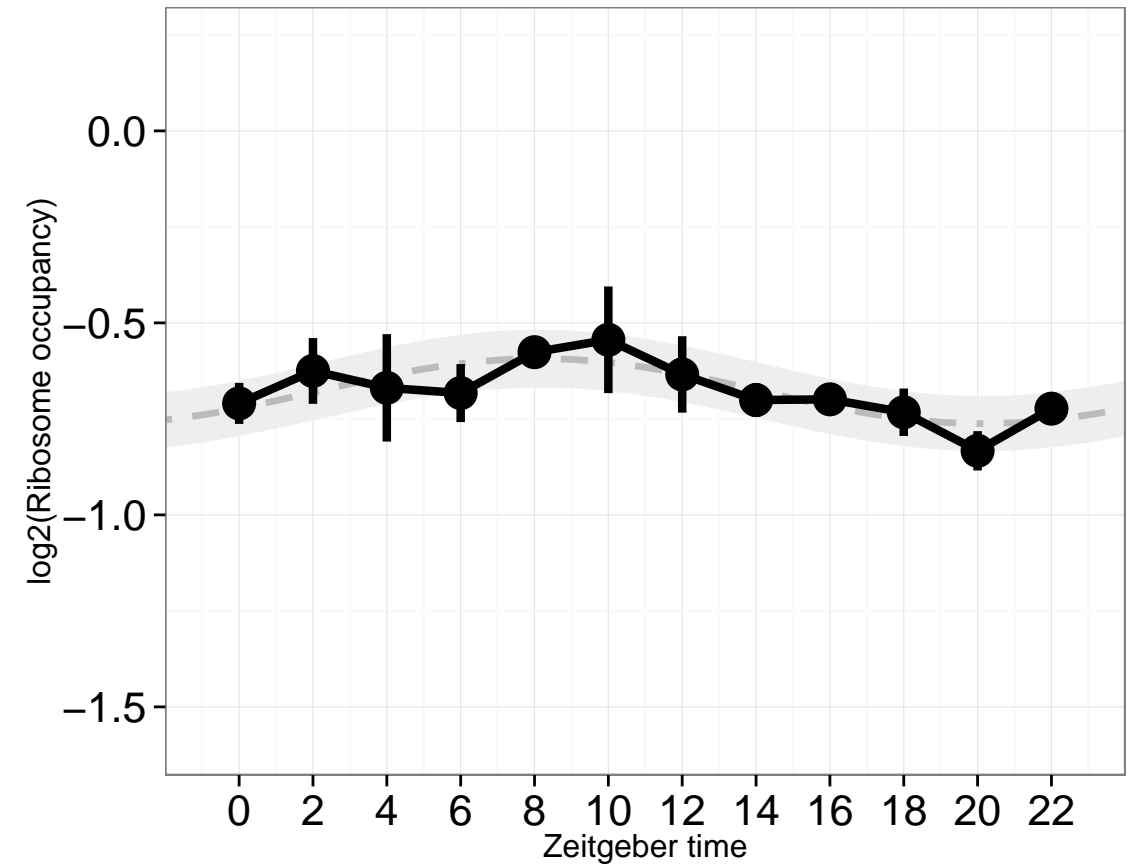

Supplement: Supplementary file 7604 [file 1]

# Fam151a

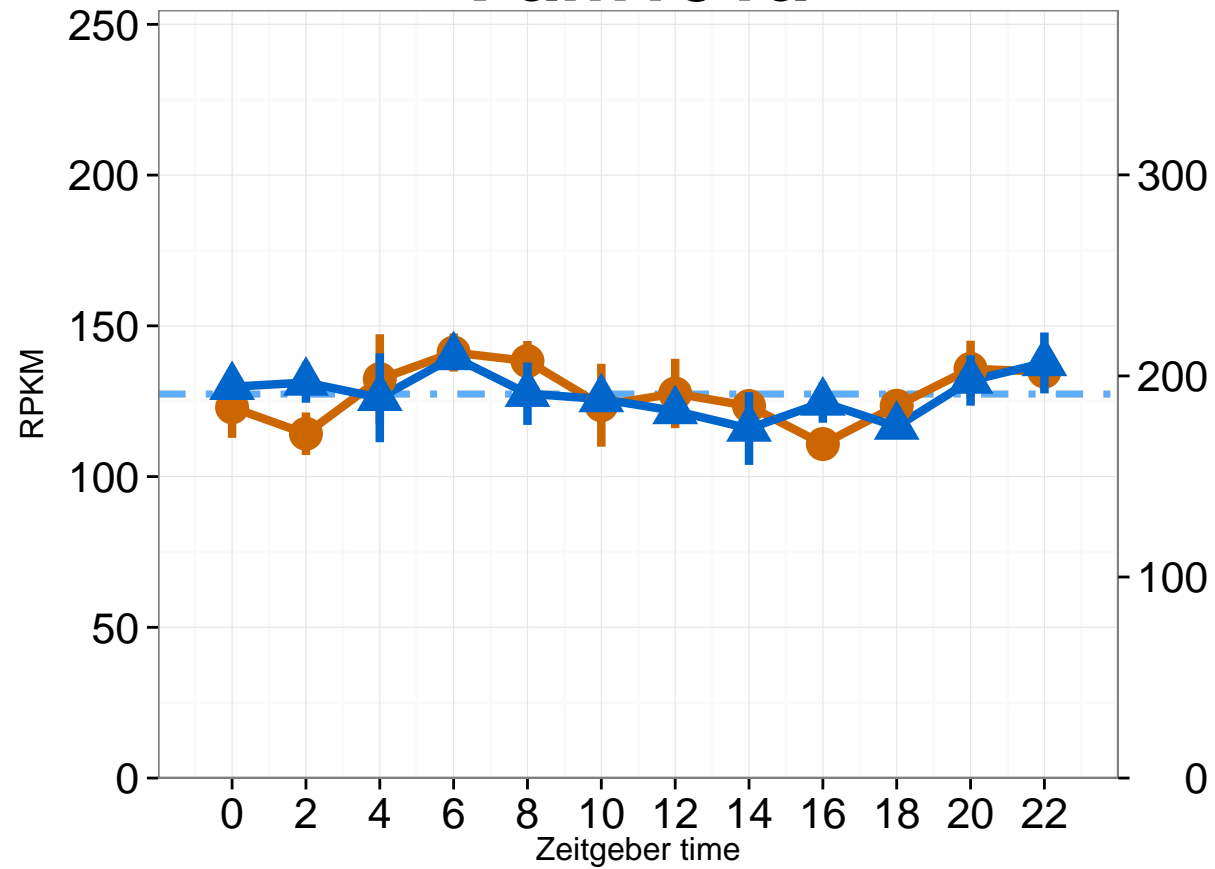

# Fam151a

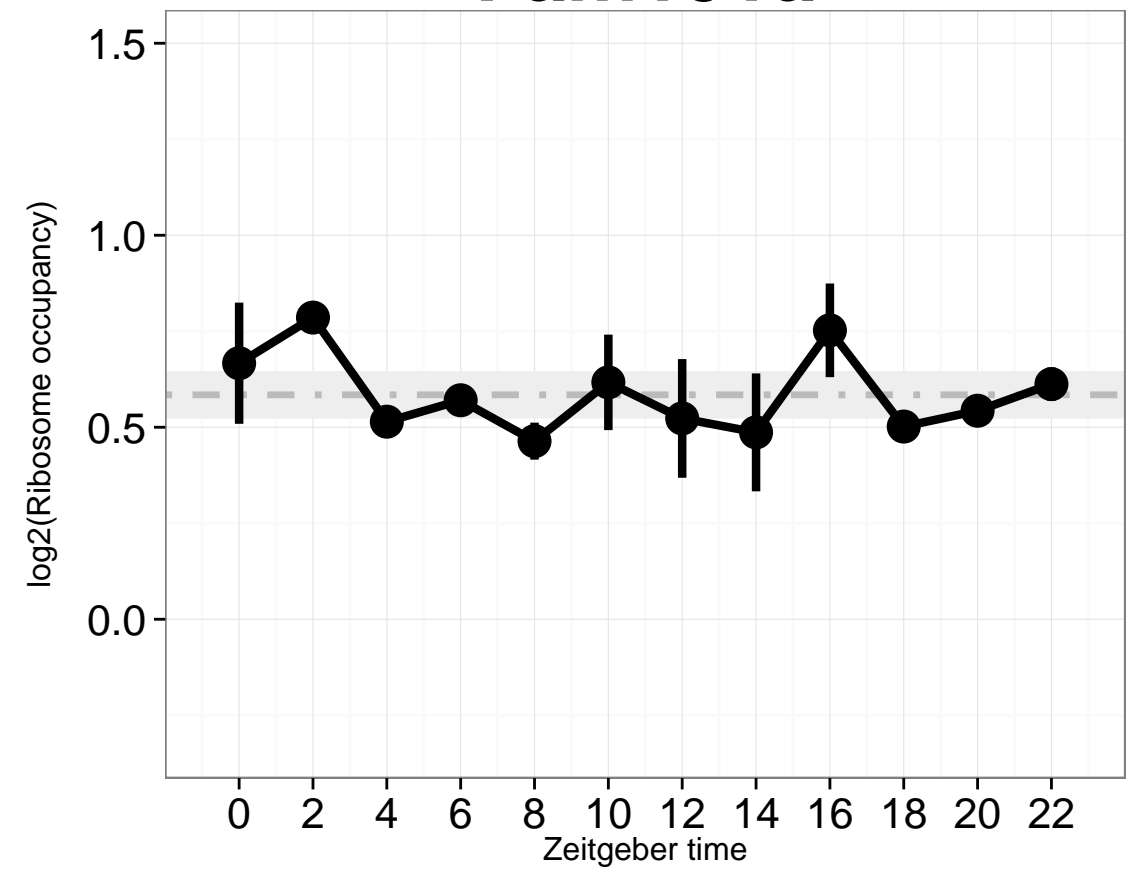

Supplement: Supplementary file 7605 [file 1]

## Stc2

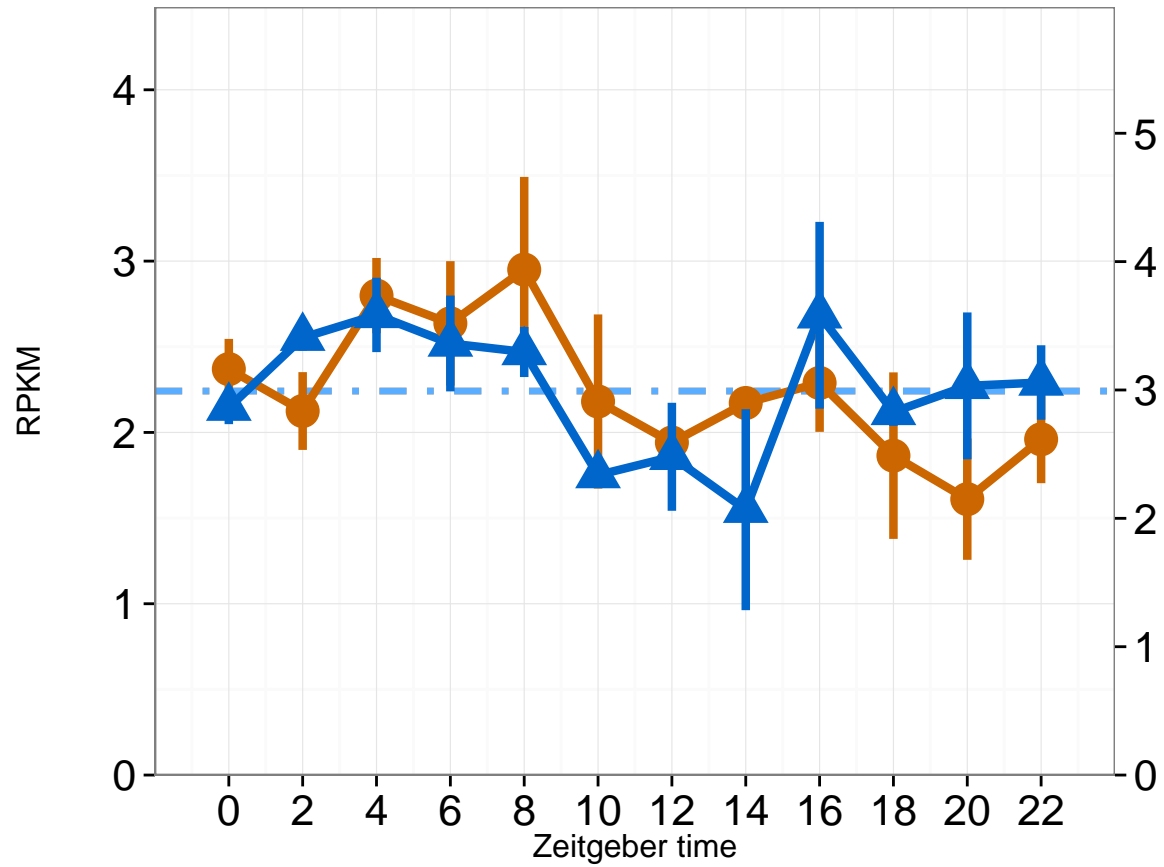

## Stc2

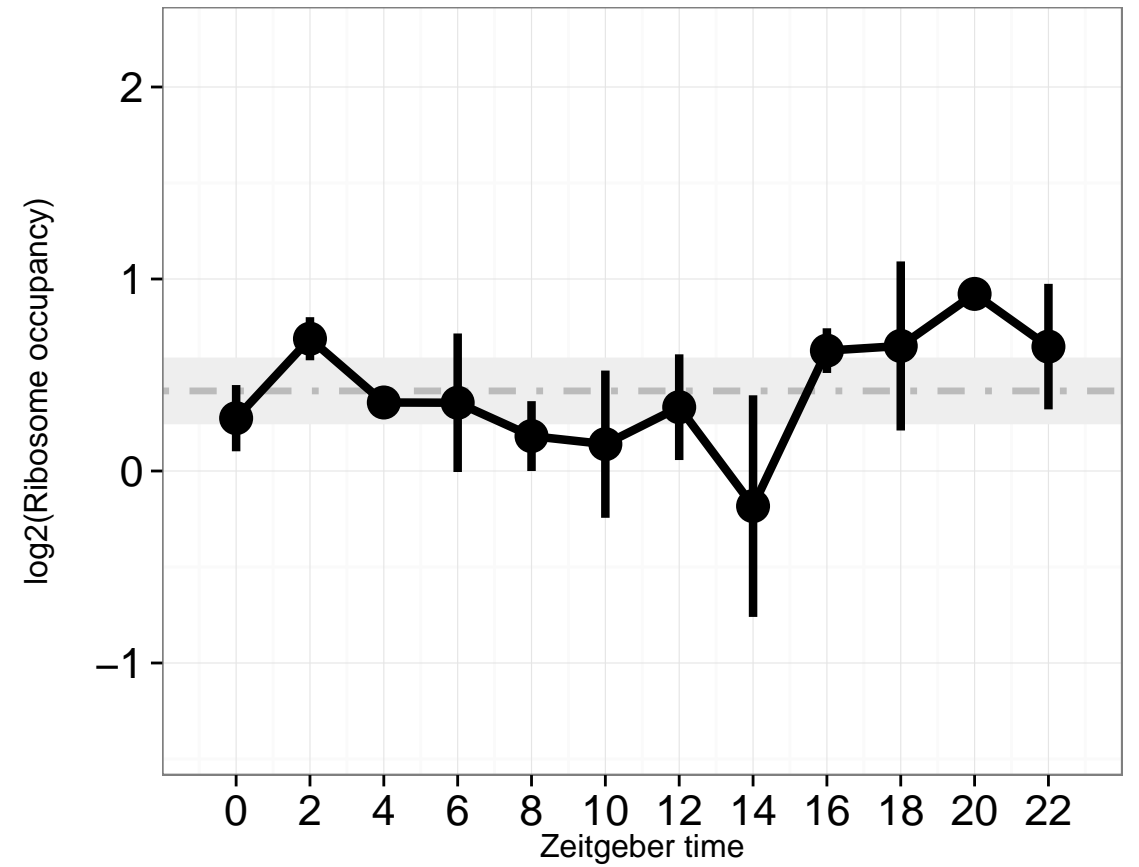

Supplement: Supplementary file 7606 [file 1]

## Mknk2

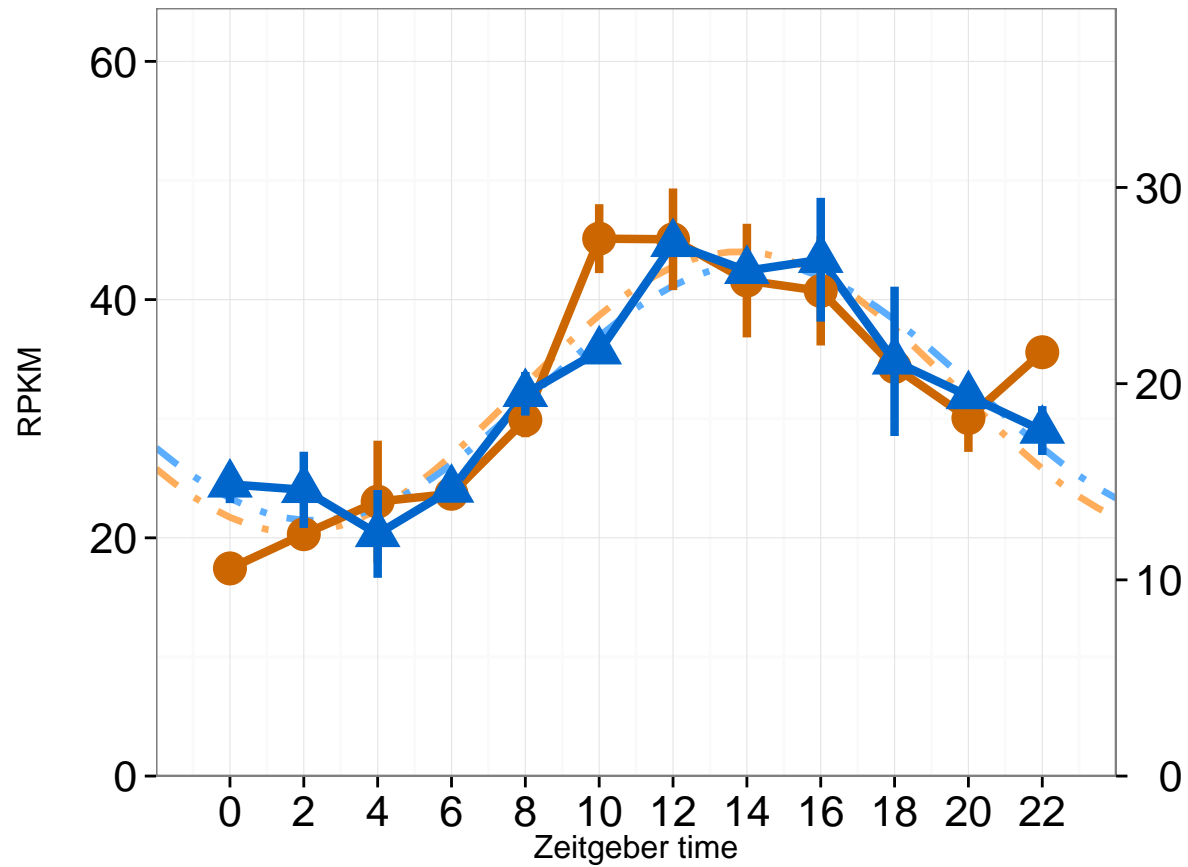

## Mknk2

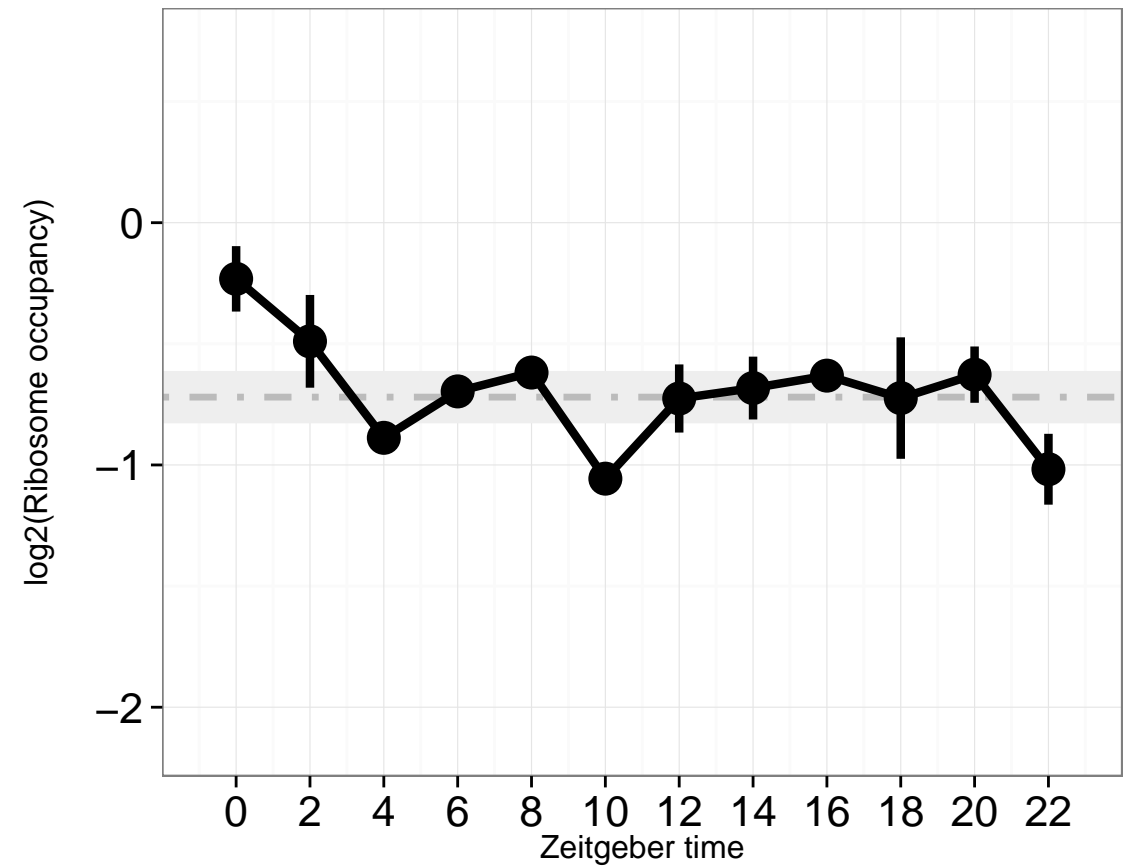

Supplement: Supplementary file 7607 [file 1]

## Dok3

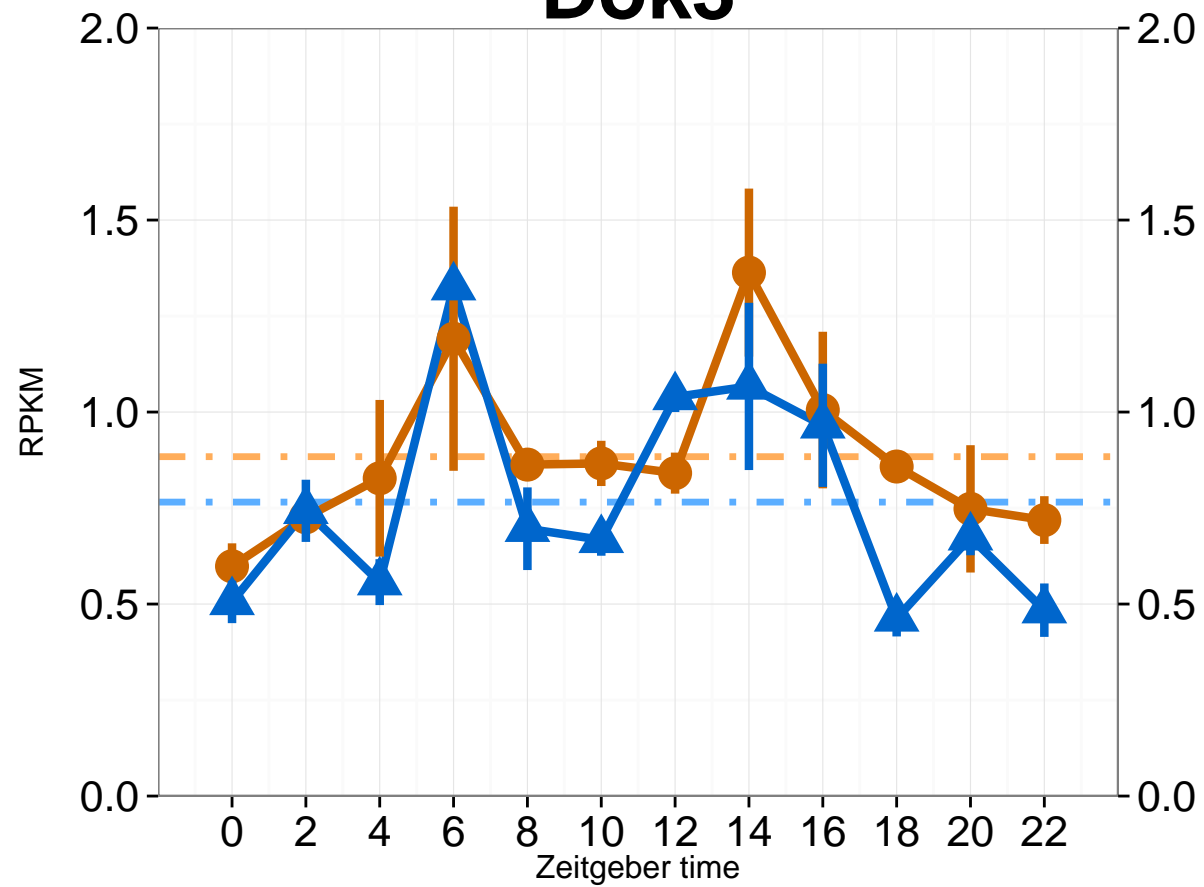

## Dok3

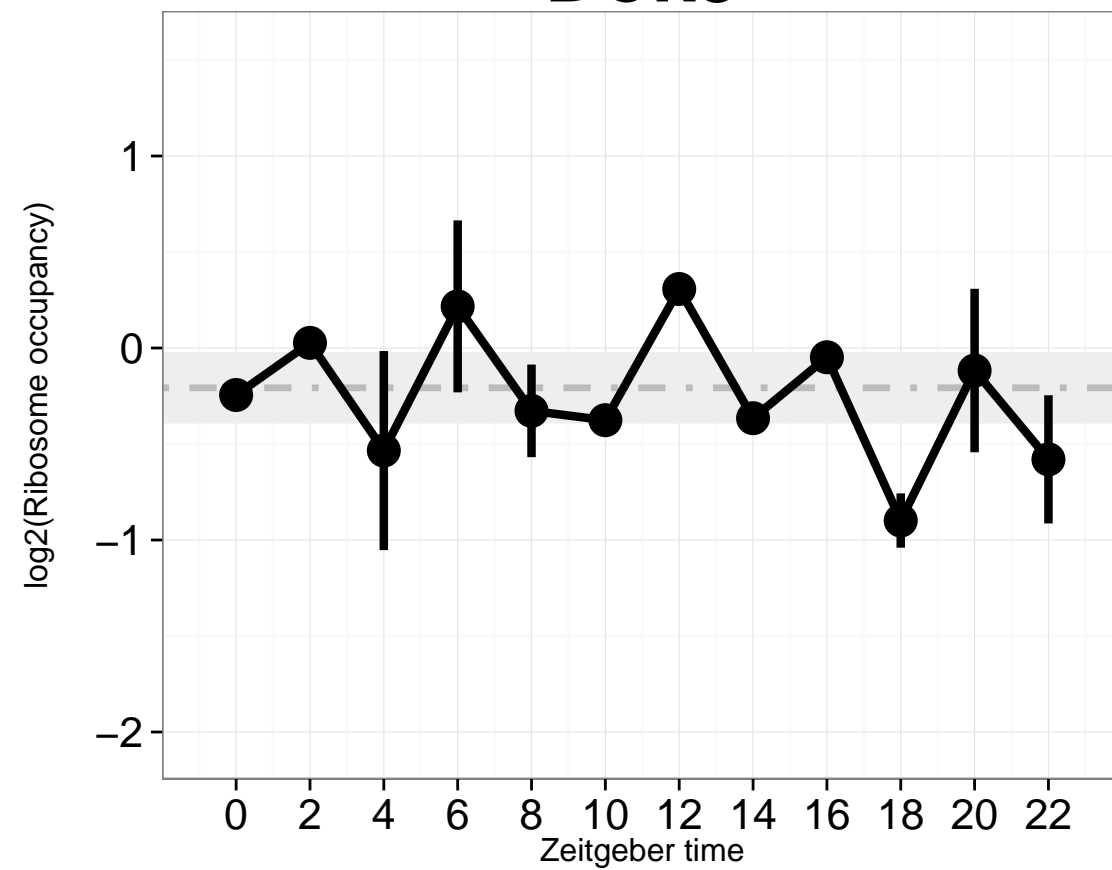

Supplement: Supplementary file 7608 [file 1]

## Ypel2

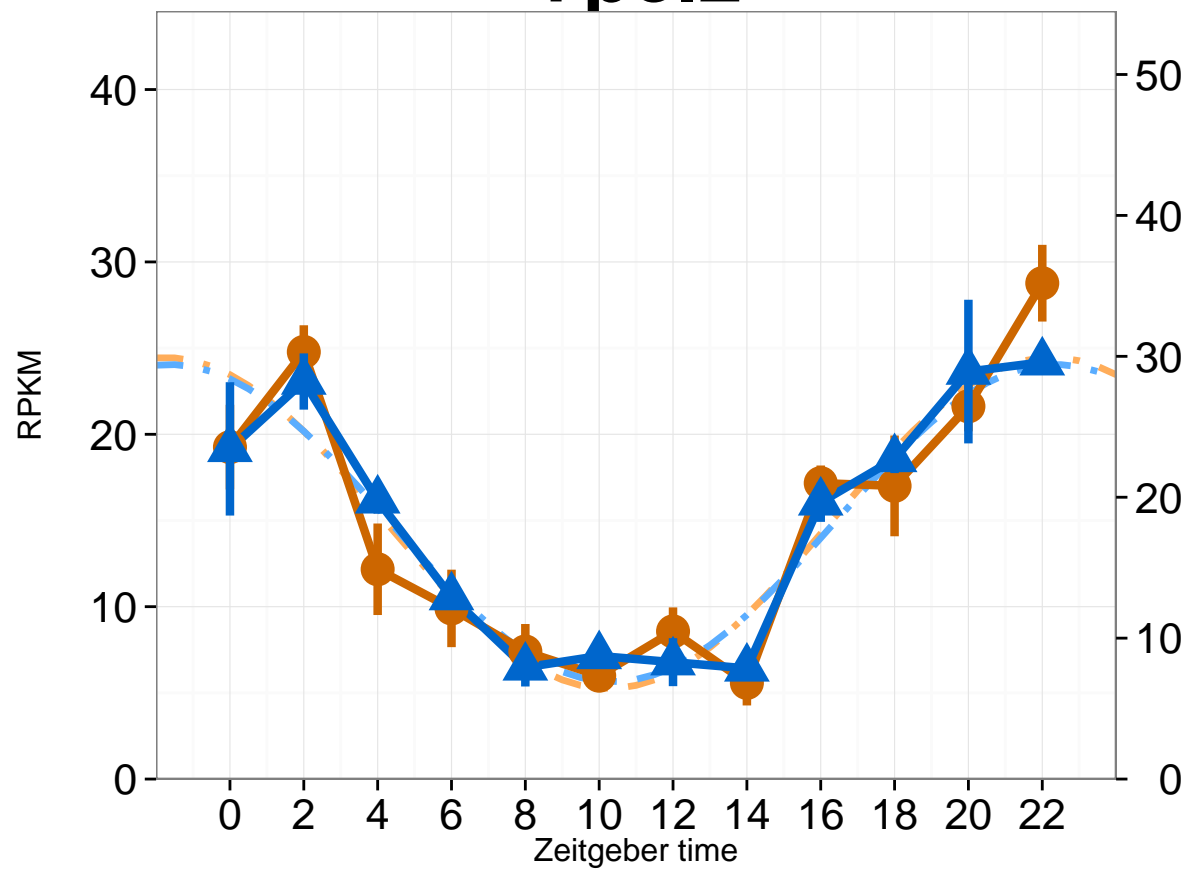

## Ypel2

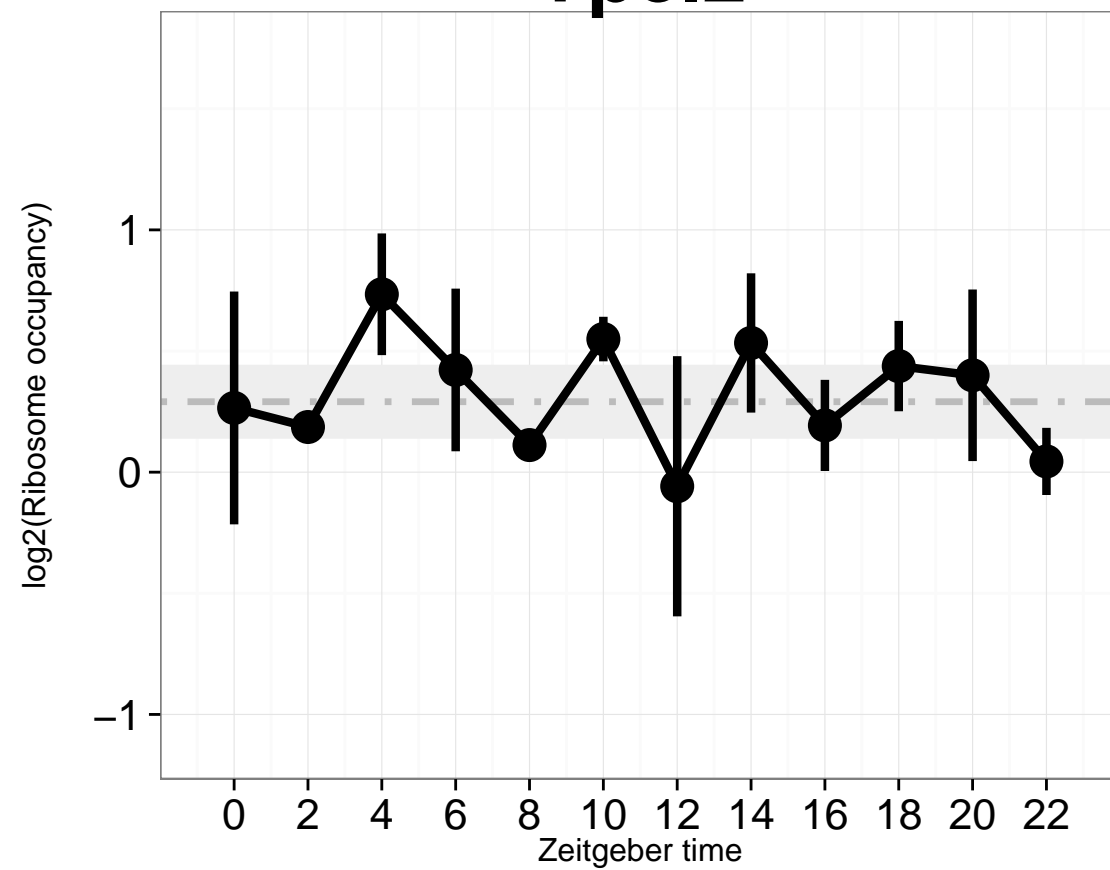

Supplement: Supplementary file 7609 [file 1]

## G6pc

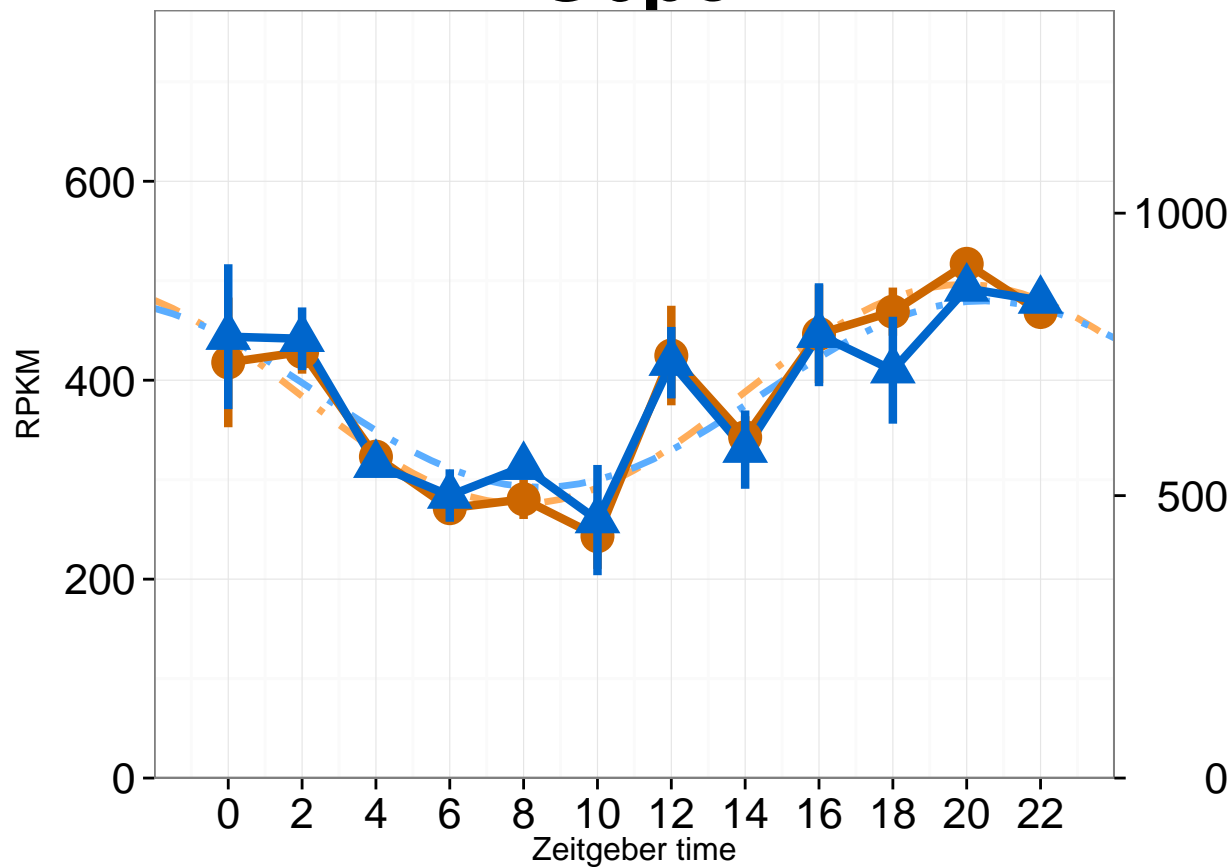

## G6pc

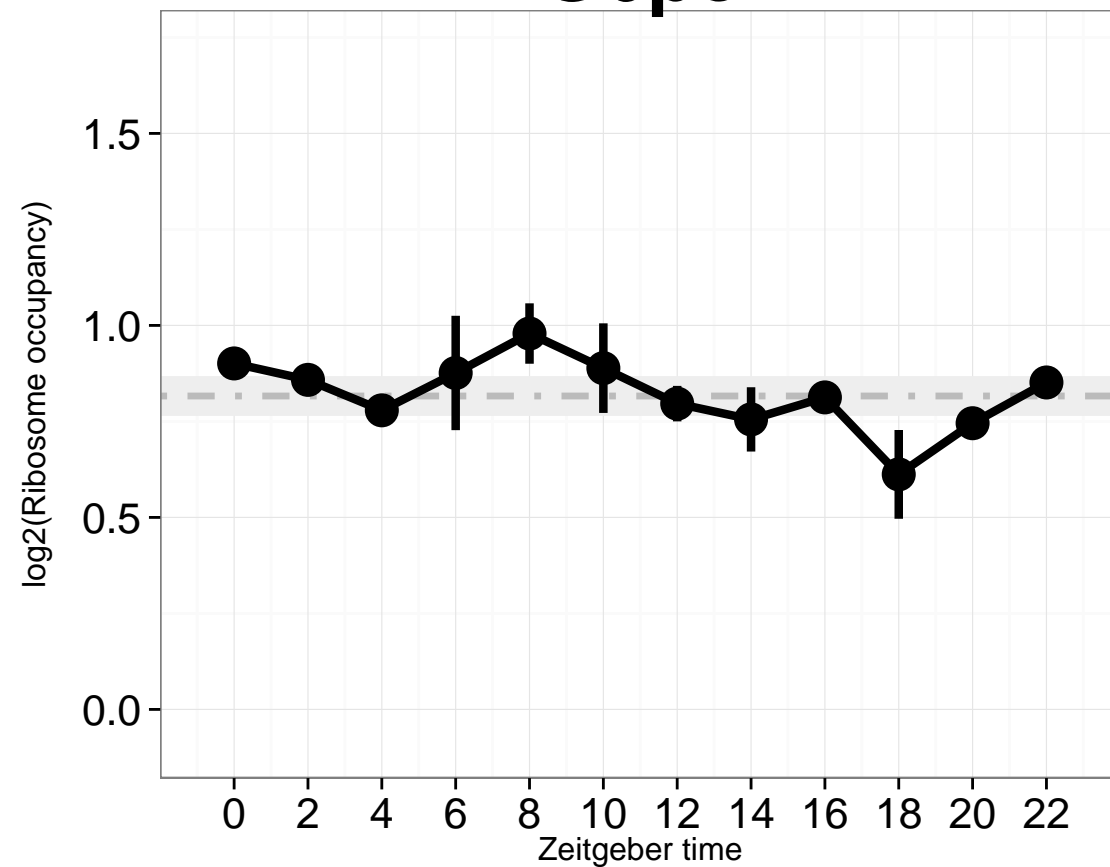

Supplement: Supplementary file 7610 [file 1]

## Rab15

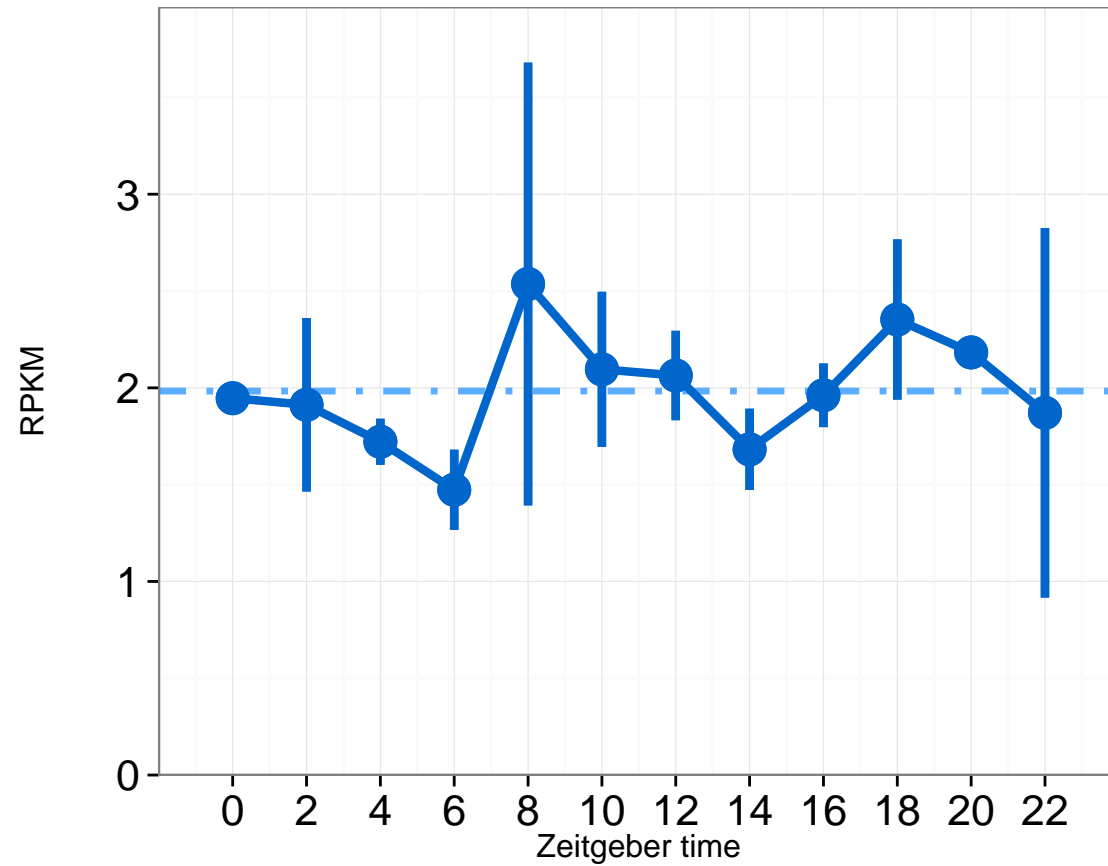

## Rab15 log2(Ribosome occupancy

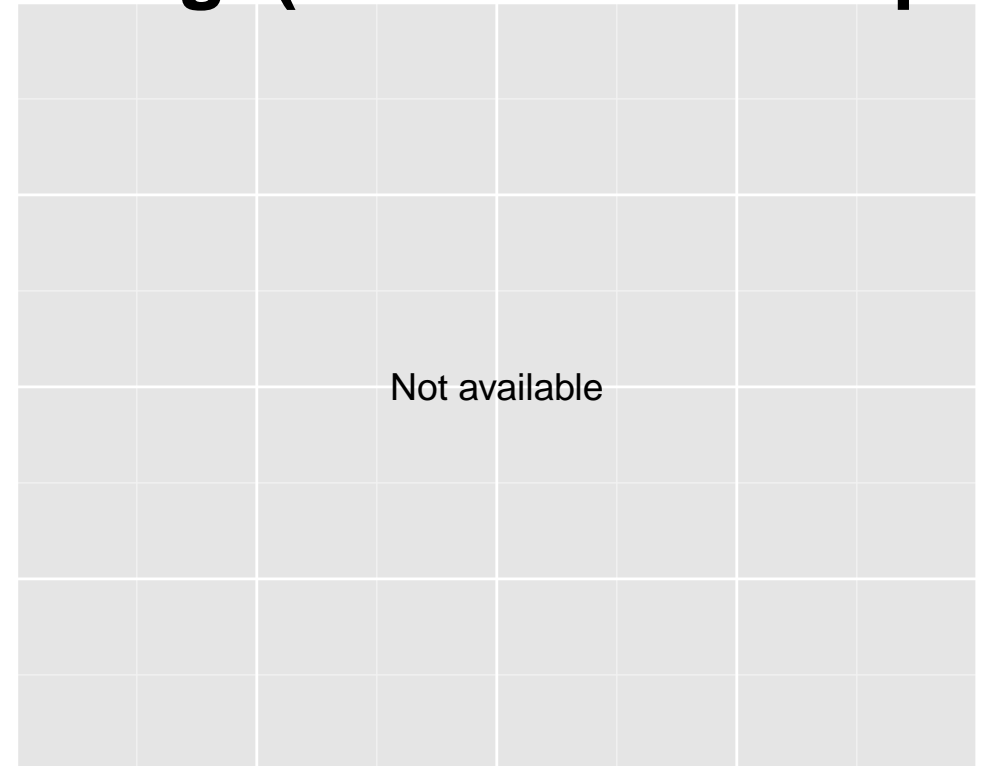

Supplement: Supplementary file 7611 [file 1]

## Pdia4

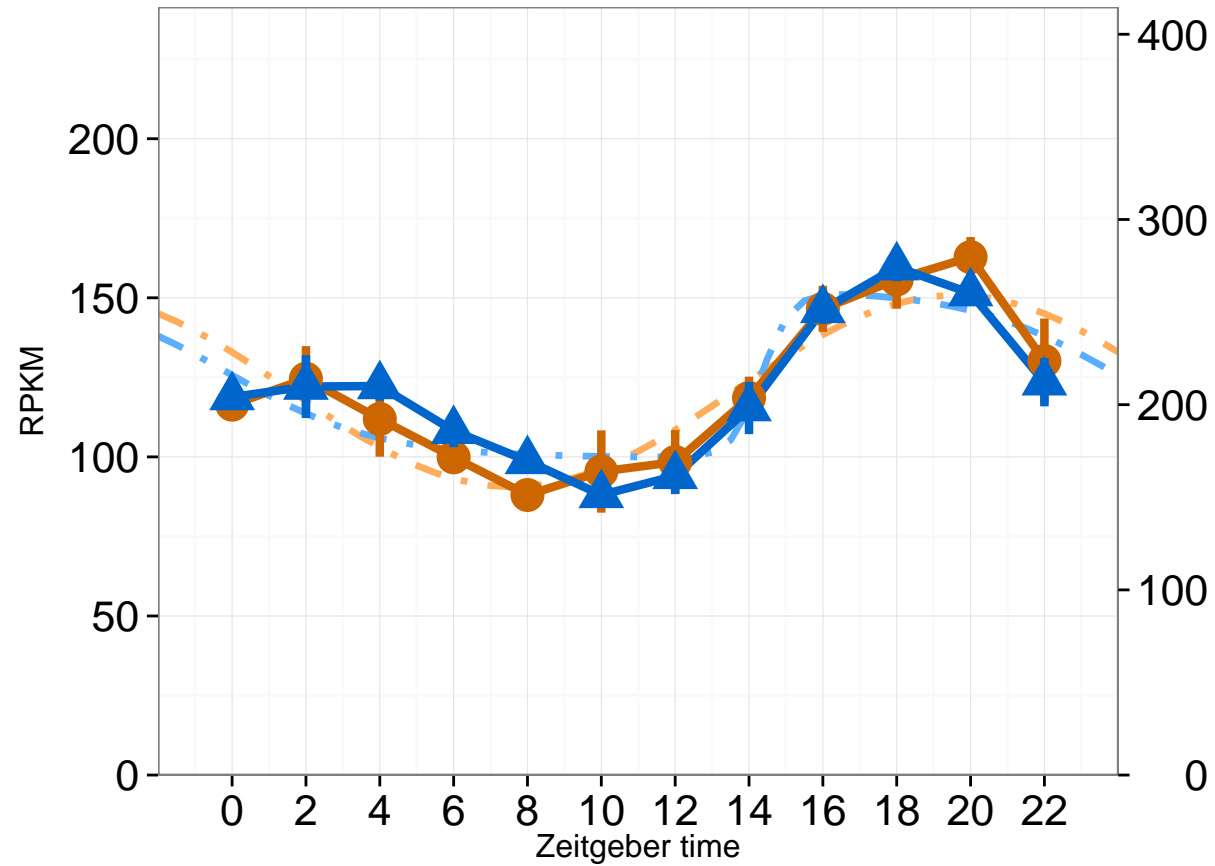

## Pdia4

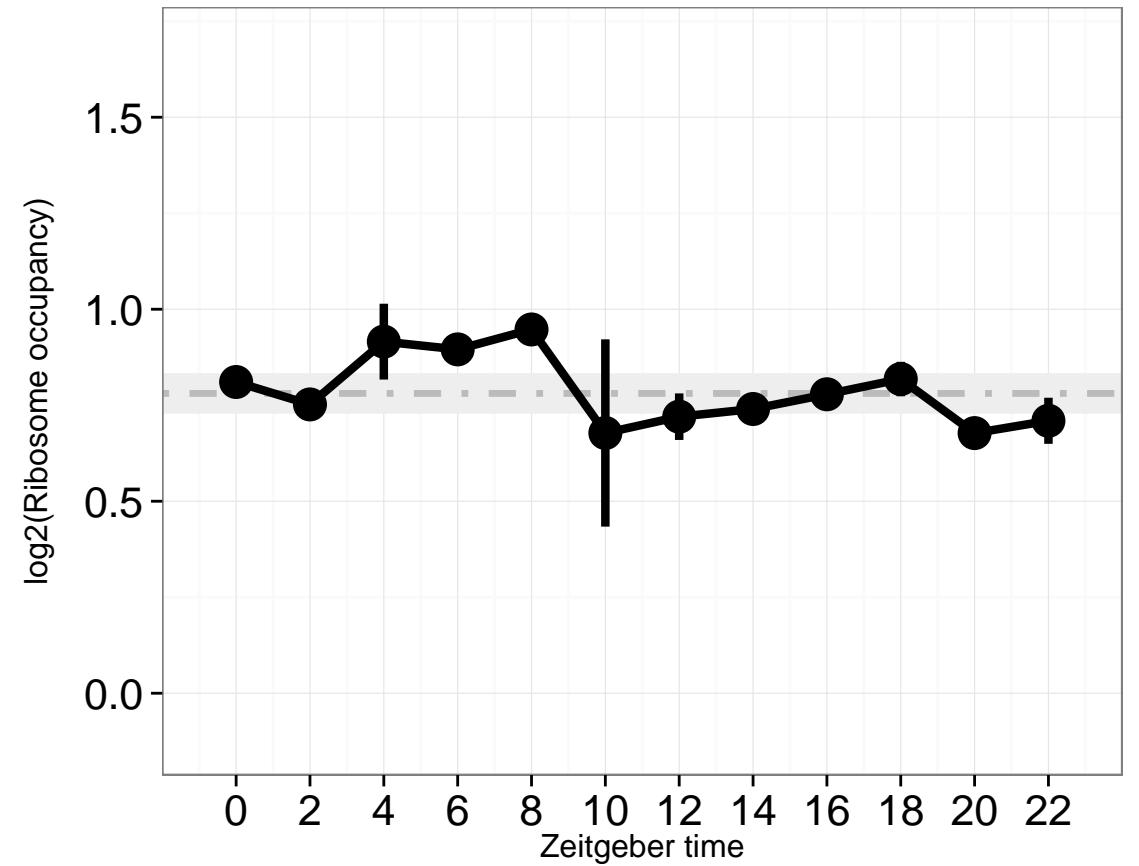

Supplement: Supplementary file 7612 [file 1]

# Mrps34

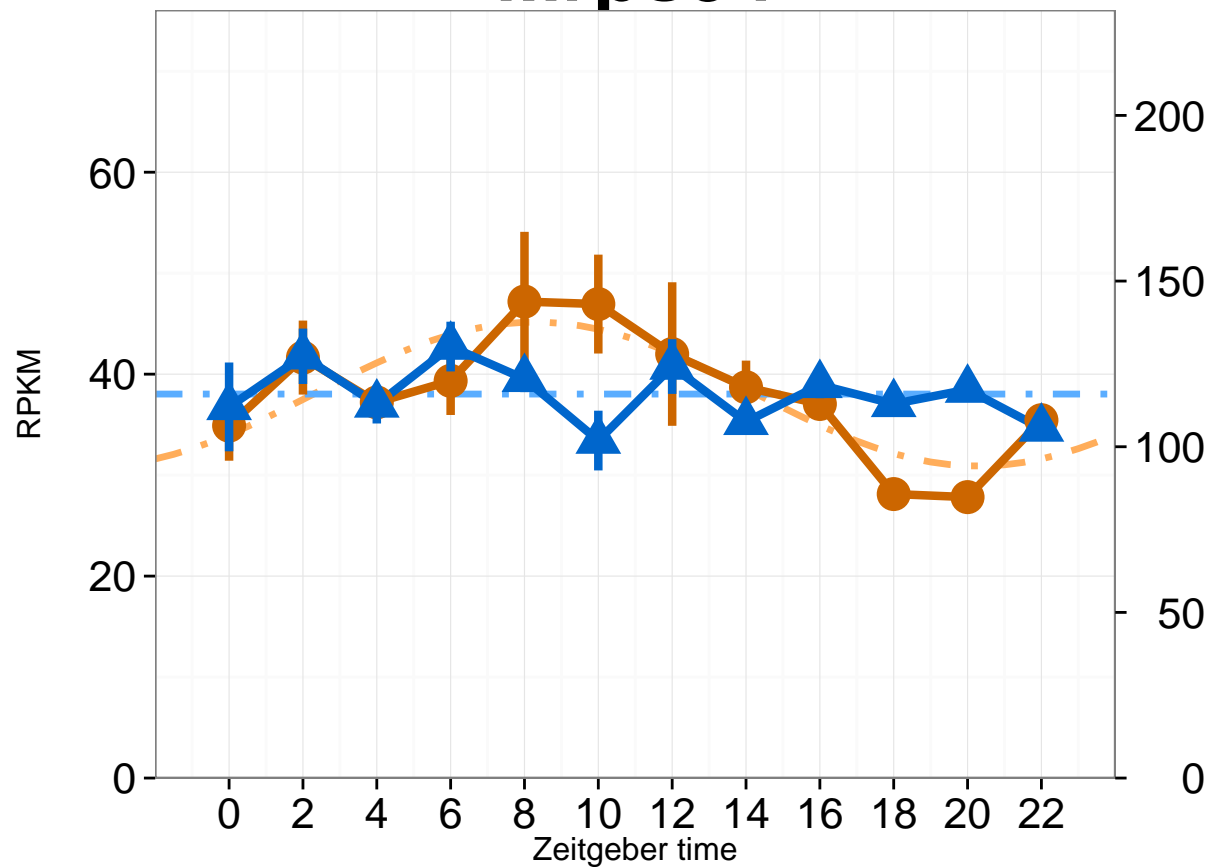

# Mrps34

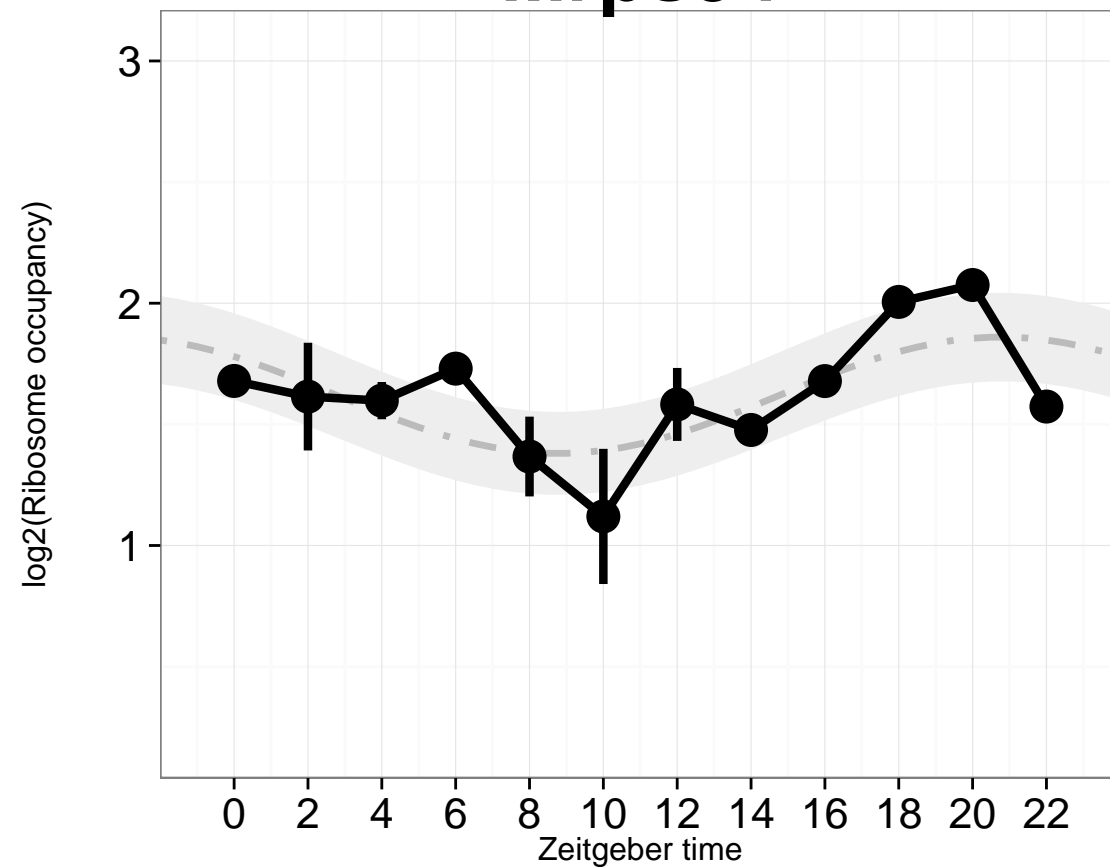

Supplement: Supplementary file 7613 [file 1]

# Sectm1a

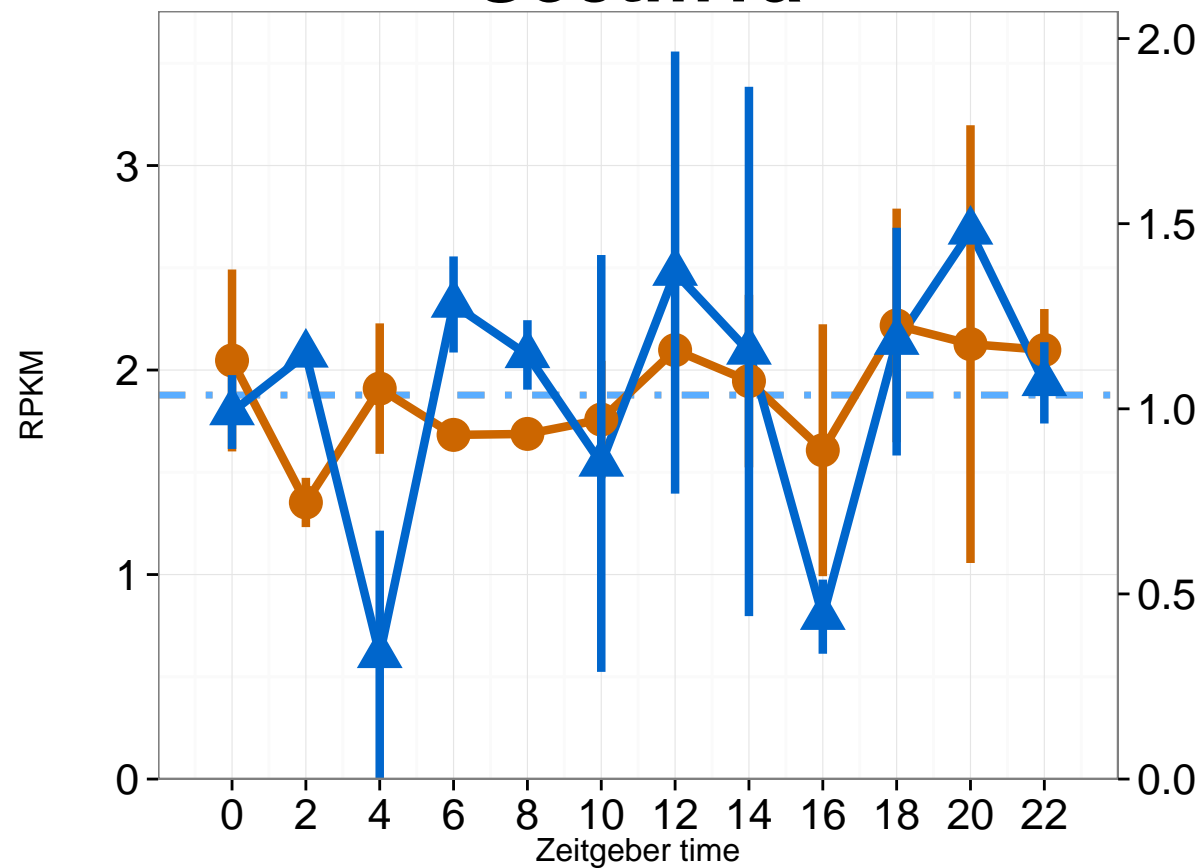

# Sectm1a

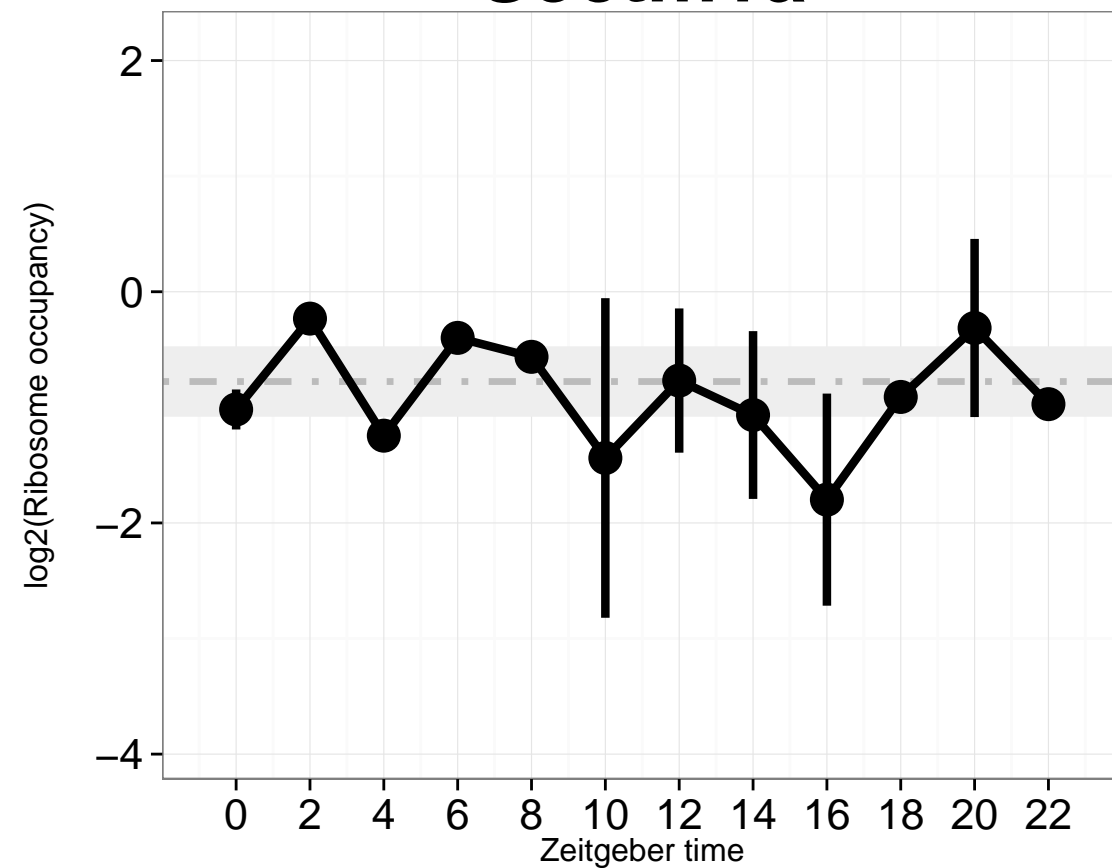

Supplement: Supplementary file 7614 [file 1]

## Lrrc57

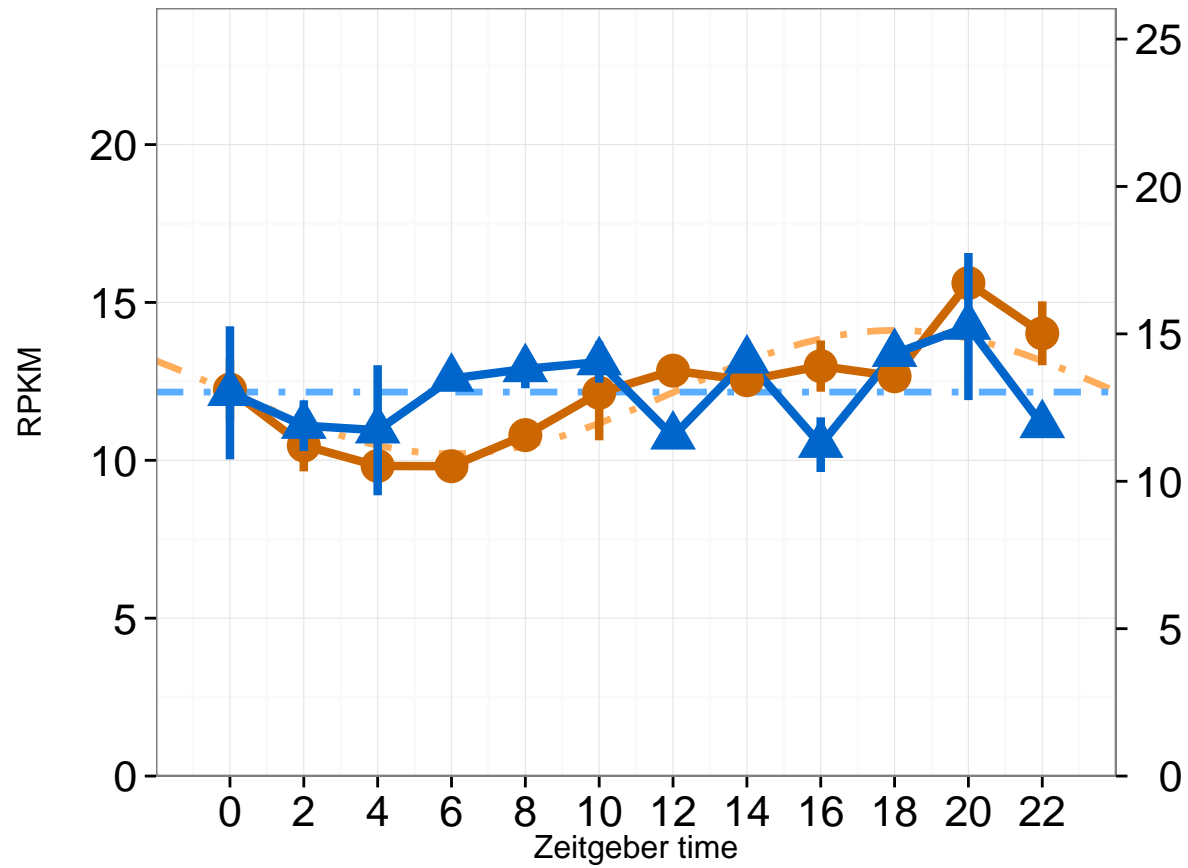

## Lrrc57

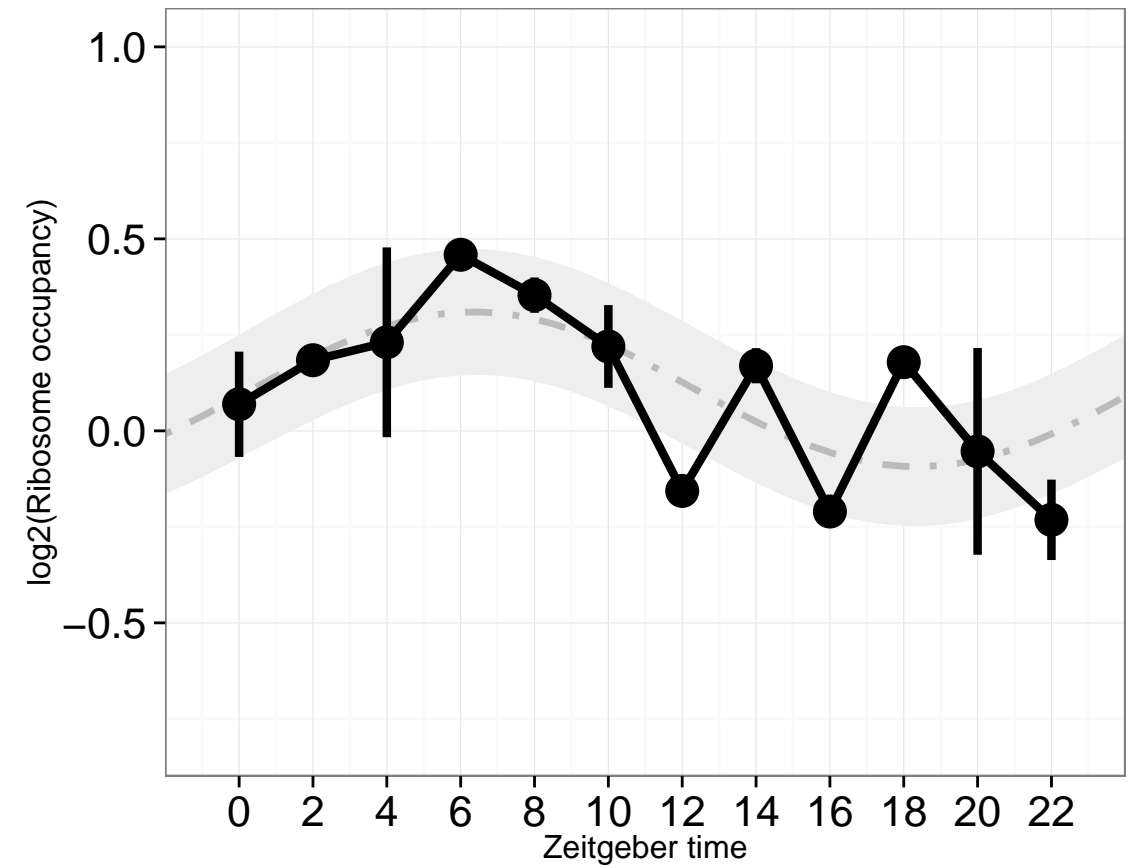

Supplement: Supplementary file 7615 [file 1]

# Cc2d2a

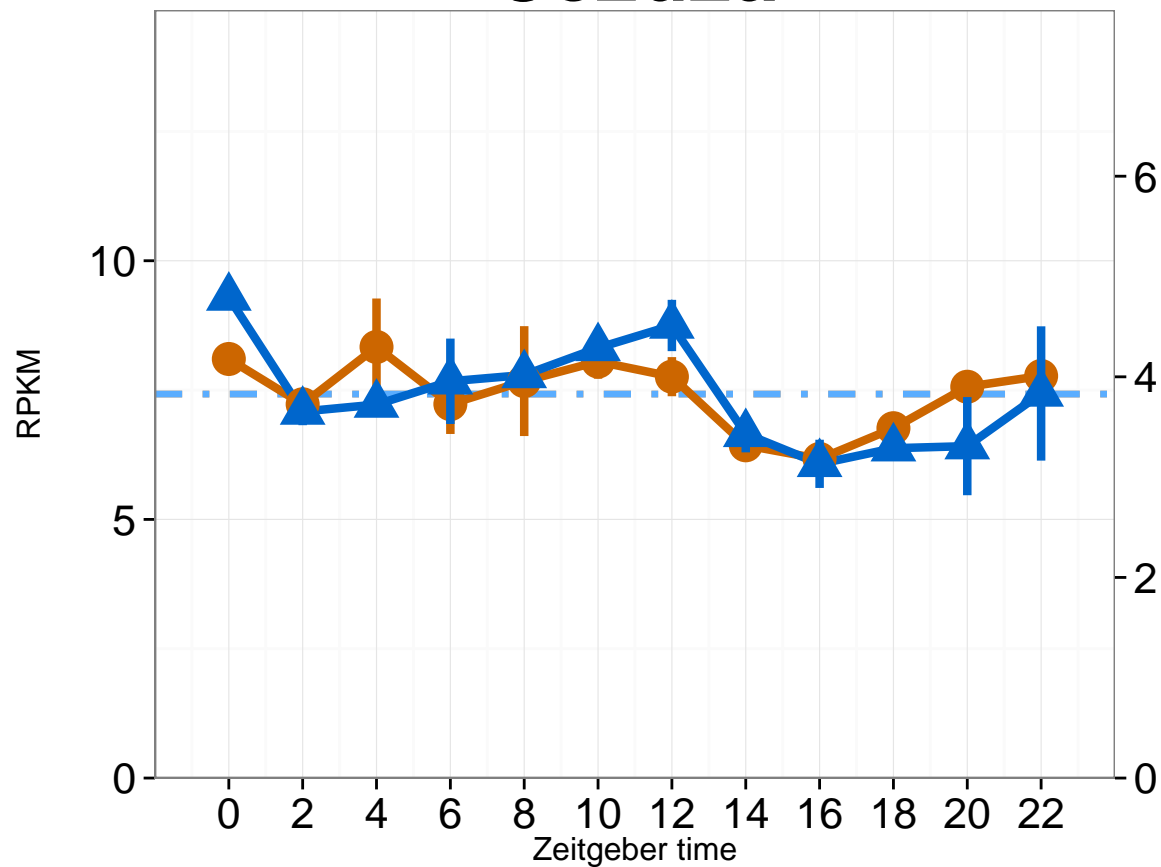

# Cc2d2a

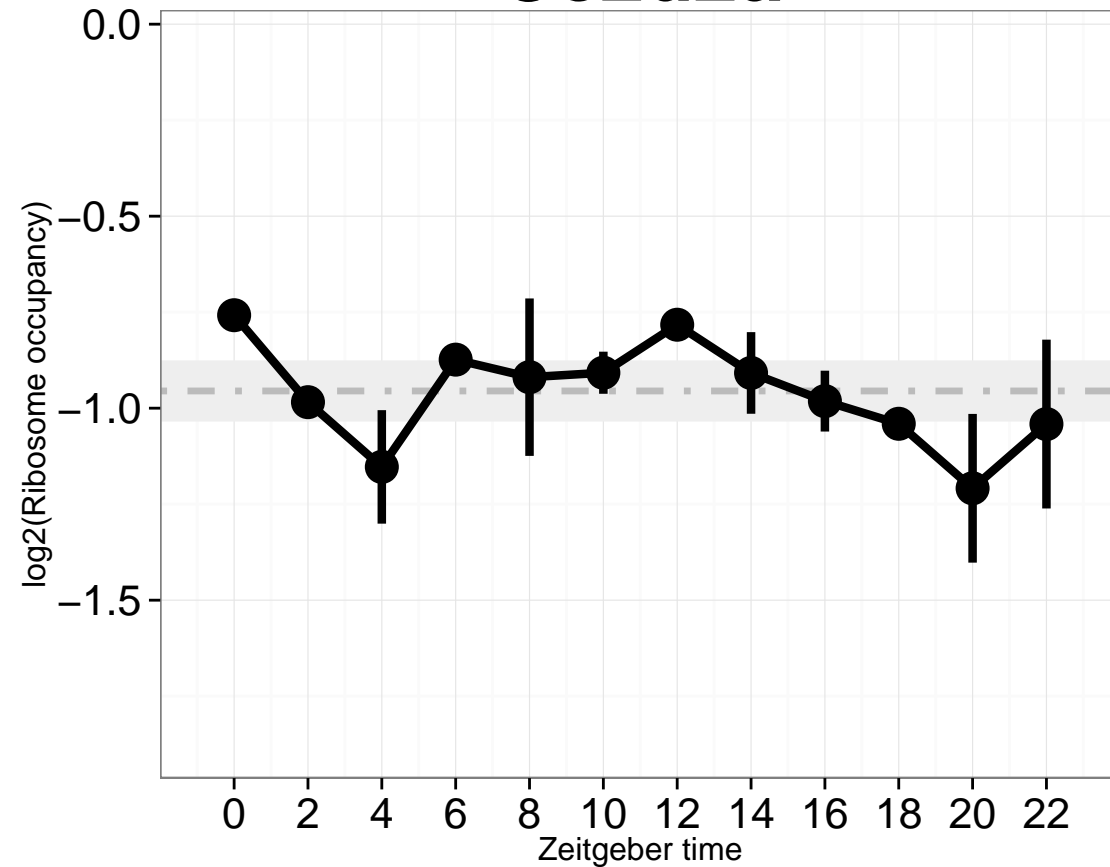

Supplement: Supplementary file 7616 [file 1]

## Ubl4

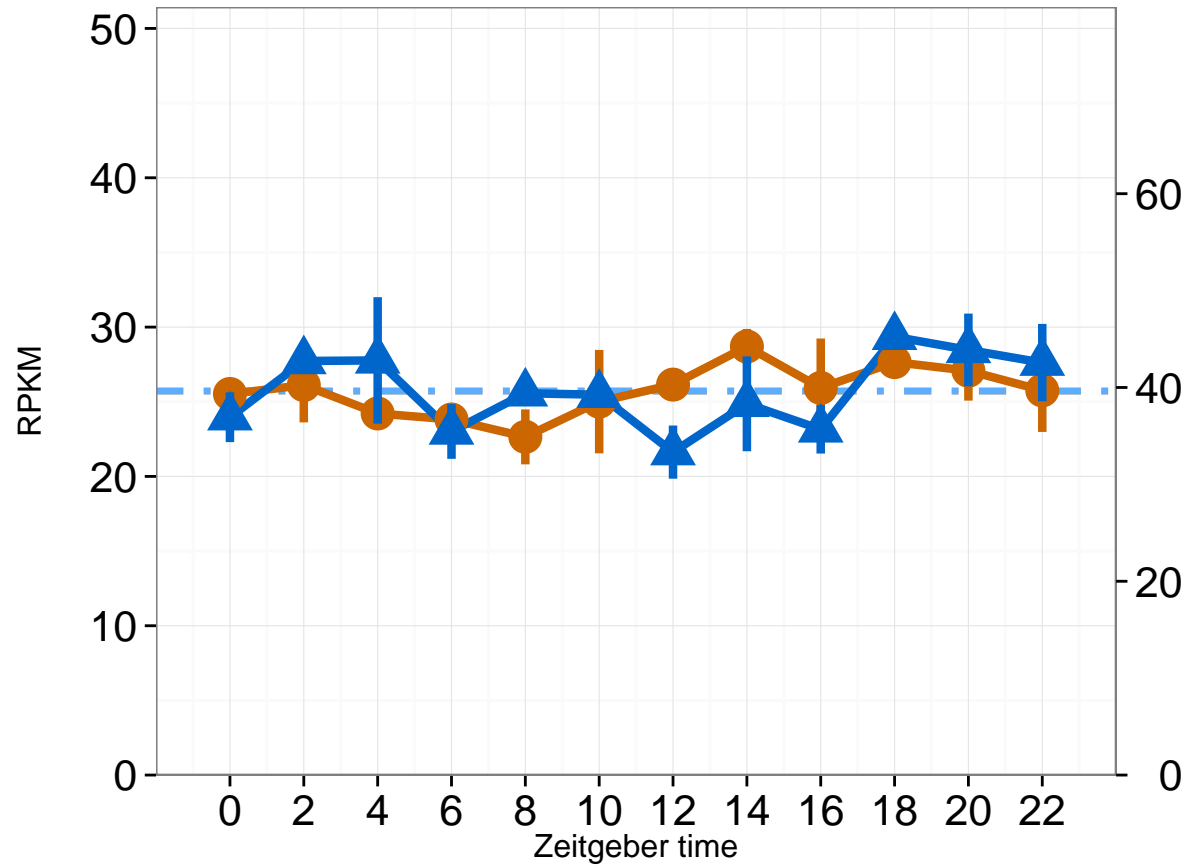

## Ubl4

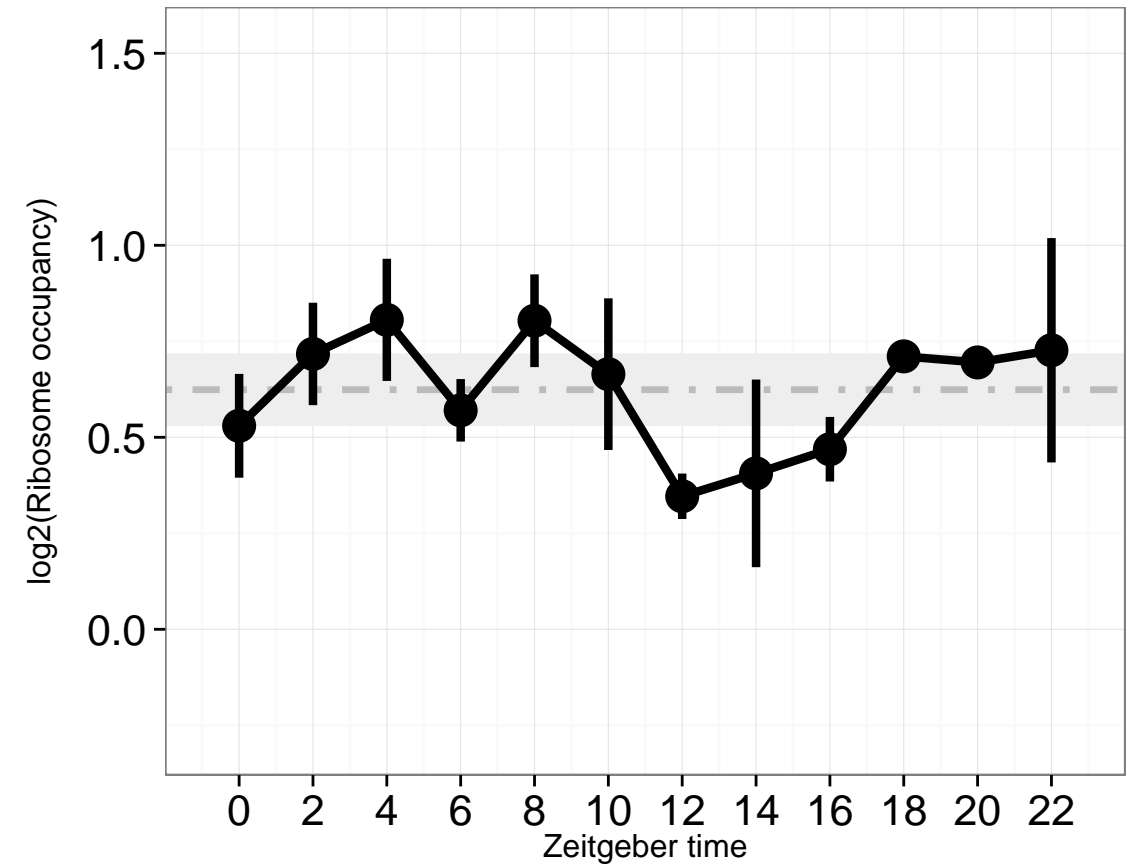

Supplement: Supplementary file 7617 [file 1]

# Tenc1

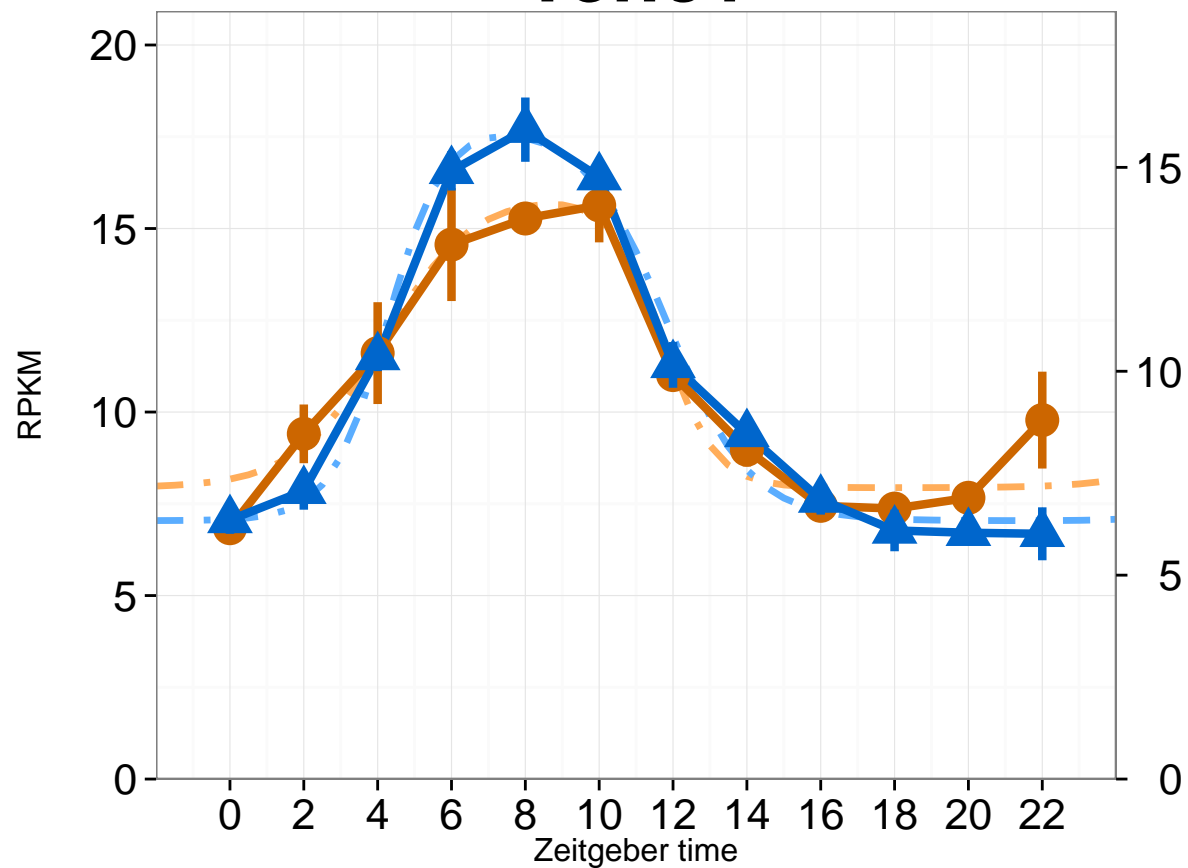

# Tenc1

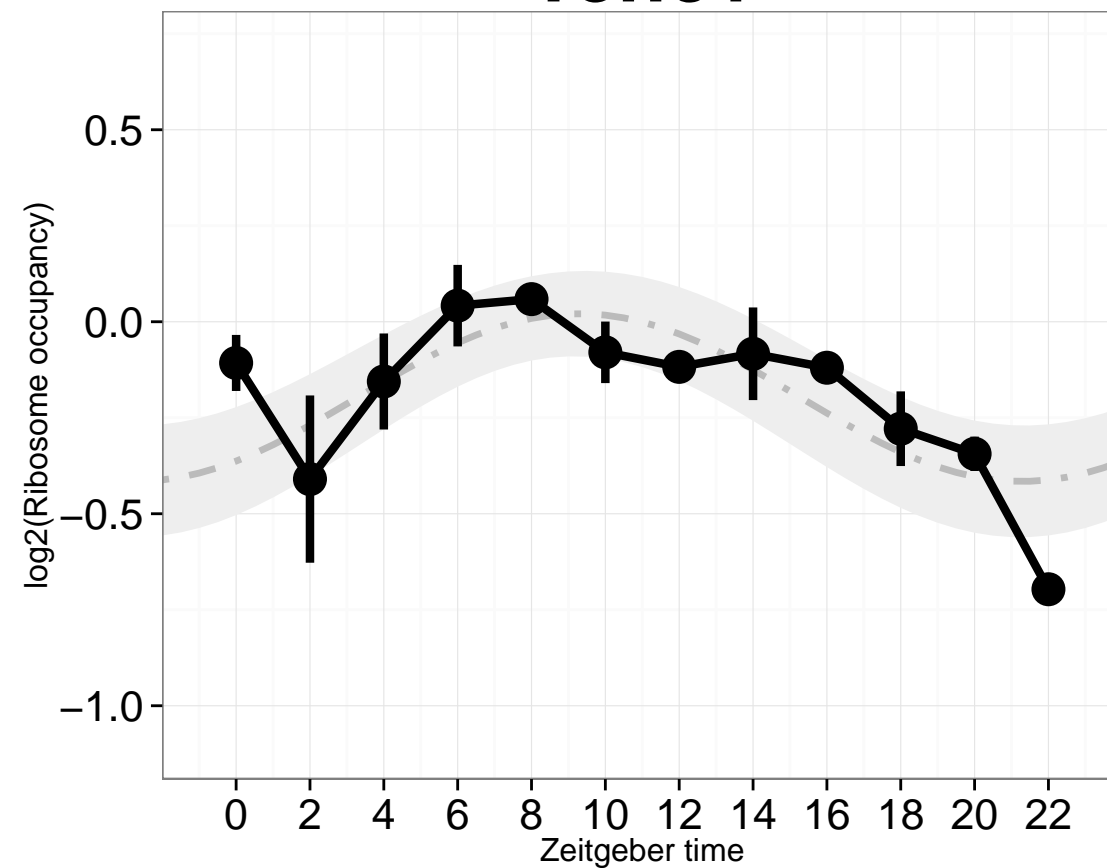

Supplement: Supplementary file 7618 [file 1]

# Trp53rk

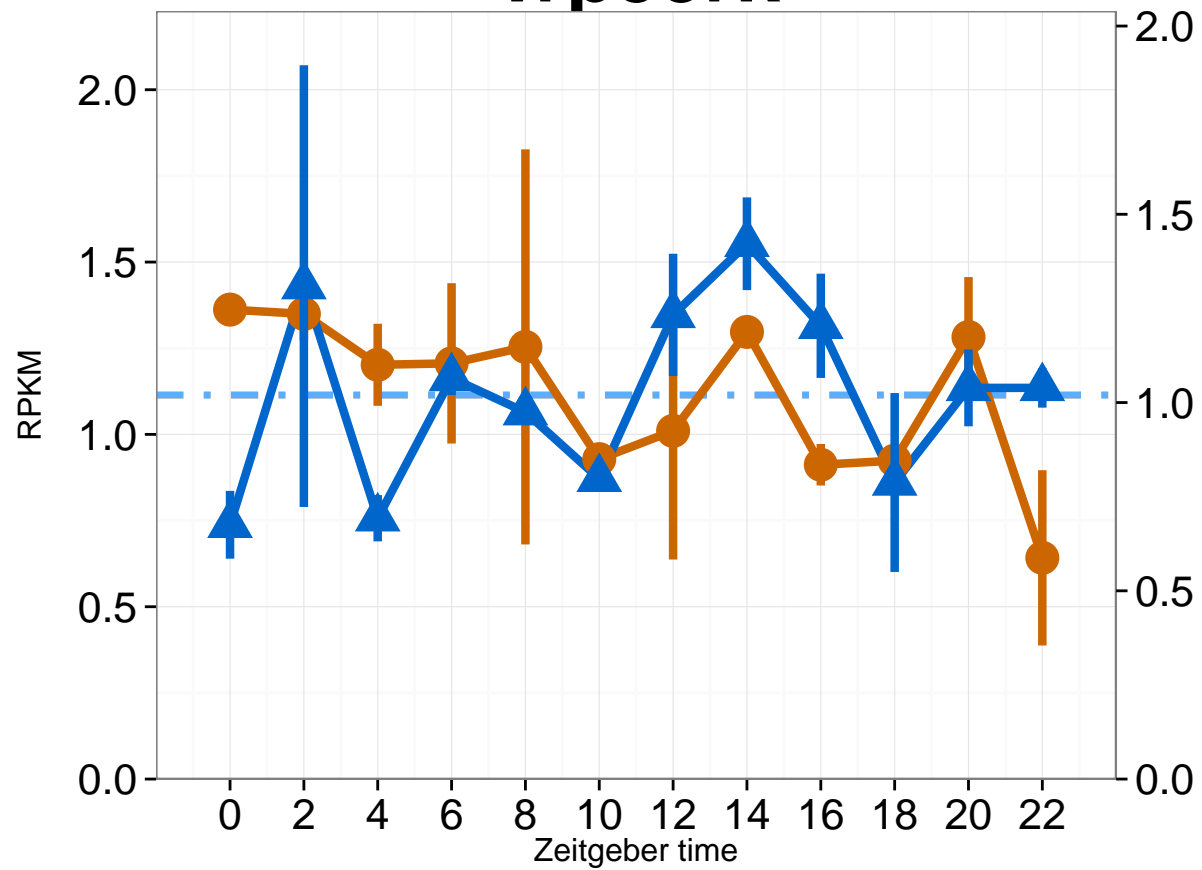

# Trp53rk

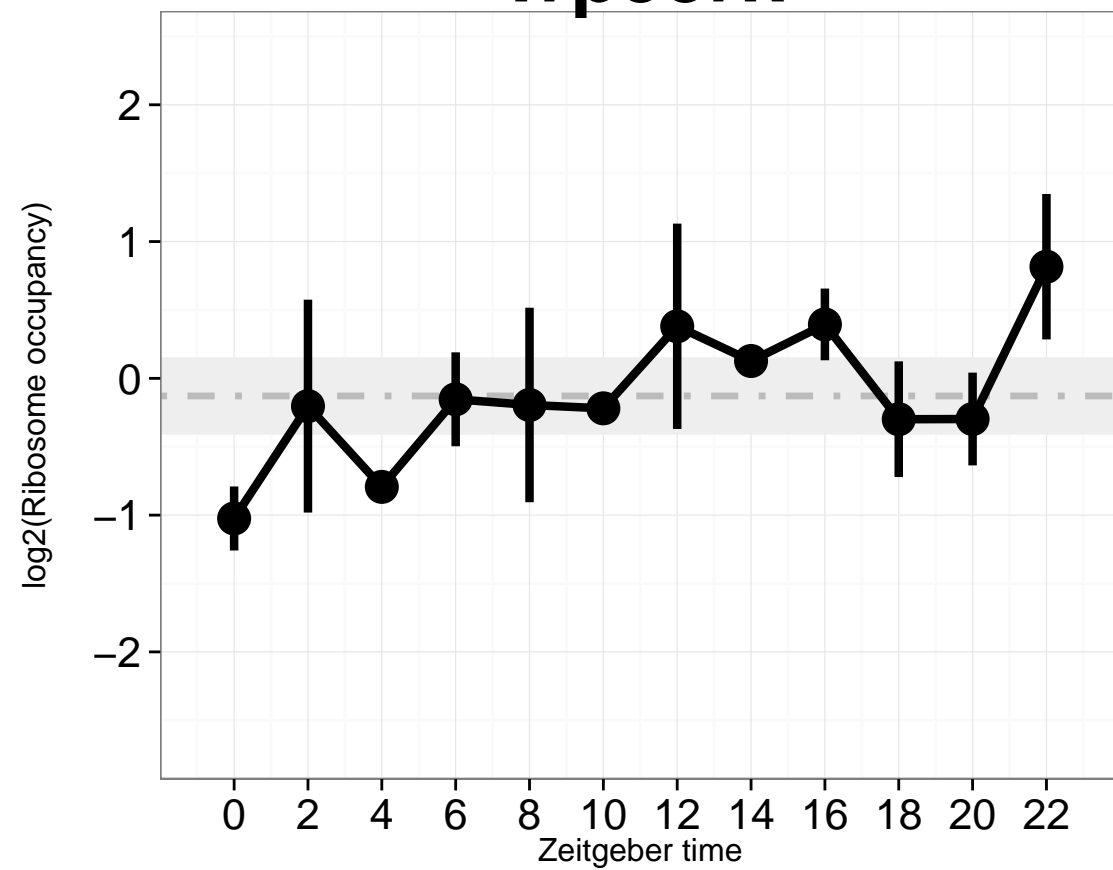

Supplement: Supplementary file 7619 [file 1]

## Med10

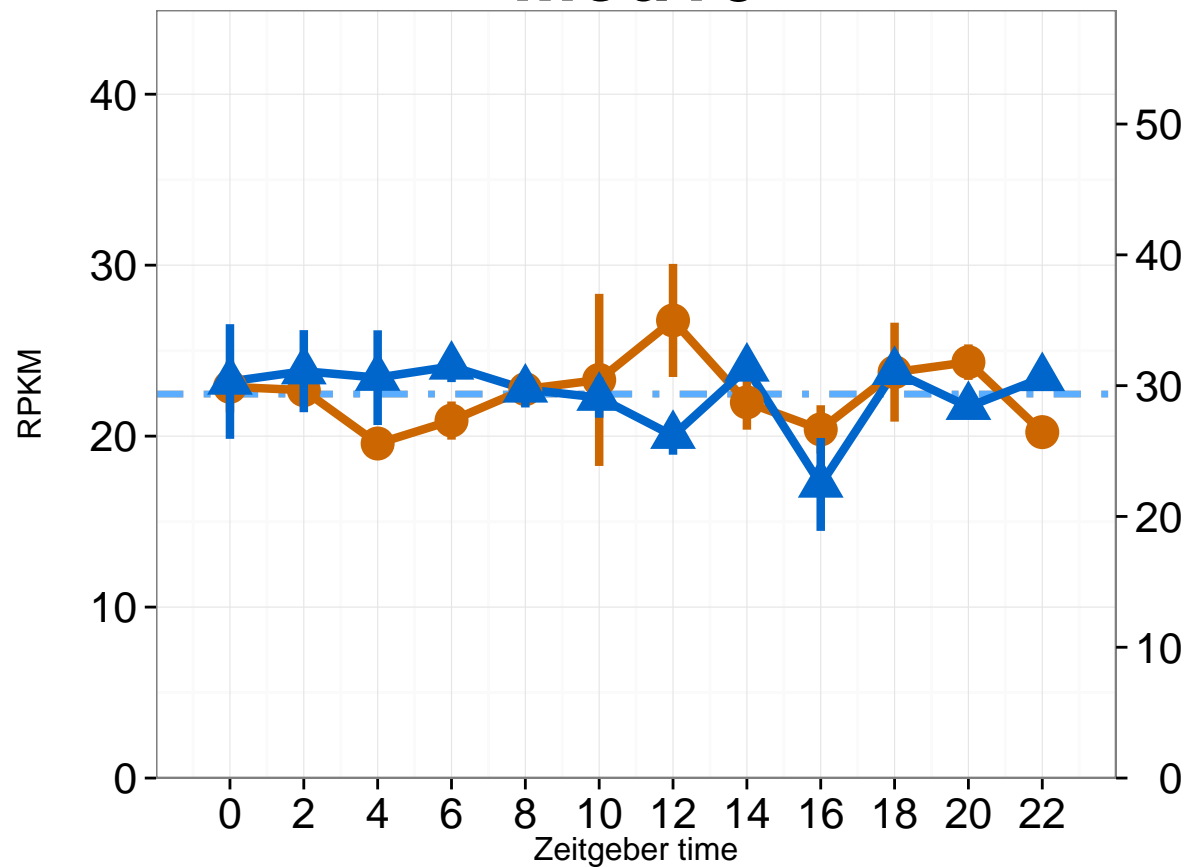

## Med10

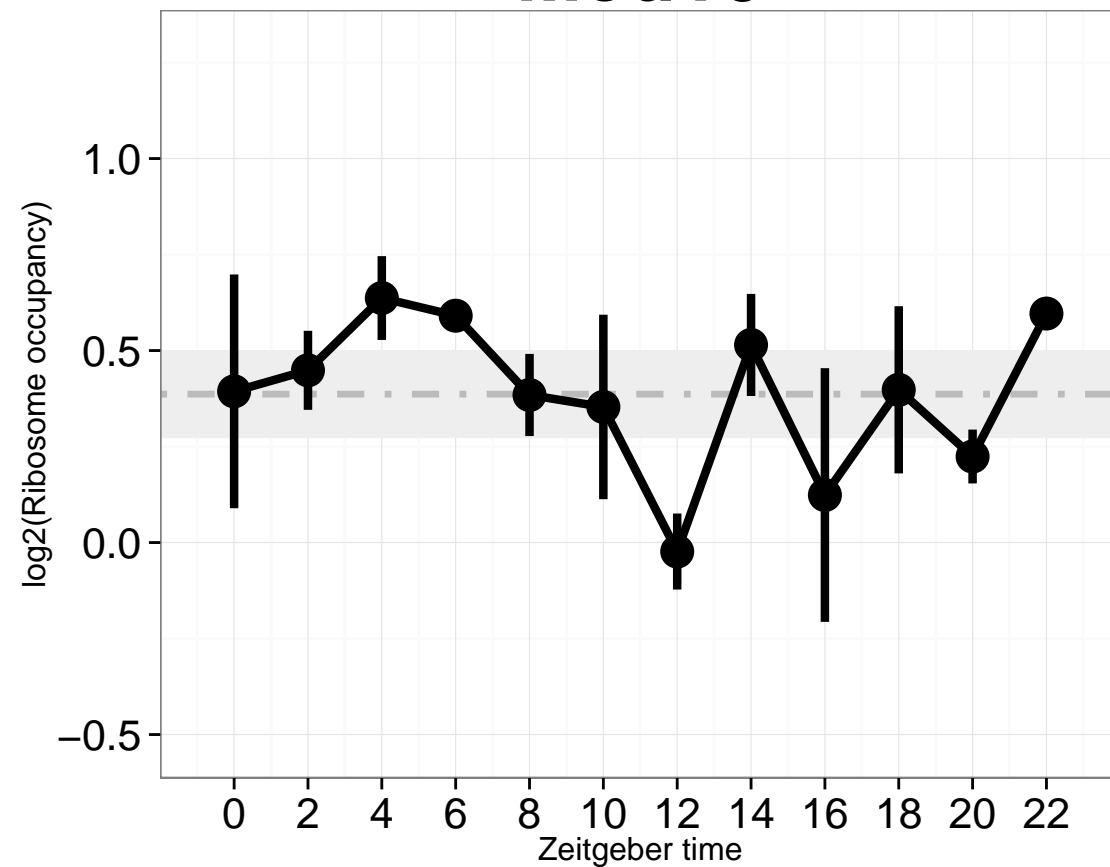

Supplement: Supplementary file 7620 [file 1]

## Actb

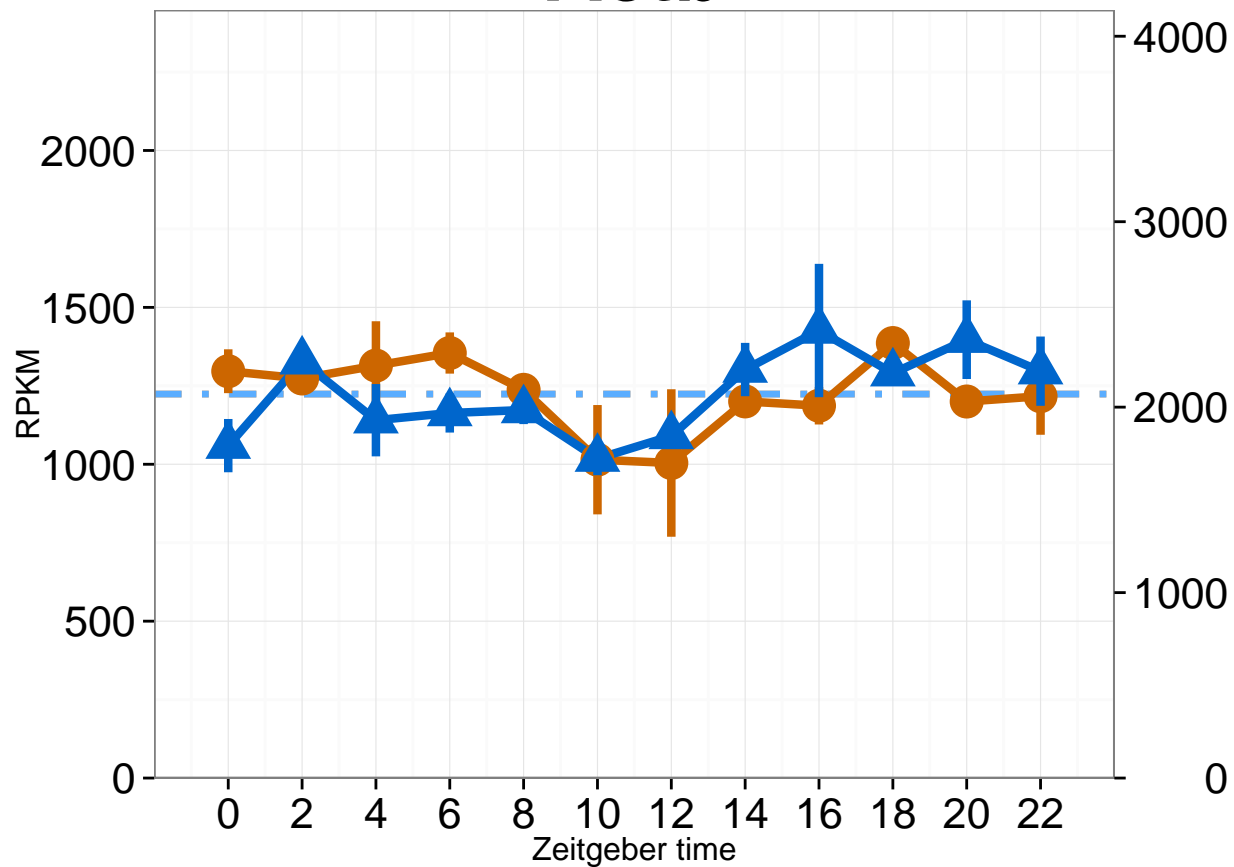

## Actb

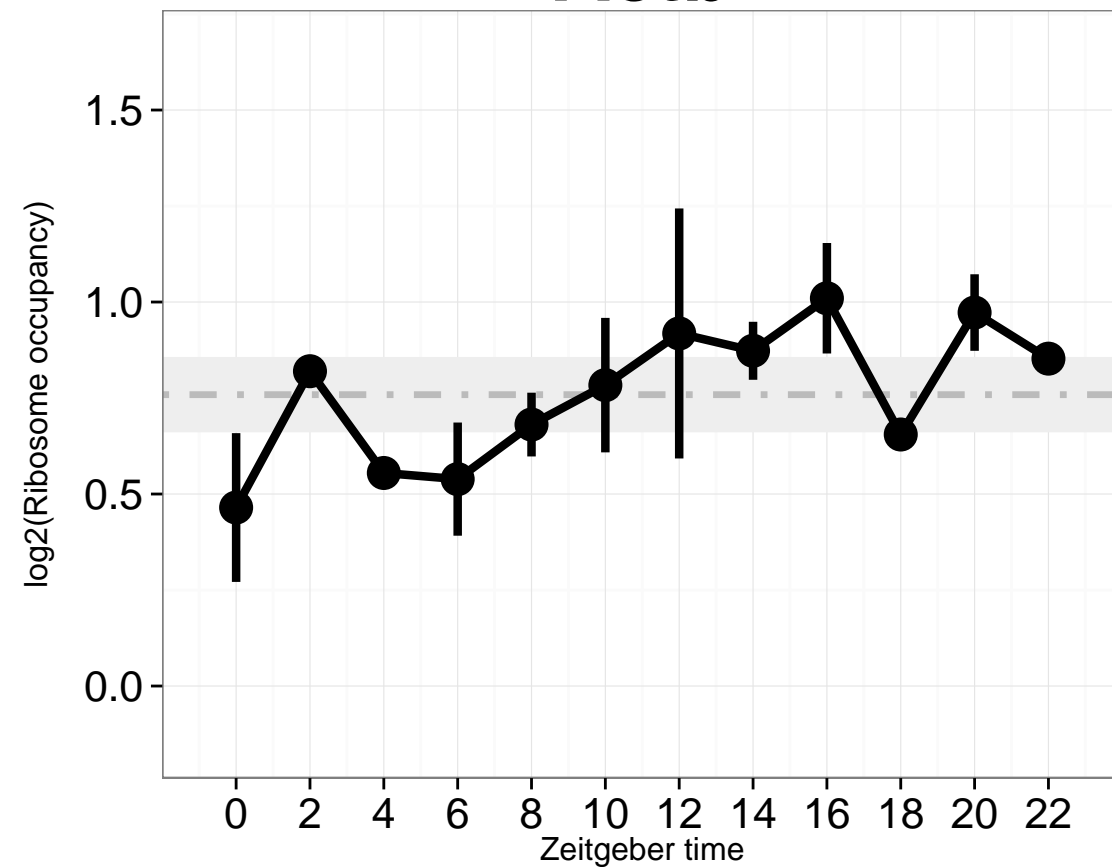

Supplement: Supplementary file 7621 [file 1]

# Ift52

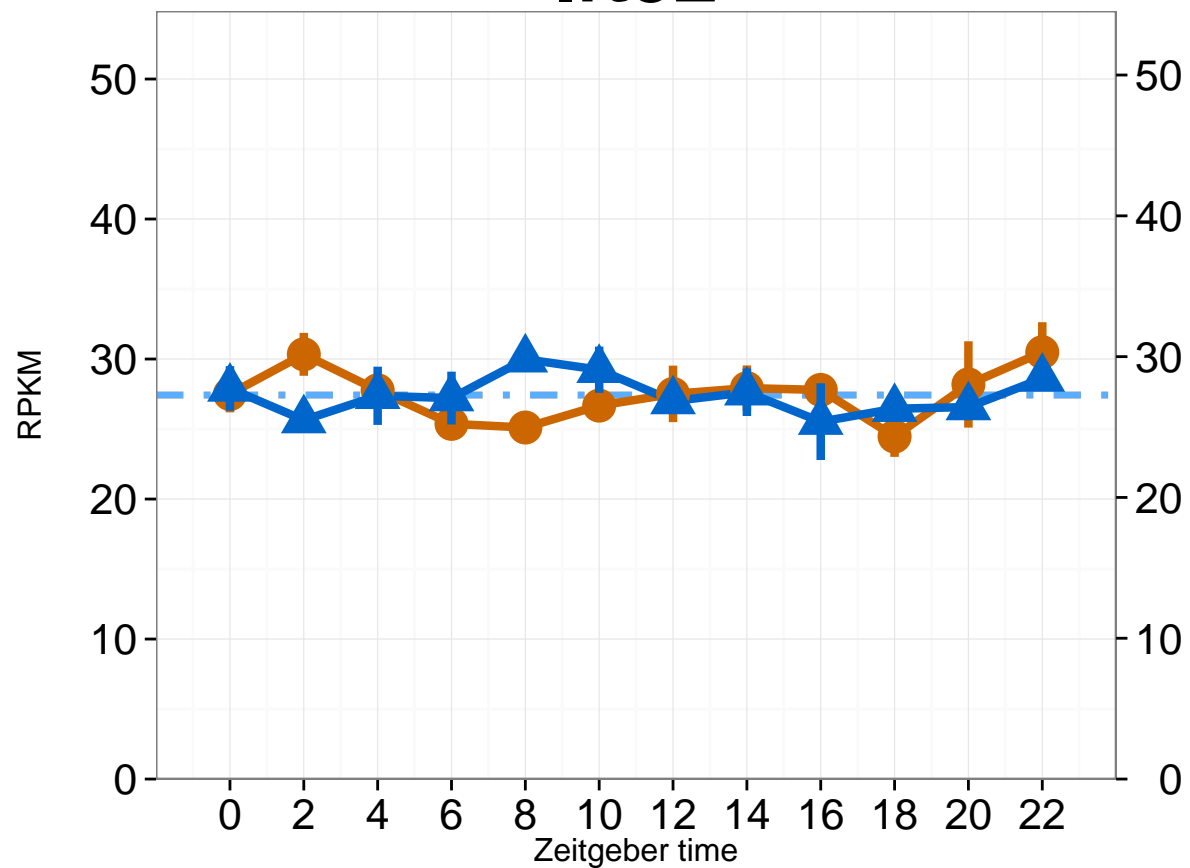

# Ift52

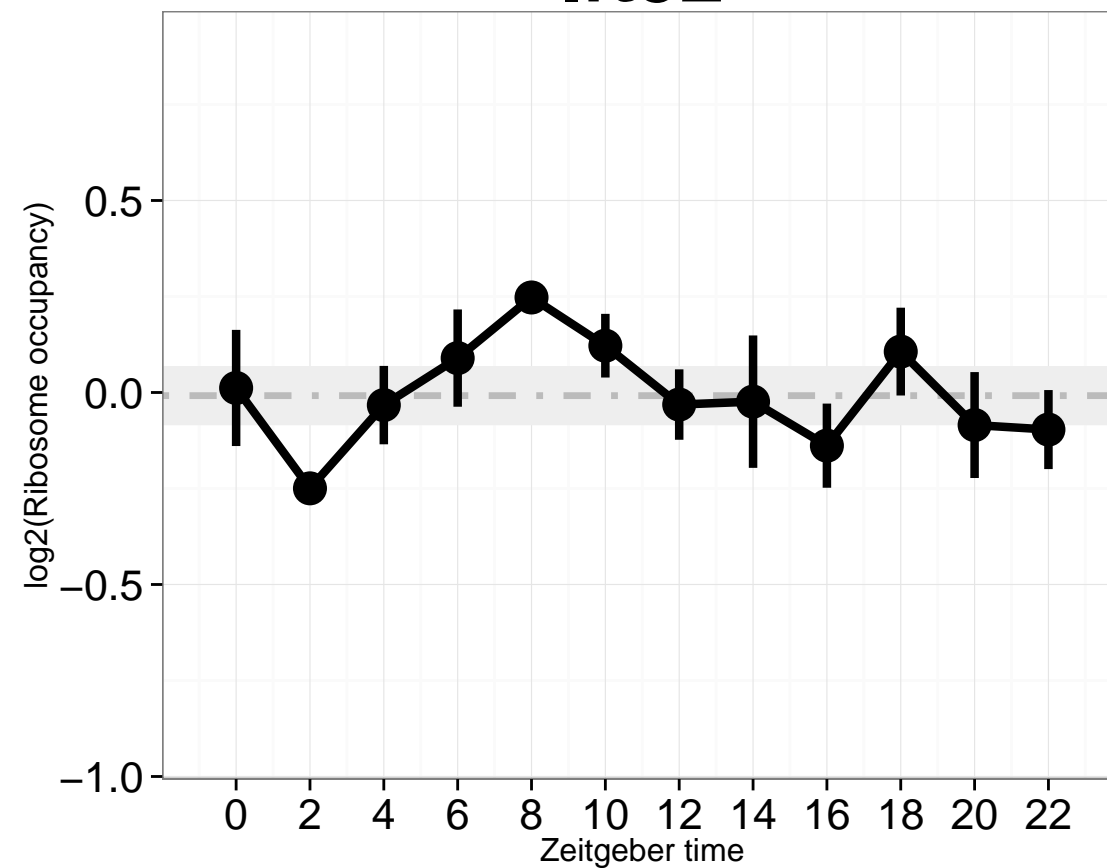

Supplement: Supplementary file 7622 [file 1]

## Dnah7b

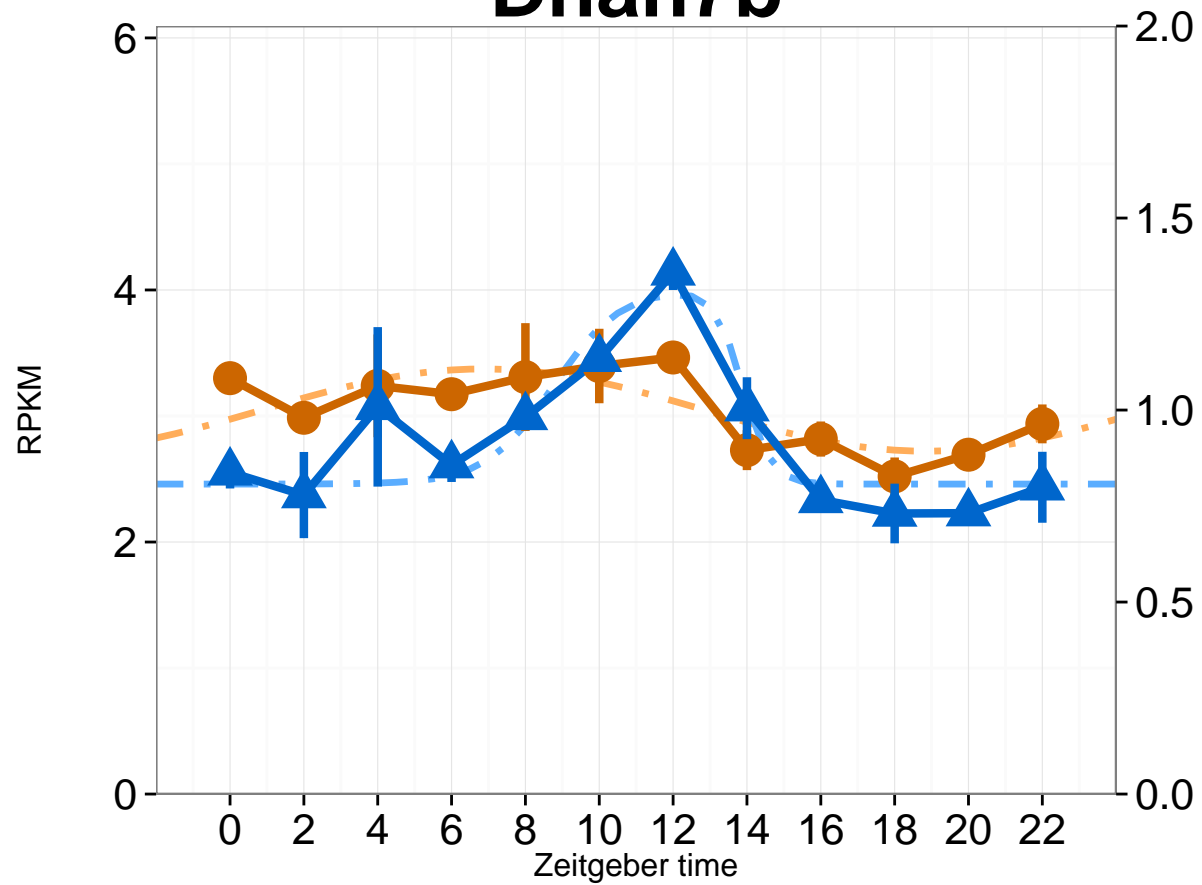

## Dnah7b

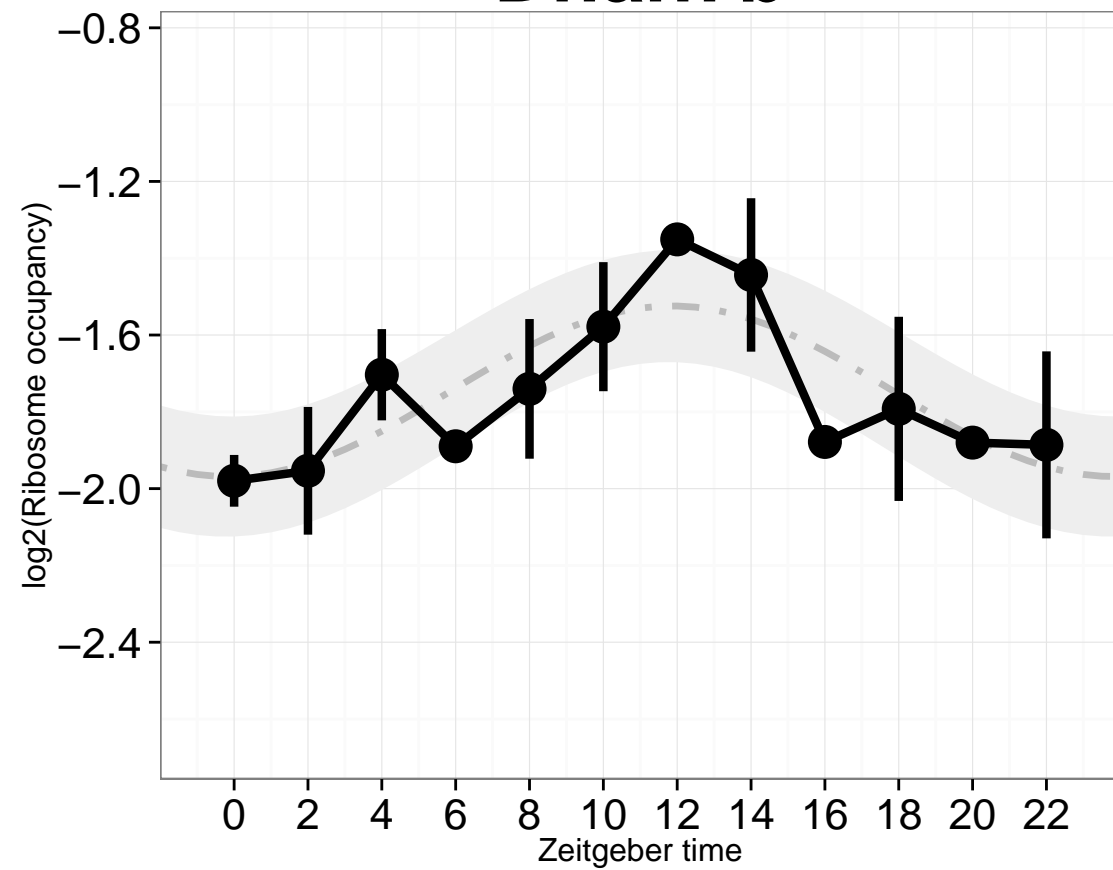

Supplement: Supplementary file 7623 [file 1]

## Rest

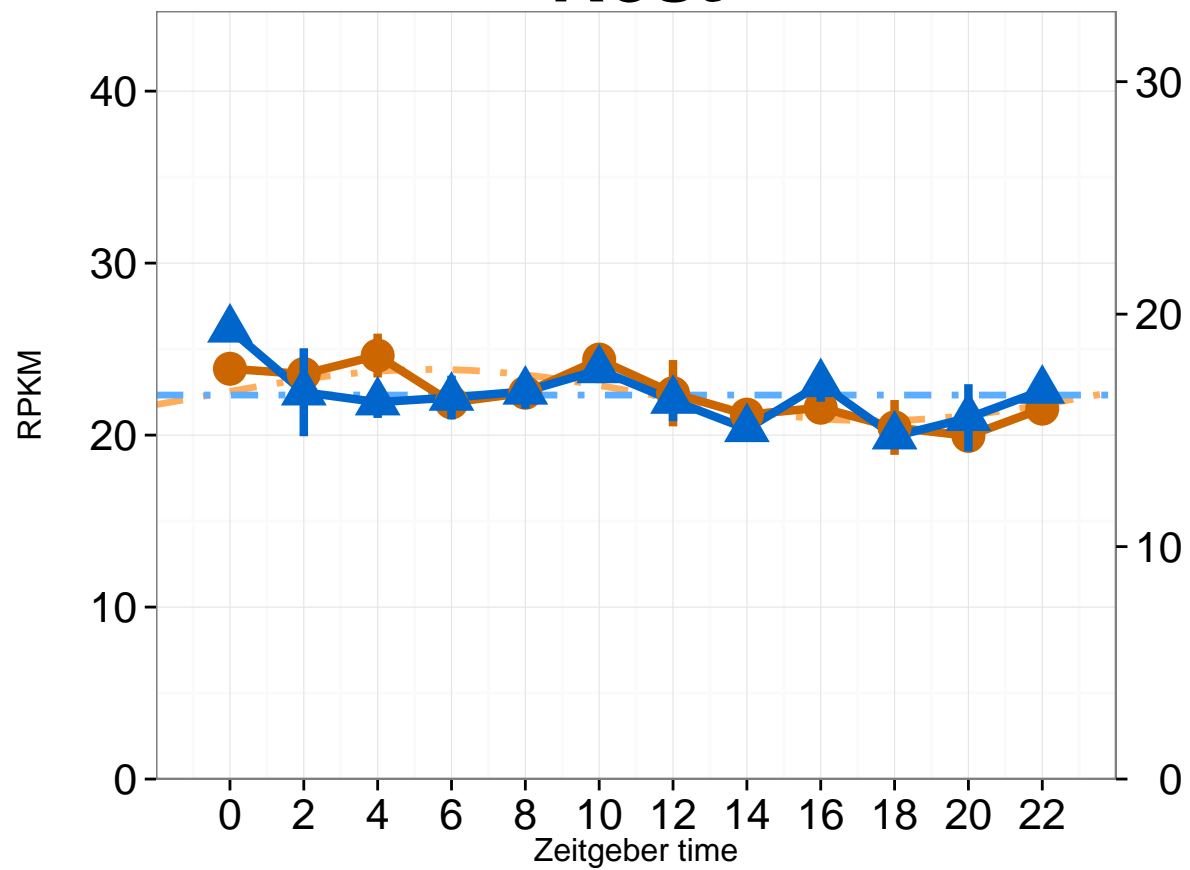

## Rest

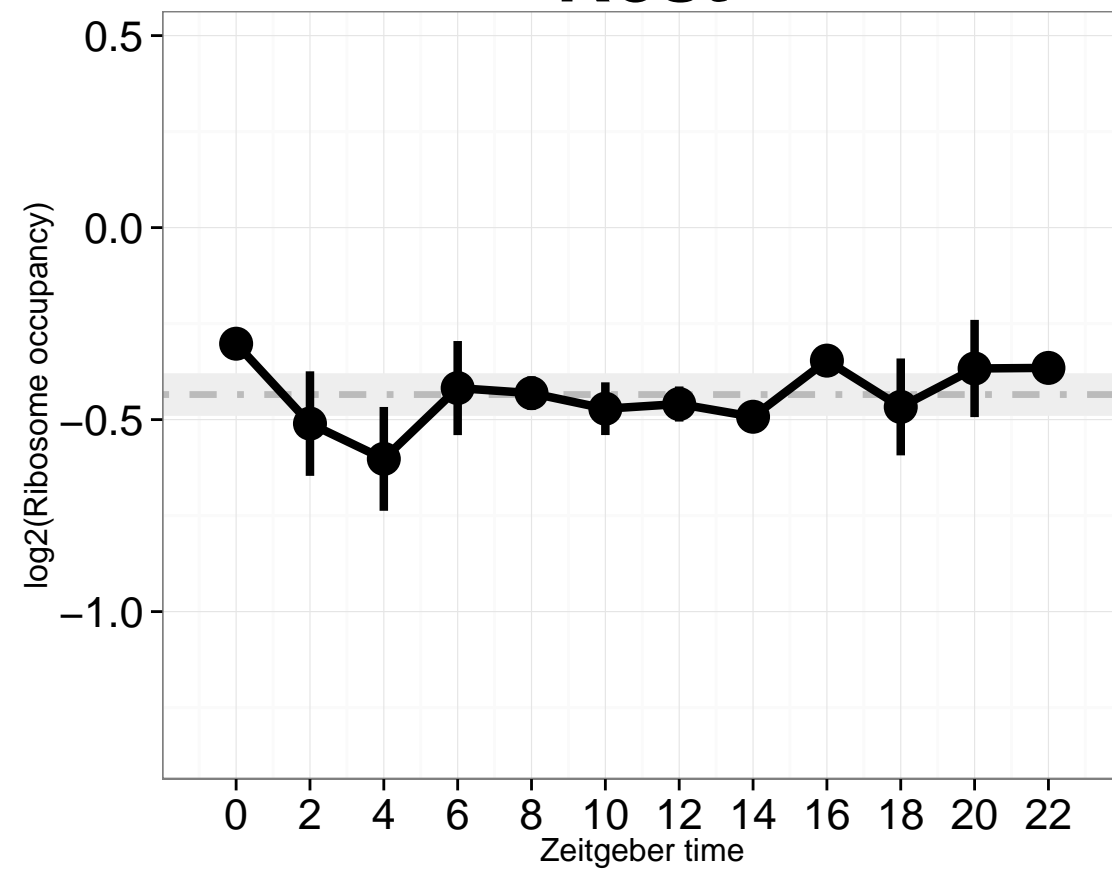

Supplement: Supplementary file 7624 [file 1]
