# Supplementary material (part 77 of 133)
Source: publisher figshare collection journal article supplement (https://springernature.figshare.com/articles/dataset/_/4903193)

# 1700016C15Rik

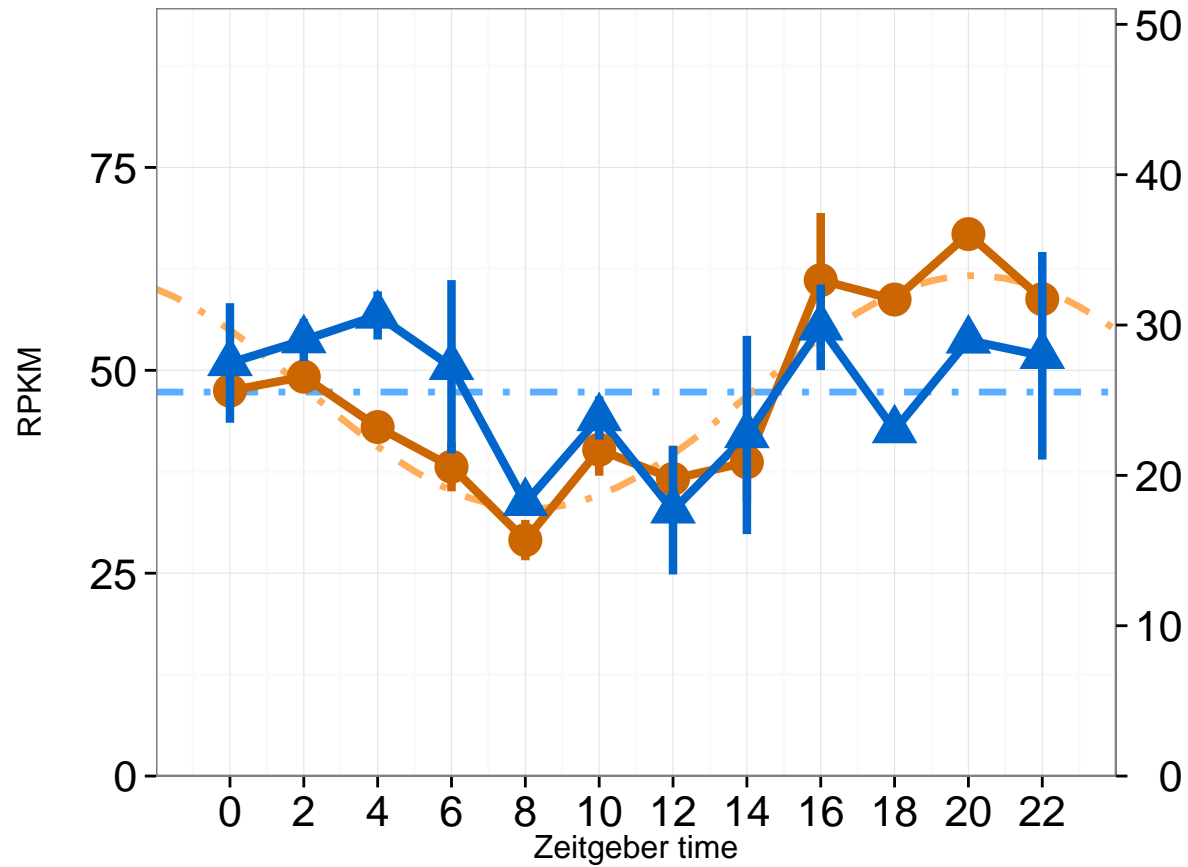

# 1700016C15Rik

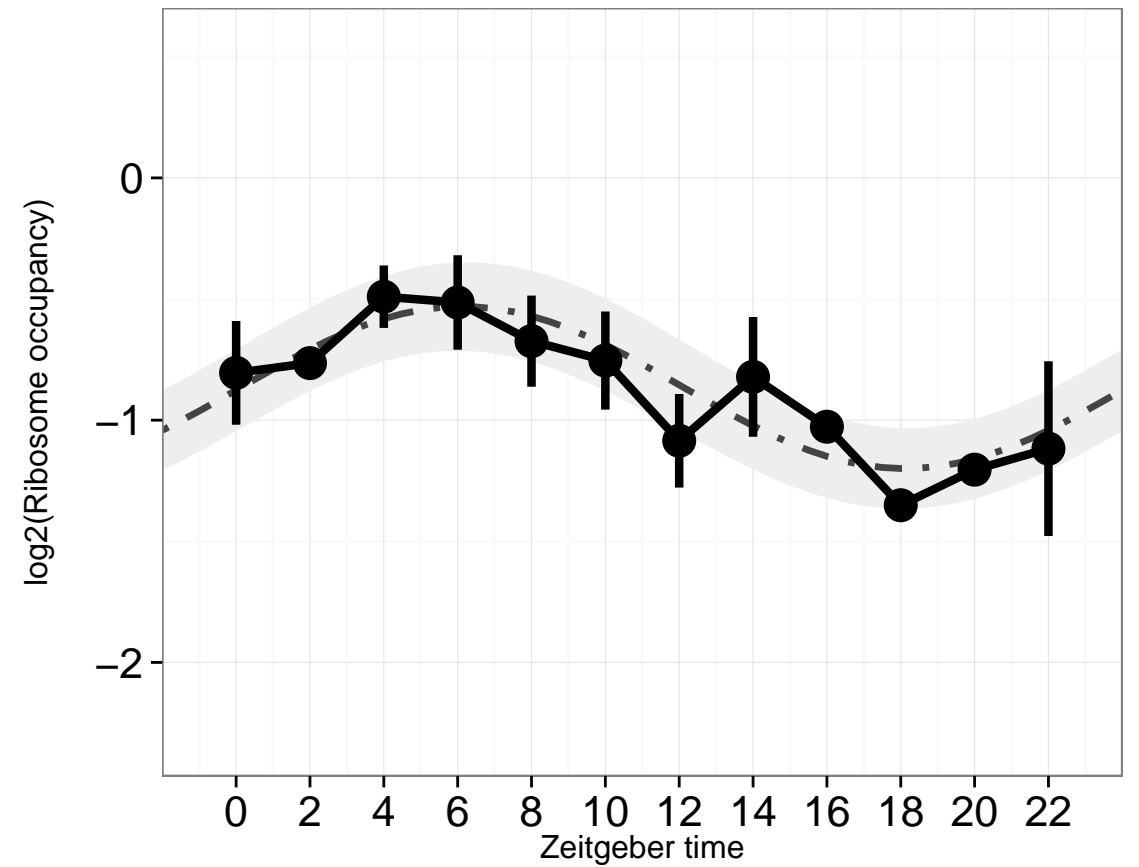

Supplement: Supplementary file 7625 [file 1]

# Cyp24a1

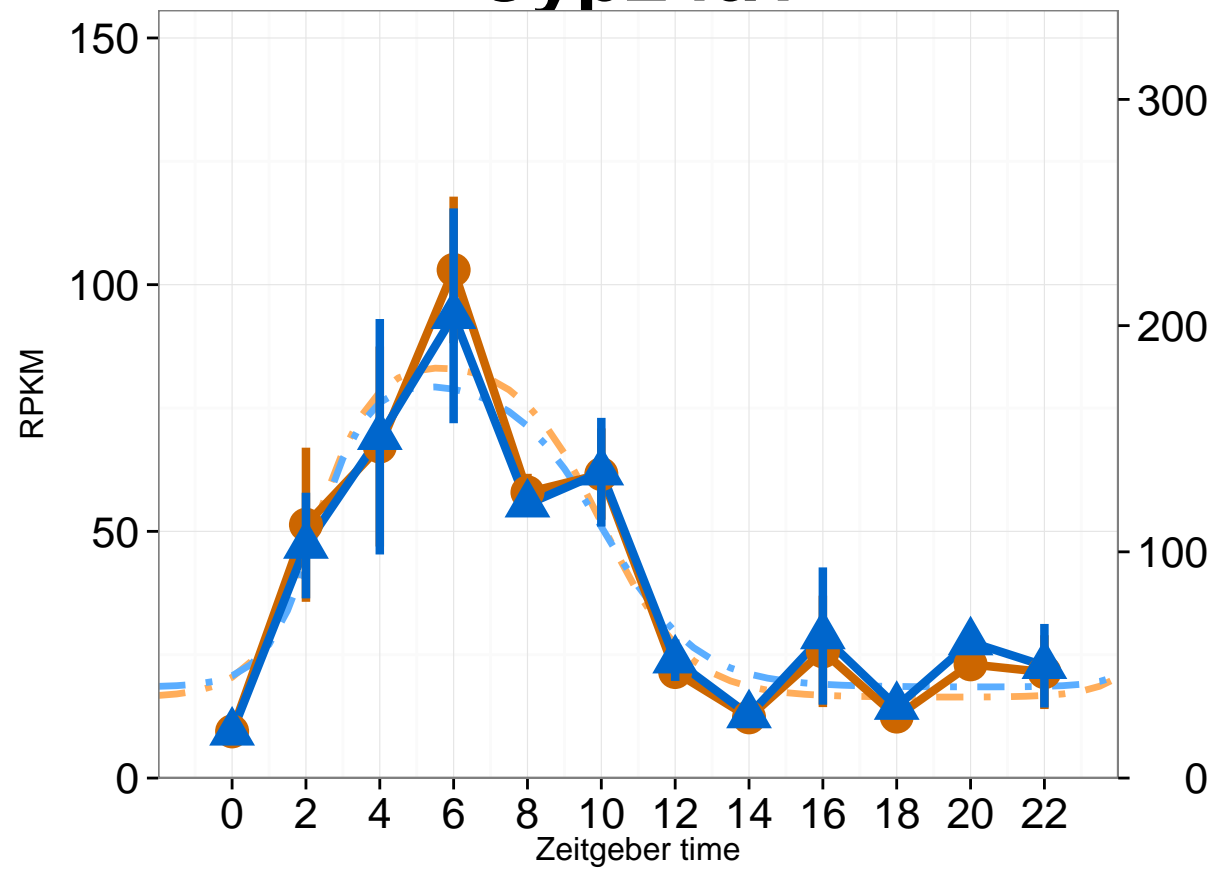

# Cyp24a1

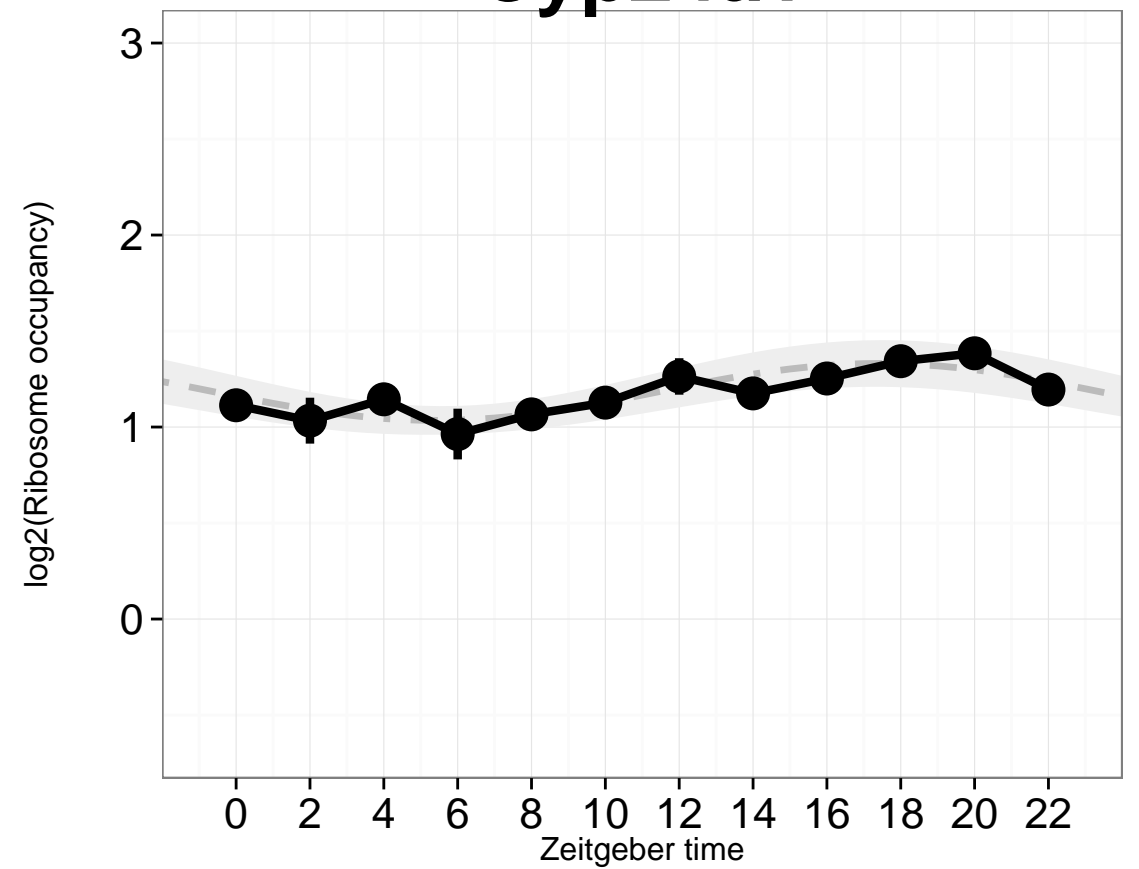

Supplement: Supplementary file 7626 [file 1]

## Nf1

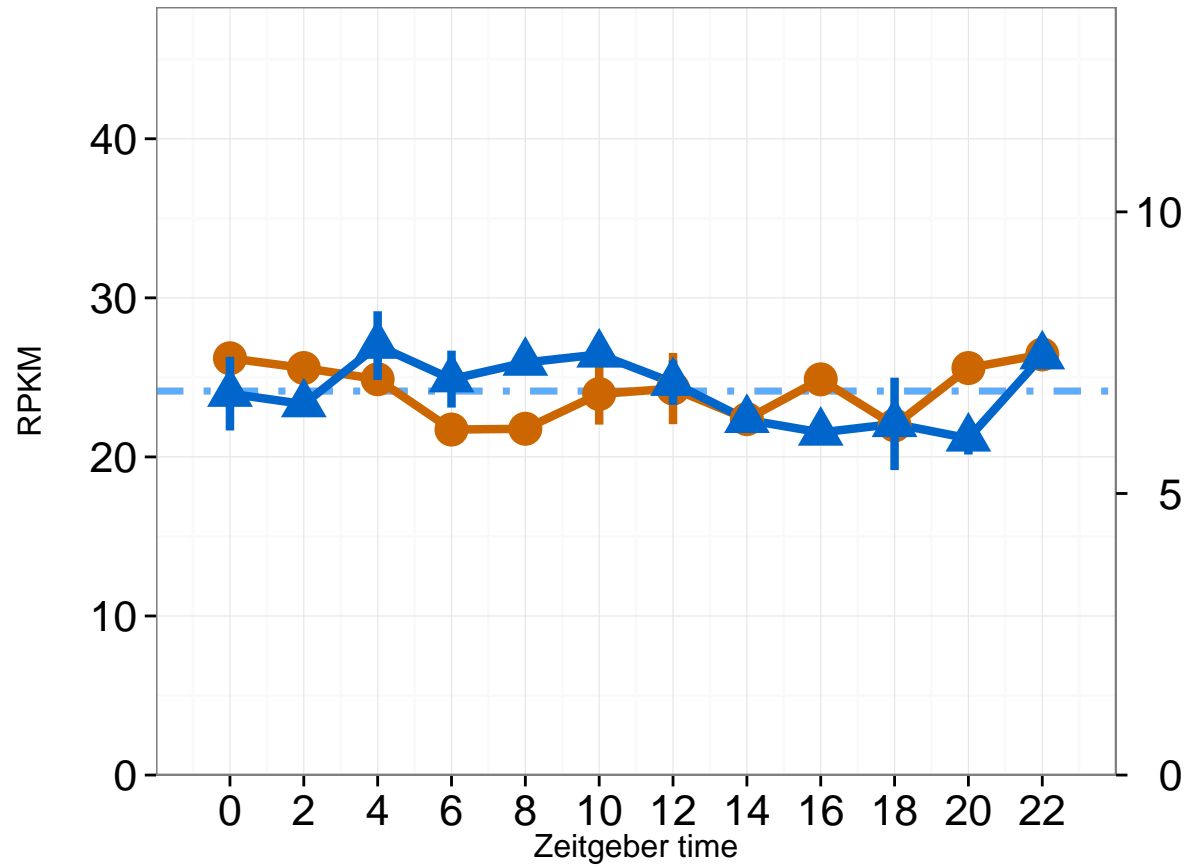

## Nf1

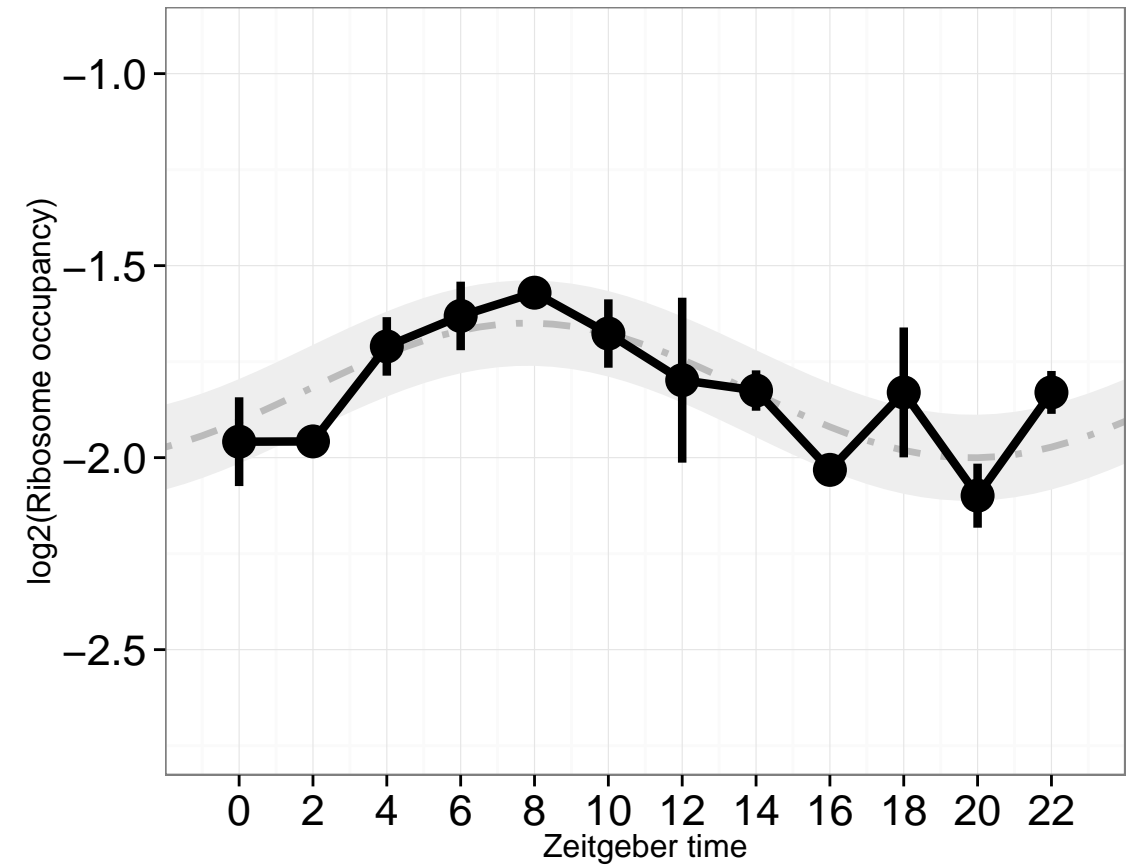

Supplement: Supplementary file 7627 [file 1]

# Hgsnat

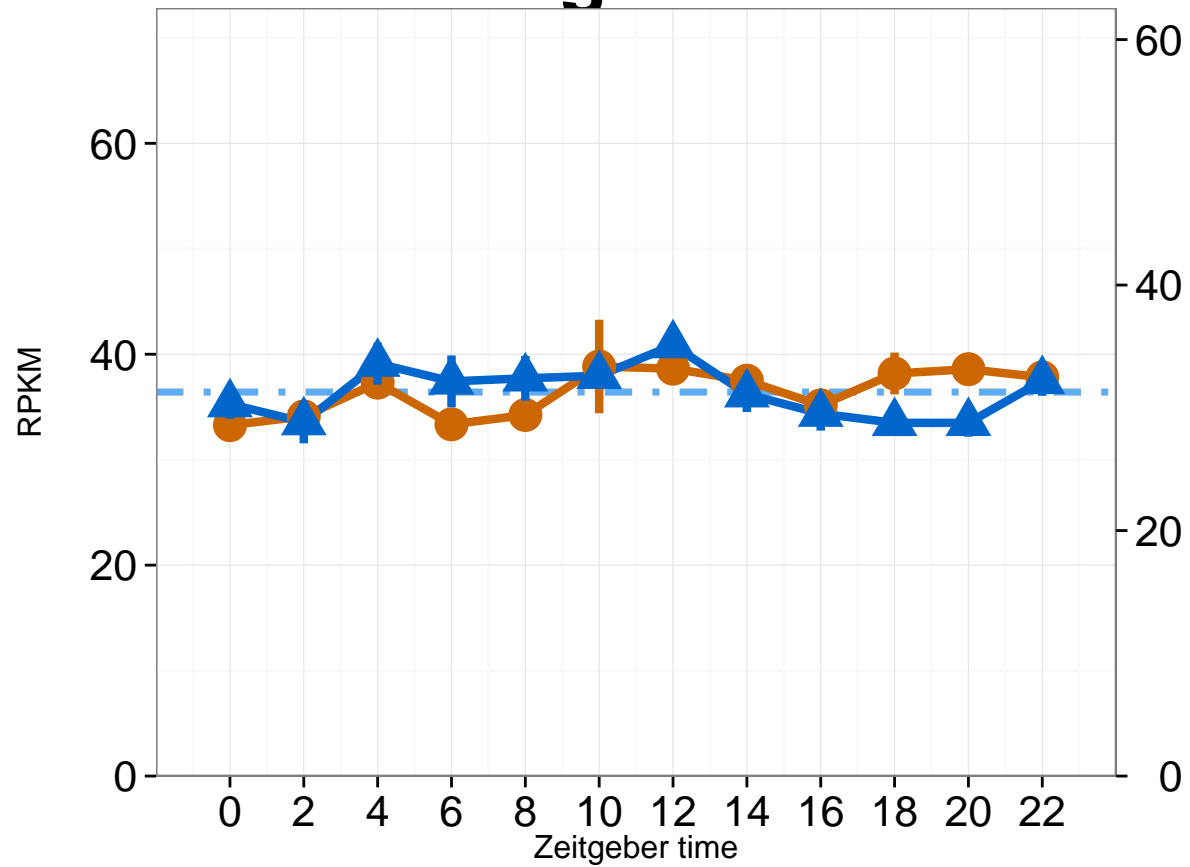

# Hgsnat

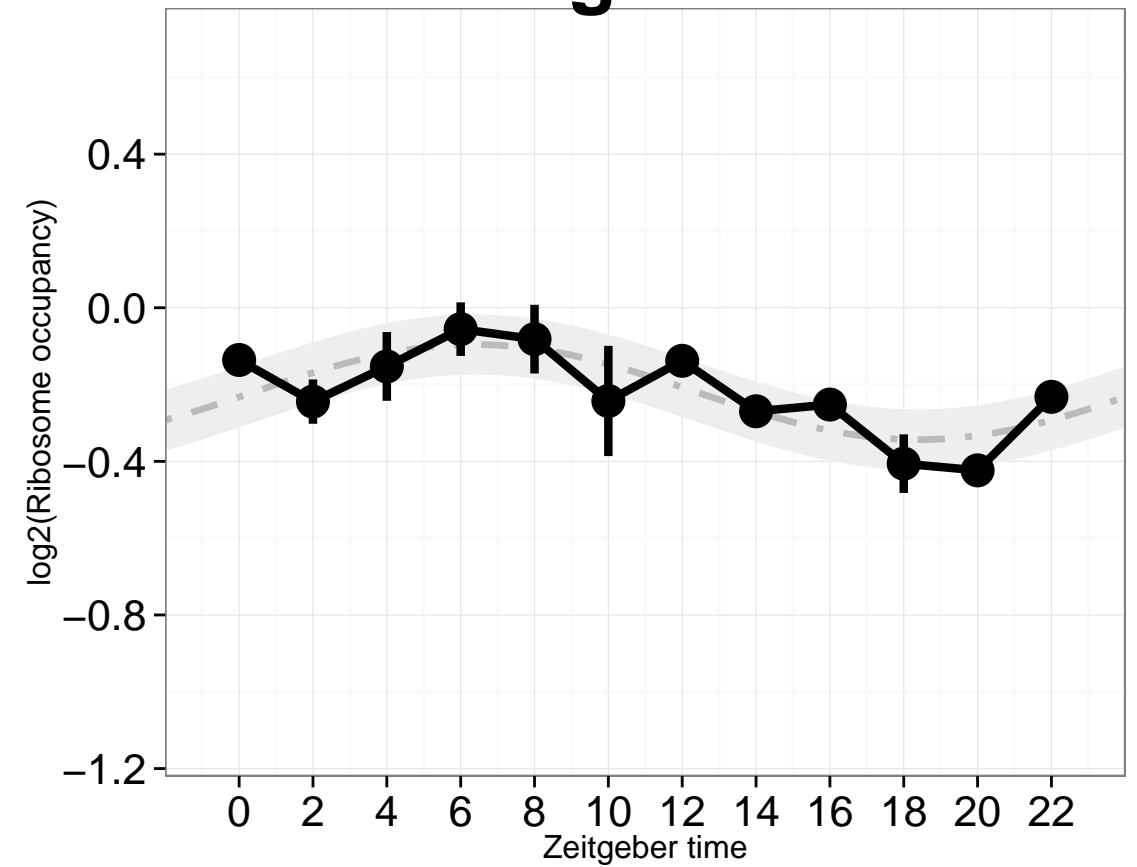

Supplement: Supplementary file 7628 [file 1]

## Napsa

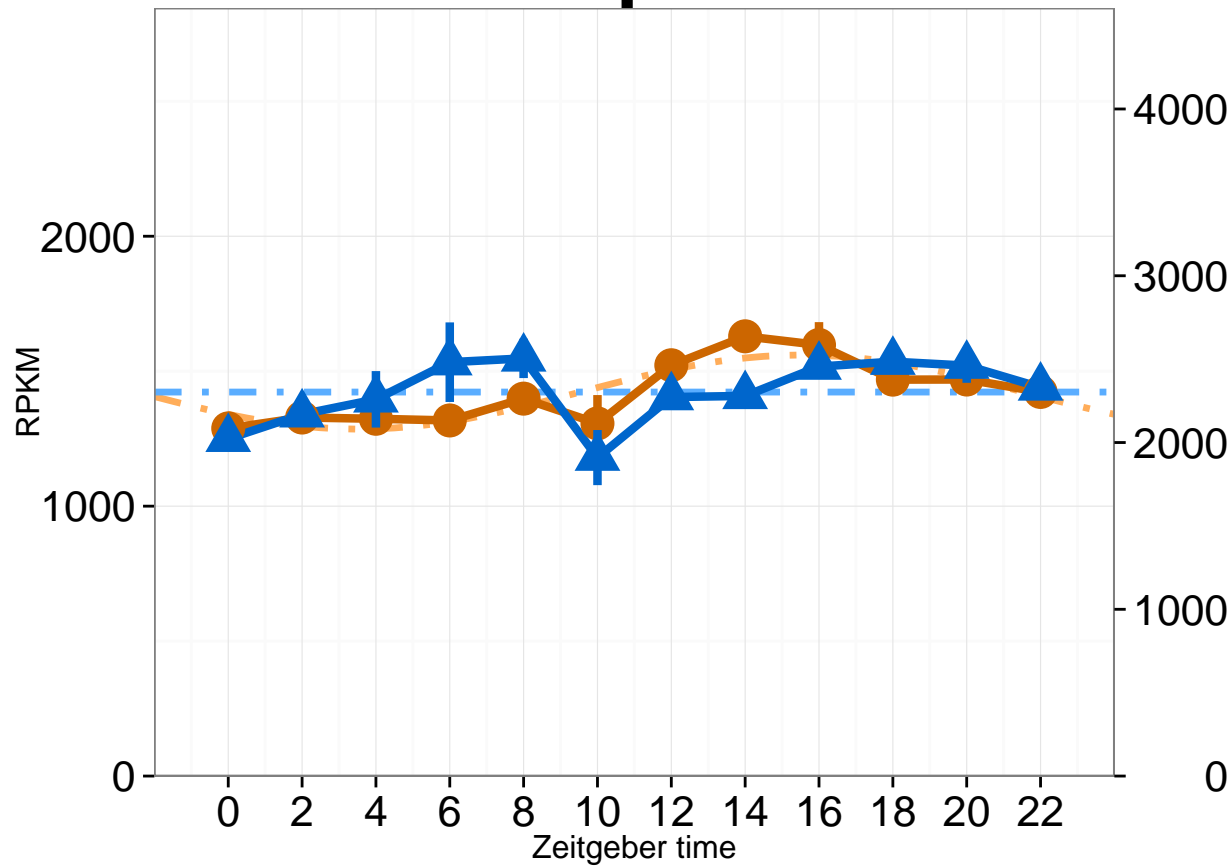

## Napsa

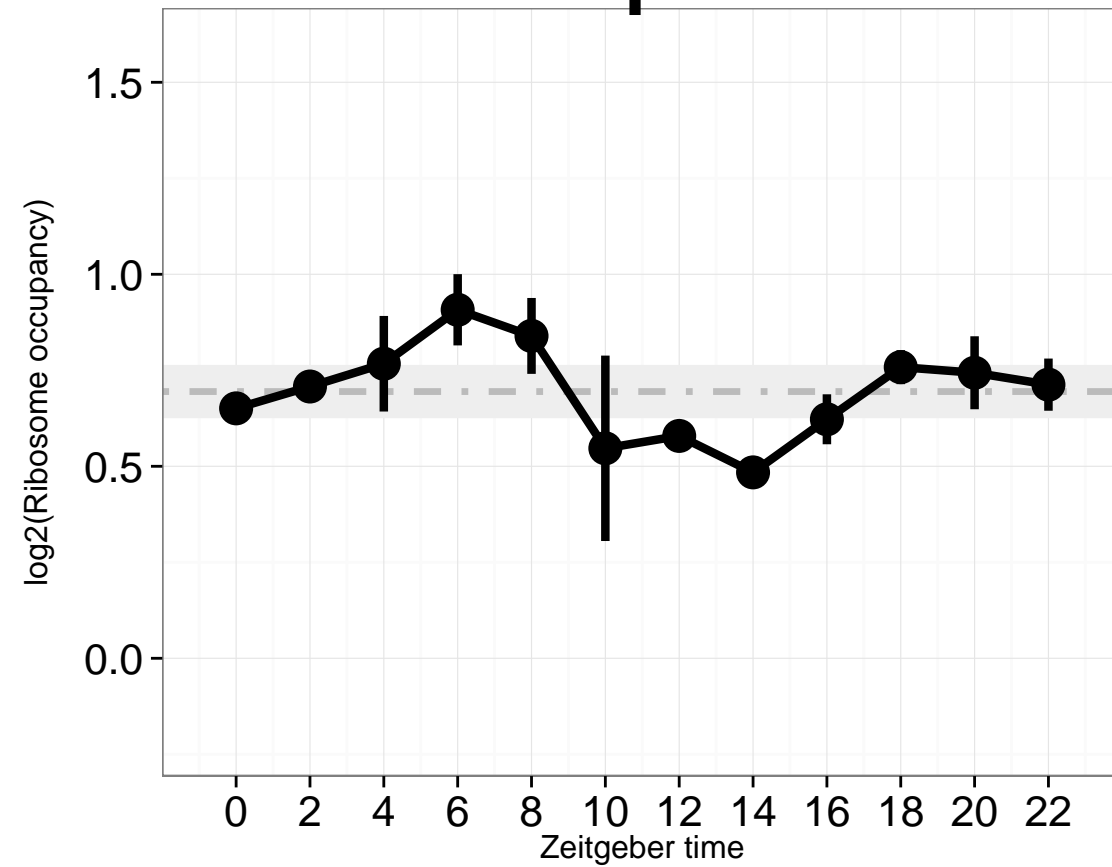

Supplement: Supplementary file 7629 [file 1]

## Fes

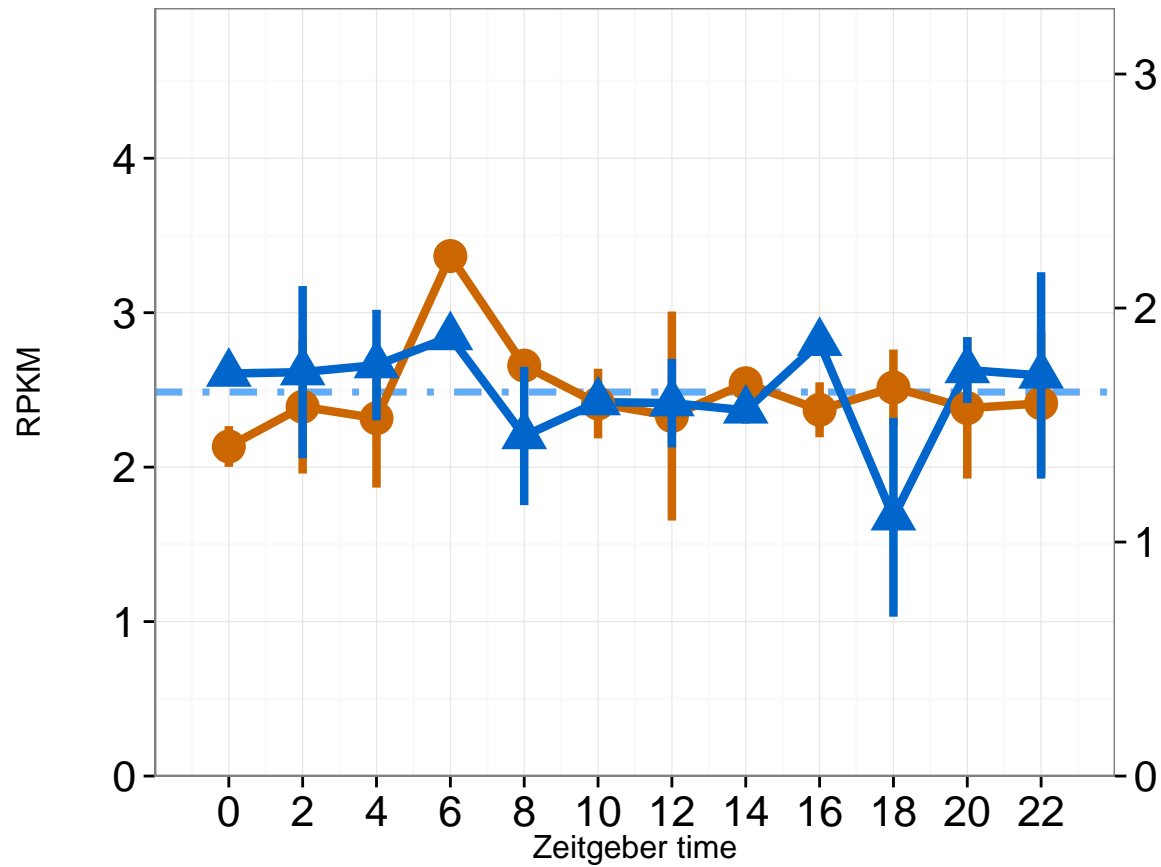

## Fes

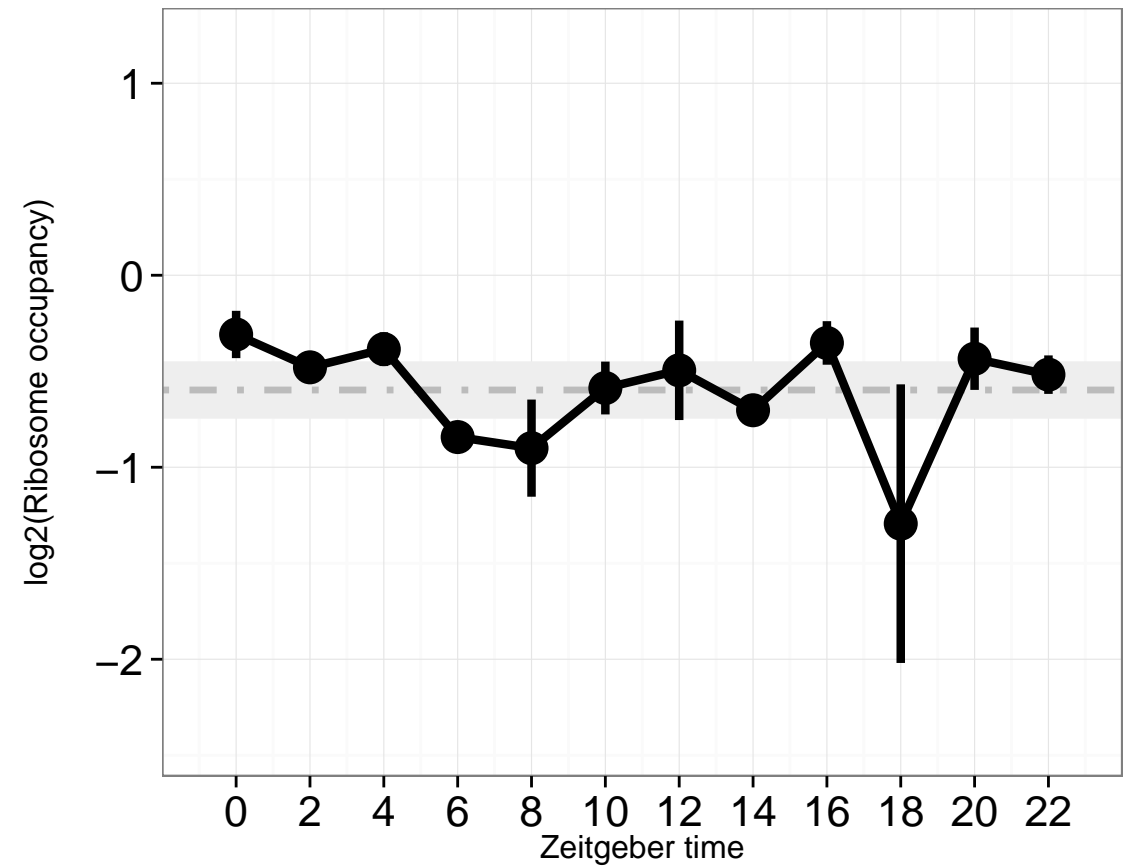

Supplement: Supplementary file 7630 [file 1]

## Dzip1l

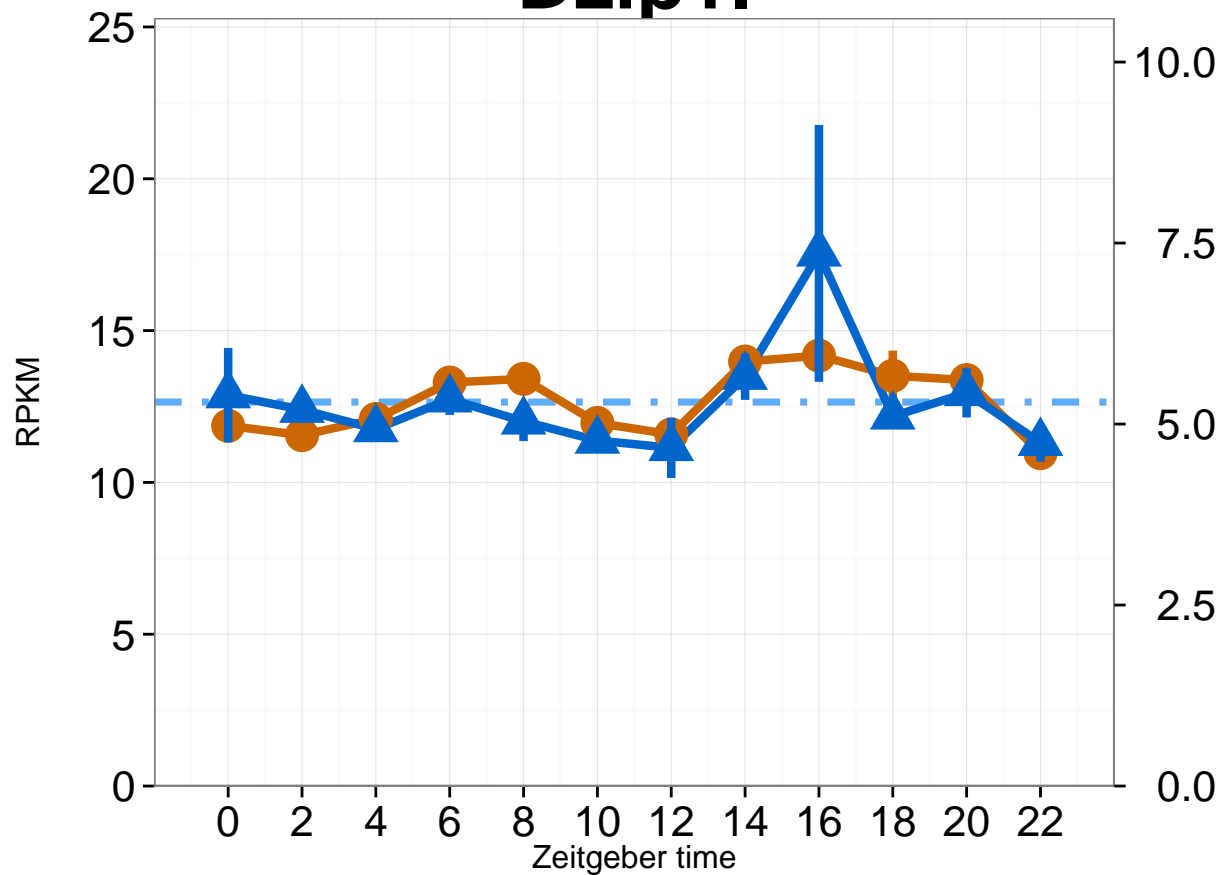

## Dzip1l

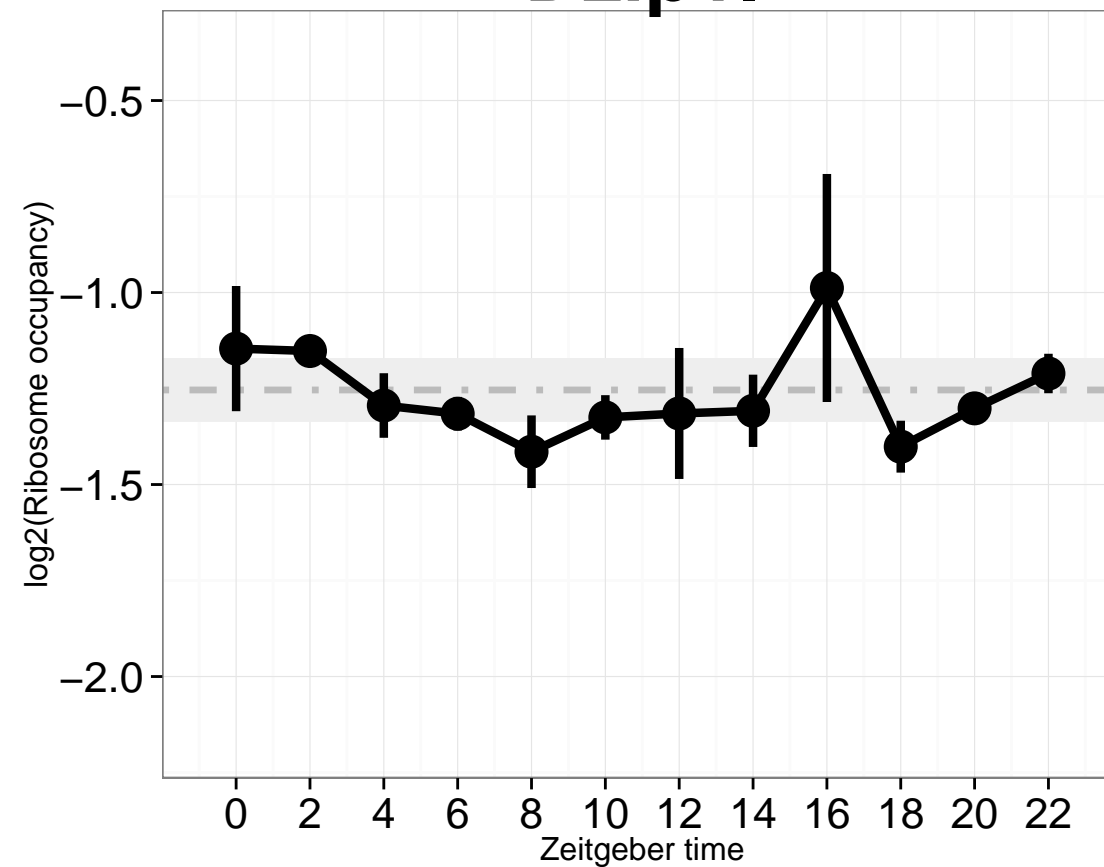

Supplement: Supplementary file 7631 [file 1]

# Tbc1d19

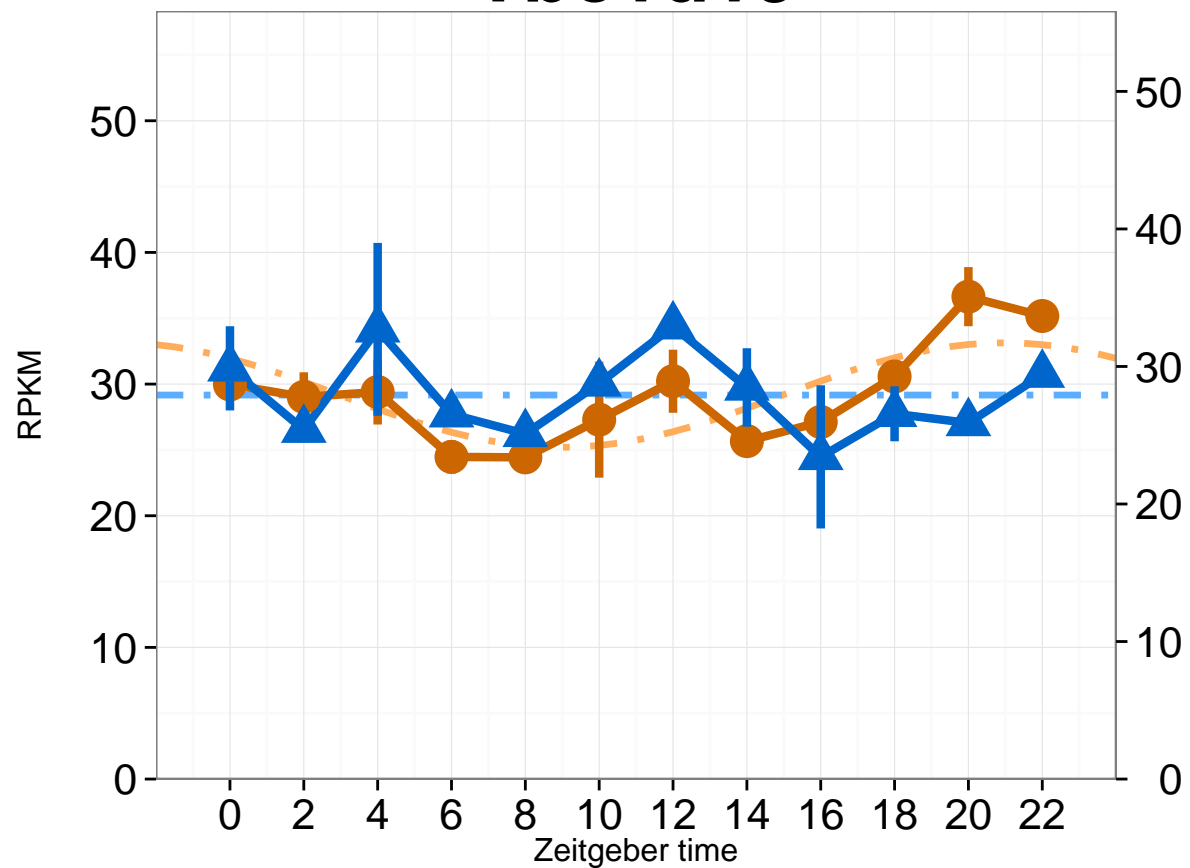

# Tbc1d19

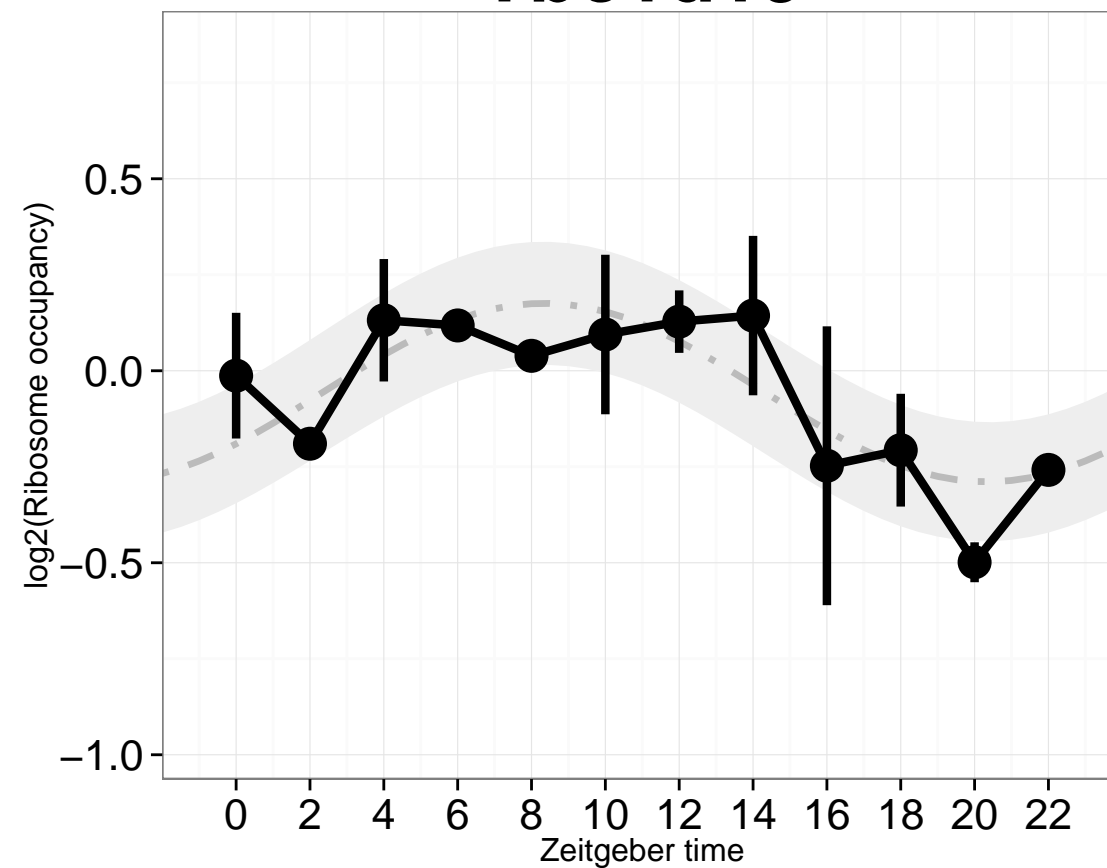

Supplement: Supplementary file 7632 [file 1]

# 1700017B05Rik

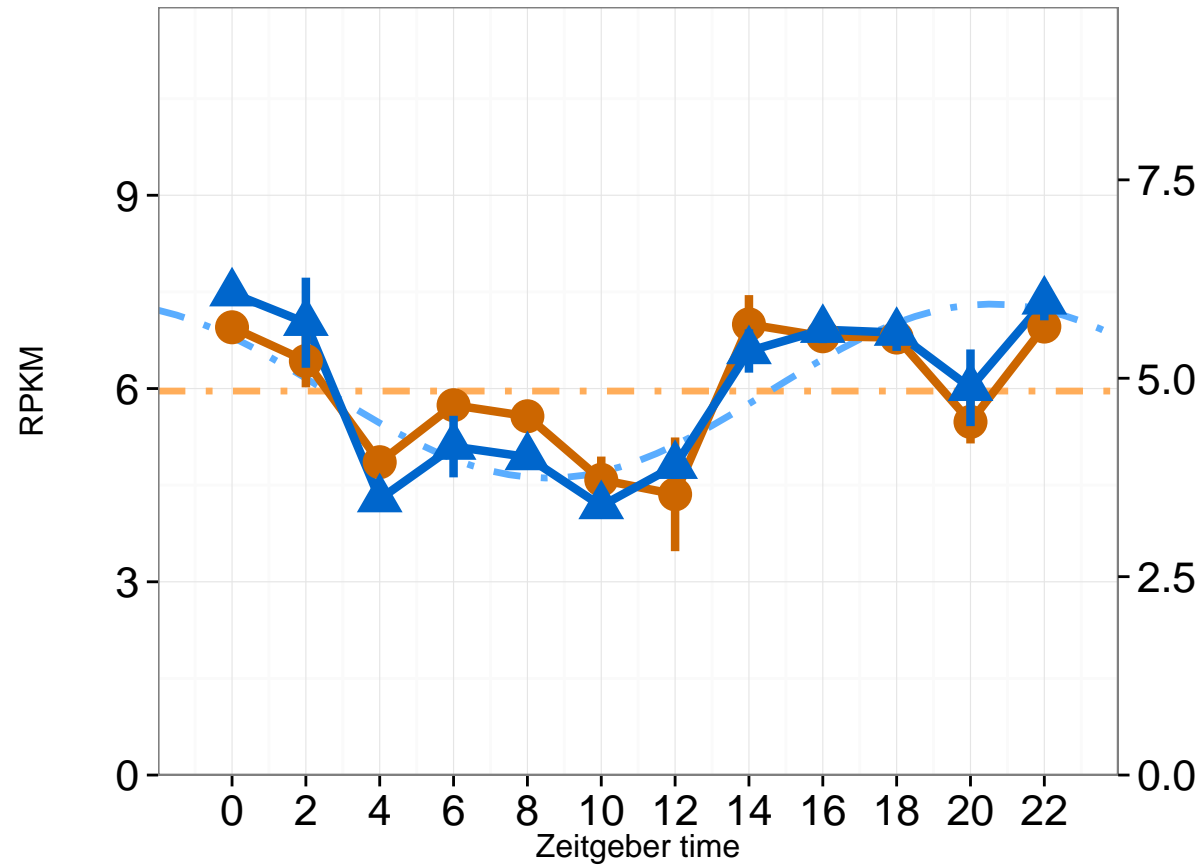

# 1700017B05Rik

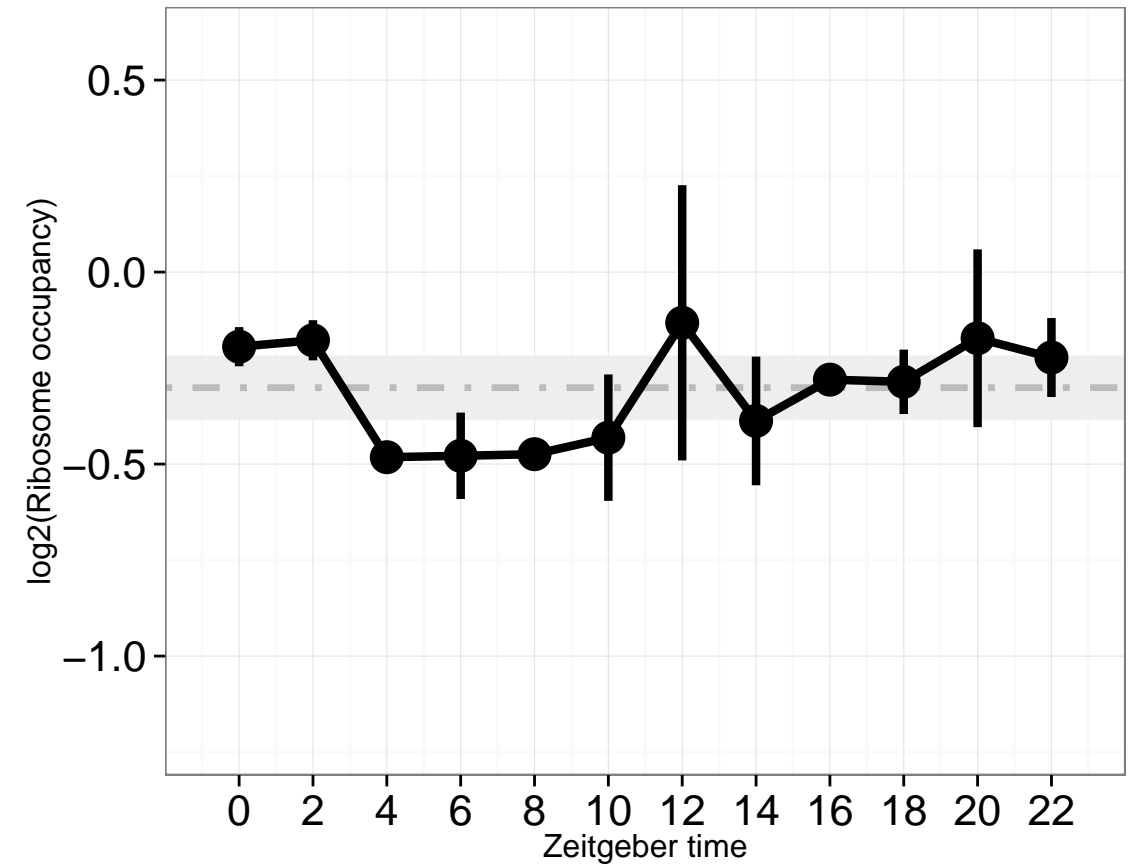

Supplement: Supplementary file 7633 [file 1]

## Camk1d

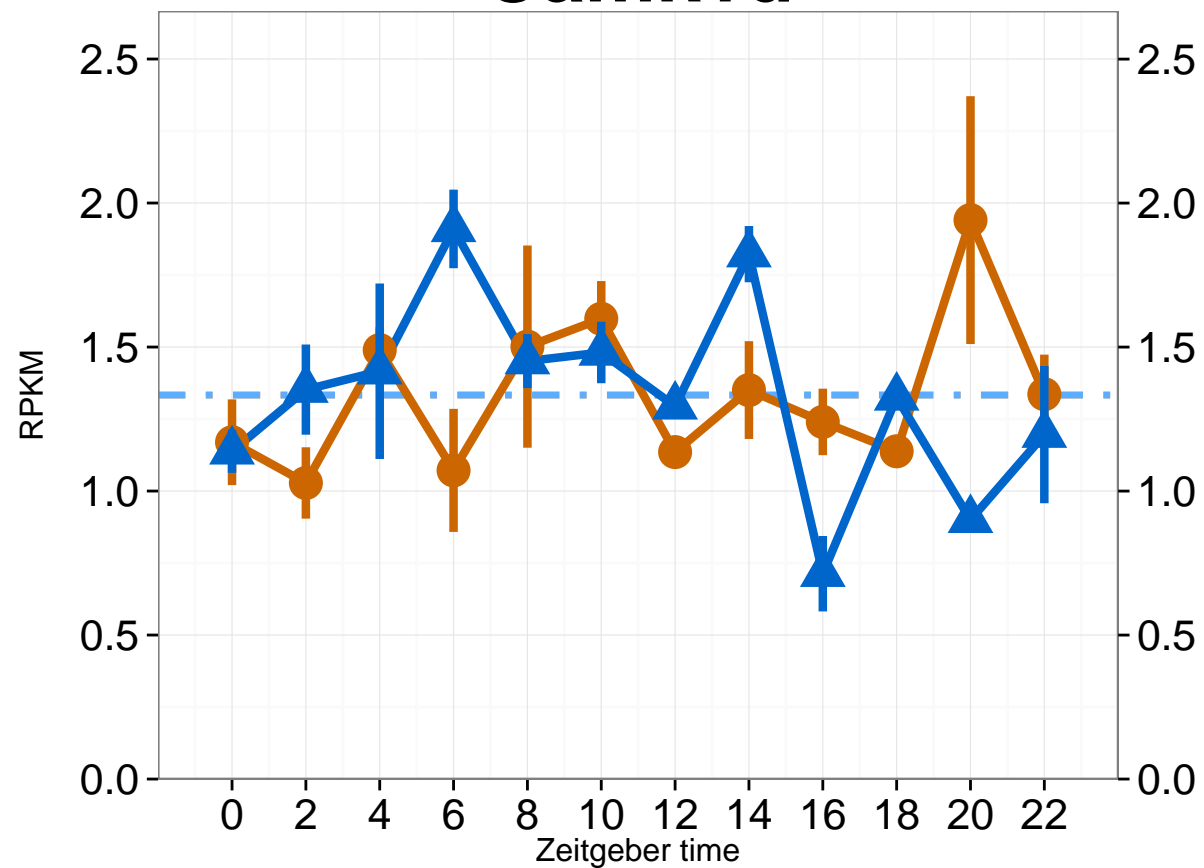

## Camk1d

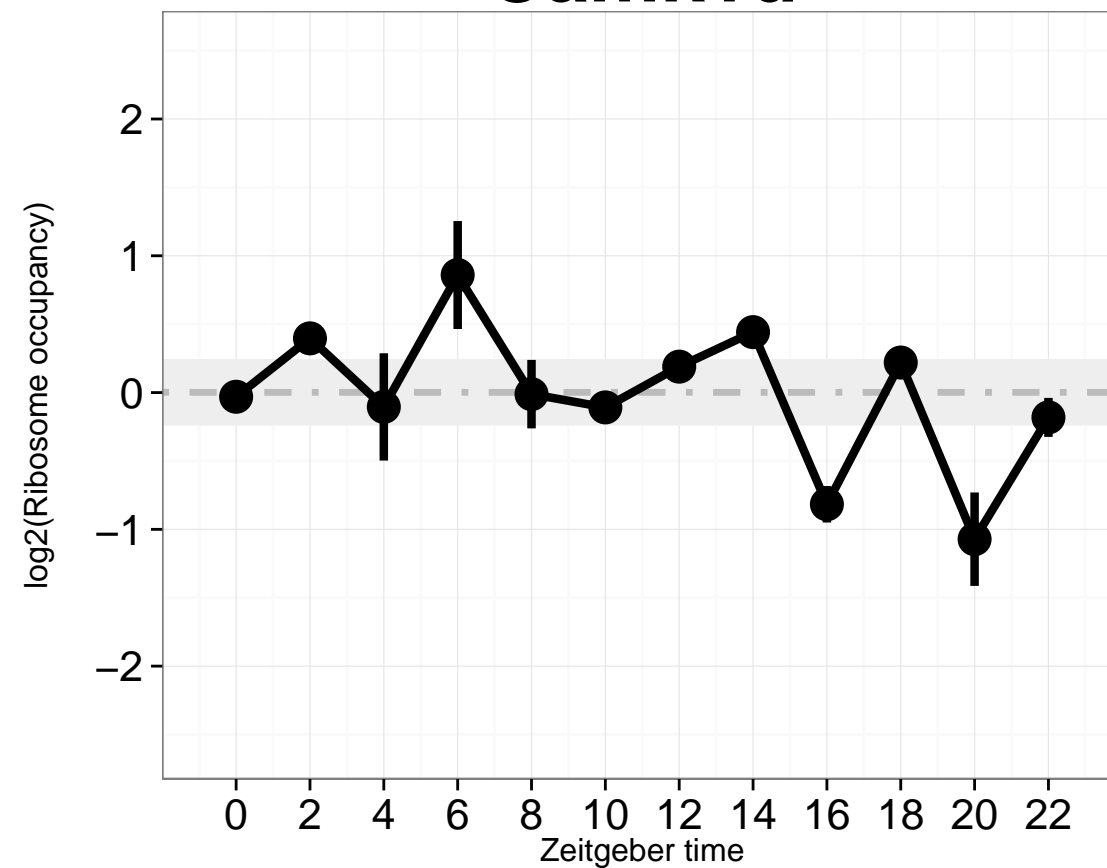

Supplement: Supplementary file 7634 [file 1]

# Dgcr14

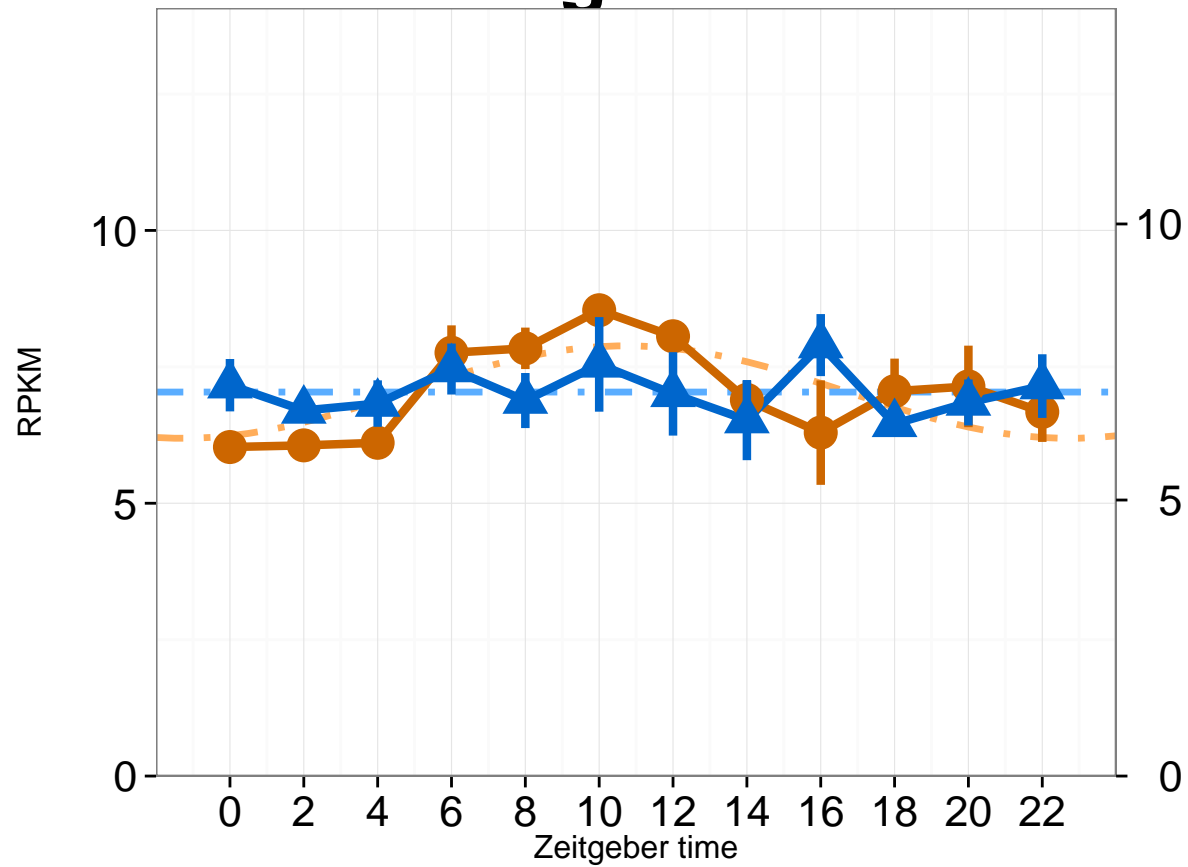

# Dgcr14

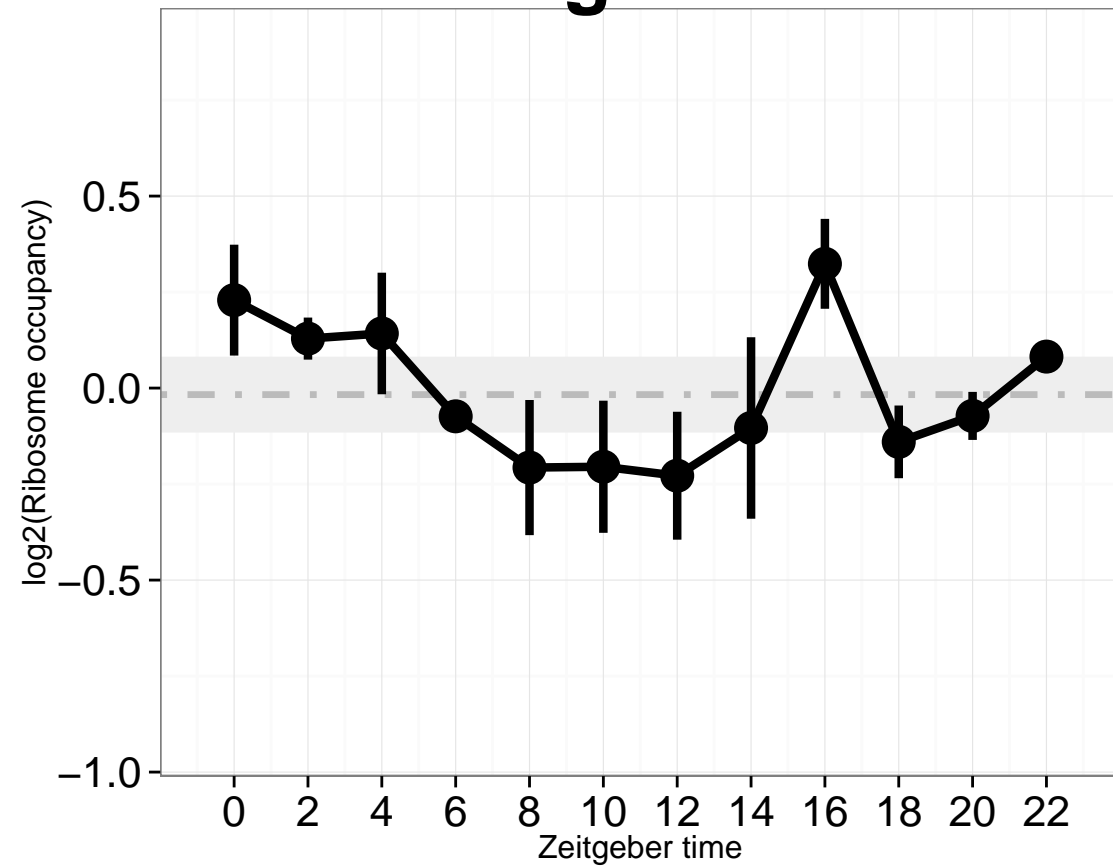

Supplement: Supplementary file 7635 [file 1]

# Cdc42se1

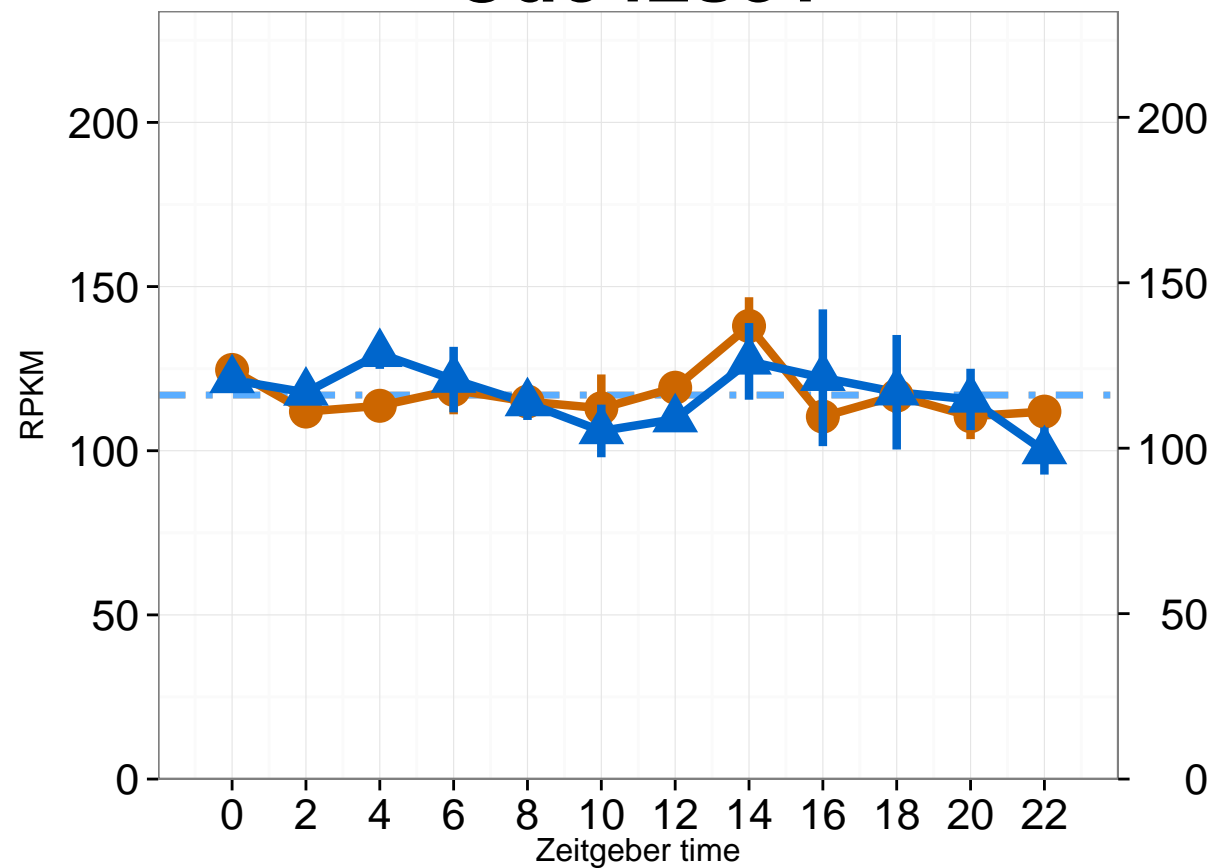

# Cdc42se1

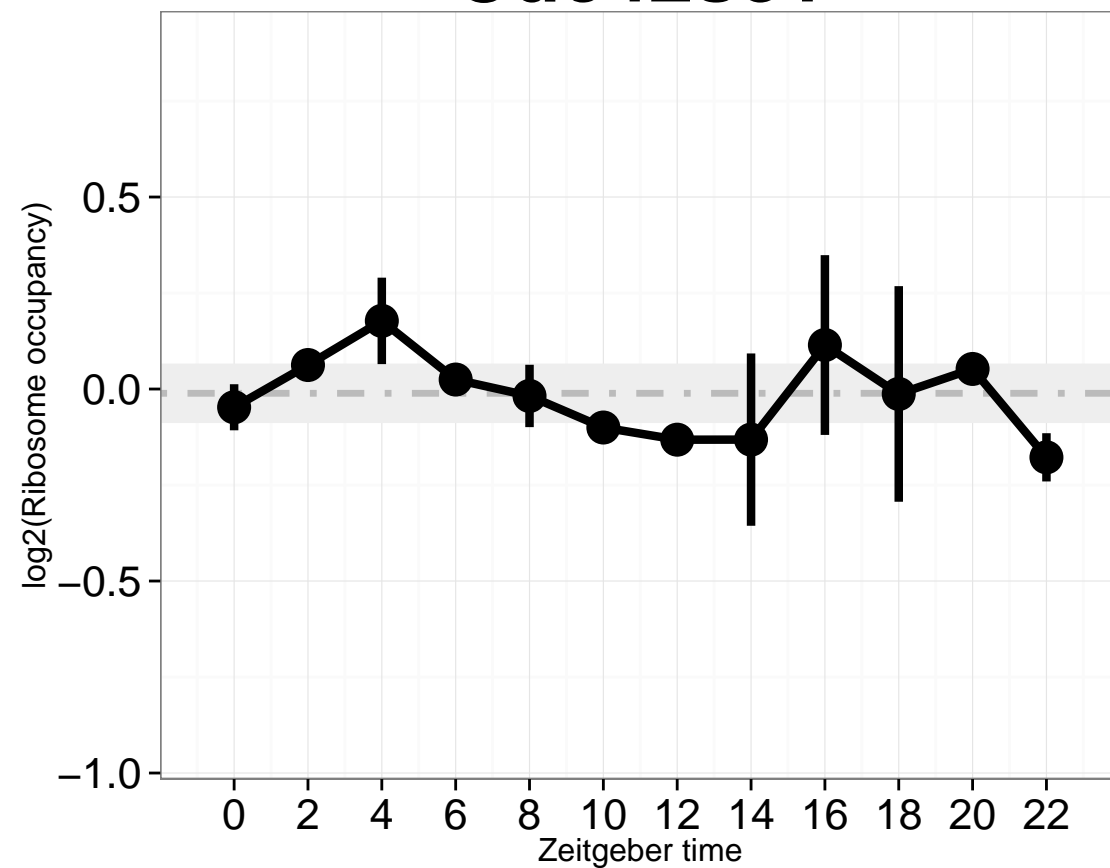

Supplement: Supplementary file 7636 [file 1]

## Rab28

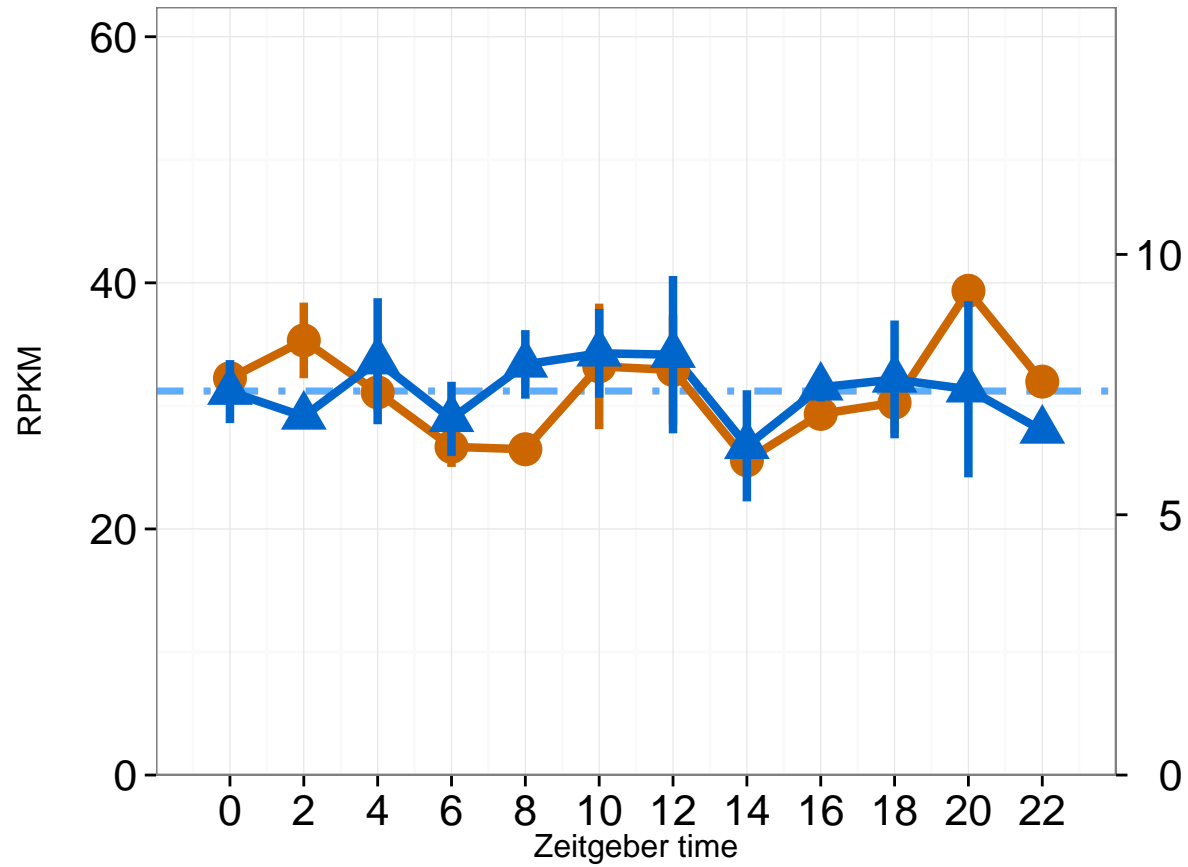

## Rab28

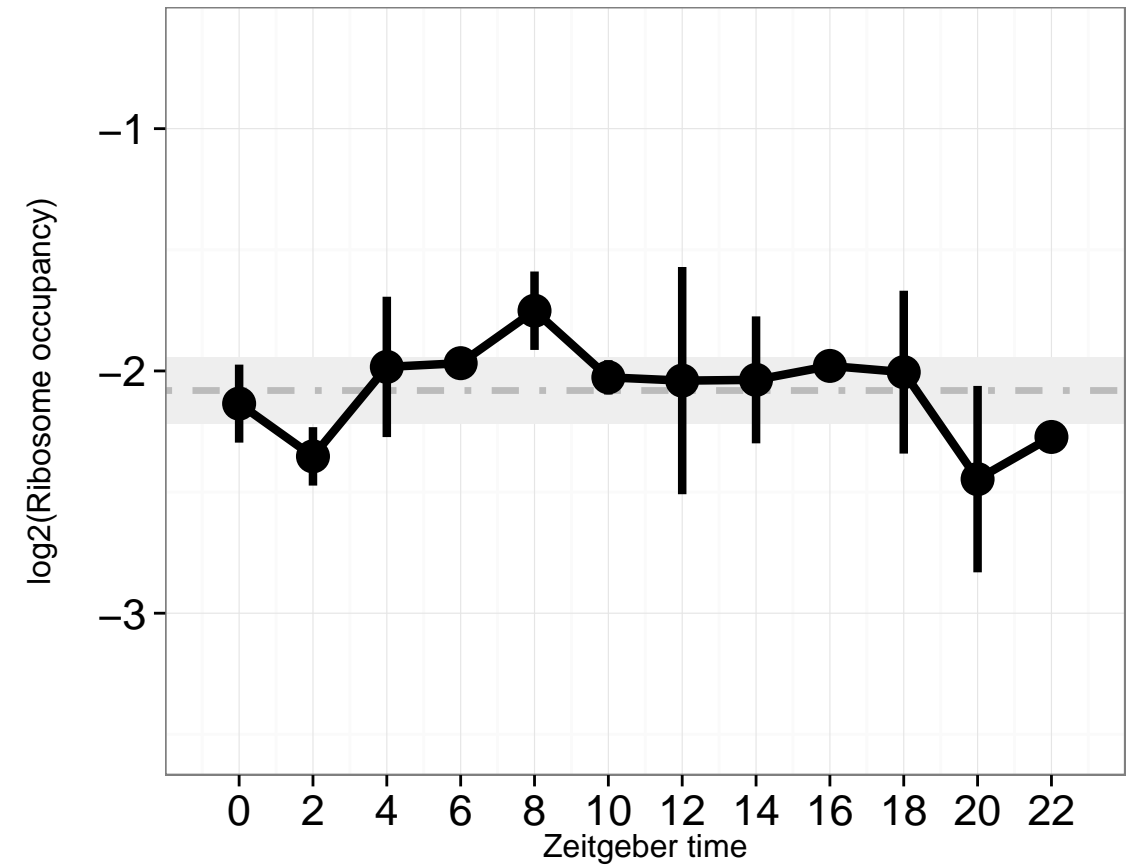

Supplement: Supplementary file 7637 [file 1]

# Tut1

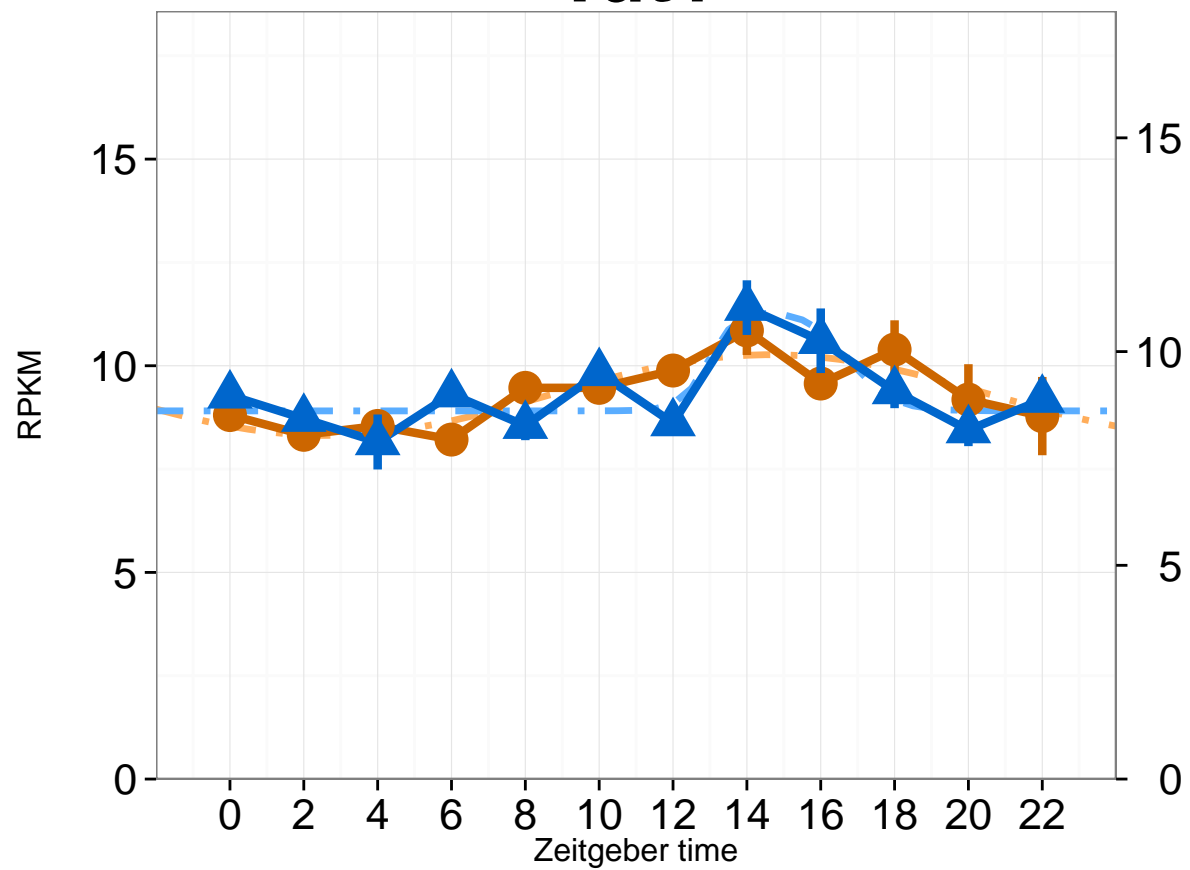

# Tut1

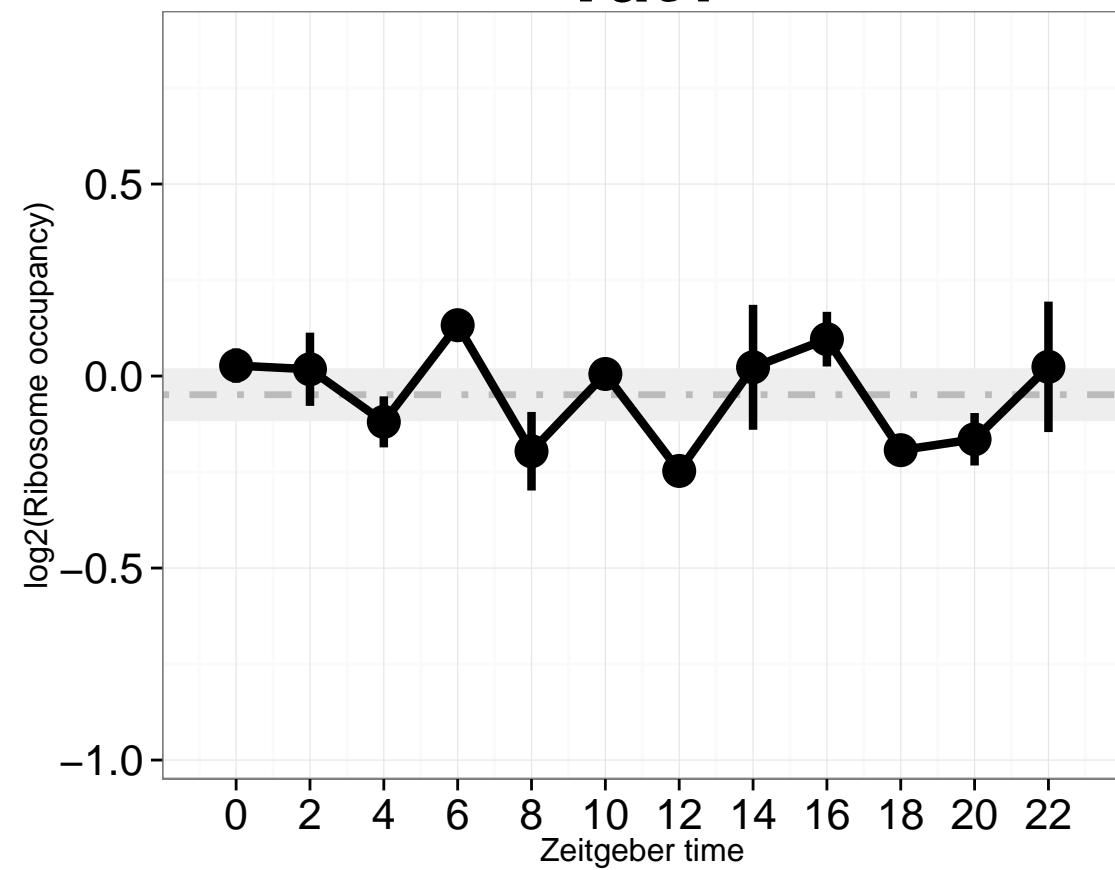

Supplement: Supplementary file 7638 [file 1]

# Mtmr7

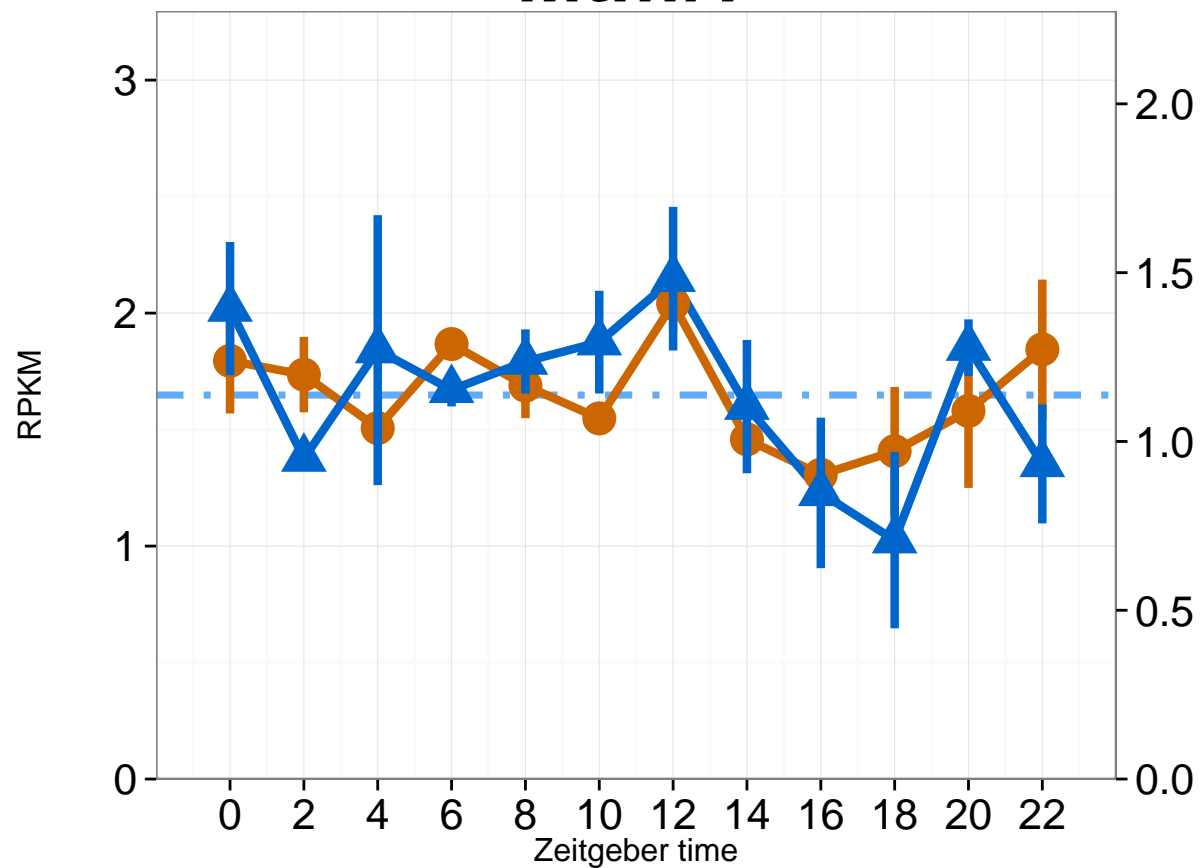

# Mtmr7

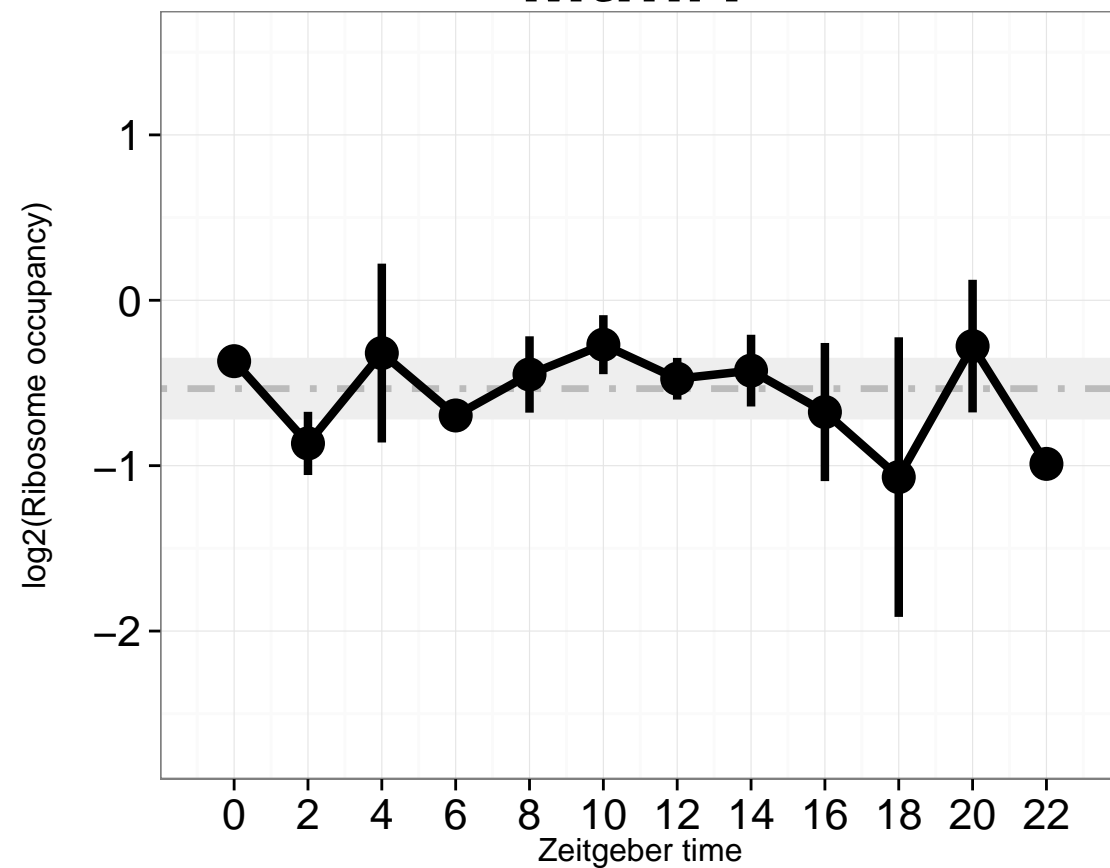

Supplement: Supplementary file 7639 [file 1]

# Espl1

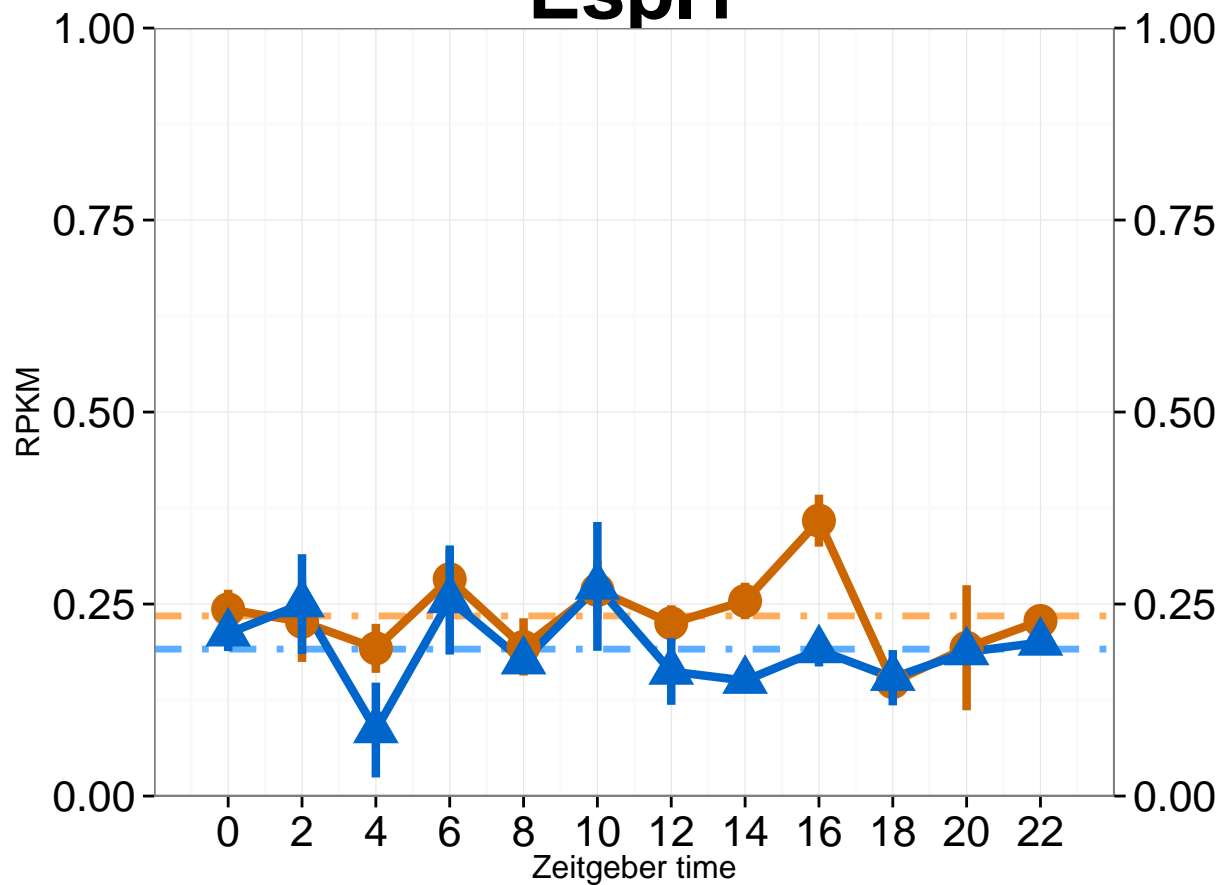

# Espl1

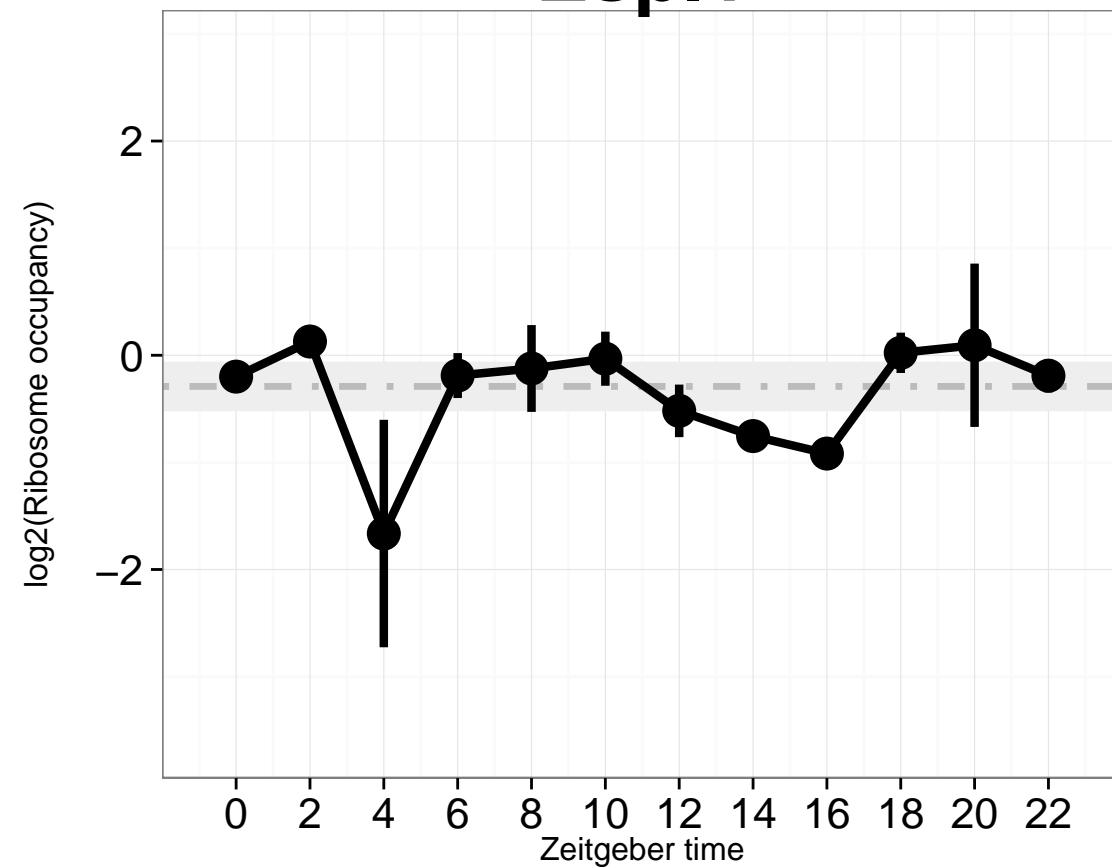

Supplement: Supplementary file 7640 [file 1]

## Tmed10

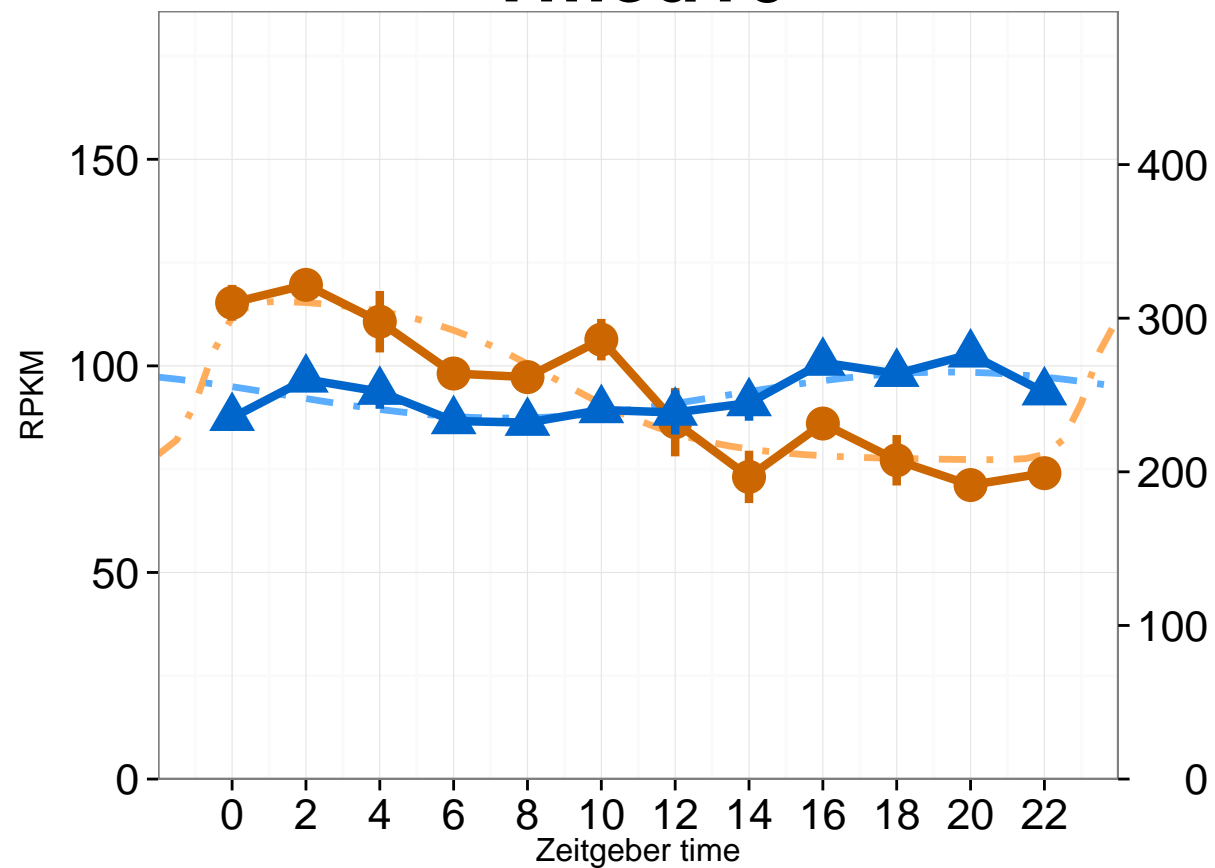

## Tmed10

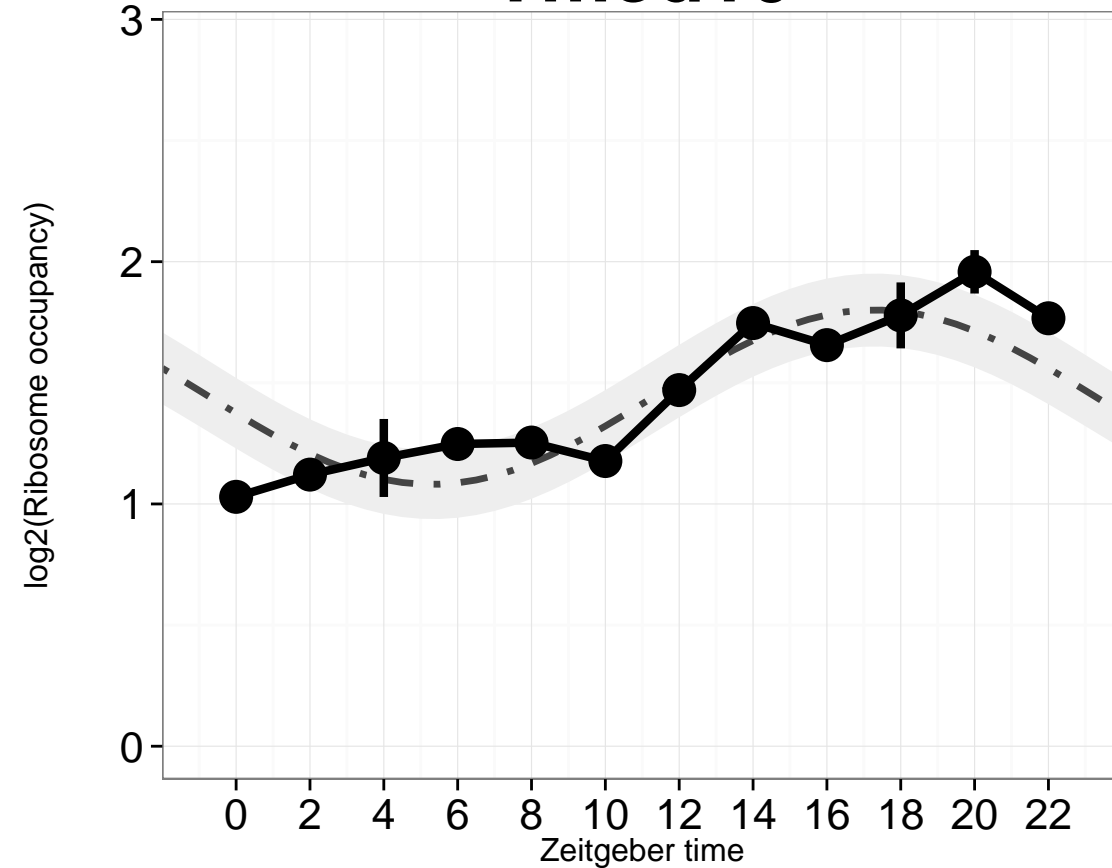

Supplement: Supplementary file 7641 [file 1]

## Mmaa

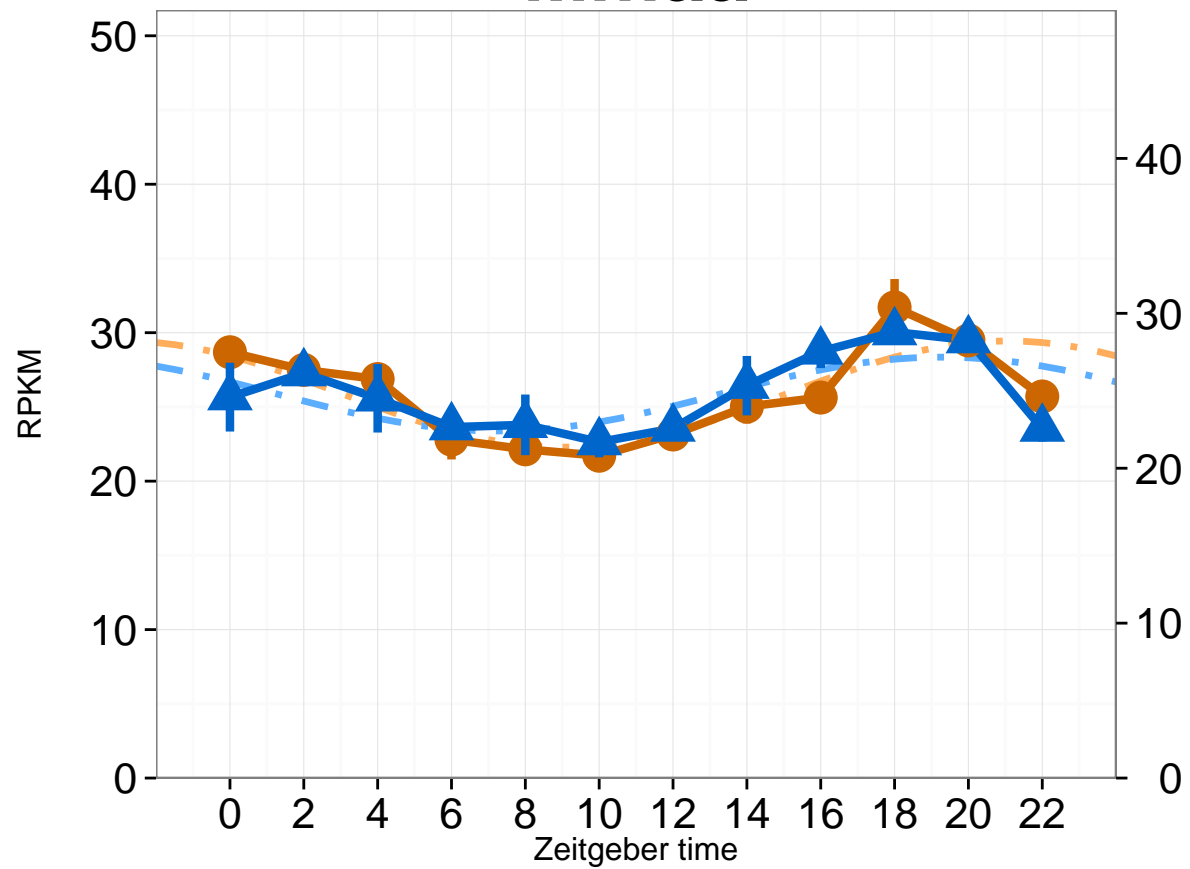

## Mmaa

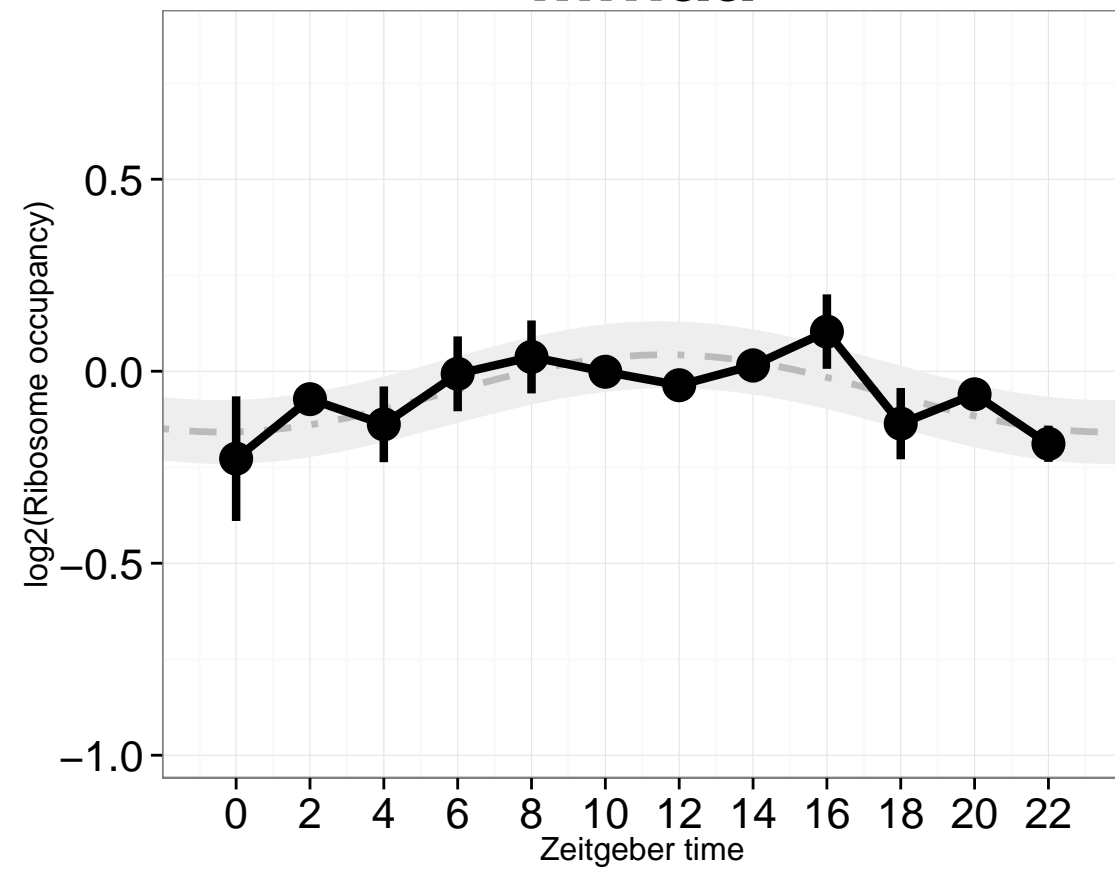

Supplement: Supplementary file 7642 [file 1]

## Ghdc

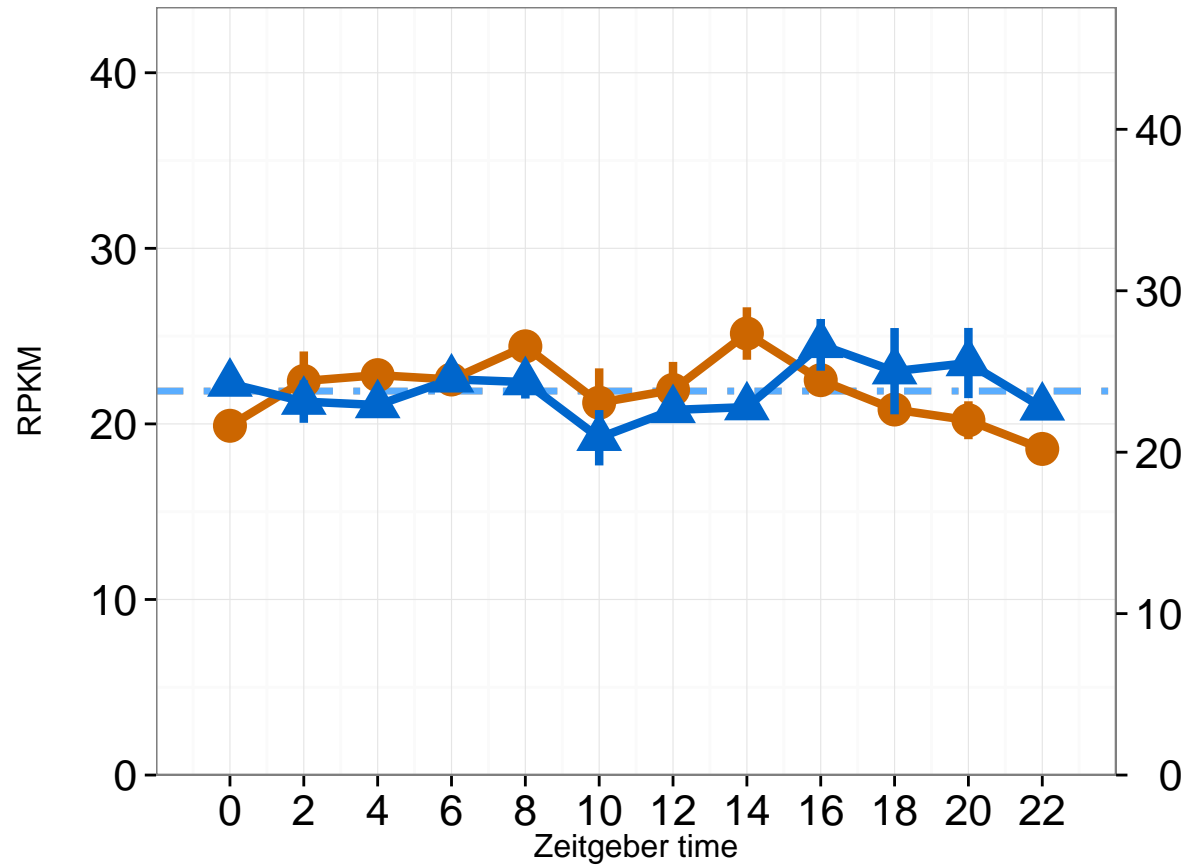

## Ghdc

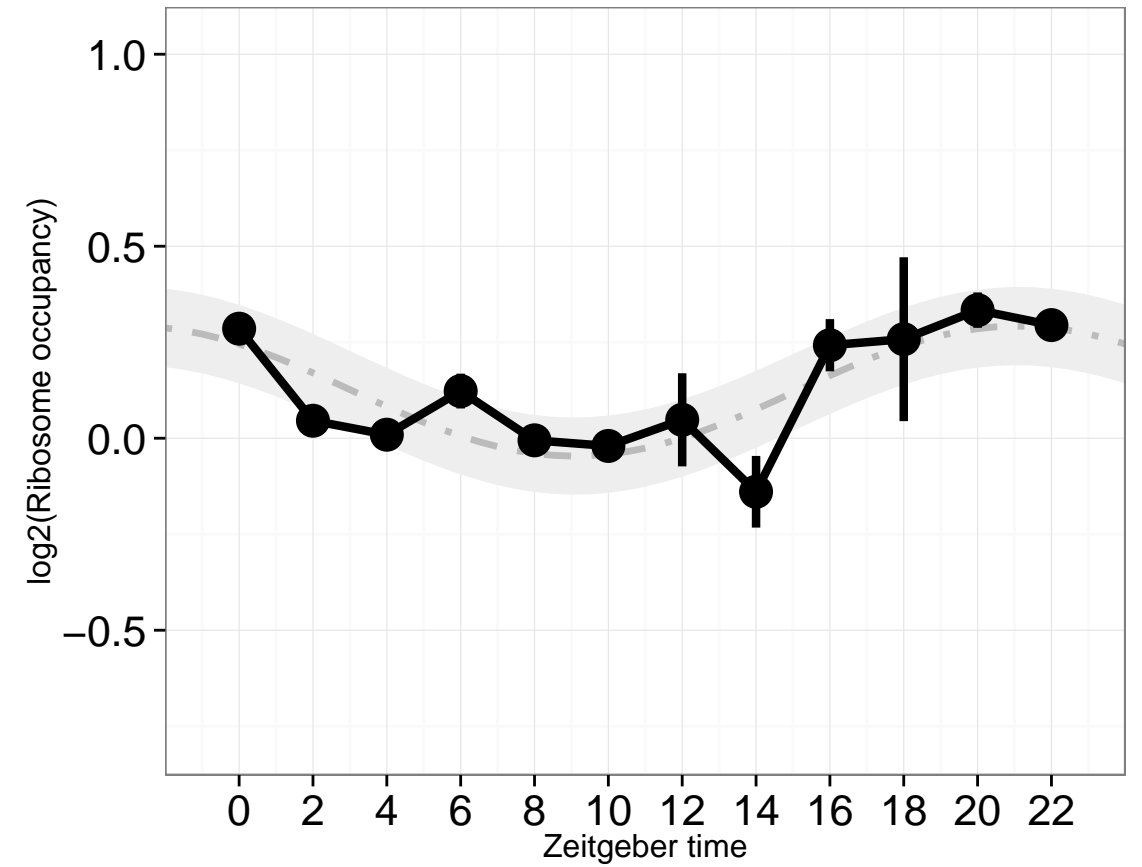

Supplement: Supplementary file 7643 [file 1]

## Senp6

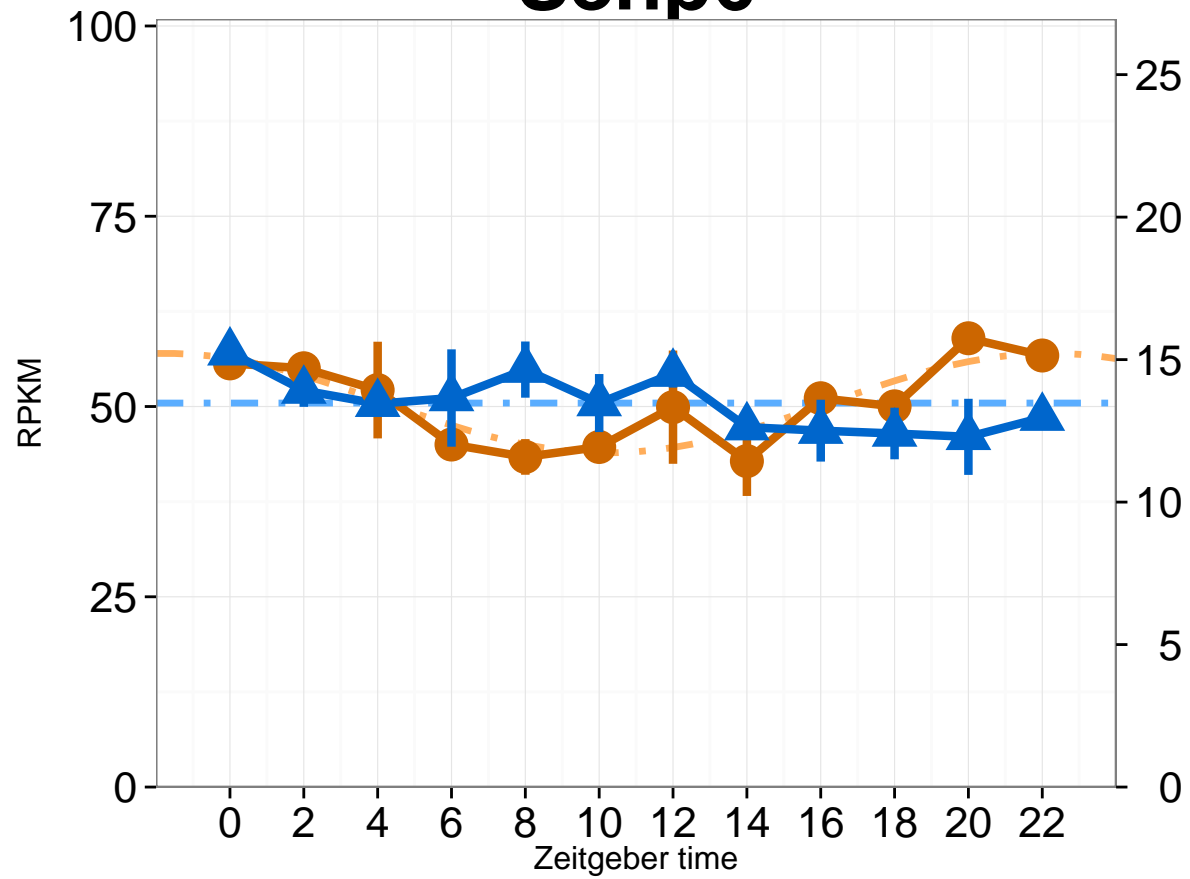

## Senp6

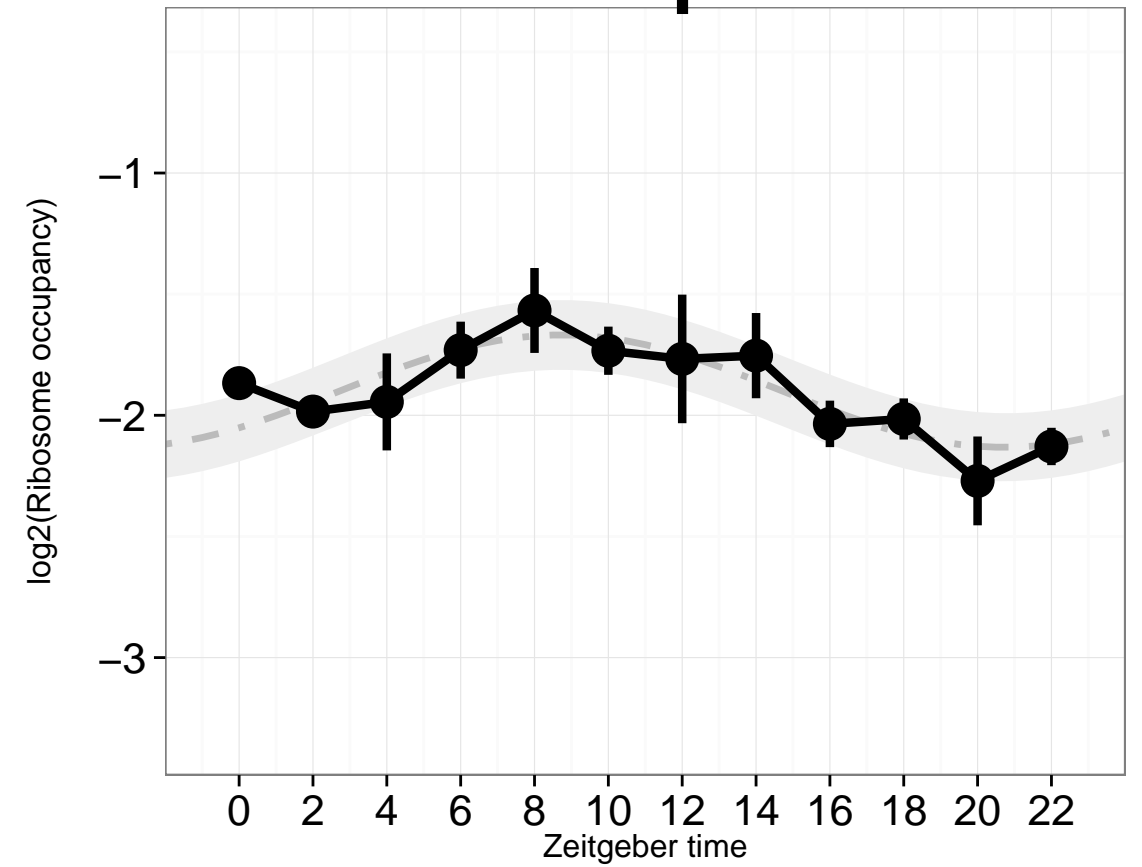

Supplement: Supplementary file 7644 [file 1]

# Mageh1

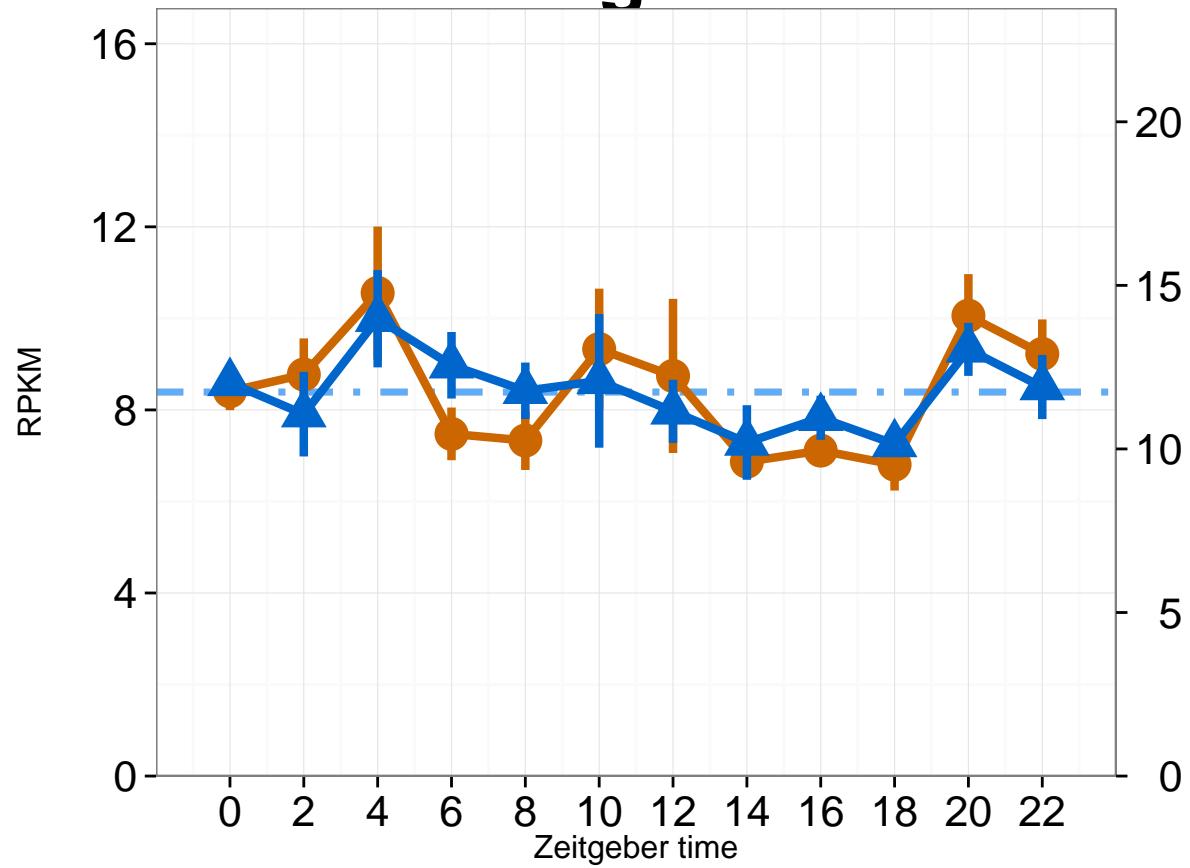

# Mageh1

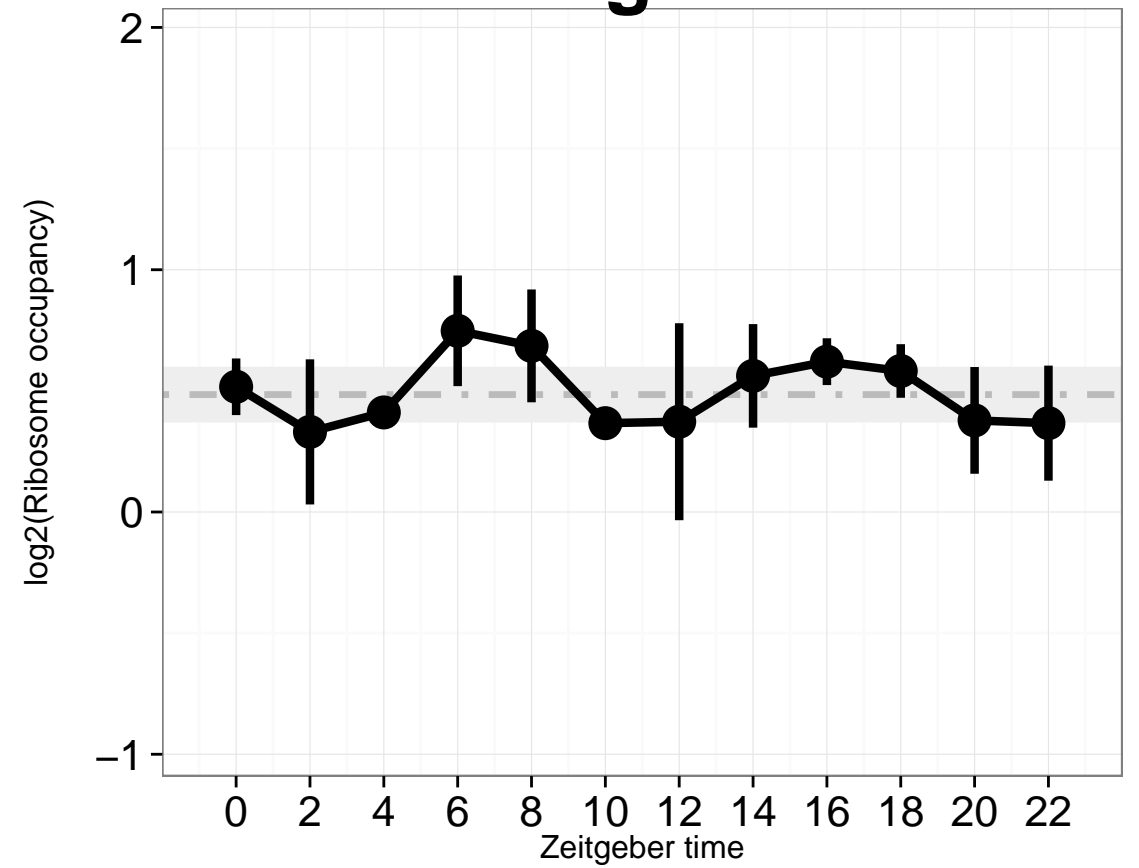

Supplement: Supplementary file 7645 [file 1]

## Bbs5

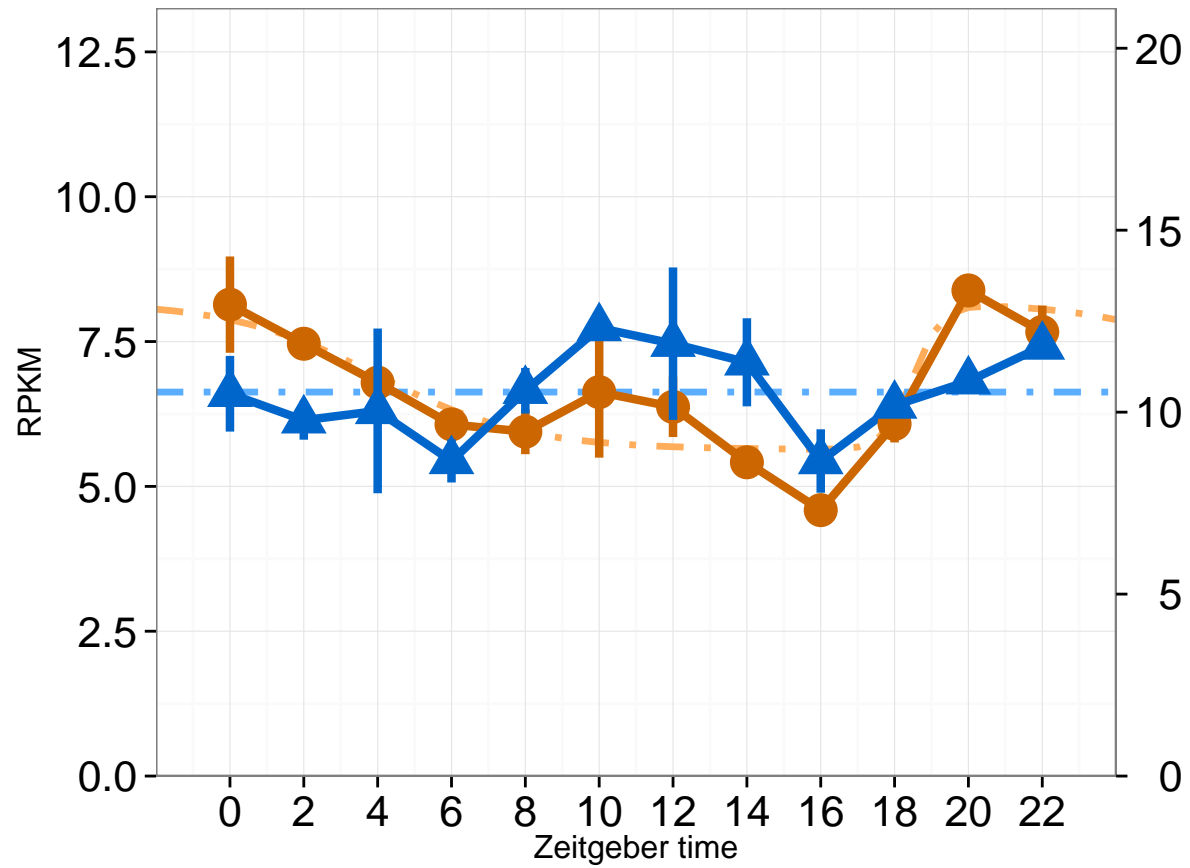

## Bbs5

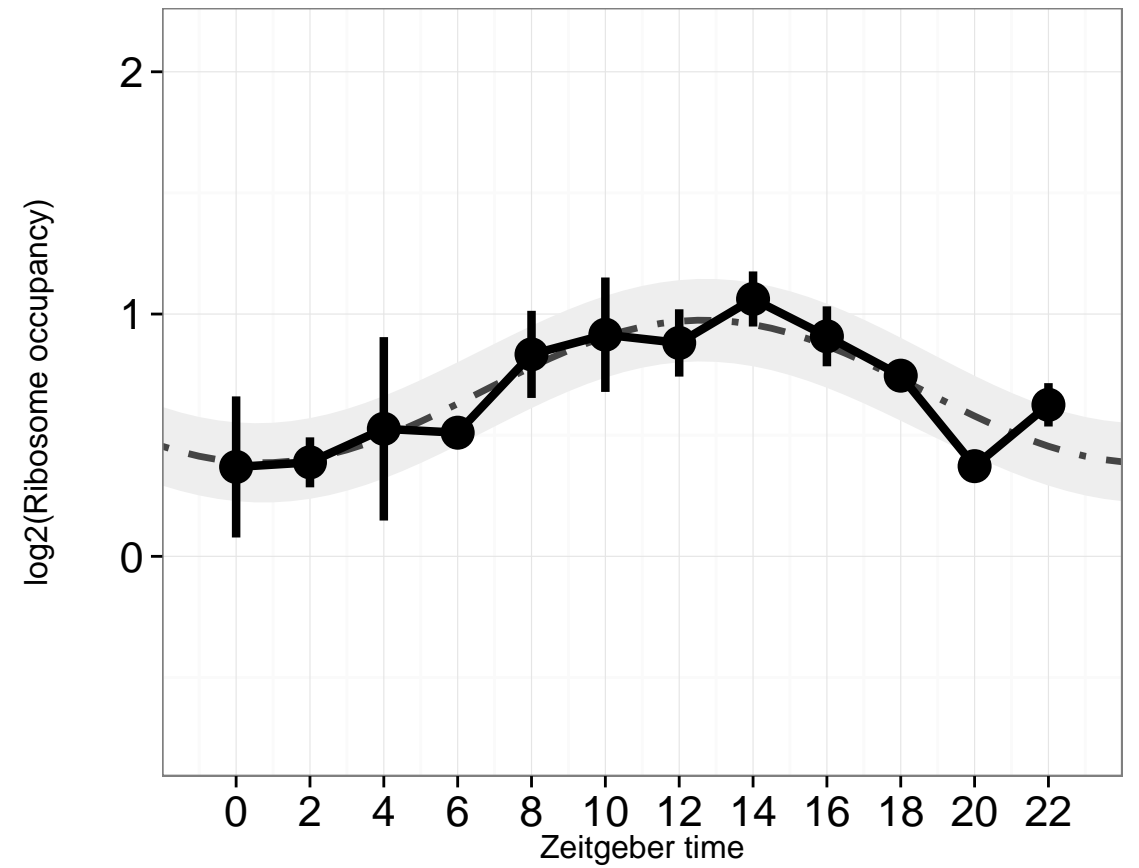

Supplement: Supplementary file 7646 [file 1]

# Alas1

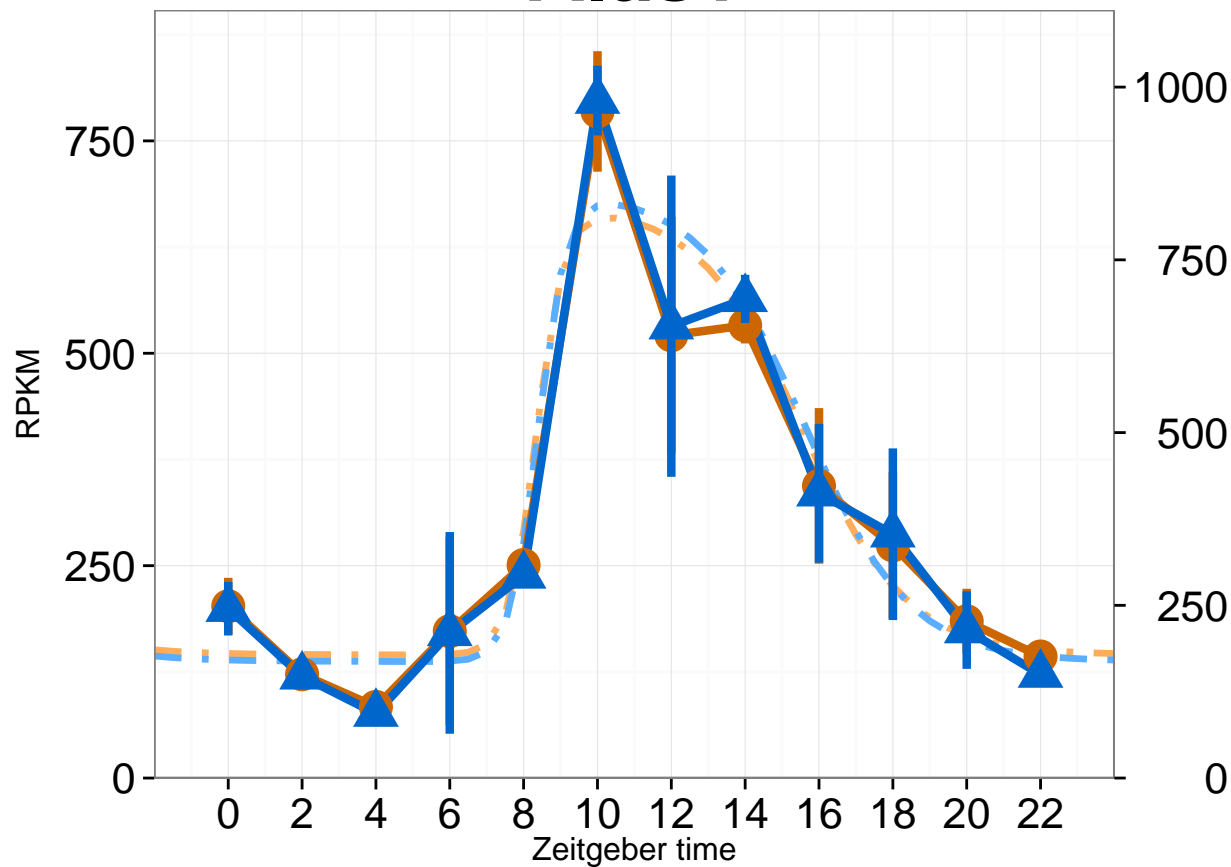

# Alas1

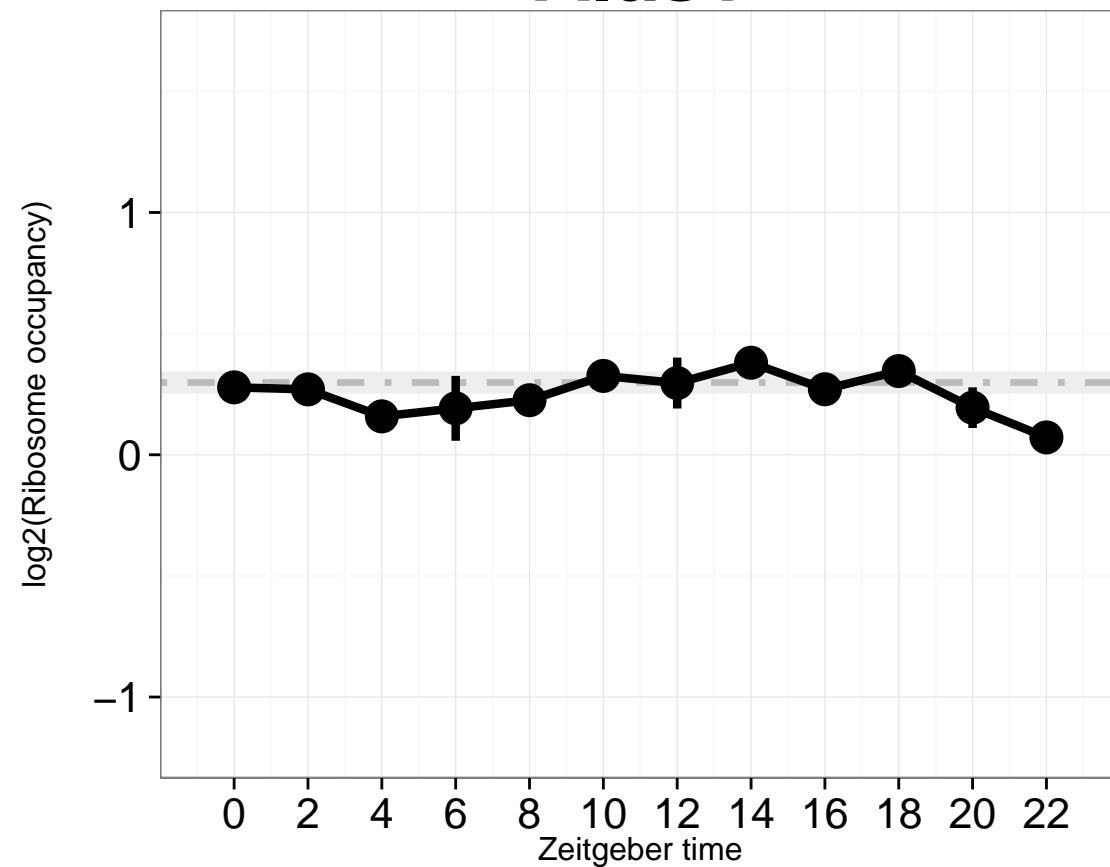

Supplement: Supplementary file 7647 [file 1]

# Timd2

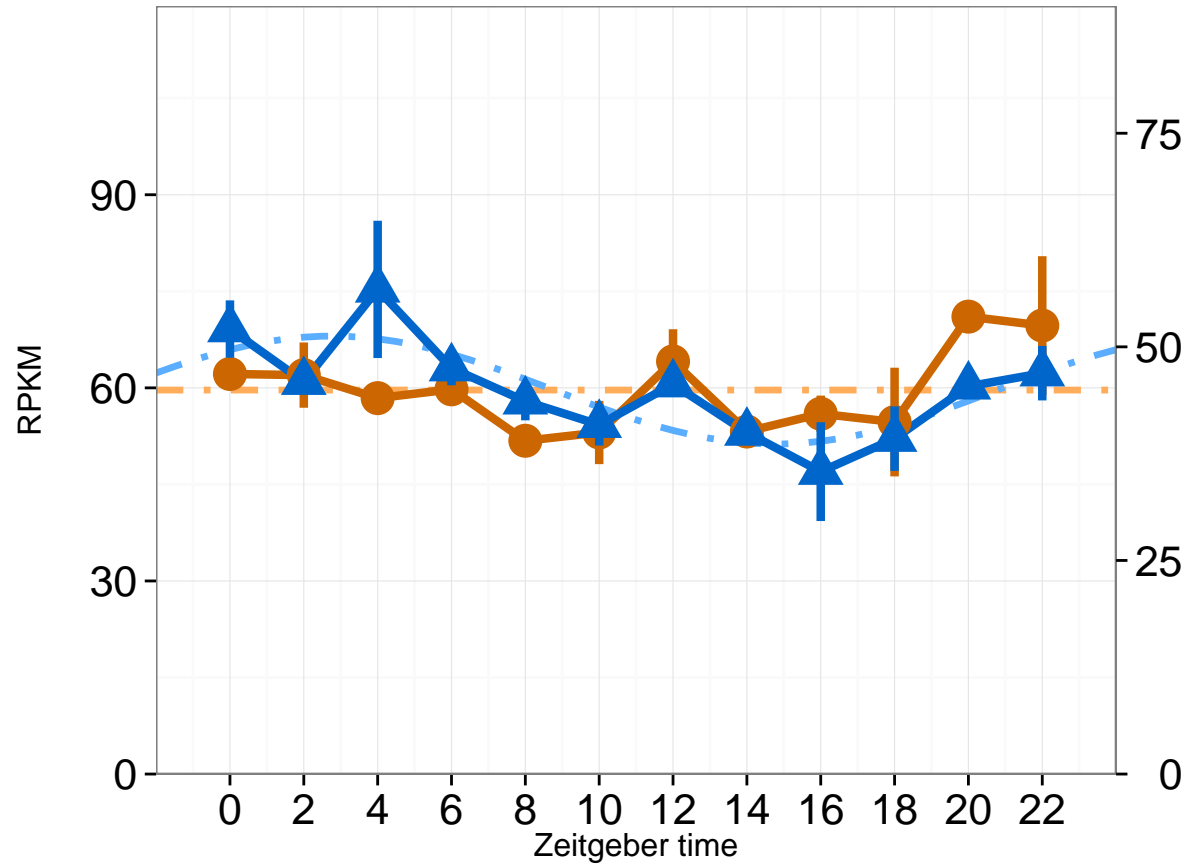

# Timd2

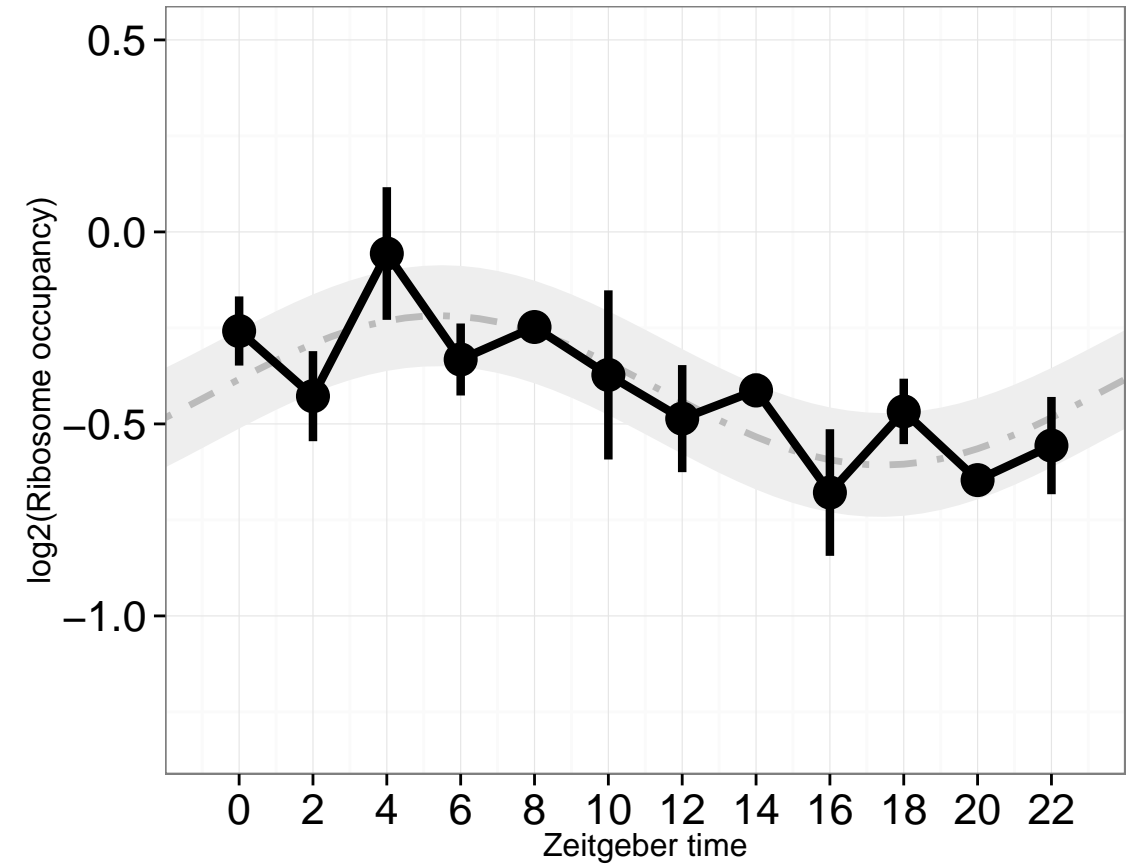

Supplement: Supplementary file 7648 [file 1]

## Osbp2

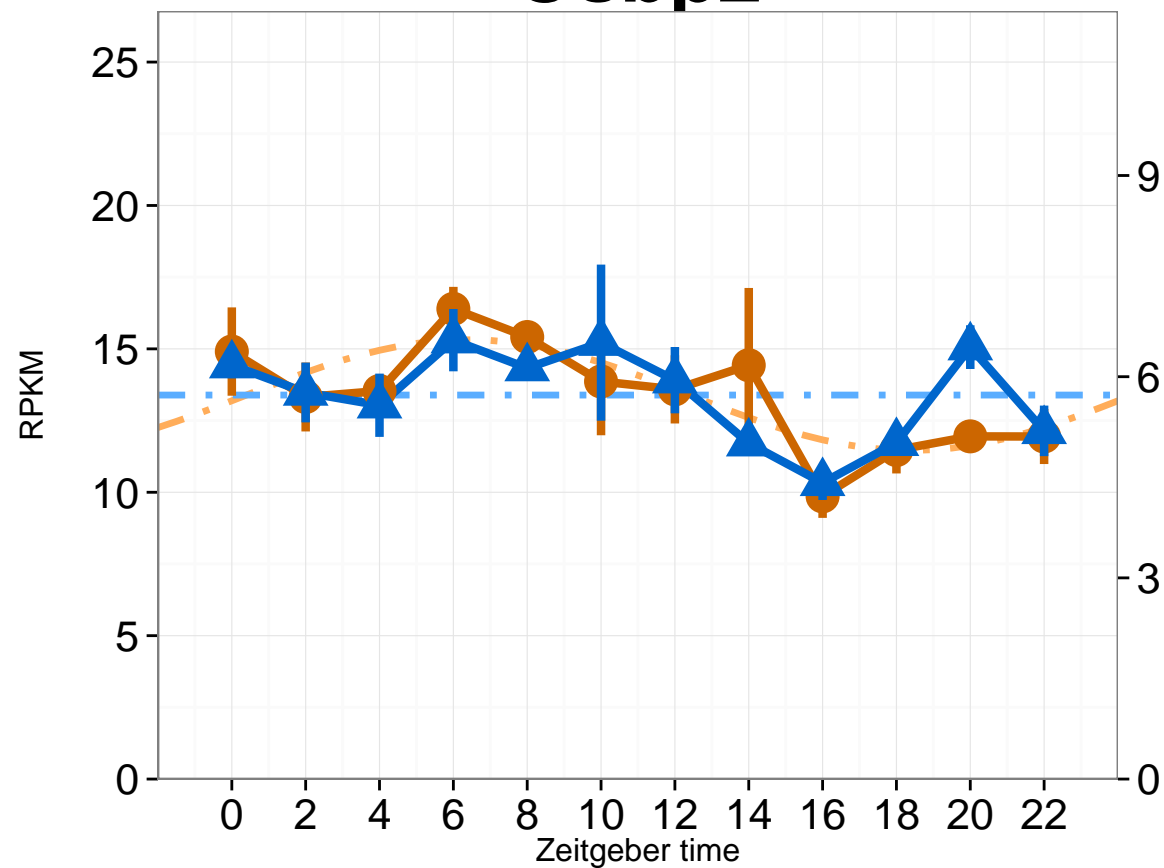

## Osbp2

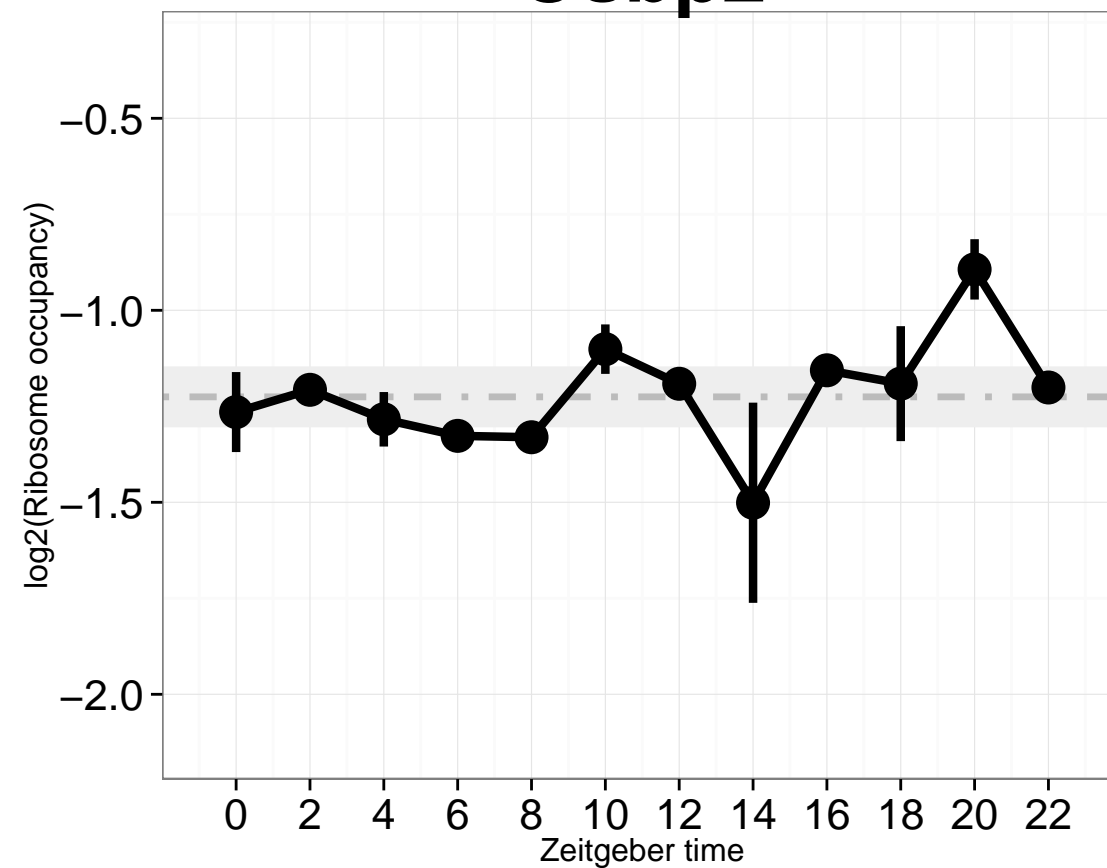

Supplement: Supplementary file 7649 [file 1]

# Kctd17

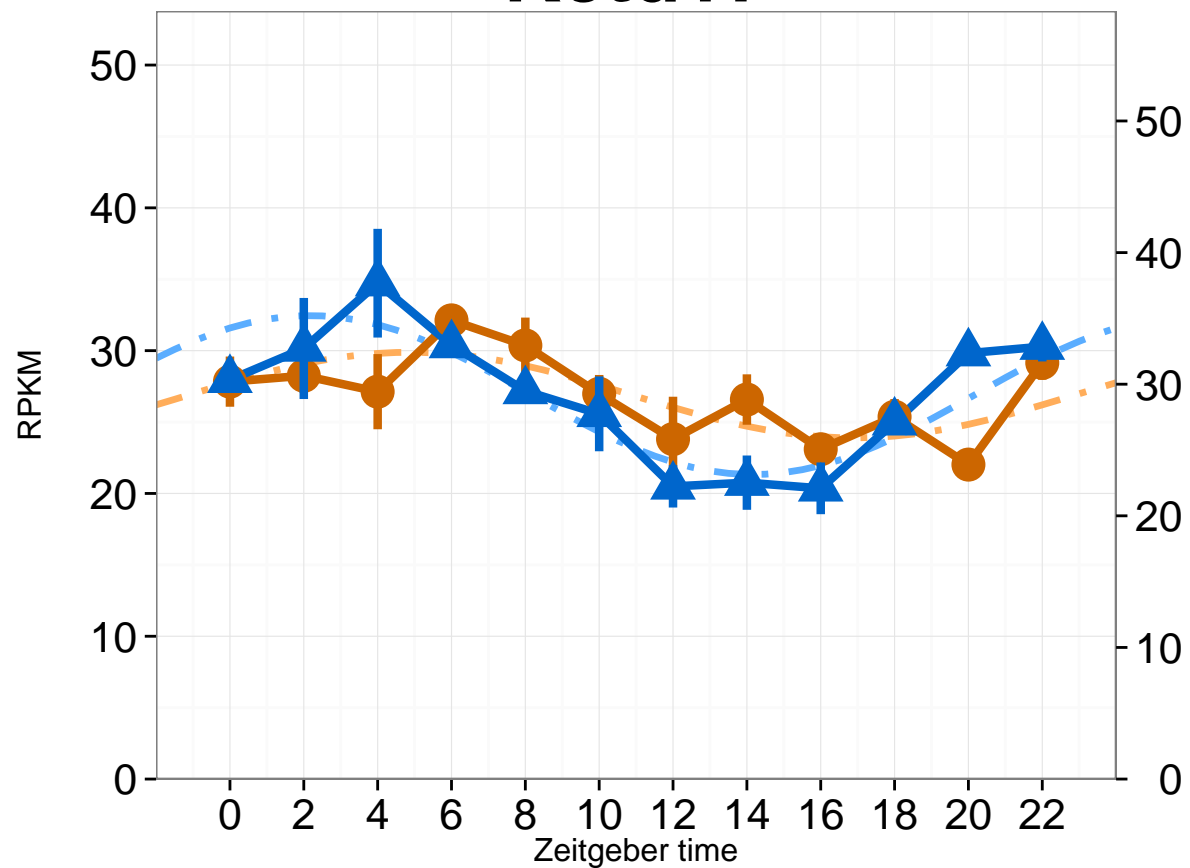

# Kctd17

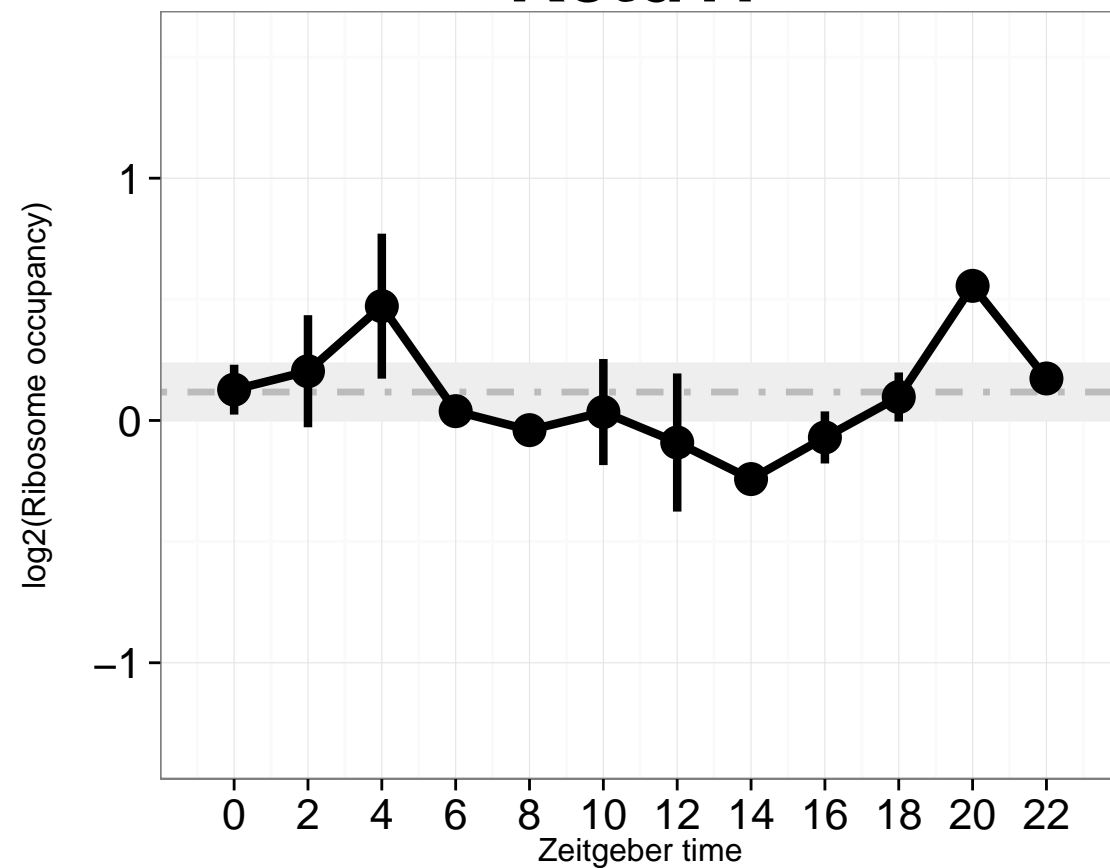

Supplement: Supplementary file 7650 [file 1]

# Depdc5

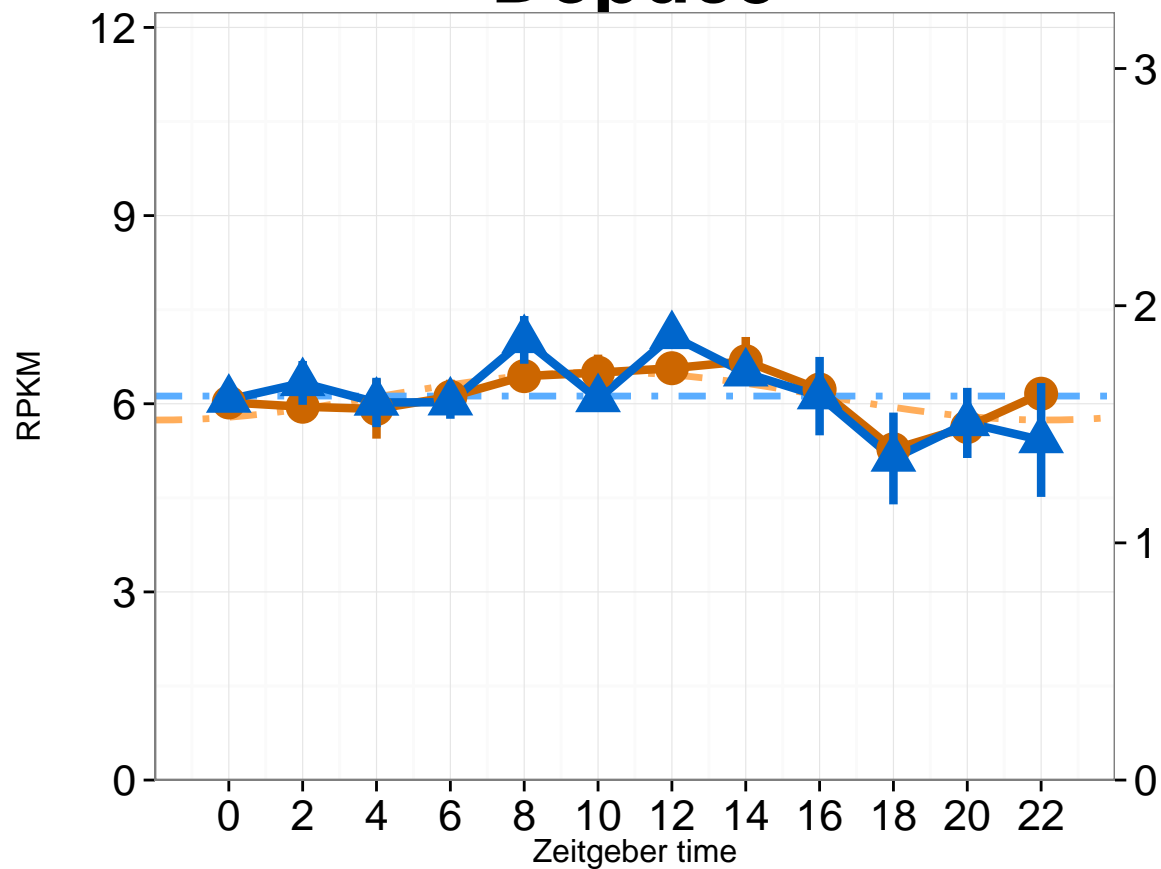

# Depdc5

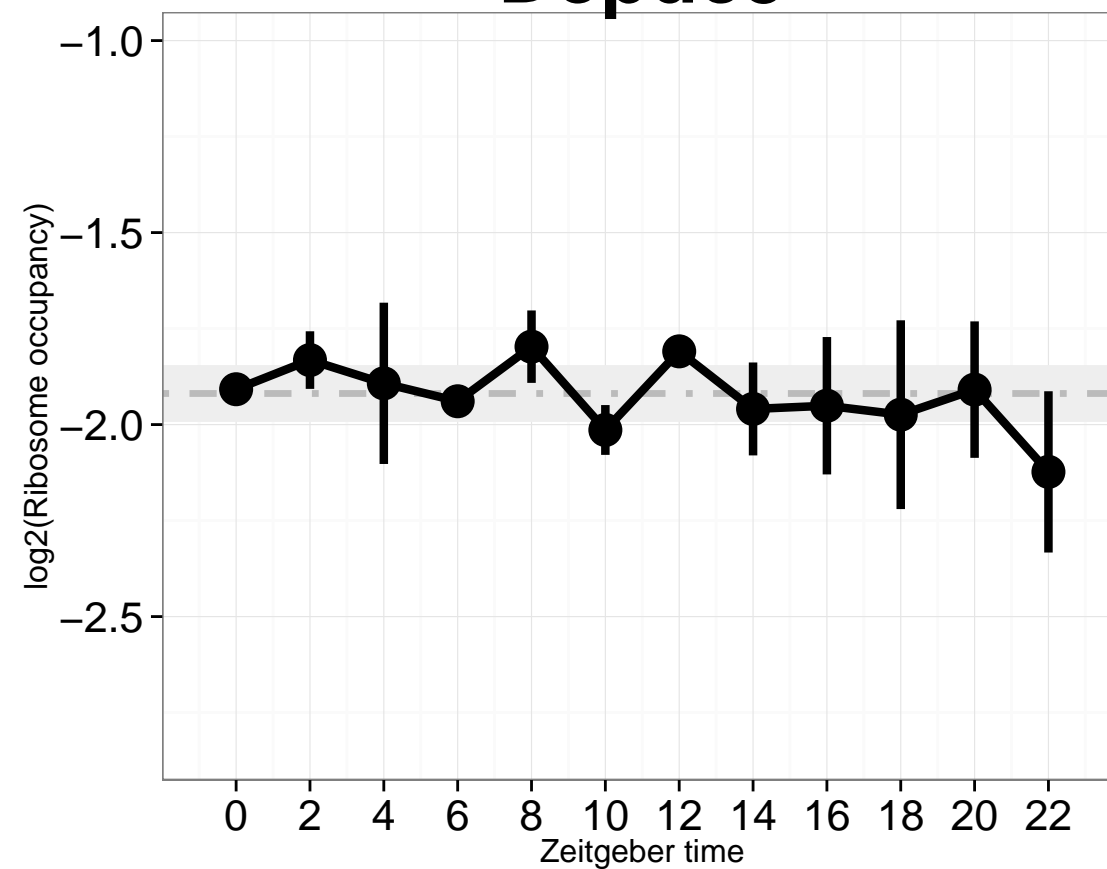

Supplement: Supplementary file 7651 [file 1]

## Mphosph6

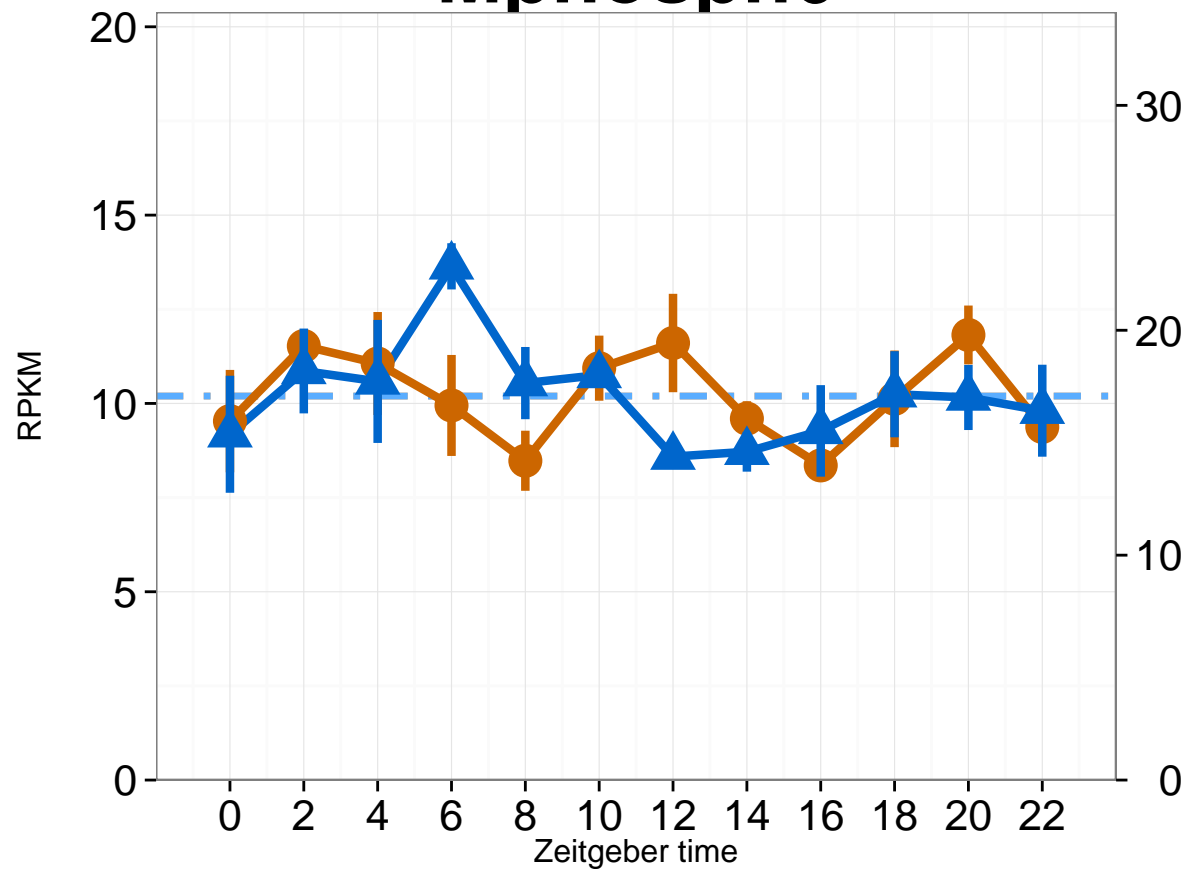

## Mphosph6

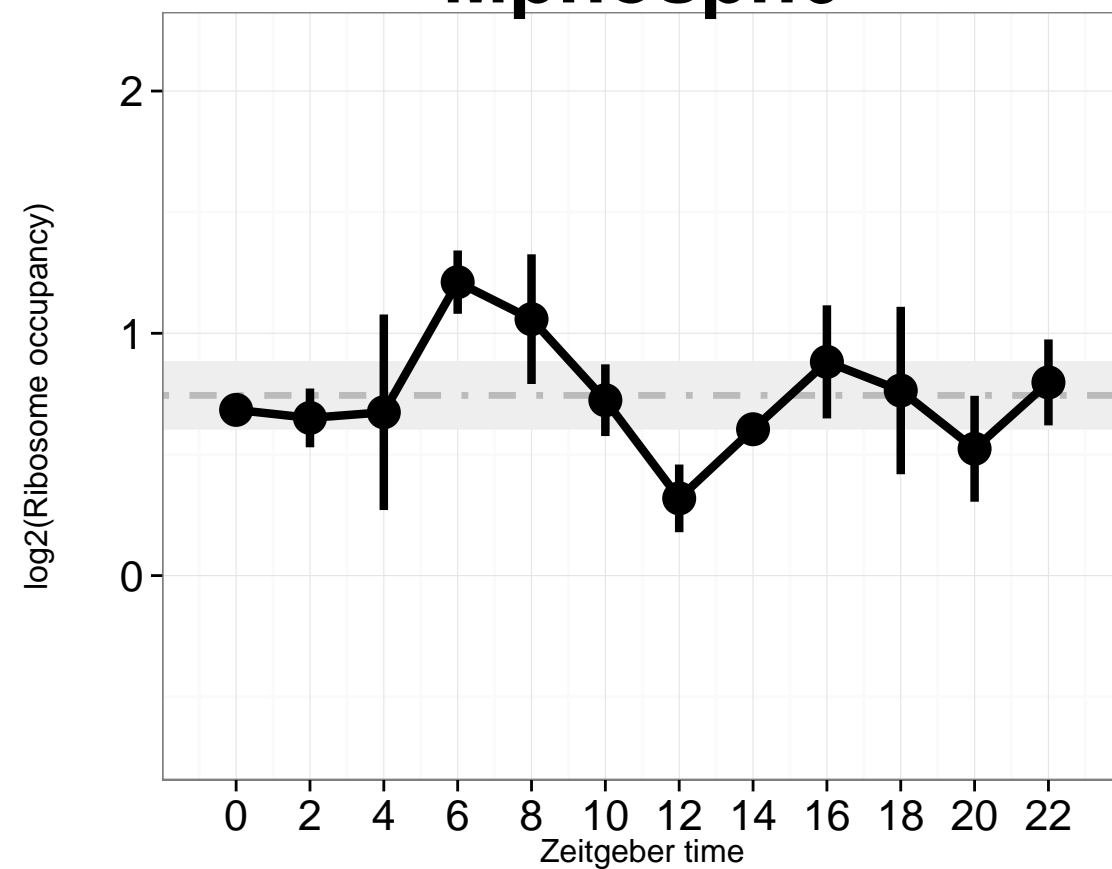

Supplement: Supplementary file 7652 [file 1]

## Rrp12

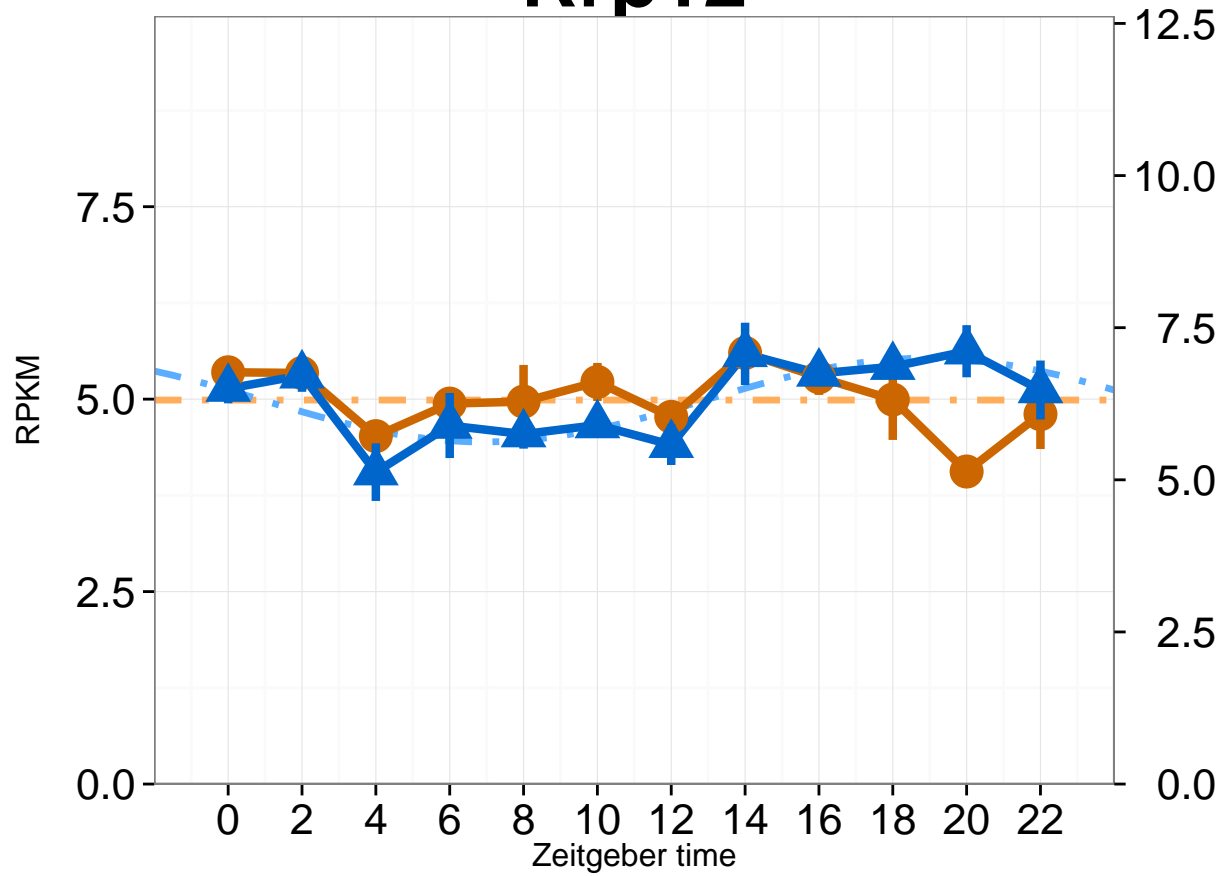

## Rrp12

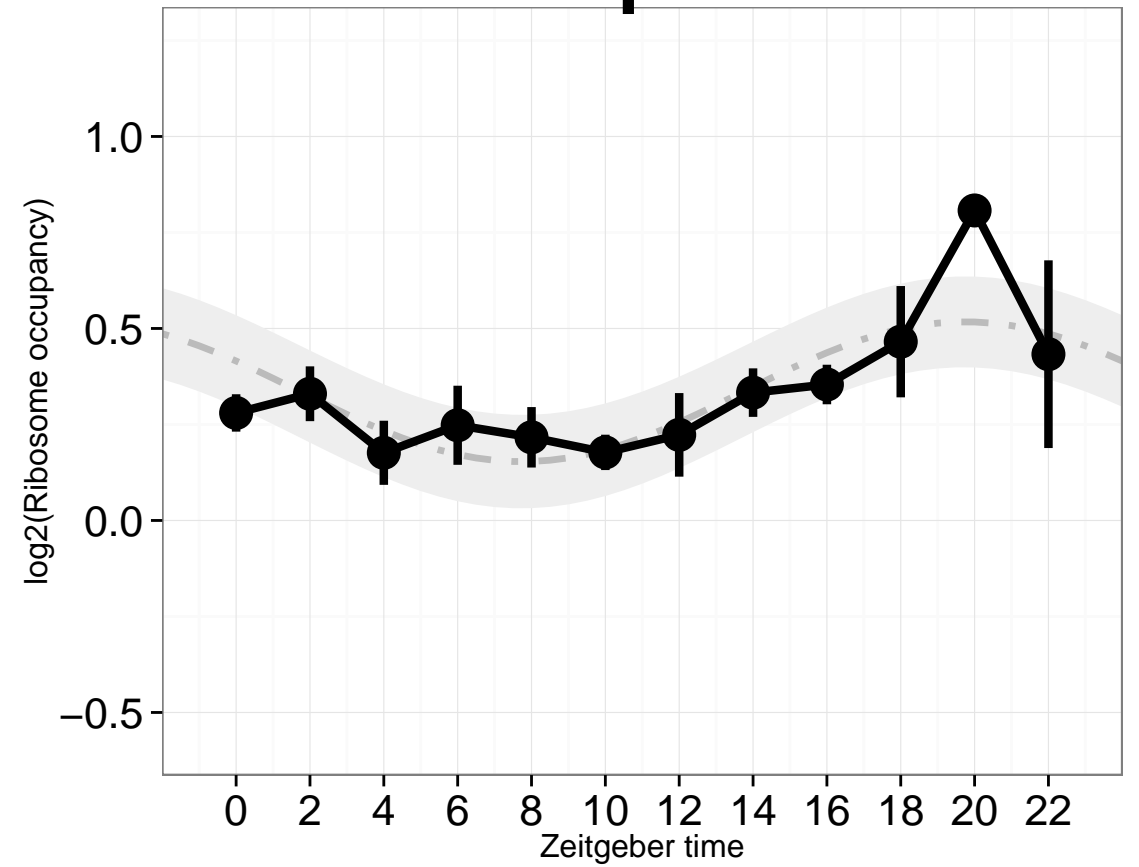

Supplement: Supplementary file 7653 [file 1]

# Stat5b

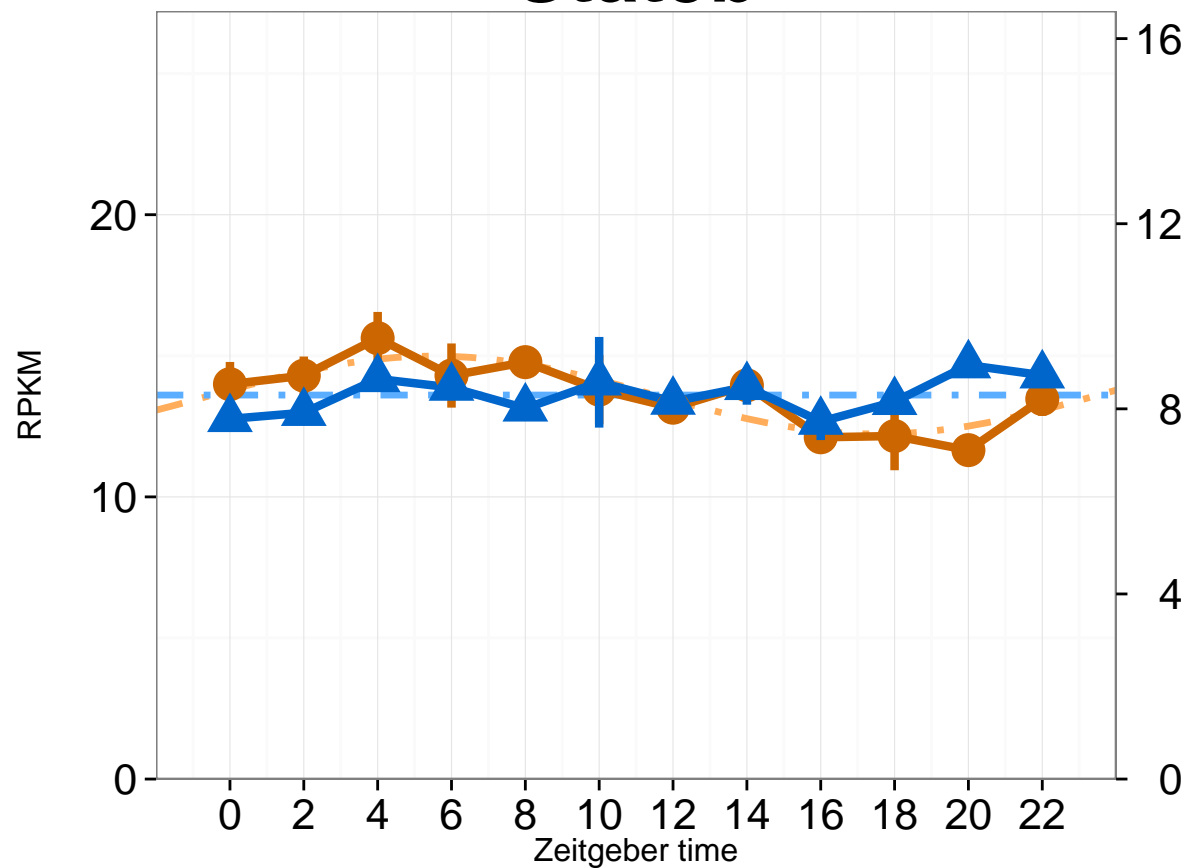

# Stat5b

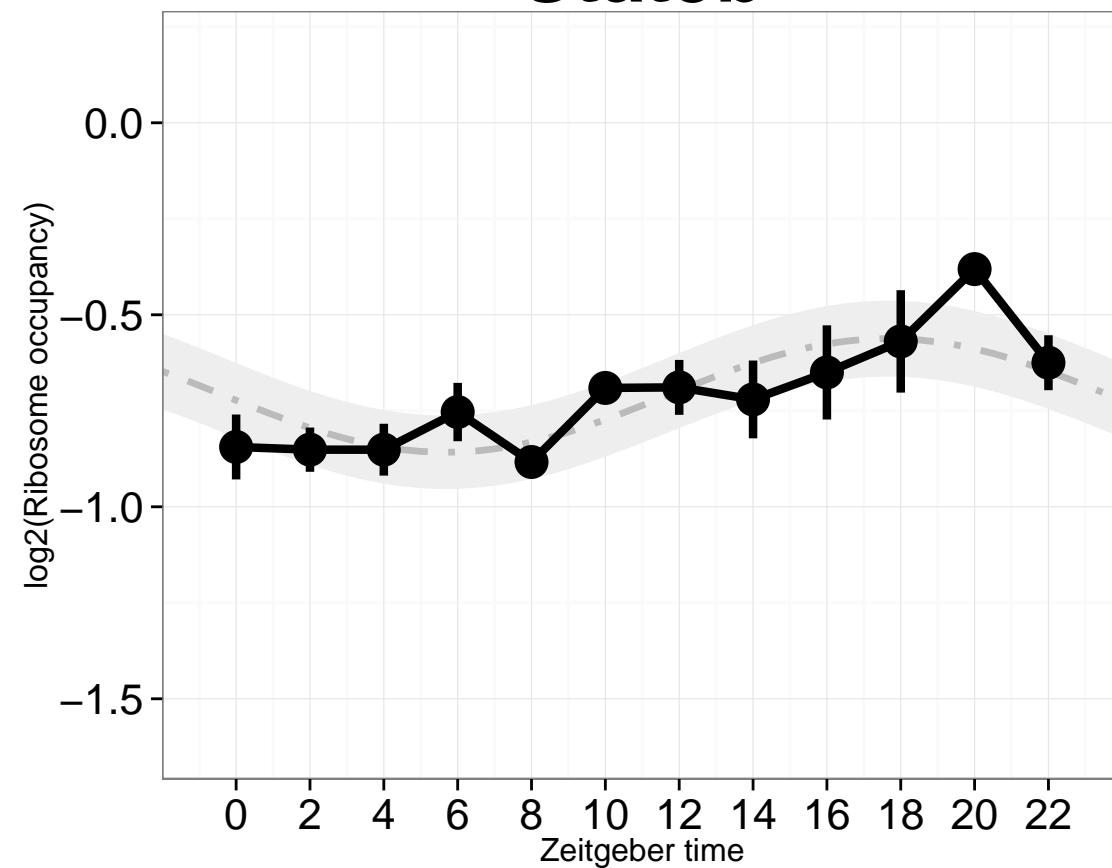

Supplement: Supplementary file 7654 [file 1]

## Ankrd23

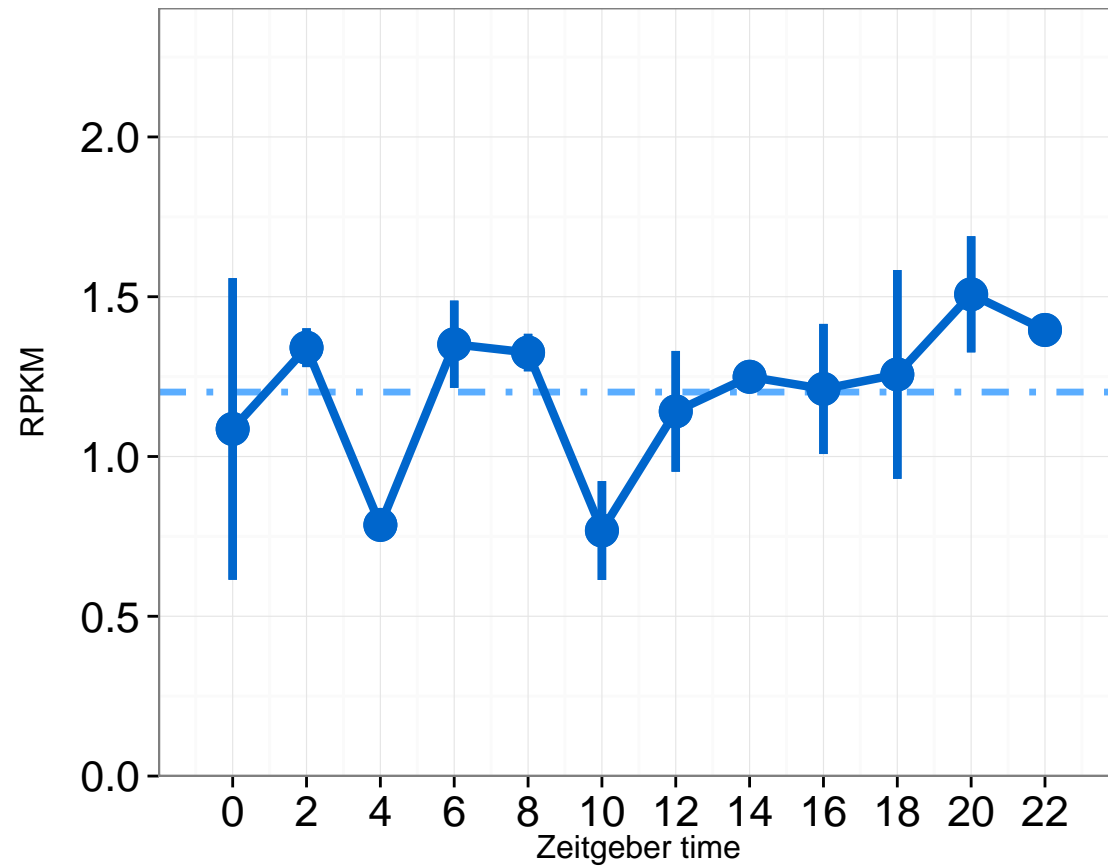

## Ankrd23 log2(Ribosome occupanc

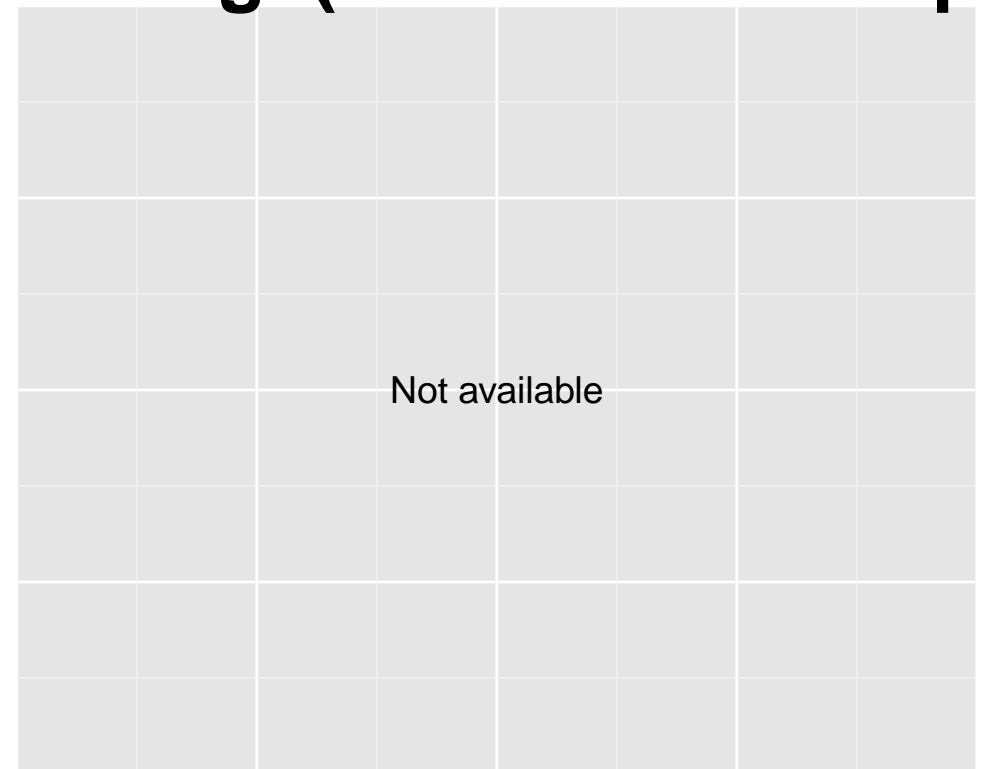

Supplement: Supplementary file 7655 [file 1]

## Mtpn

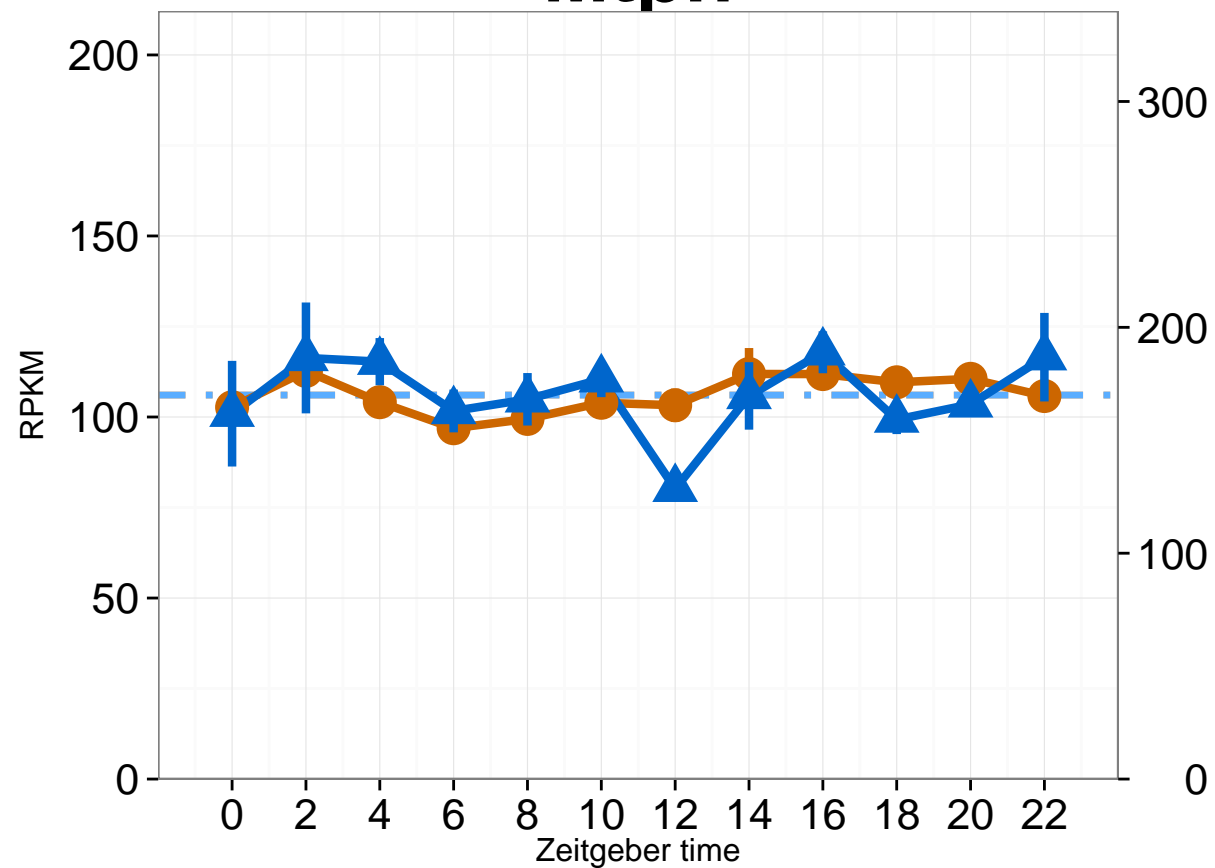

## Mtpn

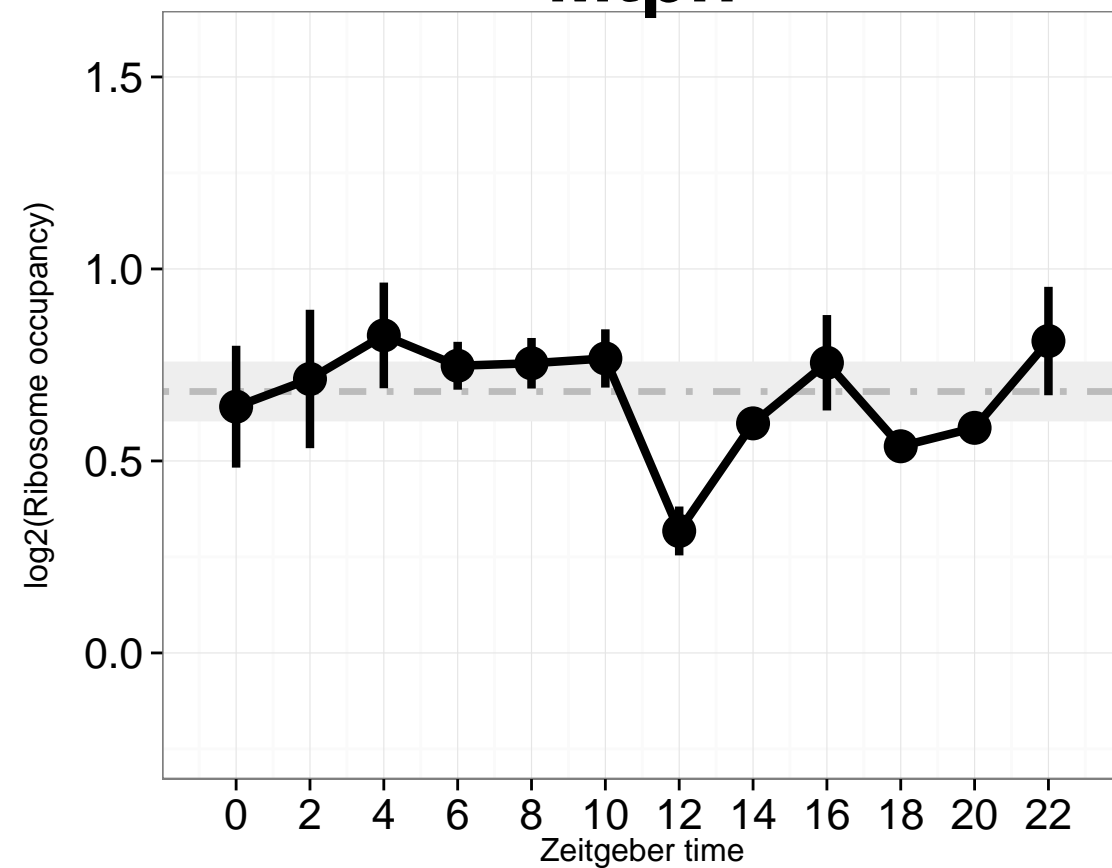

Supplement: Supplementary file 7656 [file 1]

# Phactr1

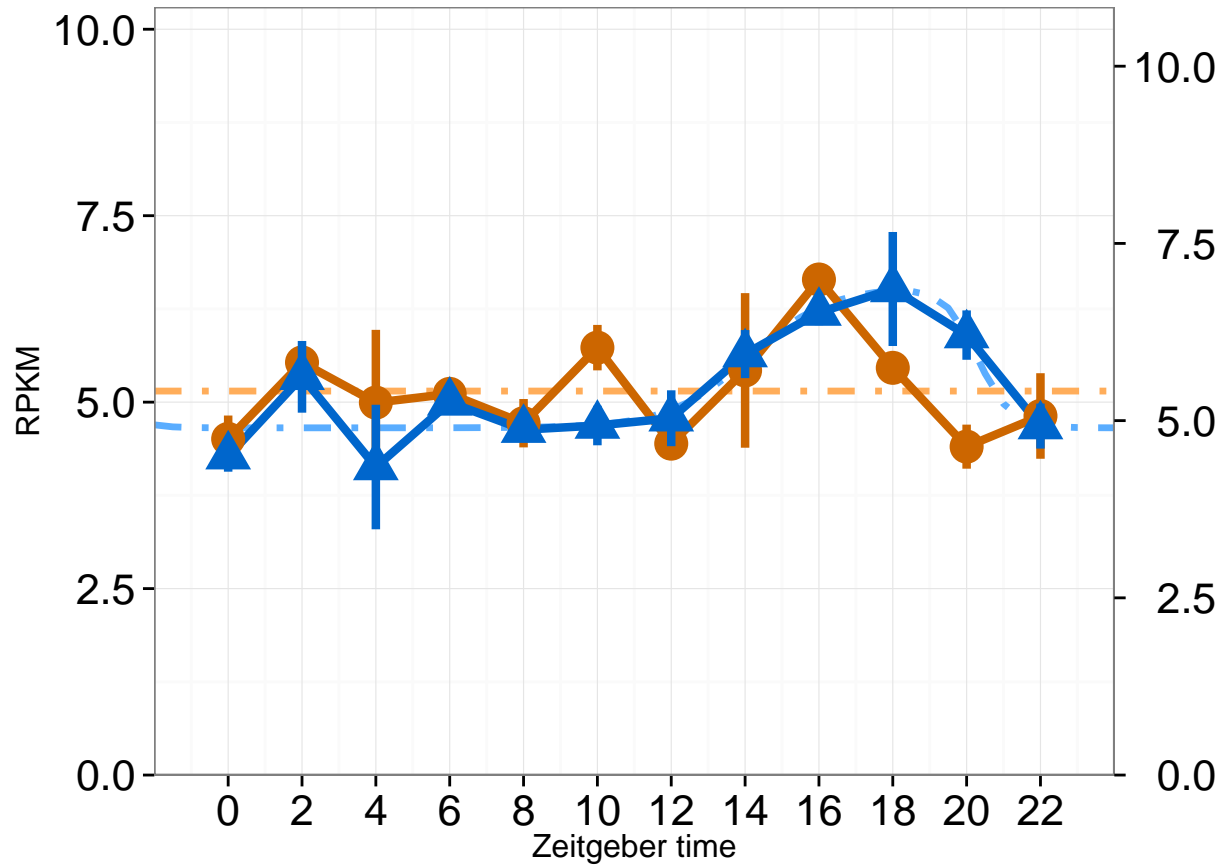

# Phactr1

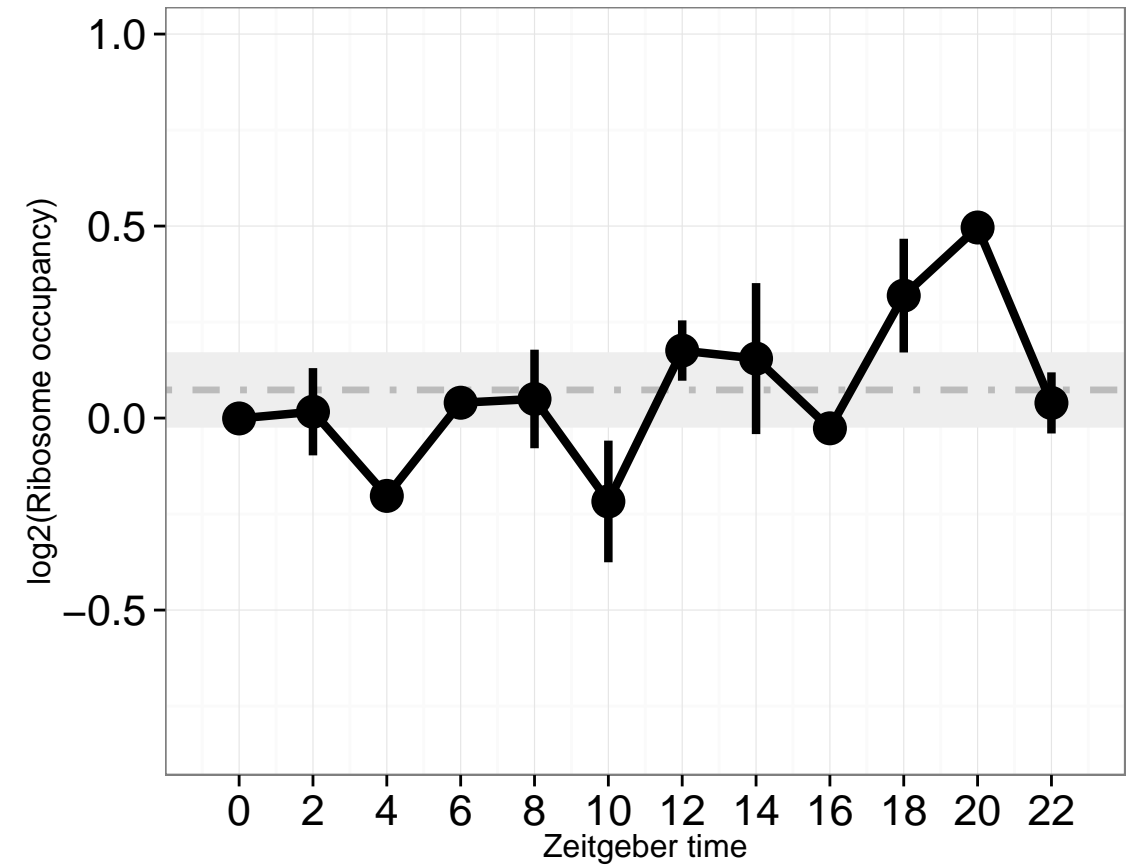

Supplement: Supplementary file 7657 [file 1]

# Zfp281

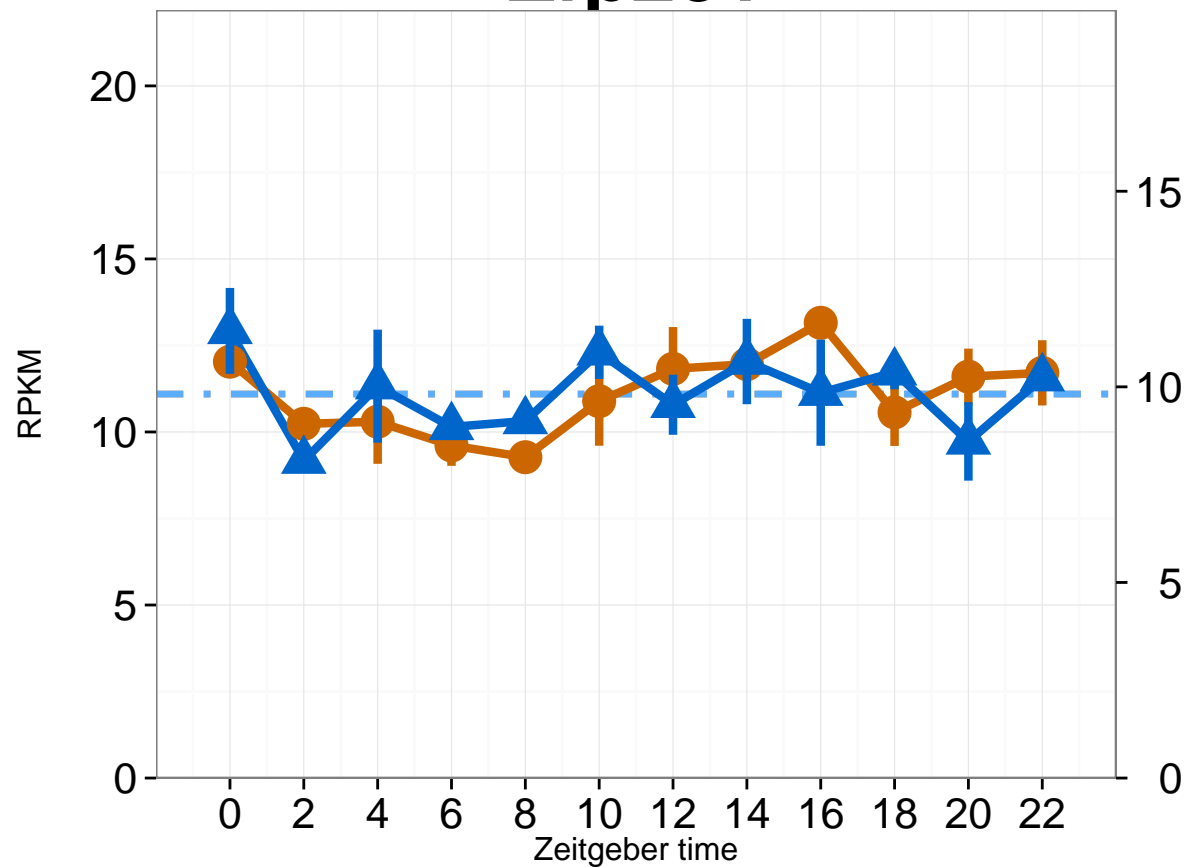

# Zfp281

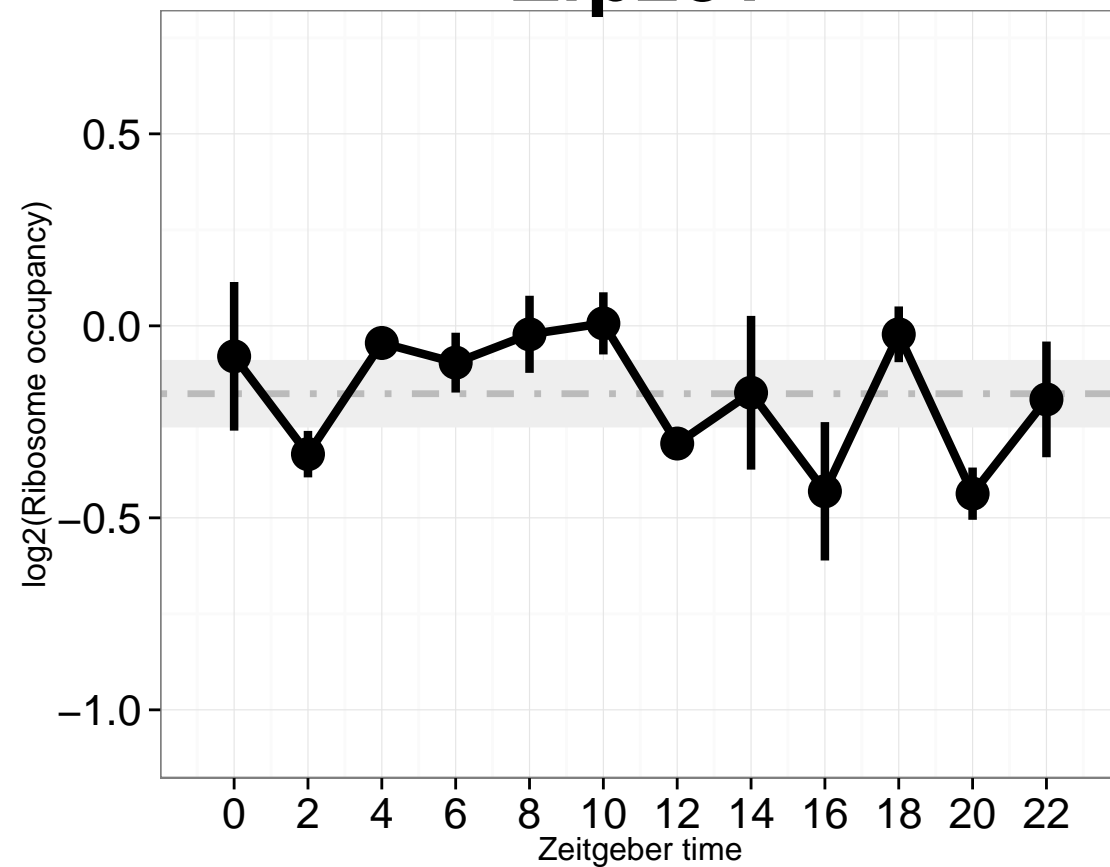

Supplement: Supplementary file 7658 [file 1]

## Map4k5

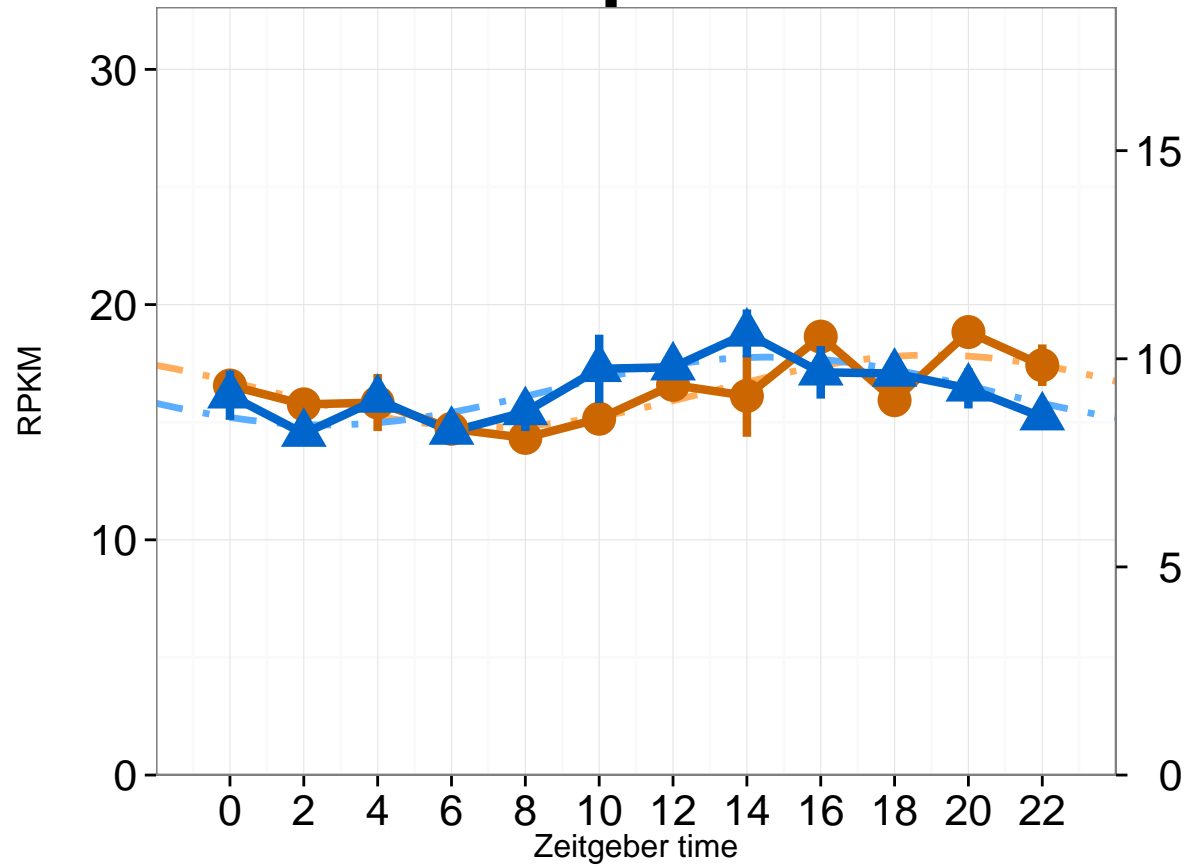

## Map4k5

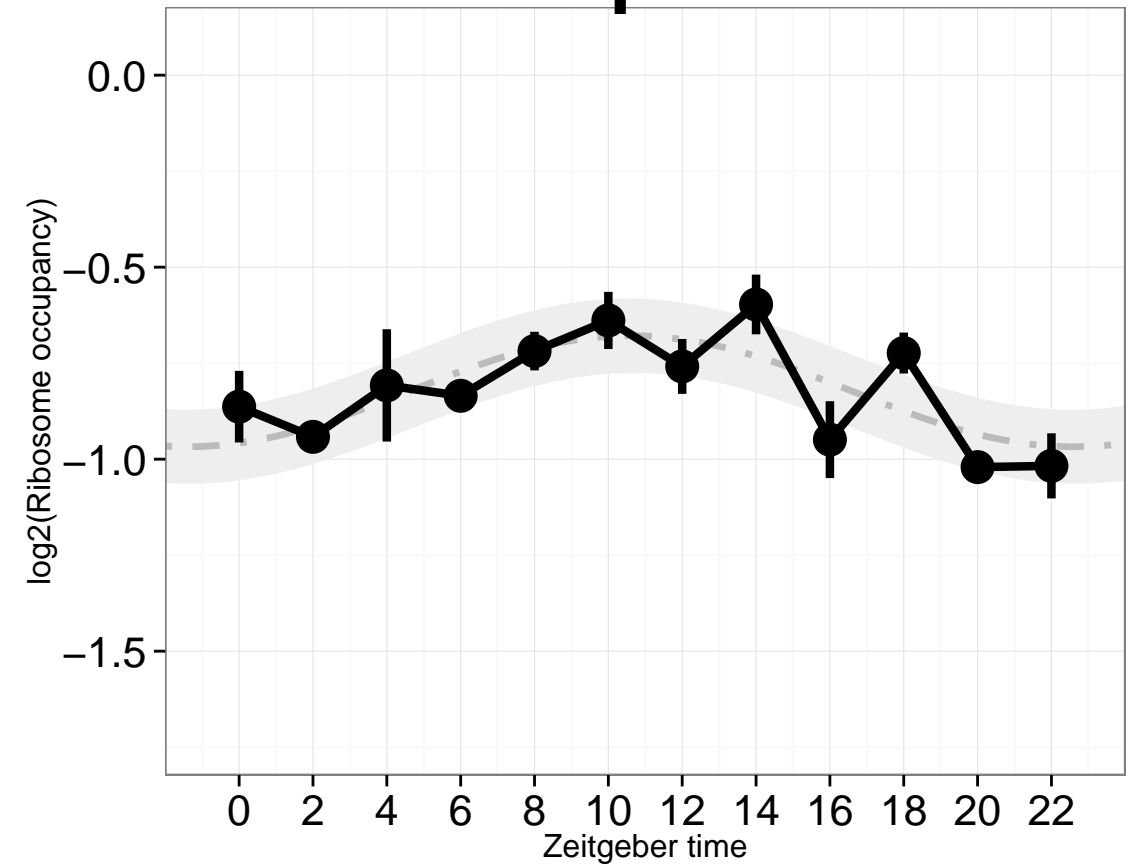

Supplement: Supplementary file 7659 [file 1]

# Prpf40a

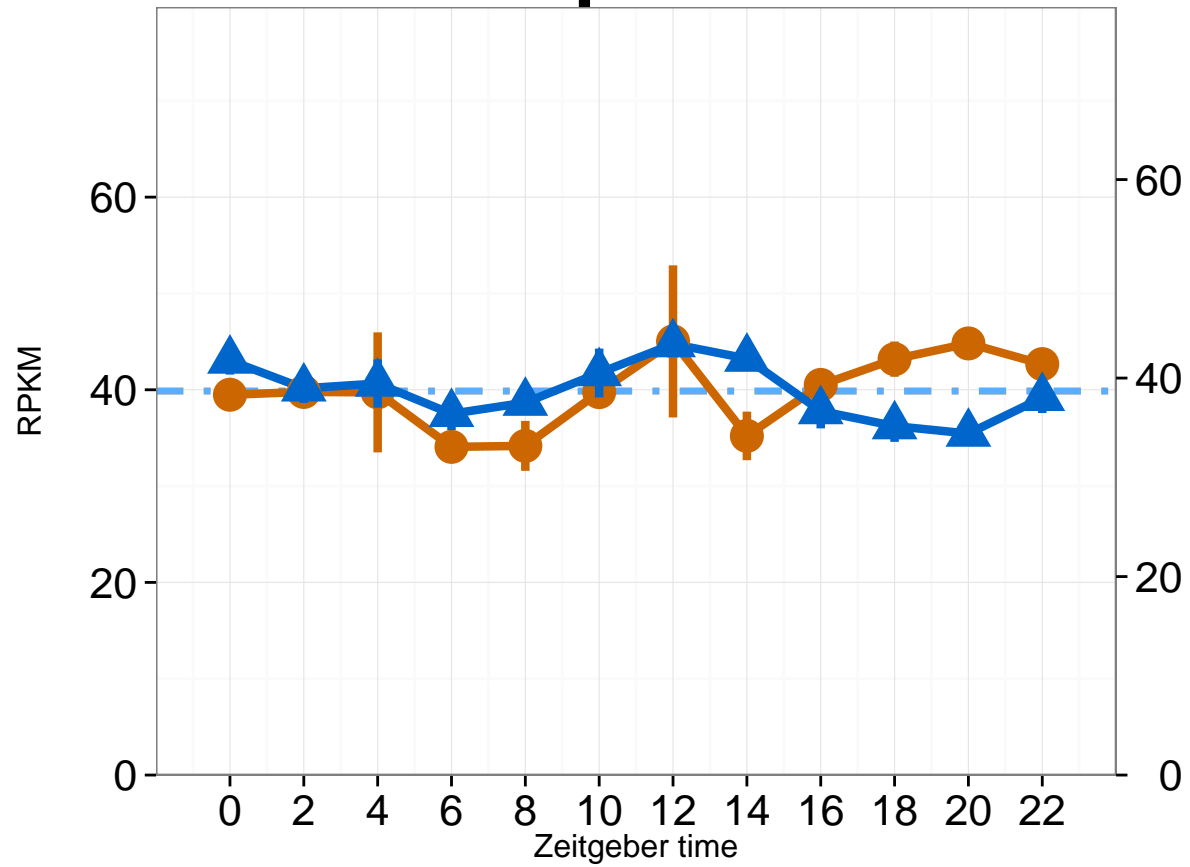

# Prpf40a

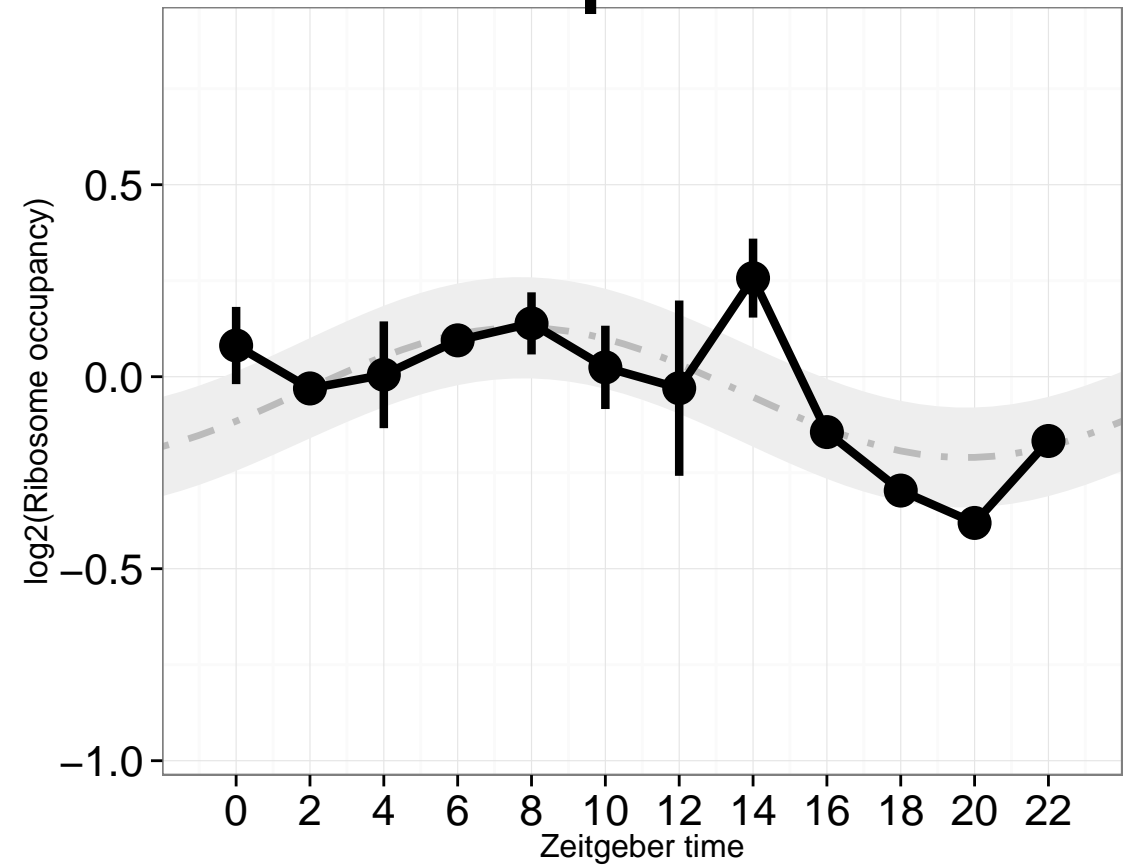

Supplement: Supplementary file 7660 [file 1]

# Fam105b

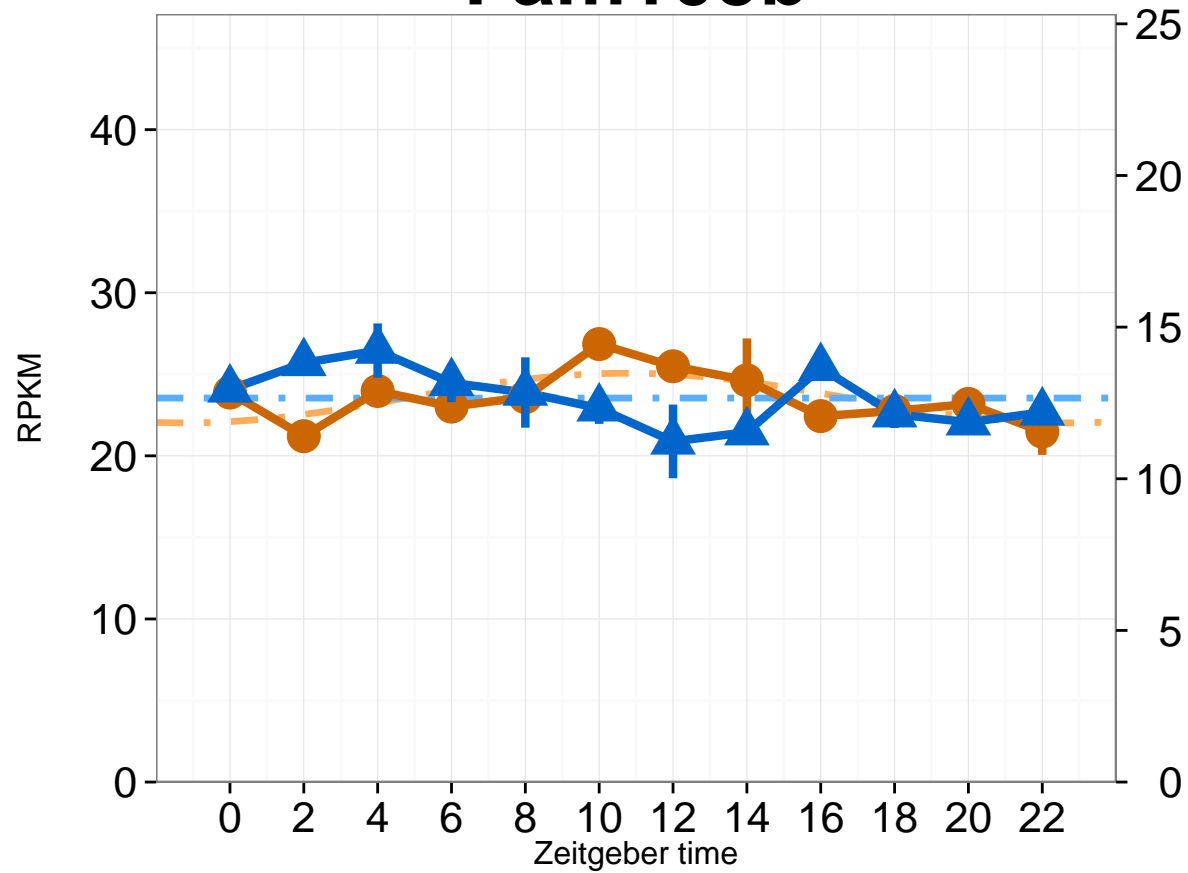

# Fam105b

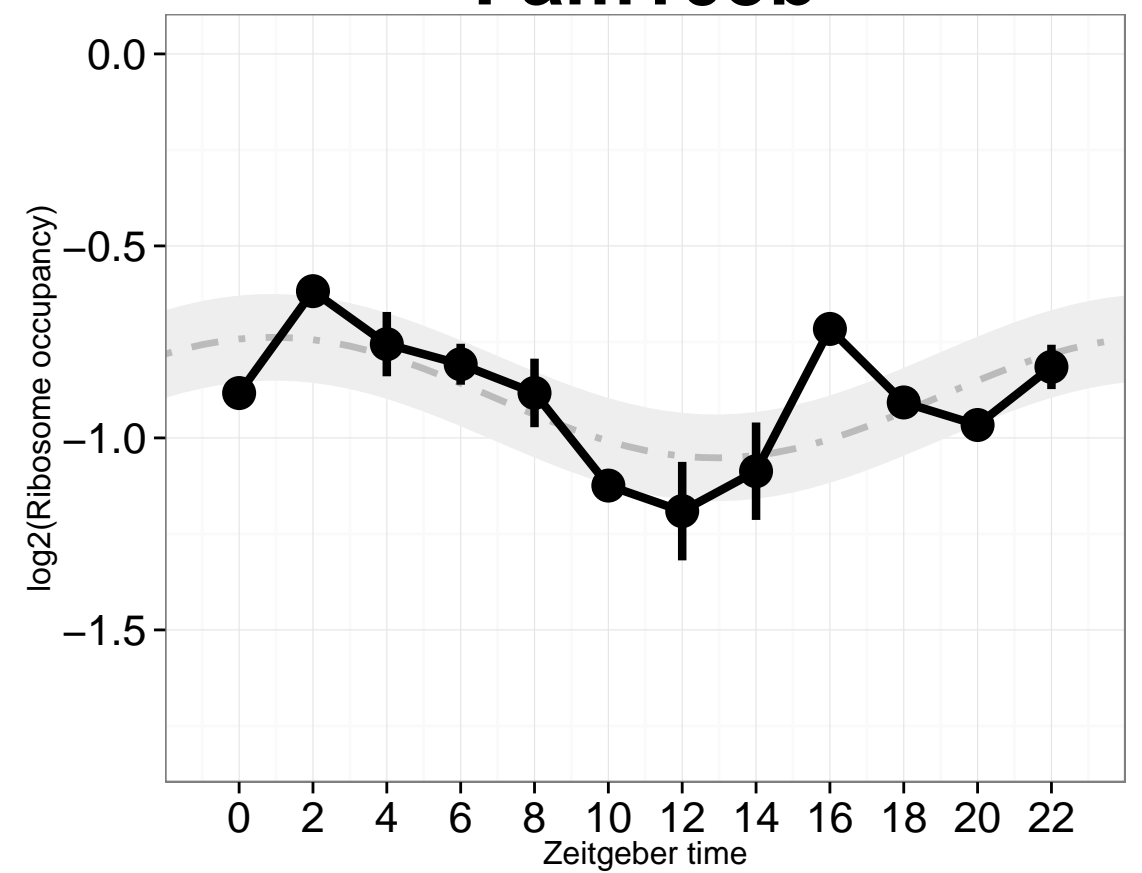

Supplement: Supplementary file 7661 [file 1]

## Tfcp2

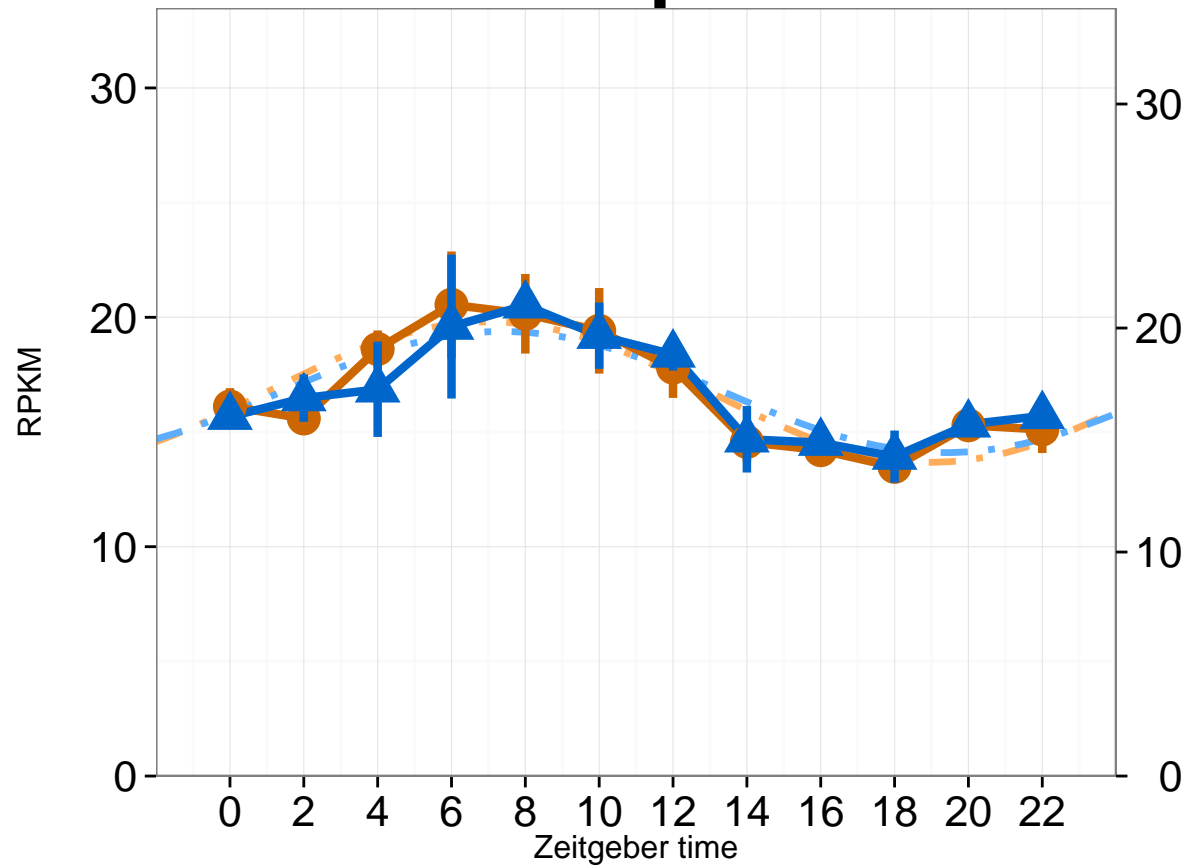

## Tfcp2

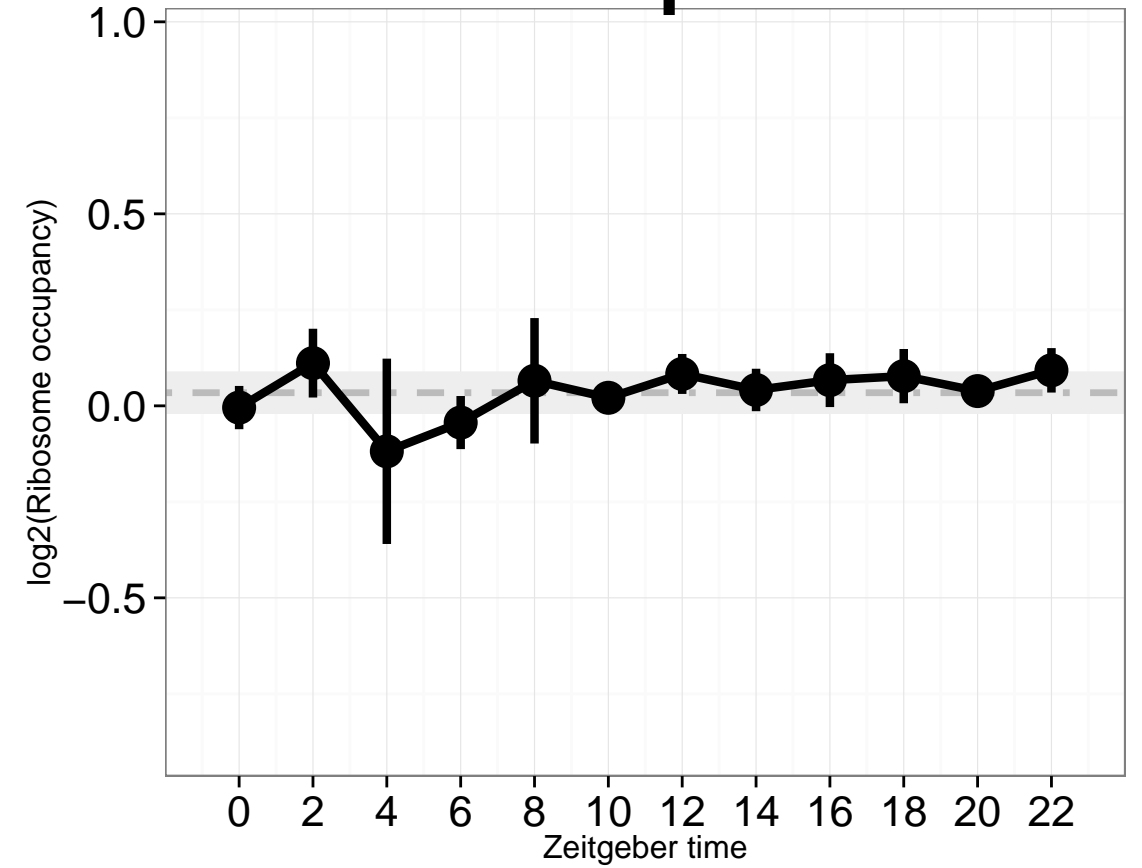

Supplement: Supplementary file 7662 [file 1]

## Ttc22

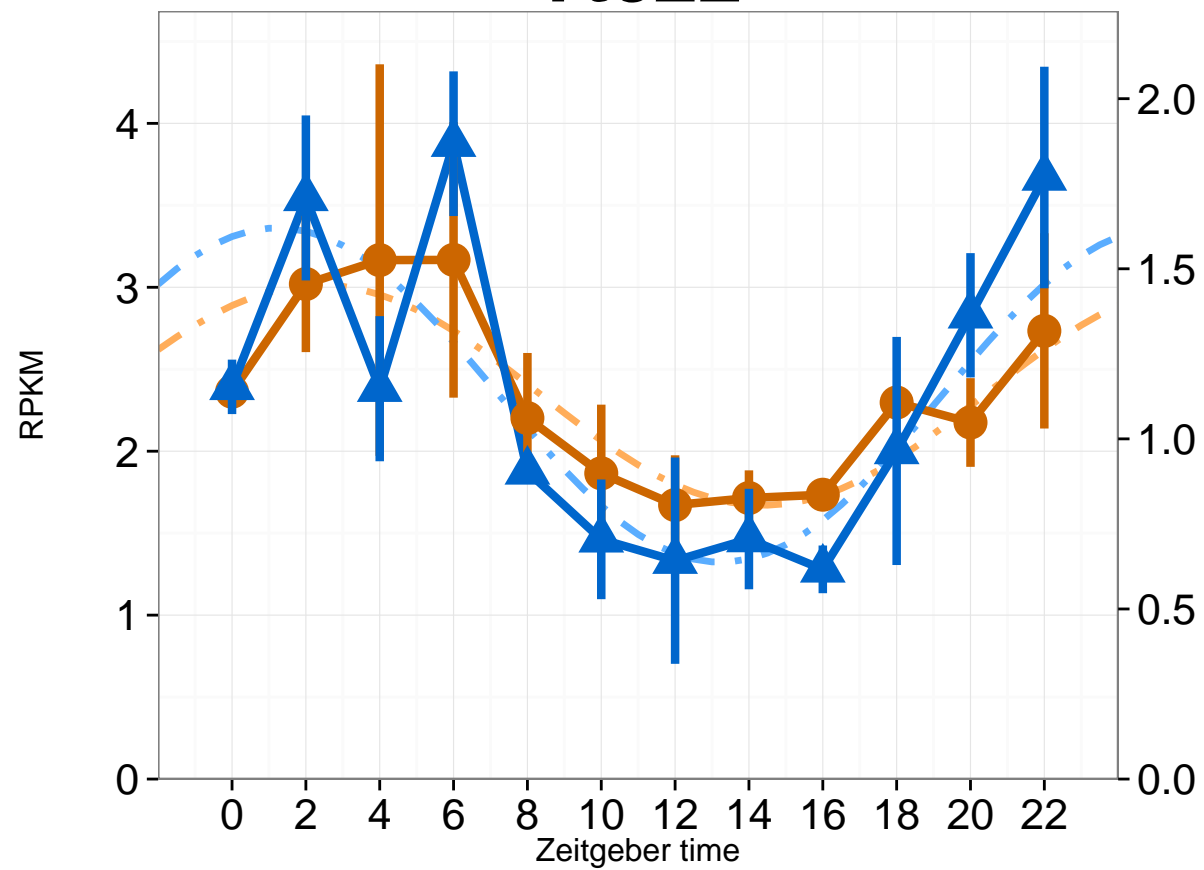

## Ttc22

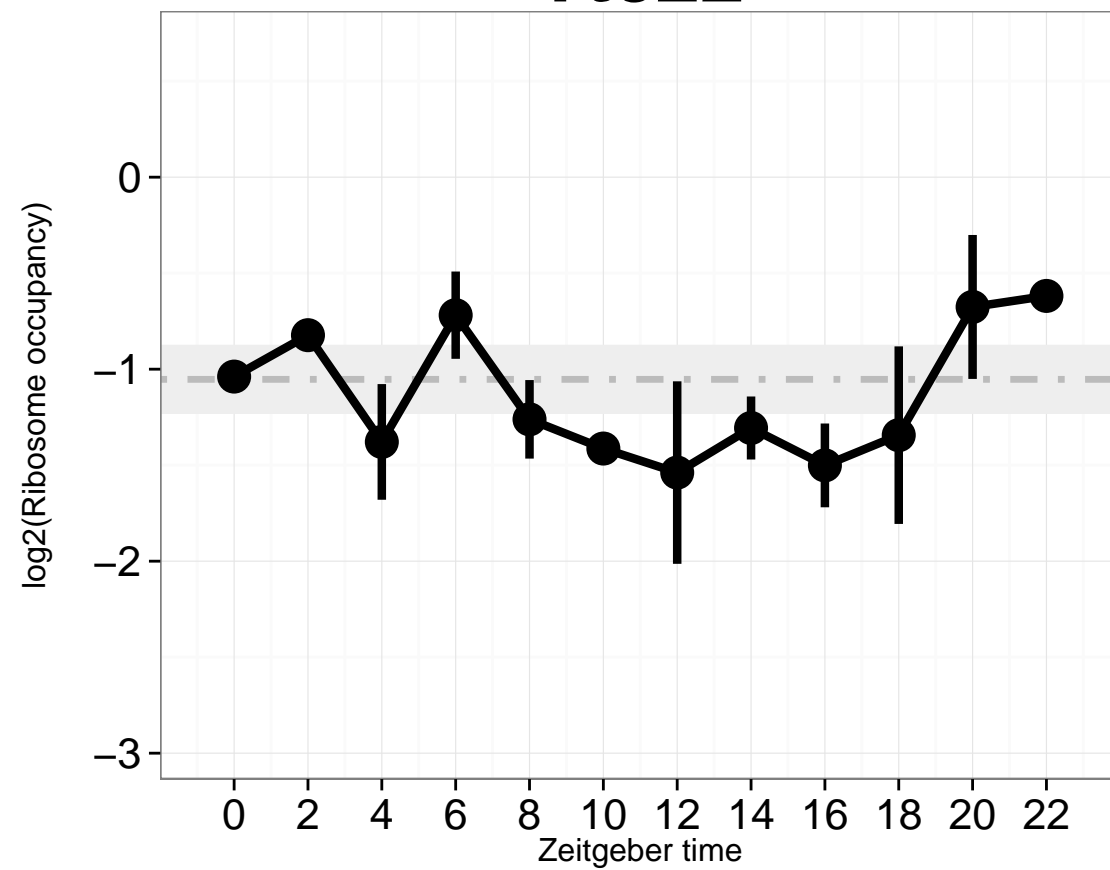

Supplement: Supplementary file 7663 [file 1]

# Fam83g

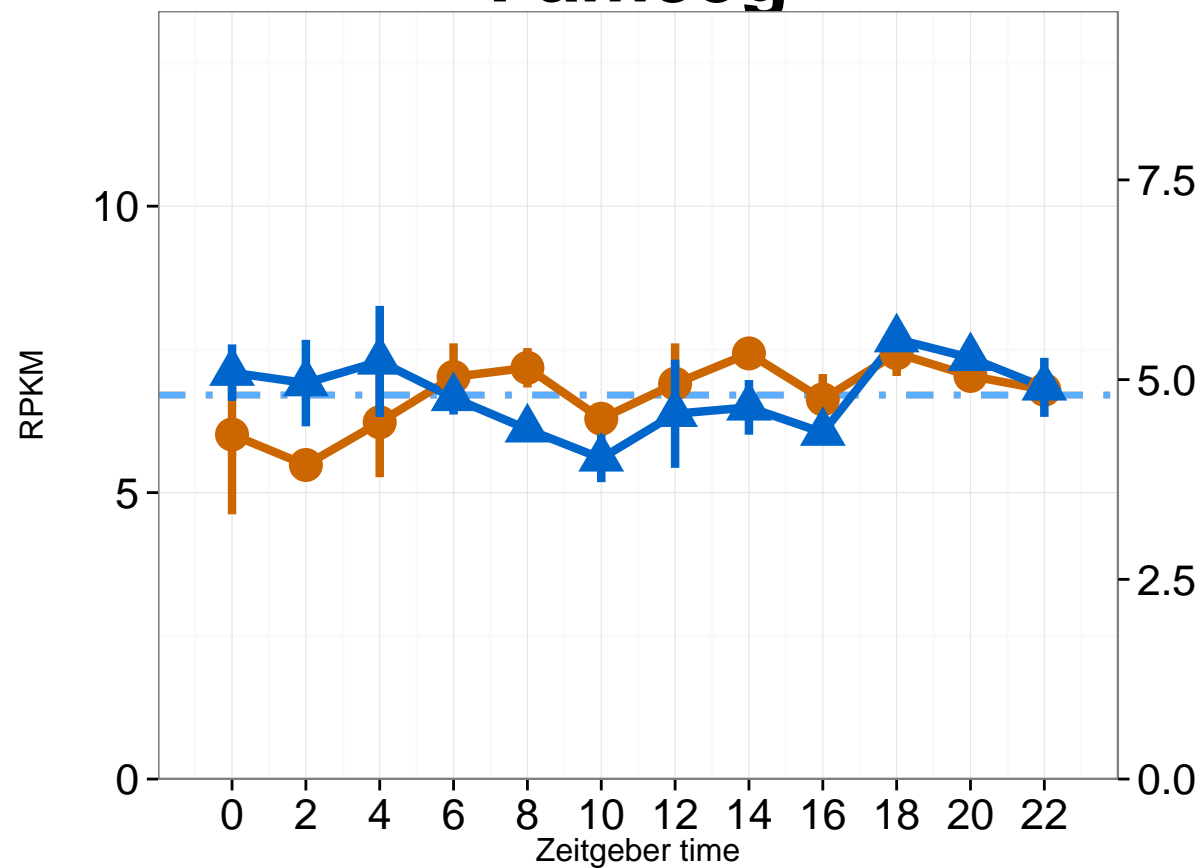

# Fam83g

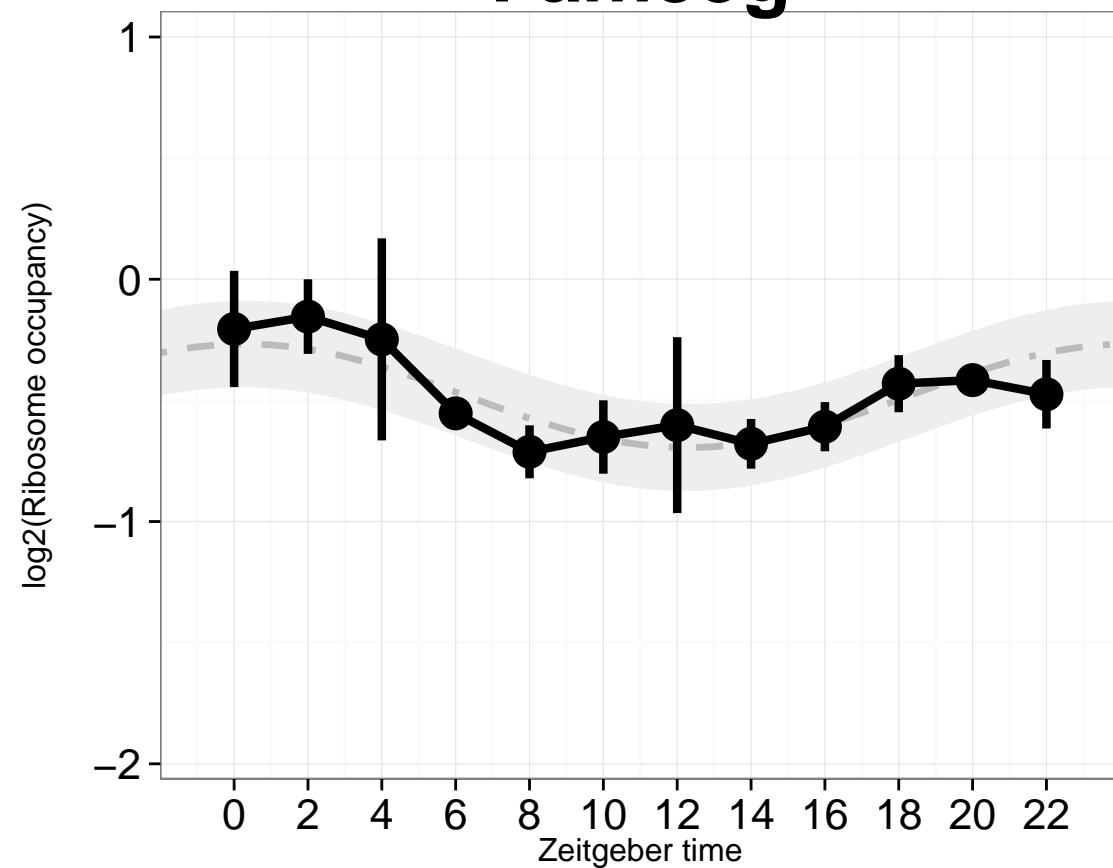

Supplement: Supplementary file 7664 [file 1]

# Slc46a1

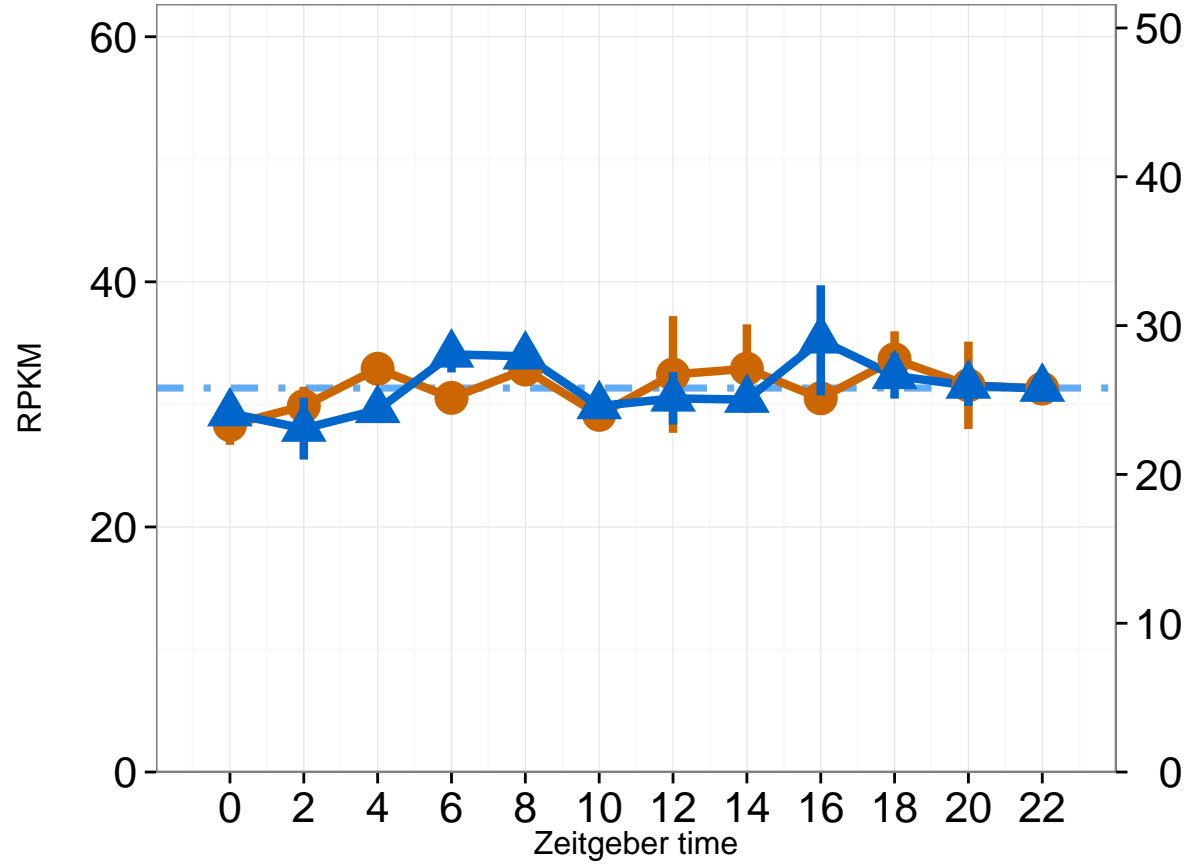

# Slc46a1

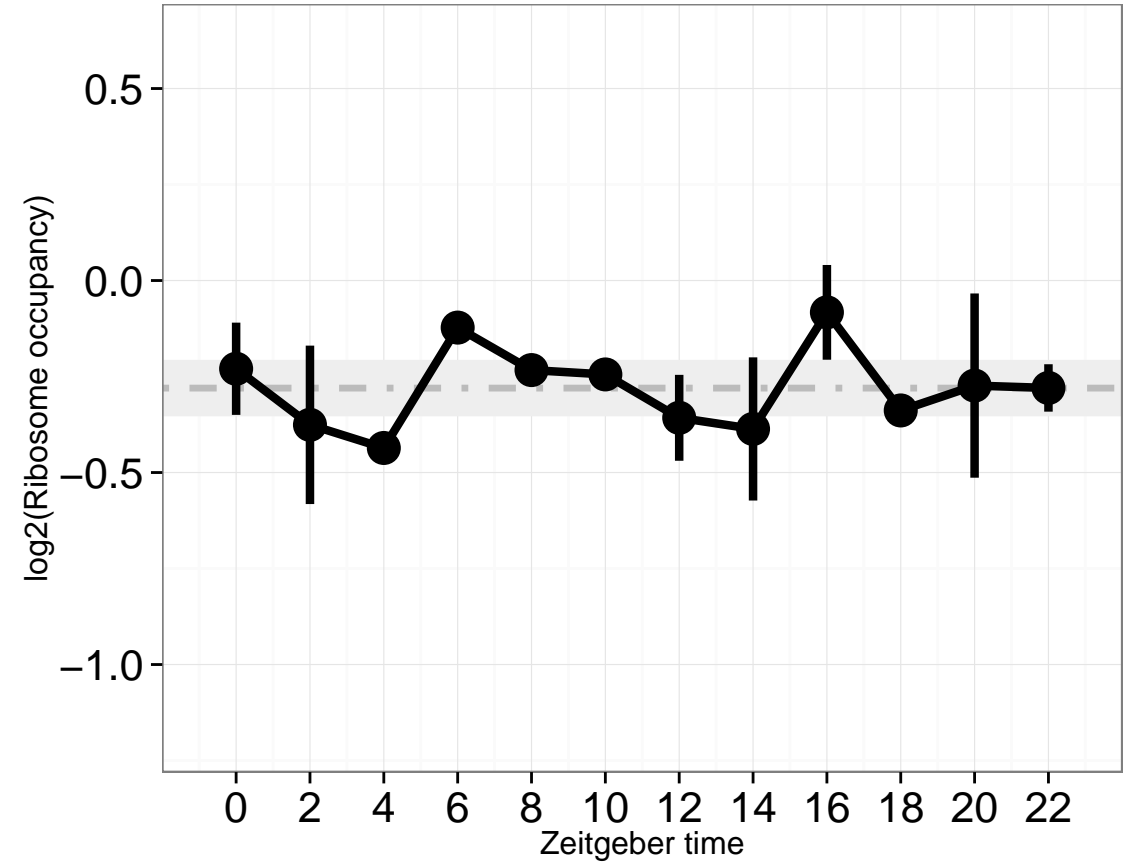

Supplement: Supplementary file 7665 [file 1]

## Nadk2

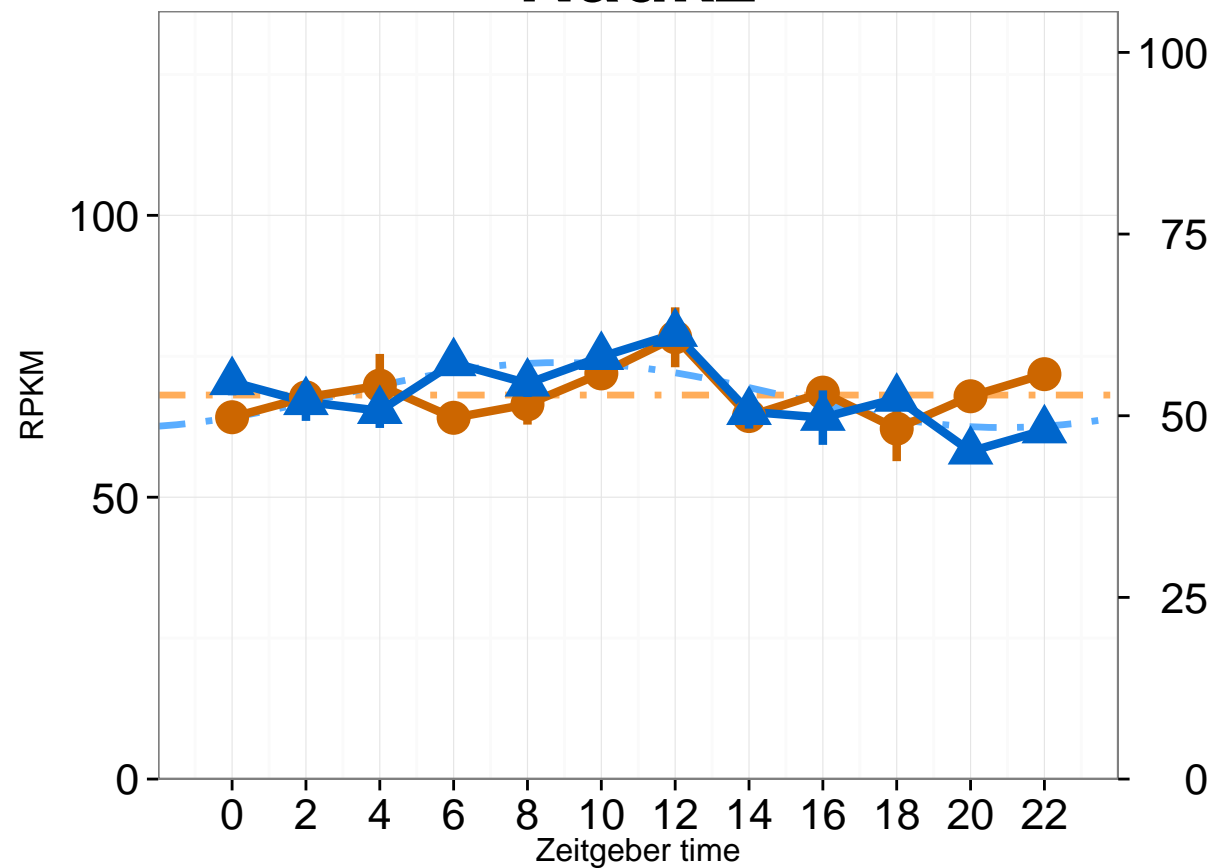

## Nadk2

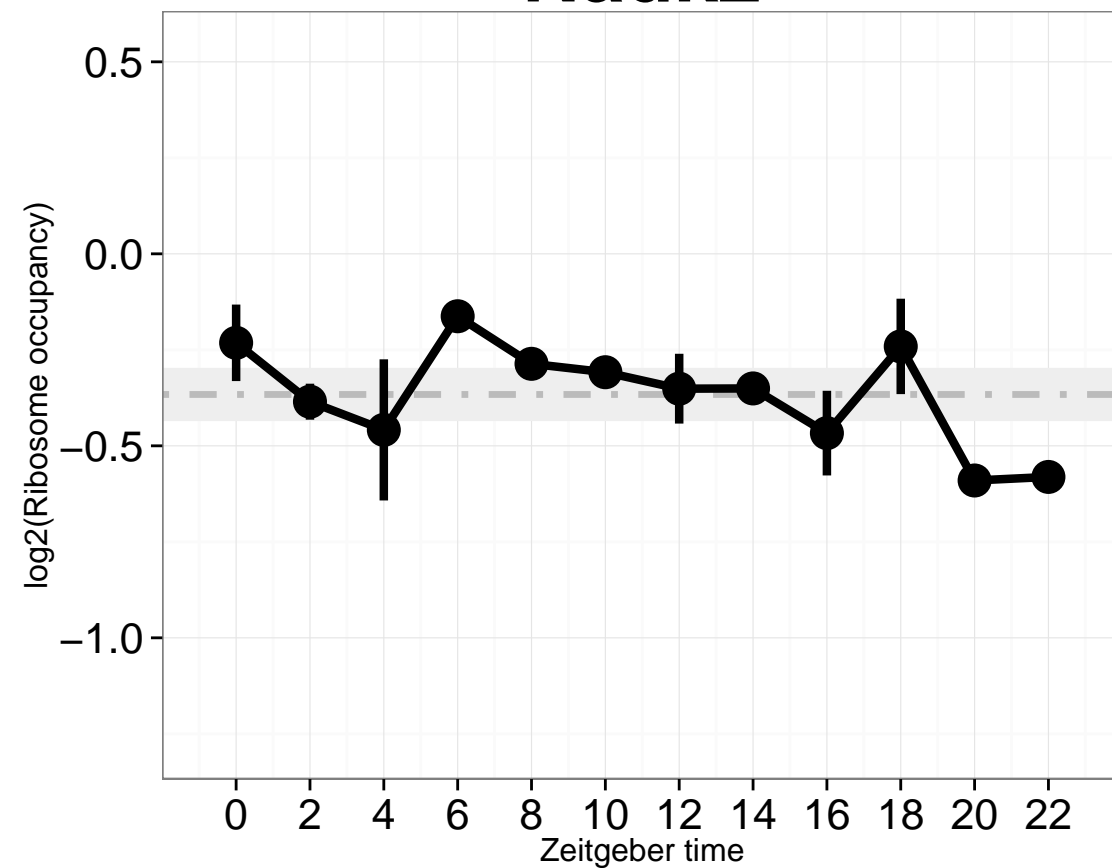

Supplement: Supplementary file 7666 [file 1]

## Akap8l

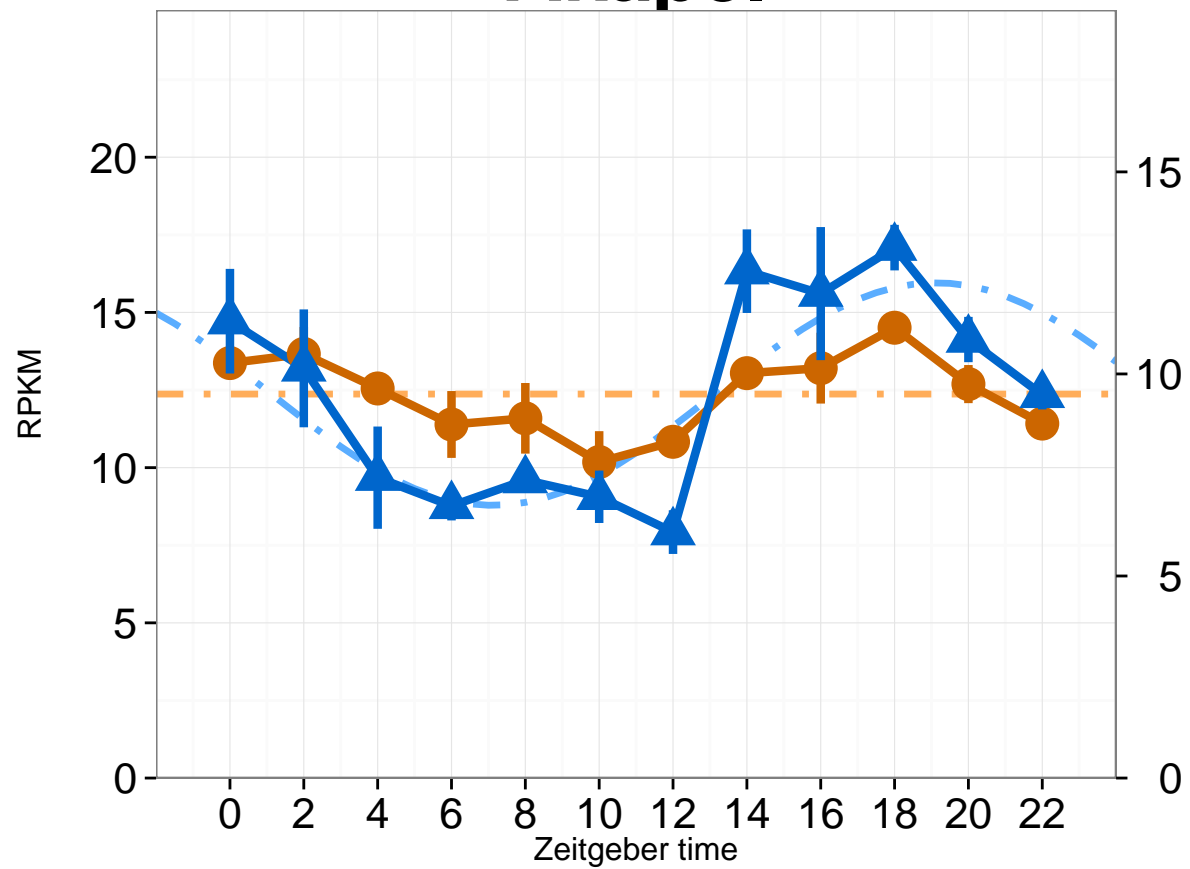

## Akap8l

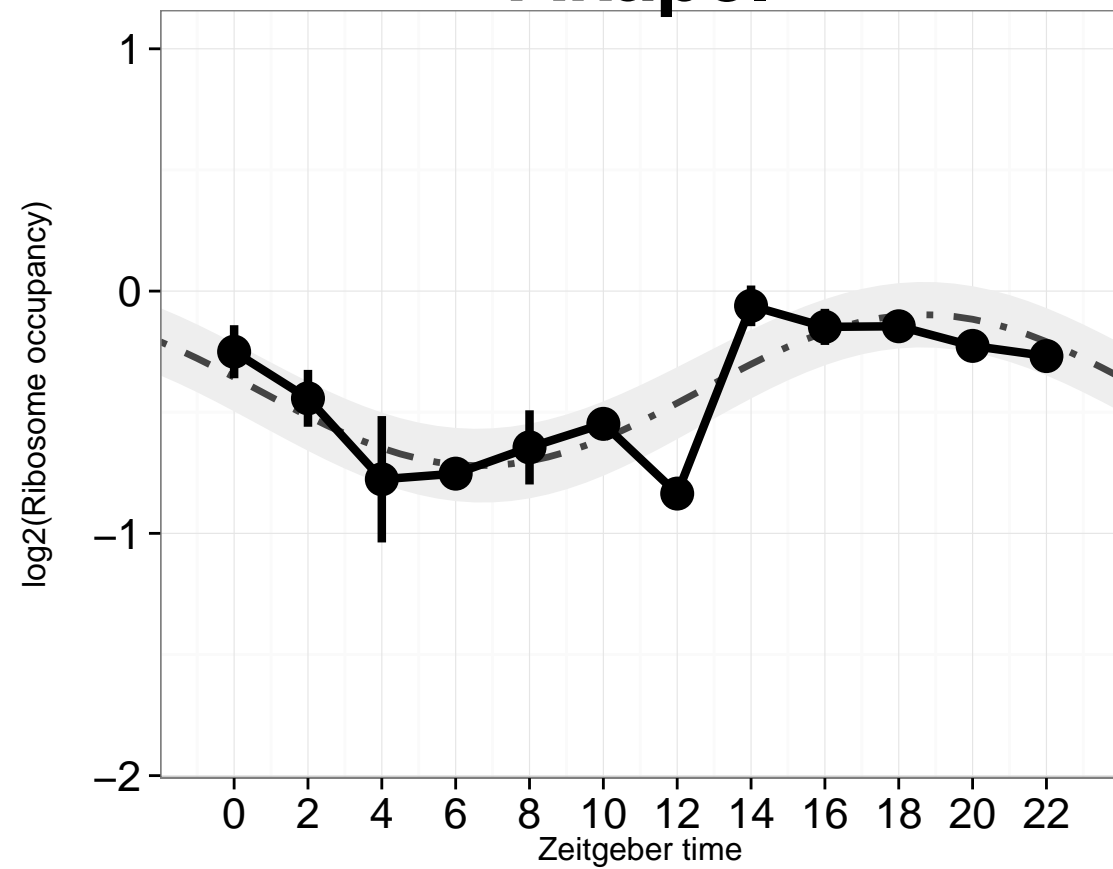

Supplement: Supplementary file 7667 [file 1]

# Tmem106c

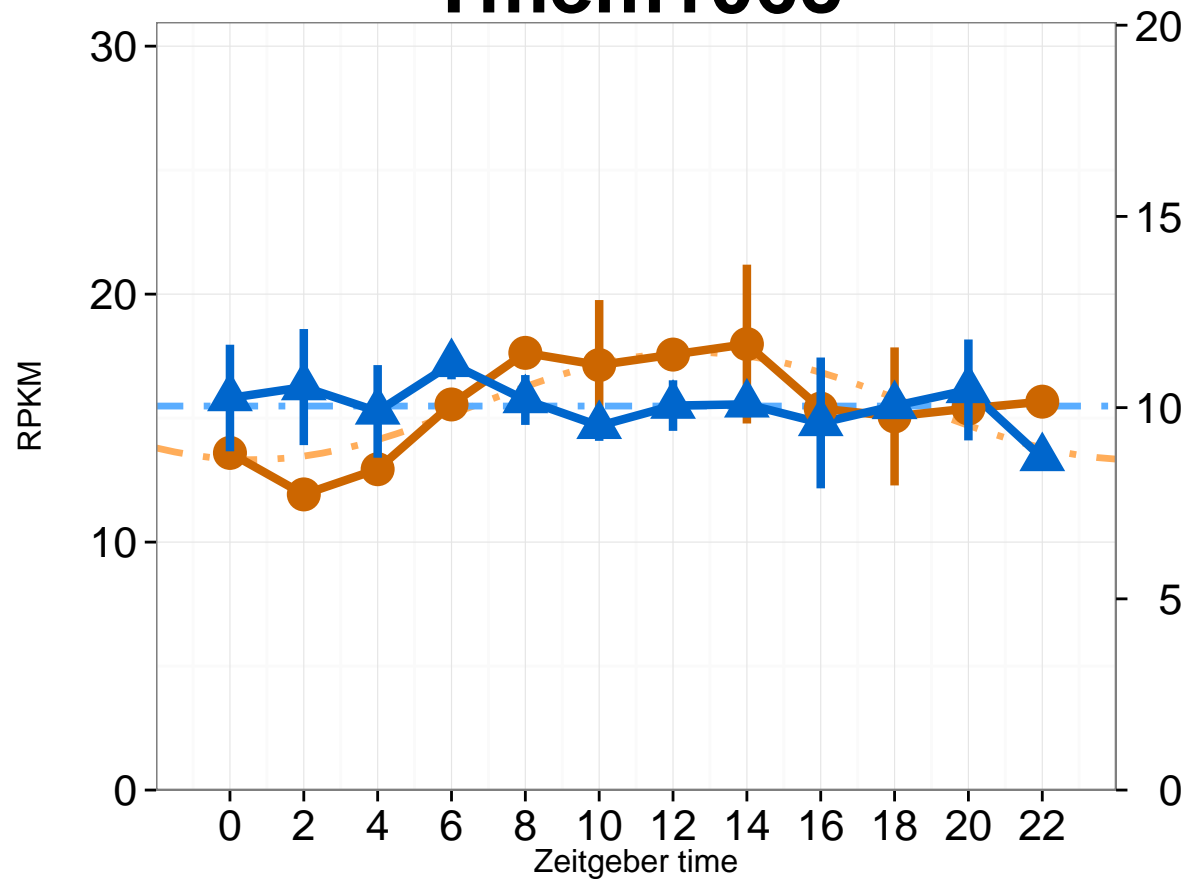

# Tmem106c

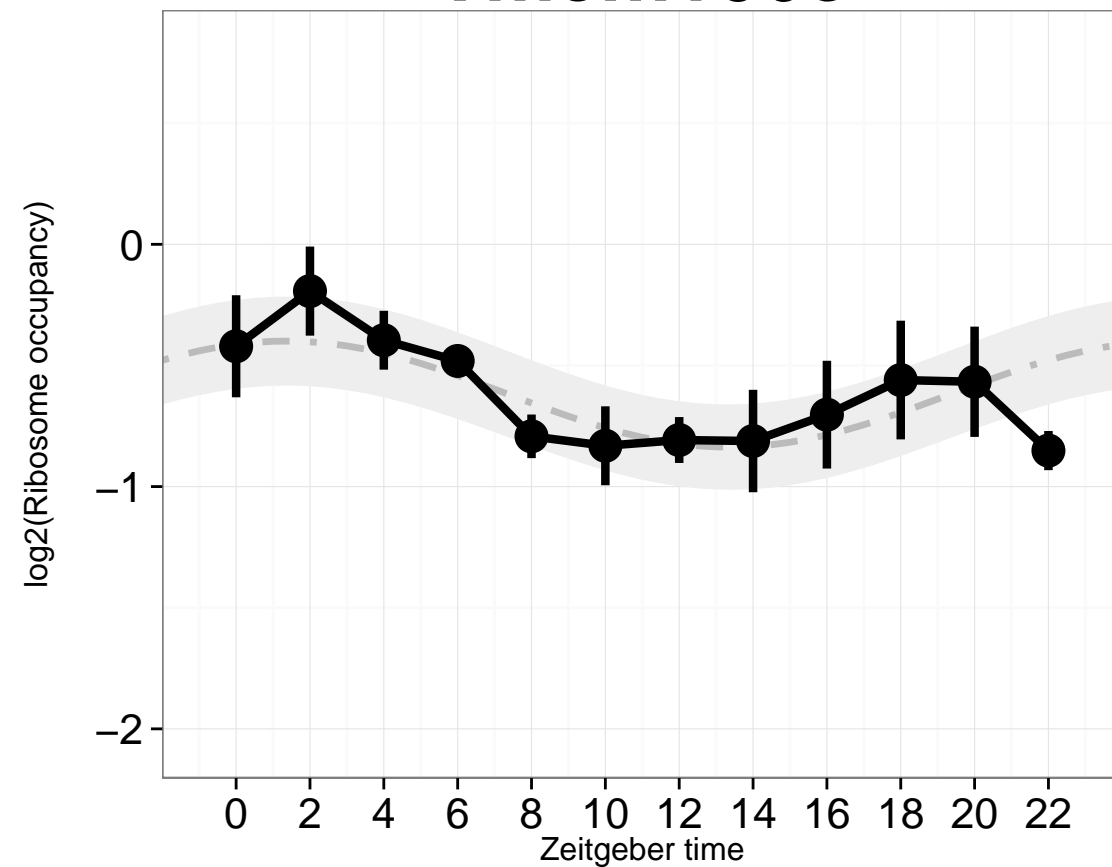

Supplement: Supplementary file 7668 [file 1]

# Zfp740

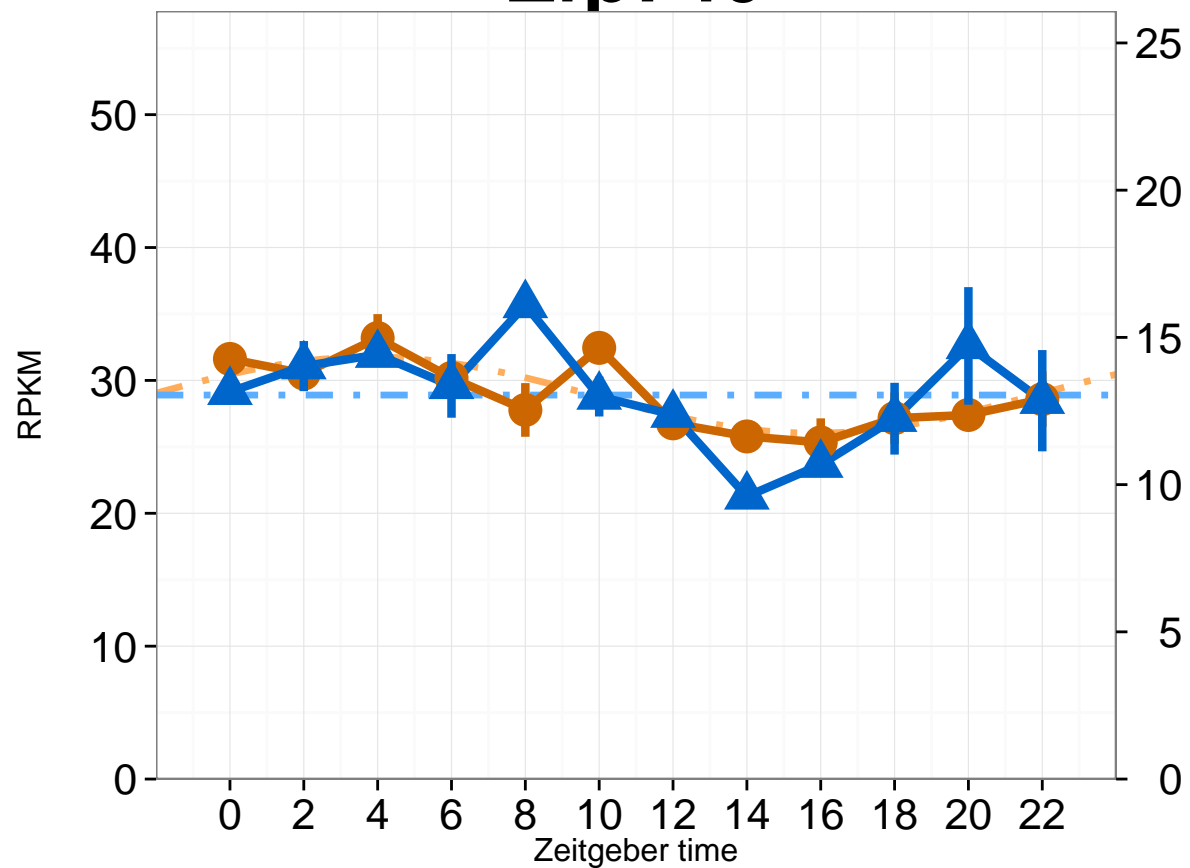

# Zfp740

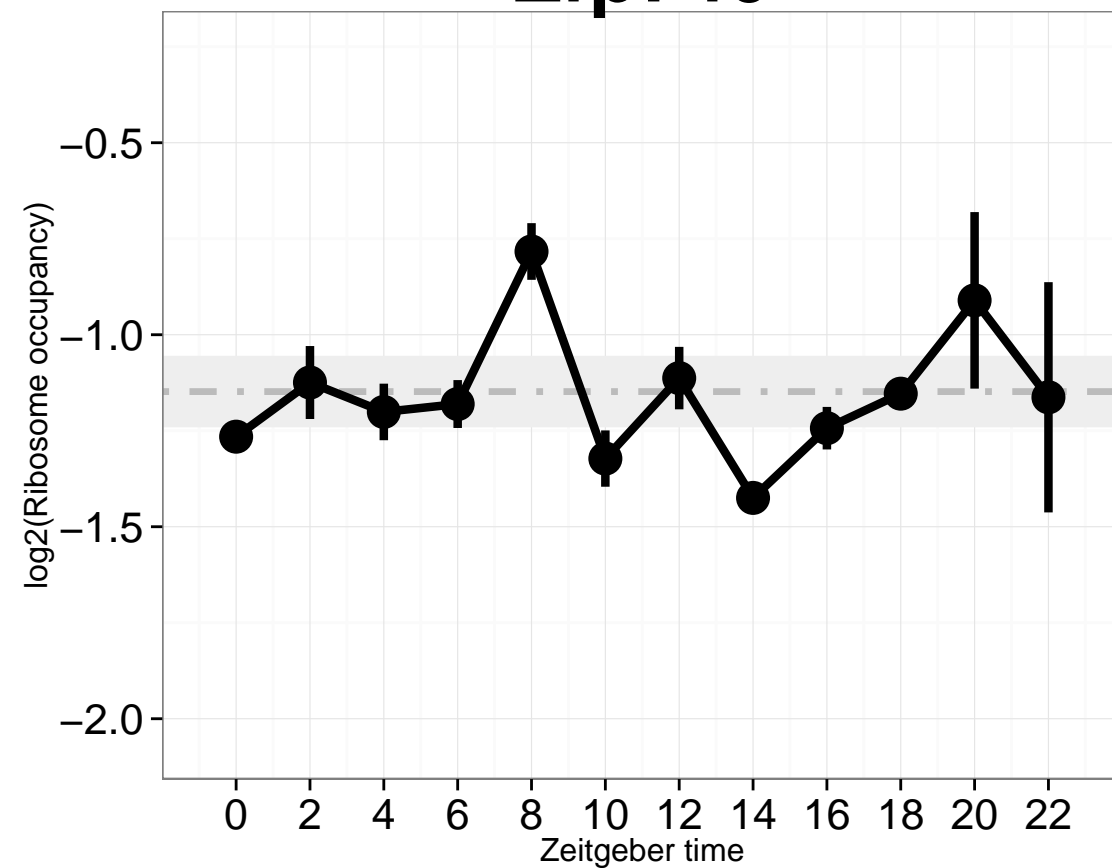

Supplement: Supplementary file 7669 [file 1]

## Epg5

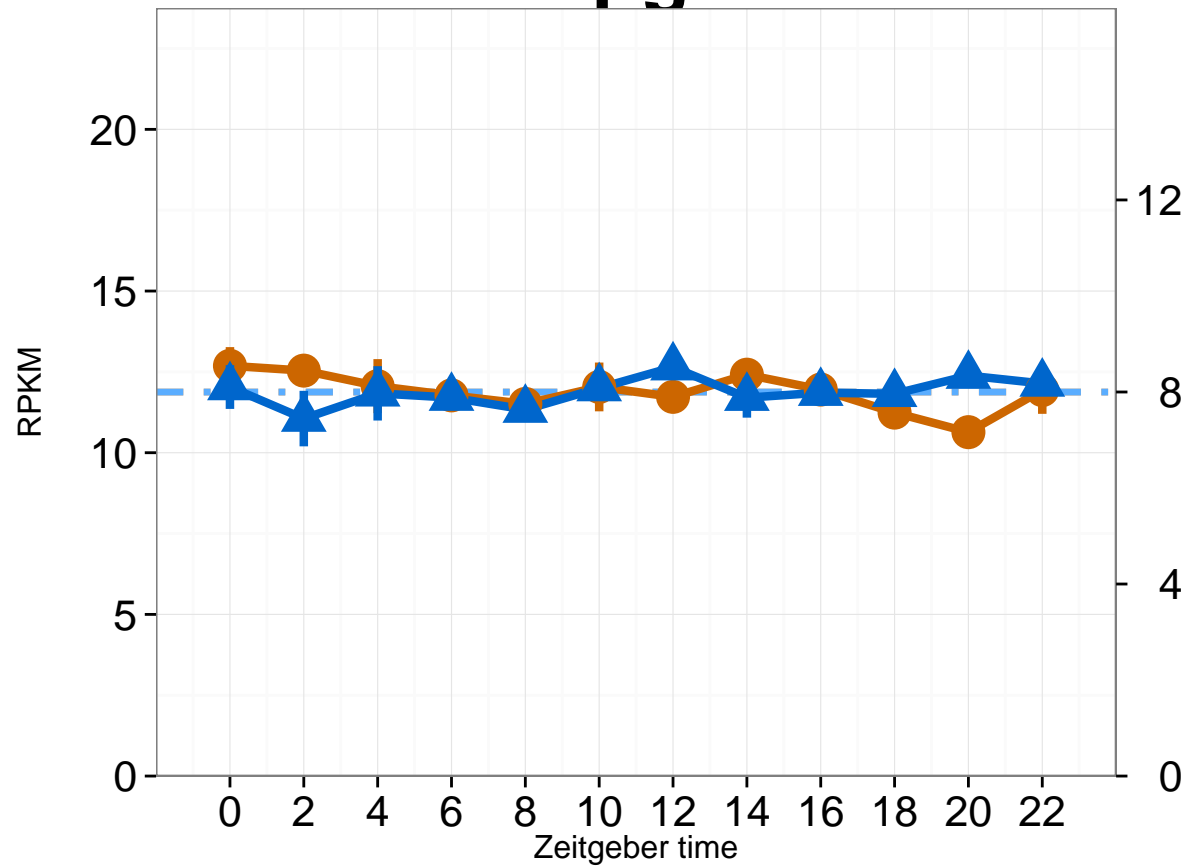

## Epg5

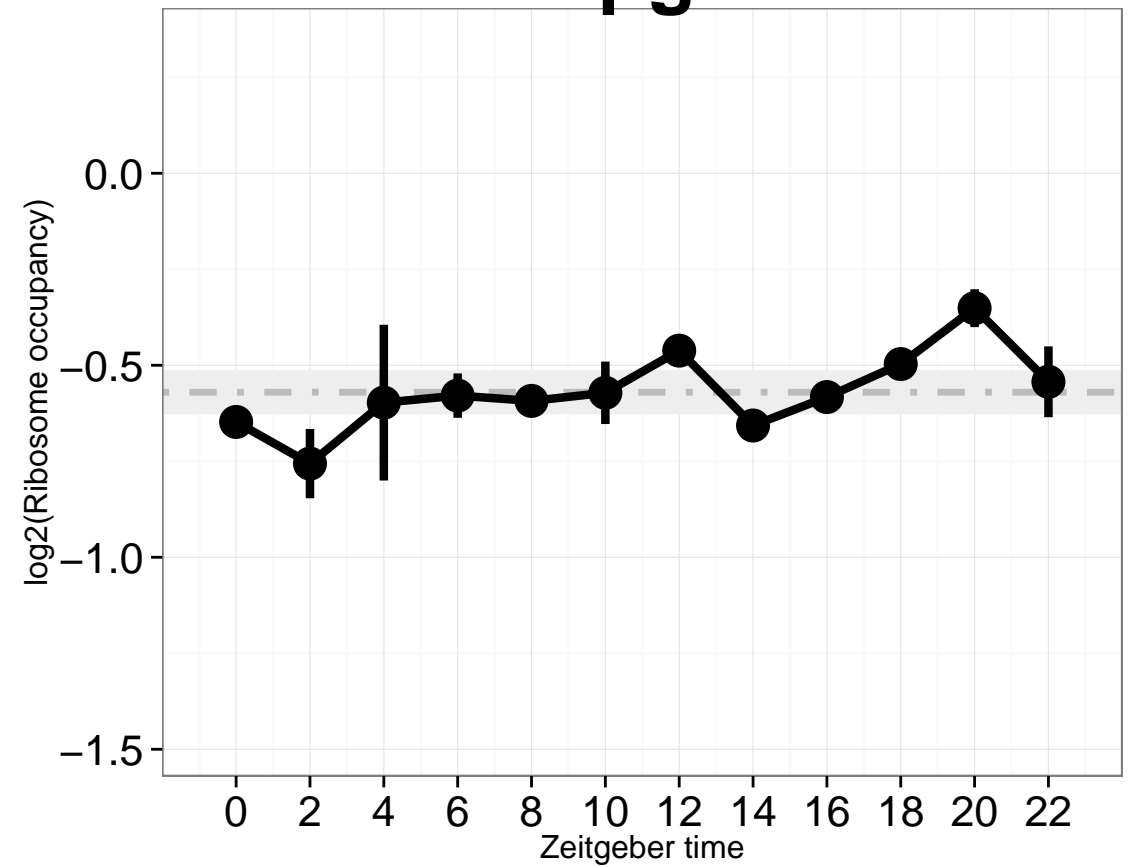

Supplement: Supplementary file 7670 [file 1]

## Ipo5

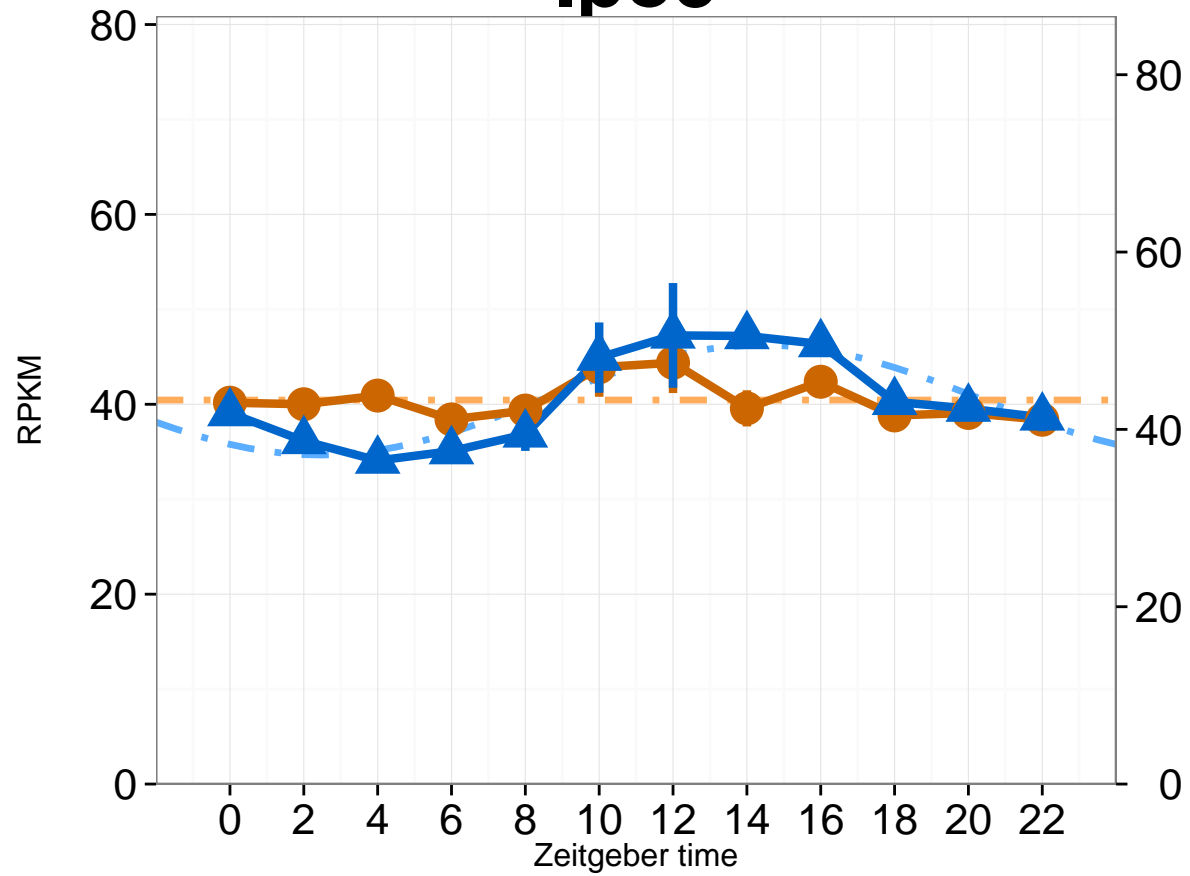

## Ipo5

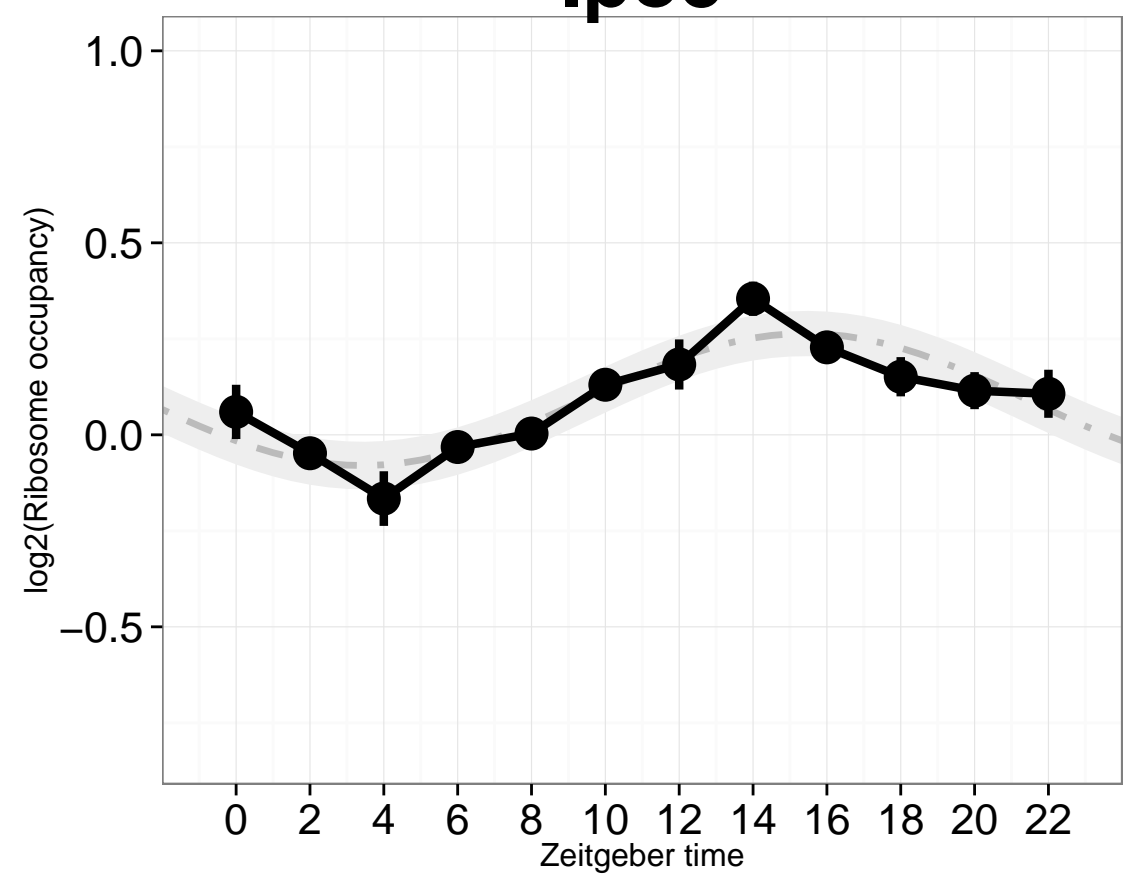

Supplement: Supplementary file 7671 [file 1]

# Smpd13b

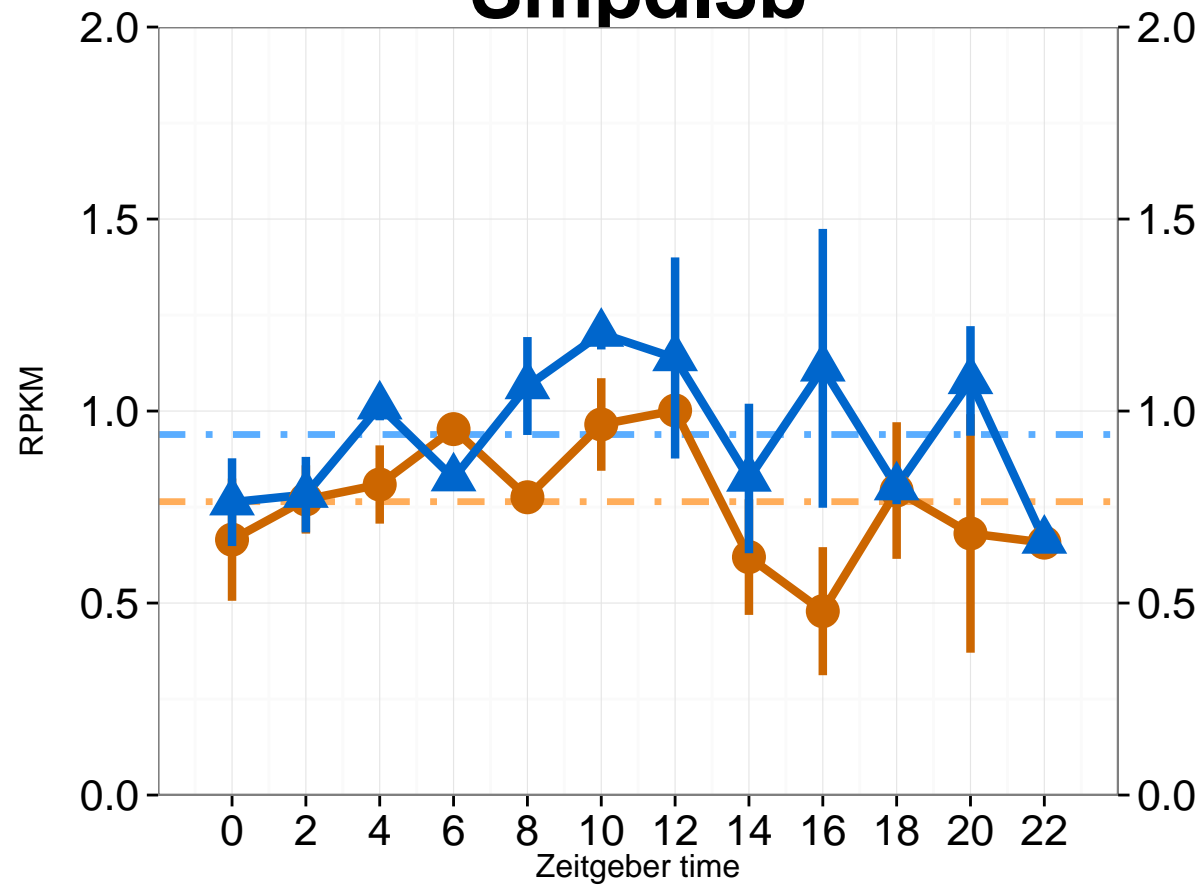

# Smpd13b

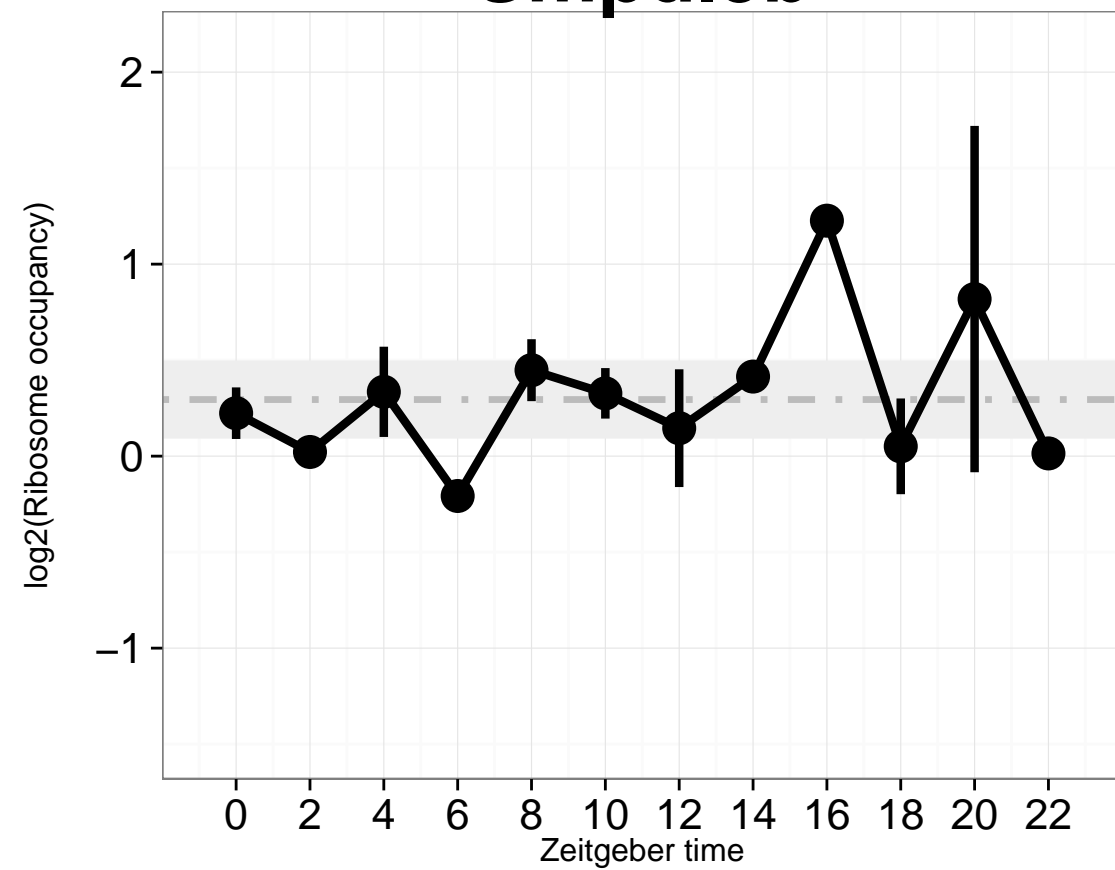

Supplement: Supplementary file 7672 [file 1]

## Wdr53

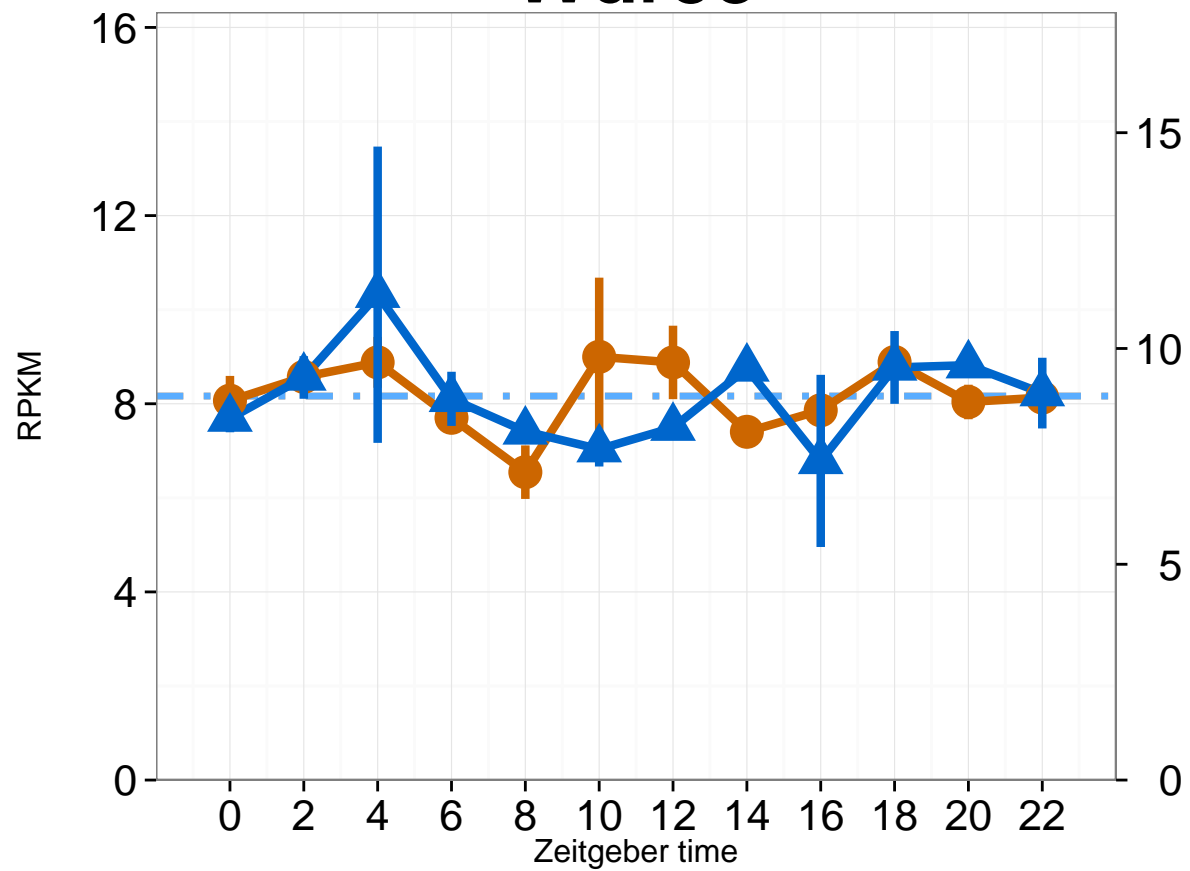

## Wdr53

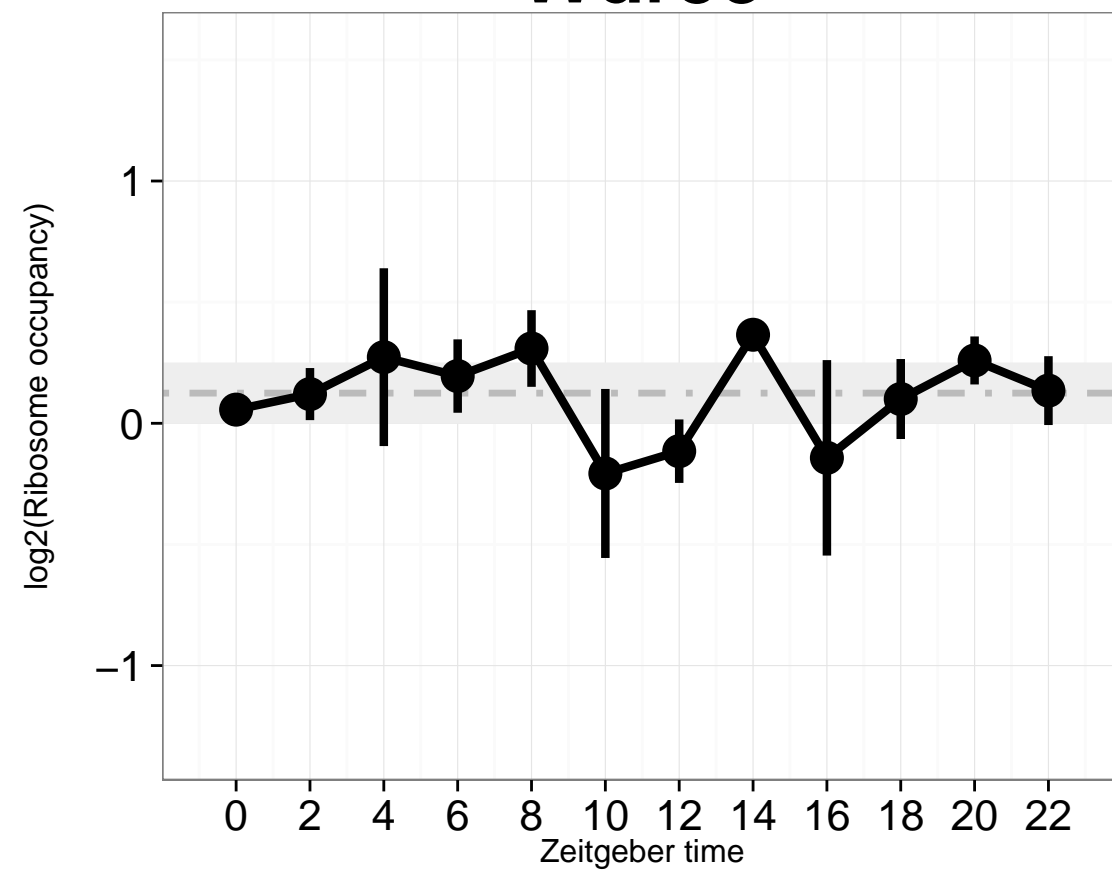

Supplement: Supplementary file 7673 [file 1]

## Klc4

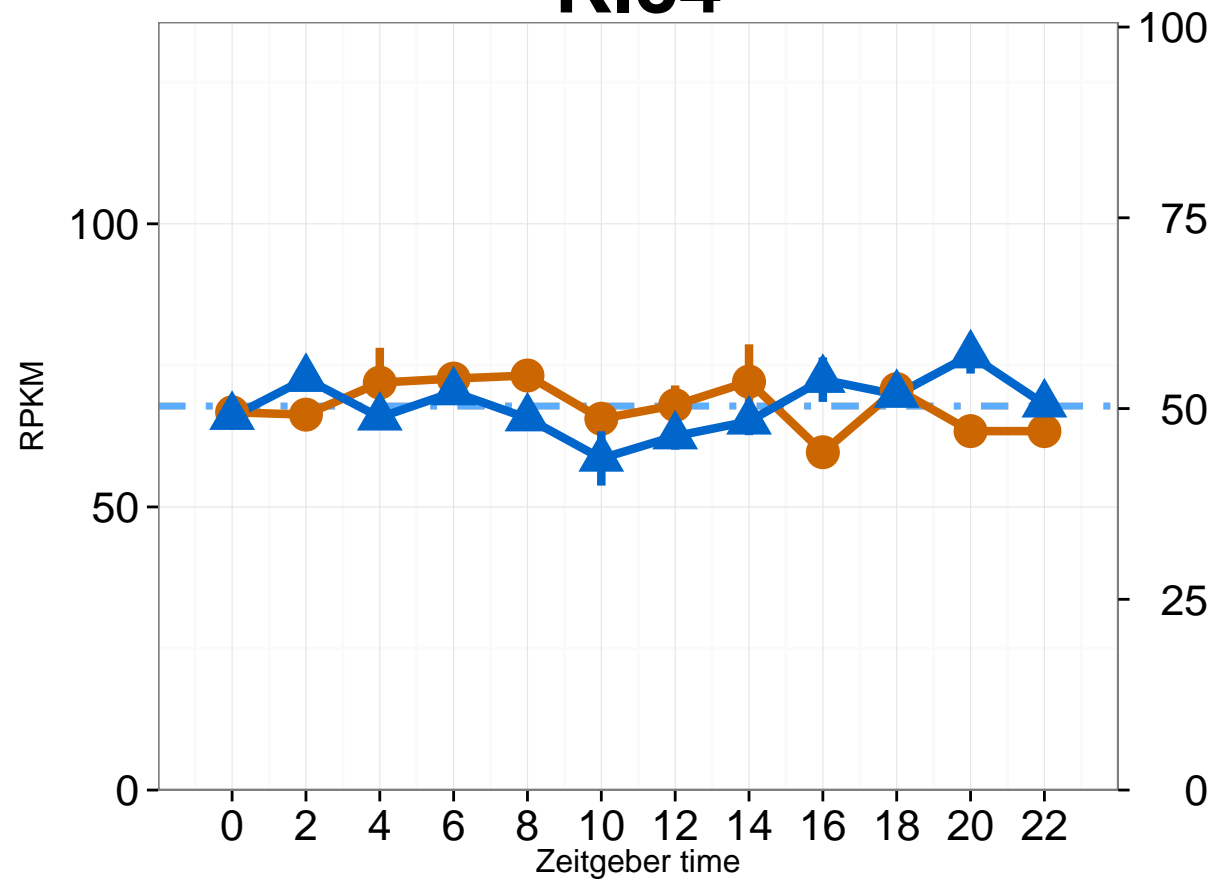

## Klc4

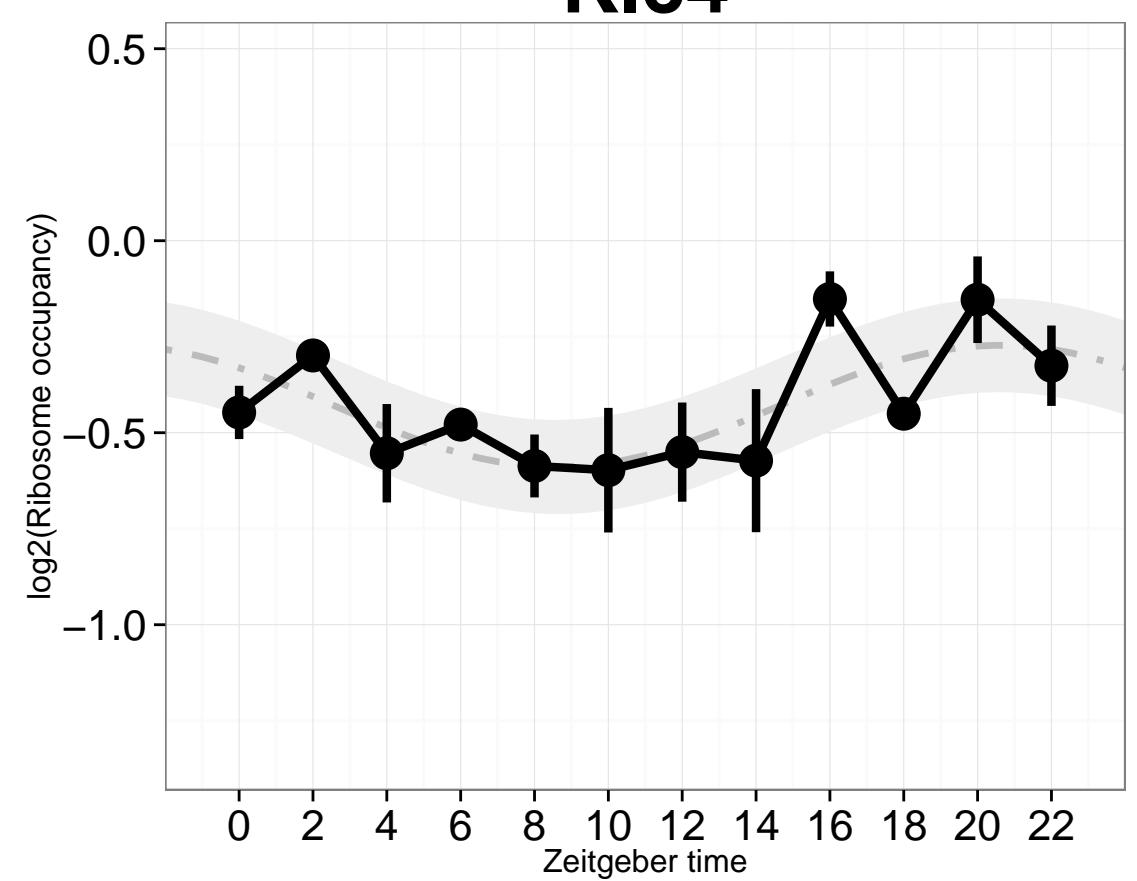

Supplement: Supplementary file 7674 [file 1]

# 1810009A15Rik

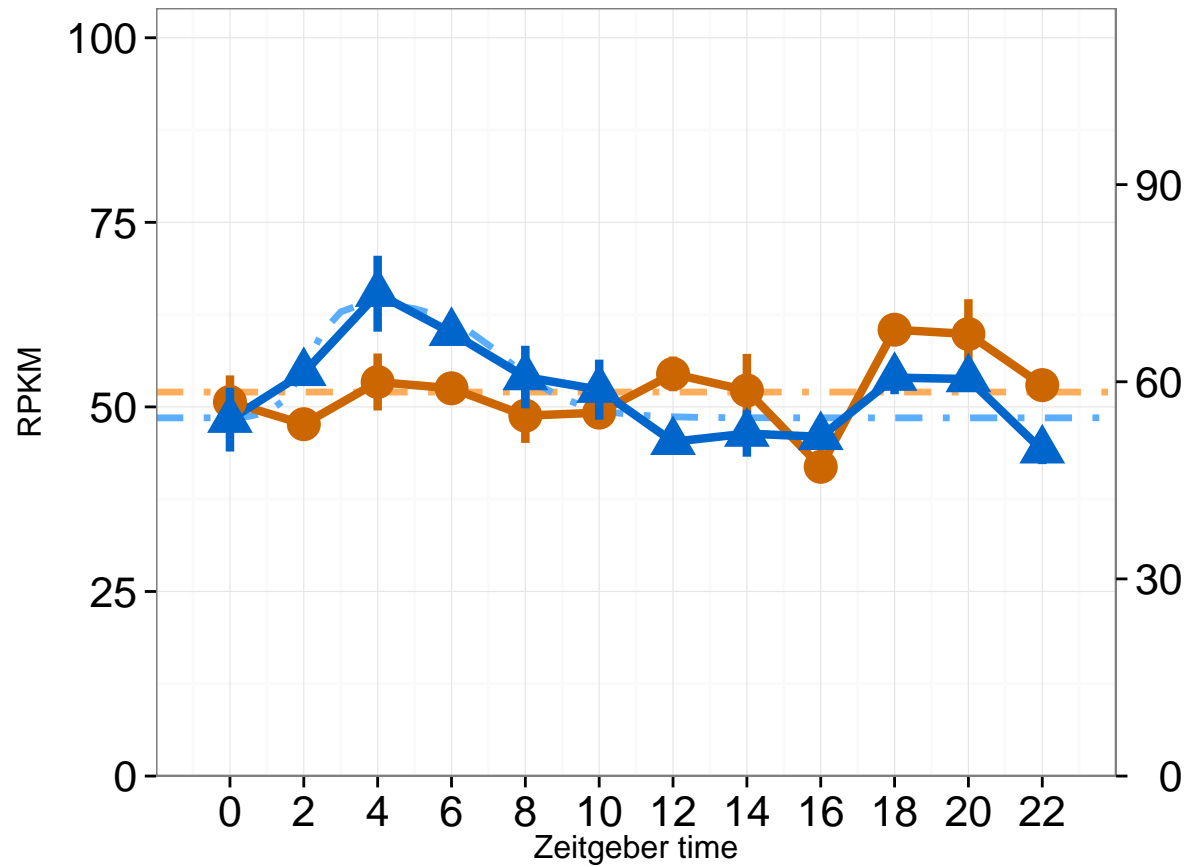

# 1810009A15Rik

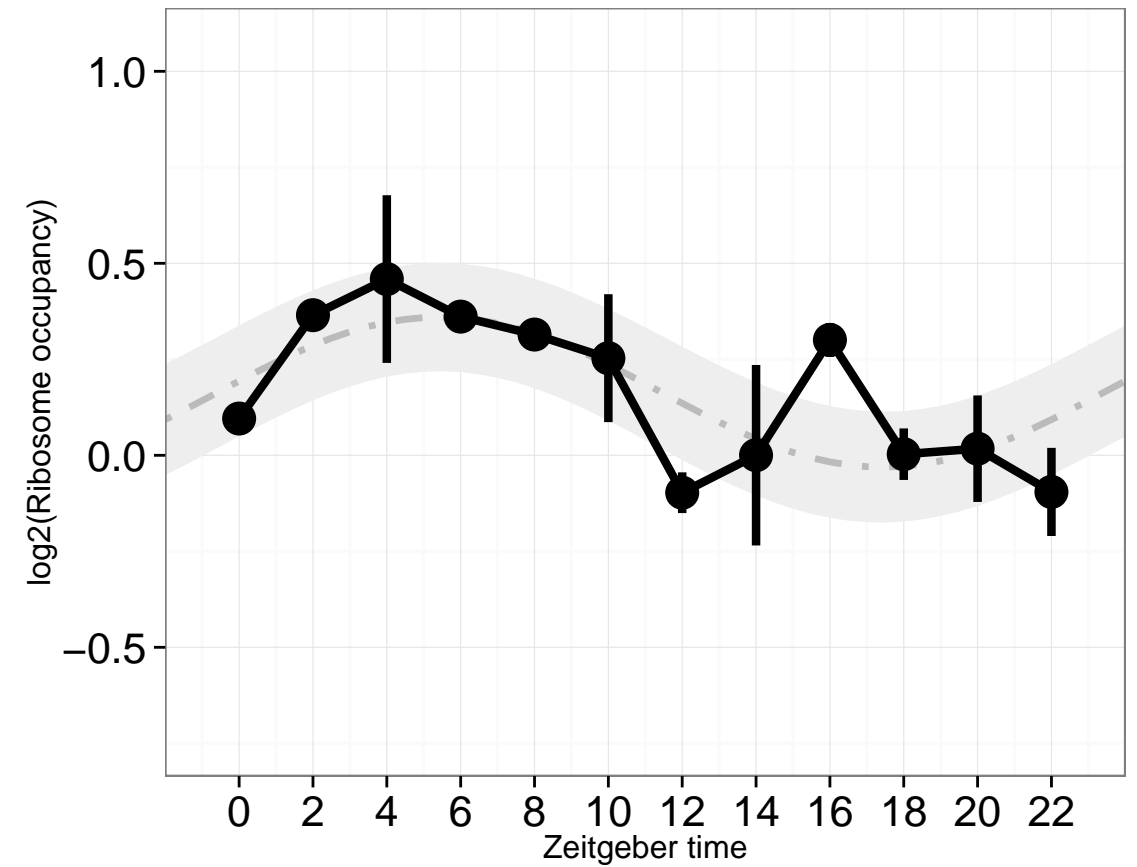

Supplement: Supplementary file 7675 [file 1]

Spata13

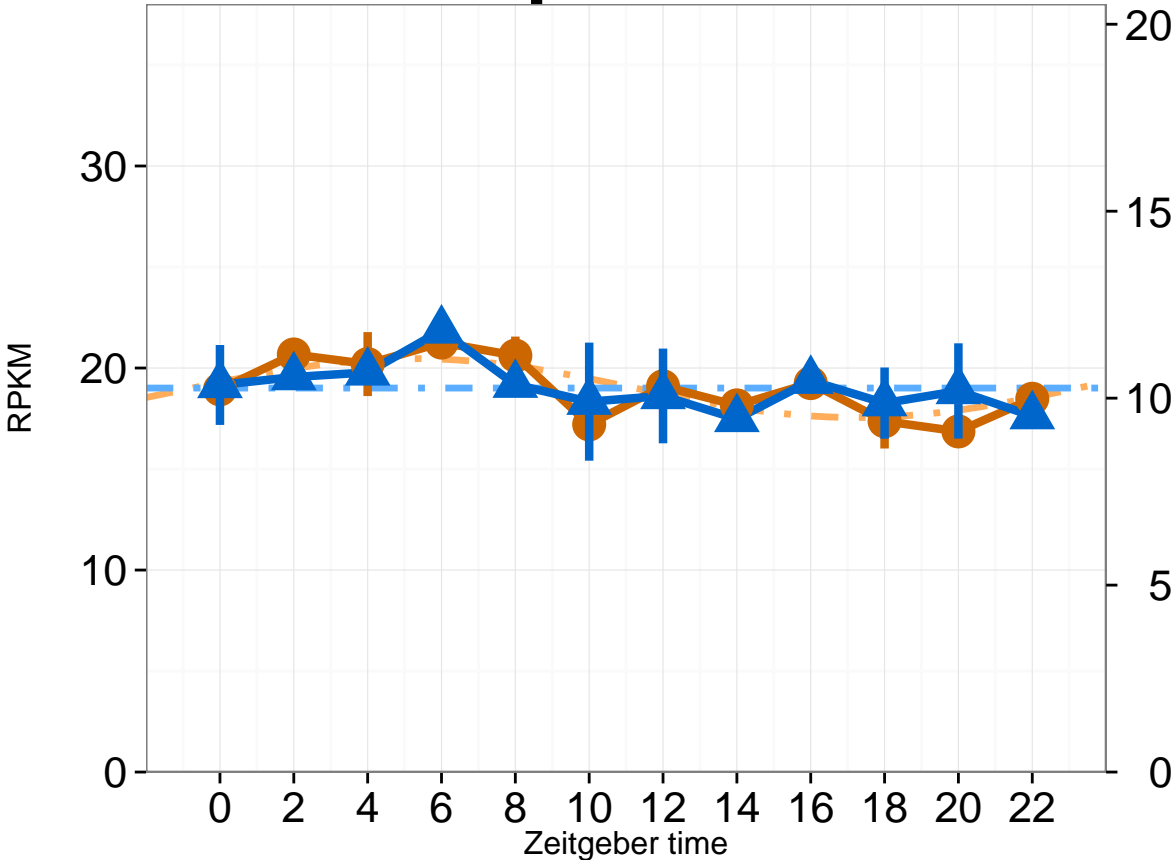

Spata13

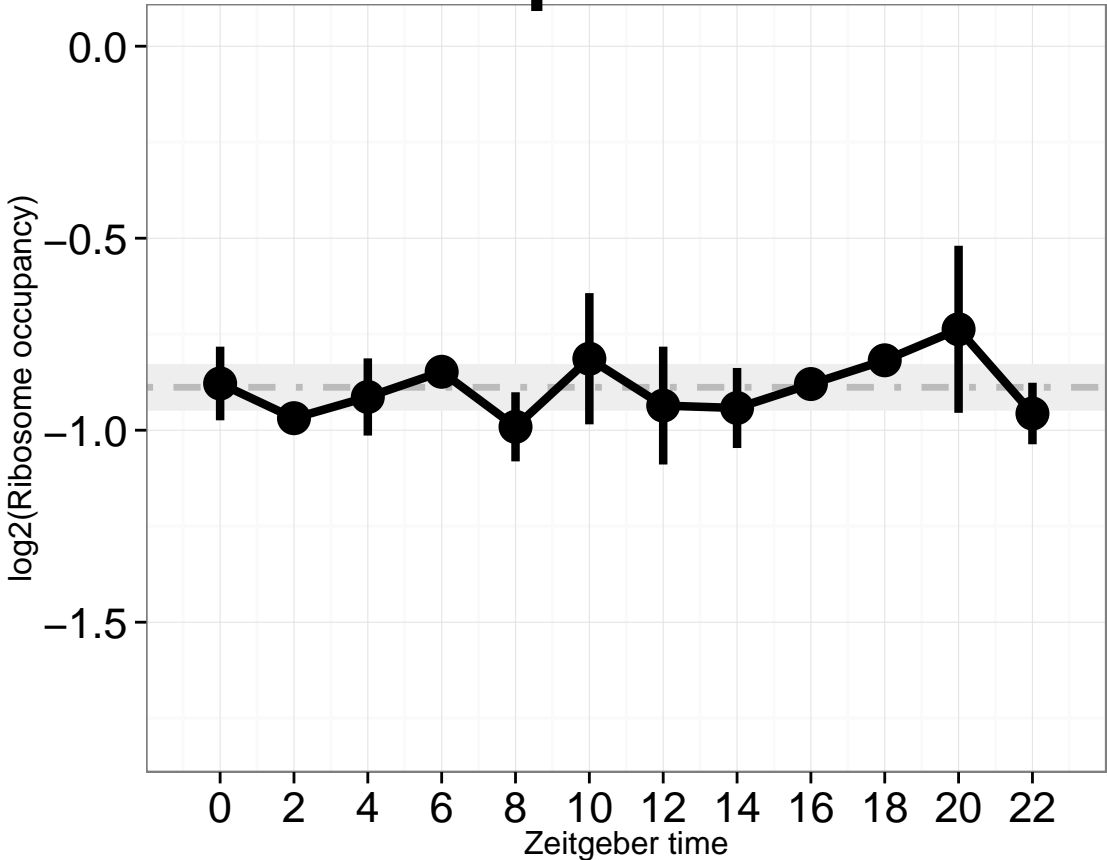

Supplement: Supplementary file 7676 [file 1]

**Hist1h2bn TR**

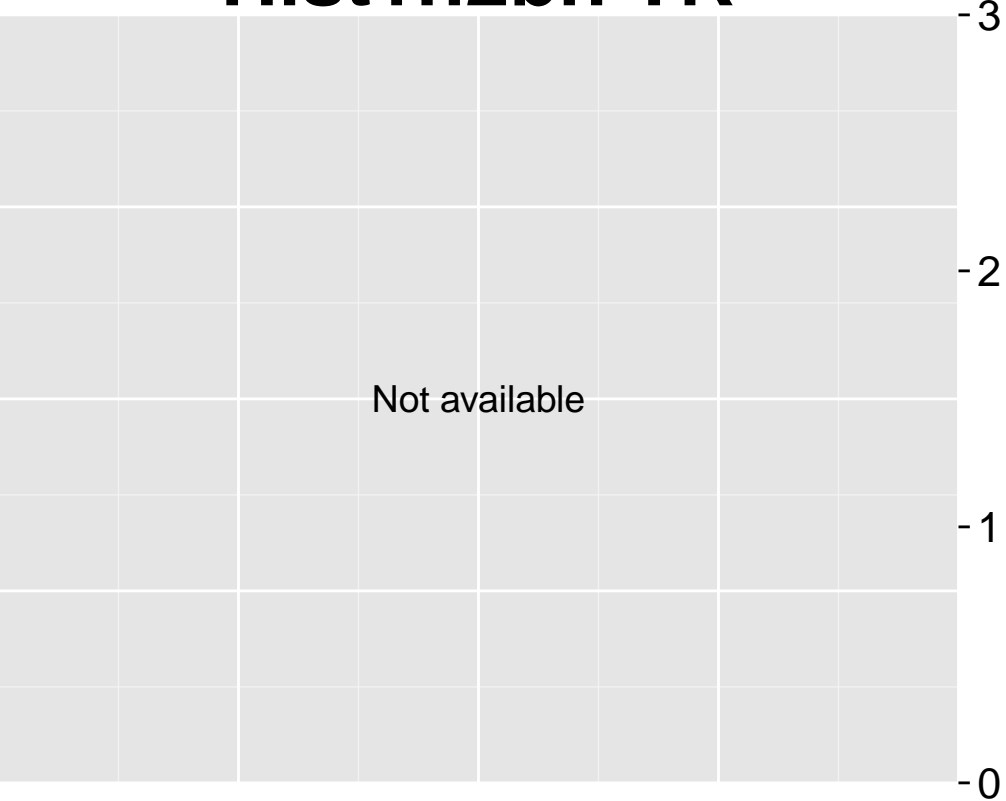

**Hist1h2bn log2(Ribosome occupanc**

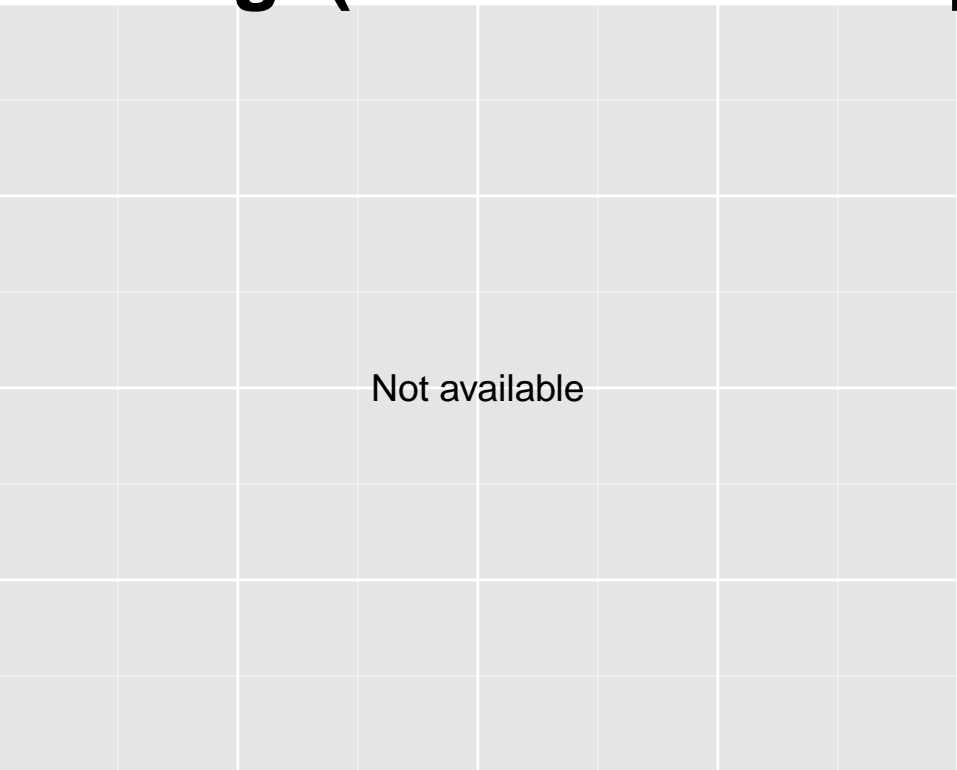

Supplement: Supplementary file 7677 [file 1]

## Wdr47

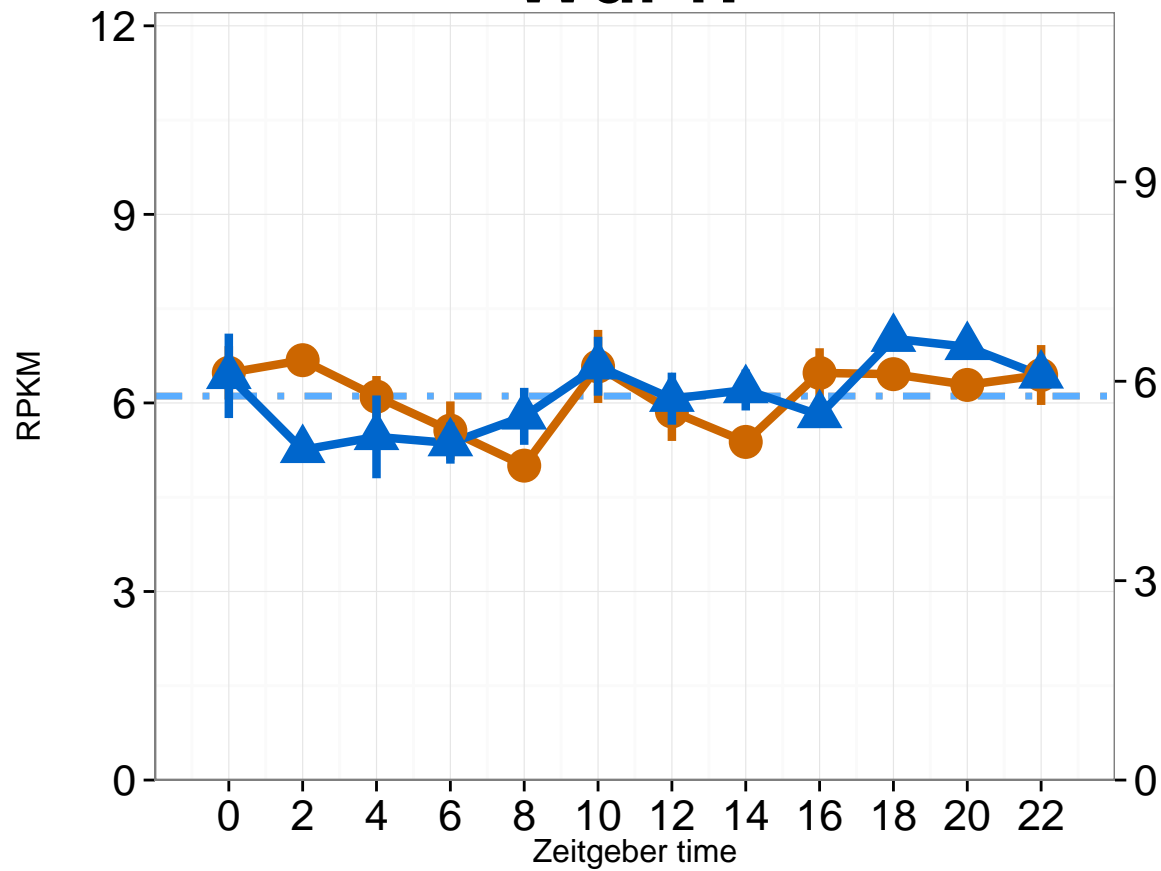

## Wdr47

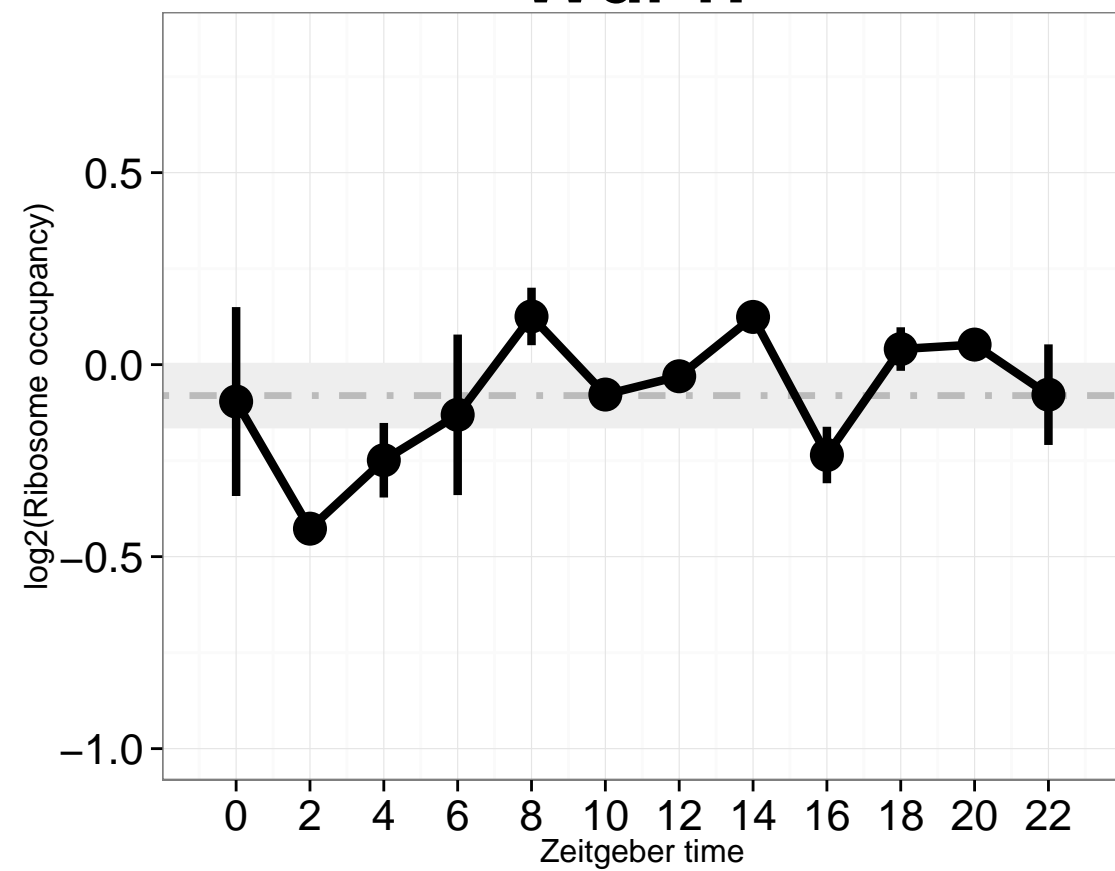

Supplement: Supplementary file 7678 [file 1]

## 2510009E07Rik

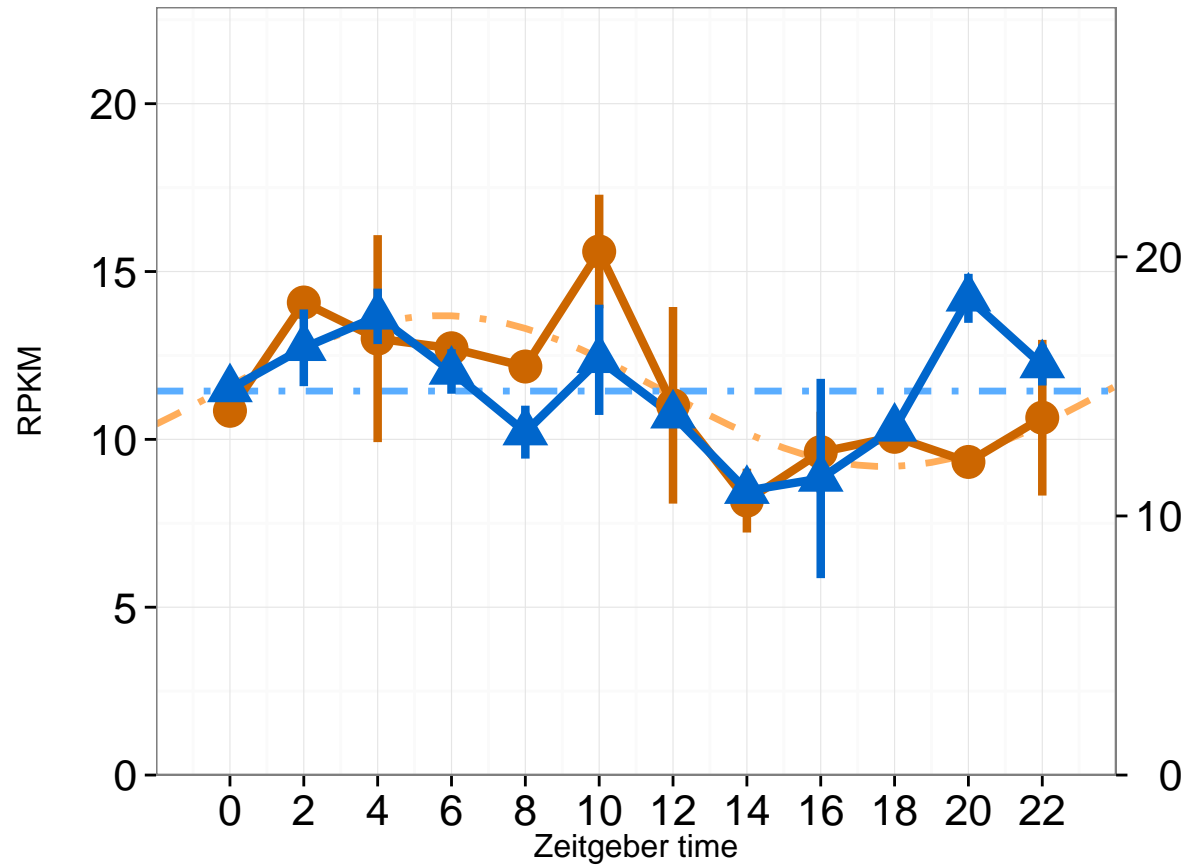

## 2510009E07Rik

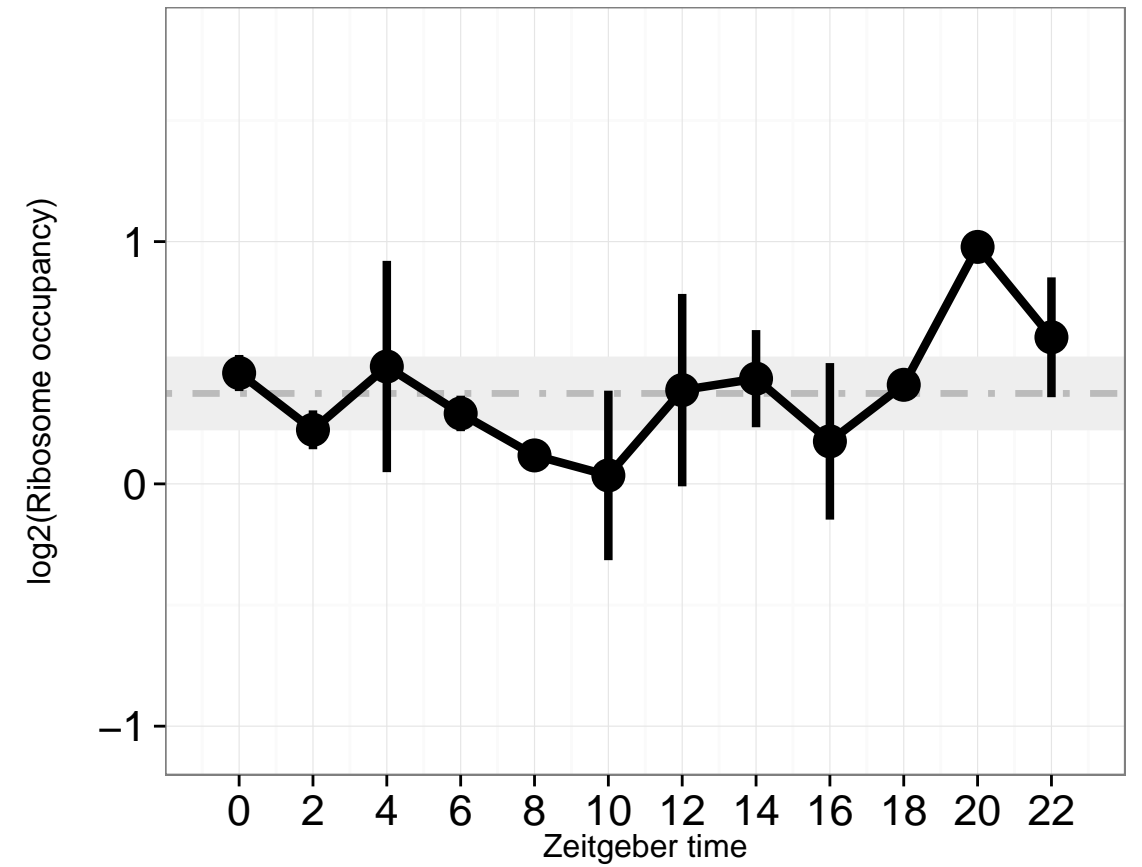

Supplement: Supplementary file 7679 [file 1]

## Ino80b

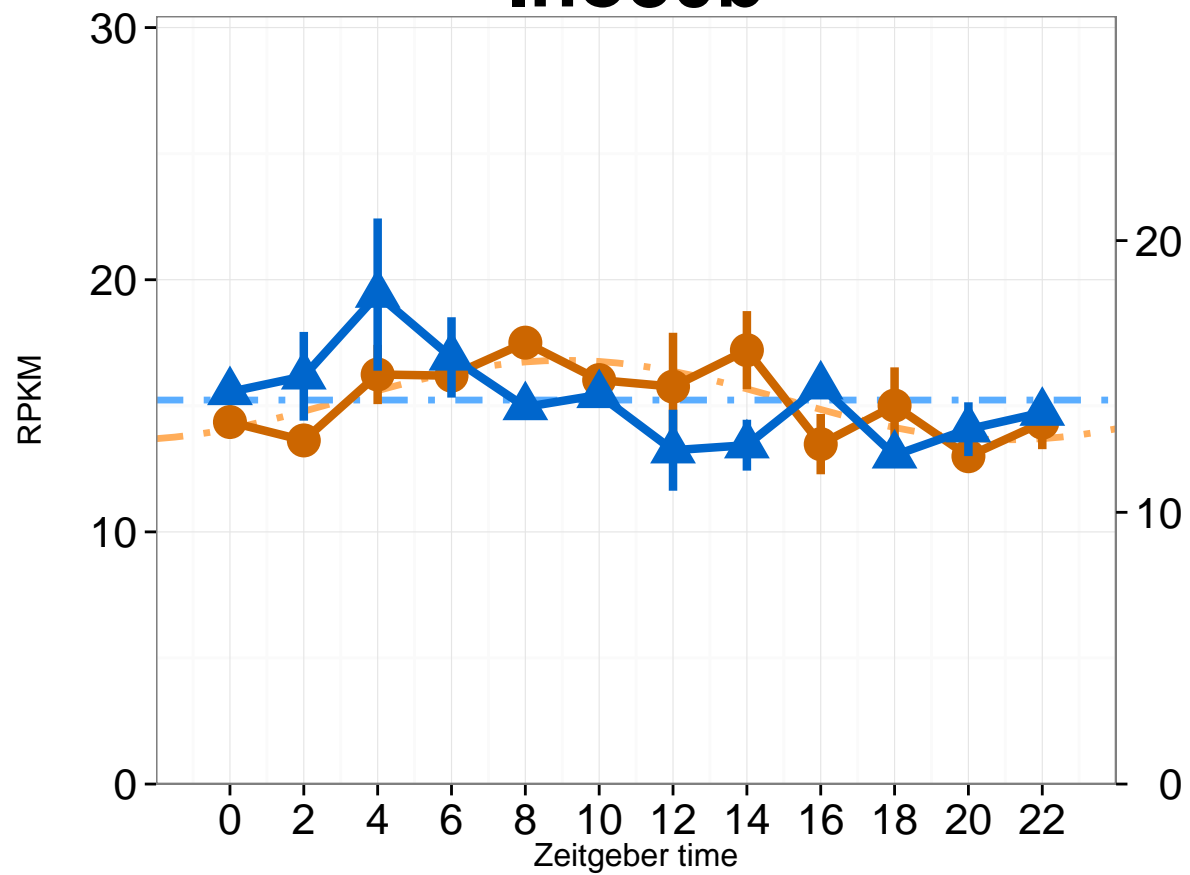

## Ino80b

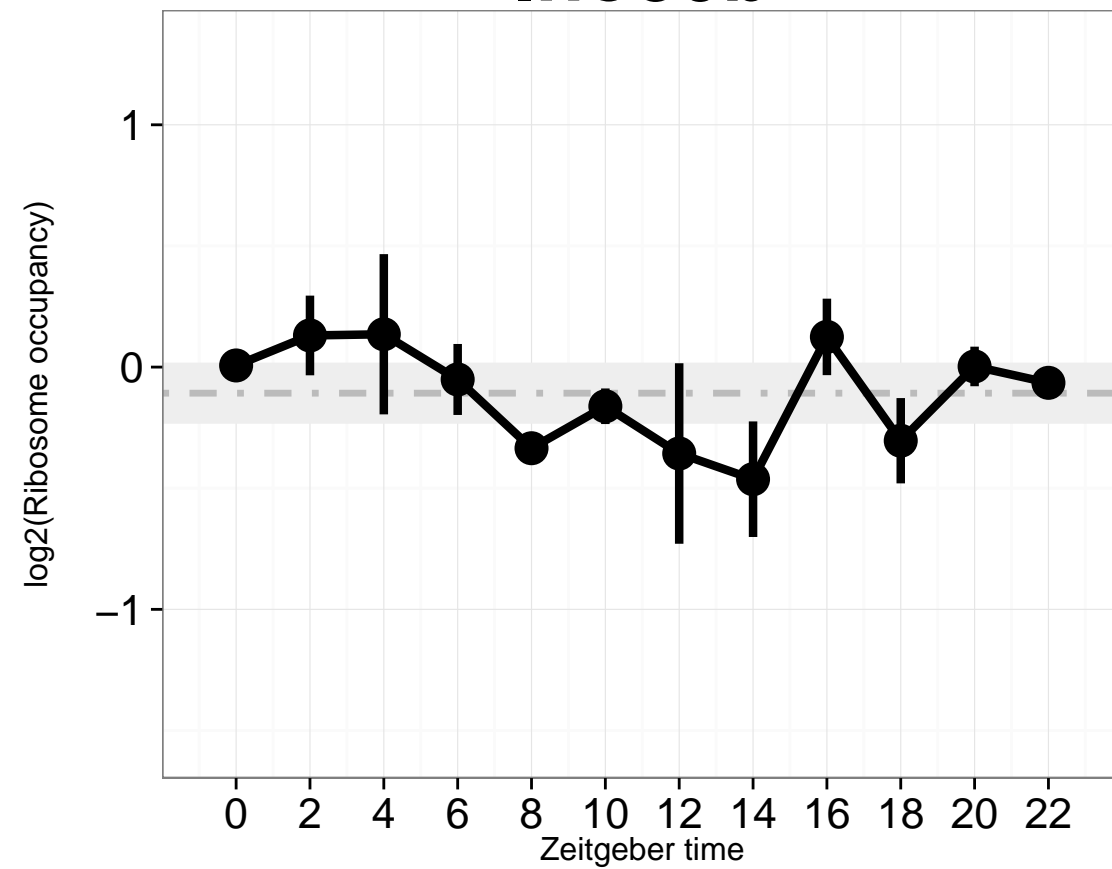

Supplement: Supplementary file 7680 [file 1]

## Surf1

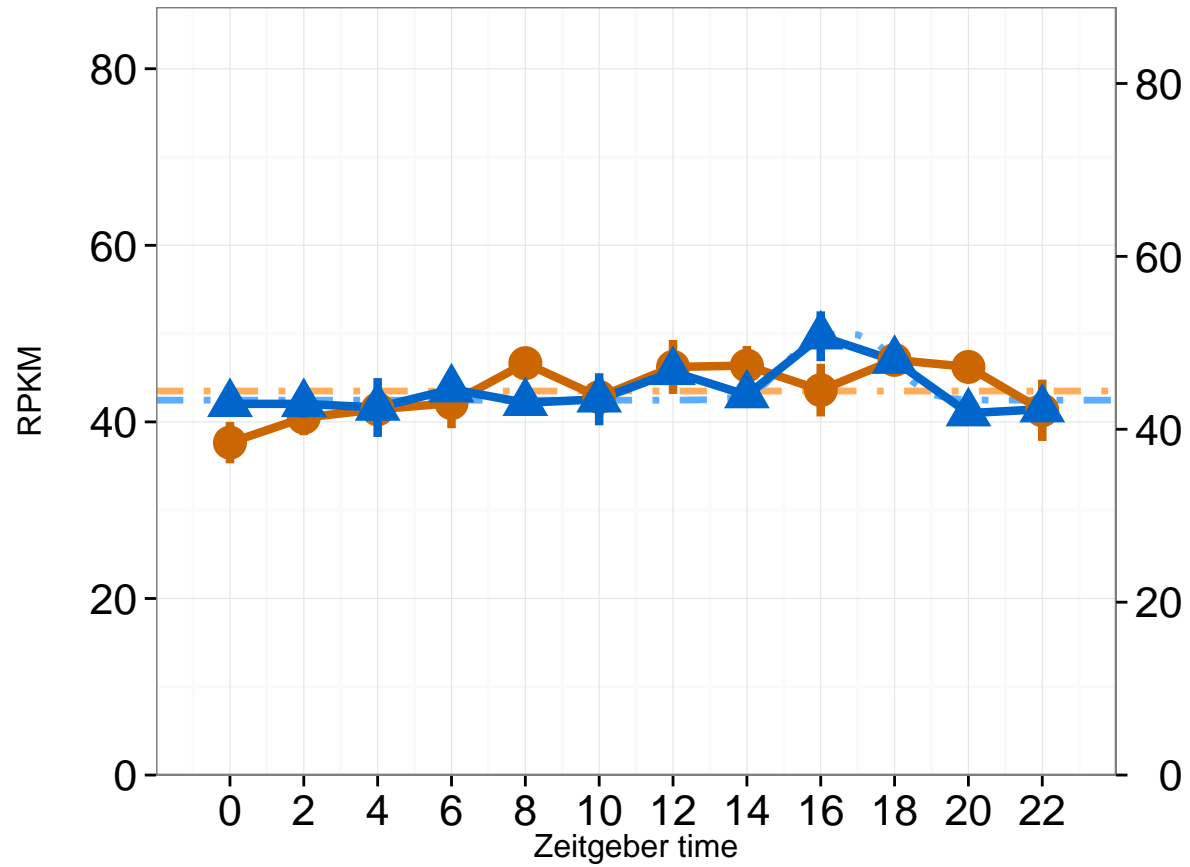

## Surf1

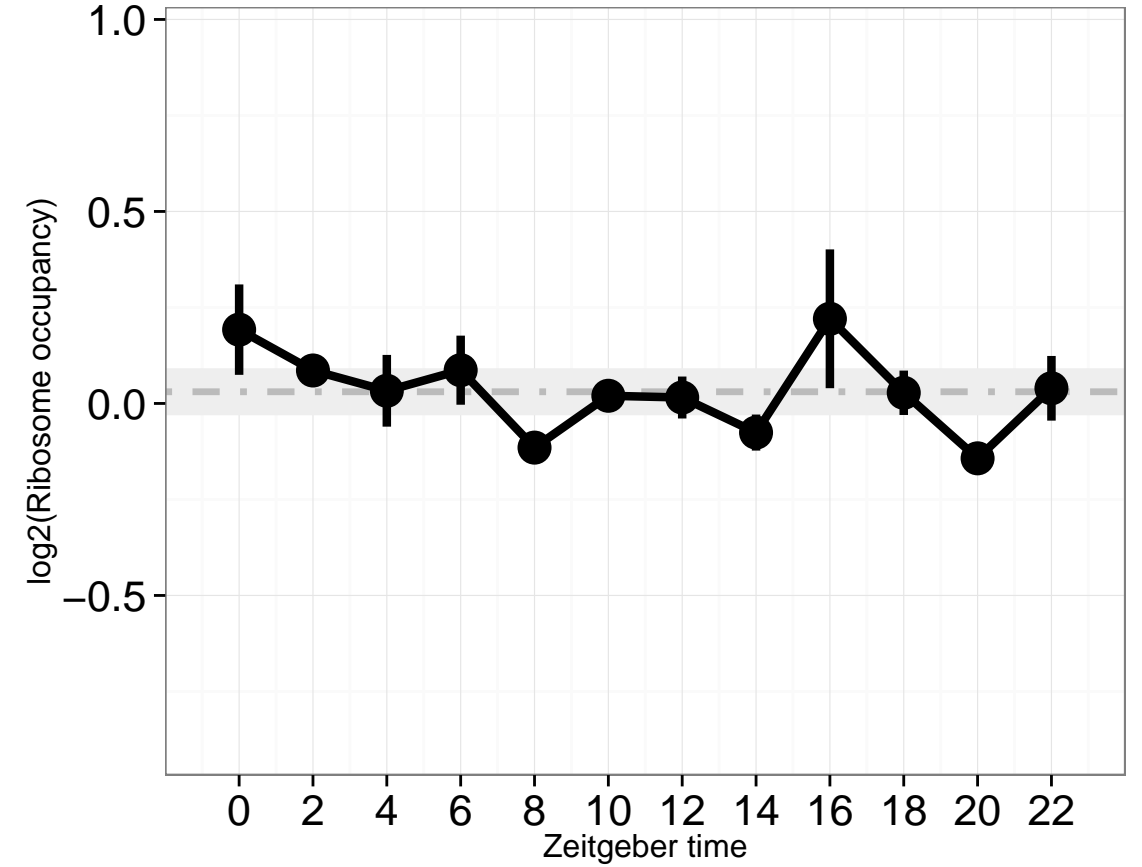

Supplement: Supplementary file 7681 [file 1]

## Cenpb

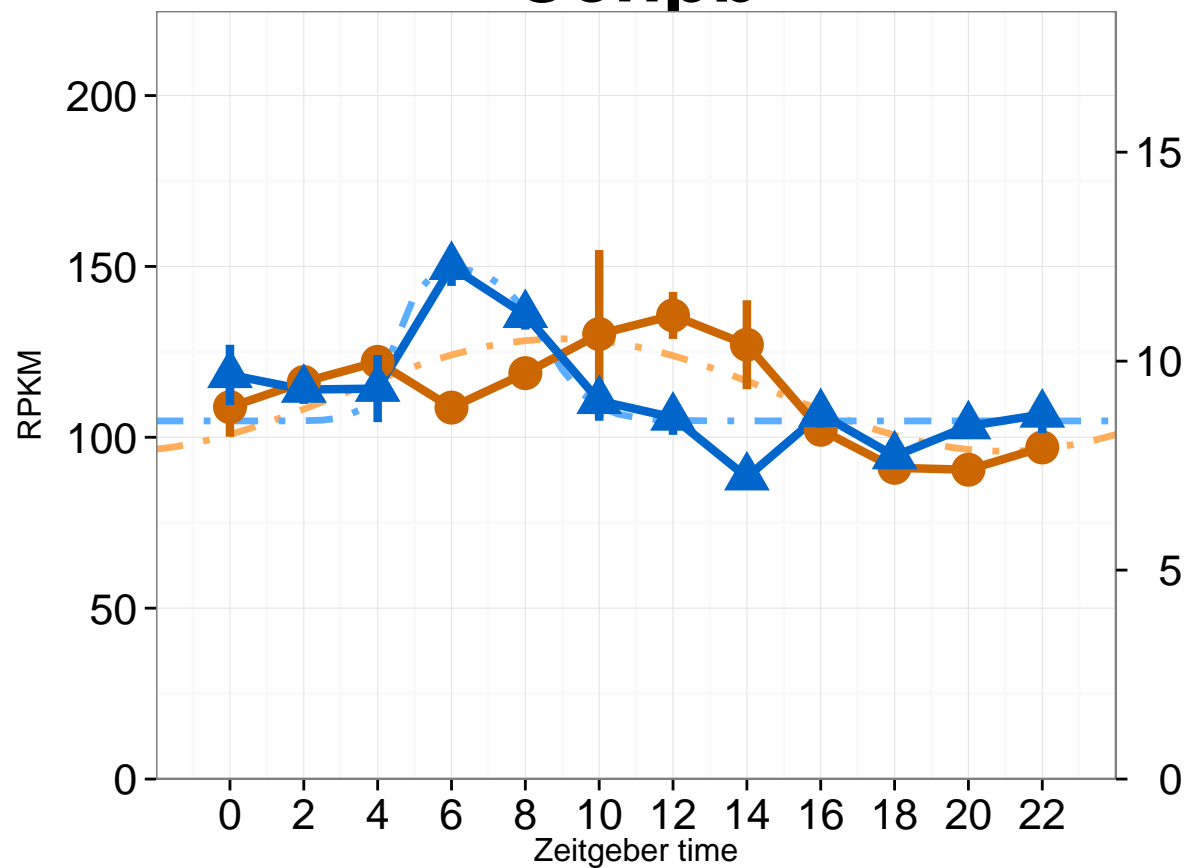

## Cenpb

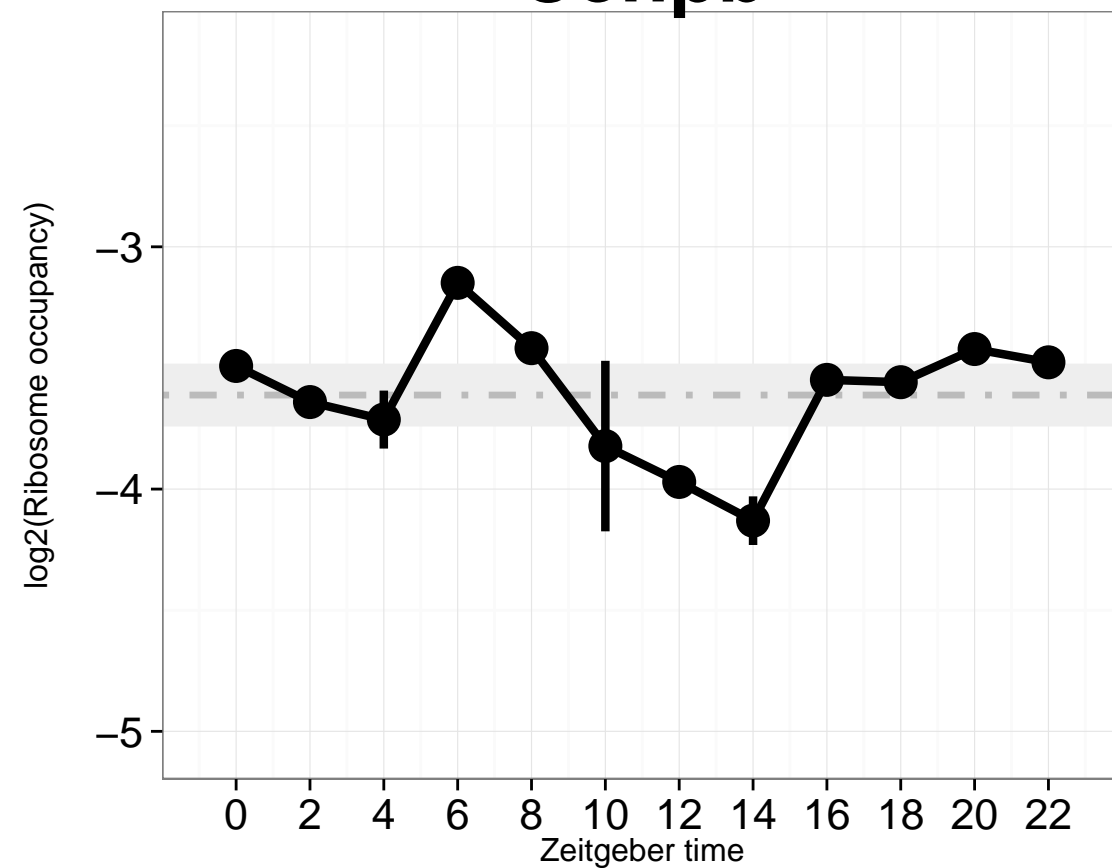

Supplement: Supplementary file 7682 [file 1]

# Cenpj

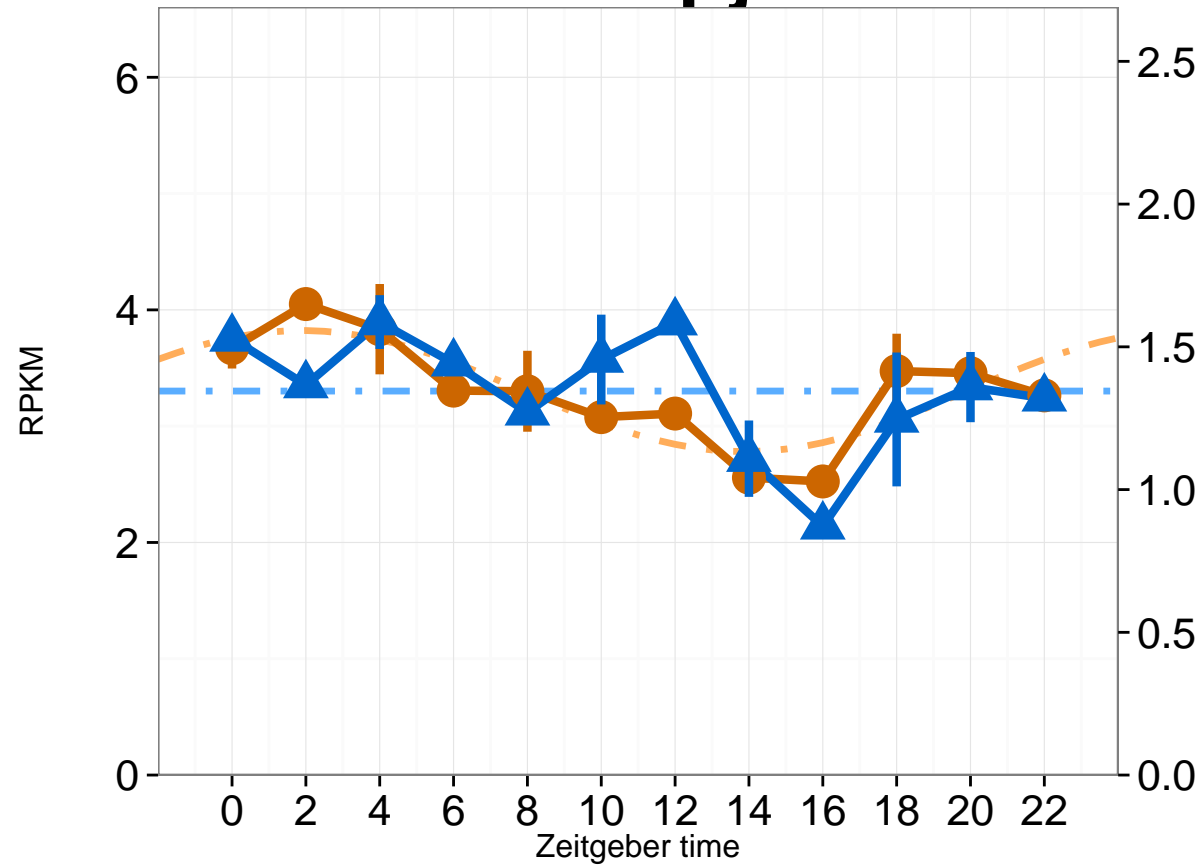

# Cenpj

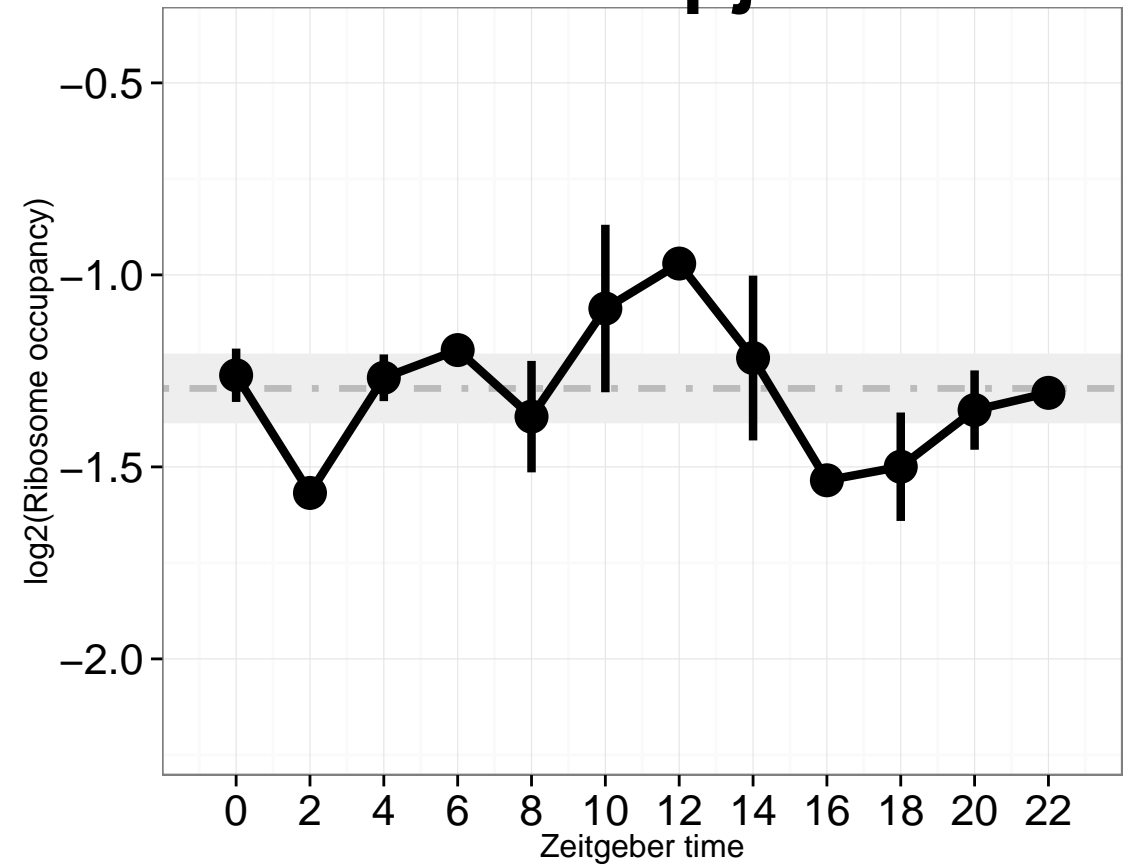

Supplement: Supplementary file 7683 [file 1]

# Tmem191c

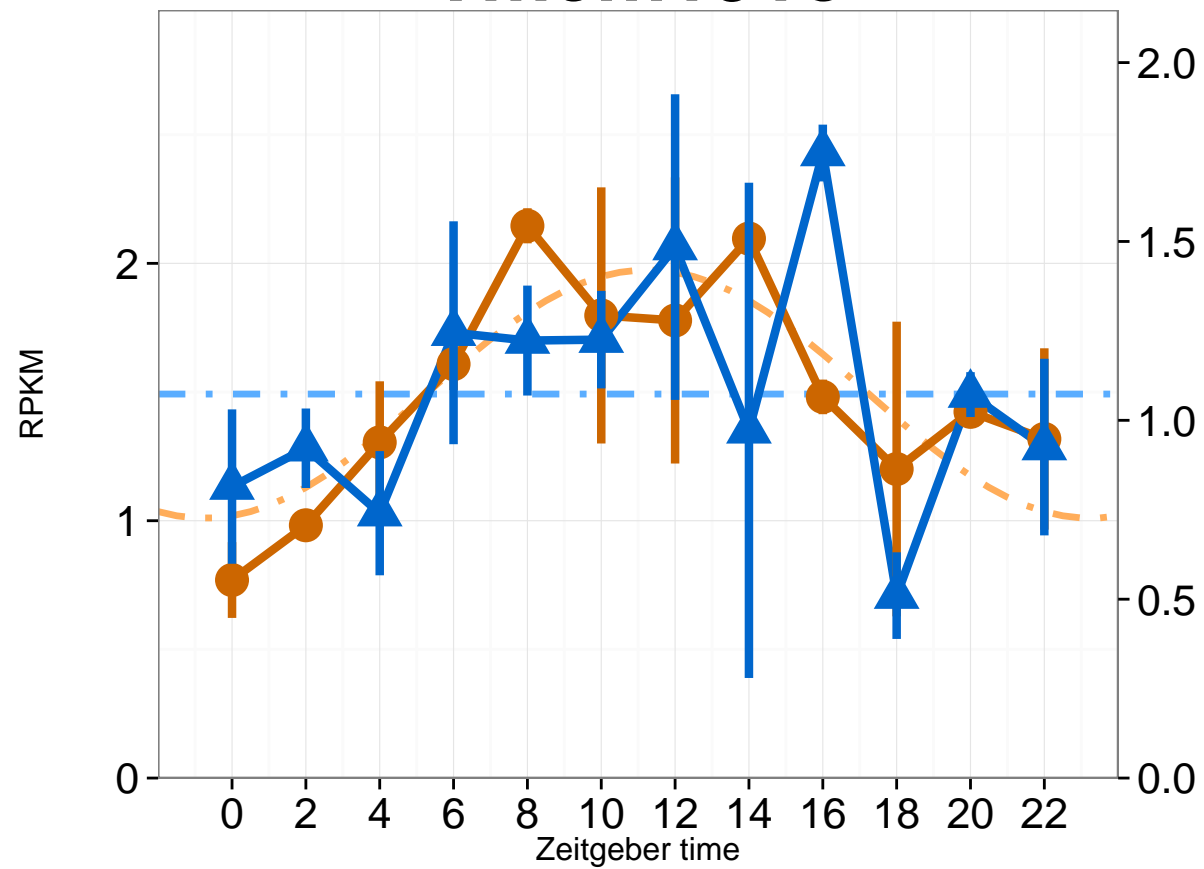

# Tmem191c

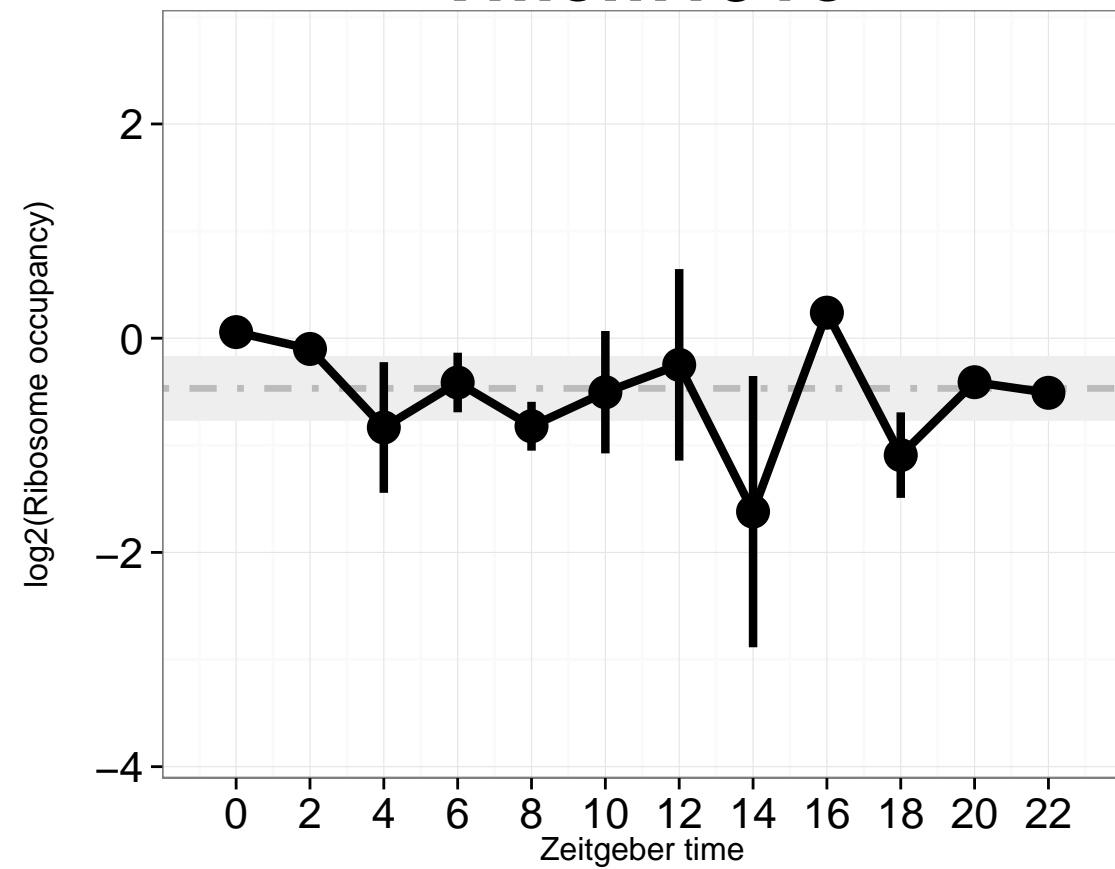

Supplement: Supplementary file 7684 [file 1]

## Rps10

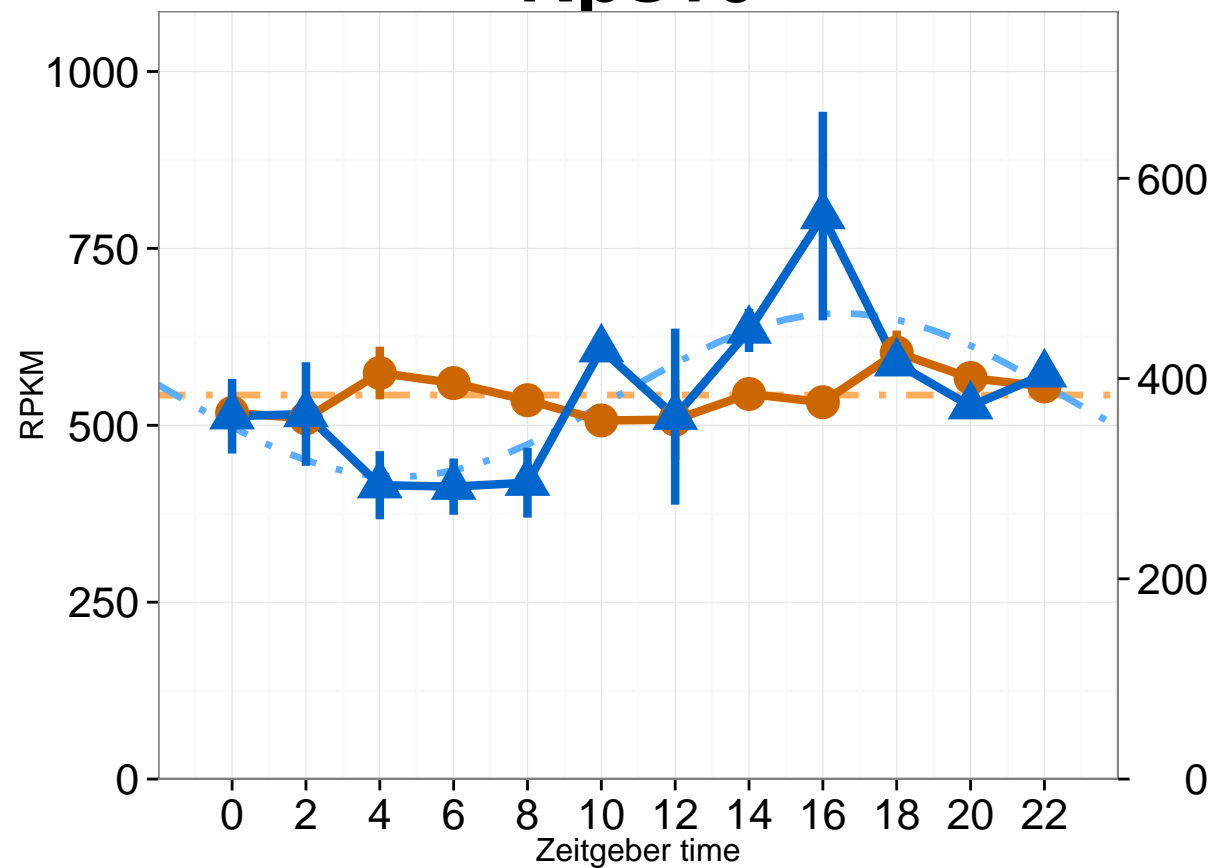

## Rps10

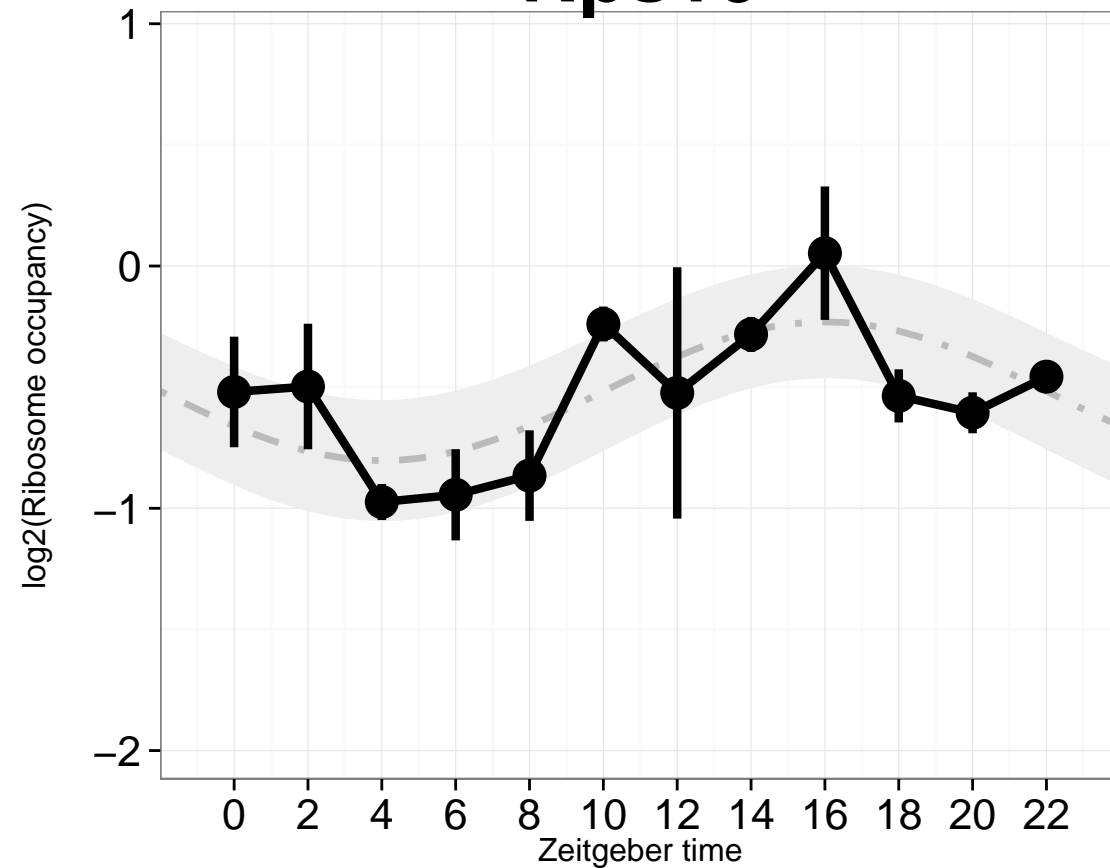

Supplement: Supplementary file 7685 [file 1]

## 2010012005Rik

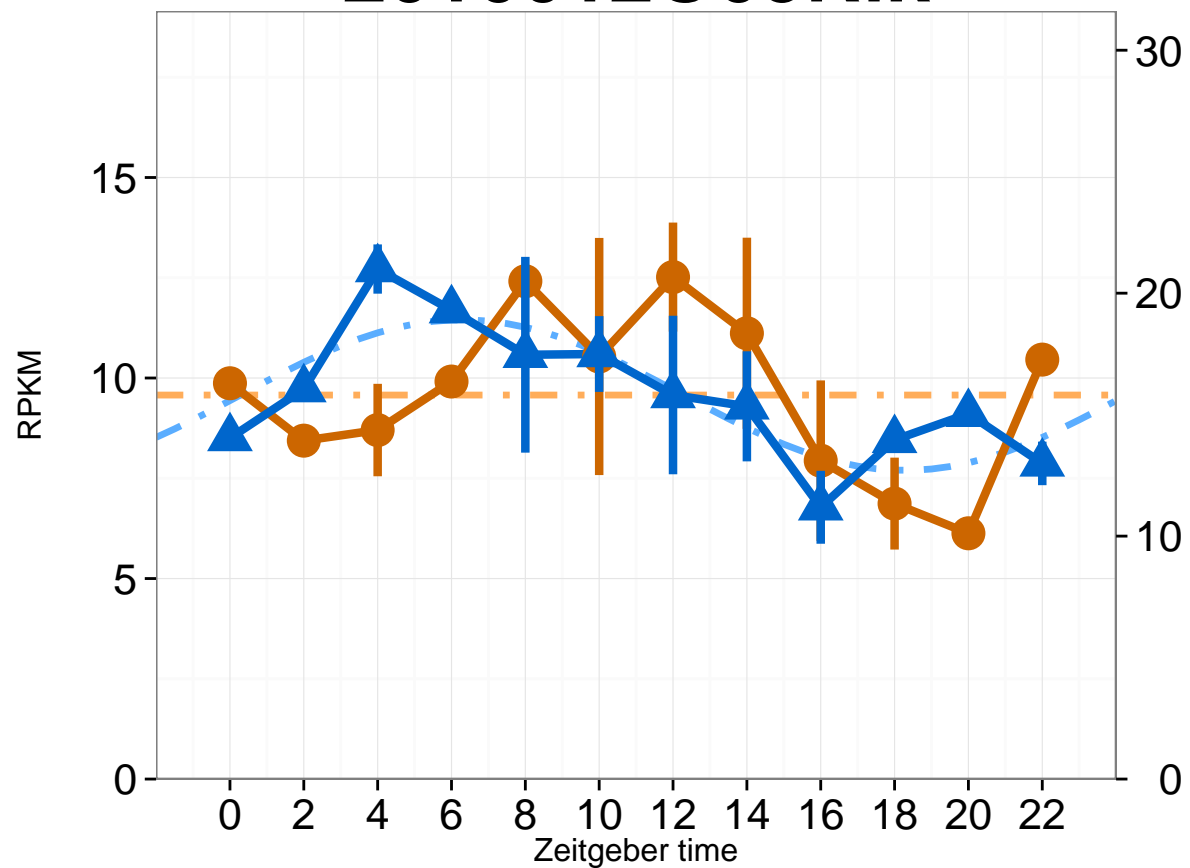

## 2010012005Rik

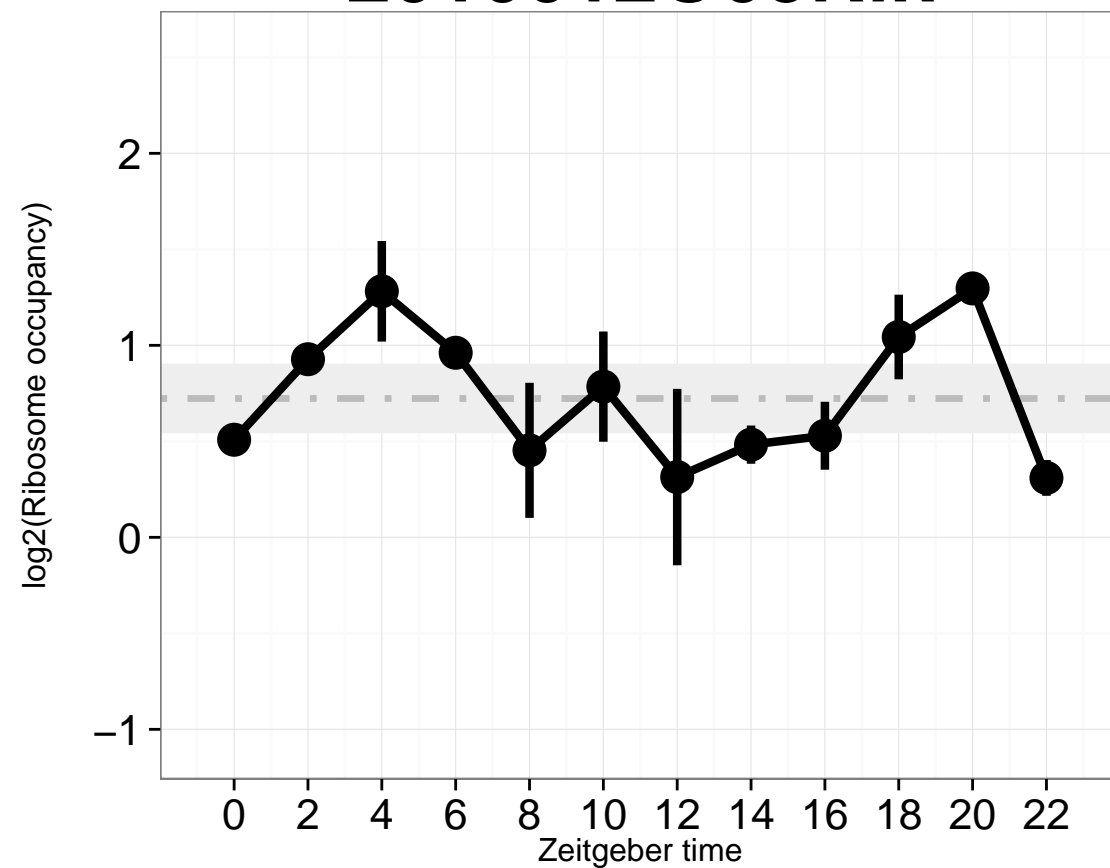

Supplement: Supplementary file 7686 [file 1]

## Mccc2

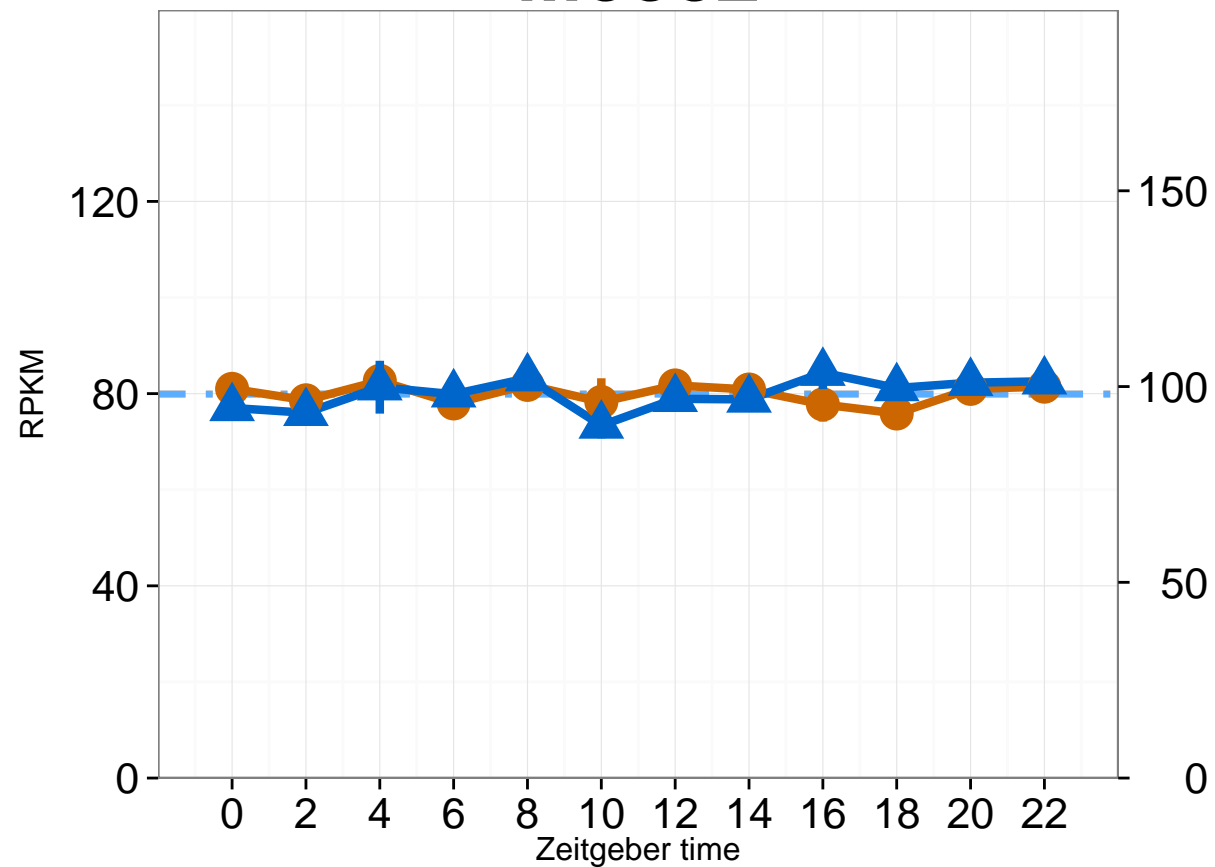

## Mccc2

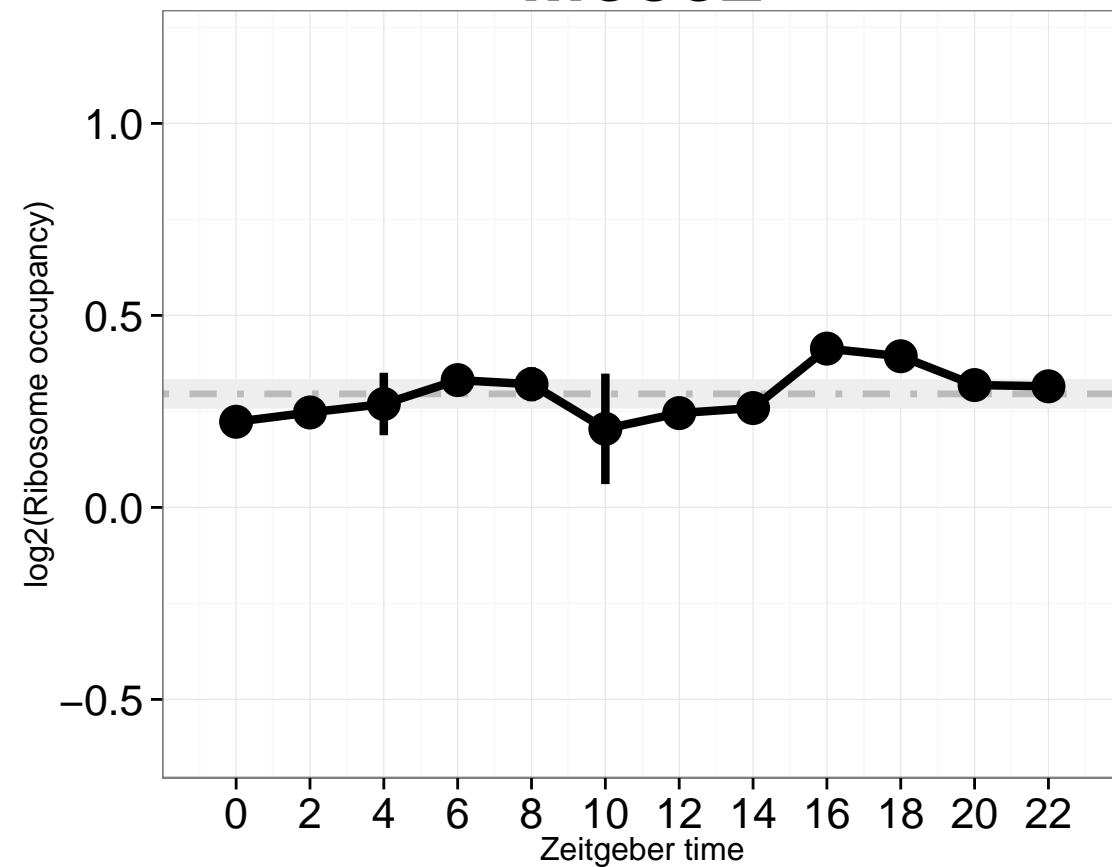

Supplement: Supplementary file 7687 [file 1]

# Scaf1

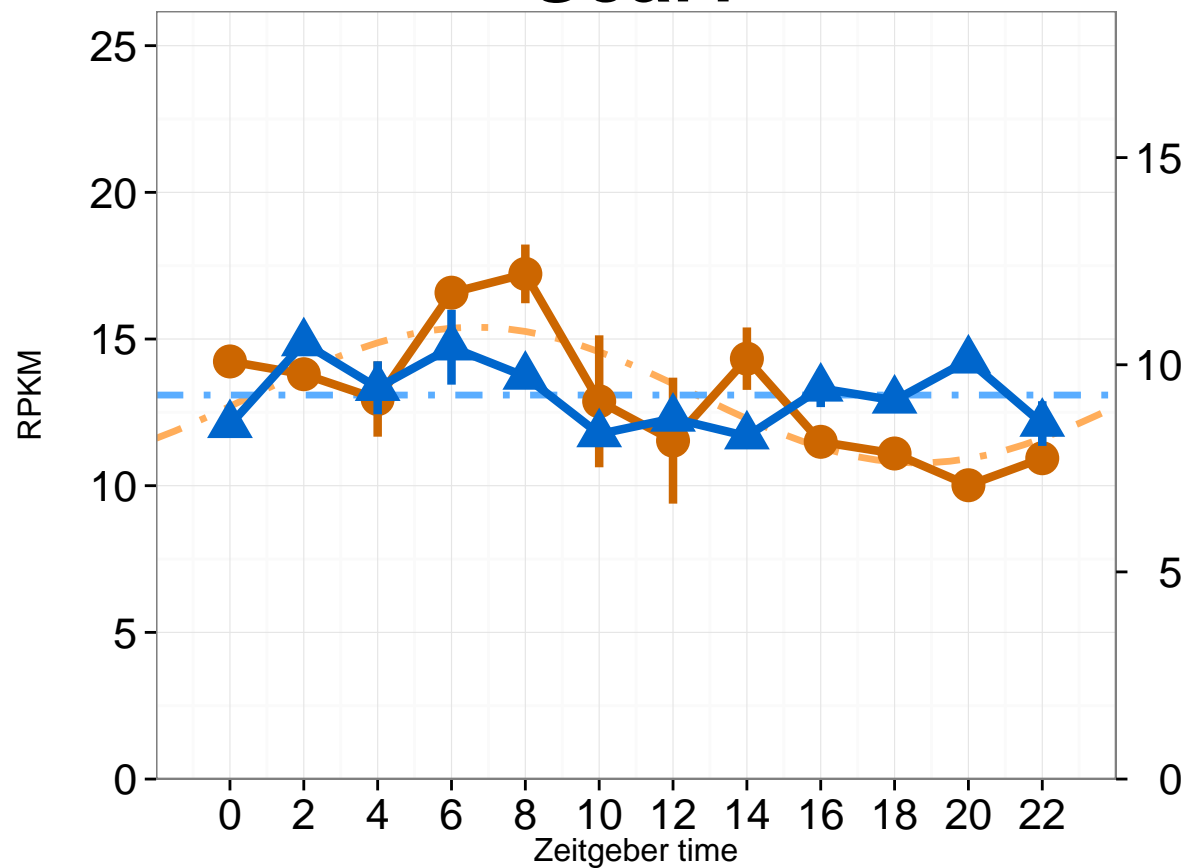

# Scaf1

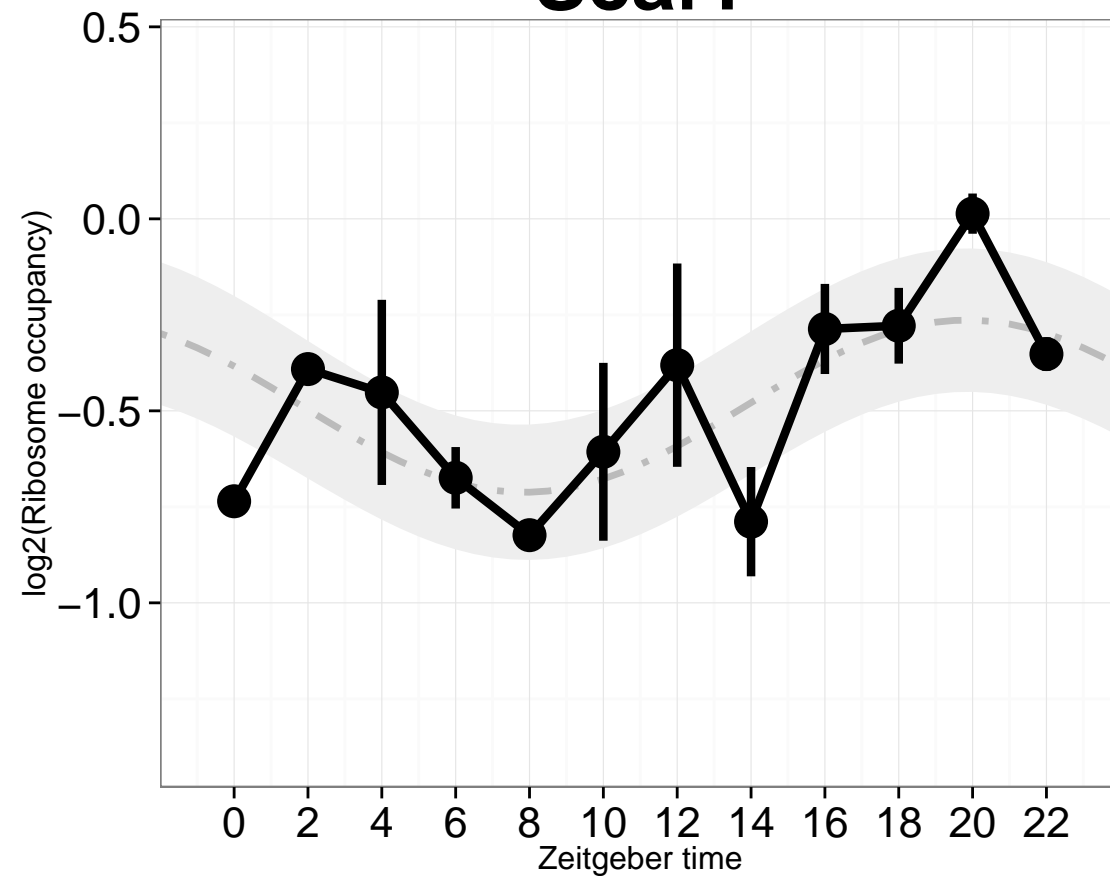

Supplement: Supplementary file 7688 [file 1]

## Kctd13

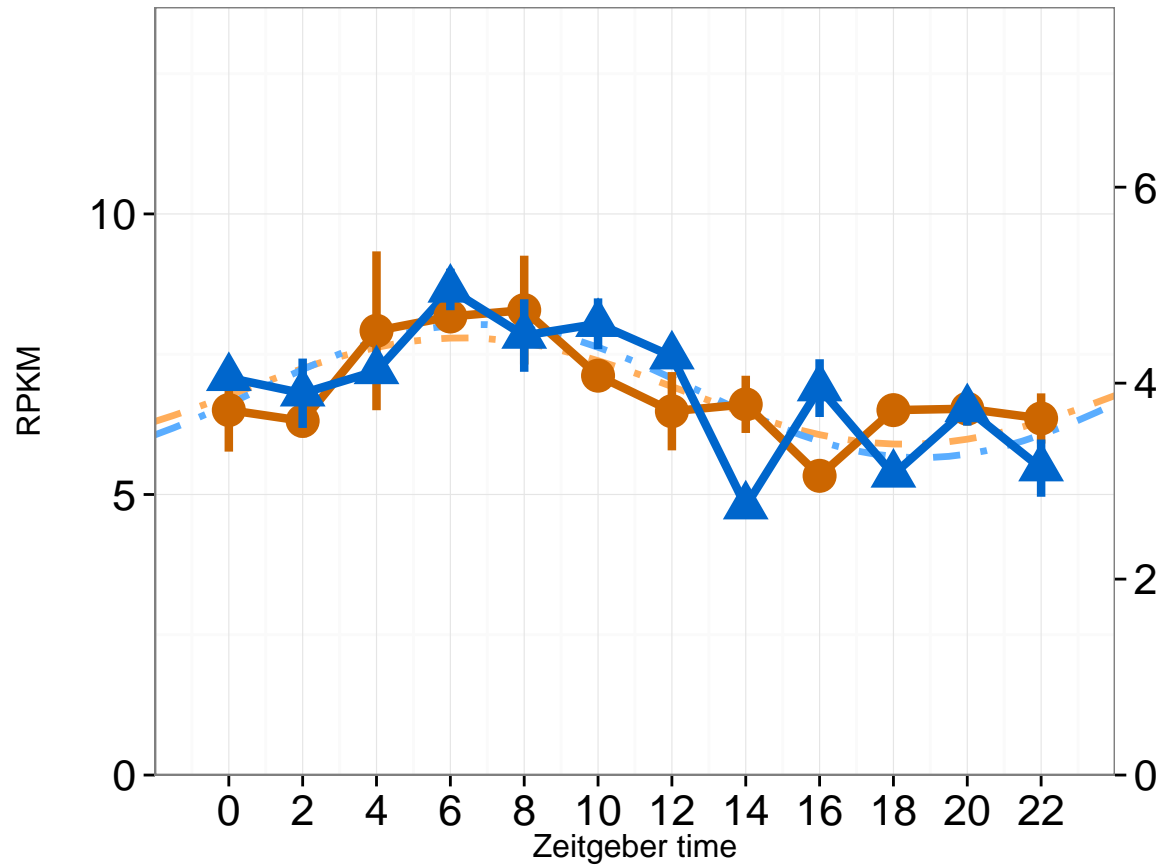

## Kctd13

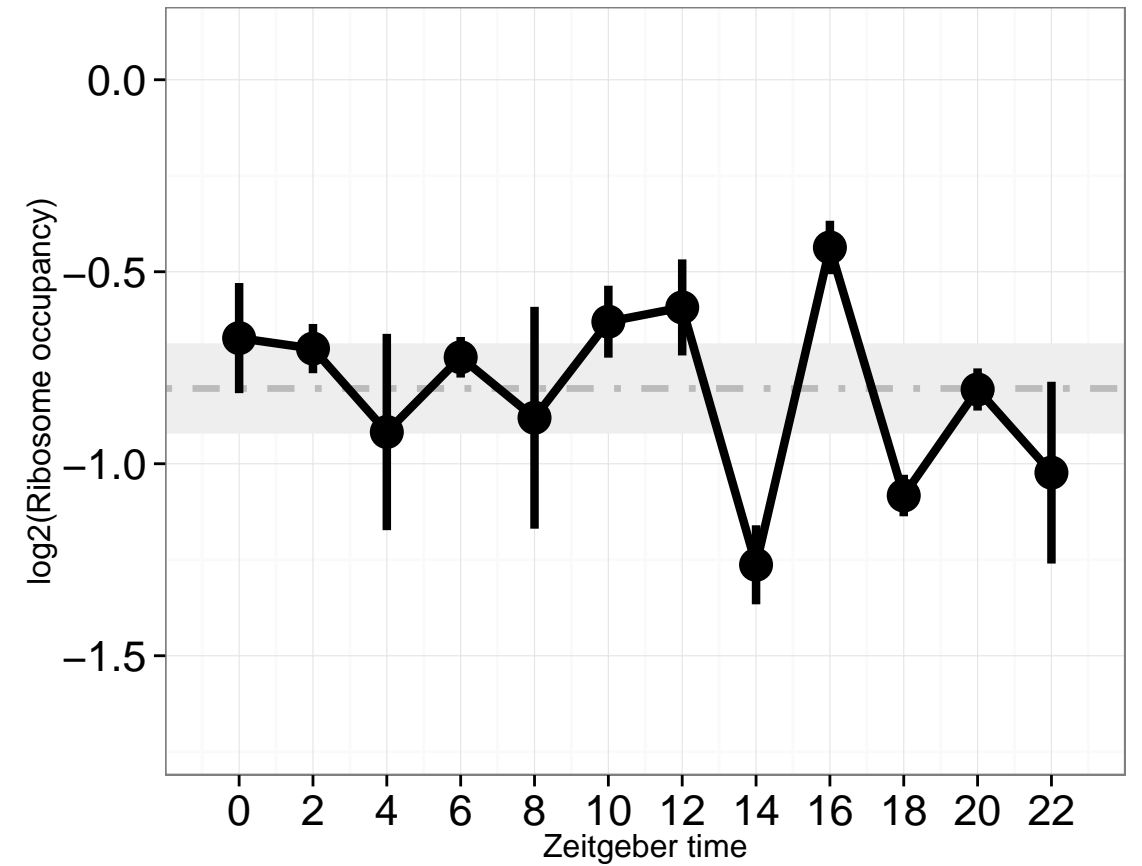

Supplement: Supplementary file 7689 [file 1]

# L3mbtl3

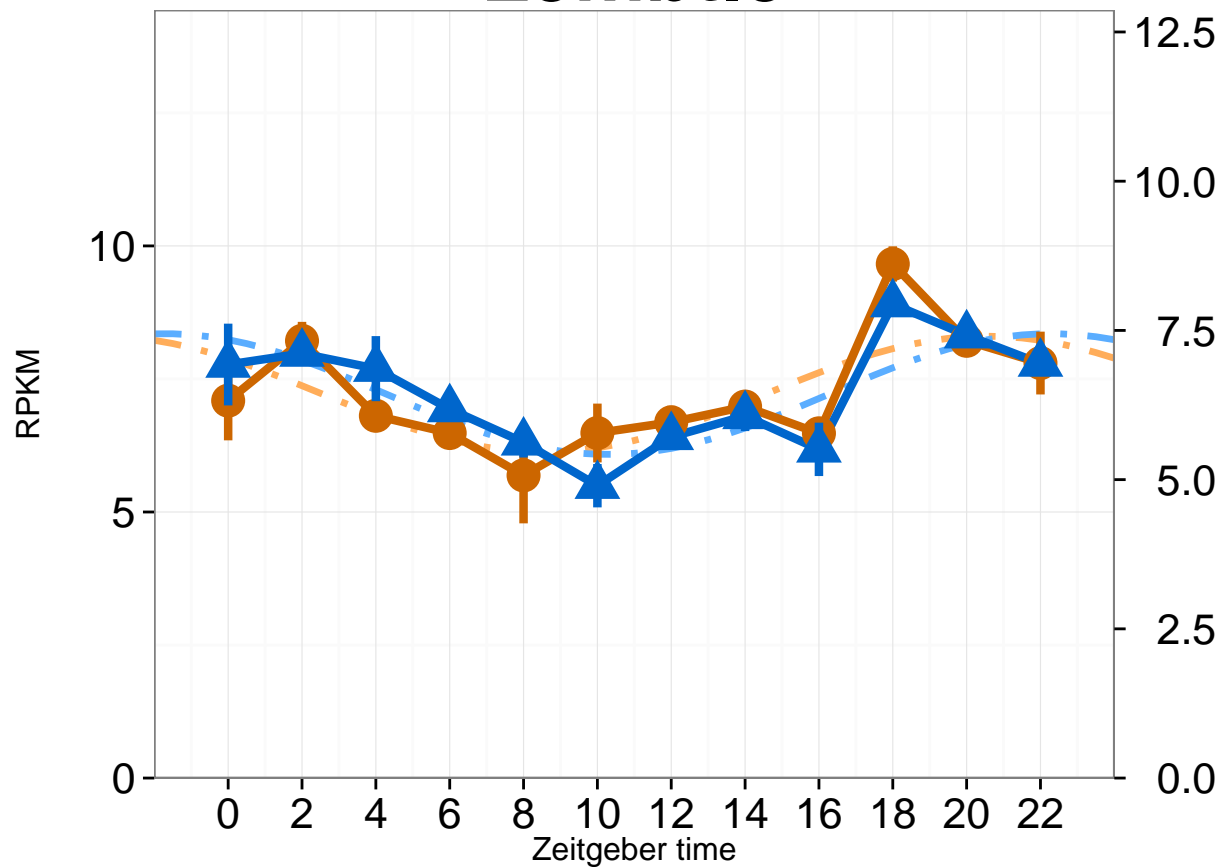

# L3mbtl3

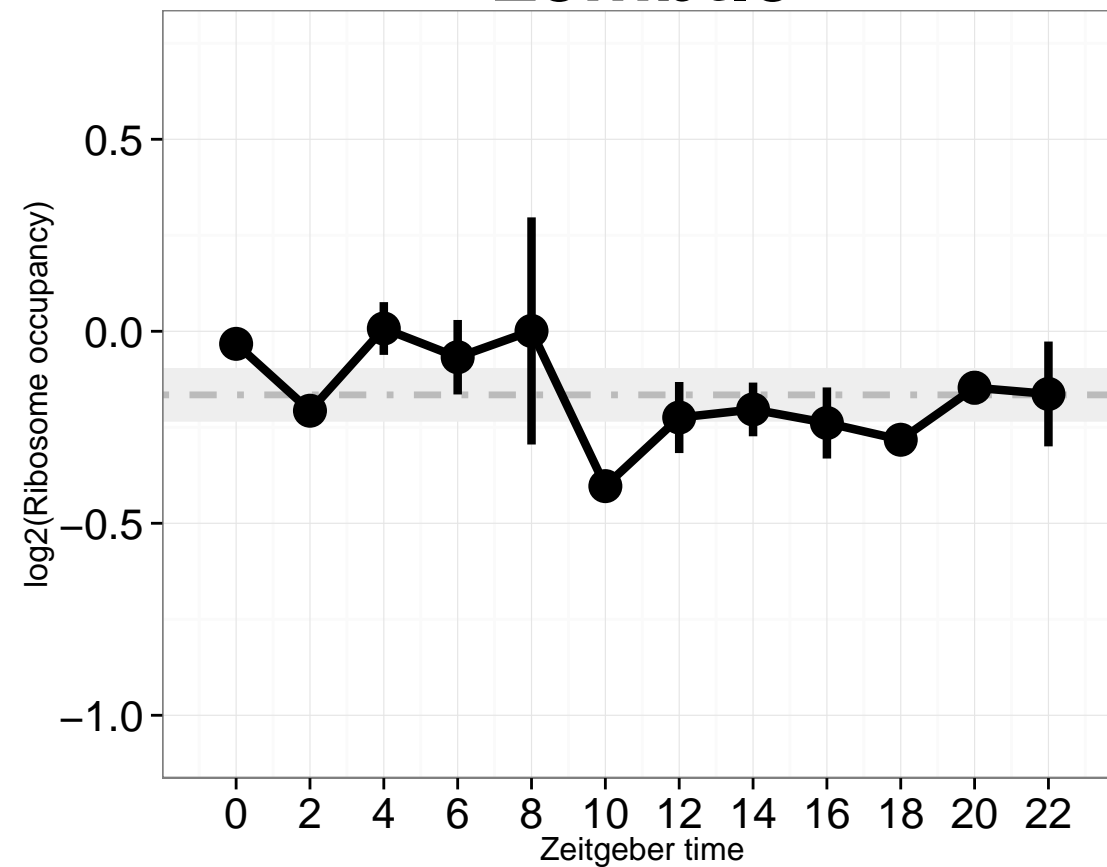

Supplement: Supplementary file 7690 [file 1]

## Rev3l

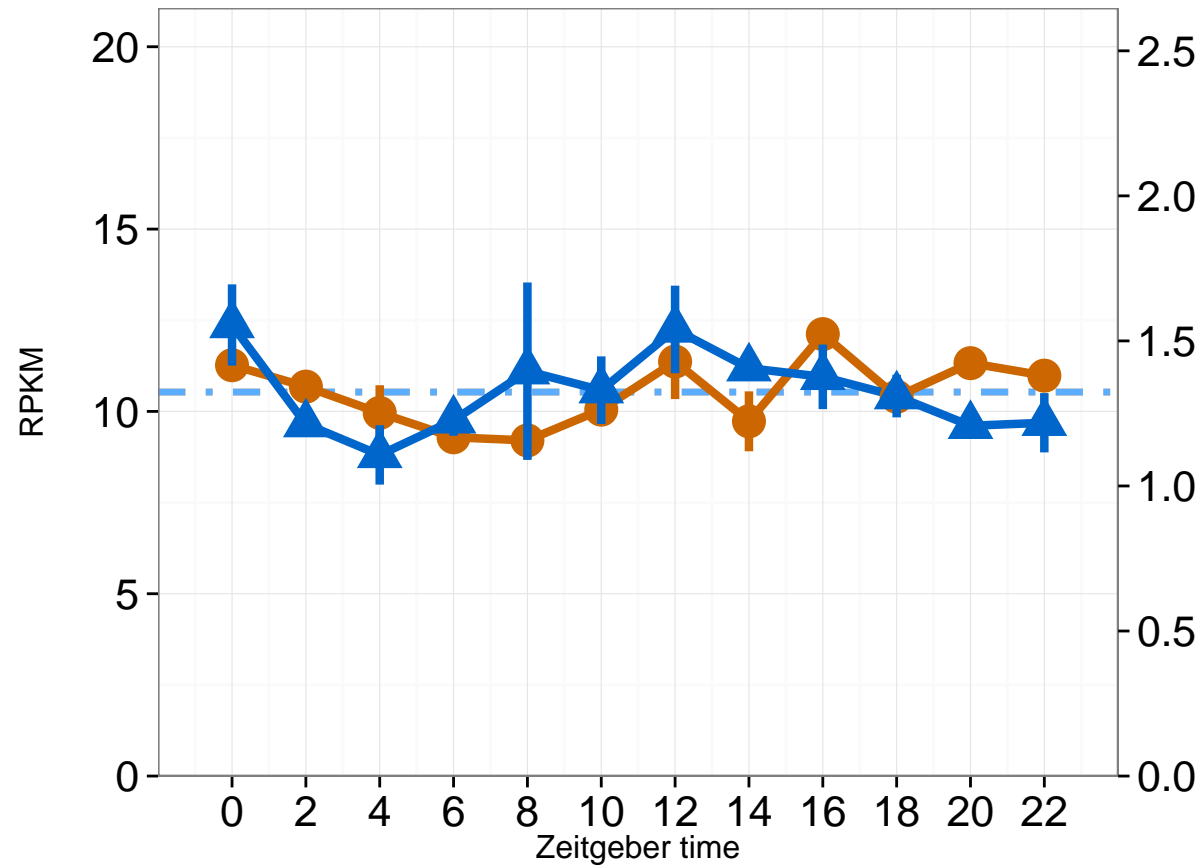

## Rev3l

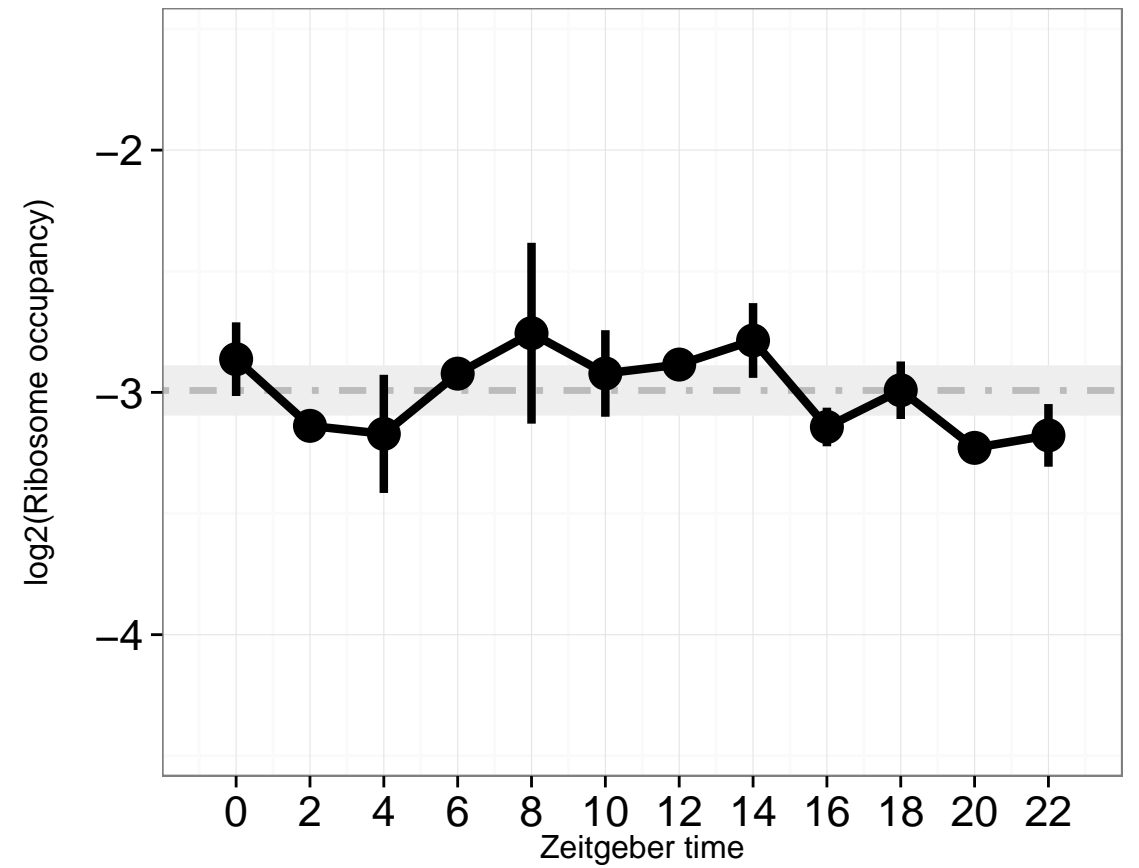

Supplement: Supplementary file 7691 [file 1]

# Tada1

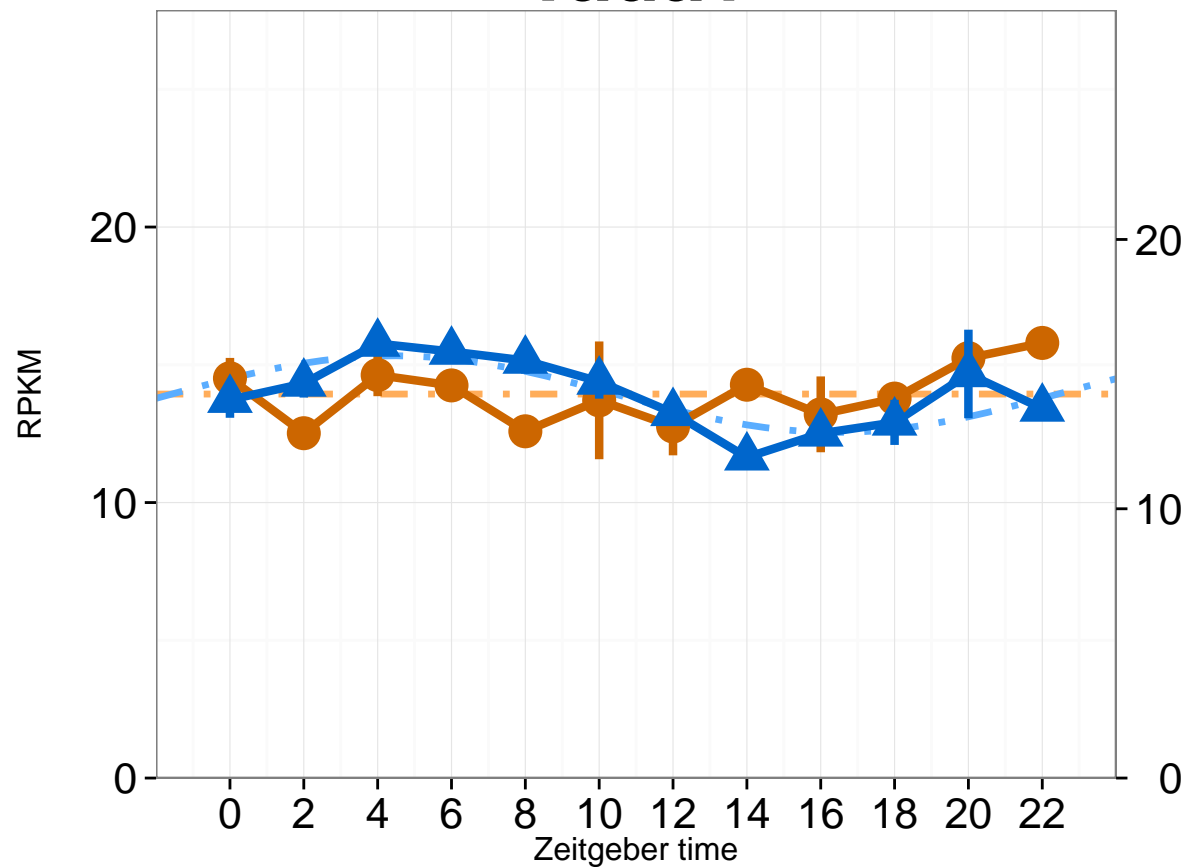

# Tada1

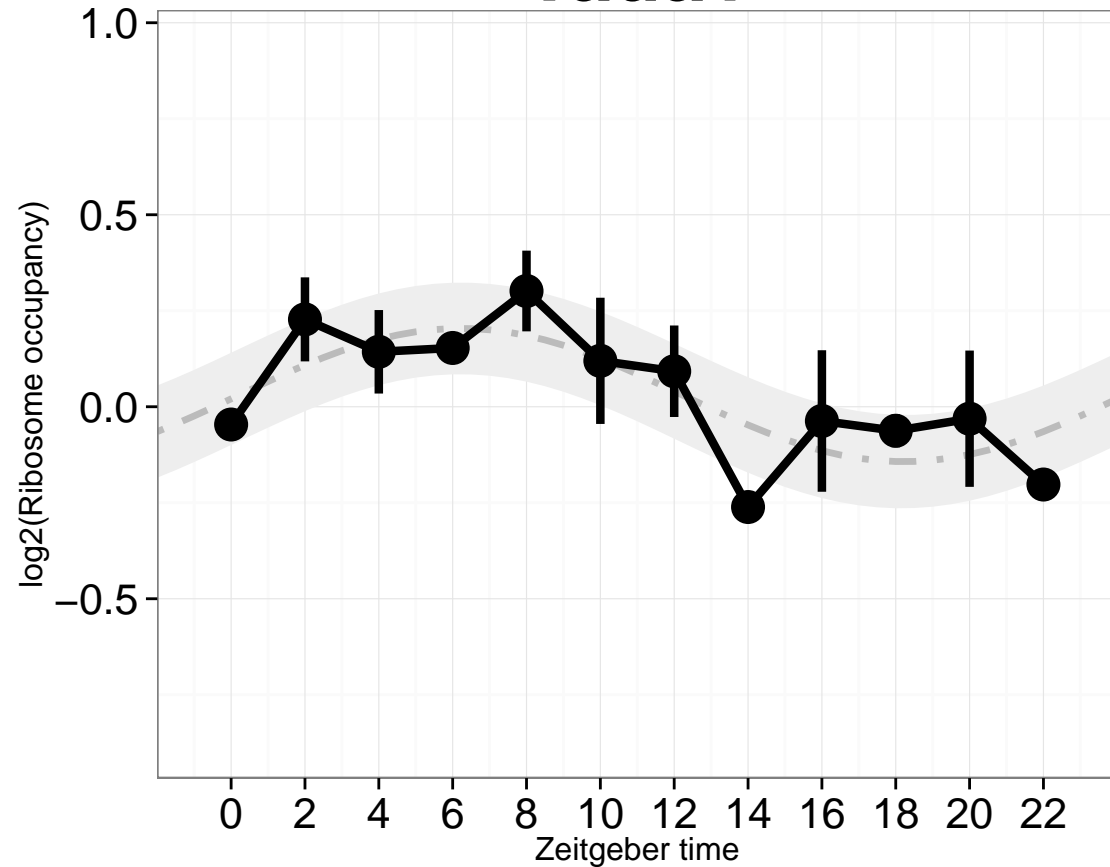

Supplement: Supplementary file 7692 [file 1]

# Tcp1

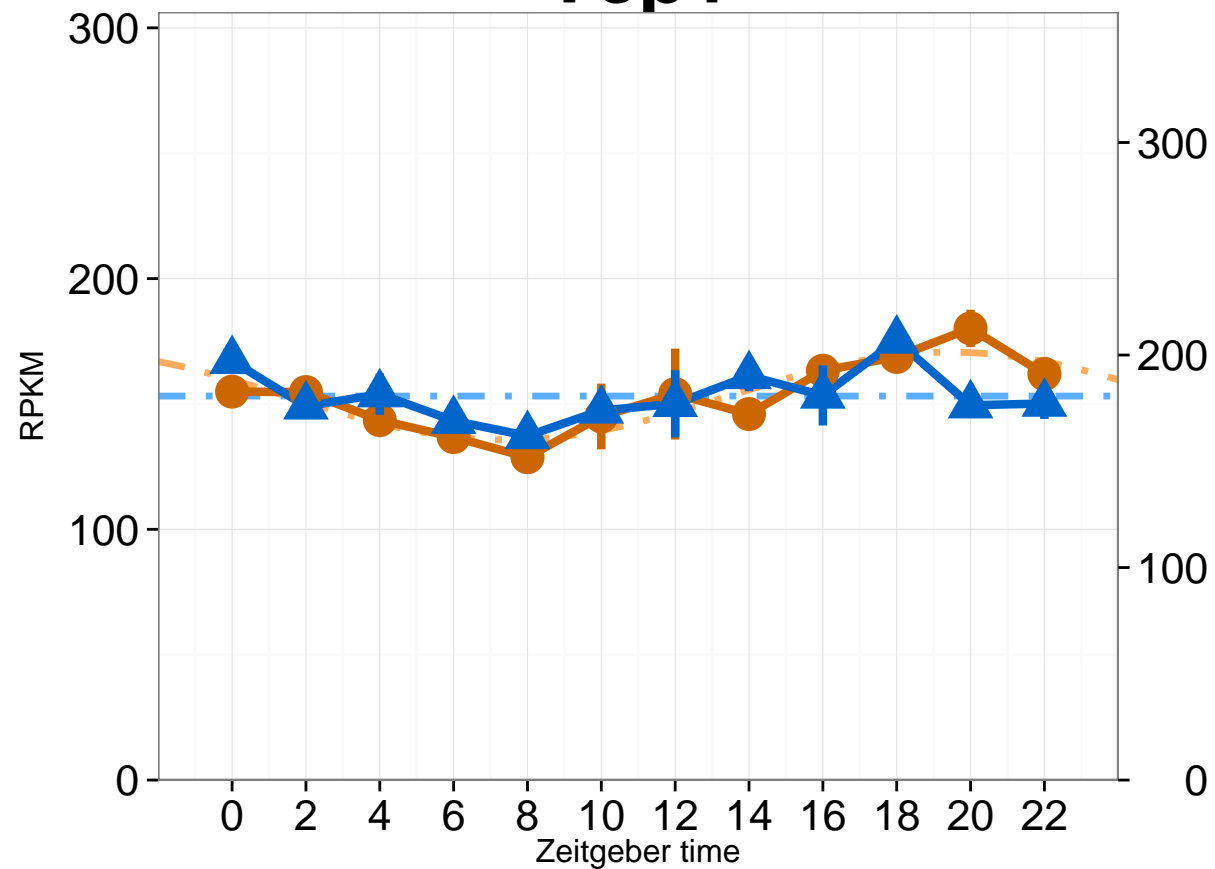

# Tcp1

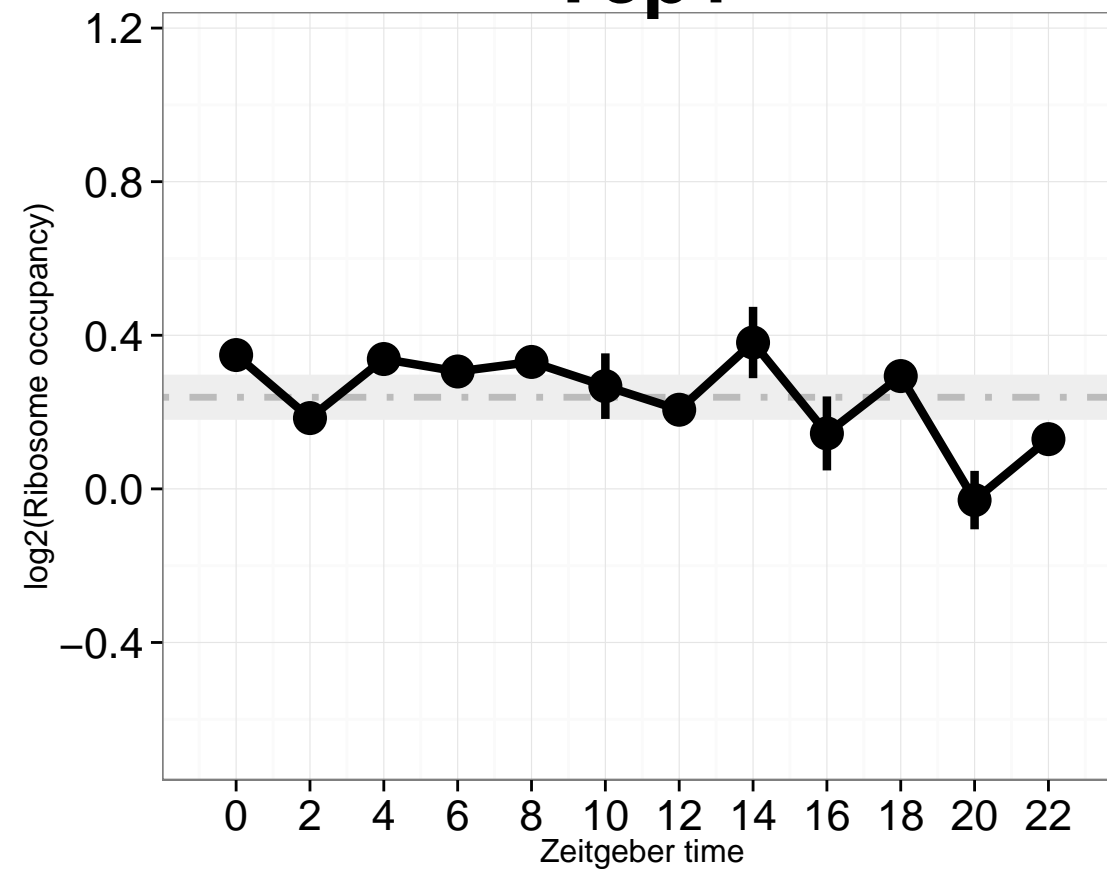

Supplement: Supplementary file 7693 [file 1]

# Rps12

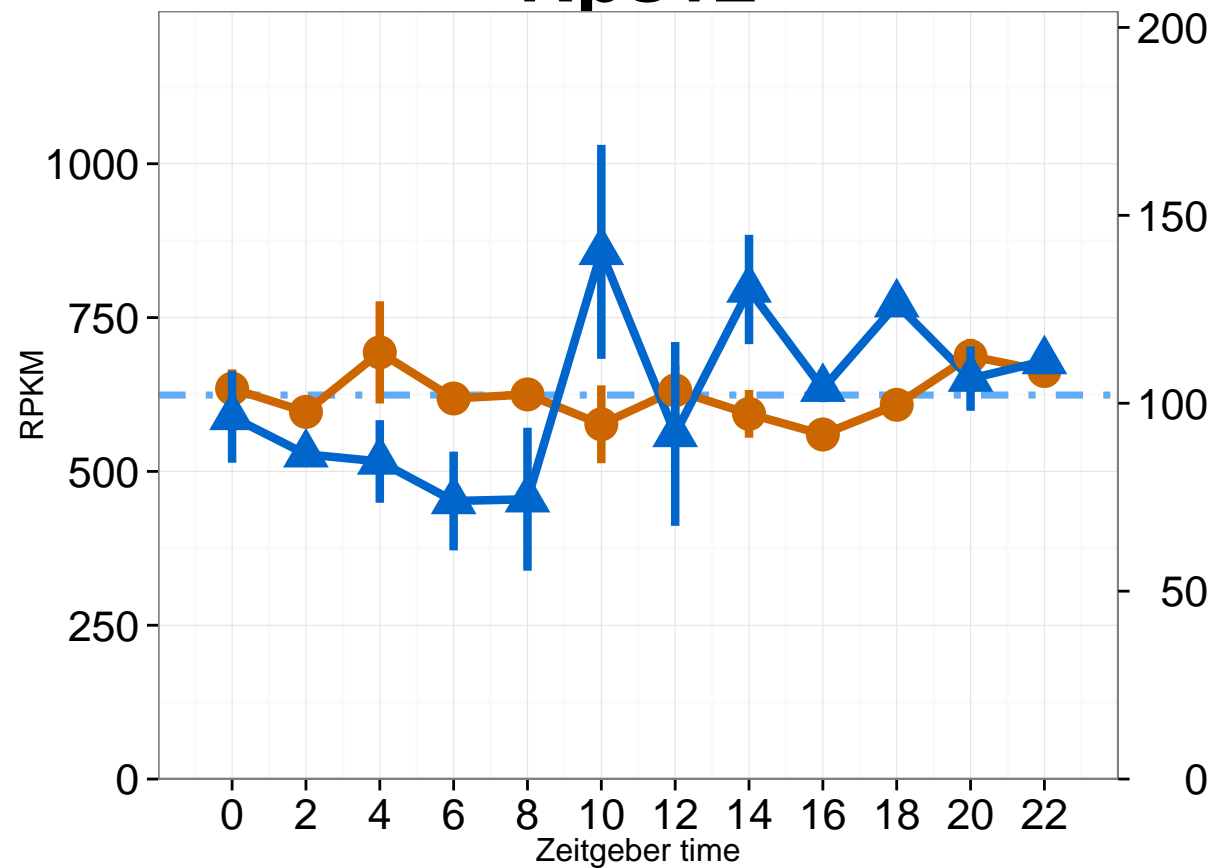

# Rps12

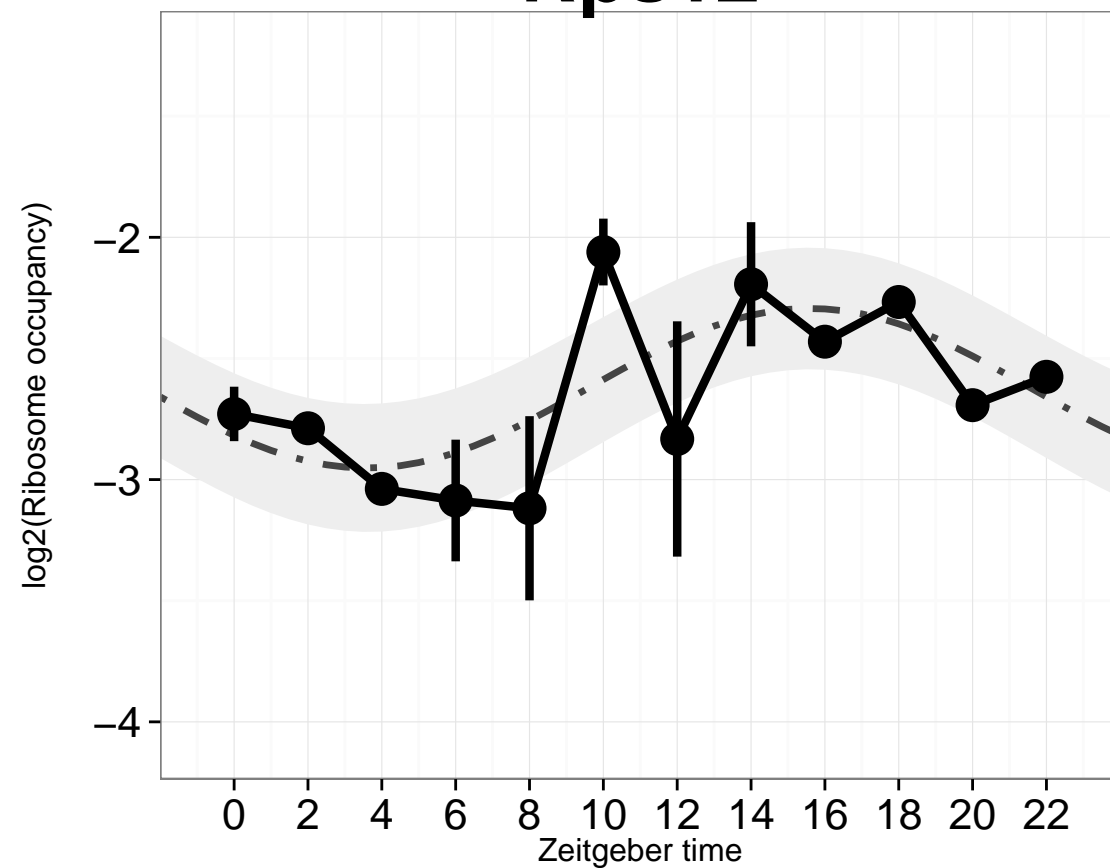

Supplement: Supplementary file 7694 [file 1]

# Tmem177

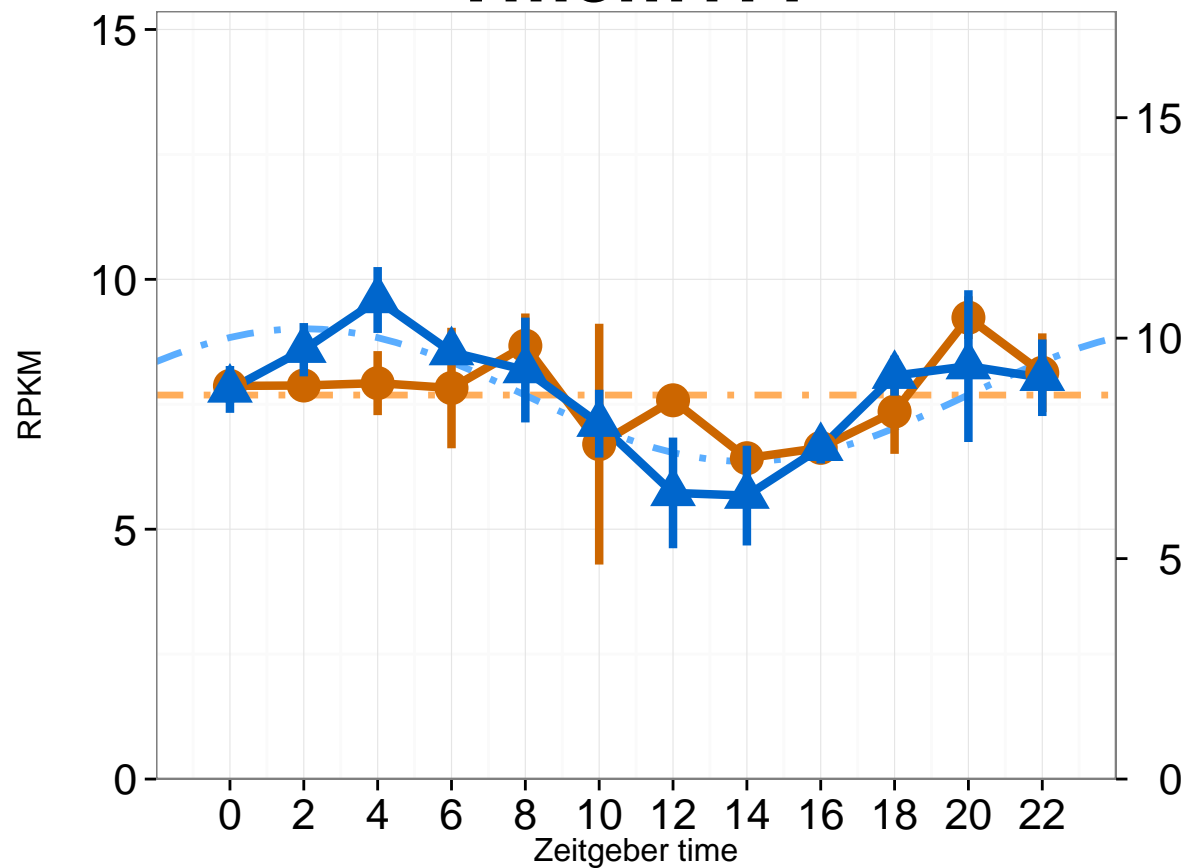

# Tmem177

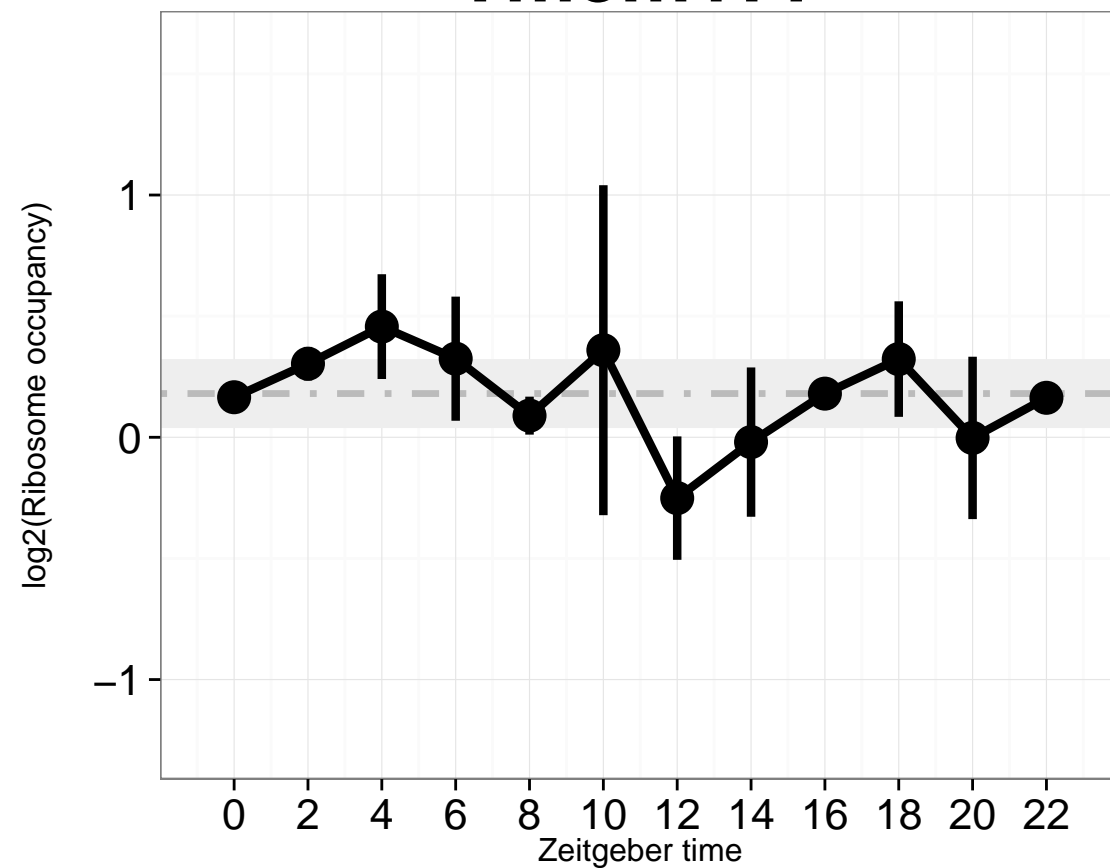

Supplement: Supplementary file 7695 [file 1]

## Ano6

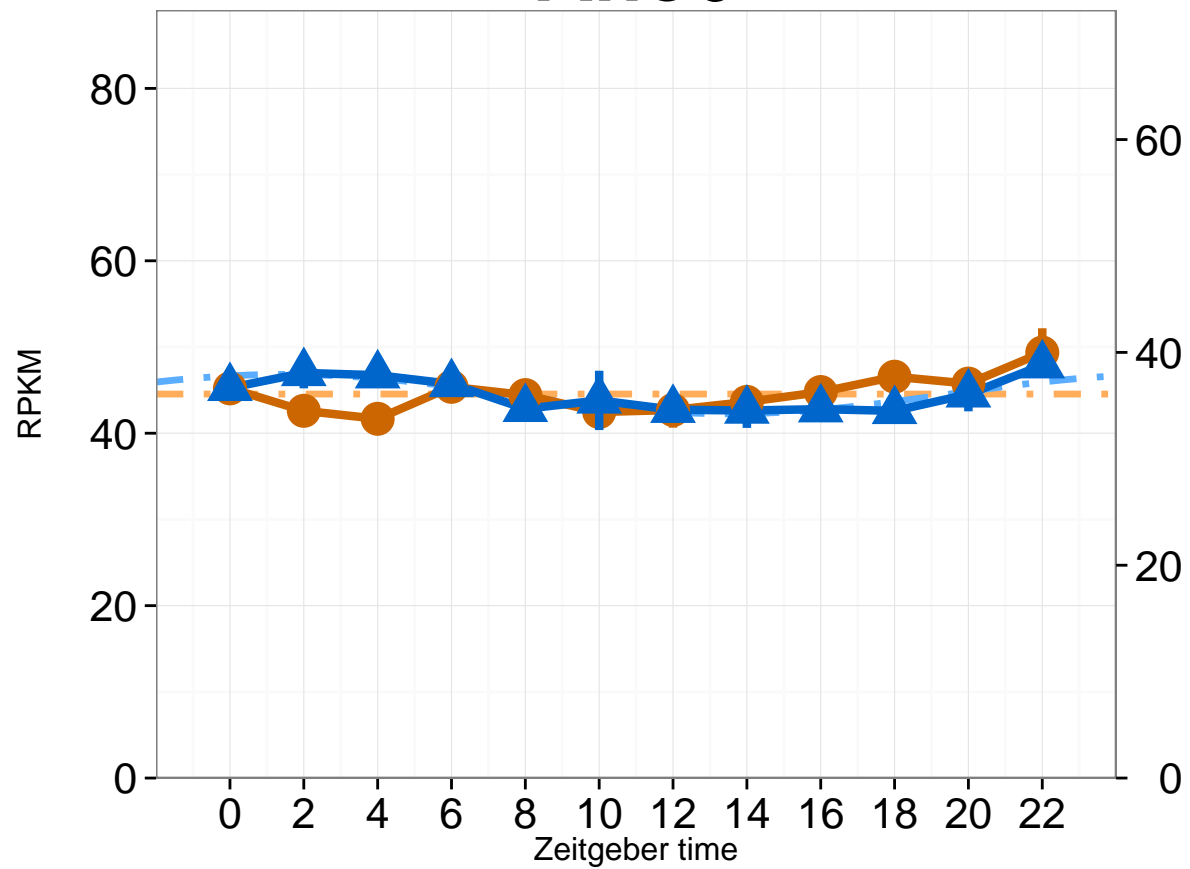

## Ano6

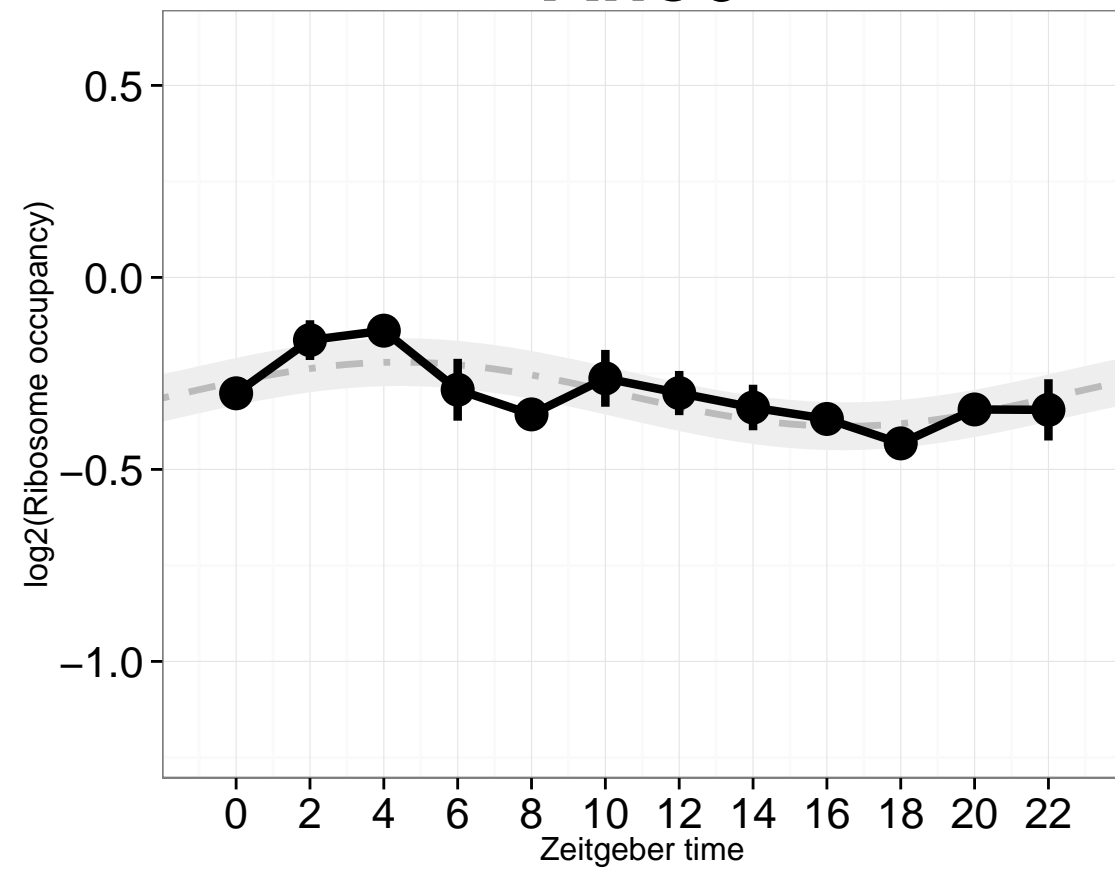

Supplement: Supplementary file 7696 [file 1]

# Morn1

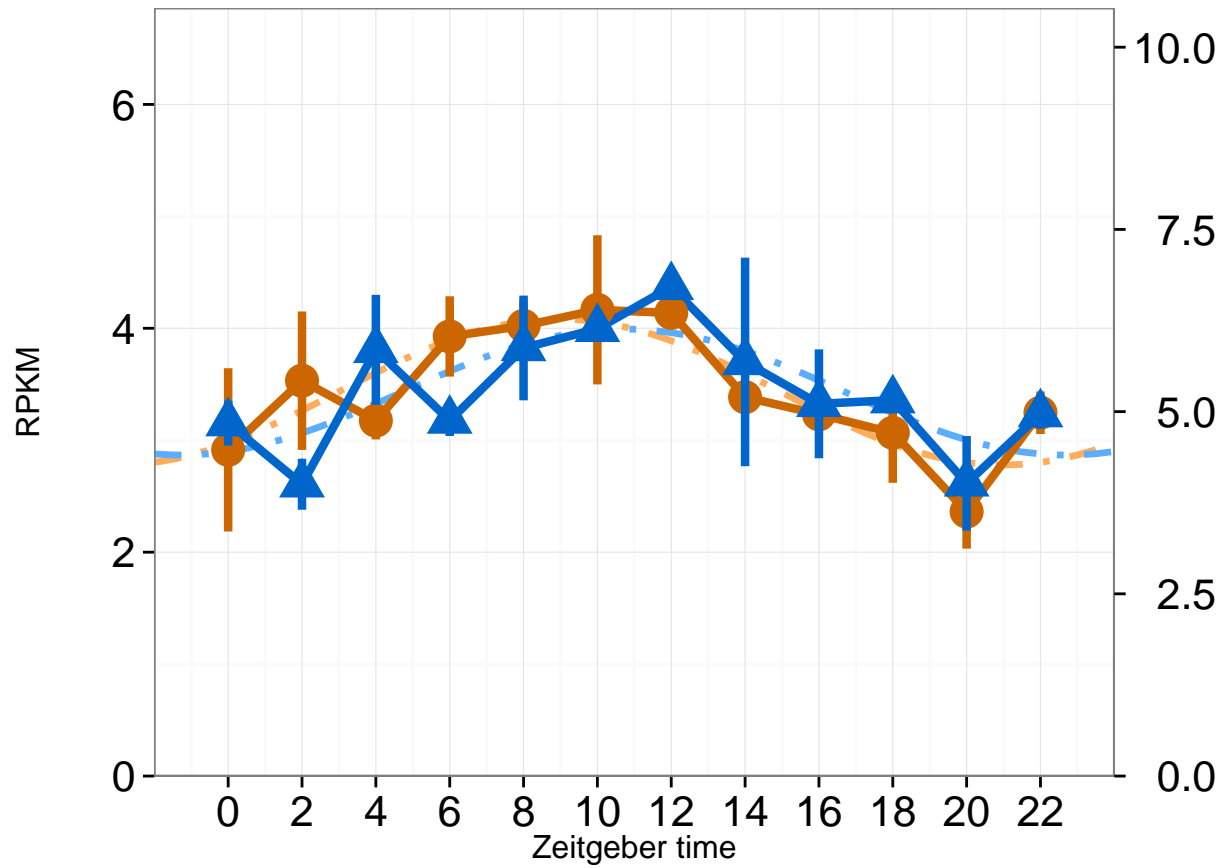

# Morn1

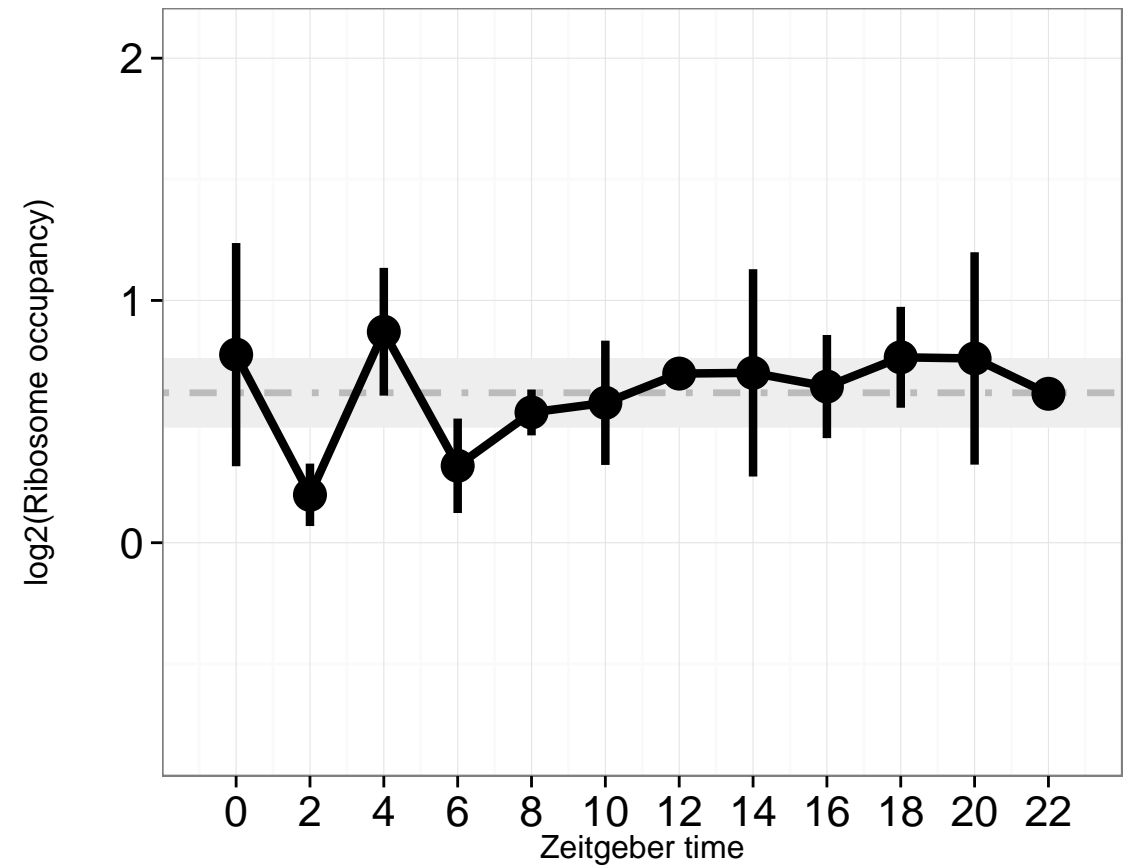

Supplement: Supplementary file 7697 [file 1]

# Mrpl39

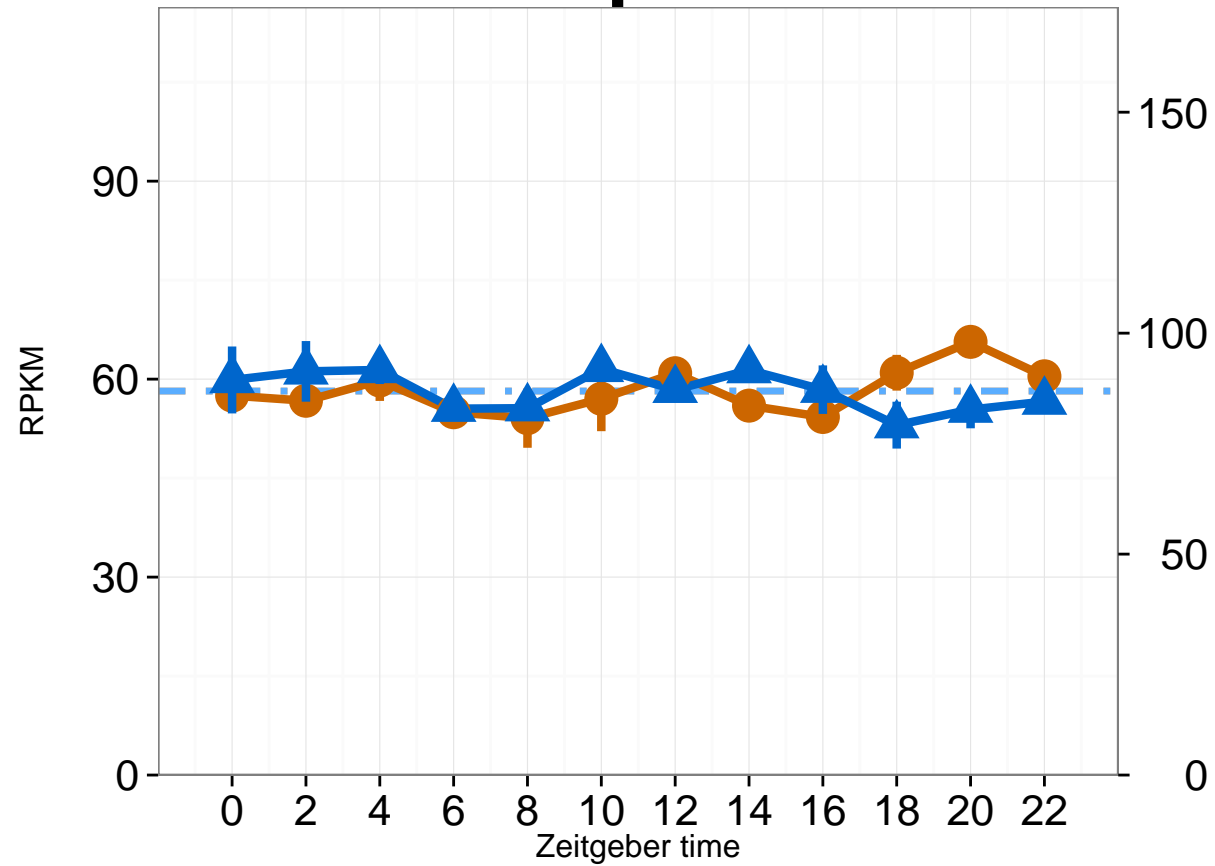

# Mrpl39

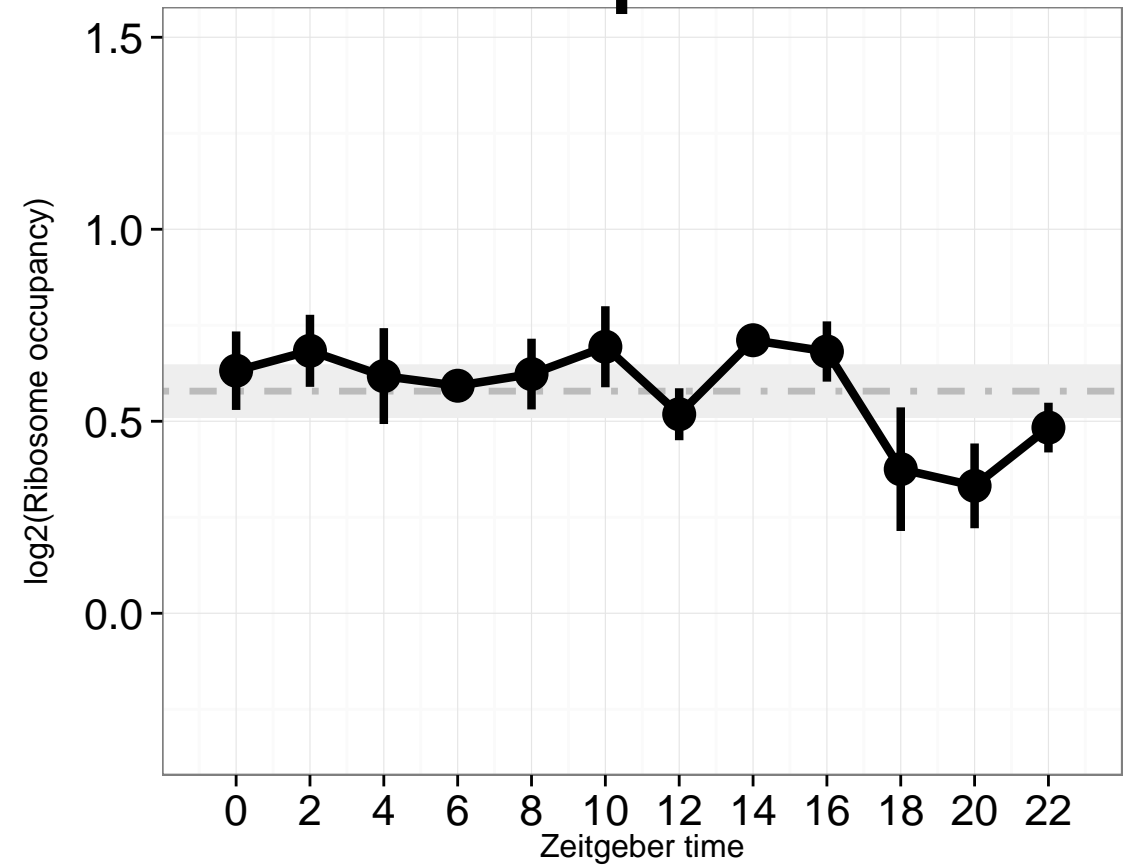

Supplement: Supplementary file 7698 [file 1]

# TagIn

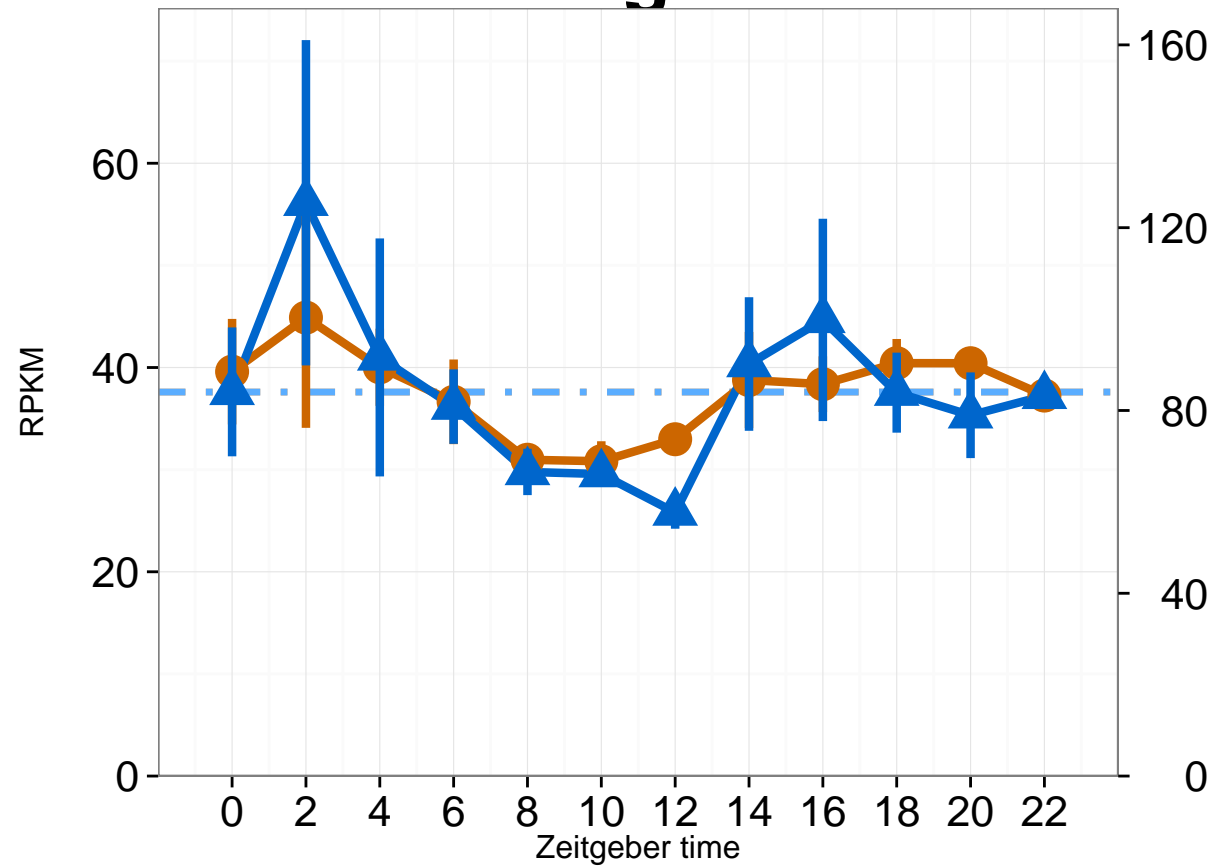

# TagIn

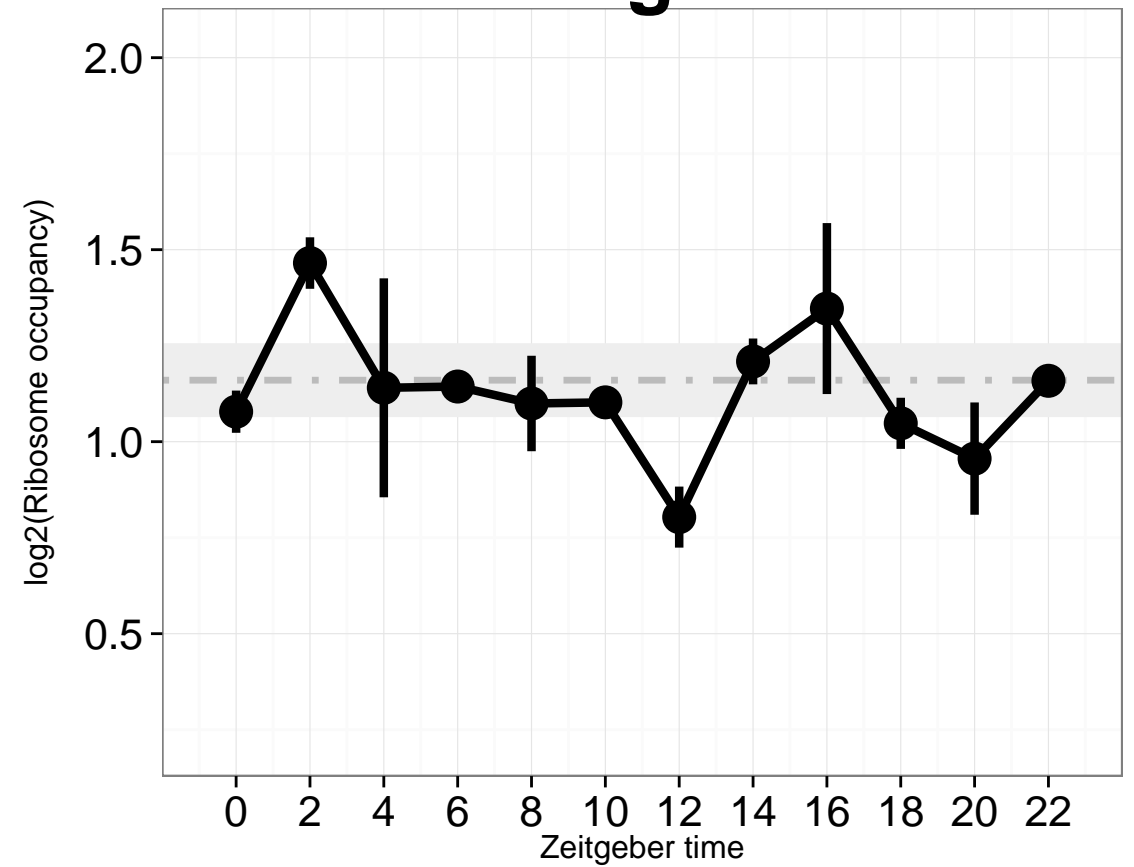

Supplement: Supplementary file 7699 [file 1]

## Setmar

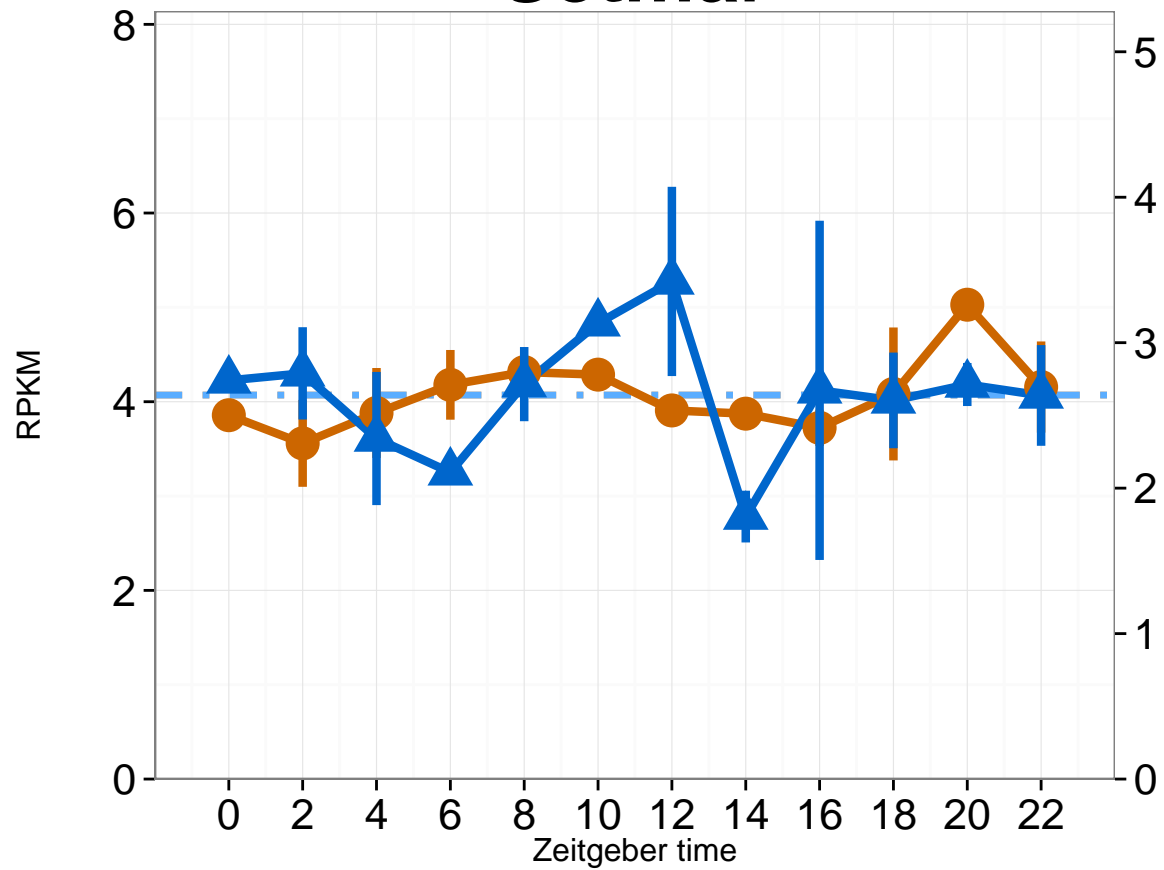

## Setmar

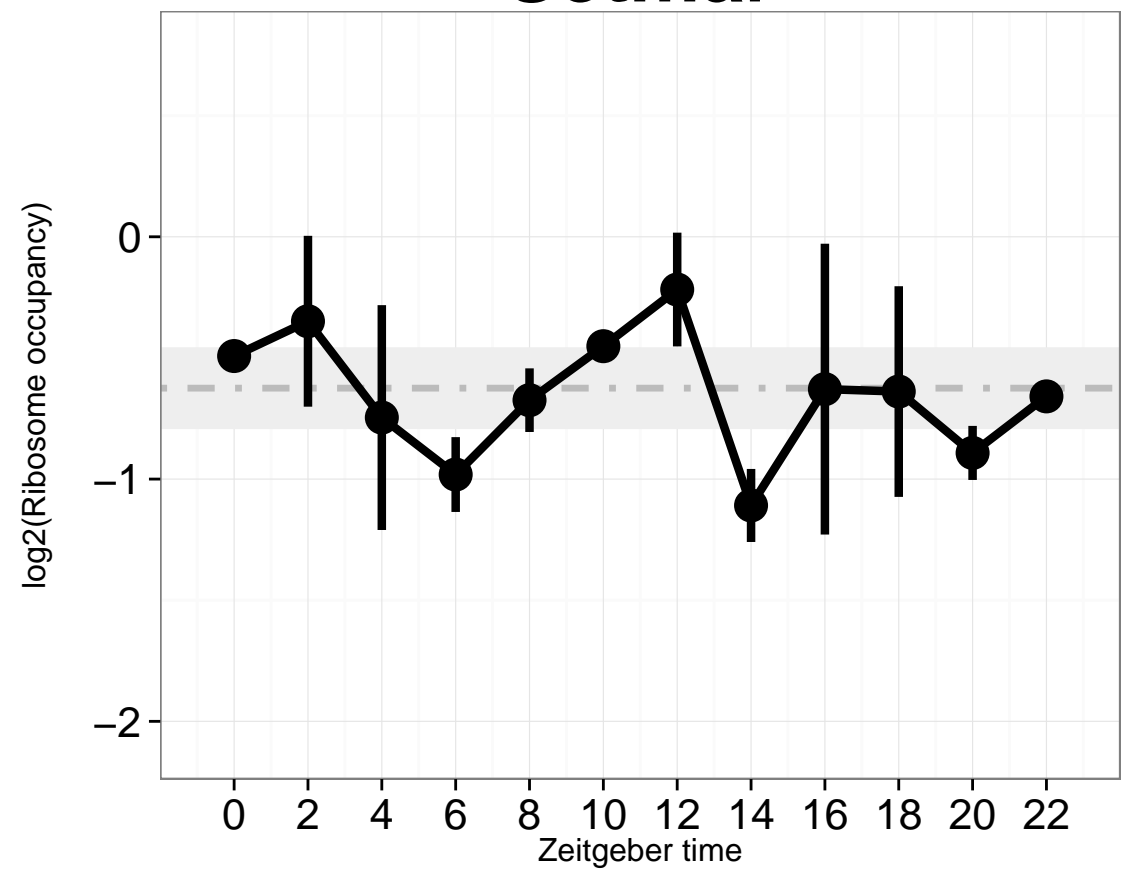

Supplement: Supplementary file 7700 [file 1]

# Mrpl28

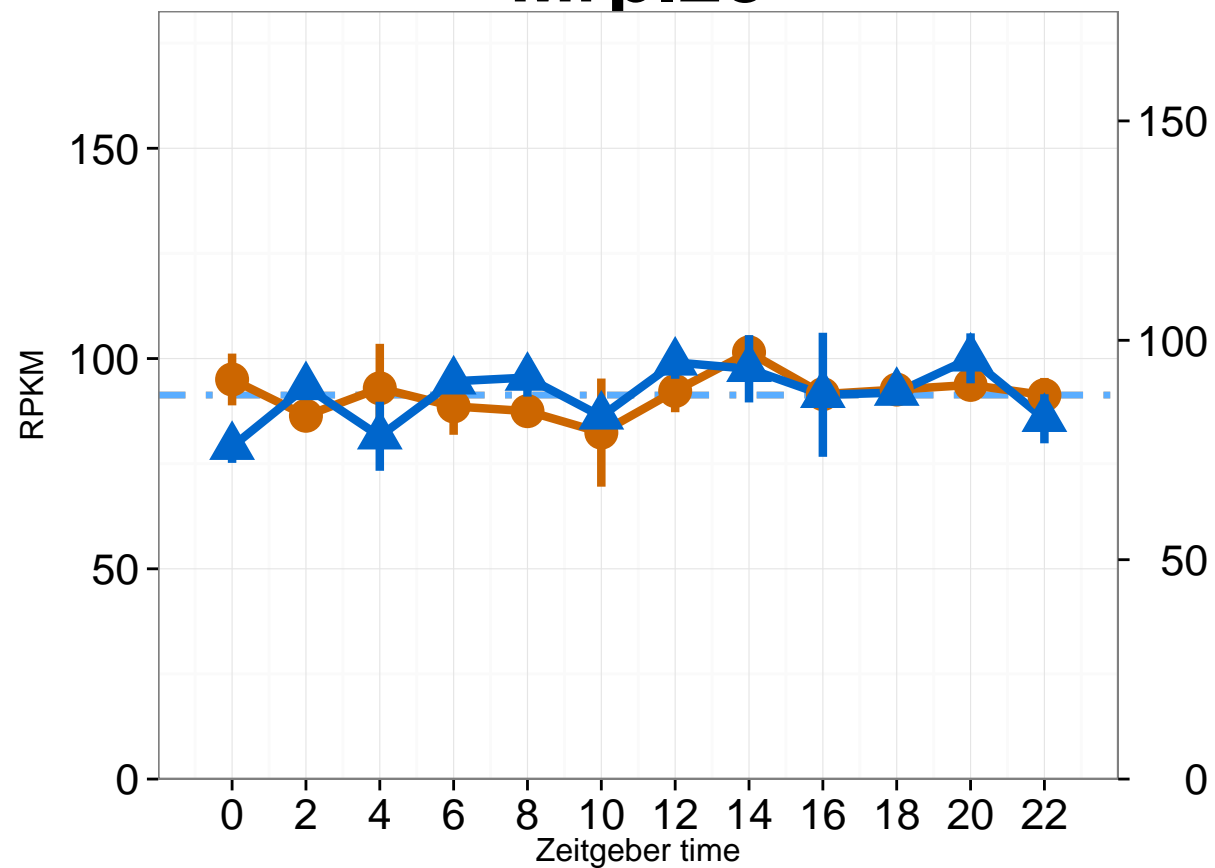

# Mrpl28

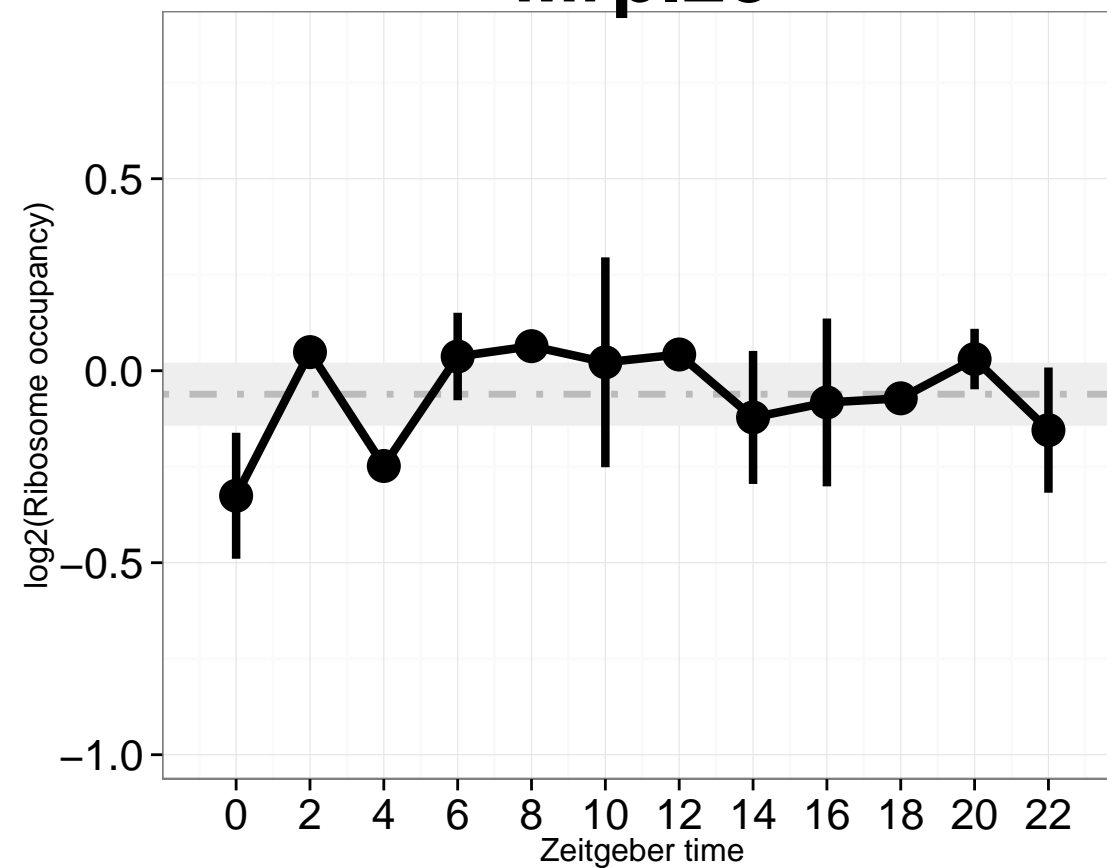

Supplement: Supplementary file 7701 [file 1]

## Loxl4

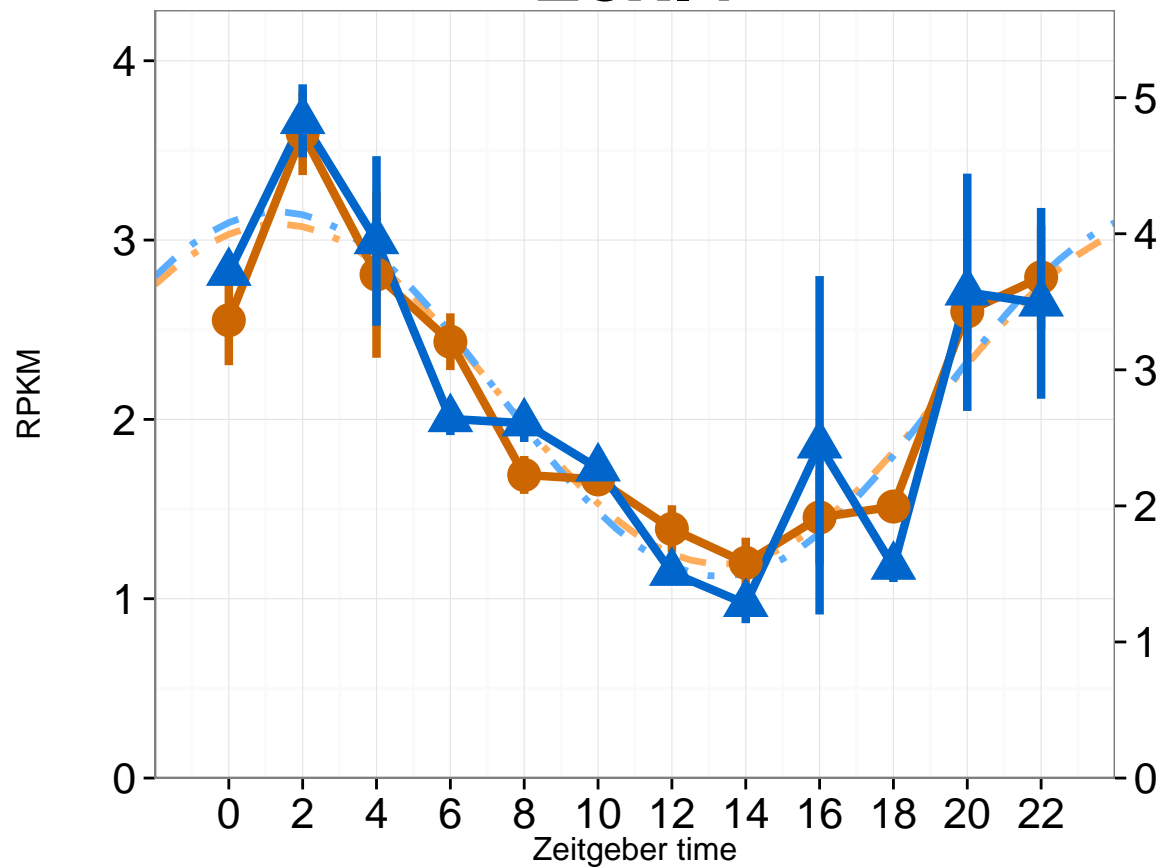

## Loxl4

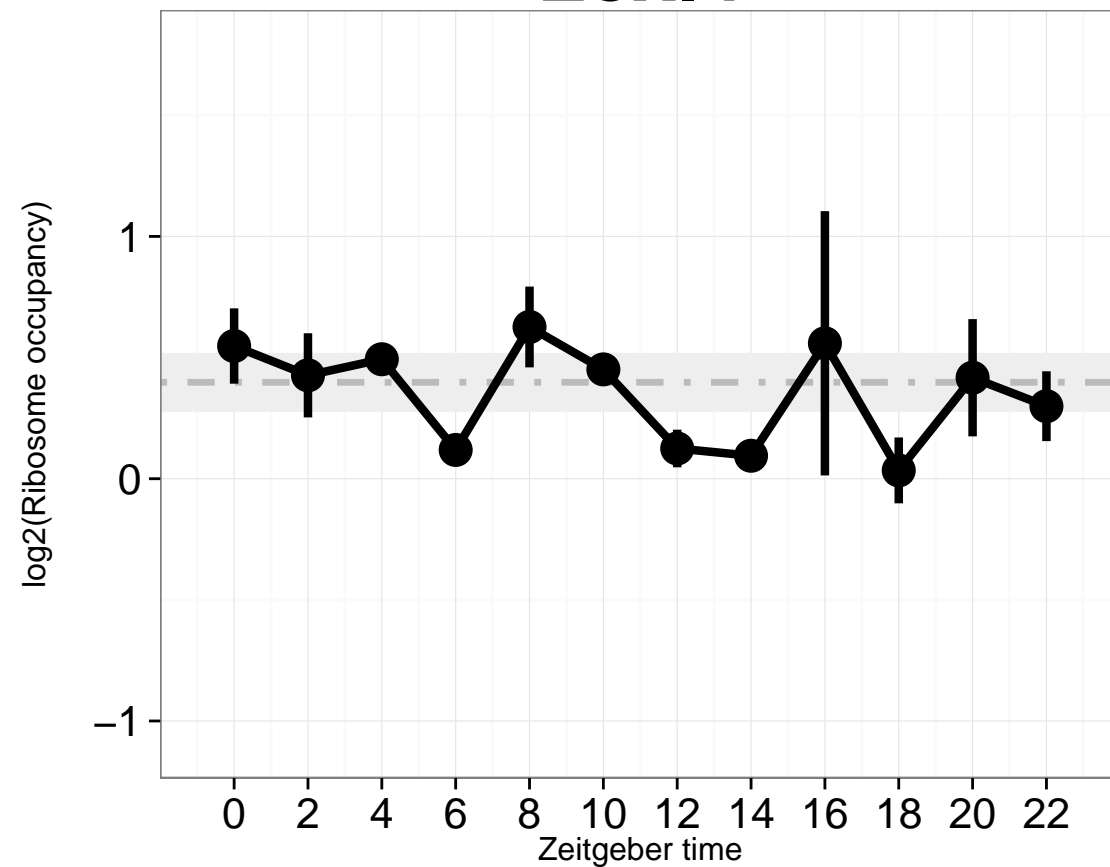

Supplement: Supplementary file 7702 [file 1]

## A230046K03Rik

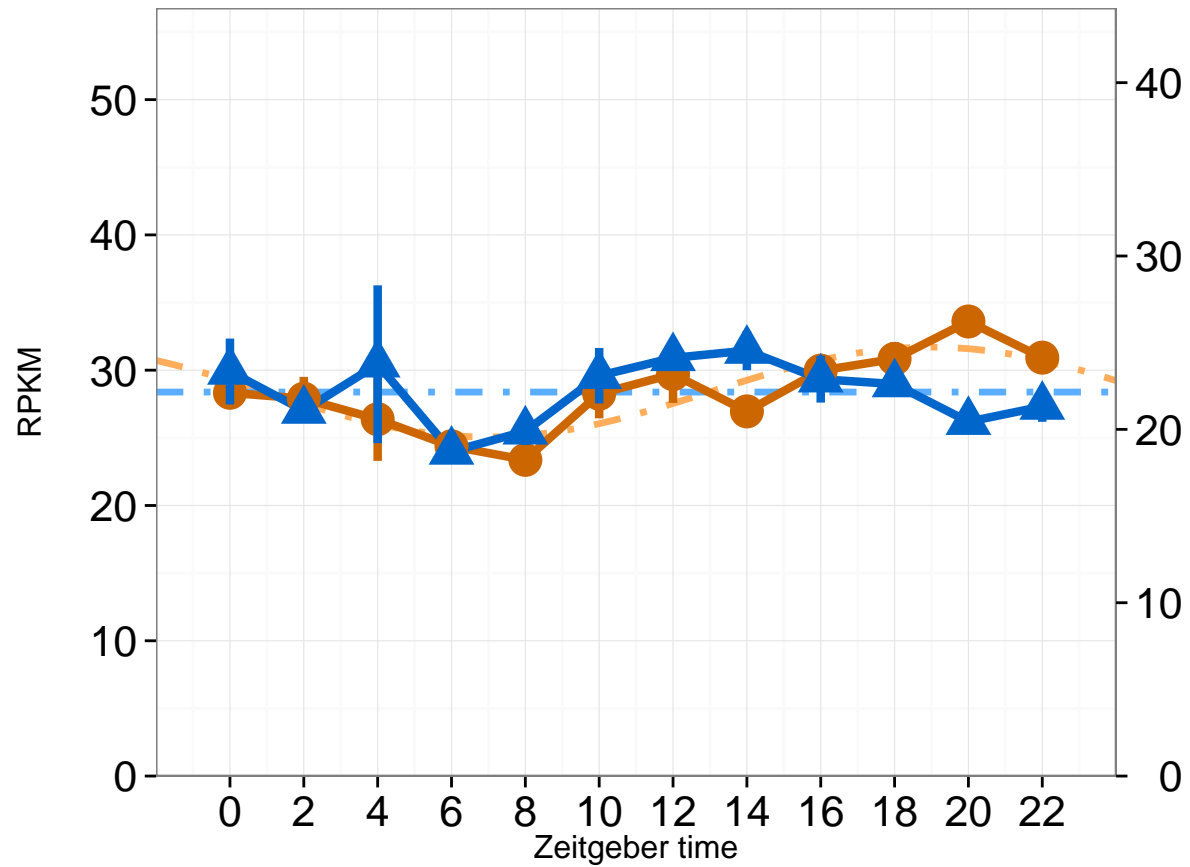

## A230046K03Rik

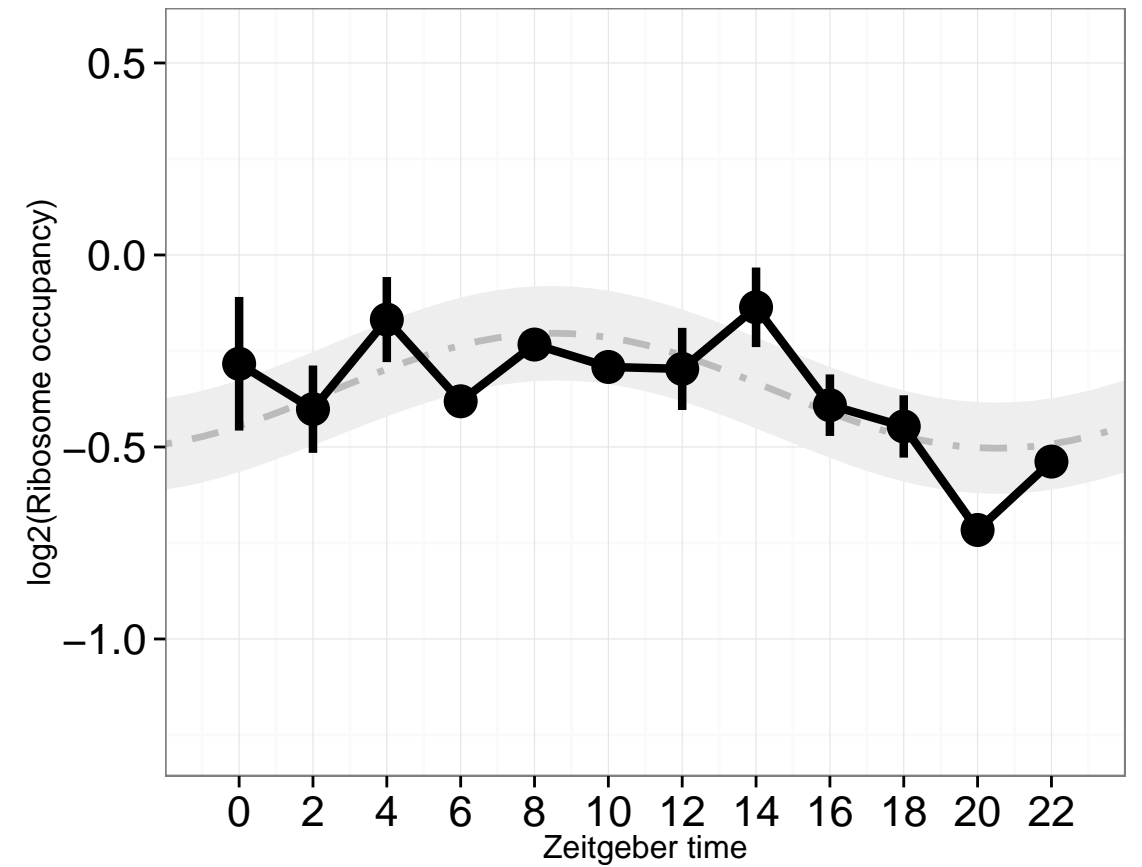

Supplement: Supplementary file 7703 [file 1]

# Hmha1

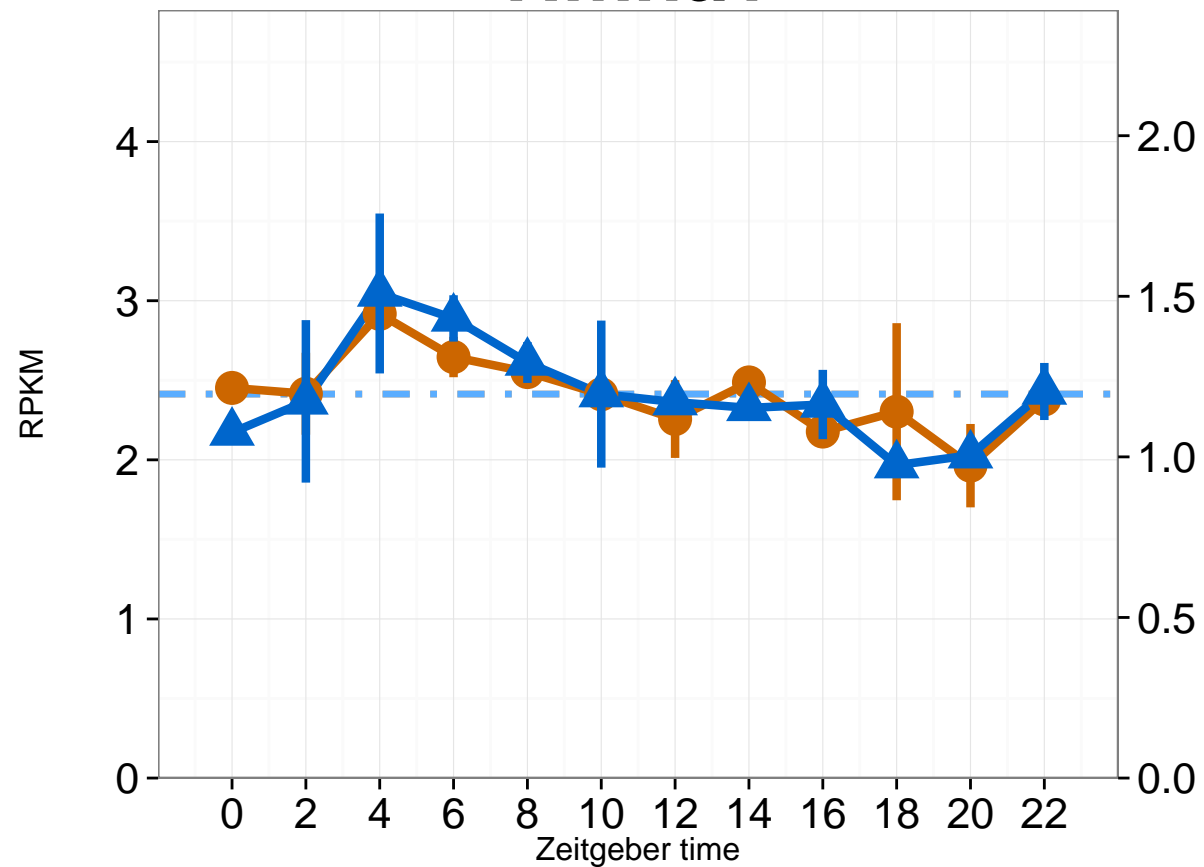

# Hmha1

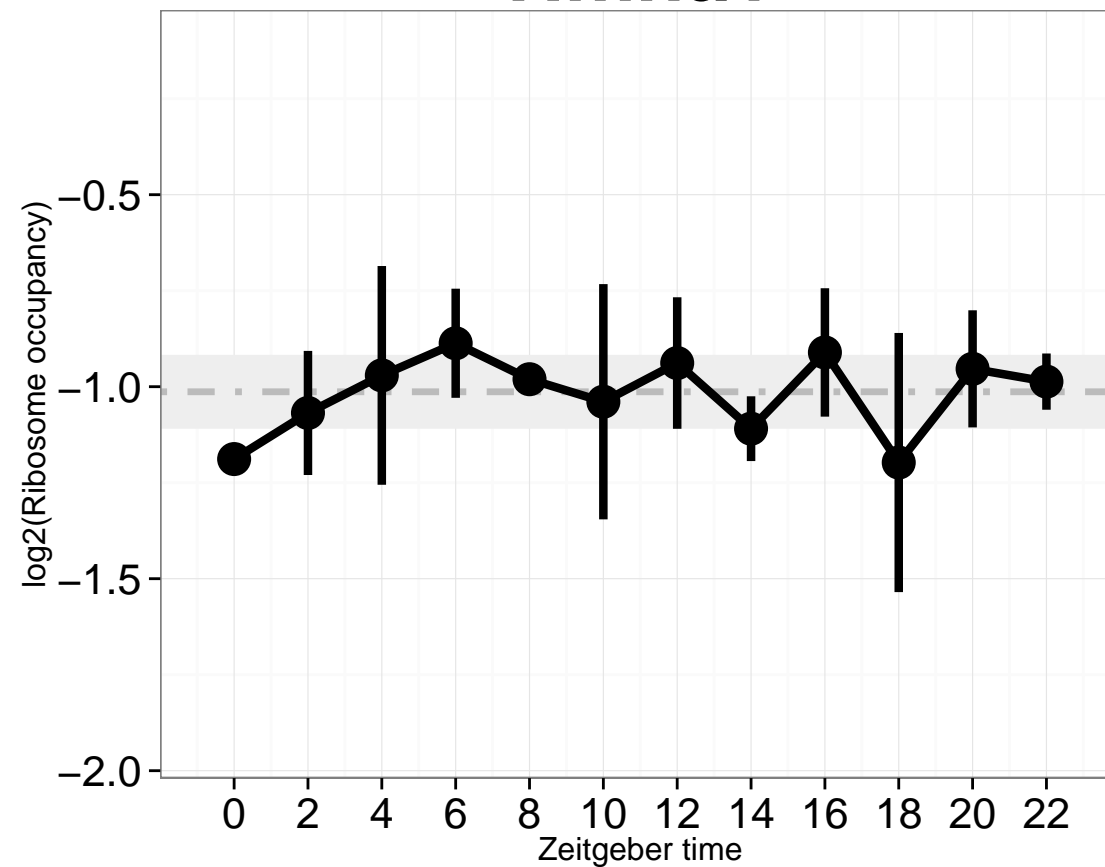

Supplement: Supplementary file 7704 [file 1]

## Cxcl9

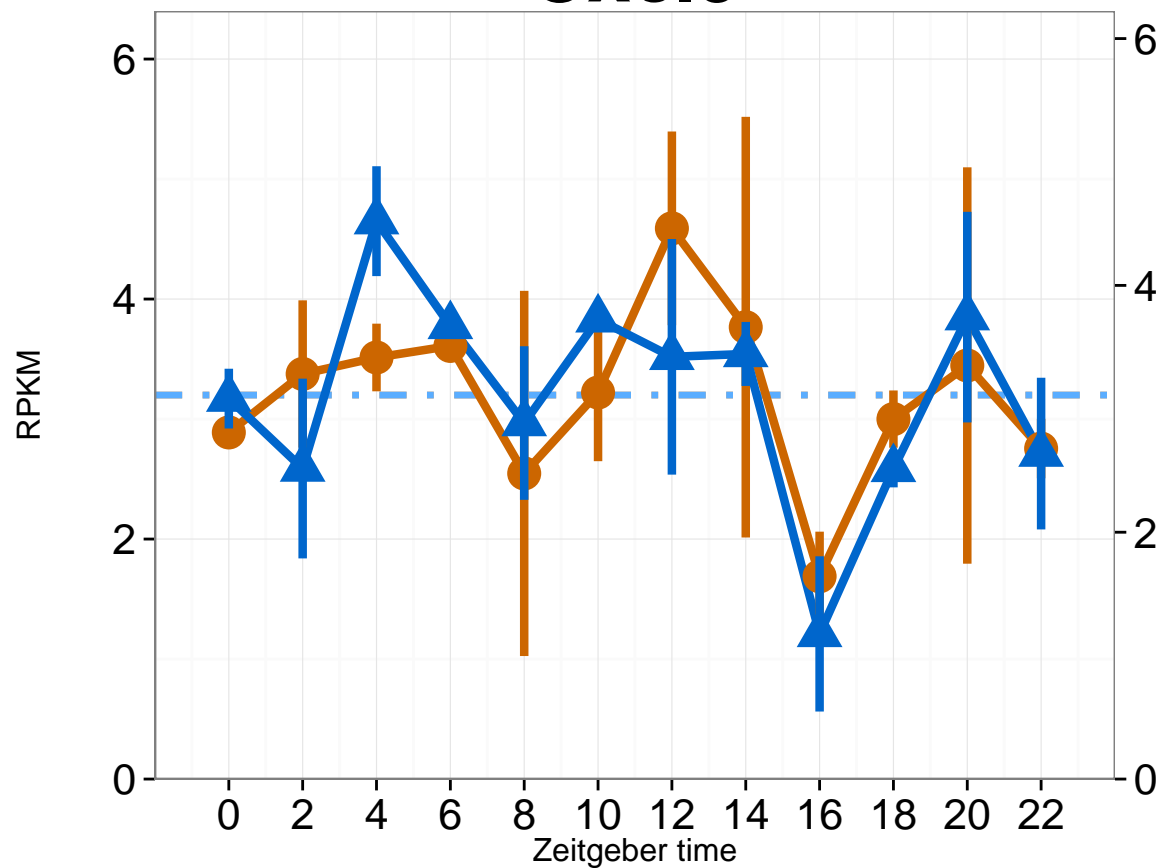

## Cxcl9

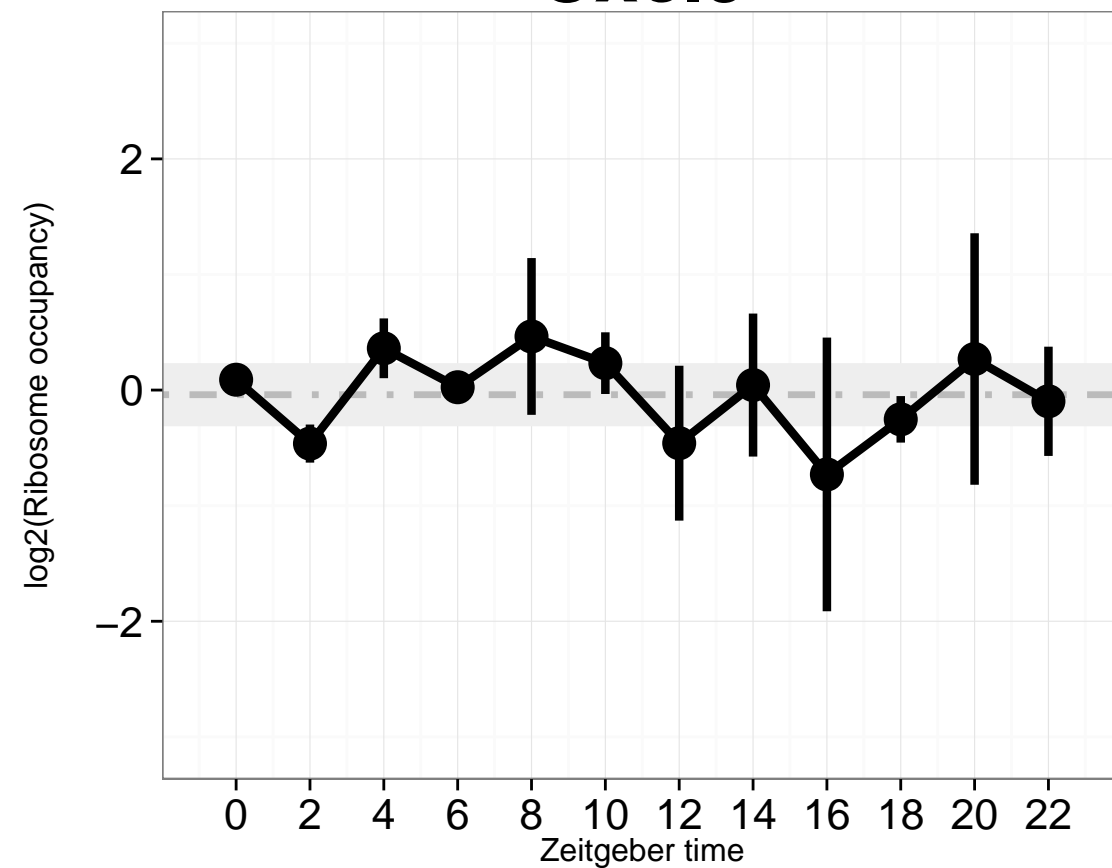

Supplement: Supplementary file 7705 [file 1]

## Prkcz

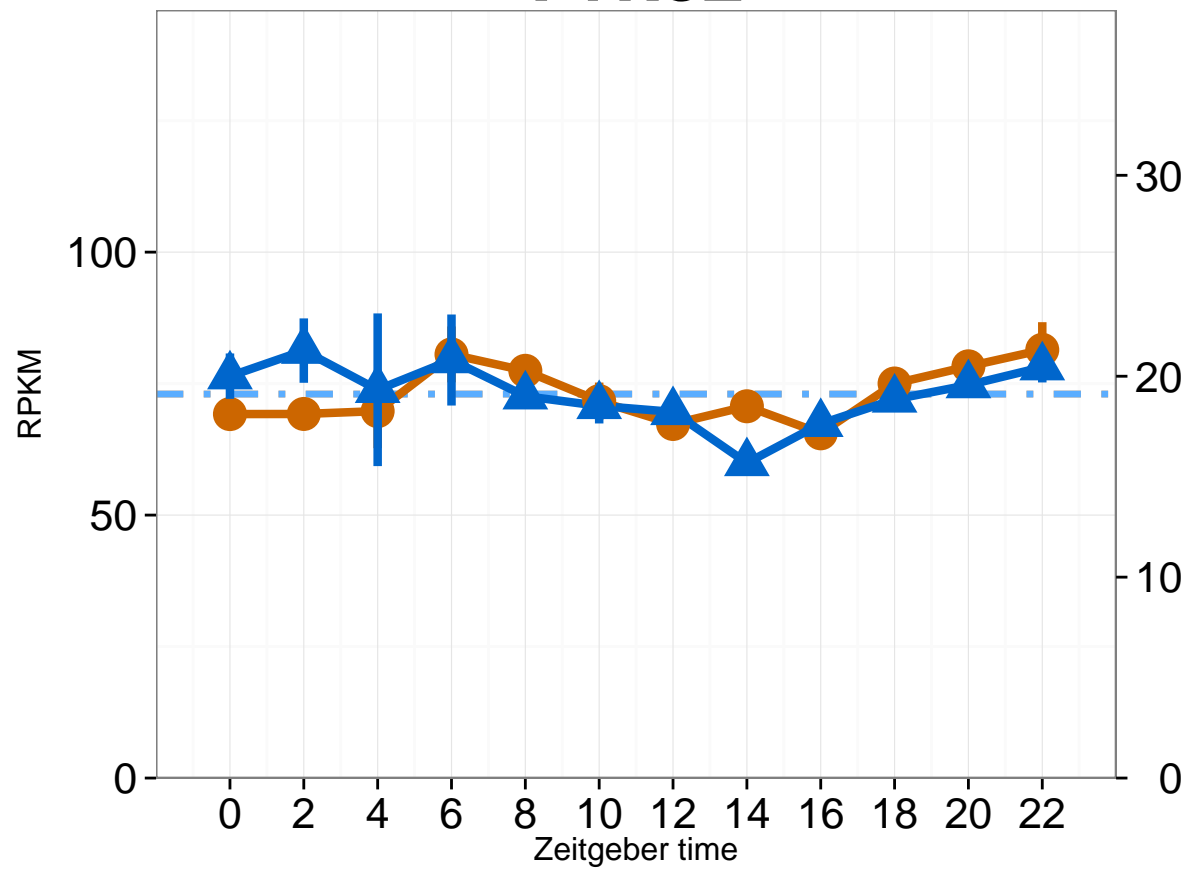

## Prkcz

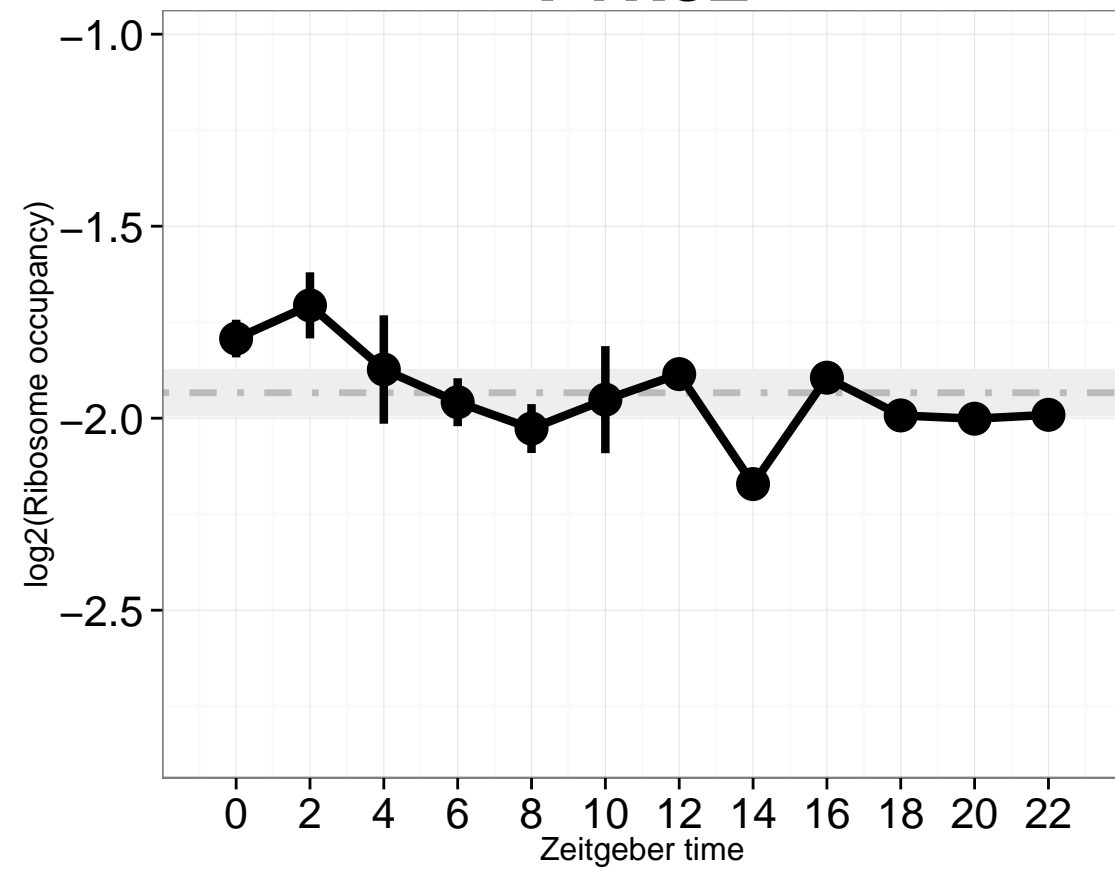

Supplement: Supplementary file 7706 [file 1]

## Ccdc82

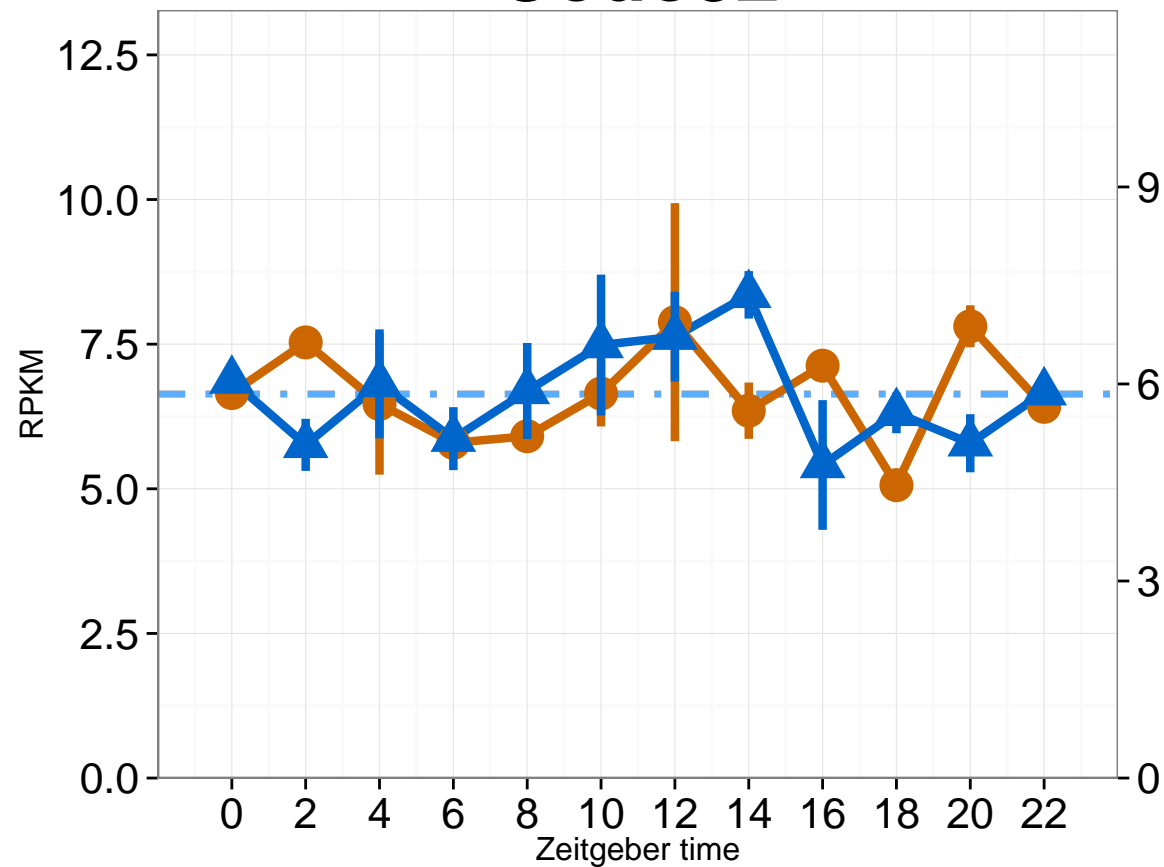

## Ccdc82

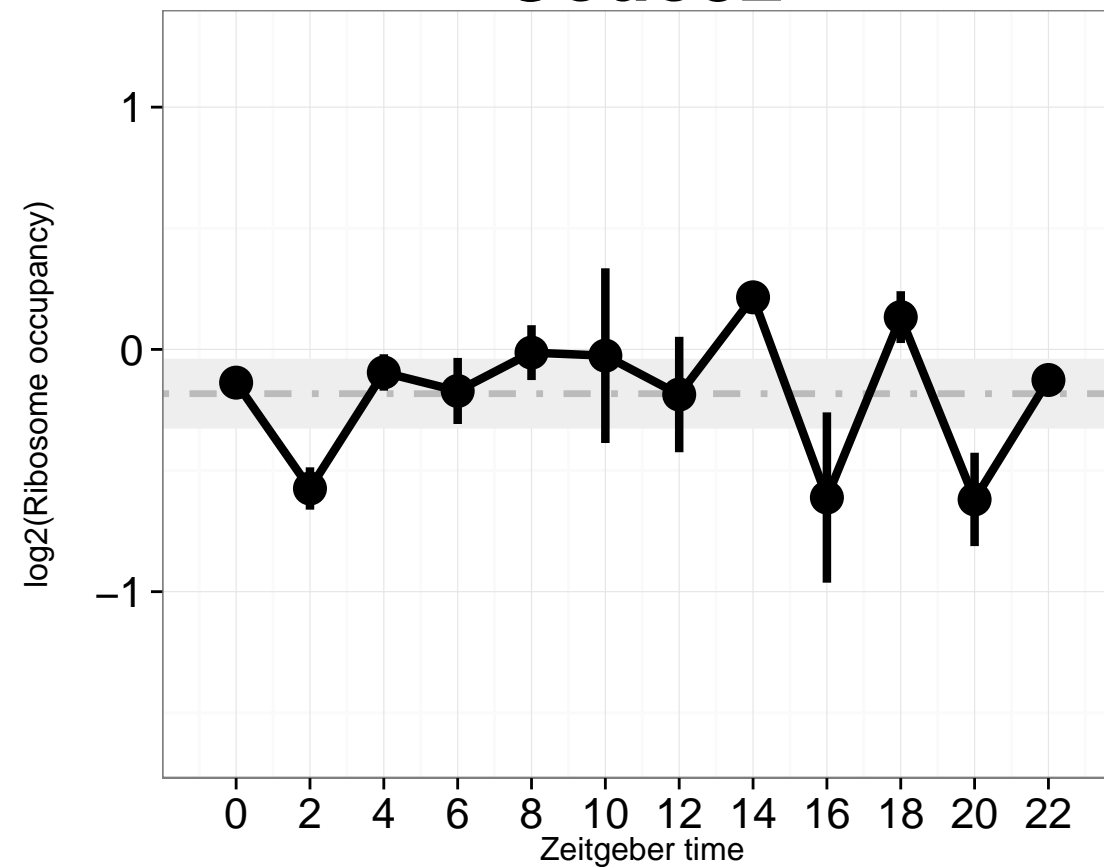

Supplement: Supplementary file 7707 [file 1]

## Nepn

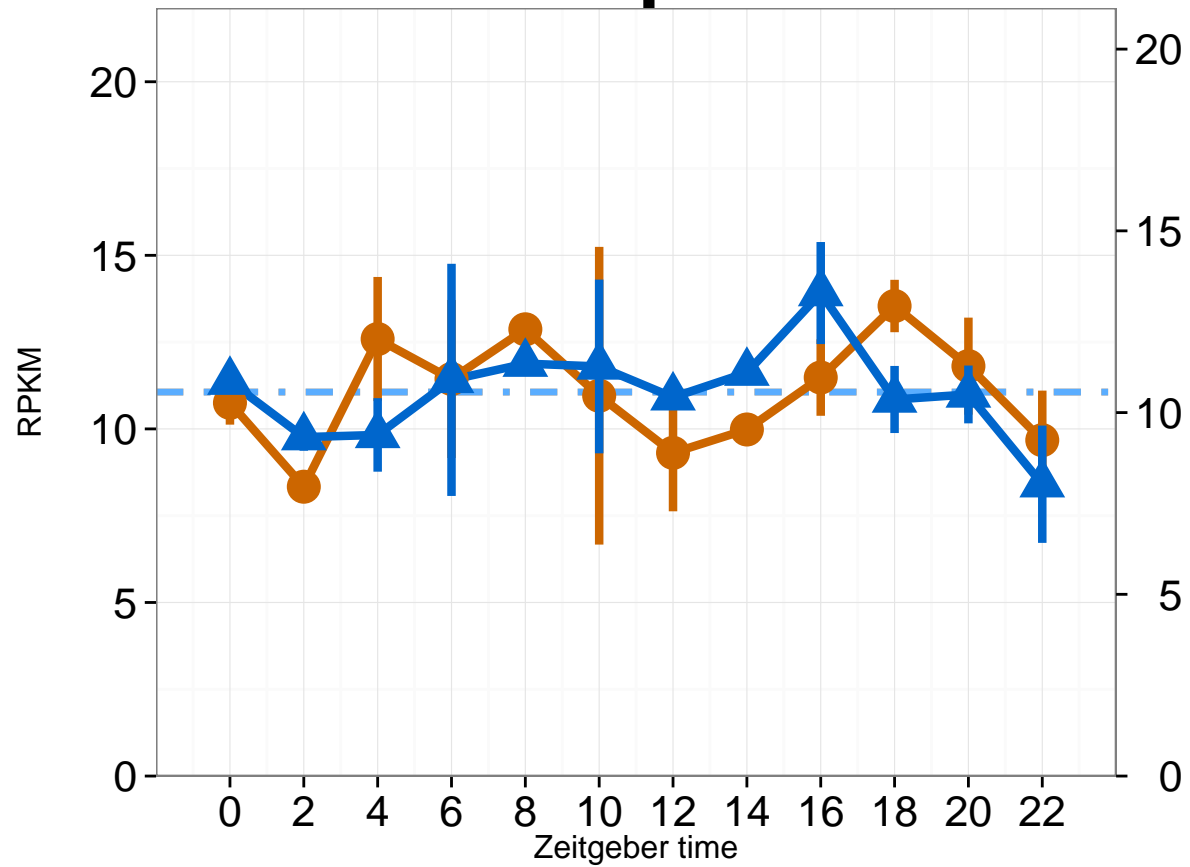

## Nepn

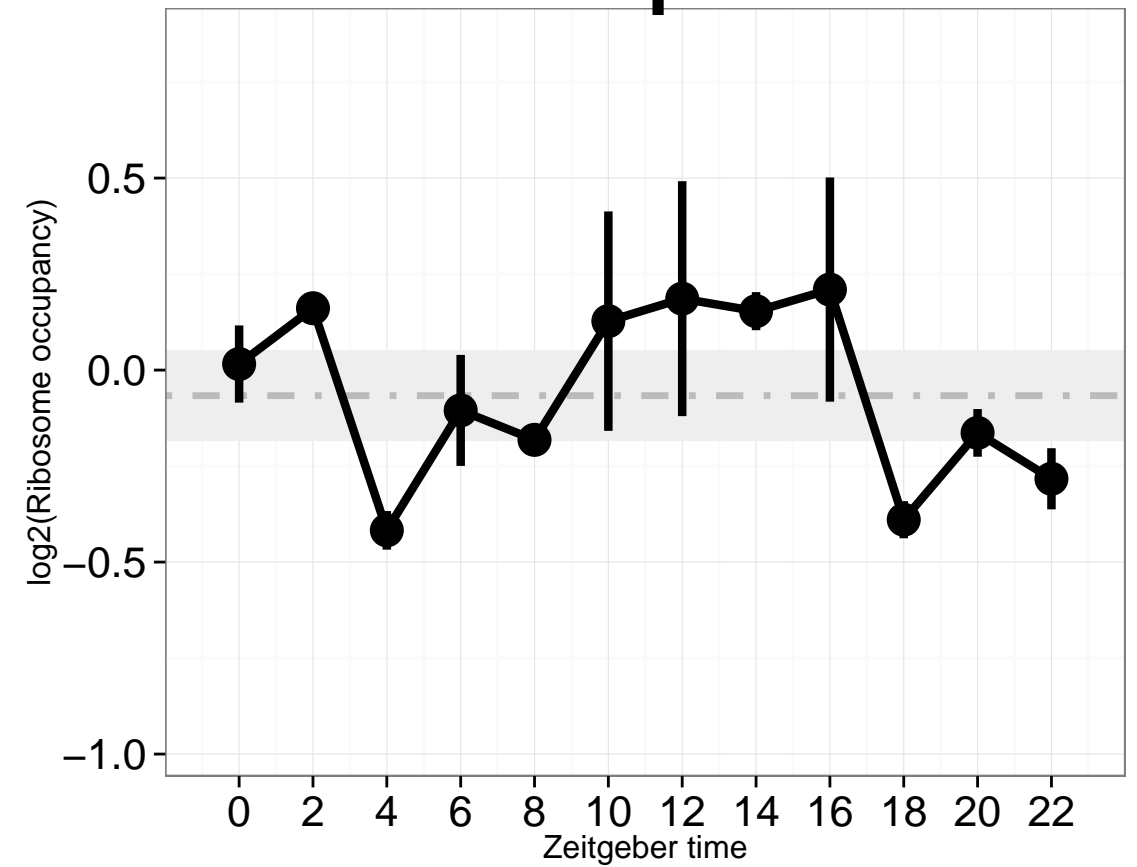

Supplement: Supplementary file 7708 [file 1]

# Fam161a

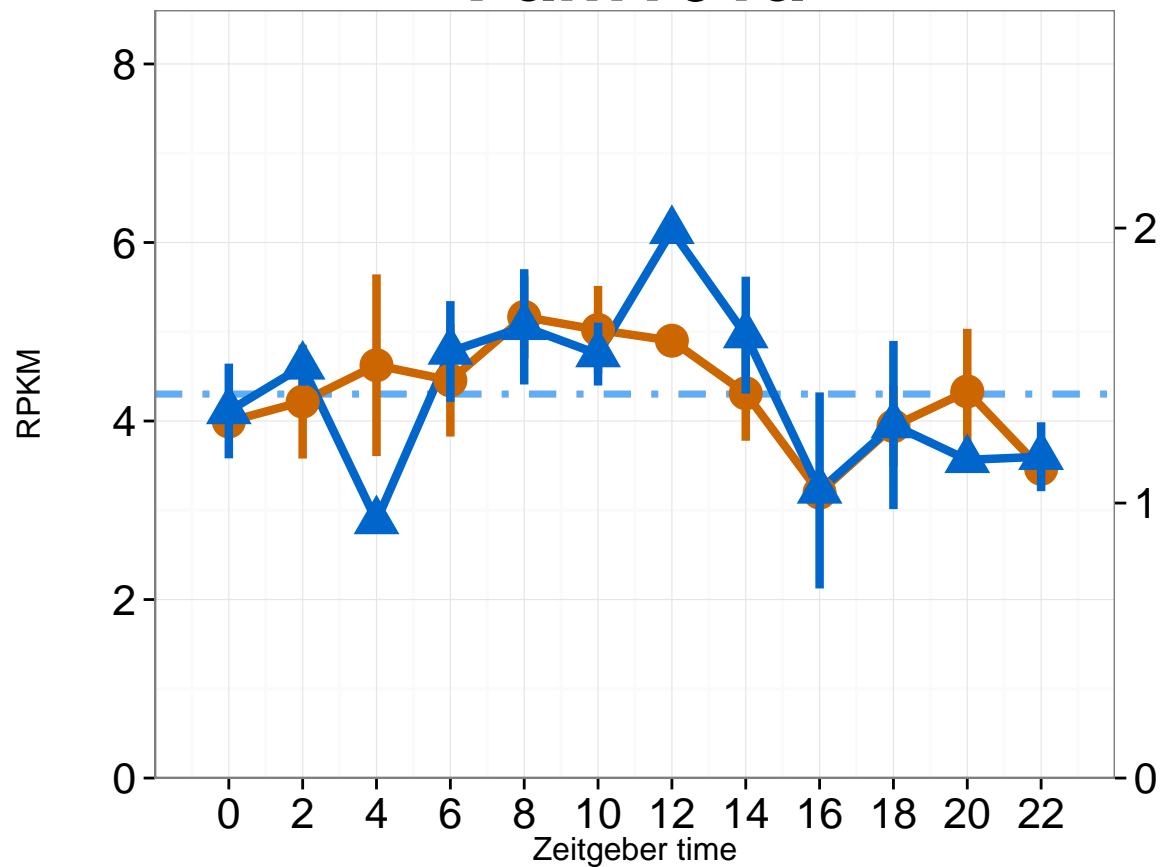

# Fam161a

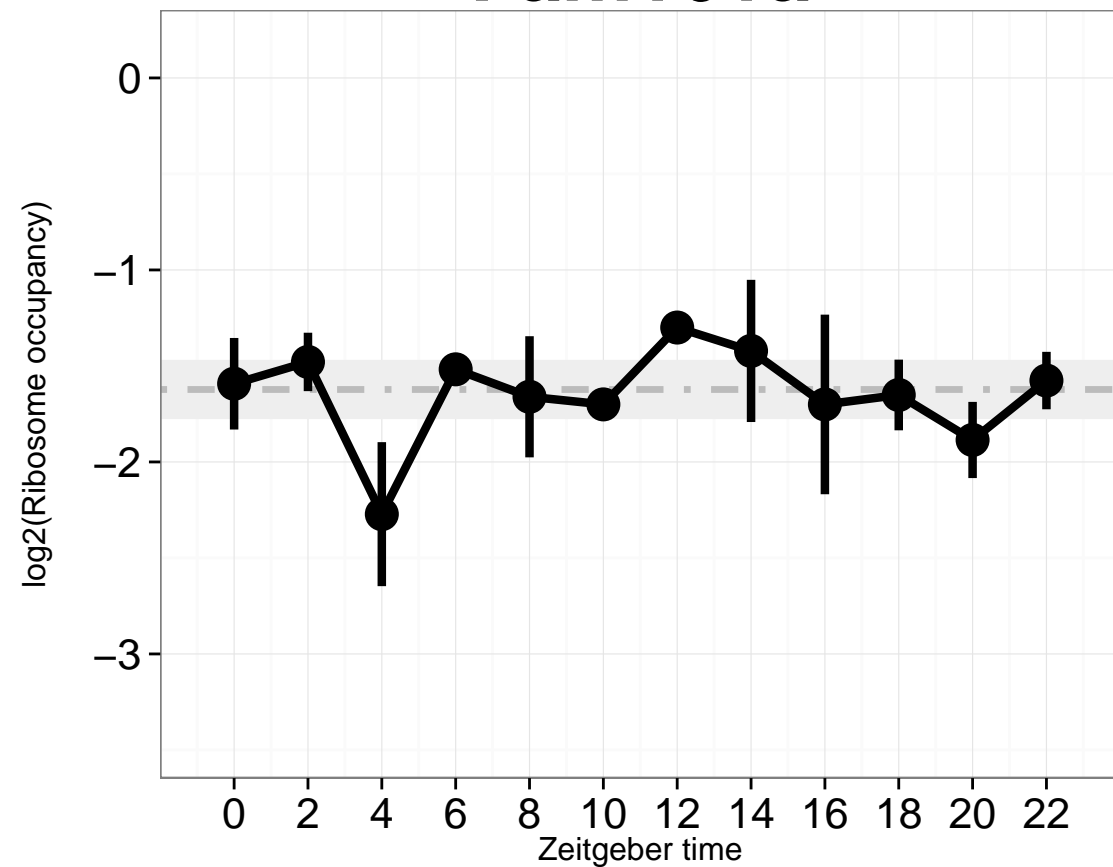

Supplement: Supplementary file 7709 [file 1]

## Cers2

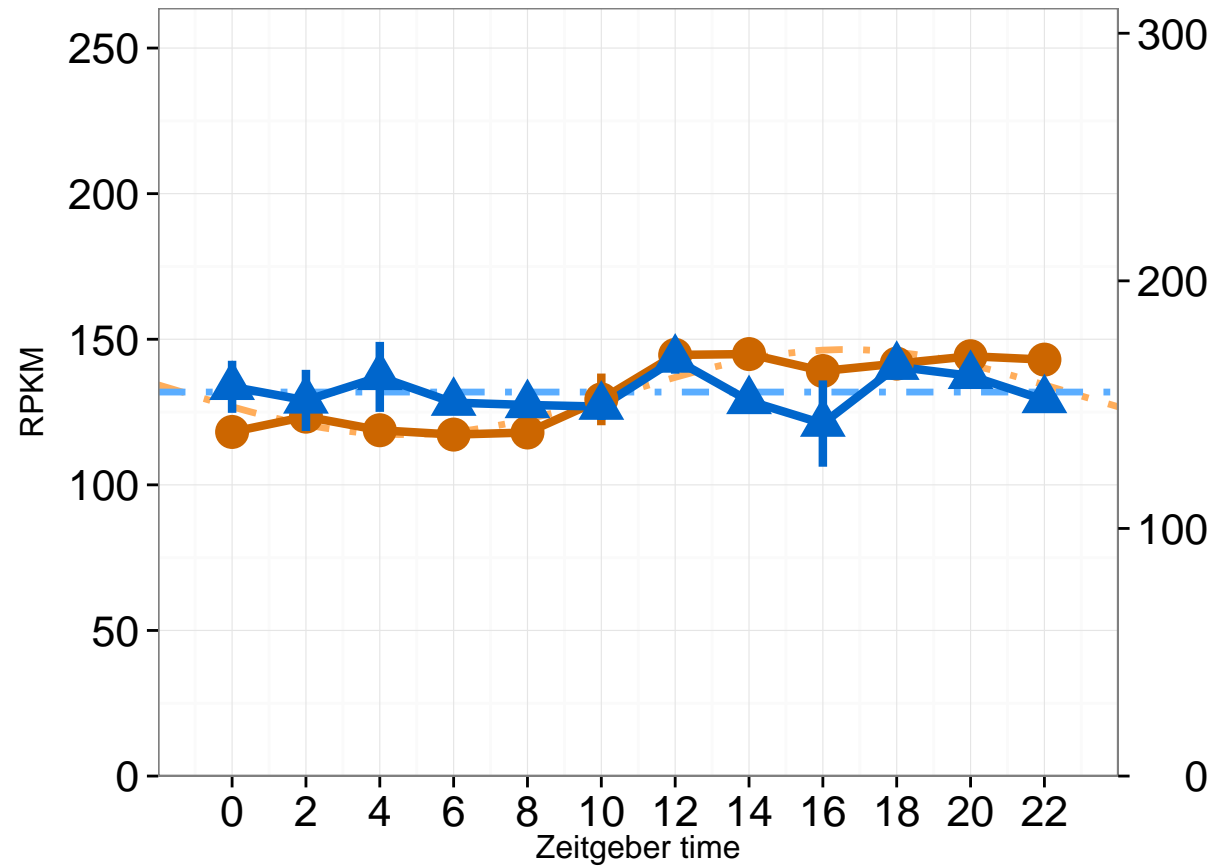

## Cers2

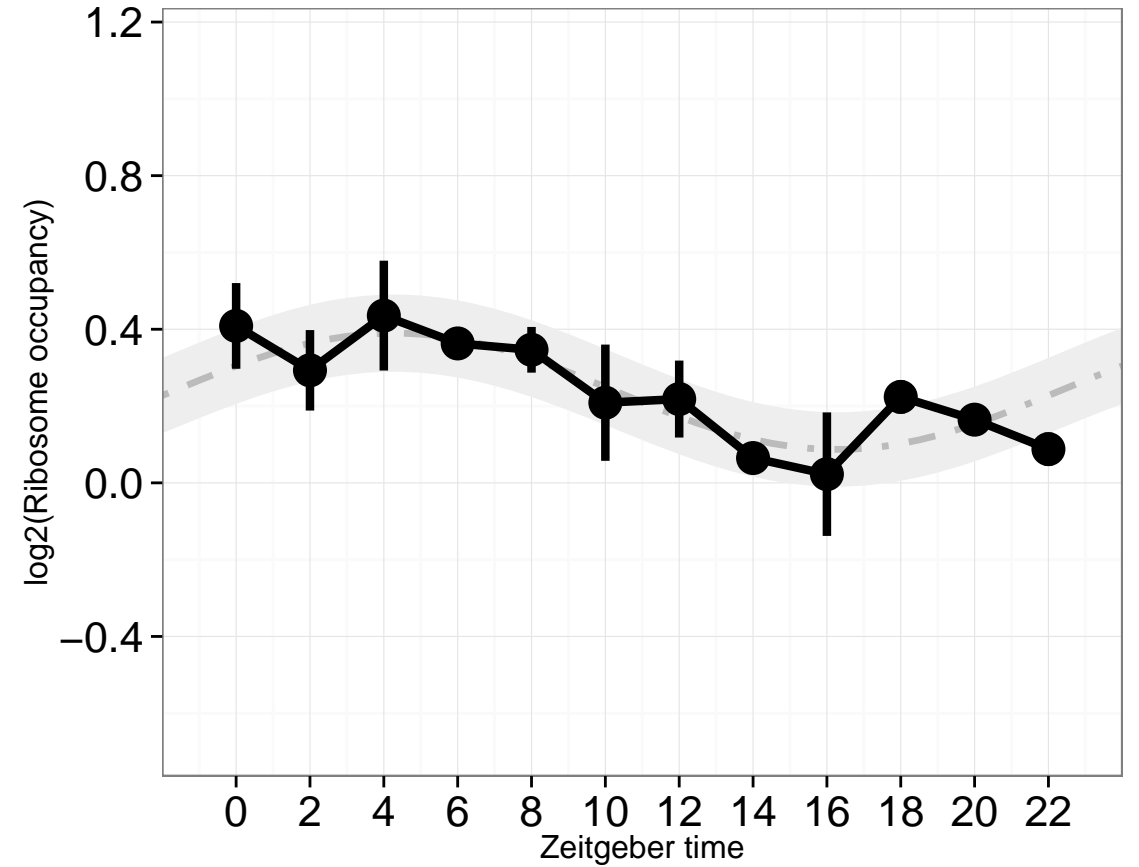

Supplement: Supplementary file 7710 [file 1]

## Gm10563

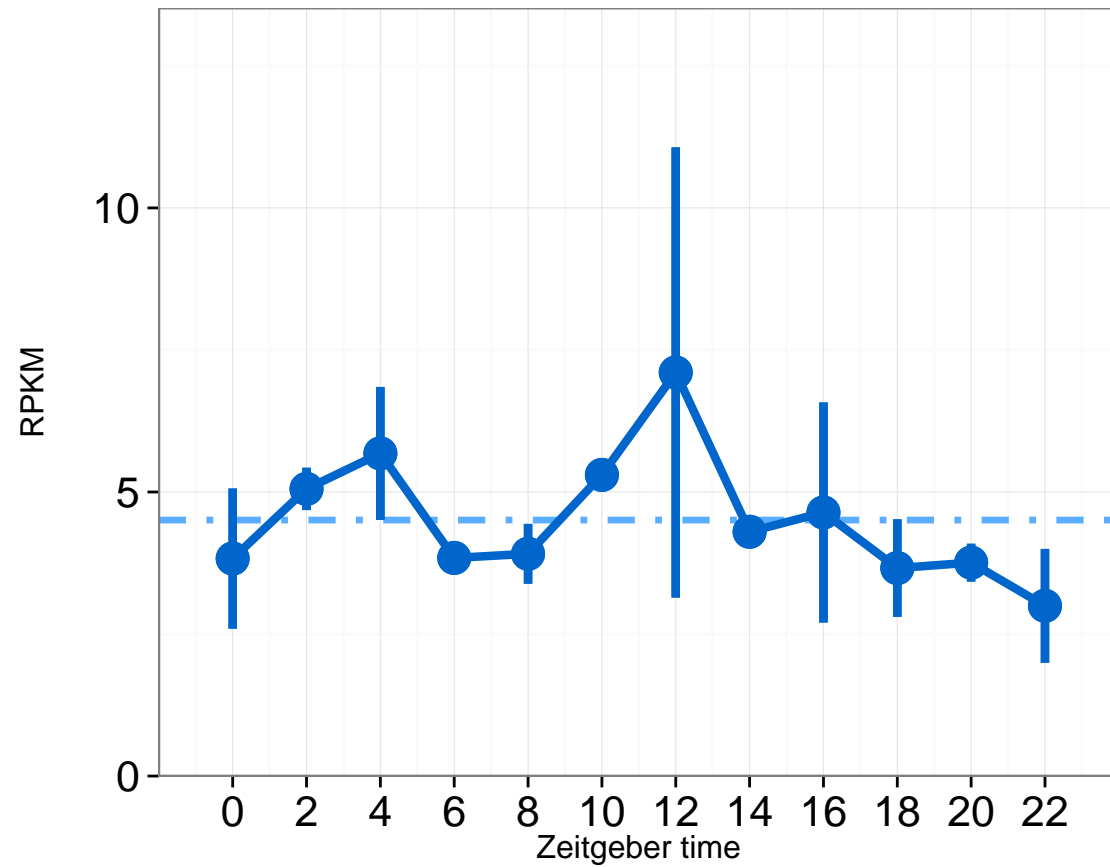

## Gm10563 log2(Ribosome occupanc

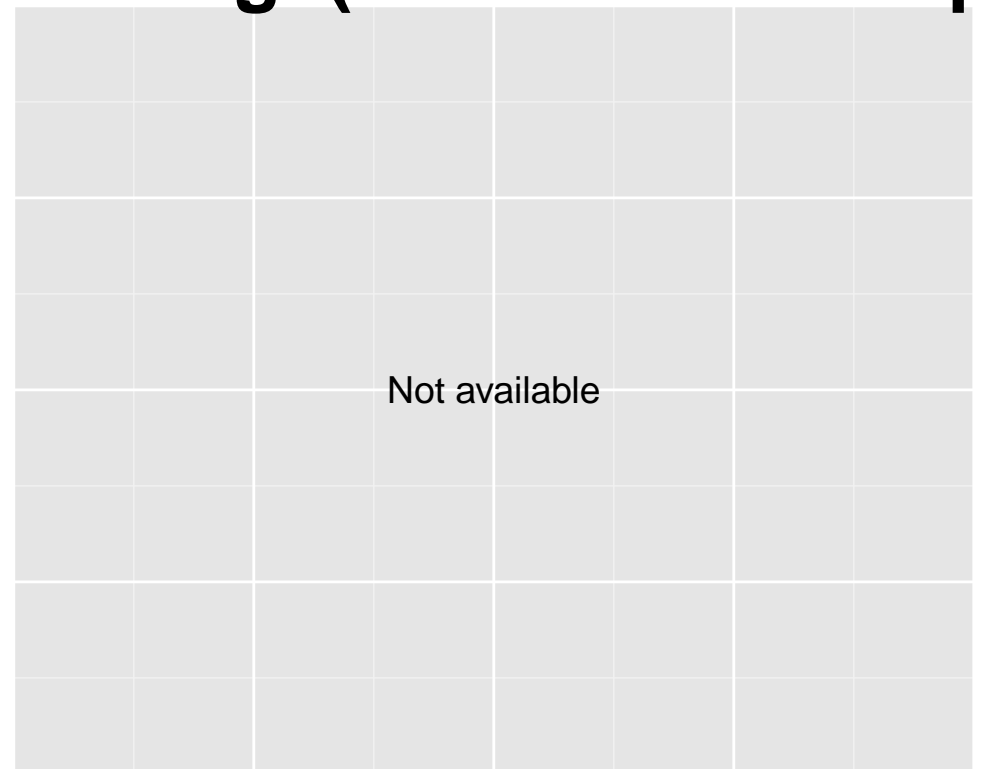

Supplement: Supplementary file 7711 [file 1]

# Rnf19b

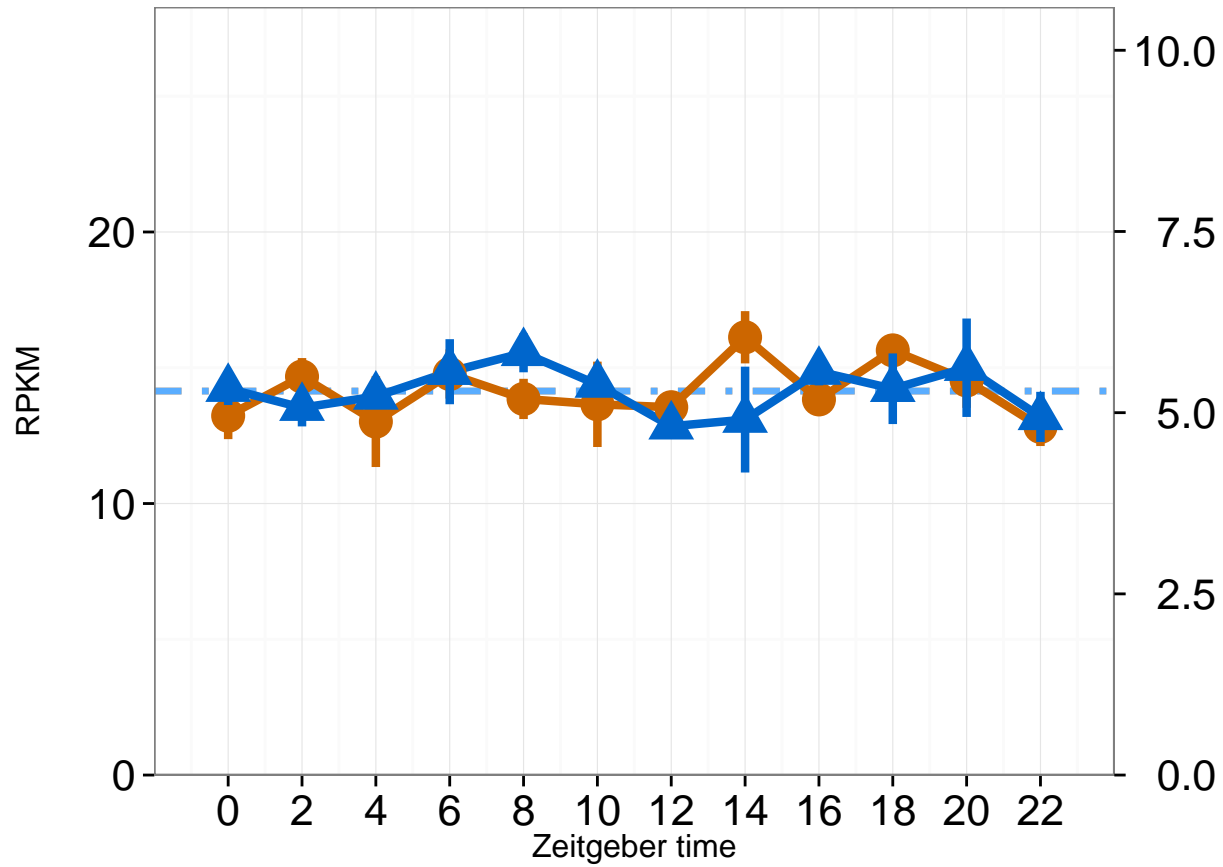

# Rnf19b

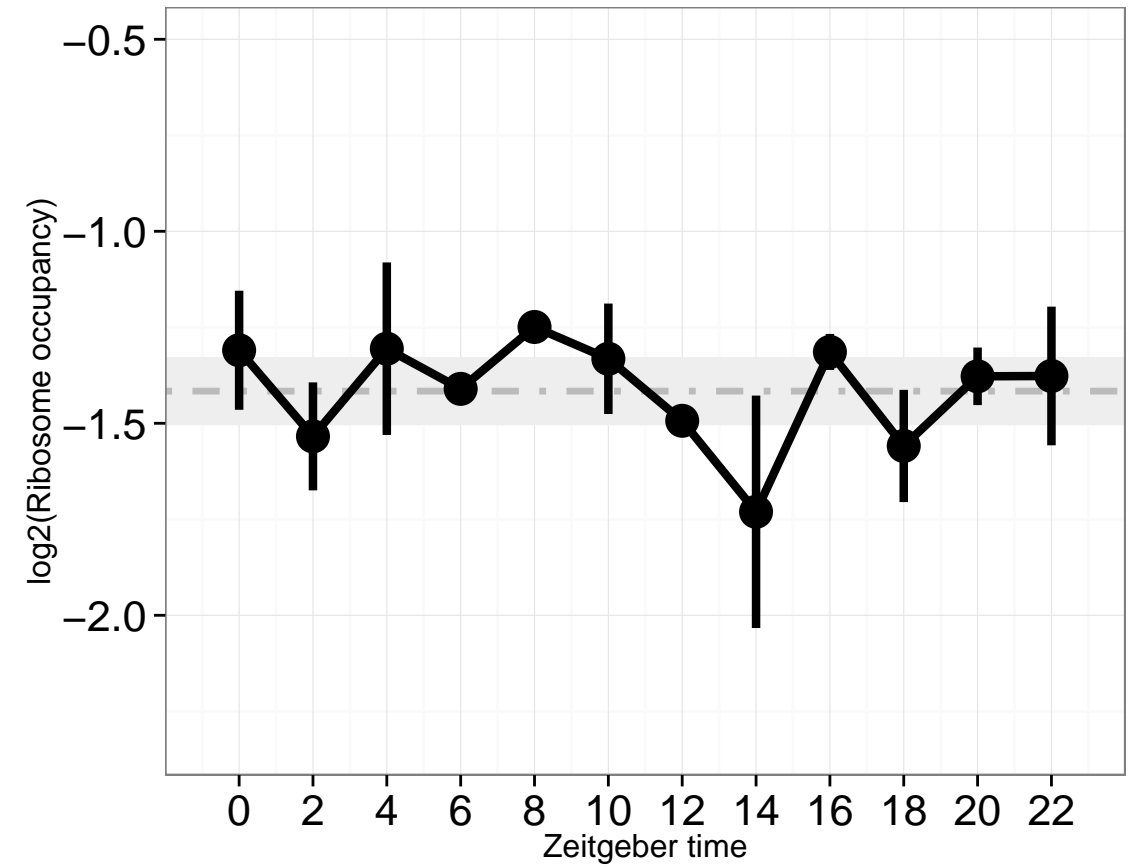

Supplement: Supplementary file 7712 [file 1]

## Bcl2l11

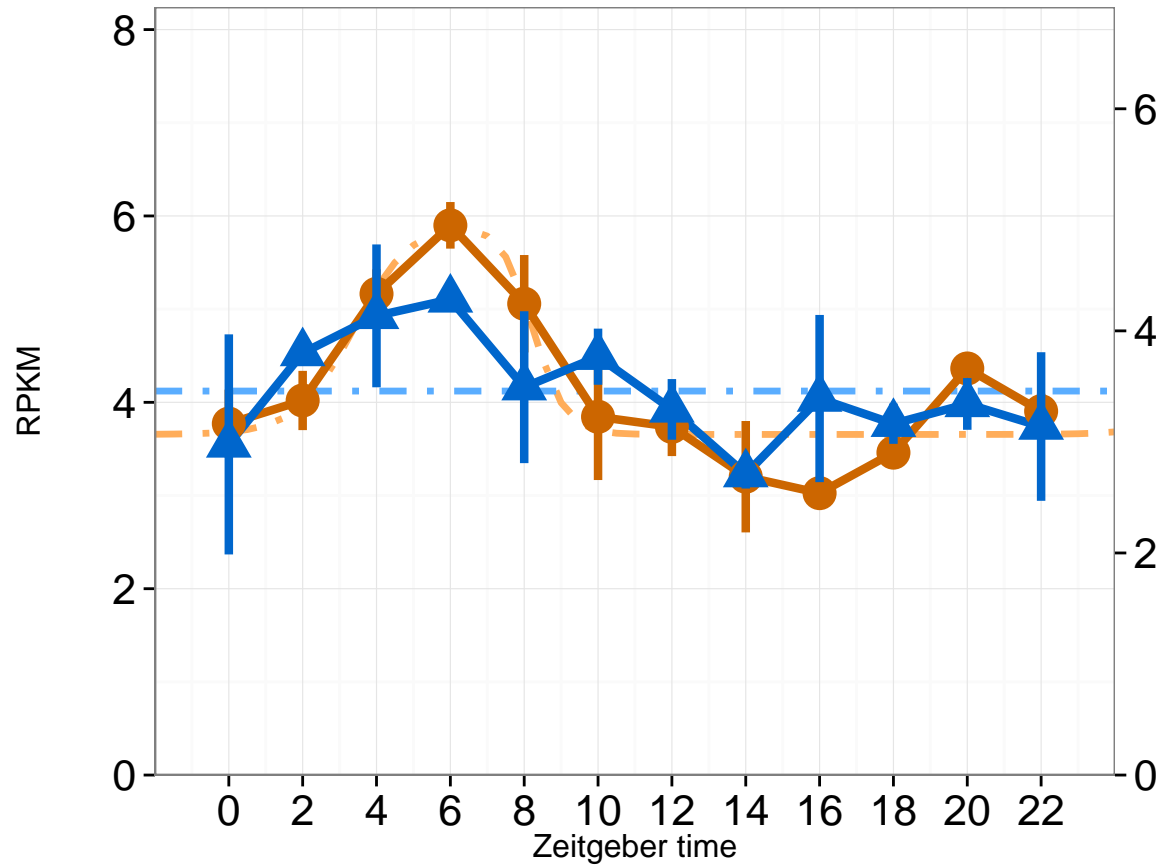

## Bcl2l11

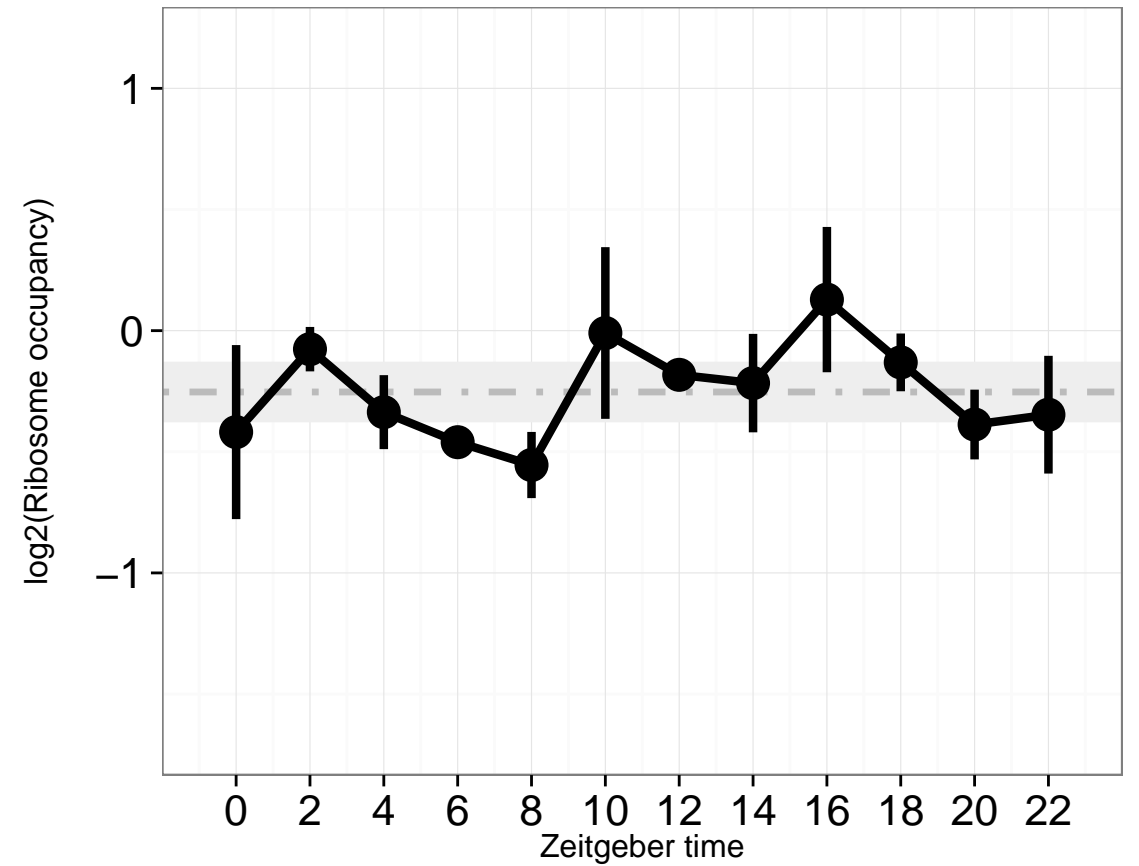

Supplement: Supplementary file 7713 [file 1]

## Epha3

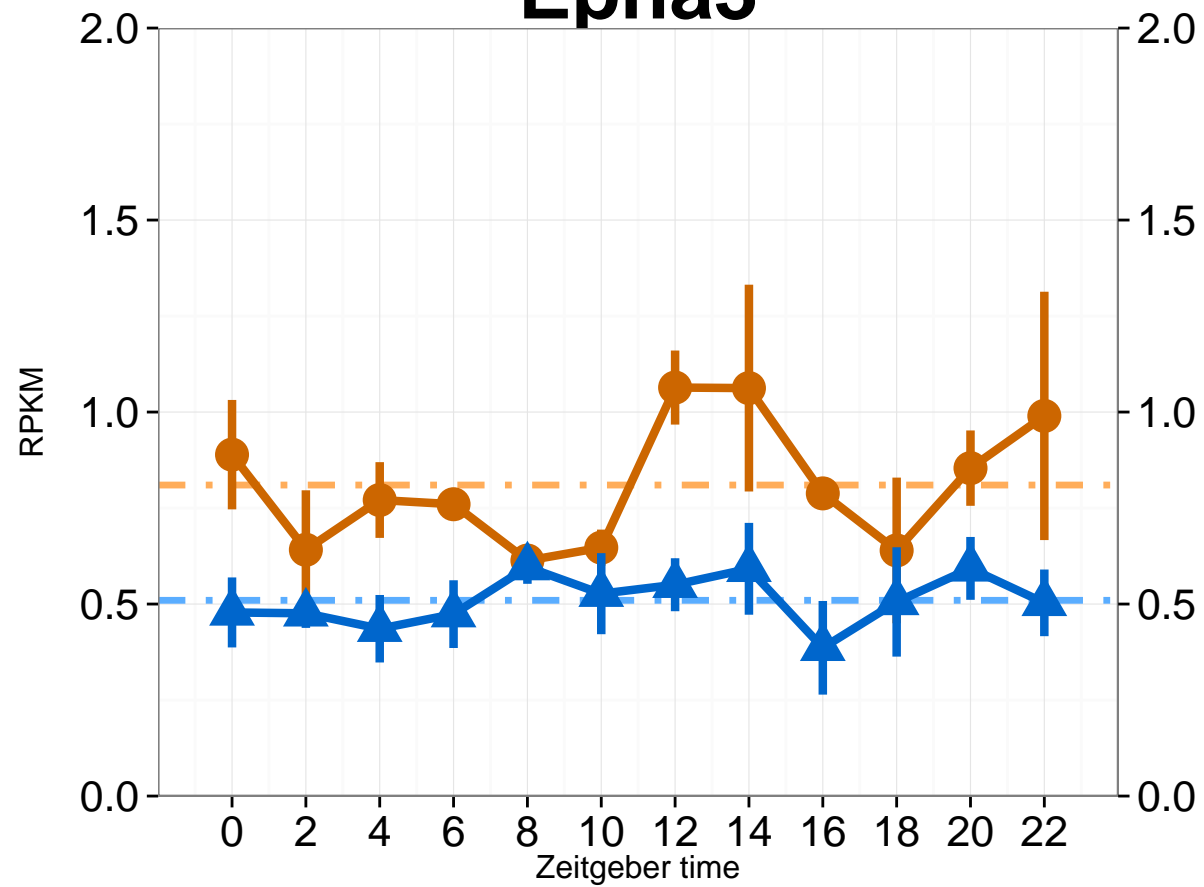

## Epha3

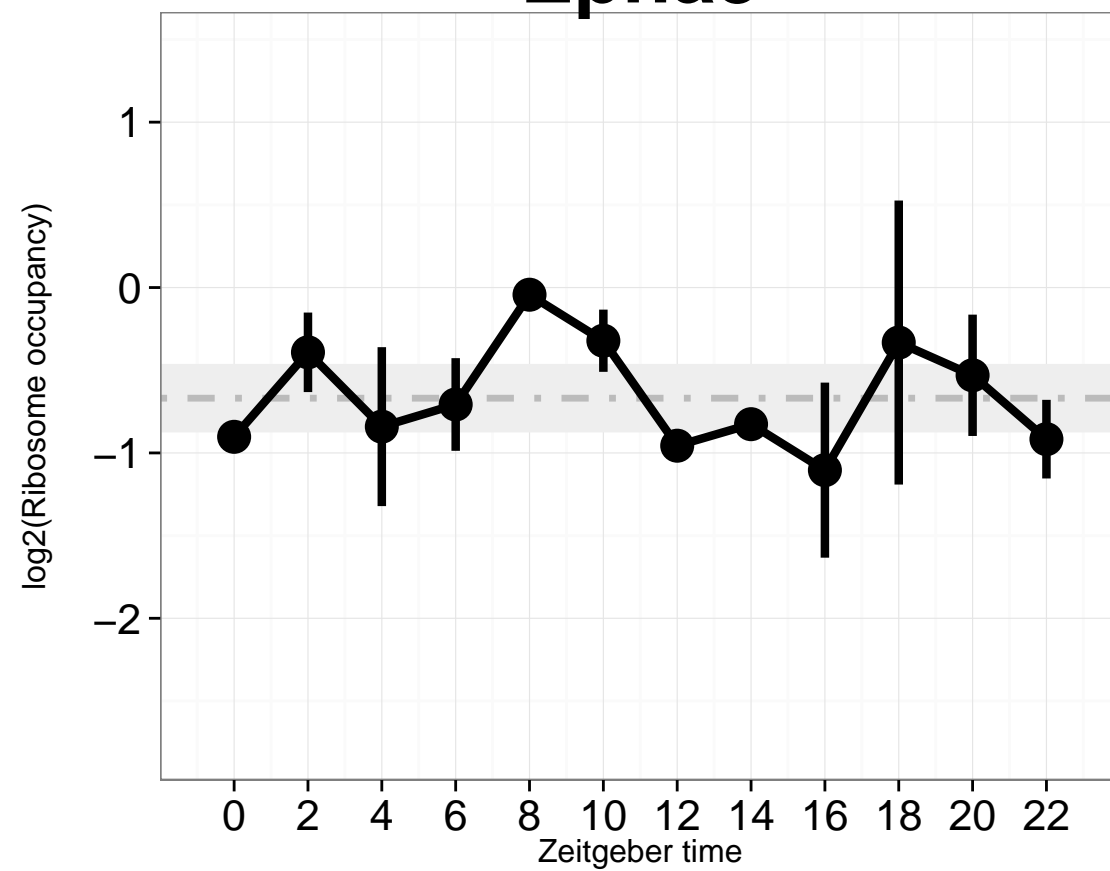

Supplement: Supplementary file 7714 [file 1]

## Ptar1

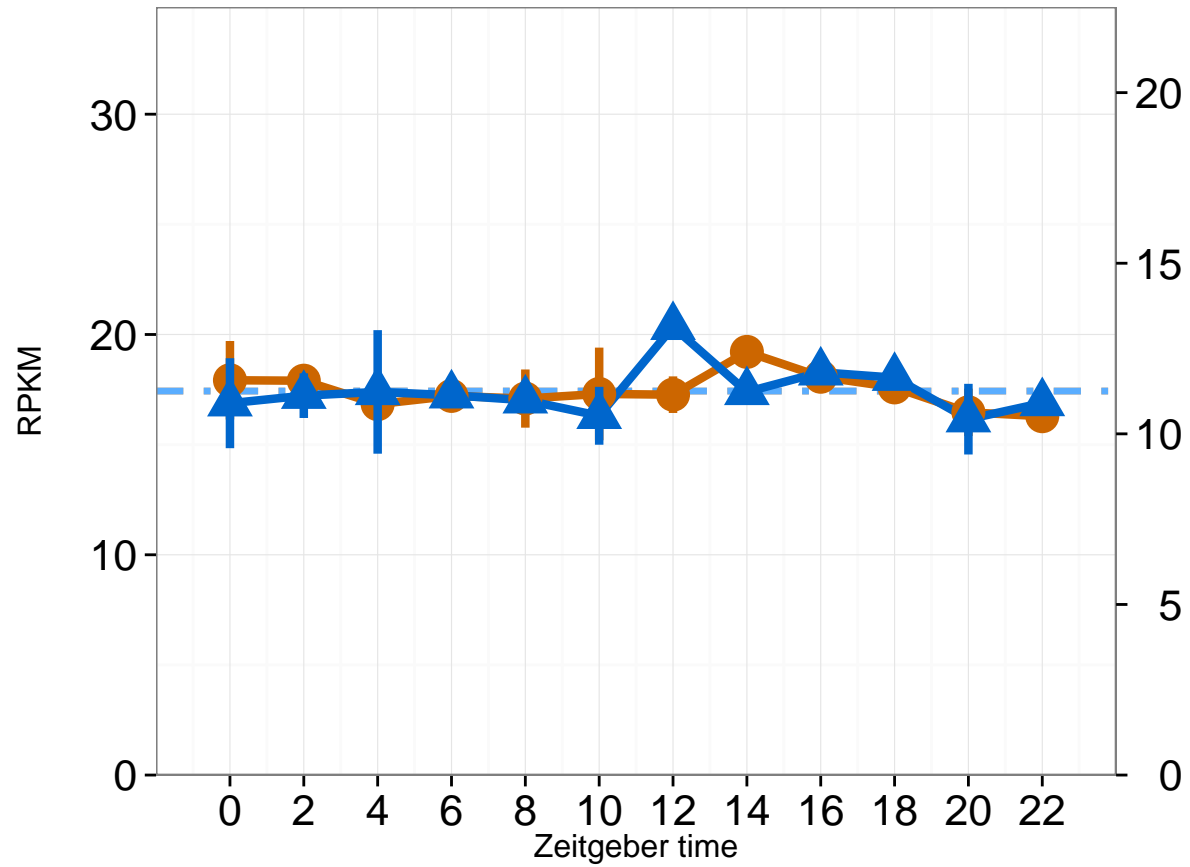

## Ptar1

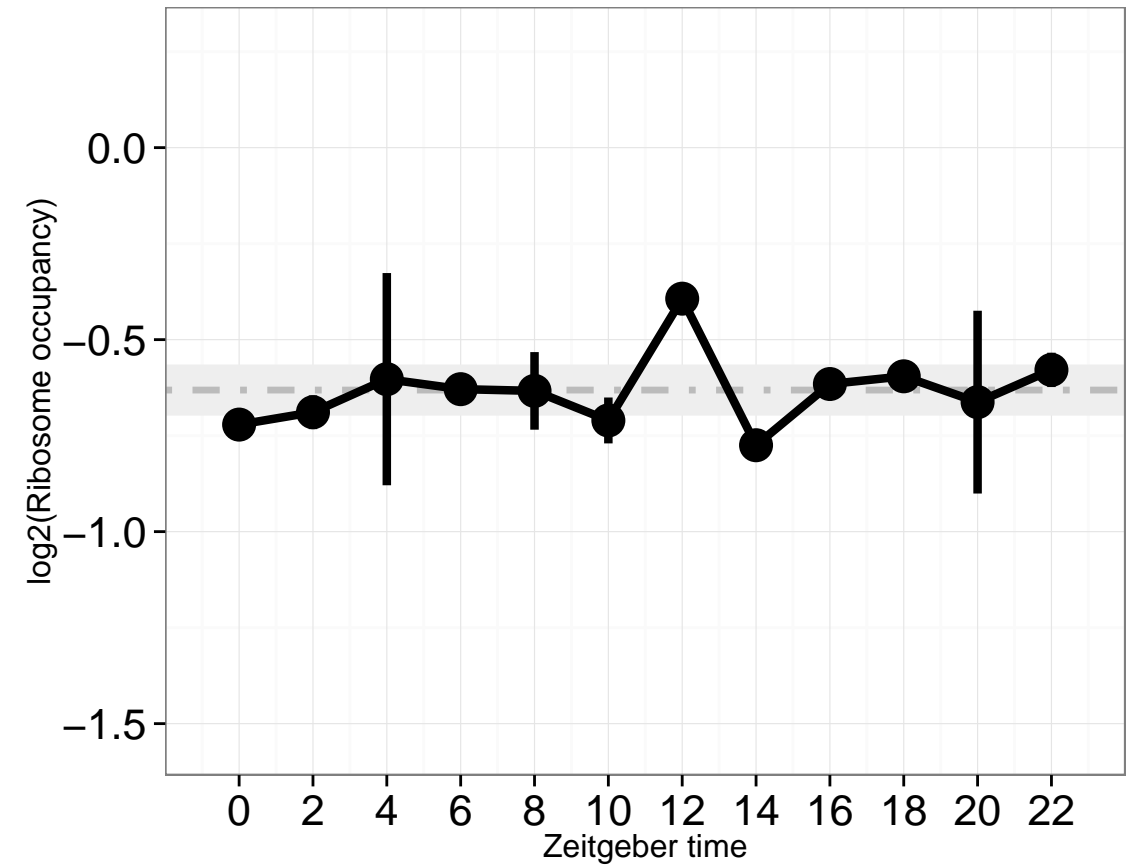

Supplement: Supplementary file 7715 [file 1]

# Mterf

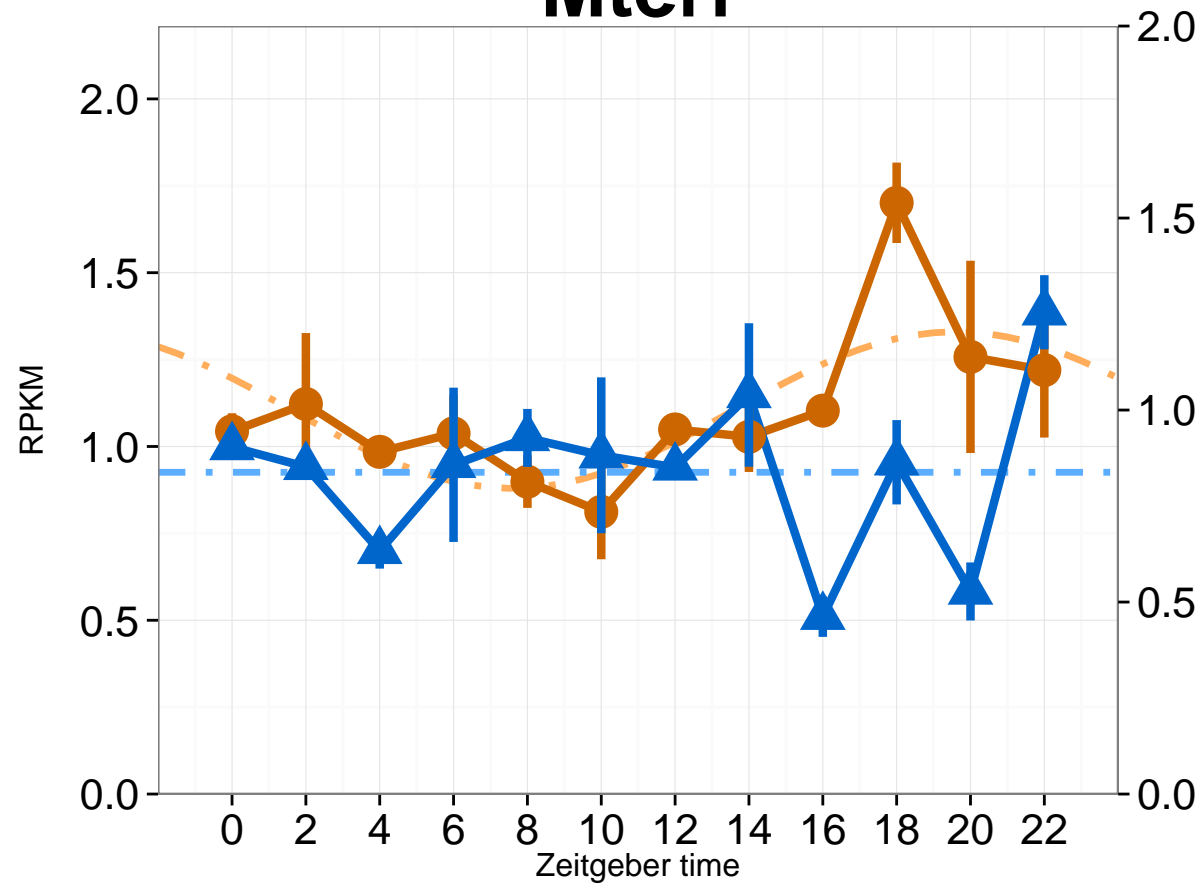

# Mterf

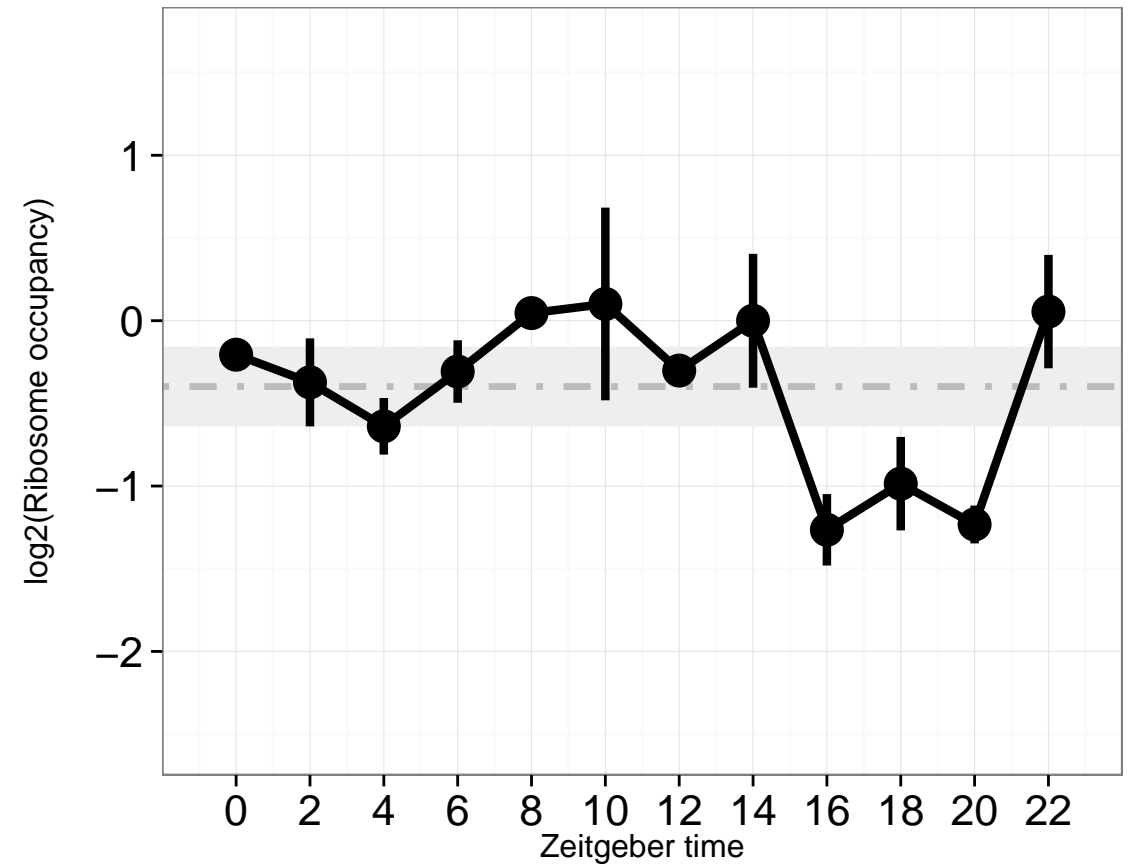

Supplement: Supplementary file 7716 [file 1]

# Agpat5

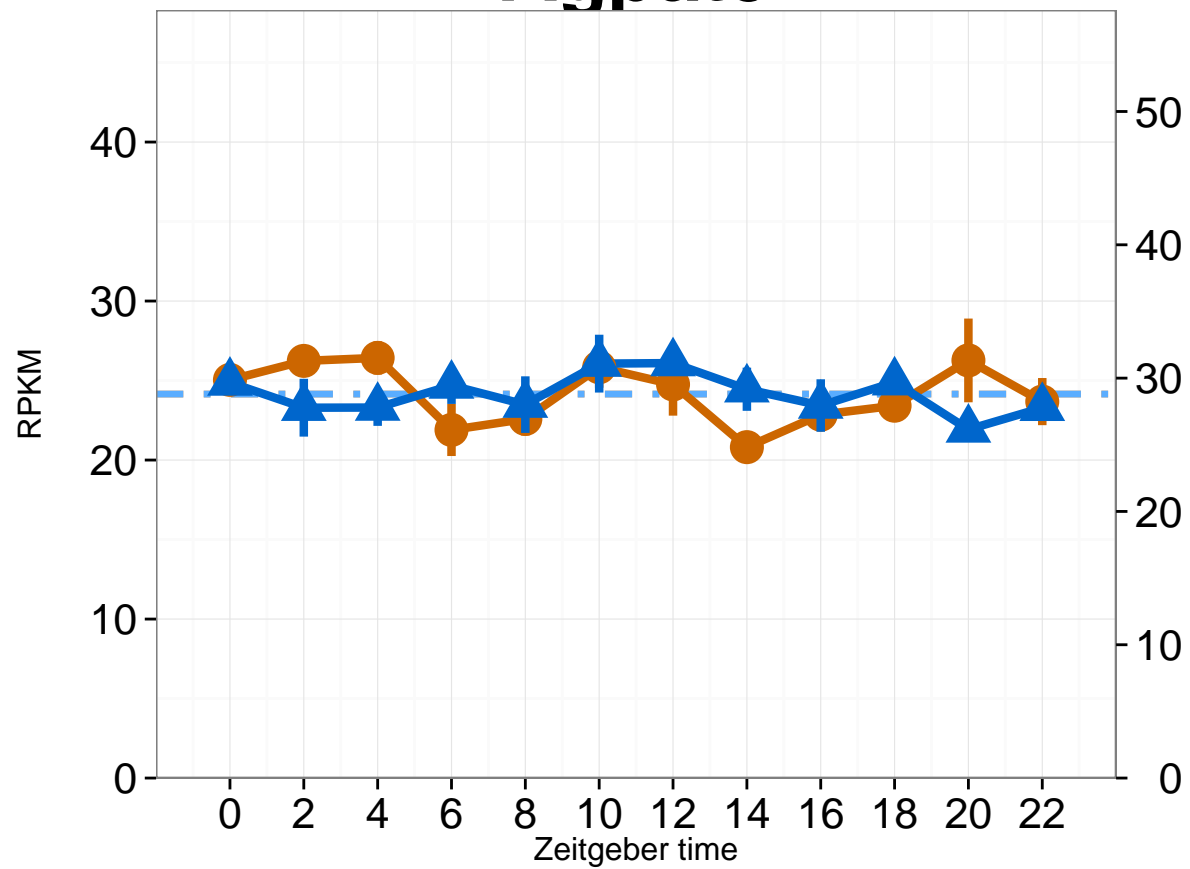

# Agpat5

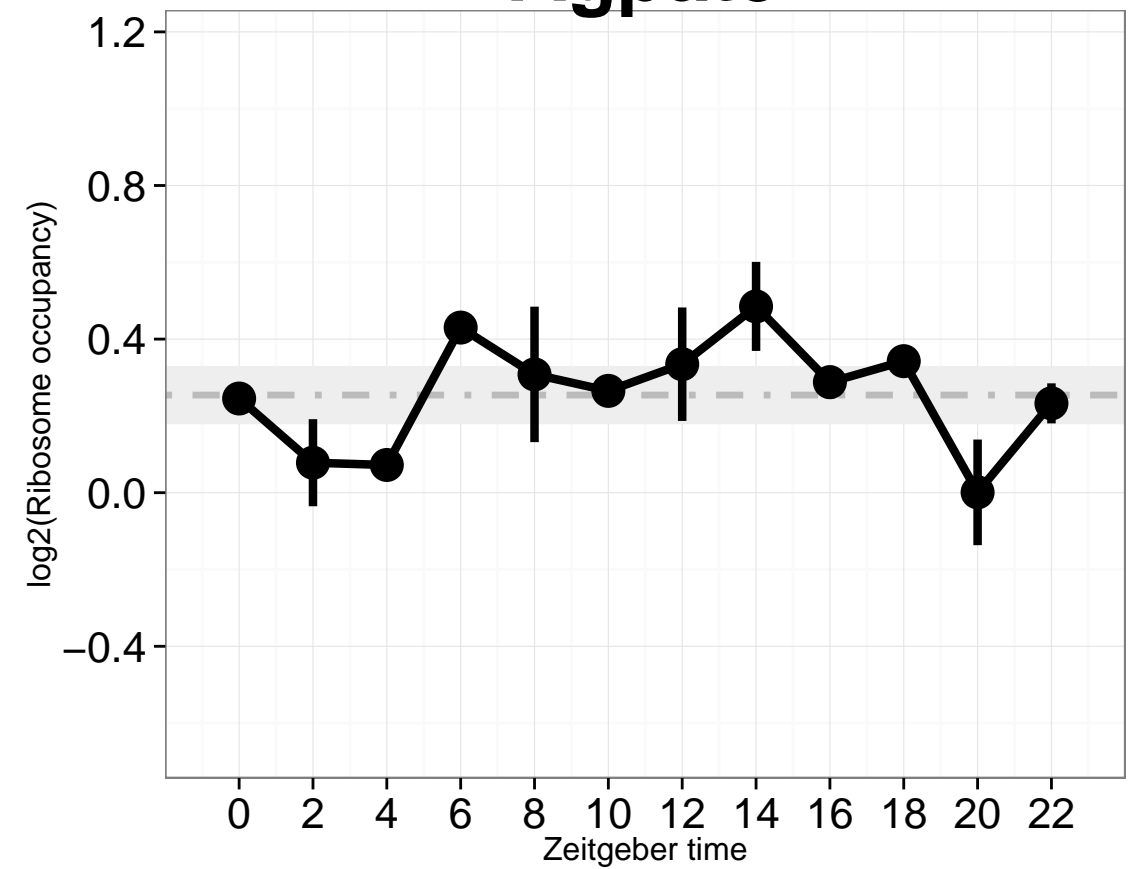

Supplement: Supplementary file 7717 [file 1]

# Txn14b

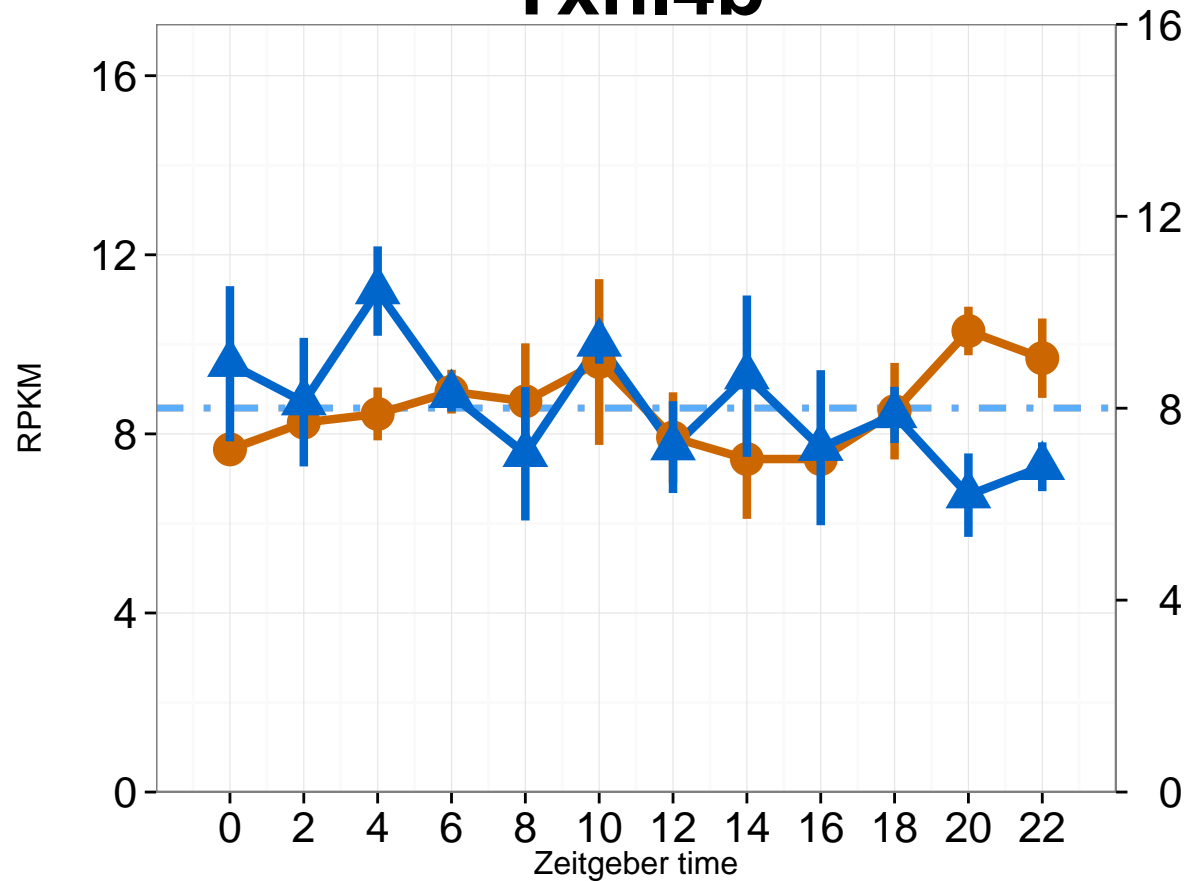

# Txn14b

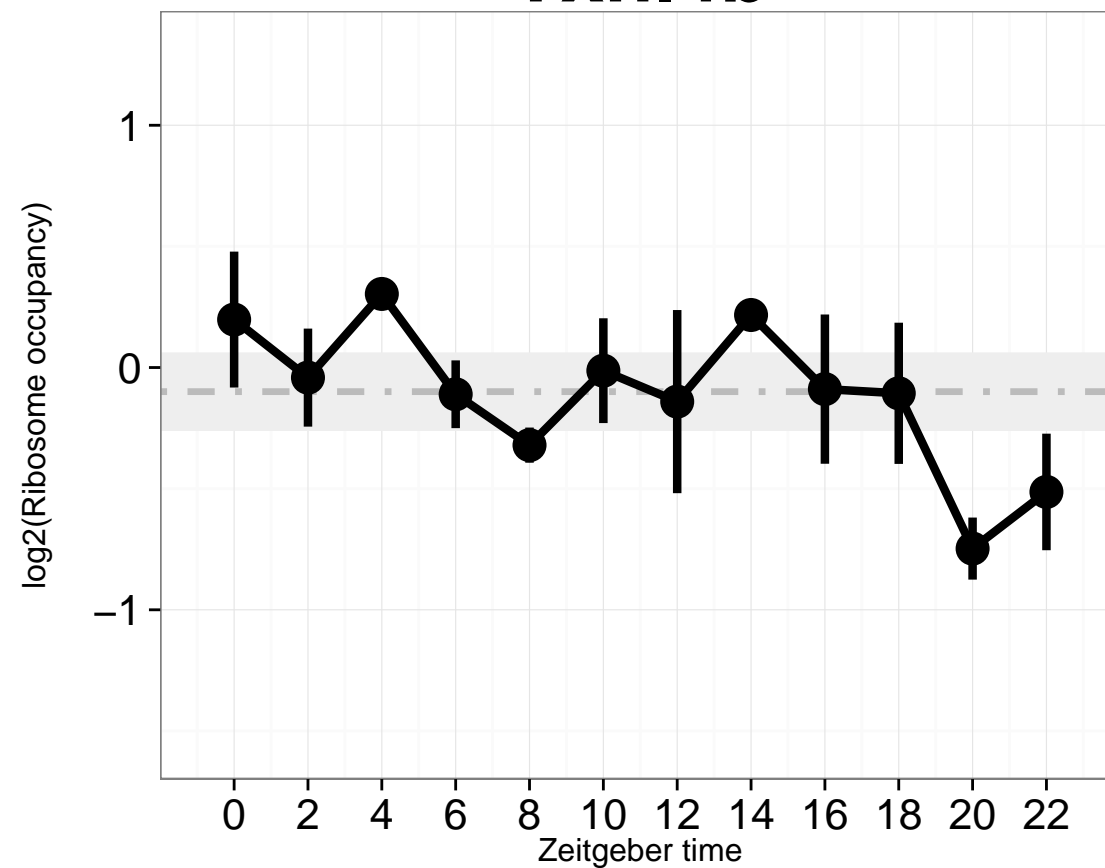

Supplement: Supplementary file 7718 [file 1]

## Gcat

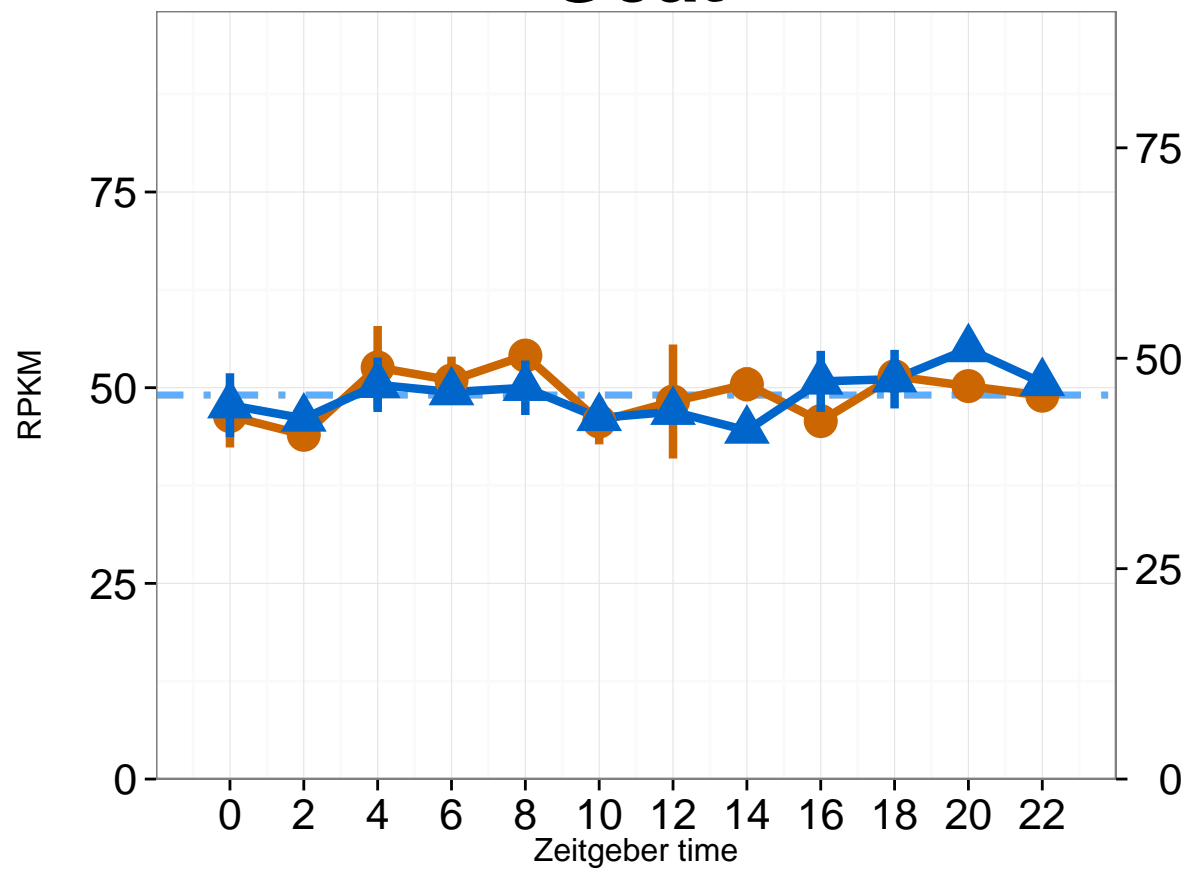

## Gcat

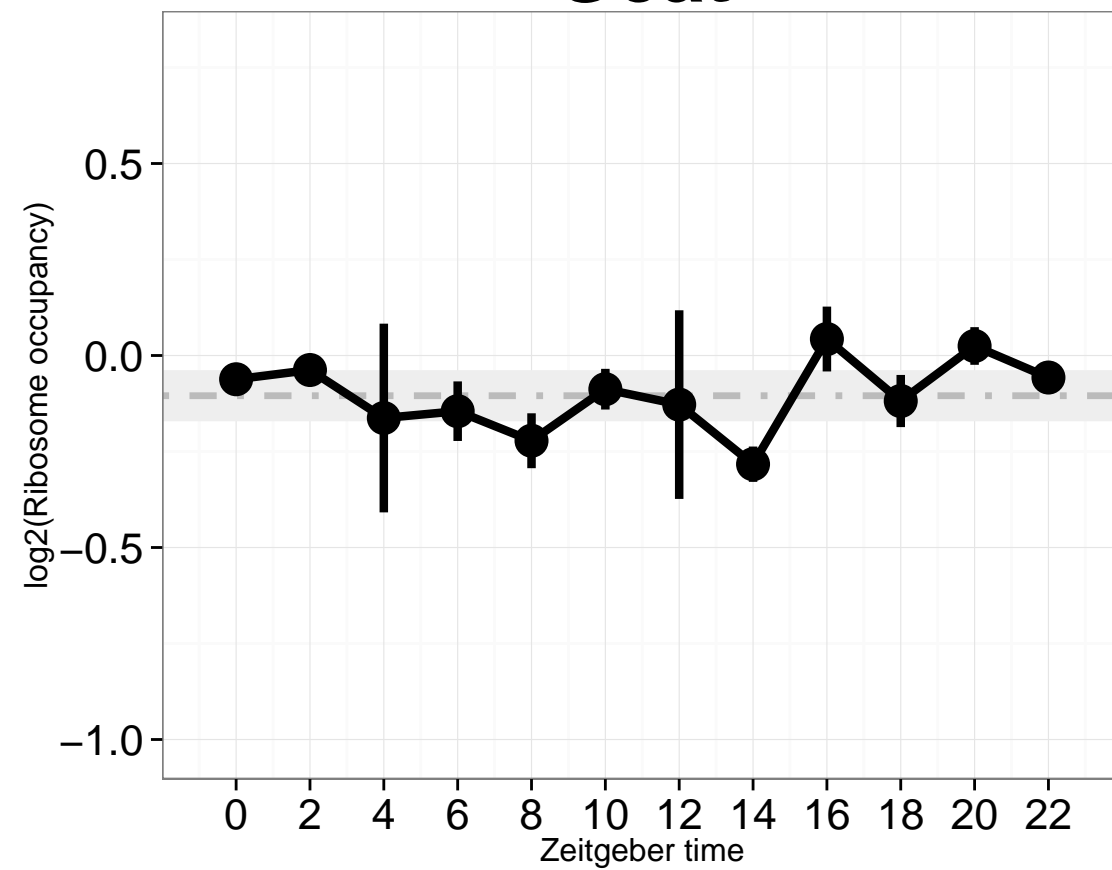

Supplement: Supplementary file 7719 [file 1]

**Eya4 TR**

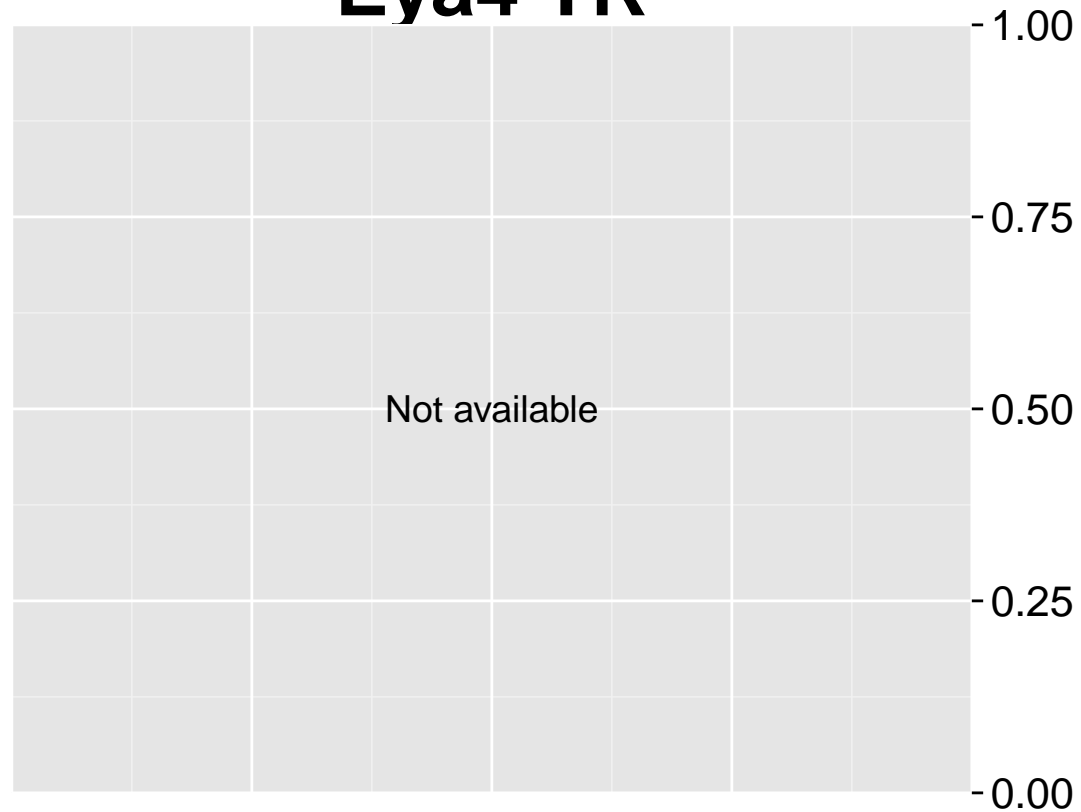

**Eya4 log2(Ribosome occupancy)**

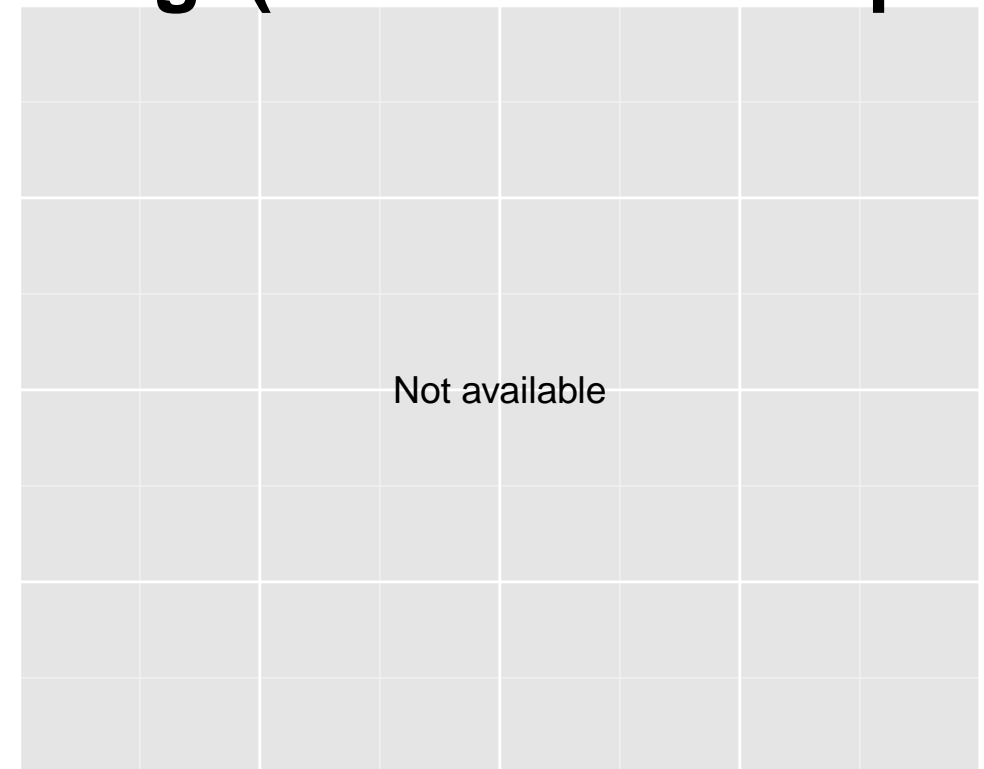

Supplement: Supplementary file 7720 [file 1]

# Svep1

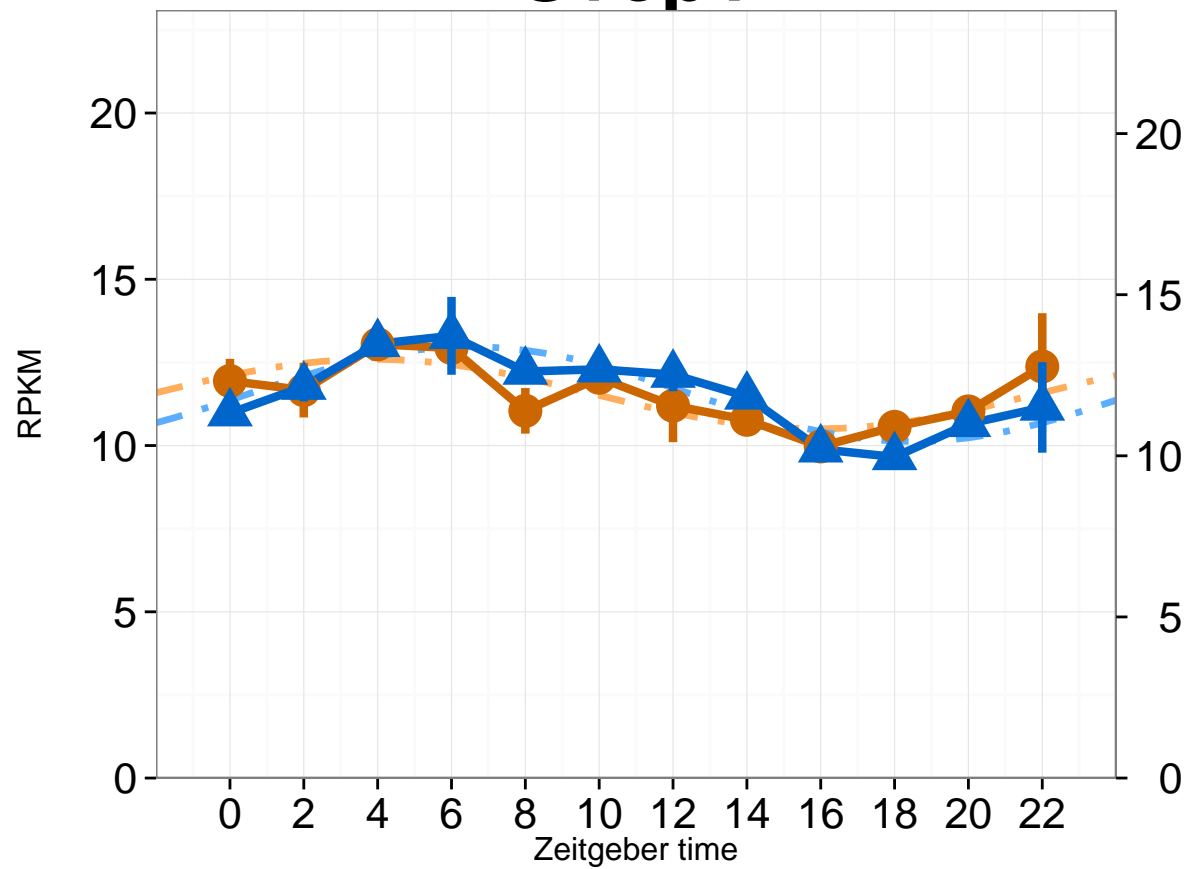

# Svep1

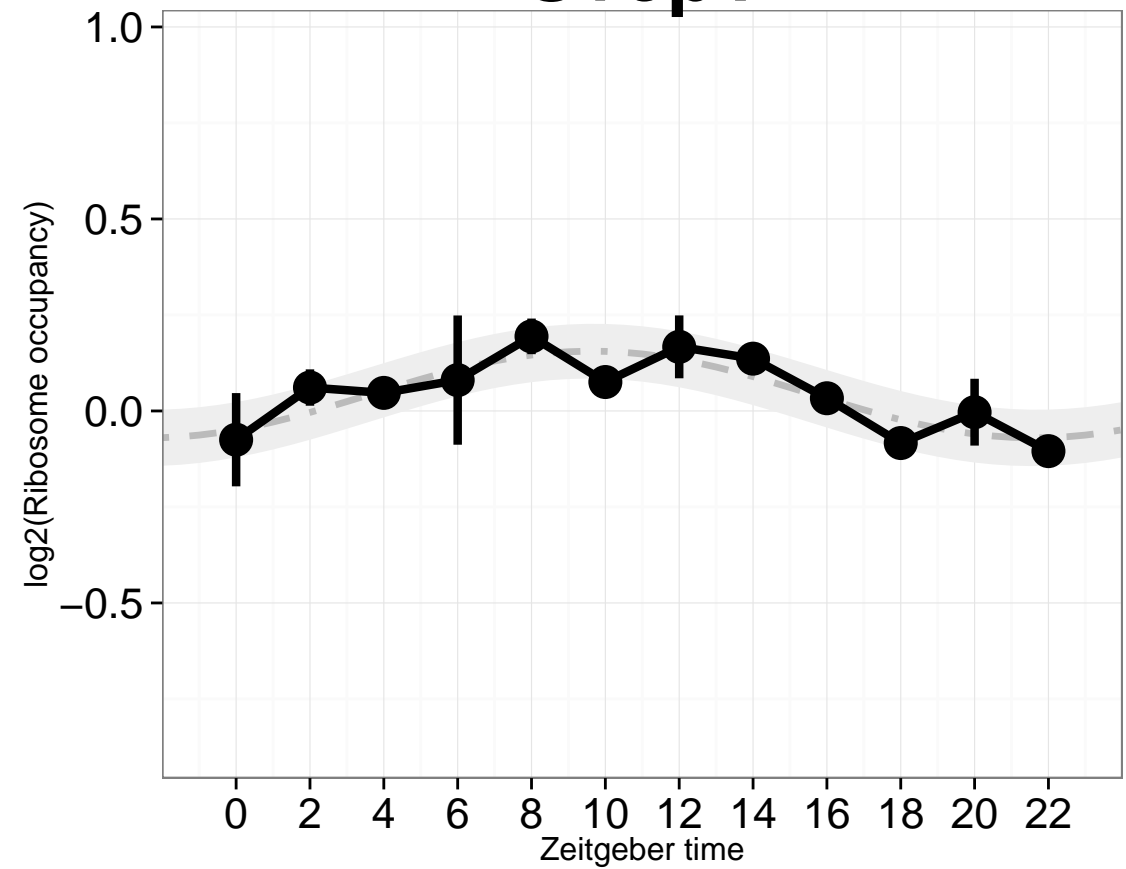

Supplement: Supplementary file 7721 [file 1]

# March1

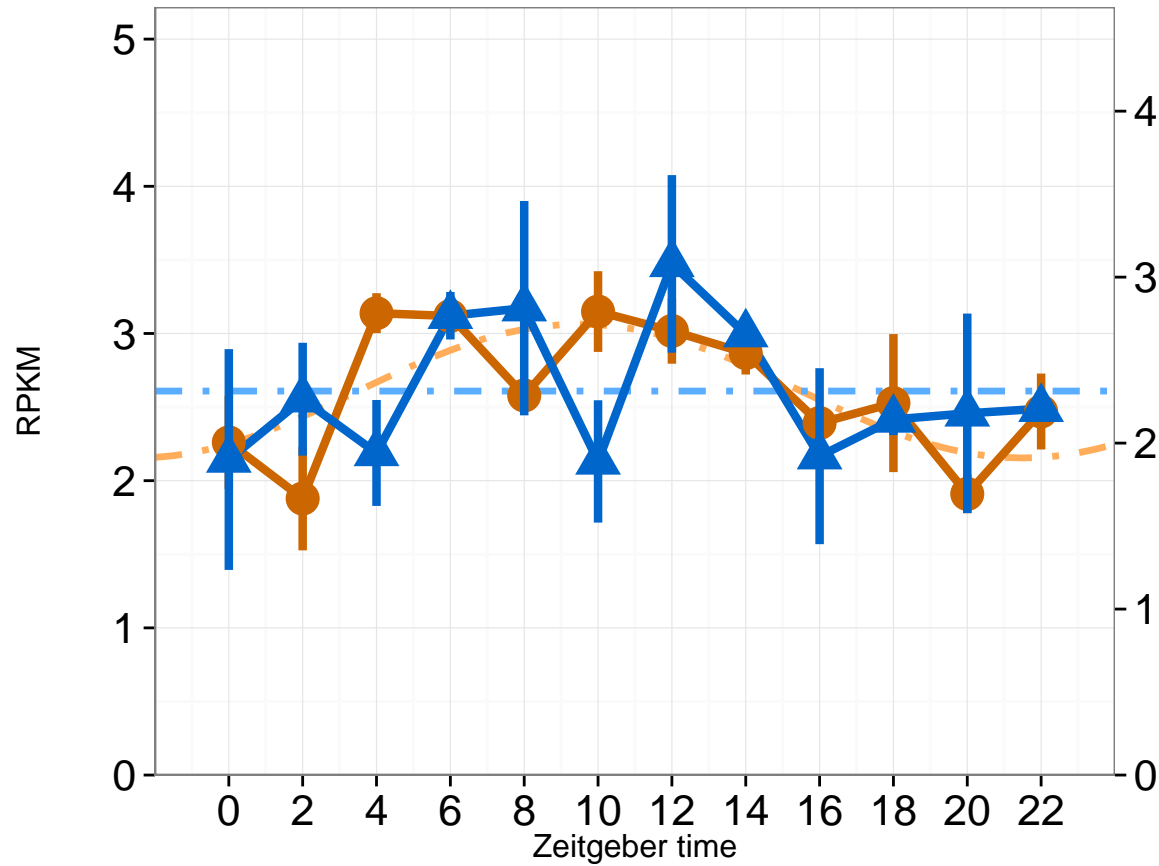

# March1

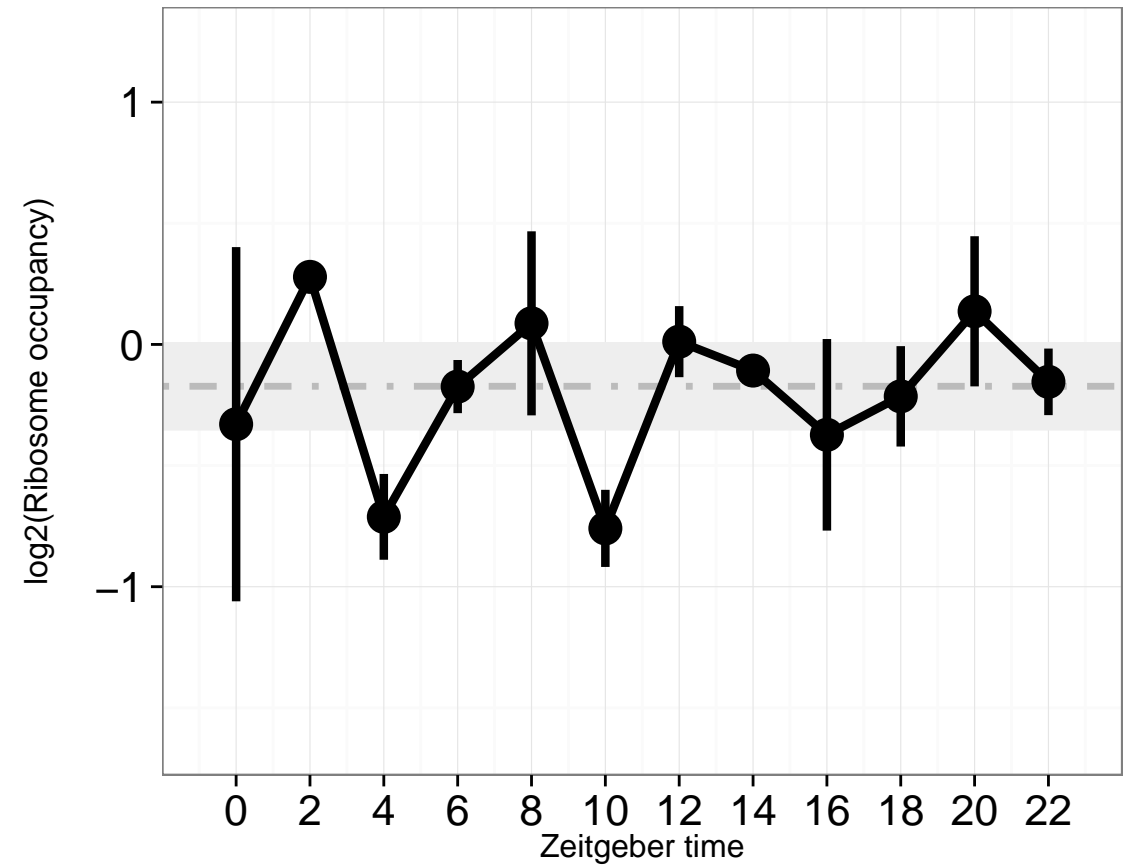

Supplement: Supplementary file 7722 [file 1]

## Cdc5l

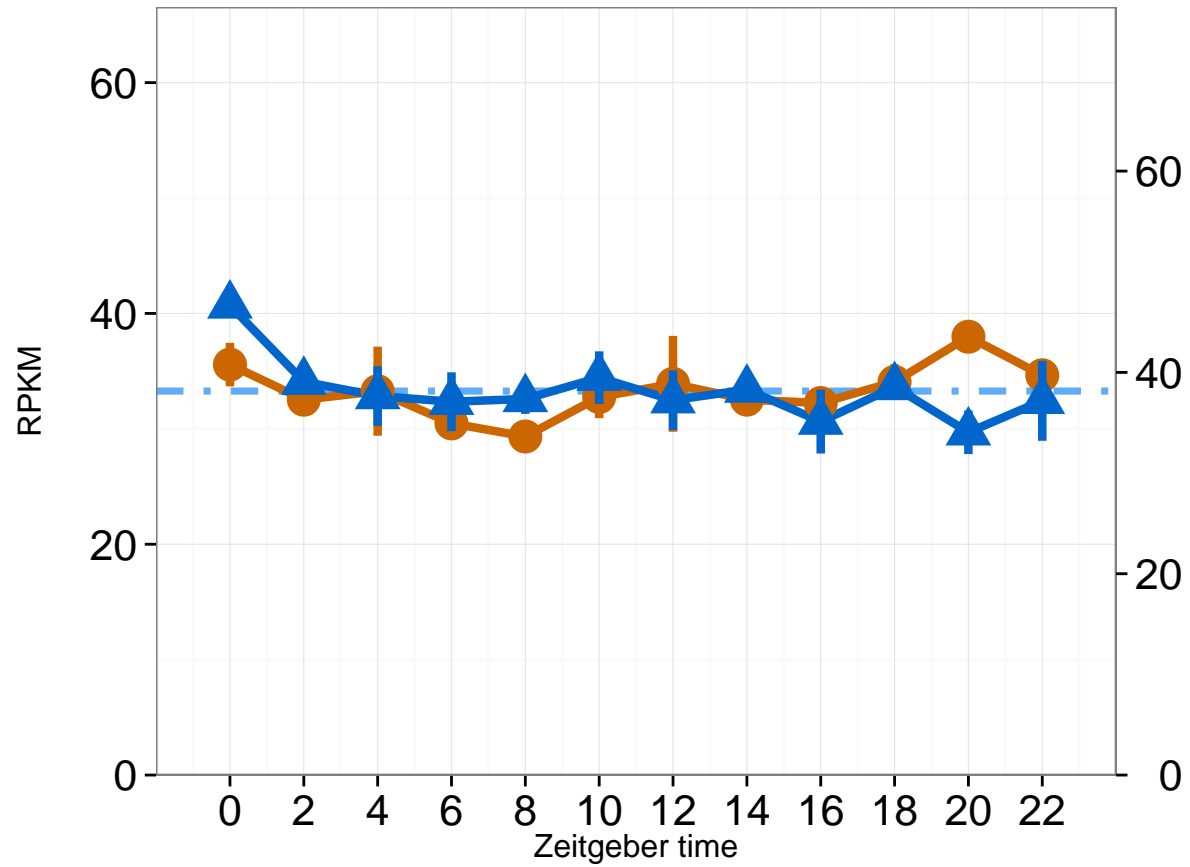

## Cdc5l

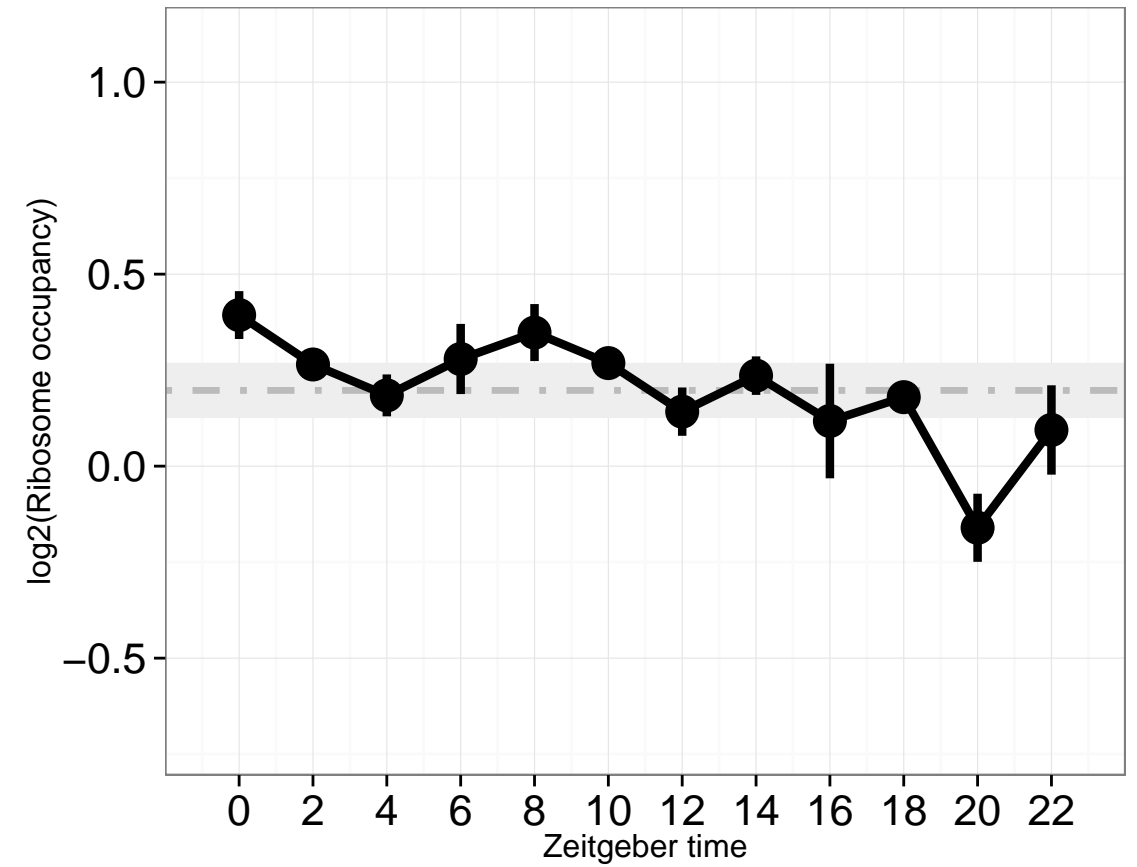

Supplement: Supplementary file 7723 [file 1]

# Csrp2

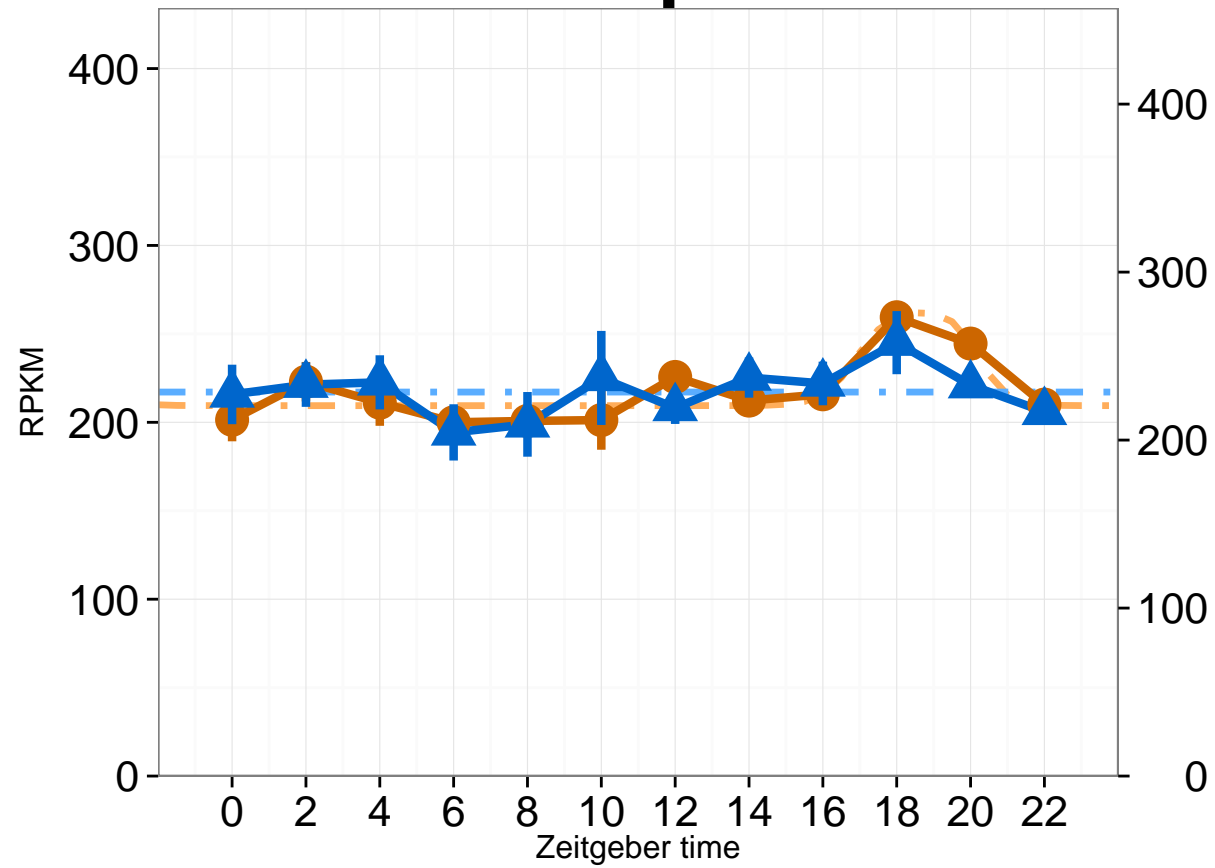

# Csrp2

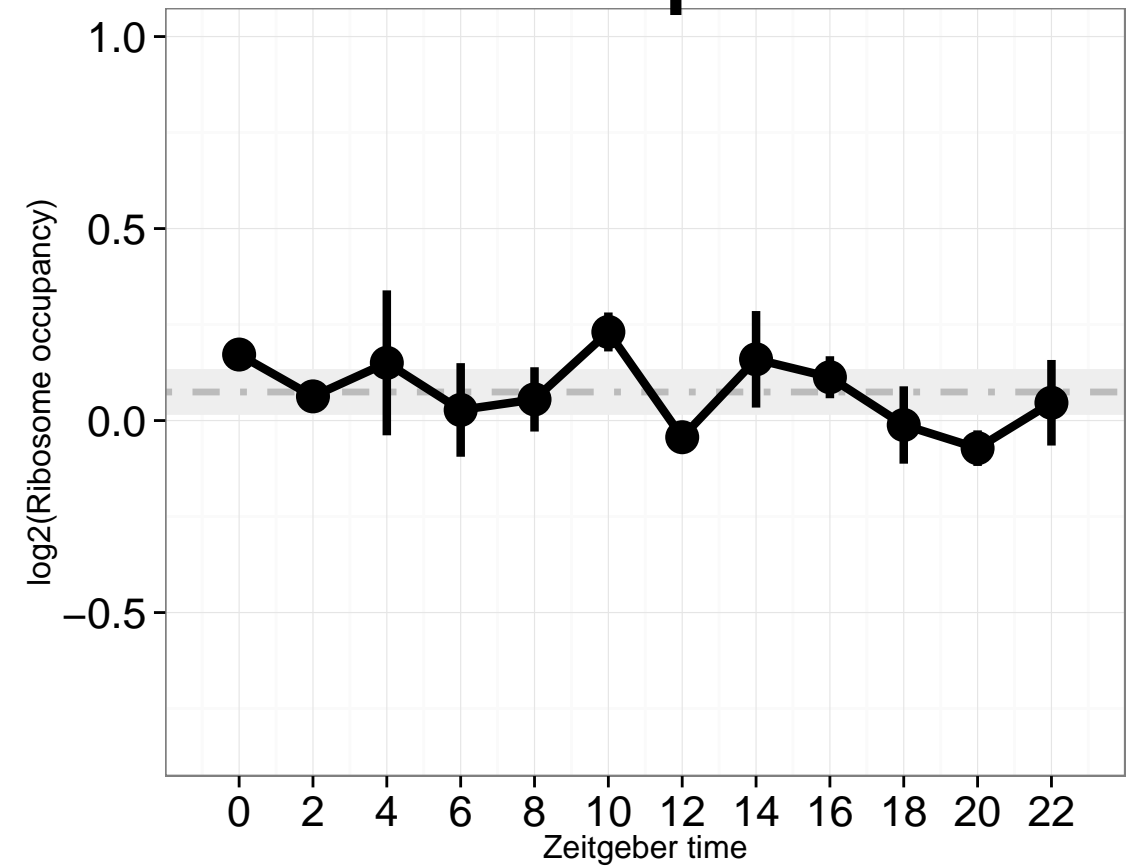

Supplement: Supplementary file 7724 [file 1]
