# Supplementary material (part 78 of 133)
Source: publisher figshare collection journal article supplement (https://springernature.figshare.com/articles/dataset/_/4903193)

## Ly6c1

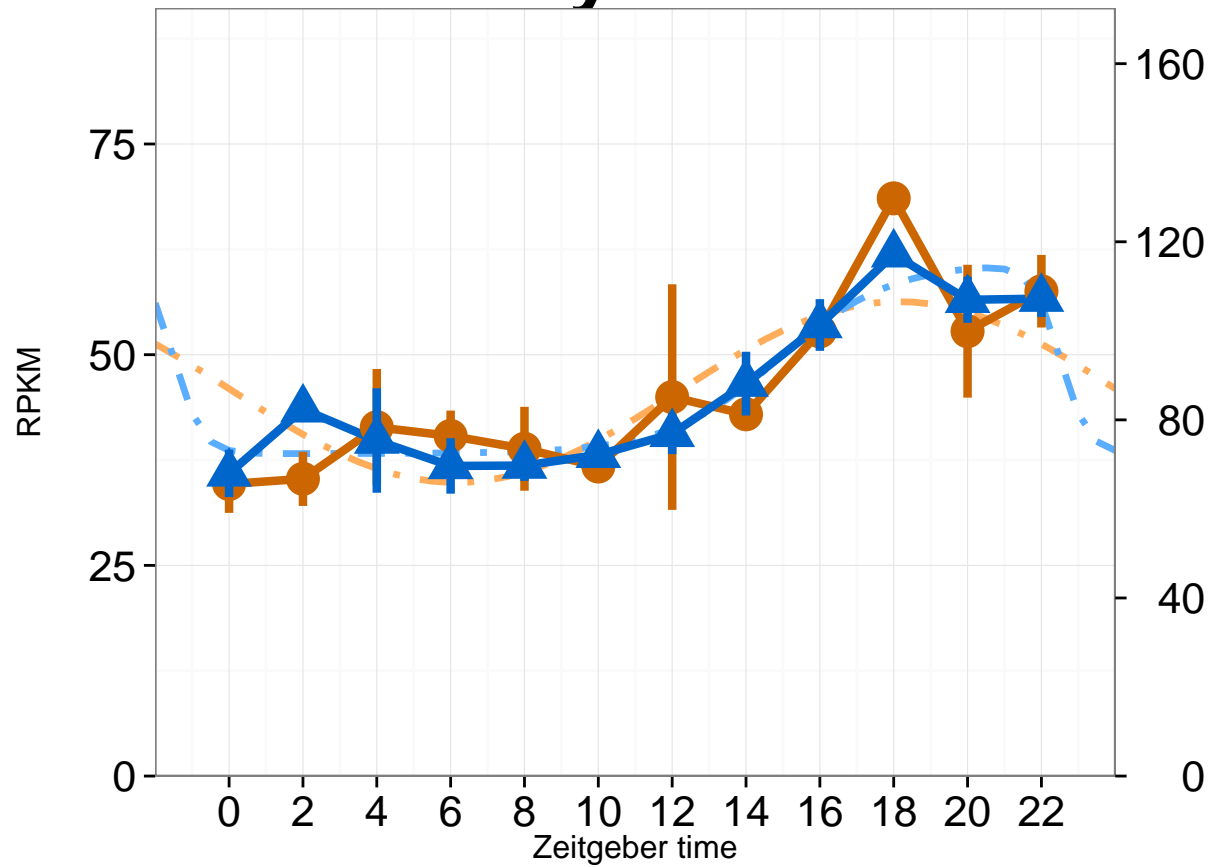

## Ly6c1

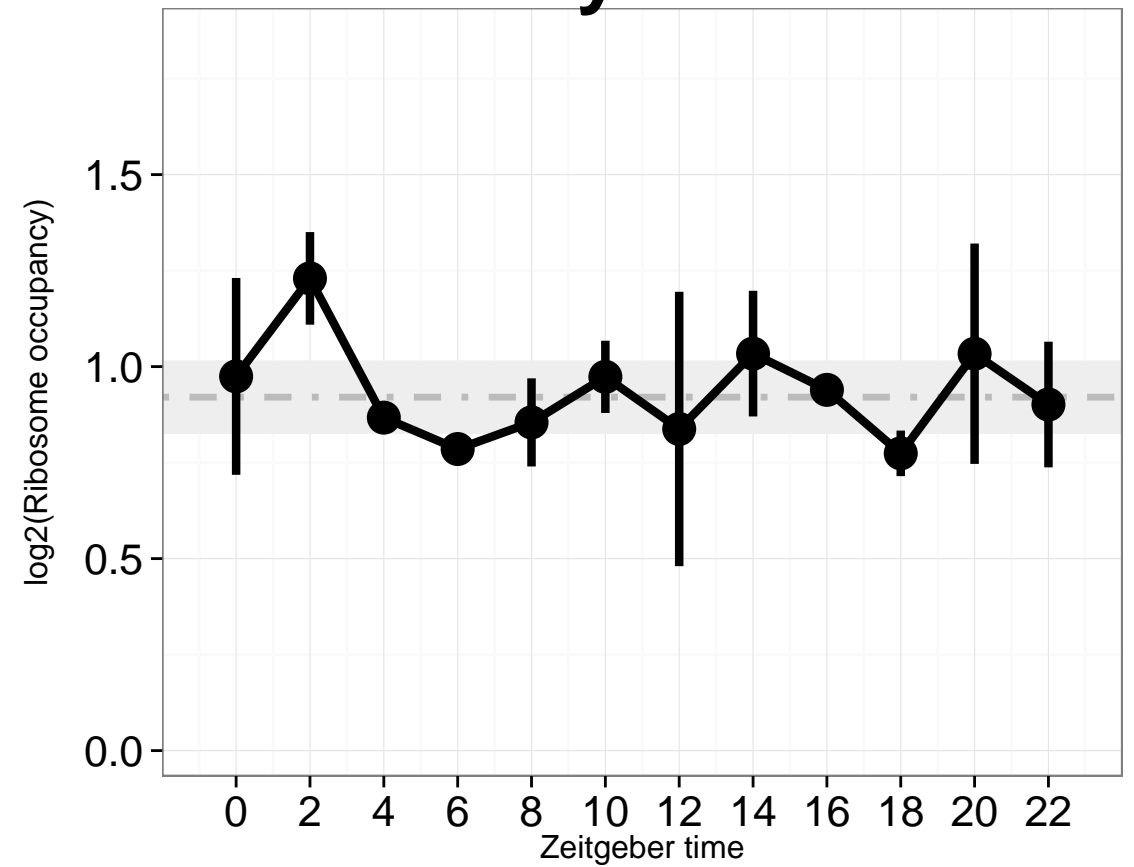

Supplement: Supplementary file 7725 [file 1]

## Gnl2

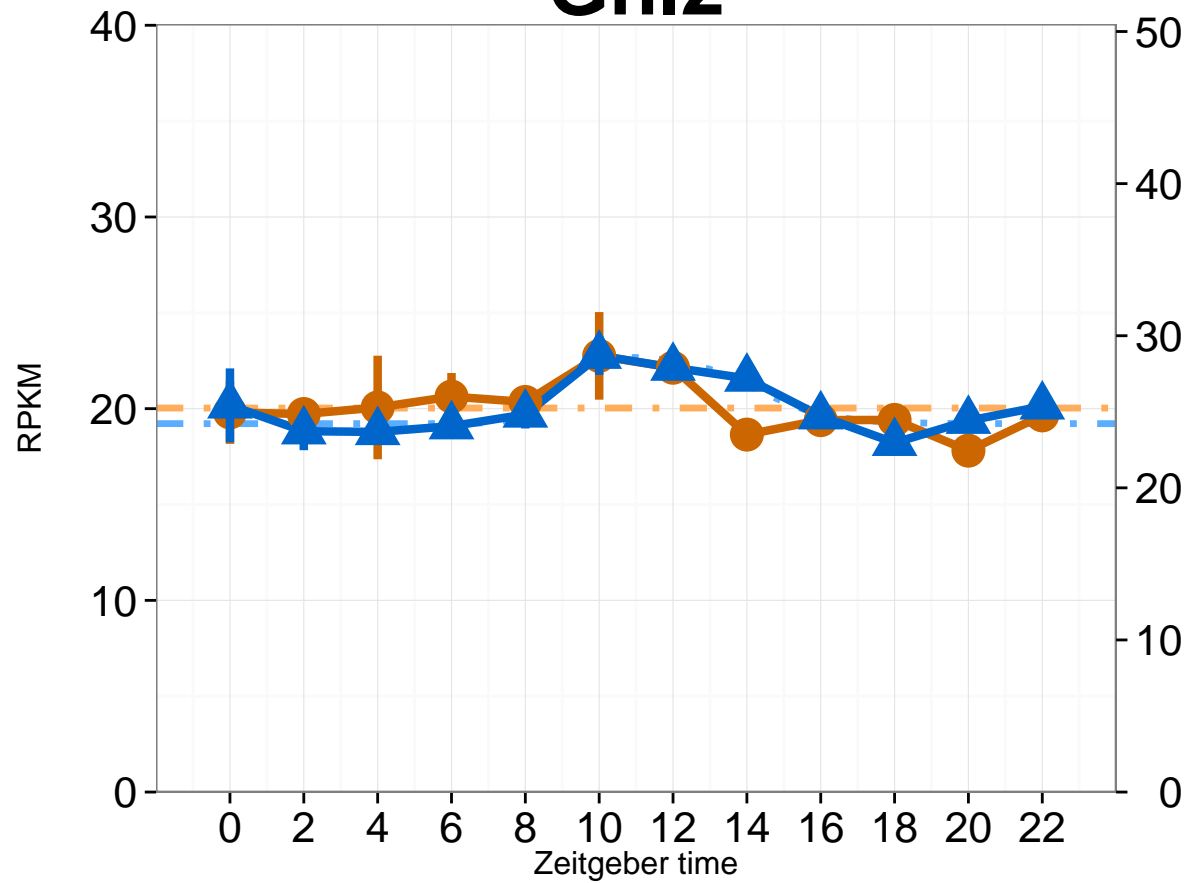

## Gnl2

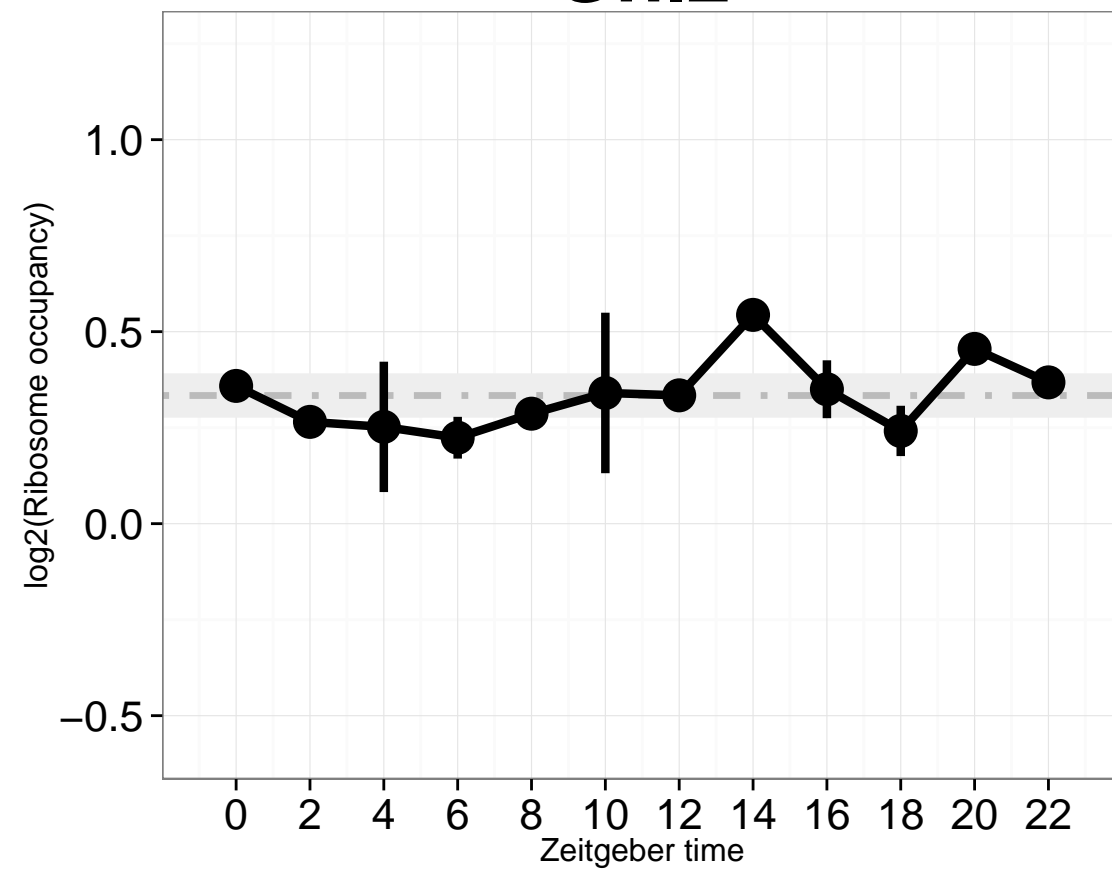

Supplement: Supplementary file 7726 [file 1]

## Sh3yl1

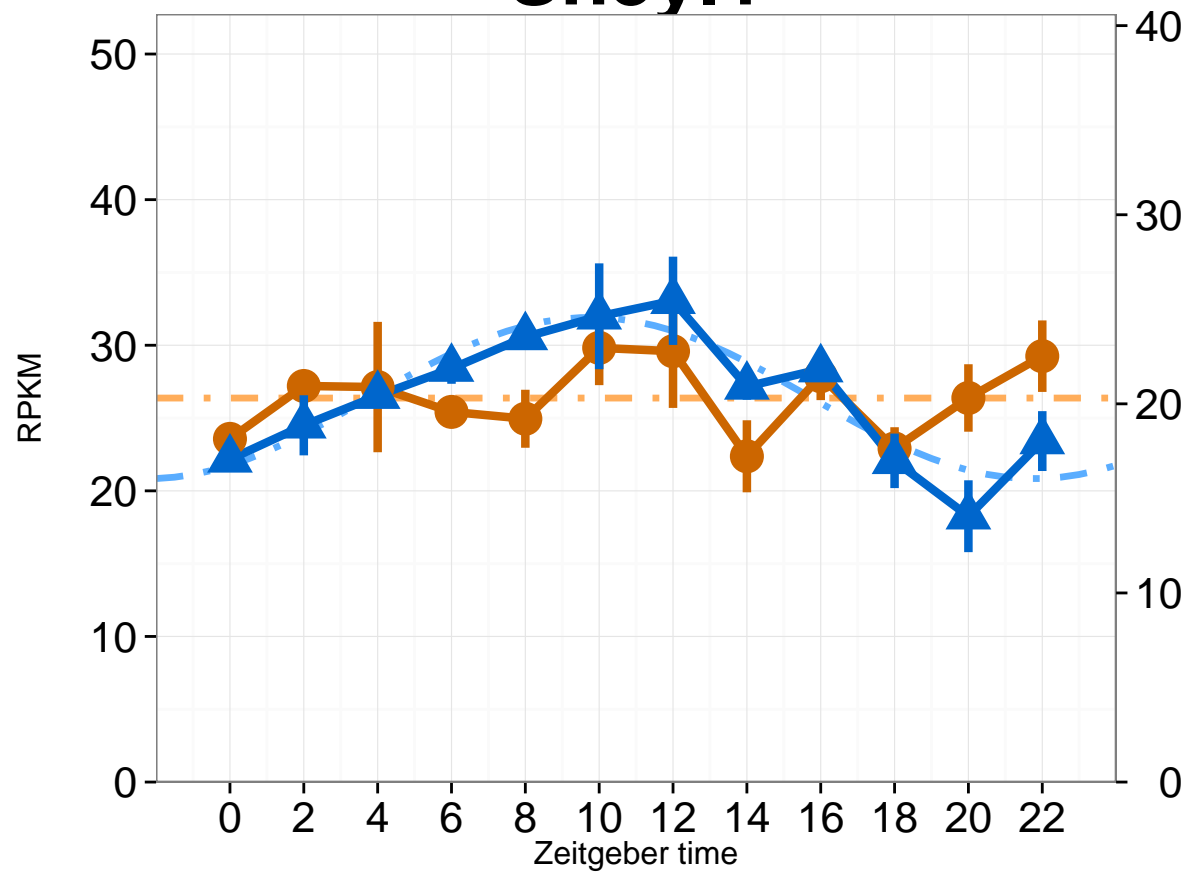

## Sh3yl1

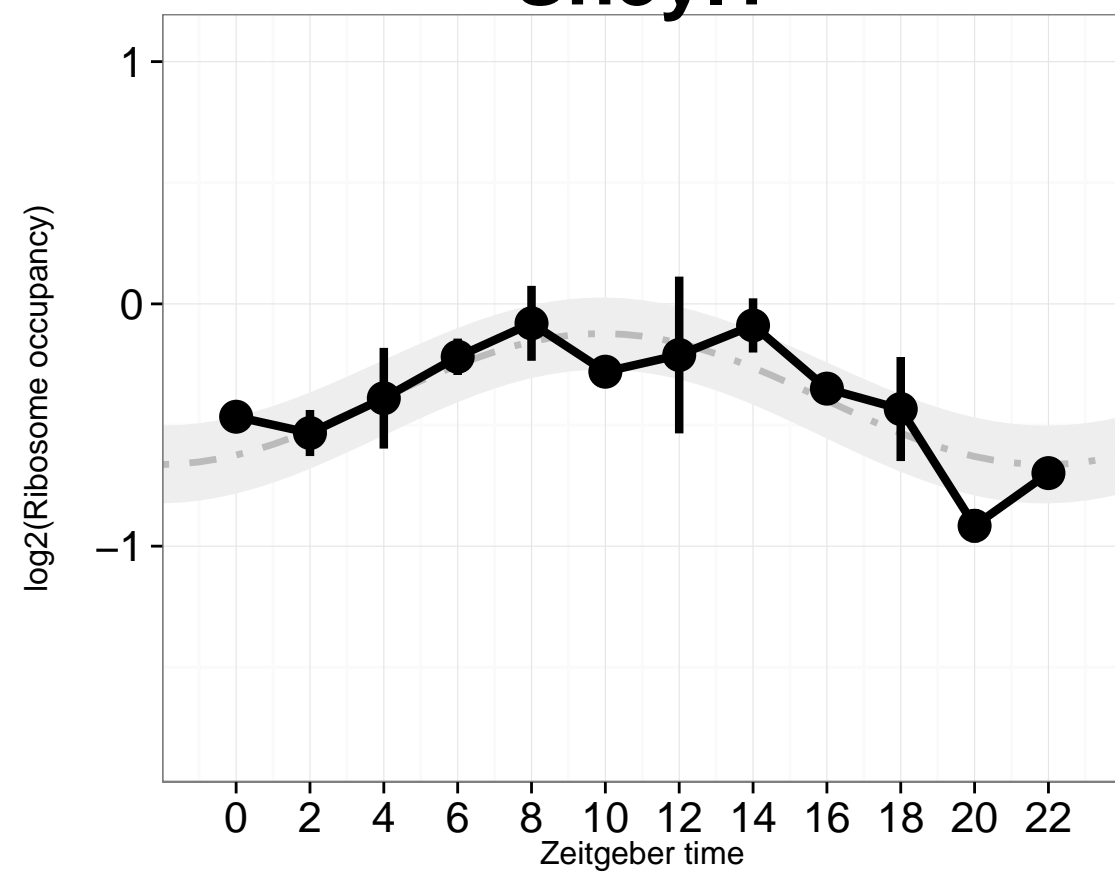

Supplement: Supplementary file 7727 [file 1]

## Abcg1

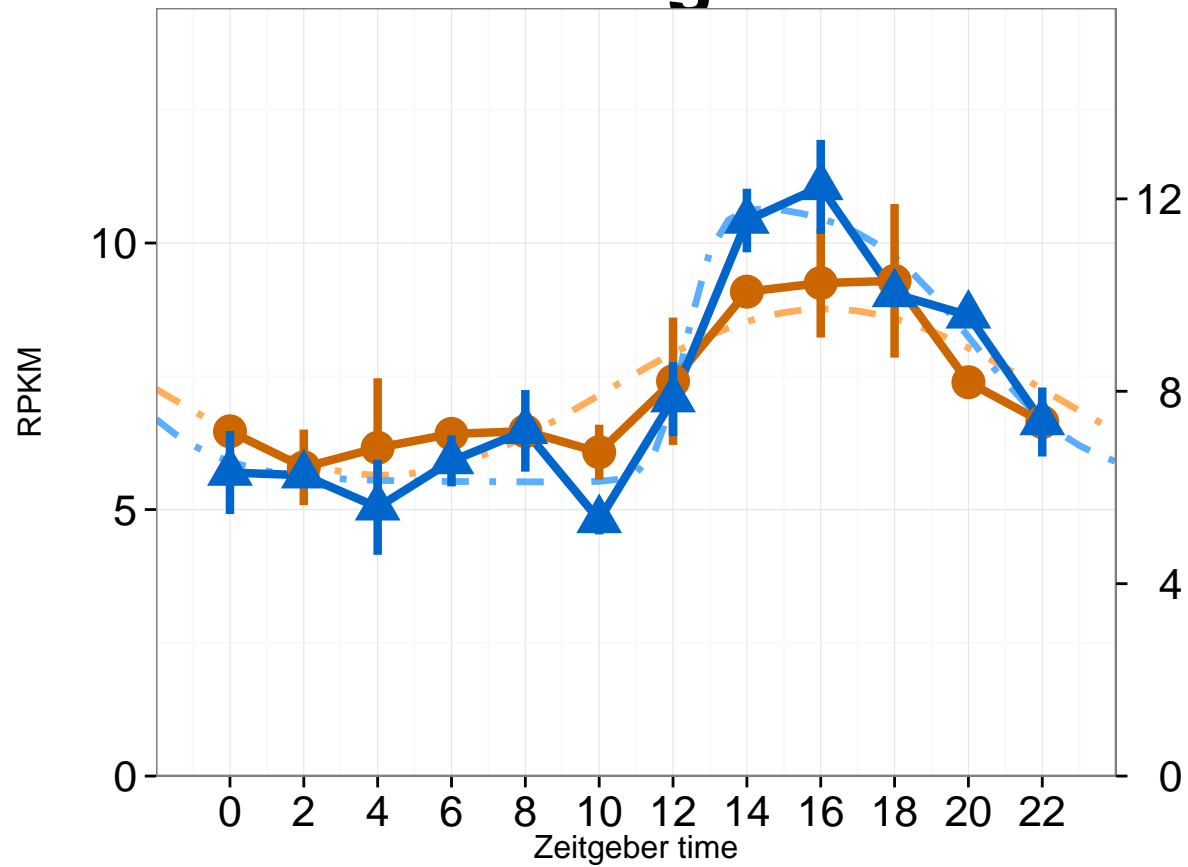

## Abcg1

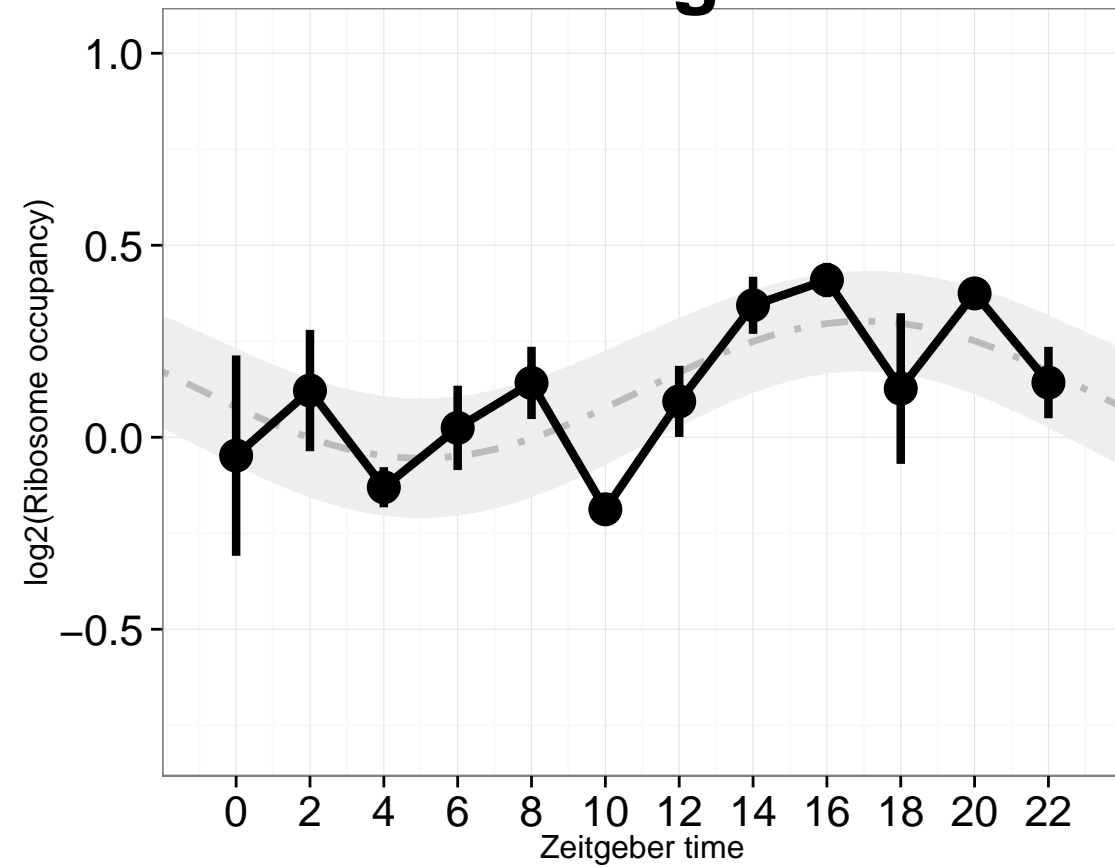

Supplement: Supplementary file 7728 [file 1]

## Sema3e

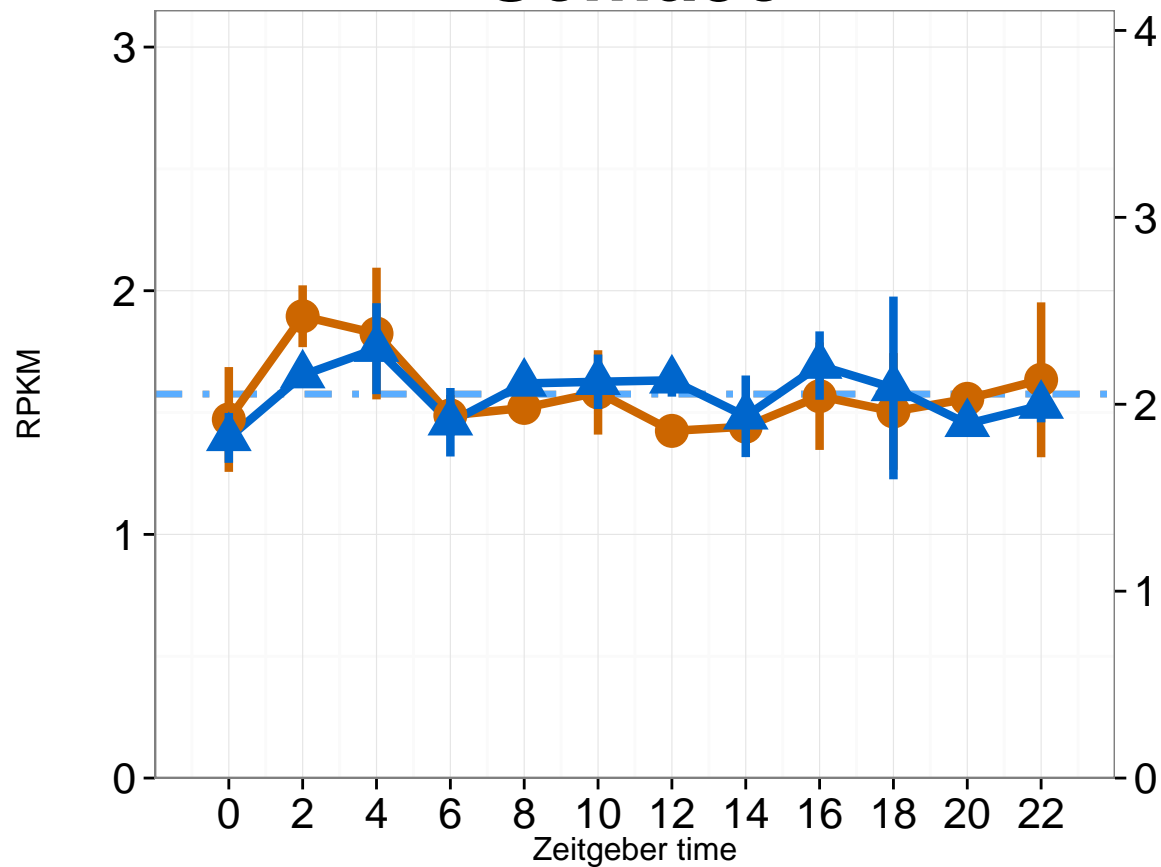

## Sema3e

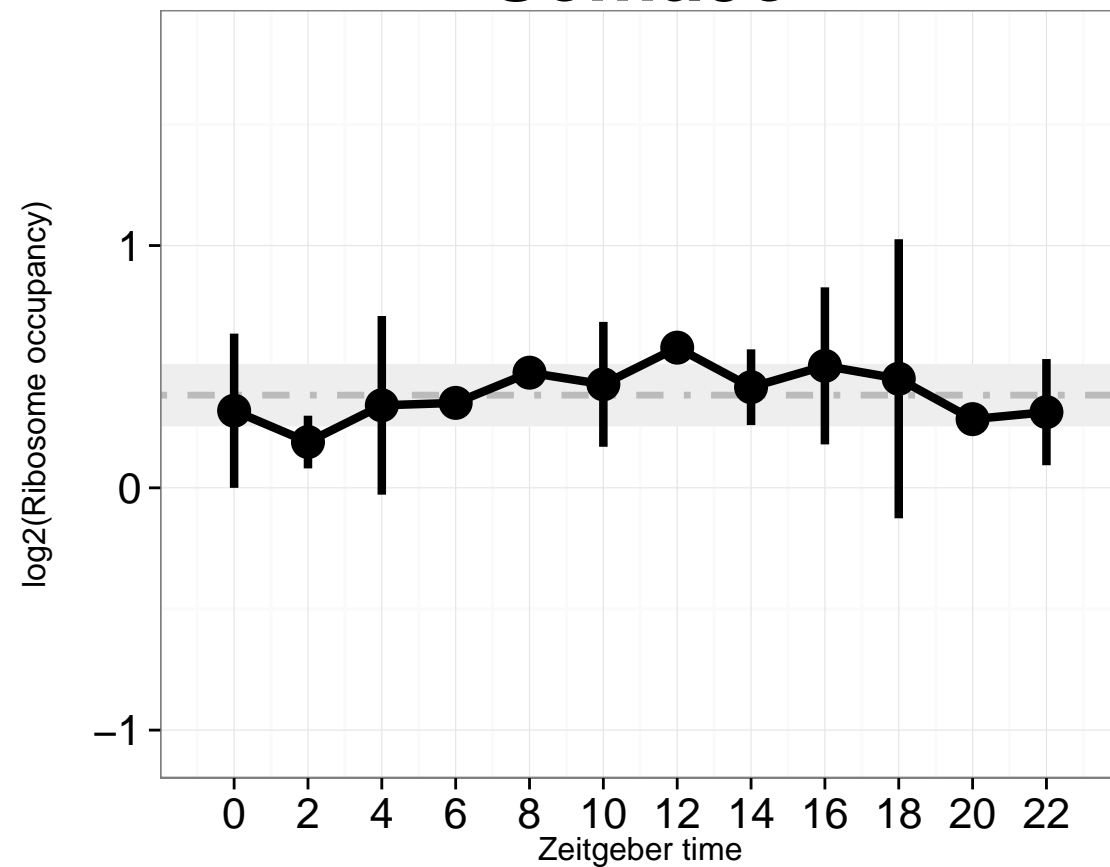

Supplement: Supplementary file 7729 [file 1]

# Tada2a

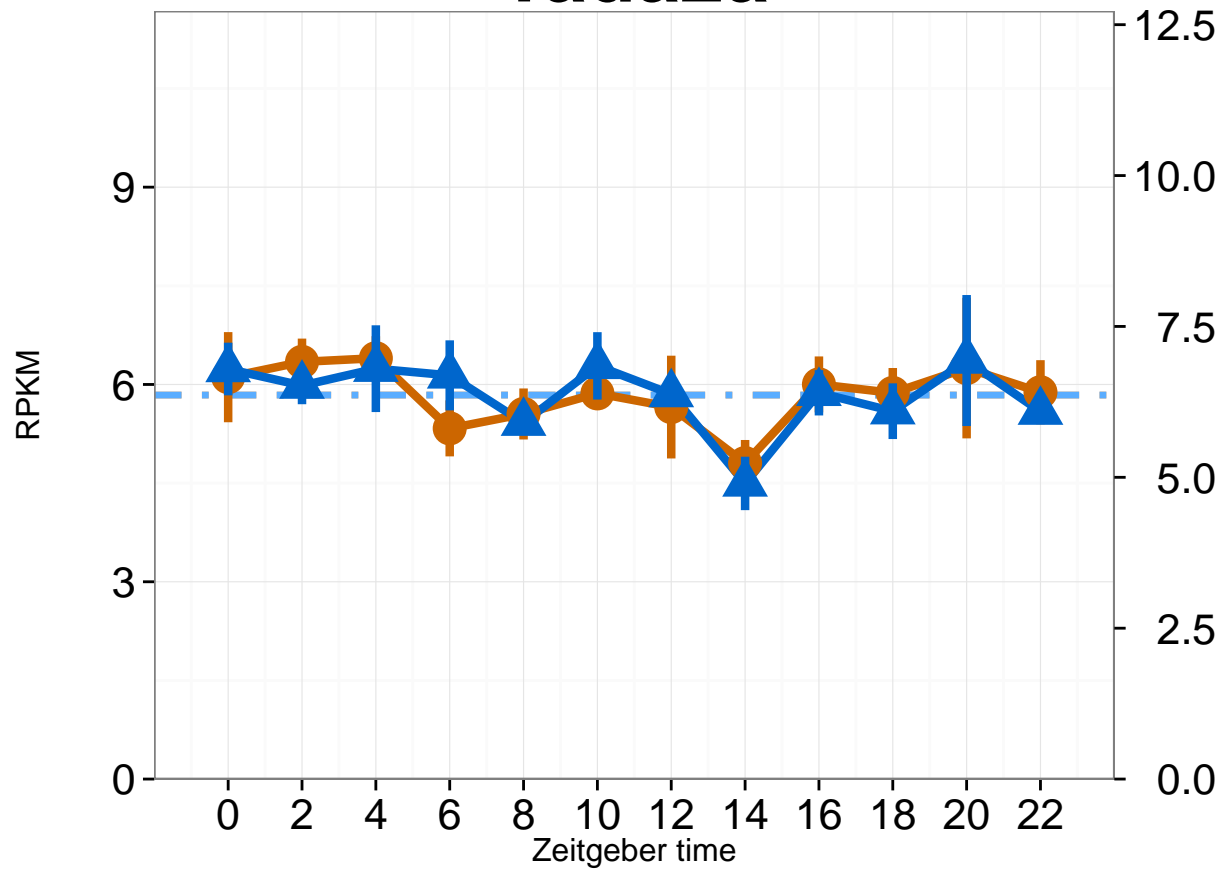

# Tada2a

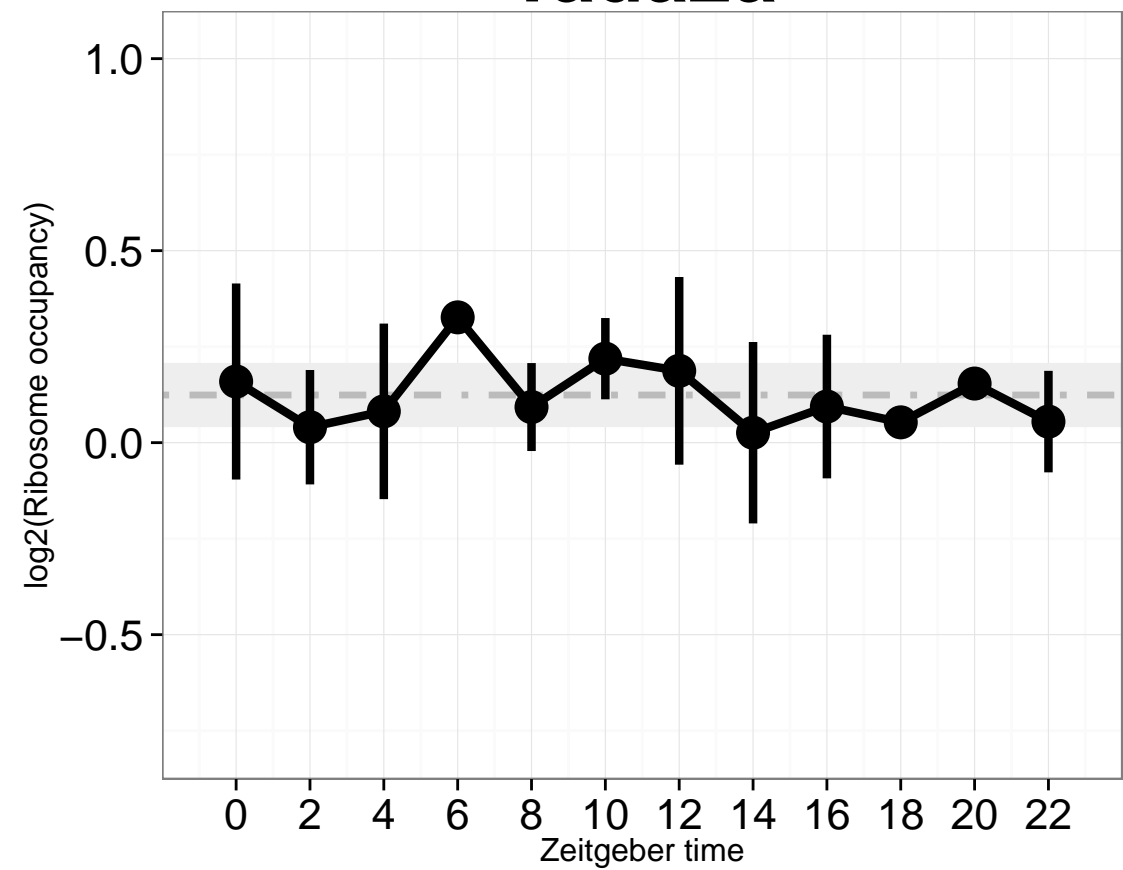

Supplement: Supplementary file 7730 [file 1]

## Snx1

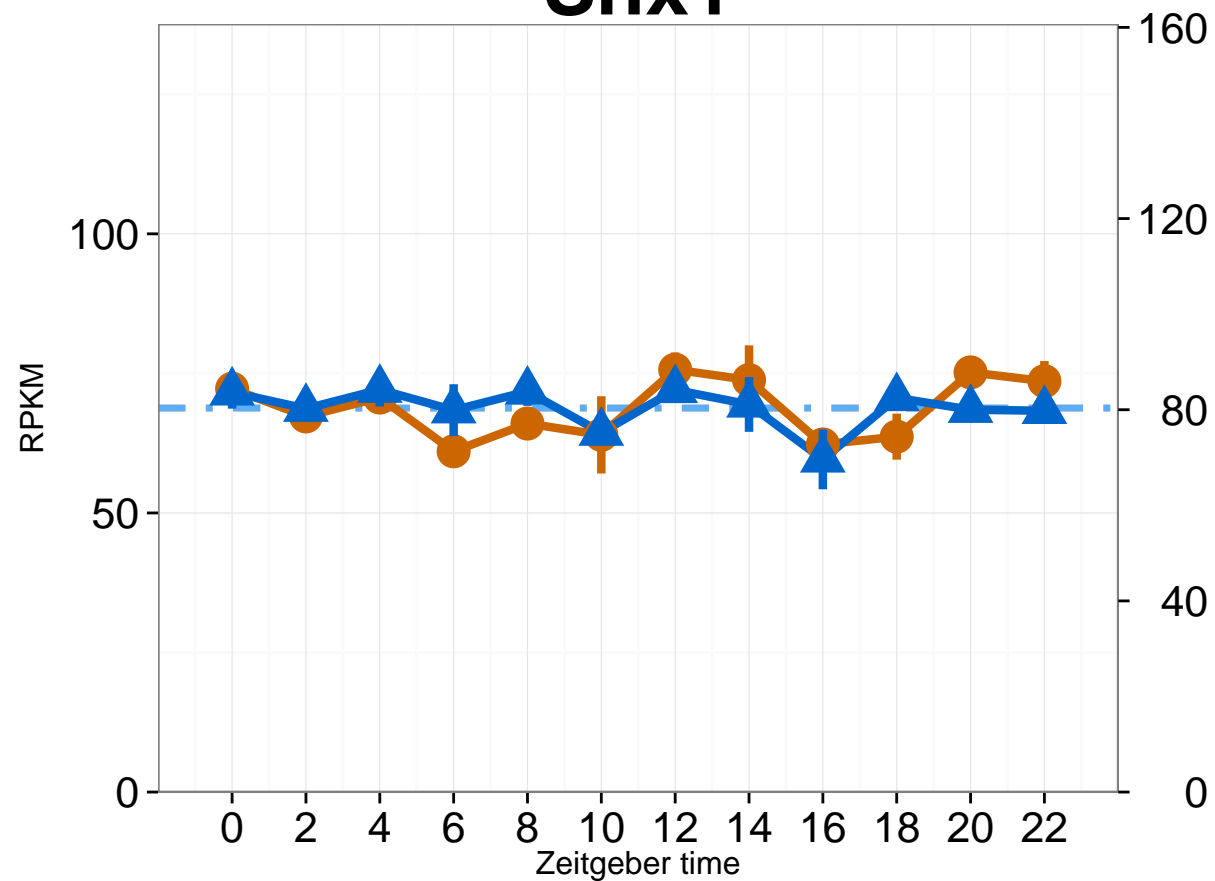

## Snx1

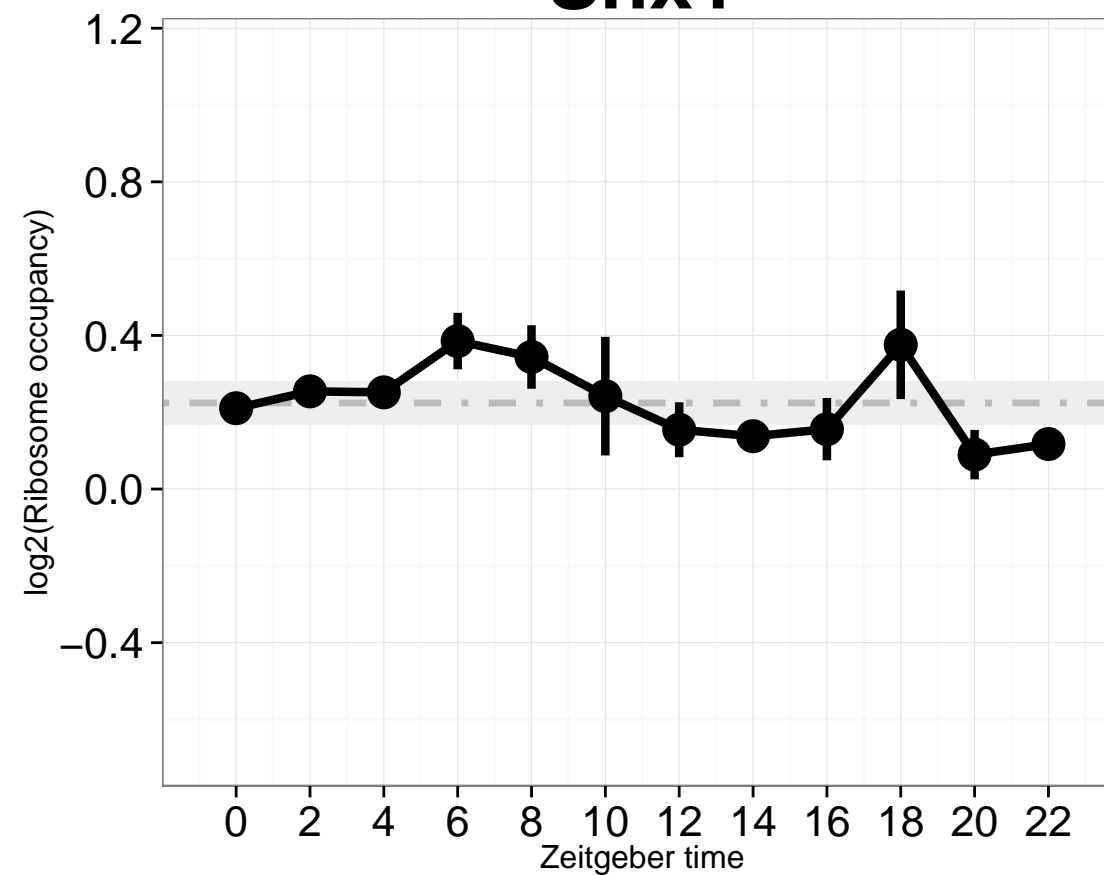

Supplement: Supplementary file 7731 [file 1]

## Nav2

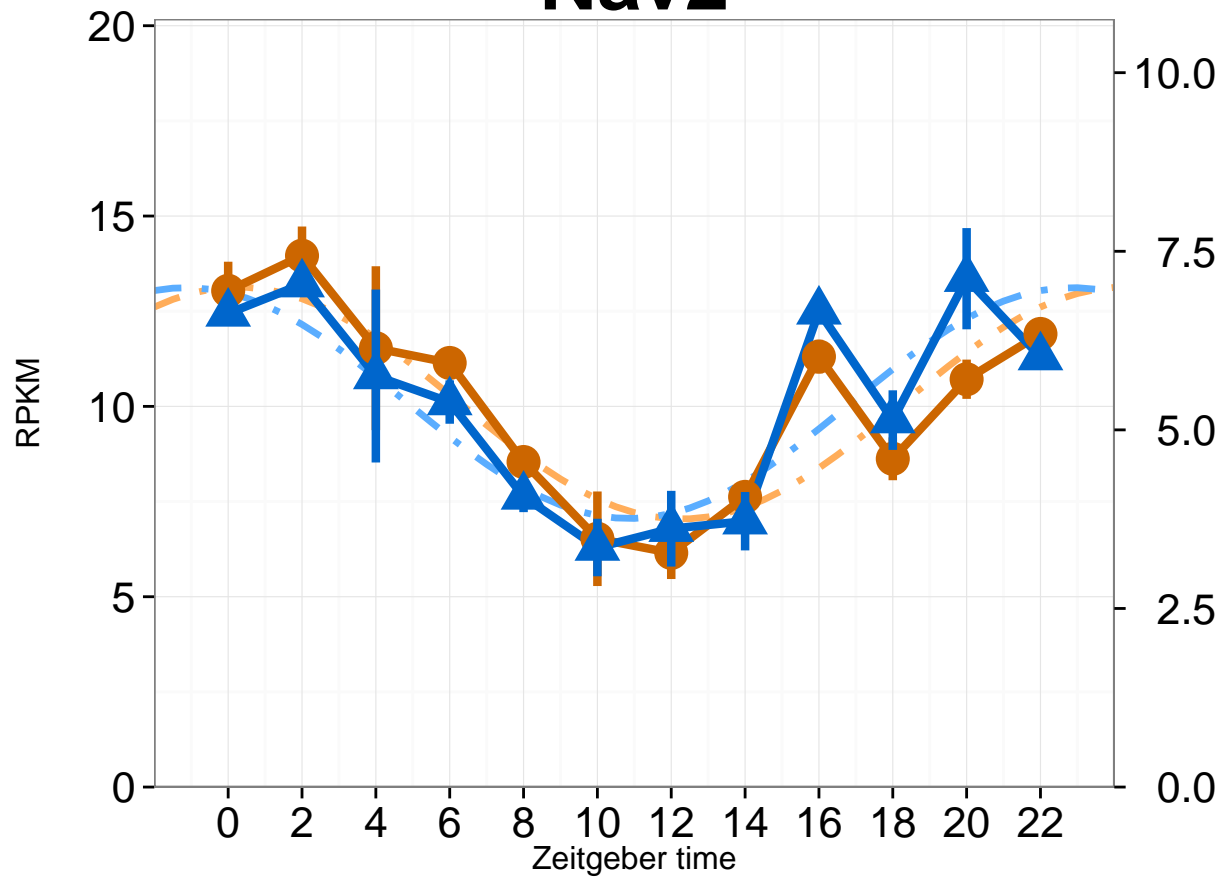

## Nav2

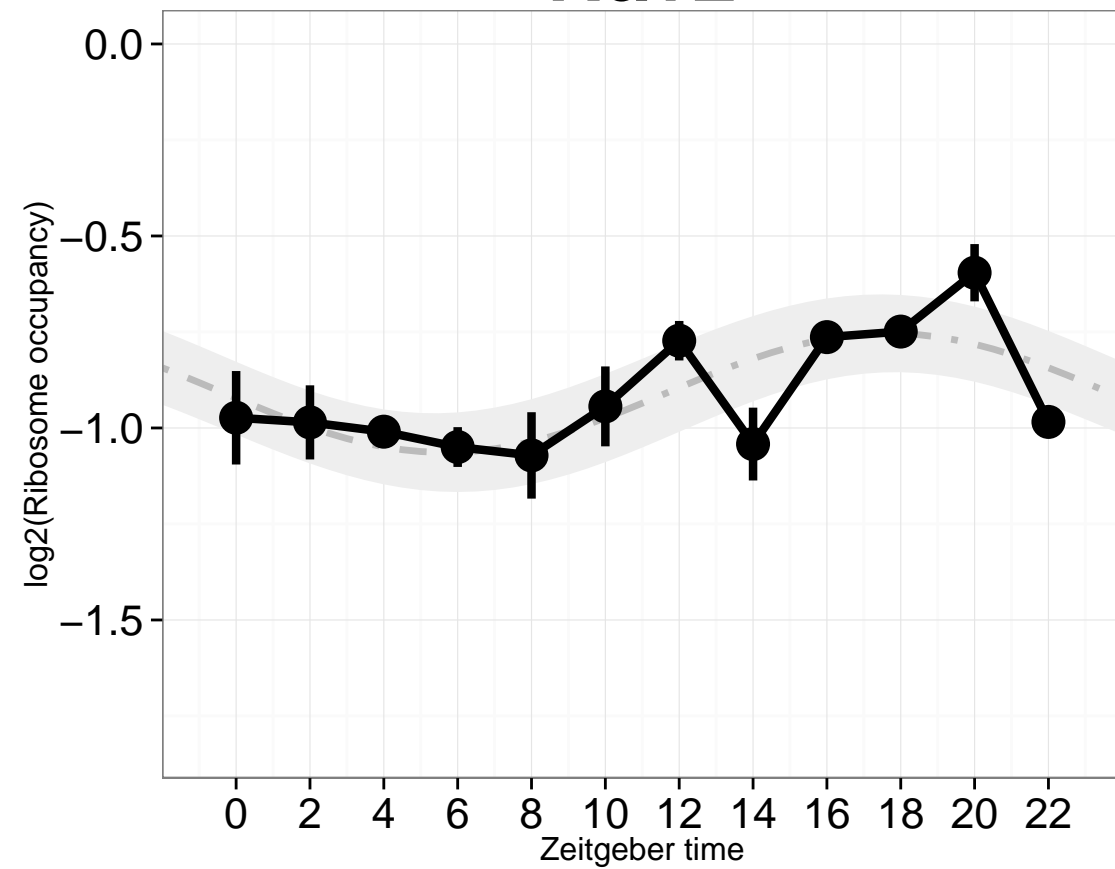

Supplement: Supplementary file 7732 [file 1]

## Ext2

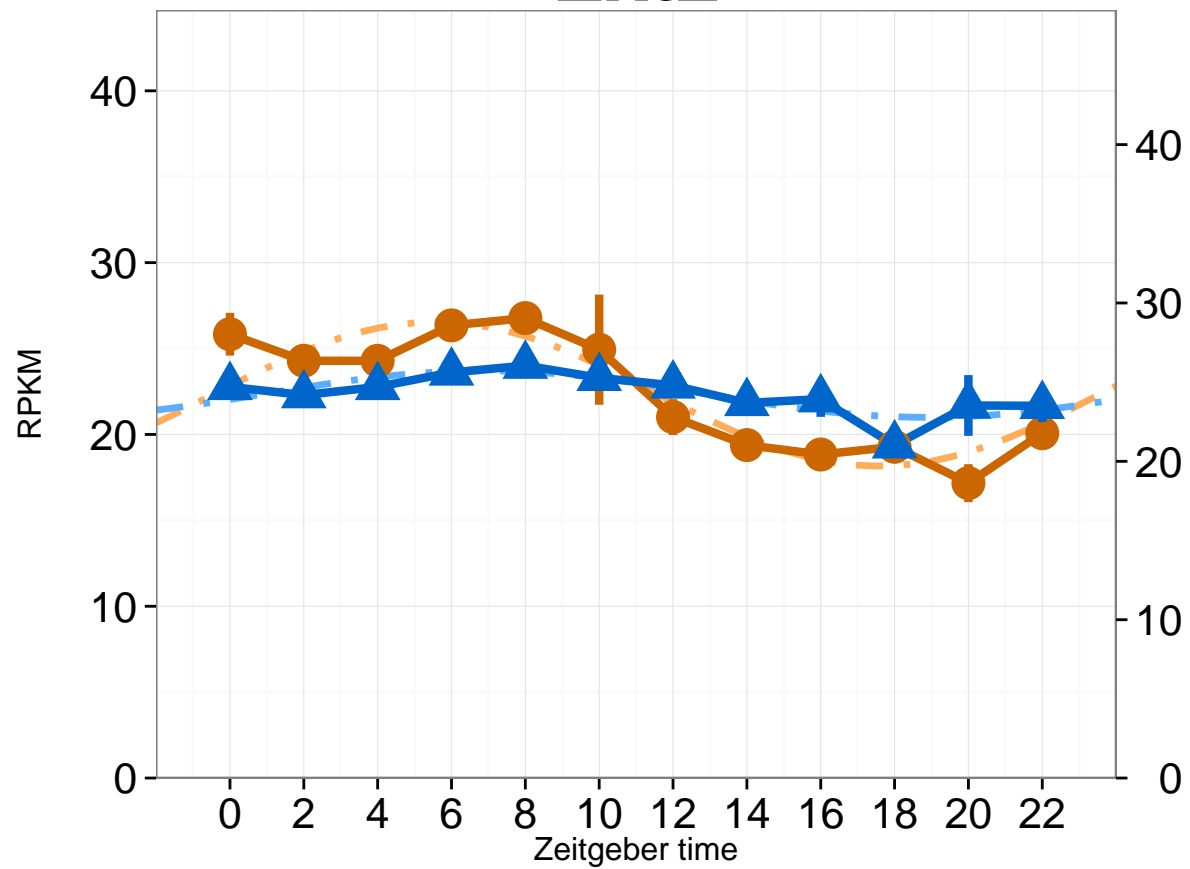

## Ext2

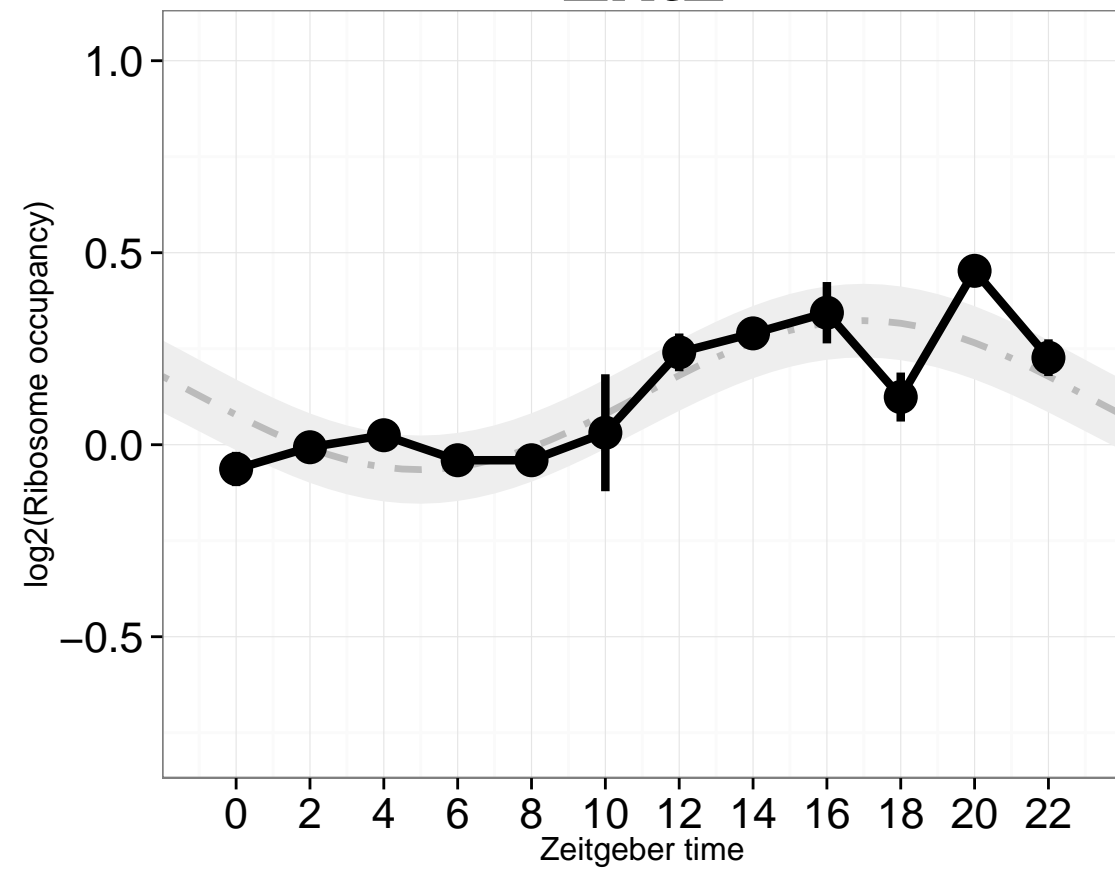

Supplement: Supplementary file 7733 [file 1]

# Rgcc

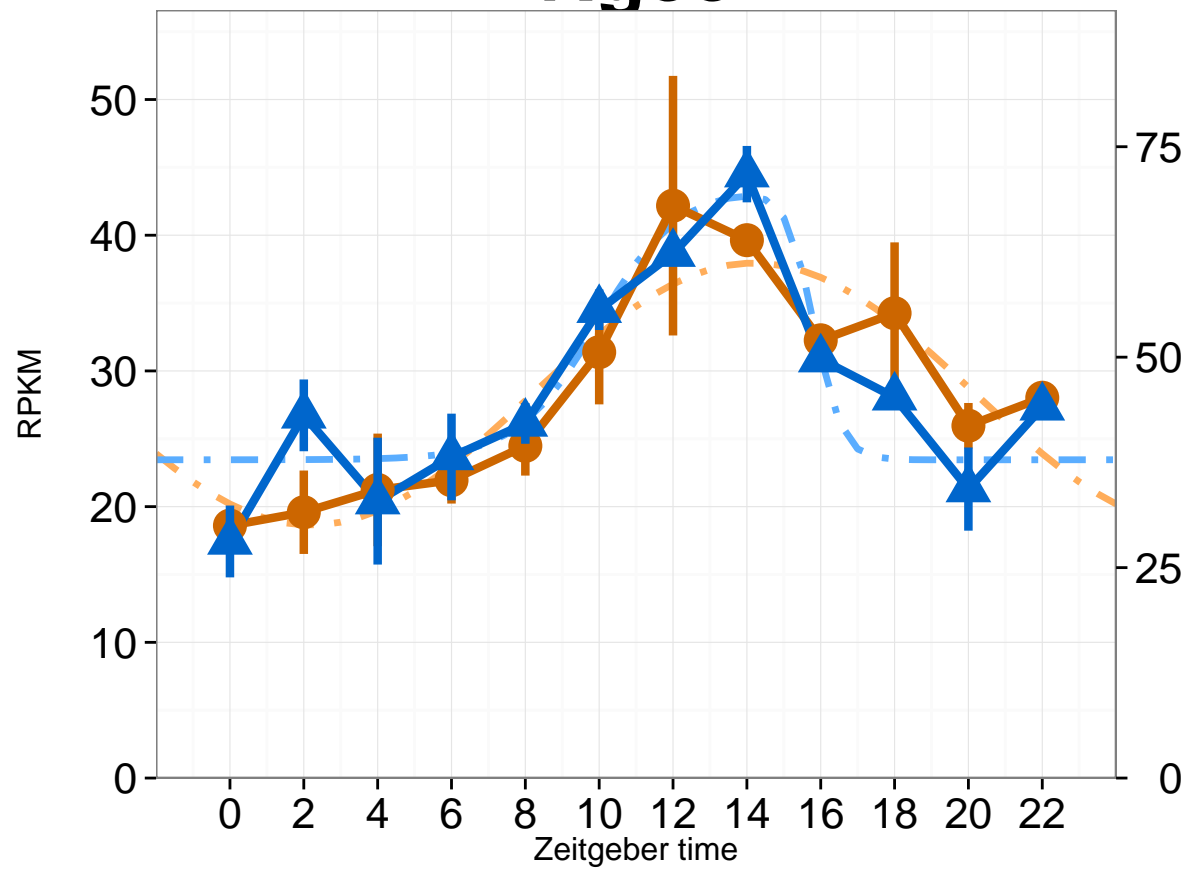

# Rgcc

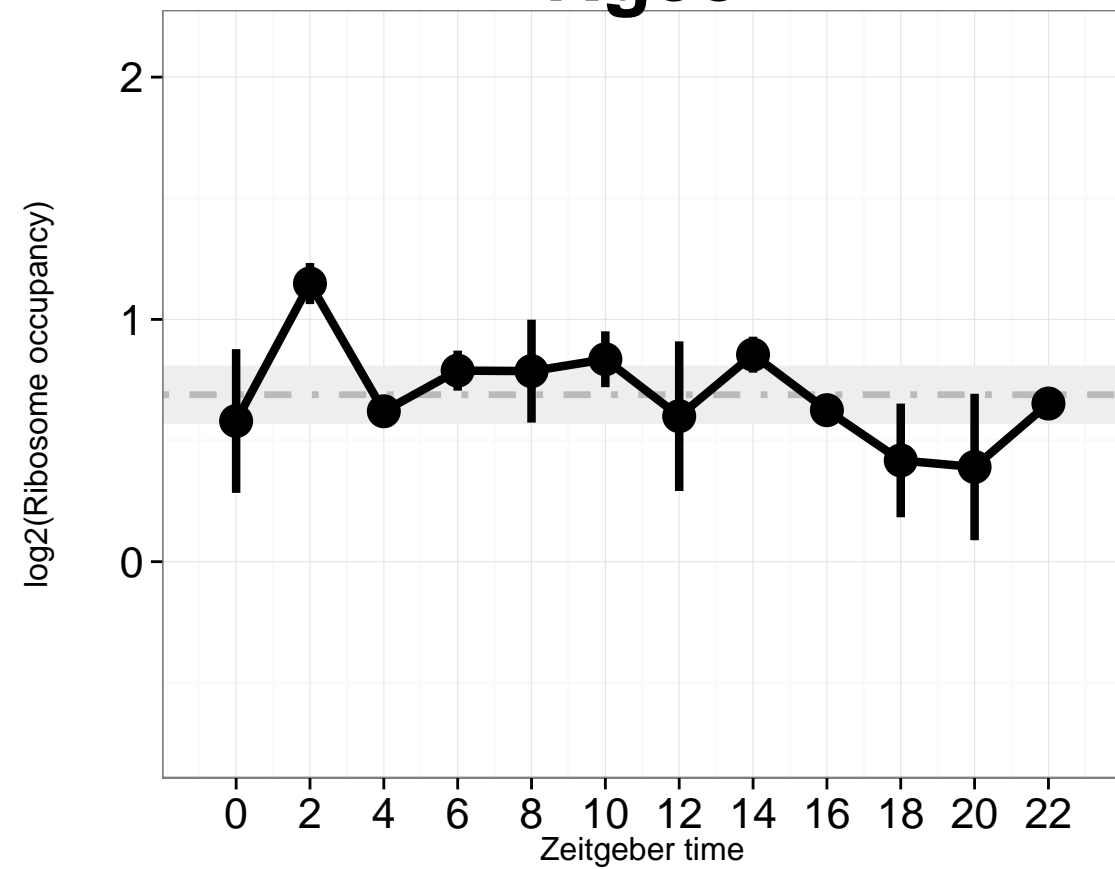

Supplement: Supplementary file 7734 [file 1]

## Tesc

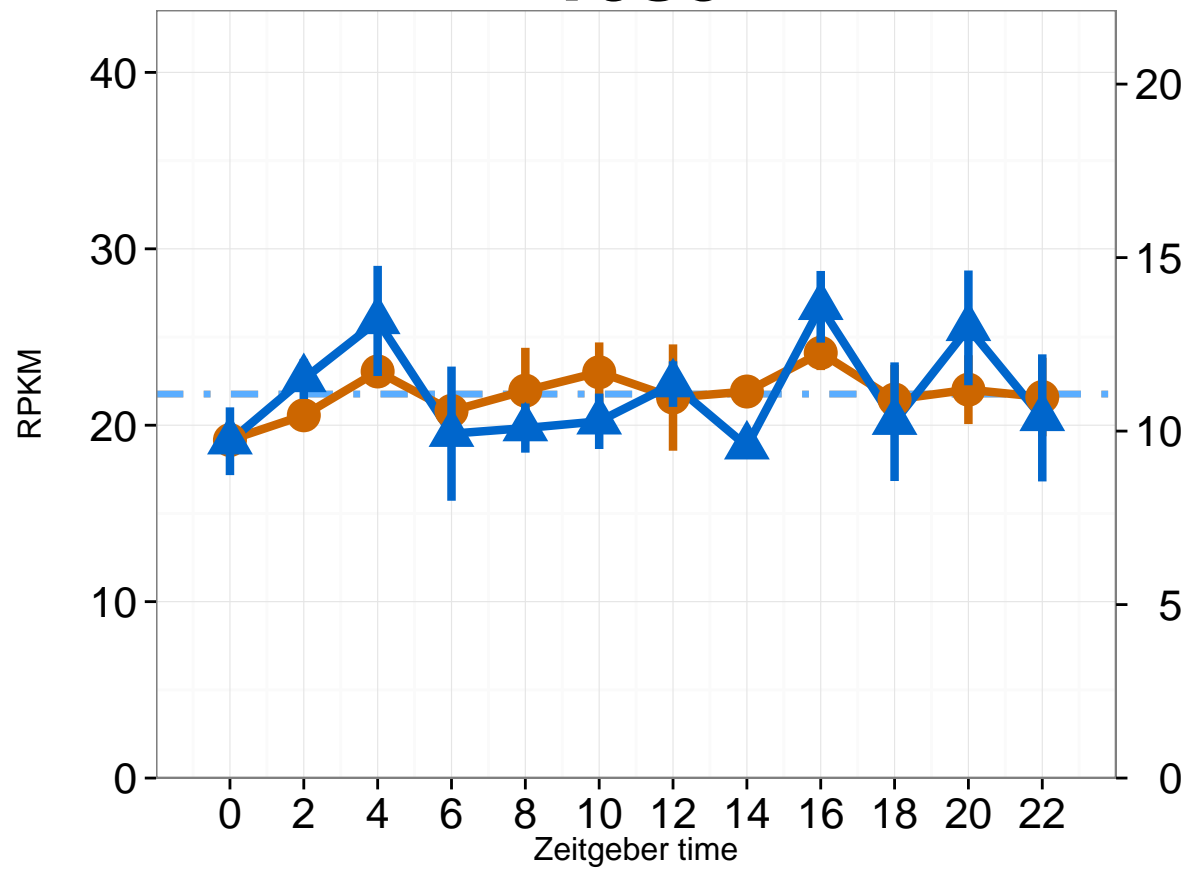

## Tesc

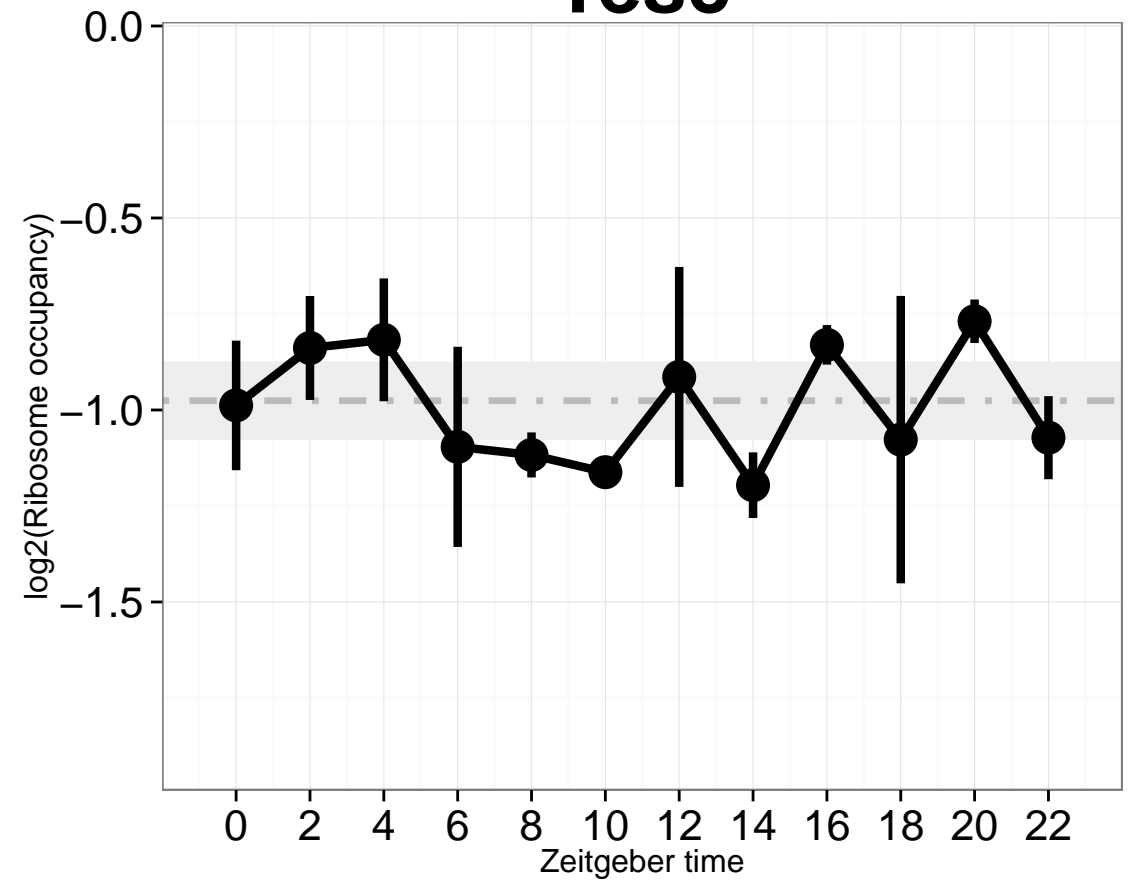

Supplement: Supplementary file 7735 [file 1]

# Ldlrap1

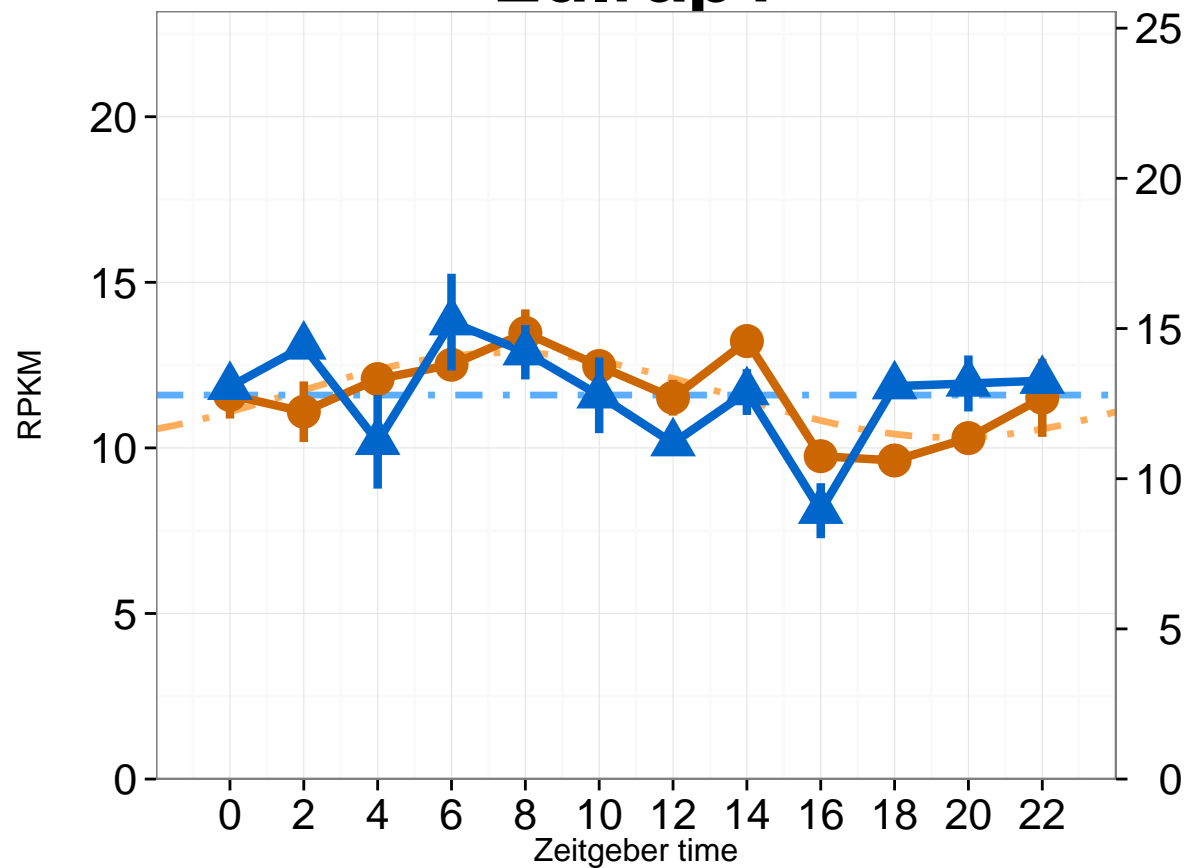

# Ldlrap1

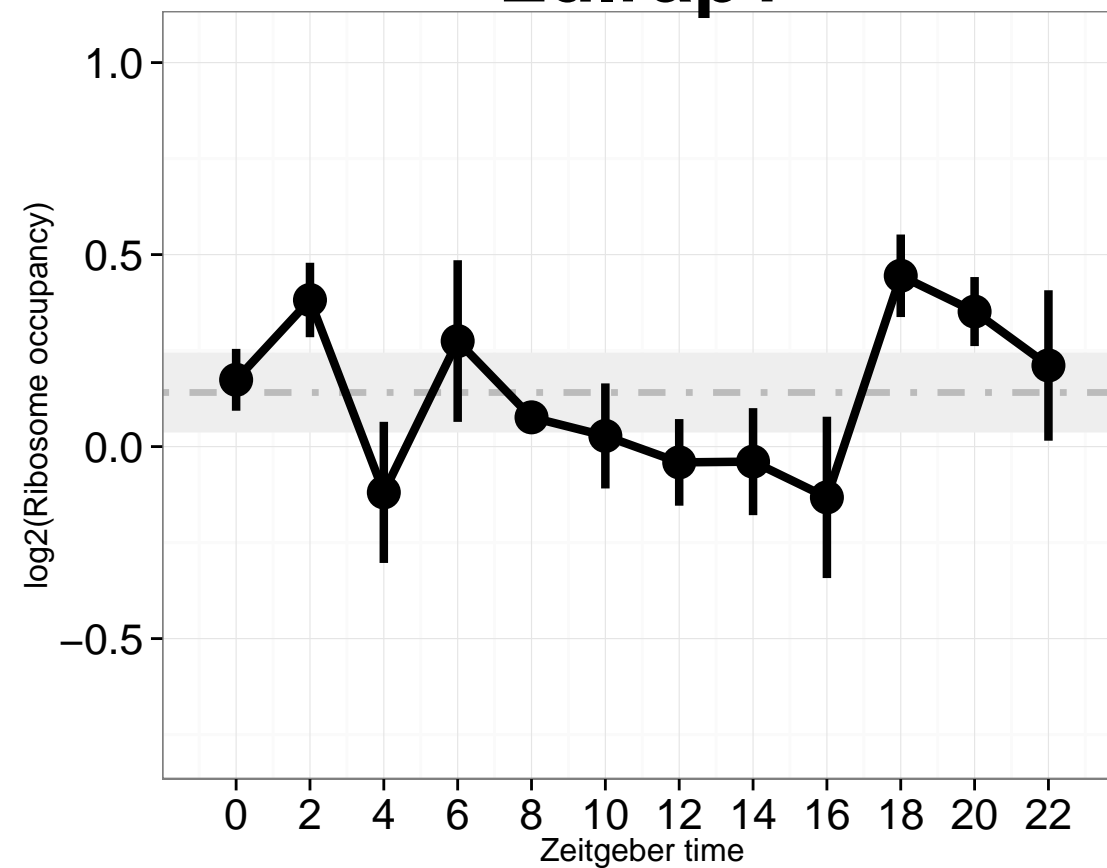

Supplement: Supplementary file 7736 [file 1]

## Prdm15

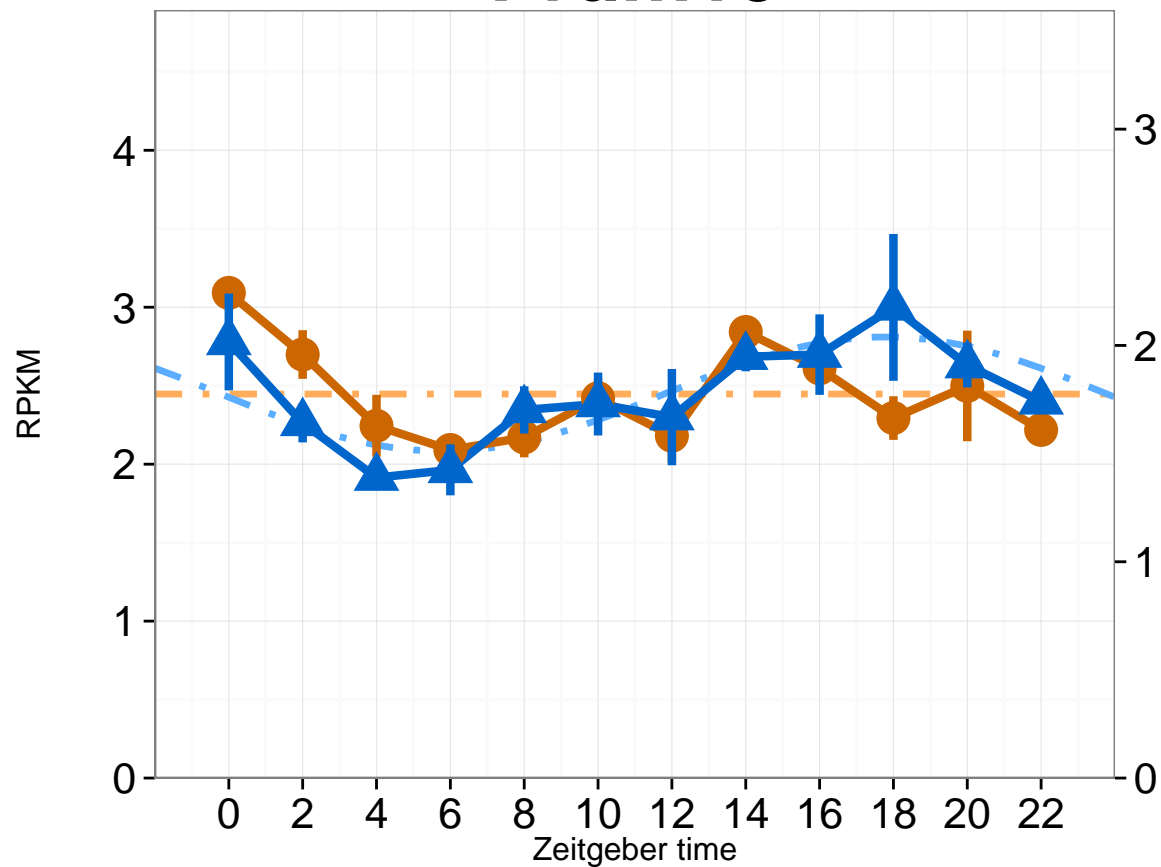

## Prdm15

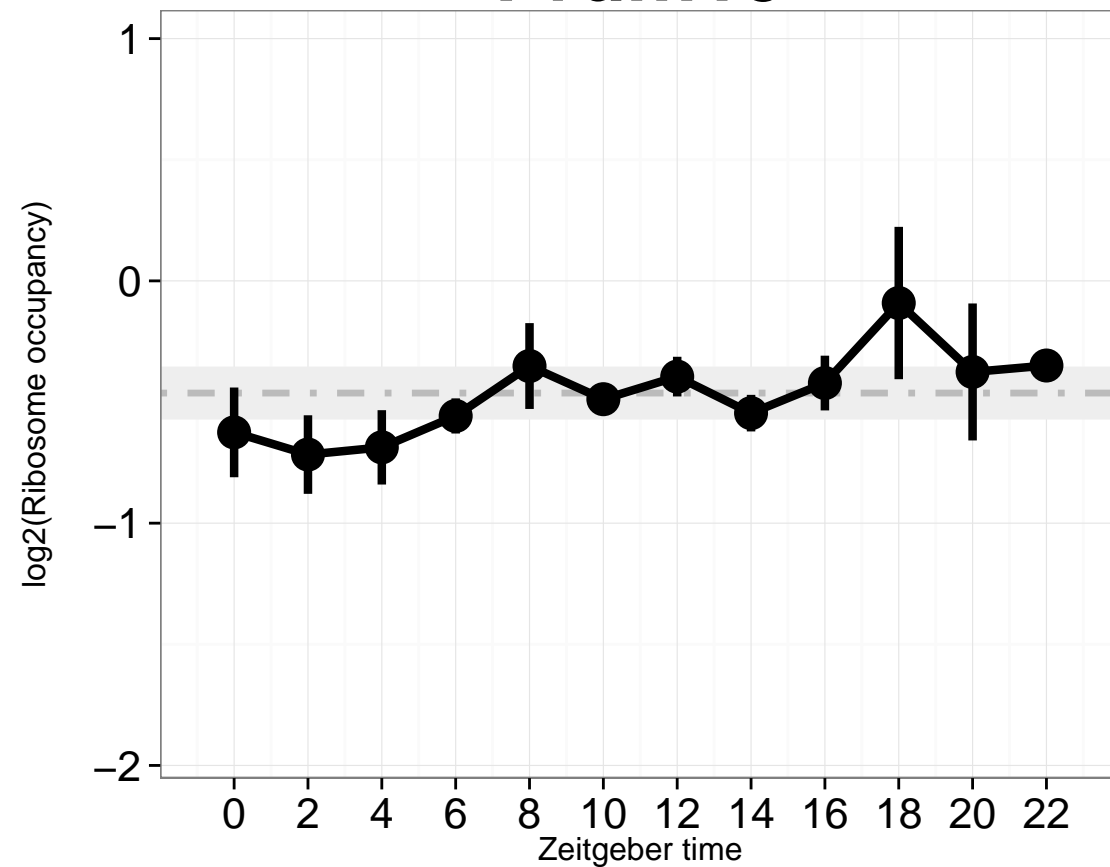

Supplement: Supplementary file 7737 [file 1]

## Yipf6

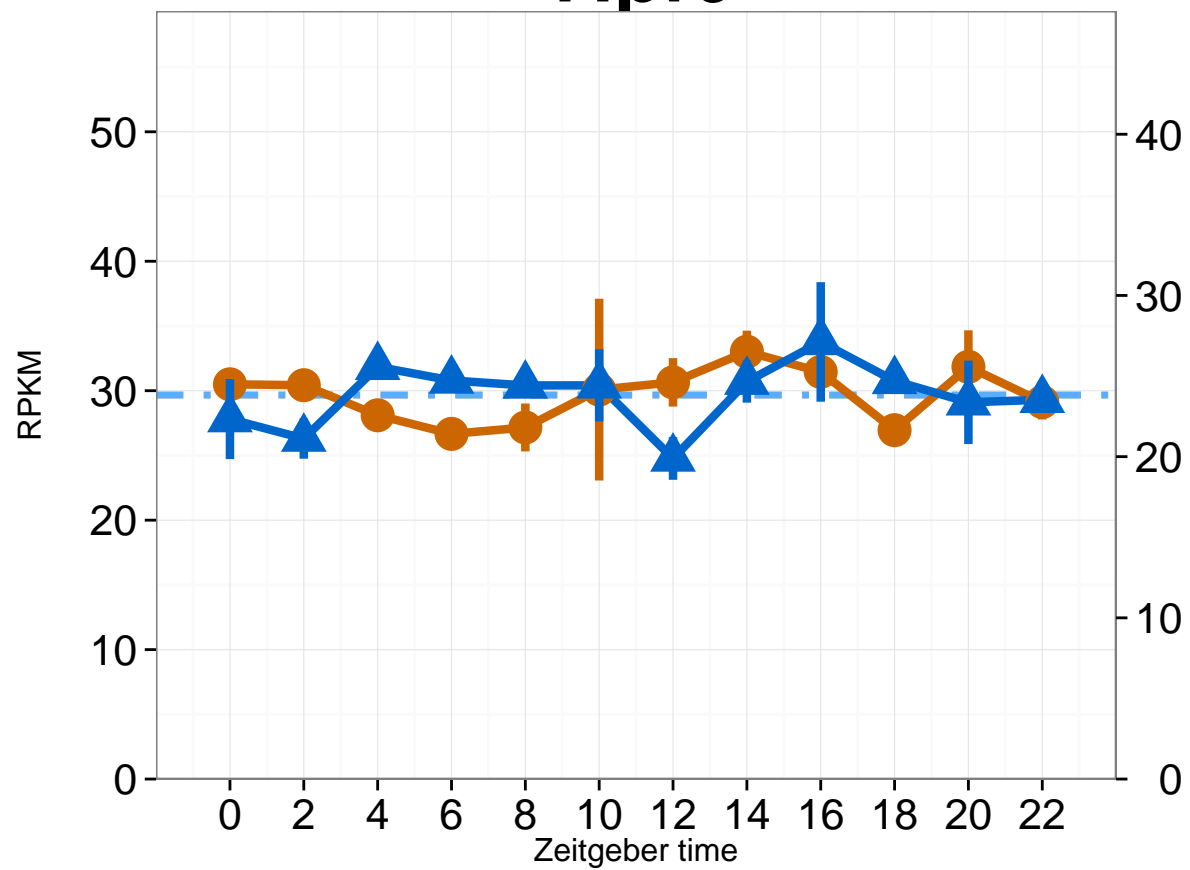

## Yipf6

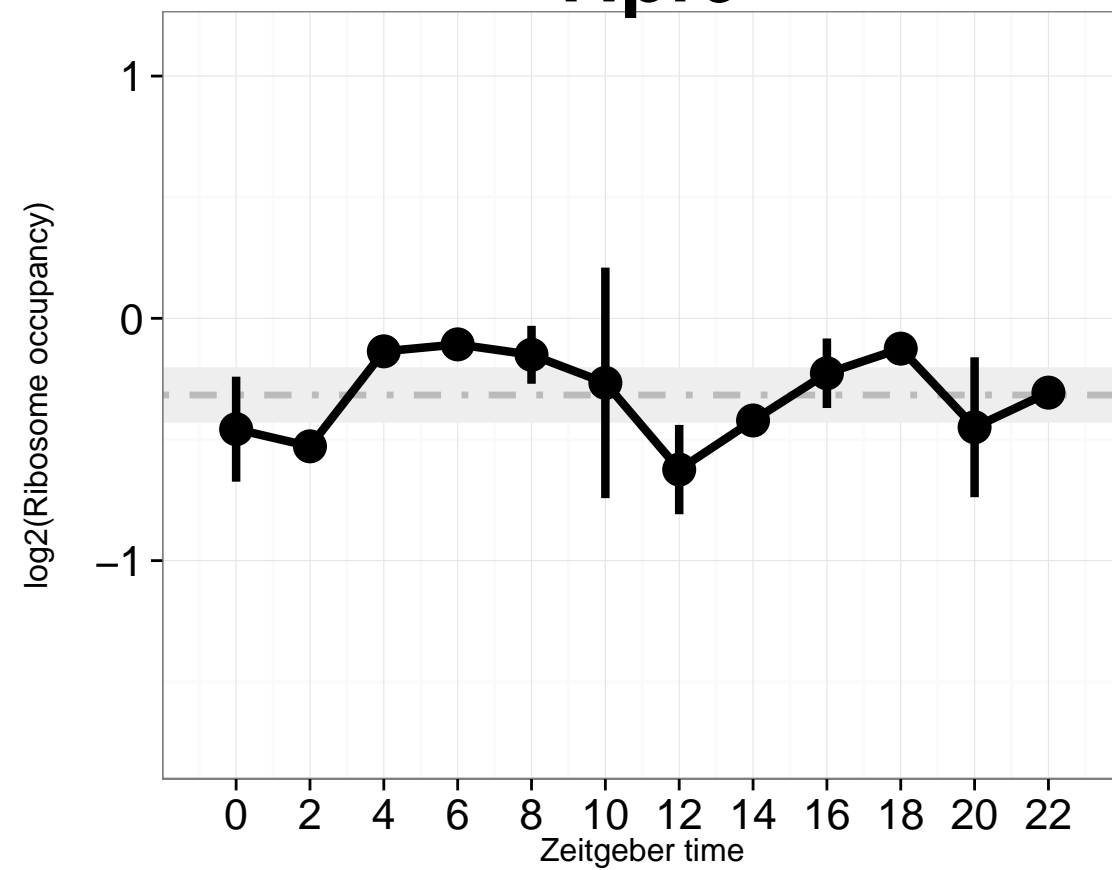

Supplement: Supplementary file 7738 [file 1]

# F<sub>n</sub>3krp

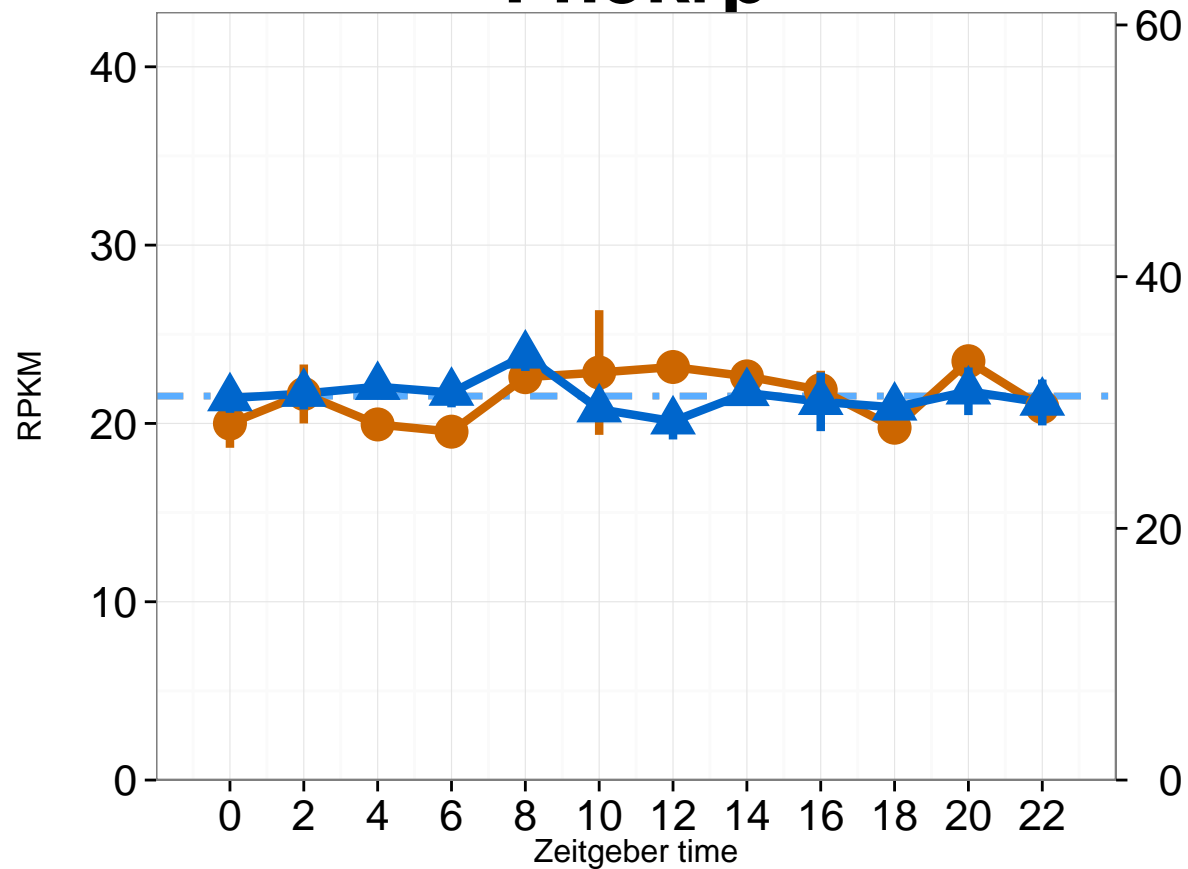

# F<sub>n</sub>3krp

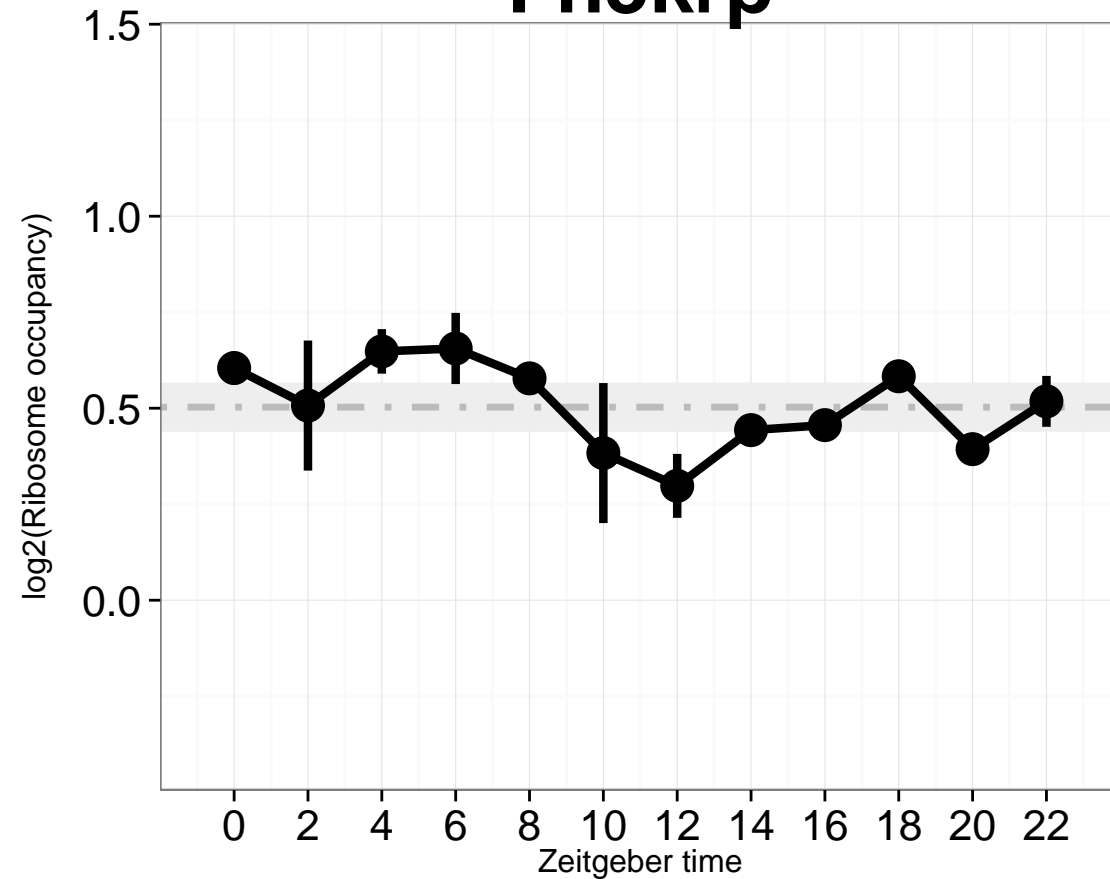

Supplement: Supplementary file 7739 [file 1]

## Upp2

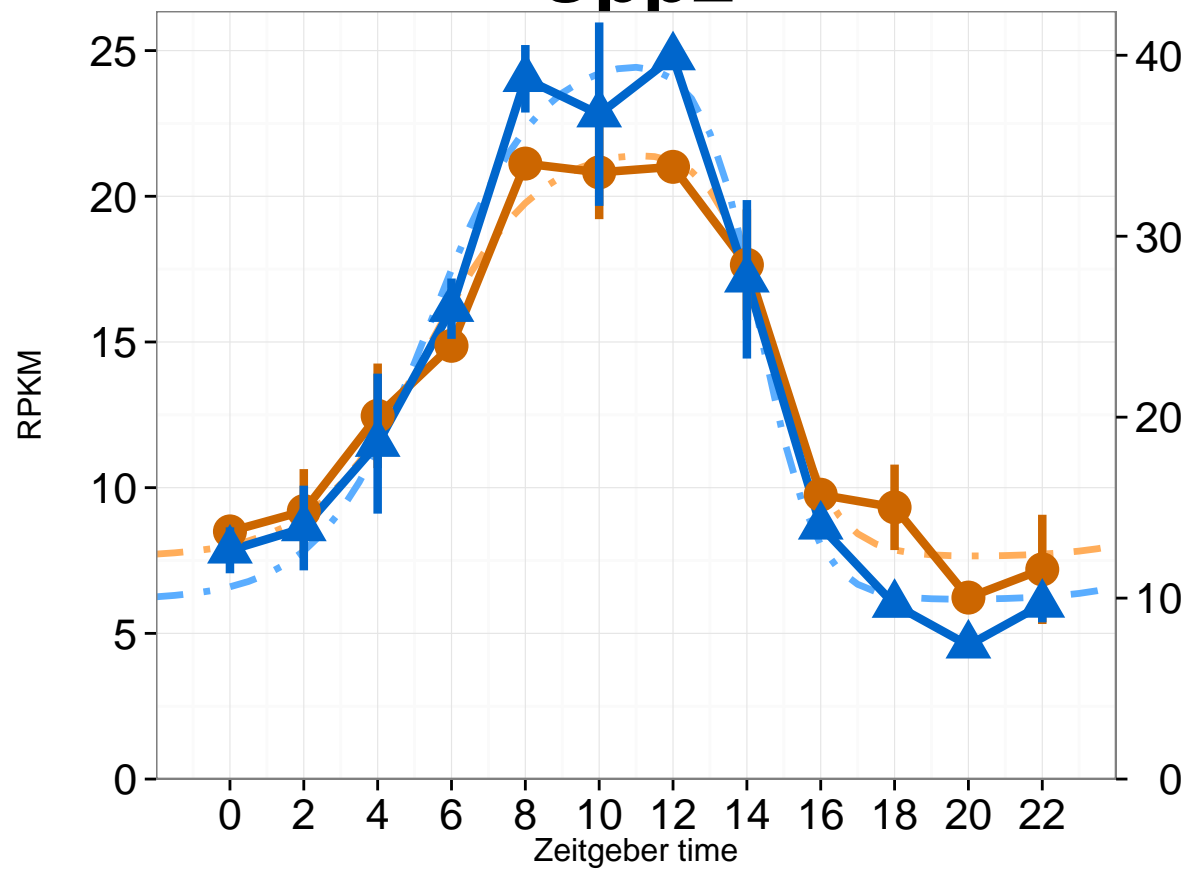

## Upp2

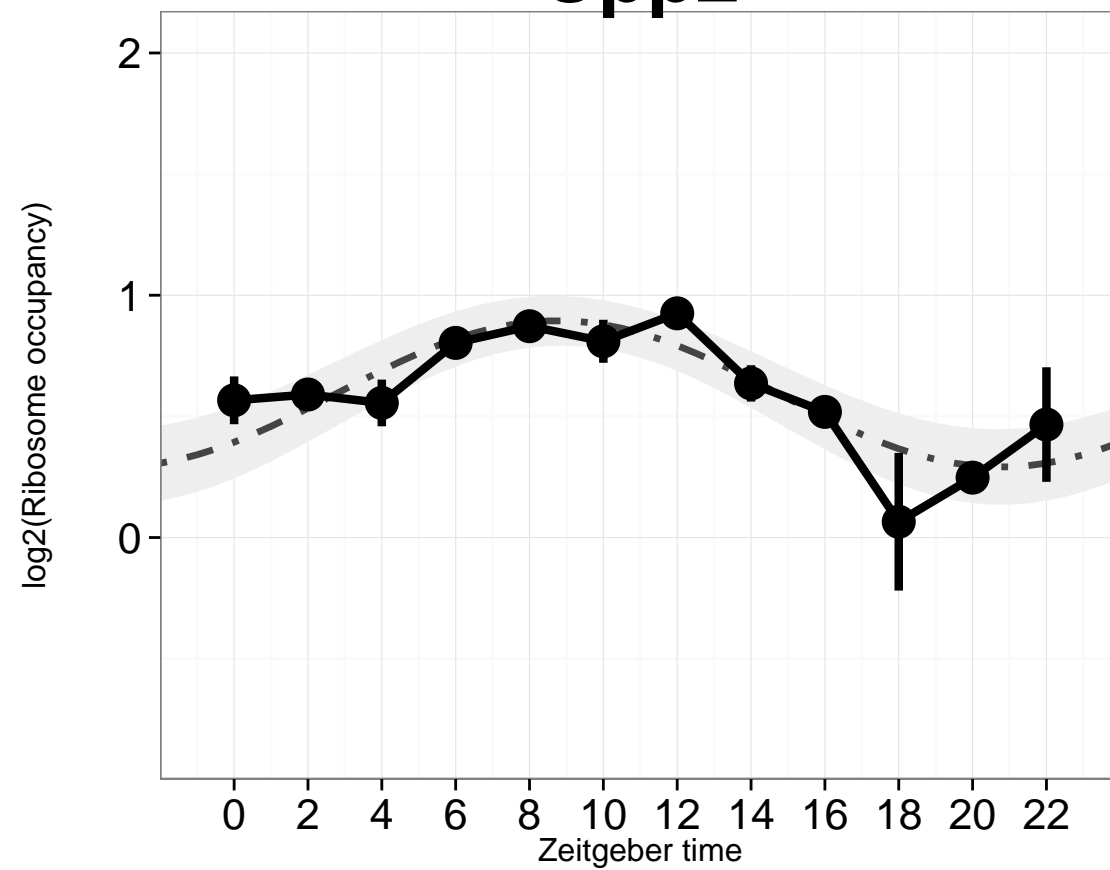

Supplement: Supplementary file 7740 [file 1]

**P2ry6**

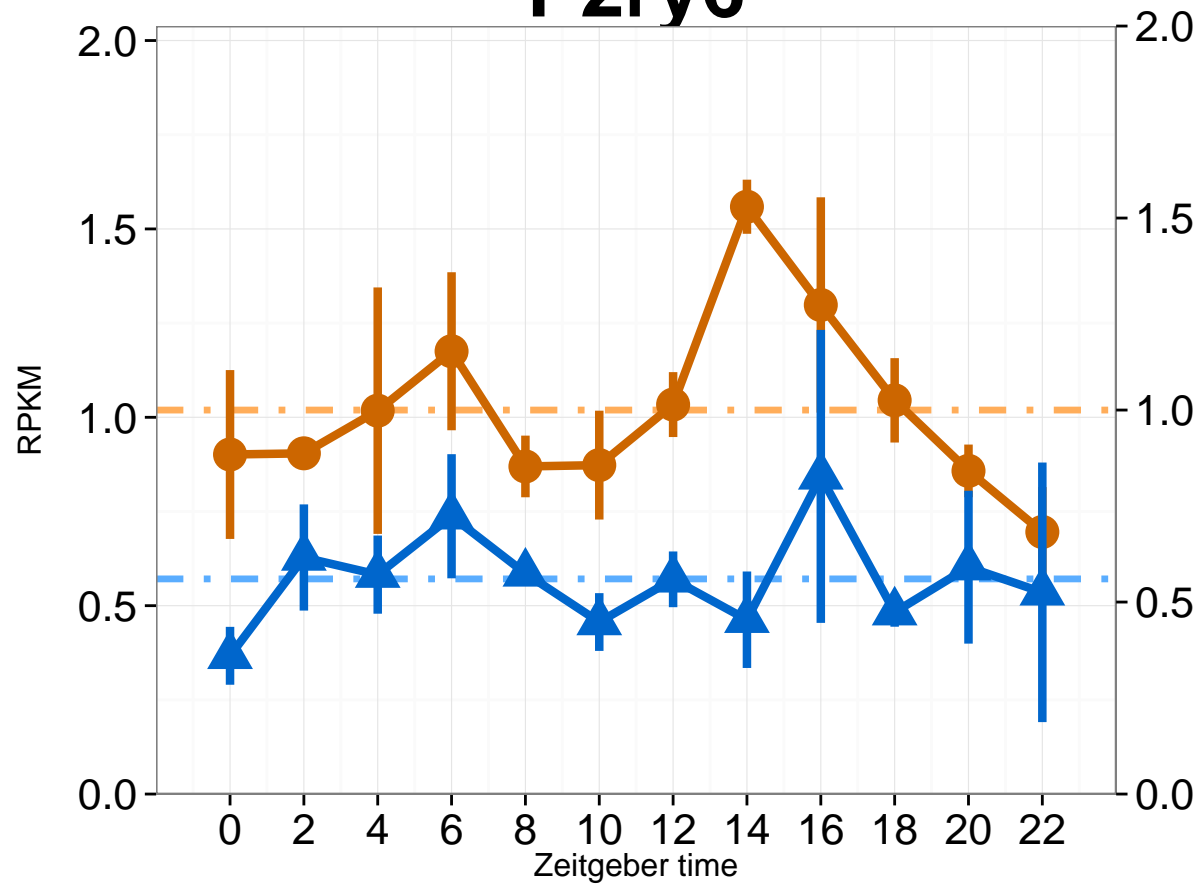

**P2ry6**

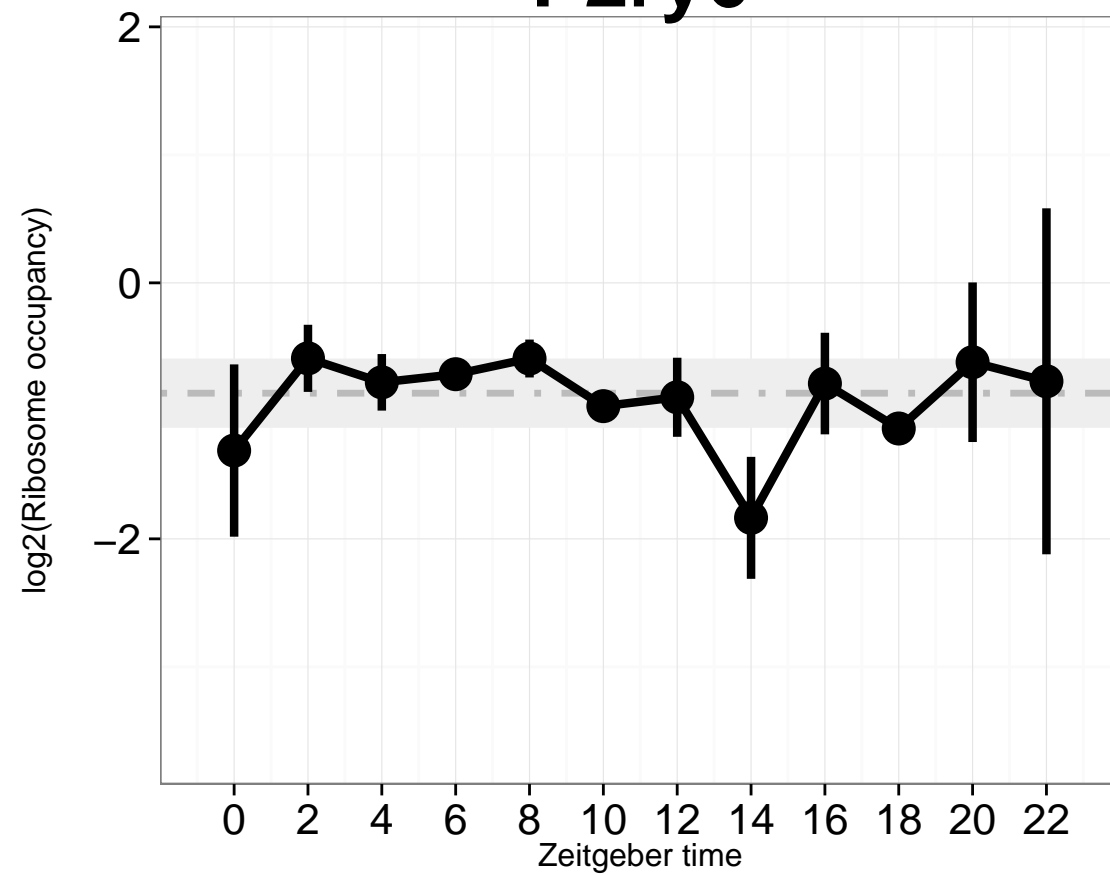

Supplement: Supplementary file 7741 [file 1]

# Zfp808

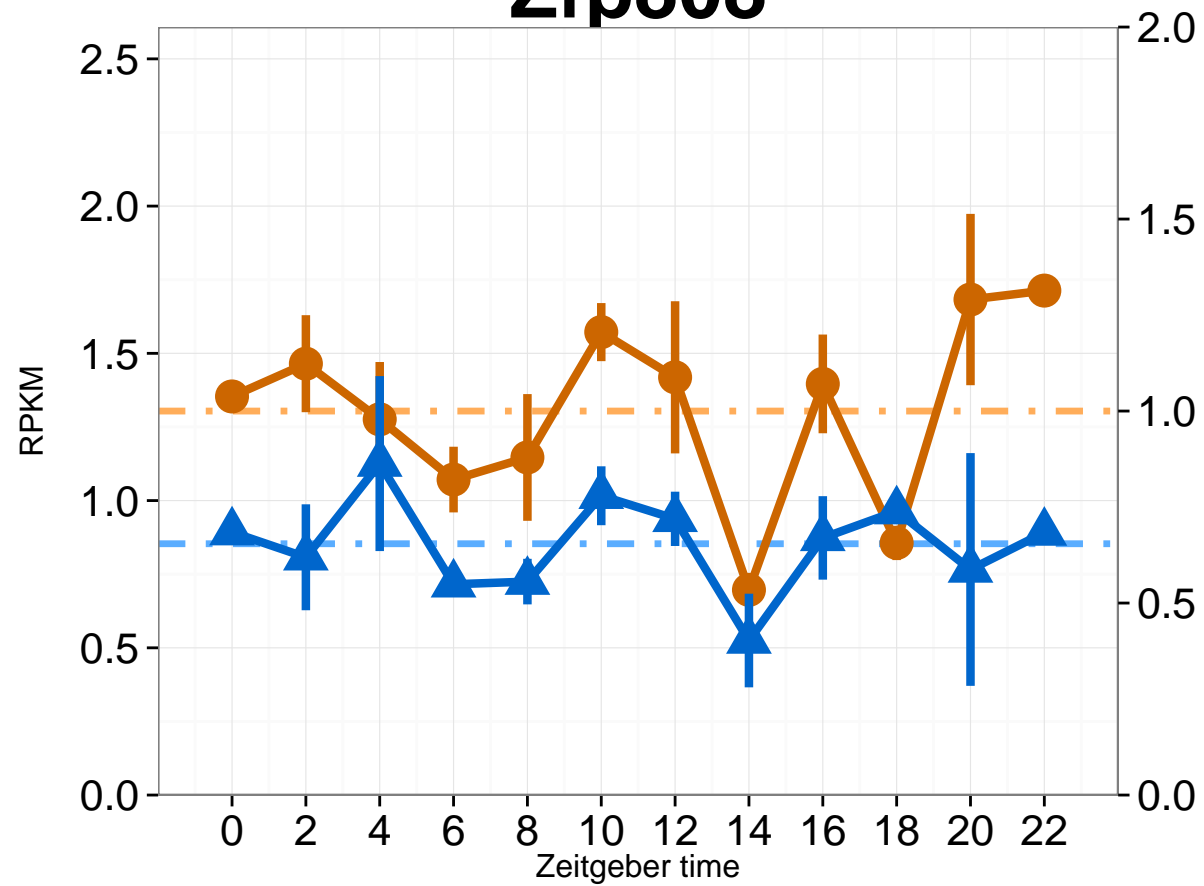

# Zfp808

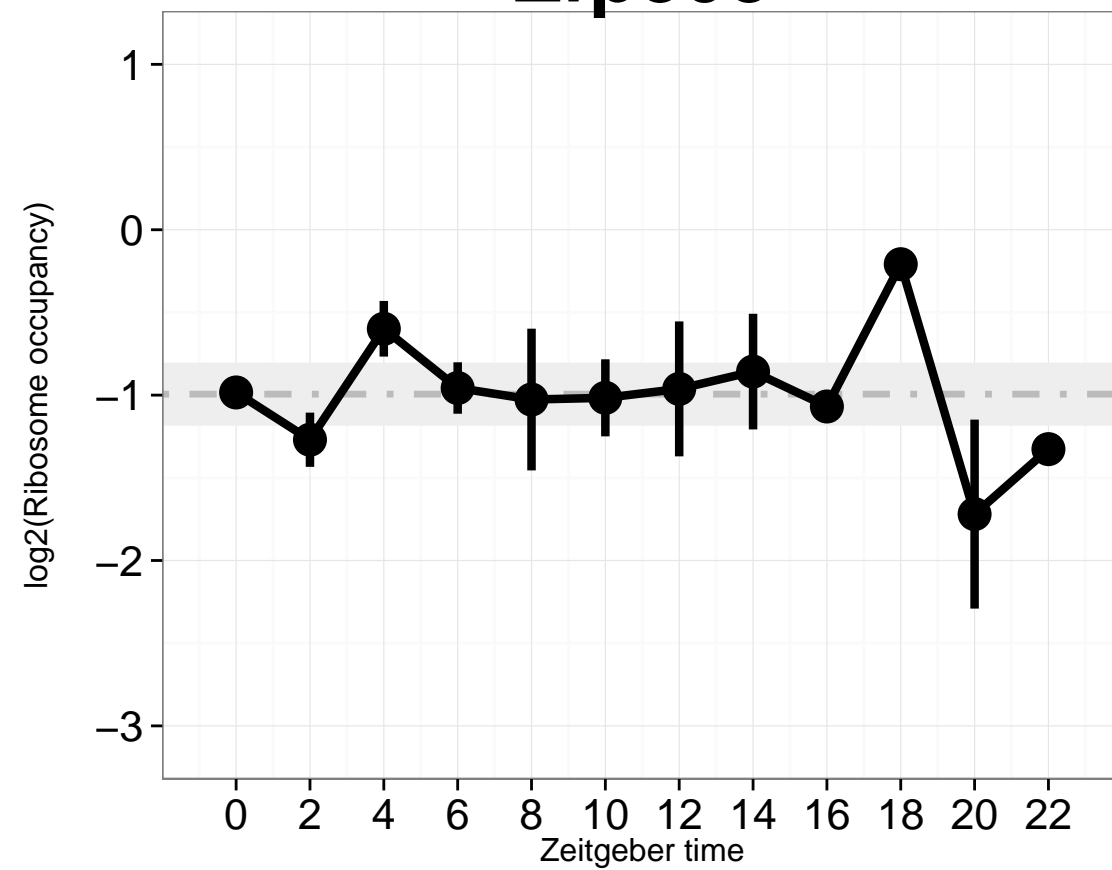

Supplement: Supplementary file 7742 [file 1]

# Rapgef11

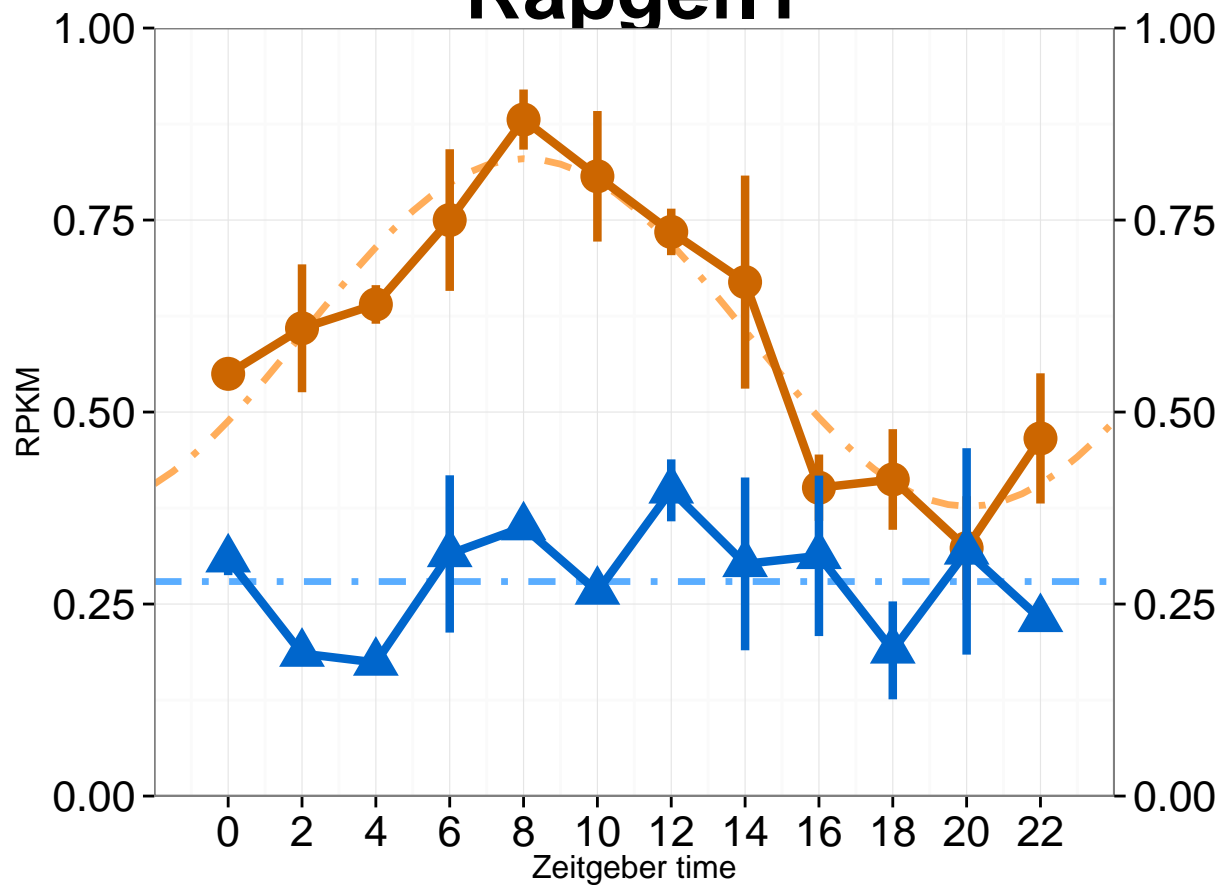

# Rapgef11

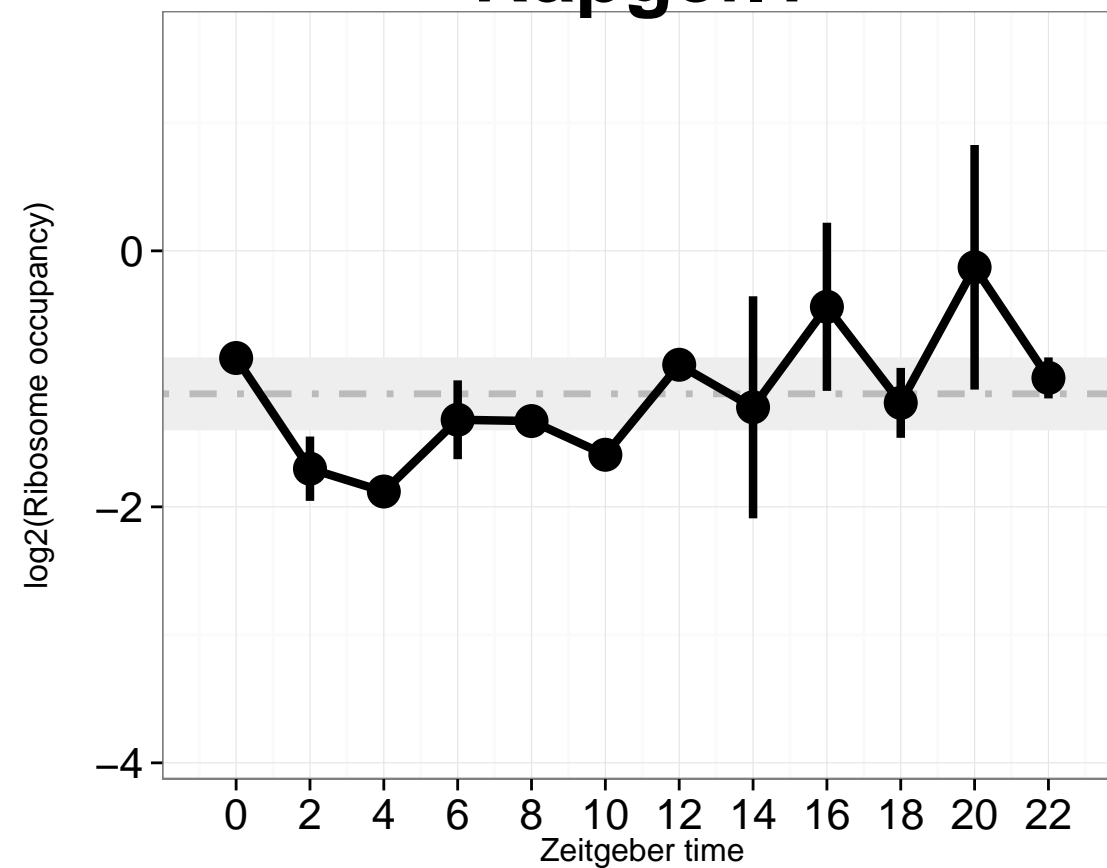

Supplement: Supplementary file 7743 [file 1]

## Cyts

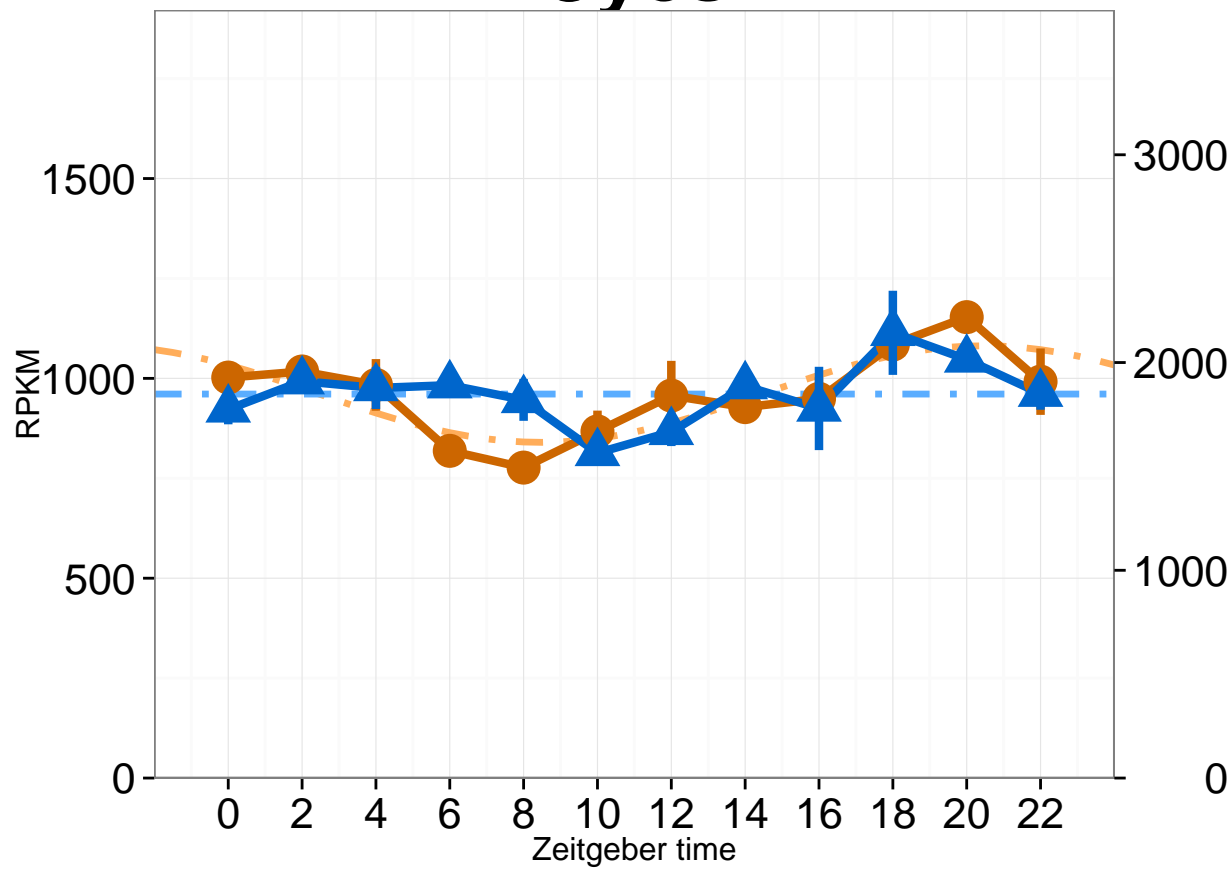

## Cyts

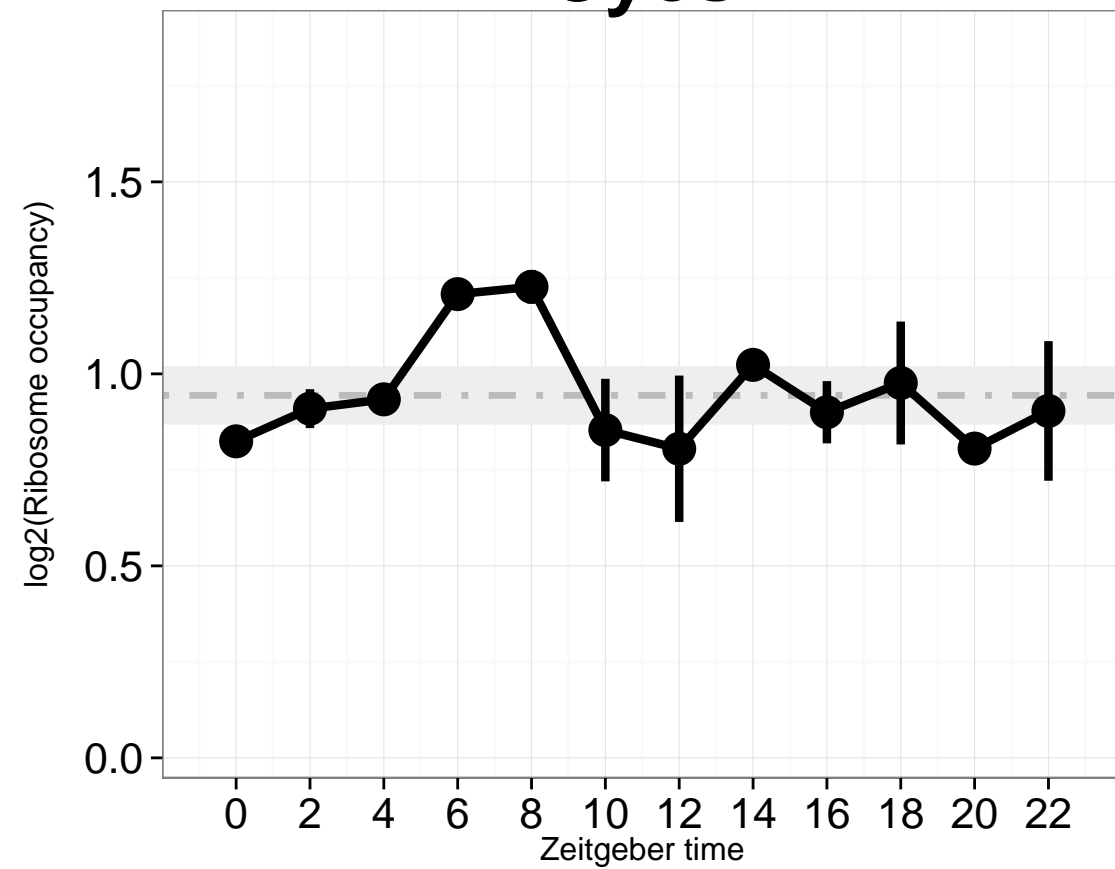

Supplement: Supplementary file 7744 [file 1]

# Mrpl41

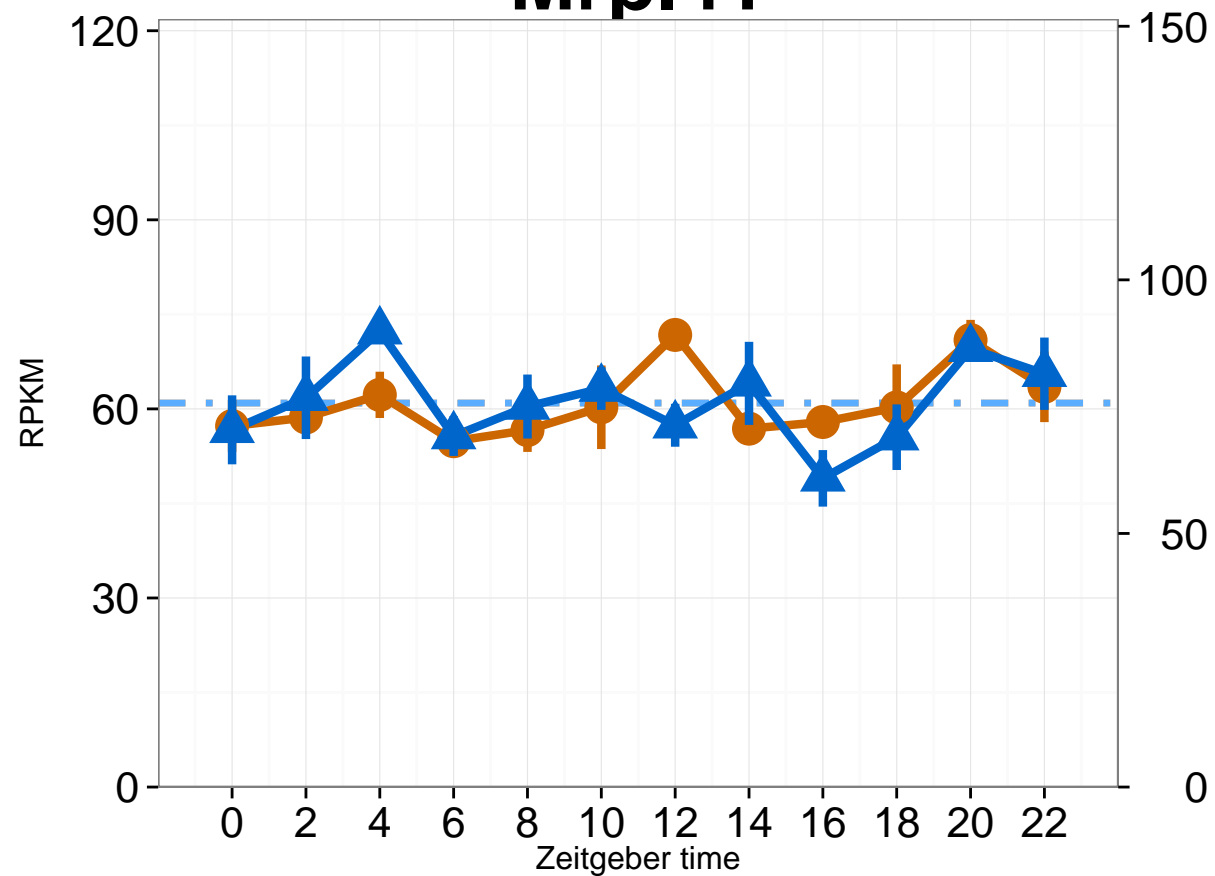

# Mrpl41

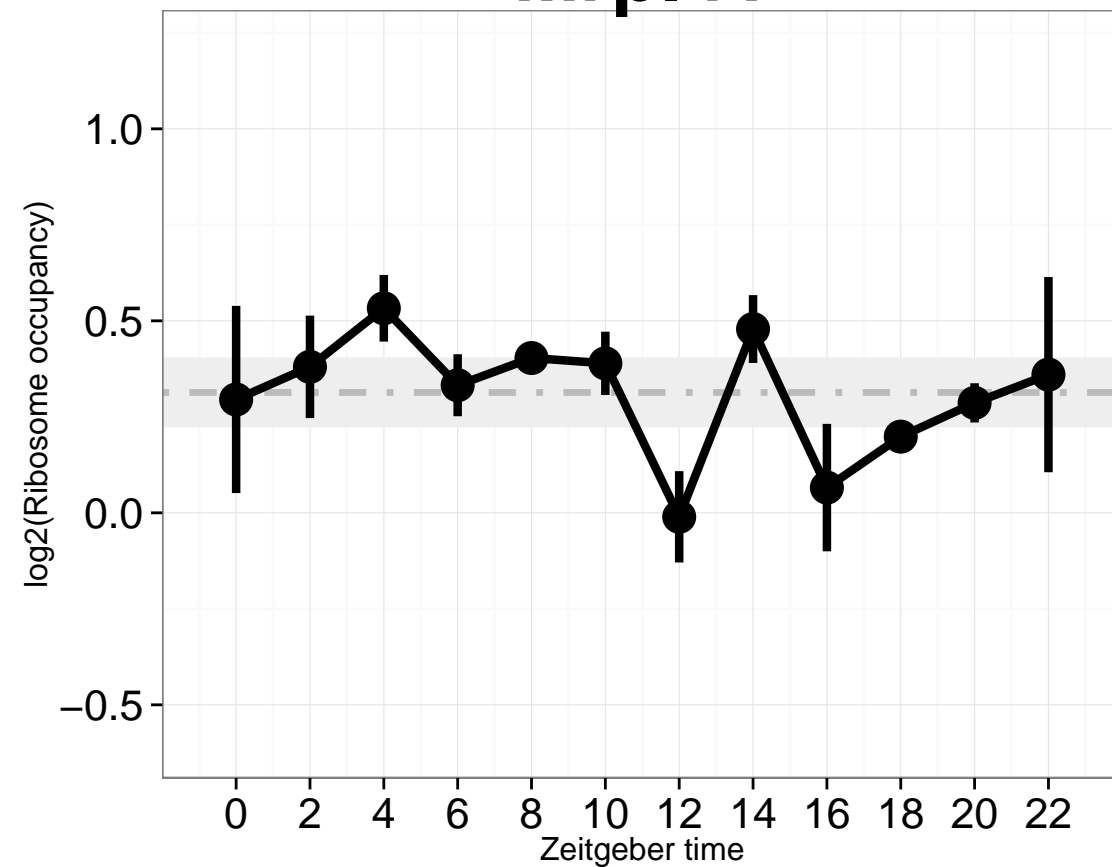

Supplement: Supplementary file 7745 [file 1]

# Angptl4

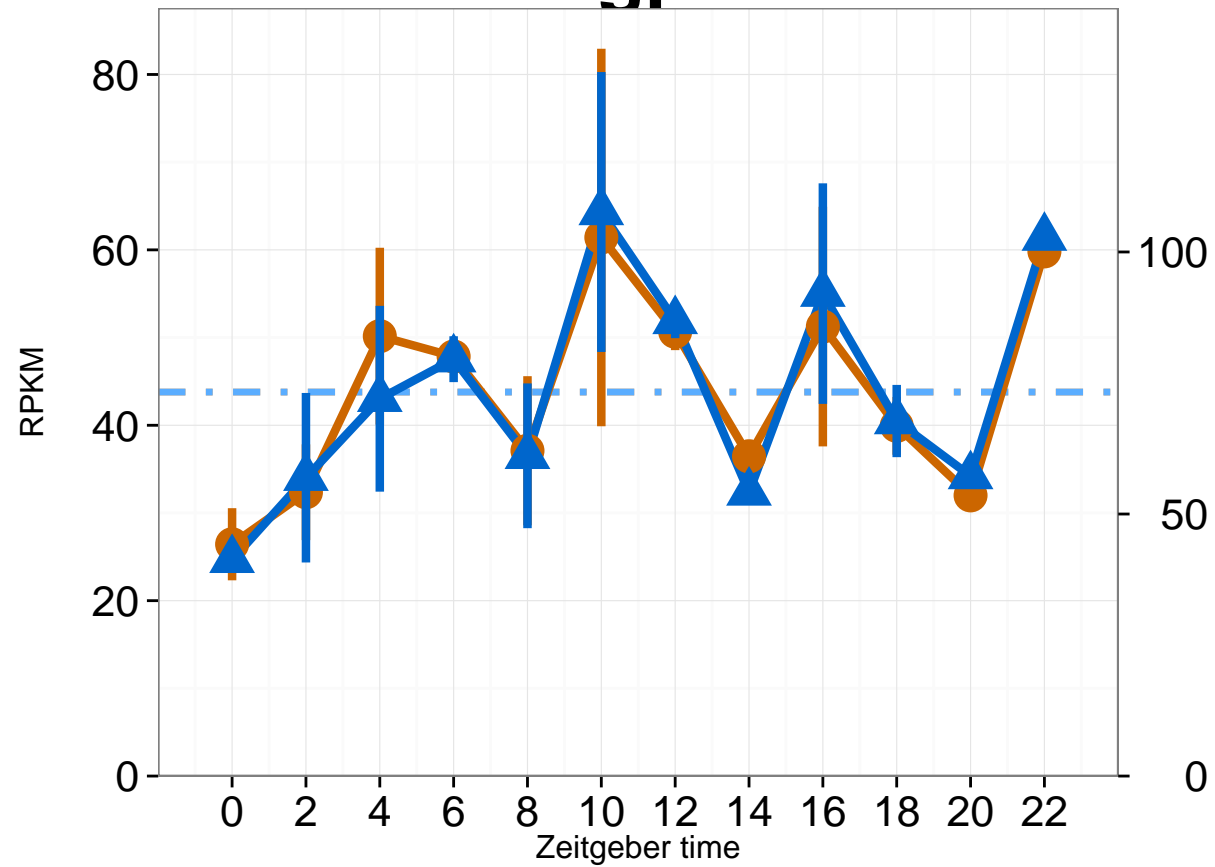

# Angptl4

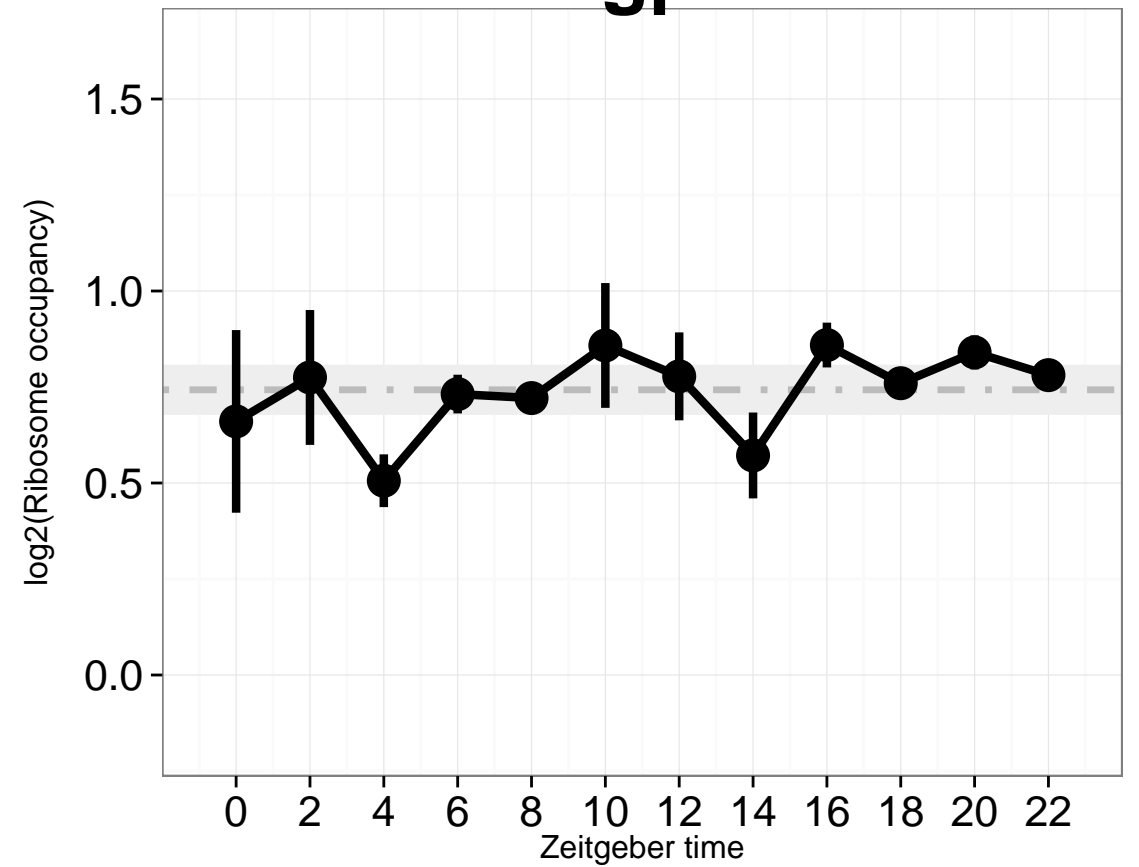

Supplement: Supplementary file 7746 [file 1]

# Smu1

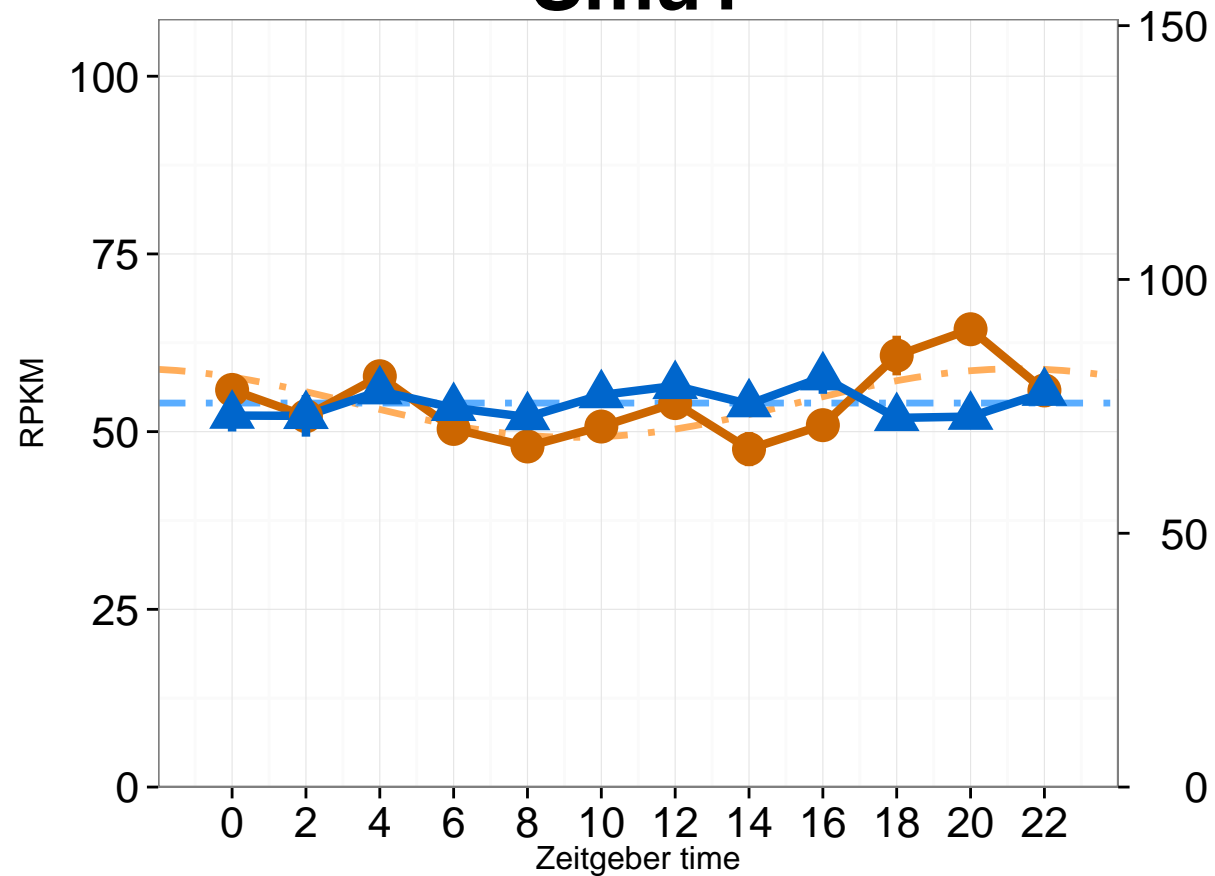

# Smu1

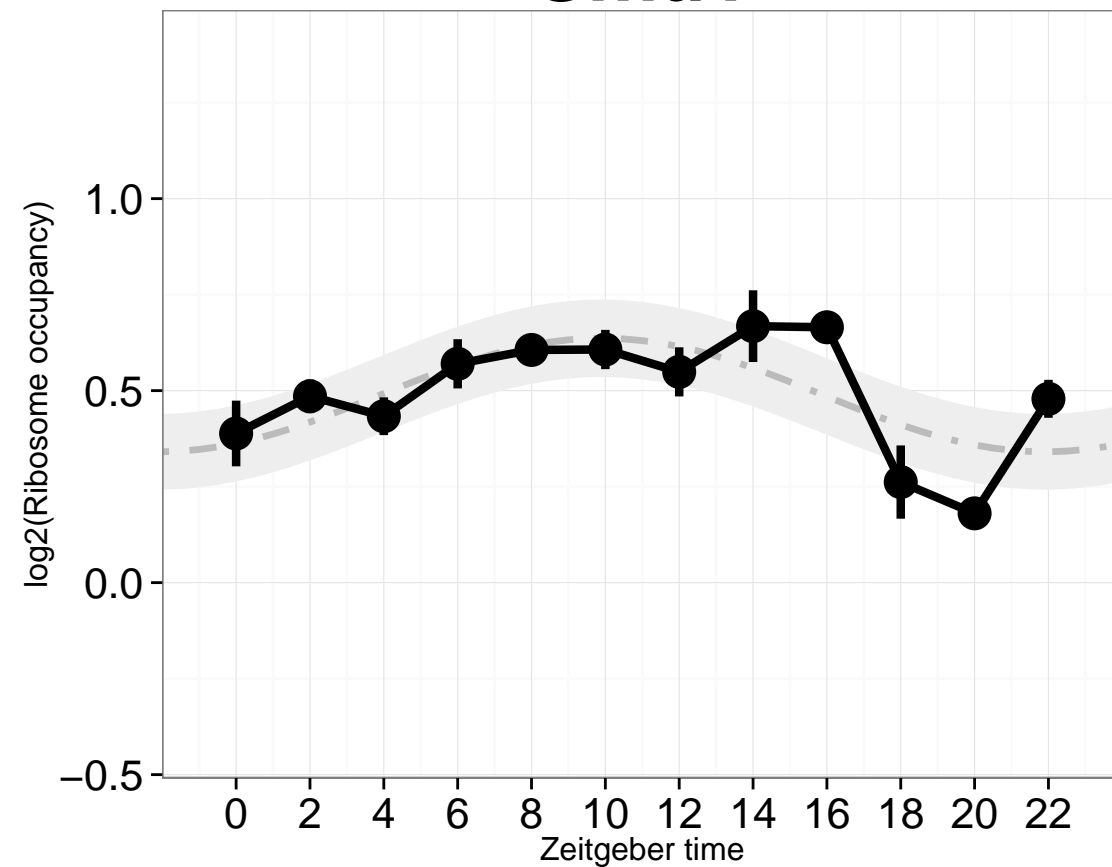

Supplement: Supplementary file 7747 [file 1]

# Kat2a

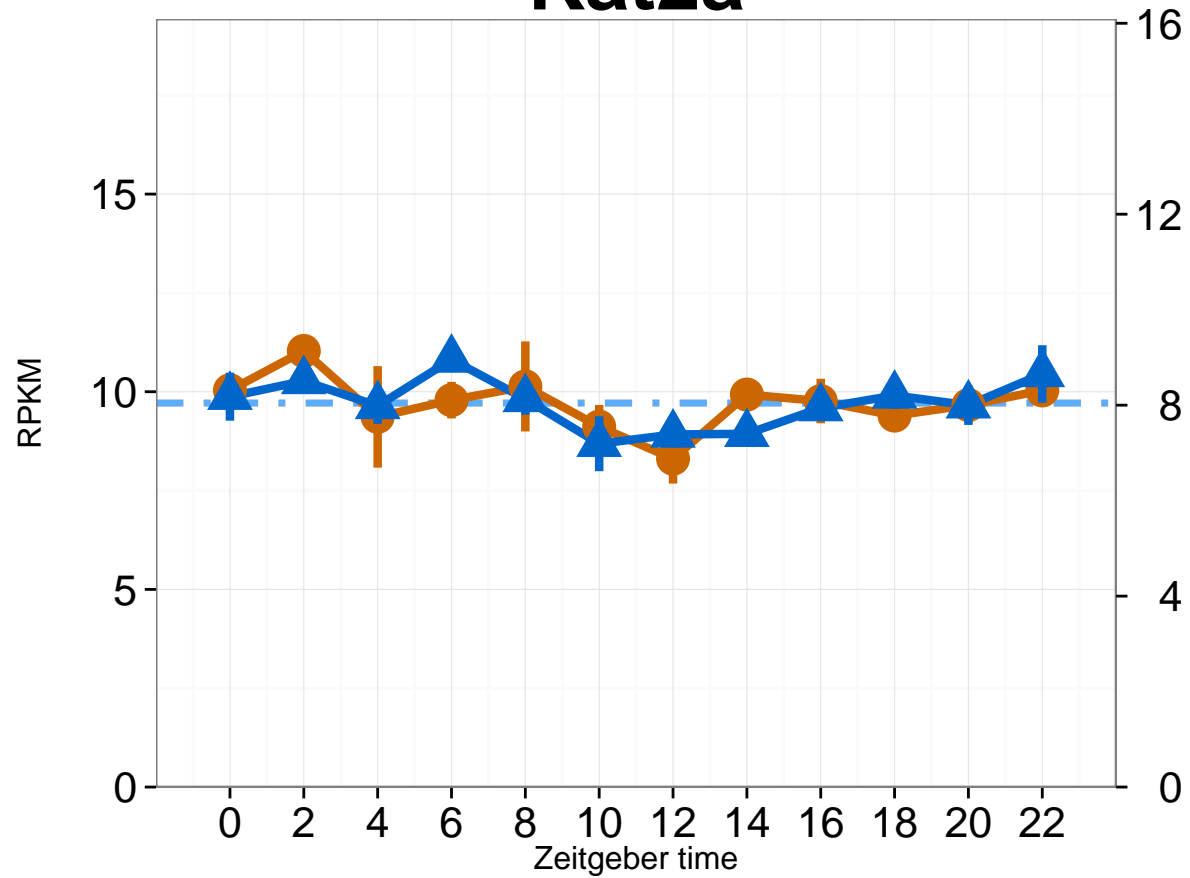

# Kat2a

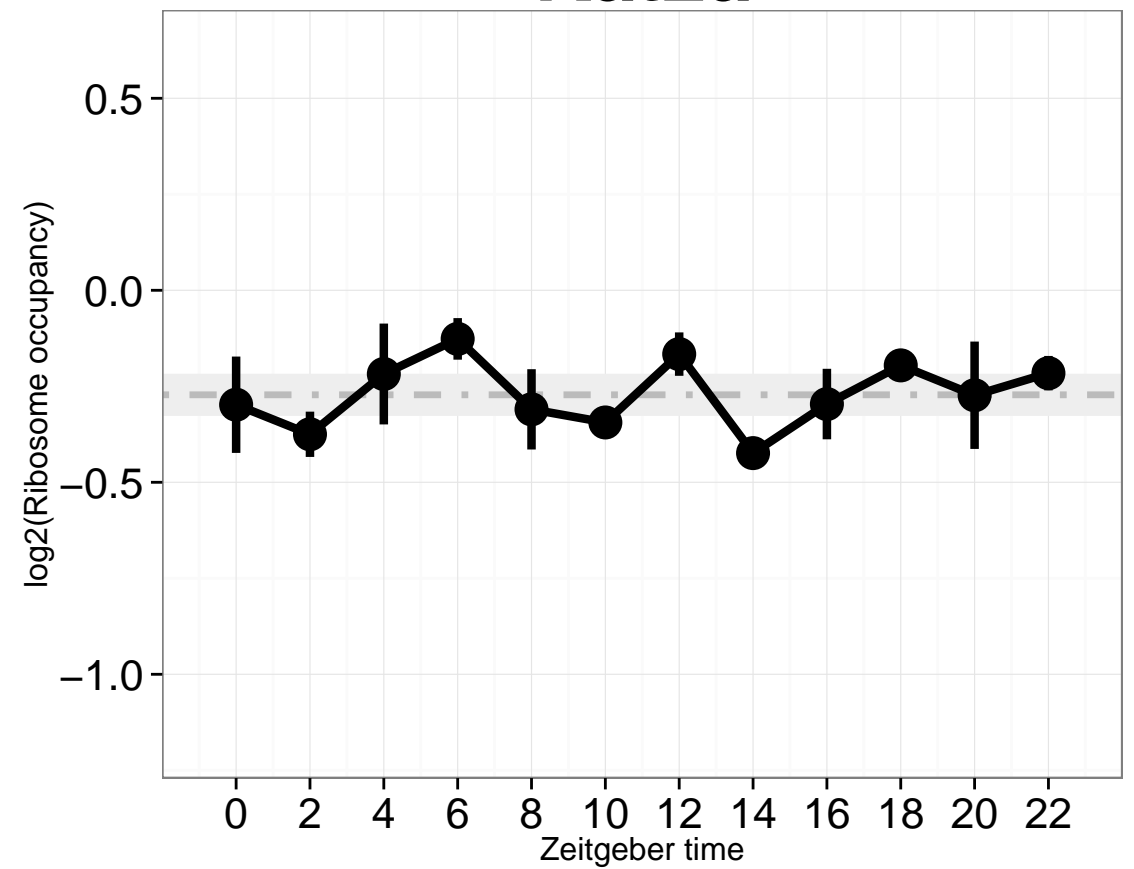

Supplement: Supplementary file 7748 [file 1]

## Smagp

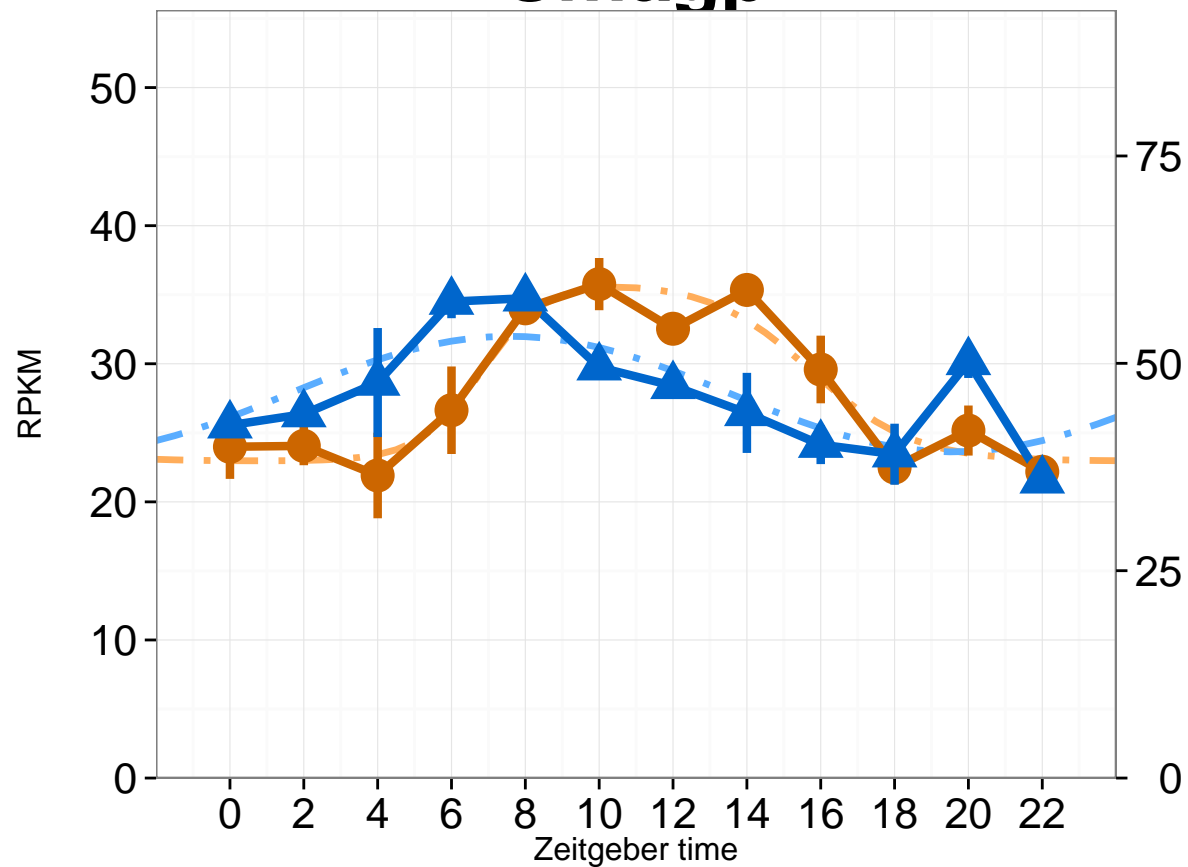

## Smagp

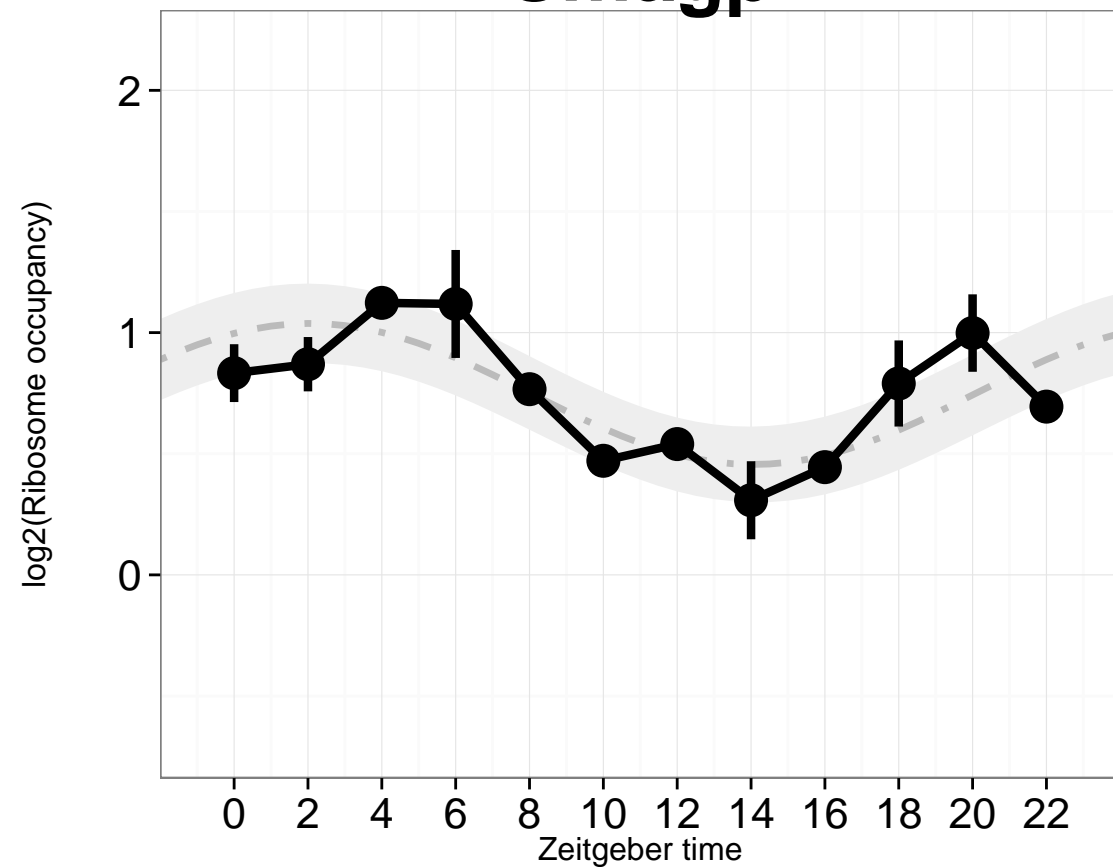

Supplement: Supplementary file 7749 [file 1]

**Pgr**

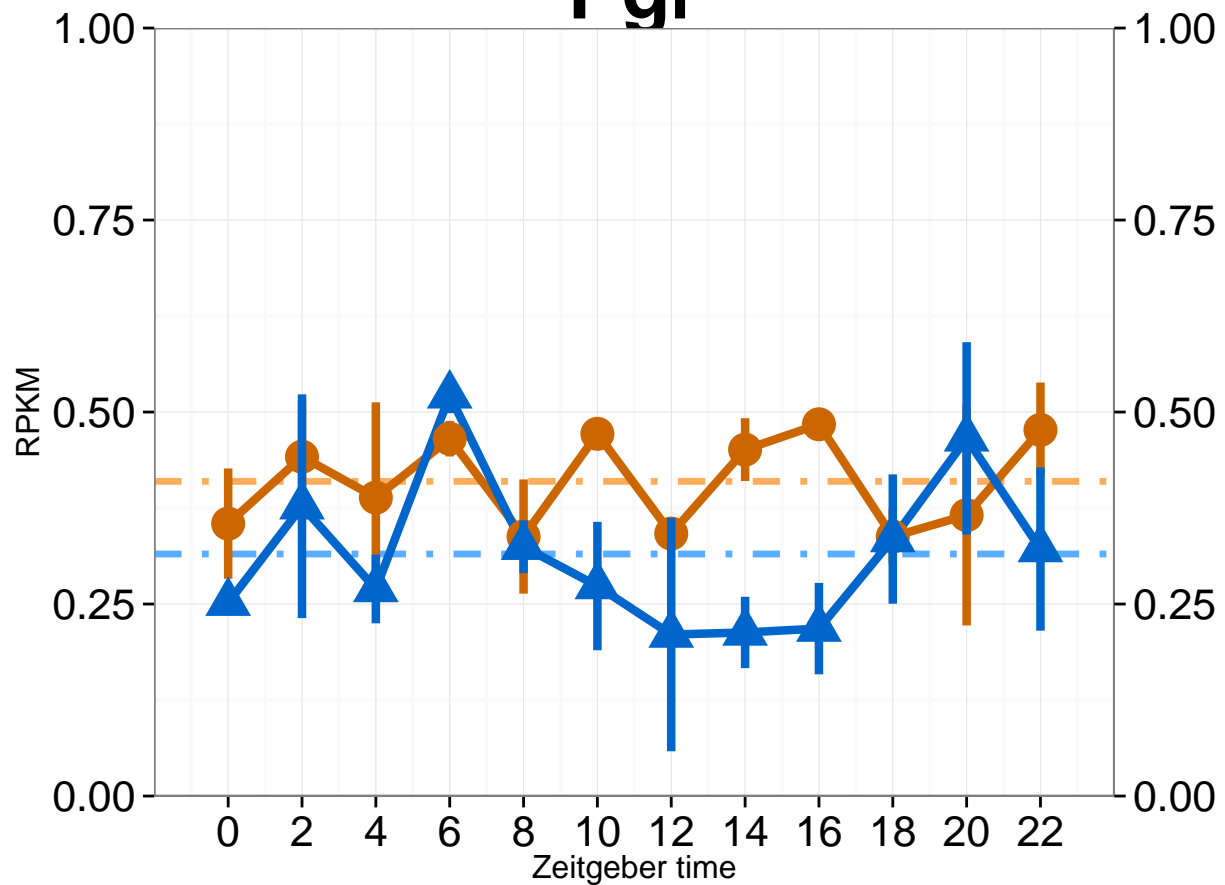

**Pgr**

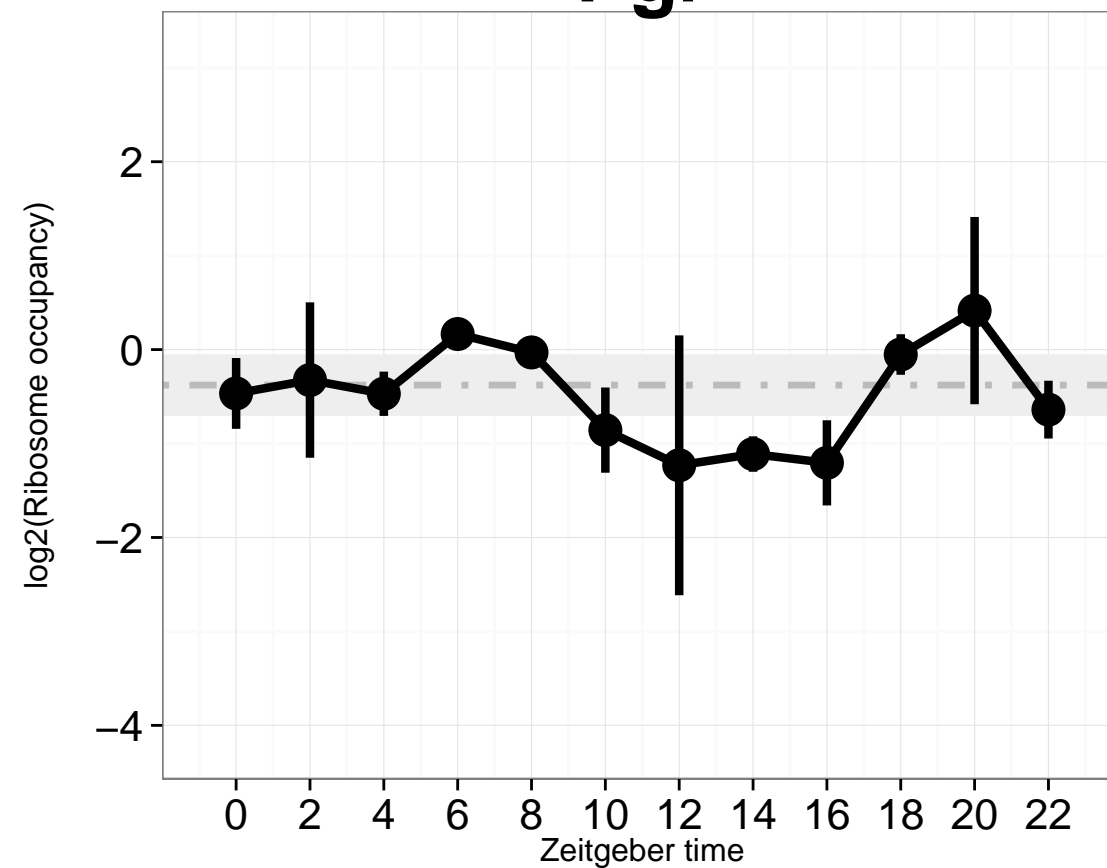

Supplement: Supplementary file 7750 [file 1]

## Ywhah

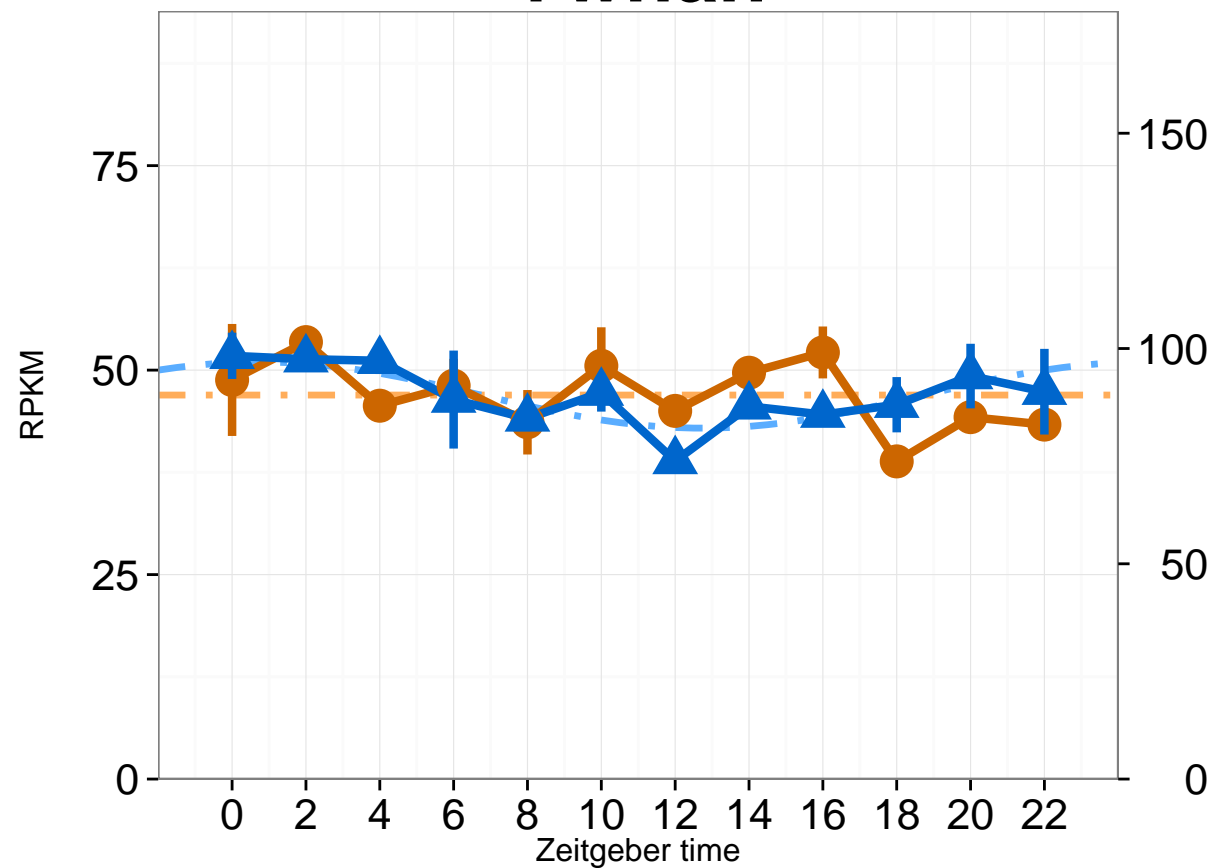

## Ywhah

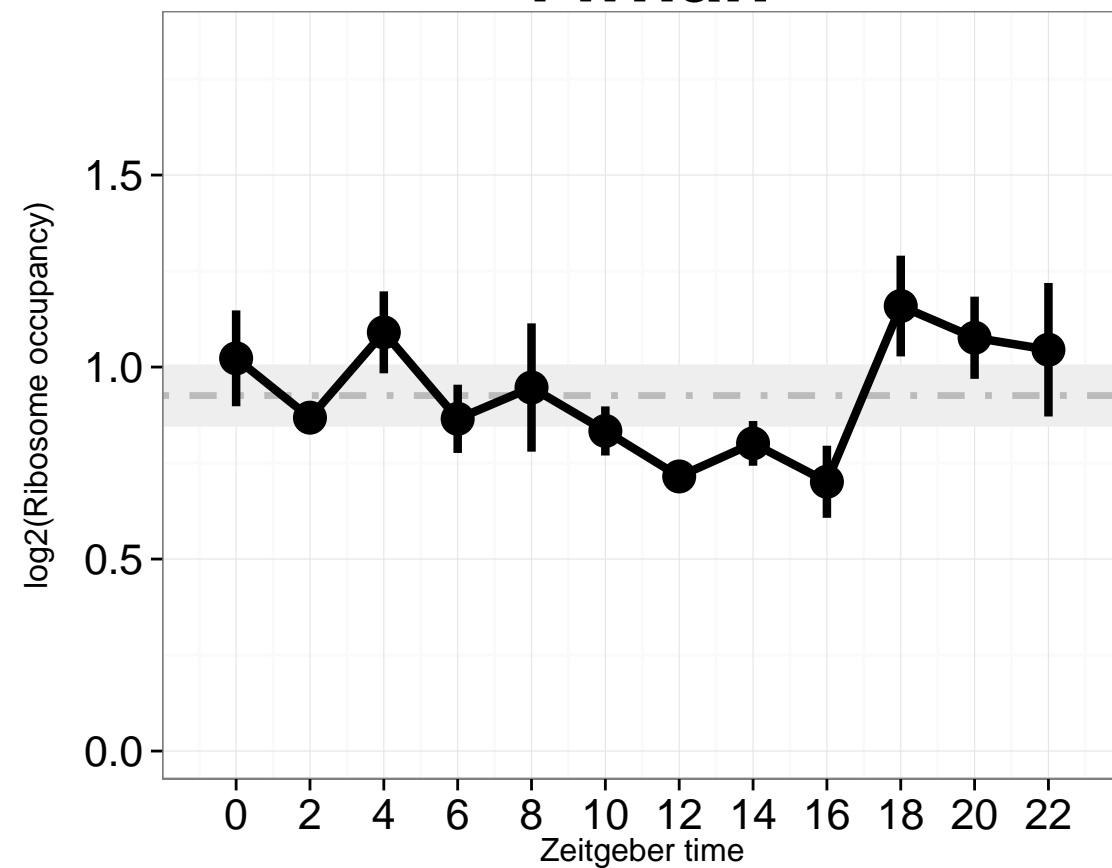

Supplement: Supplementary file 7751 [file 1]

# Zfp933

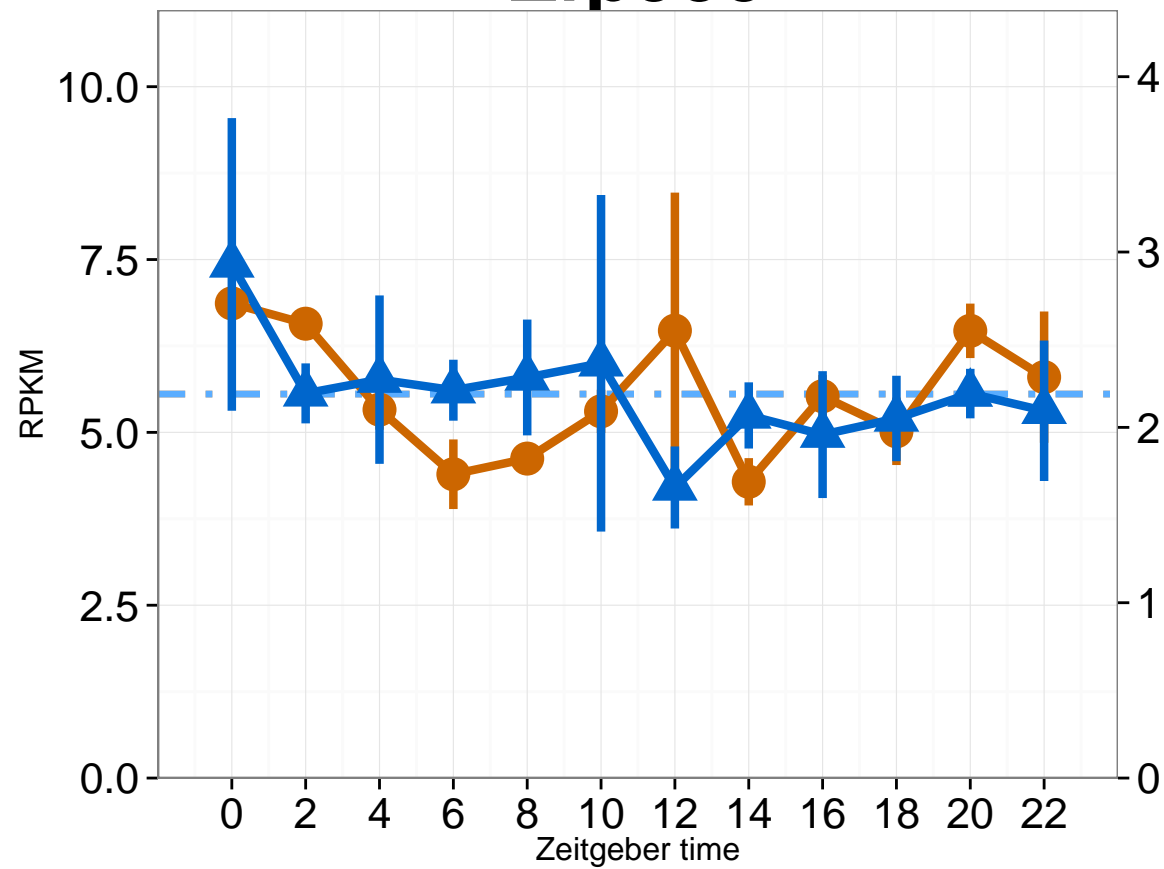

# Zfp933

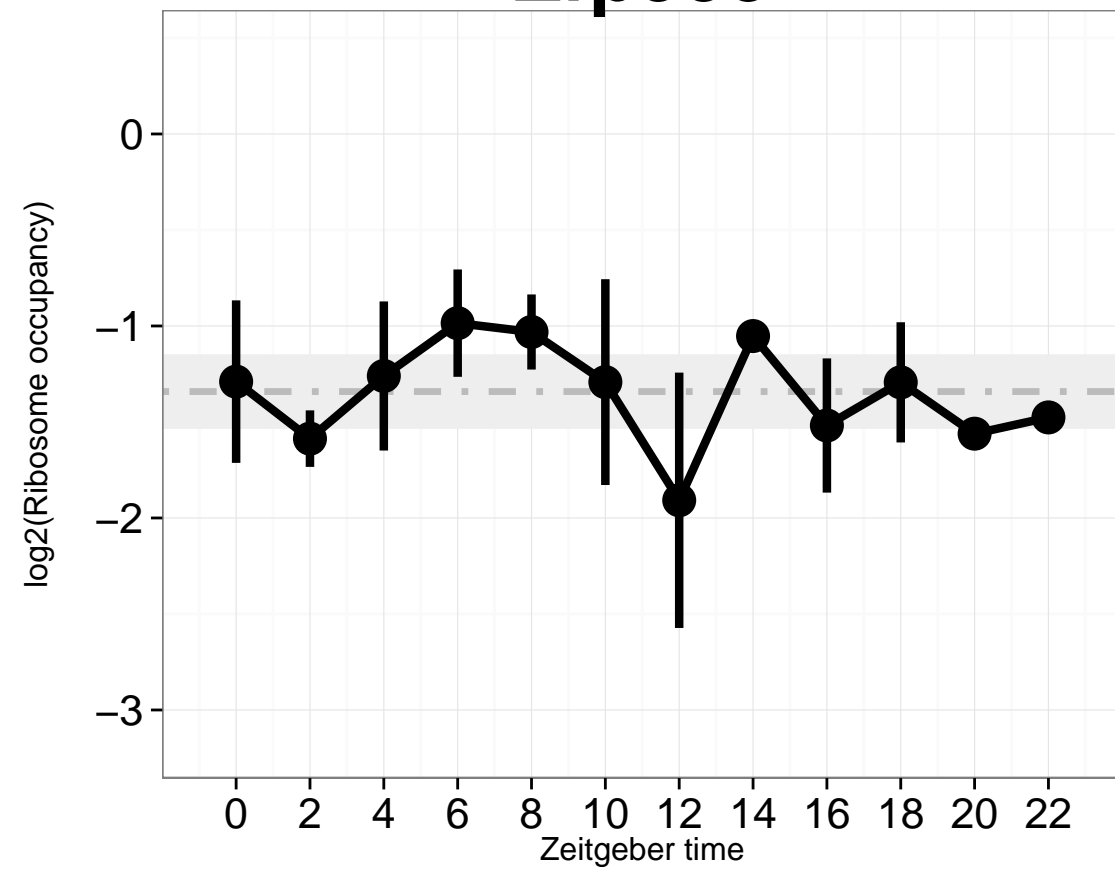

Supplement: Supplementary file 7752 [file 1]

## BC005624

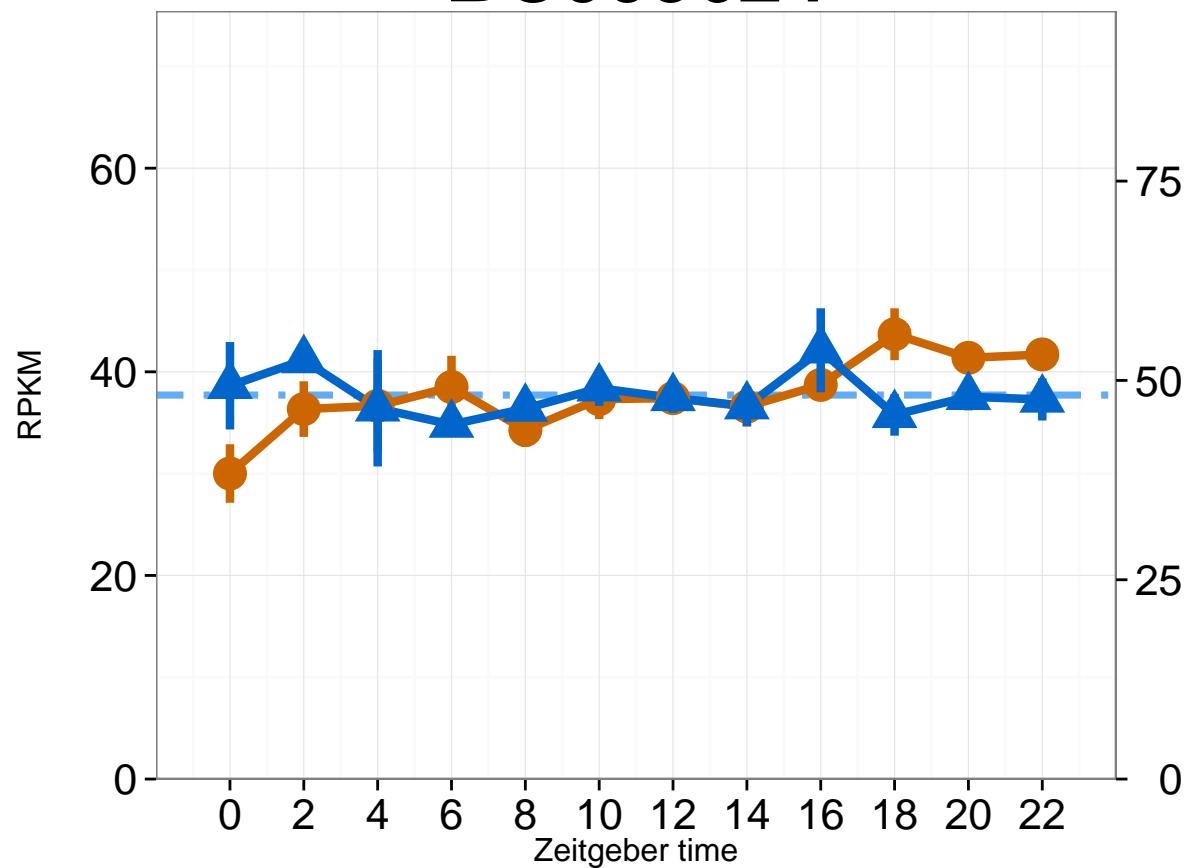

## BC005624

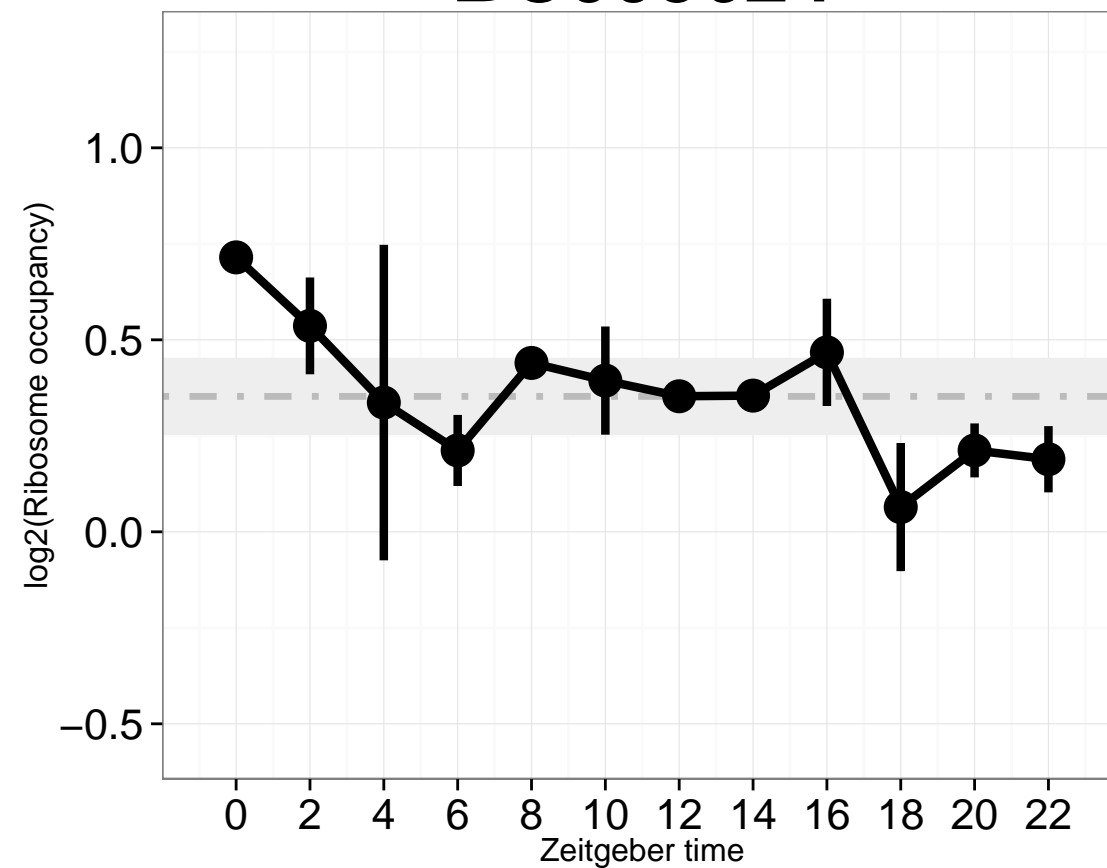

Supplement: Supplementary file 7753 [file 1]

# Wbscr16

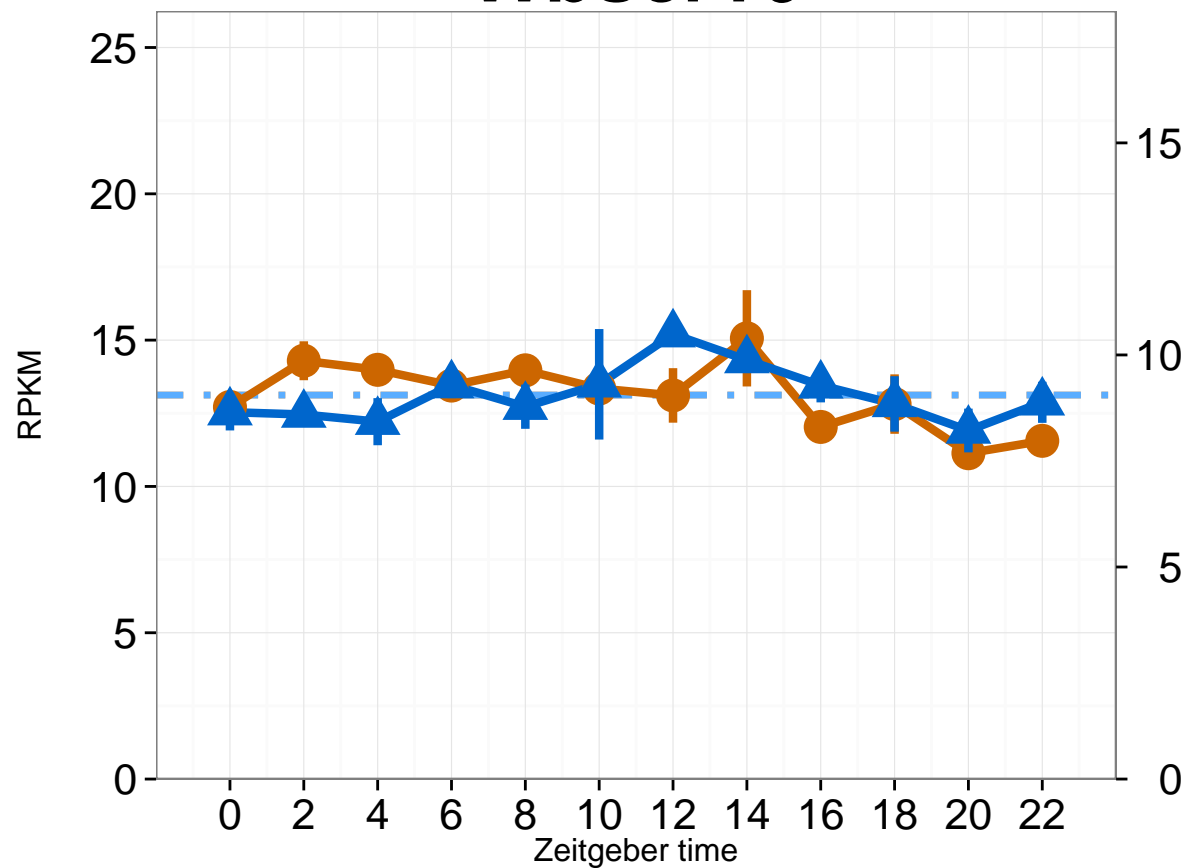

# Wbscr16

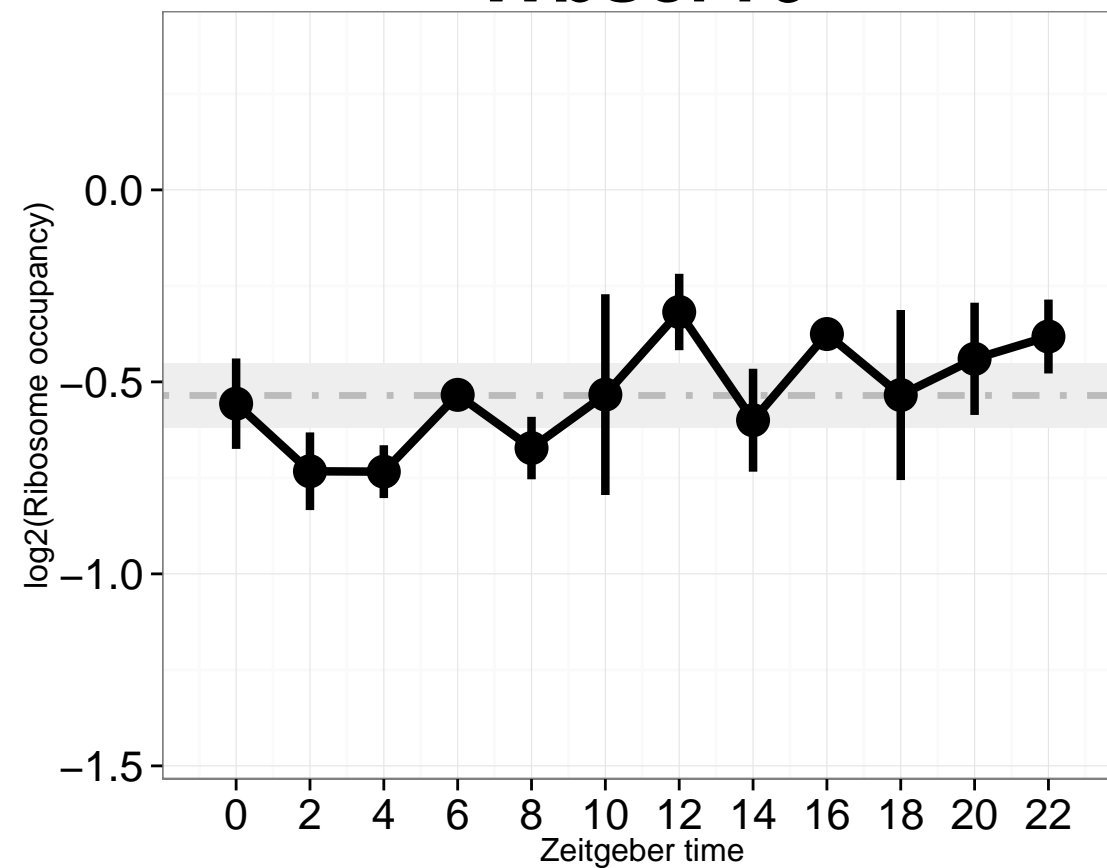

Supplement: Supplementary file 7754 [file 1]

## Zcchc4

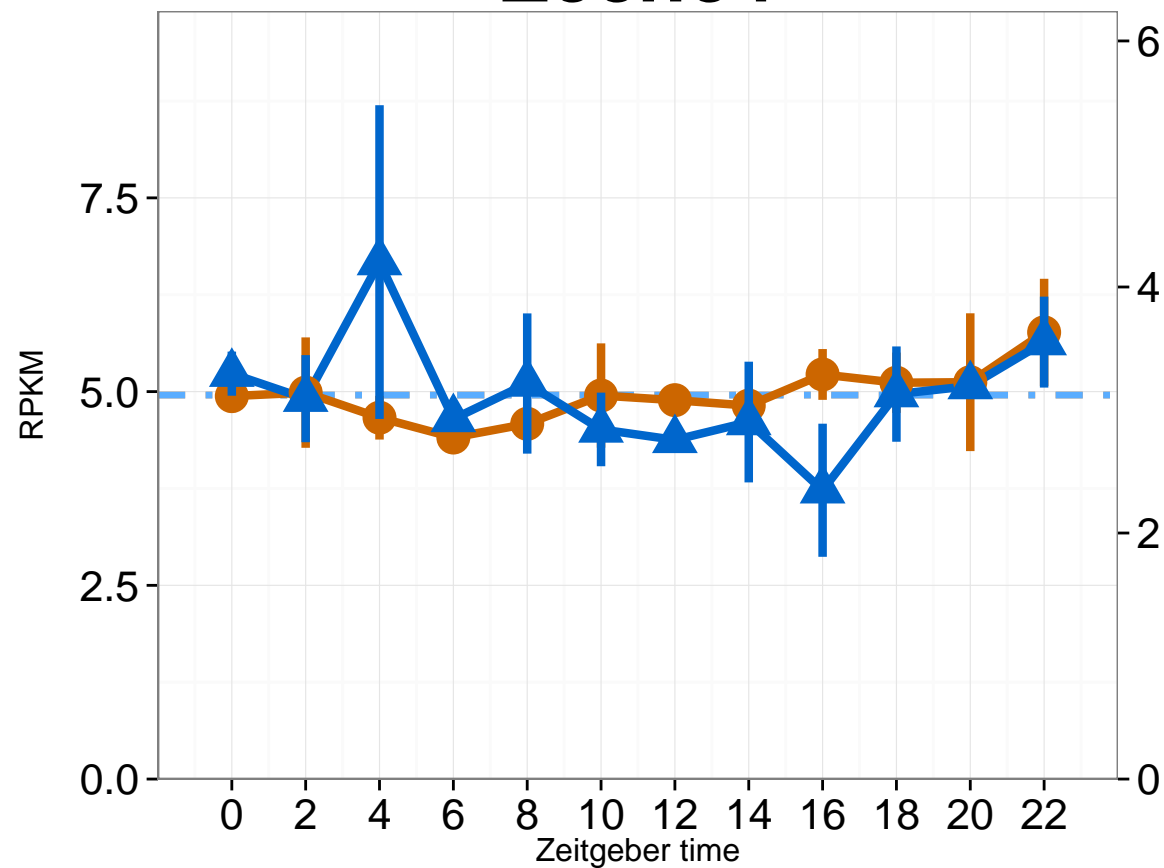

## Zcchc4

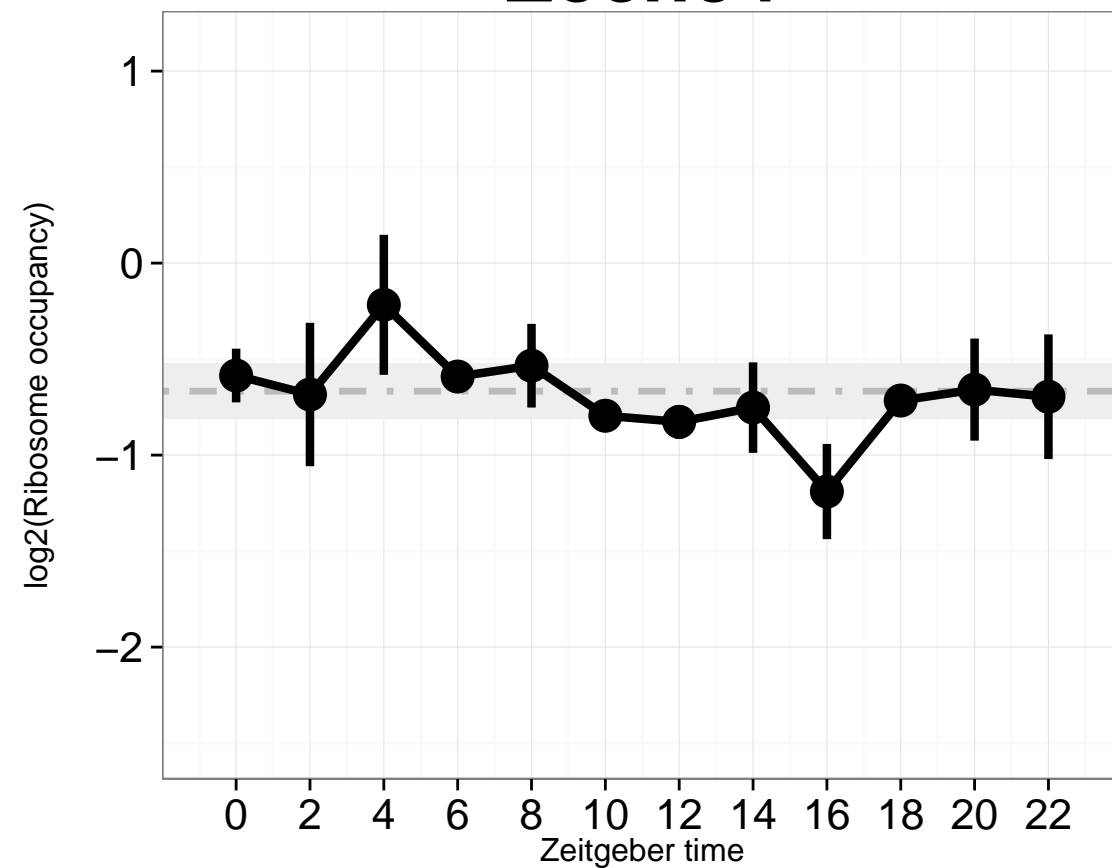

Supplement: Supplementary file 7755 [file 1]

# Zfp280d

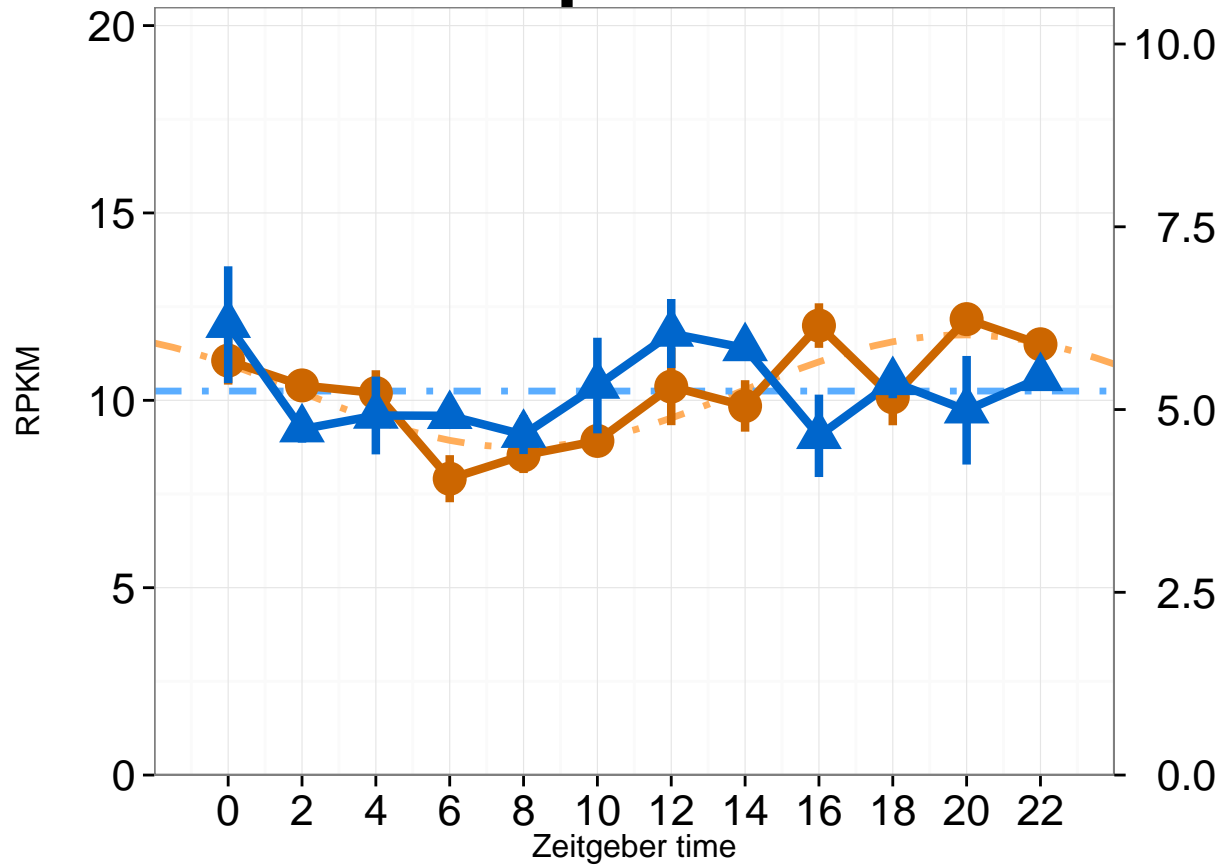

# Zfp280d

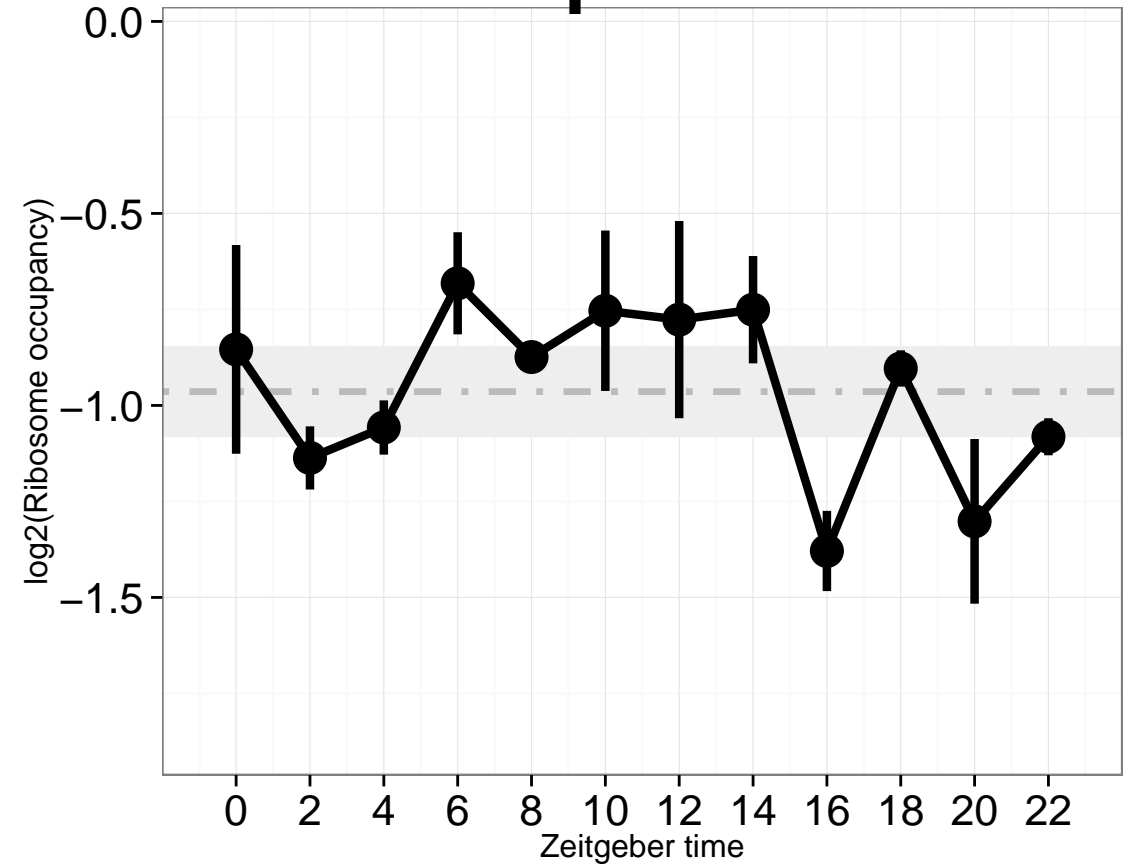

Supplement: Supplementary file 7756 [file 1]

## Bach2

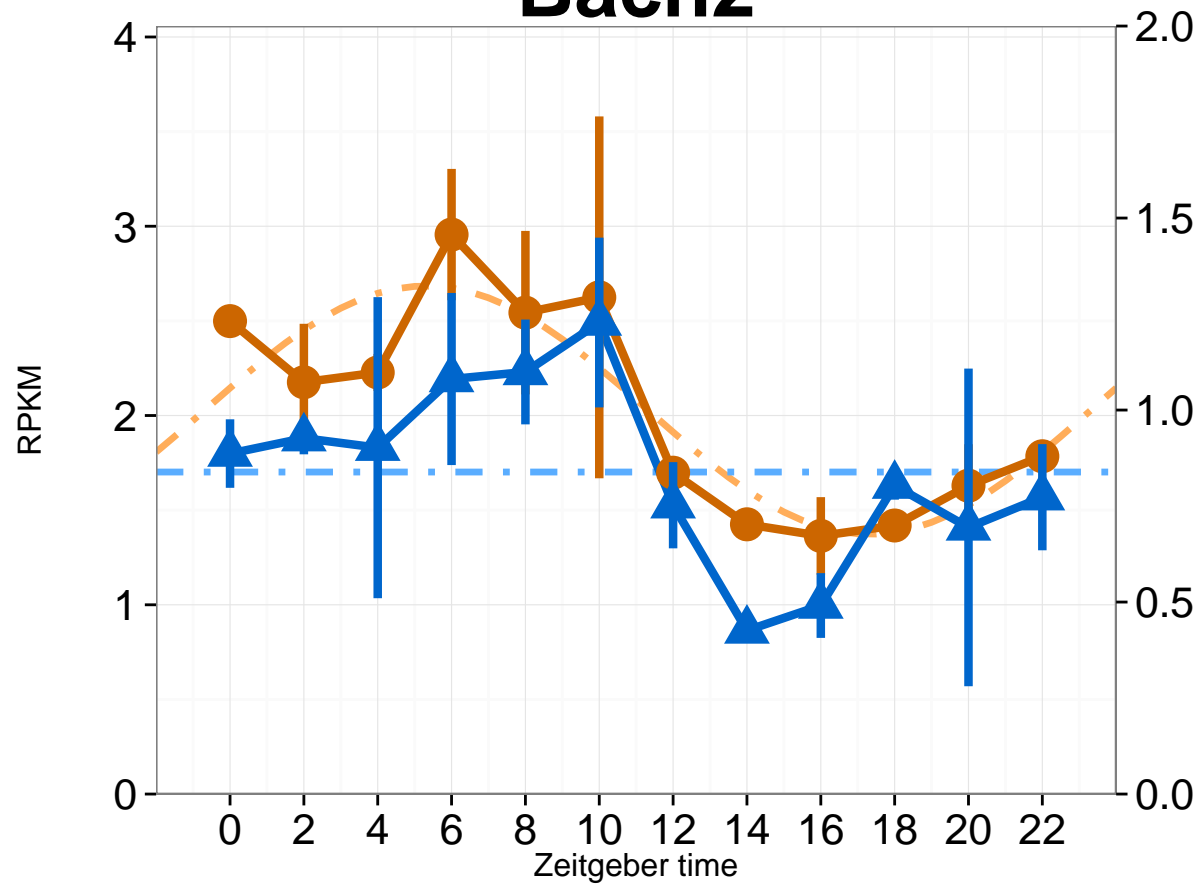

## Bach2

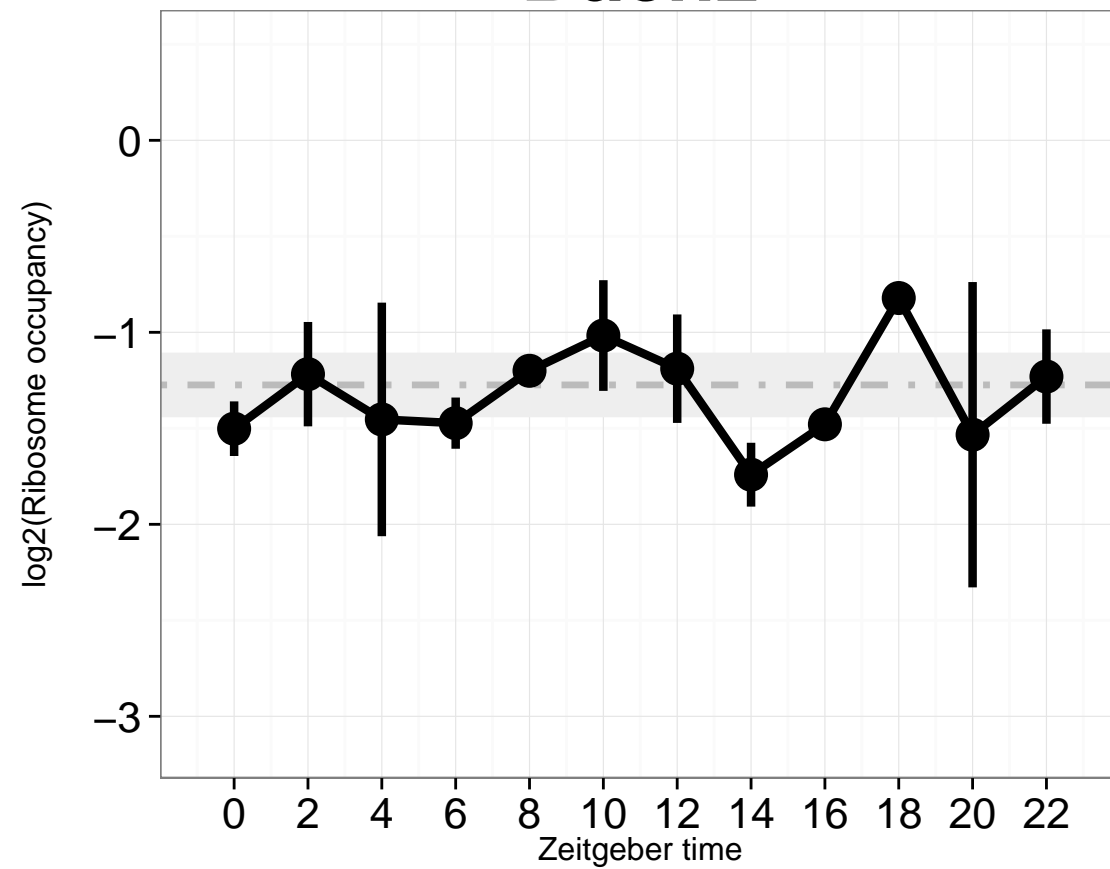

Supplement: Supplementary file 7757 [file 1]

## Mesdc2

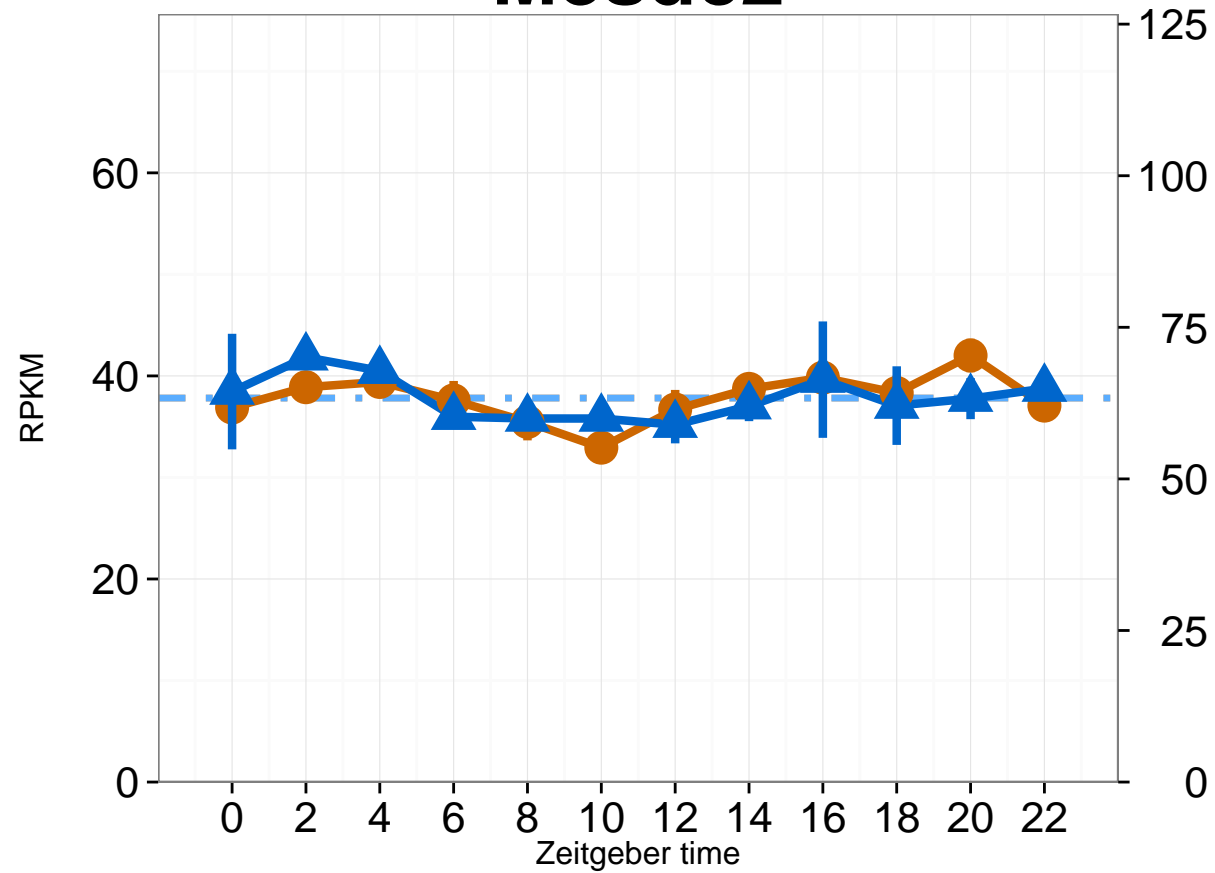

## Mesdc2

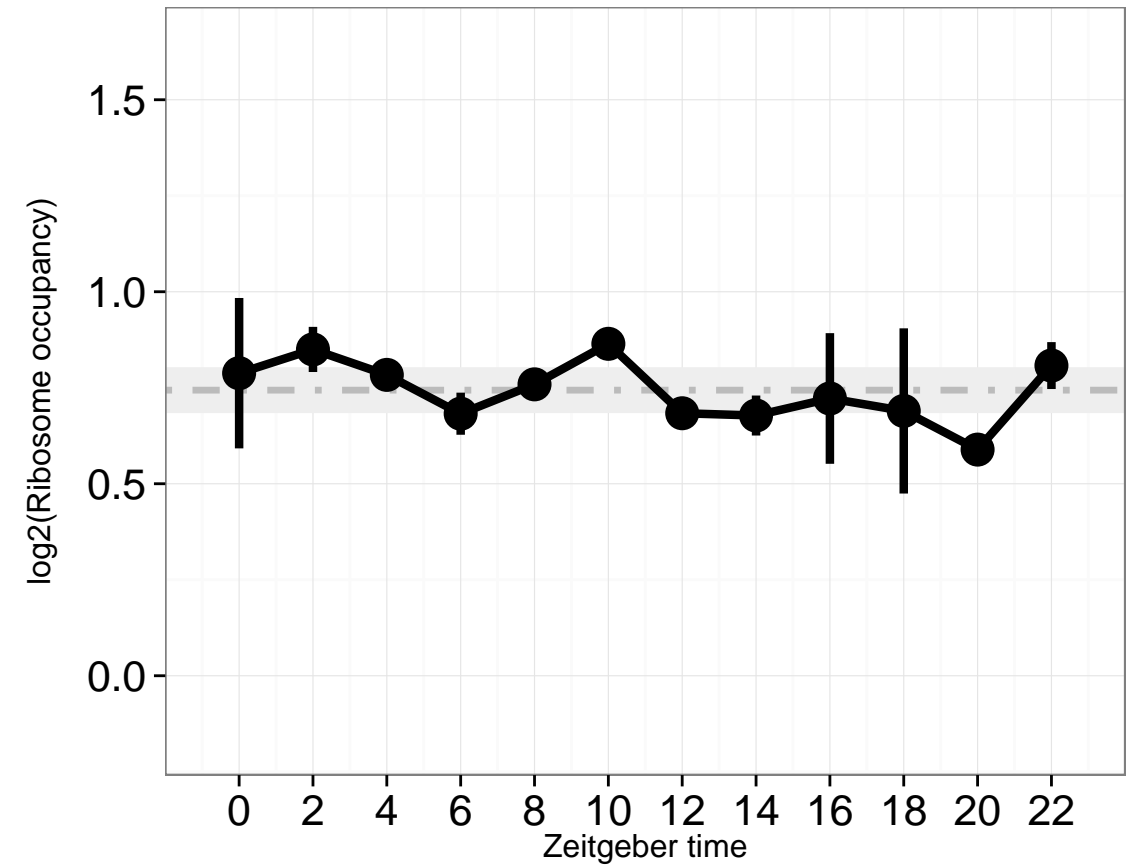

Supplement: Supplementary file 7758 [file 1]

# Lamb3

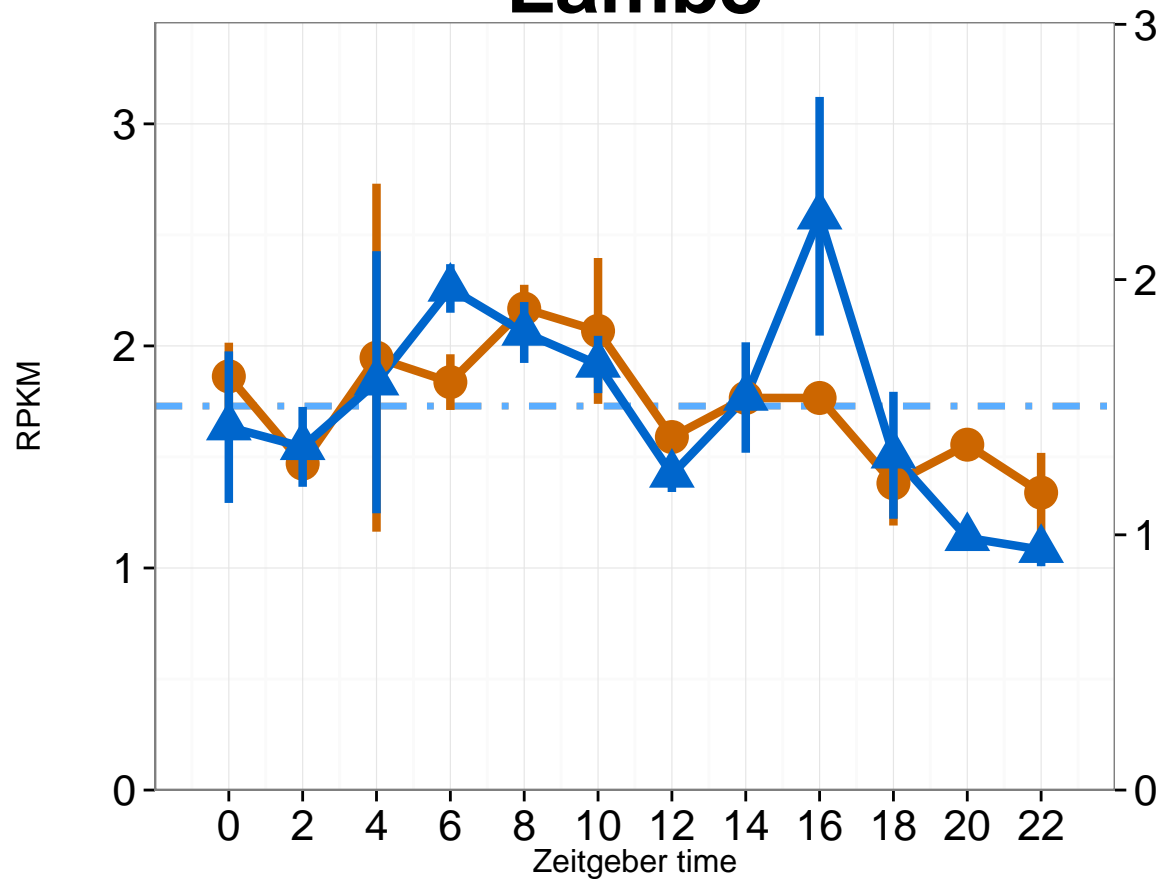

# Lamb3

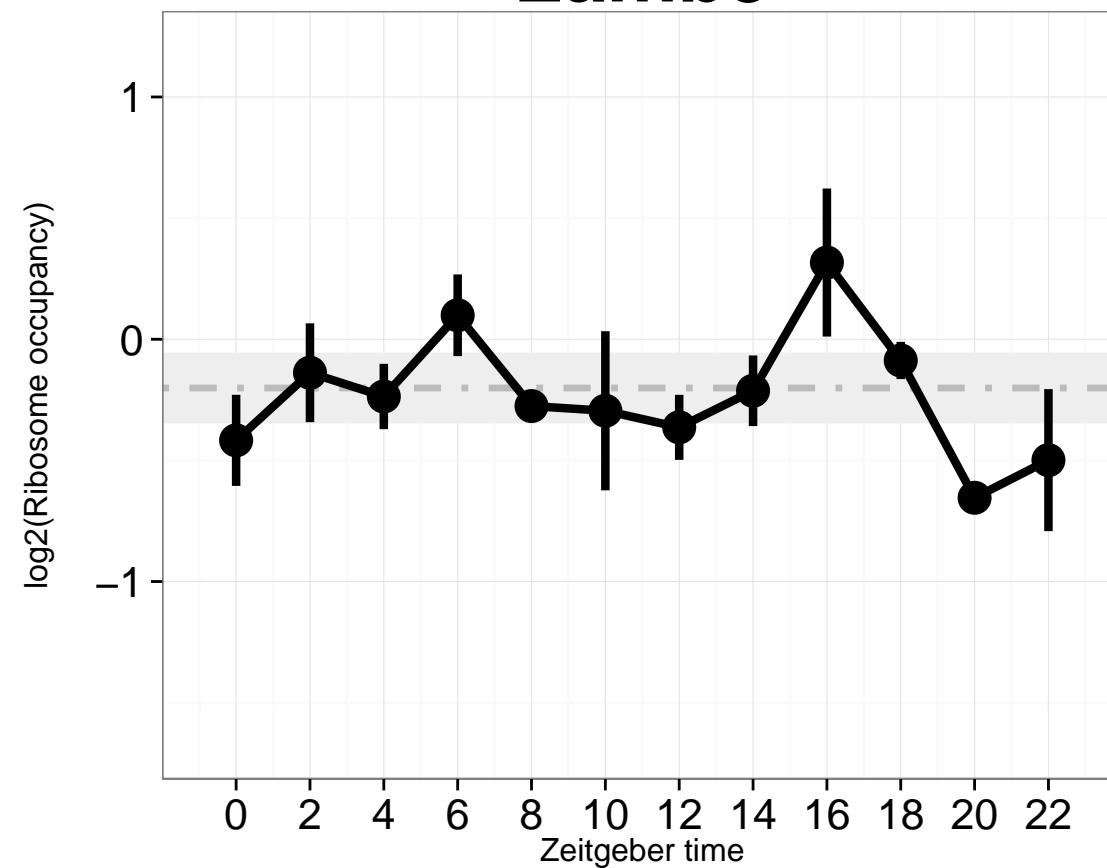

Supplement: Supplementary file 7759 [file 1]

## Kcnj5

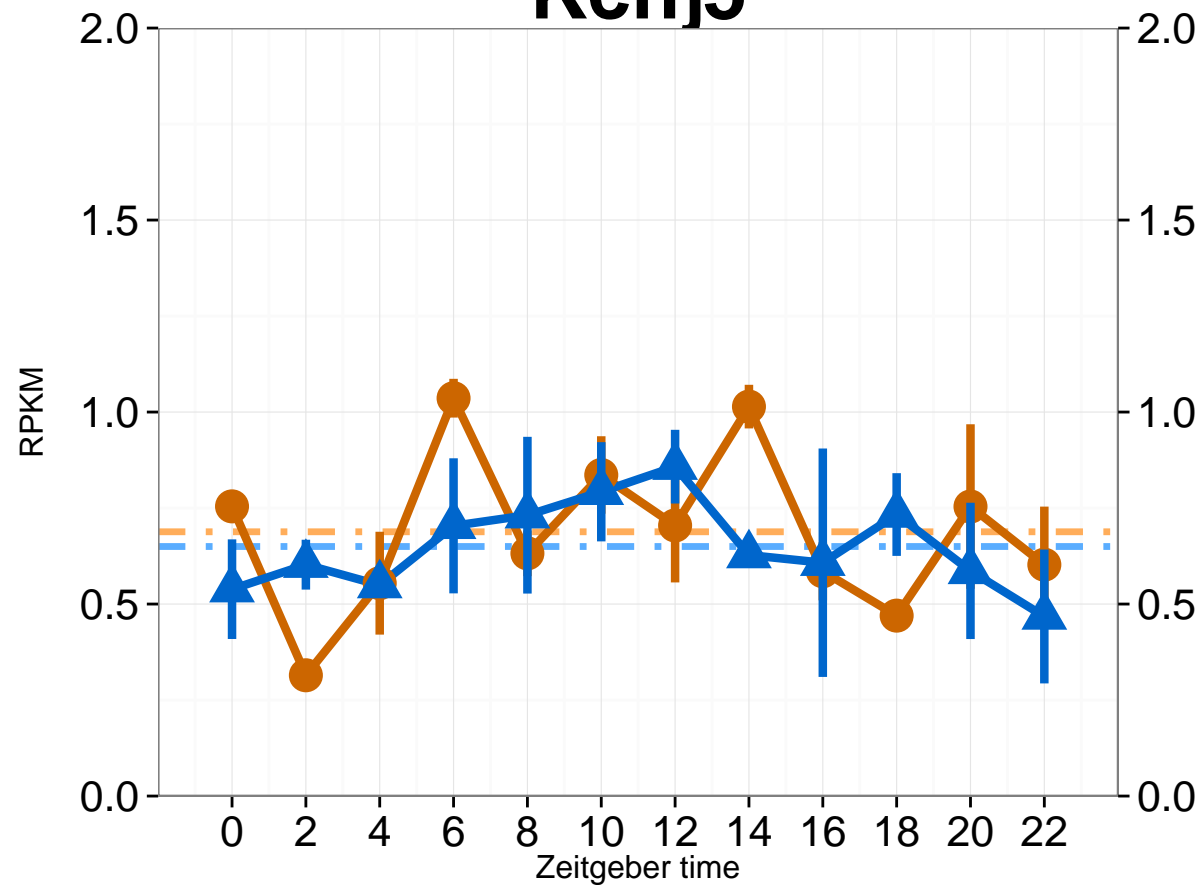

## Kcnj5

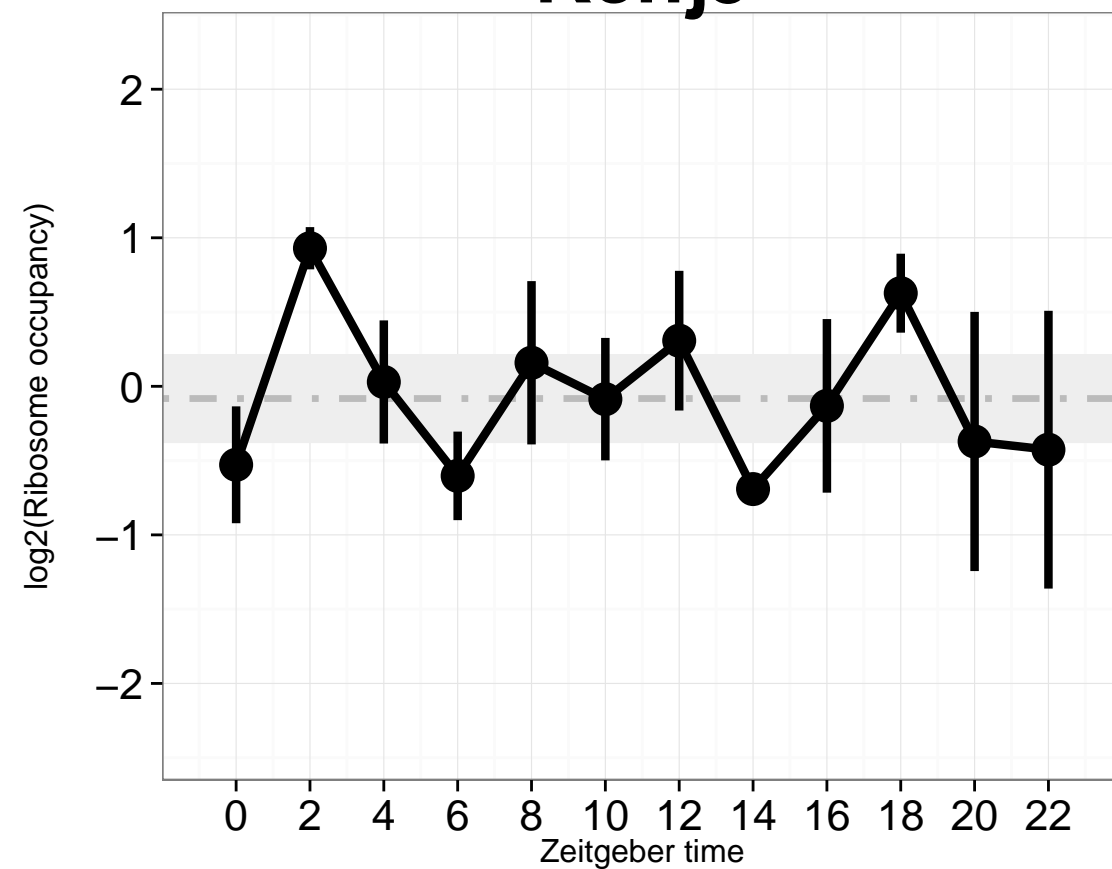

Supplement: Supplementary file 7760 [file 1]

## Gorasp1

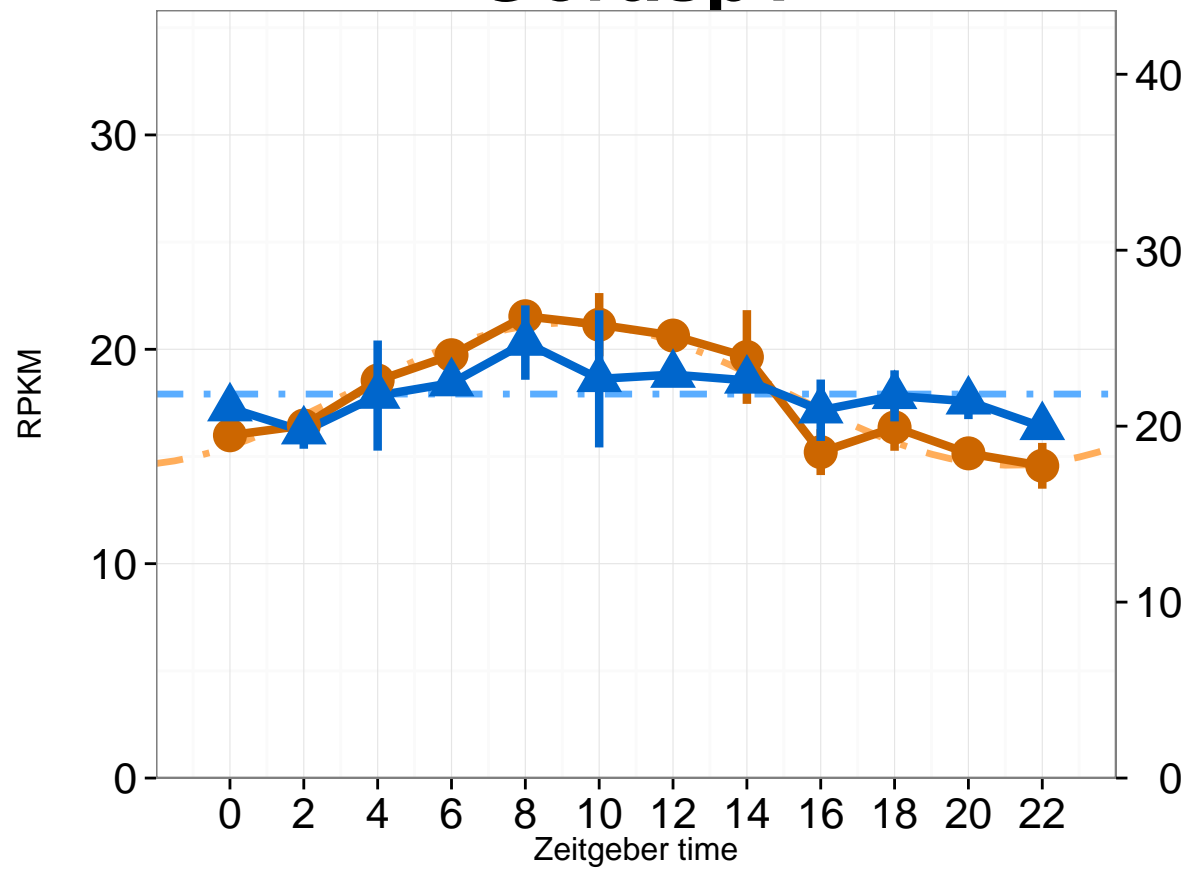

## Gorasp1

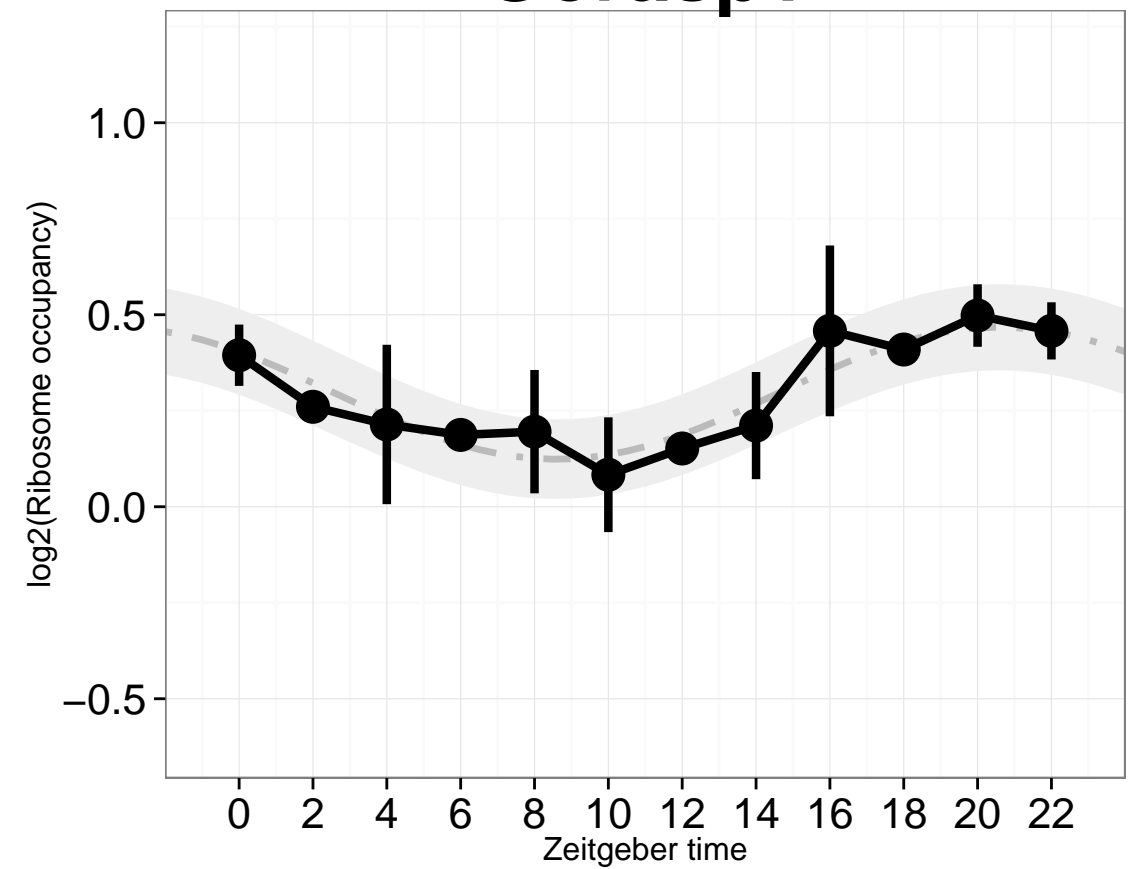

Supplement: Supplementary file 7761 [file 1]

## Cygb

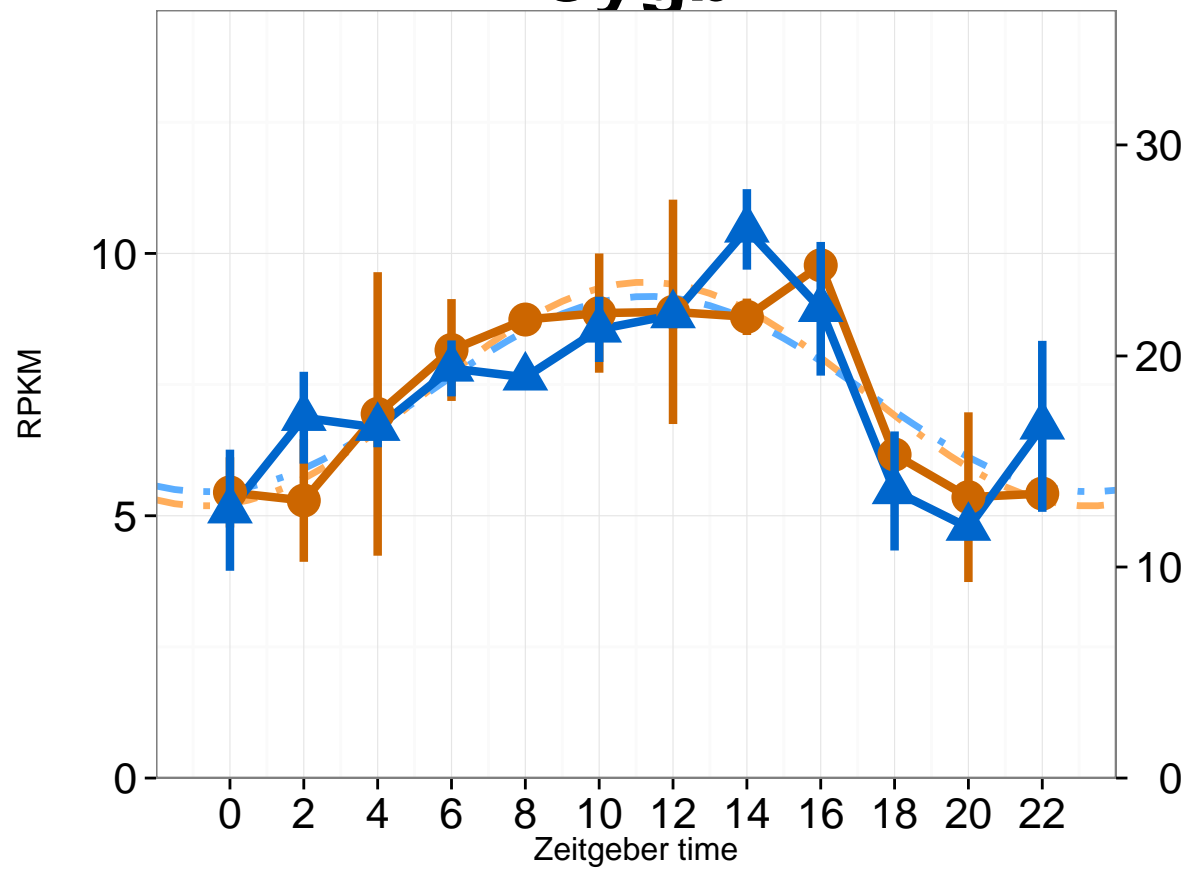

## Cygb

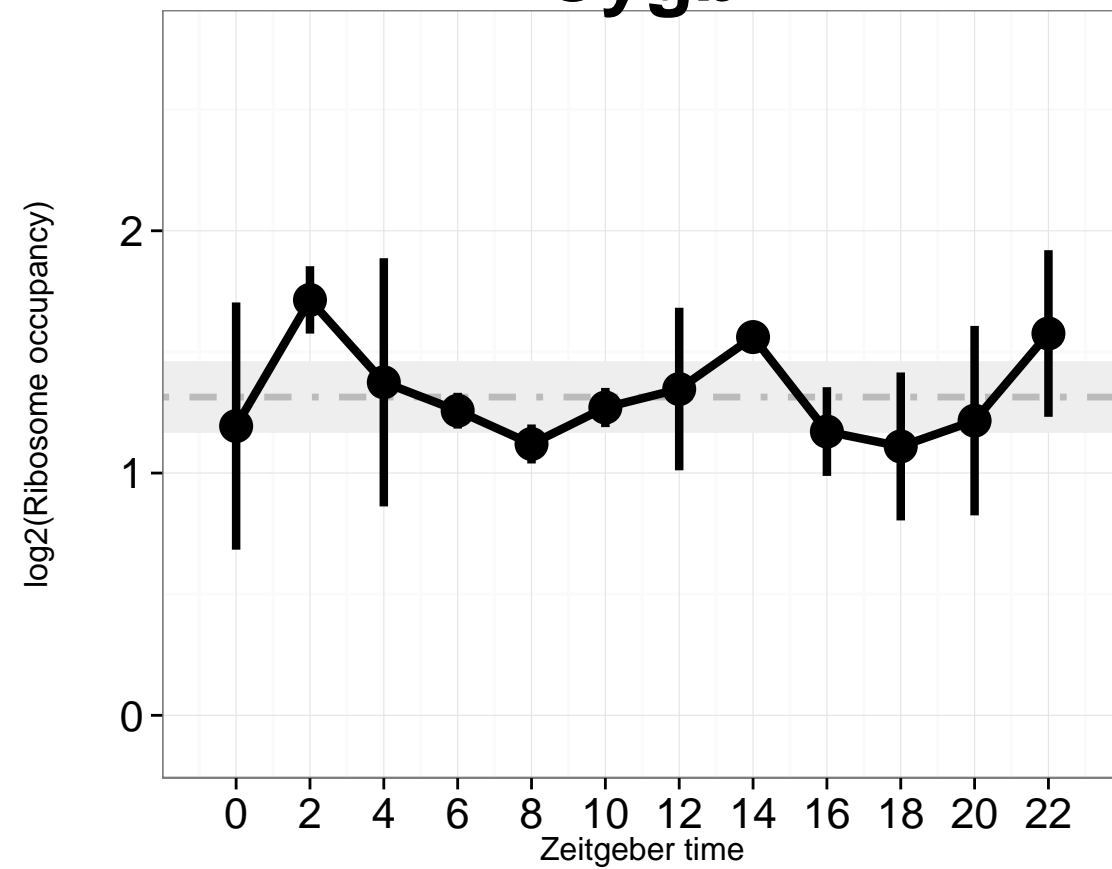

Supplement: Supplementary file 7762 [file 1]

# Atp1a2

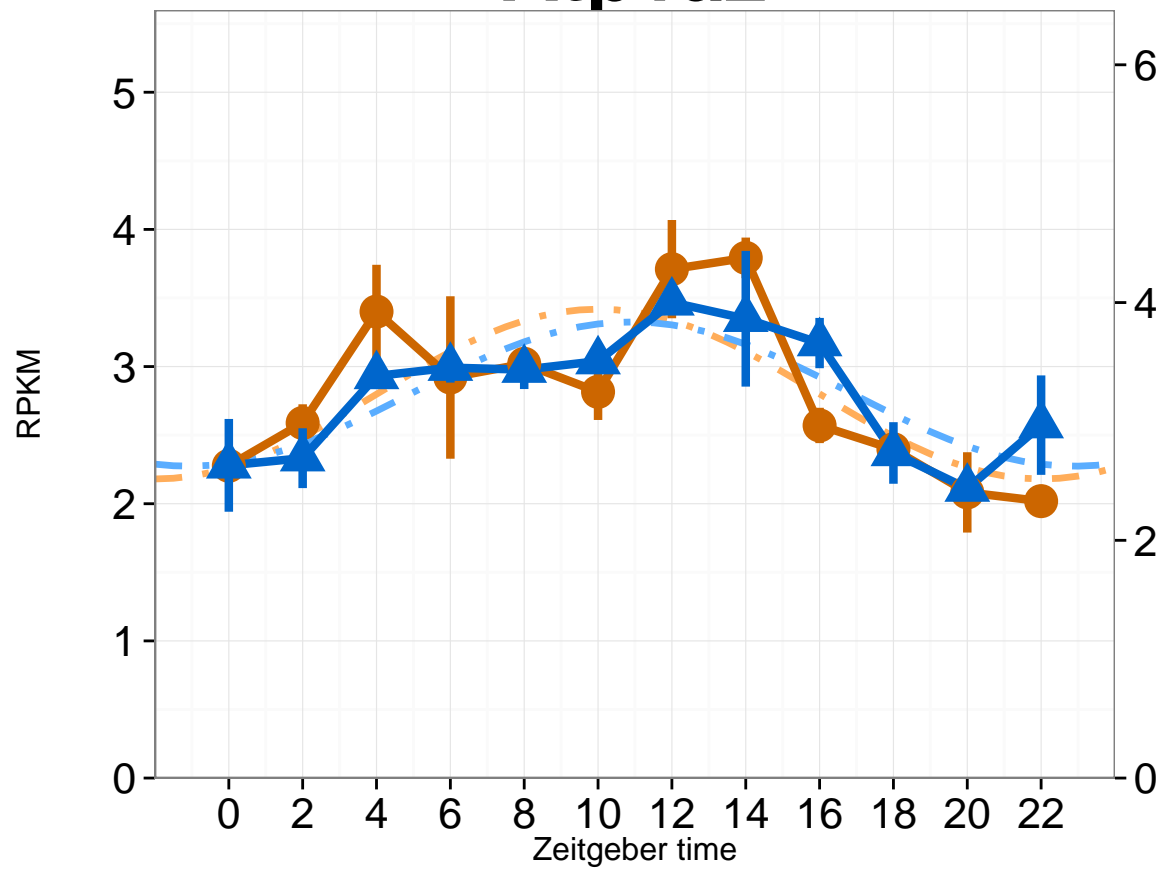

# Atp1a2

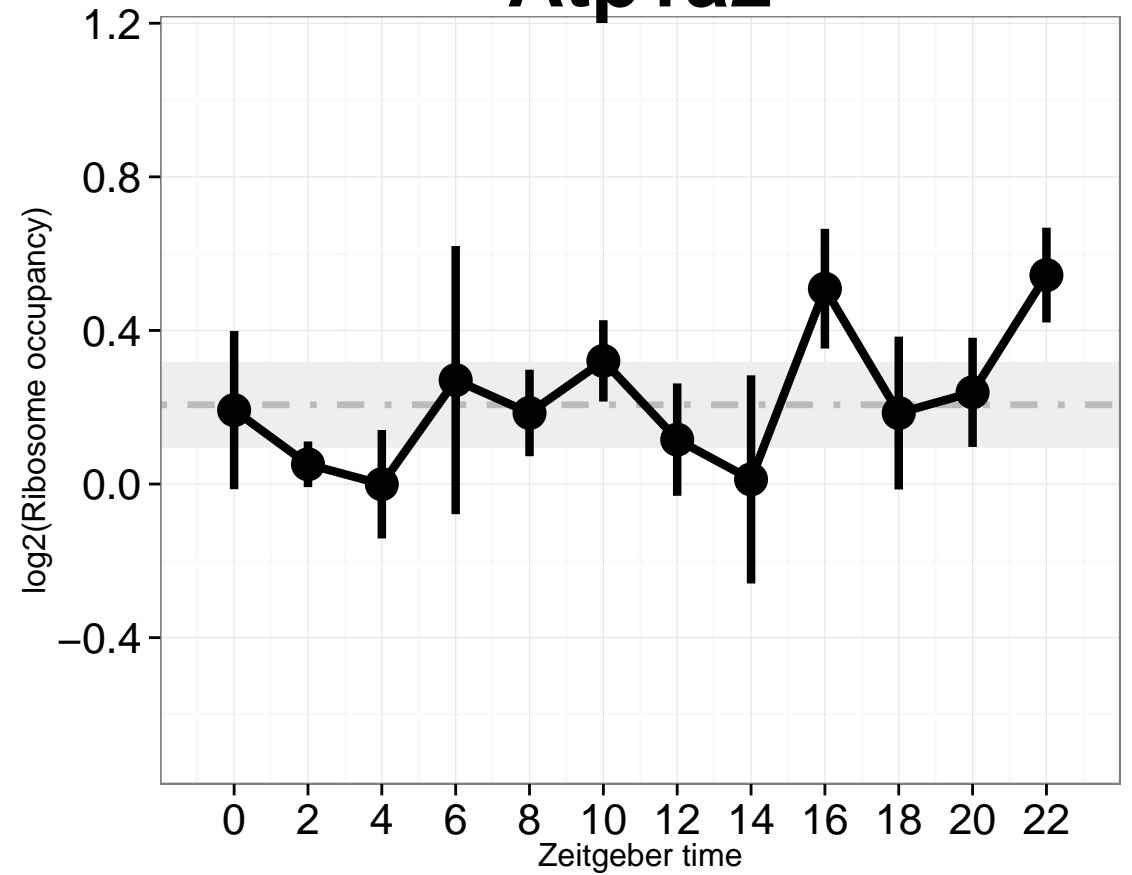

Supplement: Supplementary file 7763 [file 1]

# Rsph3a

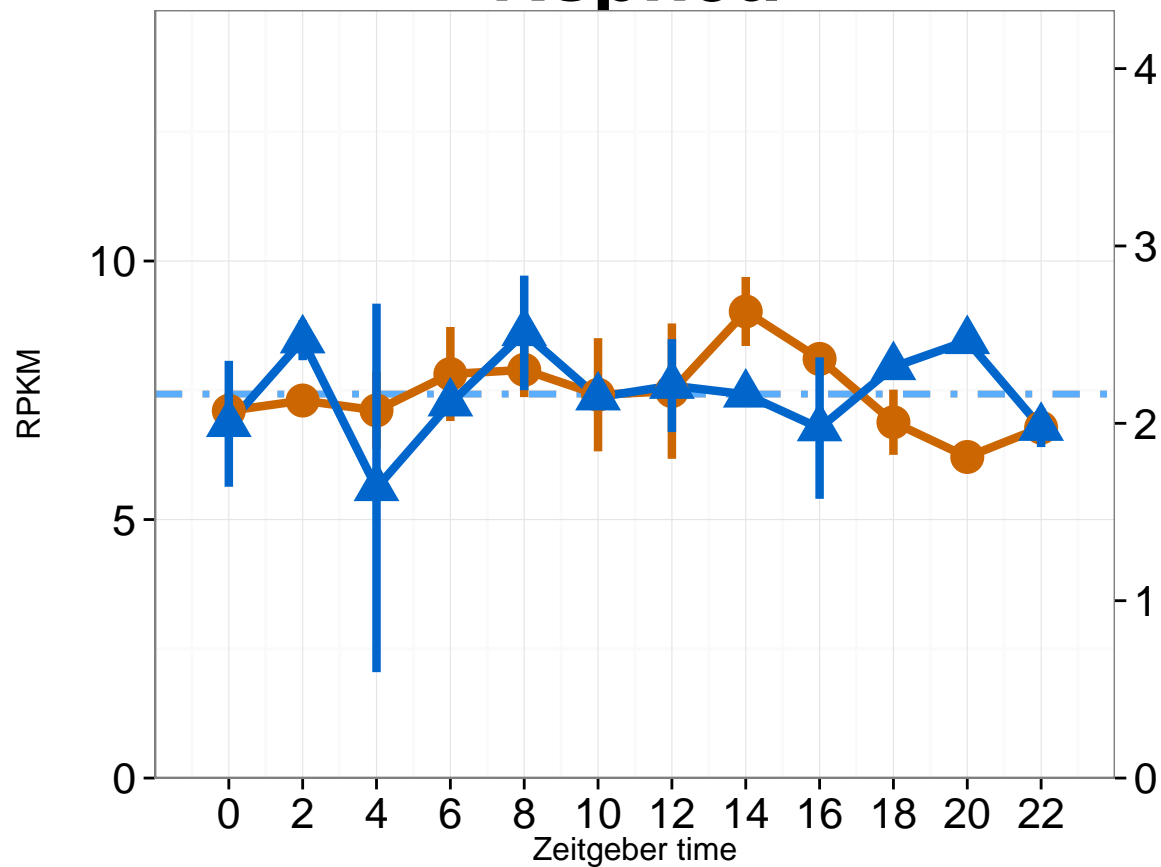

# Rsph3a

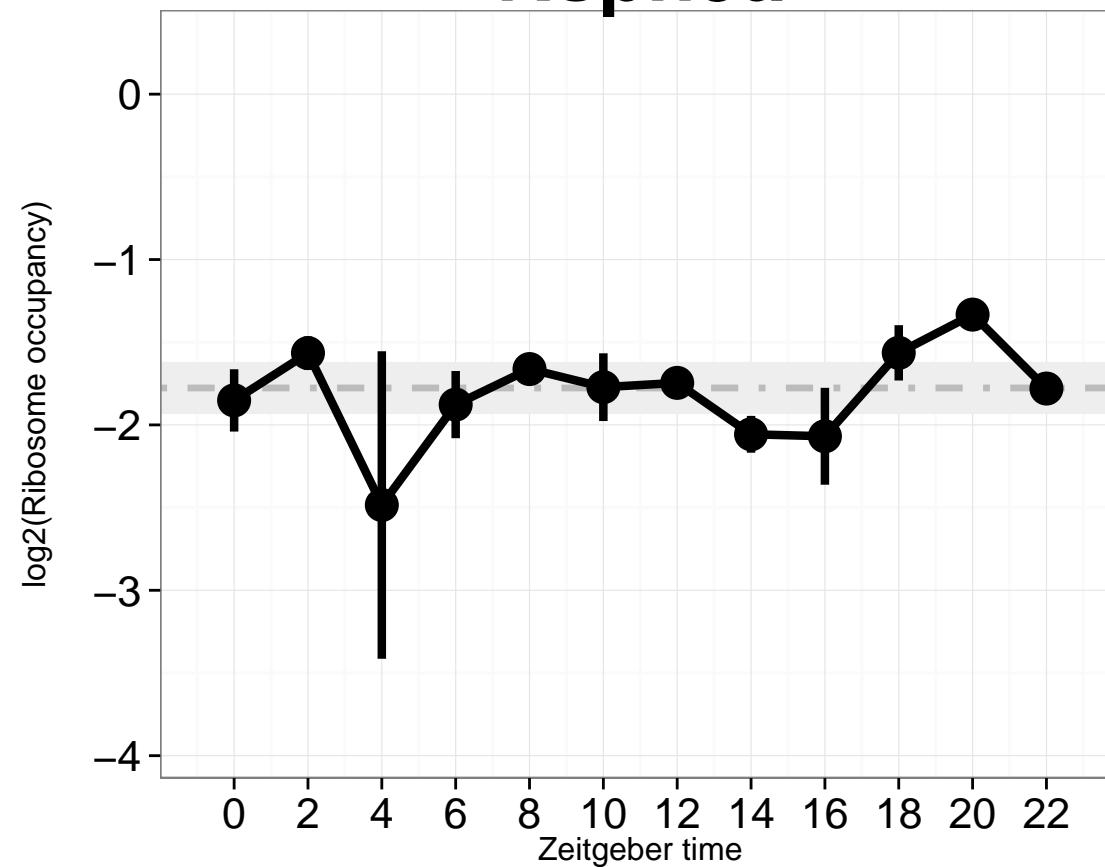

Supplement: Supplementary file 7764 [file 1]

## Gna13

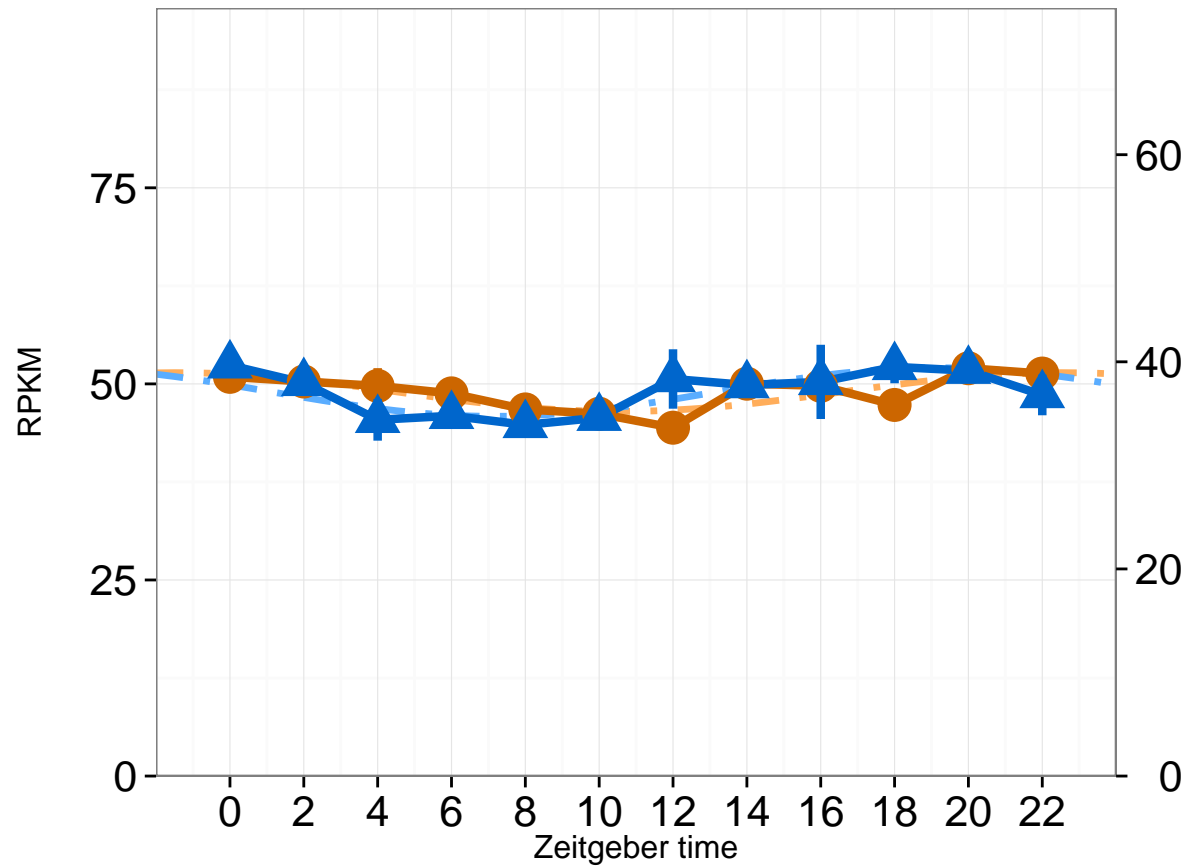

## Gna13

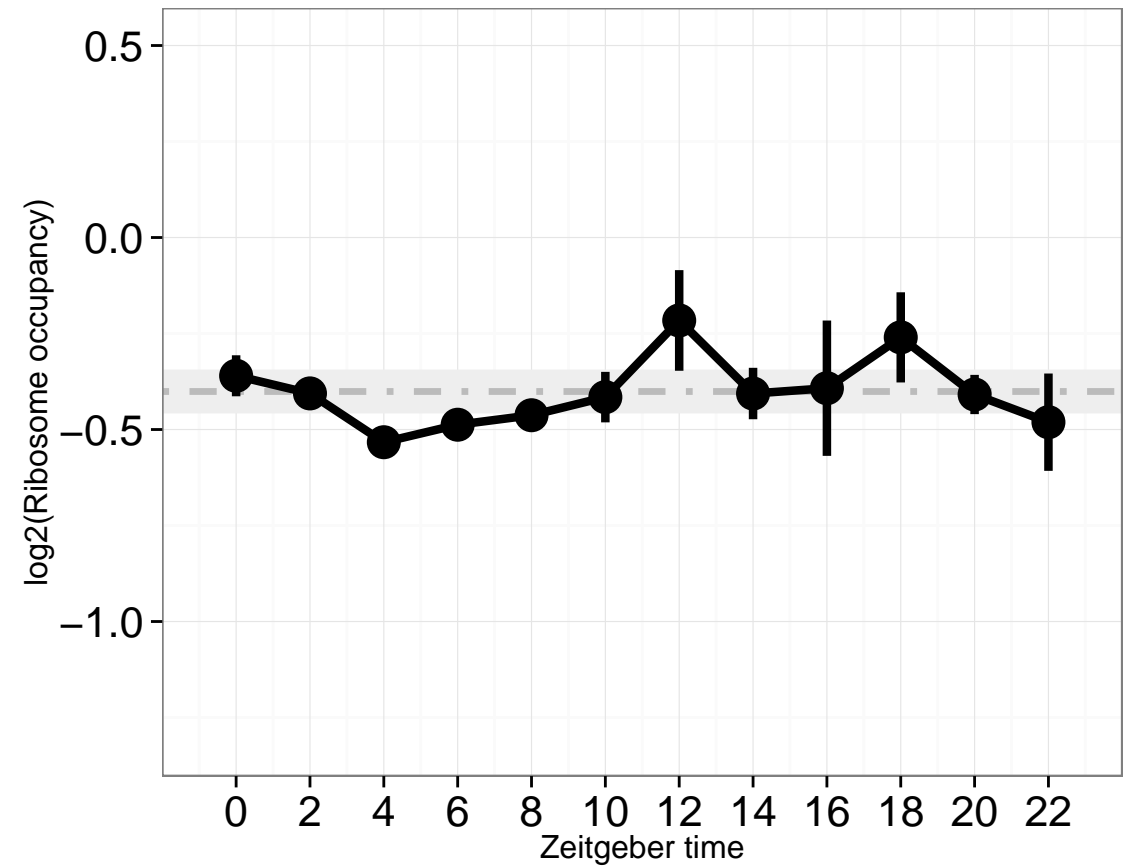

Supplement: Supplementary file 7765 [file 1]

# Tfpt

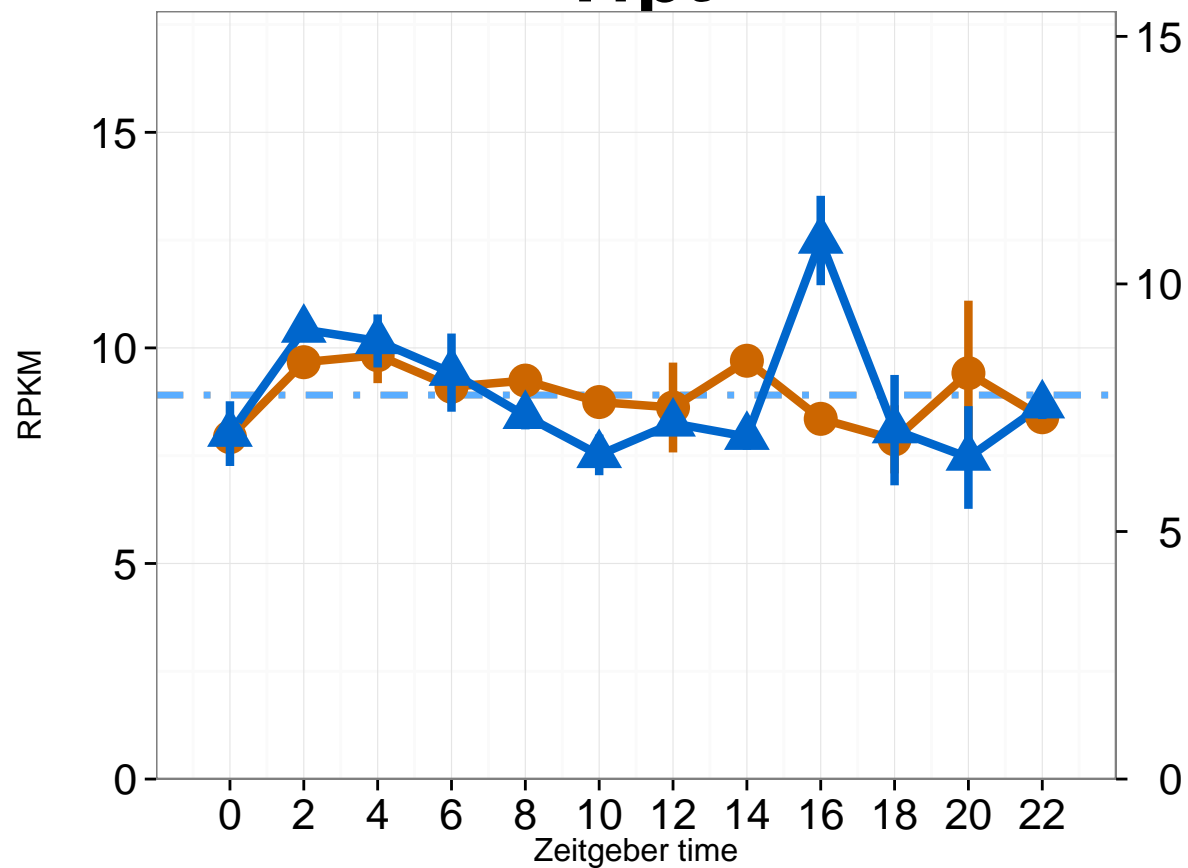

# Tfpt

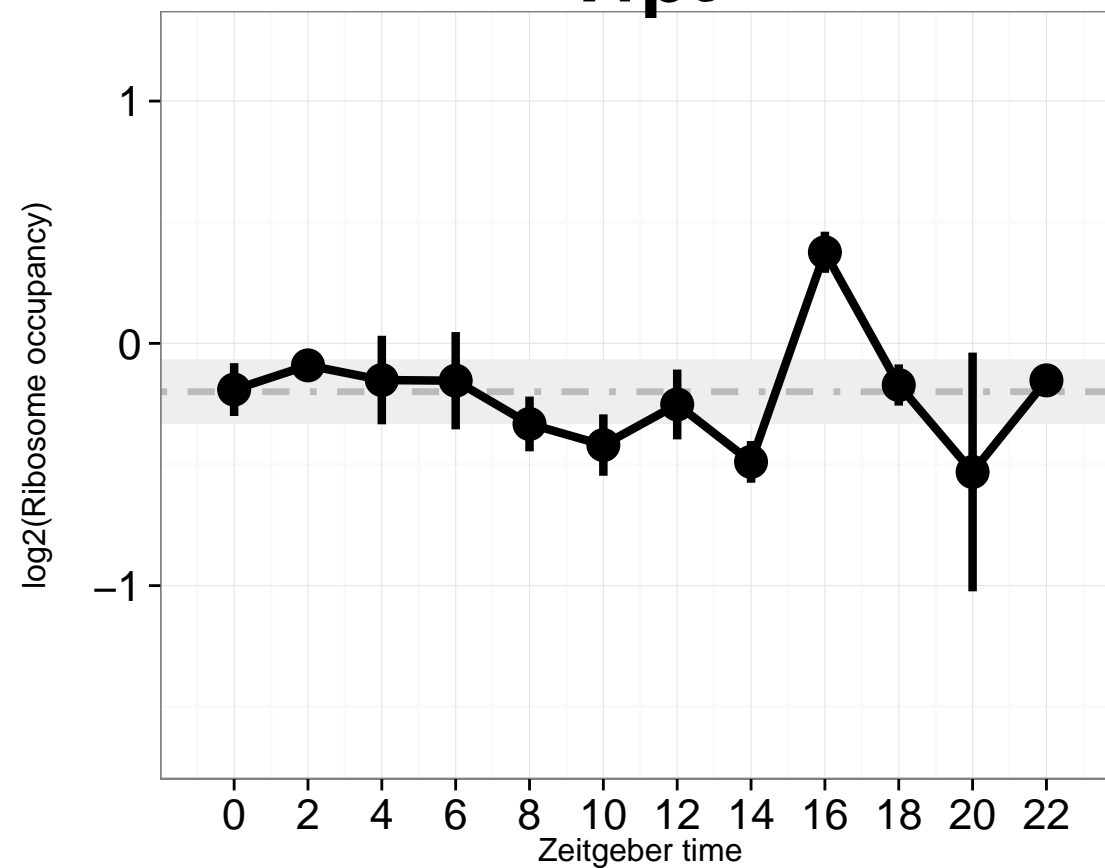

Supplement: Supplementary file 7766 [file 1]

## Surf4

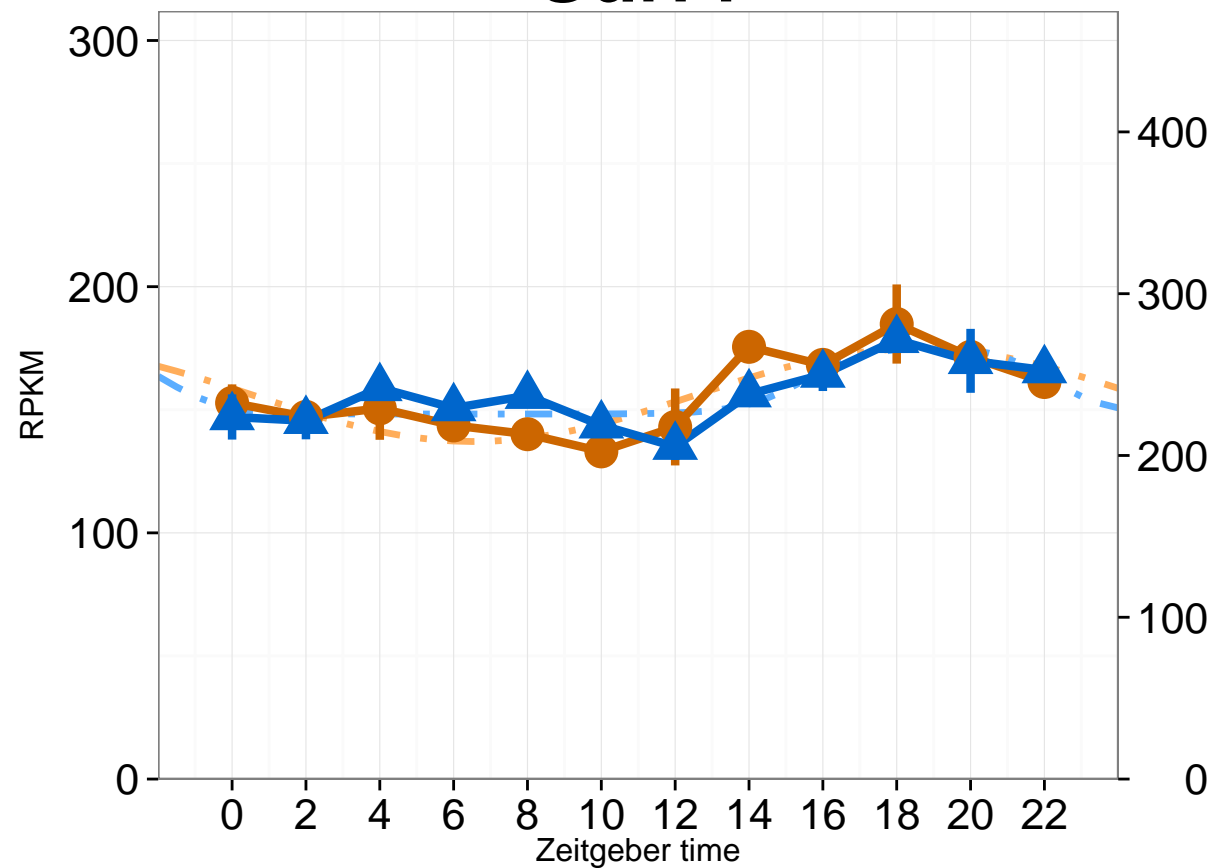

## Surf4

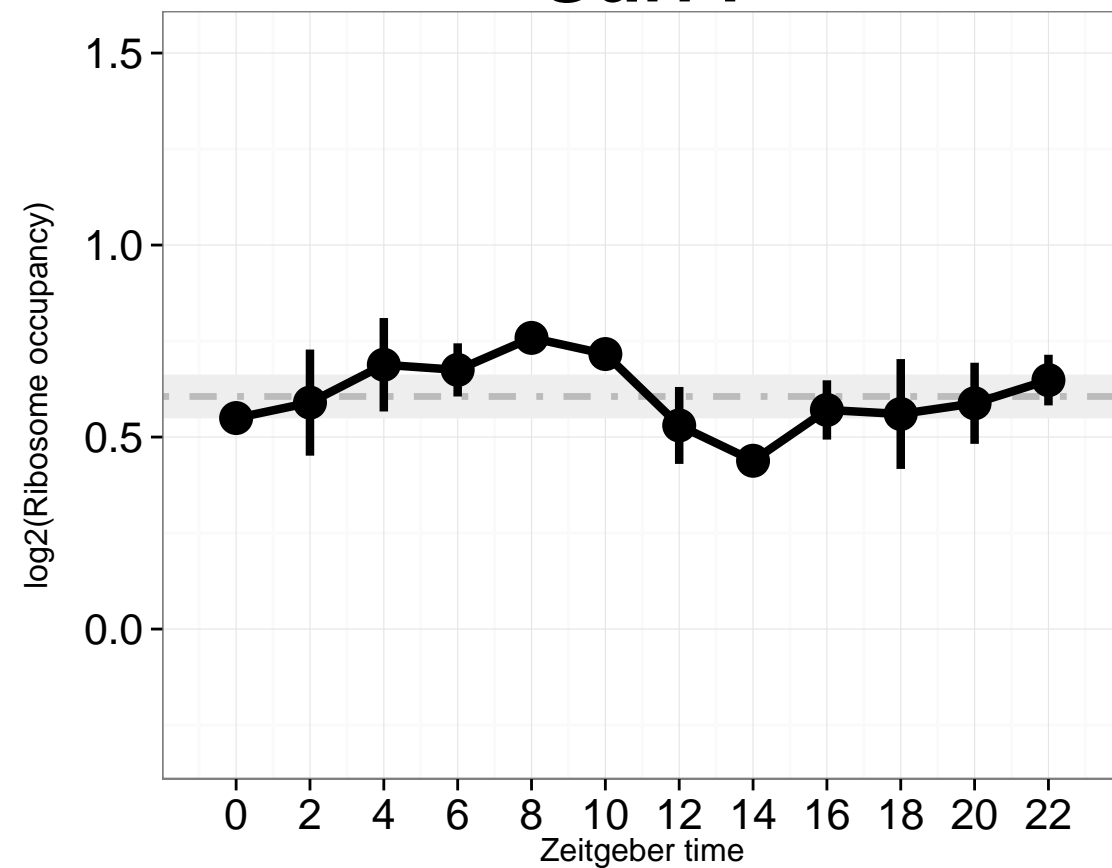

Supplement: Supplementary file 7767 [file 1]

# Pitpnm2

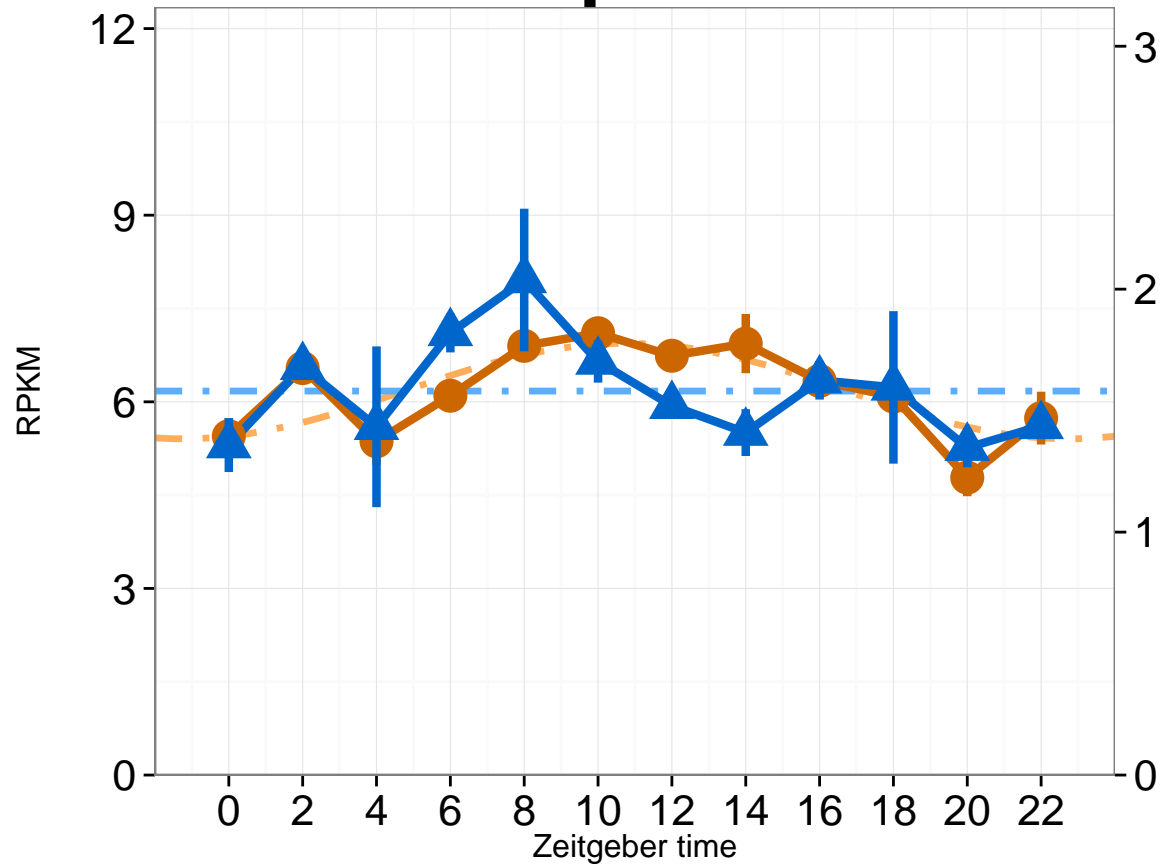

# Pitpnm2

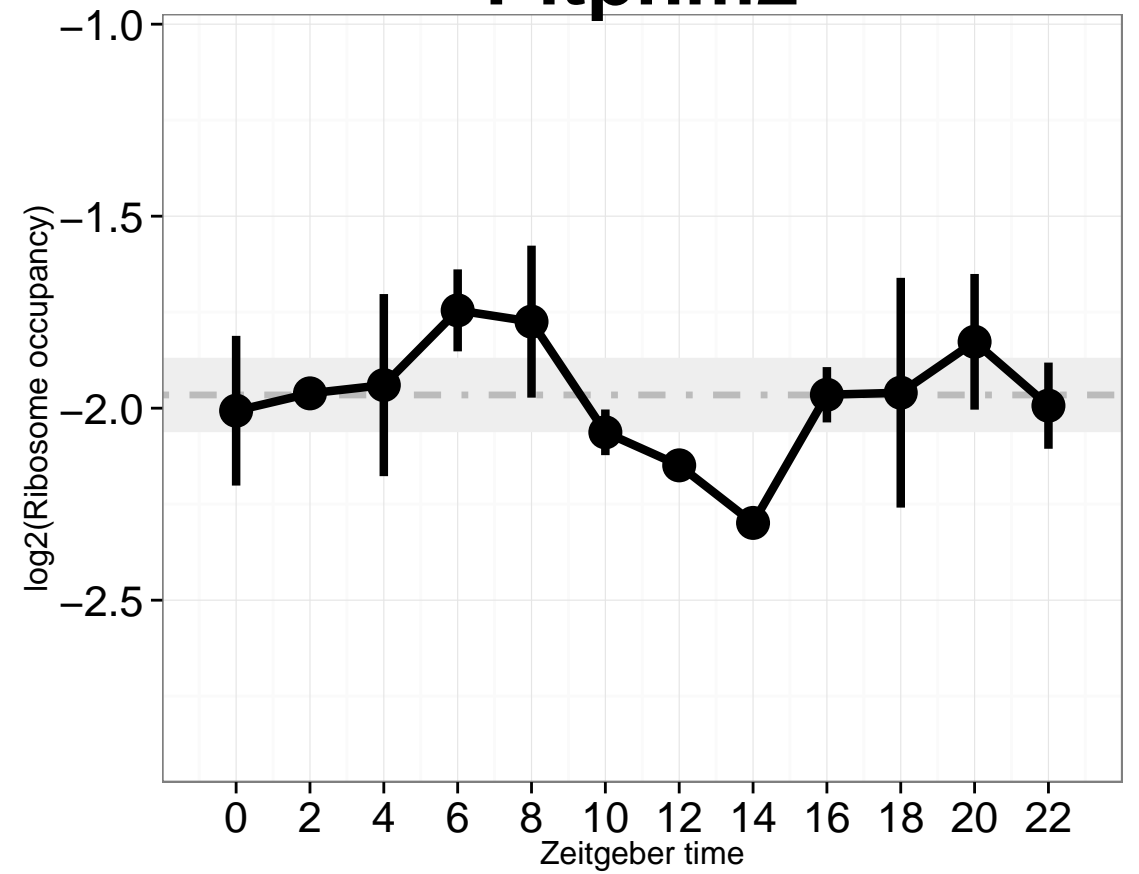

Supplement: Supplementary file 7768 [file 1]

## Il4ra

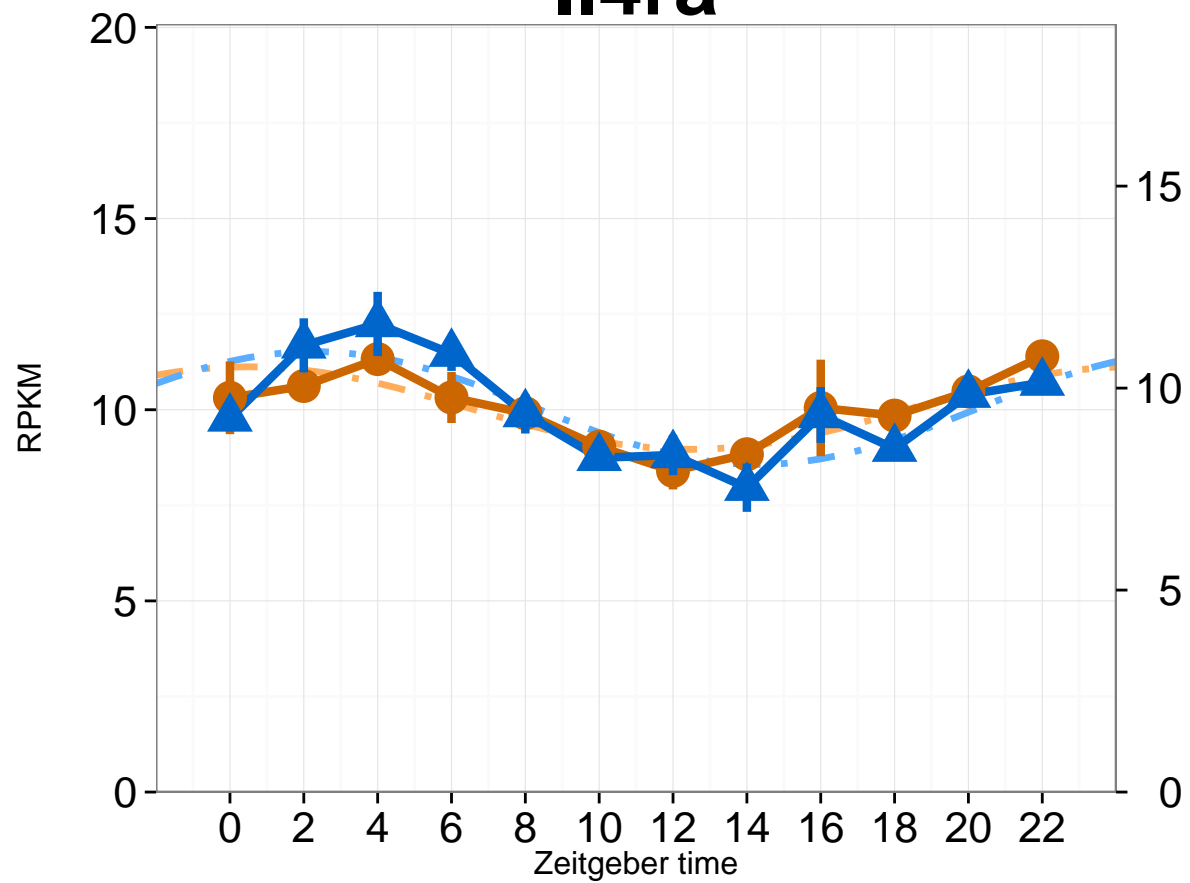

## Il4ra

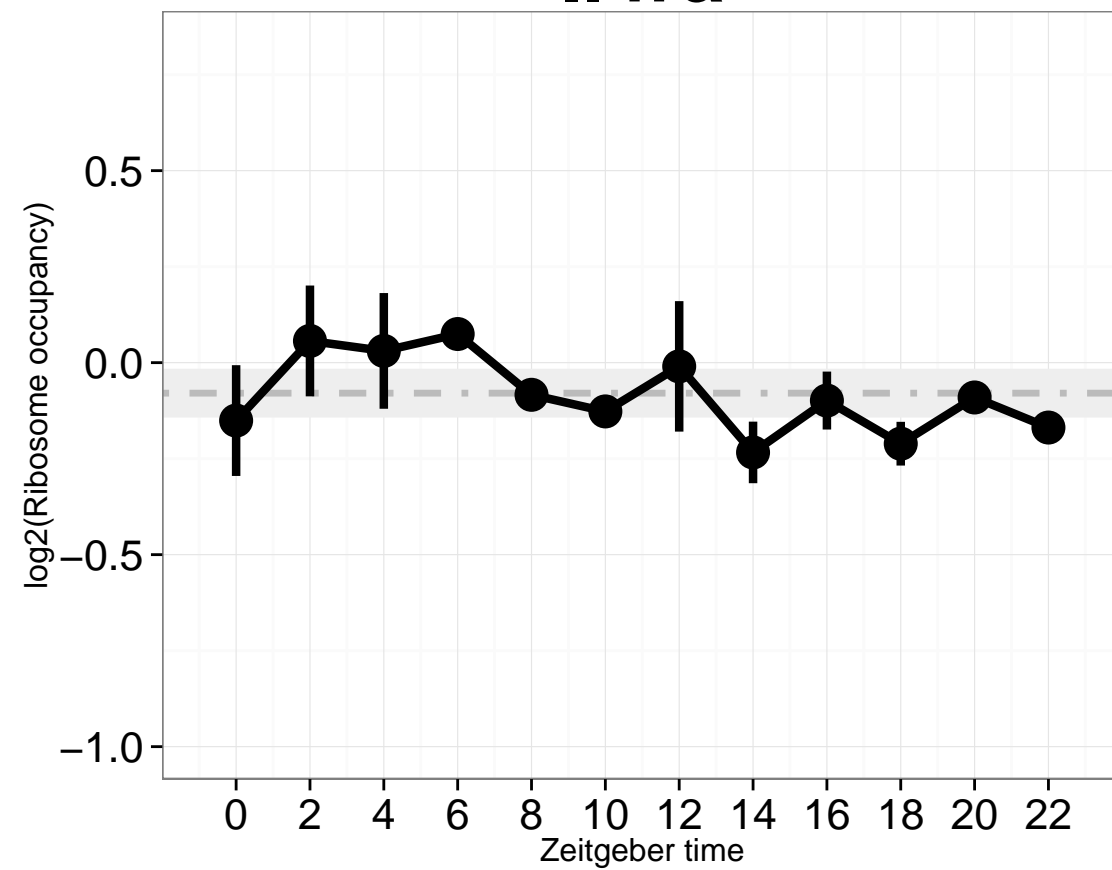

Supplement: Supplementary file 7769 [file 1]

# Anapc1

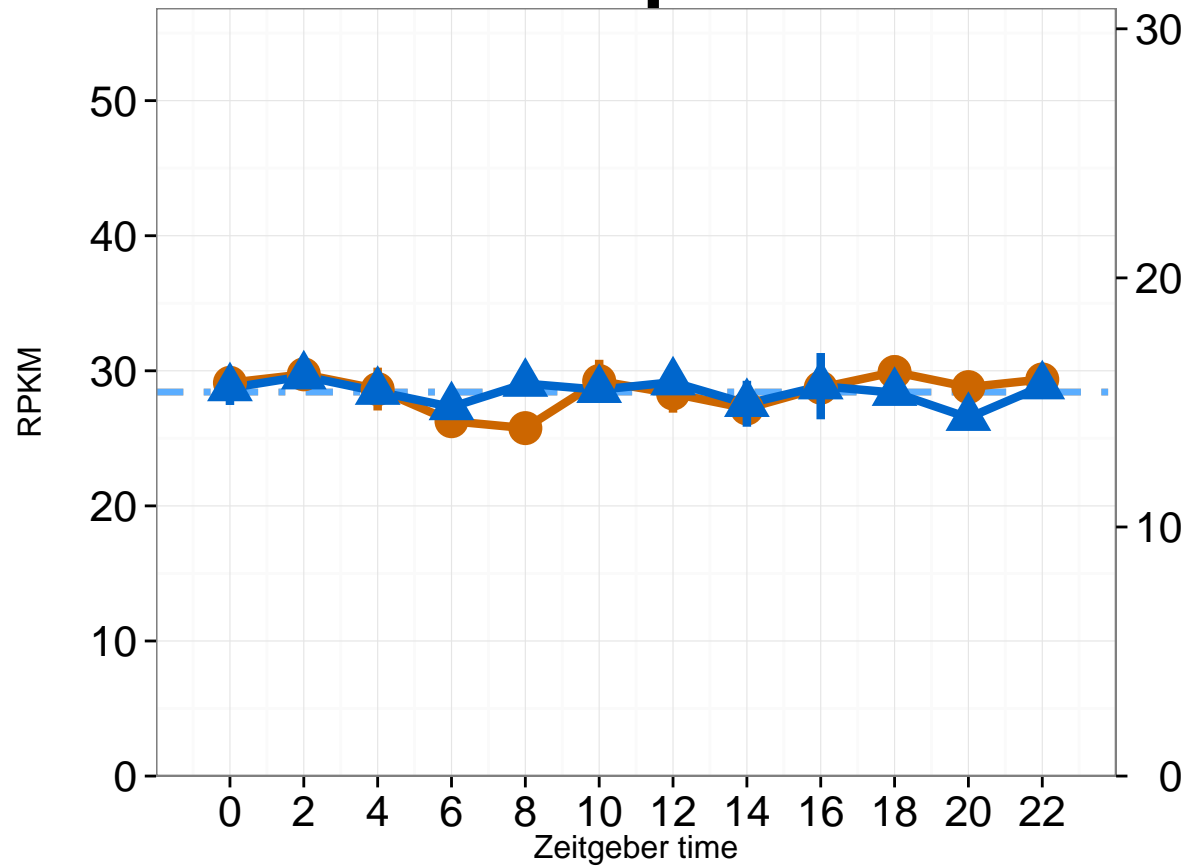

# Anapc1

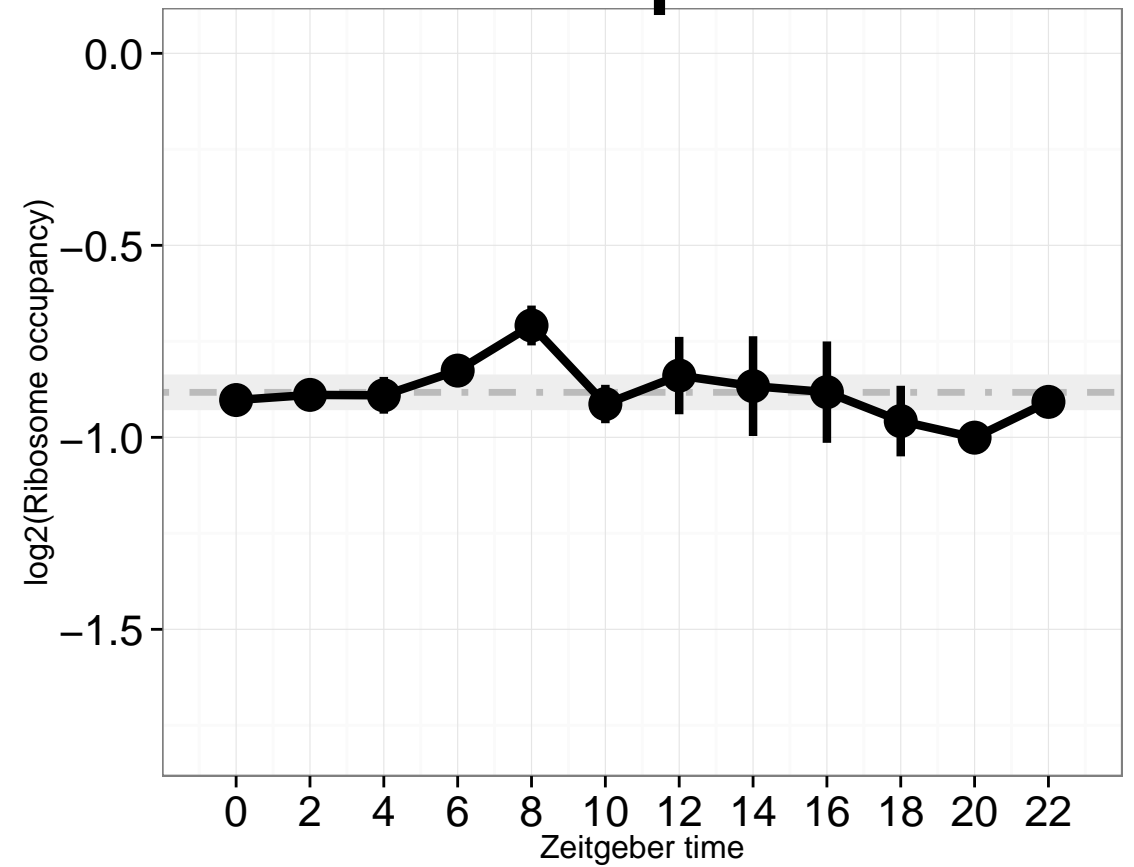

Supplement: Supplementary file 7770 [file 1]

## Mcm9

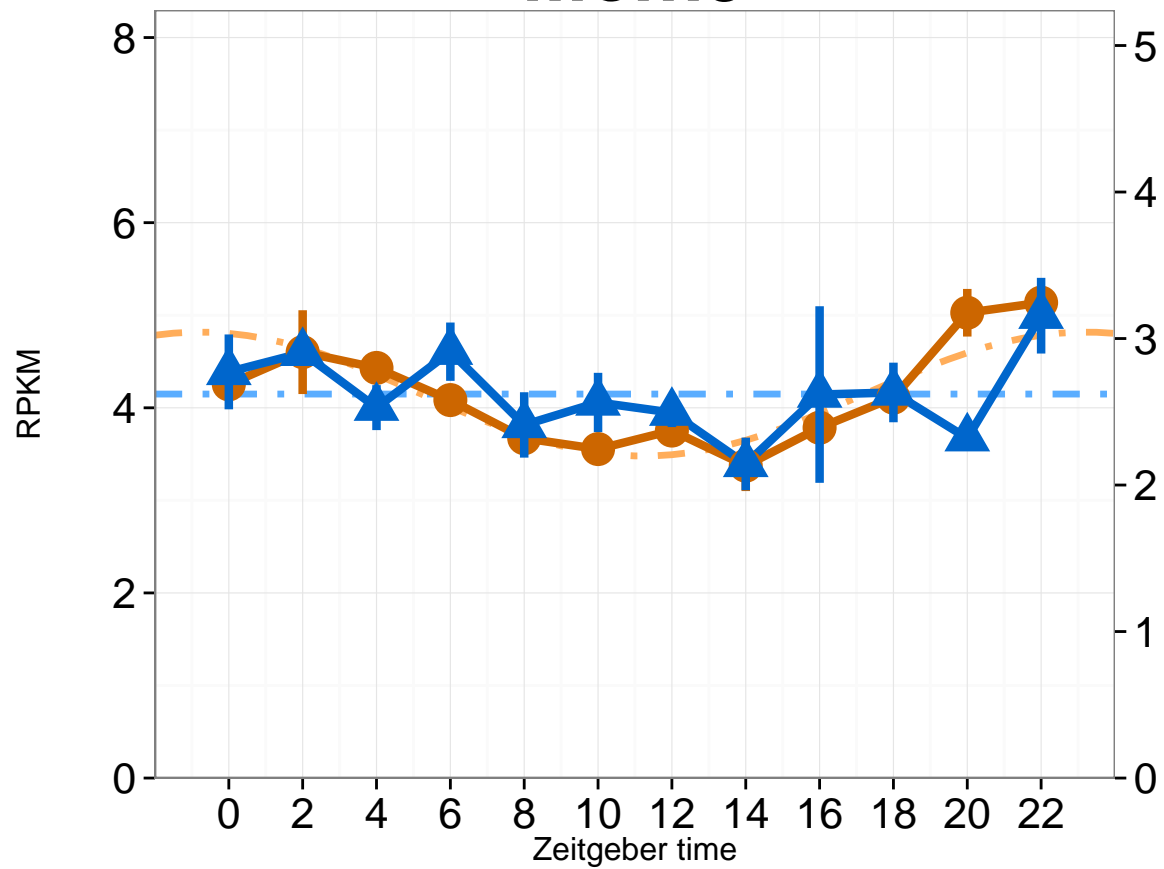

## Mcm9

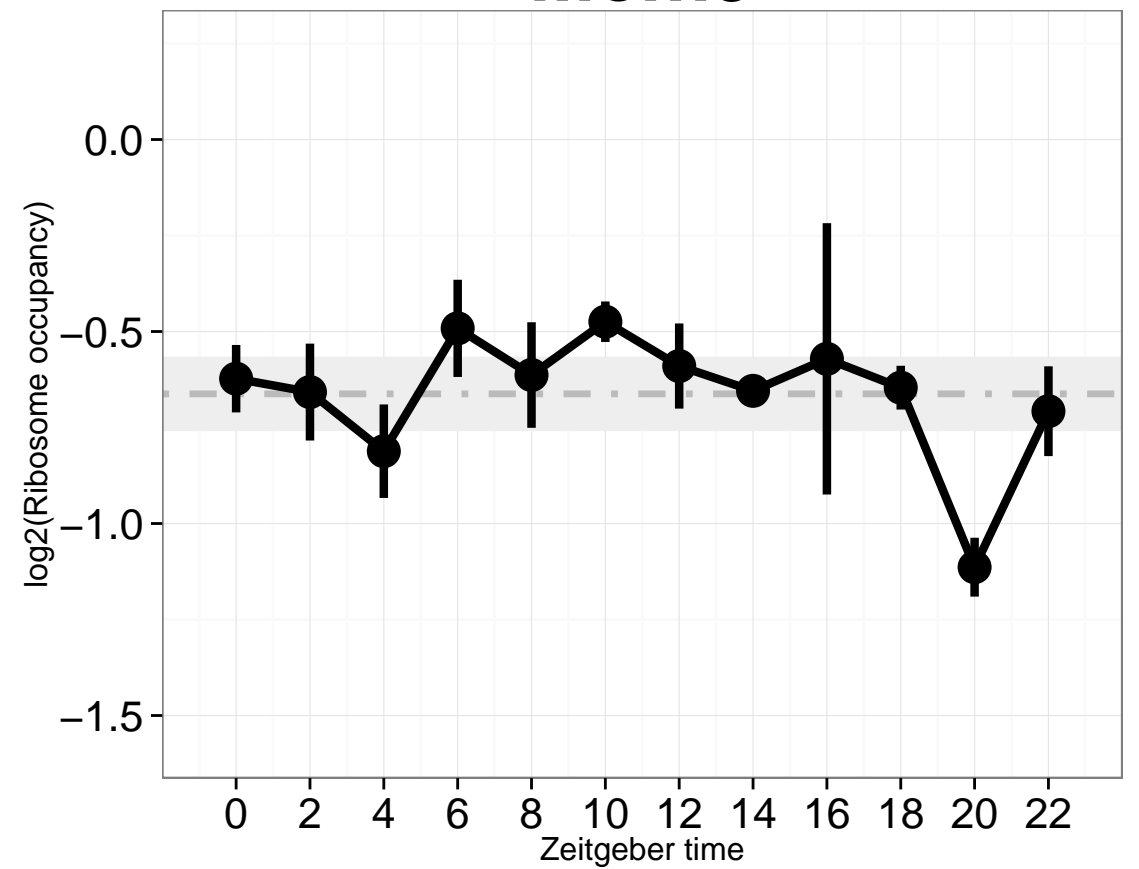

Supplement: Supplementary file 7771 [file 1]

## Hgf

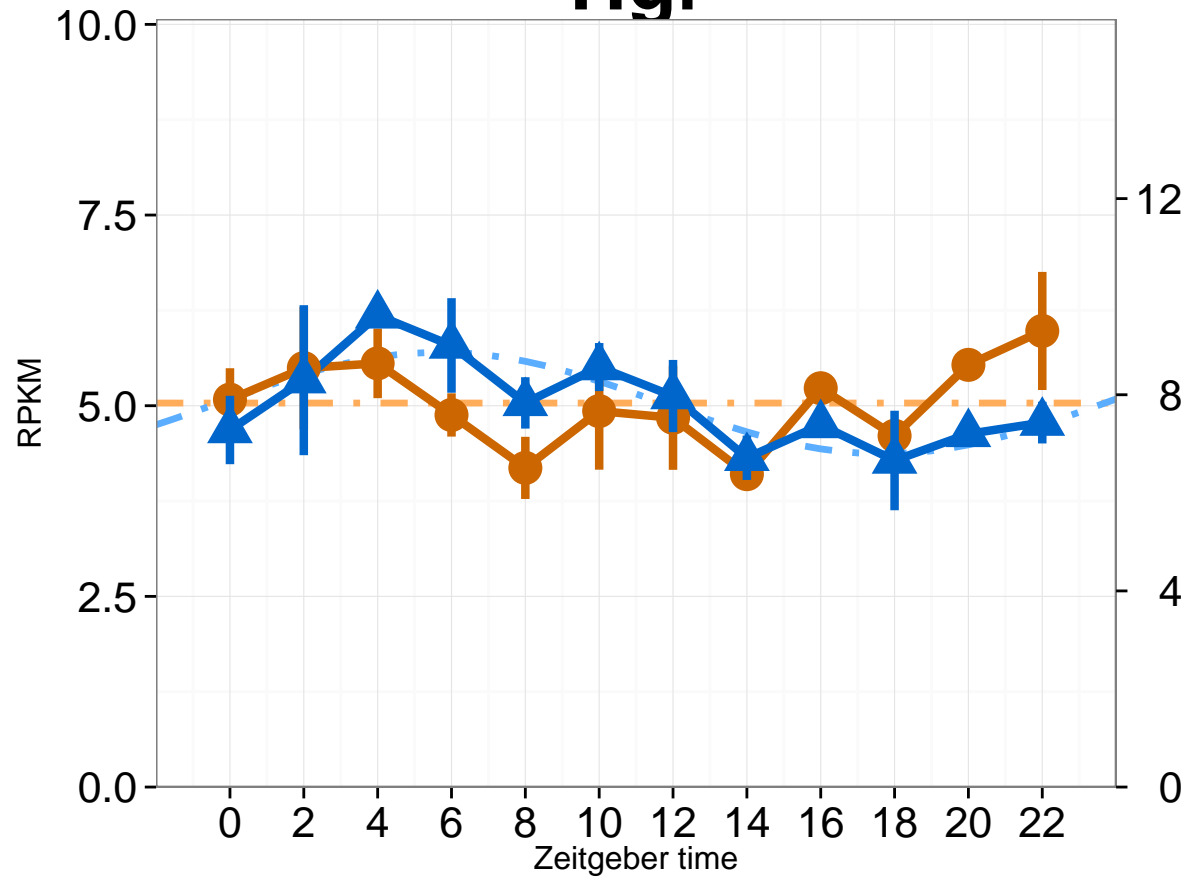

## Hgf

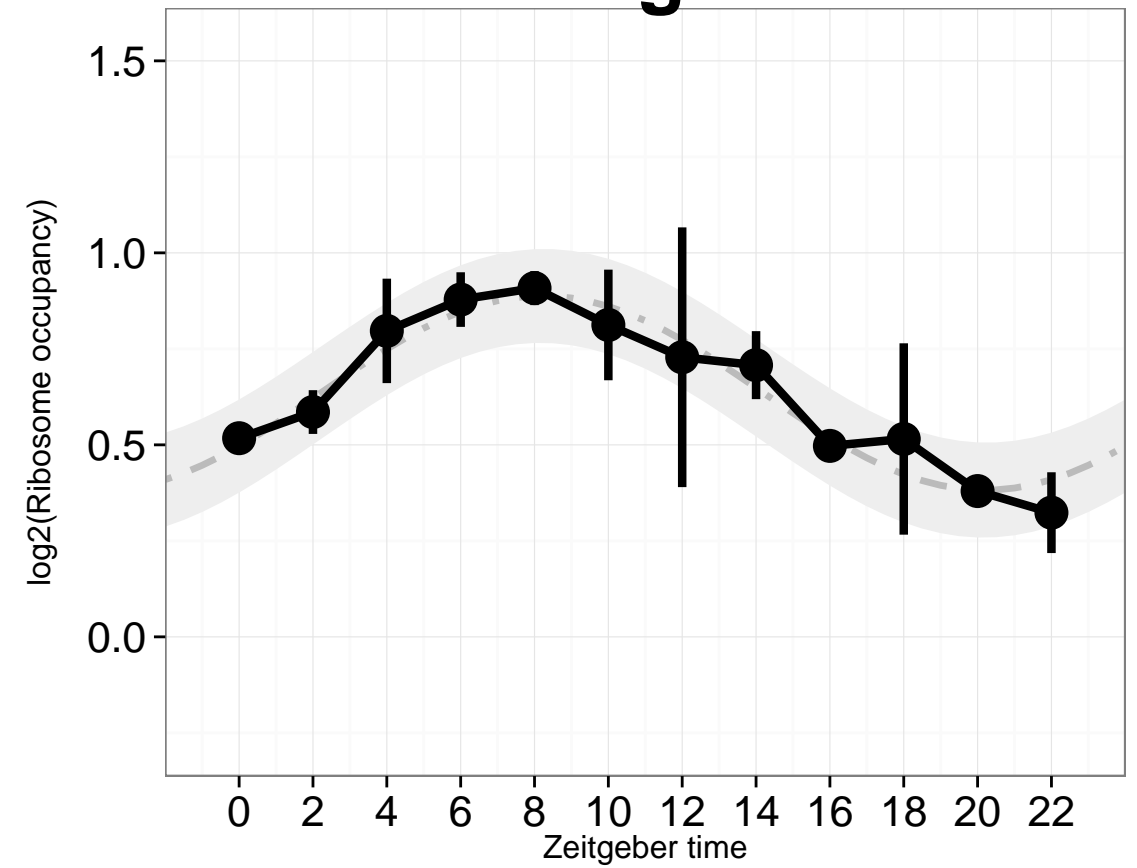

Supplement: Supplementary file 7772 [file 1]

## Dst

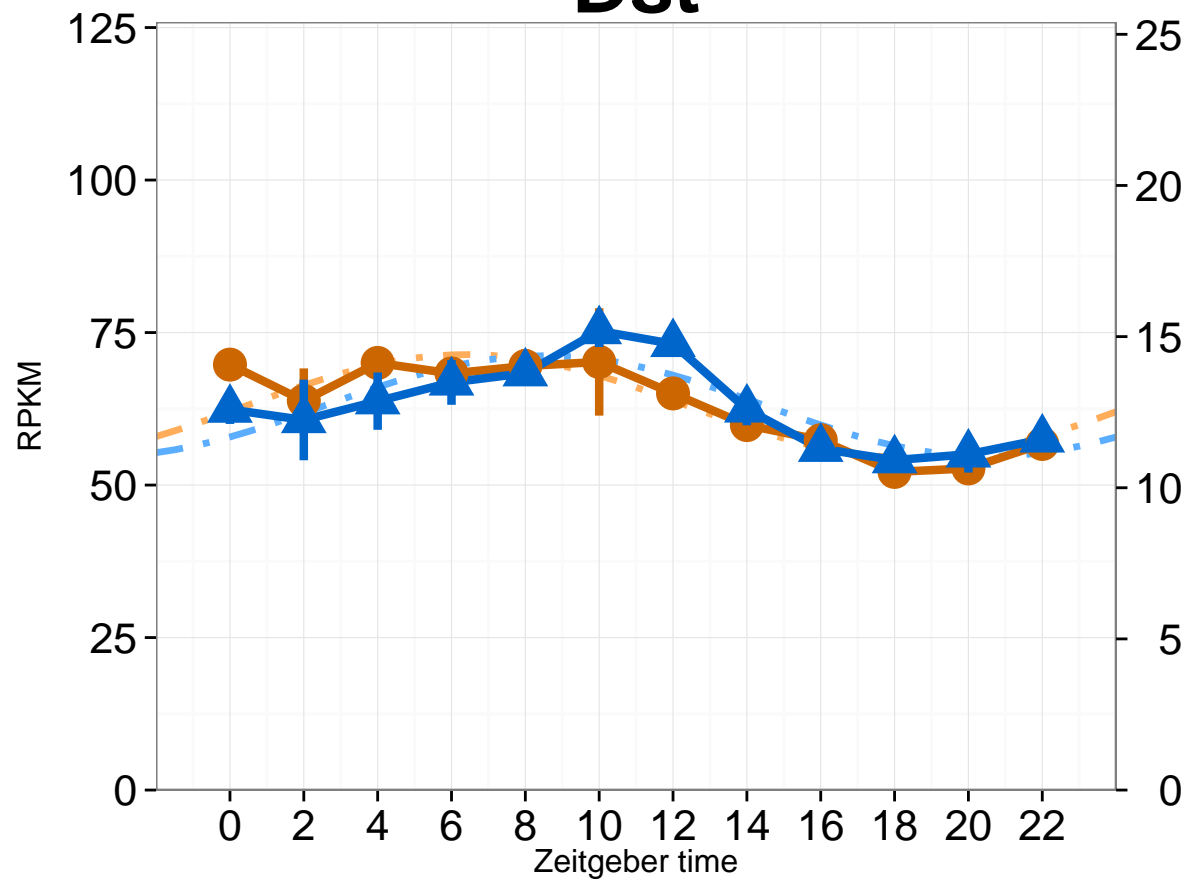

## Dst

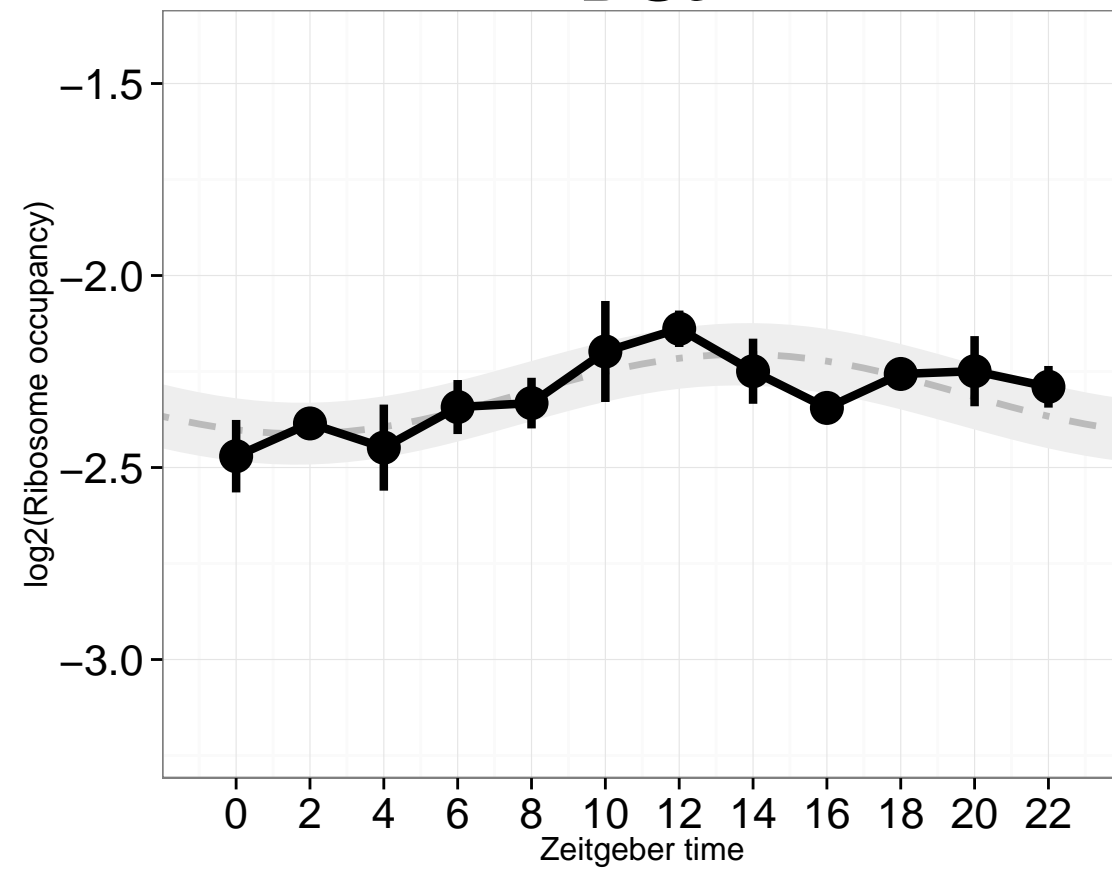

Supplement: Supplementary file 7773 [file 1]

# Taf1c

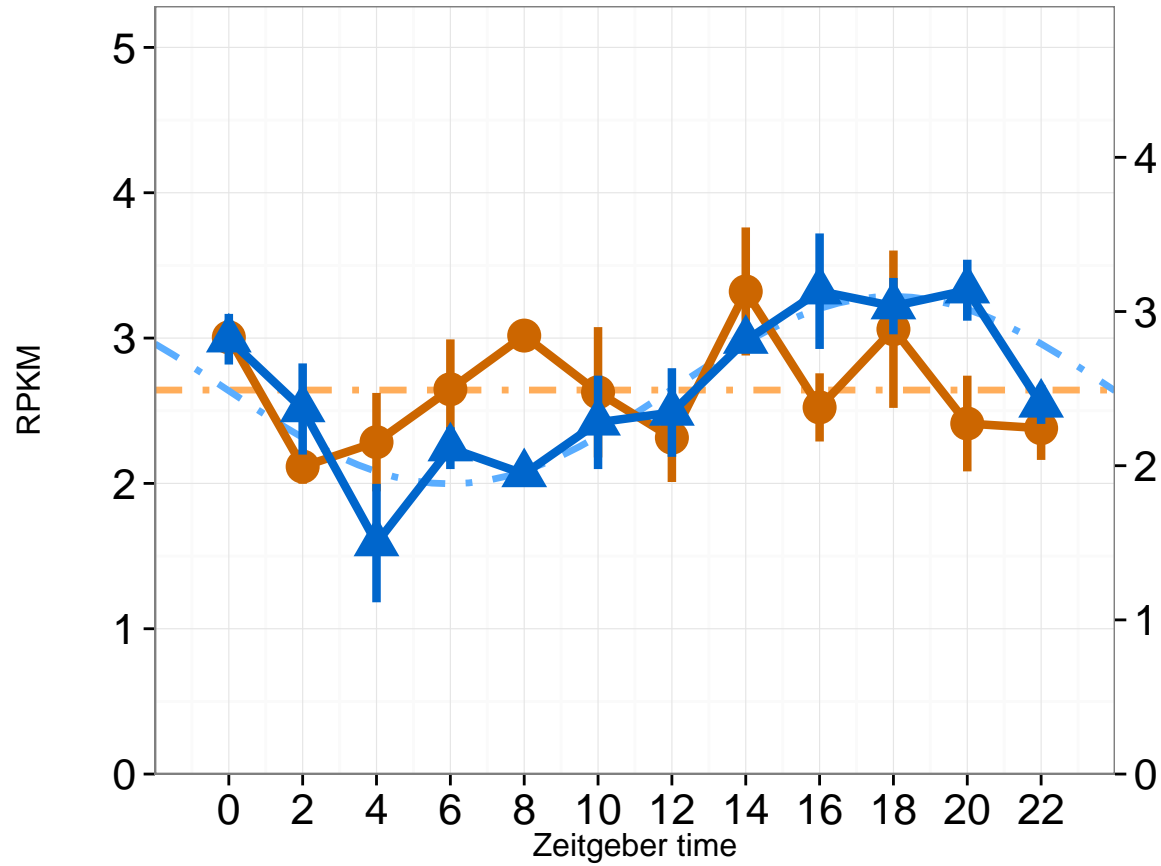

# Taf1c

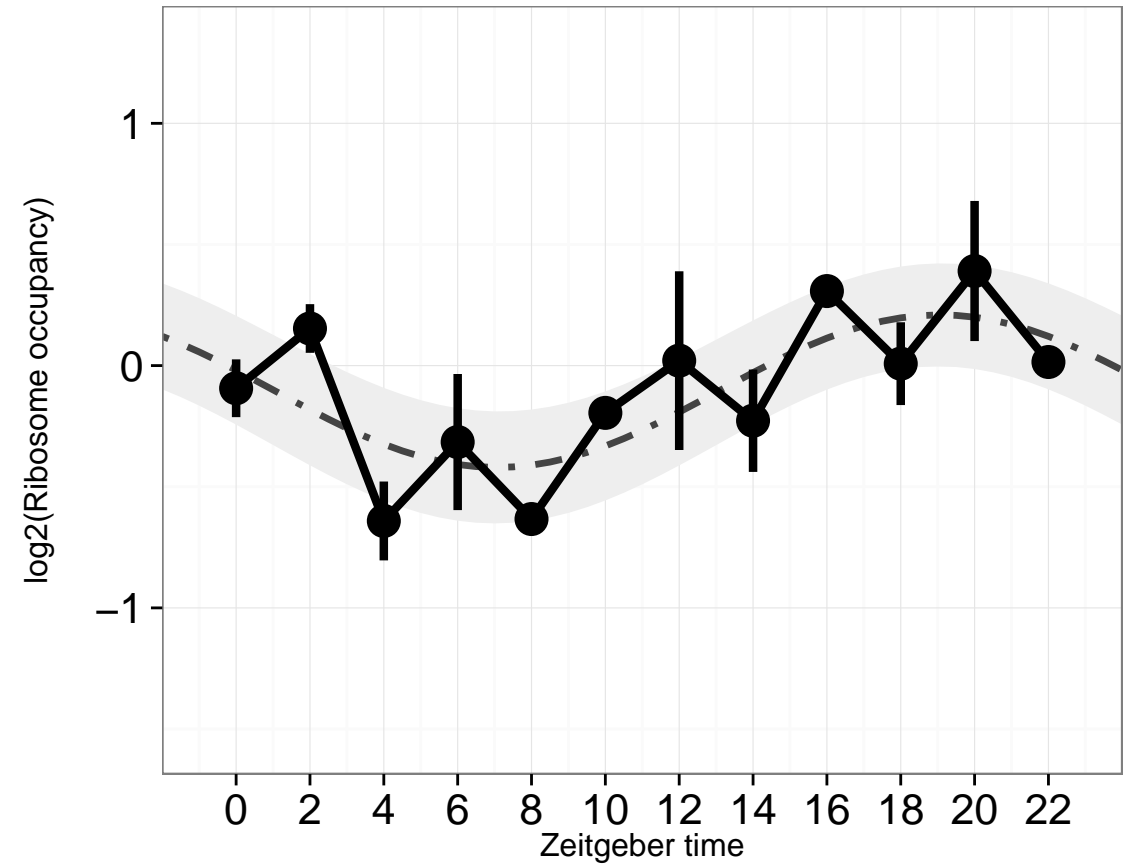

Supplement: Supplementary file 7774 [file 1]

# Hspa12b

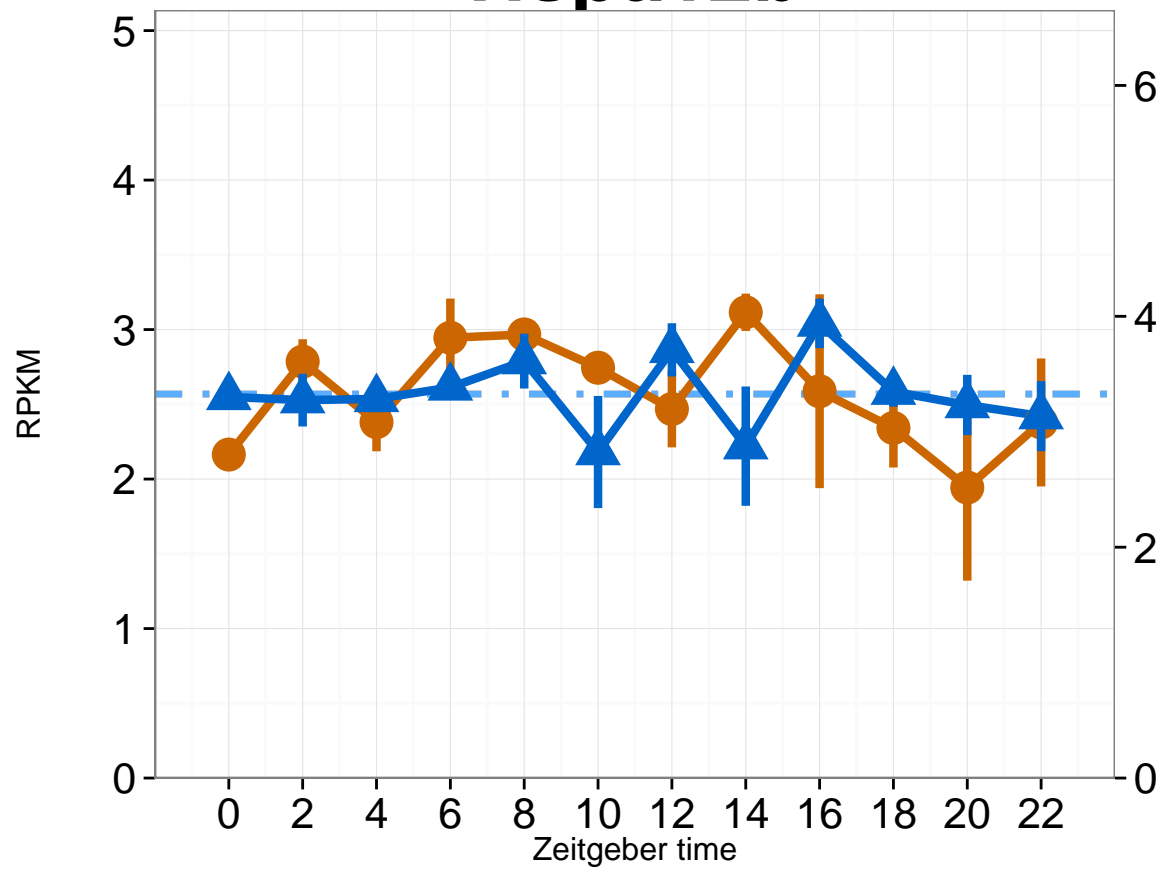

# Hspa12b

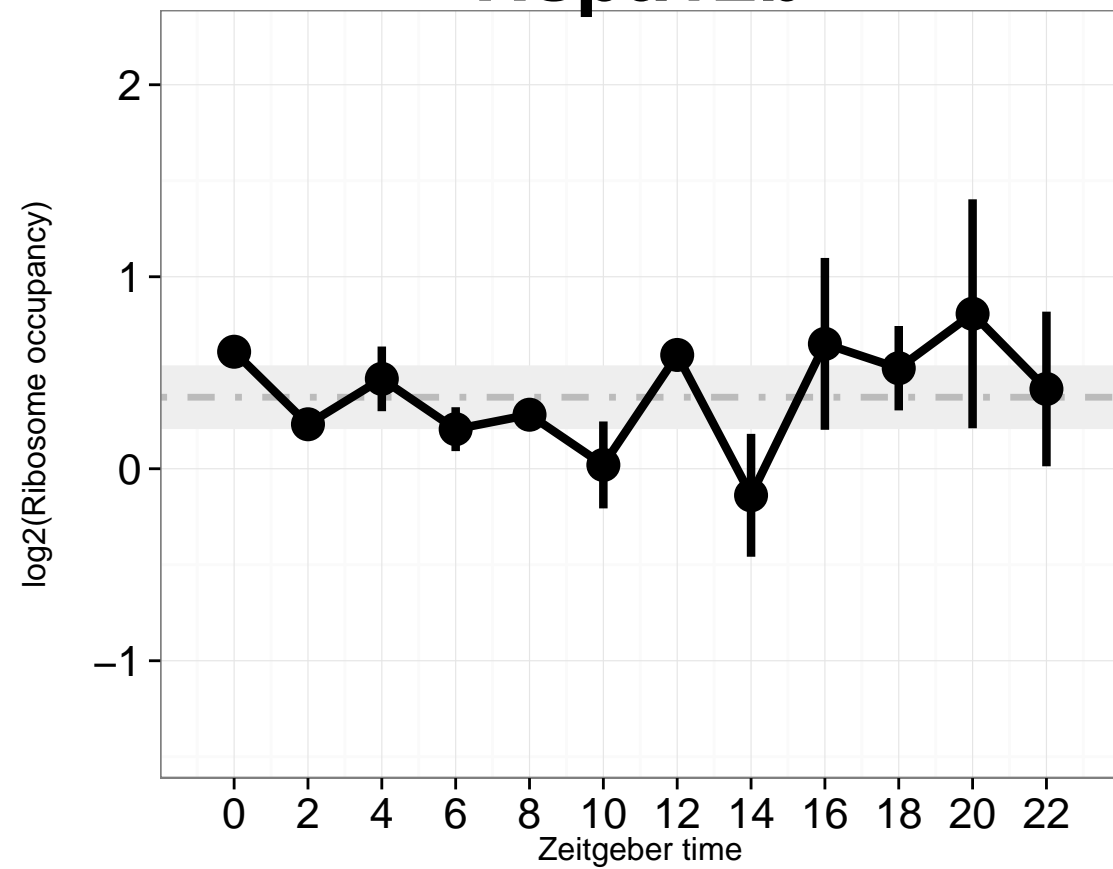

Supplement: Supplementary file 7775 [file 1]

## Rbbp4

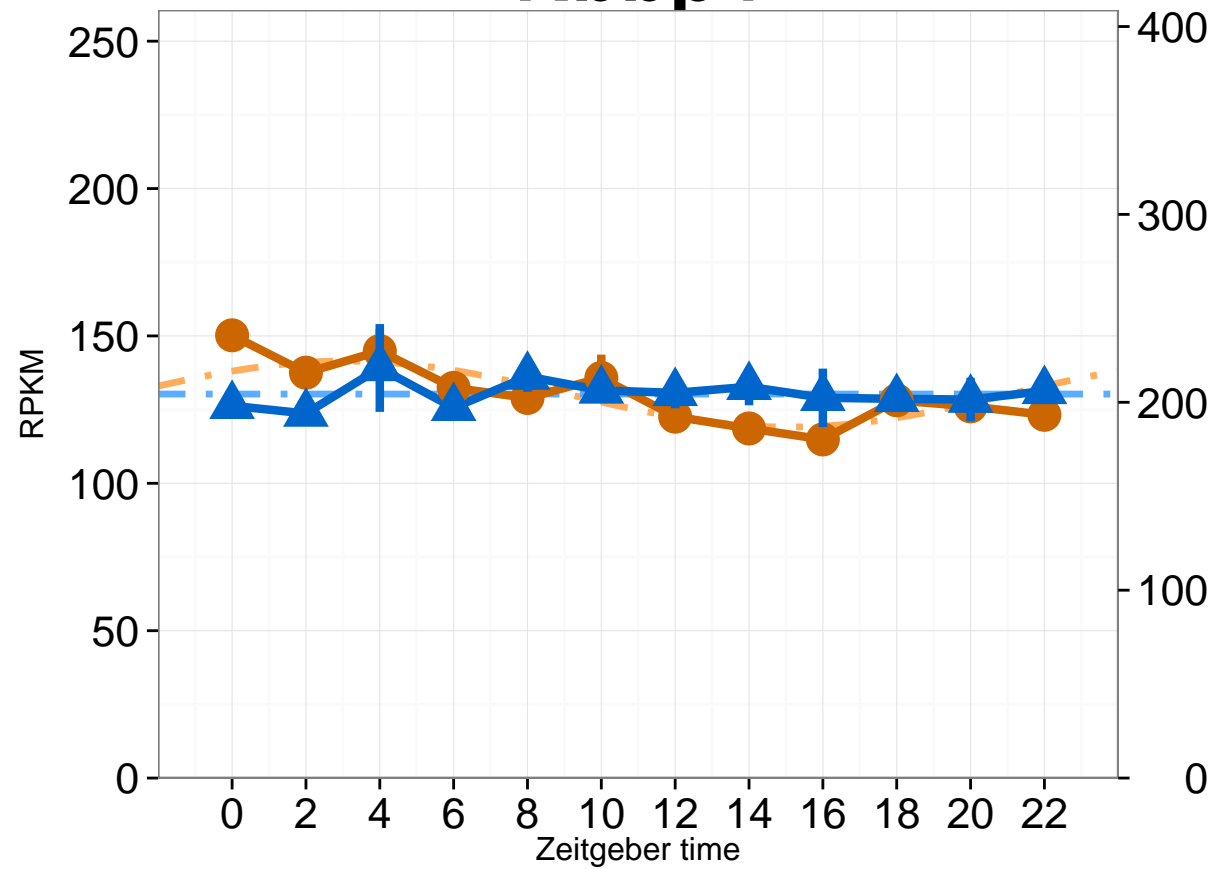

## Rbbp4

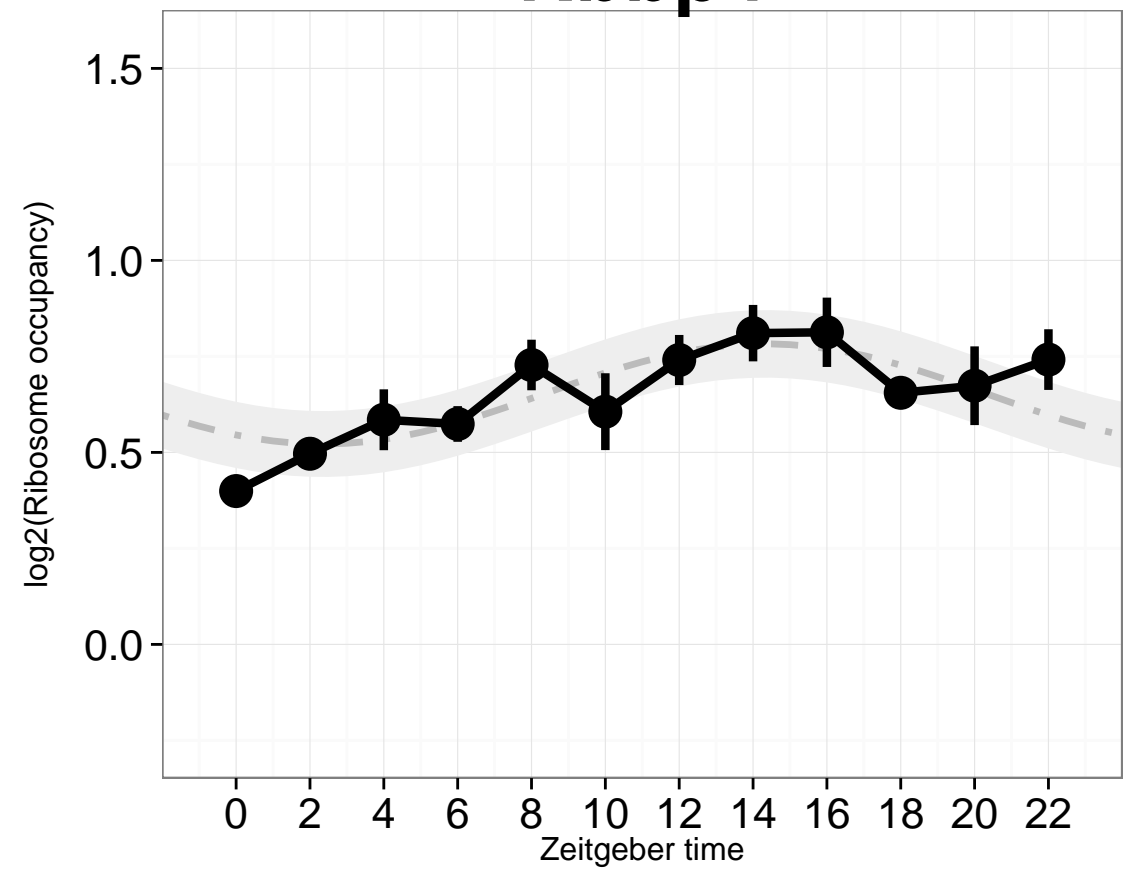

Supplement: Supplementary file 7776 [file 1]

## Mecom

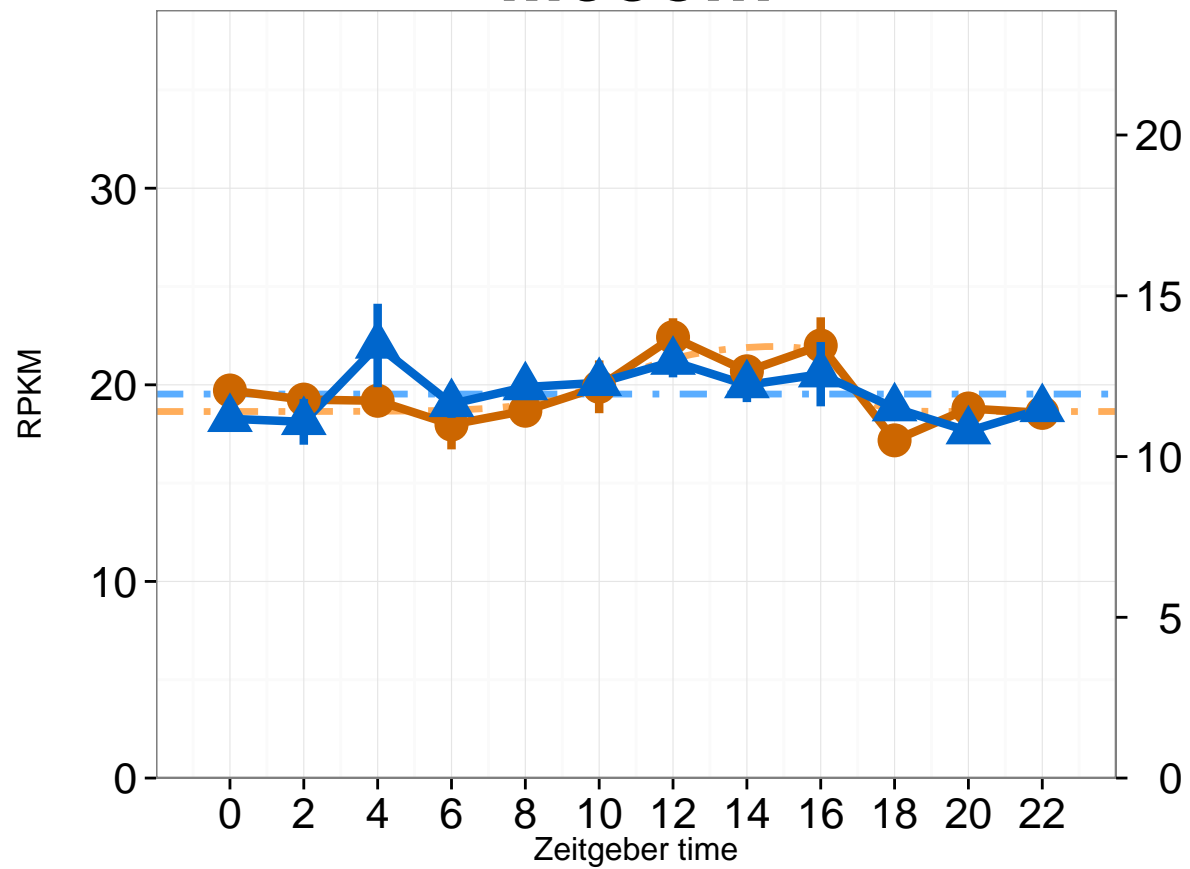

## Mecom

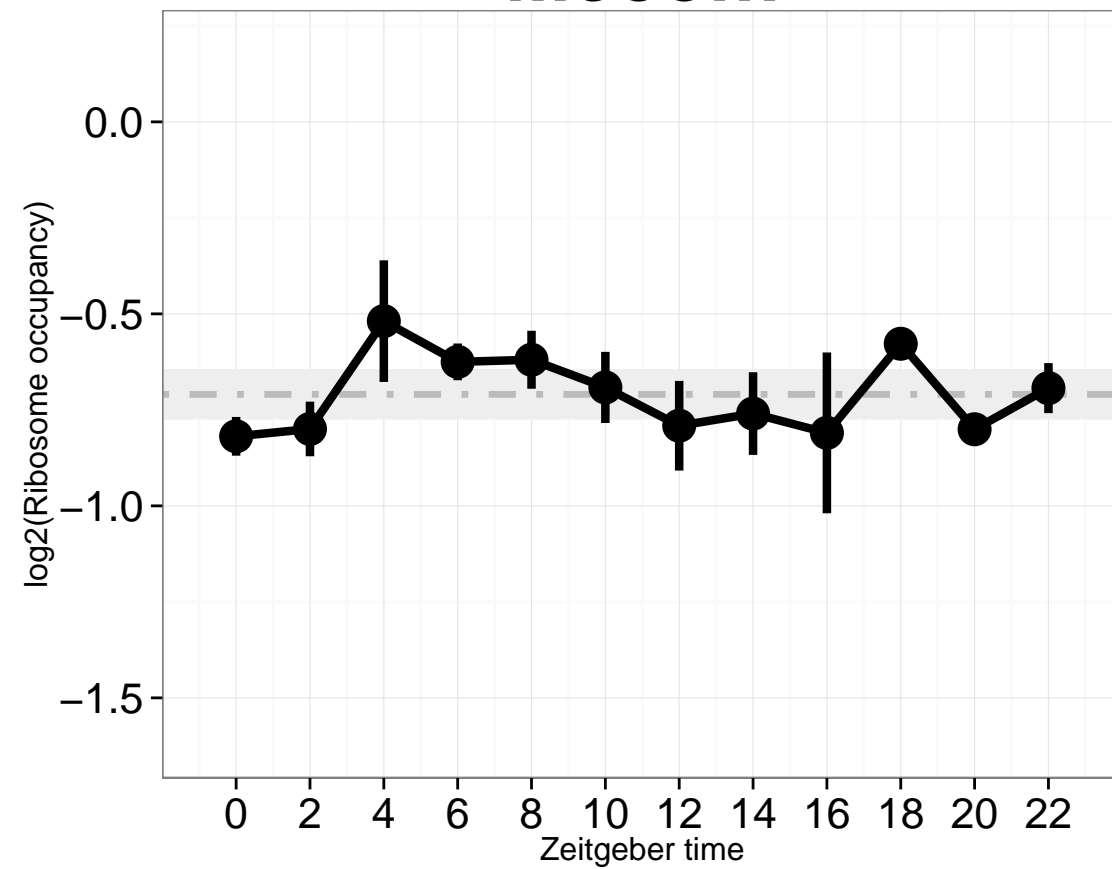

Supplement: Supplementary file 7777 [file 1]

## Zfp949

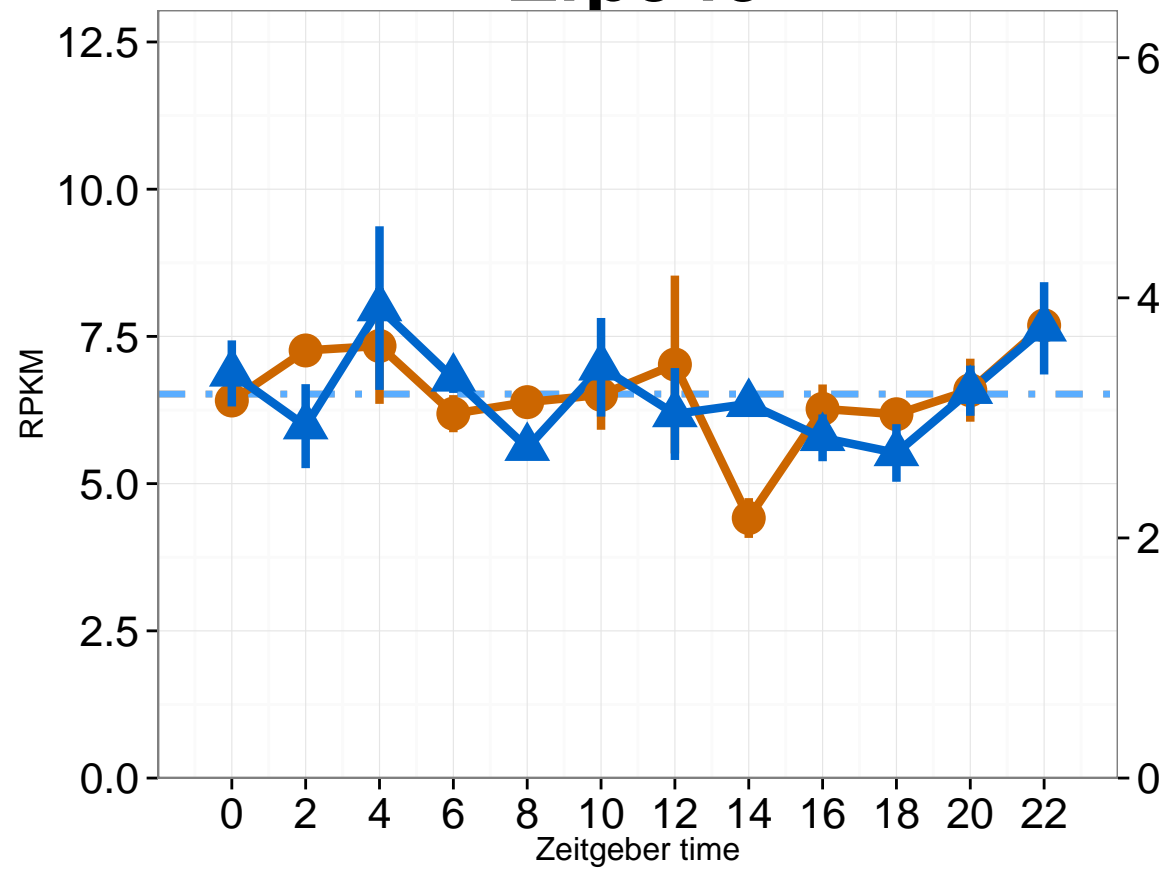

## Zfp949

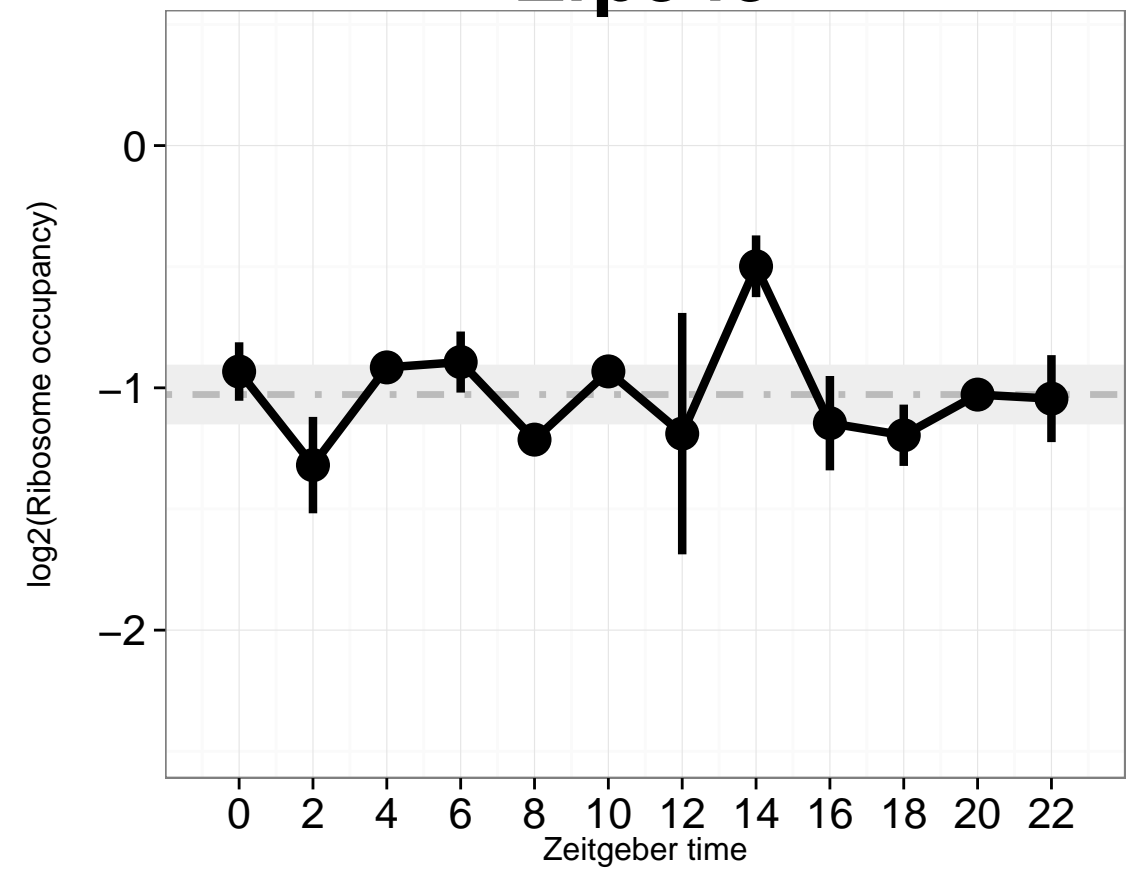

Supplement: Supplementary file 7778 [file 1]

# Rap2b

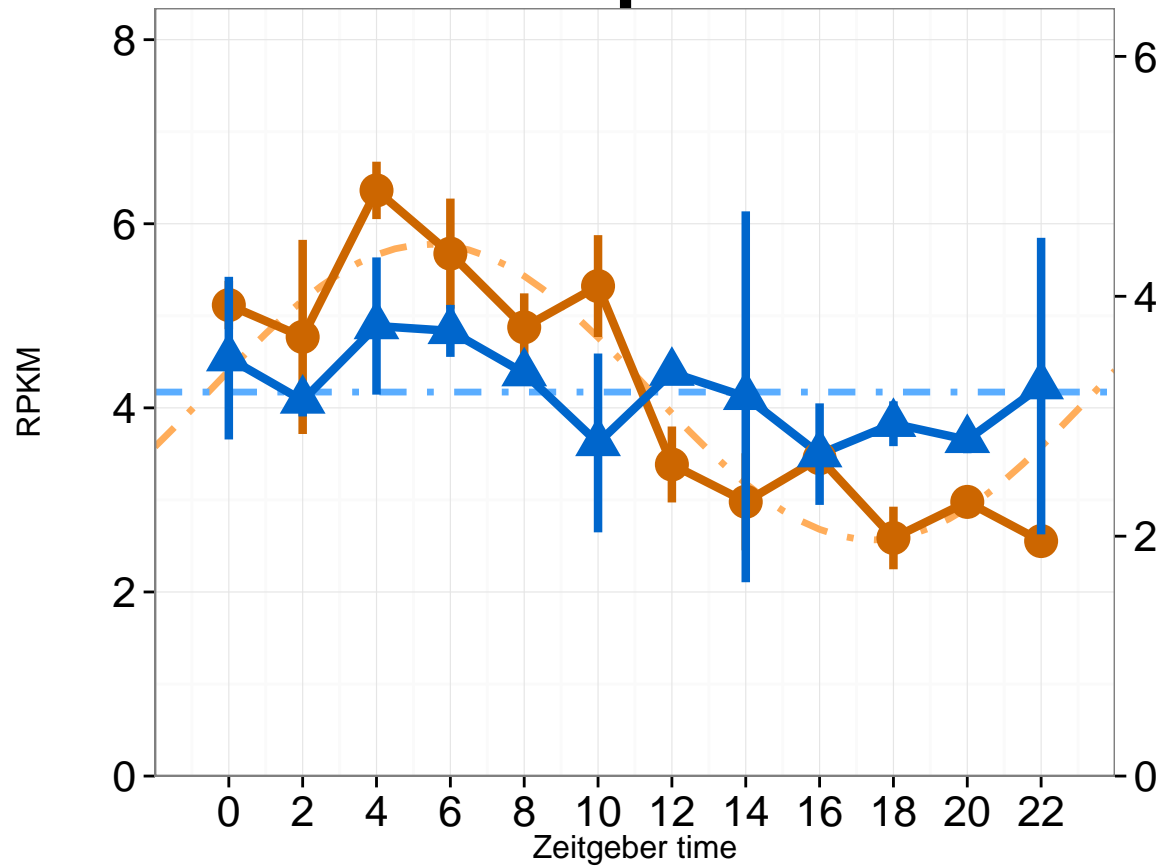

# Rap2b

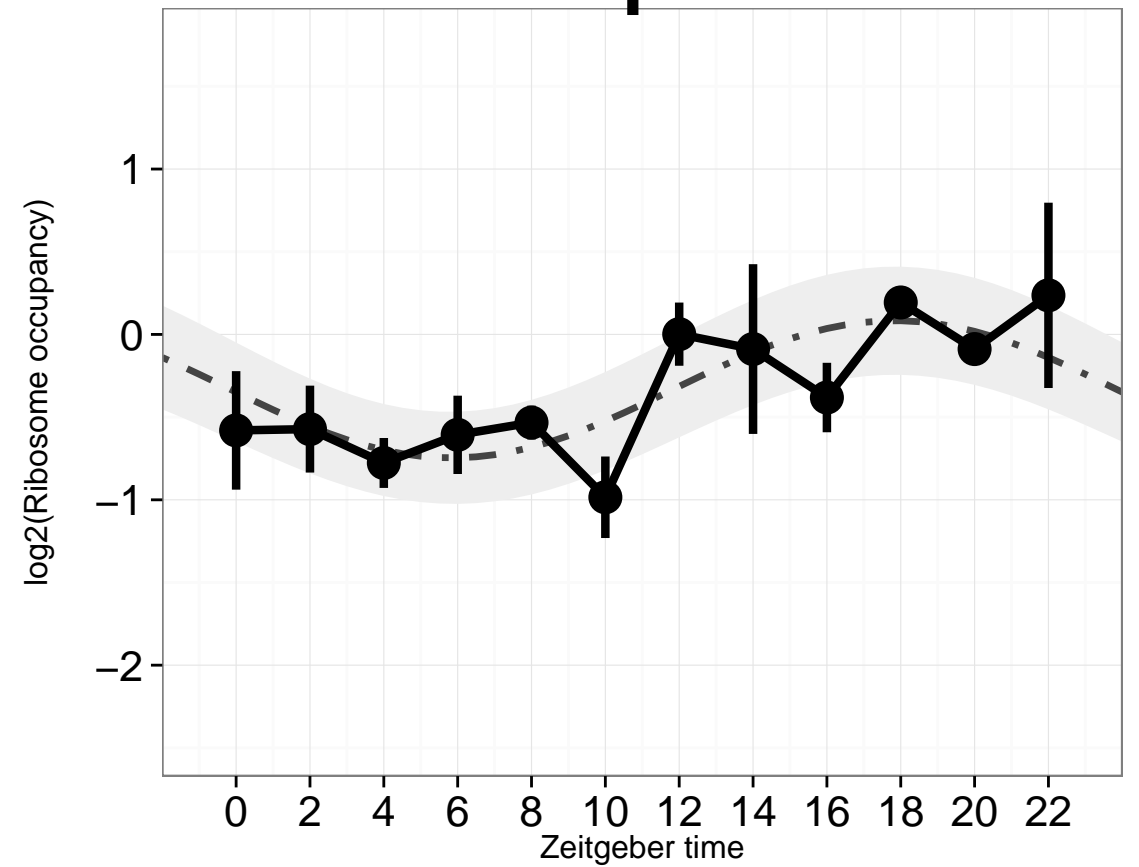

Supplement: Supplementary file 7779 [file 1]

## Gli1

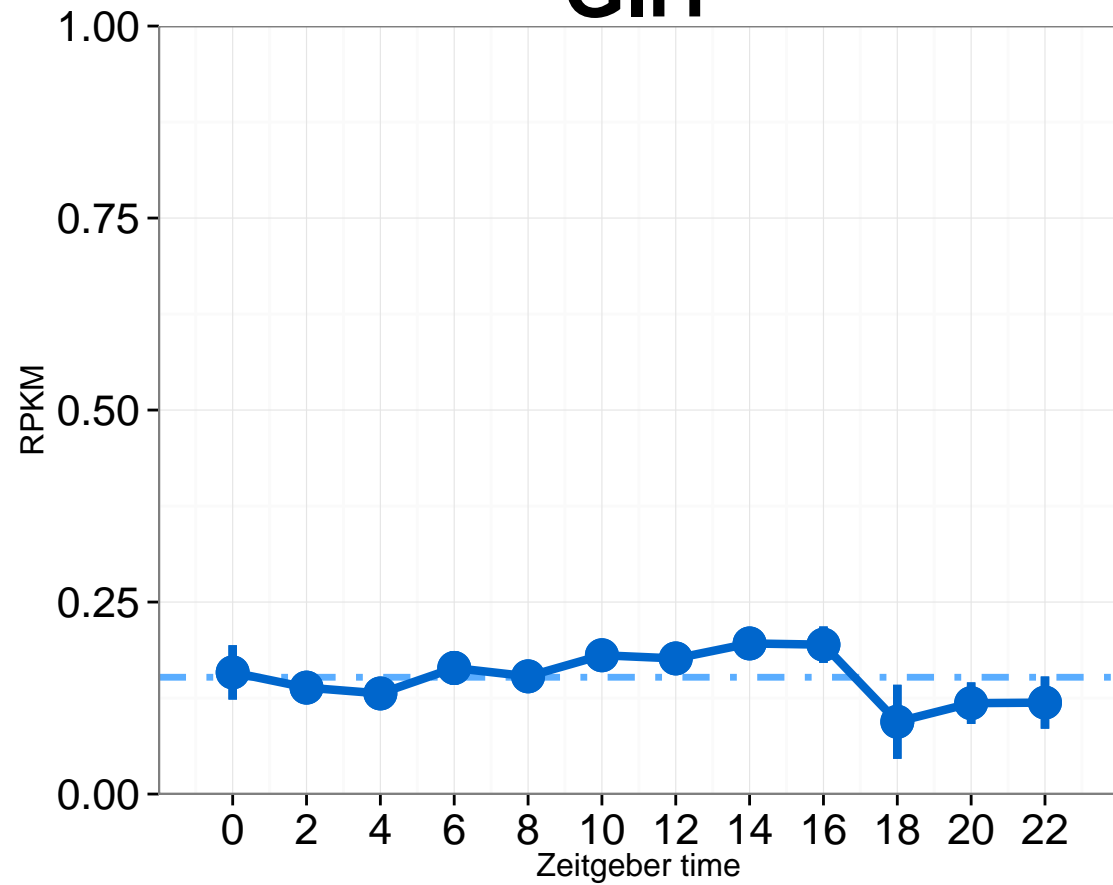

## Gli1 log2(Ribosome occupancy)

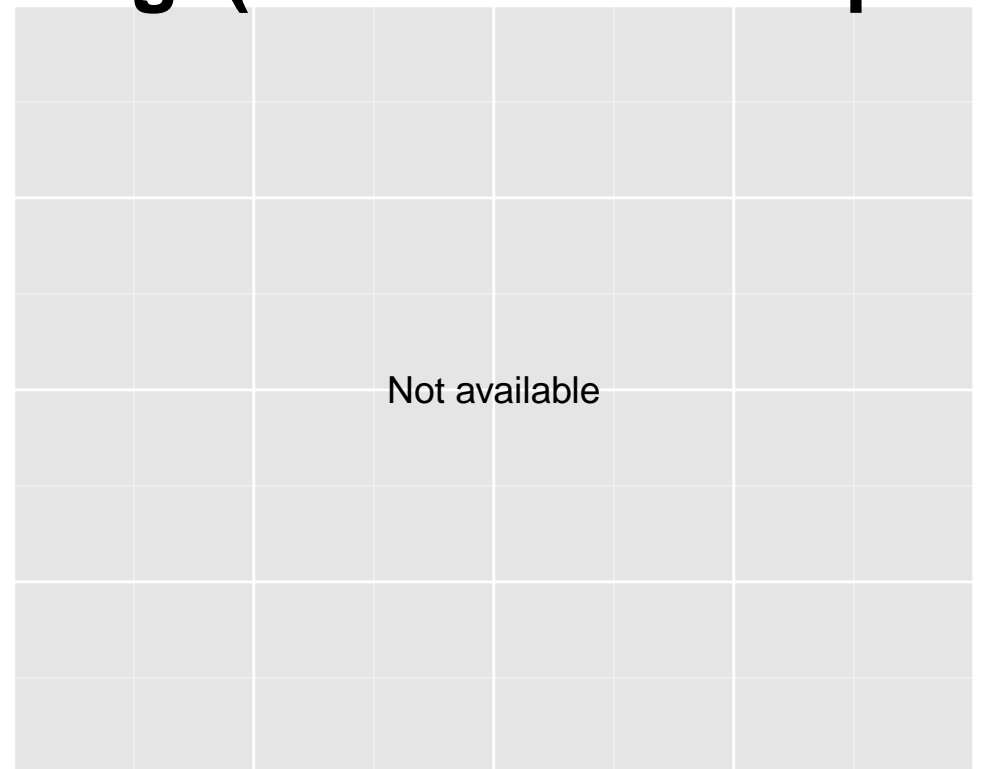

Supplement: Supplementary file 7780 [file 1]

# Tram2

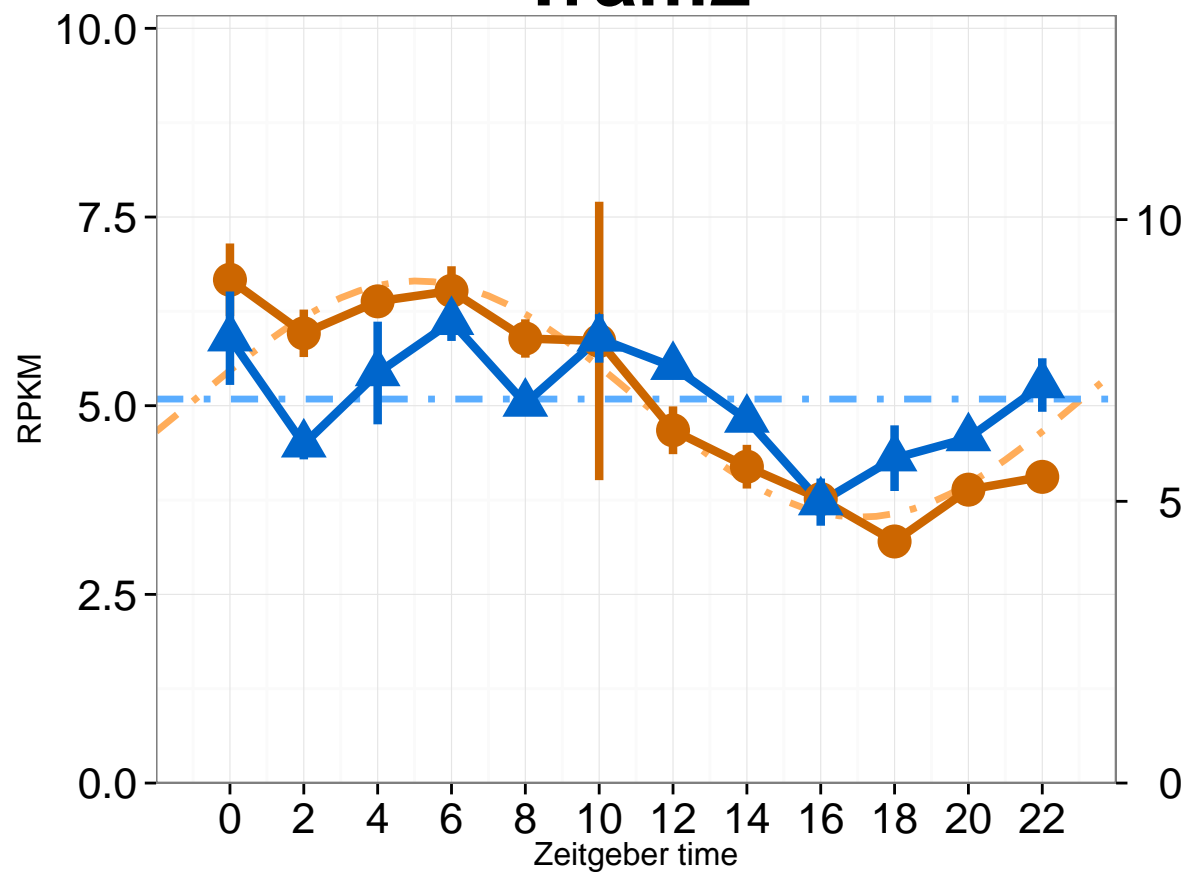

# Tram2

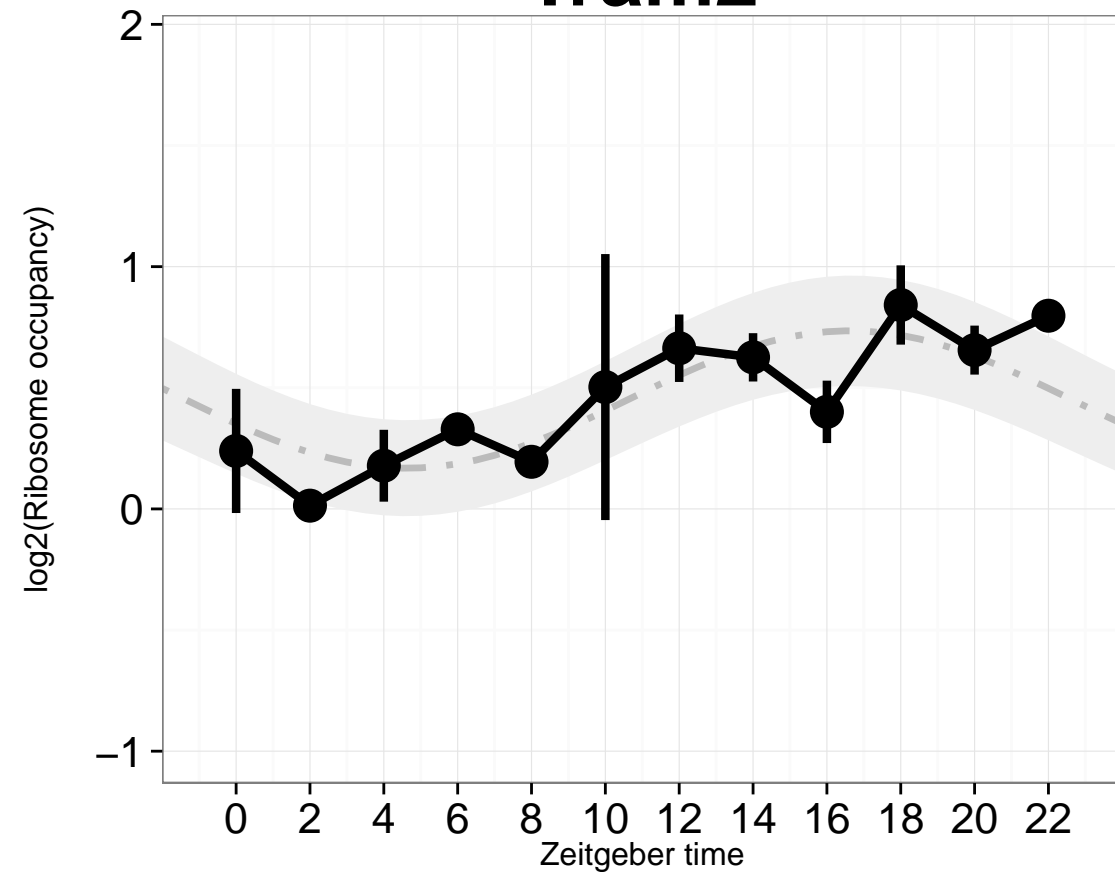

Supplement: Supplementary file 7781 [file 1]

# Pde8a

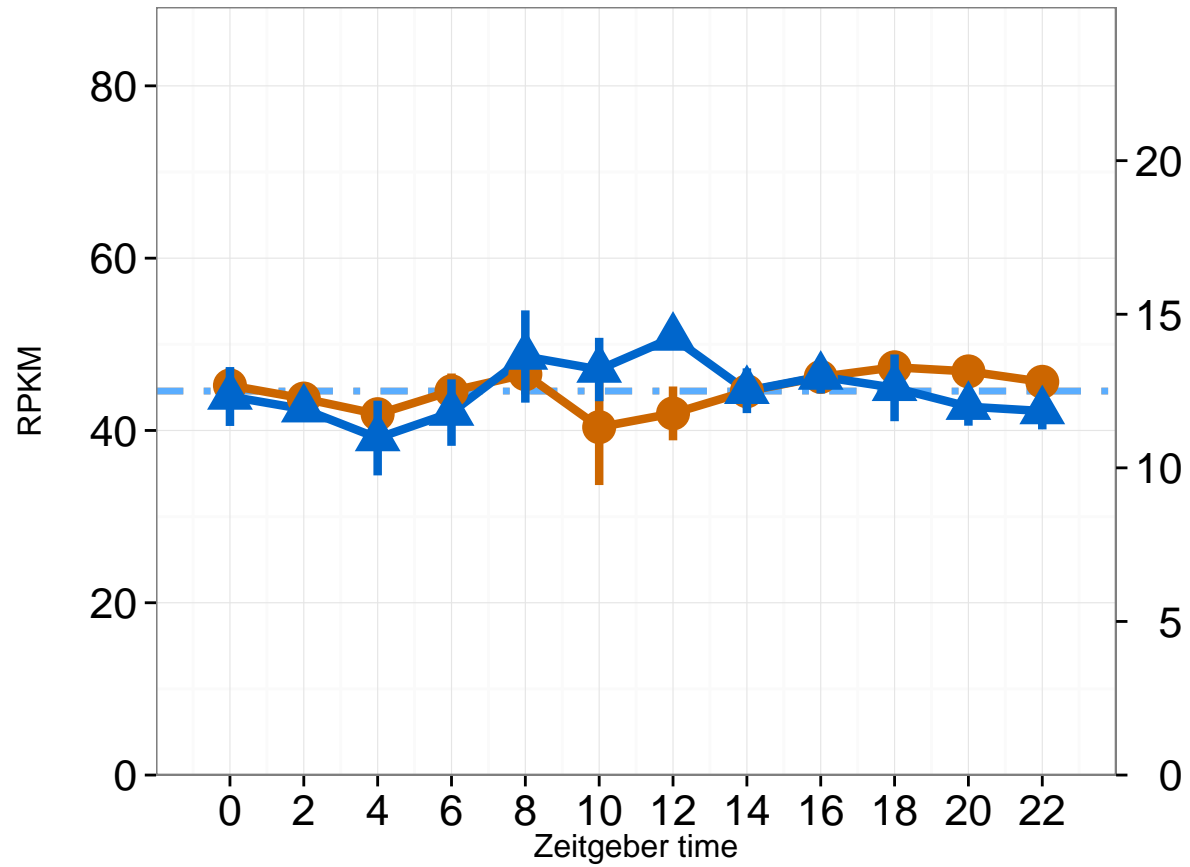

# Pde8a

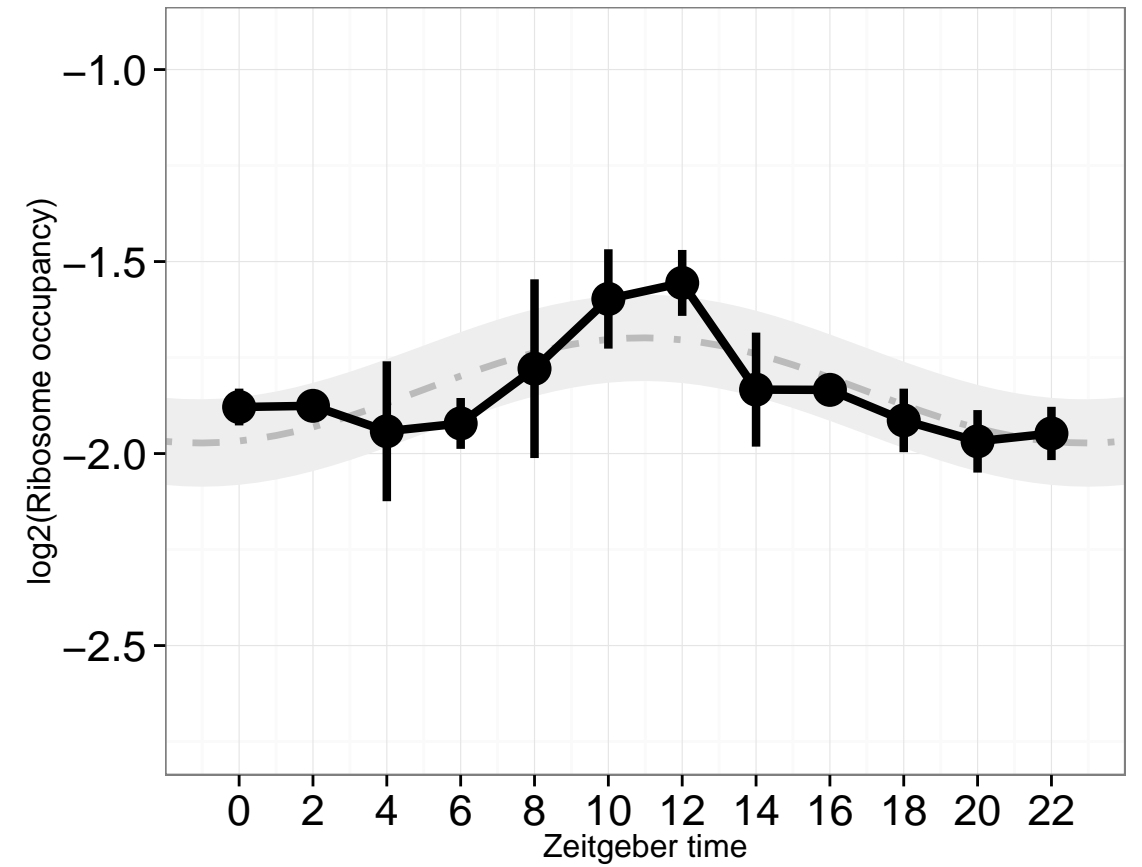

Supplement: Supplementary file 7782 [file 1]

## Golim4

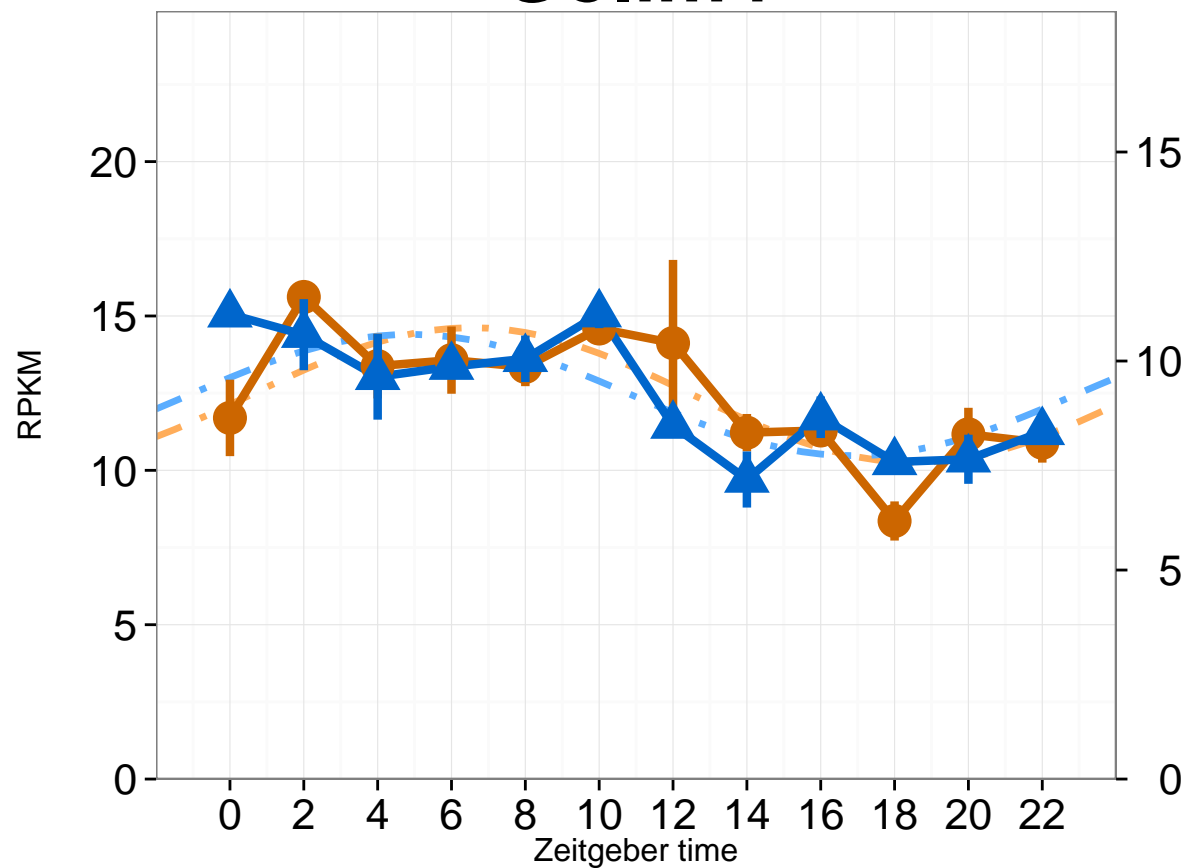

## Golim4

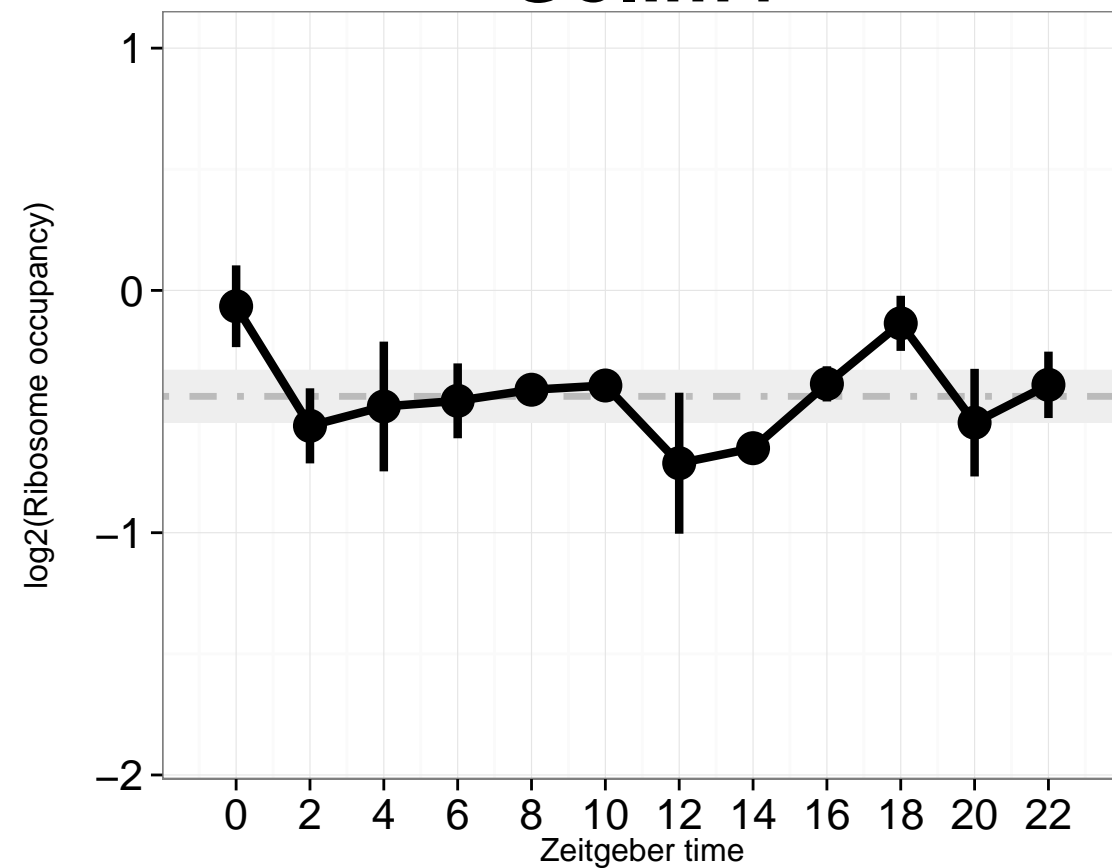

Supplement: Supplementary file 7783 [file 1]

# Mark2

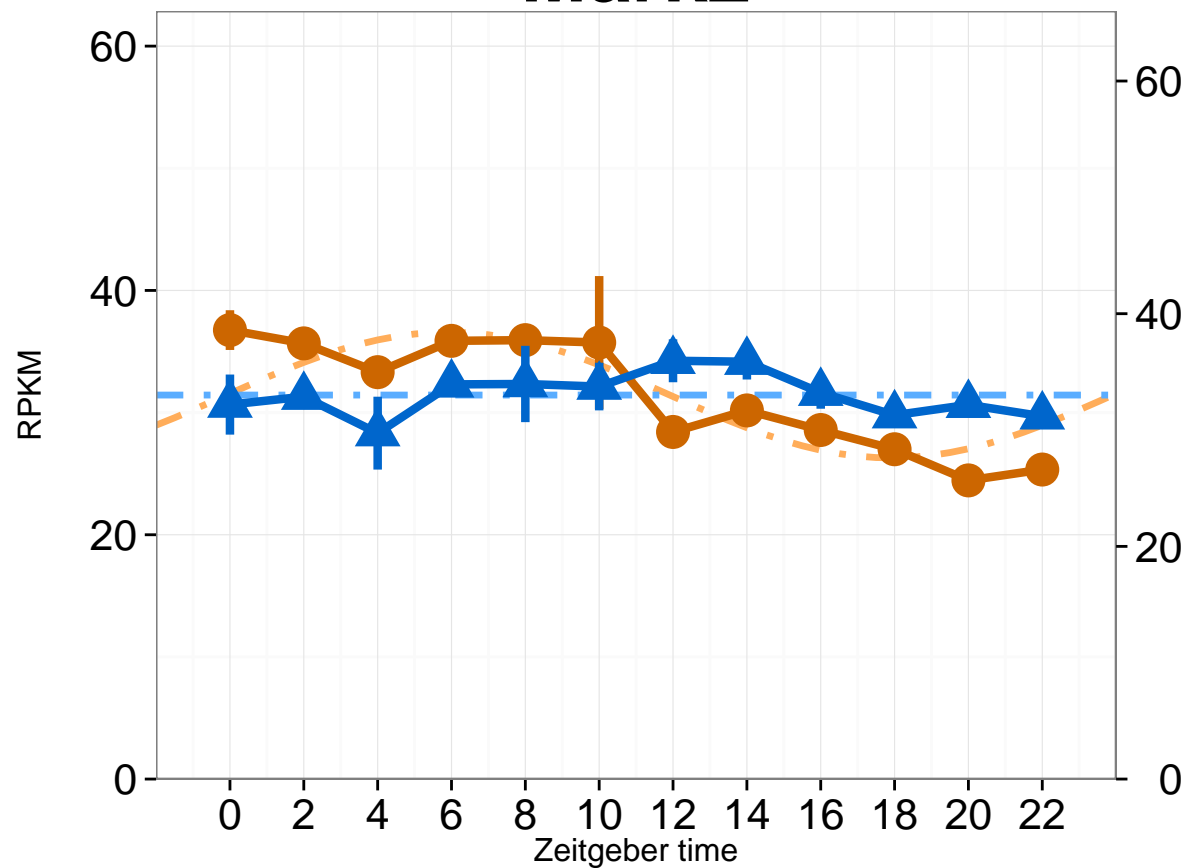

# Mark2

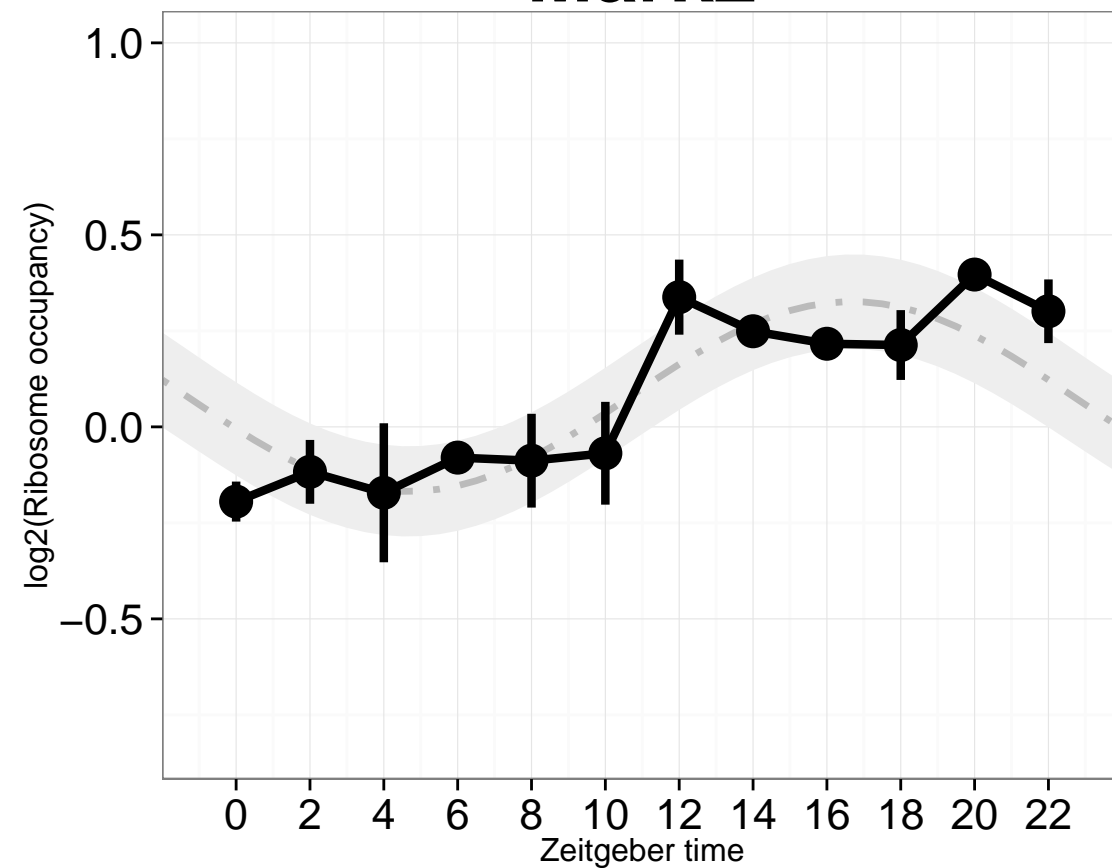

Supplement: Supplementary file 7784 [file 1]

## Rpl14

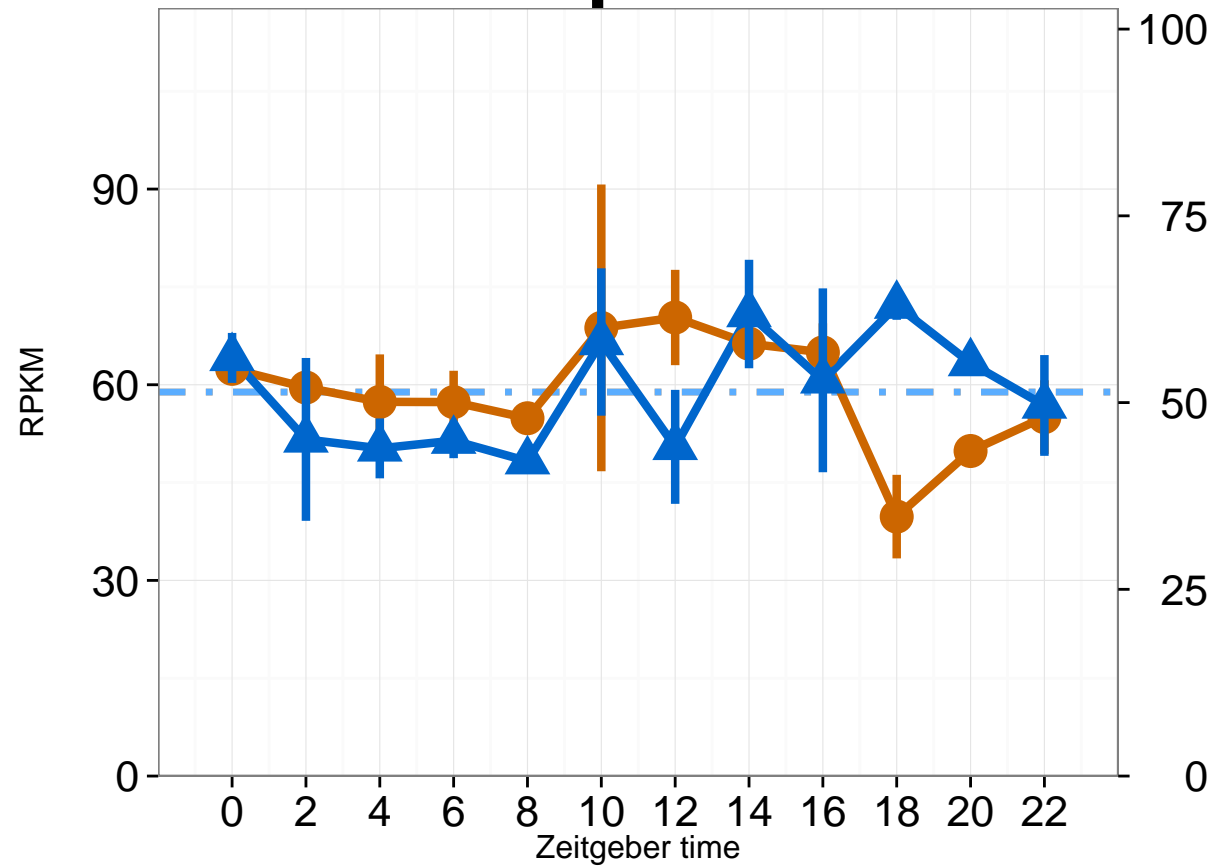

## Rpl14

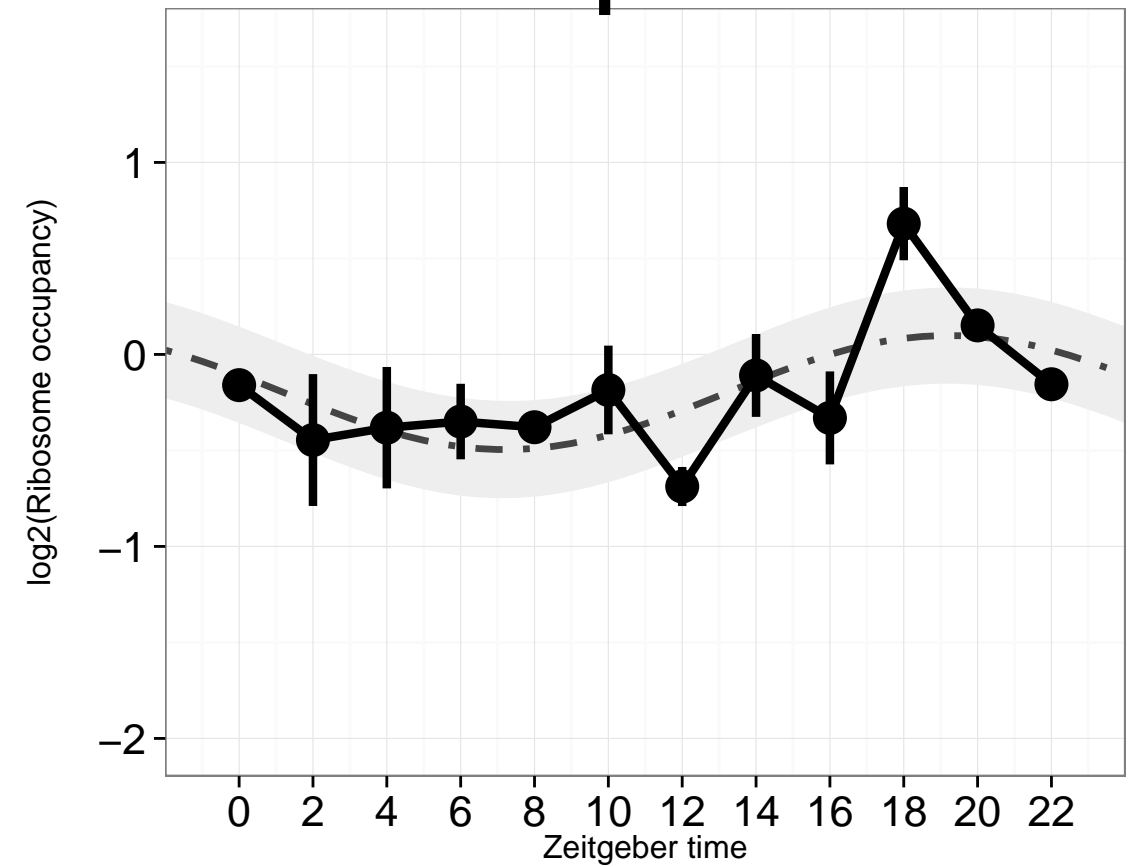

Supplement: Supplementary file 7785 [file 1]

## Egln2

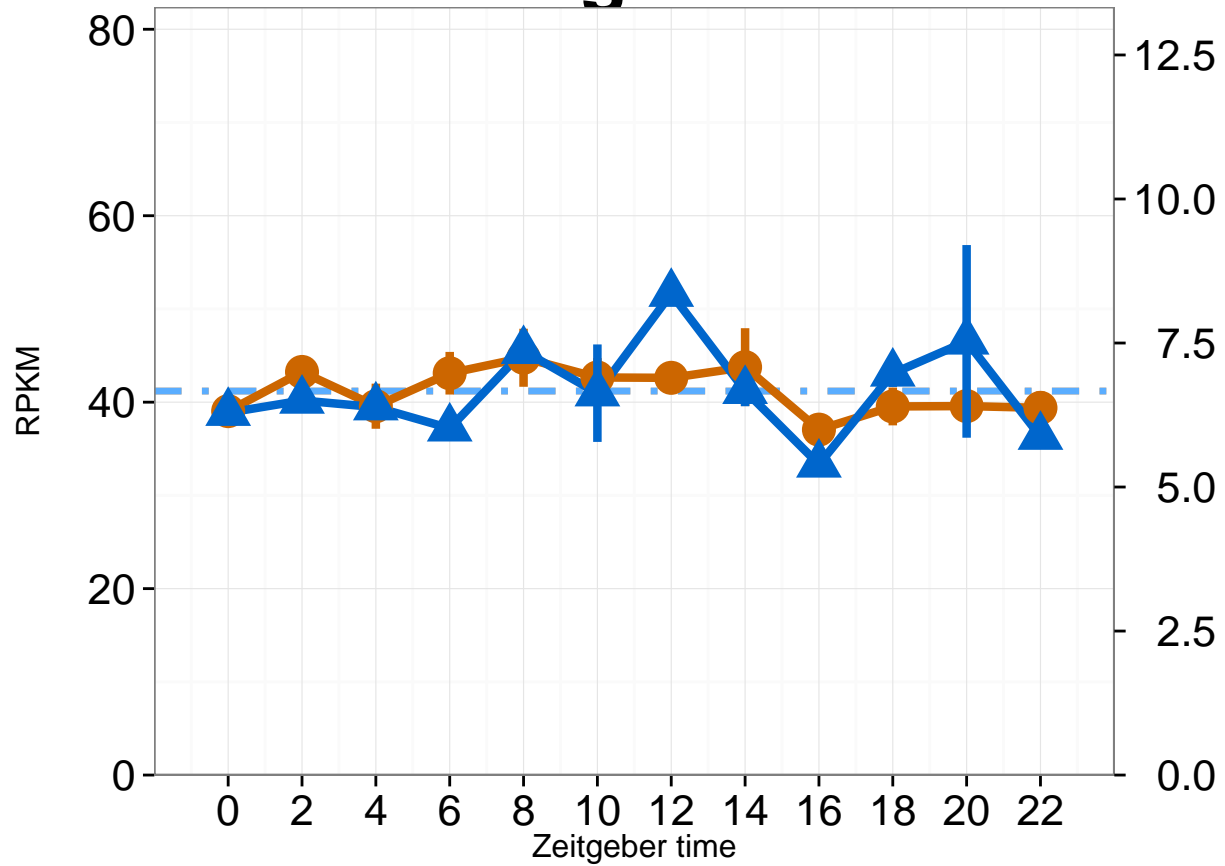

## Egln2

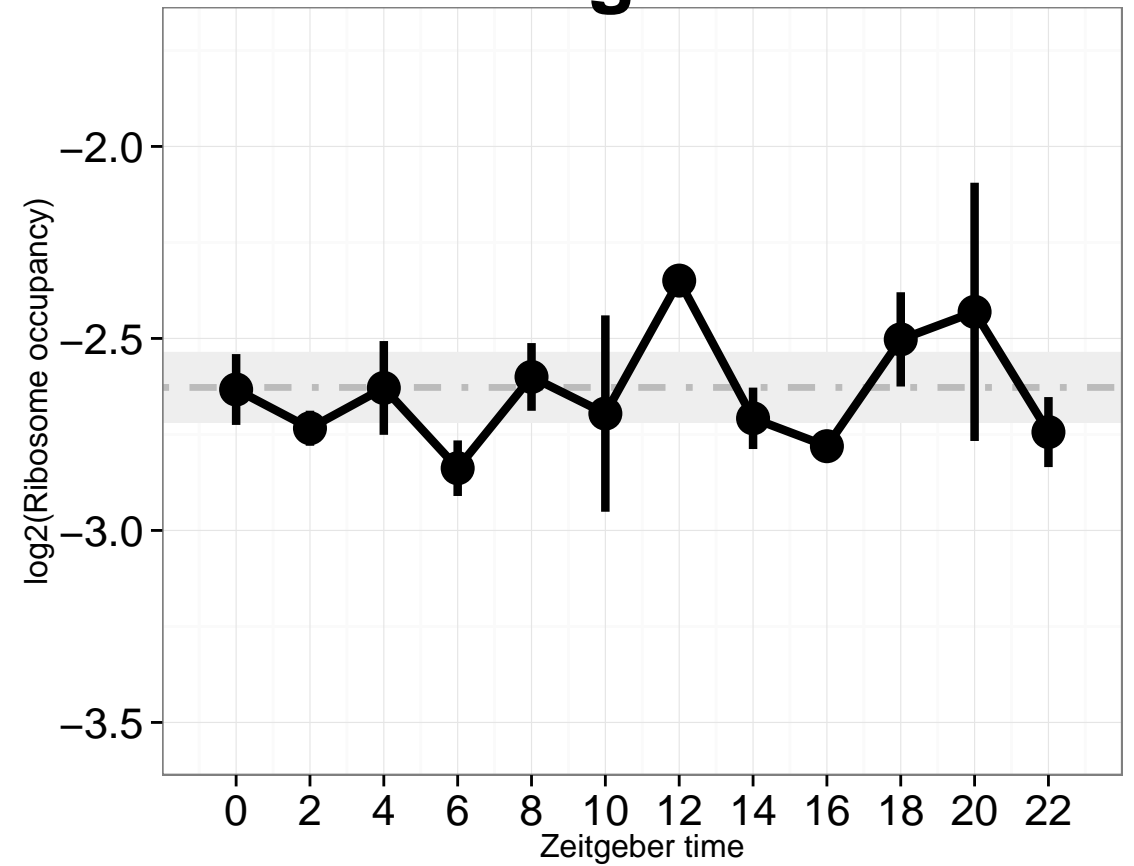

Supplement: Supplementary file 7786 [file 1]

## Snhg11

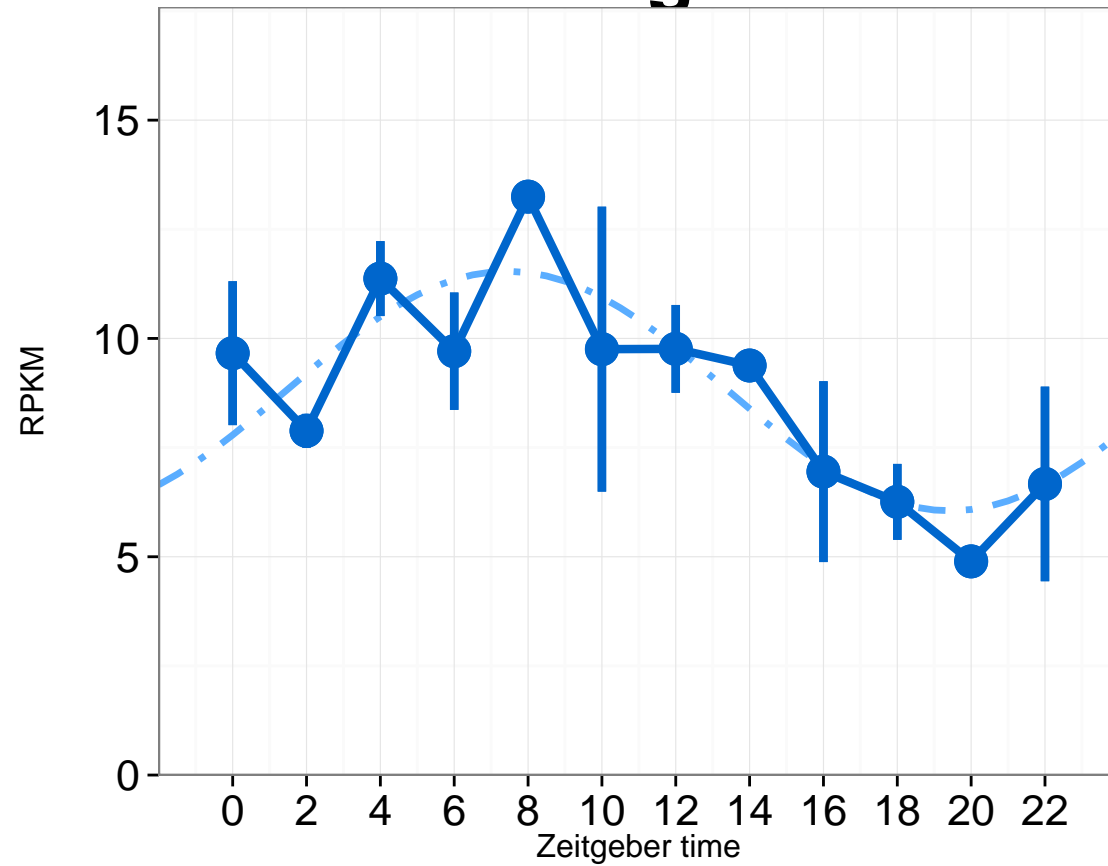

## Snhg11 log2(Ribosome occupancy)

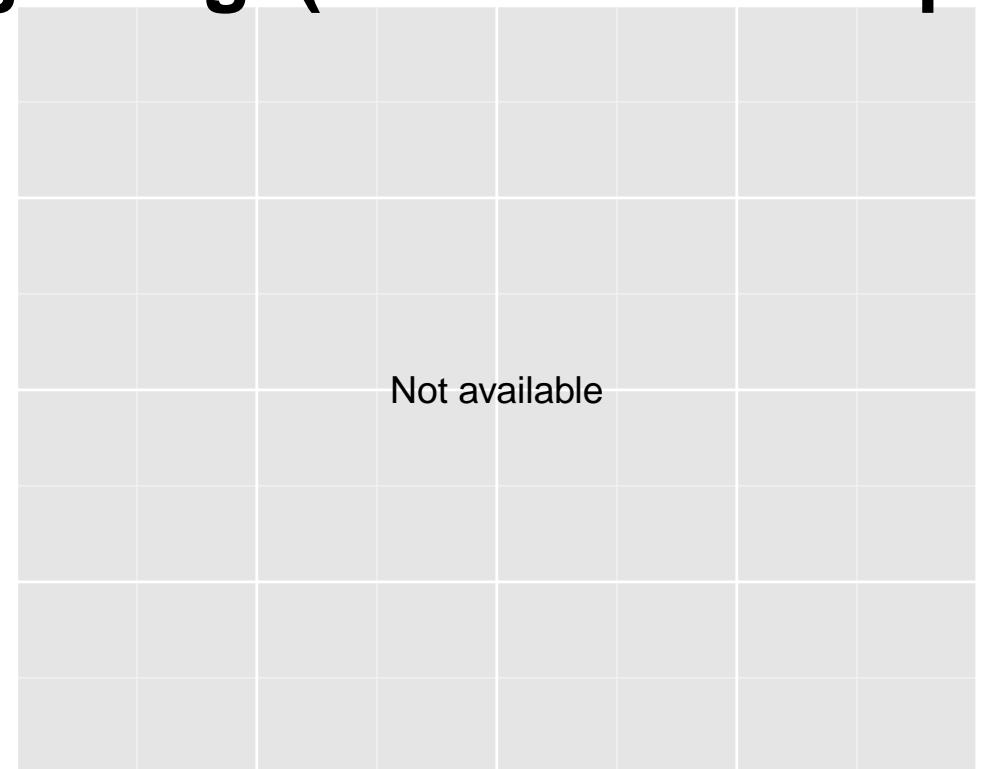

Supplement: Supplementary file 7787 [file 1]

# Col5a1

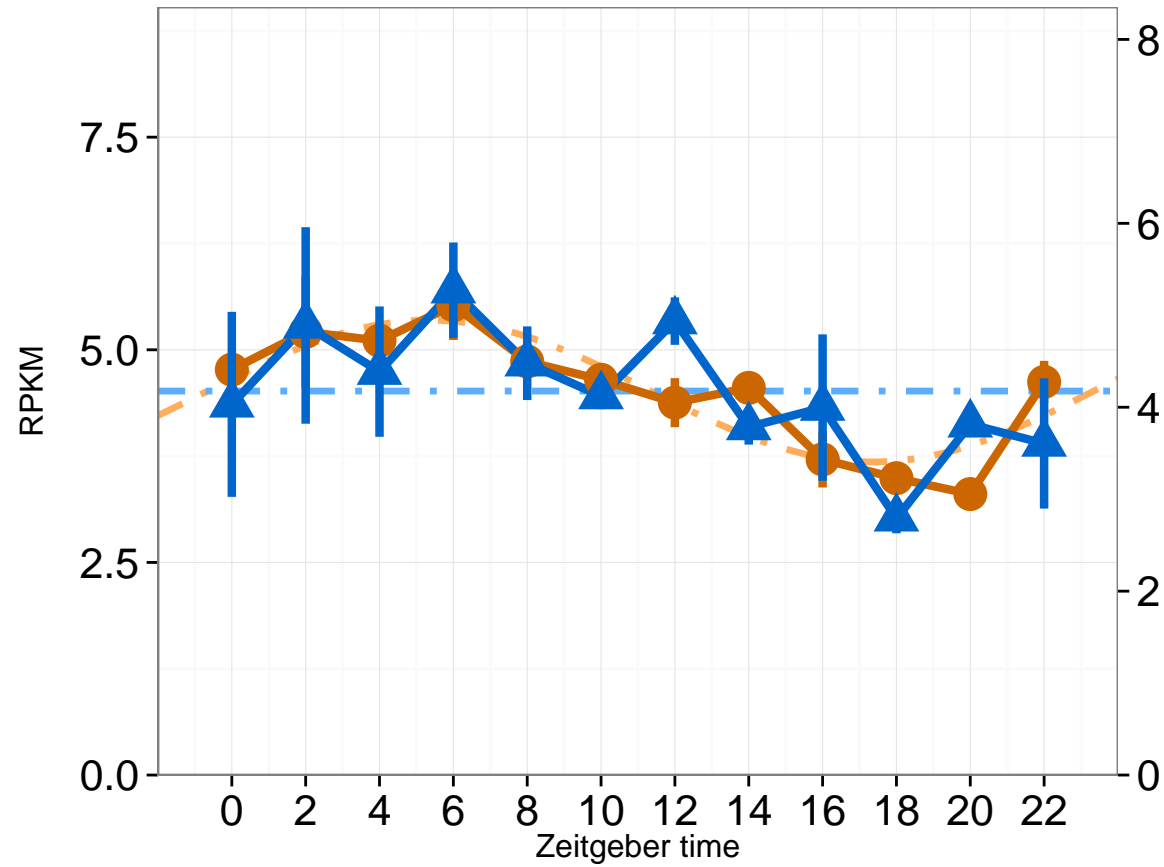

# Col5a1

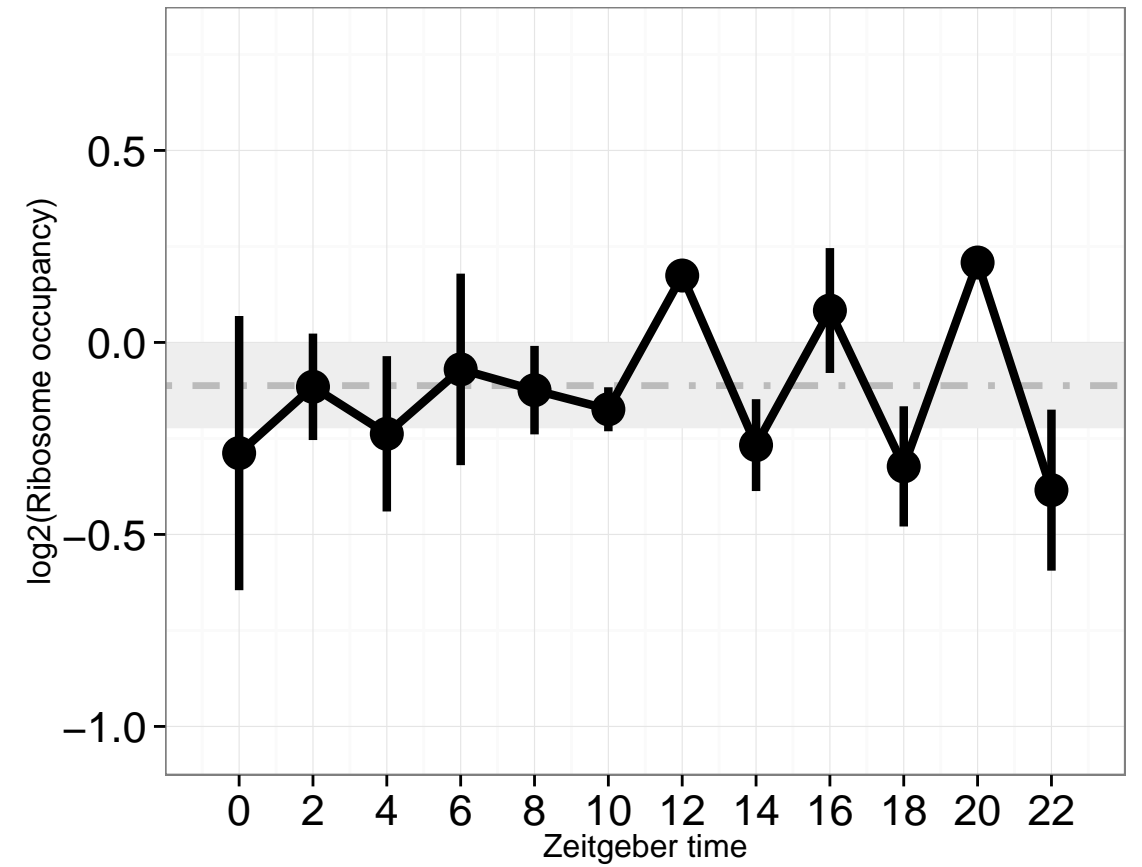

Supplement: Supplementary file 7788 [file 1]

# Trdmt1

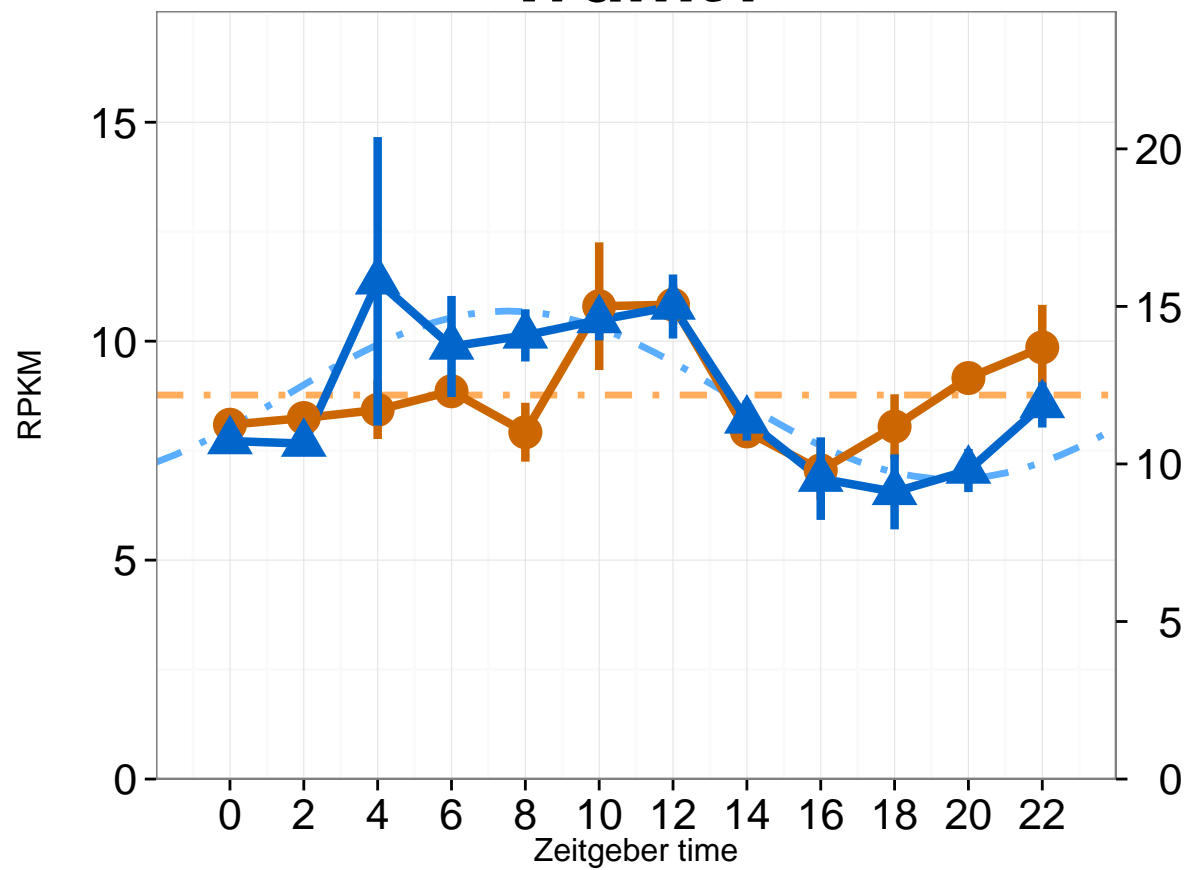

# Trdmt1

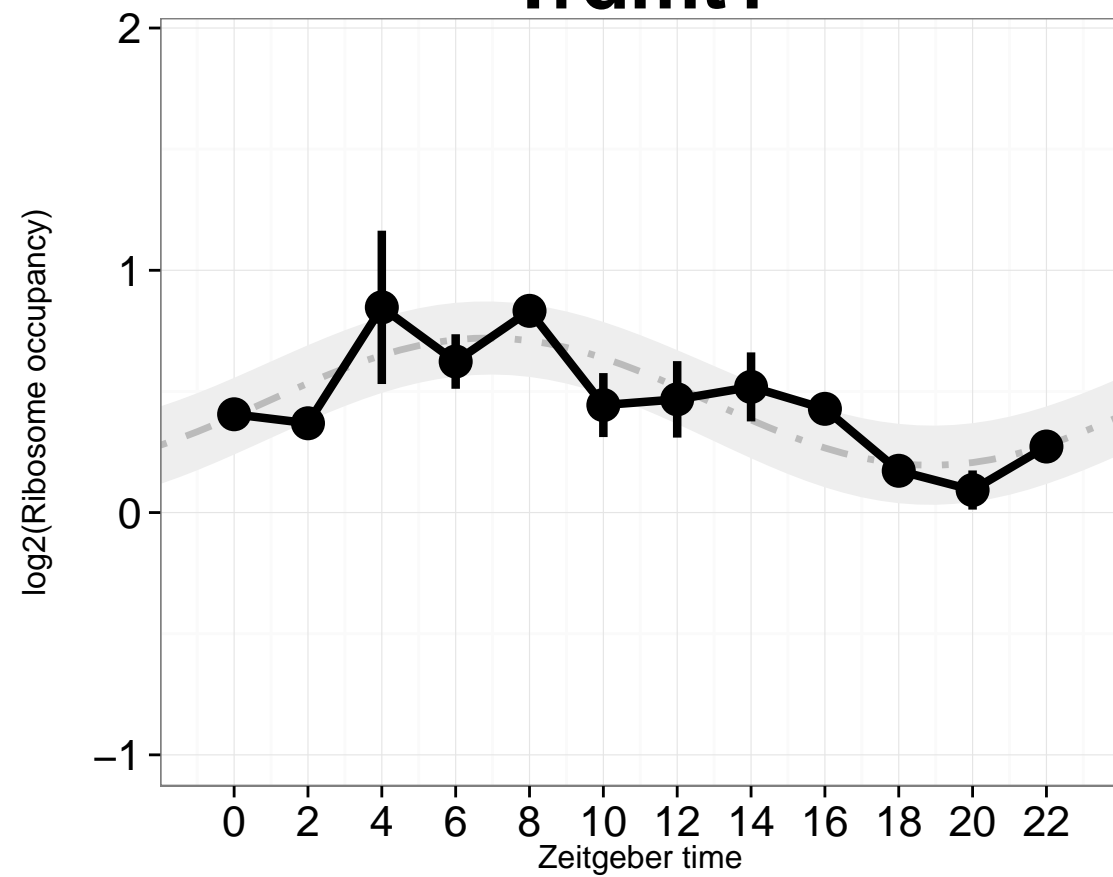

Supplement: Supplementary file 7789 [file 1]

# Dock9

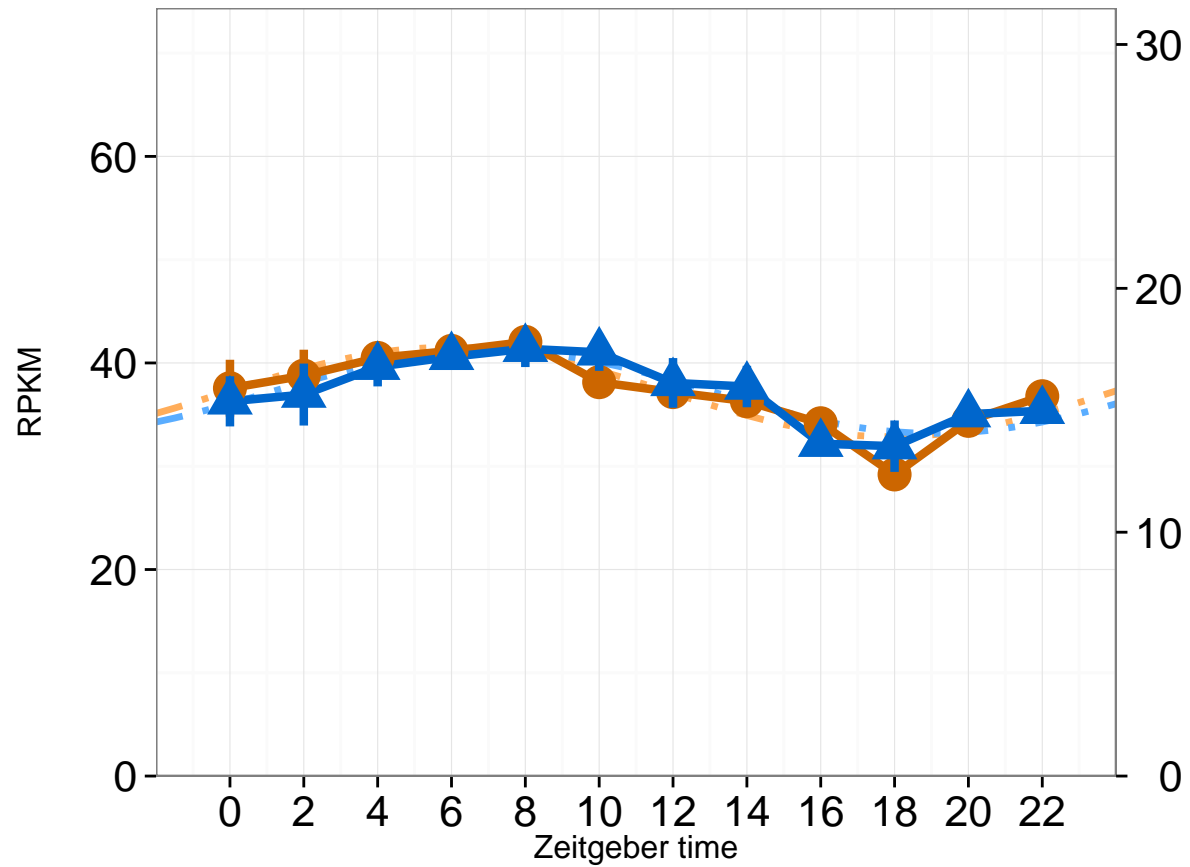

# Dock9

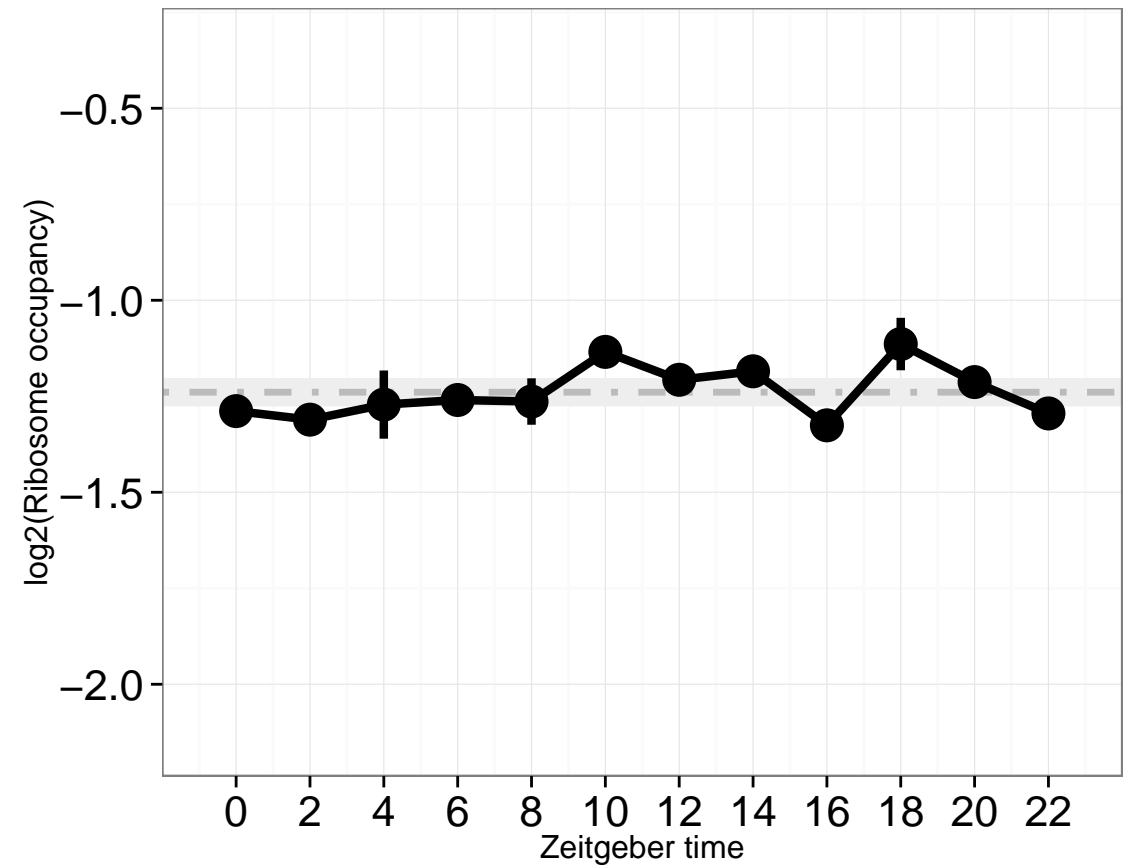

Supplement: Supplementary file 7790 [file 1]

## Slc25a19

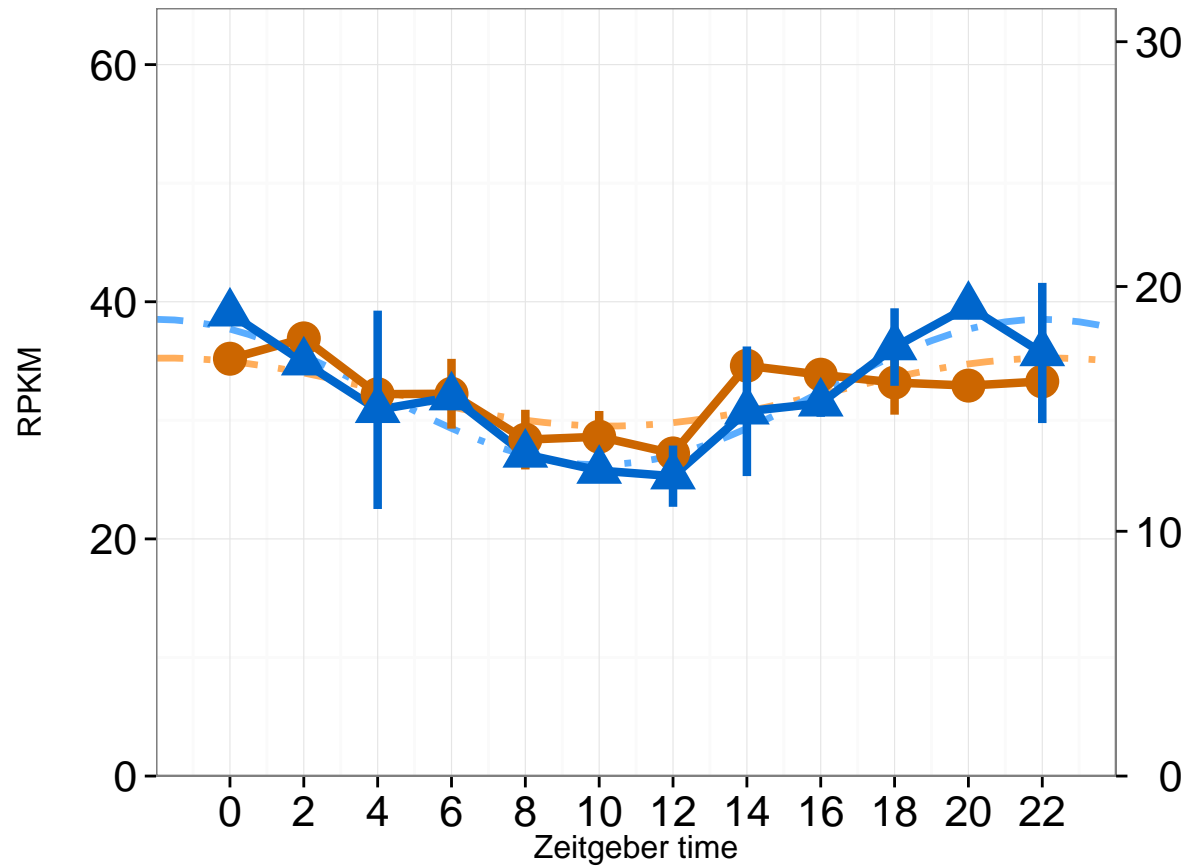

## Slc25a19

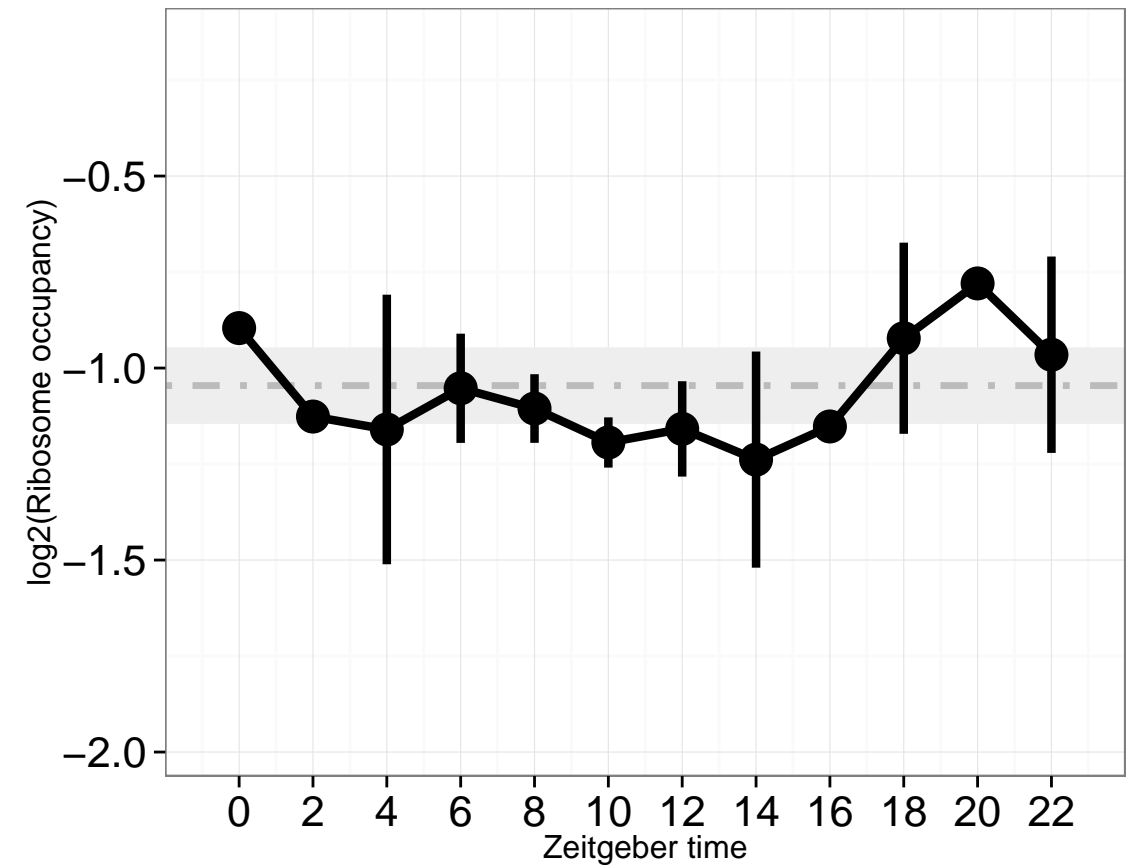

Supplement: Supplementary file 7791 [file 1]

## Slc35b2

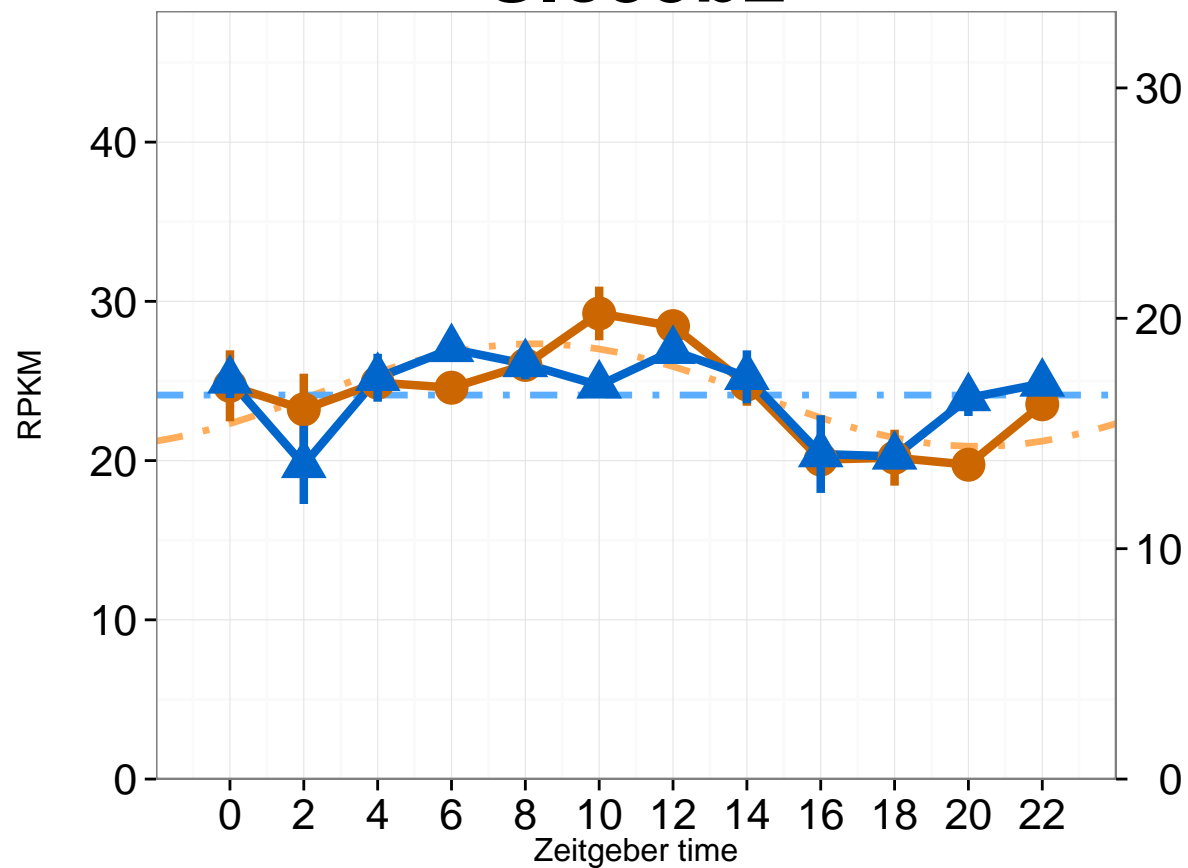

## Slc35b2

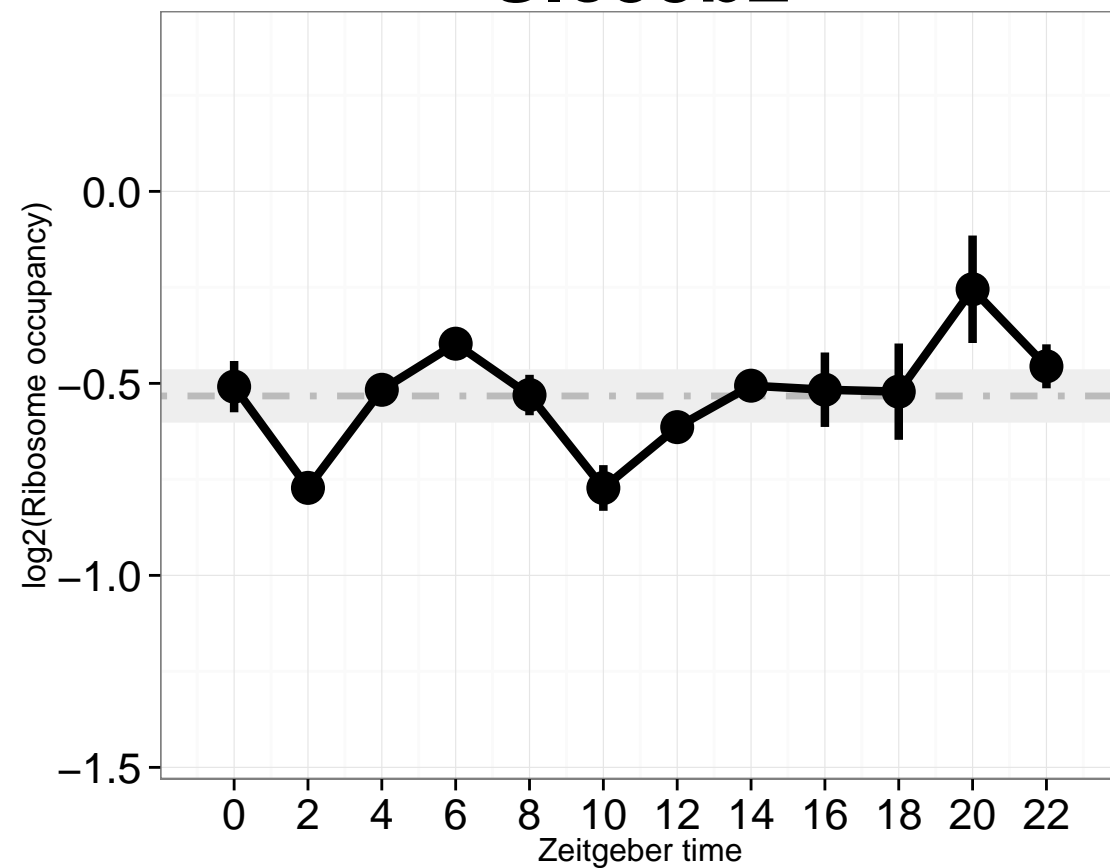

Supplement: Supplementary file 7792 [file 1]

## Tef

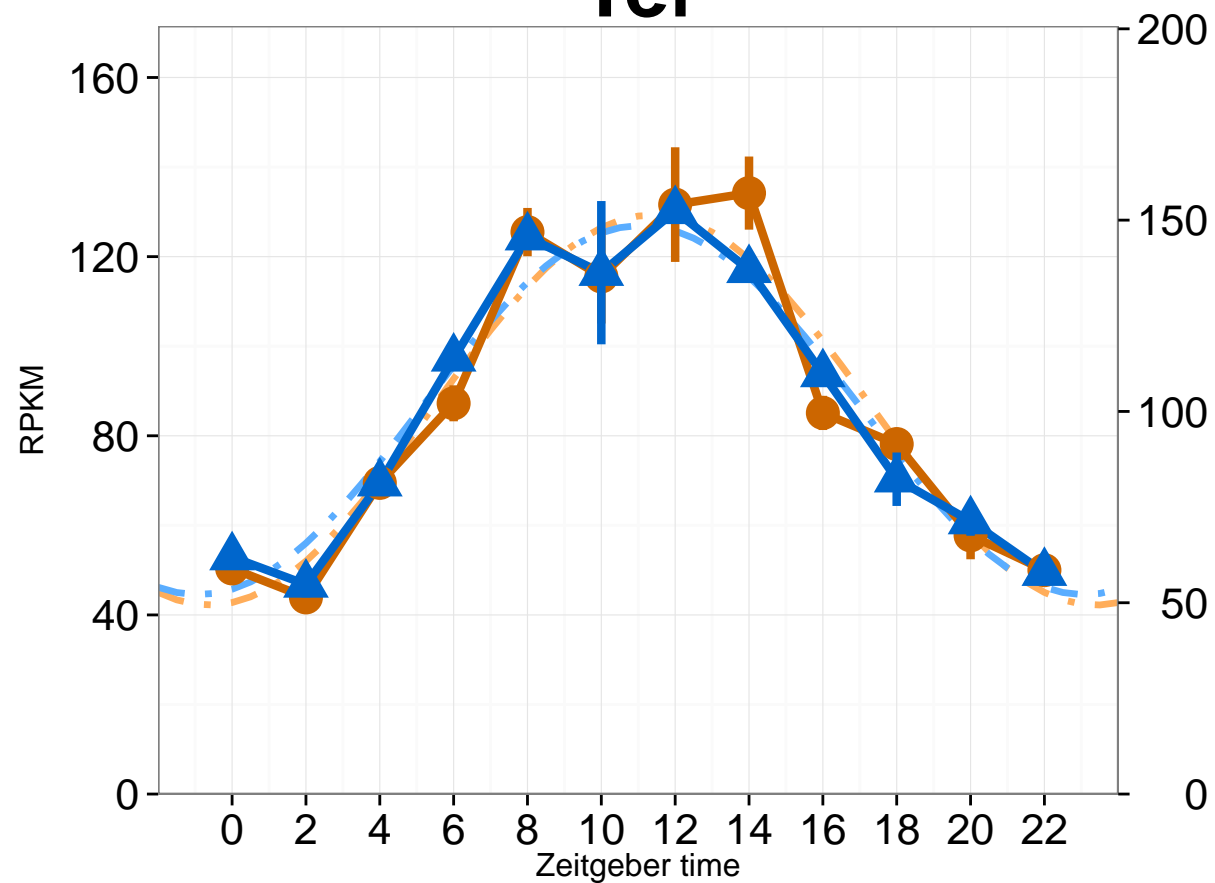

## Tef

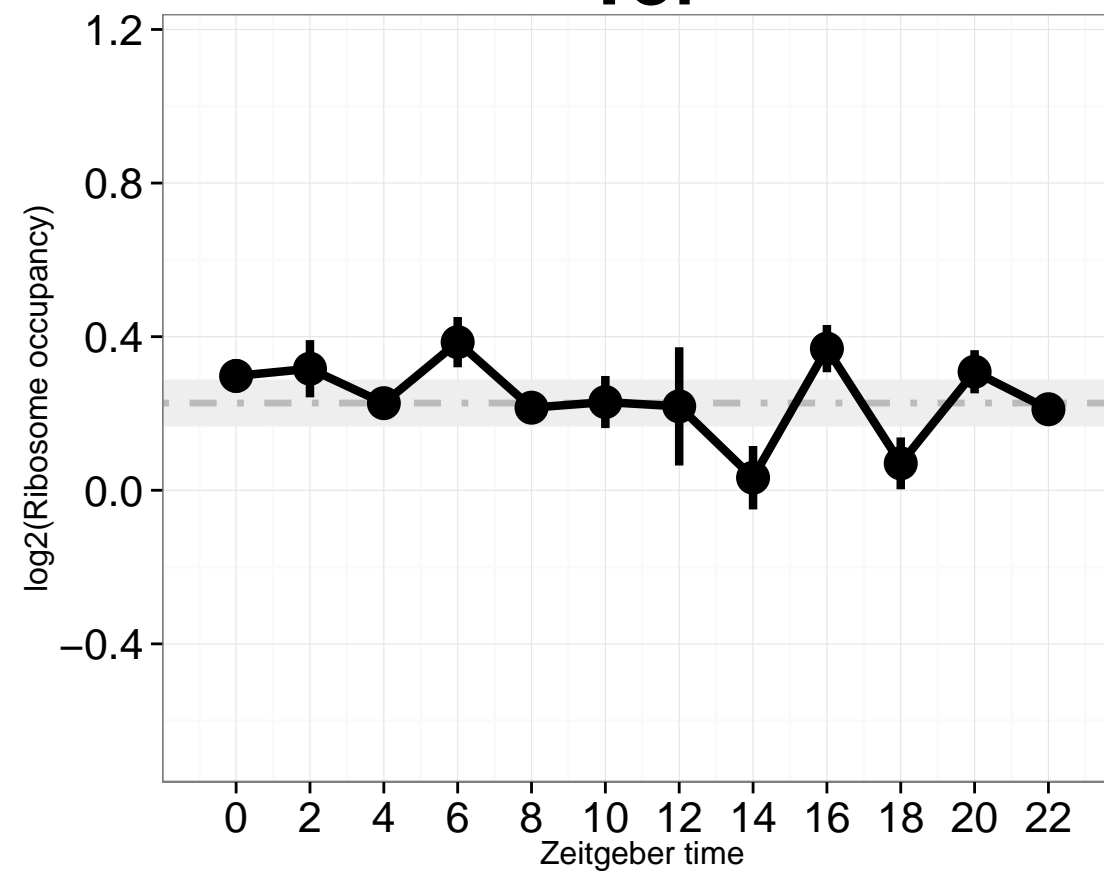

Supplement: Supplementary file 7793 [file 1]

# Bloc1s1

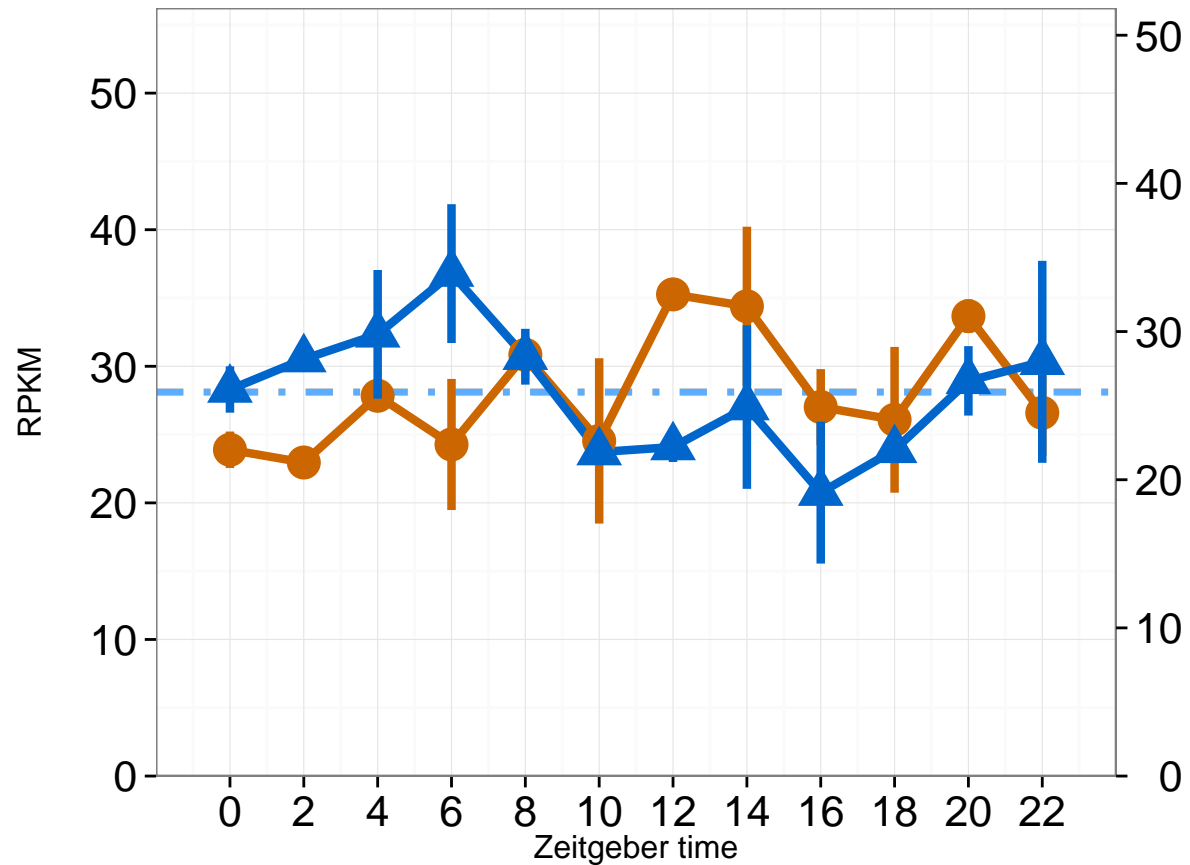

# Bloc1s1

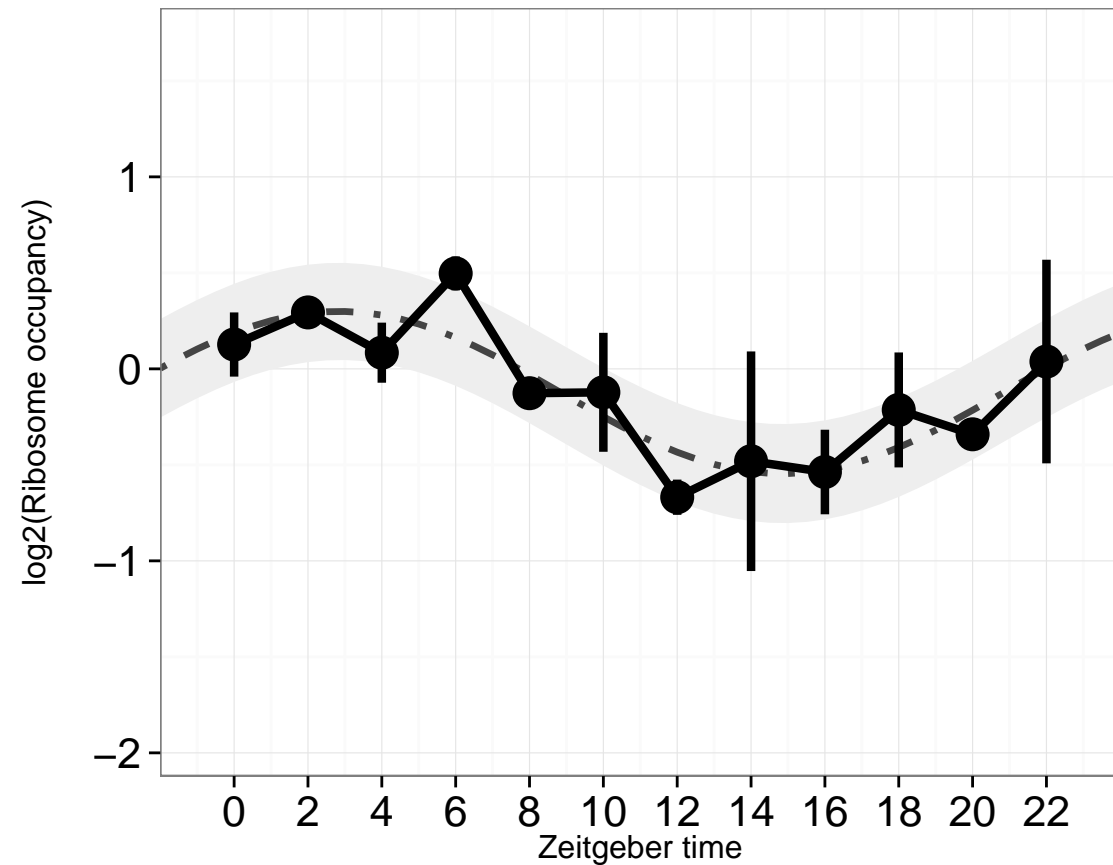

Supplement: Supplementary file 7794 [file 1]

# Haus6

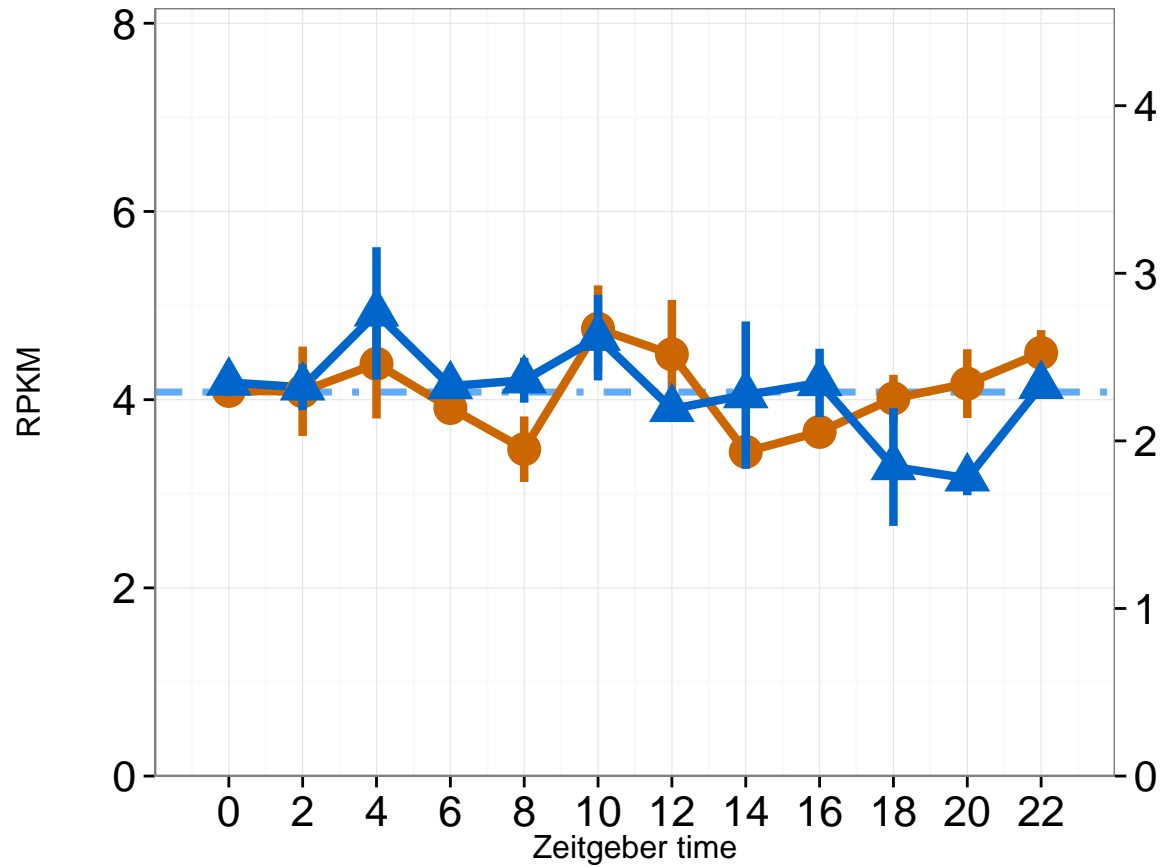

# Haus6

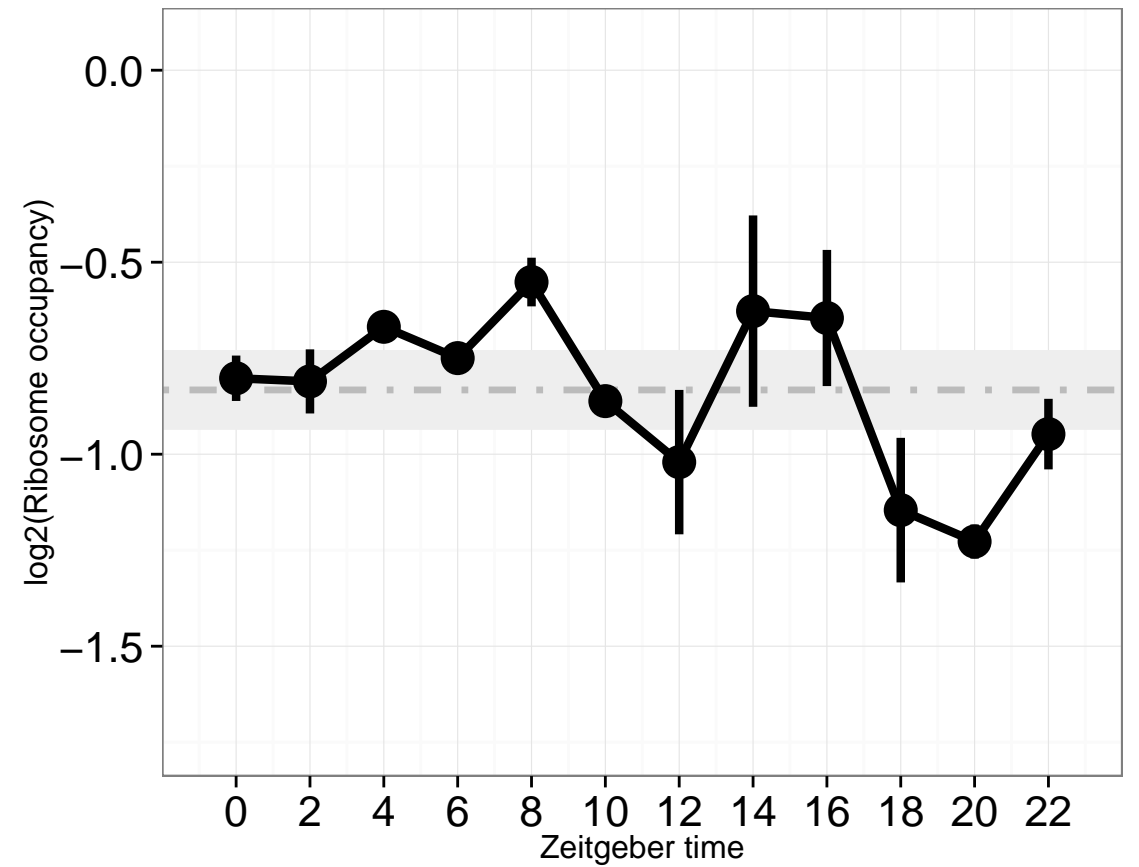

Supplement: Supplementary file 7795 [file 1]

## Arsi

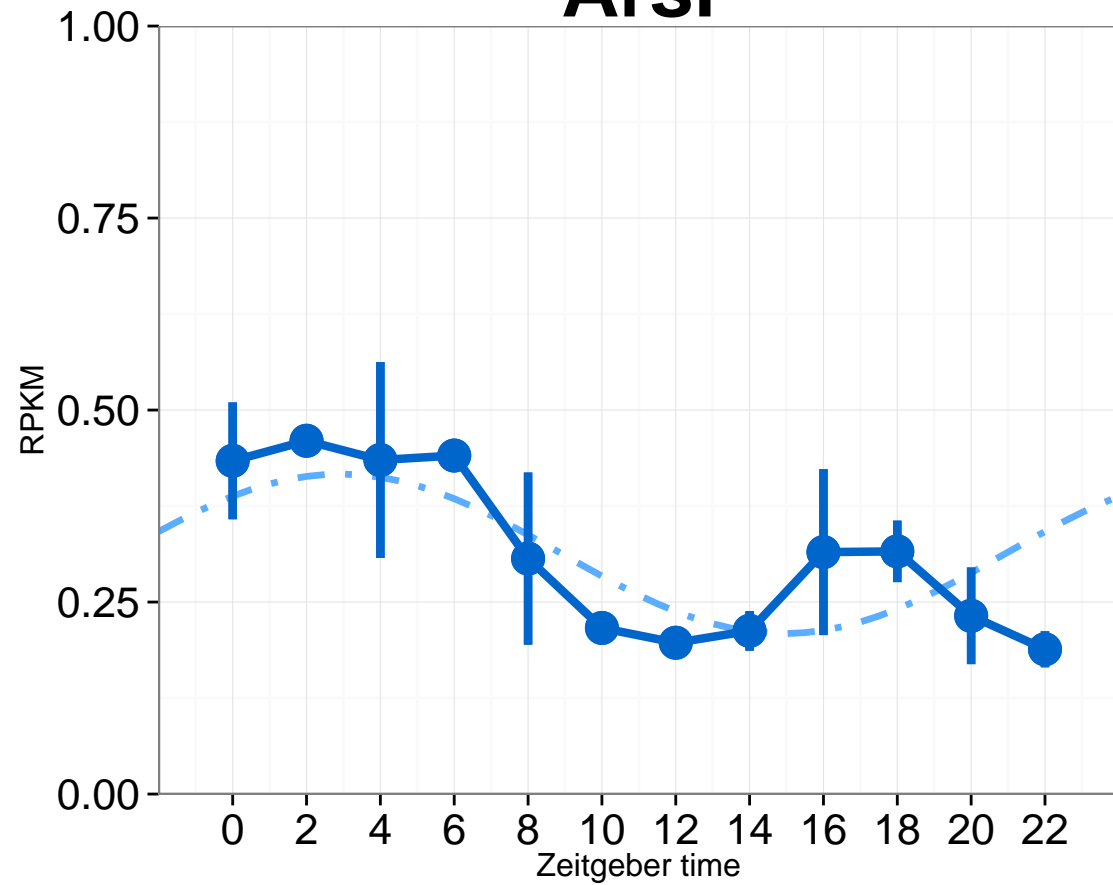

## Arsi log2(Ribosome occupancy)

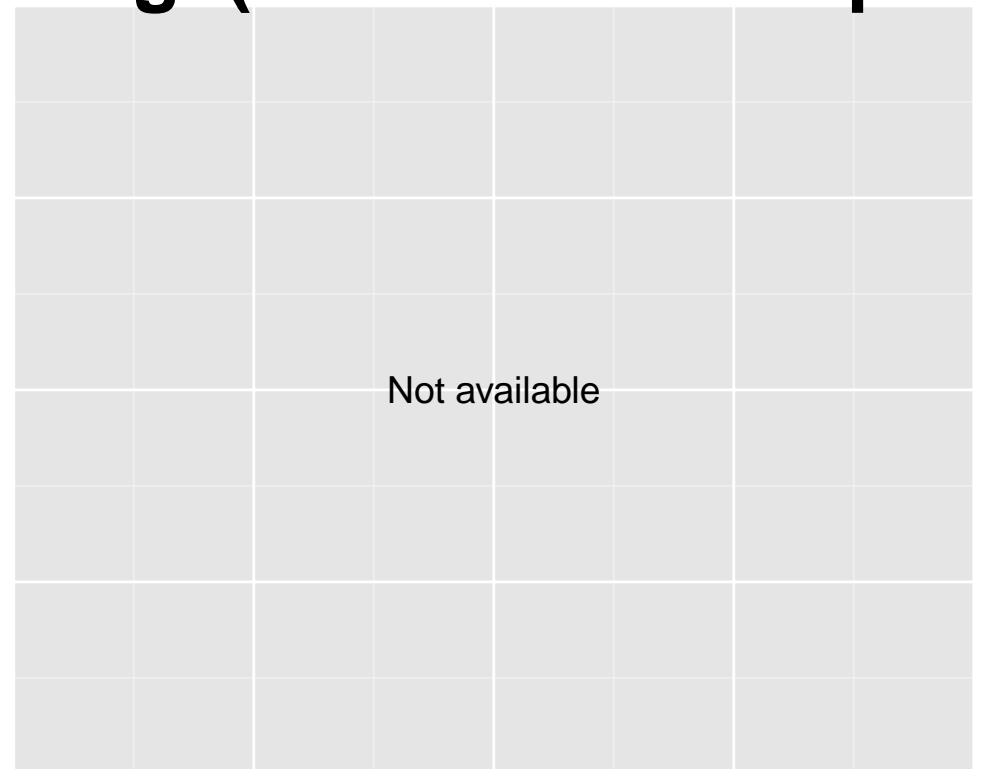

Supplement: Supplementary file 7796 [file 1]

## Ubr5

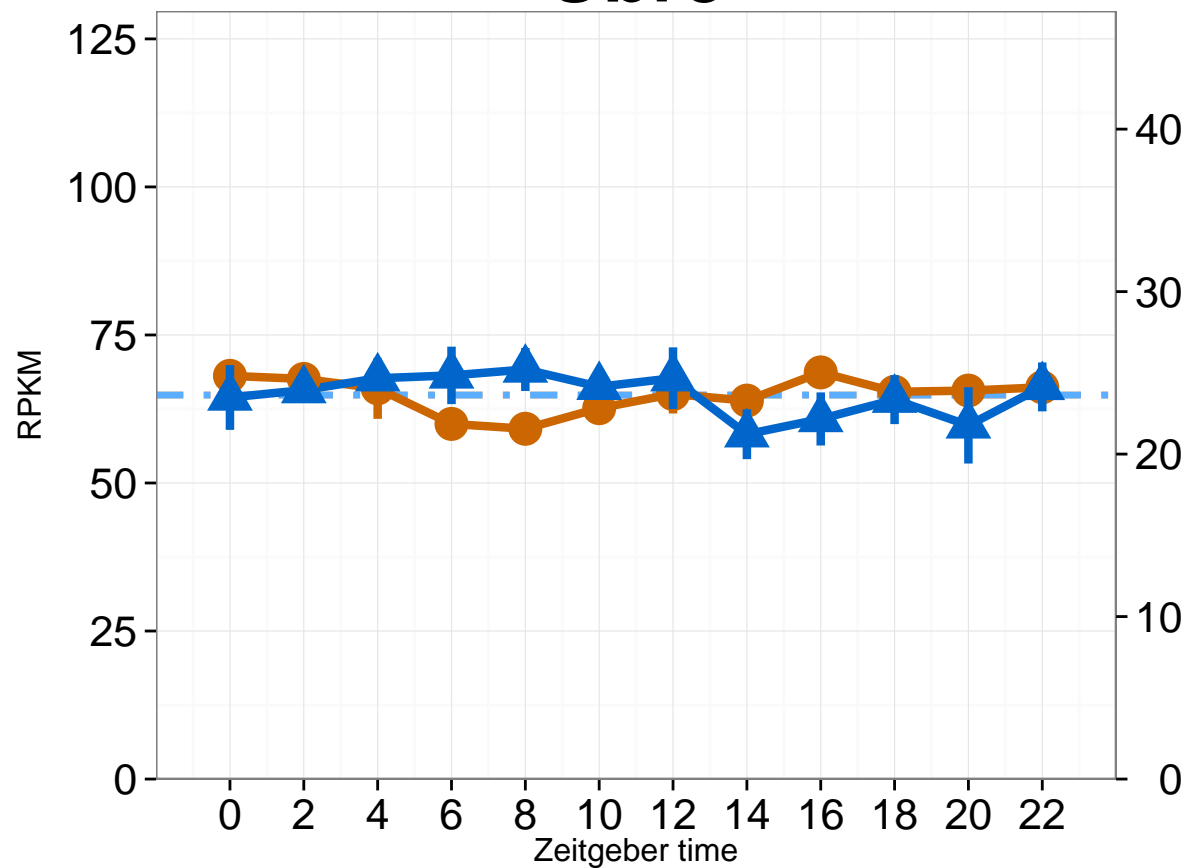

## Ubr5

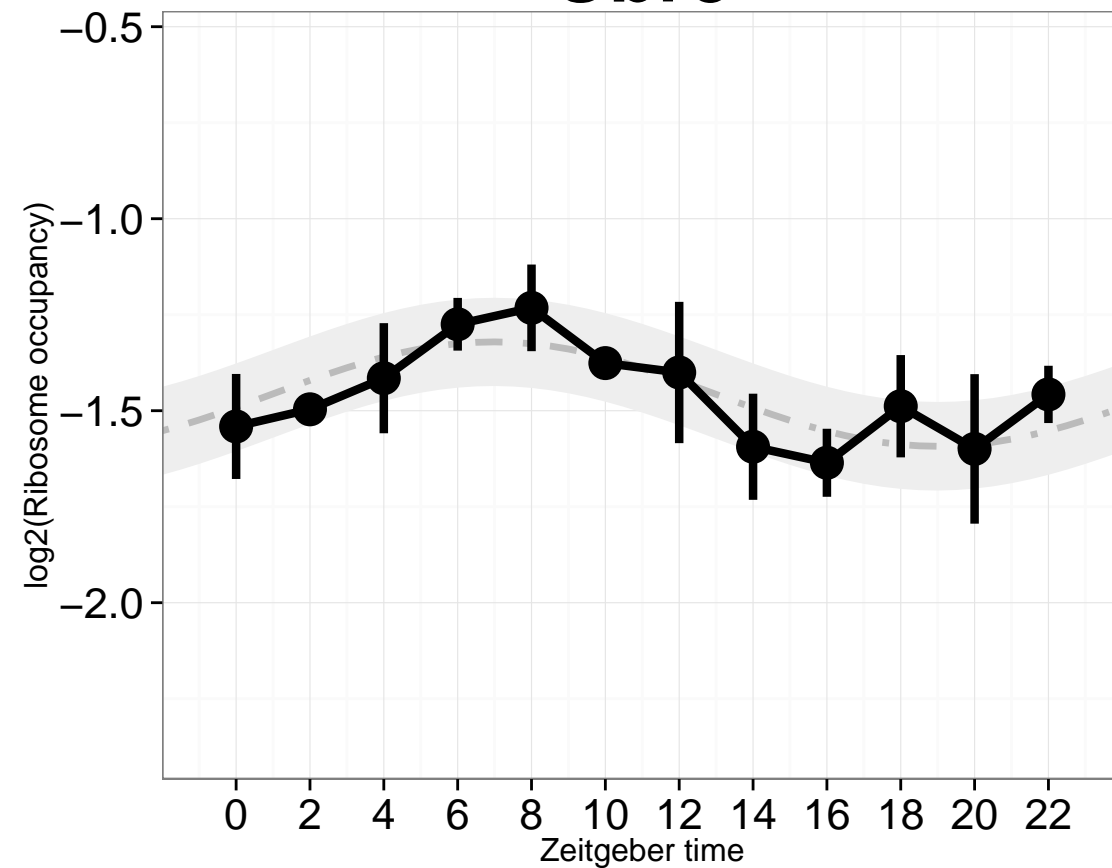

Supplement: Supplementary file 7797 [file 1]

## Ncbp2

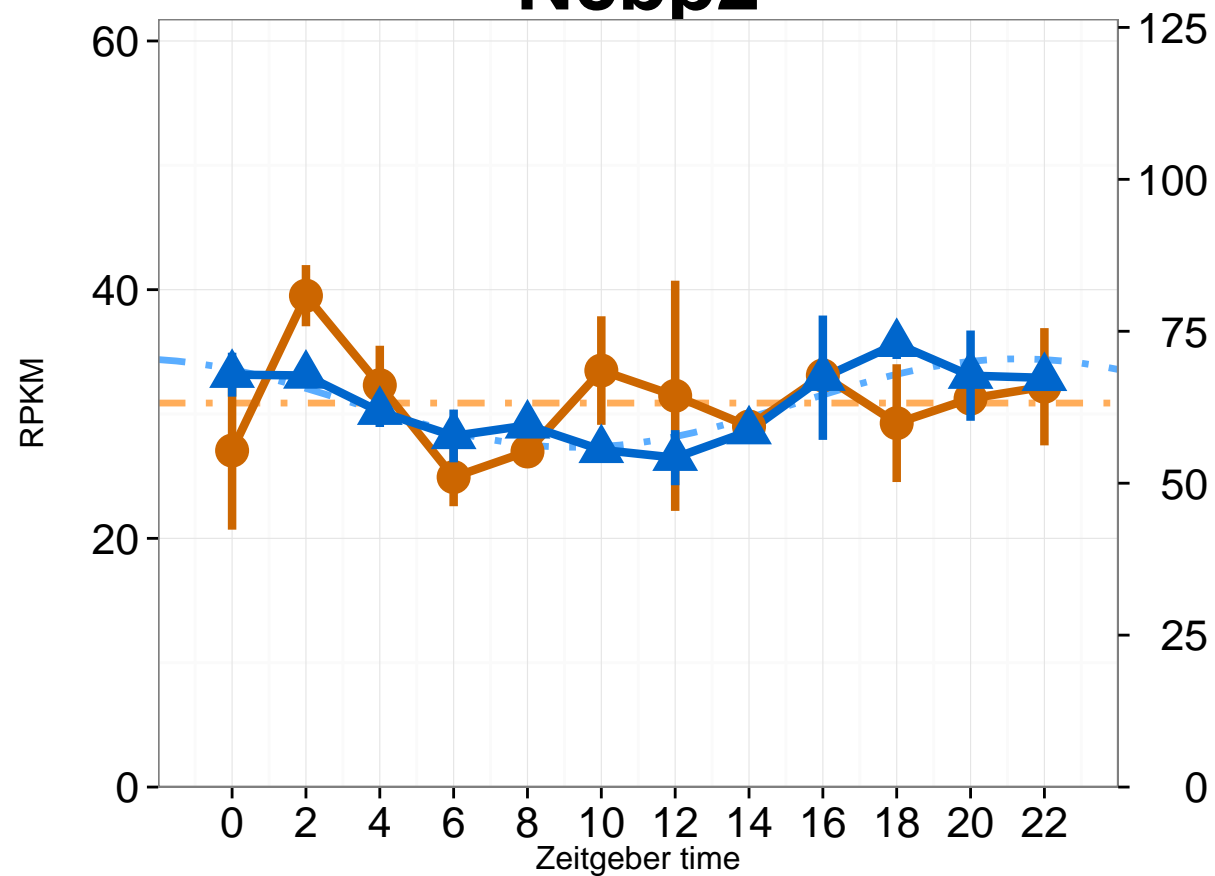

## Ncbp2

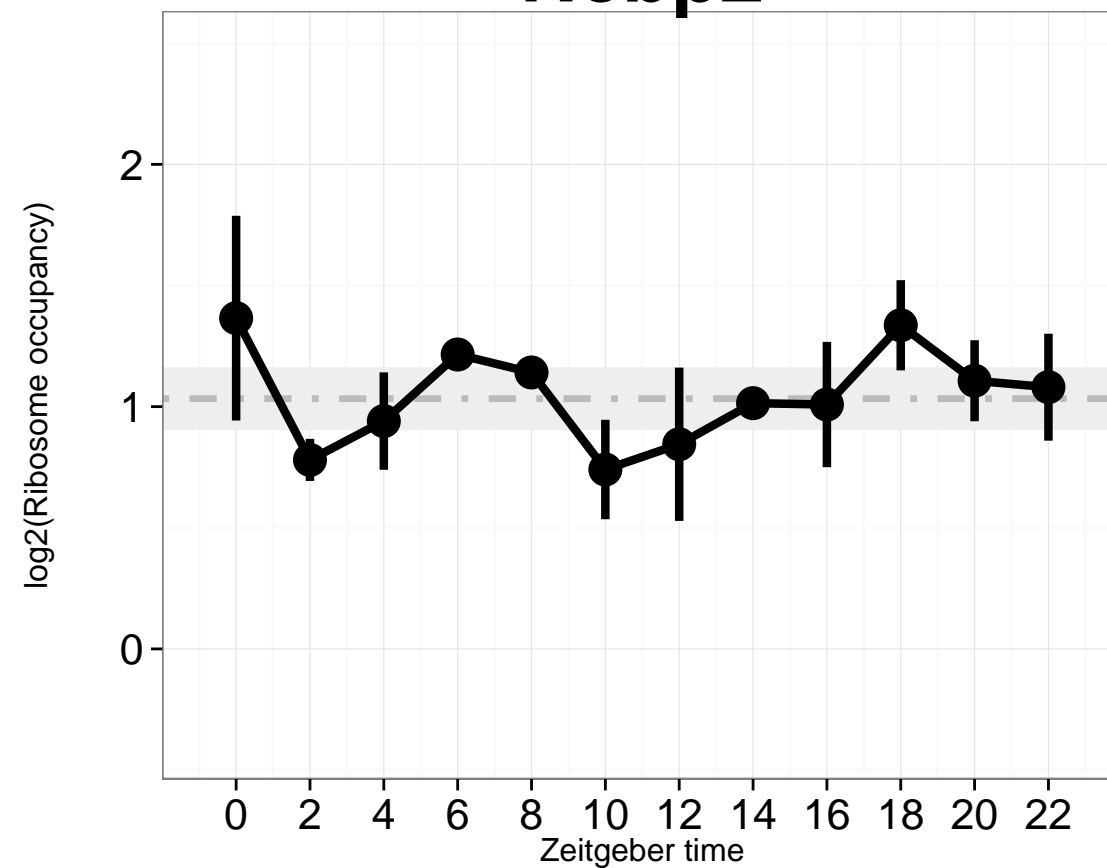

Supplement: Supplementary file 7798 [file 1]

## Bcl2l2

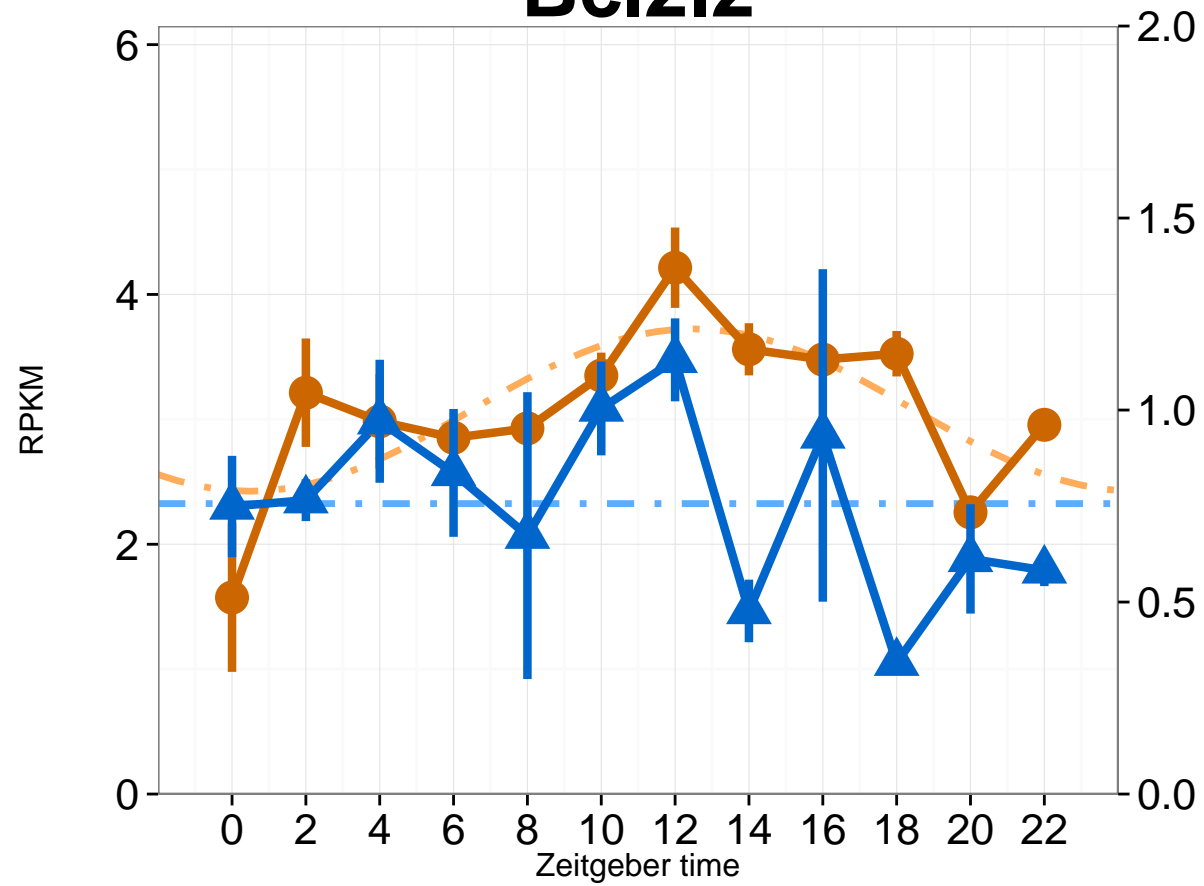

## Bcl2l2

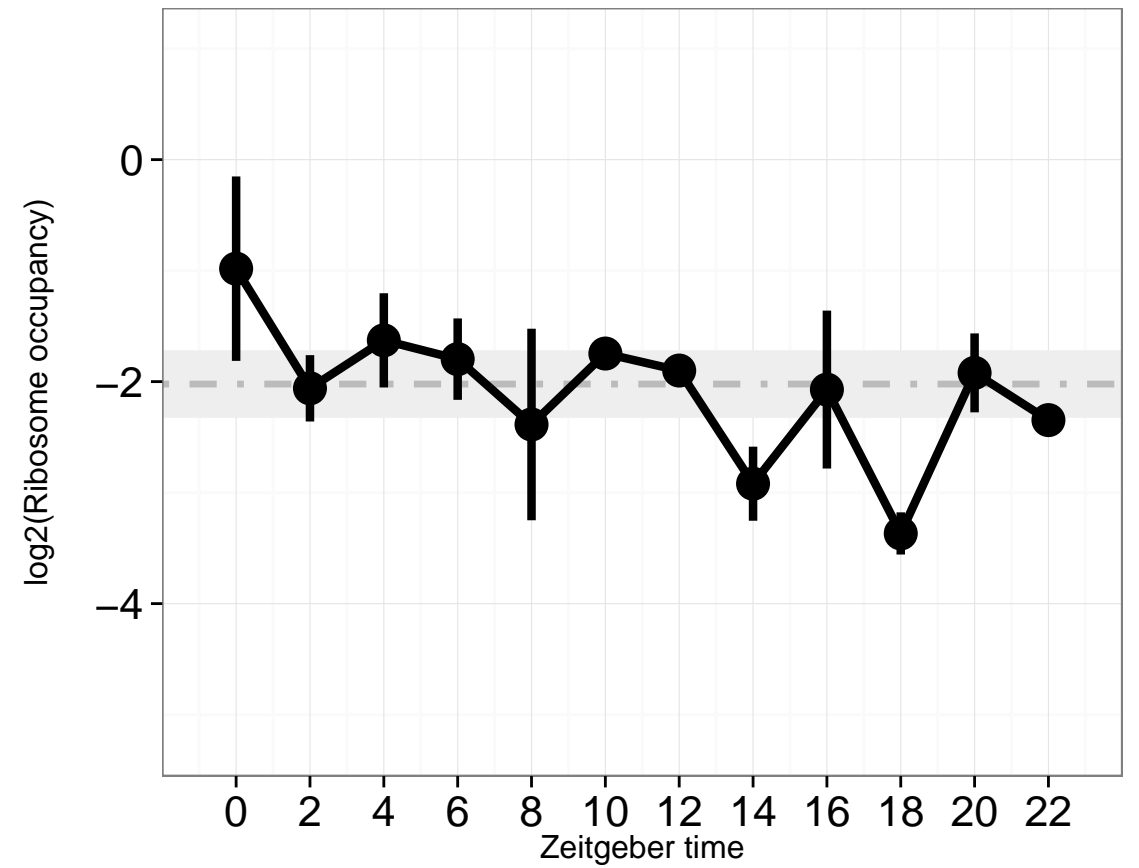

Supplement: Supplementary file 7799 [file 1]

## Kbtbd7

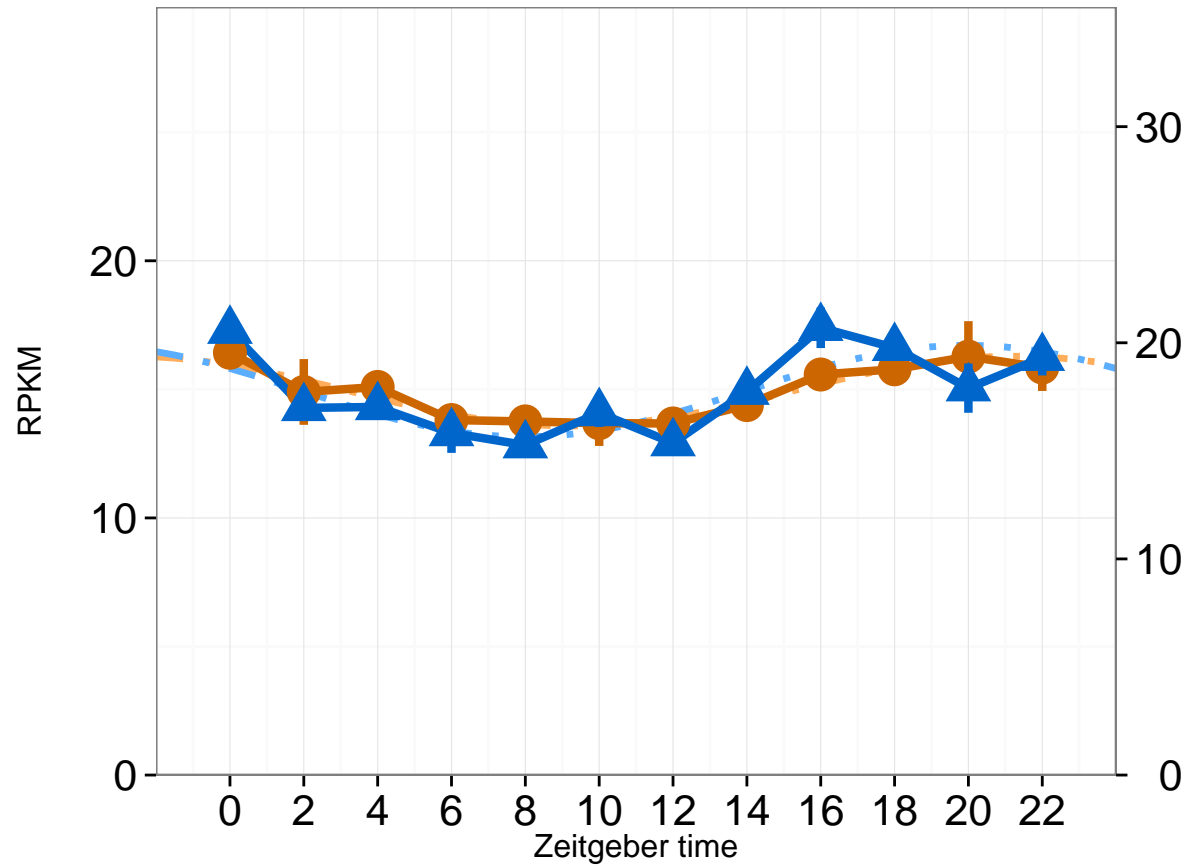

## Kbtbd7

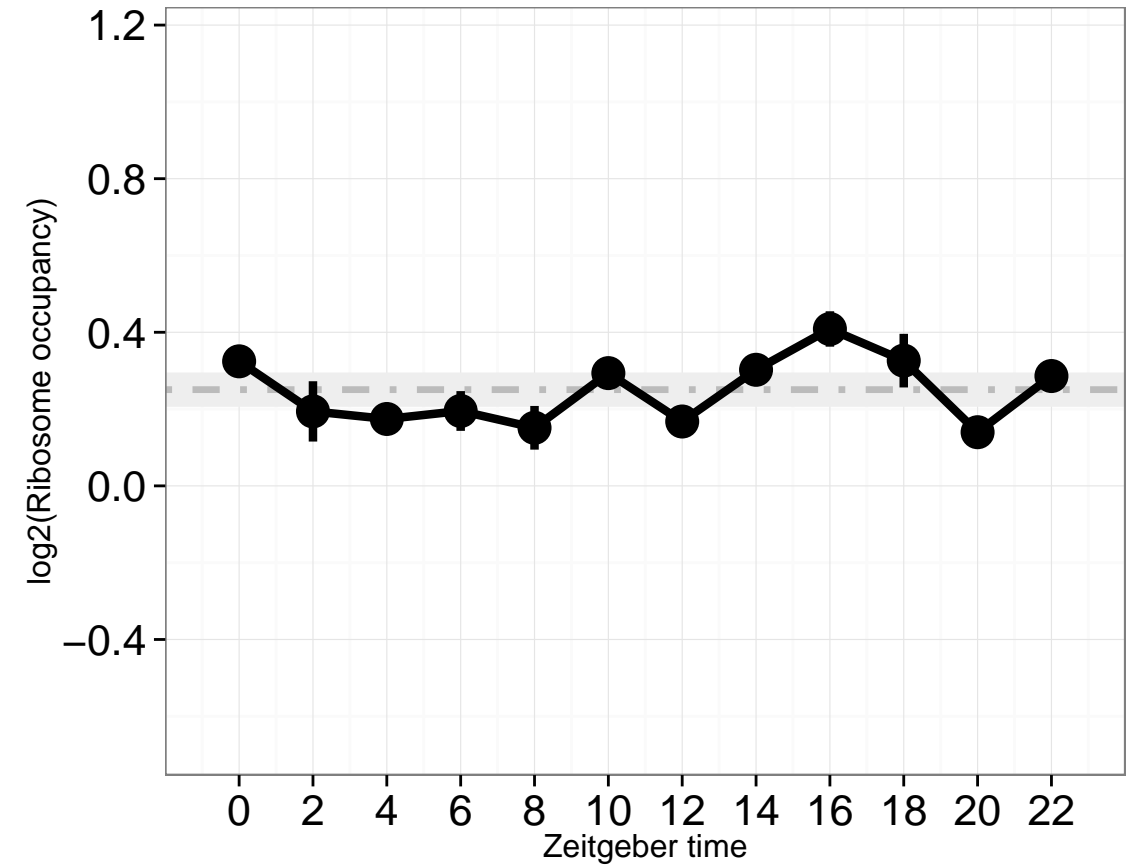

Supplement: Supplementary file 7800 [file 1]

## Epha7

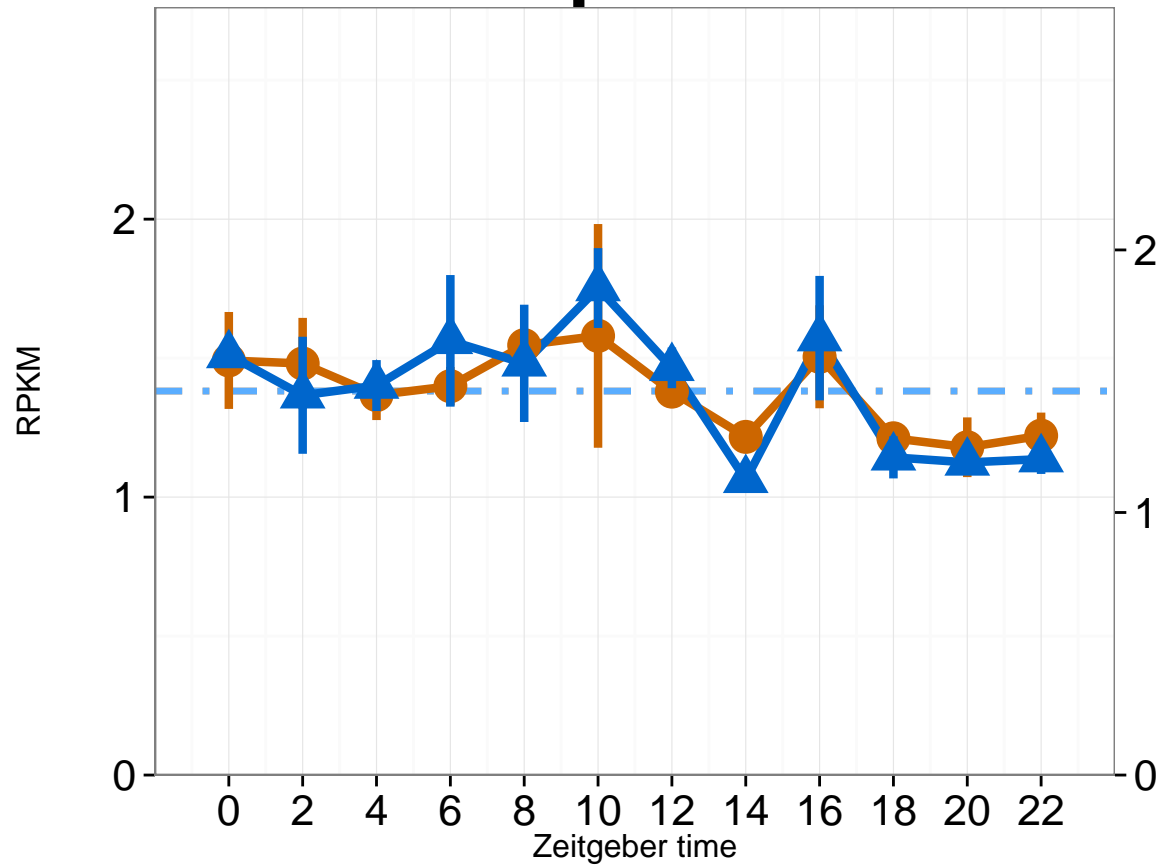

## Epha7

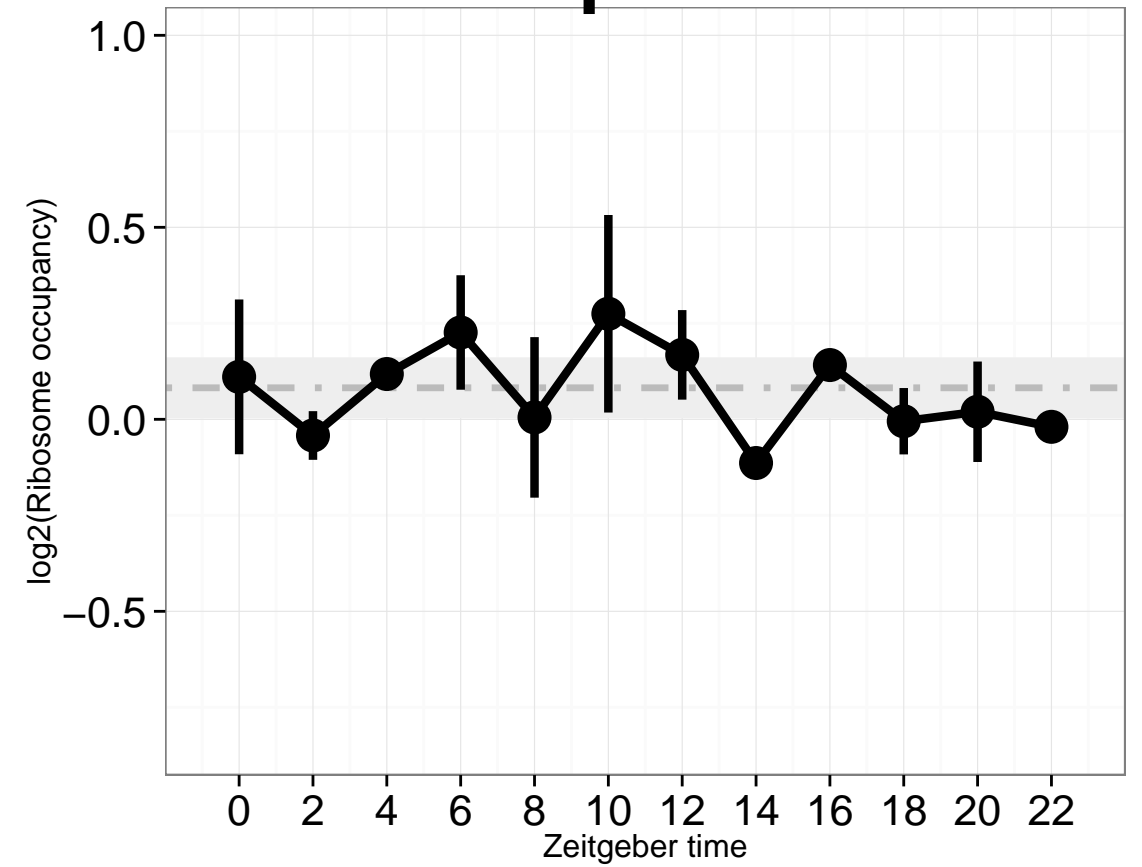

Supplement: Supplementary file 7801 [file 1]

## Ski

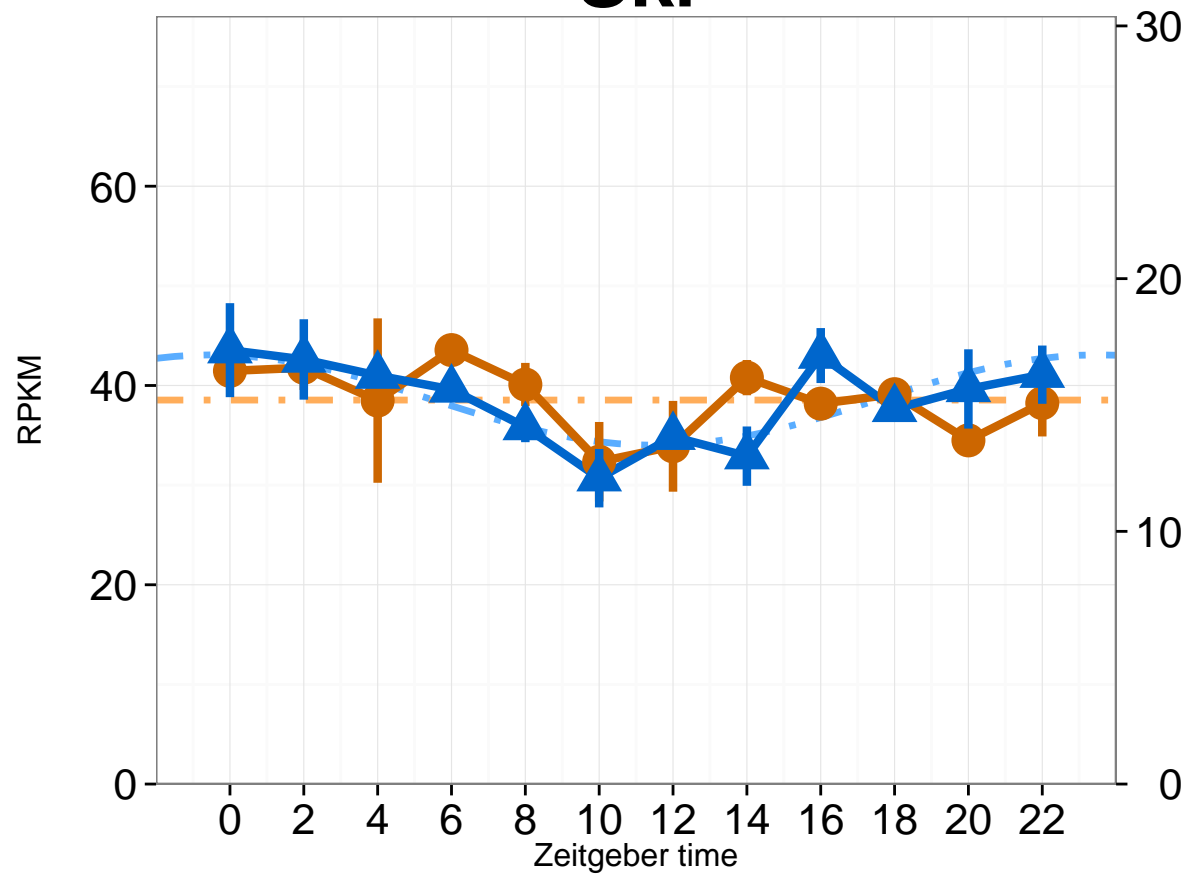

## Ski

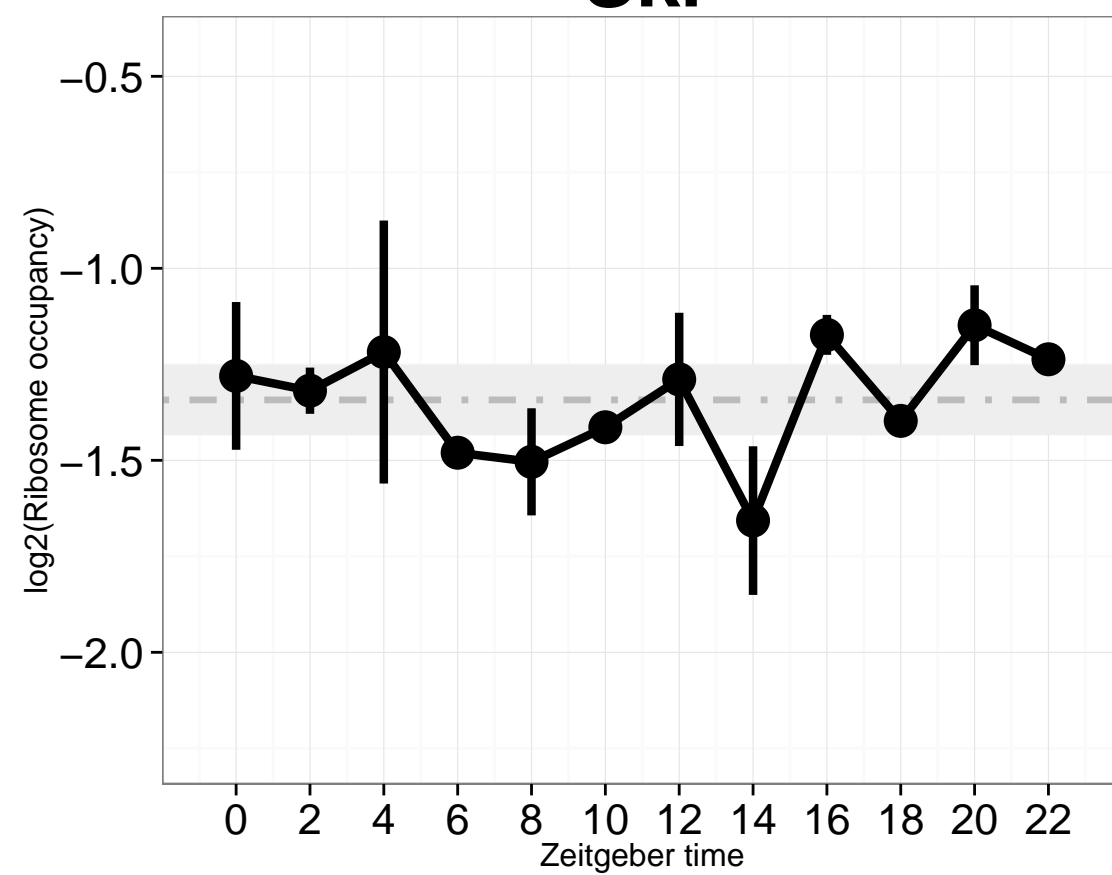

Supplement: Supplementary file 7802 [file 1]

**Lefty1 TR**

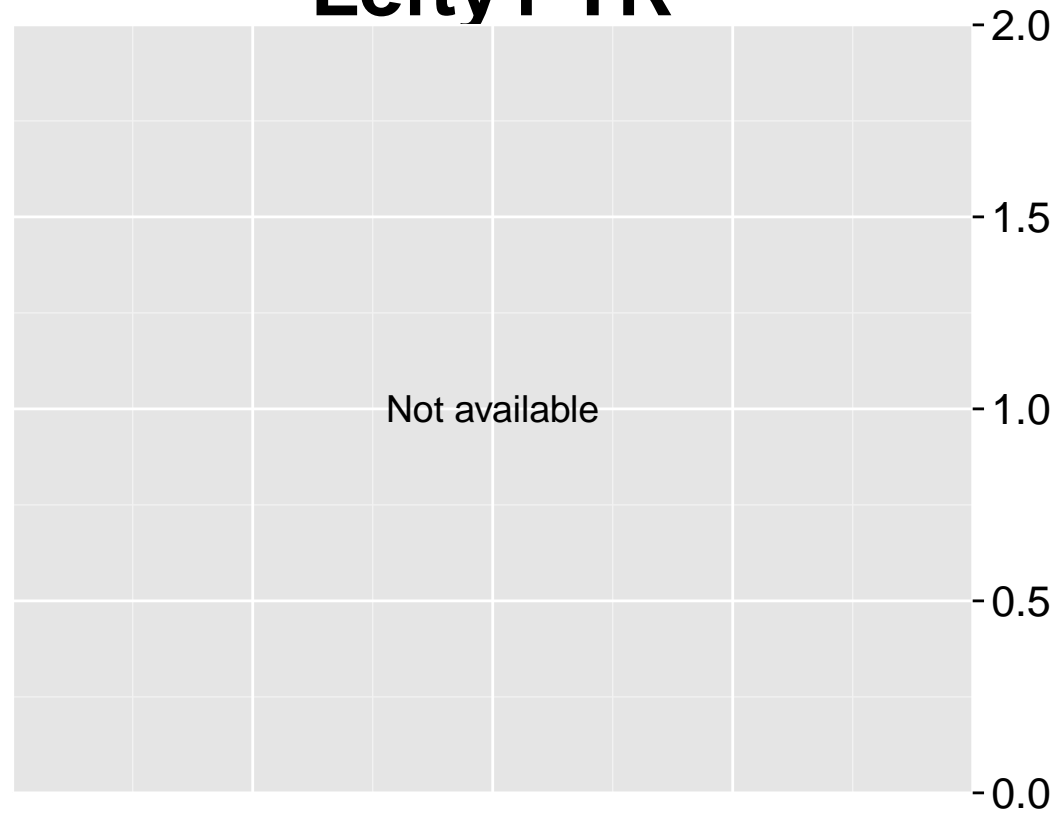

**Lefty1 log2(Ribosome occupancy**

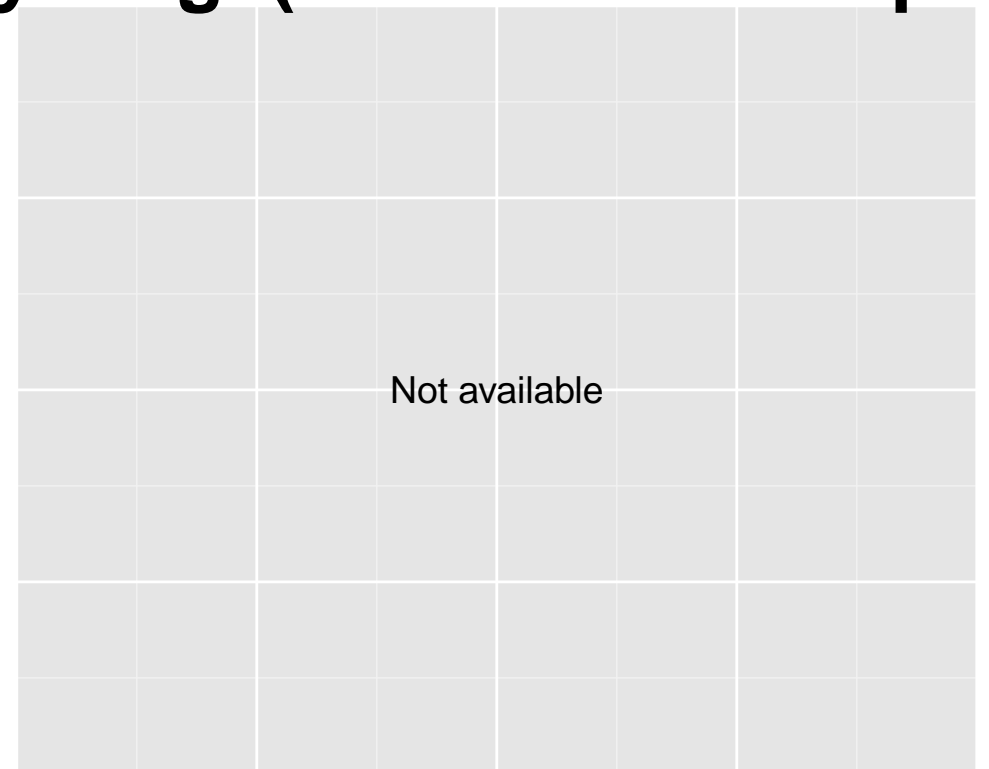

Supplement: Supplementary file 7803 [file 1]

# Atp6v0e2

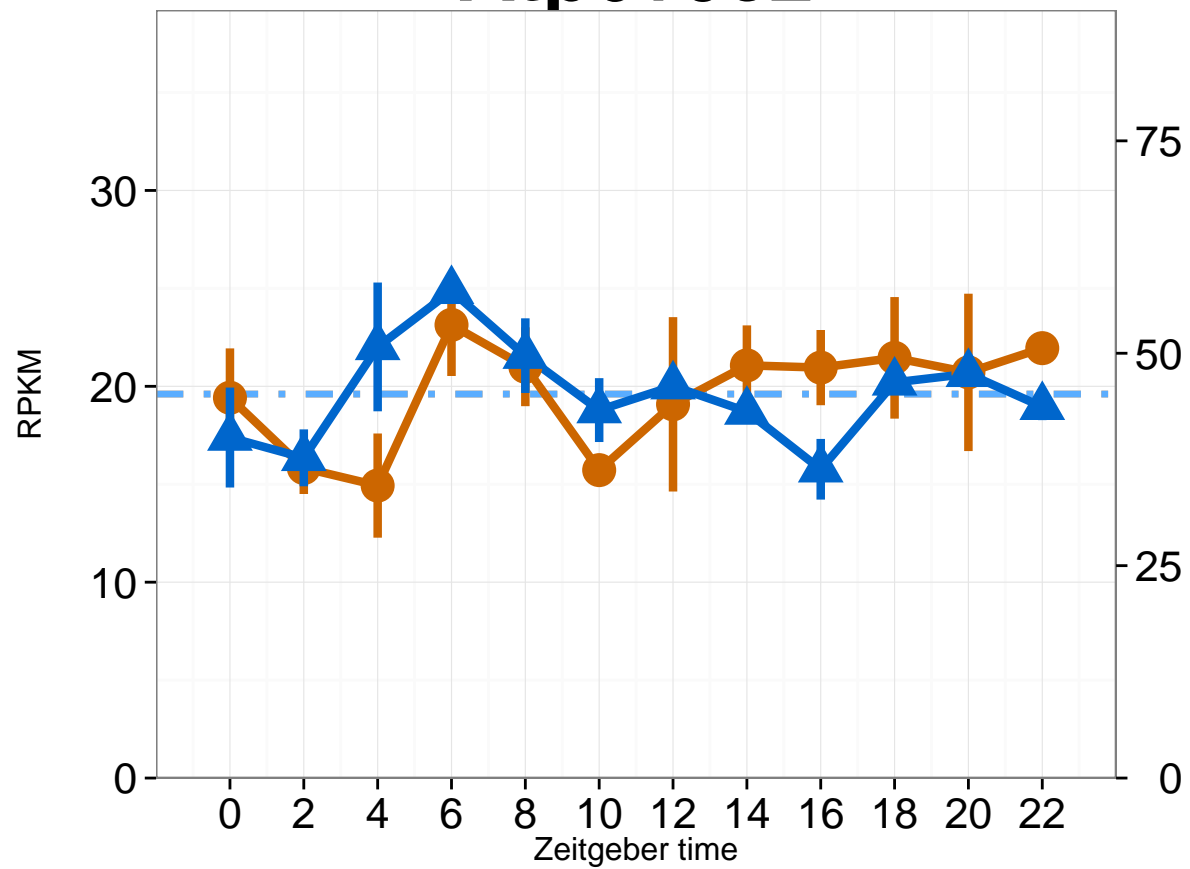

# Atp6v0e2

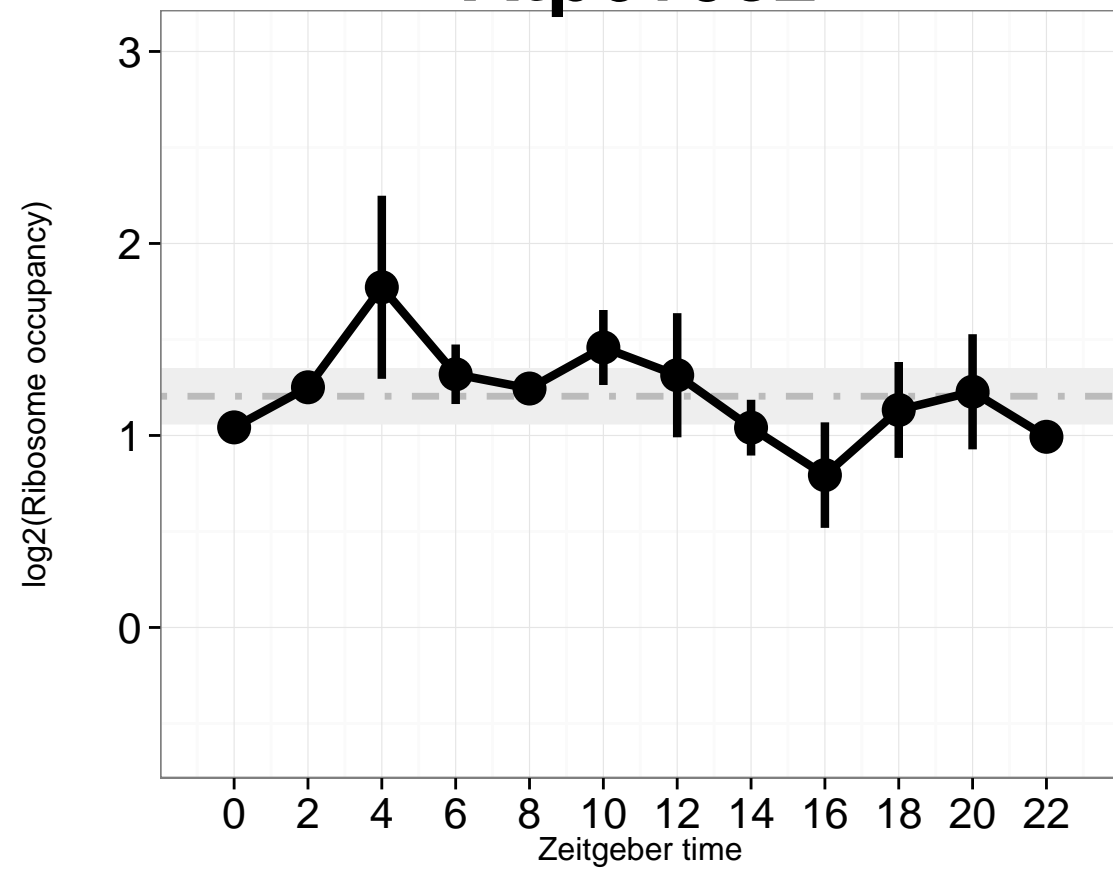

Supplement: Supplementary file 7804 [file 1]

# Fcho1

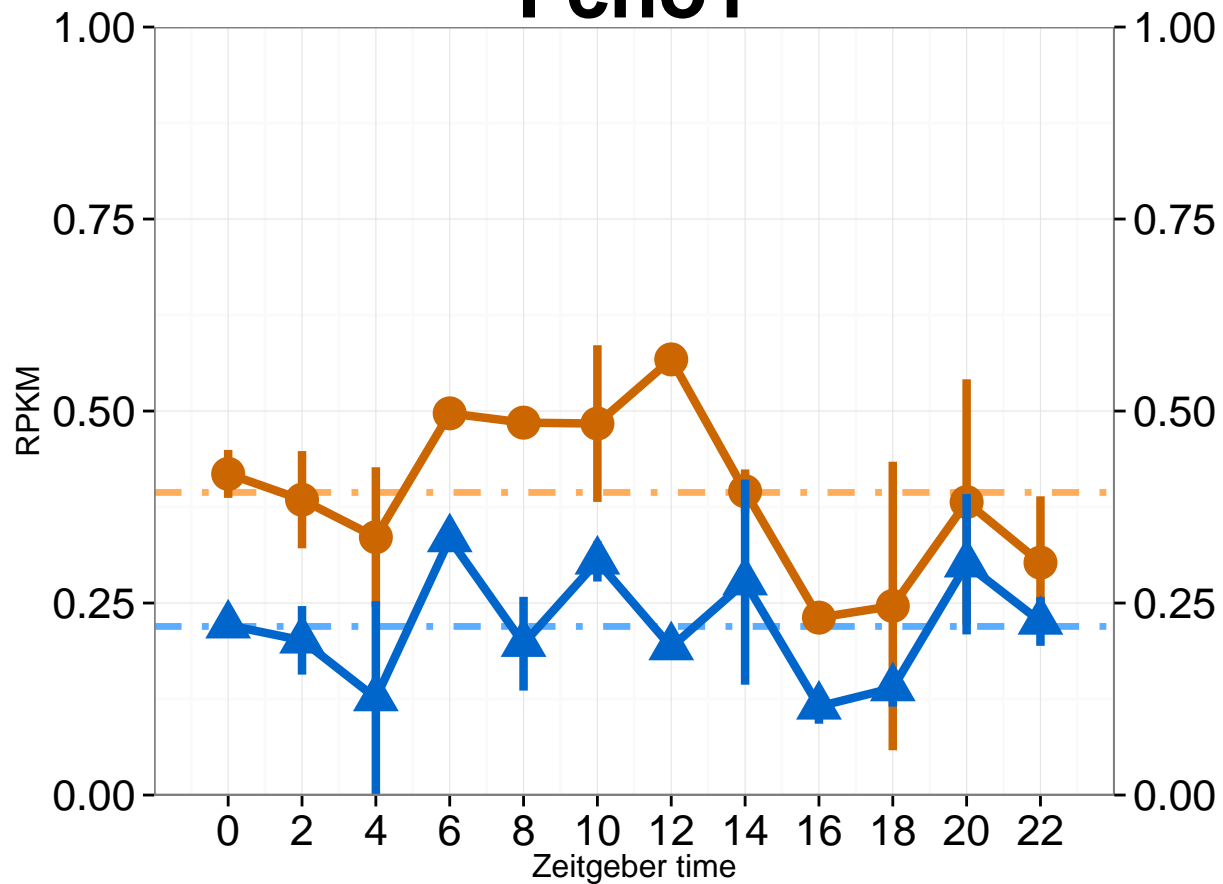

# Fcho1

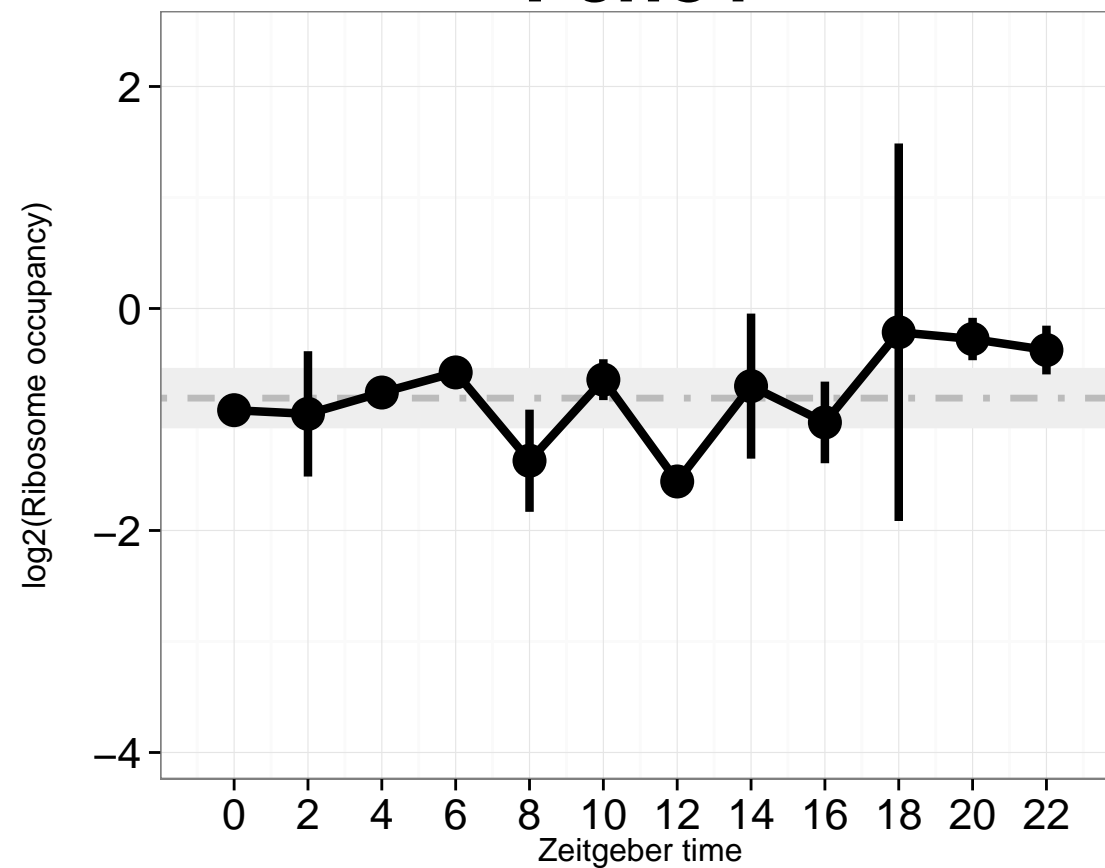

Supplement: Supplementary file 7805 [file 1]

# Pink1

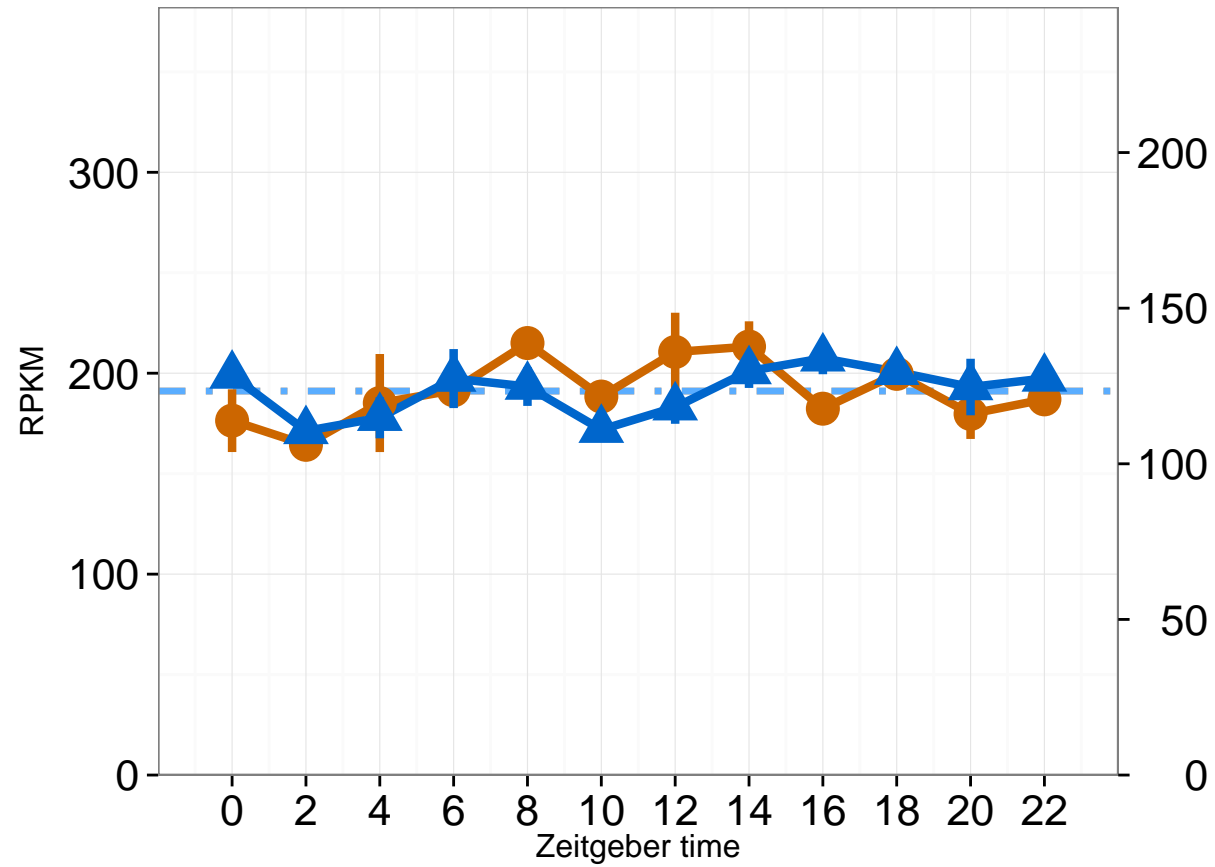

# Pink1

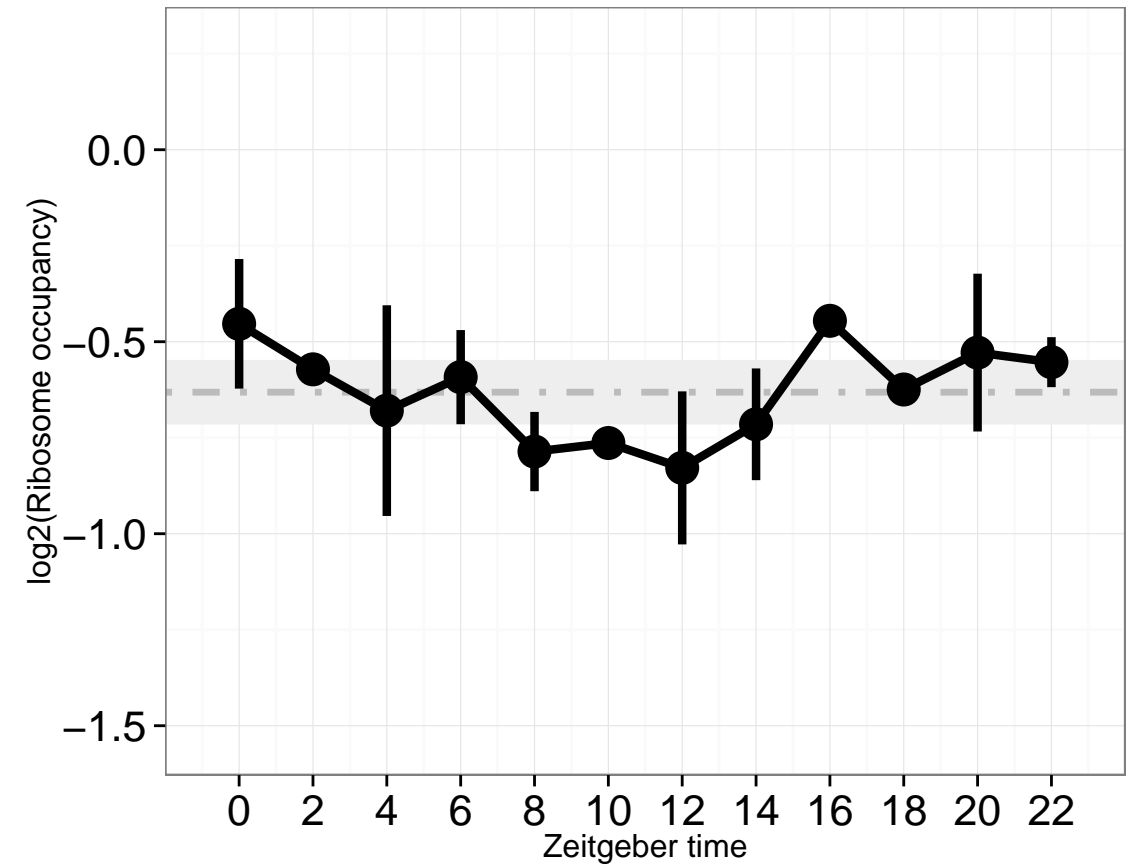

Supplement: Supplementary file 7806 [file 1]

# Kank1

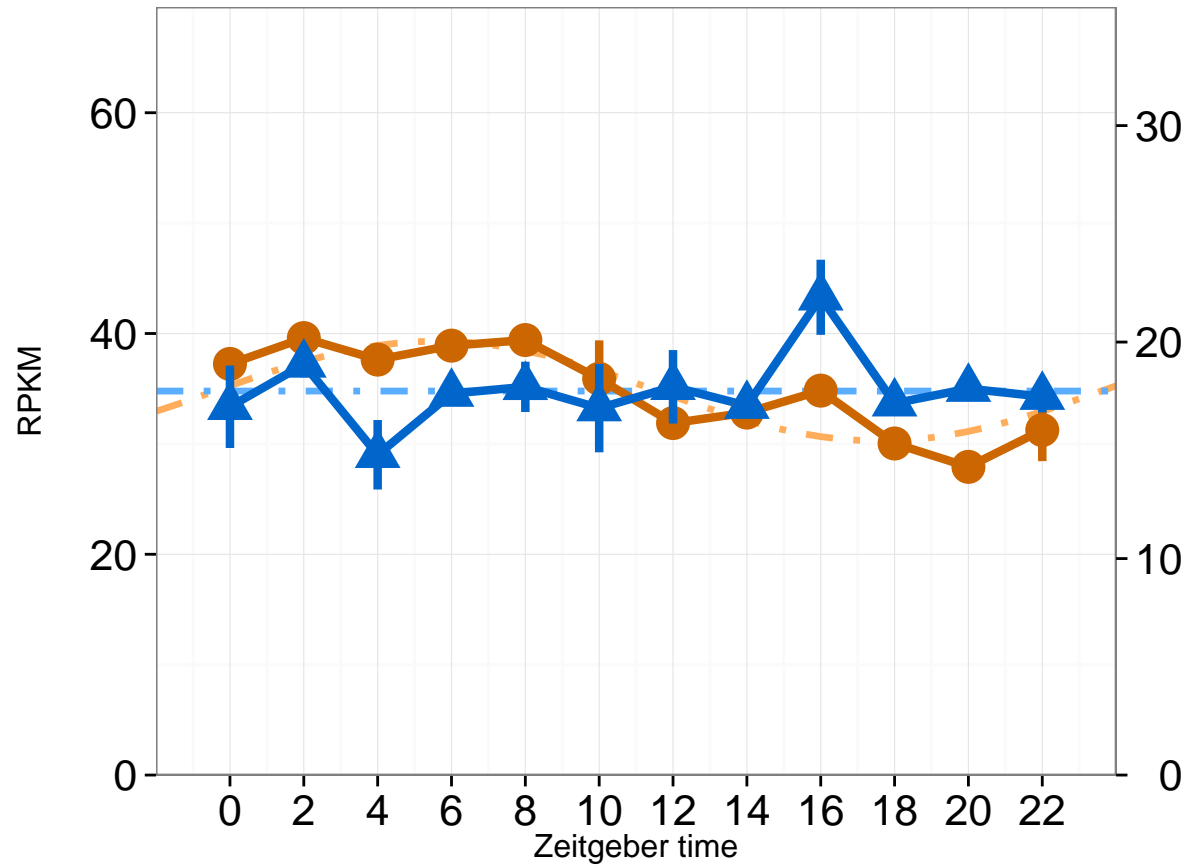

# Kank1

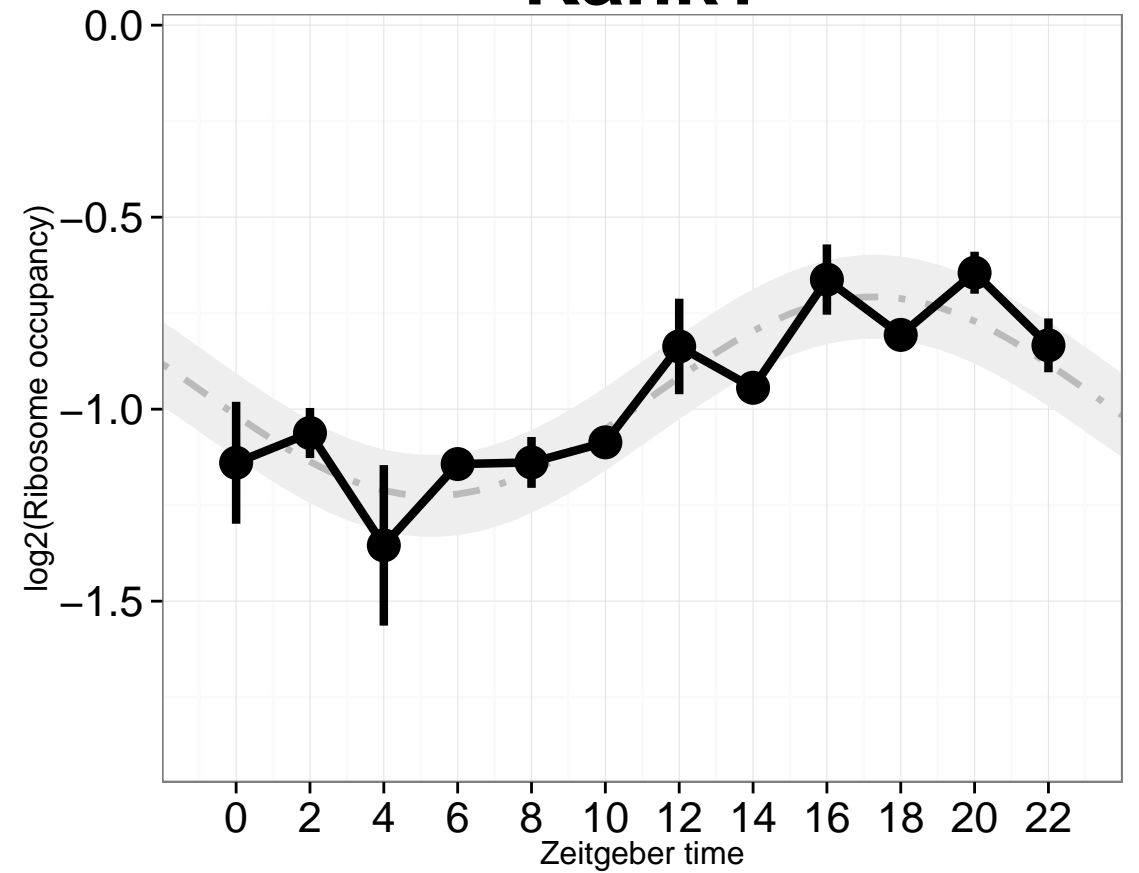

Supplement: Supplementary file 7807 [file 1]

## Speg

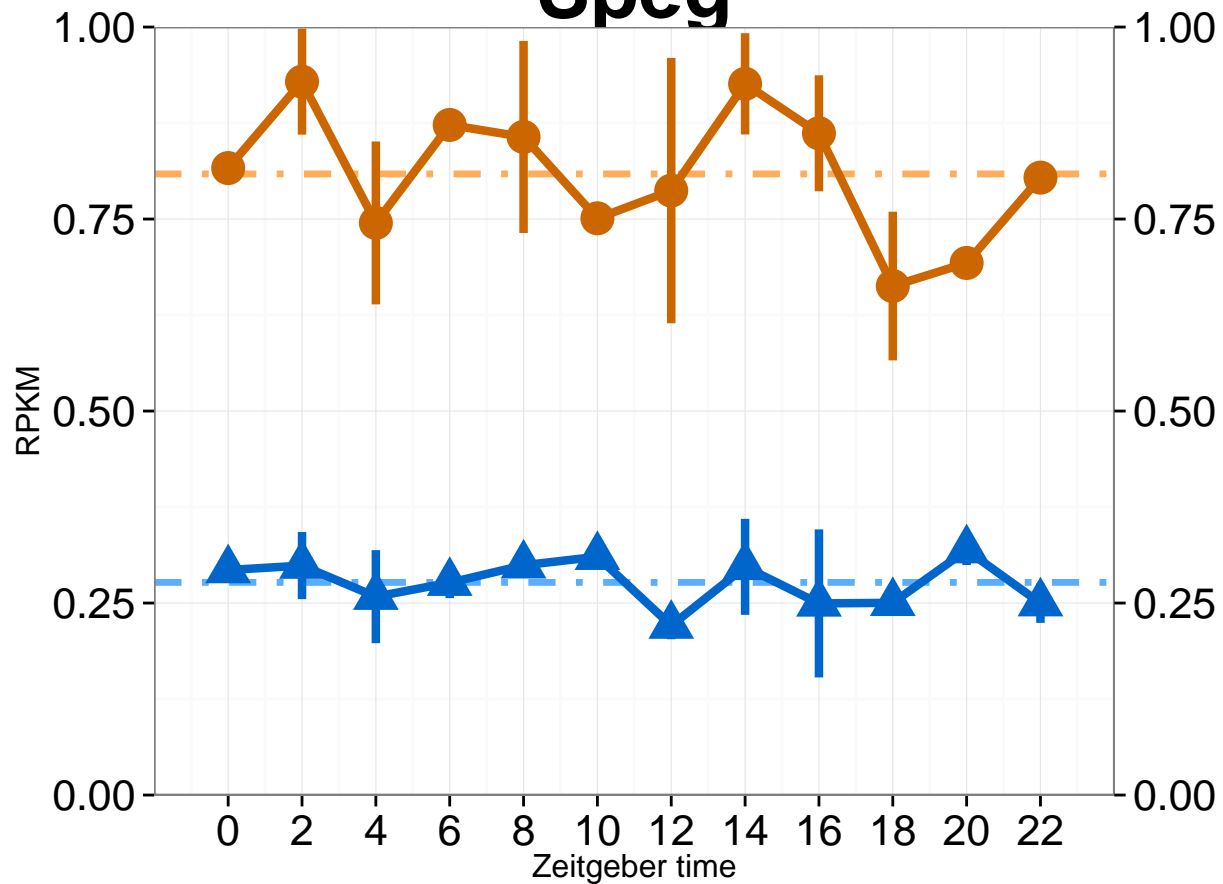

## Speg

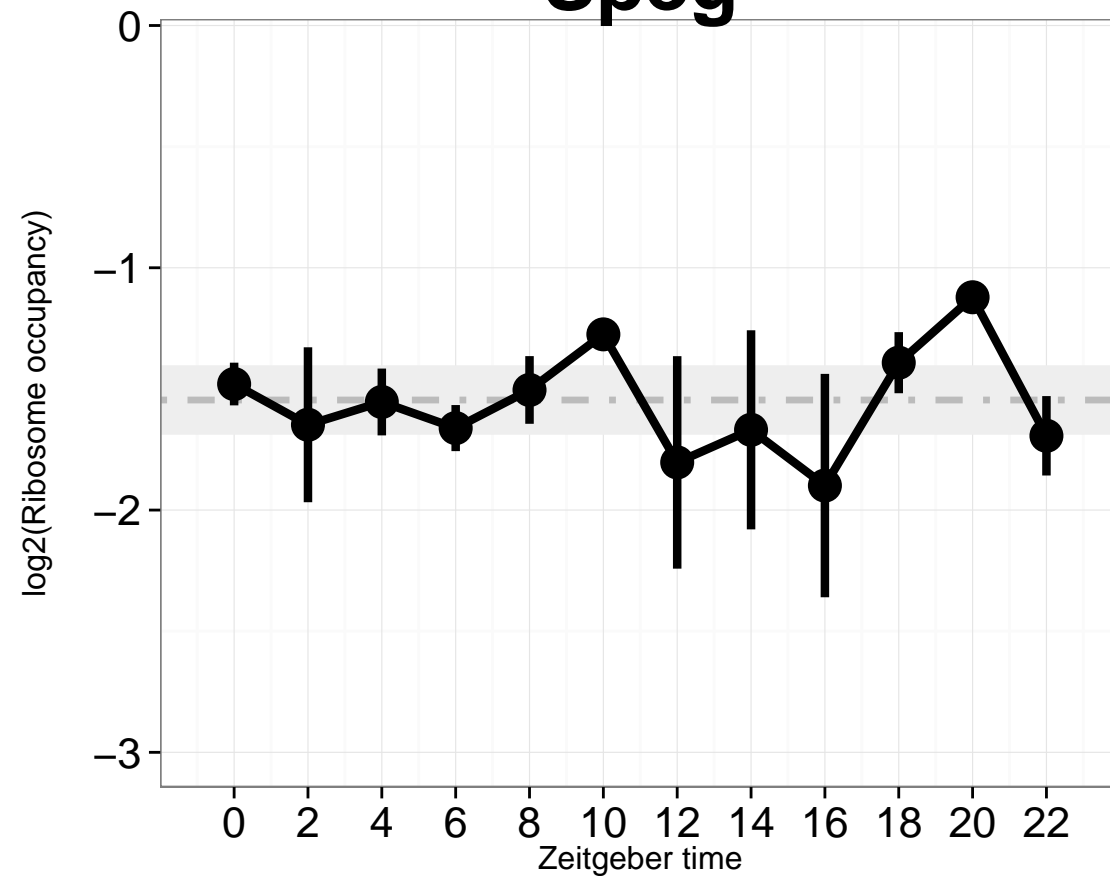

Supplement: Supplementary file 7808 [file 1]

## Sec24d

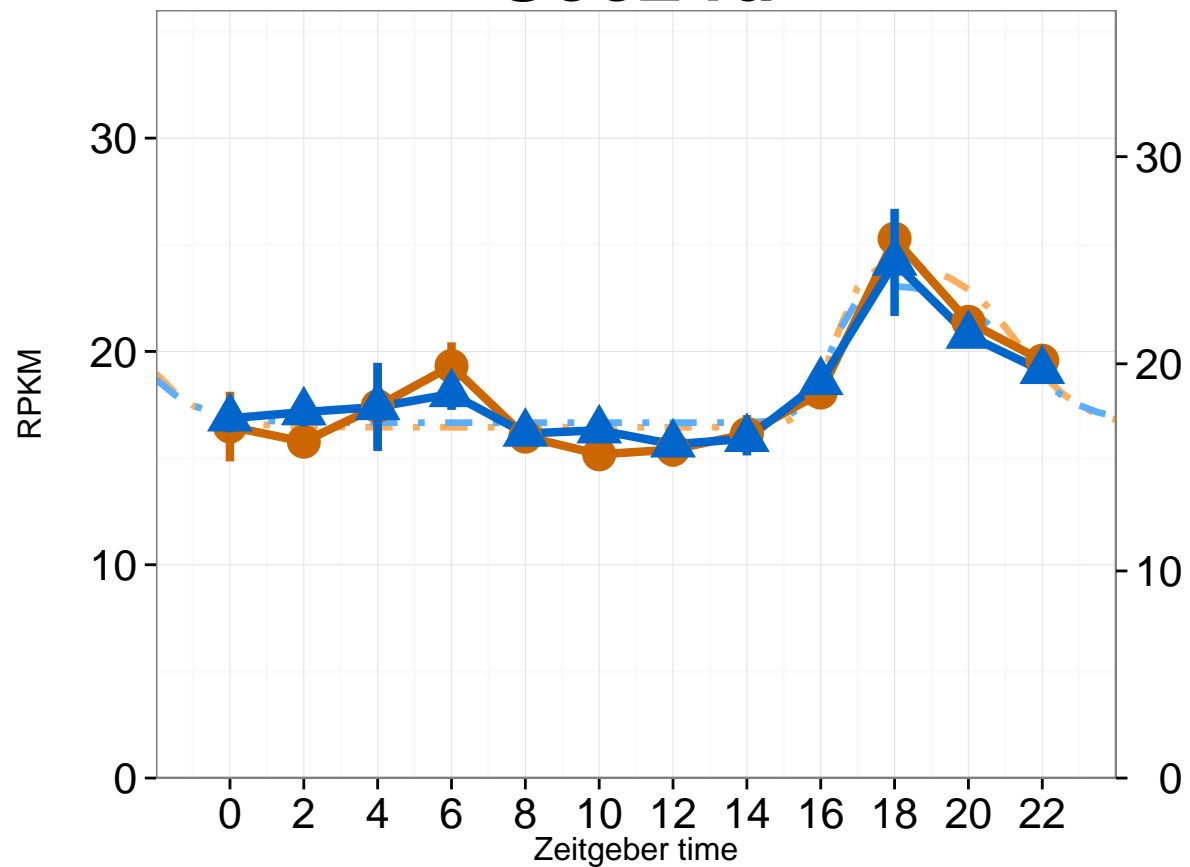

## Sec24d

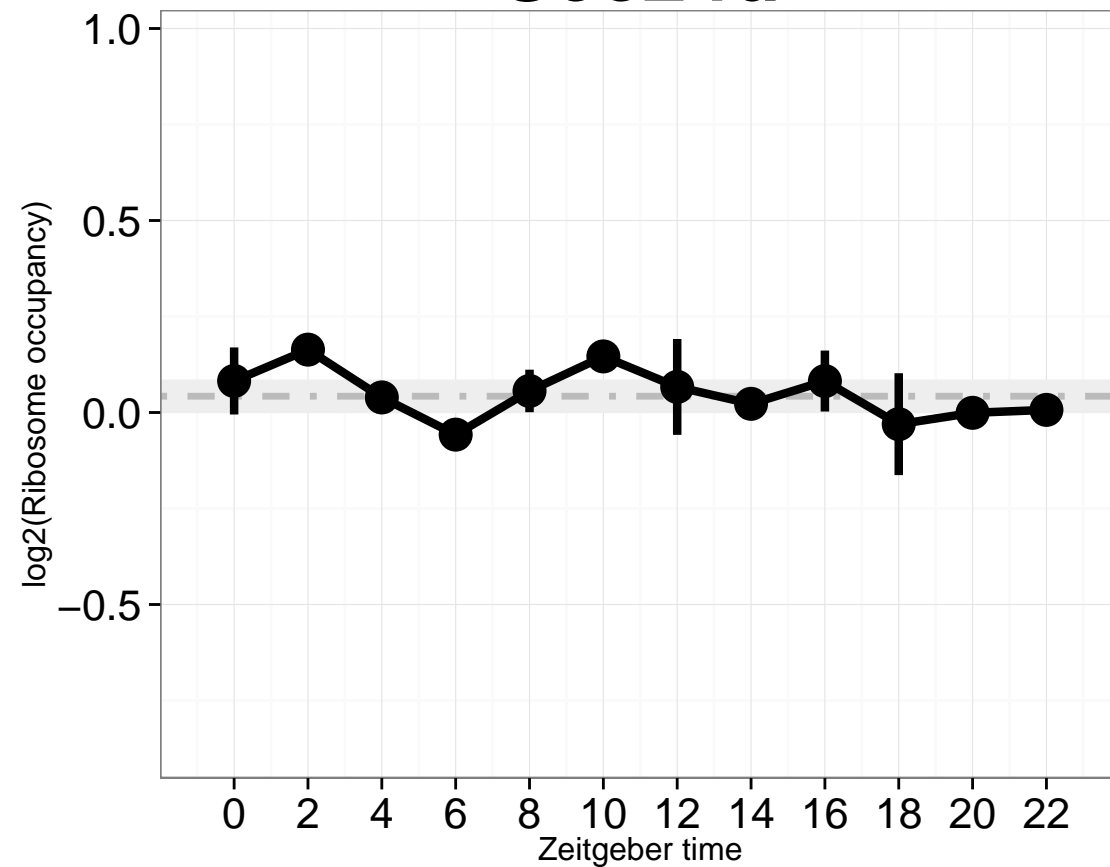

Supplement: Supplementary file 7809 [file 1]

## Senp8

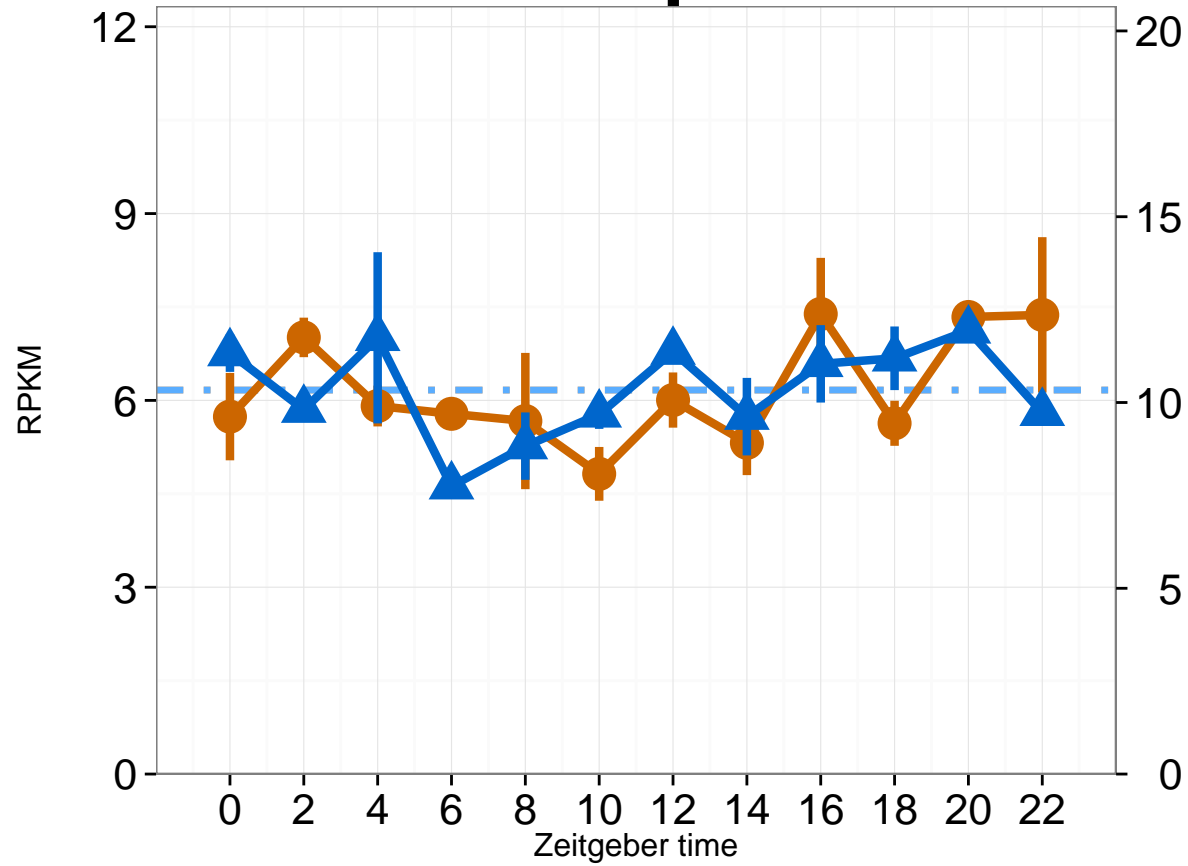

## Senp8

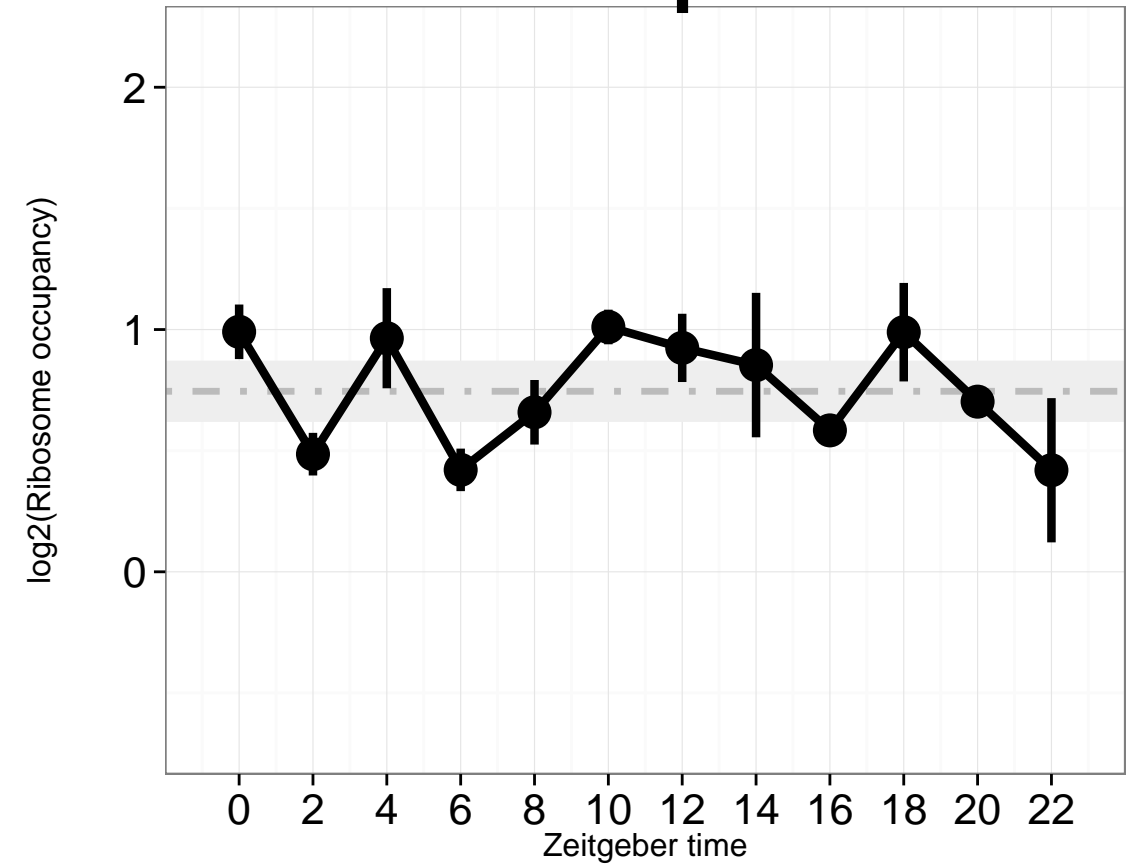

Supplement: Supplementary file 7810 [file 1]

# Cacna1d

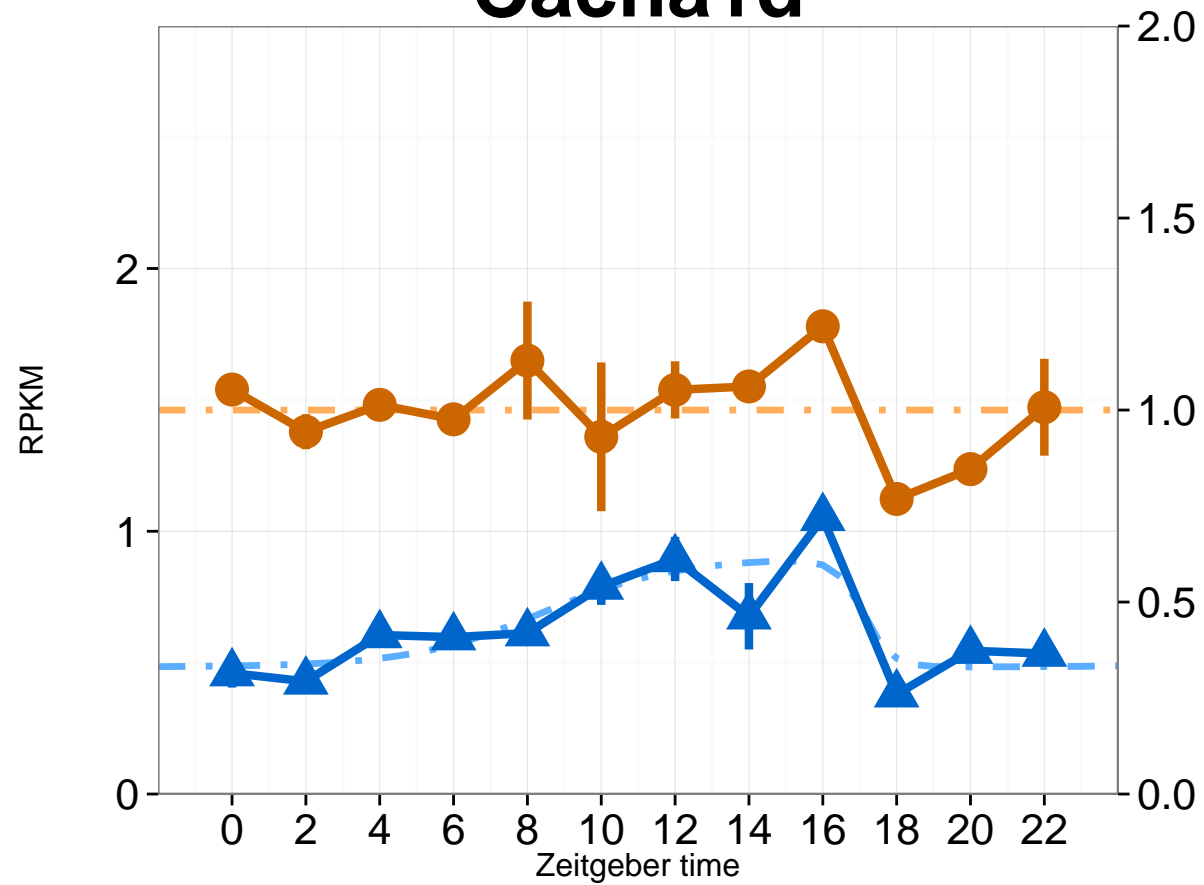

# Cacna1d

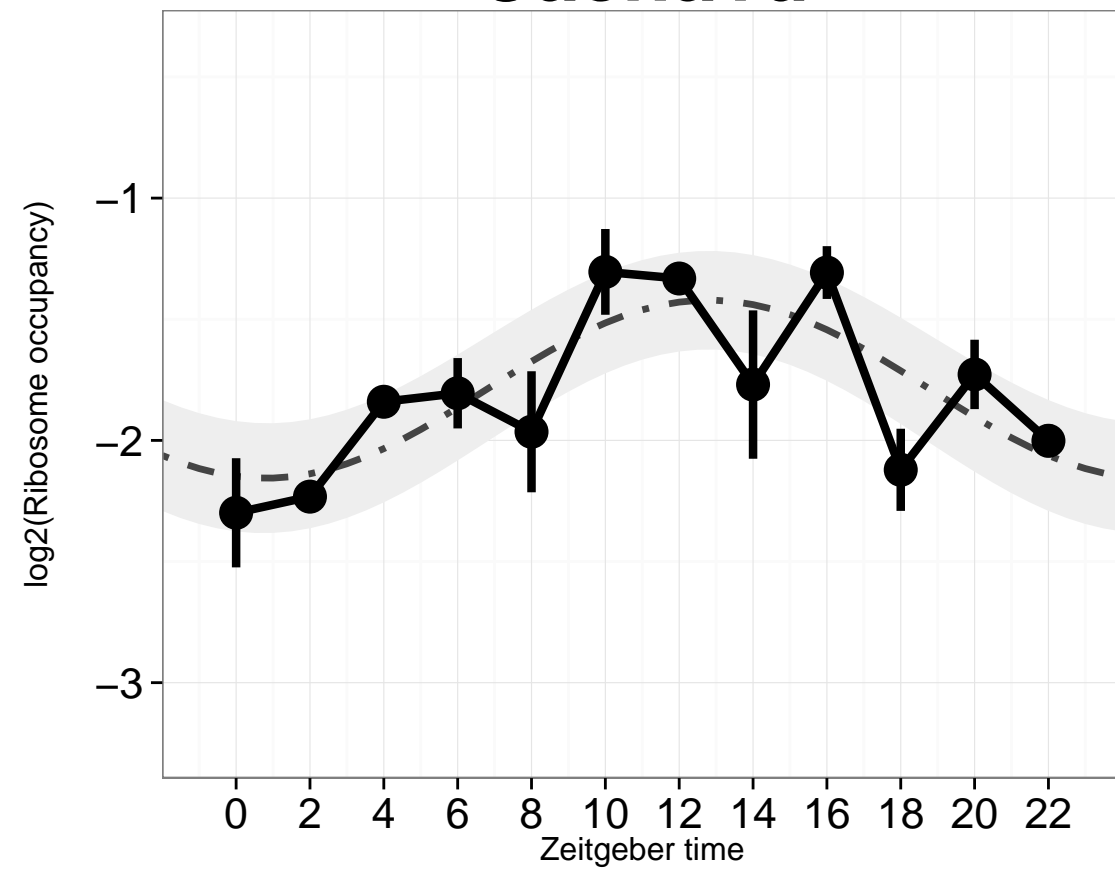

Supplement: Supplementary file 7811 [file 1]

**Hist1h3g TR**

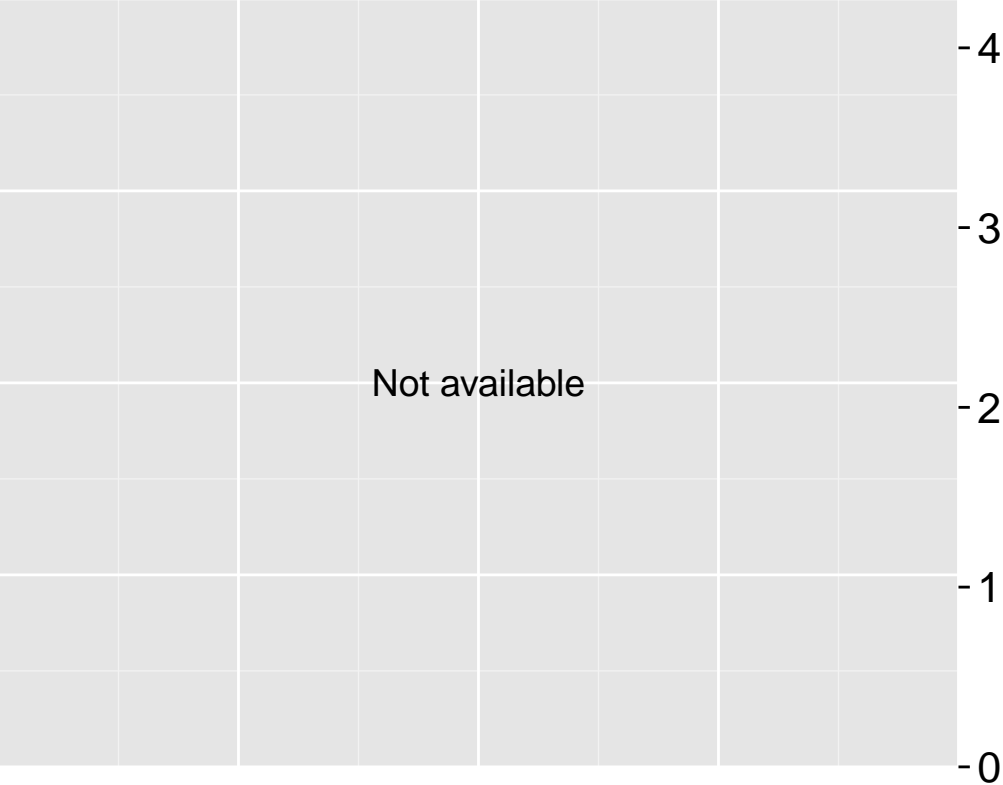

**Hist1h3g log2(Ribosome occupanc**

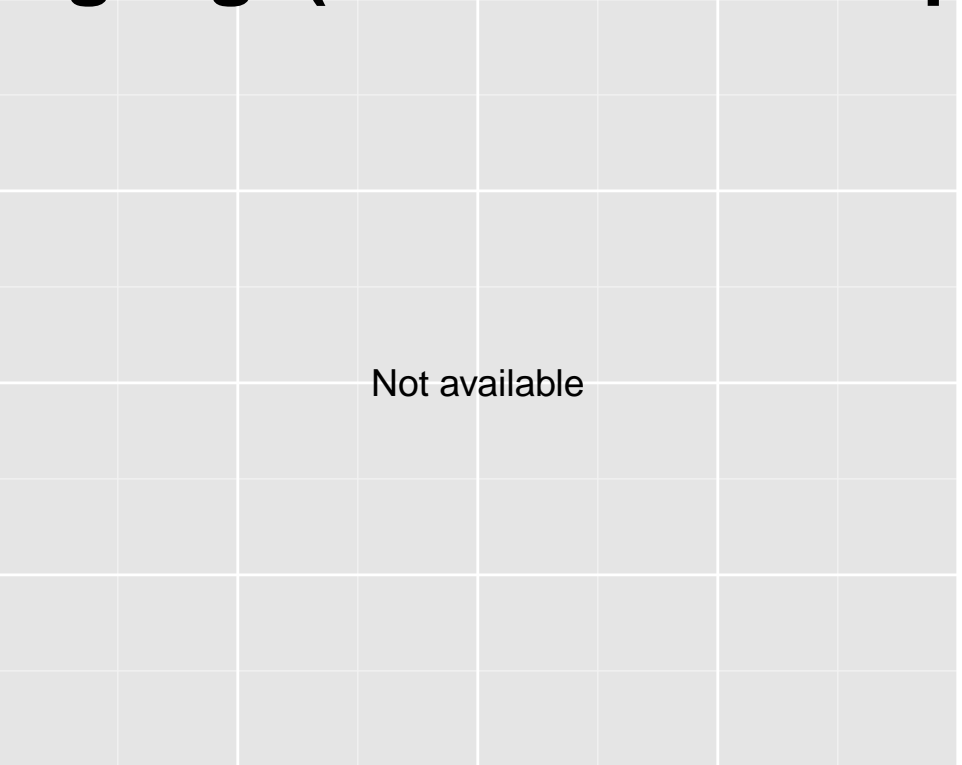

Supplement: Supplementary file 7812 [file 1]

# Slc22a19

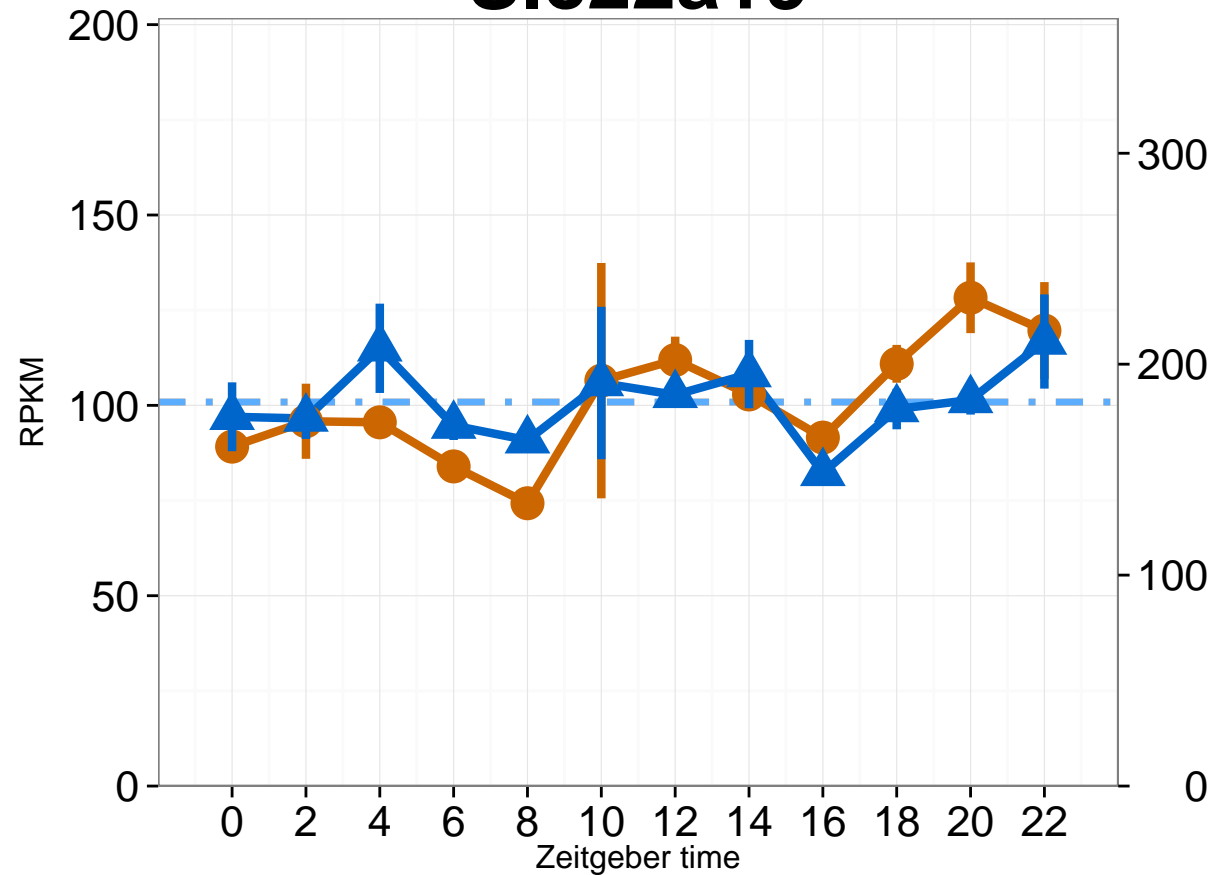

# Slc22a19

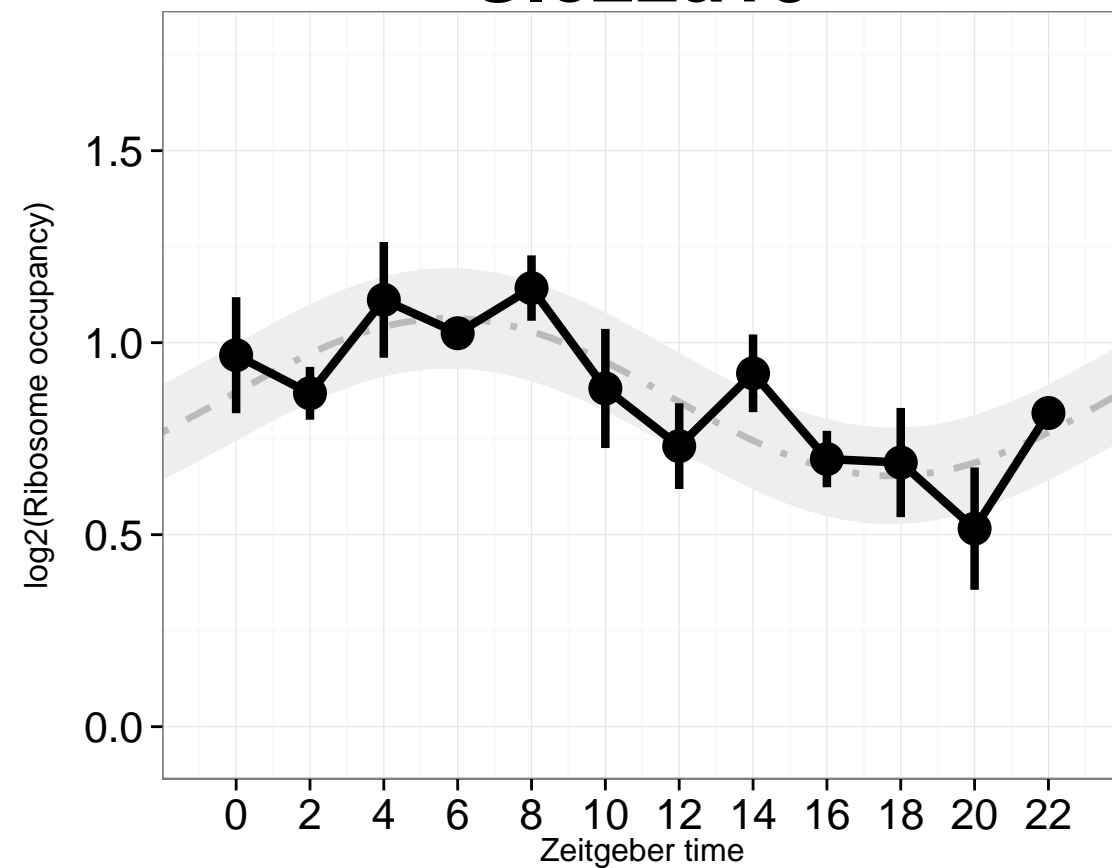

Supplement: Supplementary file 7813 [file 1]

## Dkk3

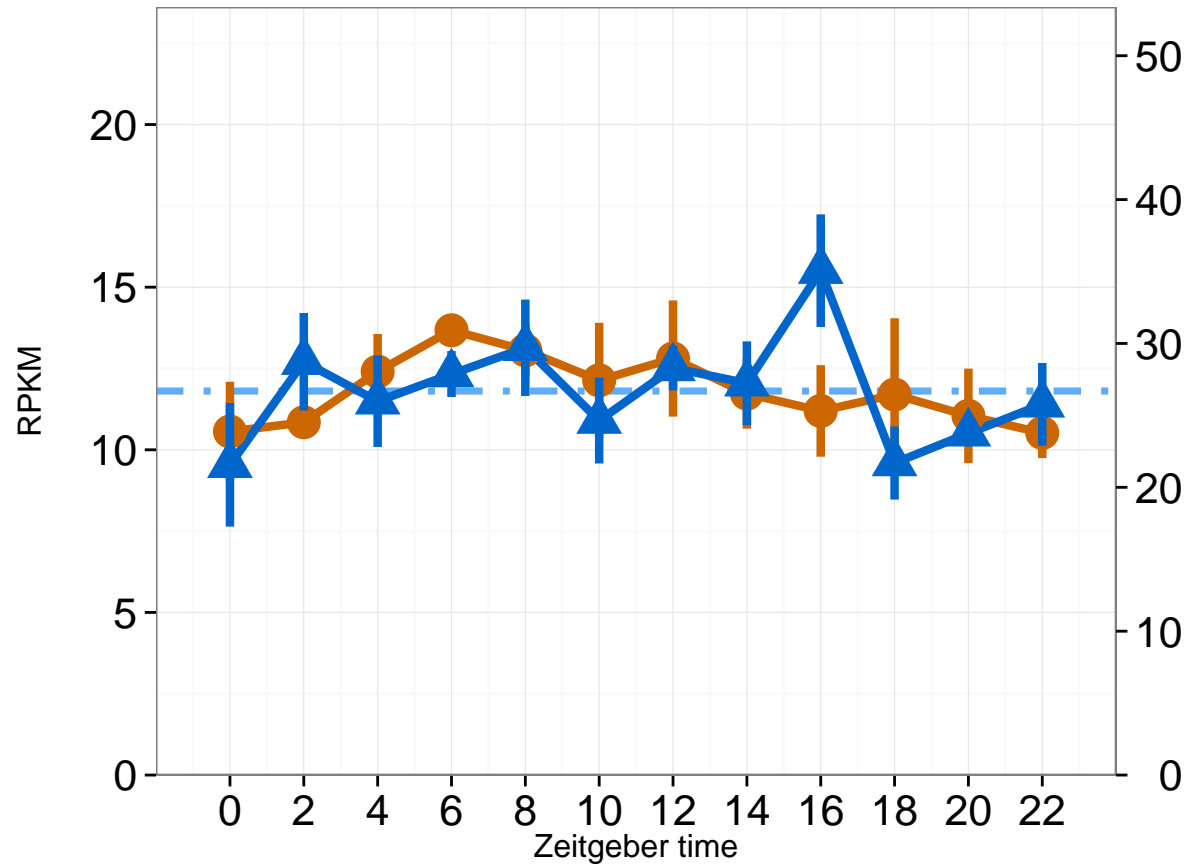

## Dkk3

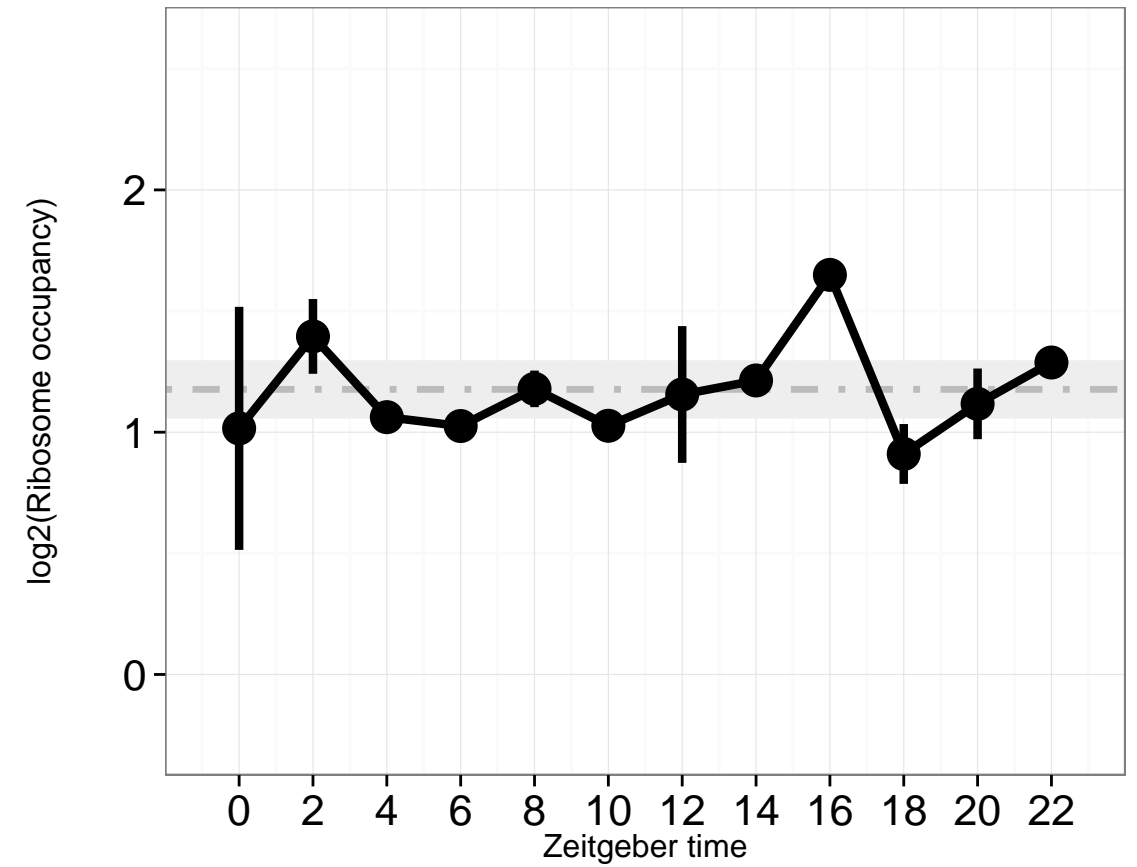

Supplement: Supplementary file 7814 [file 1]

## Gys1

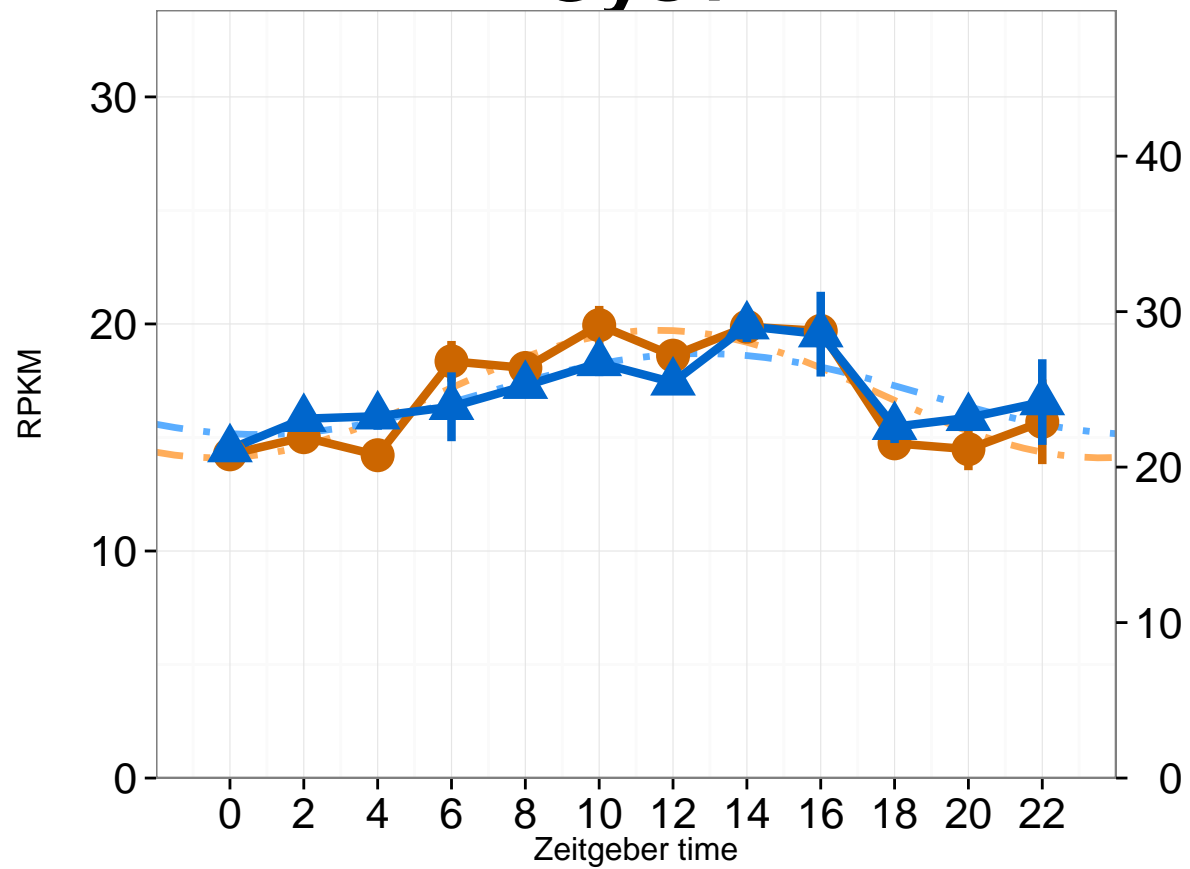

## Gys1

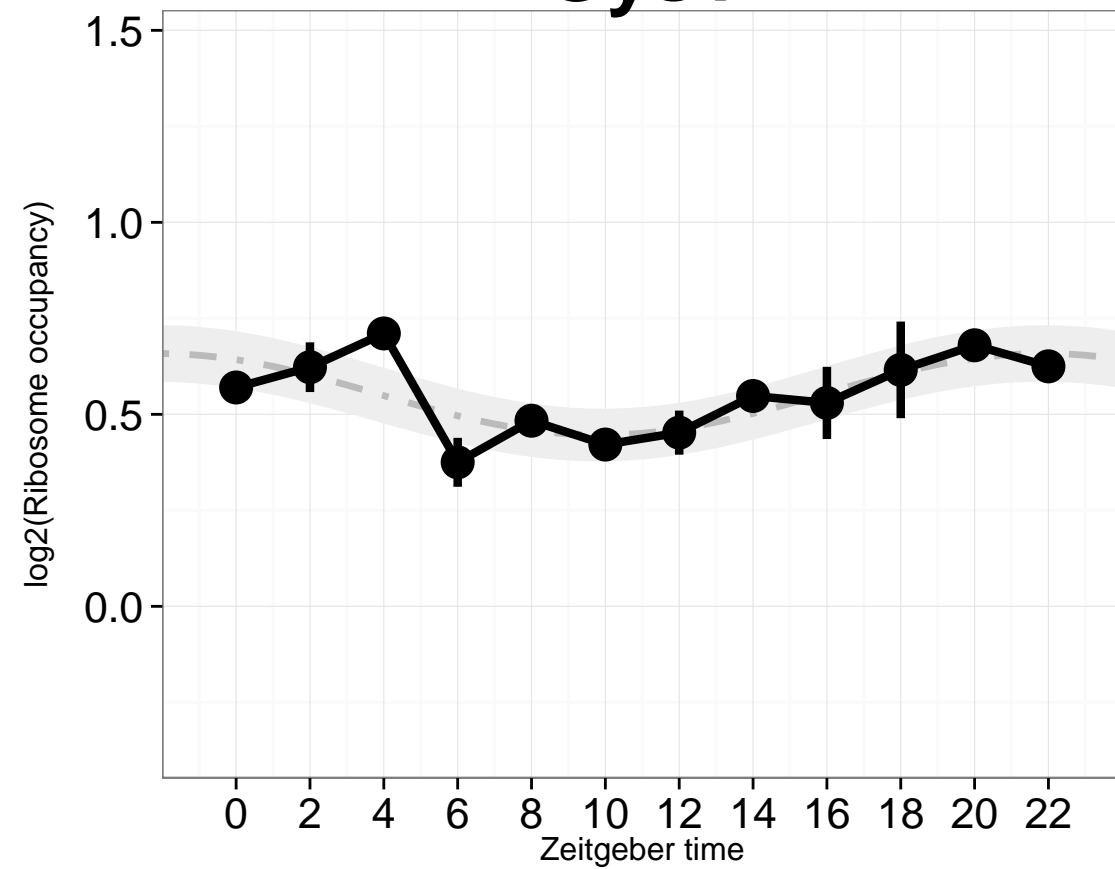

Supplement: Supplementary file 7815 [file 1]

# Syvn1

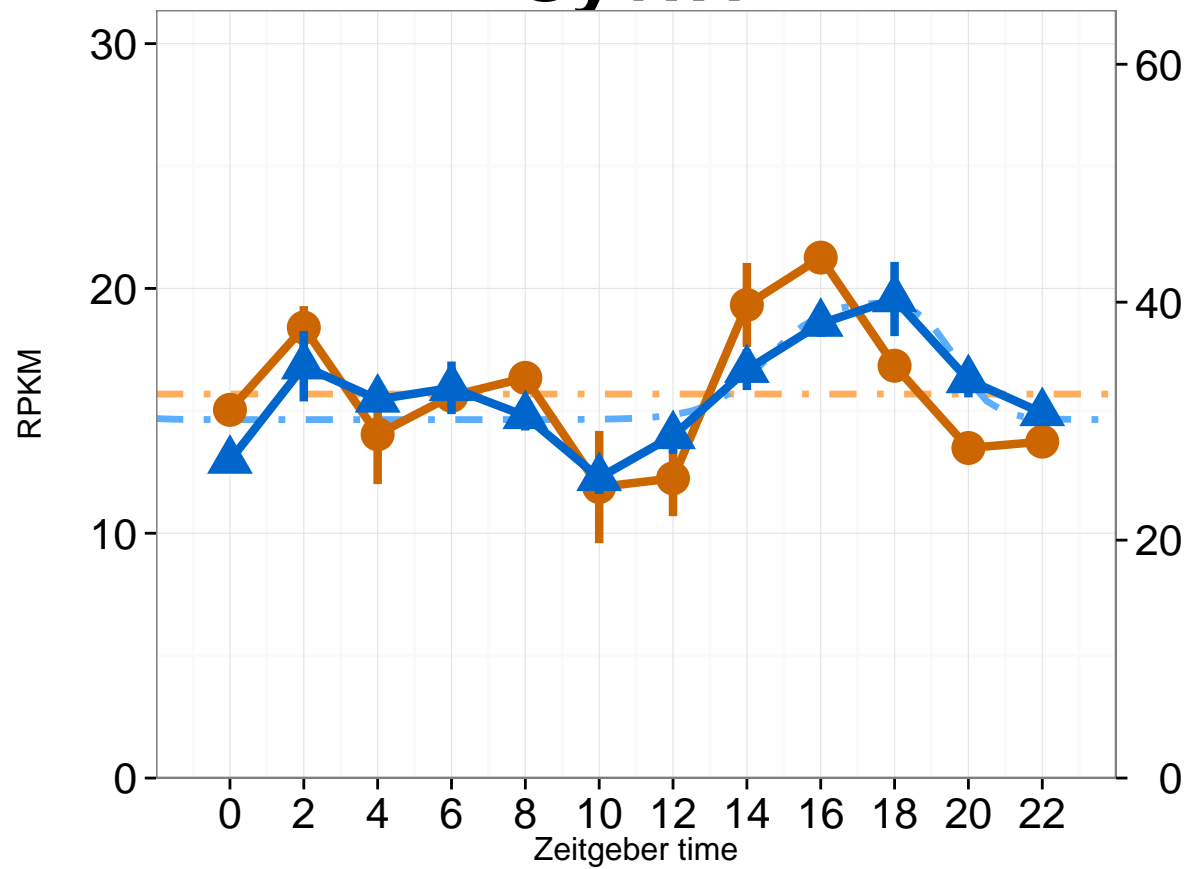

# Syvn1

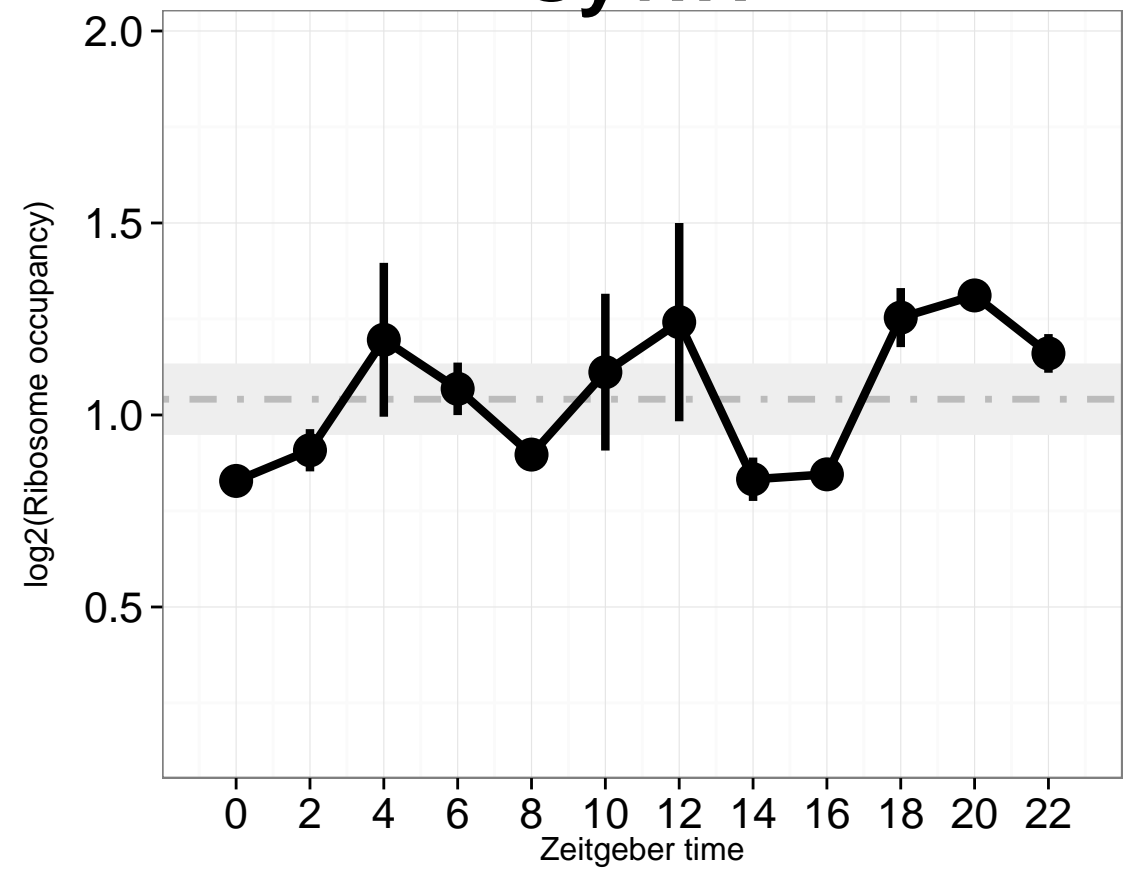

Supplement: Supplementary file 7816 [file 1]

# Arfrp1

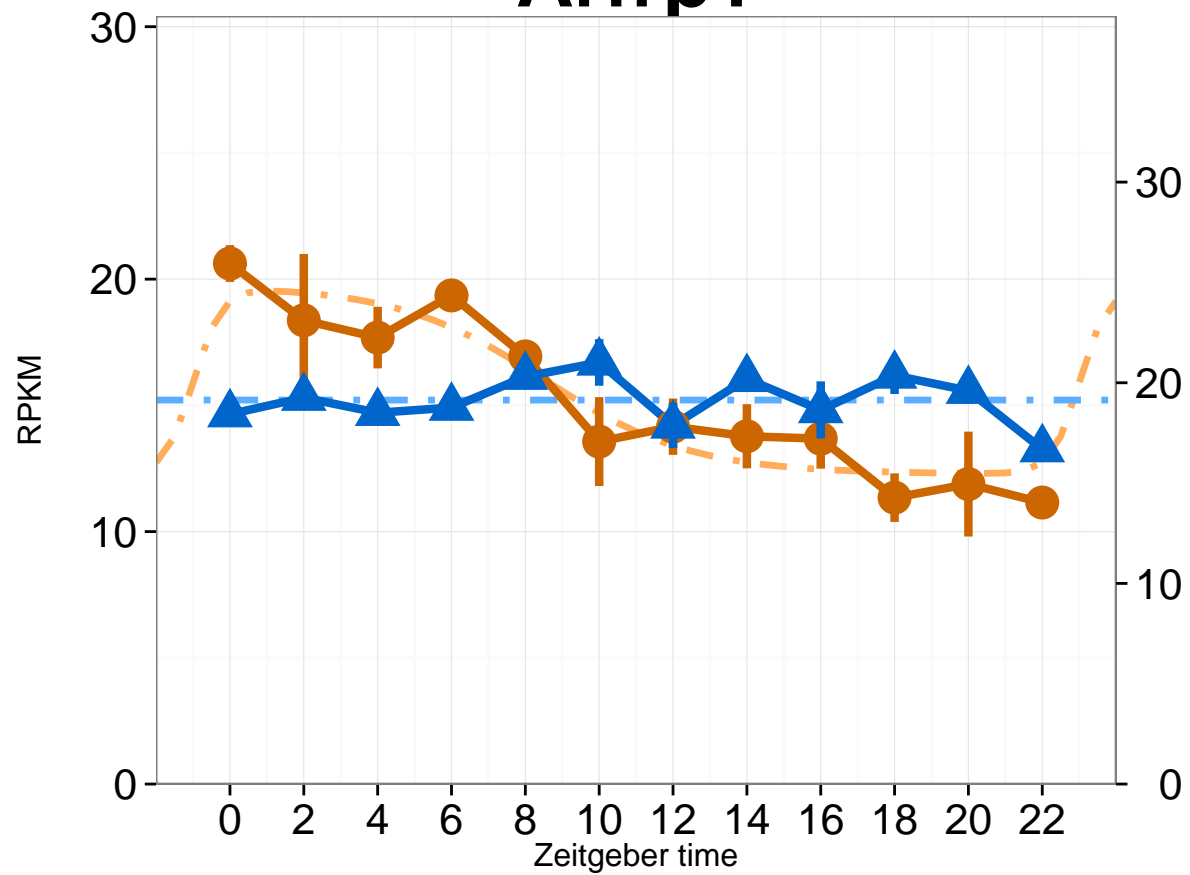

# Arfrp1

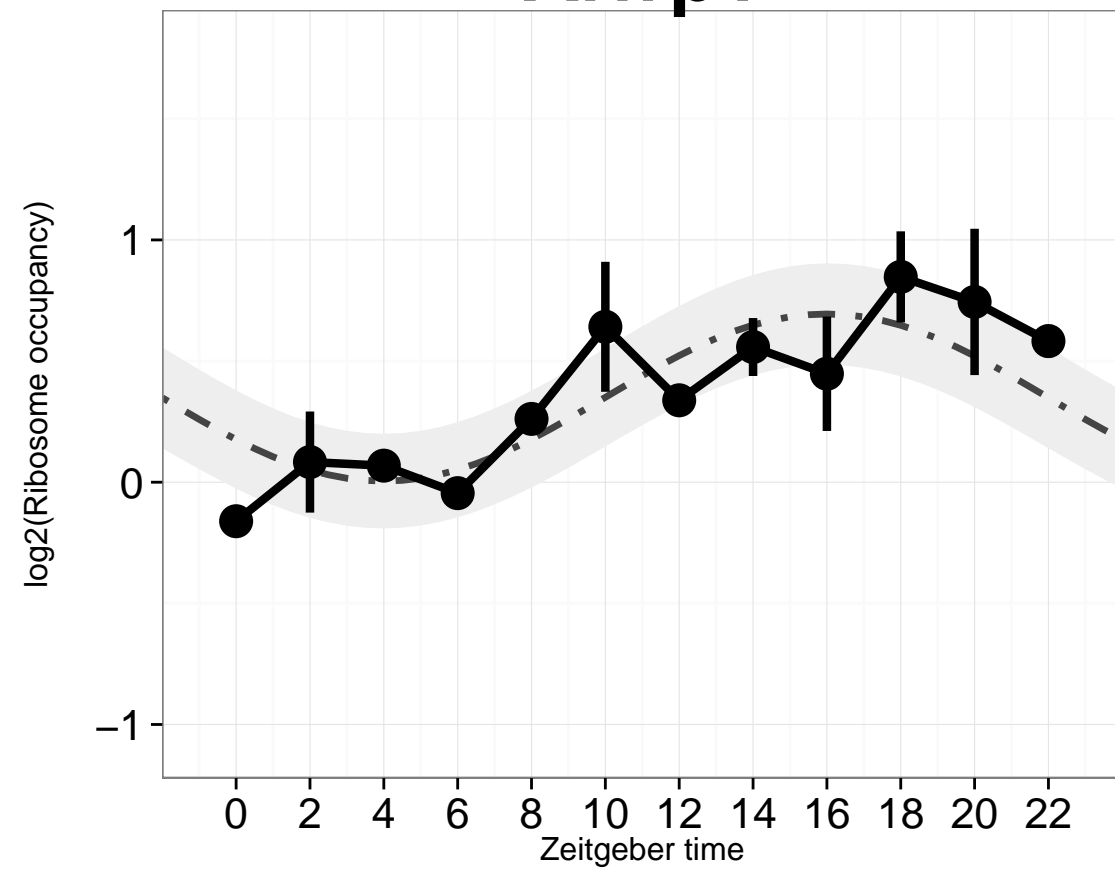

Supplement: Supplementary file 7817 [file 1]

## Mras

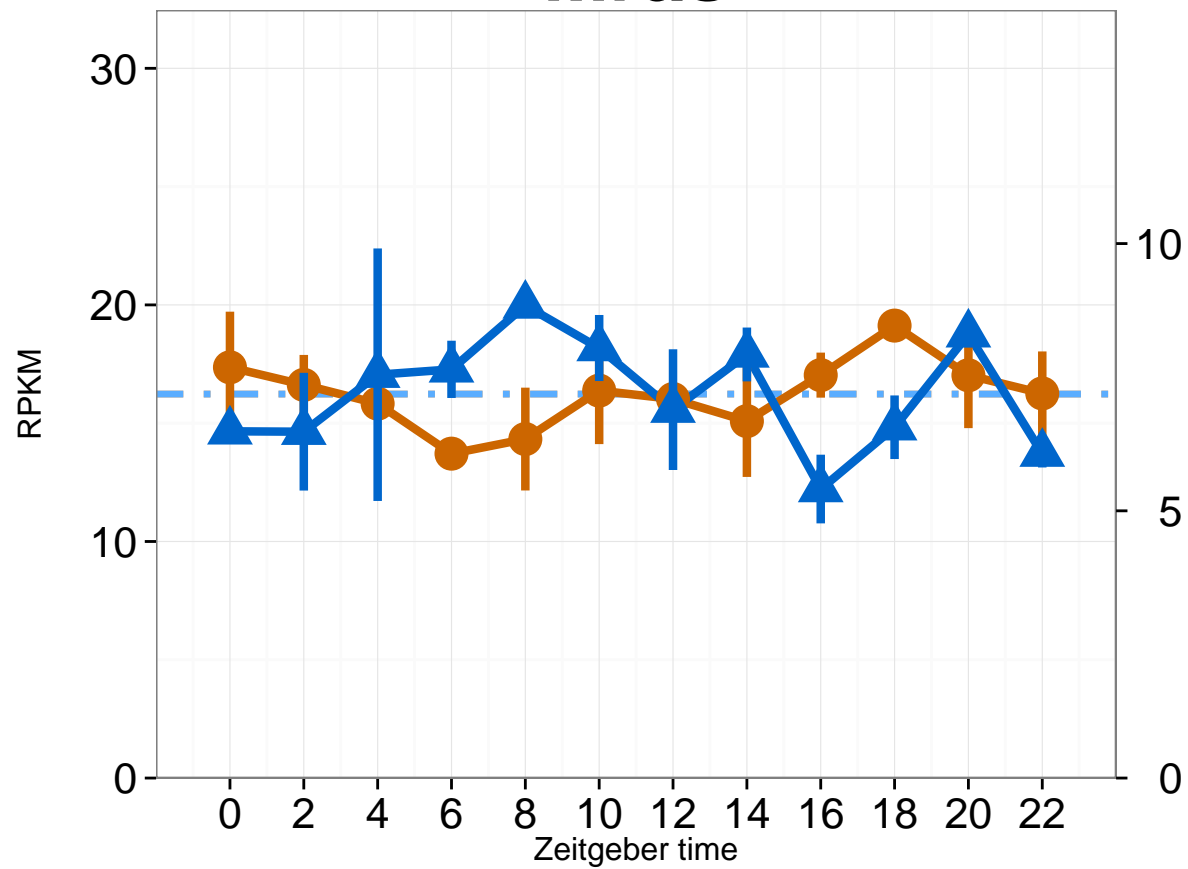

## Mras

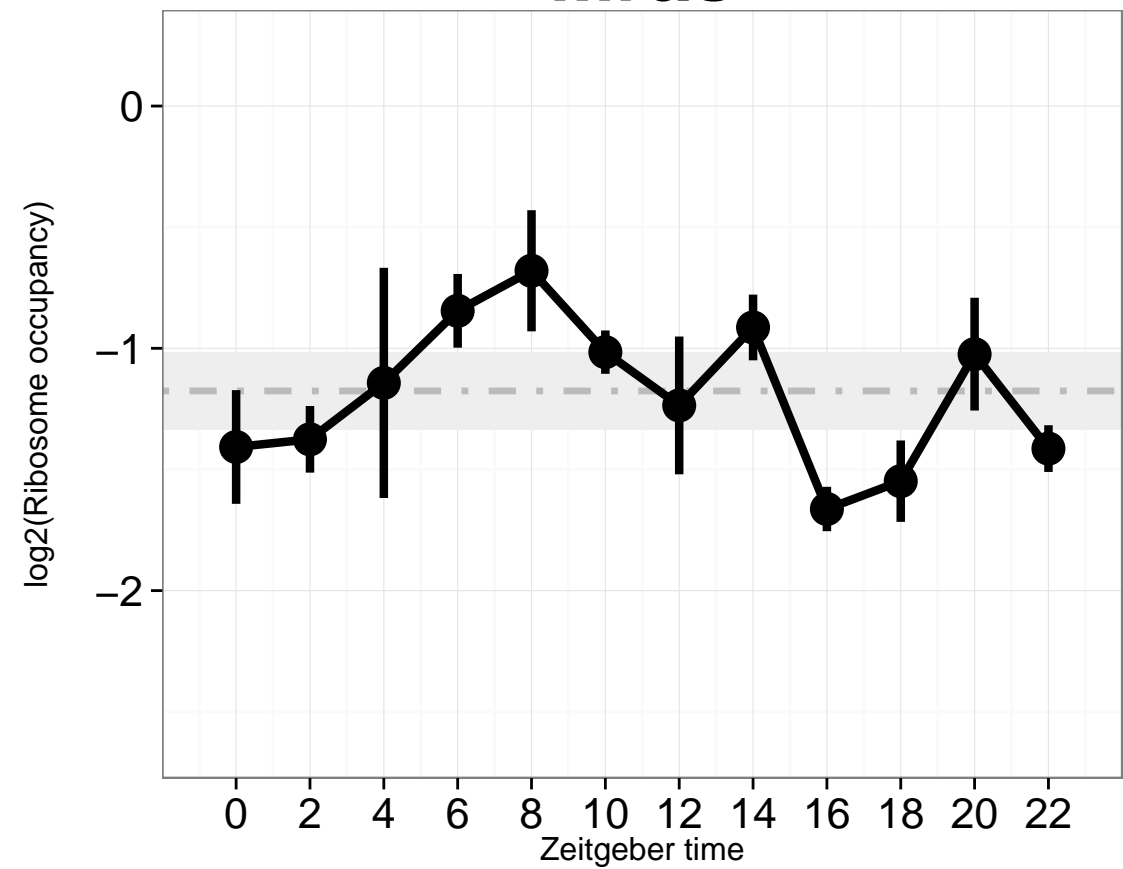

Supplement: Supplementary file 7818 [file 1]

# Clip1

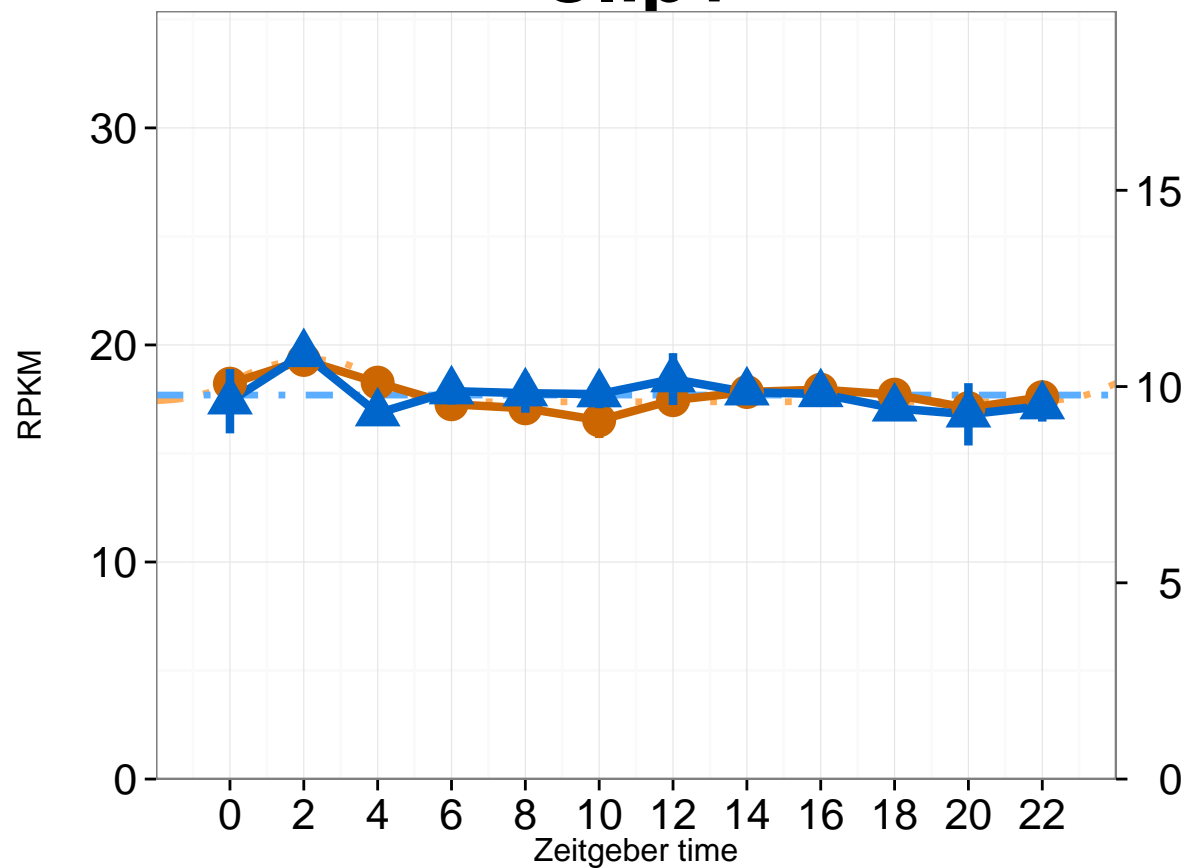

# Clip1

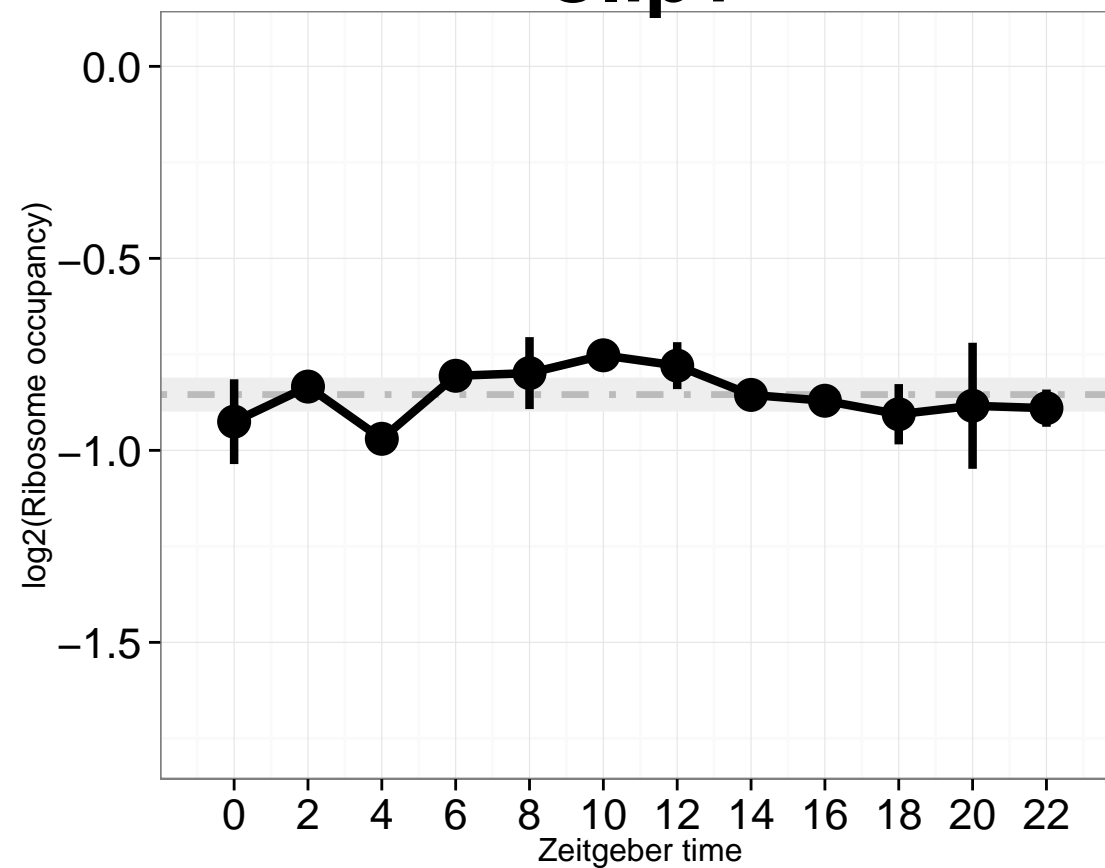

Supplement: Supplementary file 7819 [file 1]

## Slc16a1

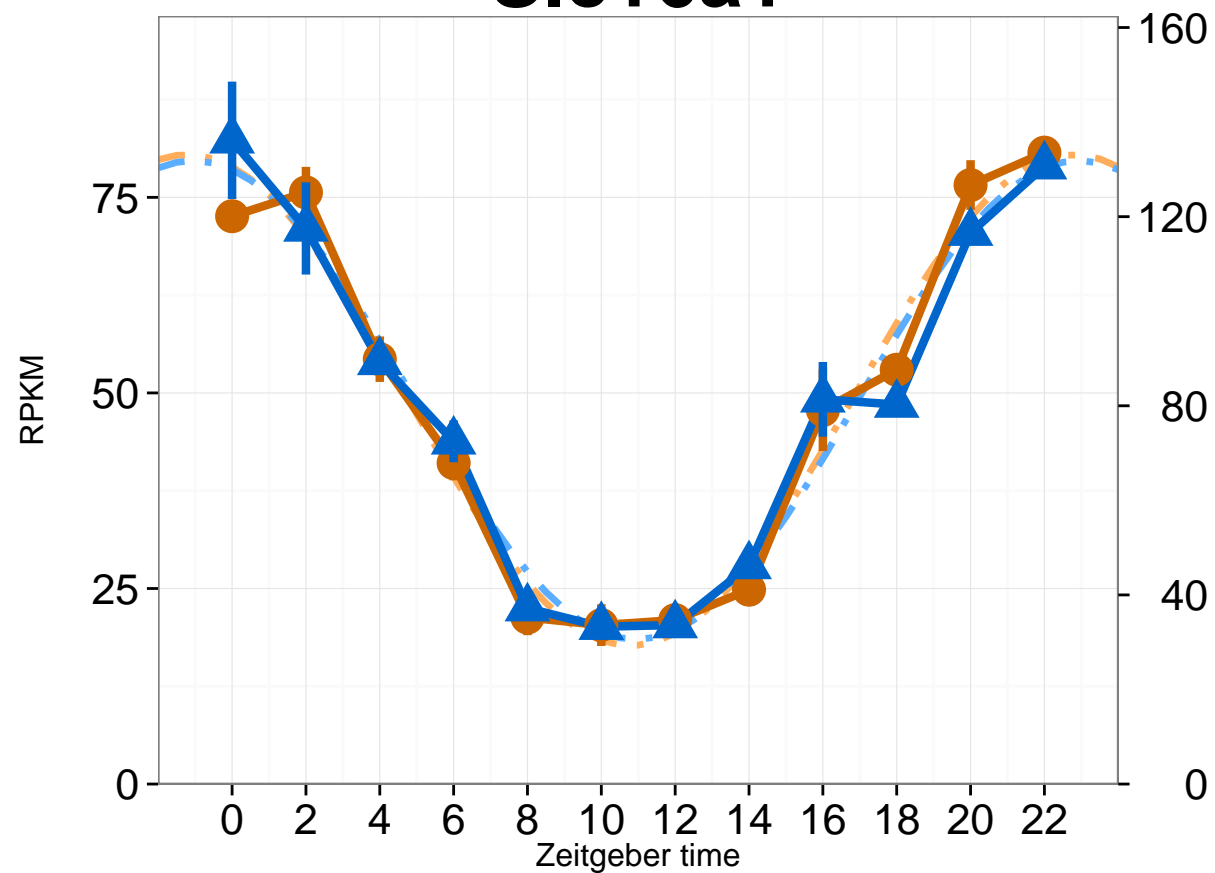

## Slc16a1

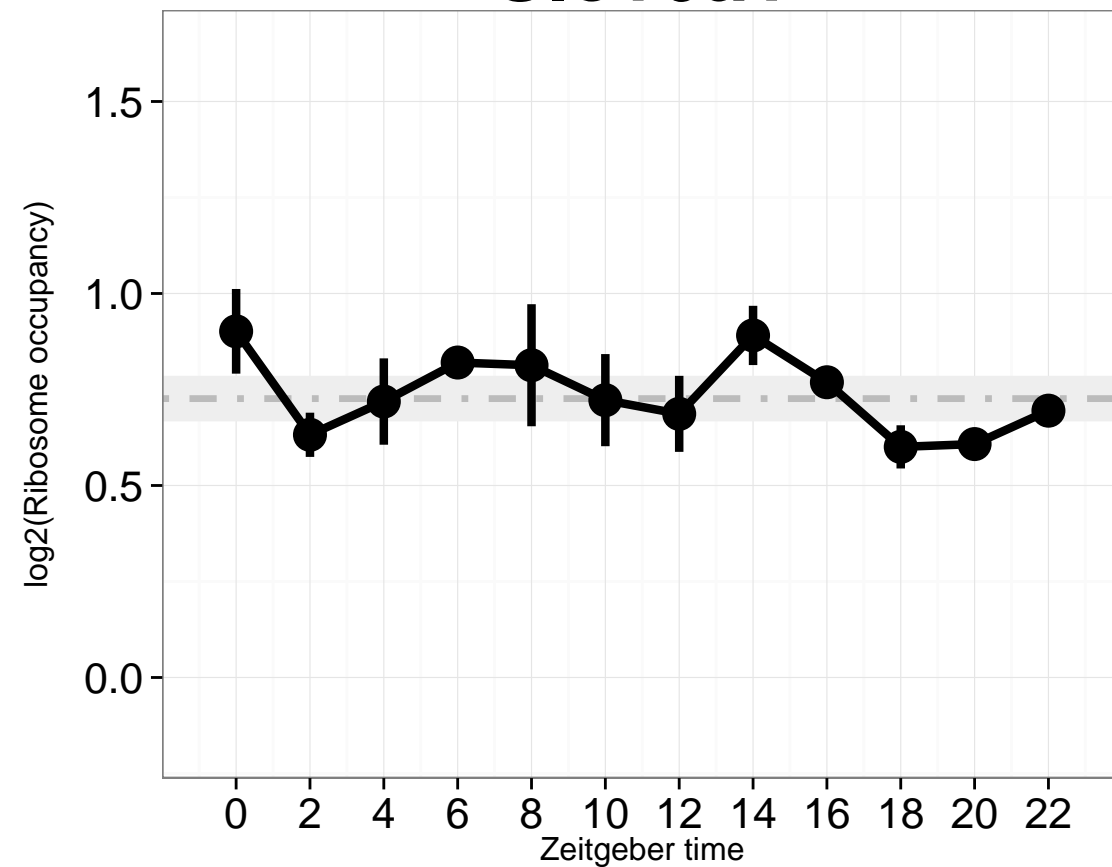

Supplement: Supplementary file 7820 [file 1]

# Acox1

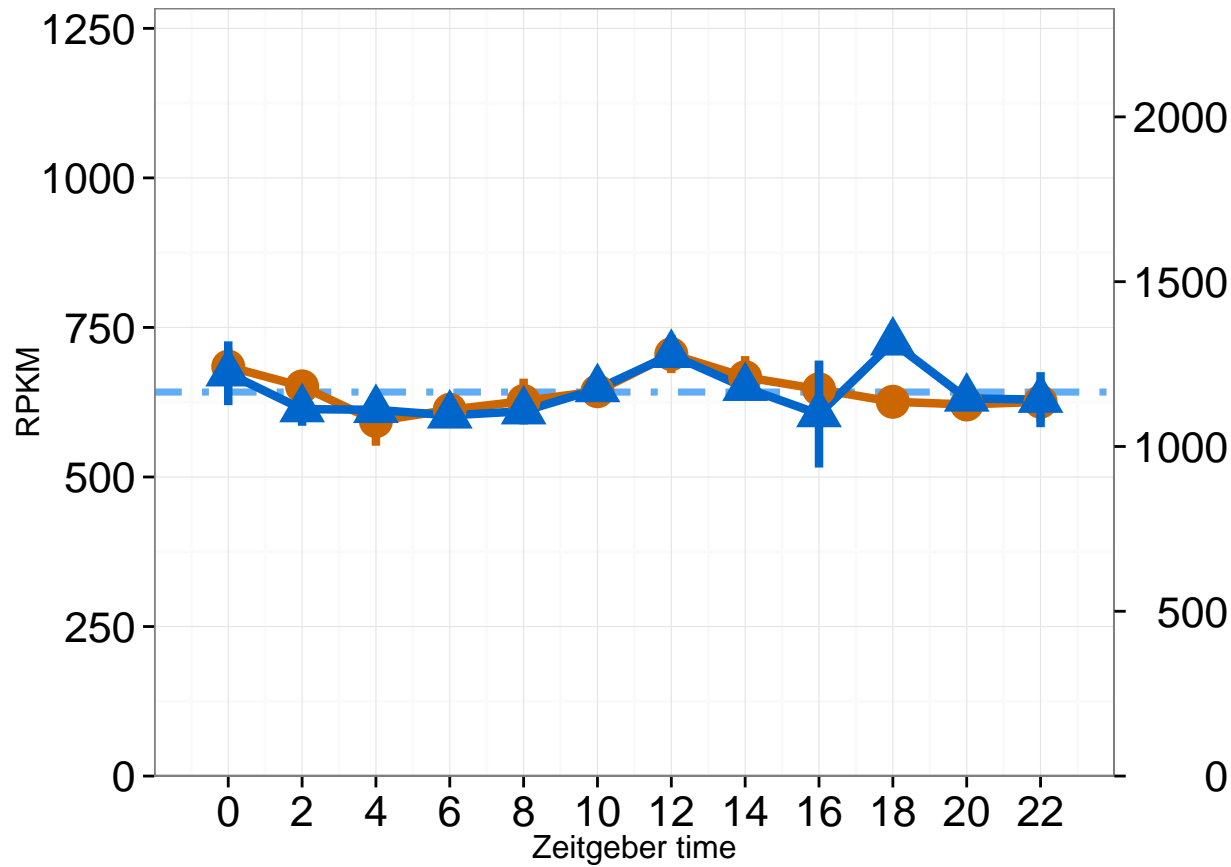

# Acox1

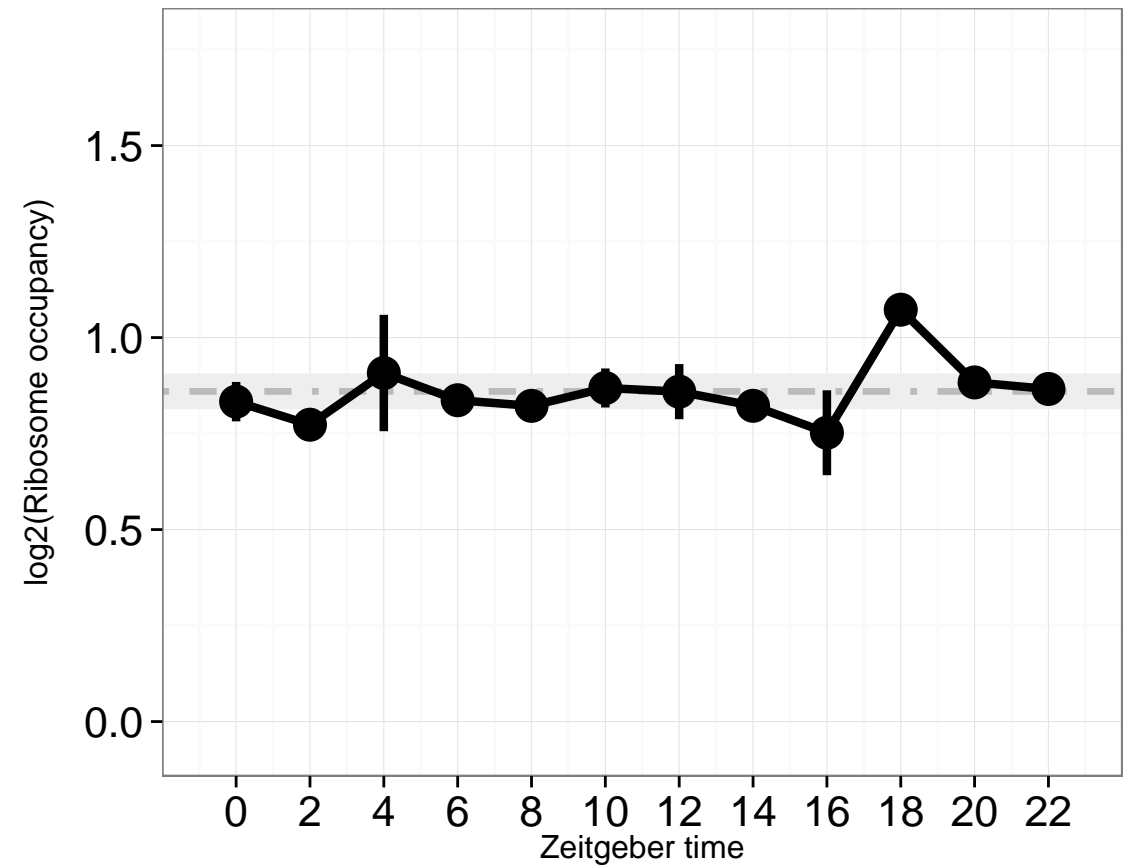

Supplement: Supplementary file 7821 [file 1]

# Lyrm7

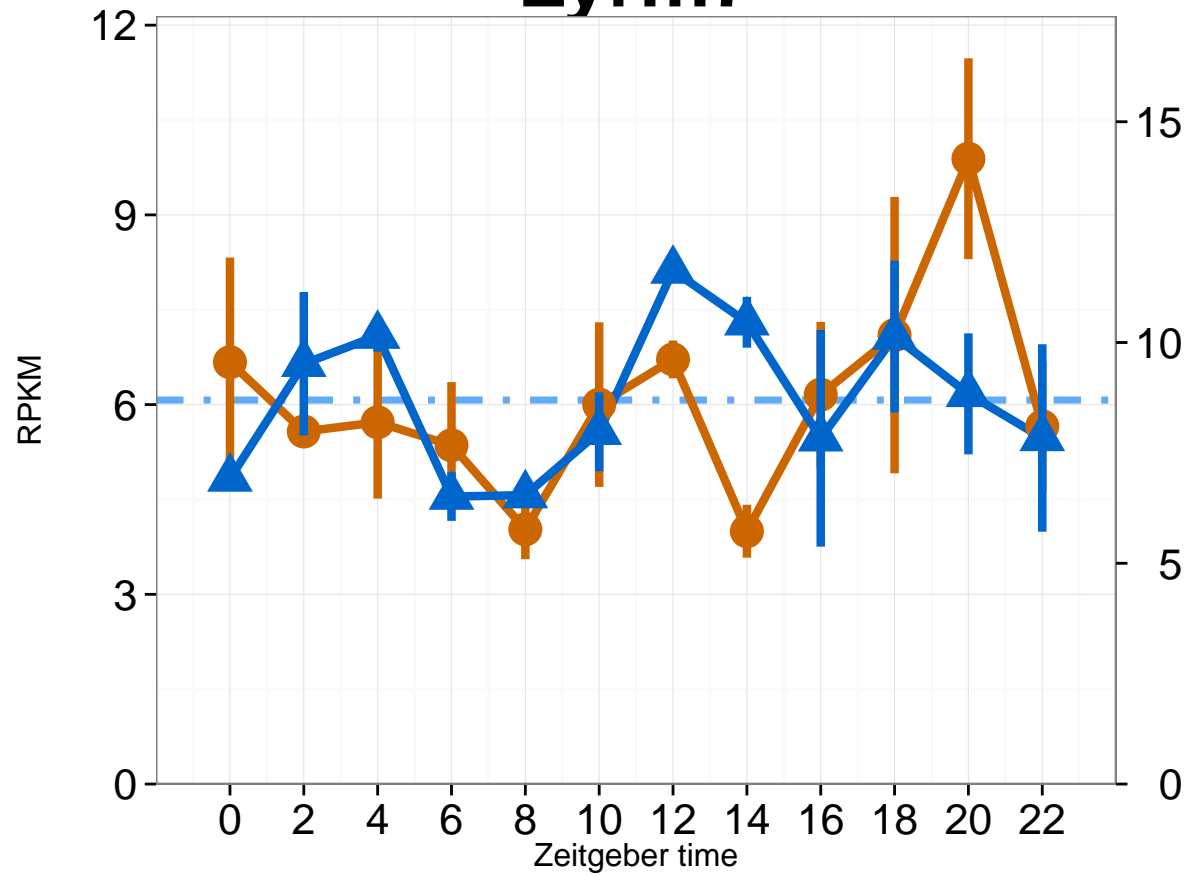

# Lyrm7

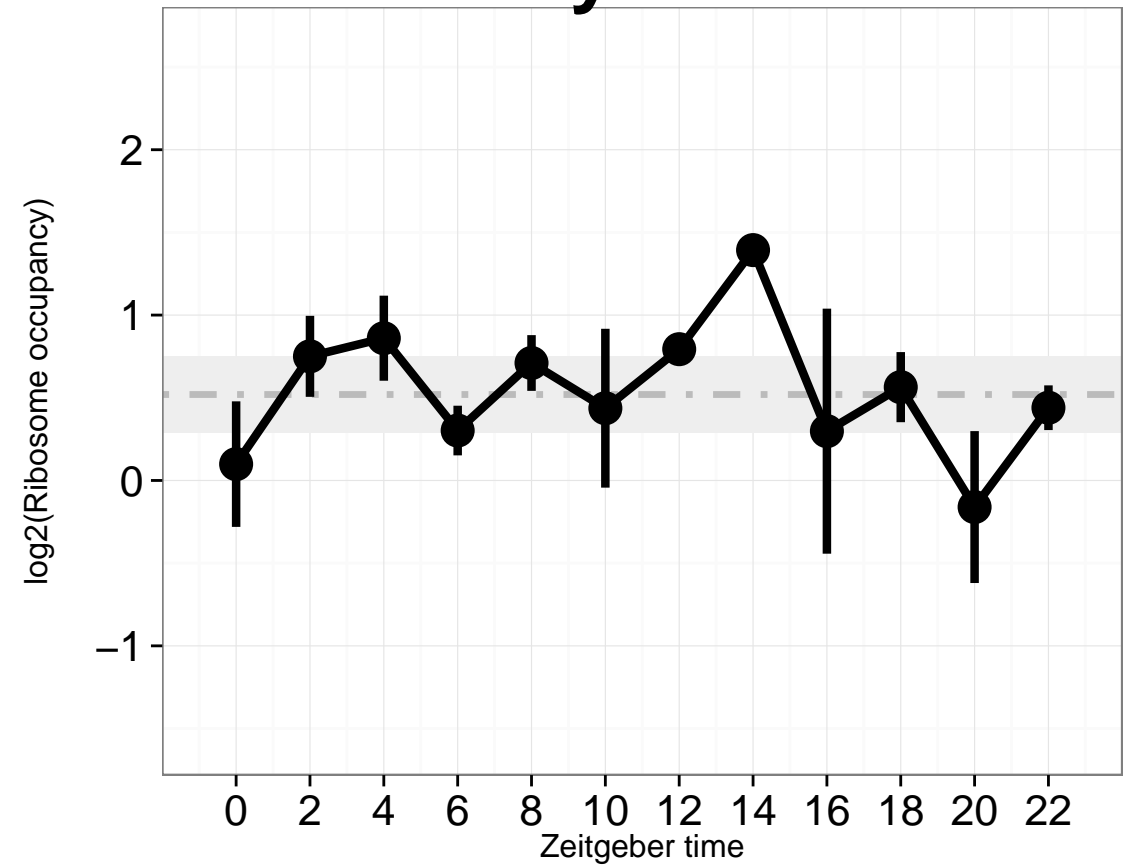

Supplement: Supplementary file 7822 [file 1]

# C2cd4d

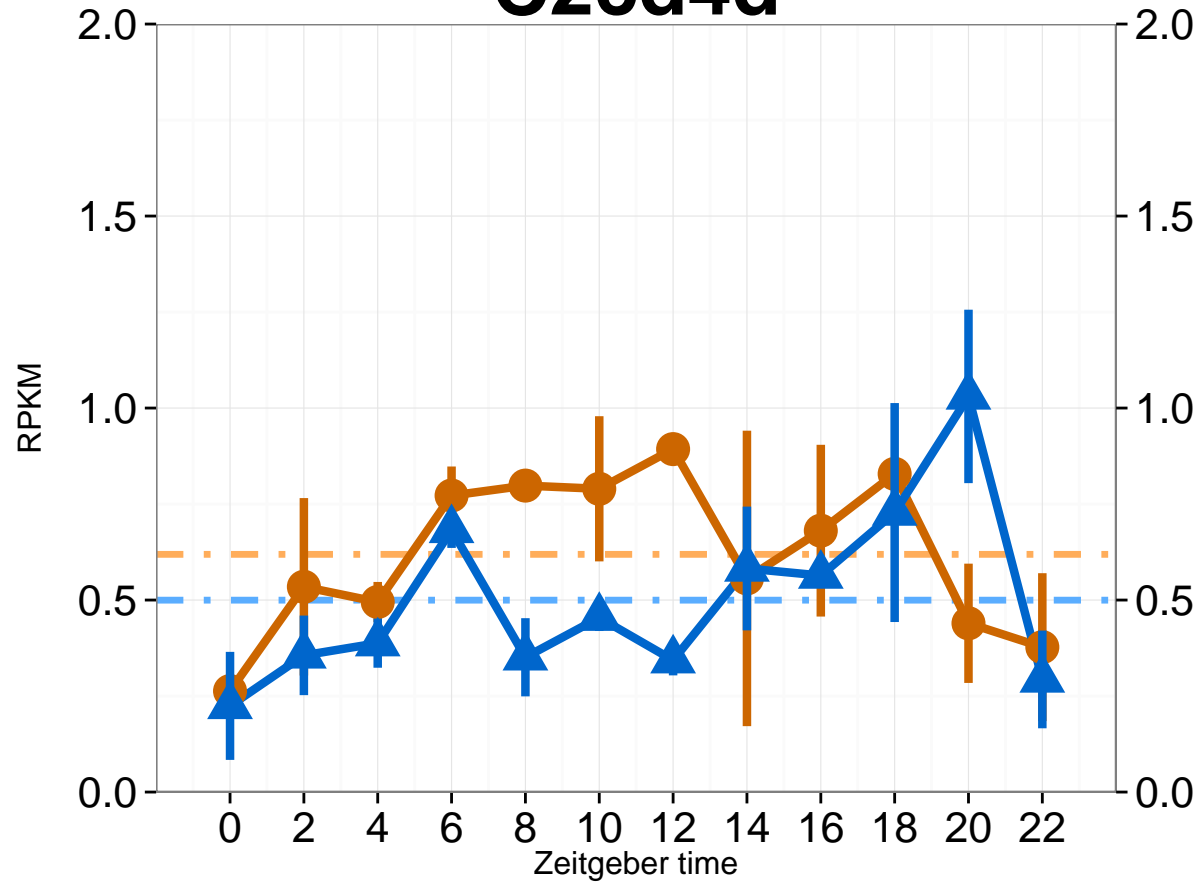

# C2cd4d

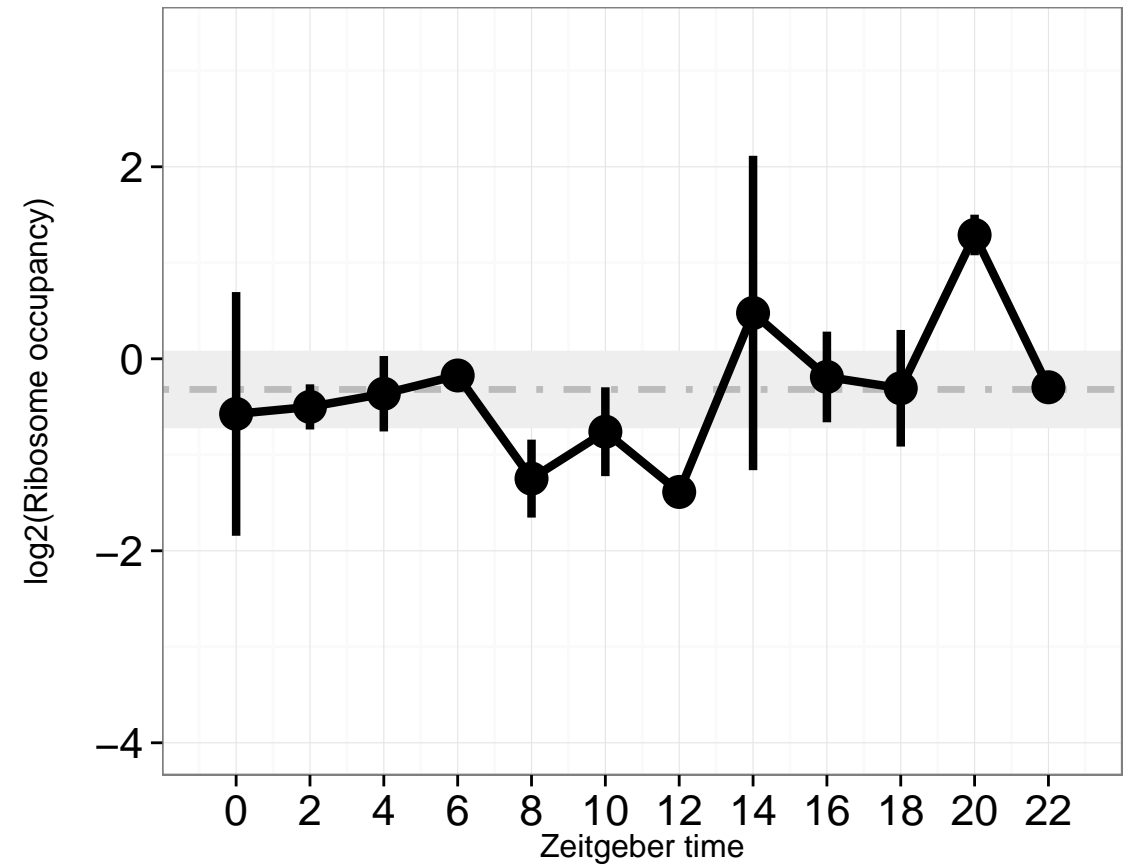

Supplement: Supplementary file 7823 [file 1]

## Acox3

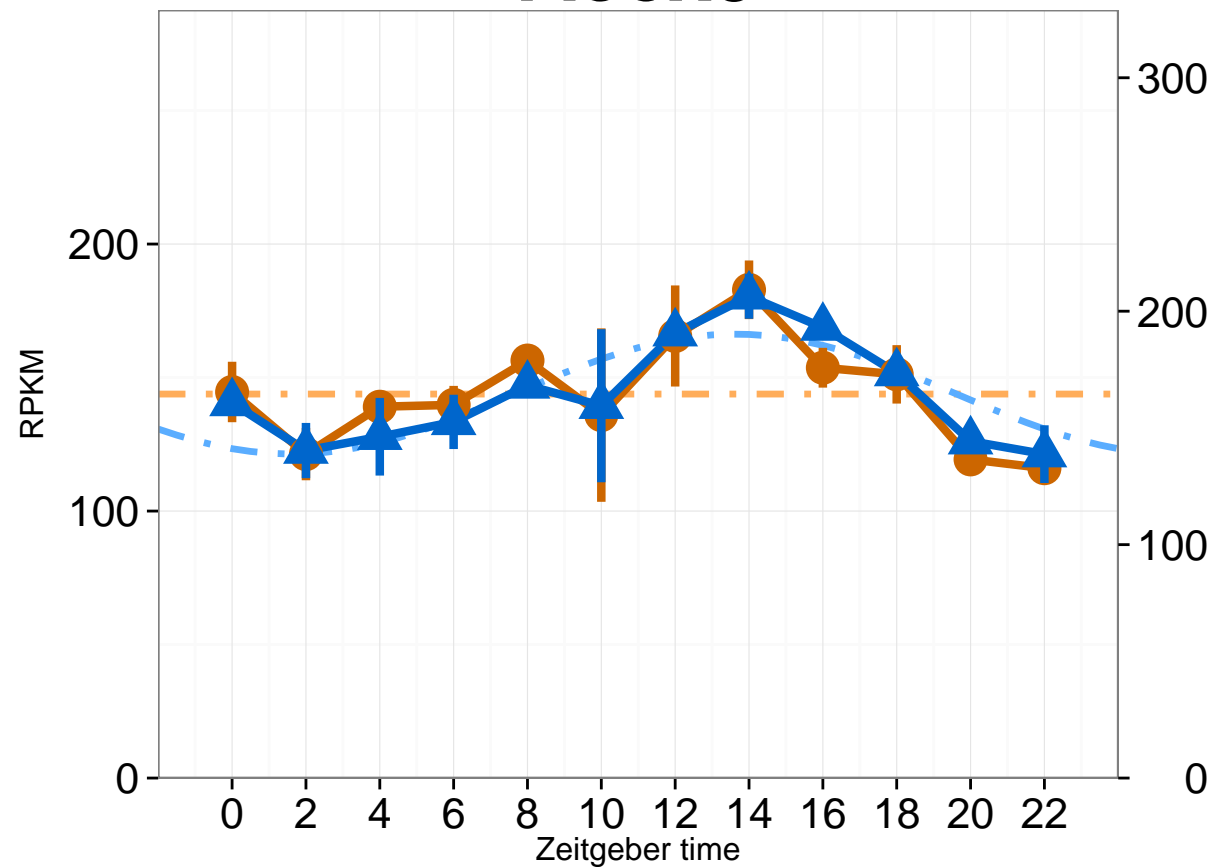

## Acox3

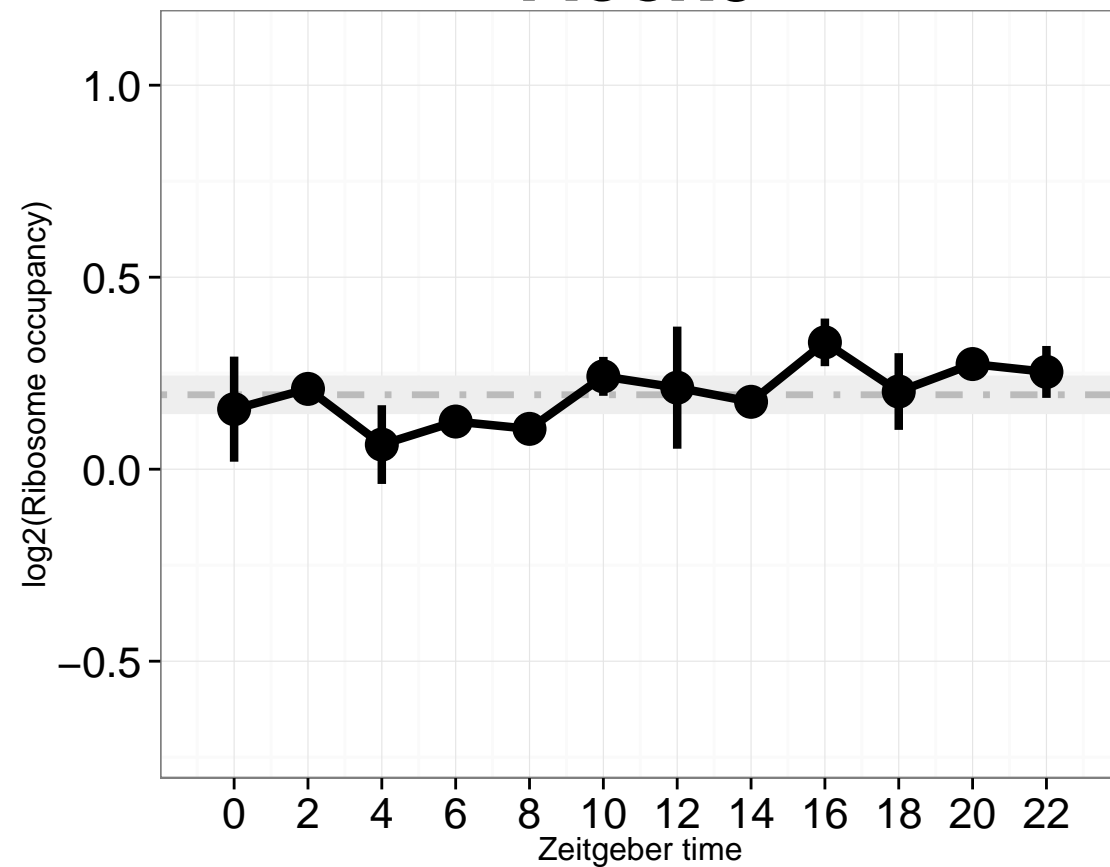

Supplement: Supplementary file 7824 [file 1]
