# Supplementary material (part 79 of 133)
Source: publisher figshare collection journal article supplement (https://springernature.figshare.com/articles/dataset/_/4903193)

**Rnaset2b TR**

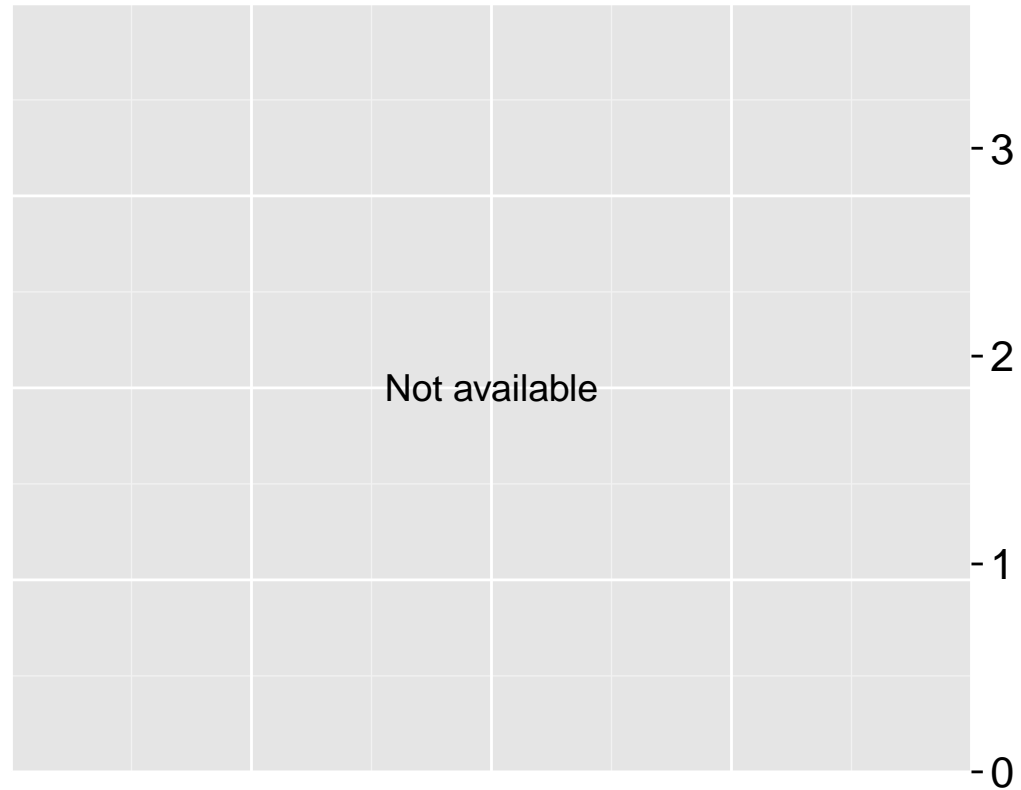

**Rnaset2b log2(Ribosome occupancy)**

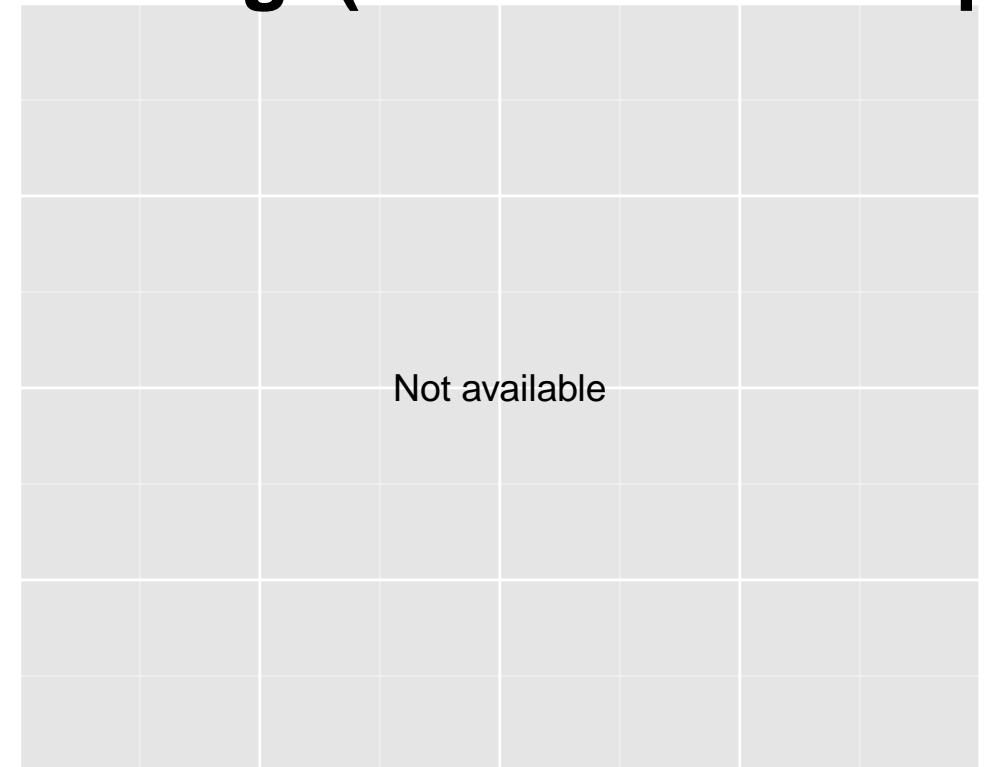

Supplement: Supplementary file 7825 [file 1]

## Gtf2i

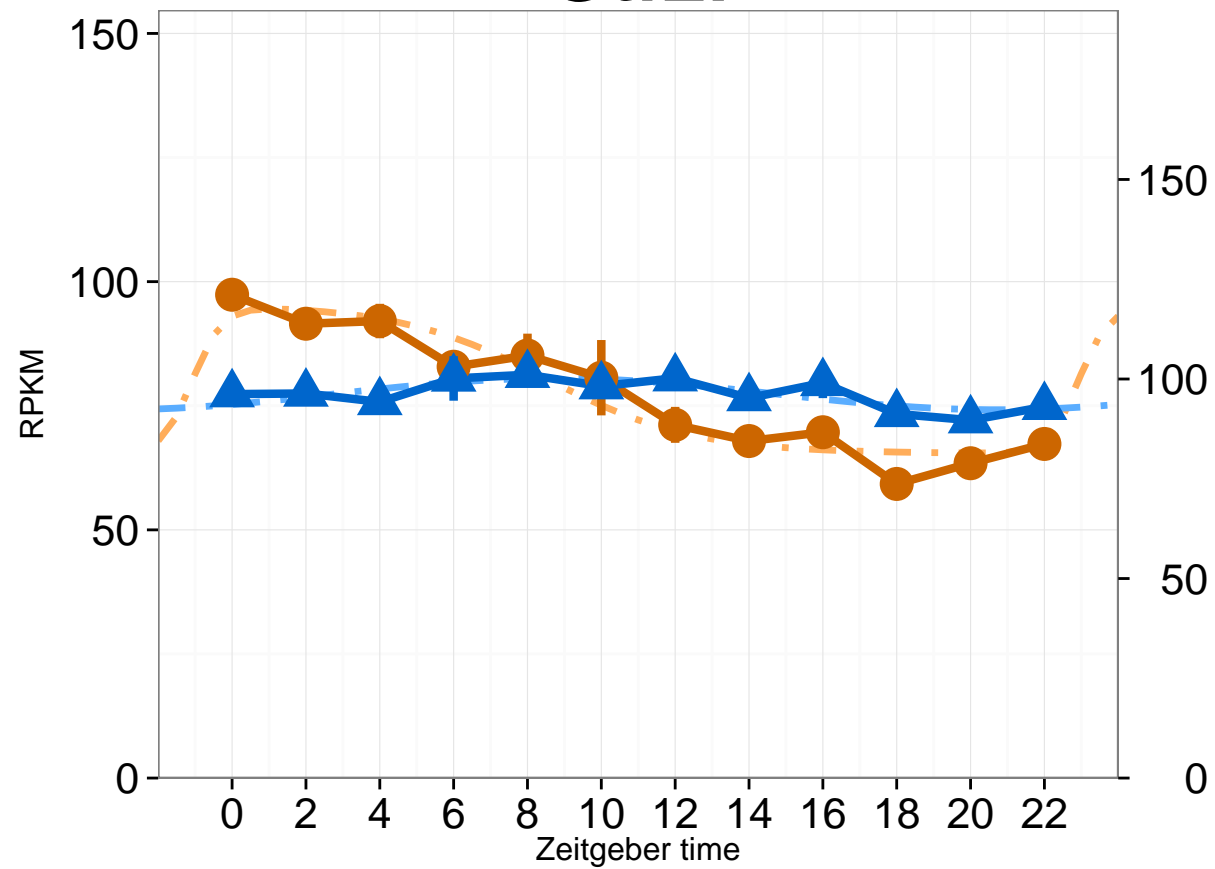

## Gtf2i

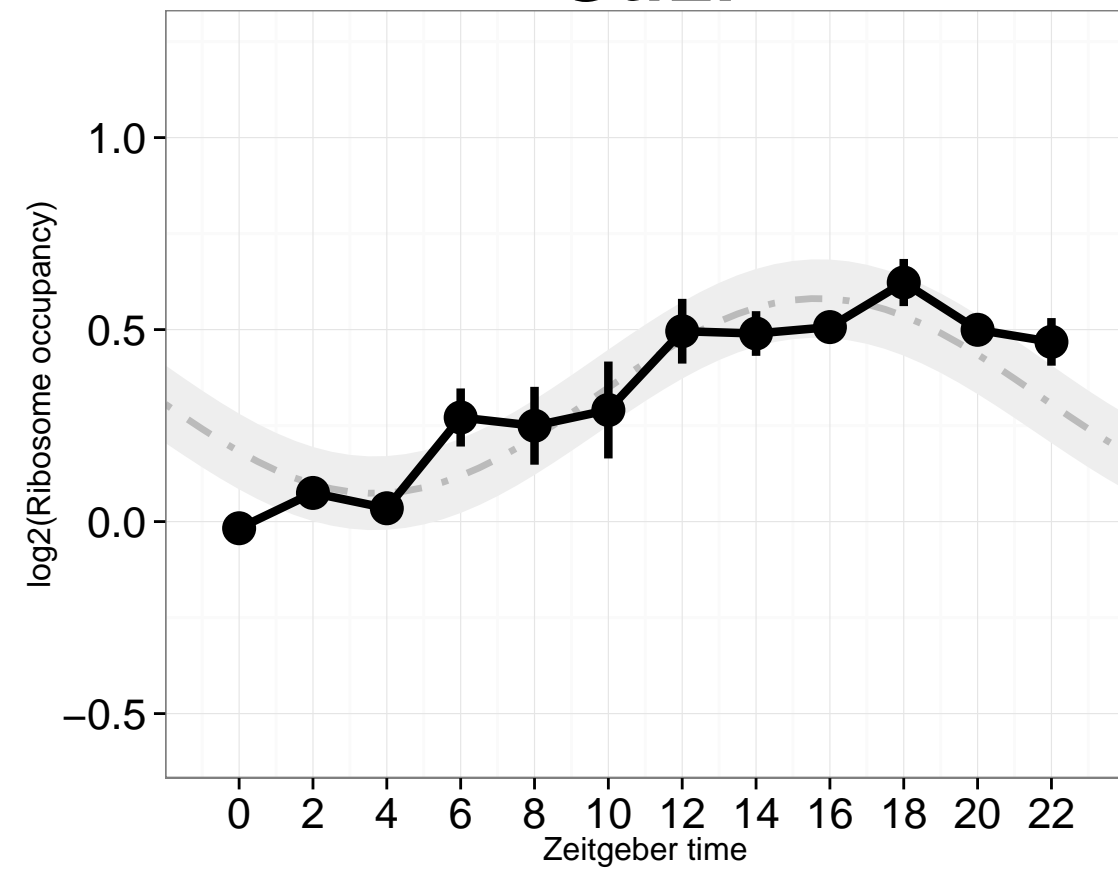

Supplement: Supplementary file 7826 [file 1]

# Bcl6b

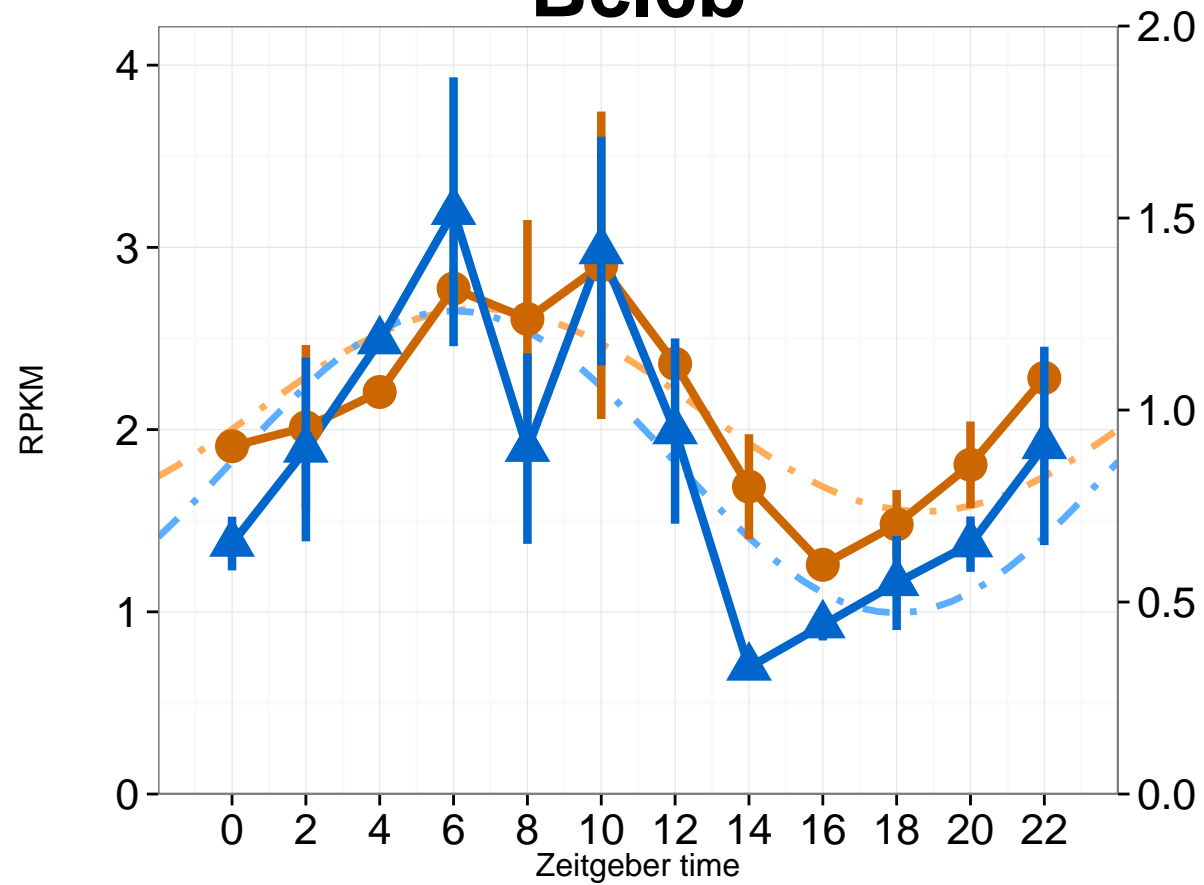

# Bcl6b

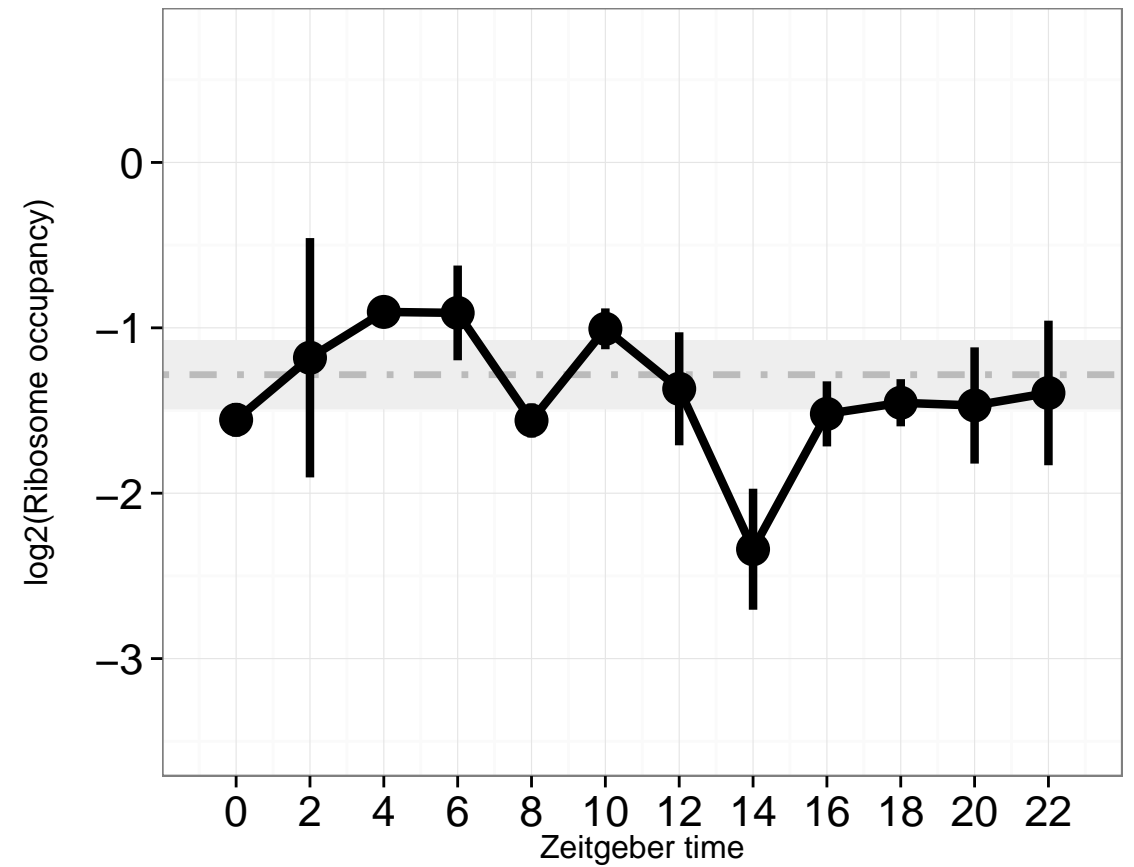

Supplement: Supplementary file 7827 [file 1]

## Vamp3

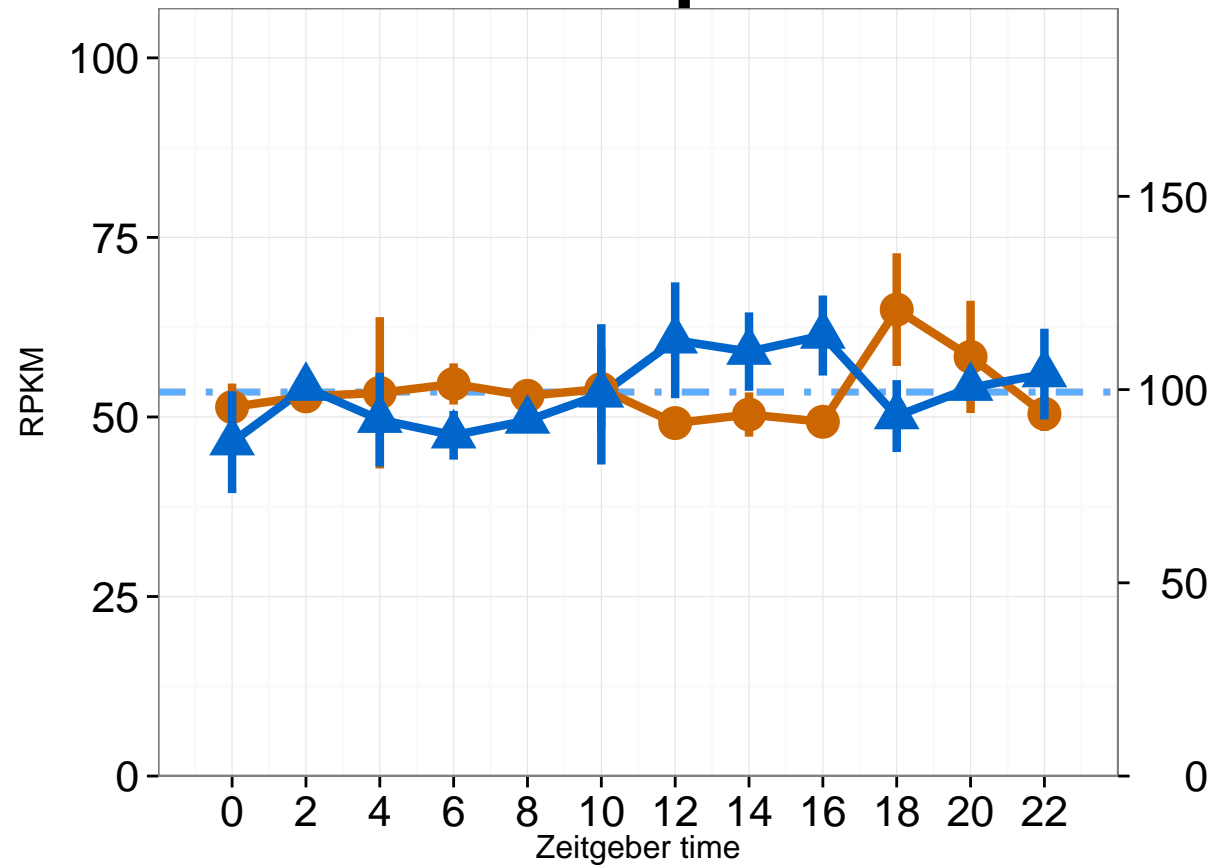

## Vamp3

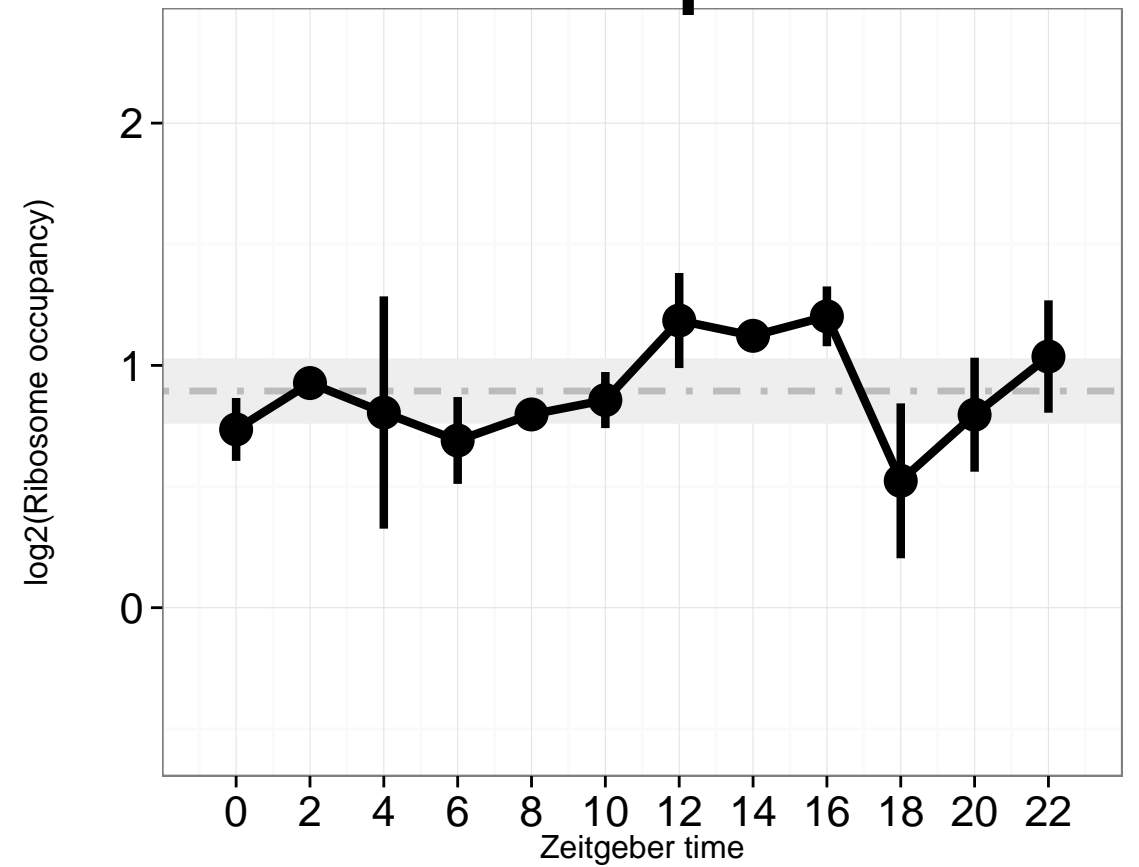

Supplement: Supplementary file 7828 [file 1]

## Sec11c

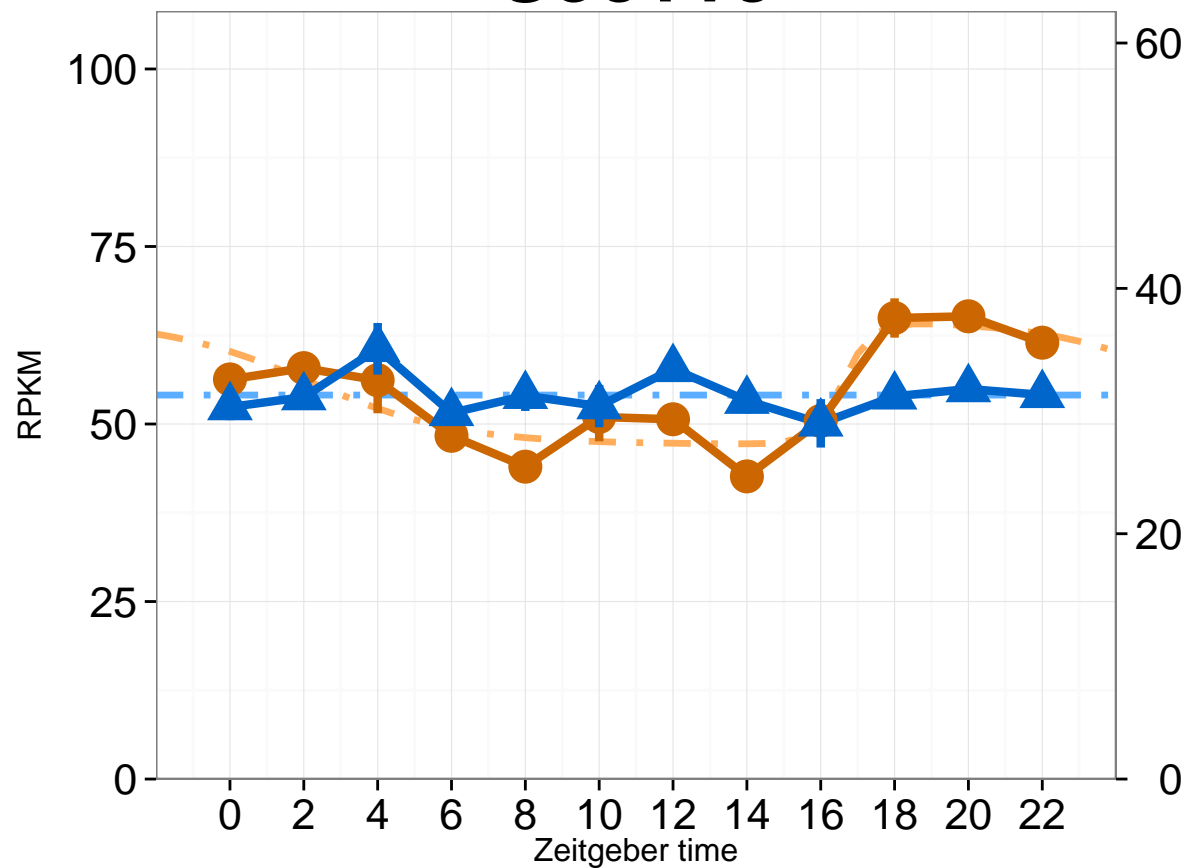

## Sec11c

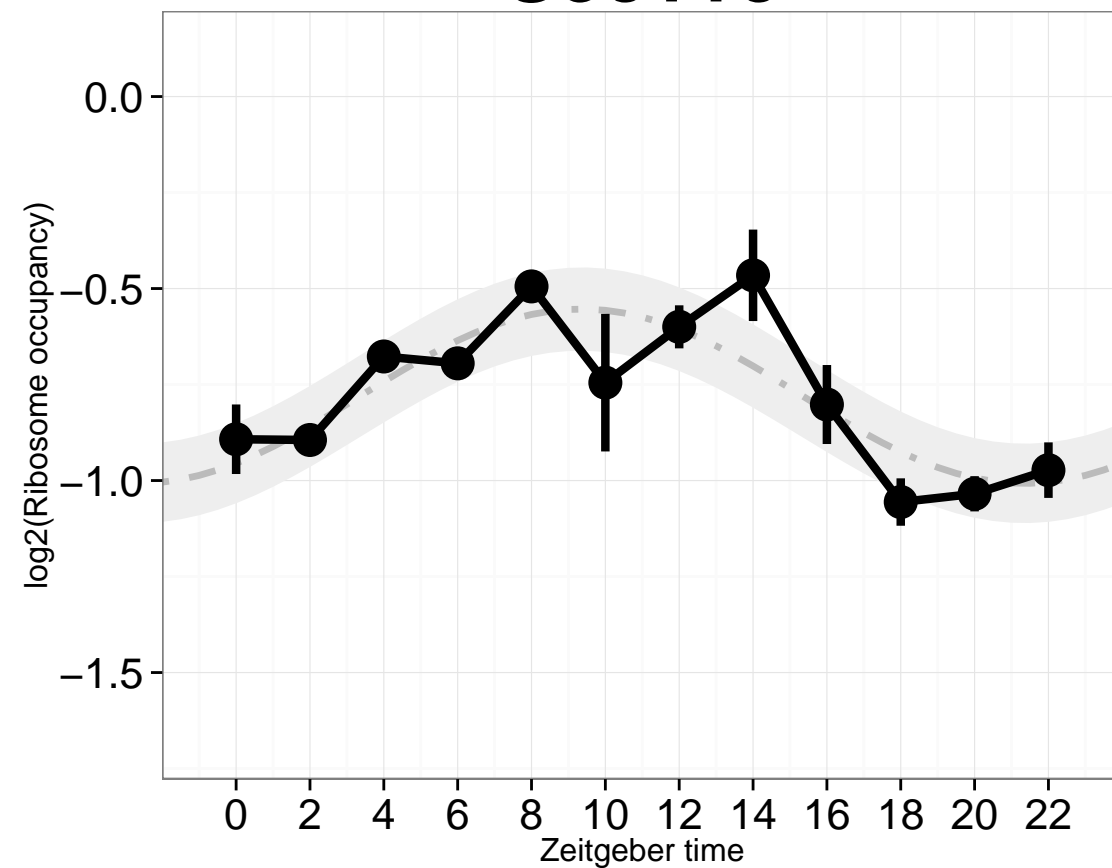

Supplement: Supplementary file 7829 [file 1]

# Chic1

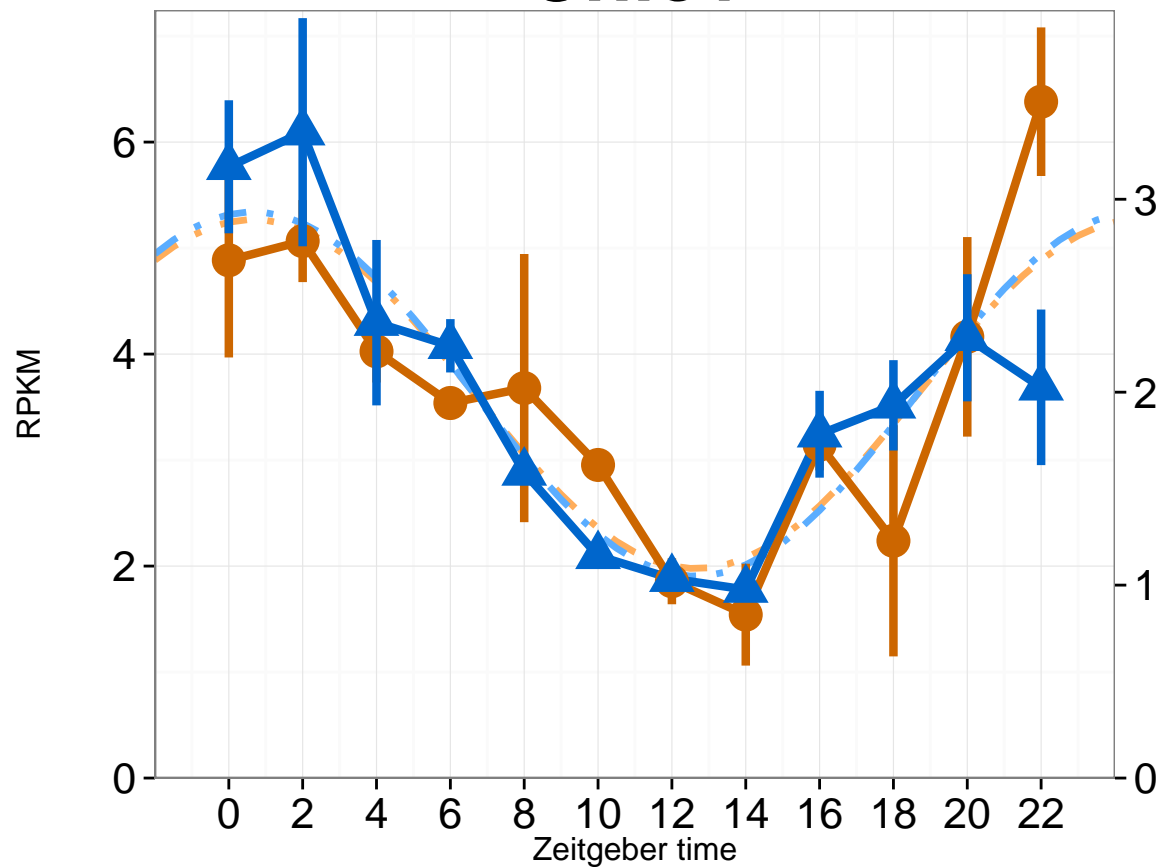

# Chic1

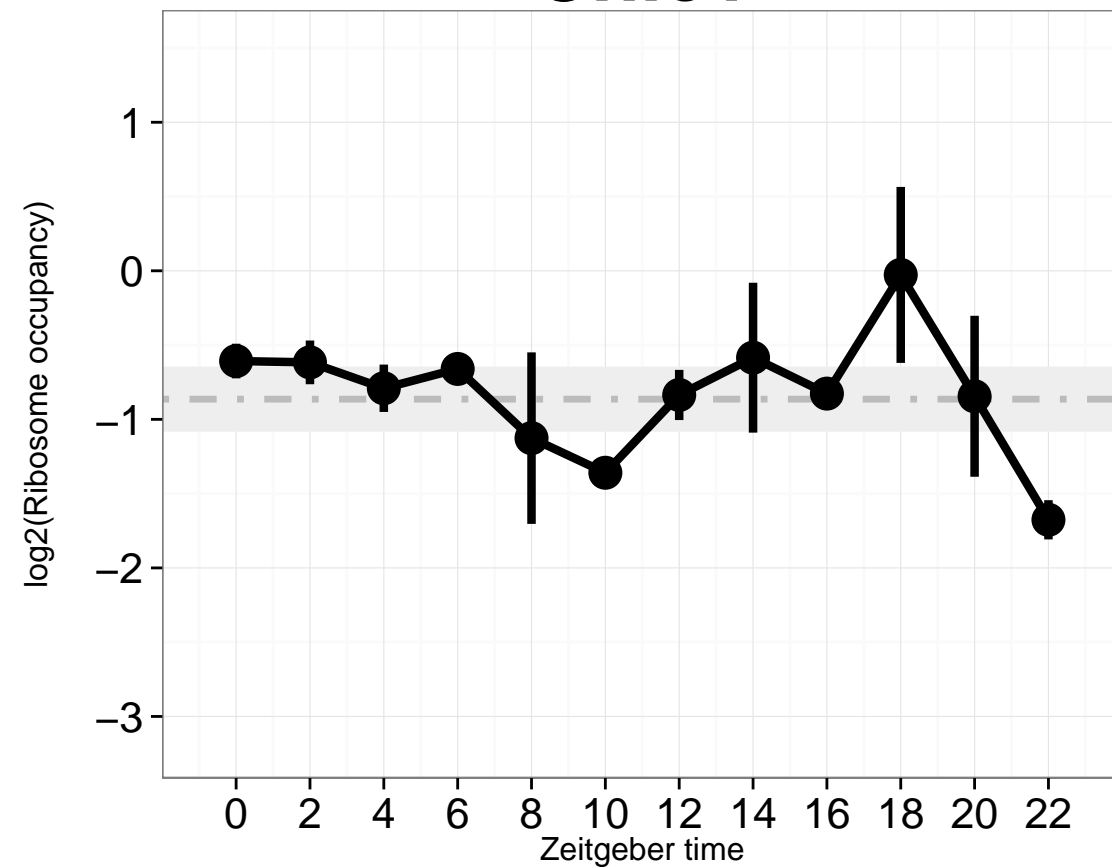

Supplement: Supplementary file 7830 [file 1]

# Nfkbil1

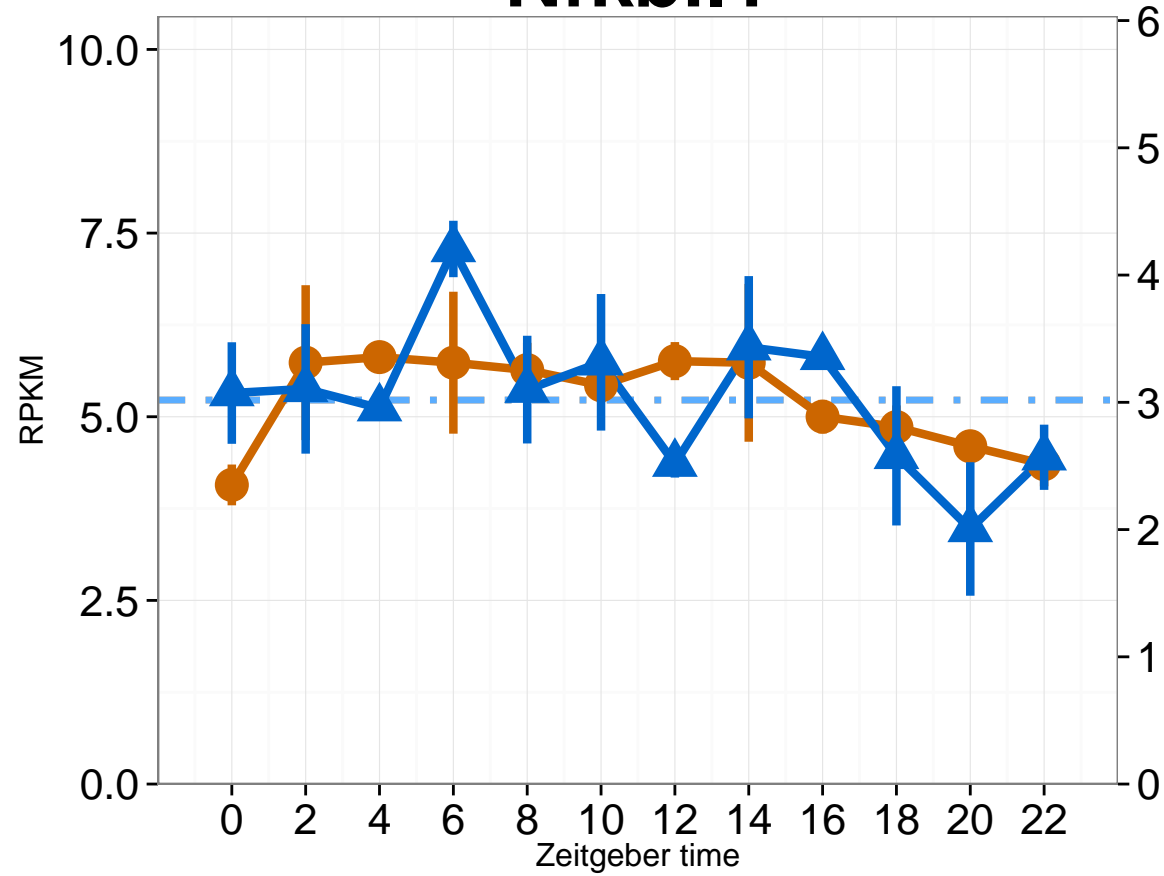

# Nfkbil1

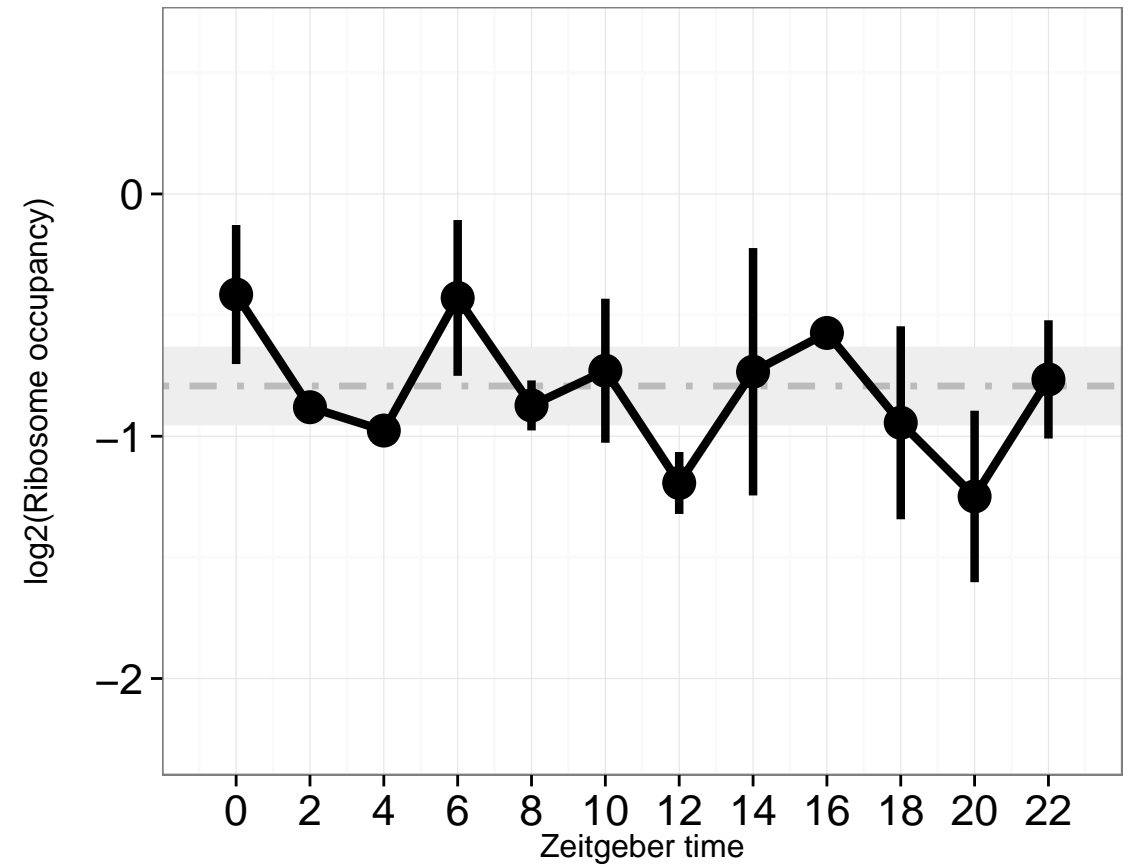

Supplement: Supplementary file 7831 [file 1]

## Cklf

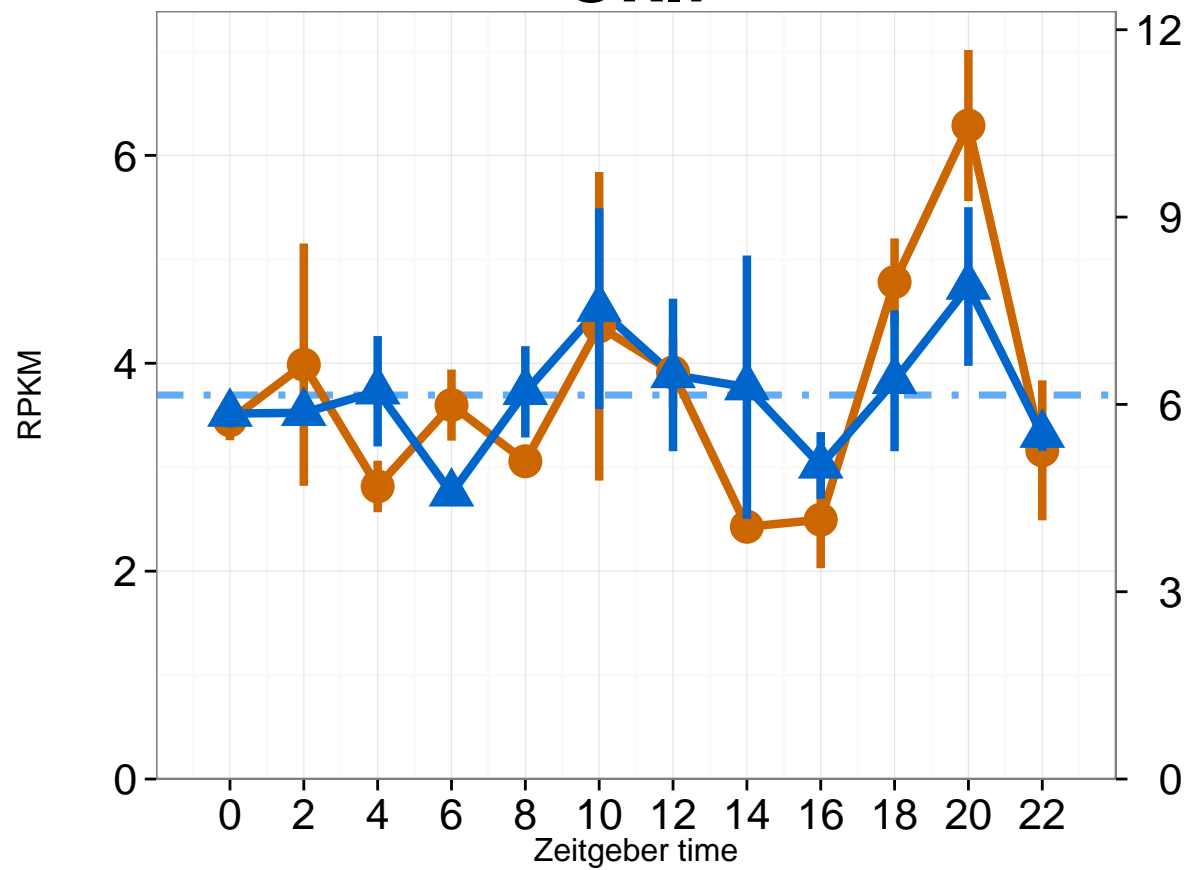

## Cklf

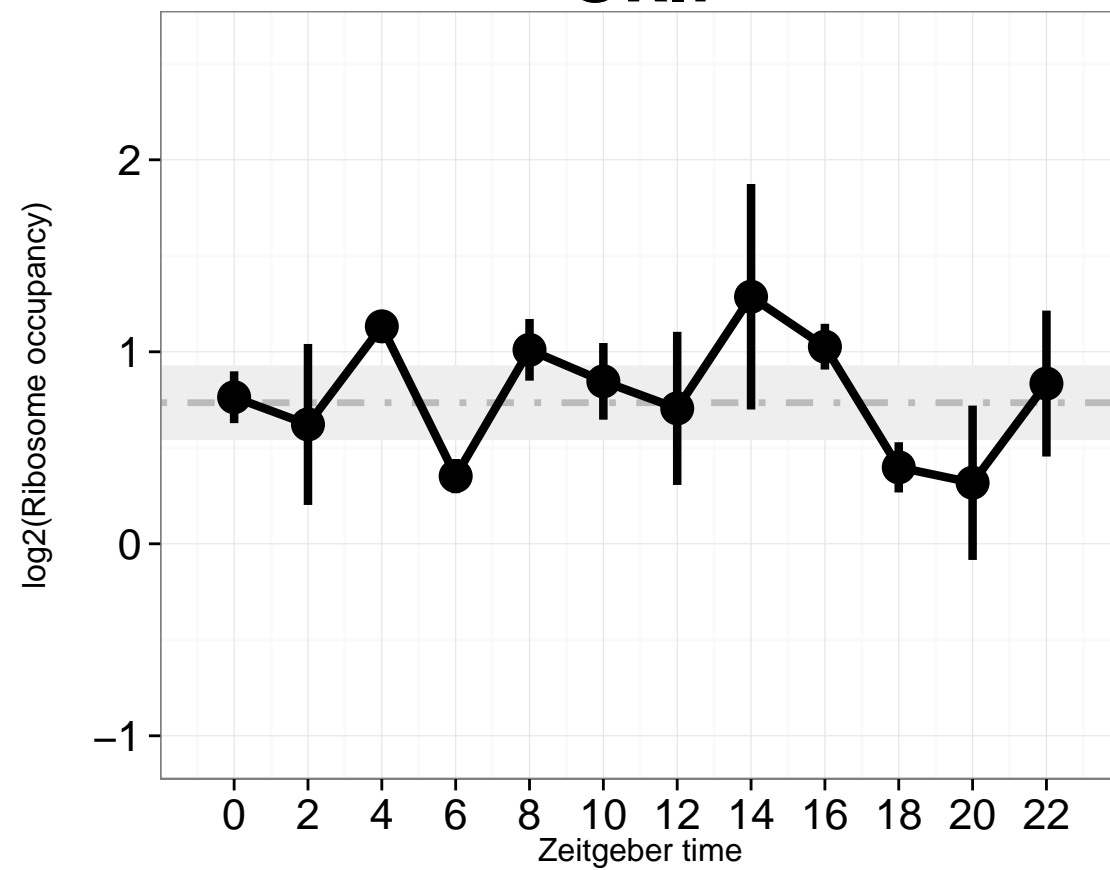

Supplement: Supplementary file 7832 [file 1]

## Cdh2

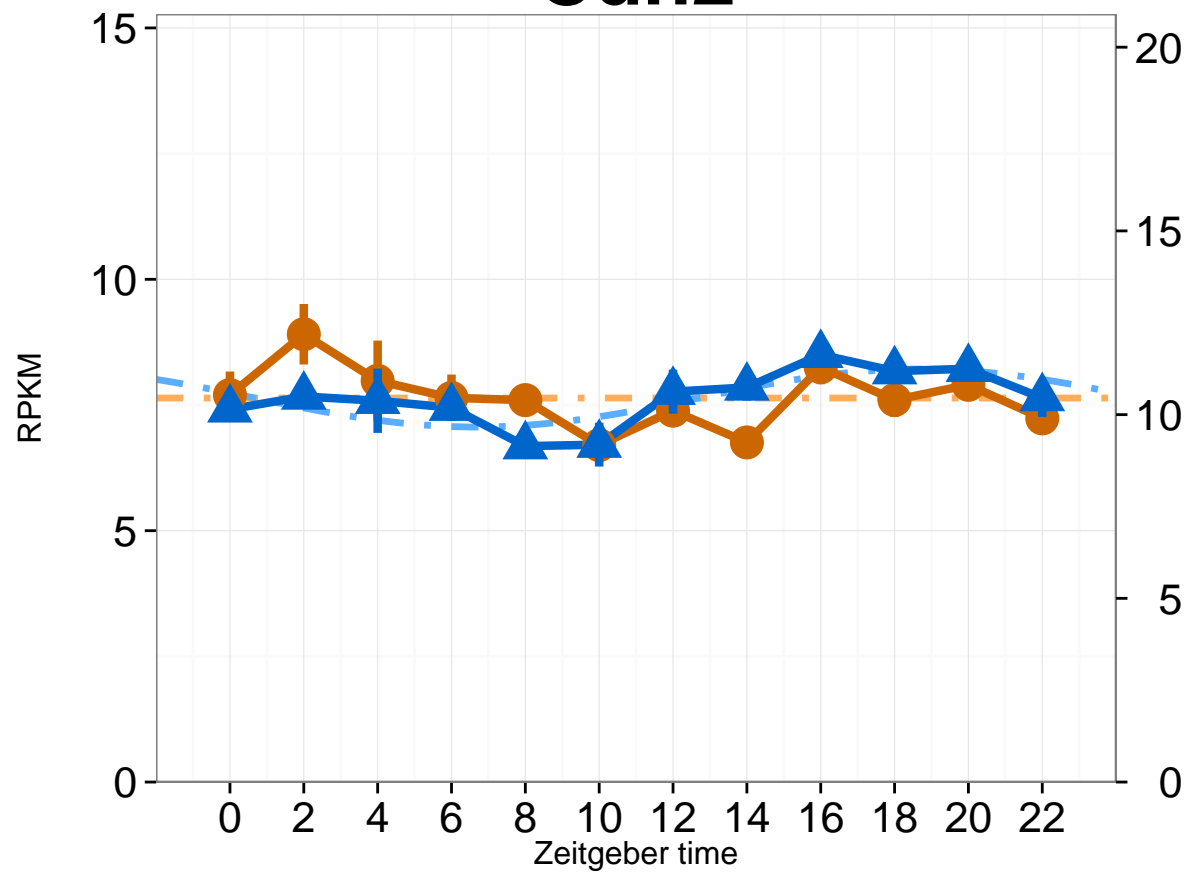

## Cdh2

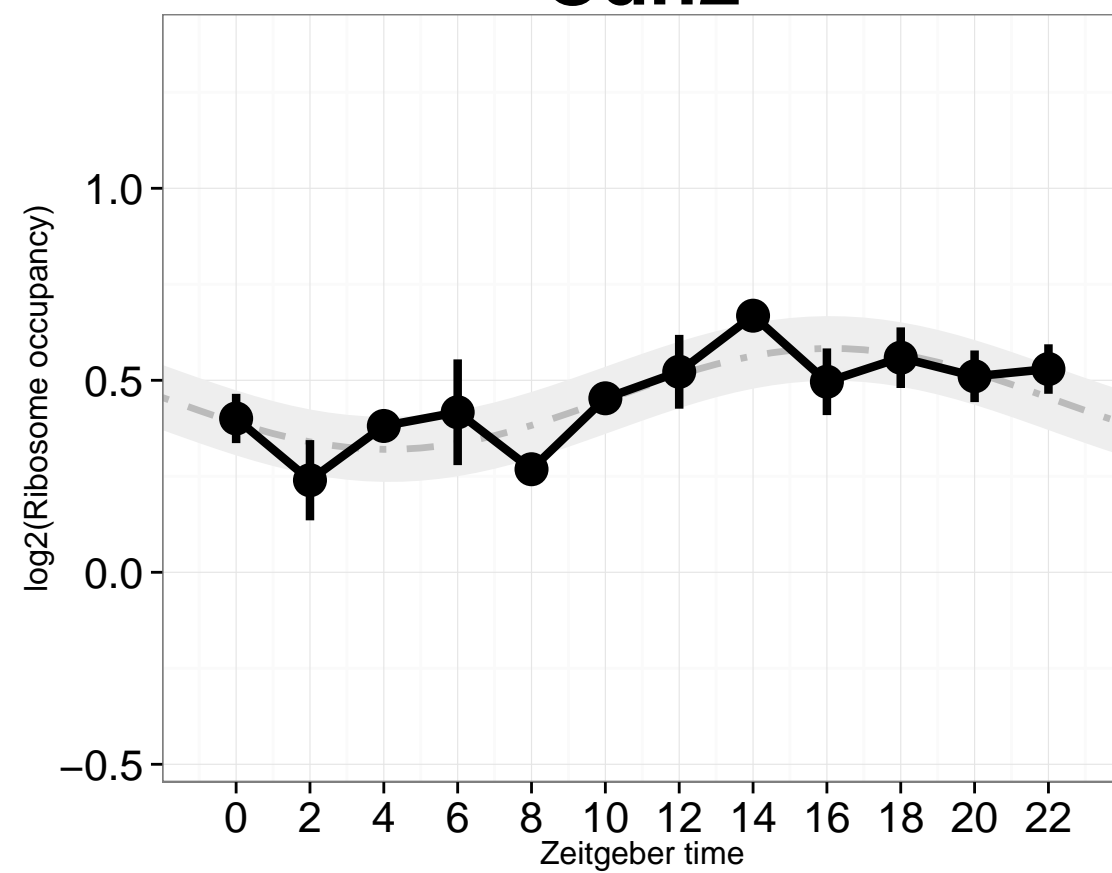

Supplement: Supplementary file 7833 [file 1]

# C8g

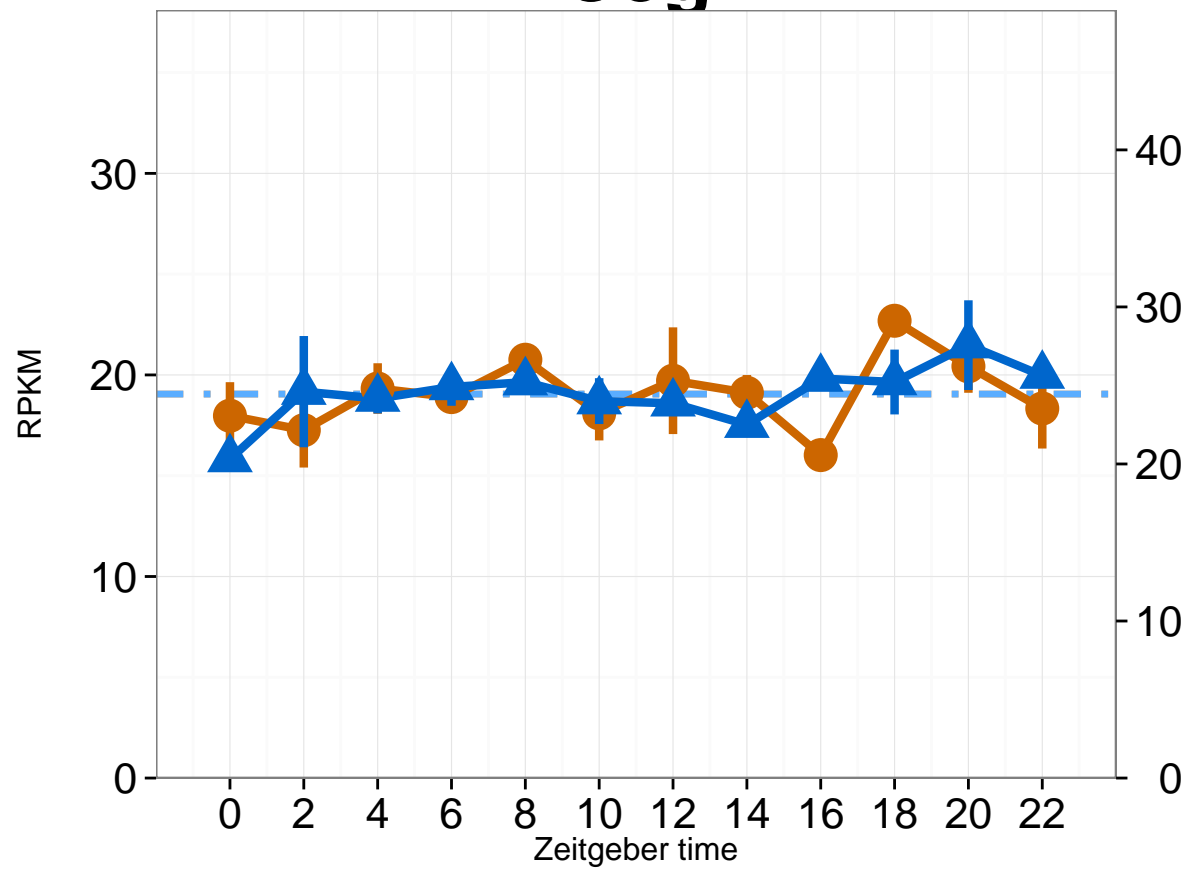

# C8g

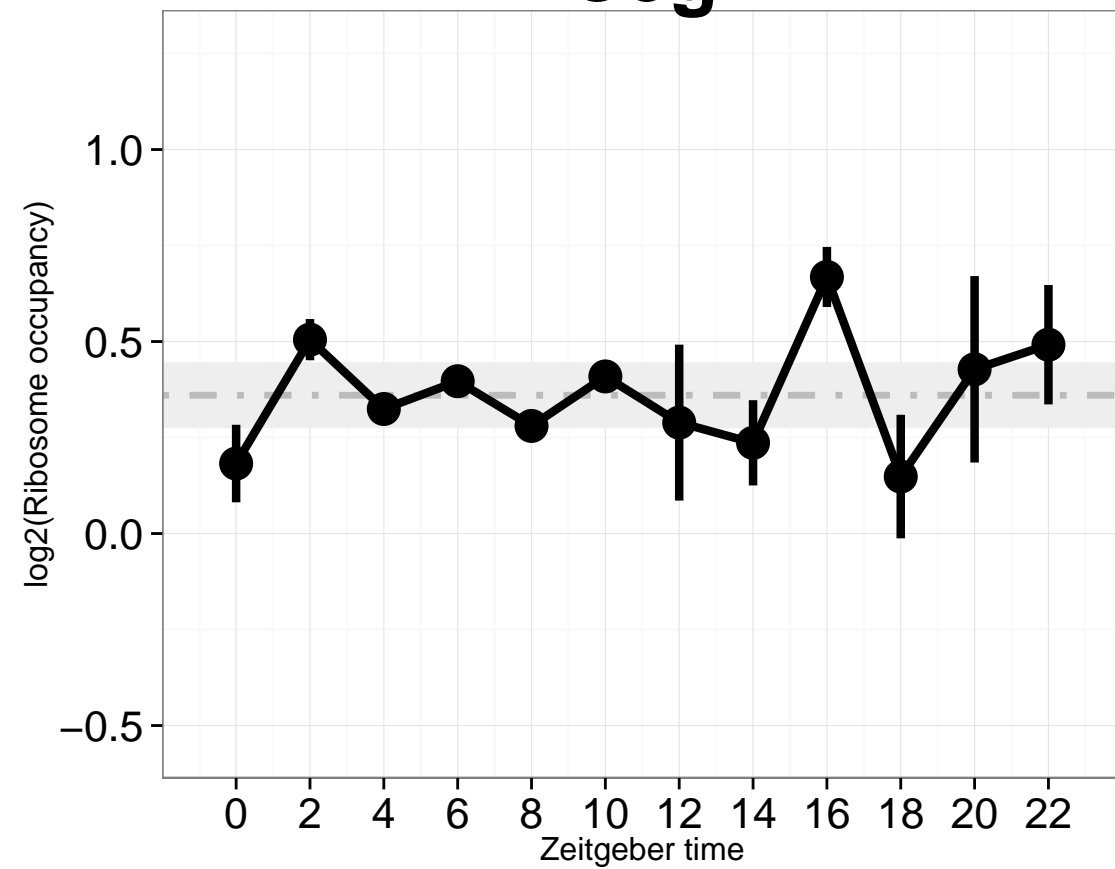

Supplement: Supplementary file 7834 [file 1]

## Eif4e

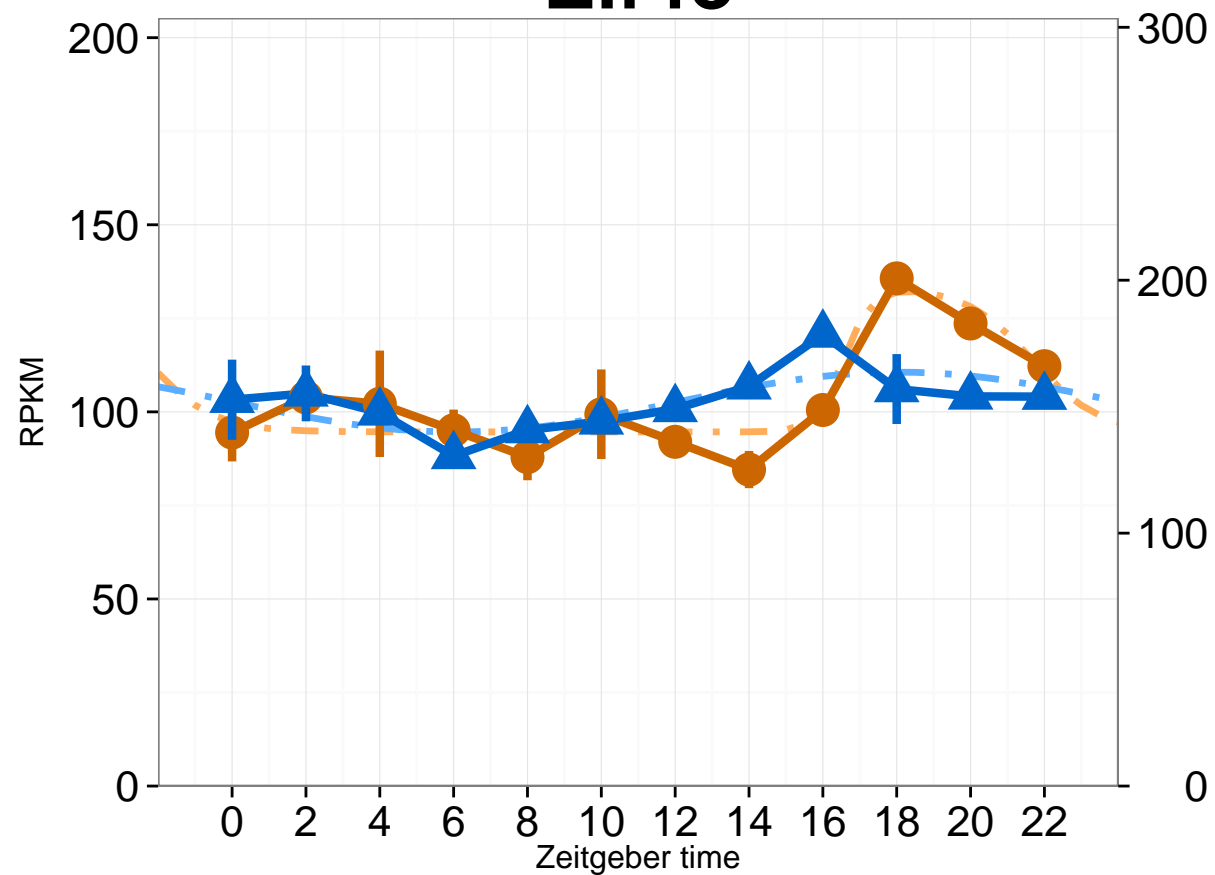

## Eif4e

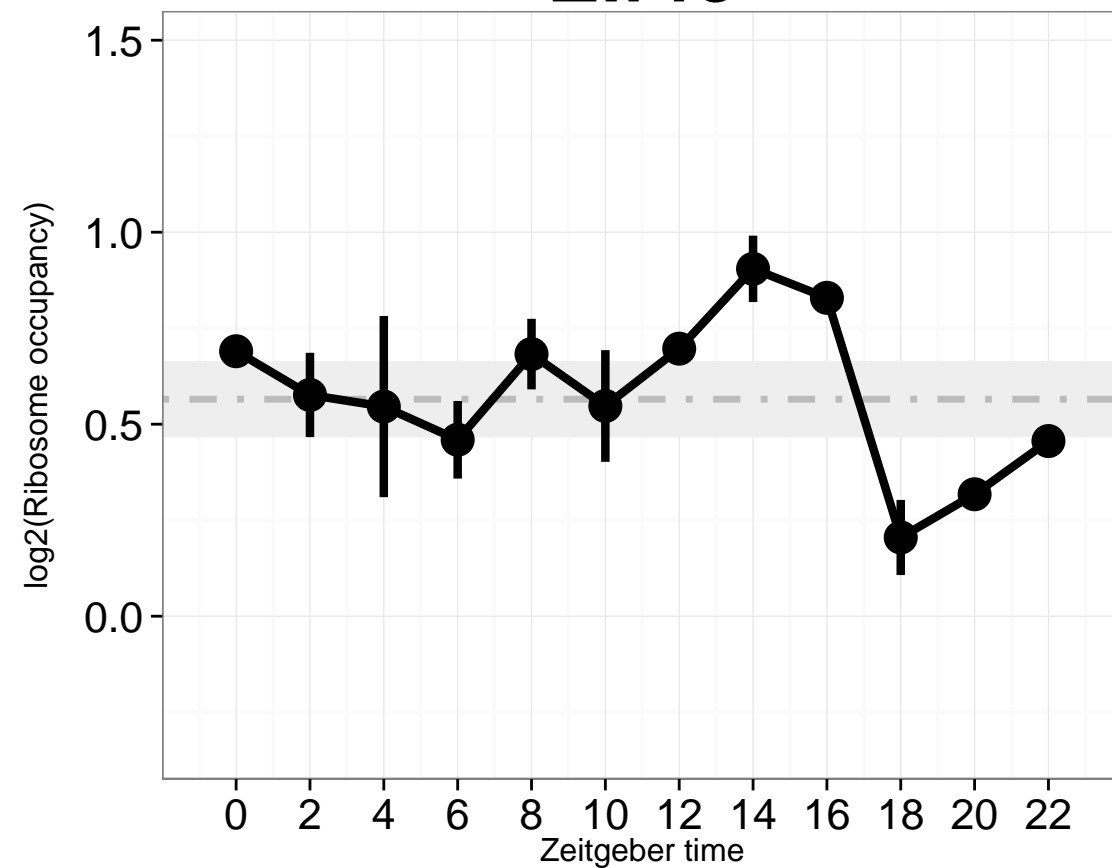

Supplement: Supplementary file 7835 [file 1]

# Rps16

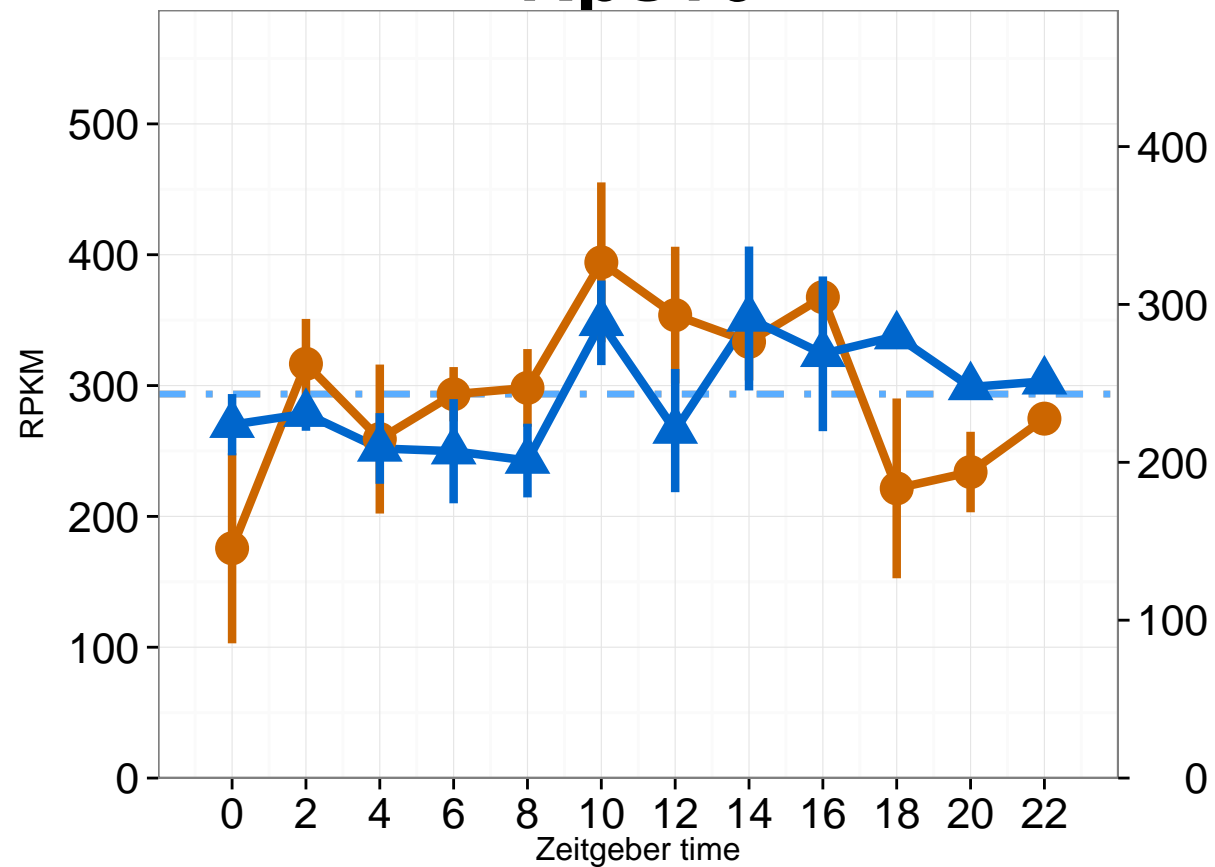

# Rps16

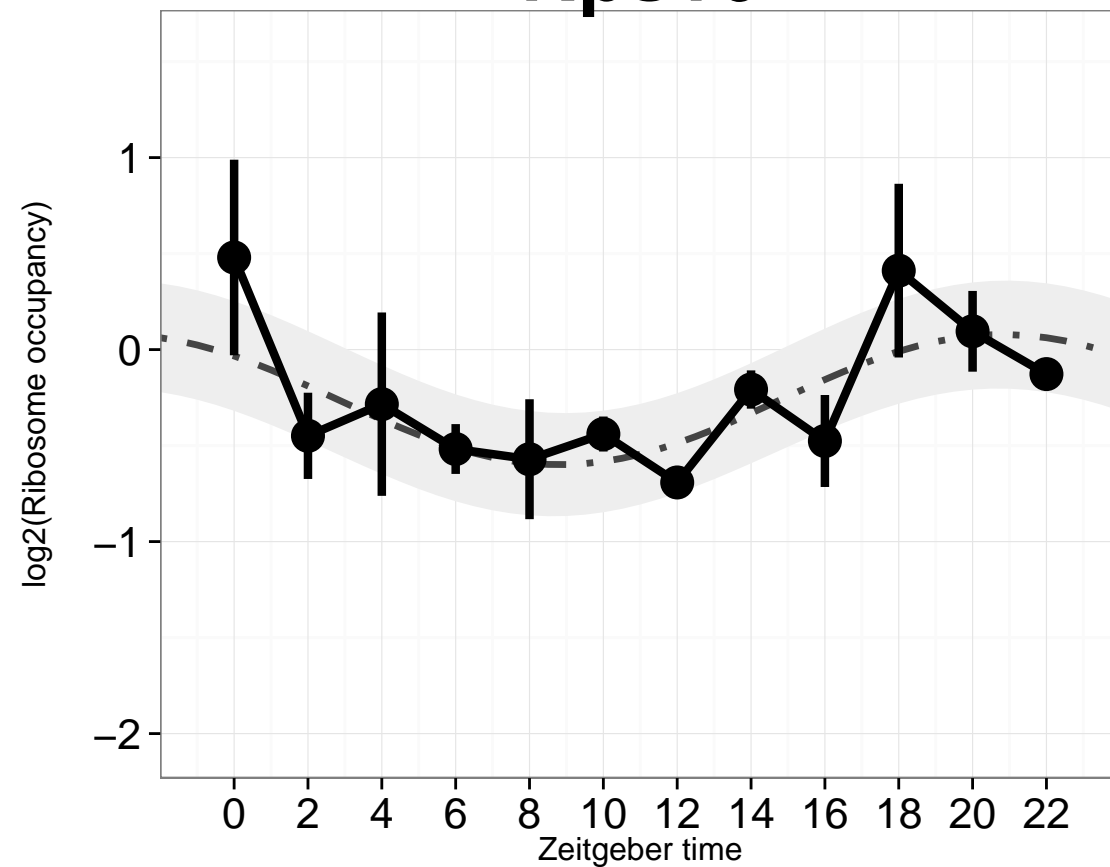

Supplement: Supplementary file 7836 [file 1]

## Fadd

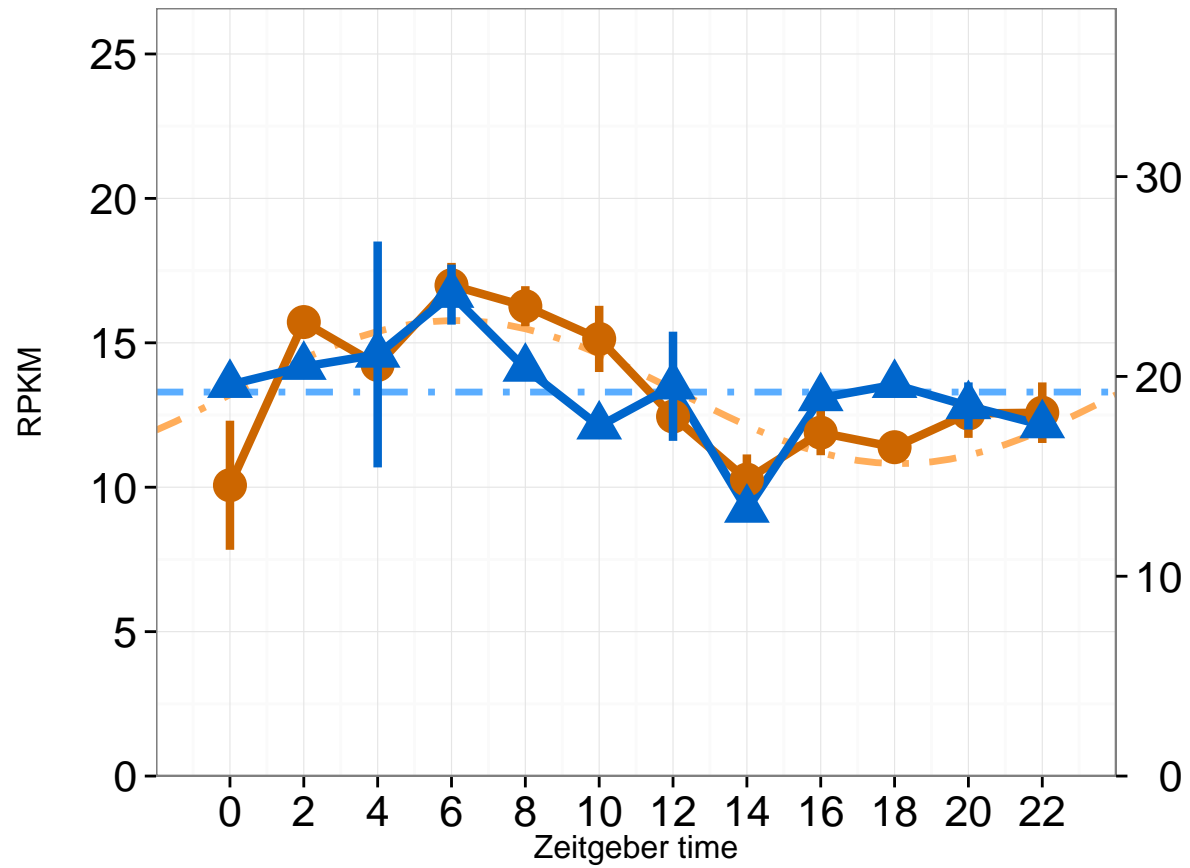

## Fadd

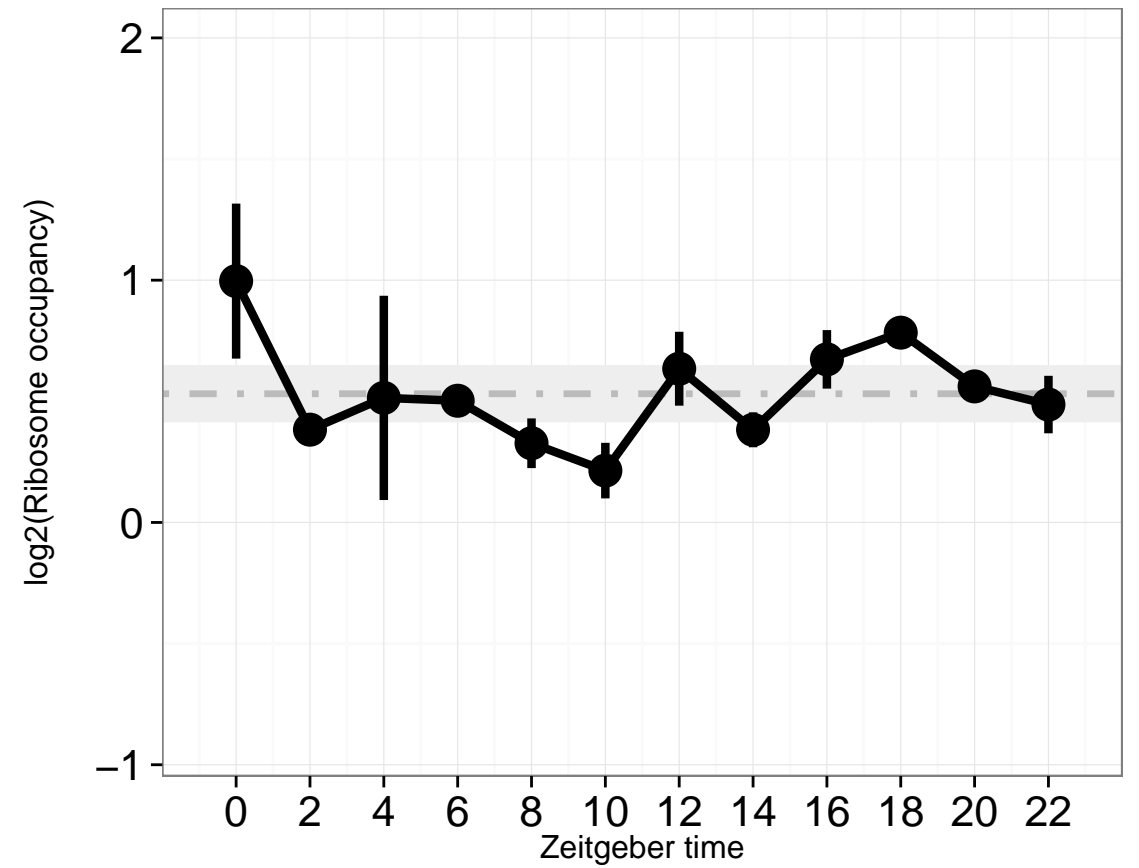

Supplement: Supplementary file 7837 [file 1]

## Uba1

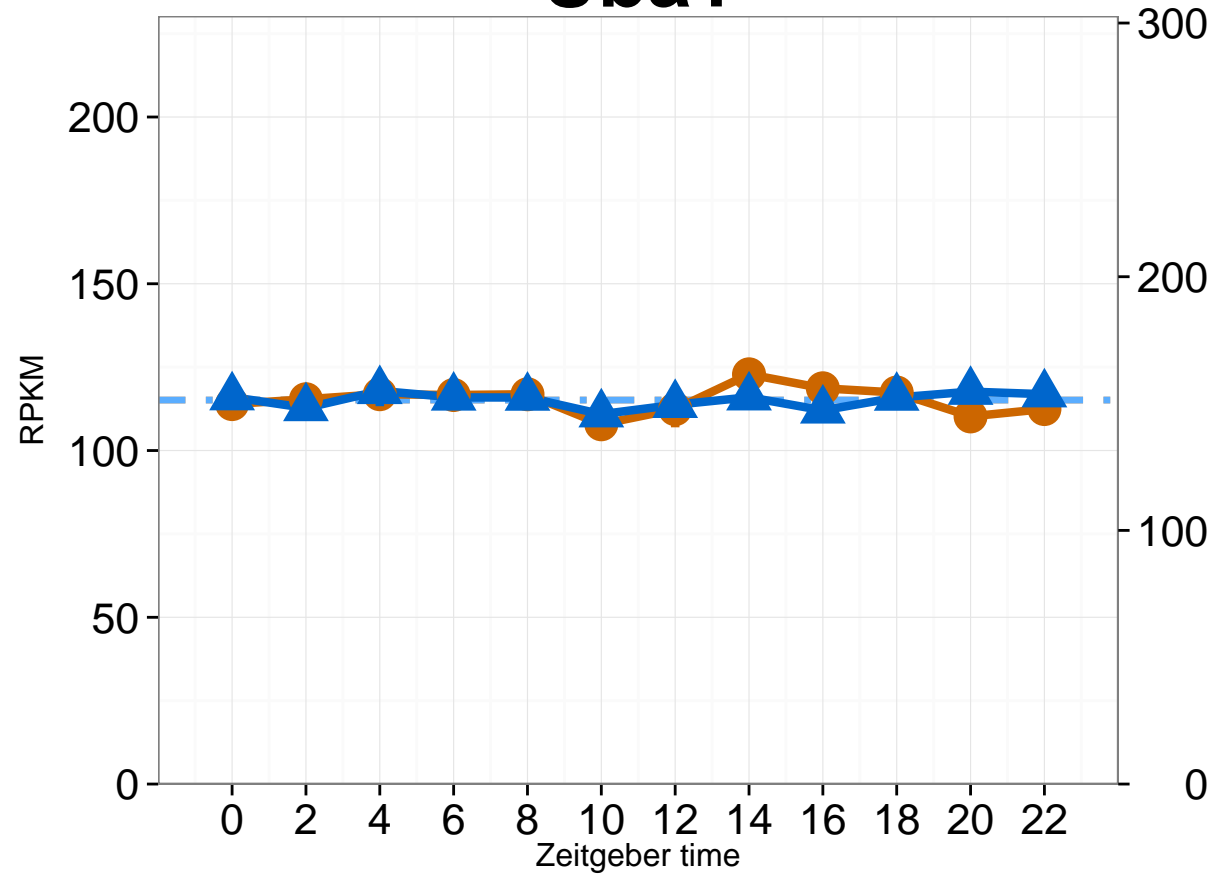

## Uba1

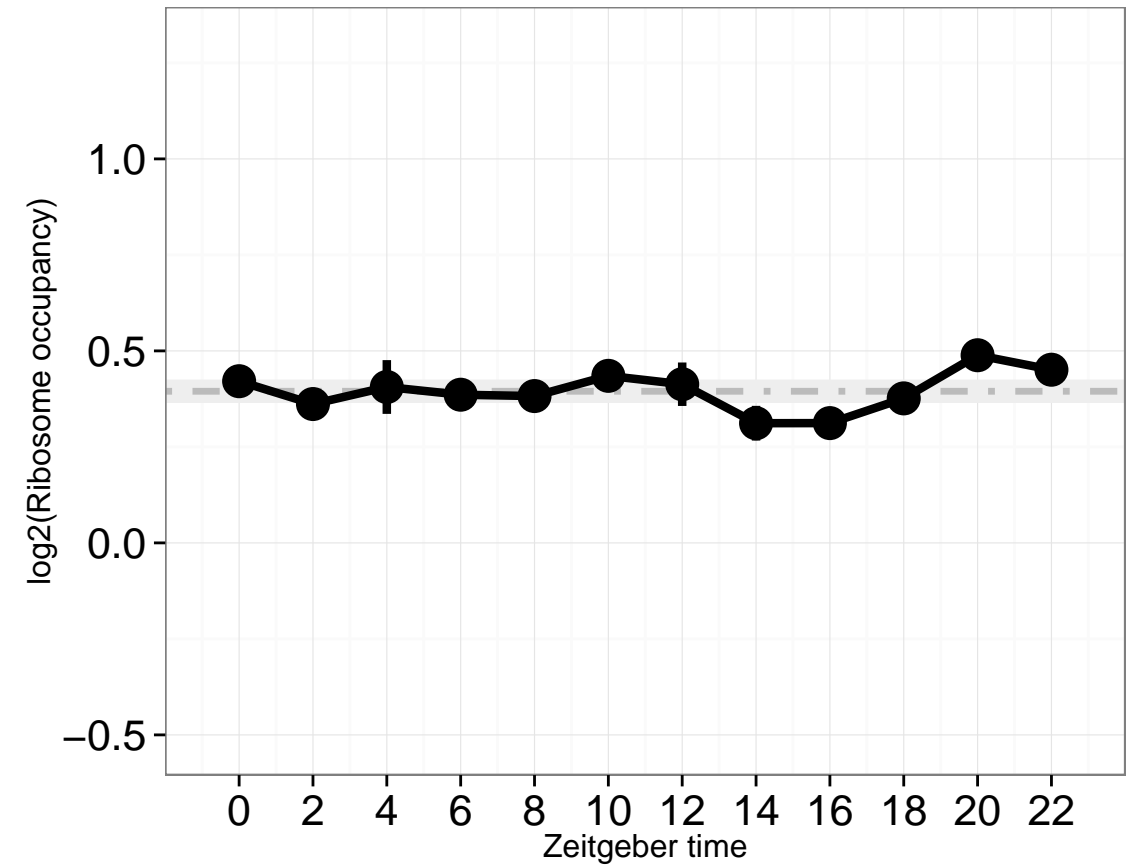

Supplement: Supplementary file 7838 [file 1]

## Thap7

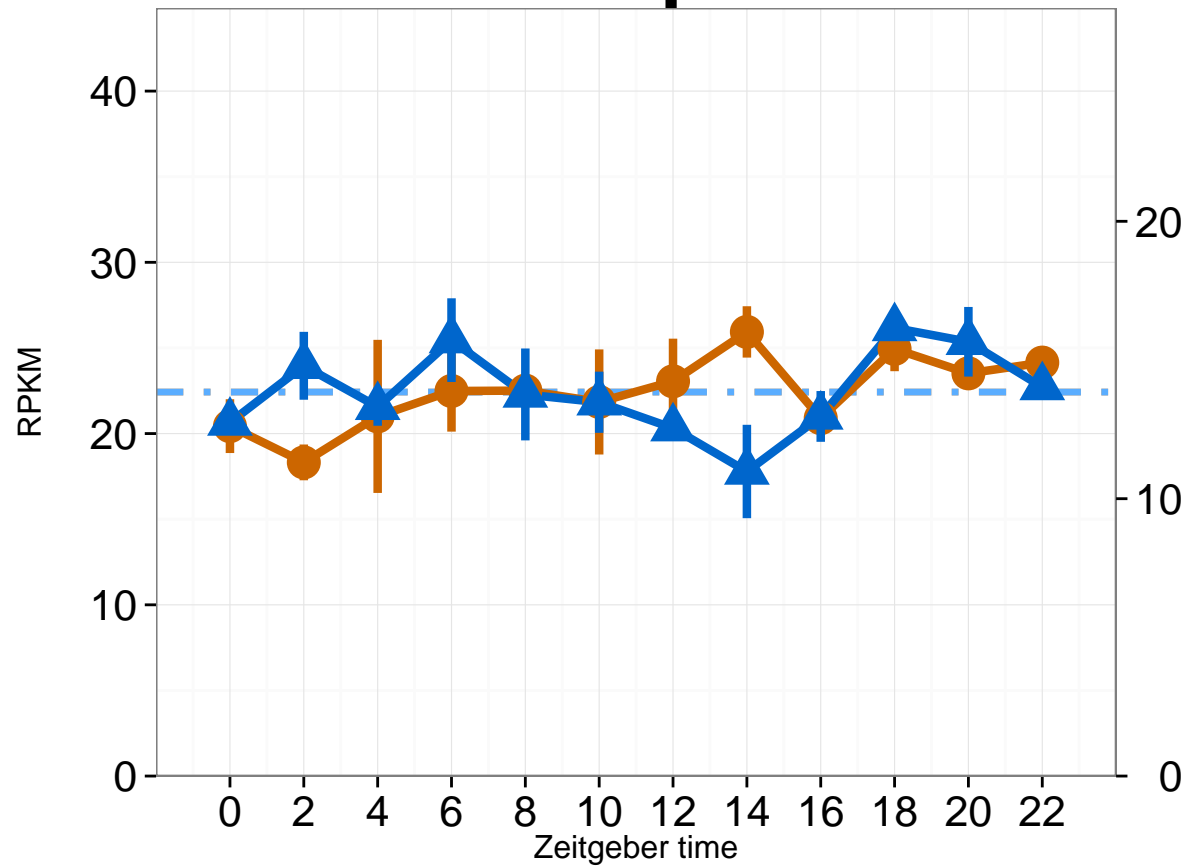

## Thap7

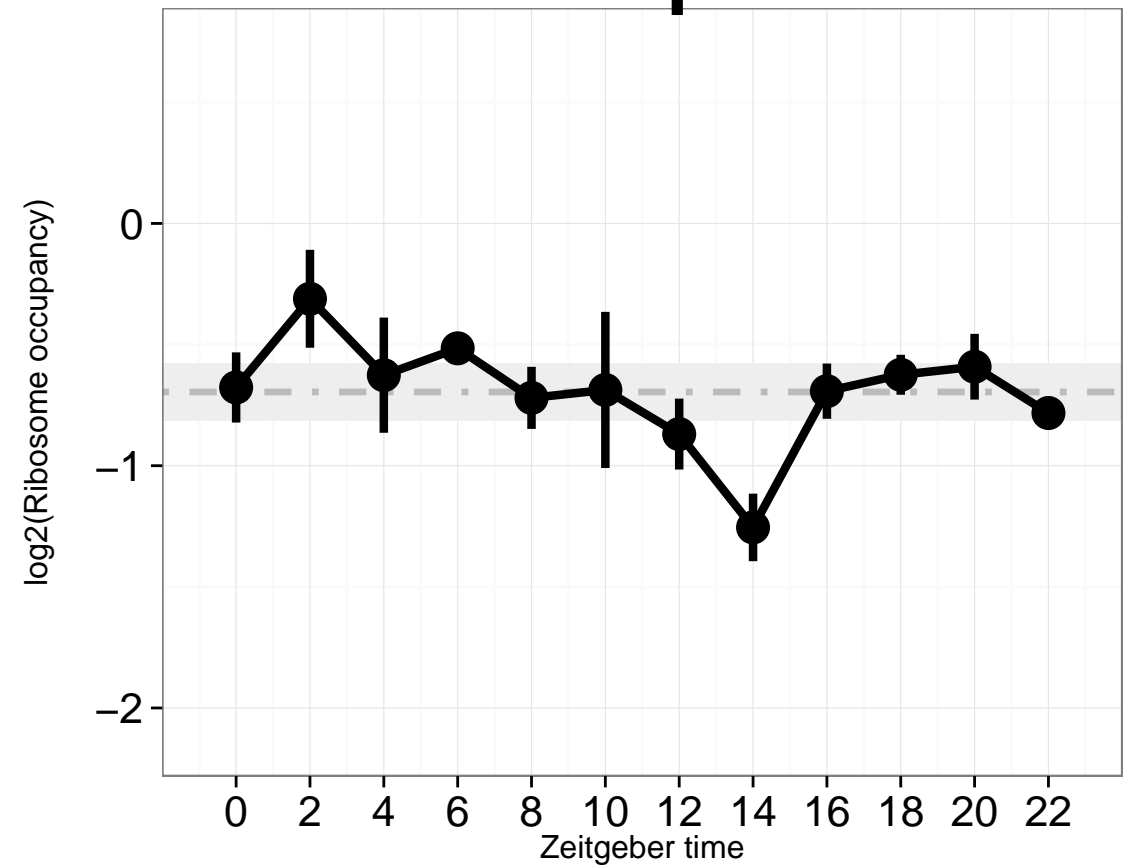

Supplement: Supplementary file 7839 [file 1]

**Zfx**

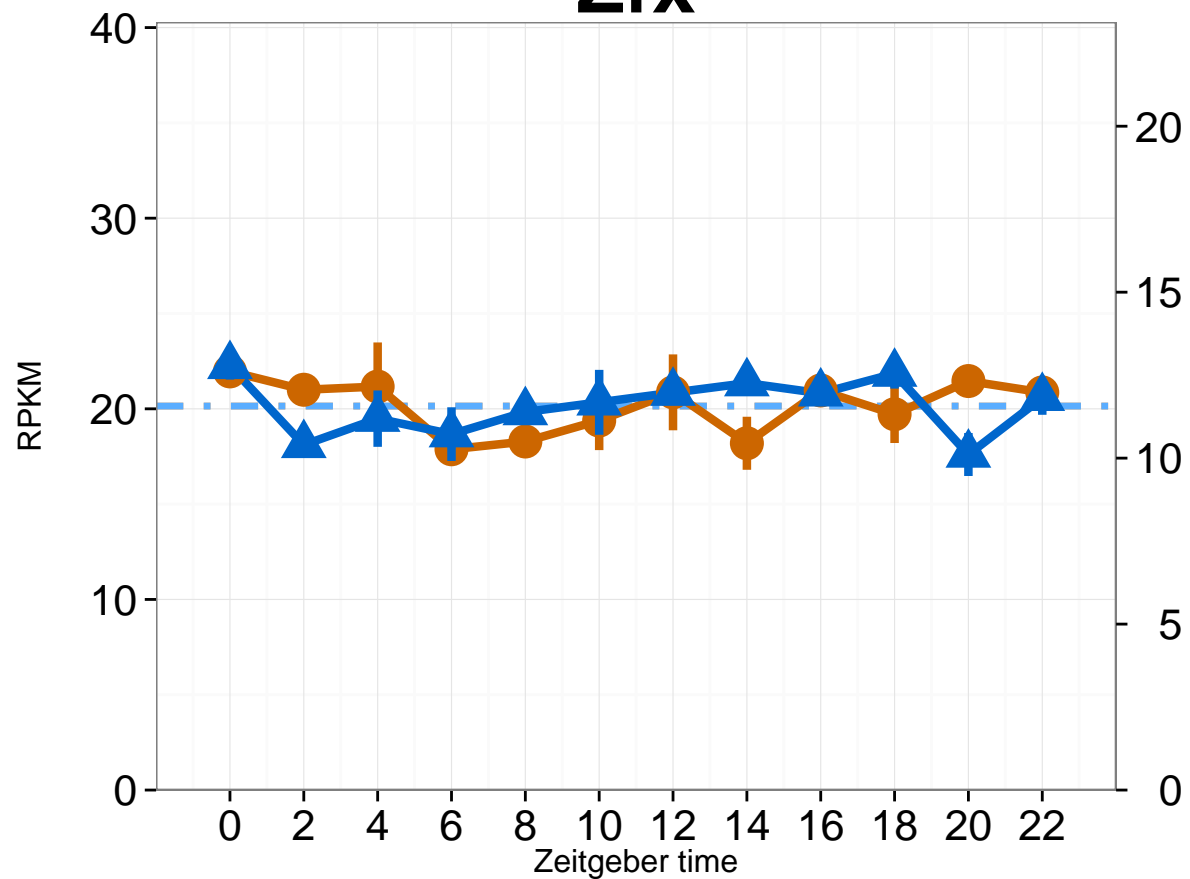

**Zfx**

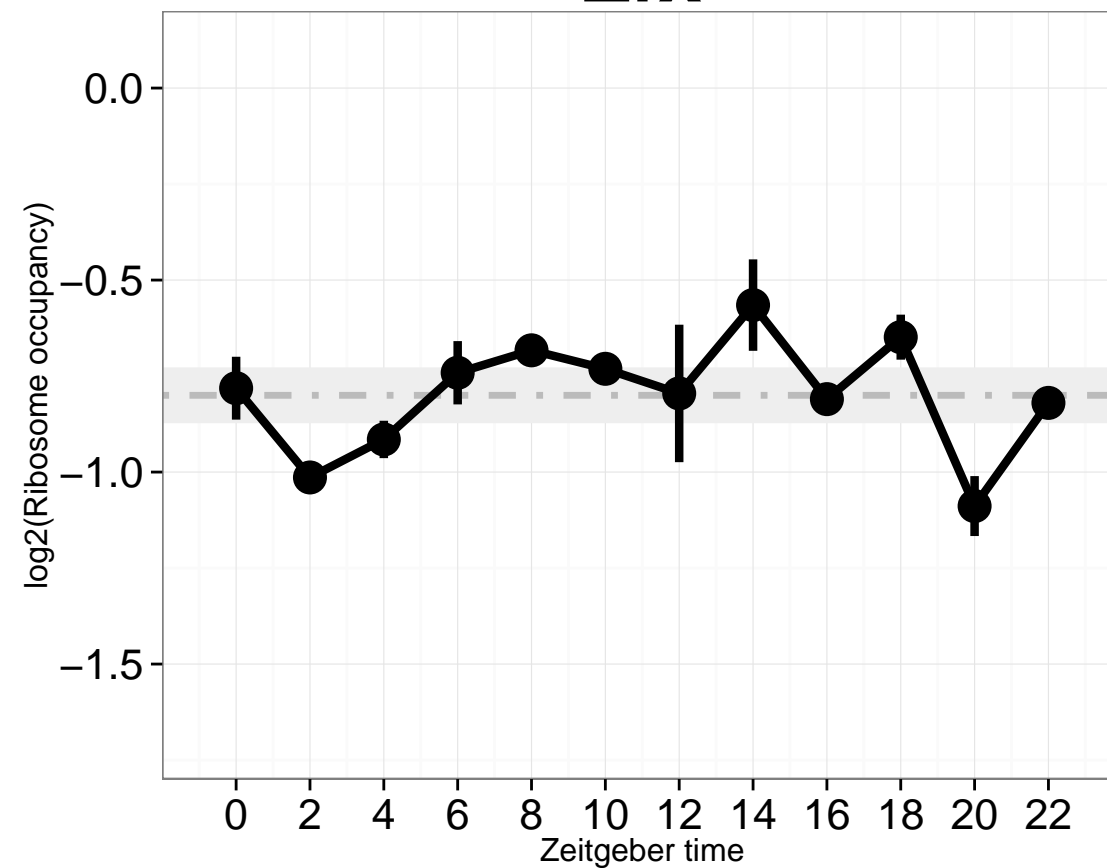

Supplement: Supplementary file 7840 [file 1]

## Ikbkb

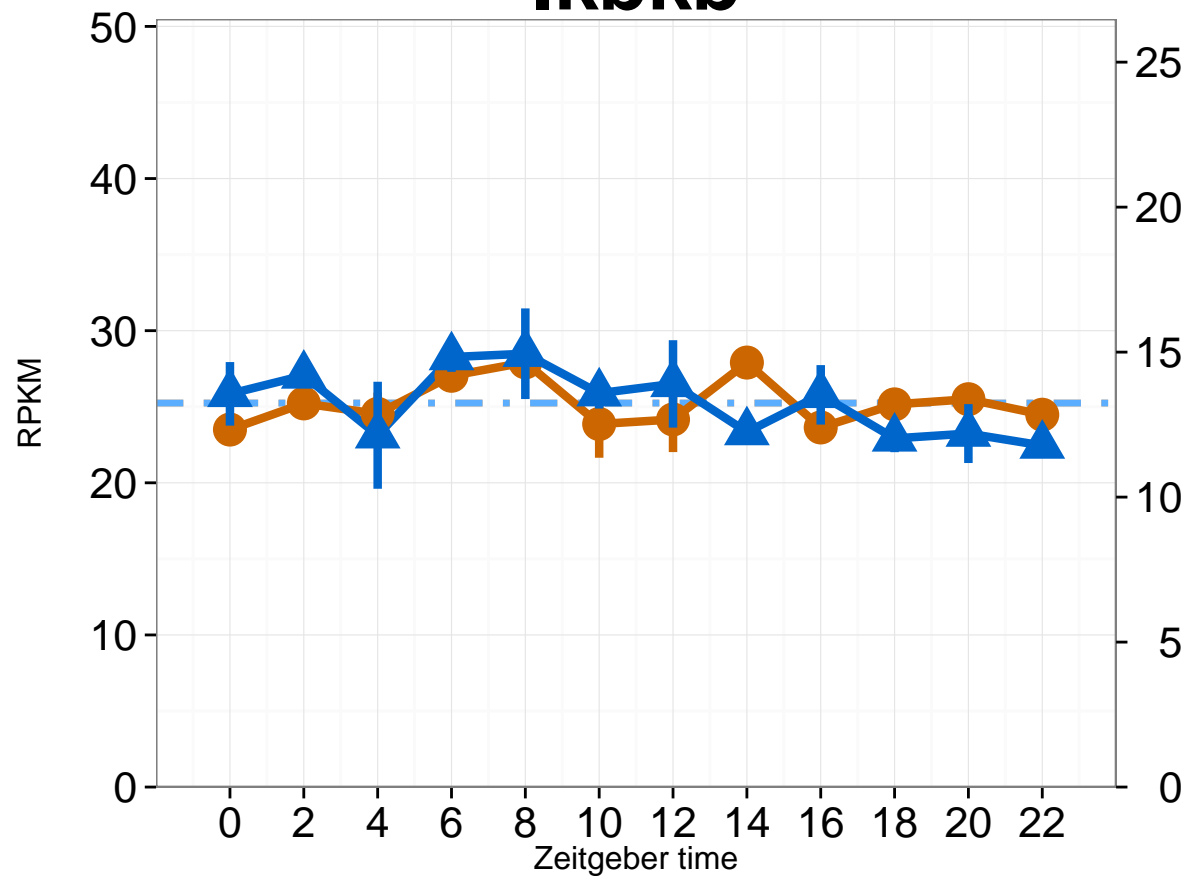

## Ikbkb

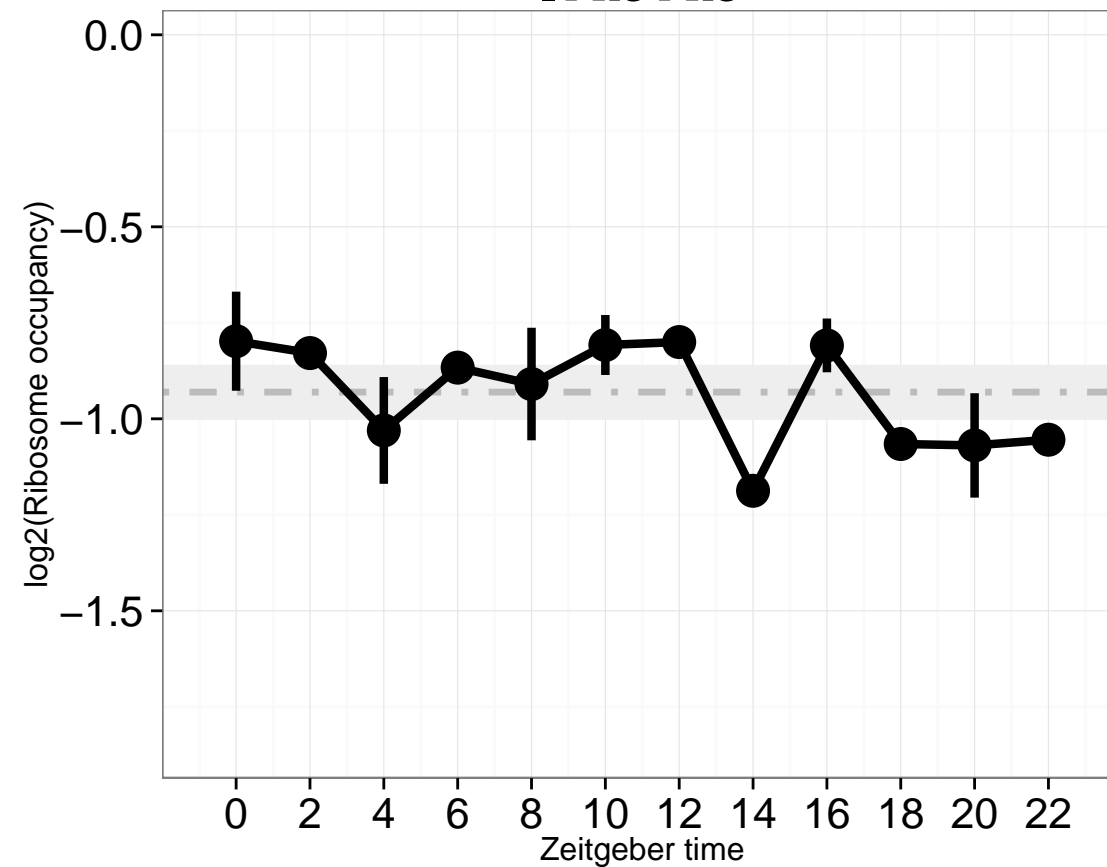

Supplement: Supplementary file 7841 [file 1]

## Parp3

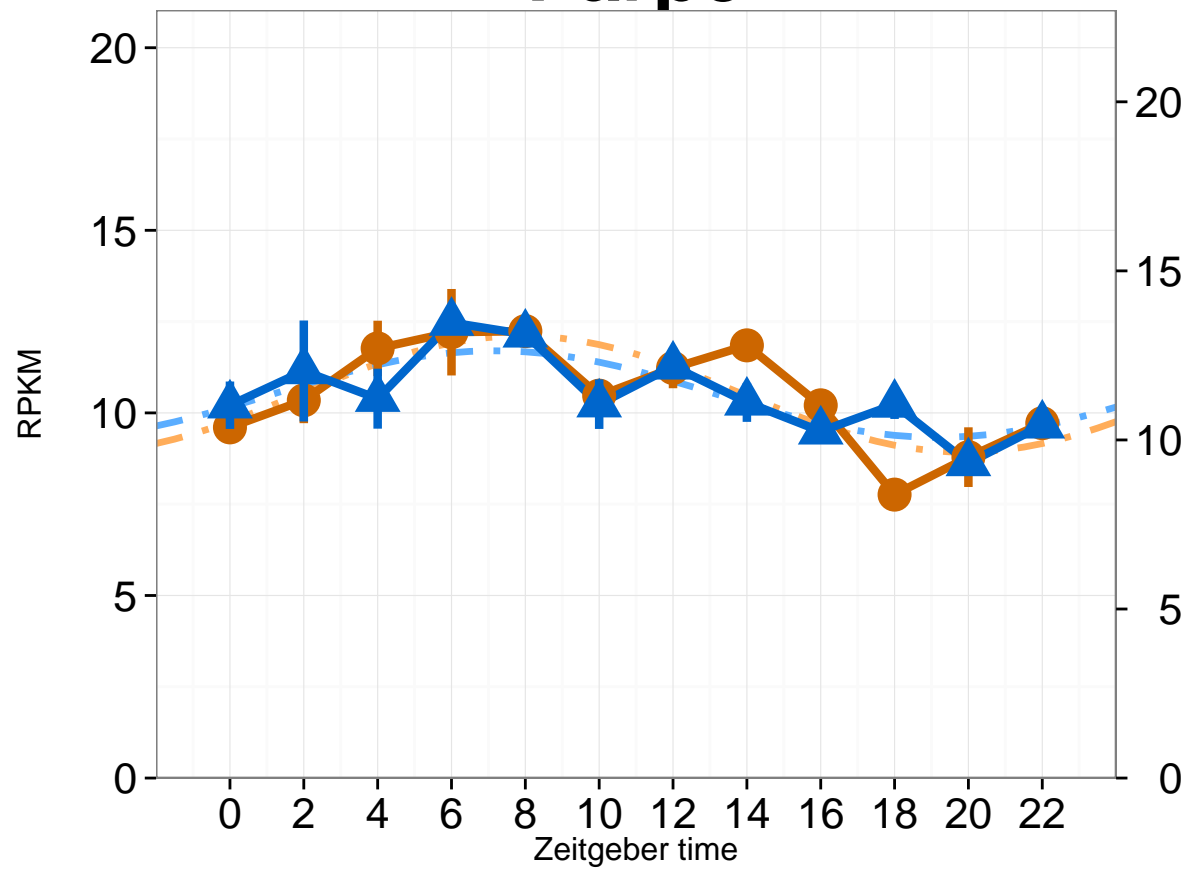

## Parp3

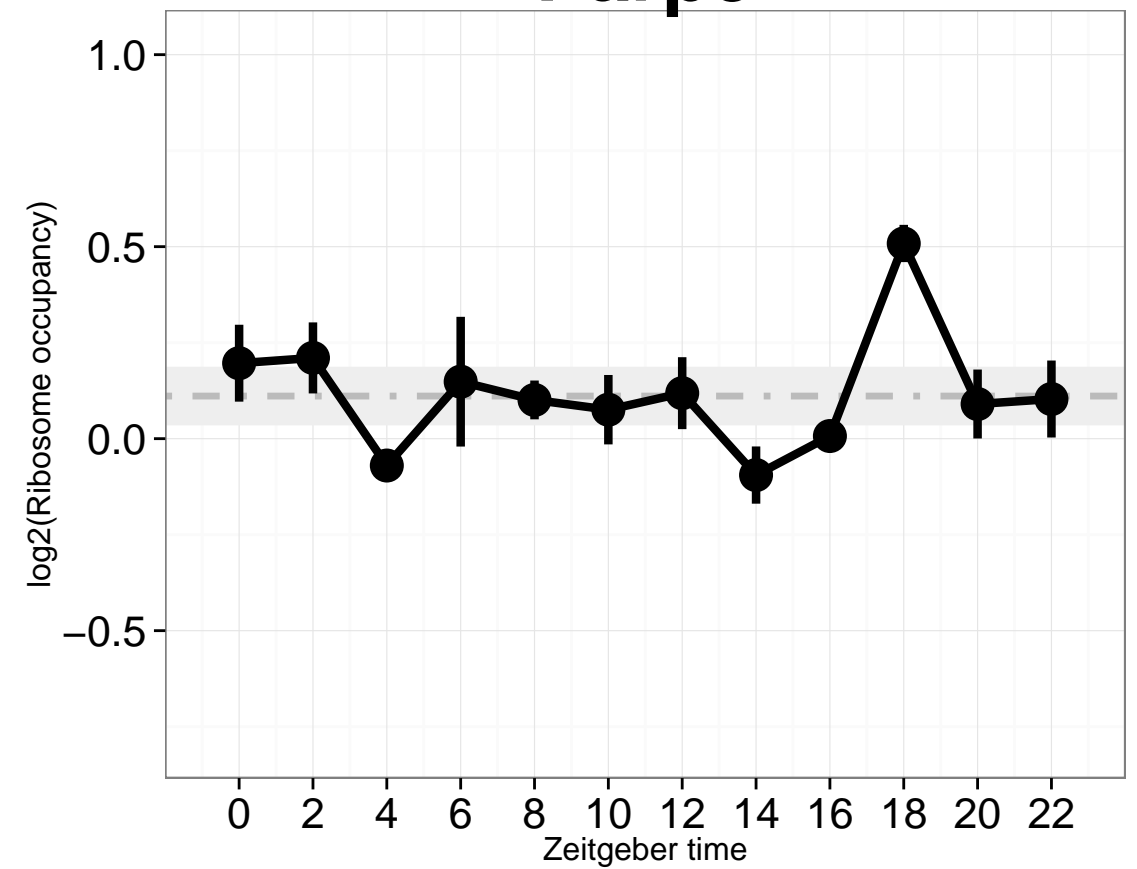

Supplement: Supplementary file 7842 [file 1]

## Zfp11

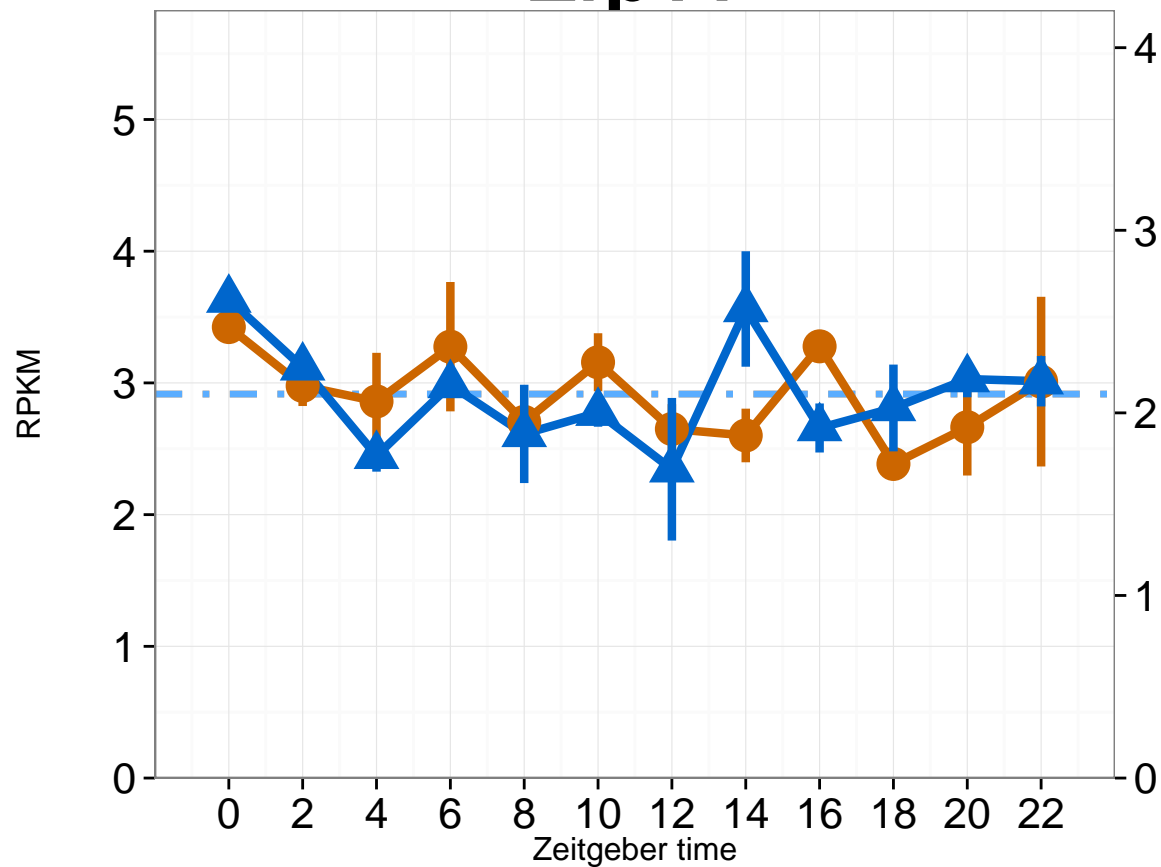

## Zfp11

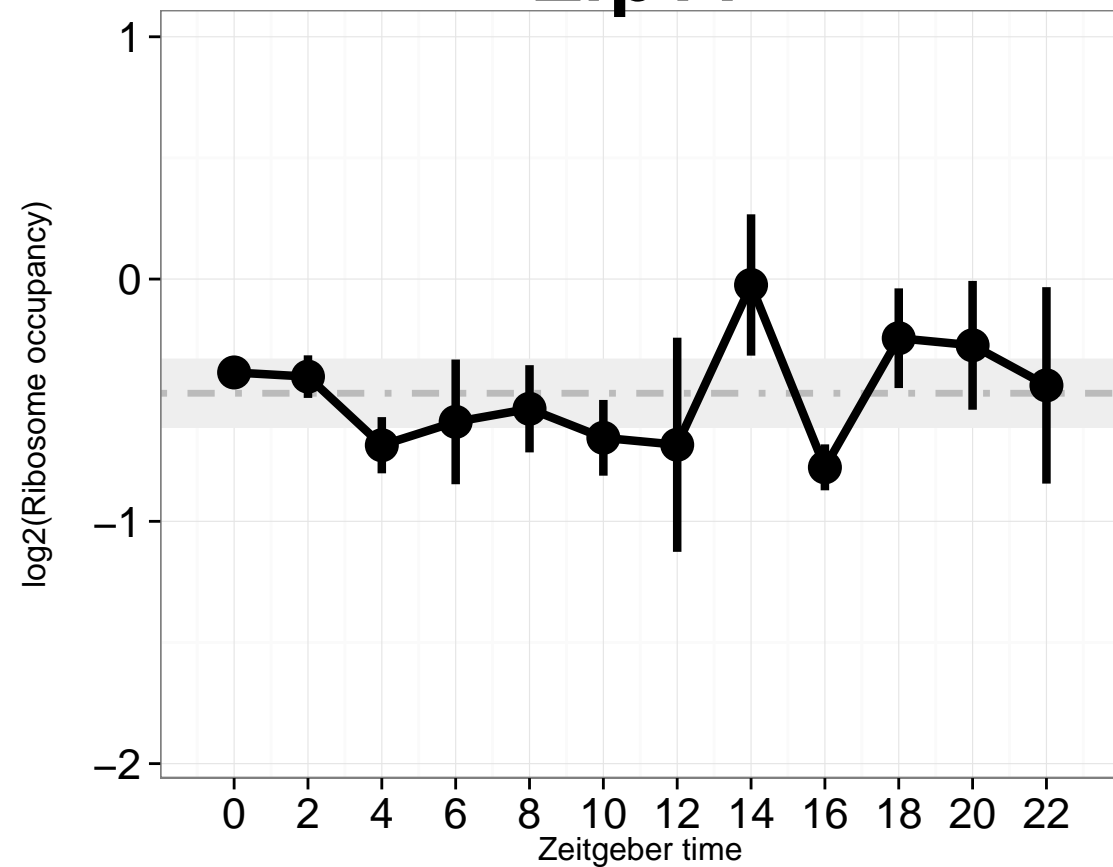

Supplement: Supplementary file 7844 [file 1]

## Sirpa

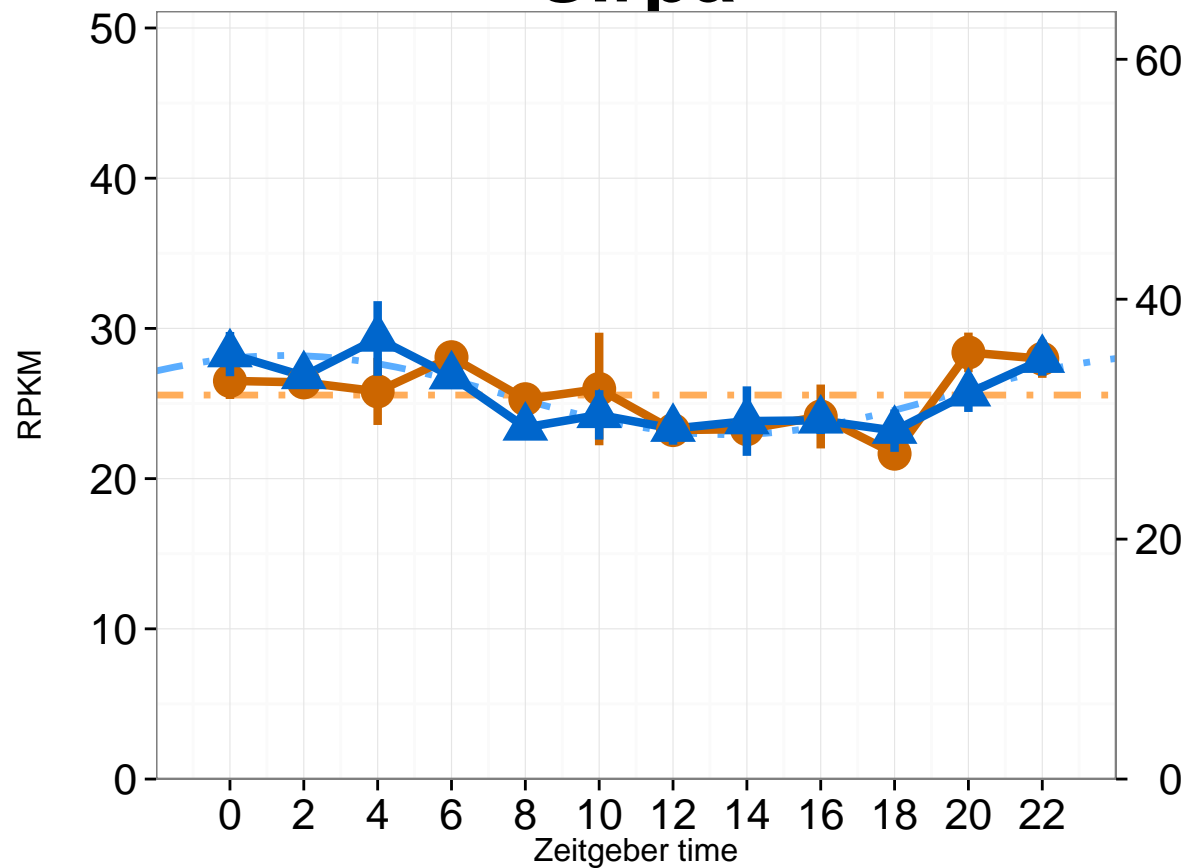

## Sirpa

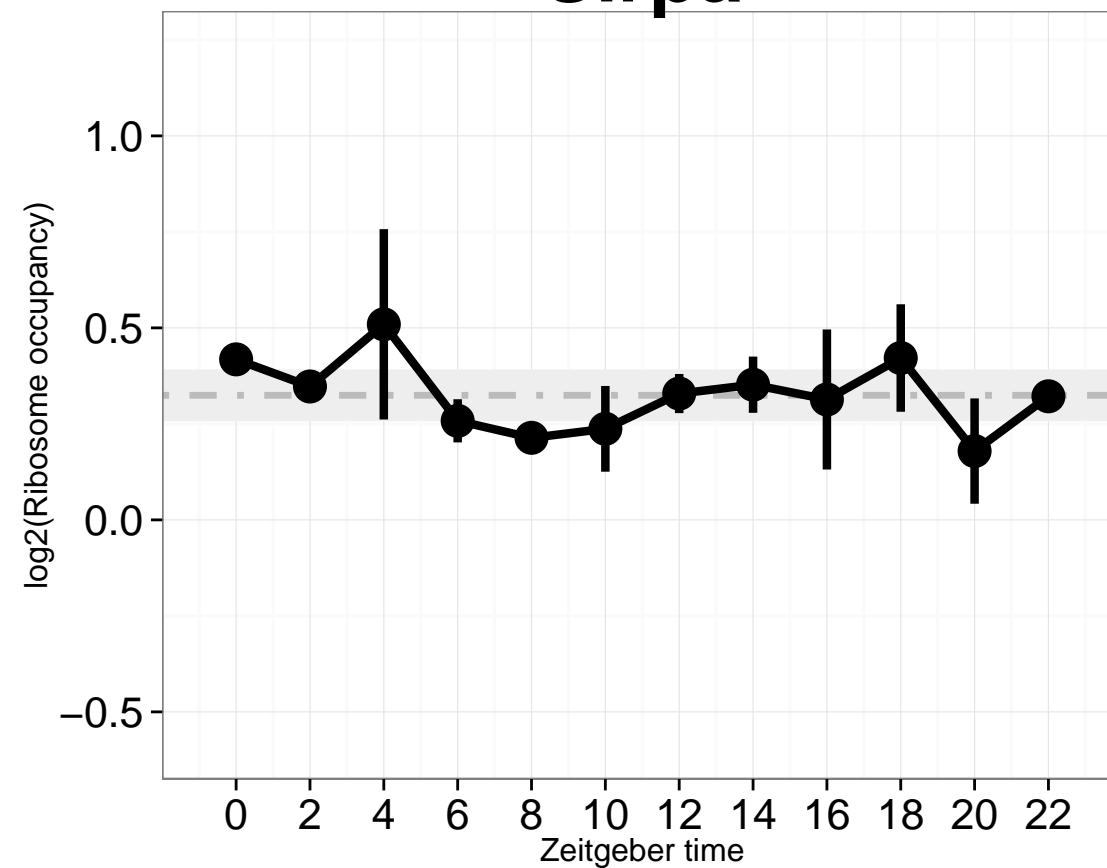

Supplement: Supplementary file 7845 [file 1]

## Kcnj16

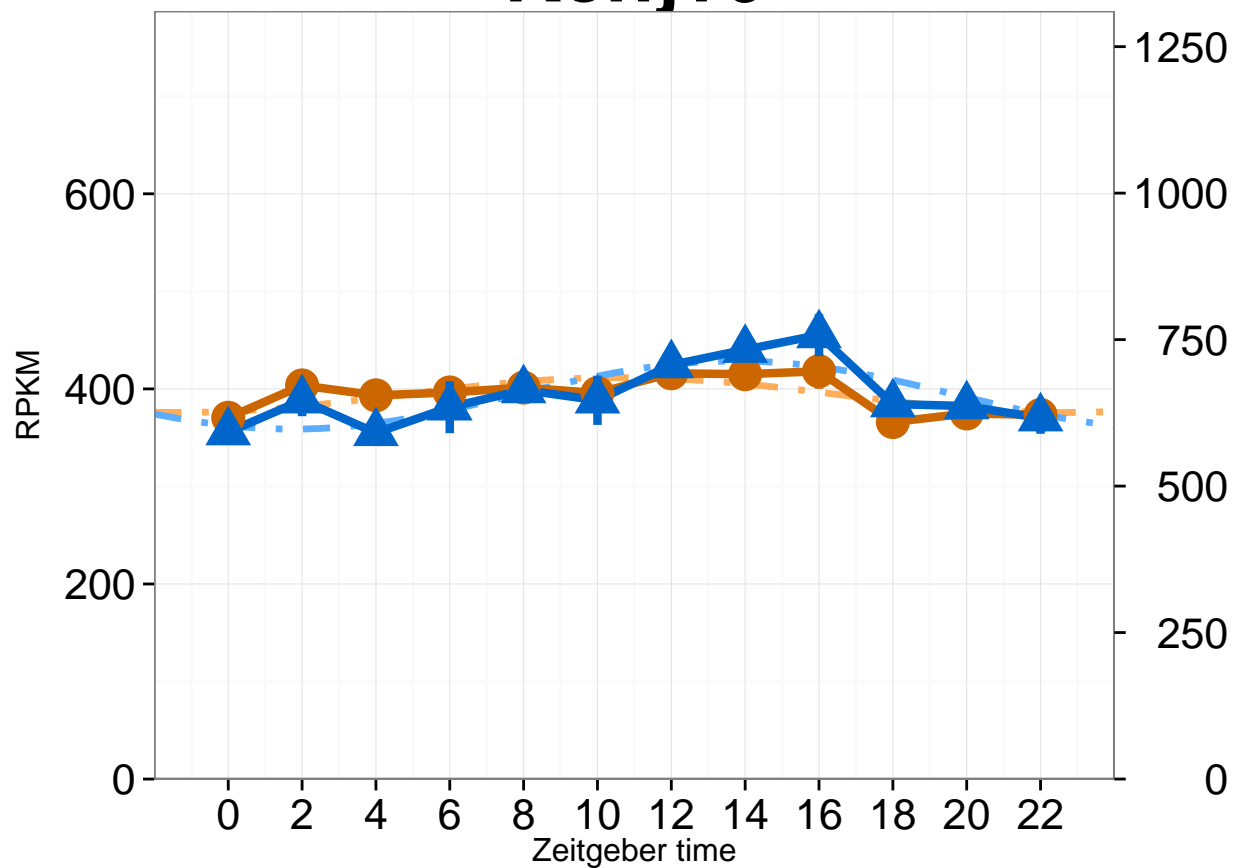

## Kcnj16

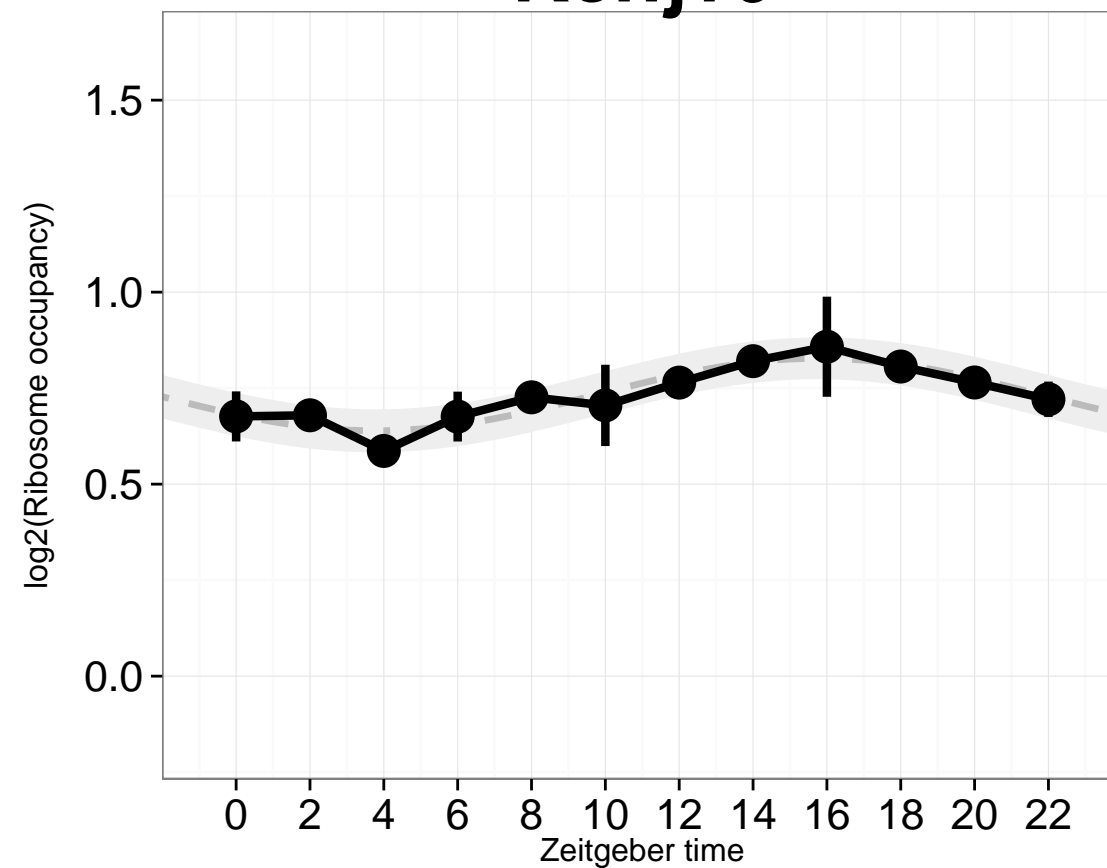

Supplement: Supplementary file 7846 [file 1]

# Adra2a

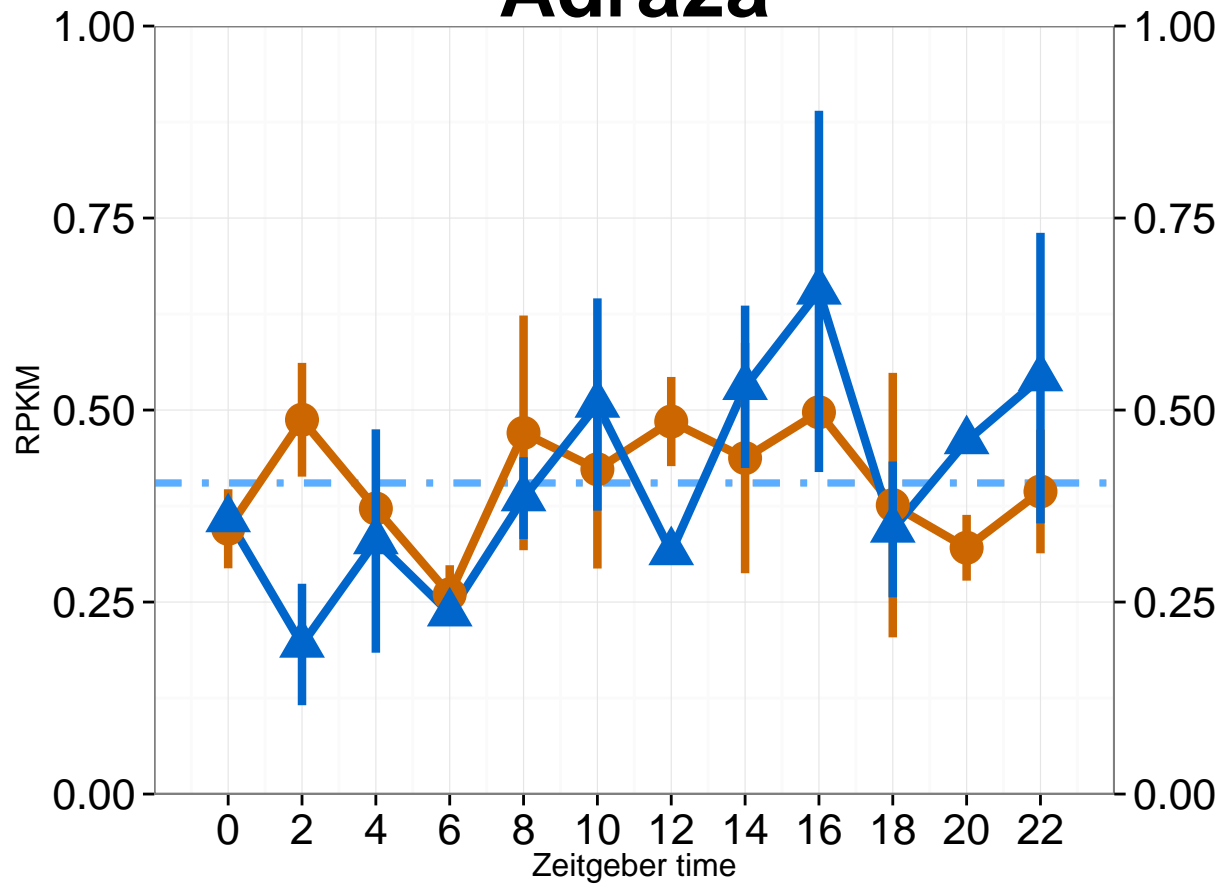

# Adra2a

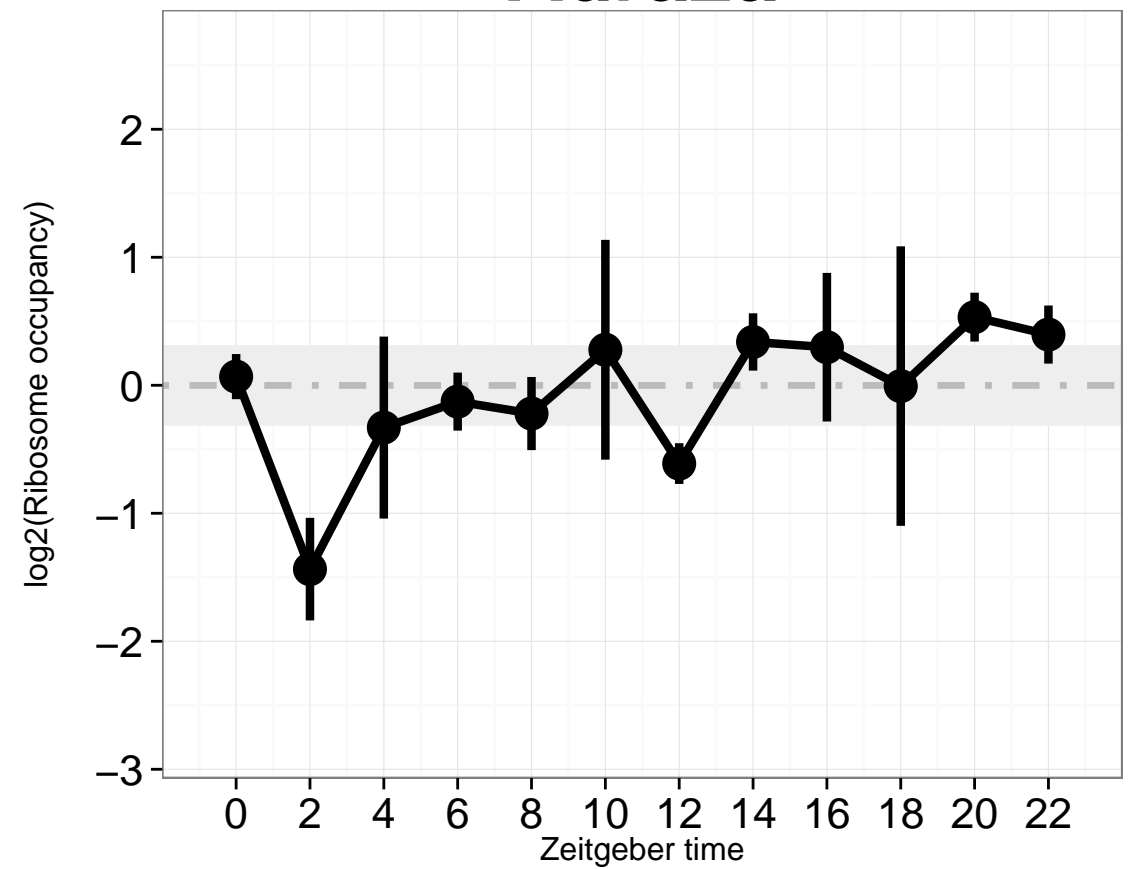

Supplement: Supplementary file 7847 [file 1]

# Fam135a

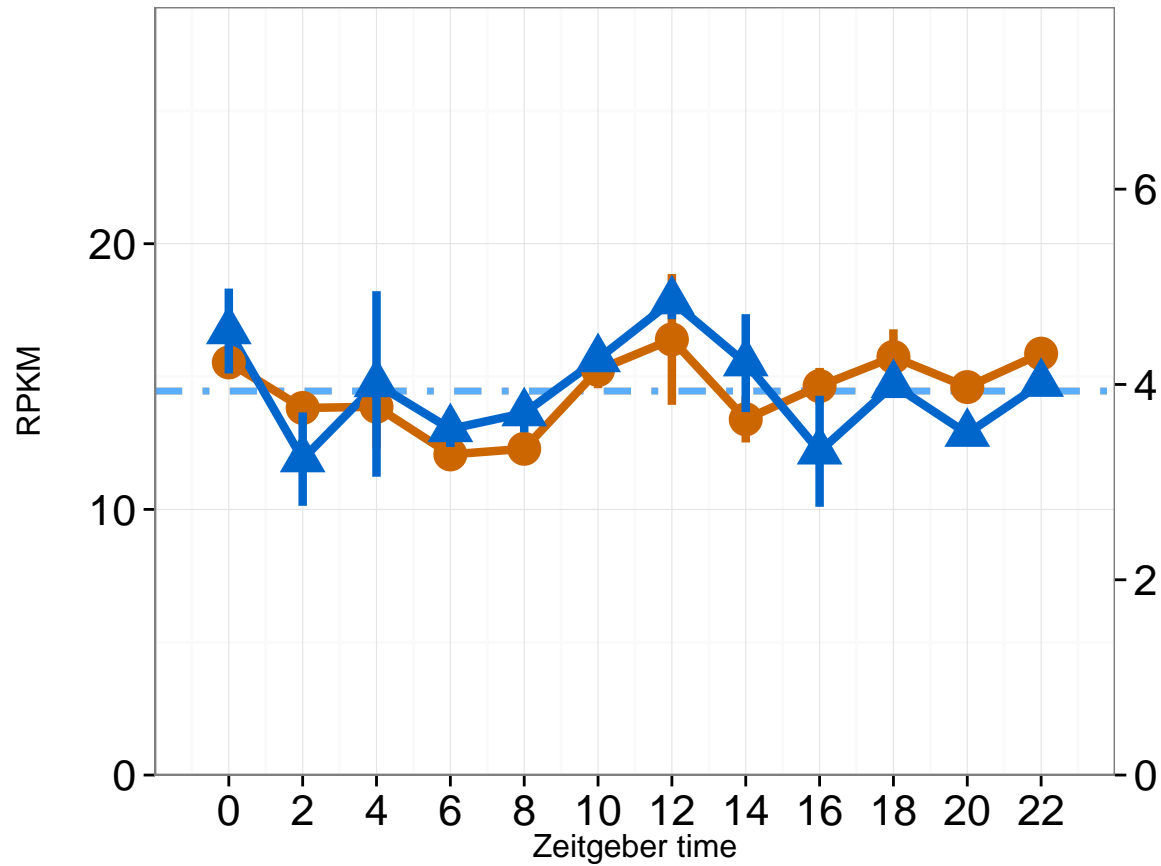

# Fam135a

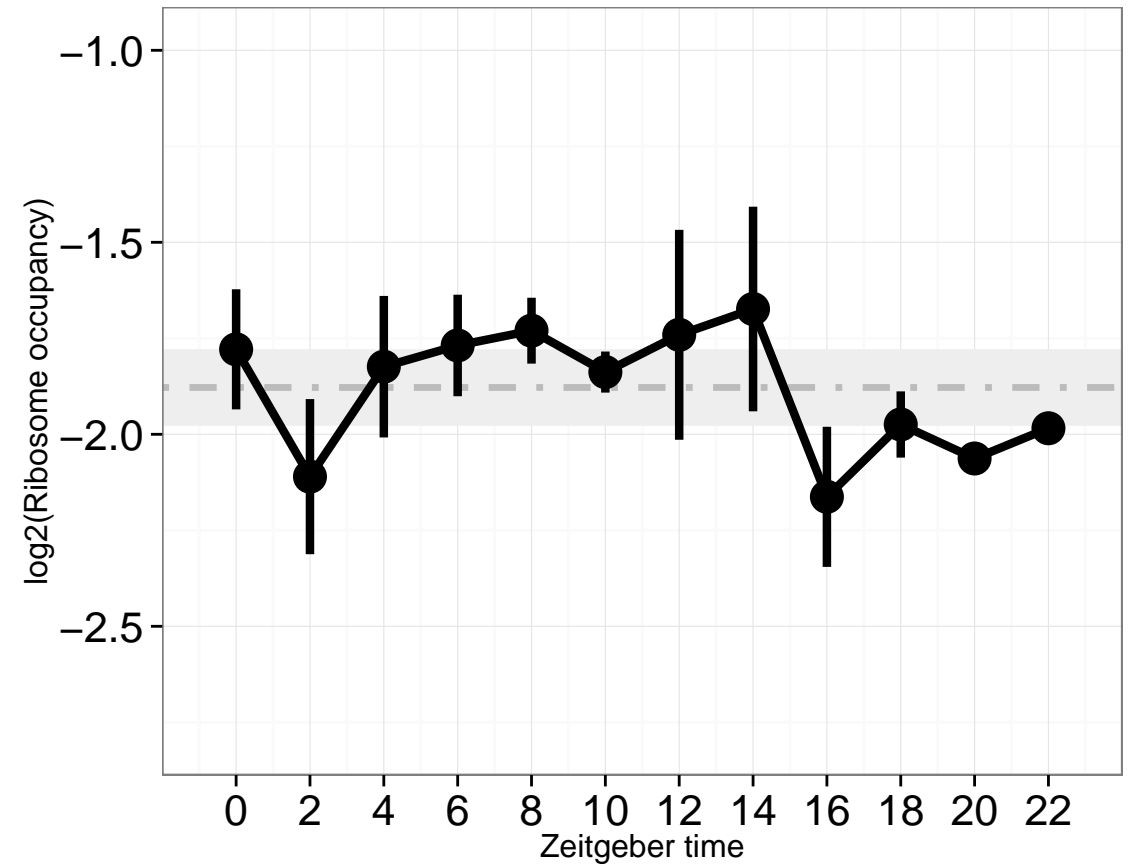

Supplement: Supplementary file 7848 [file 1]

# Hnrrnpr

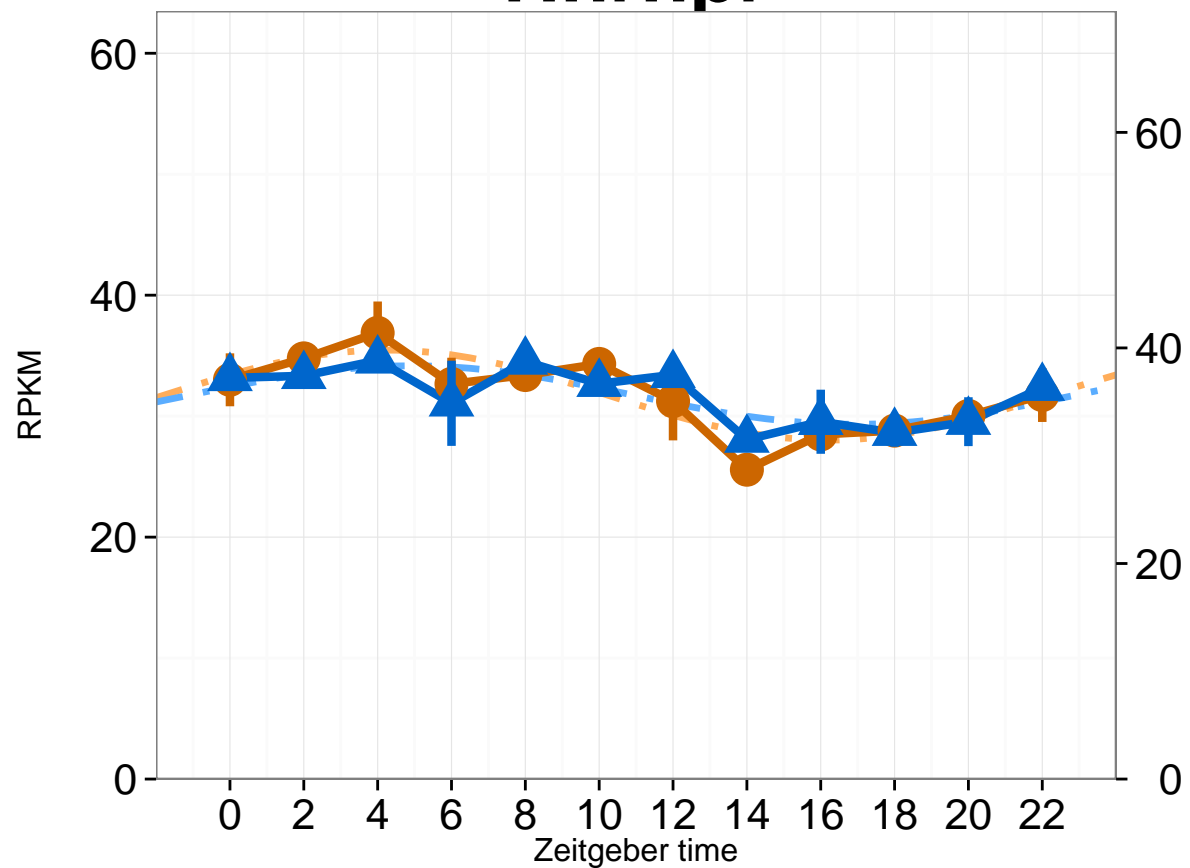

# Hnrrnpr

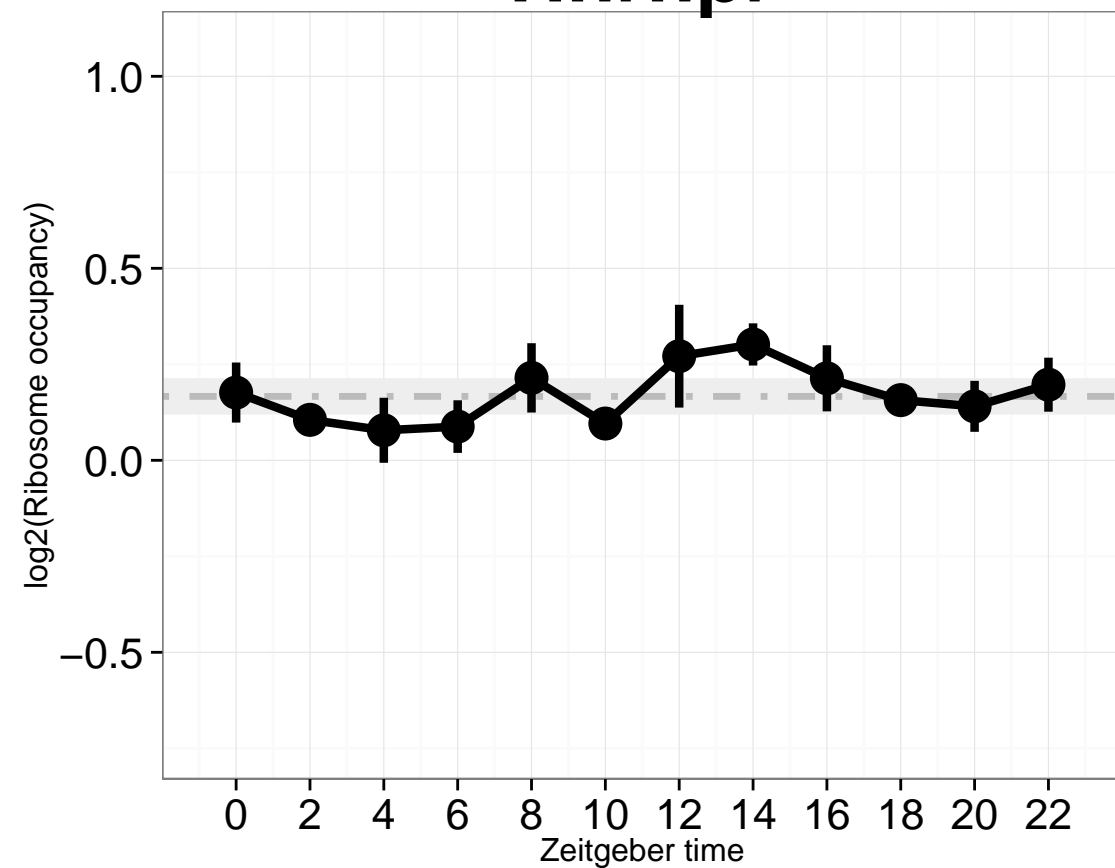

Supplement: Supplementary file 7849 [file 1]

# Sertad3

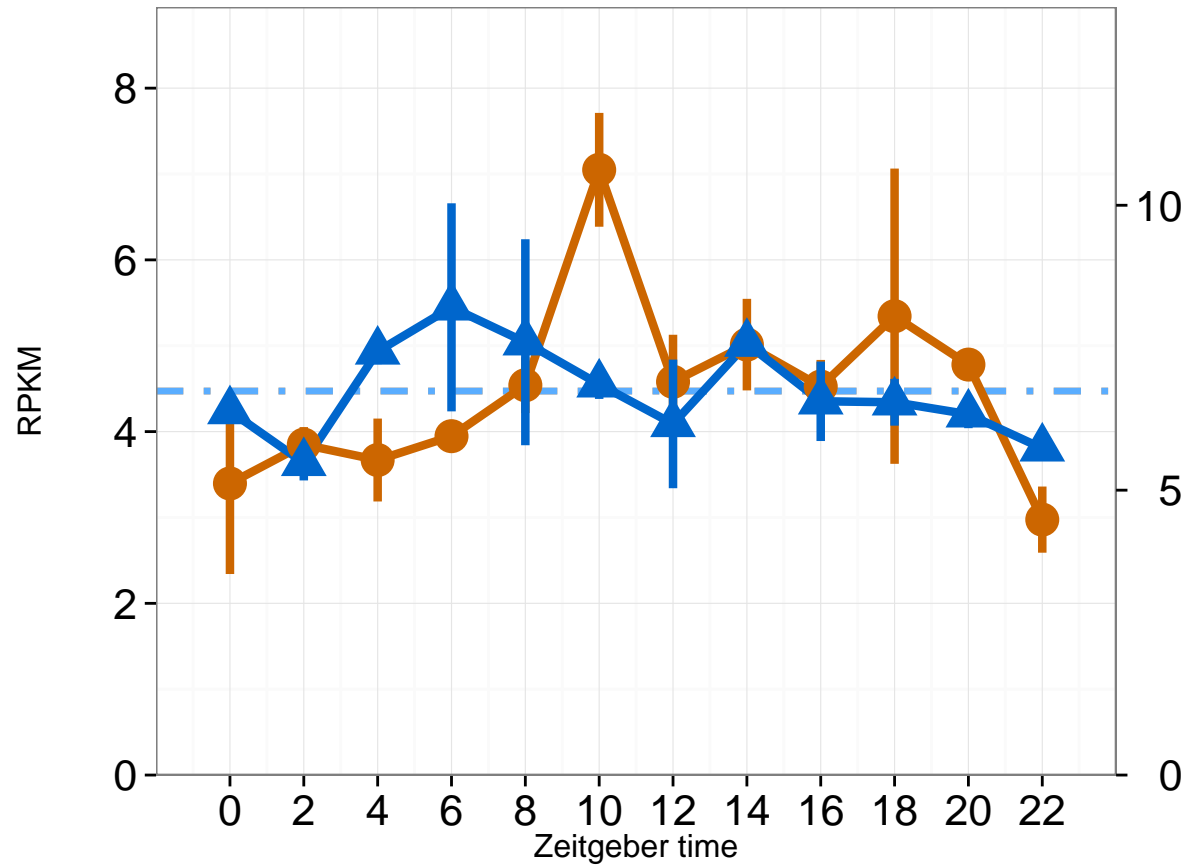

# Sertad3

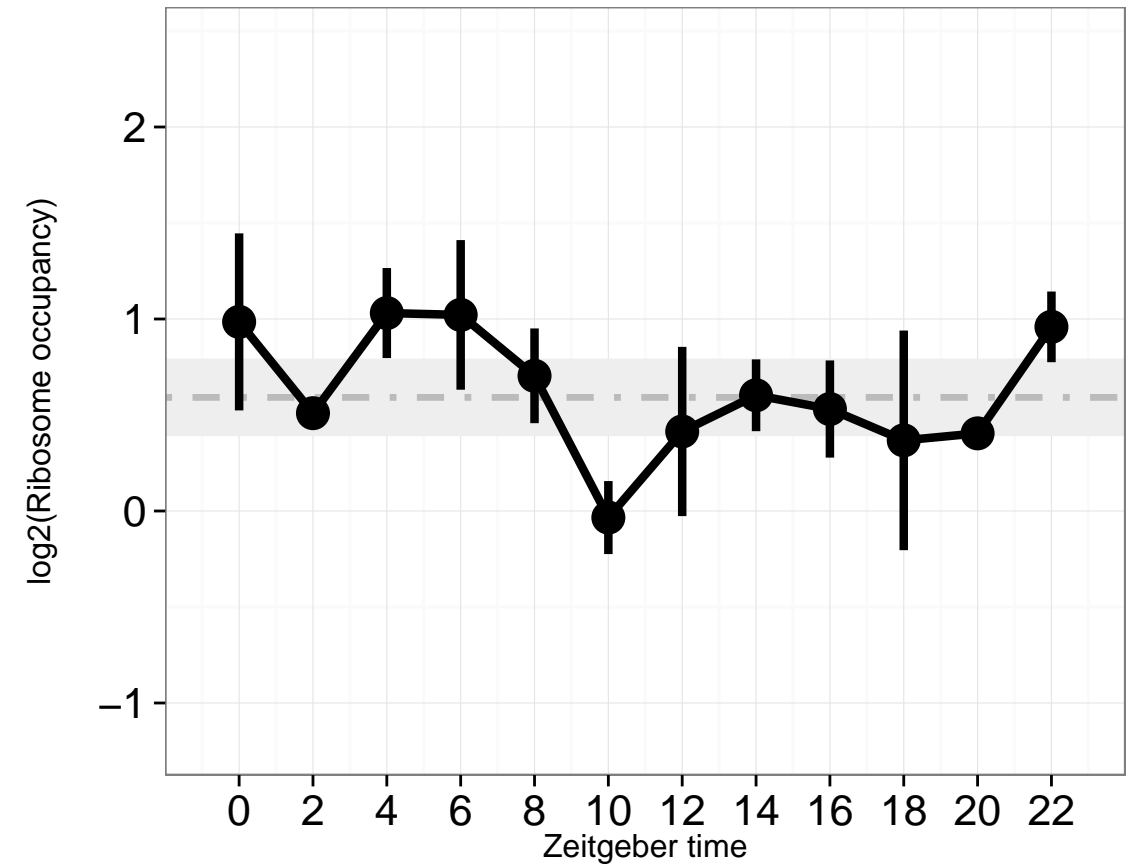

Supplement: Supplementary file 7850 [file 1]

## Bex1

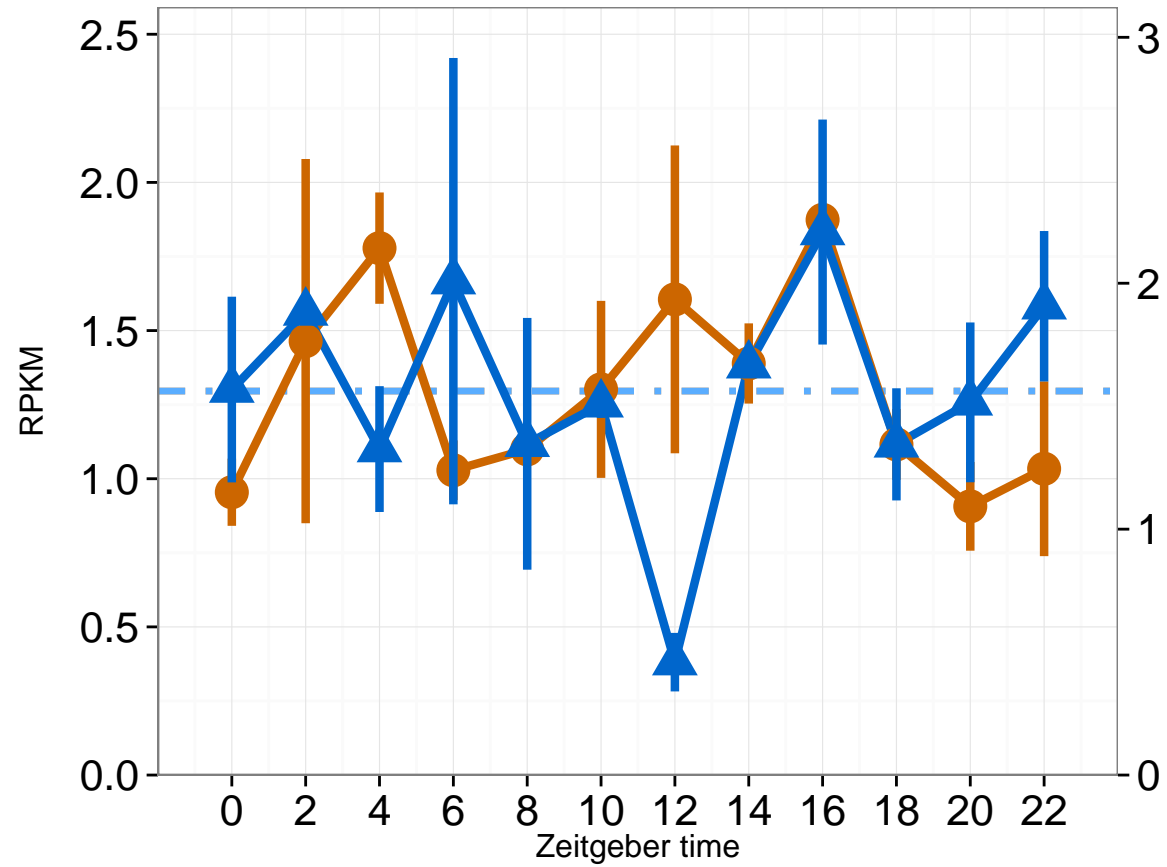

## Bex1

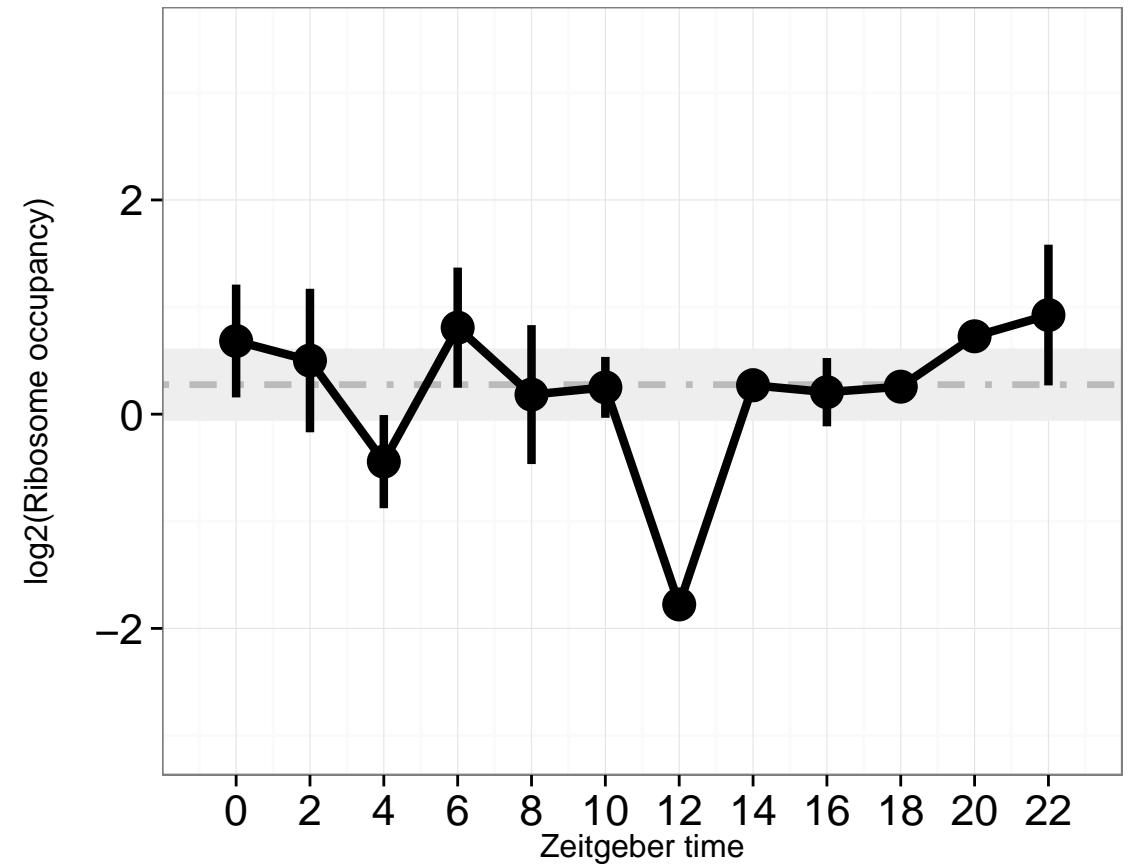

Supplement: Supplementary file 7851 [file 1]

# Paqr8

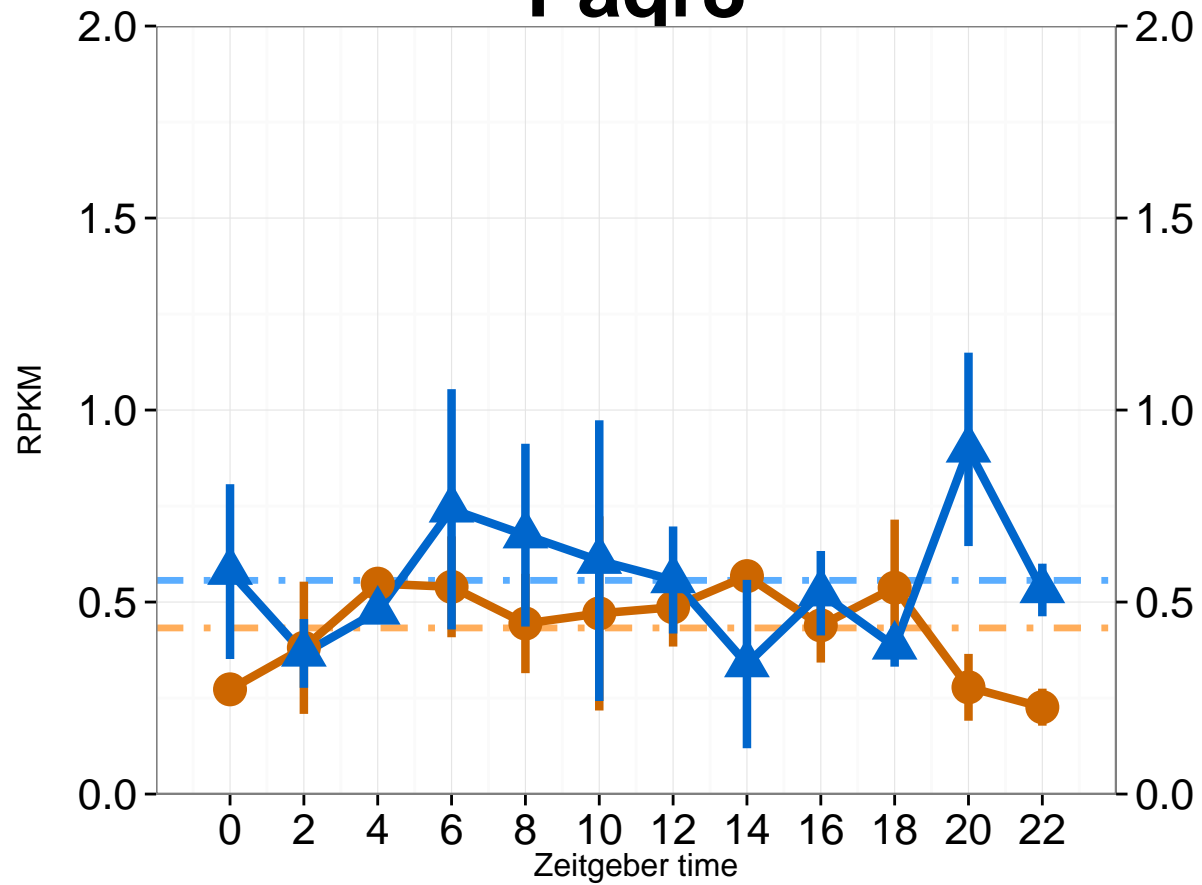

# Paqr8

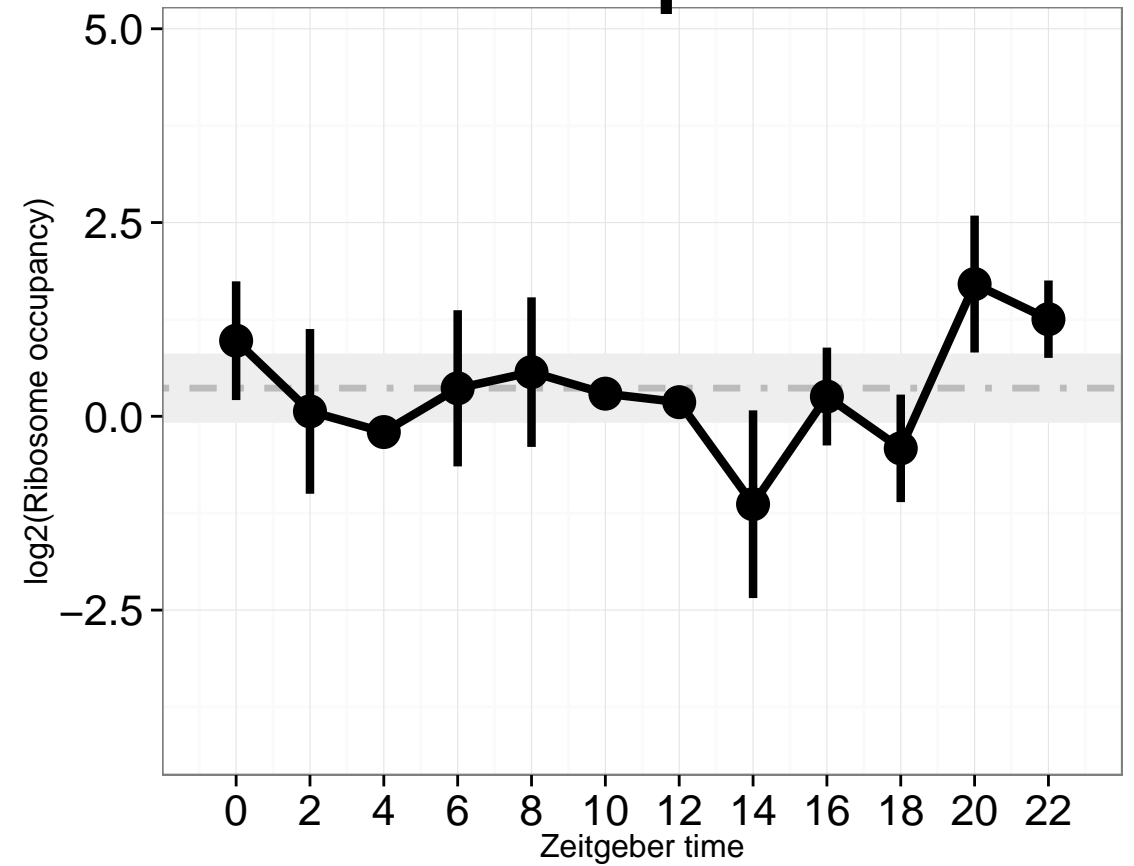

Supplement: Supplementary file 7852 [file 1]

# Map3k1

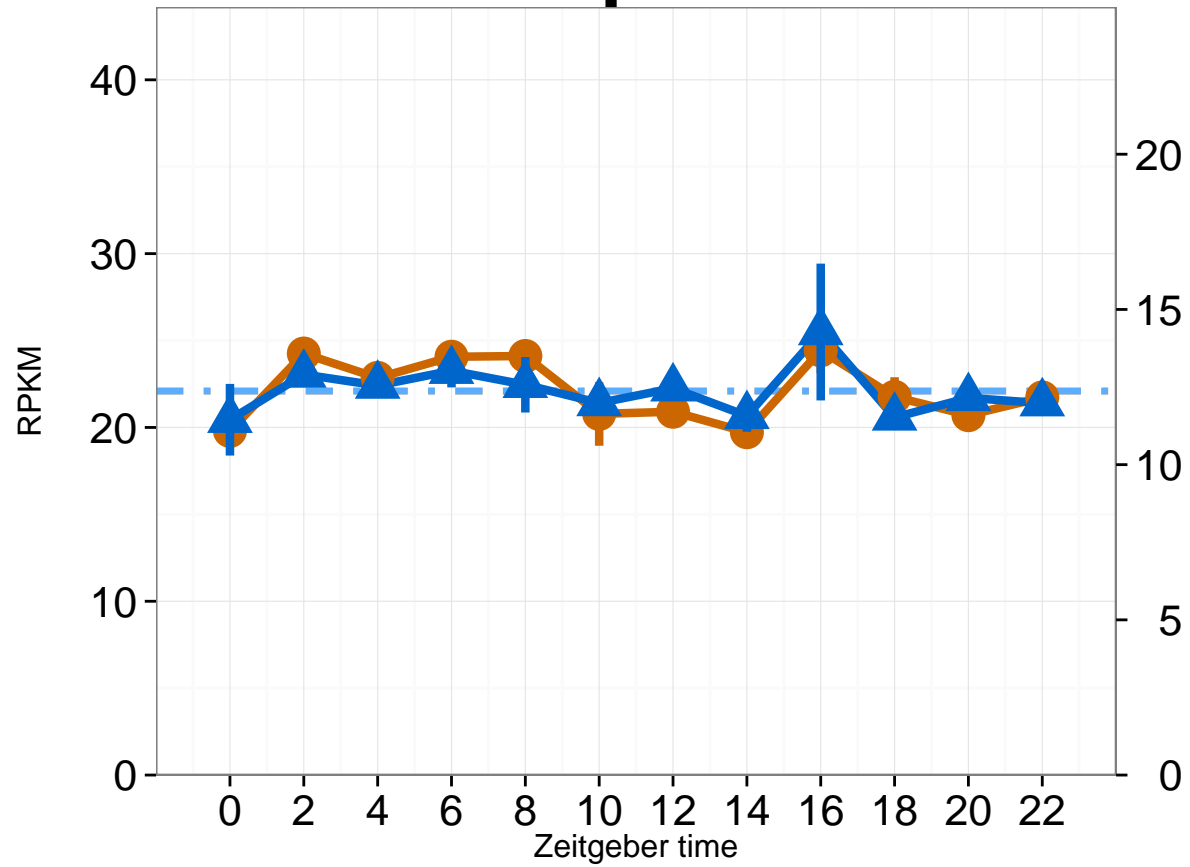

# Map3k1

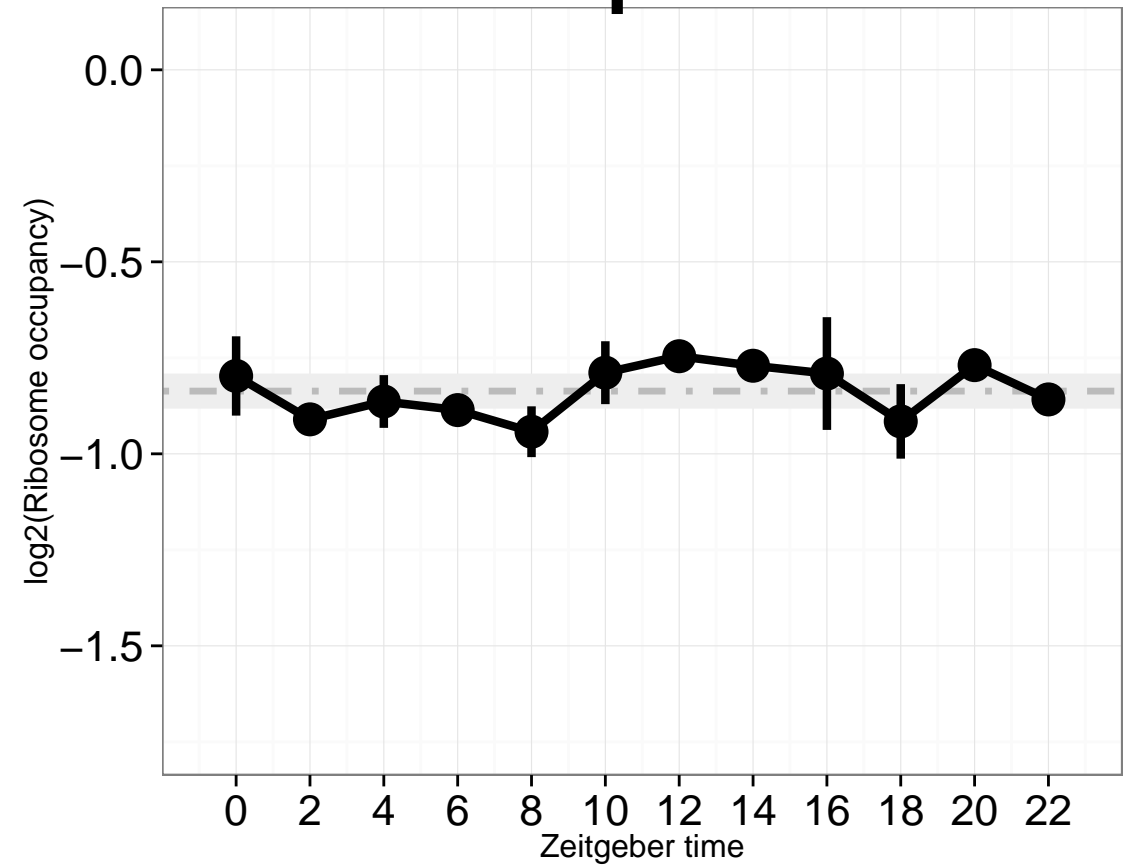

Supplement: Supplementary file 7853 [file 1]

# Thoc5

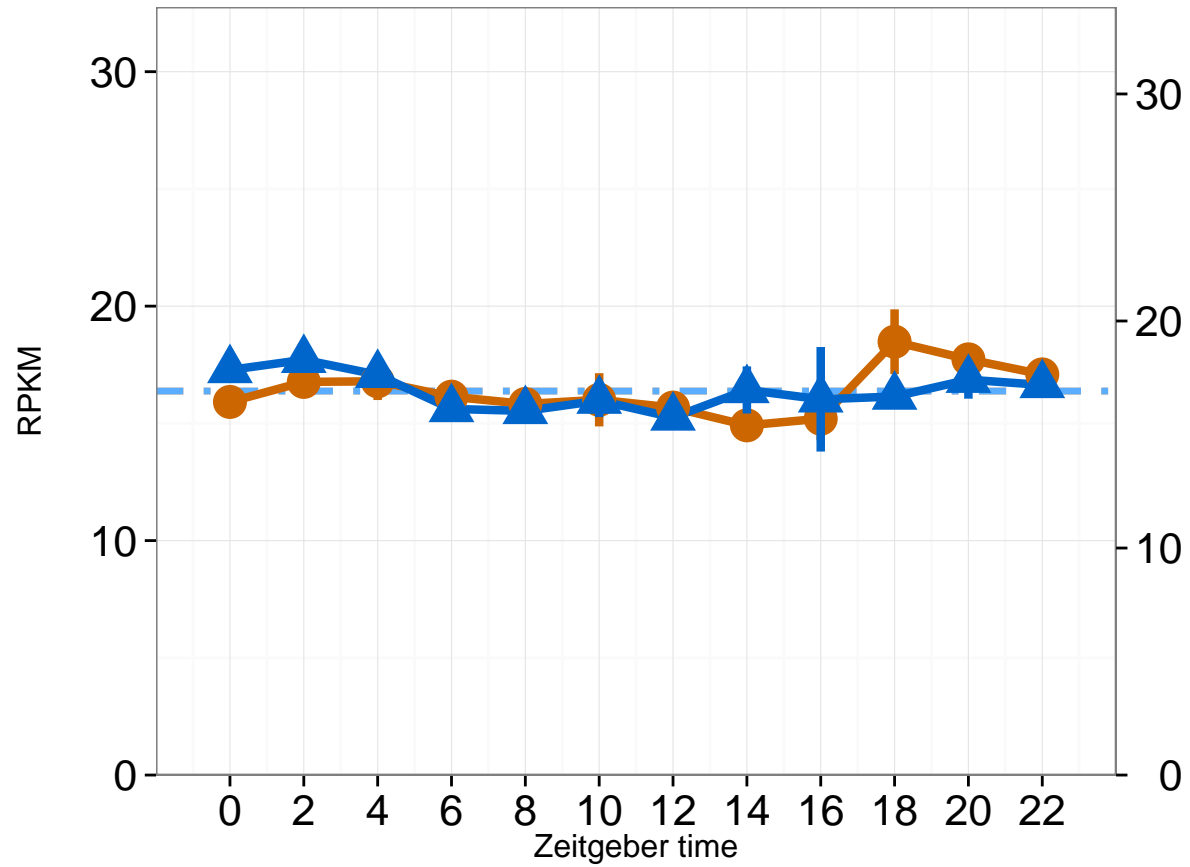

# Thoc5

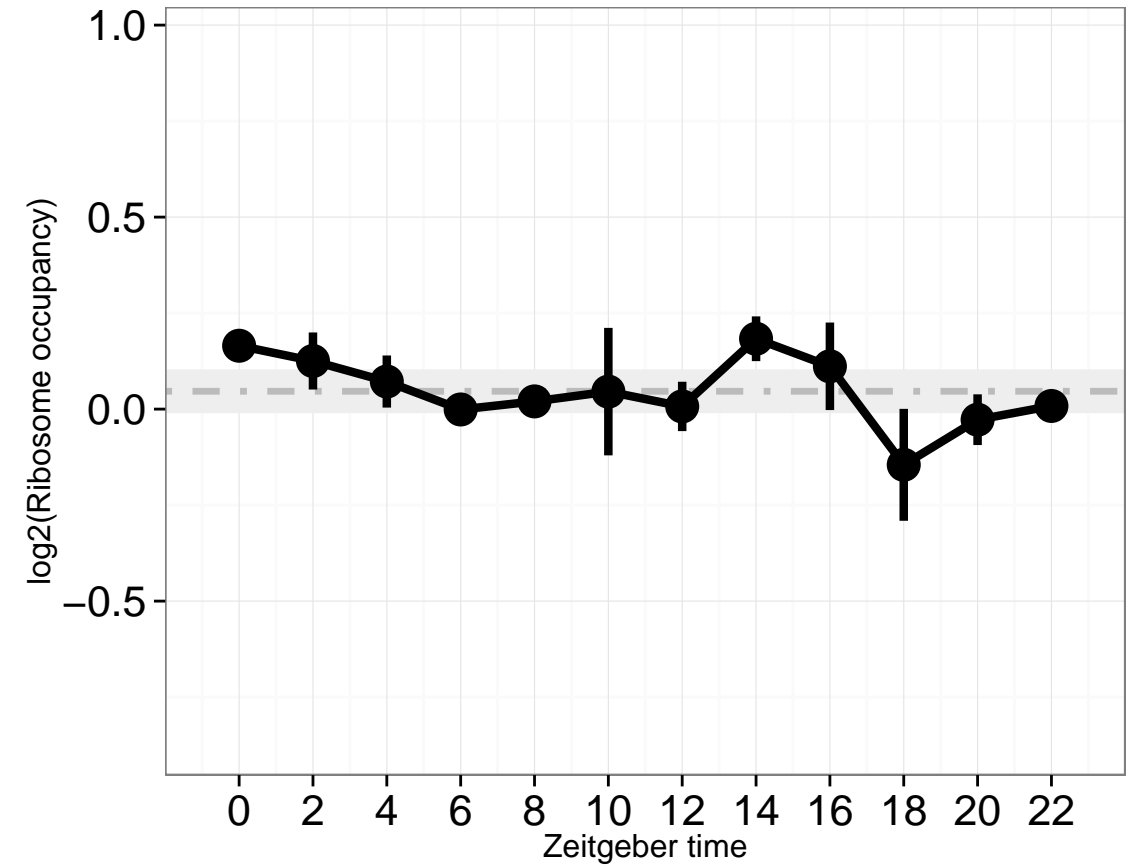

Supplement: Supplementary file 7854 [file 1]

# AI597479

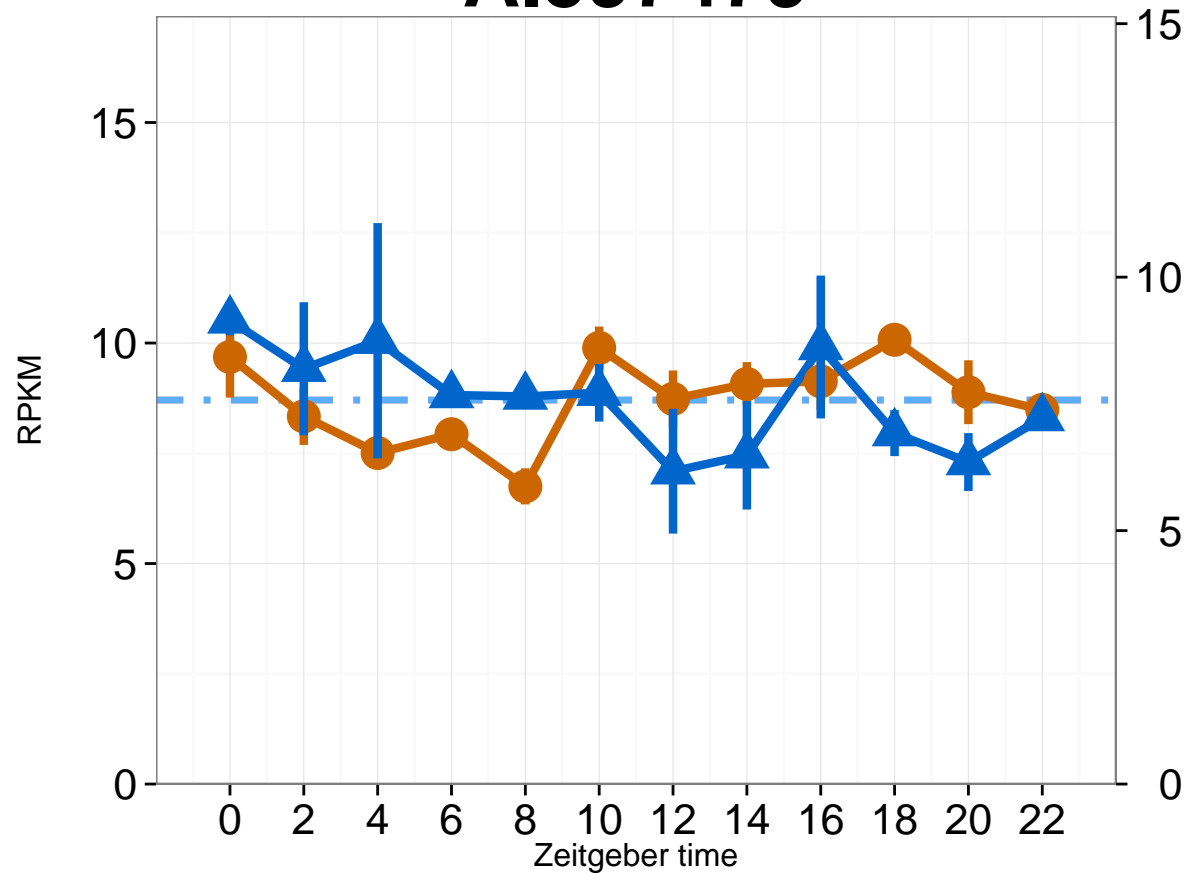

# AI597479

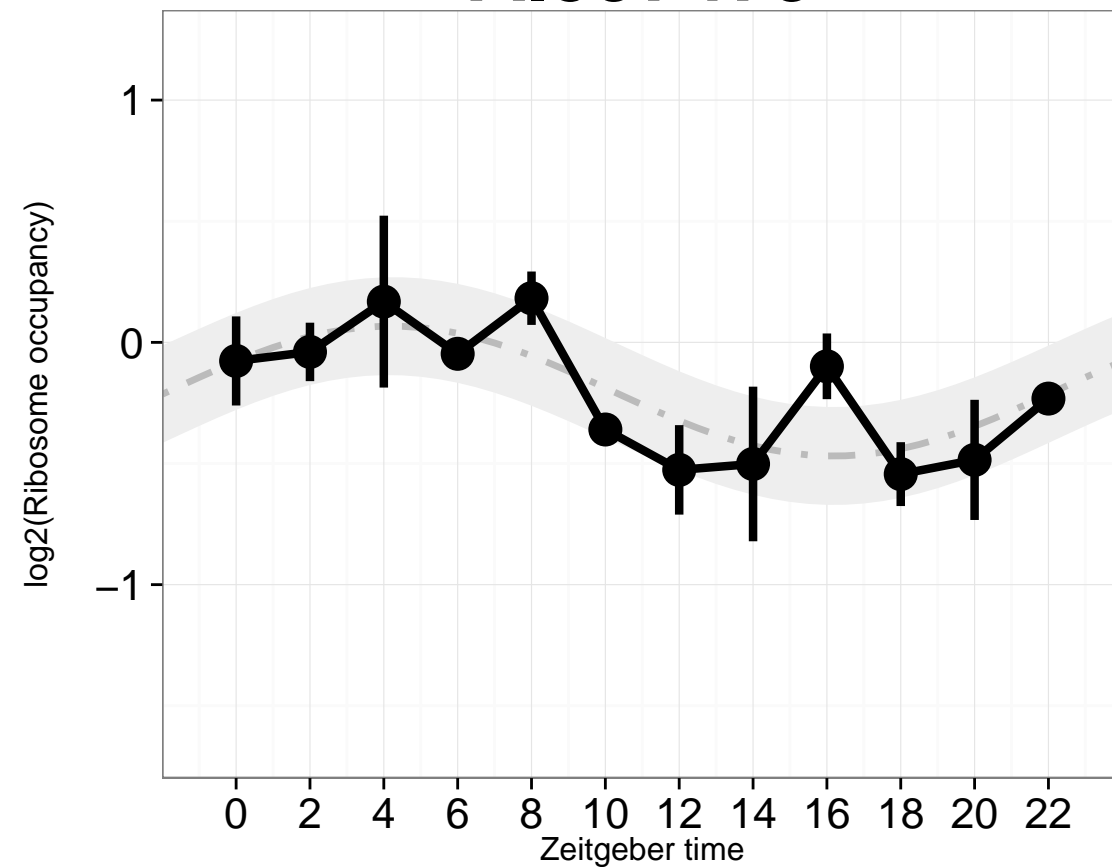

Supplement: Supplementary file 7855 [file 1]

# Zfp326

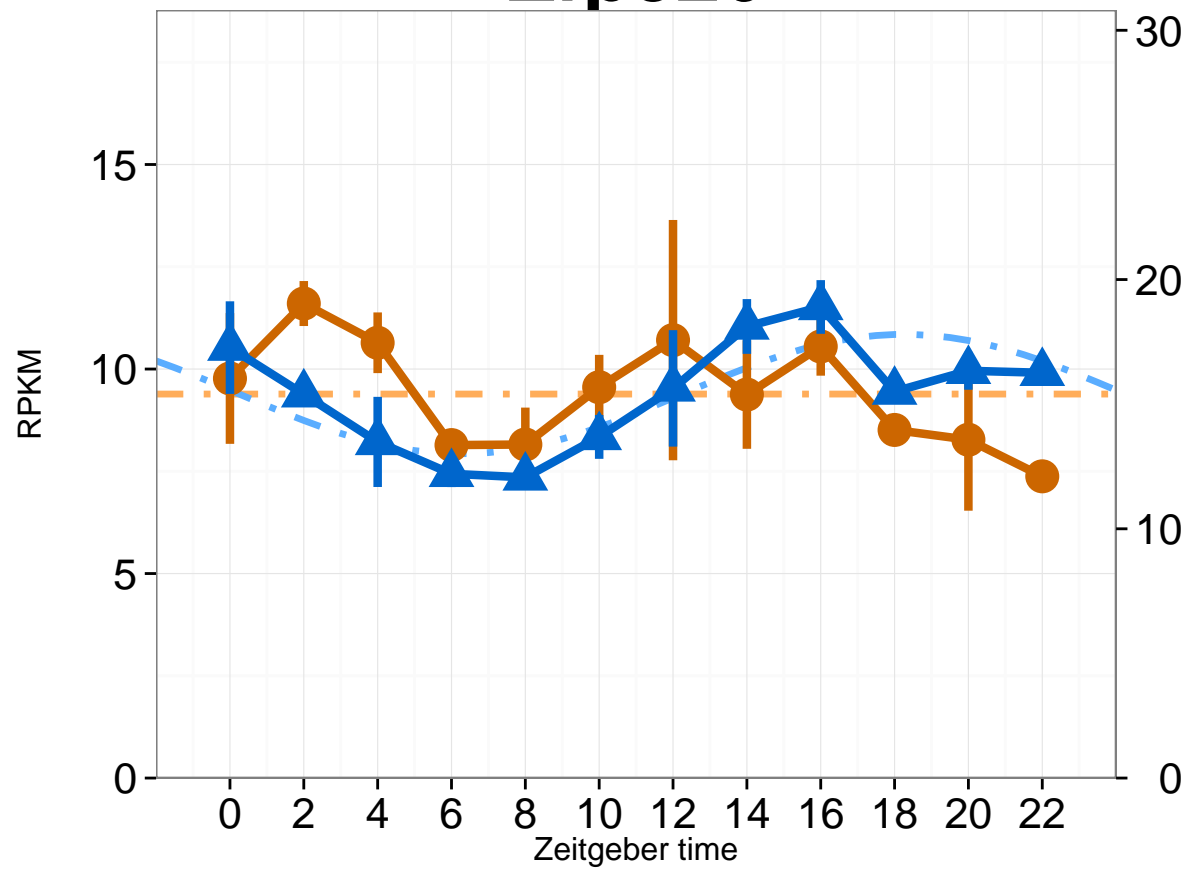

# Zfp326

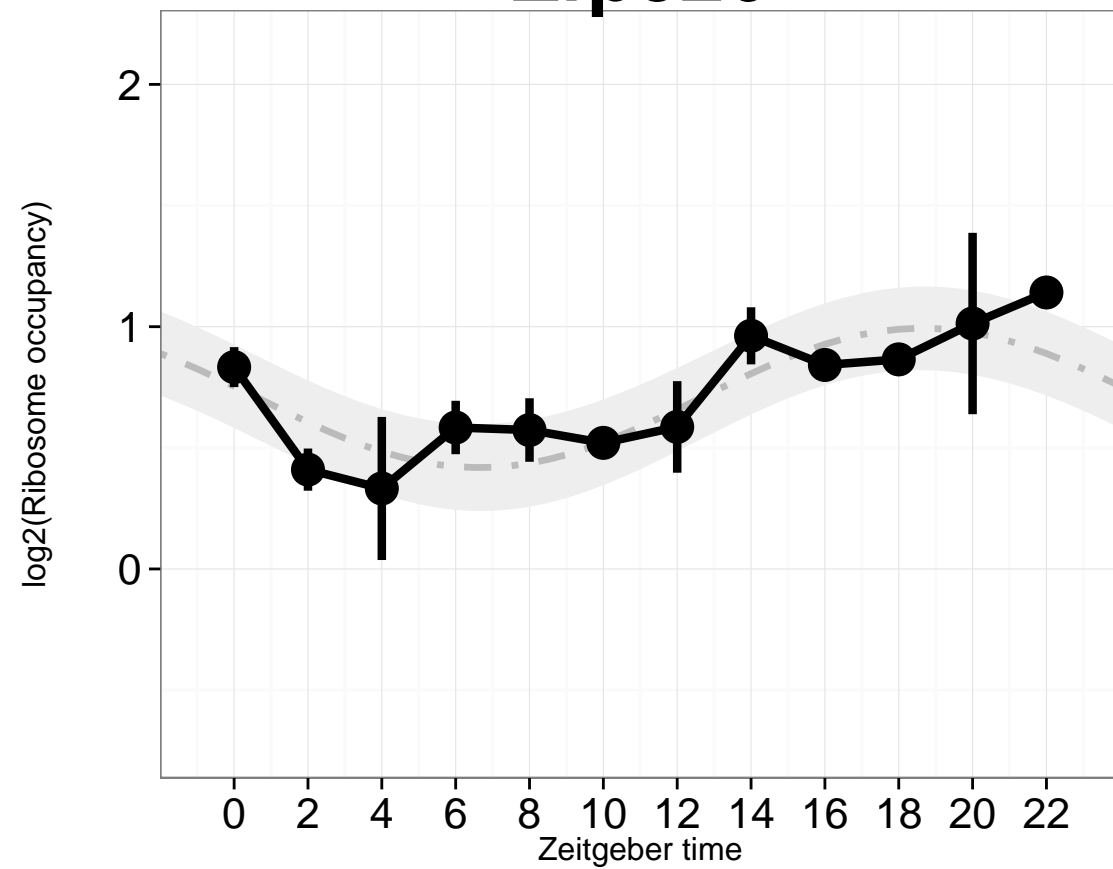

Supplement: Supplementary file 7856 [file 1]

## Spink8

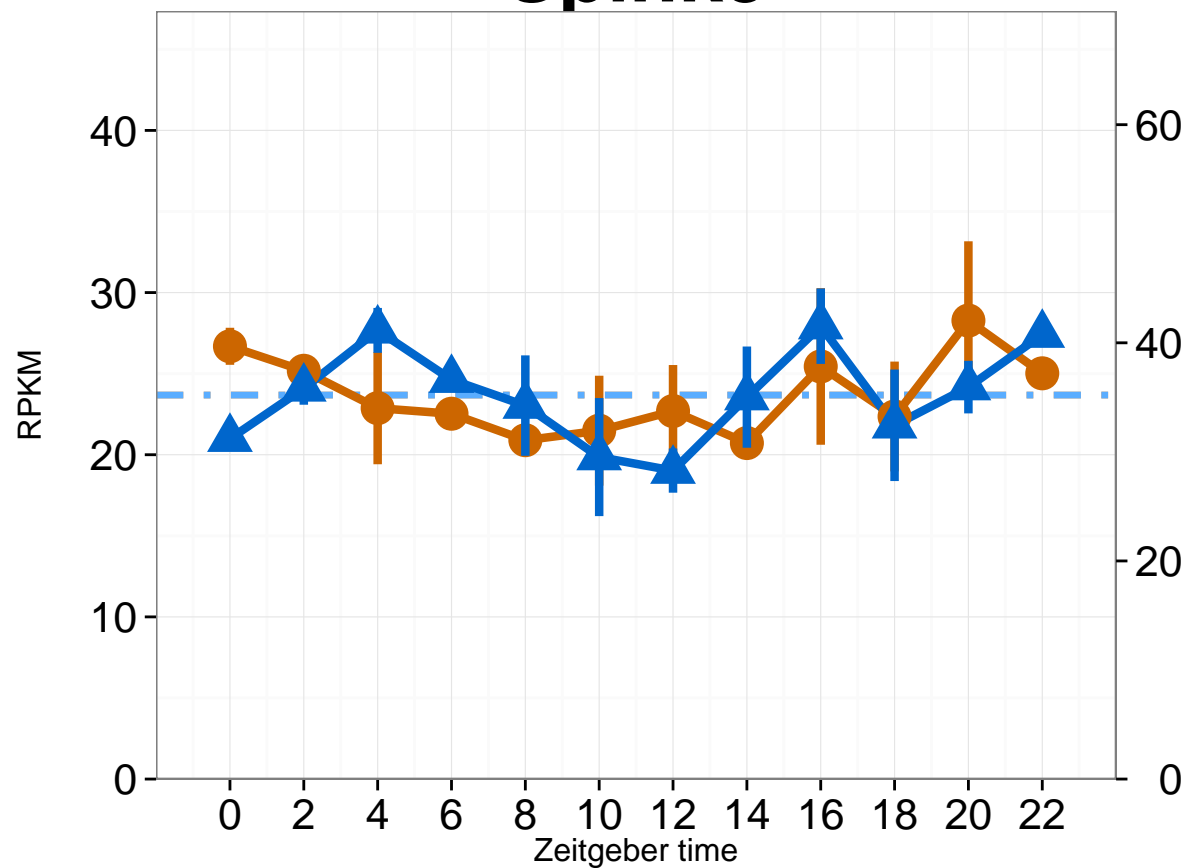

## Spink8

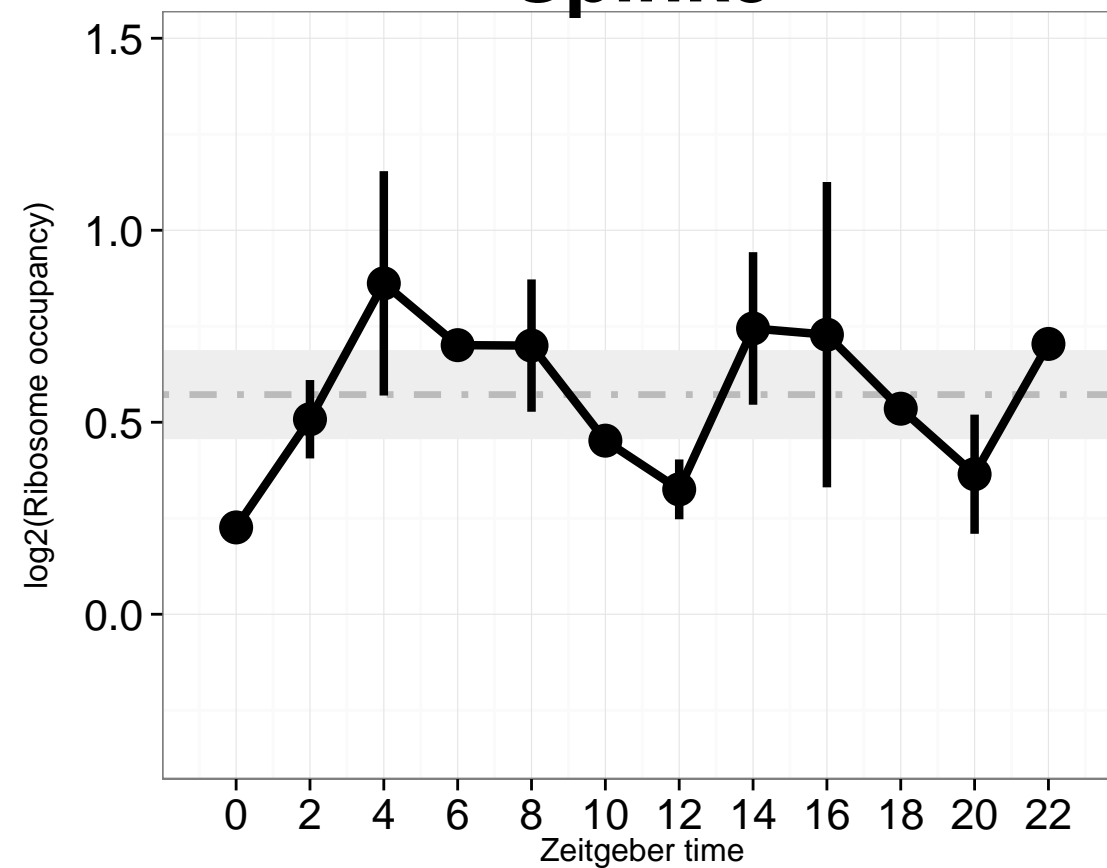

Supplement: Supplementary file 7857 [file 1]

## Nfyc

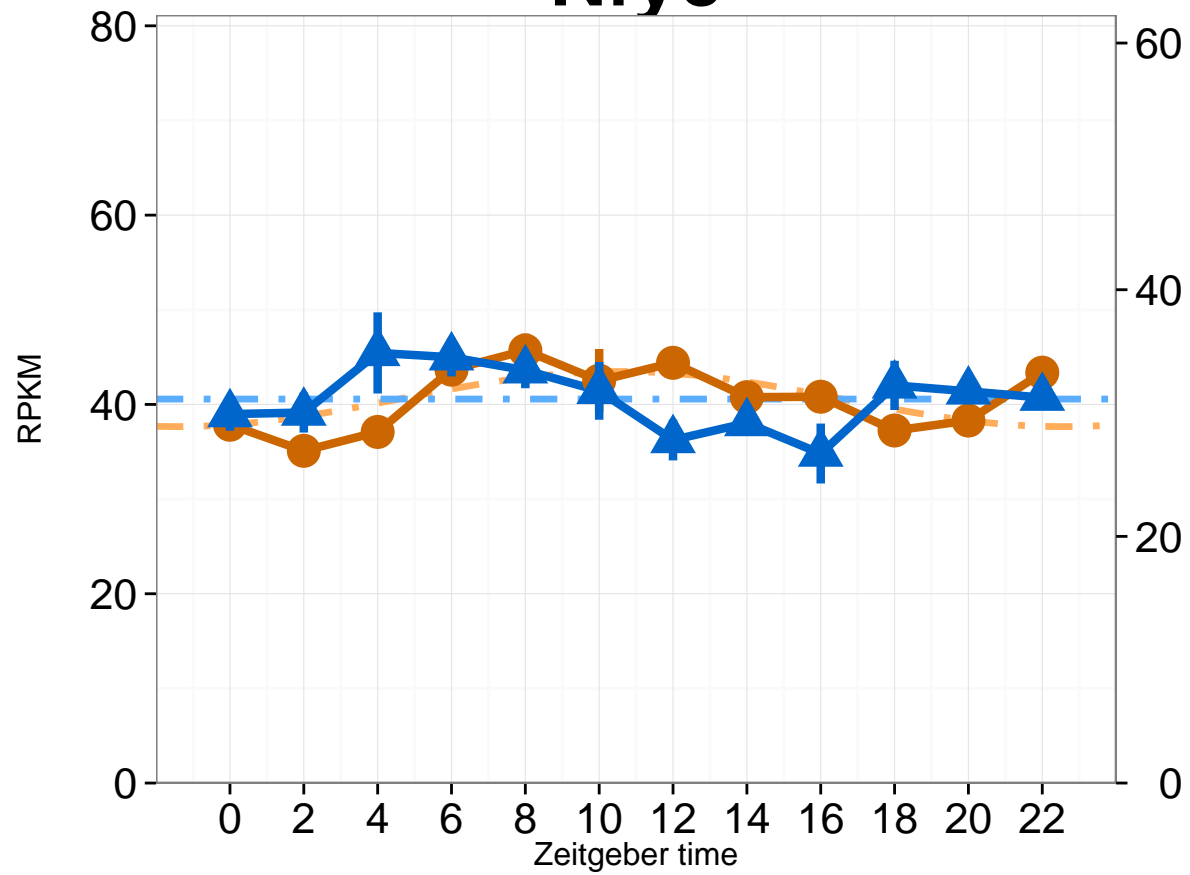

## Nfyc

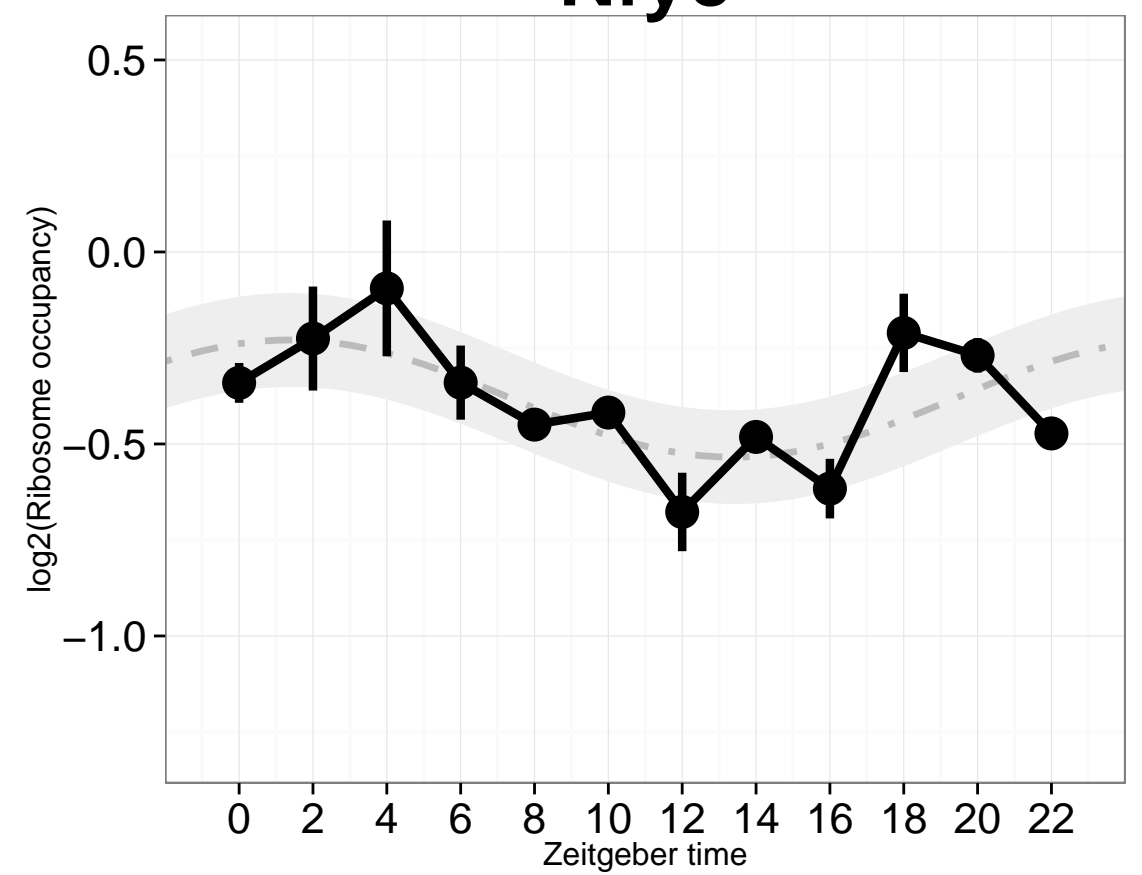

Supplement: Supplementary file 7858 [file 1]

## Rbm6

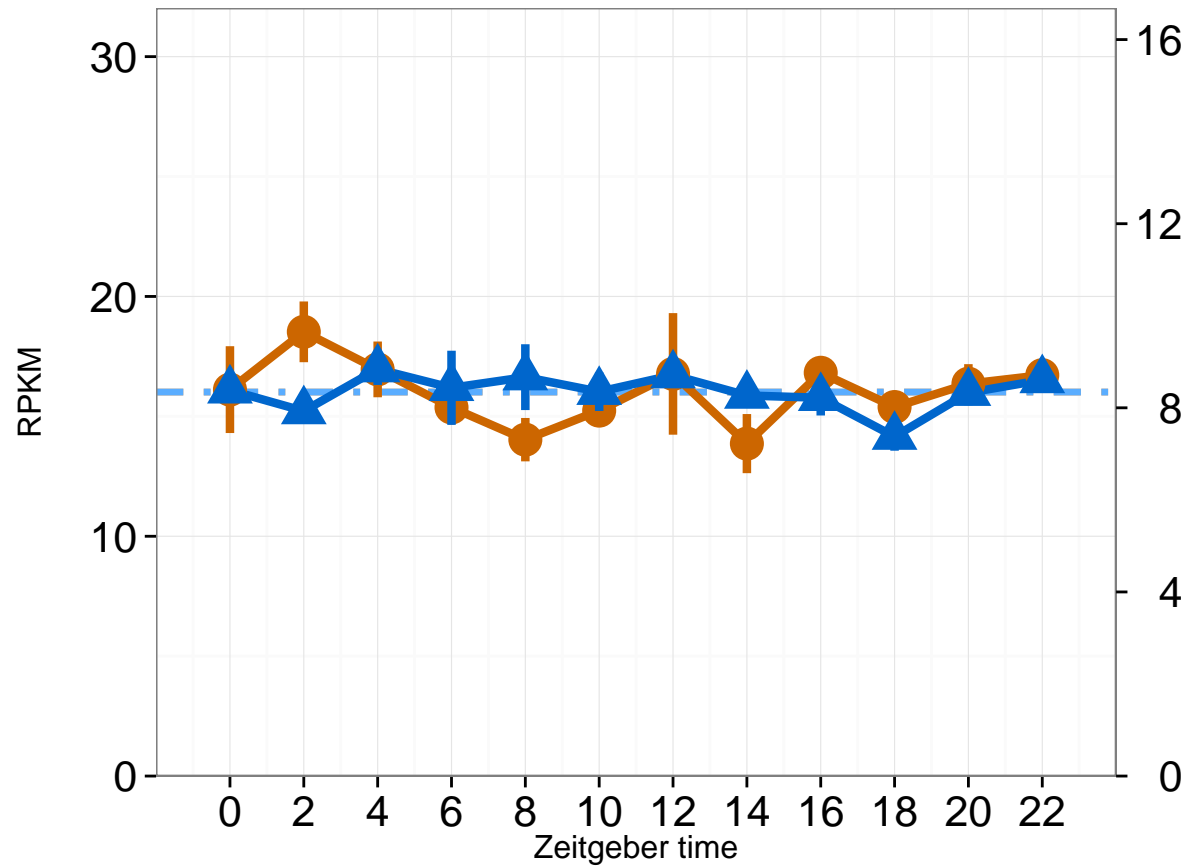

## Rbm6

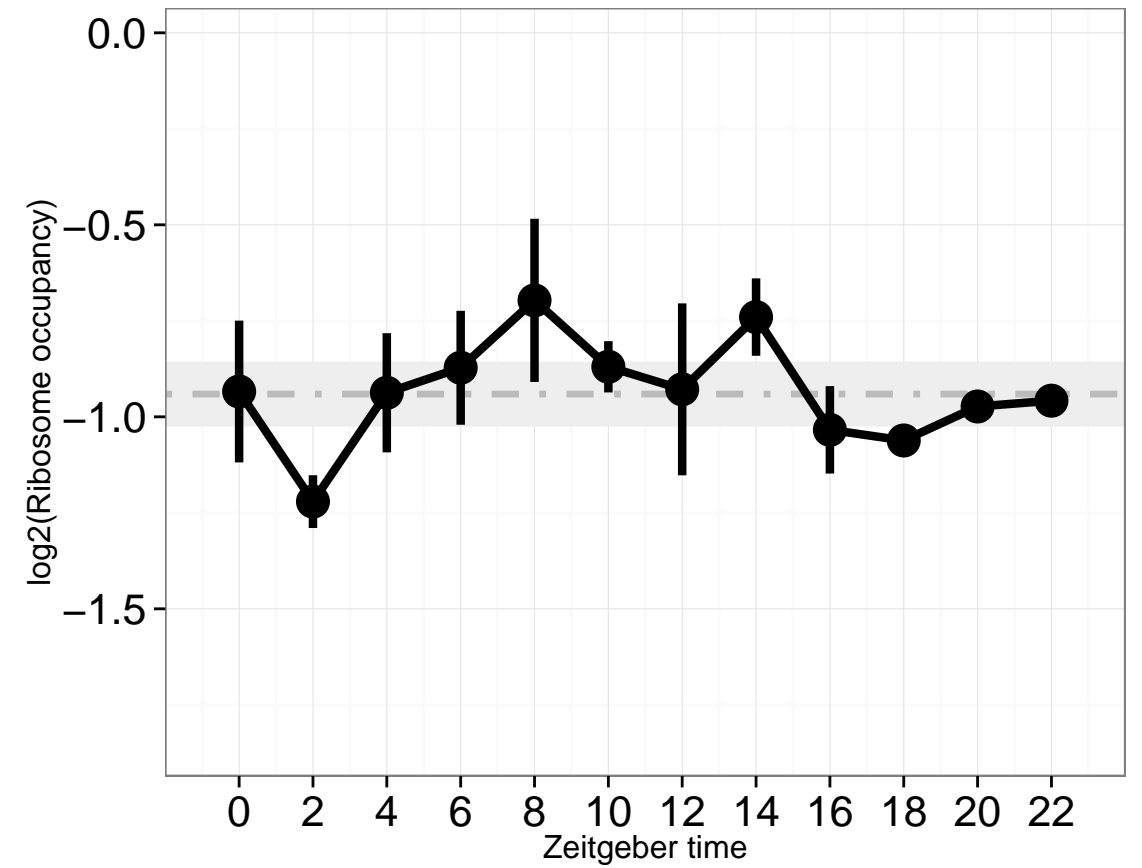

Supplement: Supplementary file 7859 [file 1]

# Scnn1b

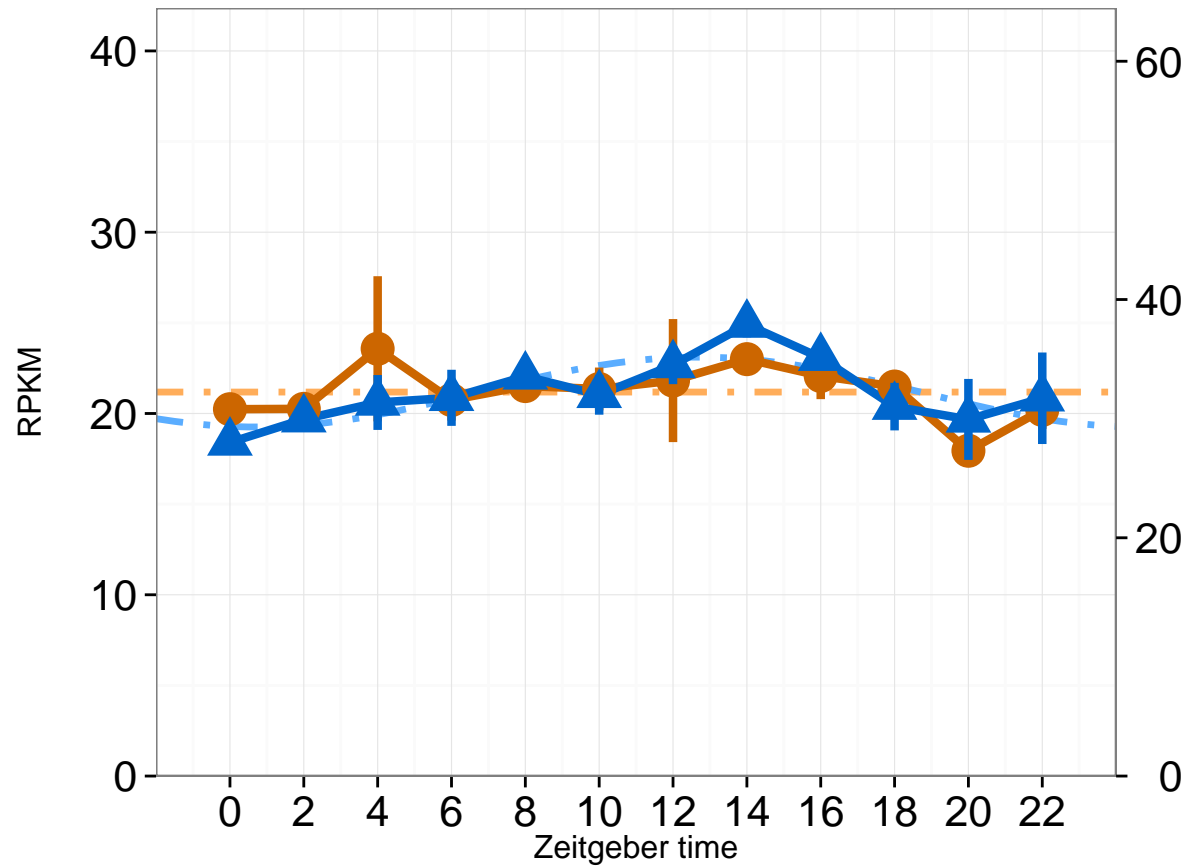

# Scnn1b

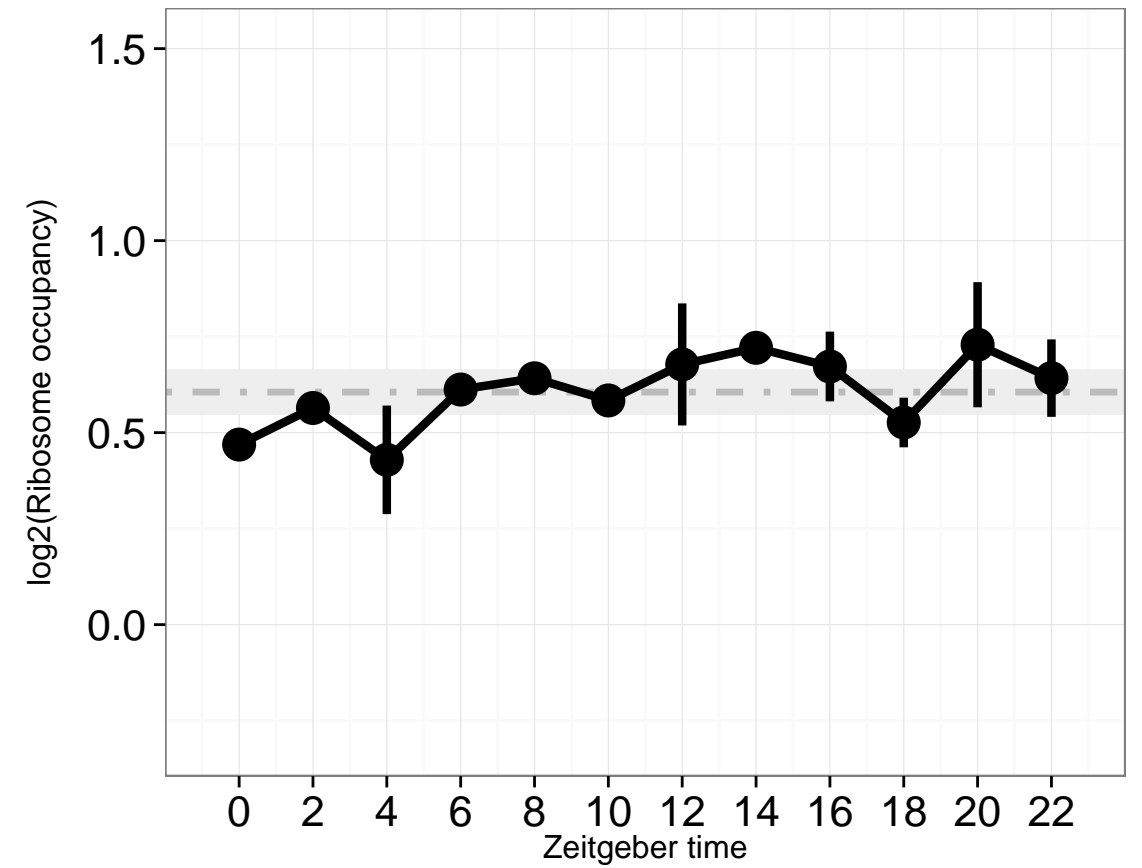

Supplement: Supplementary file 7860 [file 1]

# Ccdc159

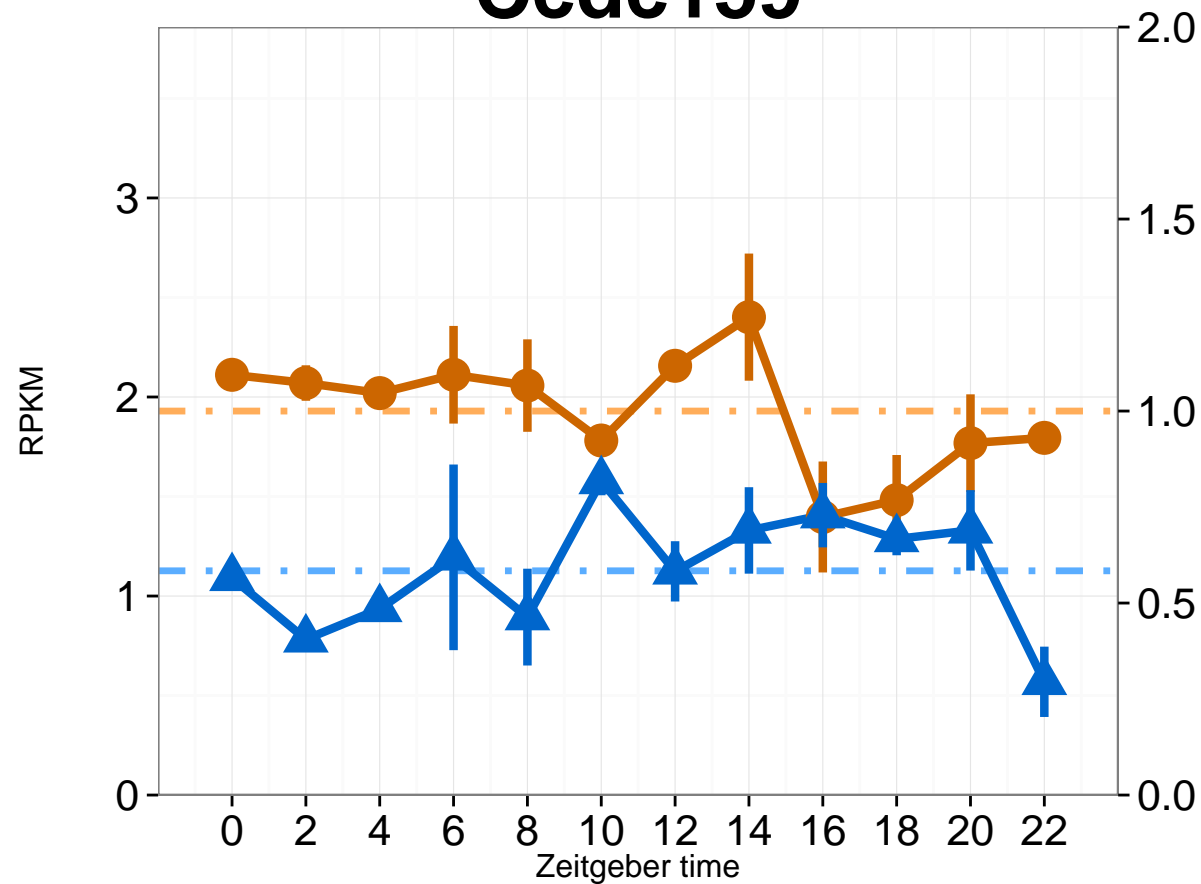

# Ccdc159

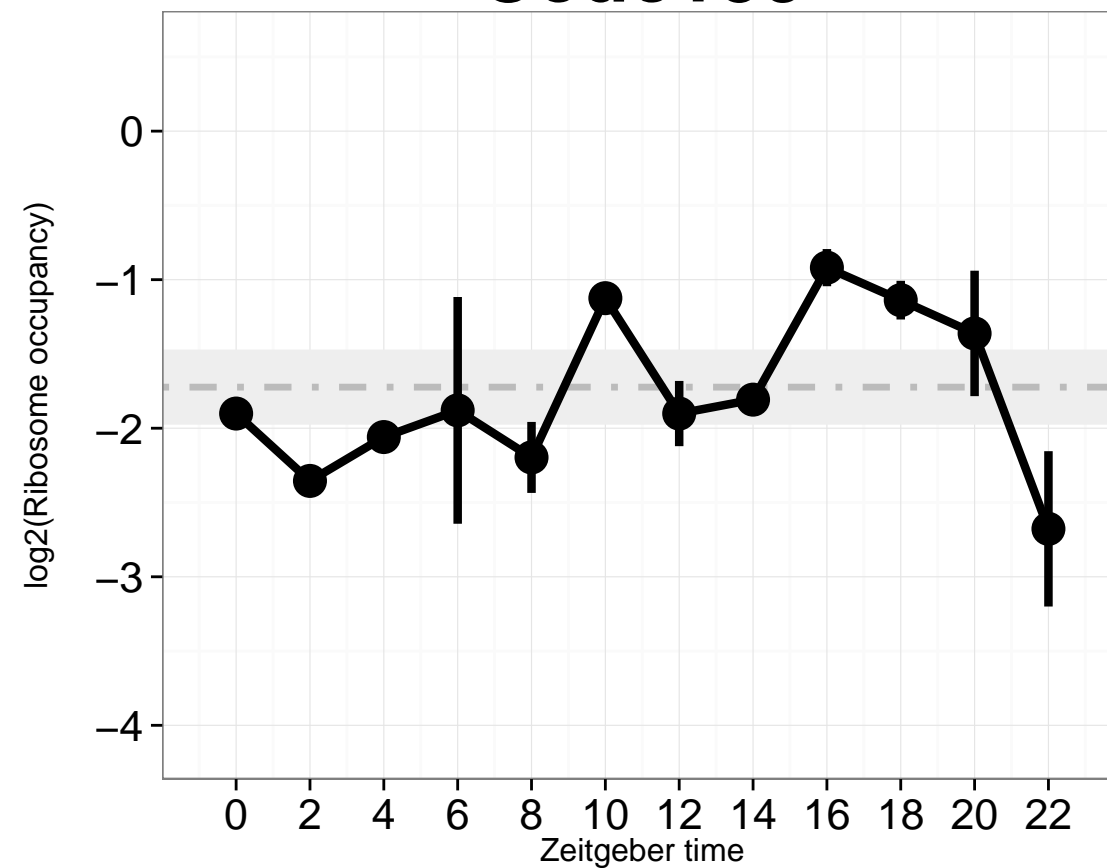

Supplement: Supplementary file 7861 [file 1]

# Lmbr1l

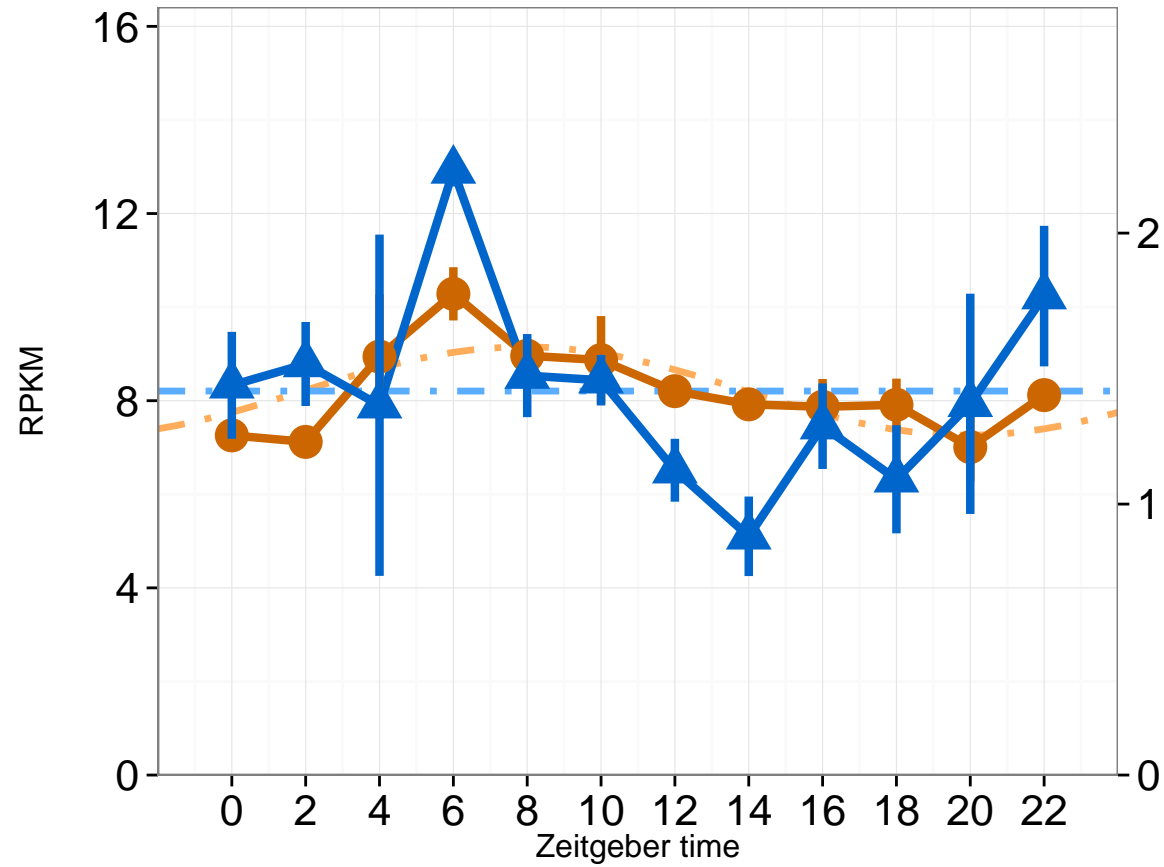

# Lmbr1l

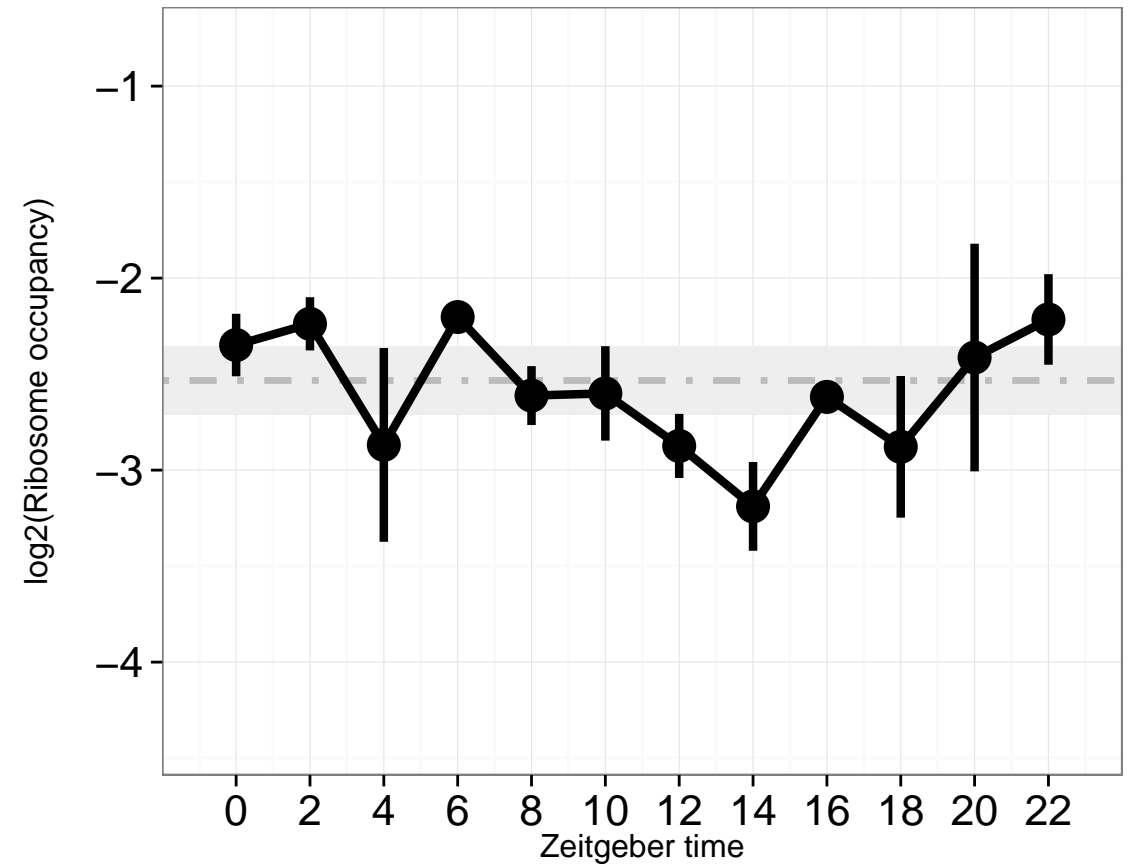

Supplement: Supplementary file 7862 [file 1]

## Stx2

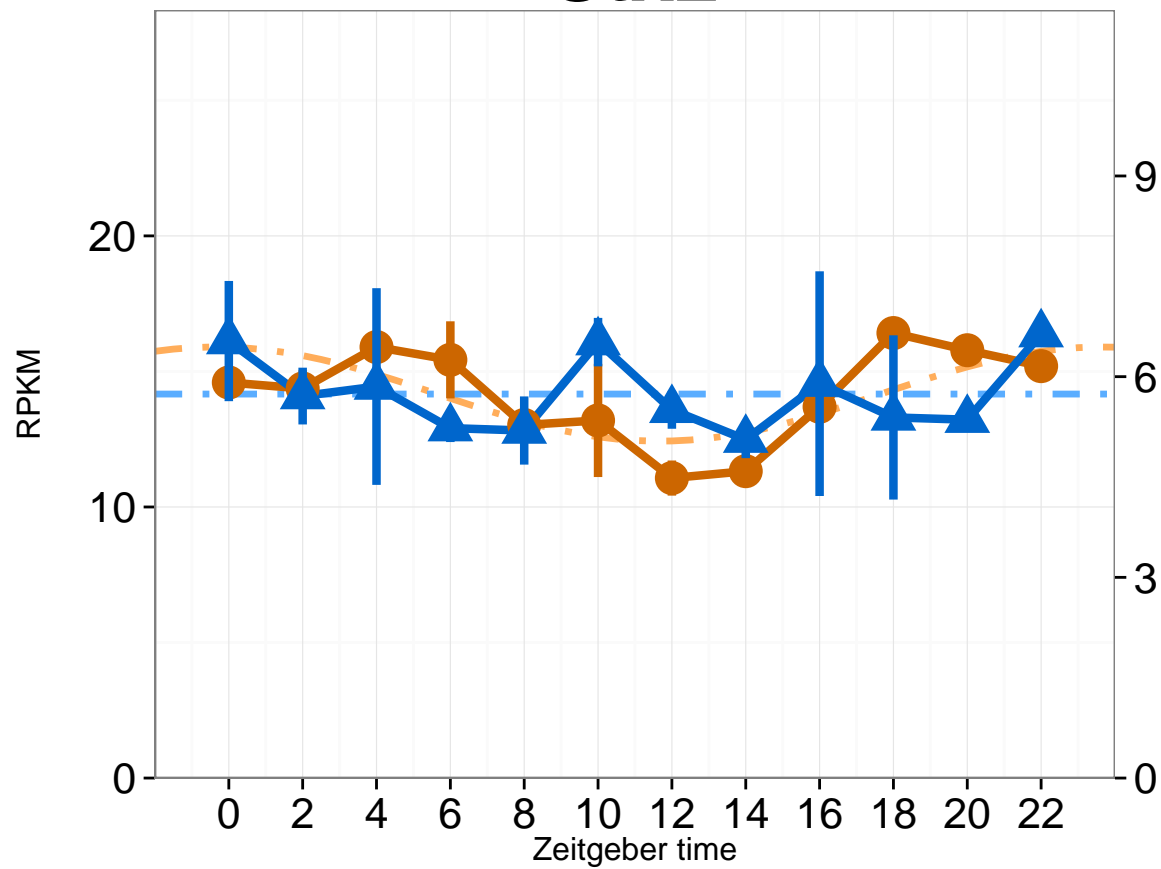

## Stx2

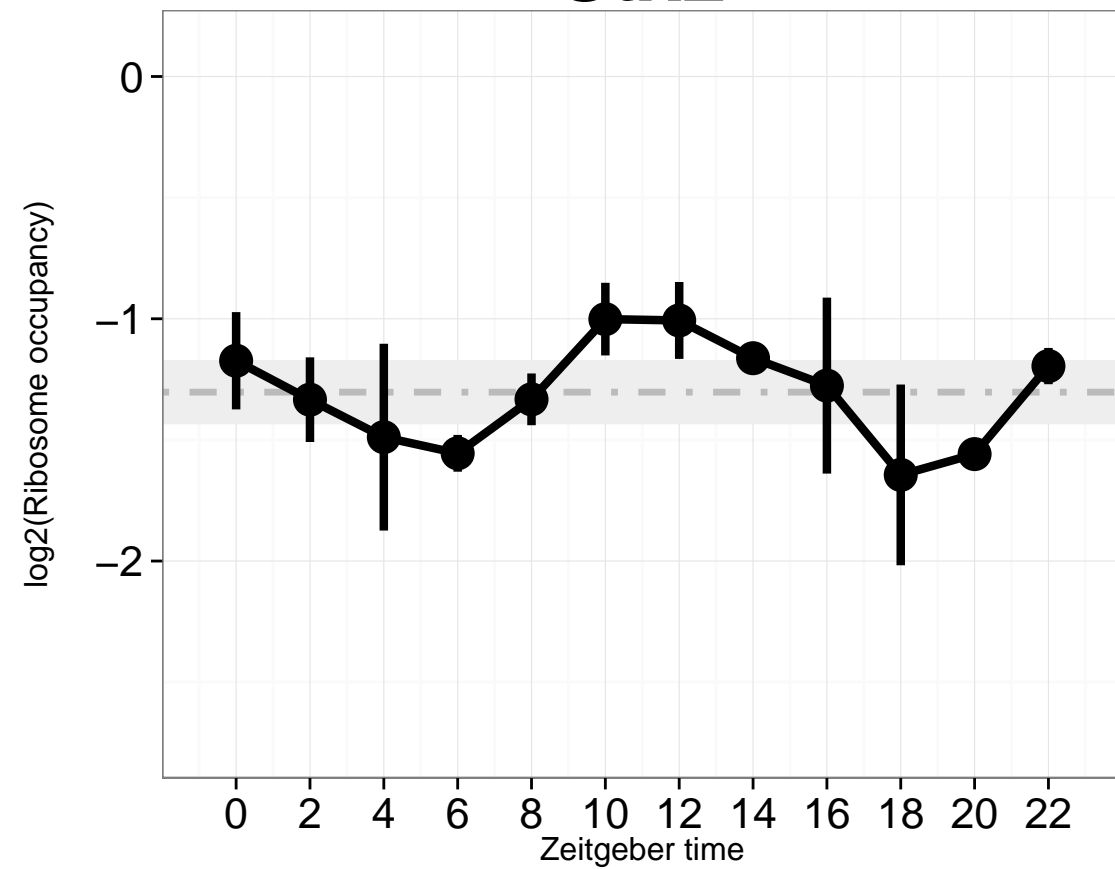

Supplement: Supplementary file 7863 [file 1]

## Prnp

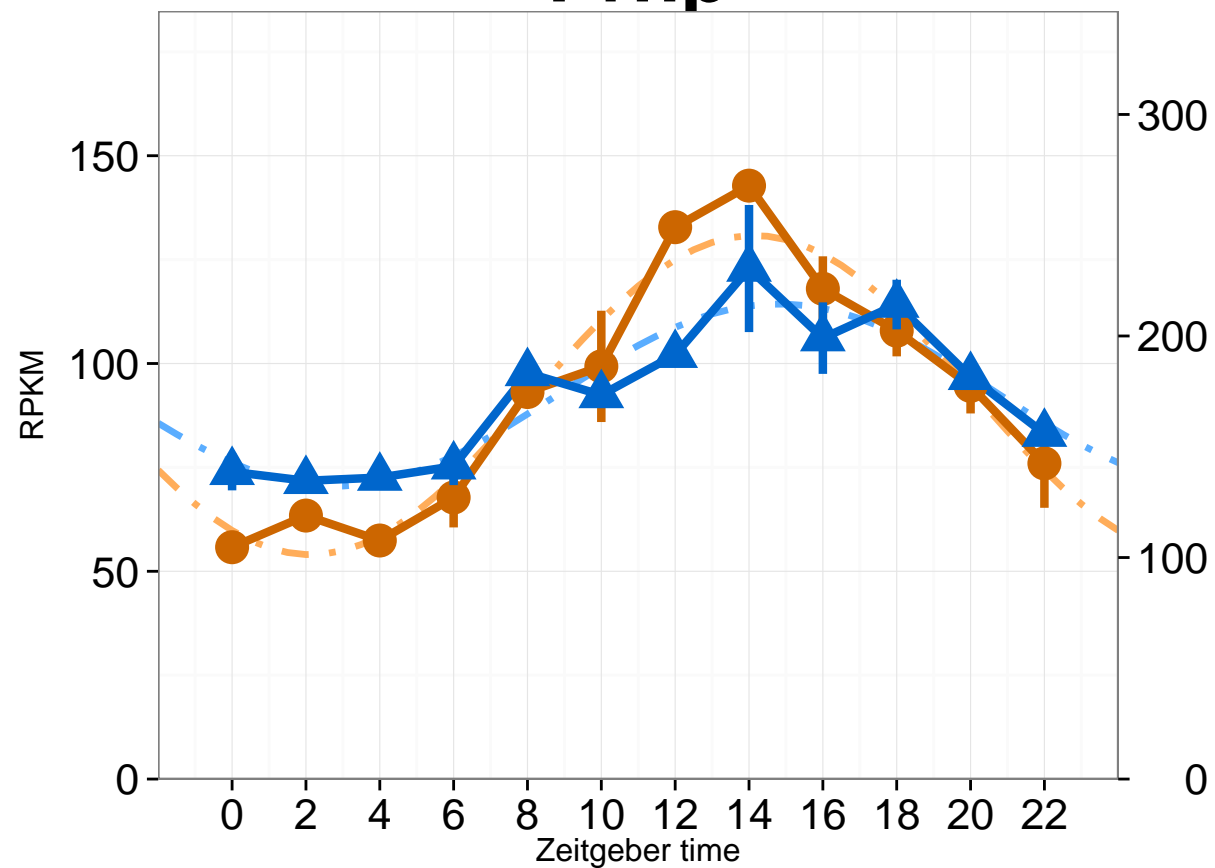

## Prnp

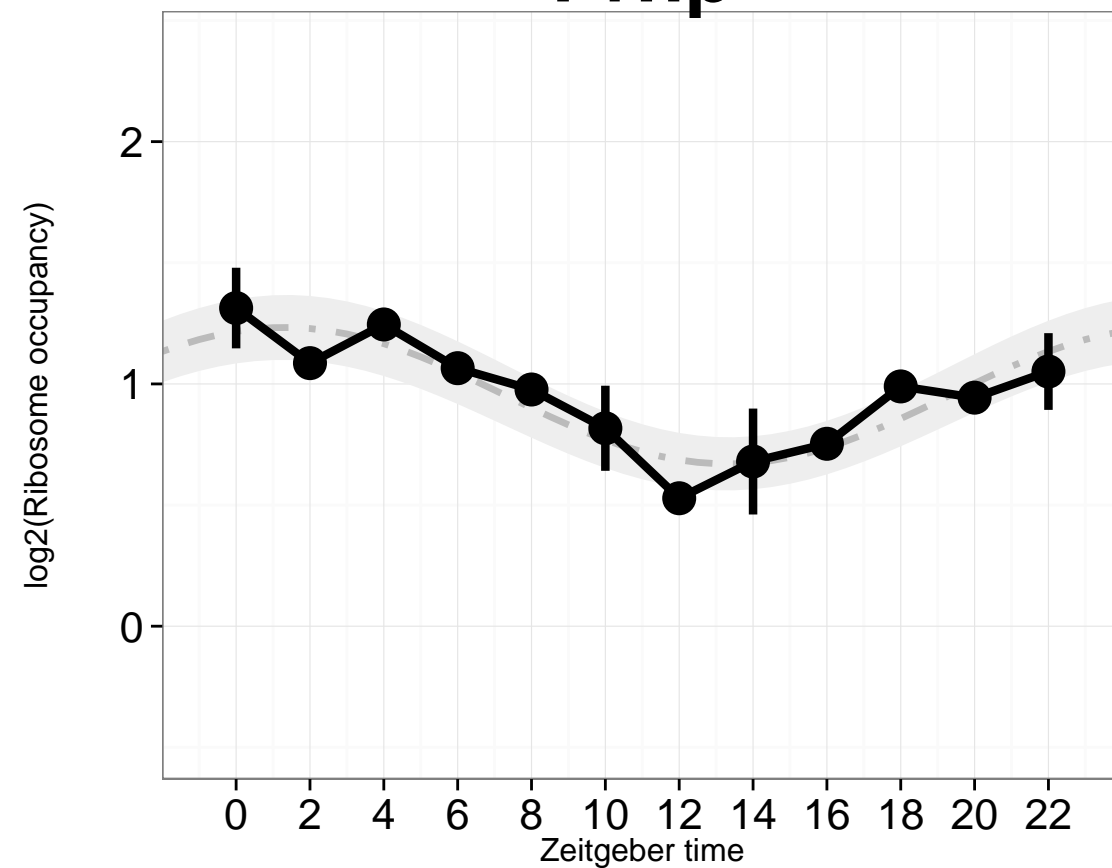

Supplement: Supplementary file 7864 [file 1]

## HsdI1

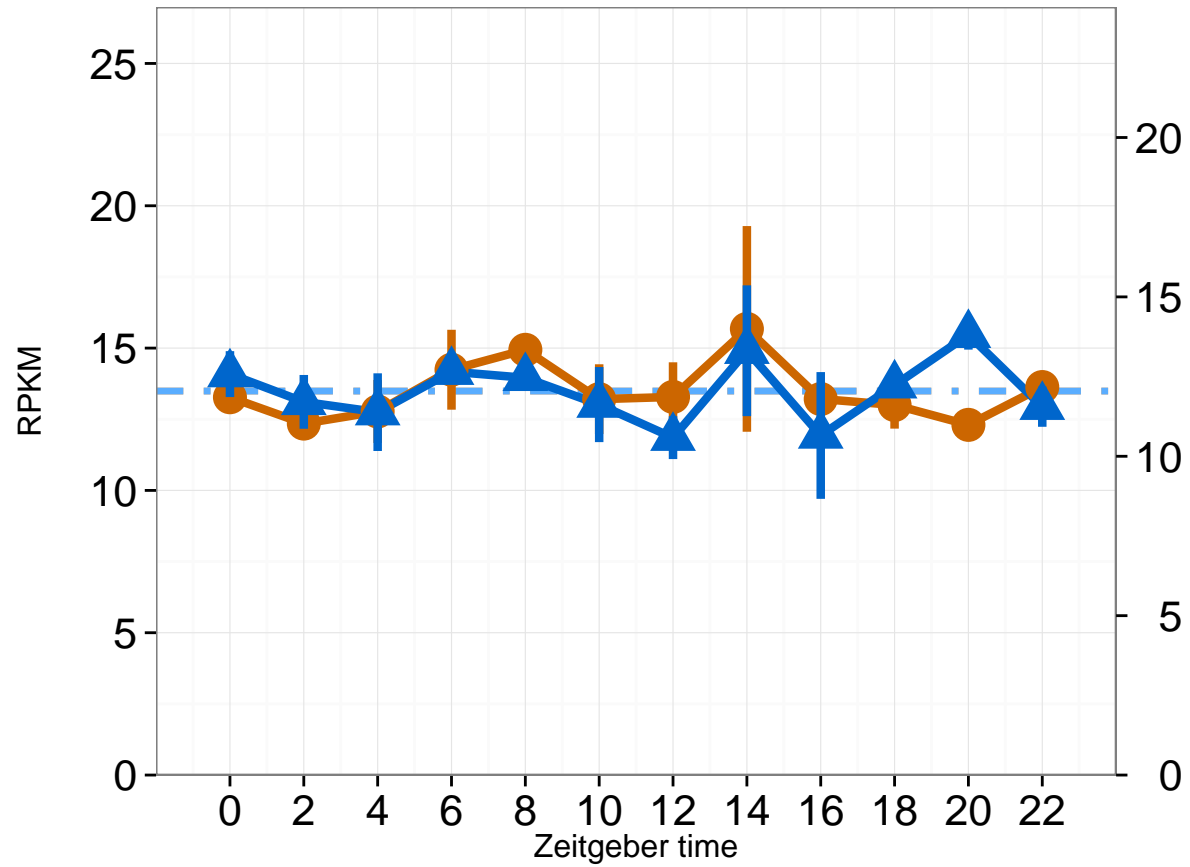

## HsdI1

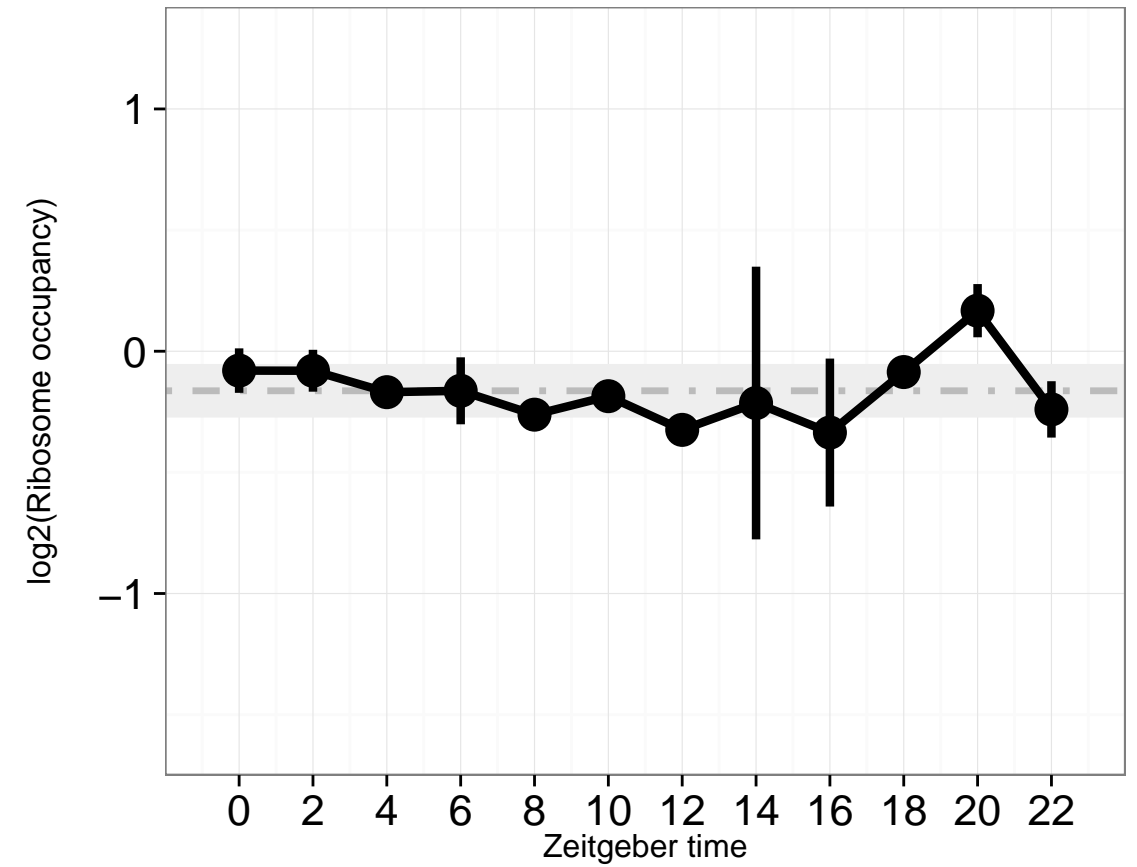

Supplement: Supplementary file 7865 [file 1]

## Vipas39

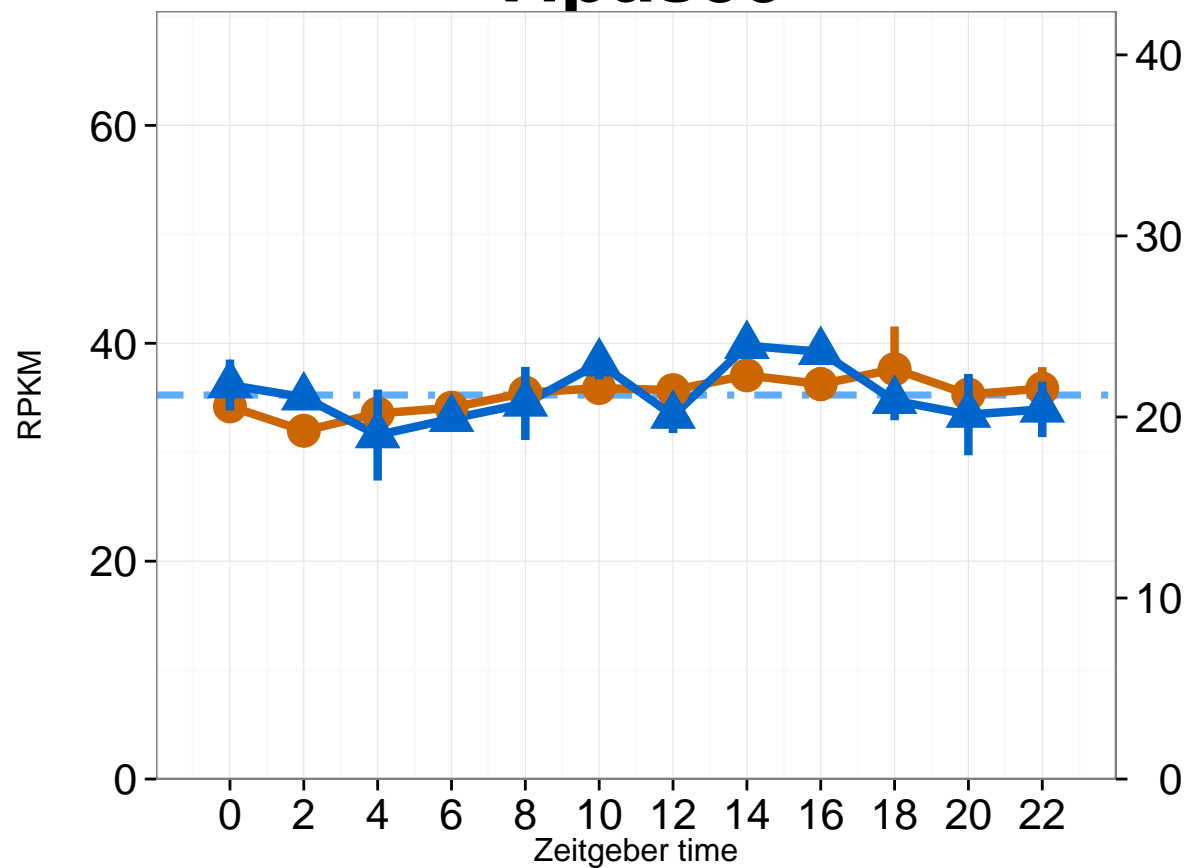

## Vipas39

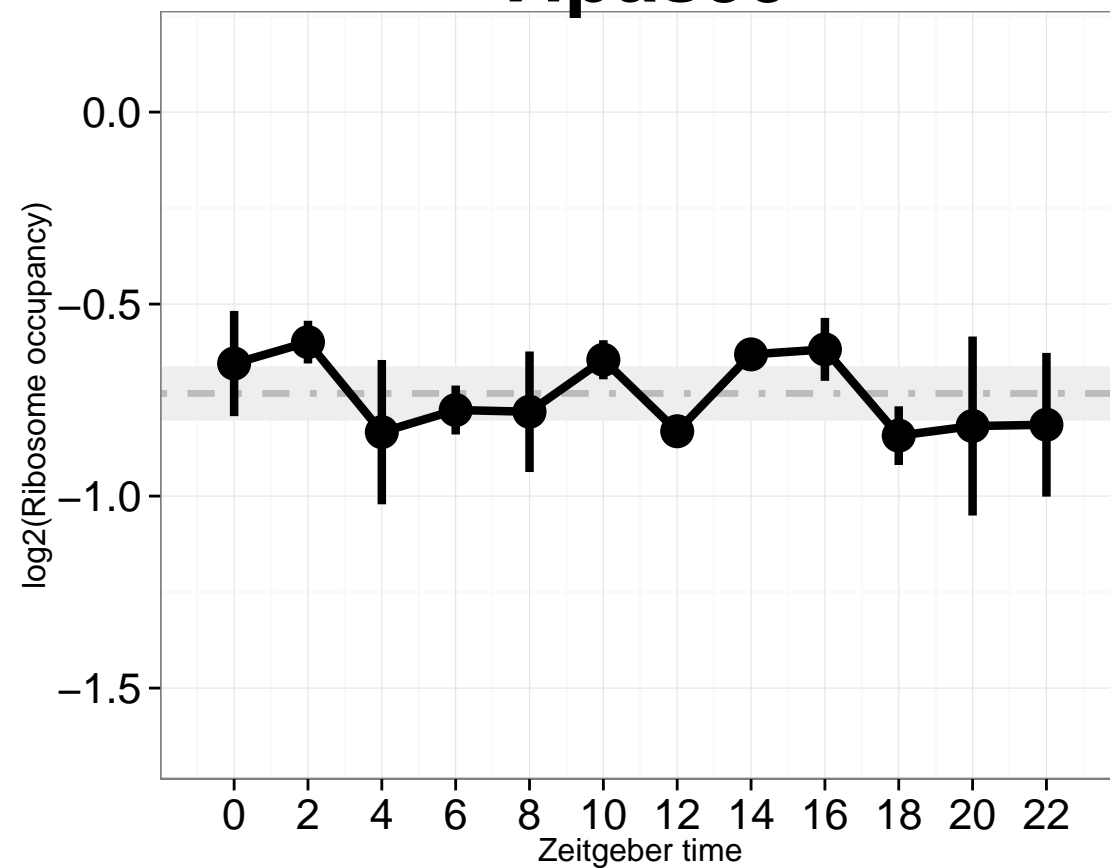

Supplement: Supplementary file 7866 [file 1]

## Nck1

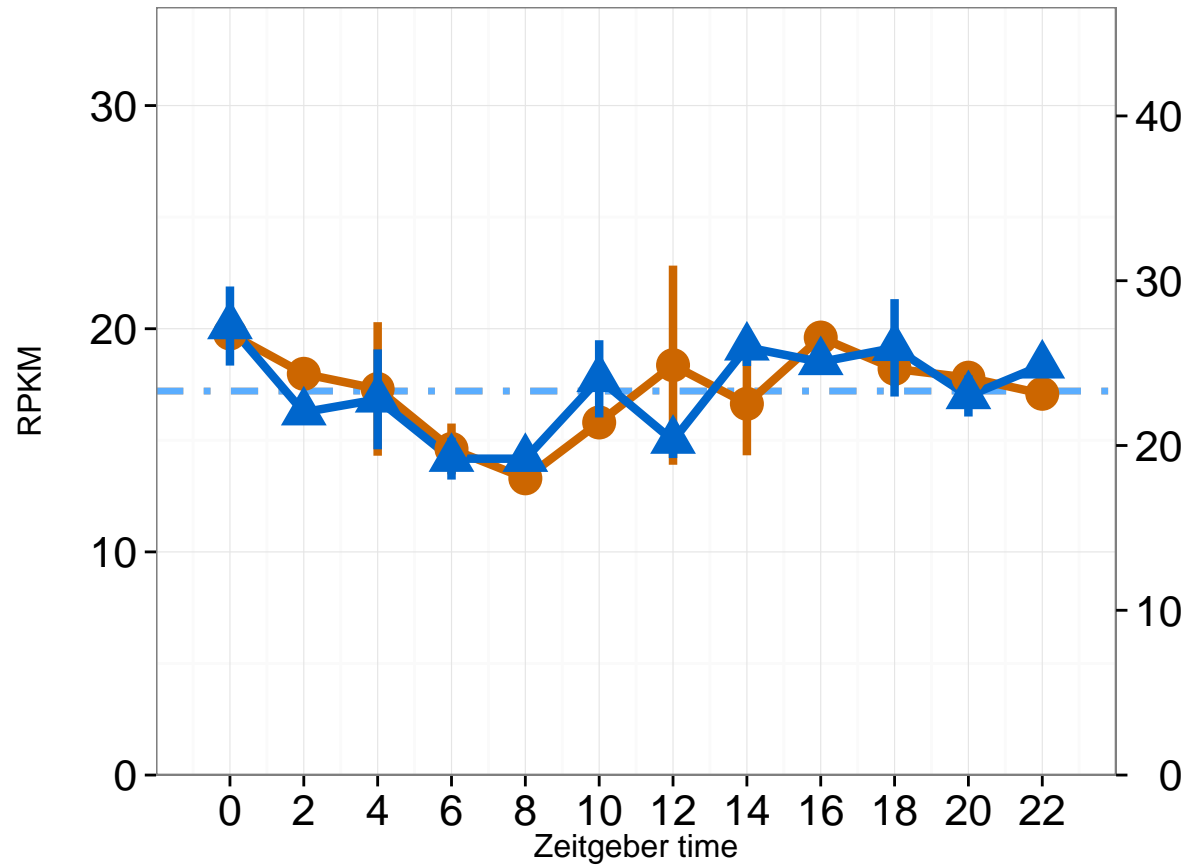

## Nck1

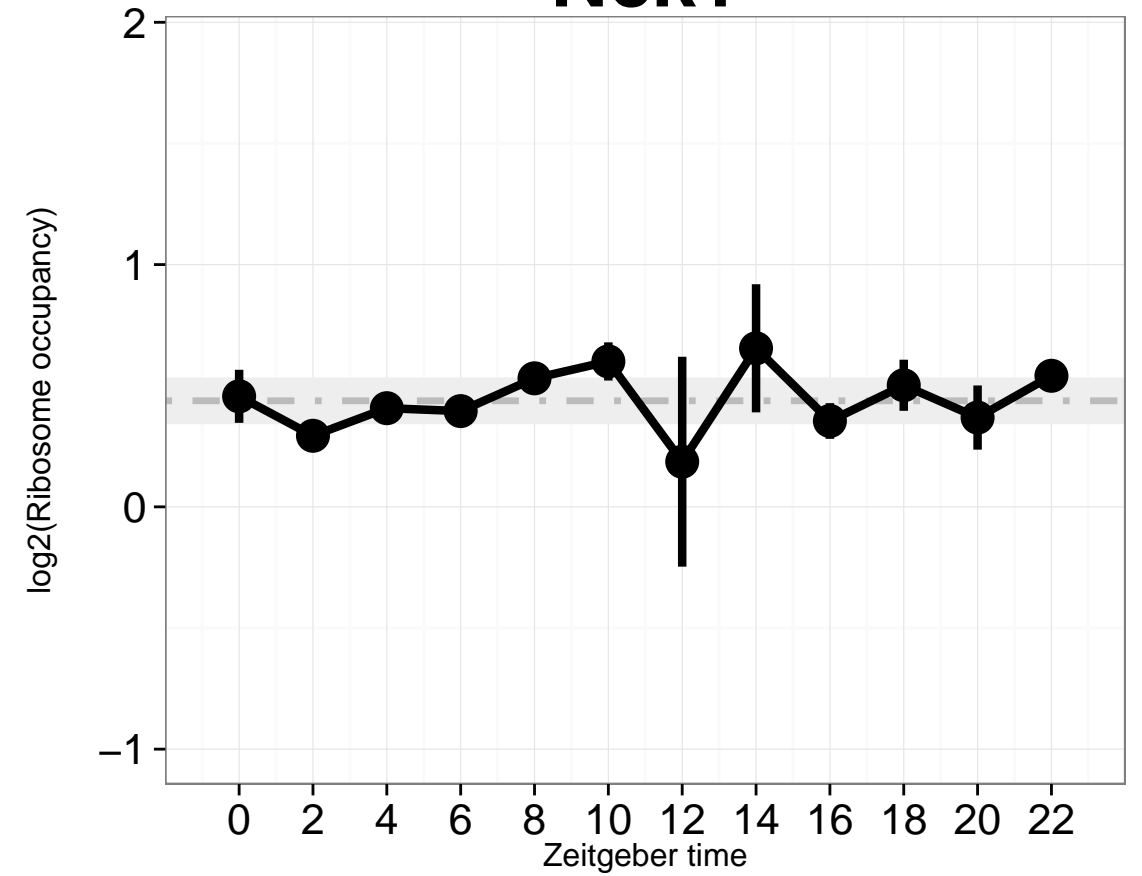

Supplement: Supplementary file 7867 [file 1]

## Fcer1g

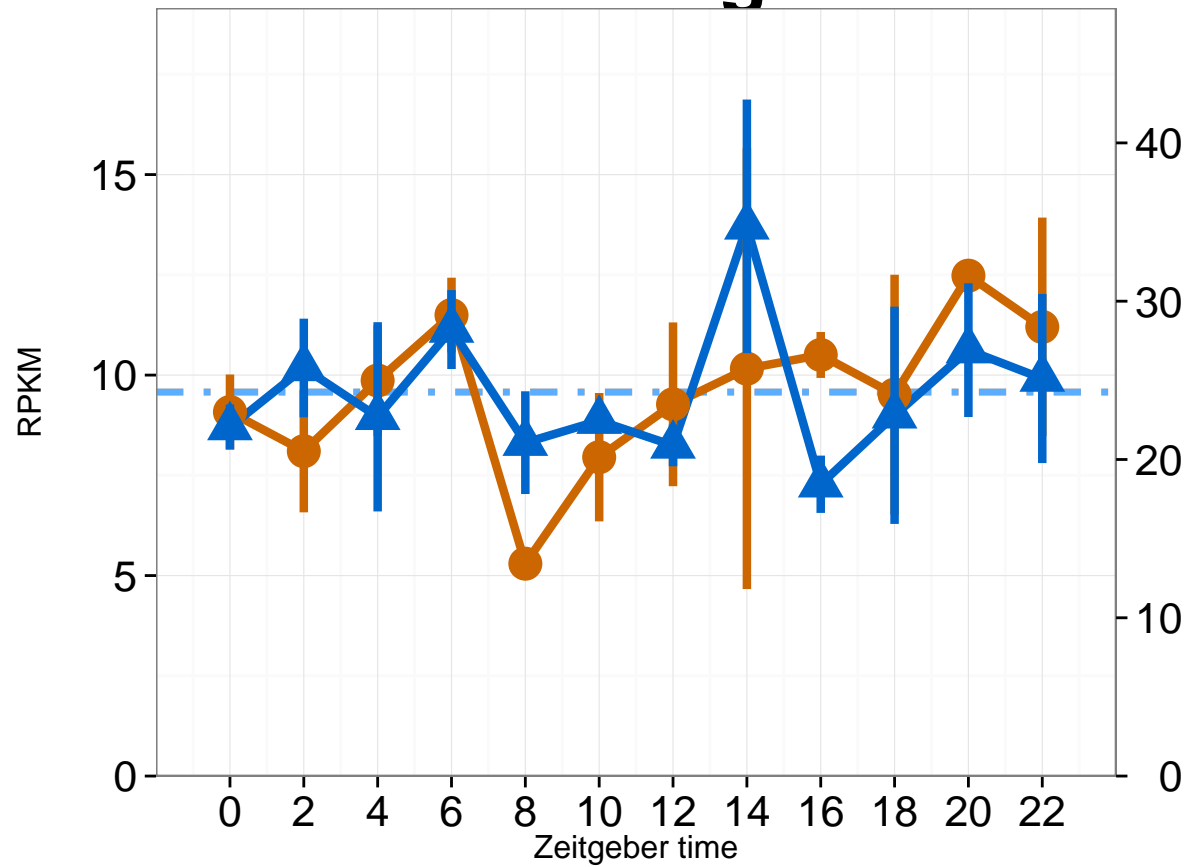

## Fcer1g

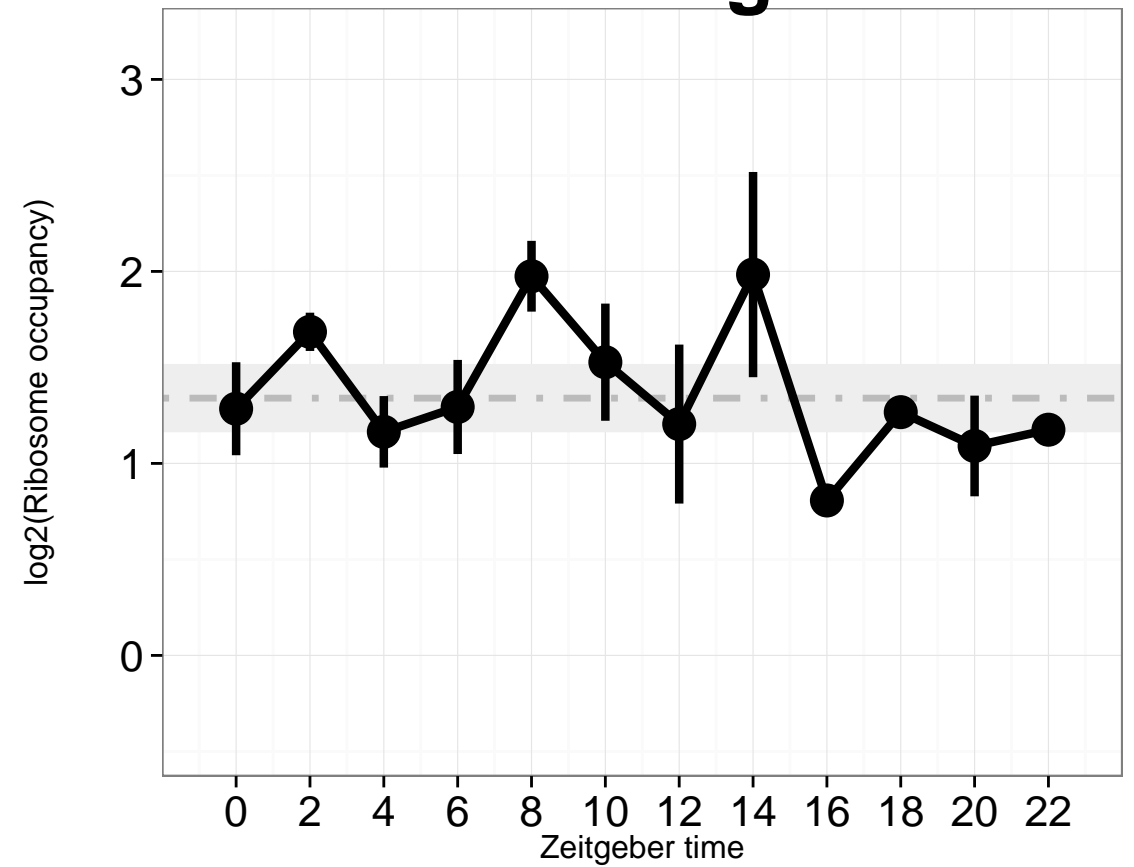

Supplement: Supplementary file 7868 [file 1]

## Tfcp2l1

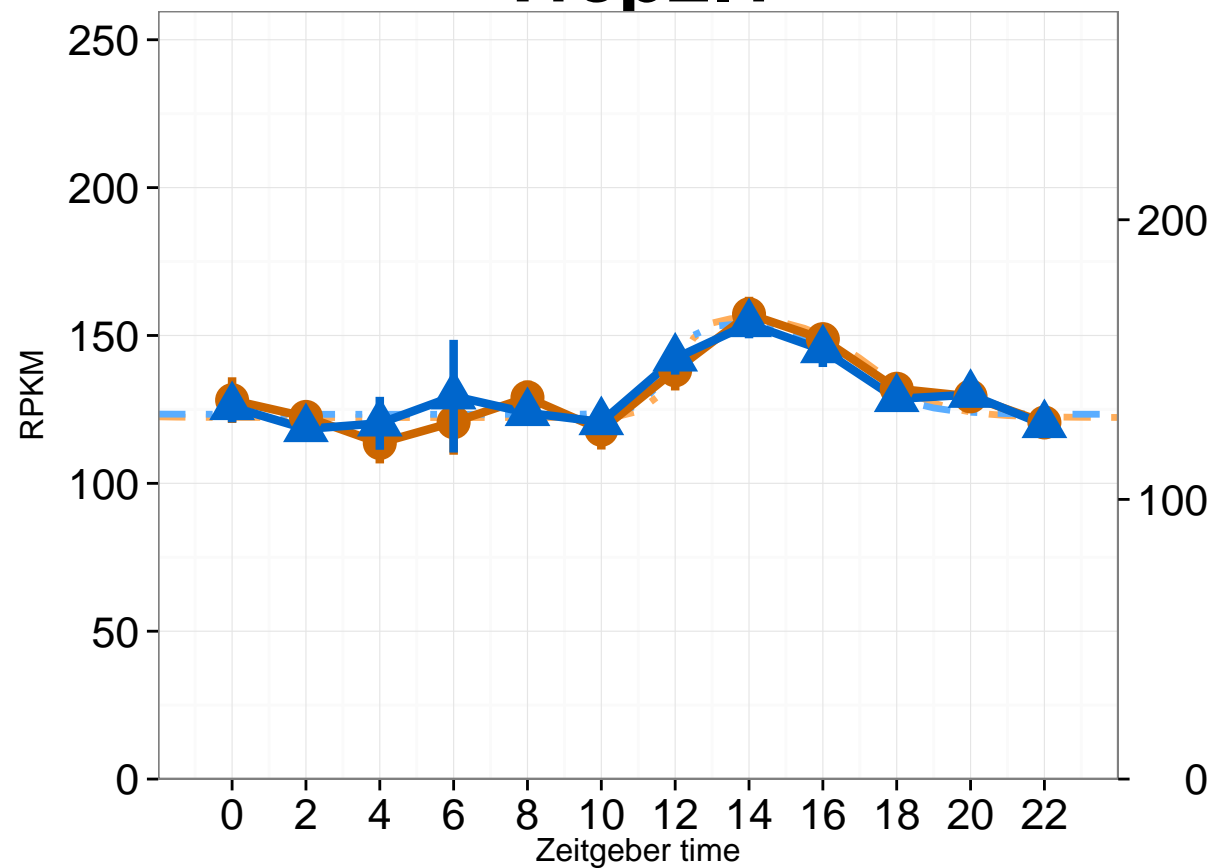

## Tfcp2l1

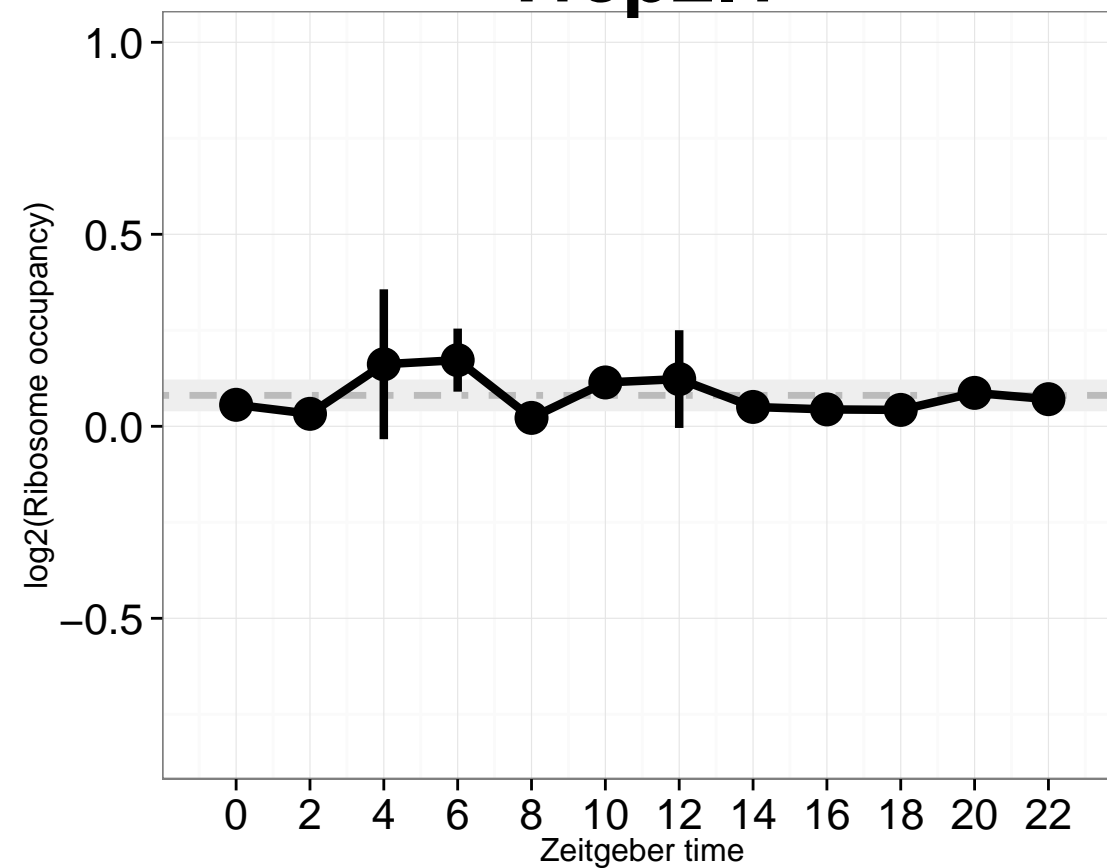

Supplement: Supplementary file 7869 [file 1]

# Zfp110

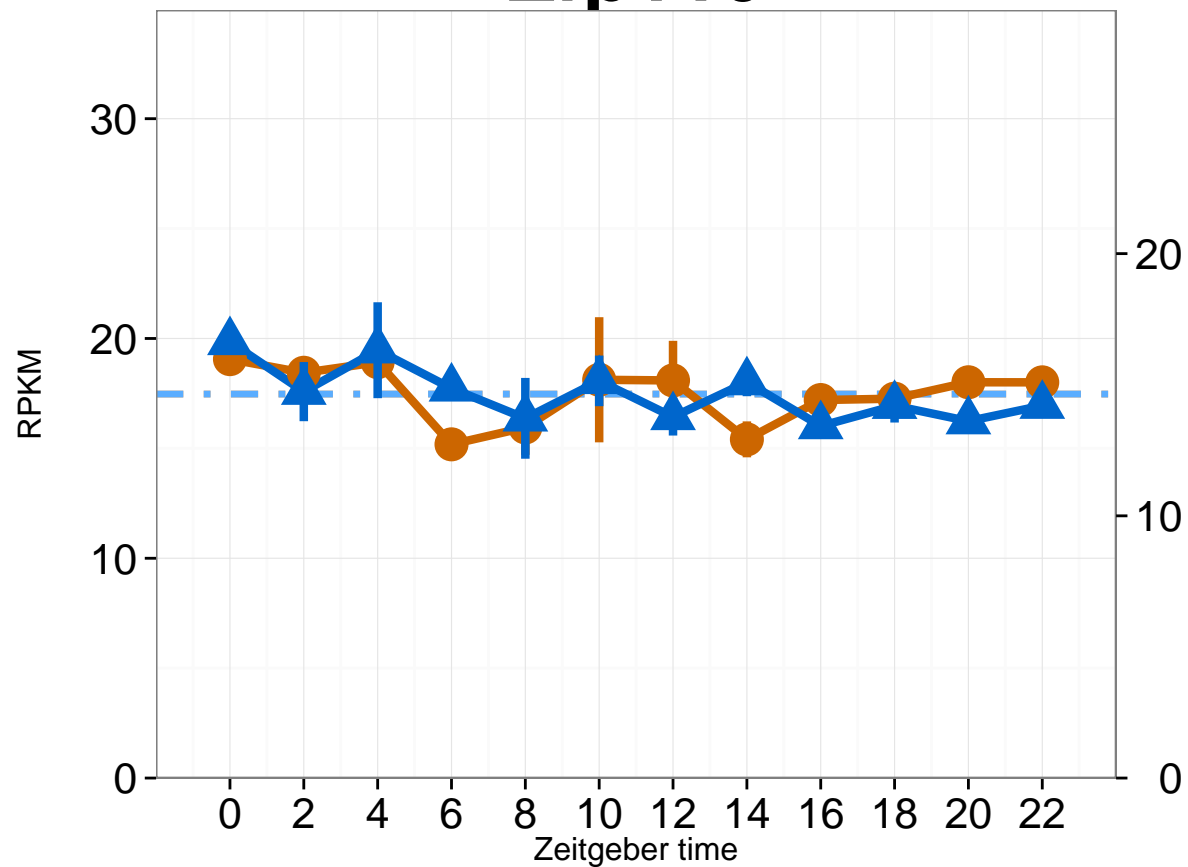

# Zfp110

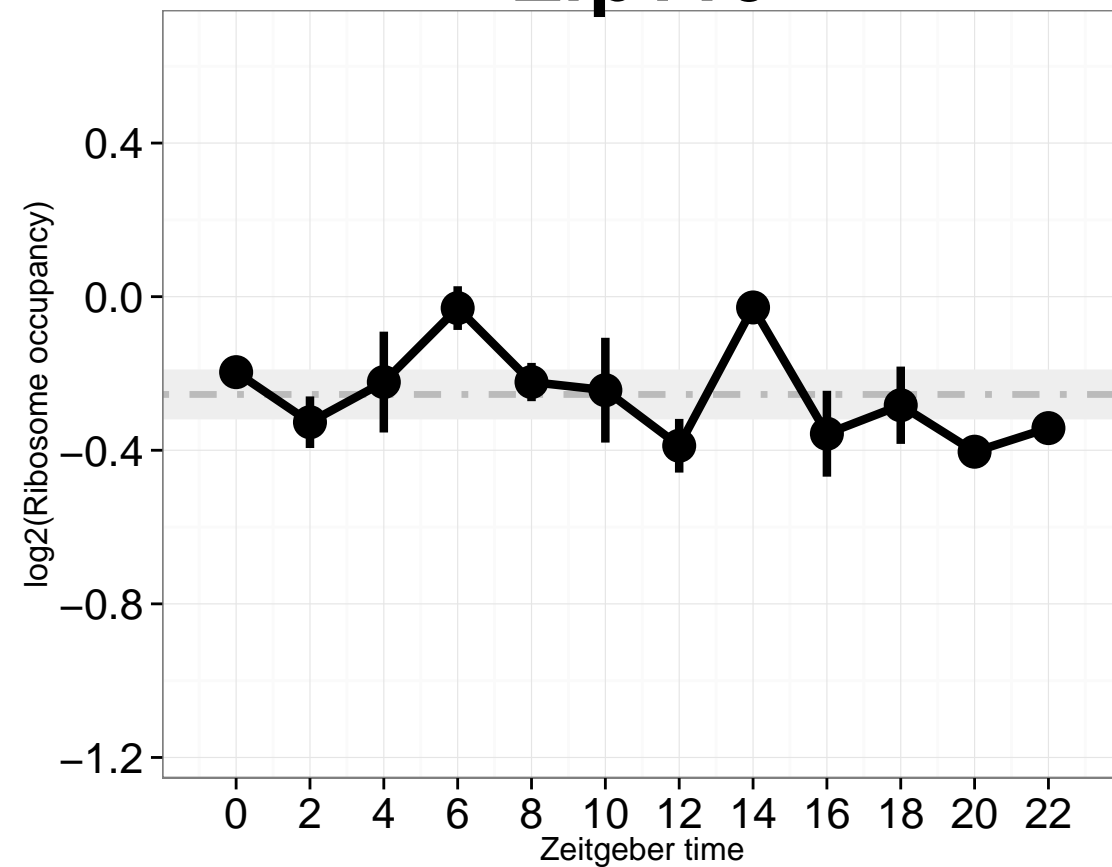

Supplement: Supplementary file 7870 [file 1]

# Hibadh

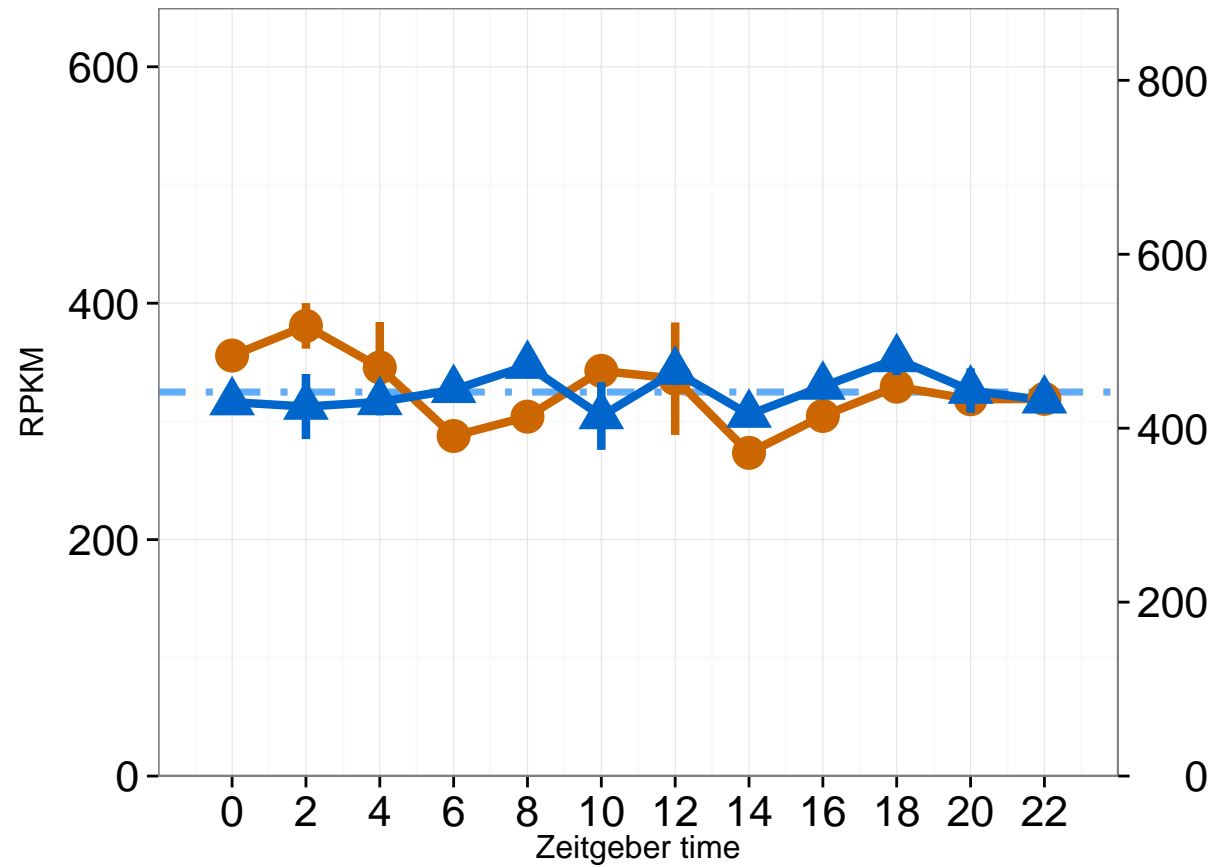

# Hibadh

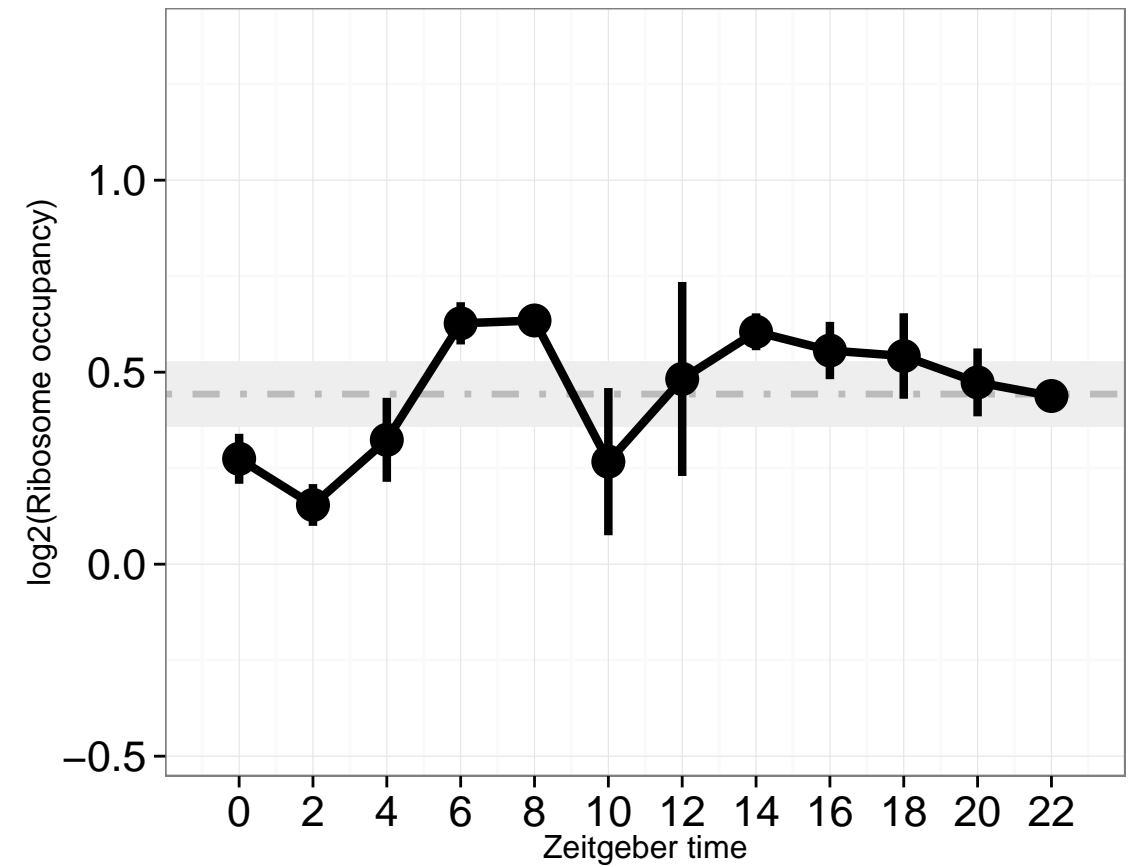

Supplement: Supplementary file 7871 [file 1]

## Fam20a

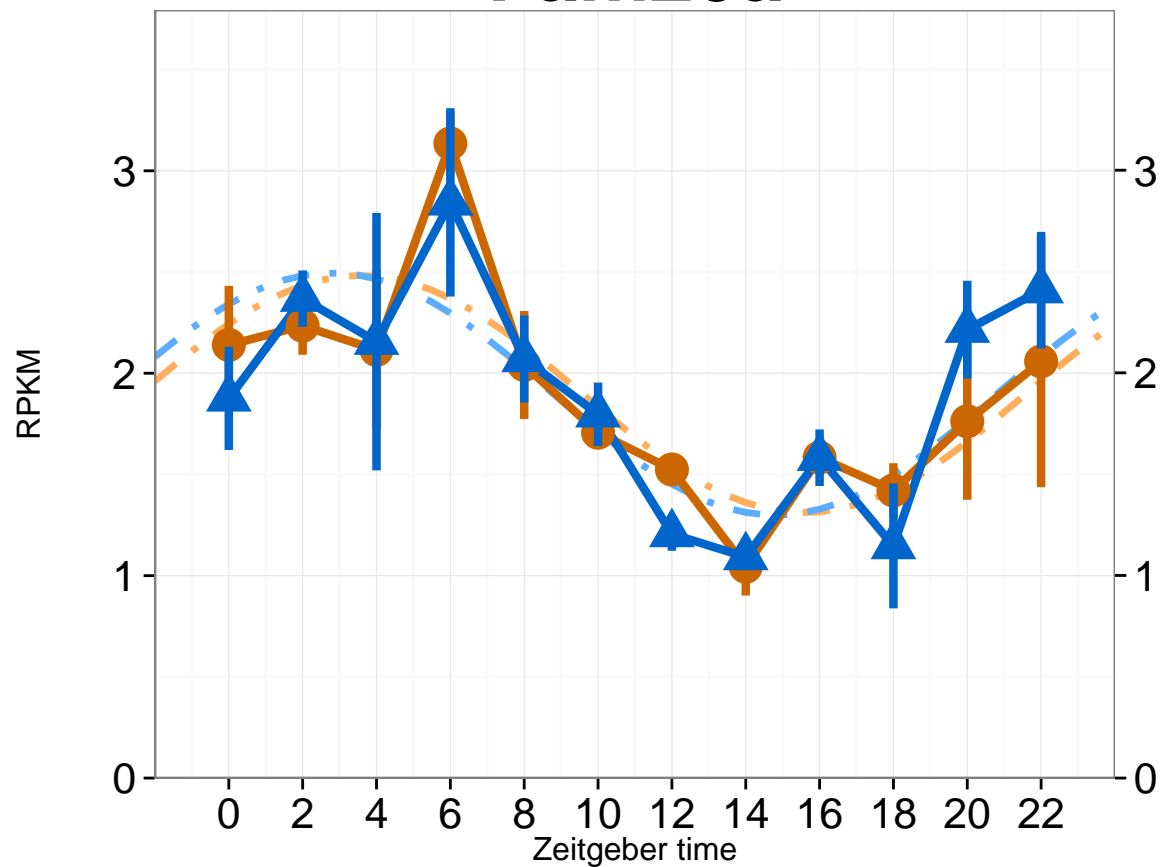

## Fam20a

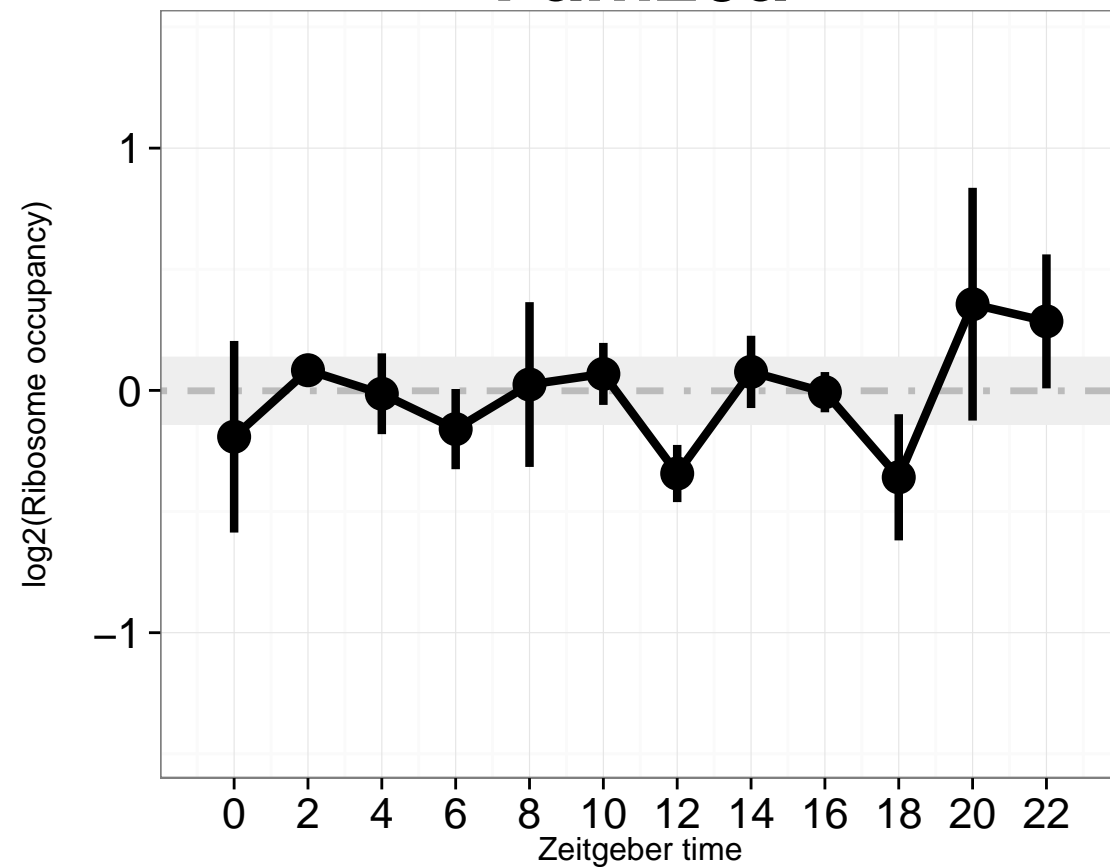

Supplement: Supplementary file 7872 [file 1]

# Ptpn3

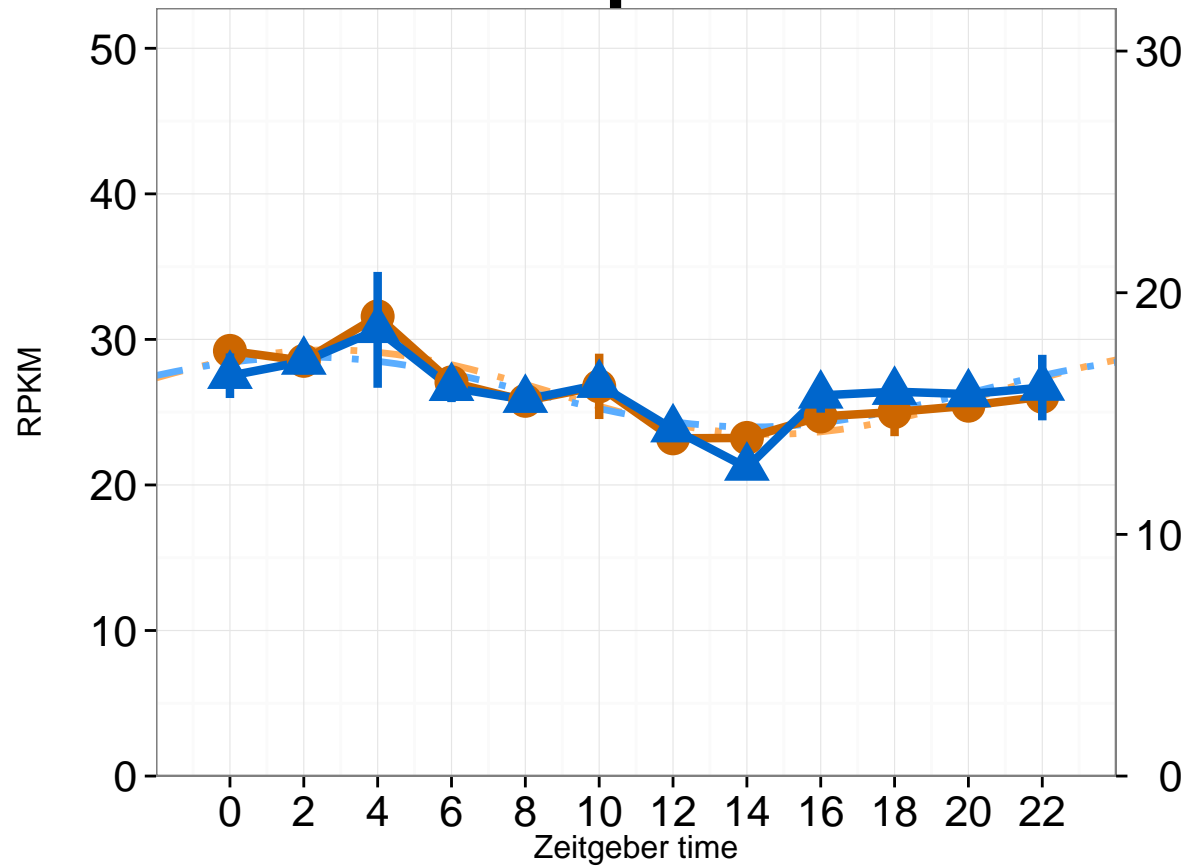

# Ptpn3

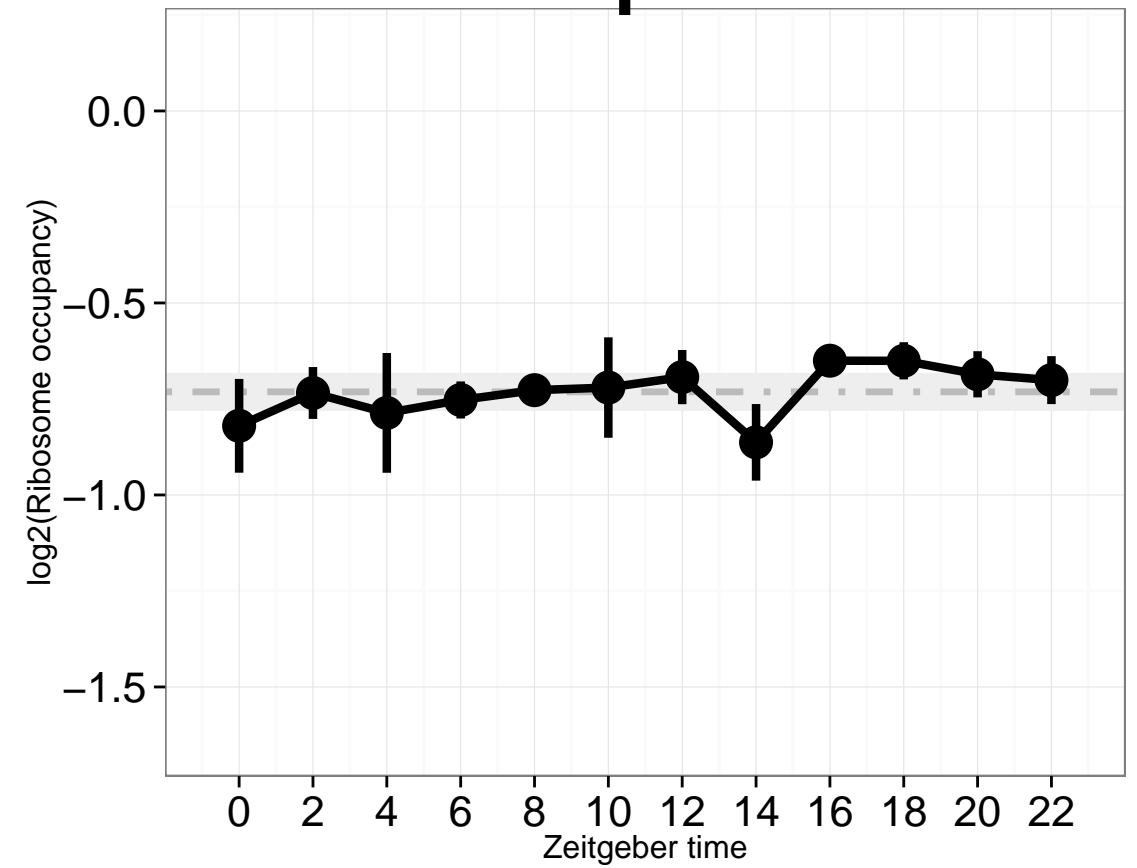

Supplement: Supplementary file 7873 [file 1]

# Pkp4

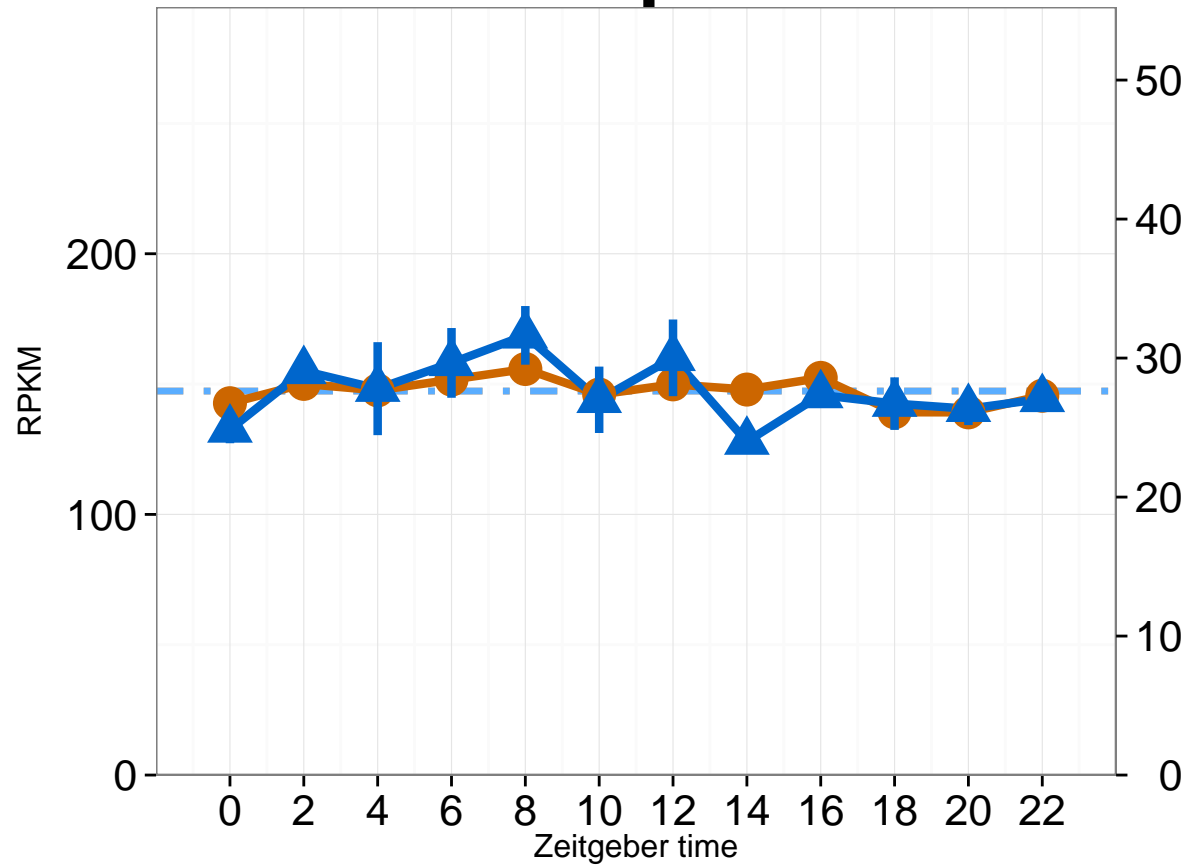

# Pkp4

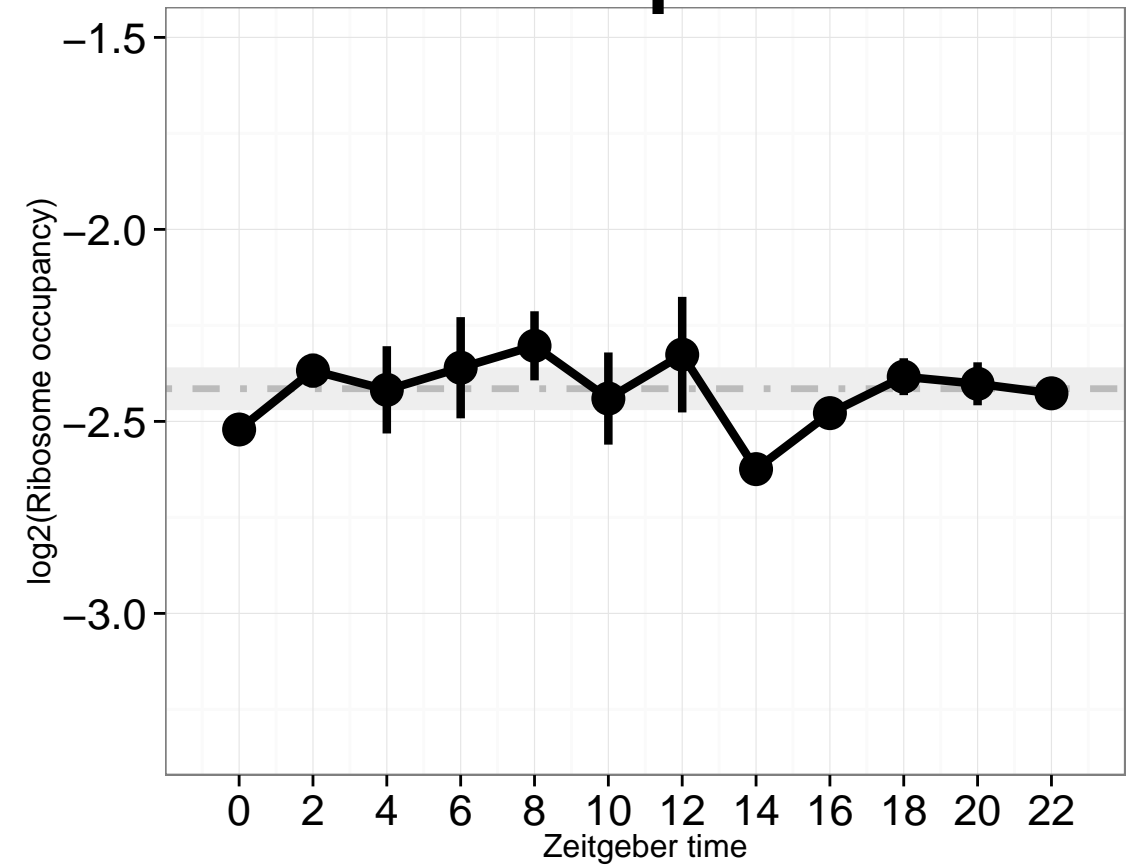

Supplement: Supplementary file 7874 [file 1]

# B230118H07Rik

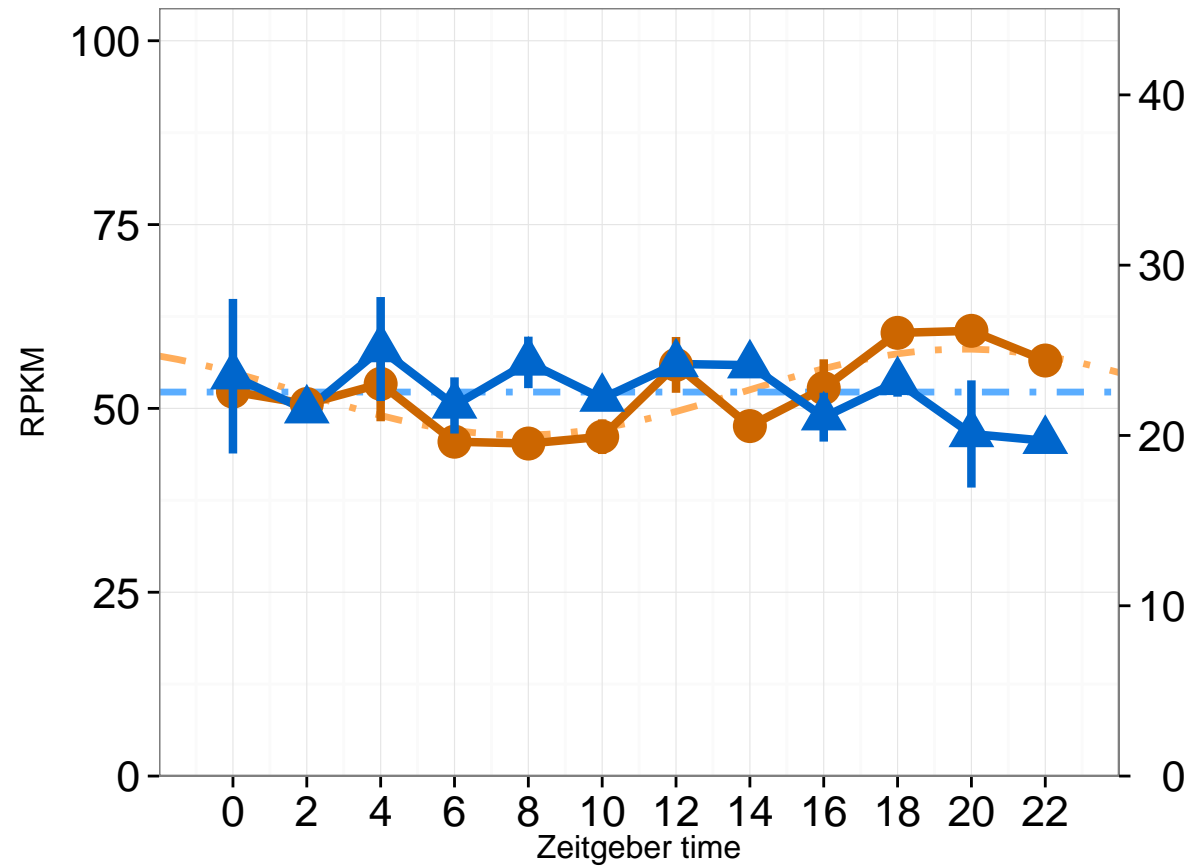

# B230118H07Rik

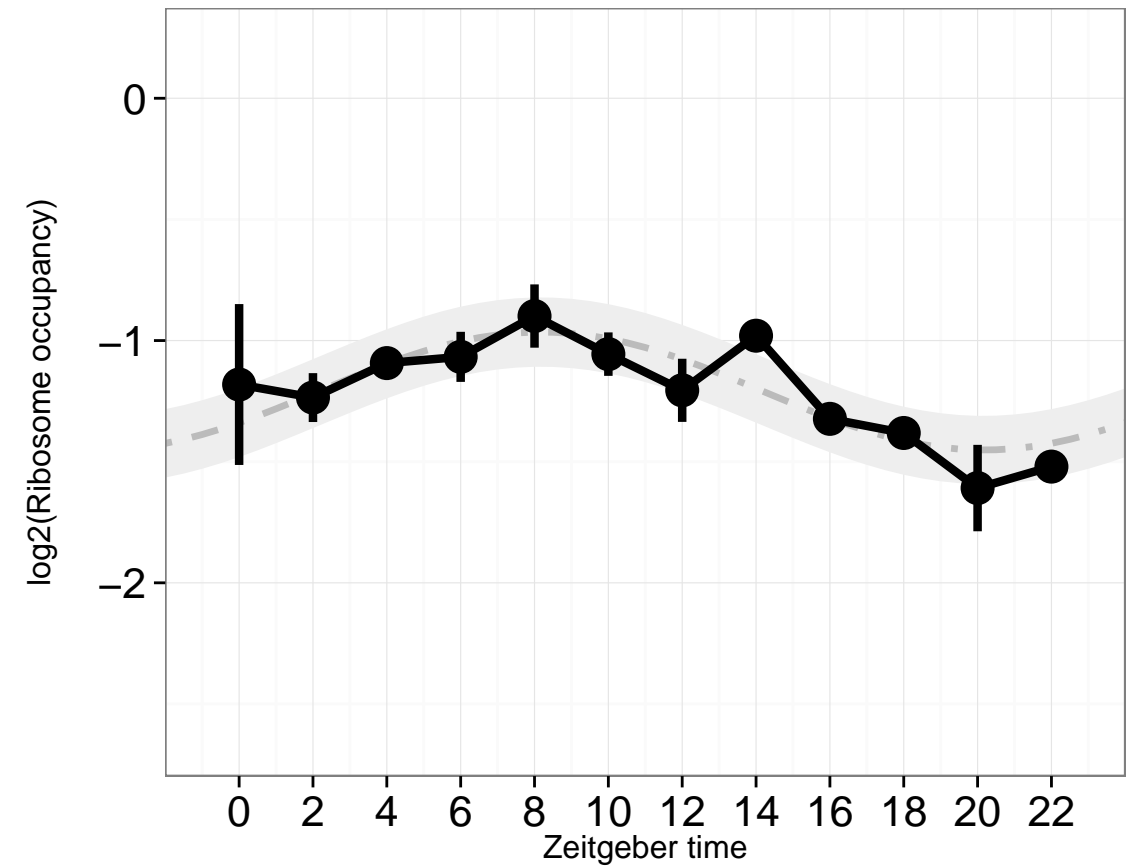

Supplement: Supplementary file 7875 [file 1]

## Stx1a

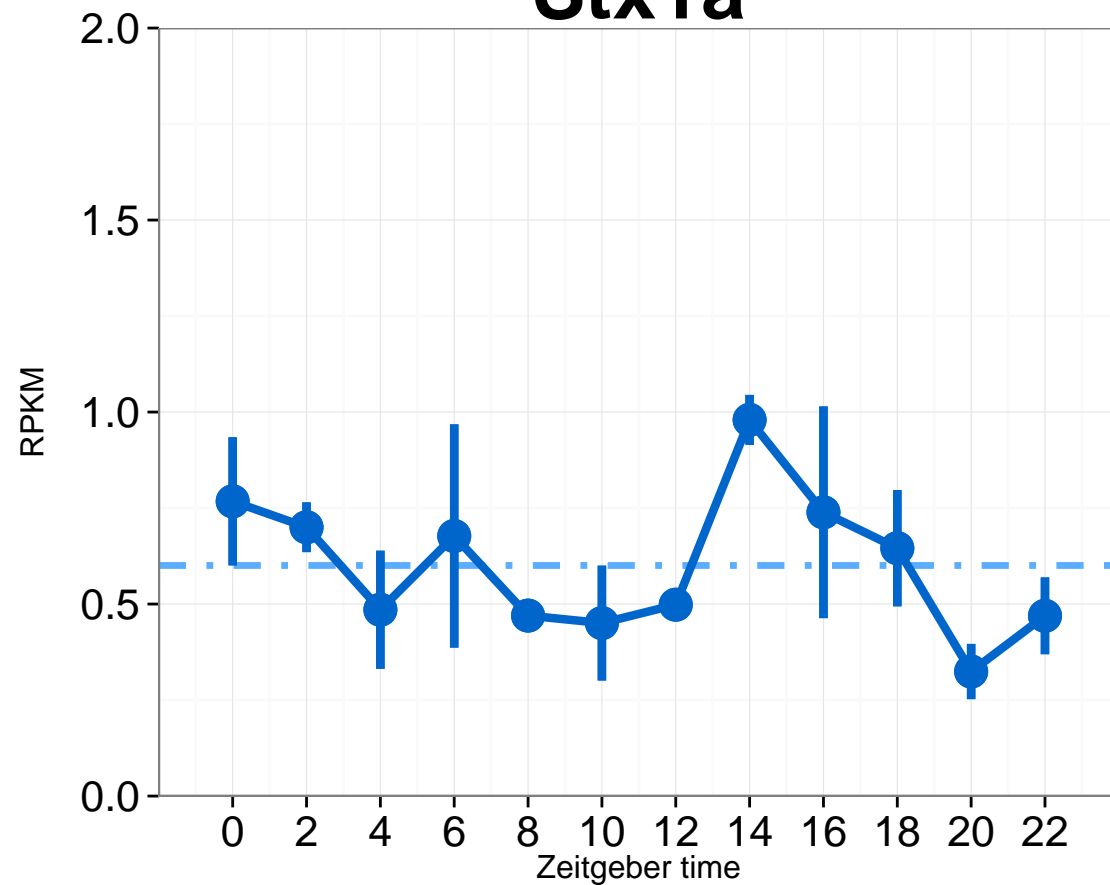

## Stx1a log2(Ribosome occupancy)

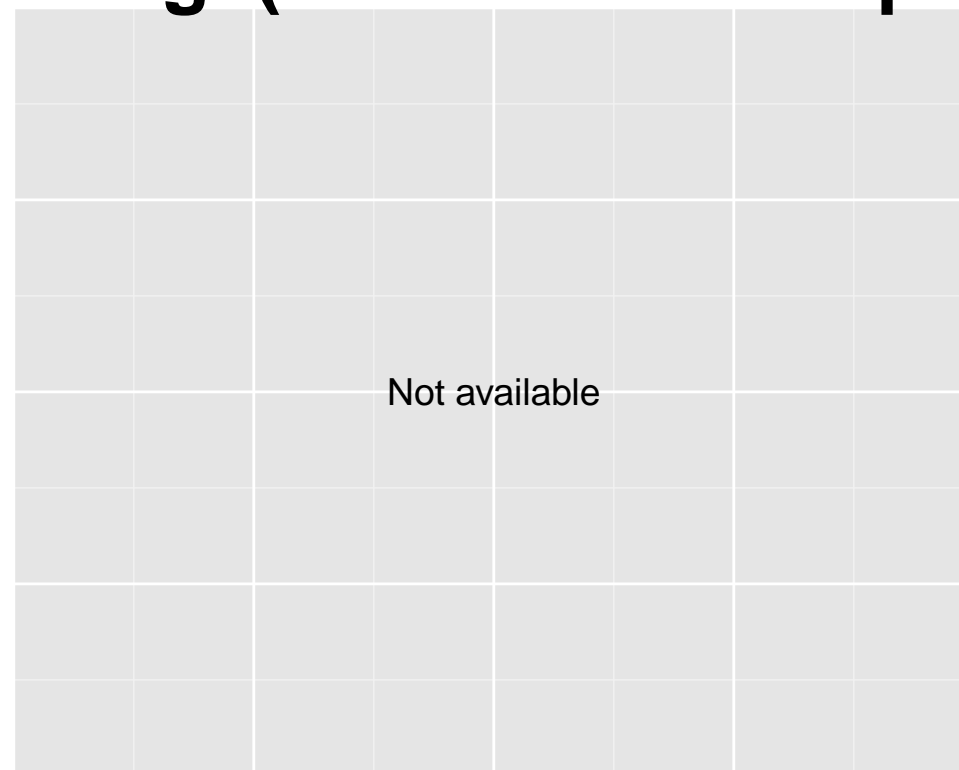

Supplement: Supplementary file 7876 [file 1]

## Pcgf2

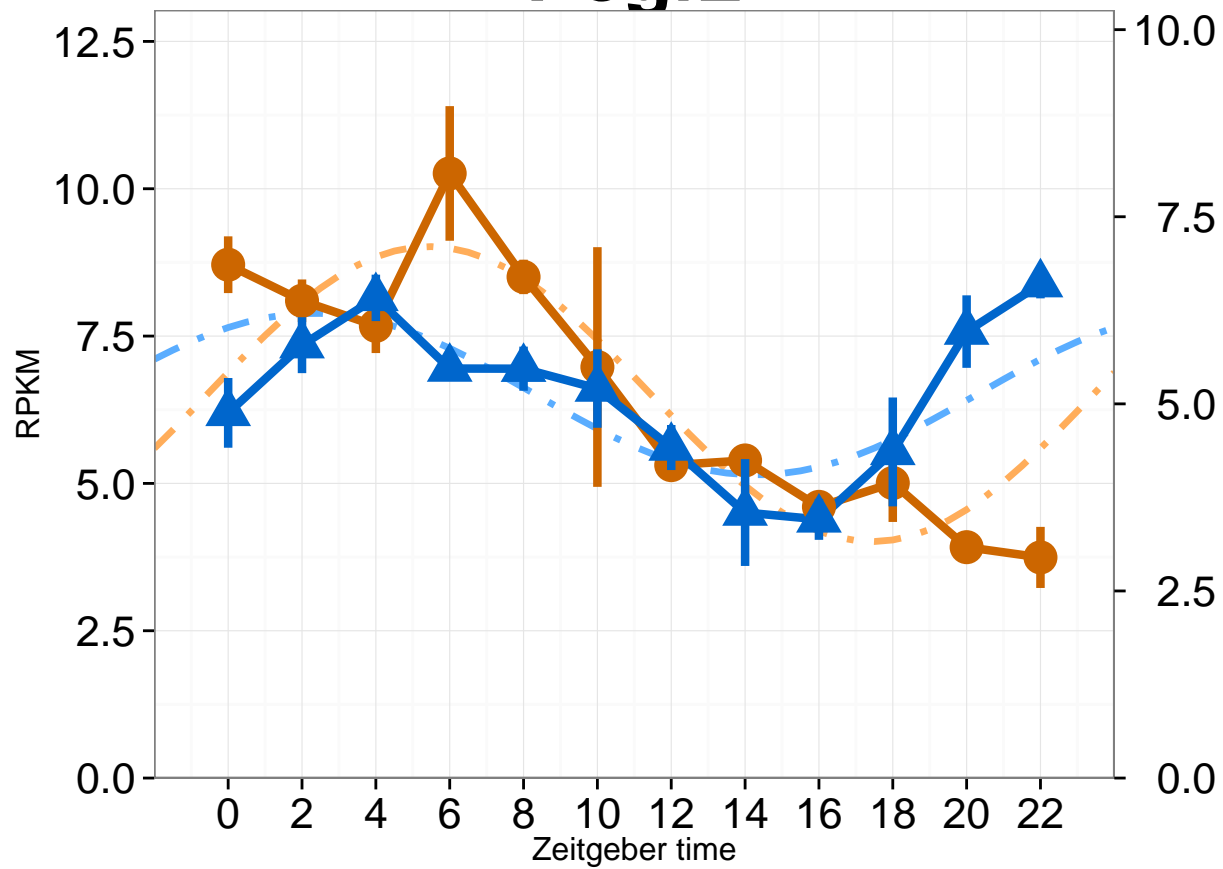

## Pcgf2

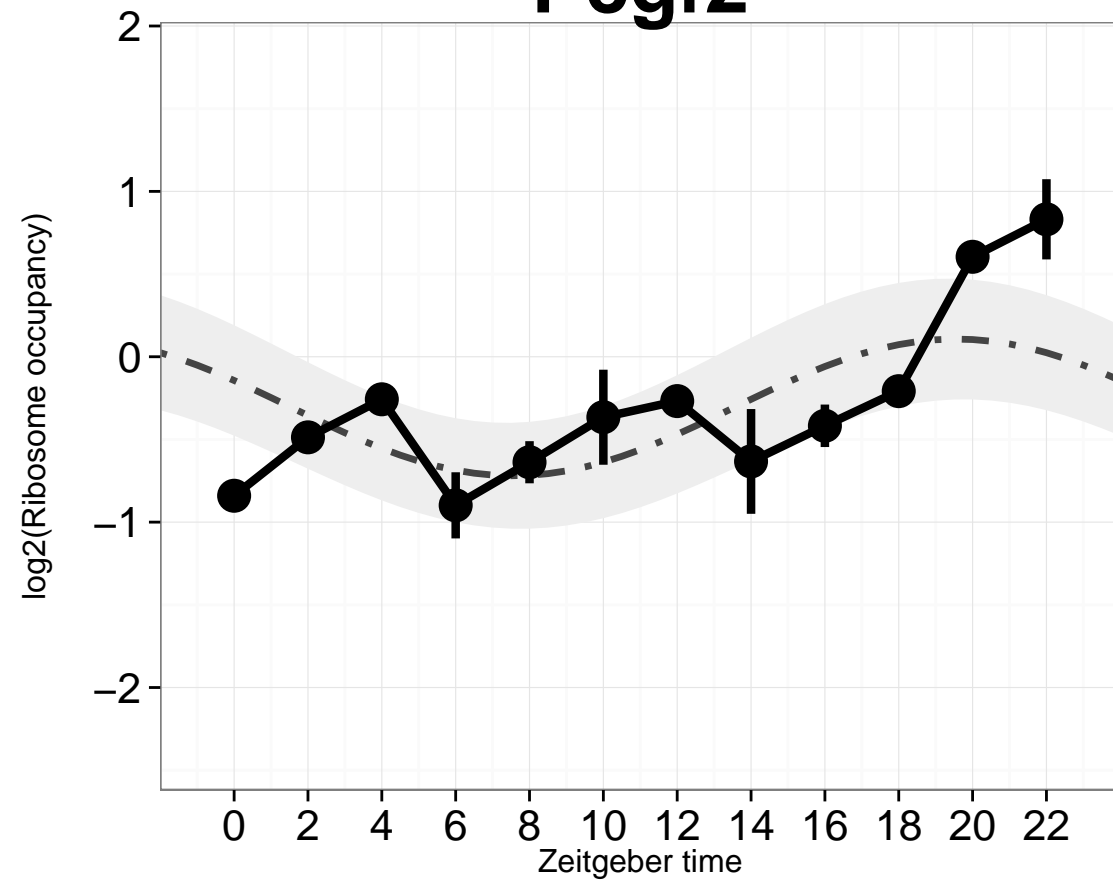

Supplement: Supplementary file 7877 [file 1]

## Znrf3

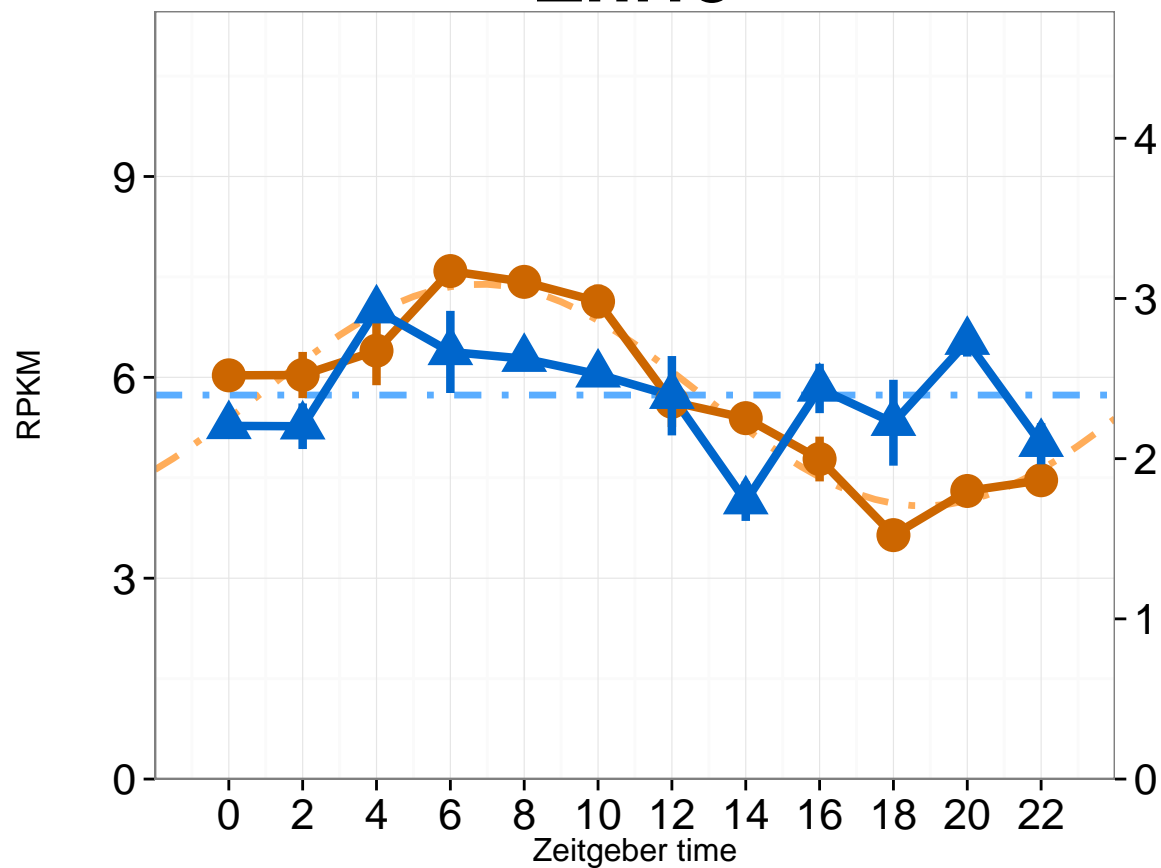

## Znrf3

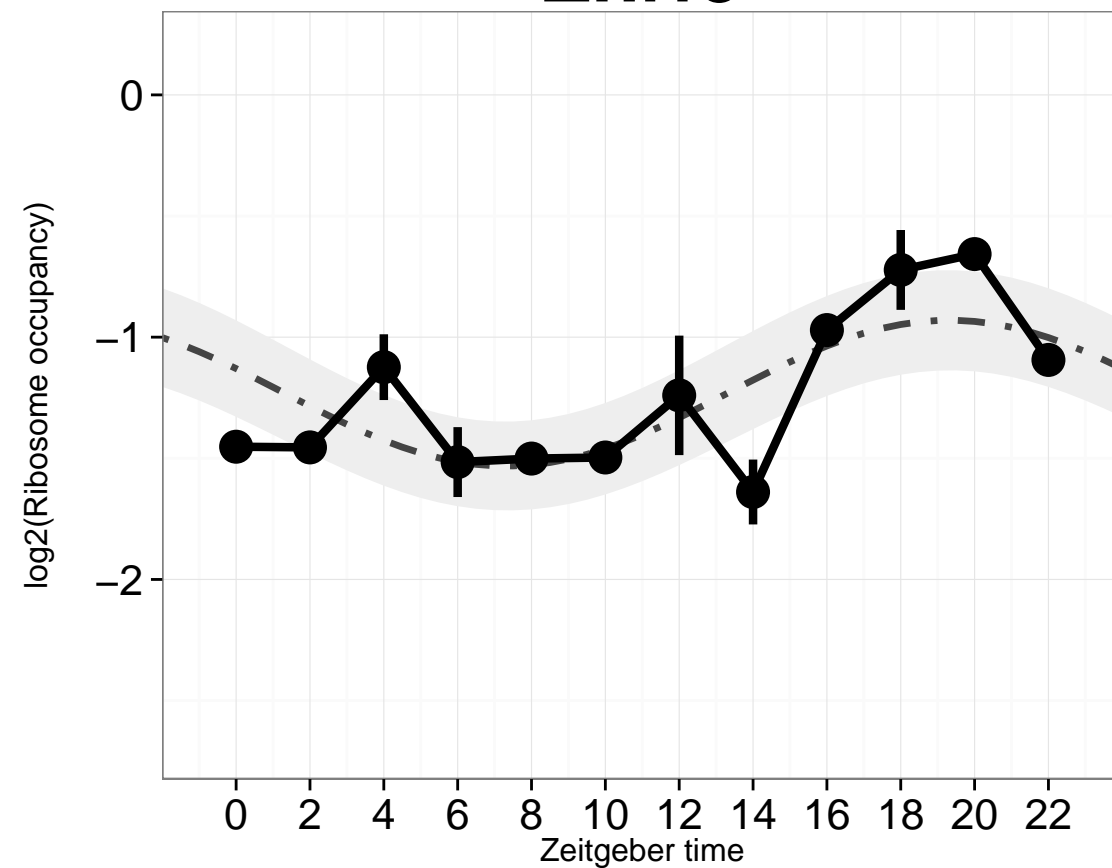

Supplement: Supplementary file 7878 [file 1]

## Ppia

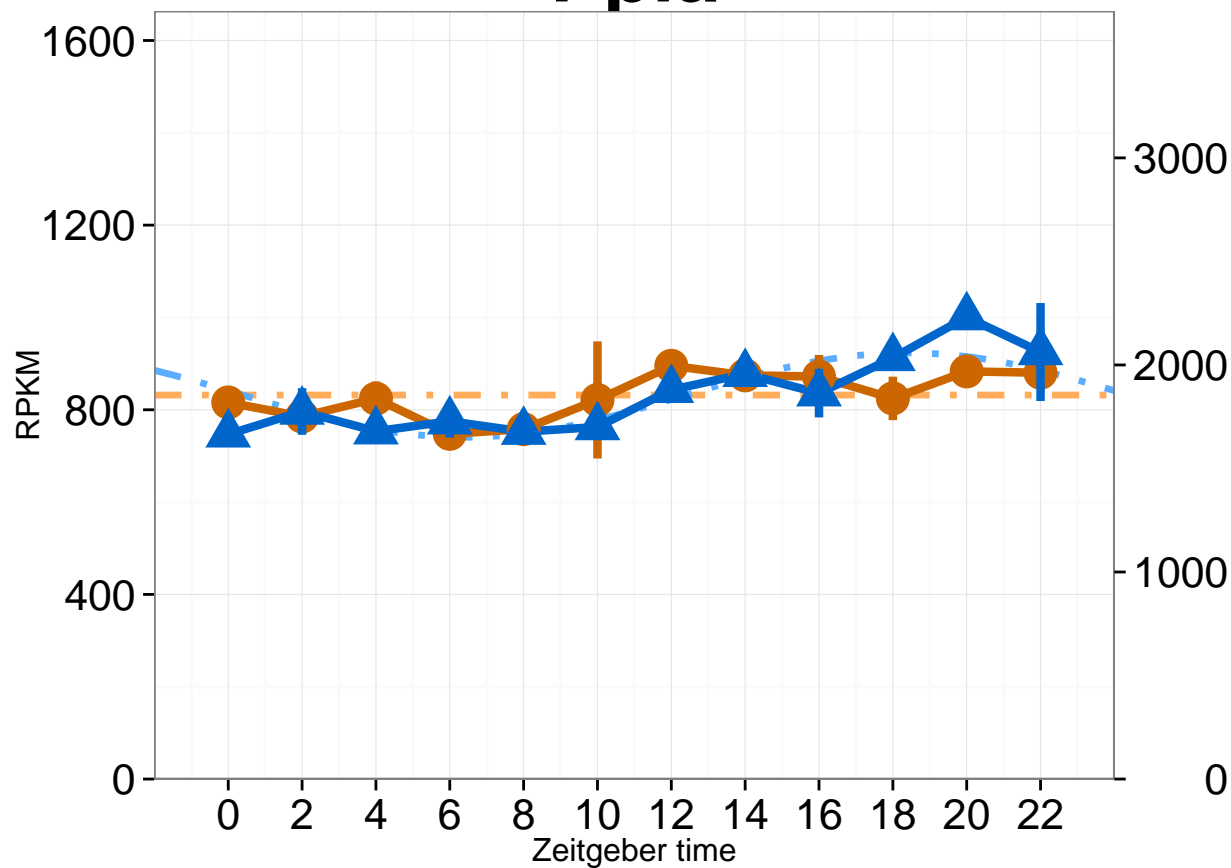

## Ppia

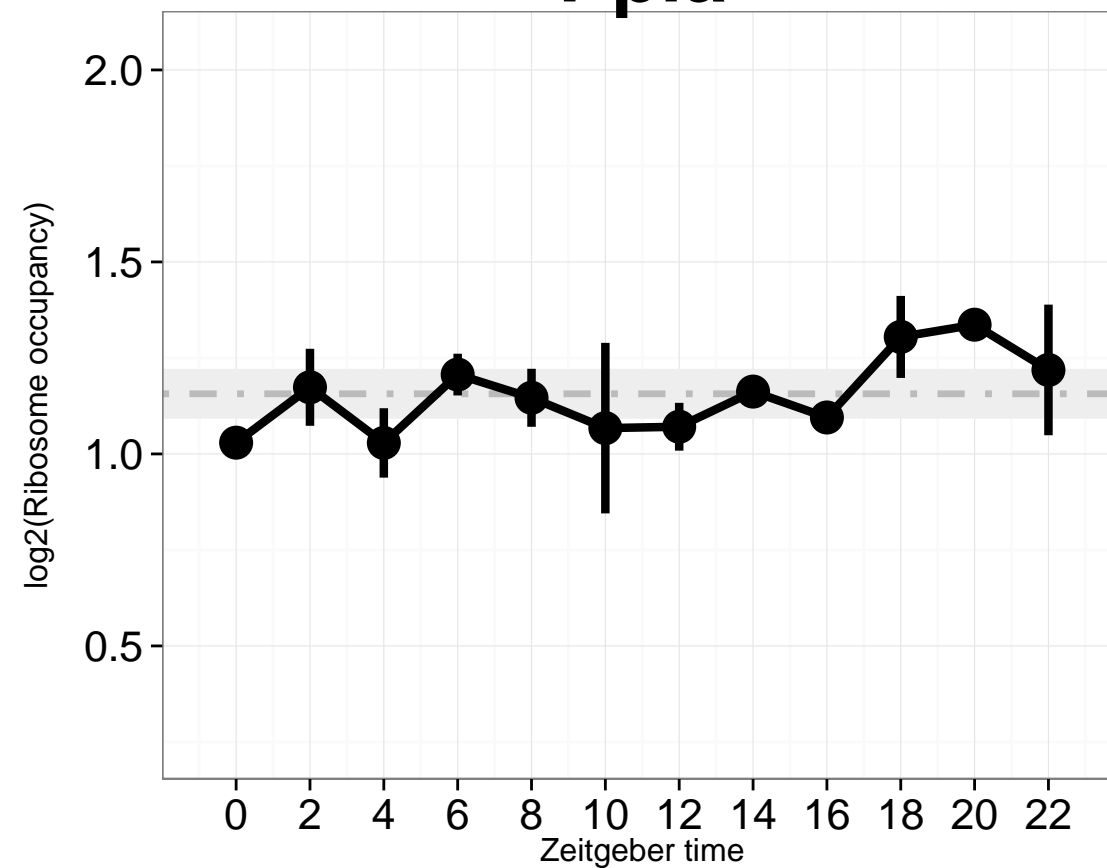

Supplement: Supplementary file 7879 [file 1]

## Sympk

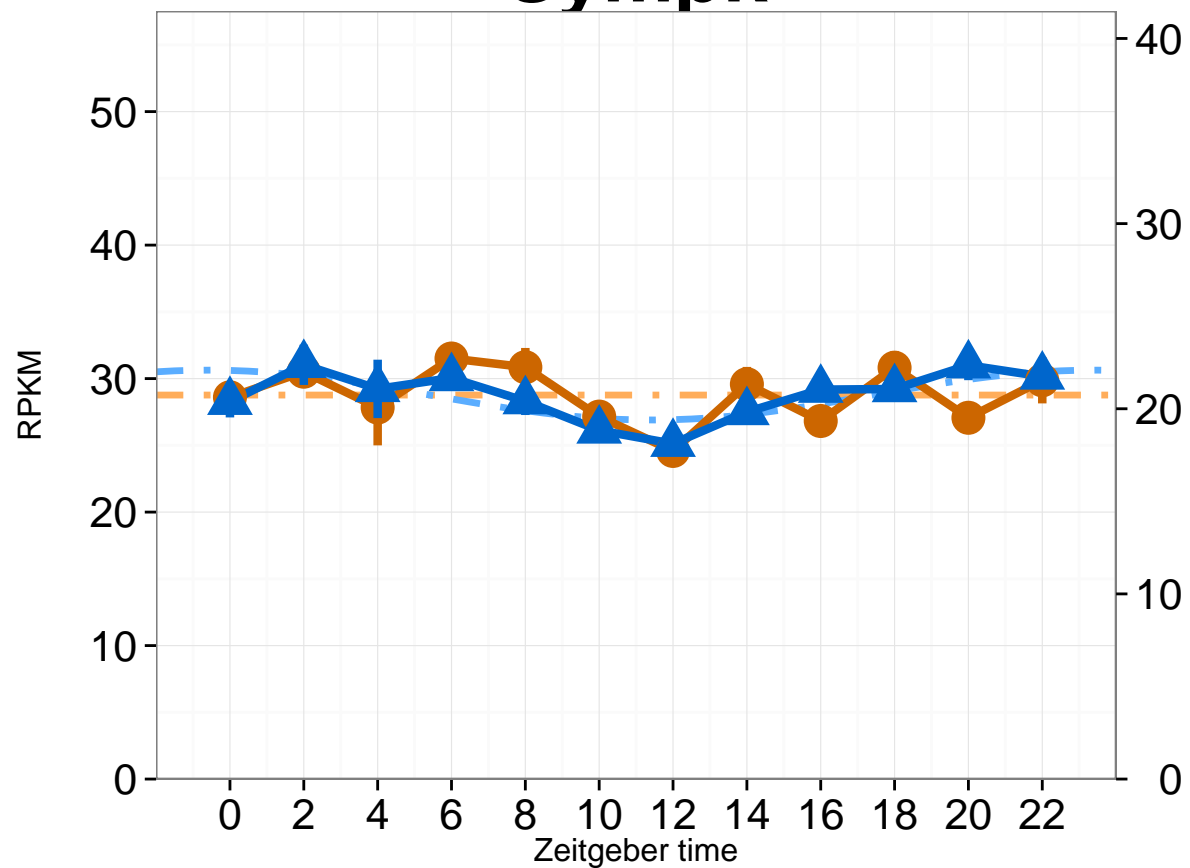

## Sympk

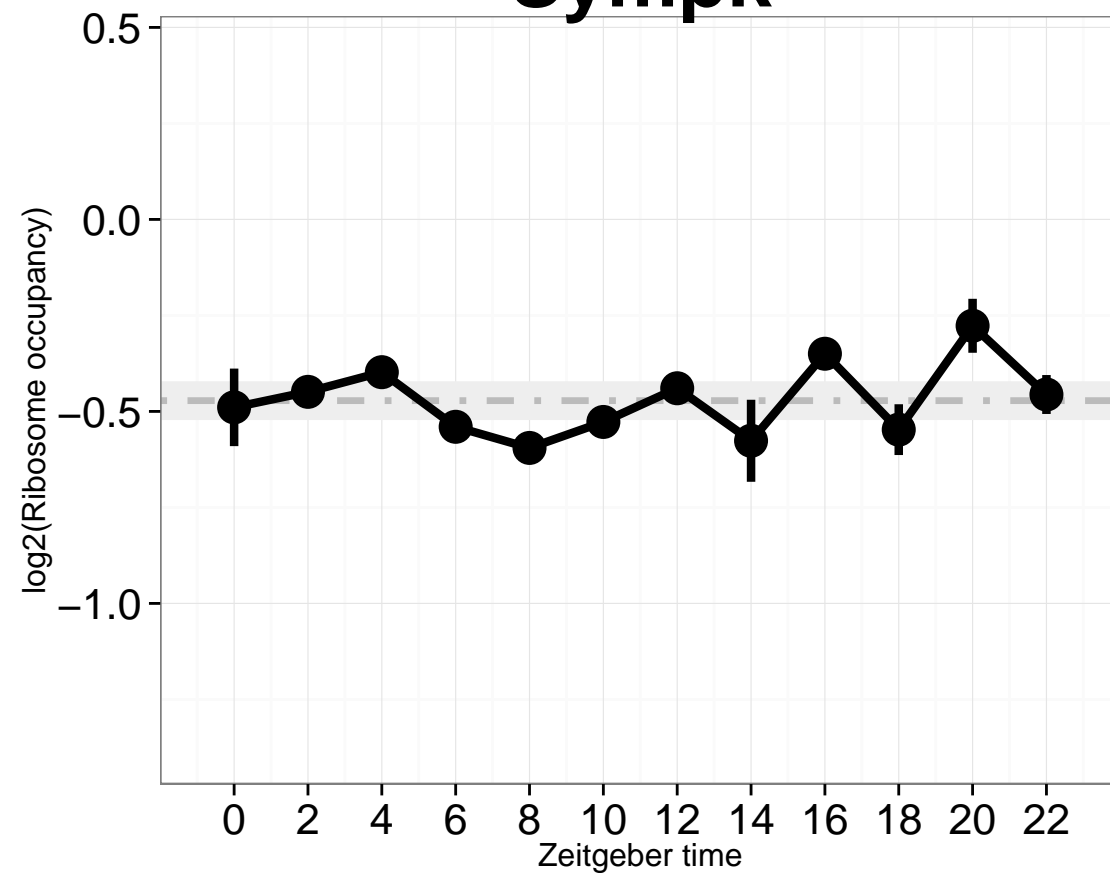

Supplement: Supplementary file 7880 [file 1]

# Clcn4-2

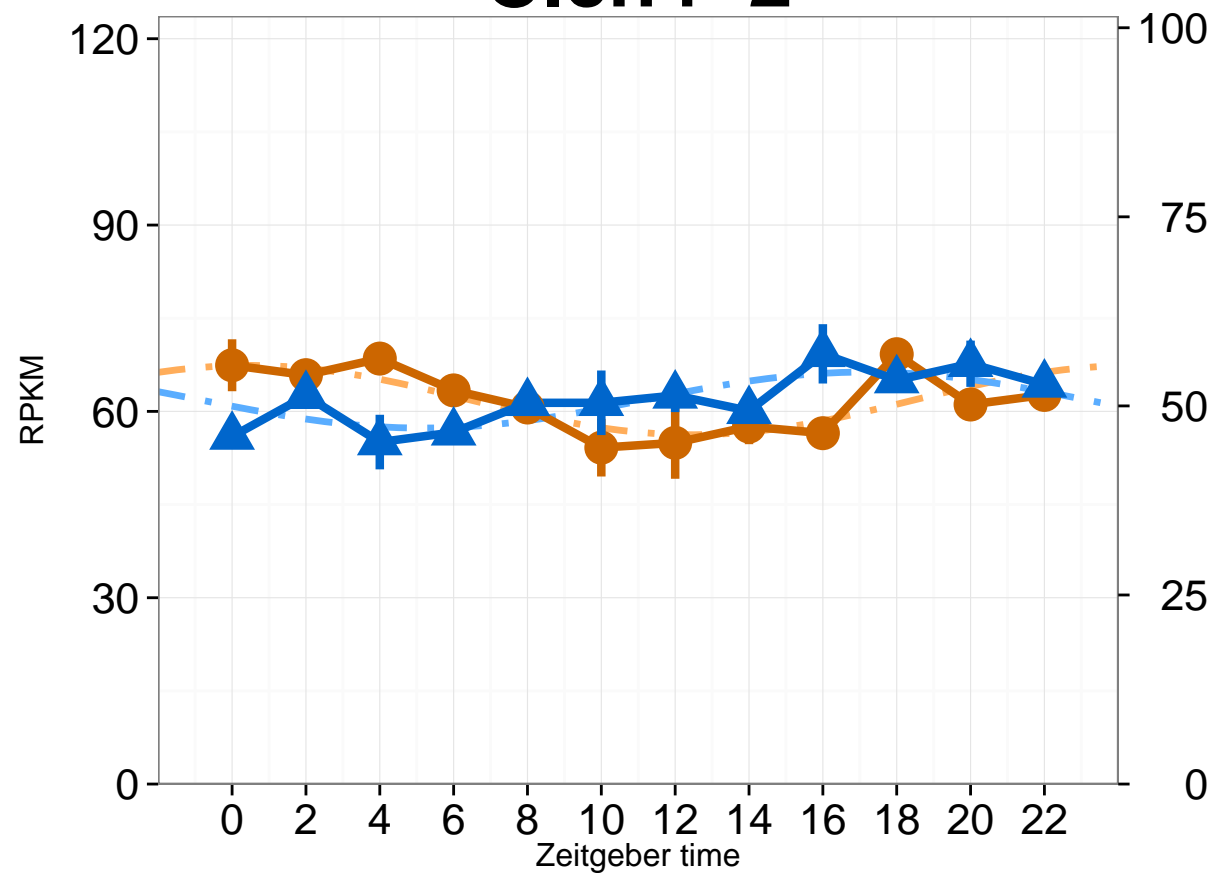

# Clcn4-2

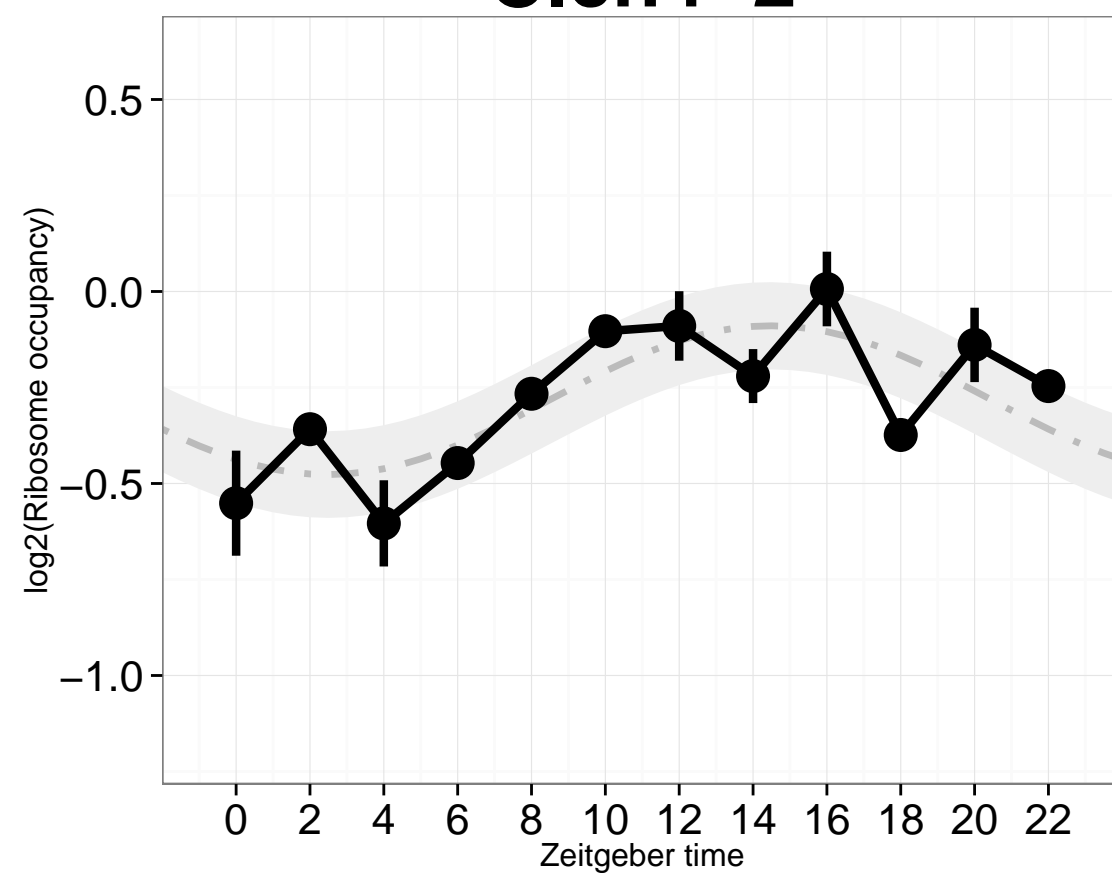

Supplement: Supplementary file 7881 [file 1]

## Habp4

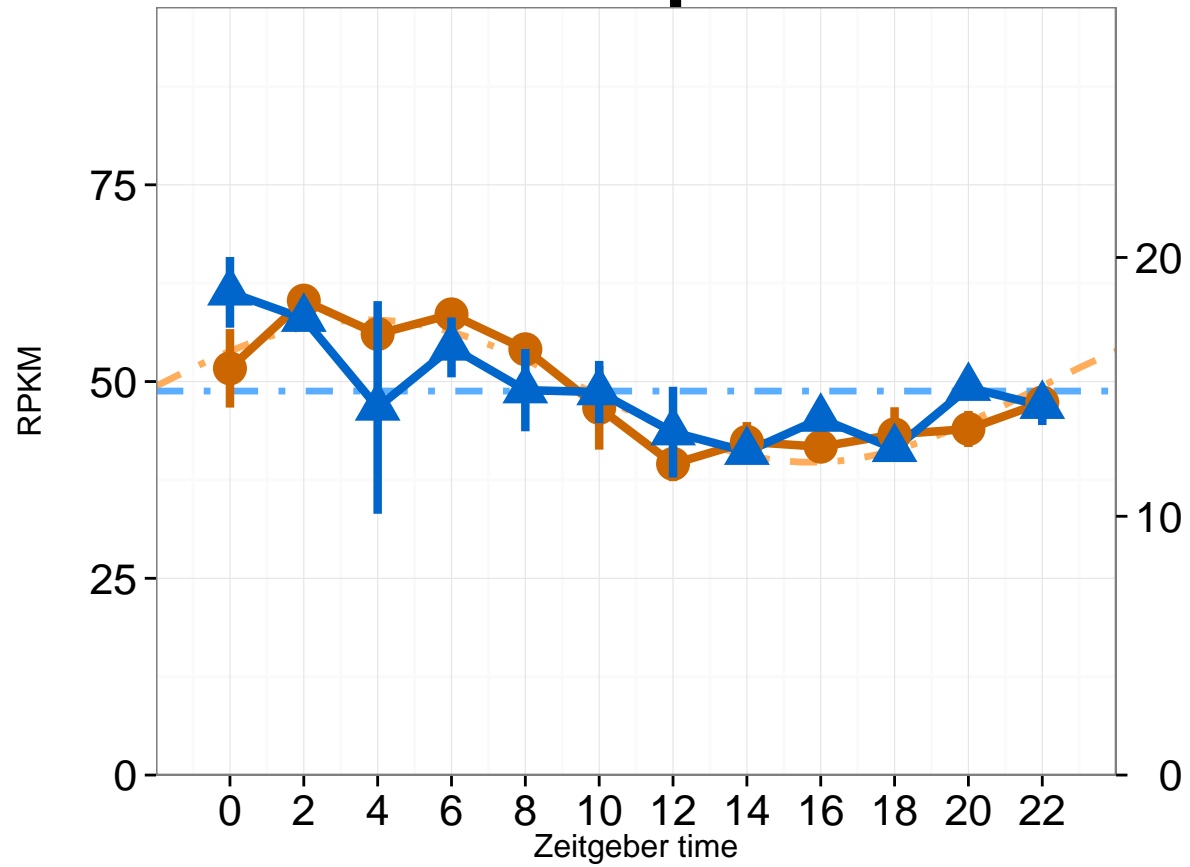

## Habp4

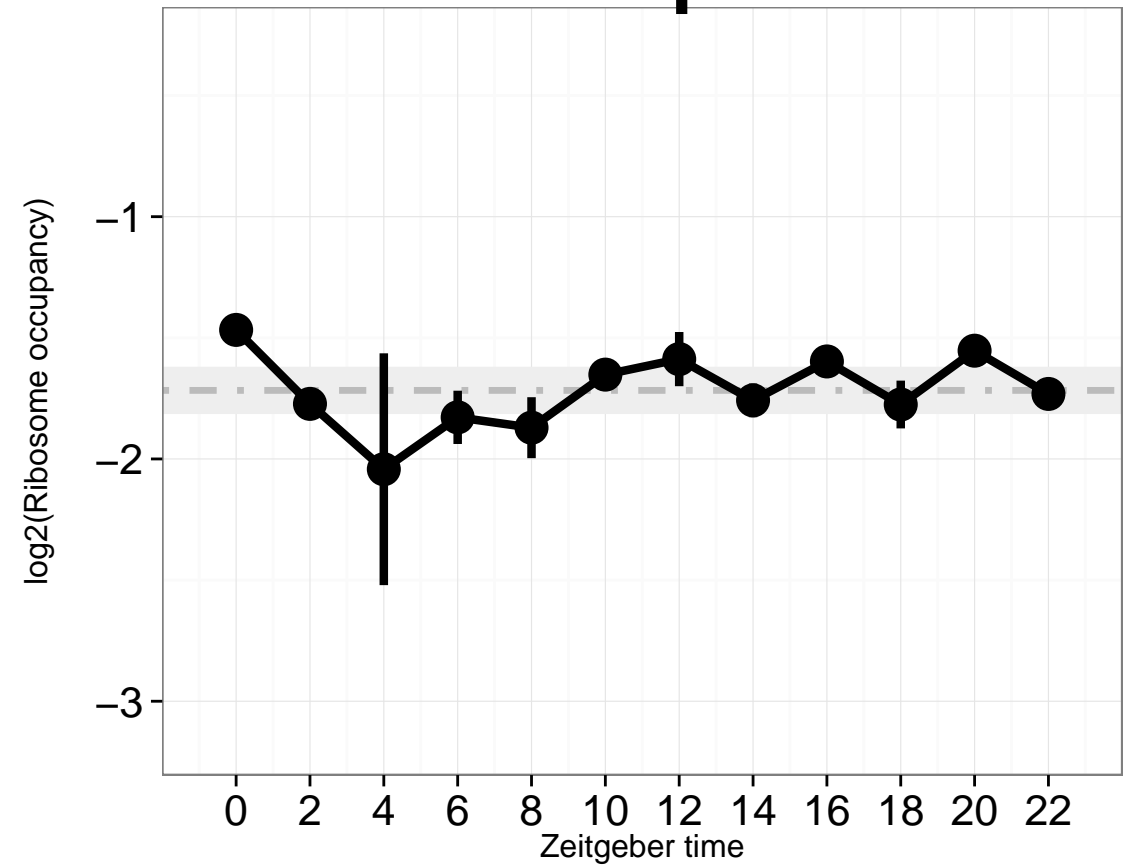

Supplement: Supplementary file 7882 [file 1]

## Ddx3y

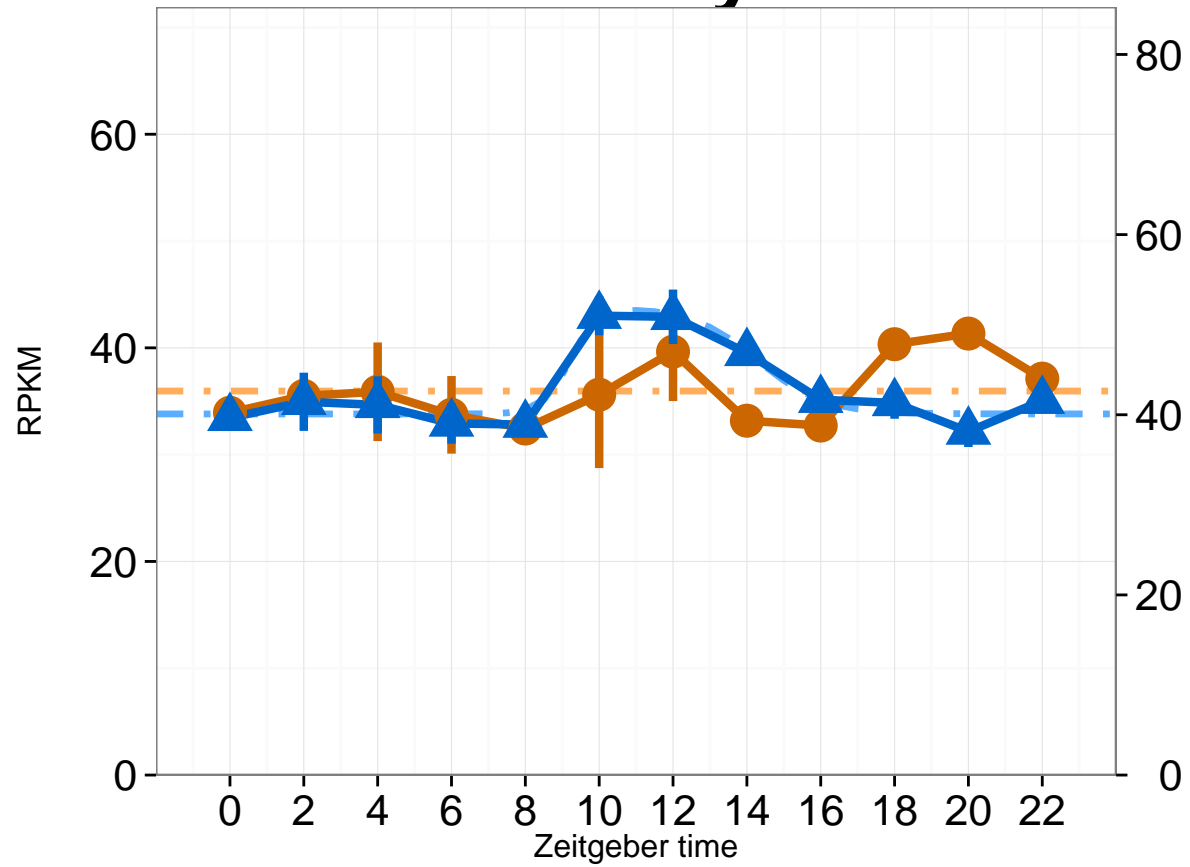

## Ddx3y

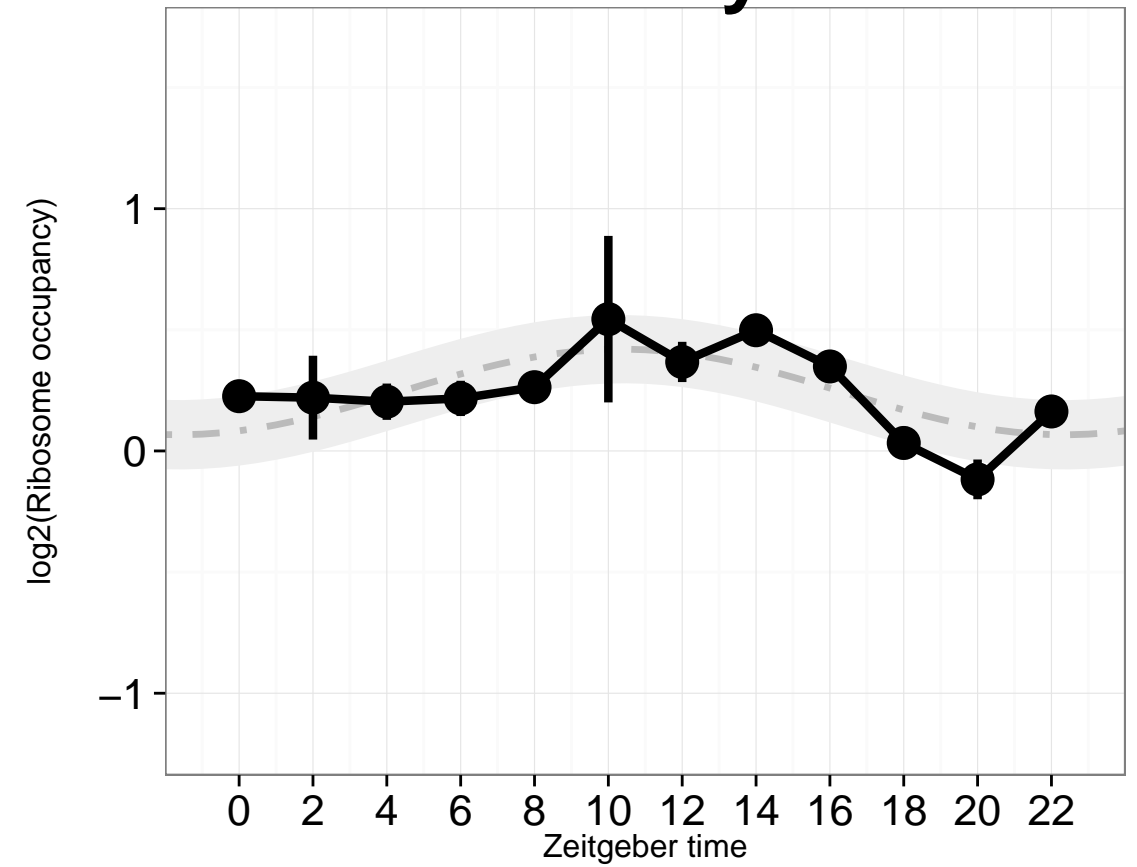

Supplement: Supplementary file 7883 [file 1]

## Mdfic

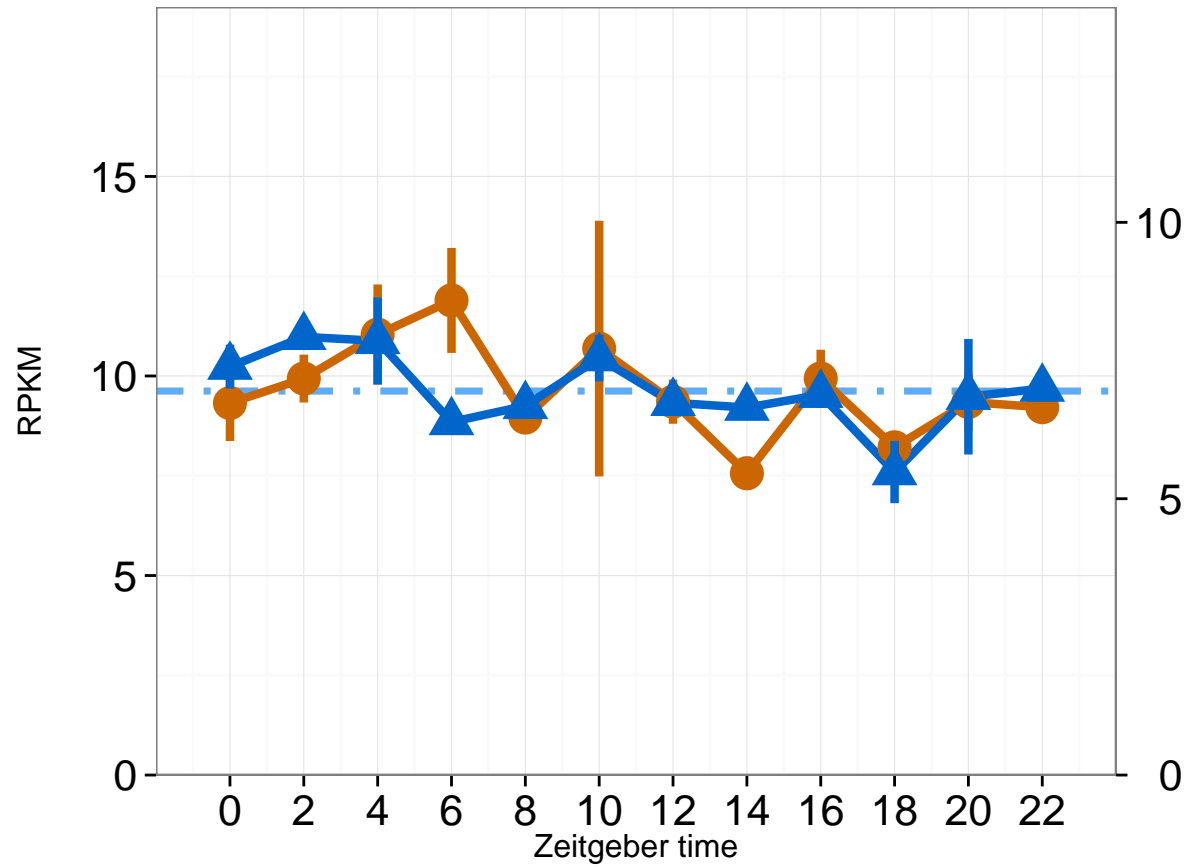

## Mdfic

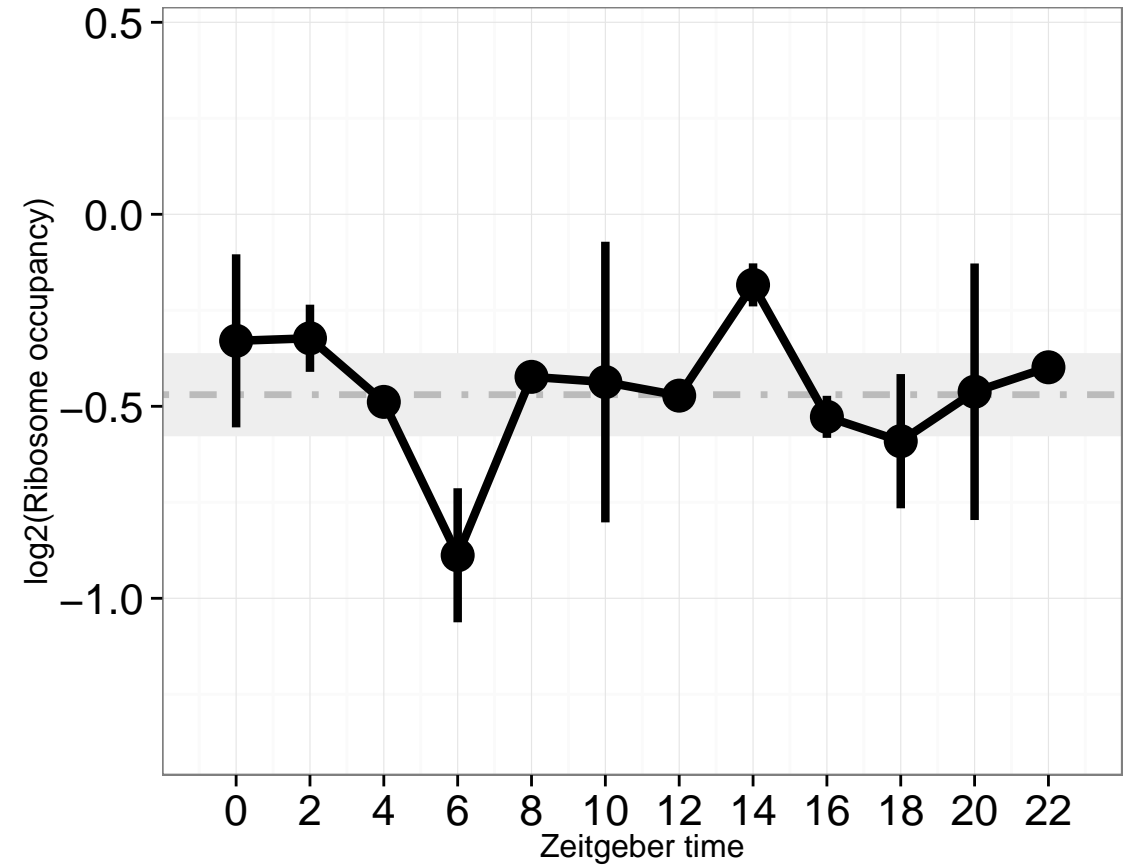

Supplement: Supplementary file 7884 [file 1]

# Kcnmb1

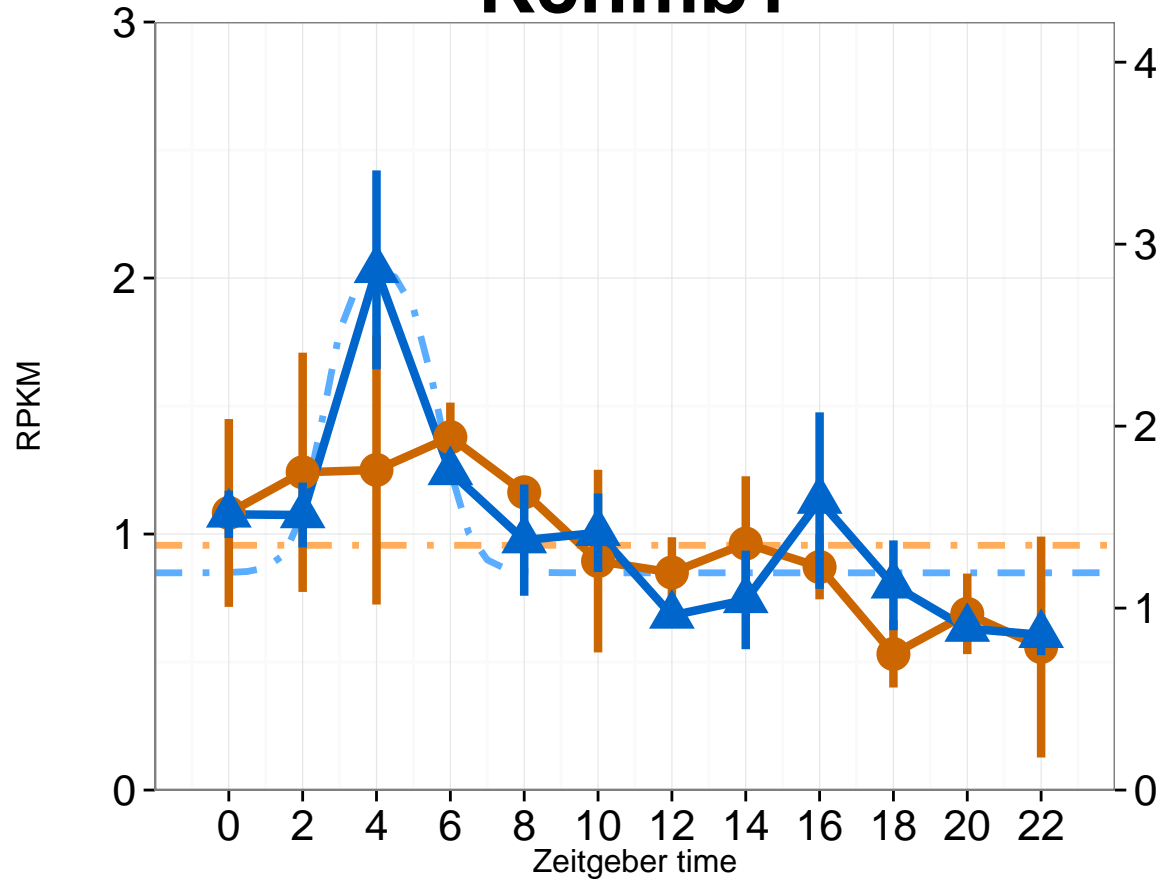

# Kcnmb1

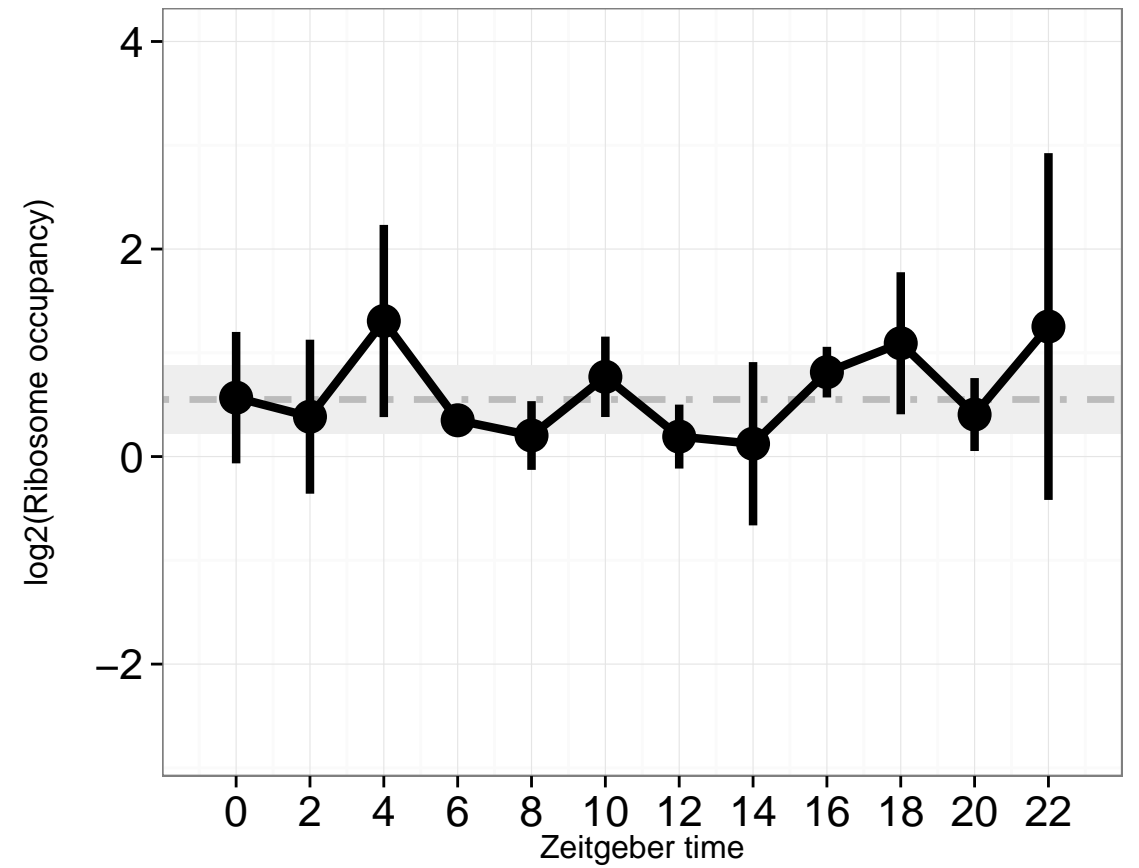

Supplement: Supplementary file 7885 [file 1]

## Pygo2

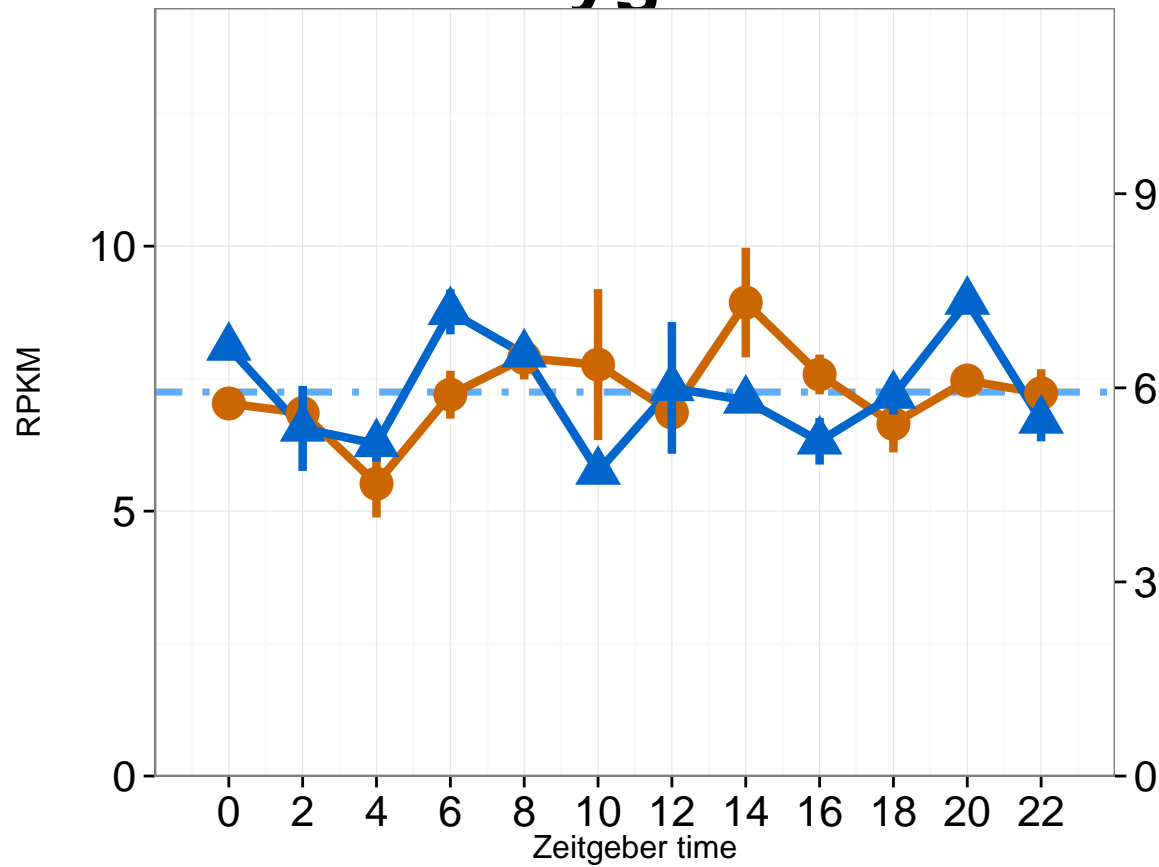

## Pygo2

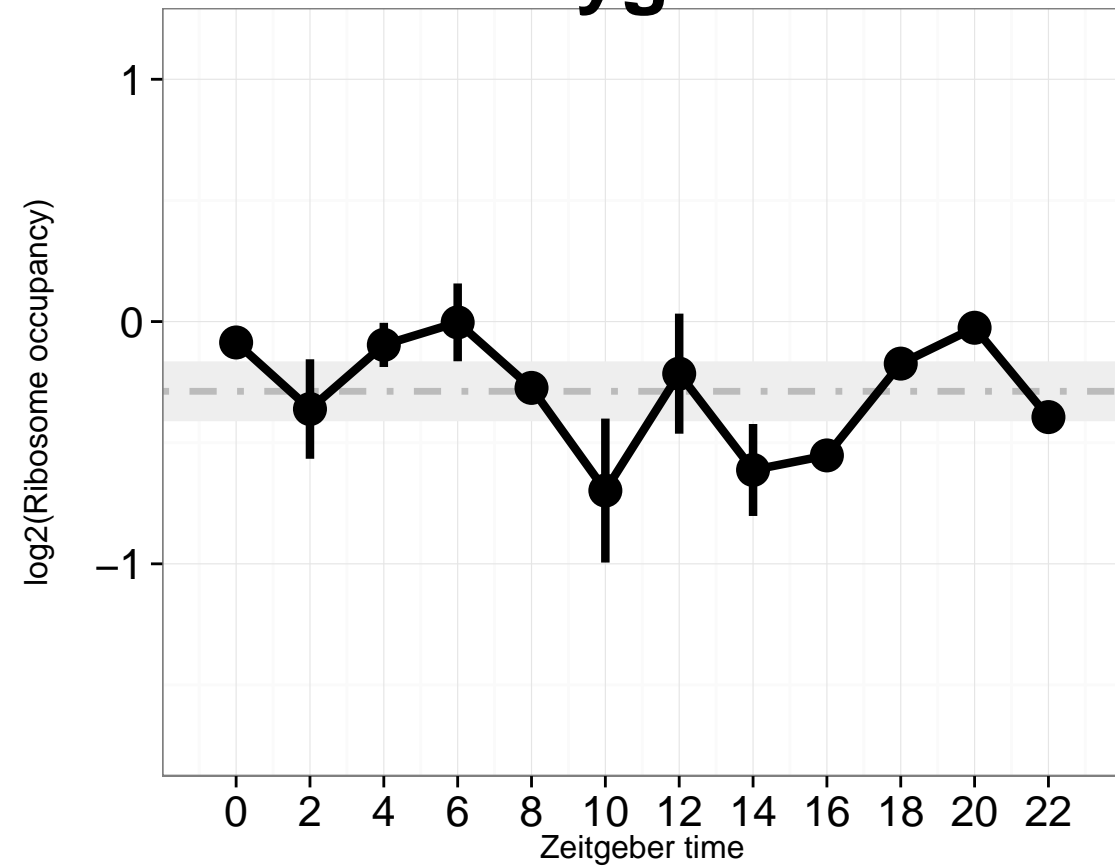

Supplement: Supplementary file 7886 [file 1]

# Chst9

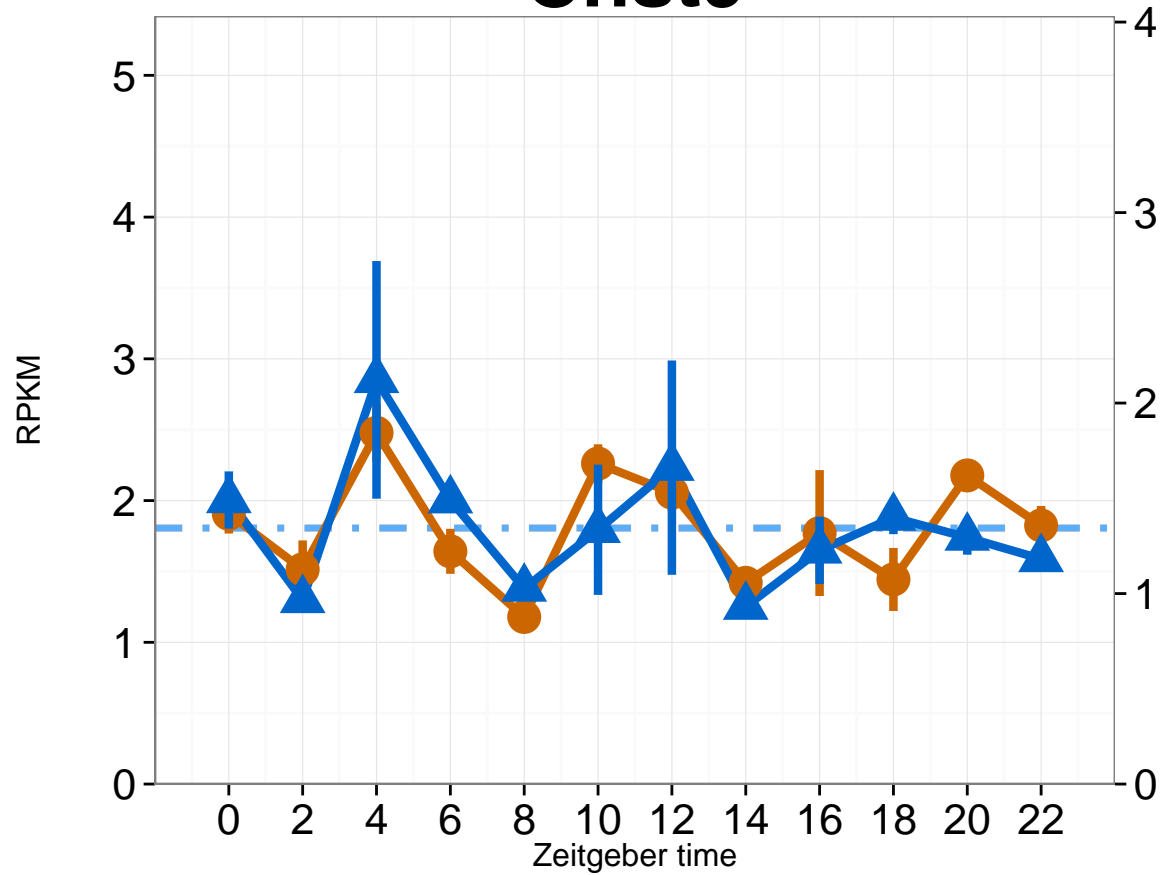

# Chst9

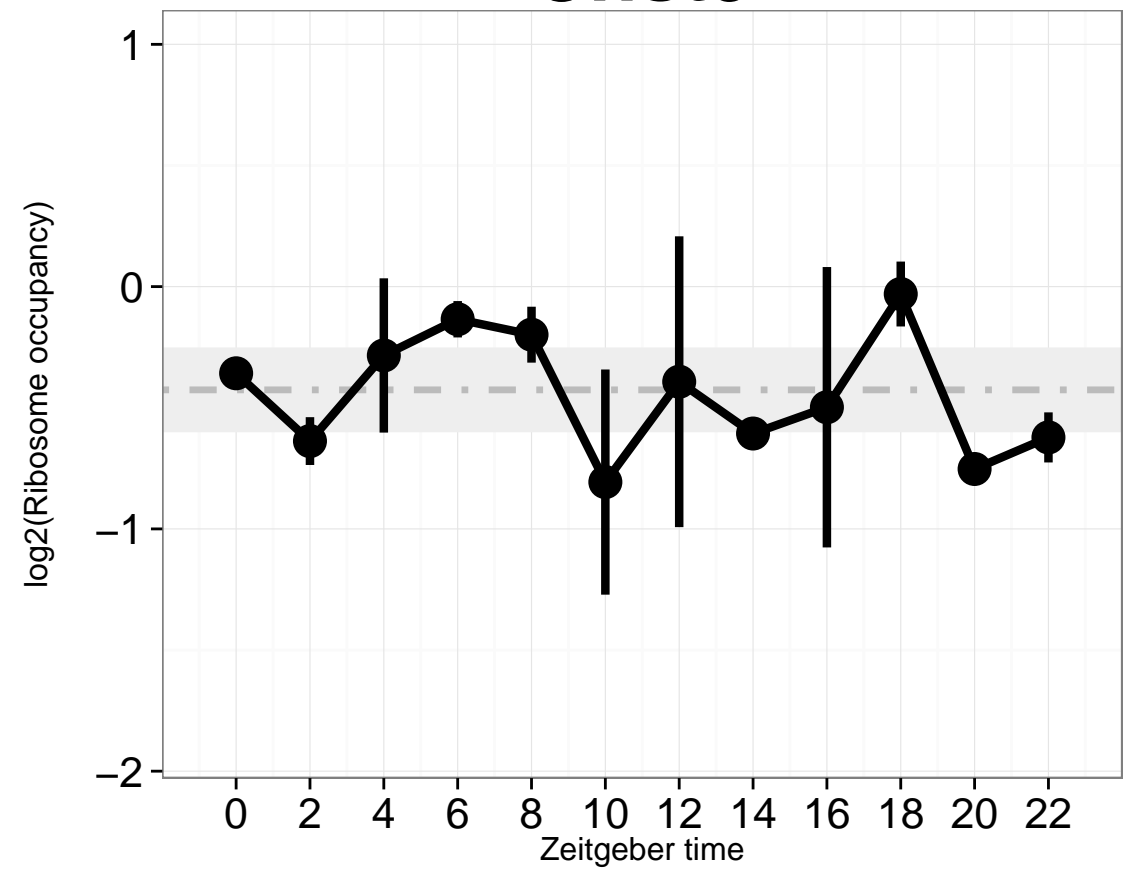

Supplement: Supplementary file 7887 [file 1]

# Zrsr2

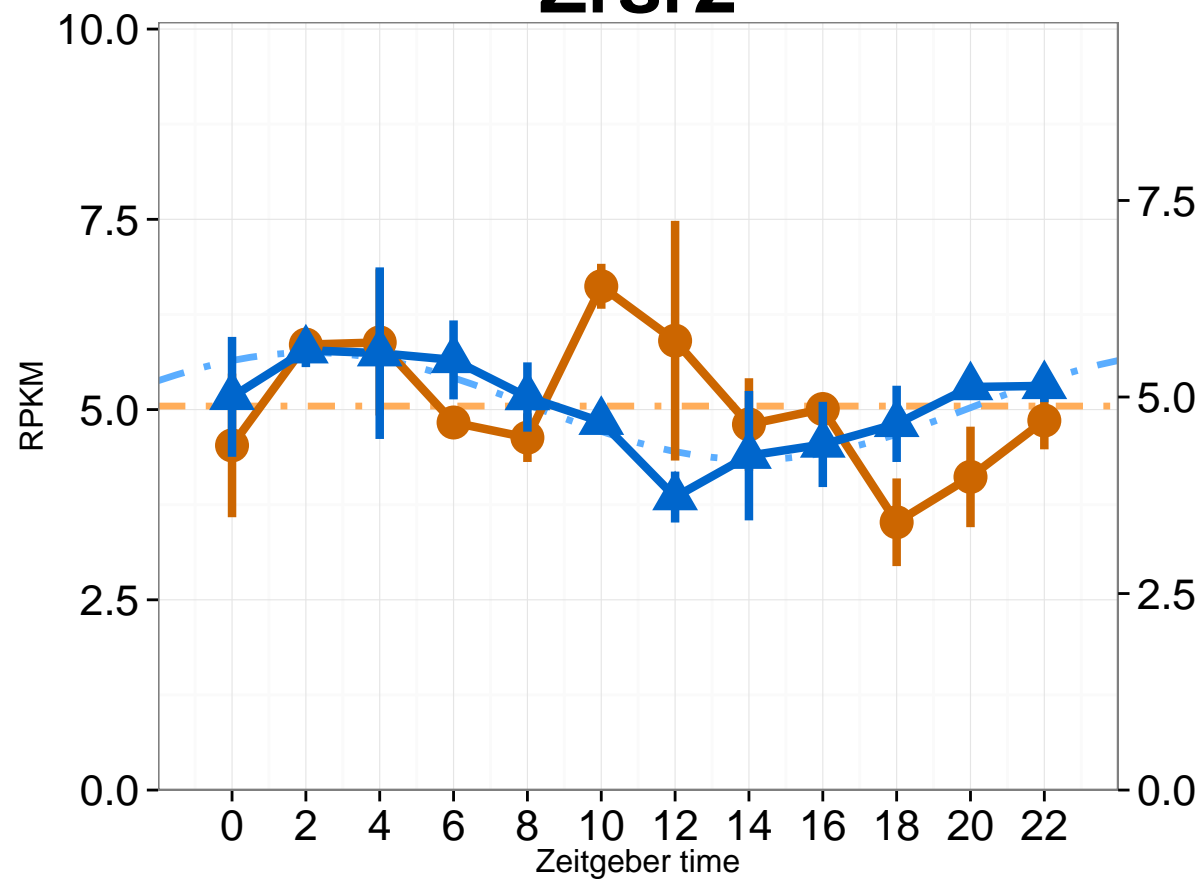

# Zrsr2

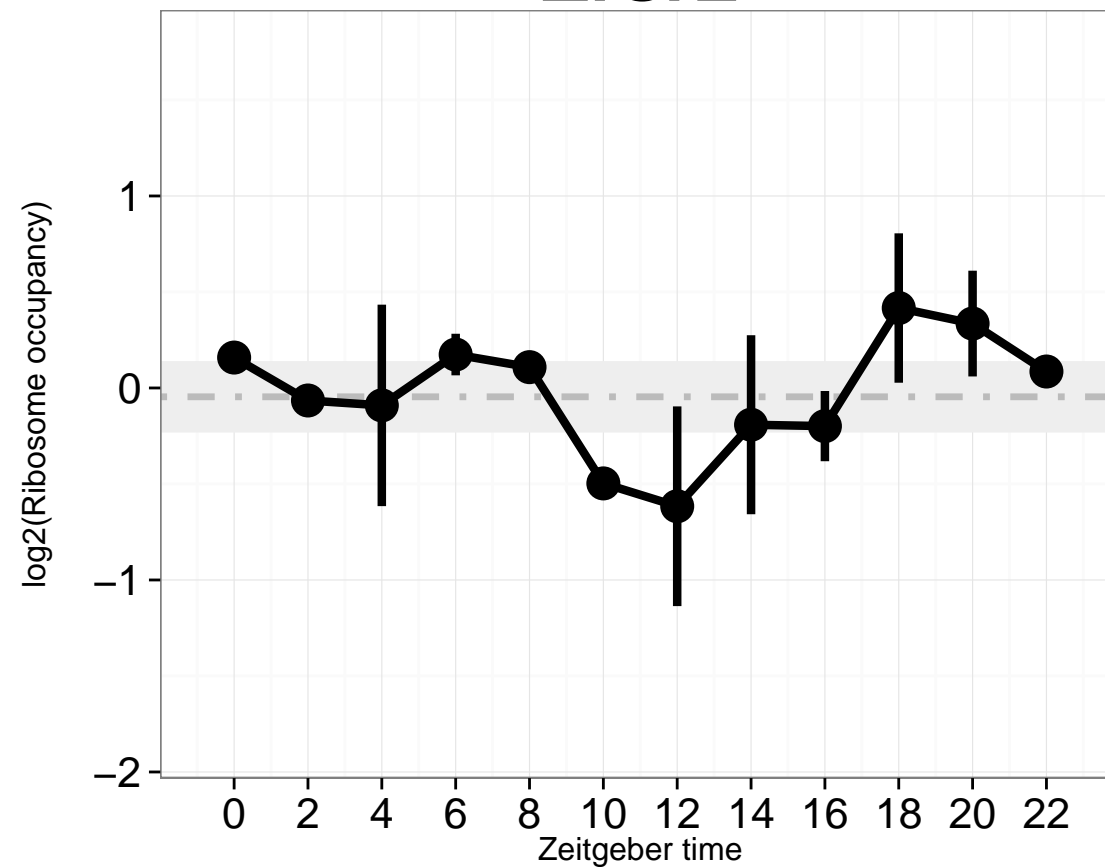

Supplement: Supplementary file 7888 [file 1]

# Zfp28

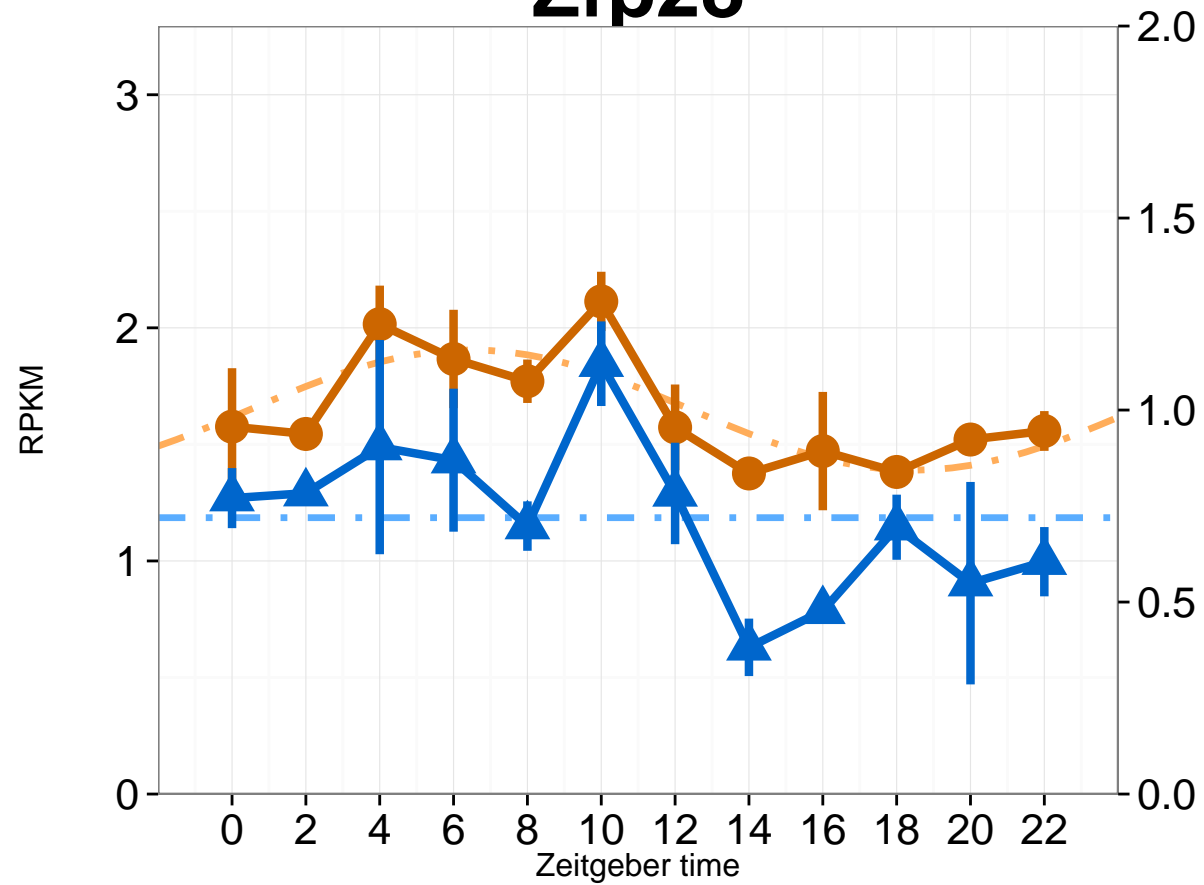

# Zfp28

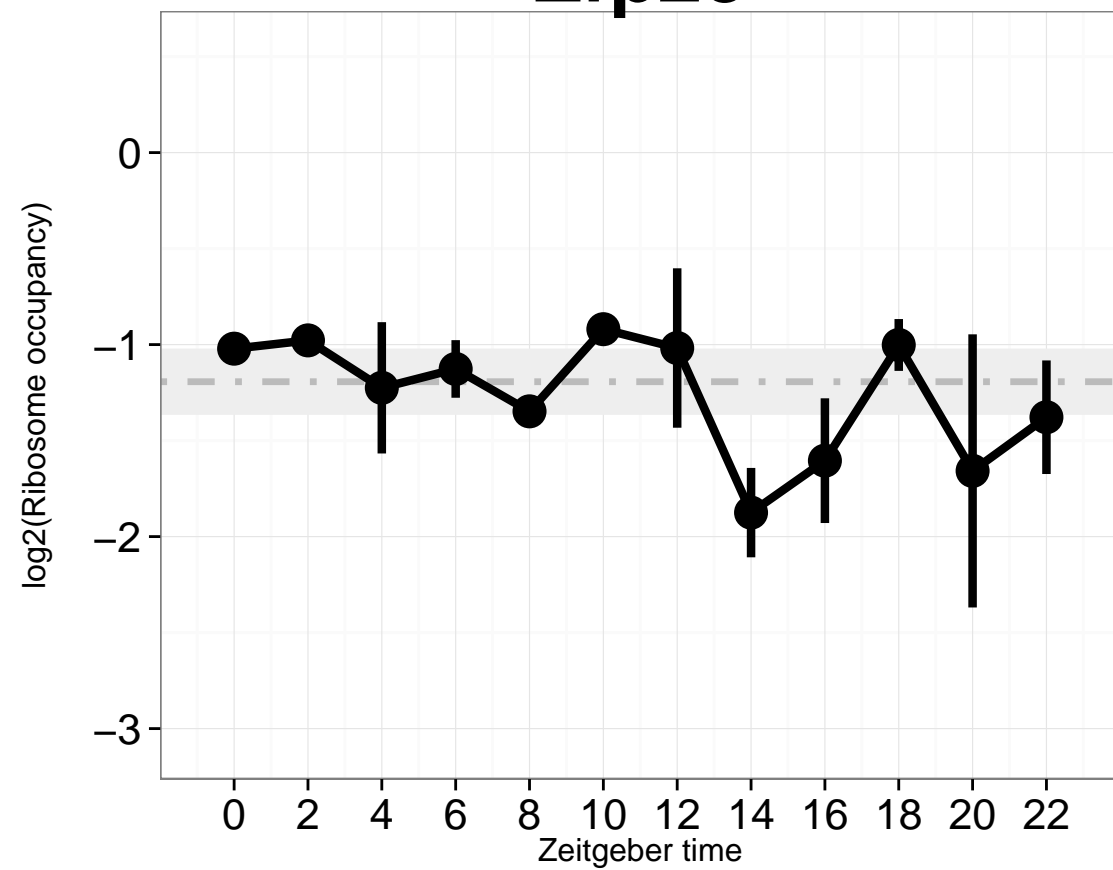

Supplement: Supplementary file 7889 [file 1]

## Ppard

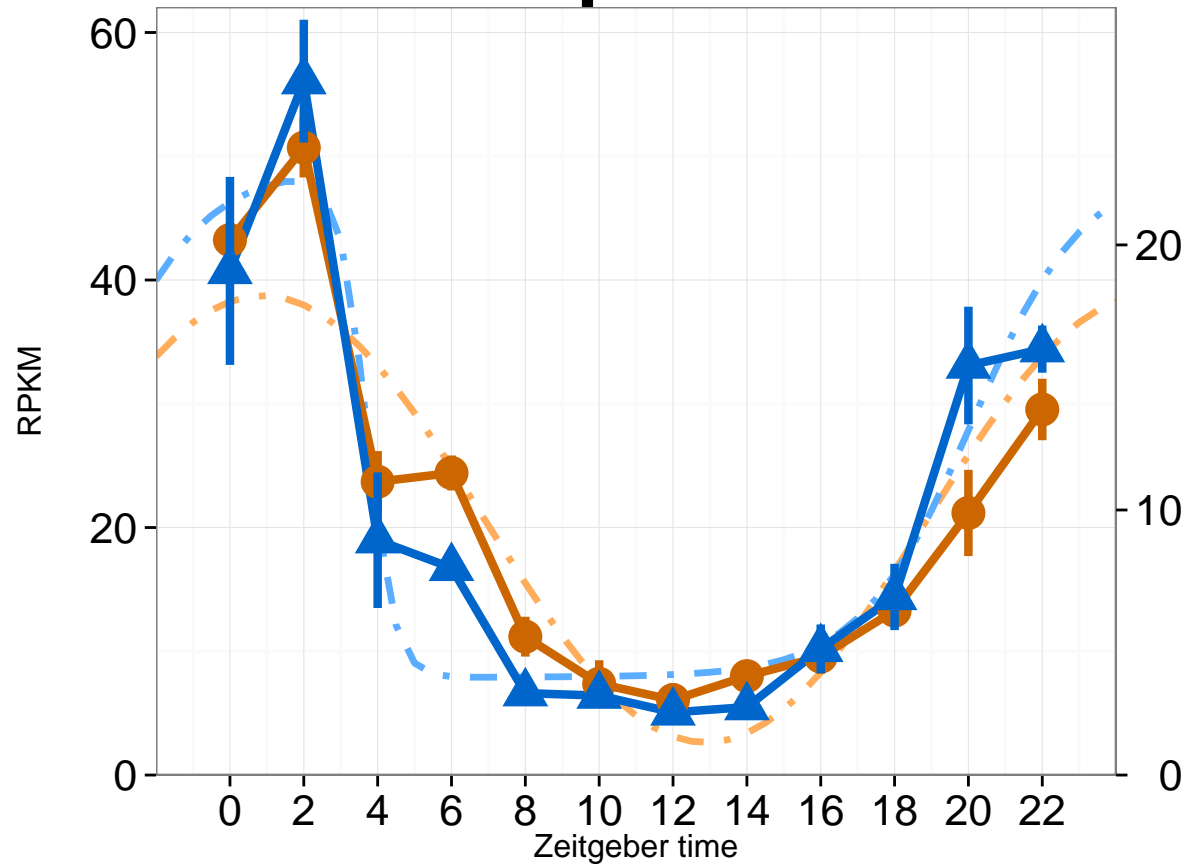

## Ppard

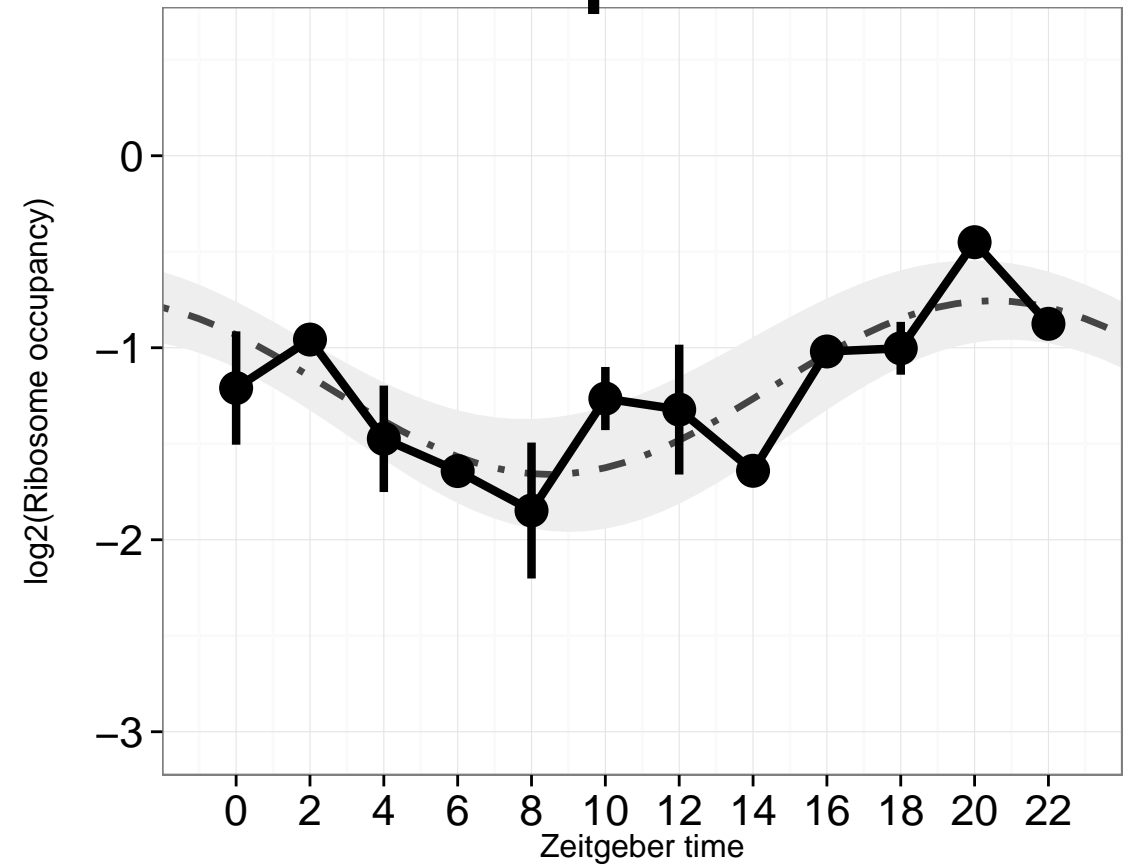

Supplement: Supplementary file 7890 [file 1]

# Syt17

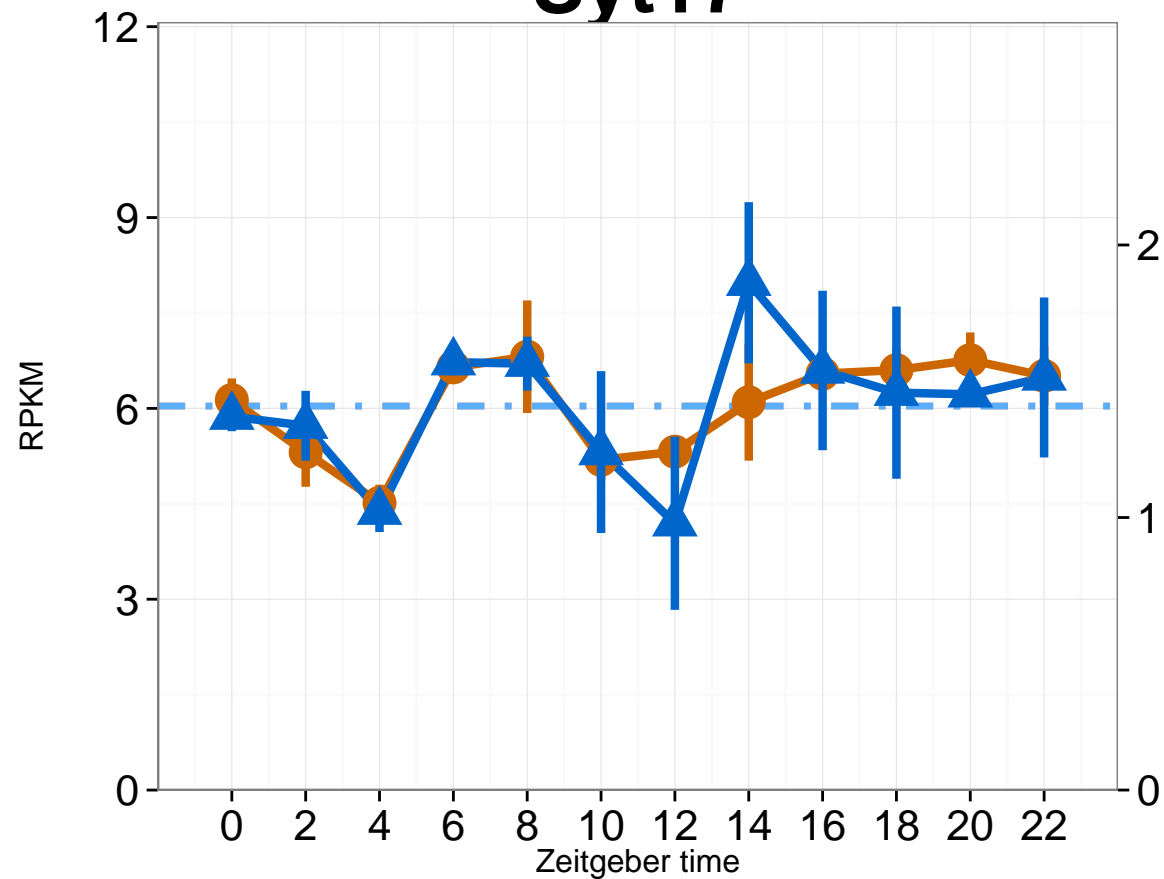

# Syt17

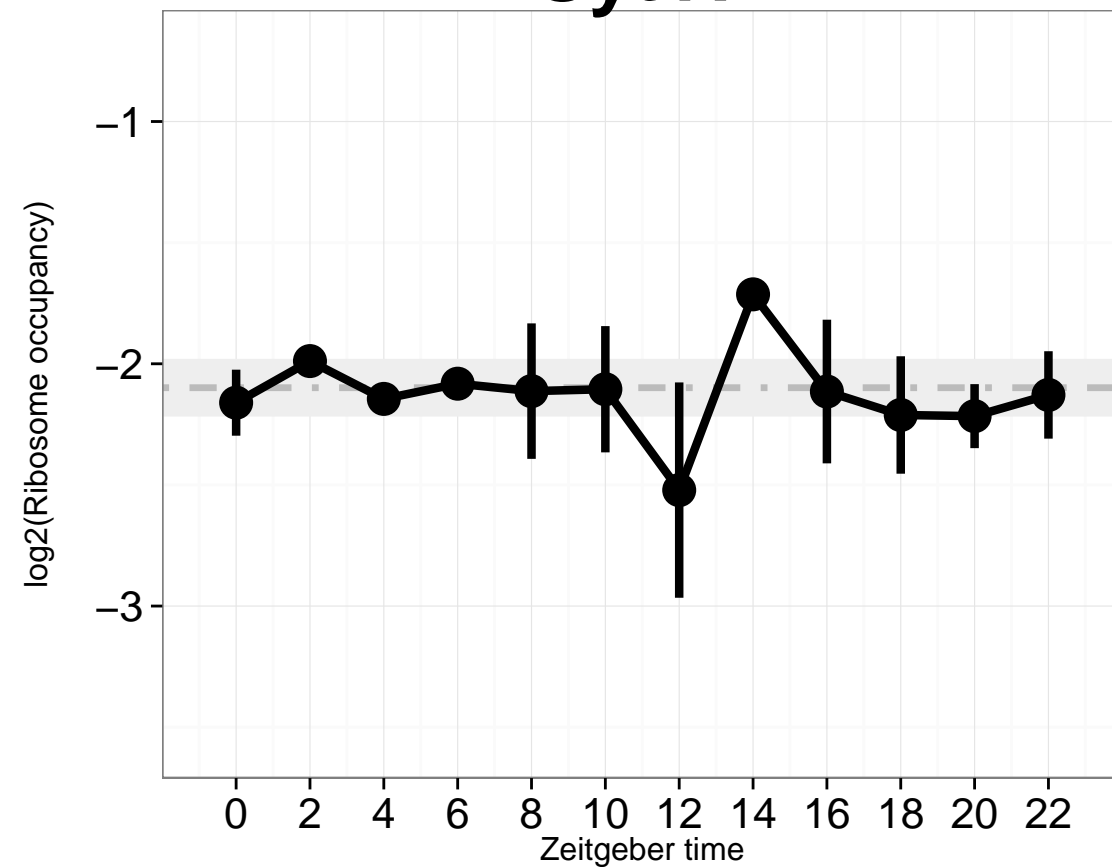

Supplement: Supplementary file 7891 [file 1]

# Cdkn1a

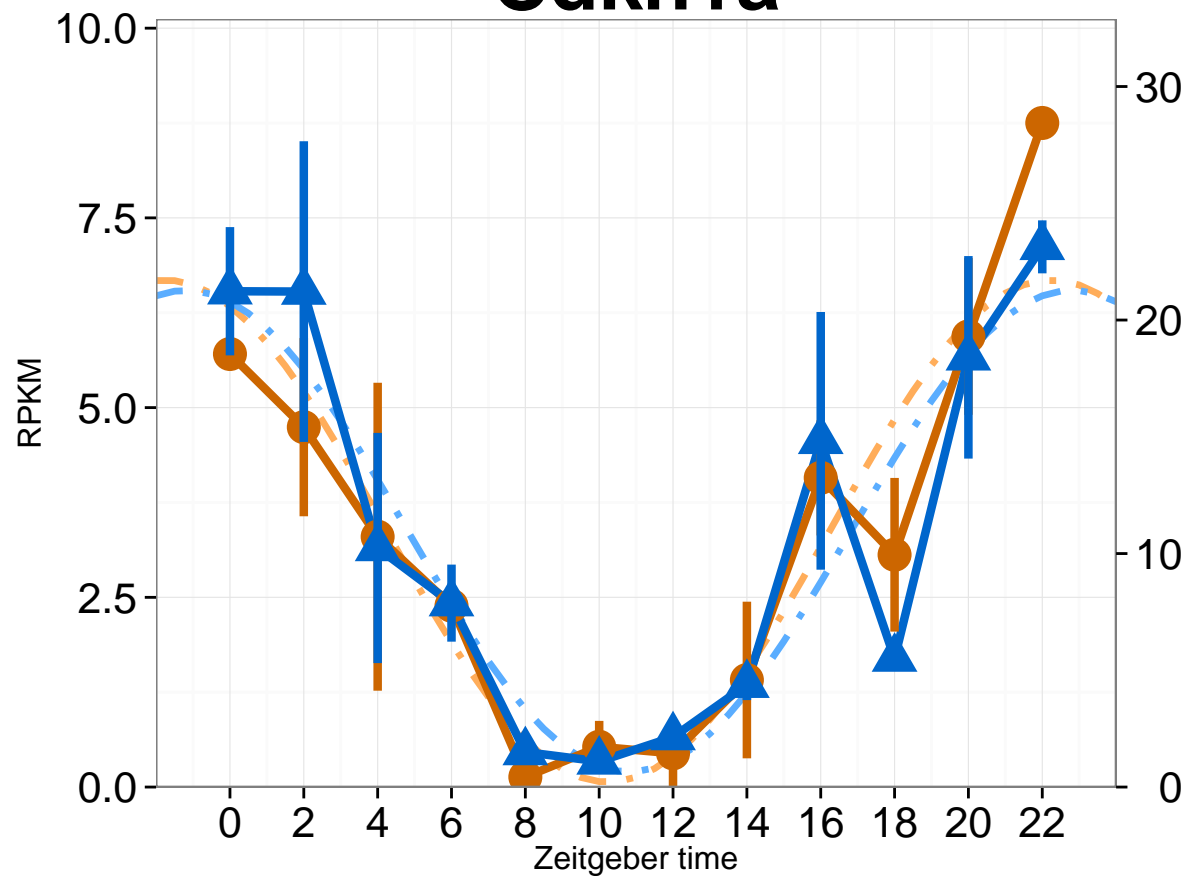

# Cdkn1a

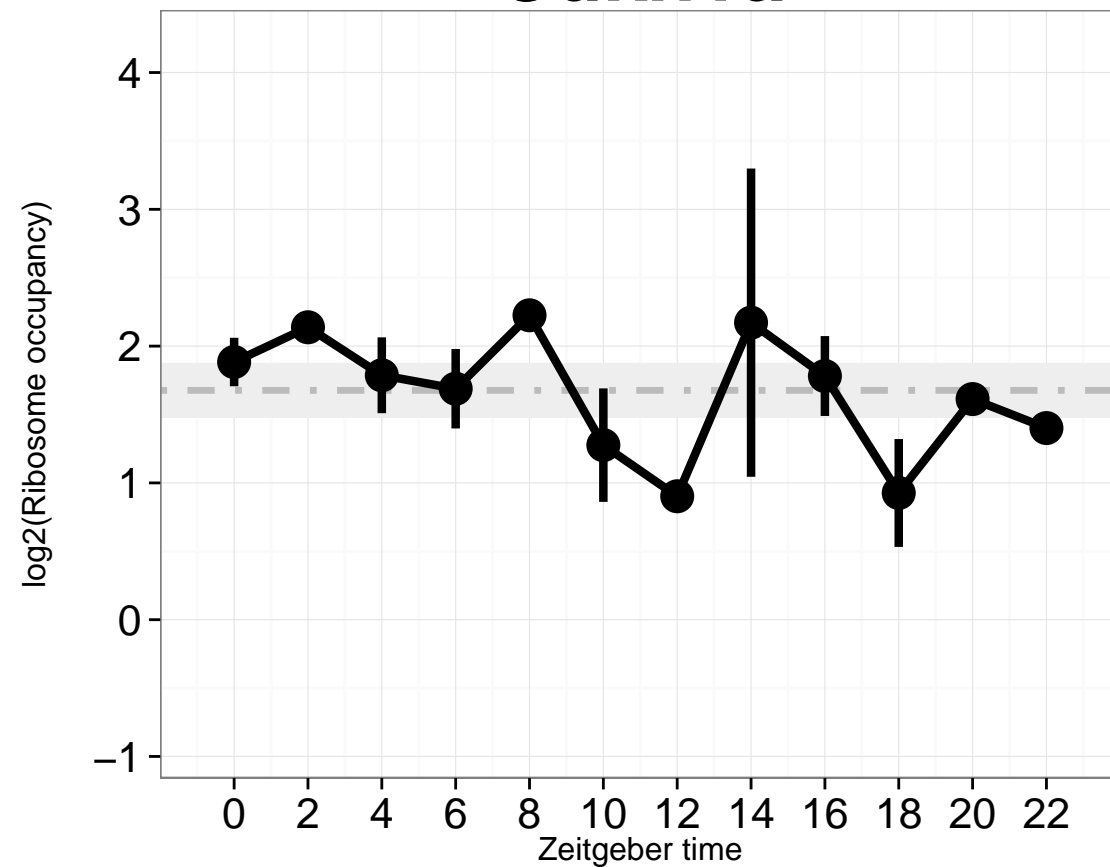

Supplement: Supplementary file 7892 [file 1]

# Zfp358

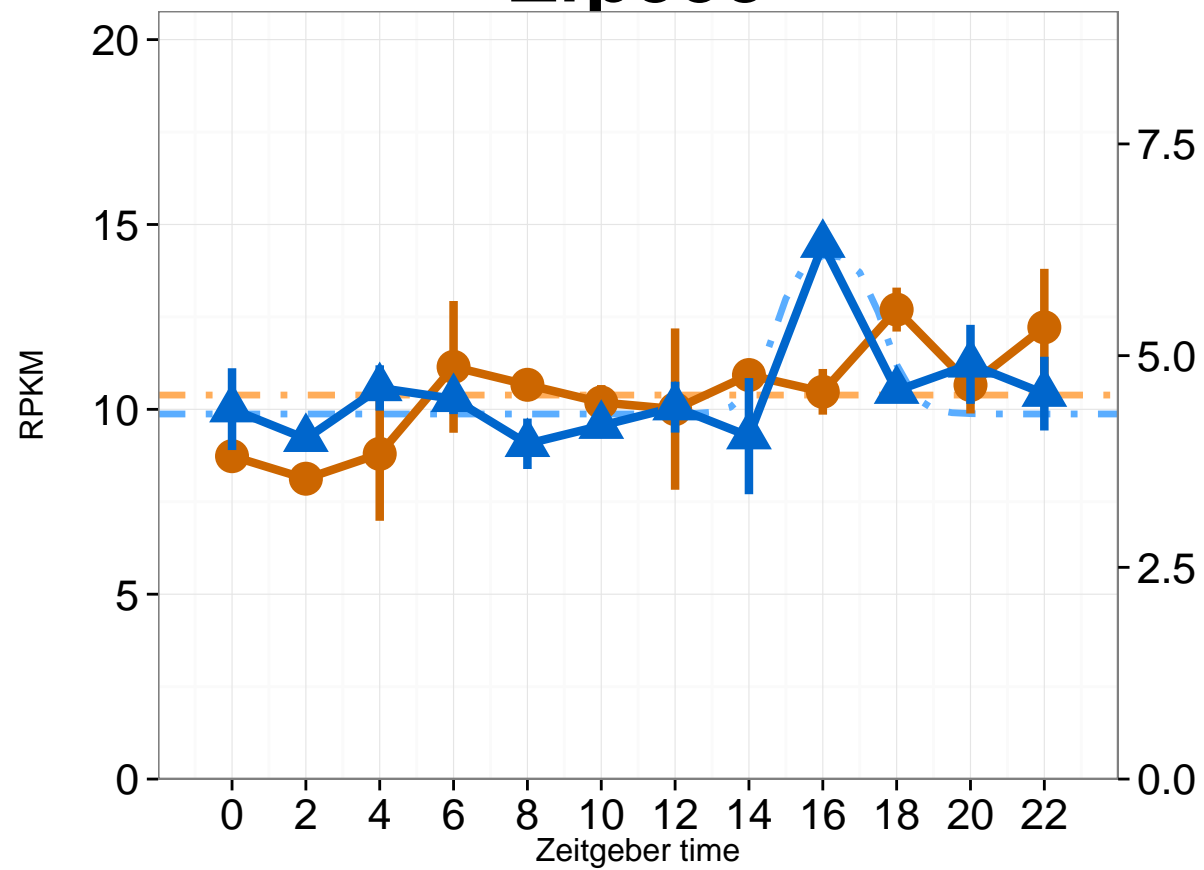

# Zfp358

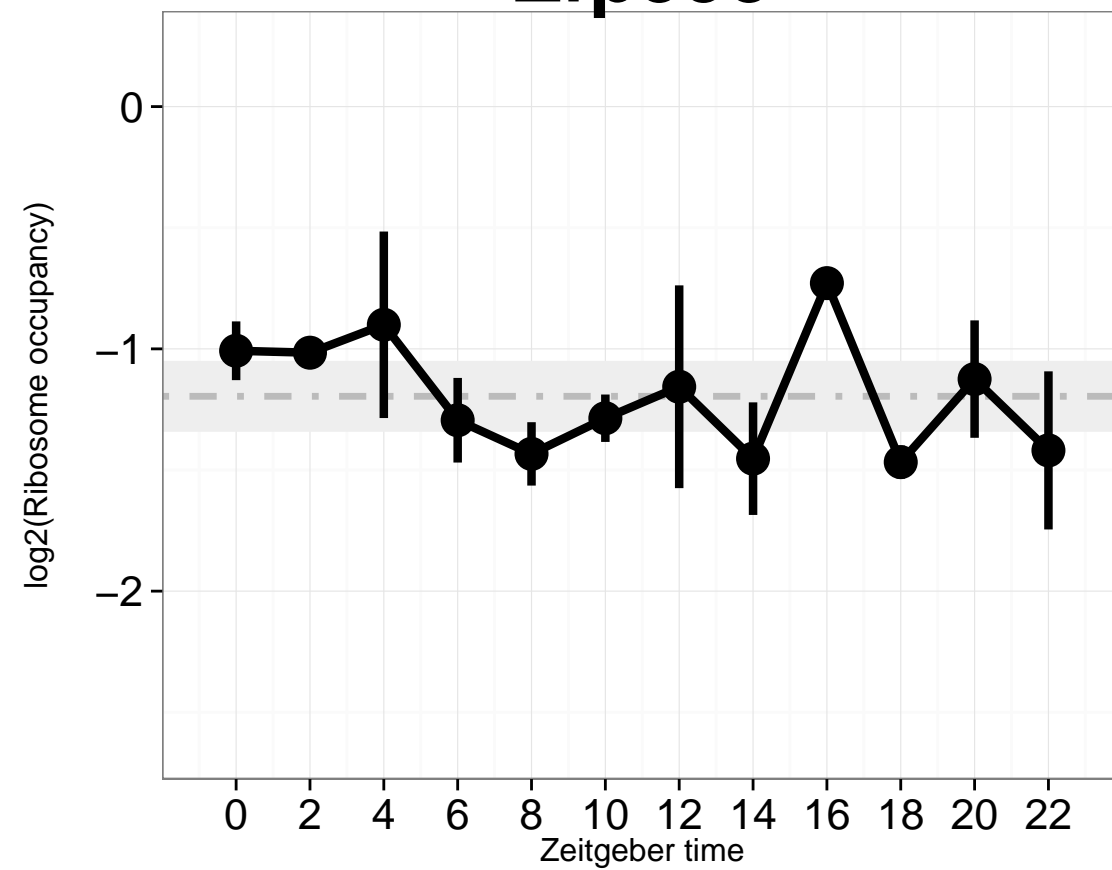

Supplement: Supplementary file 7893 [file 1]

## Pdgfb

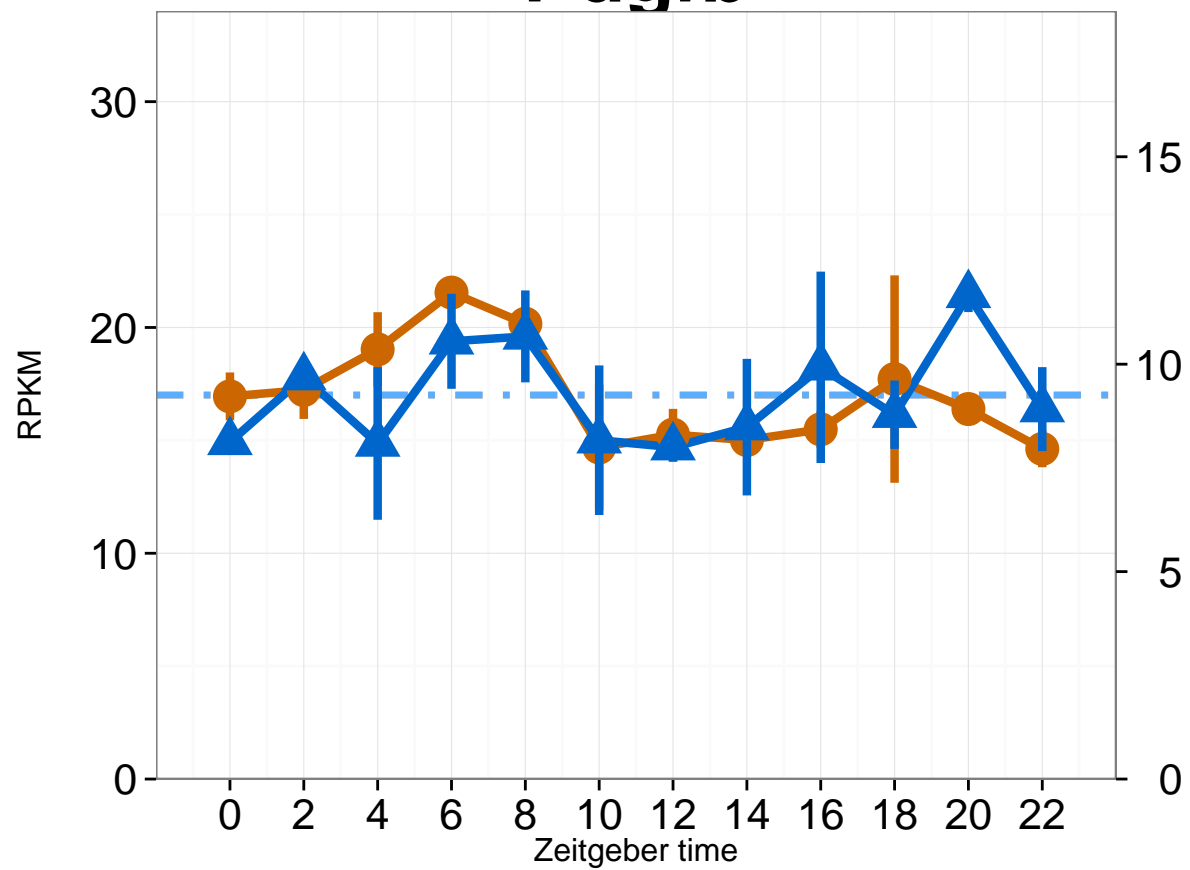

## Pdgfb

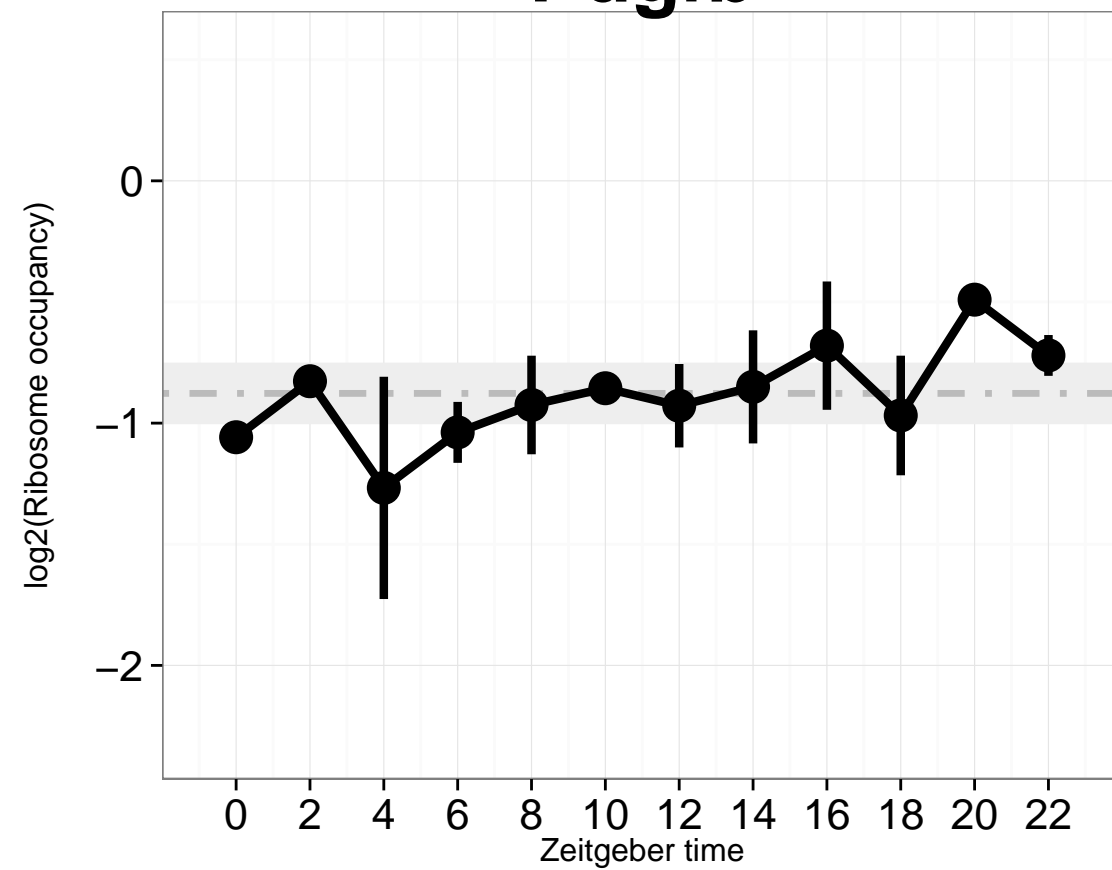

Supplement: Supplementary file 7894 [file 1]

## Lama2

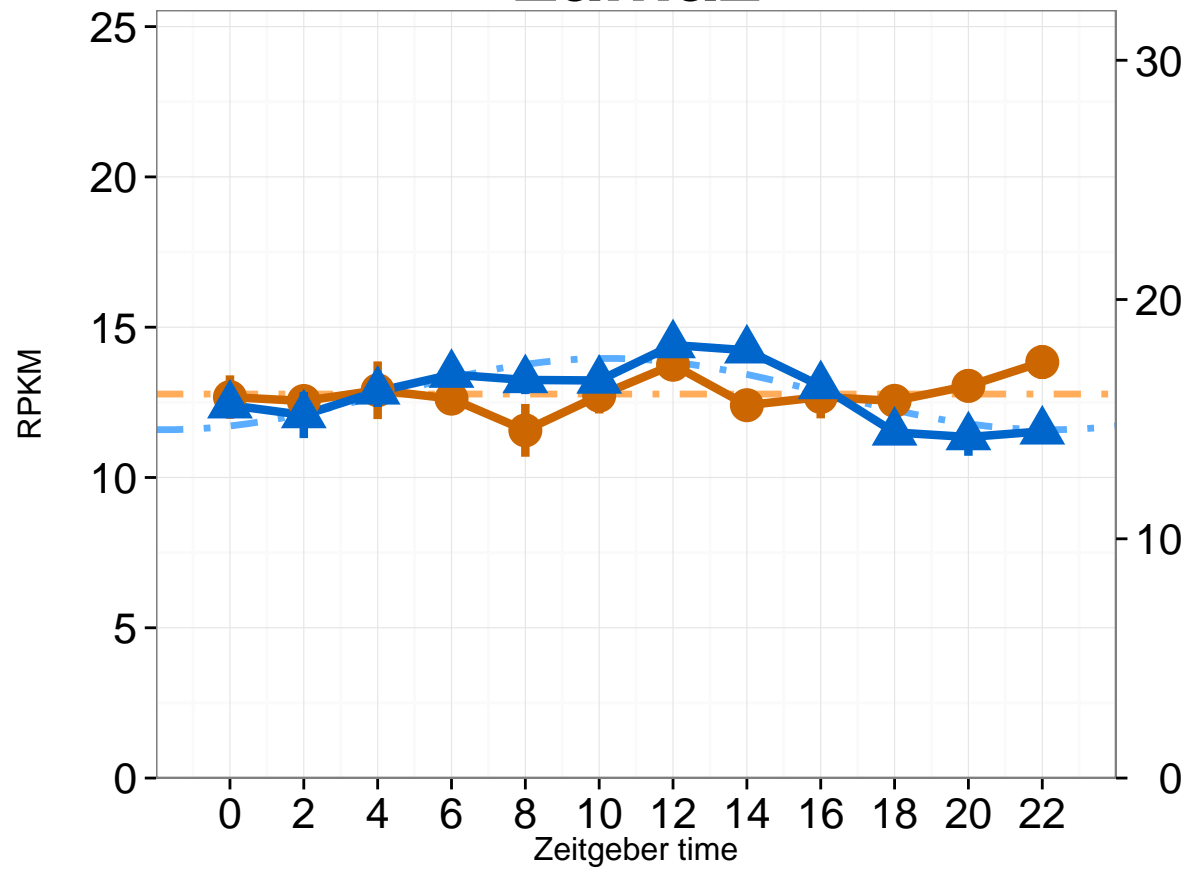

## Lama2

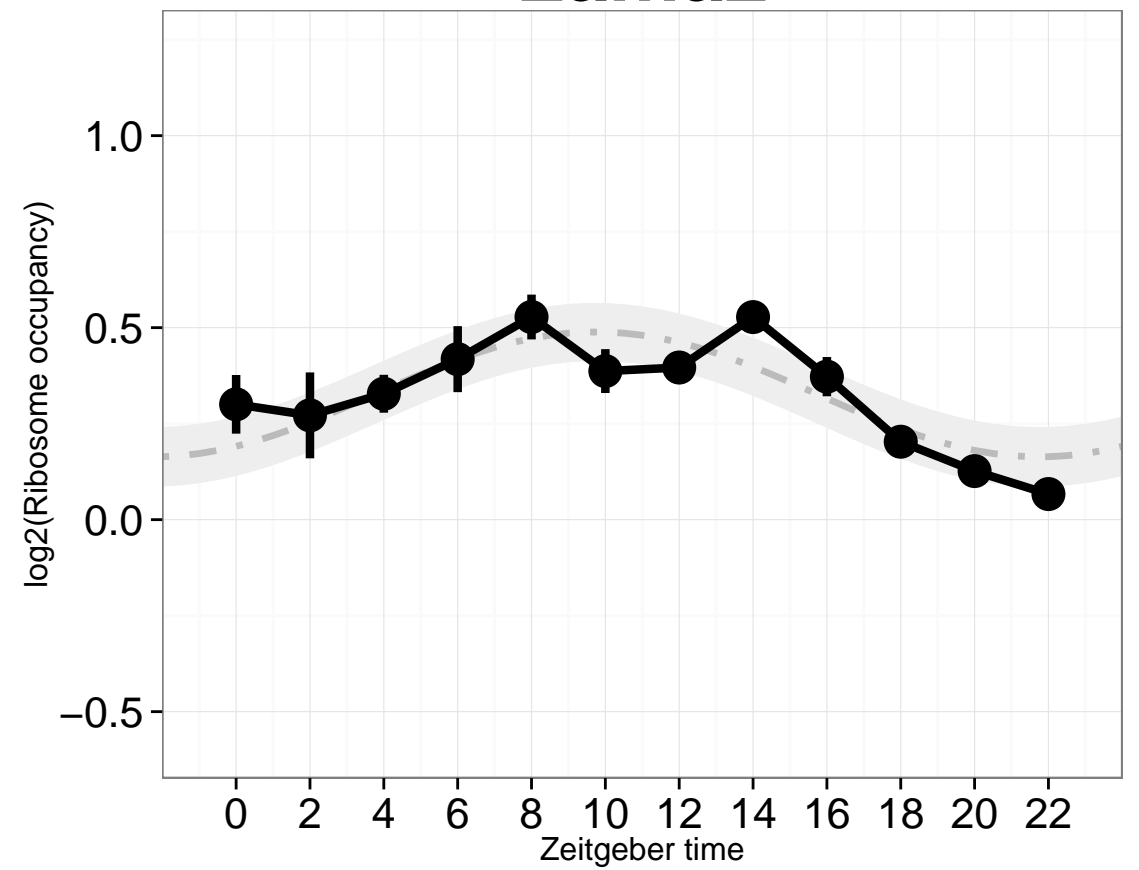

Supplement: Supplementary file 7895 [file 1]

# Ust

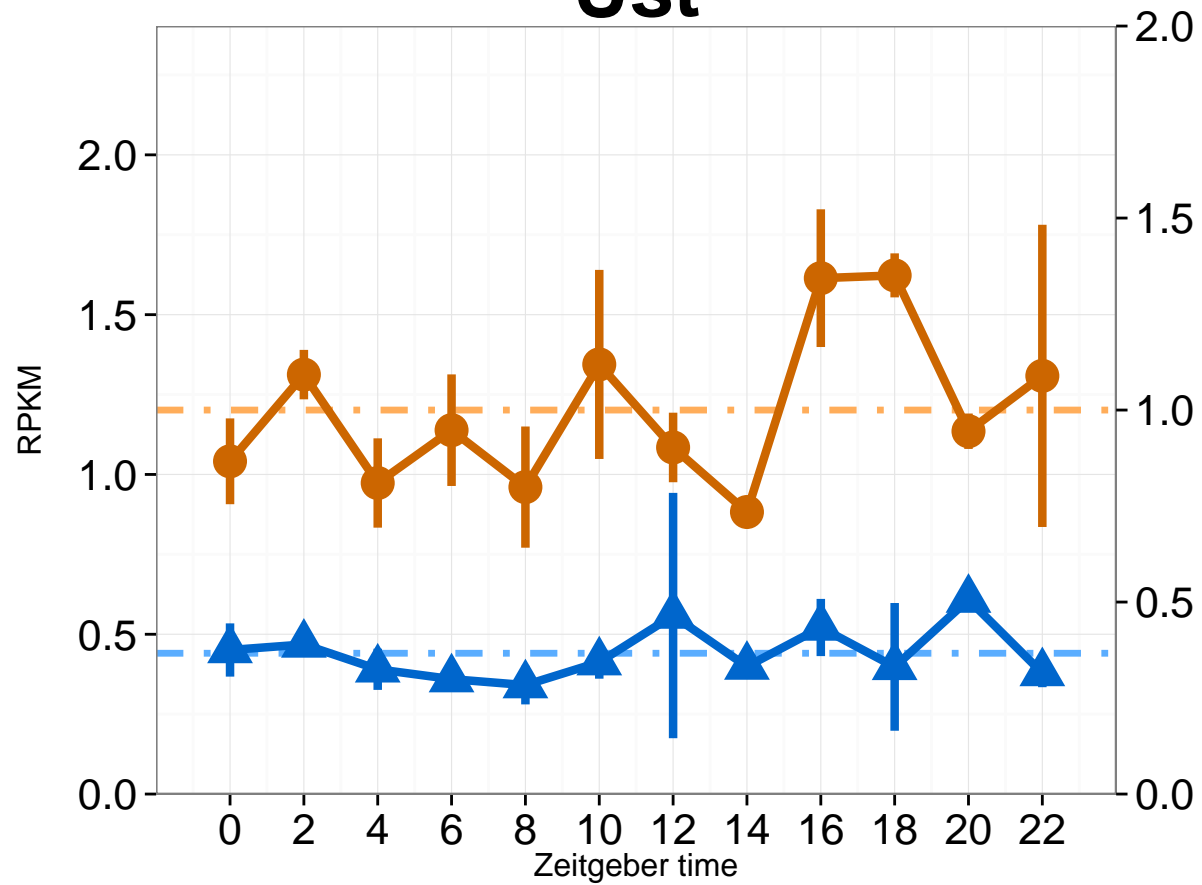

# Ust

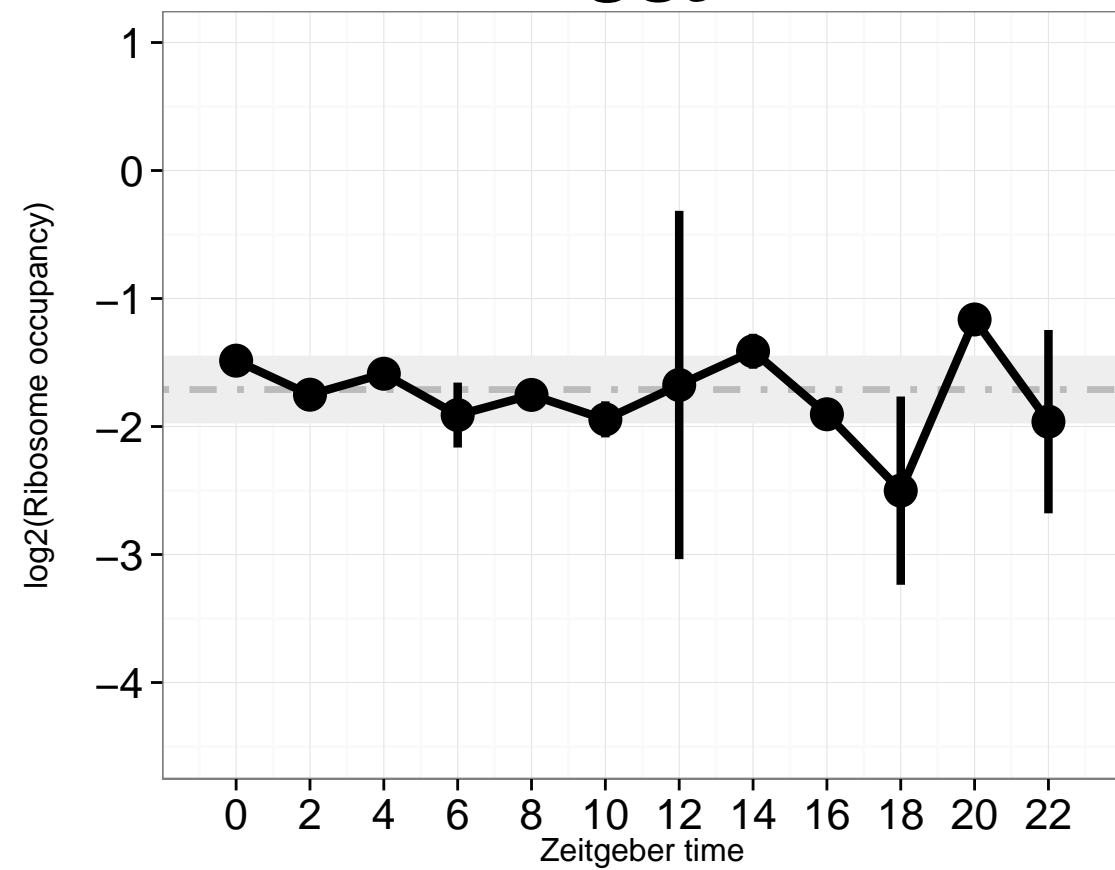

Supplement: Supplementary file 7896 [file 1]

# Scamp2

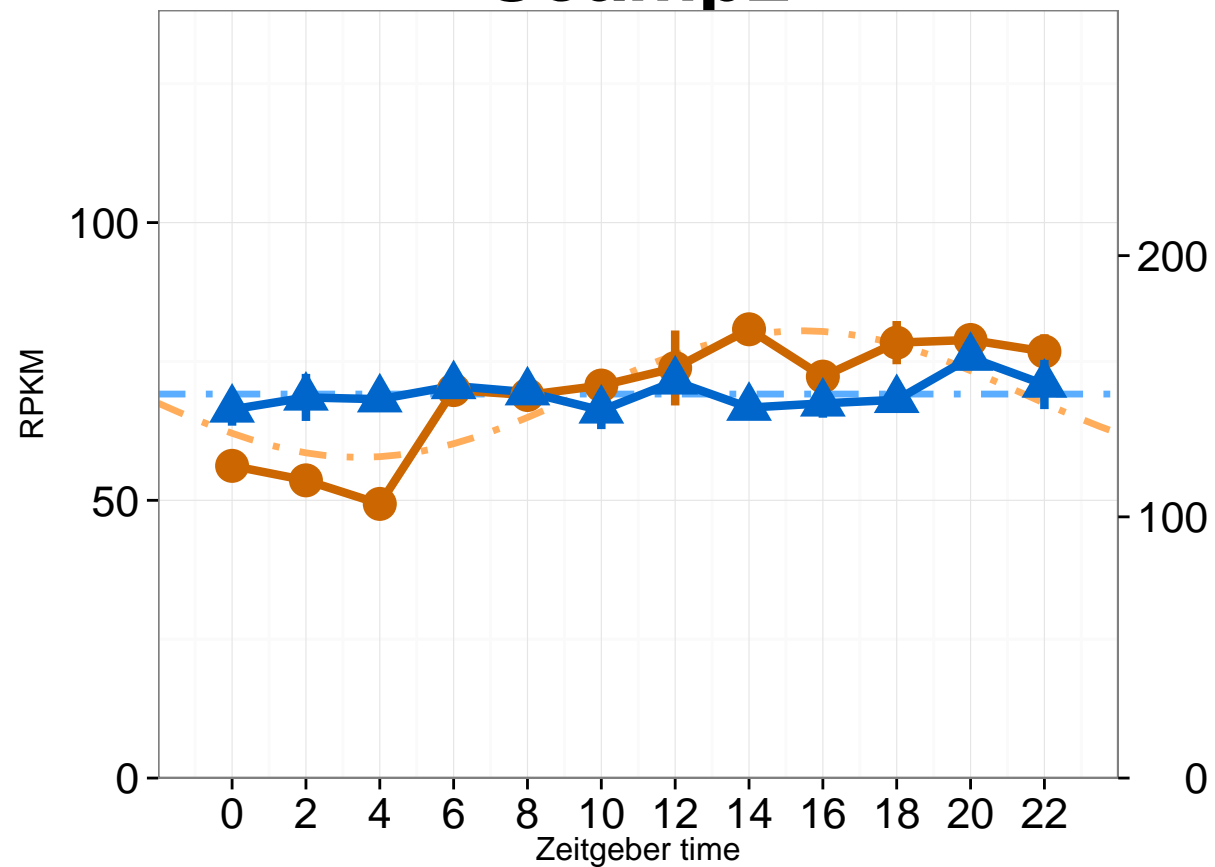

# Scamp2

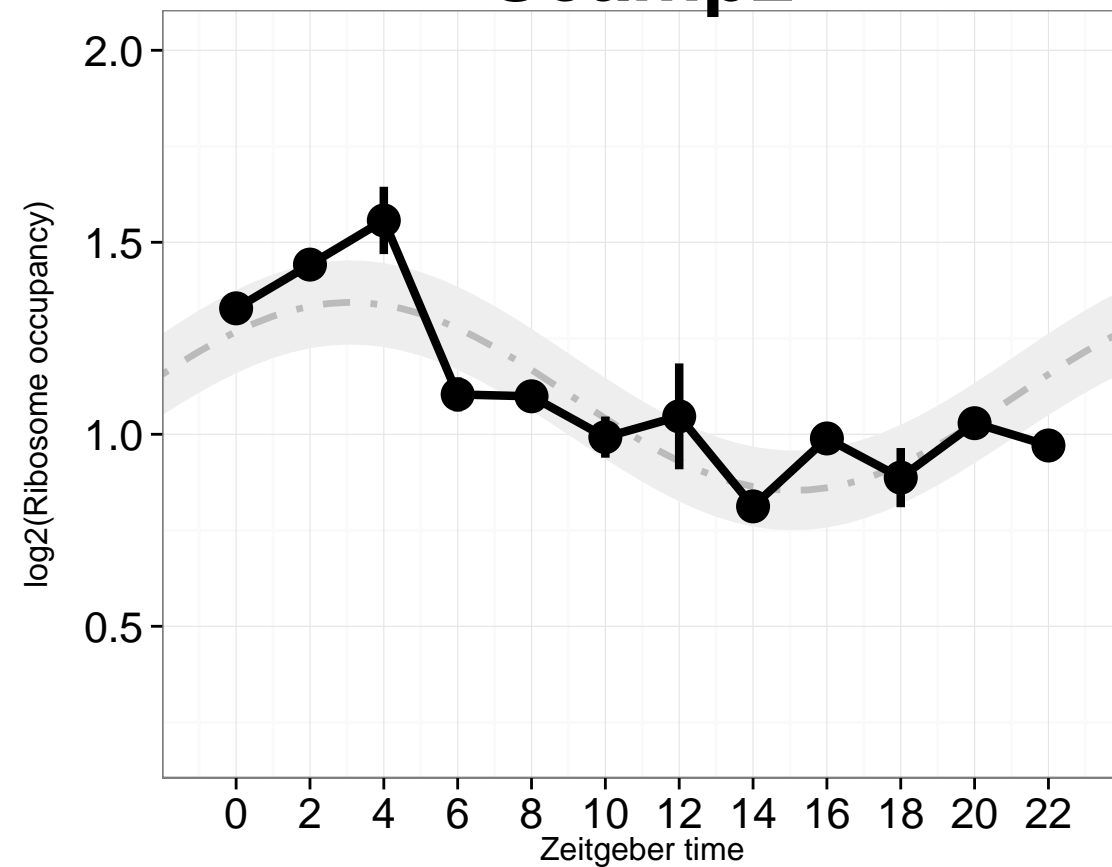

Supplement: Supplementary file 7897 [file 1]

# Zfp385a

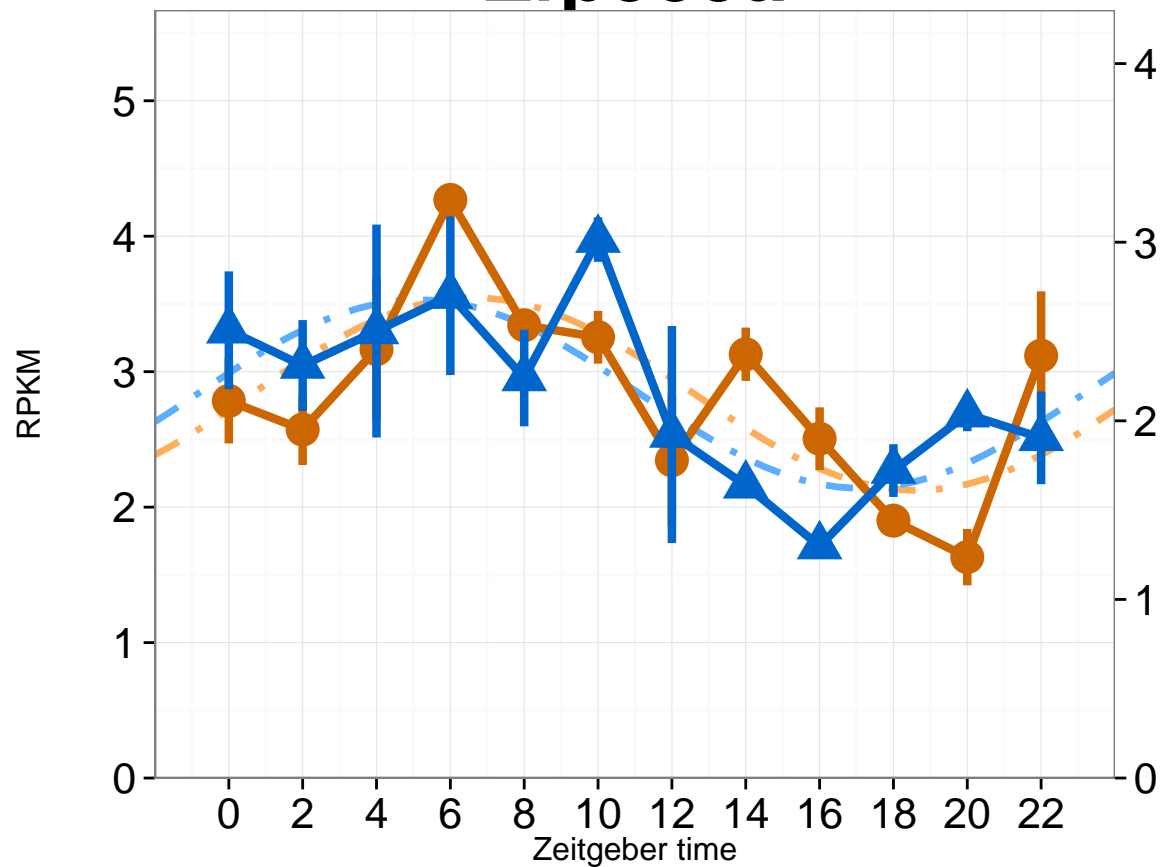

# Zfp385a

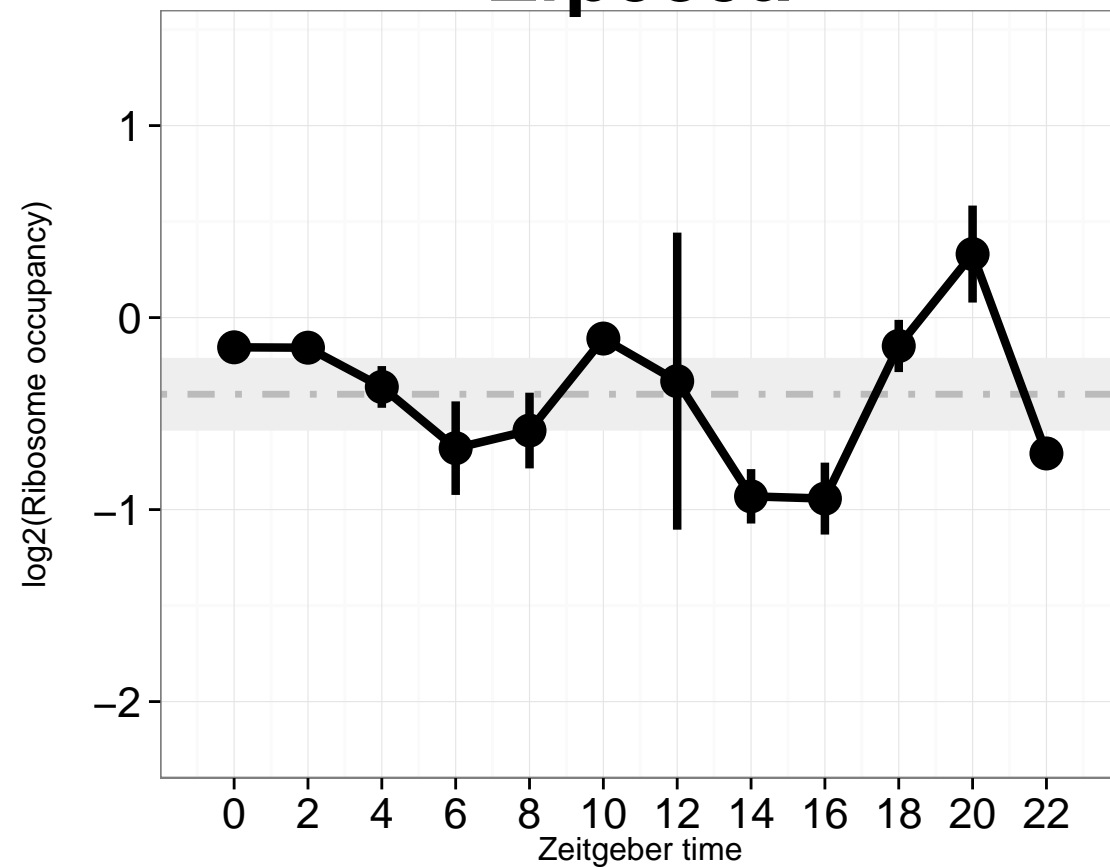

Supplement: Supplementary file 7898 [file 1]

# C7

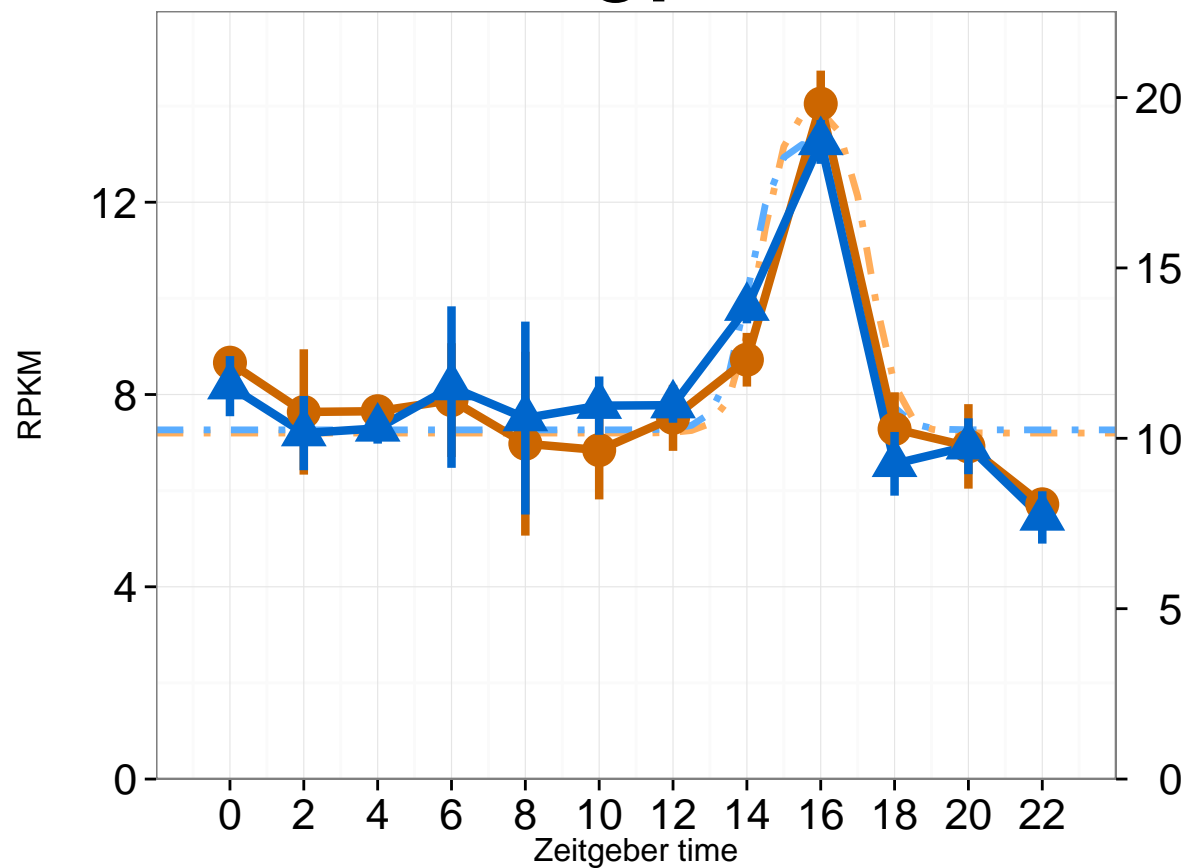

# C7

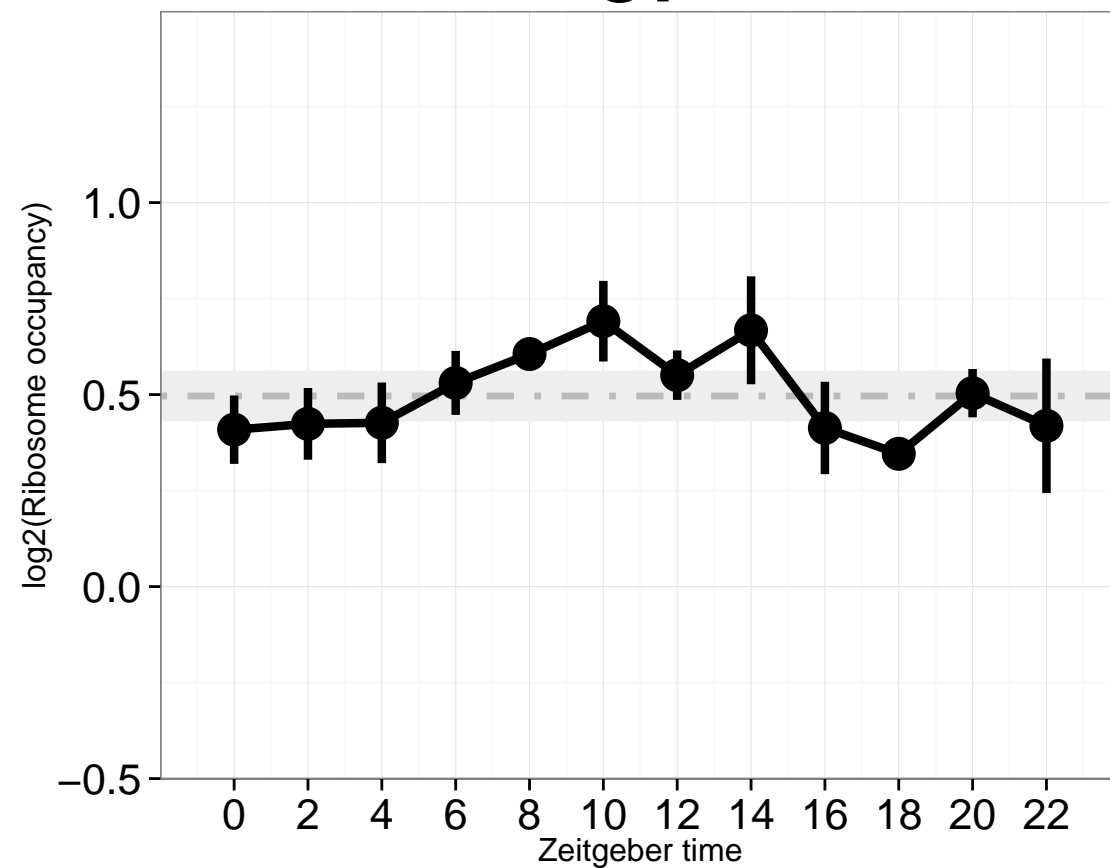

Supplement: Supplementary file 7899 [file 1]

# Ap5s1

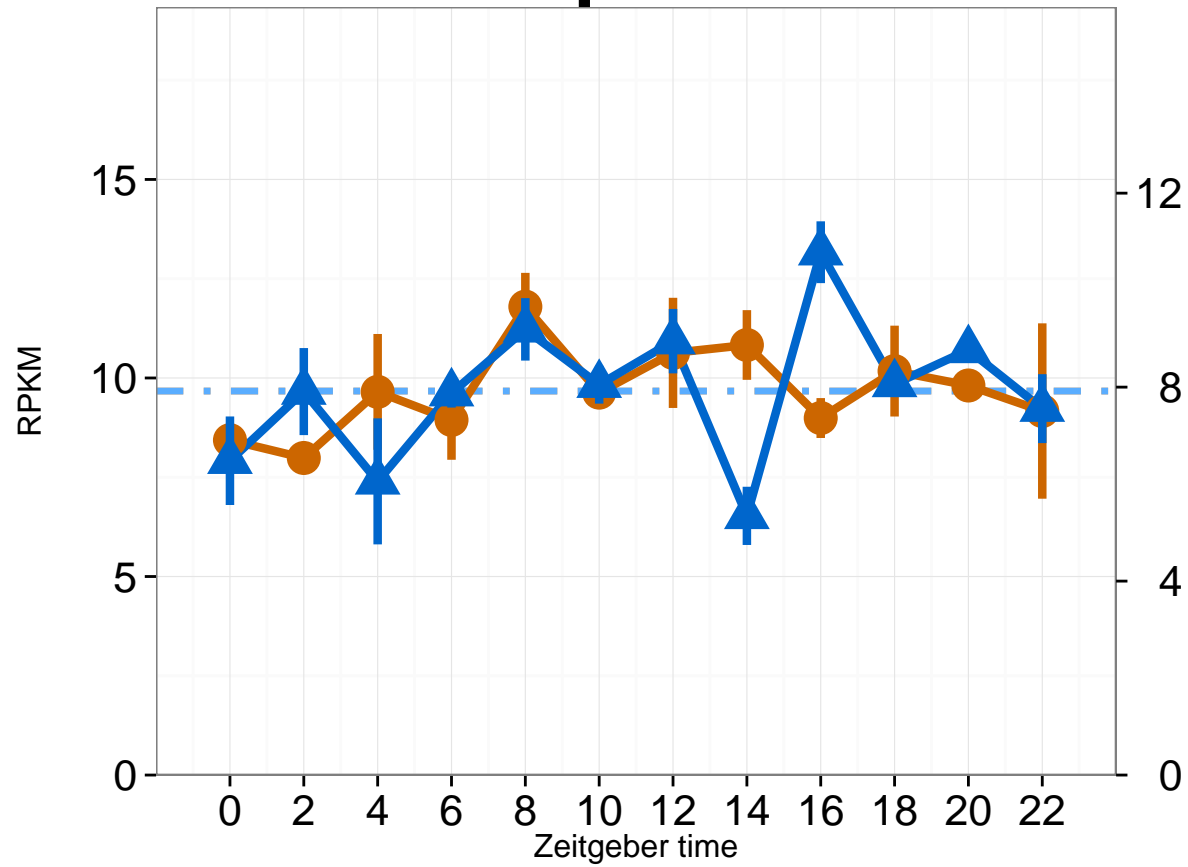

# Ap5s1

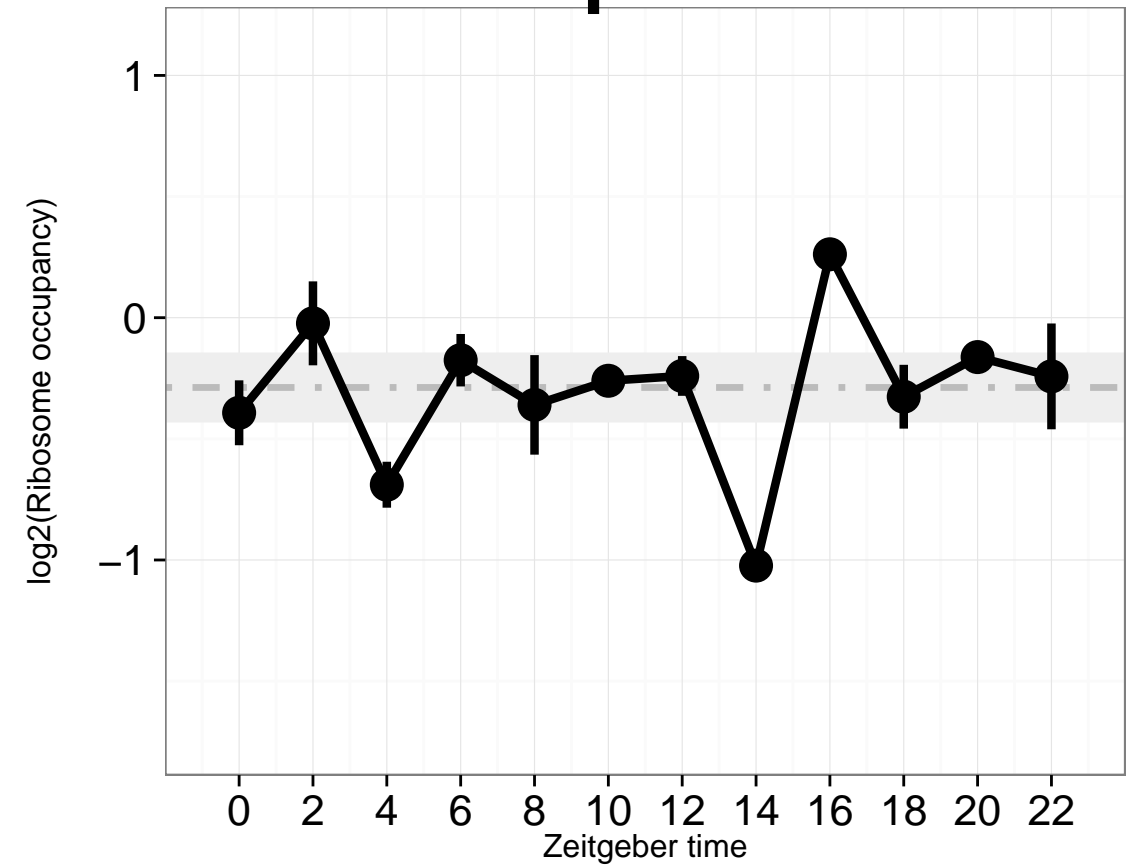

Supplement: Supplementary file 7900 [file 1]

## Pycr2

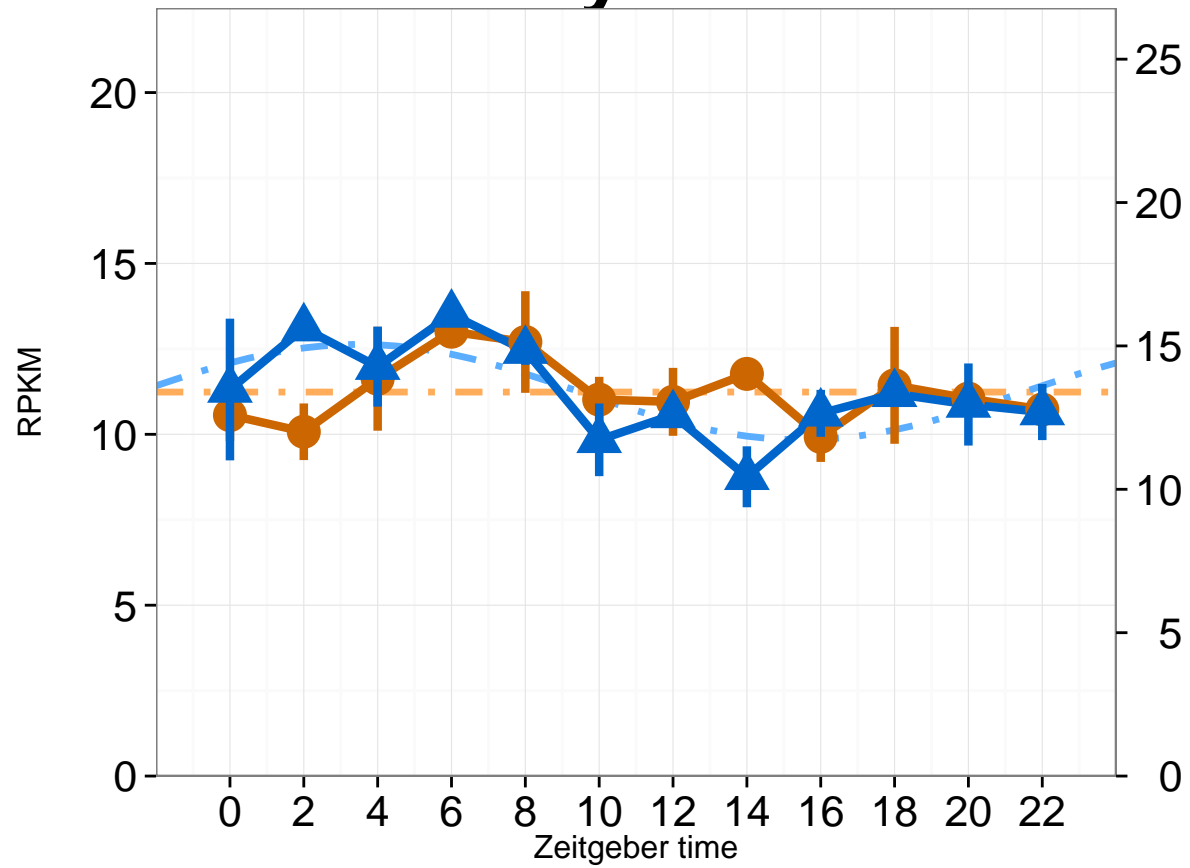

## Pycr2

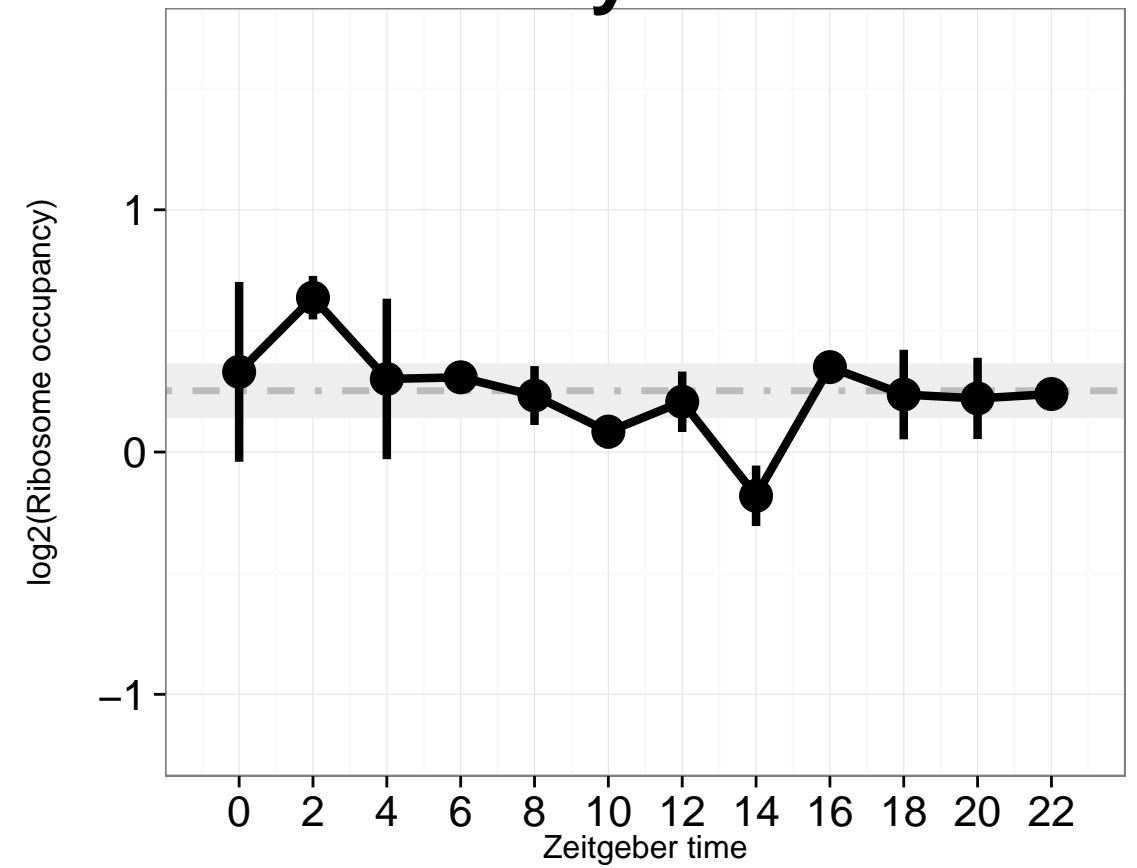

Supplement: Supplementary file 7901 [file 1]

# Ppp1r15a

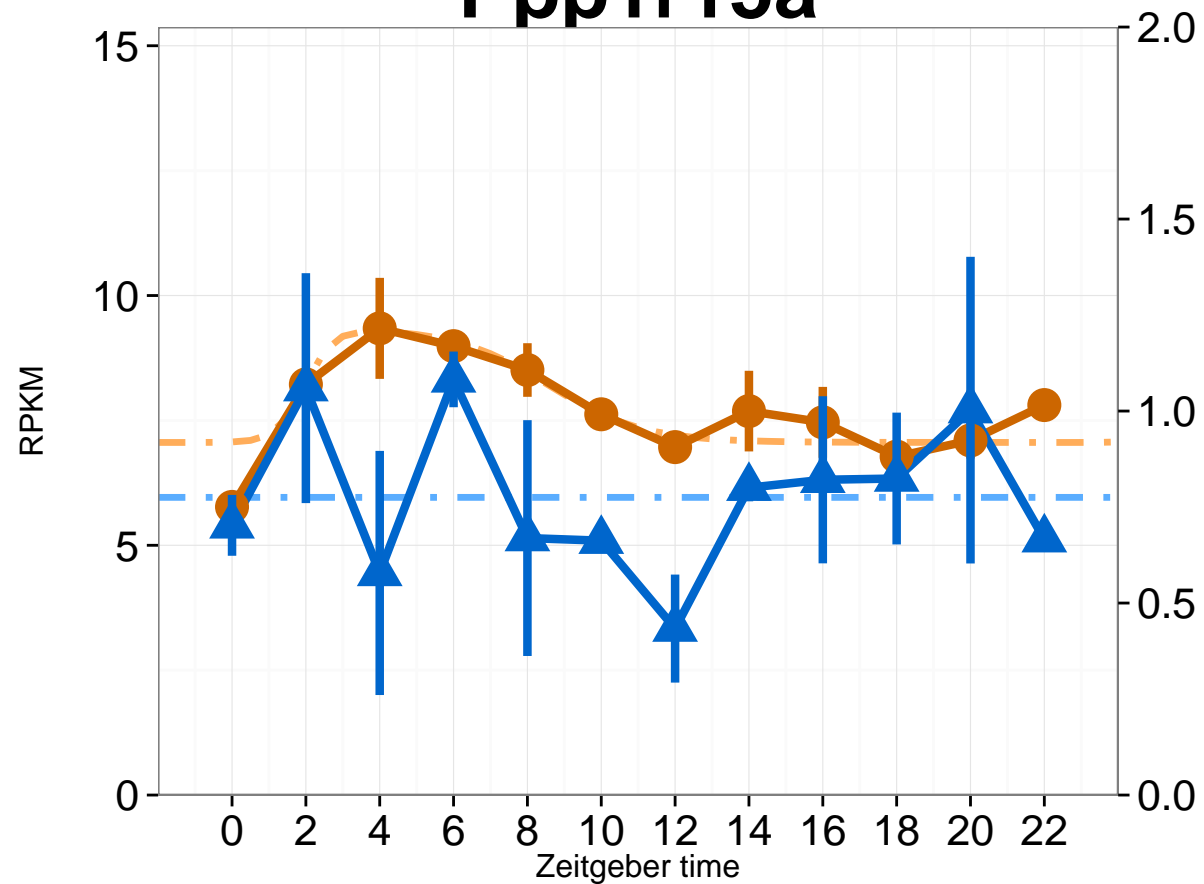

# Ppp1r15a

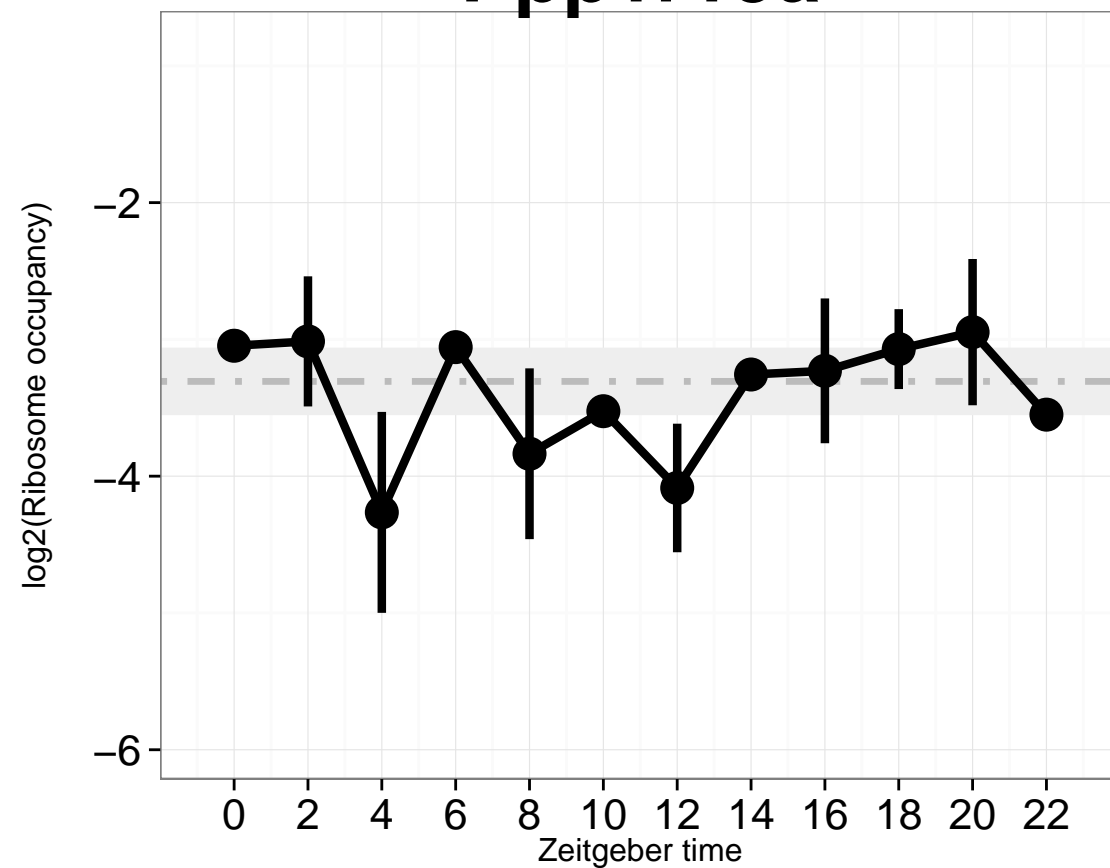

Supplement: Supplementary file 7902 [file 1]

## Med19

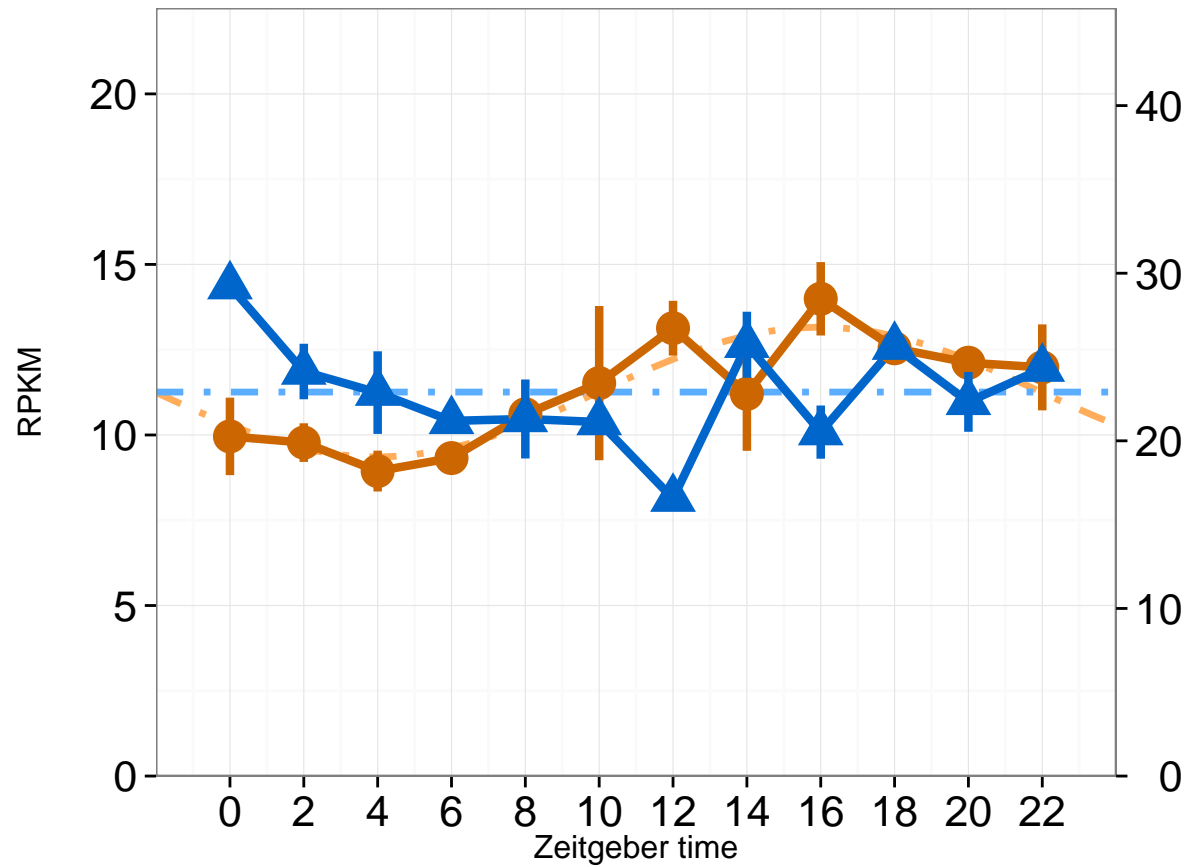

## Med19

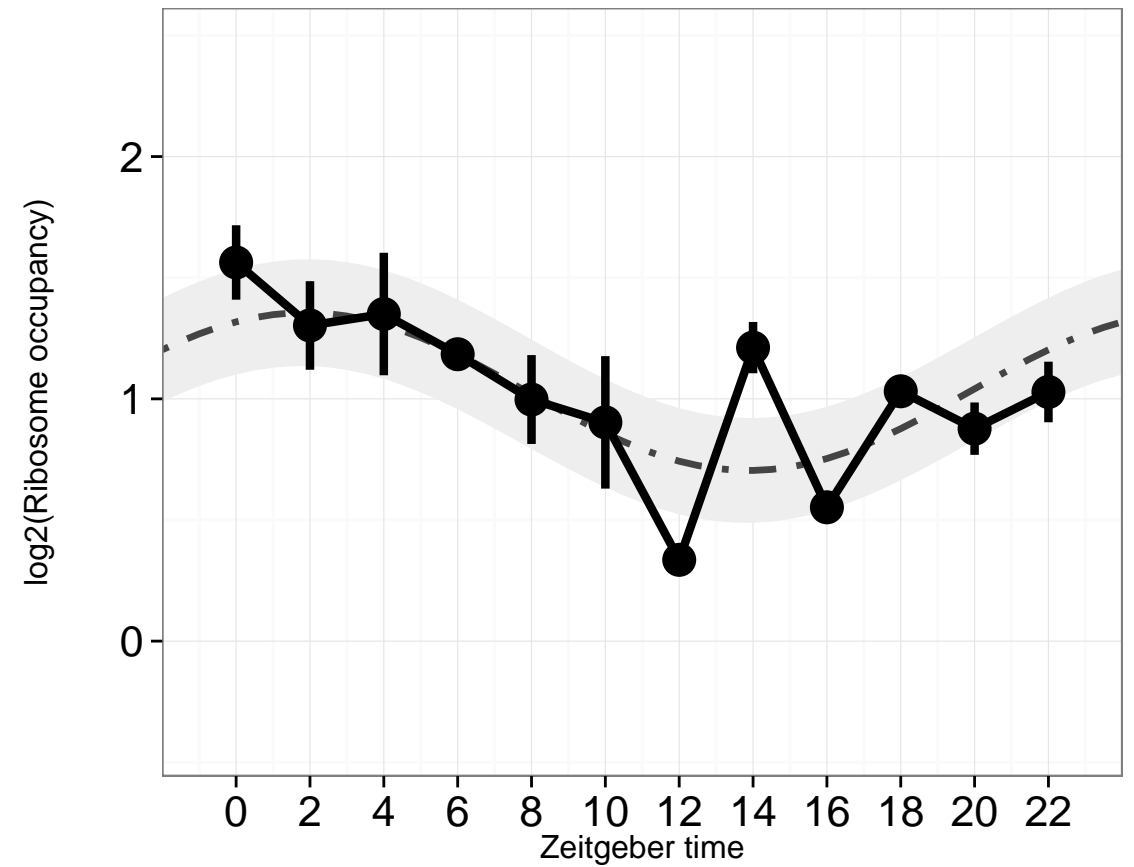

Supplement: Supplementary file 7903 [file 1]

## Mdh2

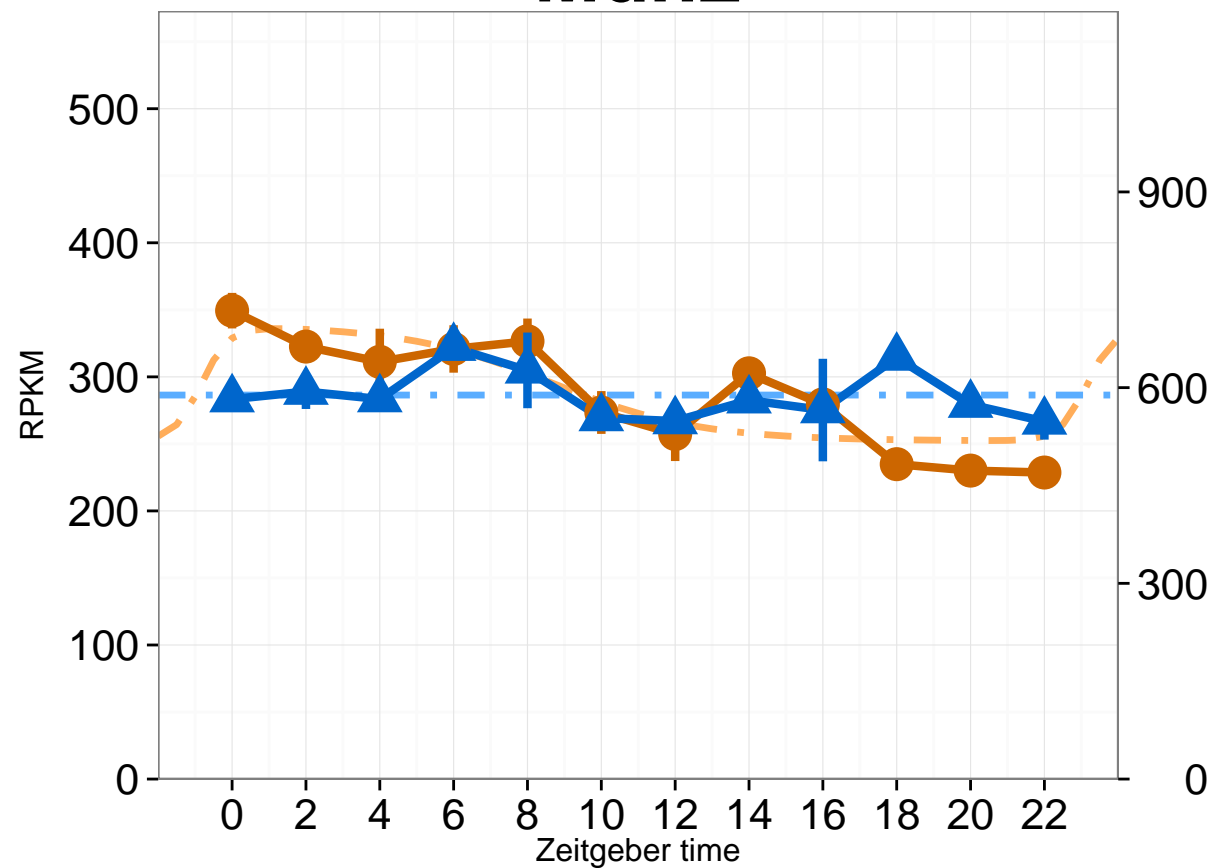

## Mdh2

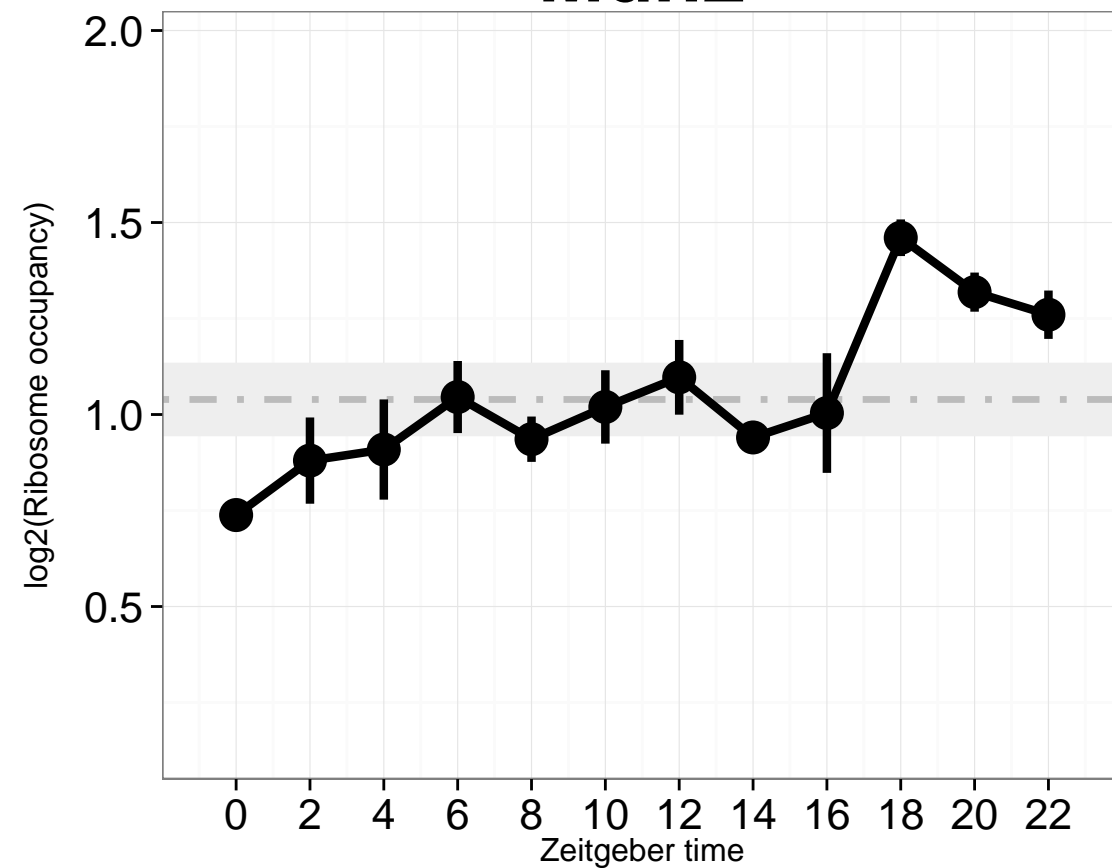

Supplement: Supplementary file 7904 [file 1]

## Gata3

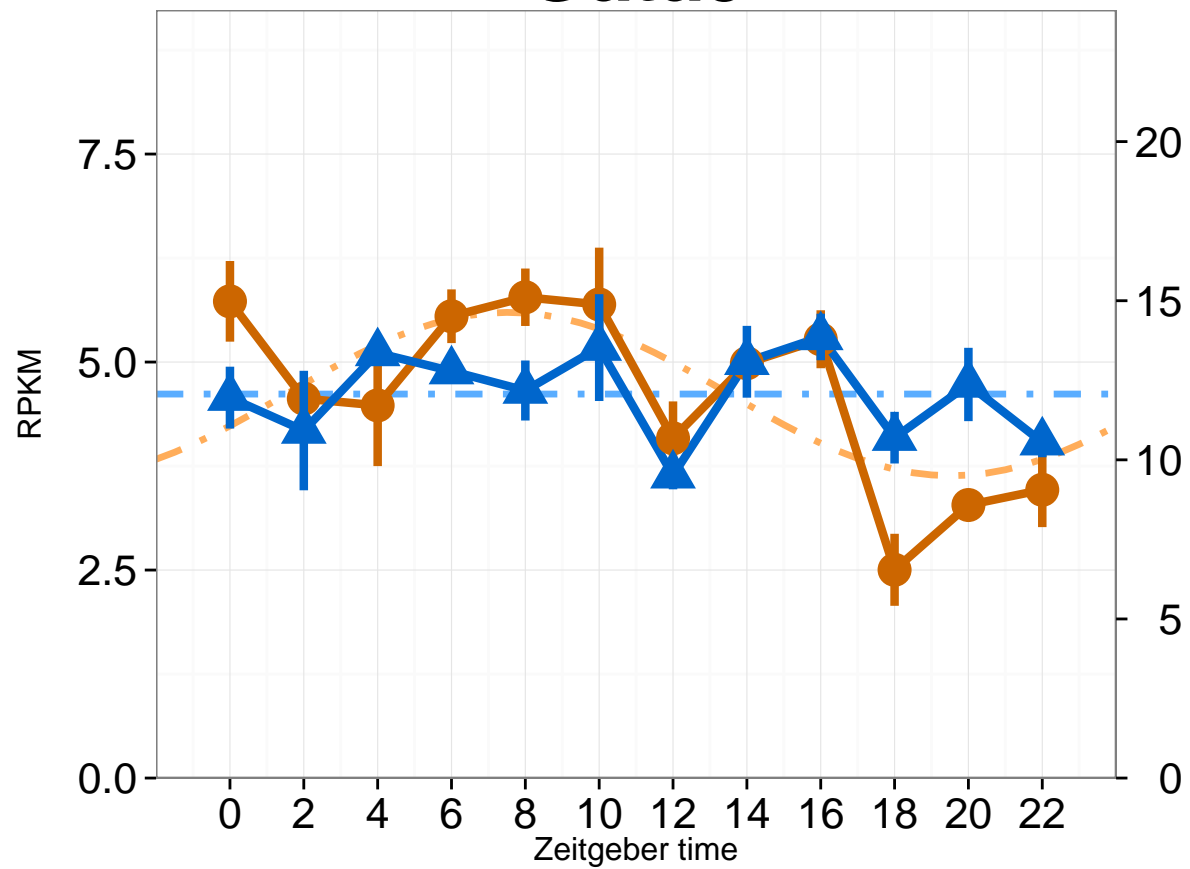

## Gata3

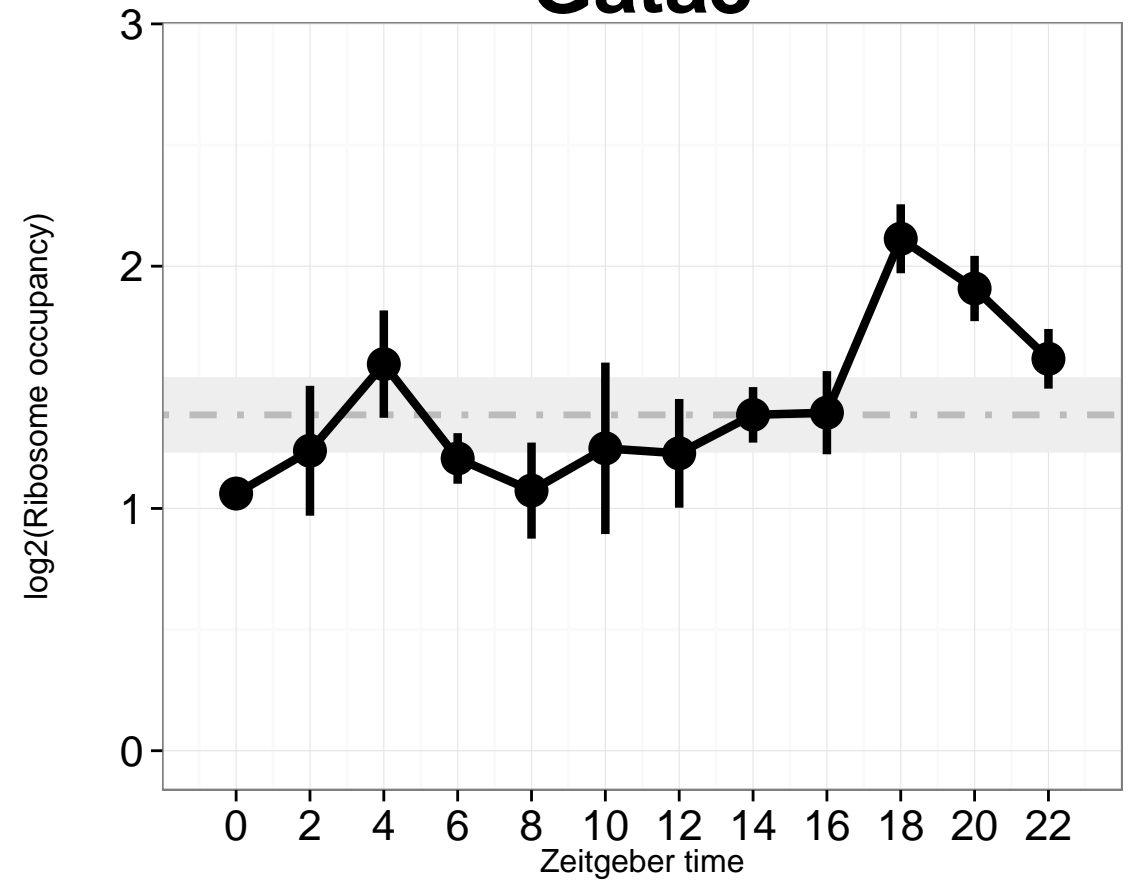

Supplement: Supplementary file 7905 [file 1]

# Clec12a

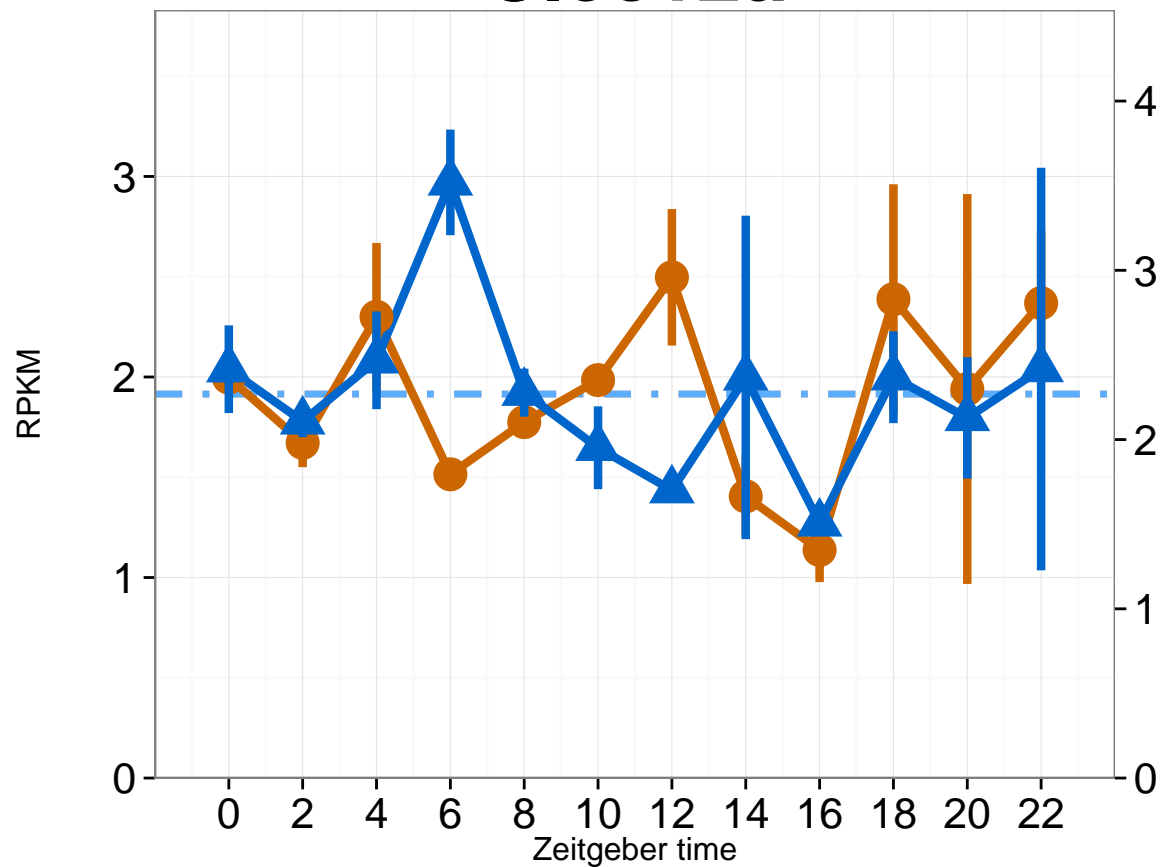

# Clec12a

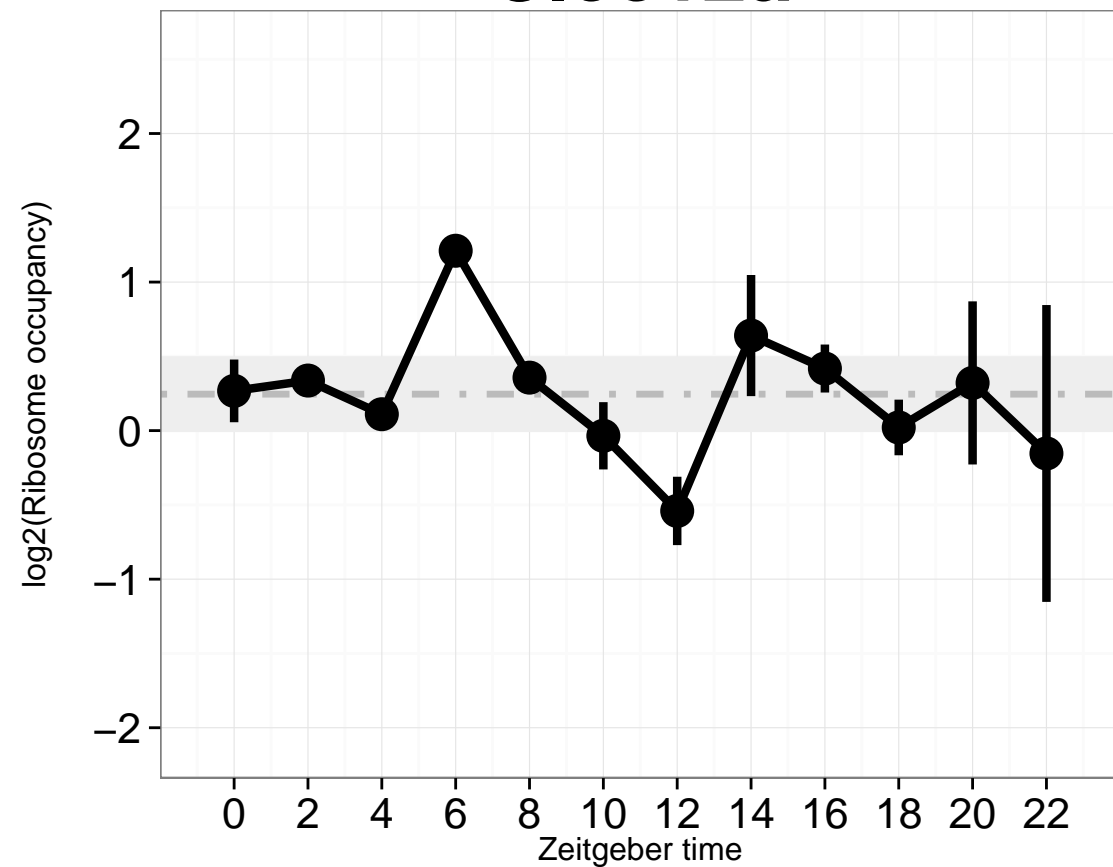

Supplement: Supplementary file 7906 [file 1]

# Fam193b

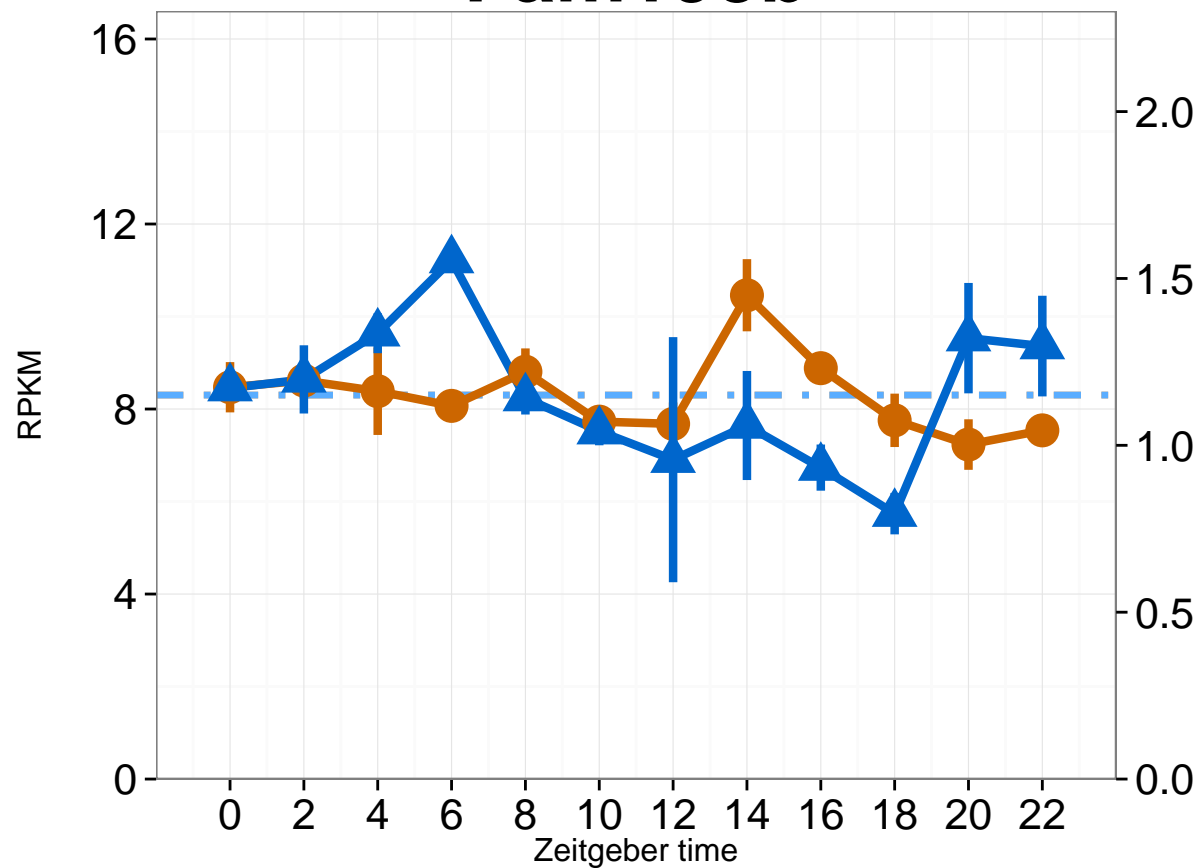

# Fam193b

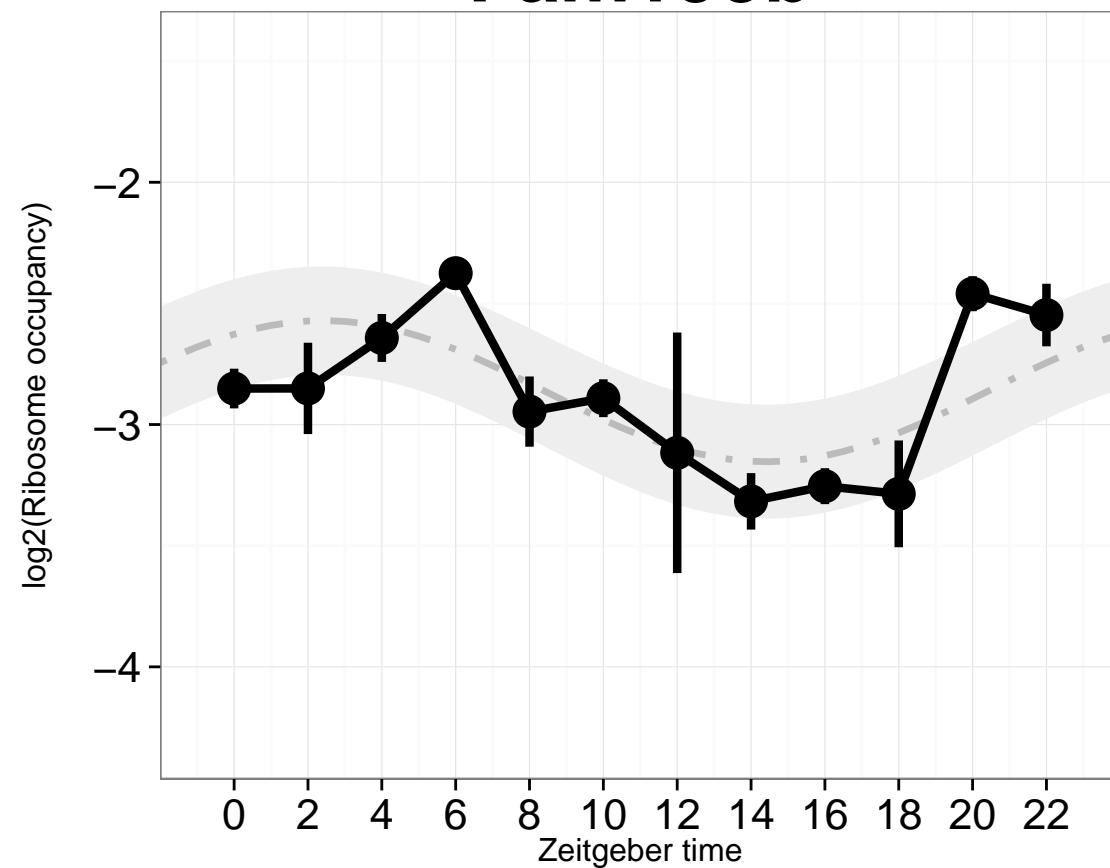

Supplement: Supplementary file 7907 [file 1]

## Npat

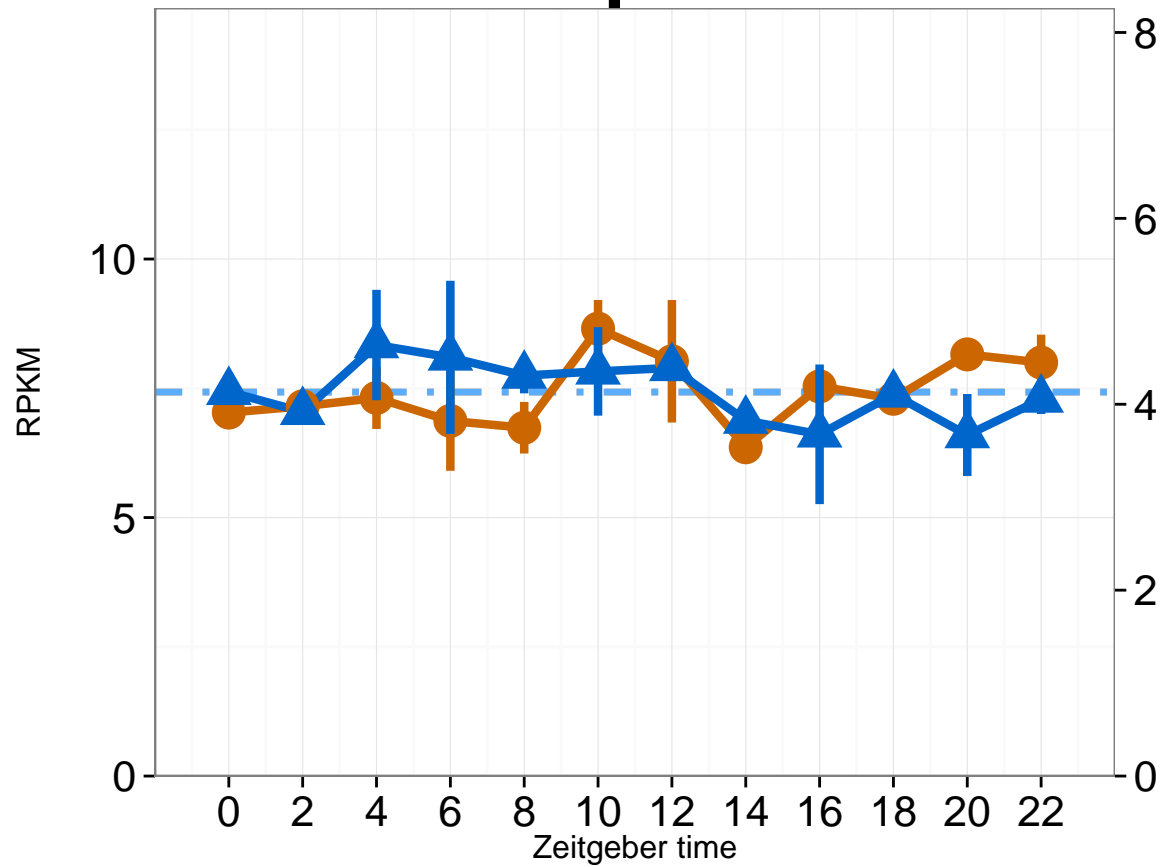

## Npat

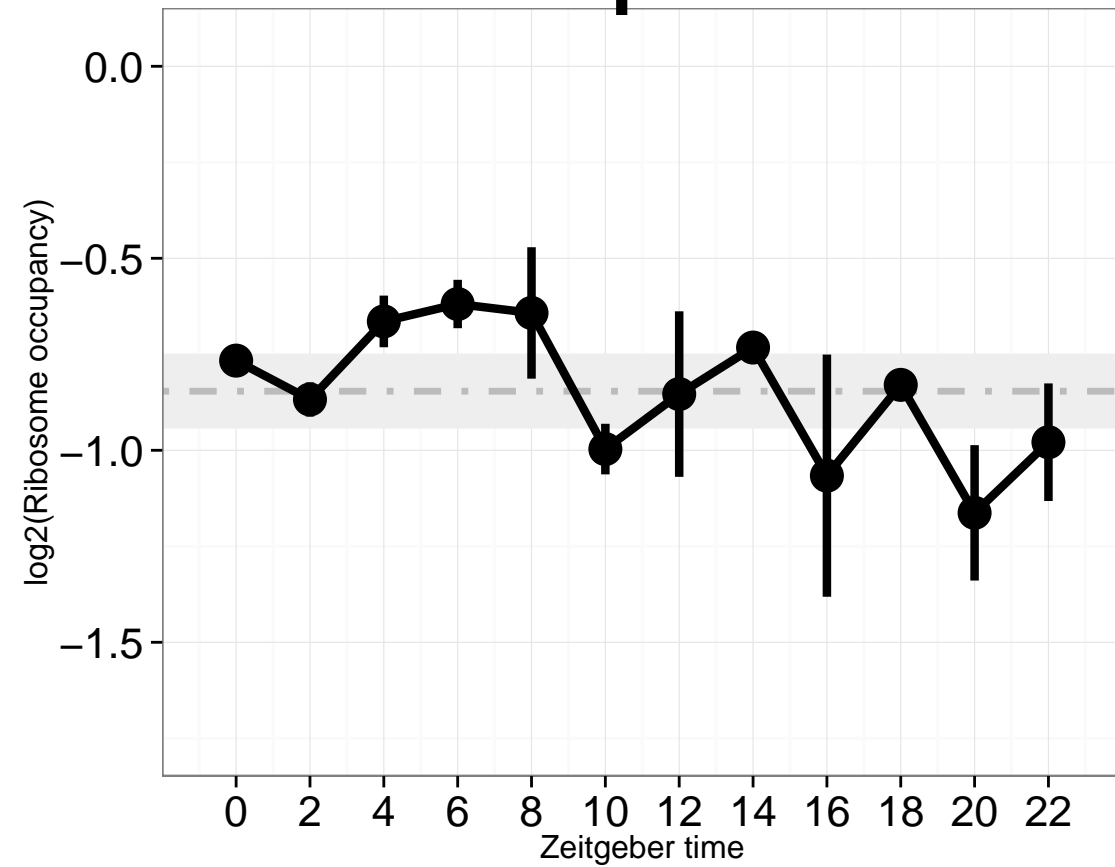

Supplement: Supplementary file 7908 [file 1]

# Hinfp

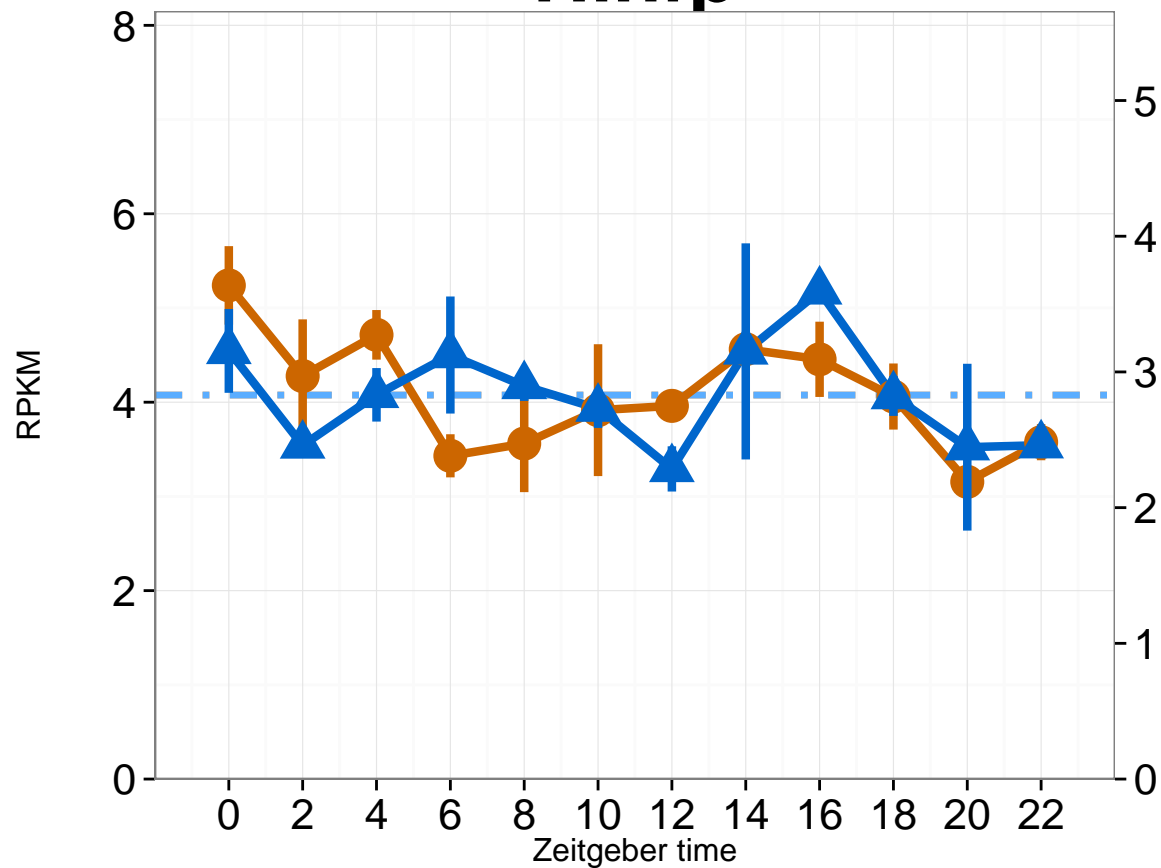

# Hinfp

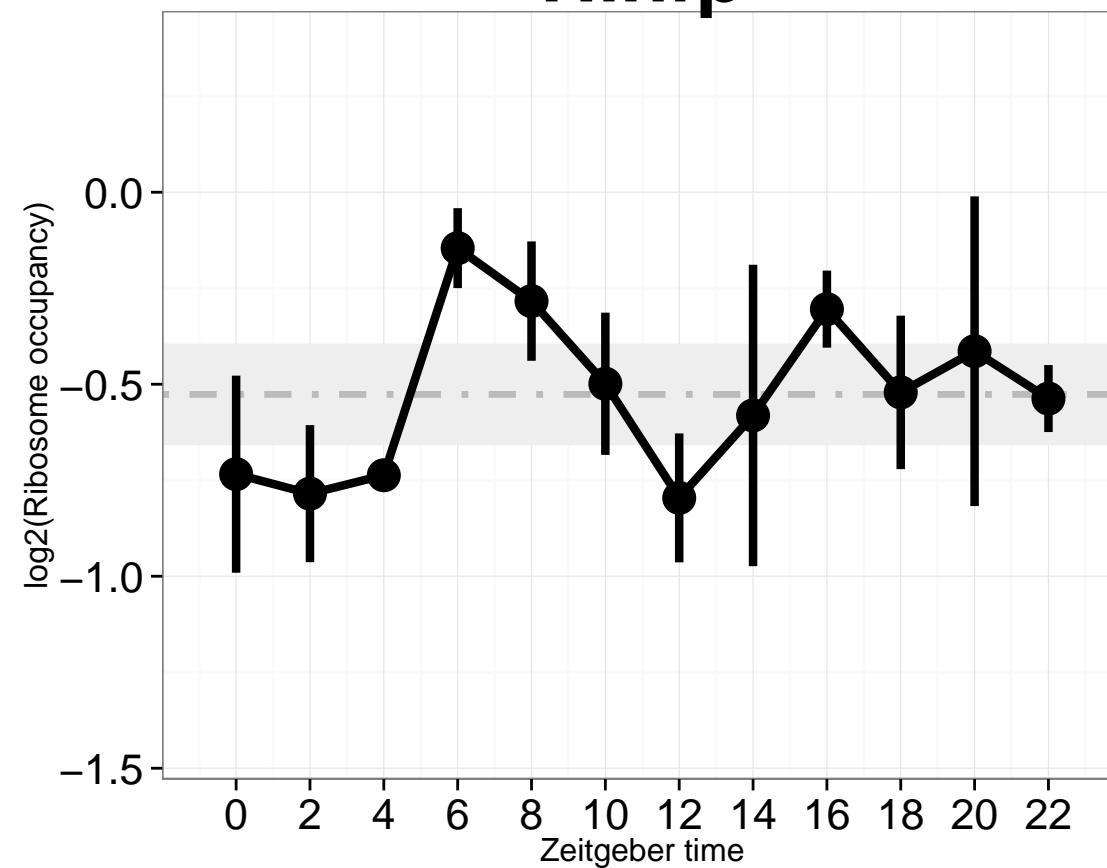

Supplement: Supplementary file 7909 [file 1]

# Gga3

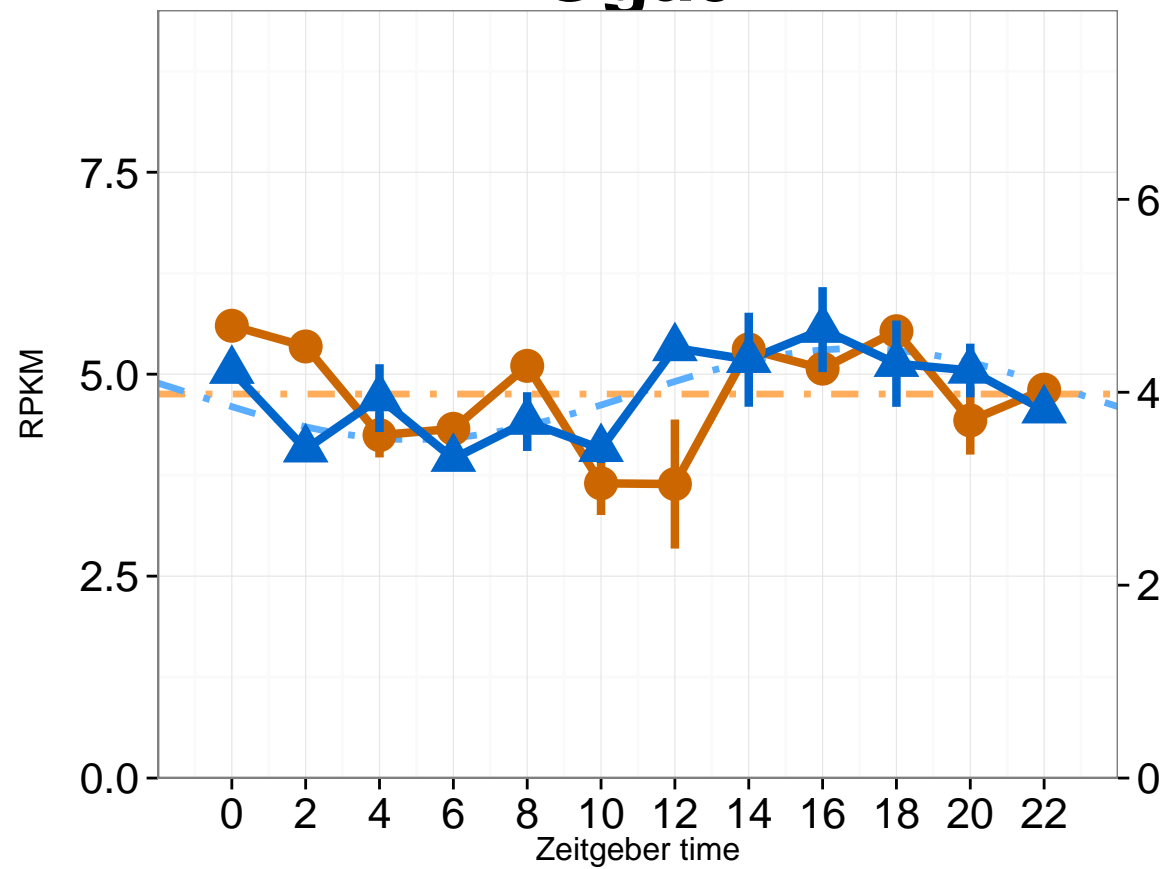

# Gga3

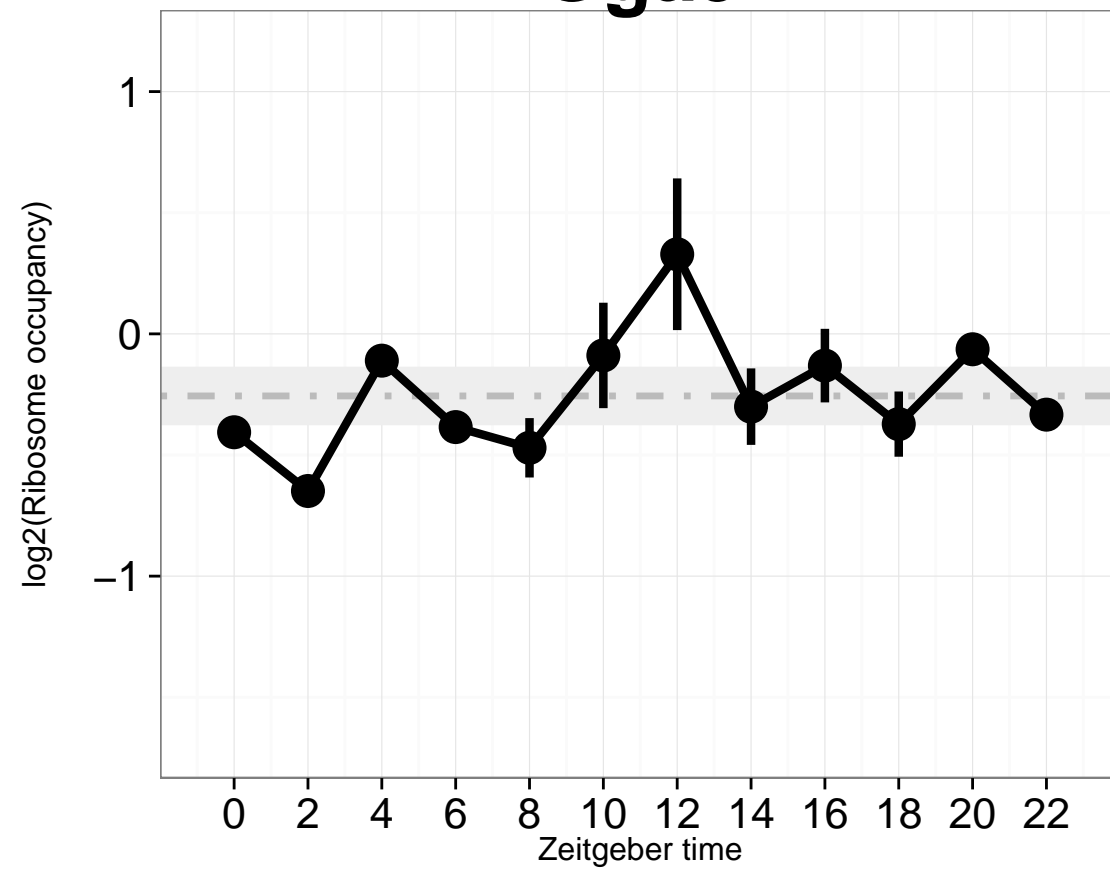

Supplement: Supplementary file 7910 [file 1]

# Pogk

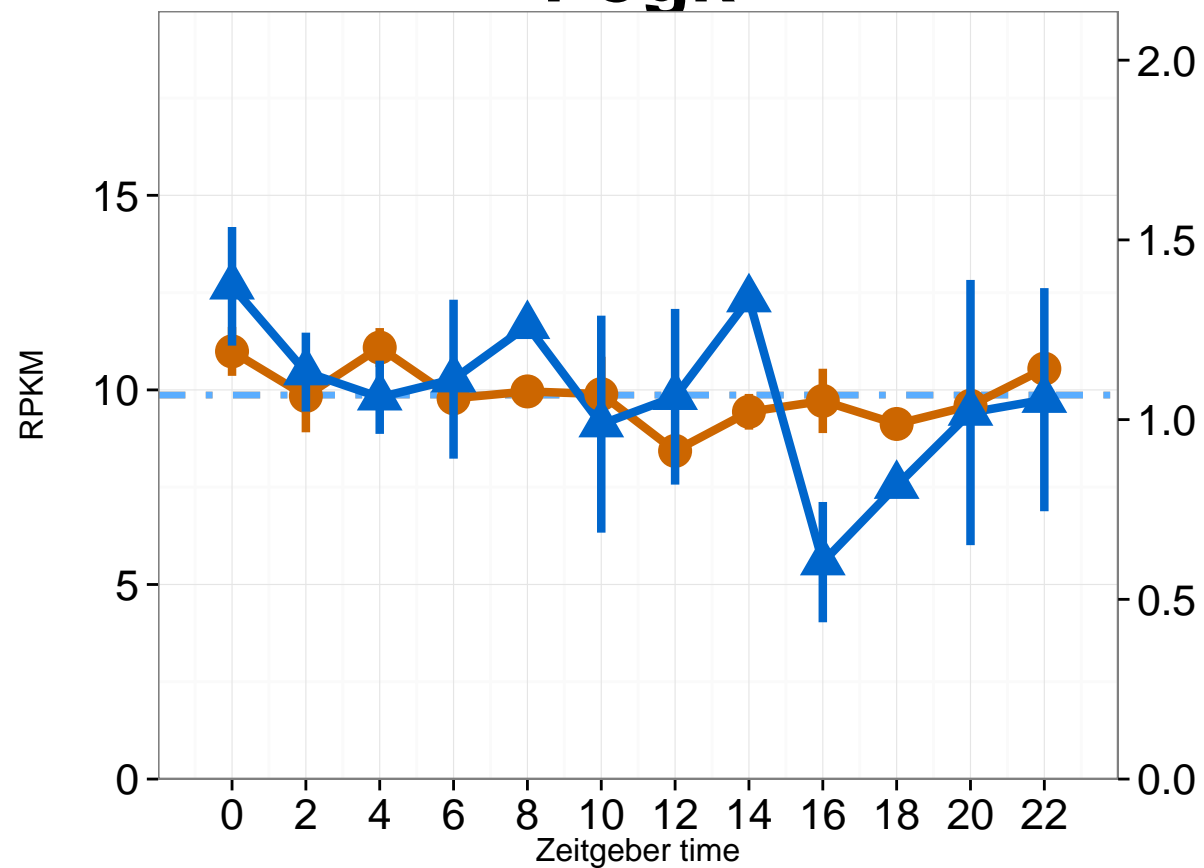

# Pogk

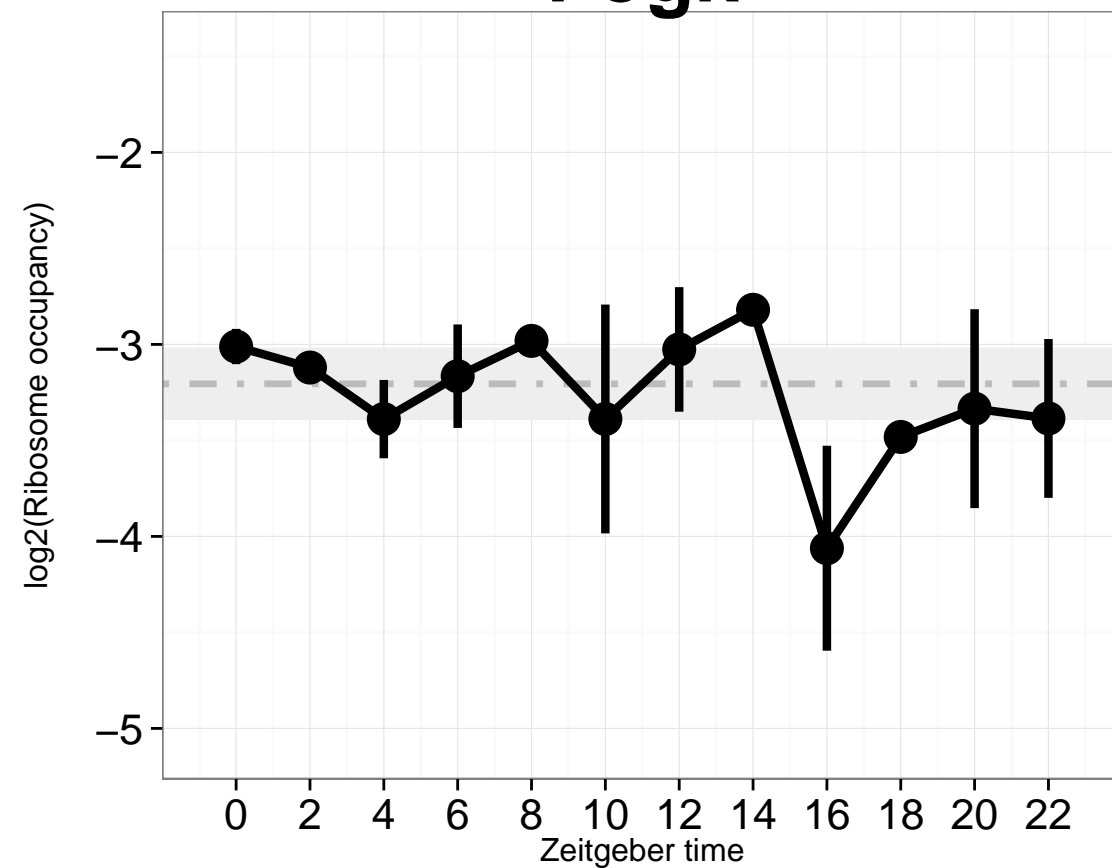

Supplement: Supplementary file 7911 [file 1]

# Tubgcp6

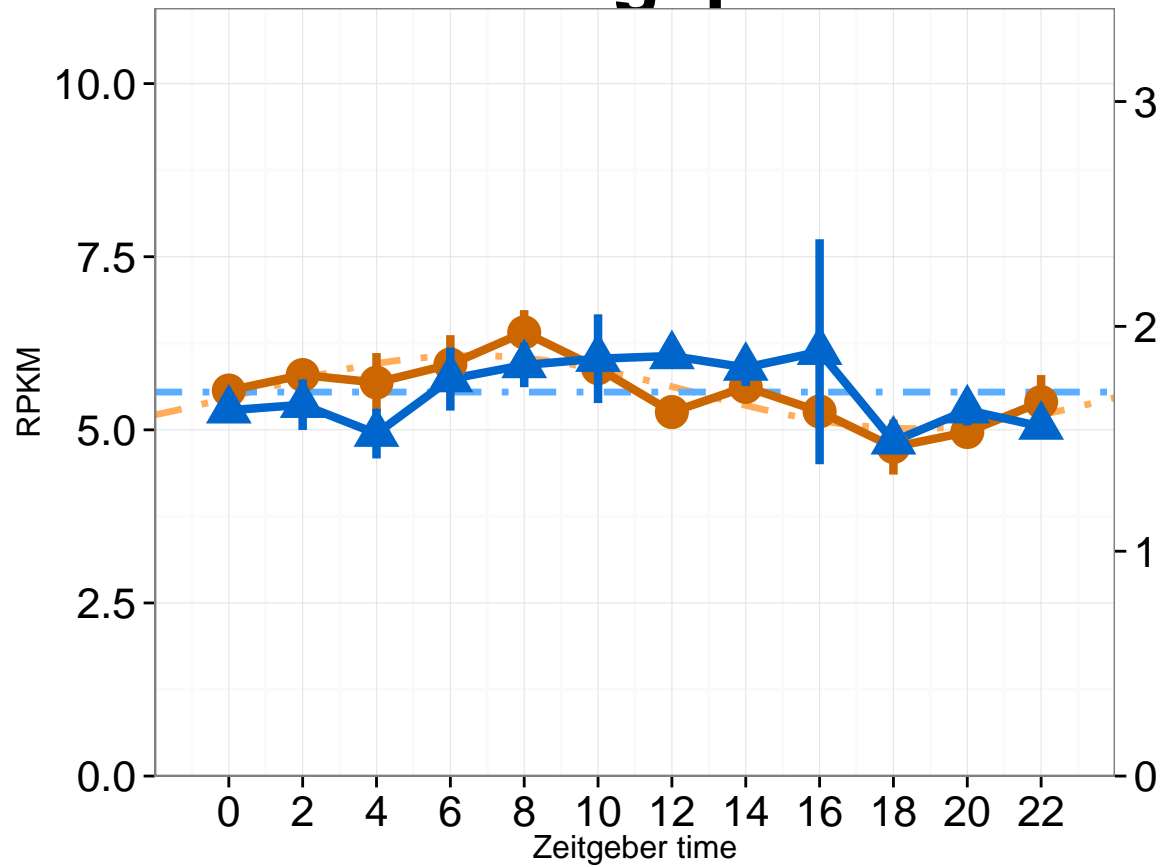

# Tubgcp6

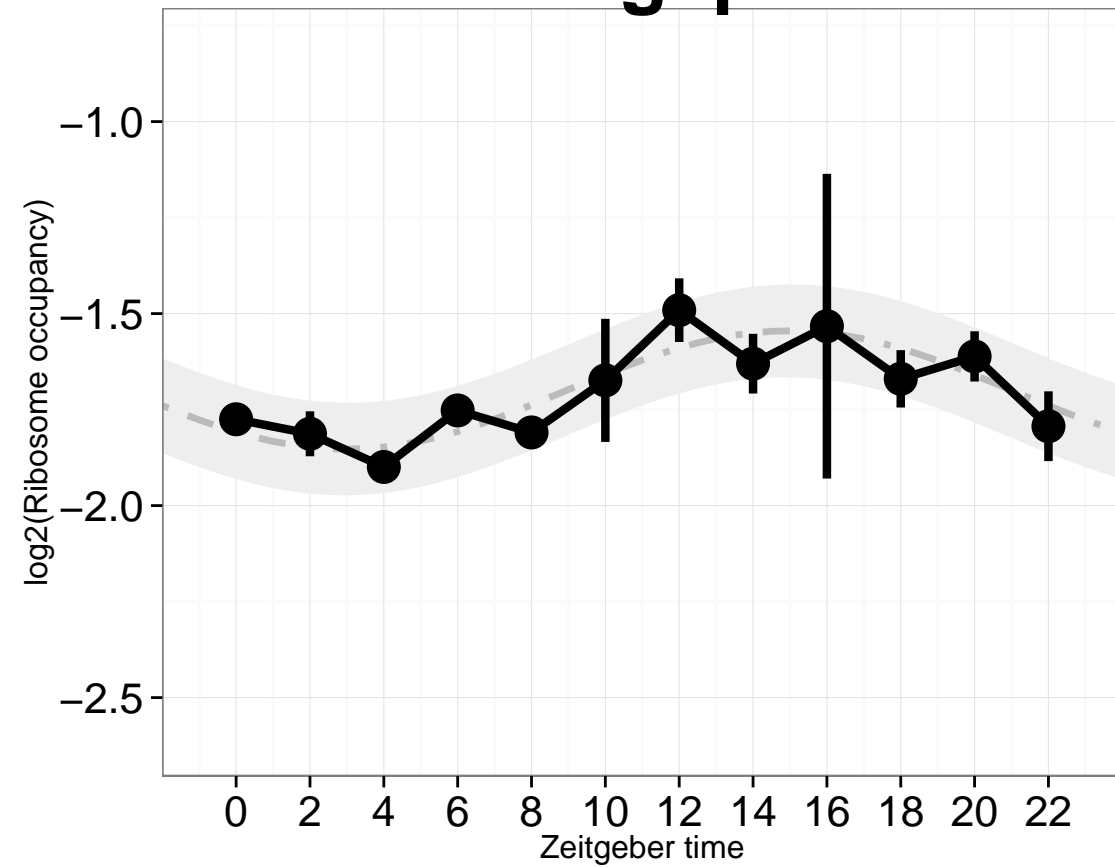

Supplement: Supplementary file 7912 [file 1]

## Srsf3

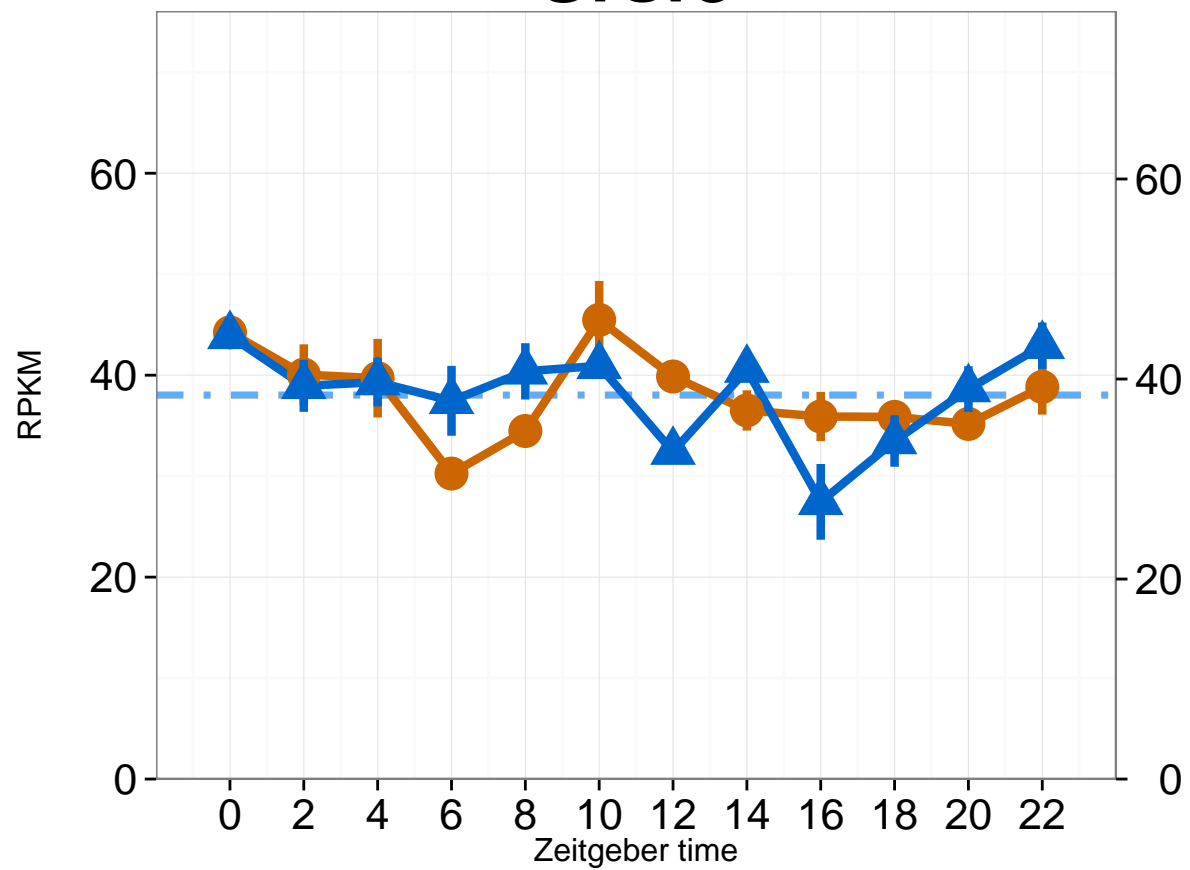

## Srsf3

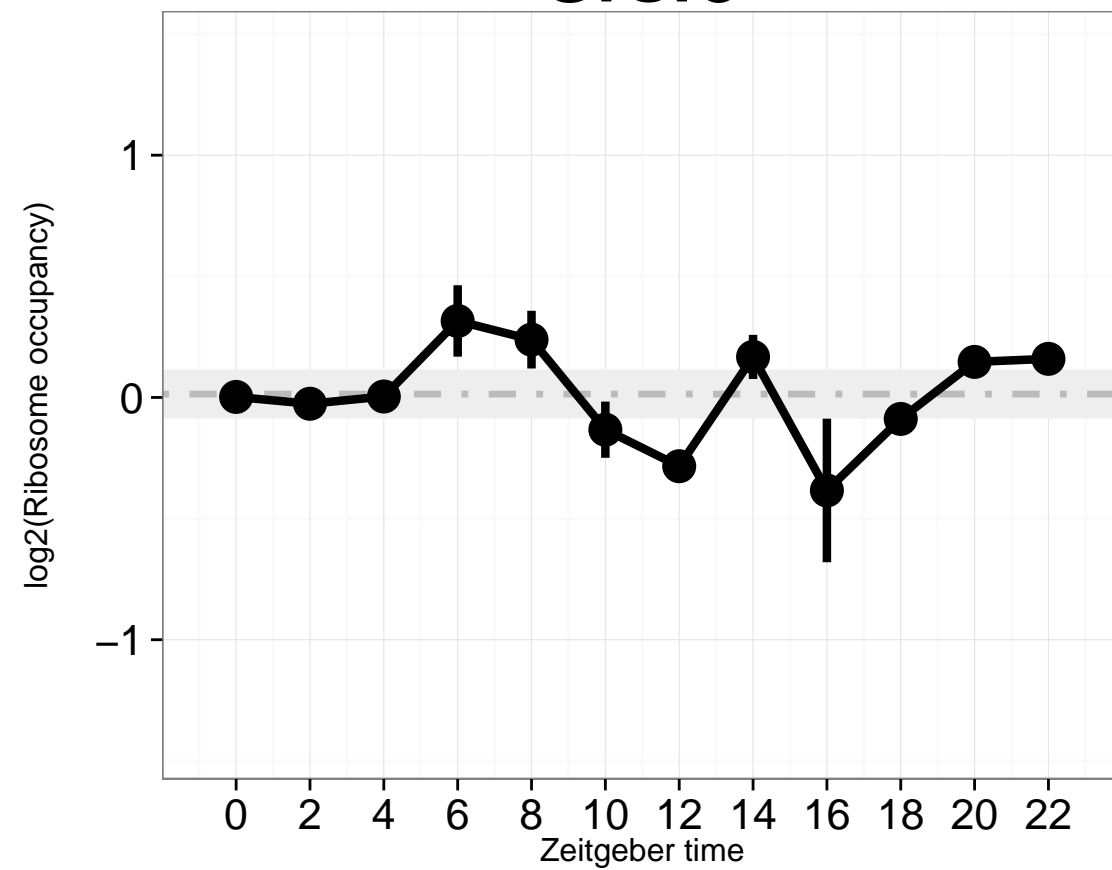

Supplement: Supplementary file 7913 [file 1]

# Tsc22d3

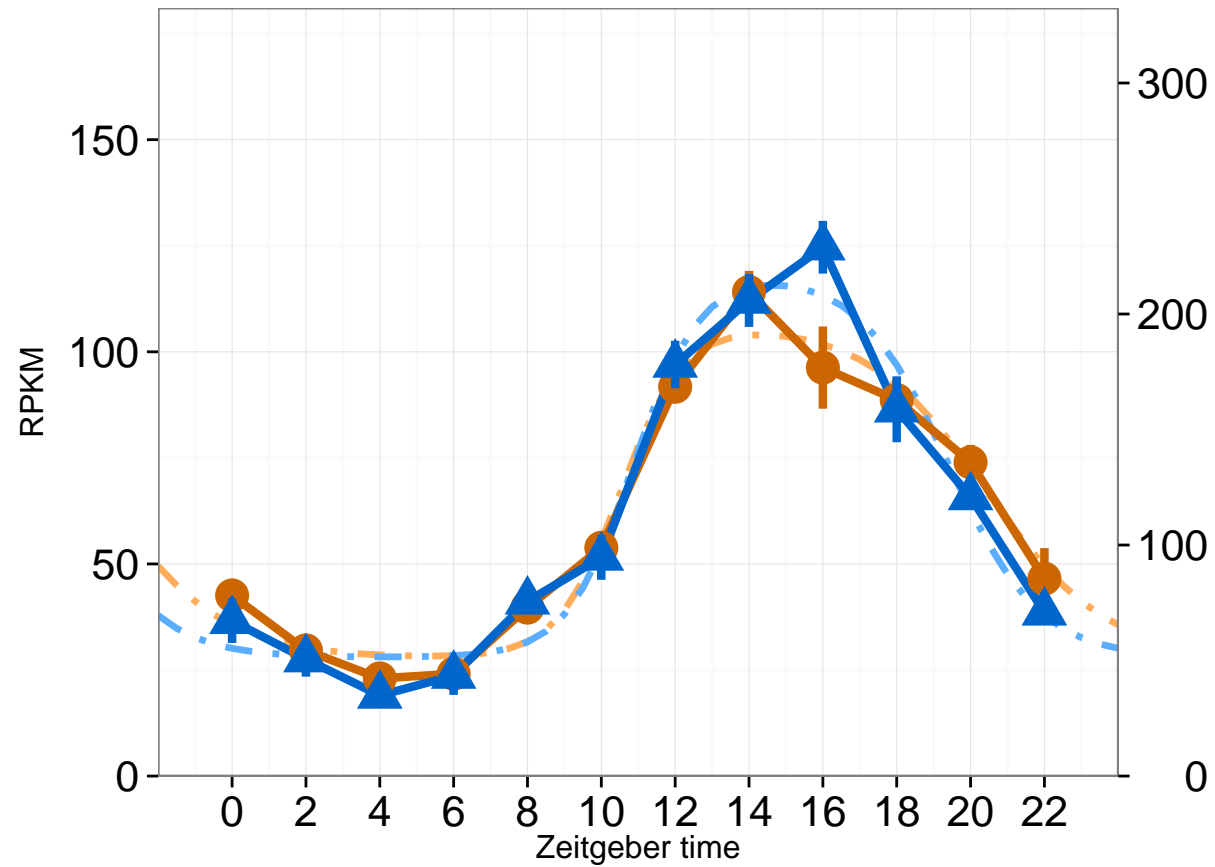

# Tsc22d3

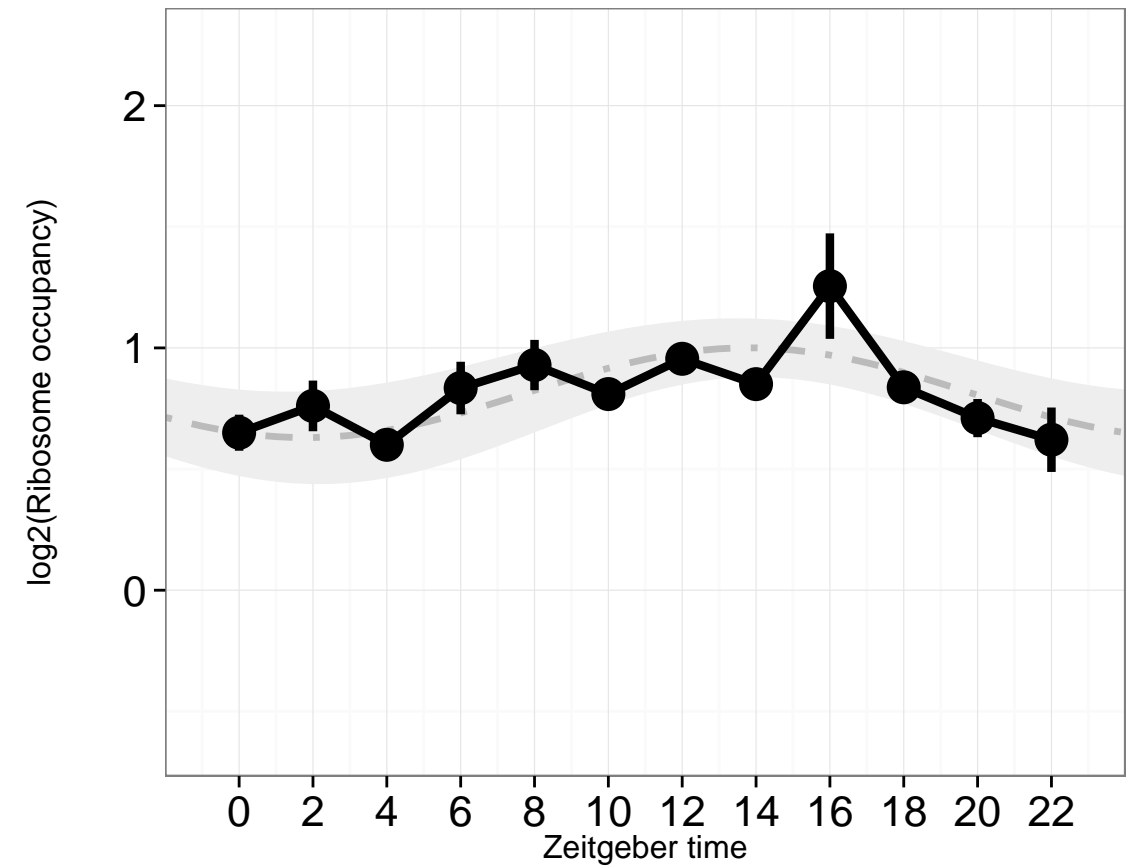

Supplement: Supplementary file 7914 [file 1]

# Irf2bp2

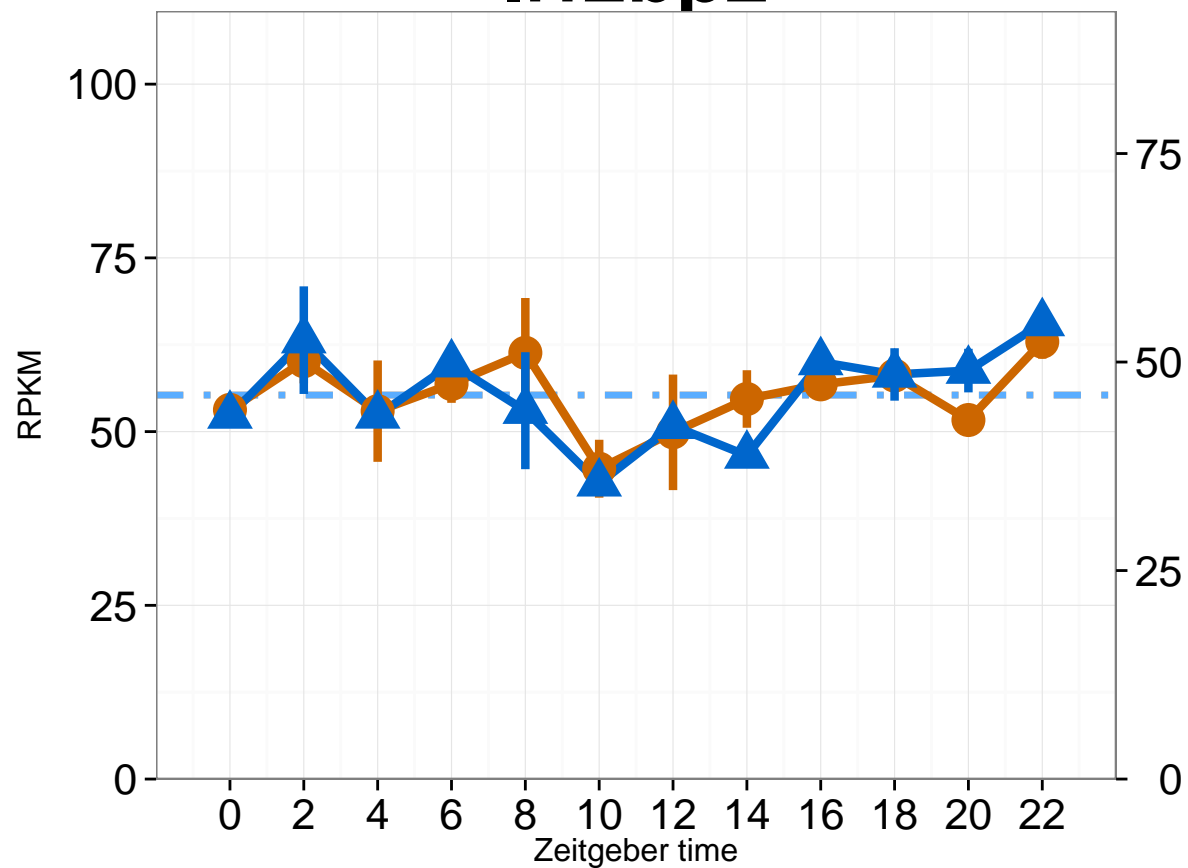

# Irf2bp2

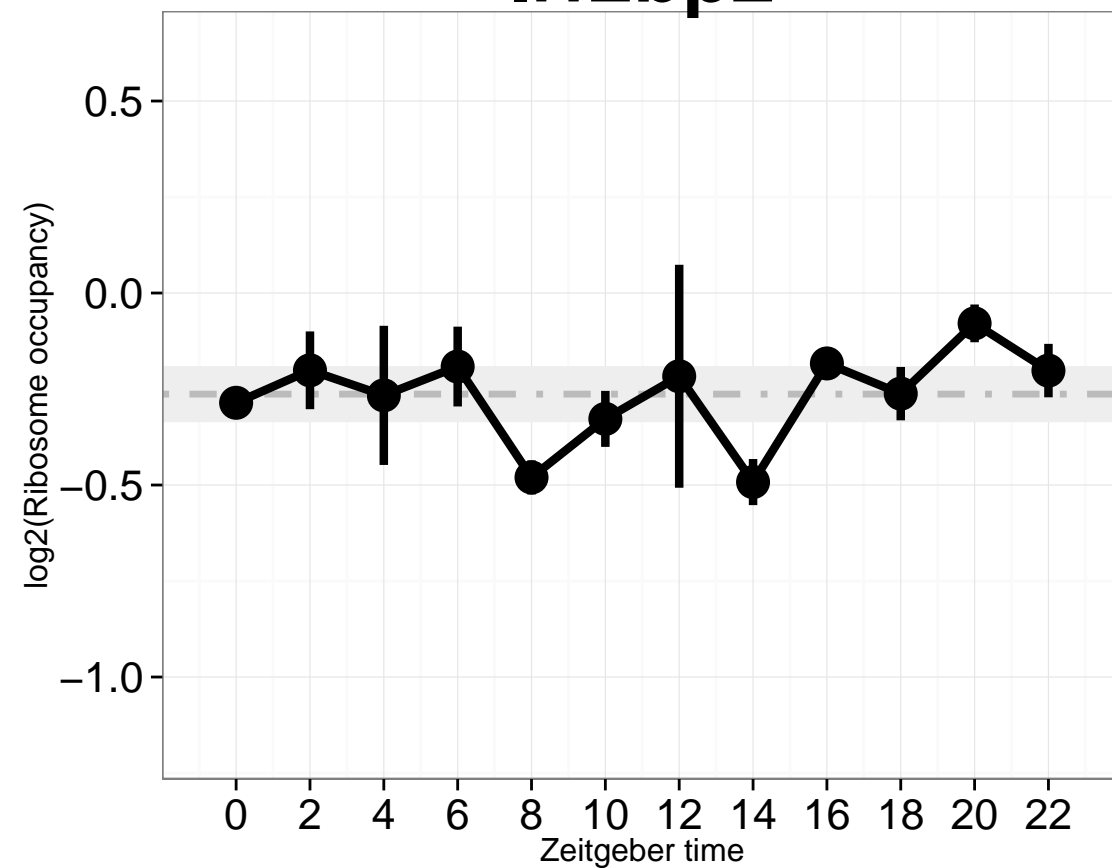

Supplement: Supplementary file 7915 [file 1]

# Fbrsl1

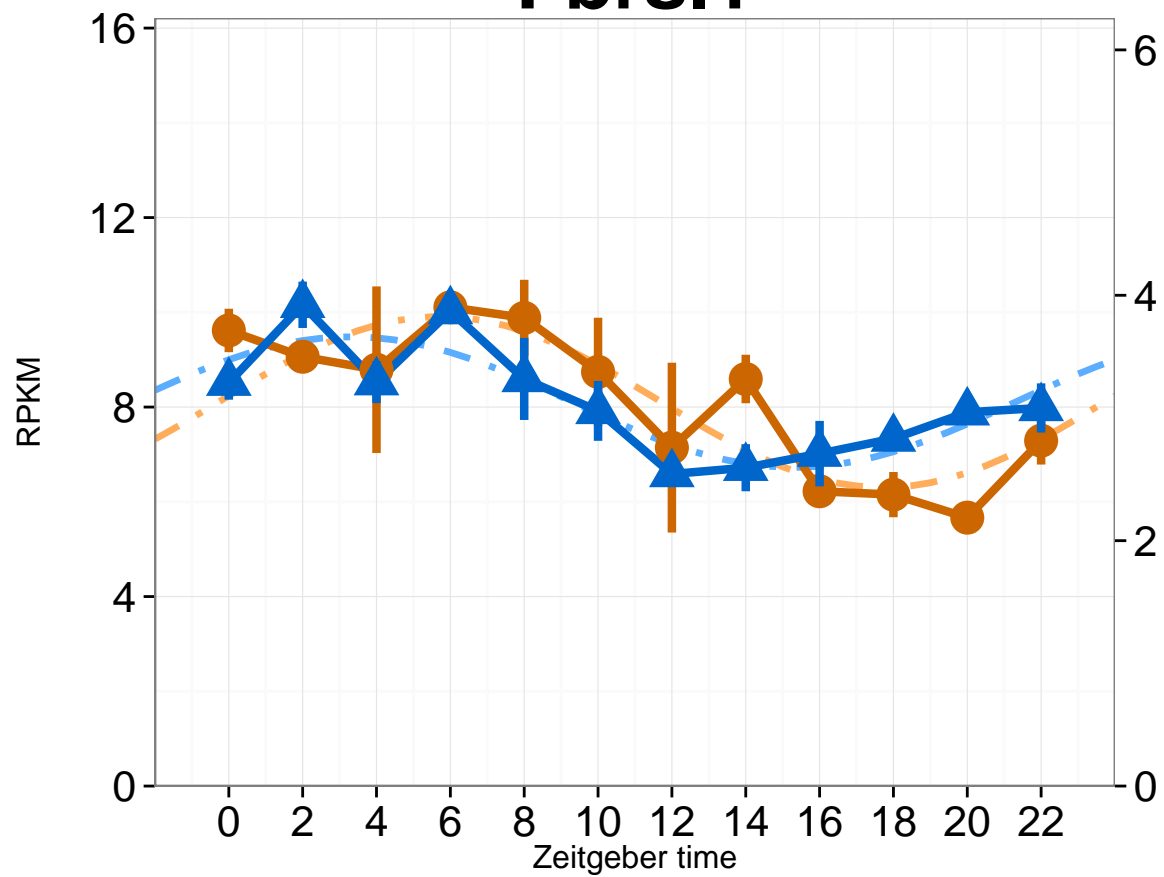

# Fbrsl1

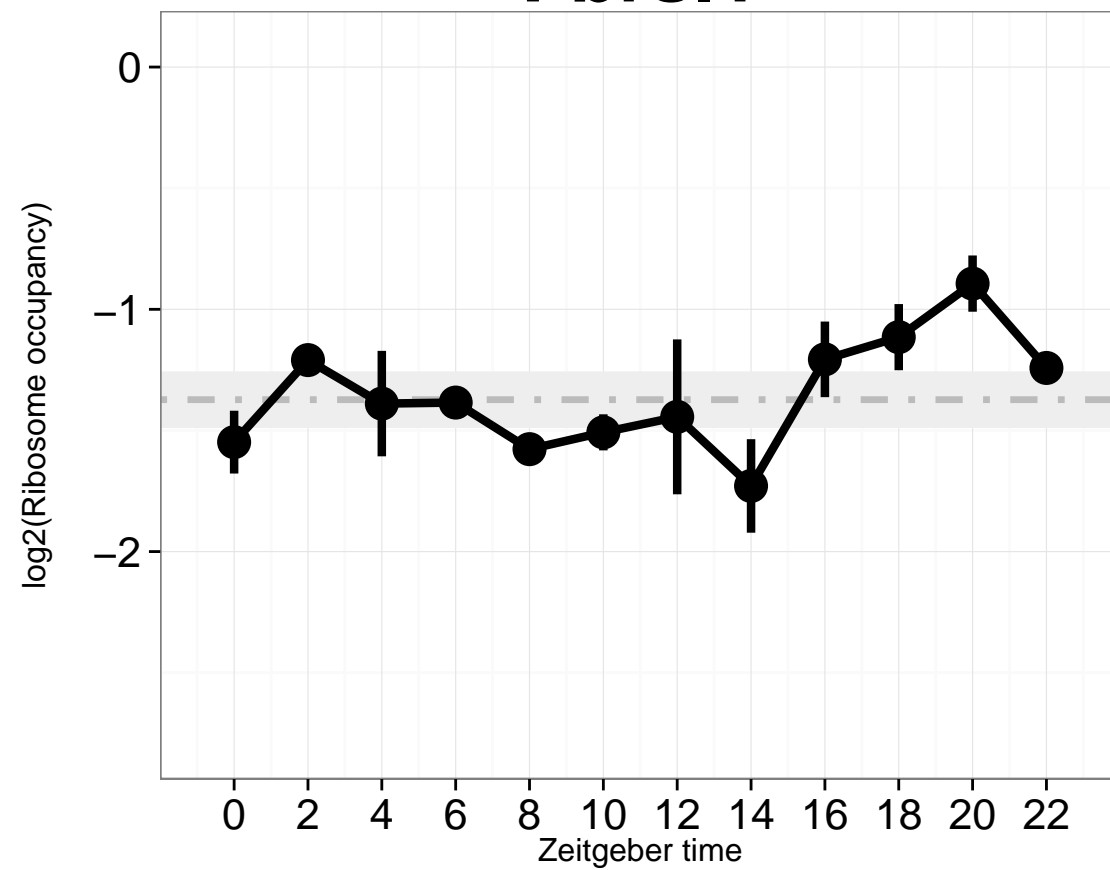

Supplement: Supplementary file 7916 [file 1]

# Acsm5

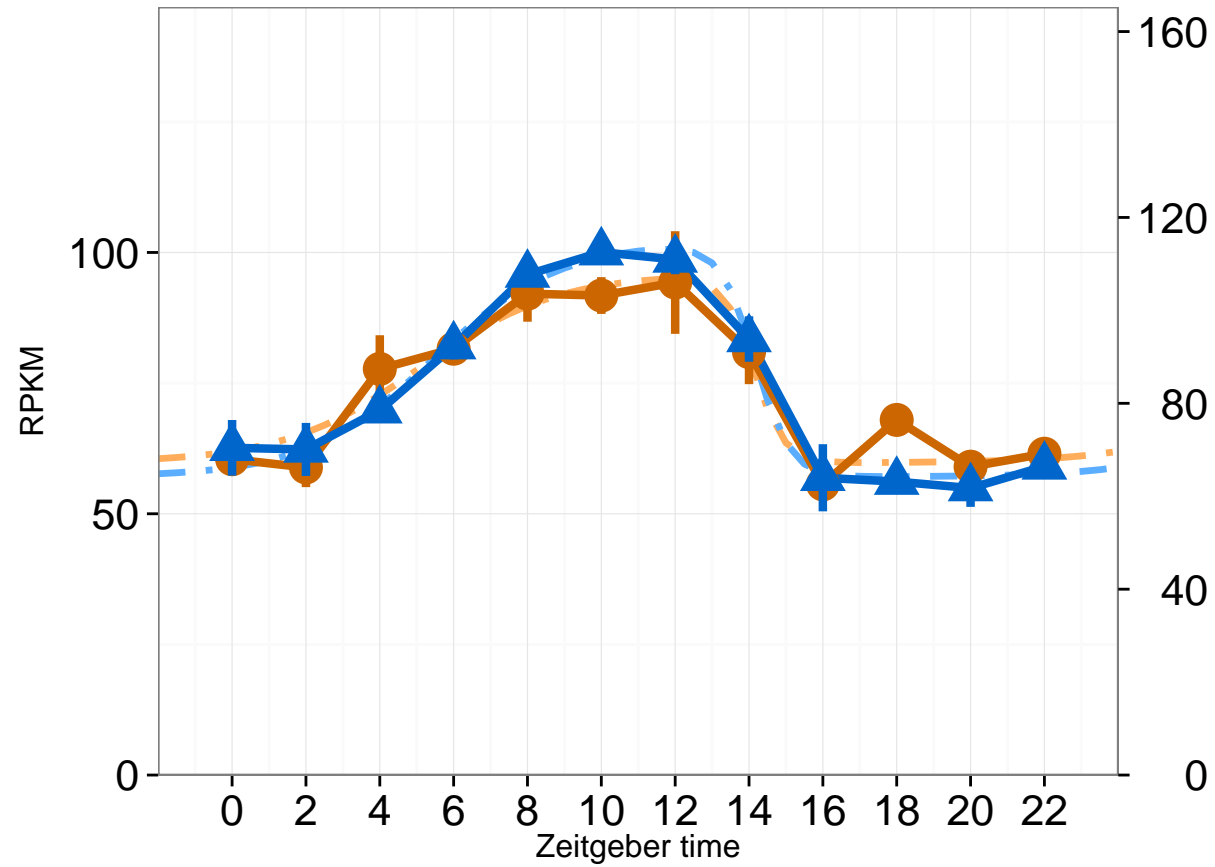

# Acsm5

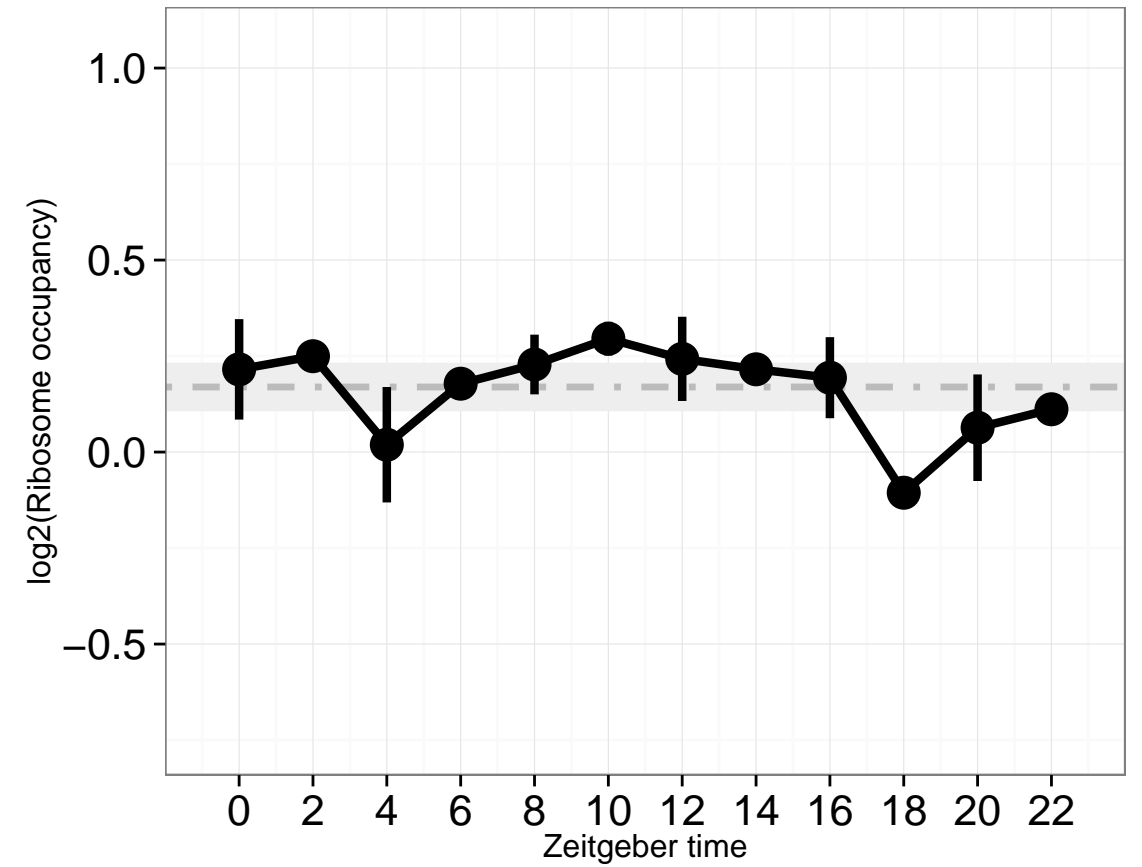

Supplement: Supplementary file 7917 [file 1]

# Cebpz

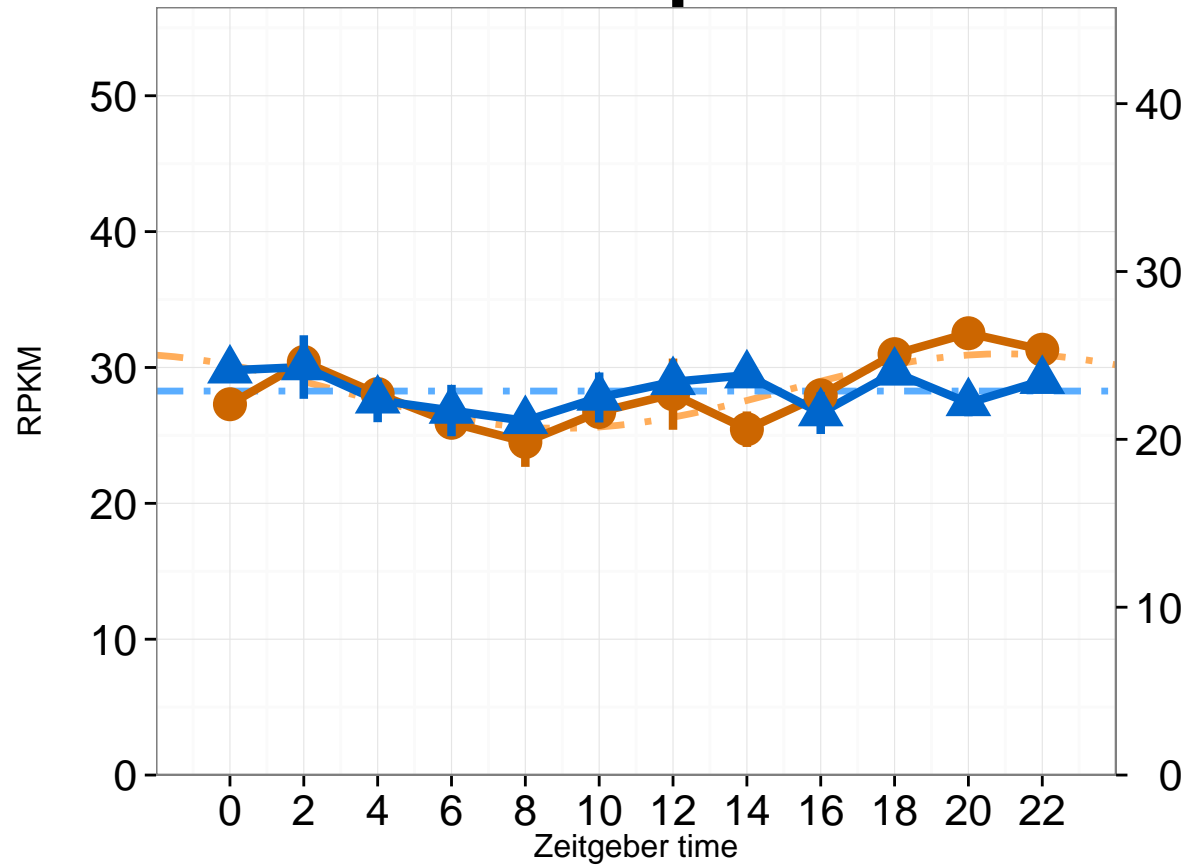

# Cebpz

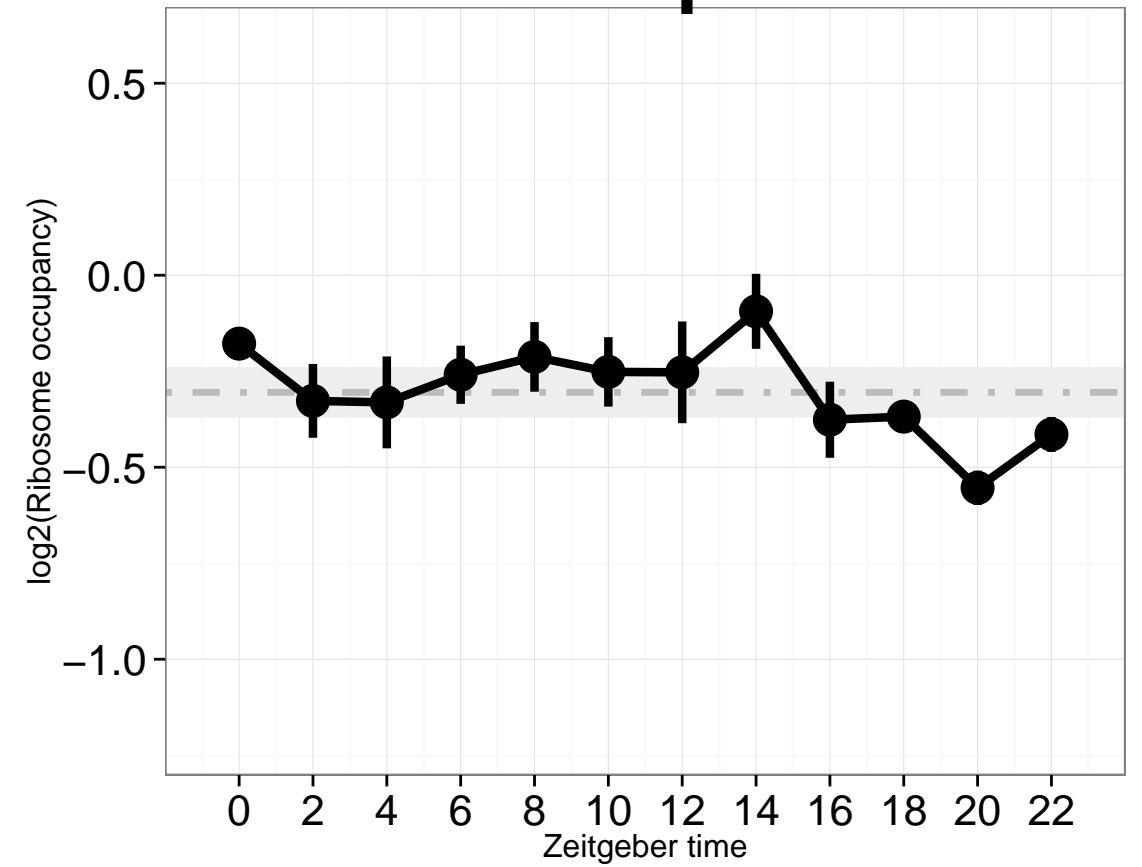

Supplement: Supplementary file 7918 [file 1]

## Lrp12

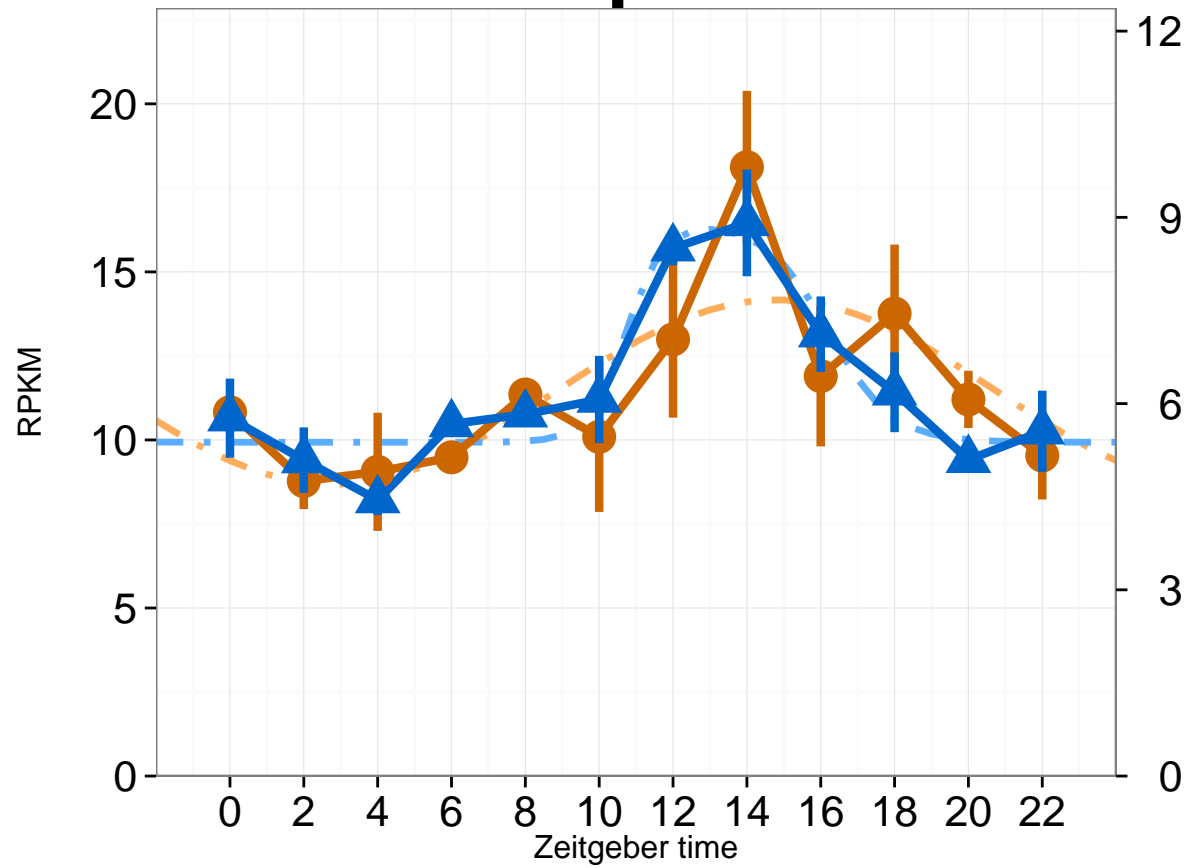

## Lrp12

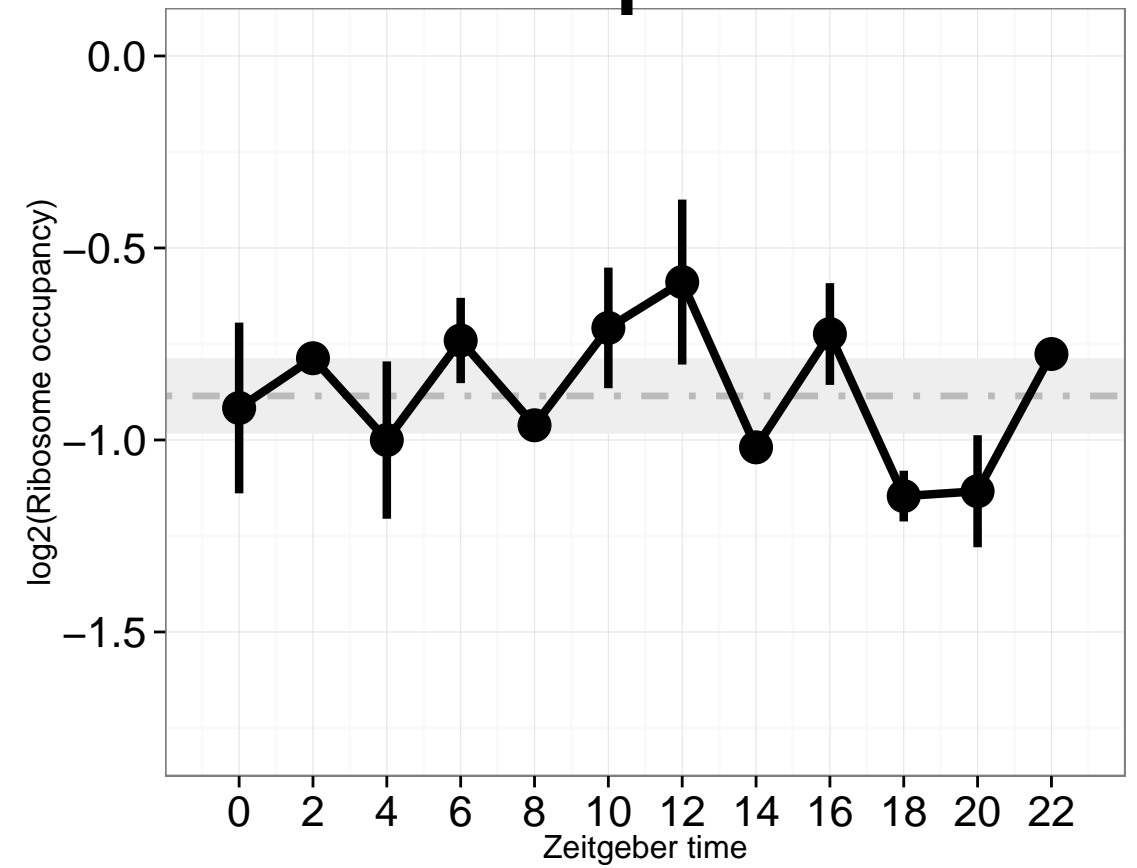

Supplement: Supplementary file 7919 [file 1]

## Nudt15

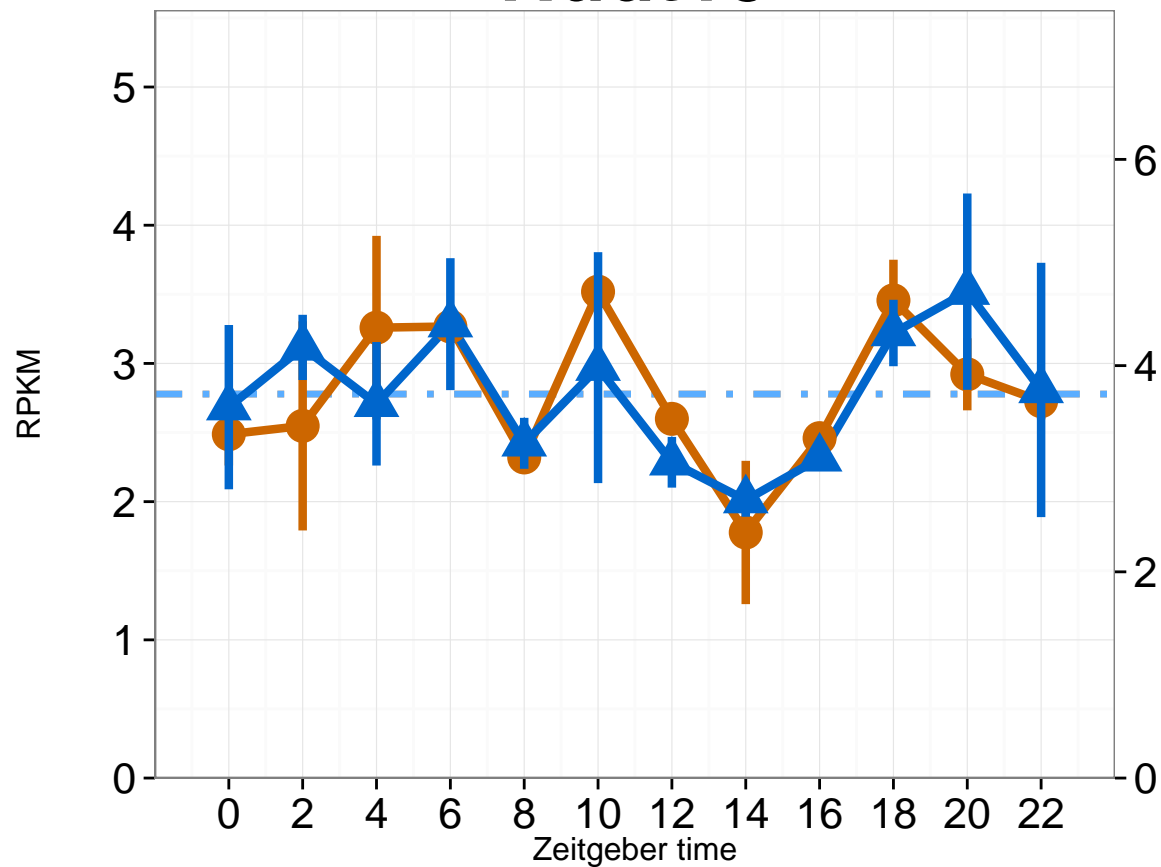

## Nudt15

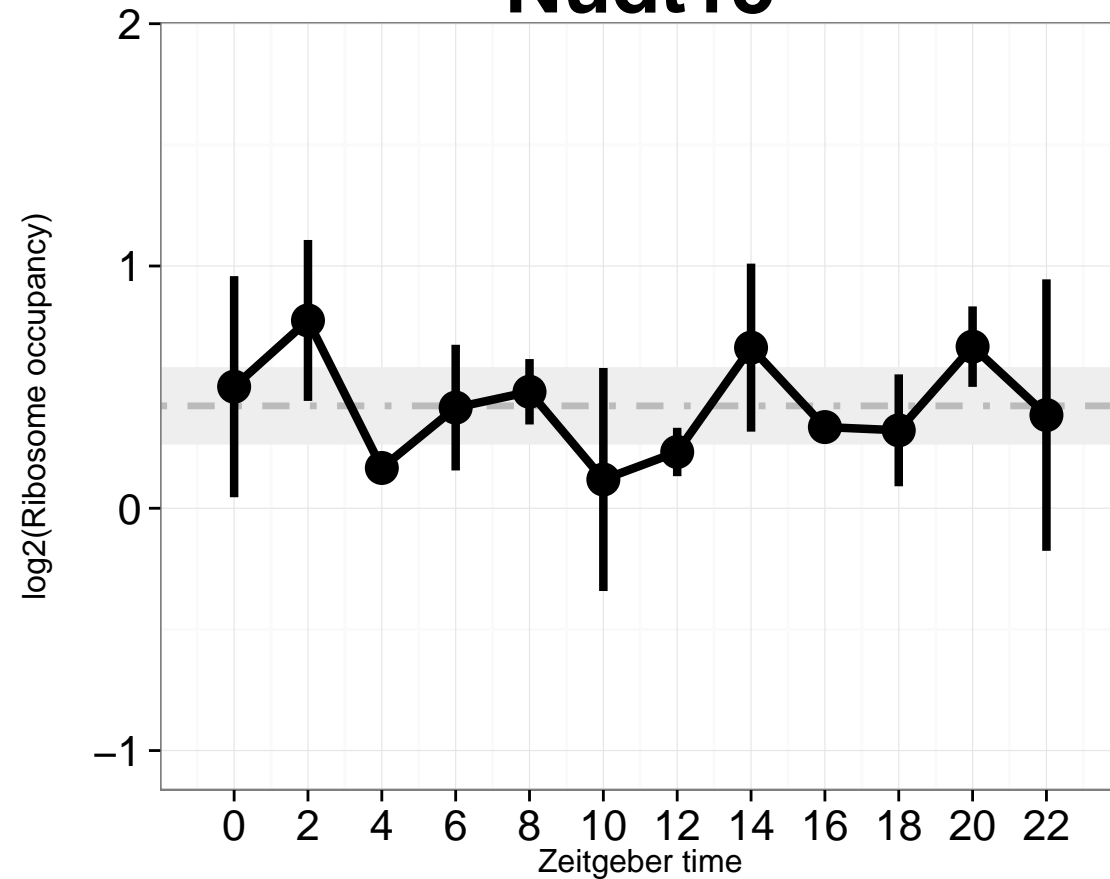

Supplement: Supplementary file 7920 [file 1]

# Gpatch1

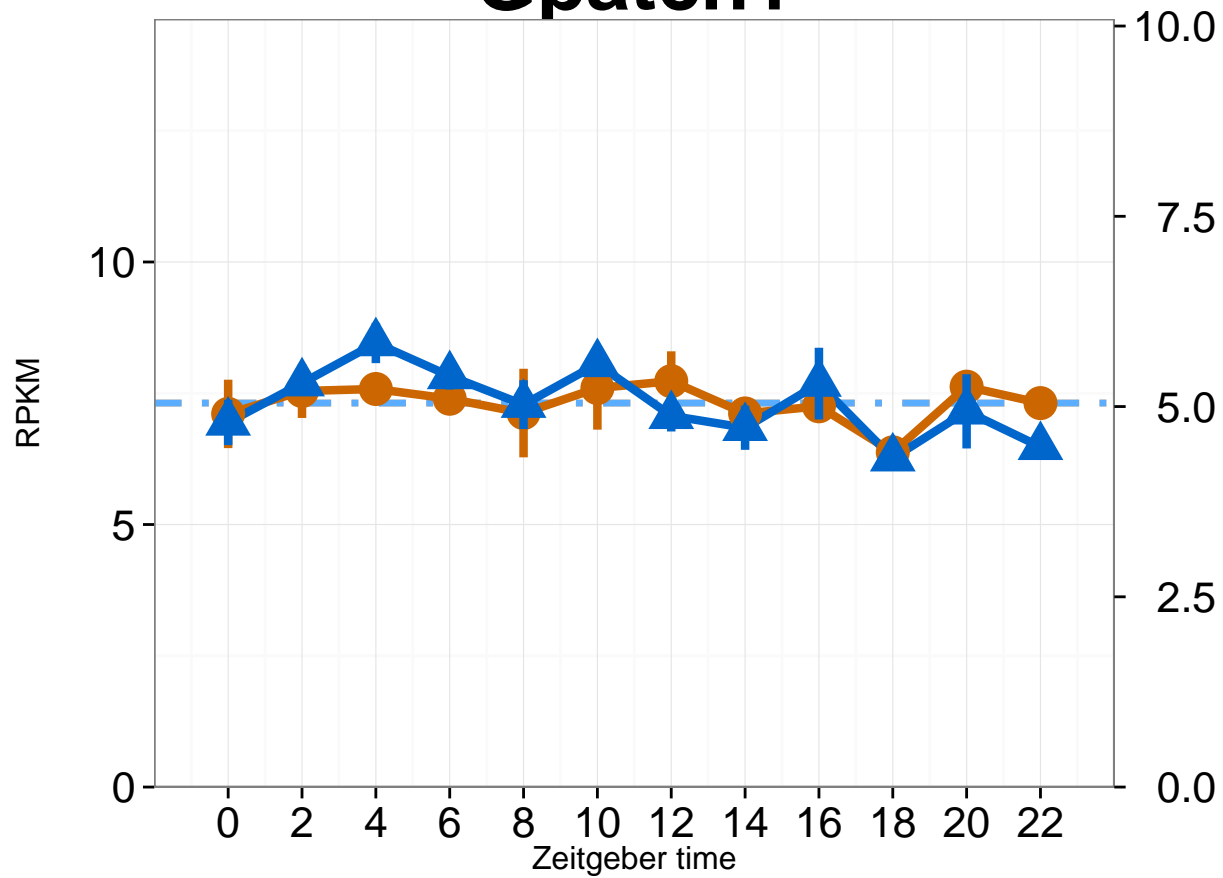

# Gpatch1

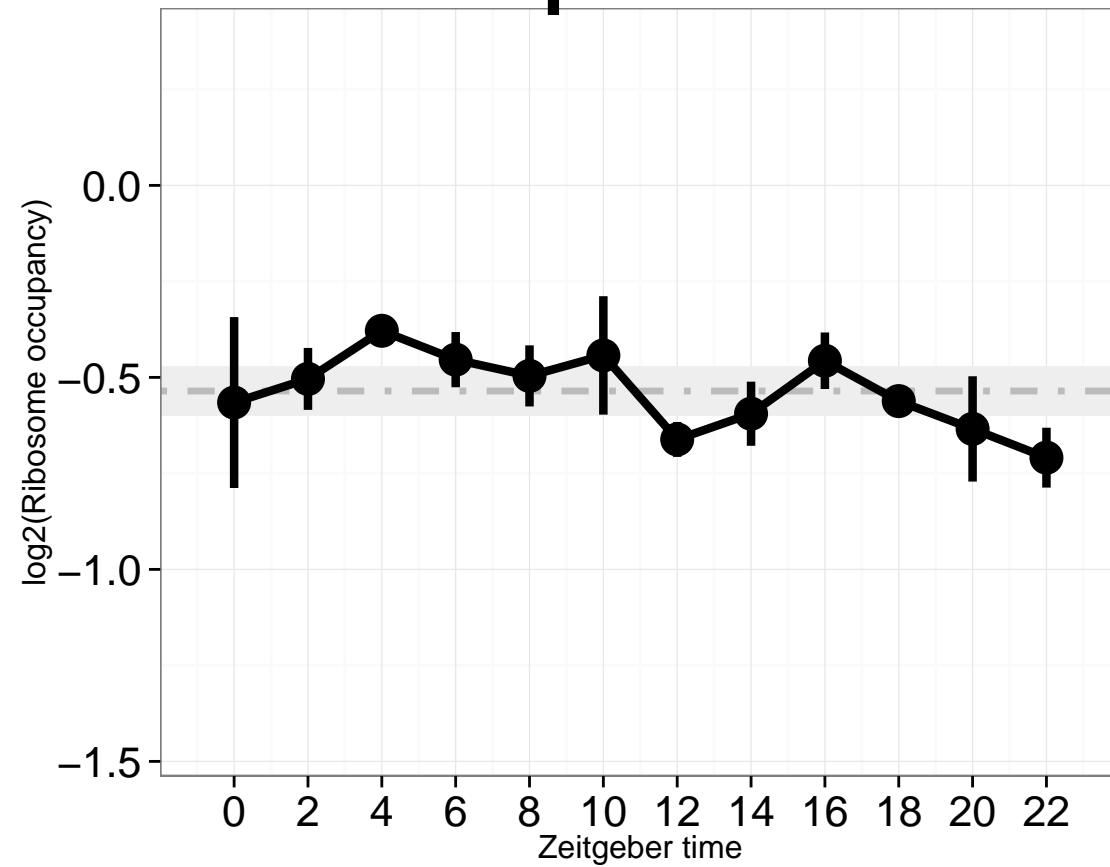

Supplement: Supplementary file 7921 [file 1]

## Msl1

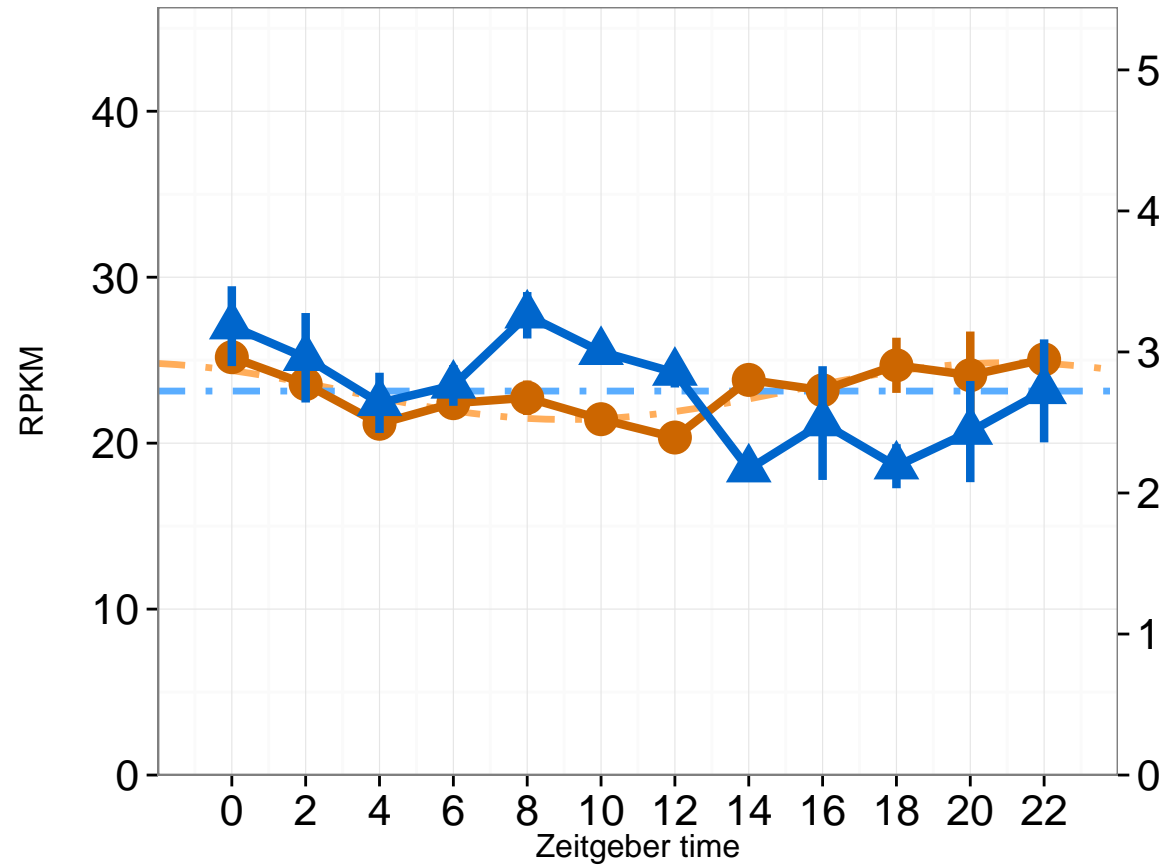

## Msl1

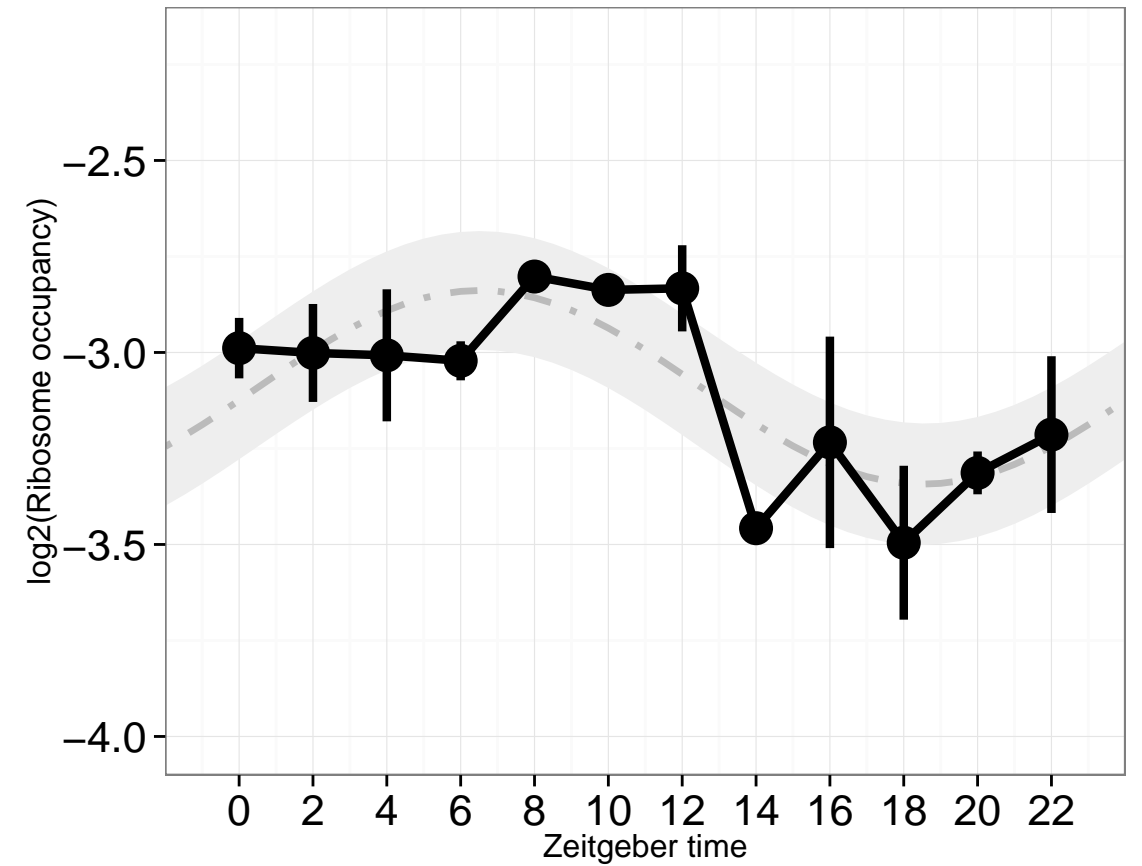

Supplement: Supplementary file 7922 [file 1]

# Ptprn2

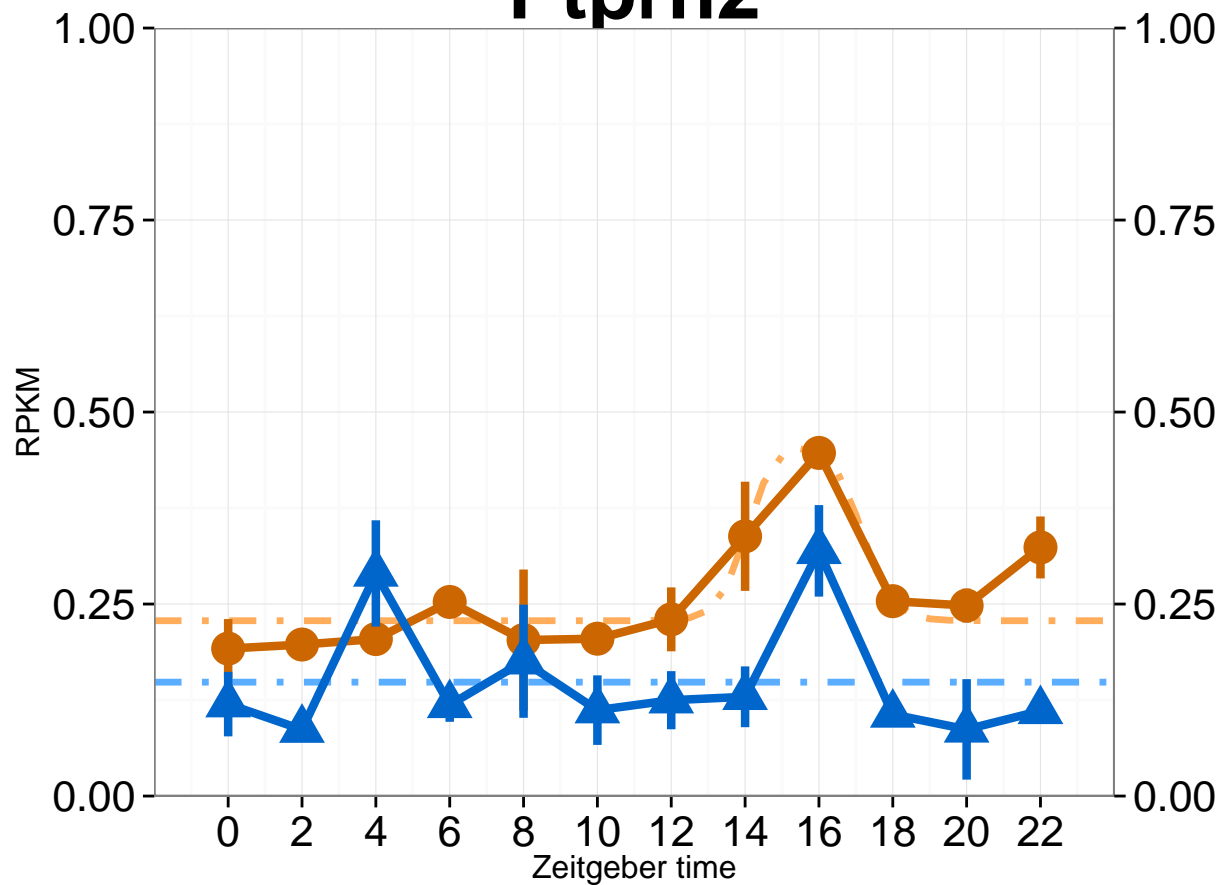

# Ptprn2

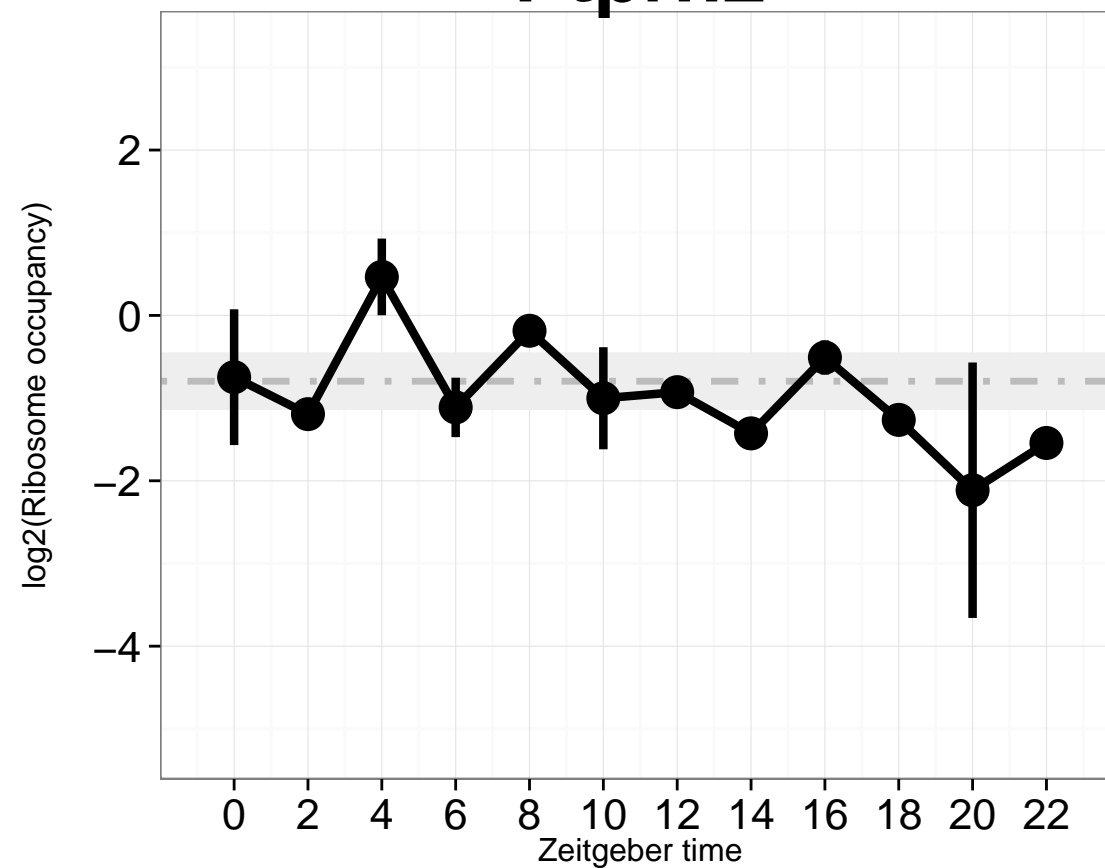

Supplement: Supplementary file 7923 [file 1]

## Ppp2r5c

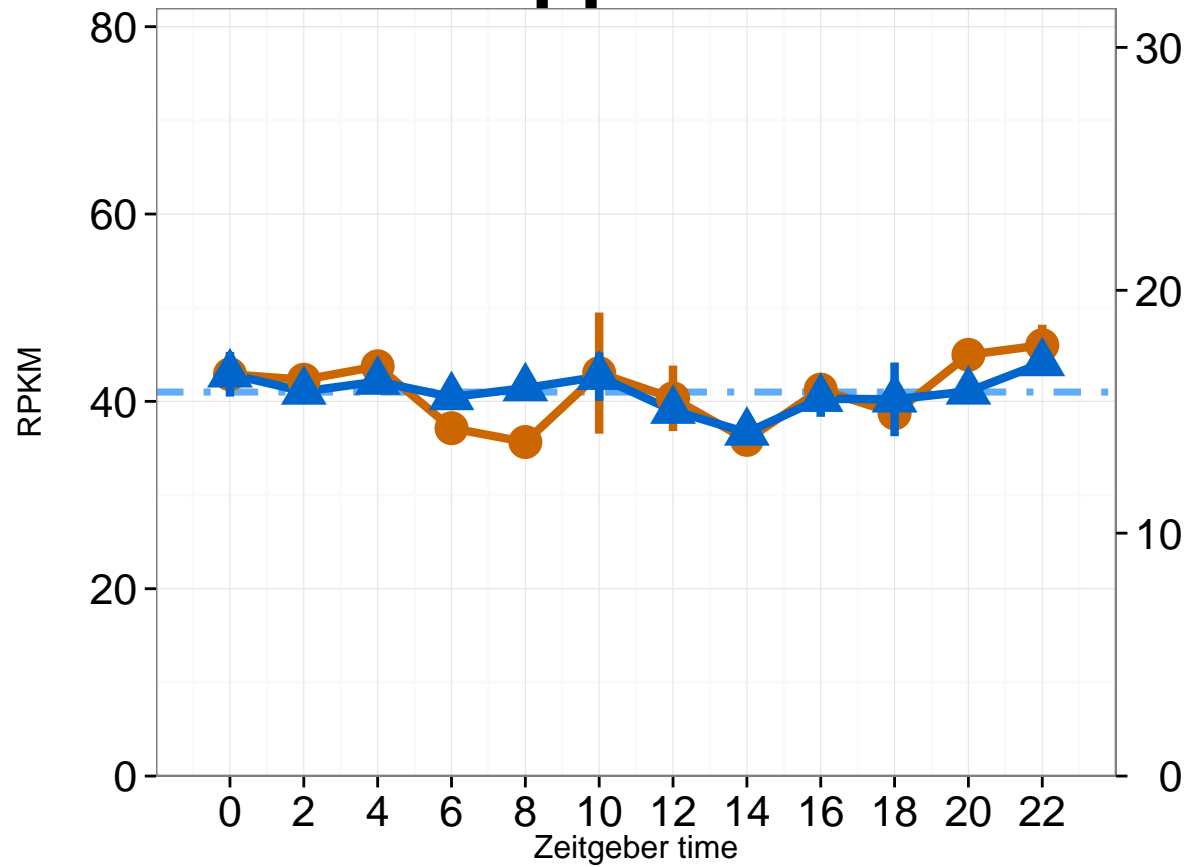

## Ppp2r5c

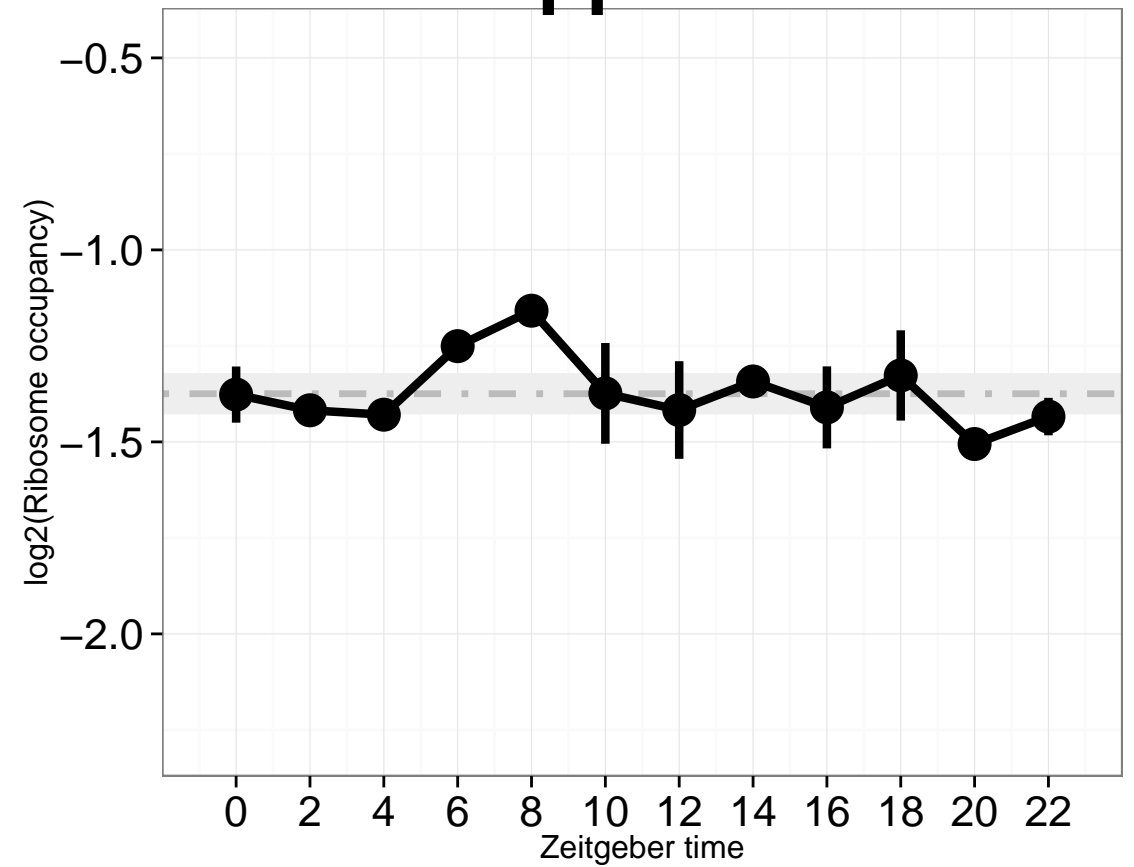

Supplement: Supplementary file 7924 [file 1]

# MYADM

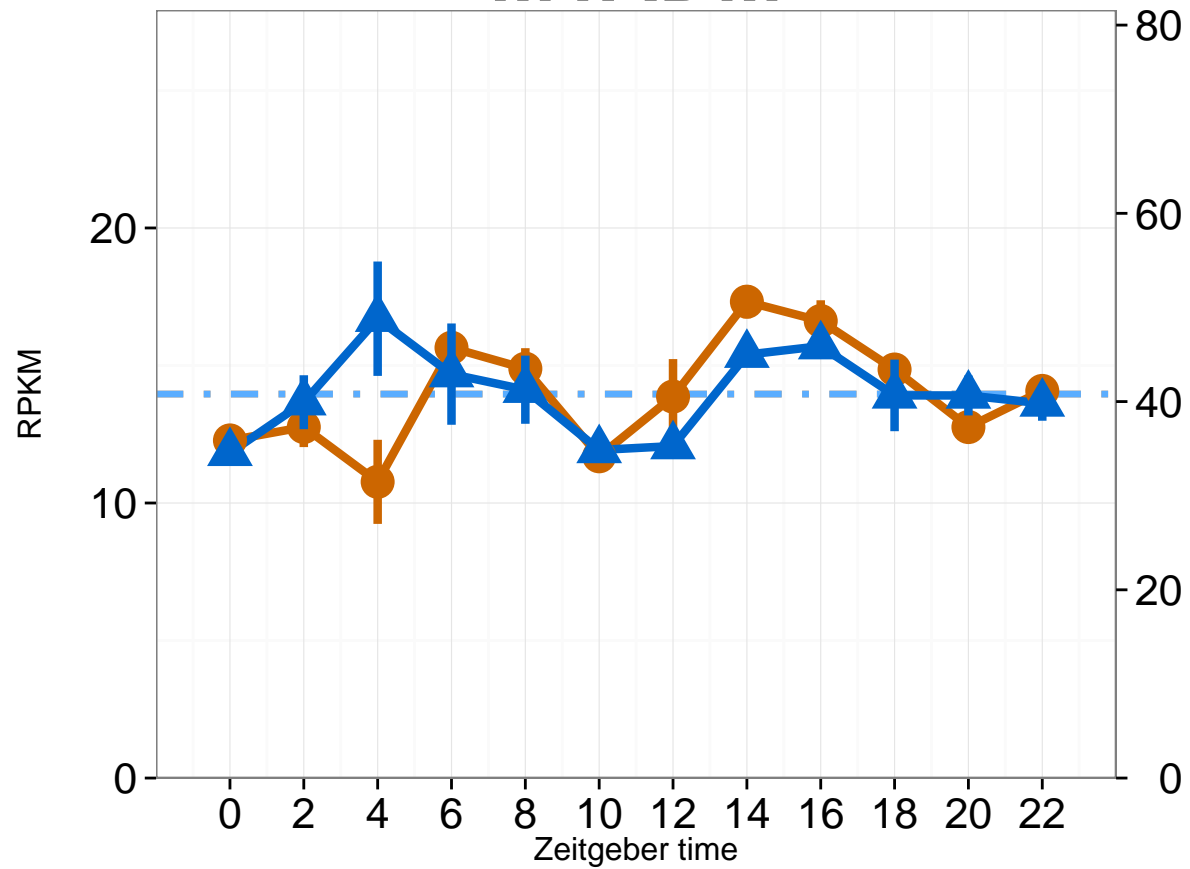

# MYADM

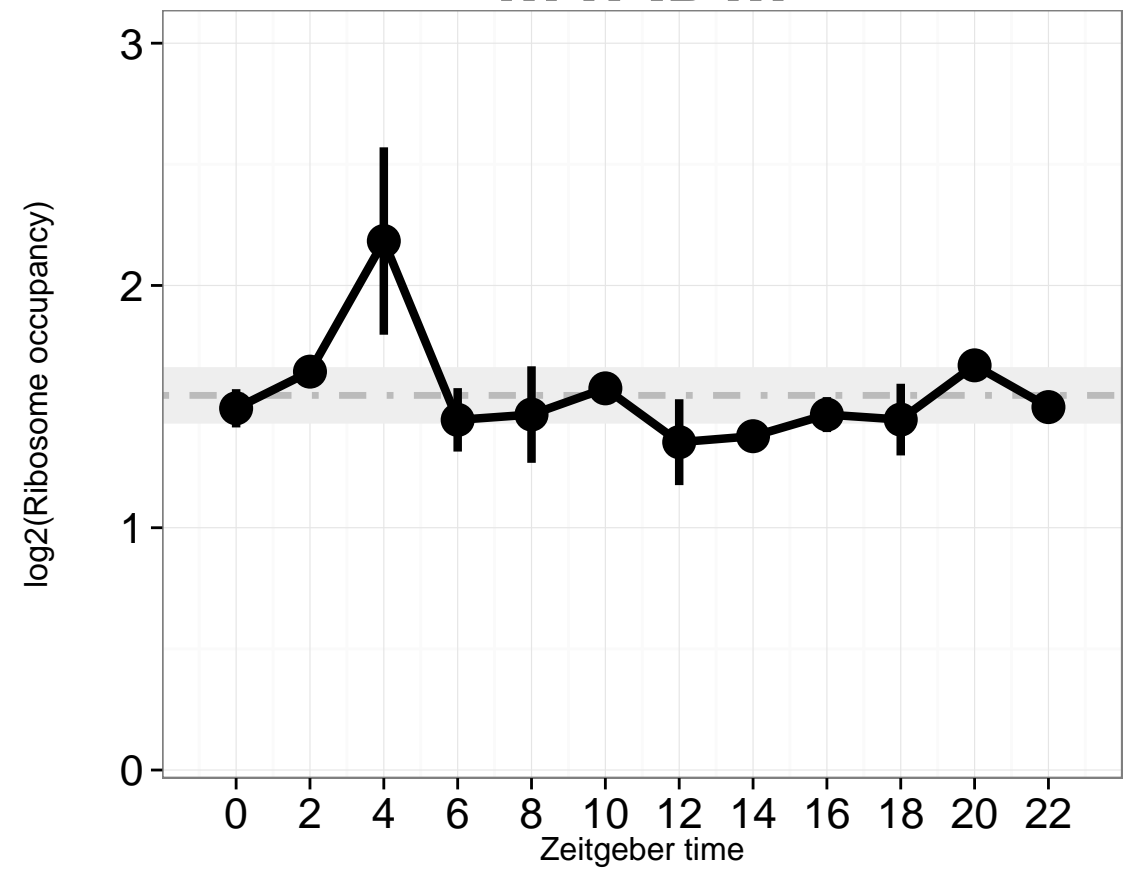

Supplement: Supplementary file 7925 [file 1]
