# Supplementary material (part 80 of 133)
Source: publisher figshare collection journal article supplement (https://springernature.figshare.com/articles/dataset/_/4903193)

## Aldh8a1

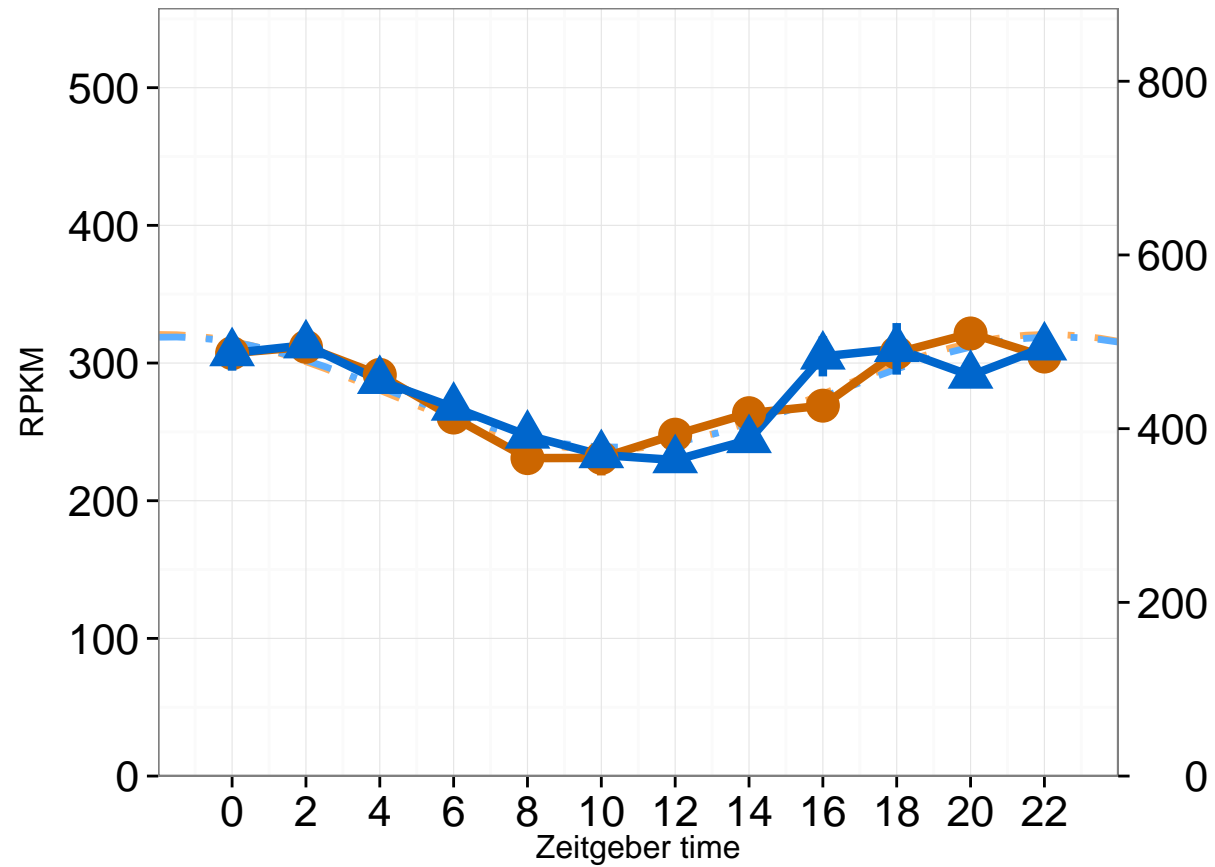

## Aldh8a1

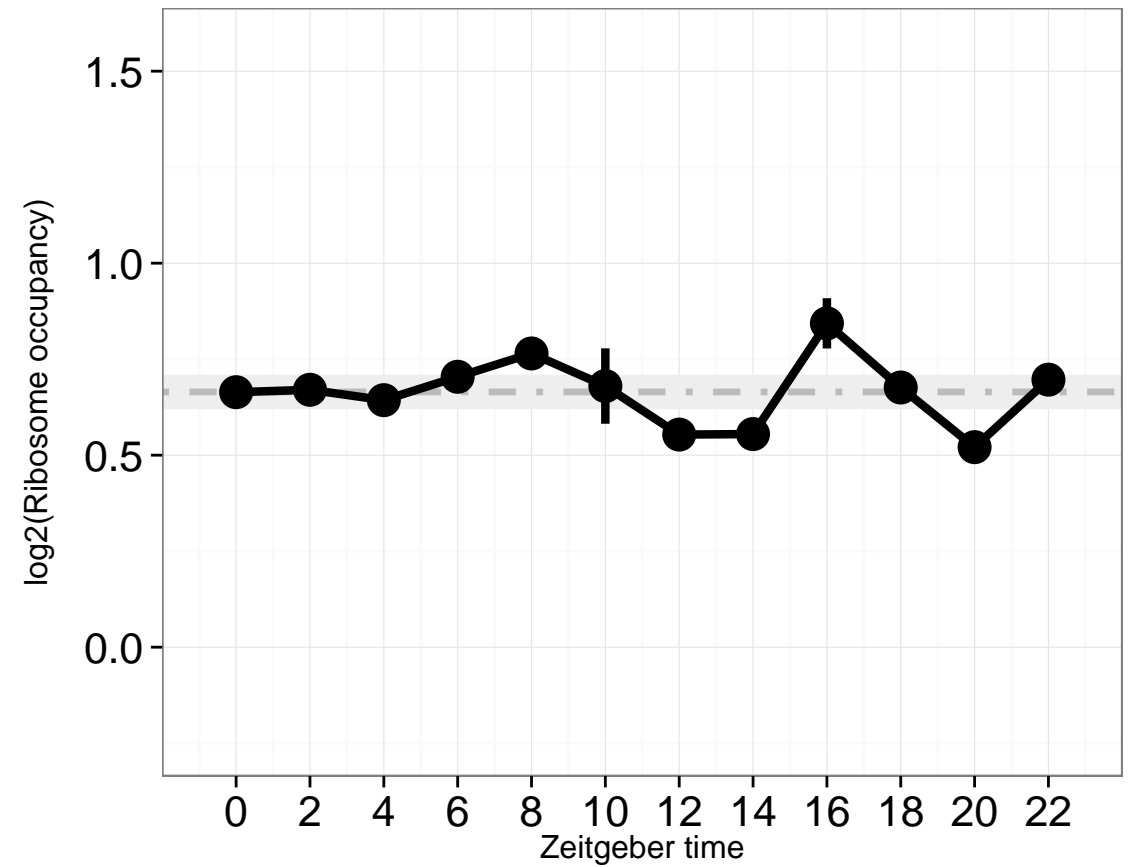

Supplement: Supplementary file 7926 [file 1]

# Lrrc17

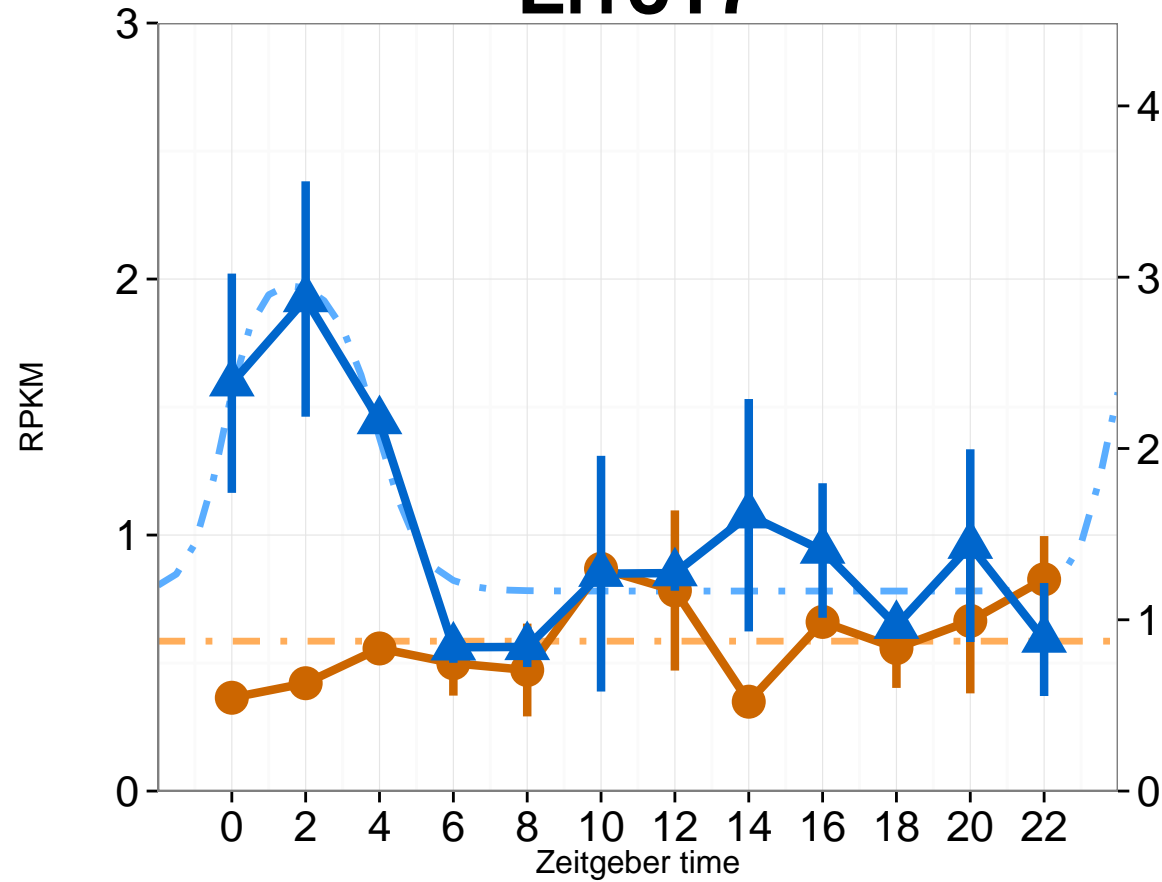

# Lrrc17

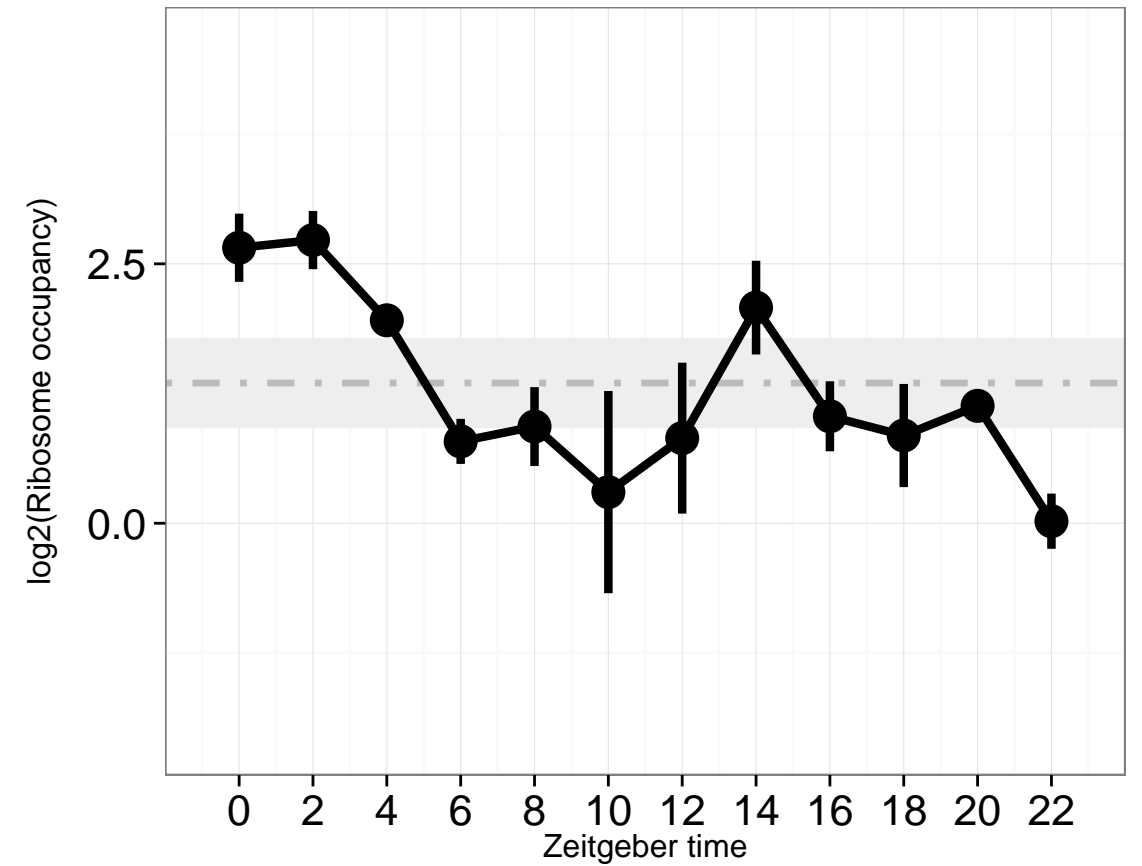

Supplement: Supplementary file 7927 [file 1]

# Cdc14b

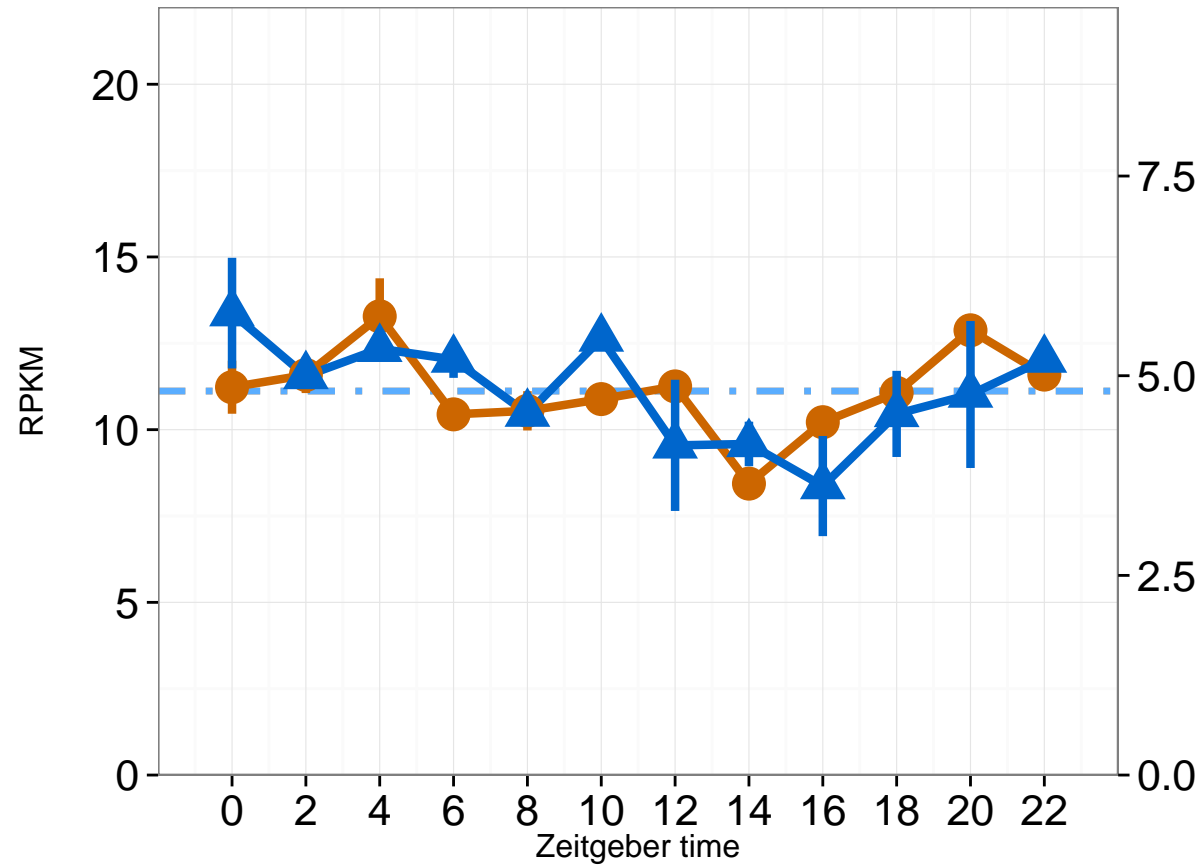

# Cdc14b

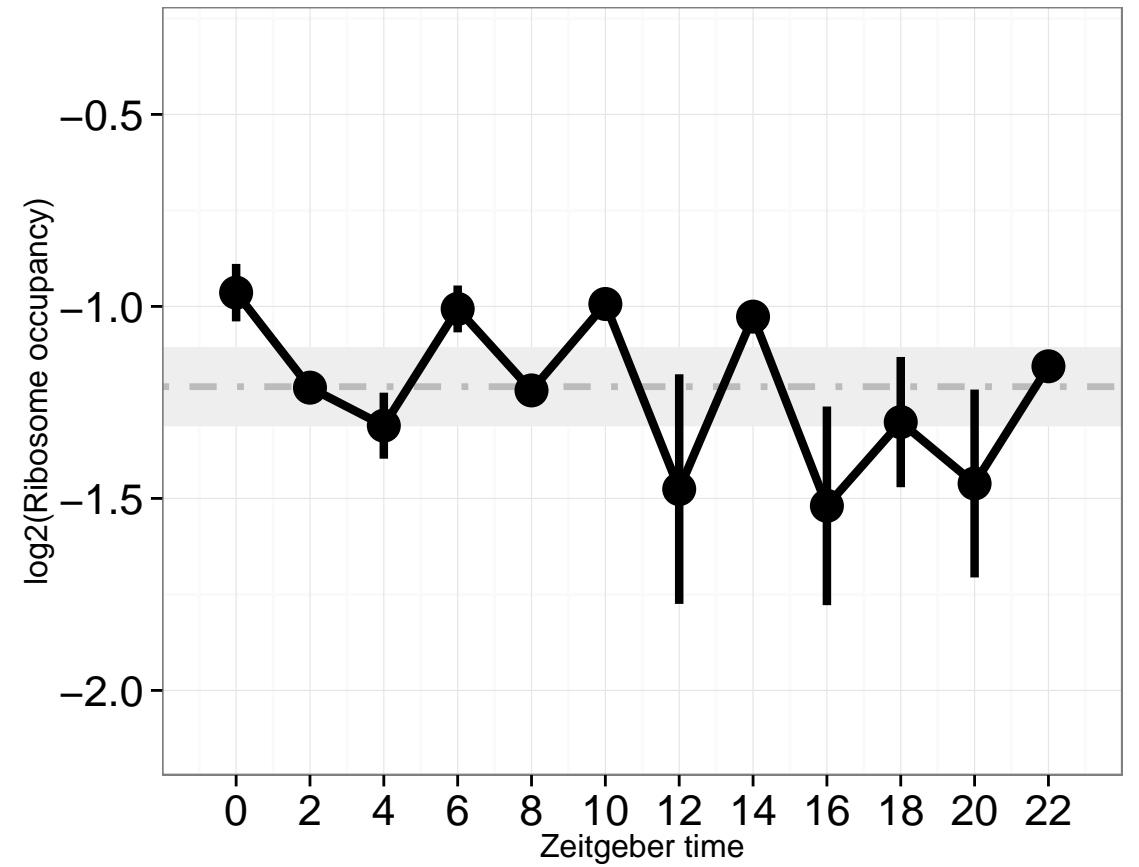

Supplement: Supplementary file 7928 [file 1]

# Trim56

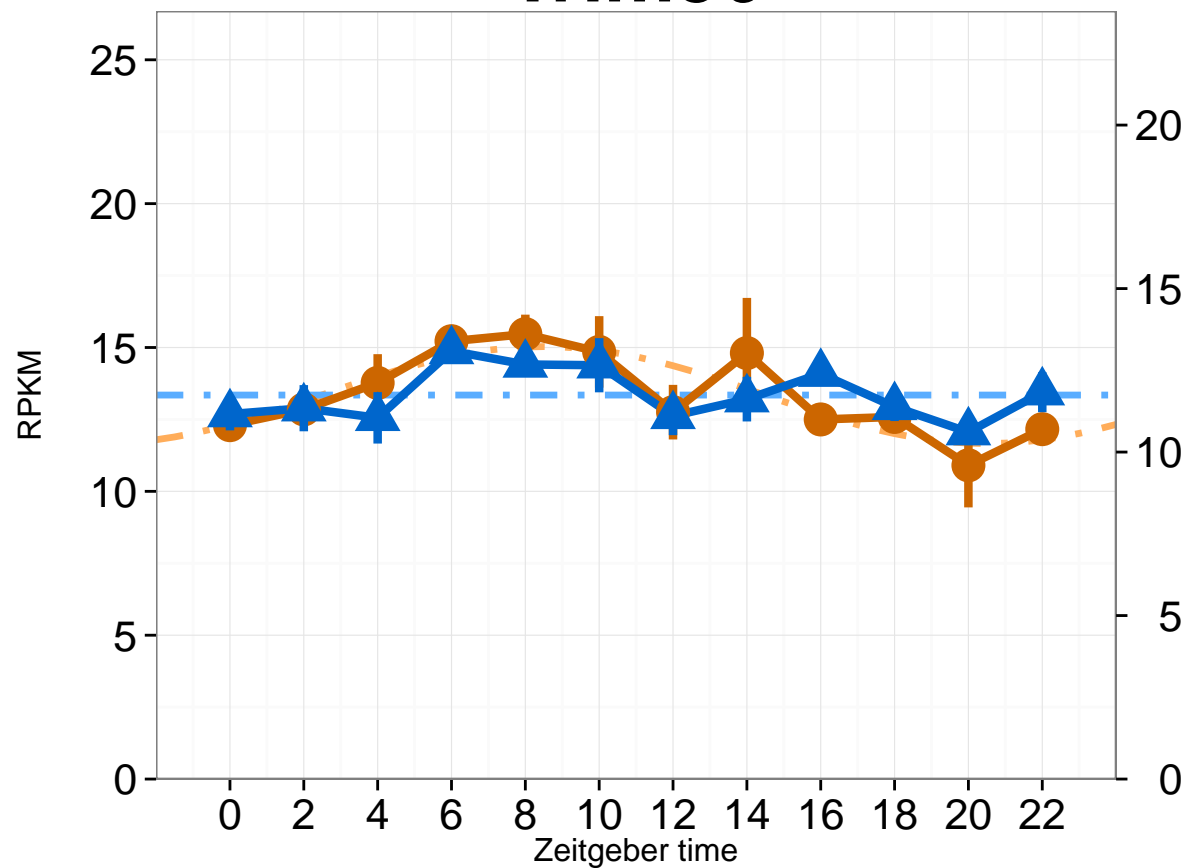

# Trim56

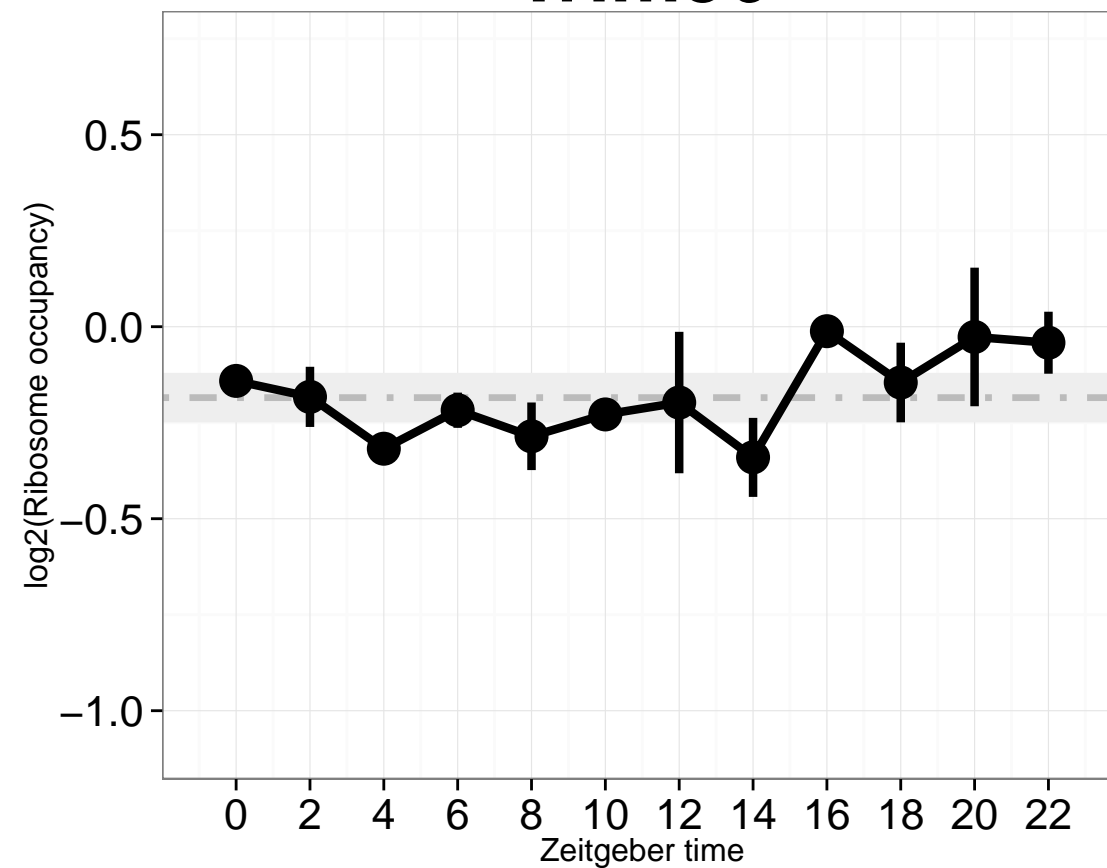

Supplement: Supplementary file 7929 [file 1]

## Gm10638

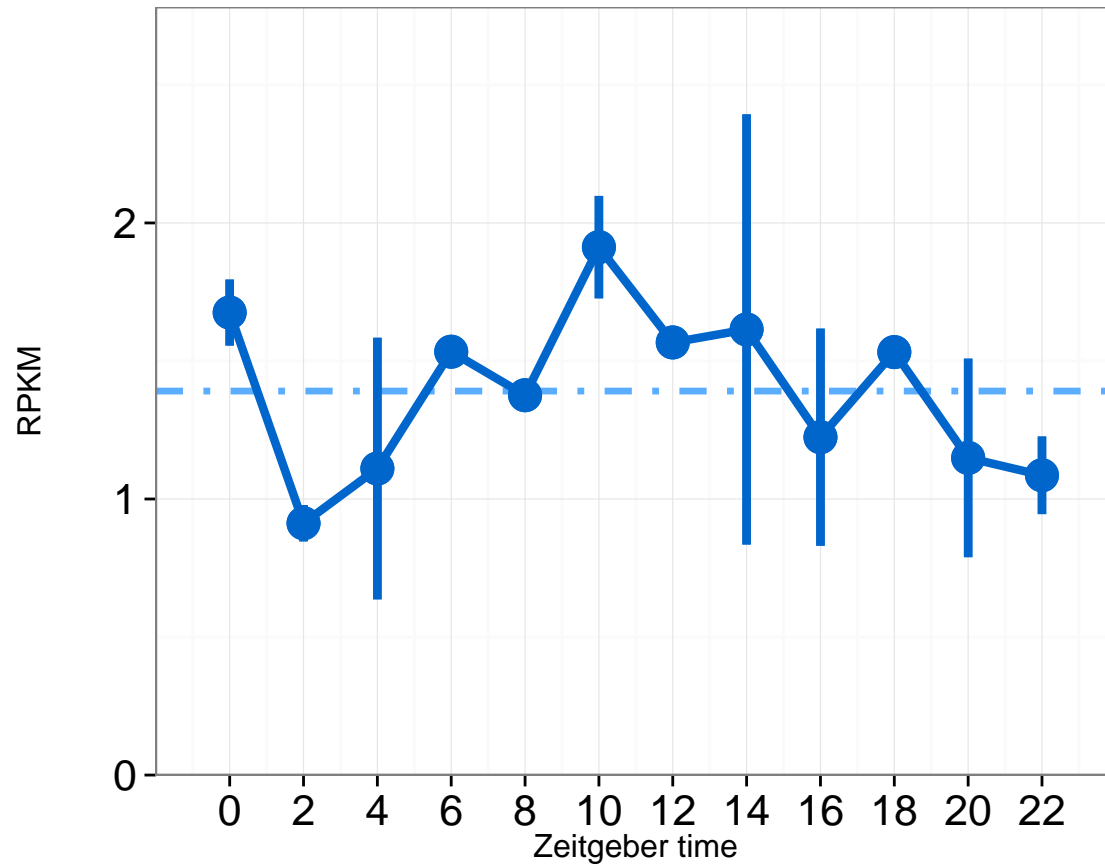

## Gm10638 log2(Ribosome occupanc

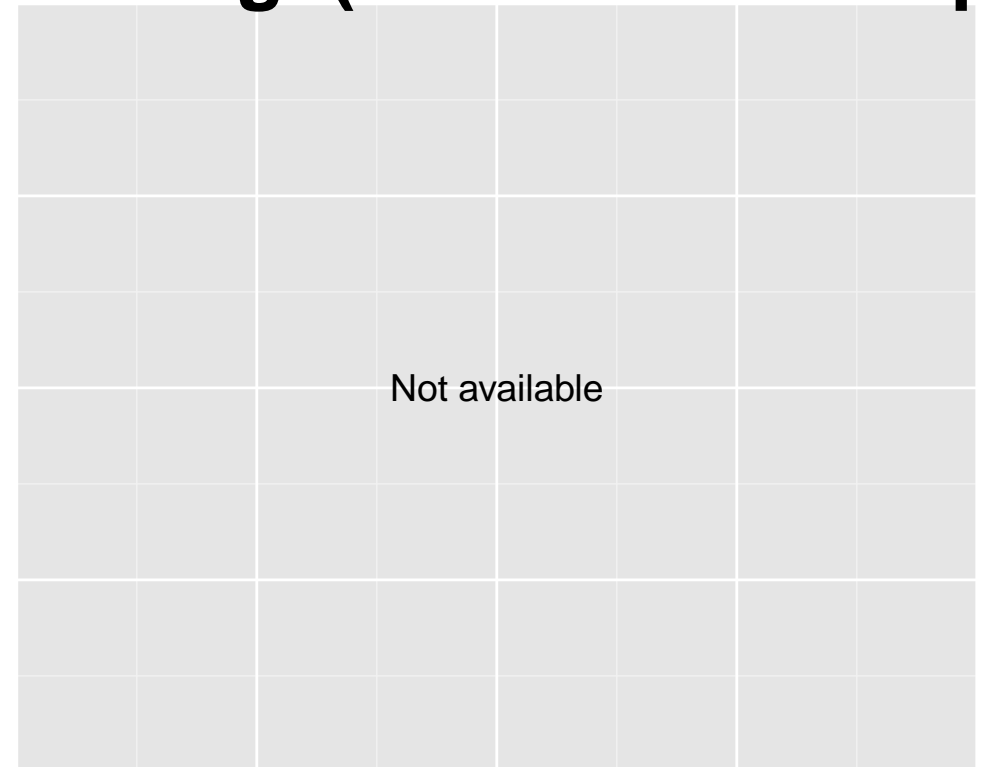

Supplement: Supplementary file 7930 [file 1]

## Cisd1

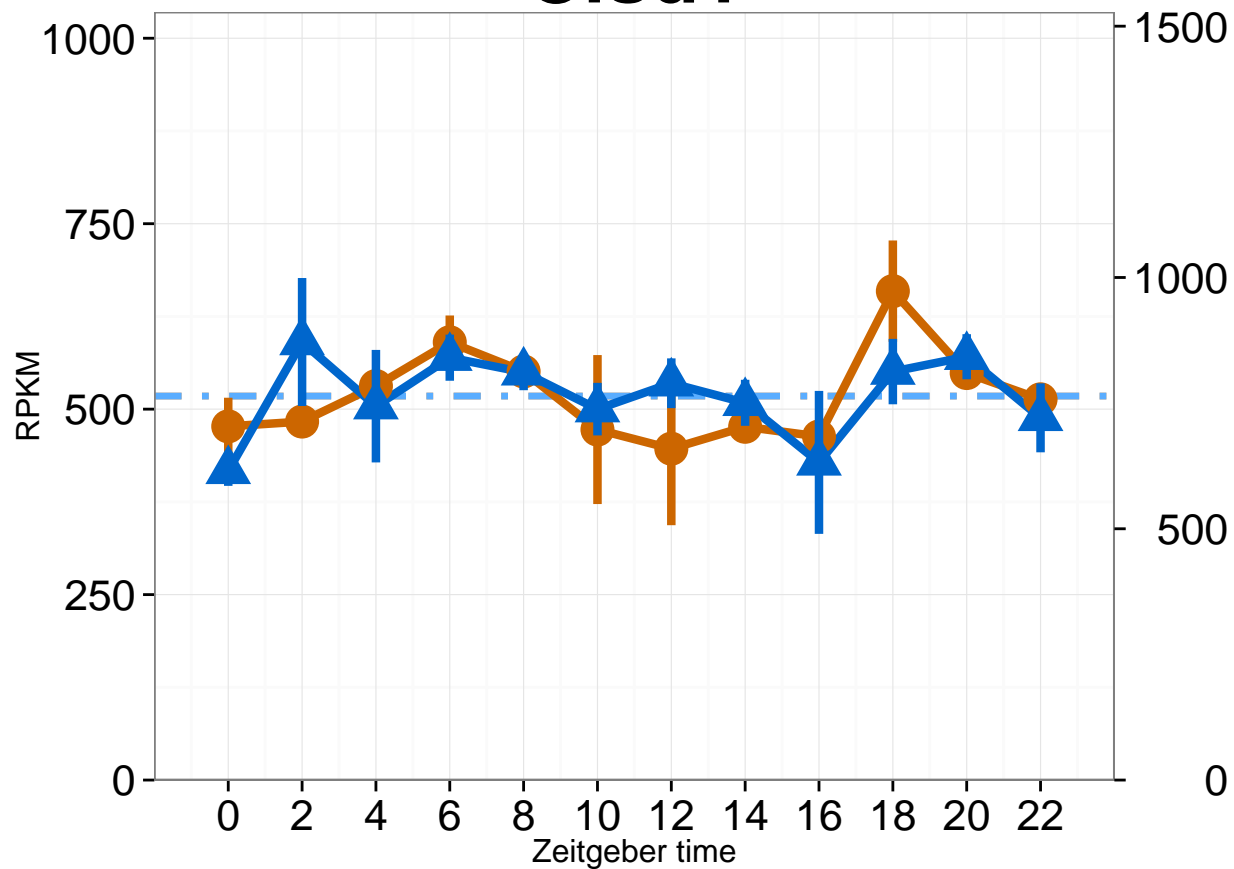

## Cisd1

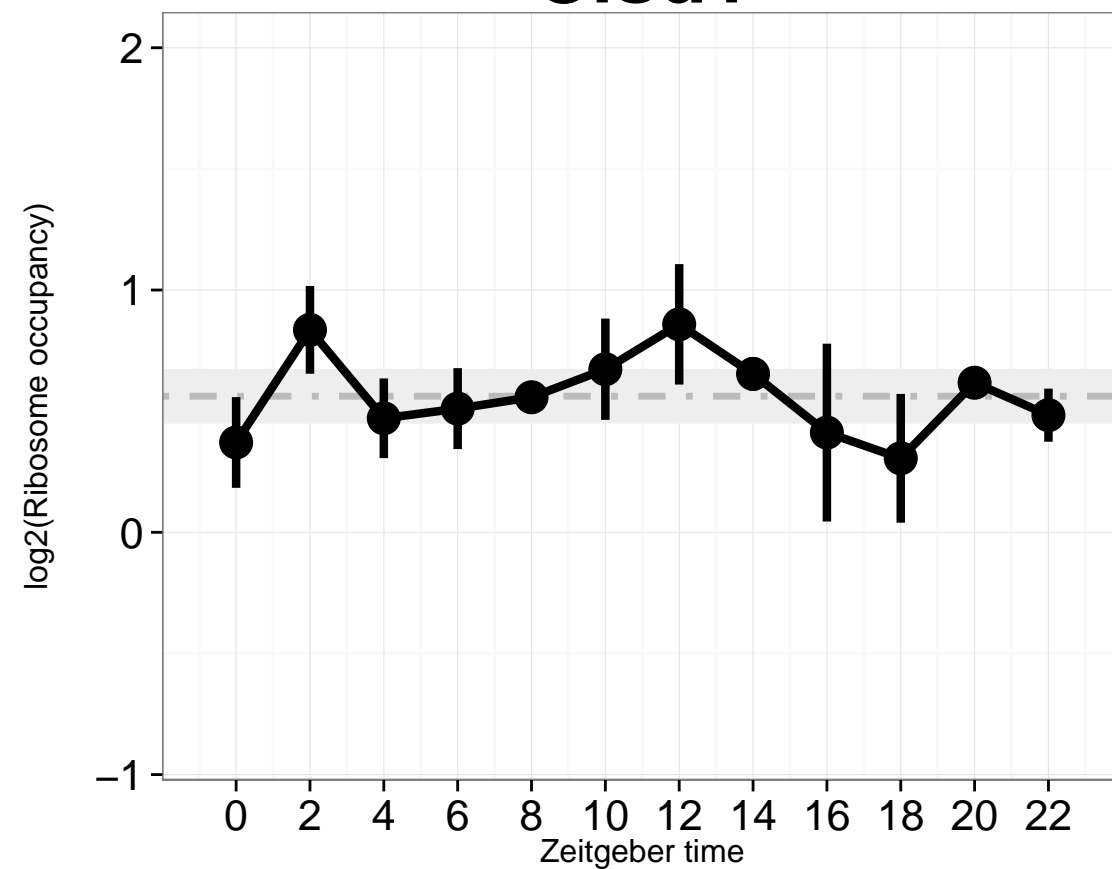

Supplement: Supplementary file 7931 [file 1]

# Ror1

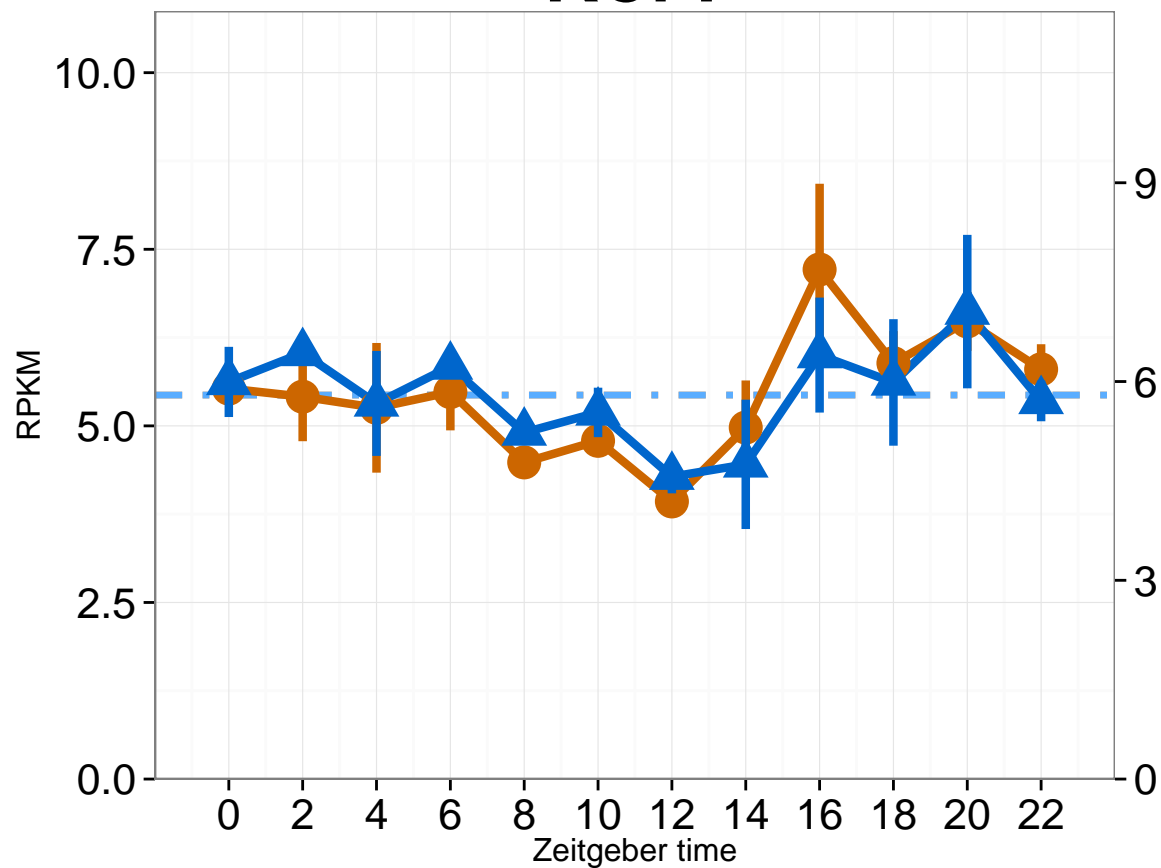

# Ror1

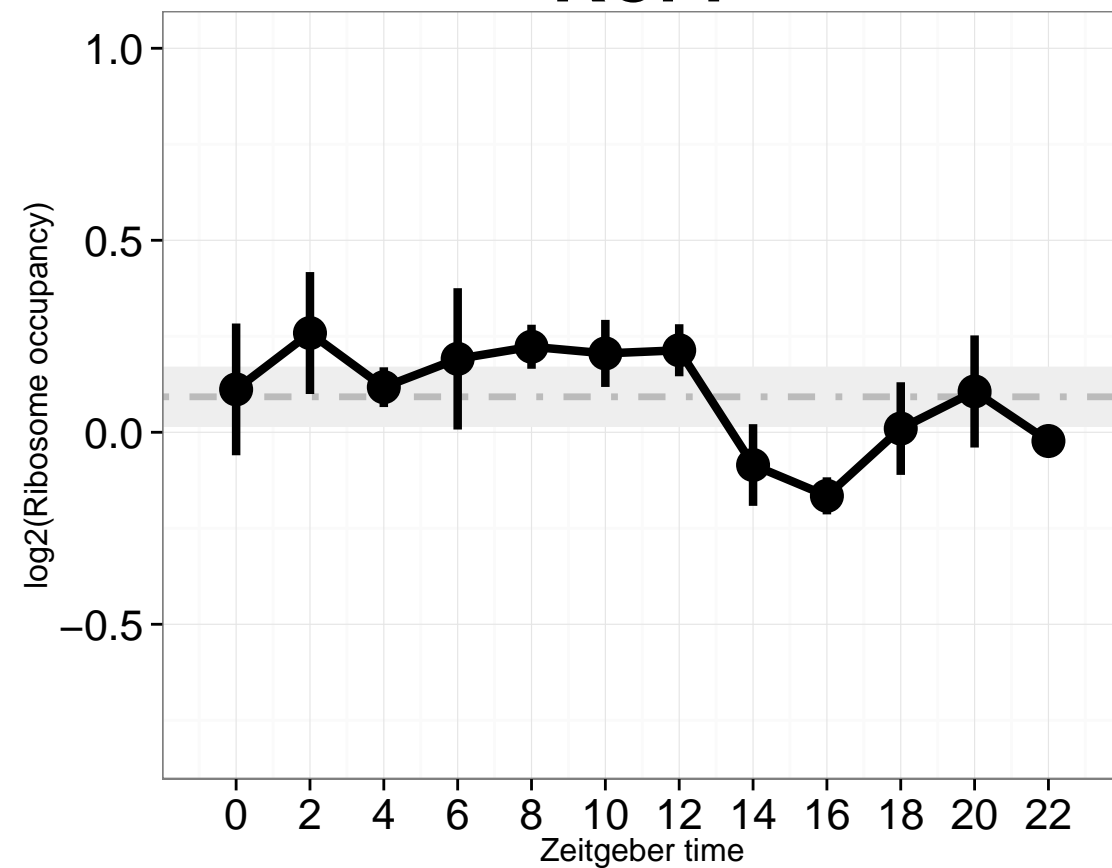

Supplement: Supplementary file 7932 [file 1]

## Ndrp1

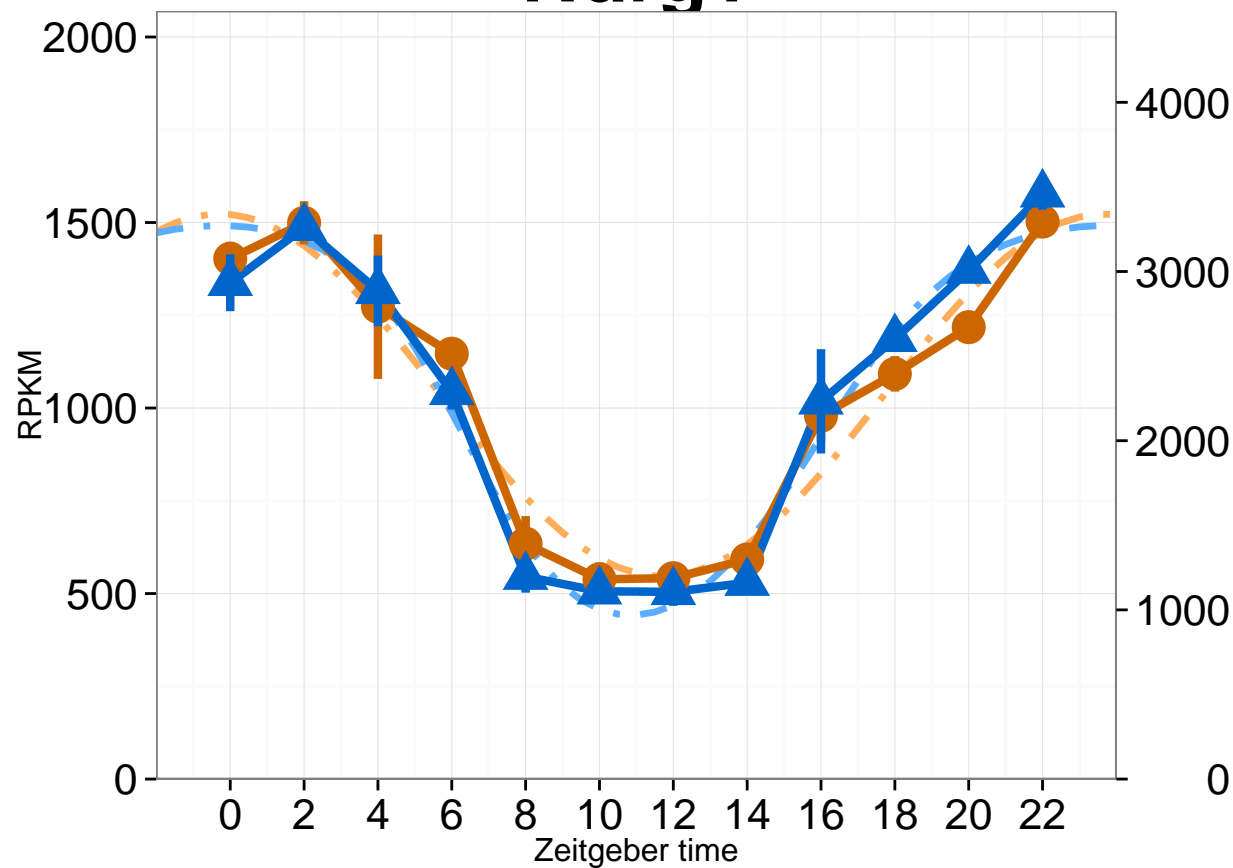

## Ndrp1

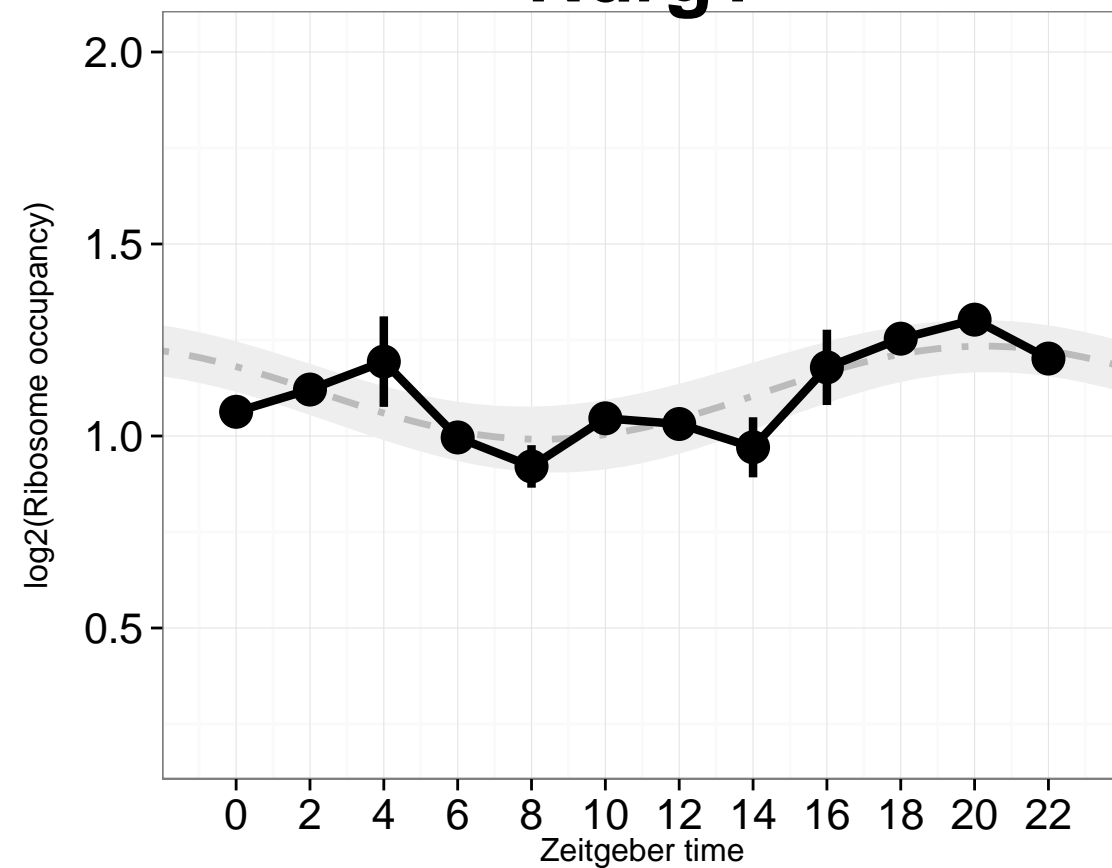

Supplement: Supplementary file 7933 [file 1]

## Rif1

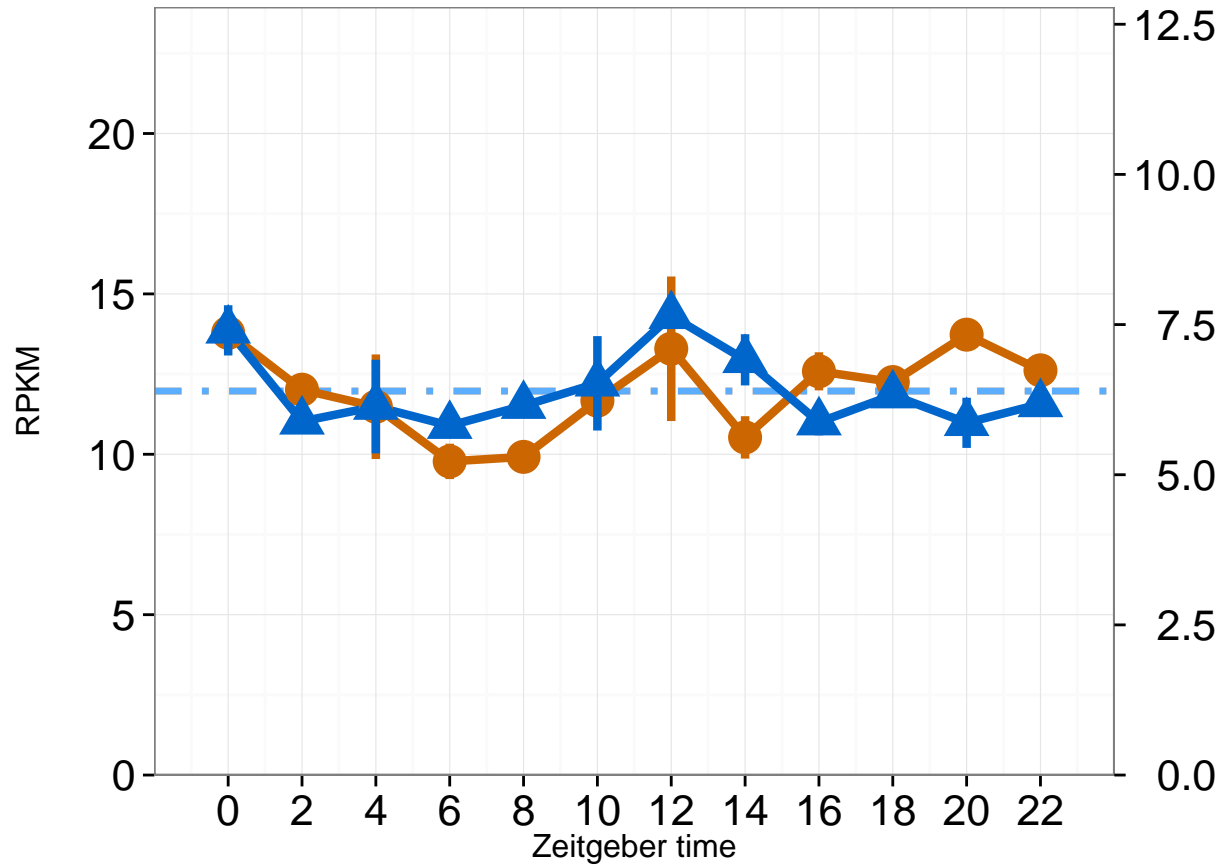

## Rif1

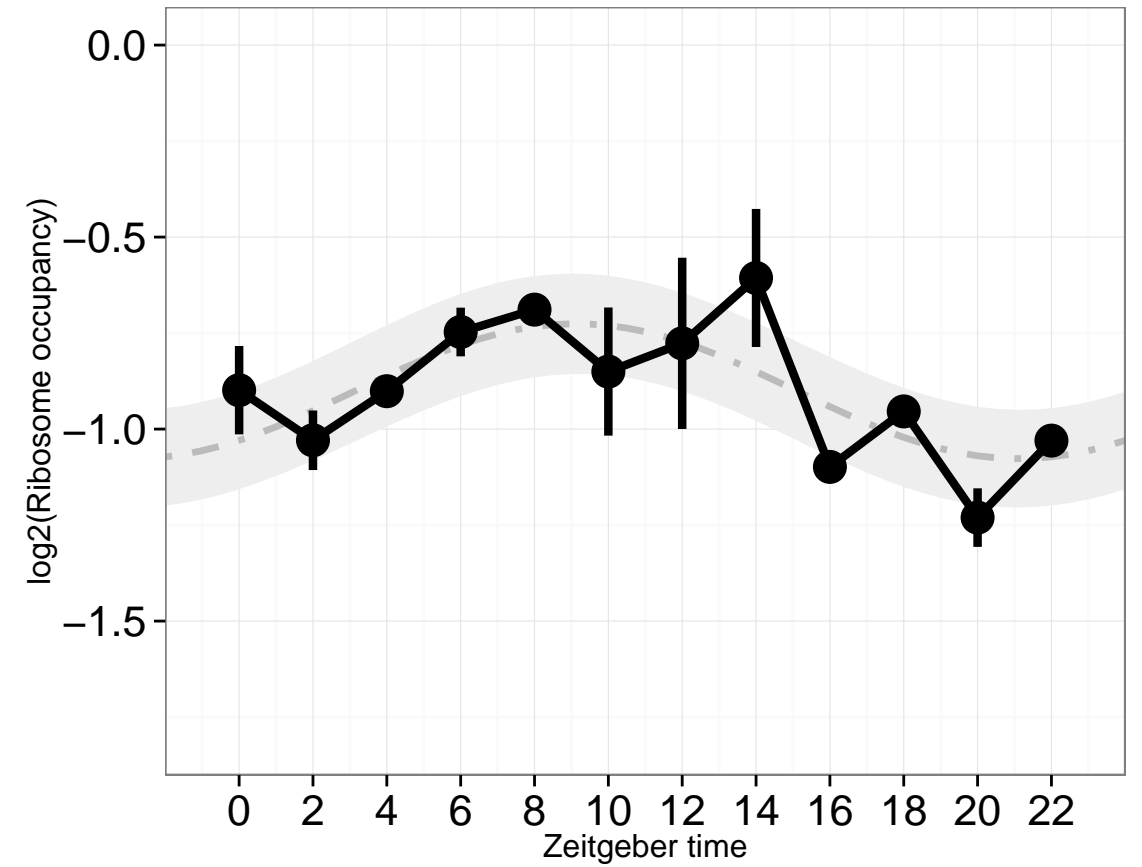

Supplement: Supplementary file 7934 [file 1]

# Zfp72

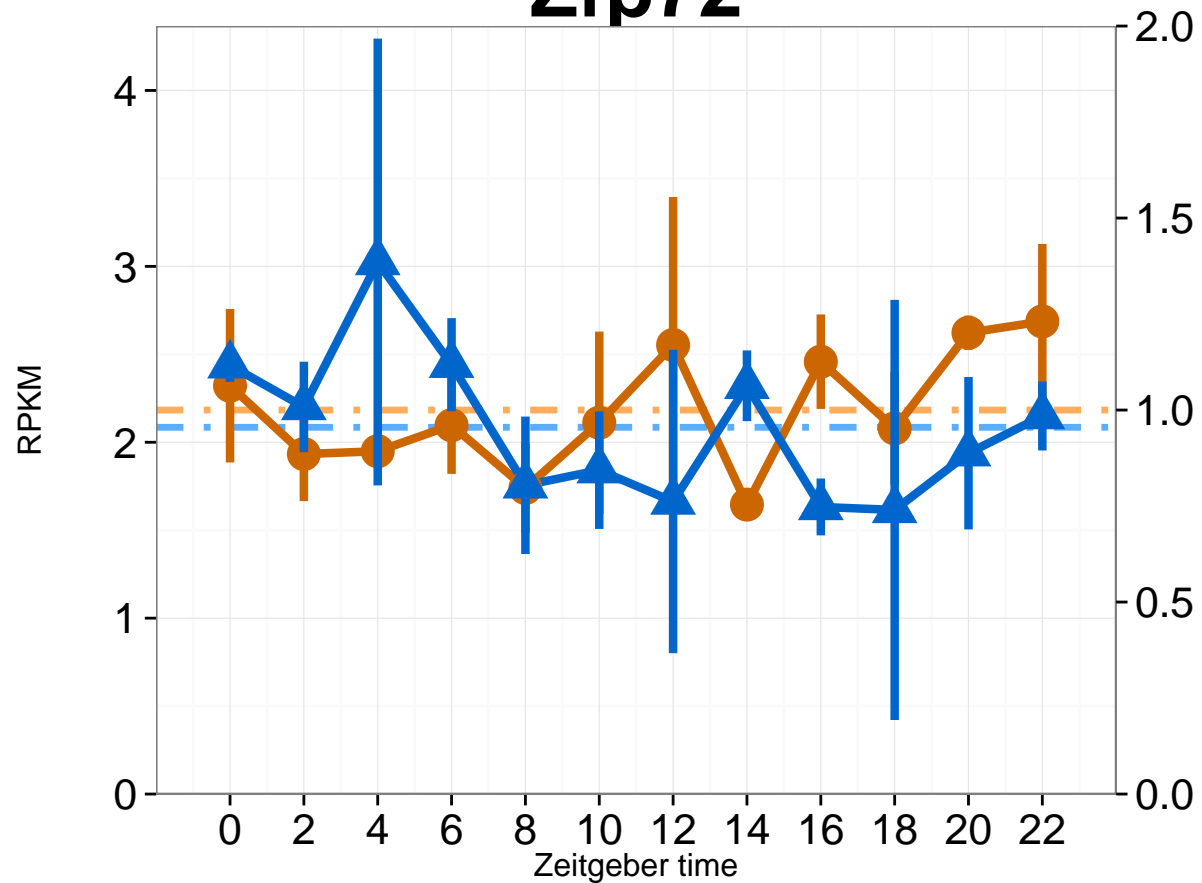

# Zfp72

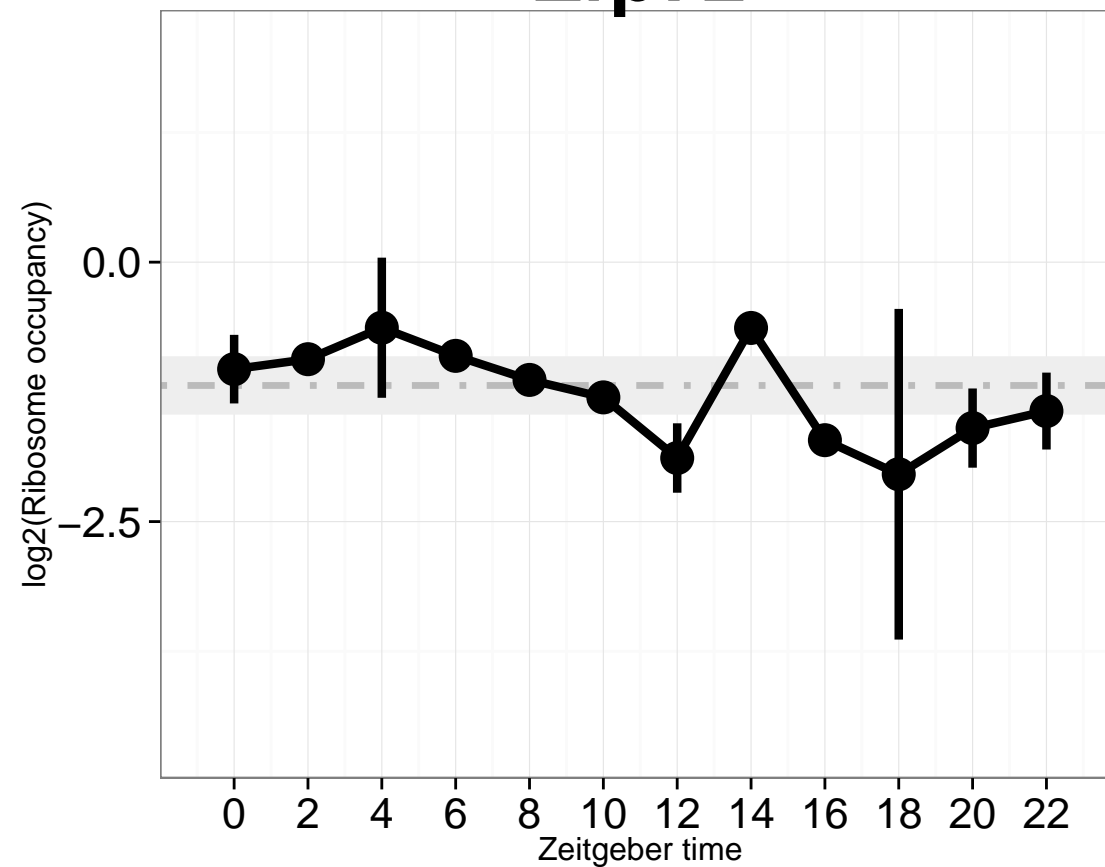

Supplement: Supplementary file 7935 [file 1]

# Cct7

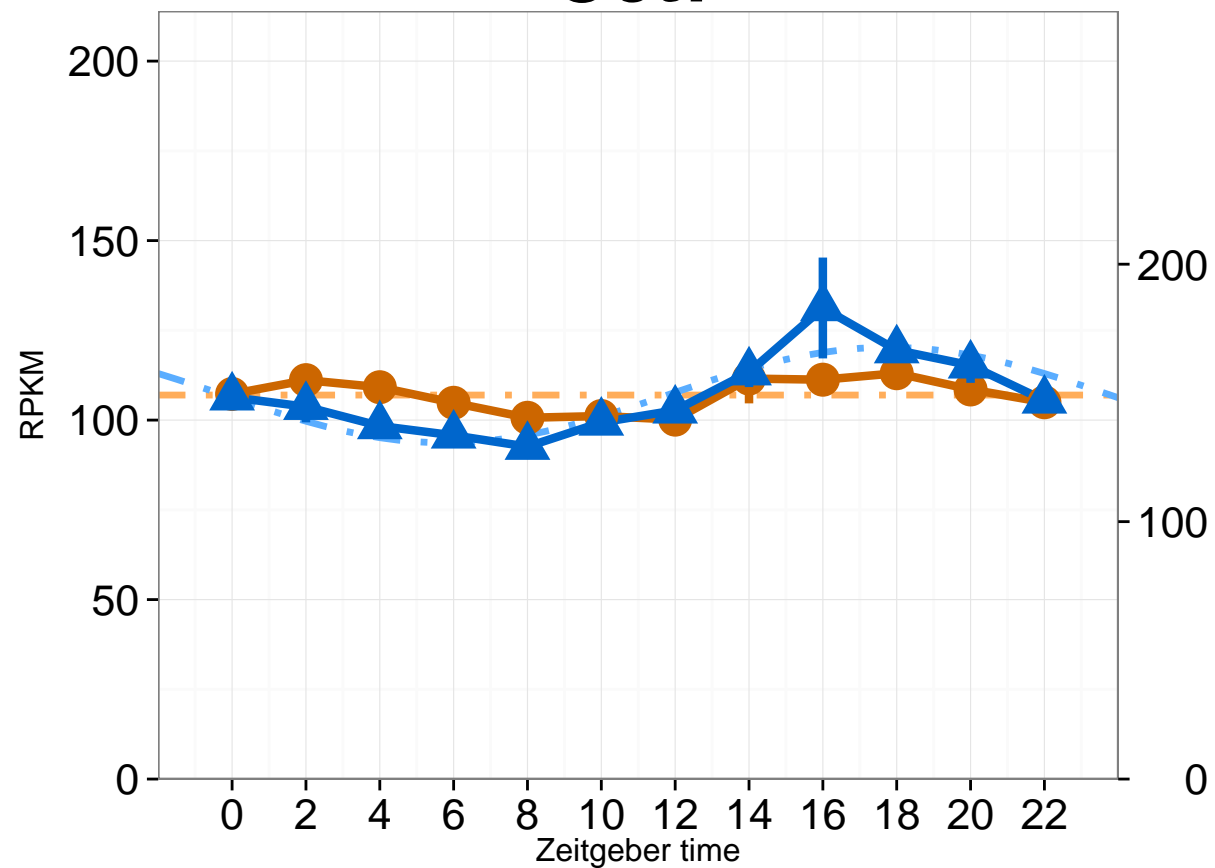

# Cct7

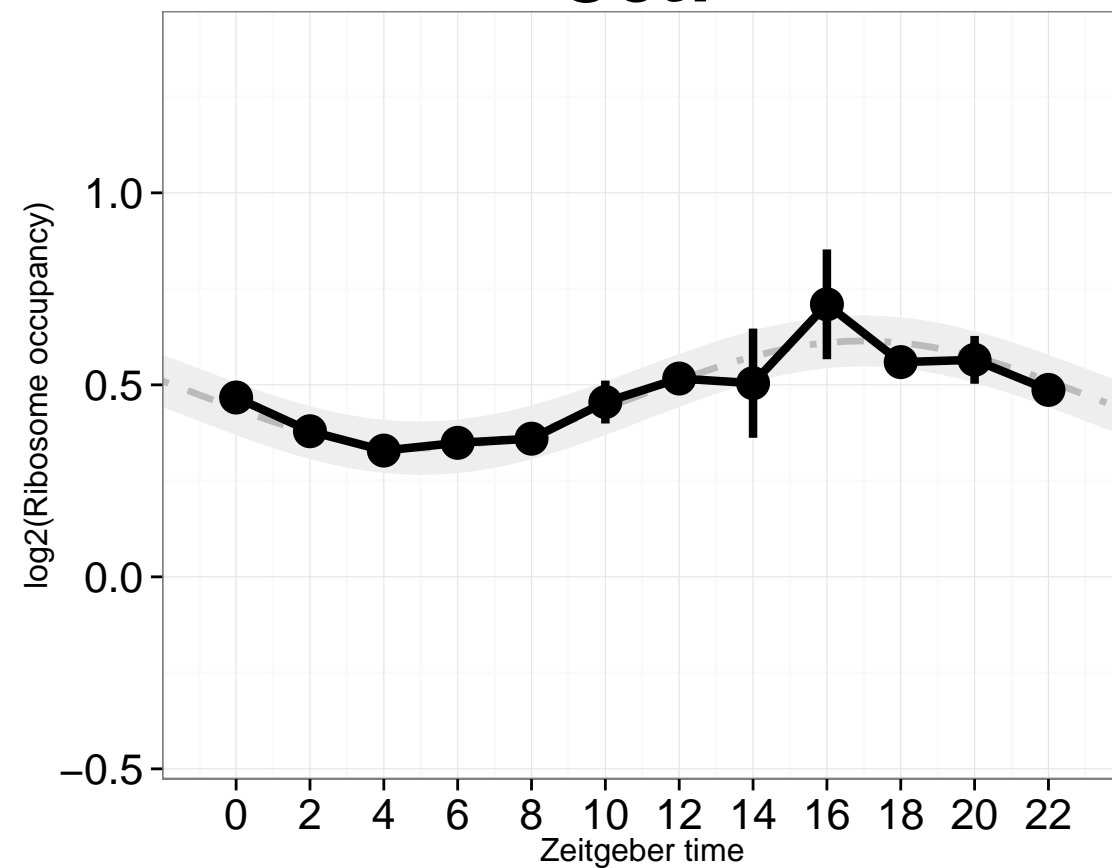

Supplement: Supplementary file 7936 [file 1]

# Selenbp2

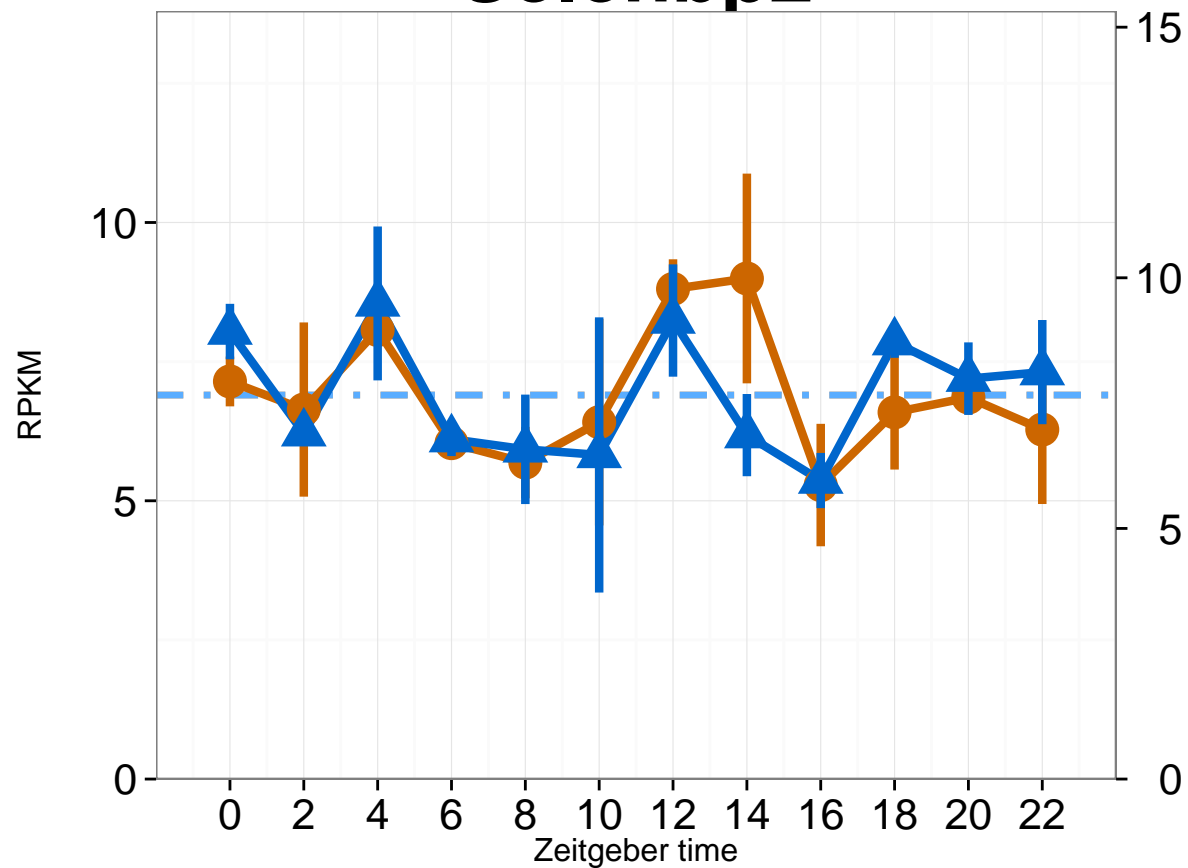

# Selenbp2

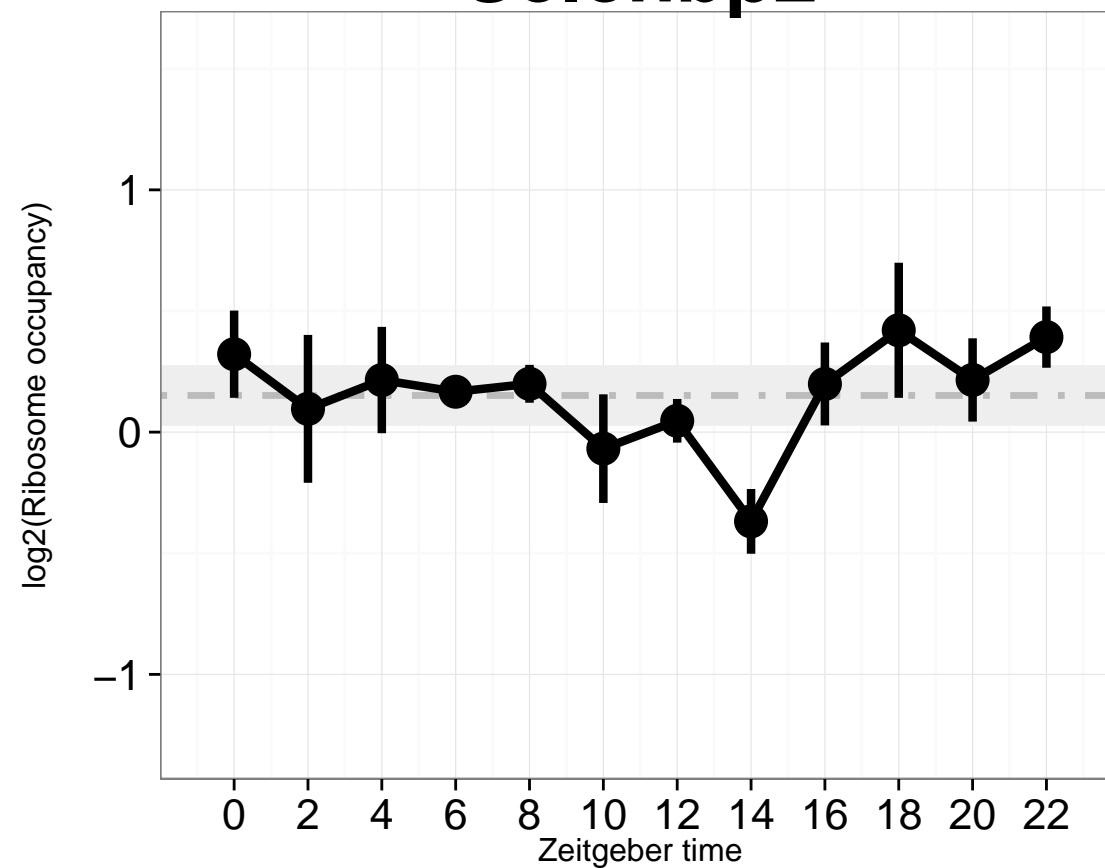

Supplement: Supplementary file 7937 [file 1]

## Rassf6

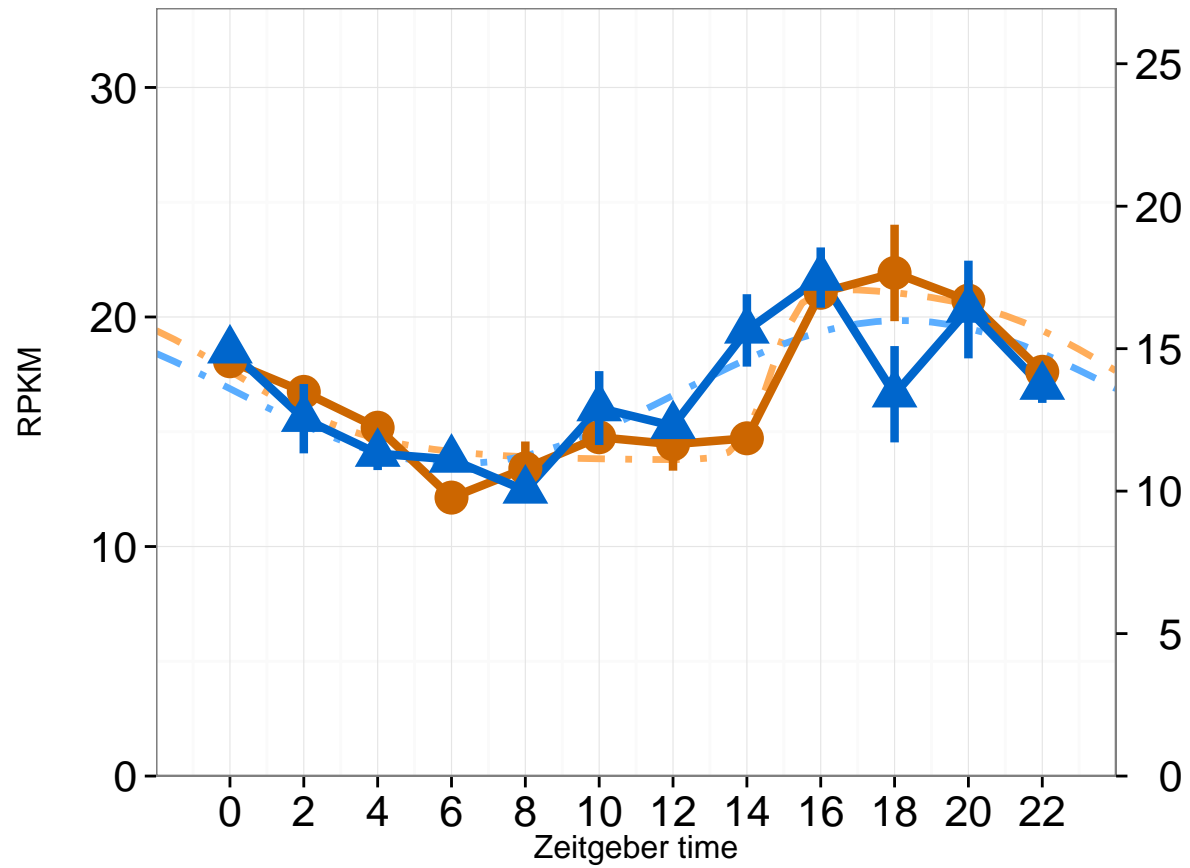

## Rassf6

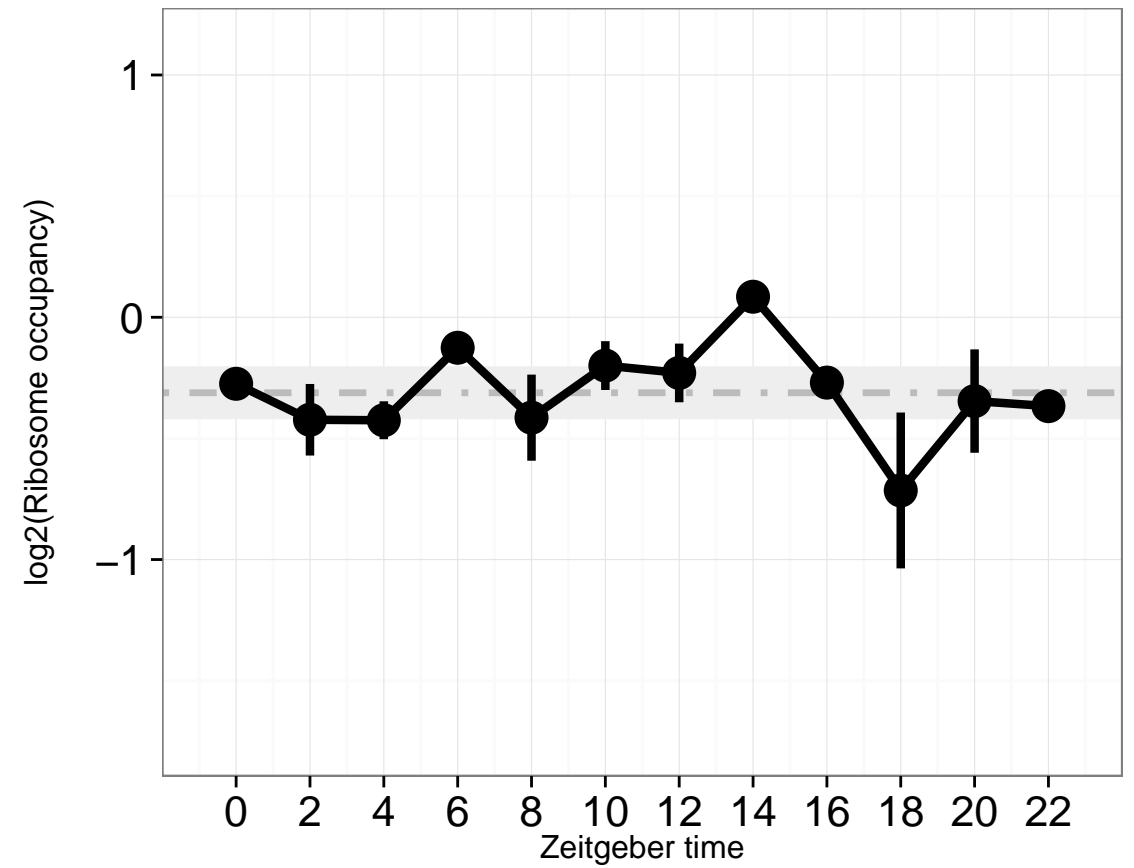

Supplement: Supplementary file 7938 [file 1]

## Zfat

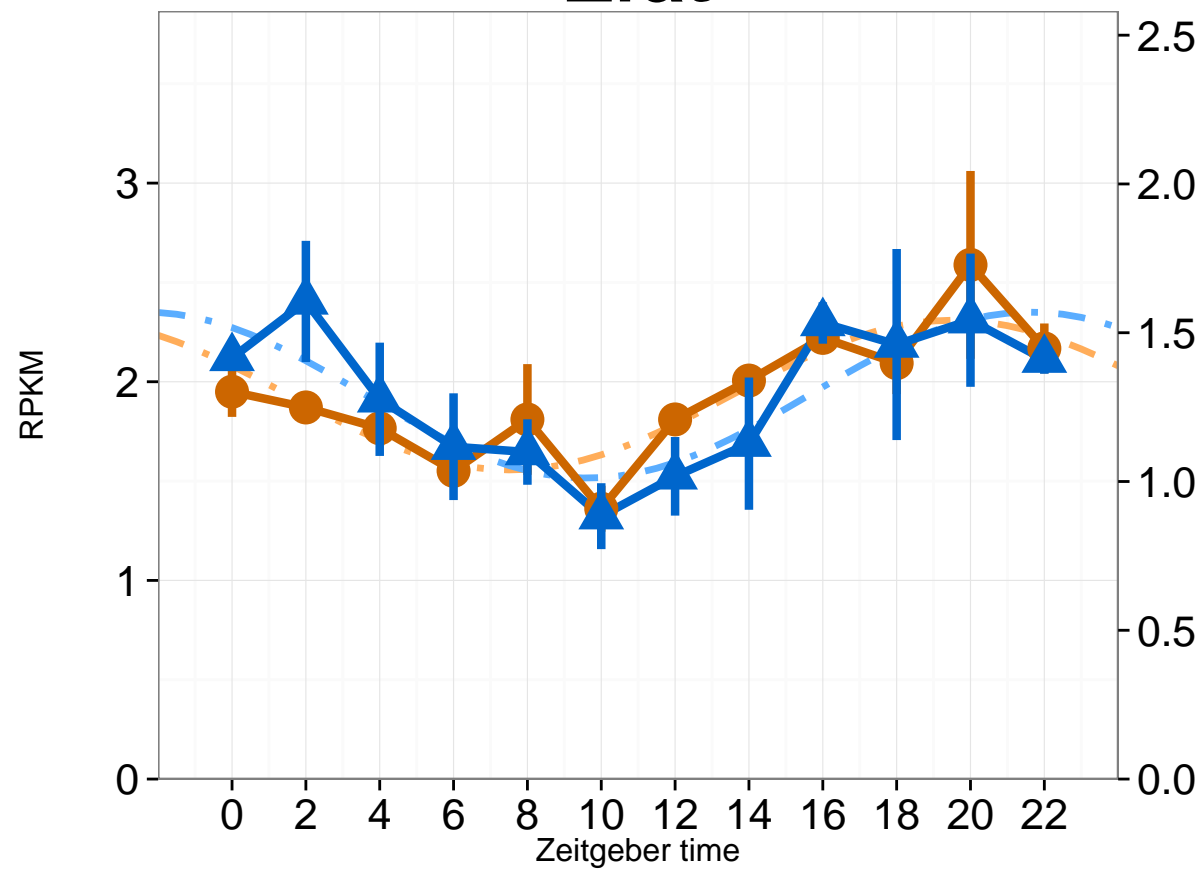

## Zfat

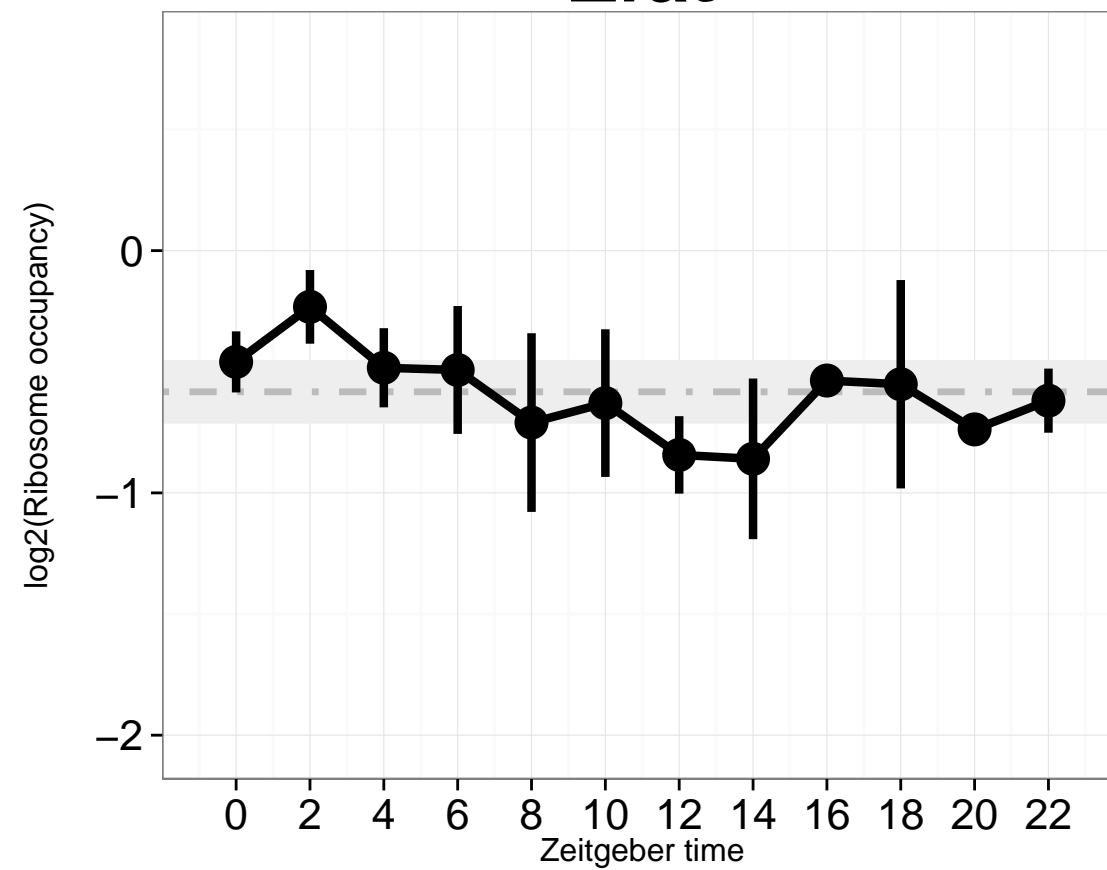

Supplement: Supplementary file 7939 [file 1]

# Csf2ra

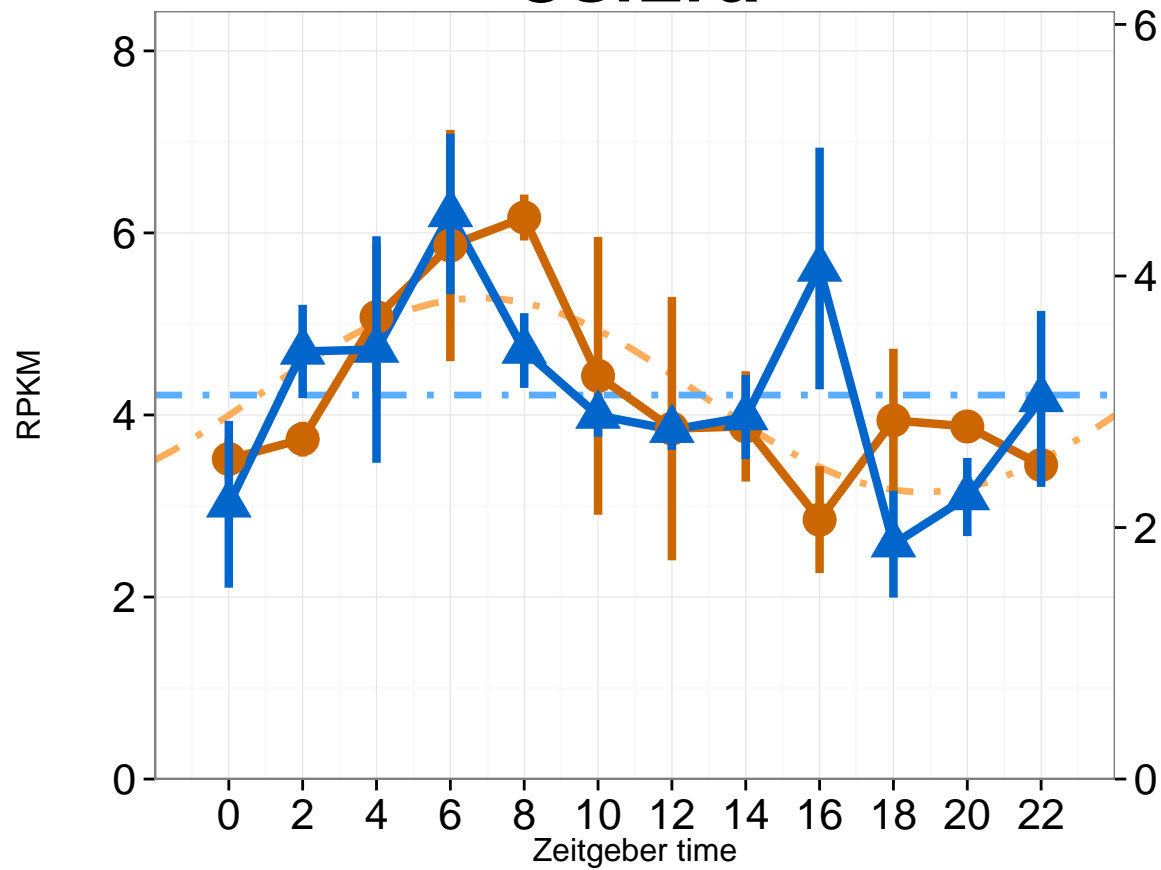

# Csf2ra

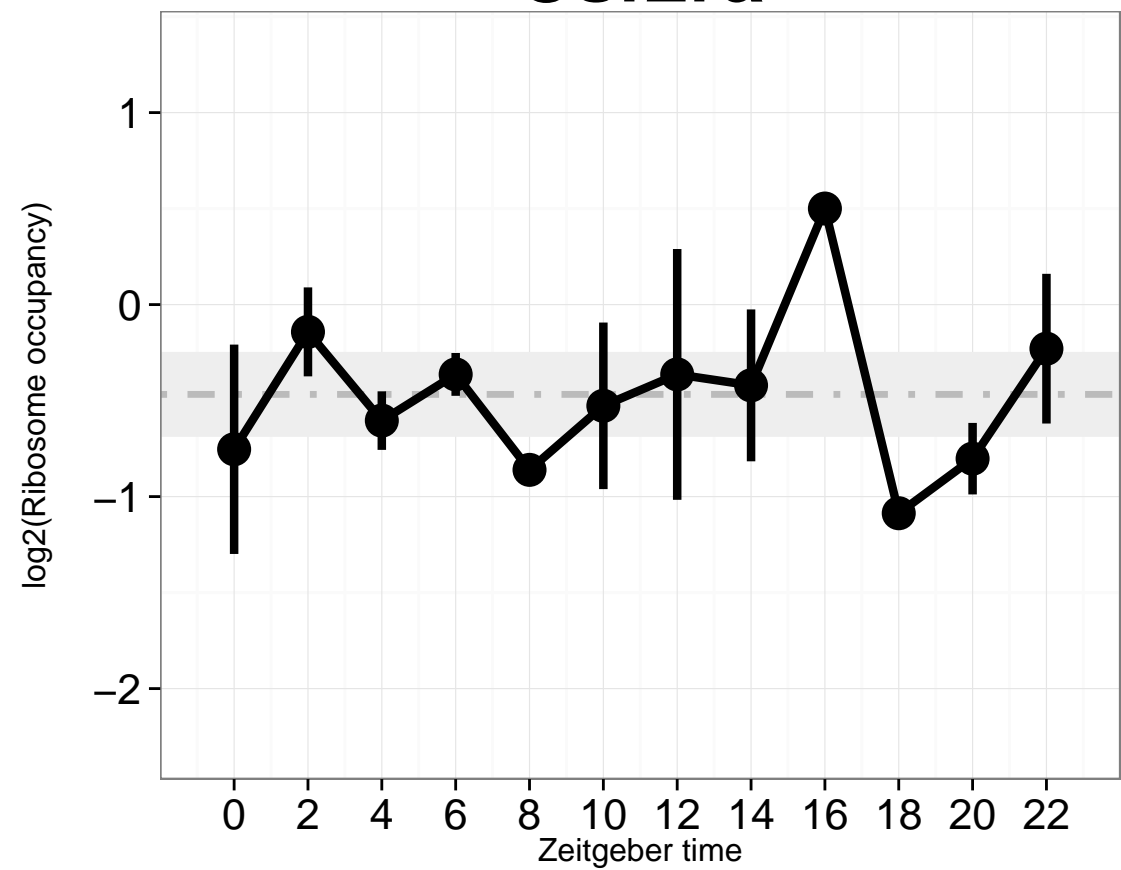

Supplement: Supplementary file 7940 [file 1]

# Cpsf6

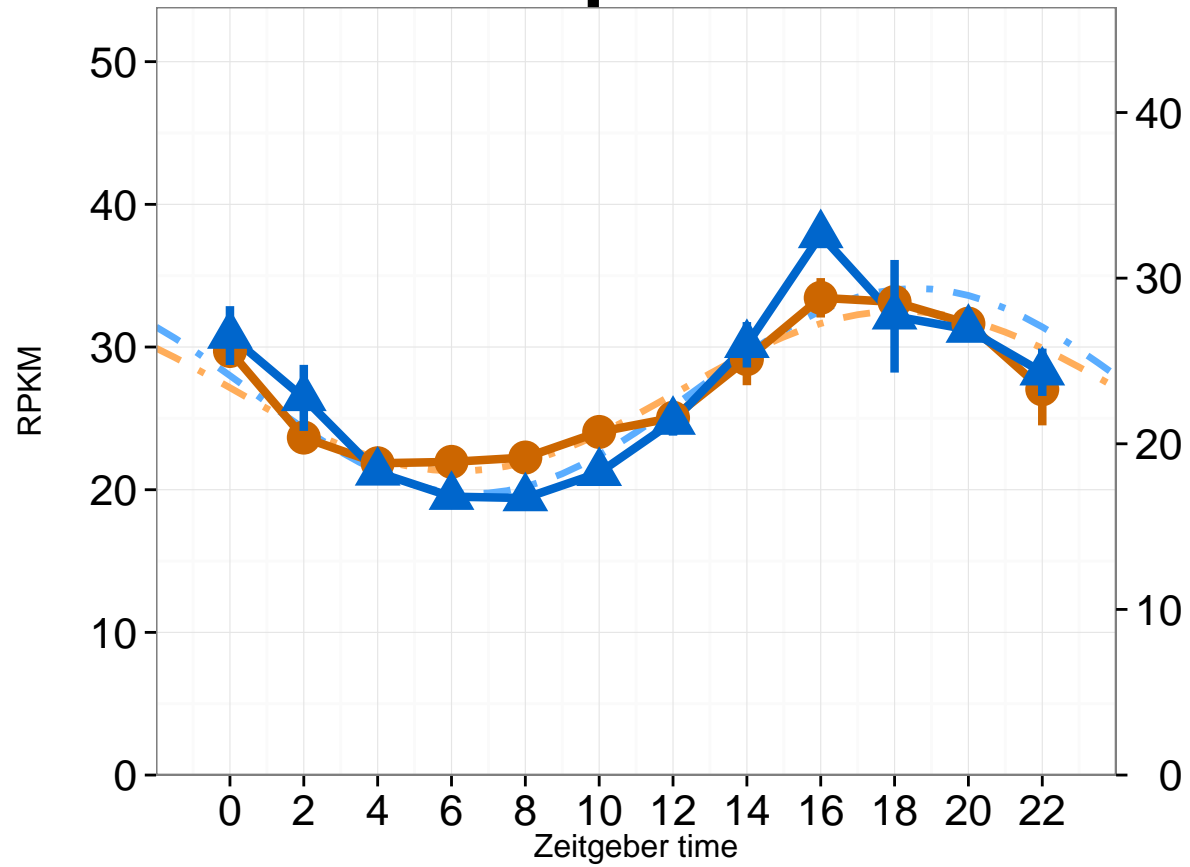

# Cpsf6

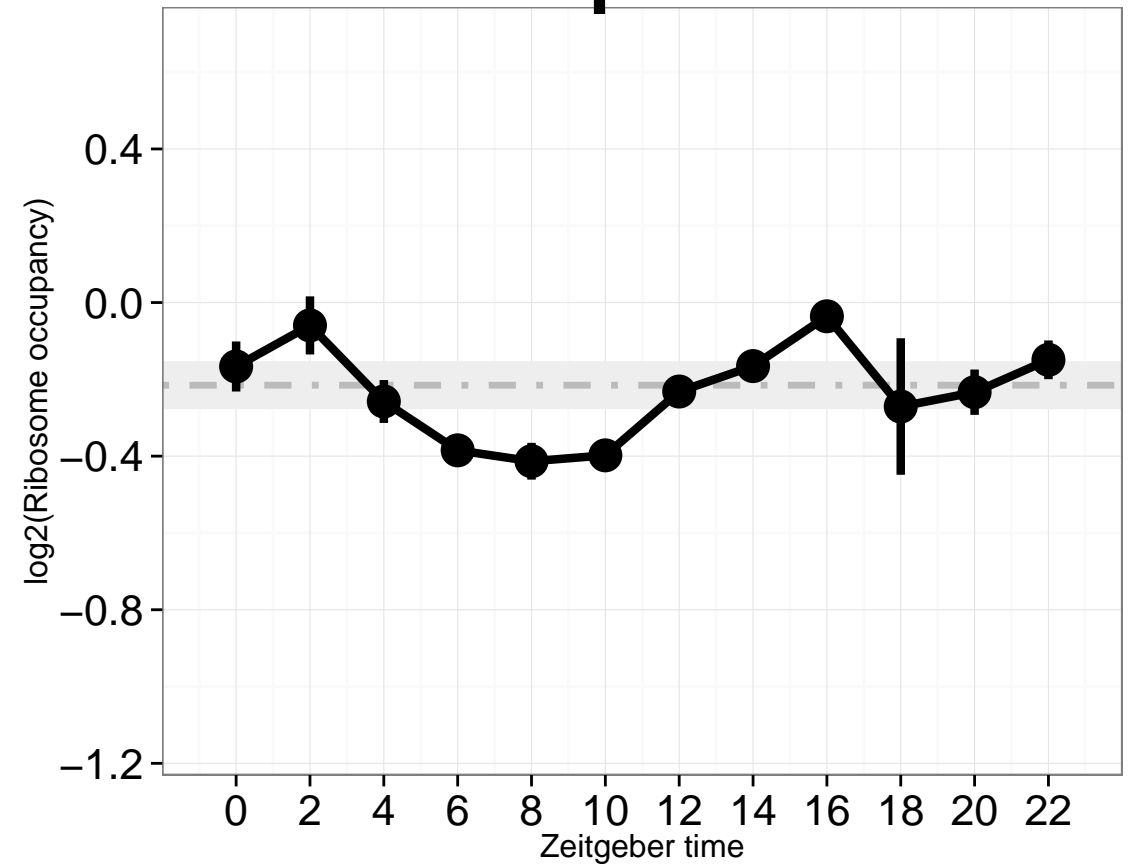

Supplement: Supplementary file 7941 [file 1]

# Vtcn1

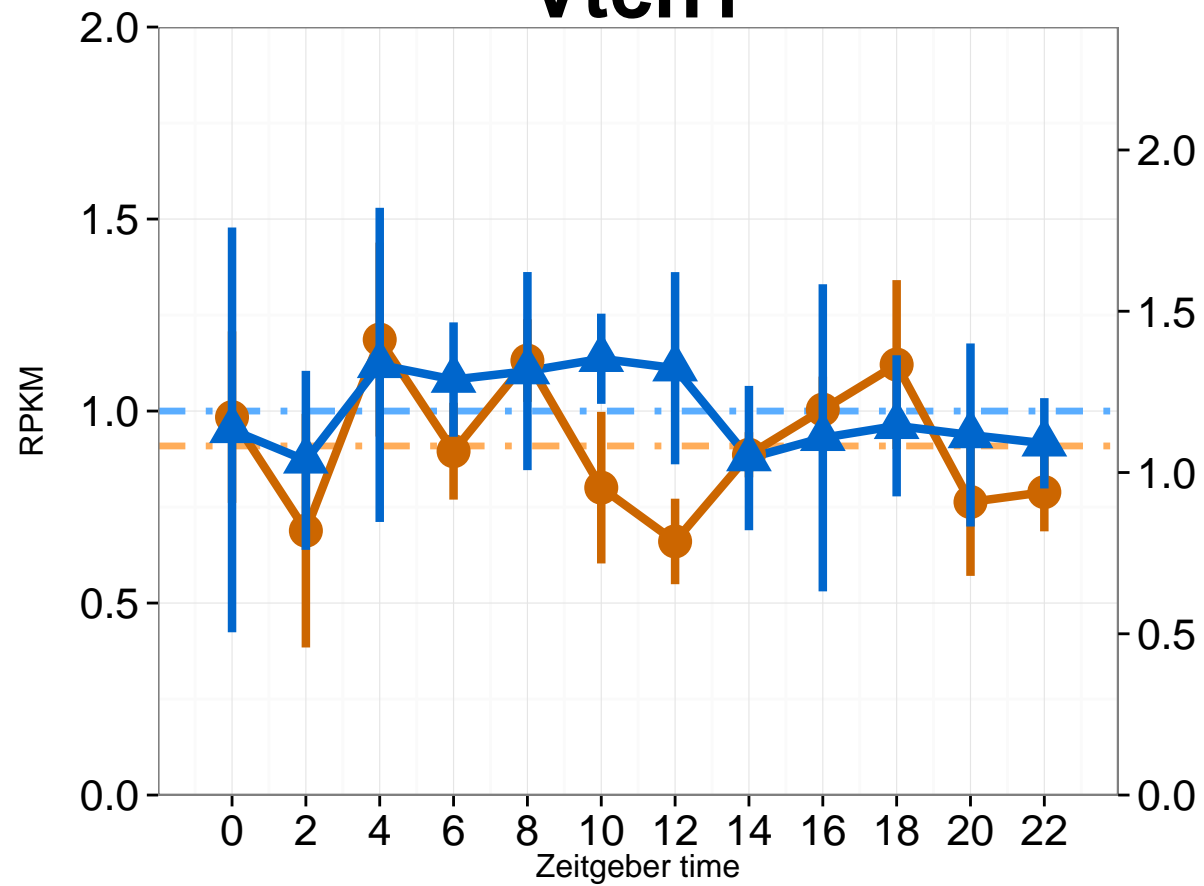

# Vtcn1

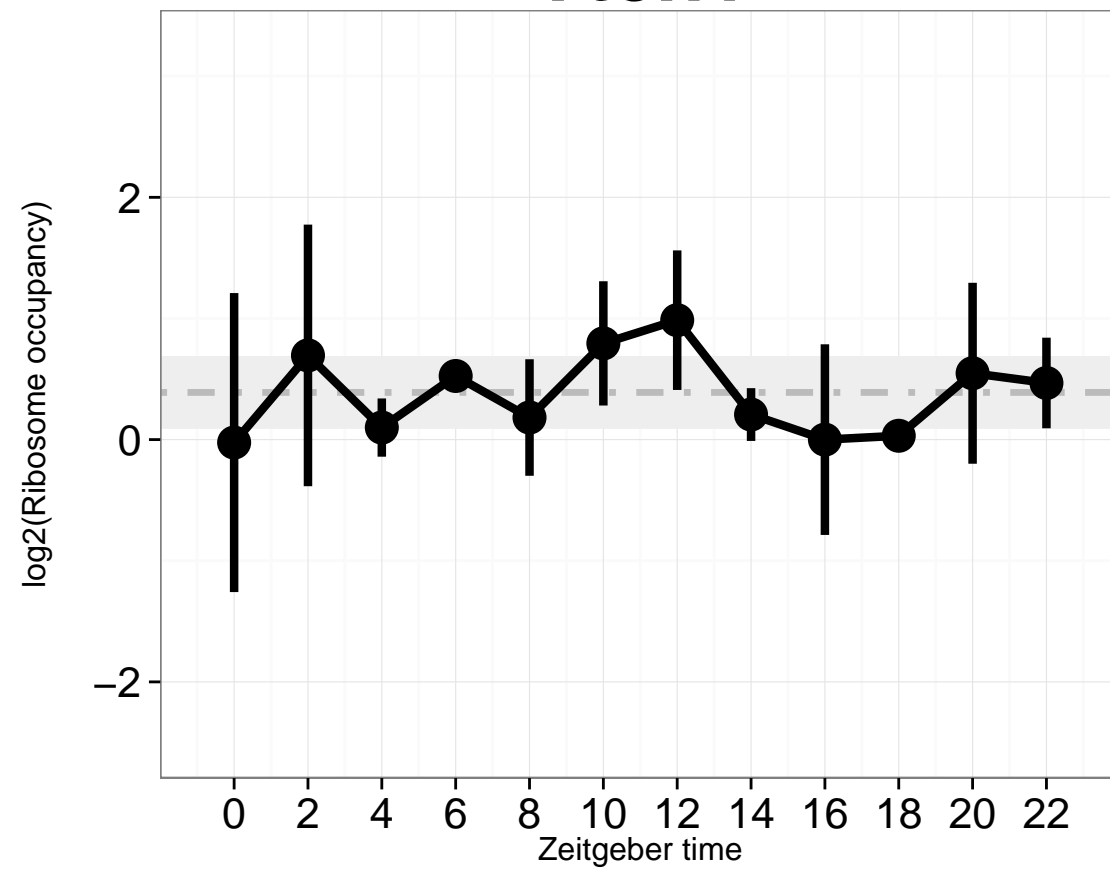

Supplement: Supplementary file 7942 [file 1]

# Akt3

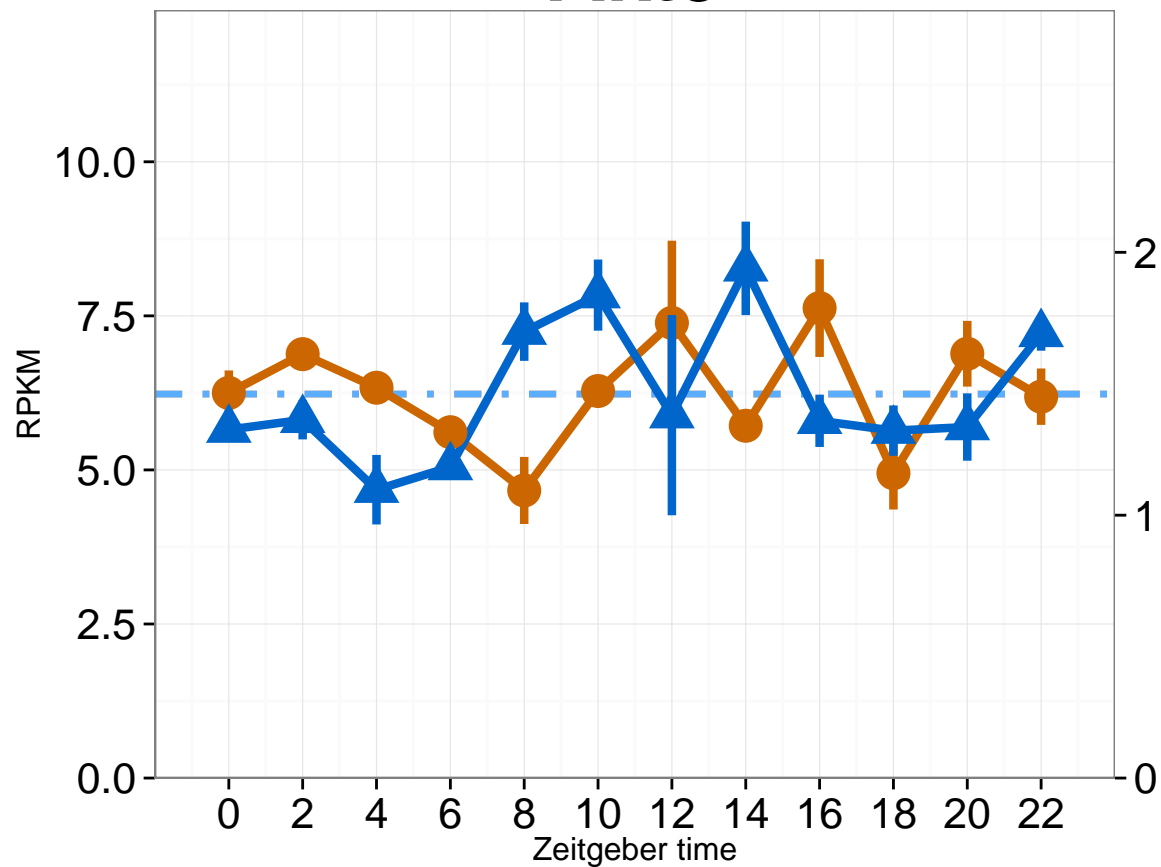

# Akt3

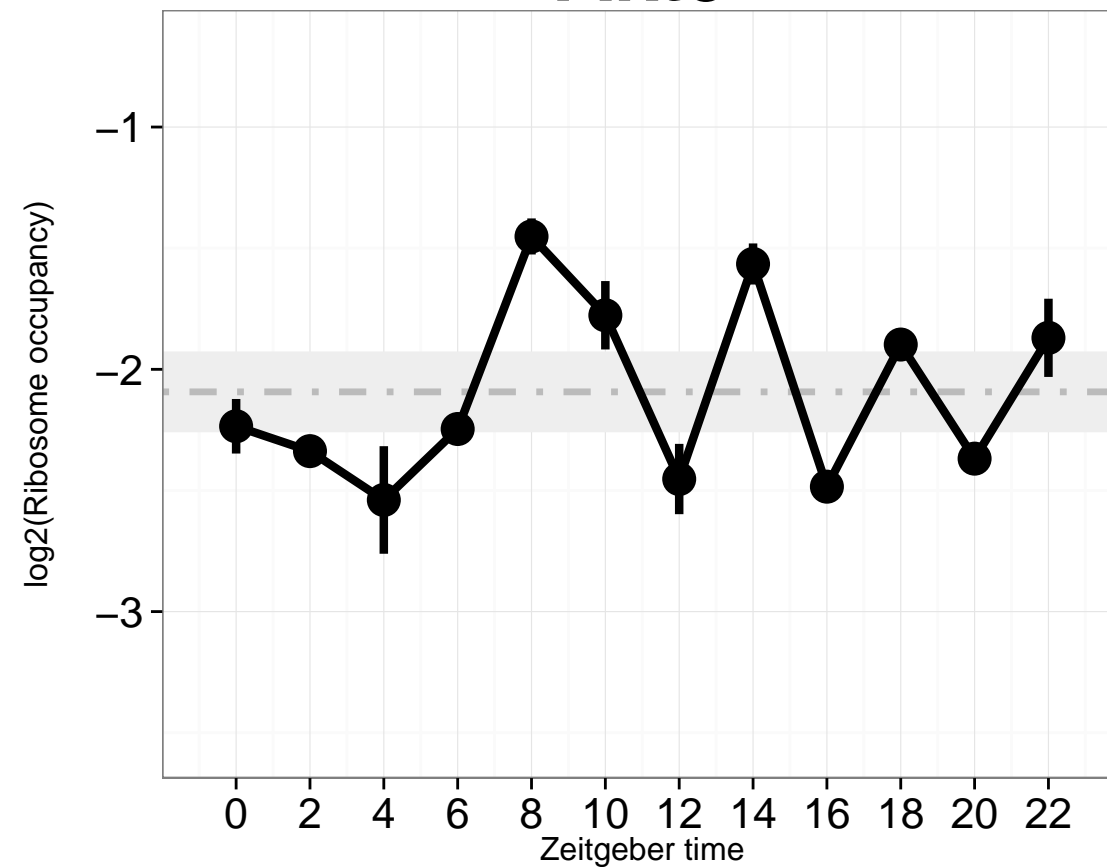

Supplement: Supplementary file 7943 [file 1]

# C1ra

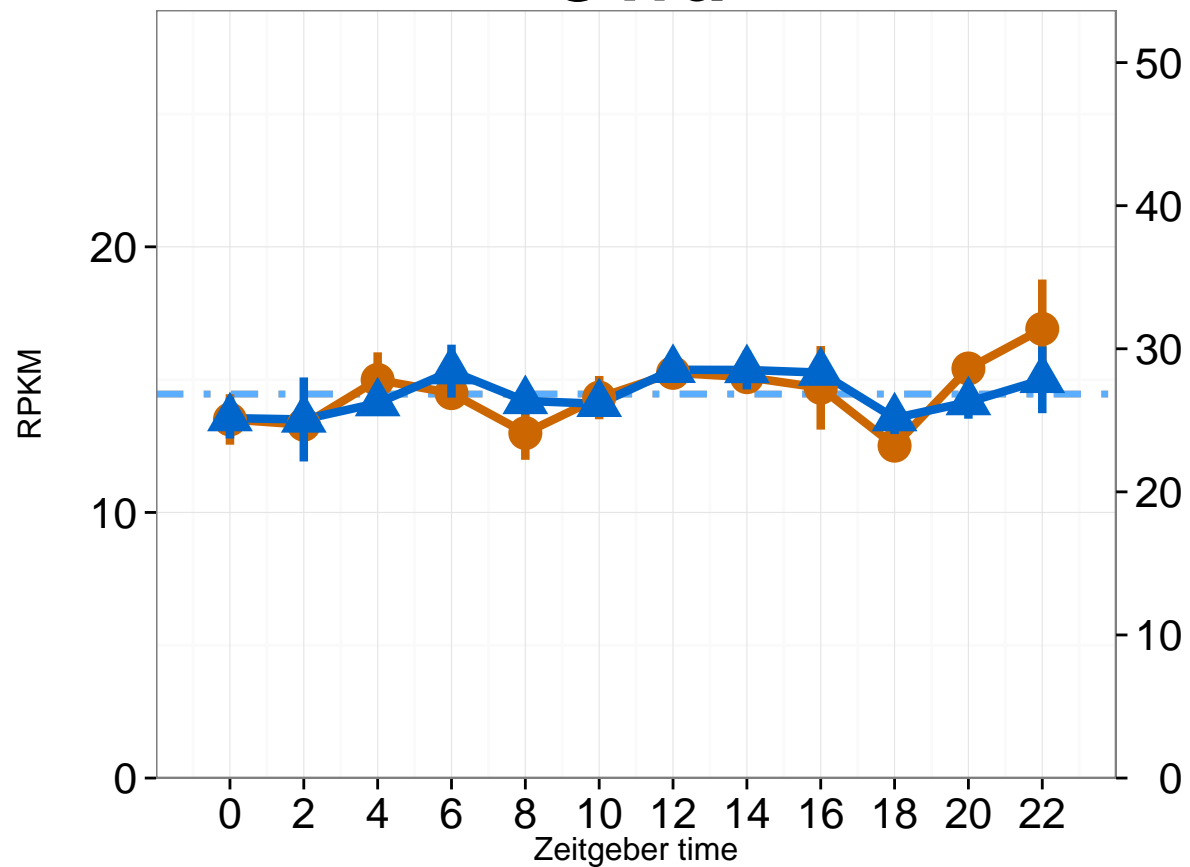

# C1ra

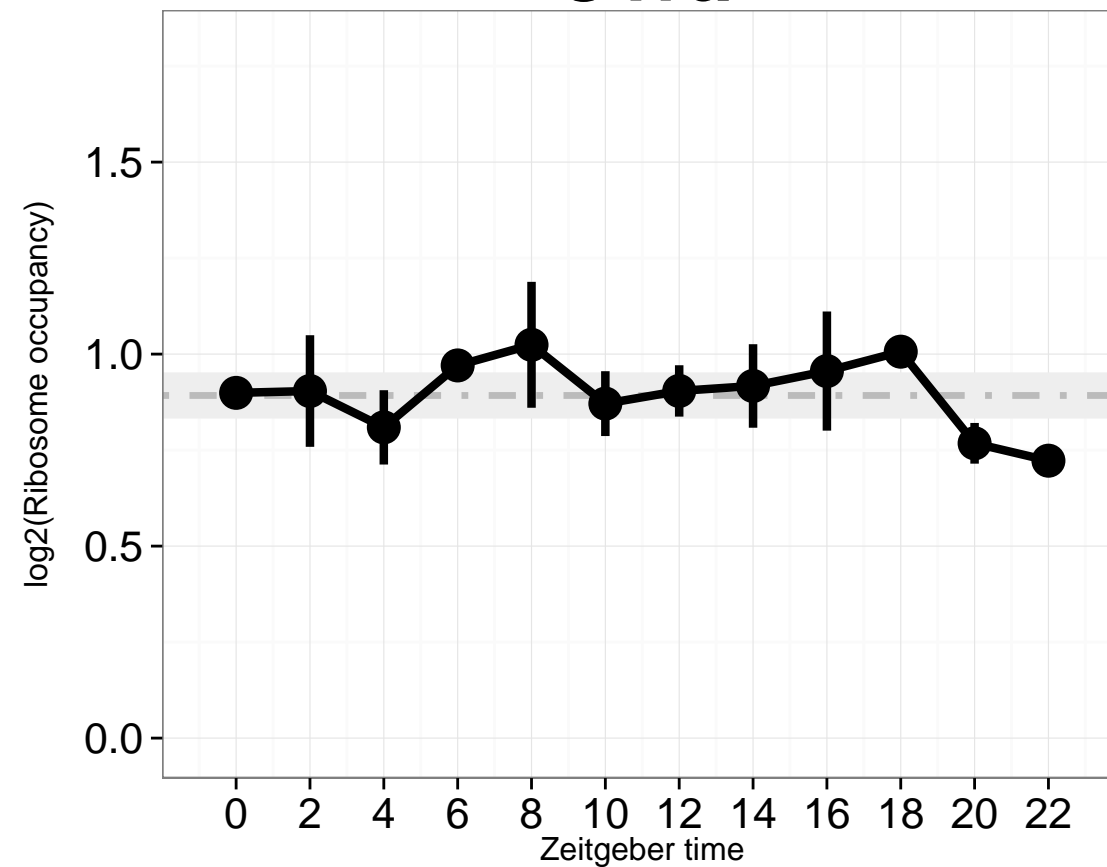

Supplement: Supplementary file 7944 [file 1]

# Taf1a

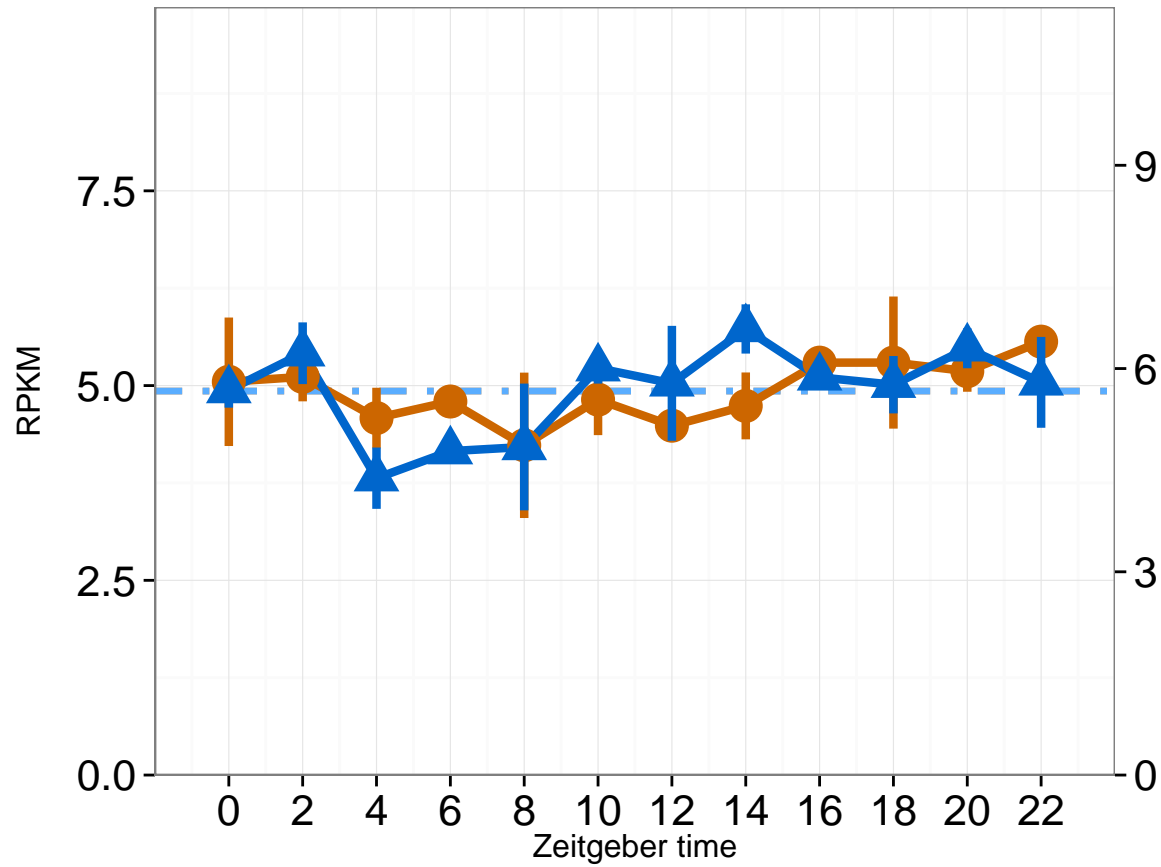

# Taf1a

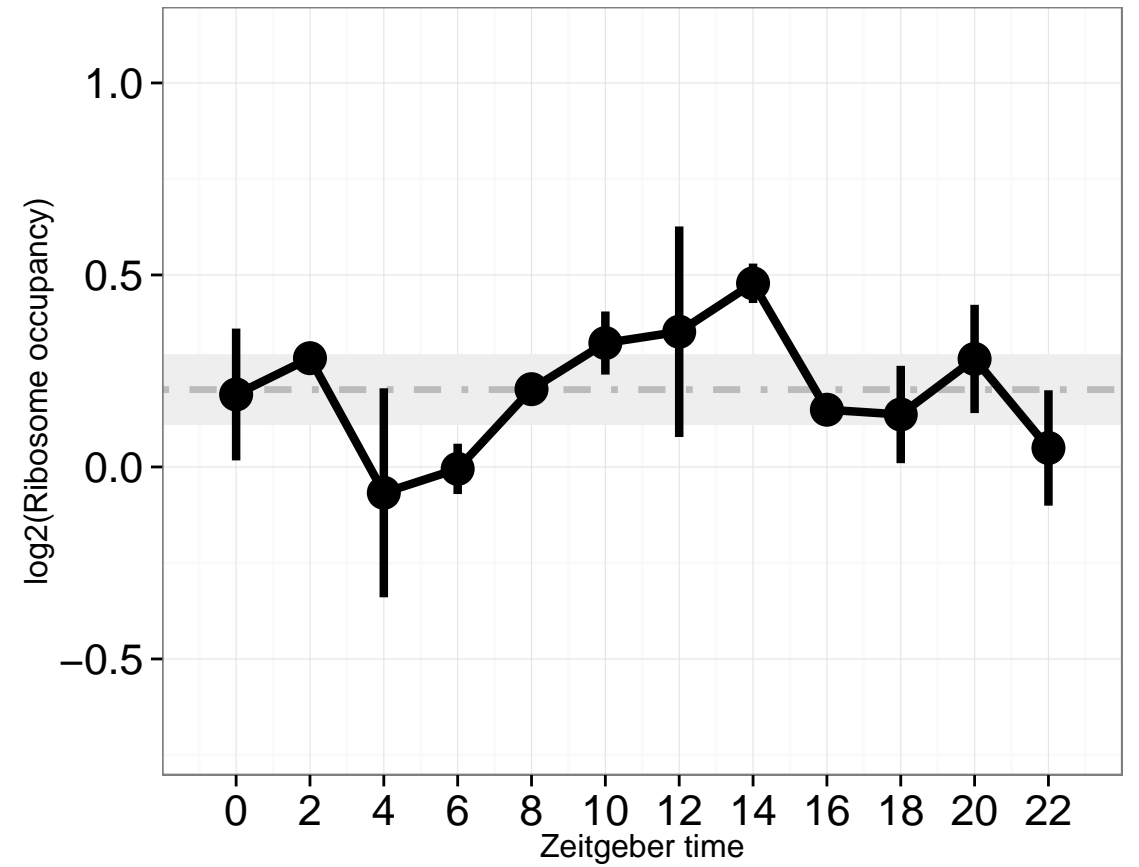

Supplement: Supplementary file 7945 [file 1]

# Gmeb1

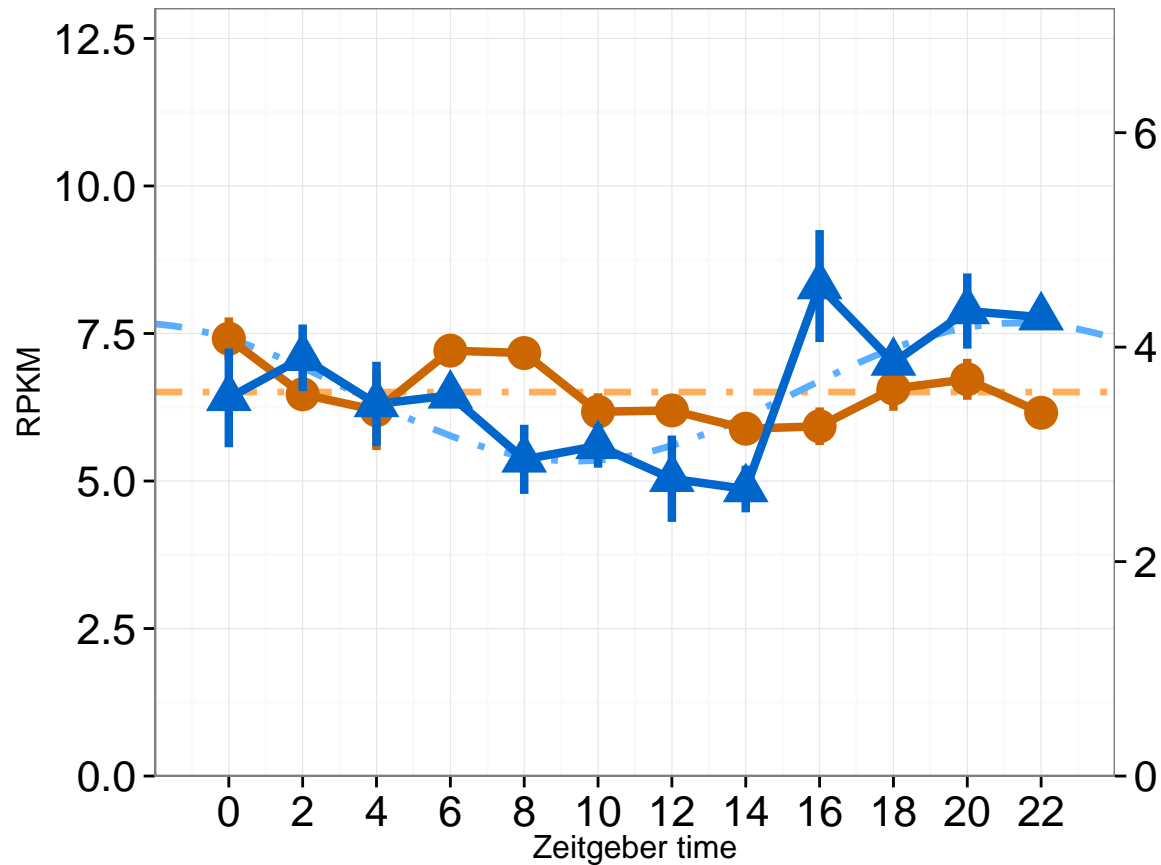

# Gmeb1

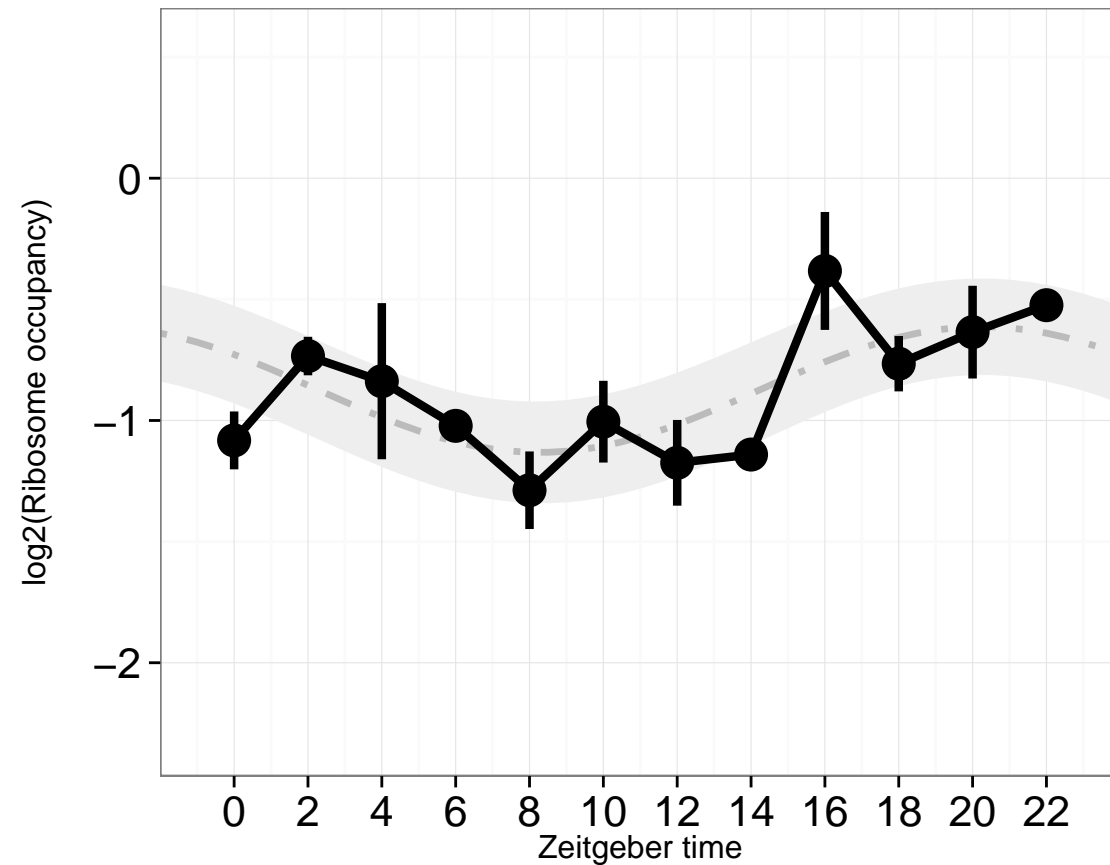

Supplement: Supplementary file 7946 [file 1]

## Pdss1

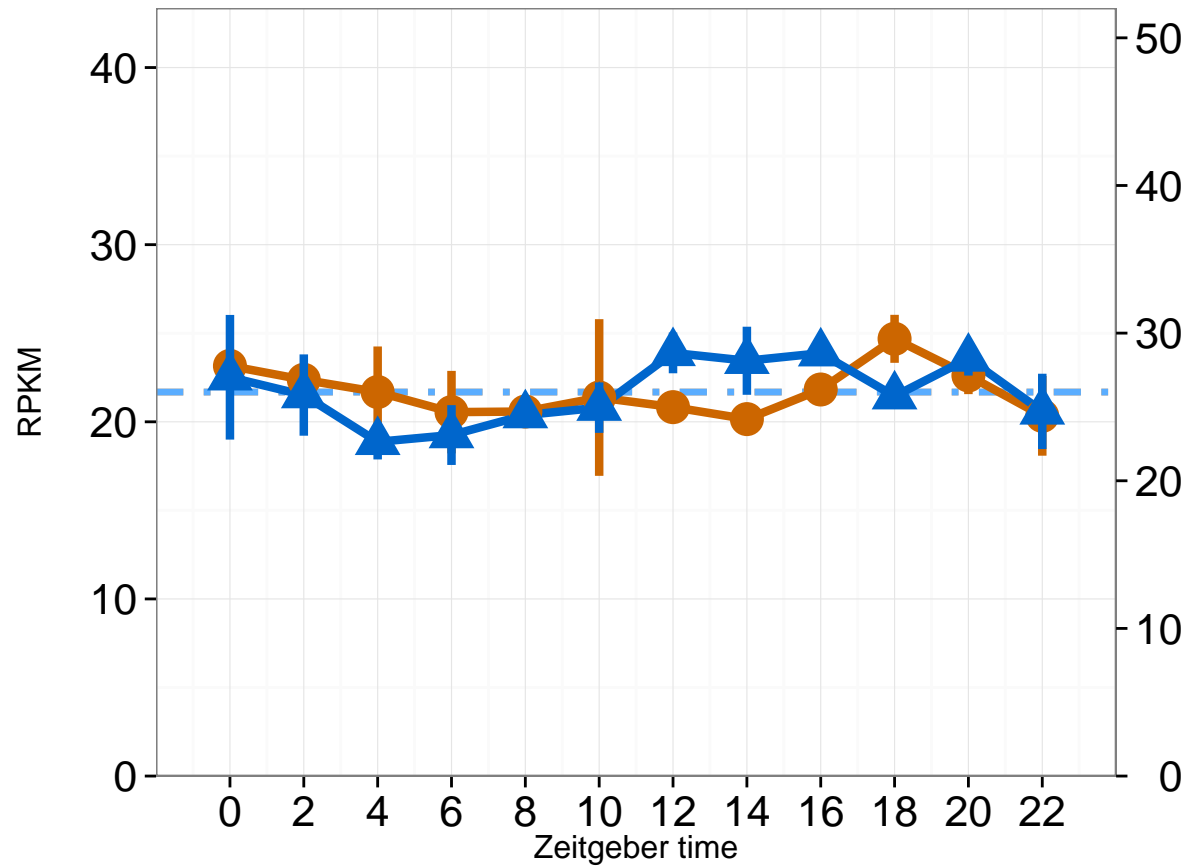

## Pdss1

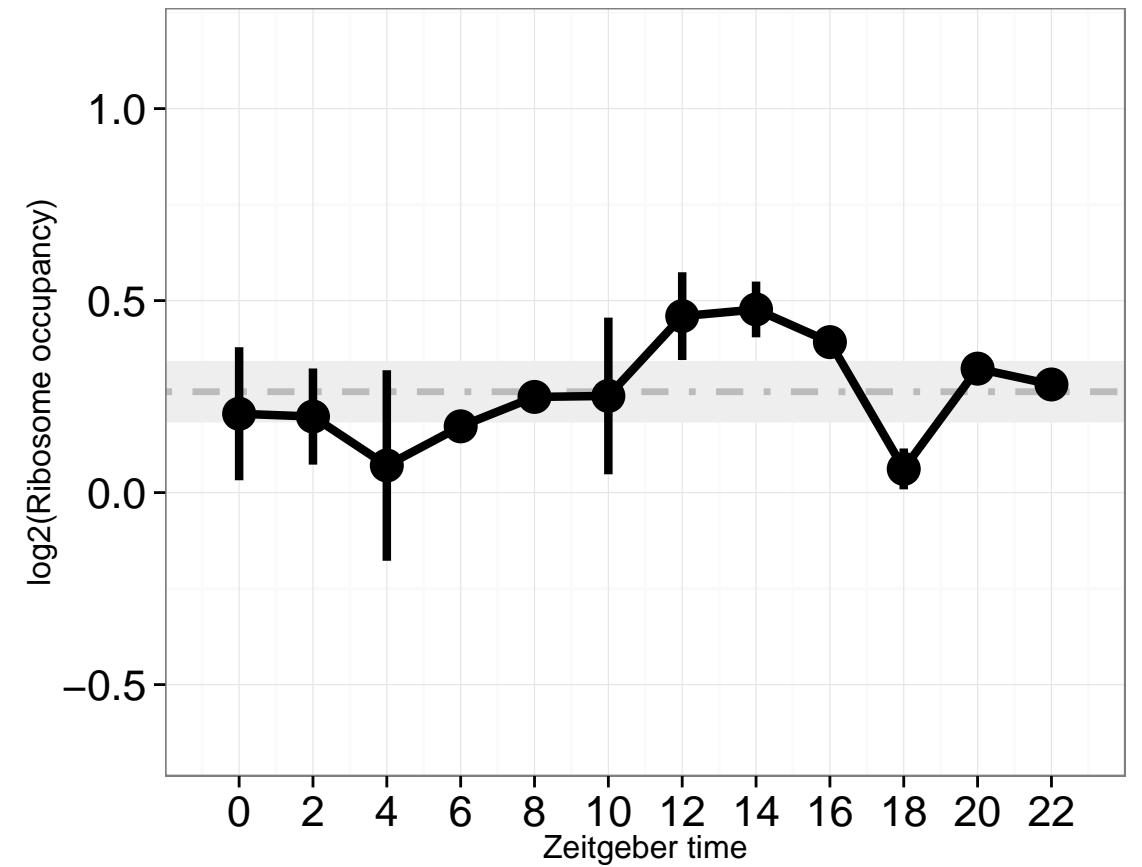

Supplement: Supplementary file 7947 [file 1]

## Uchl3

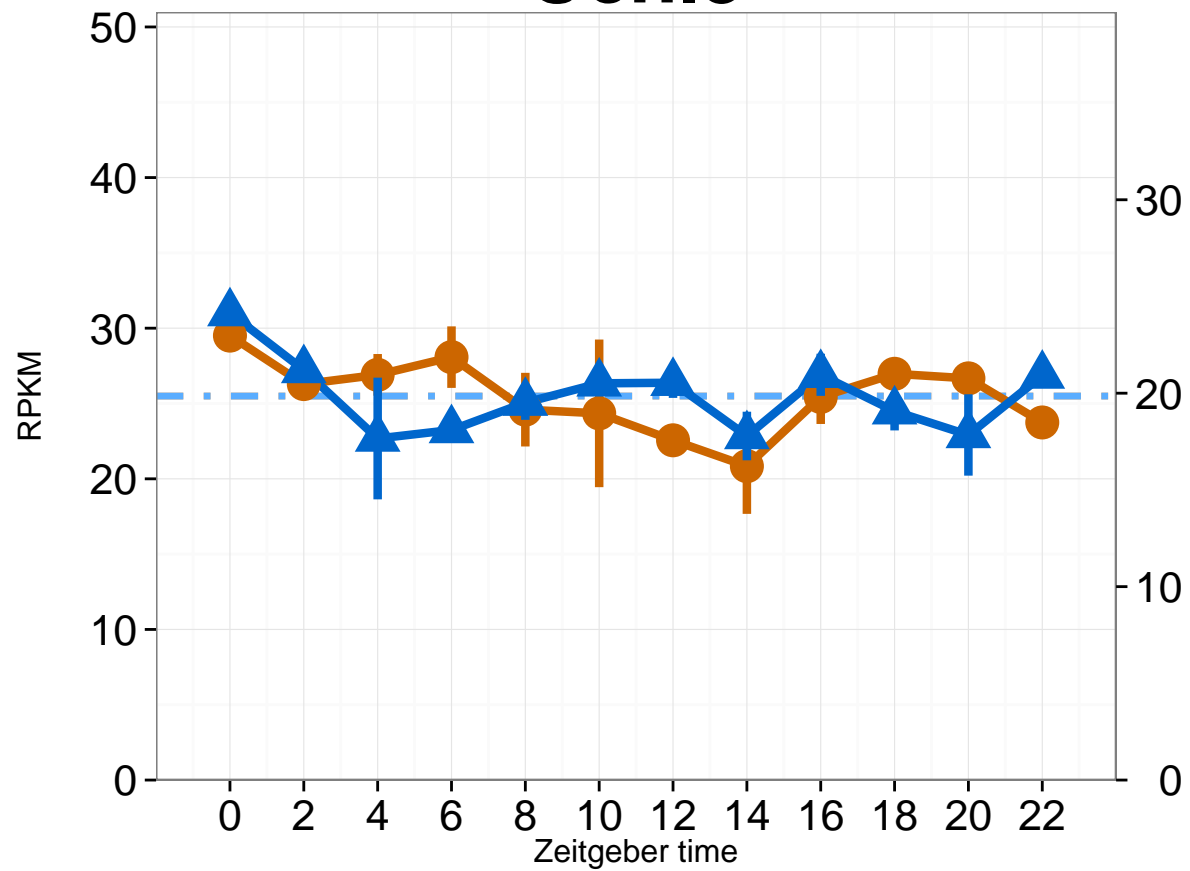

## Uchl3

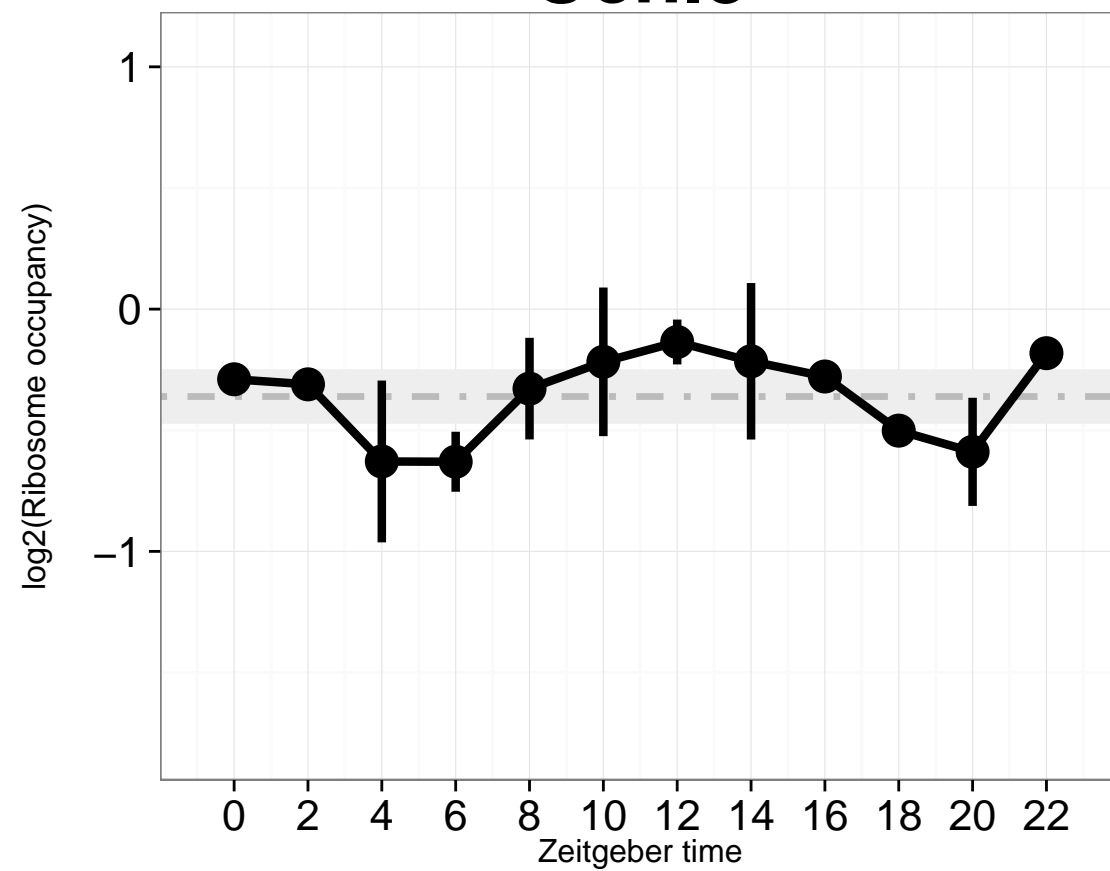

Supplement: Supplementary file 7948 [file 1]

**Slc43a1**

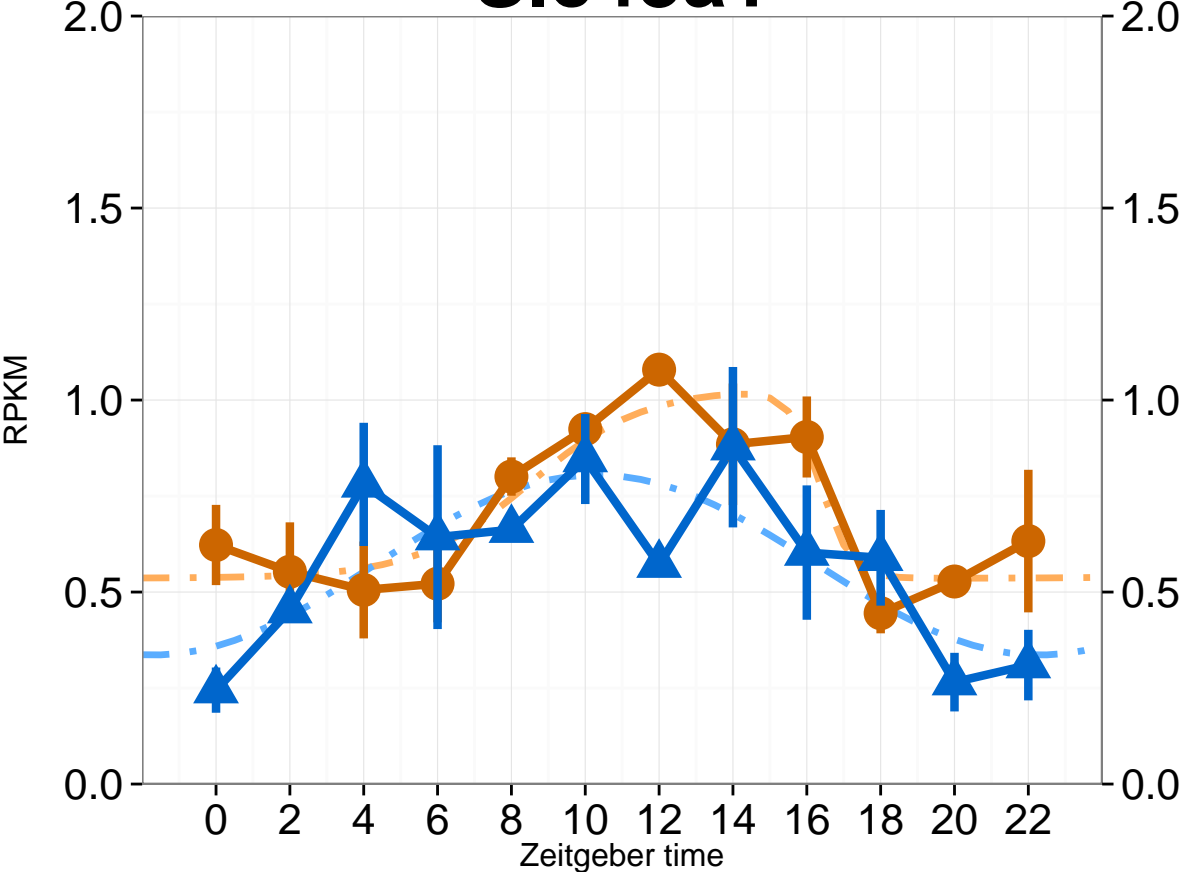

**Slc43a1**

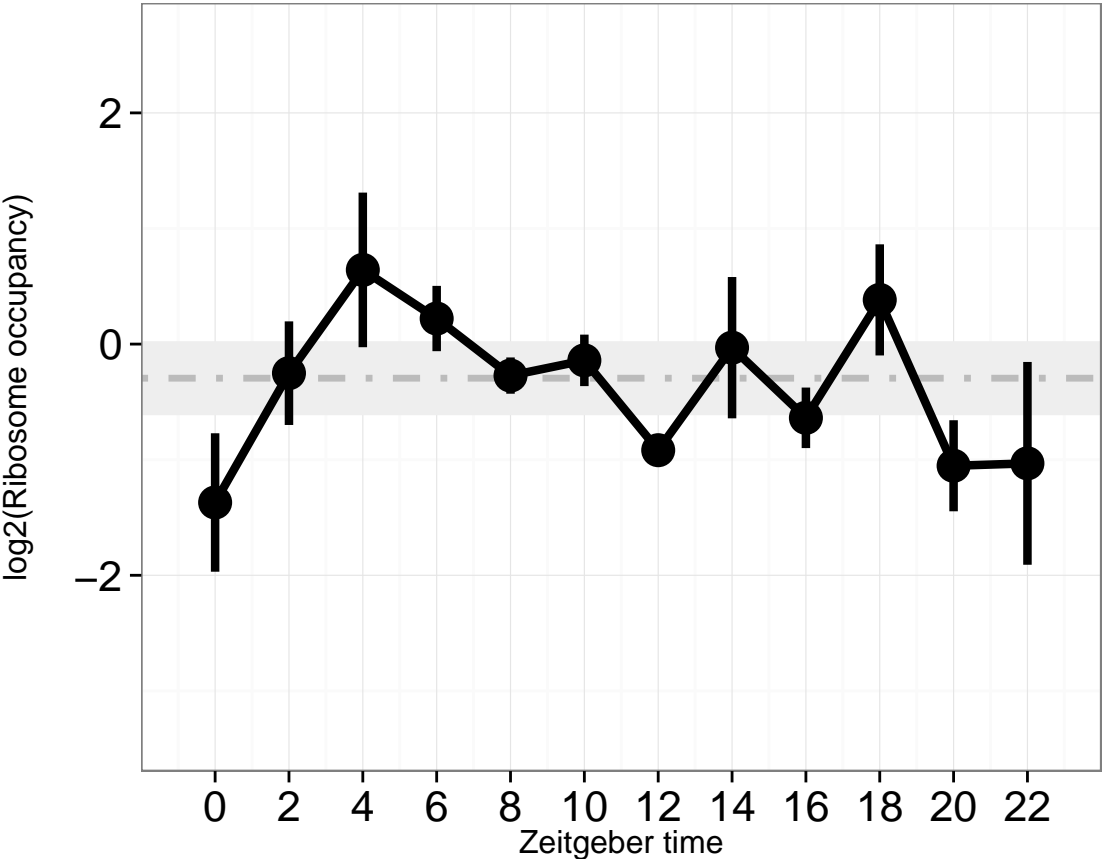

Supplement: Supplementary file 7949 [file 1]

# Kif1c

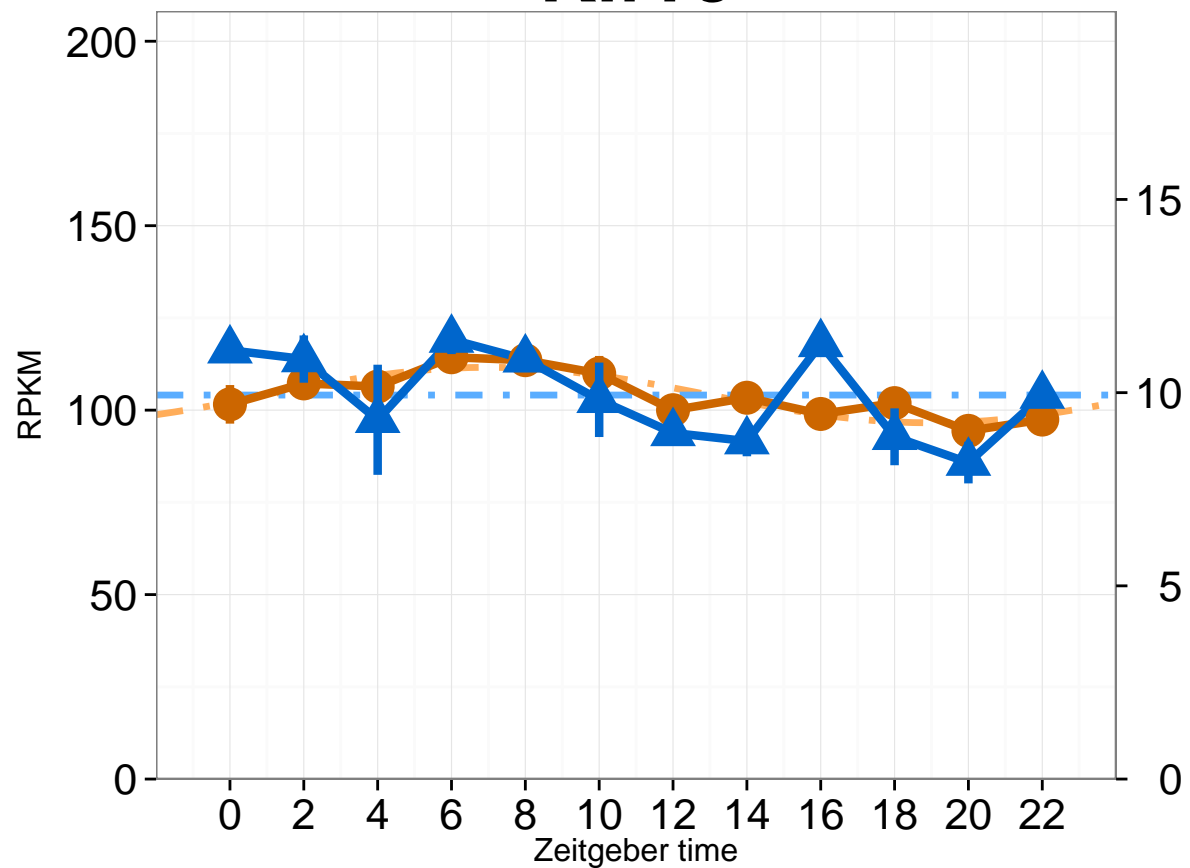

# Kif1c

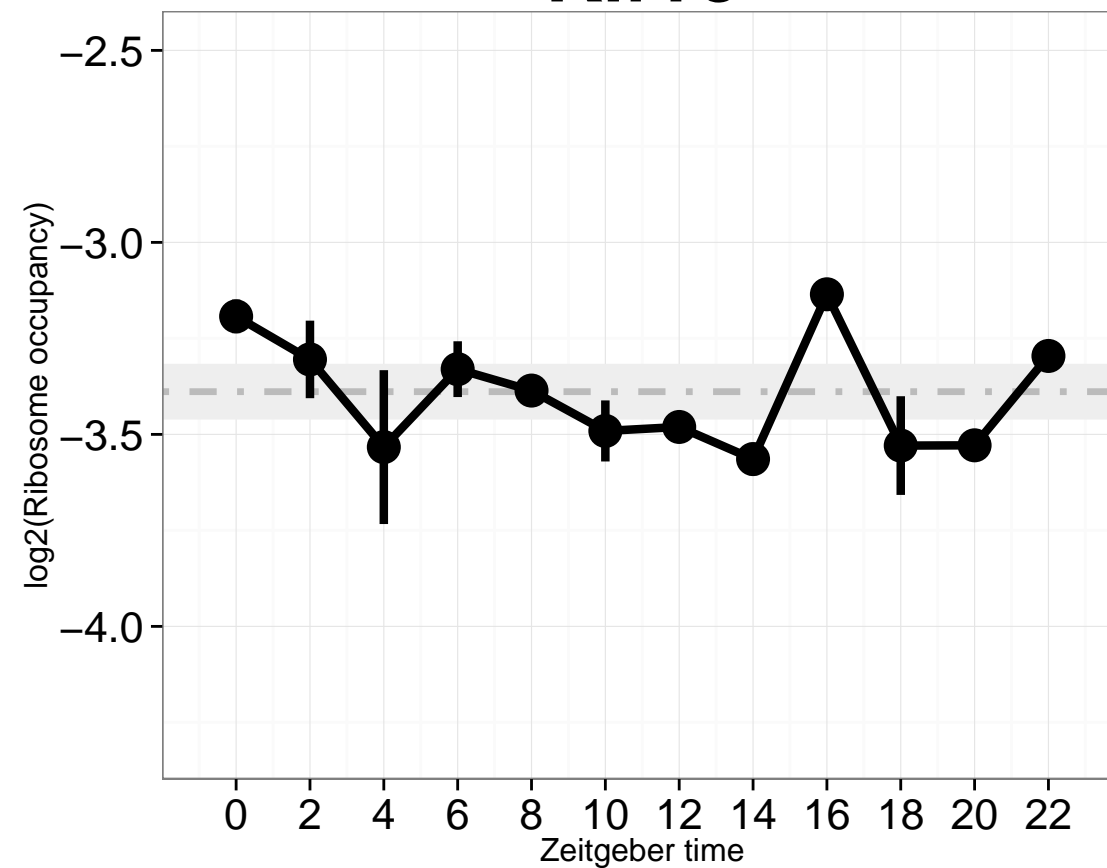

Supplement: Supplementary file 7950 [file 1]

# Nxpe2

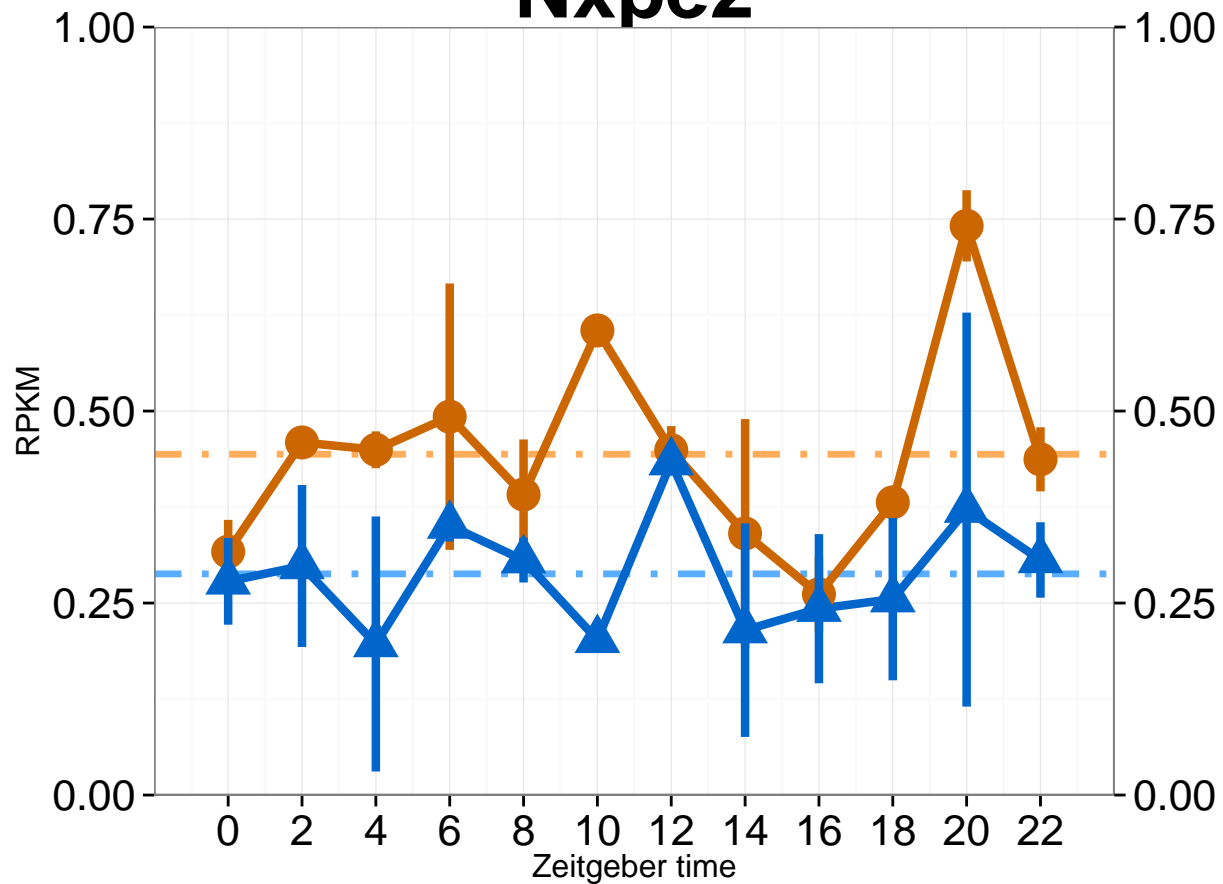

# Nxpe2

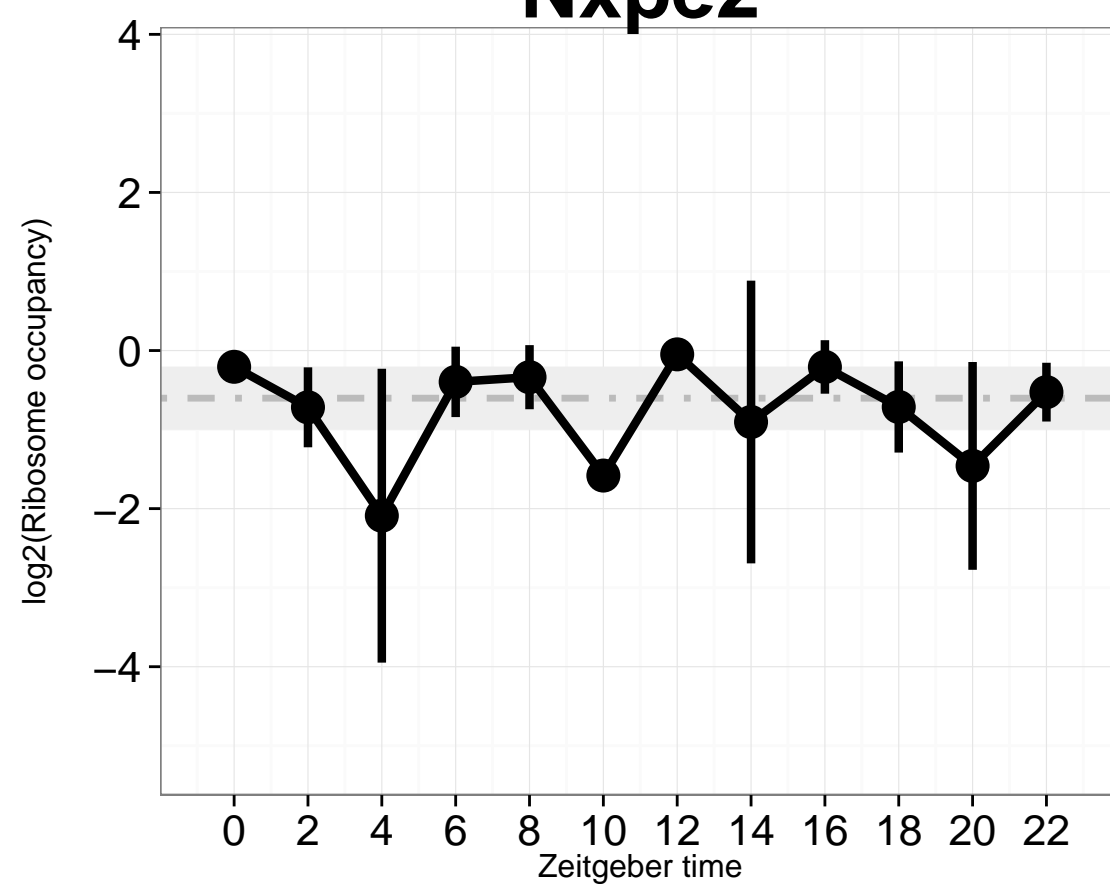

Supplement: Supplementary file 7951 [file 1]

# Mettl7a1

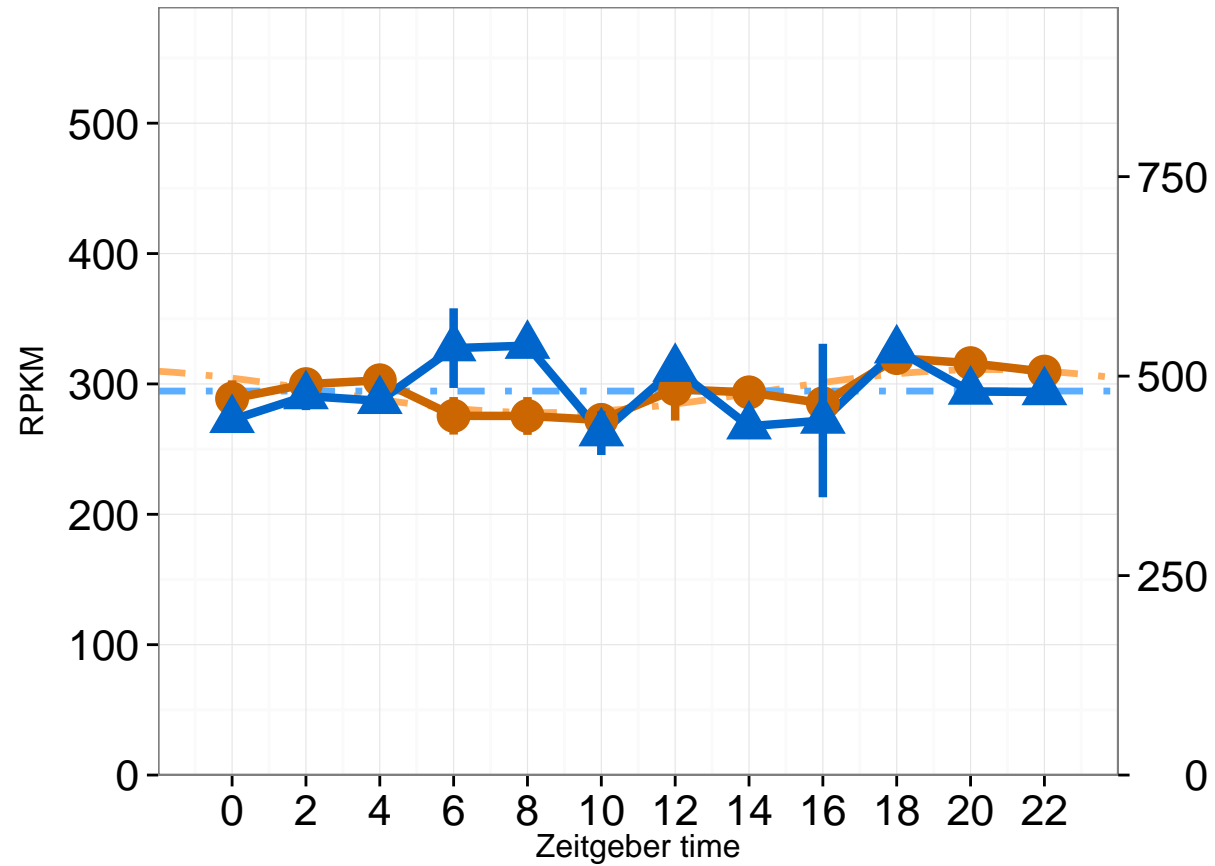

# Mettl7a1

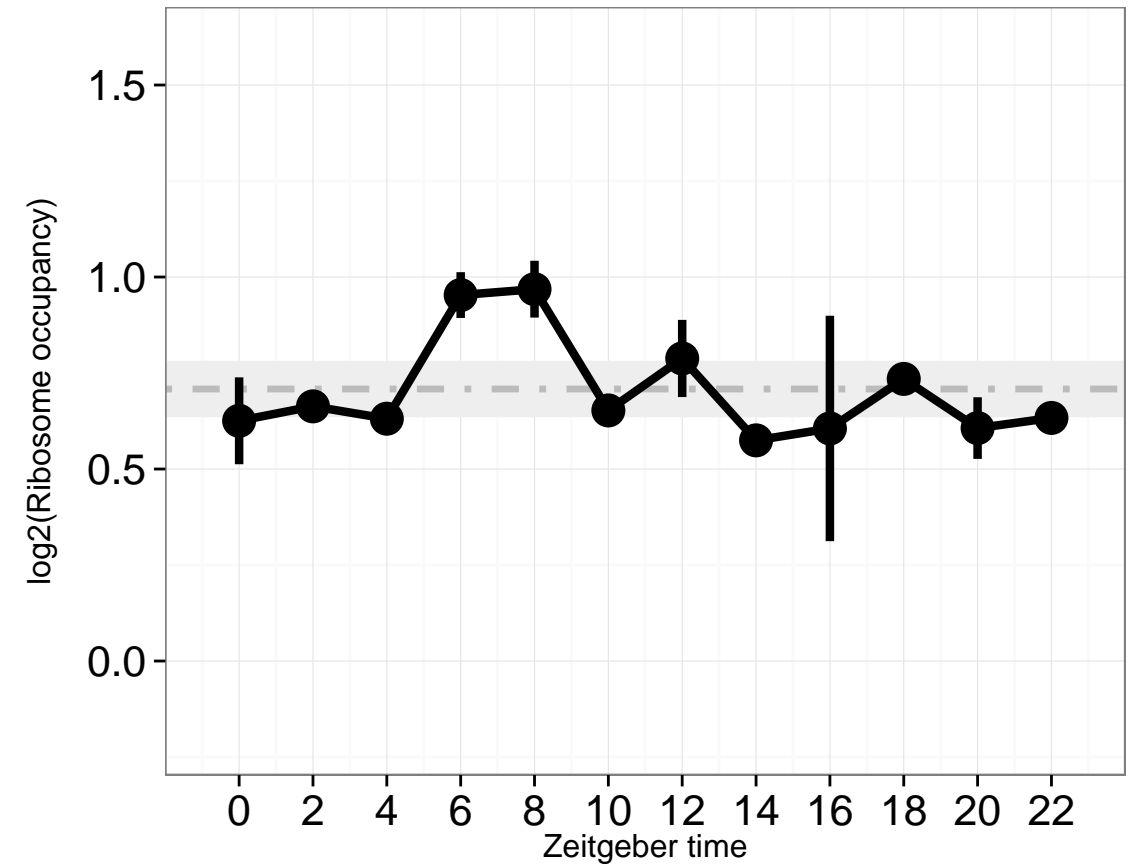

Supplement: Supplementary file 7952 [file 1]

## Morc4

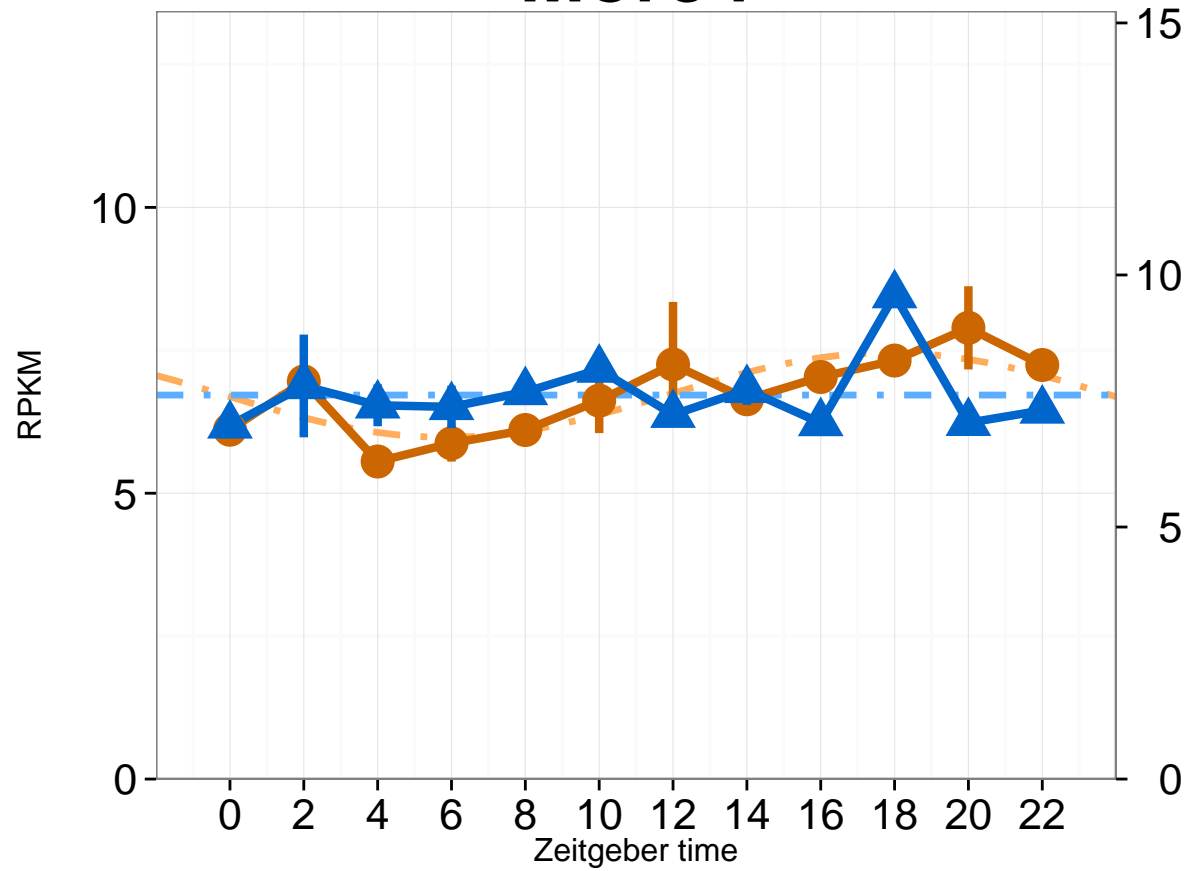

## Morc4

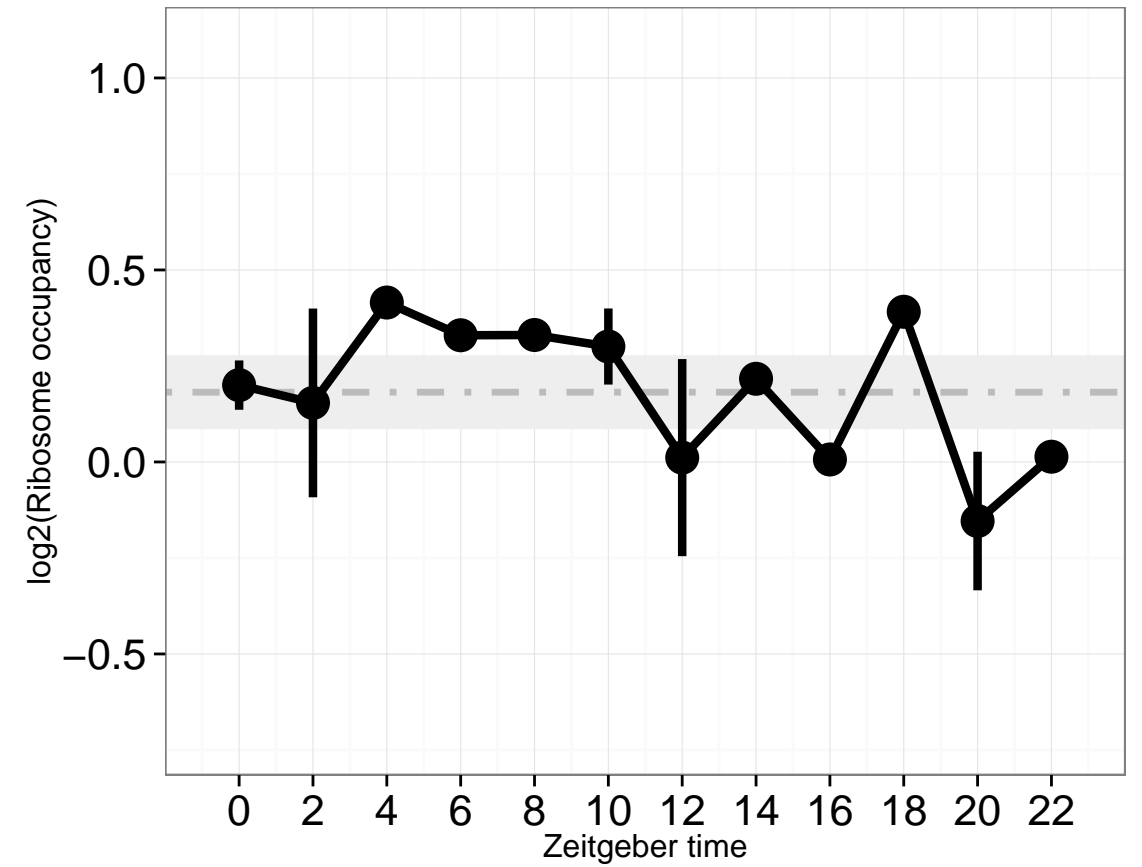

Supplement: Supplementary file 7953 [file 1]

## Polr3e

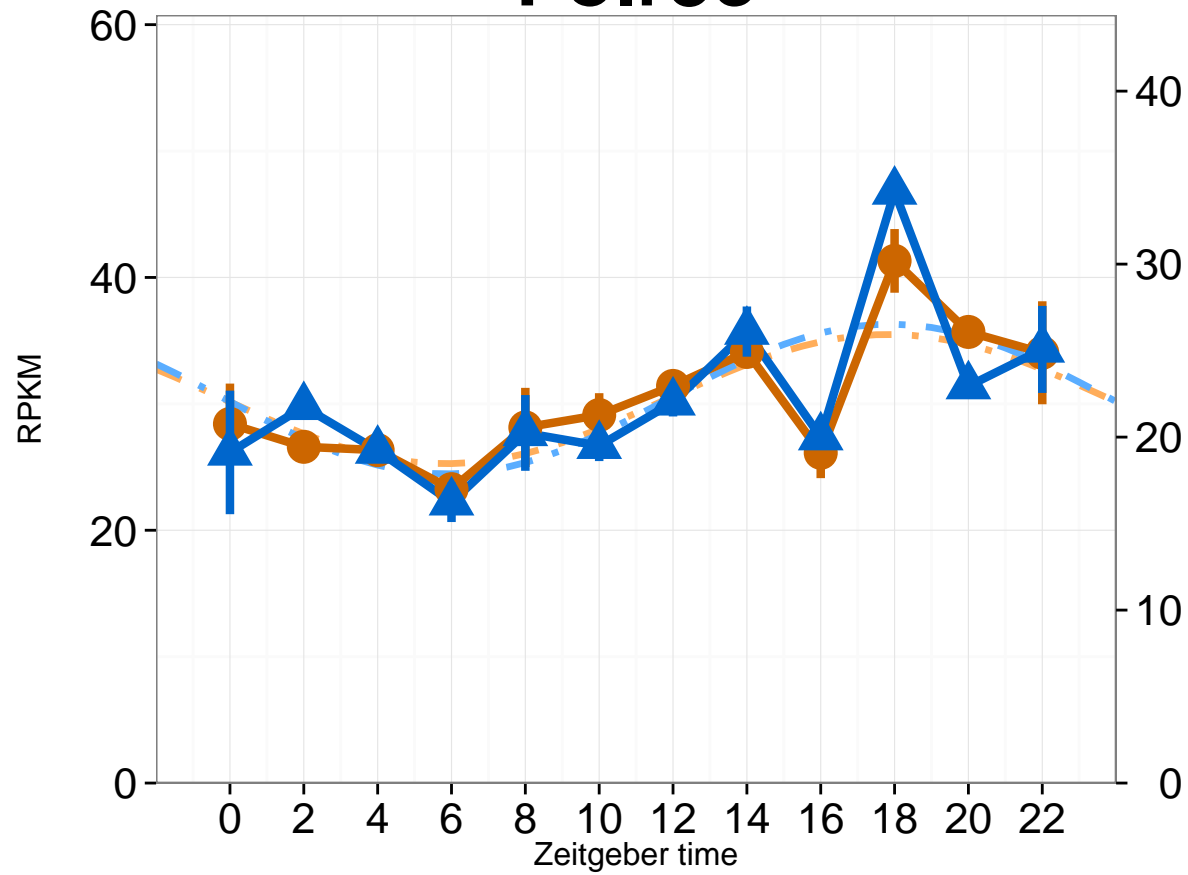

## Polr3e

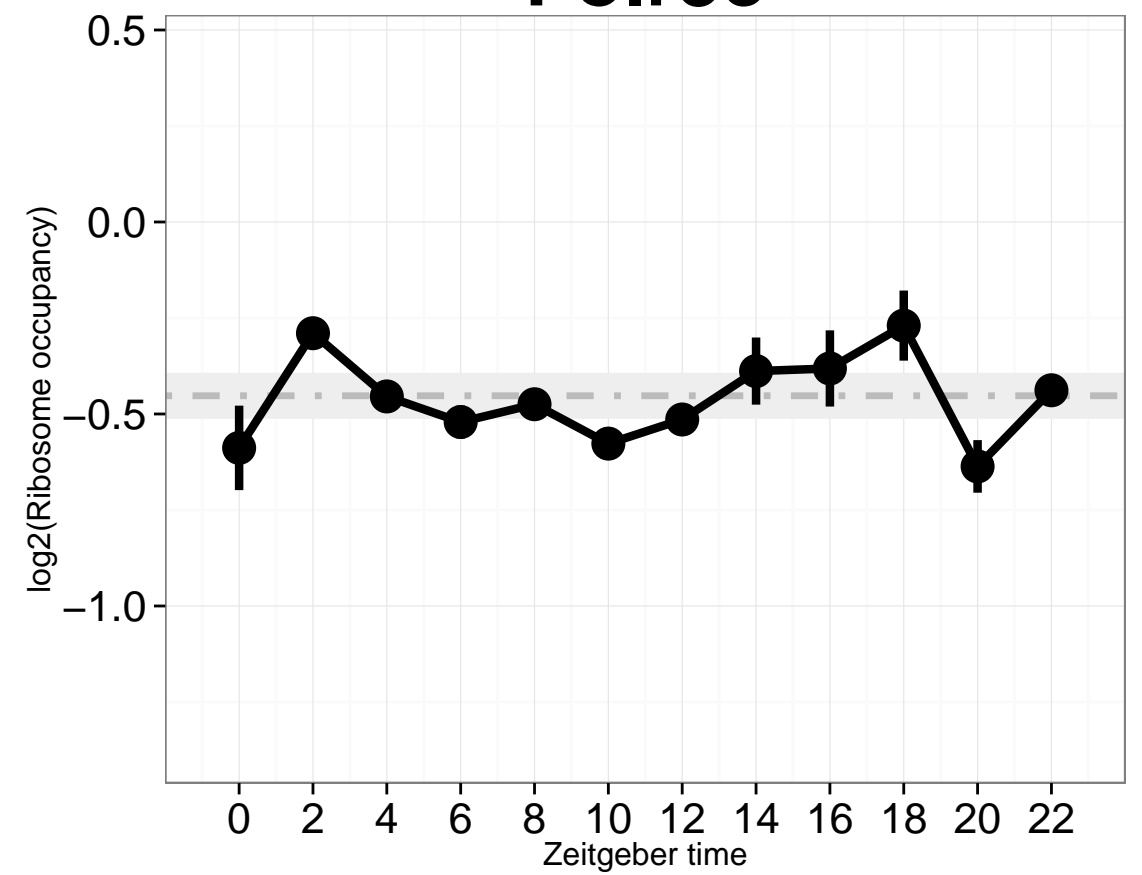

Supplement: Supplementary file 7954 [file 1]

# Leprotl1

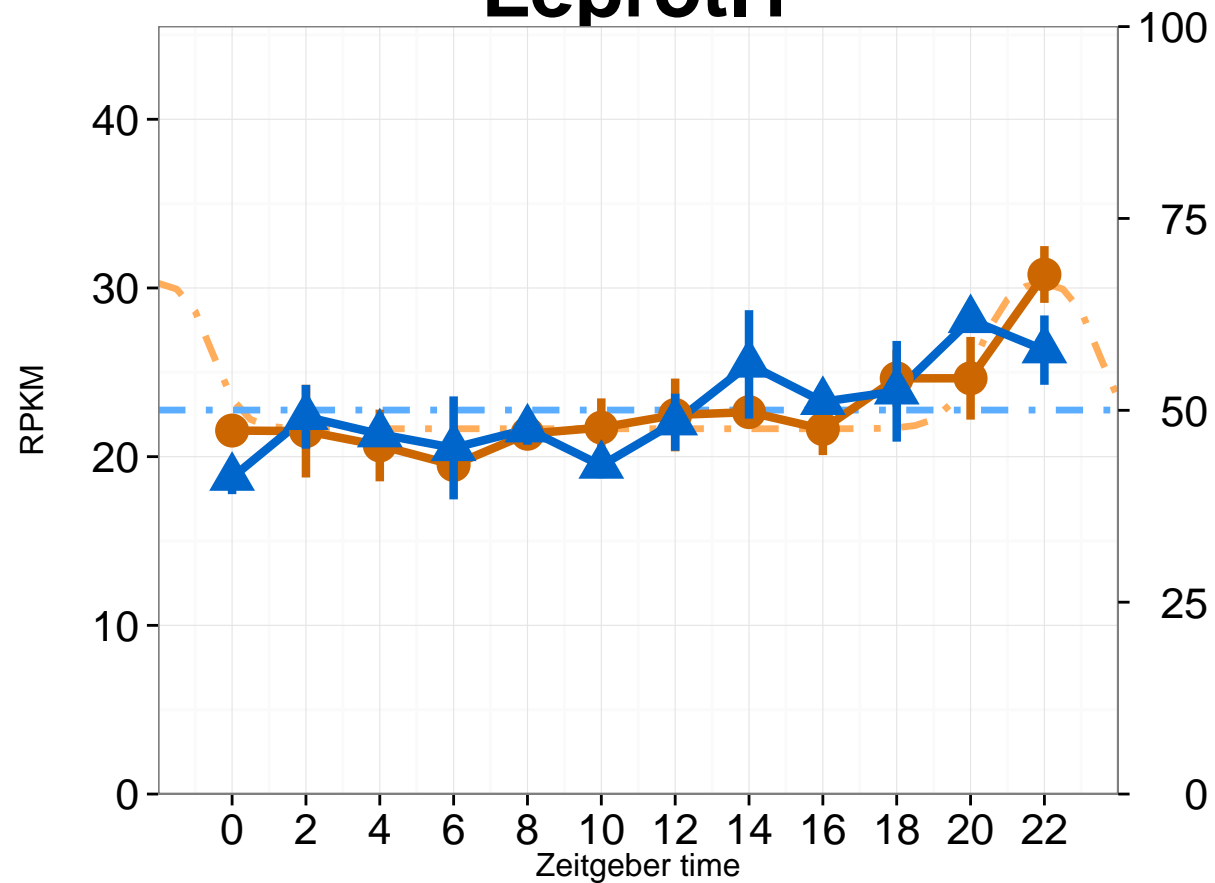

# Leprotl1

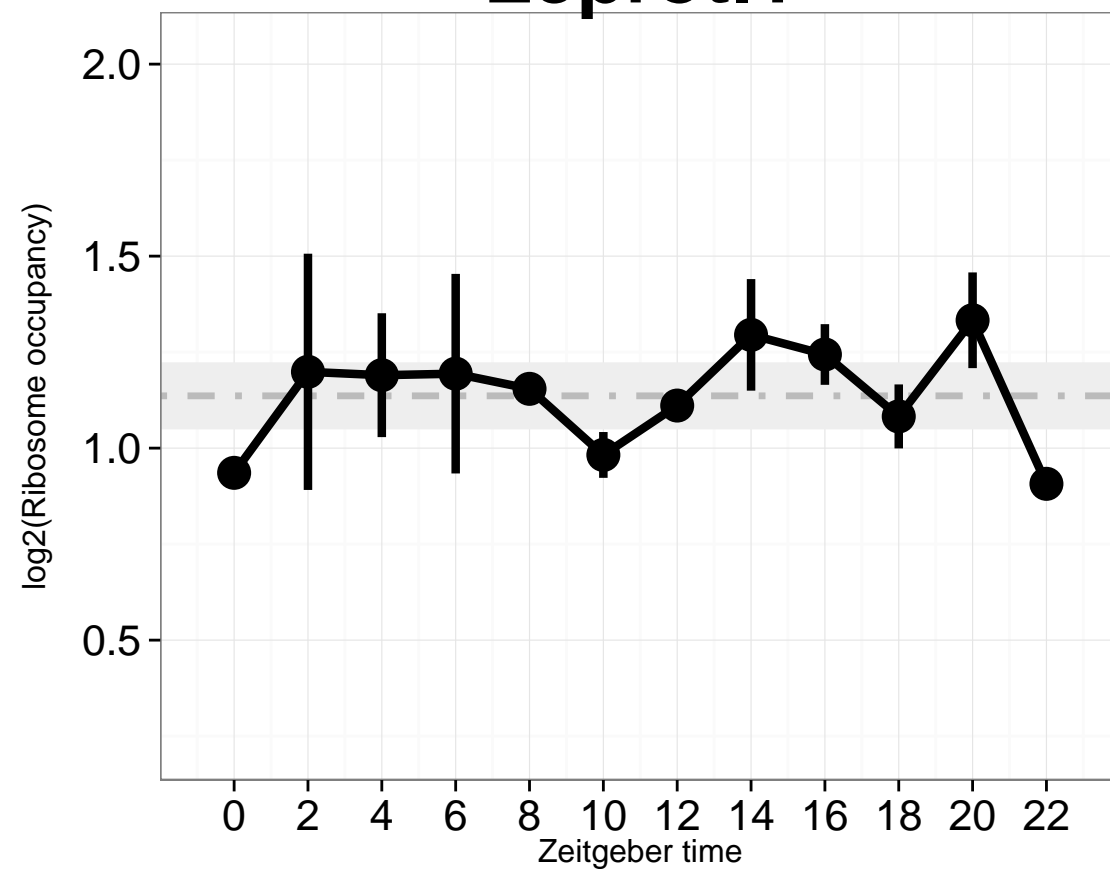

Supplement: Supplementary file 7955 [file 1]

## Ylpm1

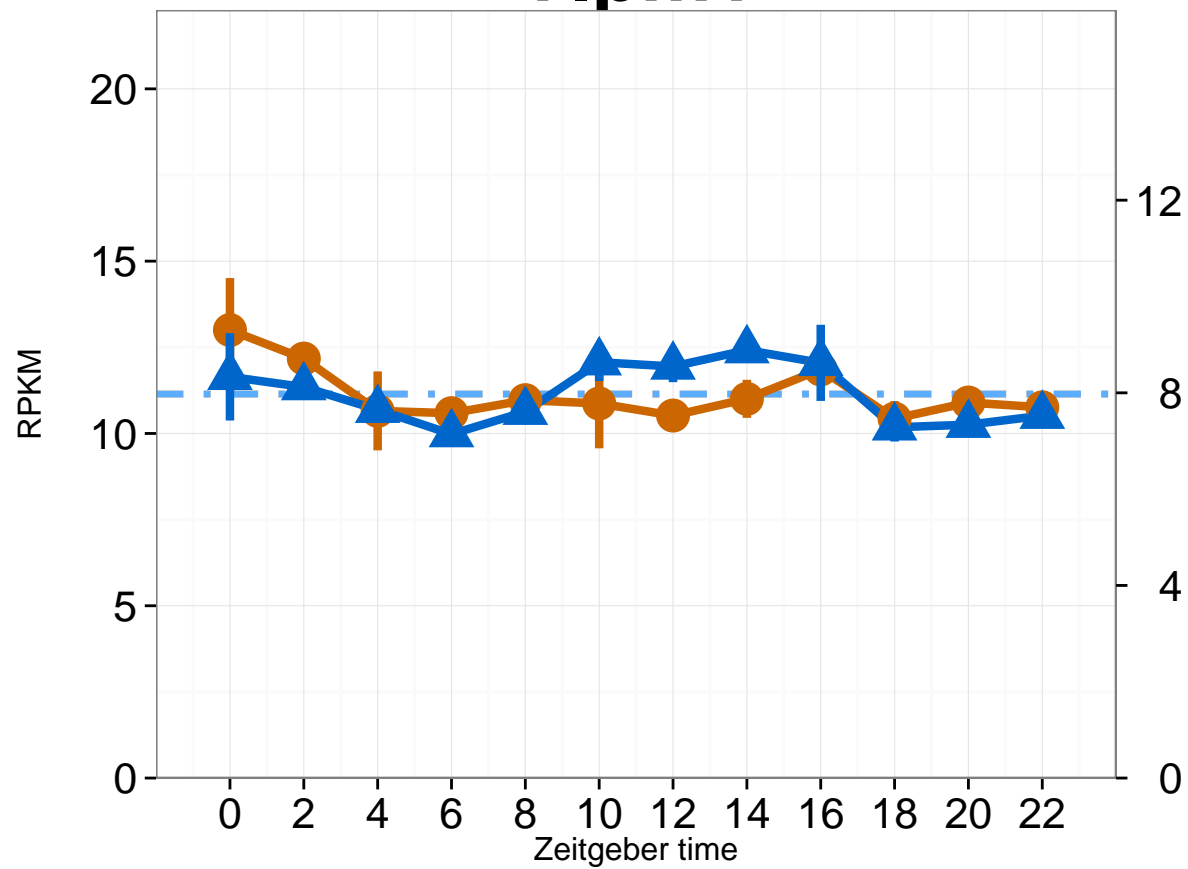

## Ylpm1

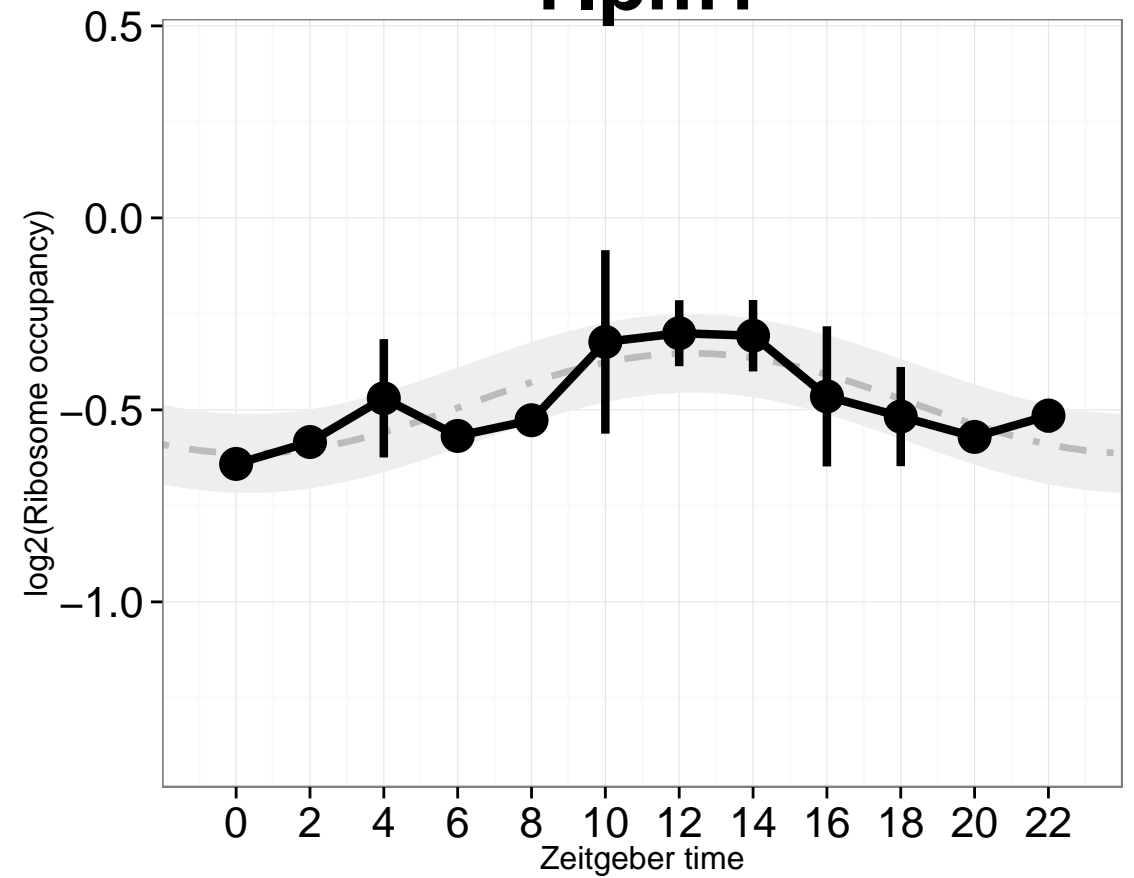

Supplement: Supplementary file 7956 [file 1]

# Zfp866

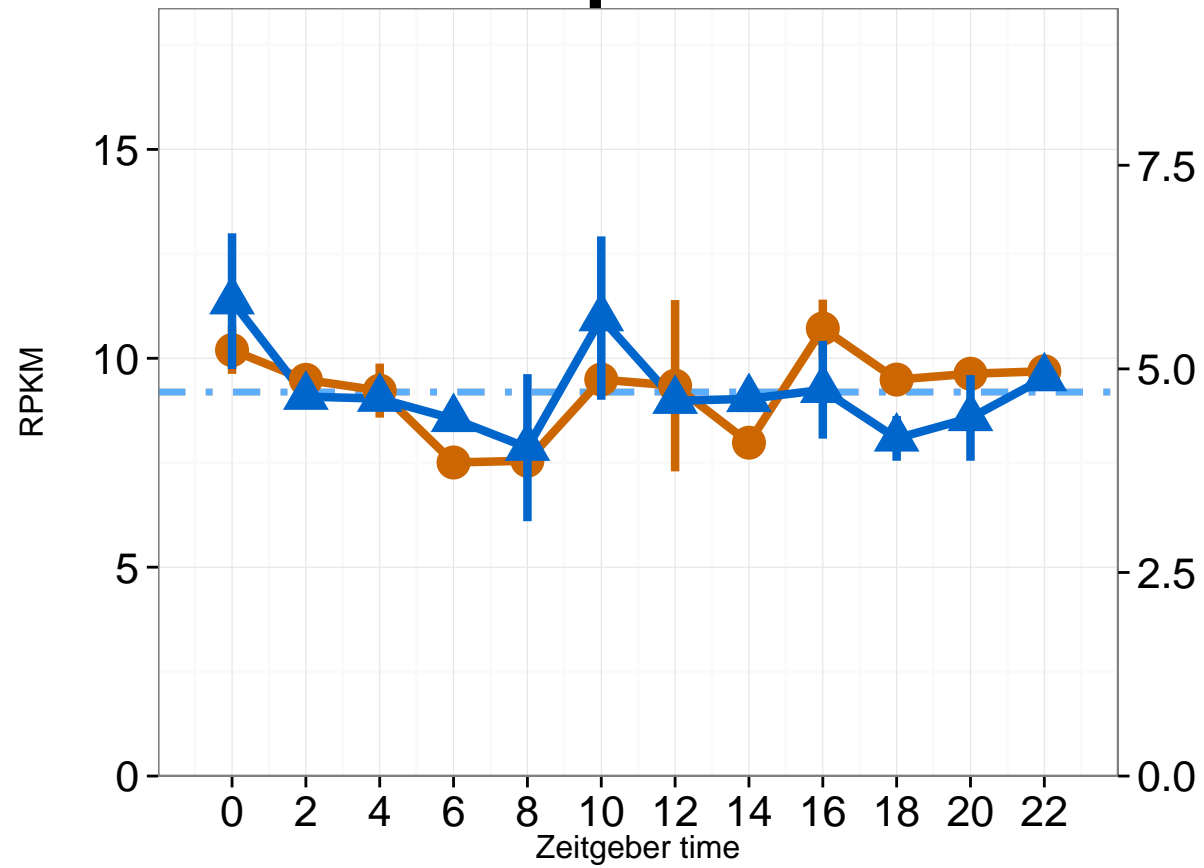

# Zfp866

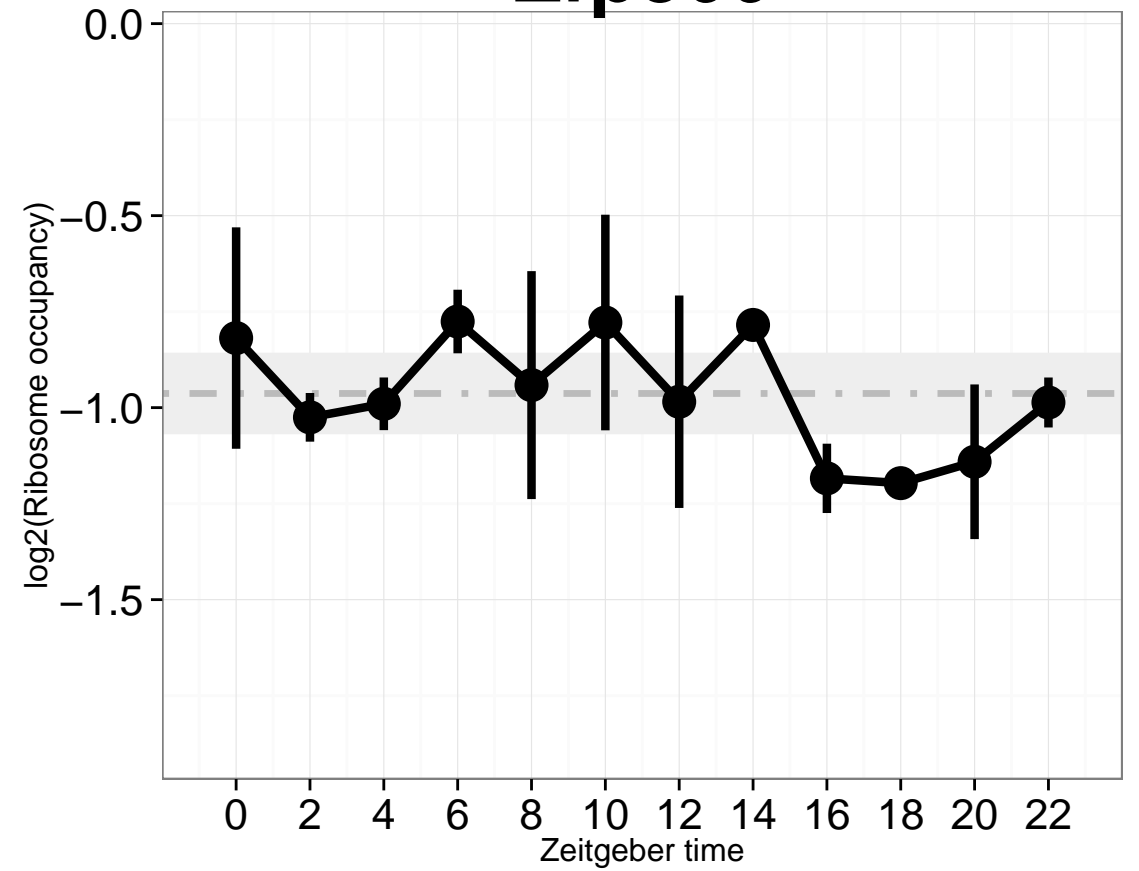

Supplement: Supplementary file 7957 [file 1]

# Btg3

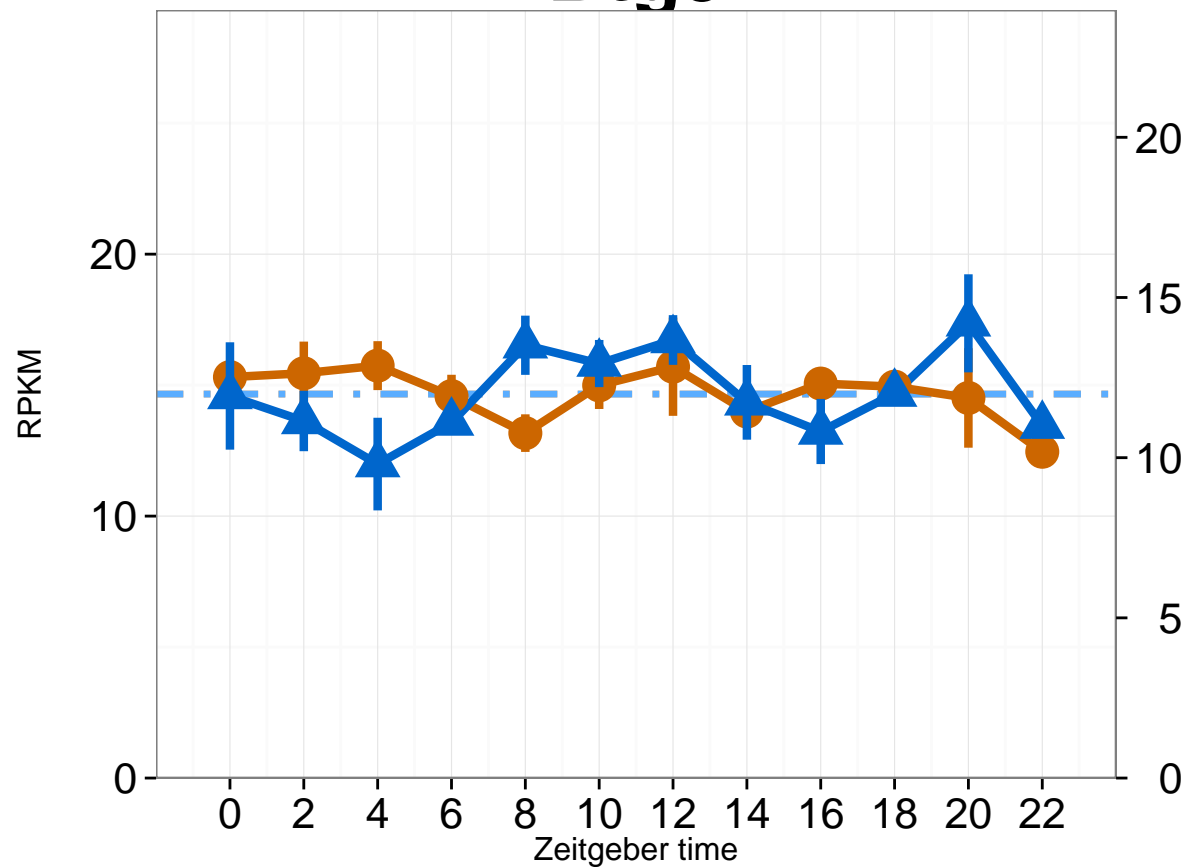

# Btg3

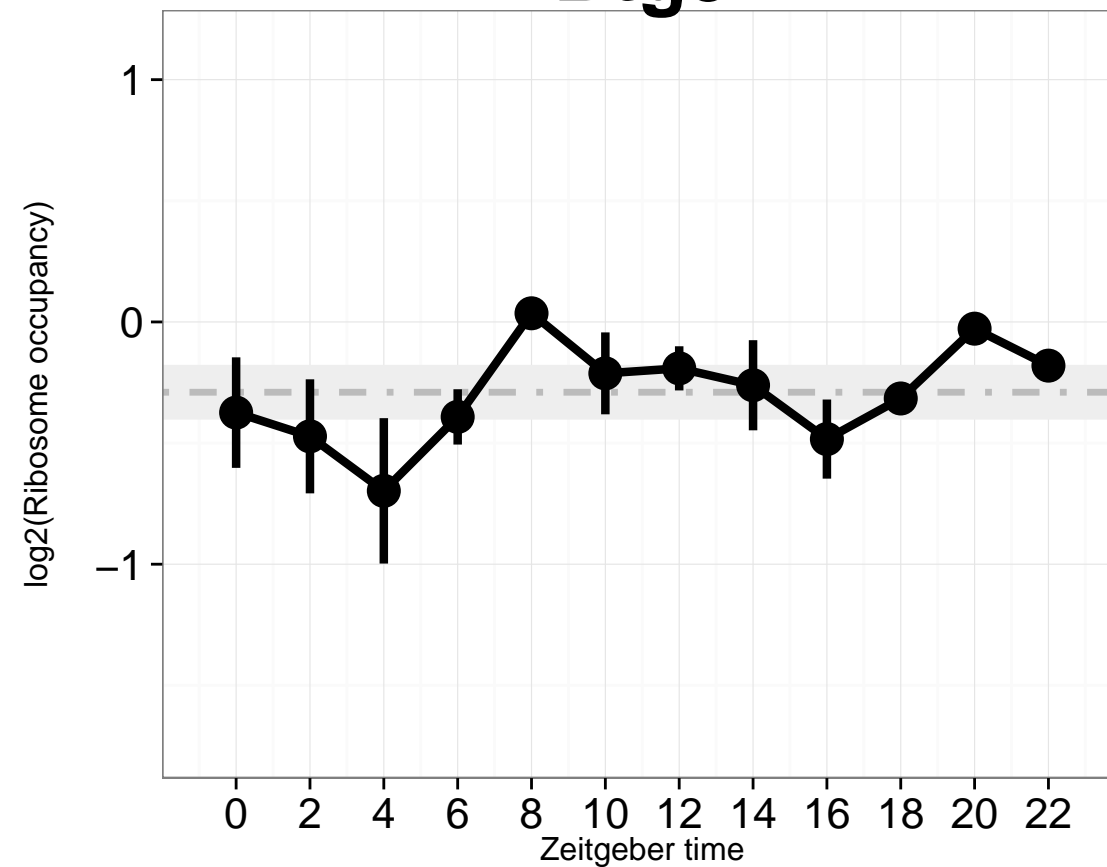

Supplement: Supplementary file 7958 [file 1]

# 3110043O21Rik

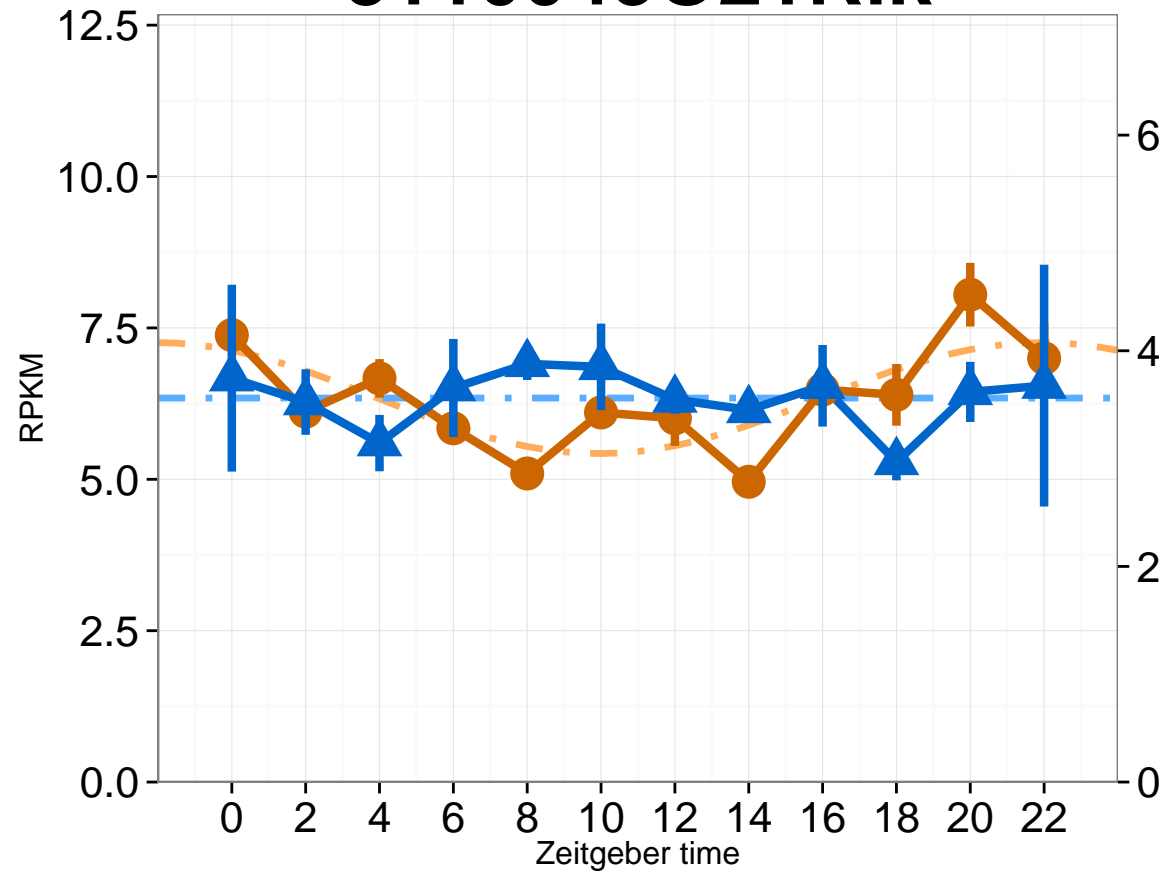

# 3110043O21Rik

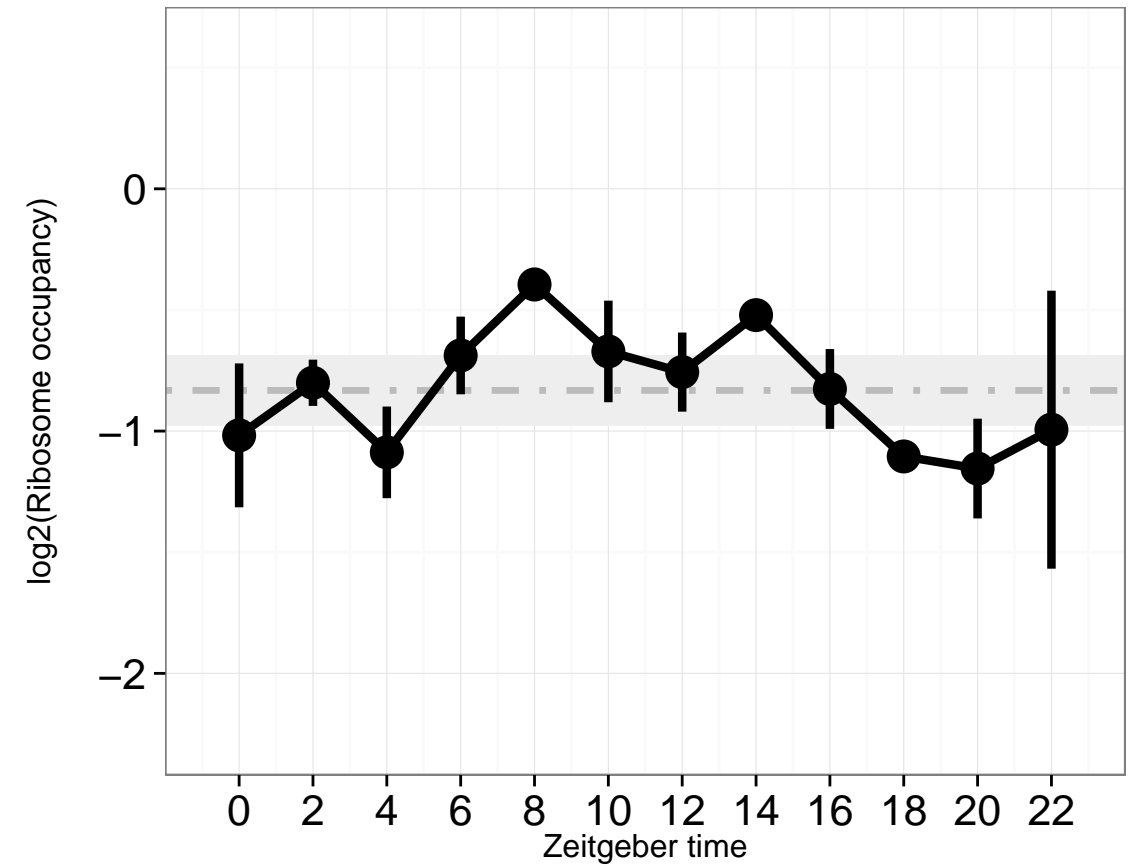

Supplement: Supplementary file 7959 [file 1]

# Zfp69

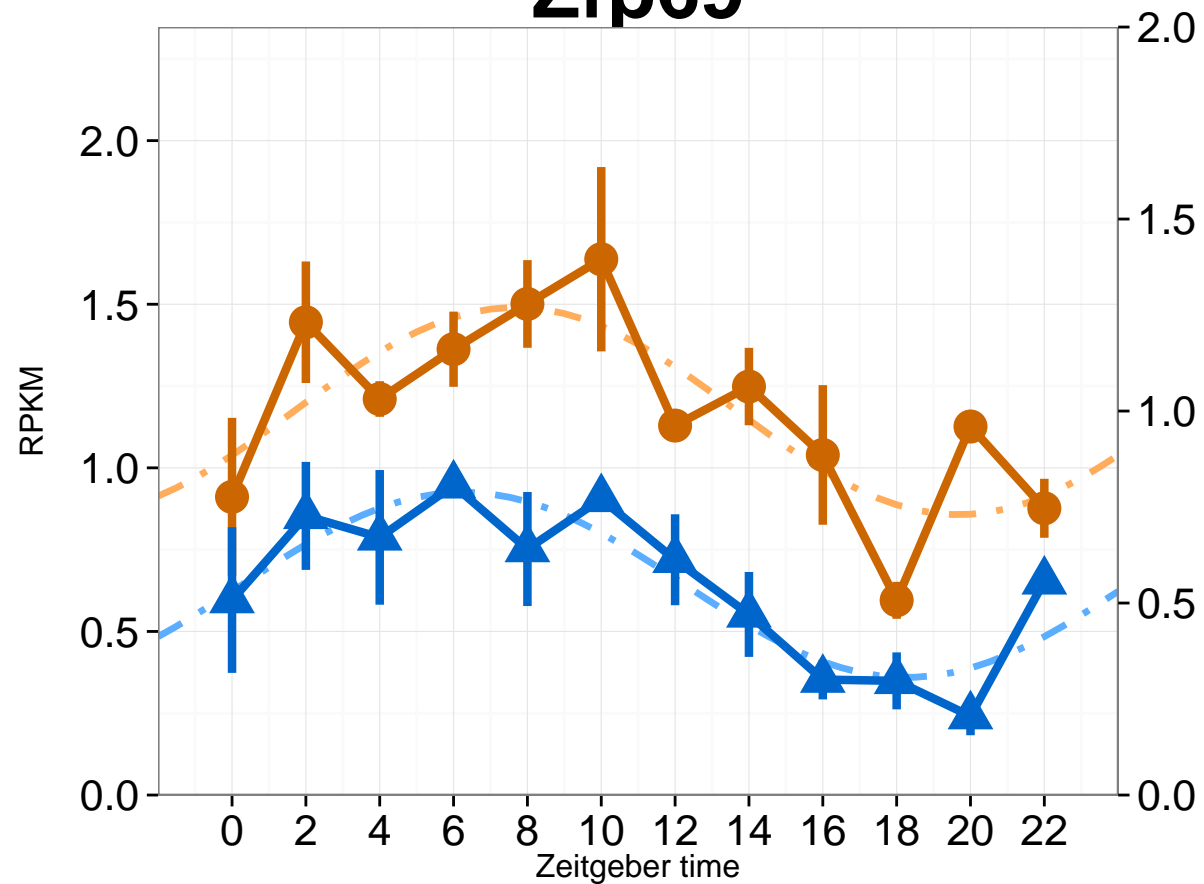

# Zfp69

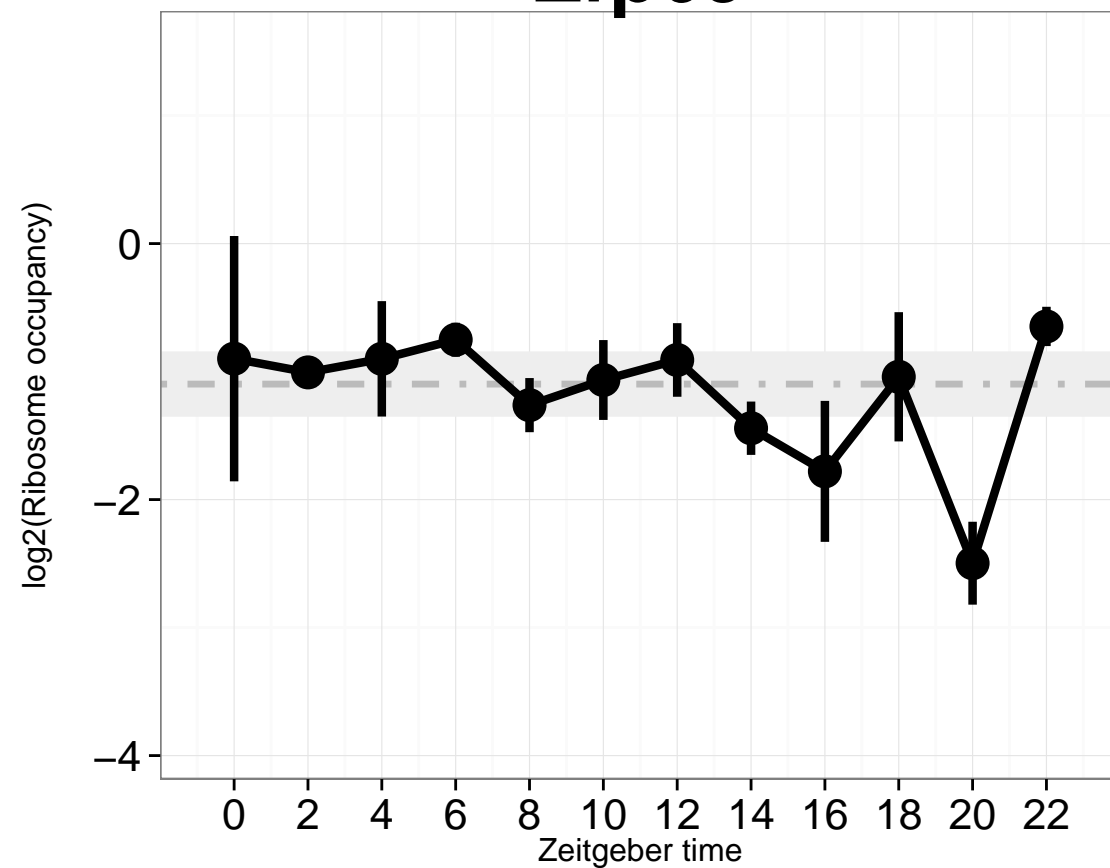

Supplement: Supplementary file 7960 [file 1]

## Pacs1

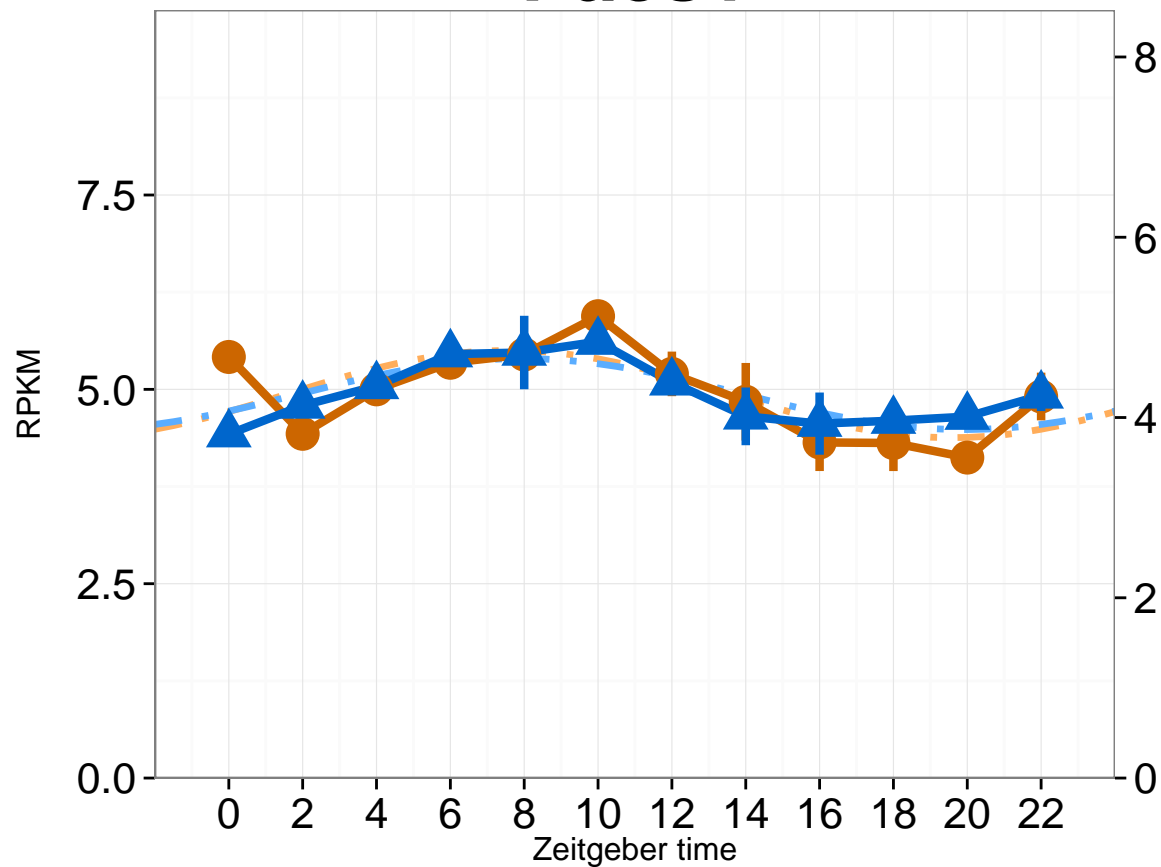

## Pacs1

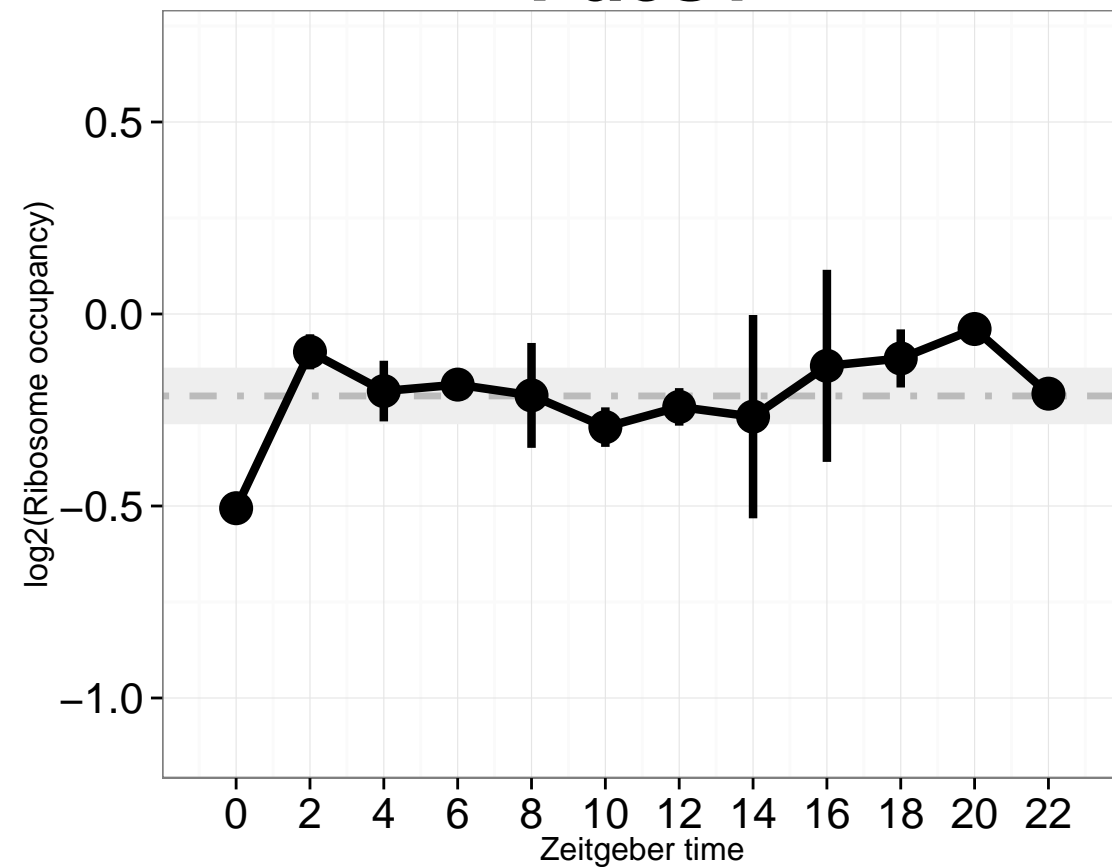

Supplement: Supplementary file 7961 [file 1]

## Cdh3

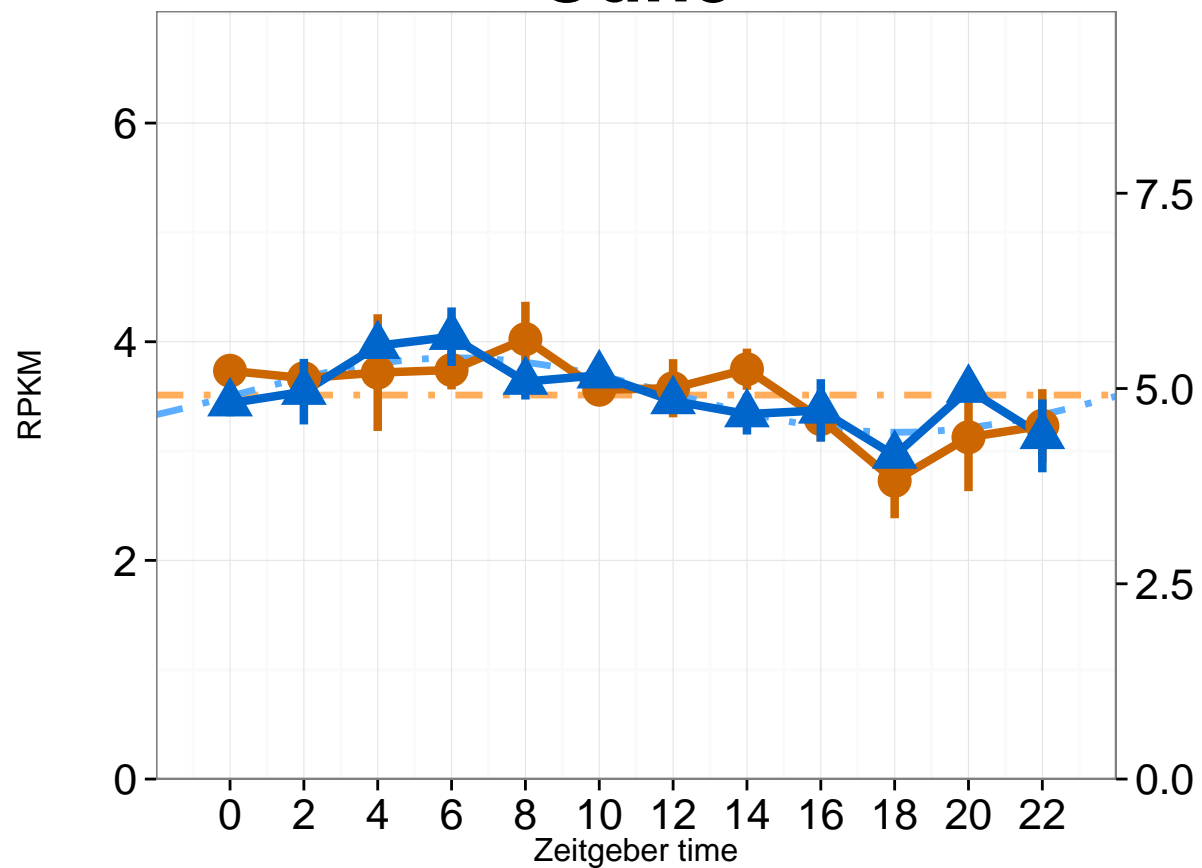

## Cdh3

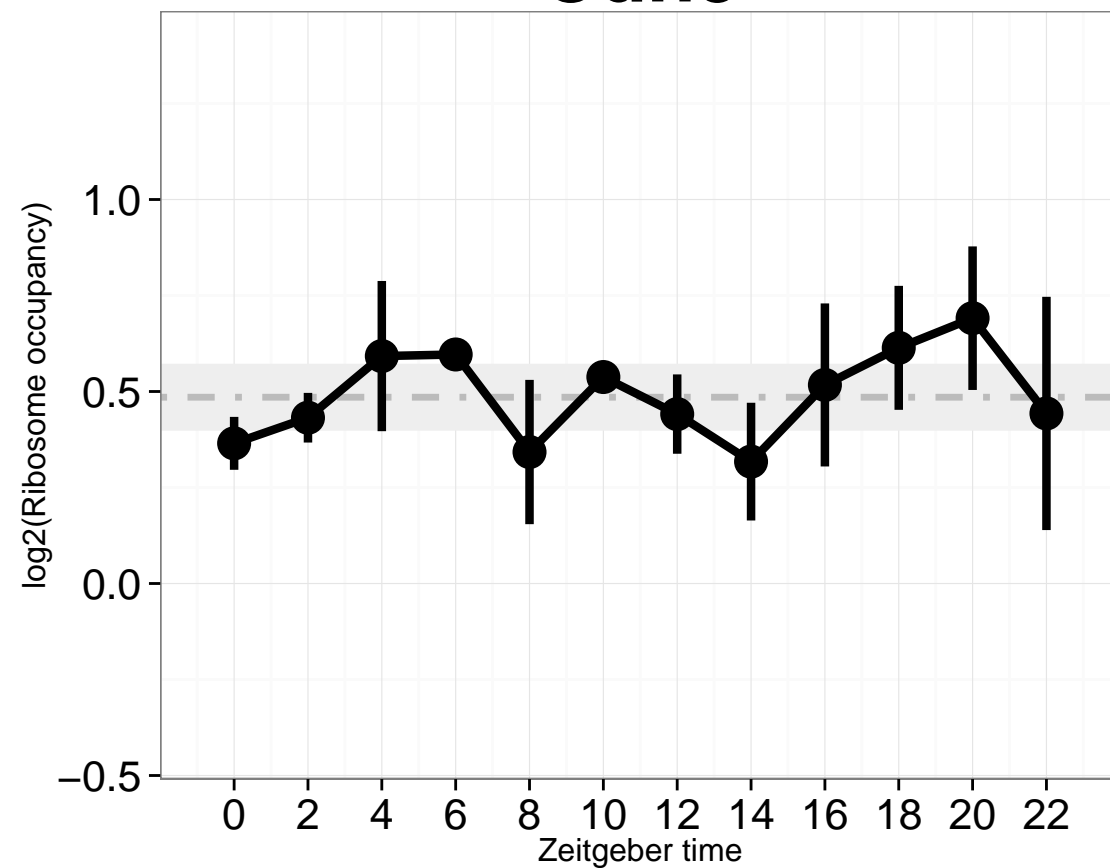

Supplement: Supplementary file 7962 [file 1]

# Tmem258

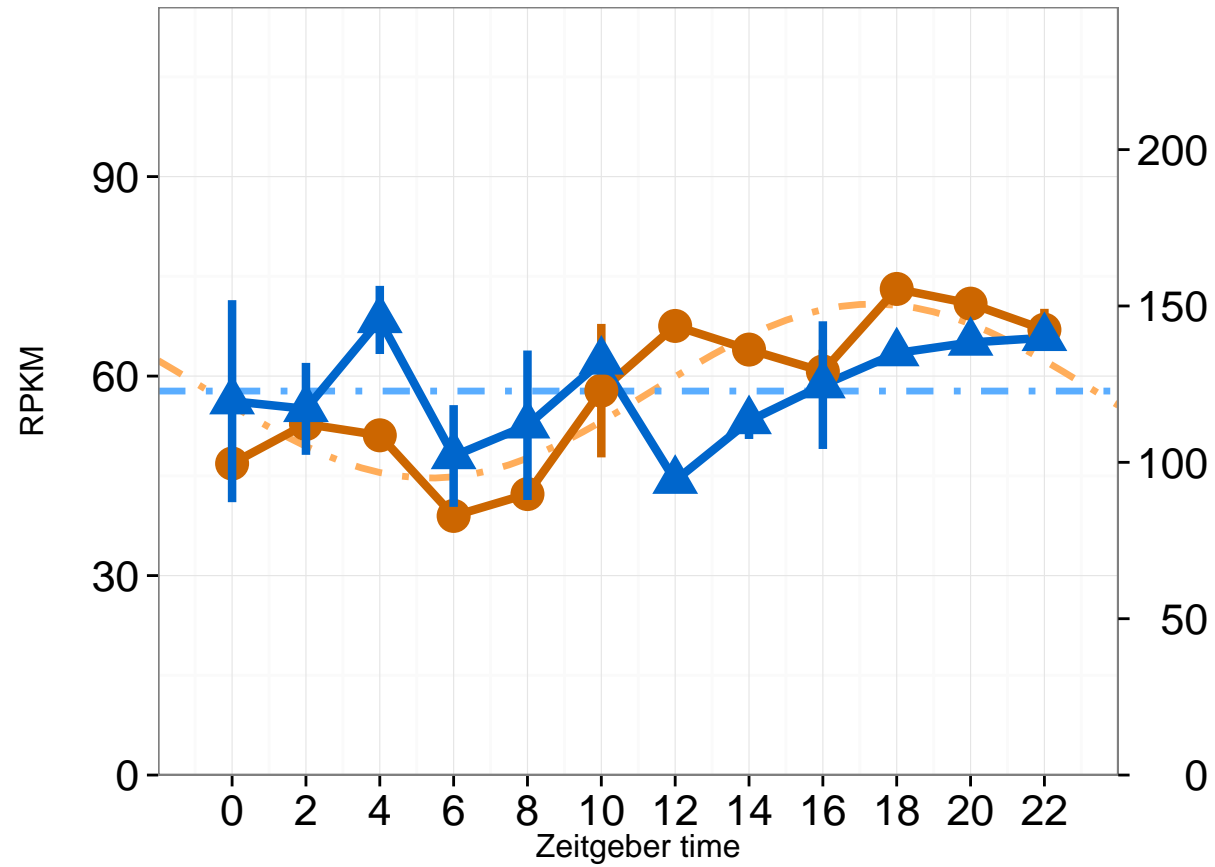

# Tmem258

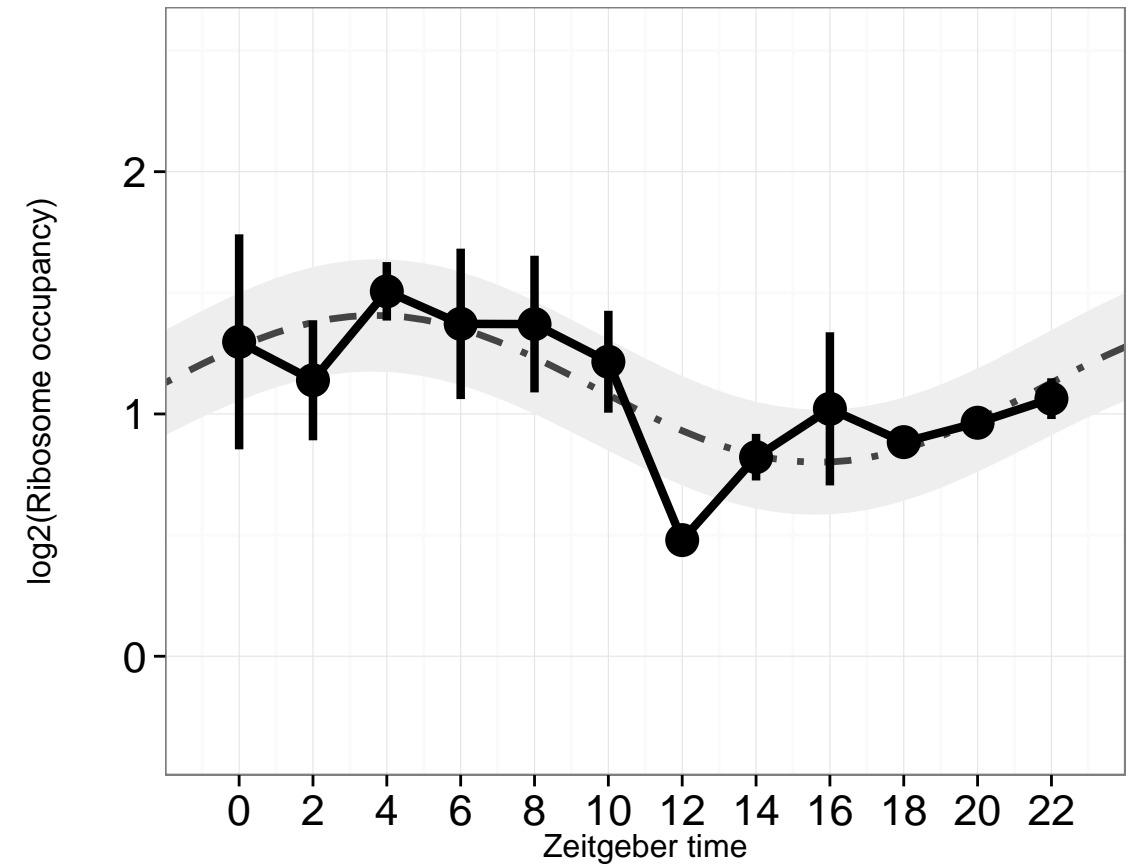

Supplement: Supplementary file 7963 [file 1]

# Fam217a

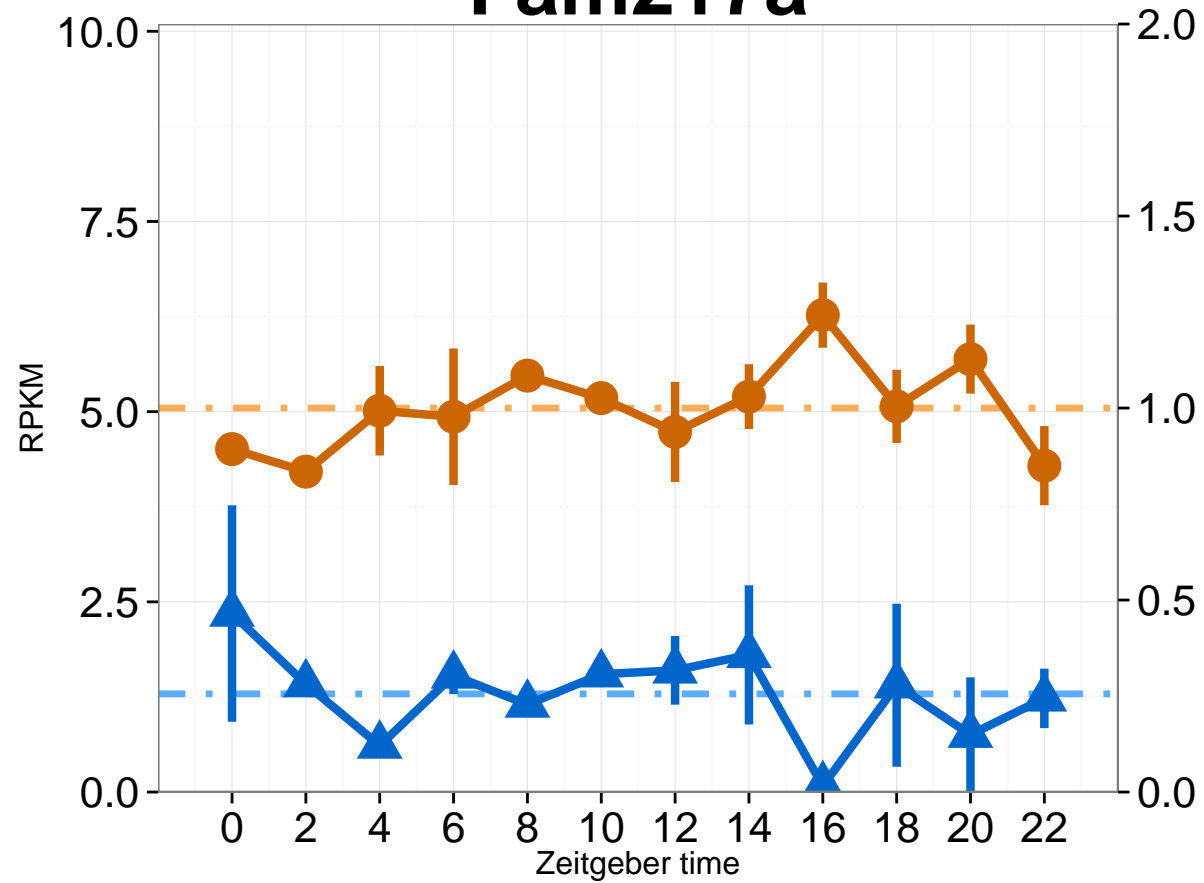

# Fam217a

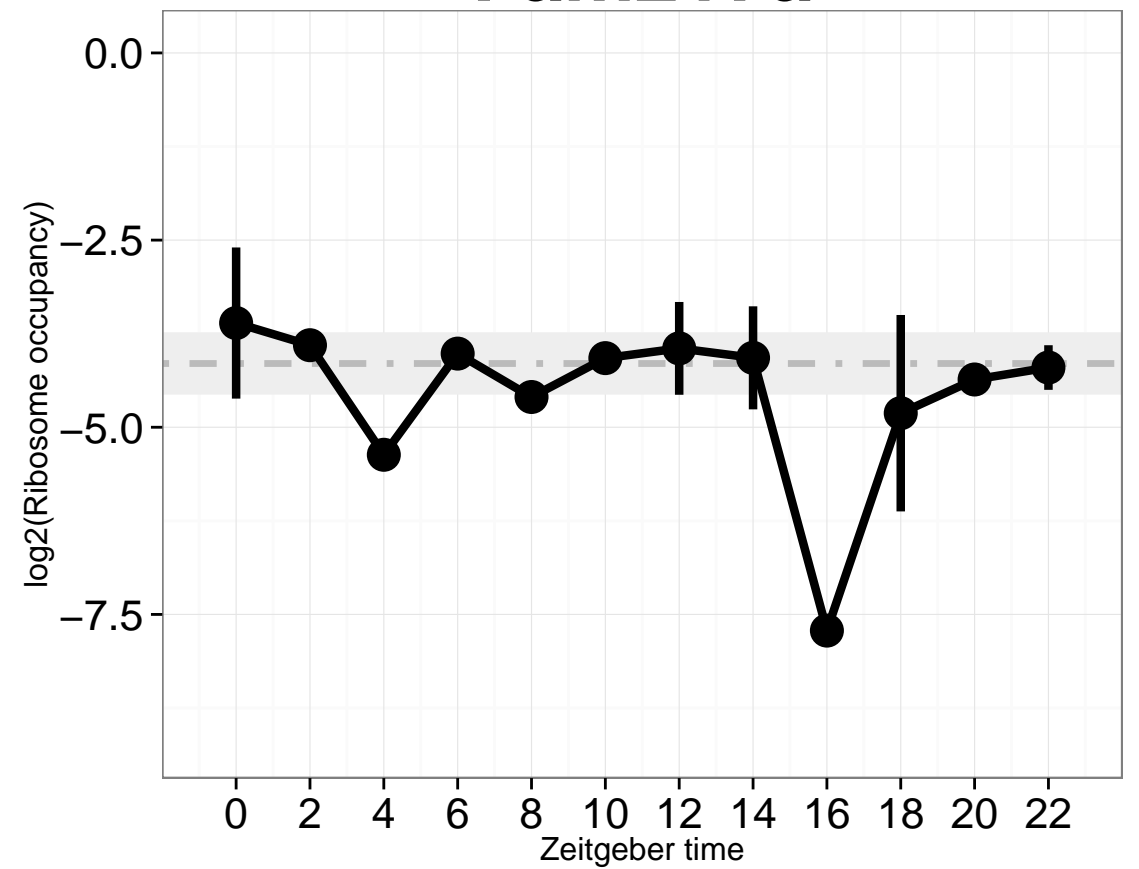

Supplement: Supplementary file 7964 [file 1]

## Cnnm1

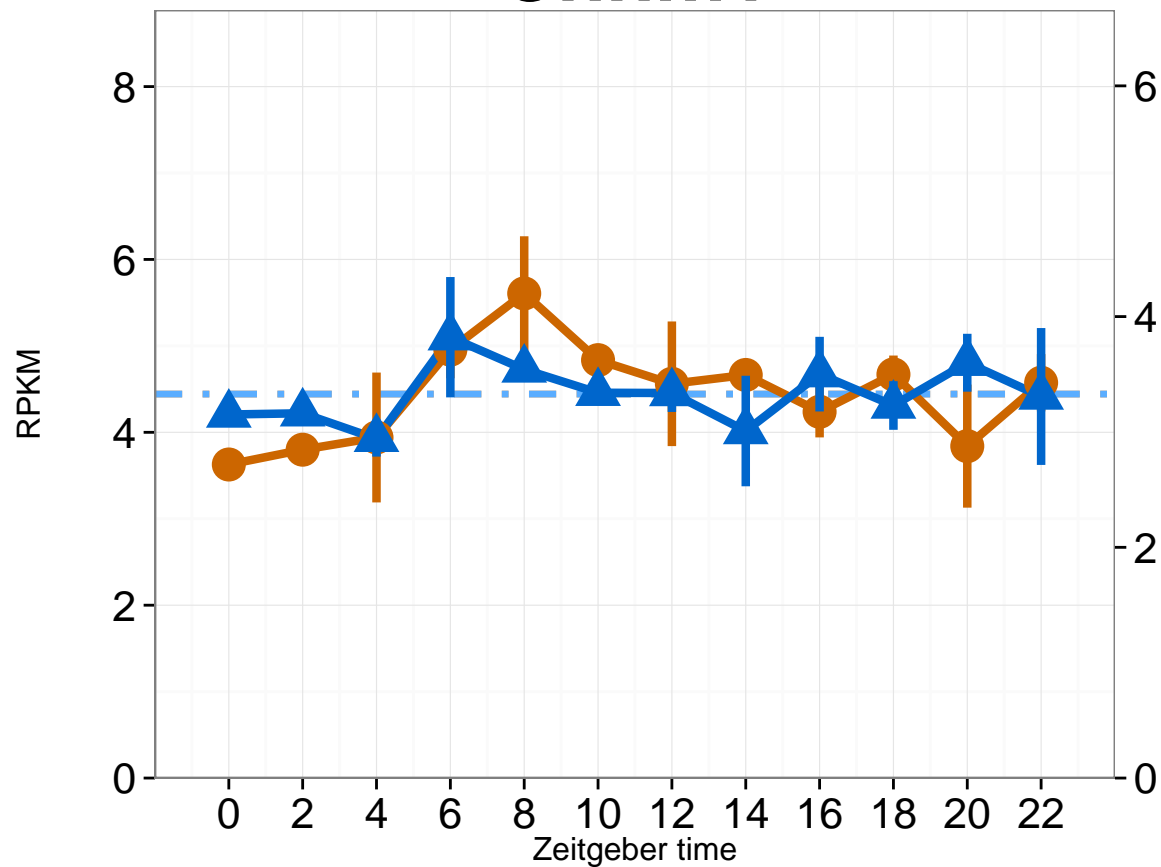

## Cnnm1

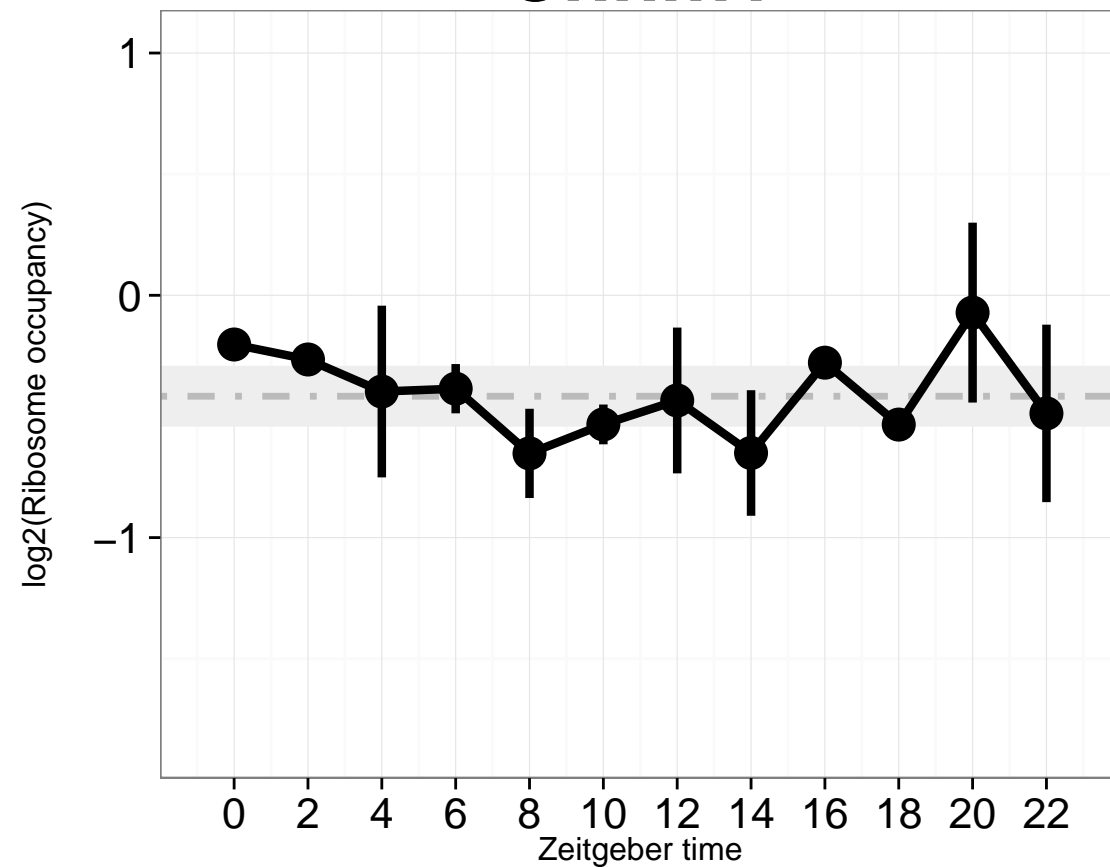

Supplement: Supplementary file 7965 [file 1]

## Slc7a12

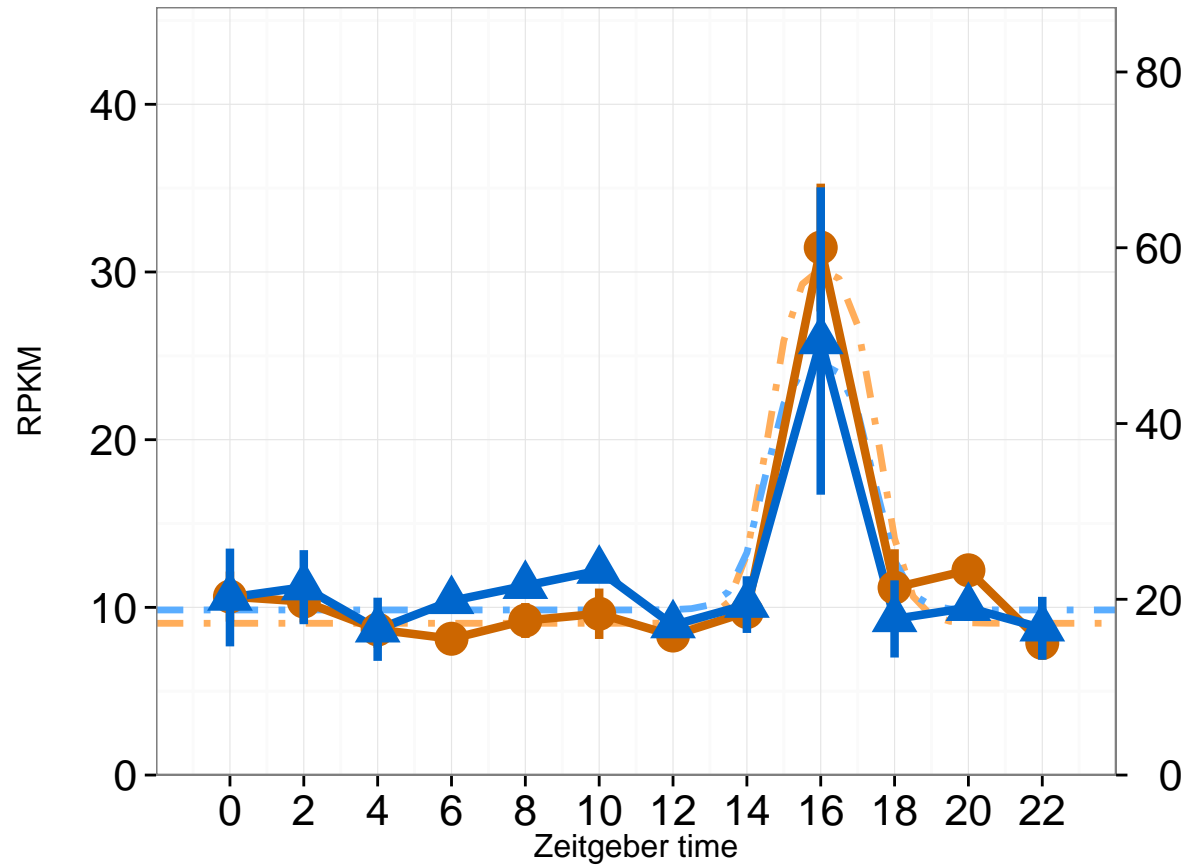

## Slc7a12

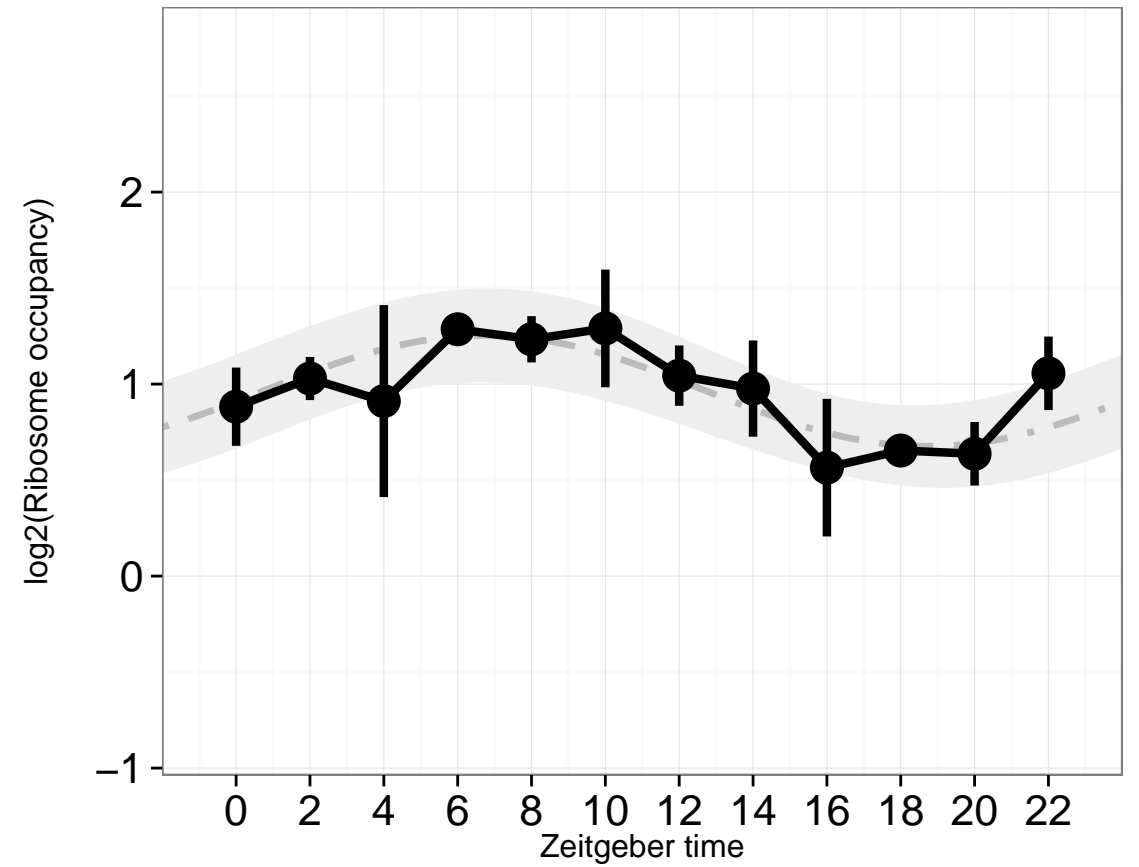

Supplement: Supplementary file 7966 [file 1]

## Wdr31

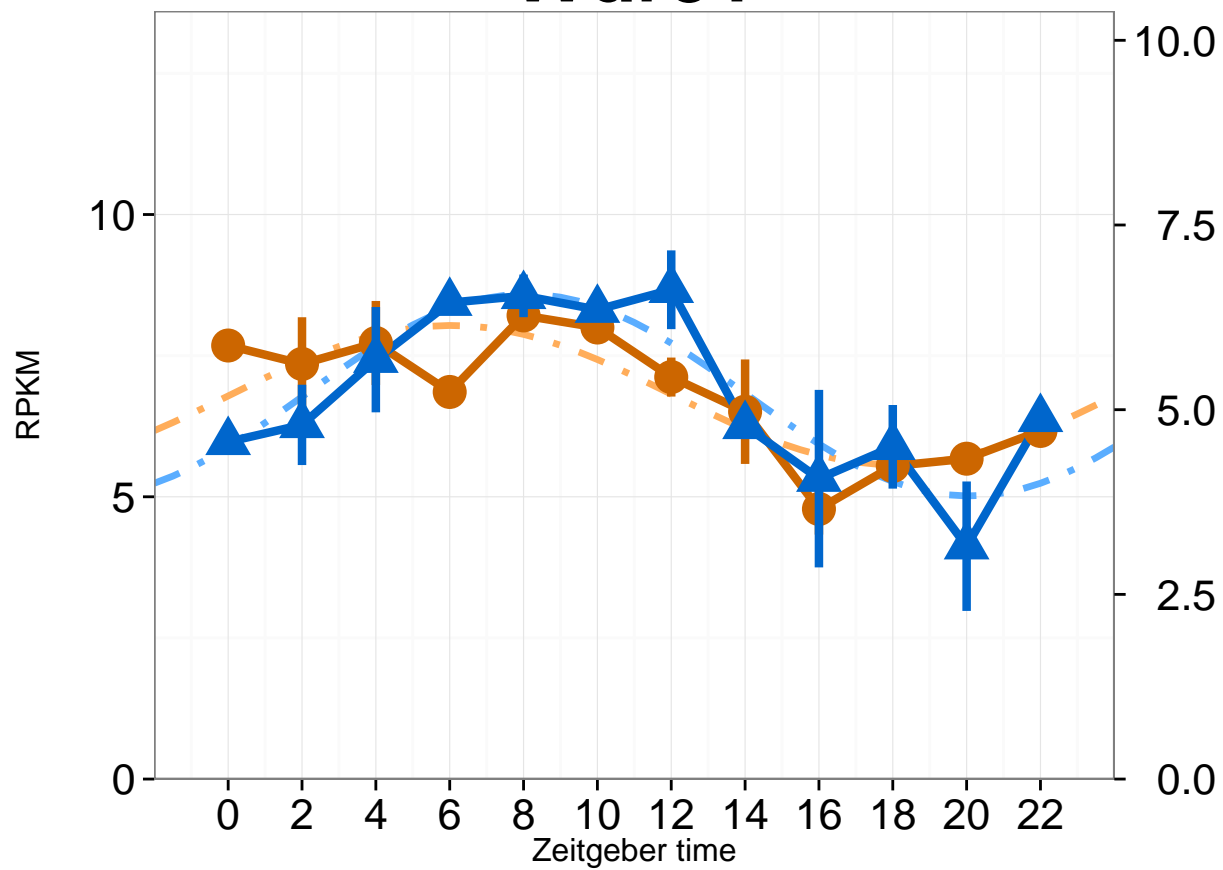

## Wdr31

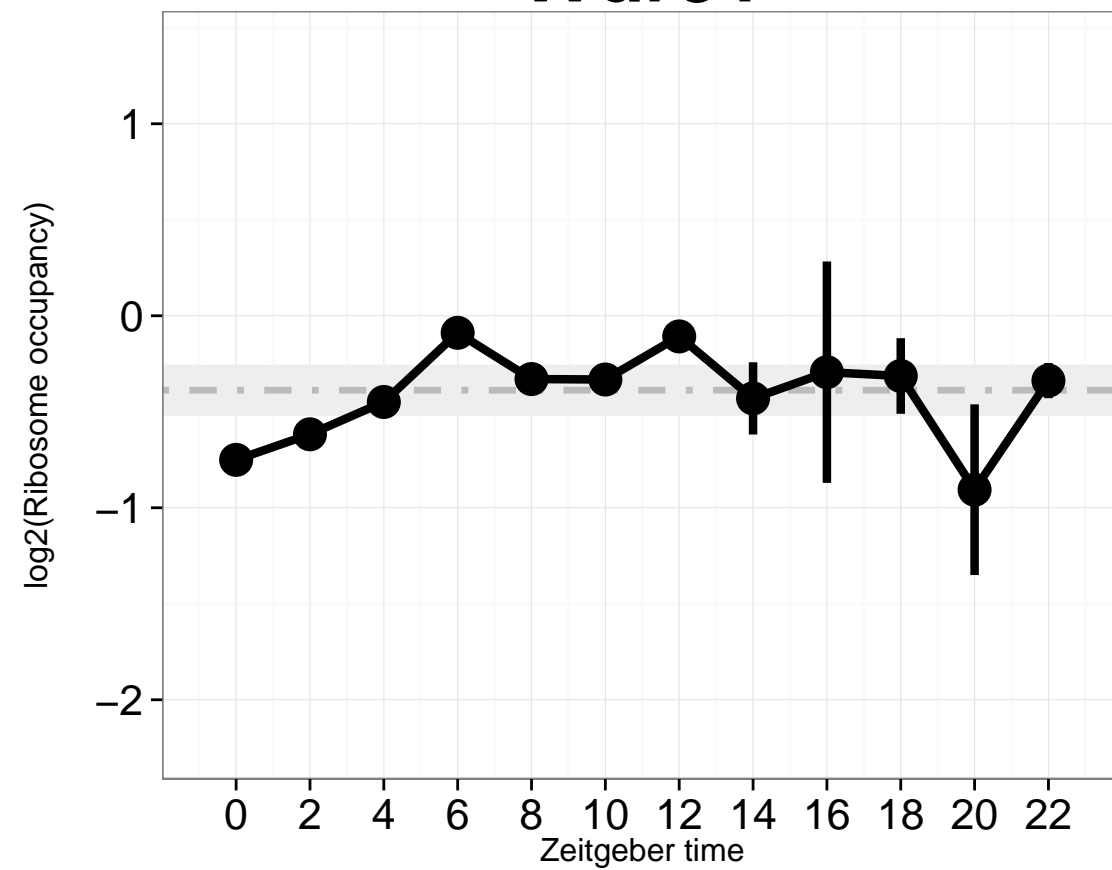

Supplement: Supplementary file 7967 [file 1]

## Rab5a

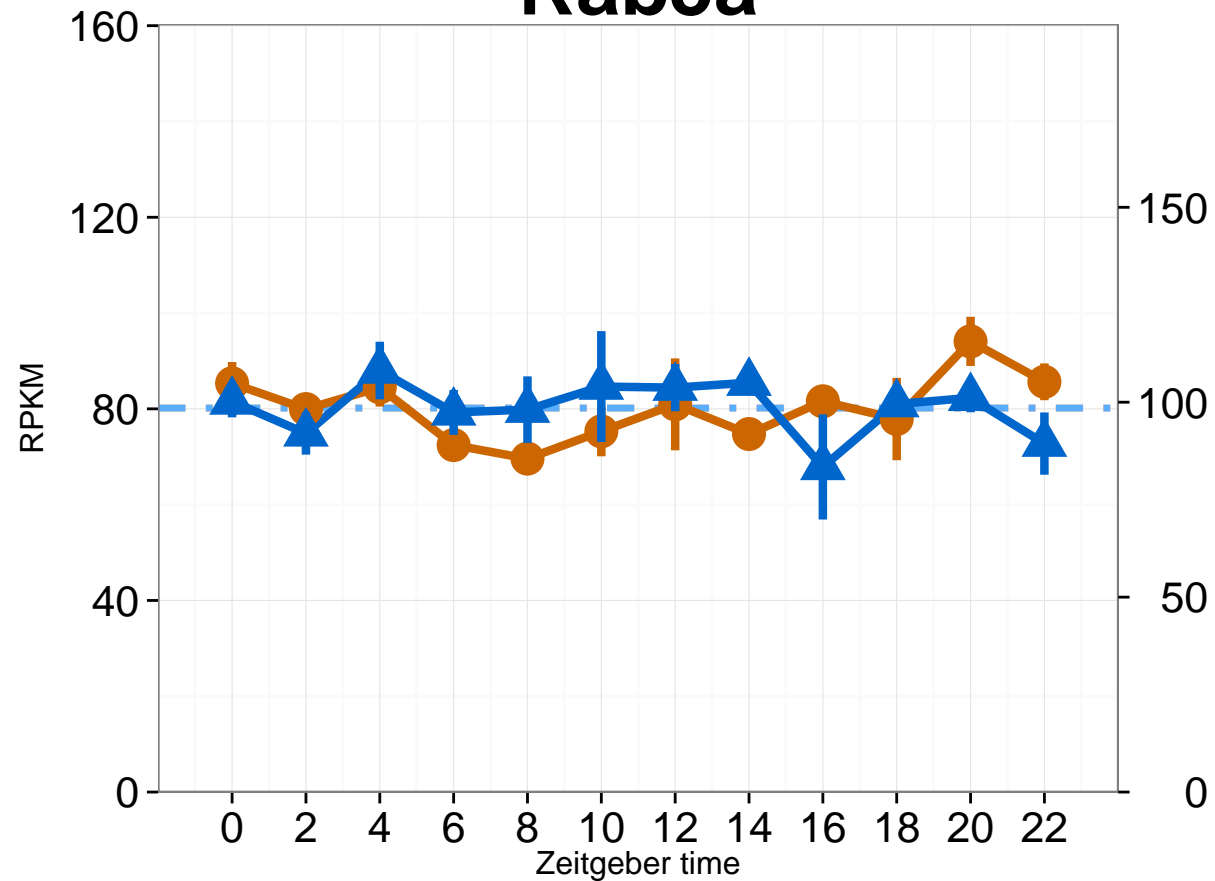

## Rab5a

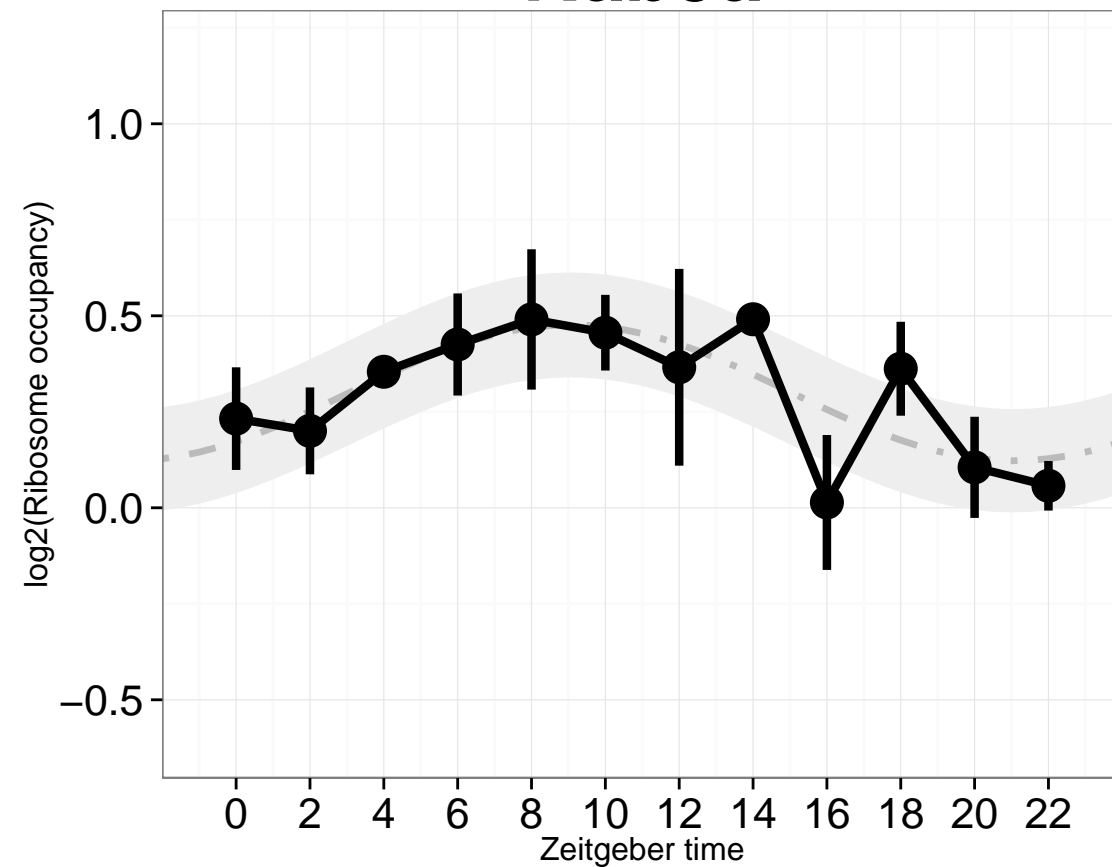

Supplement: Supplementary file 7968 [file 1]

## Wdr77

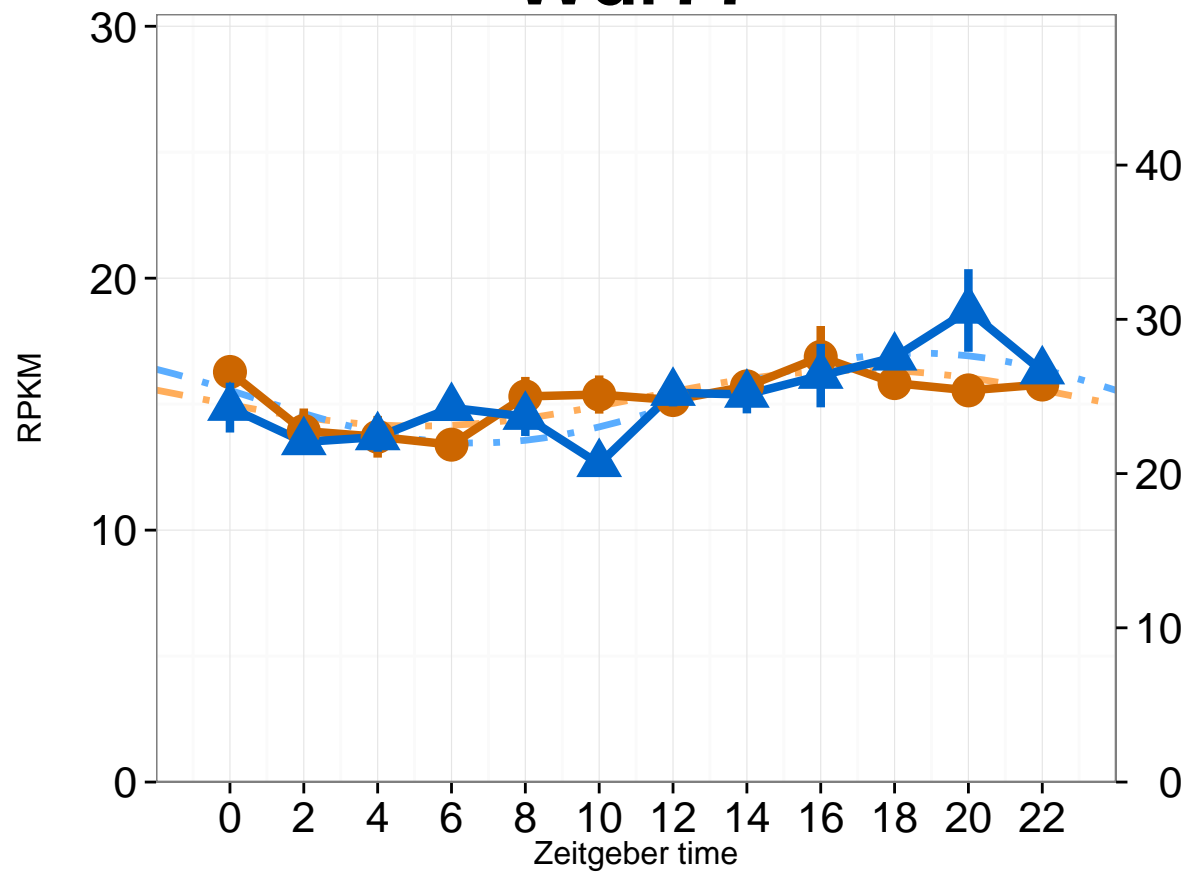

## Wdr77

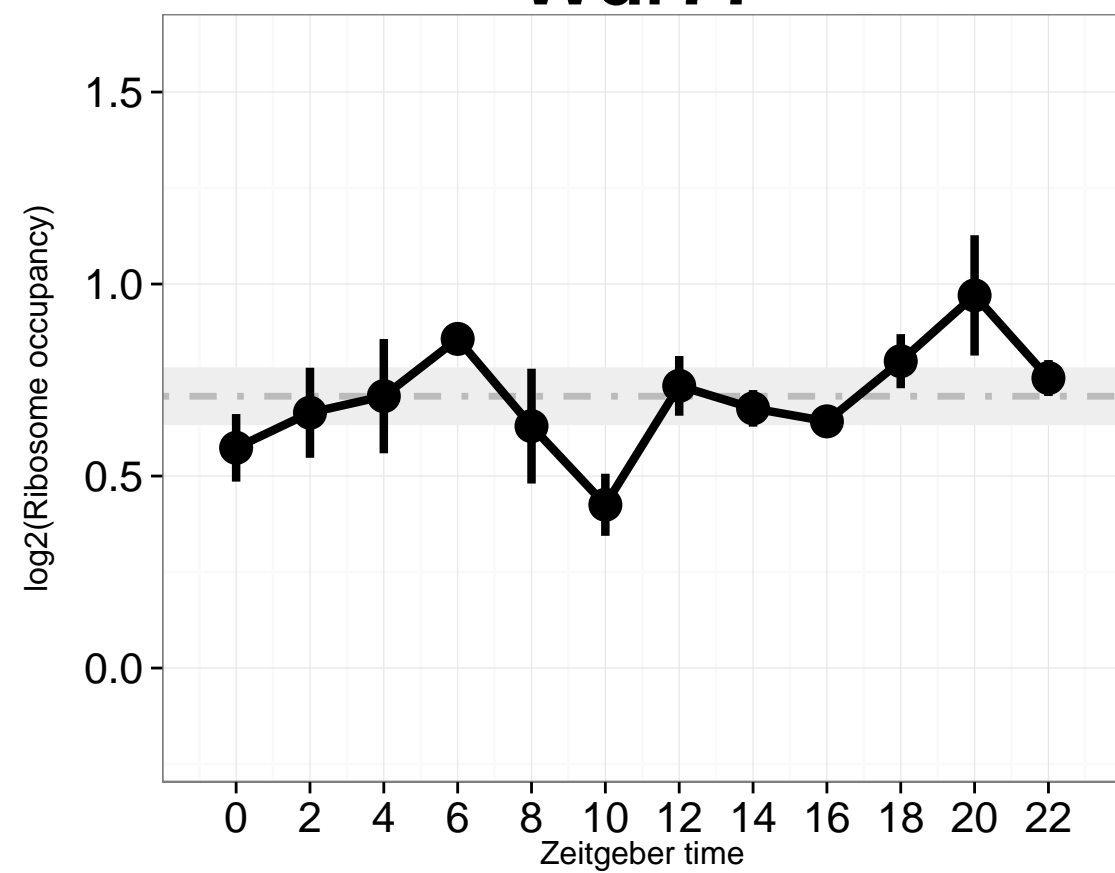

Supplement: Supplementary file 7969 [file 1]

## Immp2l

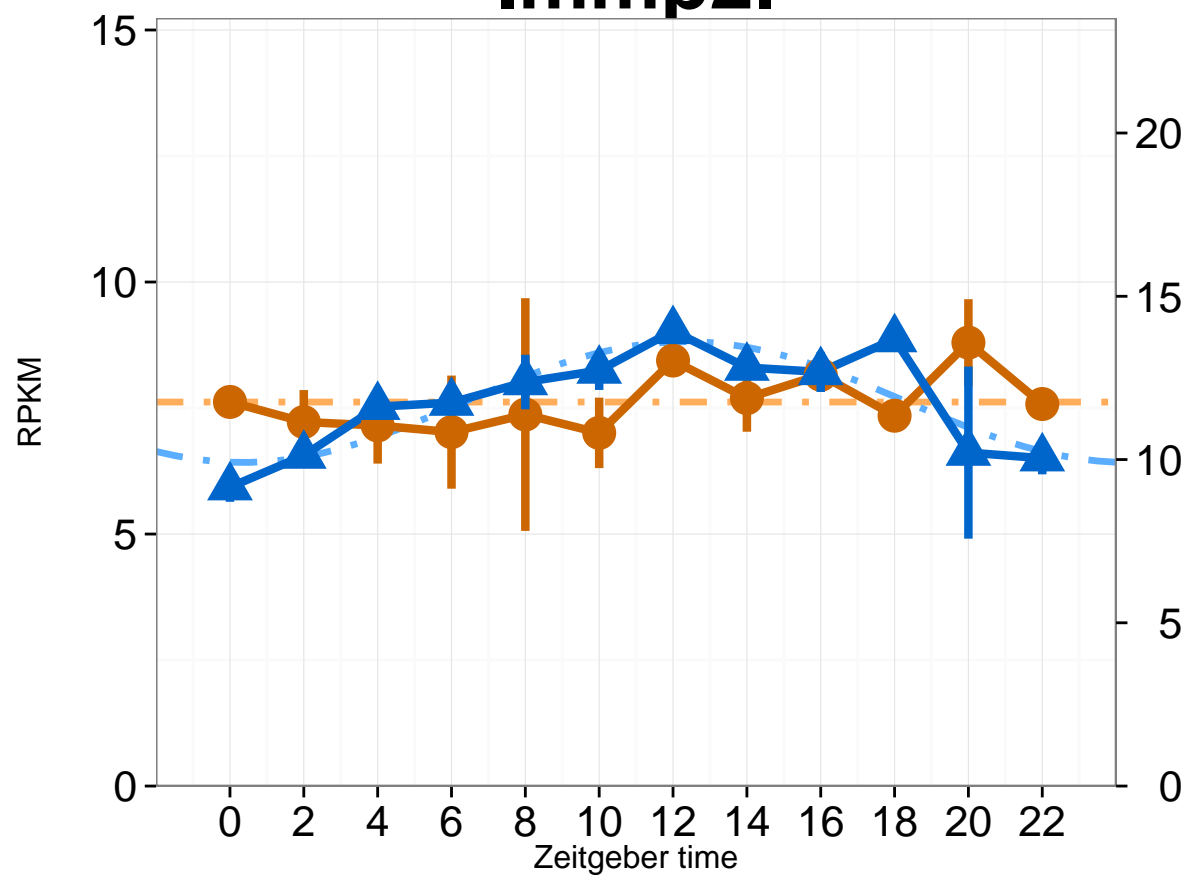

## Immp2l

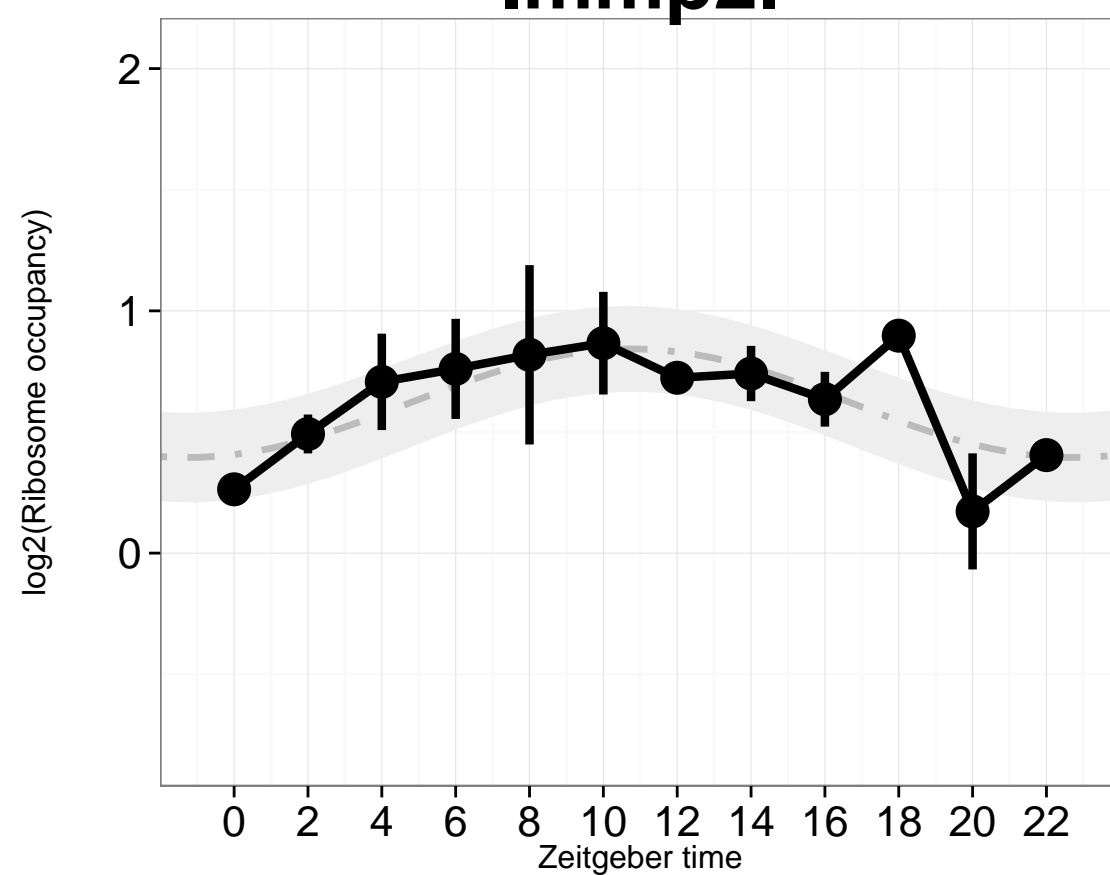

Supplement: Supplementary file 7970 [file 1]

# Zfp873

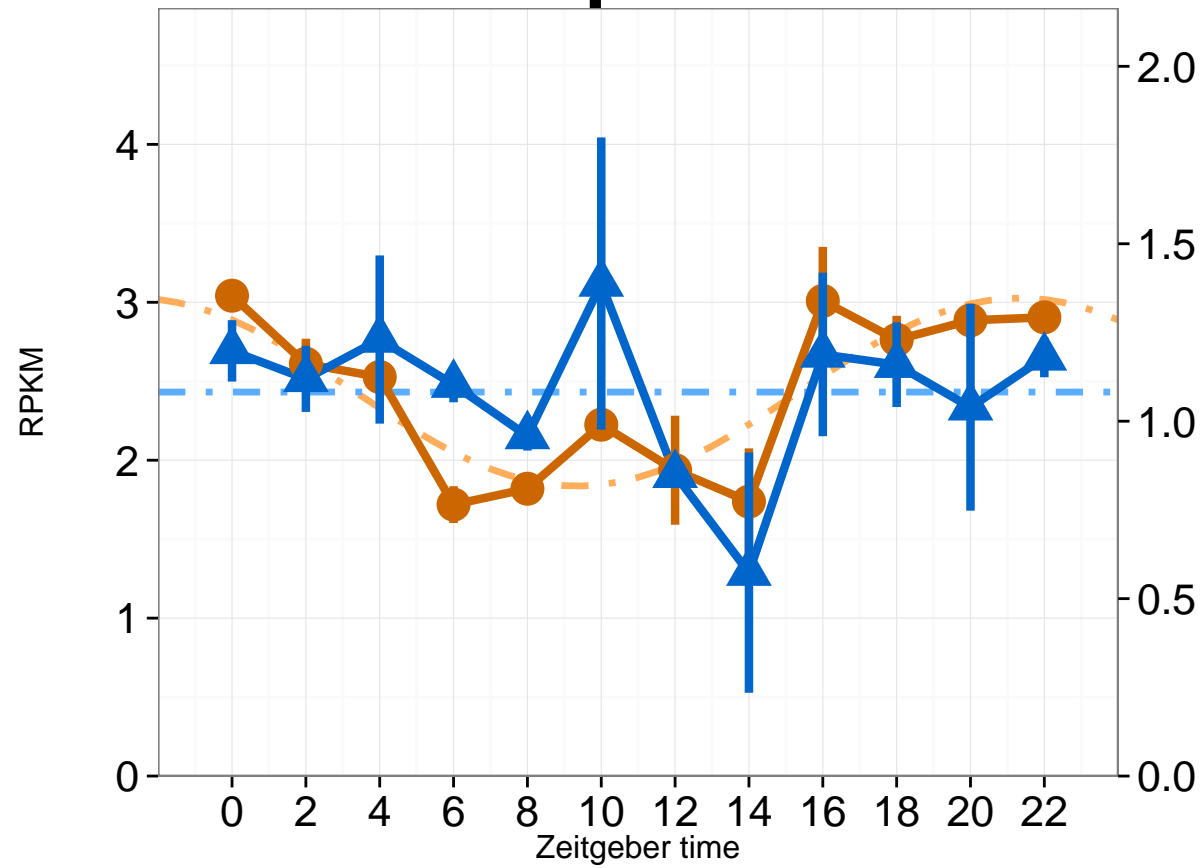

# Zfp873

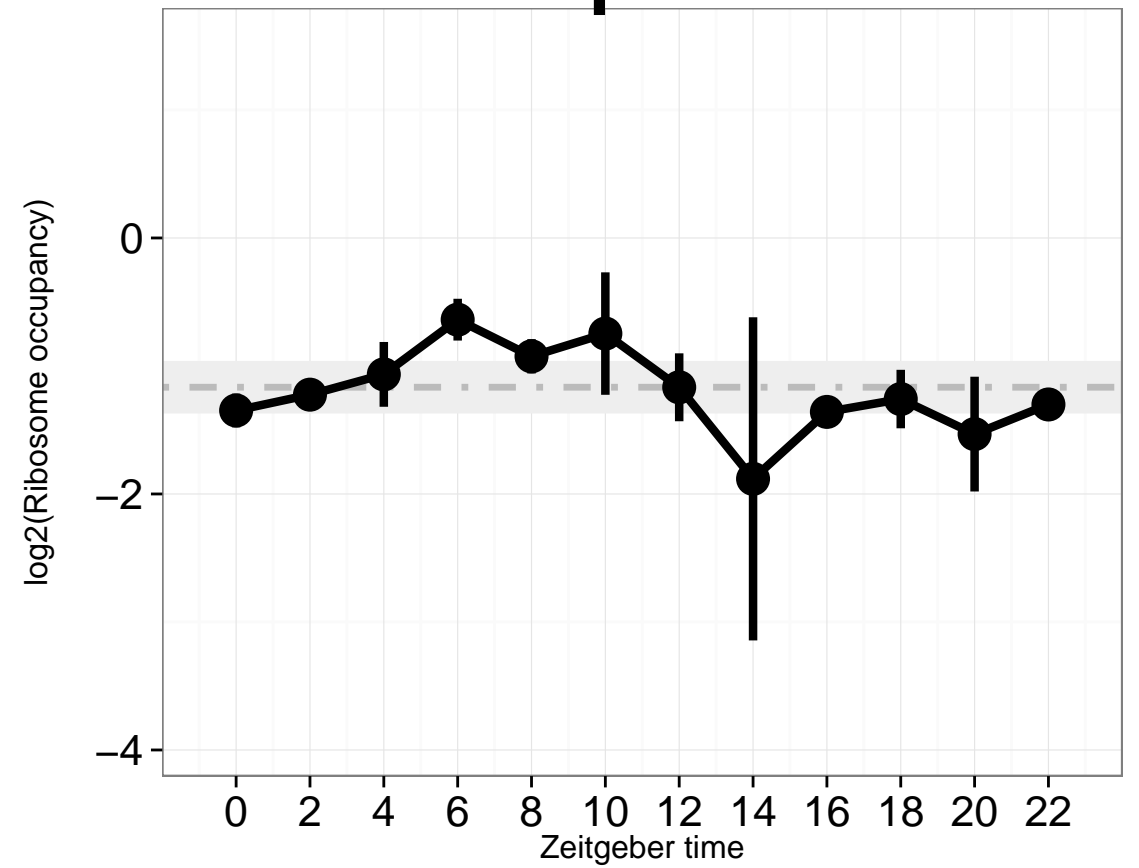

Supplement: Supplementary file 7971 [file 1]

## BC056474

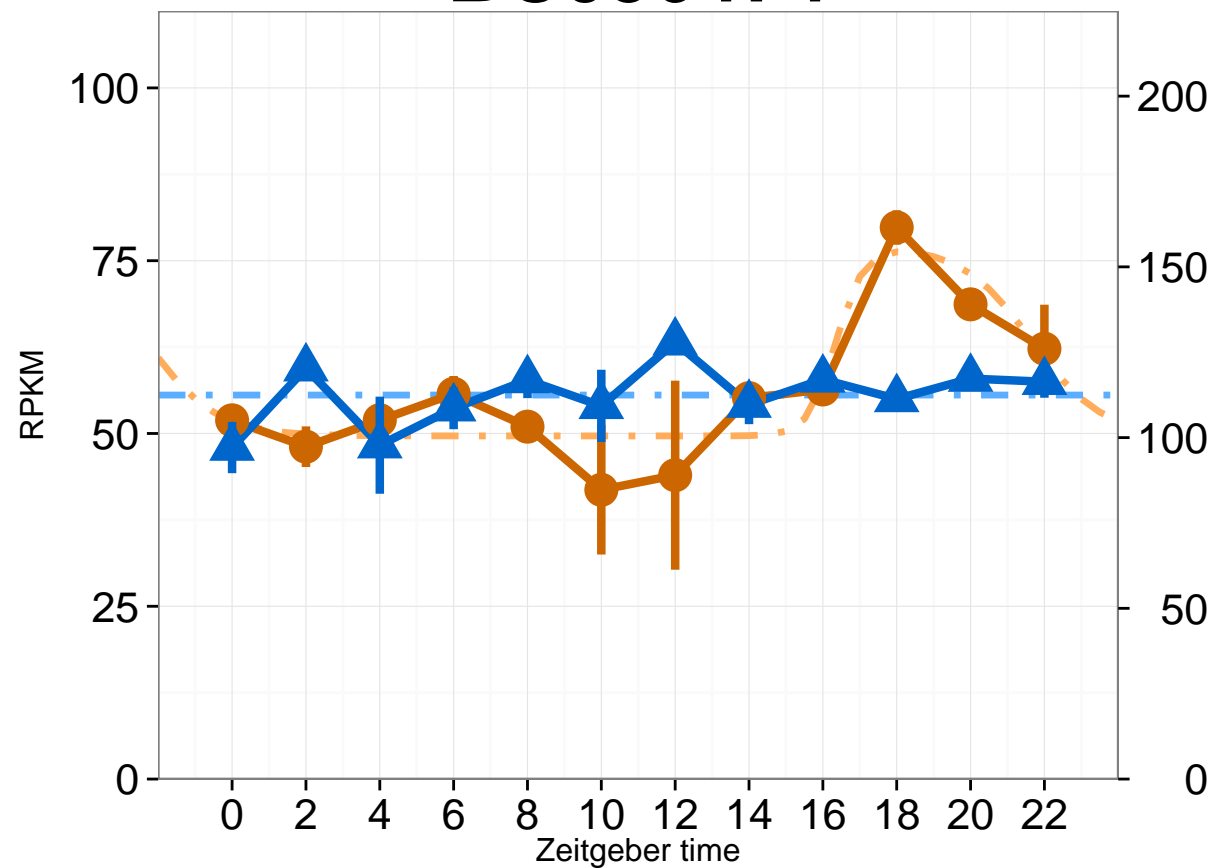

## BC056474

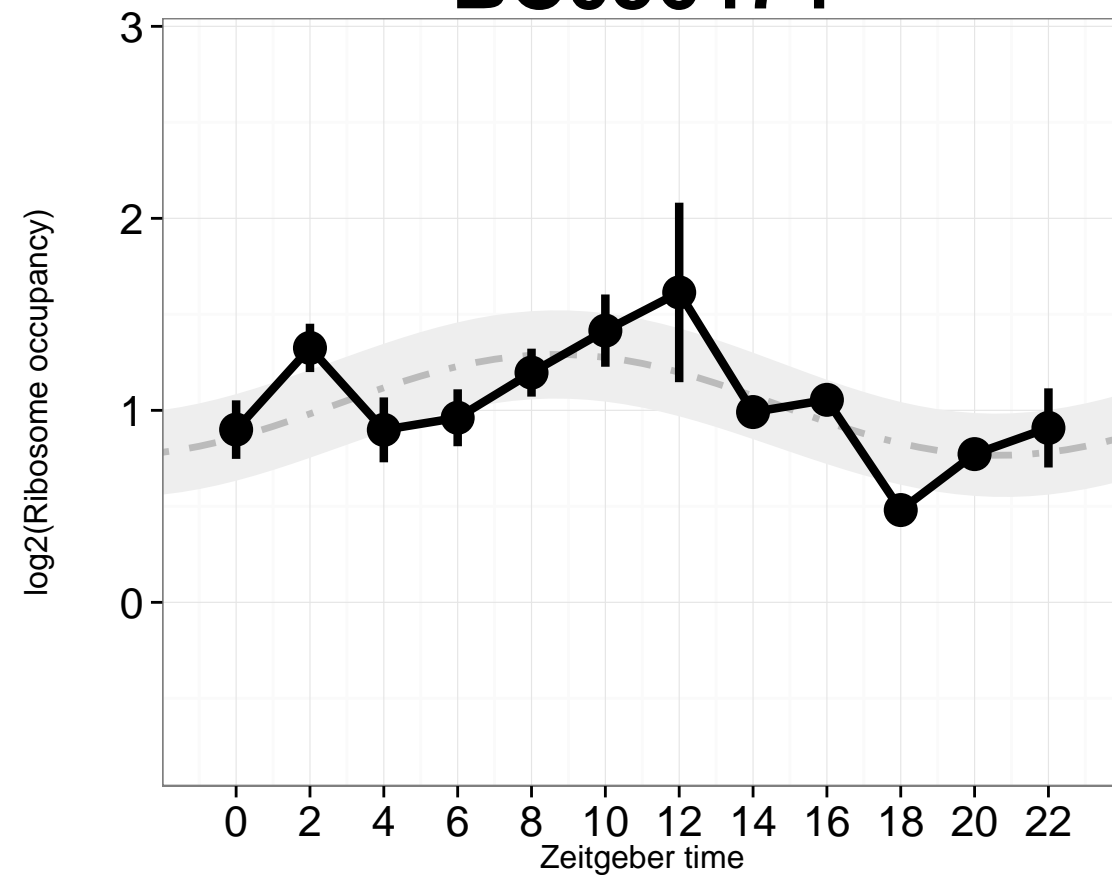

Supplement: Supplementary file 7972 [file 1]

# Cyp4f17

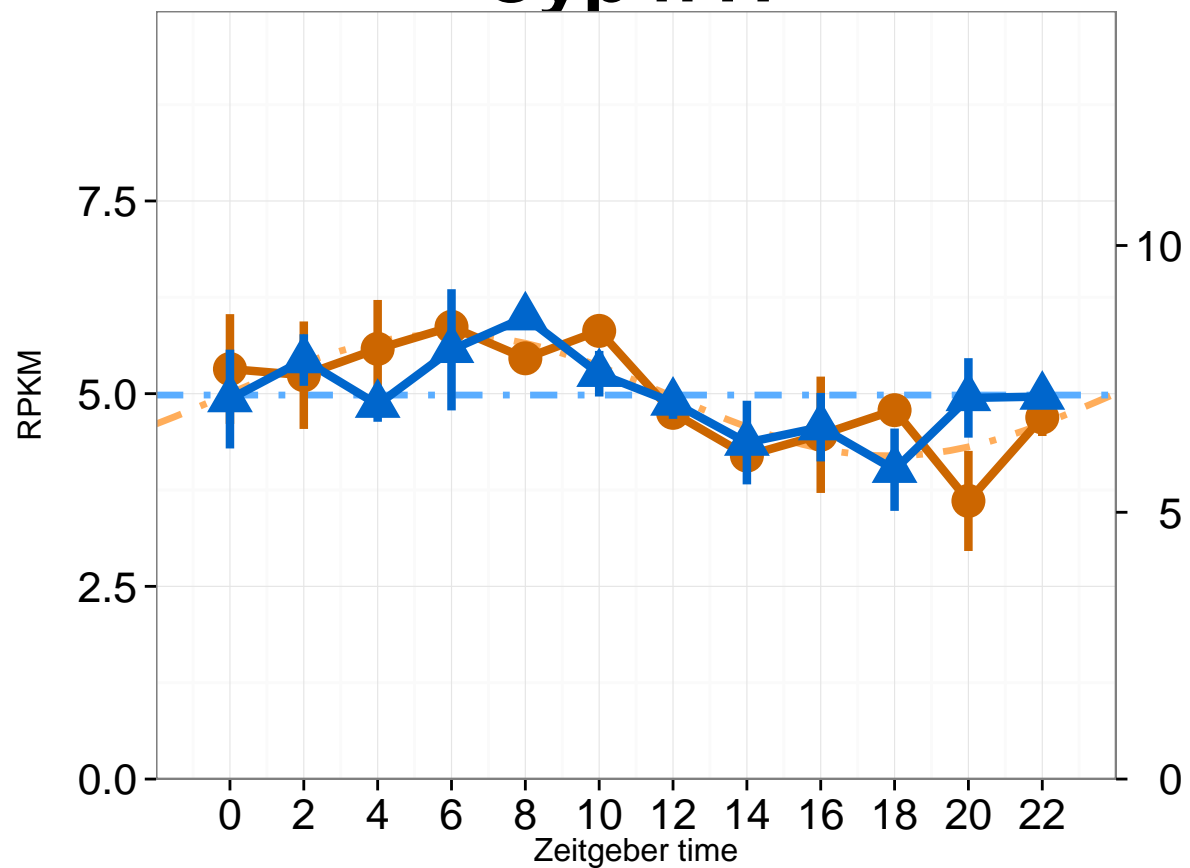

# Cyp4f17

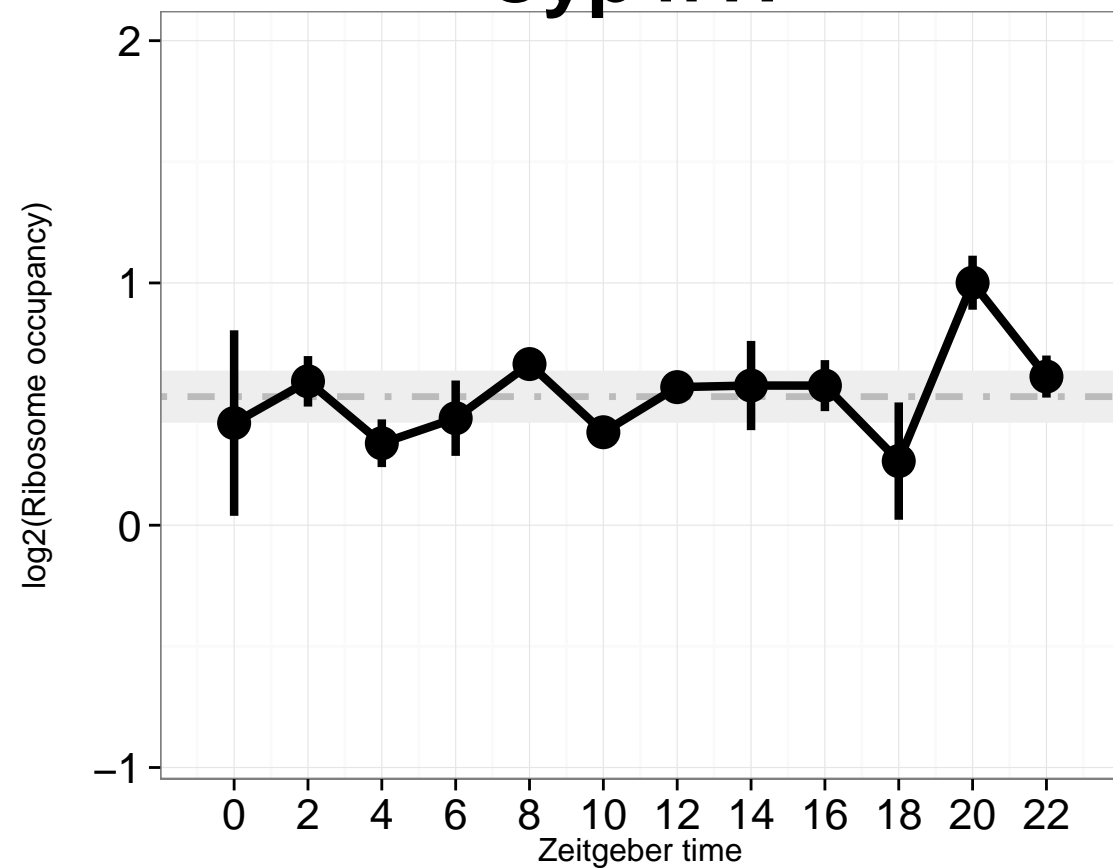

Supplement: Supplementary file 7973 [file 1]

## Ddhd1

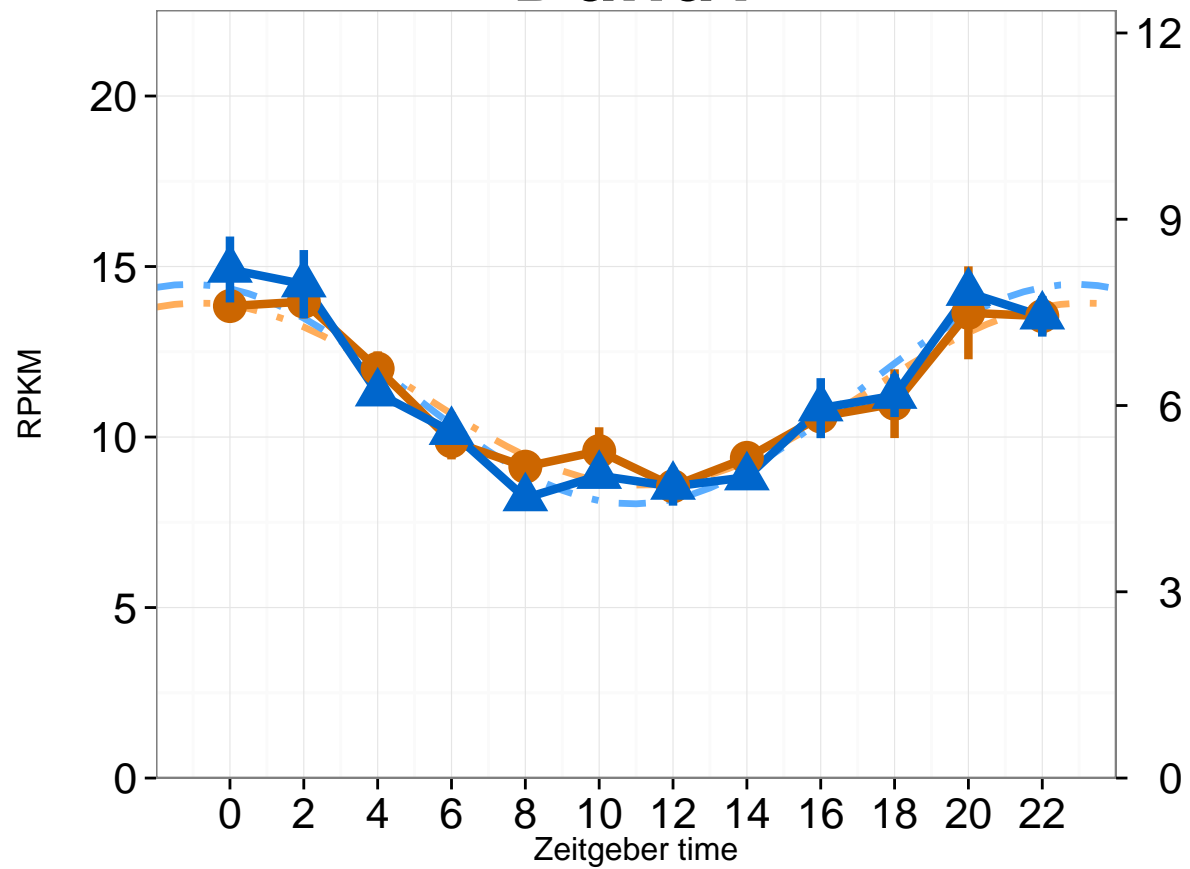

## Ddhd1

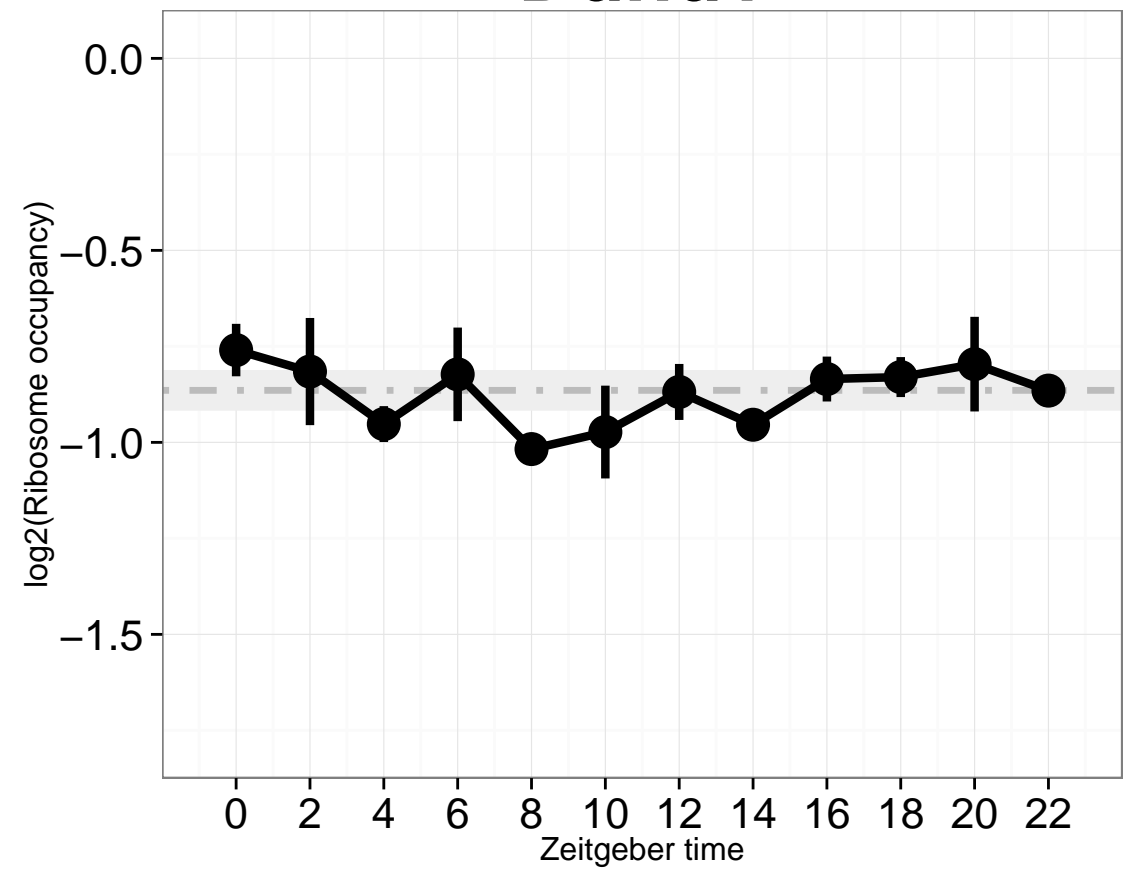

Supplement: Supplementary file 7974 [file 1]

# Fam20b

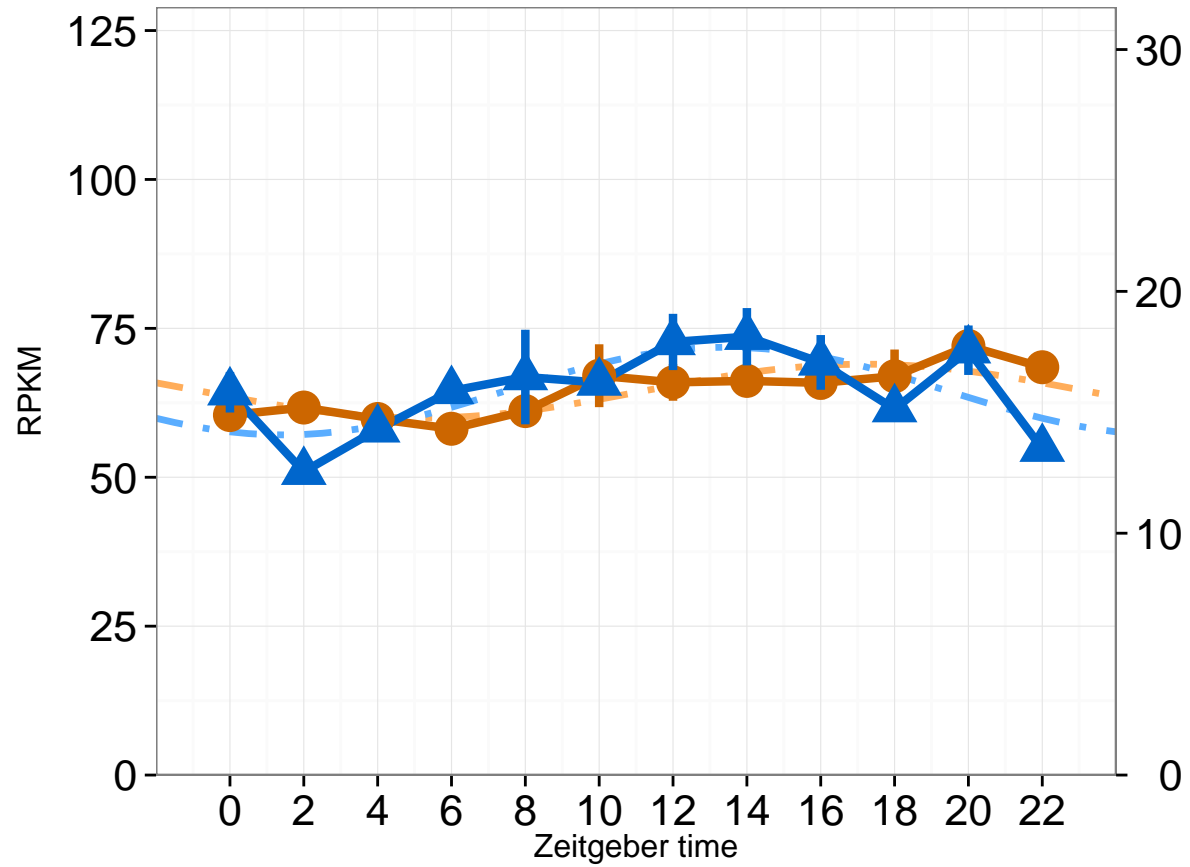

# Fam20b

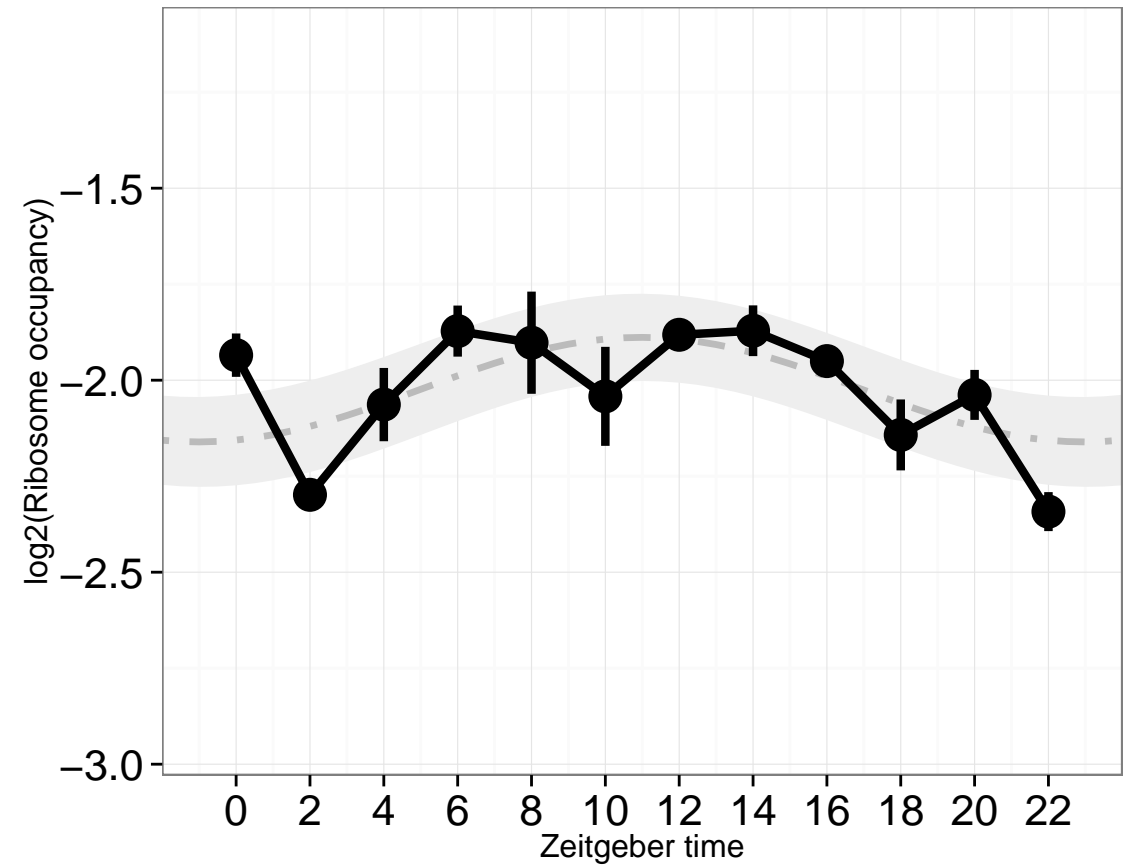

Supplement: Supplementary file 7975 [file 1]

# Gsdmc3

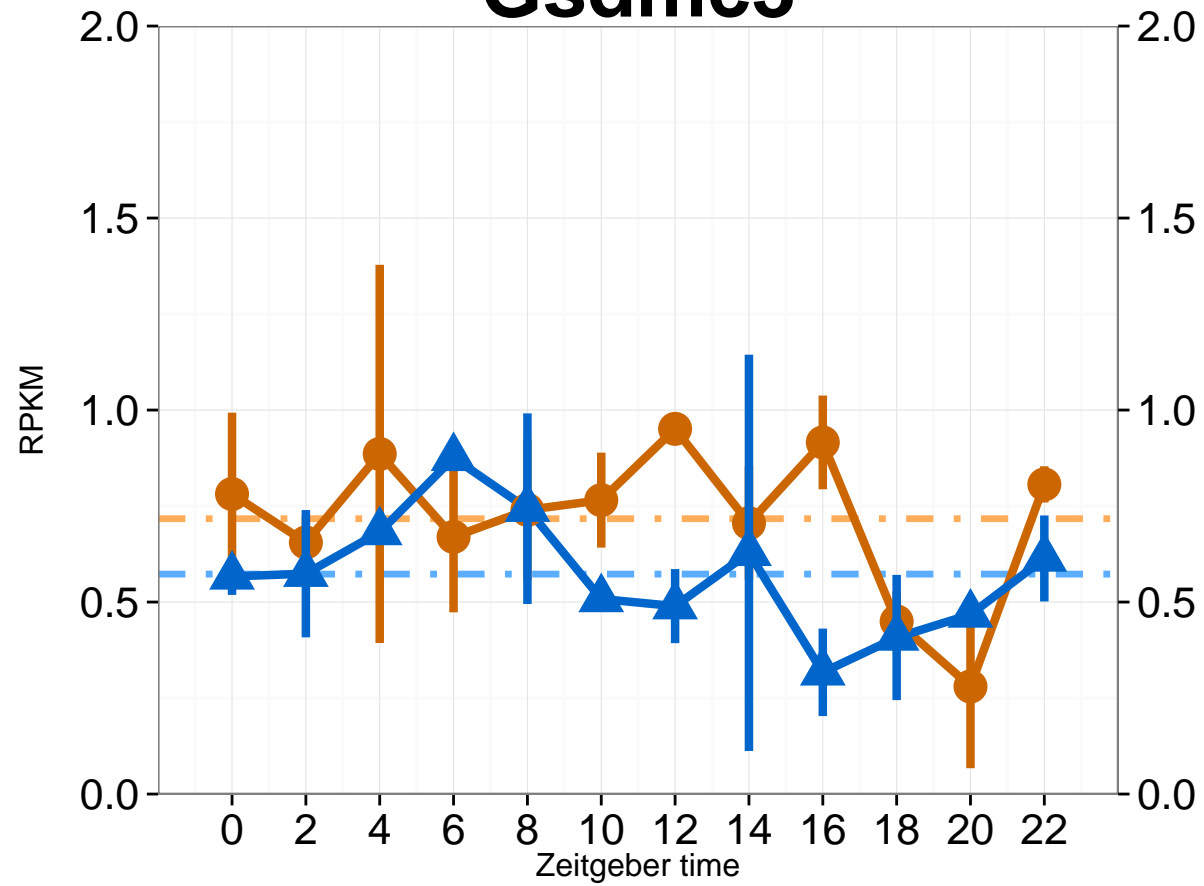

# Gsdmc3

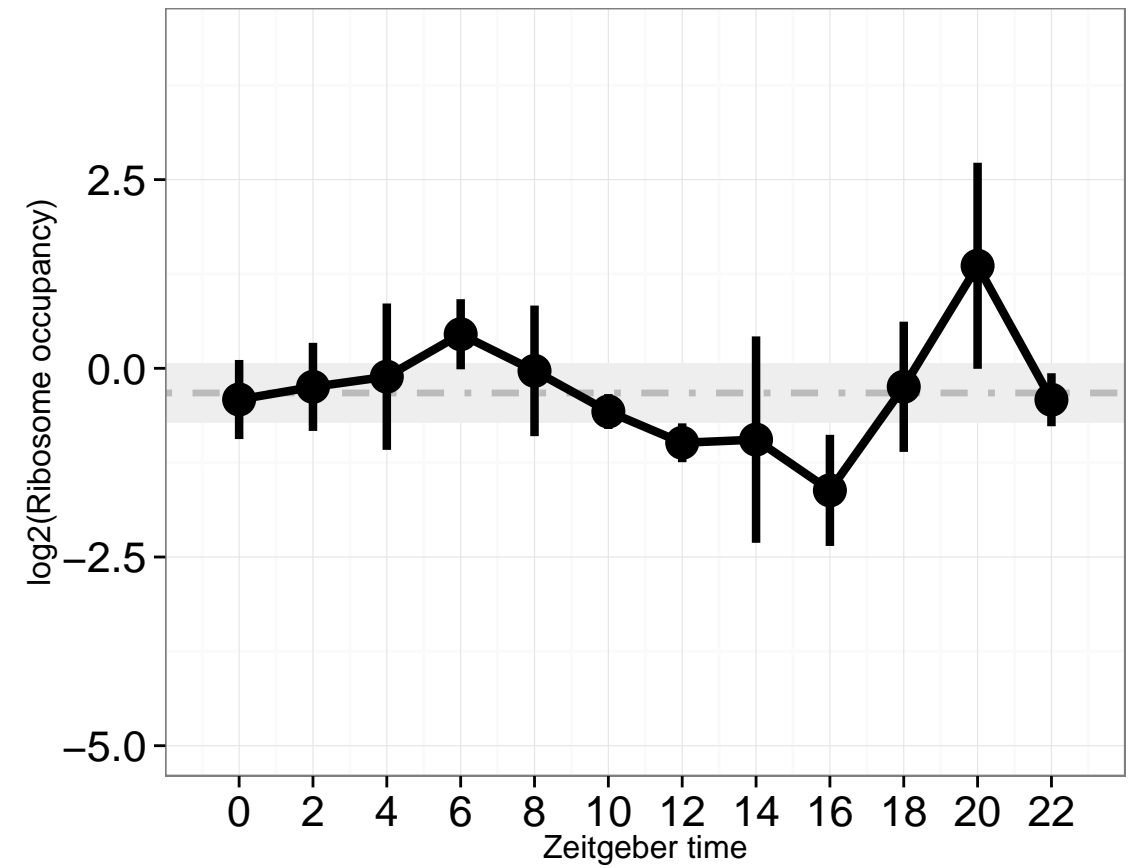

Supplement: Supplementary file 7976 [file 1]

**Oit1 TR**

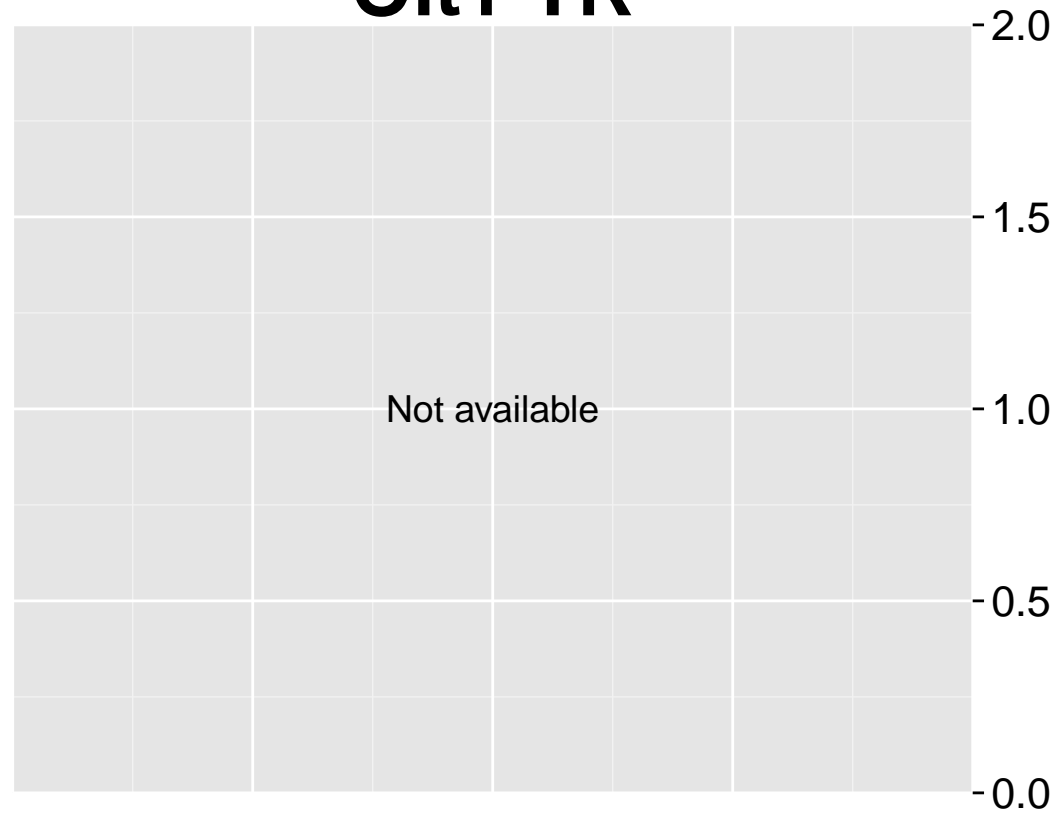

**Oit1 log2(Ribosome occupancy)**

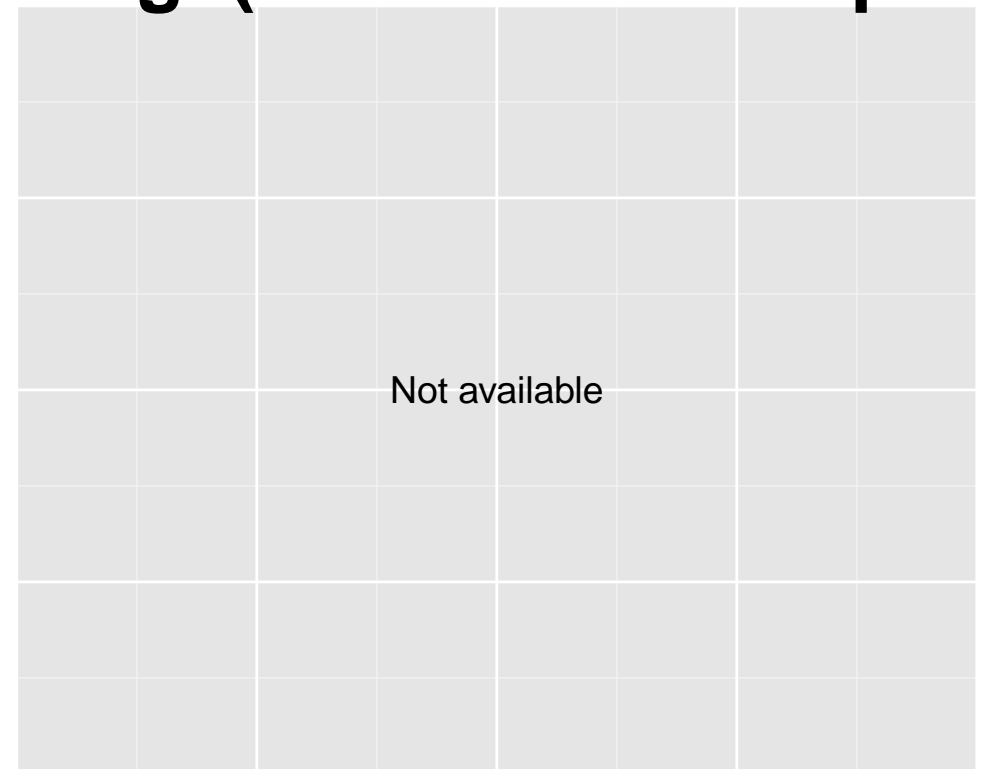

Supplement: Supplementary file 7977 [file 1]

# Nmrk1

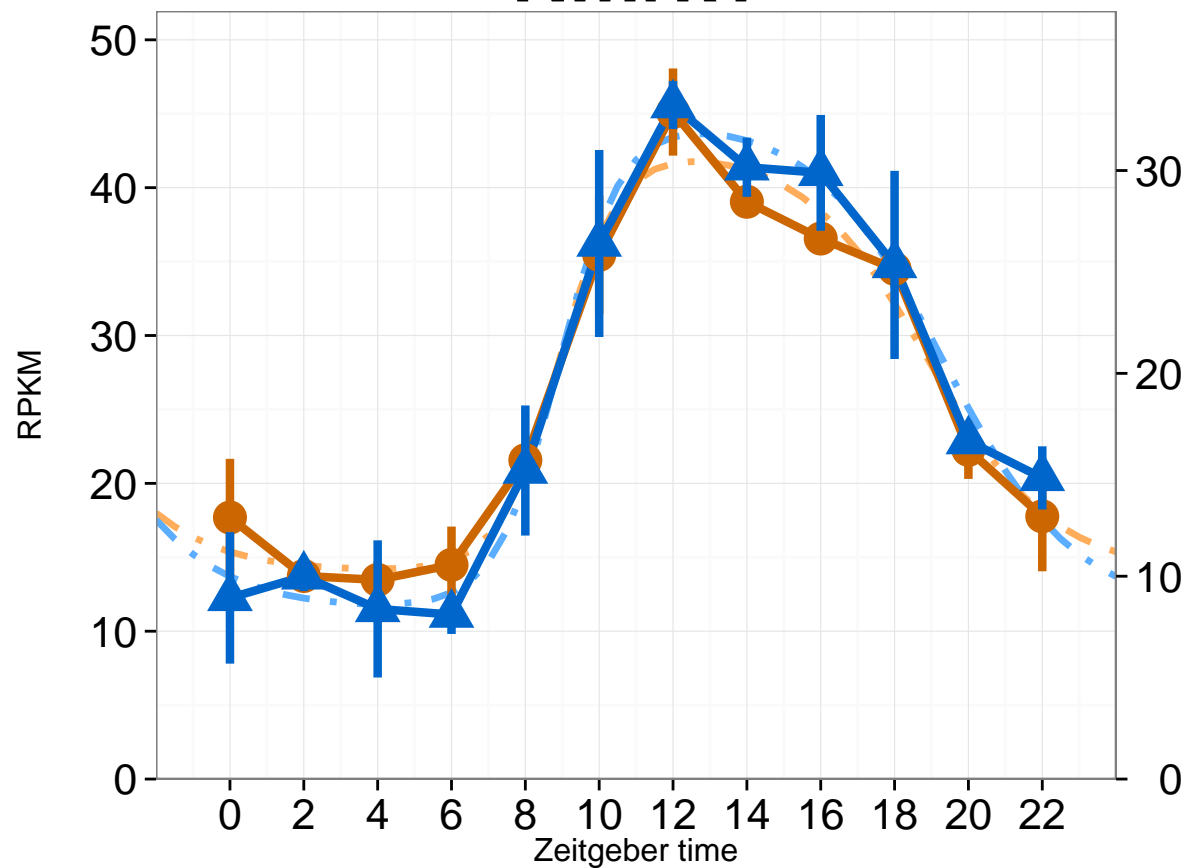

# Nmrk1

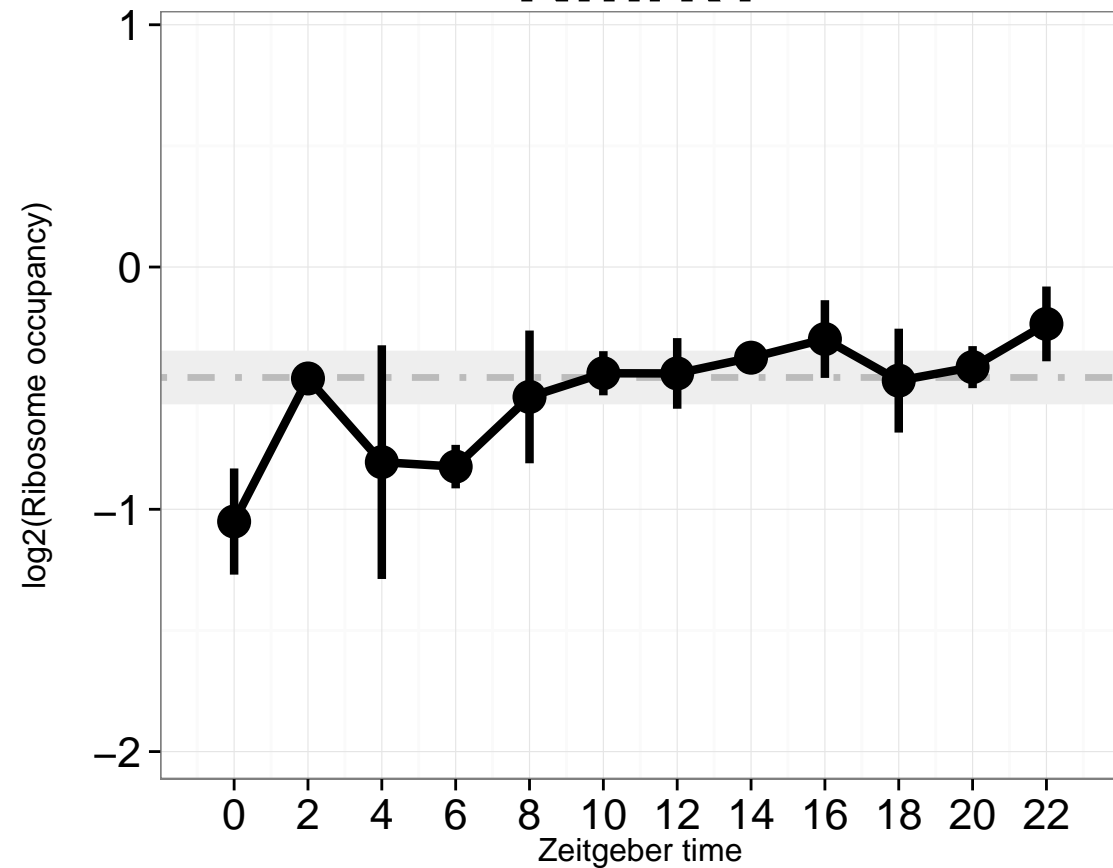

Supplement: Supplementary file 7978 [file 1]

# BC031181

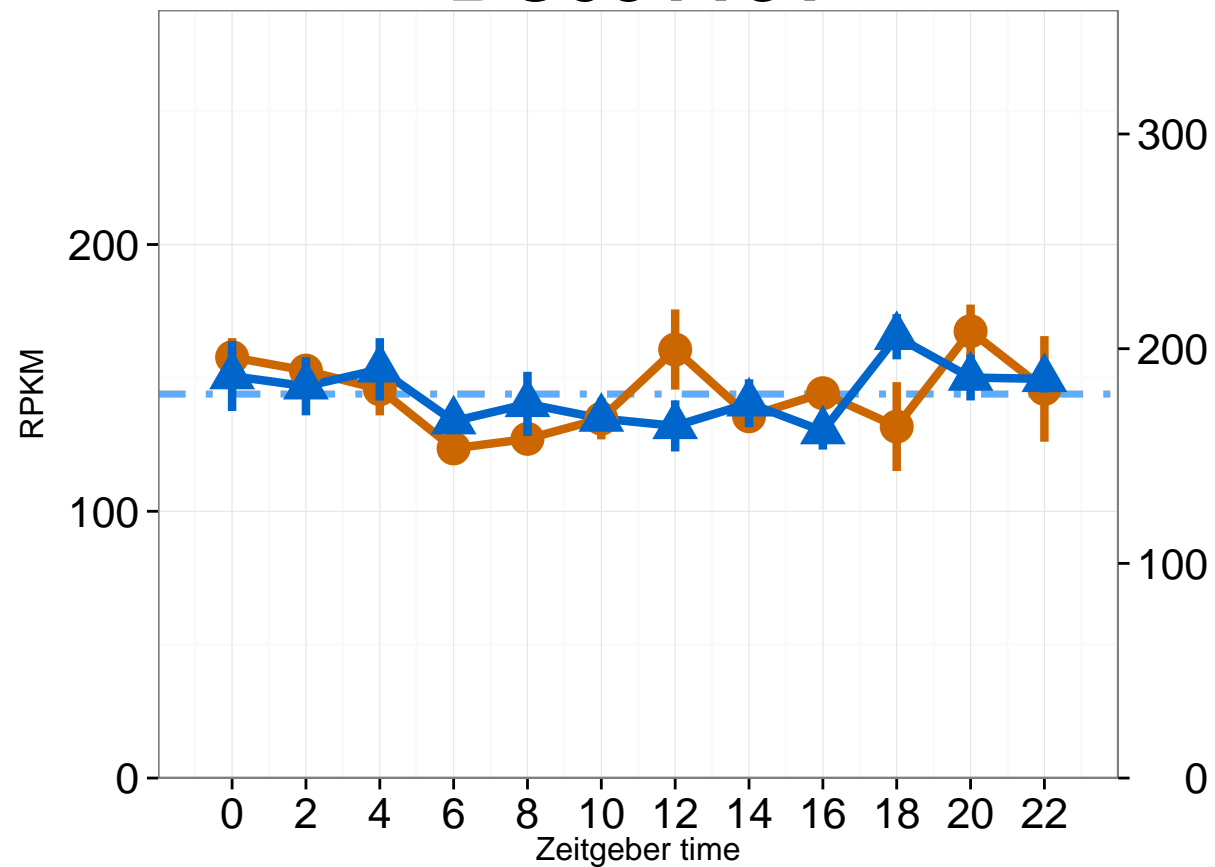

# BC031181

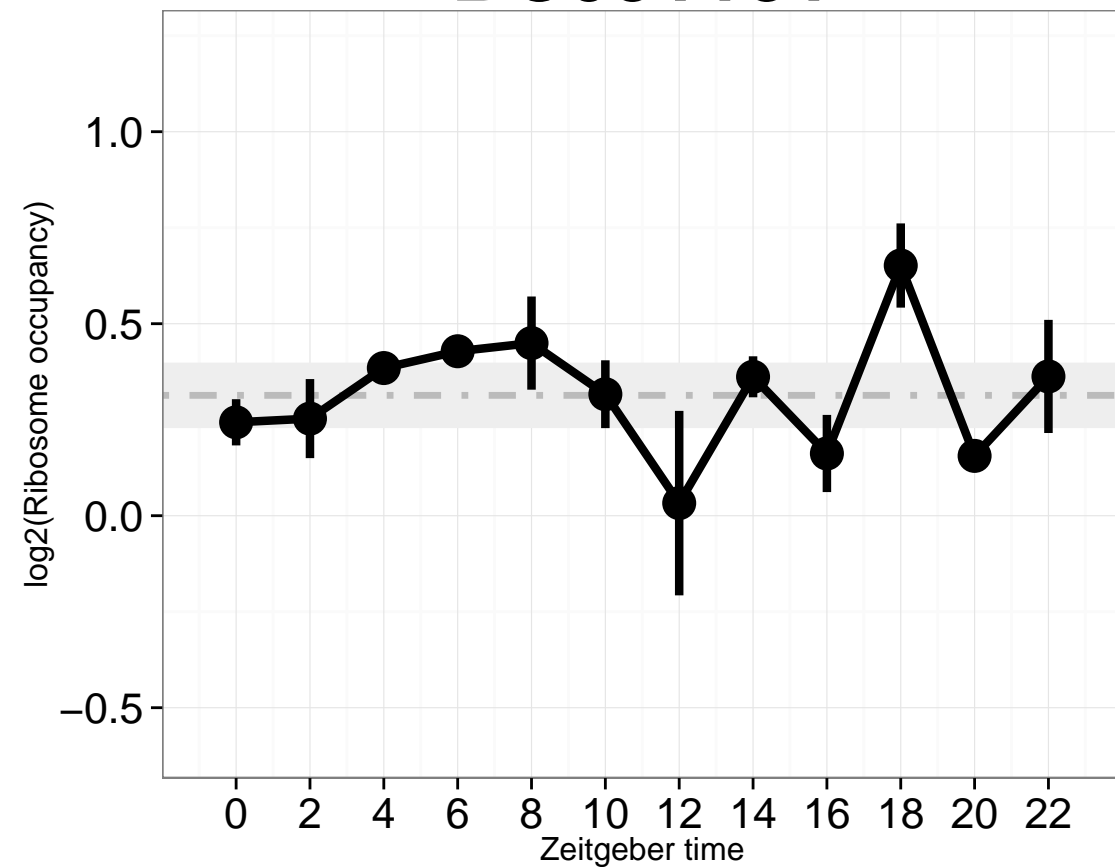

Supplement: Supplementary file 7979 [file 1]

# Zfp512

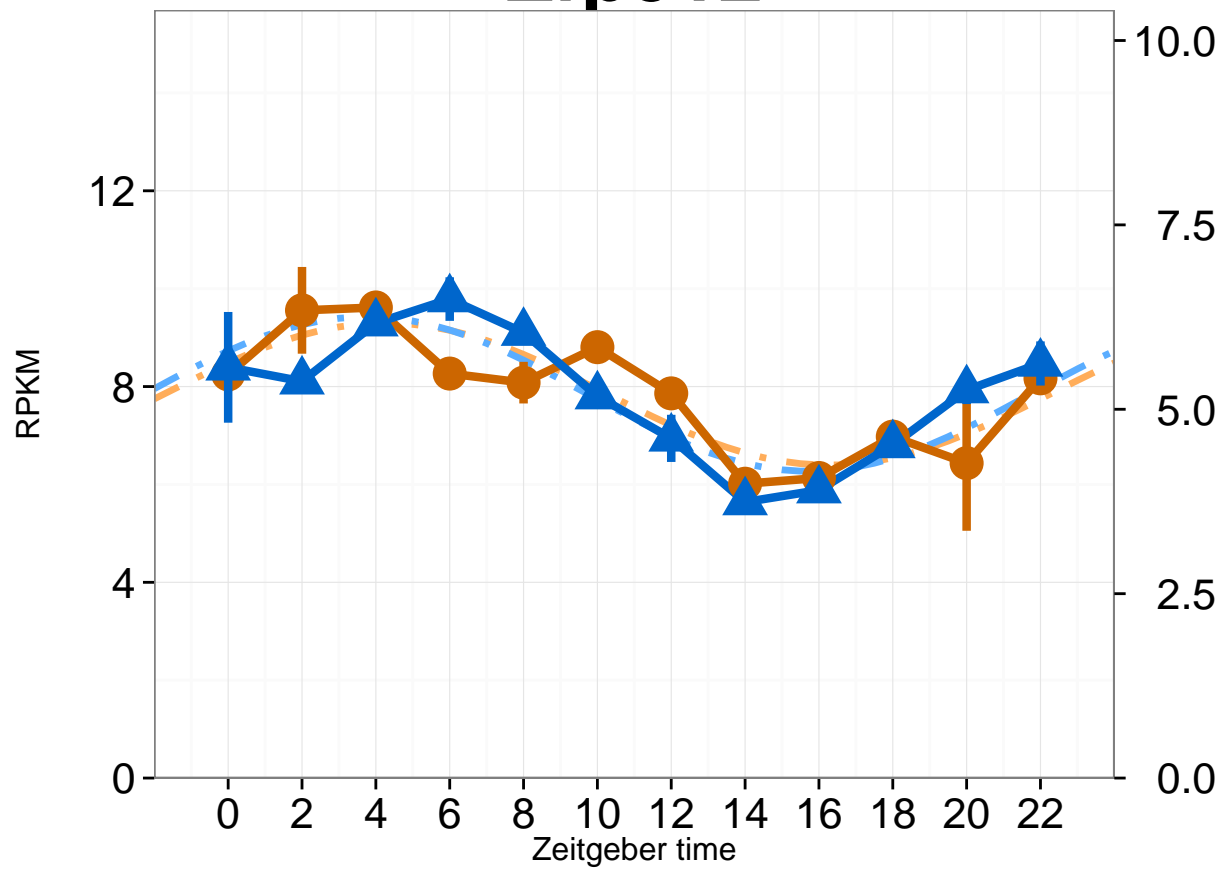

# Zfp512

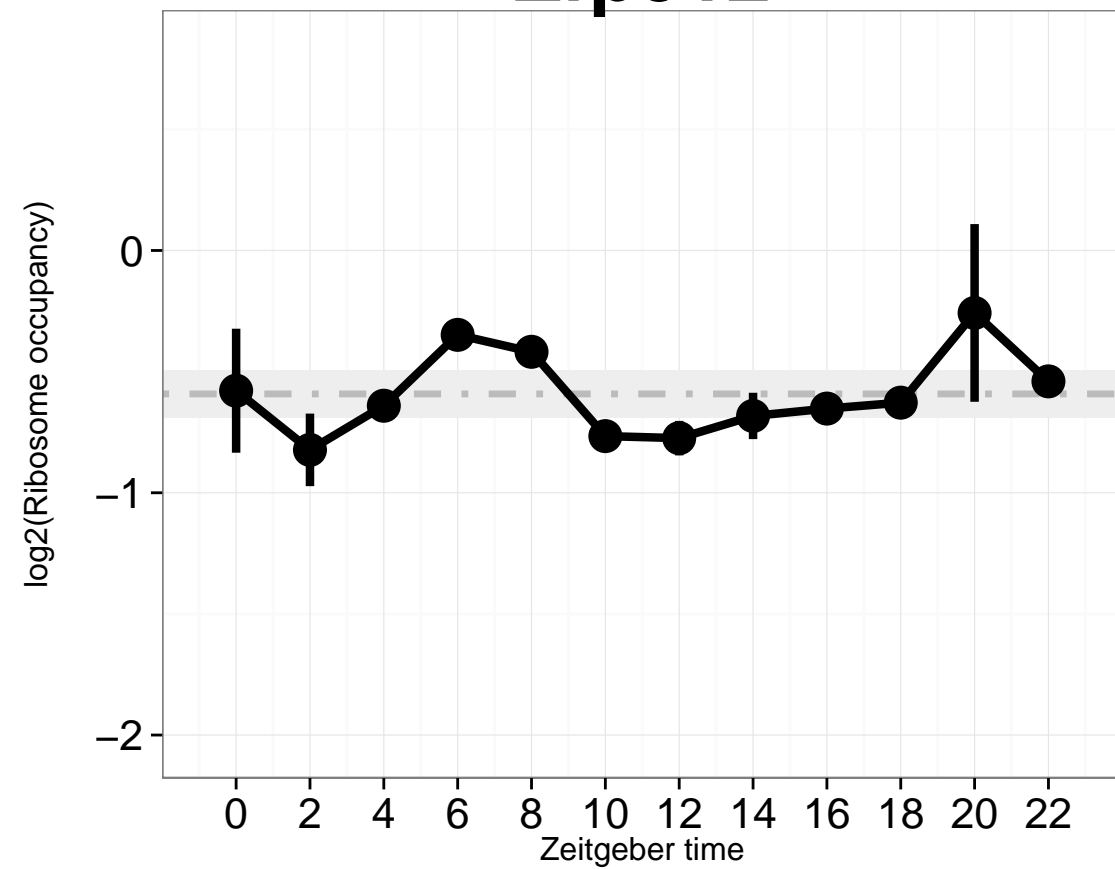

Supplement: Supplementary file 7981 [file 1]

# Rmnd1

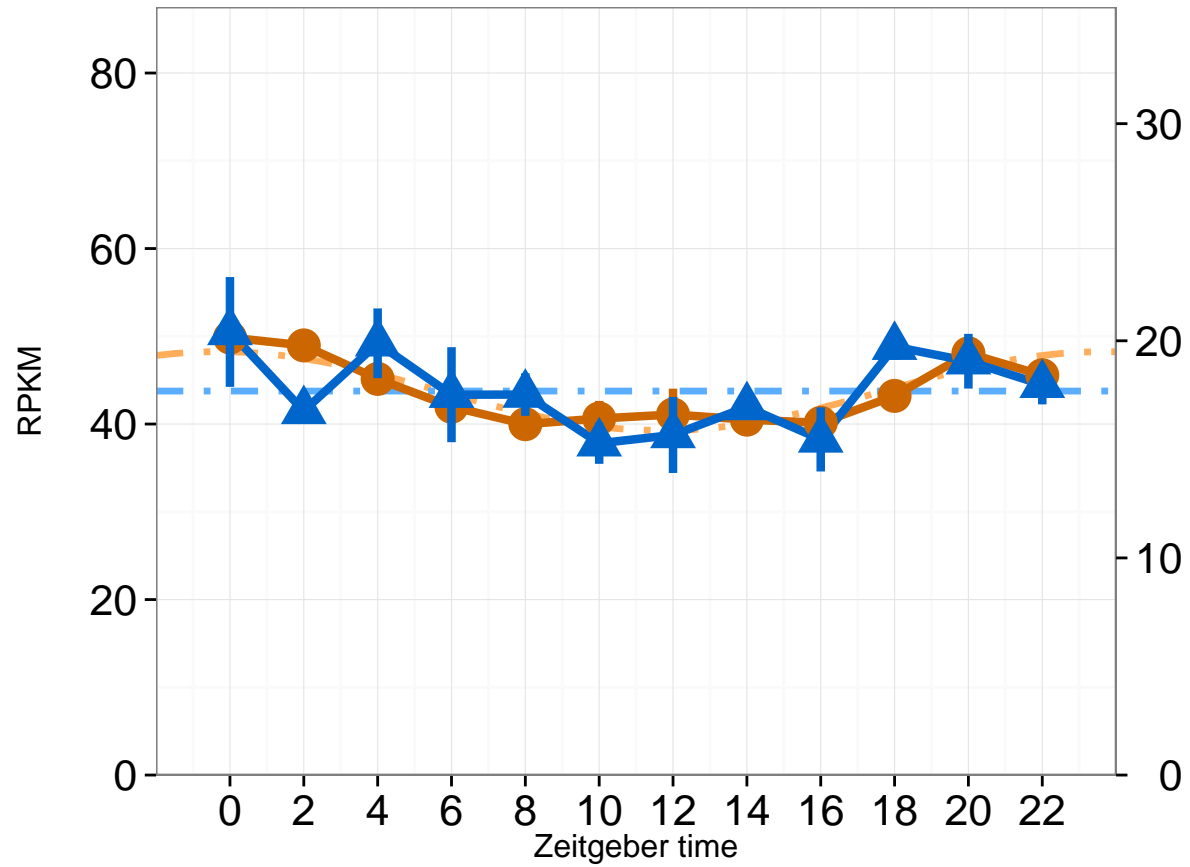

# Rmnd1

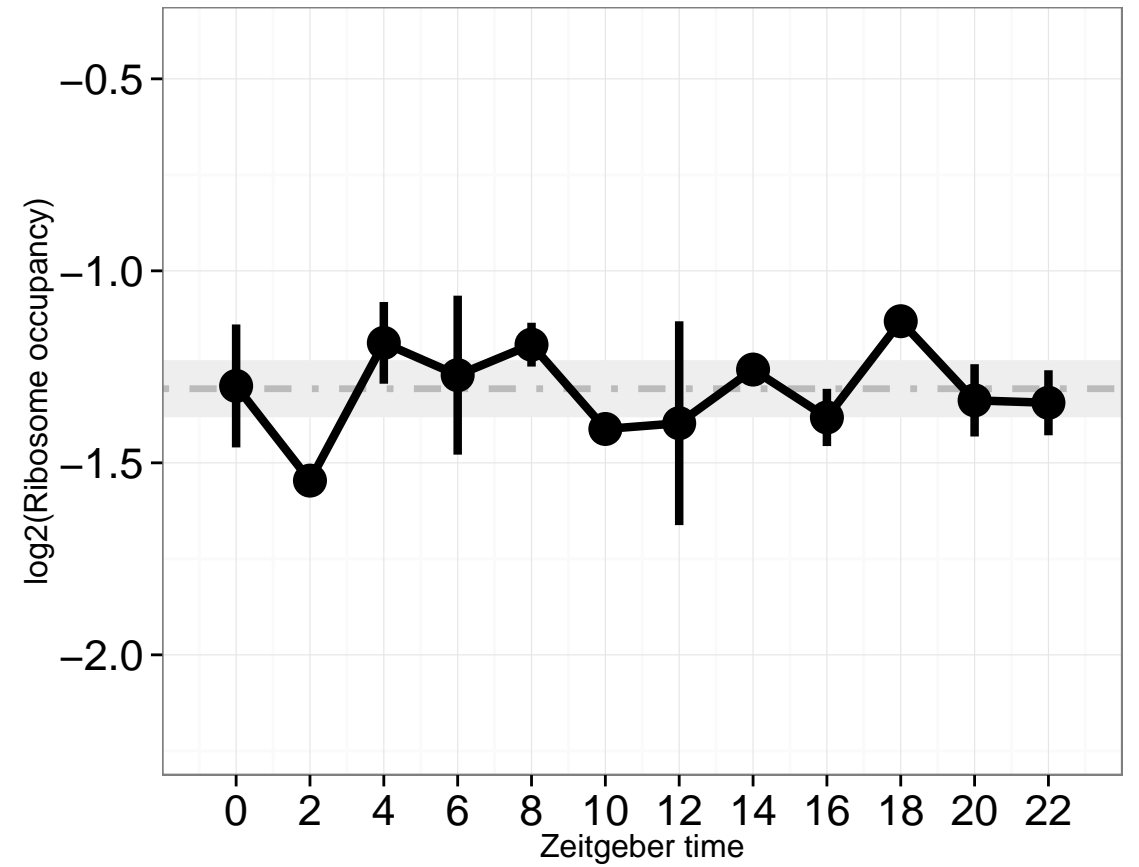

Supplement: Supplementary file 7982 [file 1]

# Atp6v1h

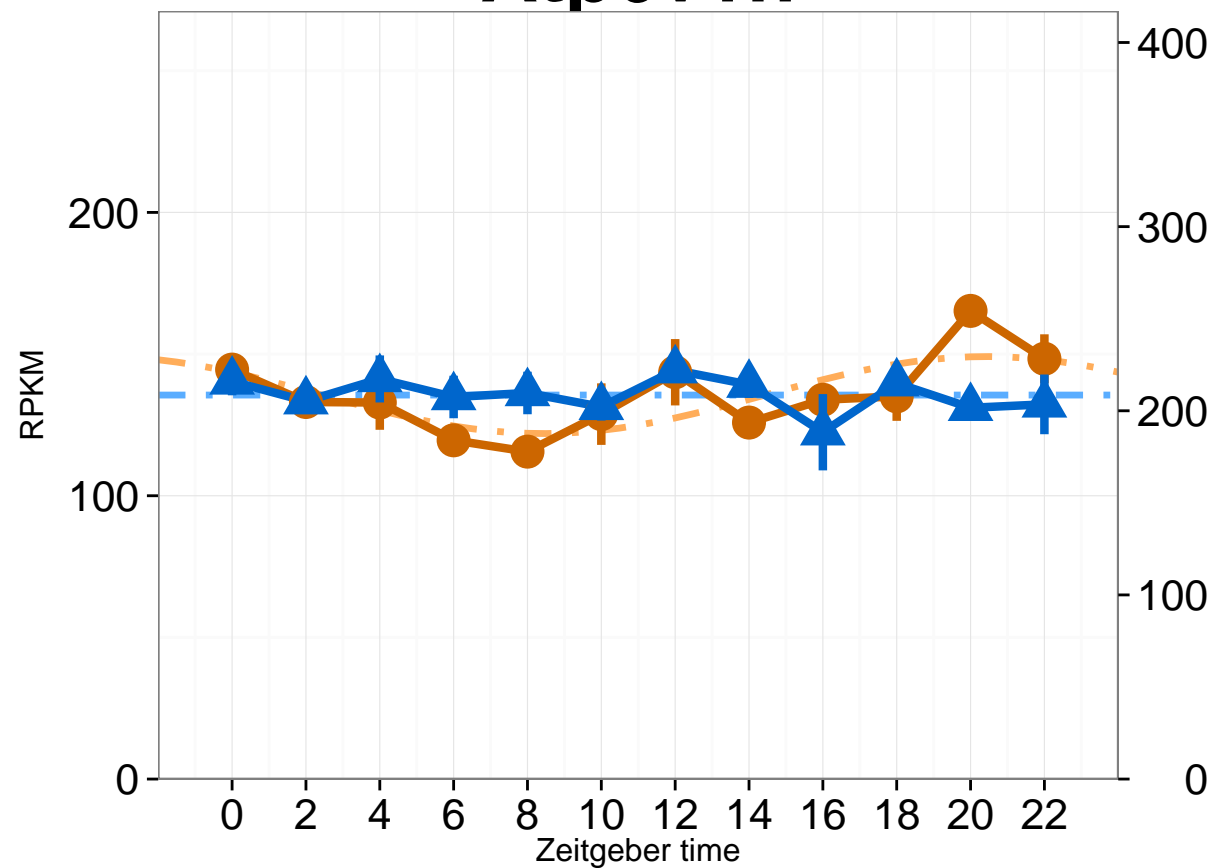

# Atp6v1h

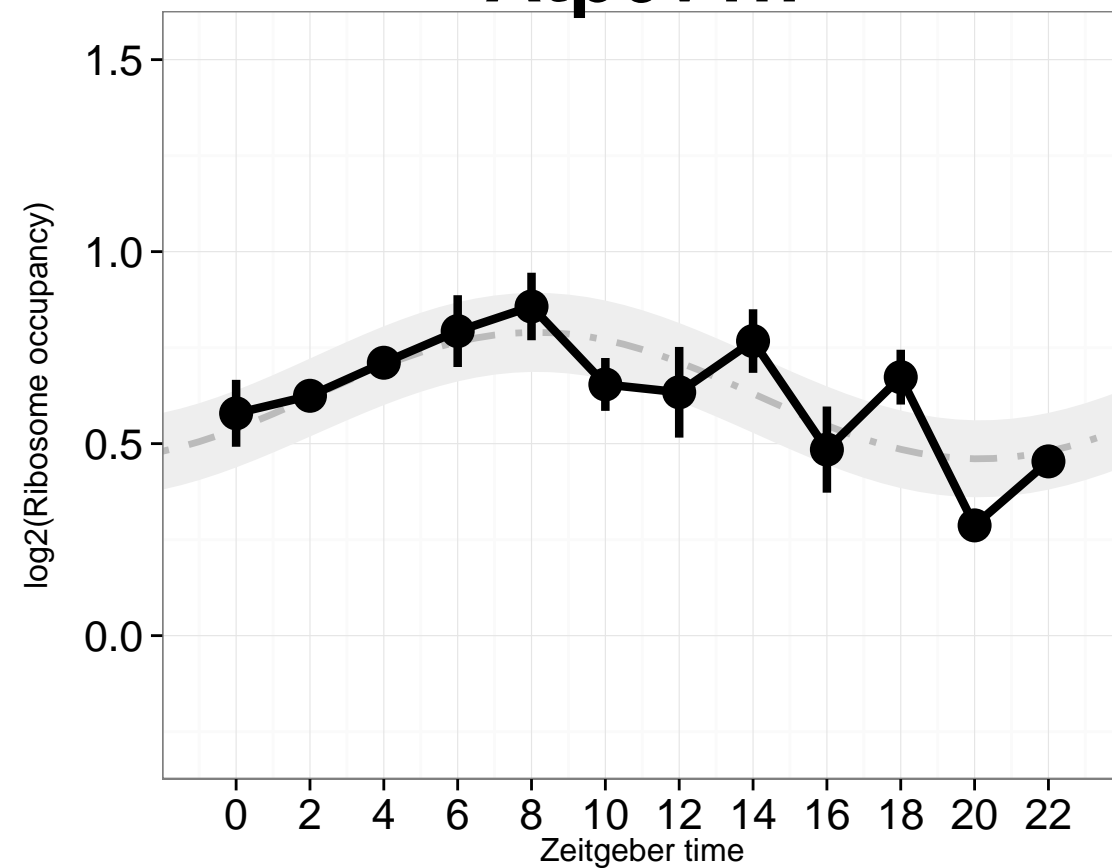

Supplement: Supplementary file 7983 [file 1]

# Mcm7

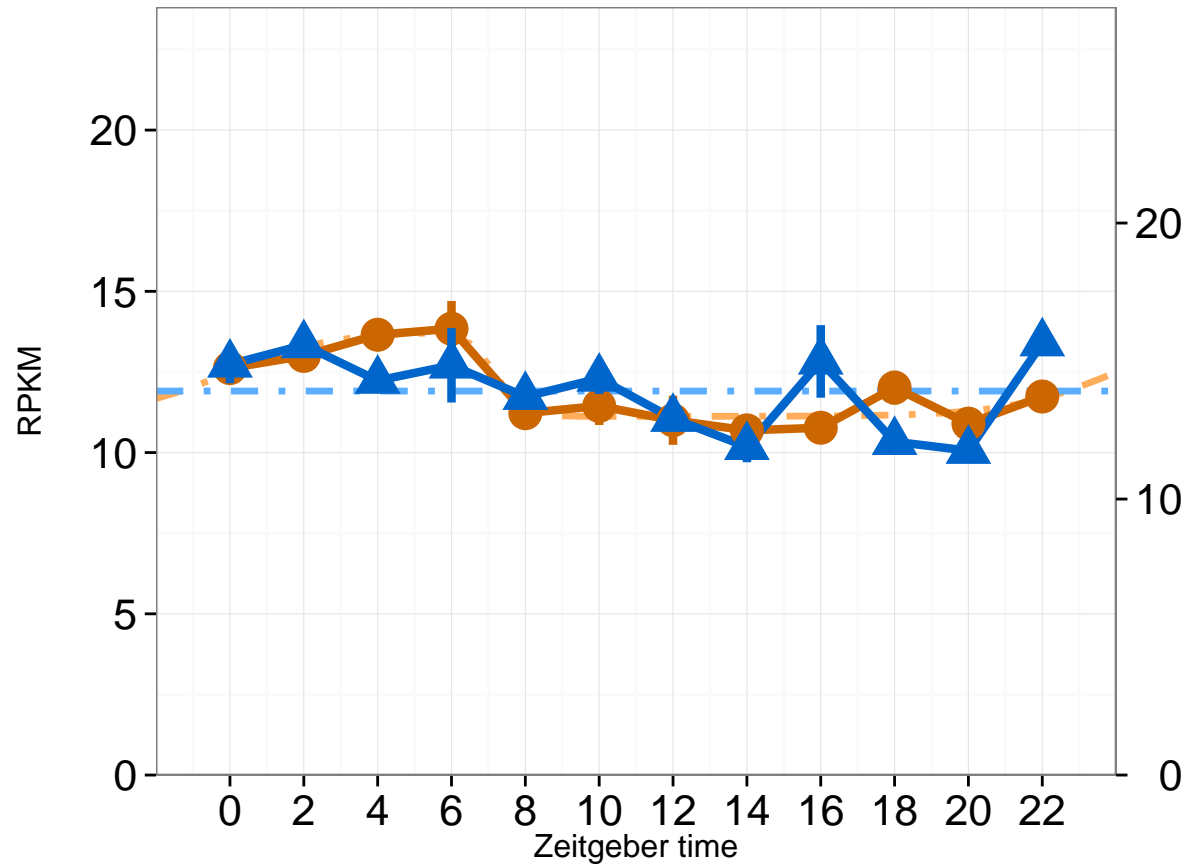

# Mcm7

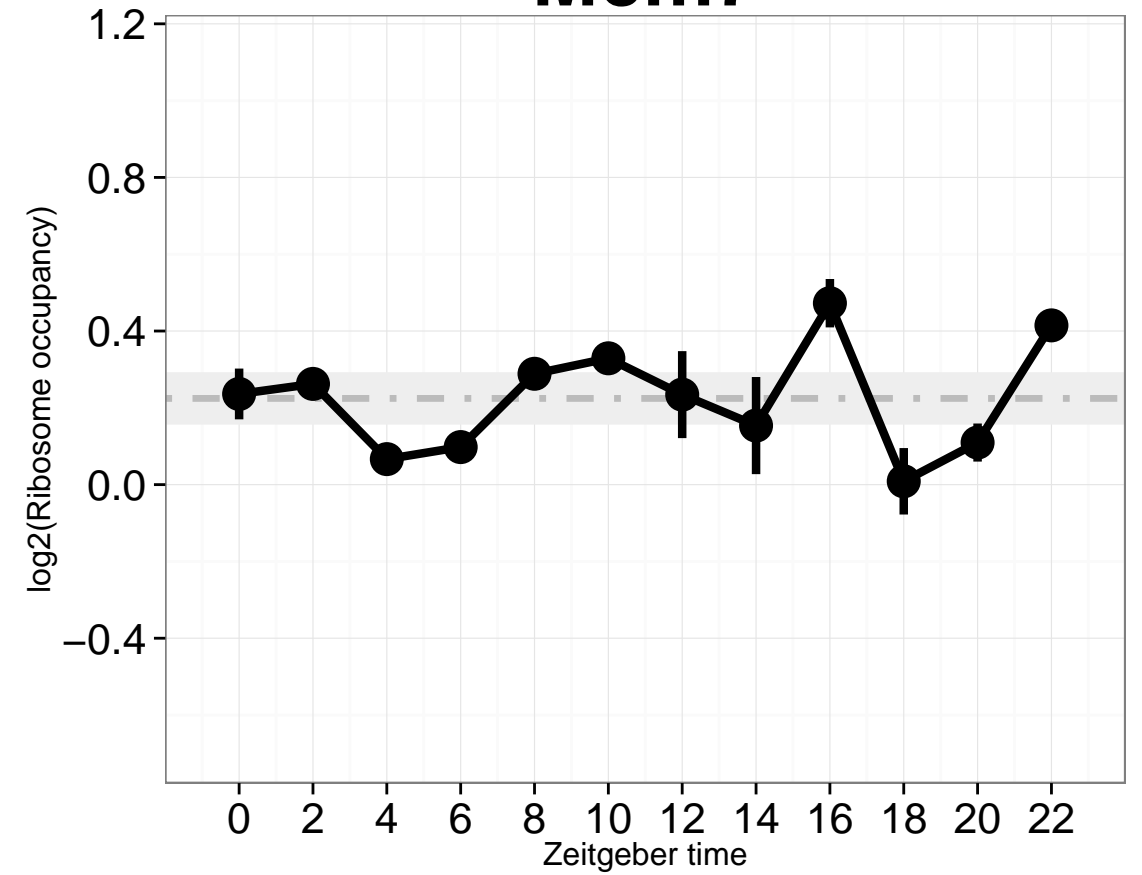

Supplement: Supplementary file 7984 [file 1]

# Slc17a4

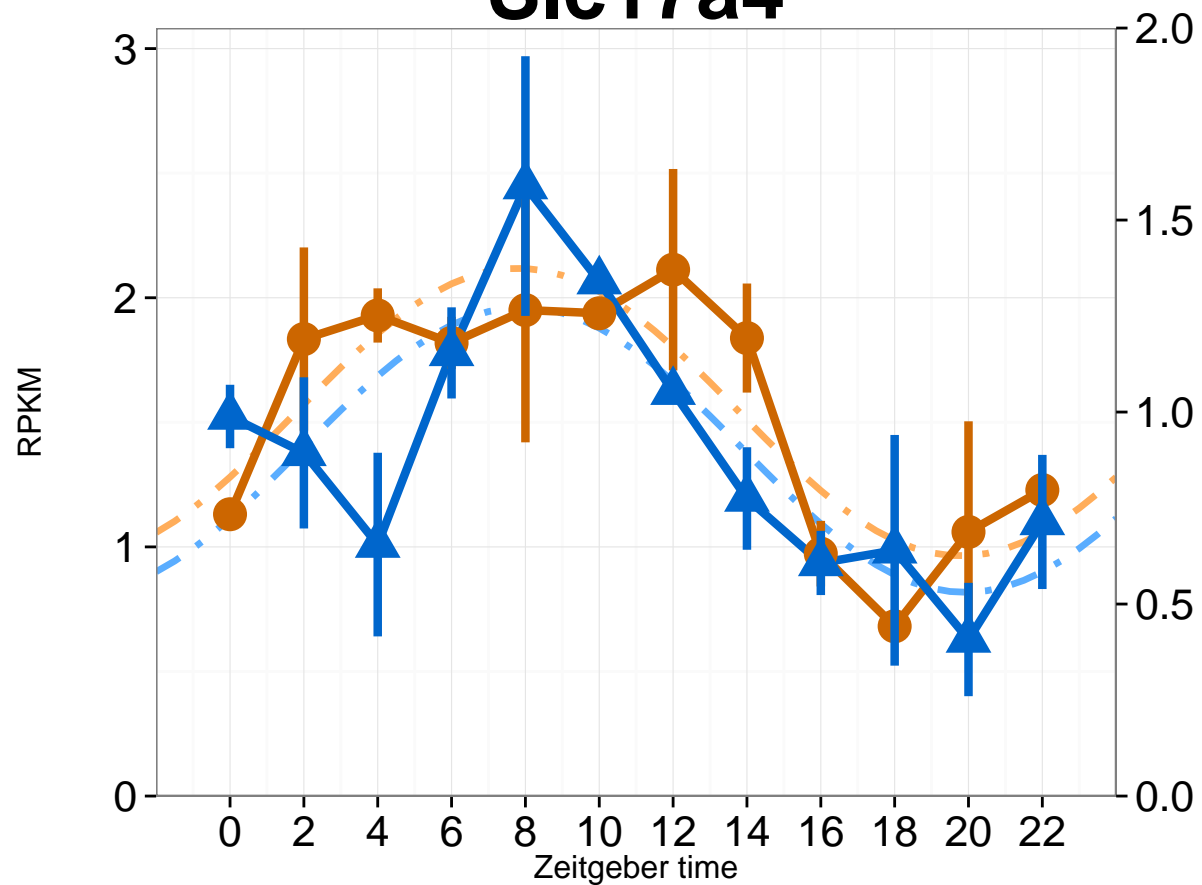

# Slc17a4

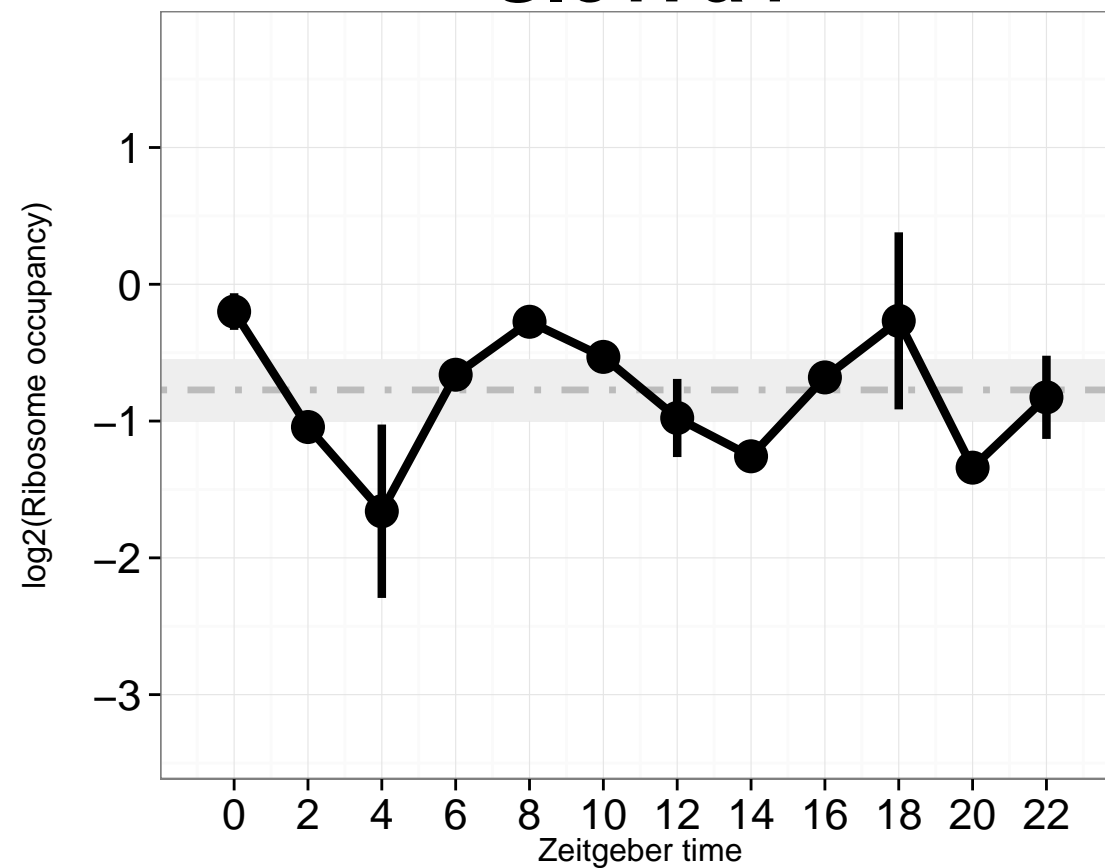

Supplement: Supplementary file 7985 [file 1]

## Bhmt2

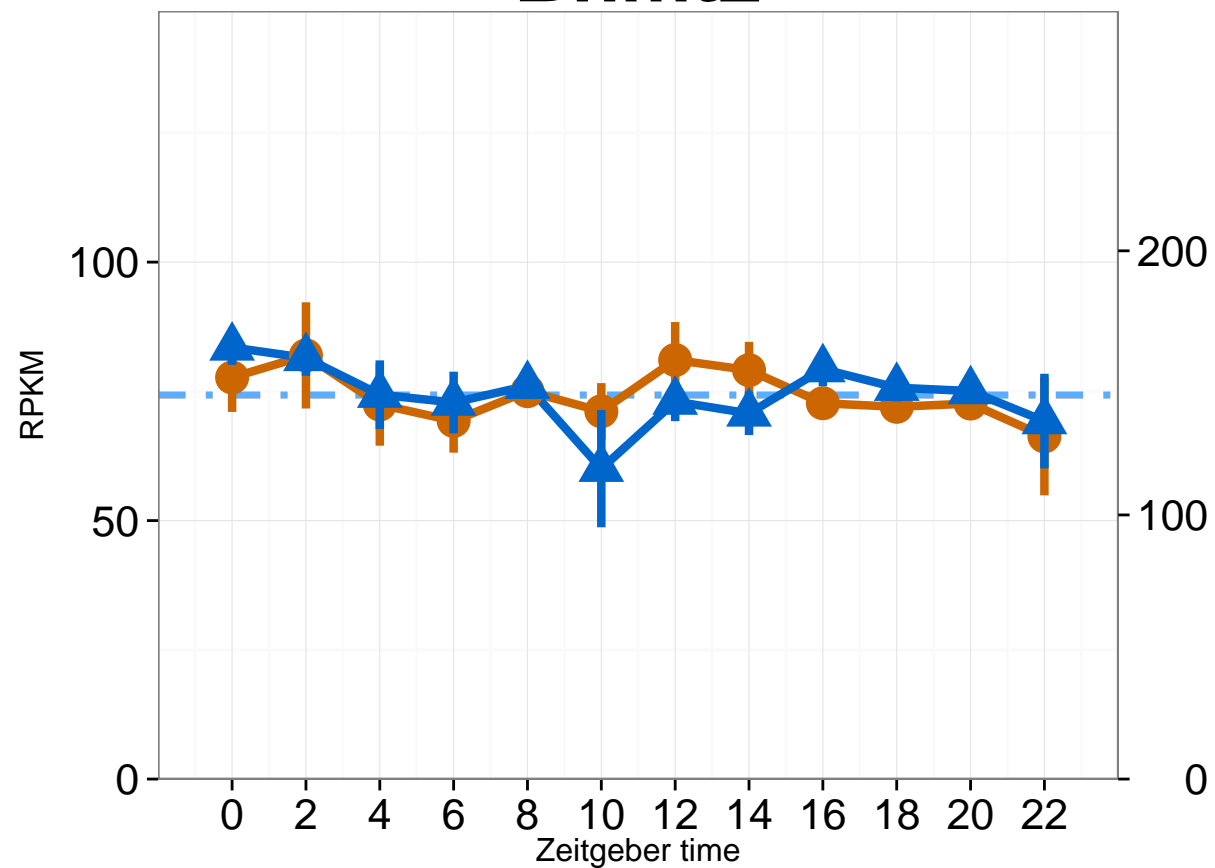

## Bhmt2

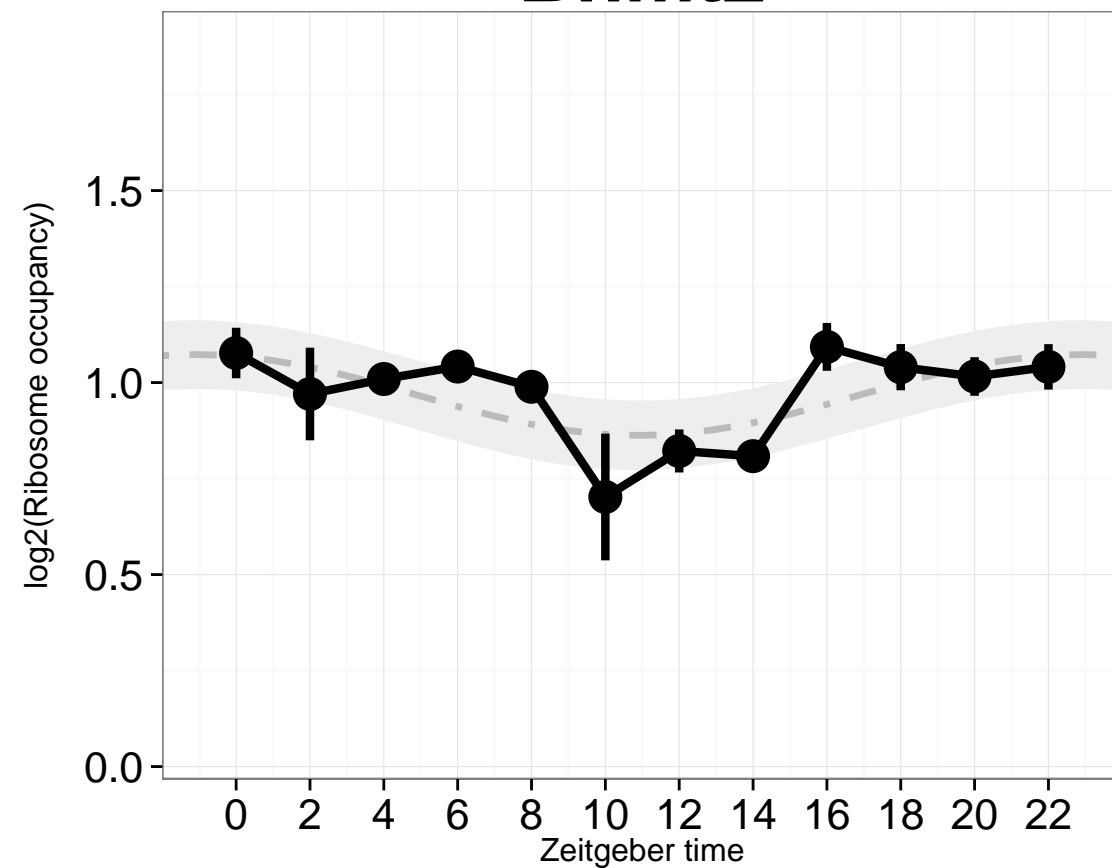

Supplement: Supplementary file 7986 [file 1]

## Ces1e

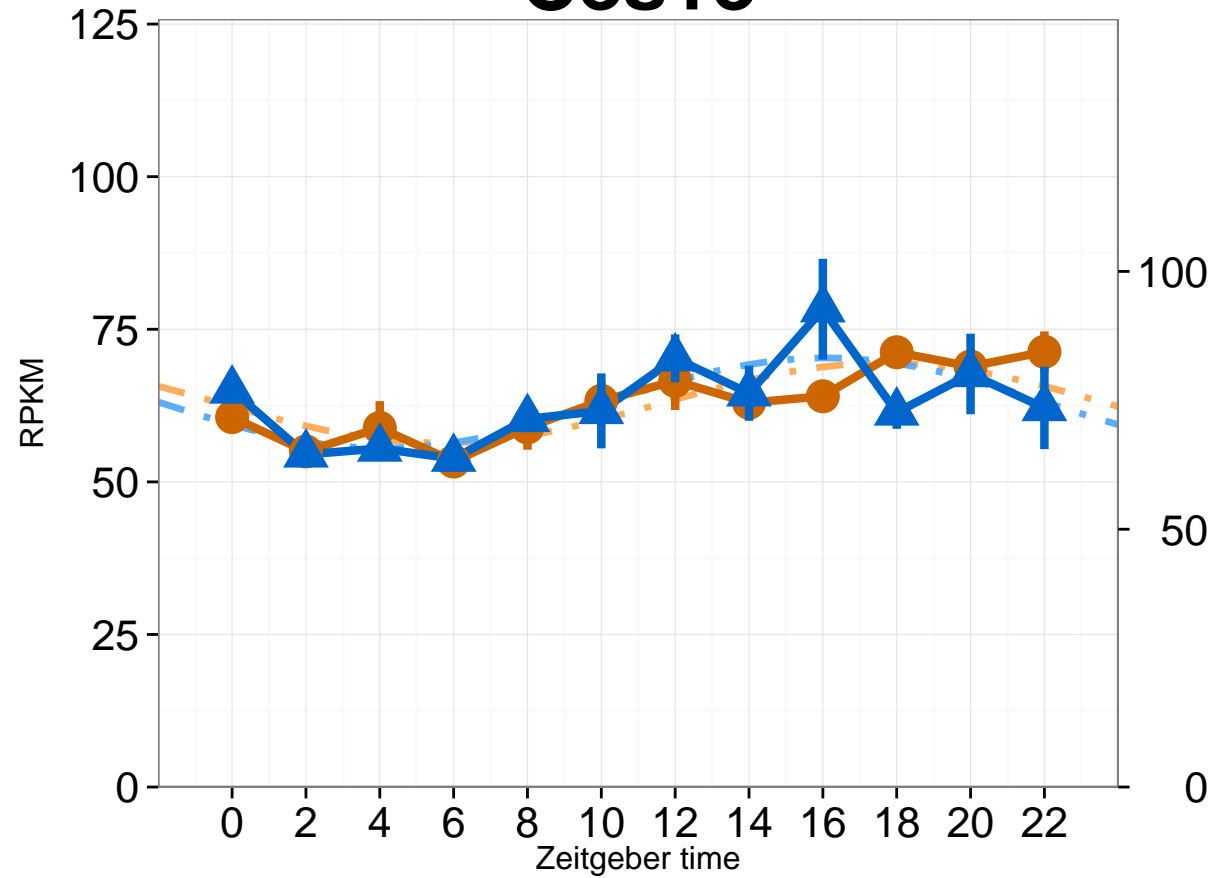

## Ces1e

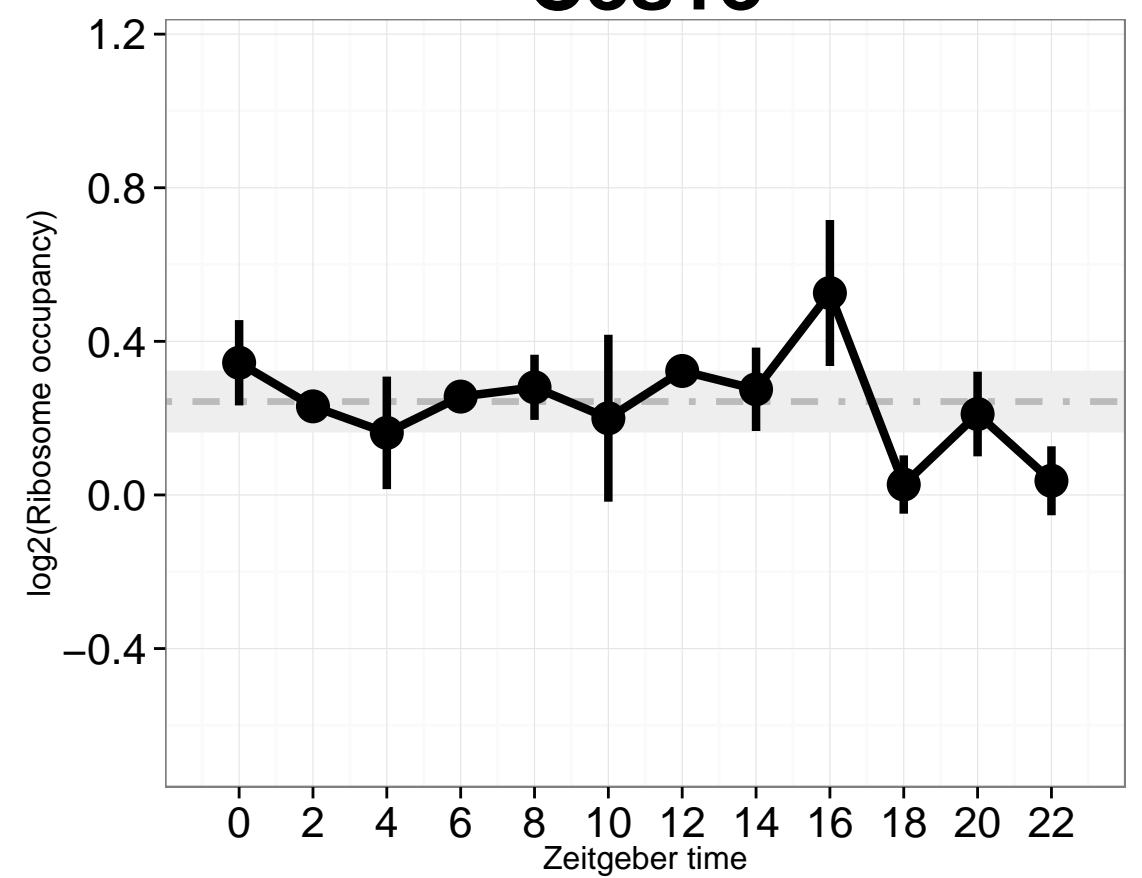

Supplement: Supplementary file 7987 [file 1]

## Nat9

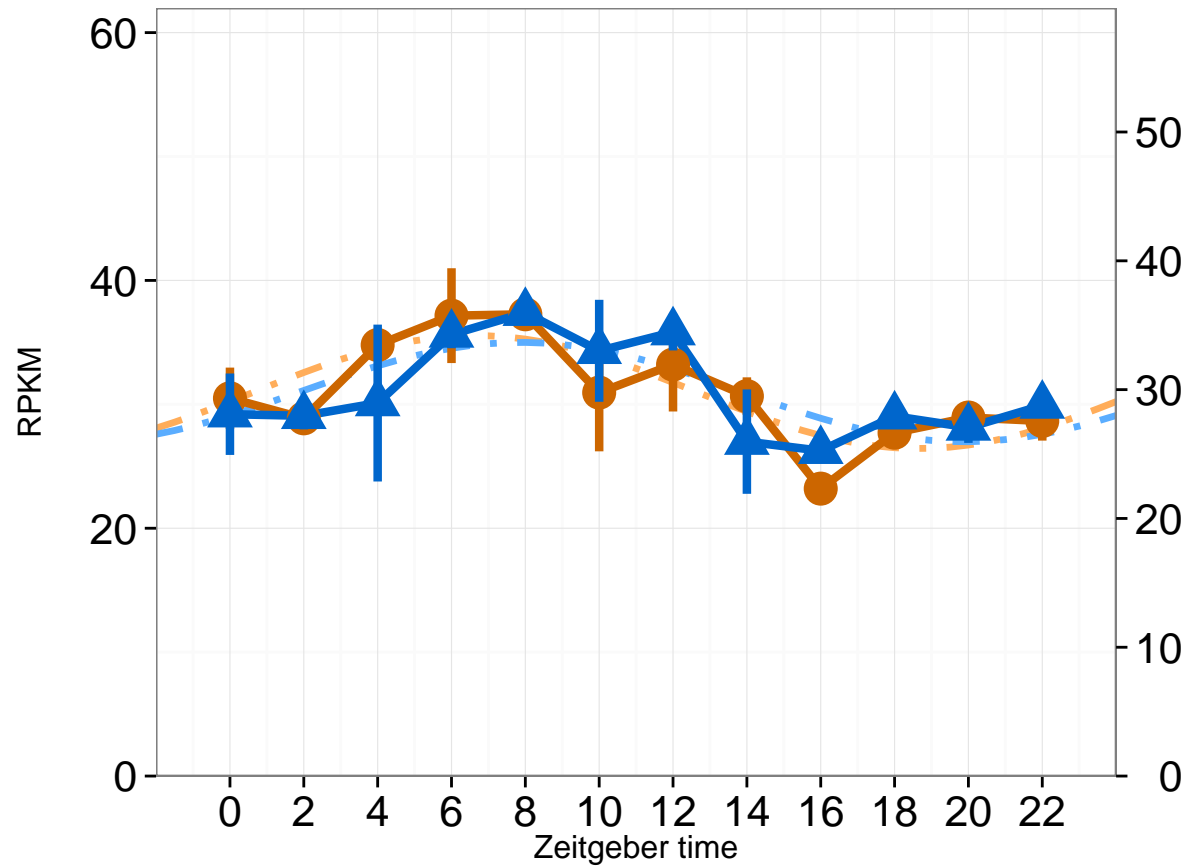

## Nat9

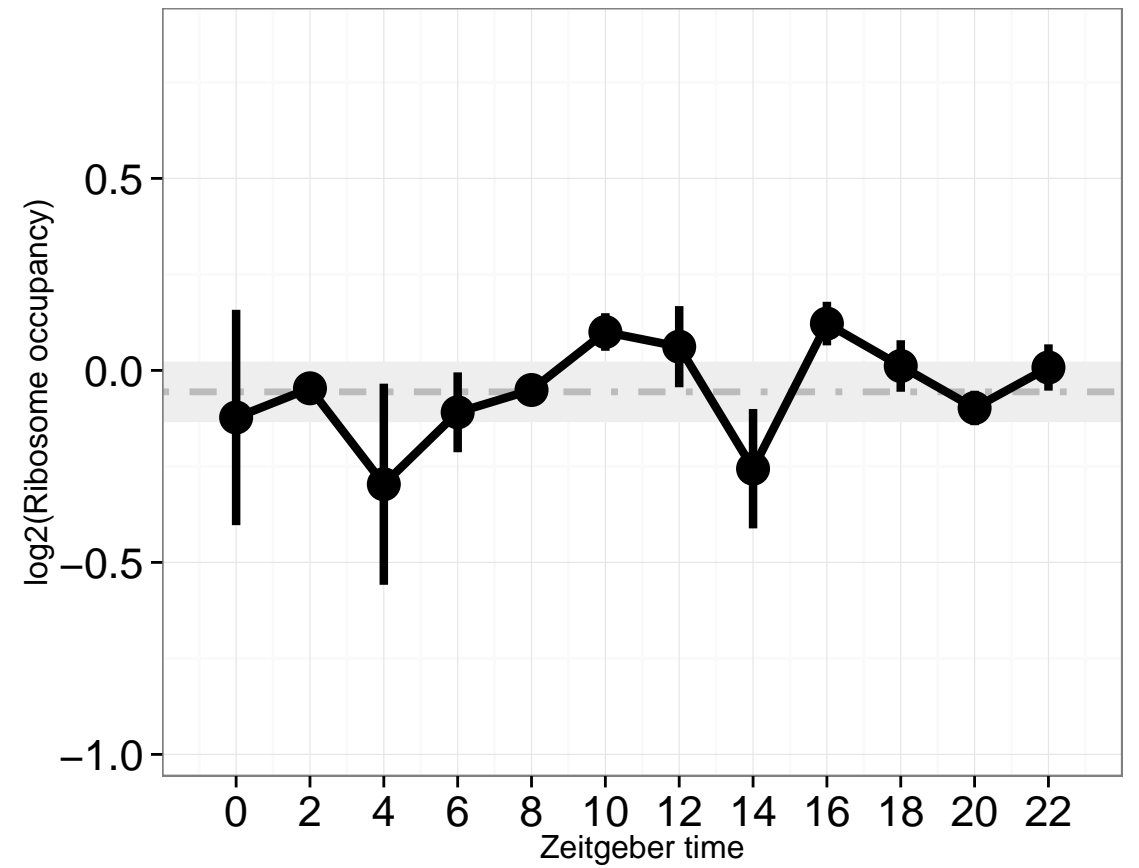

Supplement: Supplementary file 7988 [file 1]

## Lamtor2

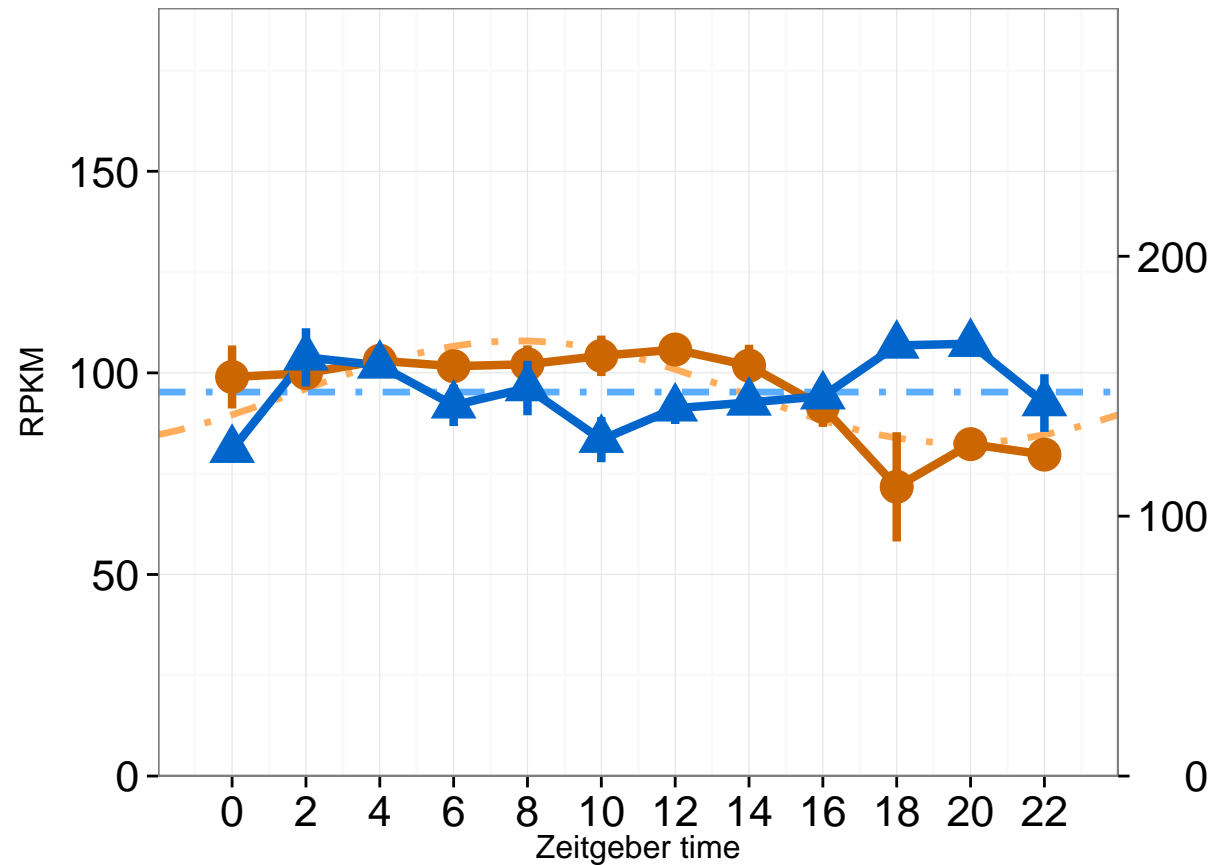

## Lamtor2

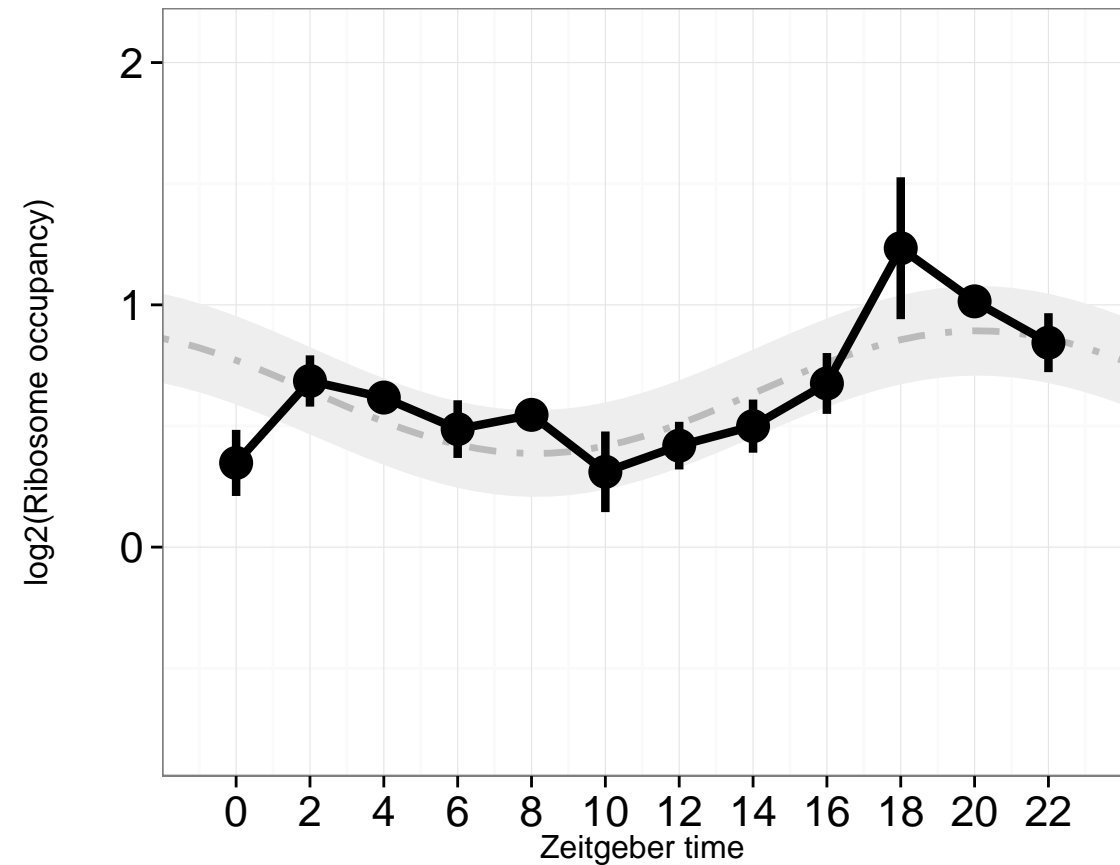

Supplement: Supplementary file 7989 [file 1]

# Cyp2j6

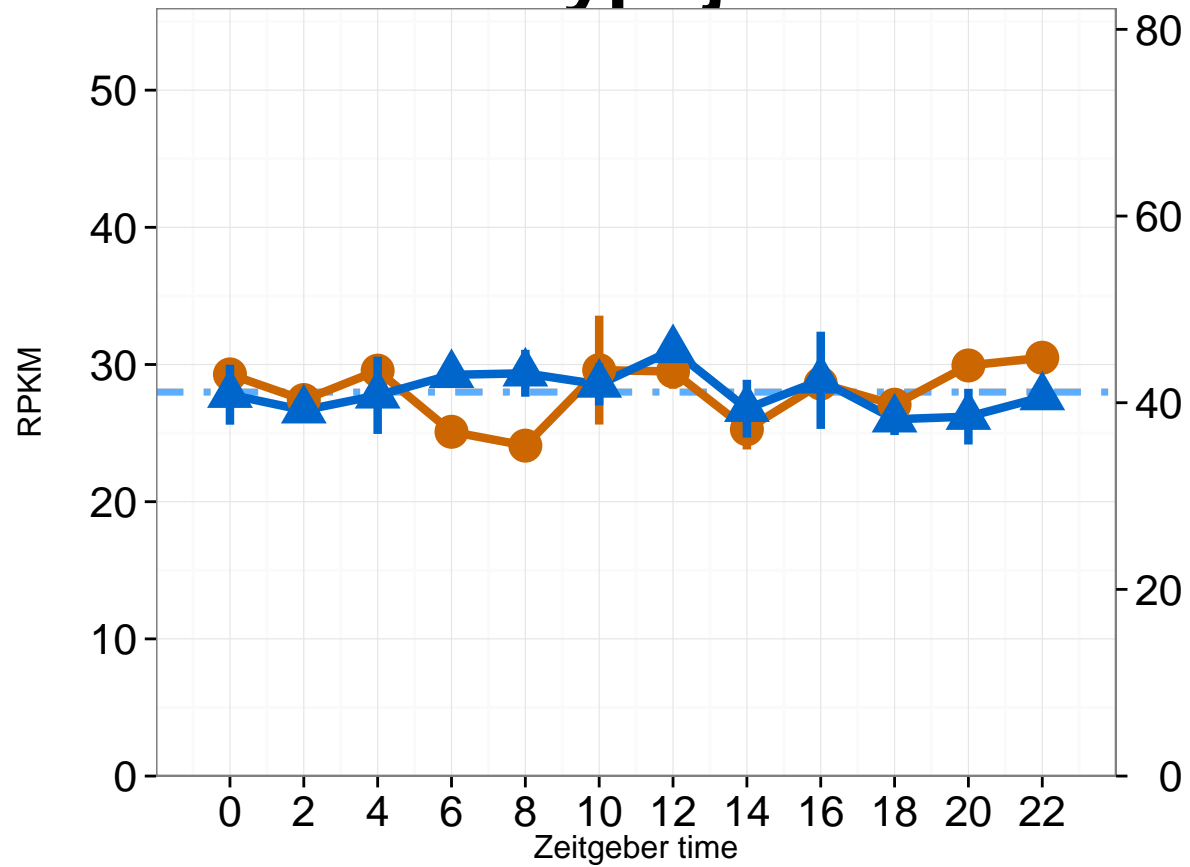

# Cyp2j6

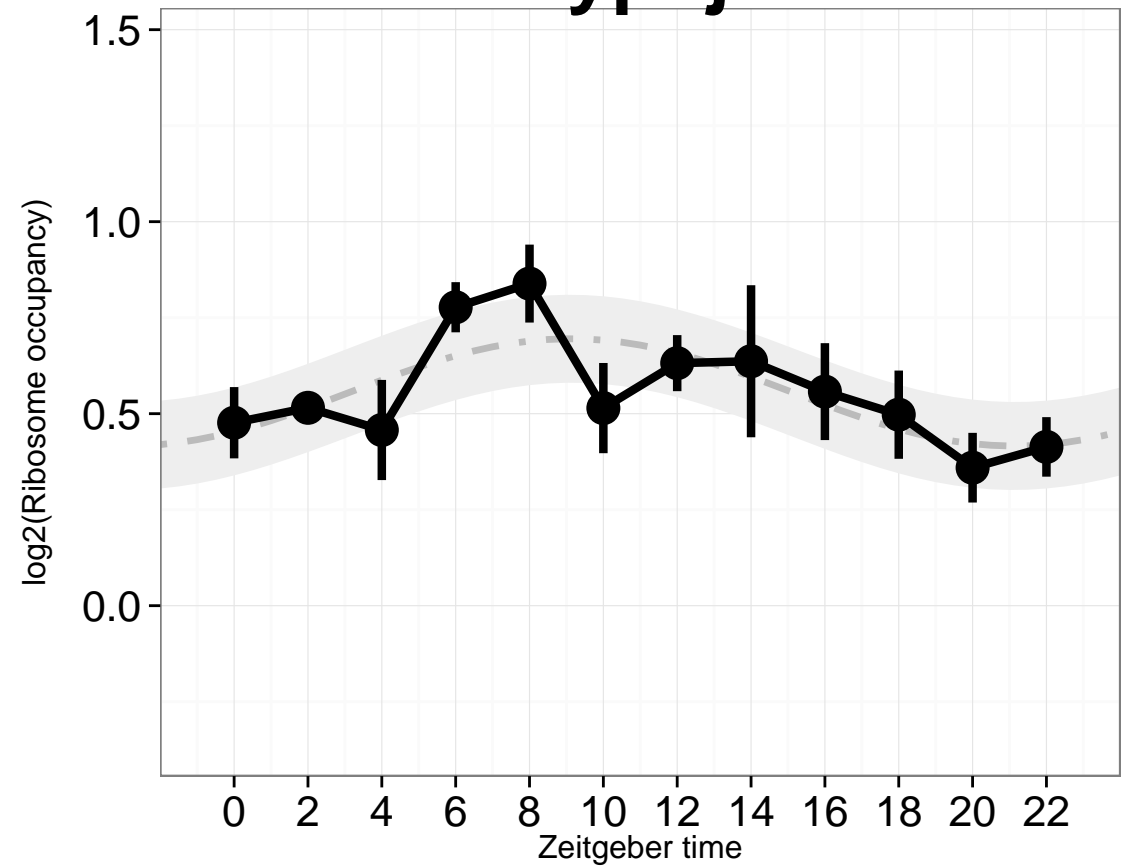

Supplement: Supplementary file 7990 [file 1]

# Hsp90ab1

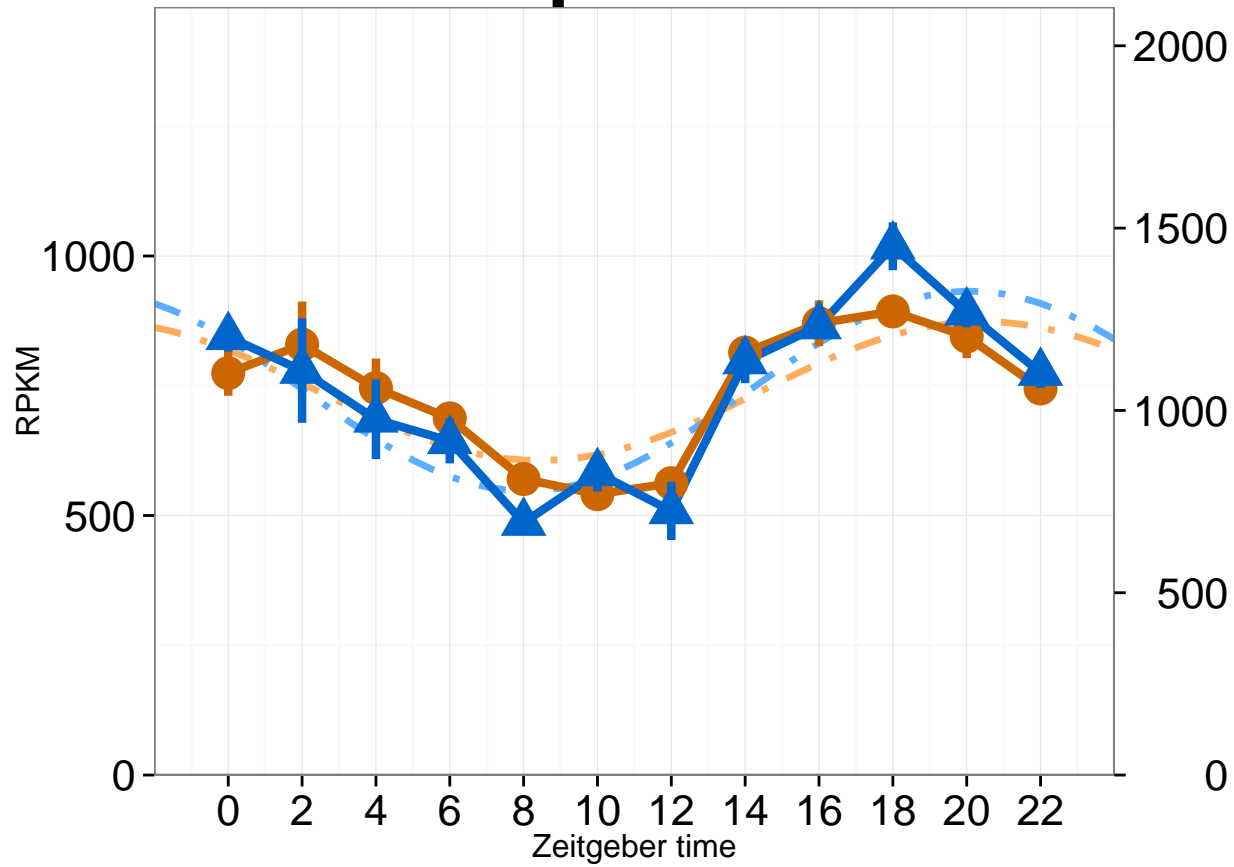

# Hsp90ab1

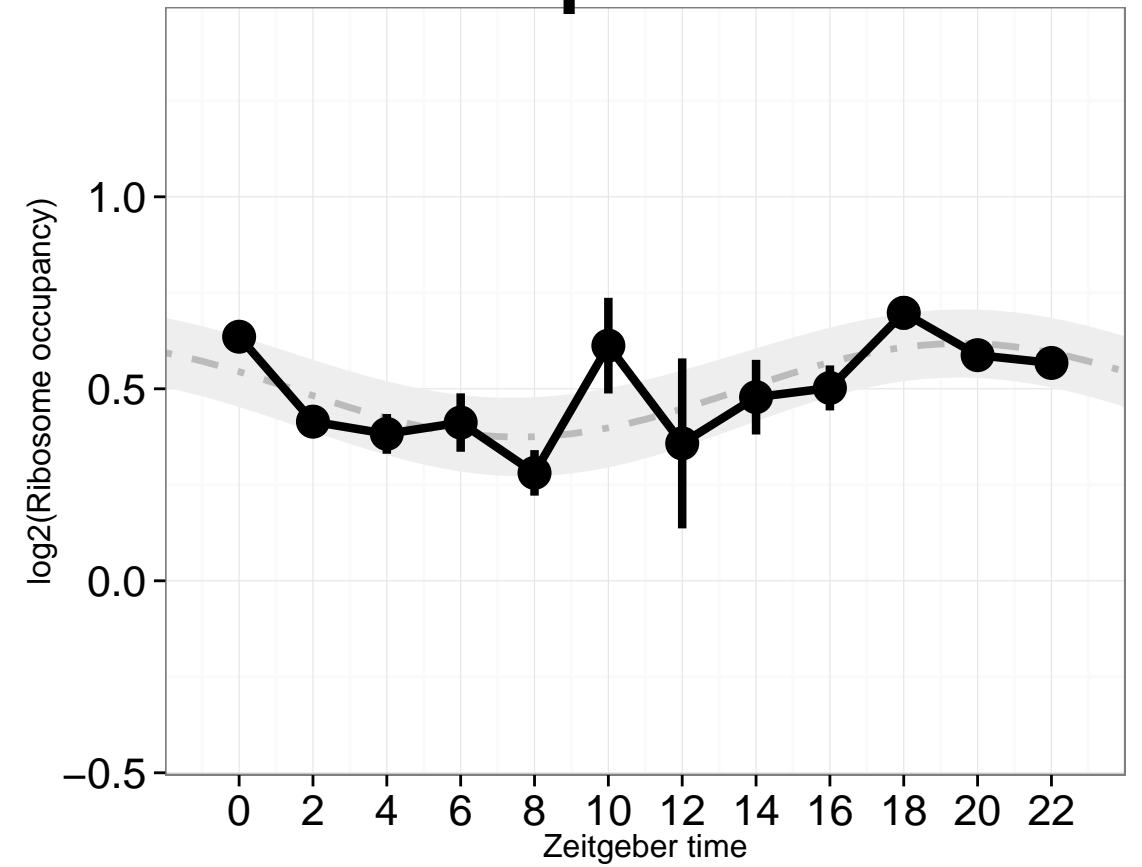

Supplement: Supplementary file 7991 [file 1]

# Mapk1ip1

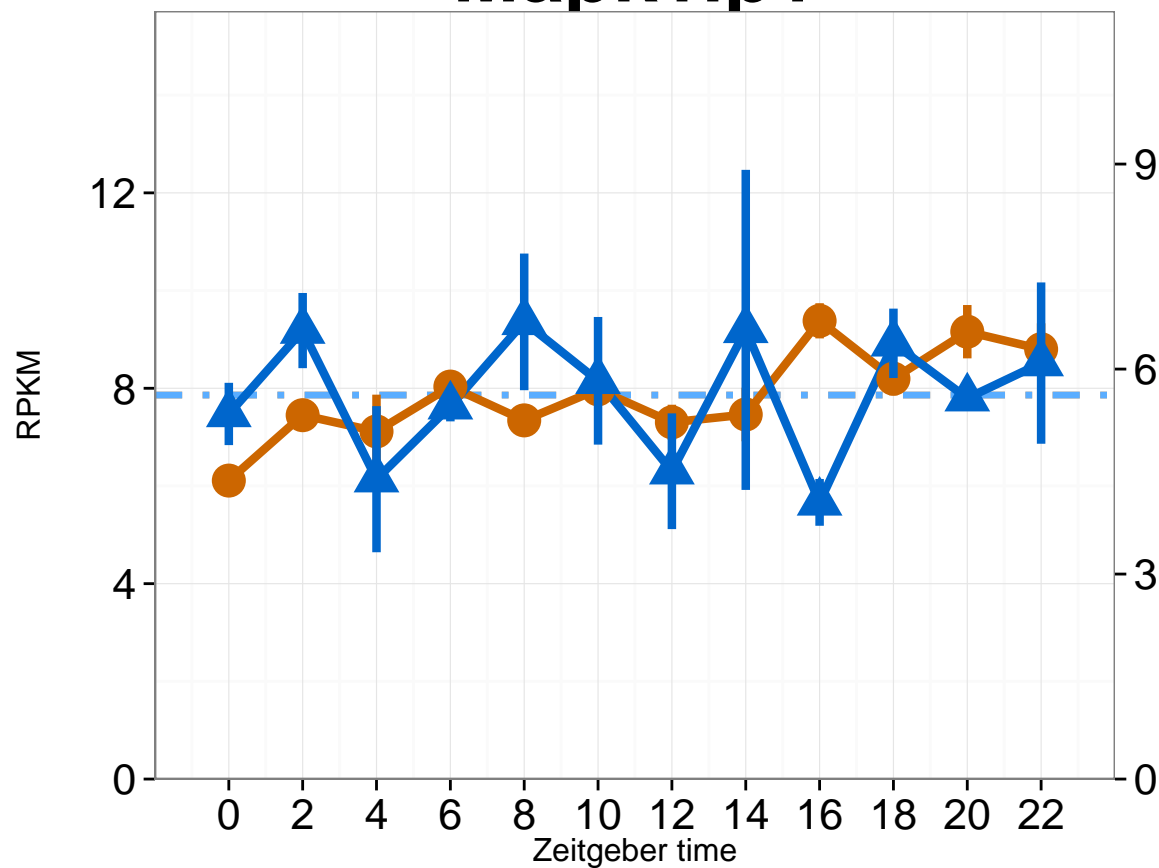

# Mapk1ip1

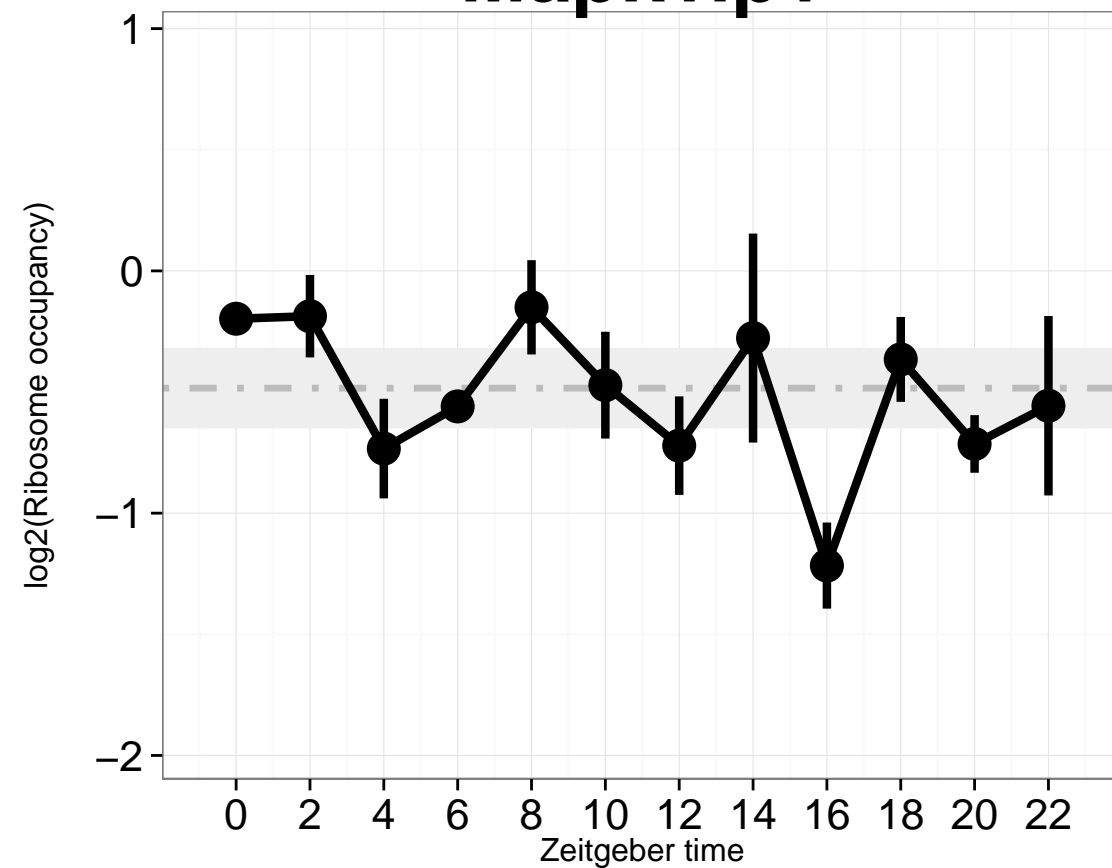

Supplement: Supplementary file 7992 [file 1]

# Mettl18

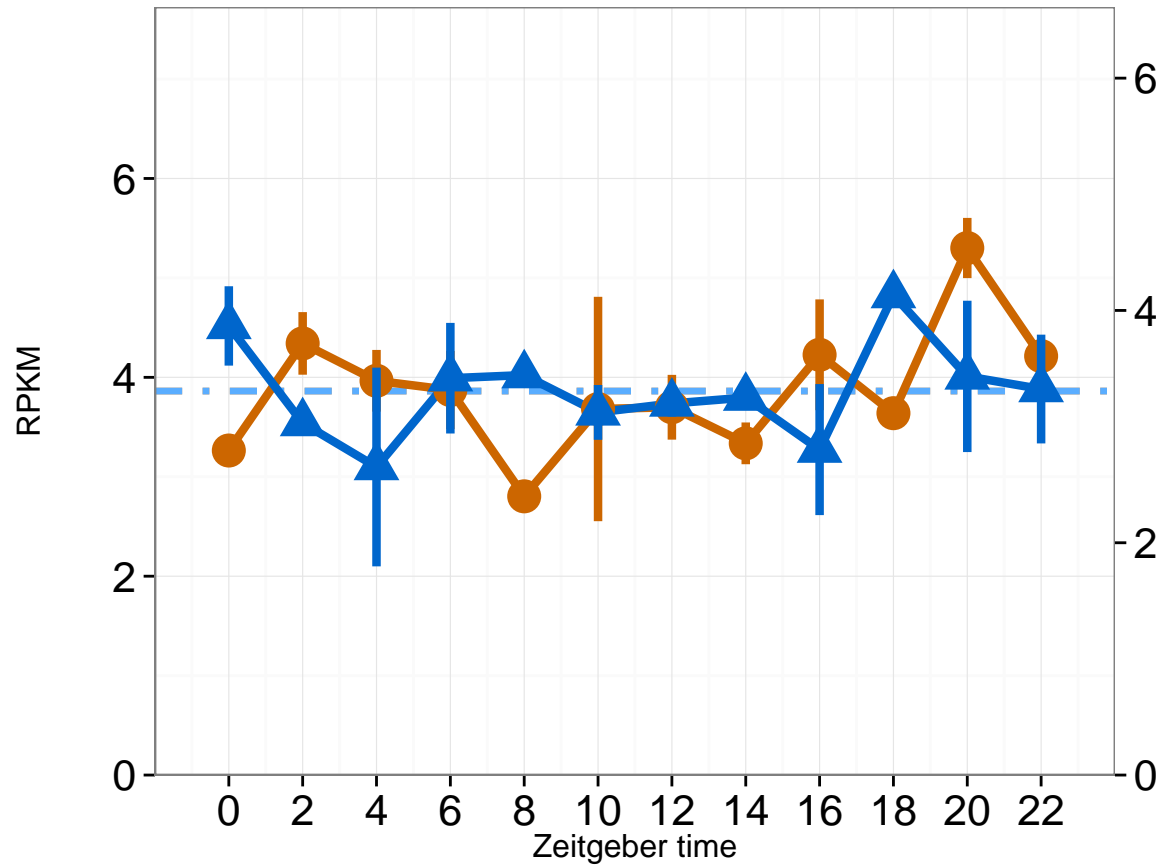

# Mettl18

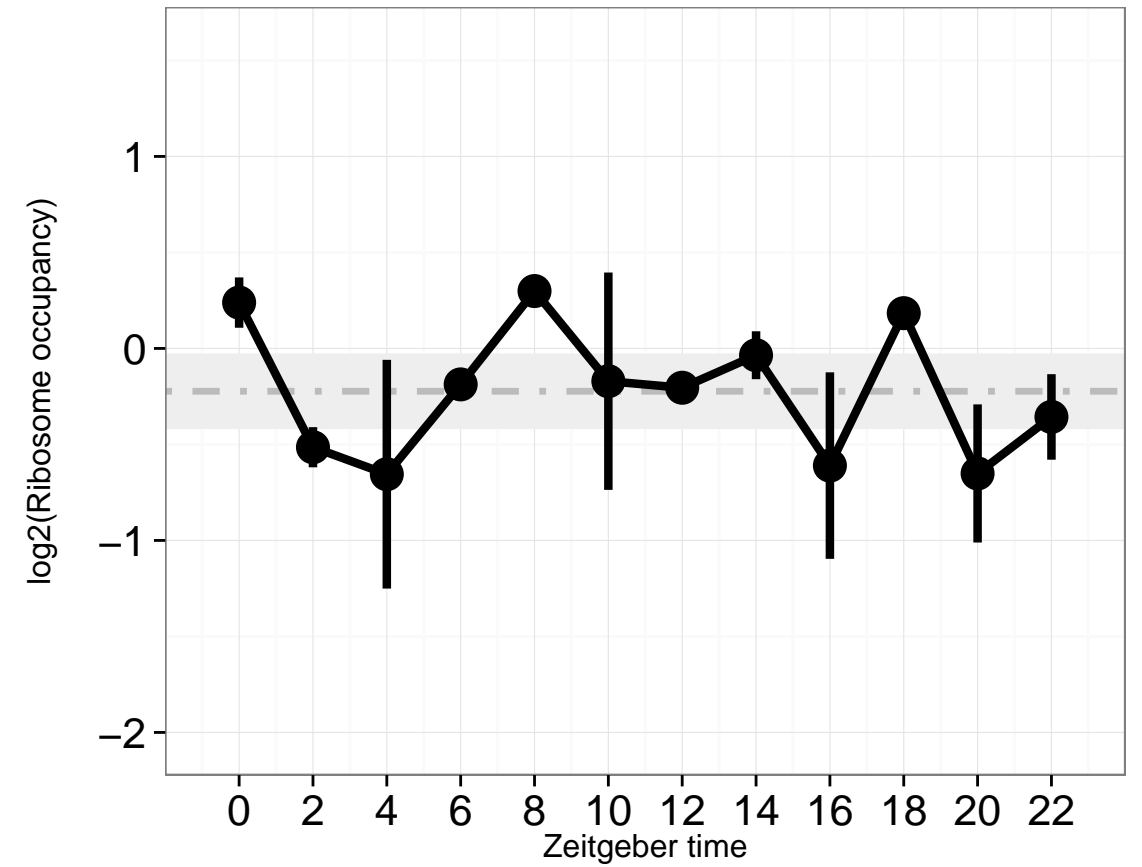

Supplement: Supplementary file 7993 [file 1]

**lyd**

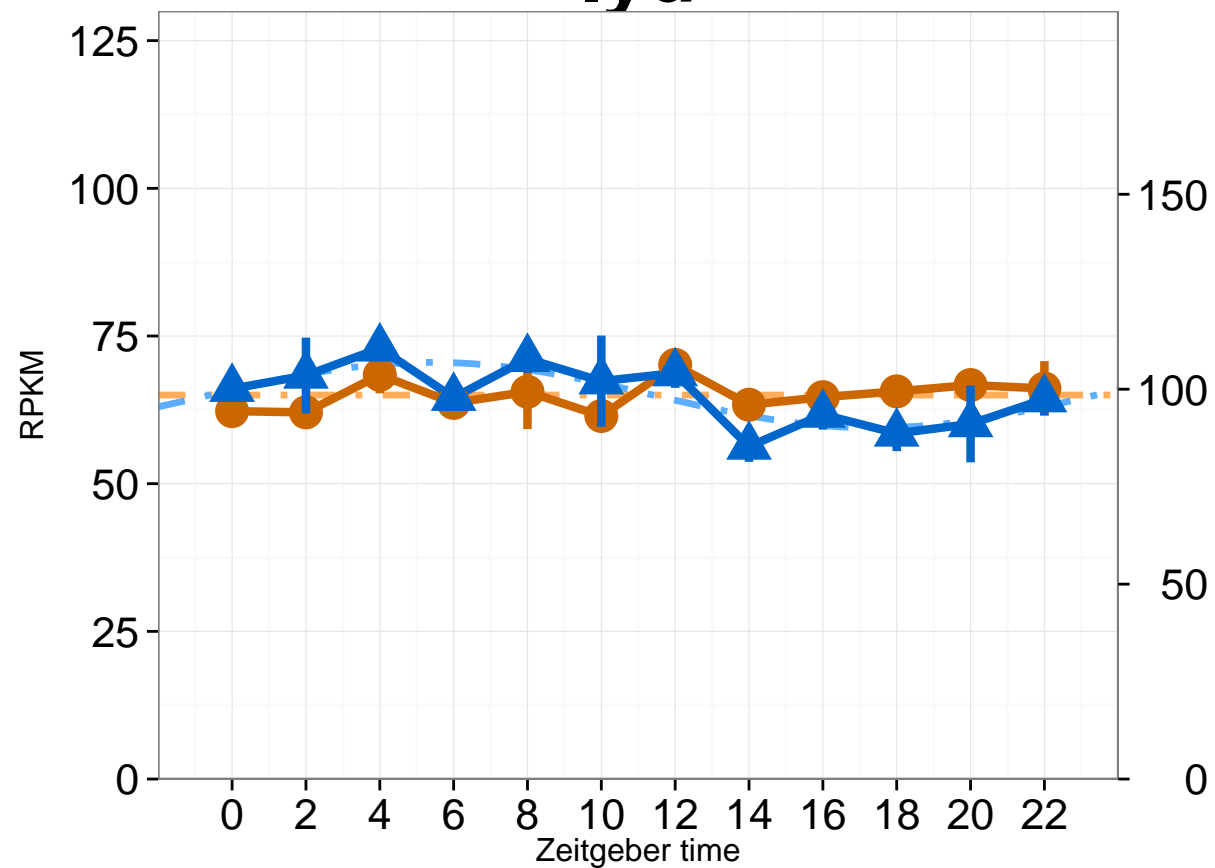

**lyd**

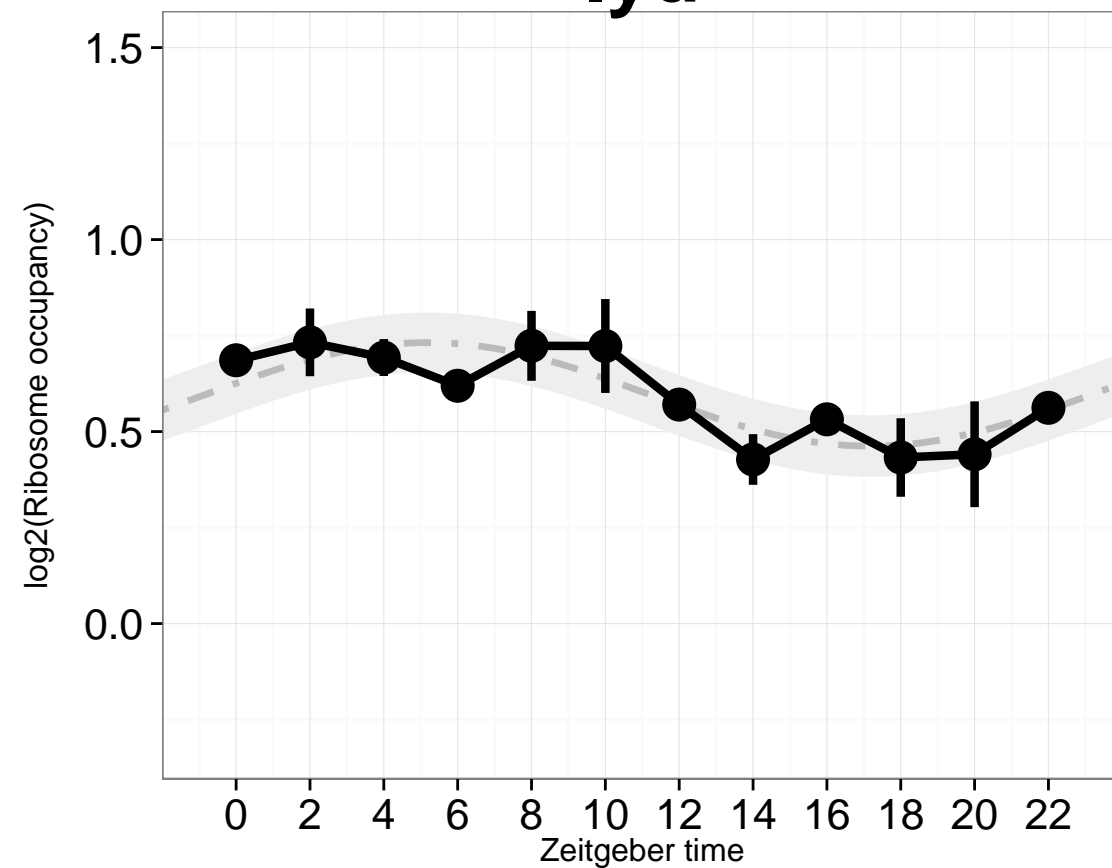

Supplement: Supplementary file 7994 [file 1]

## Slc38a10

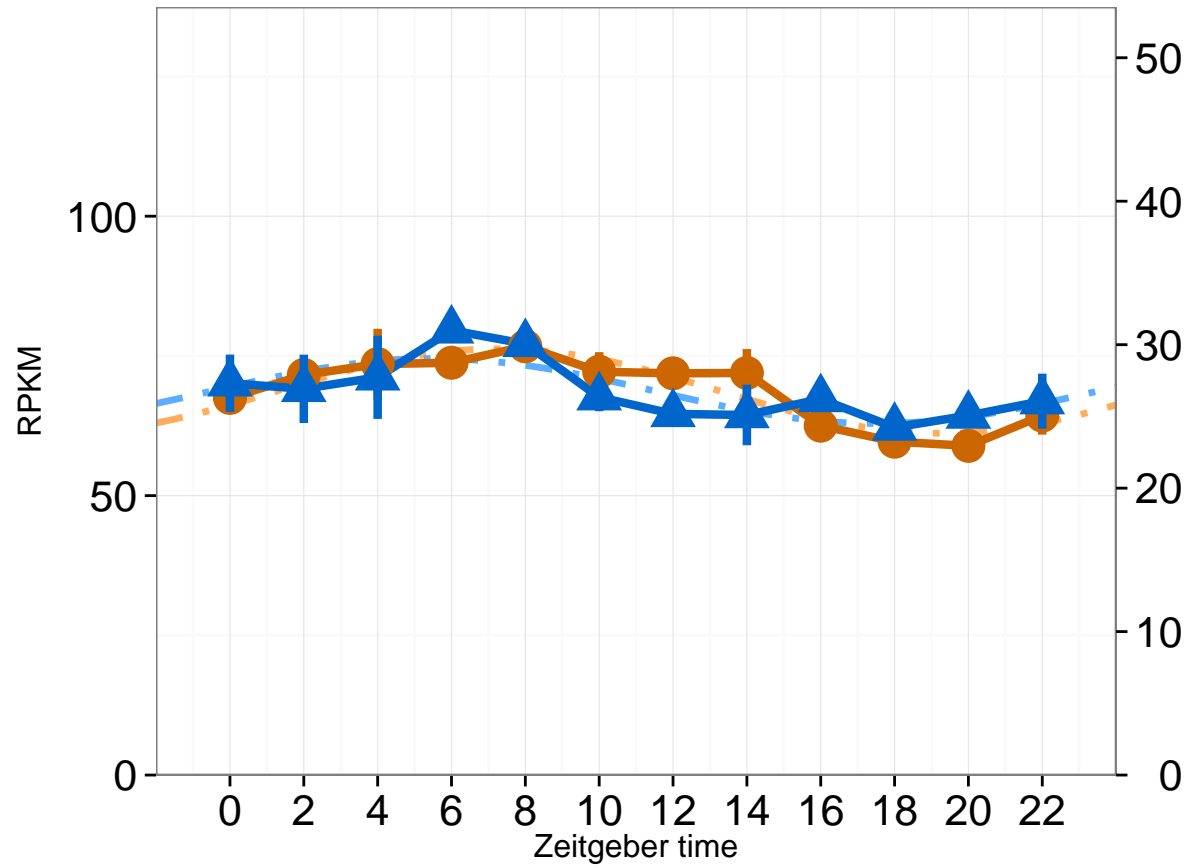

## Slc38a10

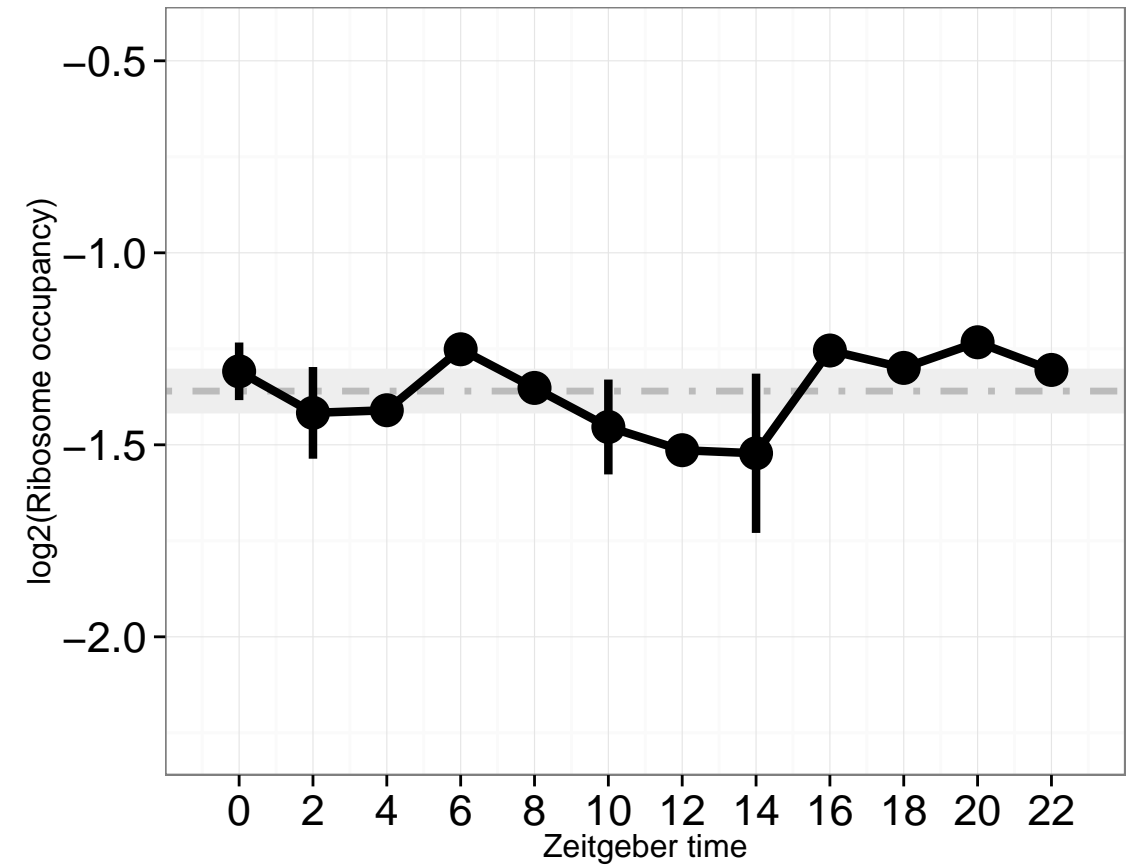

Supplement: Supplementary file 7995 [file 1]

## Nras

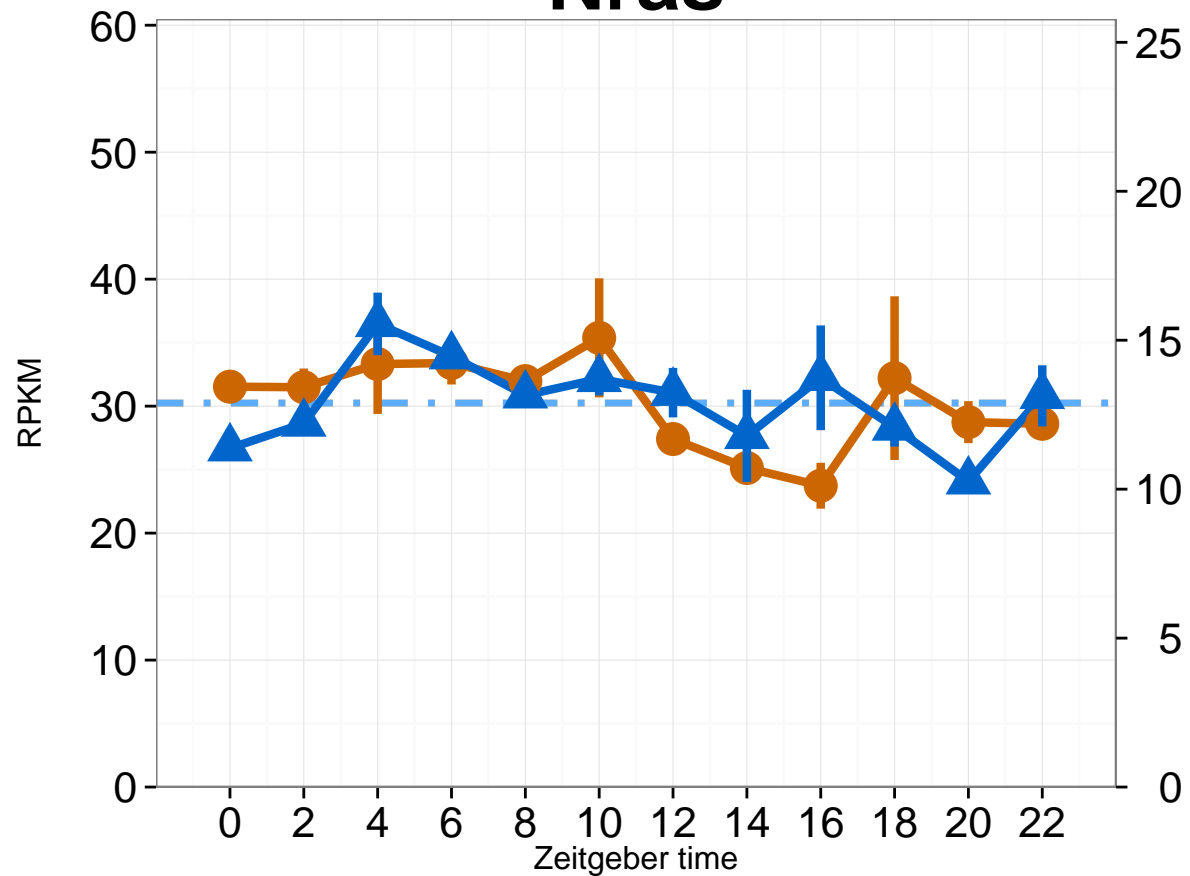

## Nras

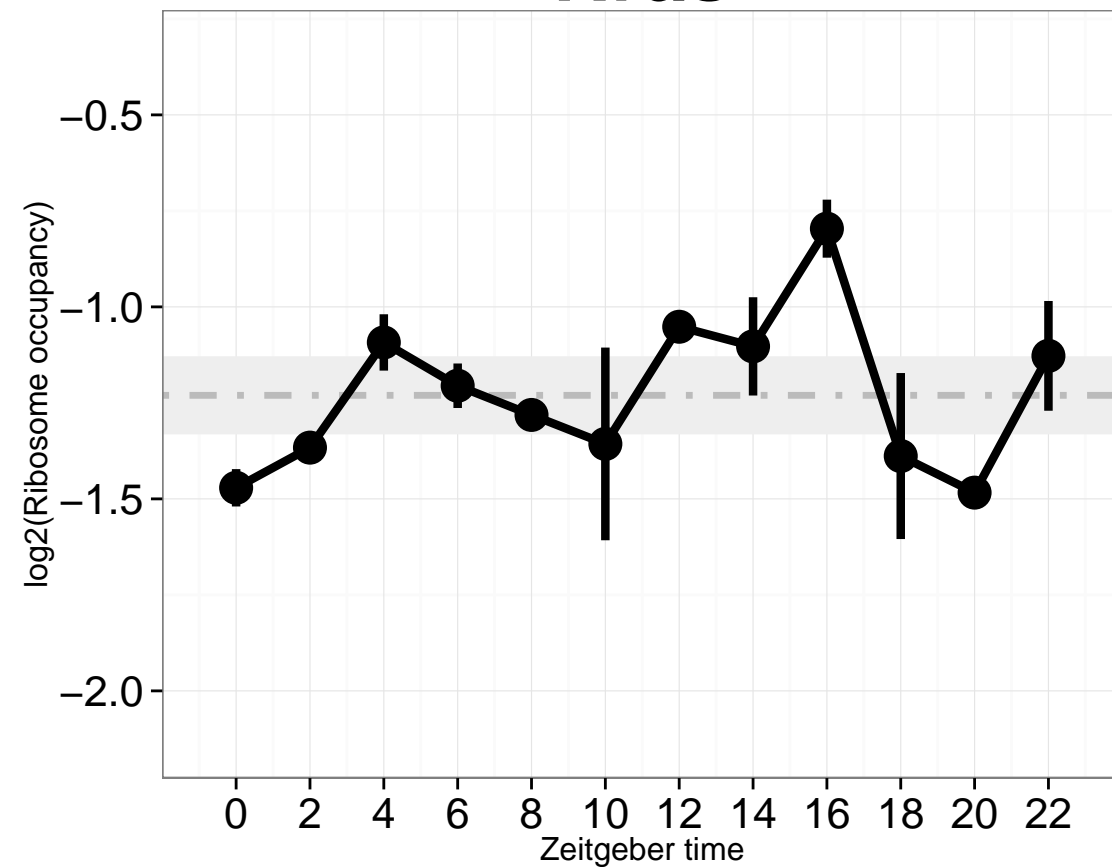

Supplement: Supplementary file 7996 [file 1]

# Pde5a

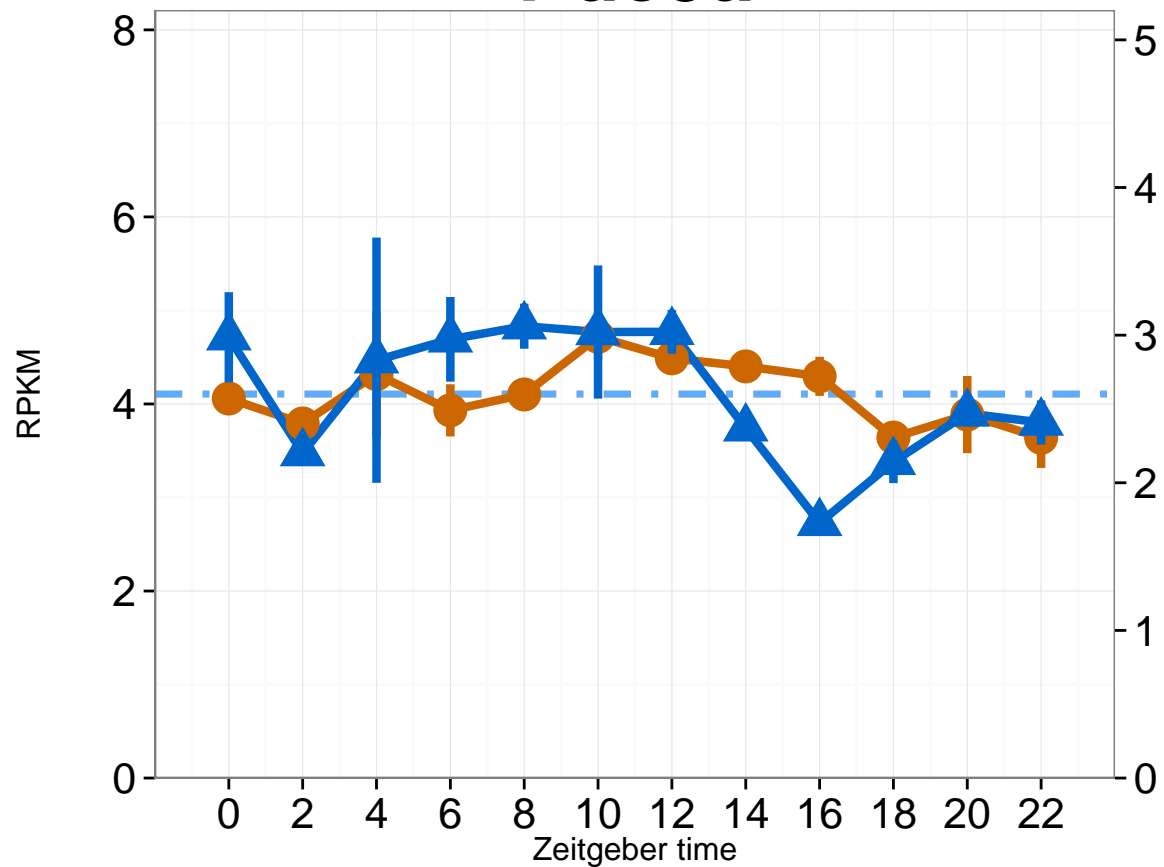

# Pde5a

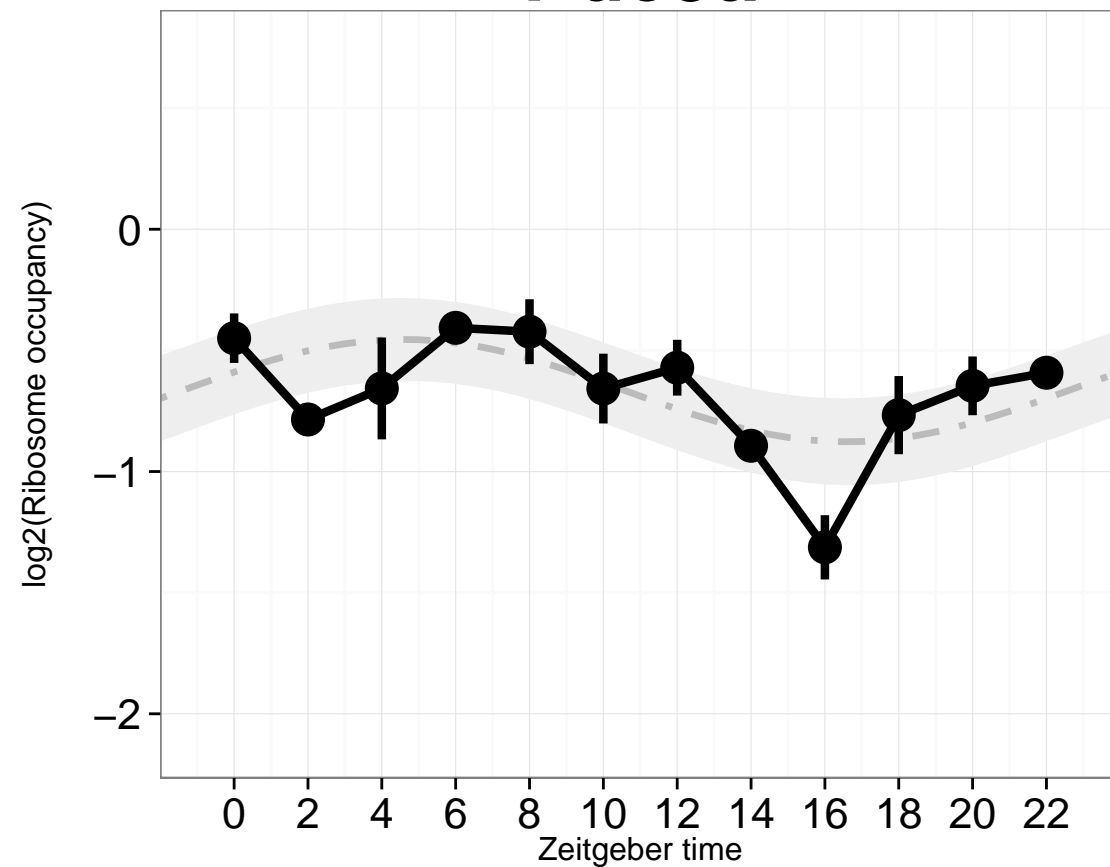

Supplement: Supplementary file 7997 [file 1]

# Ppp4r1

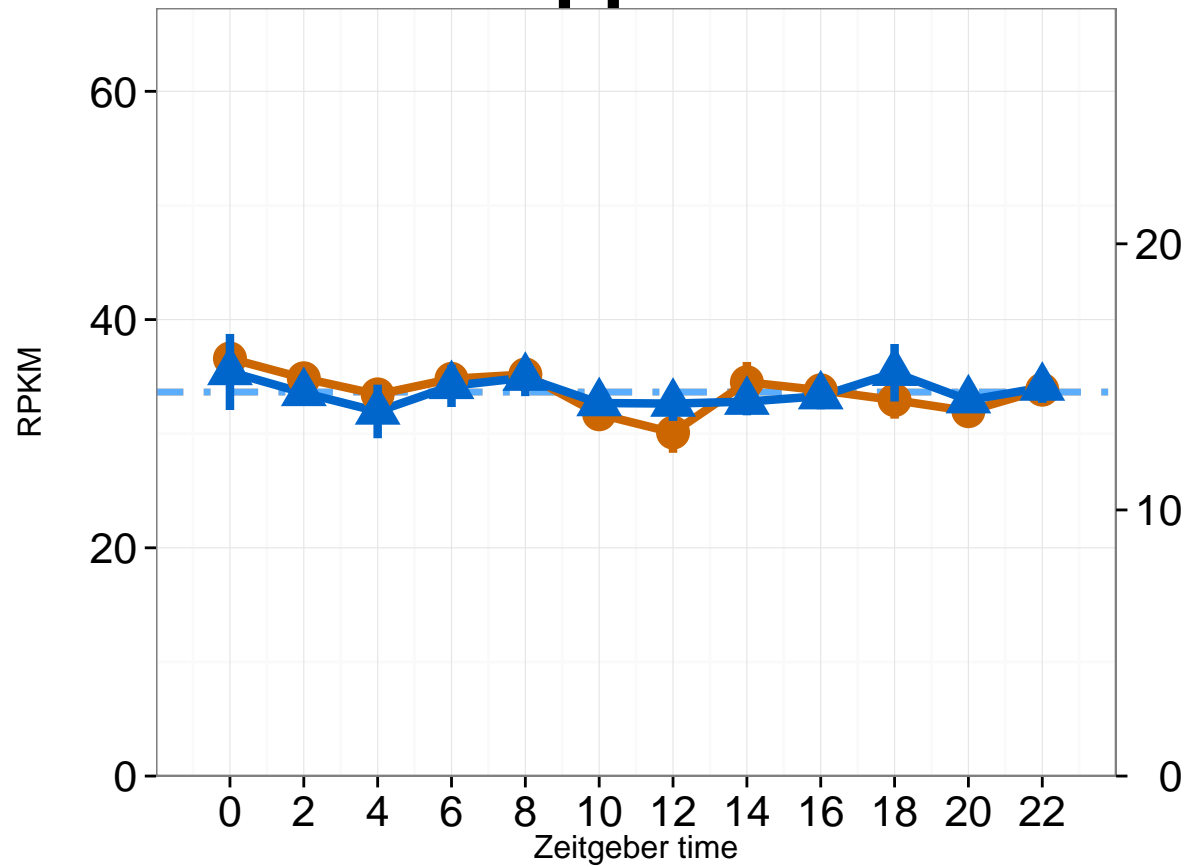

# Ppp4r1

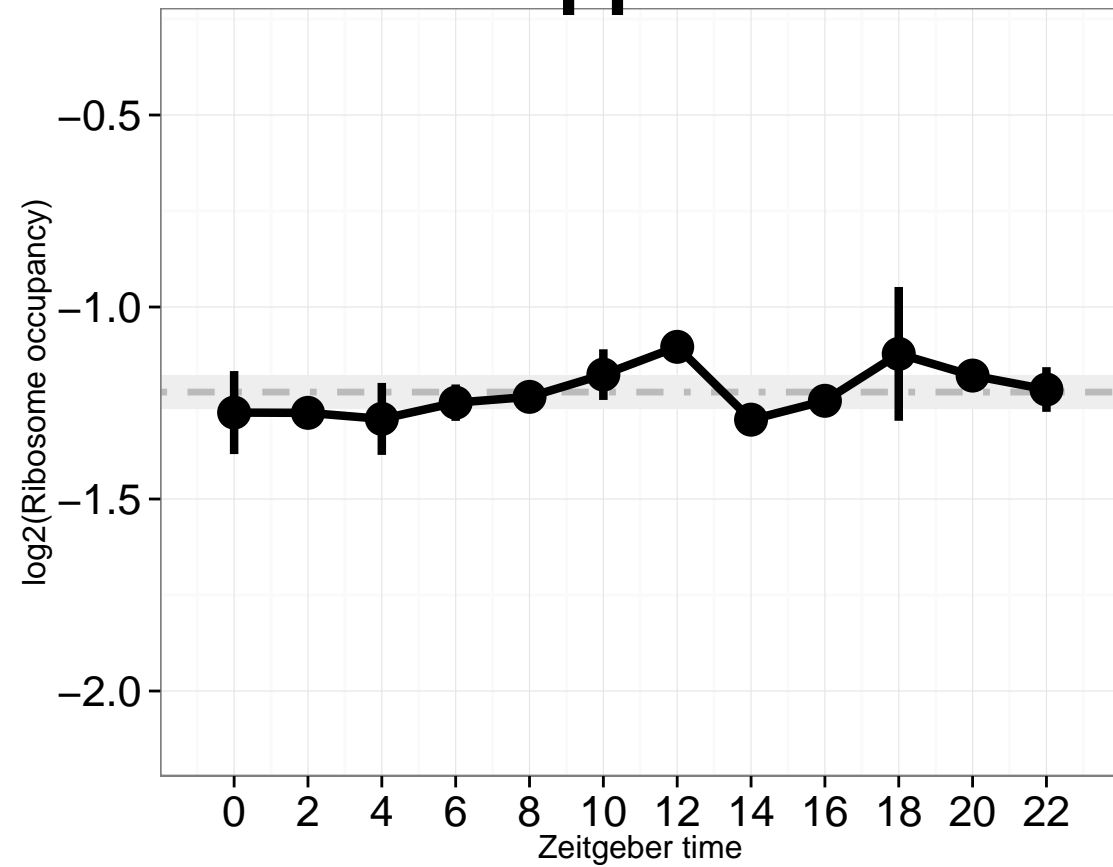

Supplement: Supplementary file 7998 [file 1]

## Myh10

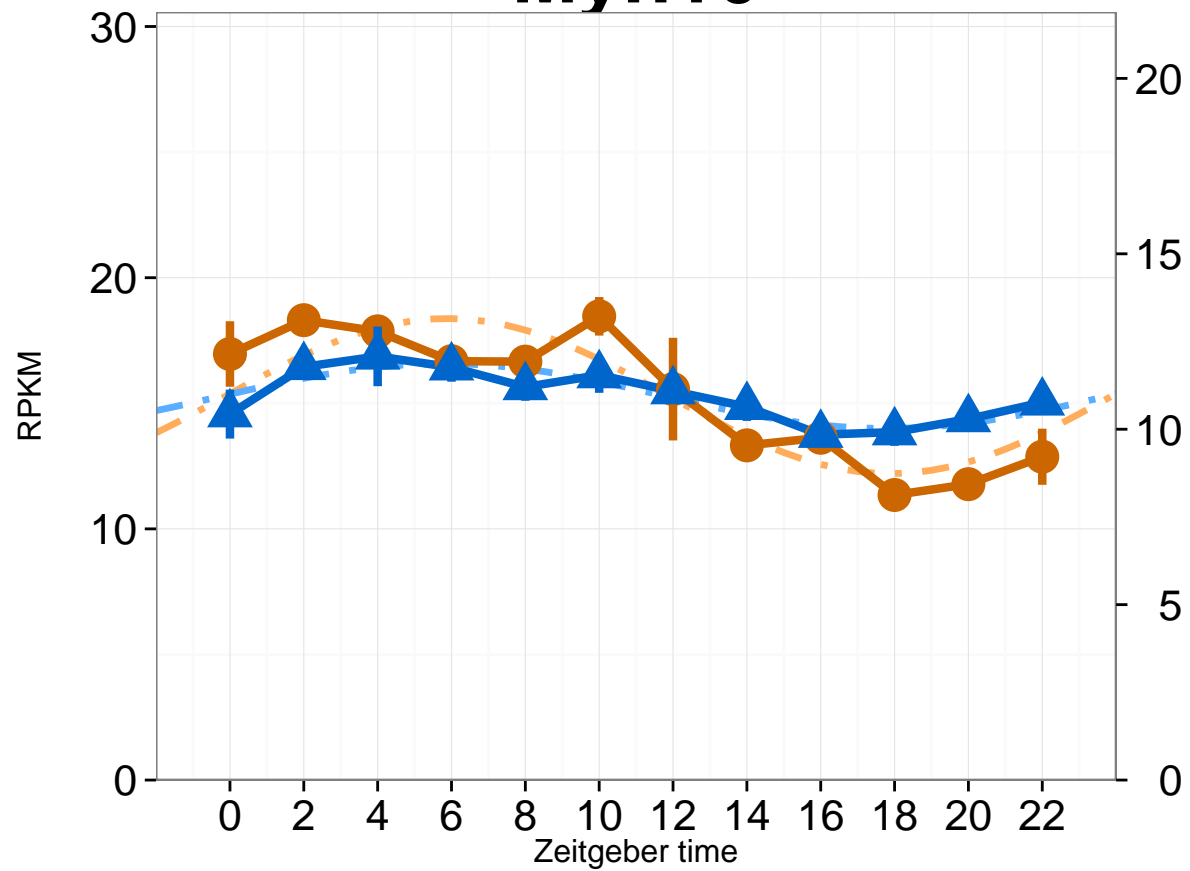

## Myh10

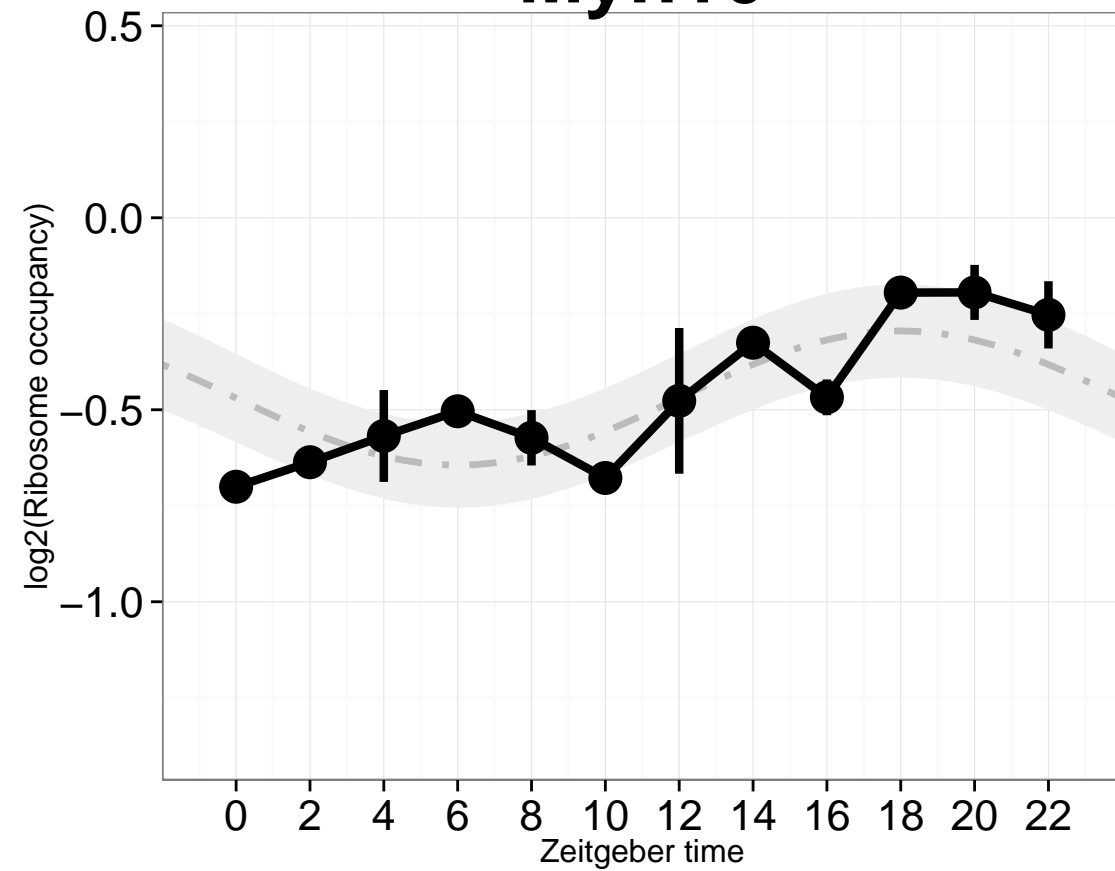

Supplement: Supplementary file 7999 [file 1]

# Ap3s1

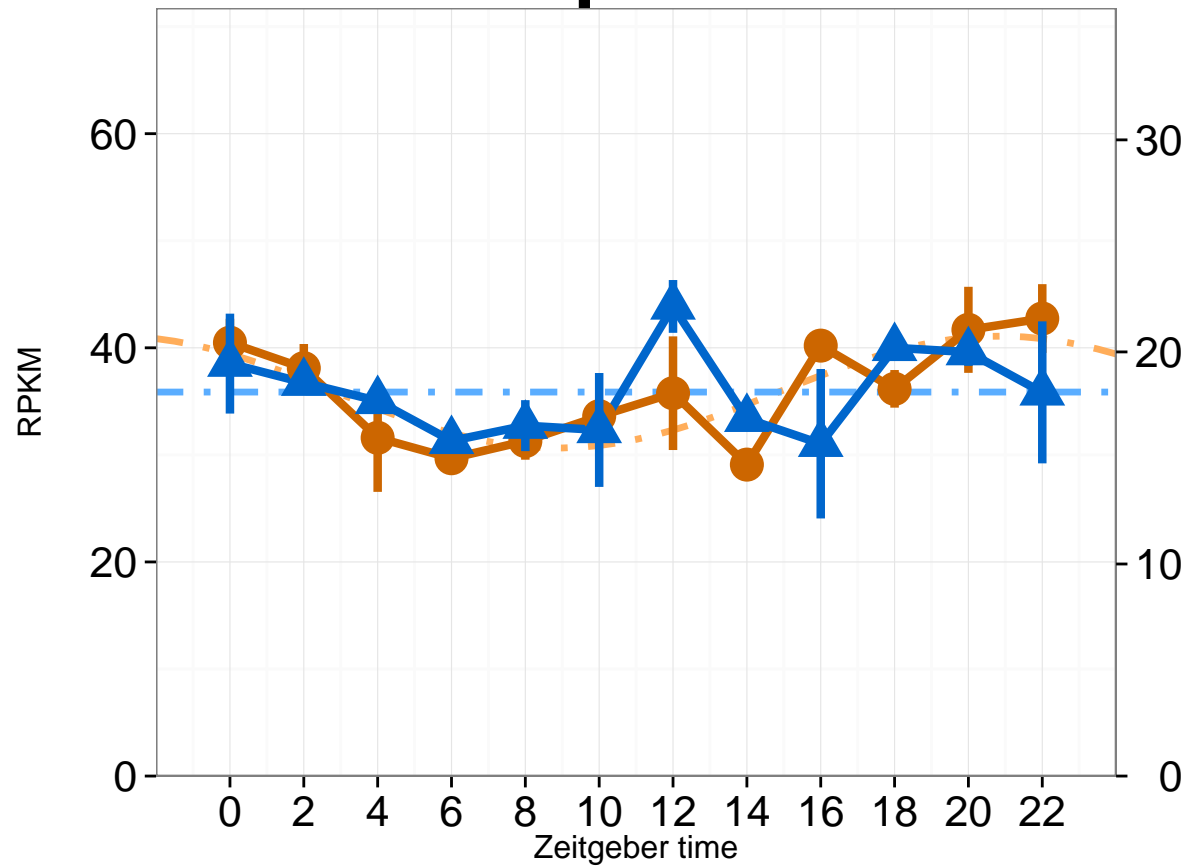

# Ap3s1

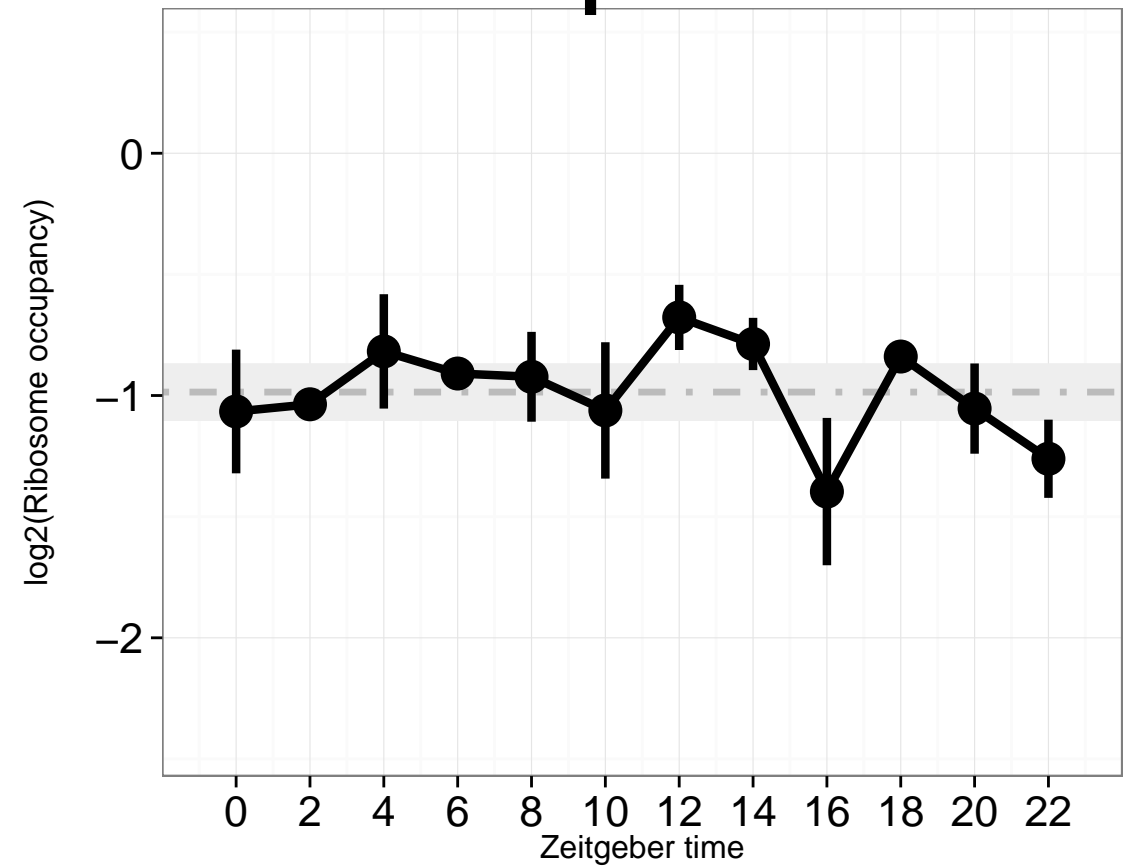

Supplement: Supplementary file 8000 [file 1]

## Hoxc10

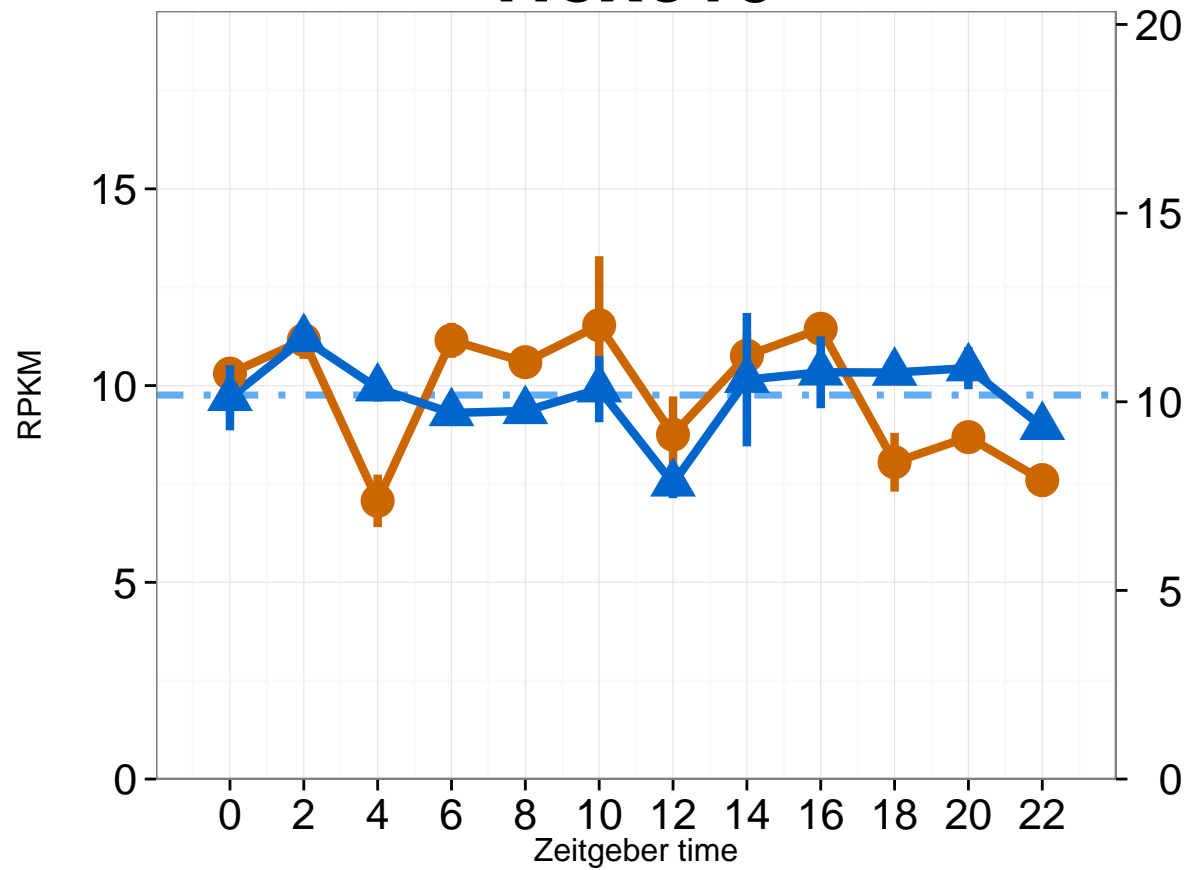

## Hoxc10

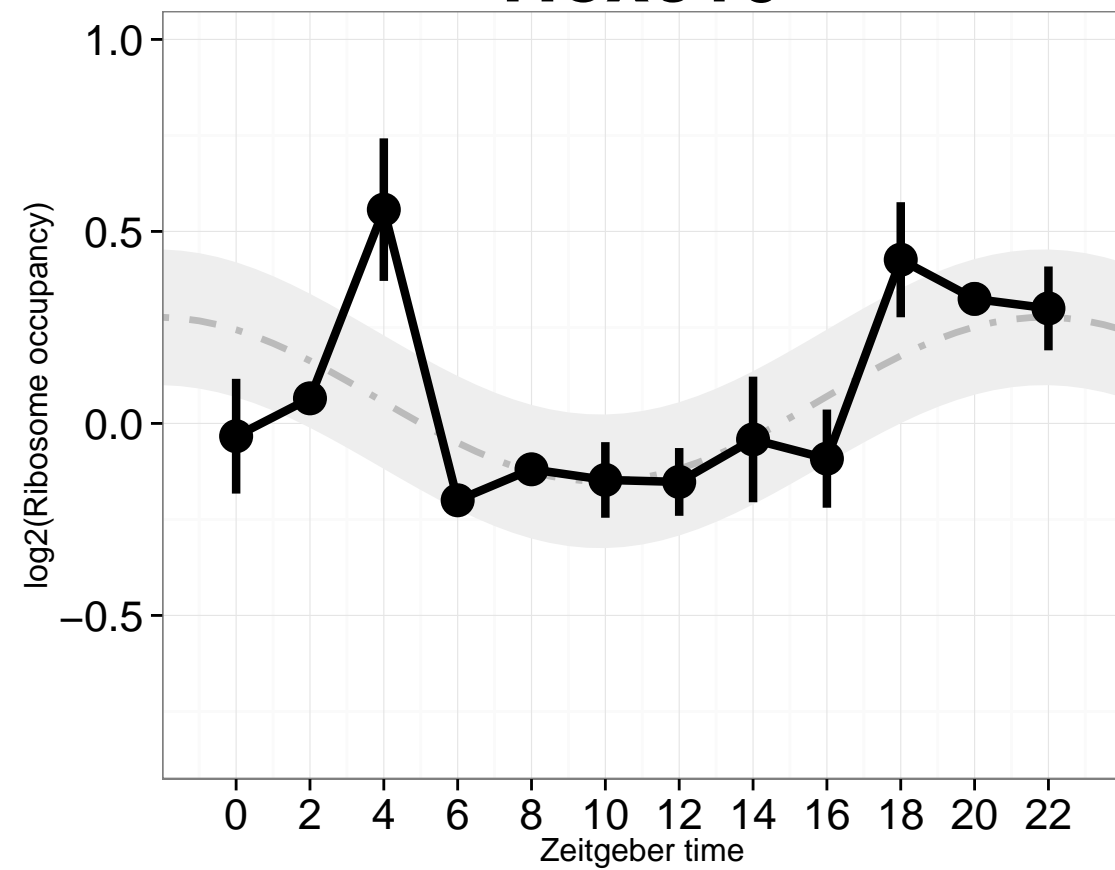

Supplement: Supplementary file 8001 [file 1]

# Rc3h2

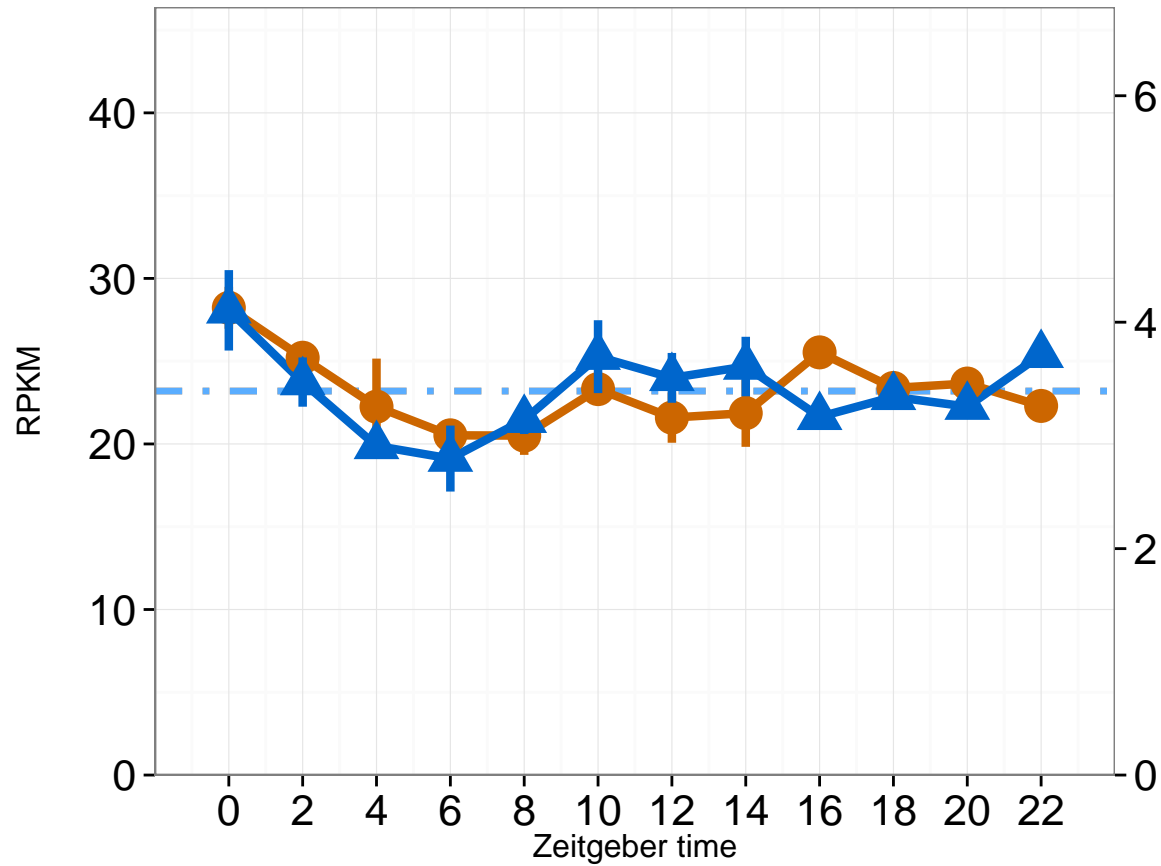

# Rc3h2

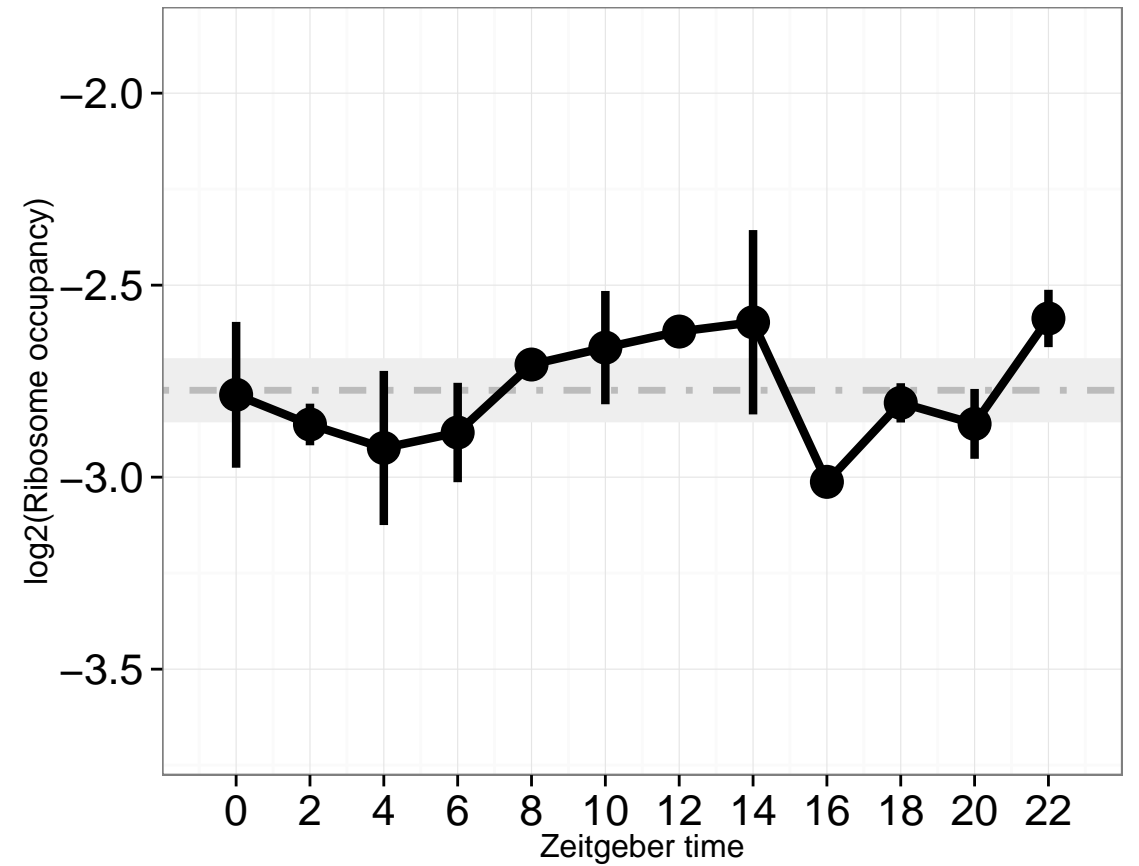

Supplement: Supplementary file 8002 [file 1]

## Thrap3

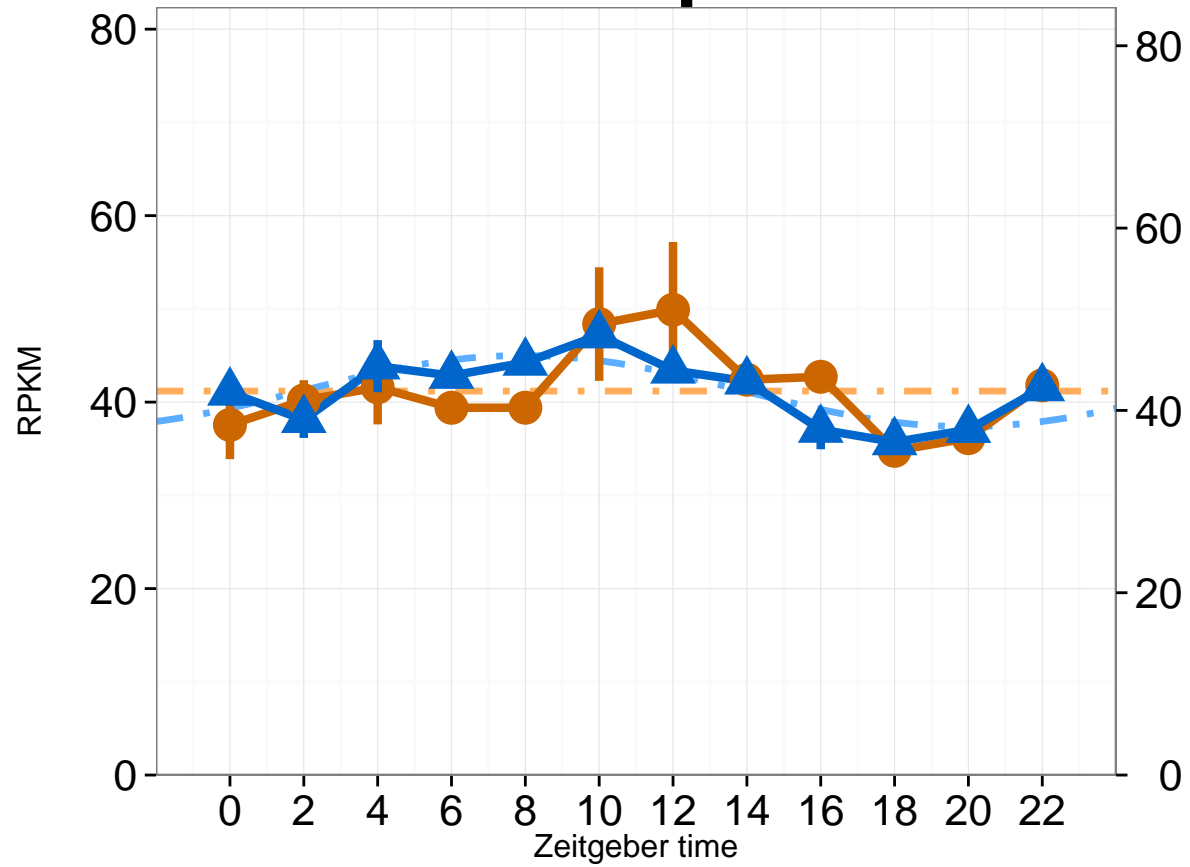

## Thrap3

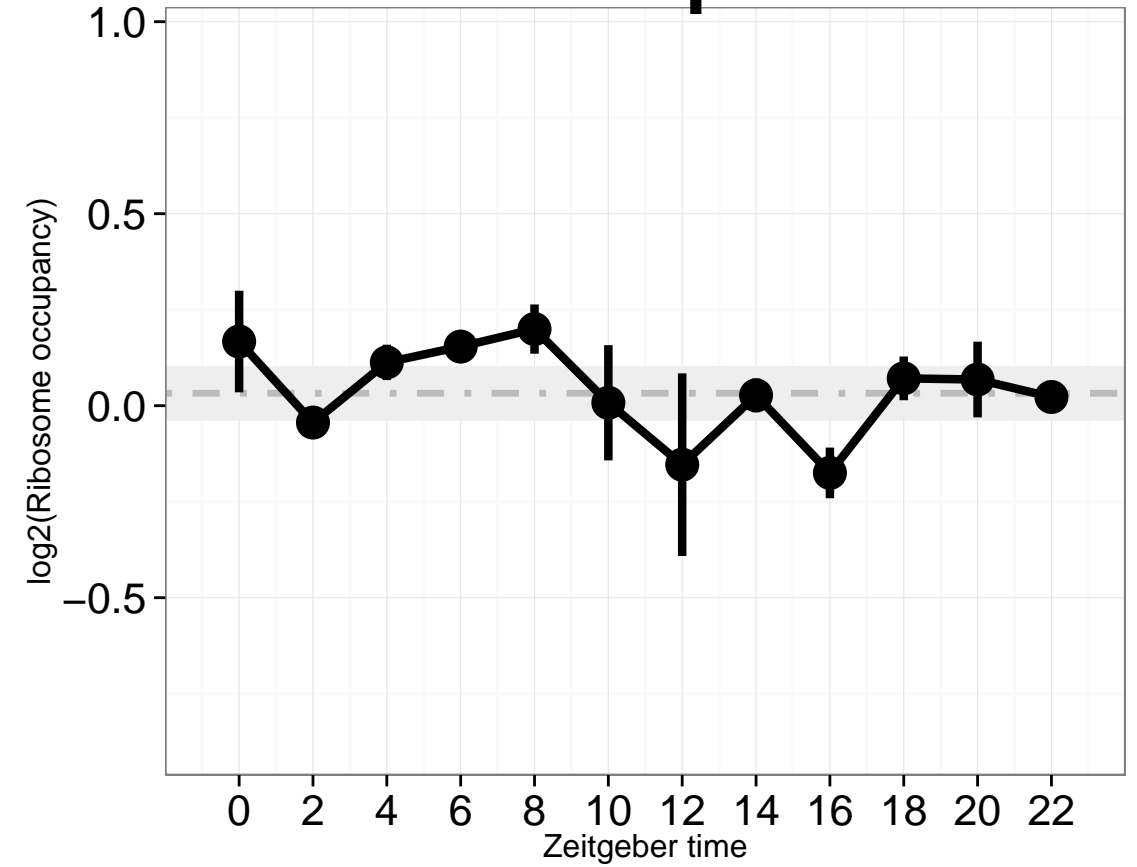

Supplement: Supplementary file 8003 [file 1]

# Nefl TR

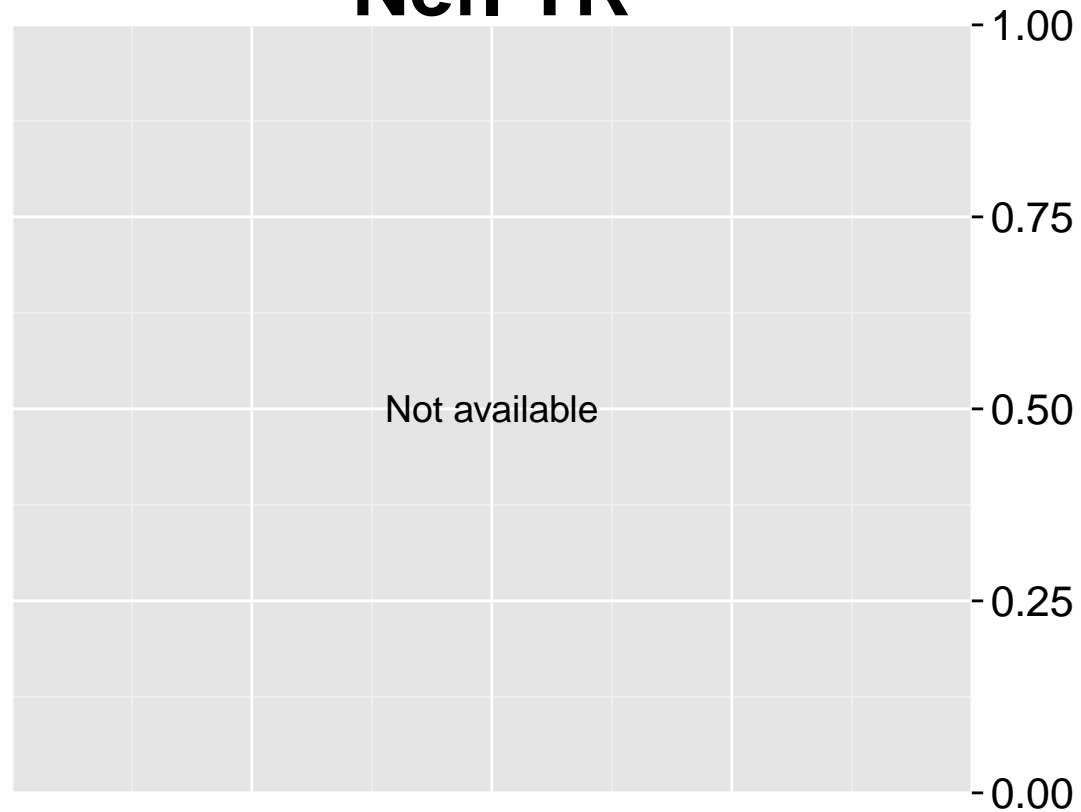

# Nefl log2(Ribosome occupancy)

Supplement: Supplementary file 8004 [file 1]

## Pcdhb9

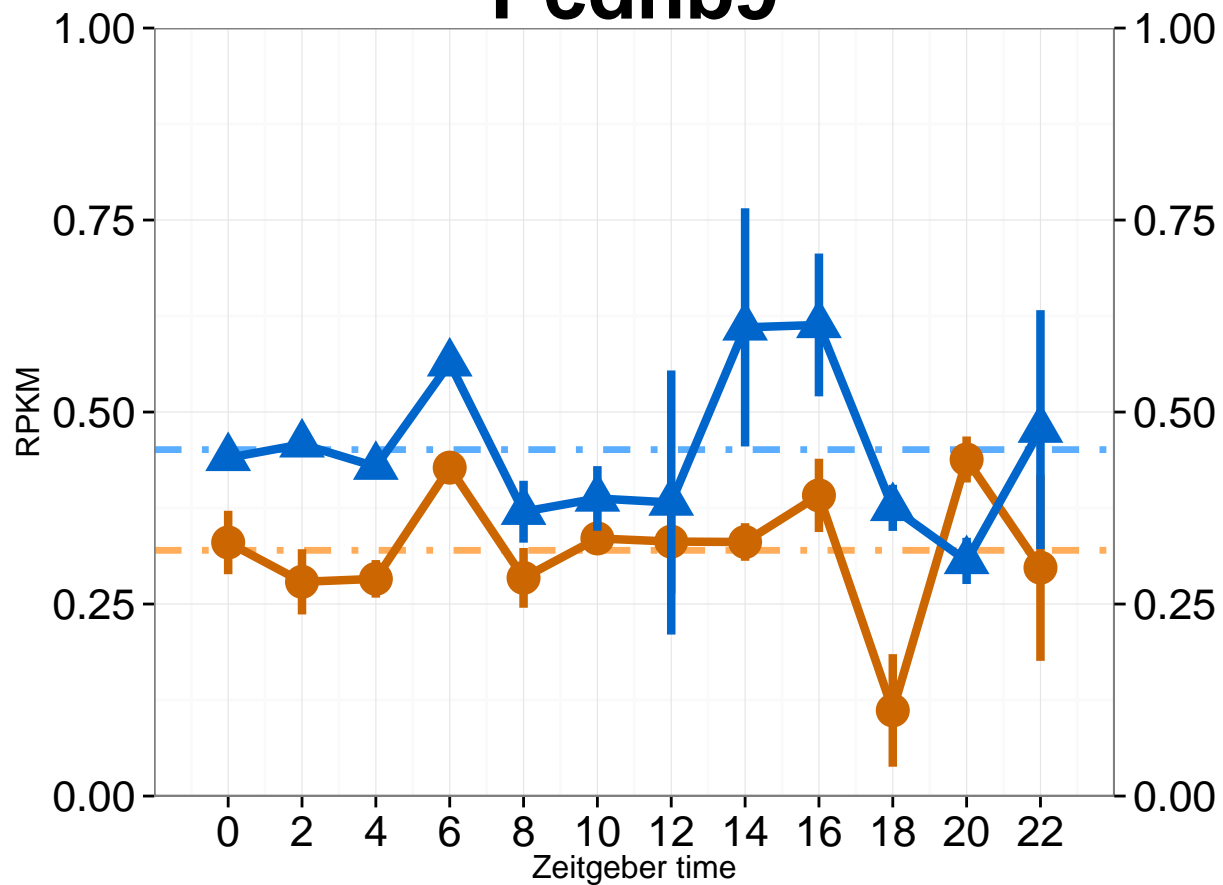

## Pcdhb9

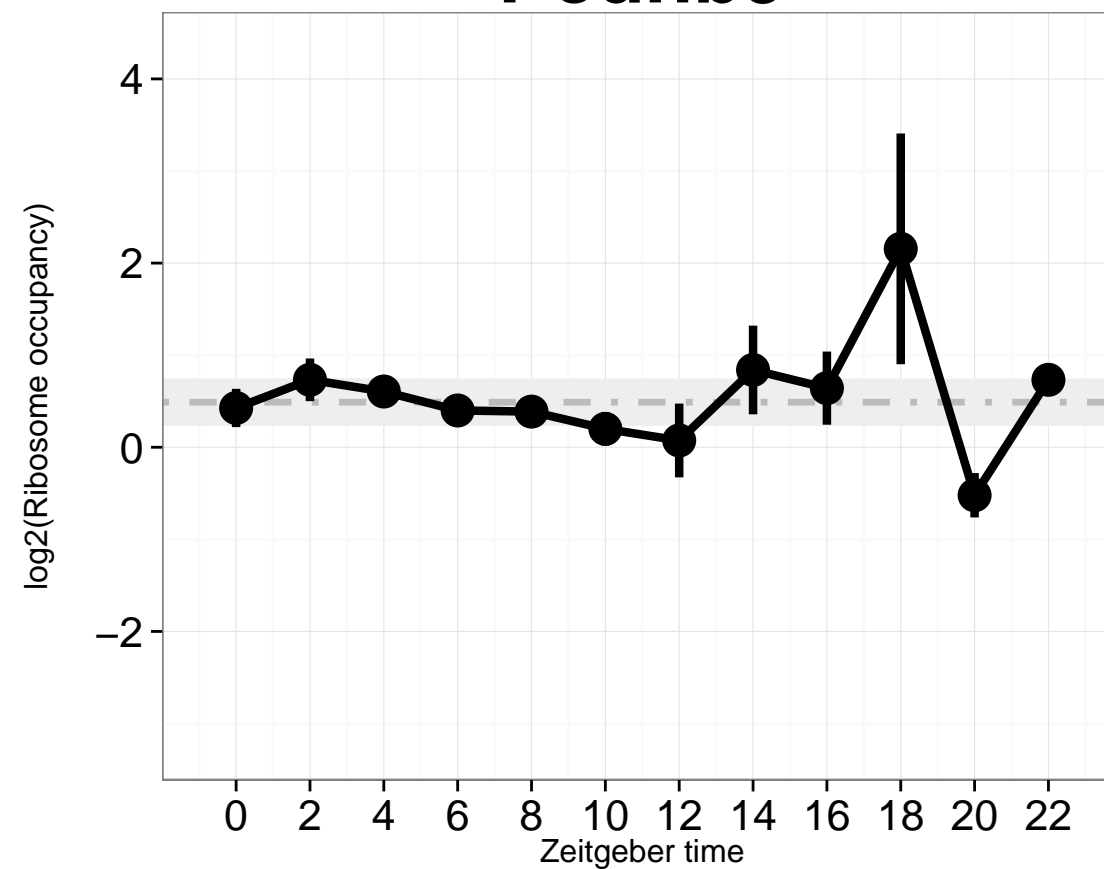

Supplement: Supplementary file 8005 [file 1]

## Ebp

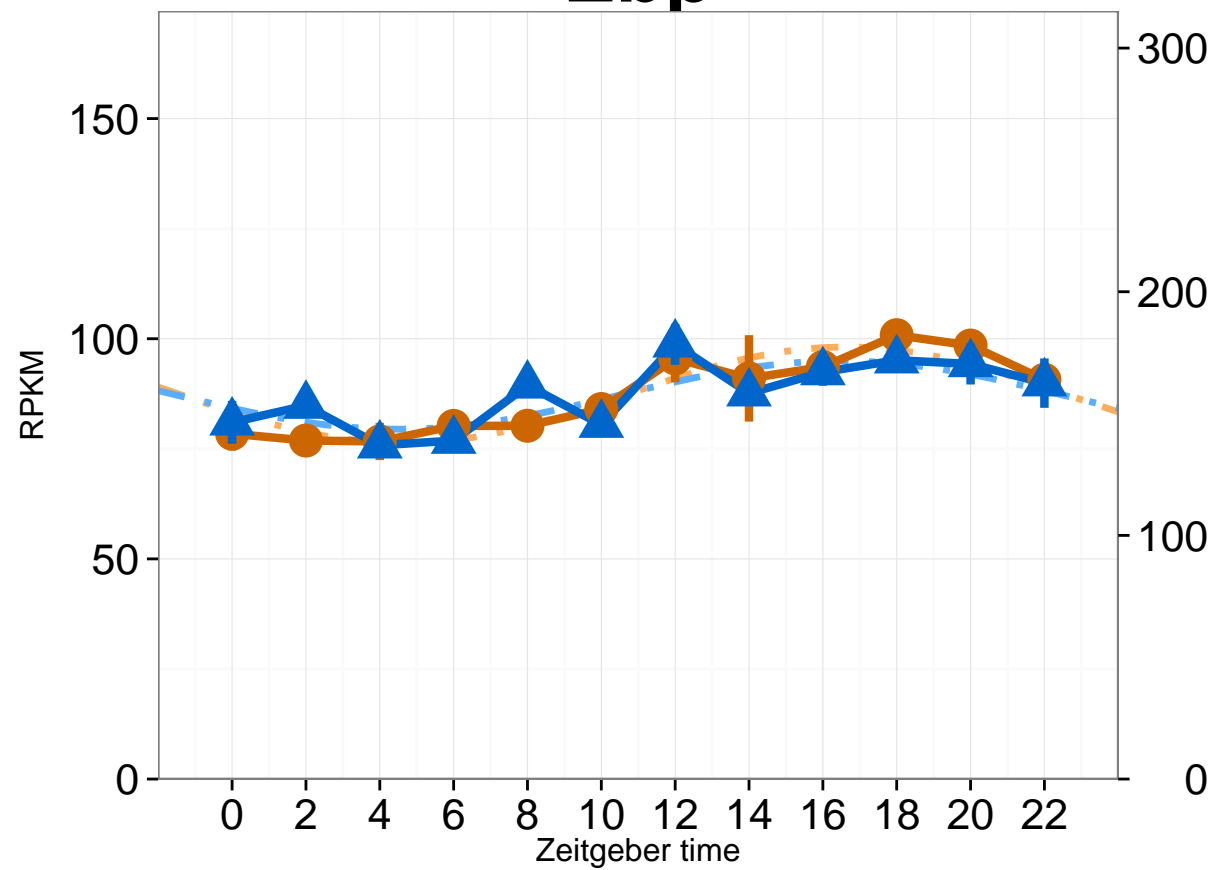

## Ebp

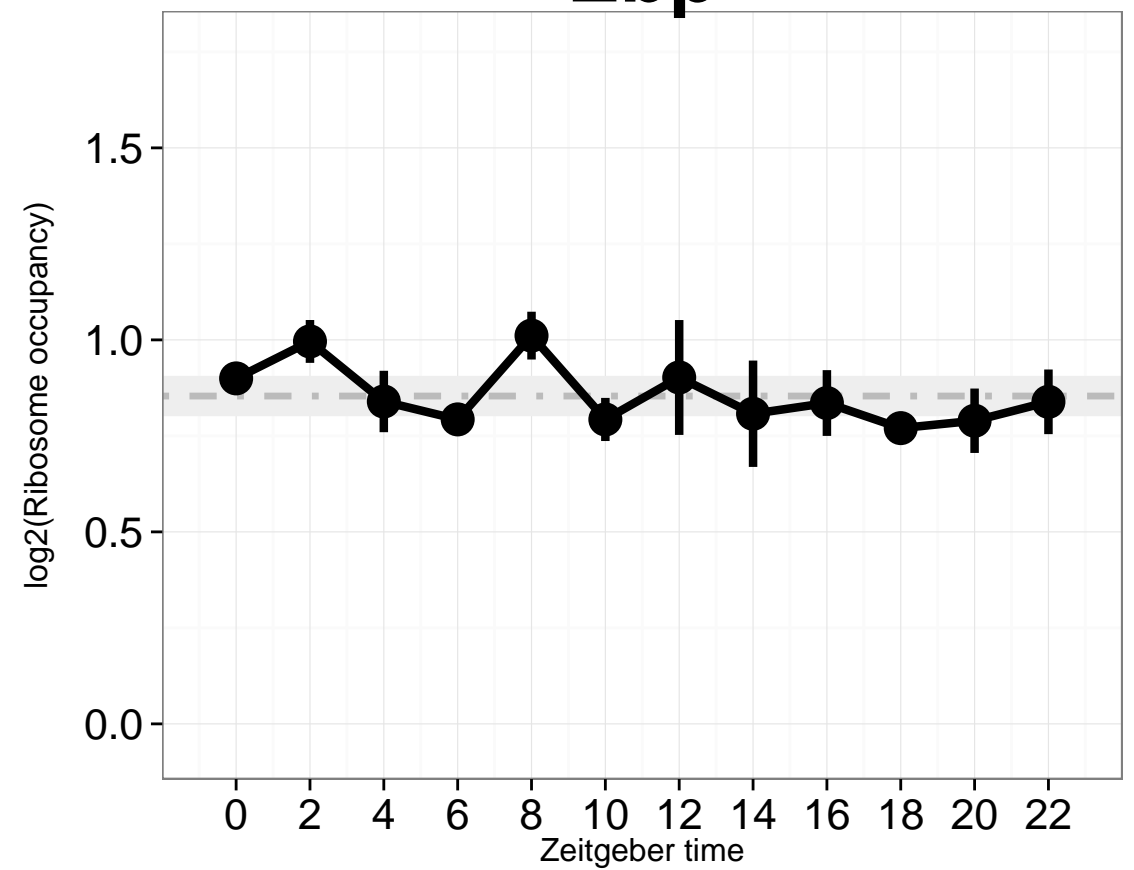

Supplement: Supplementary file 8006 [file 1]

# Mrpl55

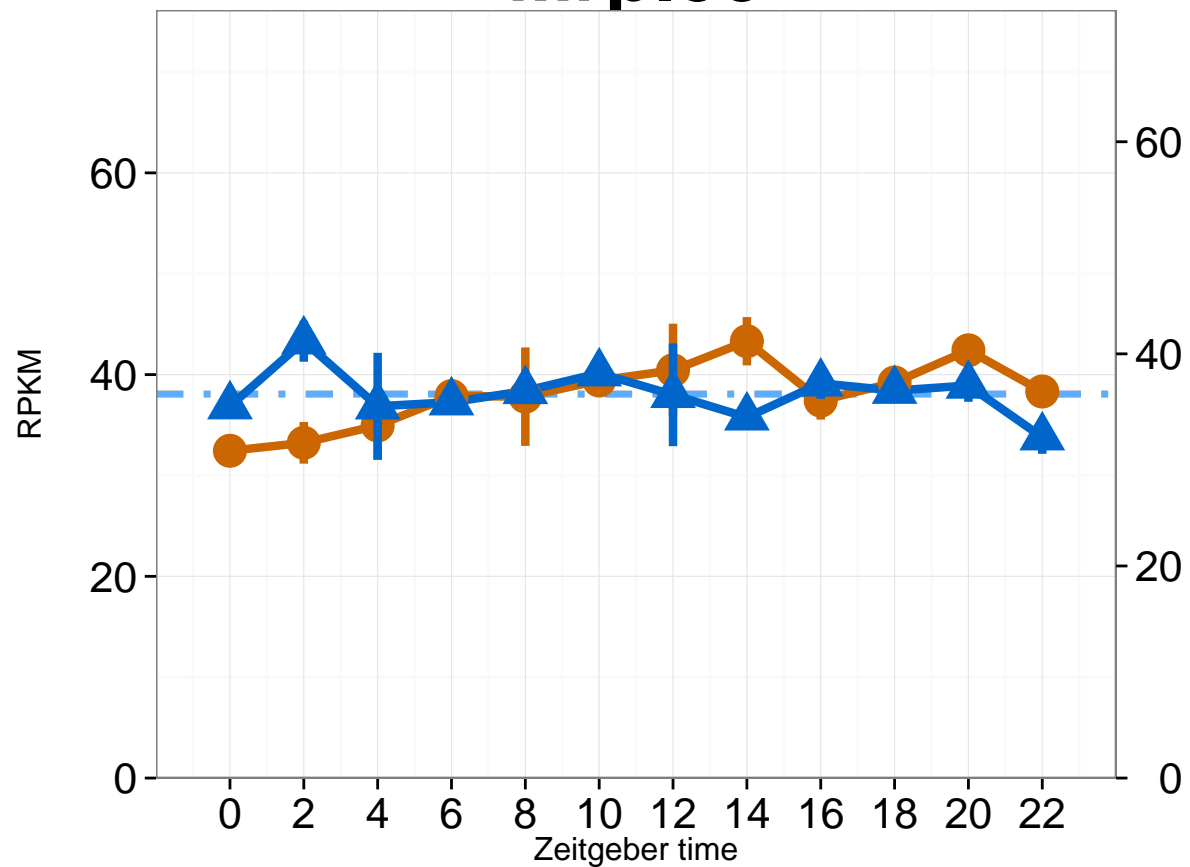

# Mrpl55

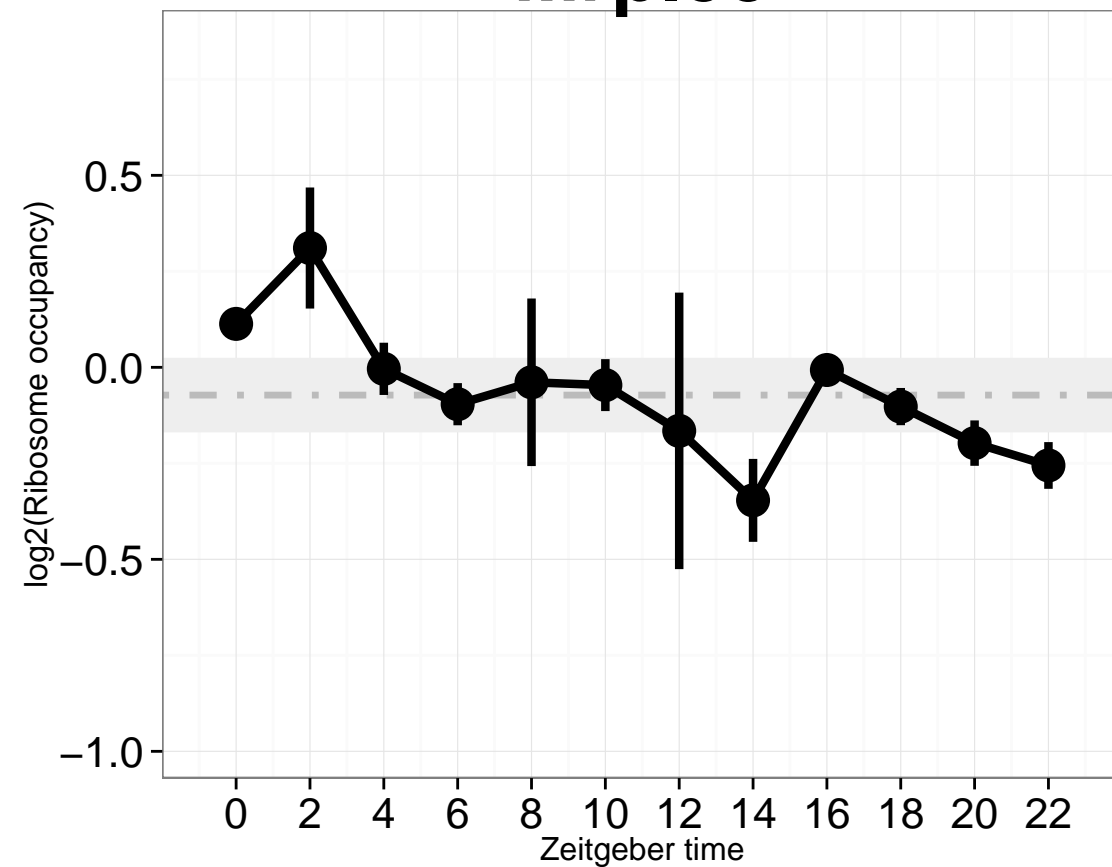

Supplement: Supplementary file 8007 [file 1]

# Fcf1

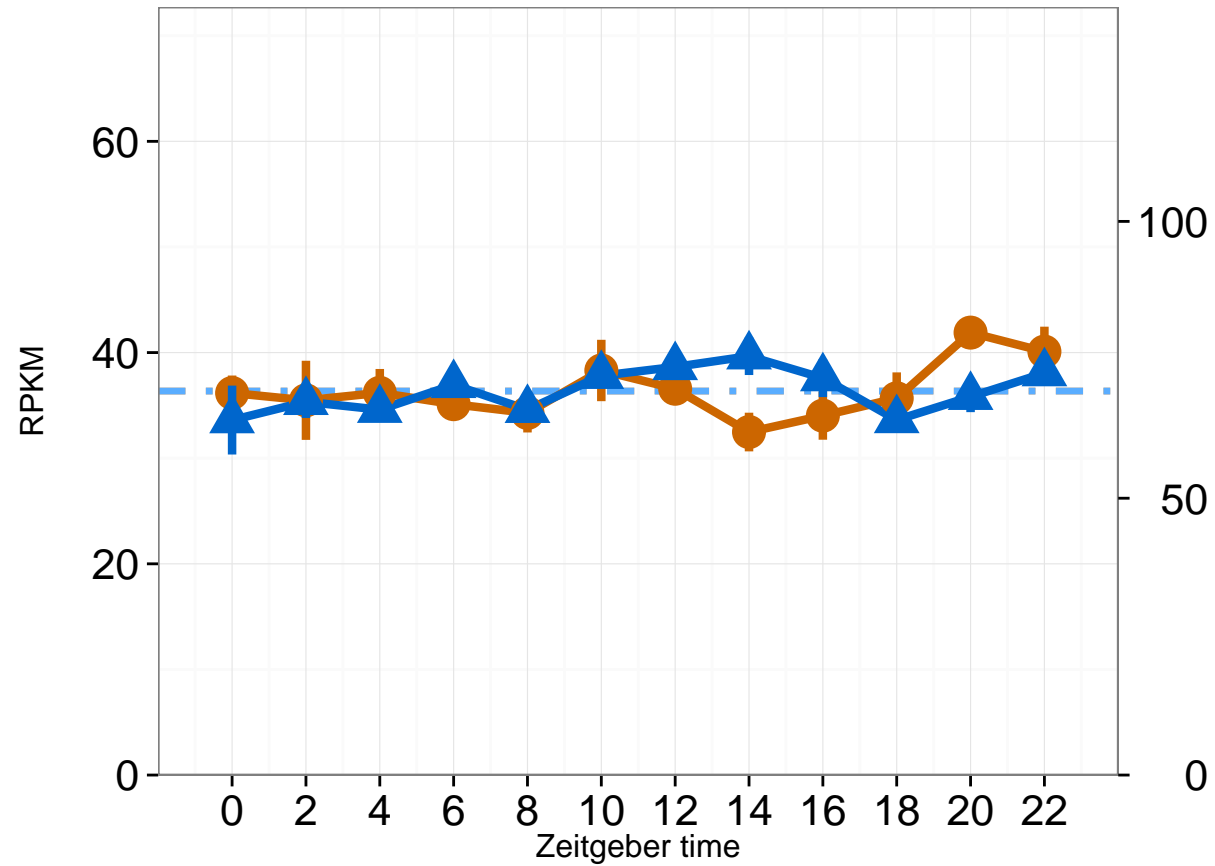

# Fcf1

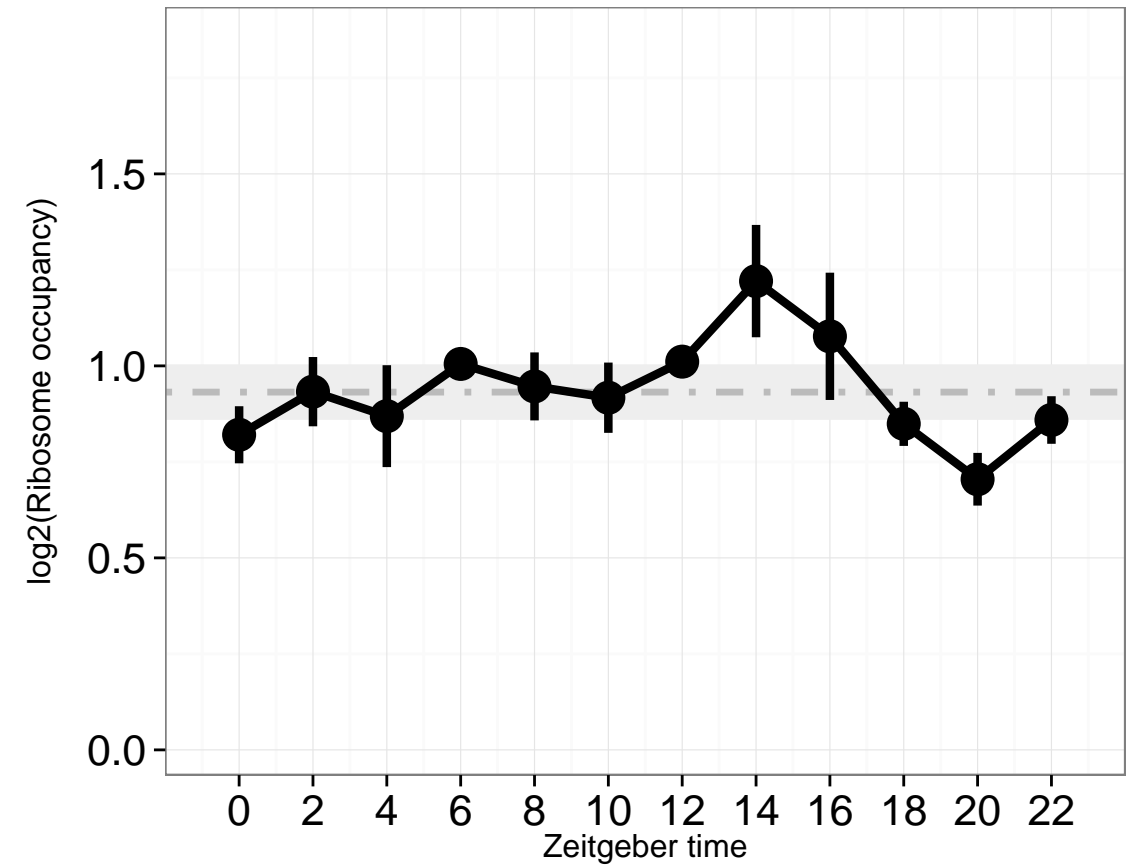

Supplement: Supplementary file 8008 [file 1]

**Gabrd TR**

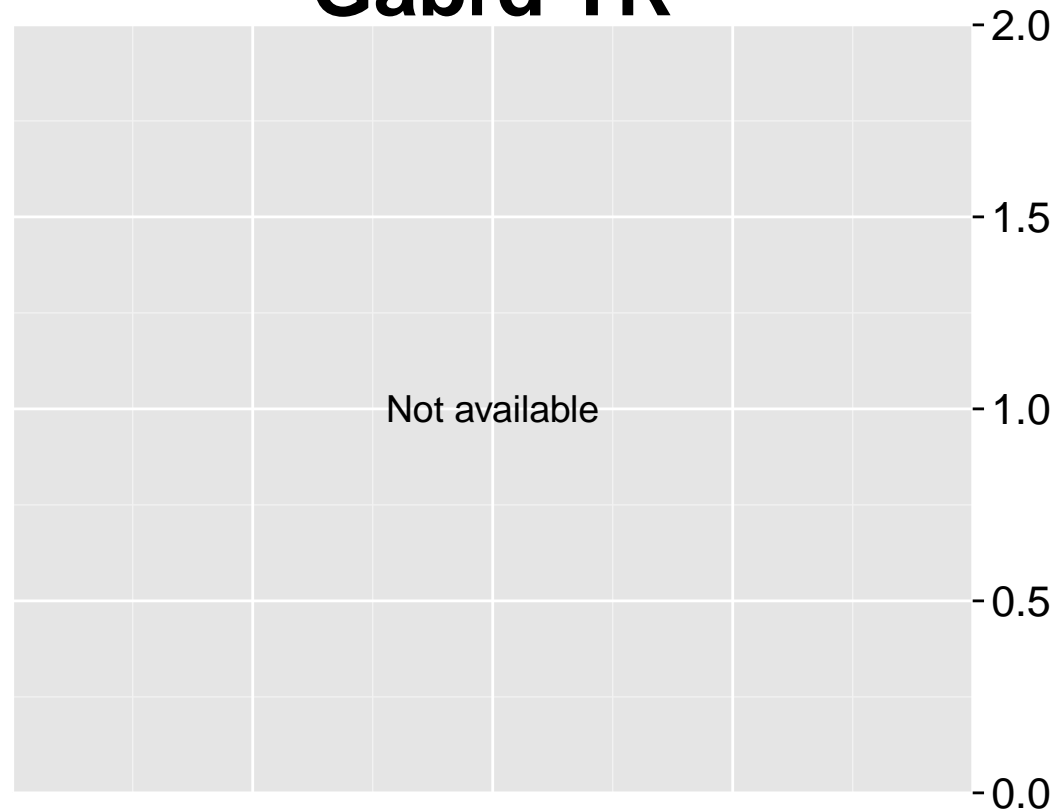

**Gabrd log2(Ribosome occupancy**

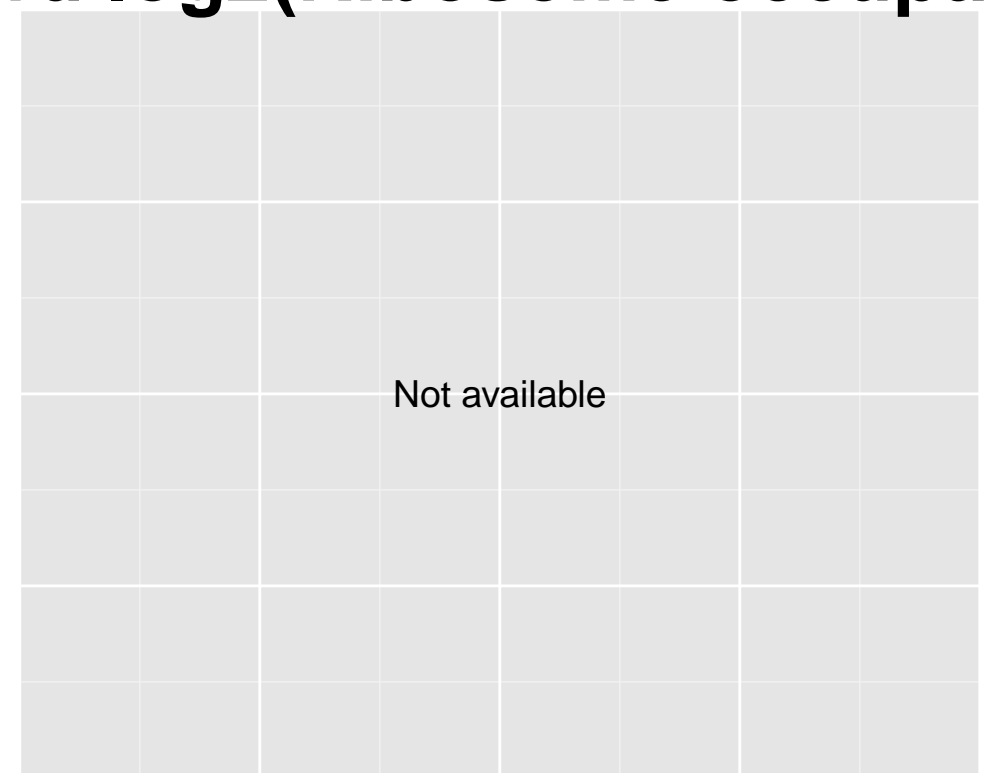

Supplement: Supplementary file 8009 [file 1]

# Kctd14

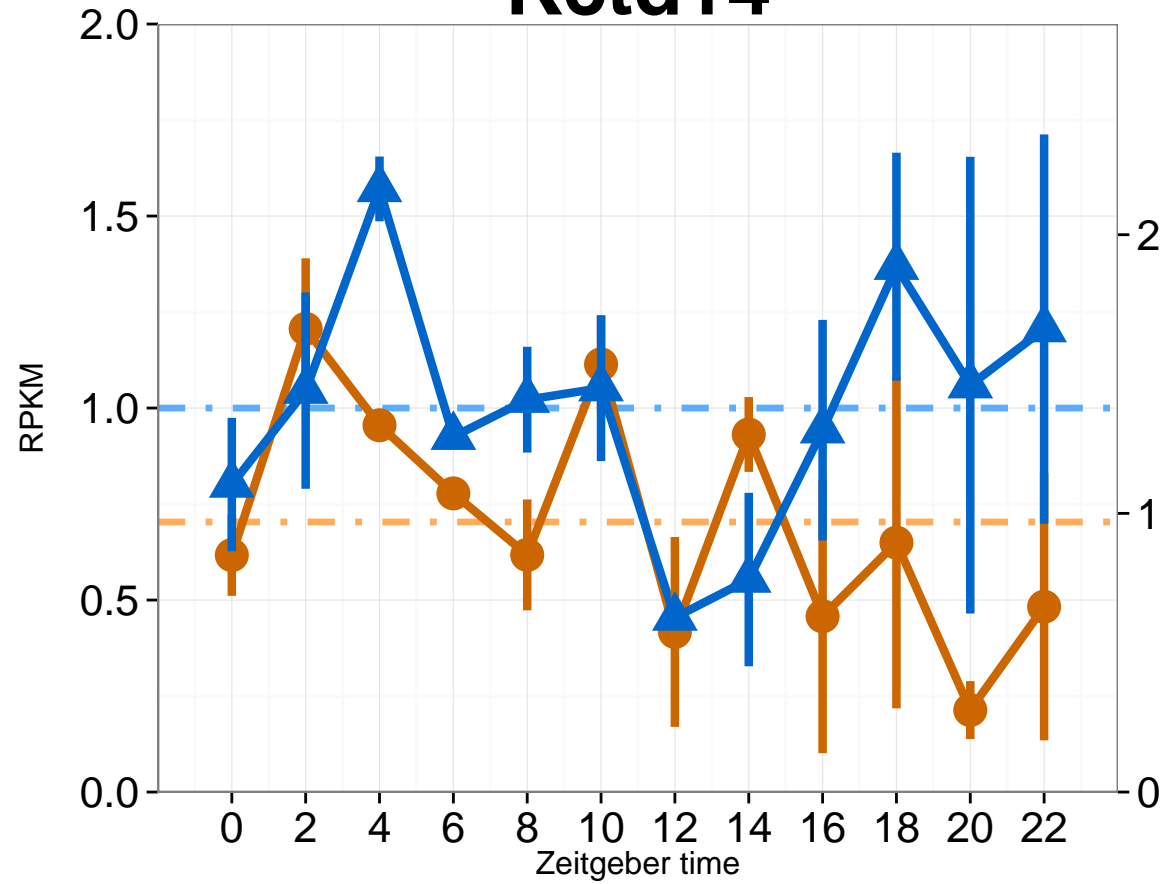

# Kctd14

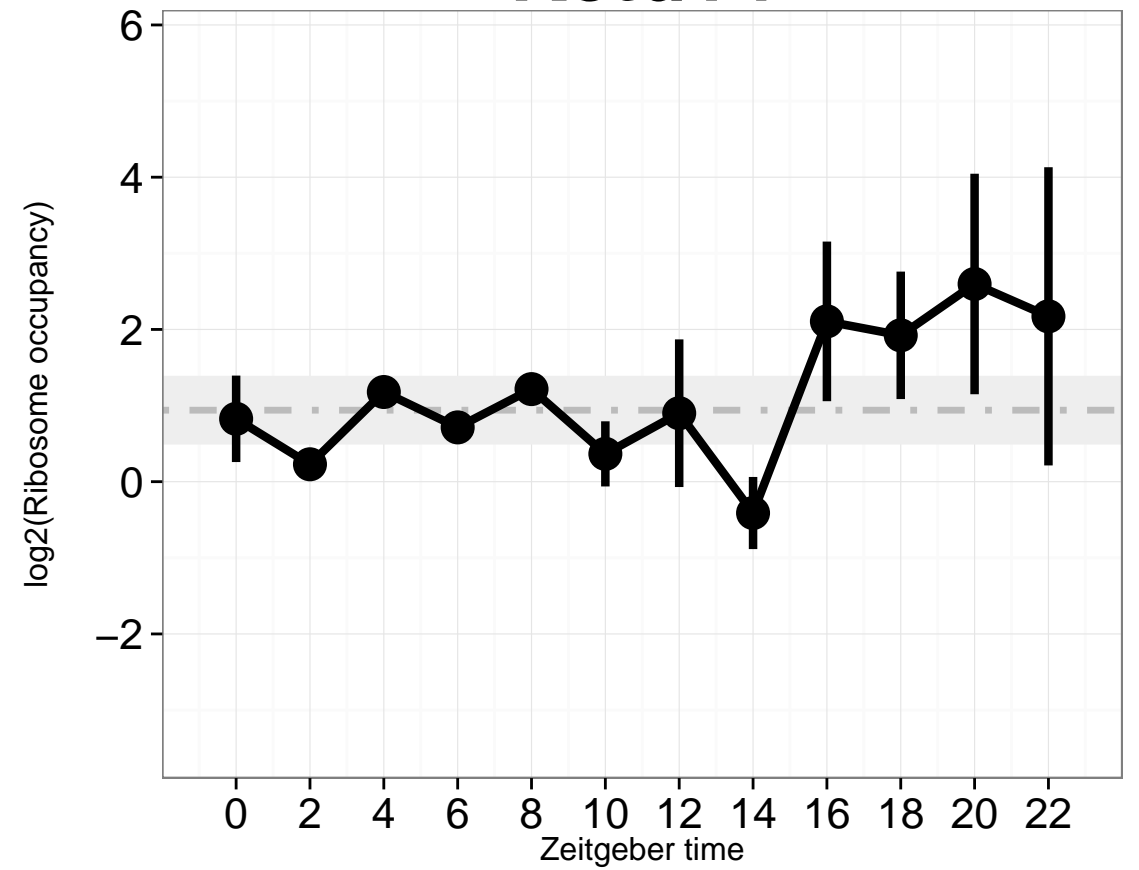

Supplement: Supplementary file 8010 [file 1]

# Rundc3a

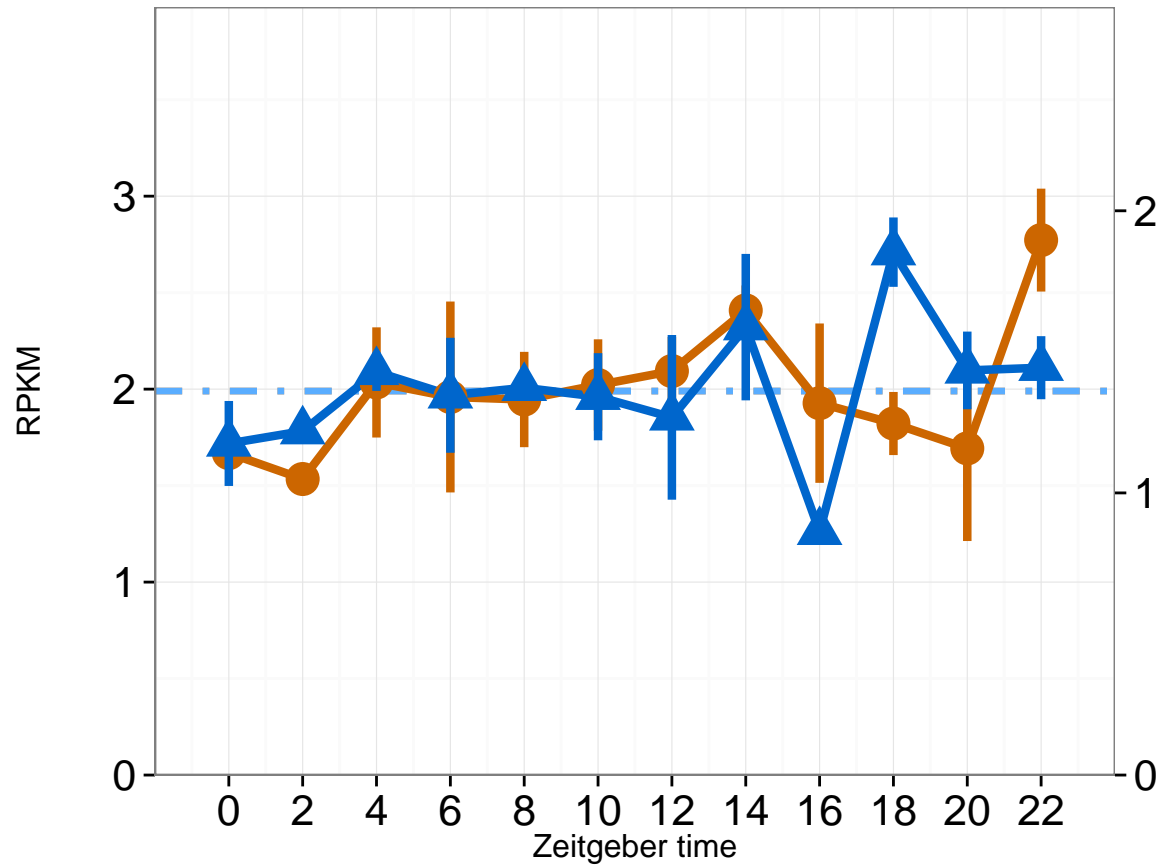

# Rundc3a

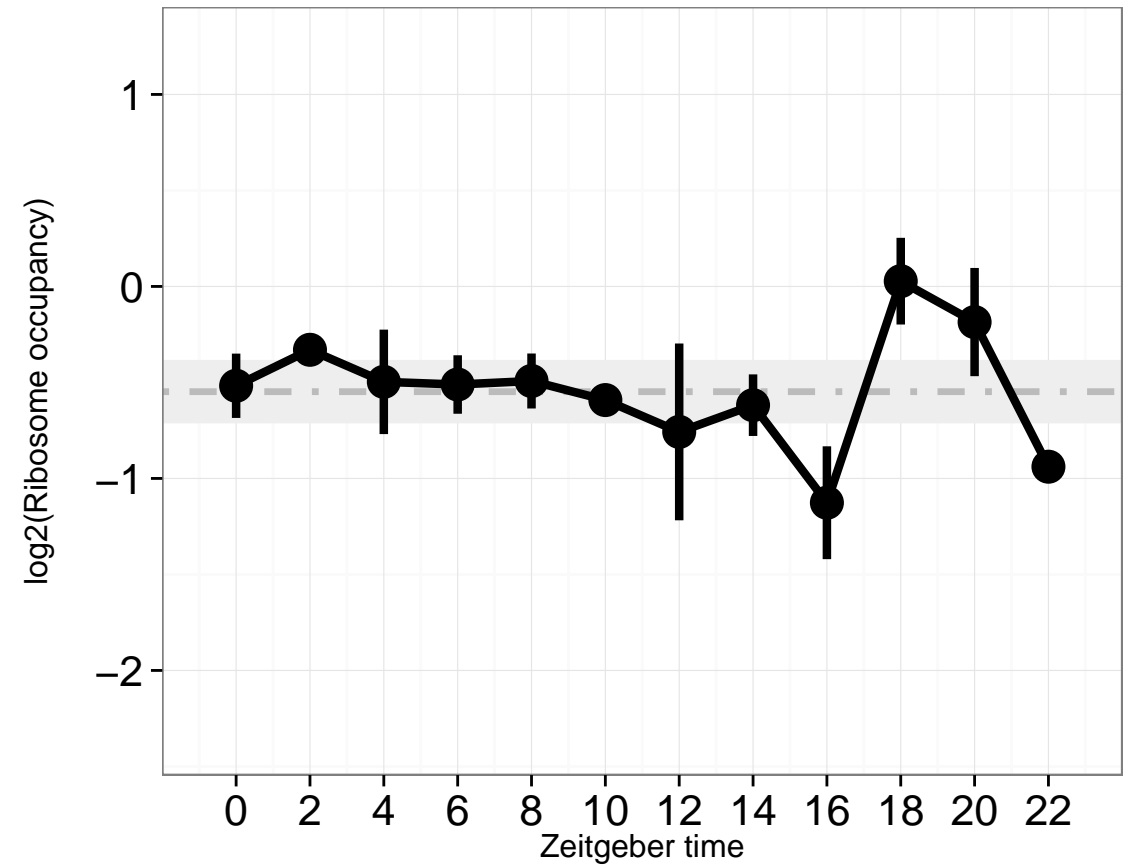

Supplement: Supplementary file 8011 [file 1]

**Jazf1 TR**

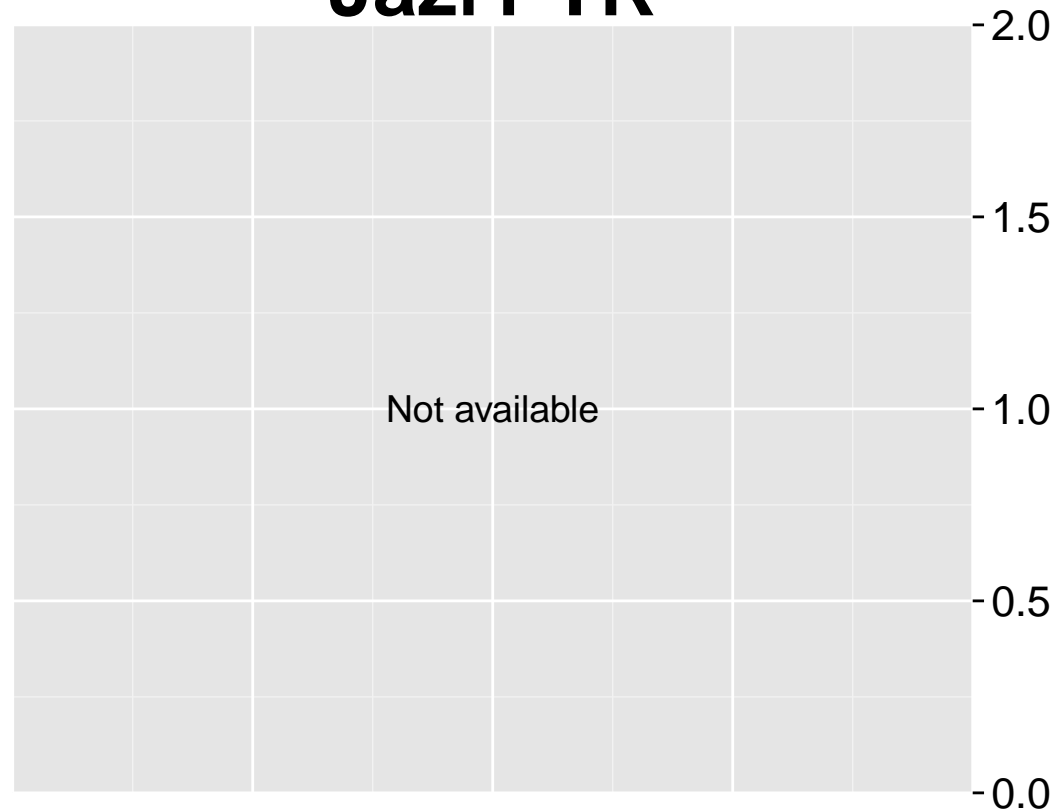

**Jazf1 log2(Ribosome occupancy)**

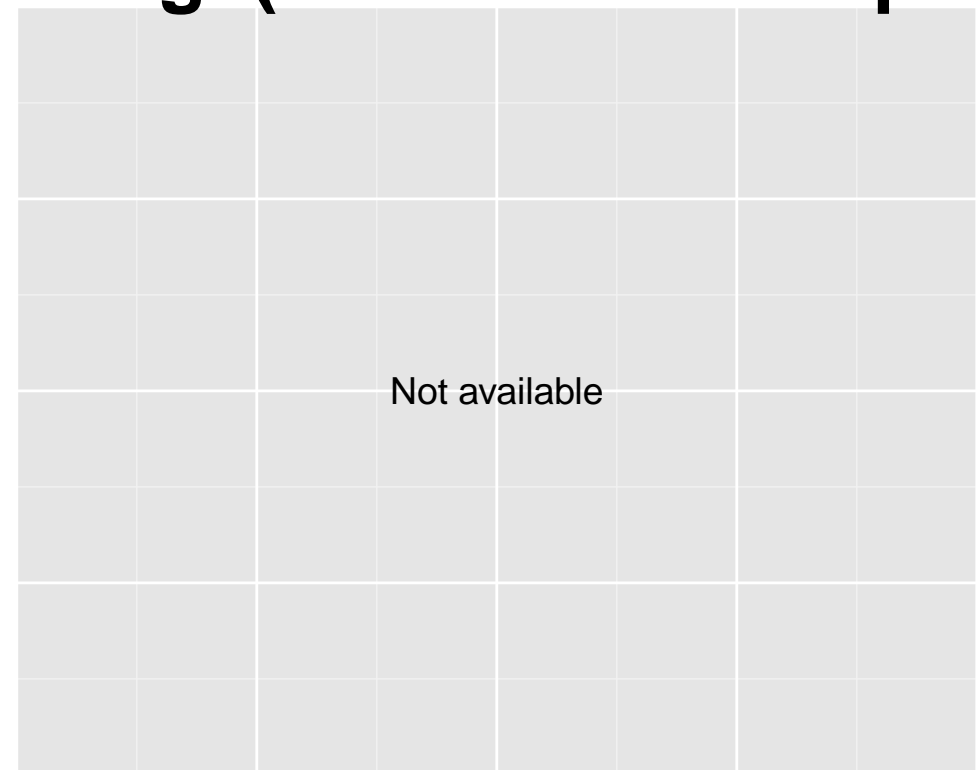

Supplement: Supplementary file 8012 [file 1]

## Asna1

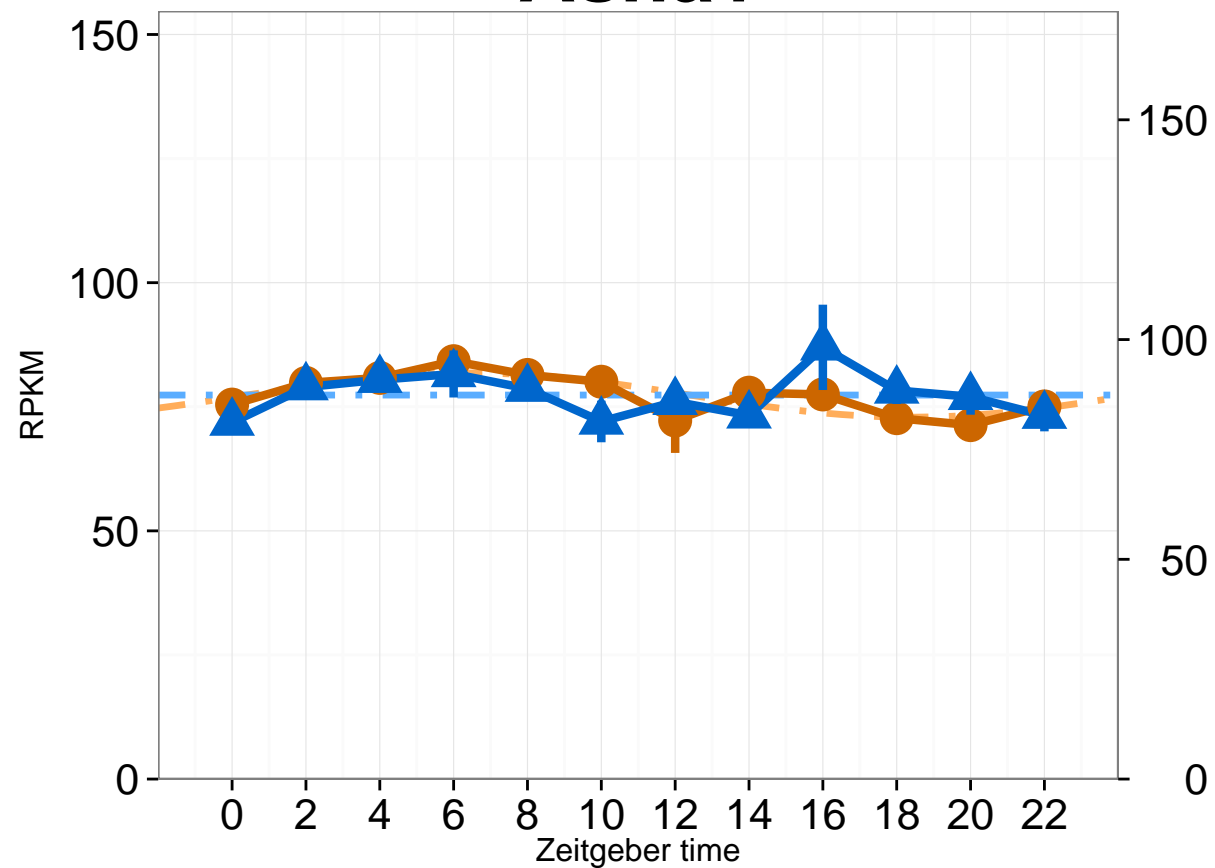

## Asna1

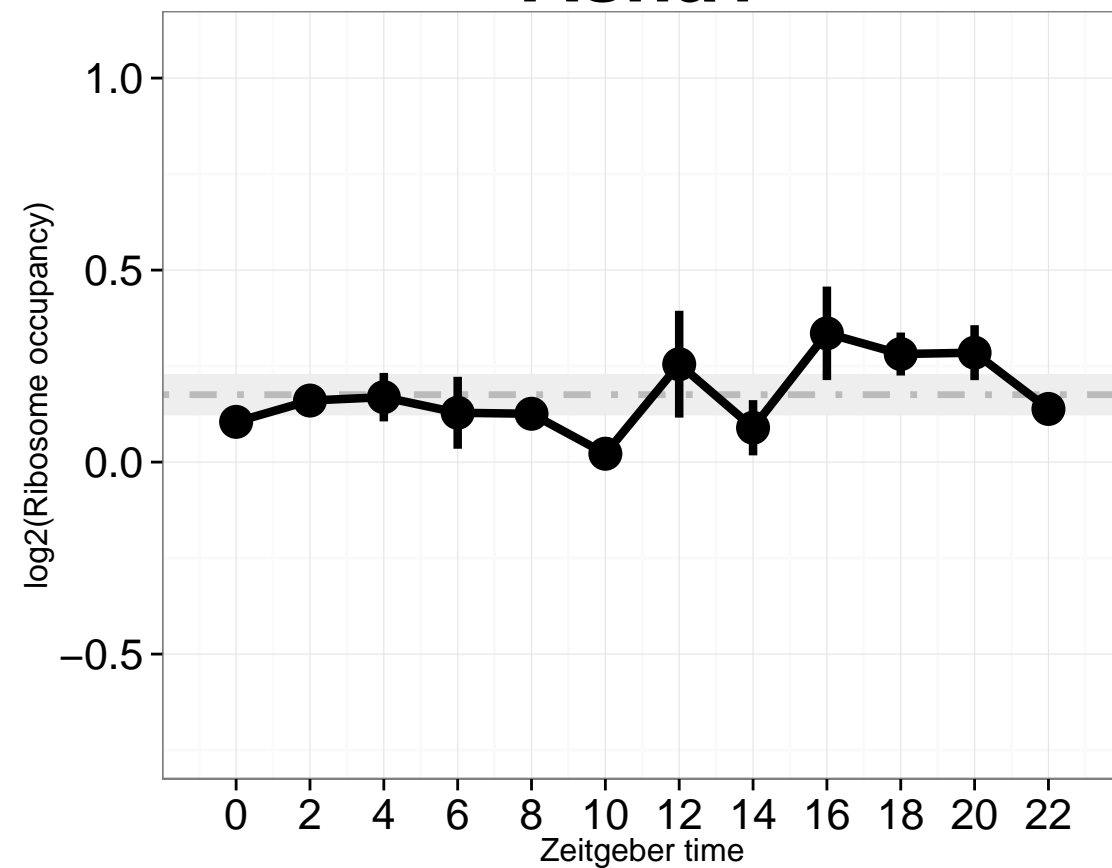

Supplement: Supplementary file 8013 [file 1]

## Rrm2

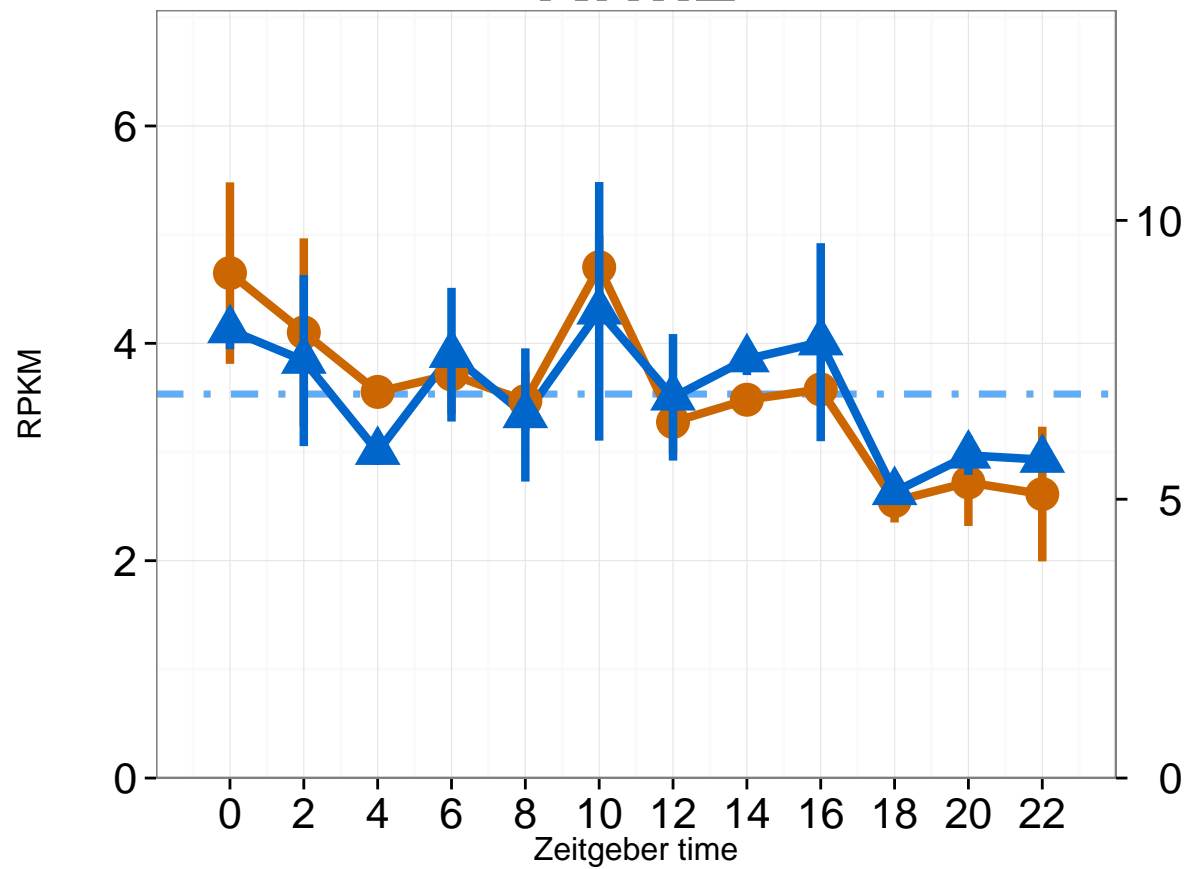

## Rrm2

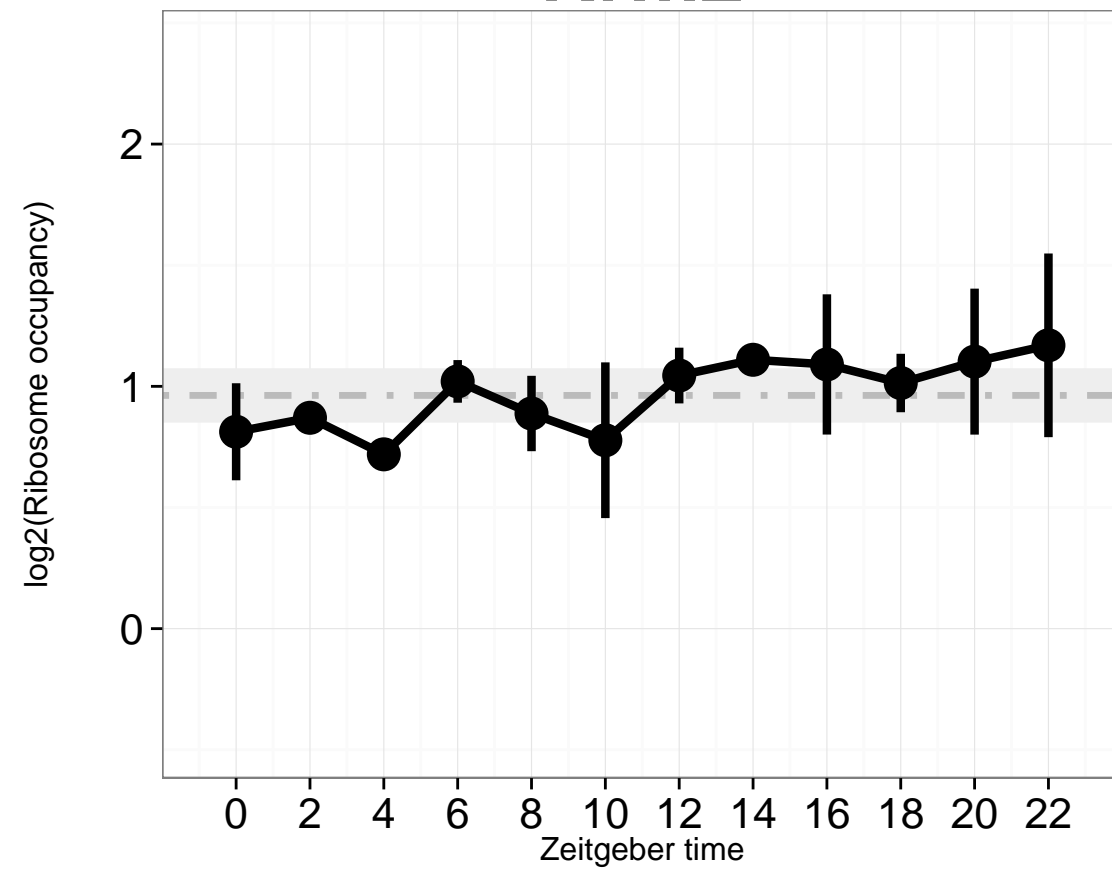

Supplement: Supplementary file 8014 [file 1]

# Rgs6

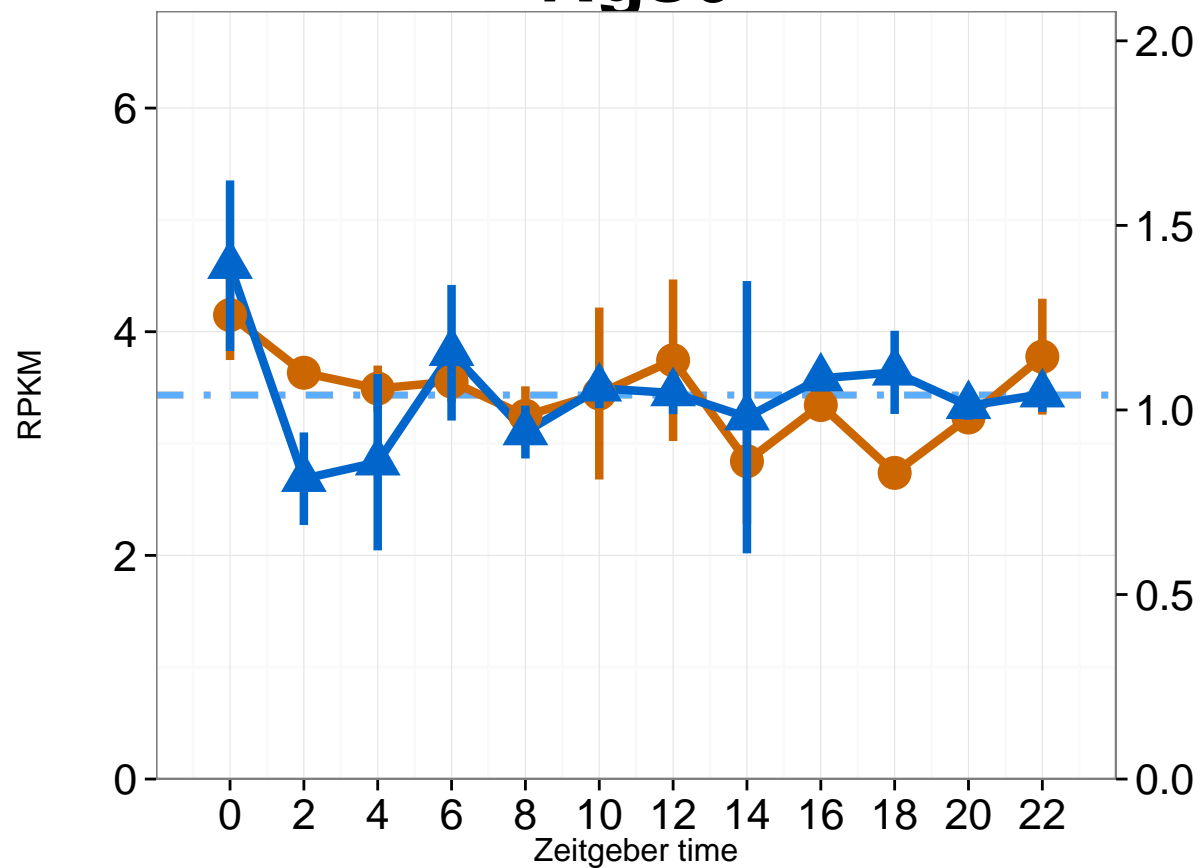

# Rgs6

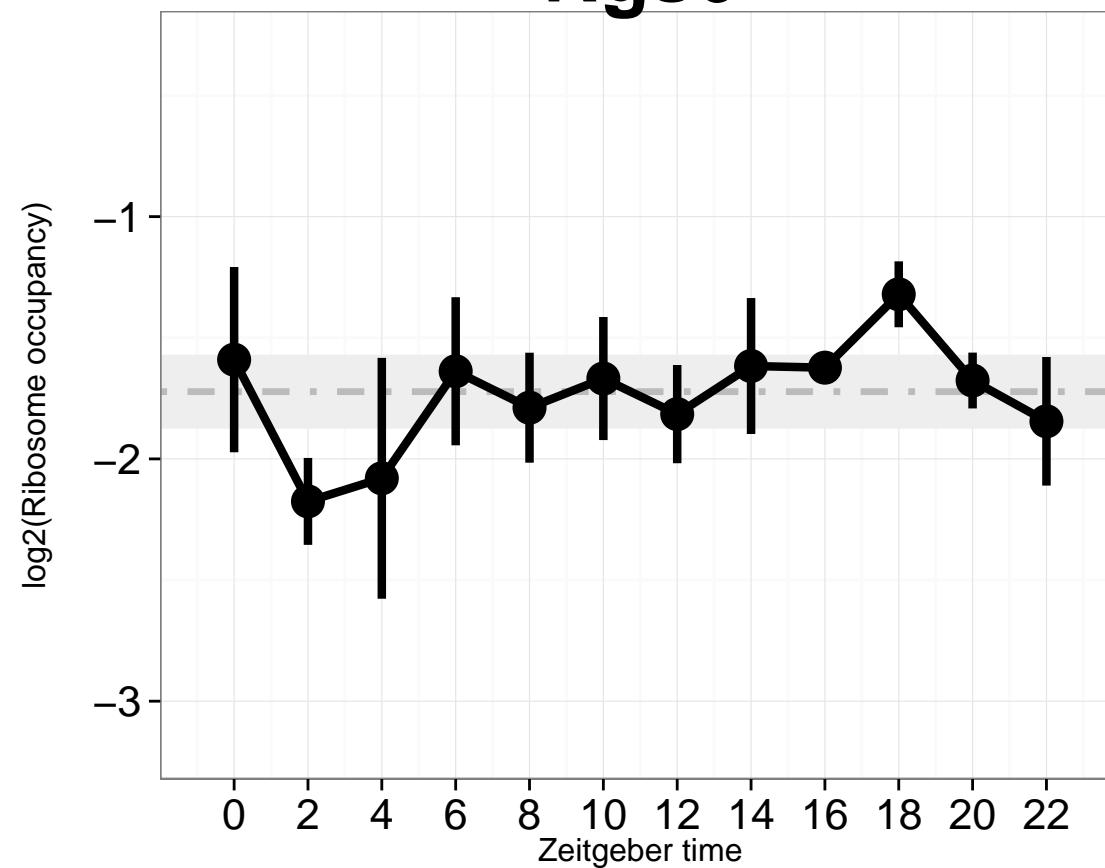

Supplement: Supplementary file 8015 [file 1]

**Smchd1**

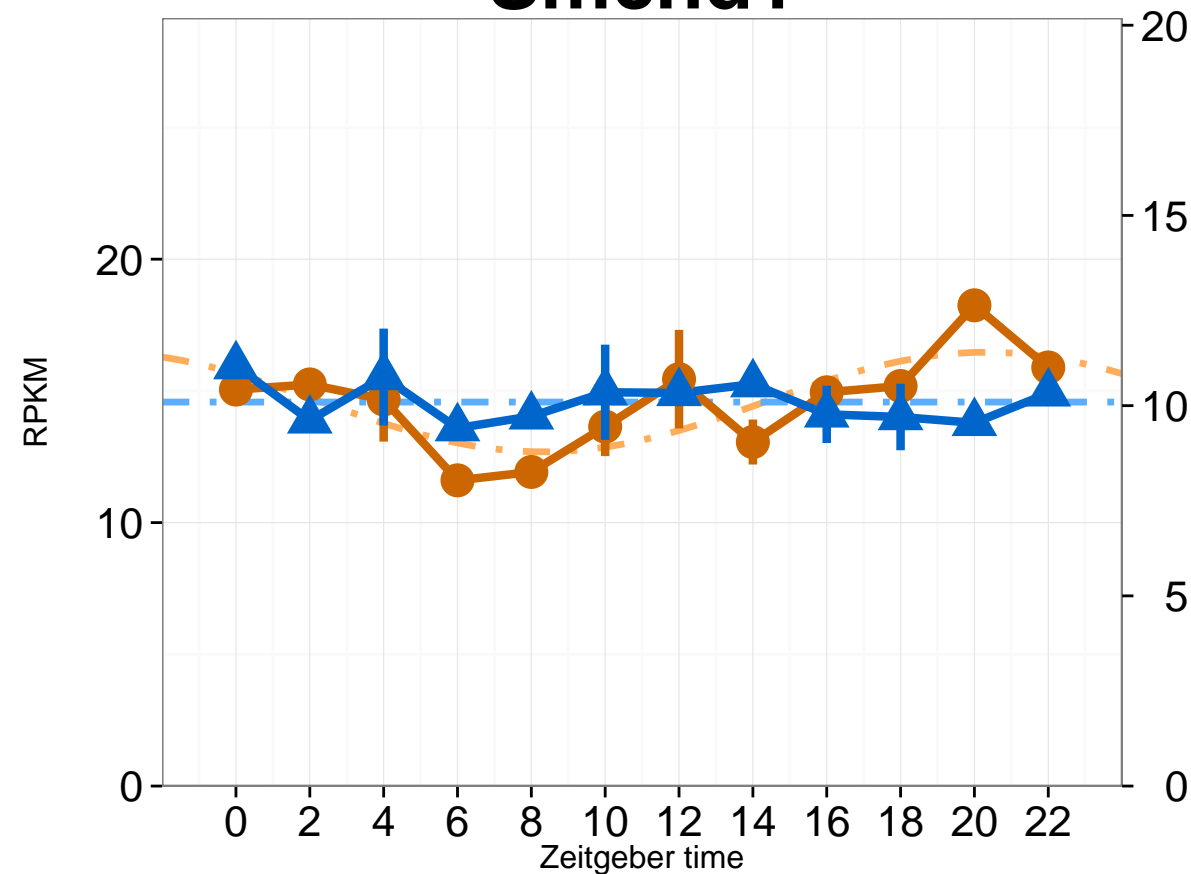

**Smchd1**

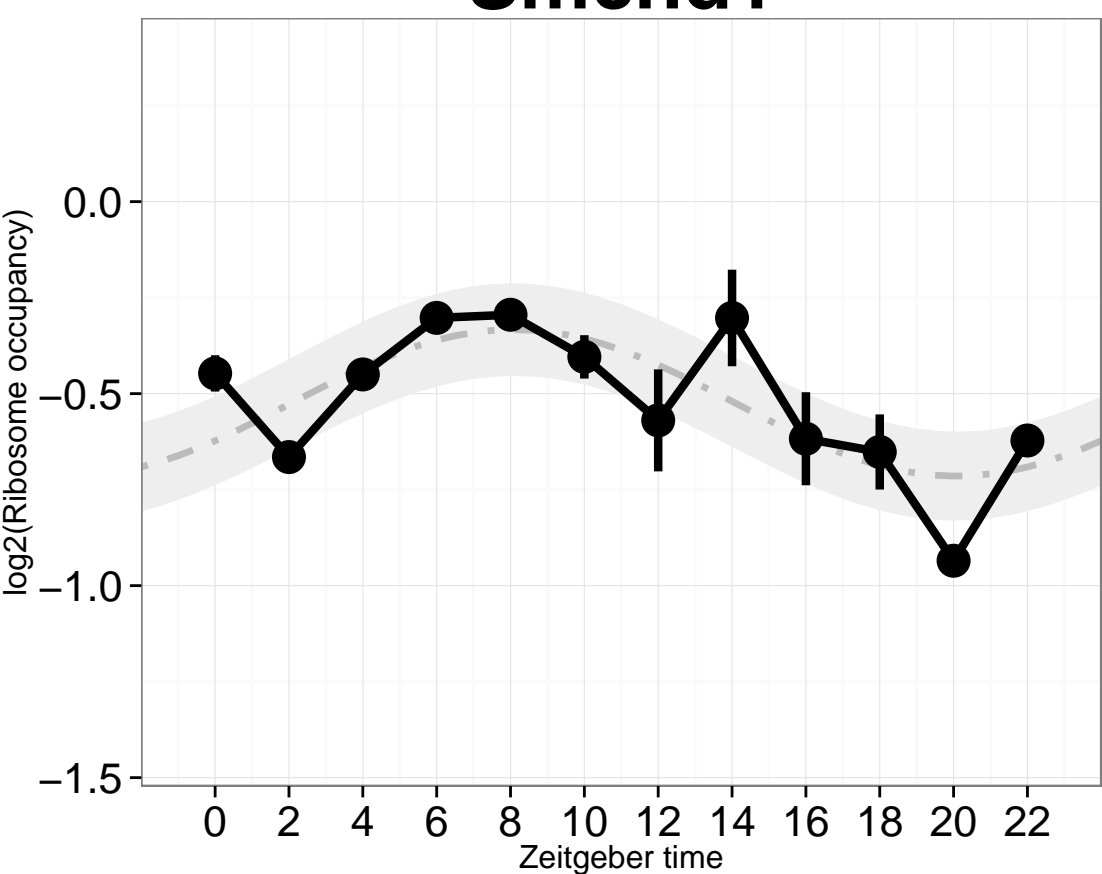

Supplement: Supplementary file 8016 [file 1]

# Spag5

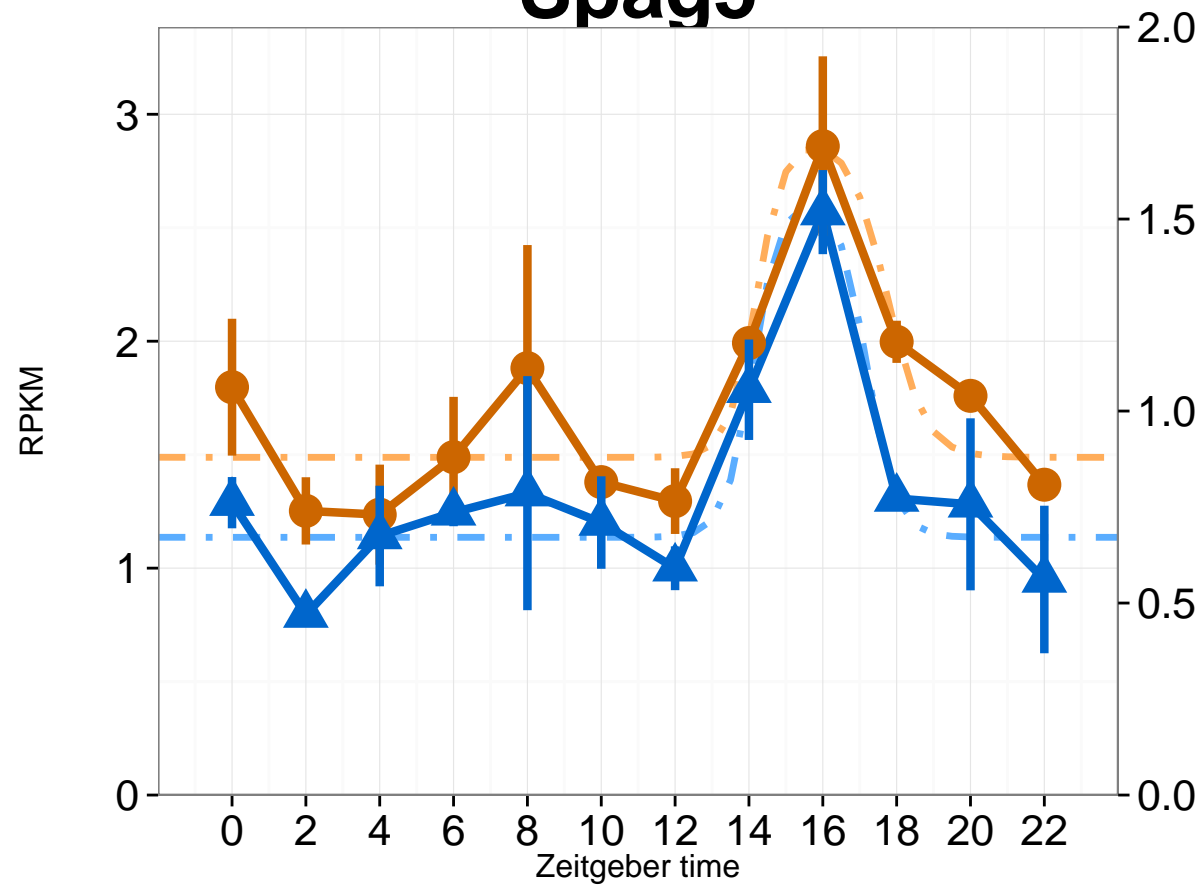

# Spag5

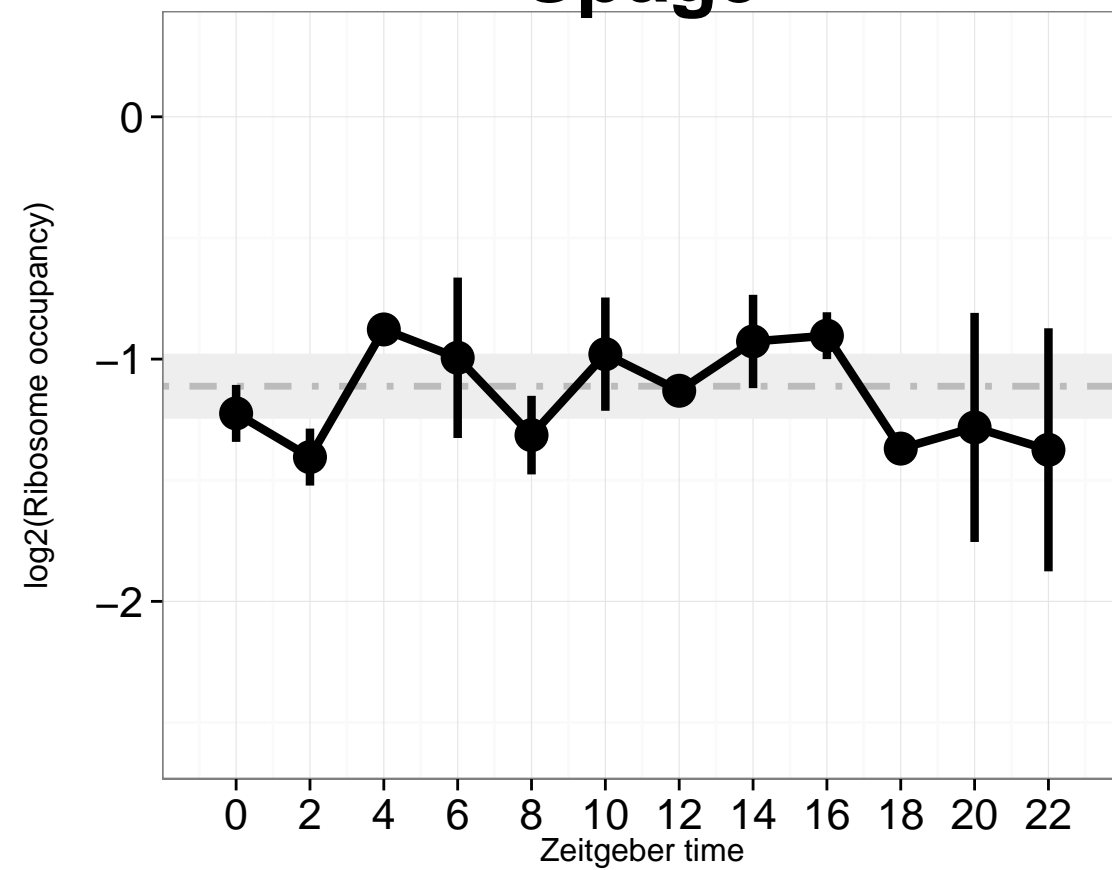

Supplement: Supplementary file 8017 [file 1]

# Nr2f1

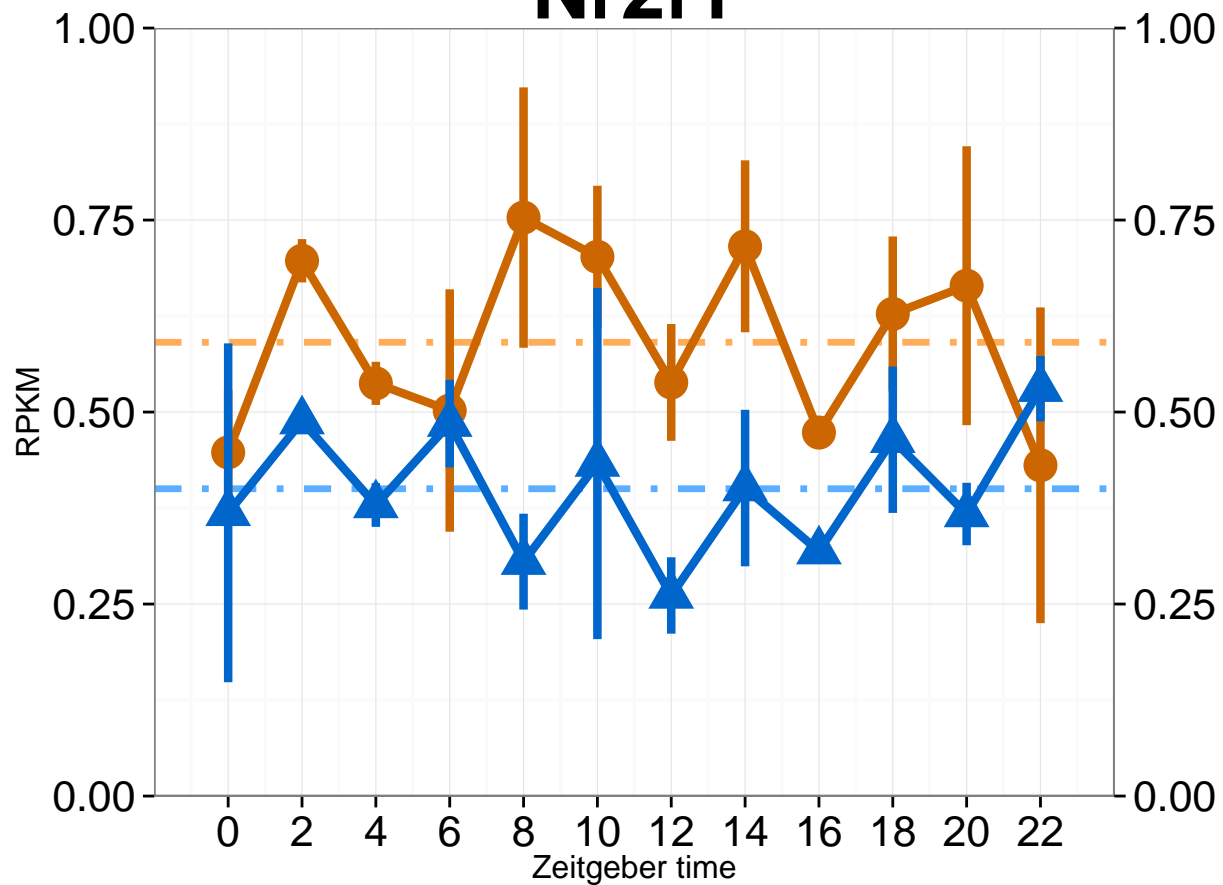

# Nr2f1

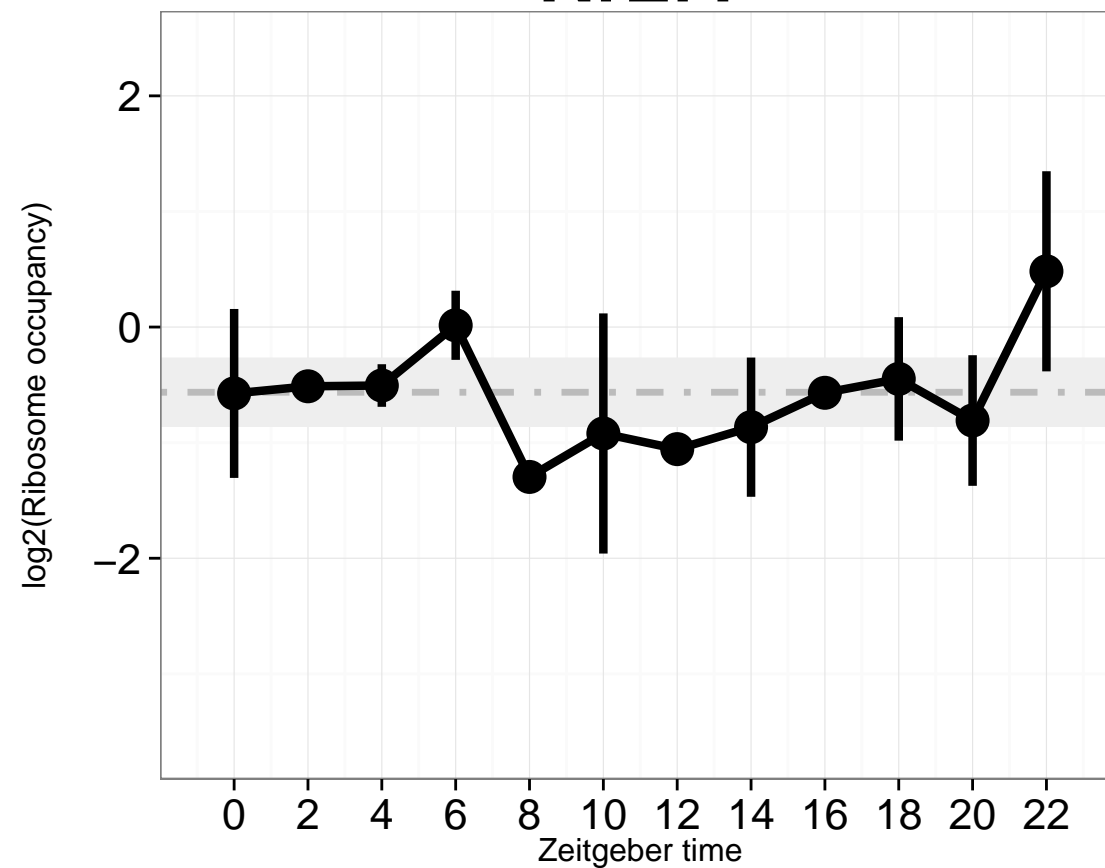

Supplement: Supplementary file 8018 [file 1]

## Hps4

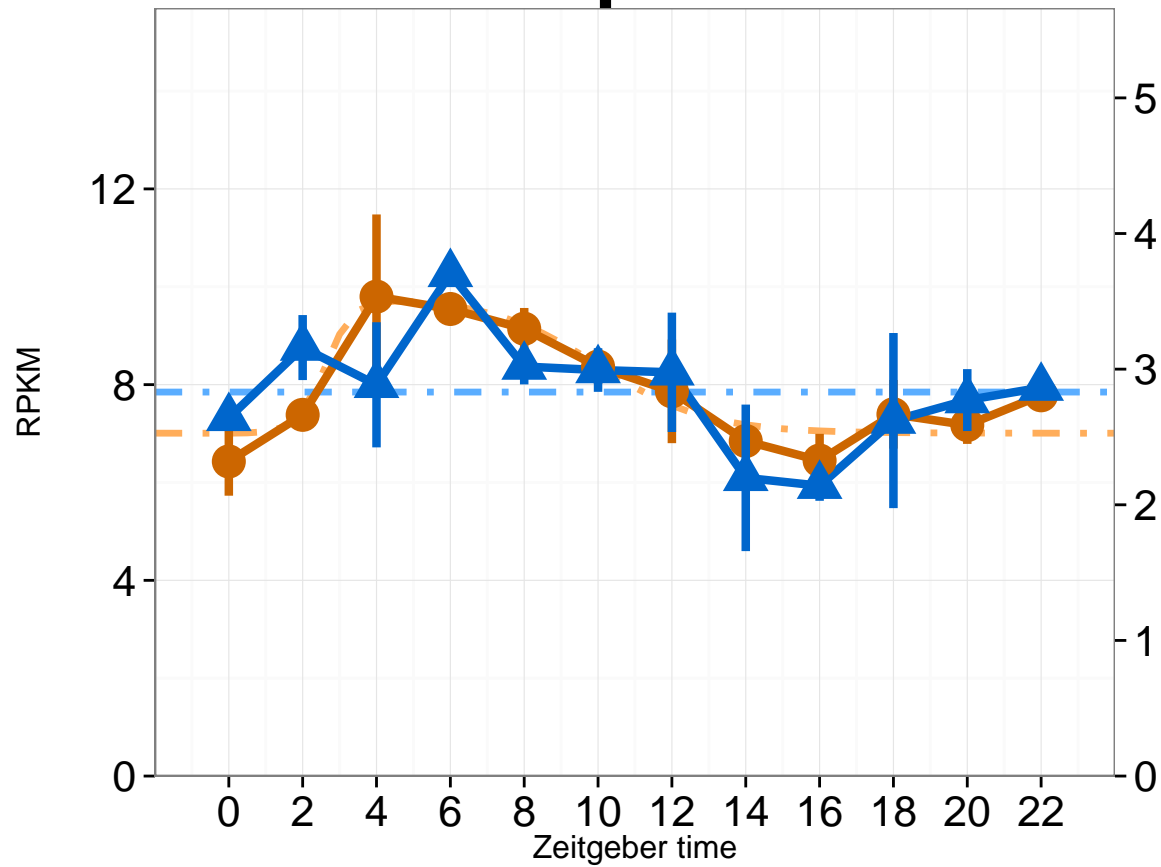

## Hps4

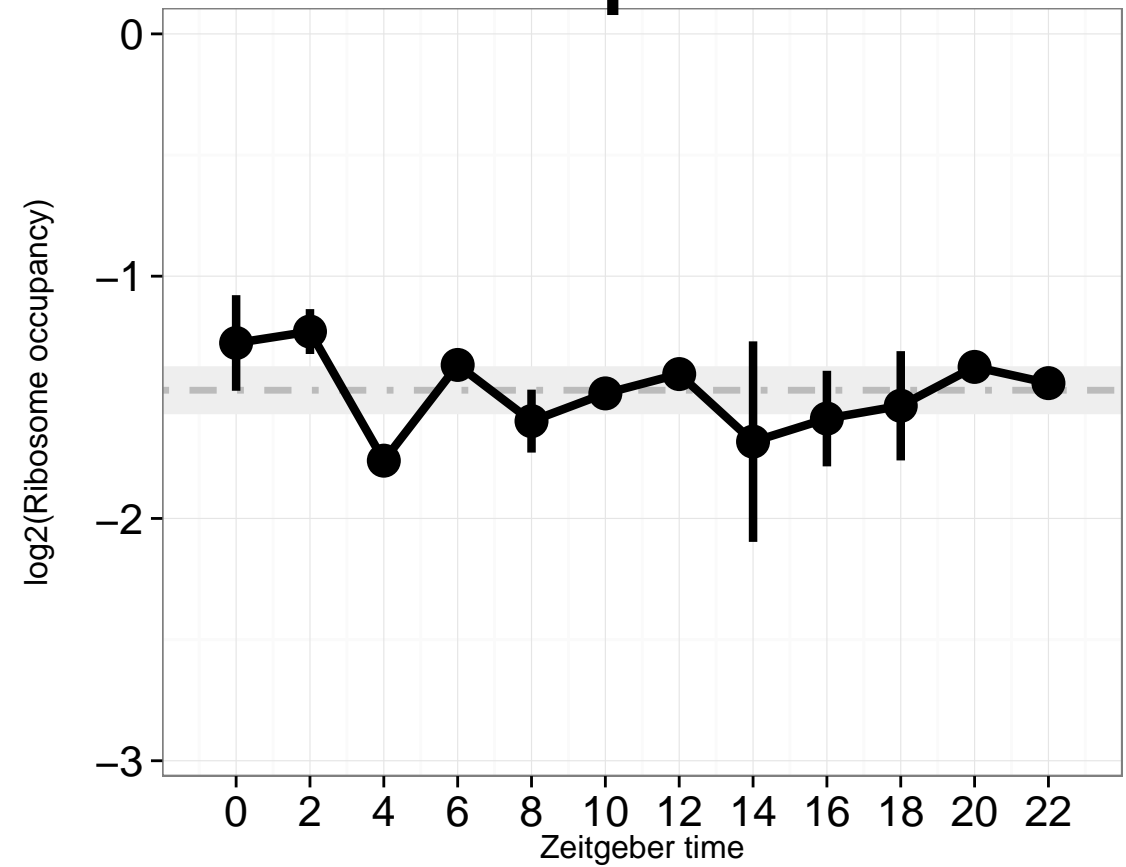

Supplement: Supplementary file 8019 [file 1]

# Herpud1

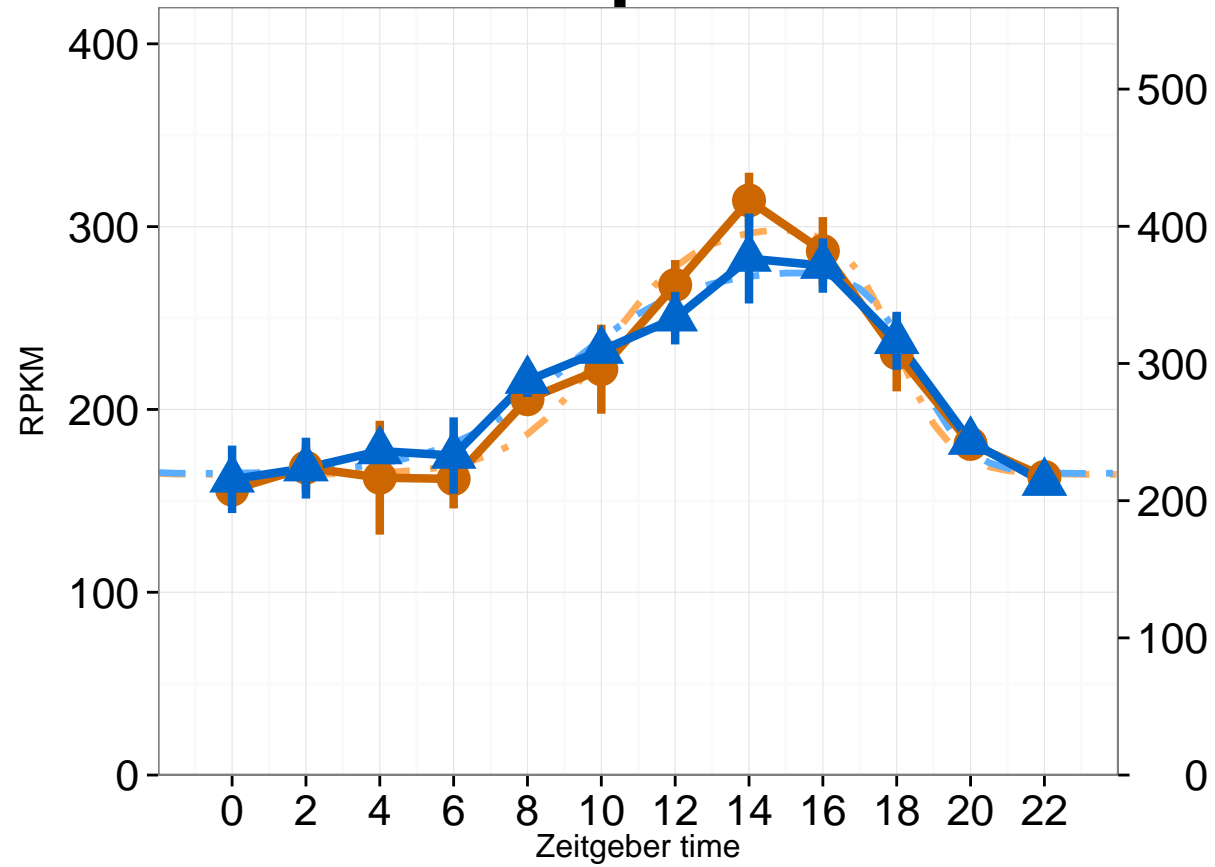

# Herpud1

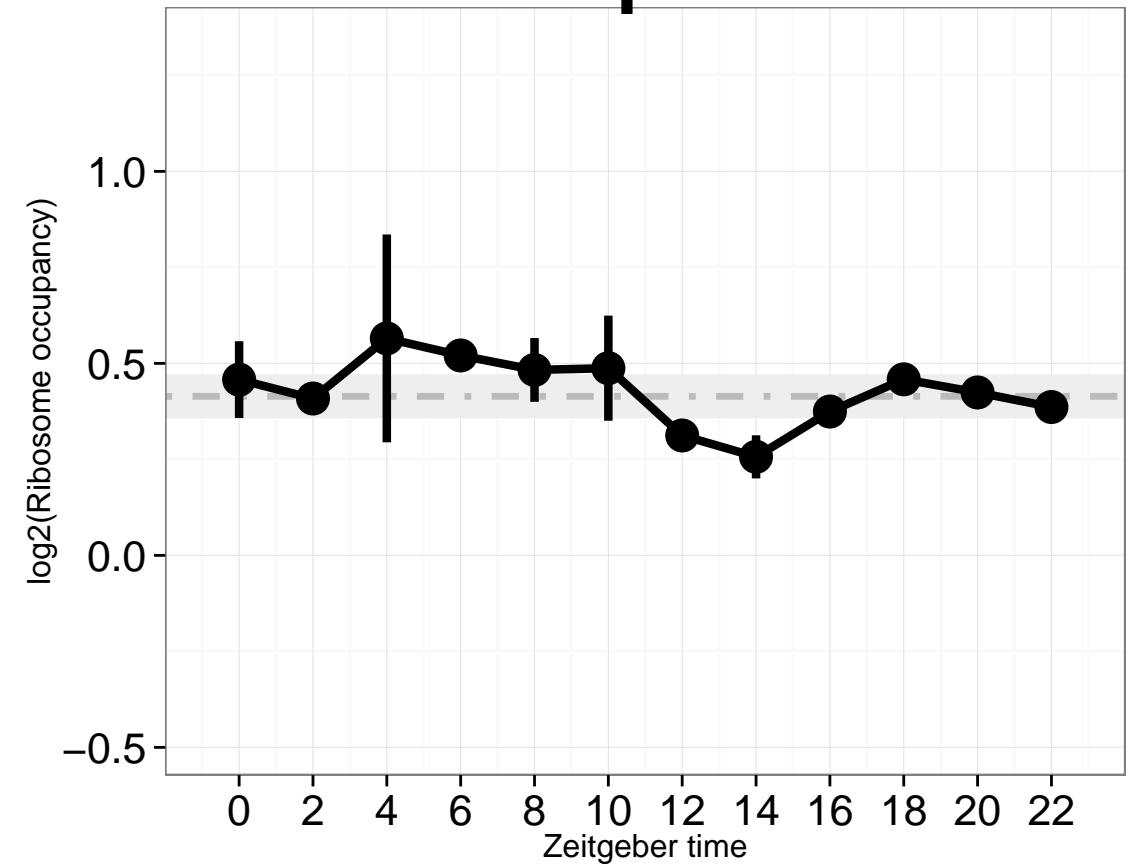

Supplement: Supplementary file 8020 [file 1]

# Gpr37

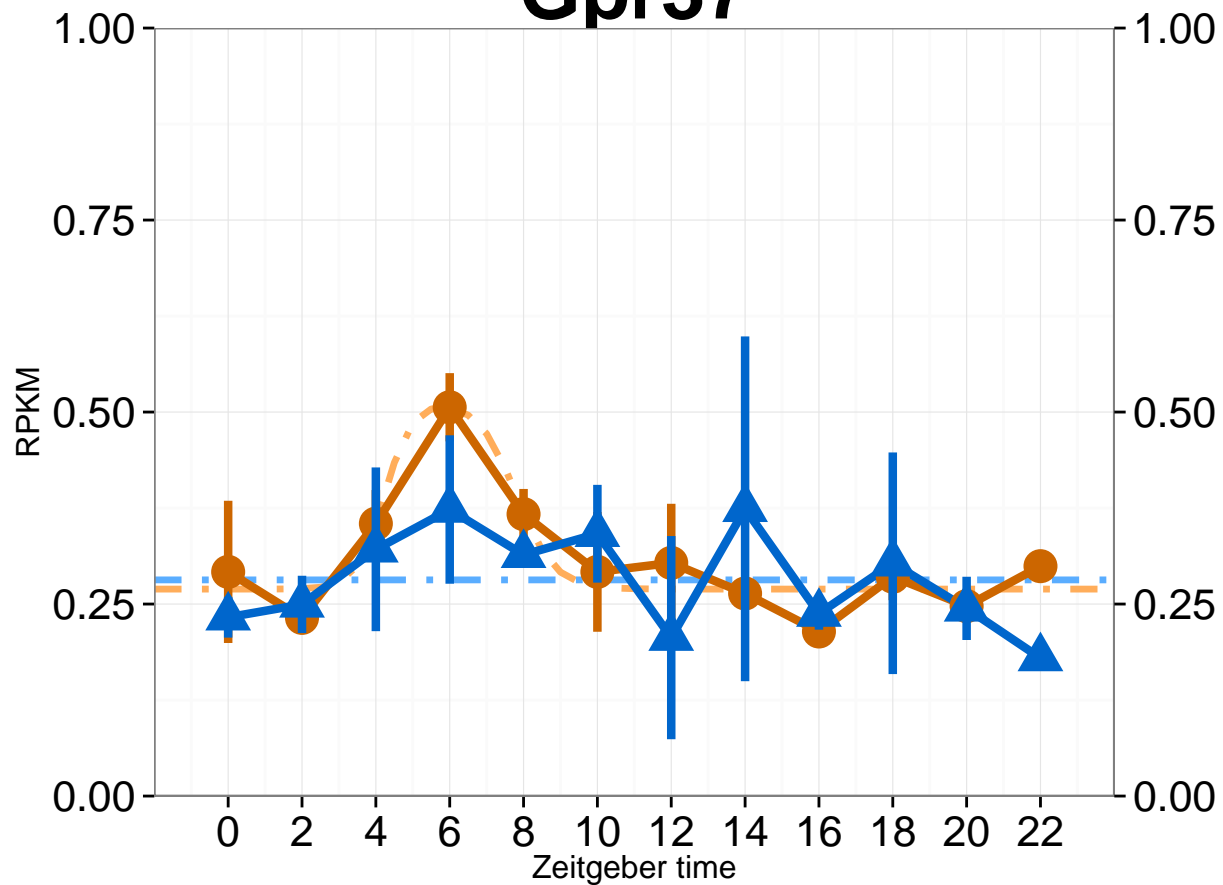

# Gpr37

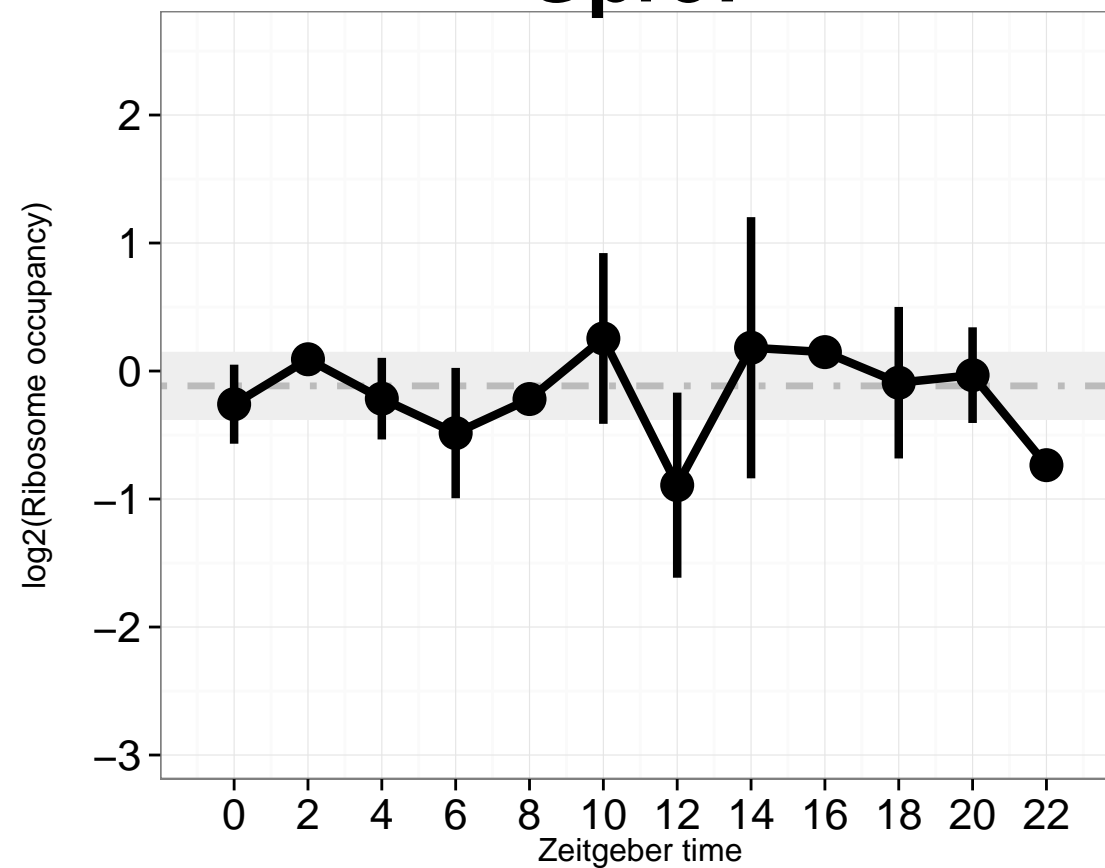

Supplement: Supplementary file 8021 [file 1]

# Tapbpl

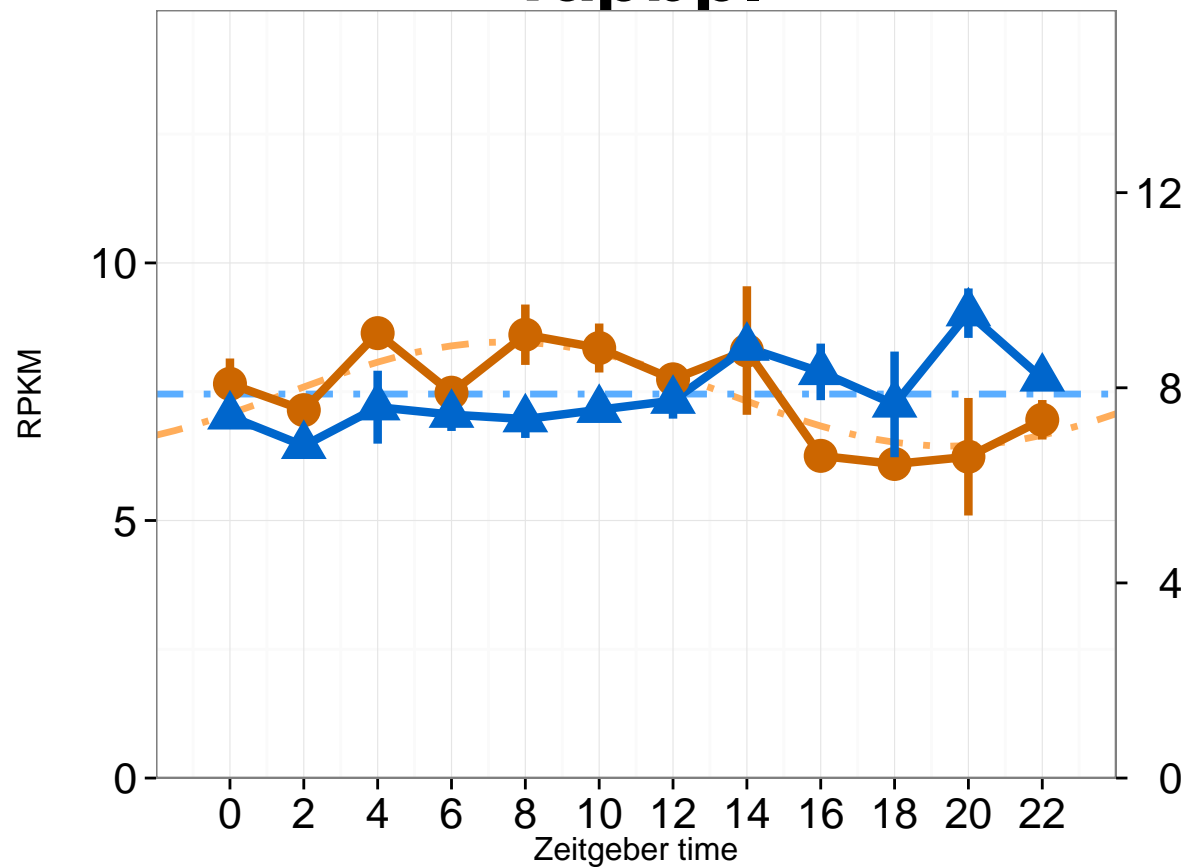

# Tapbpl

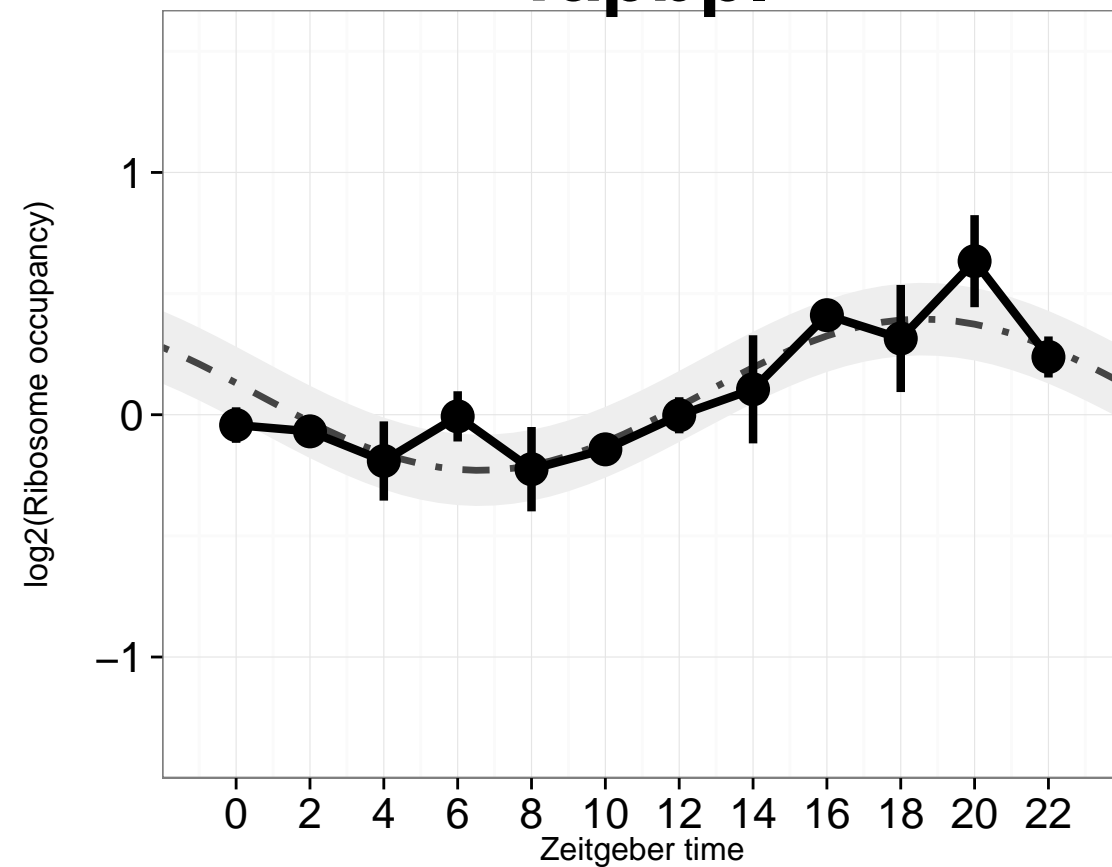

Supplement: Supplementary file 8022 [file 1]

## Ubxn1

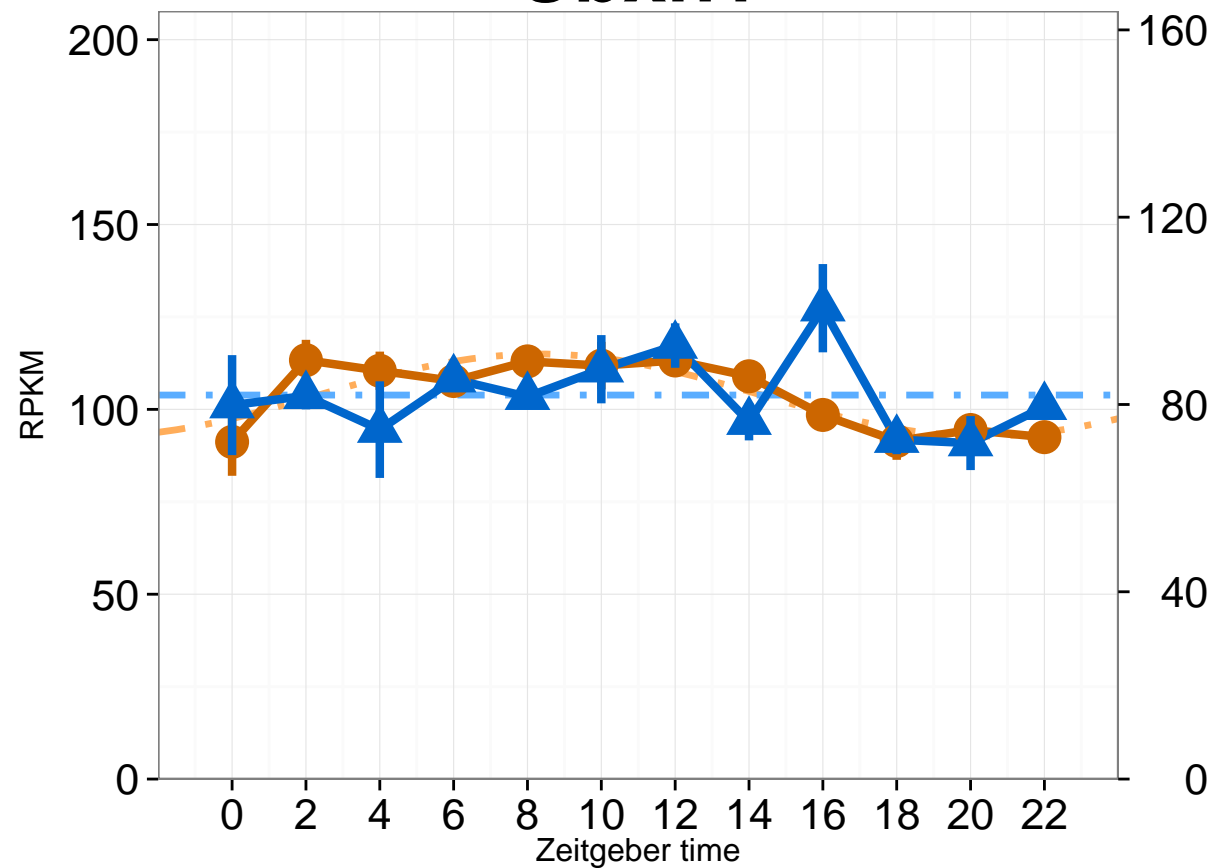

## Ubxn1

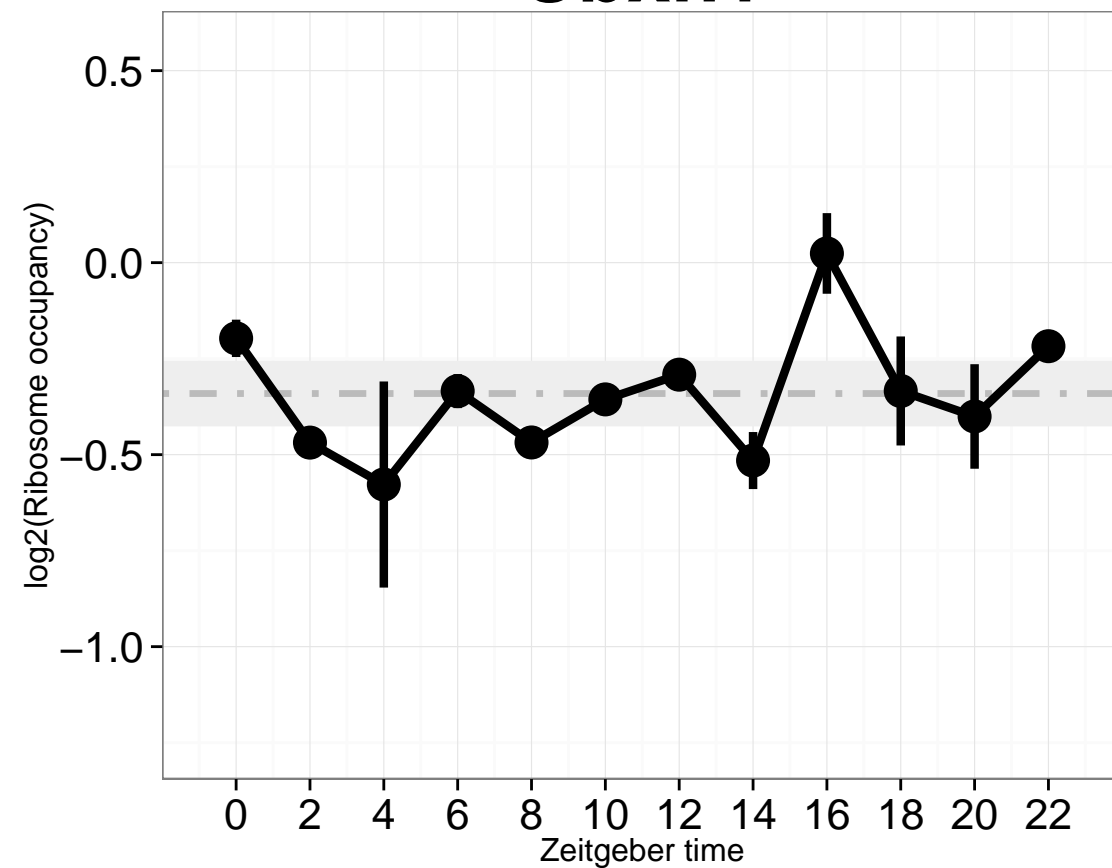

Supplement: Supplementary file 8023 [file 1]

# A2m

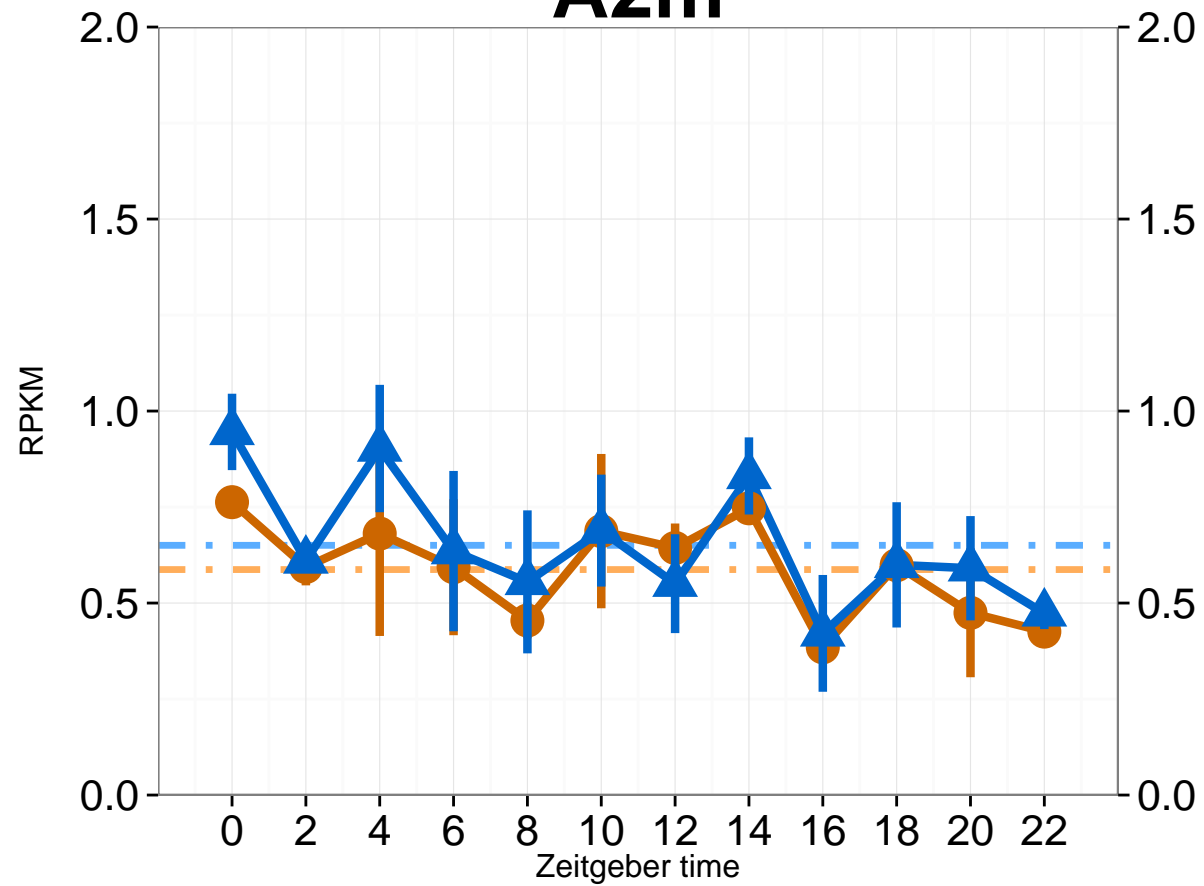

# A2m

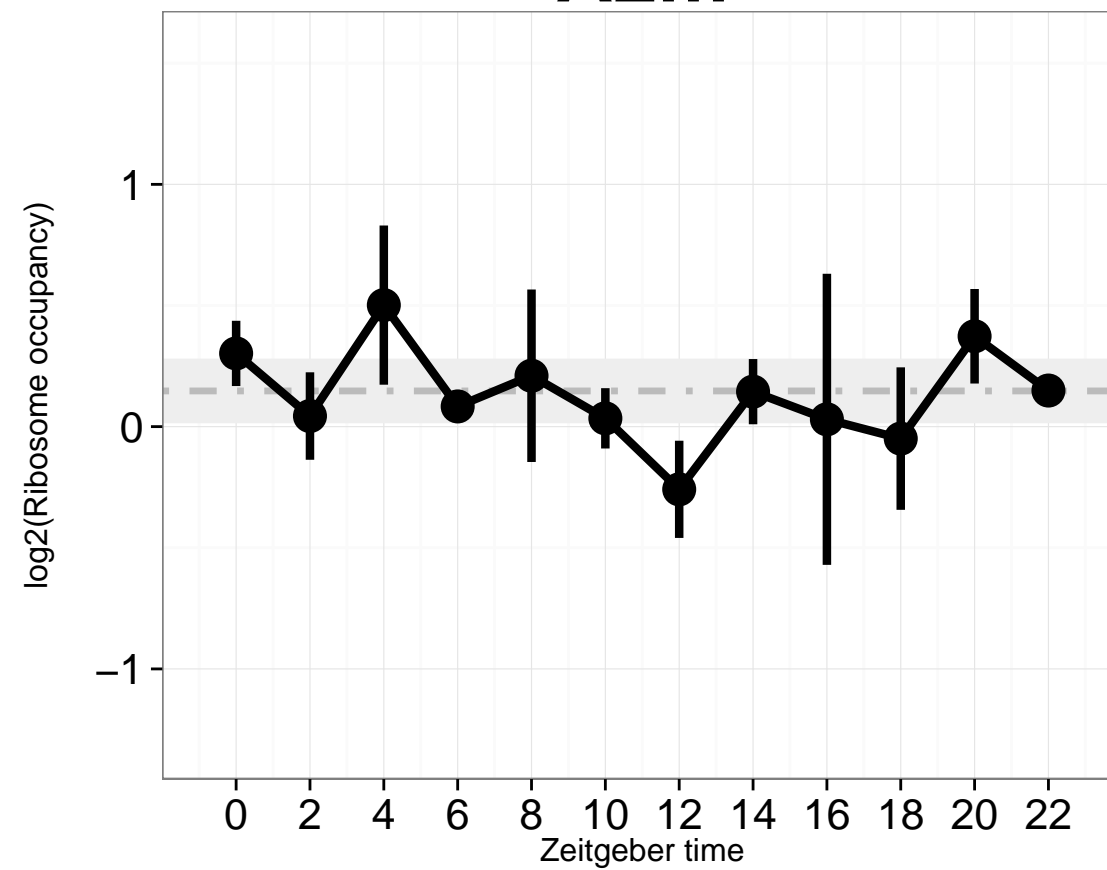

Supplement: Supplementary file 8024 [file 1]

# Atp6v0d2

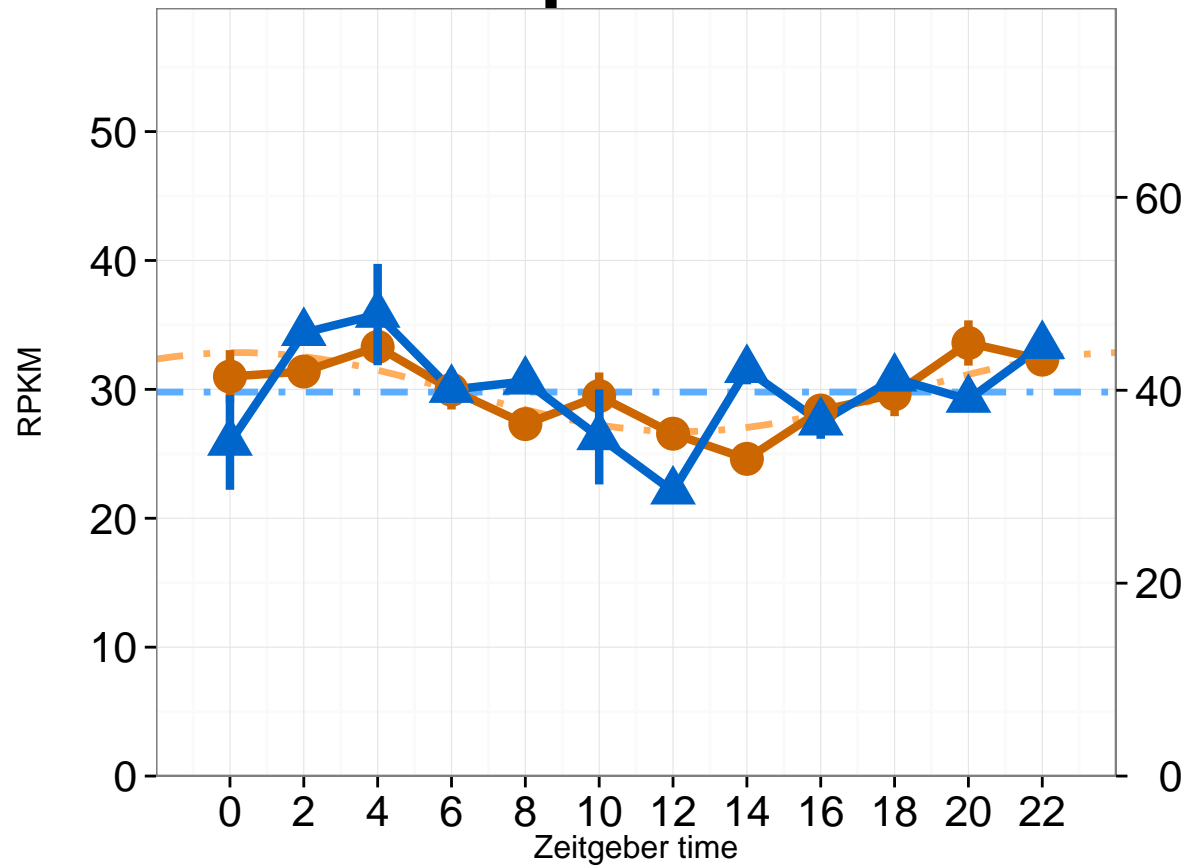

# Atp6v0d2

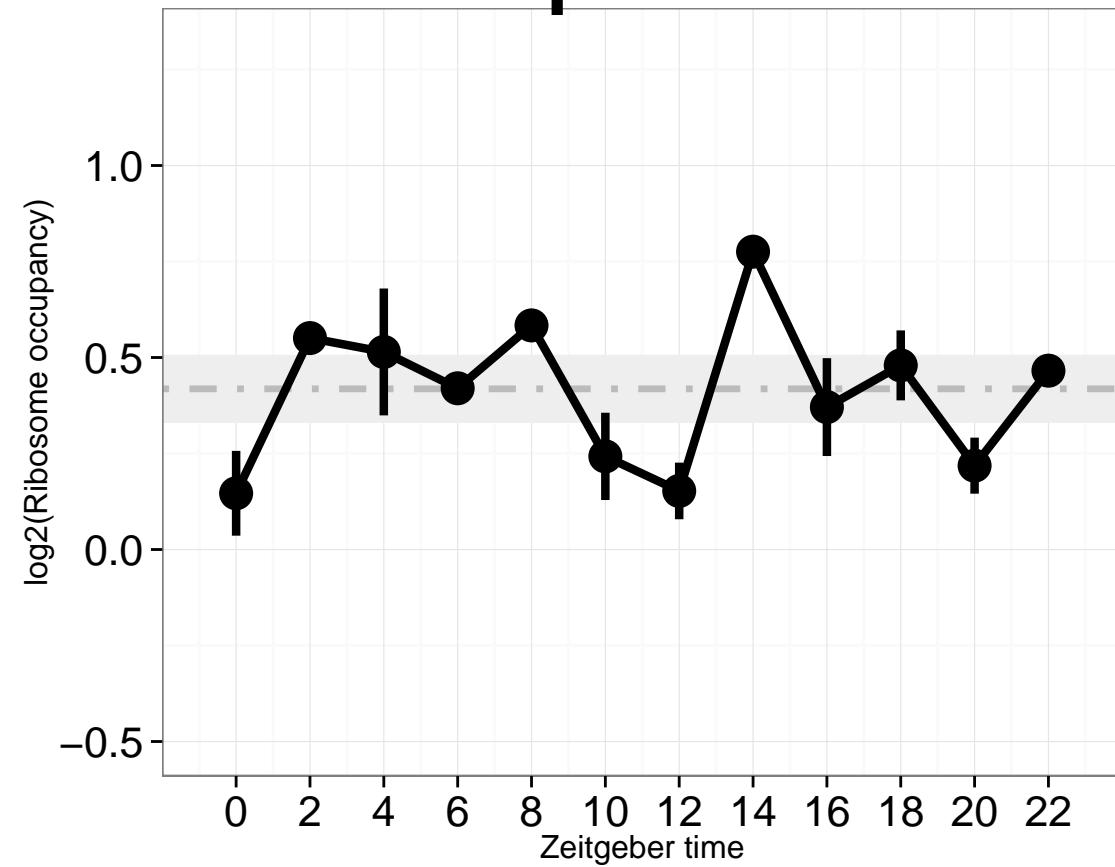

Supplement: Supplementary file 8025 [file 1]

## Plekhb2

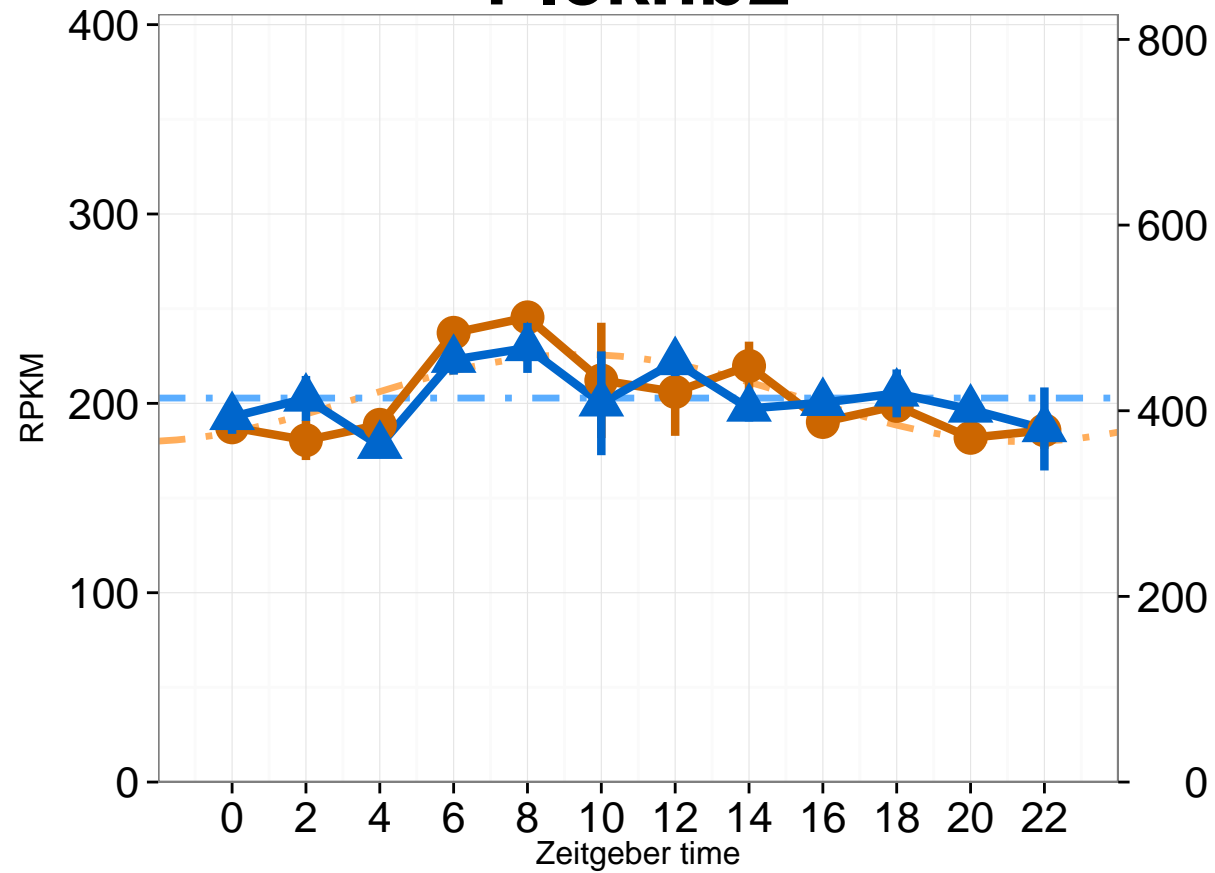

## Plekhb2

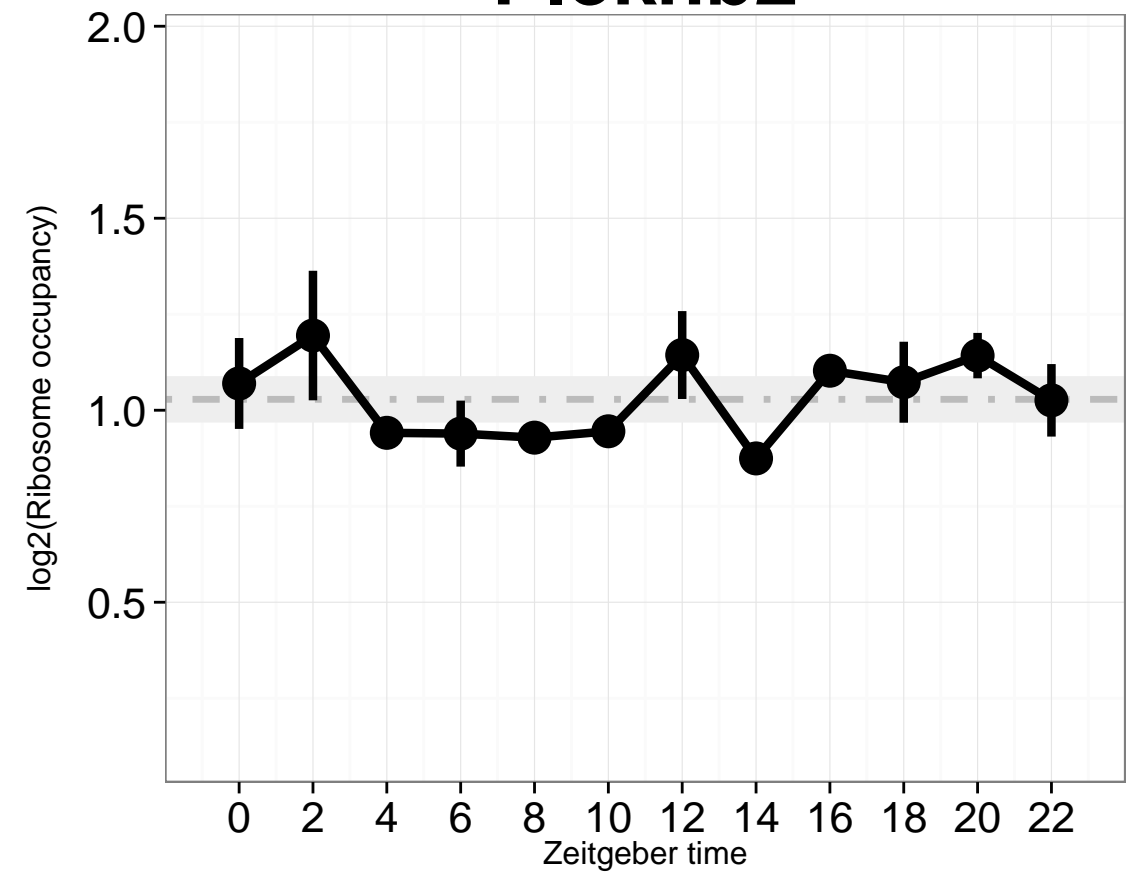

Supplement: Supplementary file 8026 [file 1]
