# Supplementary material (part 81 of 133)
Source: publisher figshare collection journal article supplement (https://springernature.figshare.com/articles/dataset/_/4903193)

# Tmem140

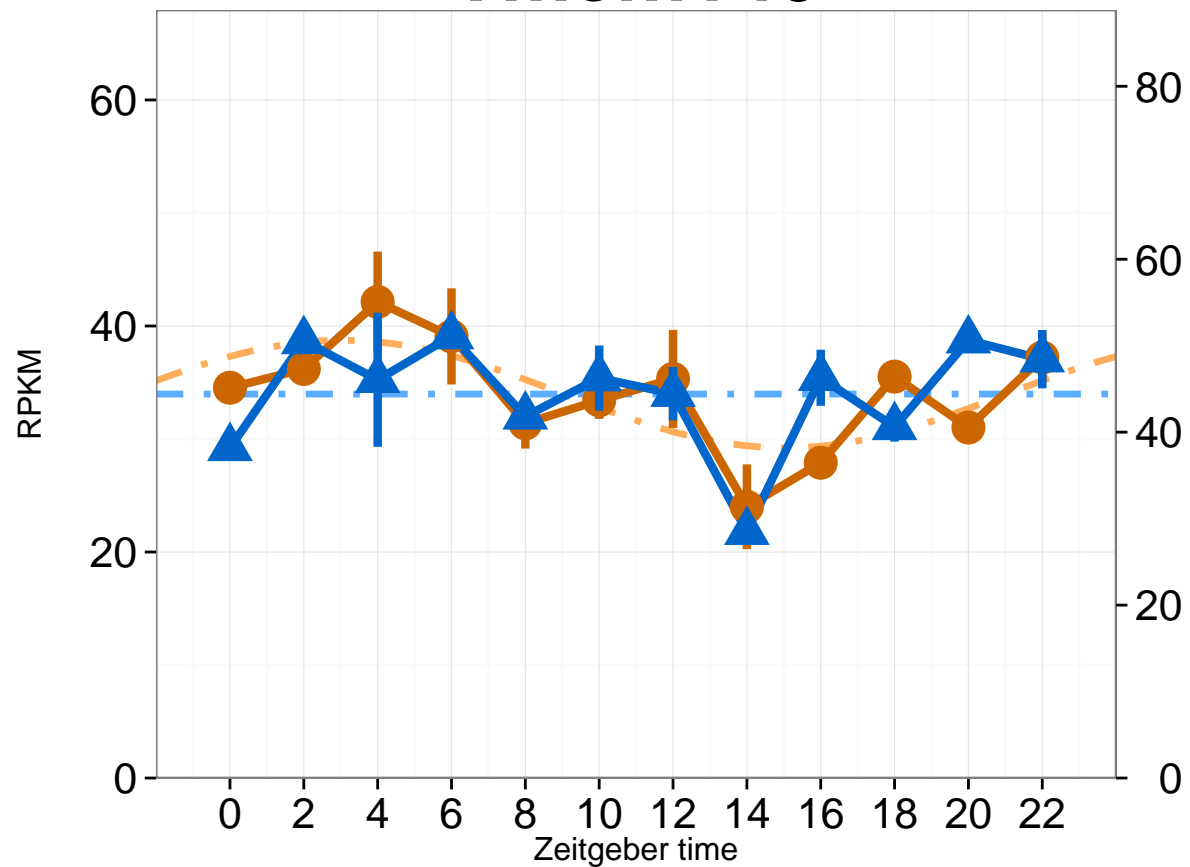

# Tmem140

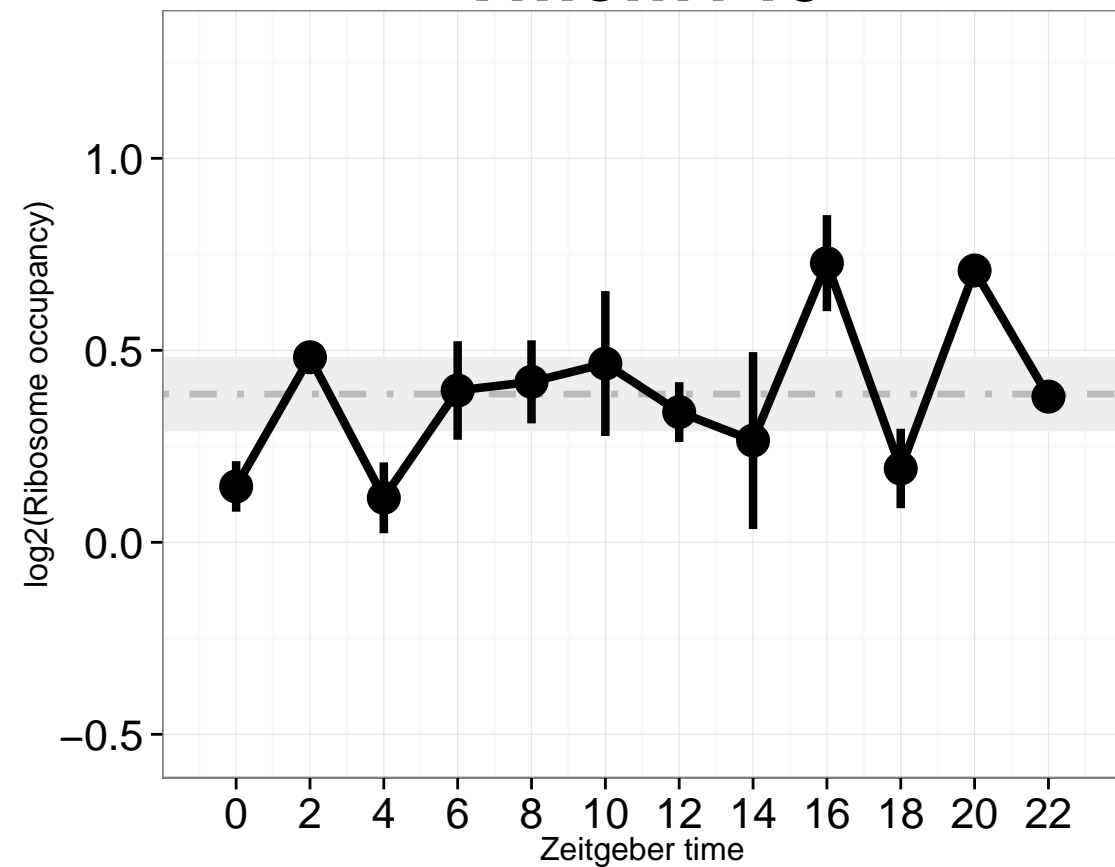

Supplement: Supplementary file 8027 [file 1]

# H2-DMb2

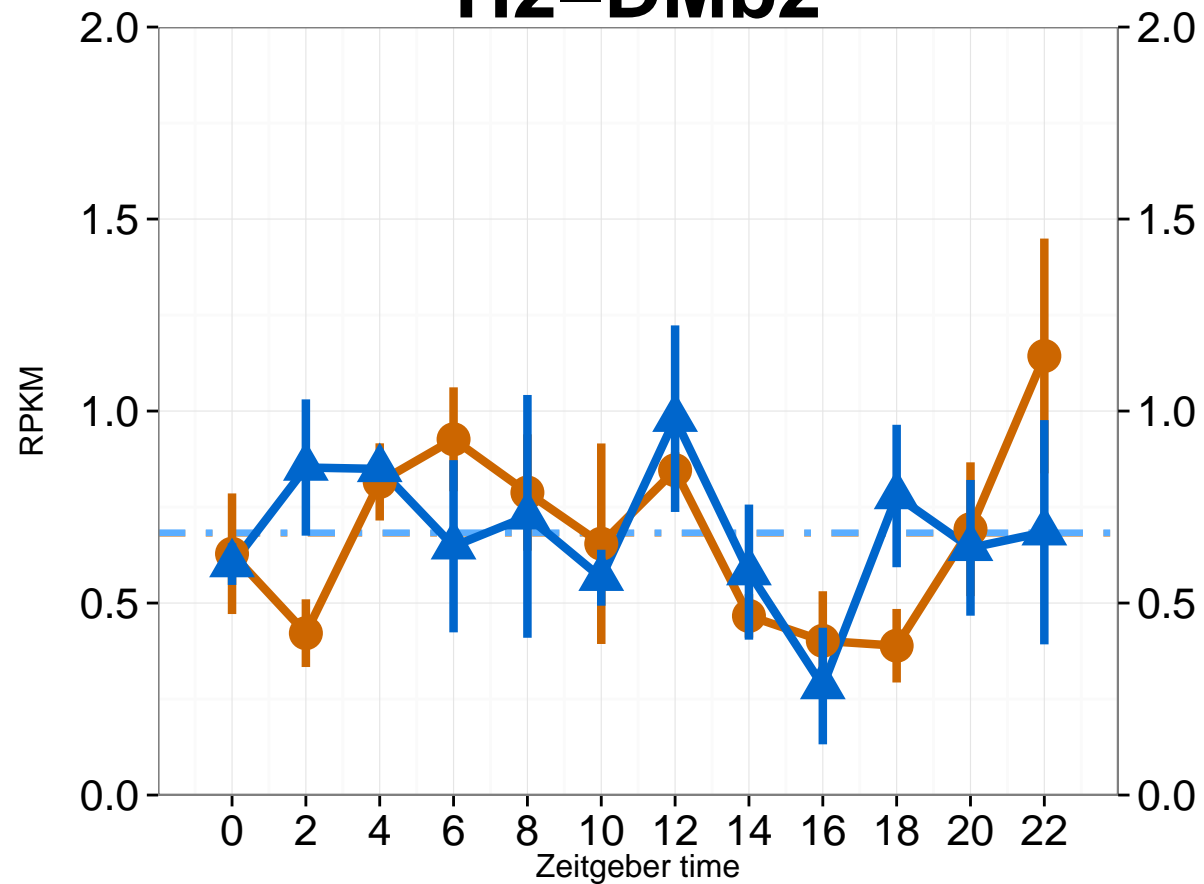

# H2-DMb2

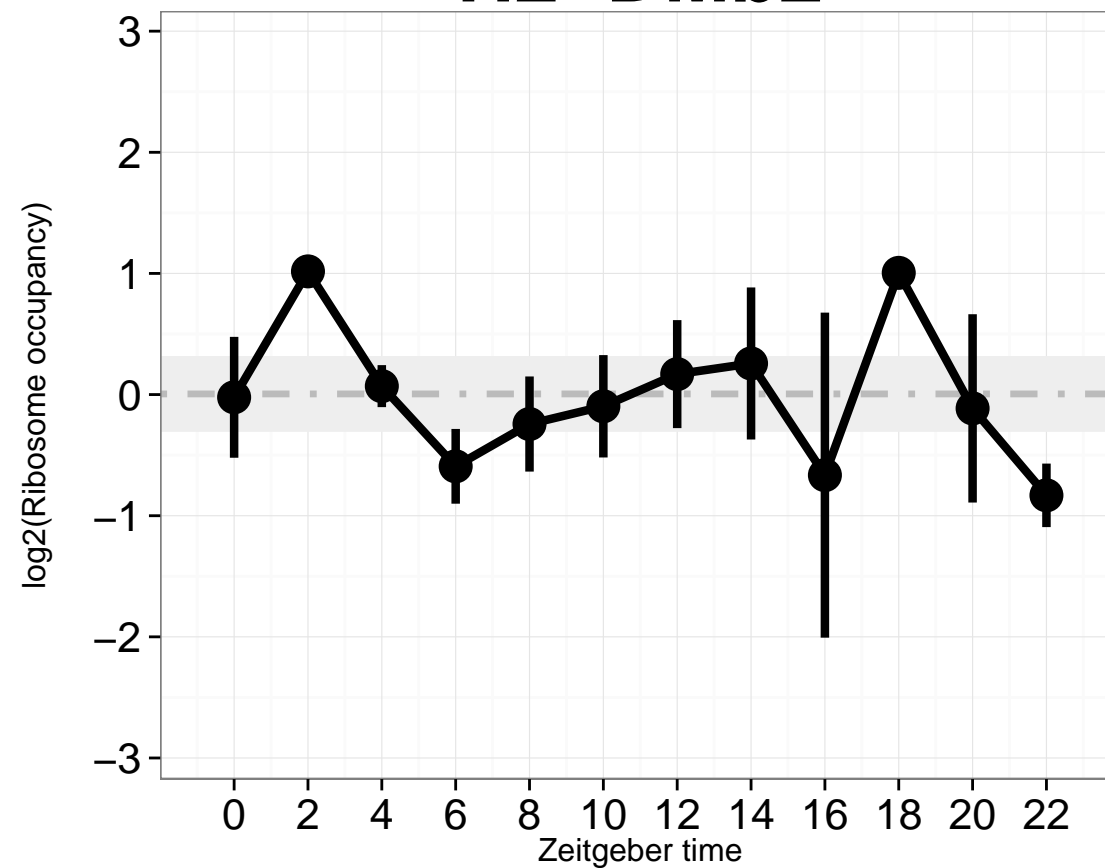

Supplement: Supplementary file 8028 [file 1]

## Polr2a

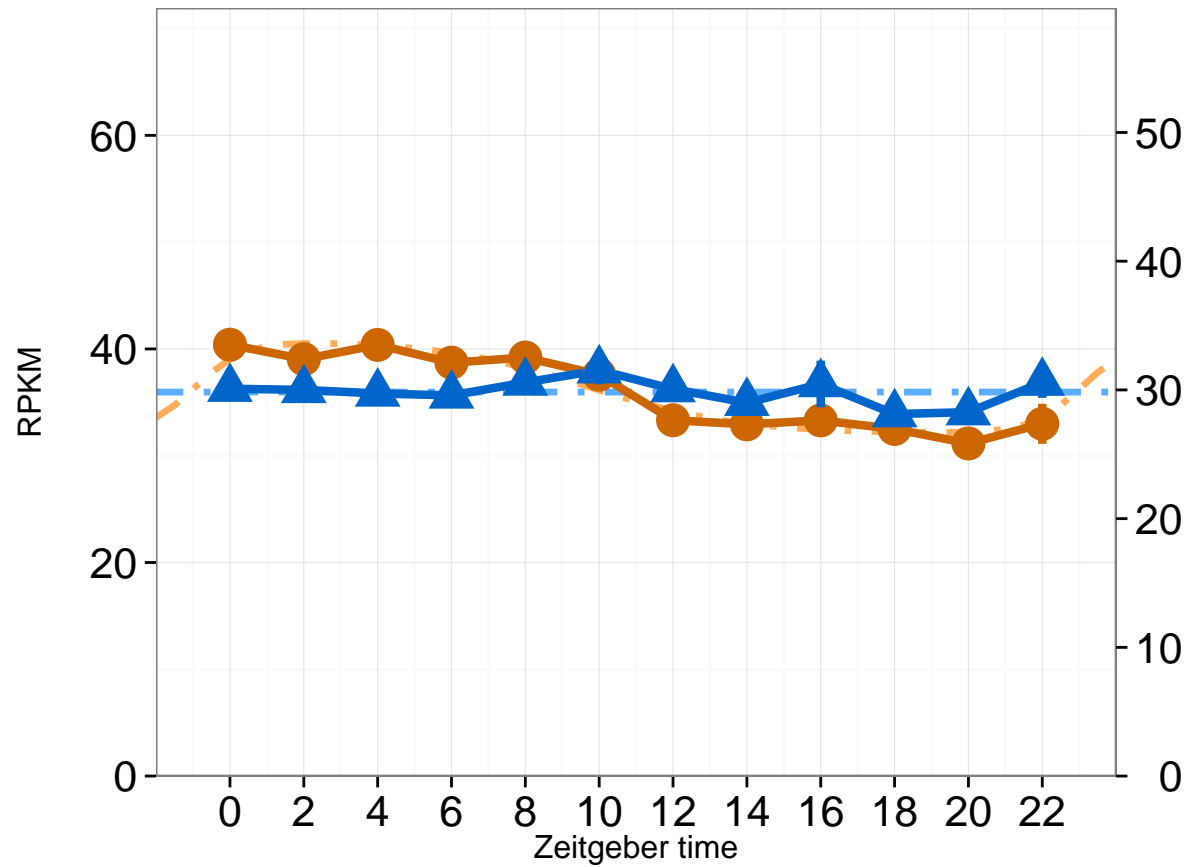

## Polr2a

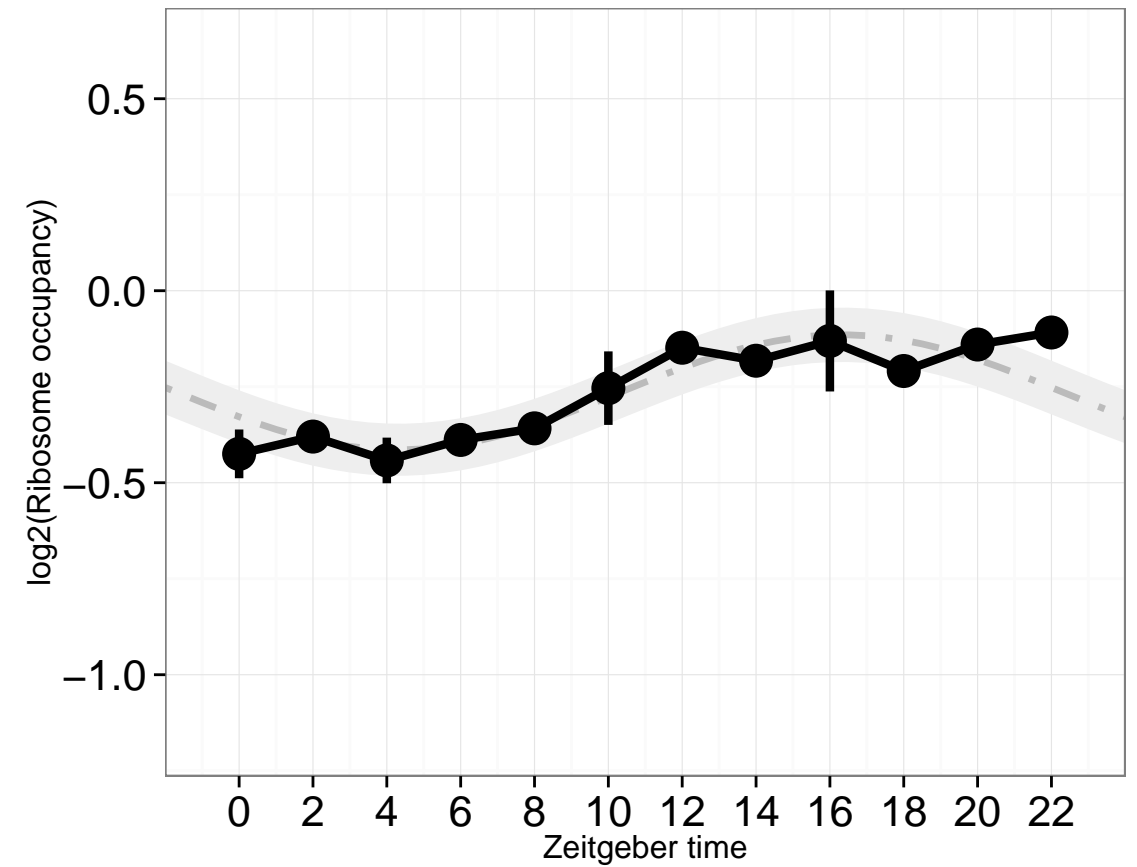

Supplement: Supplementary file 8029 [file 1]

## Golga3

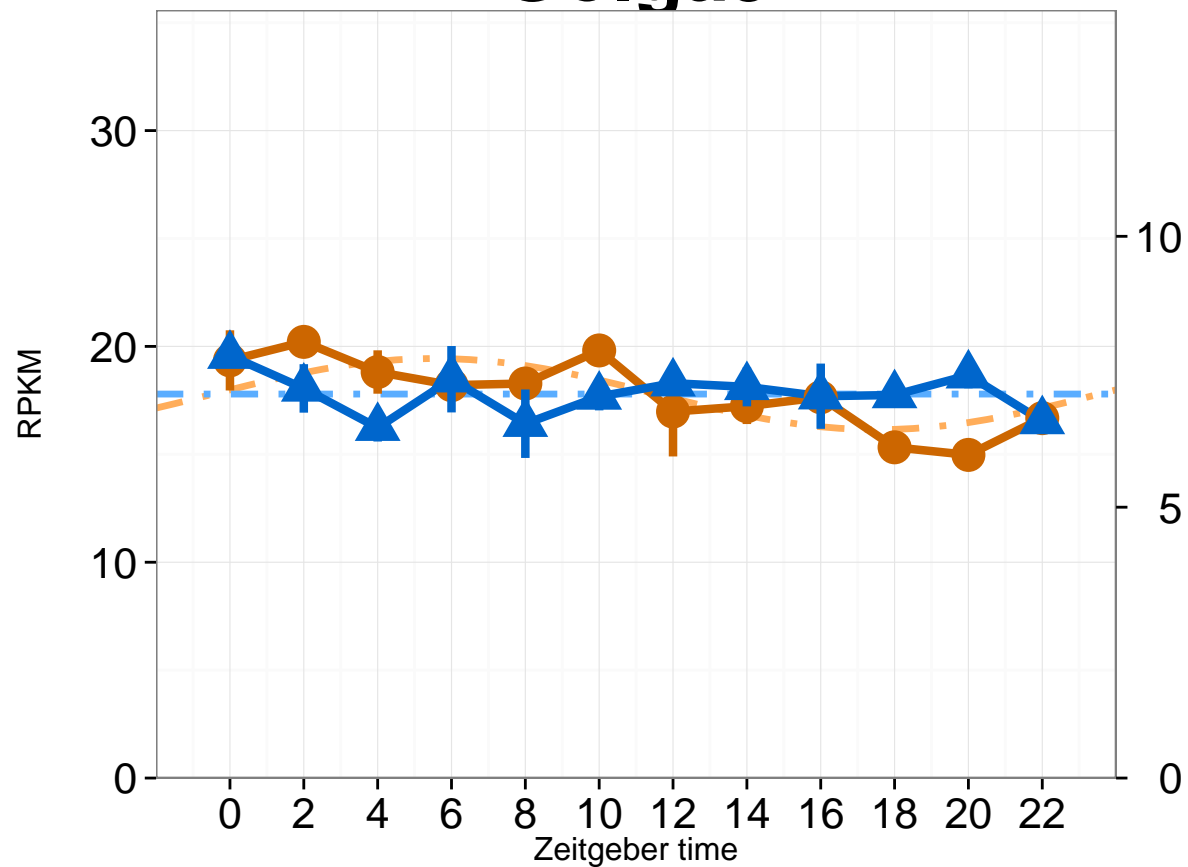

## Golga3

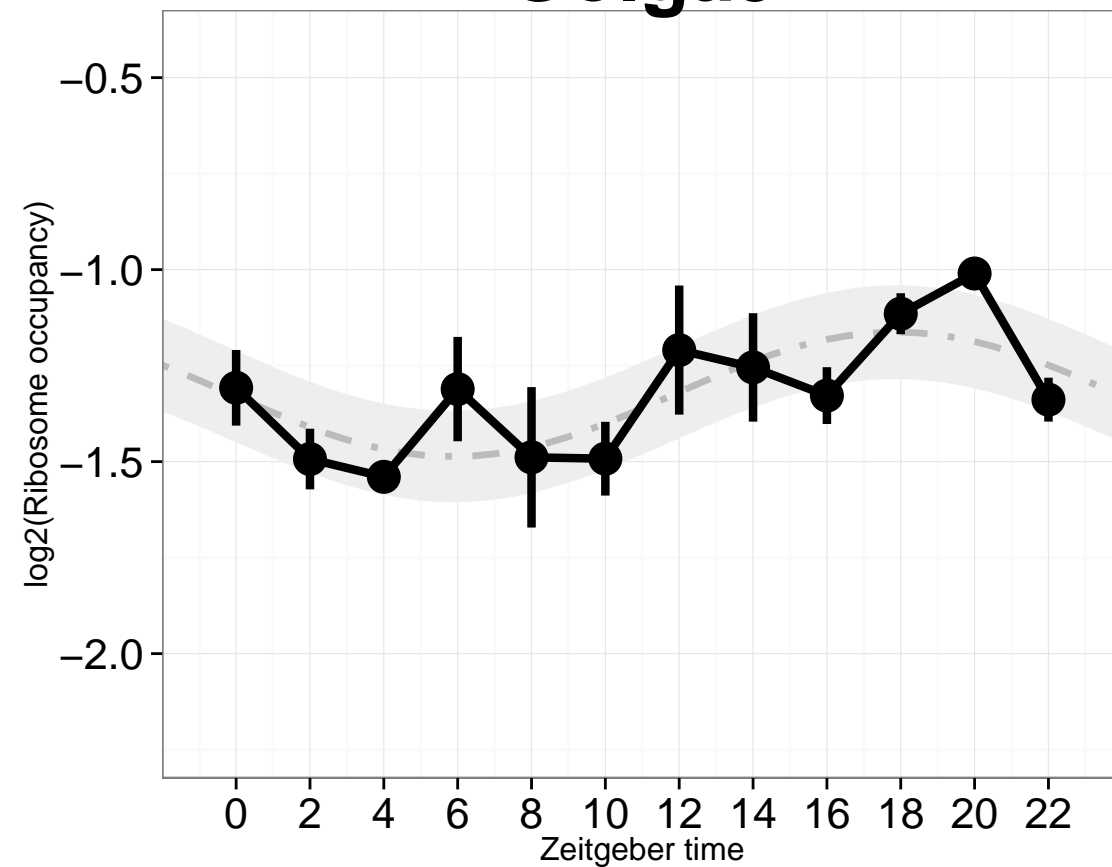

Supplement: Supplementary file 8030 [file 1]

**Sox8 TR**

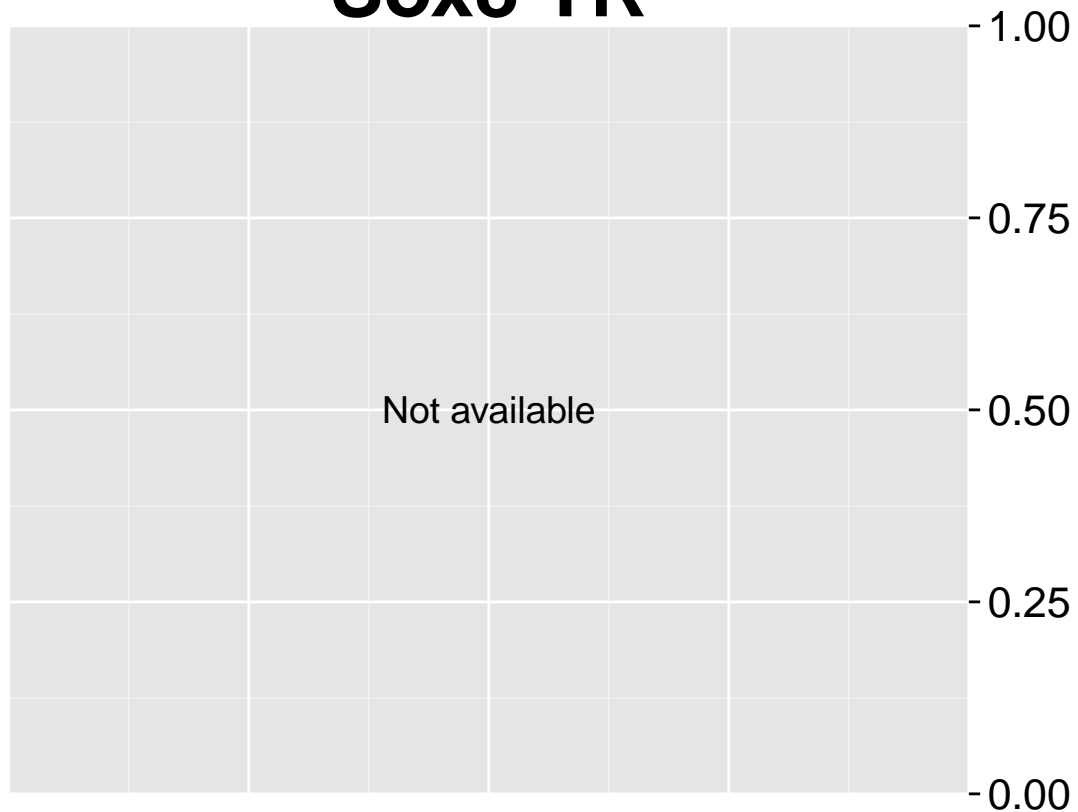

**Sox8 log2(Ribosome occupancy)**

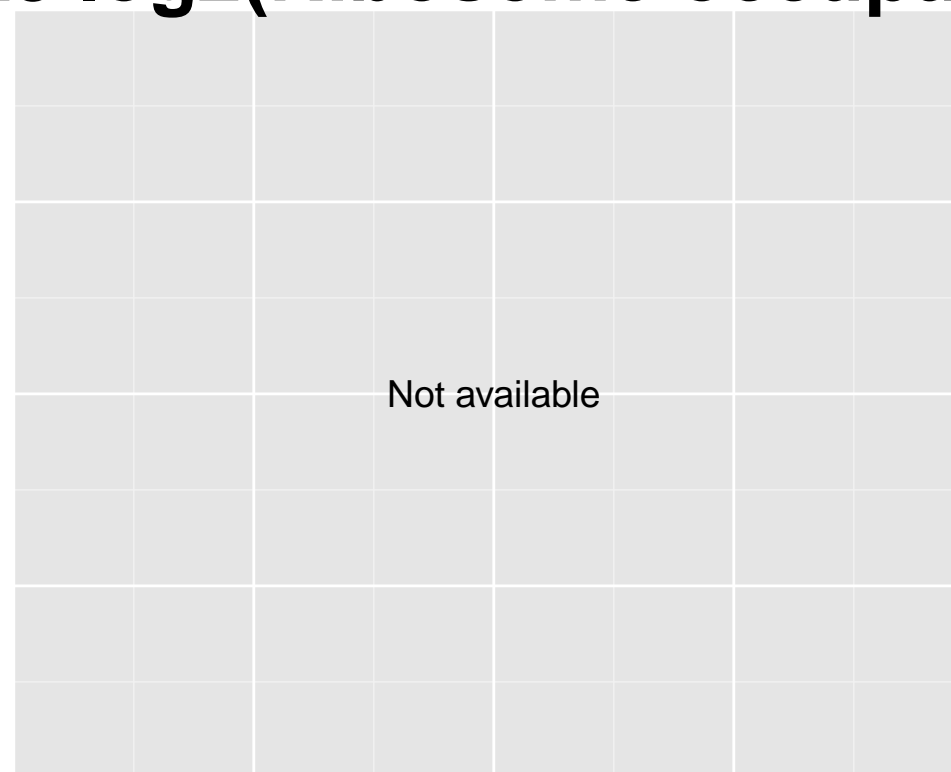

Supplement: Supplementary file 8031 [file 1]

# Ptplad2

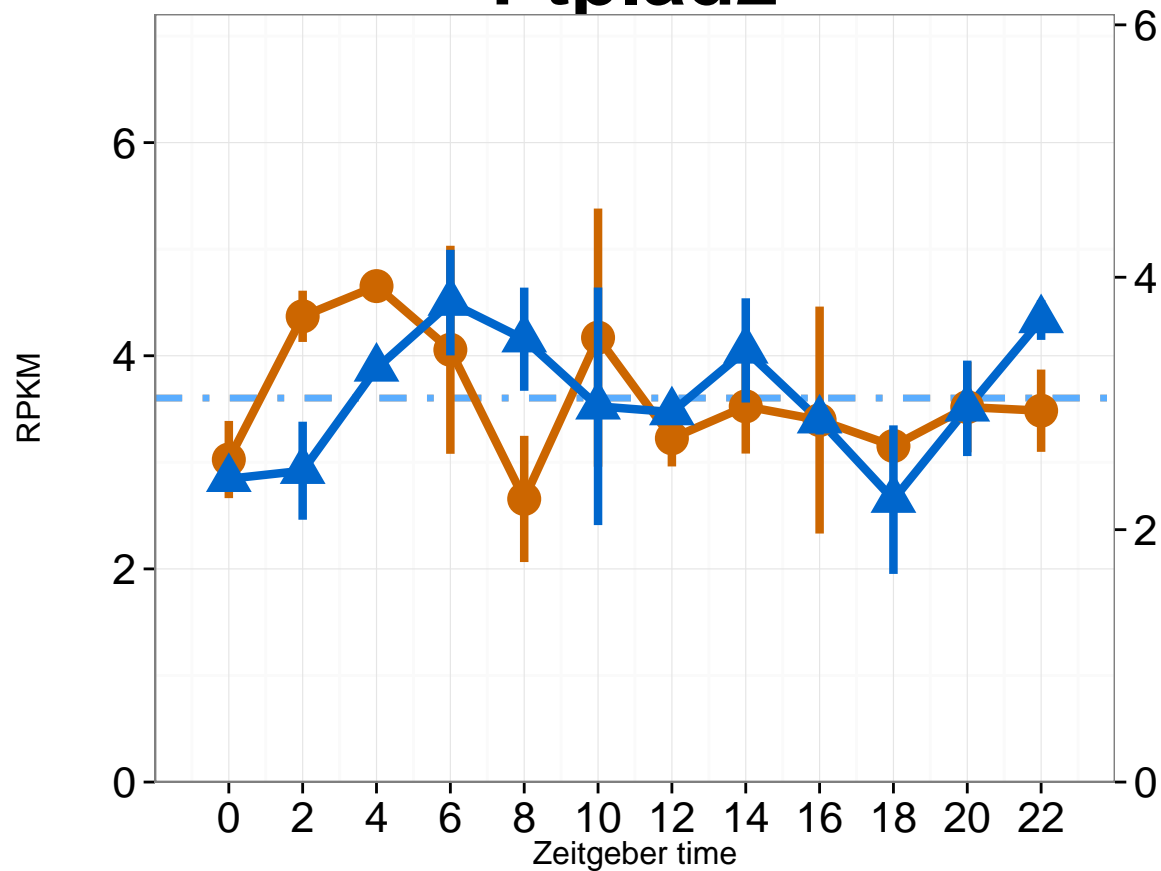

# Ptplad2

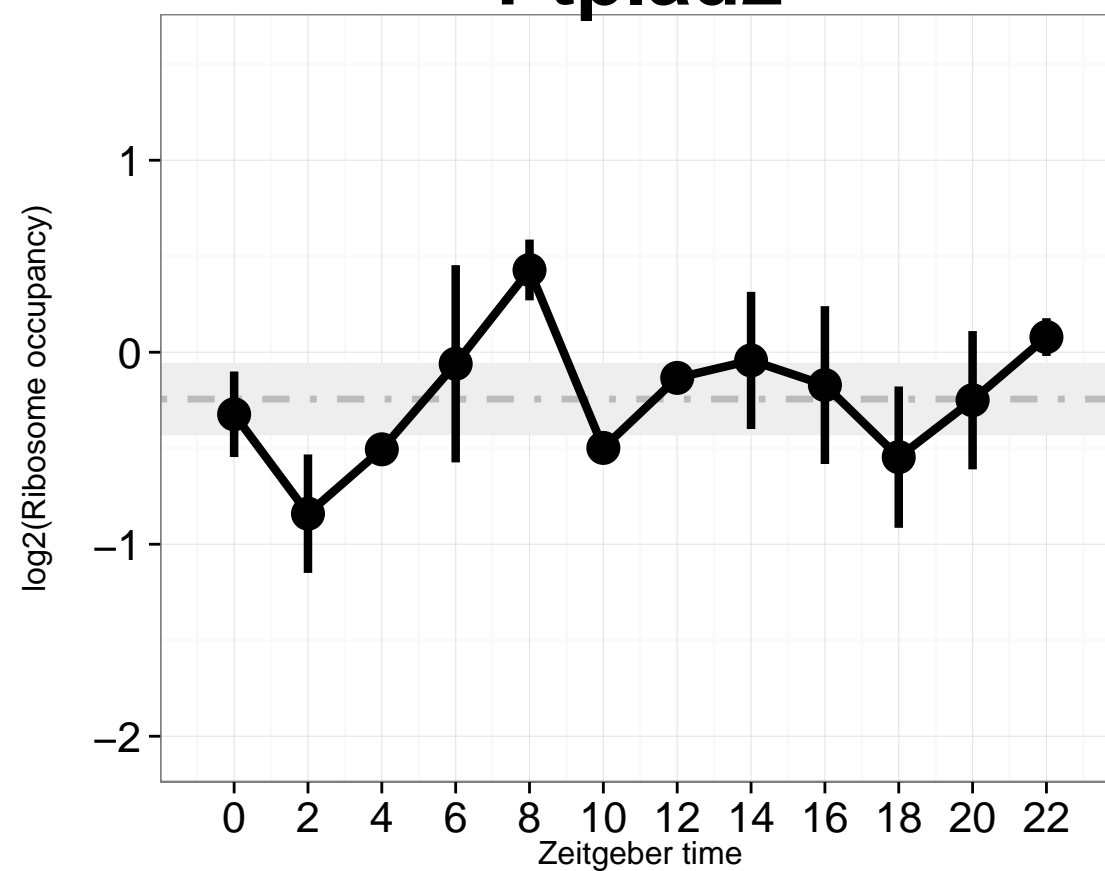

Supplement: Supplementary file 8032 [file 1]

## Atxn7l3b

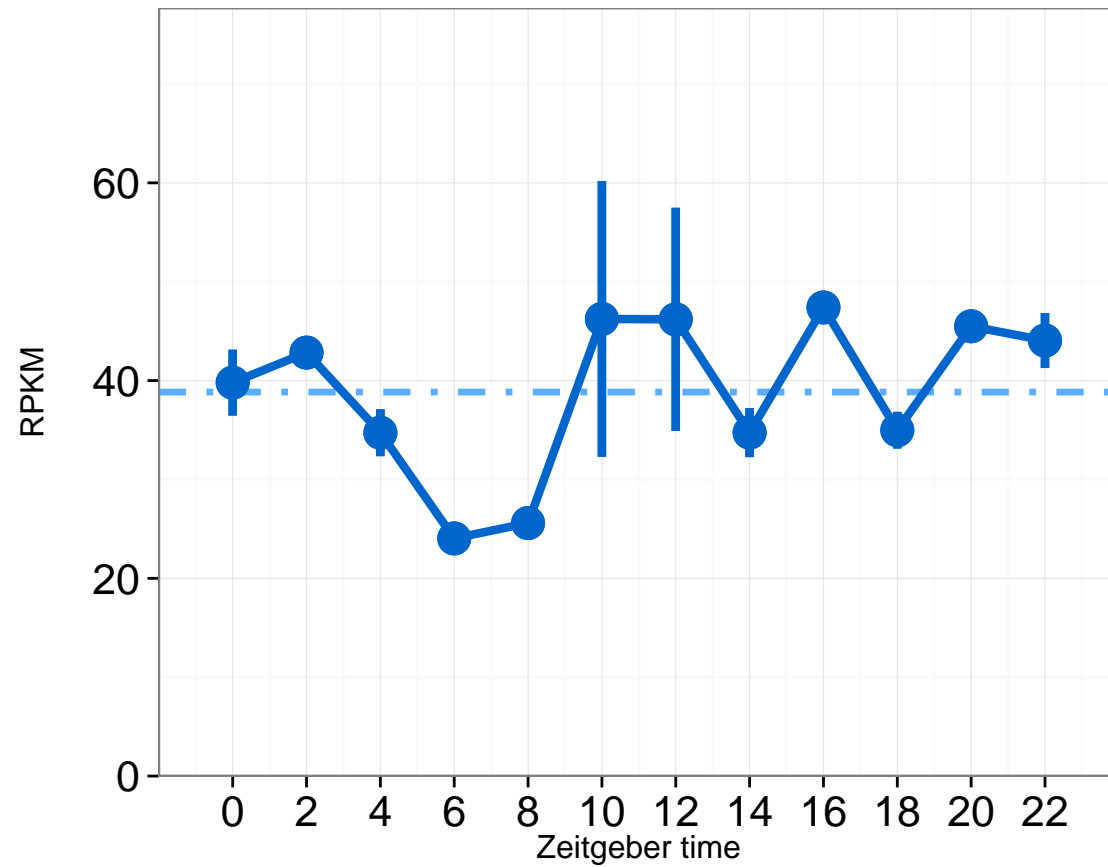

## Atxn7l3b log2(Ribosome occupanc

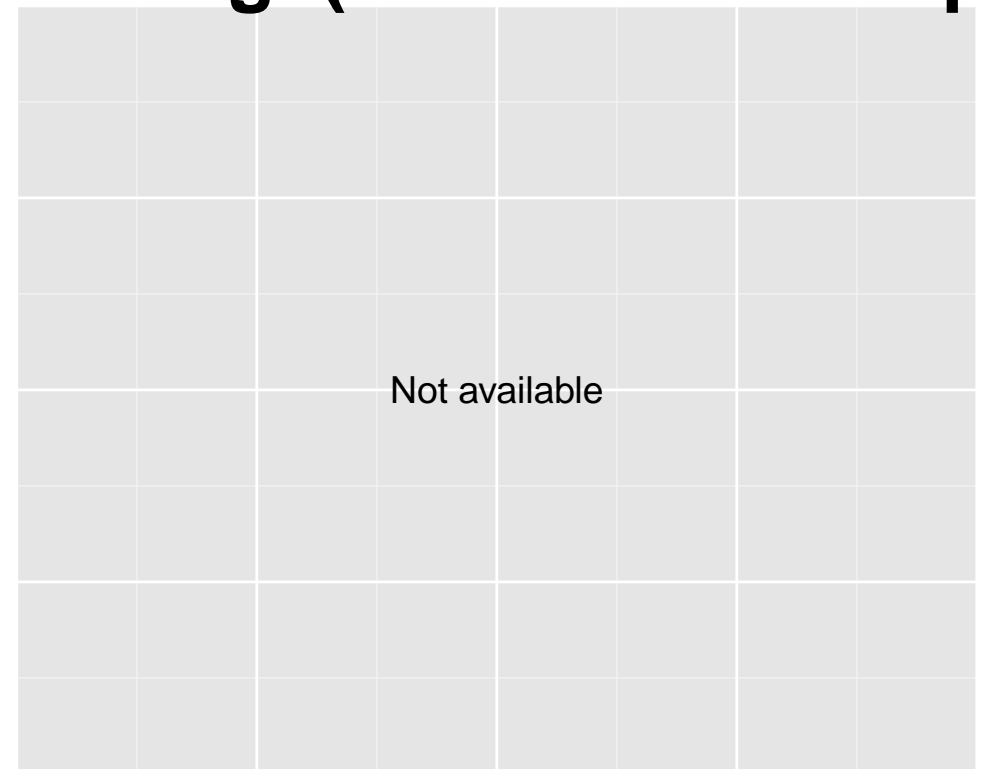

Supplement: Supplementary file 8033 [file 1]

# Cyb561d2

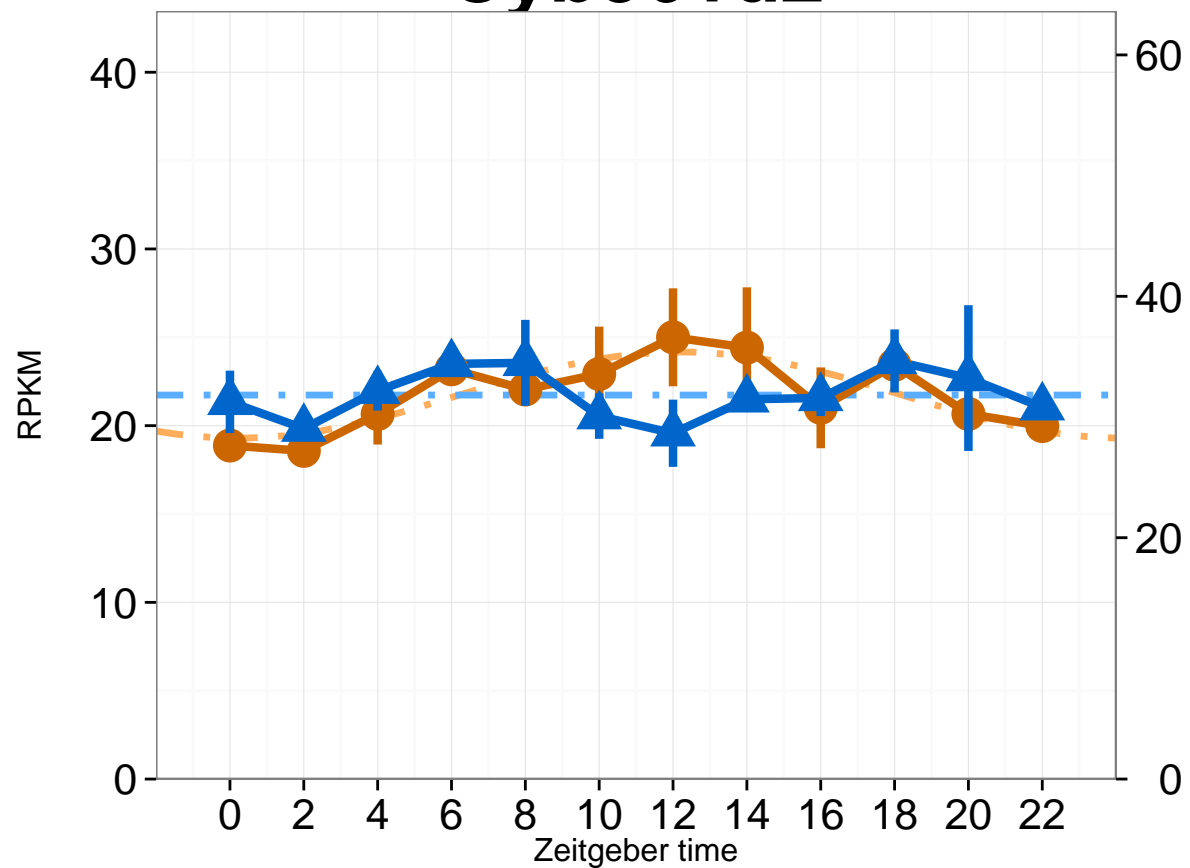

# Cyb561d2

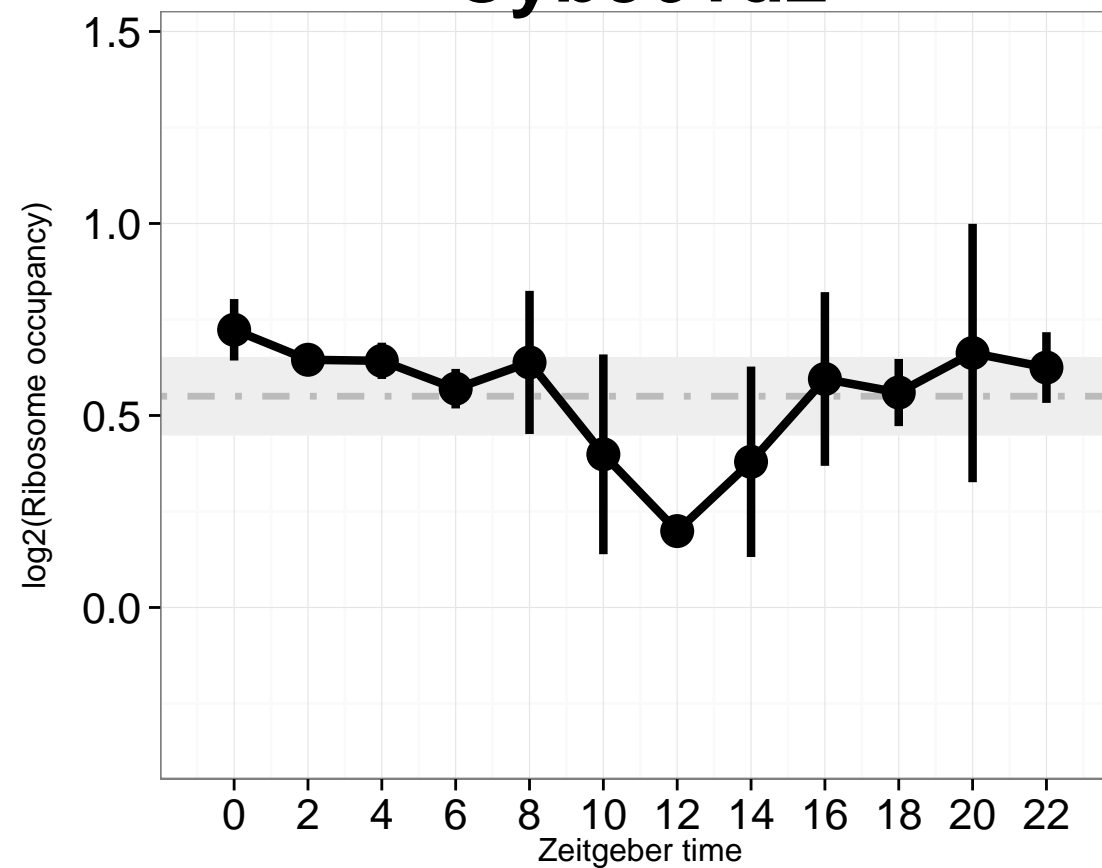

Supplement: Supplementary file 8035 [file 1]

## Kcnip2

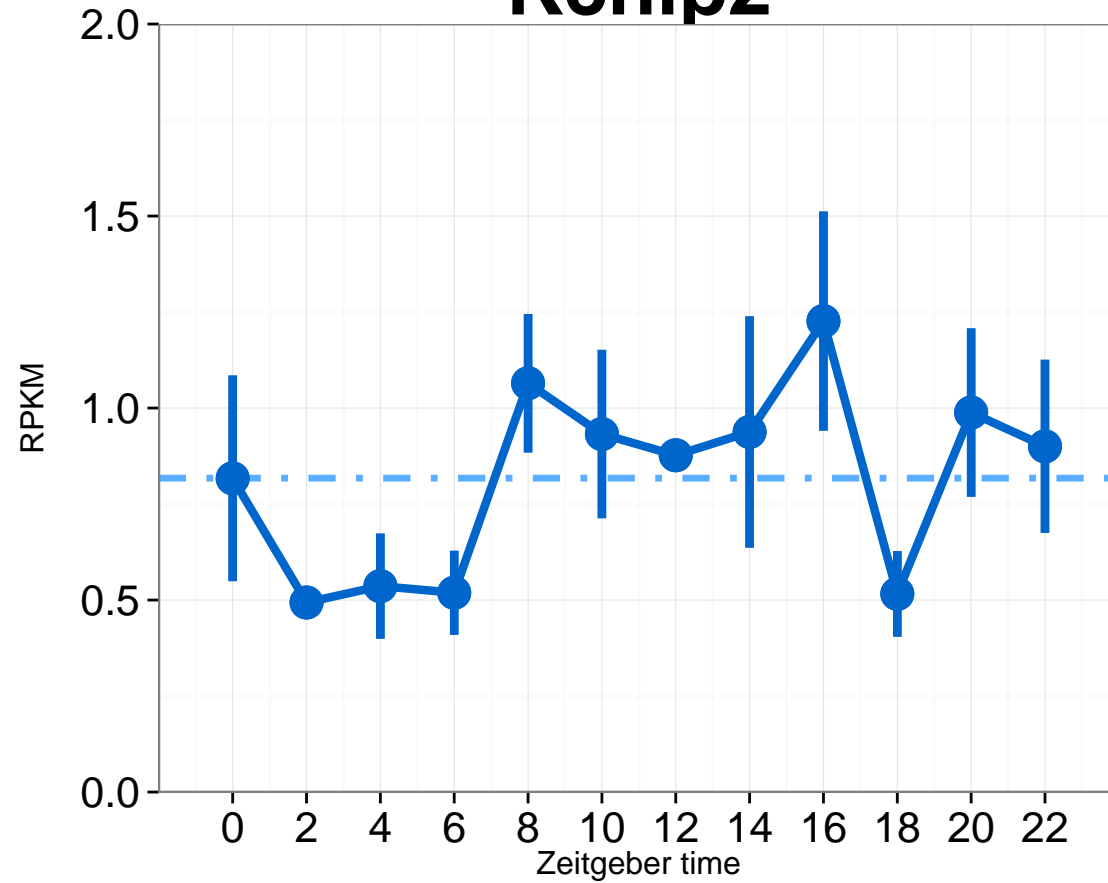

## Kcnip2 log2(Ribosome occupancy

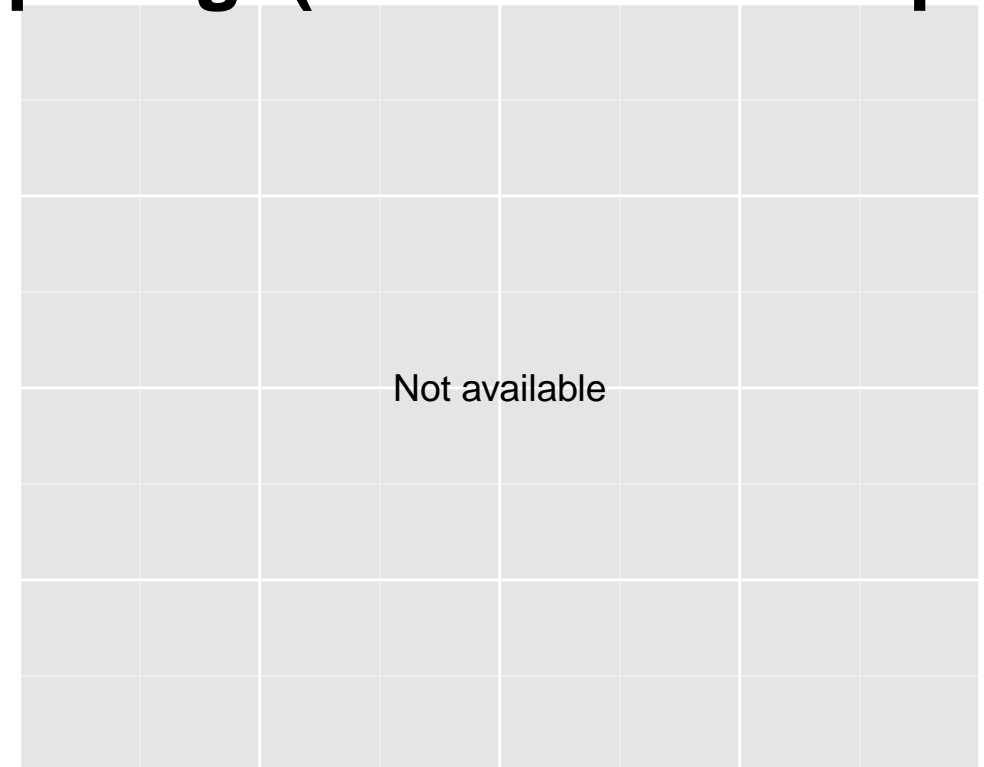

Supplement: Supplementary file 8036 [file 1]

# Ppp2r1b

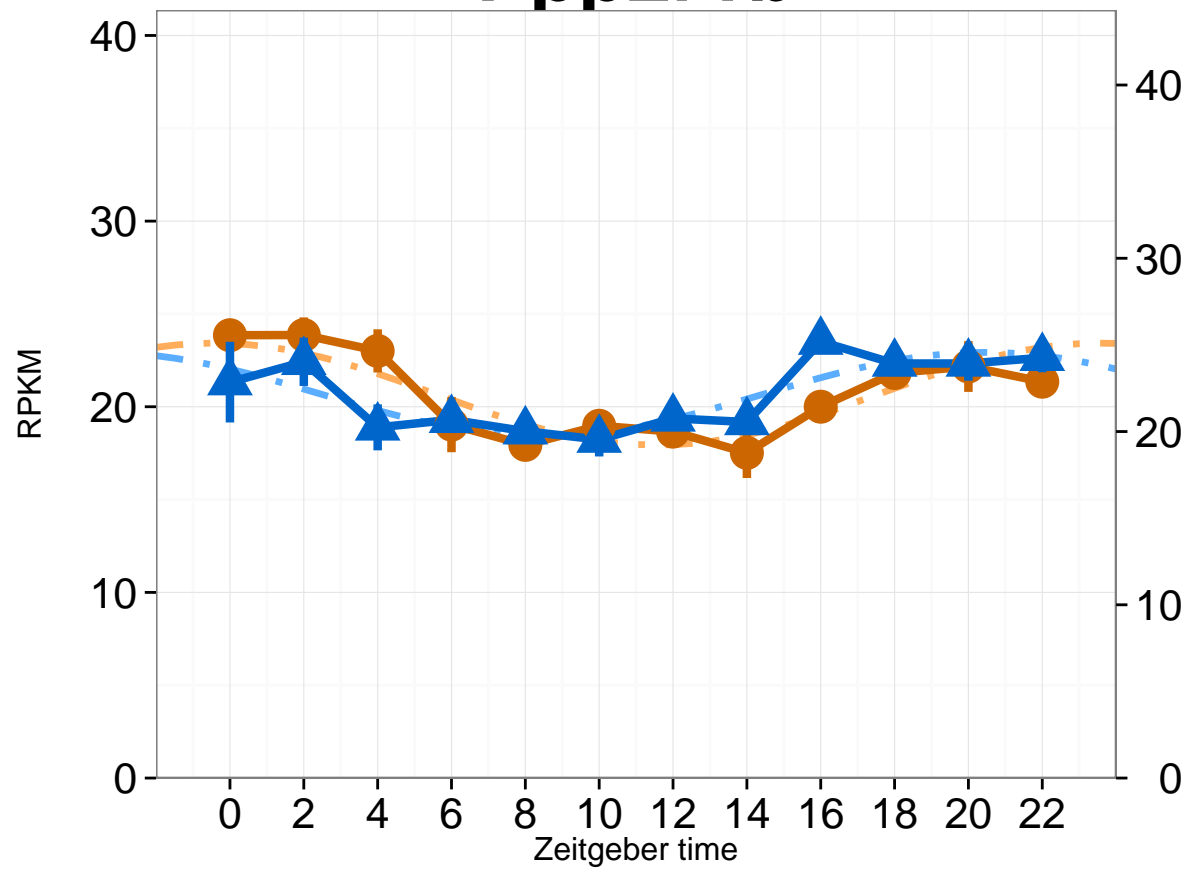

# Ppp2r1b

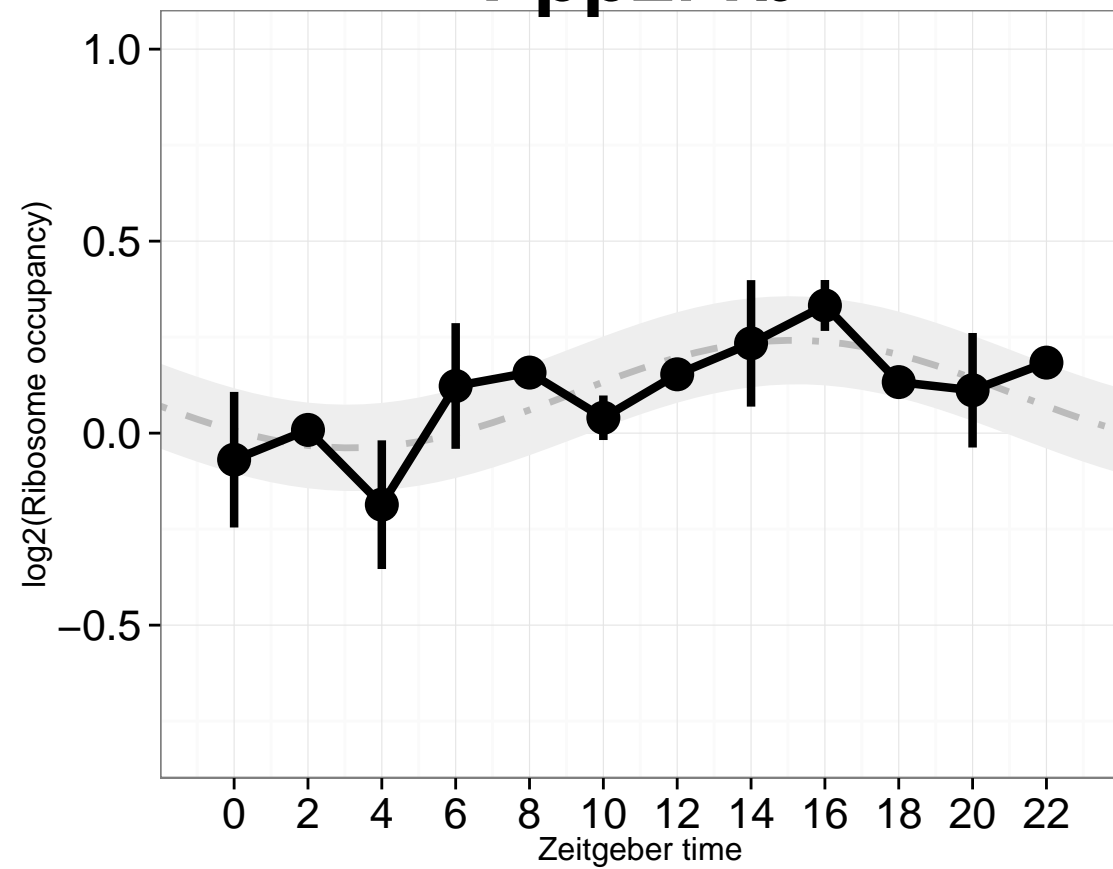

Supplement: Supplementary file 8037 [file 1]

## Gaa

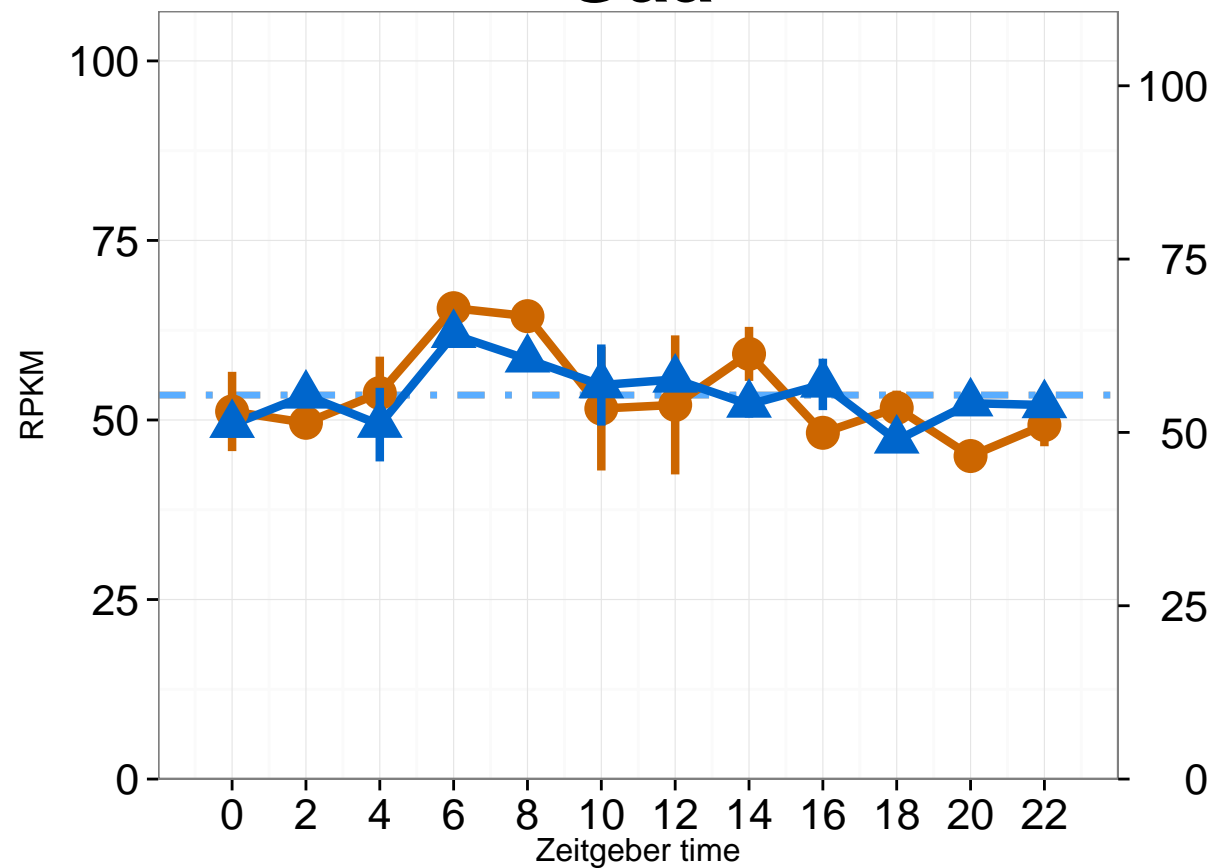

## Gaa

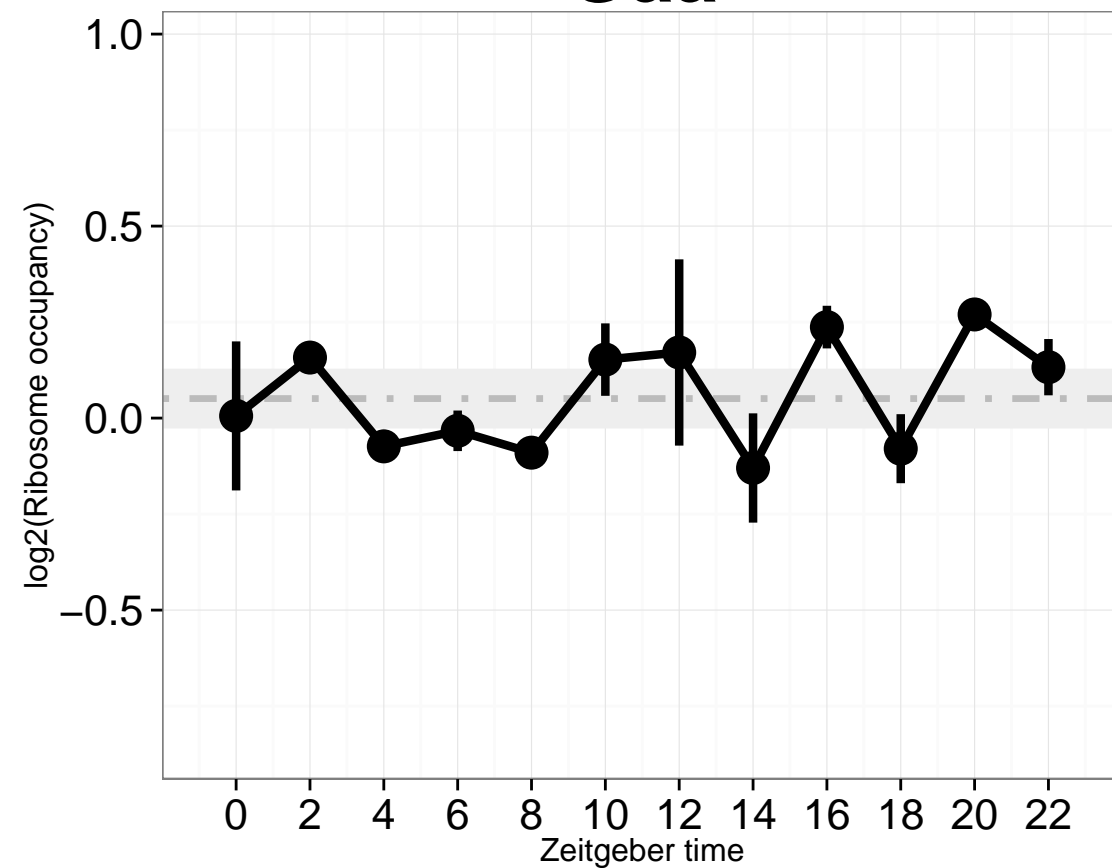

Supplement: Supplementary file 8038 [file 1]

## Hdac4

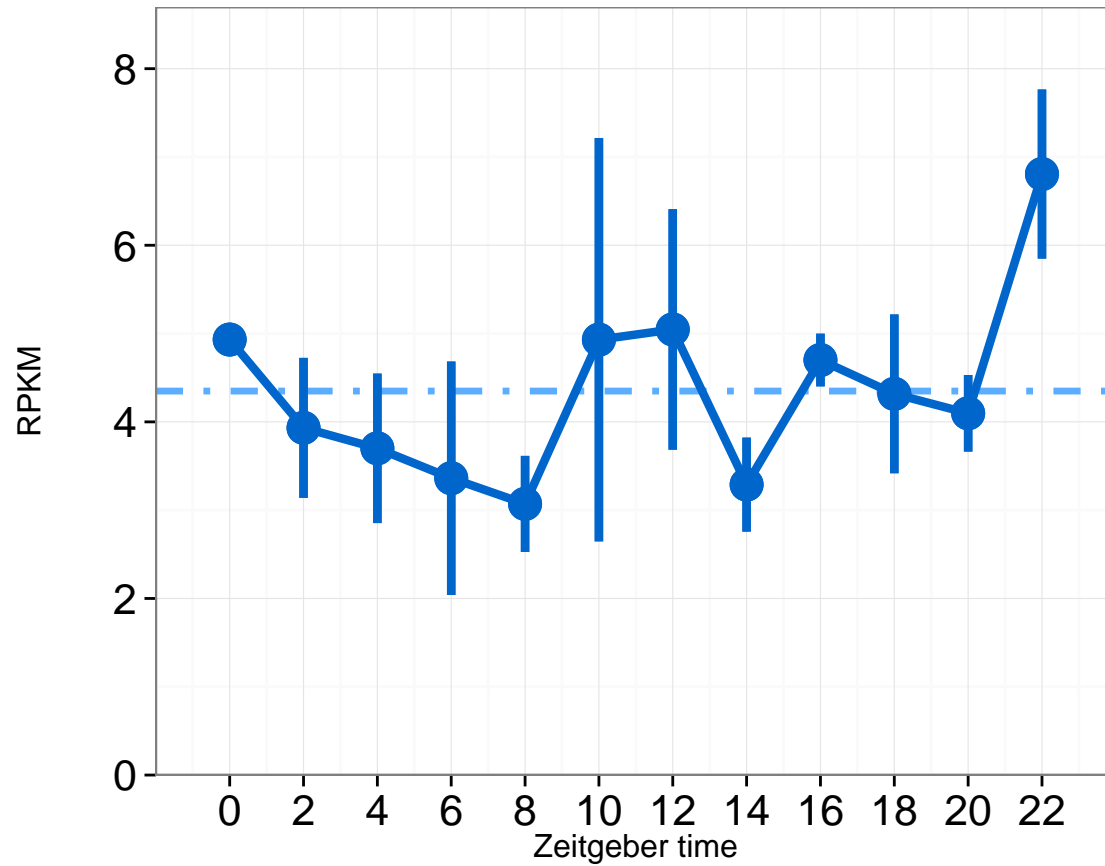

## Hdac4 log2(Ribosome occupancy

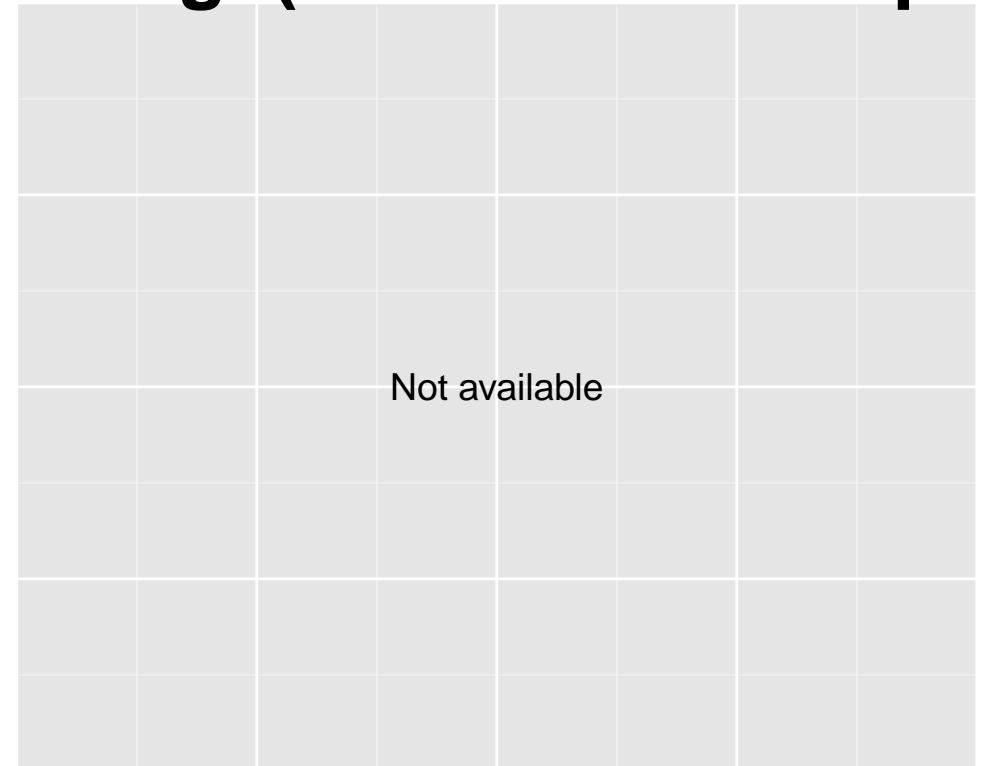

Supplement: Supplementary file 8039 [file 1]

# Slc5a6

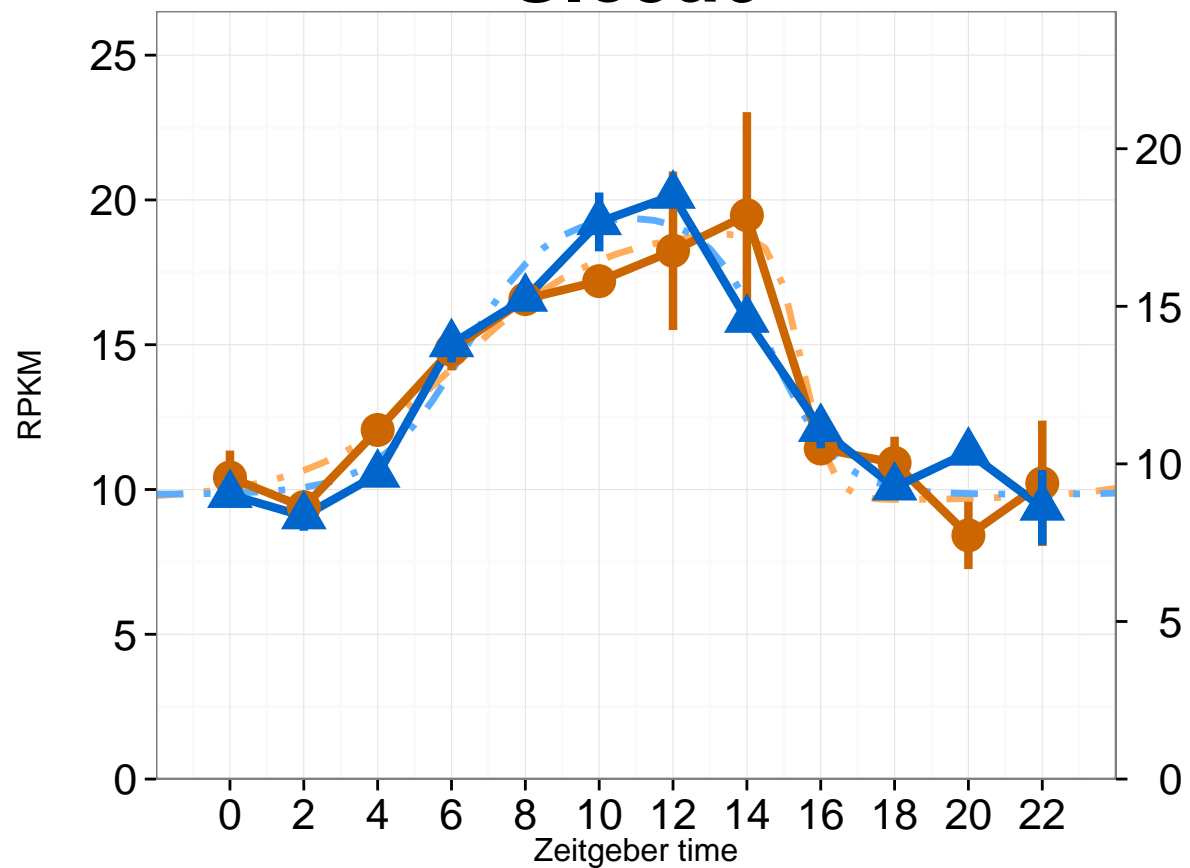

# Slc5a6

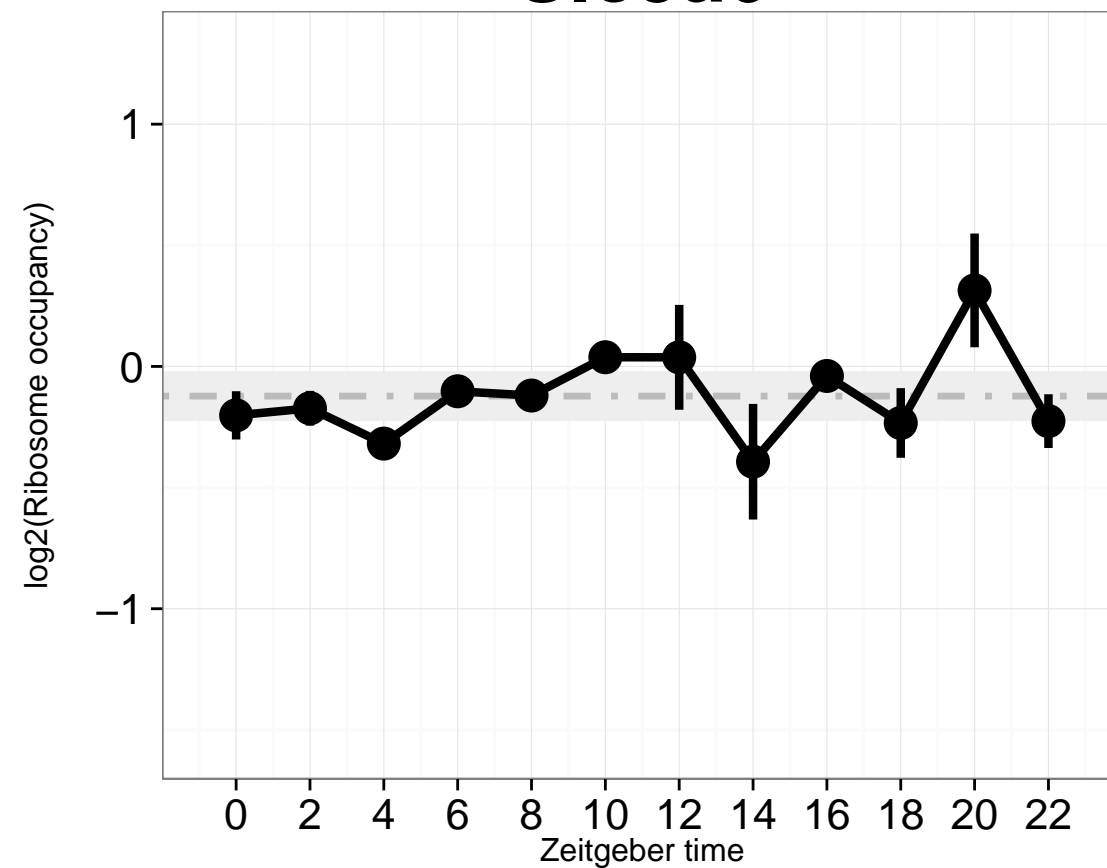

Supplement: Supplementary file 8040 [file 1]

# Dcun1d2

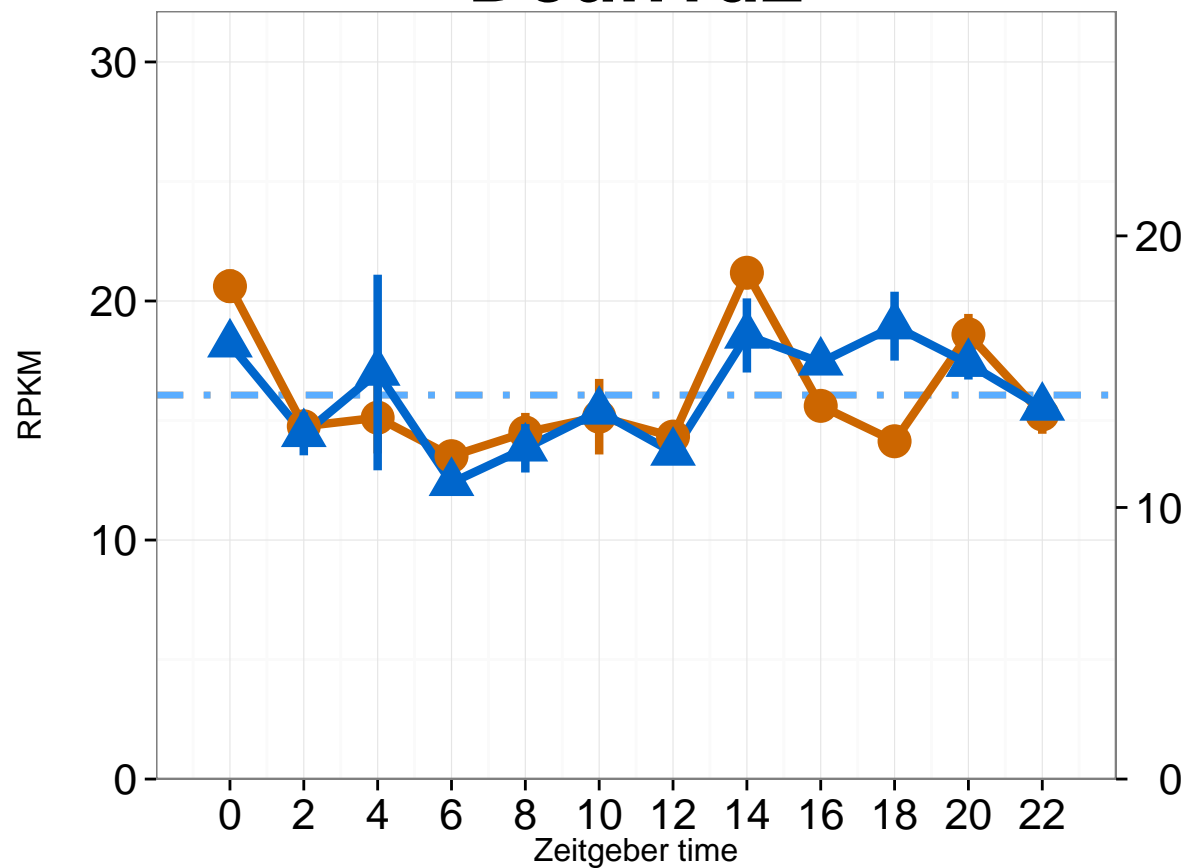

# Dcun1d2

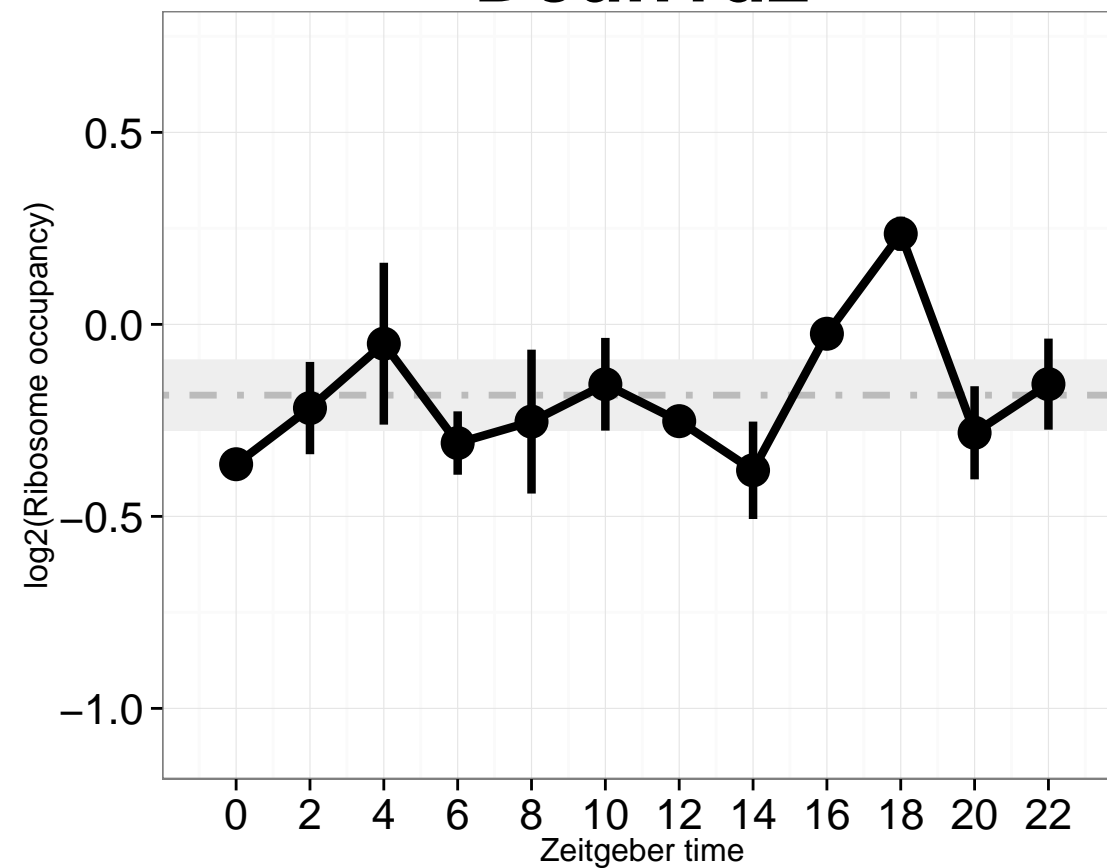

Supplement: Supplementary file 8041 [file 1]

# Flt4

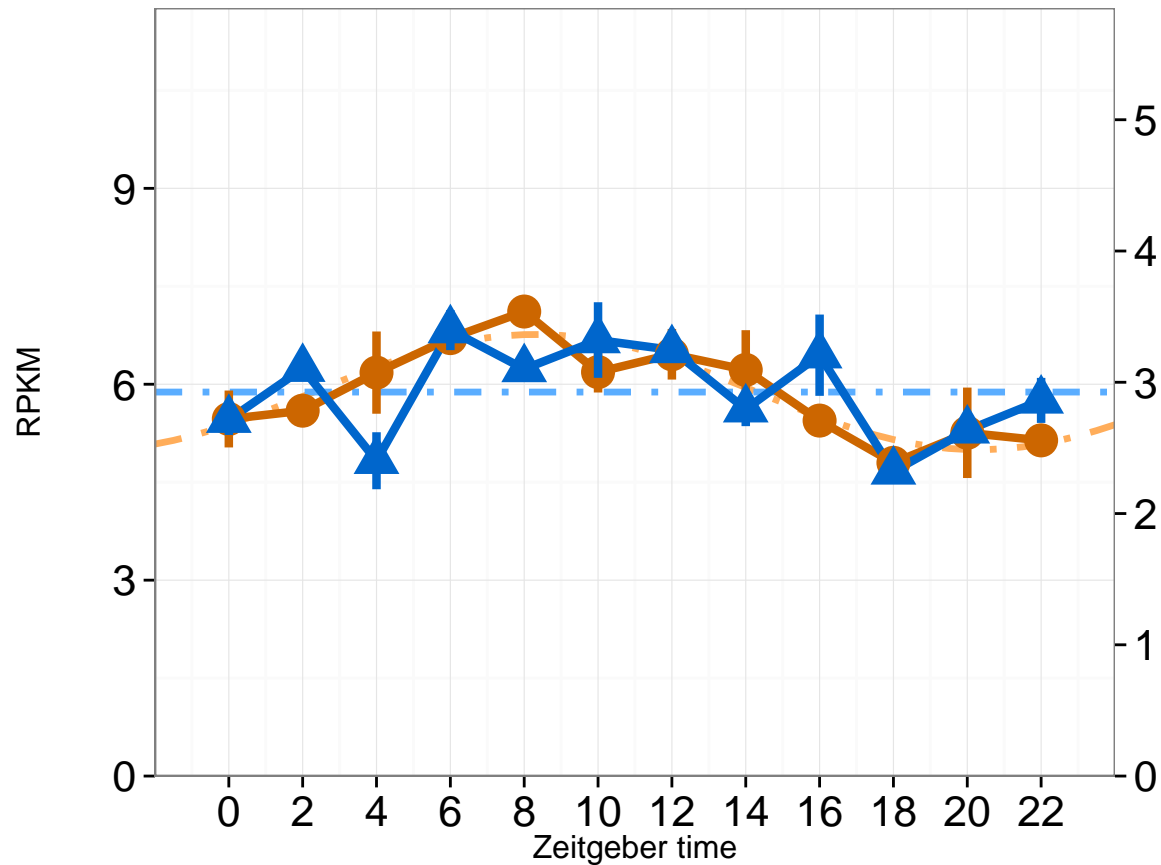

# Flt4

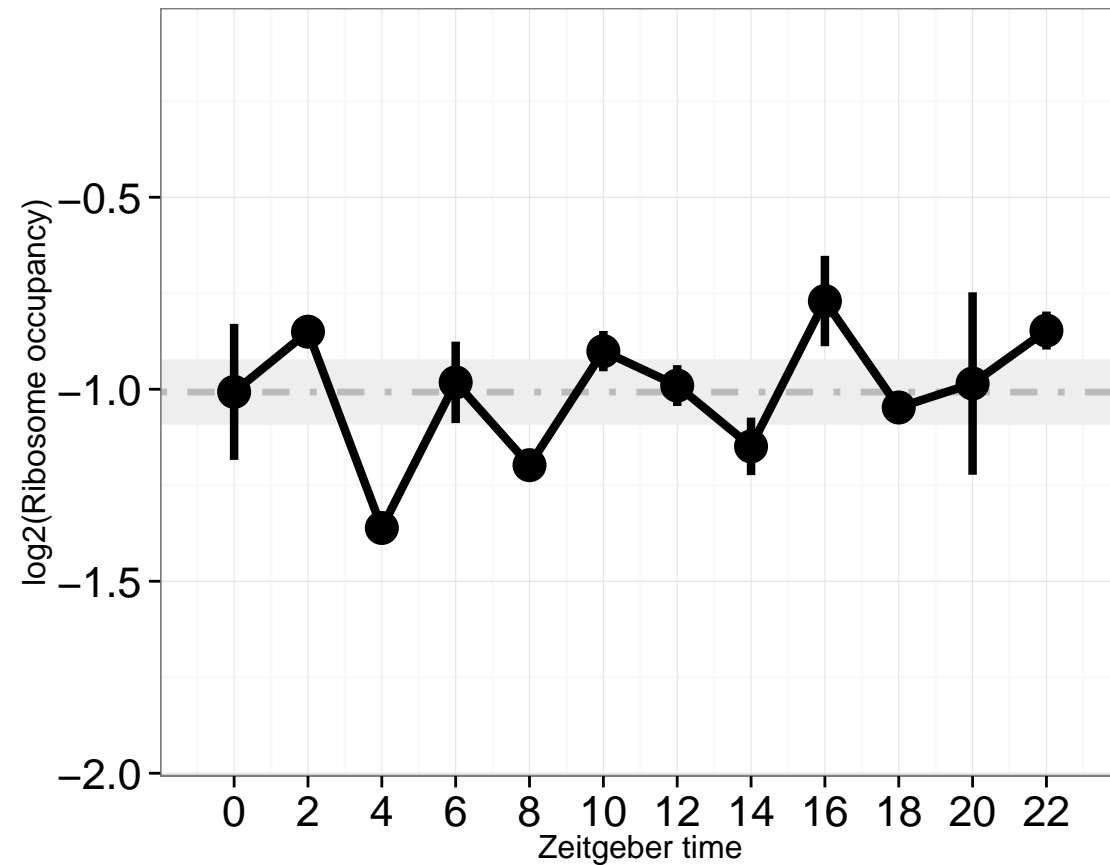

Supplement: Supplementary file 8042 [file 1]

# Cdkn1a

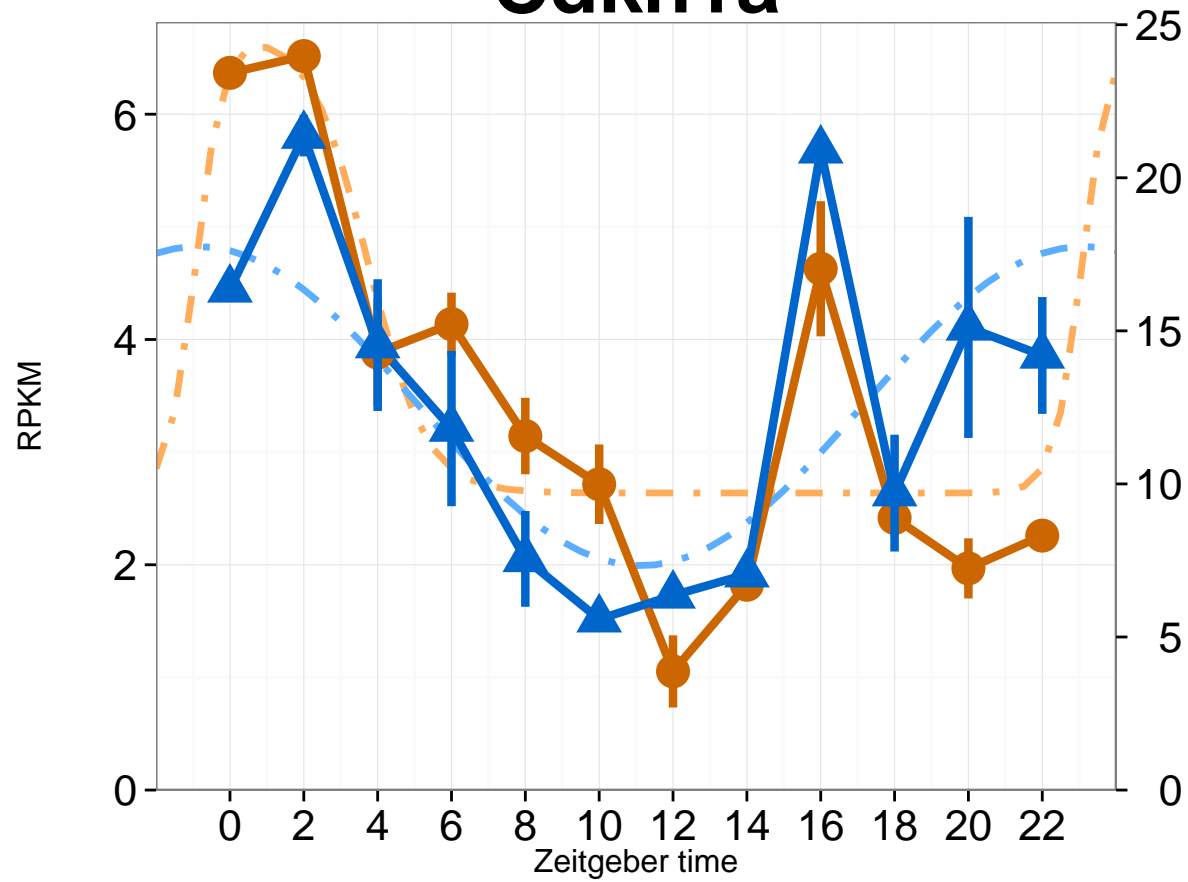

# Cdkn1a

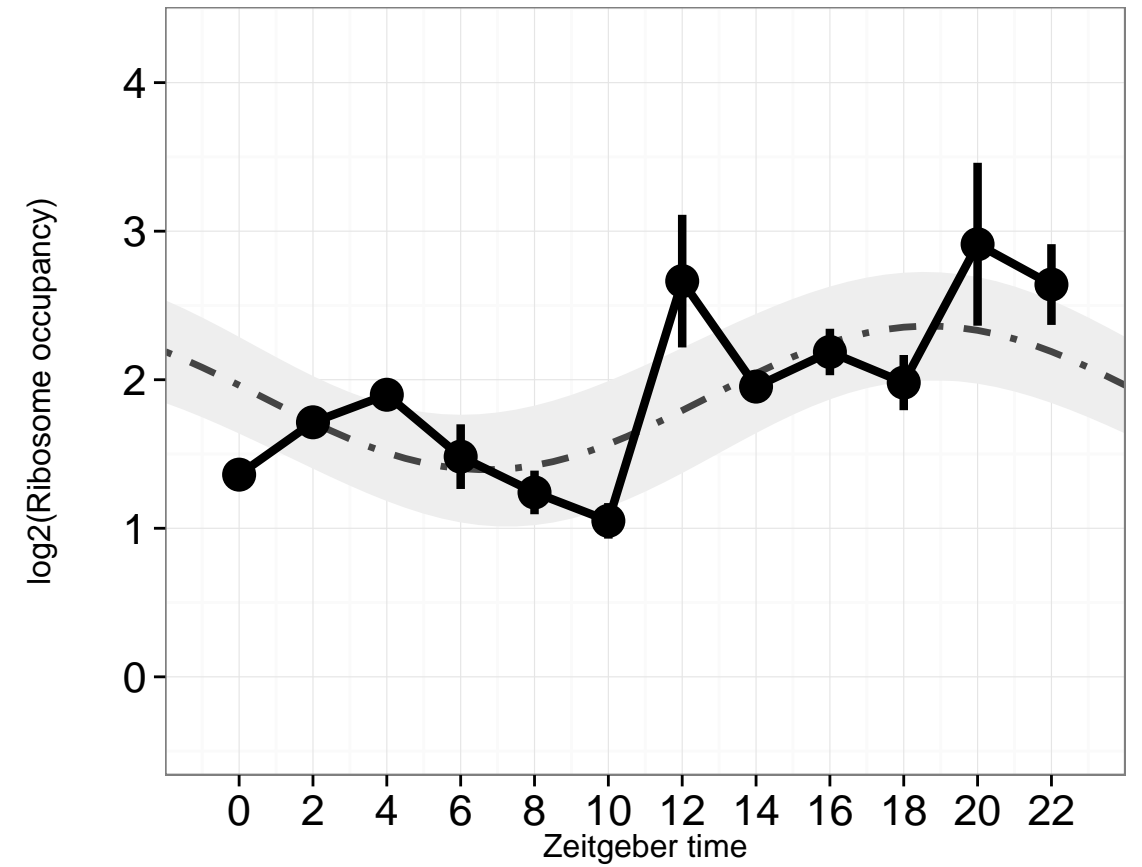

Supplement: Supplementary file 8043 [file 1]

# Serpina1f

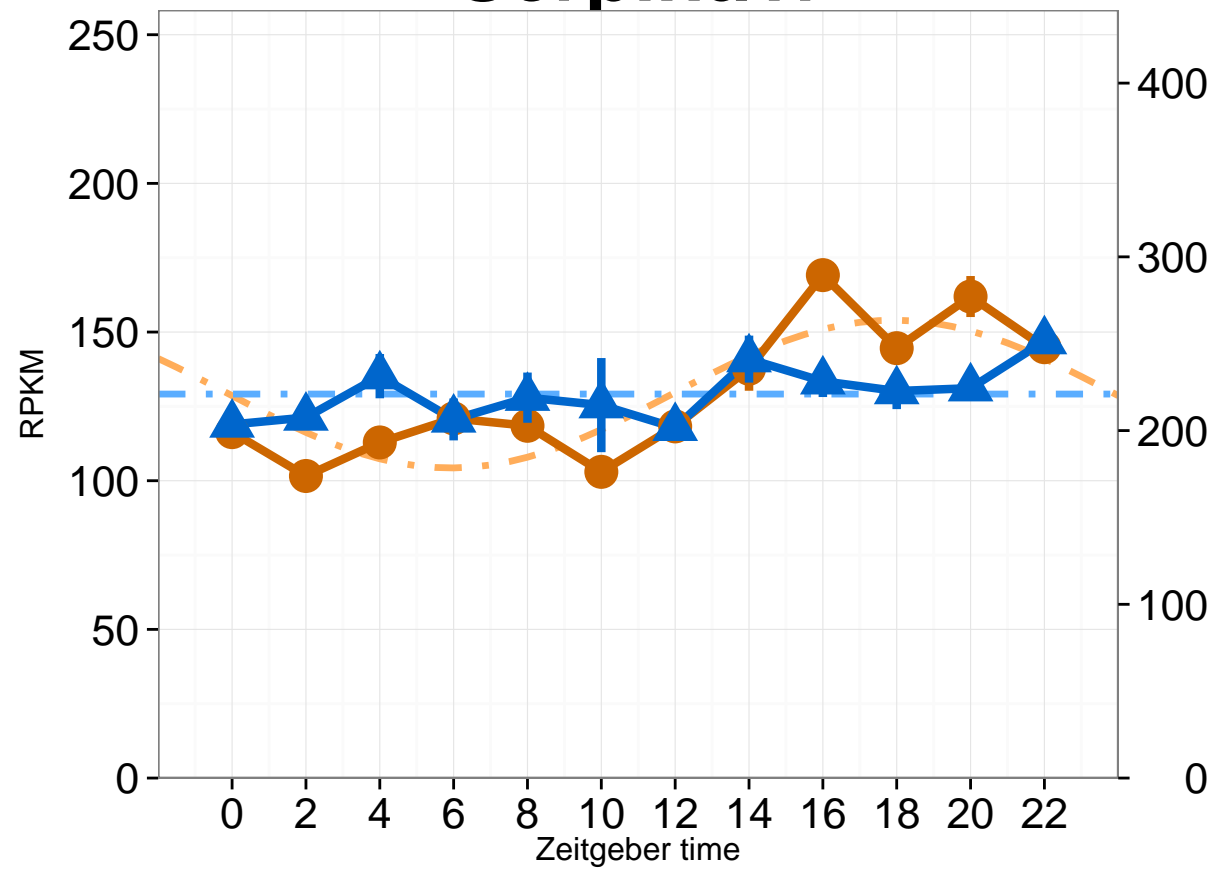

# Serpina1f

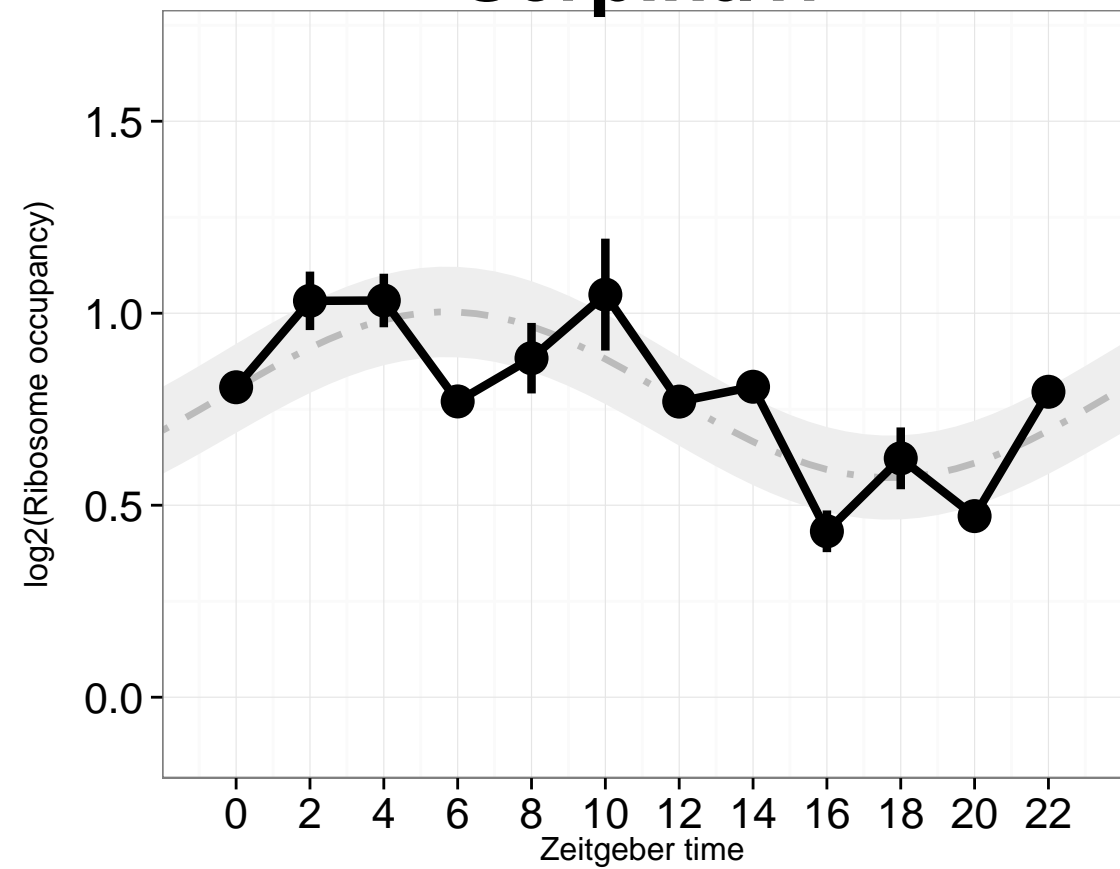

Supplement: Supplementary file 8044 [file 1]

## Plekhf1

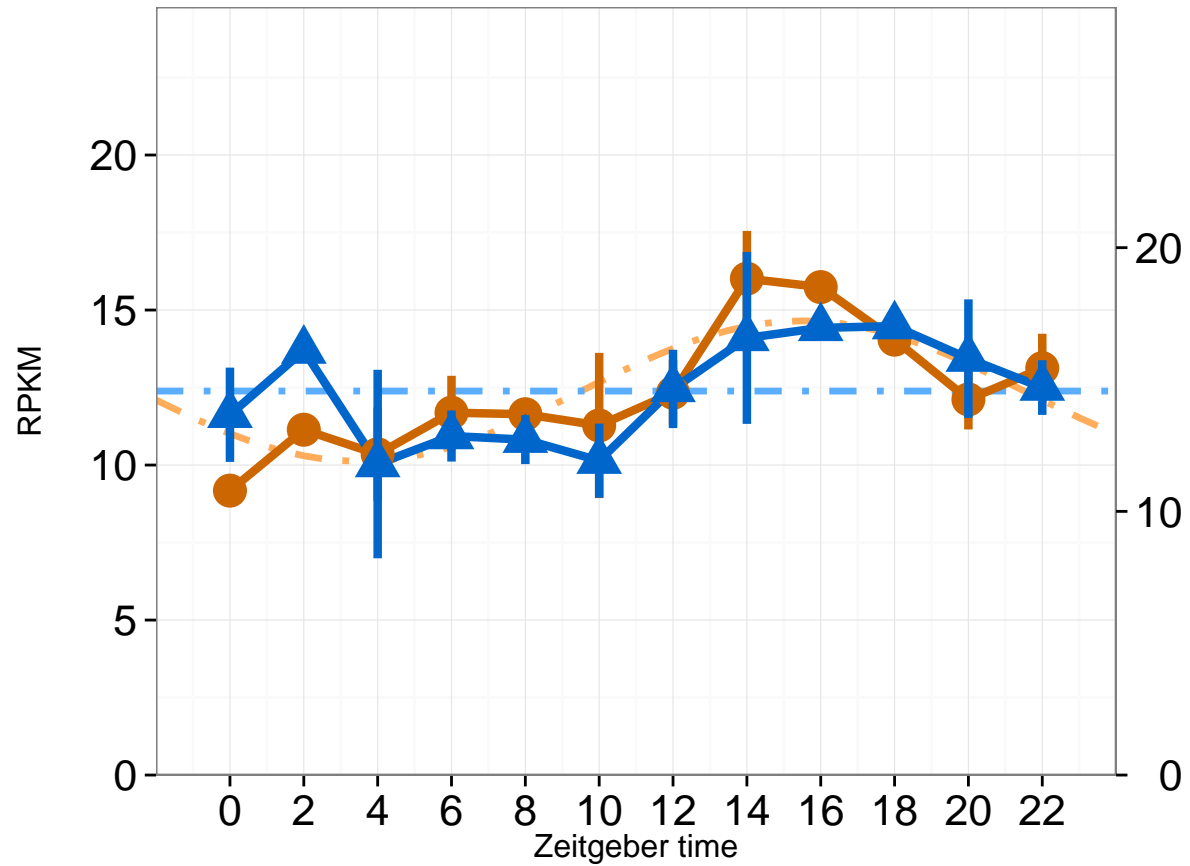

## Plekhf1

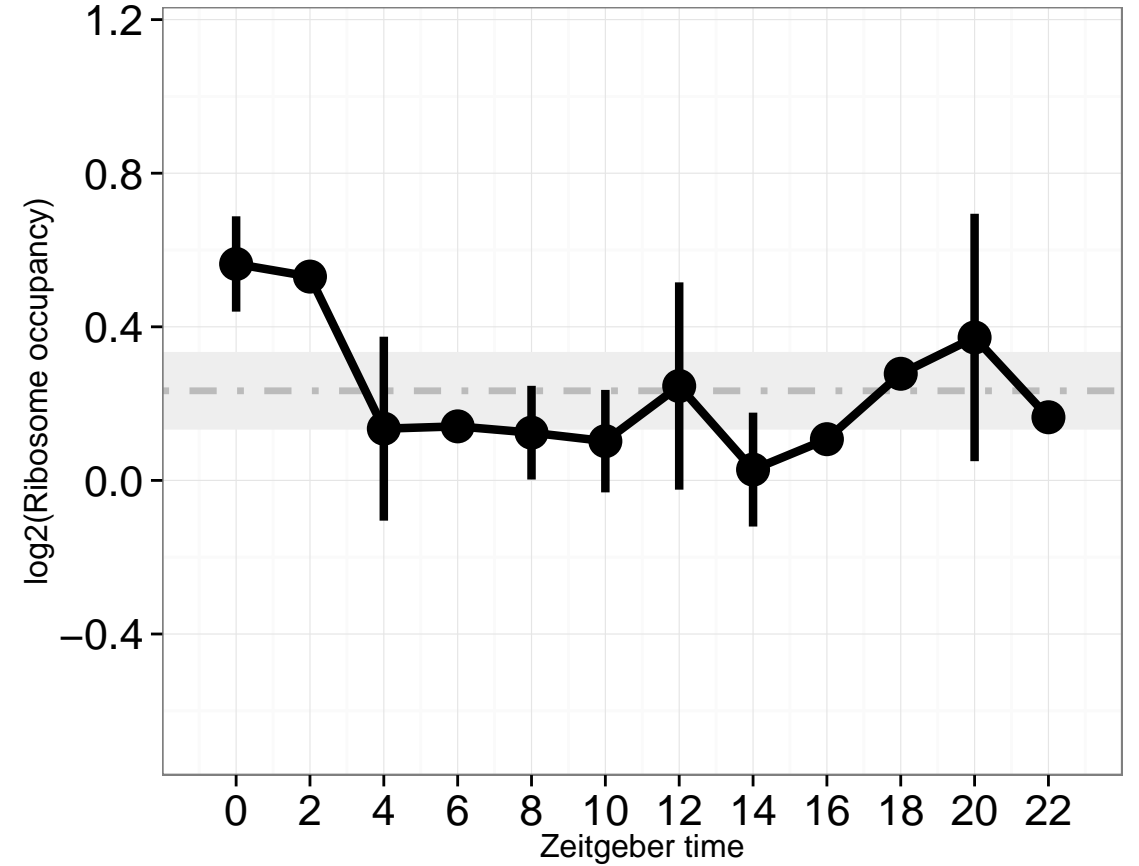

Supplement: Supplementary file 8045 [file 1]

## Dcn

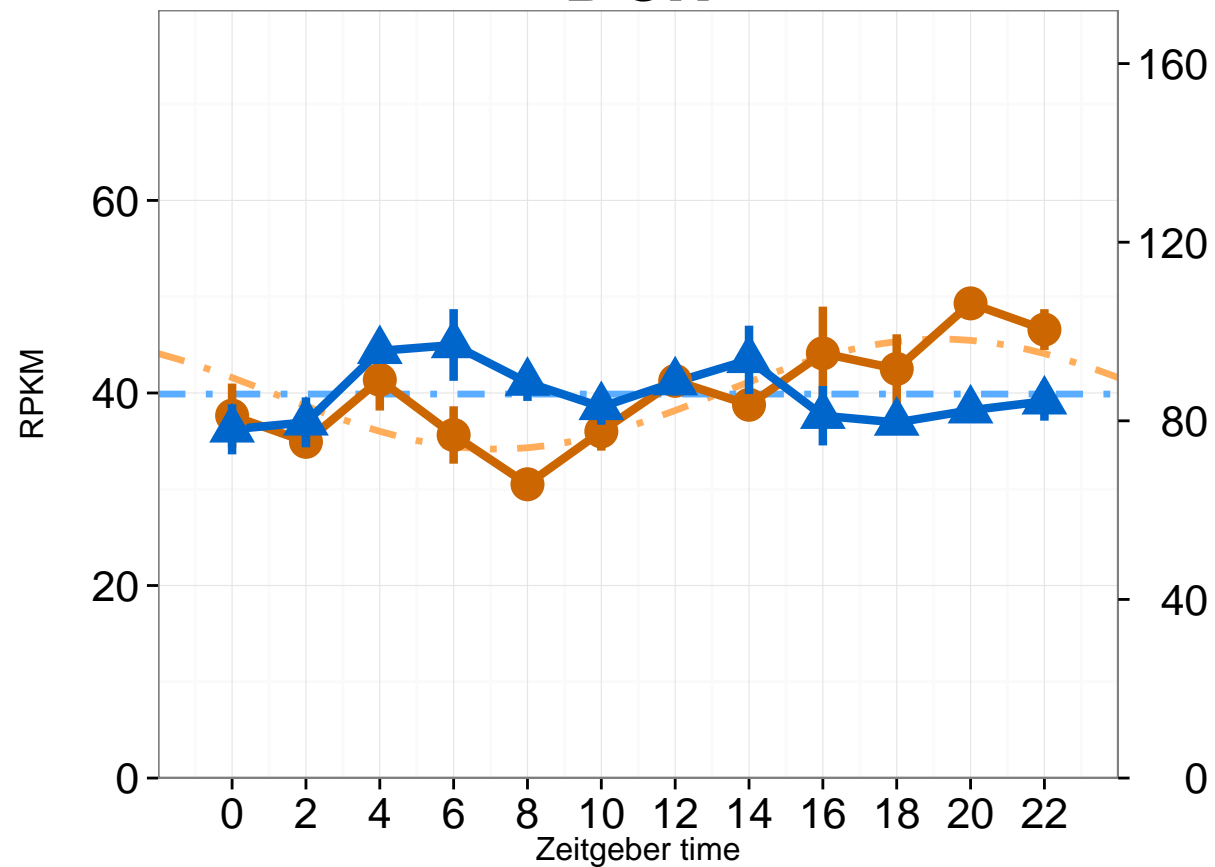

## Dcn

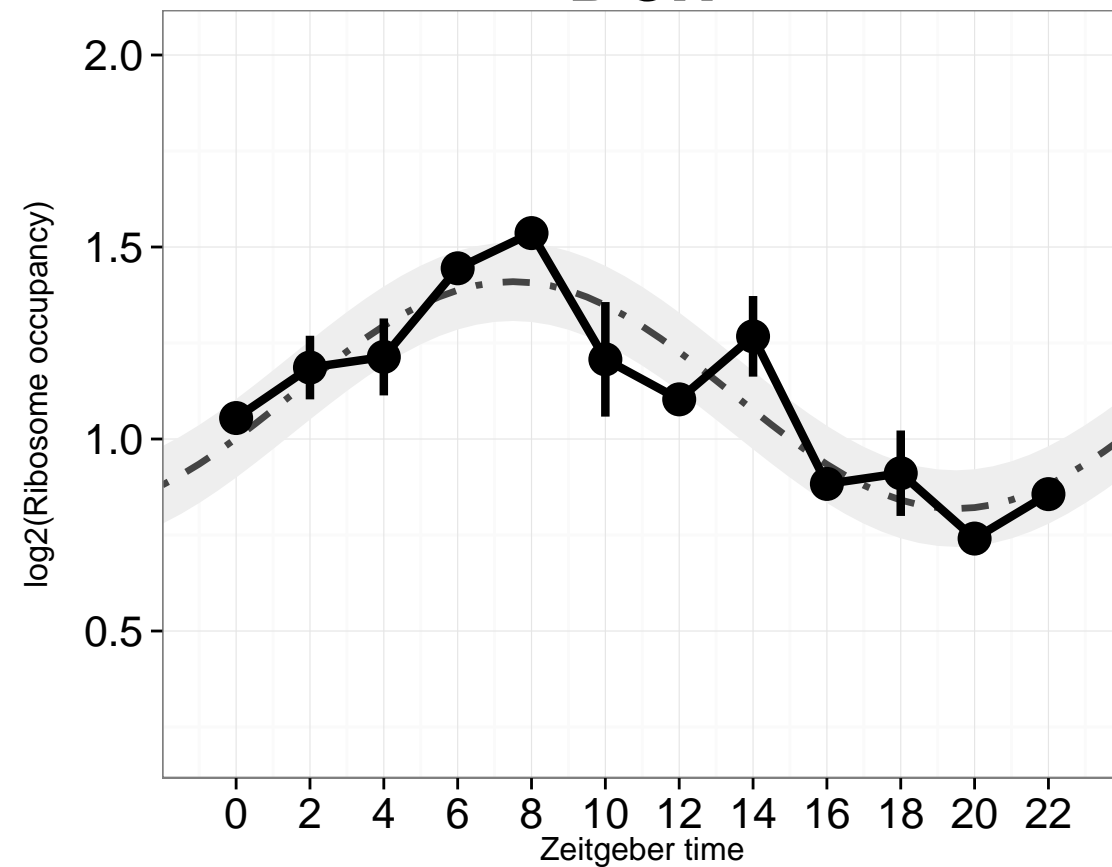

Supplement: Supplementary file 8046 [file 1]

# Plagl2

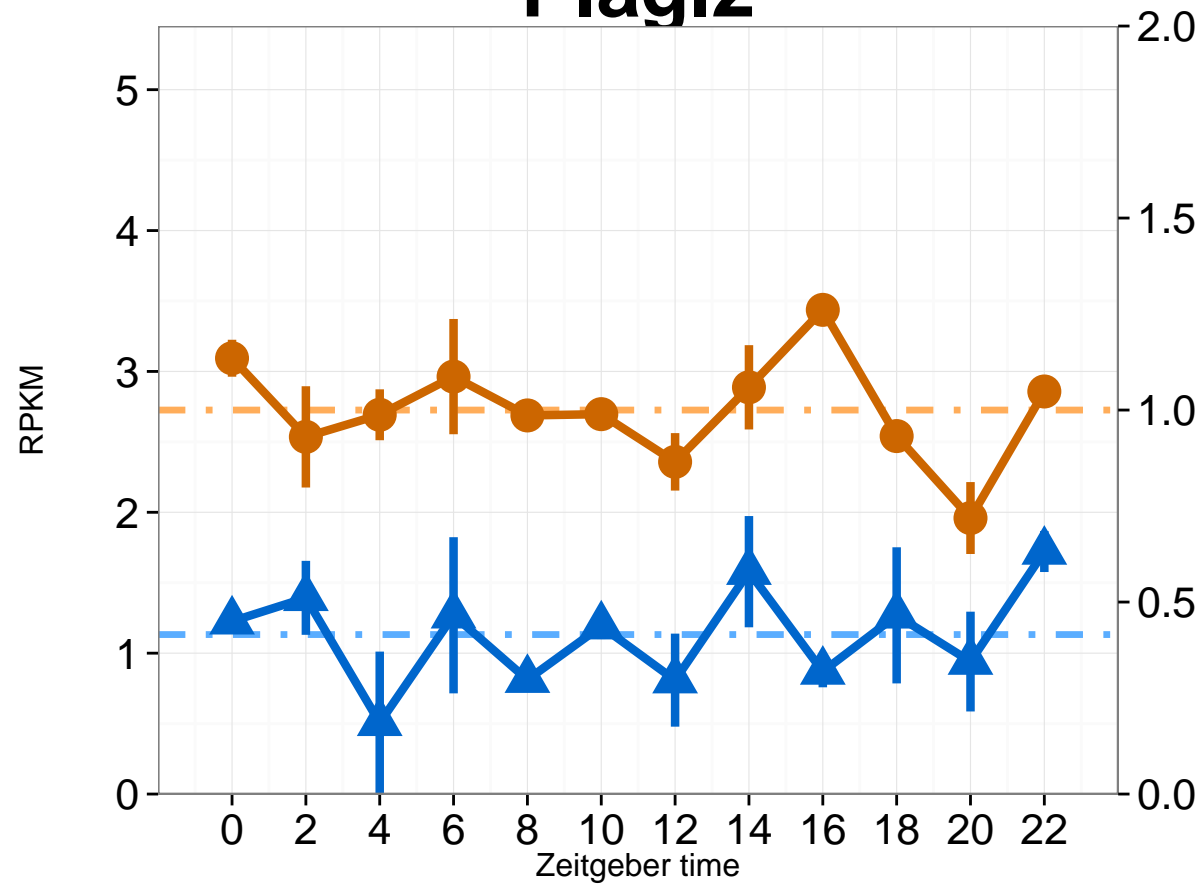

# Plagl2

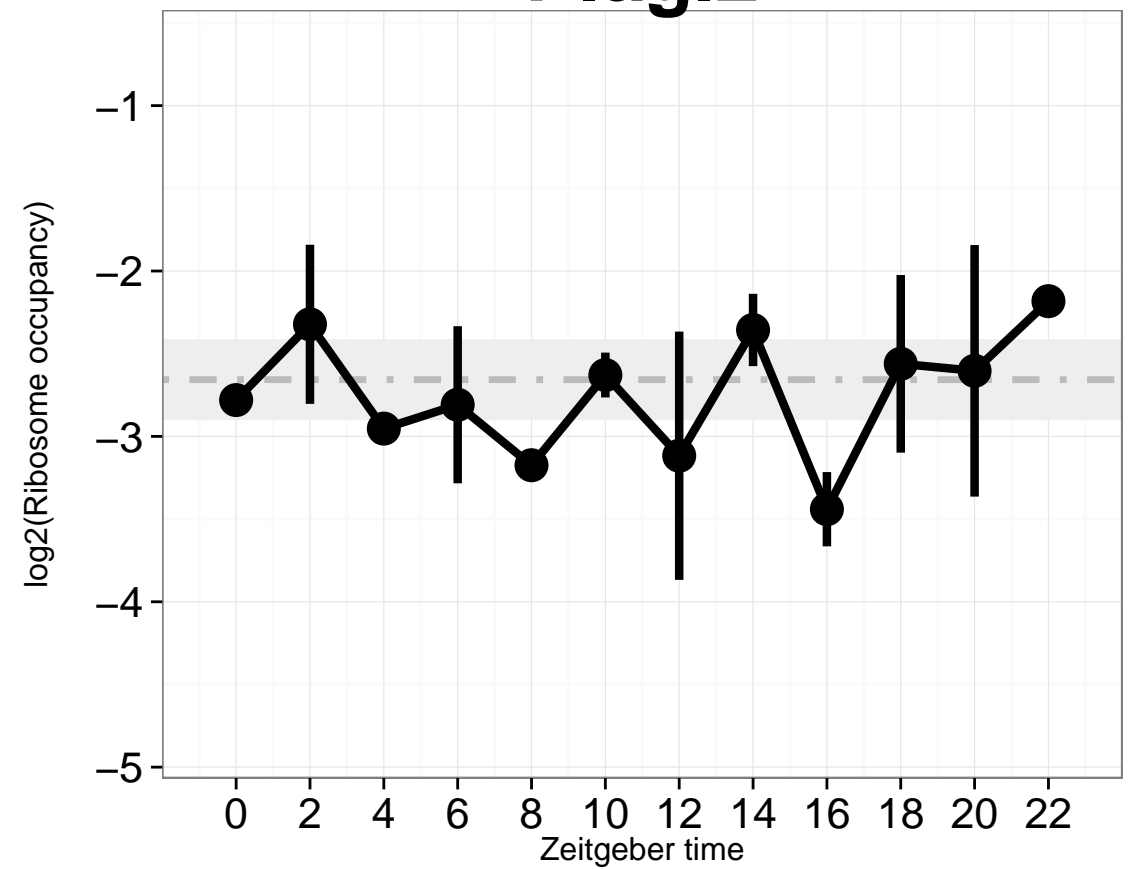

Supplement: Supplementary file 8047 [file 1]

## Dock5

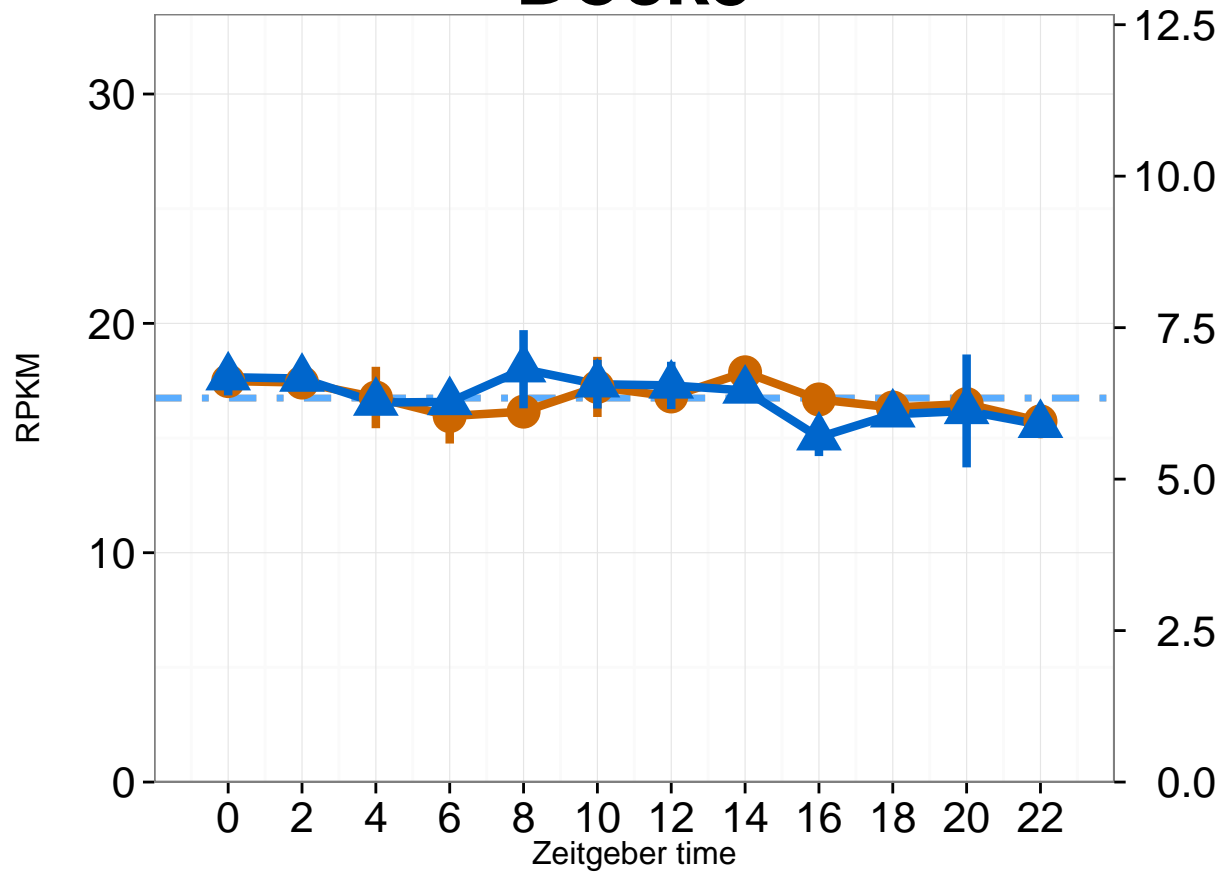

## Dock5

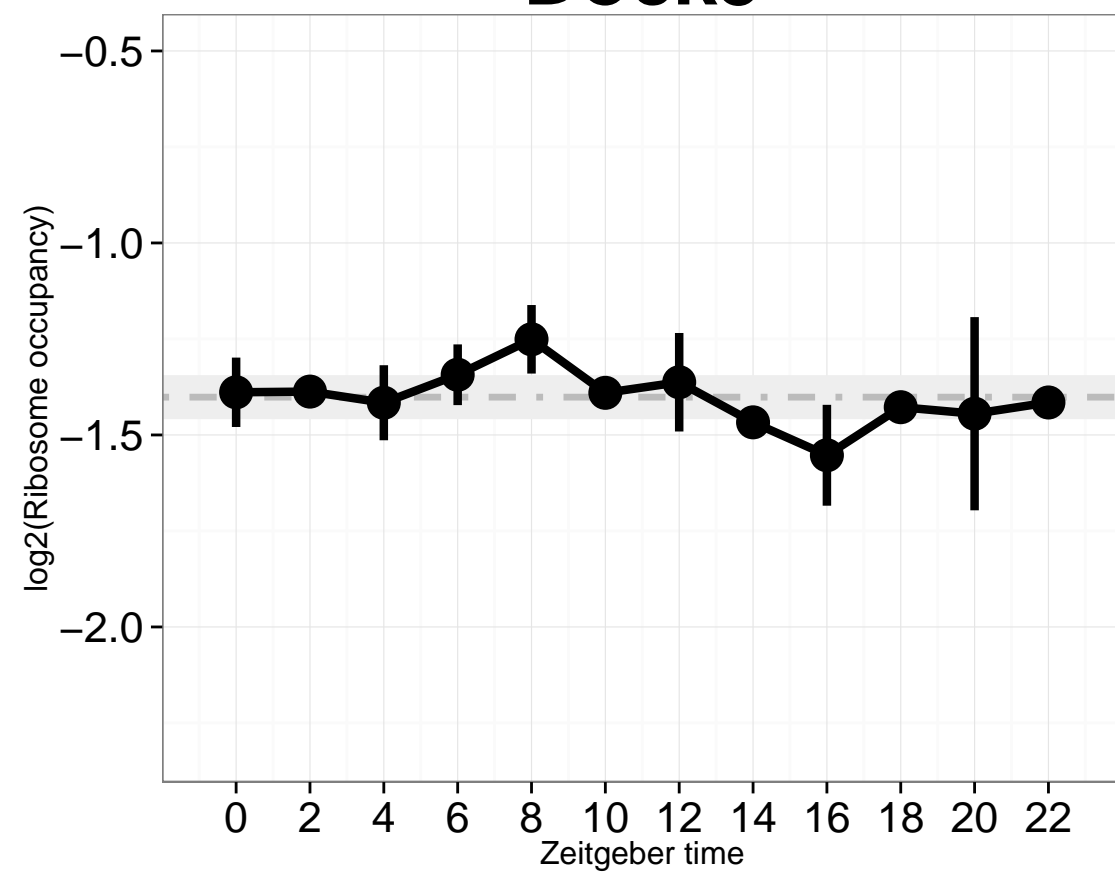

Supplement: Supplementary file 8048 [file 1]

# Lypd6b

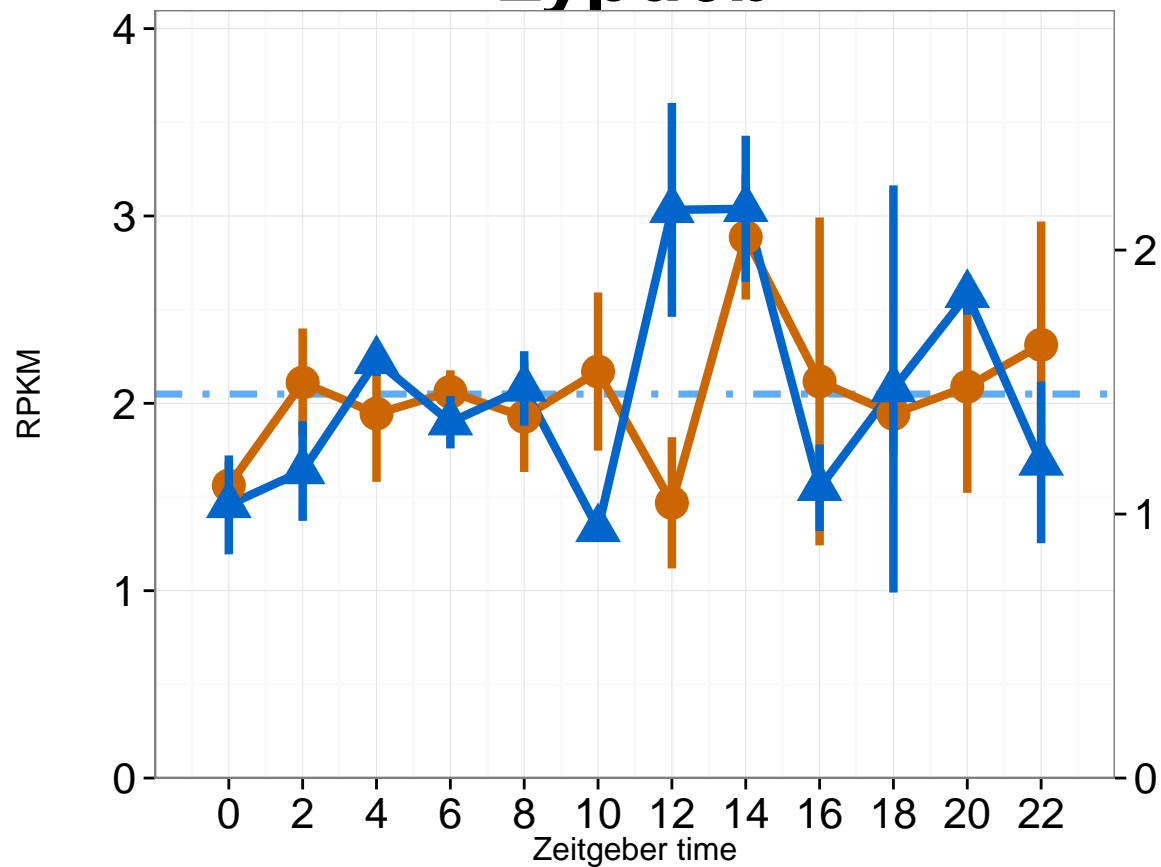

# Lypd6b

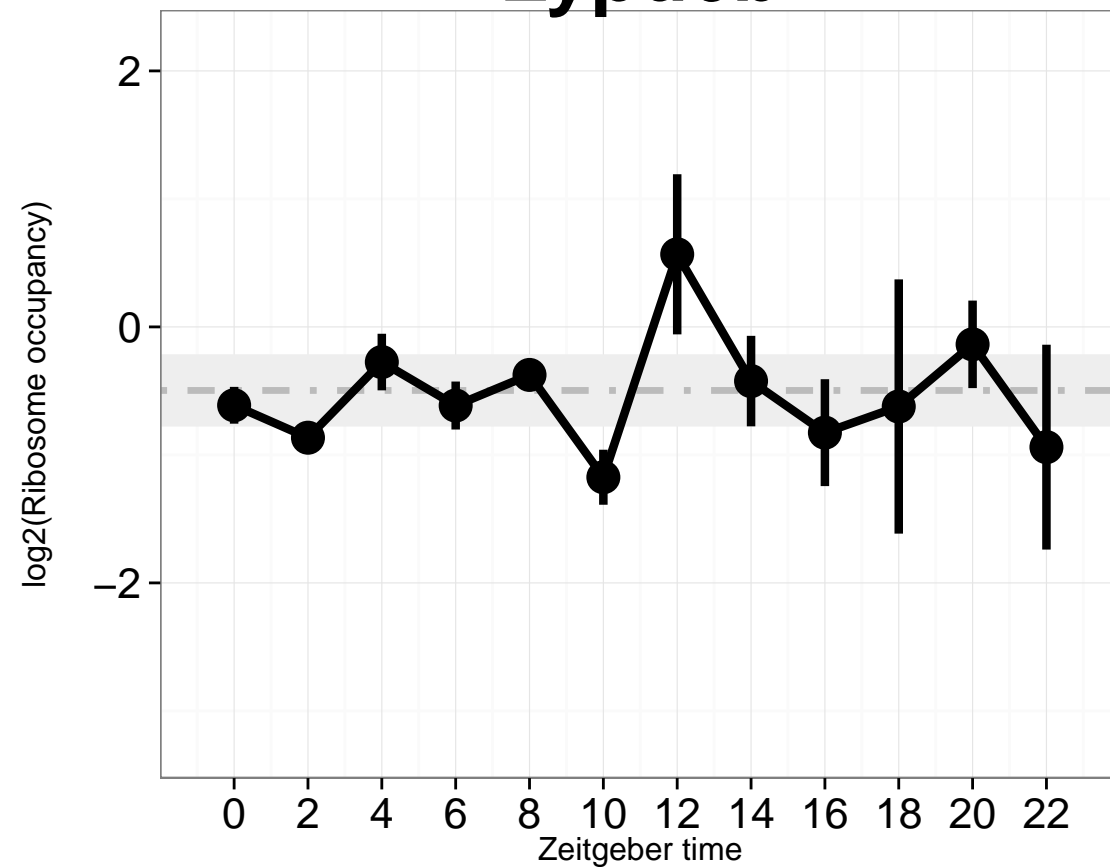

Supplement: Supplementary file 8049 [file 1]

## Slc45a4

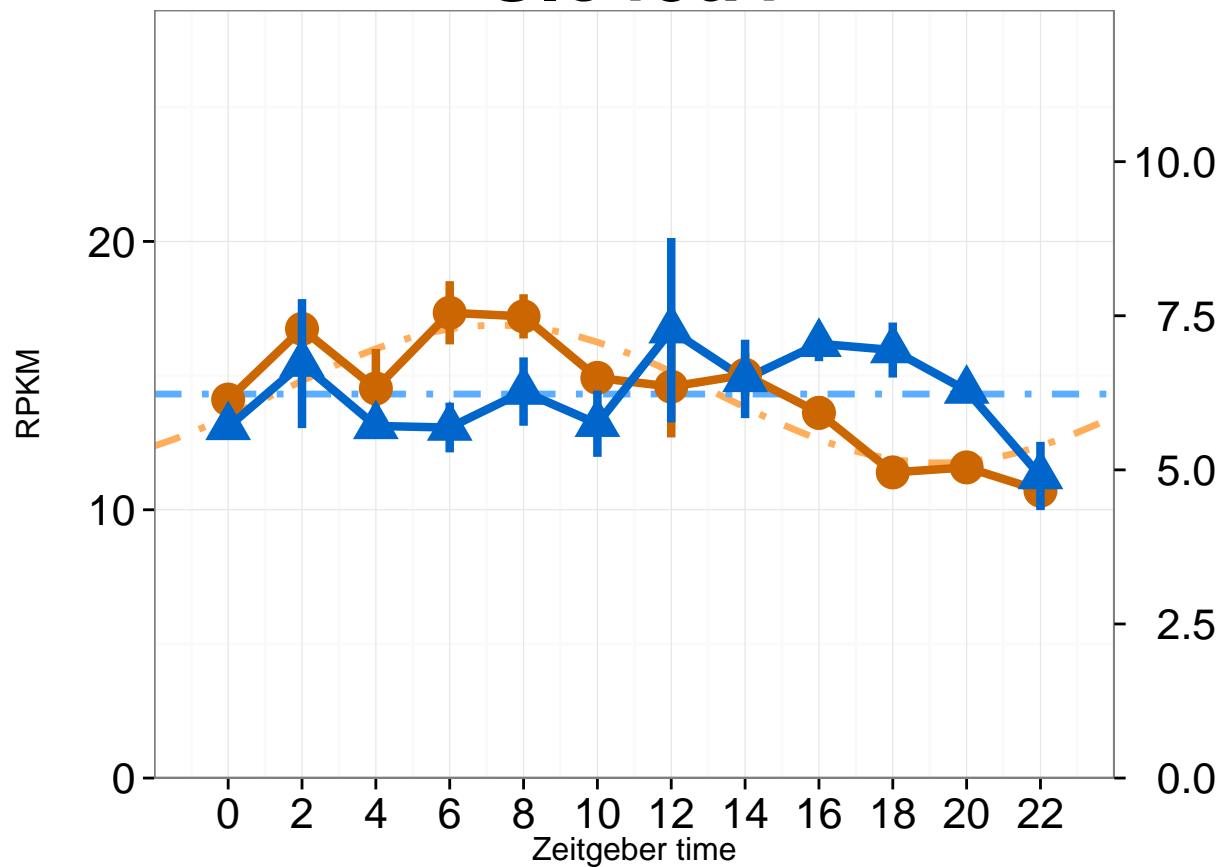

## Slc45a4

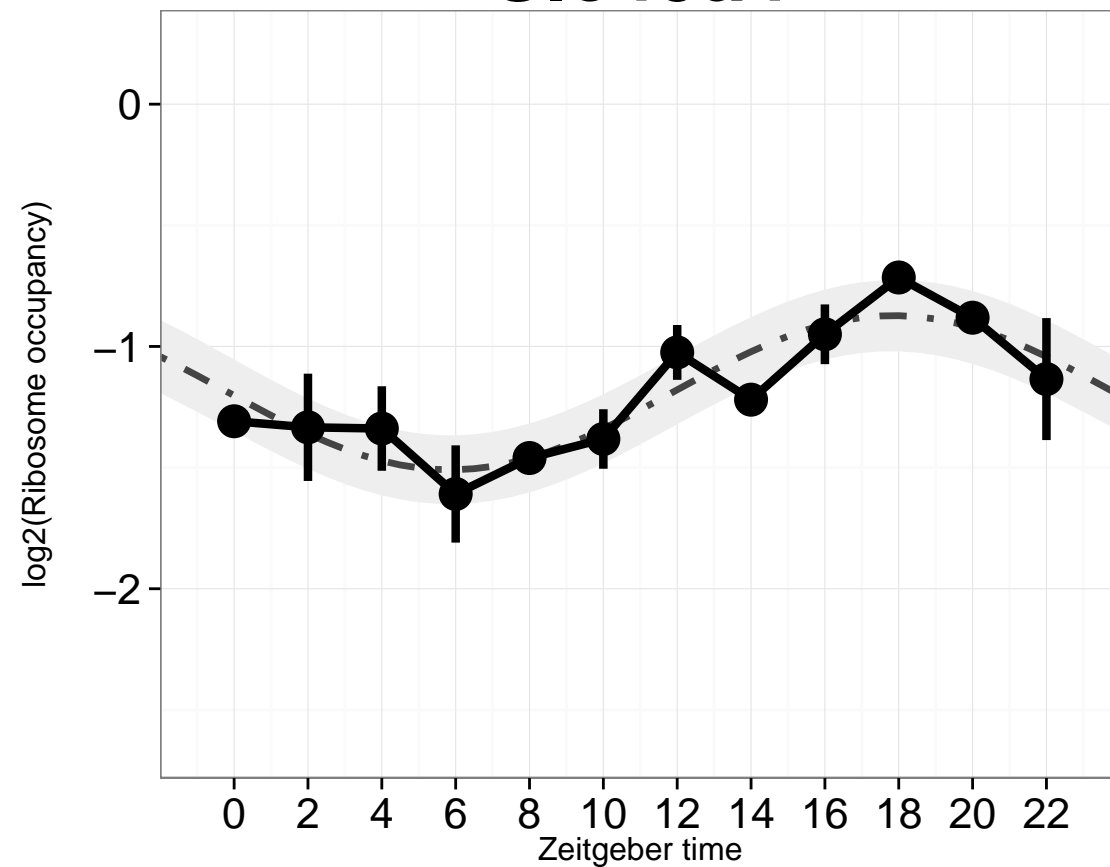

Supplement: Supplementary file 8050 [file 1]

## Vcam1

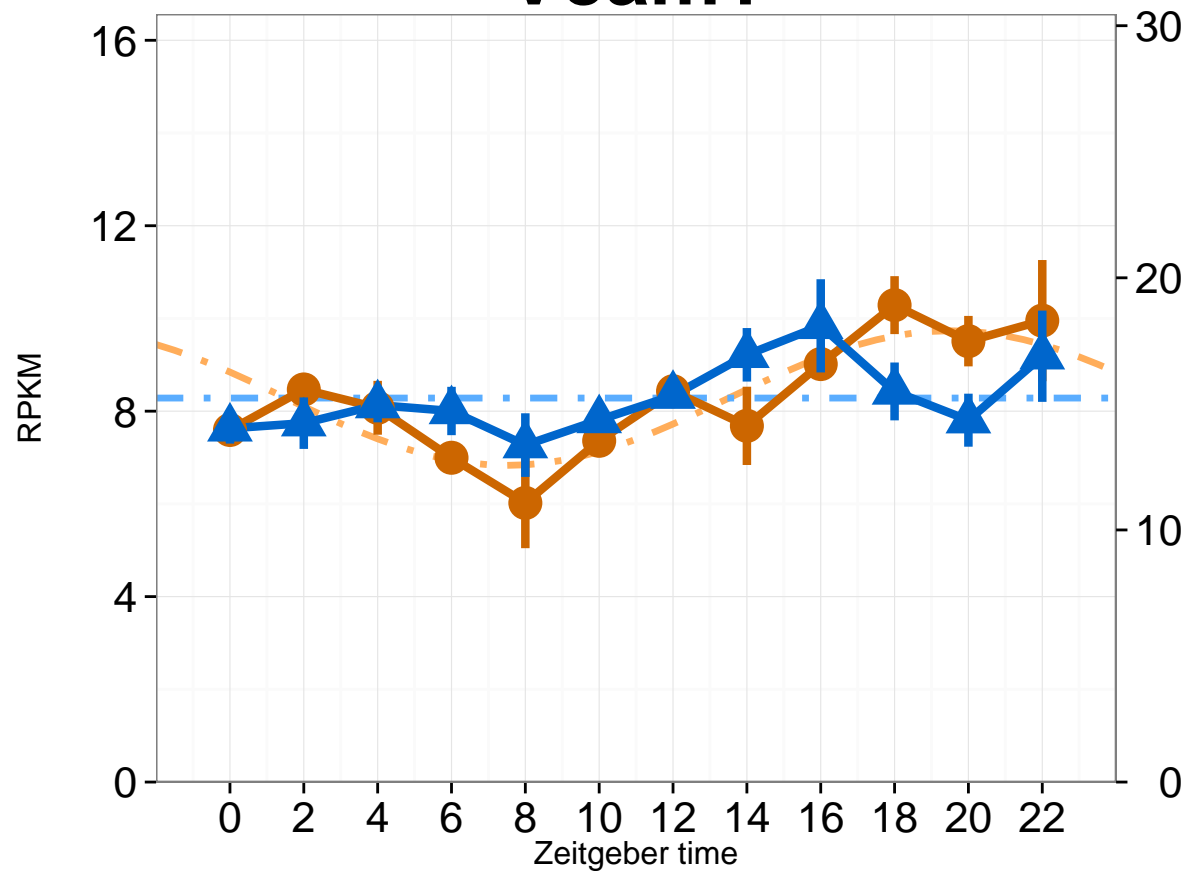

## Vcam1

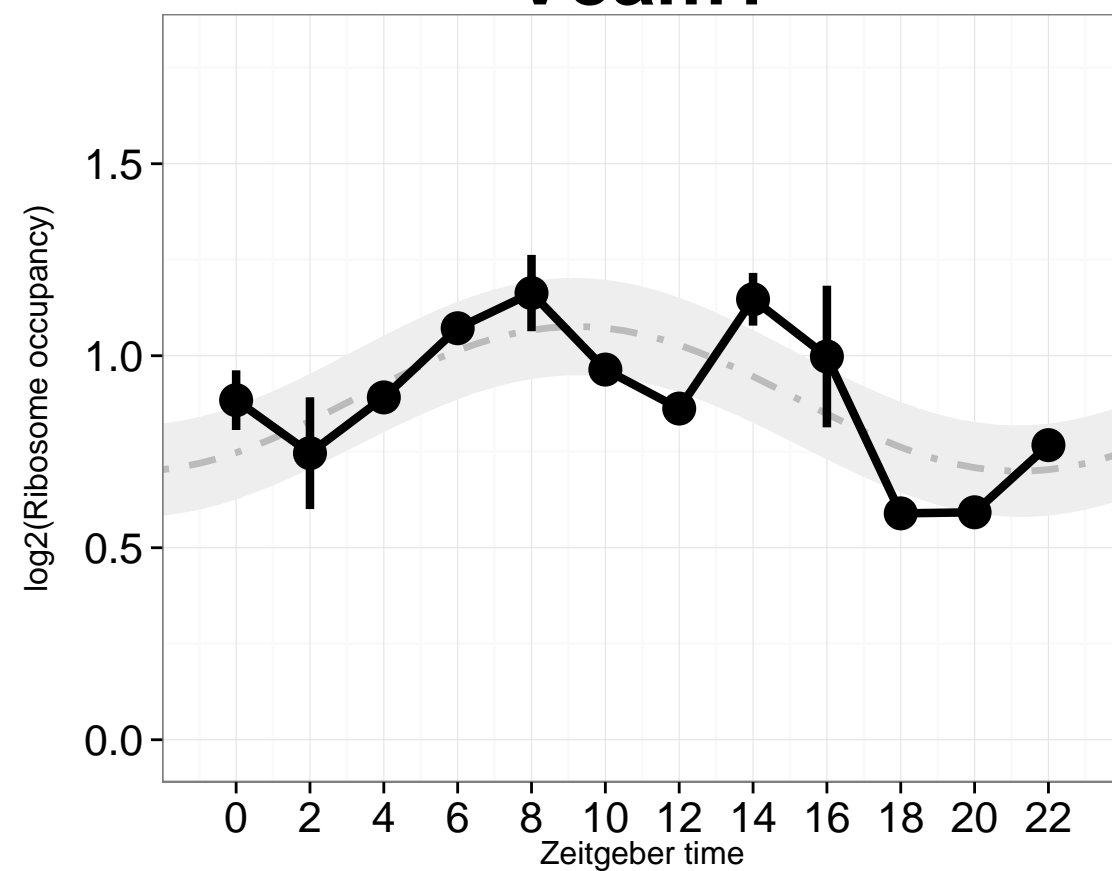

Supplement: Supplementary file 8051 [file 1]

## Cyld

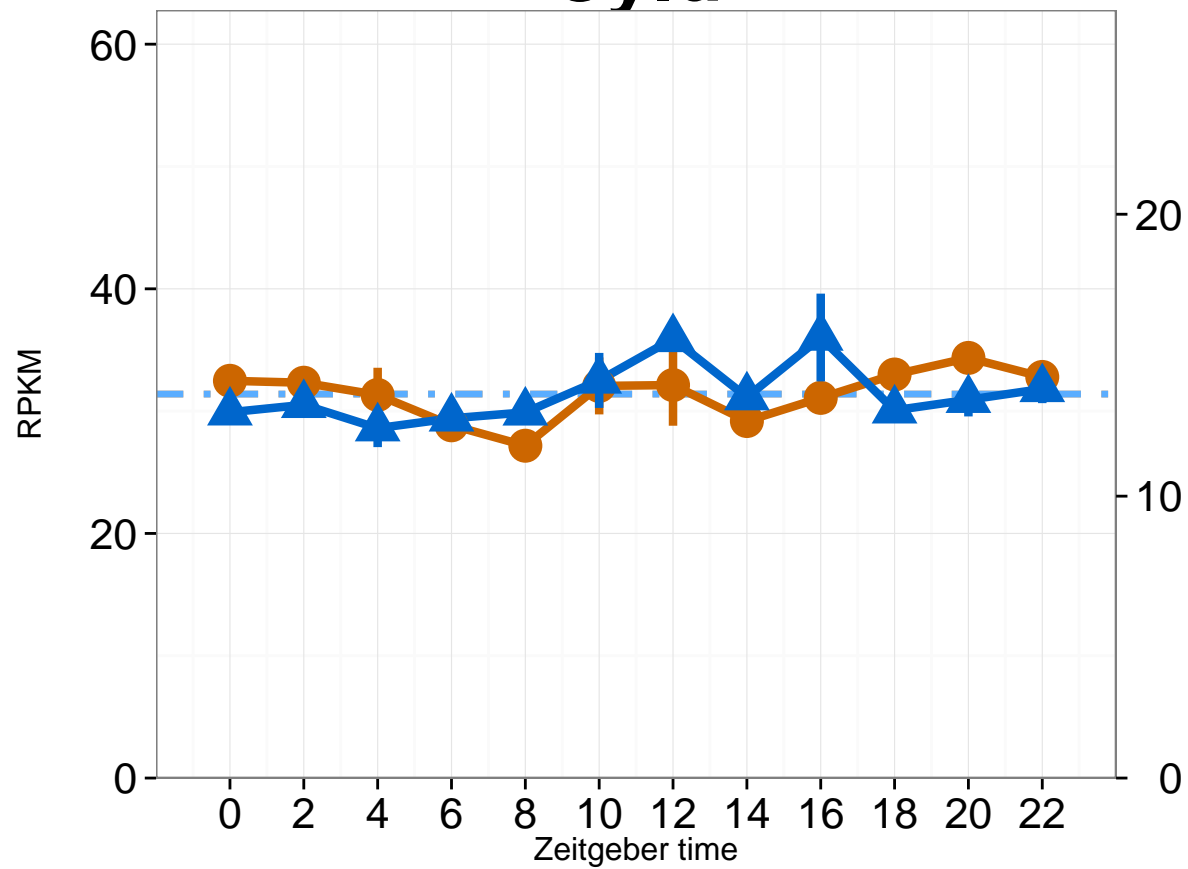

## Cyld

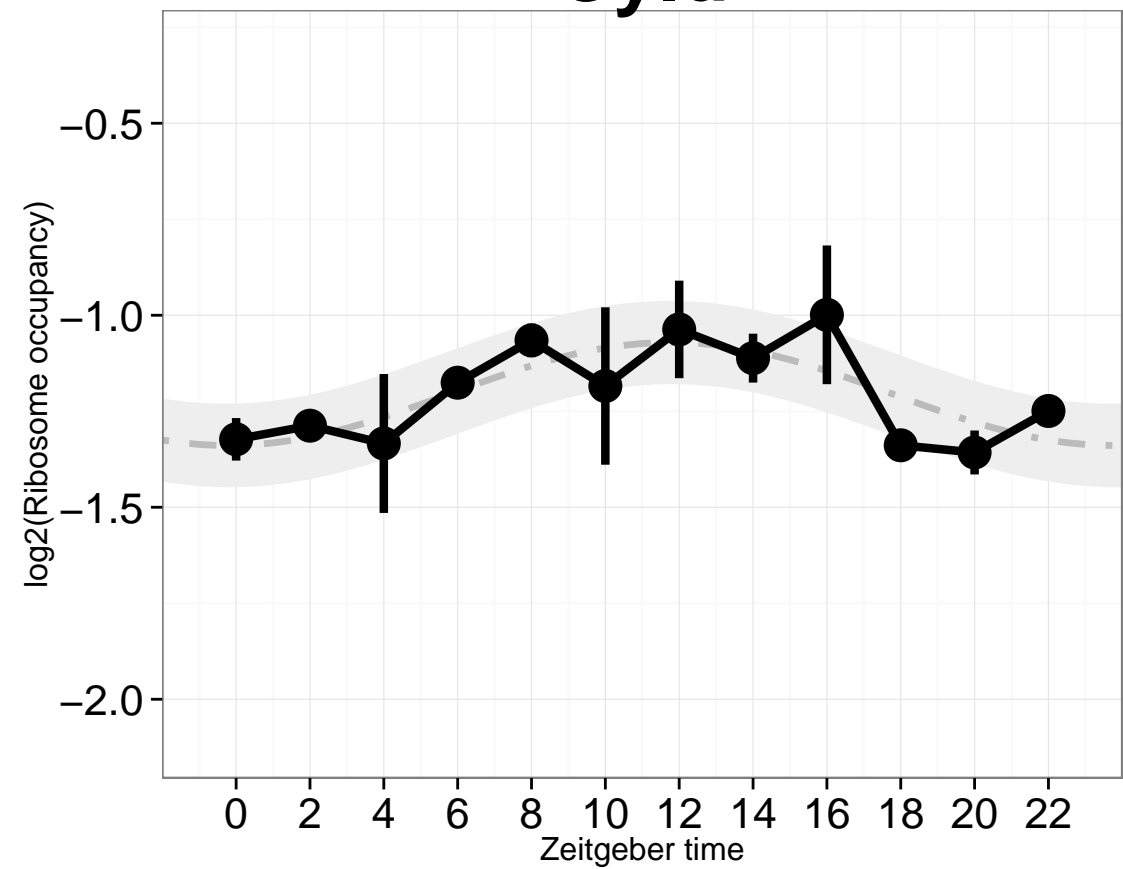

Supplement: Supplementary file 8052 [file 1]

## Lanc1

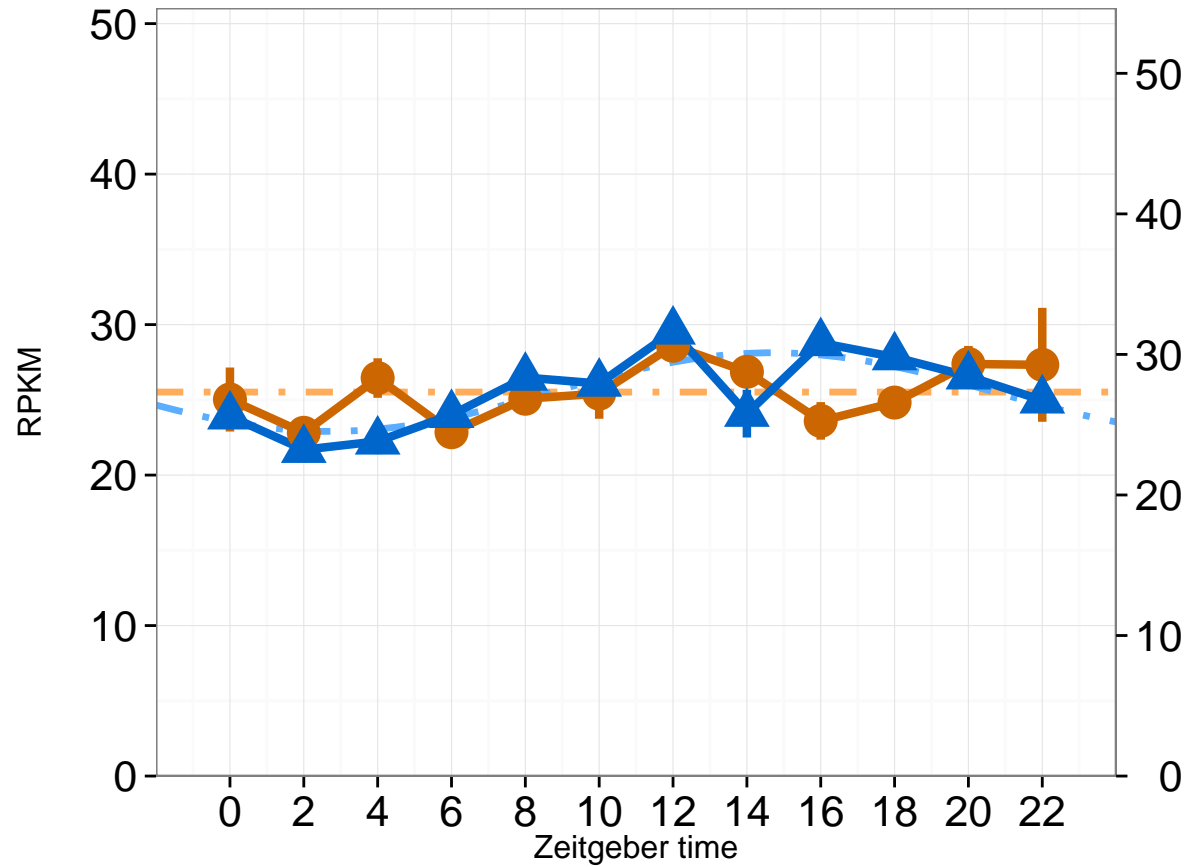

## Lanc1

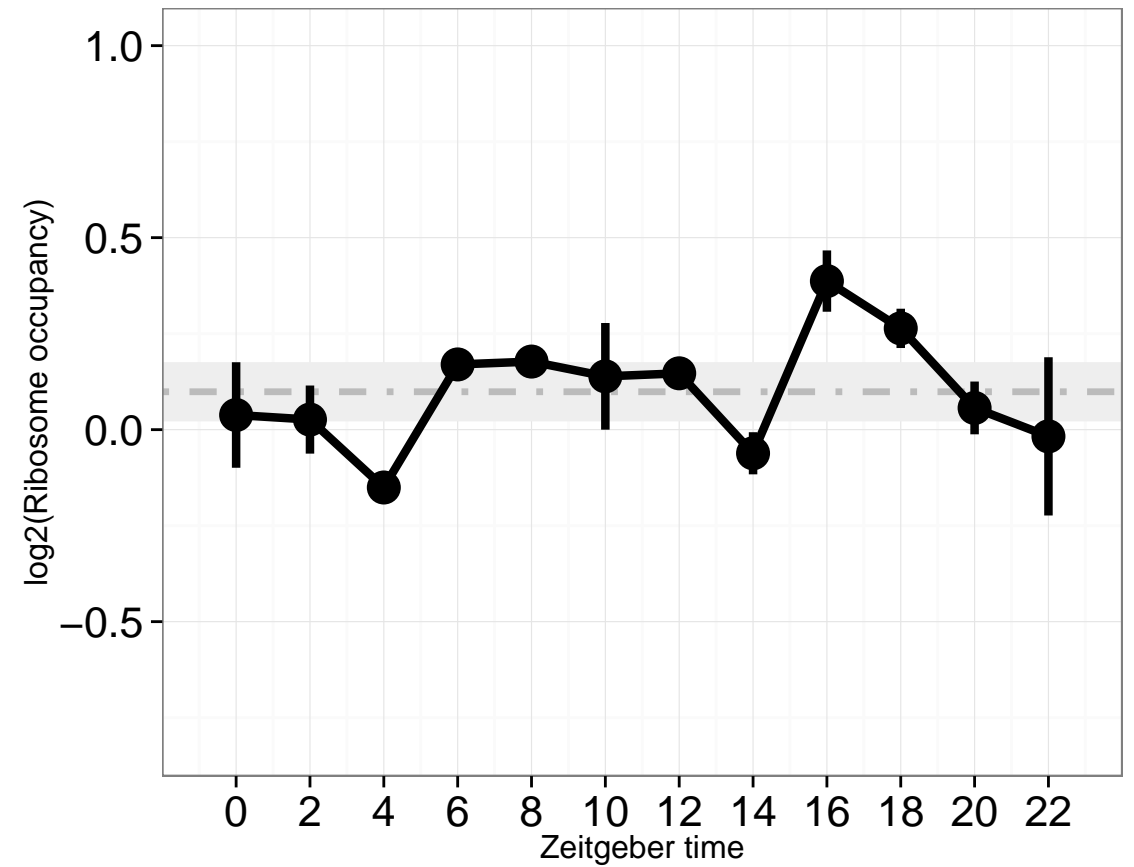

Supplement: Supplementary file 8053 [file 1]

# Sult1d1

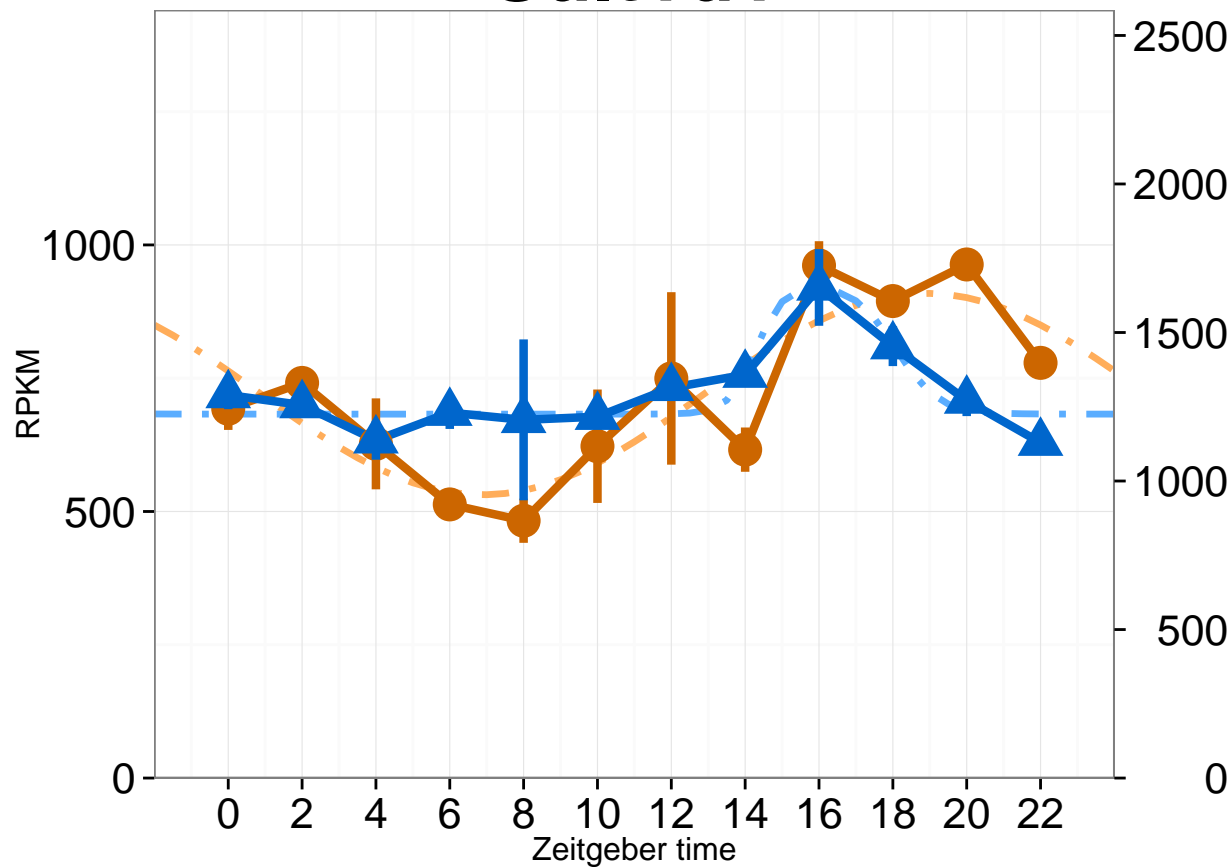

# Sult1d1

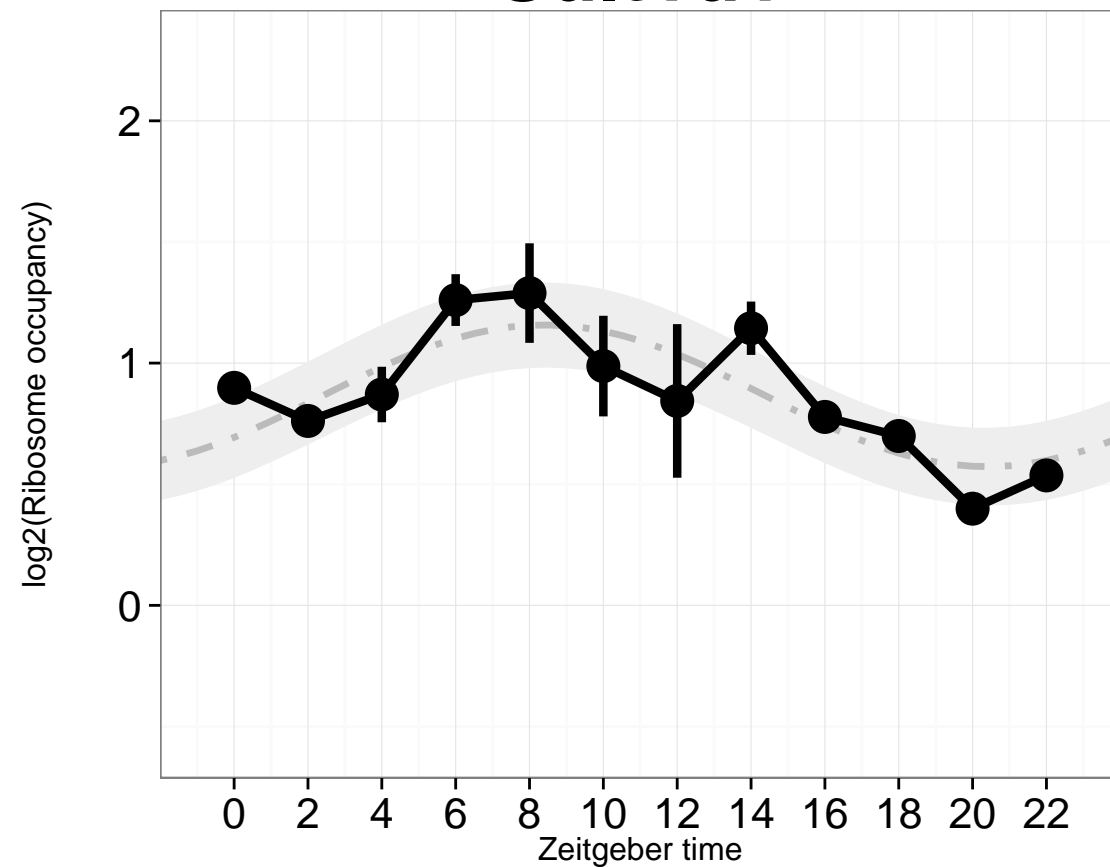

Supplement: Supplementary file 8054 [file 1]

# Ppapdc1b

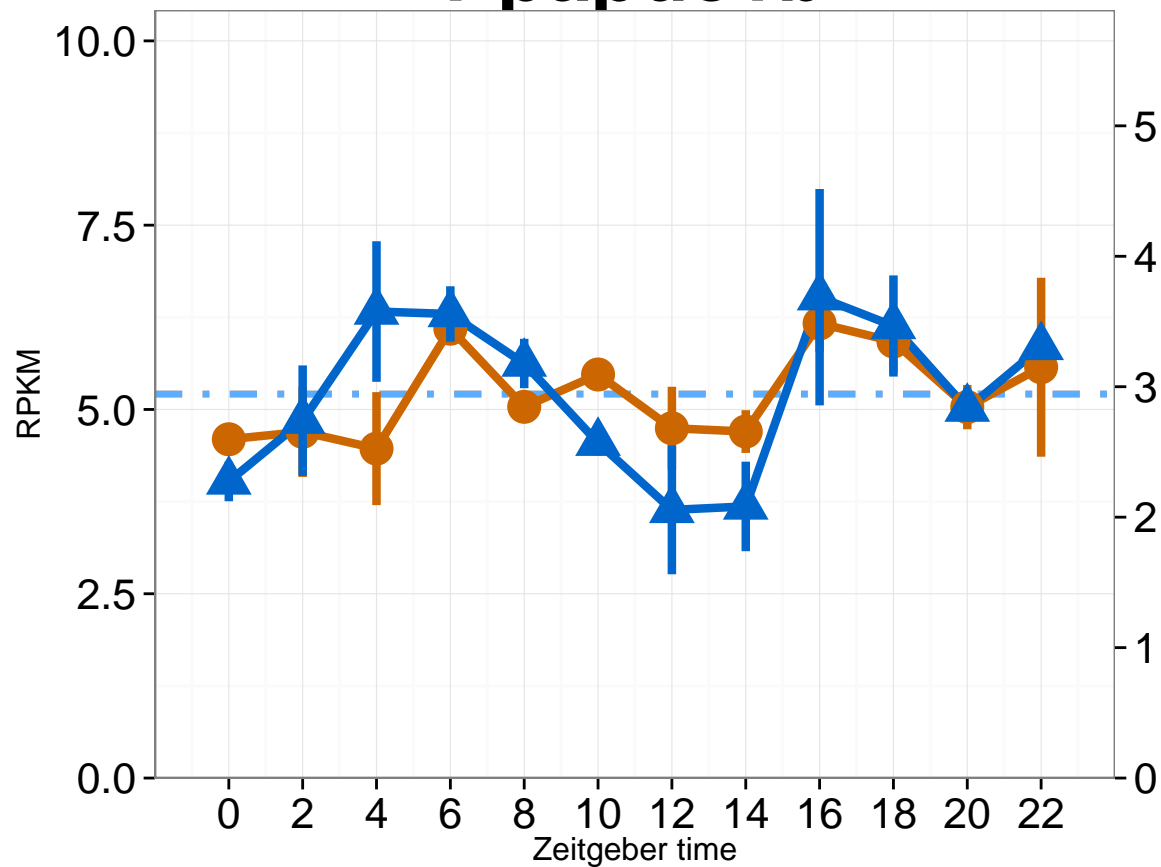

# Ppapdc1b

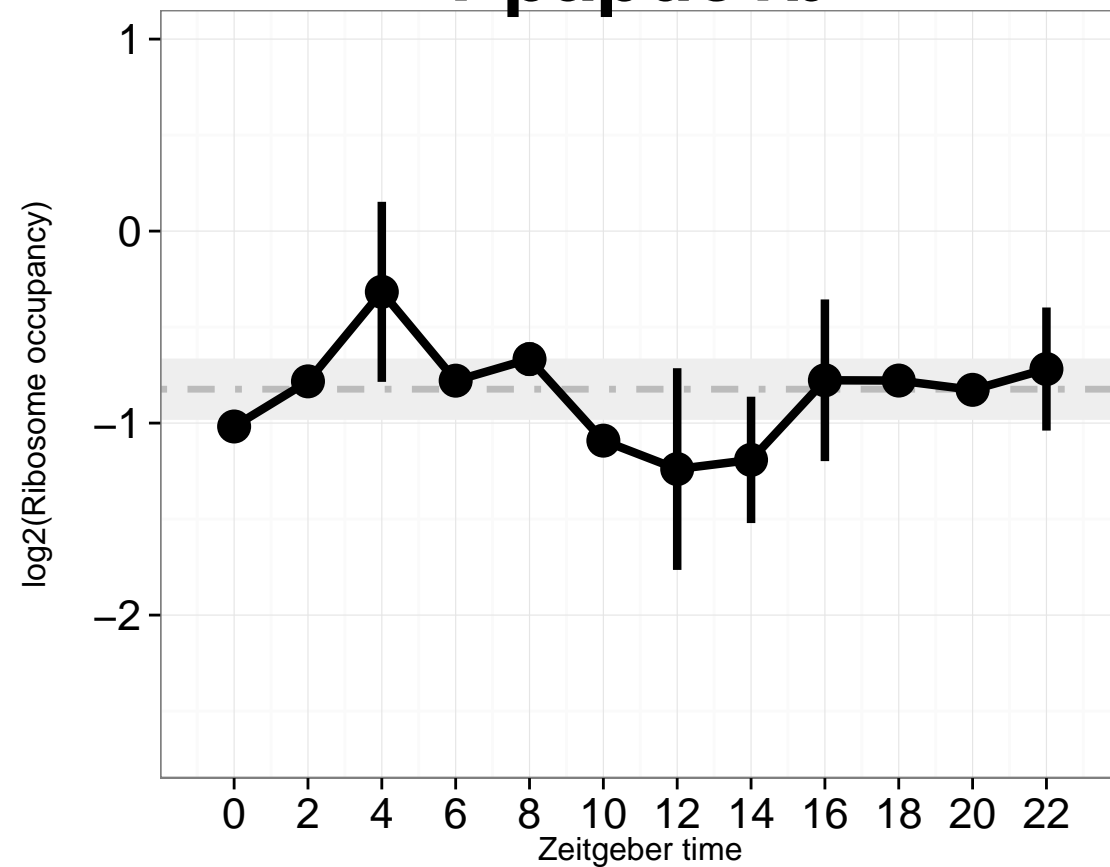

Supplement: Supplementary file 8055 [file 1]

# Ube2q1

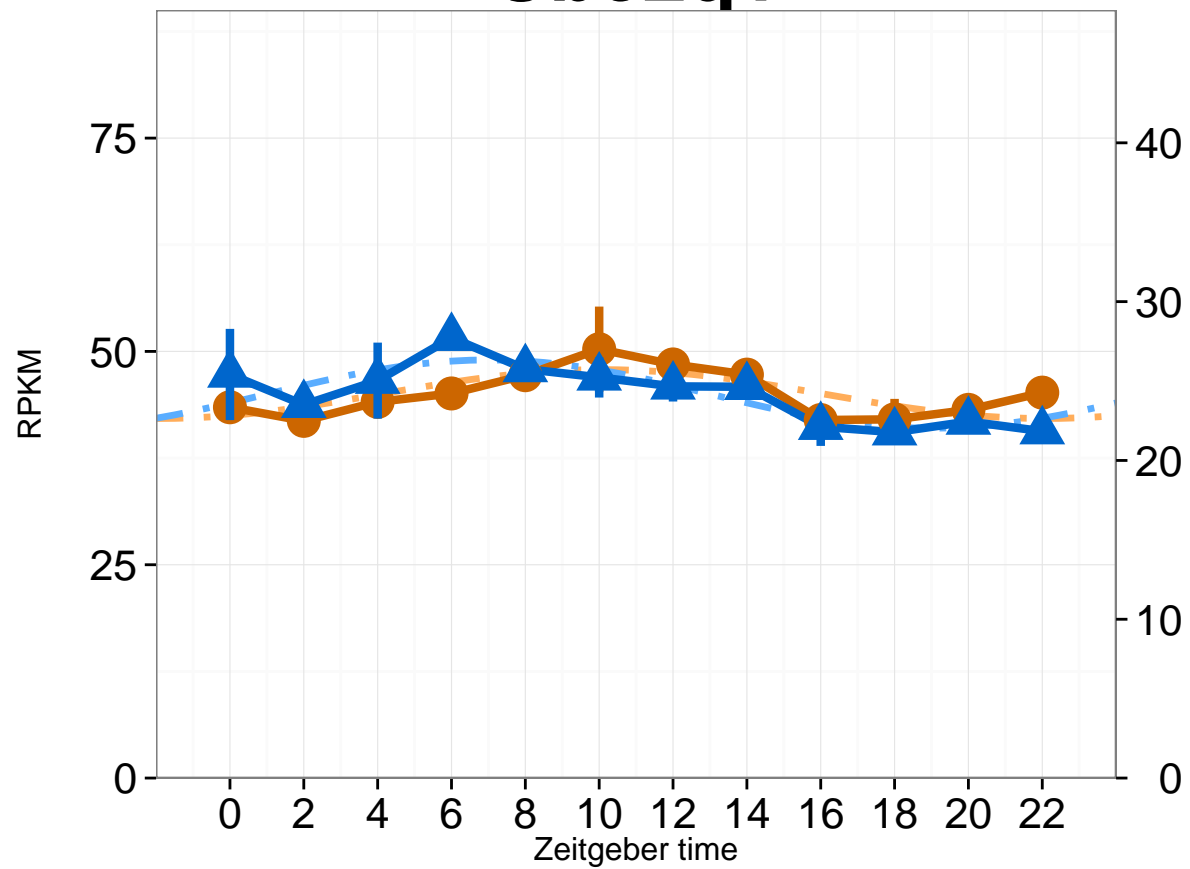

# Ube2q1

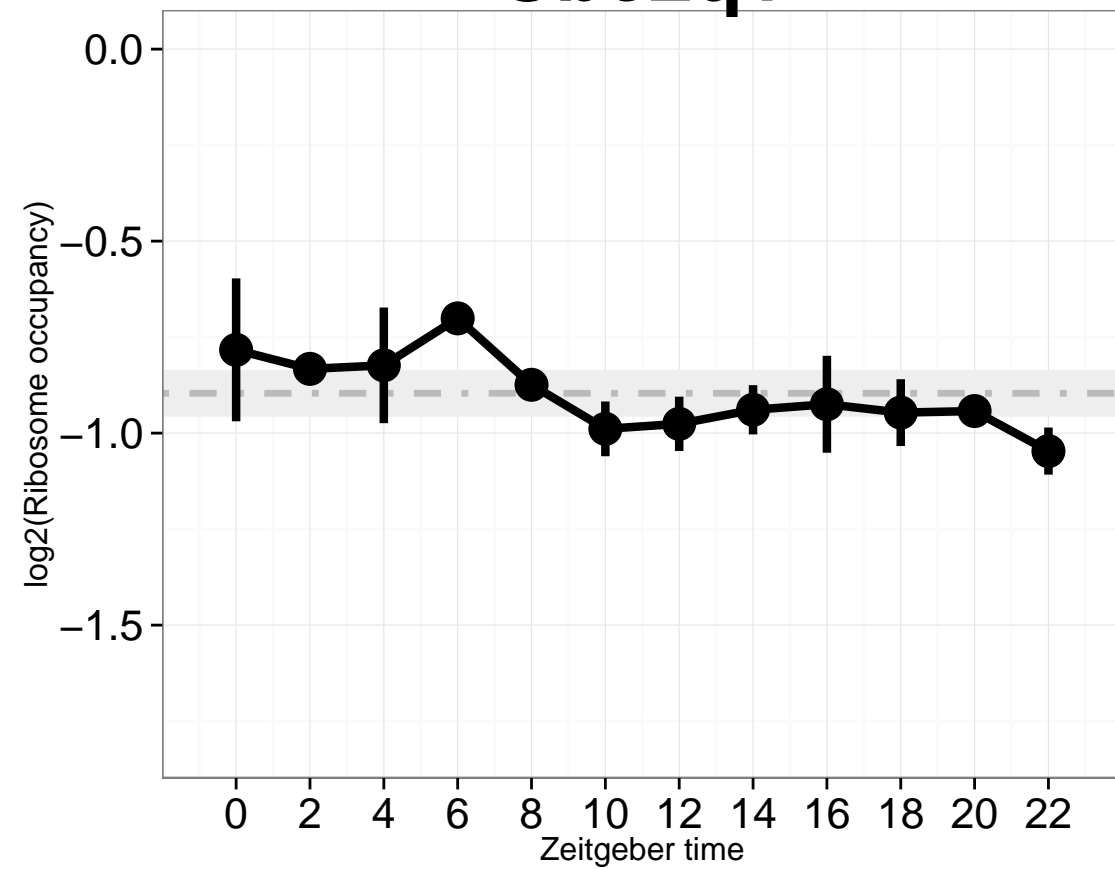

Supplement: Supplementary file 8056 [file 1]

# Mon2

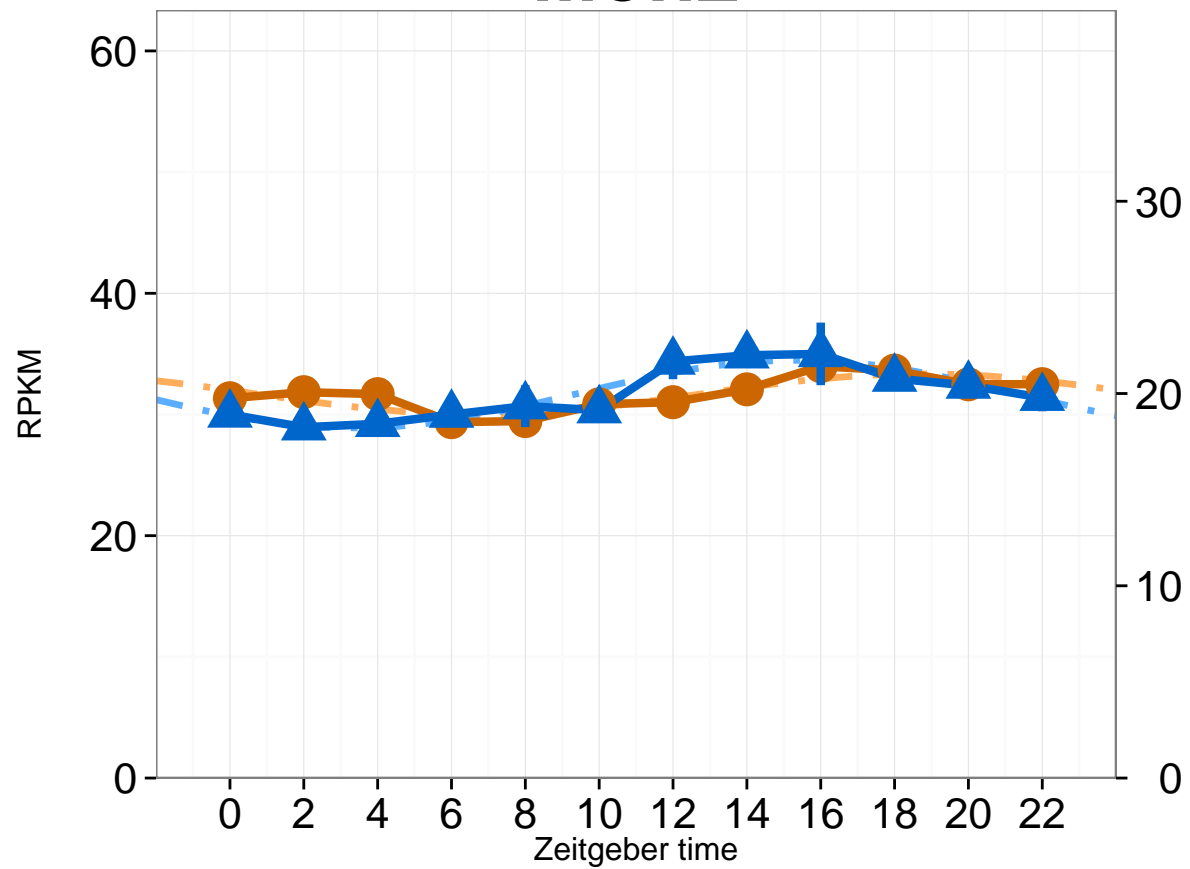

# Mon2

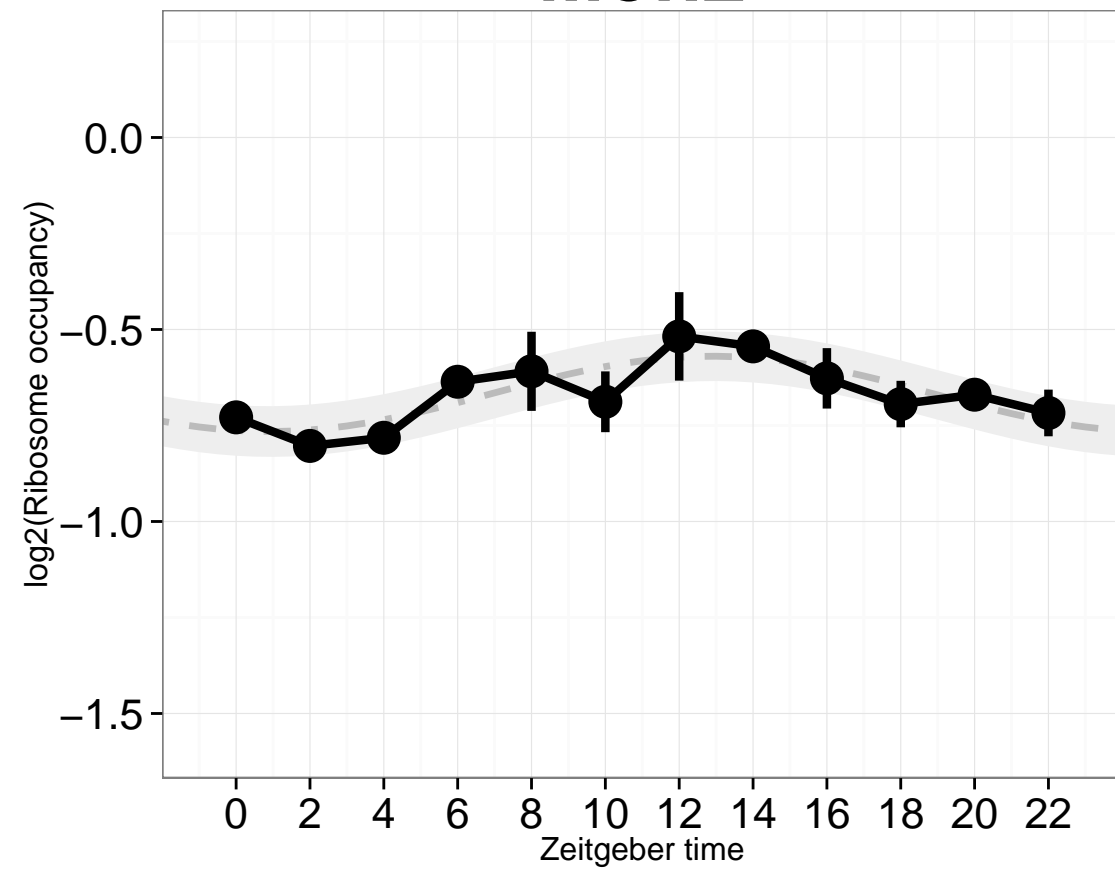

Supplement: Supplementary file 8057 [file 1]

## Smarcc2

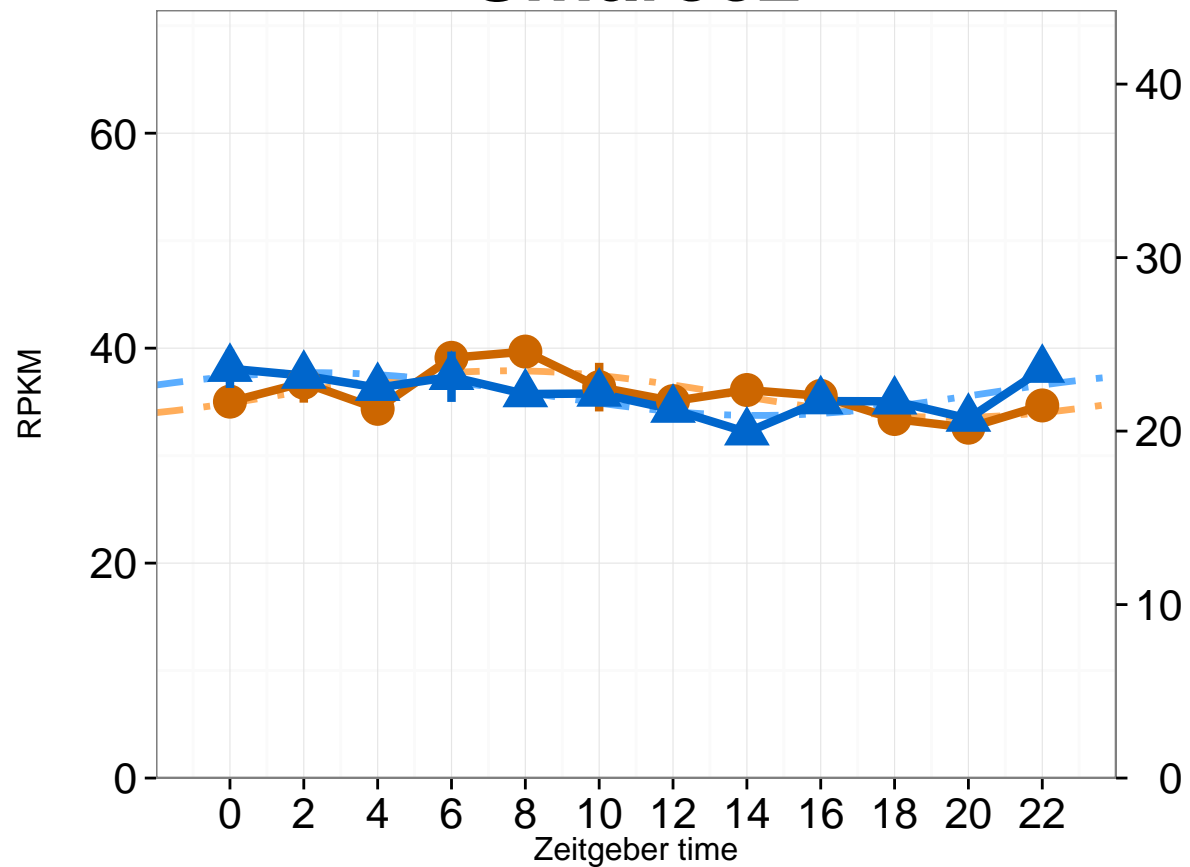

## Smarcc2

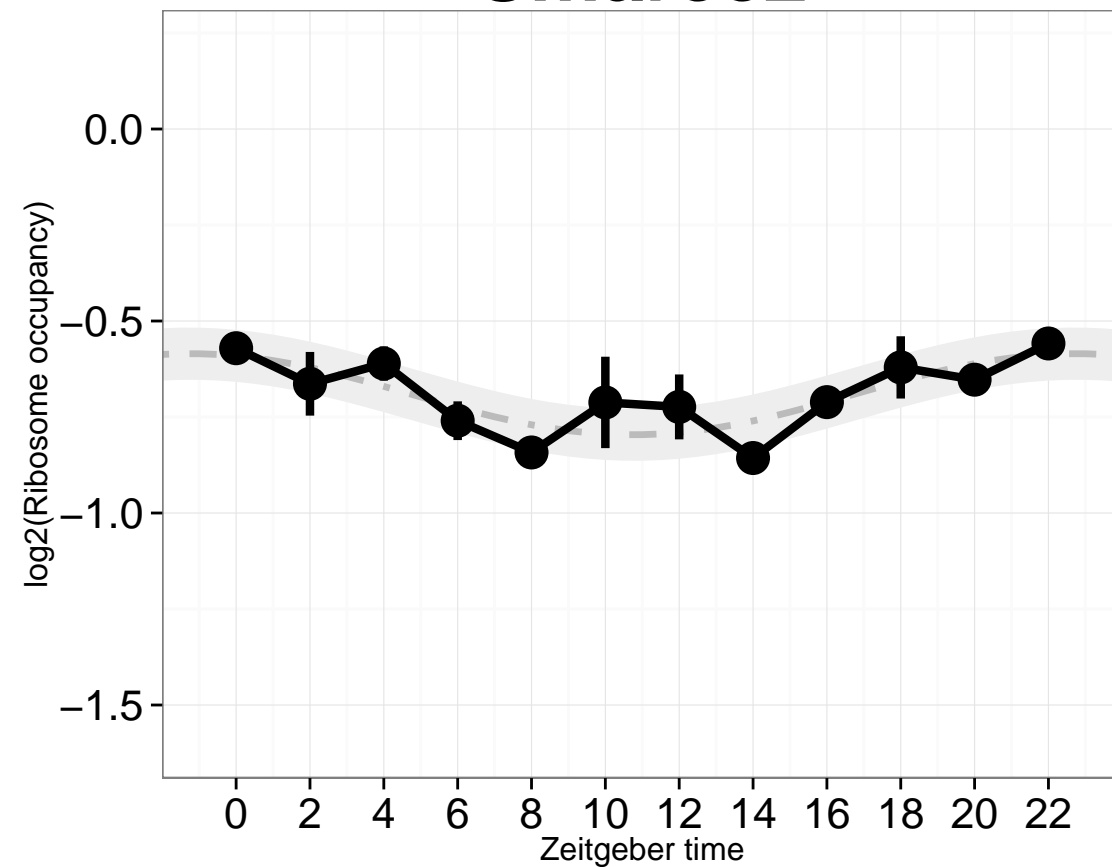

Supplement: Supplementary file 8058 [file 1]

## Snrk

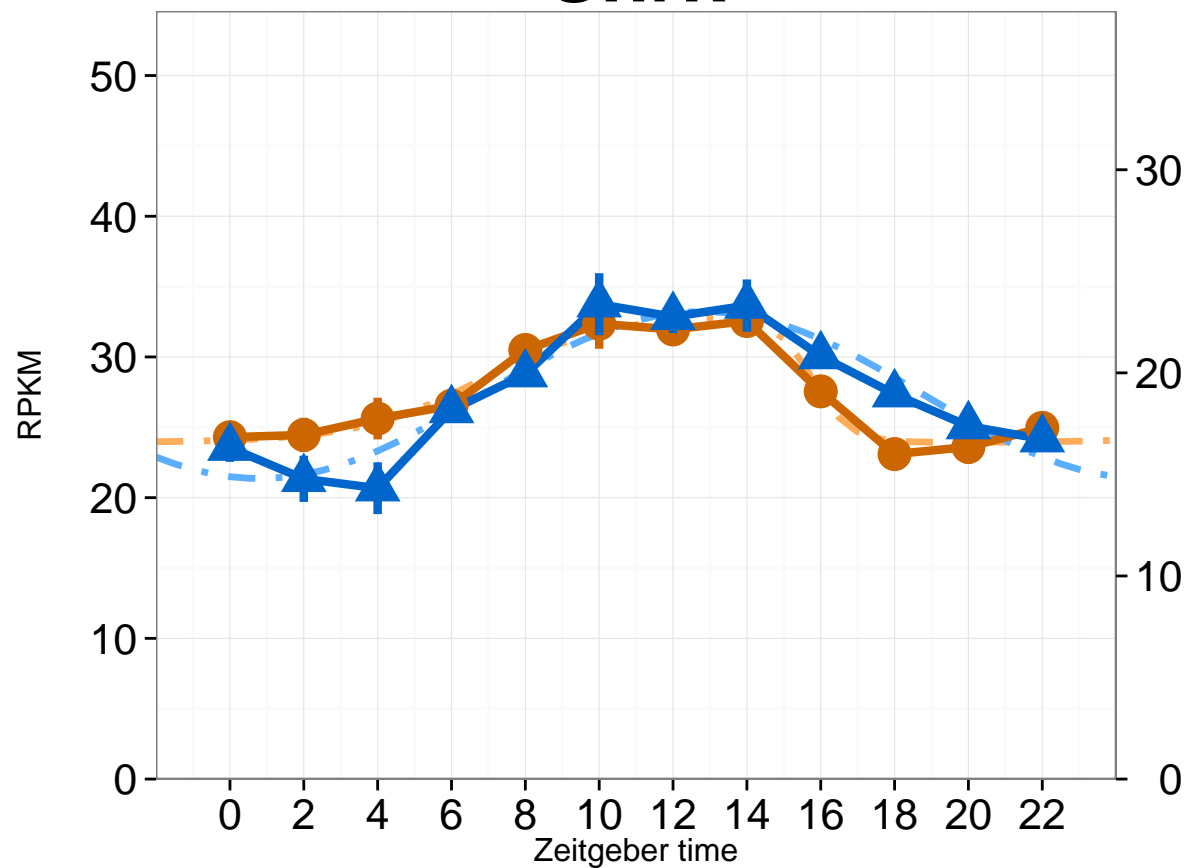

## Snrk

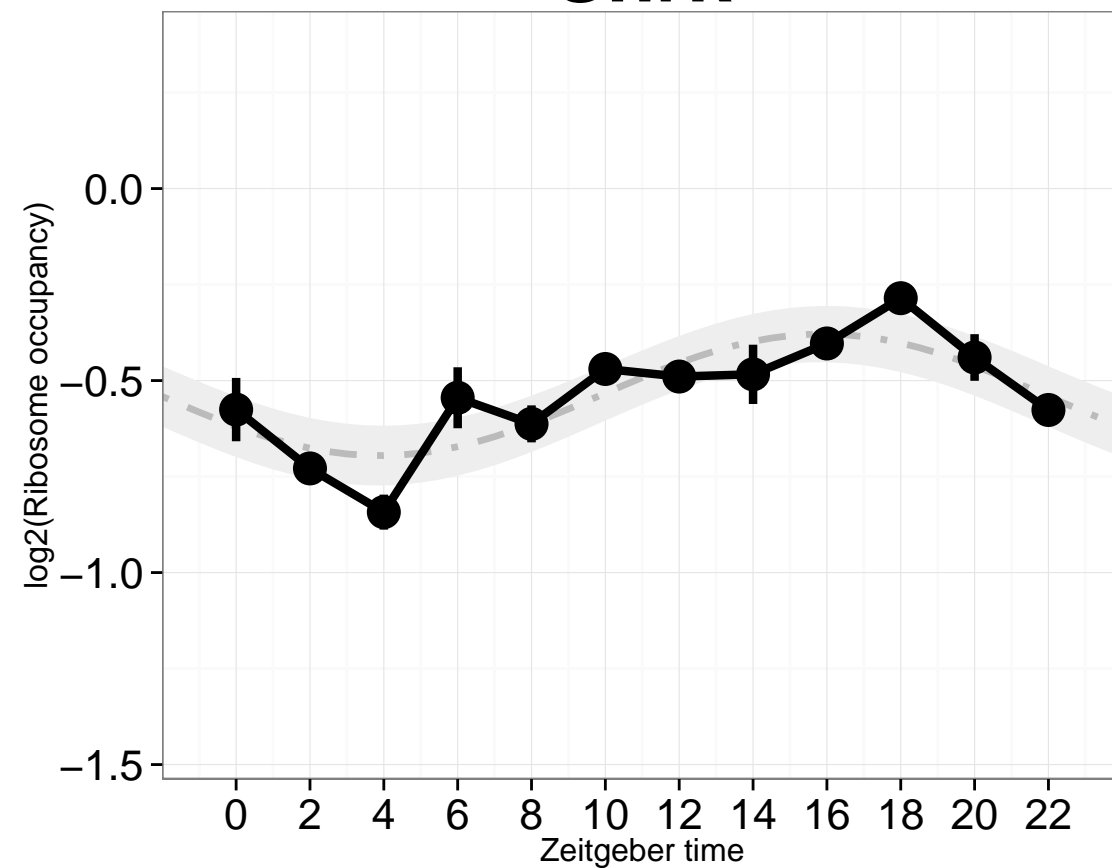

Supplement: Supplementary file 8059 [file 1]

# Tsga10

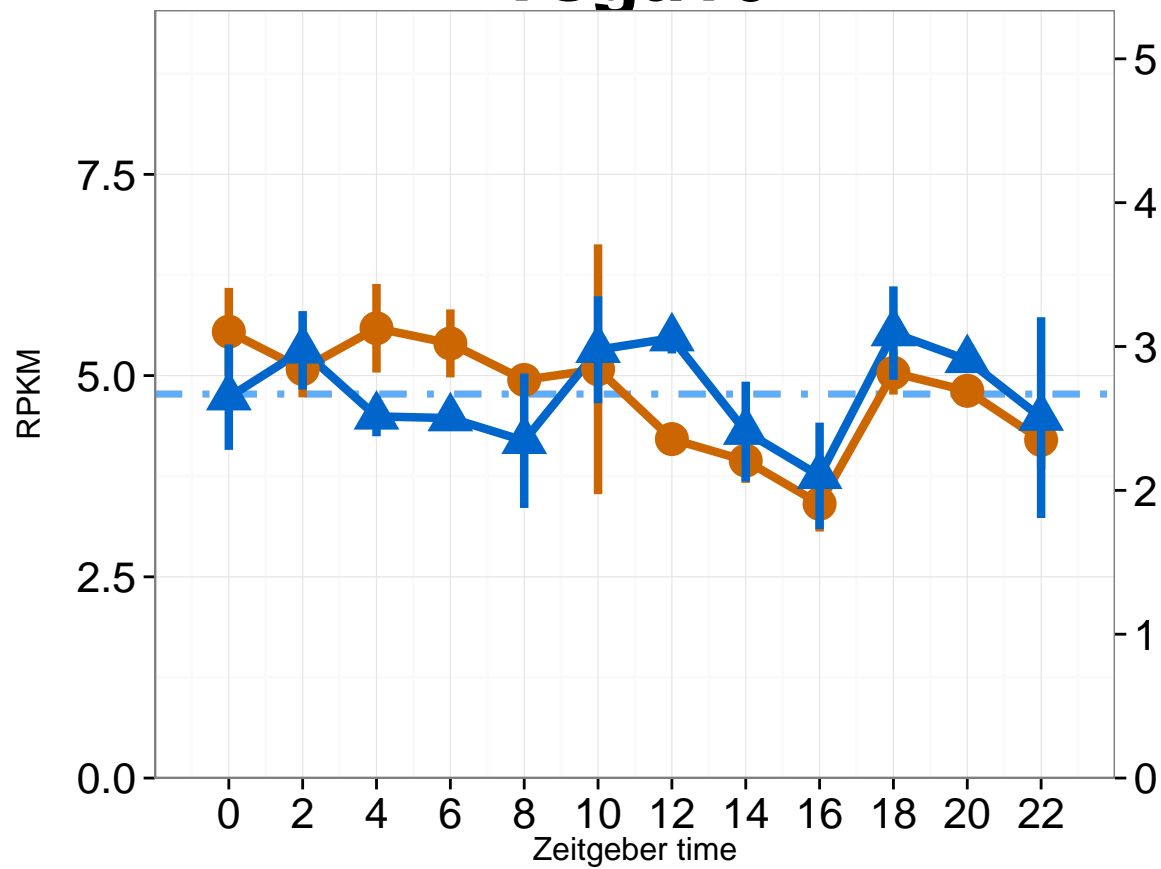

# Tsga10

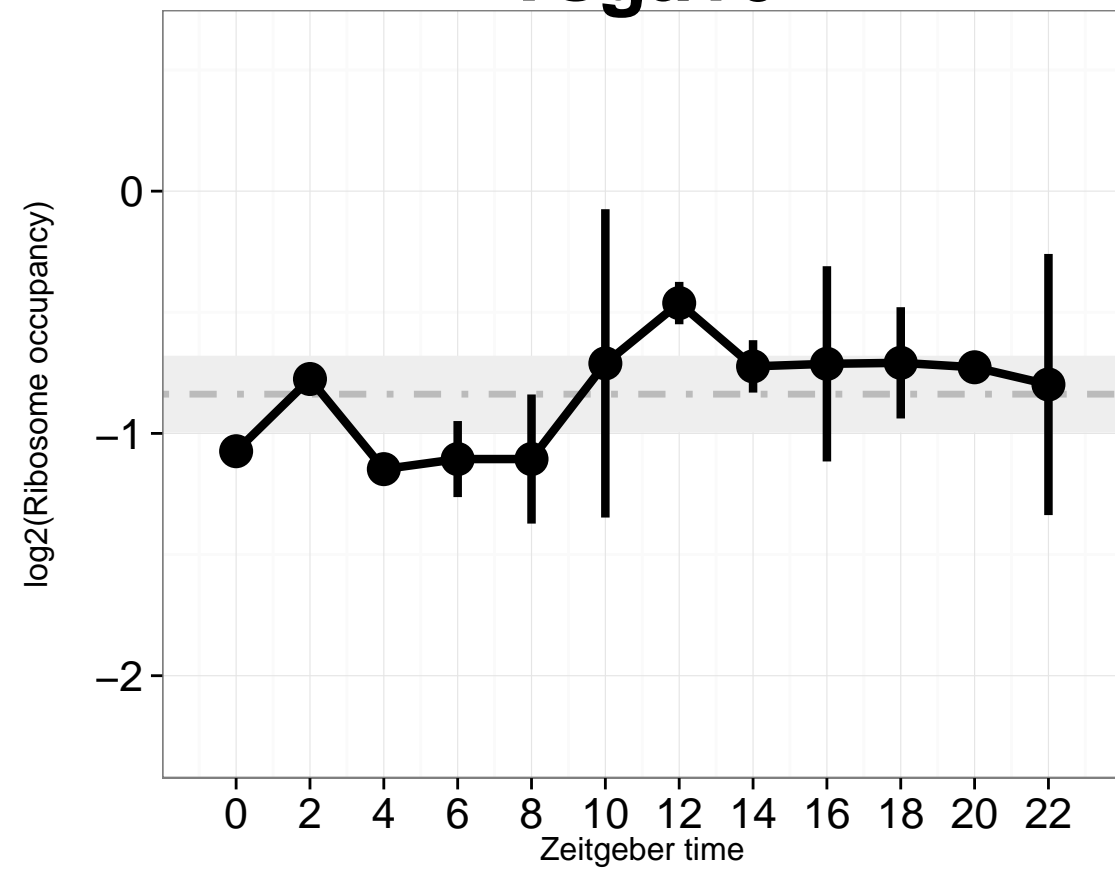

Supplement: Supplementary file 8060 [file 1]

# Plin5

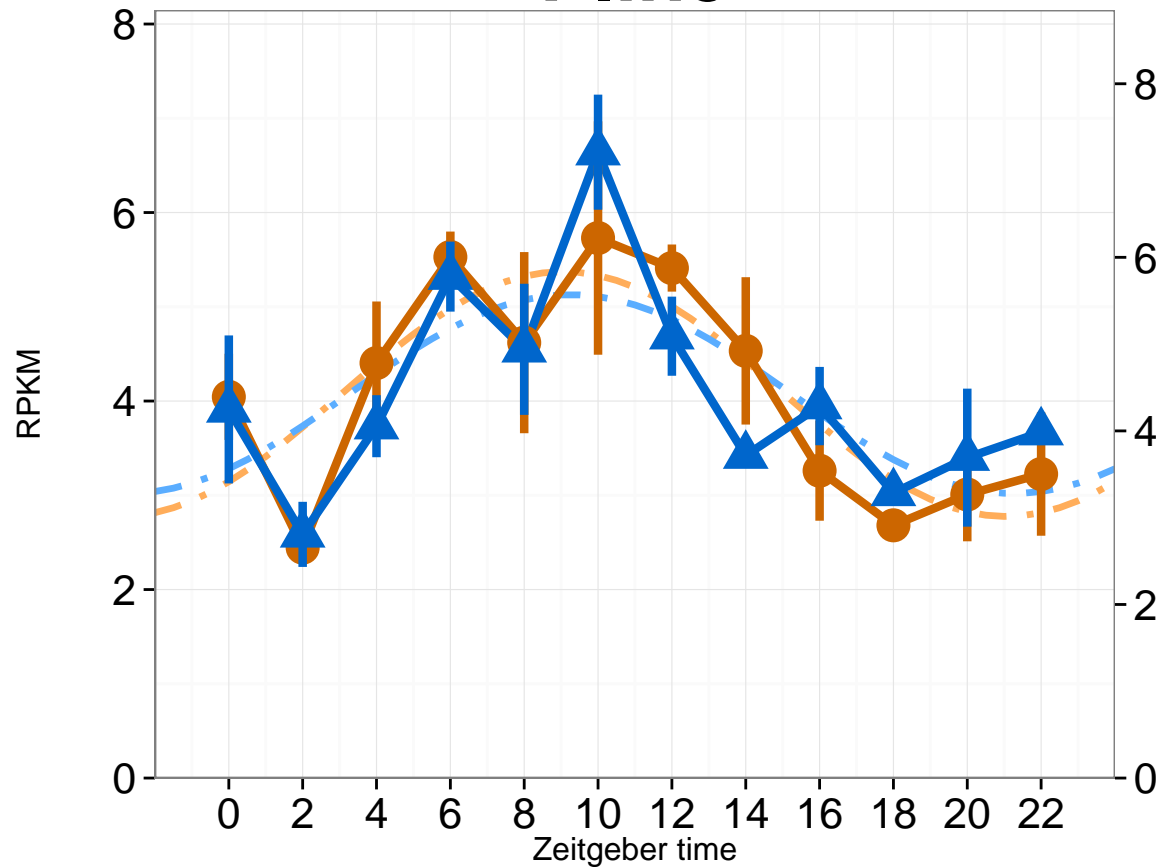

# Plin5

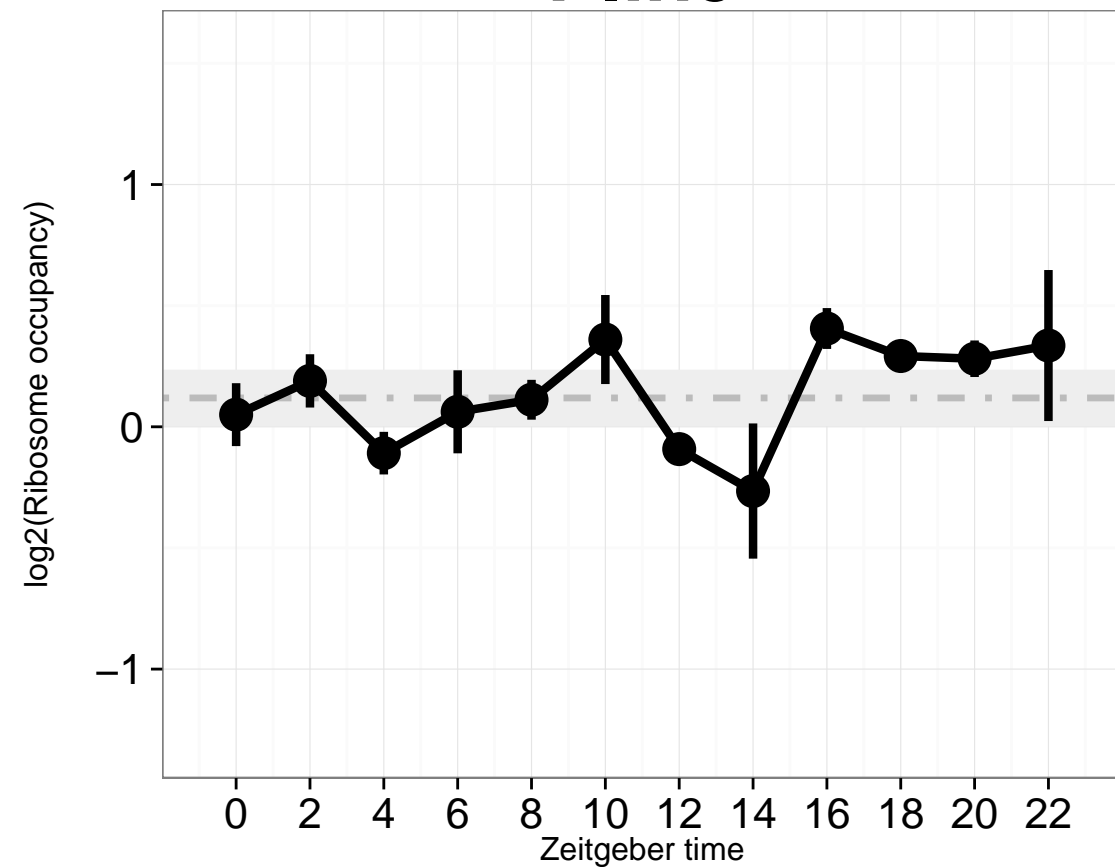

Supplement: Supplementary file 8061 [file 1]

## Gemin7

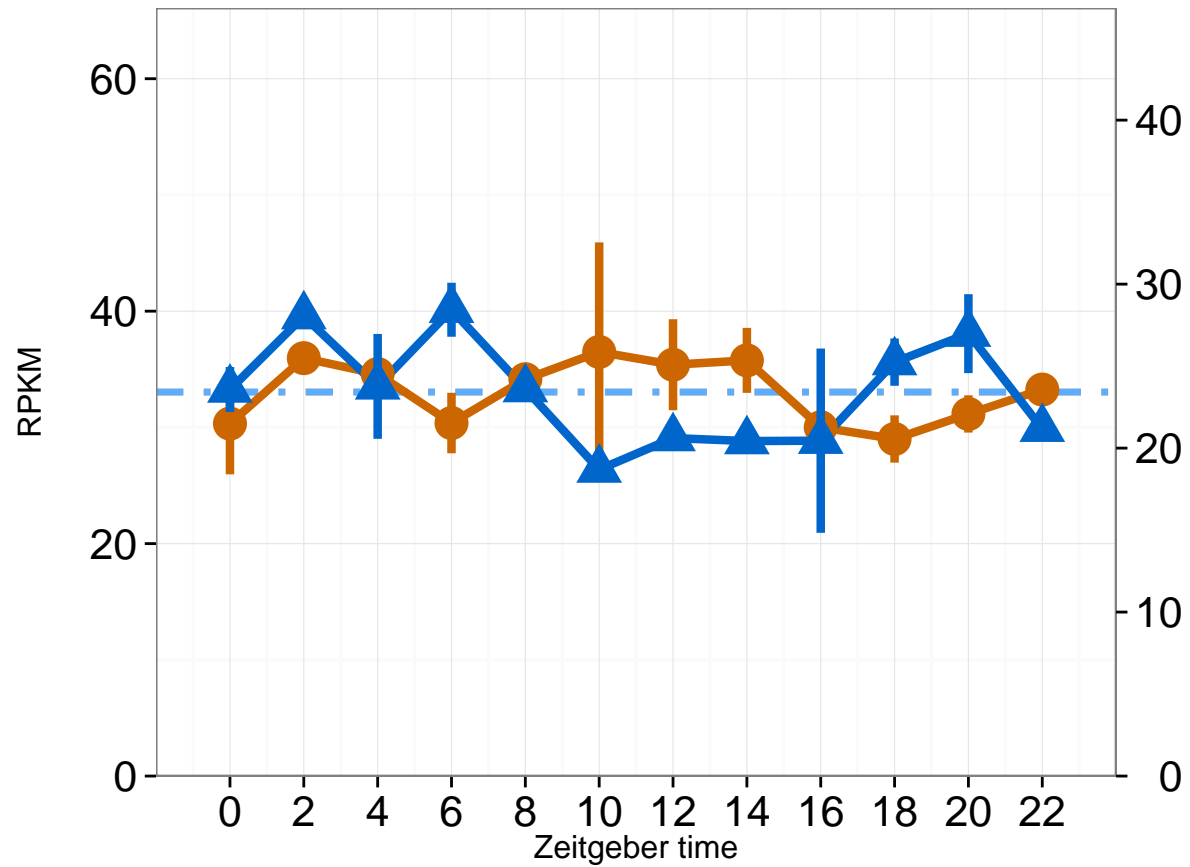

## Gemin7

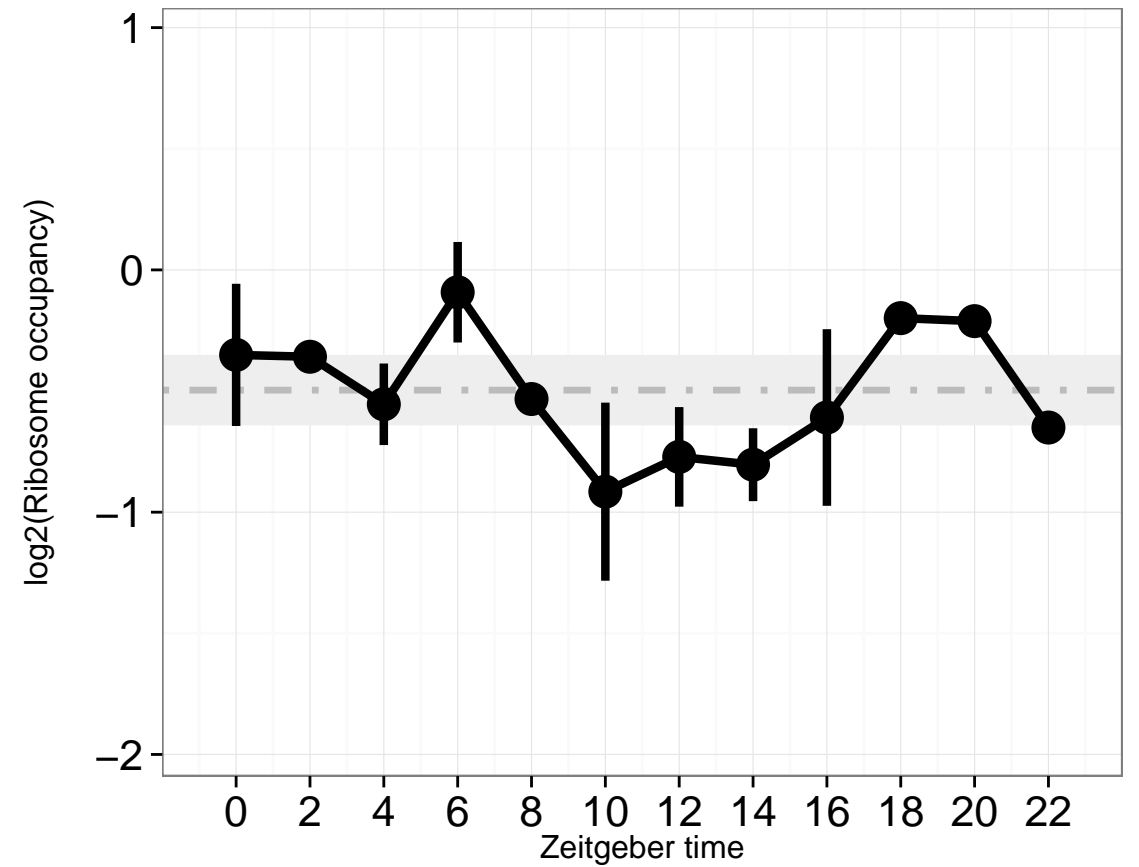

Supplement: Supplementary file 8062 [file 1]

## Snap47

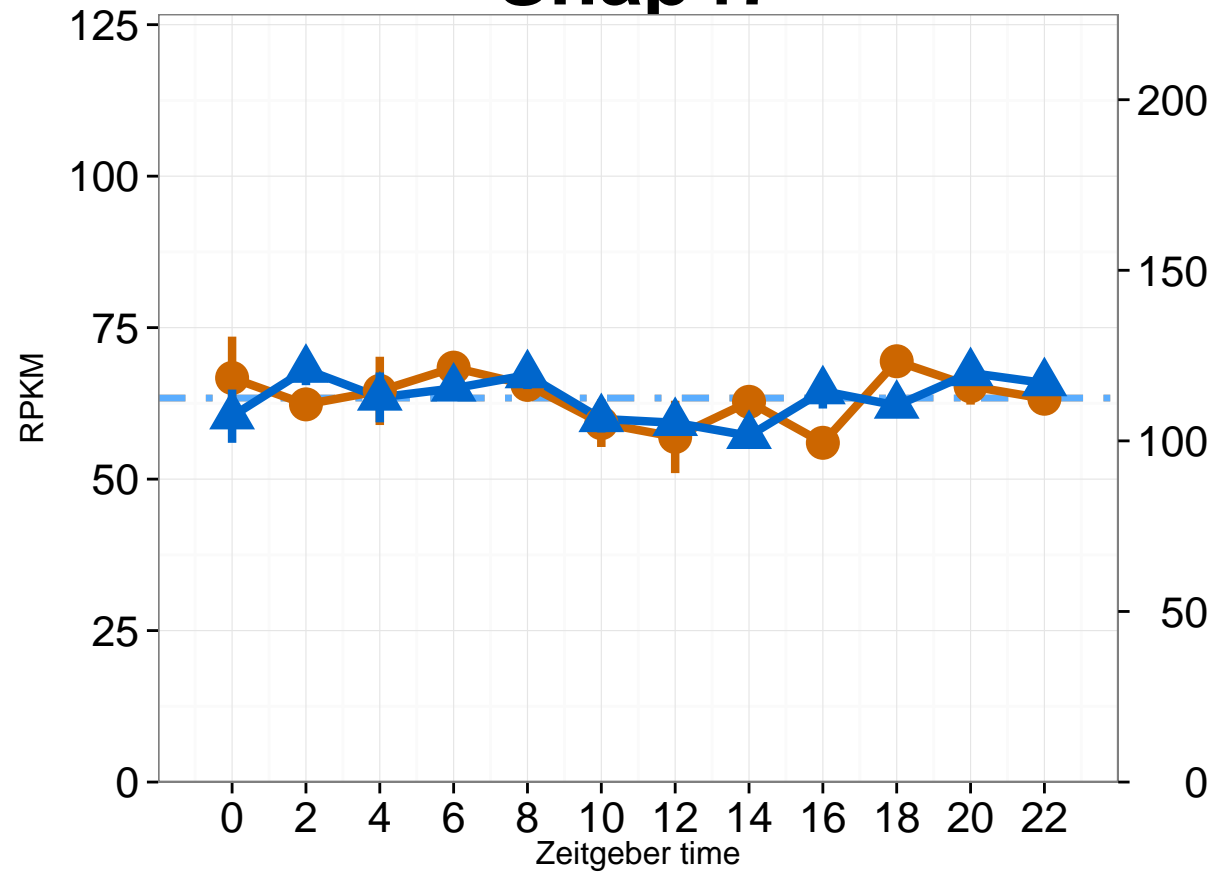

## Snap47

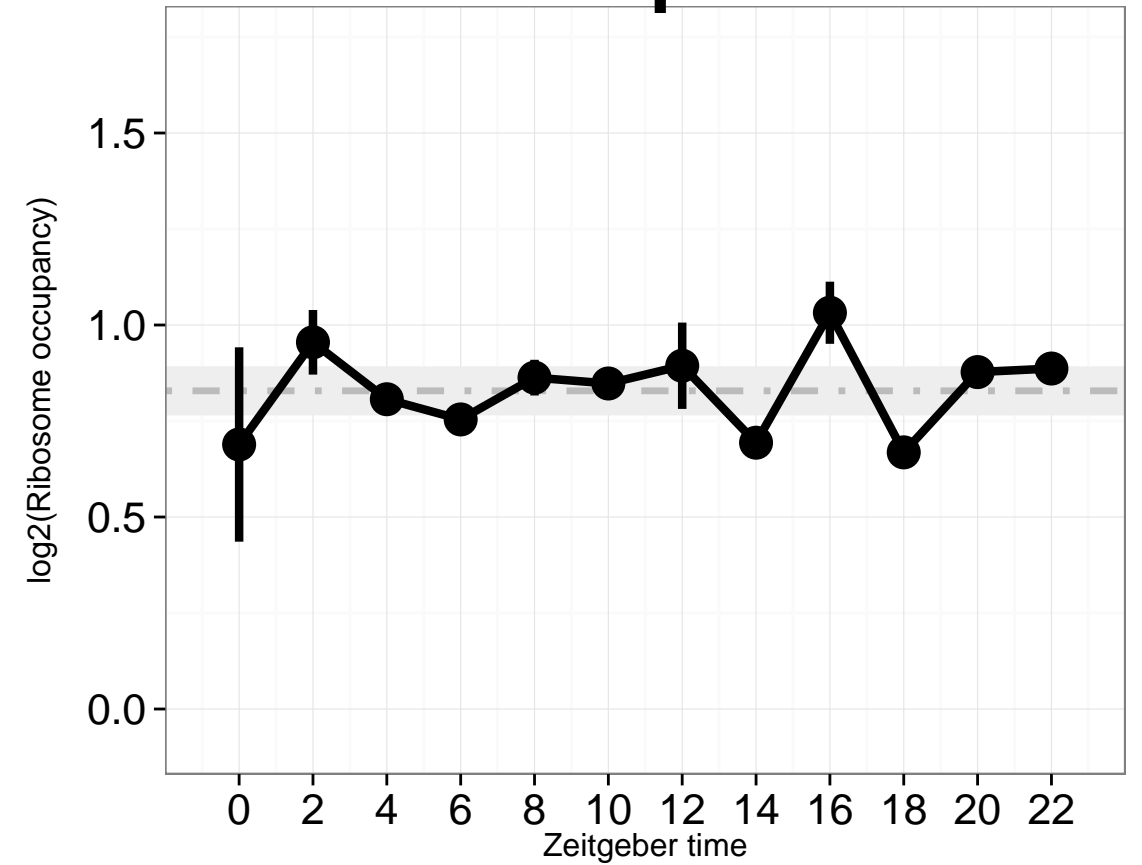

Supplement: Supplementary file 8063 [file 1]

## Il6st

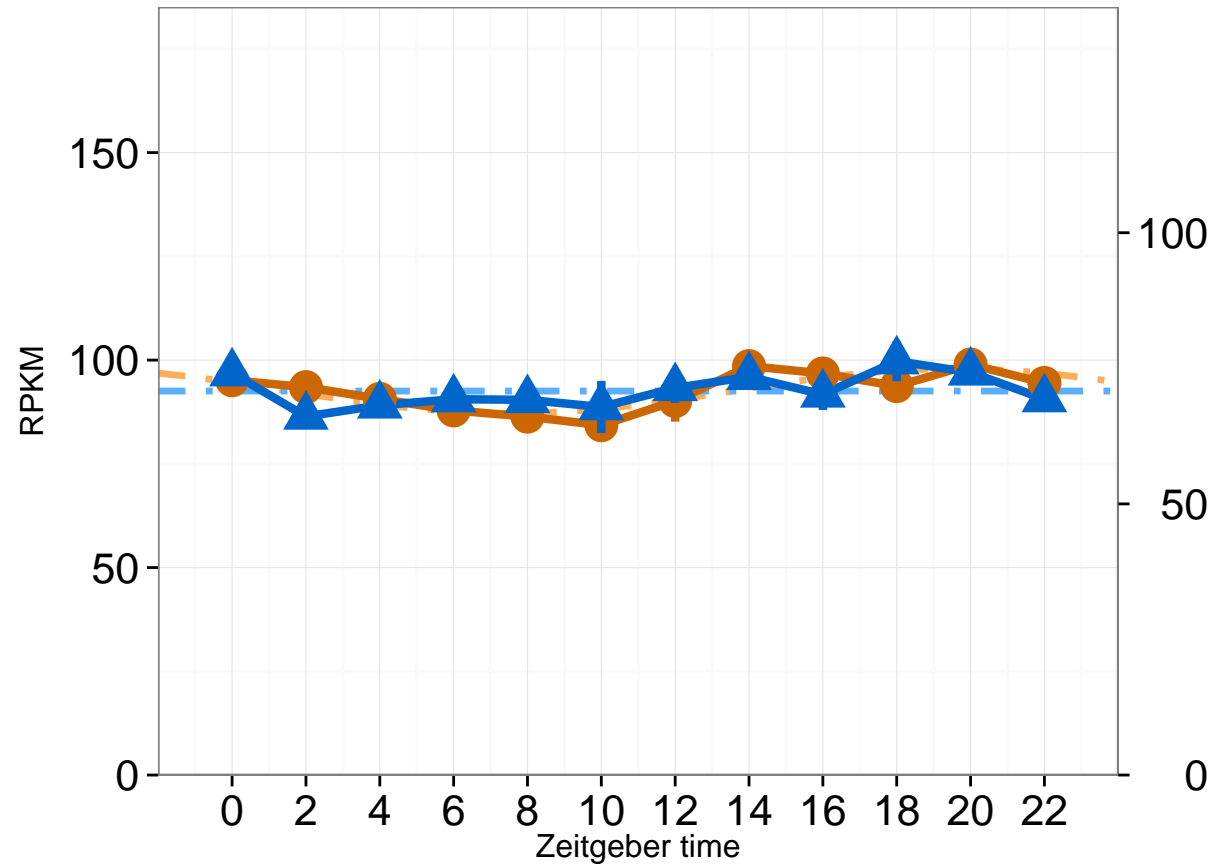

## Il6st

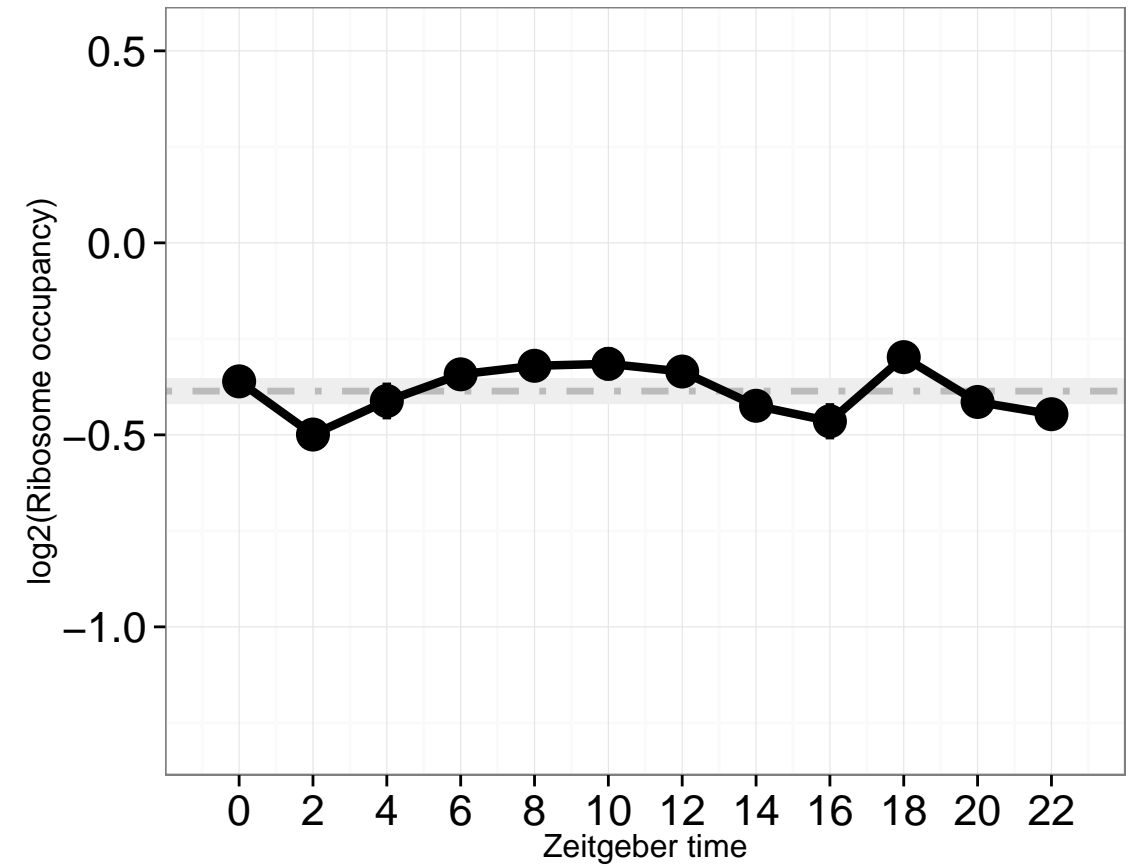

Supplement: Supplementary file 8064 [file 1]

# Dctn5

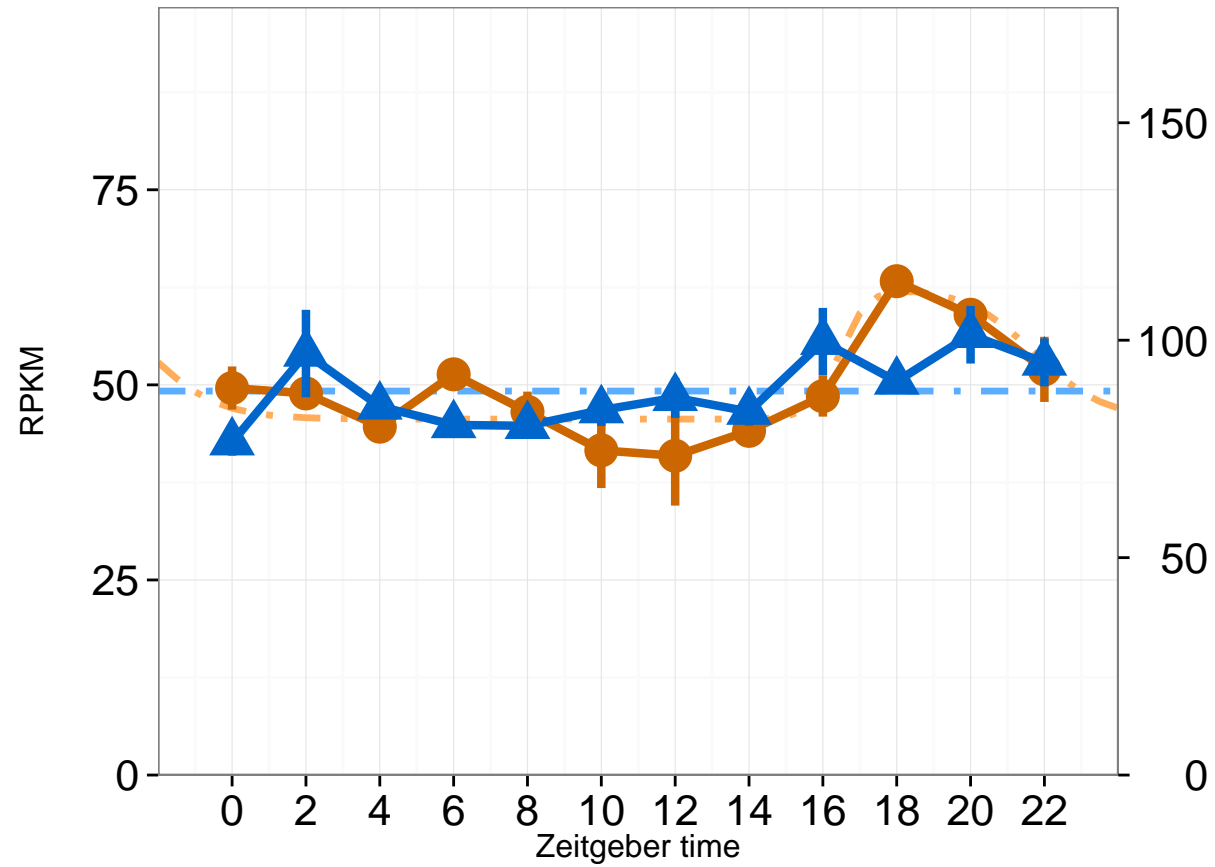

# Dctn5

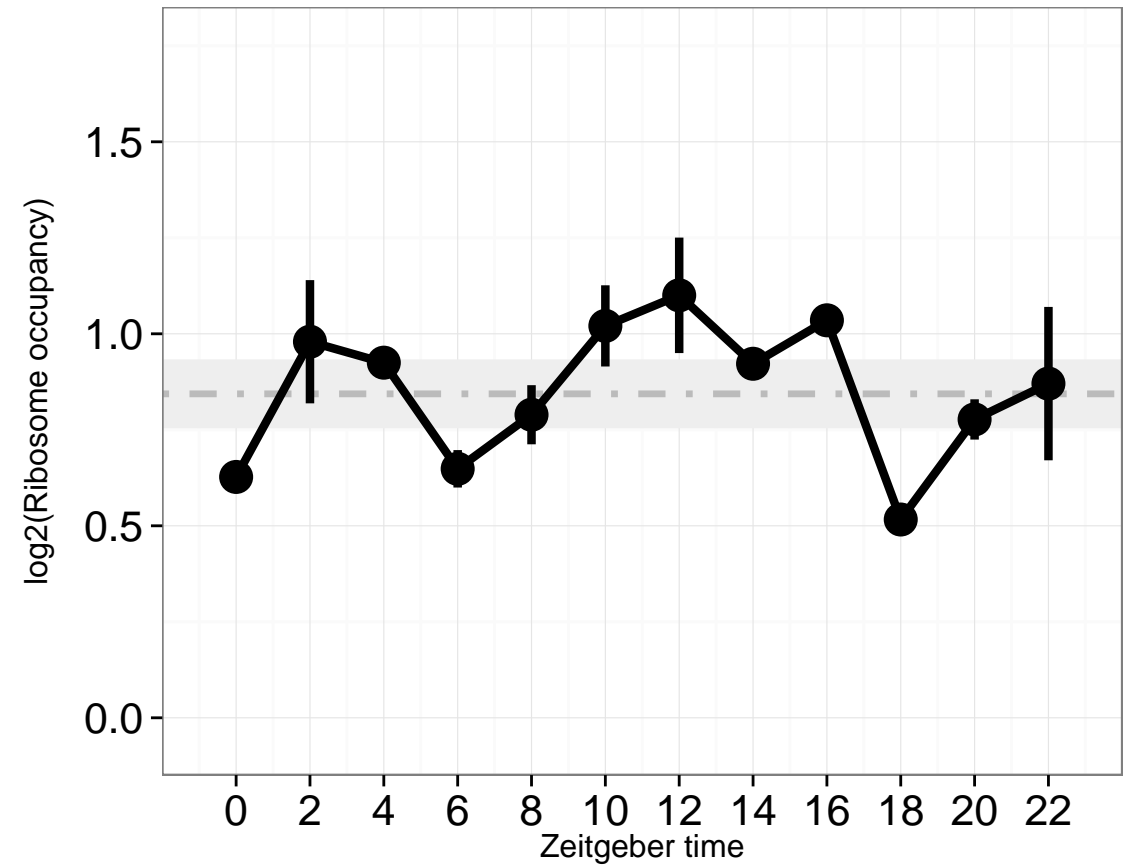

Supplement: Supplementary file 8065 [file 1]

## Lamtor1

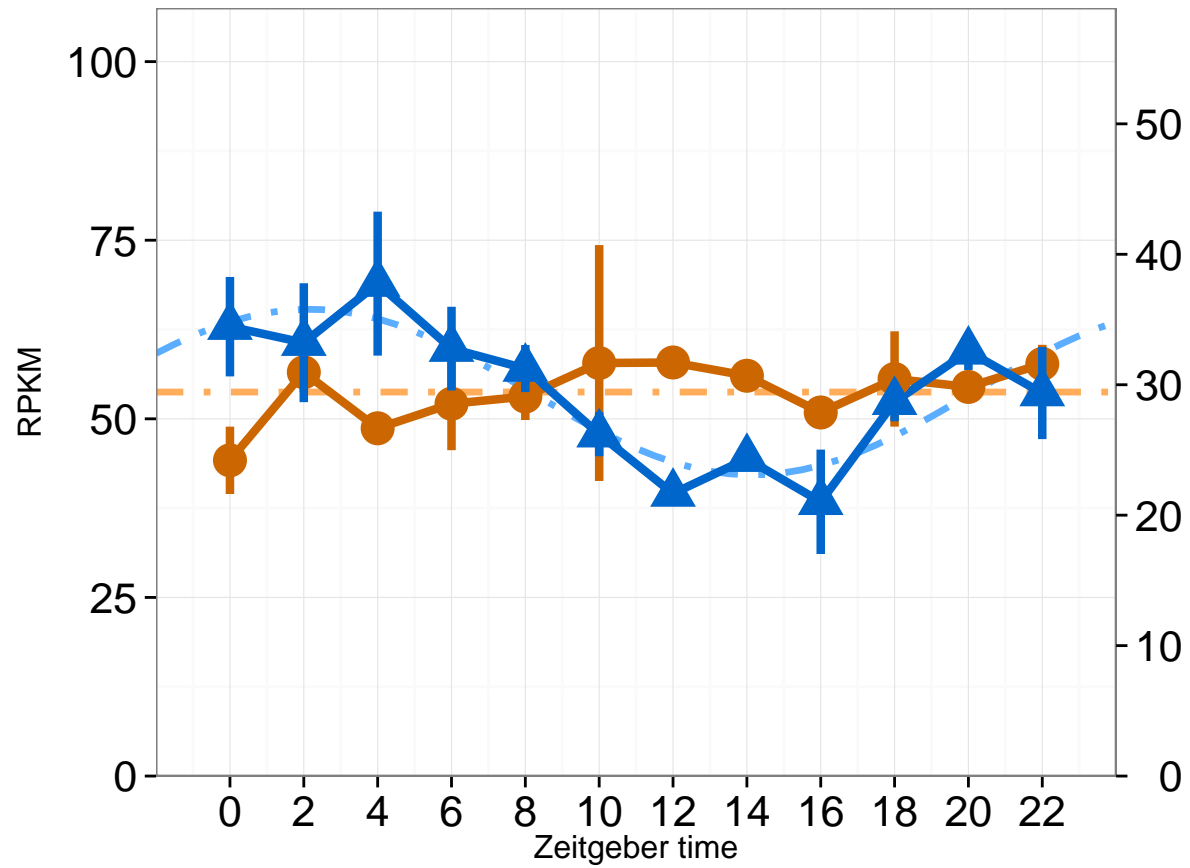

## Lamtor1

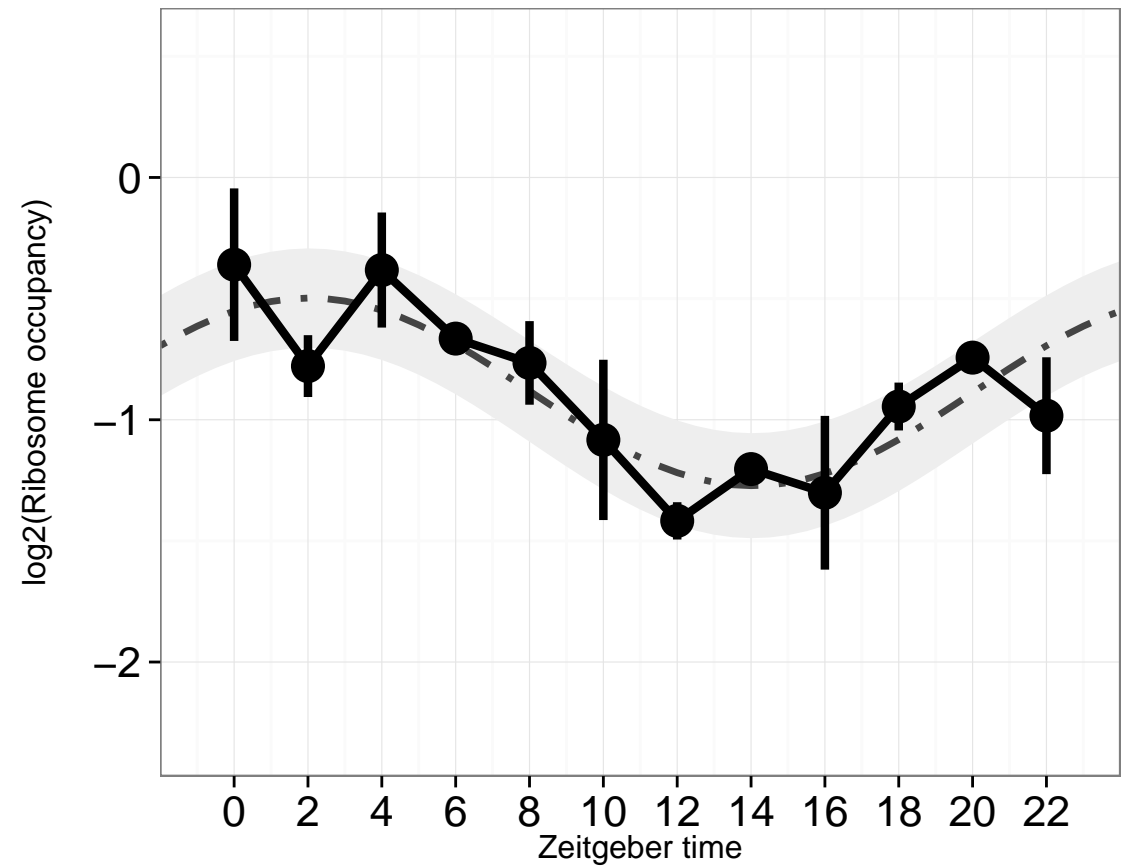

Supplement: Supplementary file 8066 [file 1]

# Lrrfip2

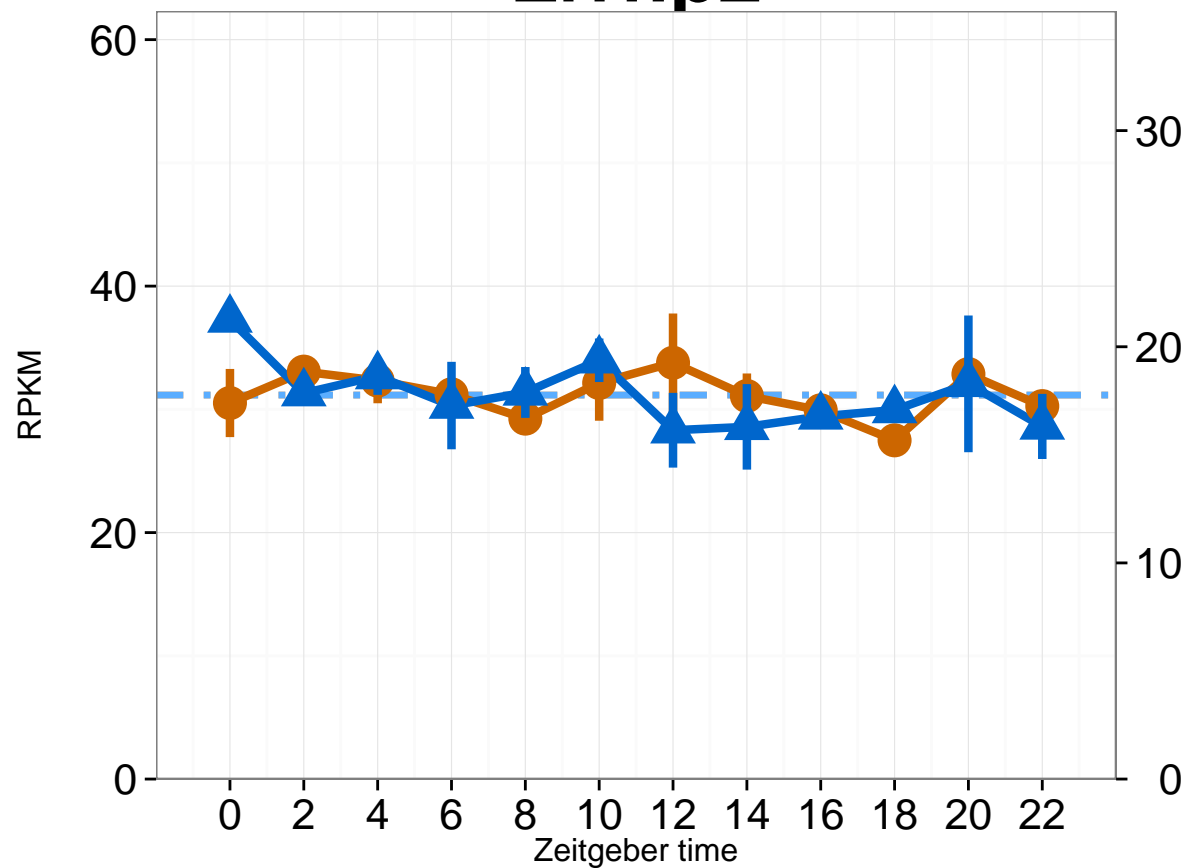

# Lrrfip2

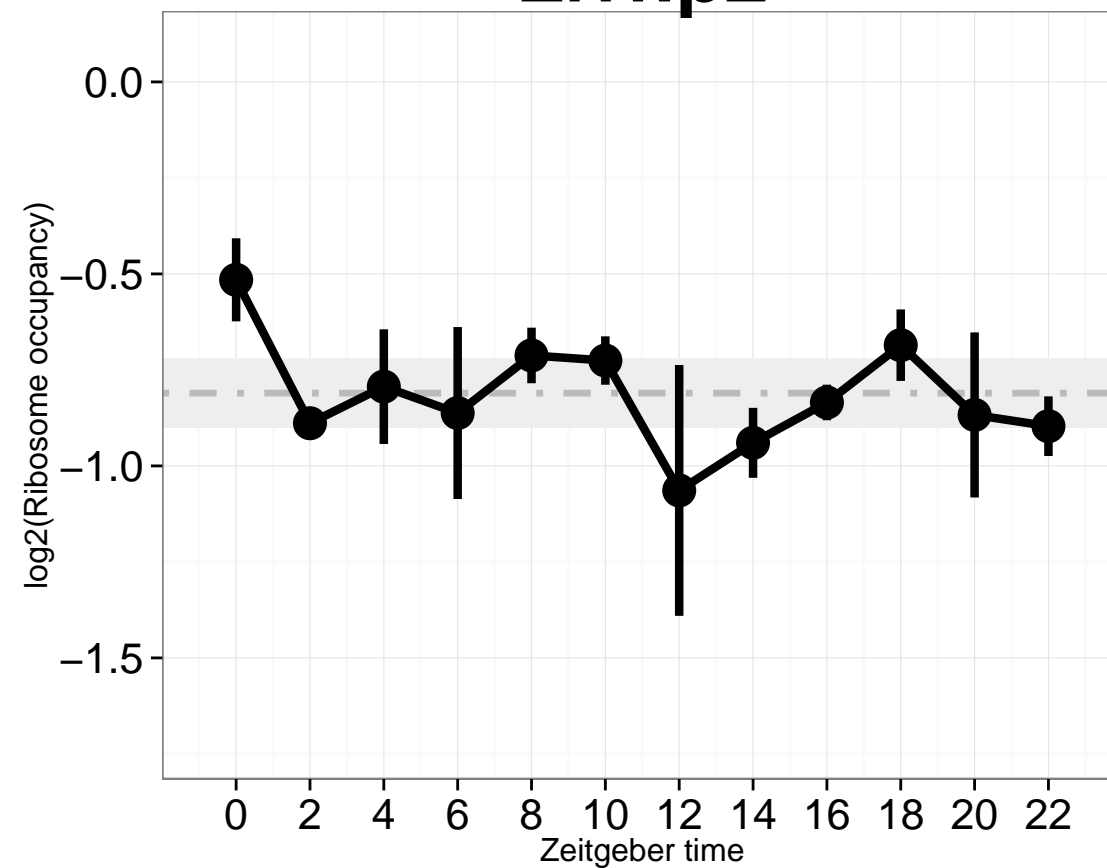

Supplement: Supplementary file 8067 [file 1]

# Ppp1r14d

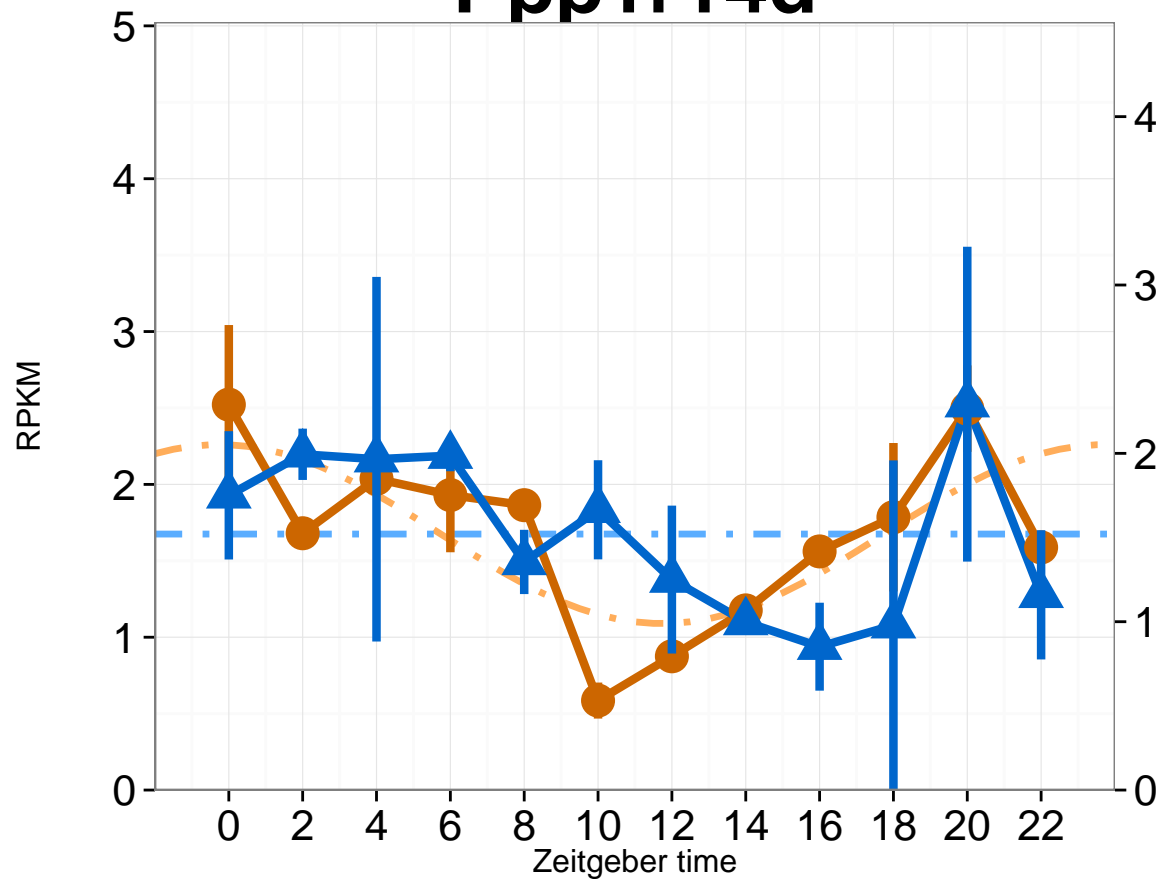

# Ppp1r14d

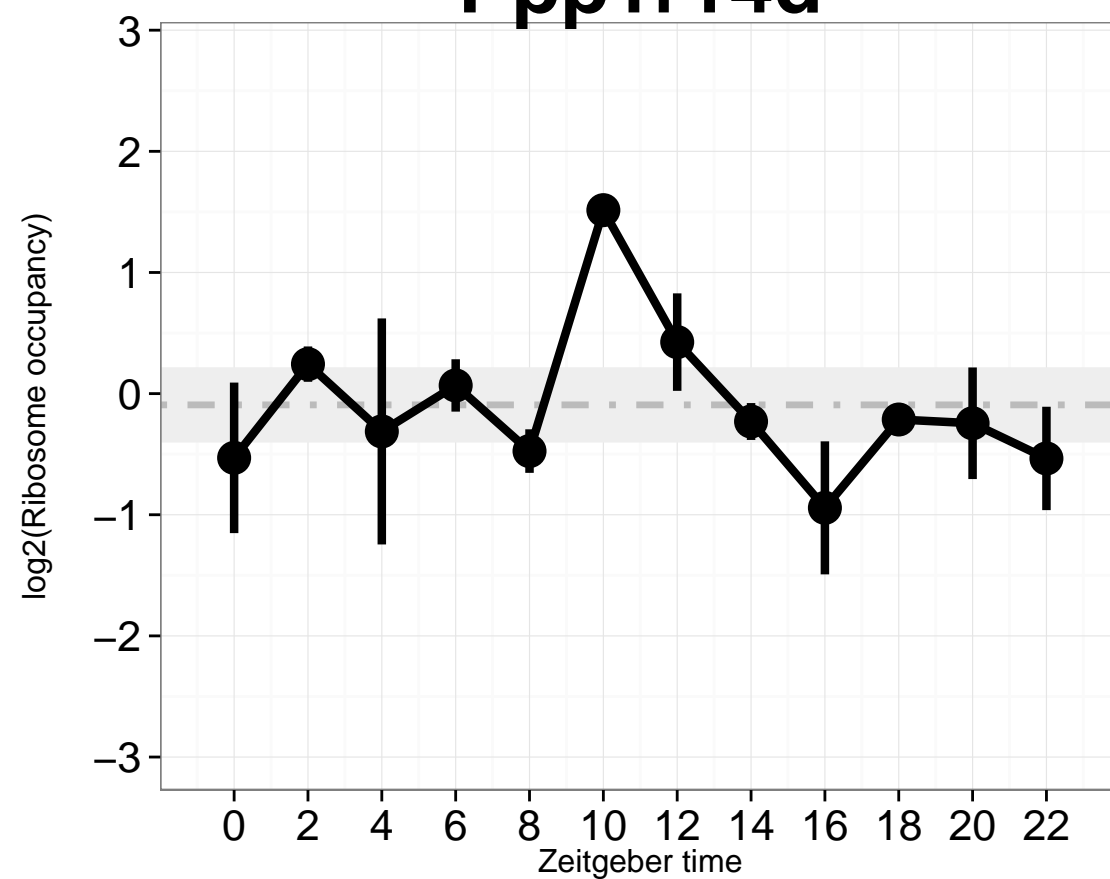

Supplement: Supplementary file 8068 [file 1]

## Ctbs

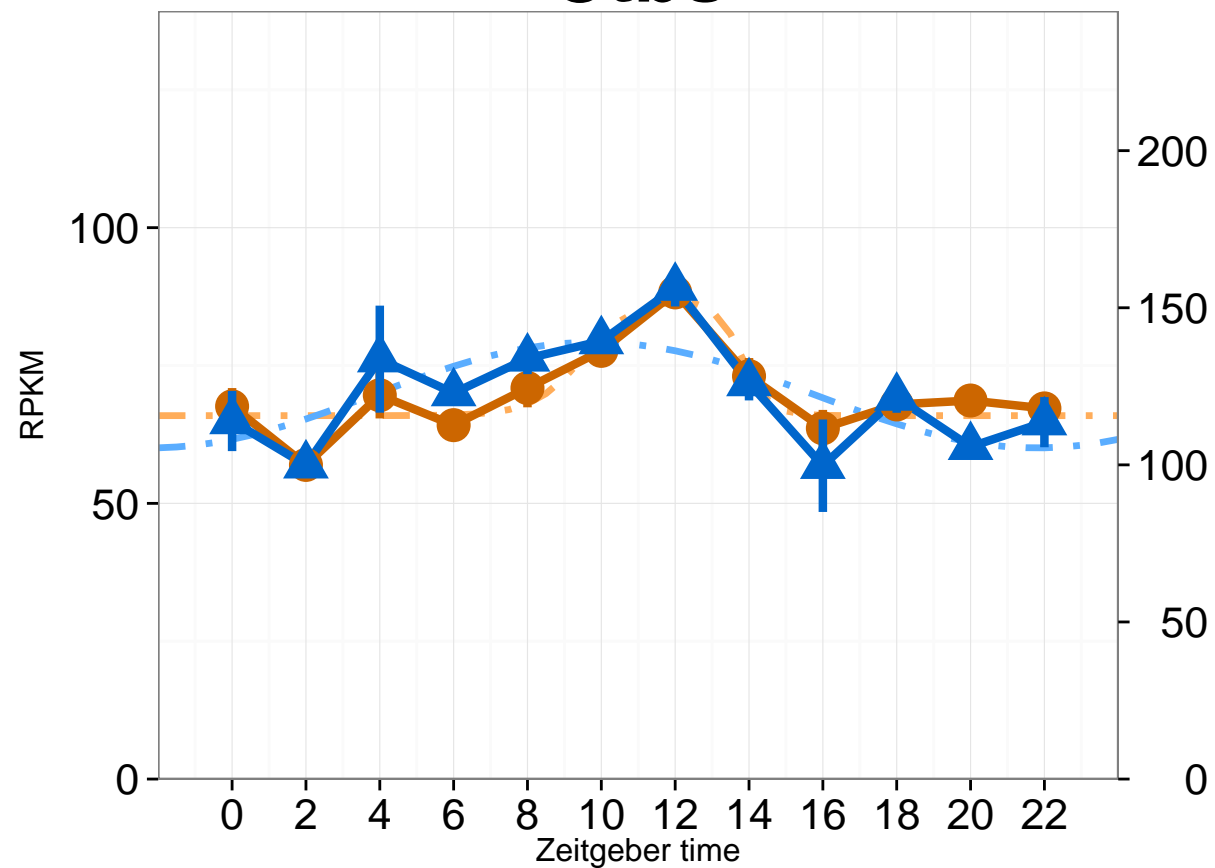

## Ctbs

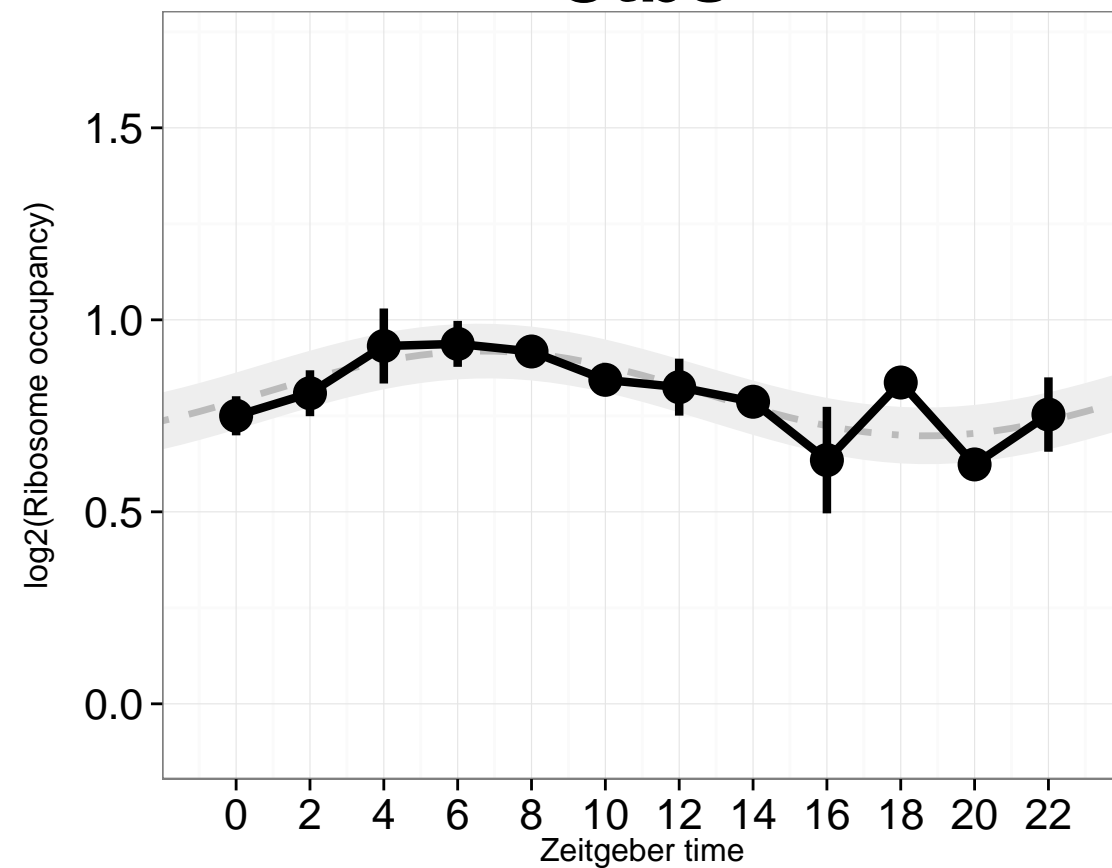

Supplement: Supplementary file 8069 [file 1]

# Ctdnep1

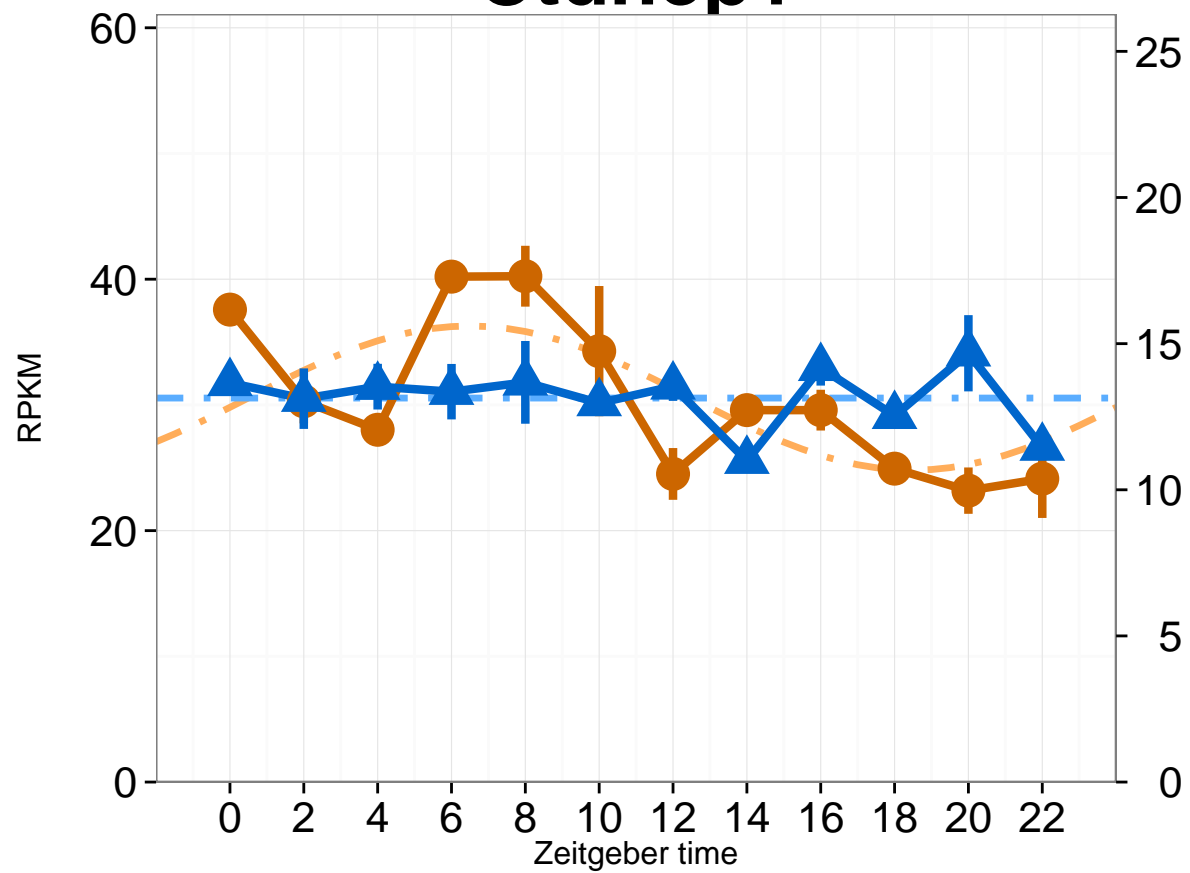

# Ctdnep1

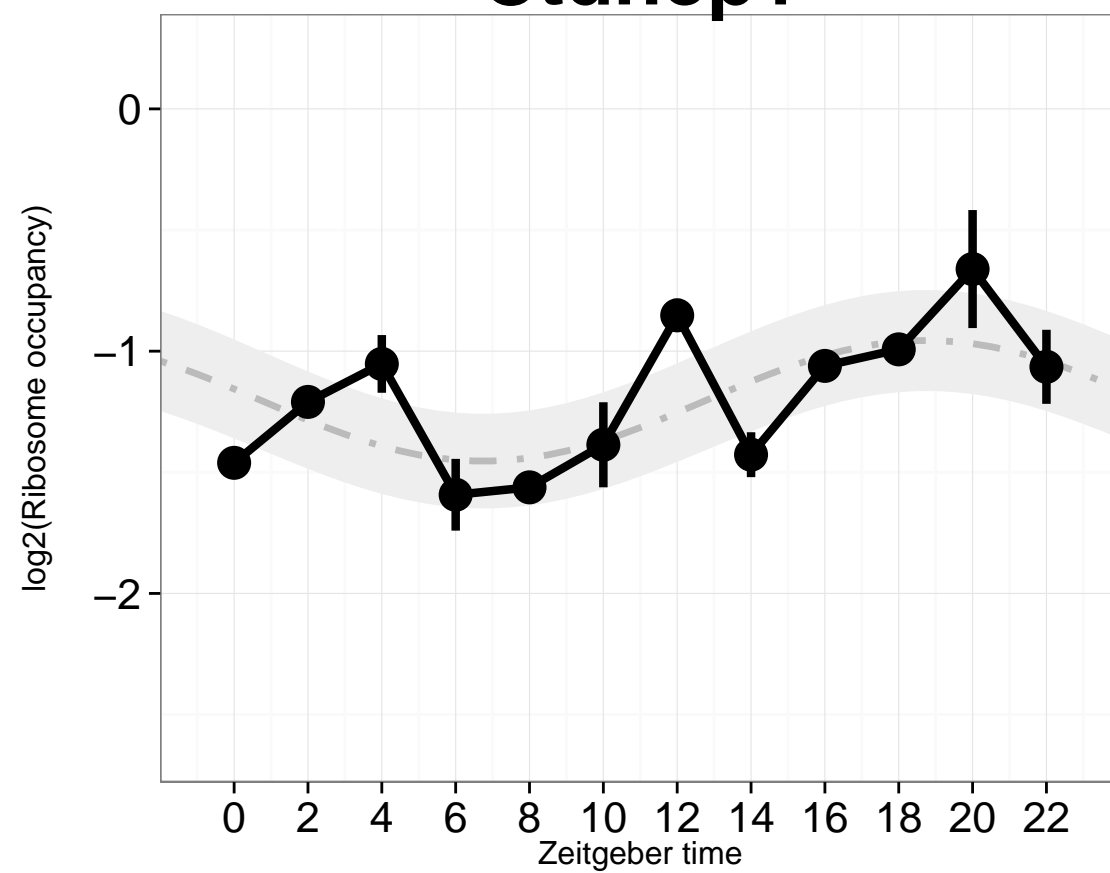

Supplement: Supplementary file 8070 [file 1]

# Abcd2

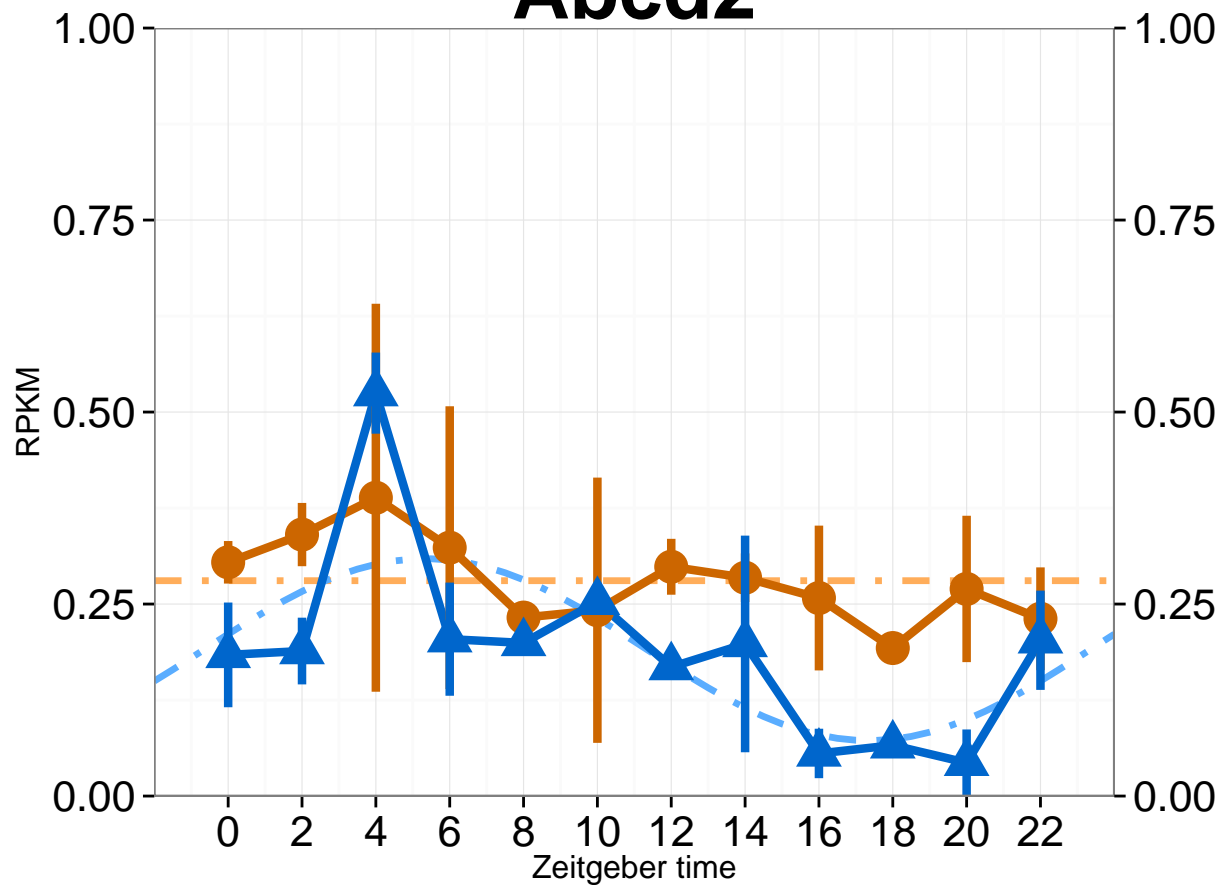

# Abcd2

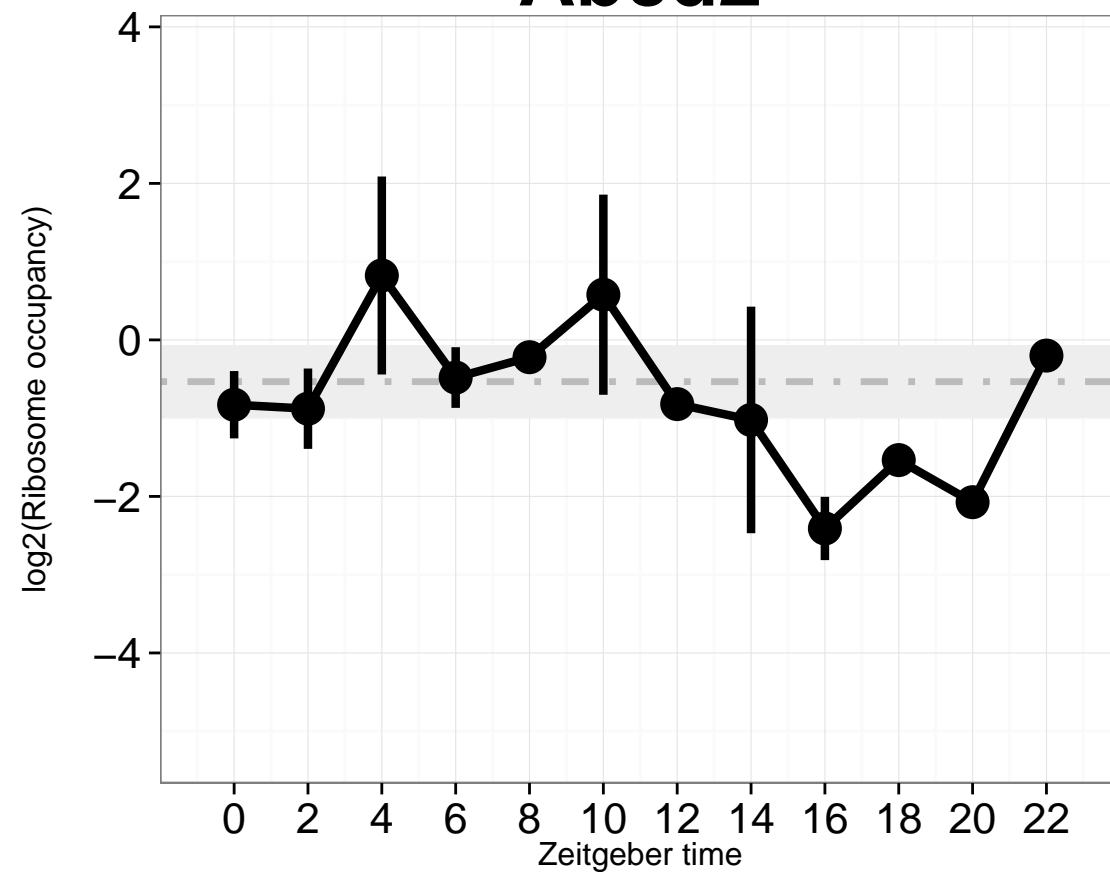

Supplement: Supplementary file 8071 [file 1]

# Trnau1ap

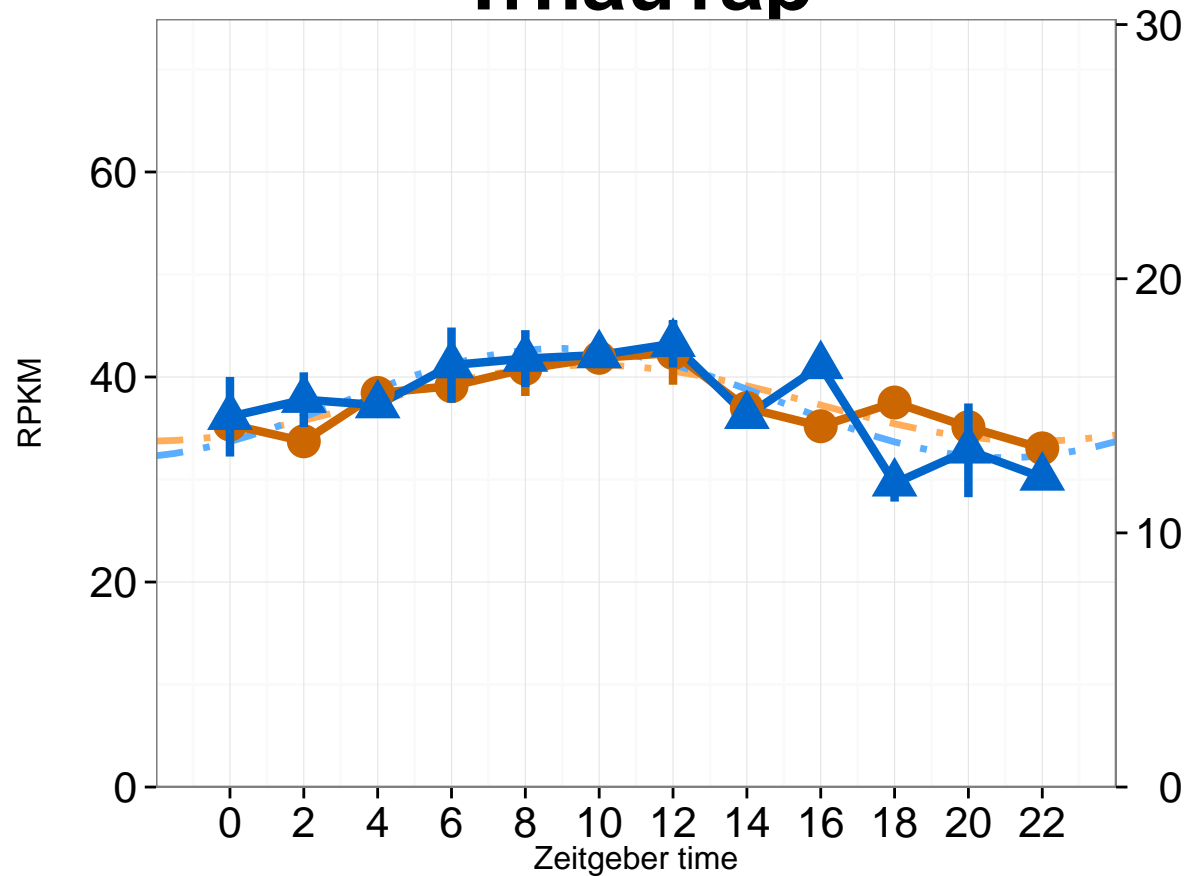

# Trnau1ap

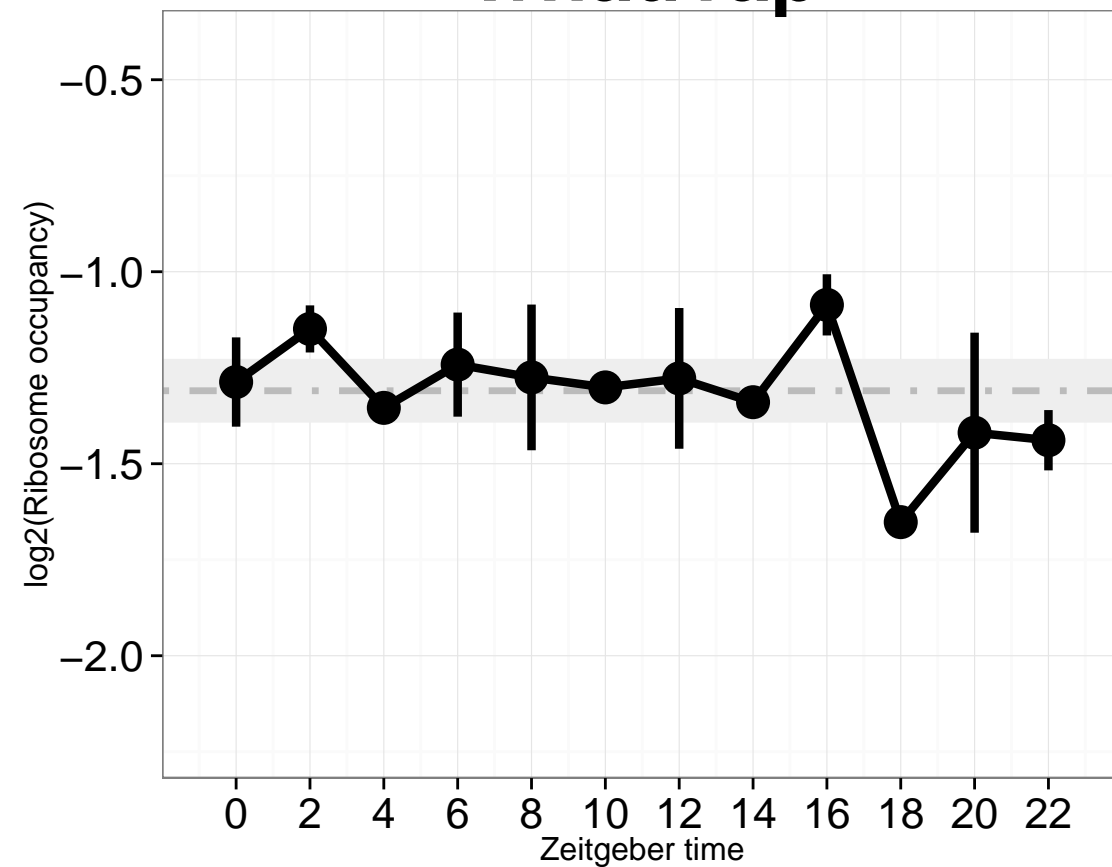

Supplement: Supplementary file 8072 [file 1]

# Tagap1

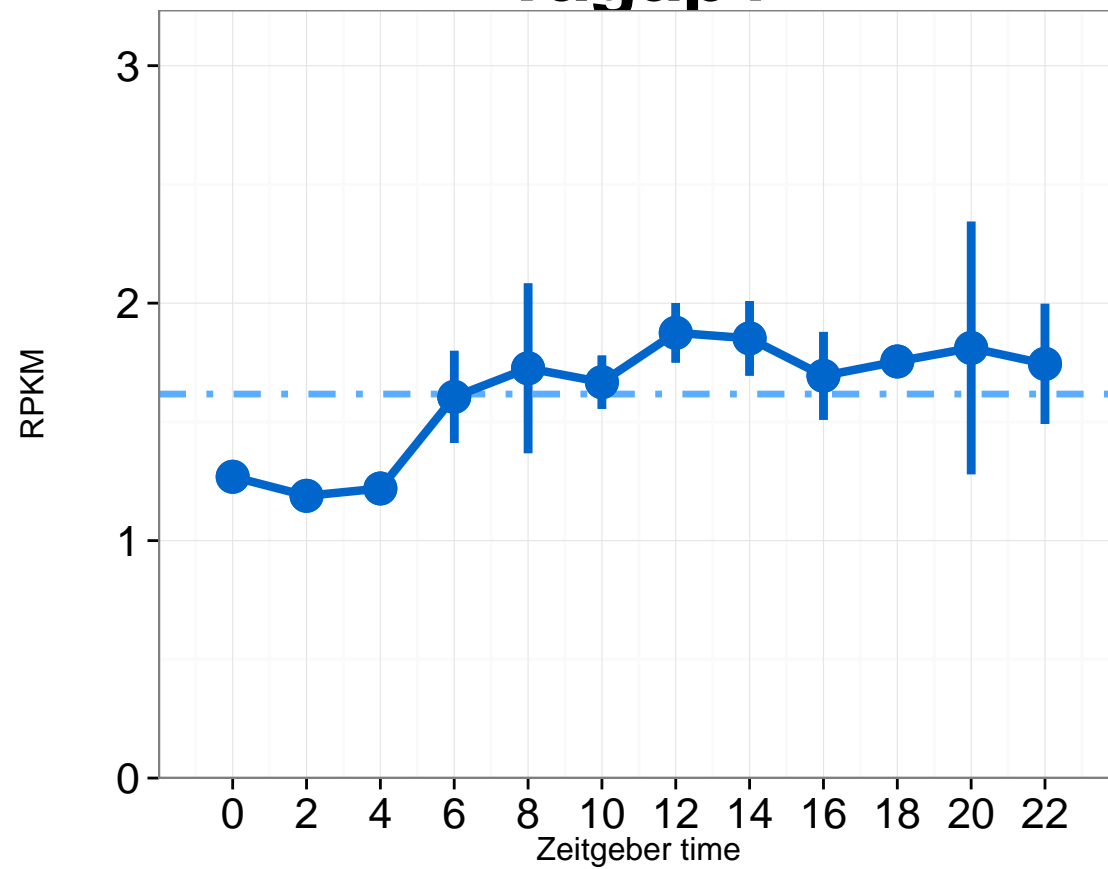

# Tagap1 log2(Ribosome occupancy

Supplement: Supplementary file 8073 [file 1]

# 3110040N11Rik

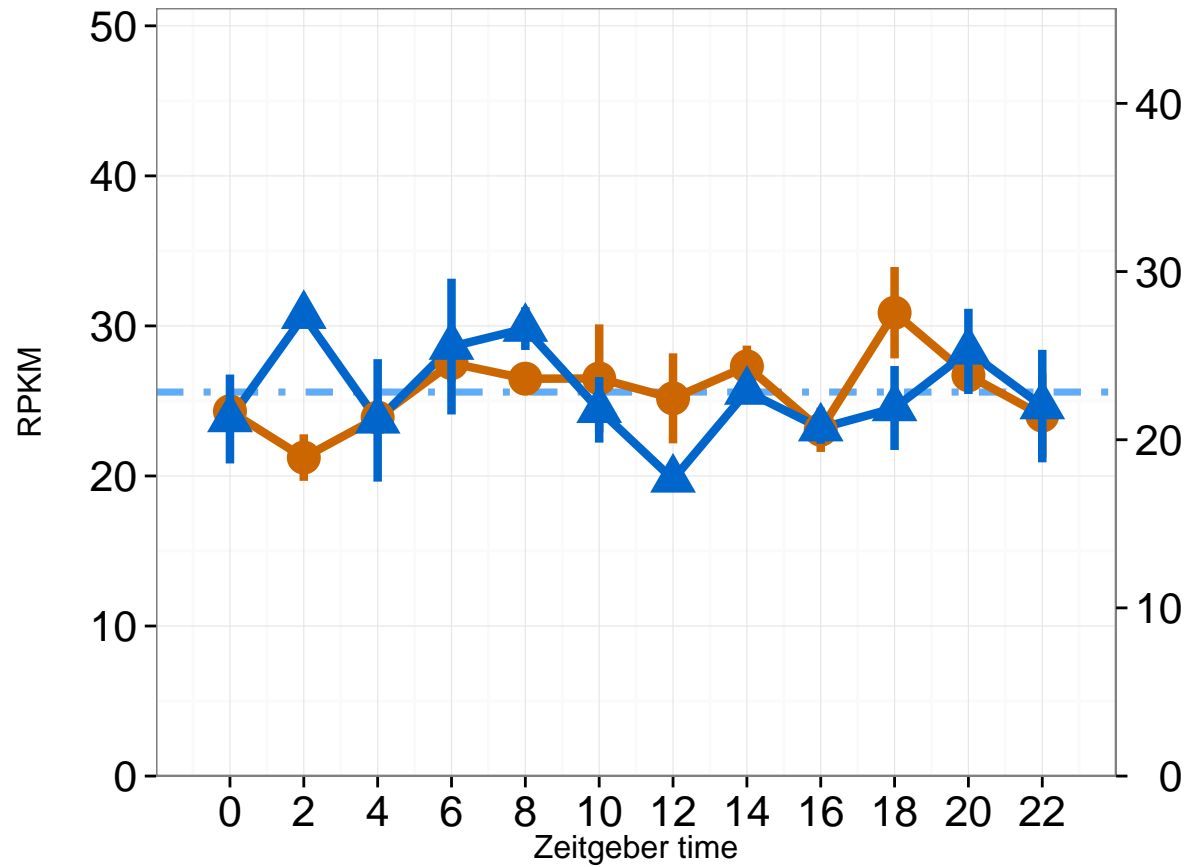

# 3110040N11Rik

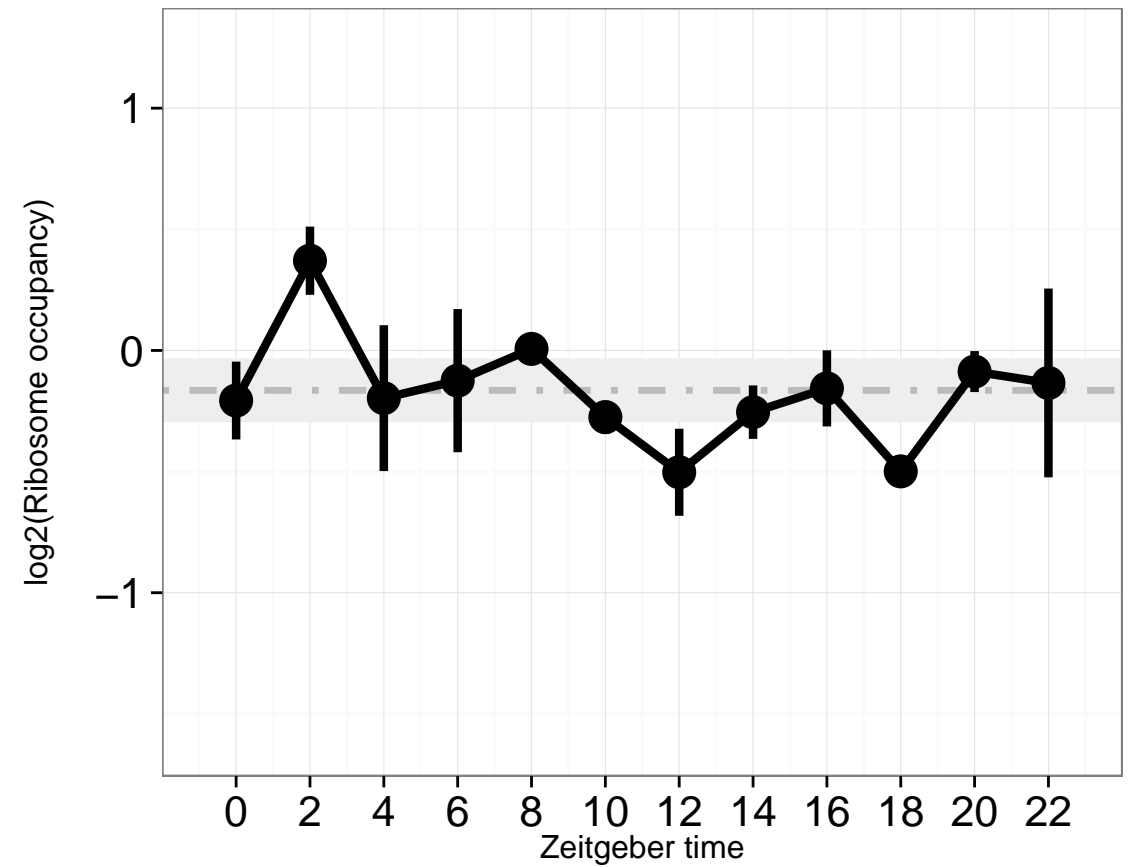

Supplement: Supplementary file 8074 [file 1]

# Mrvi1

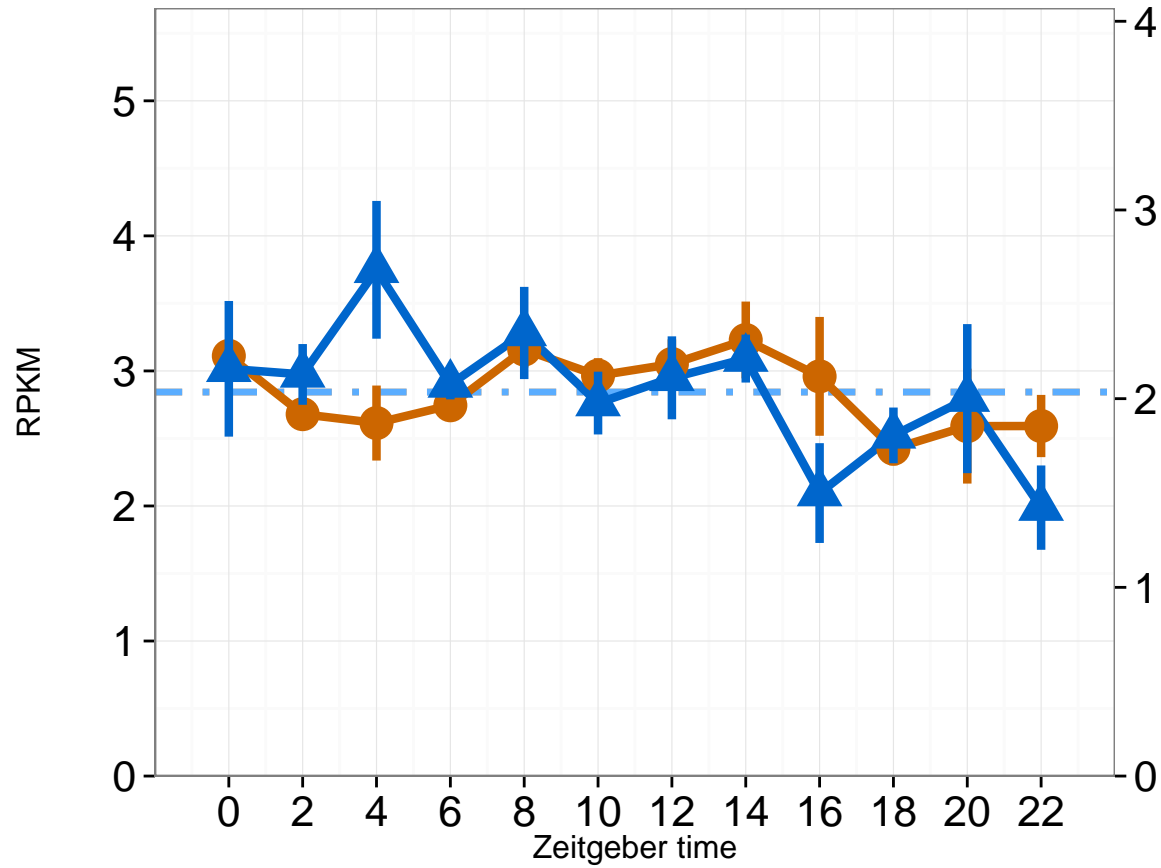

# Mrvi1

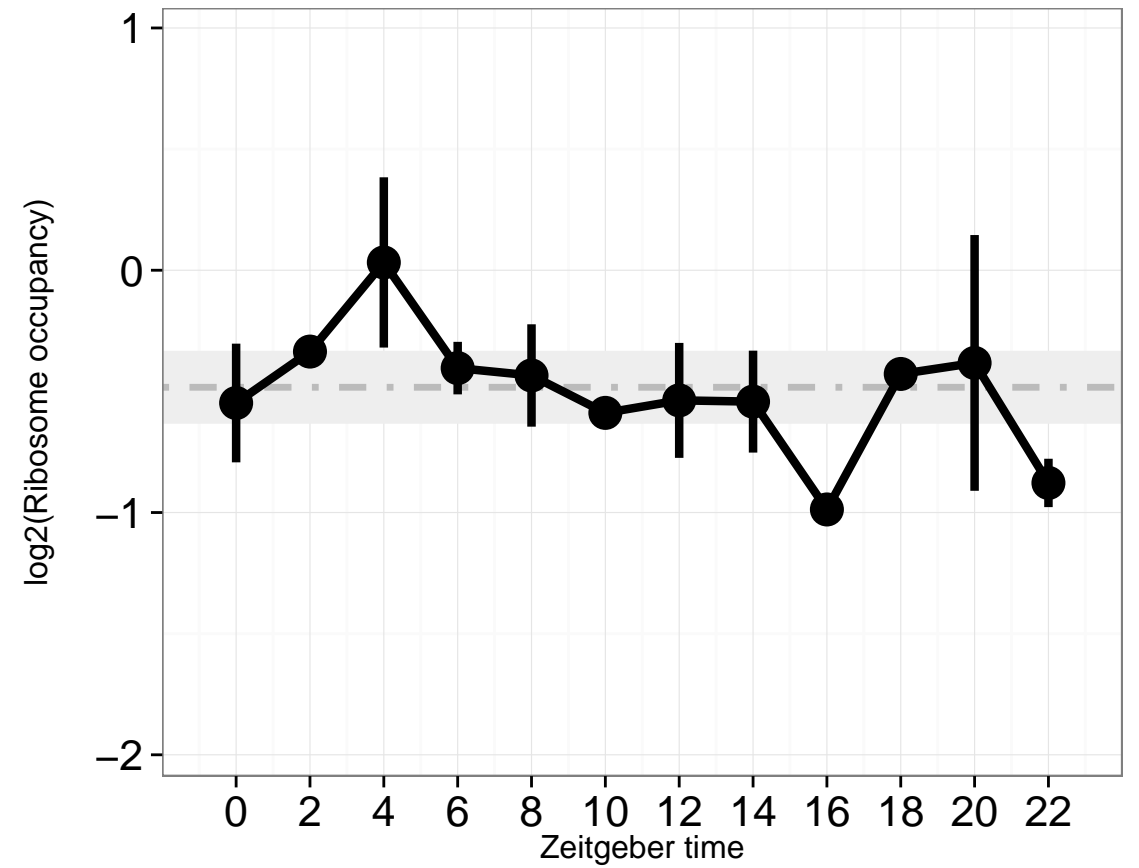

Supplement: Supplementary file 8075 [file 1]

## Farsa

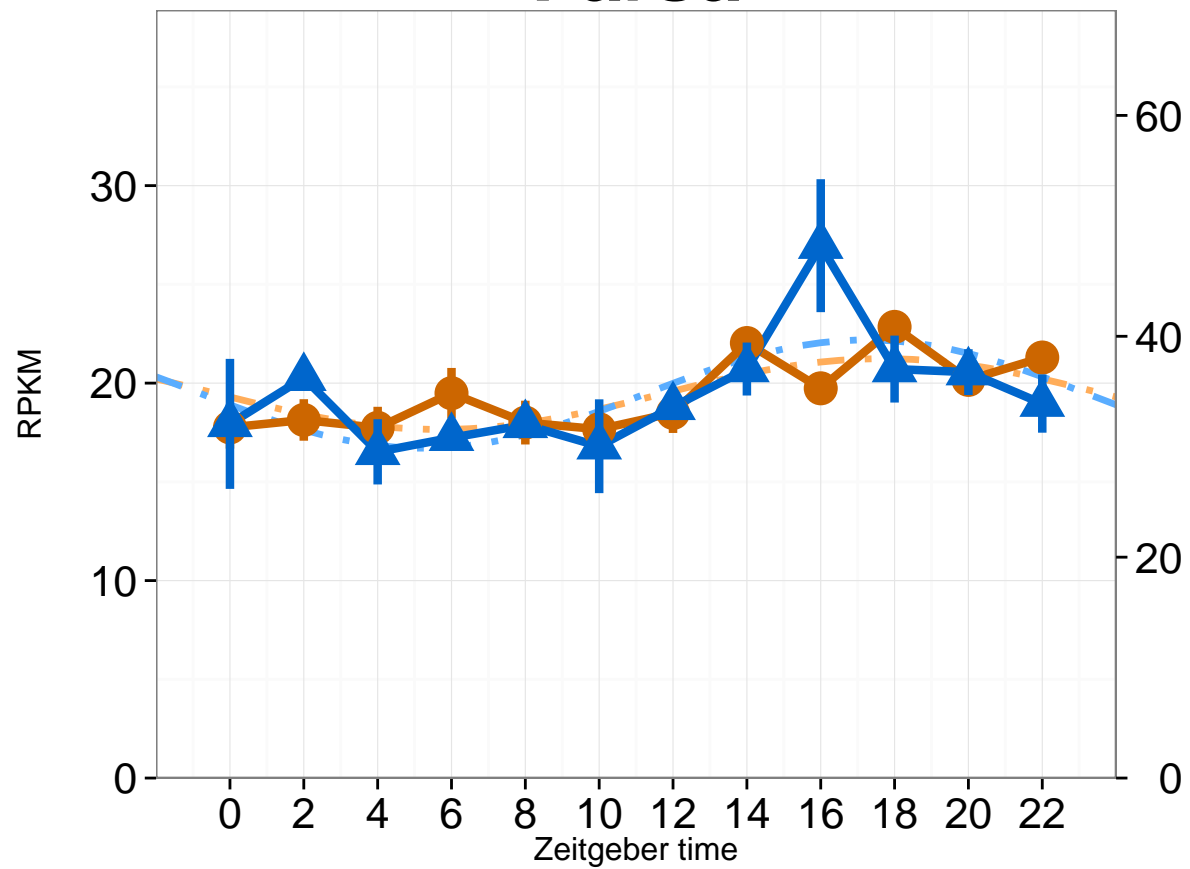

## Farsa

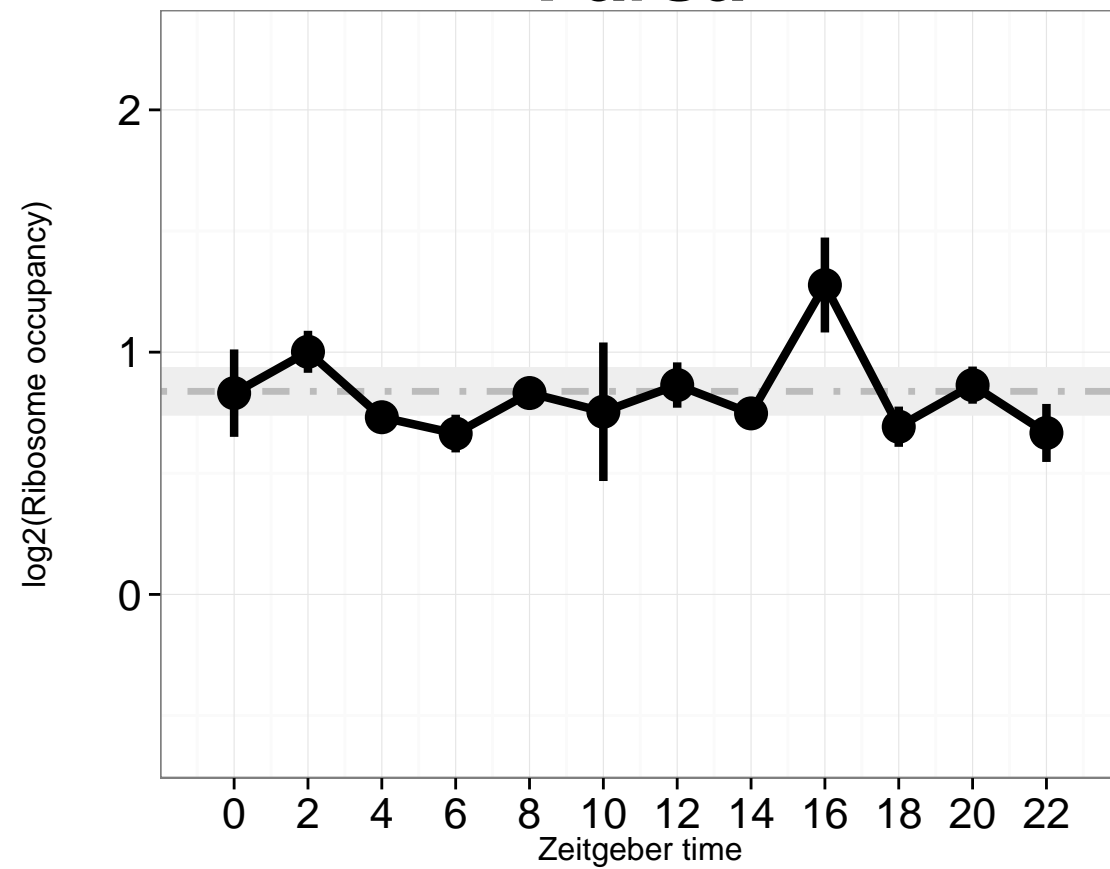

Supplement: Supplementary file 8076 [file 1]

# Palid1

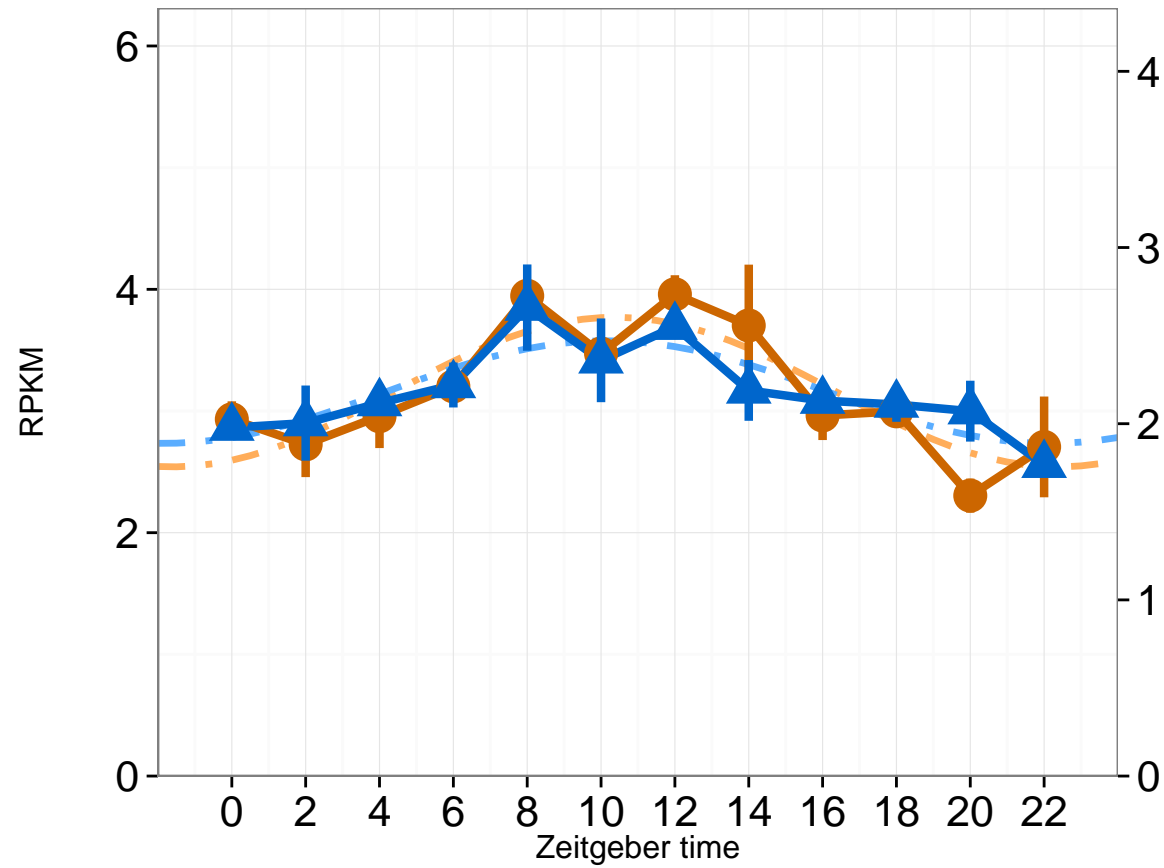

# Palid1

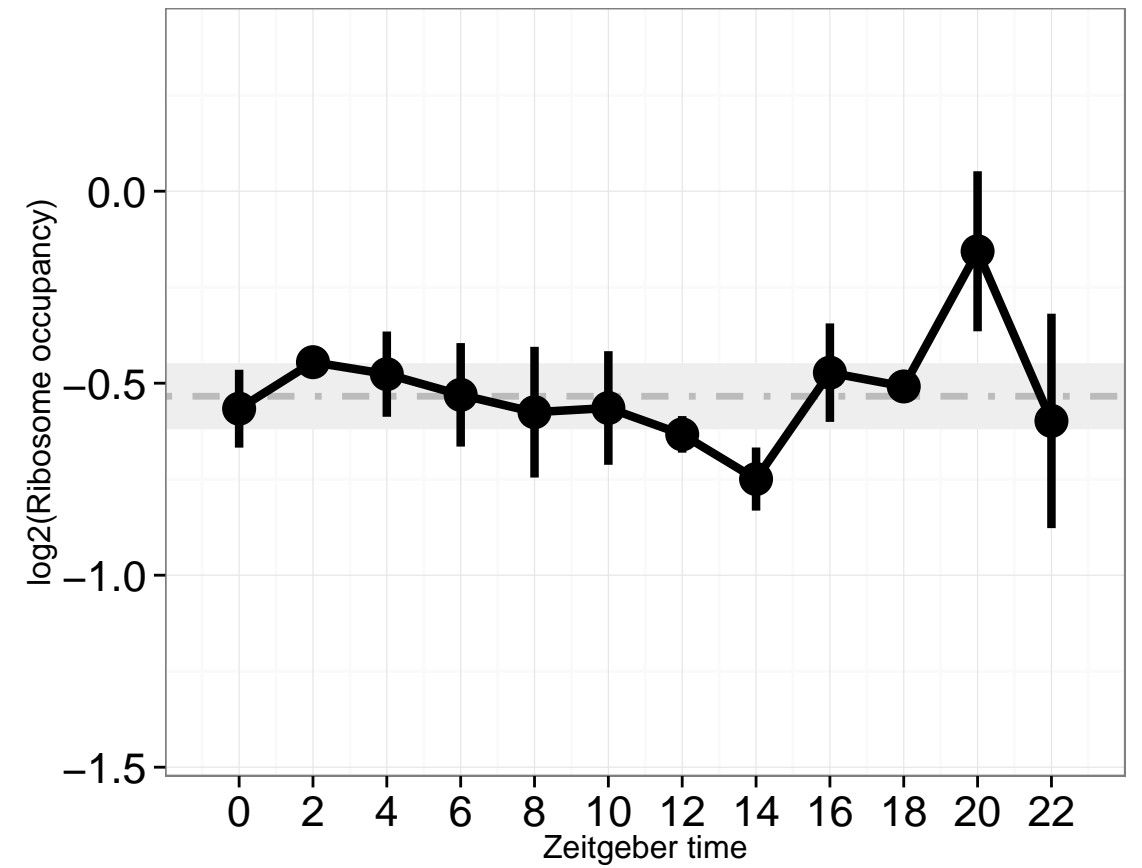

Supplement: Supplementary file 8077 [file 1]

# Ccdc8

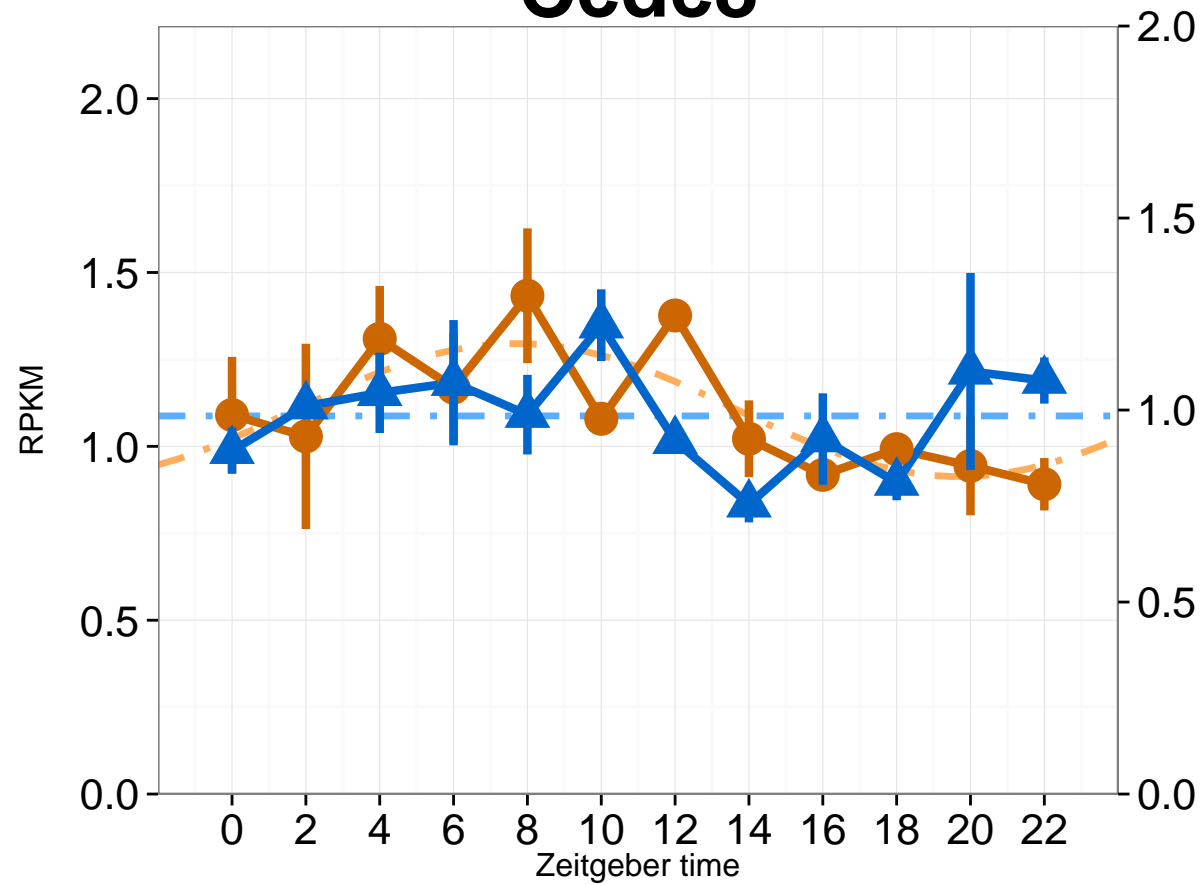

# Ccdc8

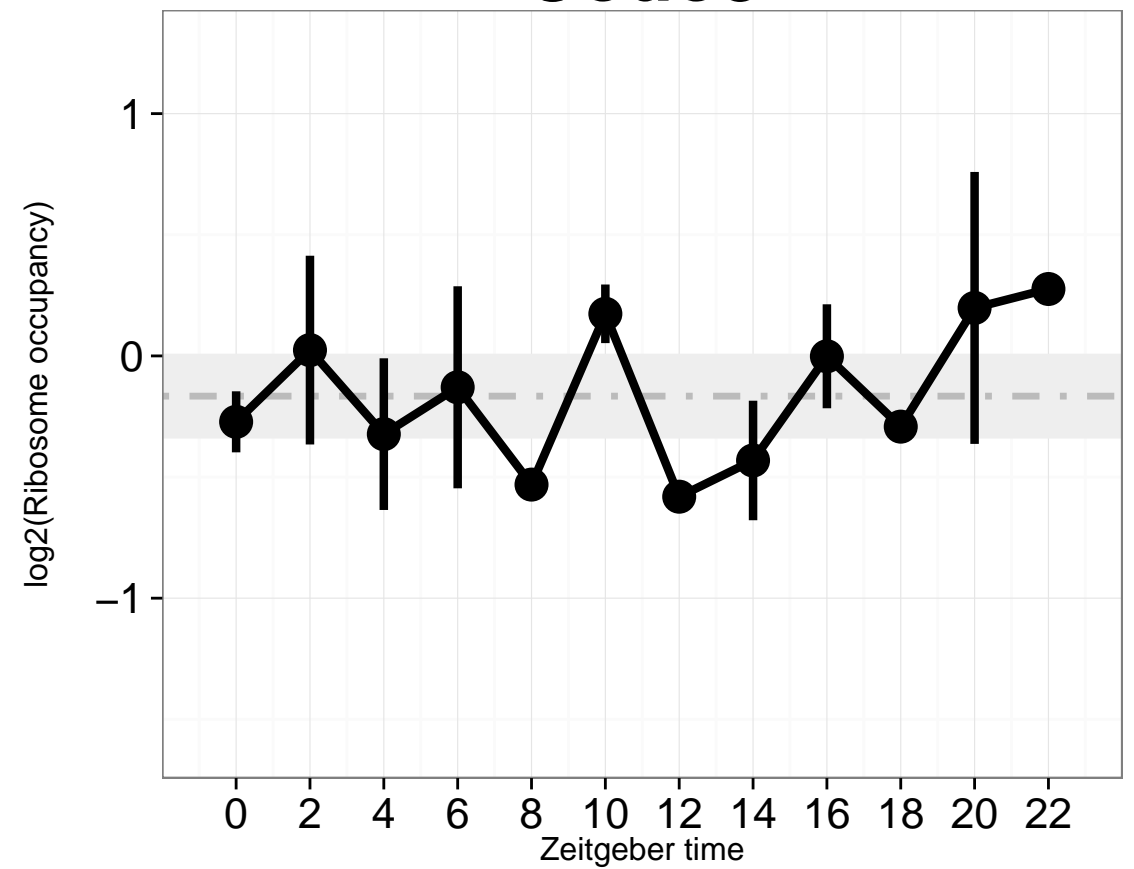

Supplement: Supplementary file 8078 [file 1]

## Wdr26

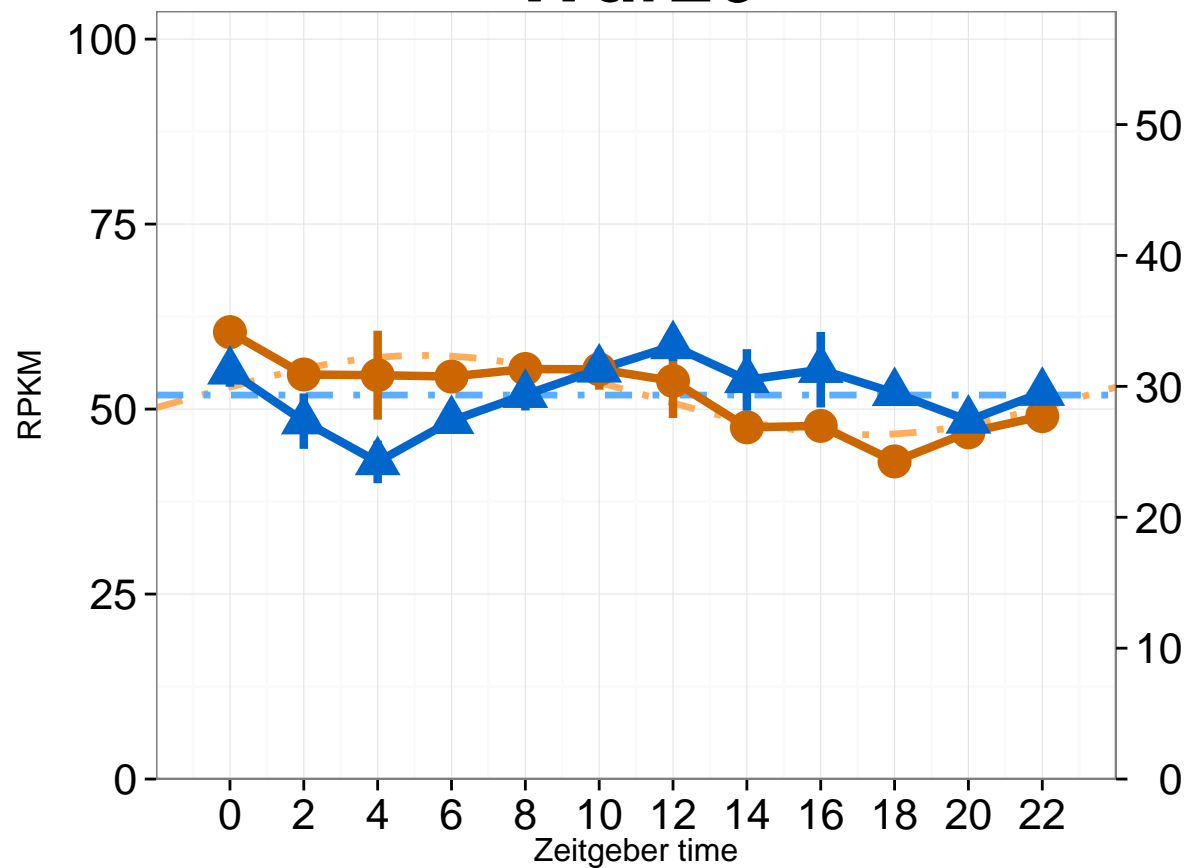

## Wdr26

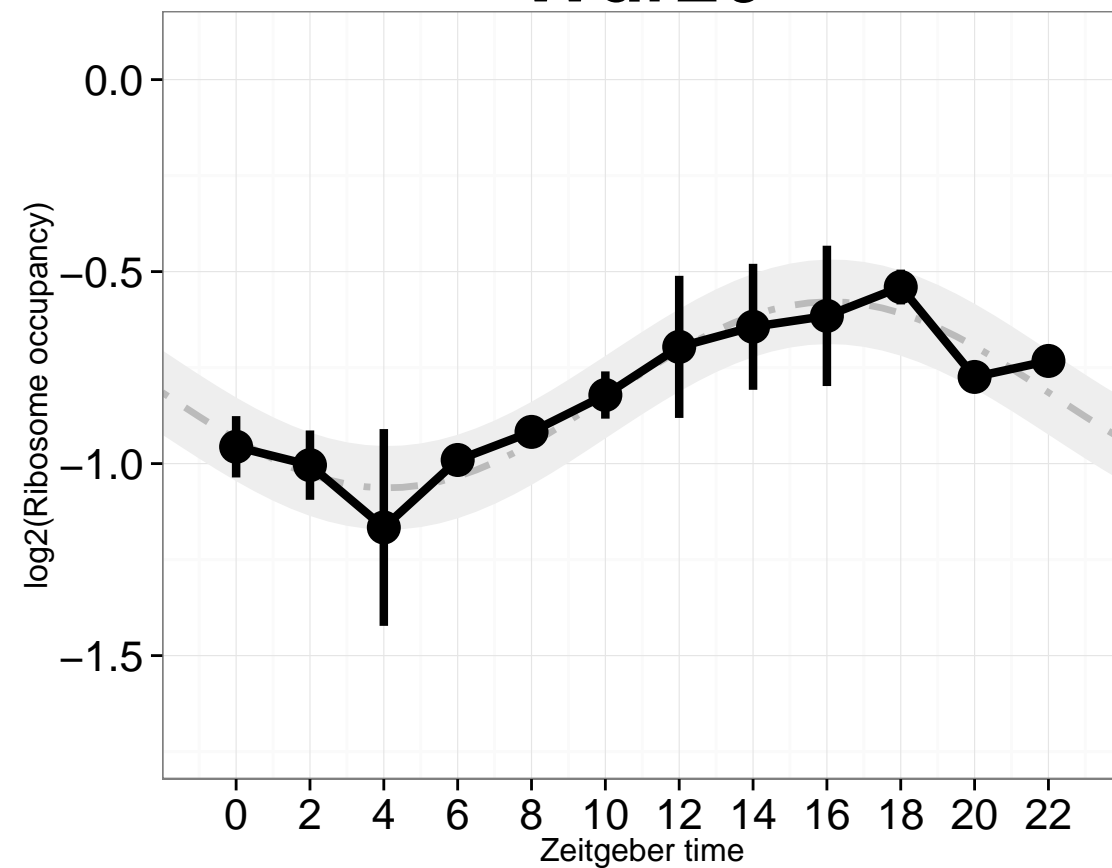

Supplement: Supplementary file 8079 [file 1]

# Dock10

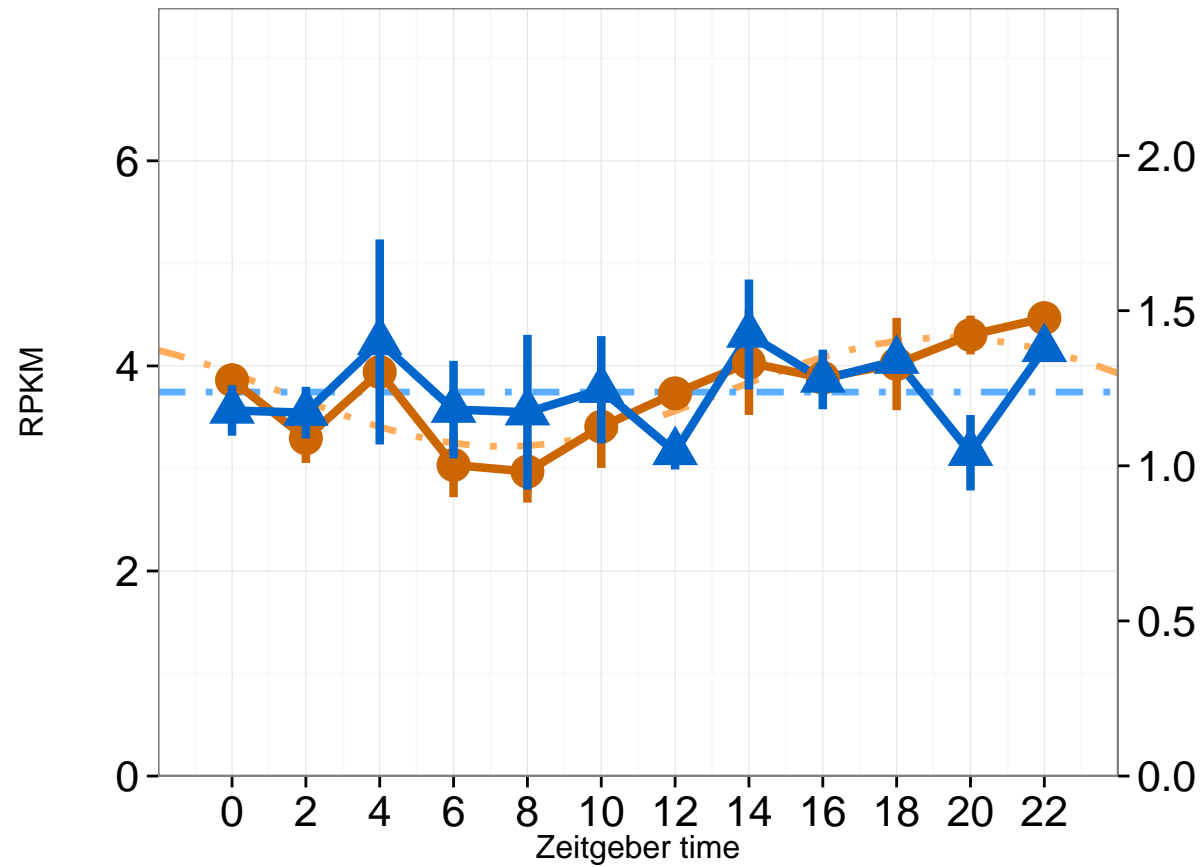

# Dock10

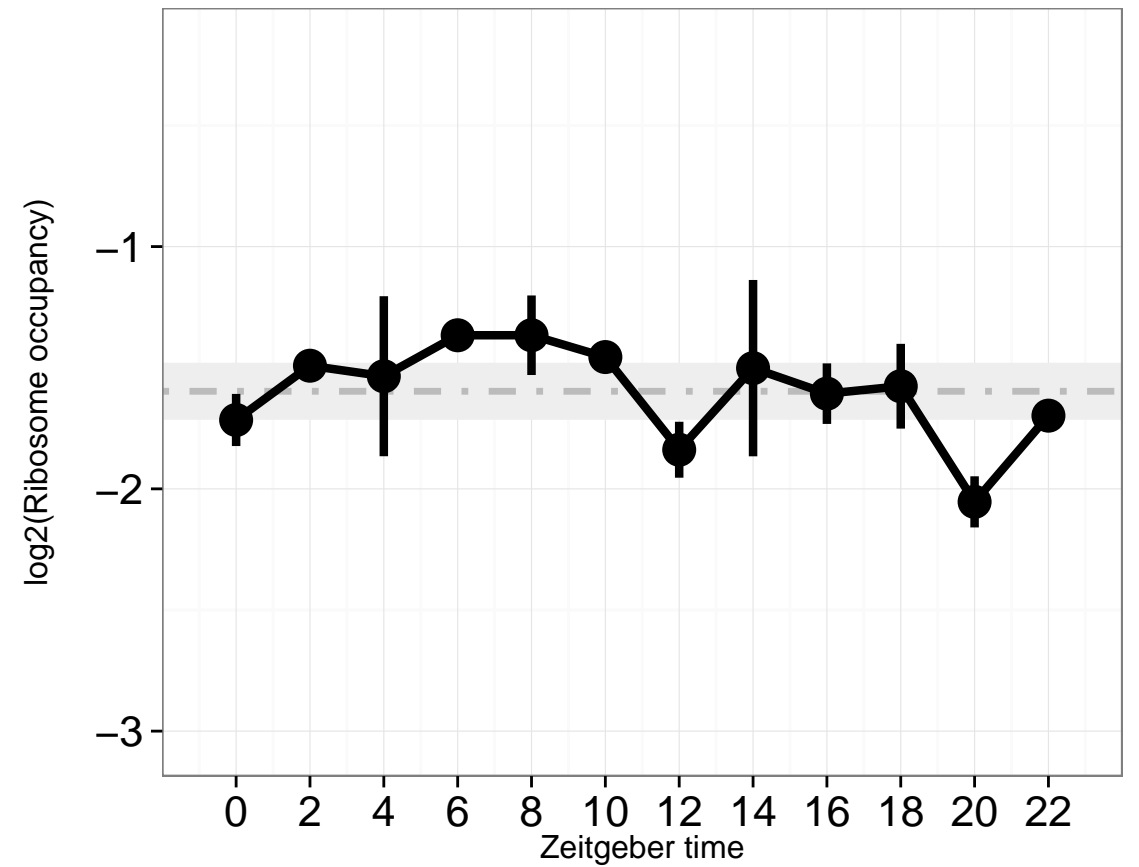

Supplement: Supplementary file 8080 [file 1]

## Polr1d

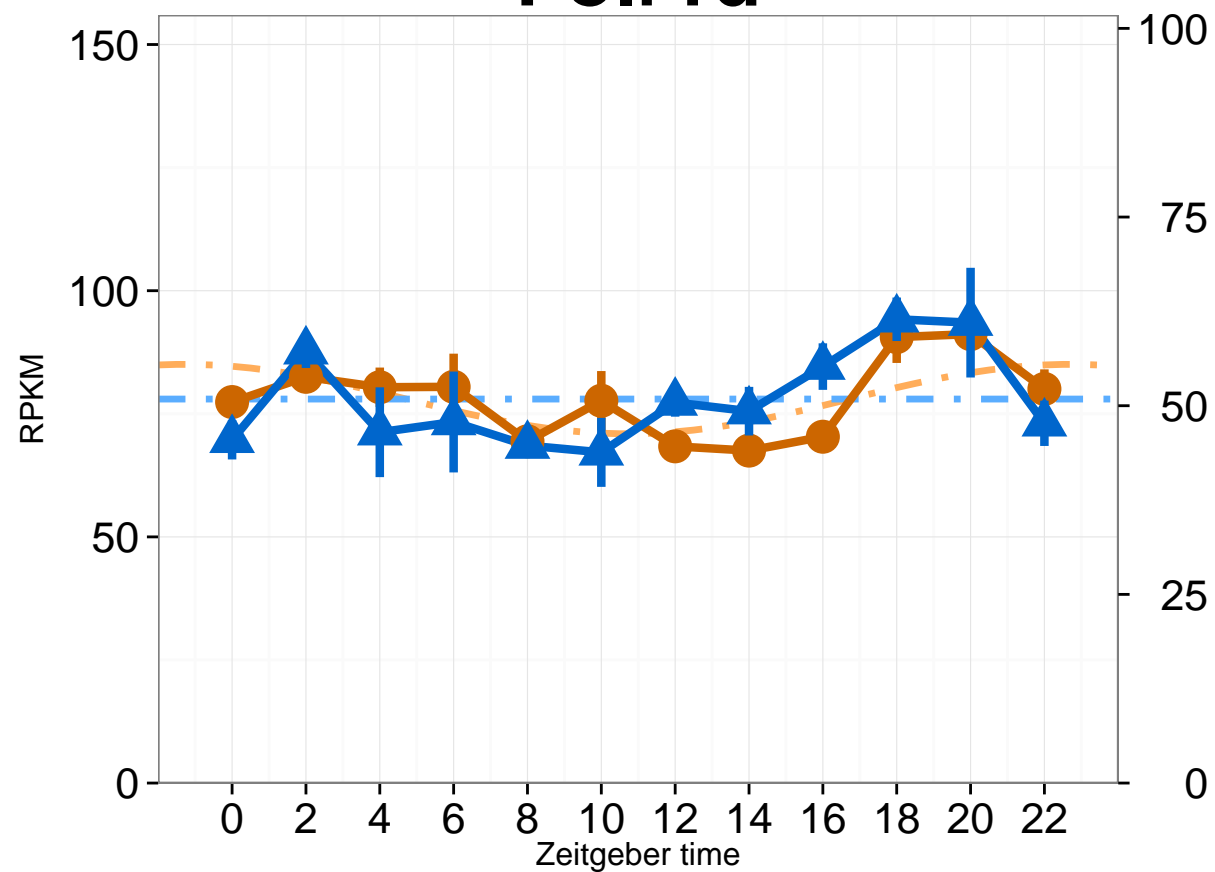

## Polr1d

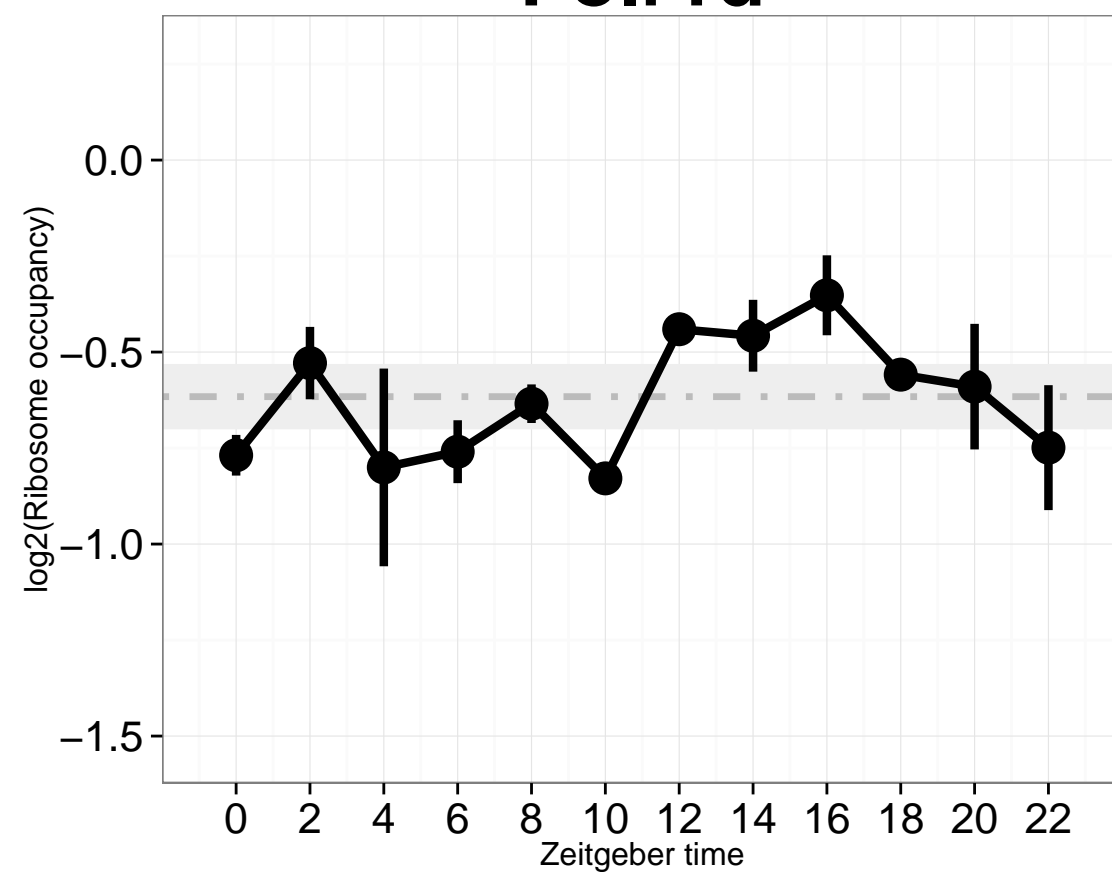

Supplement: Supplementary file 8081 [file 1]

## Got2

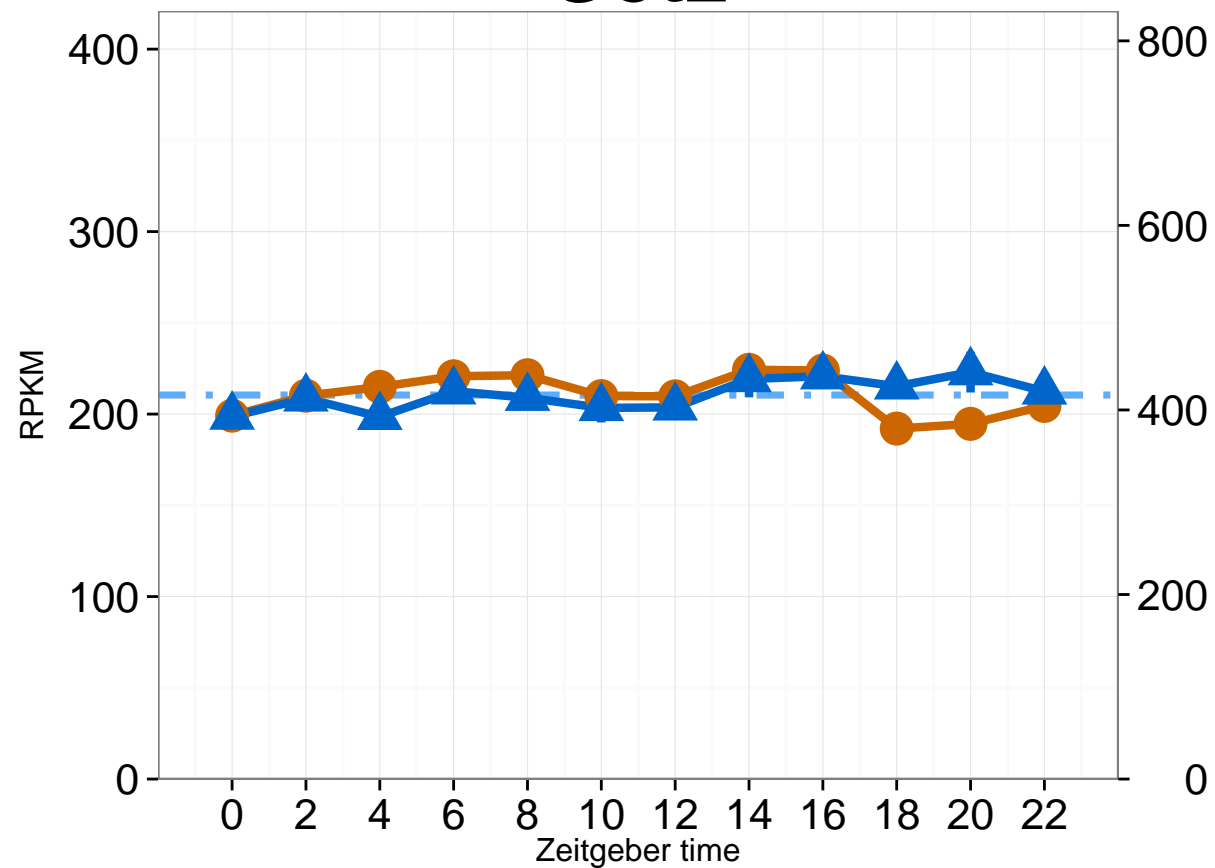

## Got2

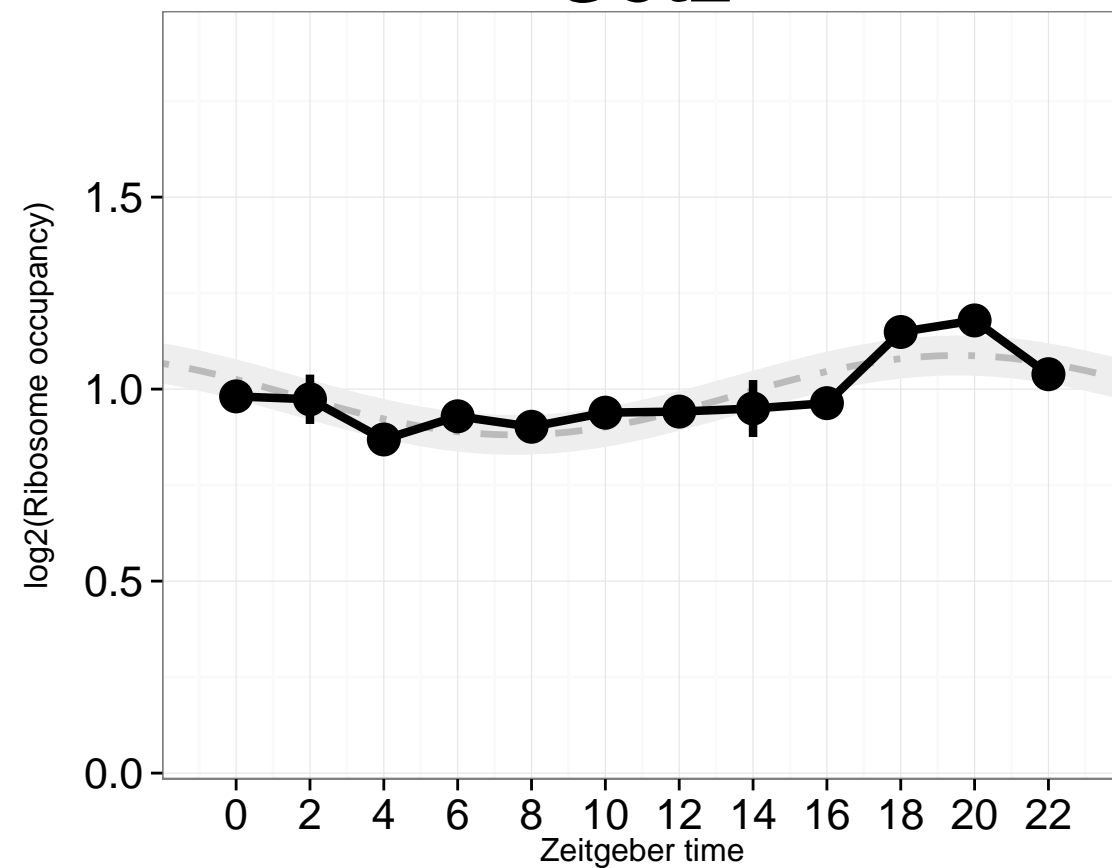

Supplement: Supplementary file 8082 [file 1]

# Acaa1b

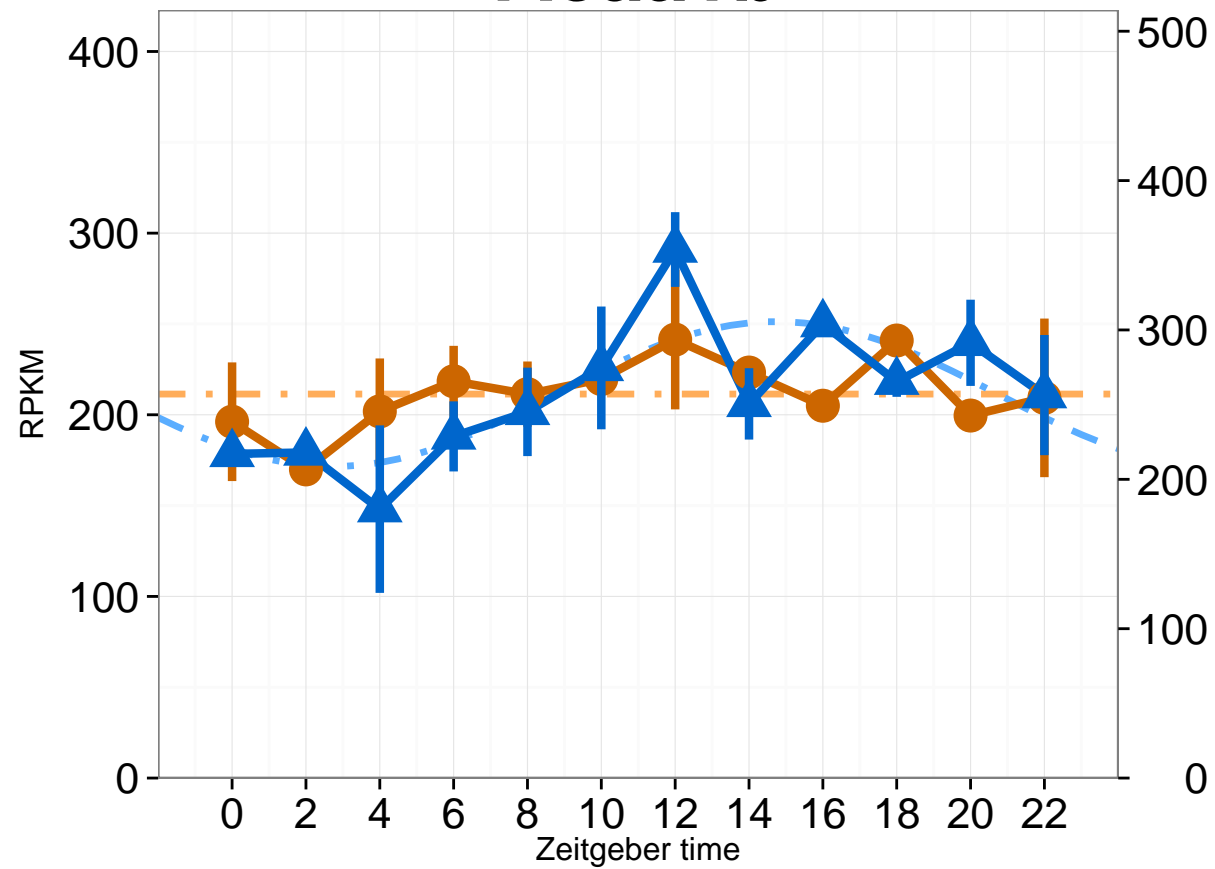

# Acaa1b

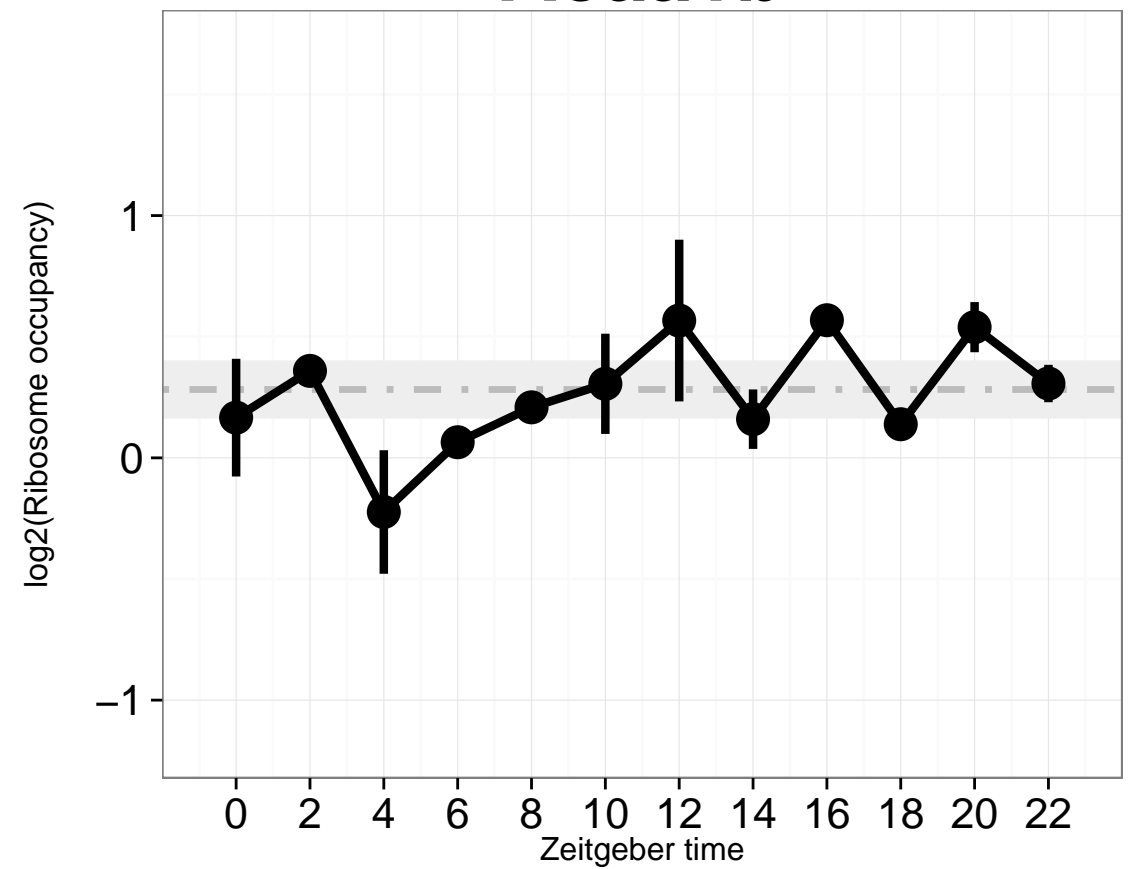

Supplement: Supplementary file 8083 [file 1]

## Src

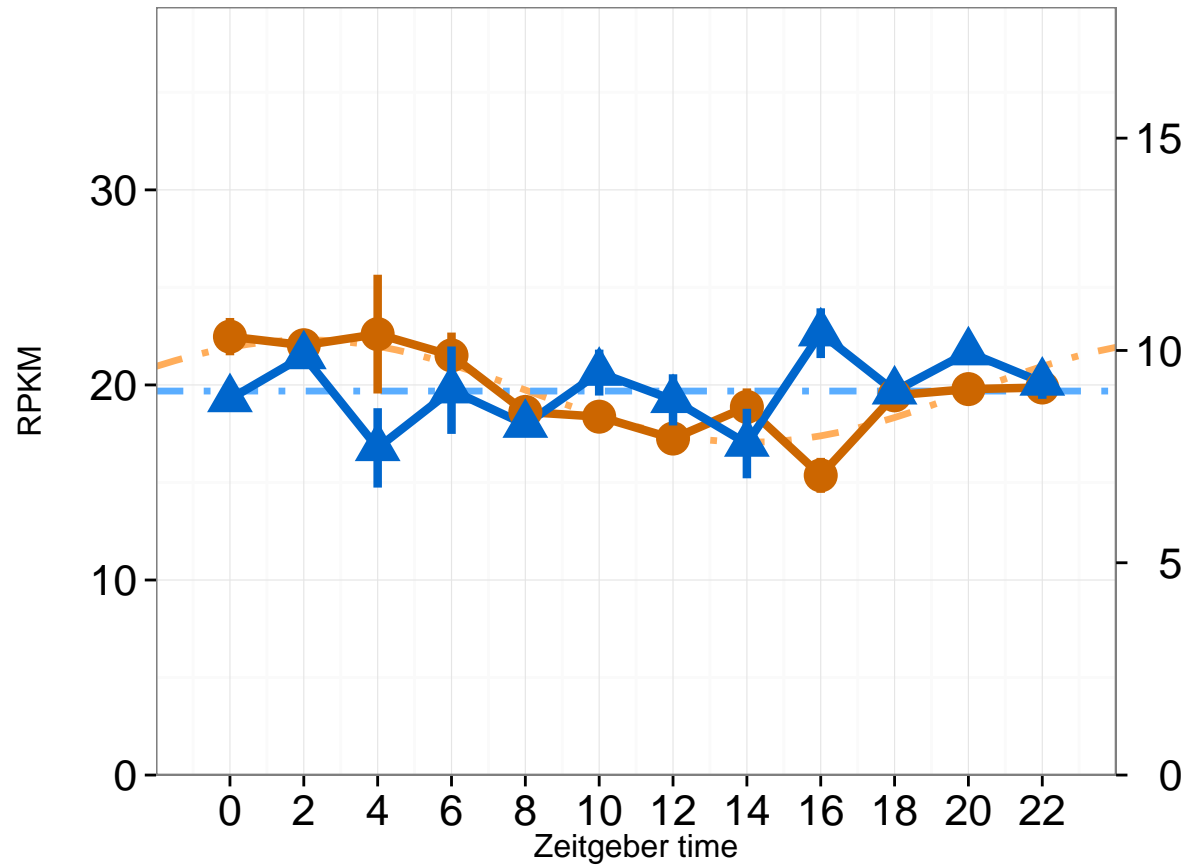

## Src

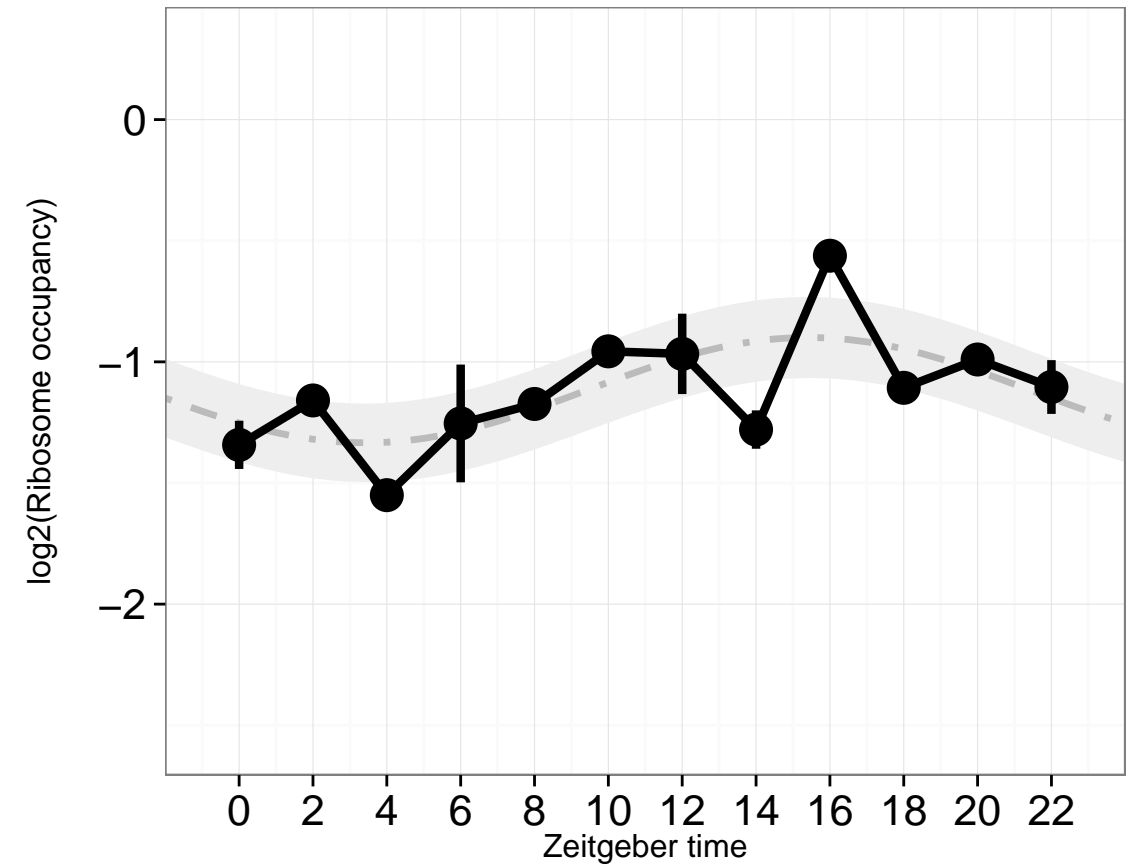

Supplement: Supplementary file 8084 [file 1]

# Lrrc19

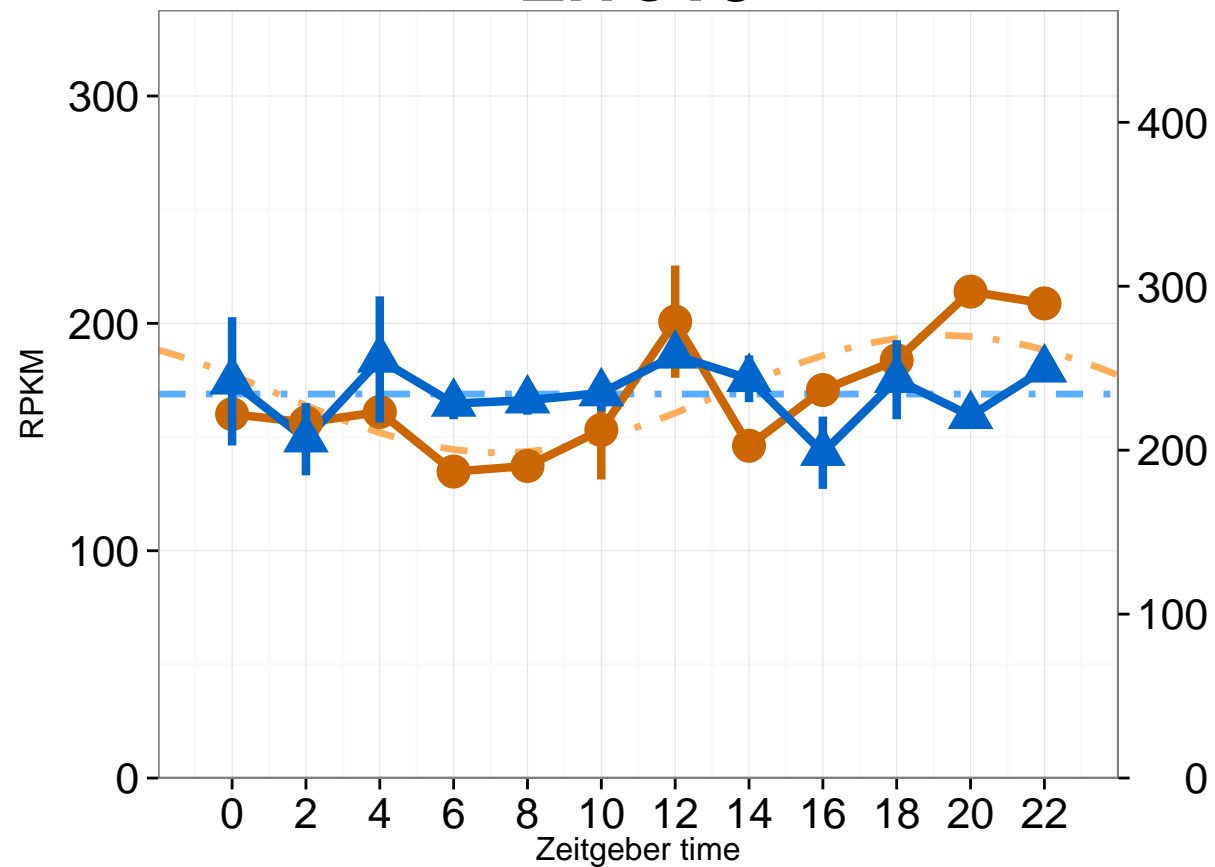

# Lrrc19

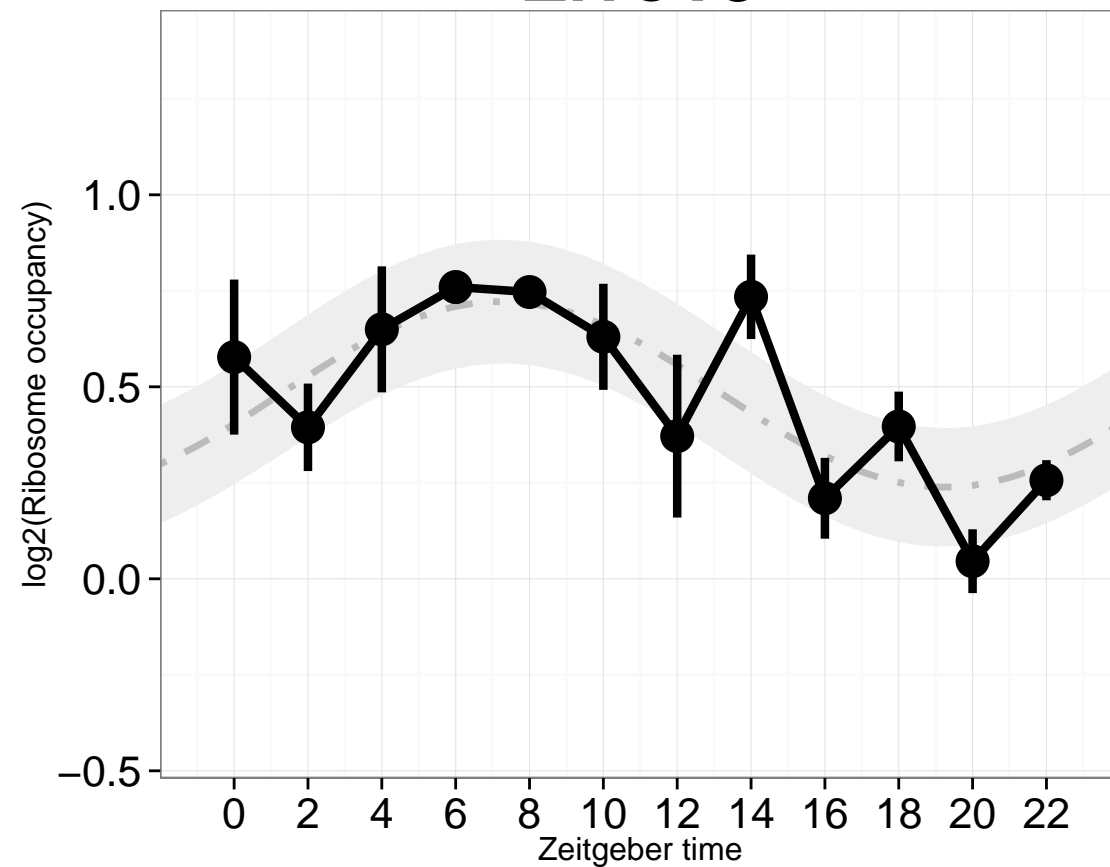

Supplement: Supplementary file 8085 [file 1]

## Ss18l1

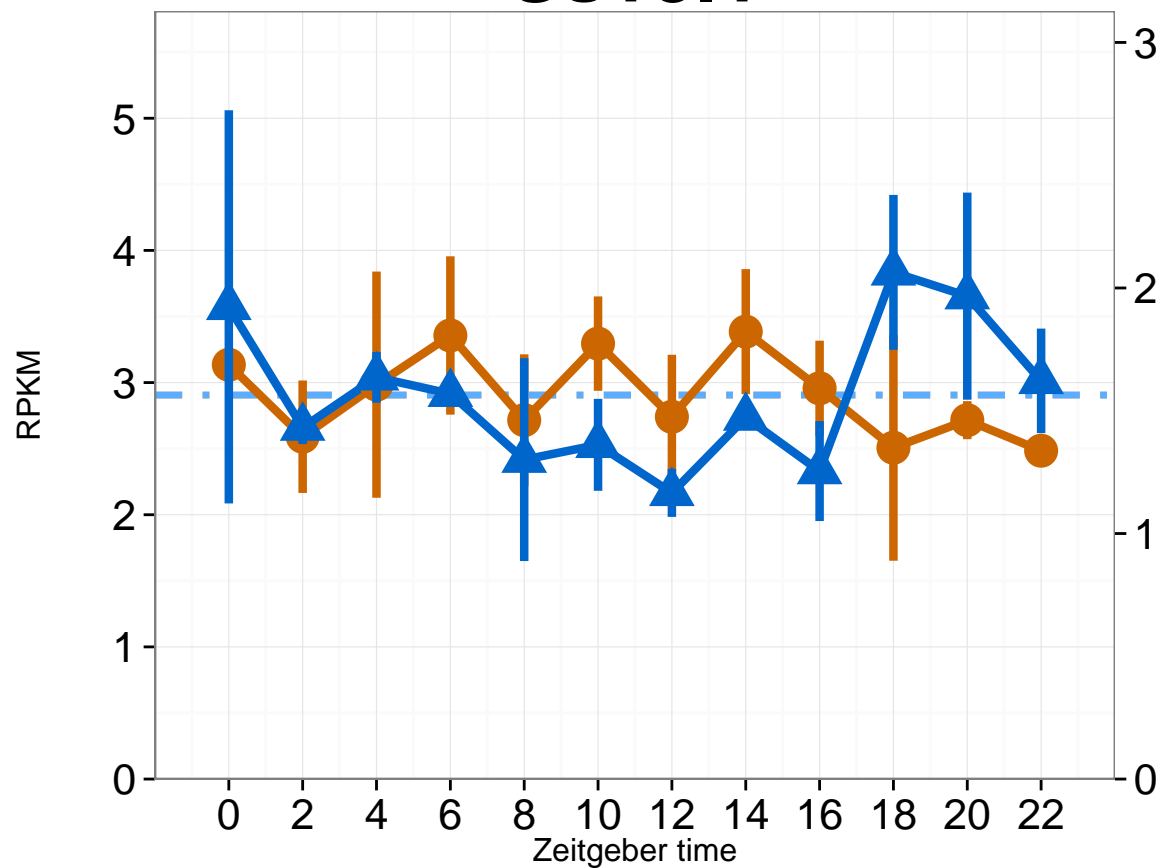

## Ss18l1

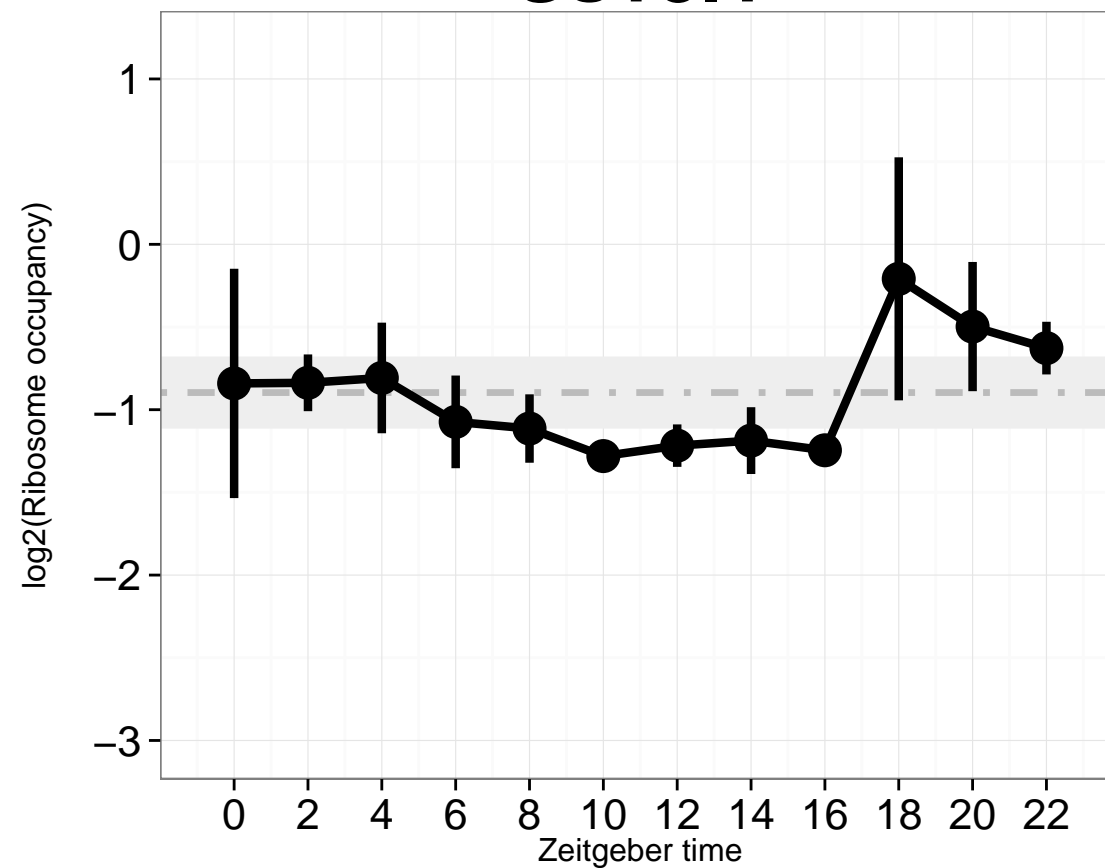

Supplement: Supplementary file 8086 [file 1]

# Flna

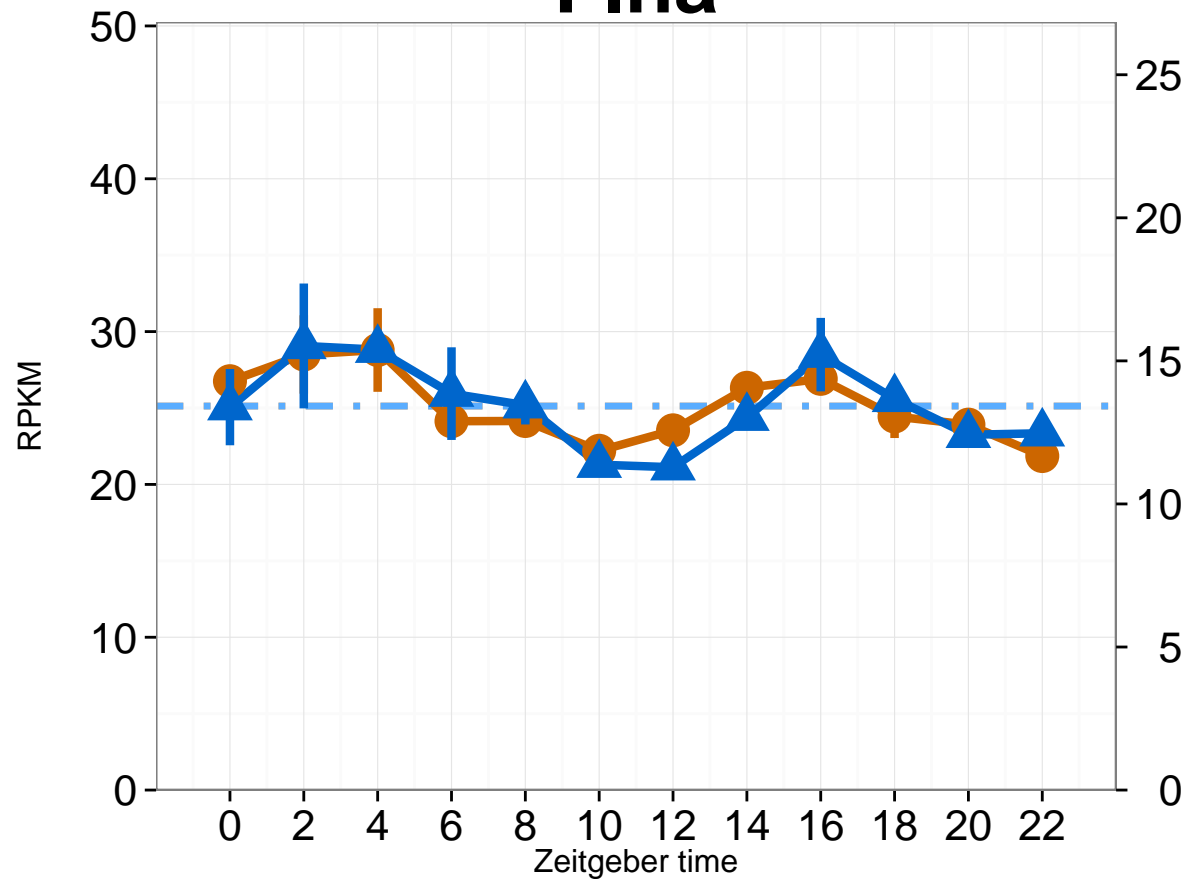

# Flna

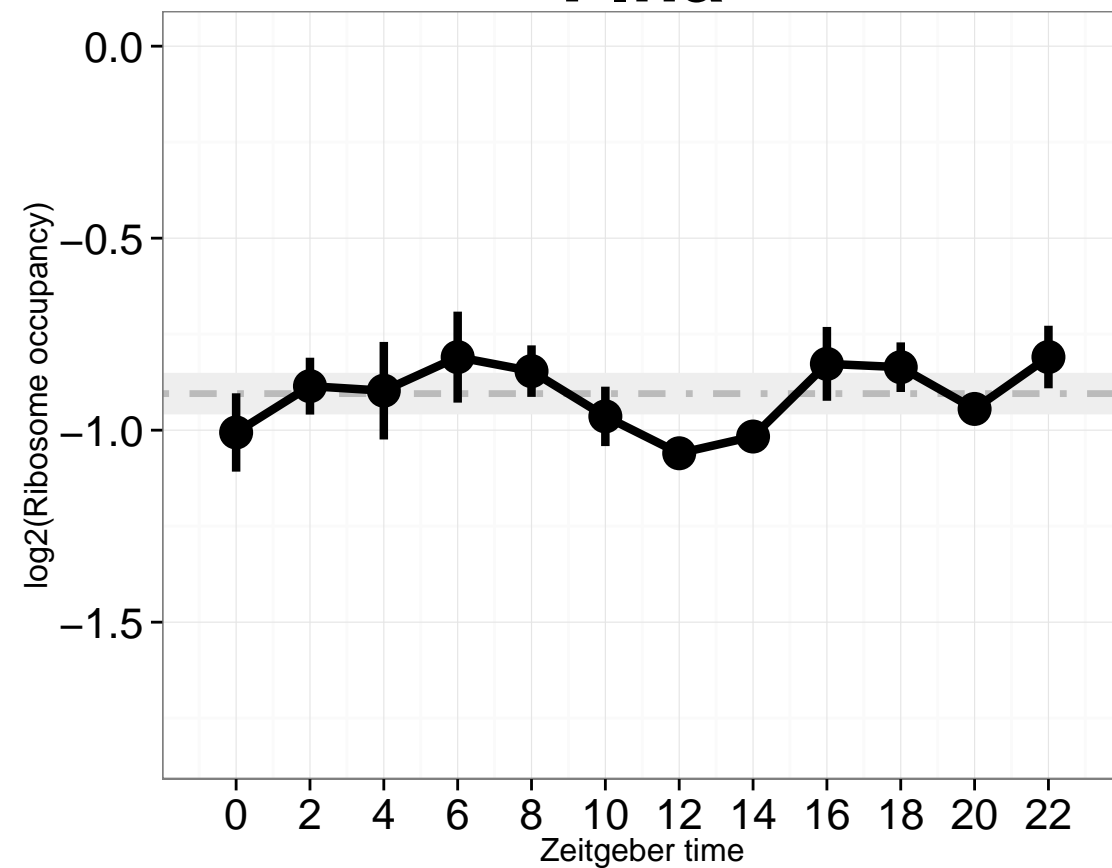

Supplement: Supplementary file 8087 [file 1]

## Rasgrp2

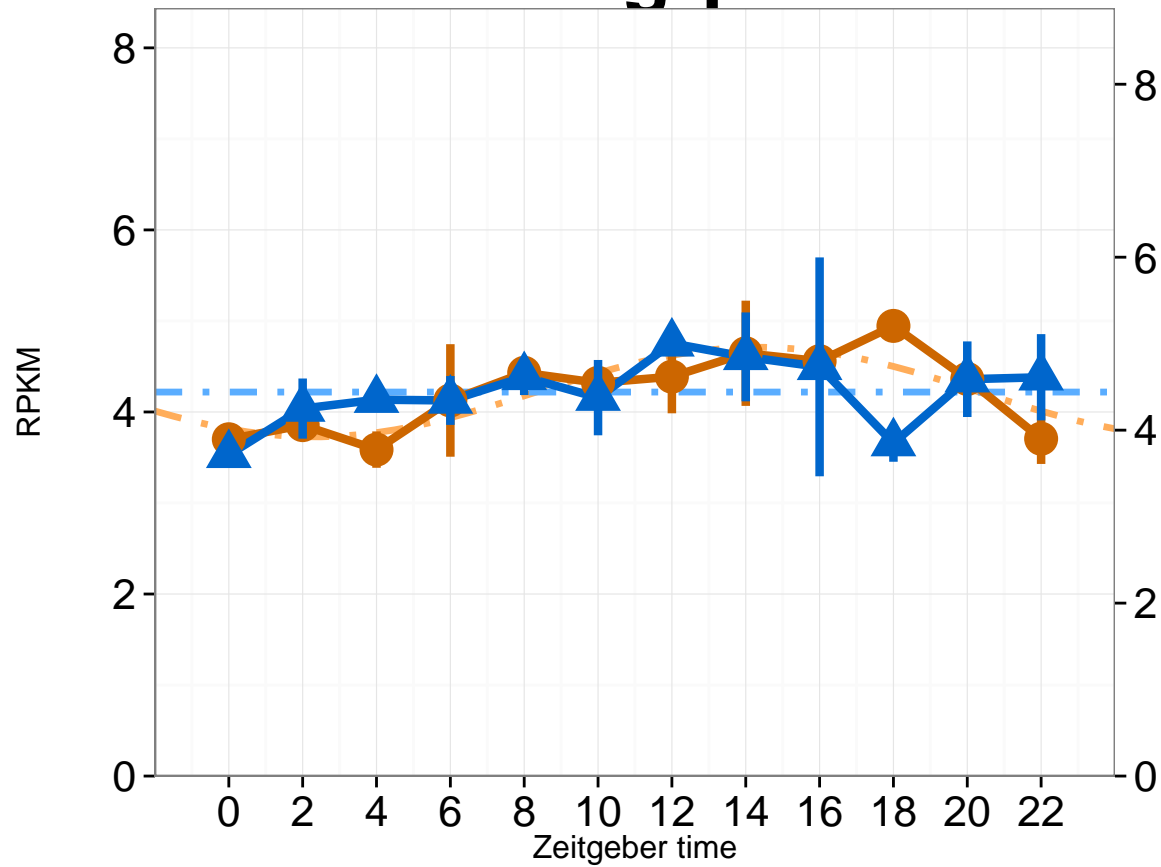

## Rasgrp2

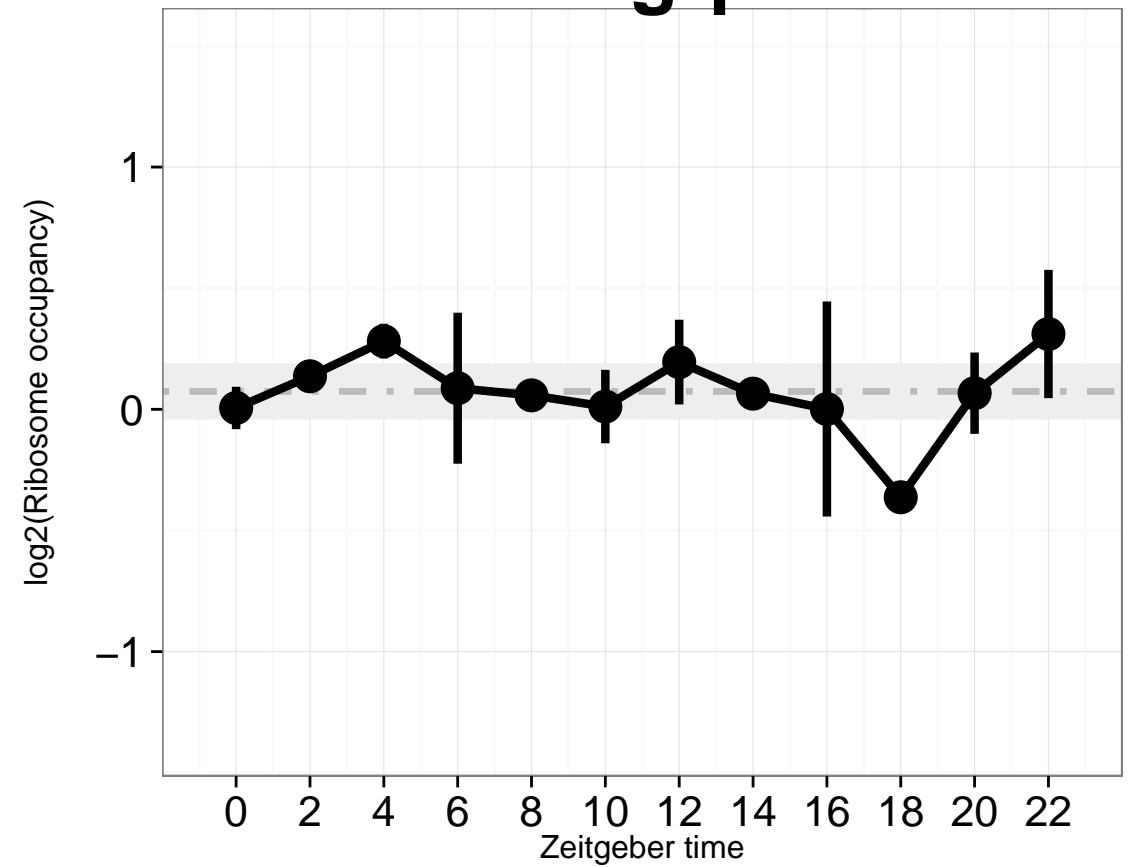

Supplement: Supplementary file 8088 [file 1]

## Prkd3

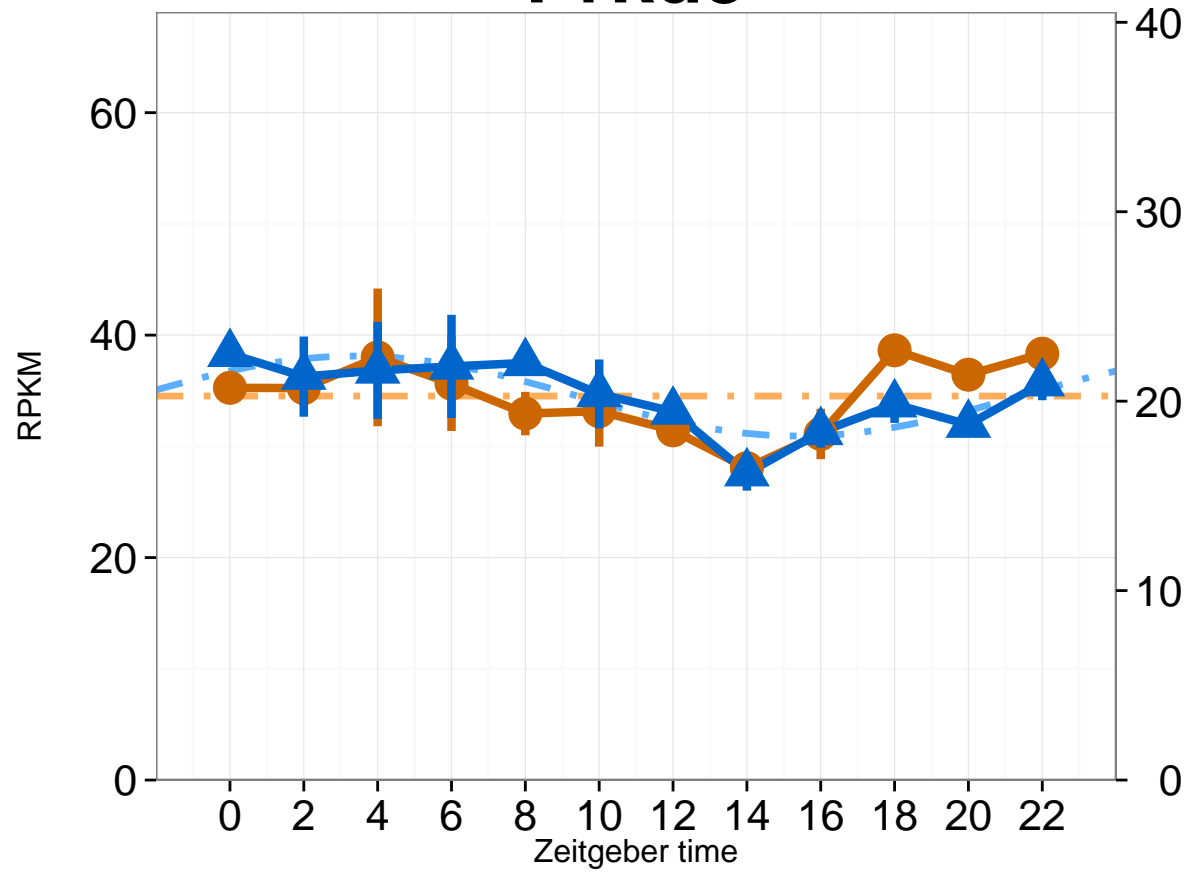

## Prkd3

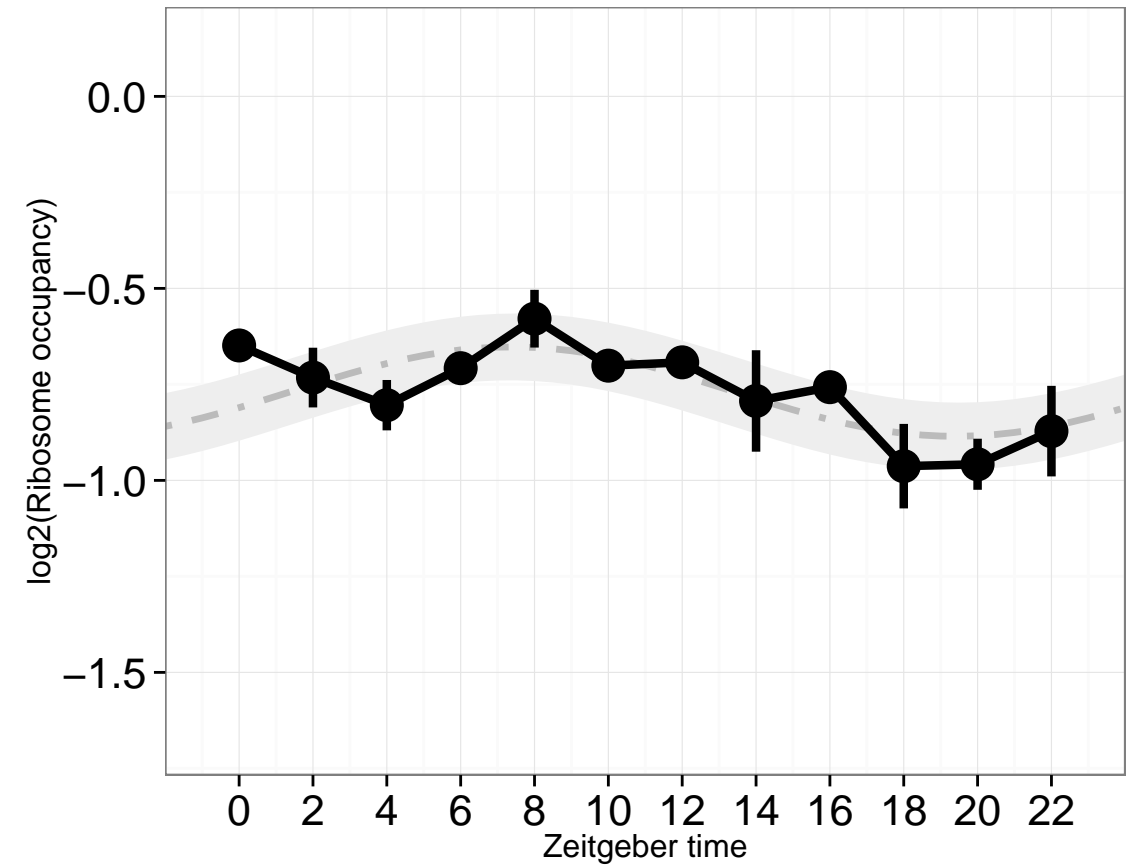

Supplement: Supplementary file 8089 [file 1]

## Mettl5

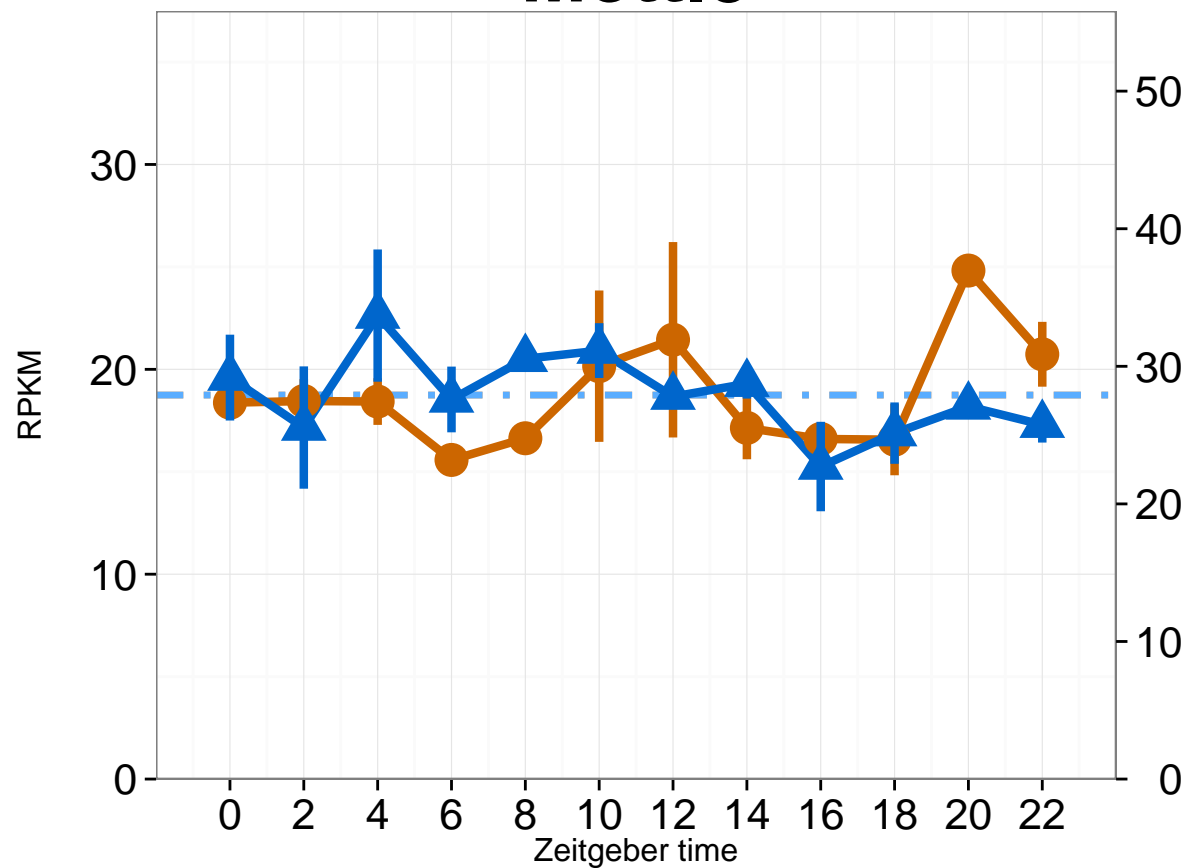

## Mettl5

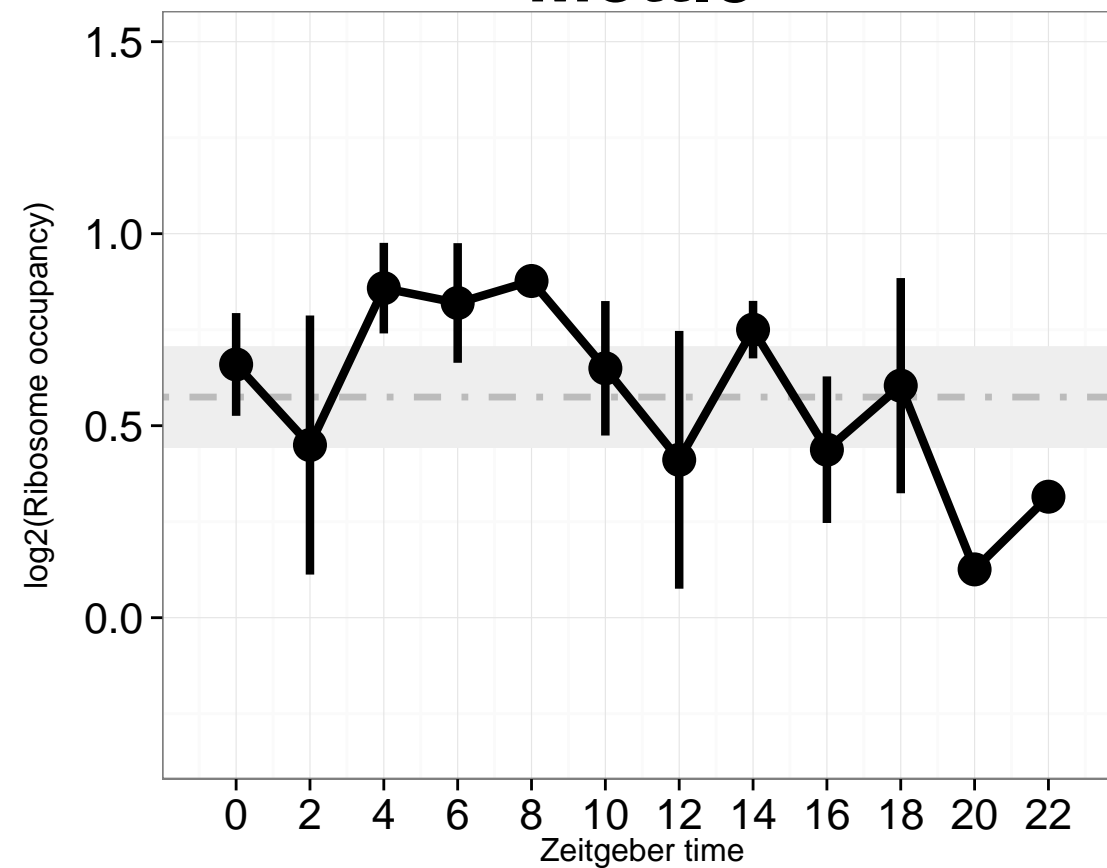

Supplement: Supplementary file 8090 [file 1]

# S1pr2

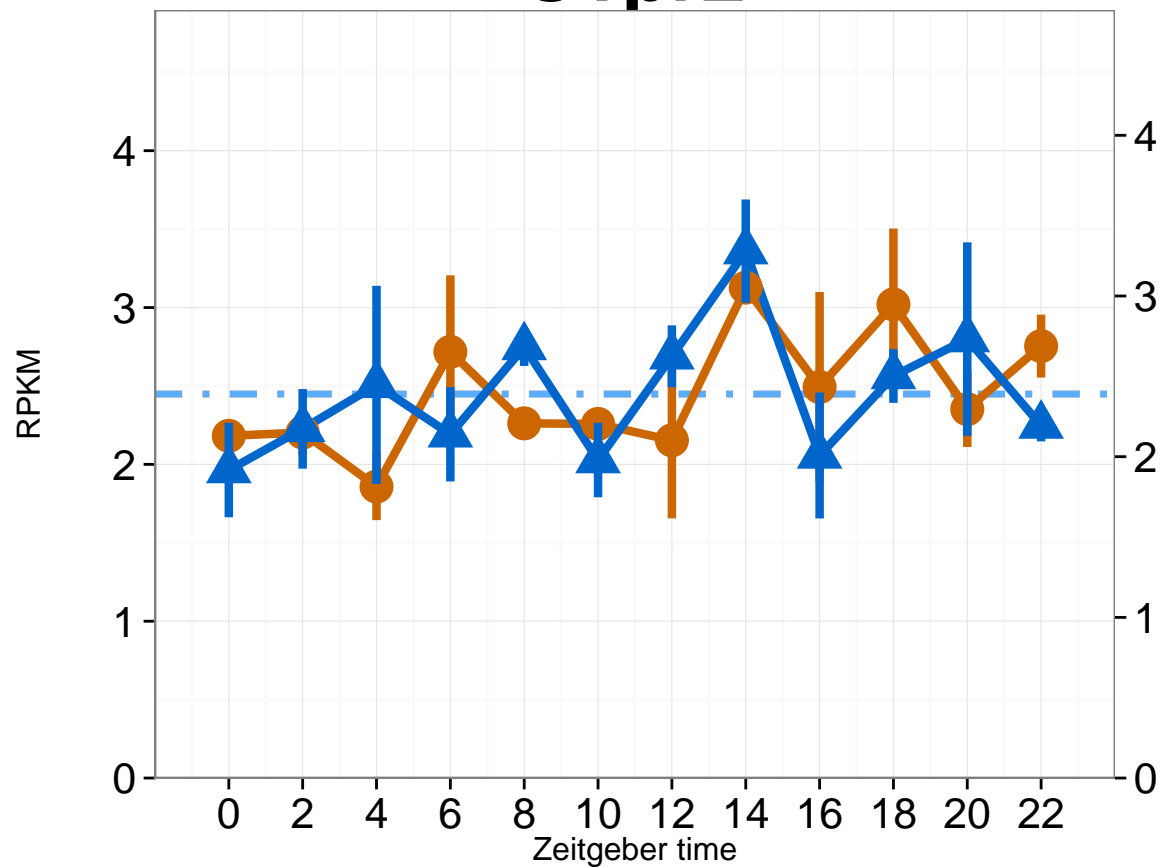

# S1pr2

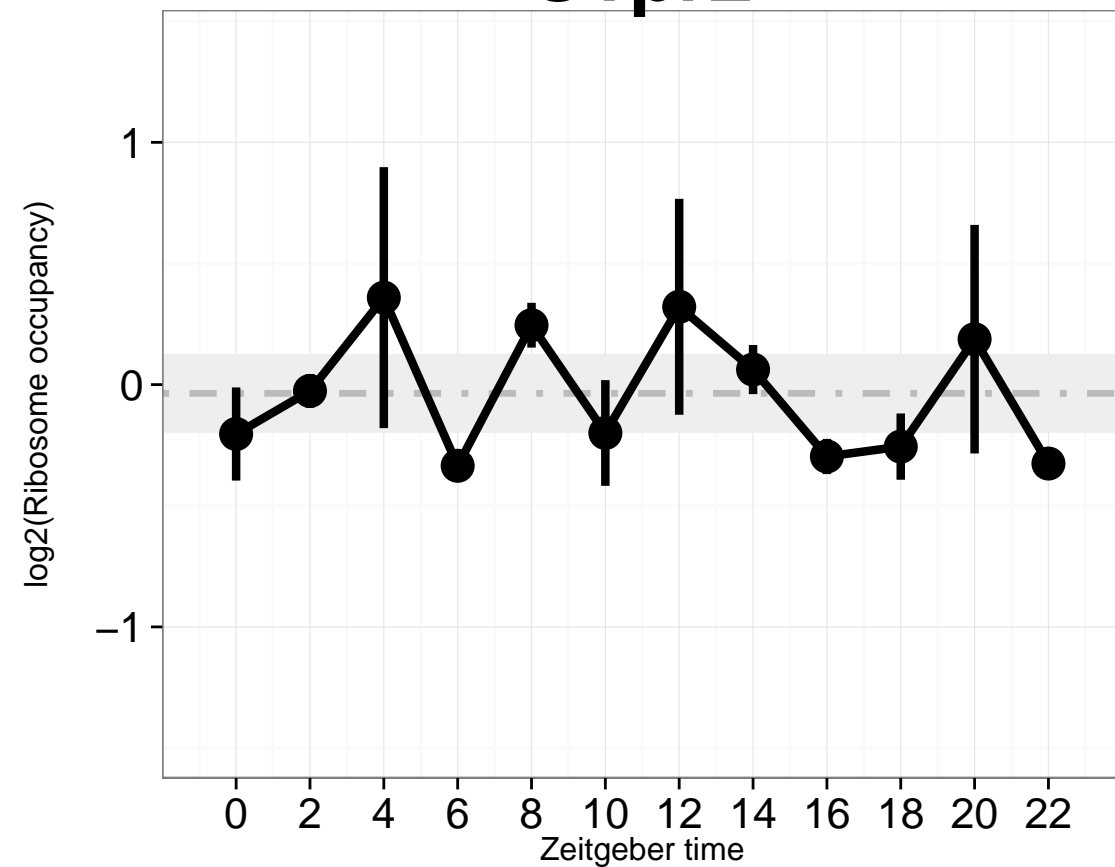

Supplement: Supplementary file 8091 [file 1]

## Lmbrd2

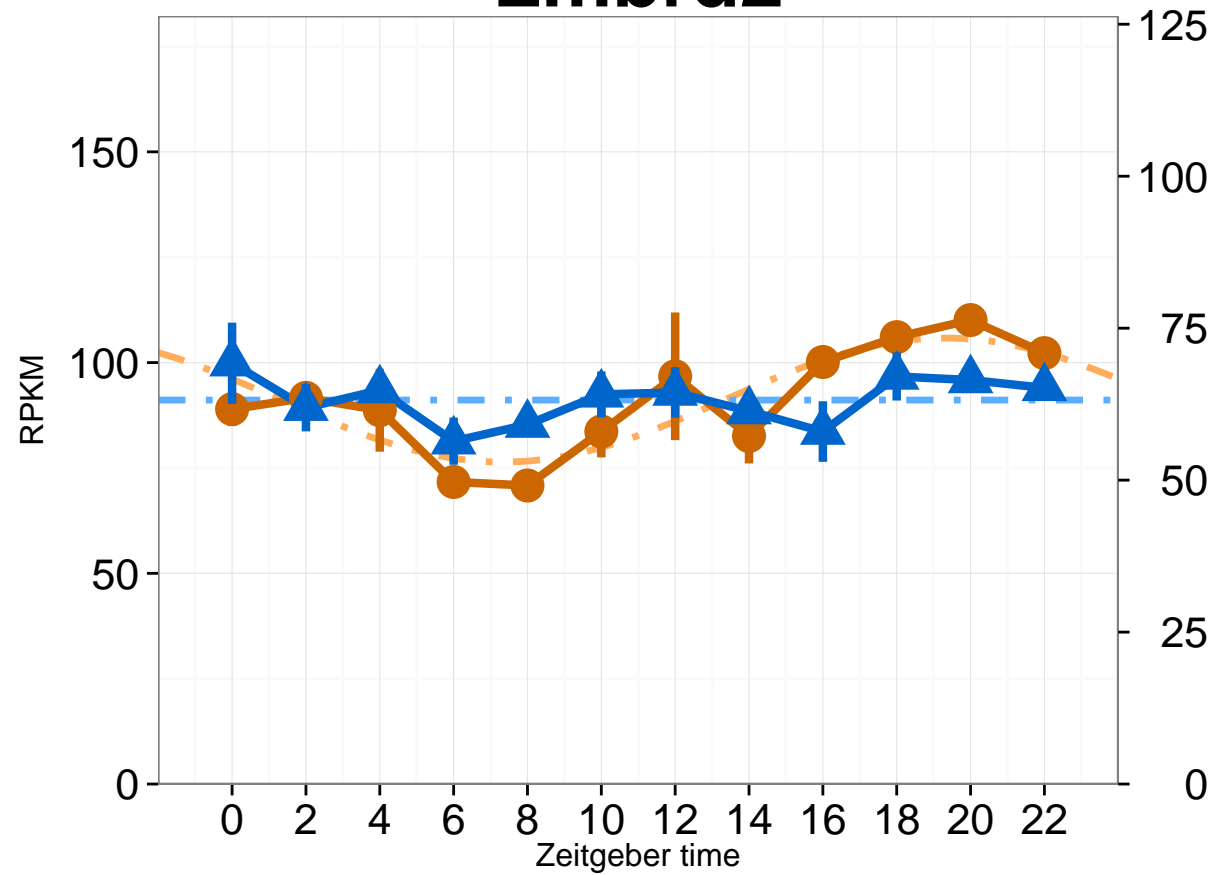

## Lmbrd2

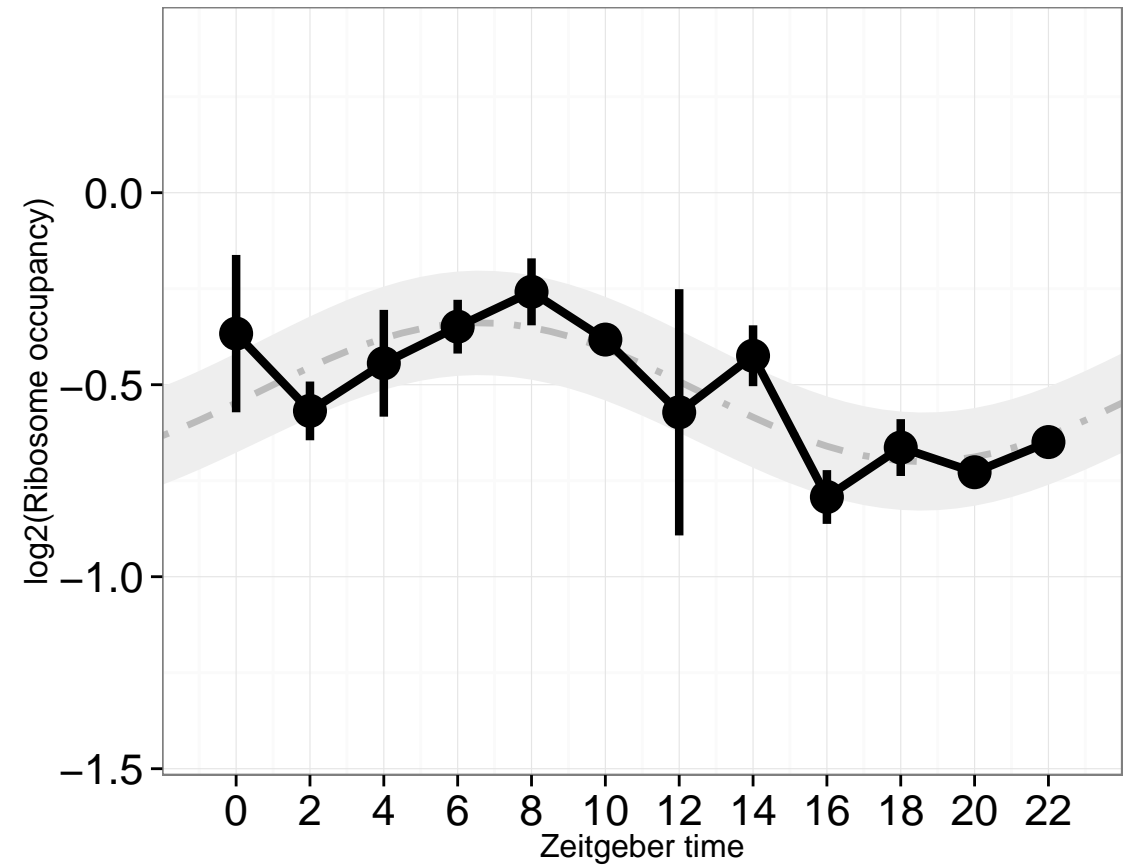

Supplement: Supplementary file 8092 [file 1]

## Tnfaip8

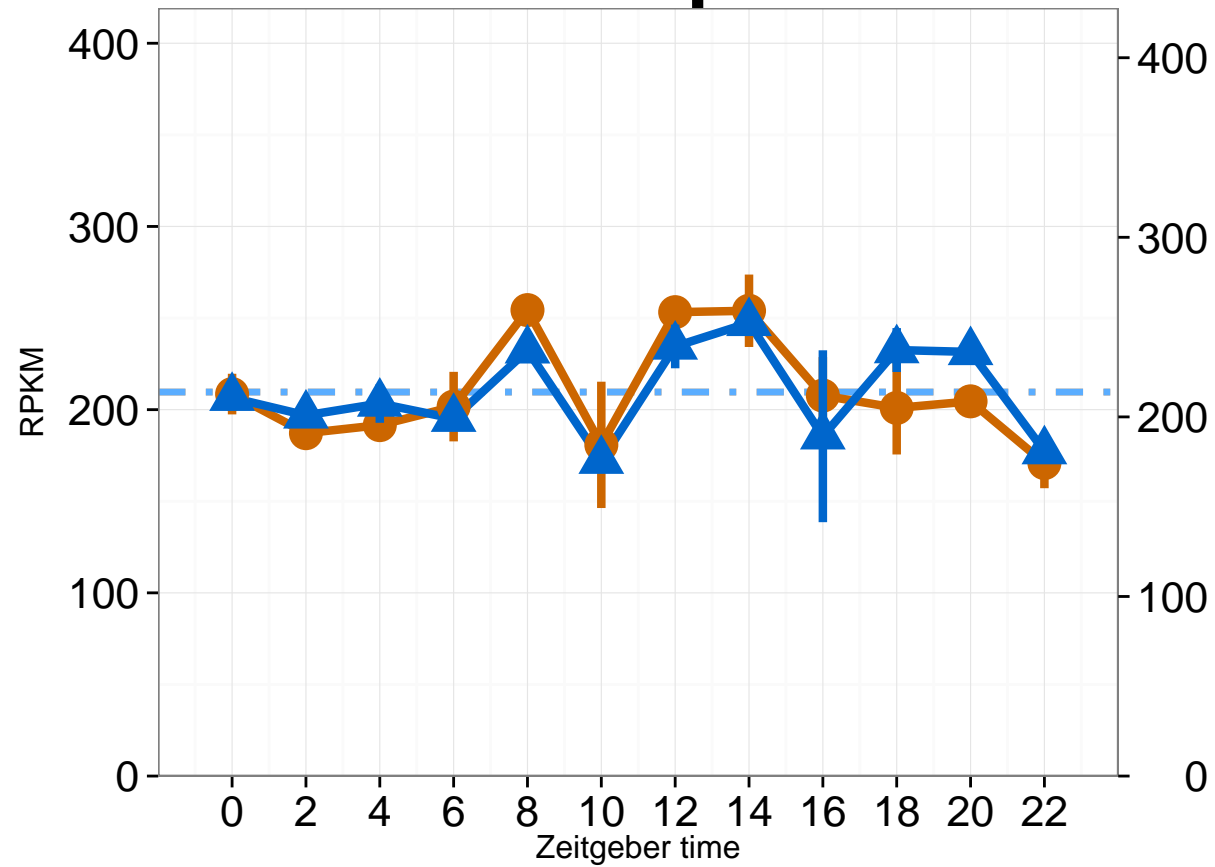

## Tnfaip8

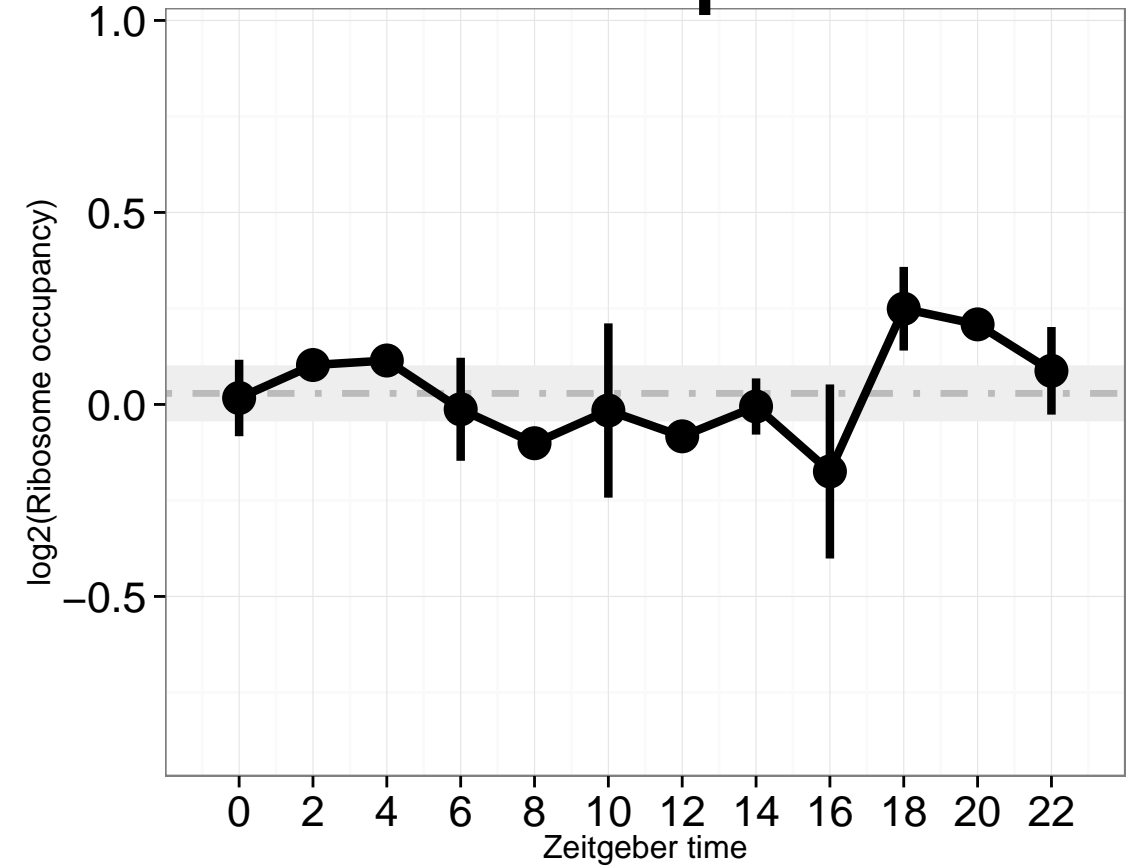

Supplement: Supplementary file 8093 [file 1]

# Hoxa3

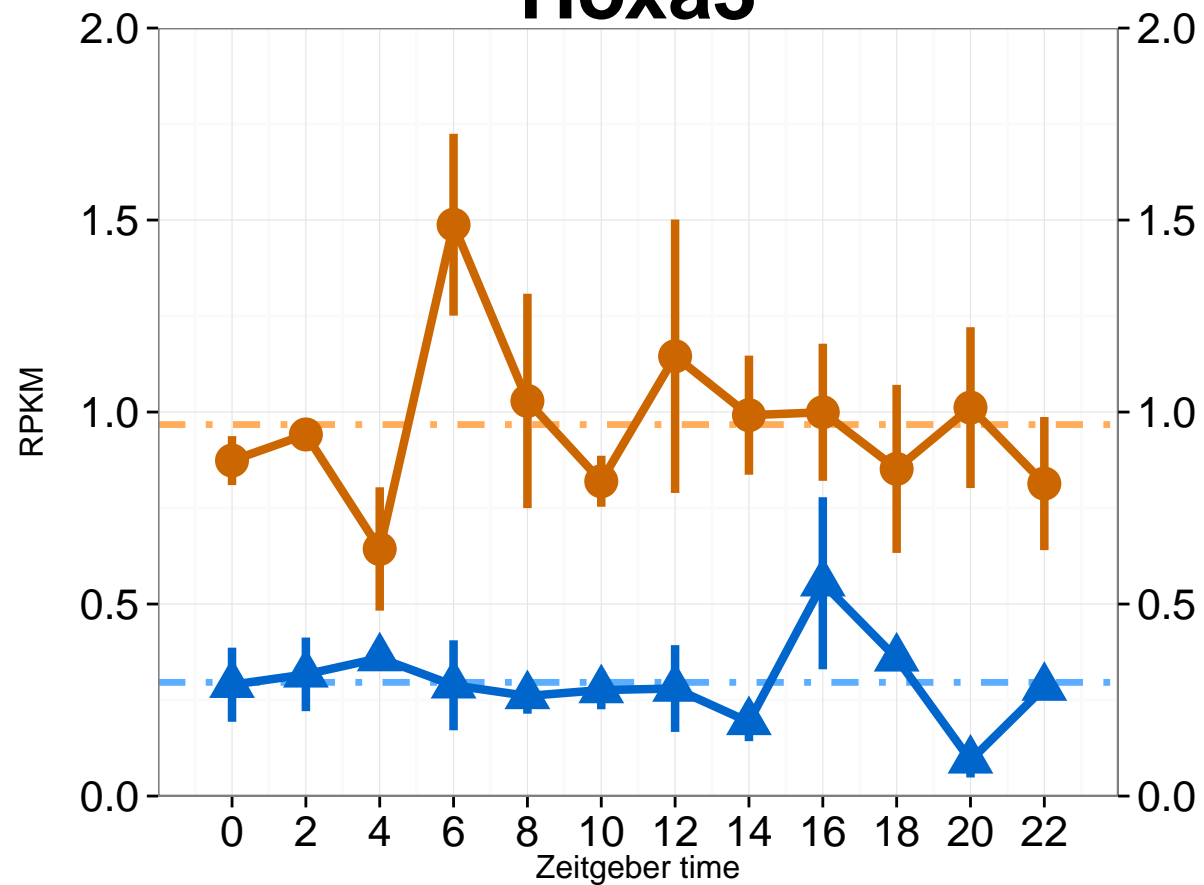

# Hoxa3

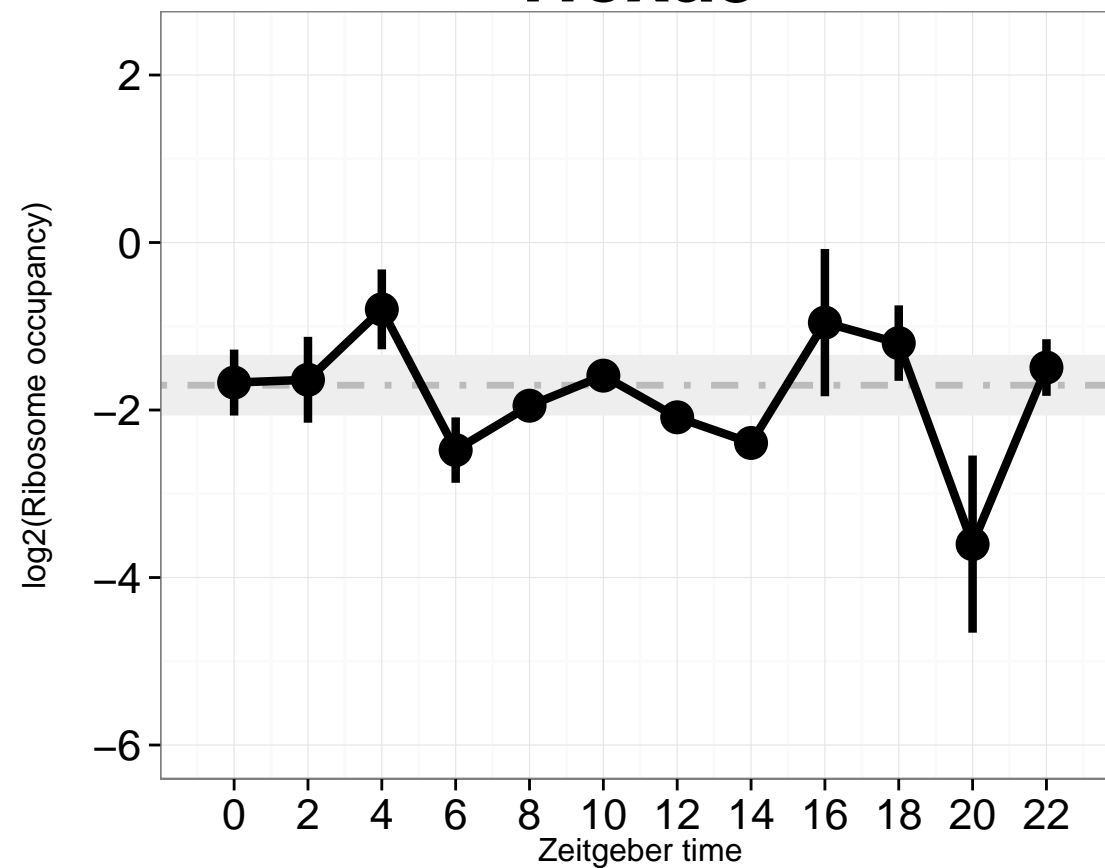

Supplement: Supplementary file 8094 [file 1]

## Prodh

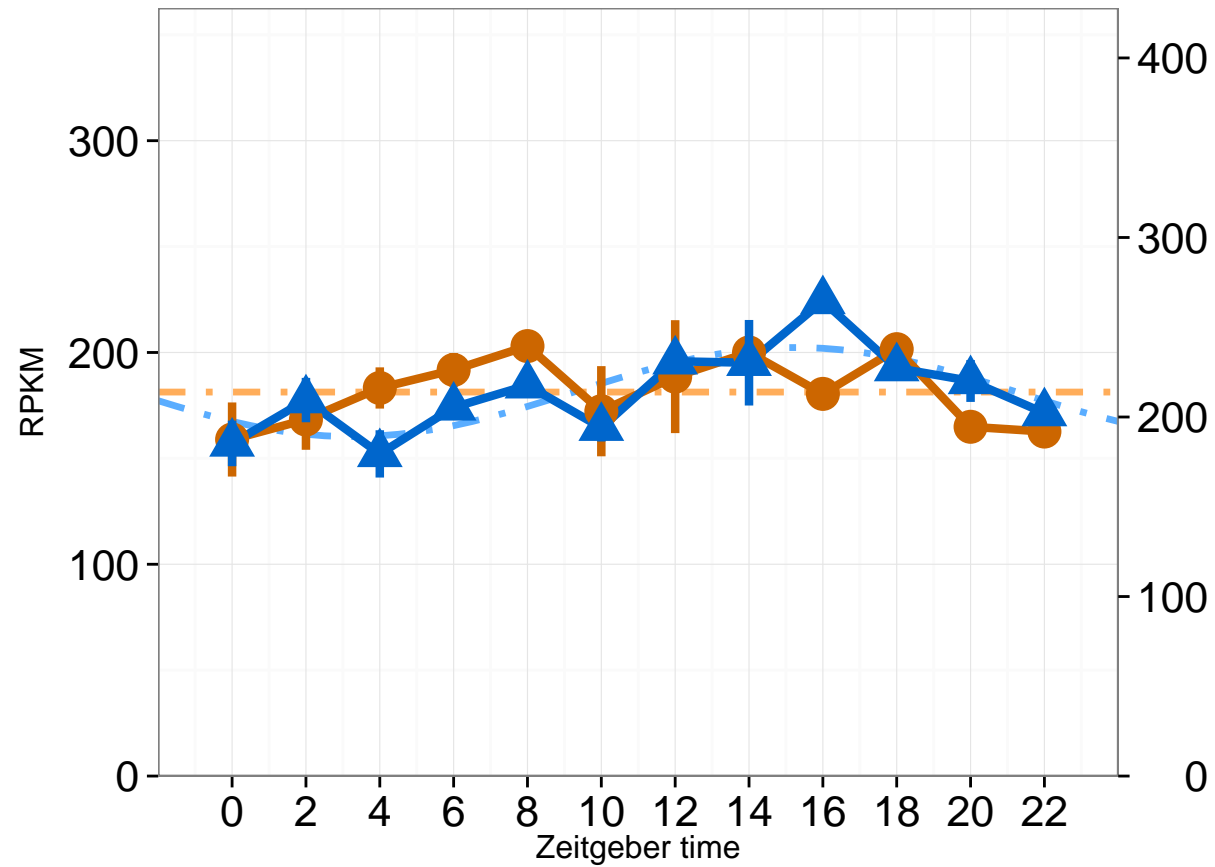

## Prodh

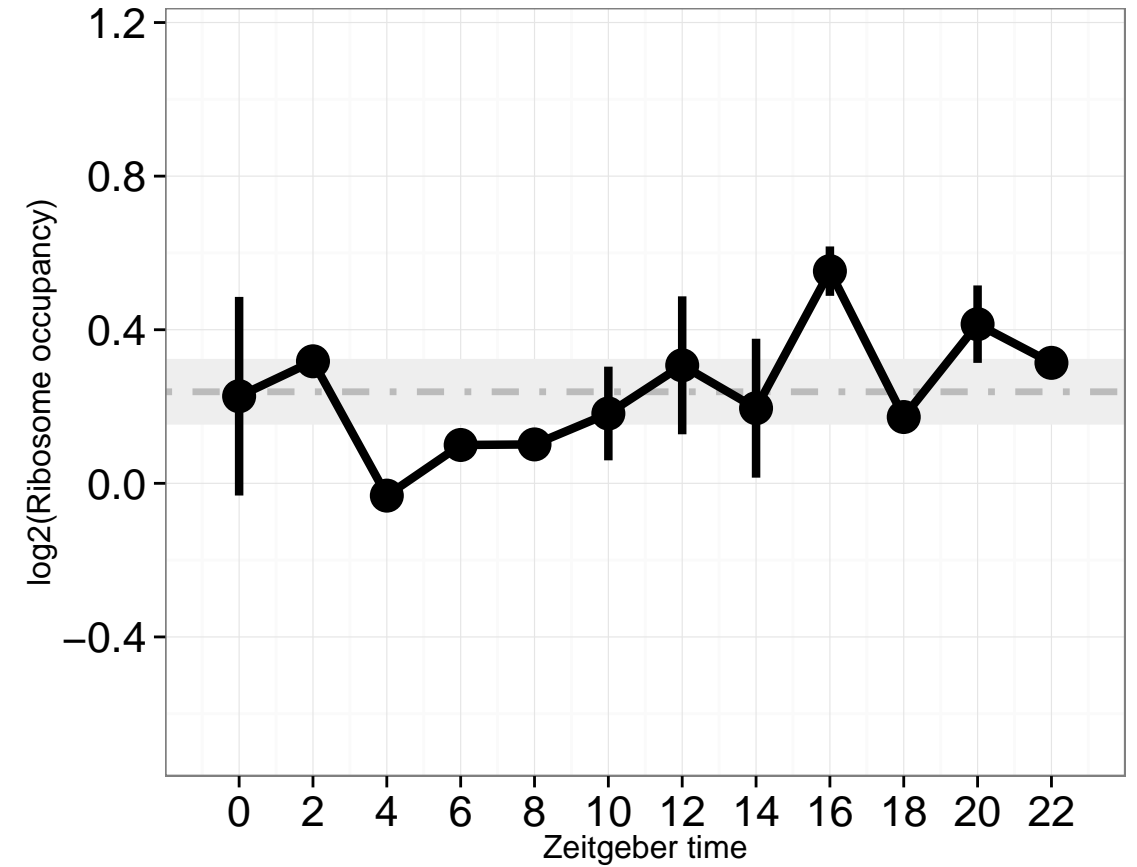

Supplement: Supplementary file 8095 [file 1]

## Rpl27

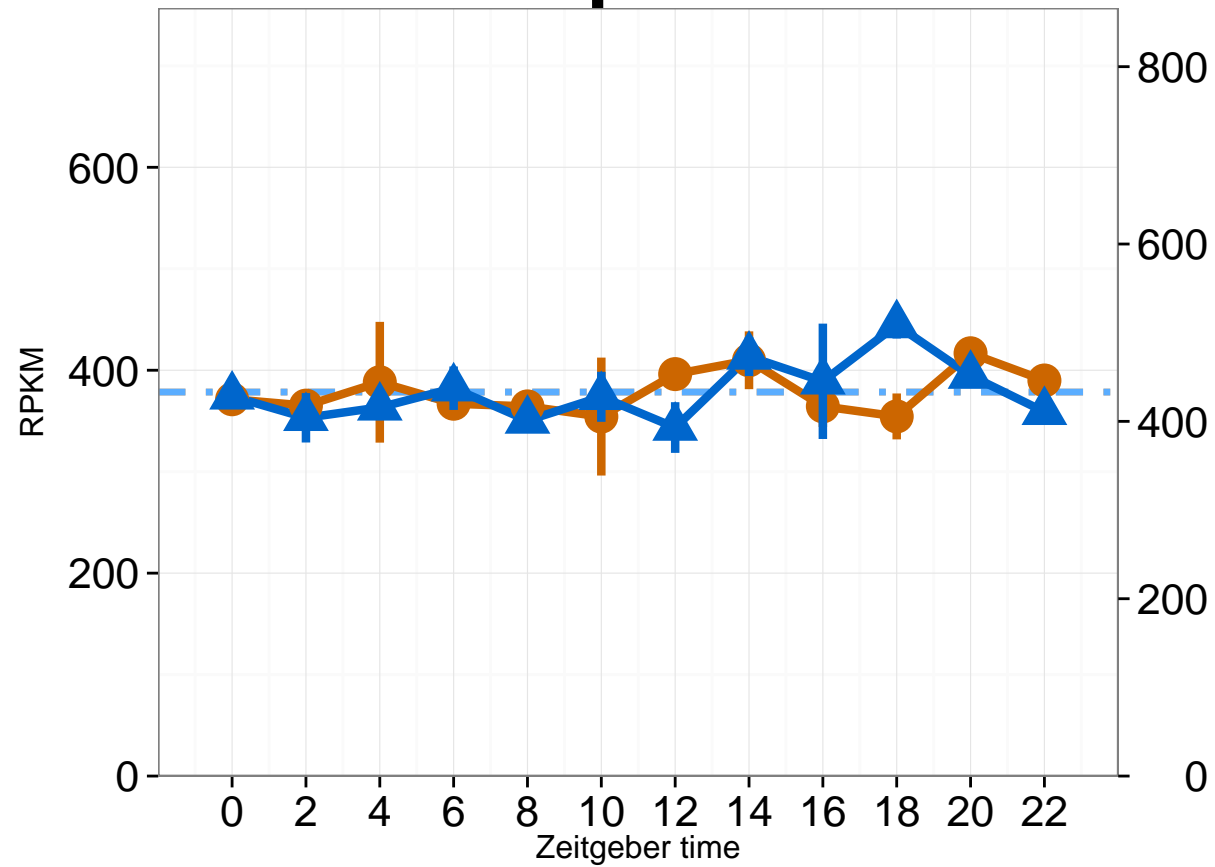

## Rpl27

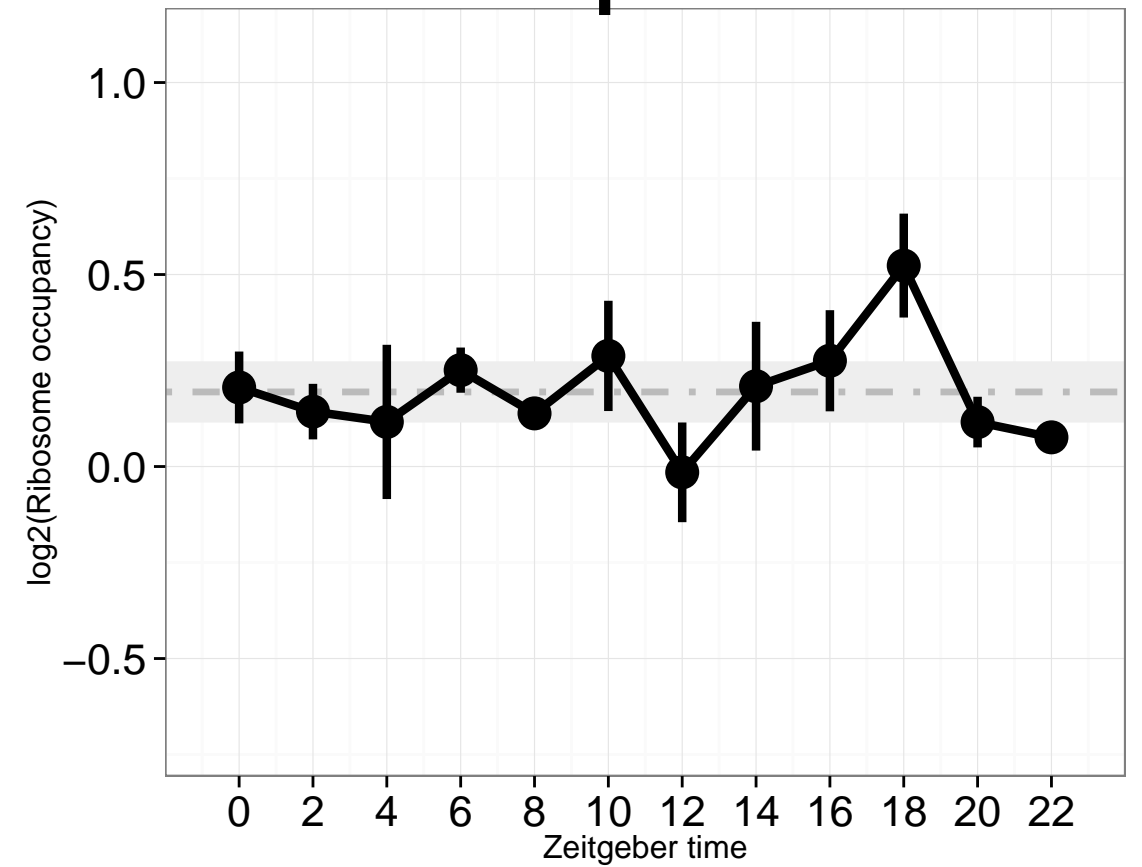

Supplement: Supplementary file 8096 [file 1]

# B3gnt7

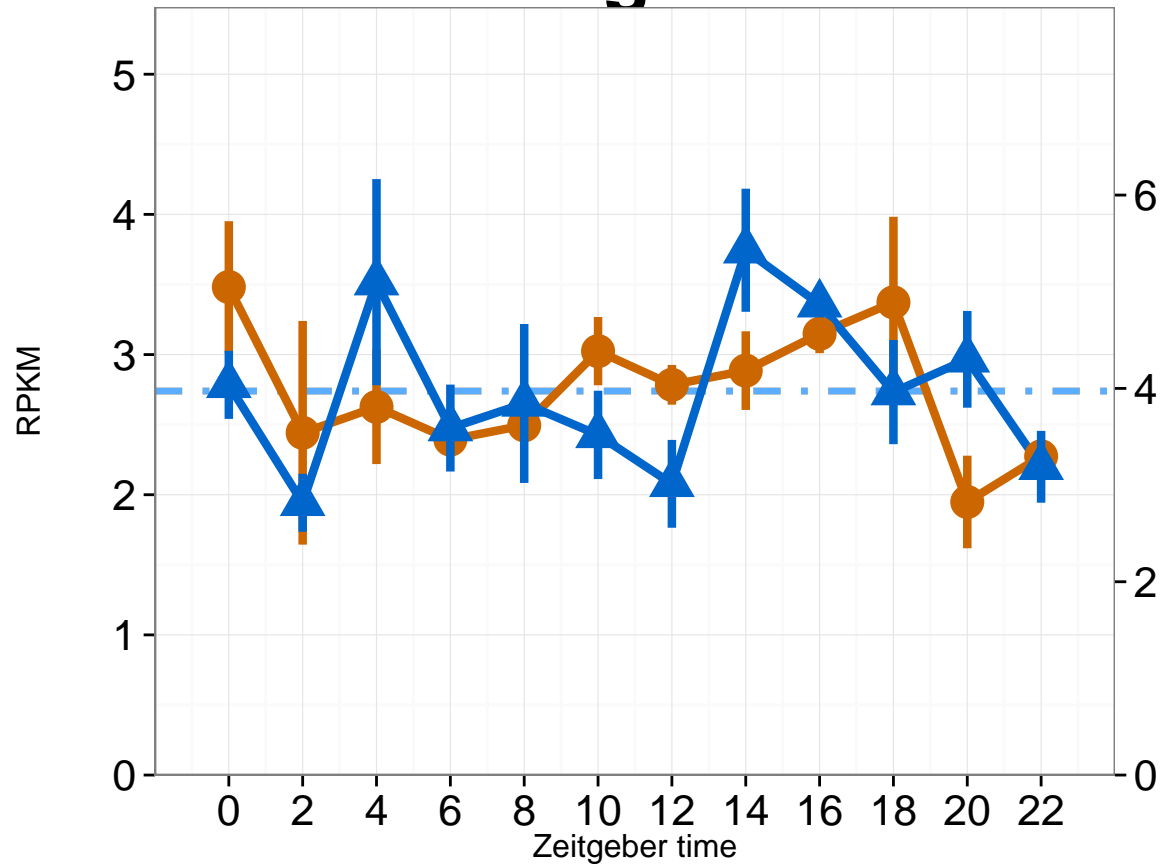

# B3gnt7

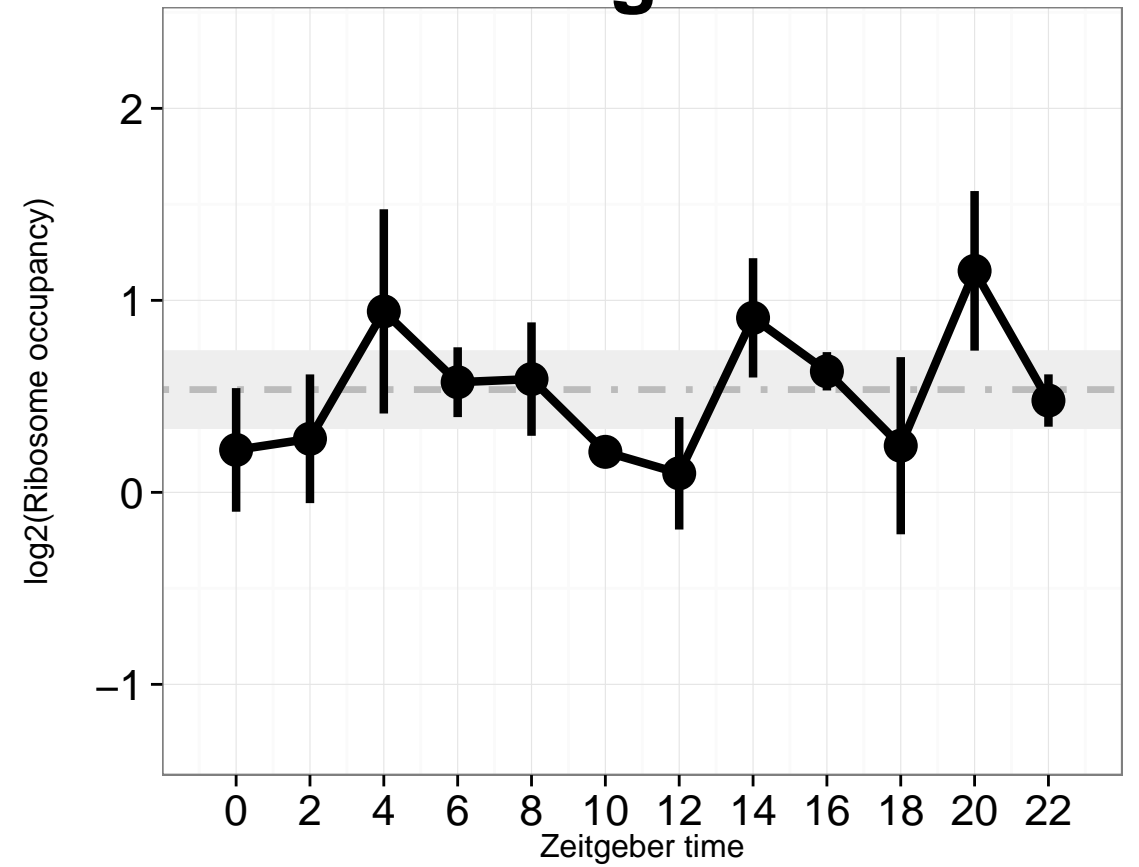

Supplement: Supplementary file 8097 [file 1]

# Slc9a6

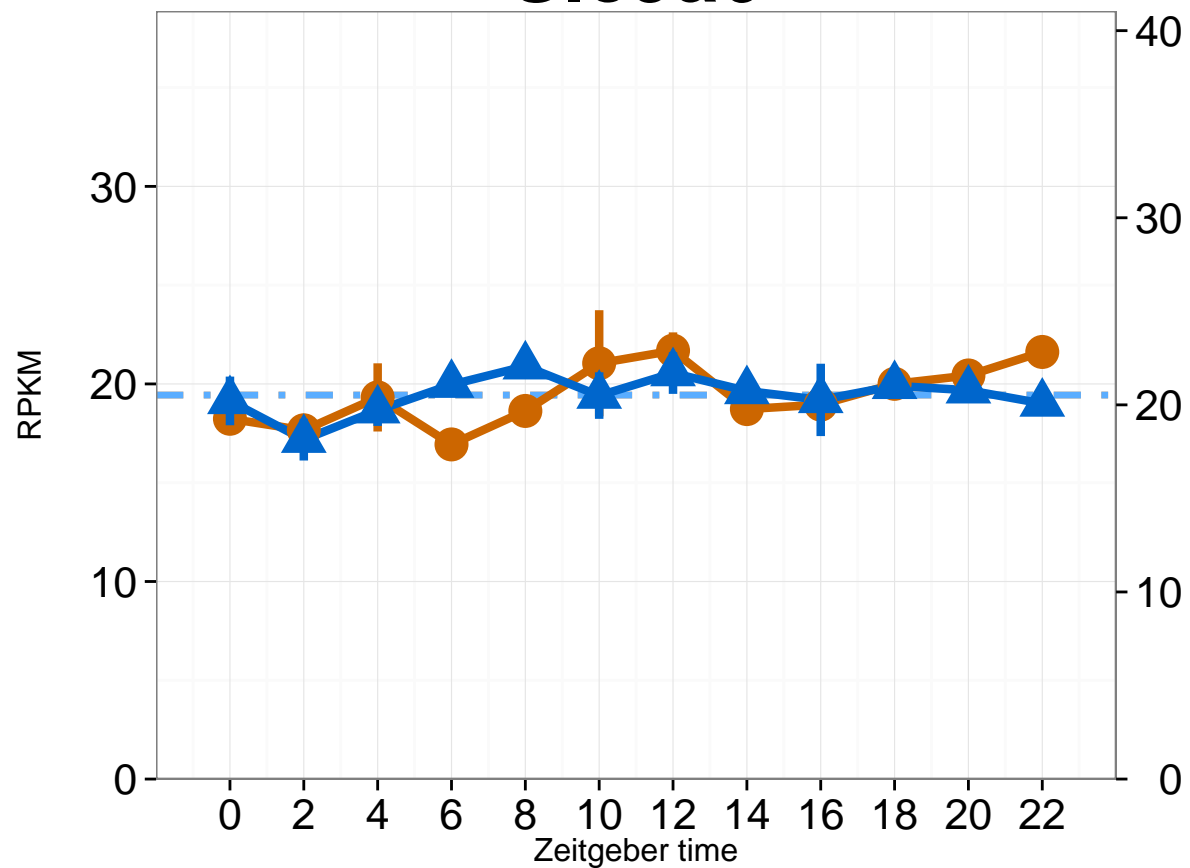

# Slc9a6

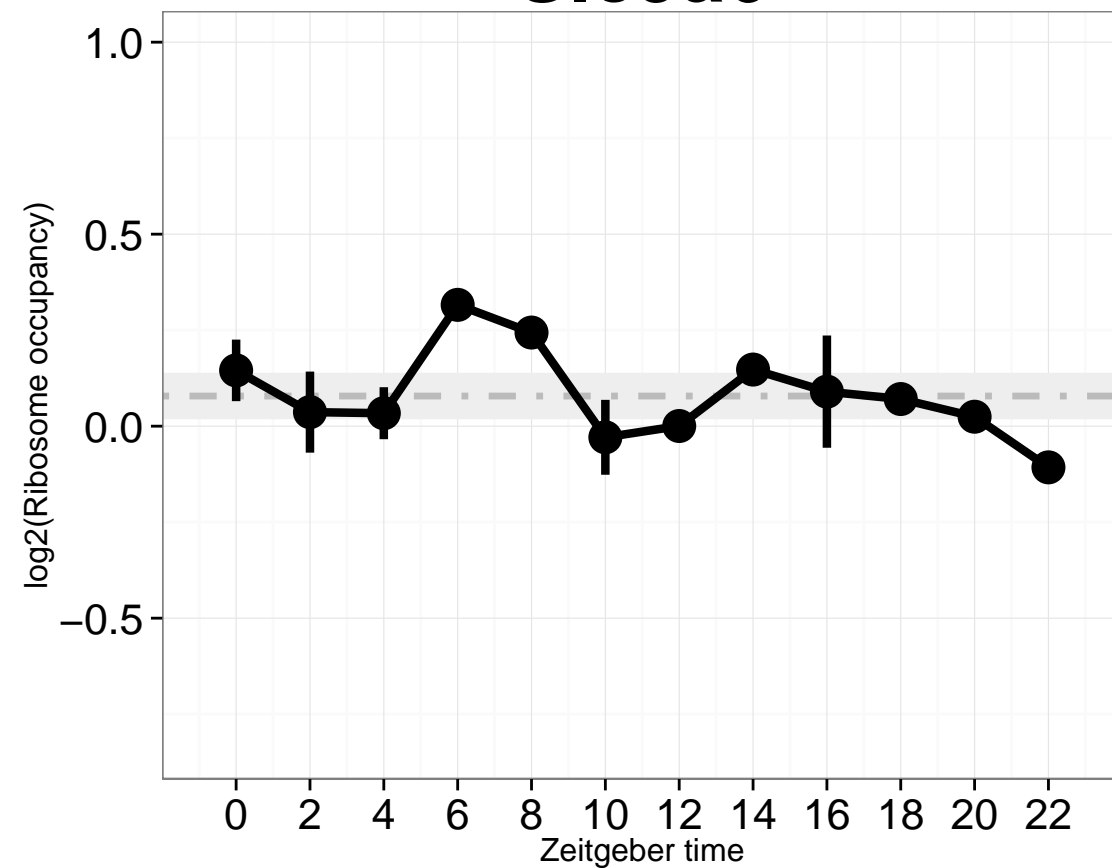

Supplement: Supplementary file 8098 [file 1]

# Fam73a

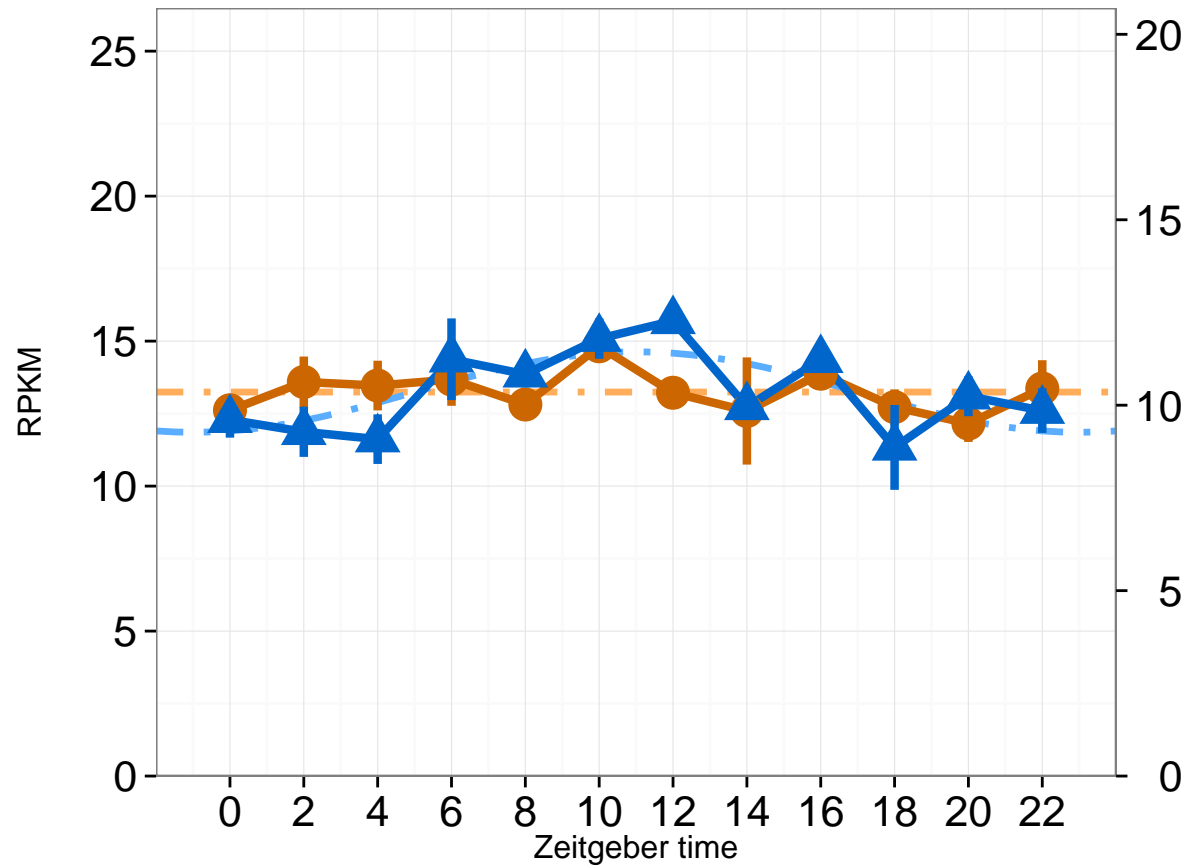

# Fam73a

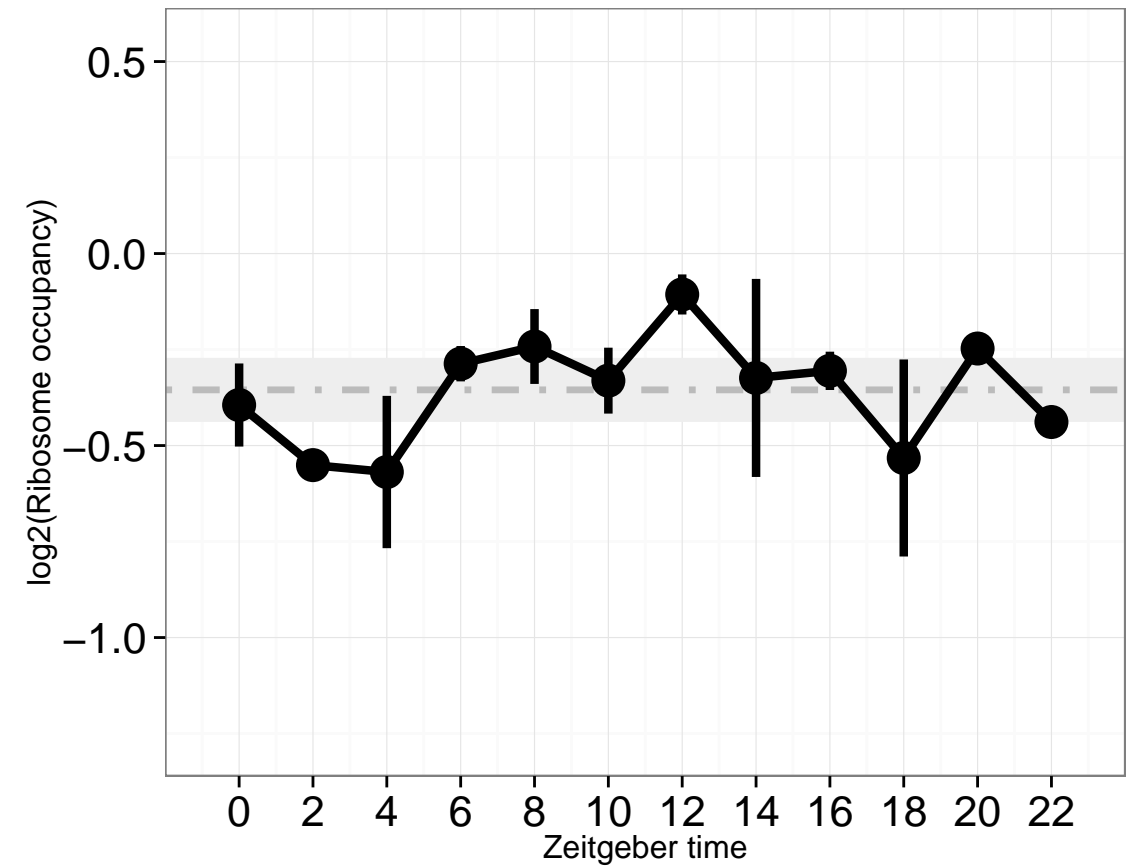

Supplement: Supplementary file 8099 [file 1]

# Cited2

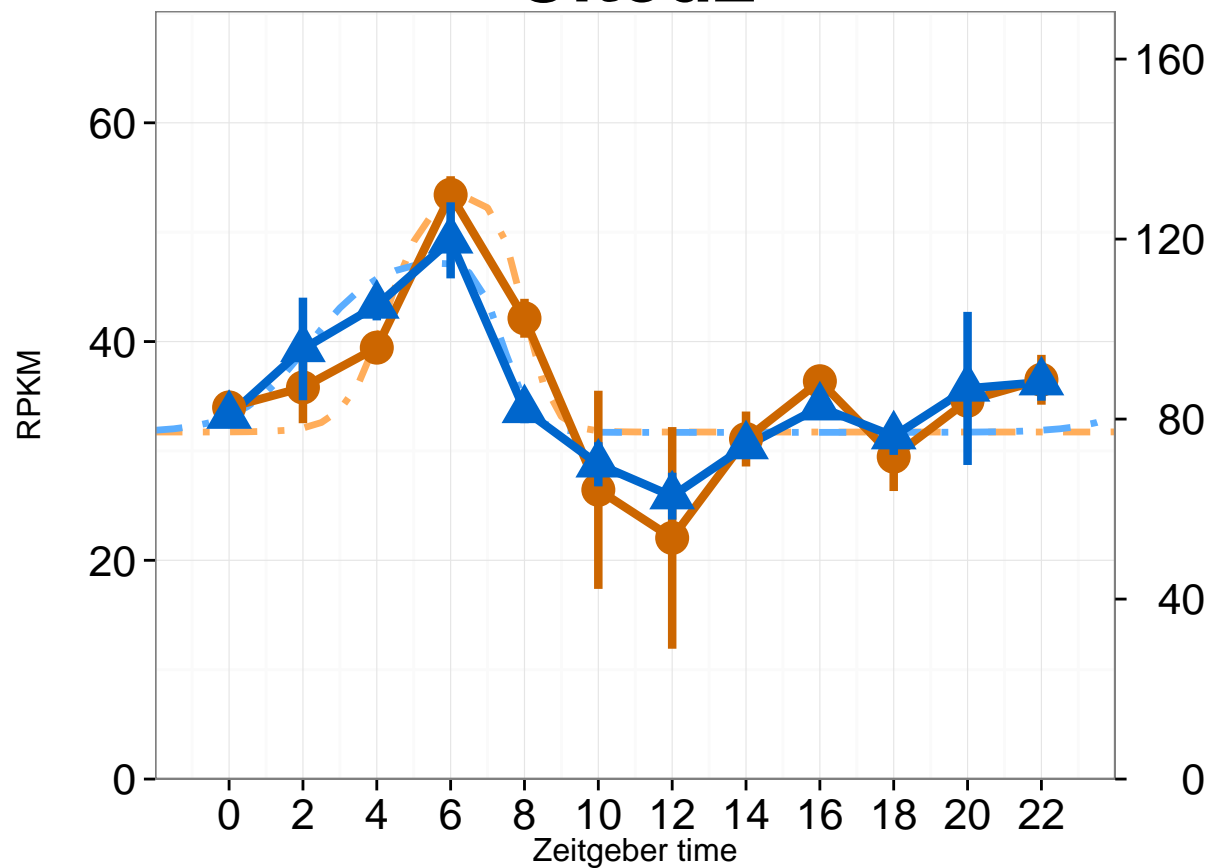

# Cited2

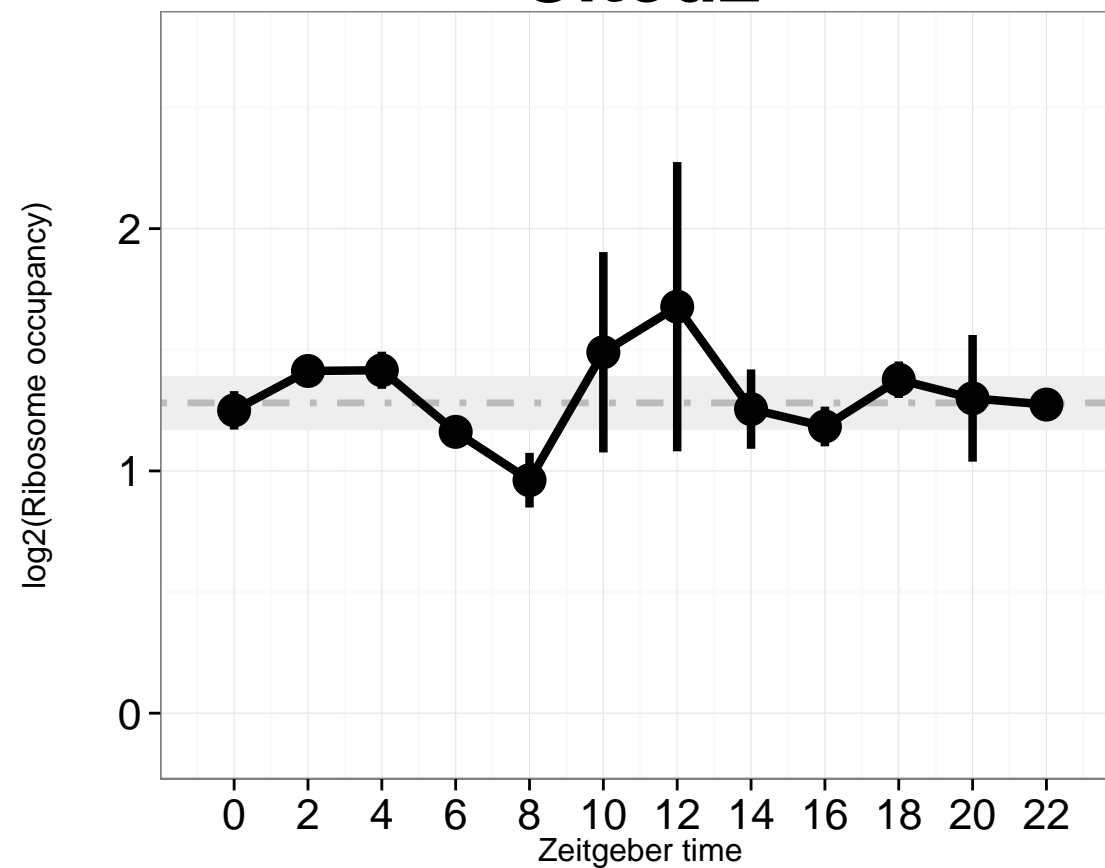

Supplement: Supplementary file 8100 [file 1]

# Trp53i11

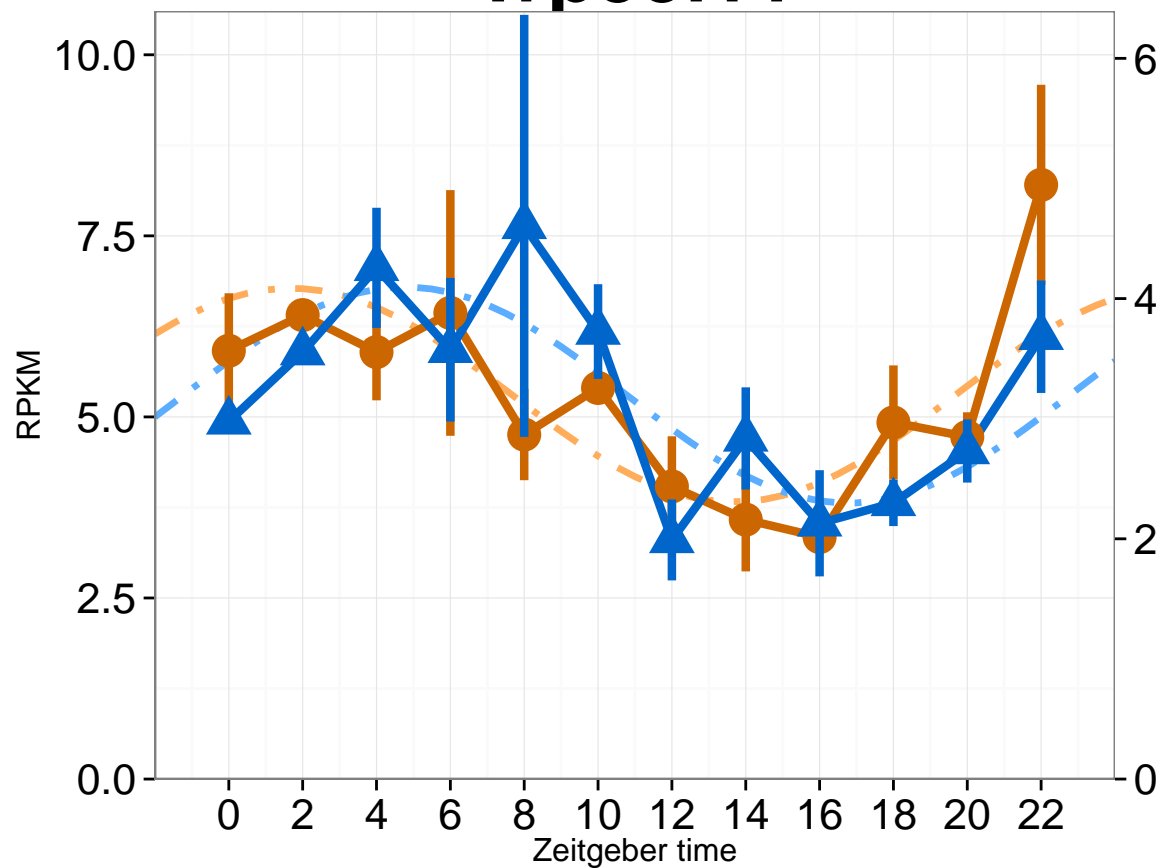

# Trp53i11

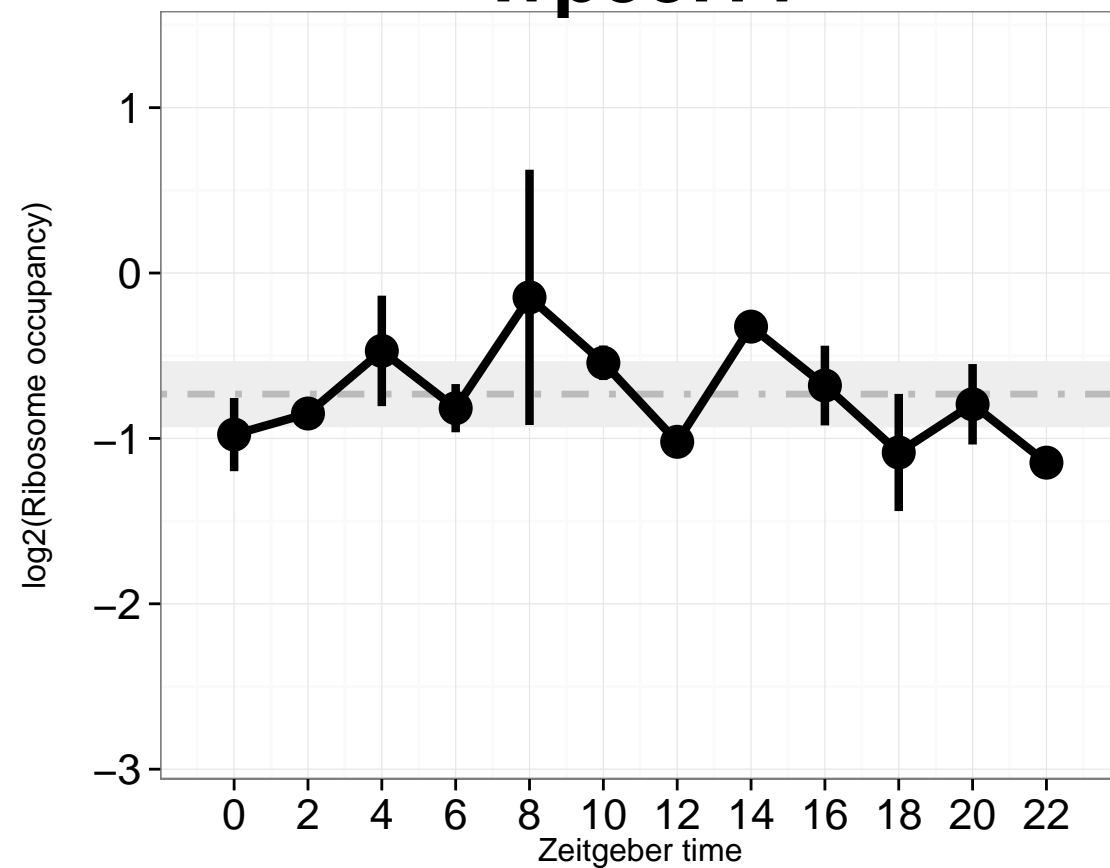

Supplement: Supplementary file 8101 [file 1]

## Tbl2

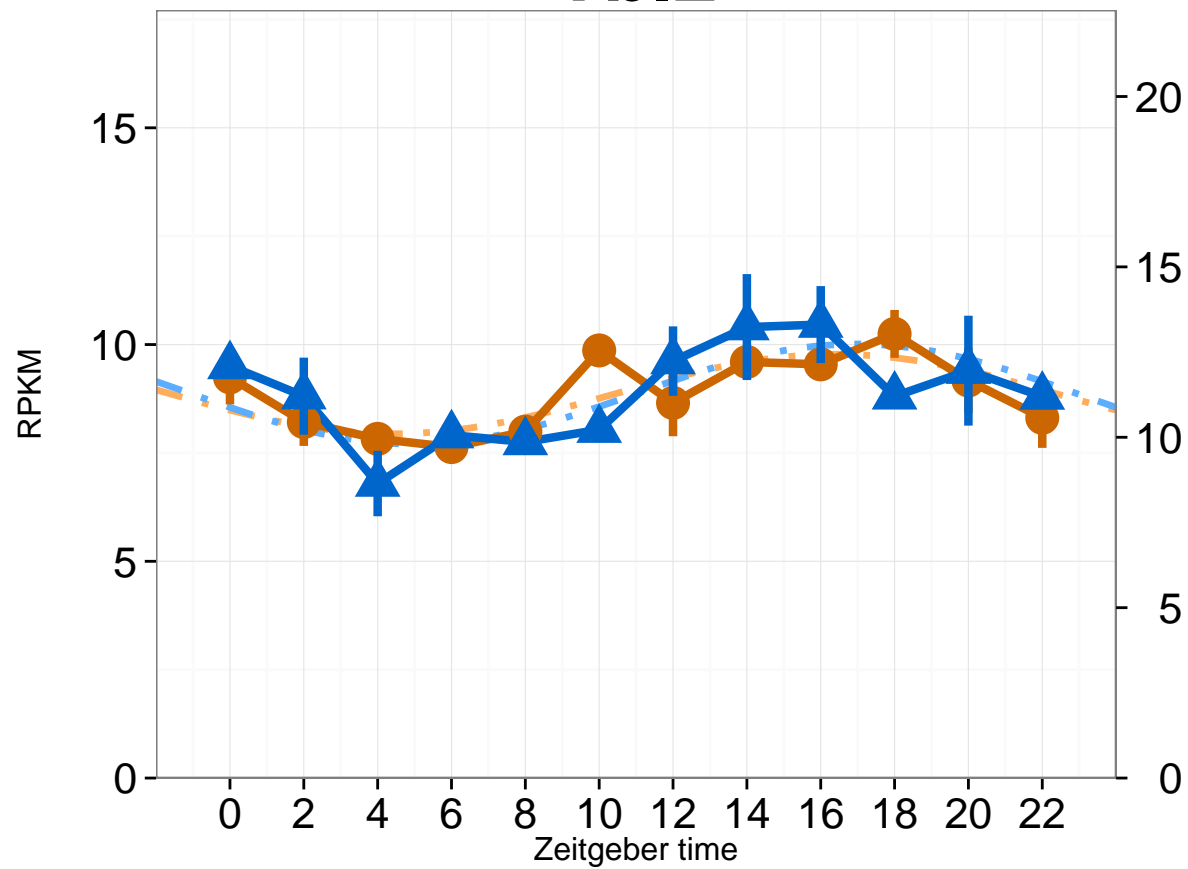

## Tbl2

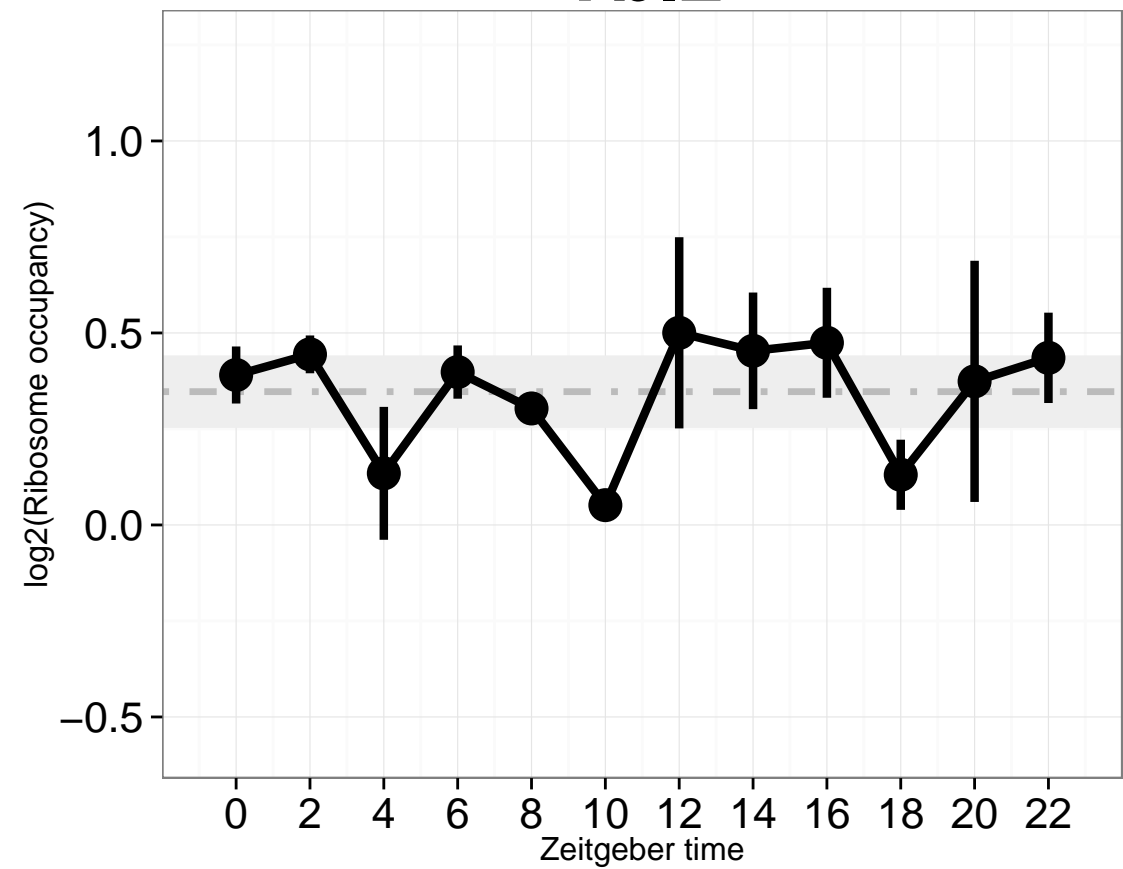

Supplement: Supplementary file 8102 [file 1]

# Cyp4a10

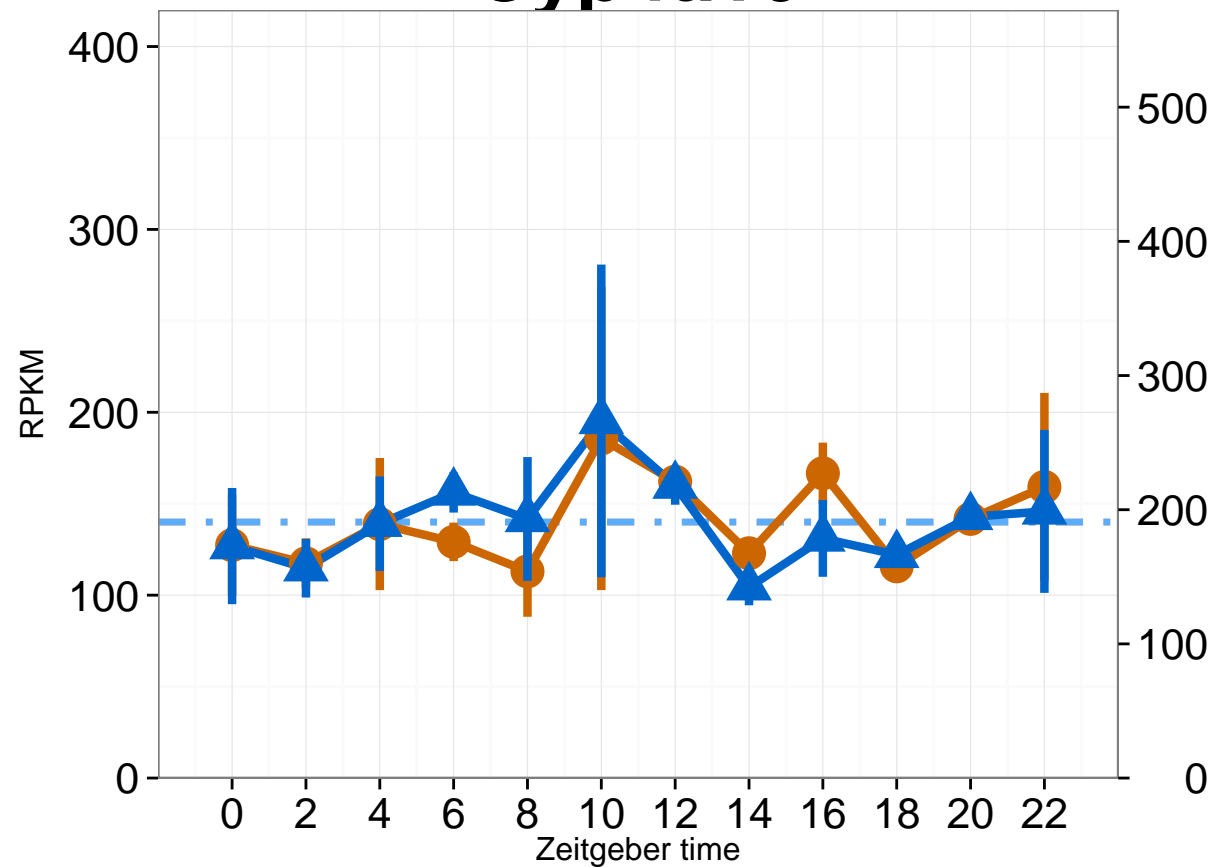

# Cyp4a10

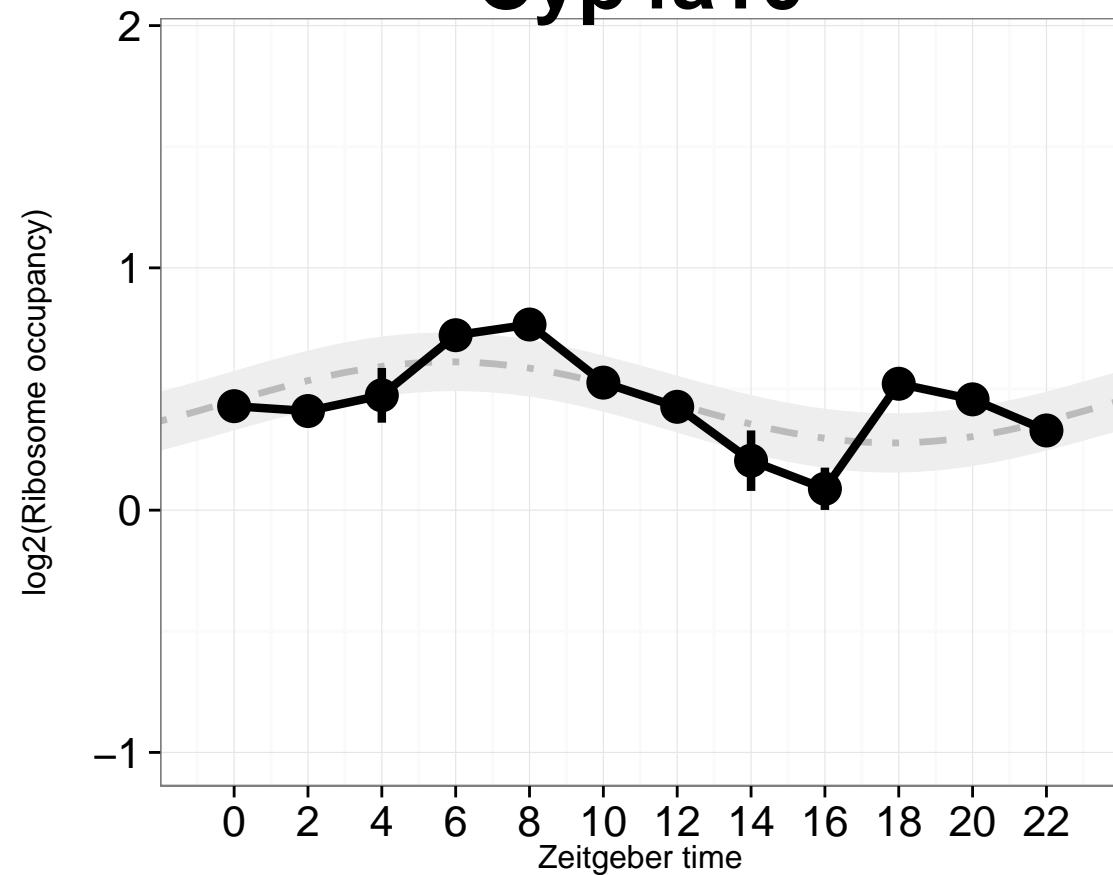

Supplement: Supplementary file 8103 [file 1]

## Bcar1

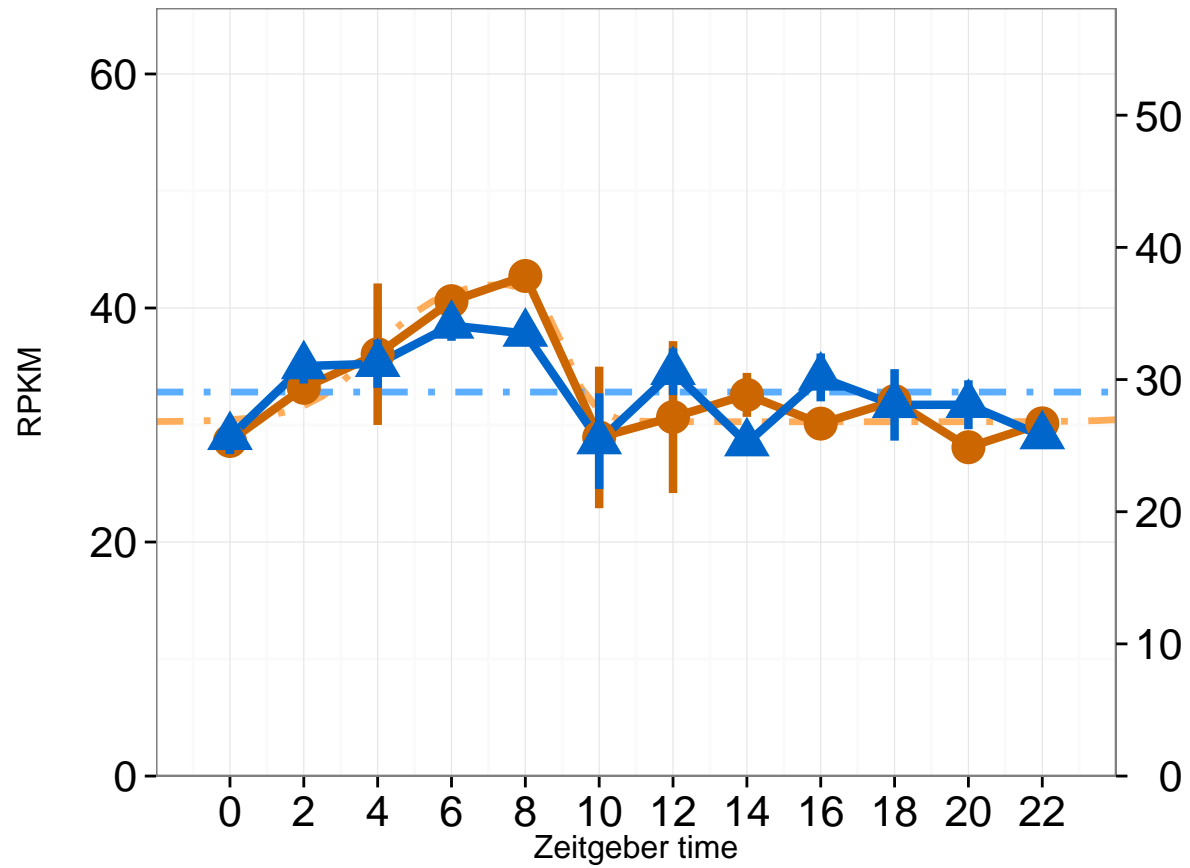

## Bcar1

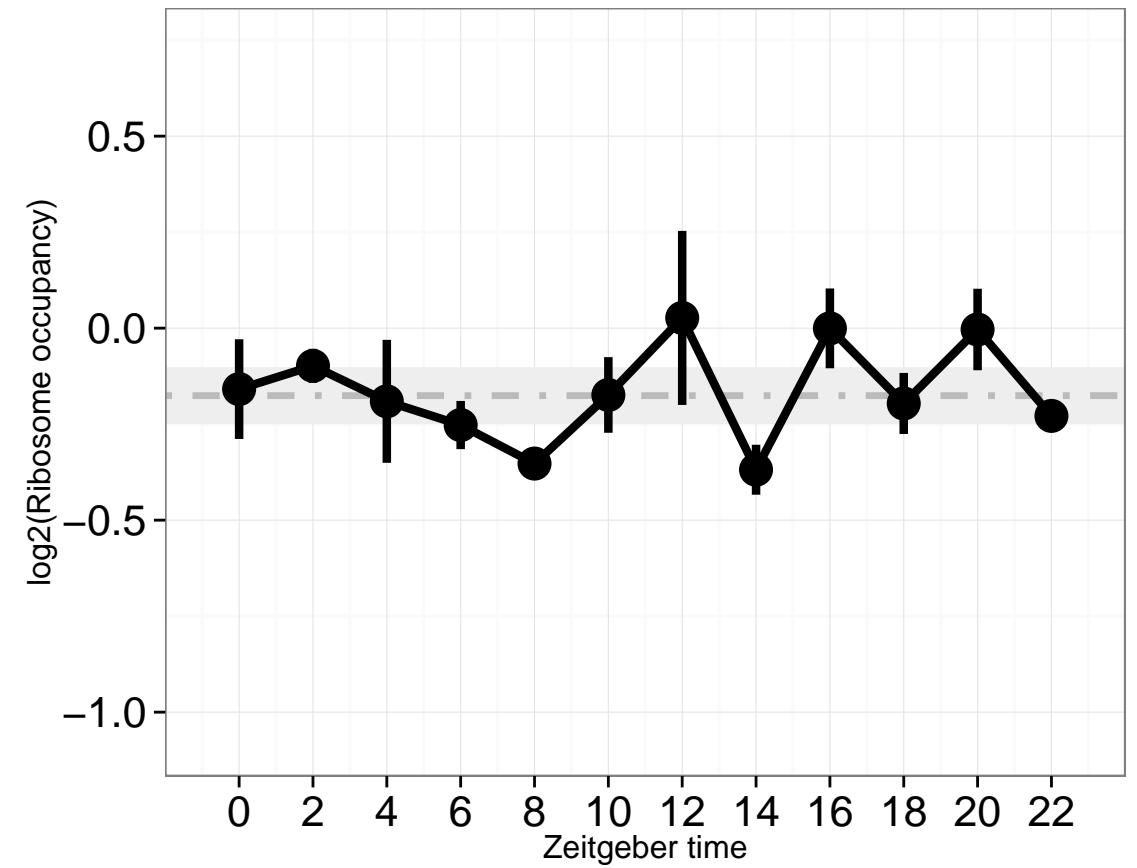

Supplement: Supplementary file 8104 [file 1]

## Gpam

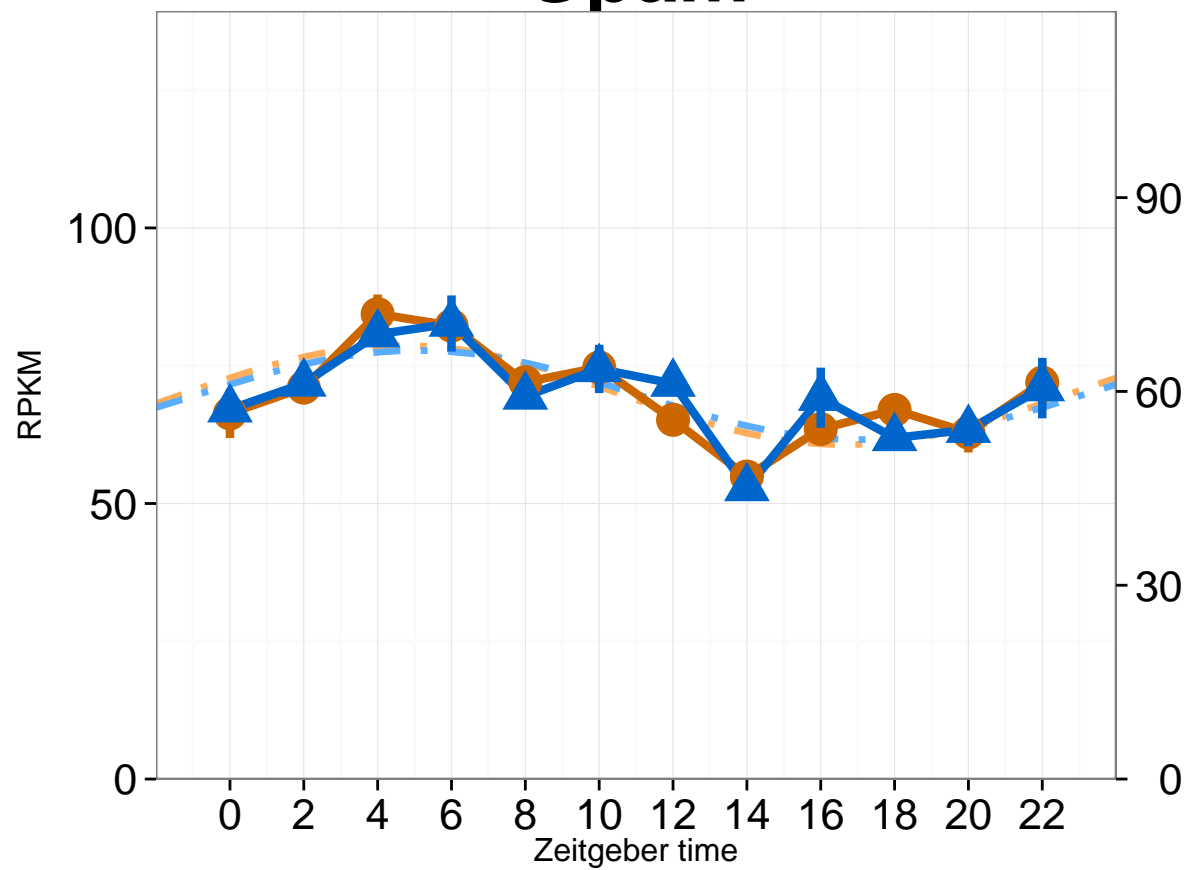

## Gpam

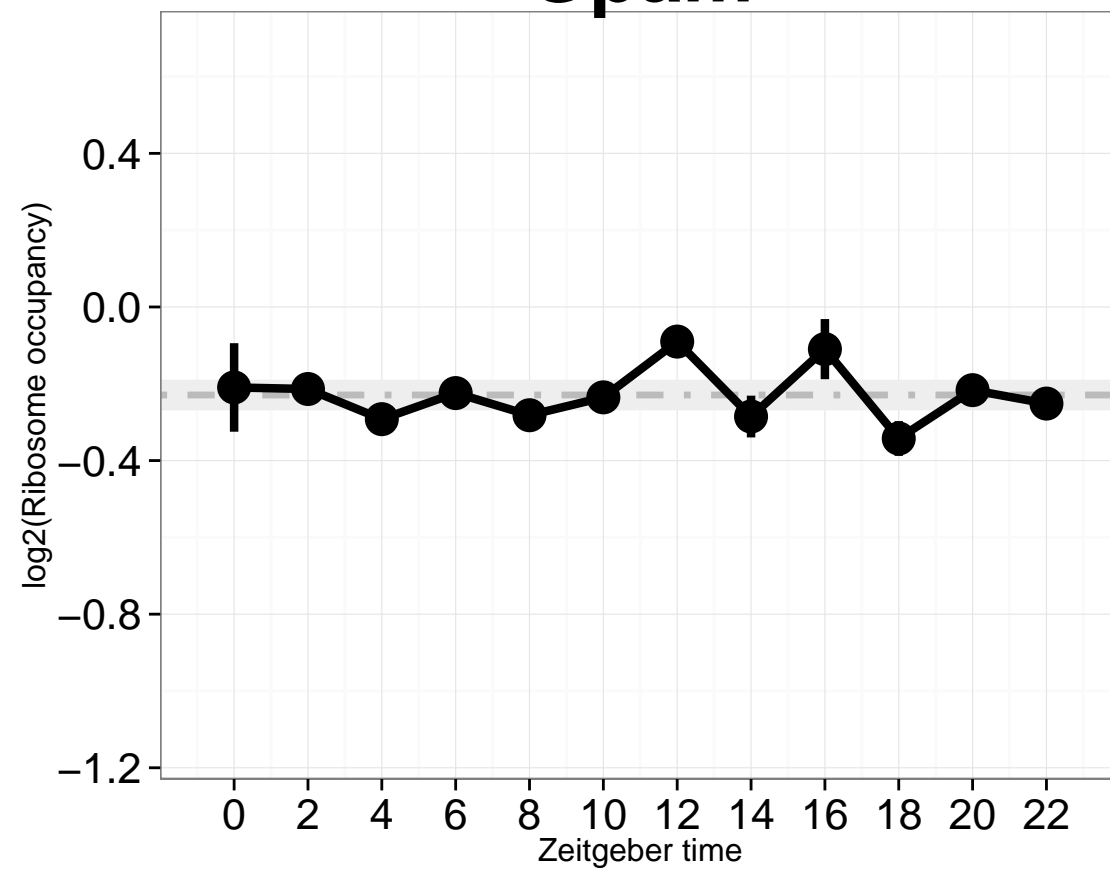

Supplement: Supplementary file 8105 [file 1]

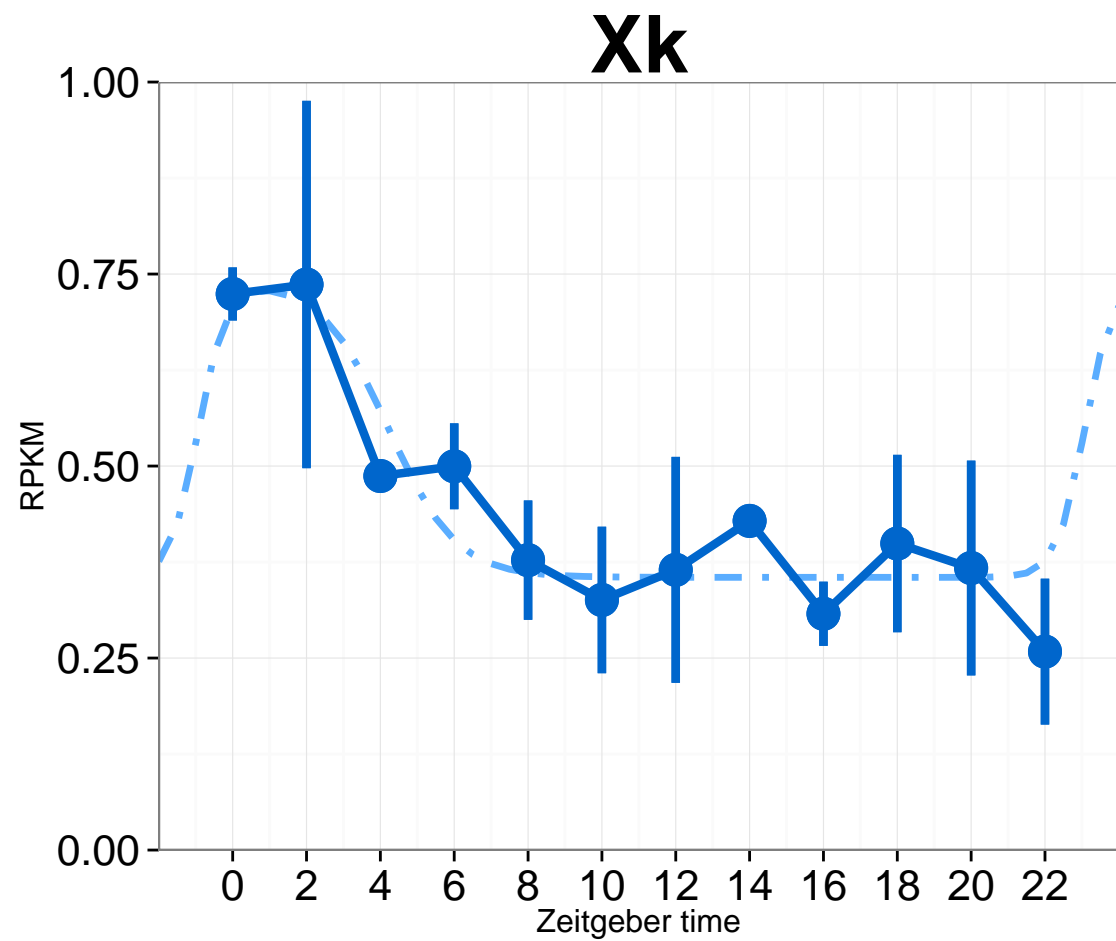

### $X_k \log_2(\text{Ribosome occupancy})$

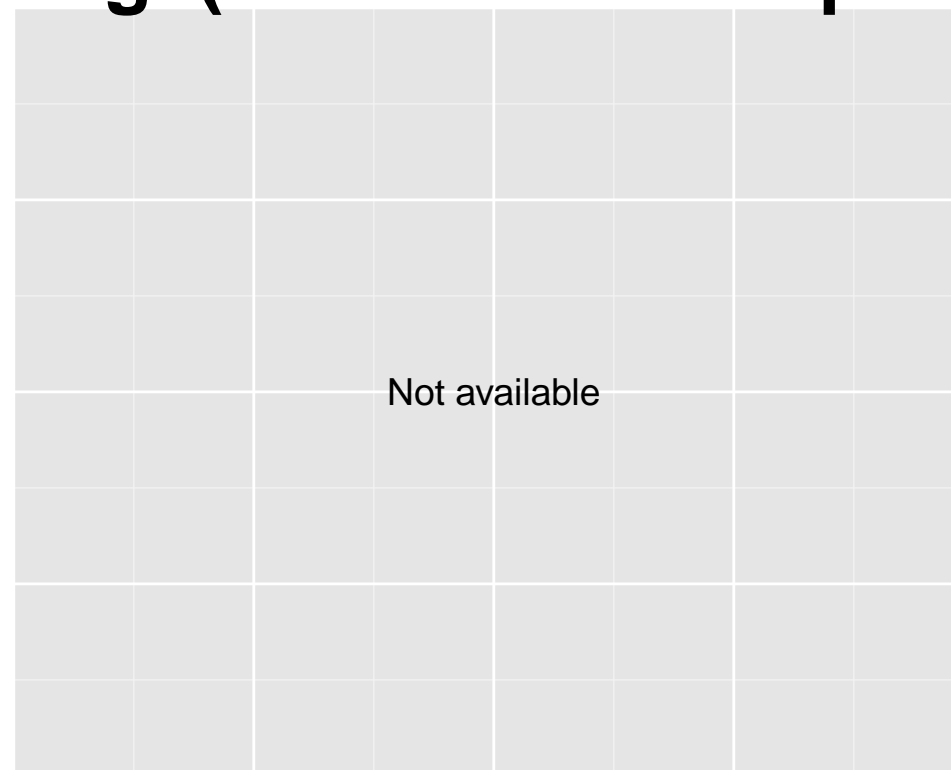

Supplement: Supplementary file 8106 [file 1]

## Susd3

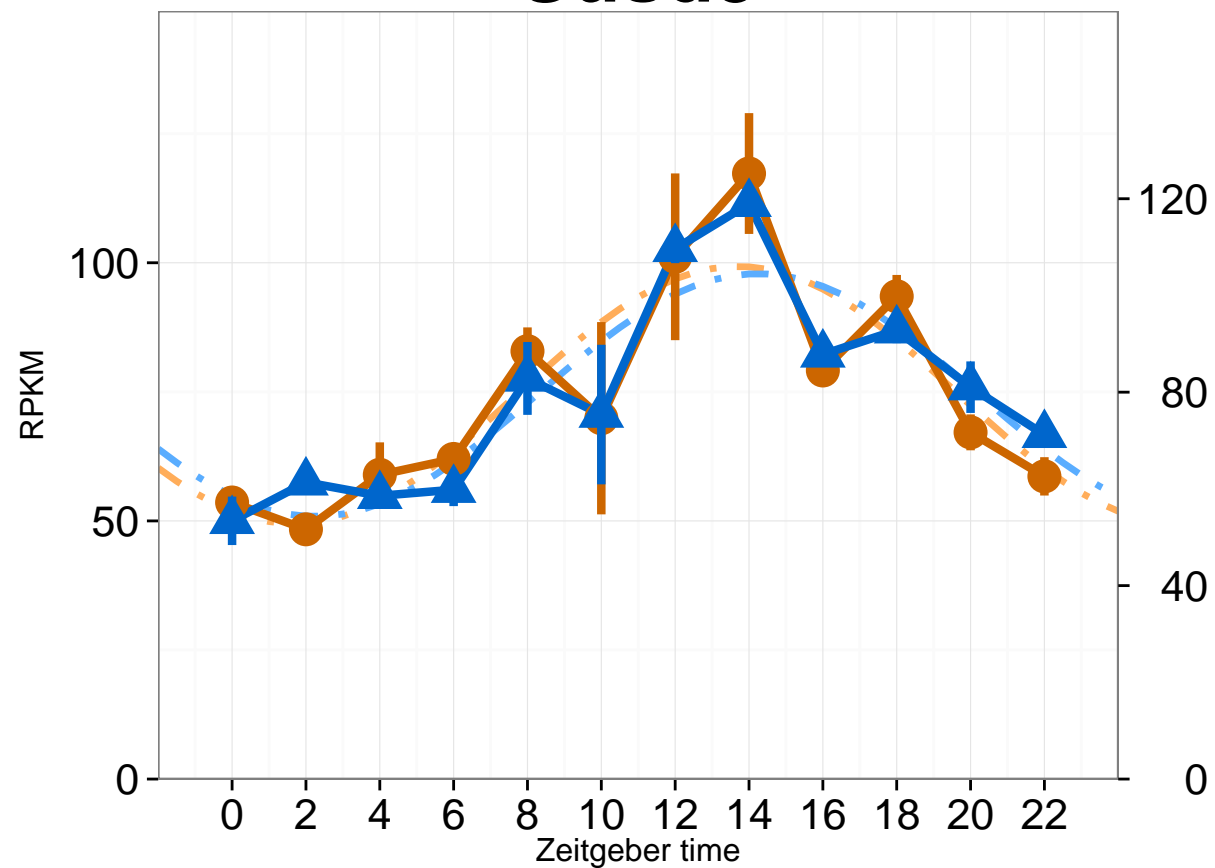

## Susd3

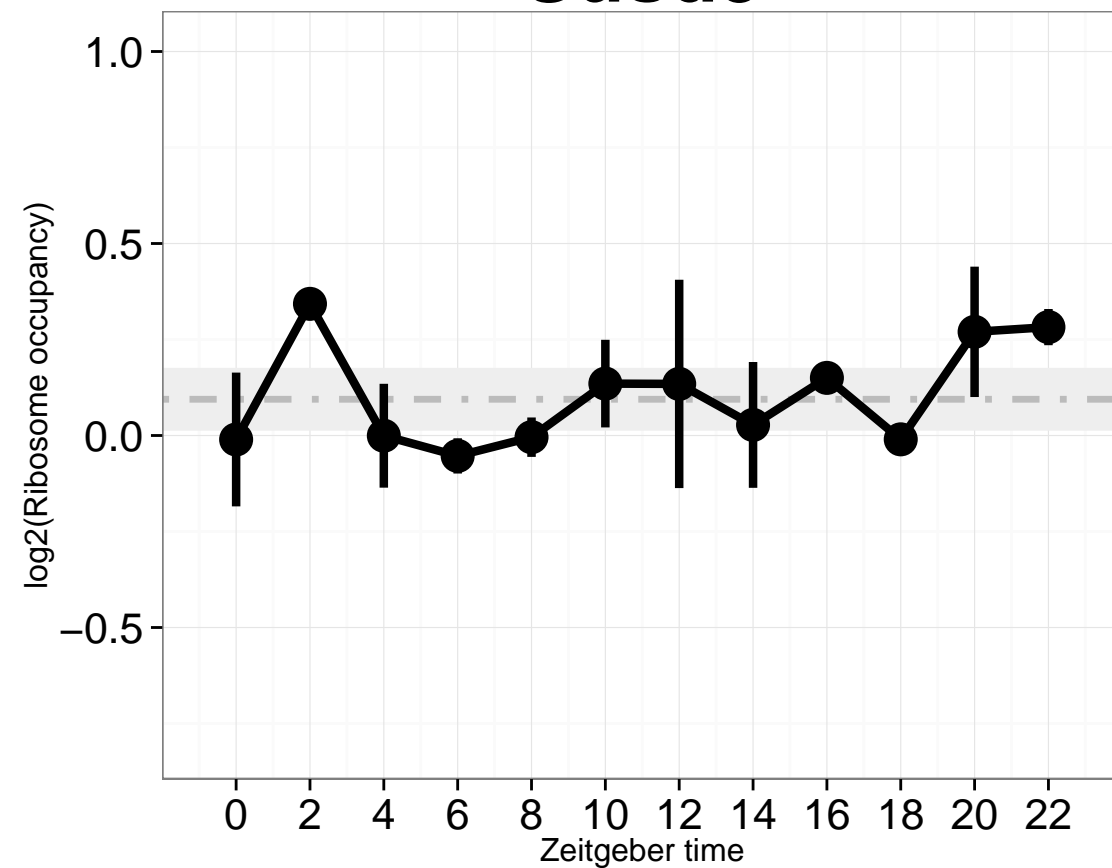

Supplement: Supplementary file 8108 [file 1]

# Rplp0

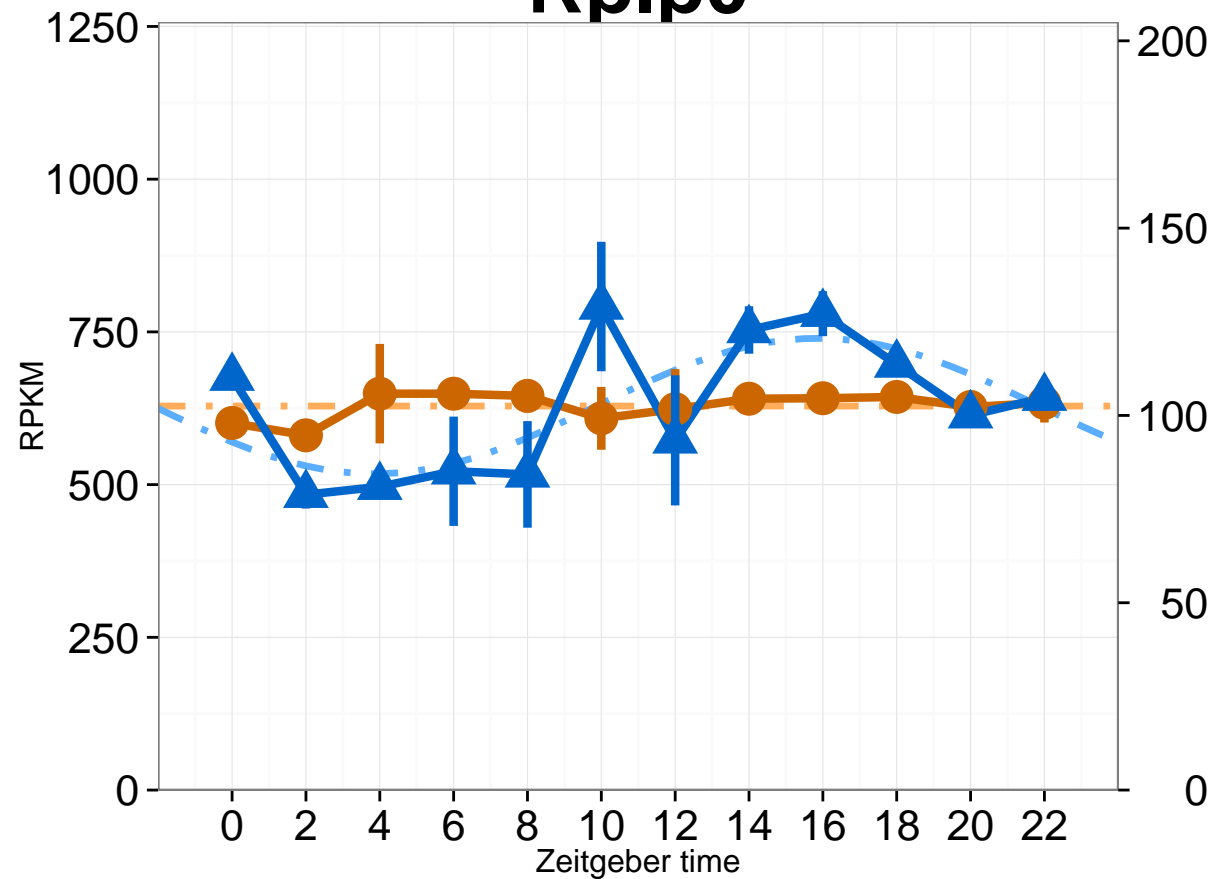

# Rplp0

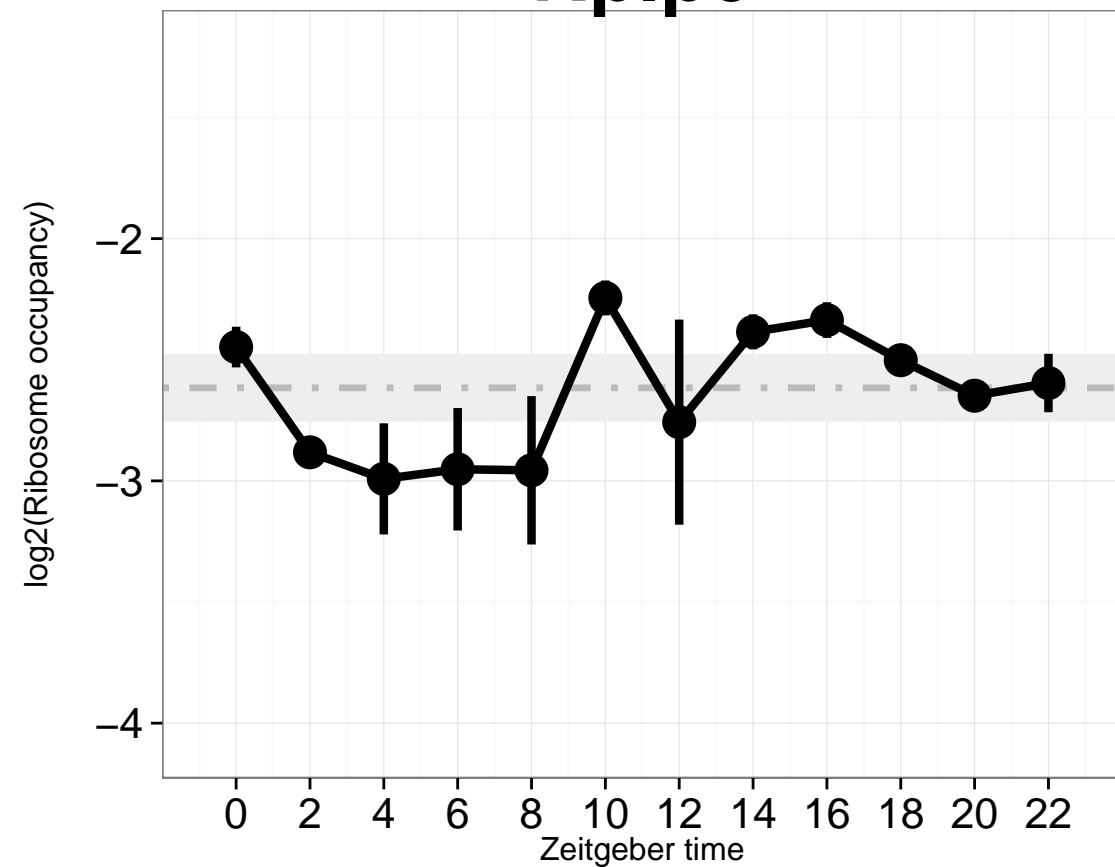

Supplement: Supplementary file 8109 [file 1]

# Synj1

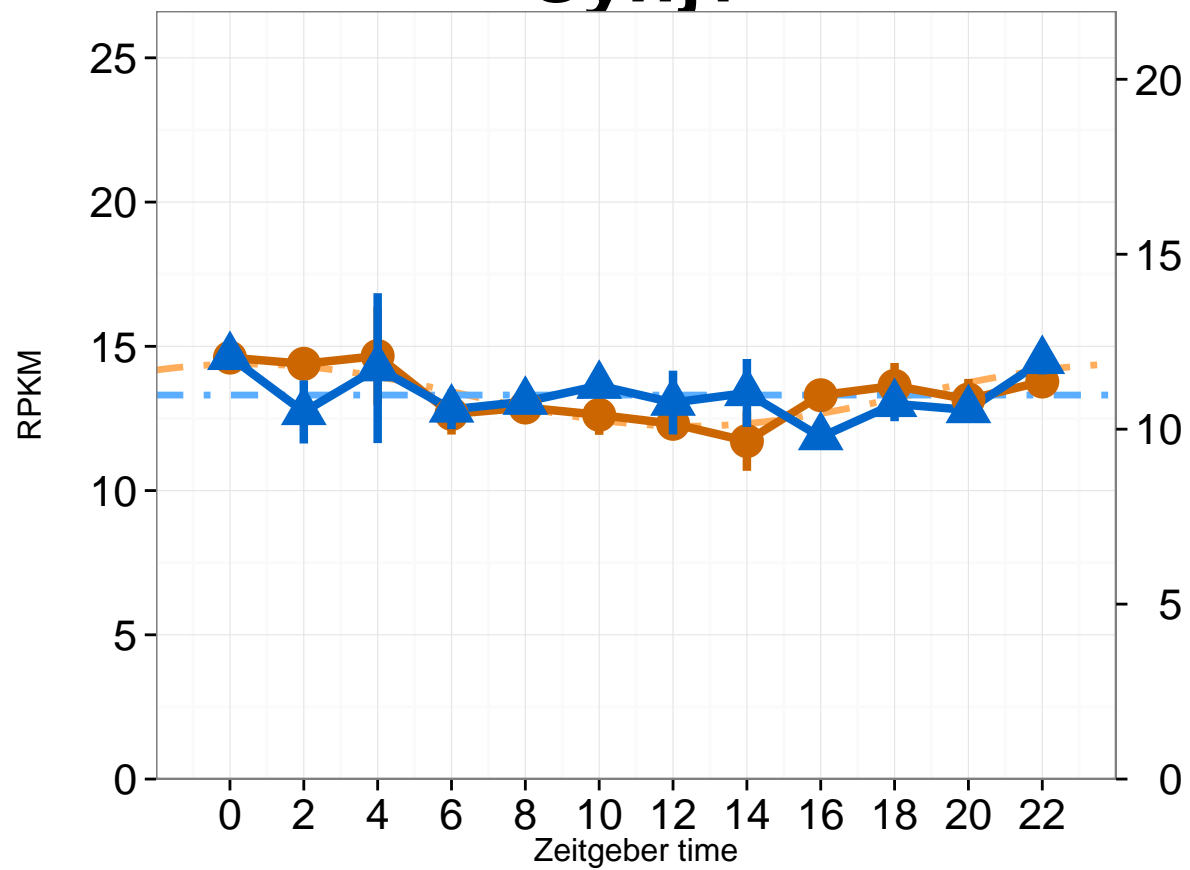

# Synj1

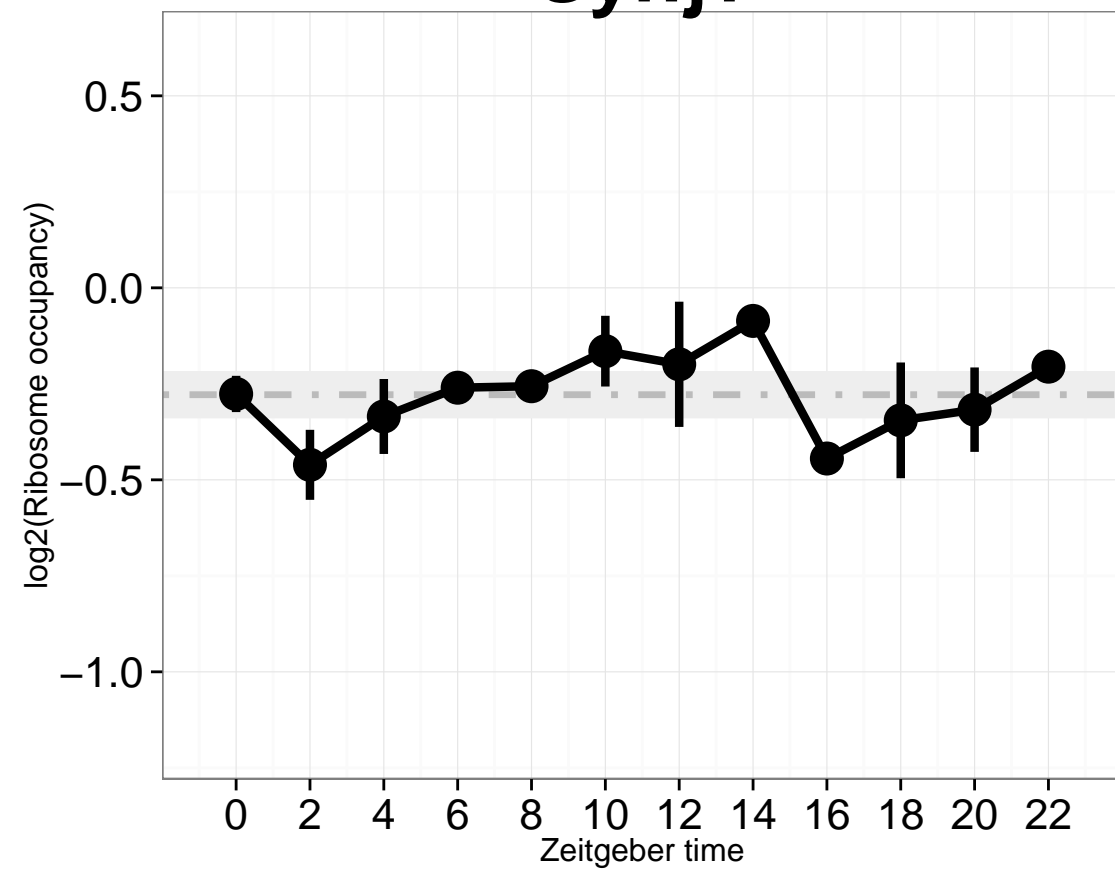

Supplement: Supplementary file 8110 [file 1]

## Slc25a35

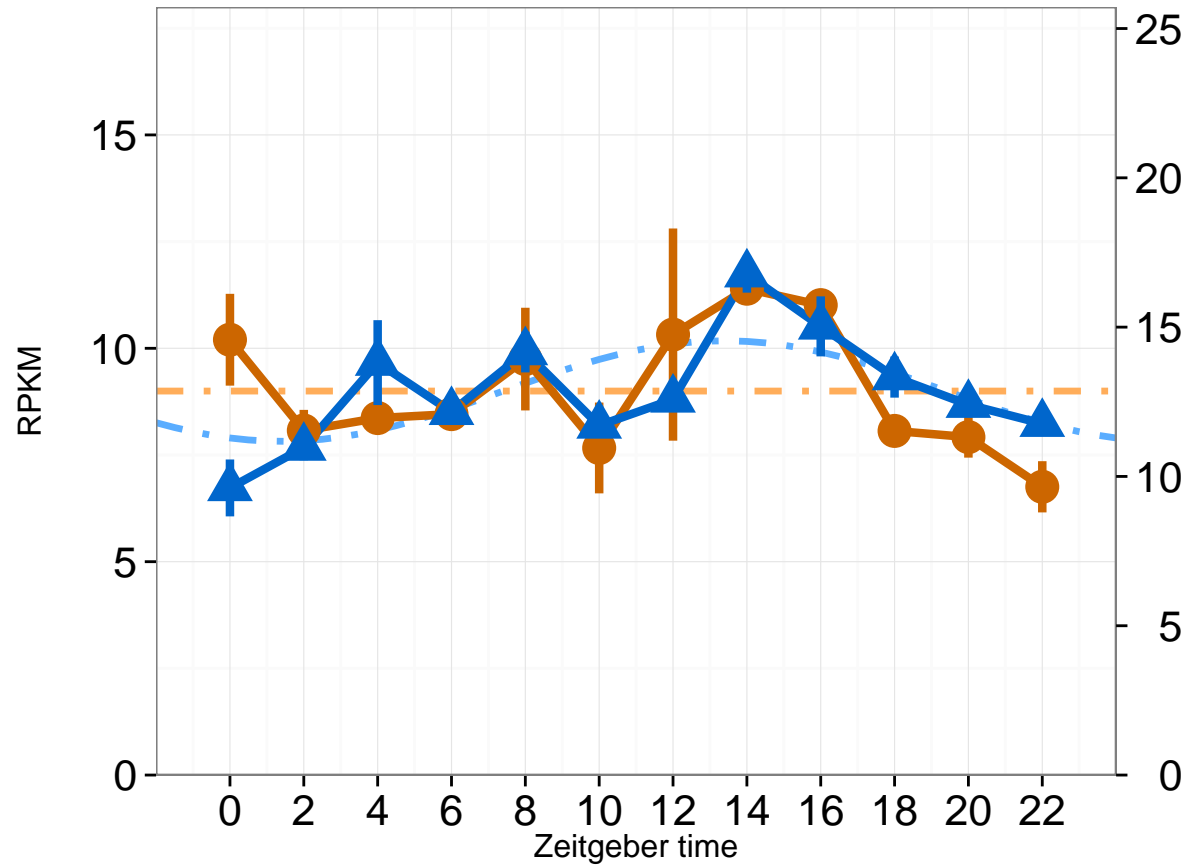

## Slc25a35

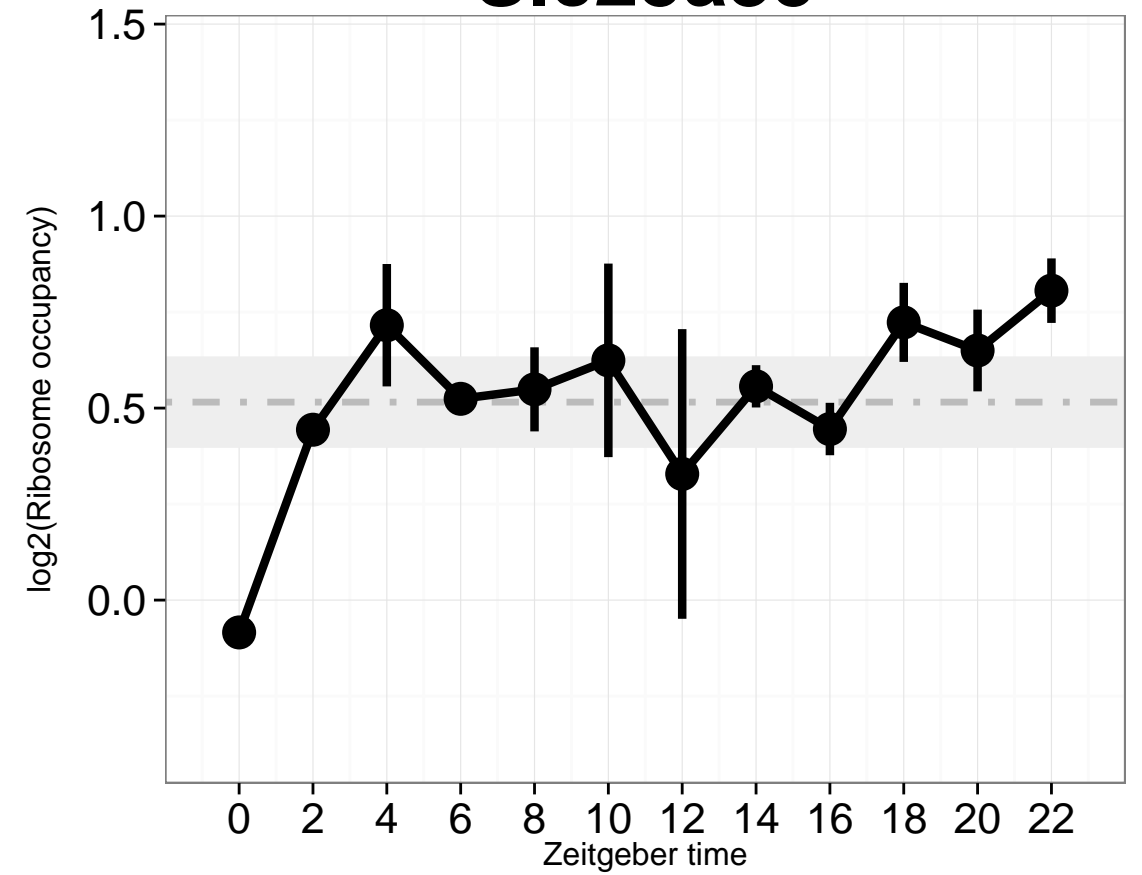

Supplement: Supplementary file 8111 [file 1]

## Mob3b

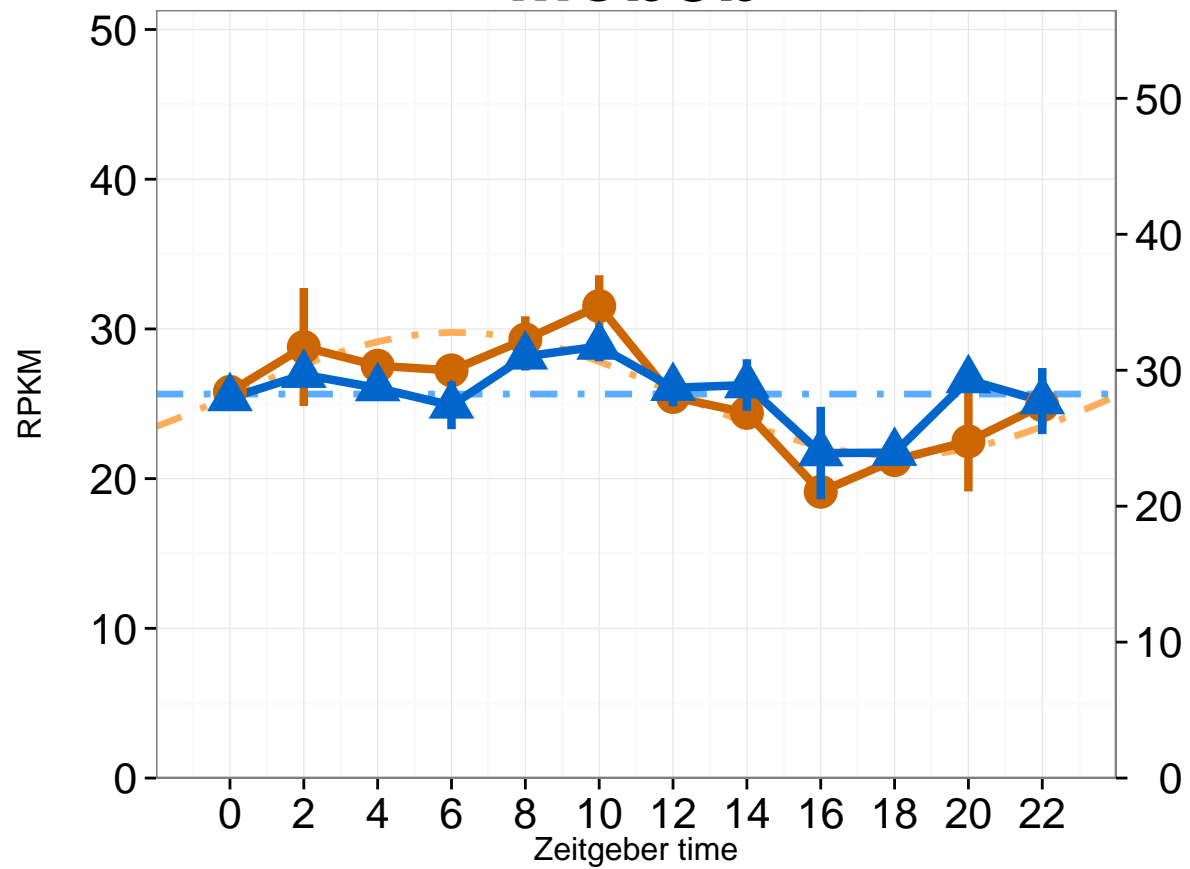

## Mob3b

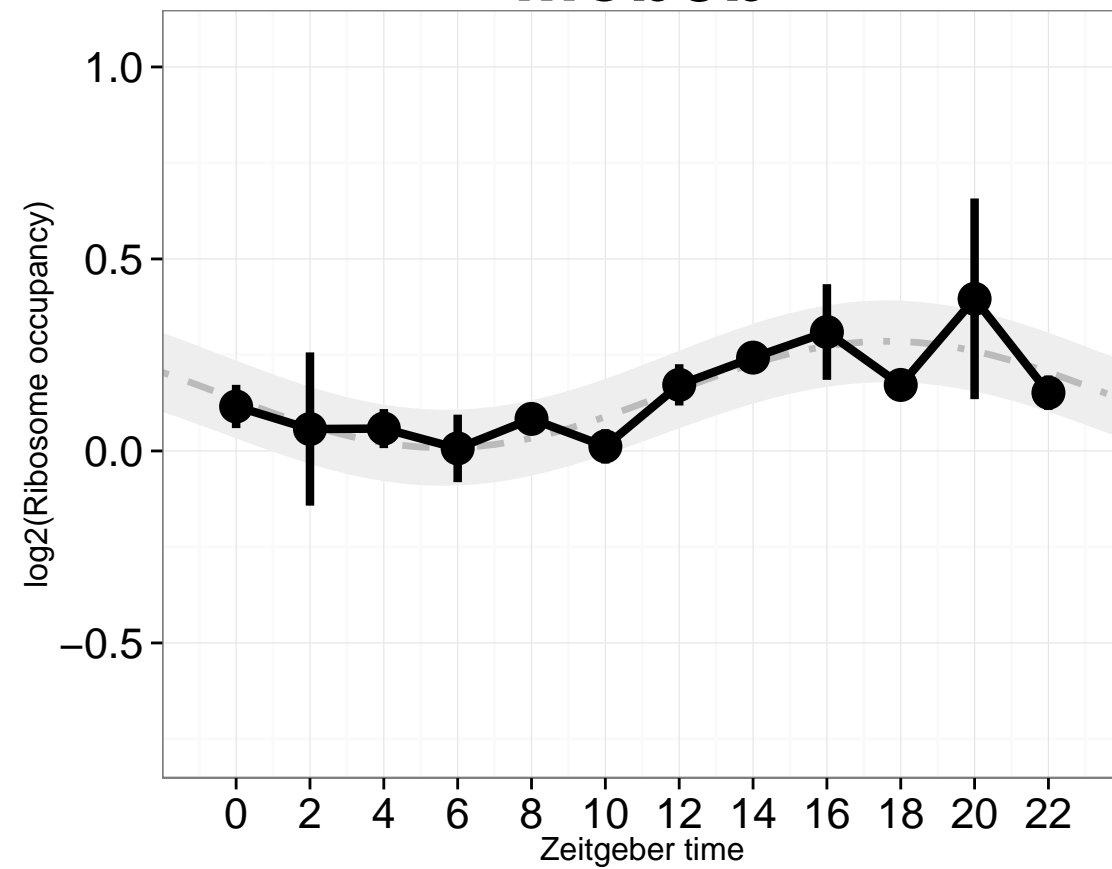

Supplement: Supplementary file 8112 [file 1]

## Fbxw4

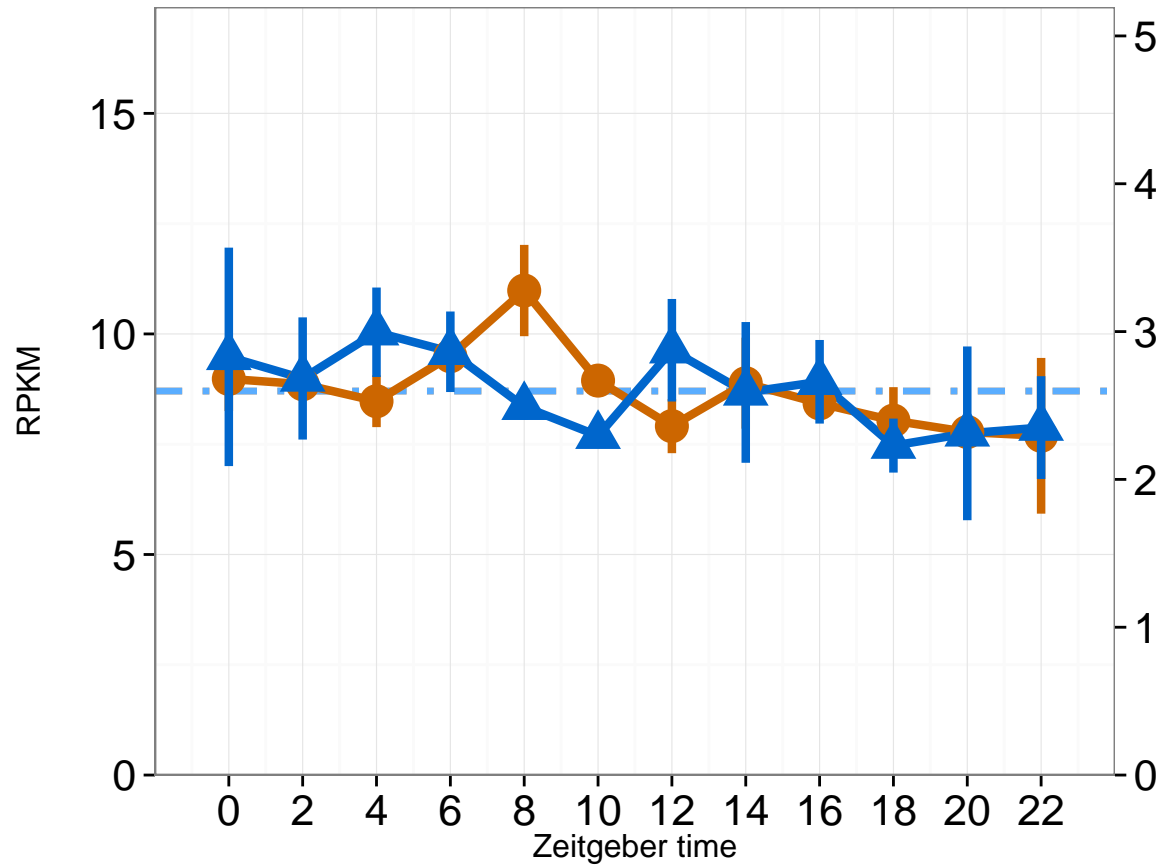

## Fbxw4

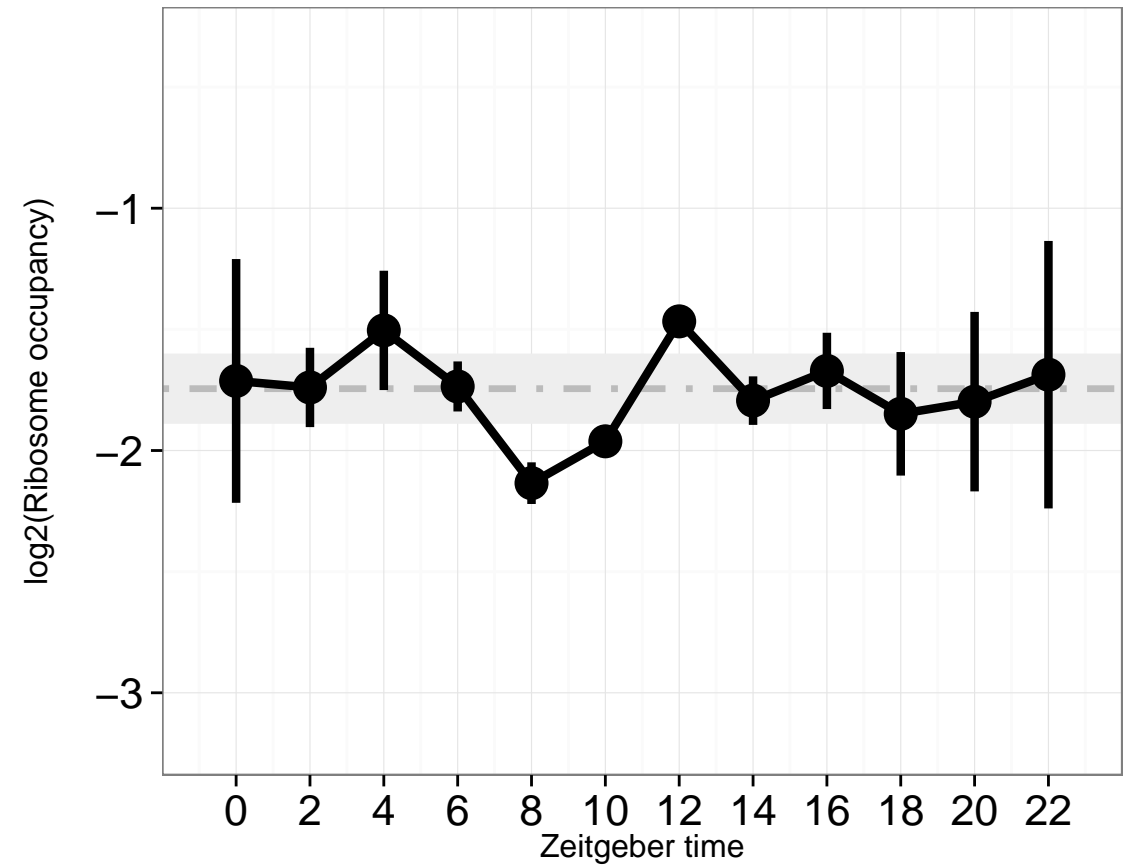

Supplement: Supplementary file 8113 [file 1]

## Smc4

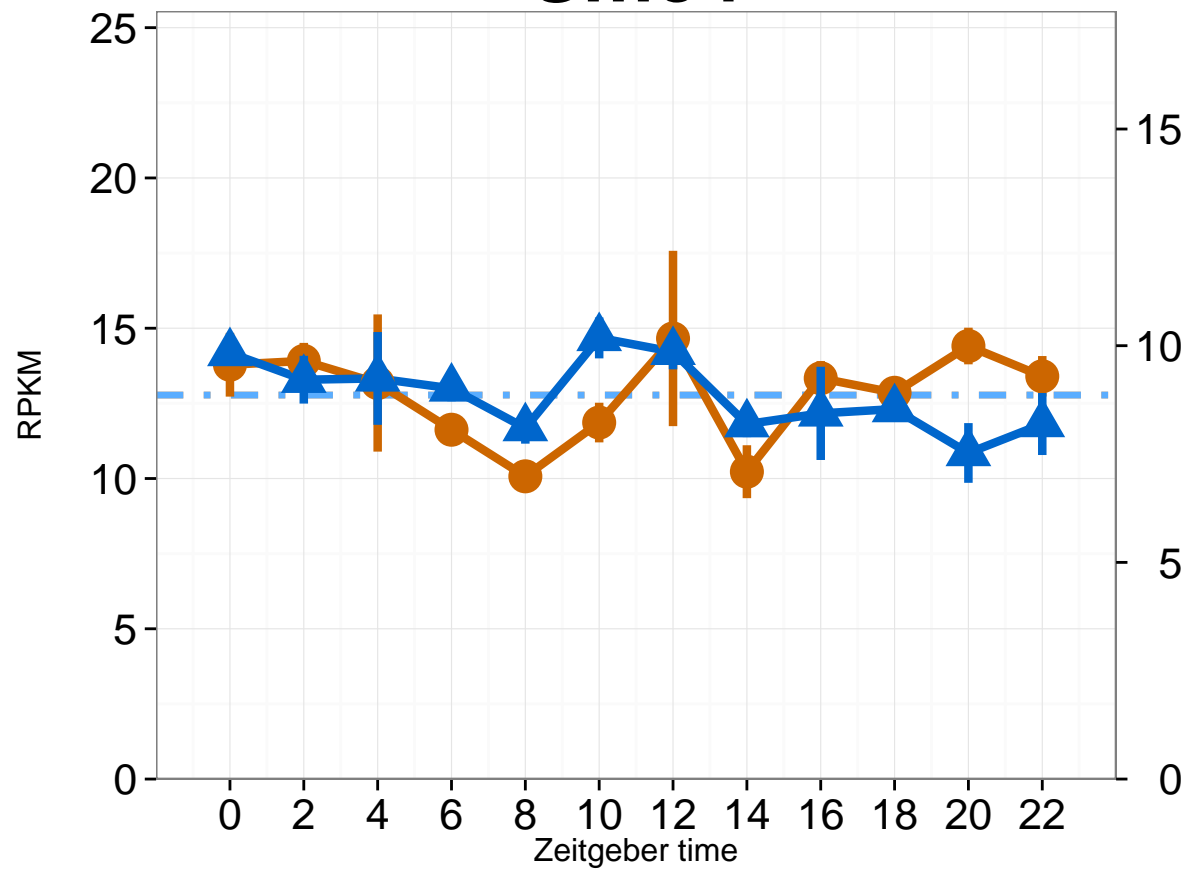

## Smc4

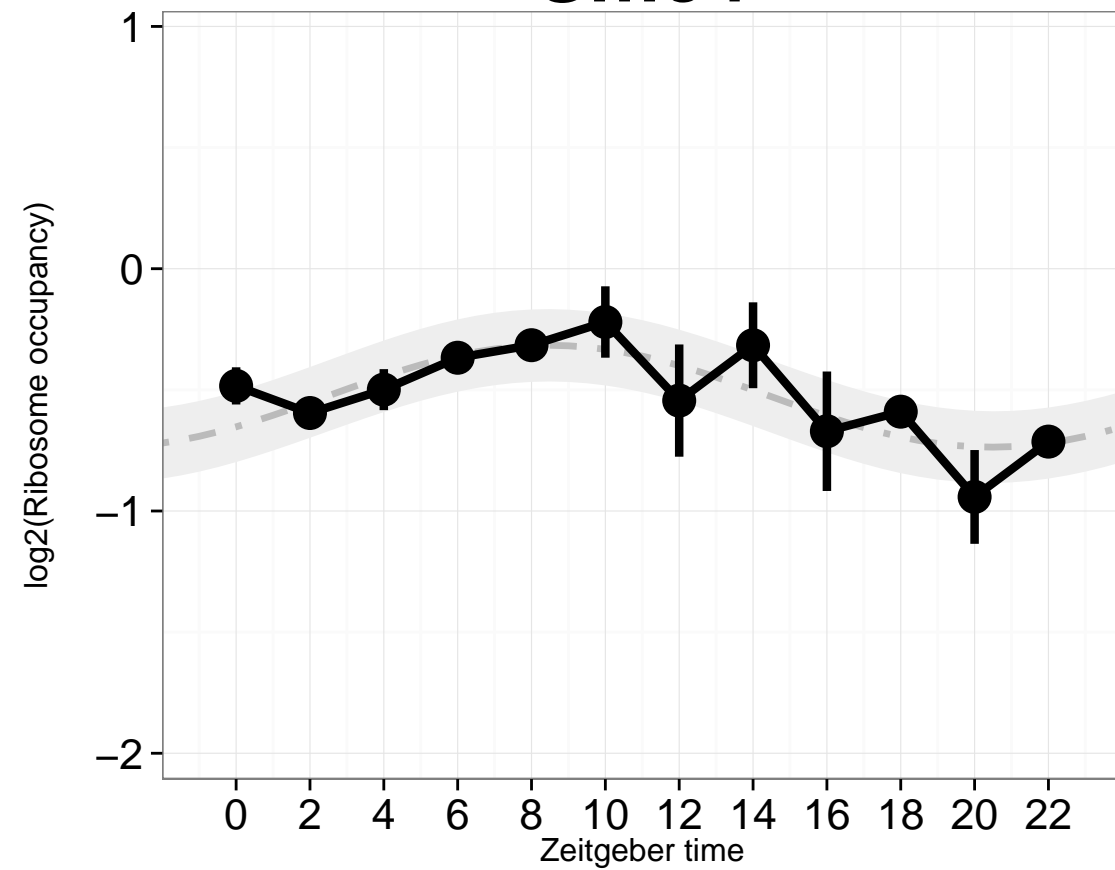

Supplement: Supplementary file 8114 [file 1]

## Chchd5

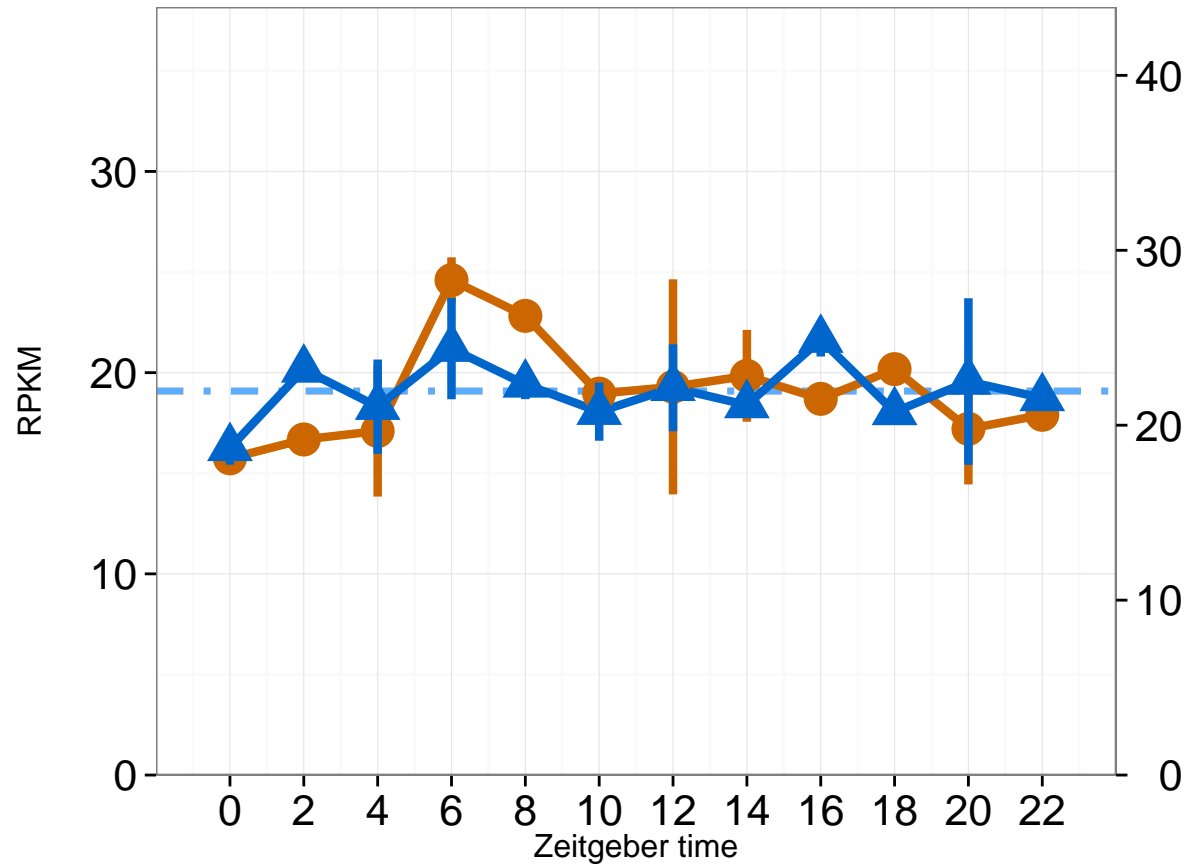

## Chchd5

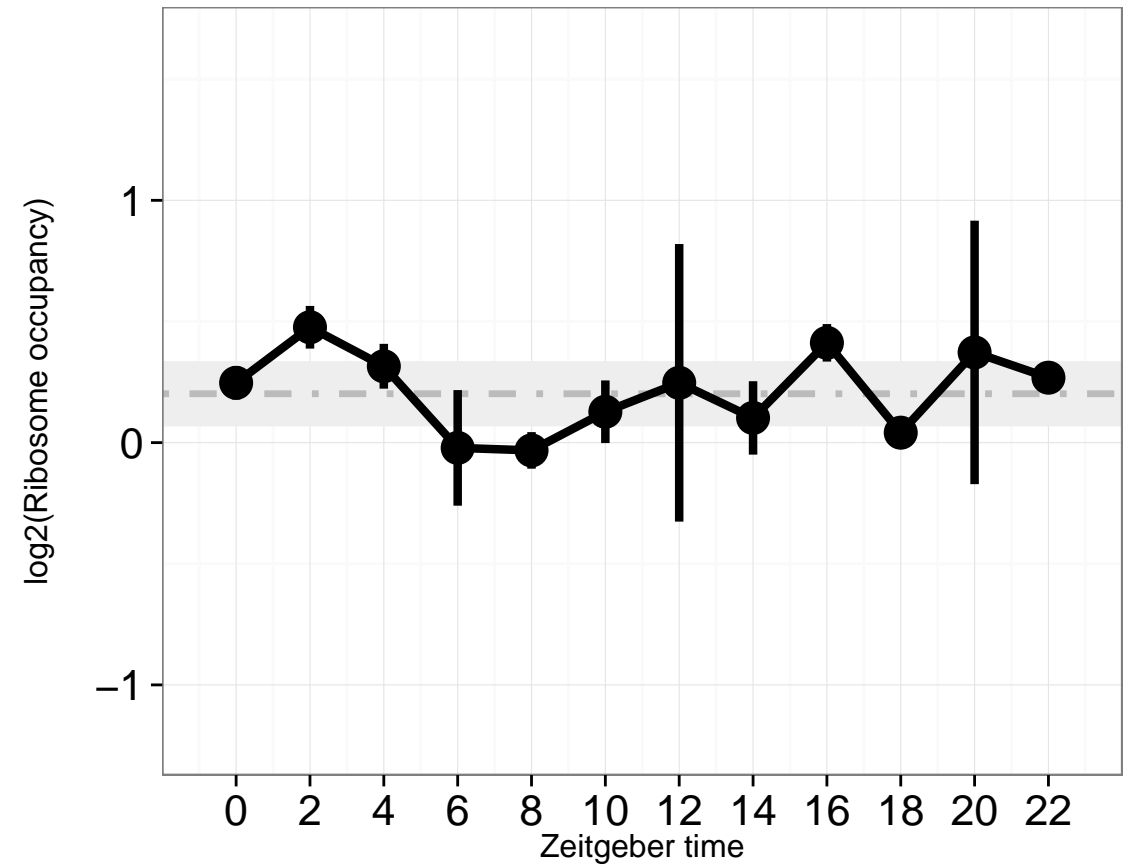

Supplement: Supplementary file 8115 [file 1]

**Sema6c**

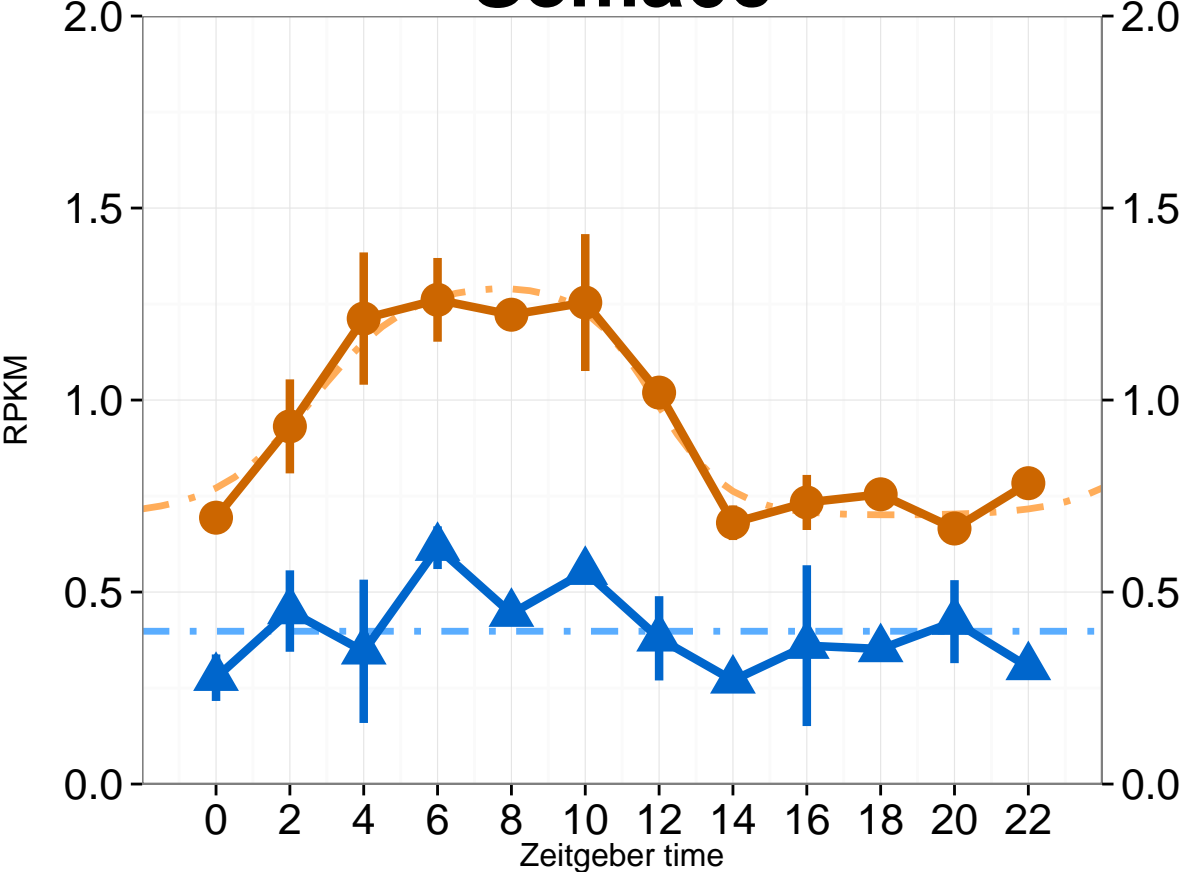

**Sema6c**

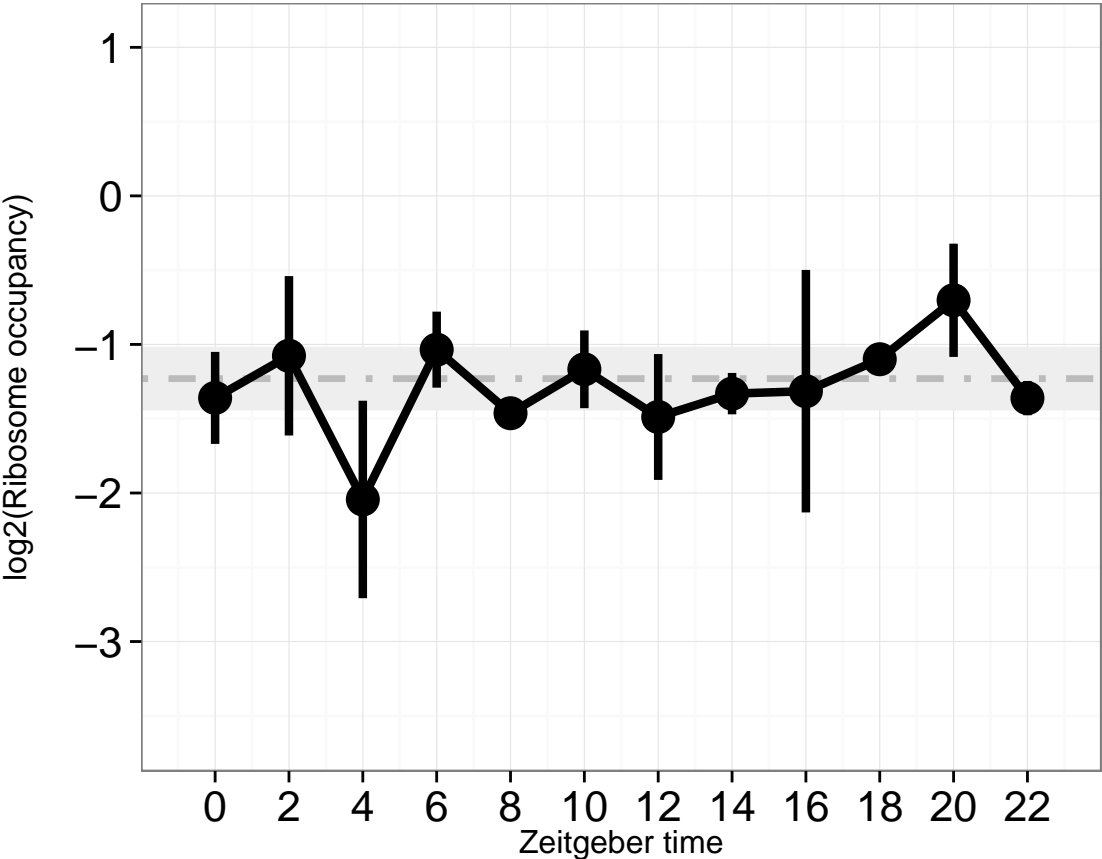

Supplement: Supplementary file 8116 [file 1]

## Ncoa3

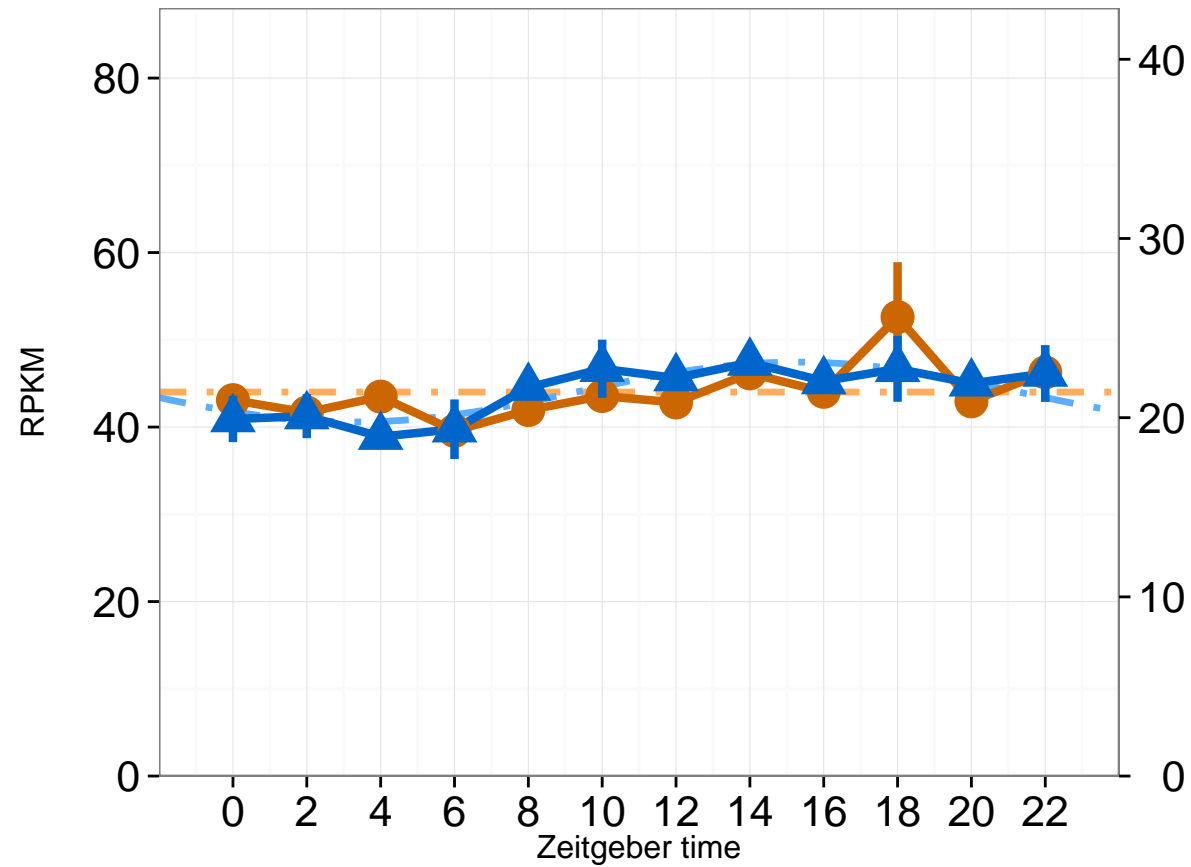

## Ncoa3

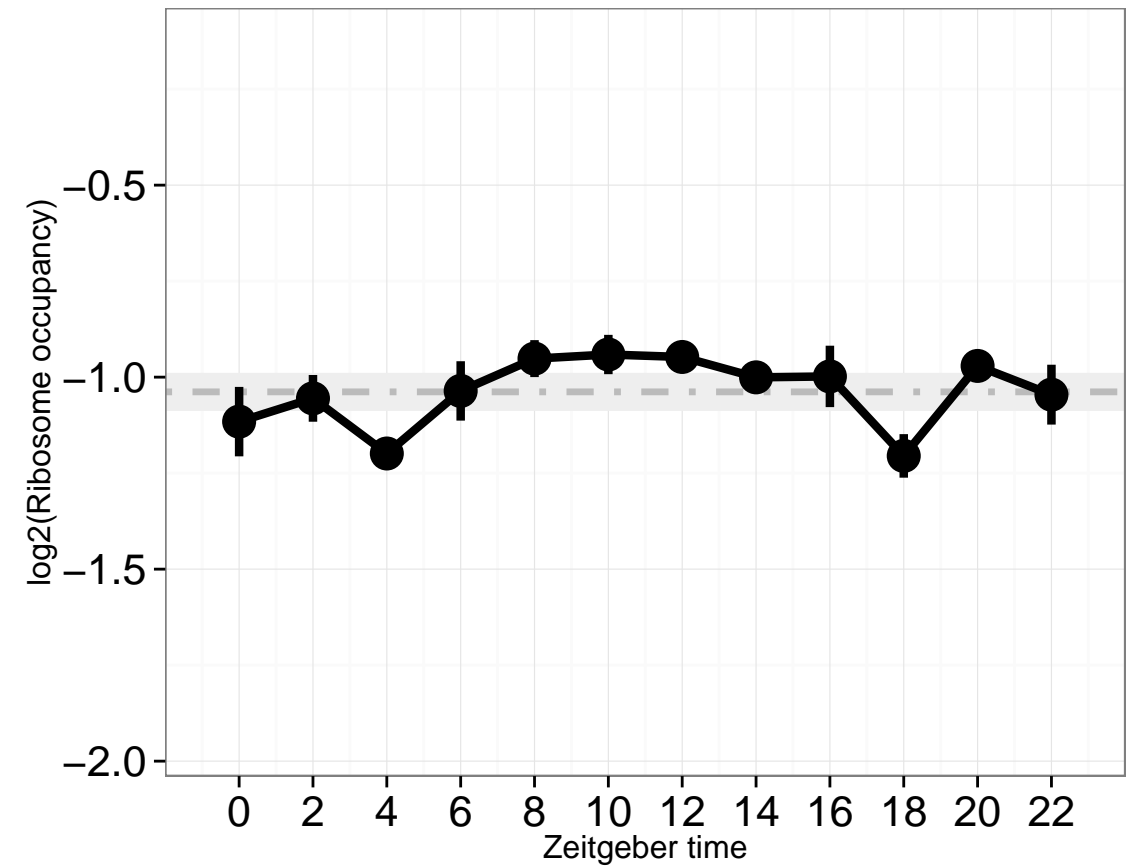

Supplement: Supplementary file 8117 [file 1]

# Rft1

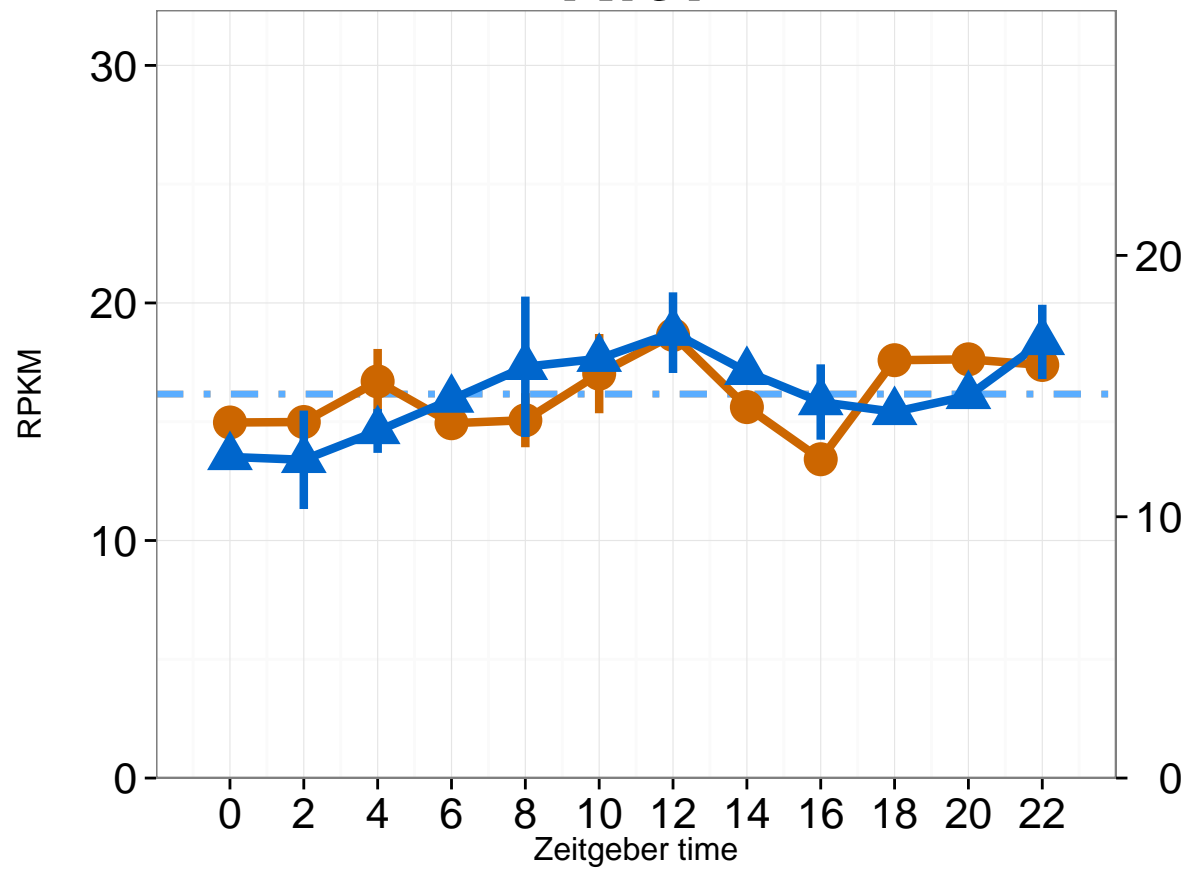

# Rft1

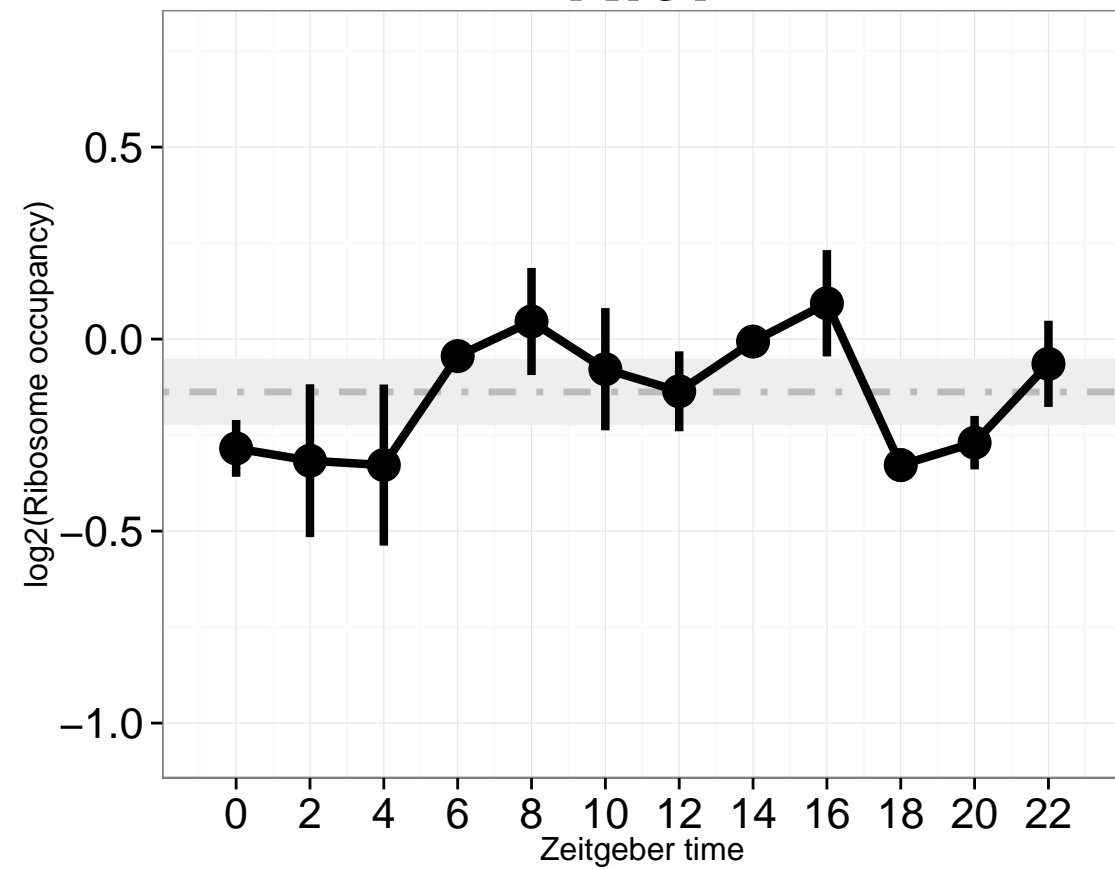

Supplement: Supplementary file 8118 [file 1]

## Chfr

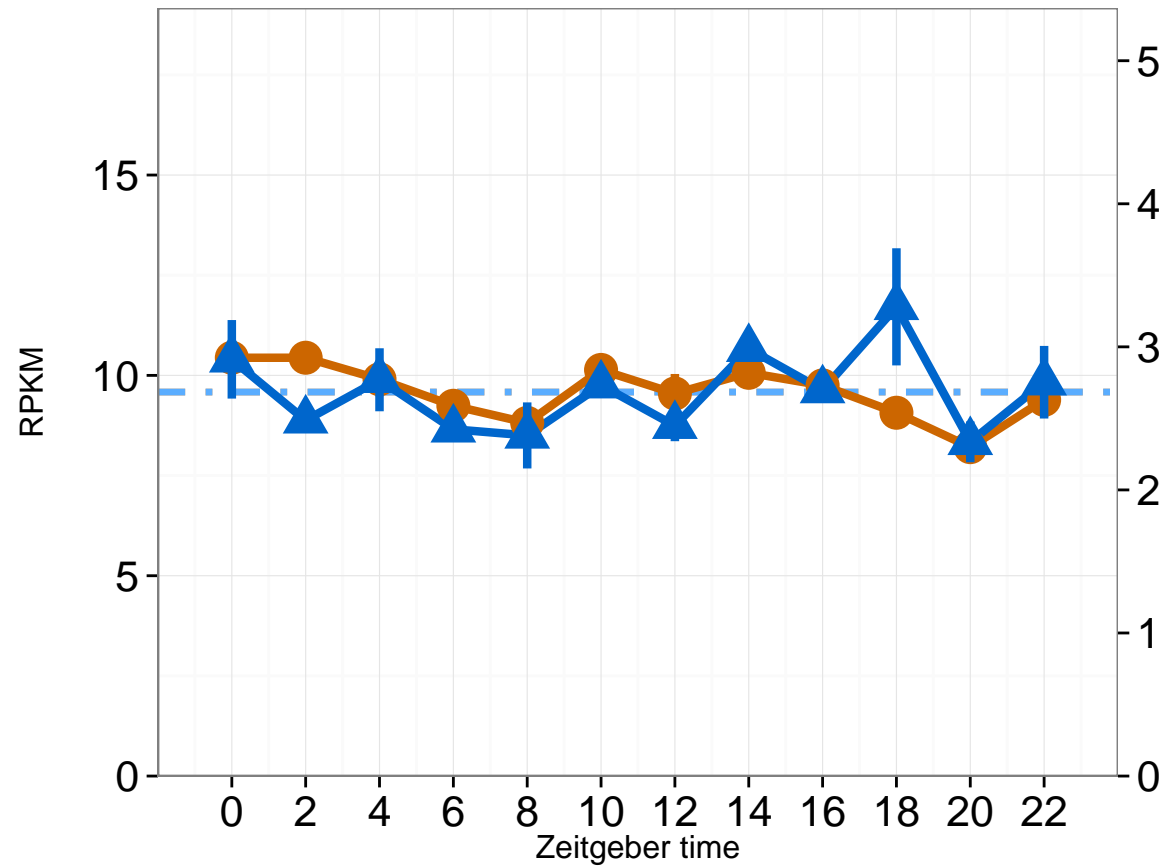

## Chfr

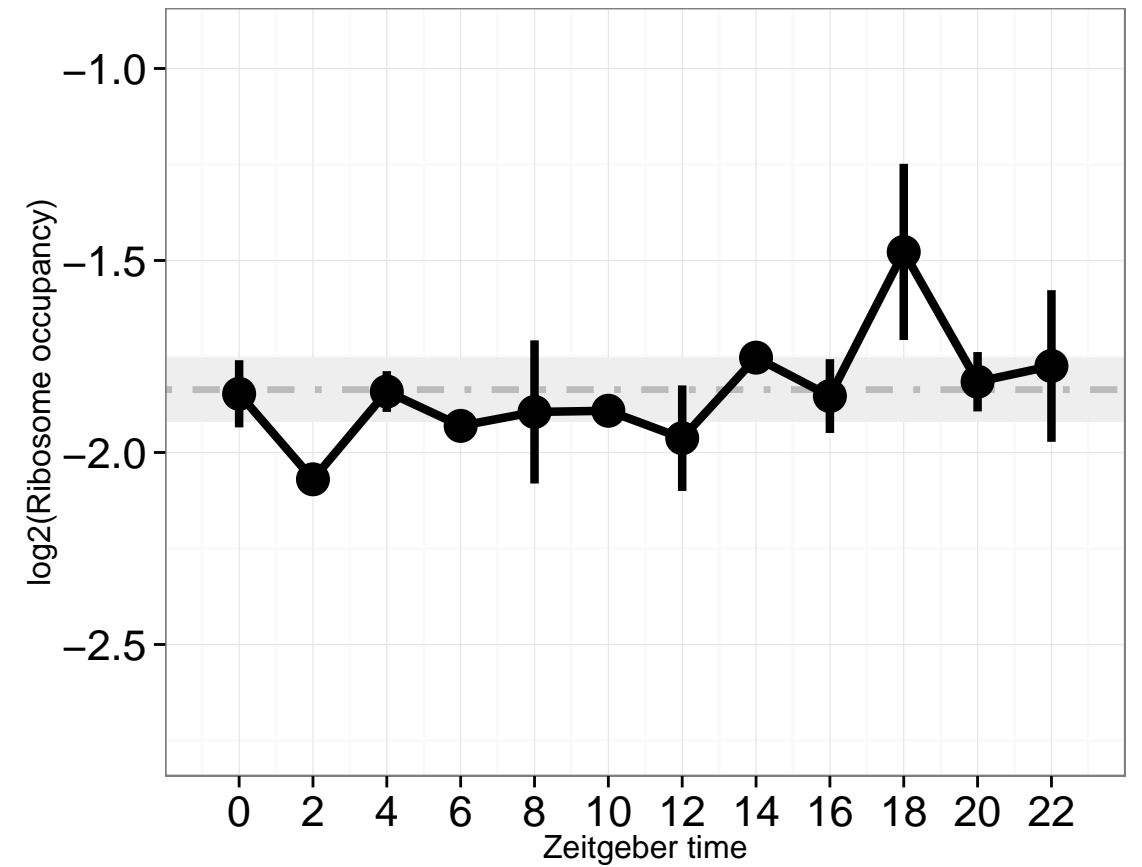

Supplement: Supplementary file 8119 [file 1]

## Pdcl

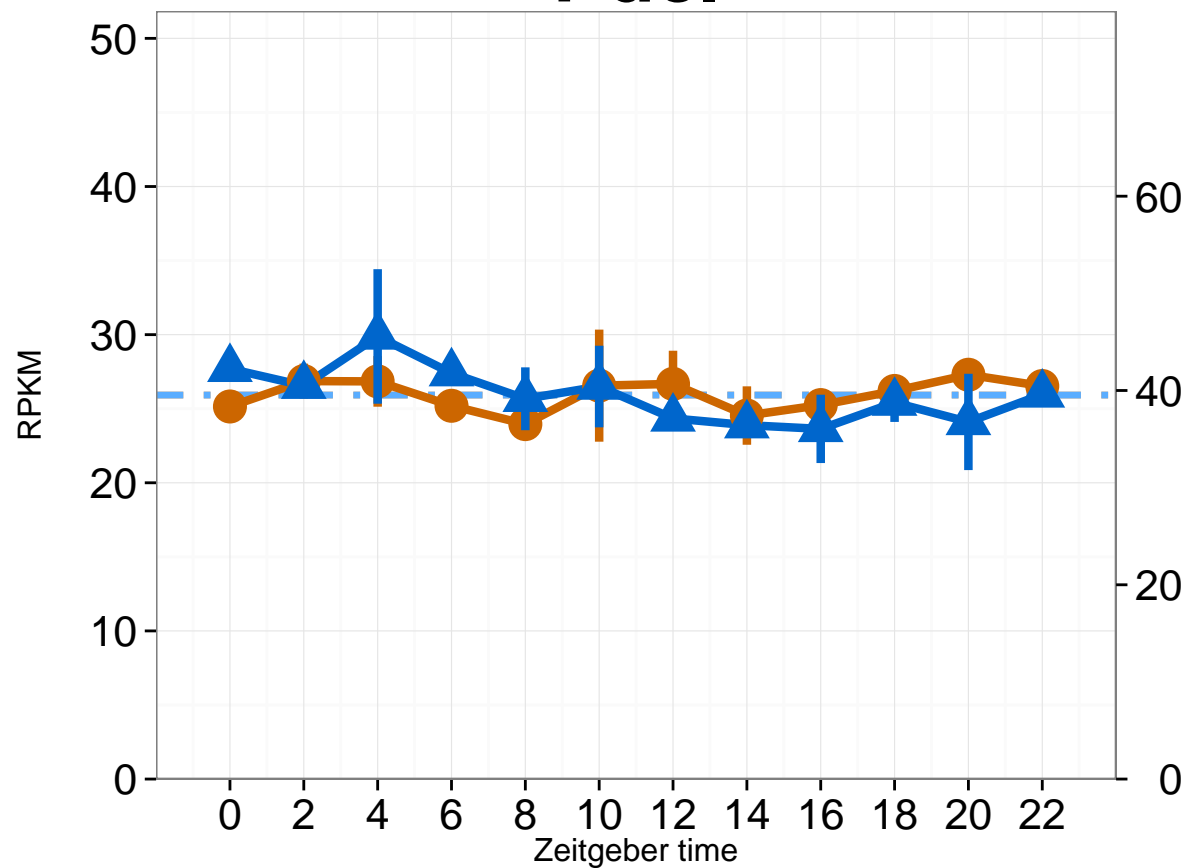

## Pdcl

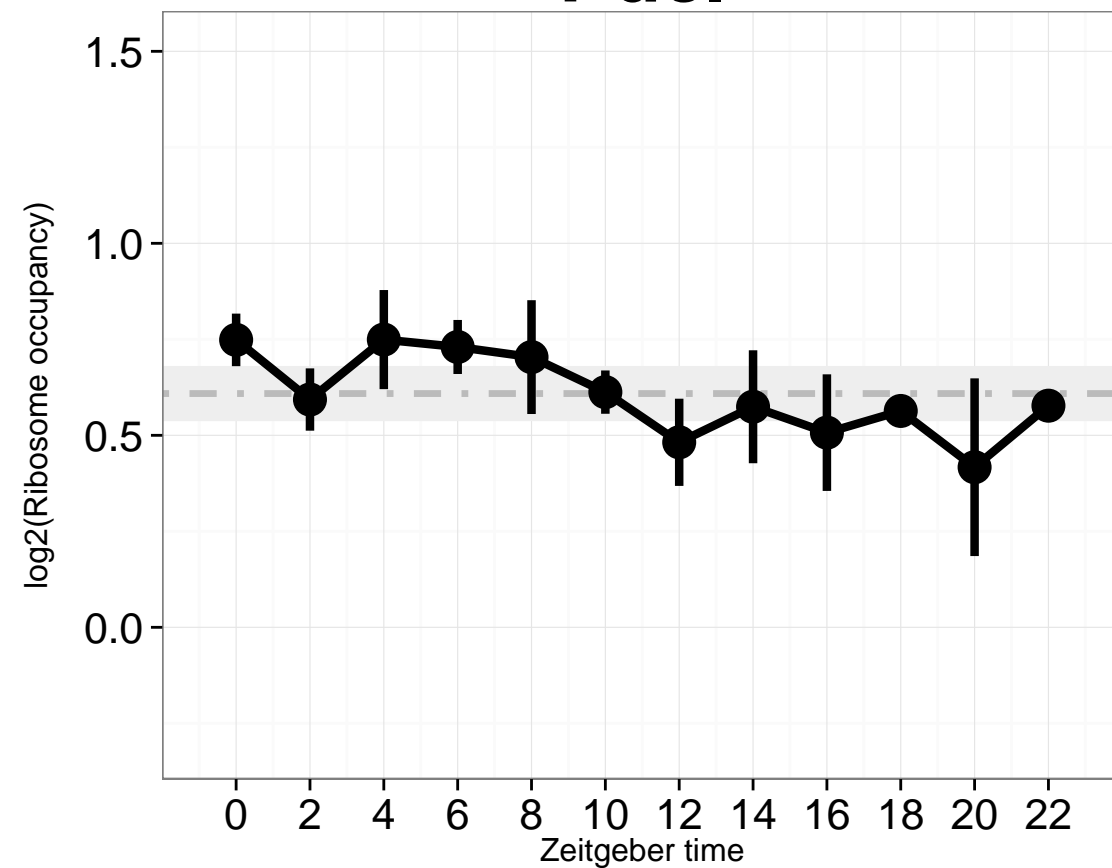

Supplement: Supplementary file 8120 [file 1]

## Ascc1

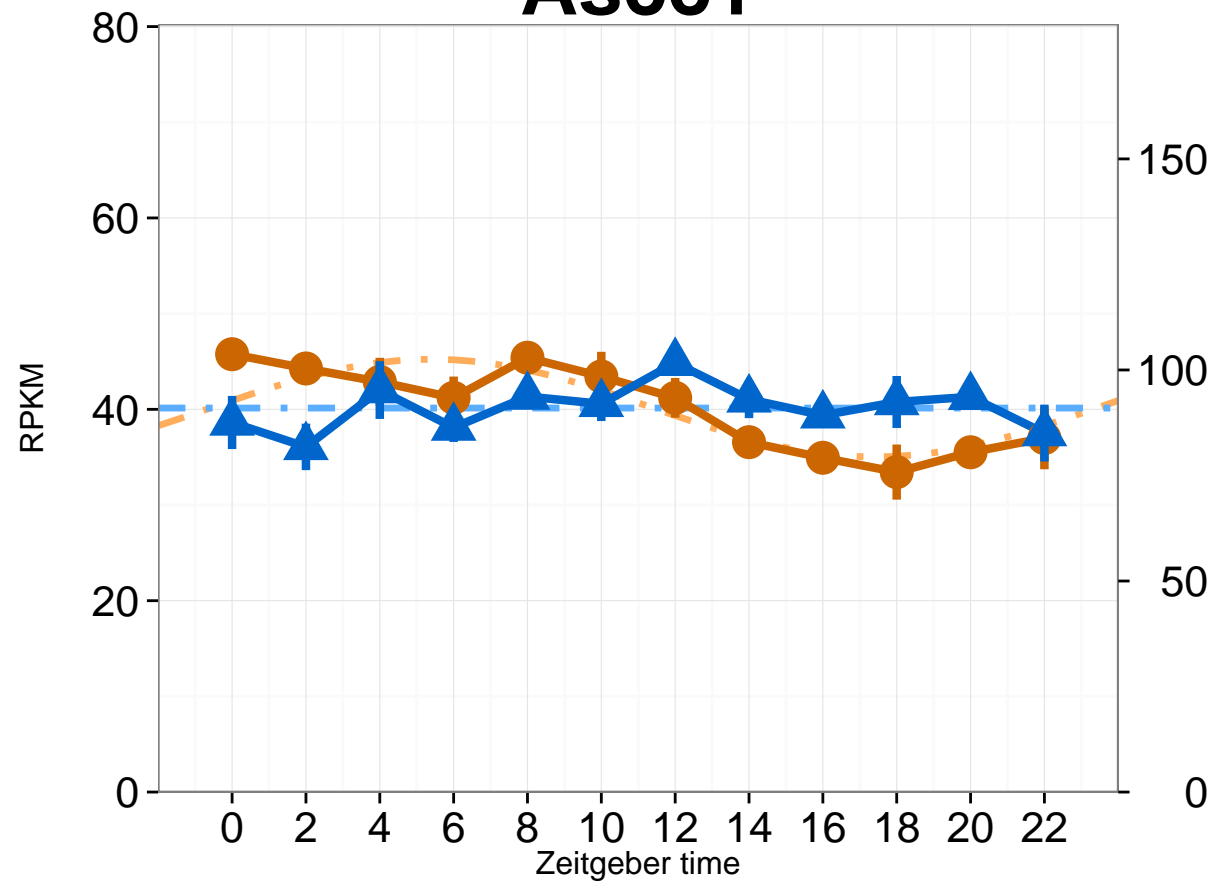

## Ascc1

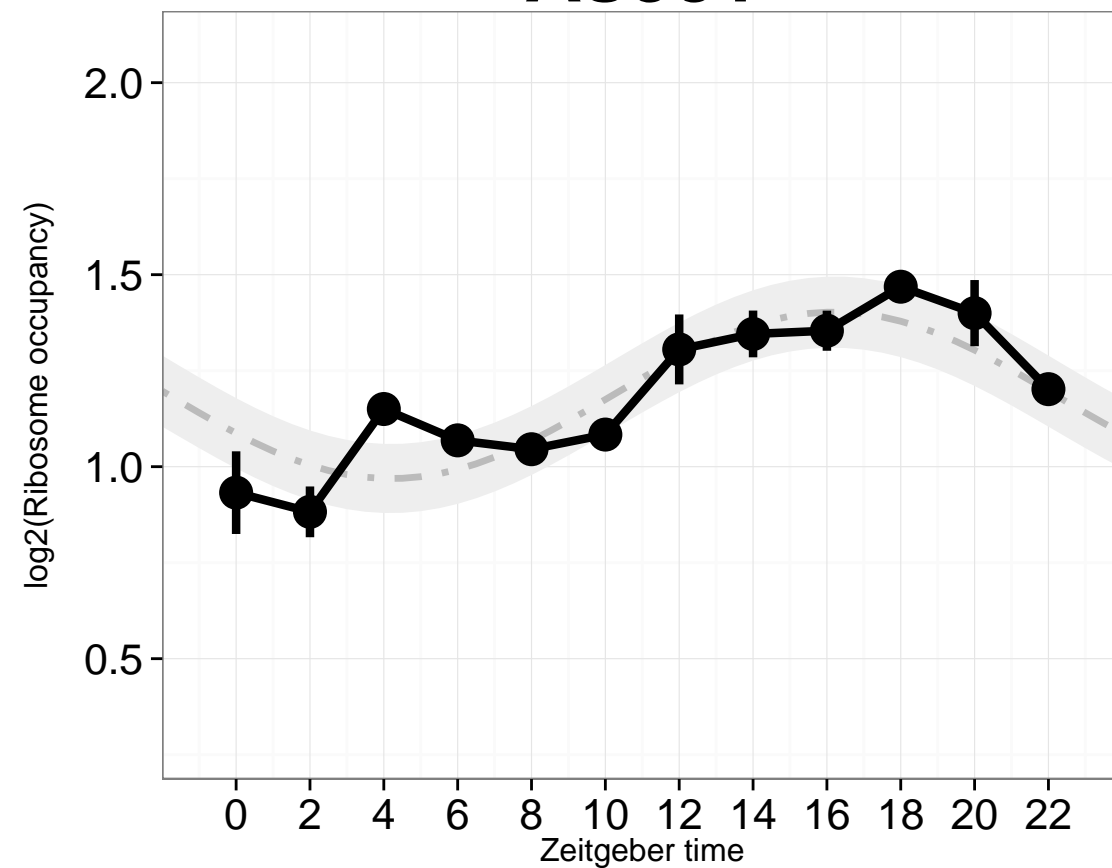

Supplement: Supplementary file 8121 [file 1]

## Maml2

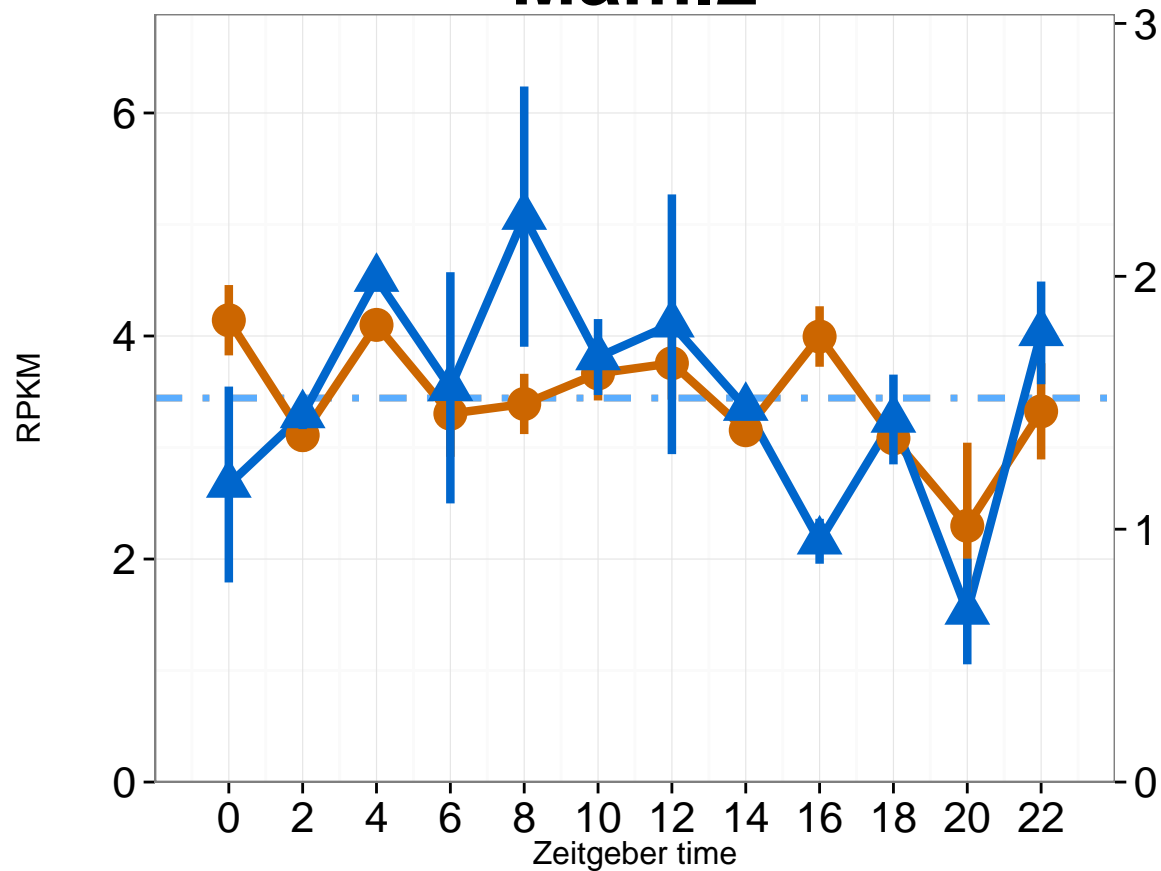

## Maml2

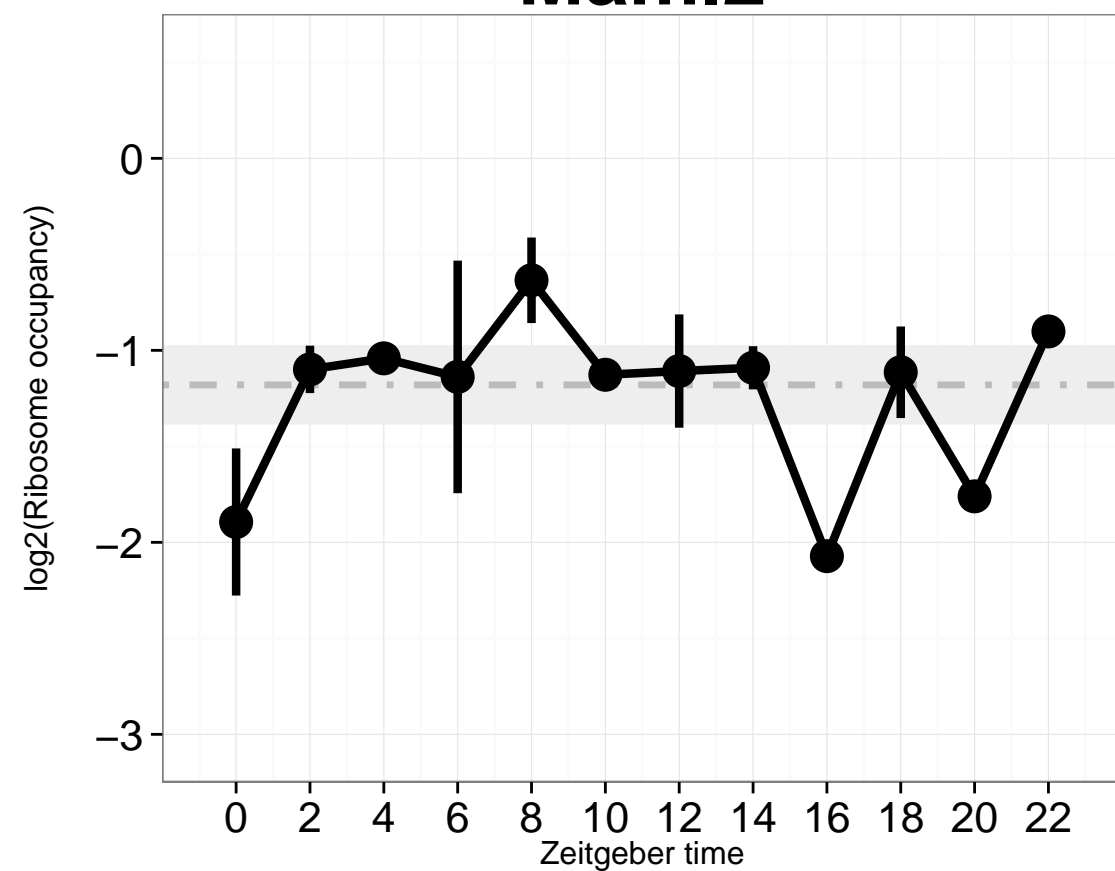

Supplement: Supplementary file 8122 [file 1]

# Uqcr11

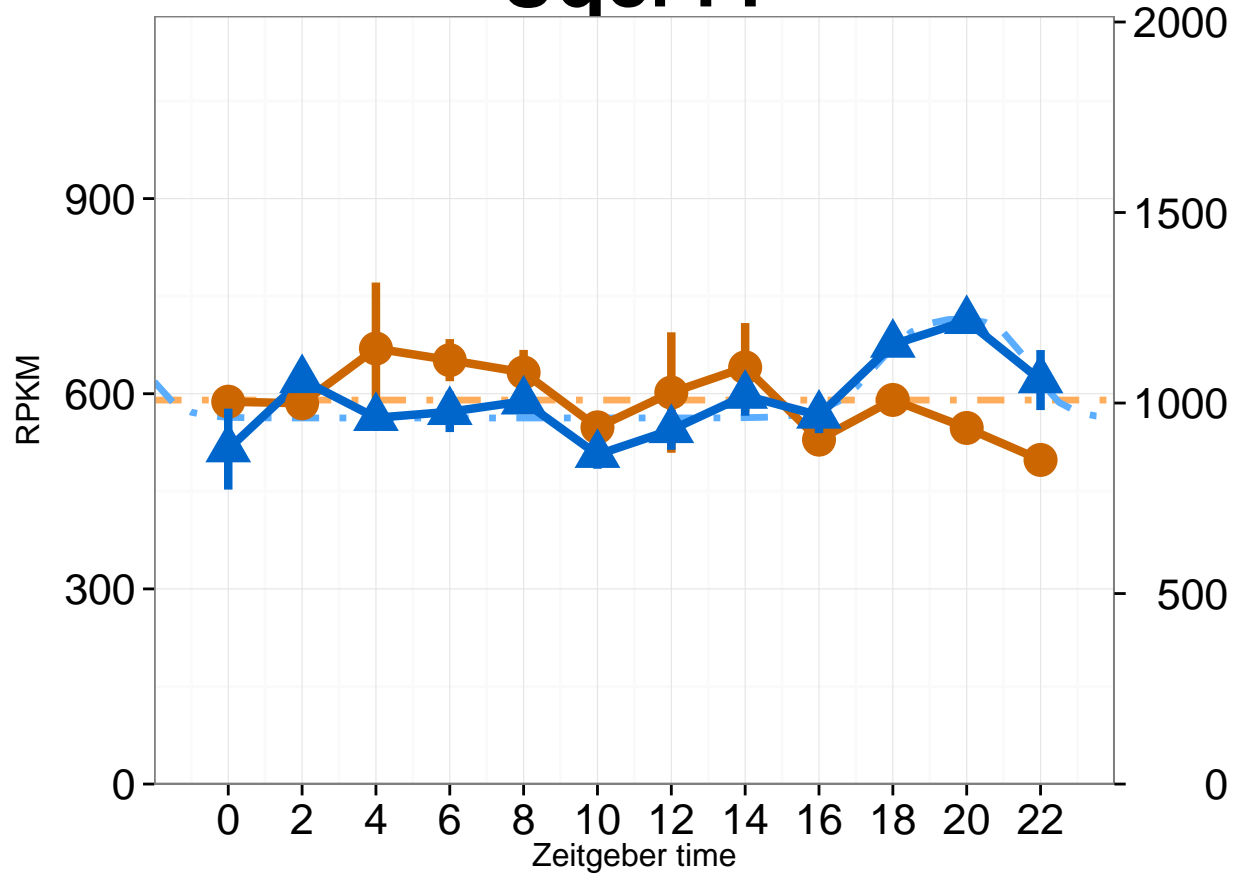

# Uqcr11

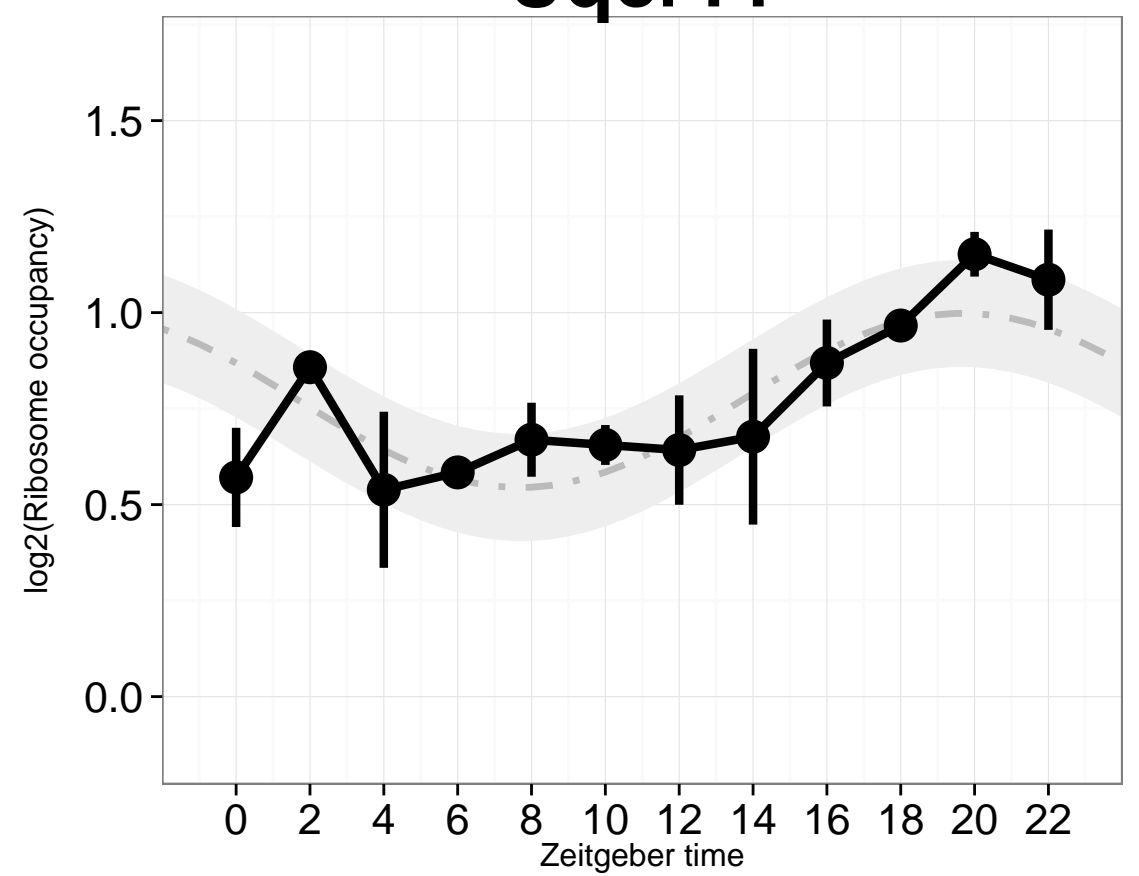

Supplement: Supplementary file 8123 [file 1]

# Rps23

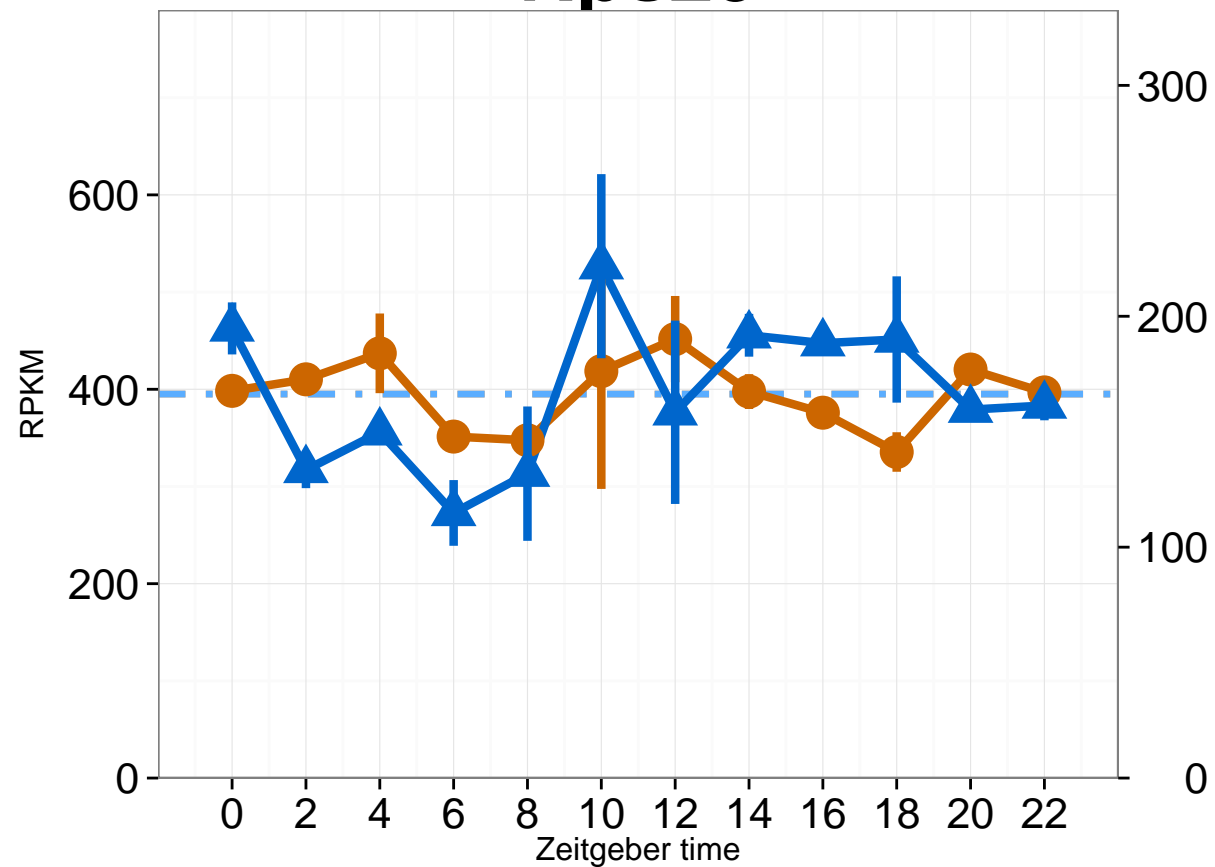

# Rps23

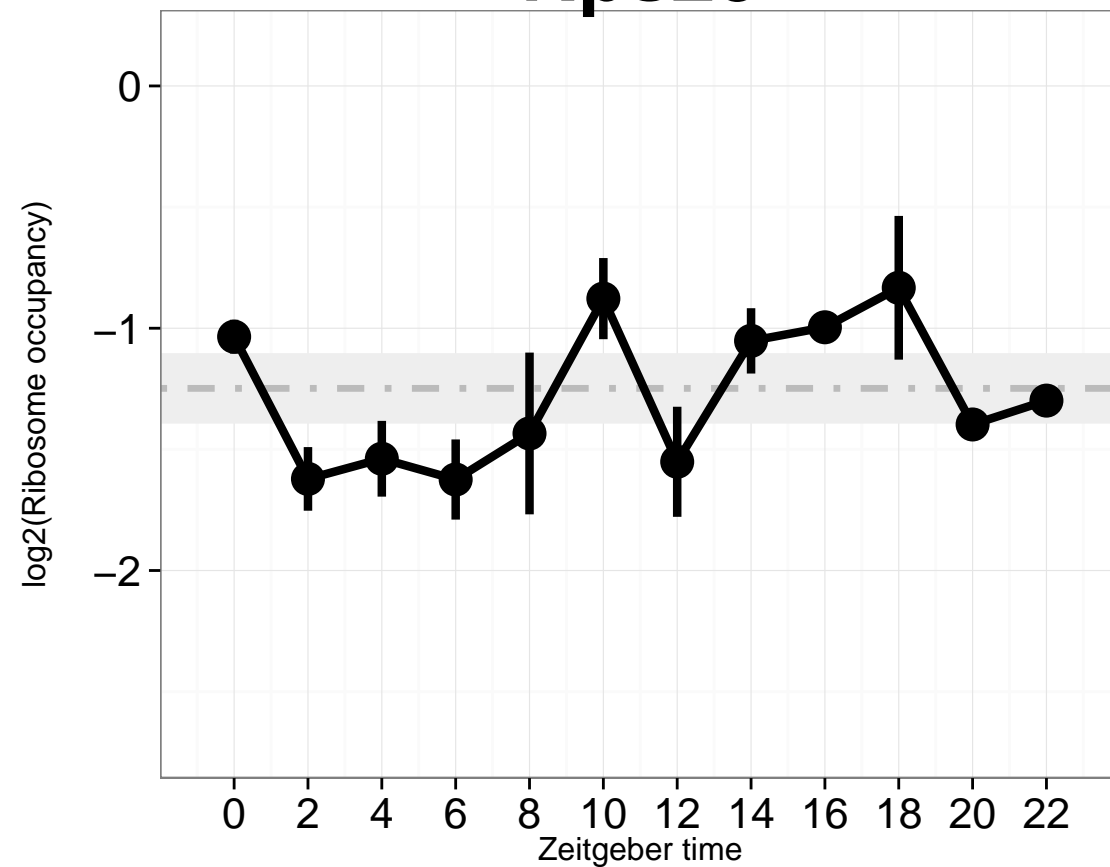

Supplement: Supplementary file 8124 [file 1]

## Rps7

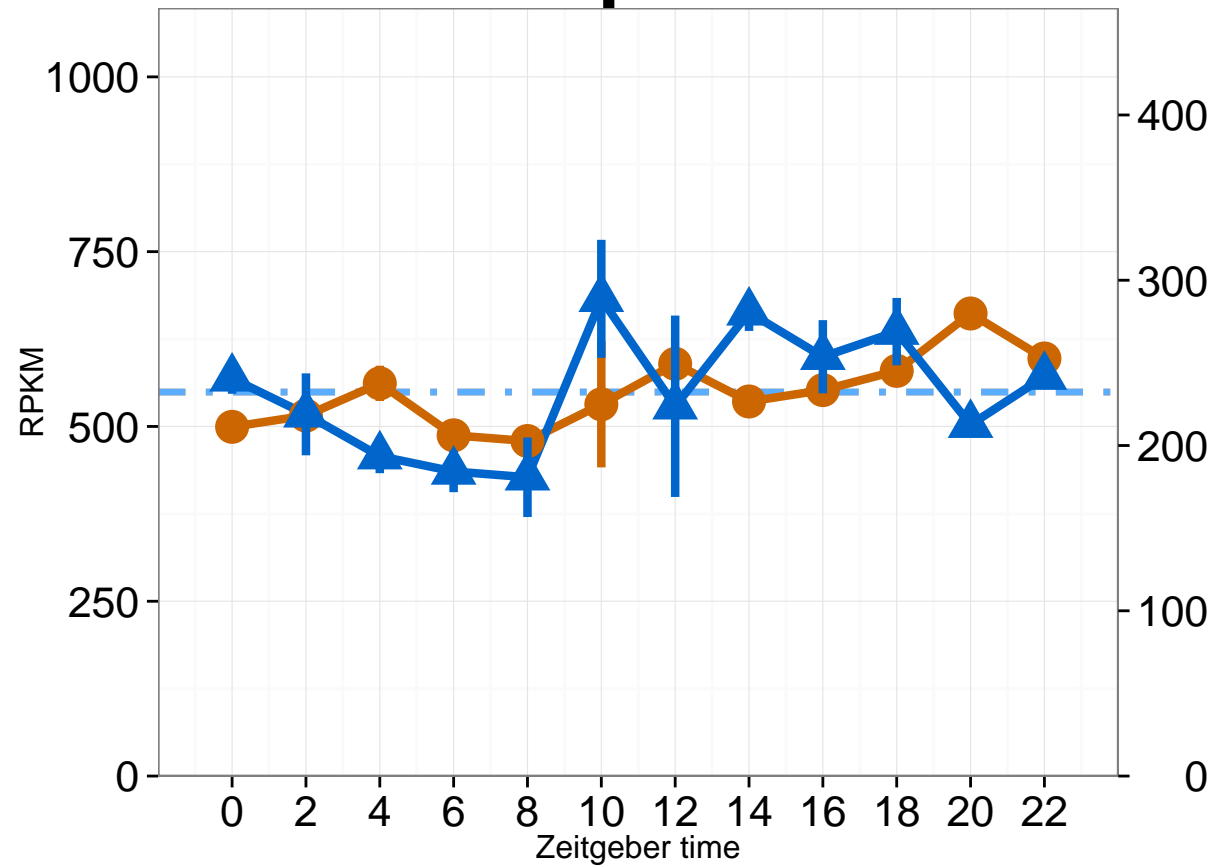

## Rps7

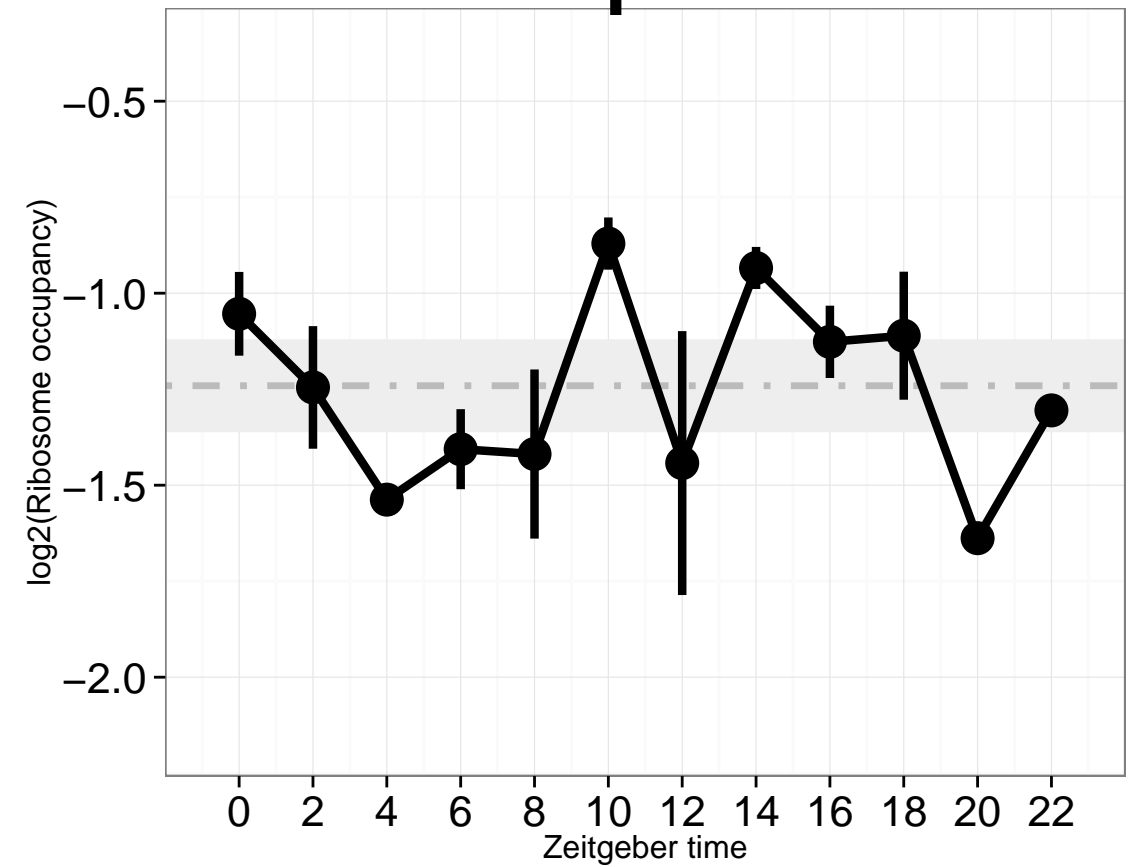

Supplement: Supplementary file 8125 [file 1]

# Thyn1

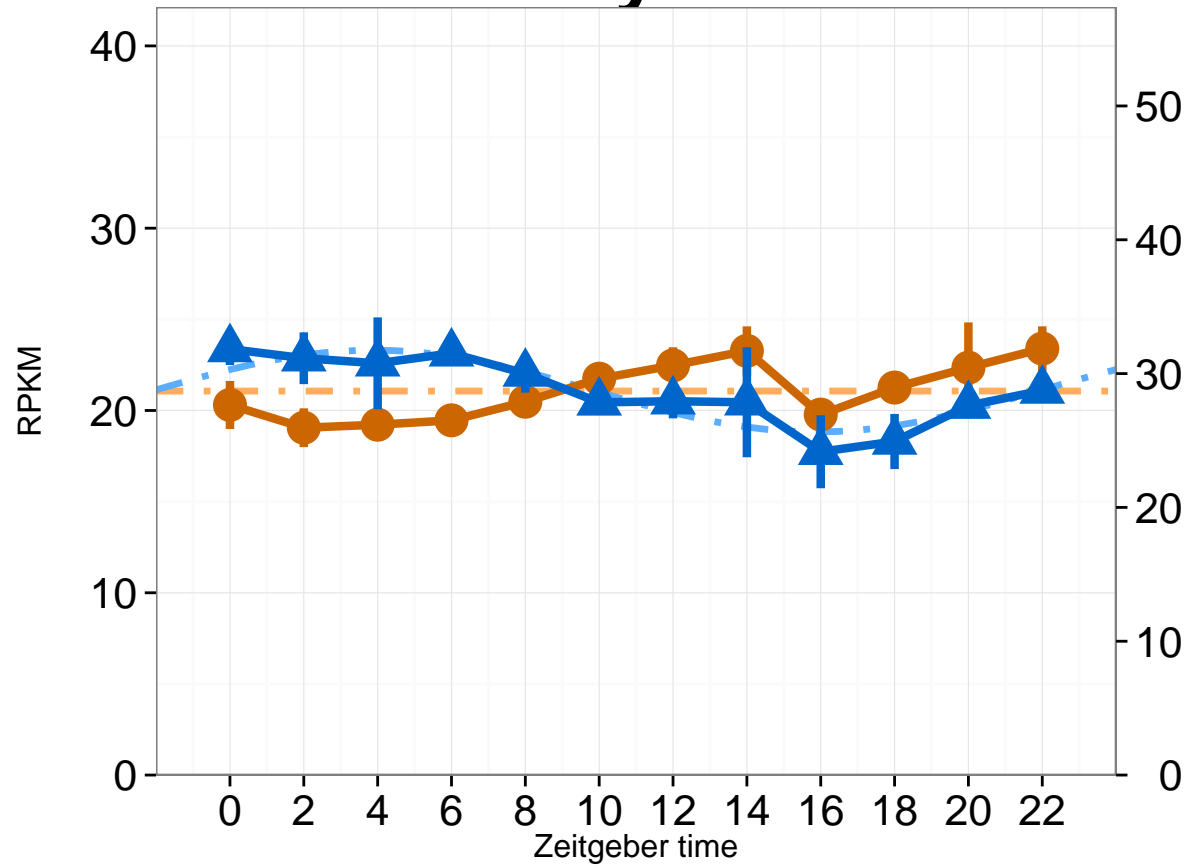

# Thyn1

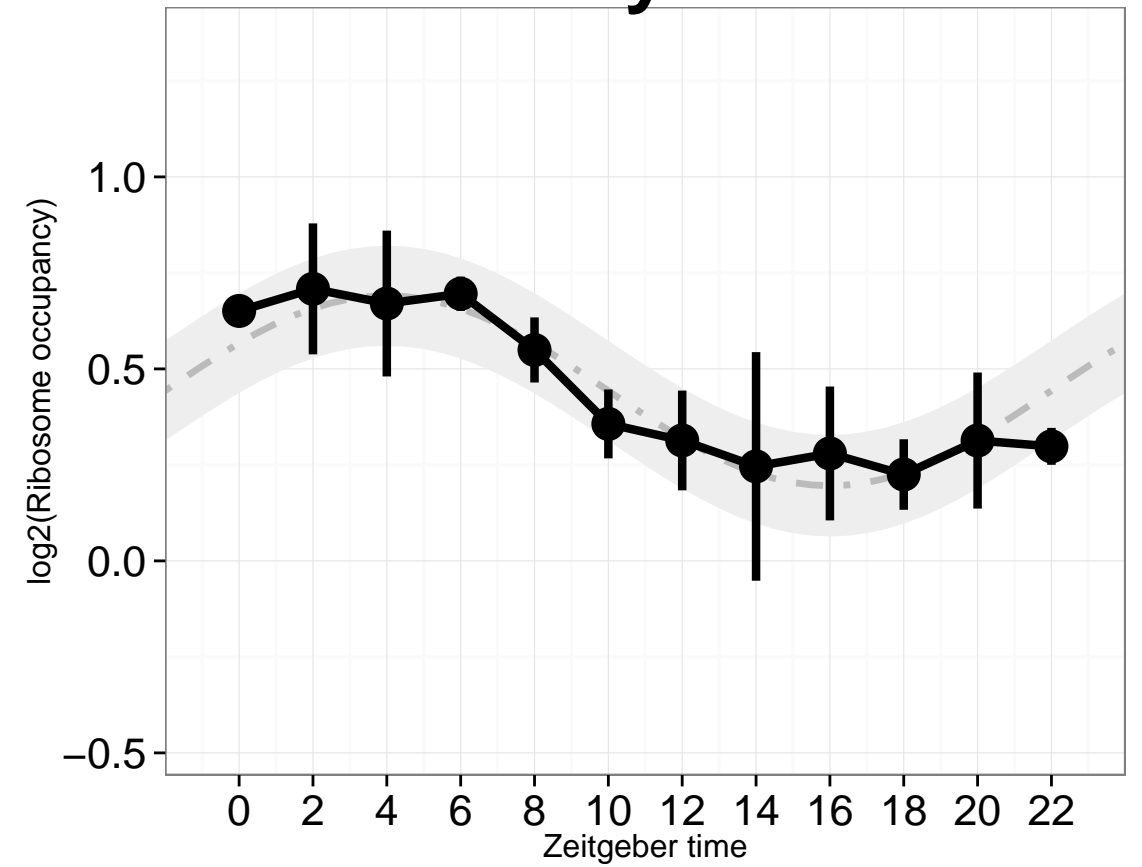

Supplement: Supplementary file 8126 [file 1]

## Cnot2

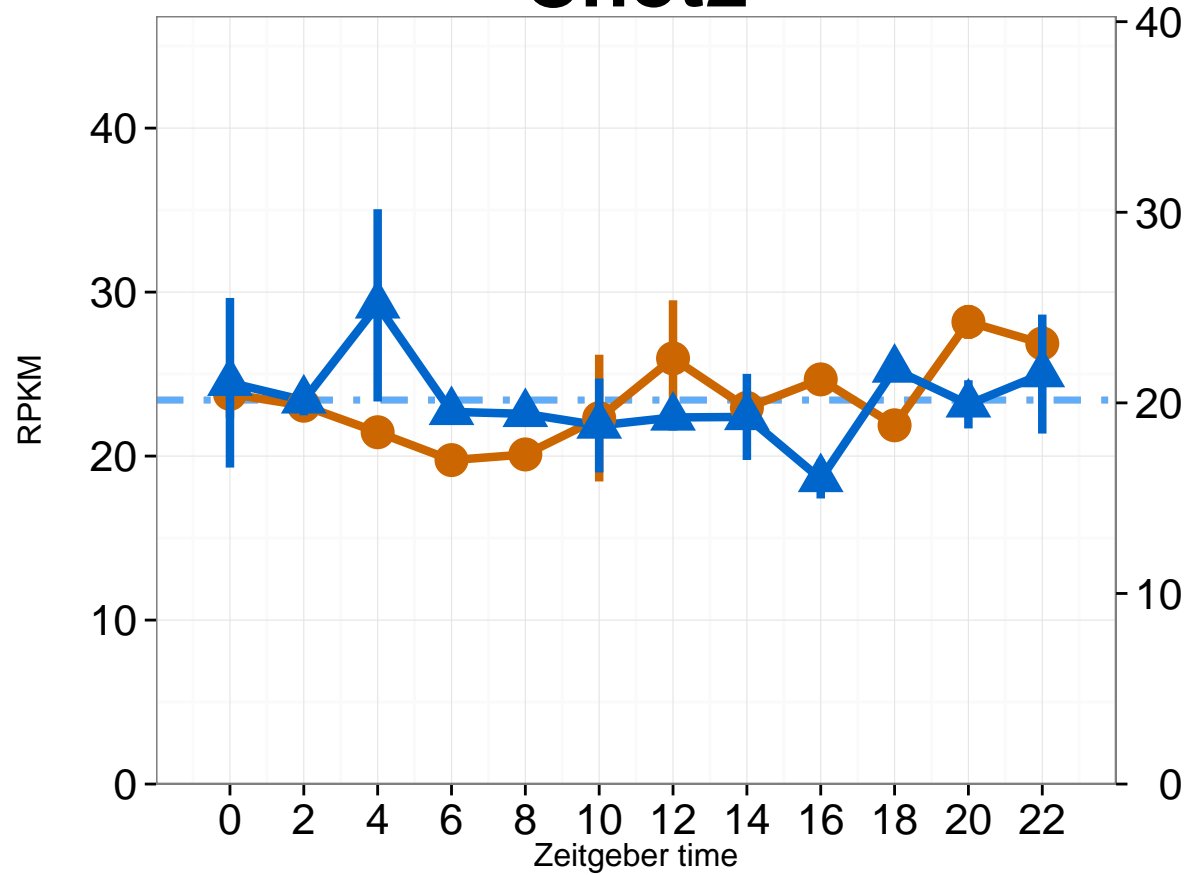

## Cnot2

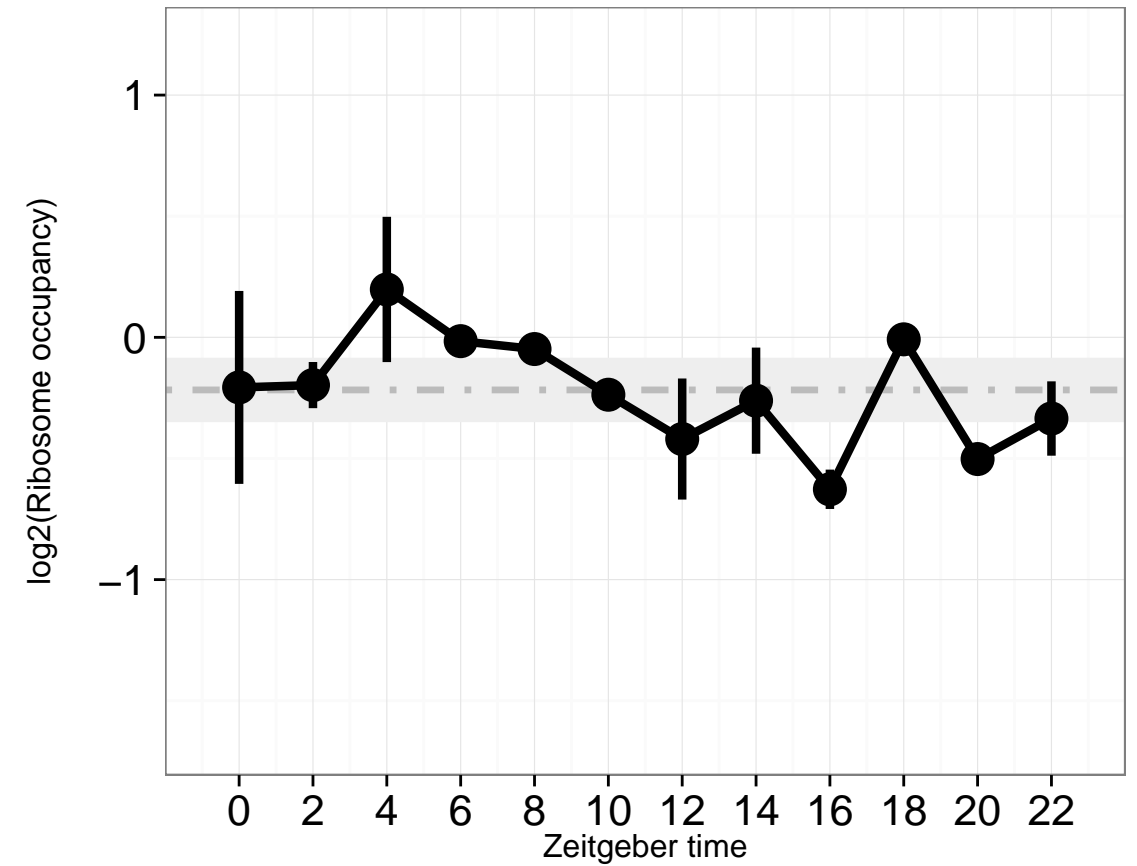

Supplement: Supplementary file 8127 [file 1]

## Cdk8

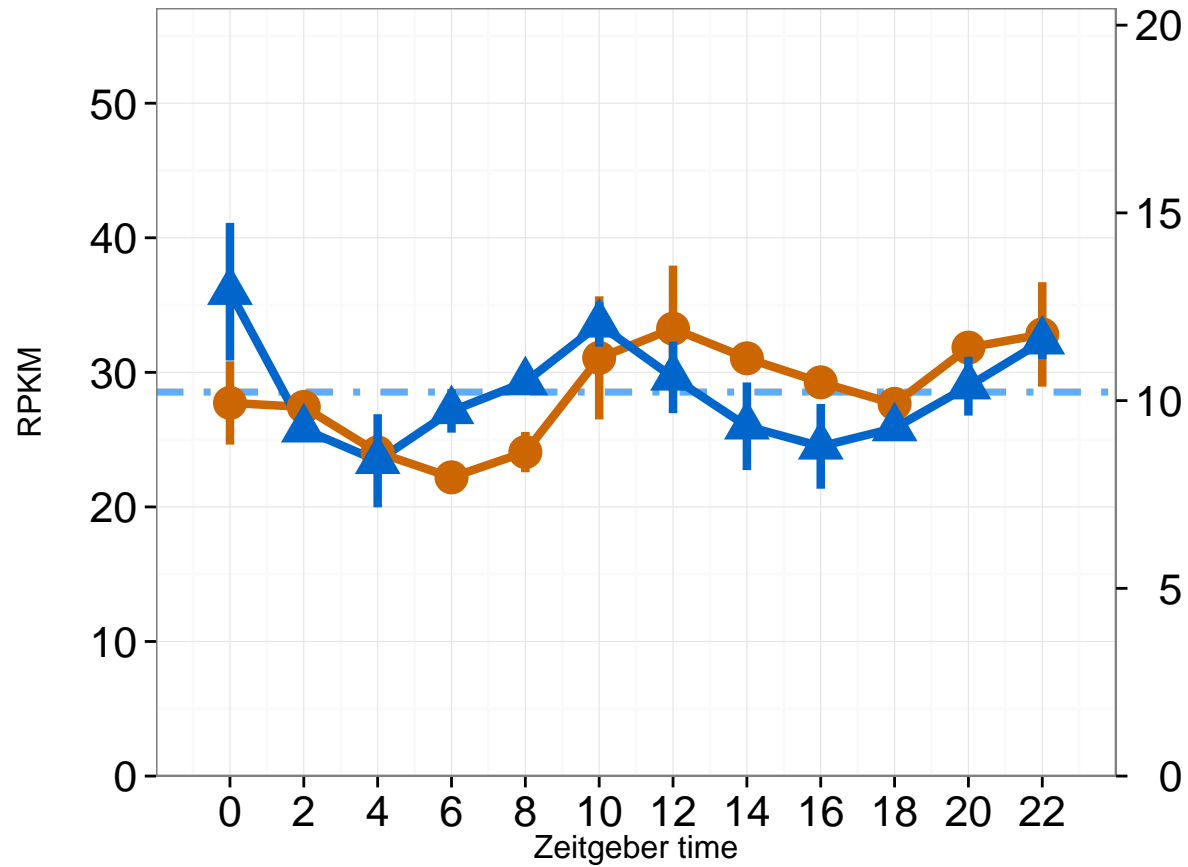

## Cdk8

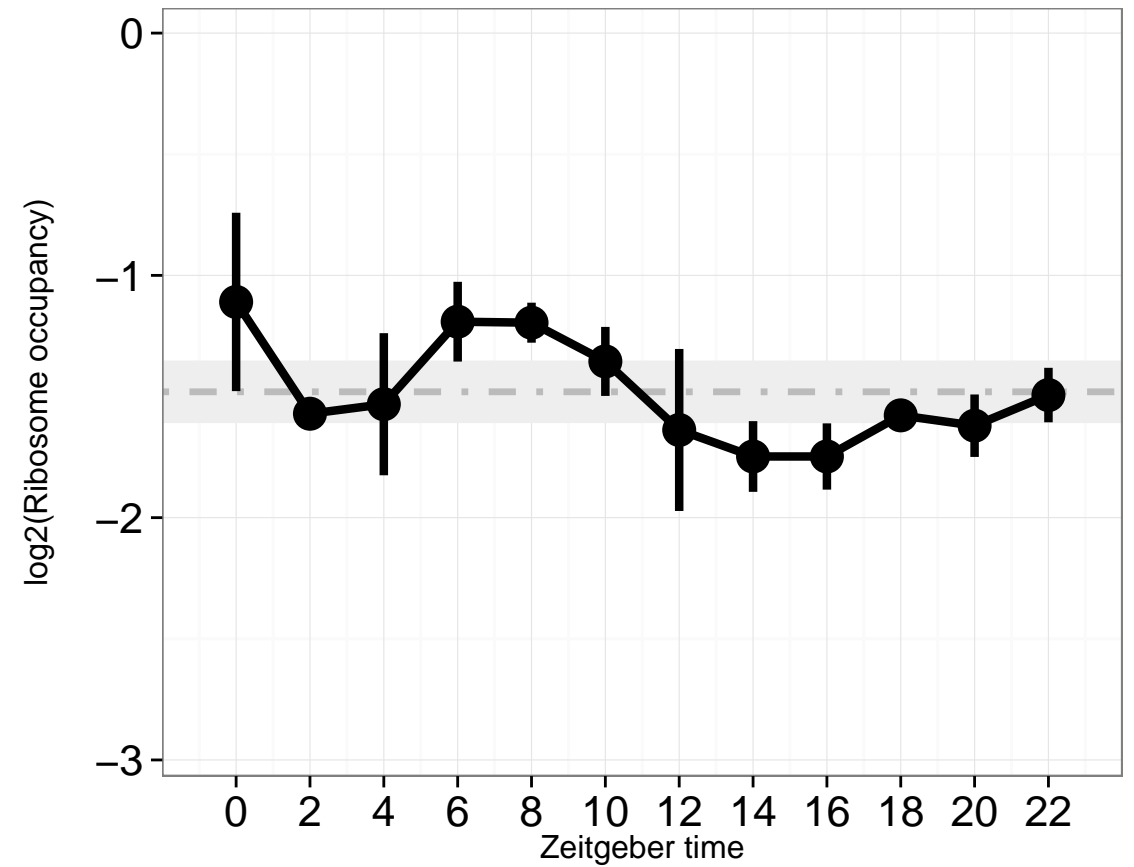

Supplement: Supplementary file 8128 [file 1]
