# Supplementary material (part 82 of 133)
Source: publisher figshare collection journal article supplement (https://springernature.figshare.com/articles/dataset/_/4903193)

# Hcfc1r1

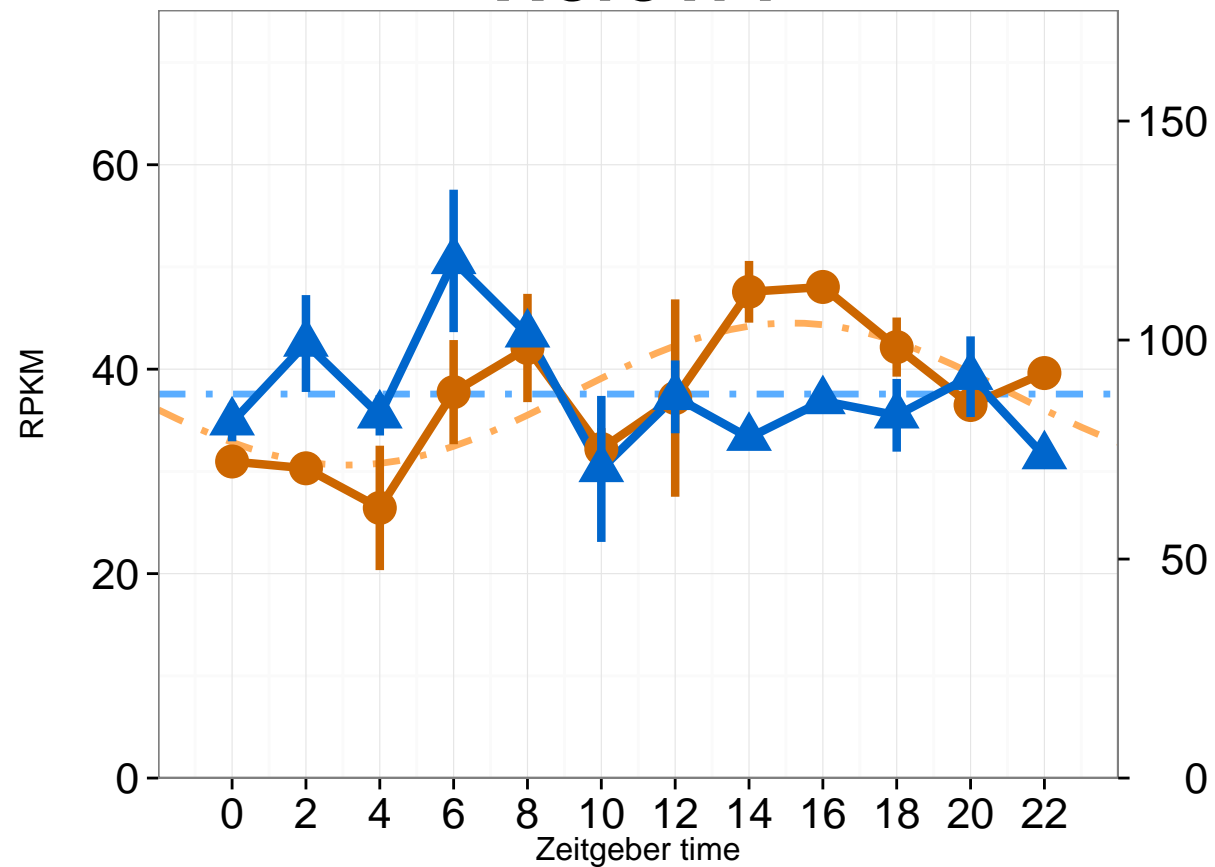

# Hcfc1r1

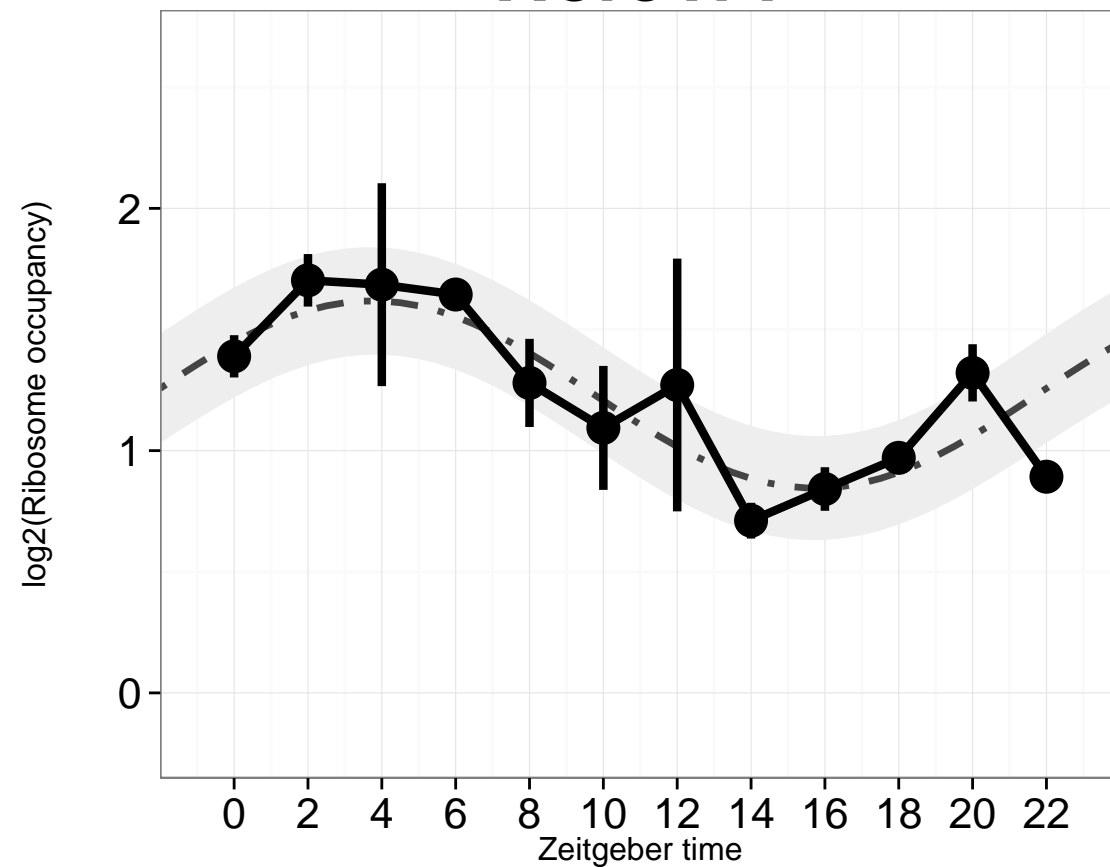

Supplement: Supplementary file 8129 [file 1]

# Bdp1

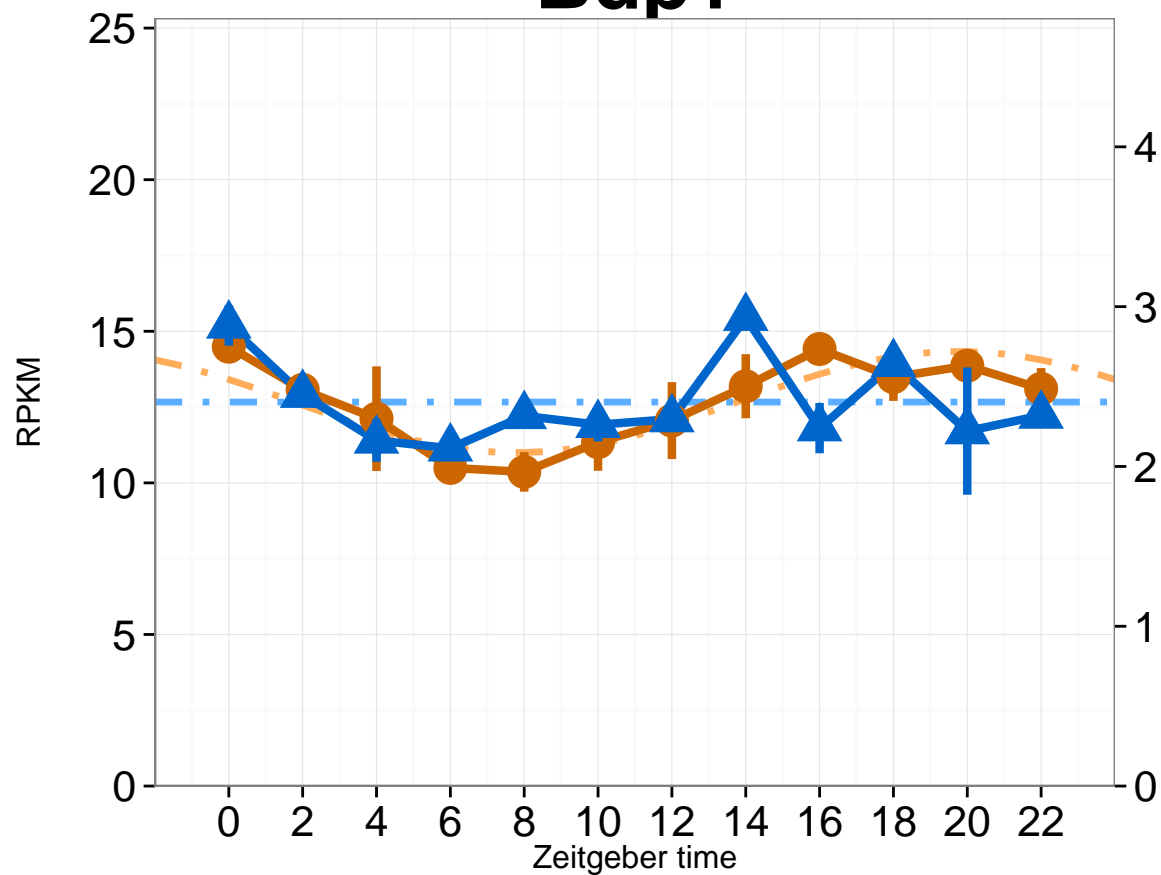

# Bdp1

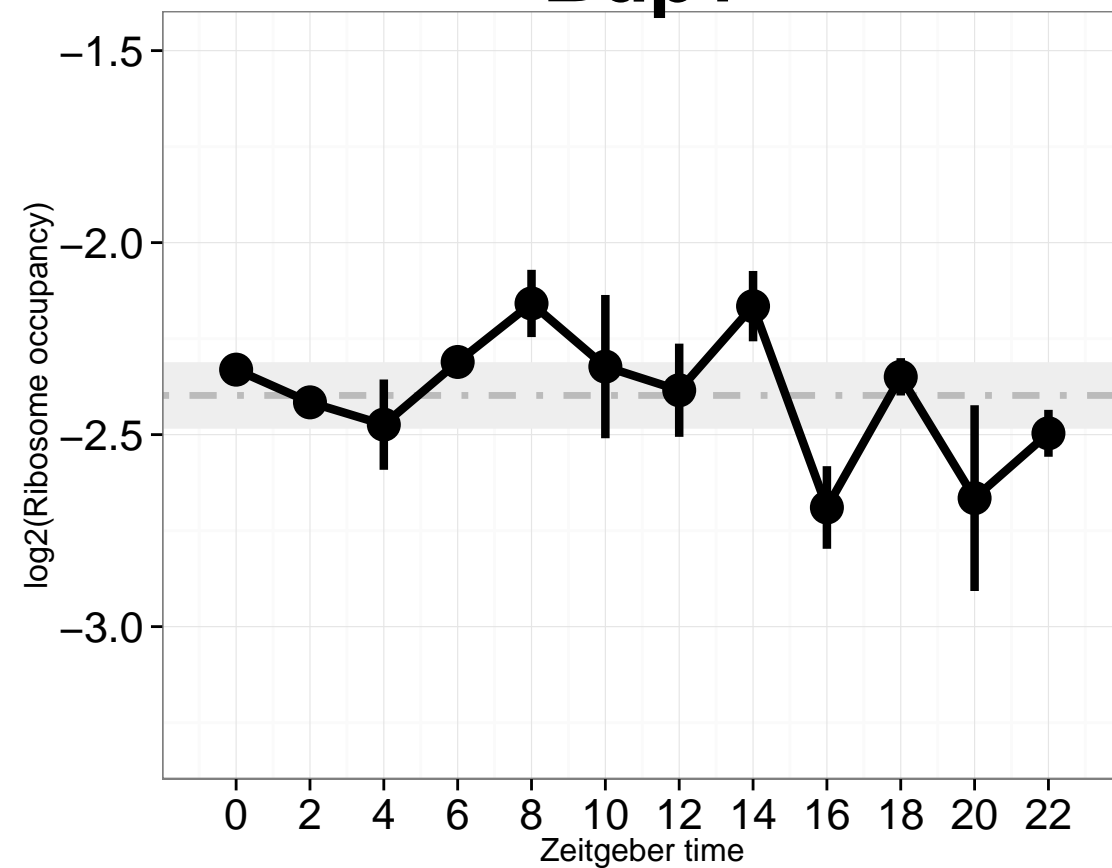

Supplement: Supplementary file 8130 [file 1]

## Prr15l

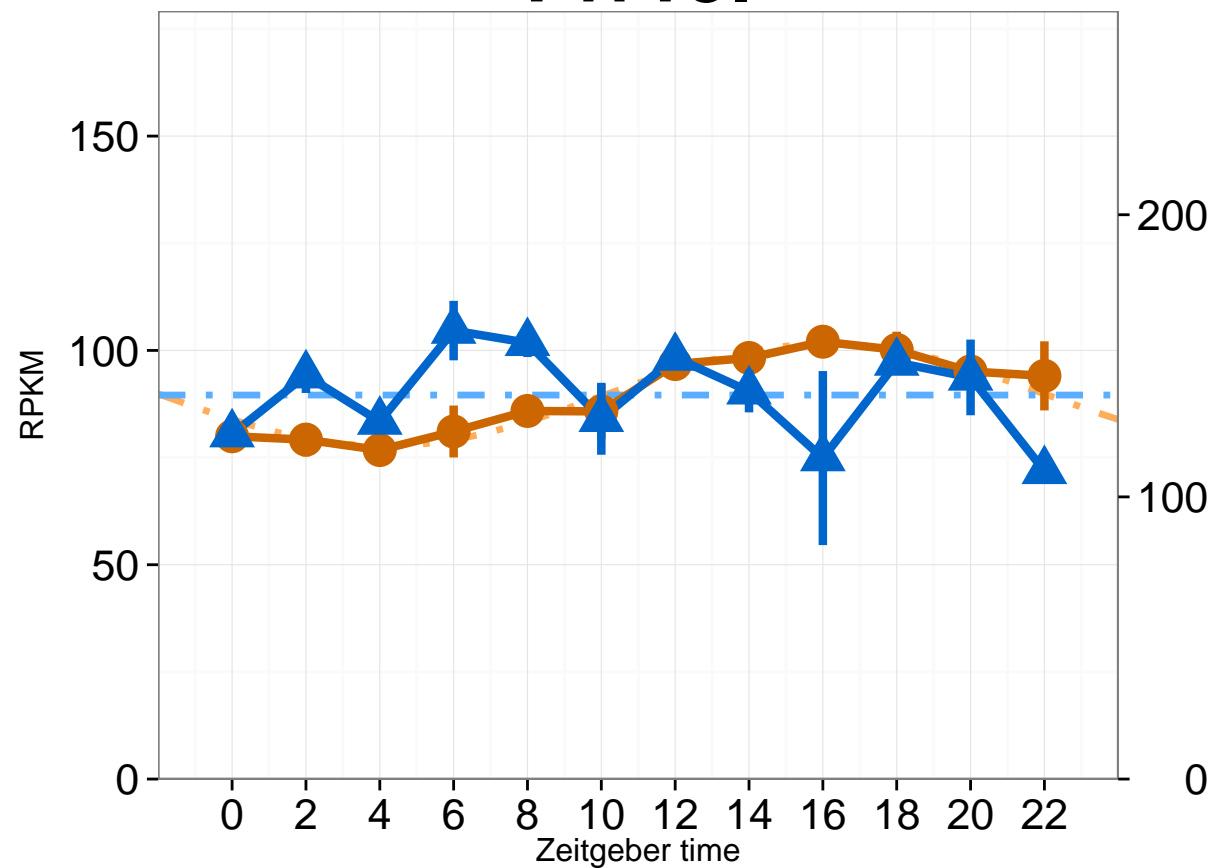

## Prr15l

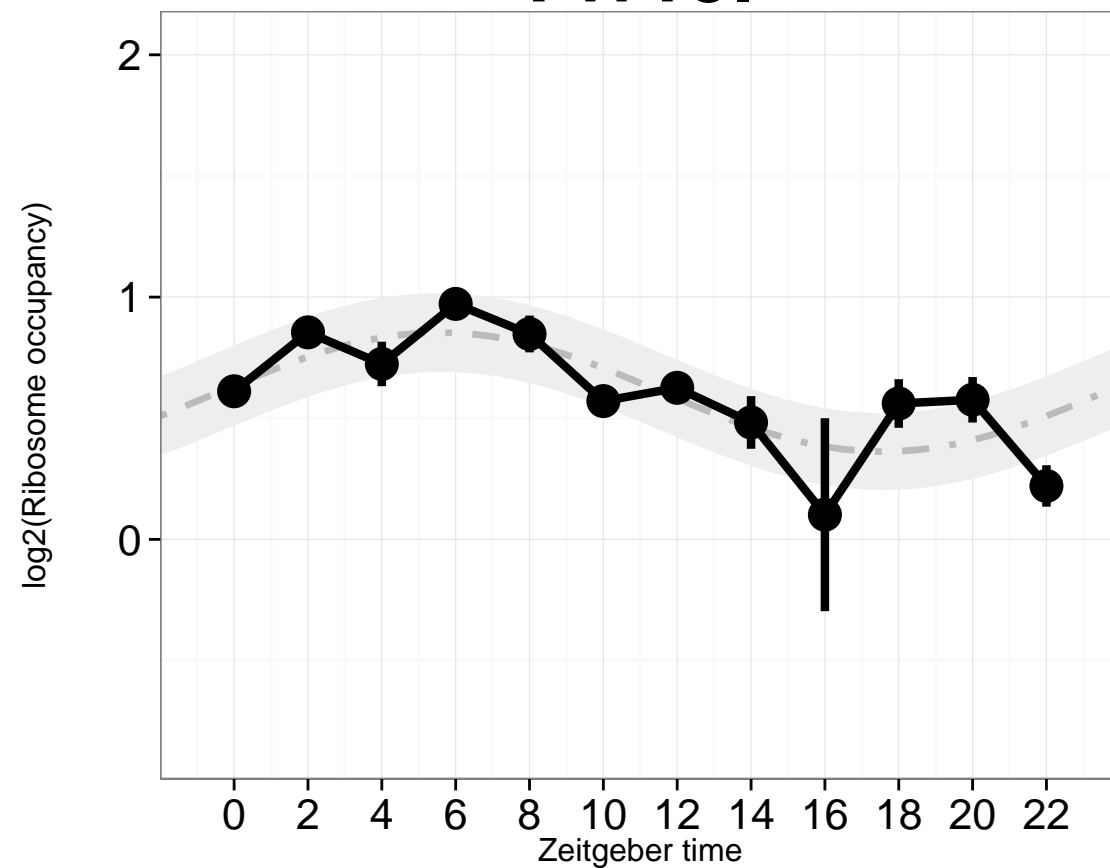

Supplement: Supplementary file 8131 [file 1]

## Slc29a2

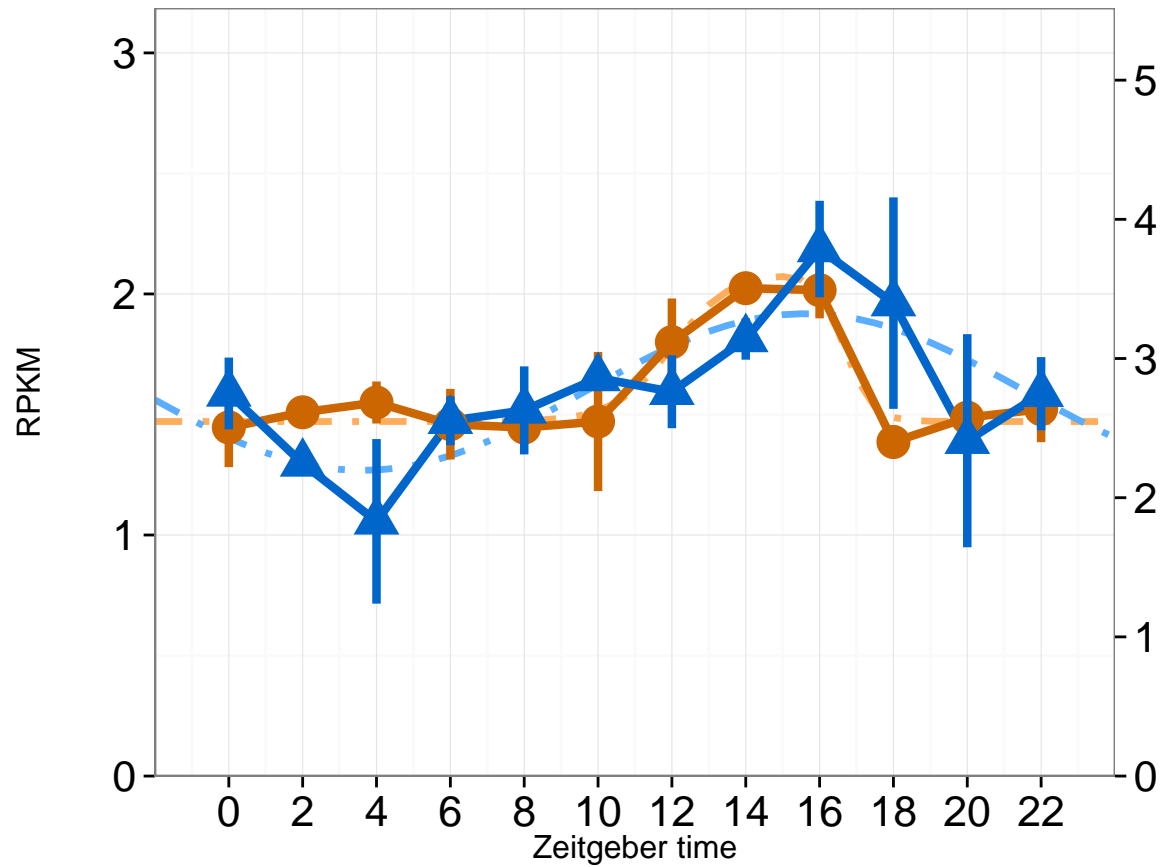

## Slc29a2

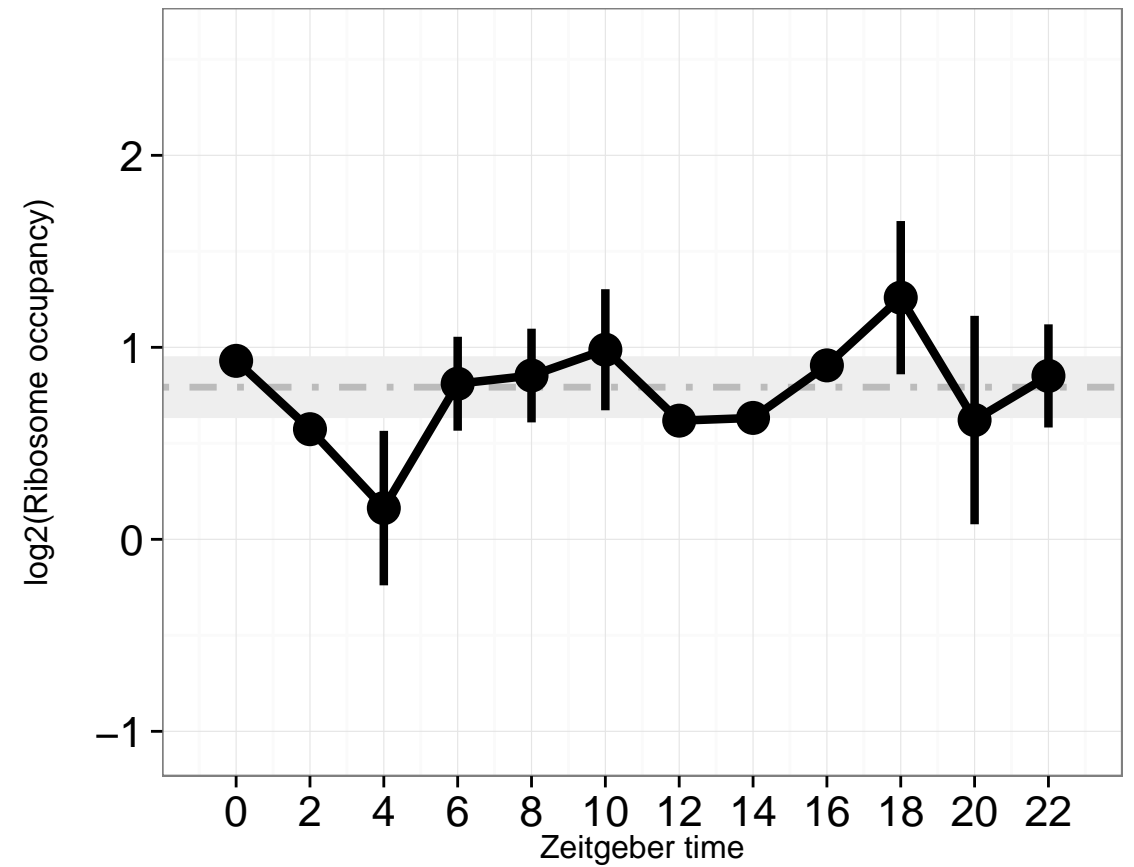

Supplement: Supplementary file 8132 [file 1]

## Lmbrd1

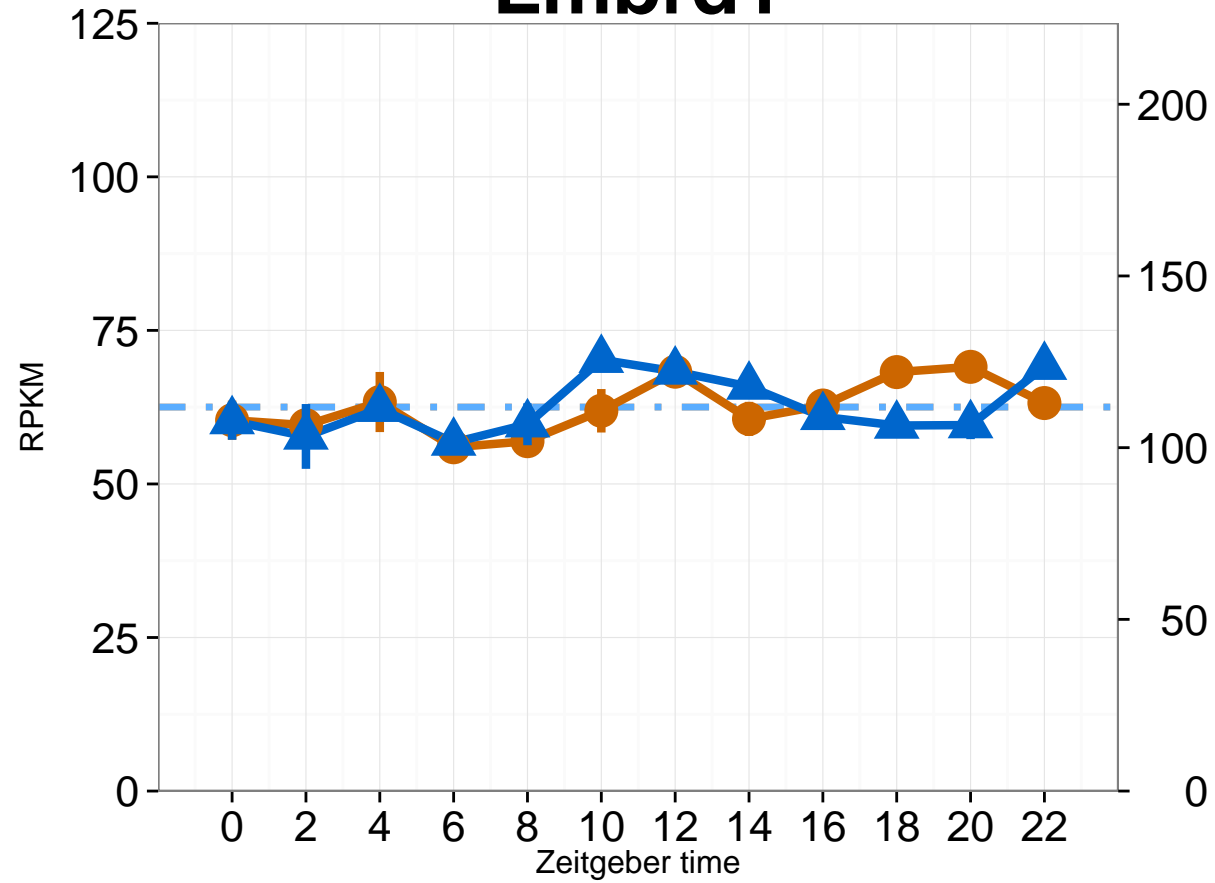

## Lmbrd1

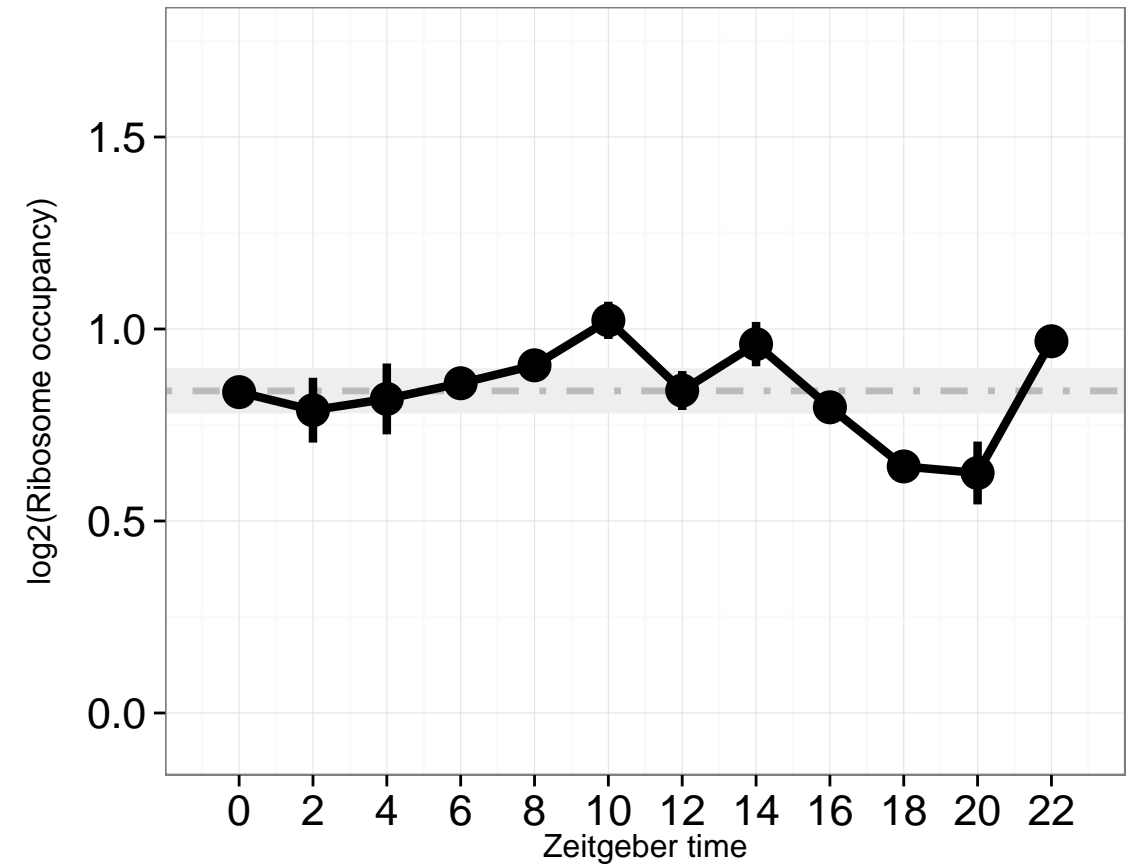

Supplement: Supplementary file 8133 [file 1]

## Nrbf2

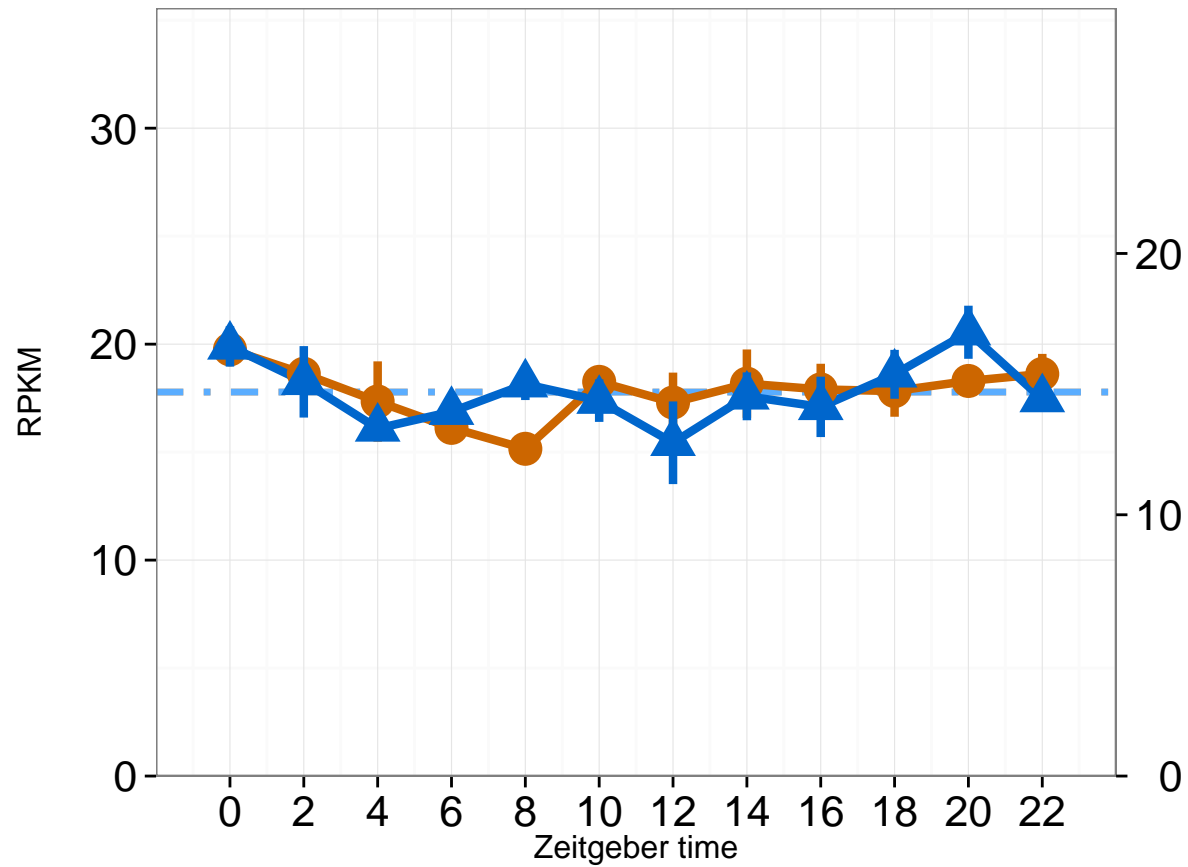

## Nrbf2

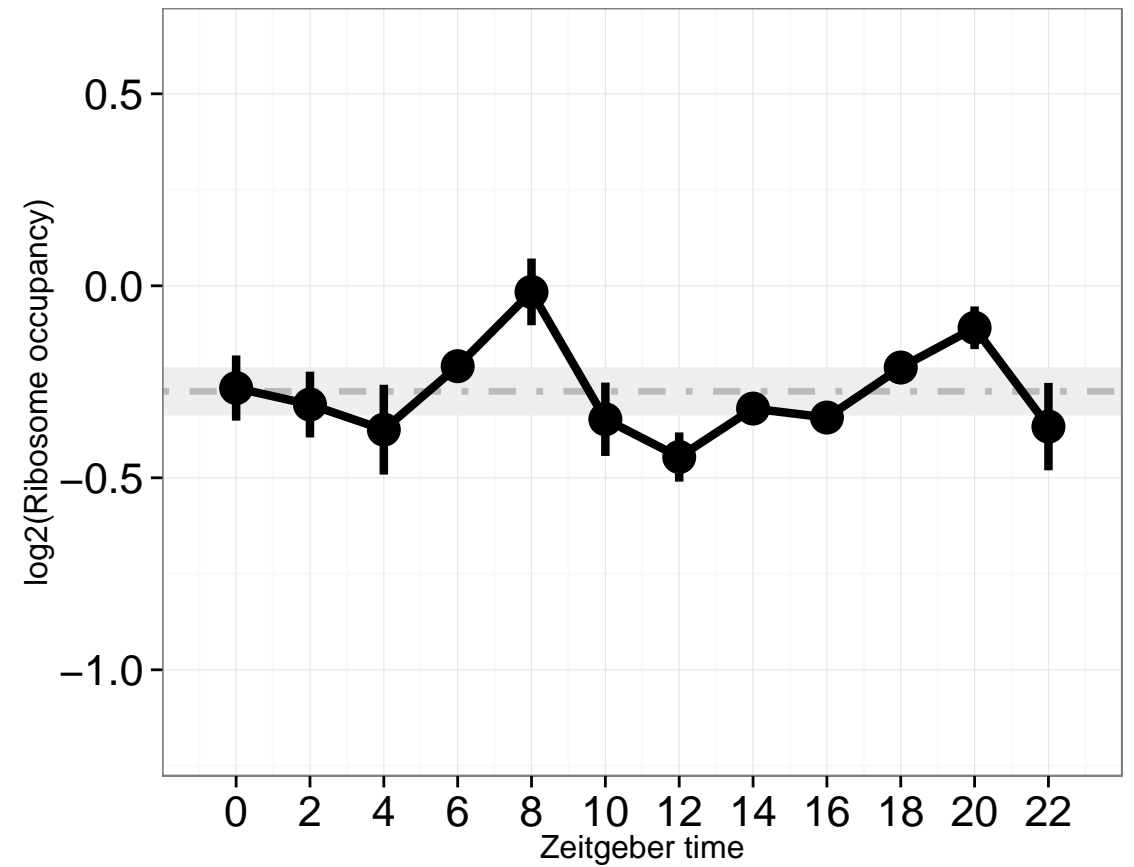

Supplement: Supplementary file 8134 [file 1]

# Pm20d2

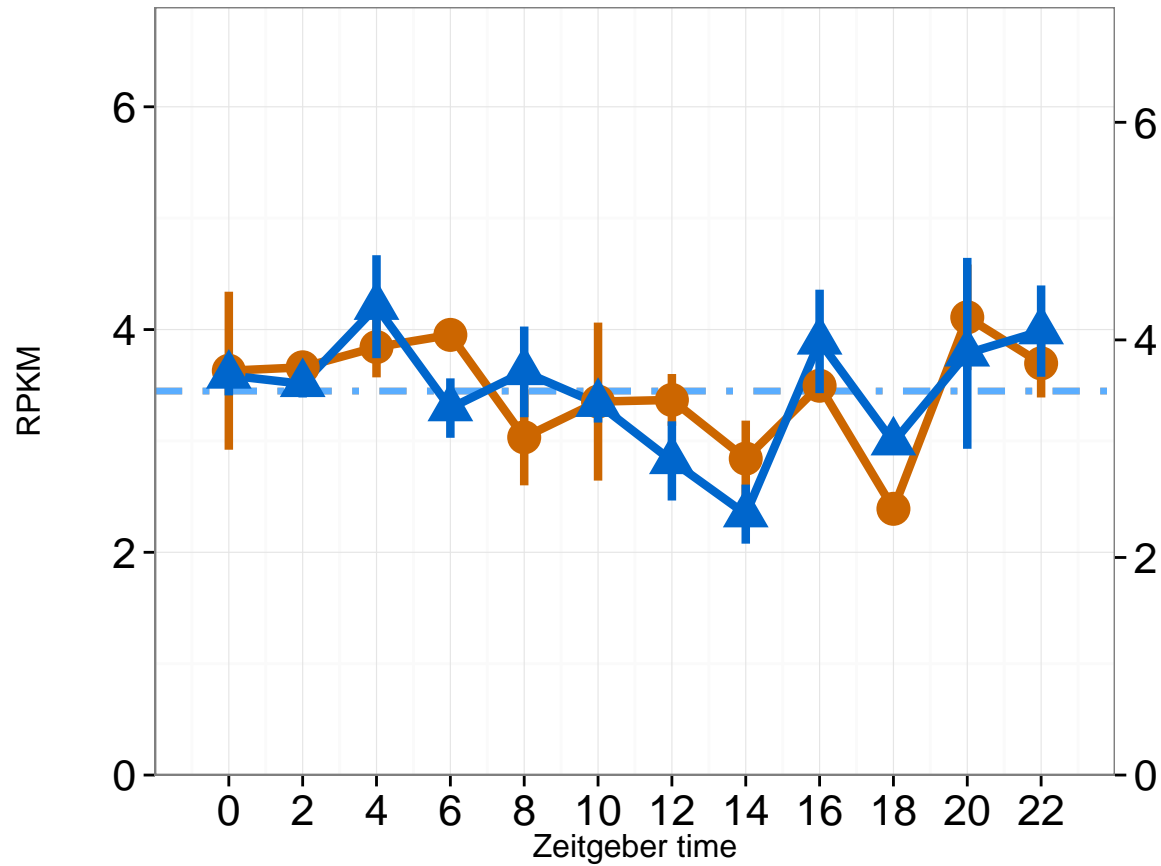

# Pm20d2

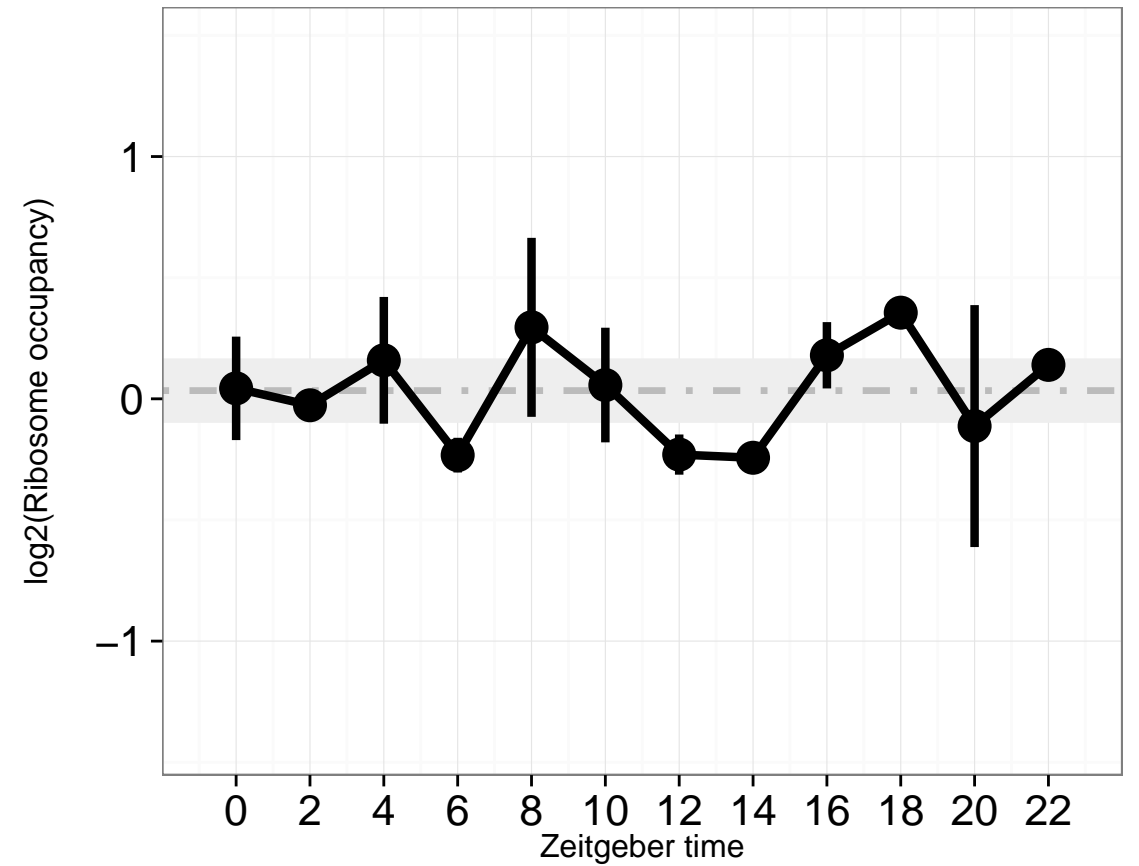

Supplement: Supplementary file 8135 [file 1]

# Cnppd1

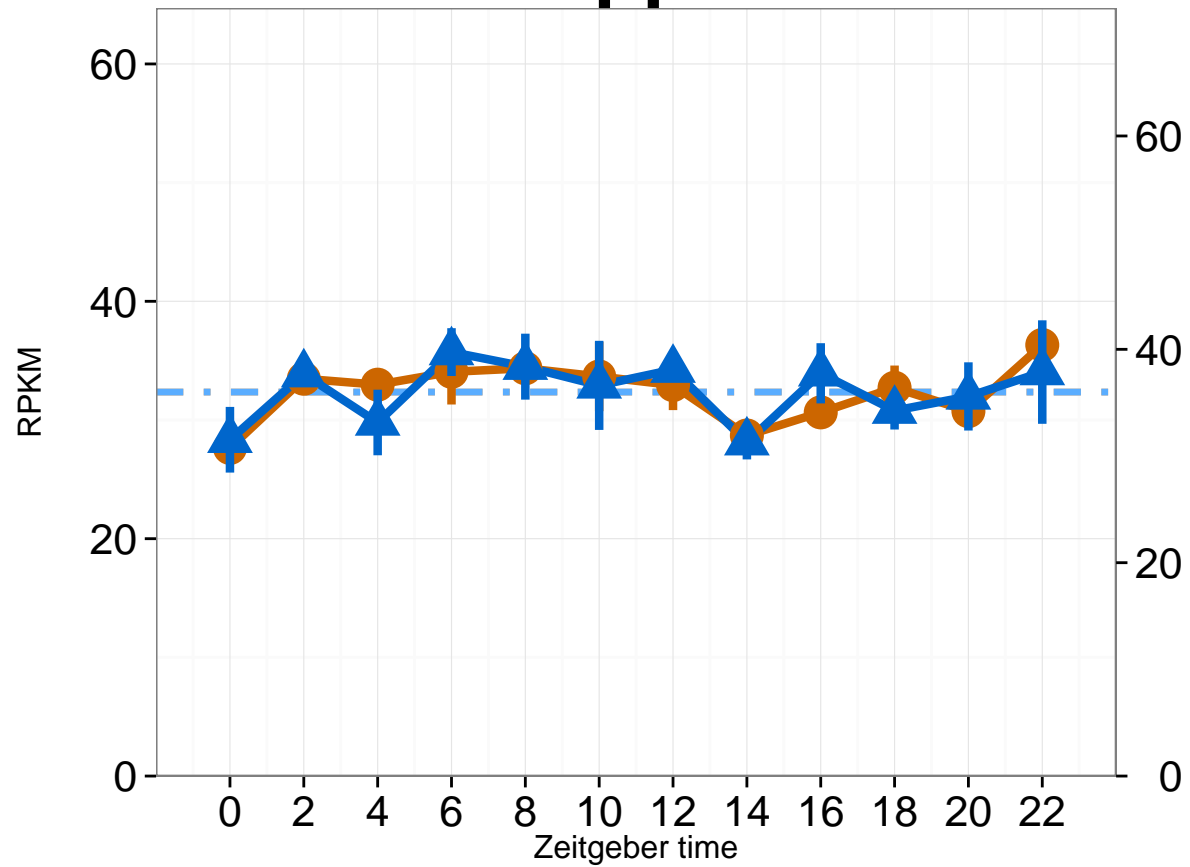

# Cnppd1

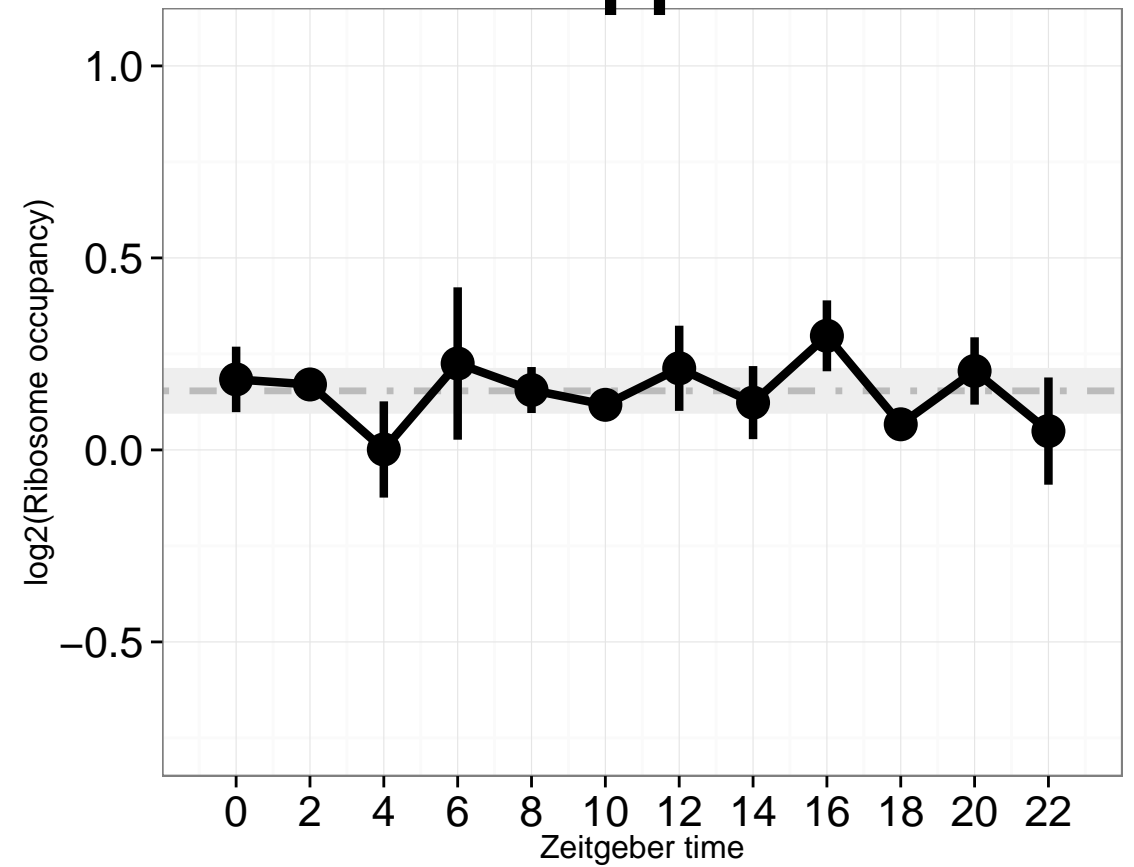

Supplement: Supplementary file 8136 [file 1]

## Slk

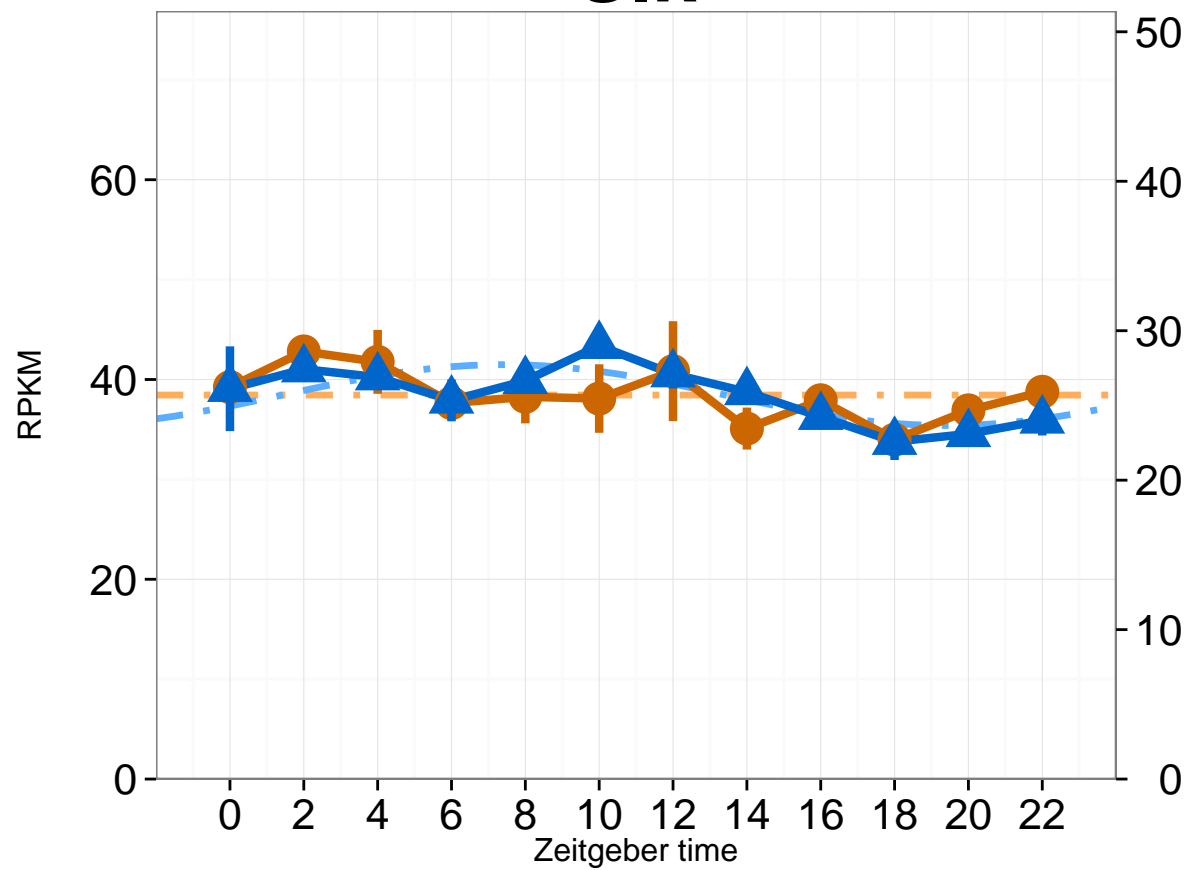

## Slk

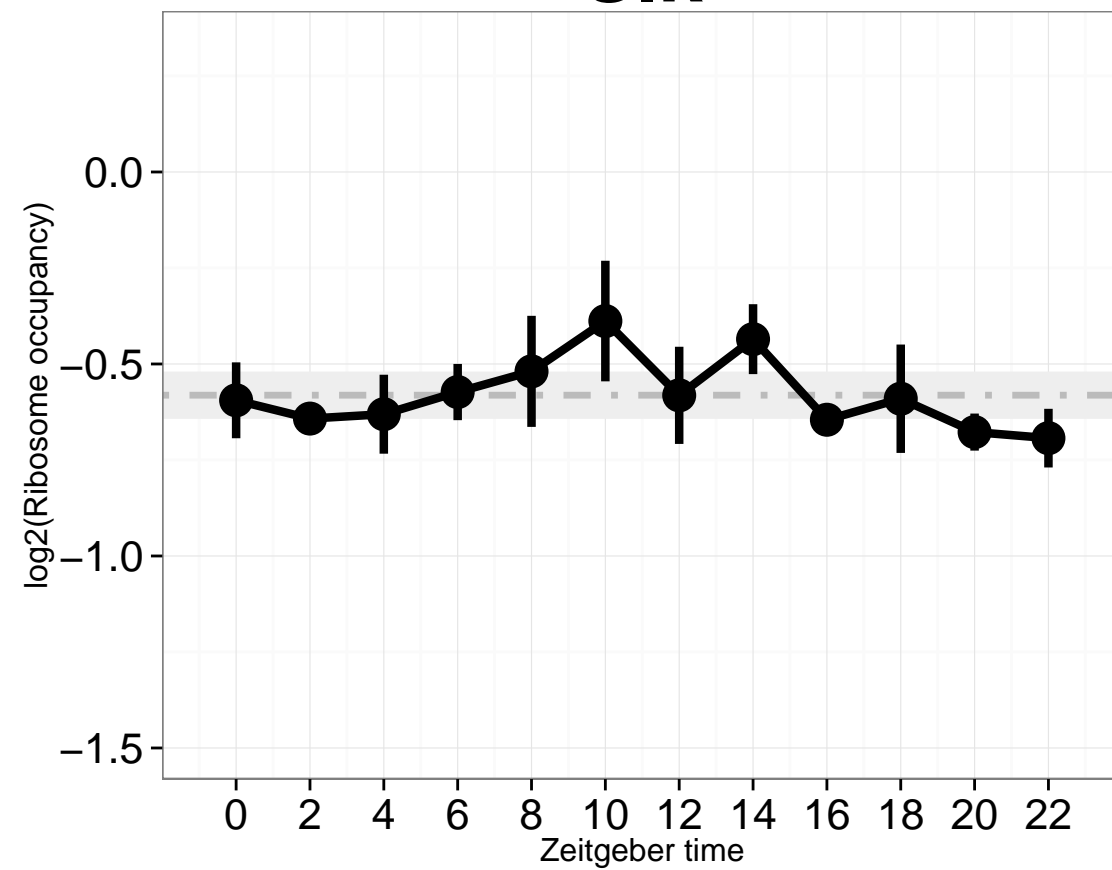

Supplement: Supplementary file 8137 [file 1]

# Arpc4

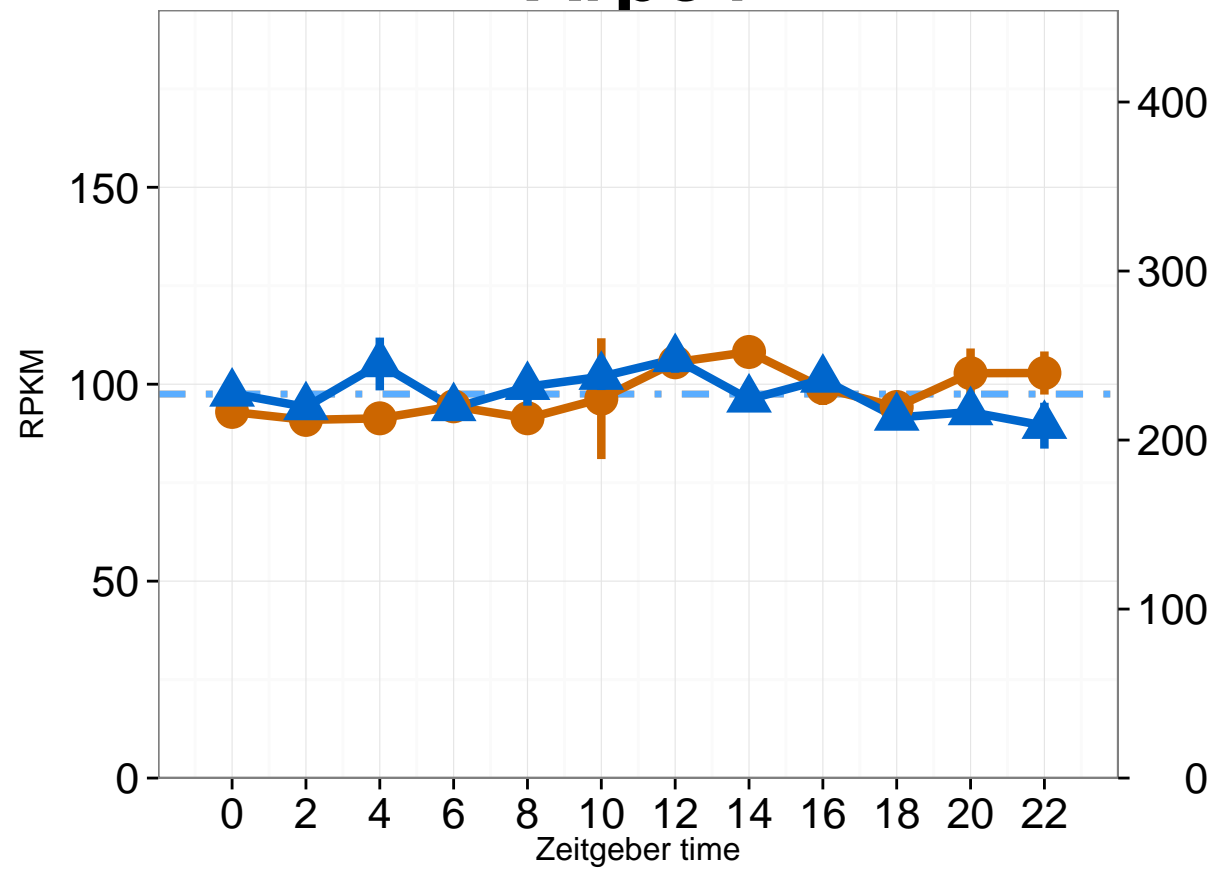

# Arpc4

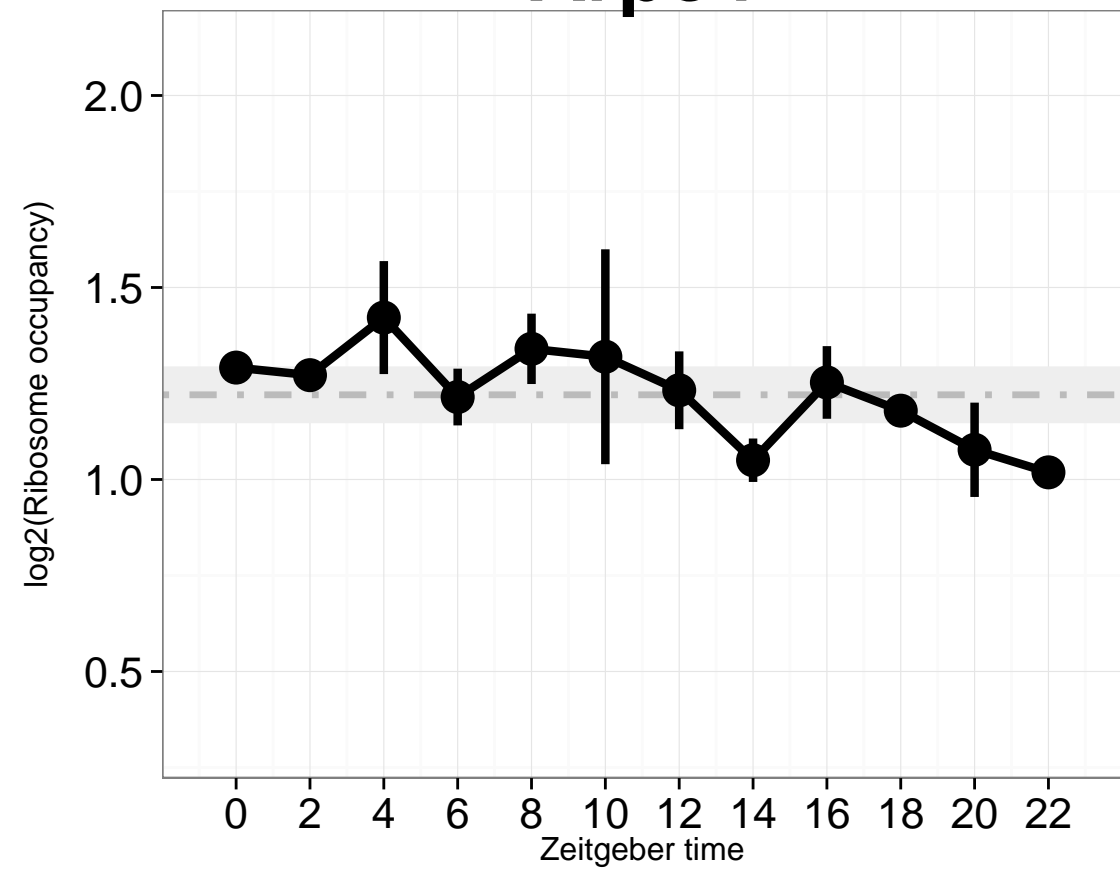

Supplement: Supplementary file 8138 [file 1]

# Spats2l

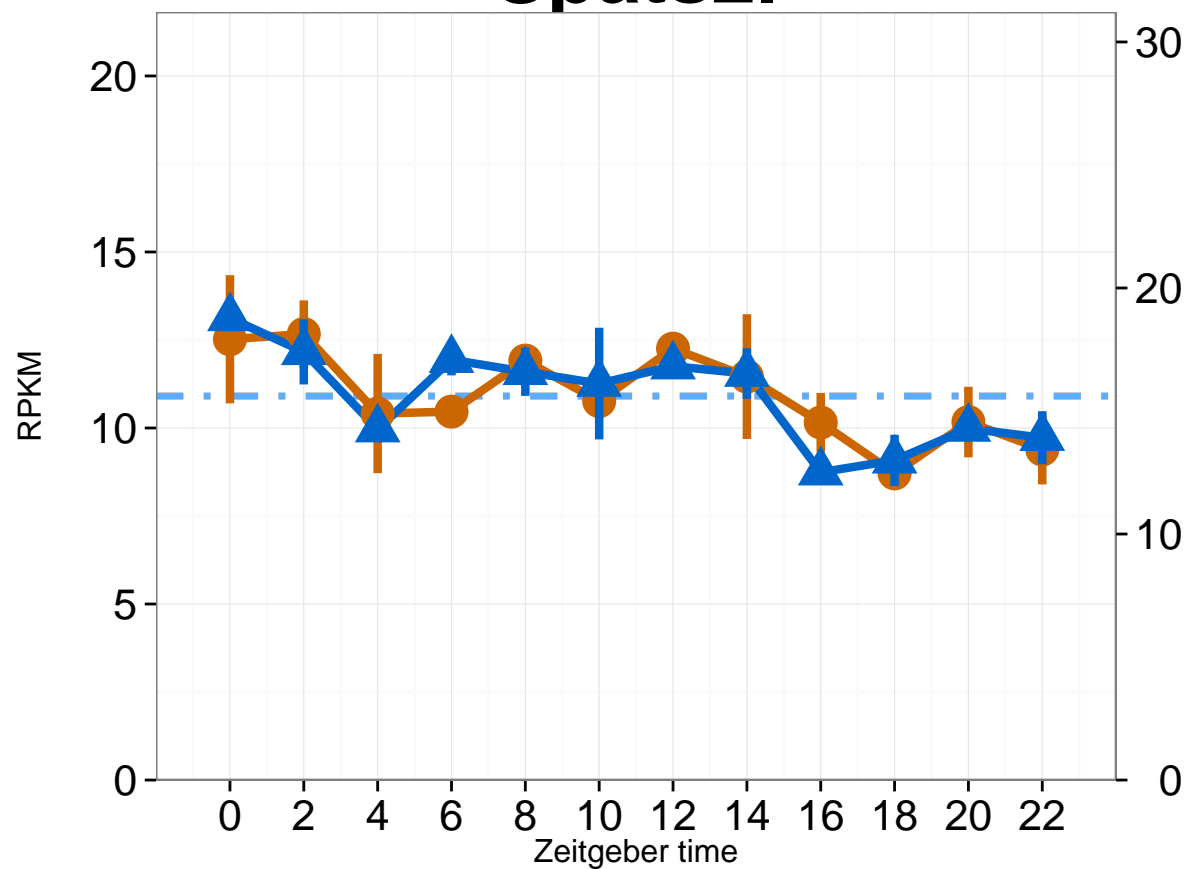

# Spats2l

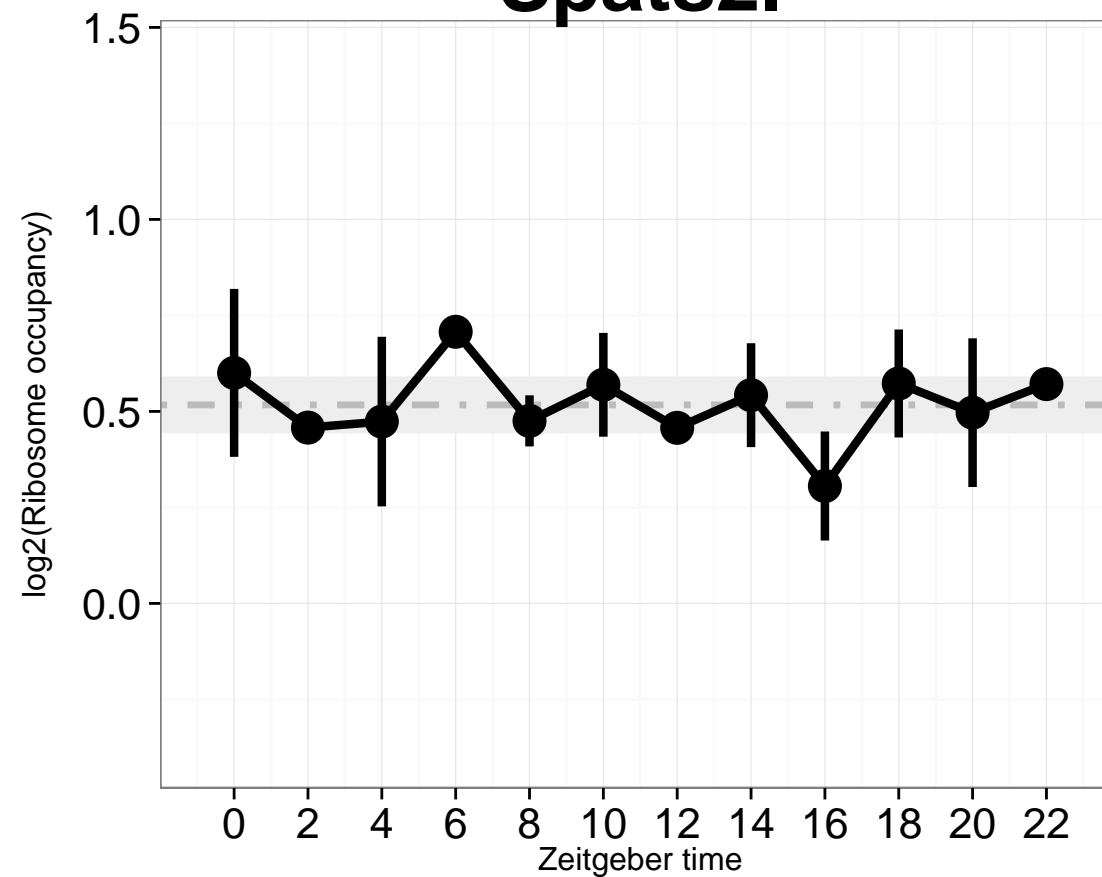

Supplement: Supplementary file 8139 [file 1]

## Vkorc1l1

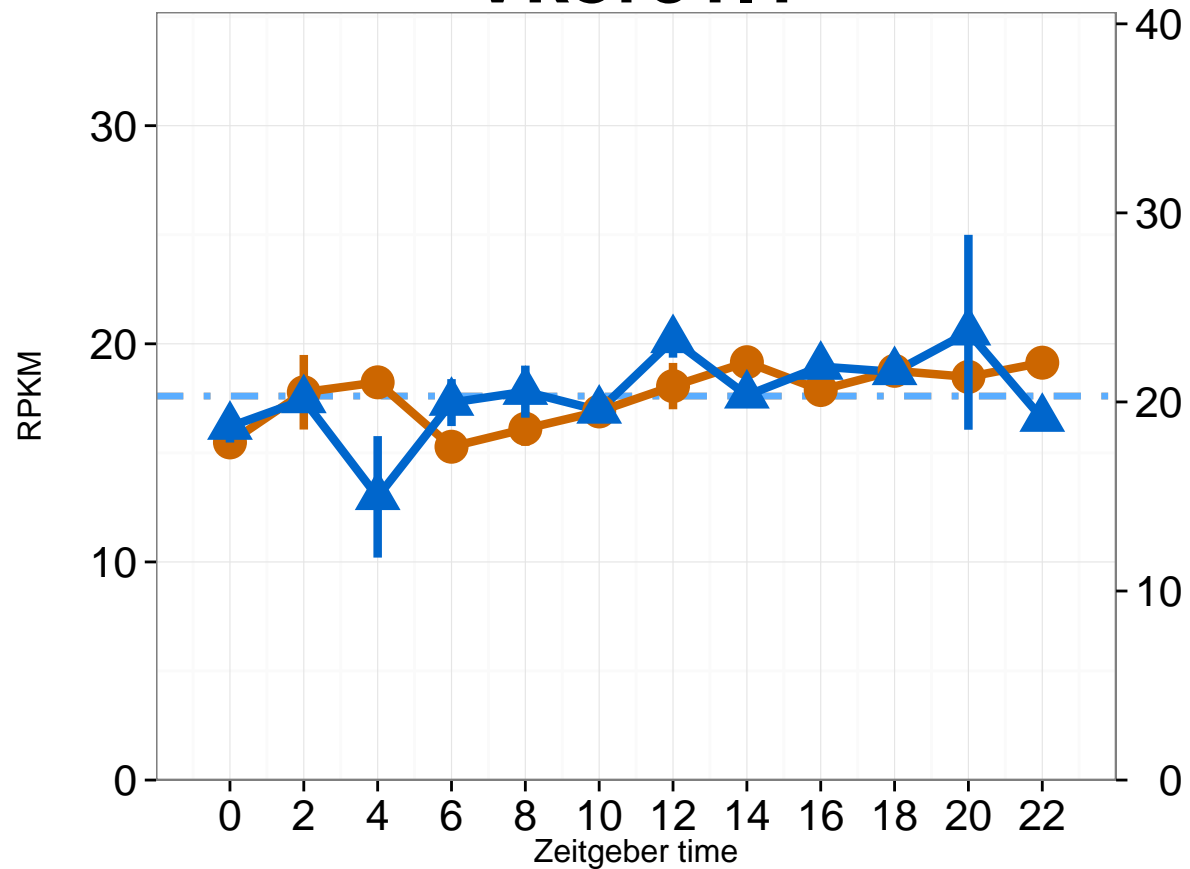

## Vkorc1l1

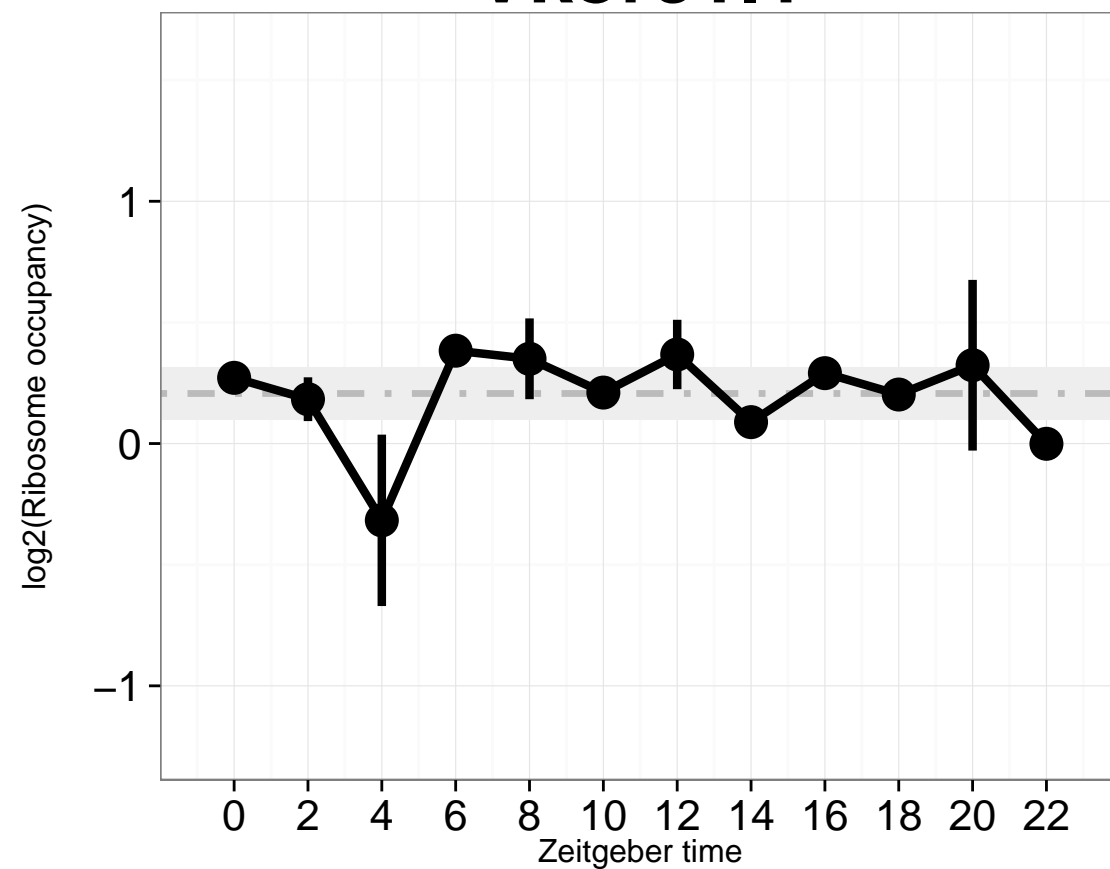

Supplement: Supplementary file 8140 [file 1]

## Prr14l

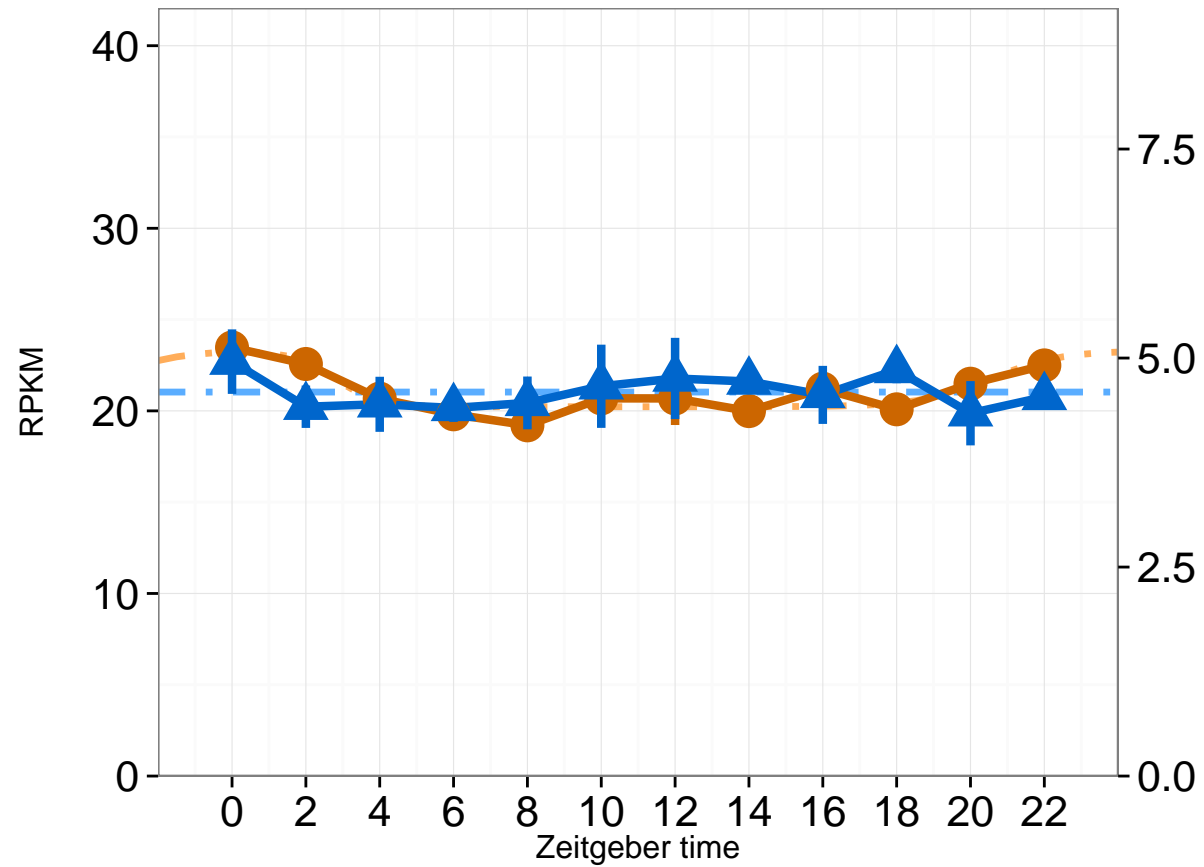

## Prr14l

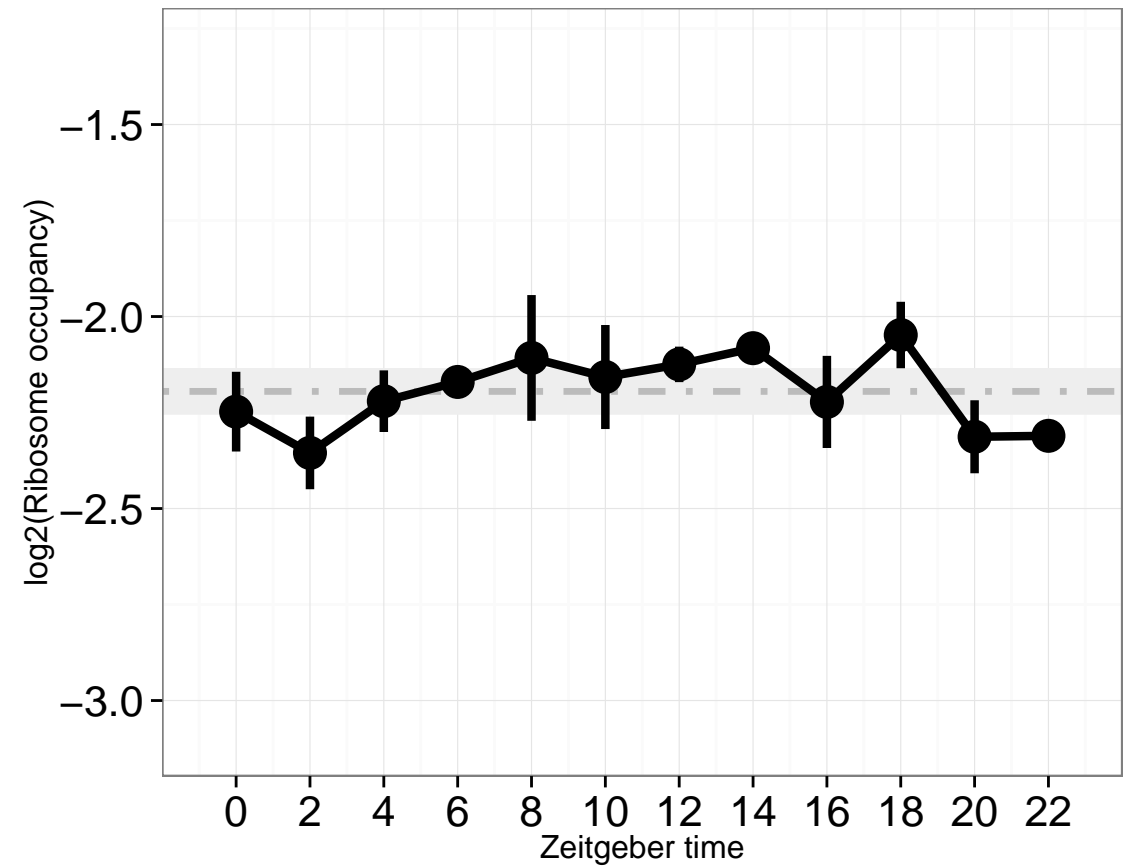

Supplement: Supplementary file 8141 [file 1]

## Arv1

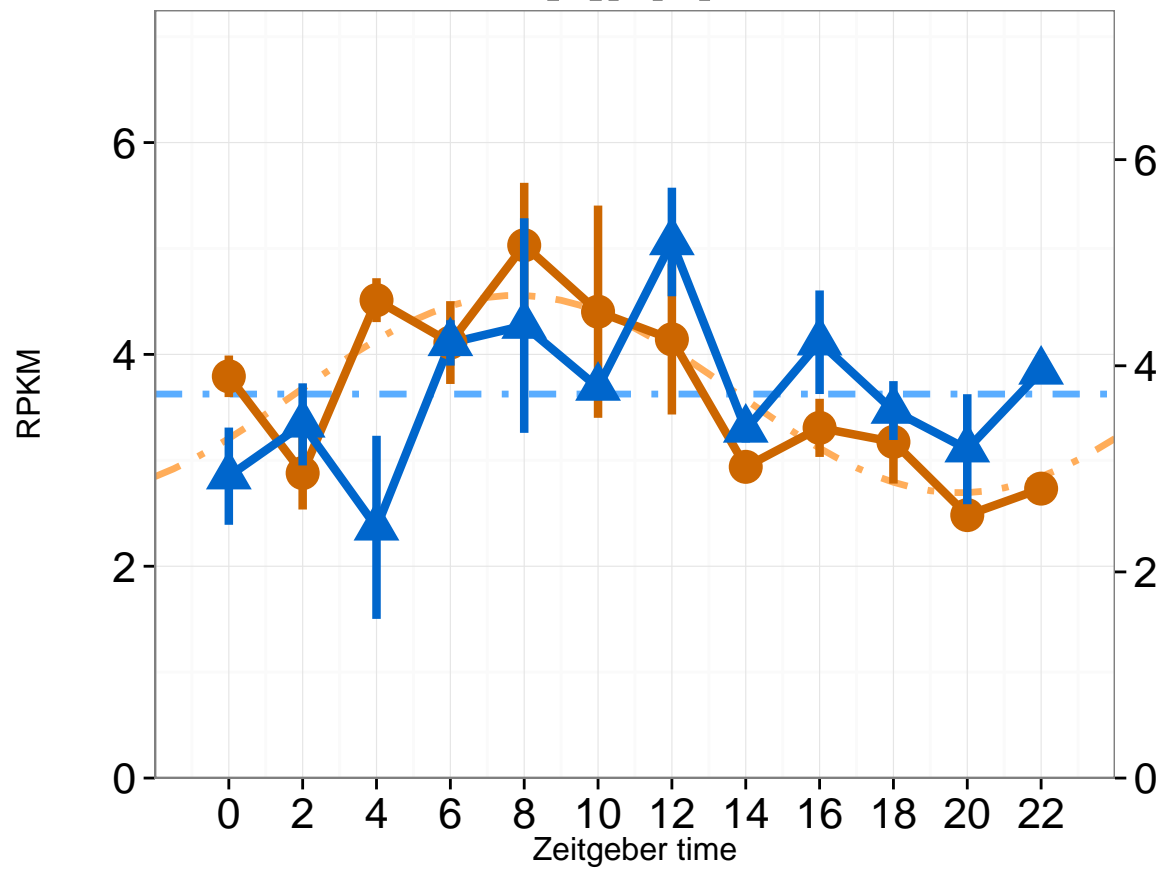

## Arv1

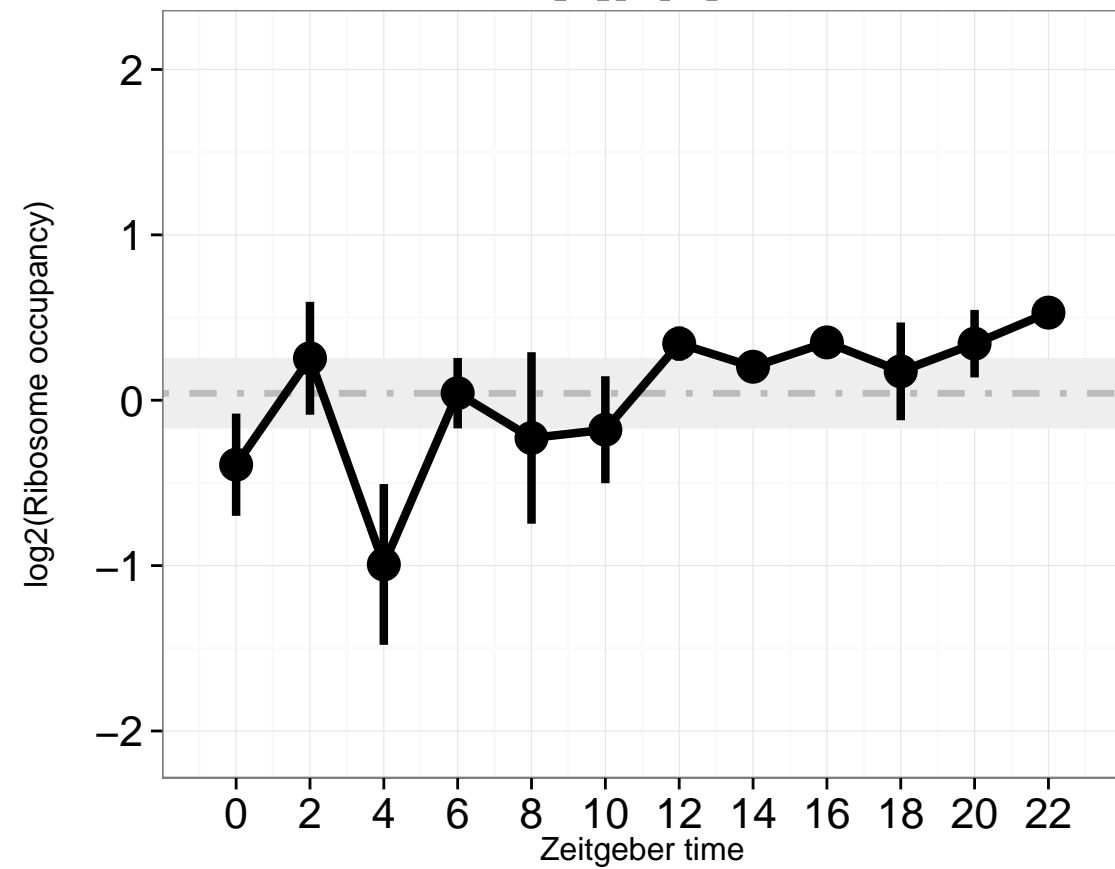

Supplement: Supplementary file 8142 [file 1]

## Glyr1

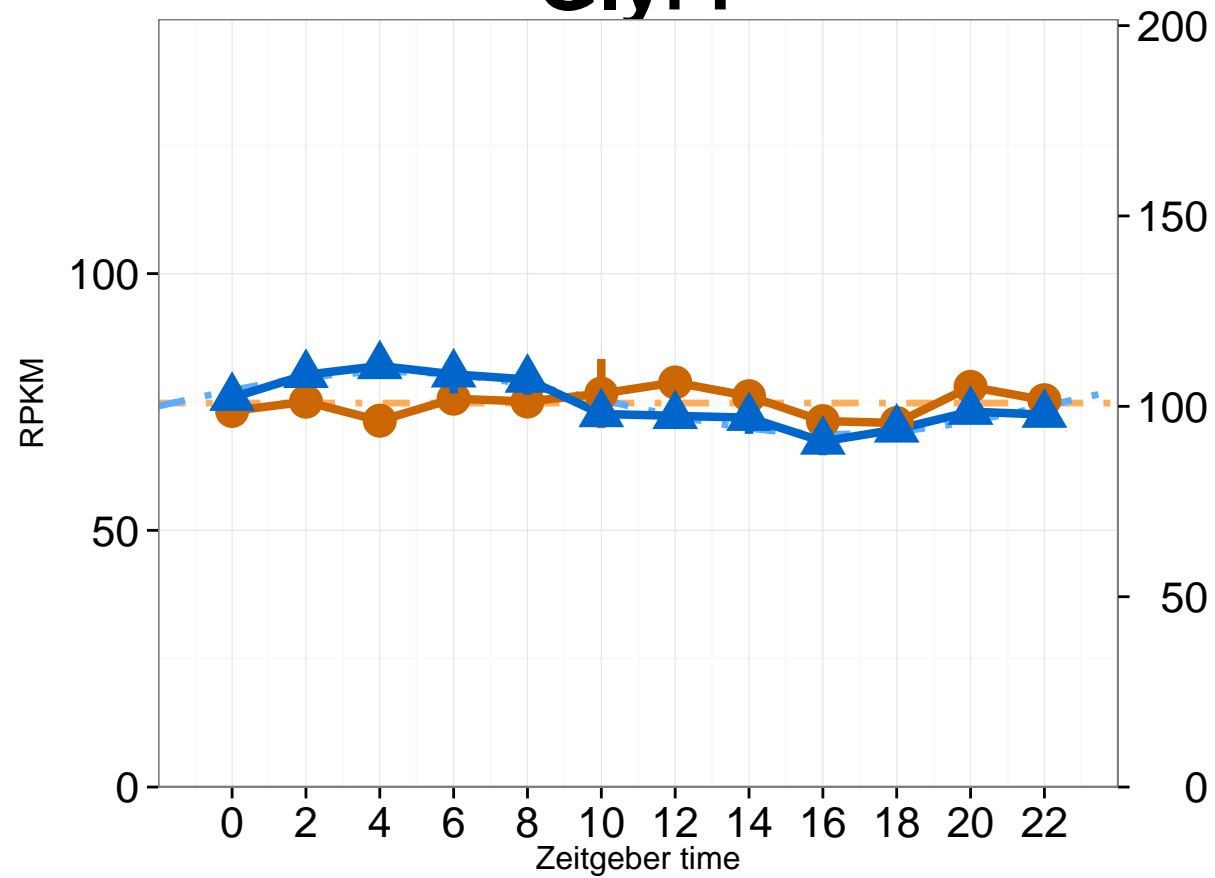

## Glyr1

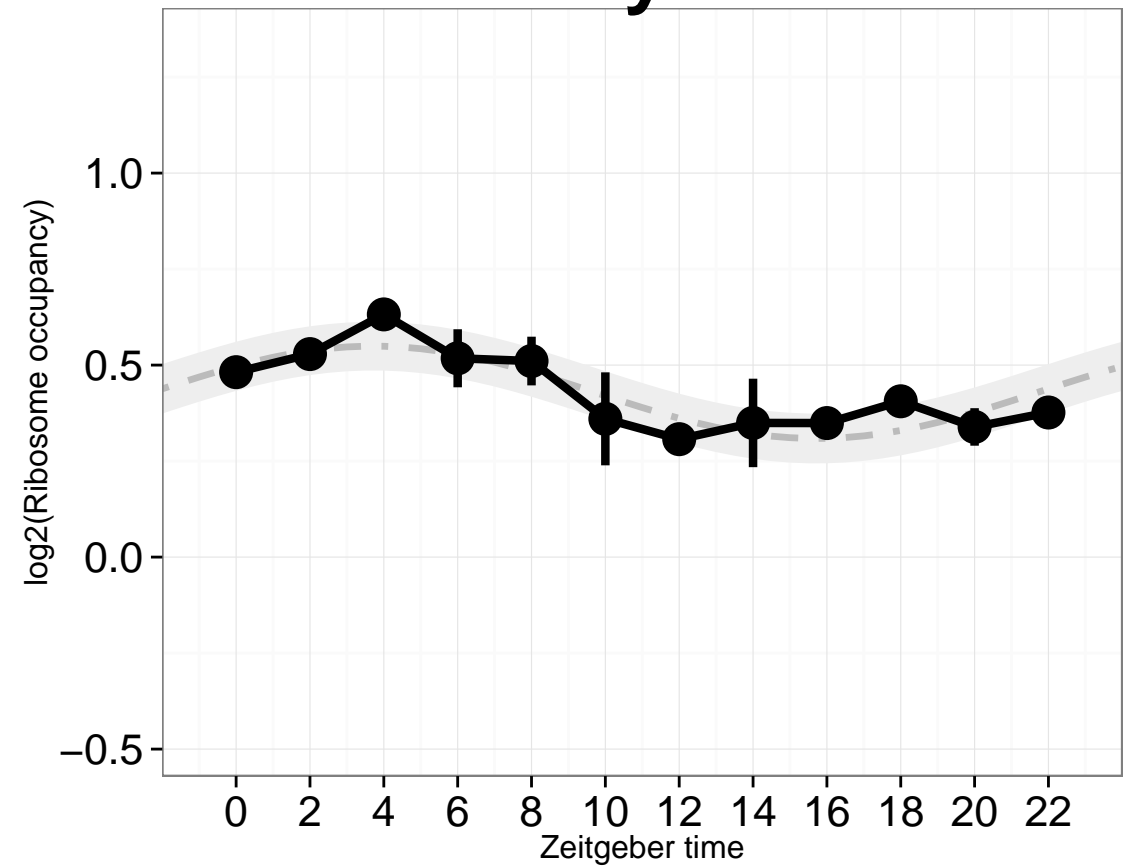

Supplement: Supplementary file 8143 [file 1]

## Med6

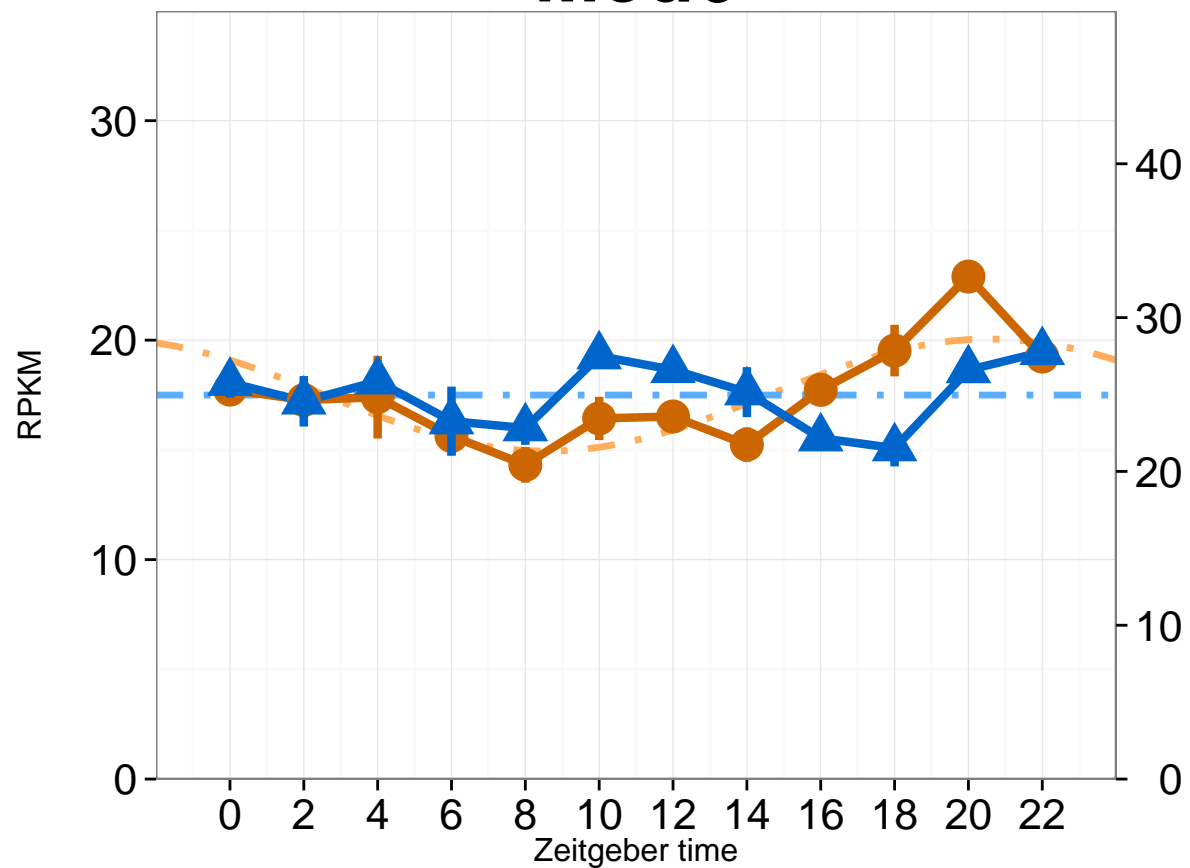

## Med6

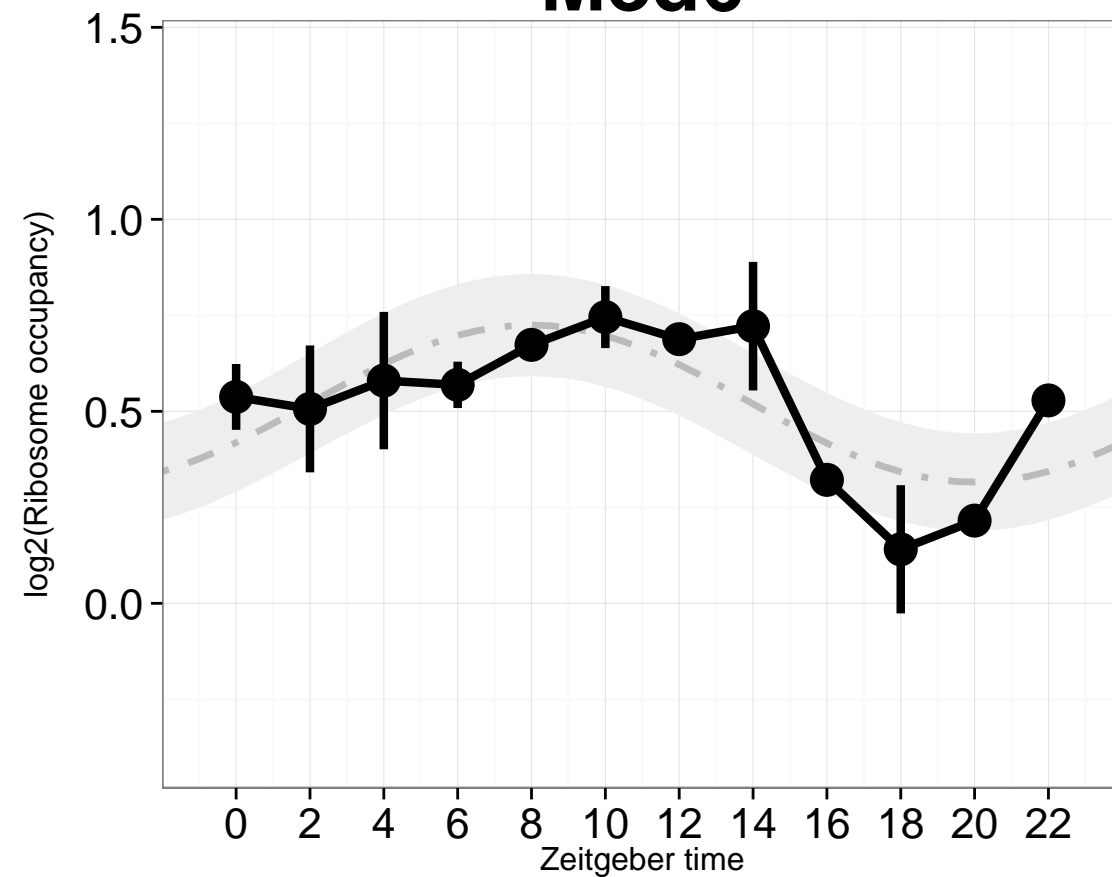

Supplement: Supplementary file 8144 [file 1]

# Wdr93

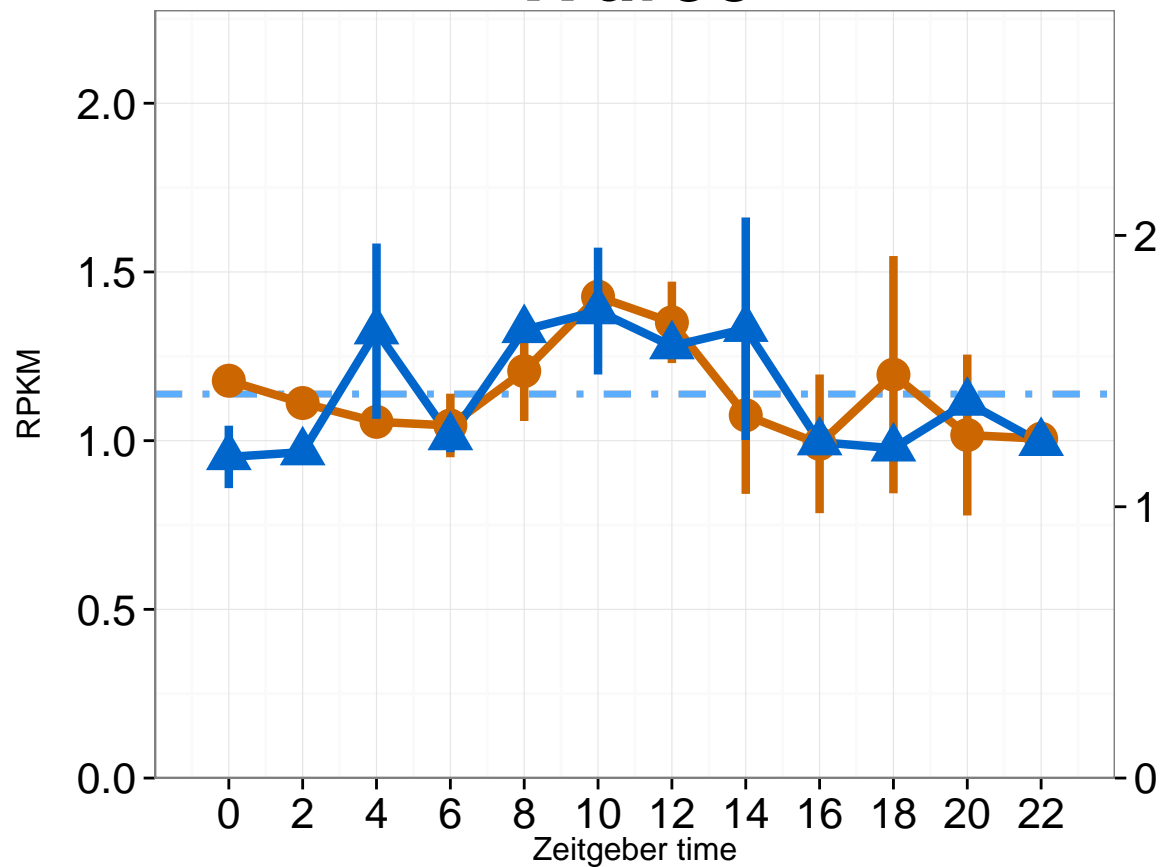

# Wdr93

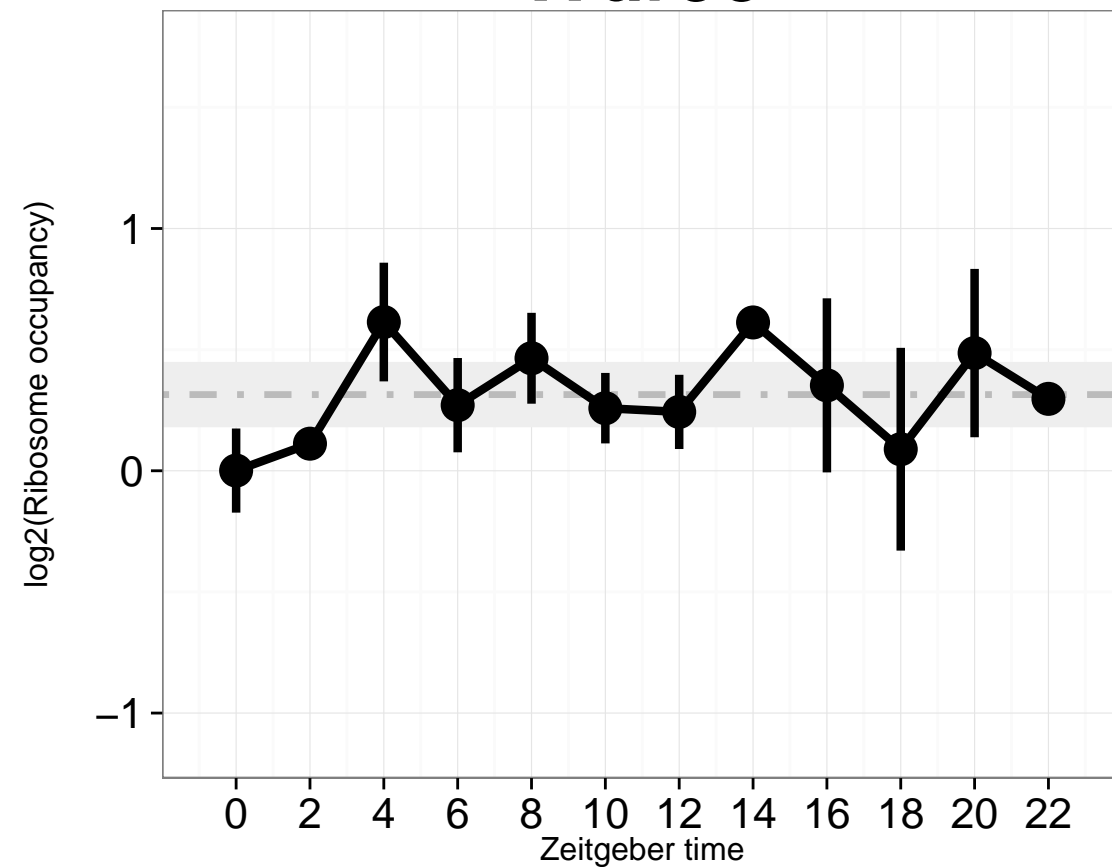

Supplement: Supplementary file 8145 [file 1]

## Pim2

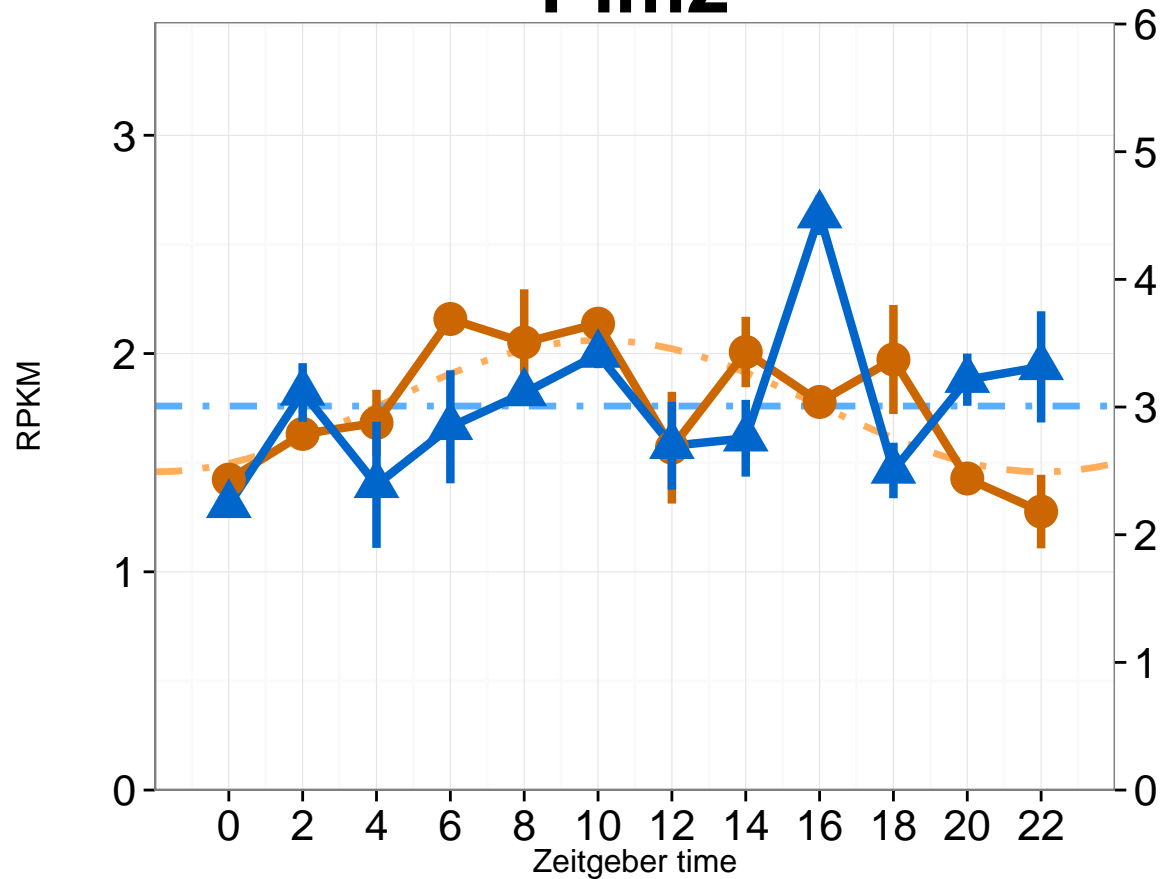

## Pim2

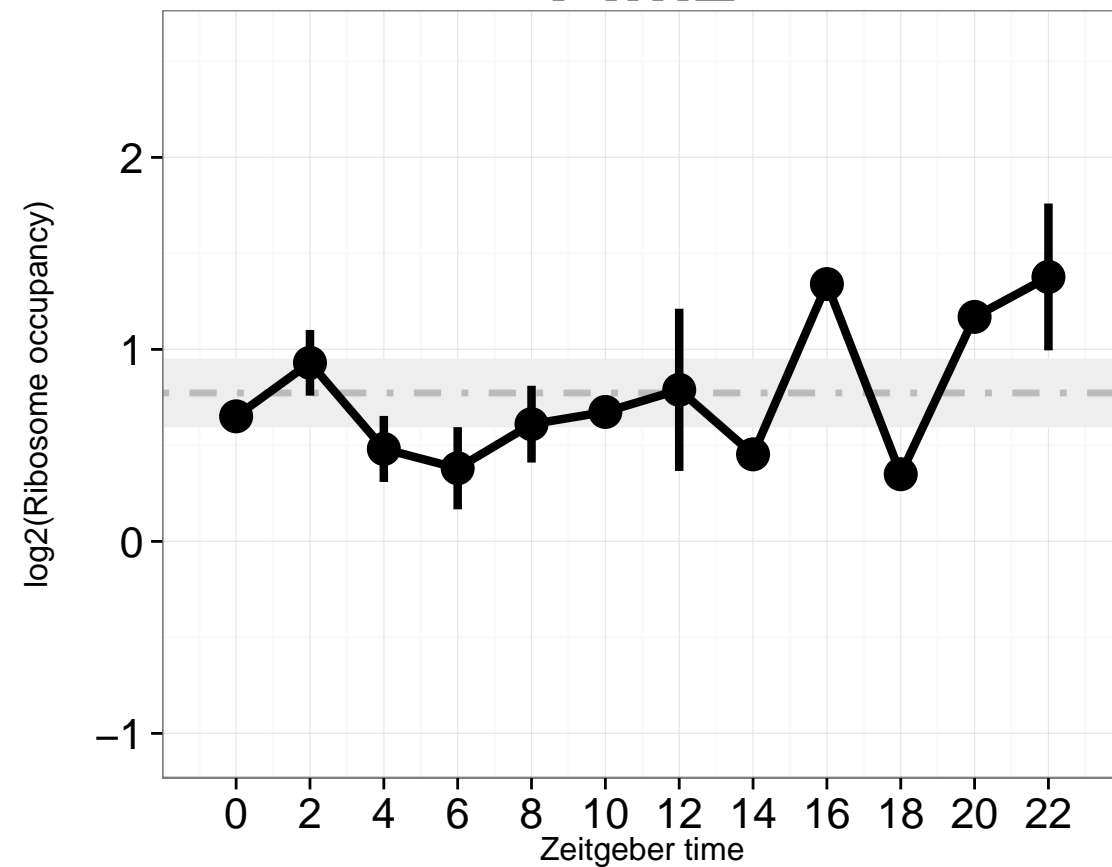

Supplement: Supplementary file 8146 [file 1]

# Slc38a2

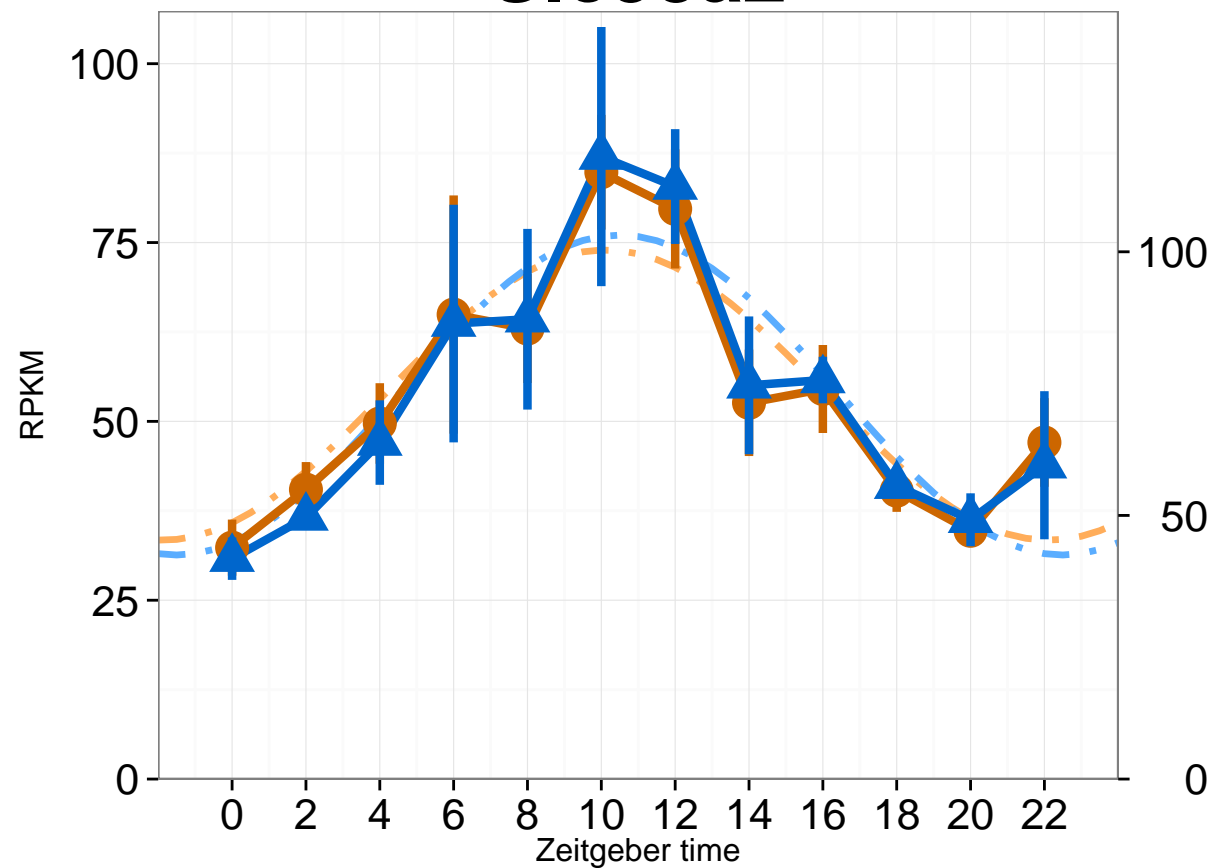

# Slc38a2

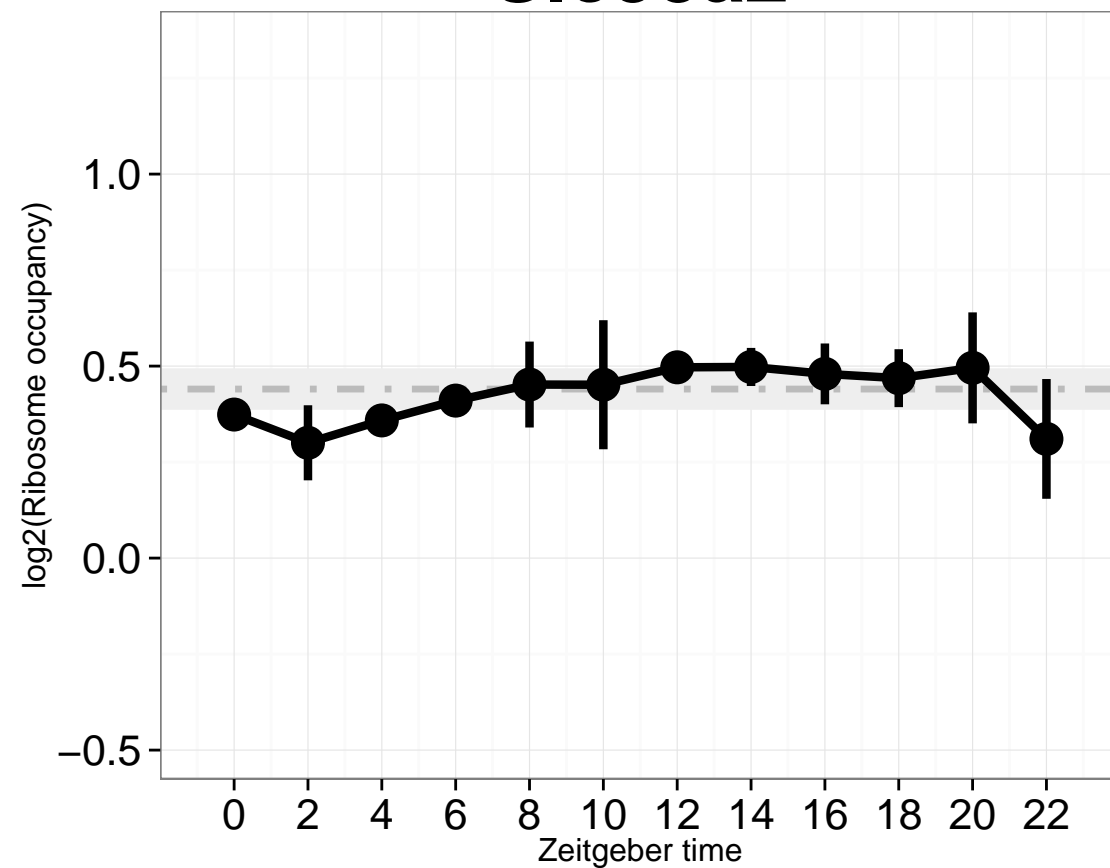

Supplement: Supplementary file 8147 [file 1]

## Tfdp2

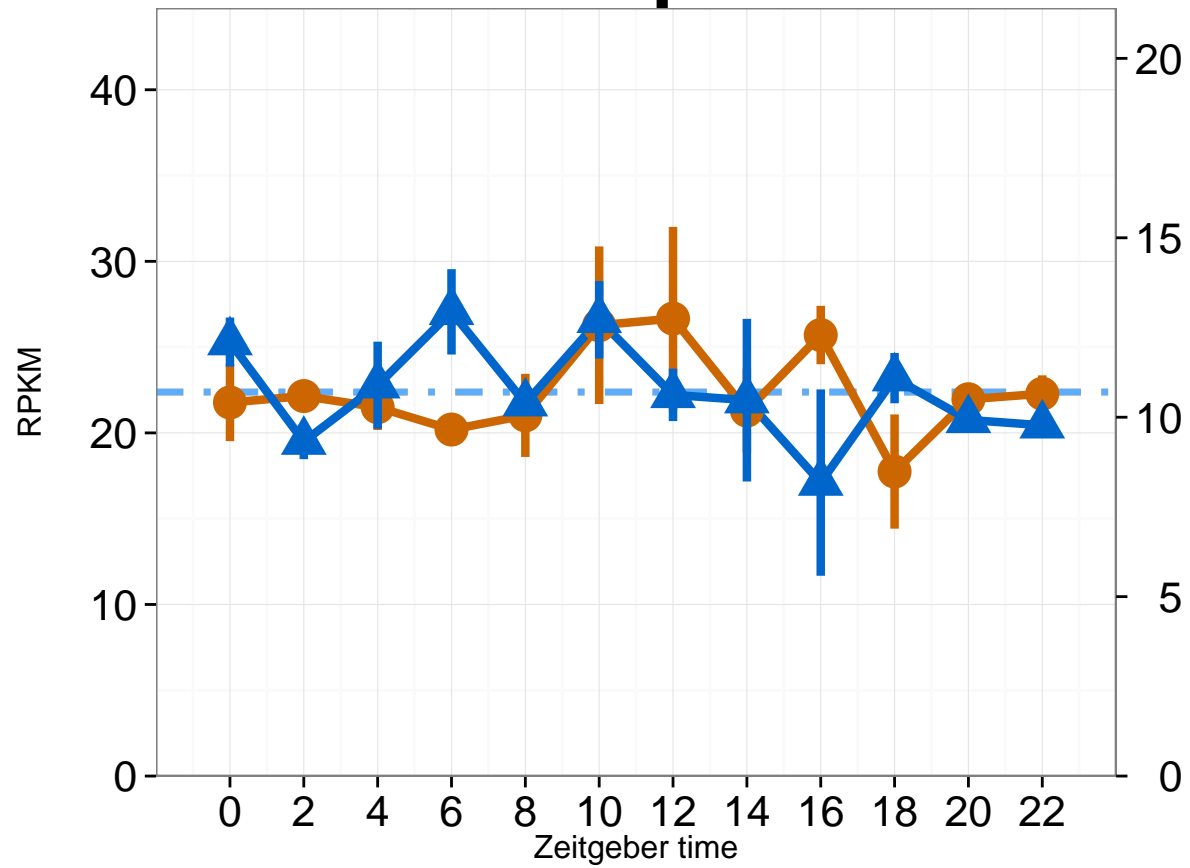

## Tfdp2

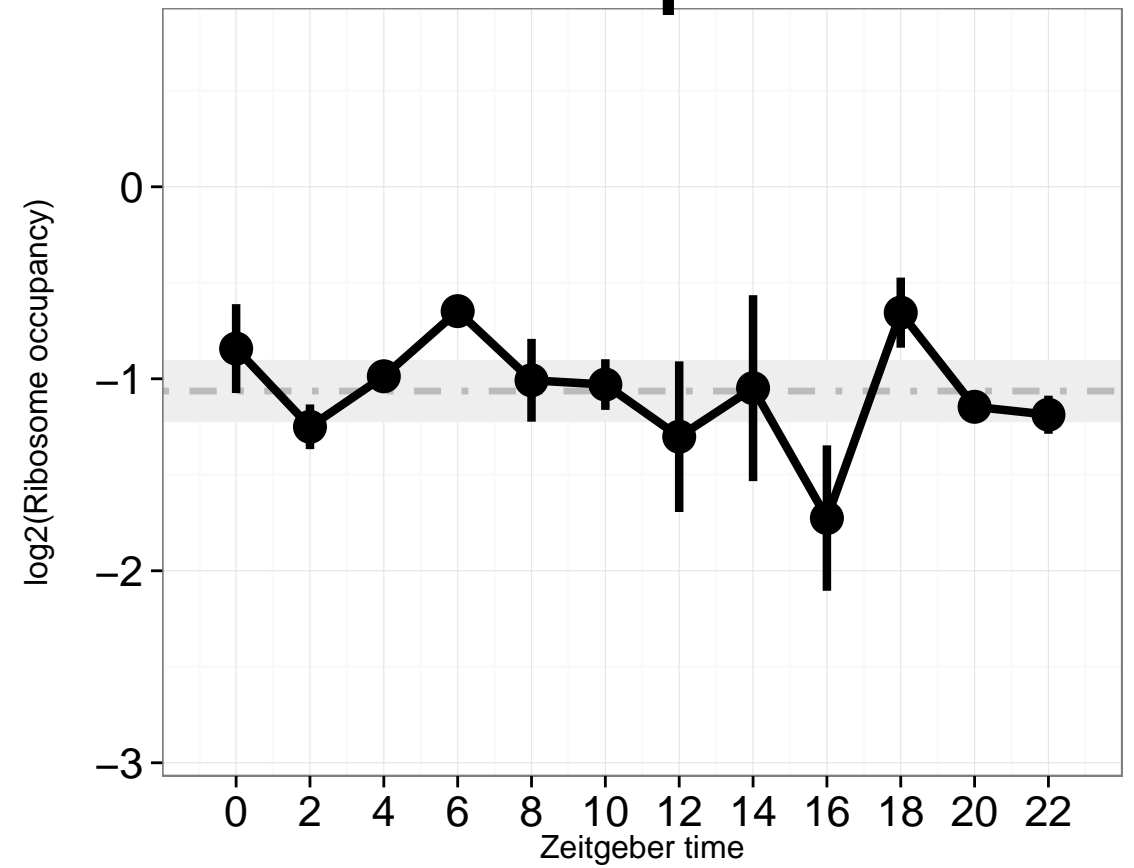

Supplement: Supplementary file 8148 [file 1]

# Leng9

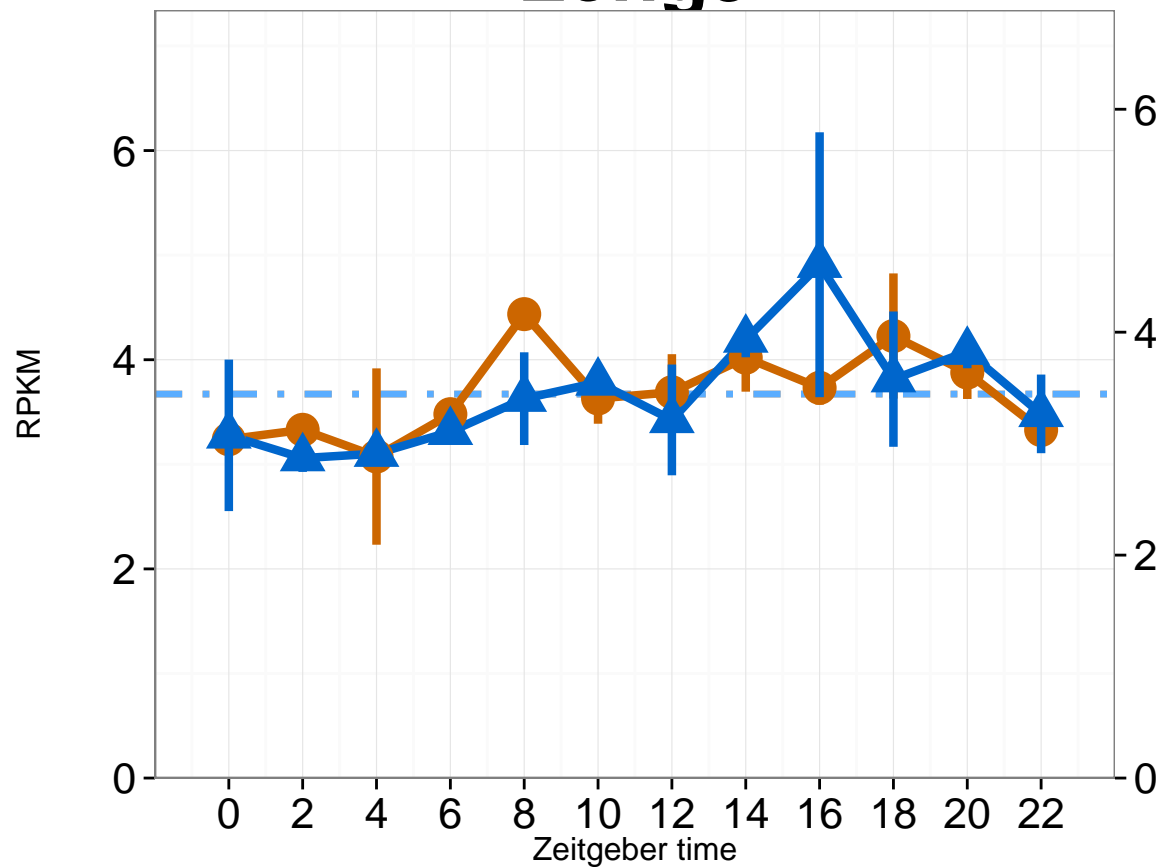

# Leng9

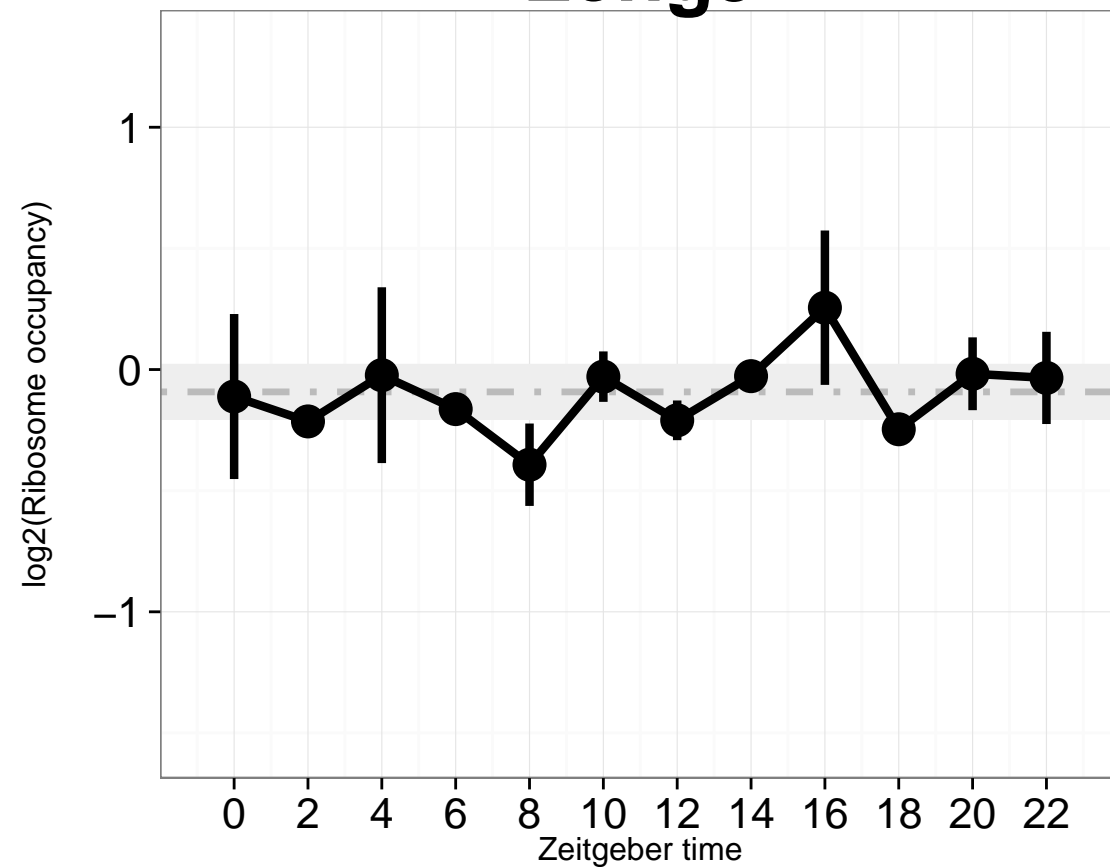

Supplement: Supplementary file 8149 [file 1]

## Zbtb40

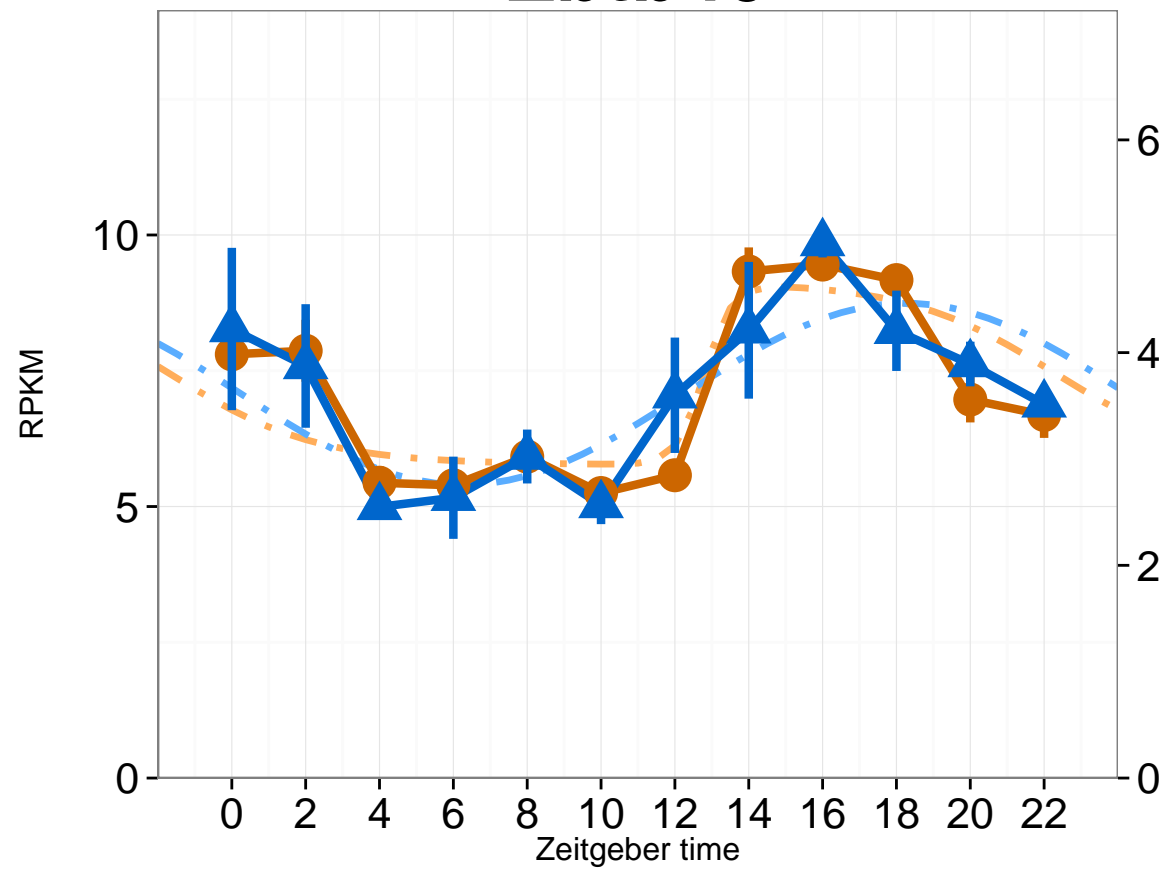

## Zbtb40

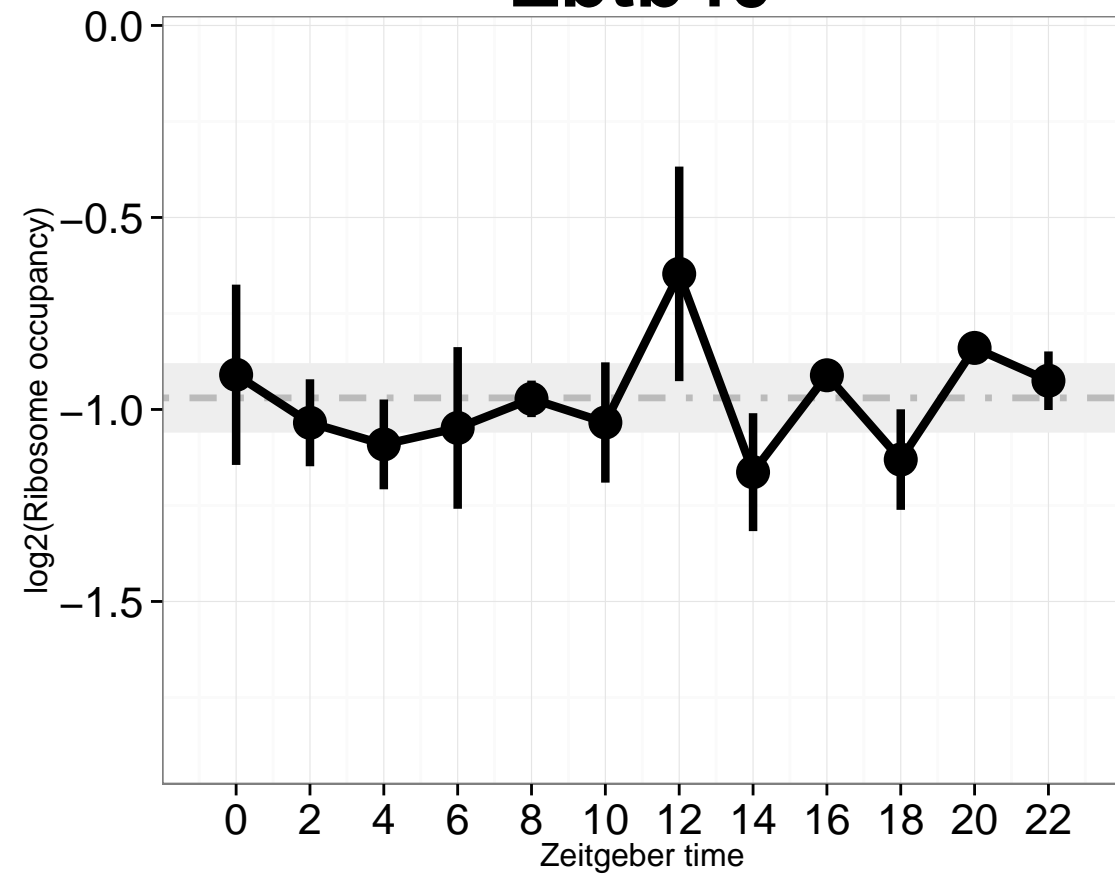

Supplement: Supplementary file 8150 [file 1]

# Ppp1r21

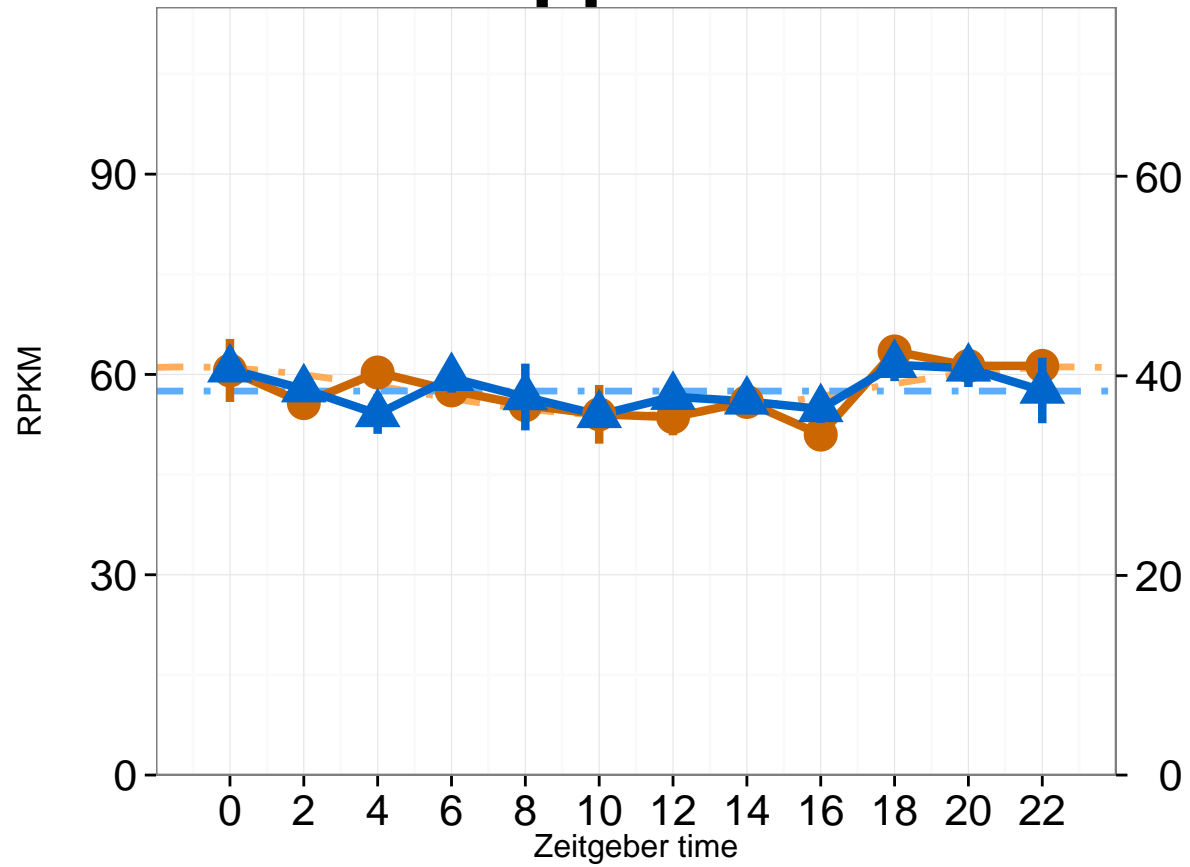

# Ppp1r21

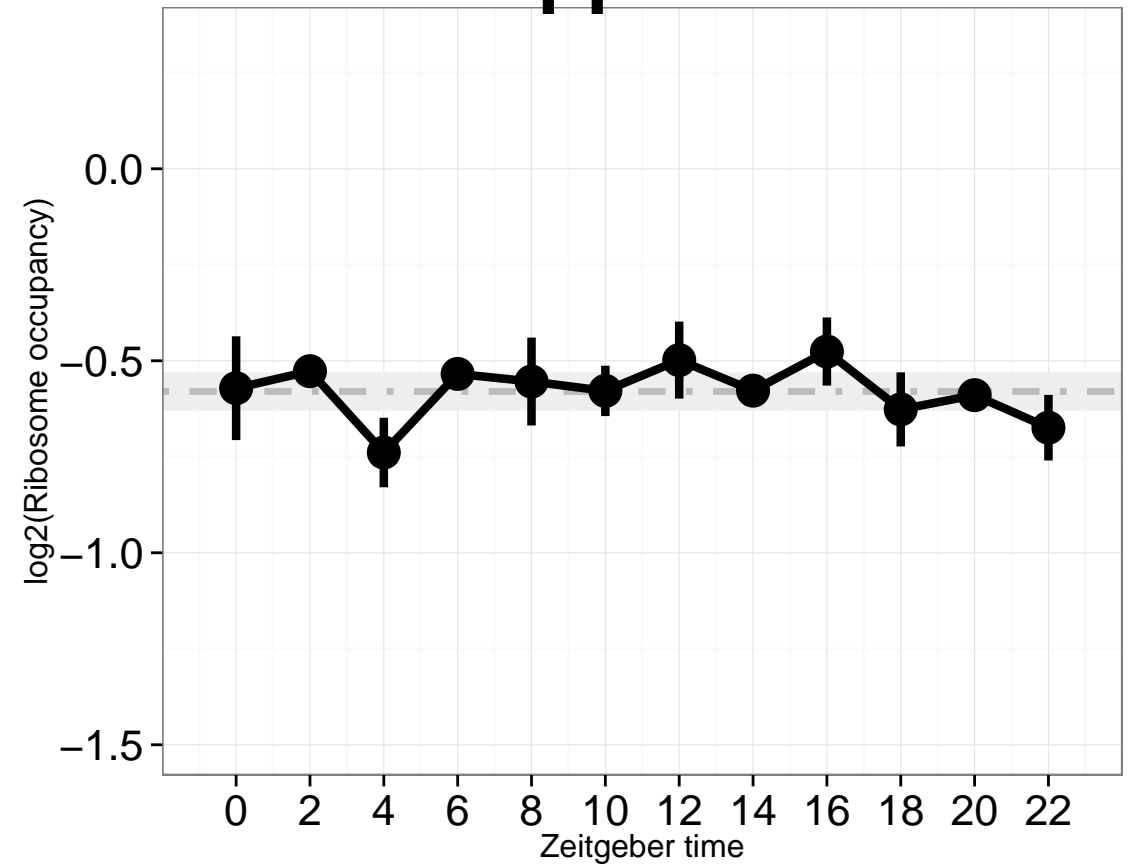

Supplement: Supplementary file 8151 [file 1]

# Zfp661

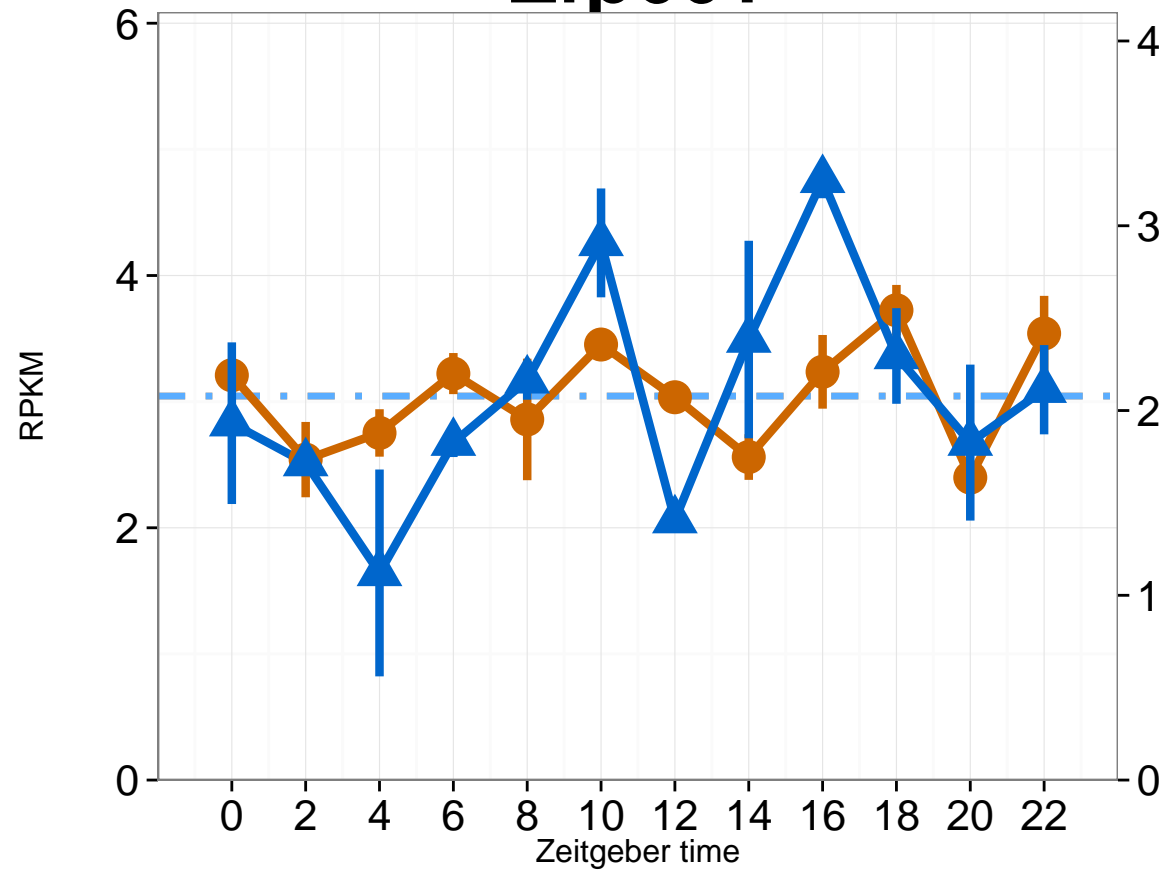

# Zfp661

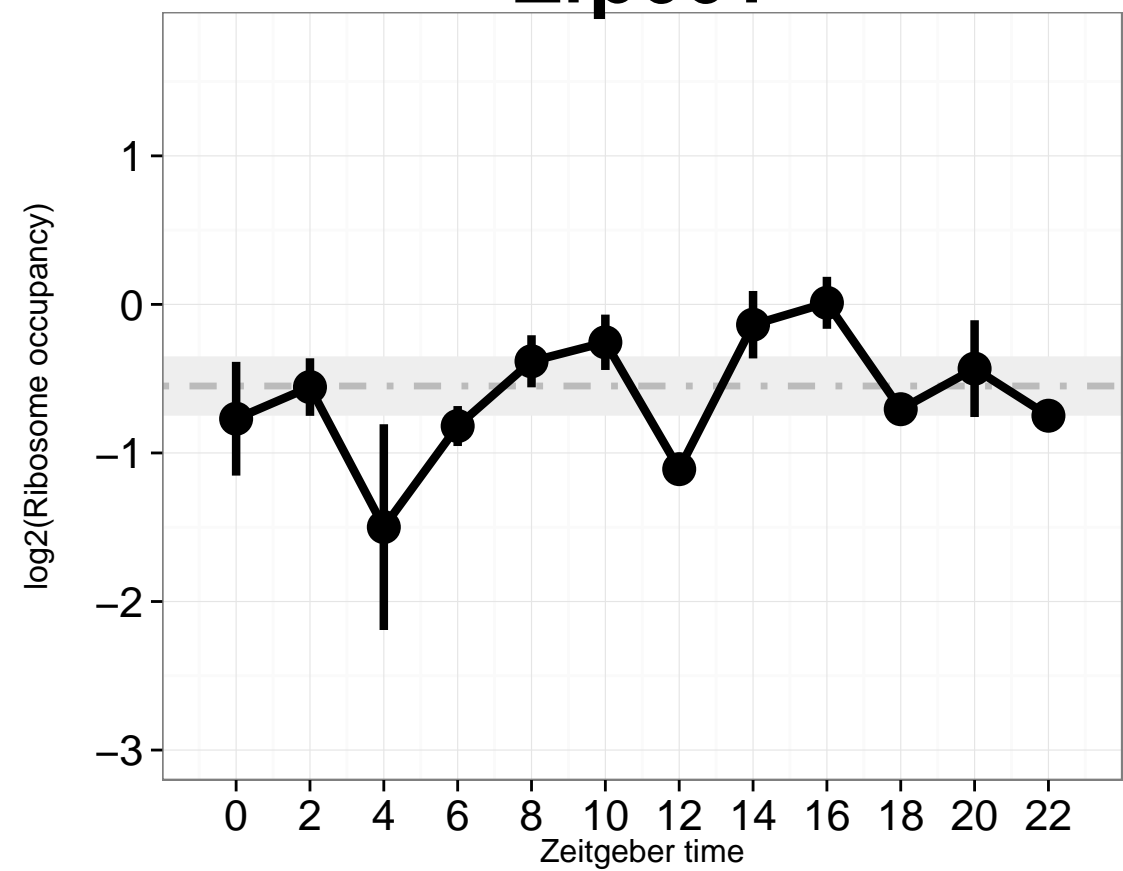

Supplement: Supplementary file 8152 [file 1]

## Twistnb

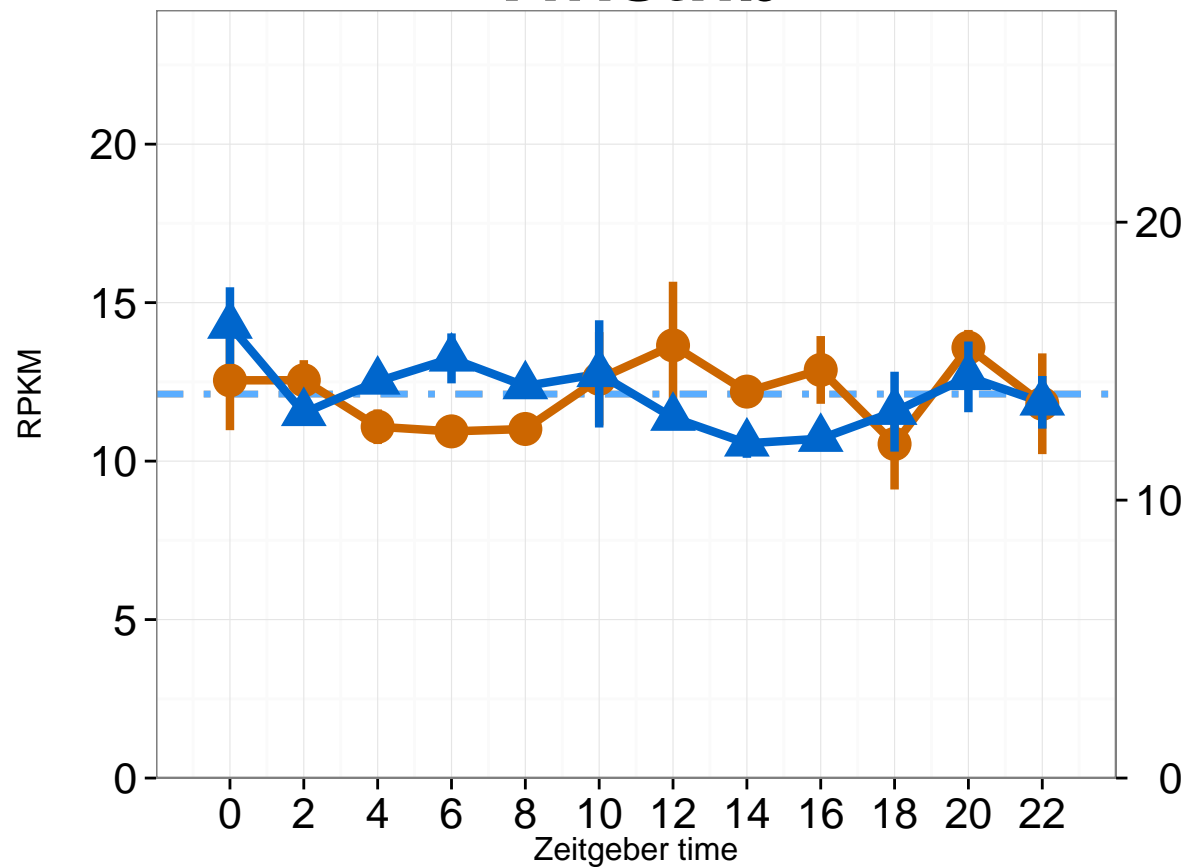

## Twistnb

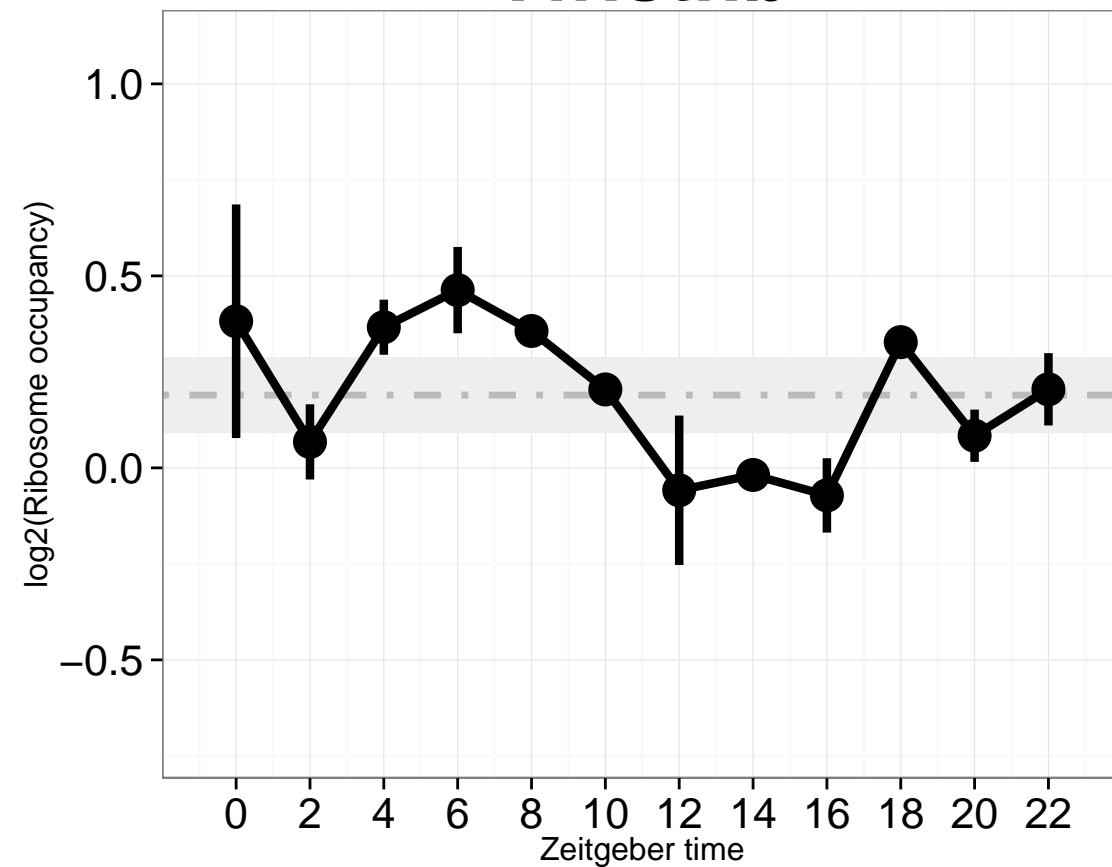

Supplement: Supplementary file 8153 [file 1]

## Dlec1

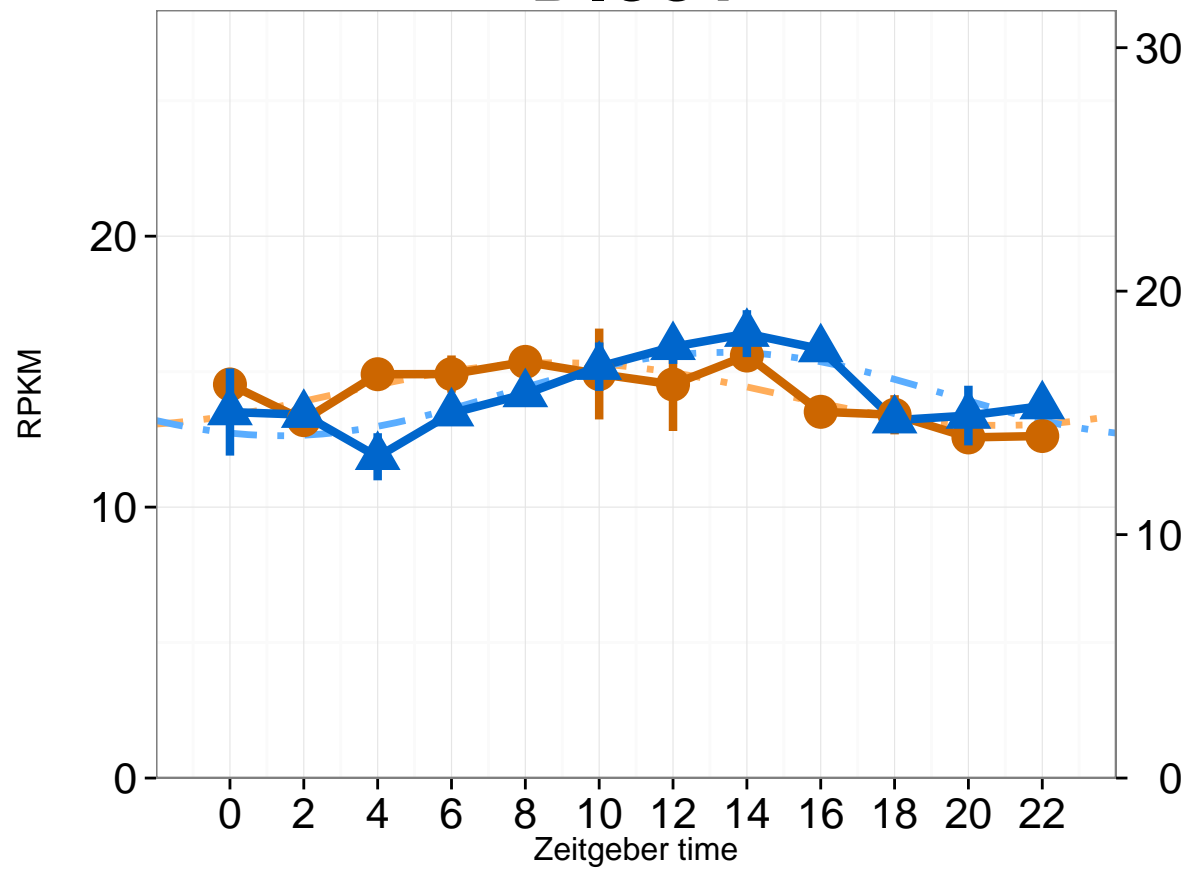

## Dlec1

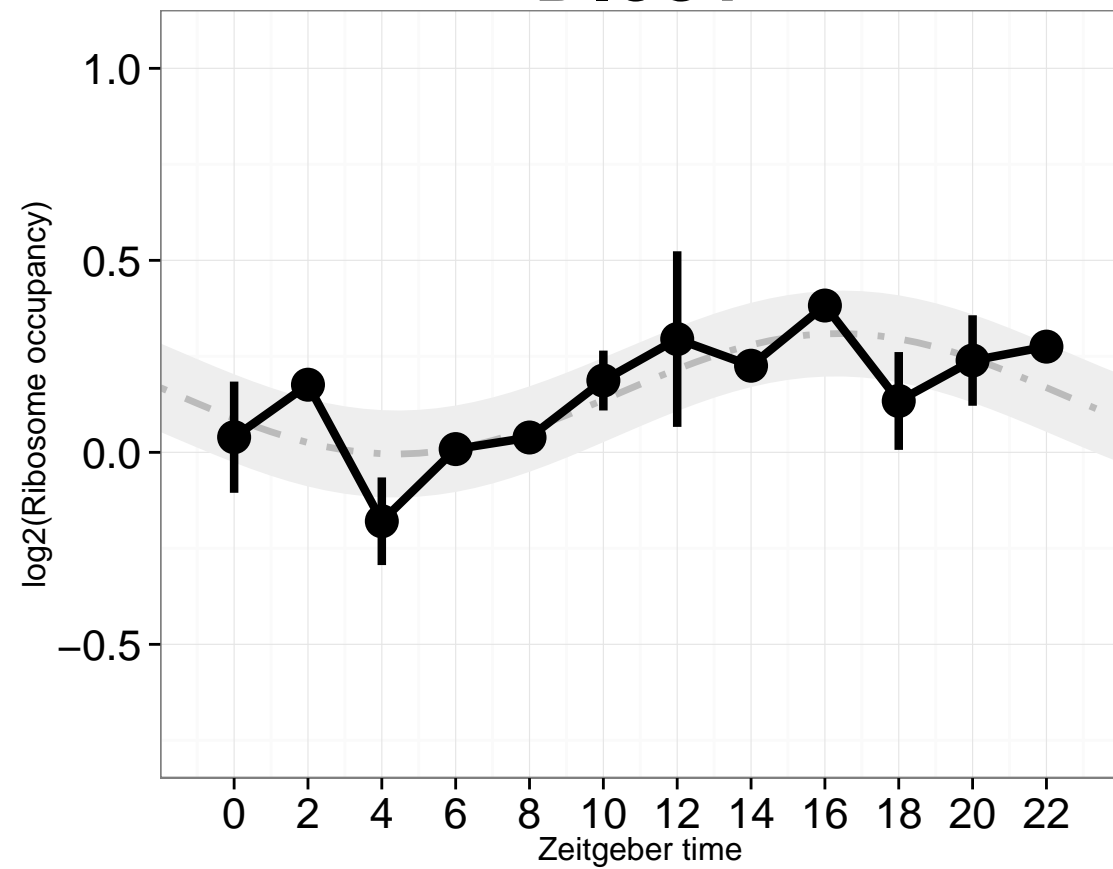

Supplement: Supplementary file 8154 [file 1]

Rasgrf2

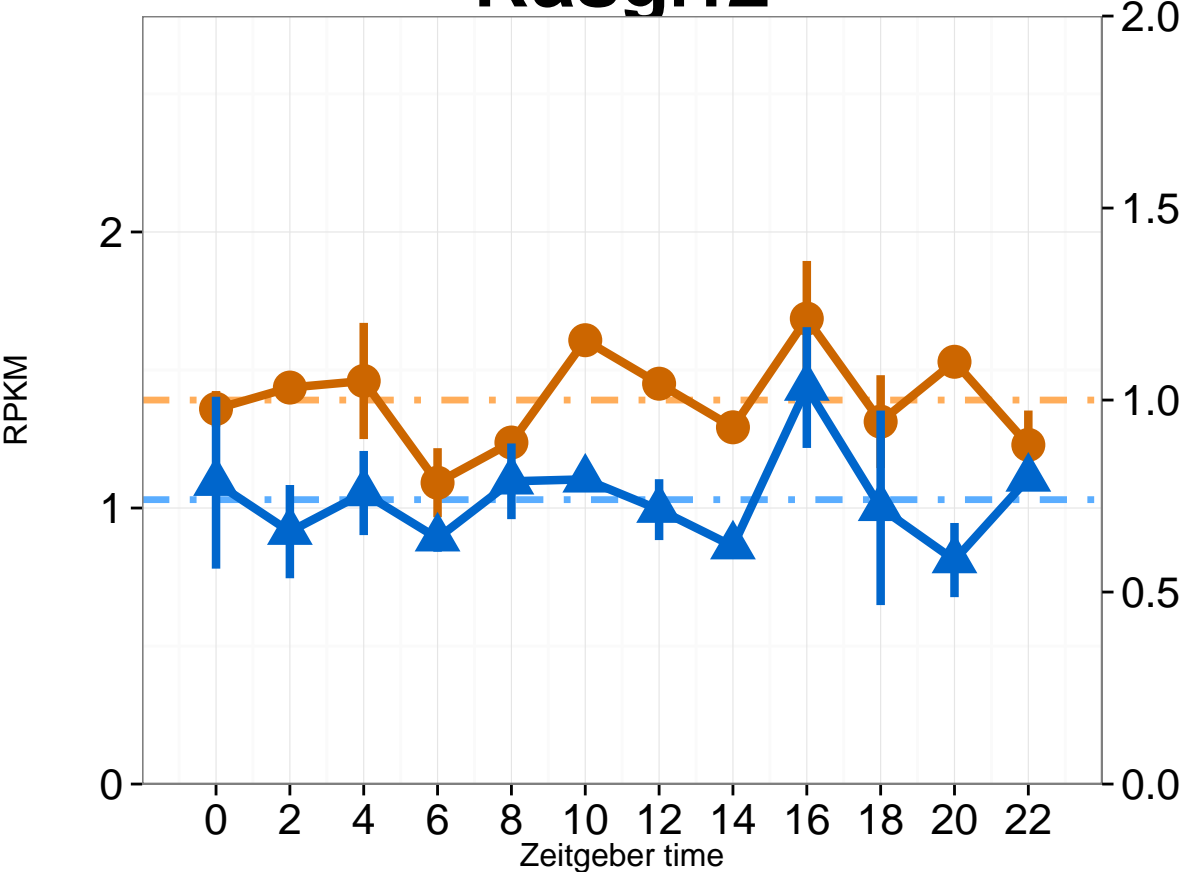

Rasgrf2

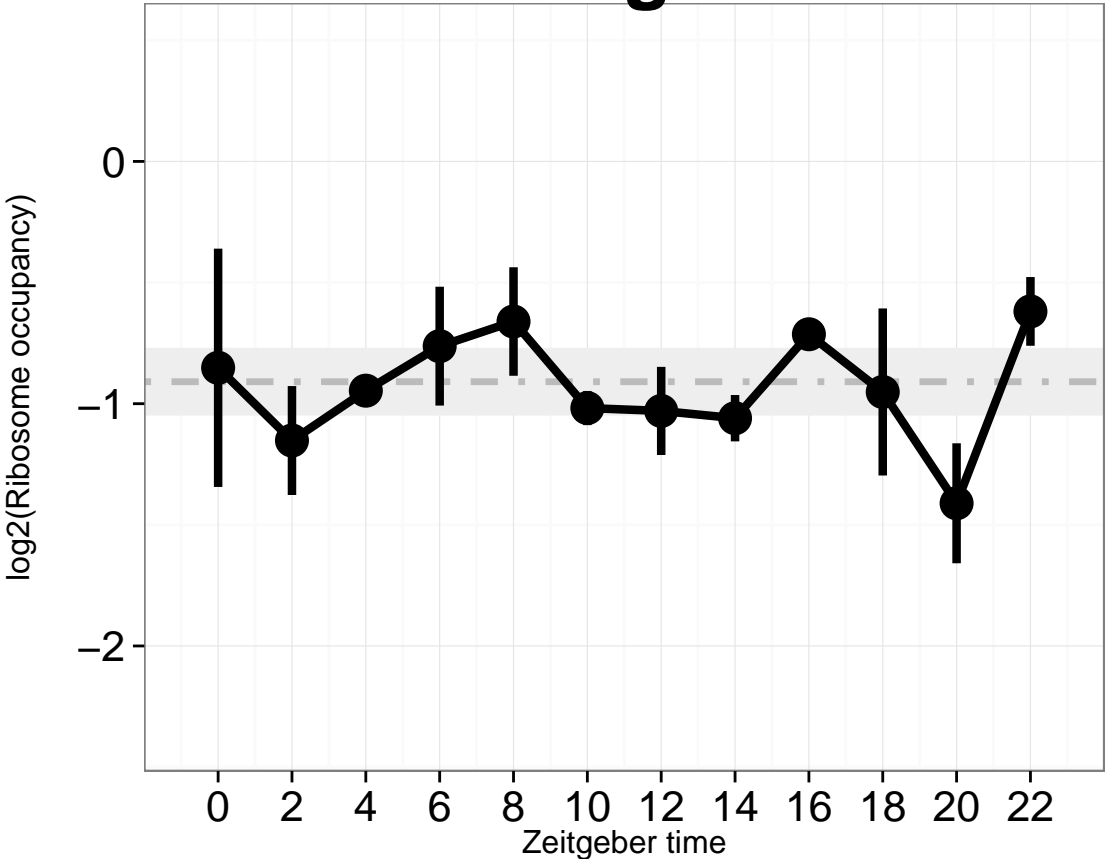

Supplement: Supplementary file 8155 [file 1]

## 2510003E04Rik

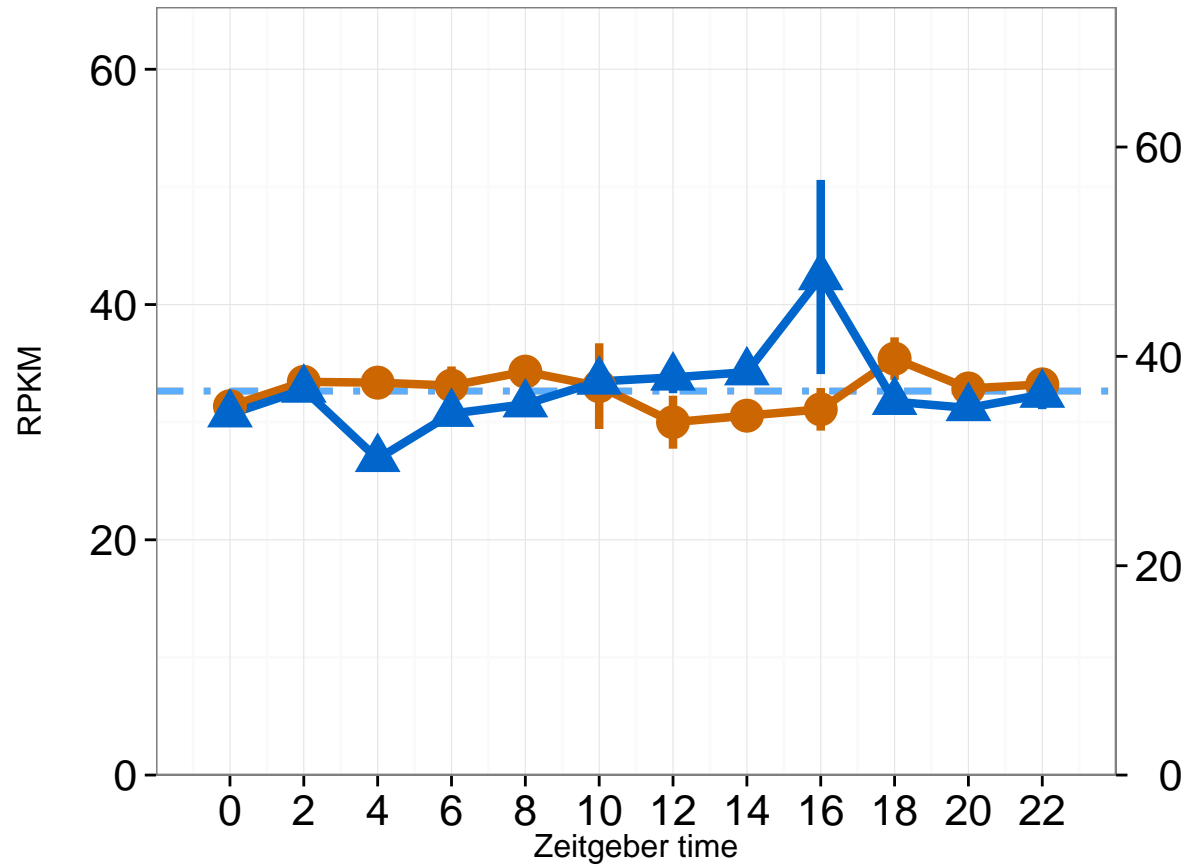

## 2510003E04Rik

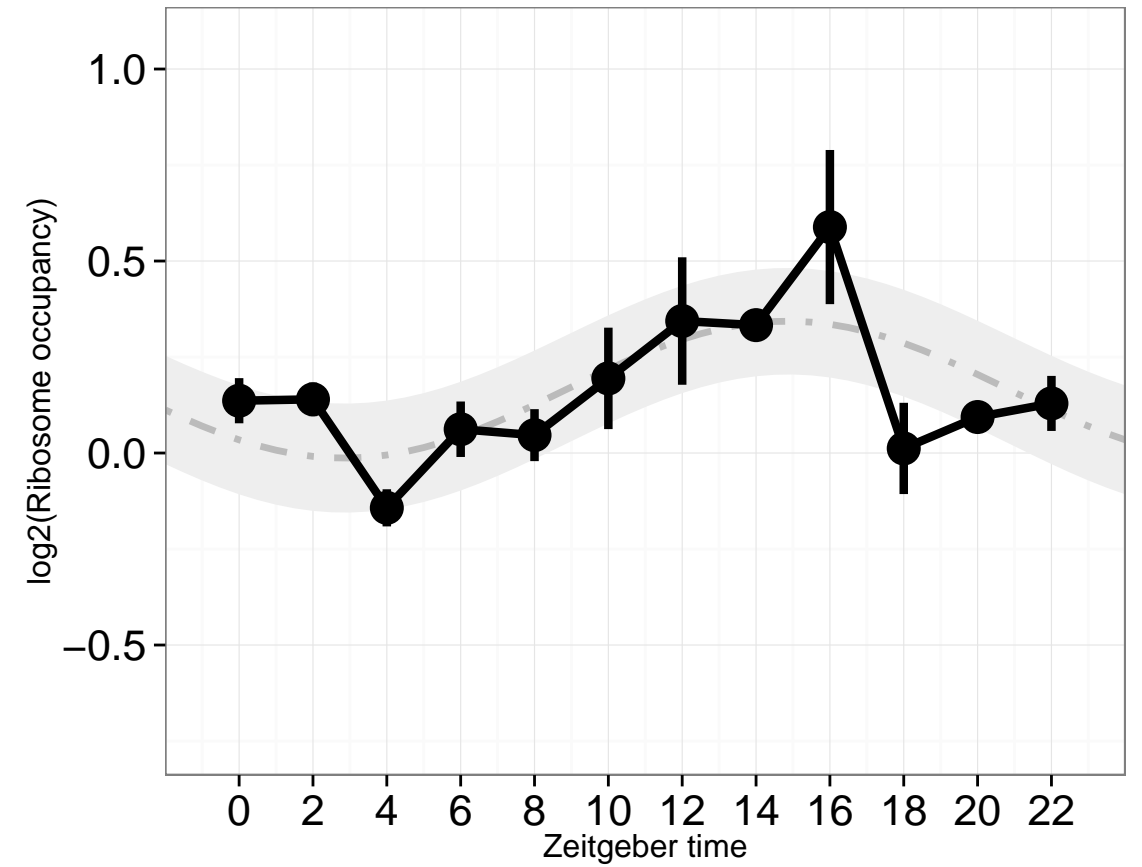

Supplement: Supplementary file 8156 [file 1]

## Polr3h

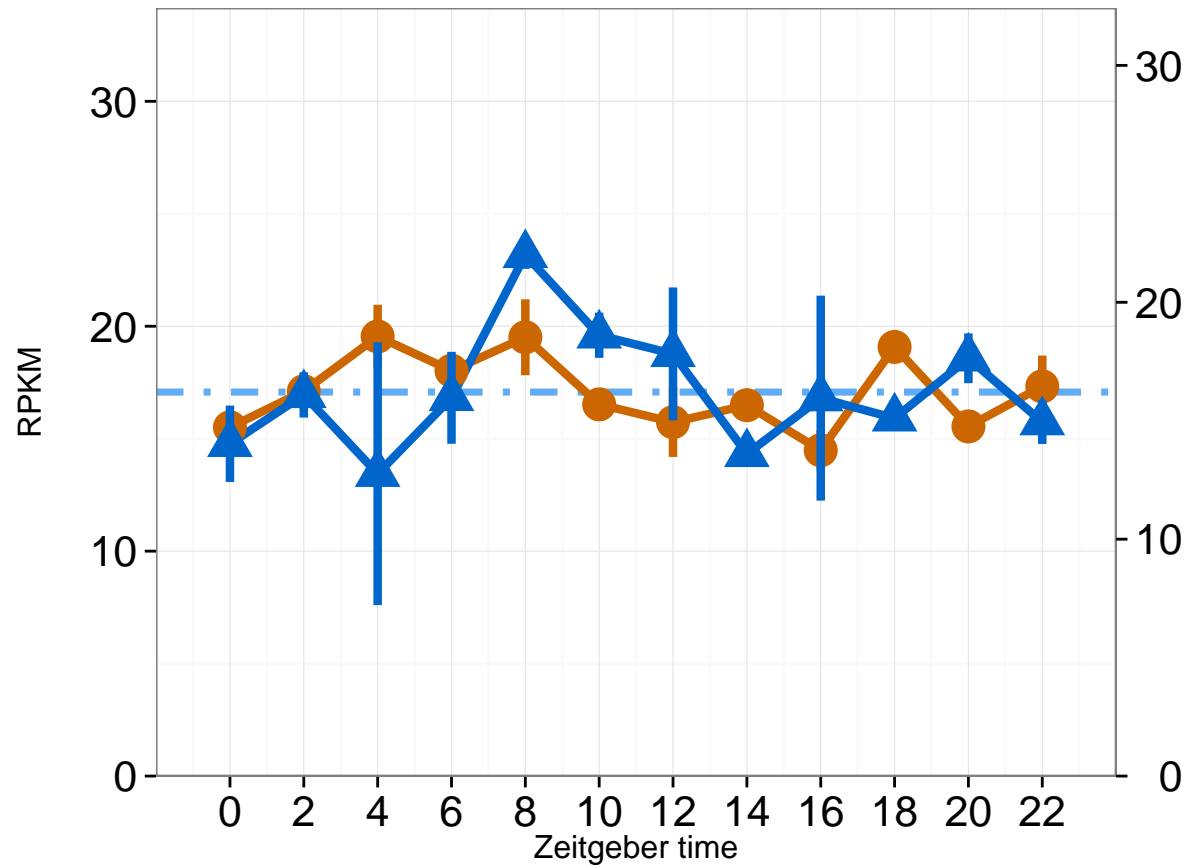

## Polr3h

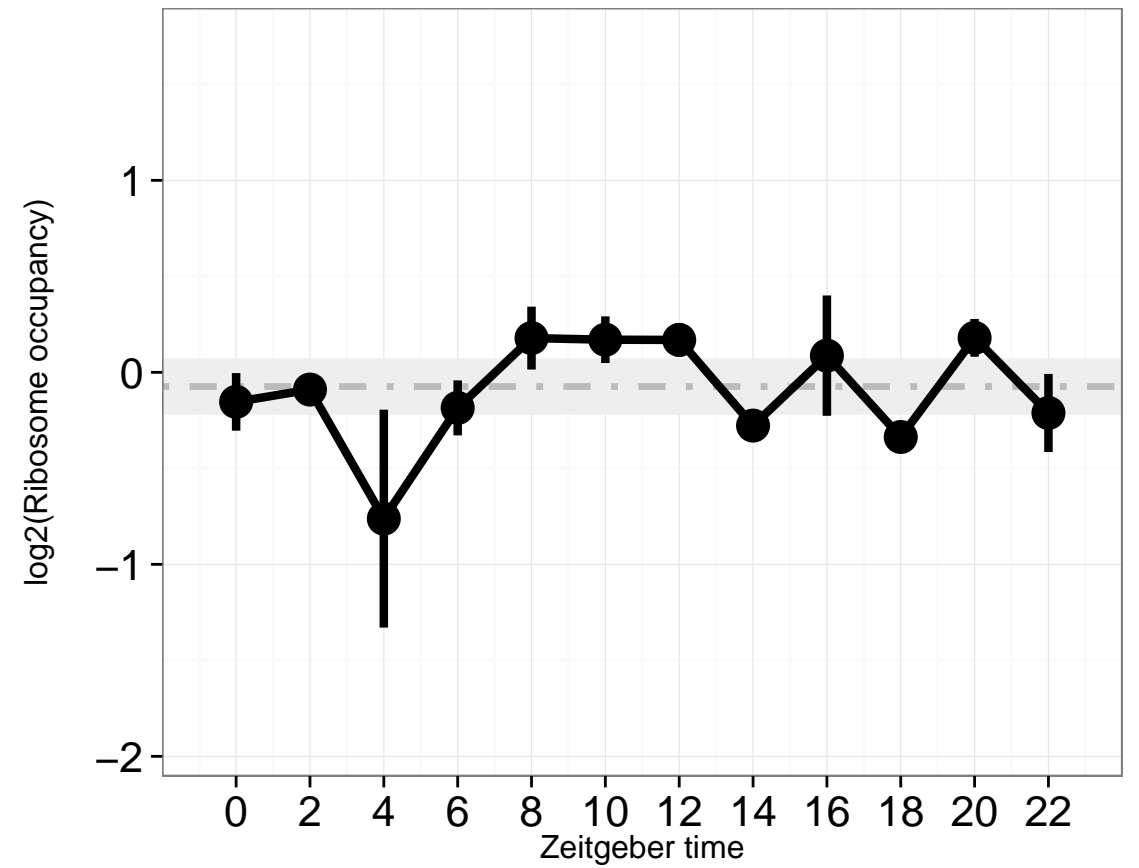

Supplement: Supplementary file 8157 [file 1]

# Prkg2

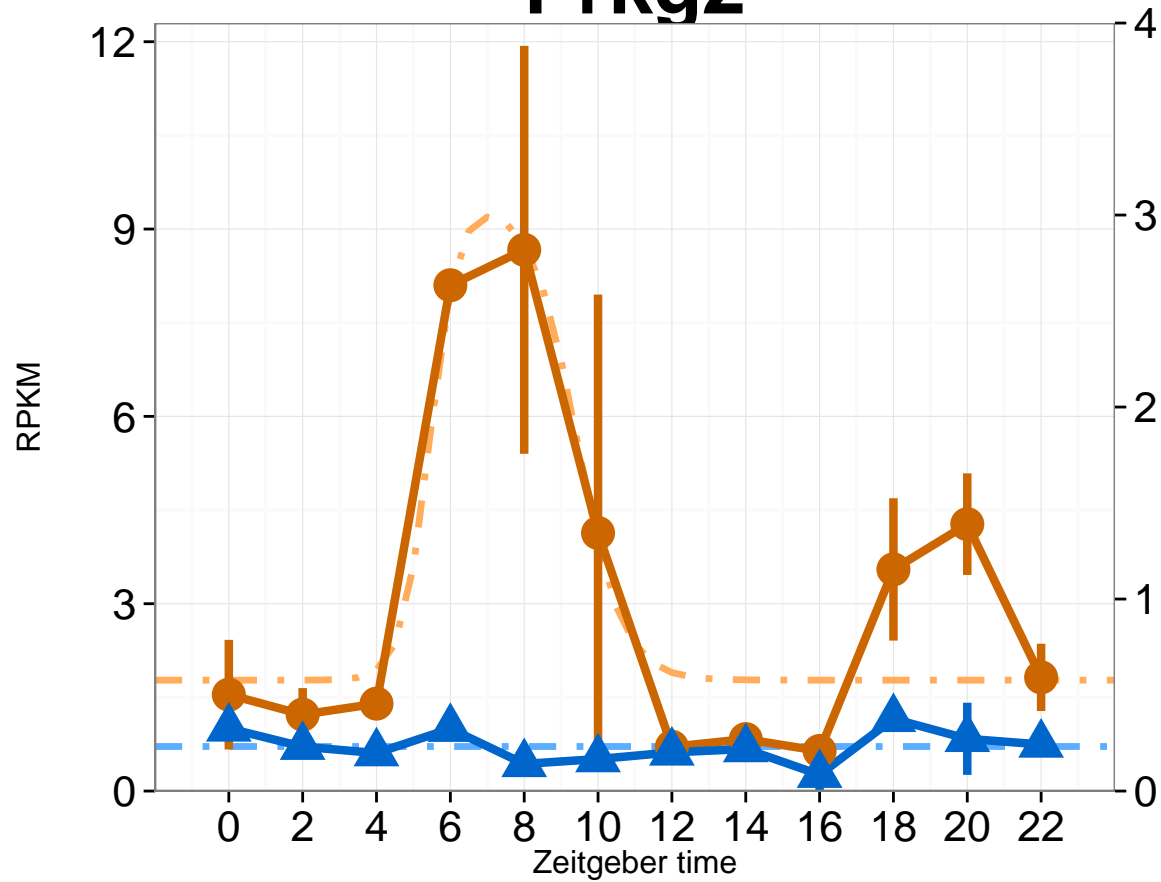

# Prkg2

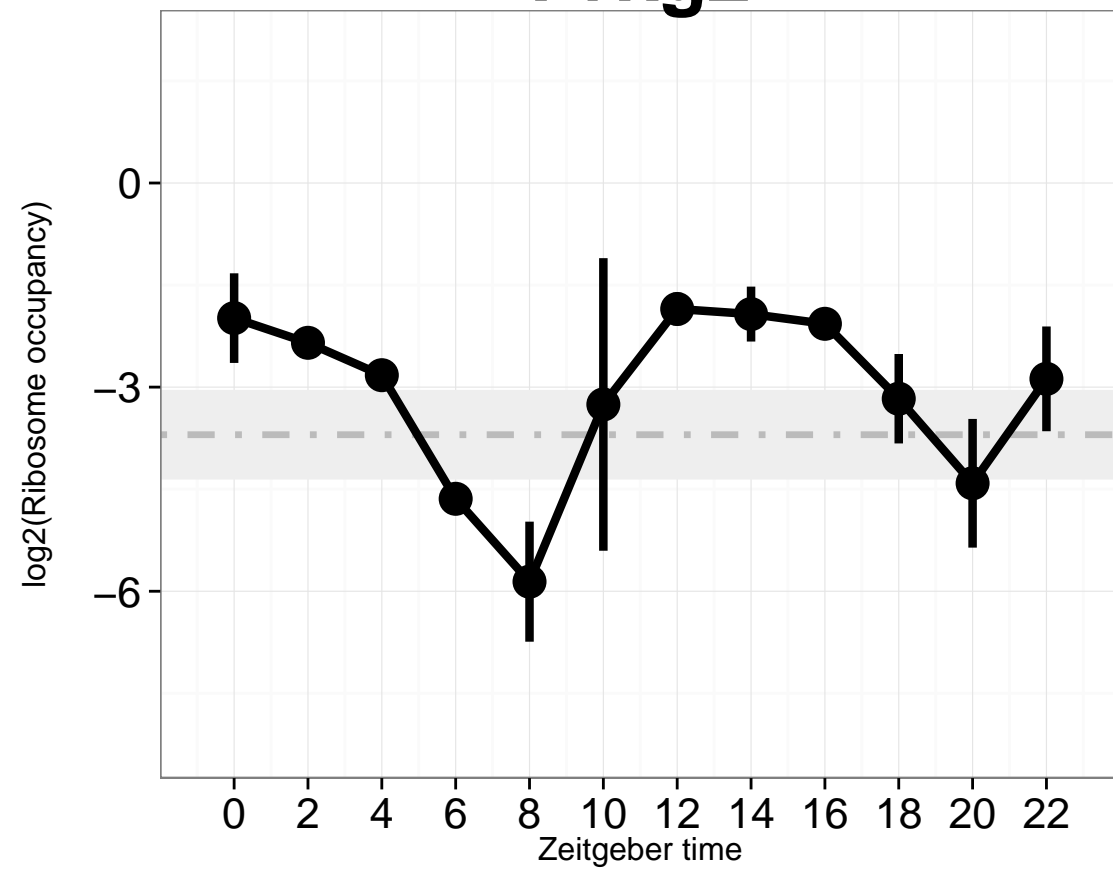

Supplement: Supplementary file 8158 [file 1]

# Mchr1

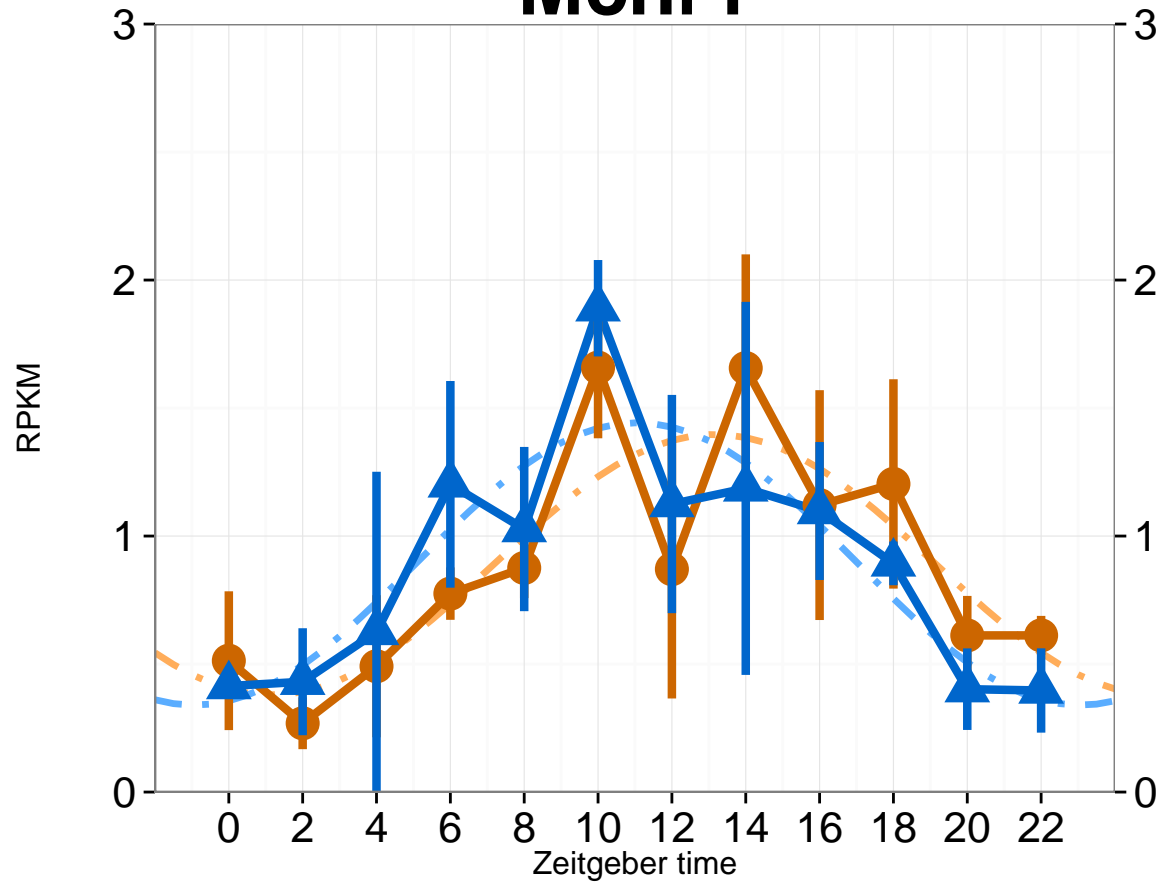

# Mchr1

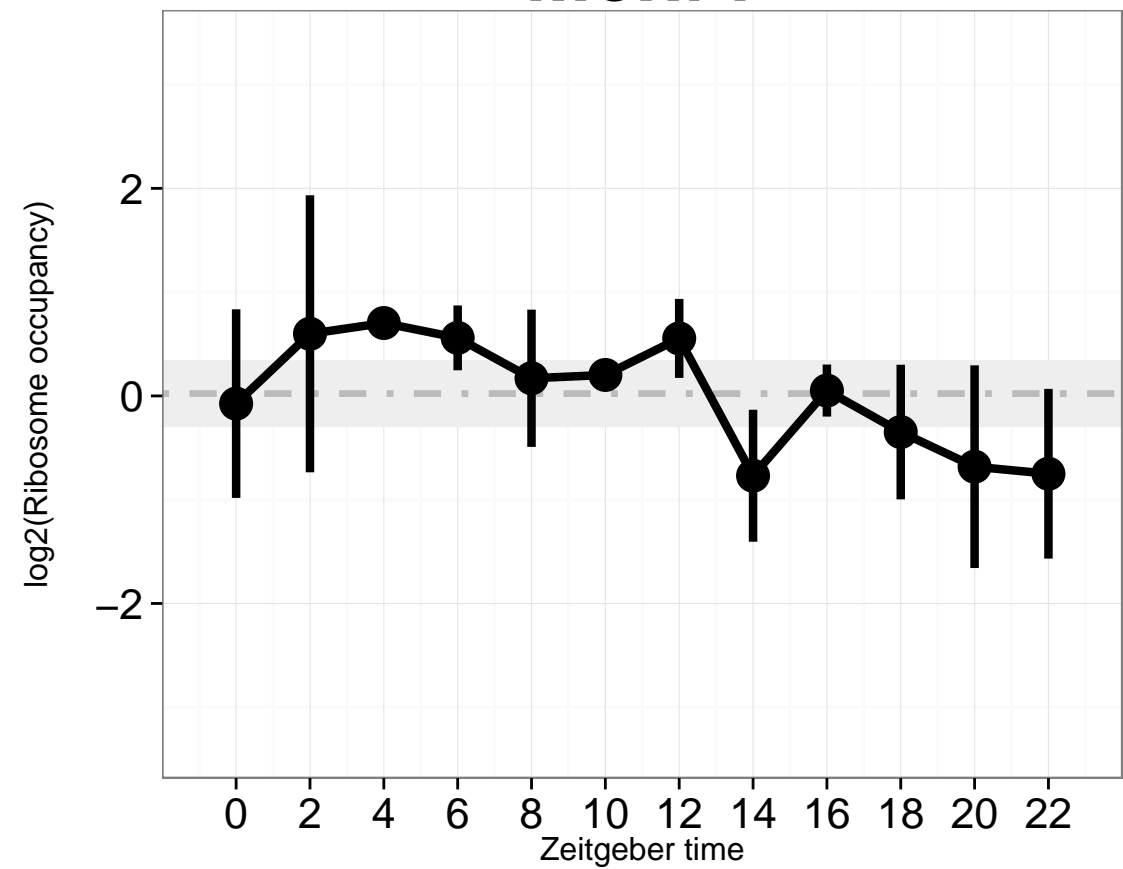

Supplement: Supplementary file 8159 [file 1]

## 2700029M09Rik

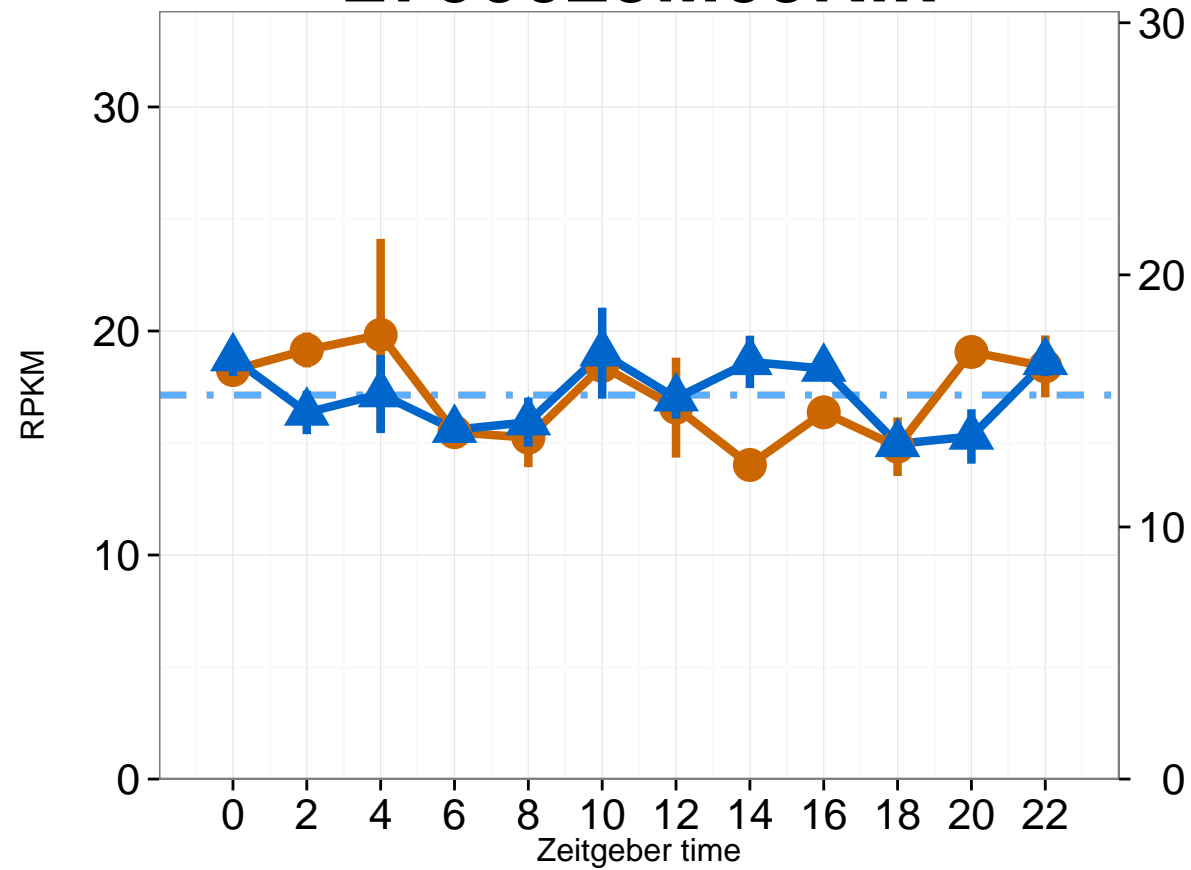

## 2700029M09Rik

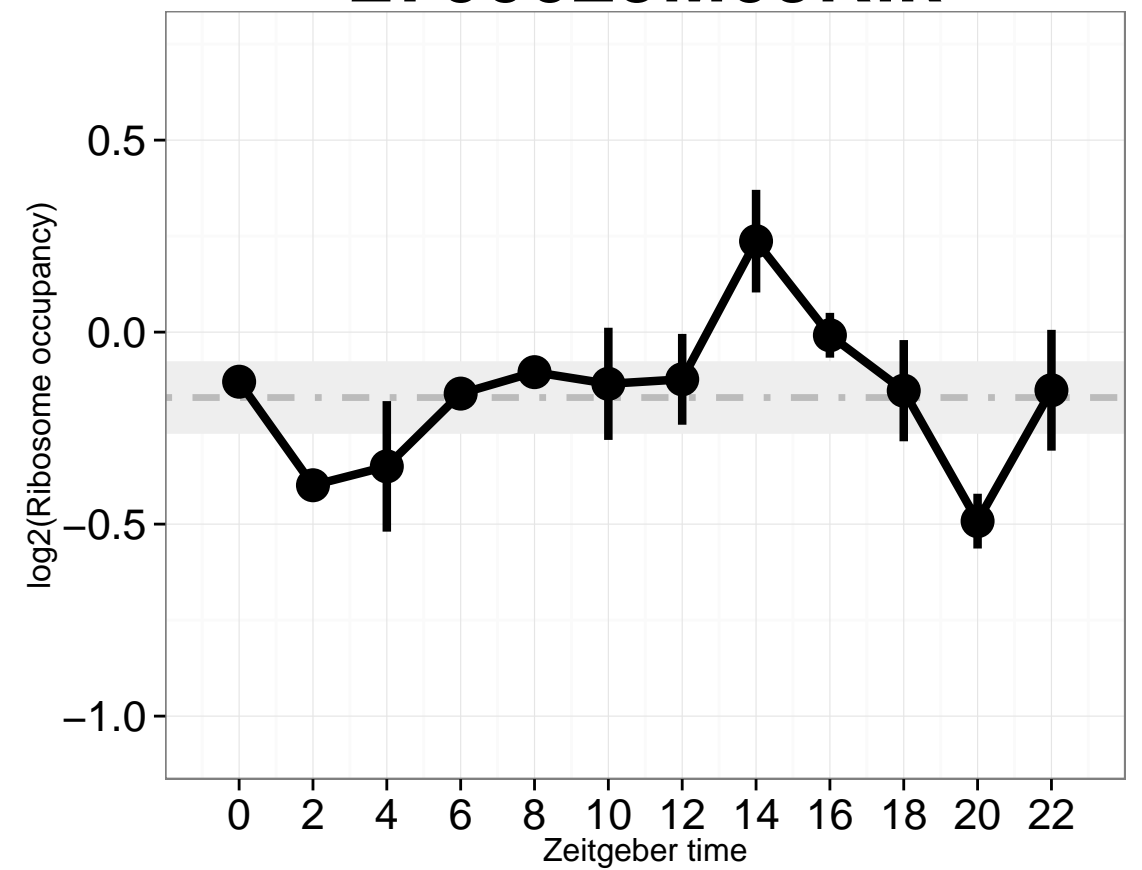

Supplement: Supplementary file 8160 [file 1]

## Tdrd3

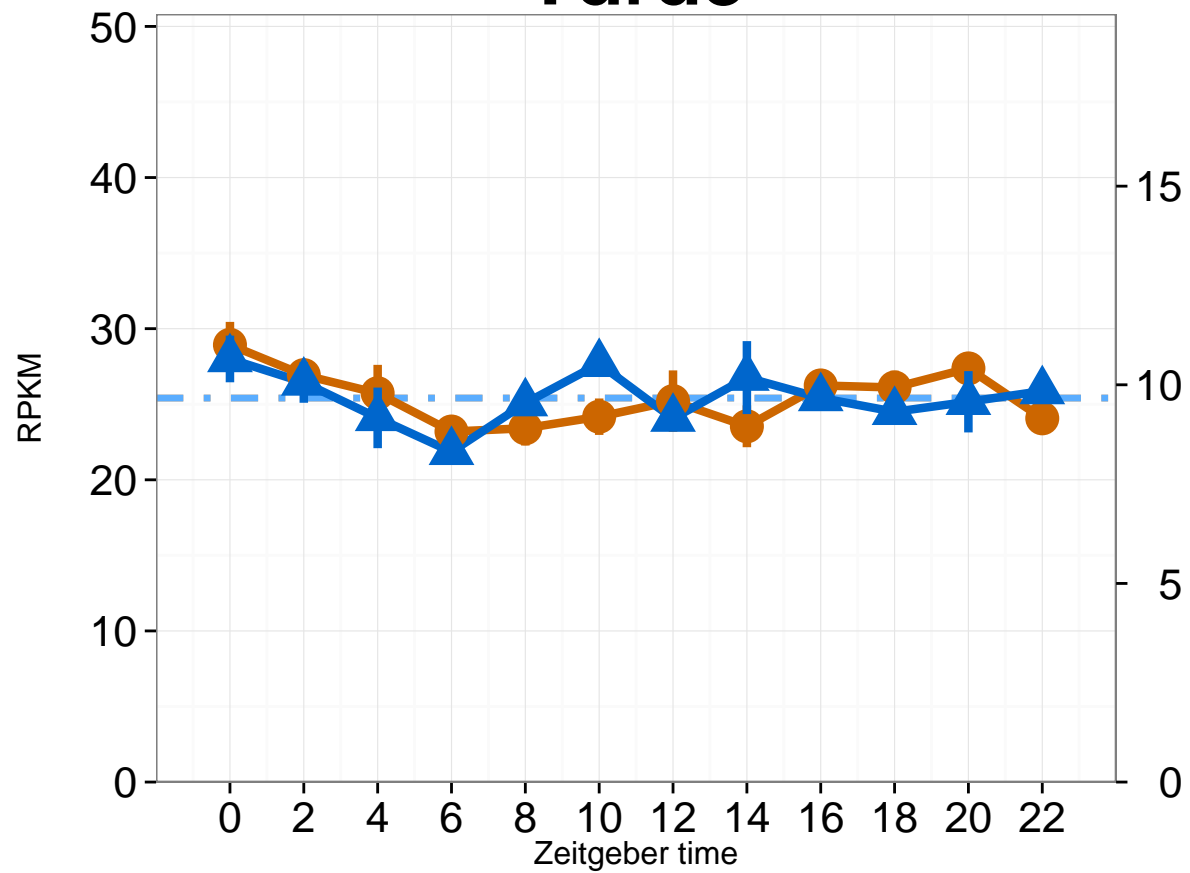

## Tdrd3

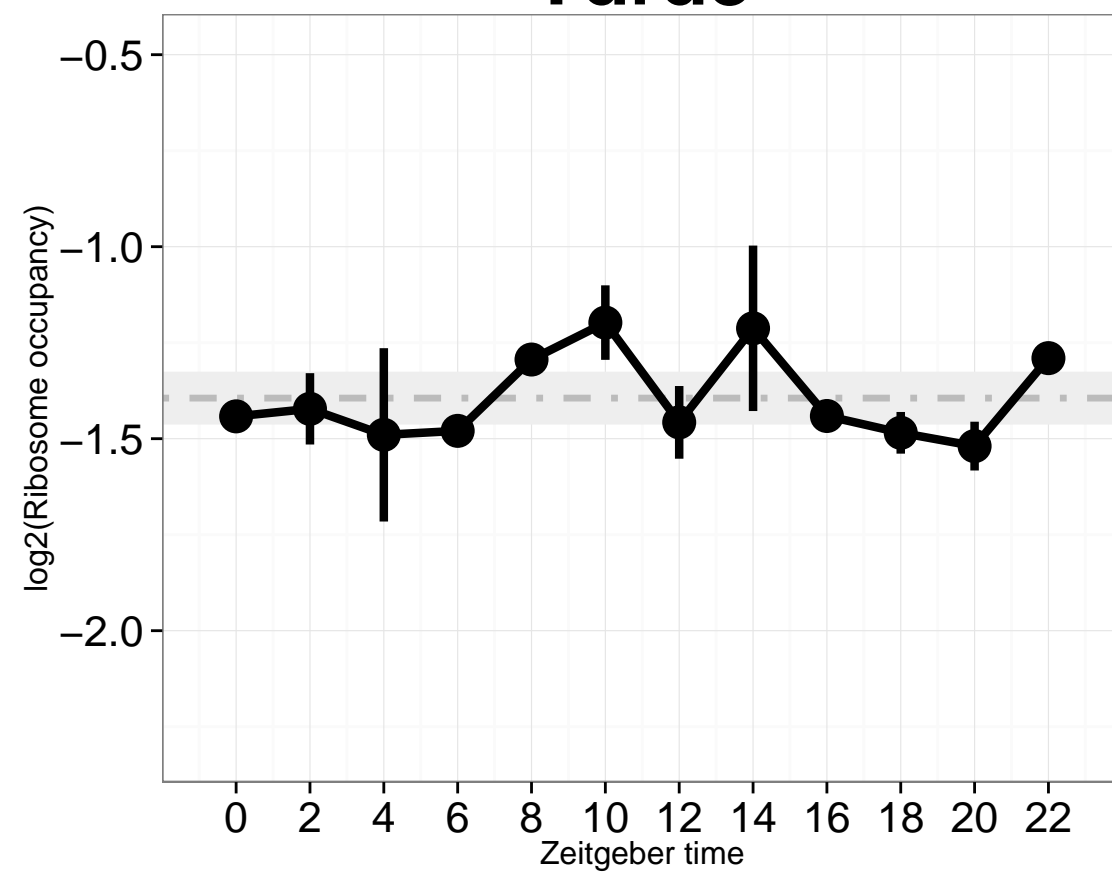

Supplement: Supplementary file 8161 [file 1]

## Ubqln1

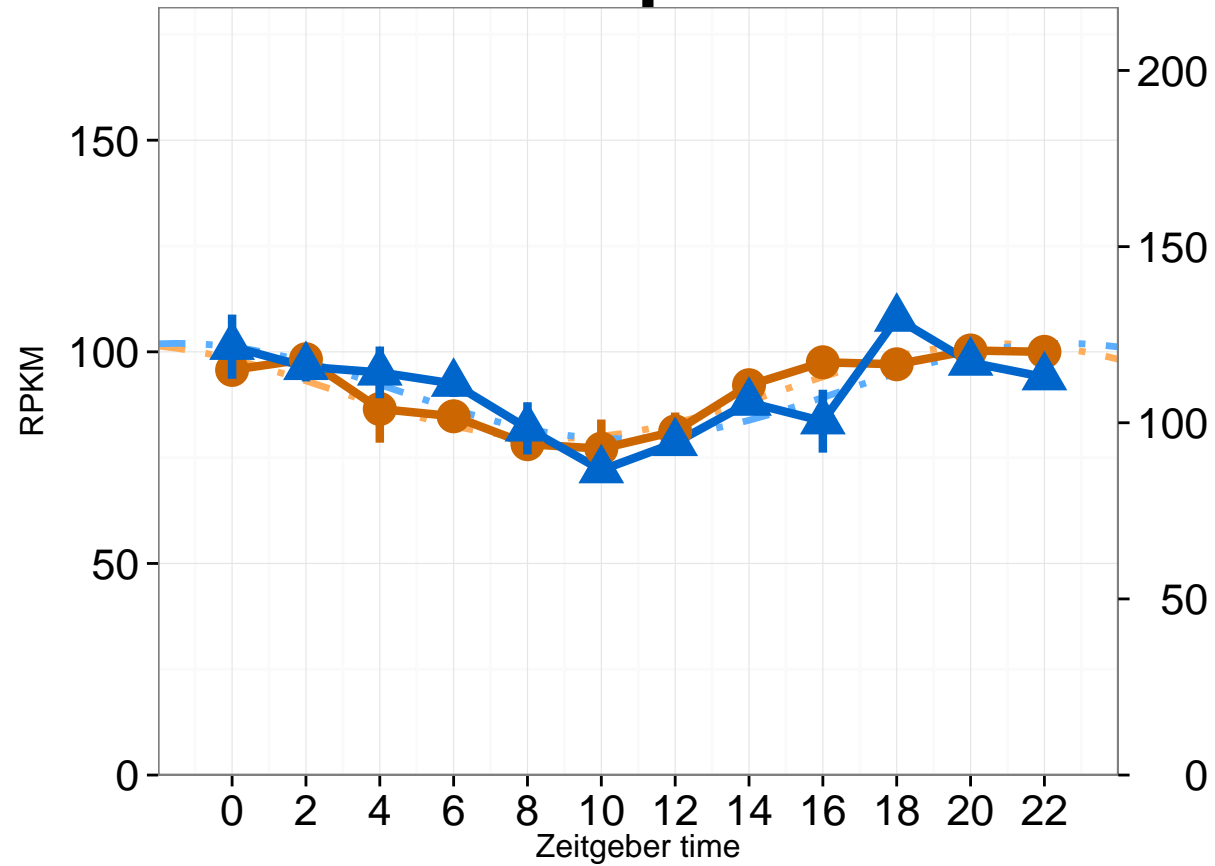

## Ubqln1

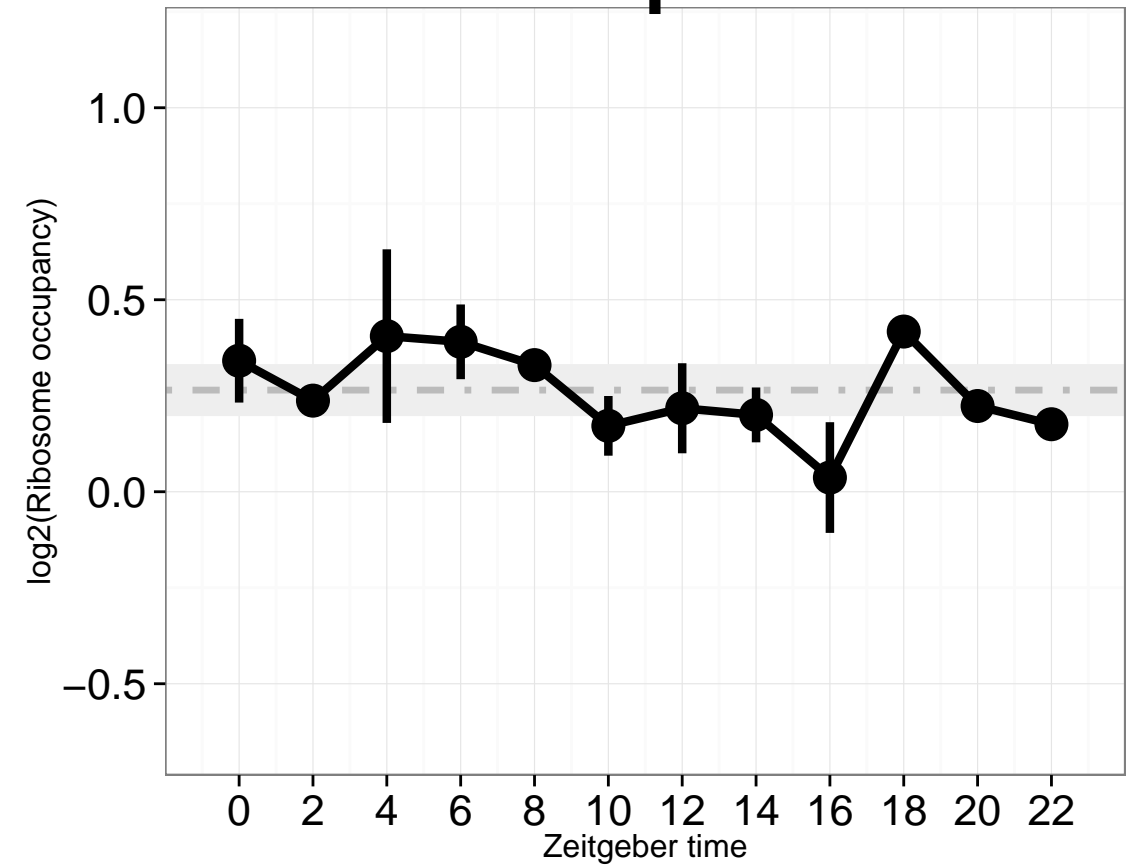

Supplement: Supplementary file 8162 [file 1]

## Syp

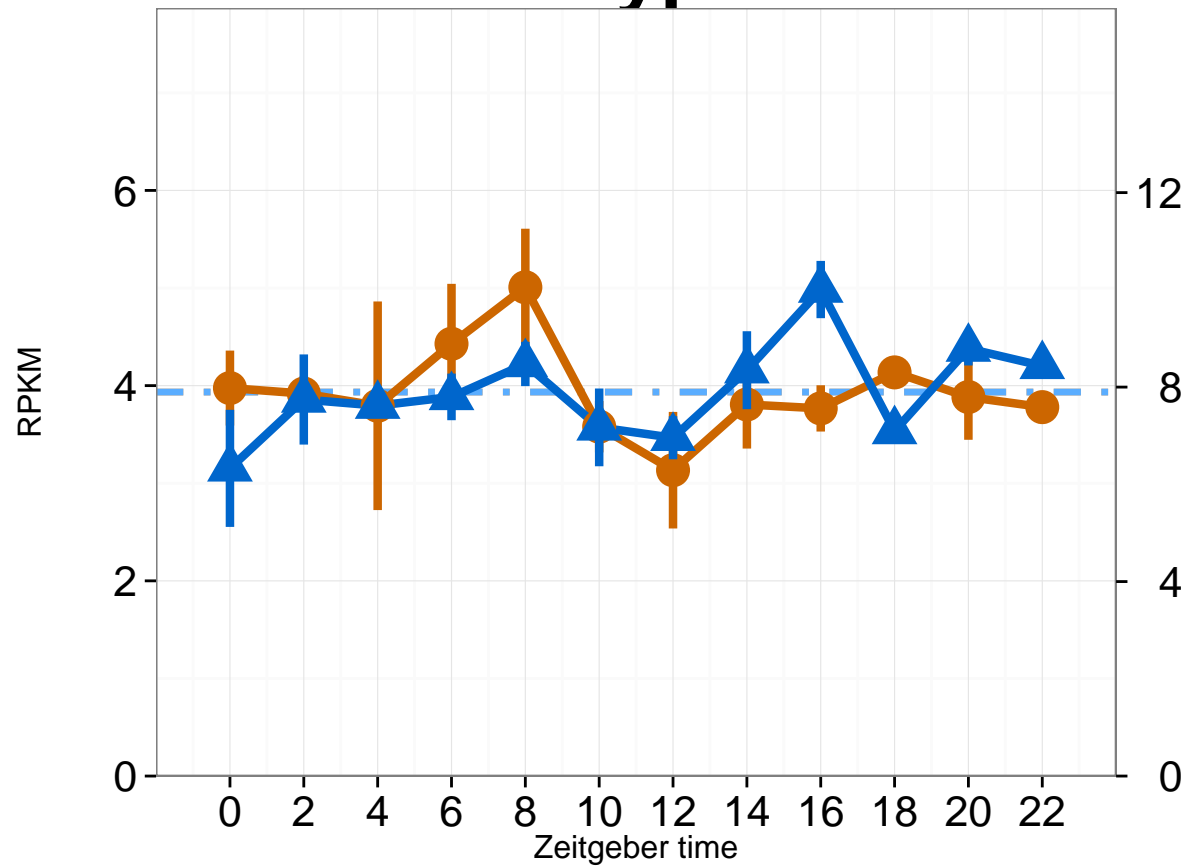

## Syp

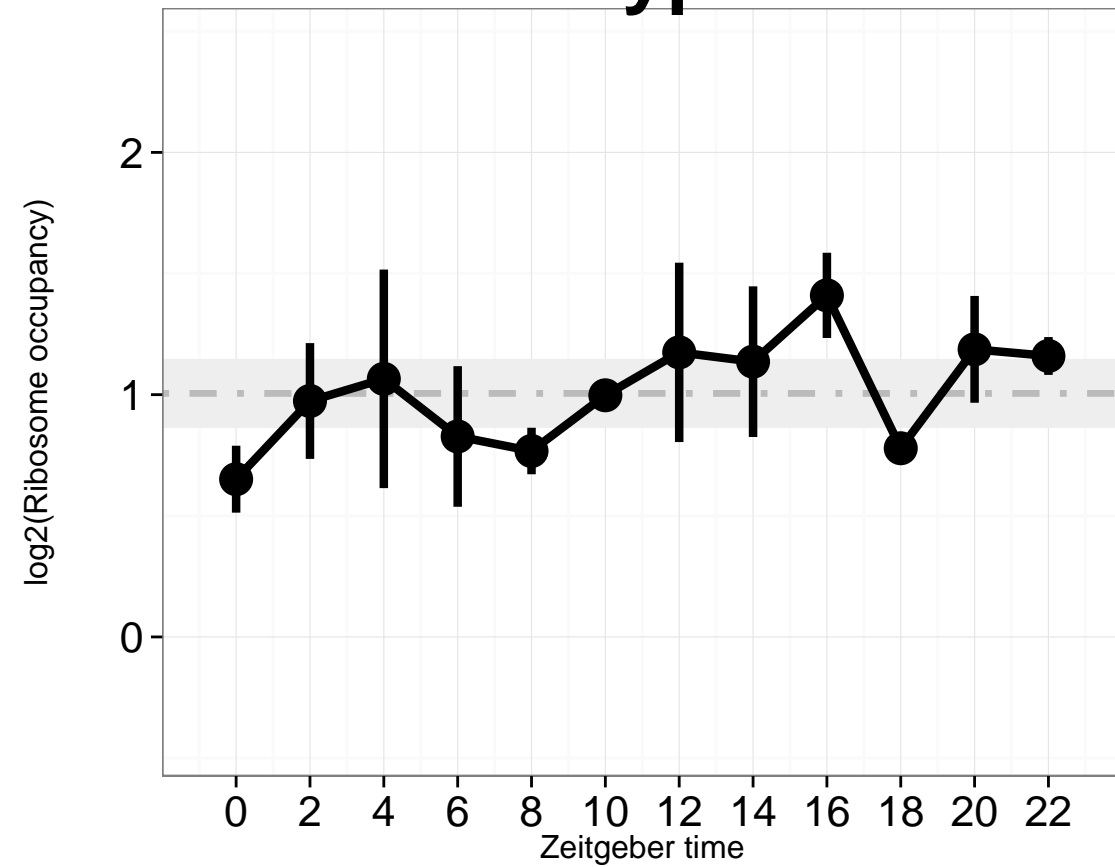

Supplement: Supplementary file 8163 [file 1]

## Mybbp1a

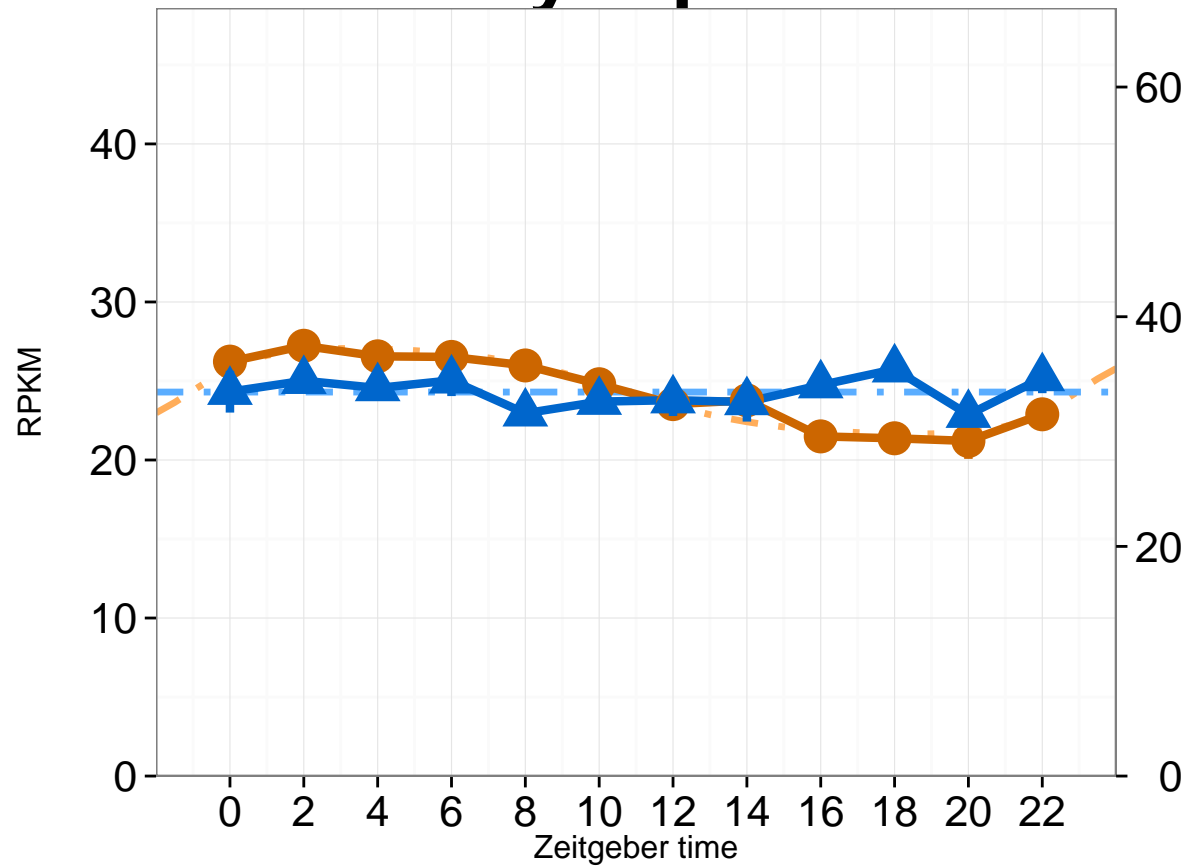

## Mybbp1a

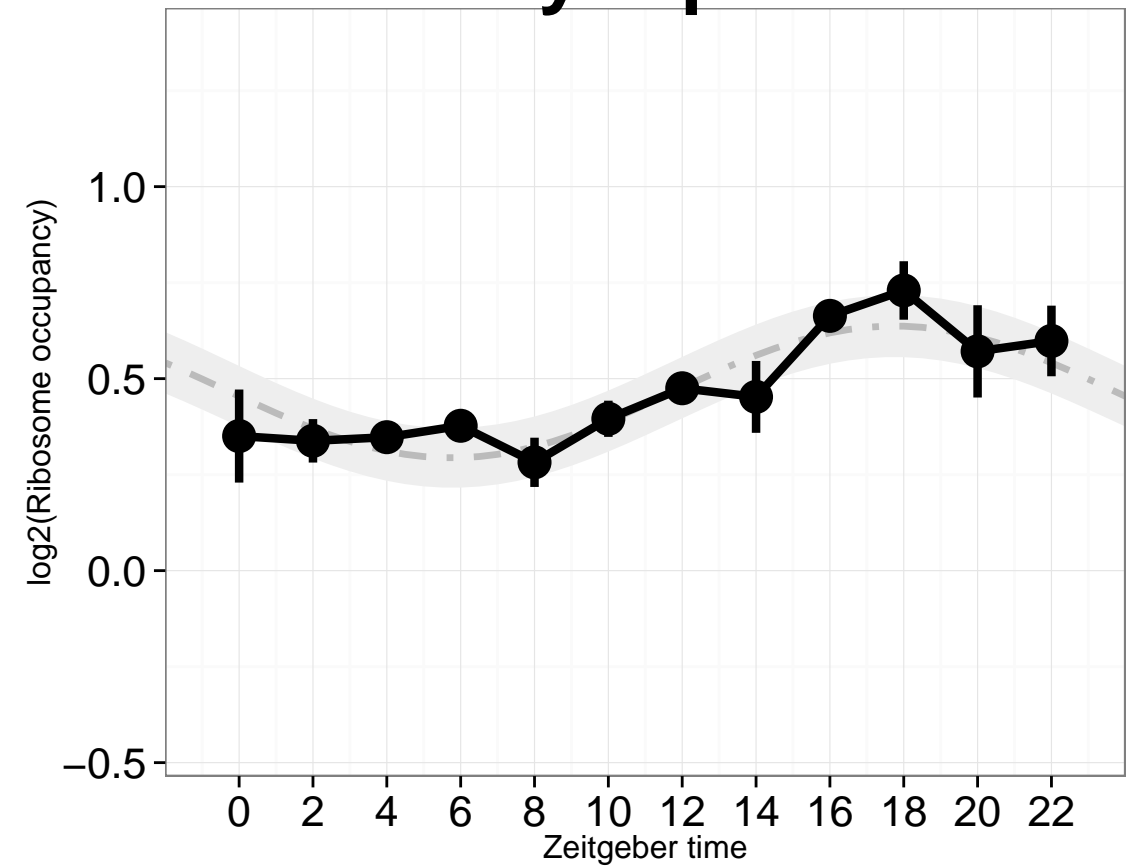

Supplement: Supplementary file 8164 [file 1]

# Epc2

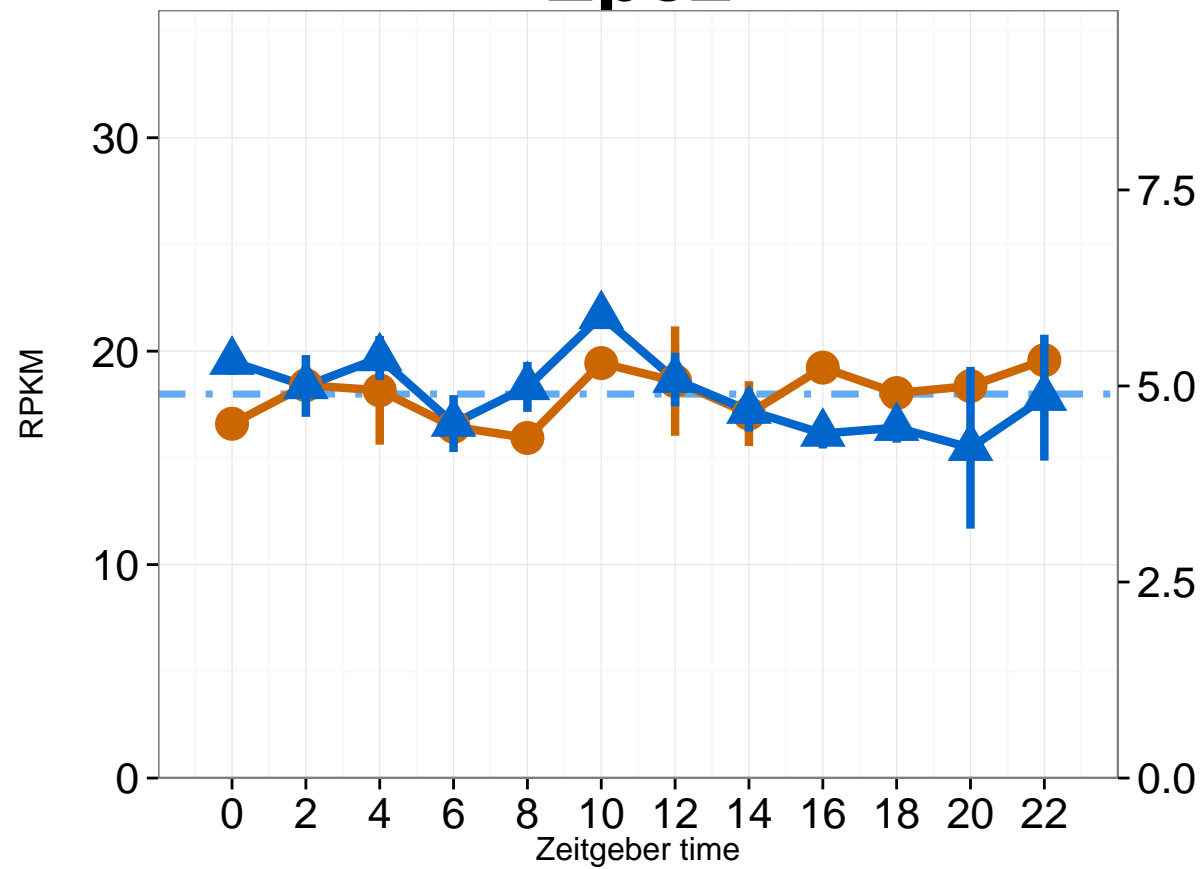

# Epc2

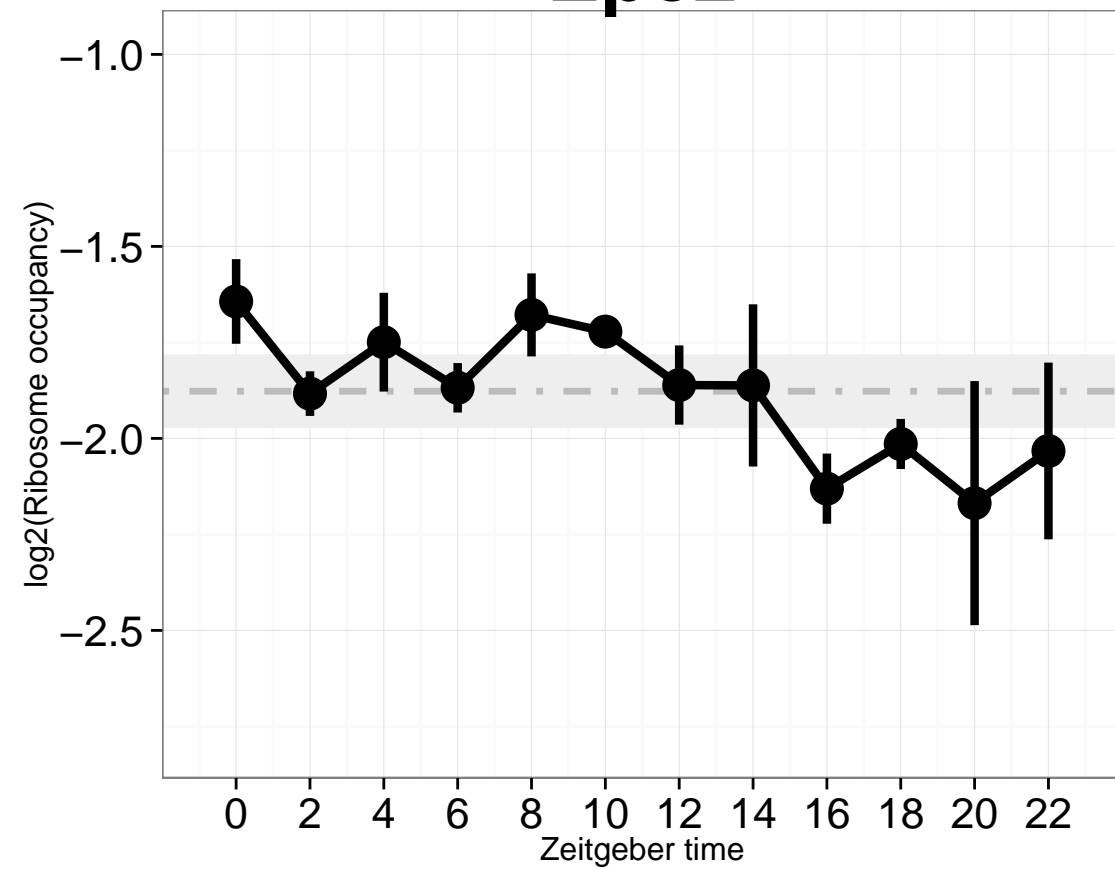

Supplement: Supplementary file 8165 [file 1]

# Fam203a

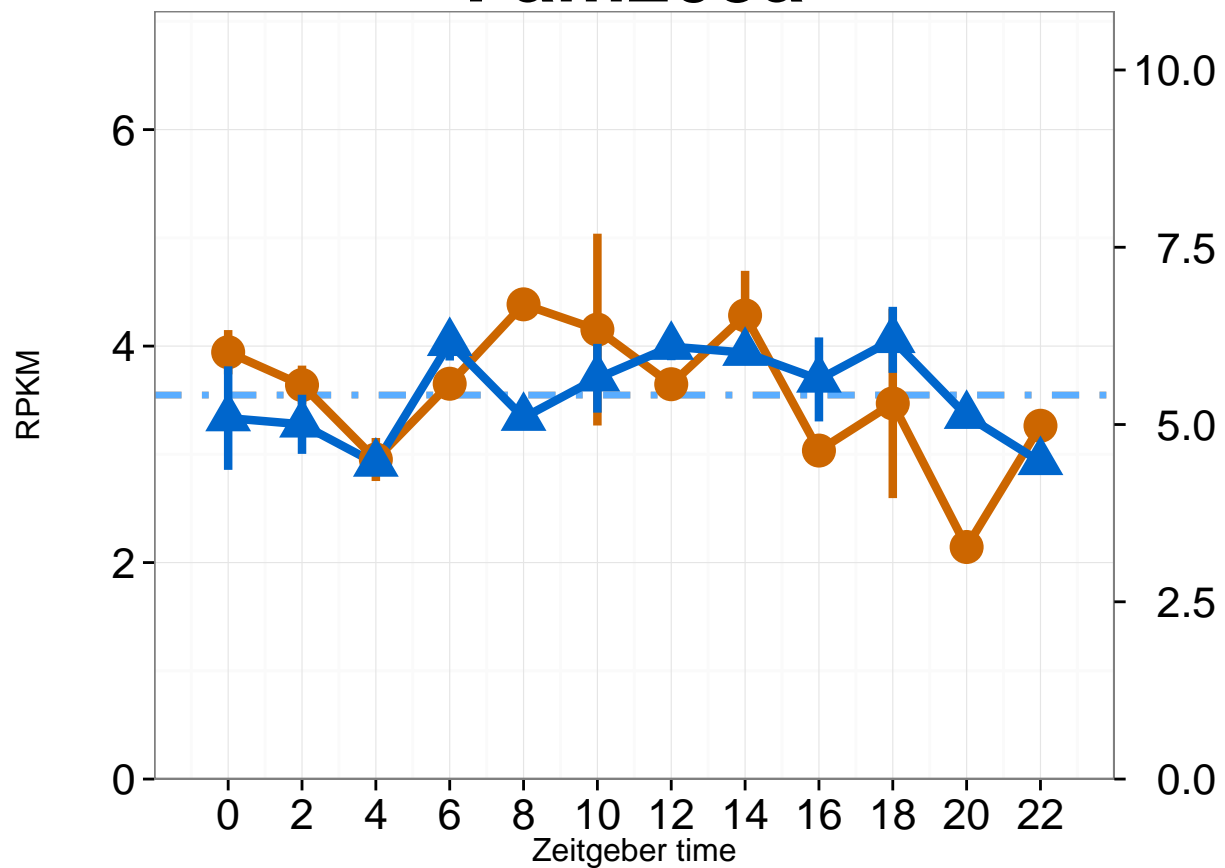

# Fam203a

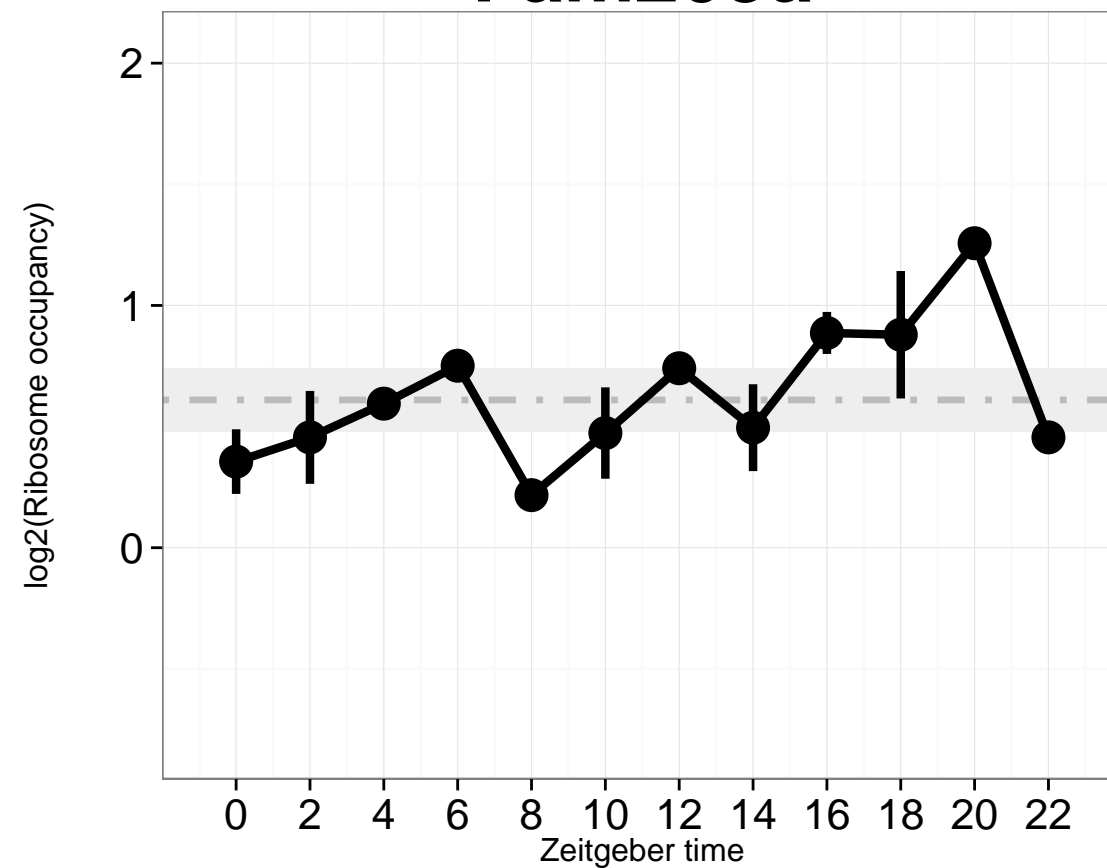

Supplement: Supplementary file 8166 [file 1]

## Clu

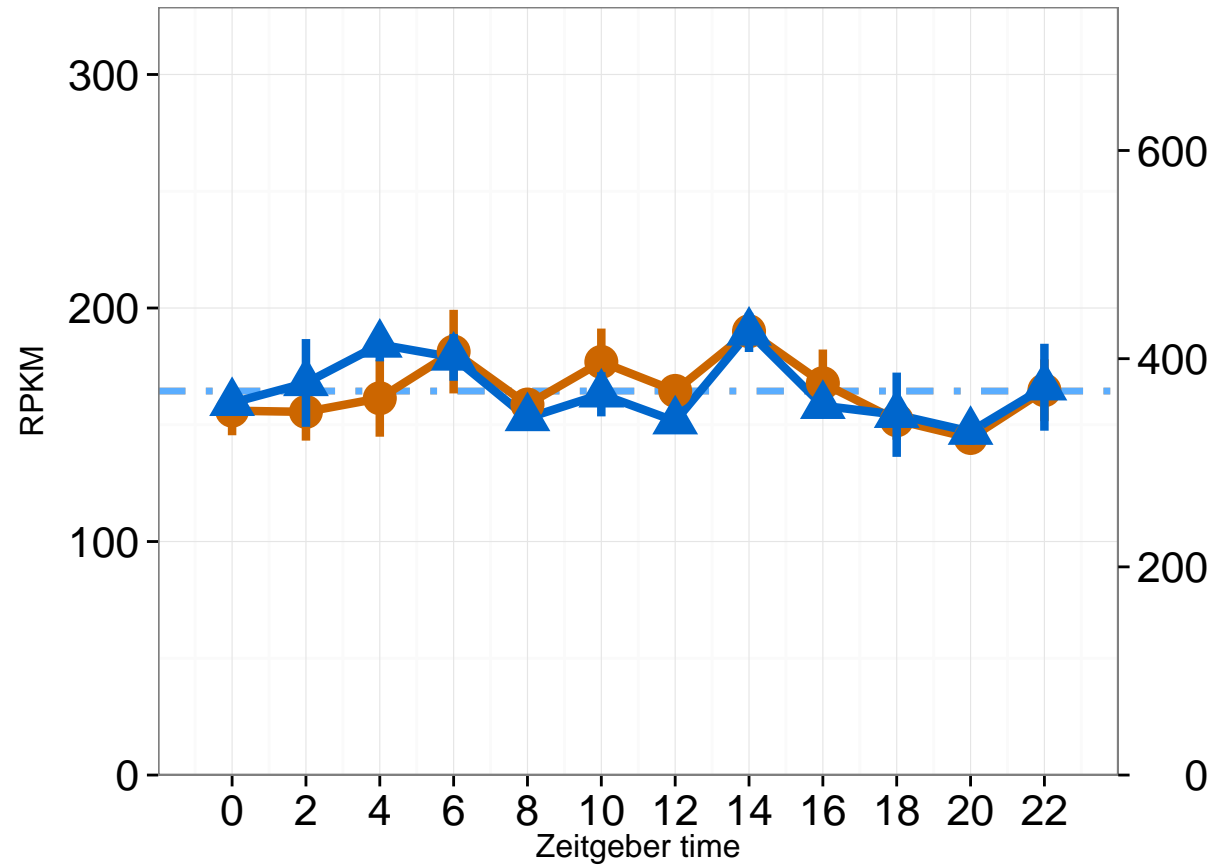

## Clu

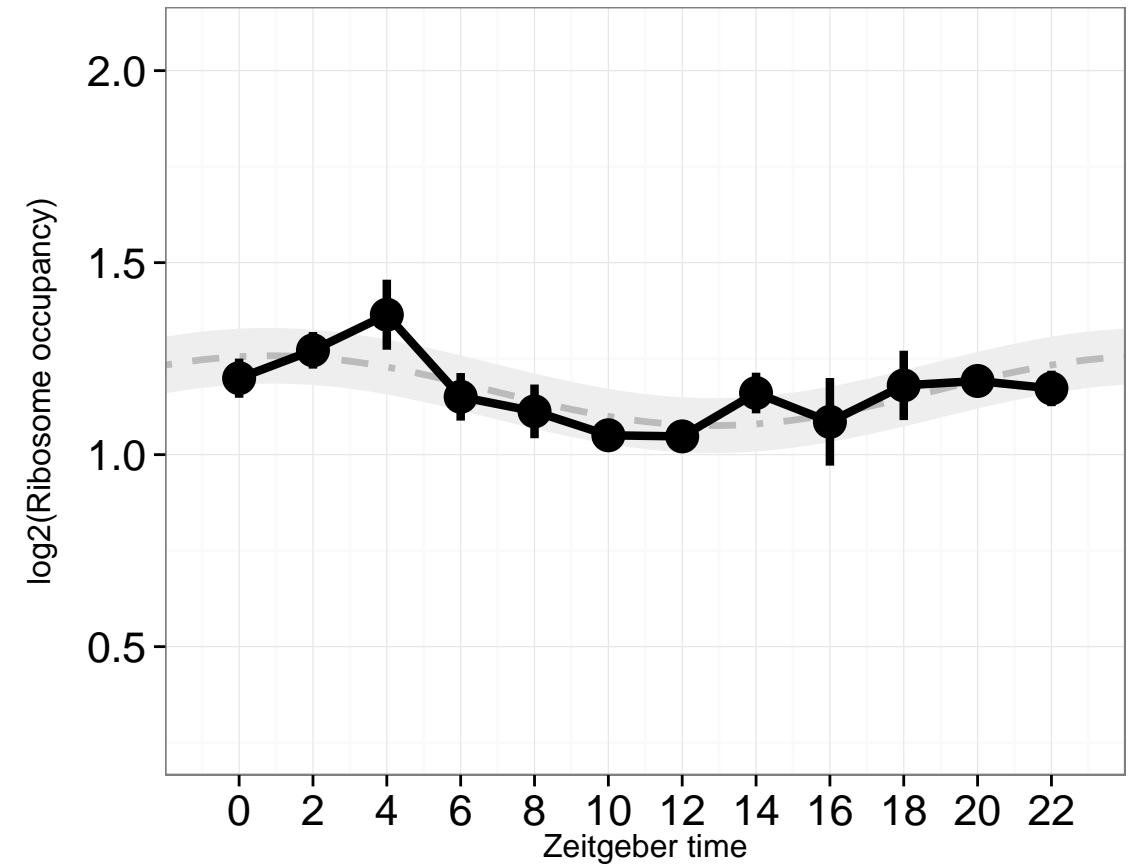

Supplement: Supplementary file 8167 [file 1]

# Gm6484

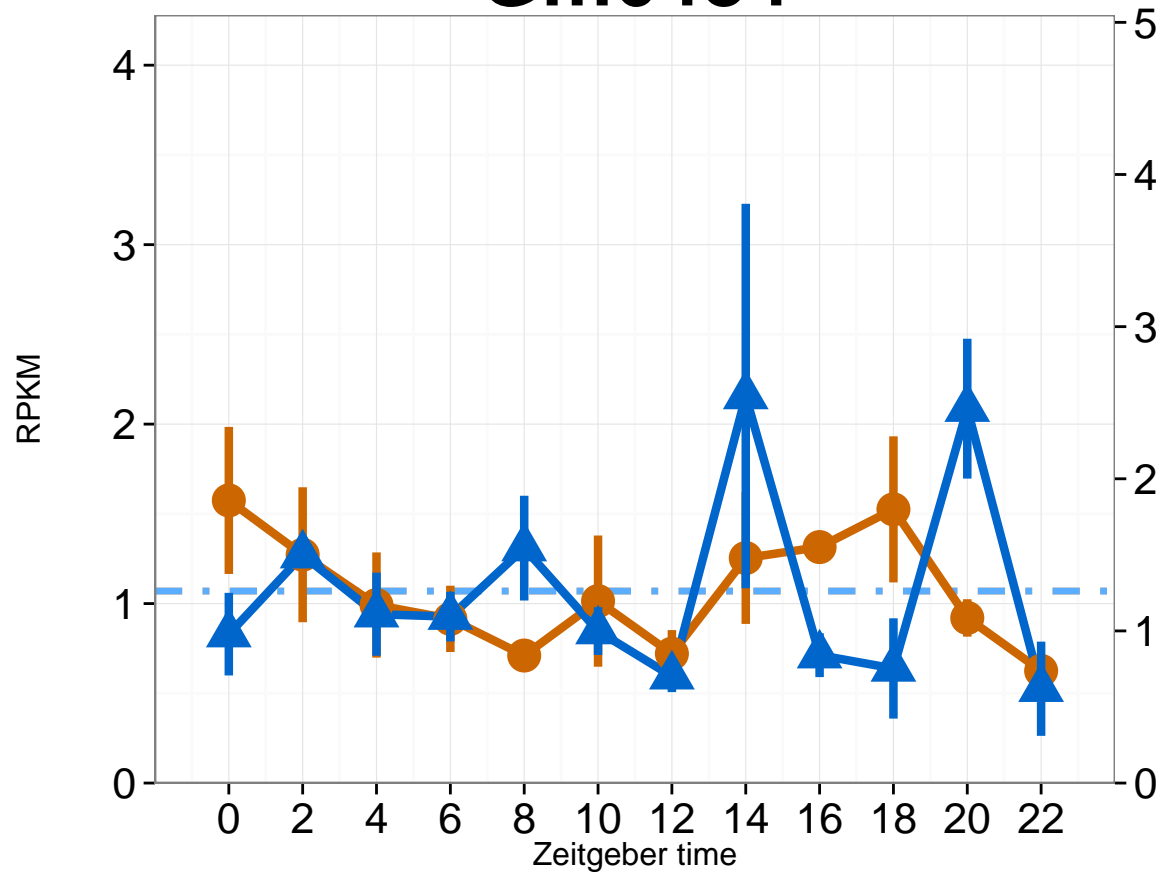

# Gm6484

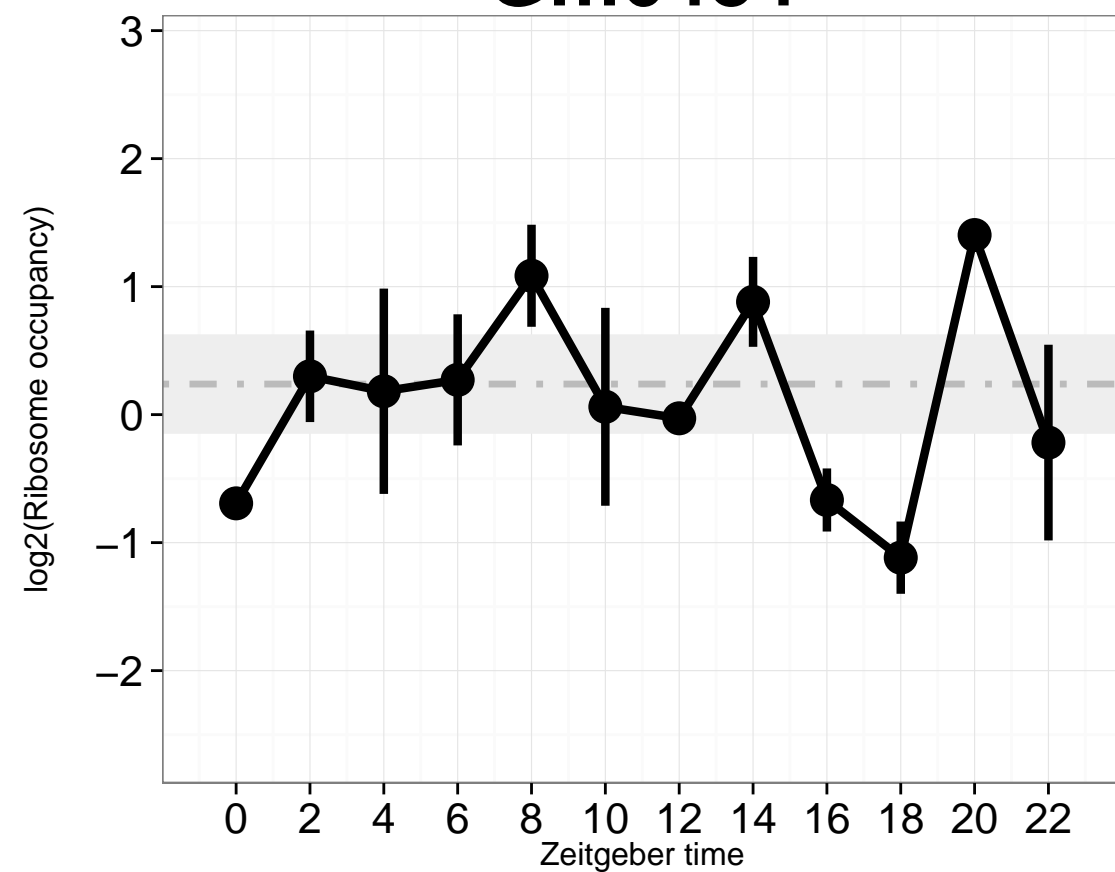

Supplement: Supplementary file 8168 [file 1]

## Psip1

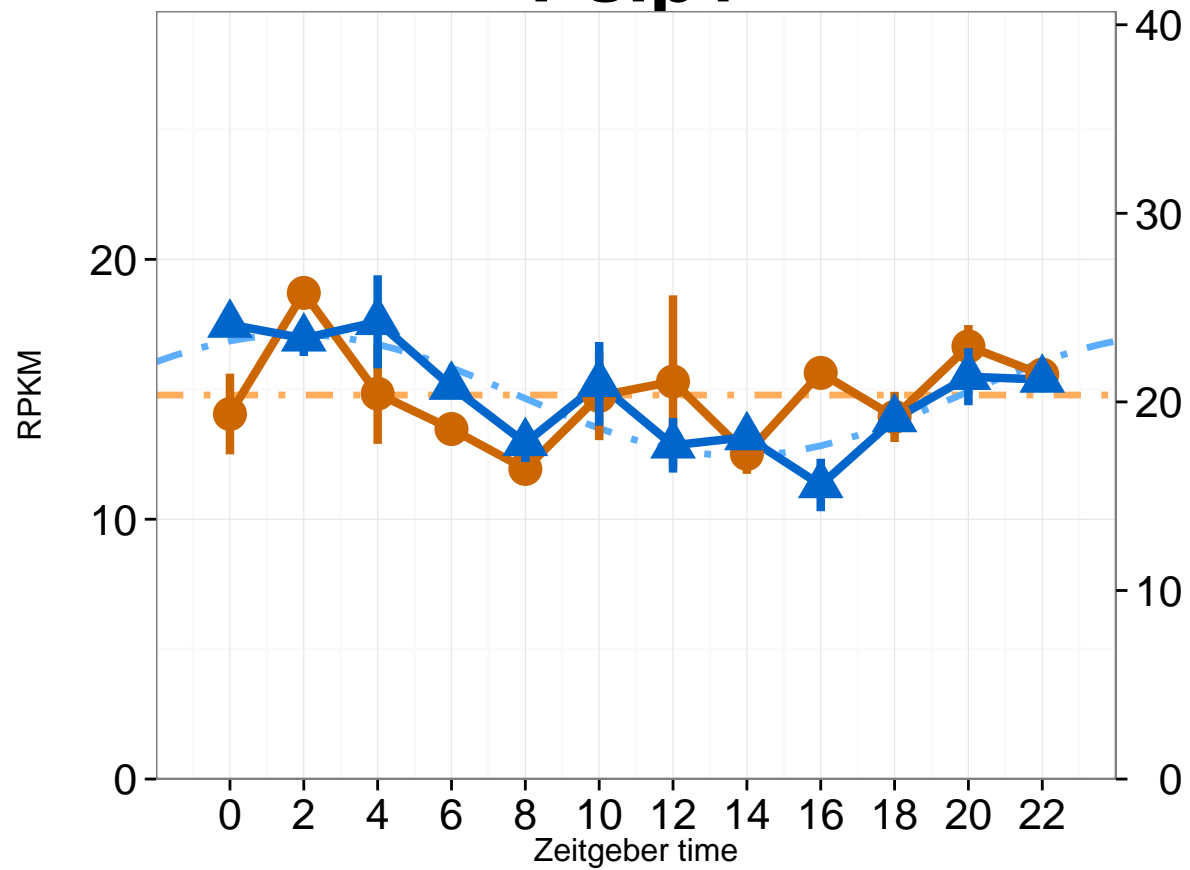

## Psip1

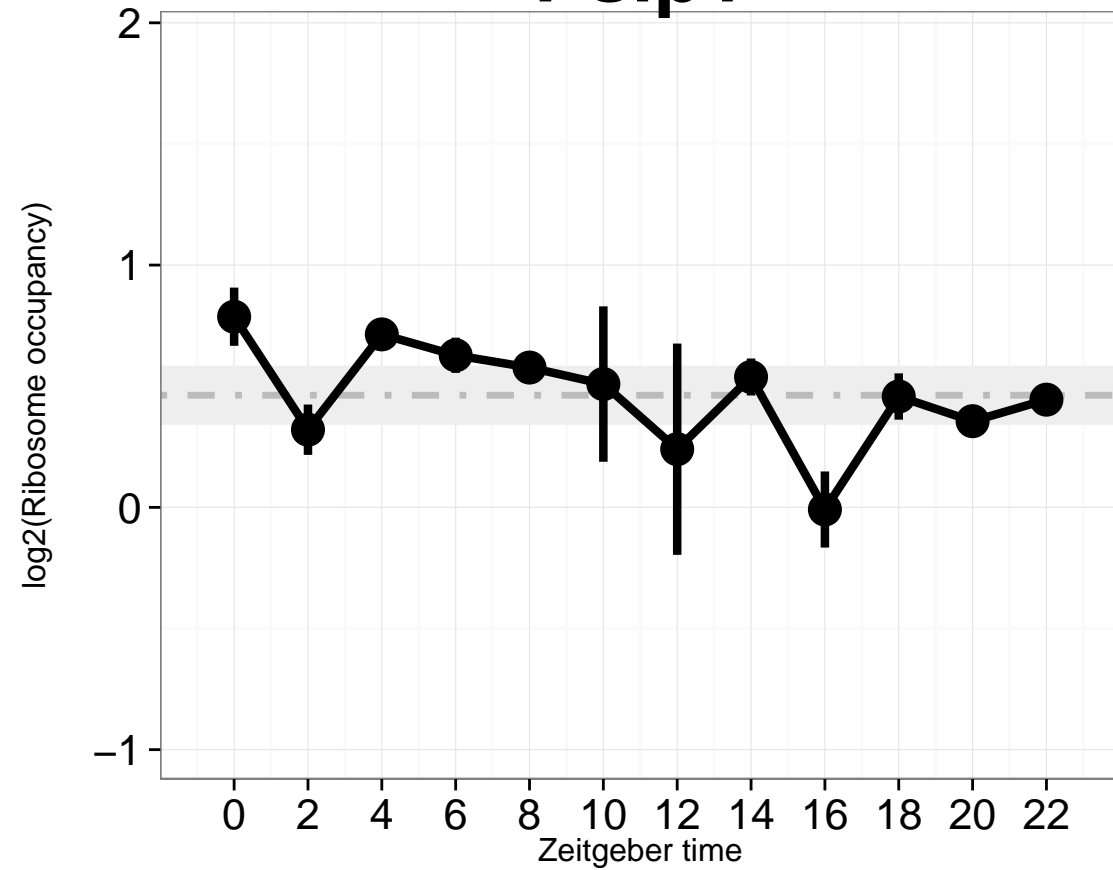

Supplement: Supplementary file 8169 [file 1]

## Nop10

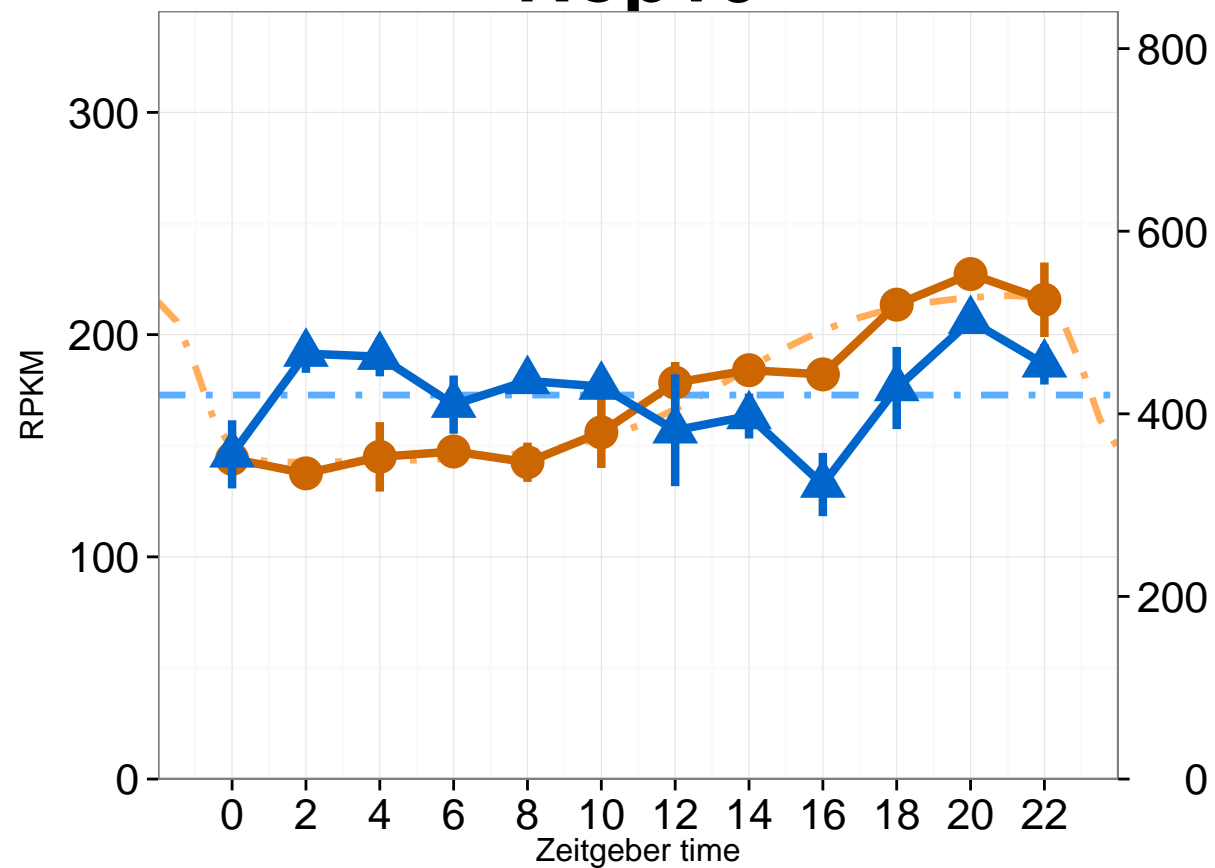

## Nop10

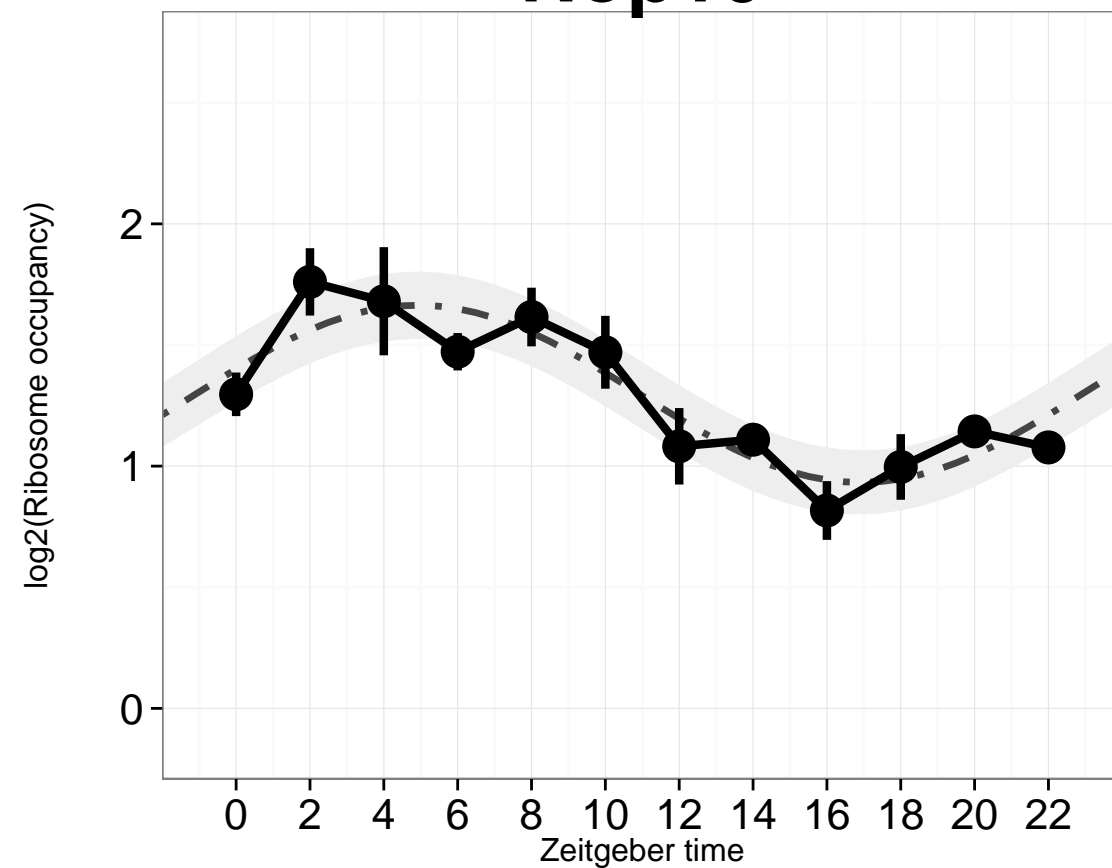

Supplement: Supplementary file 8170 [file 1]

## Xrcc6

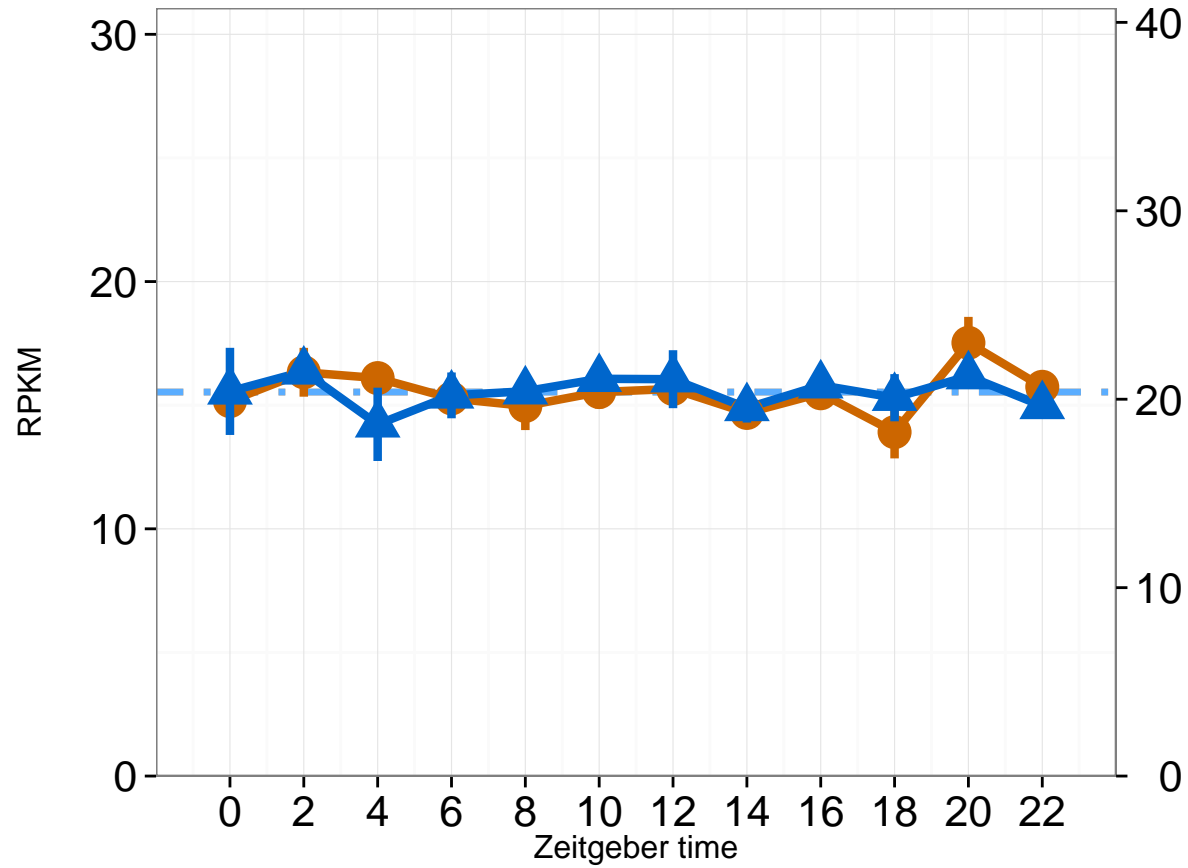

## Xrcc6

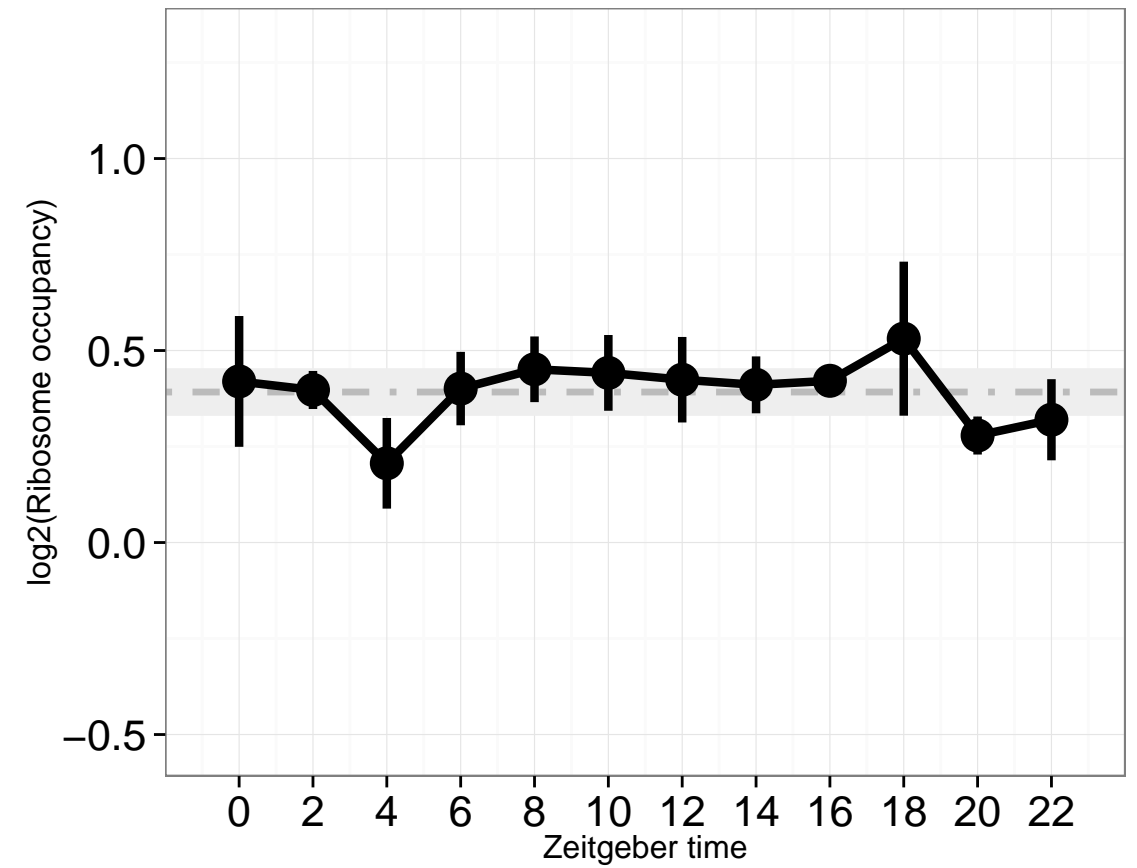

Supplement: Supplementary file 8171 [file 1]

## Slc44a2

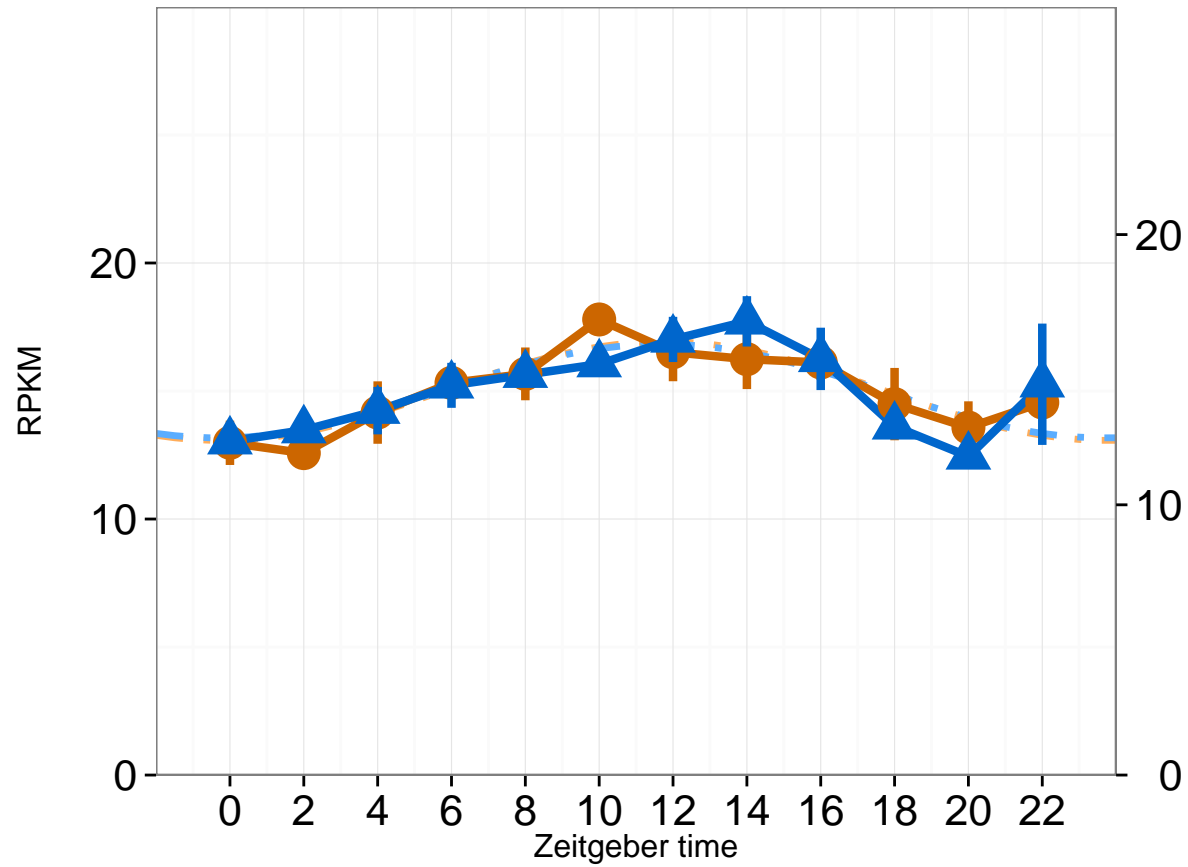

## Slc44a2

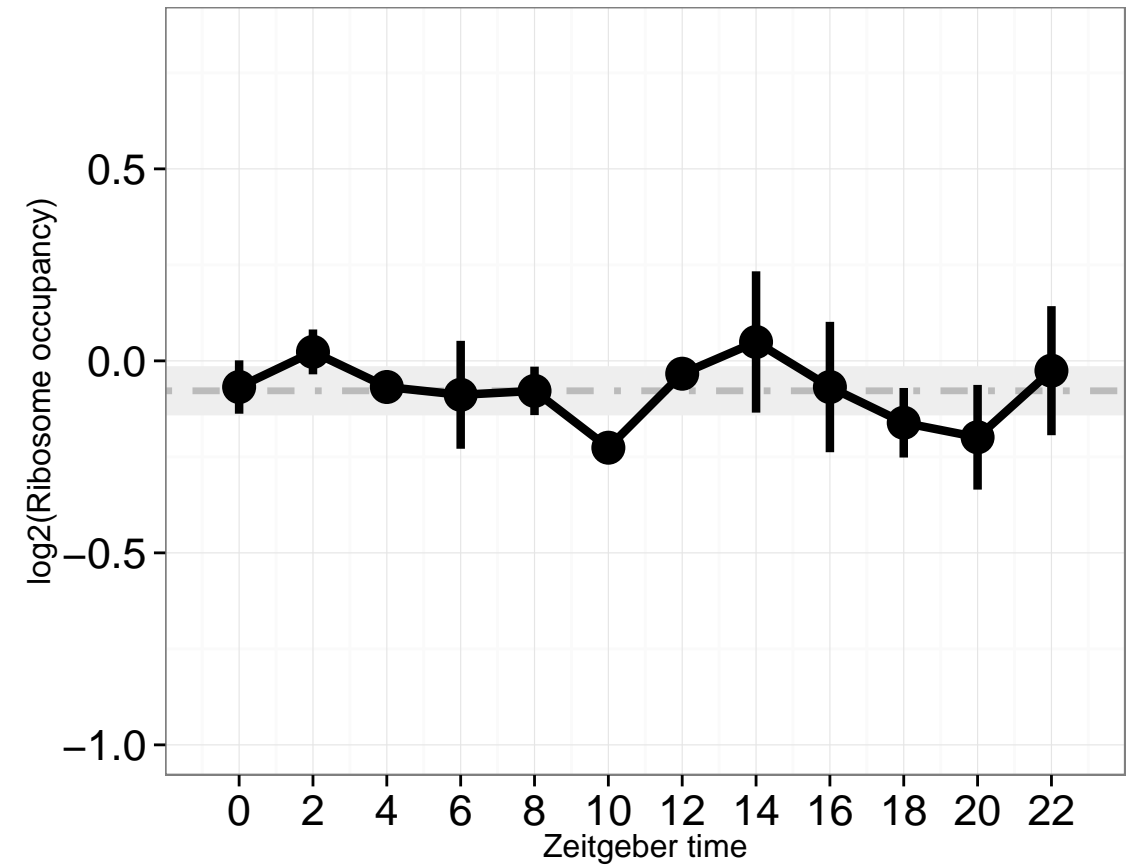

Supplement: Supplementary file 8172 [file 1]

# Nupl2

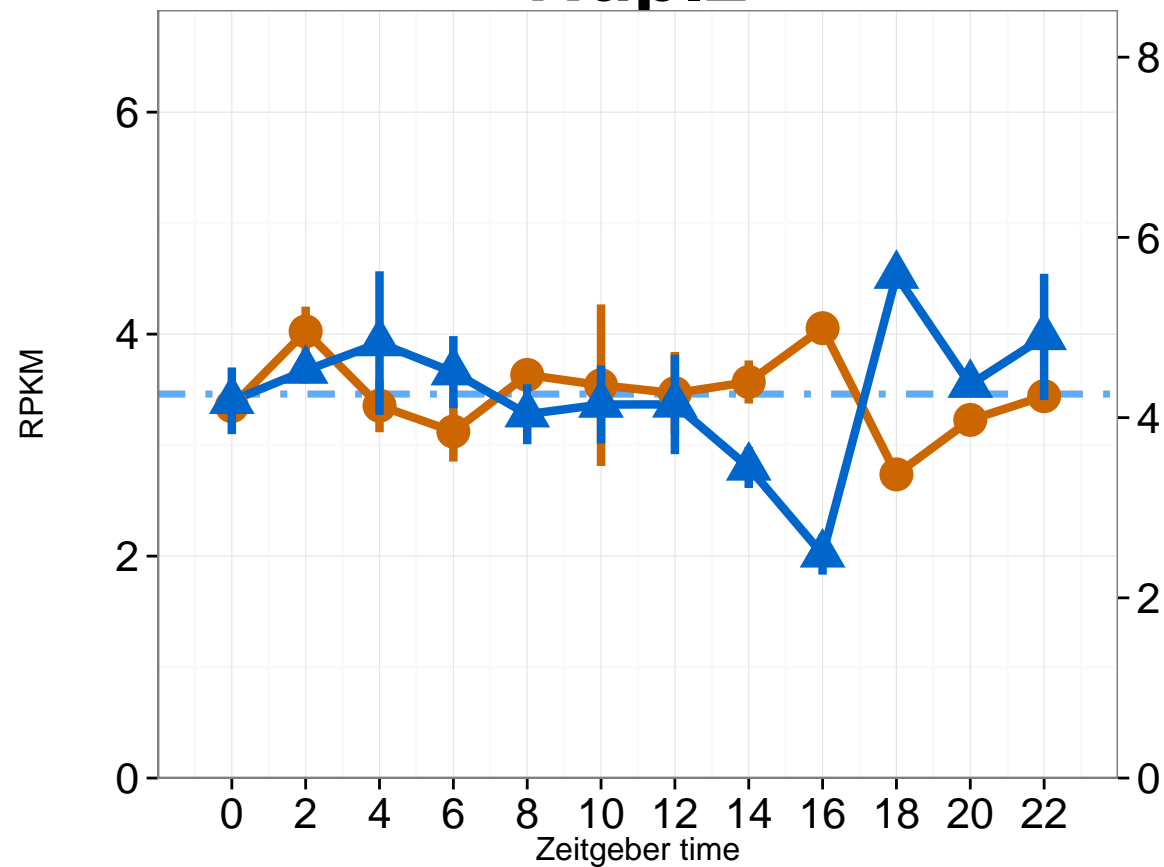

# Nupl2

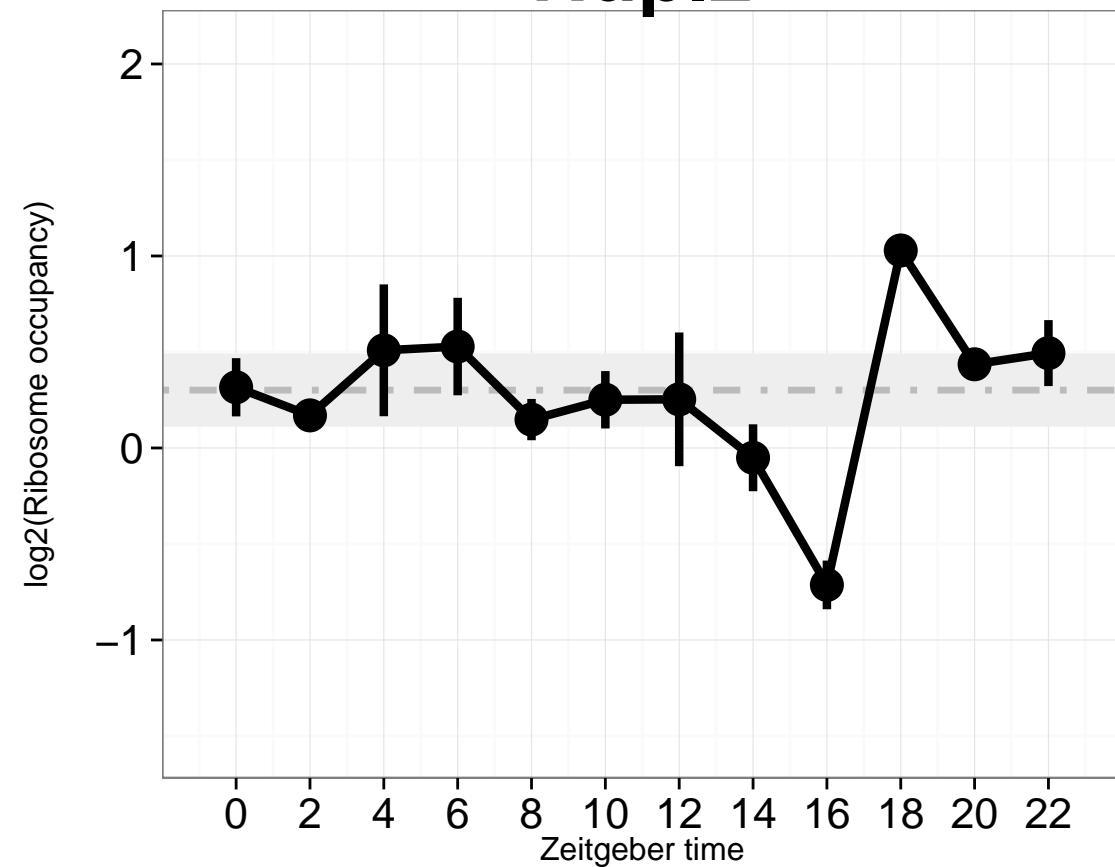

Supplement: Supplementary file 8173 [file 1]

## Aldh1a1

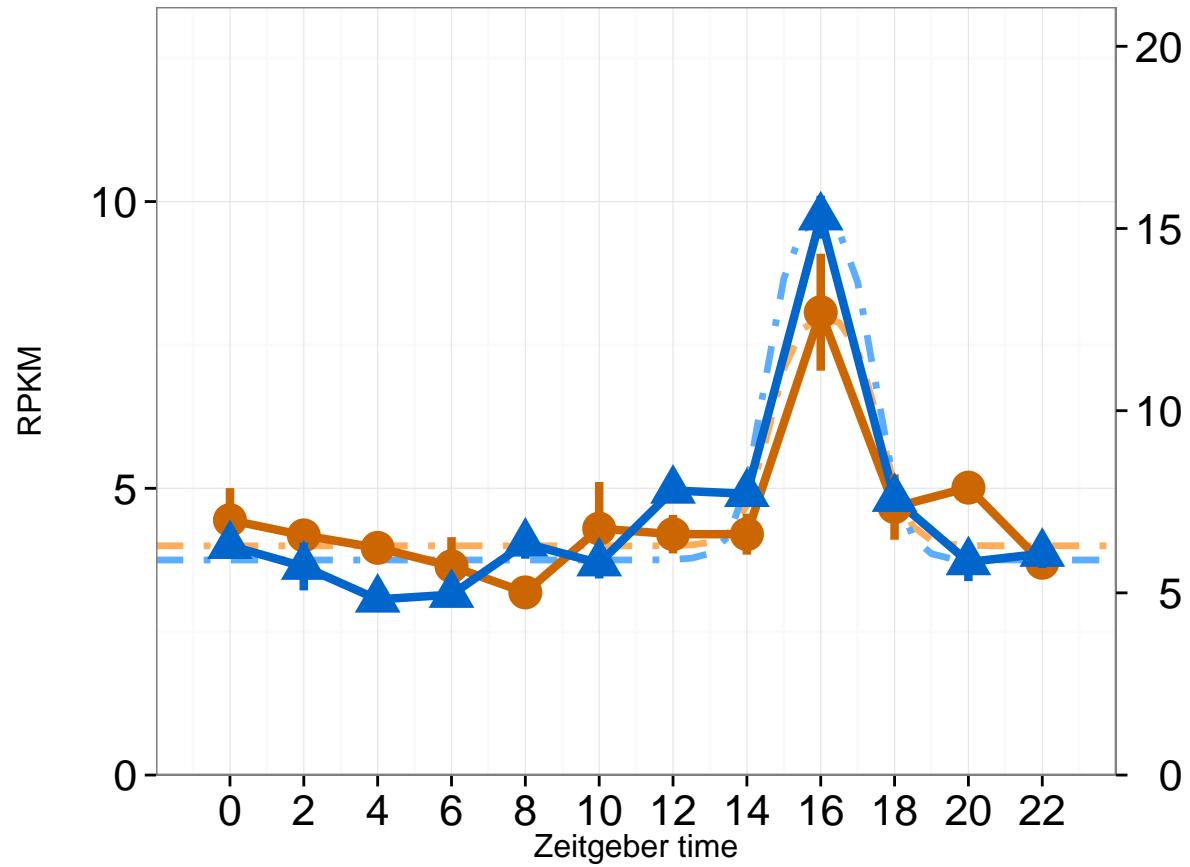

## Aldh1a1

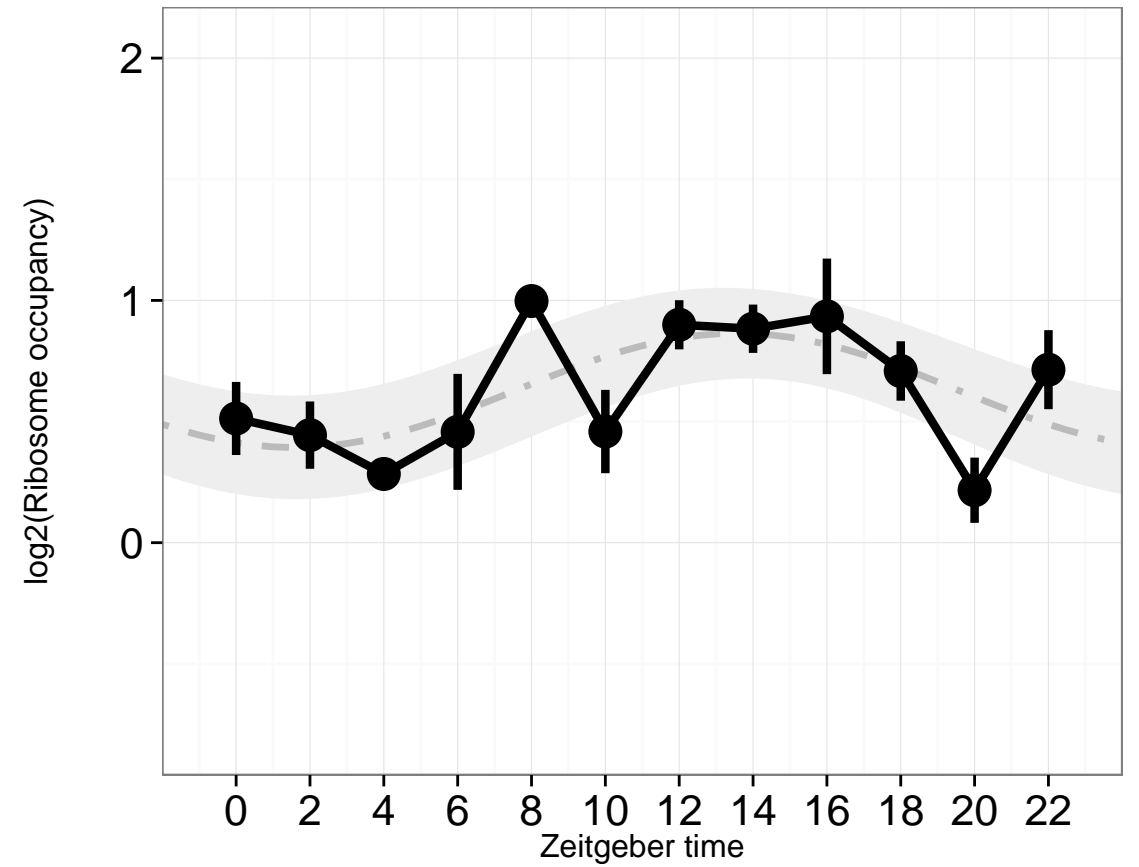

Supplement: Supplementary file 8174 [file 1]

# Tmem86a

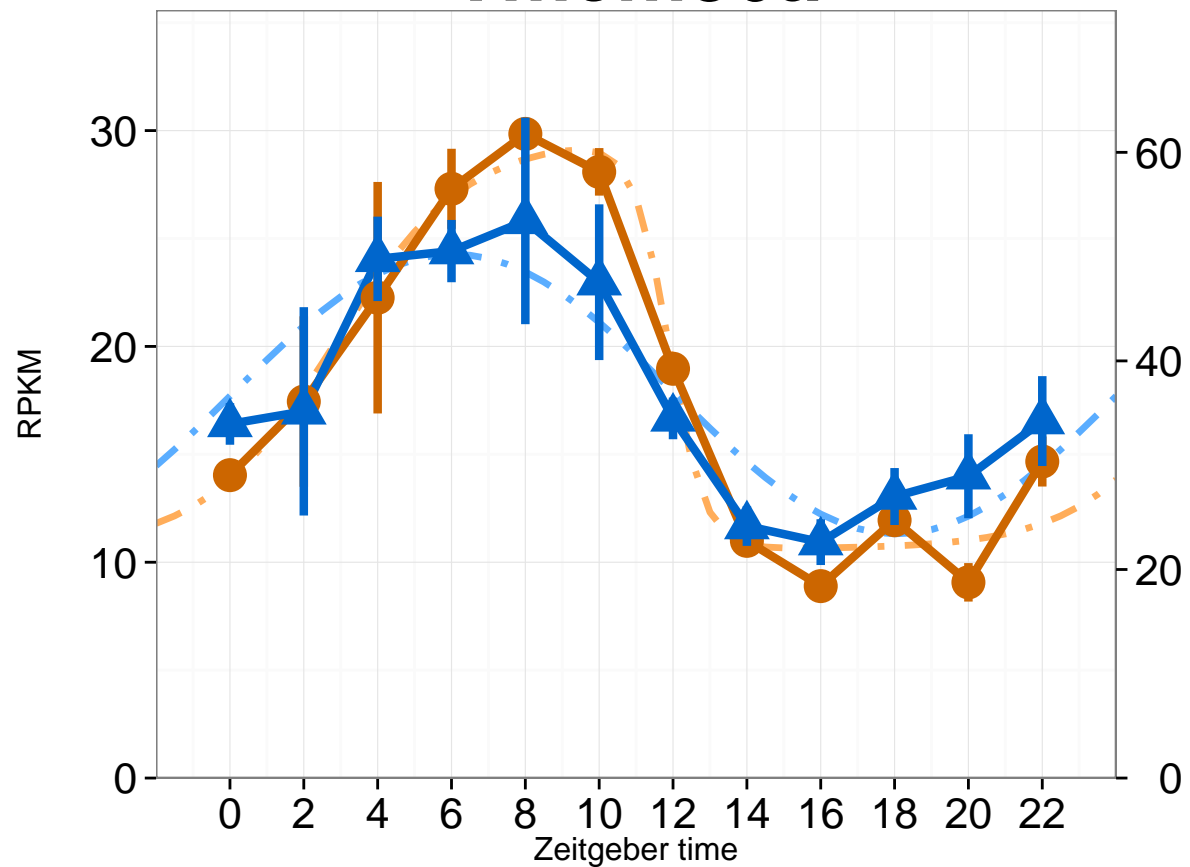

# Tmem86a

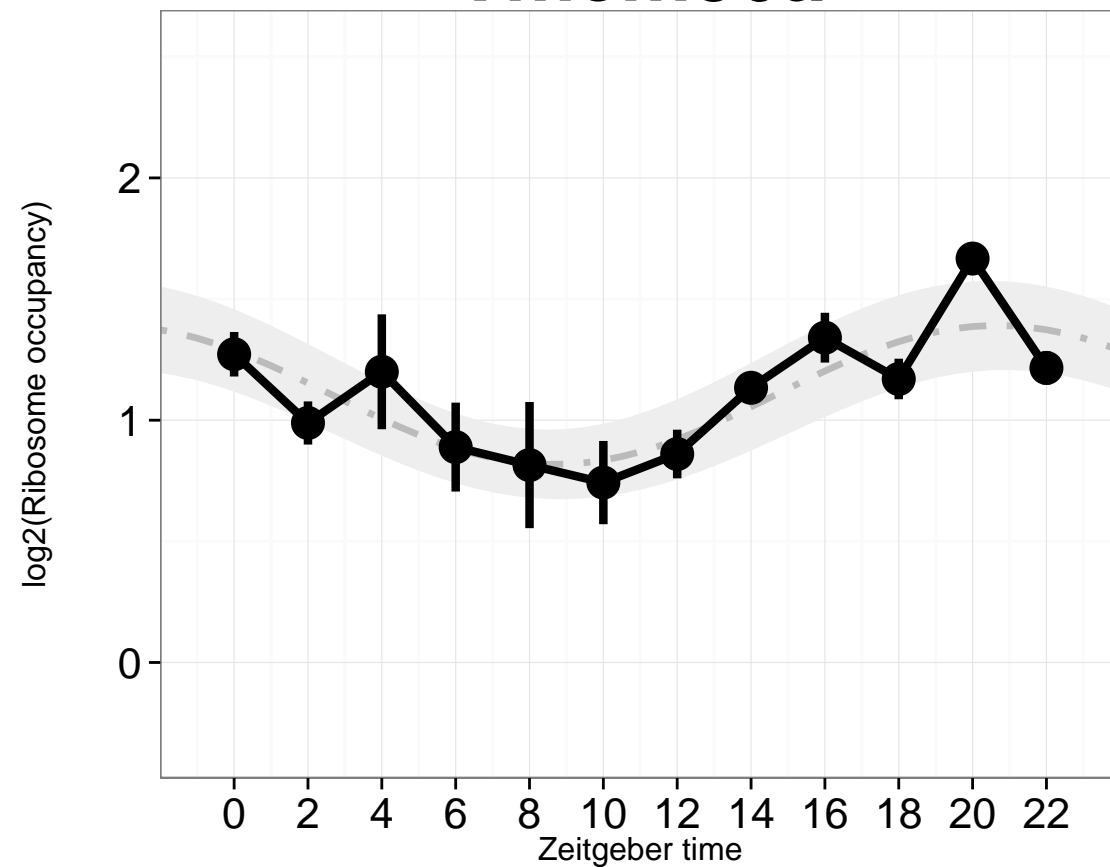

Supplement: Supplementary file 8175 [file 1]

## Senp3

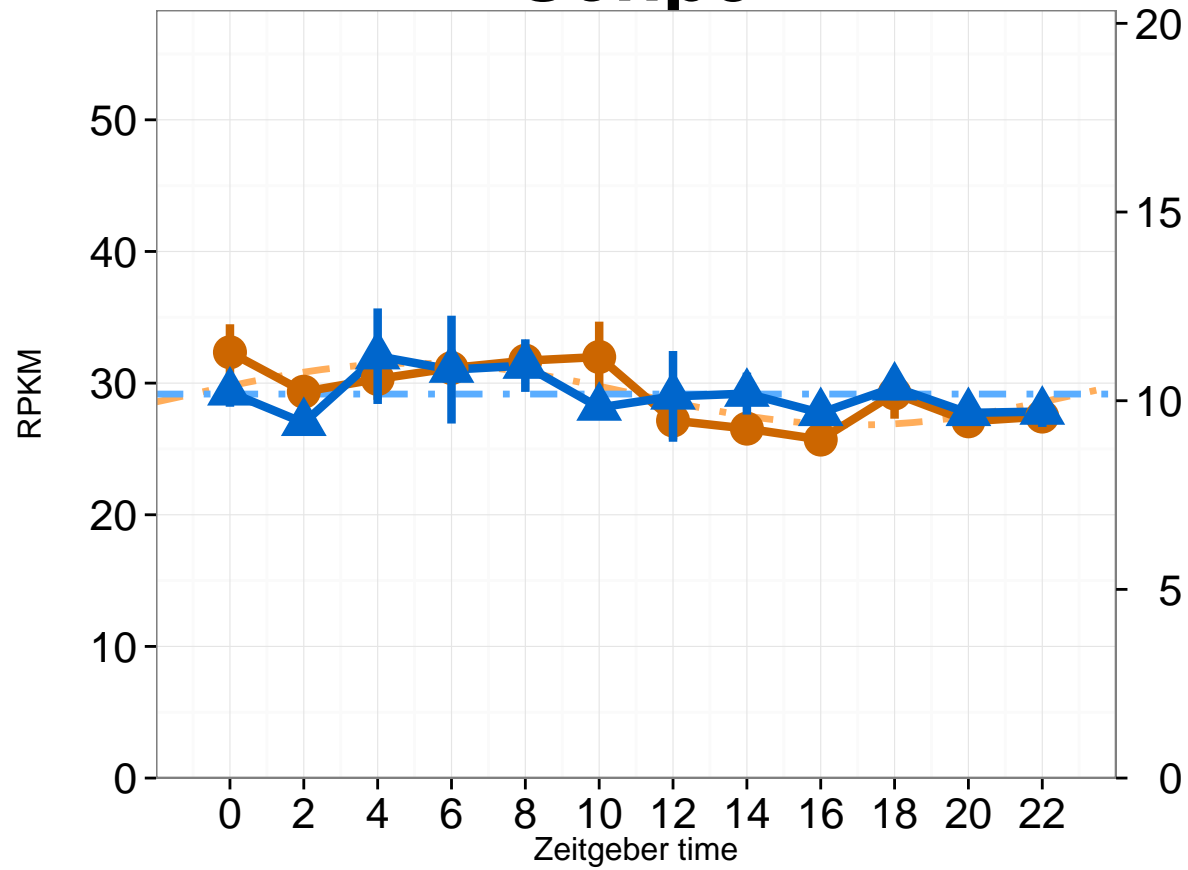

## Senp3

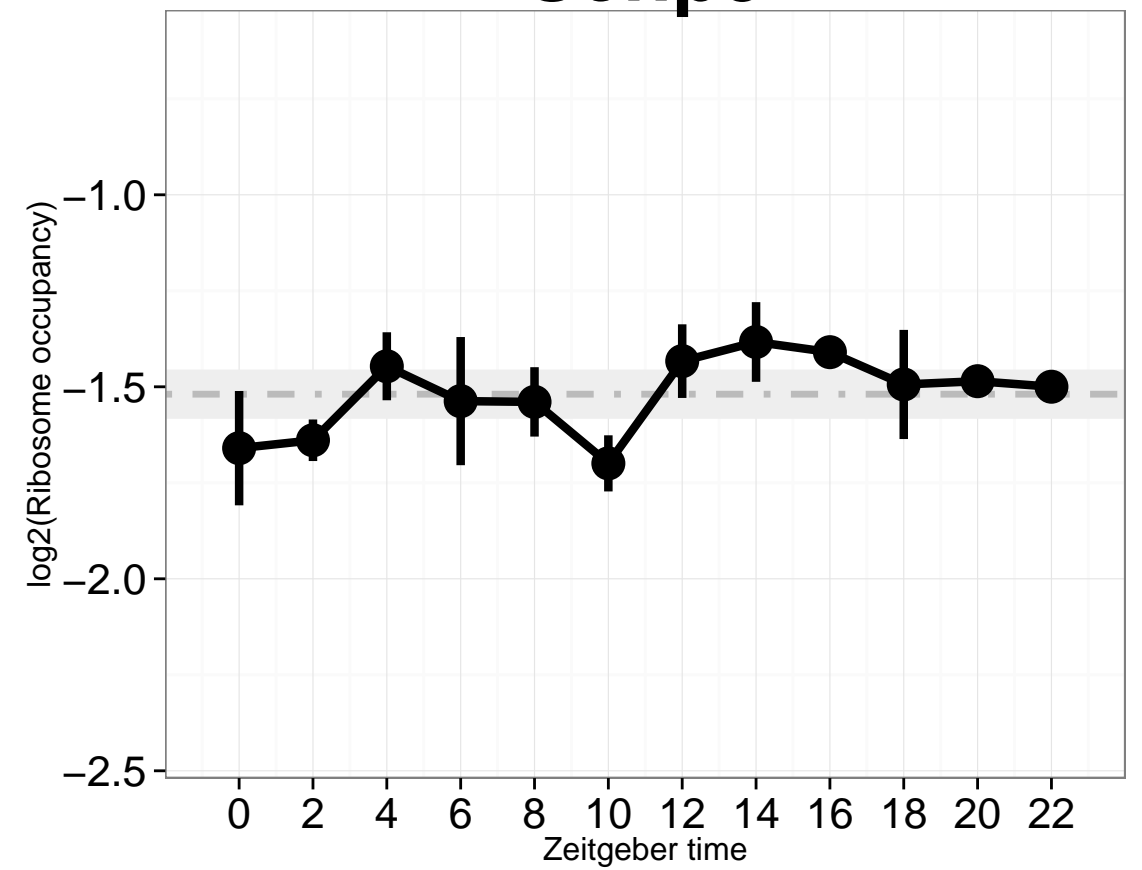

Supplement: Supplementary file 8176 [file 1]

## Nox4

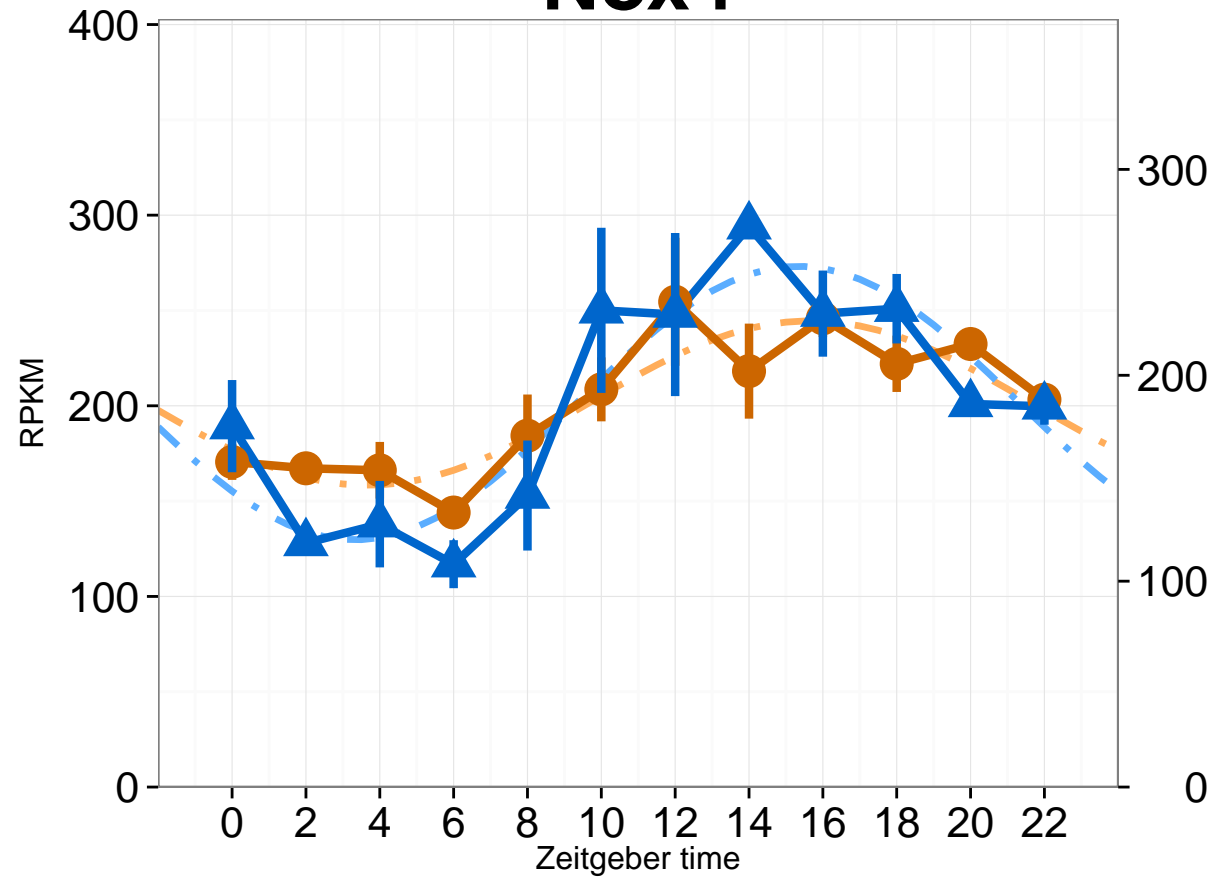

## Nox4

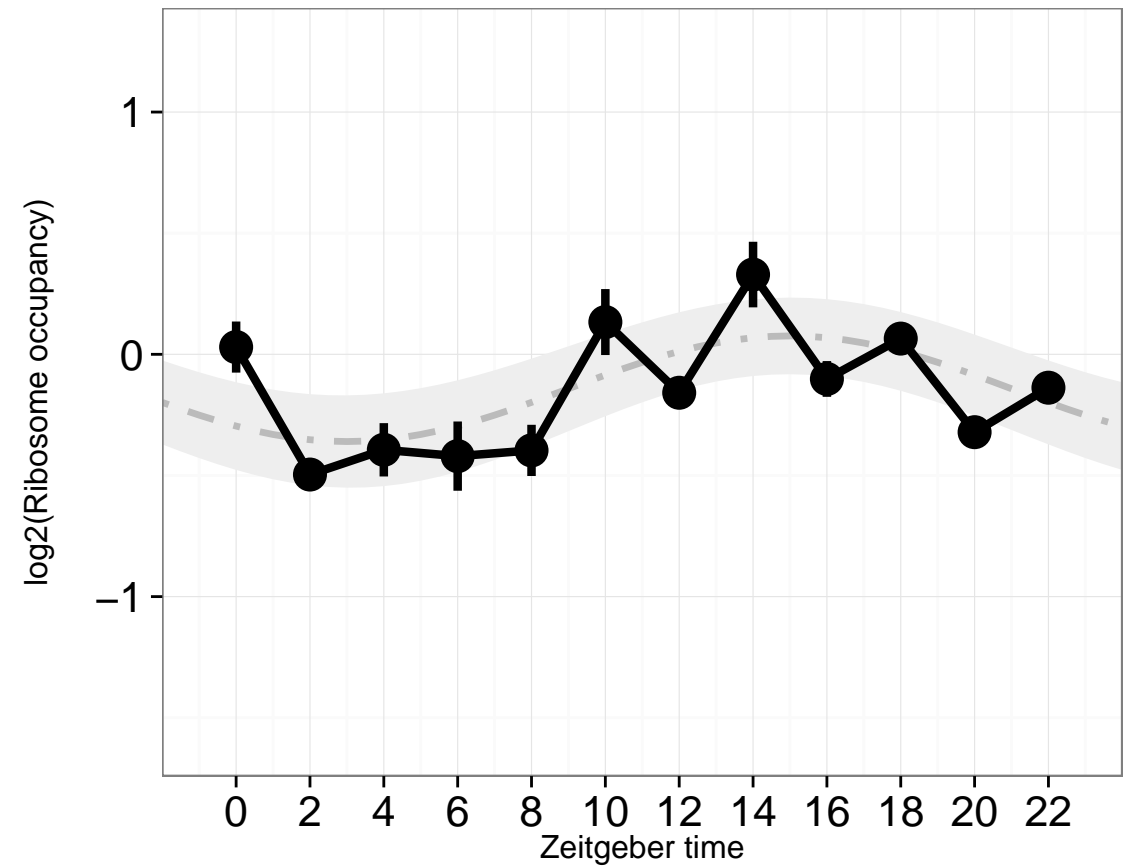

Supplement: Supplementary file 8177 [file 1]

mt-Nd4

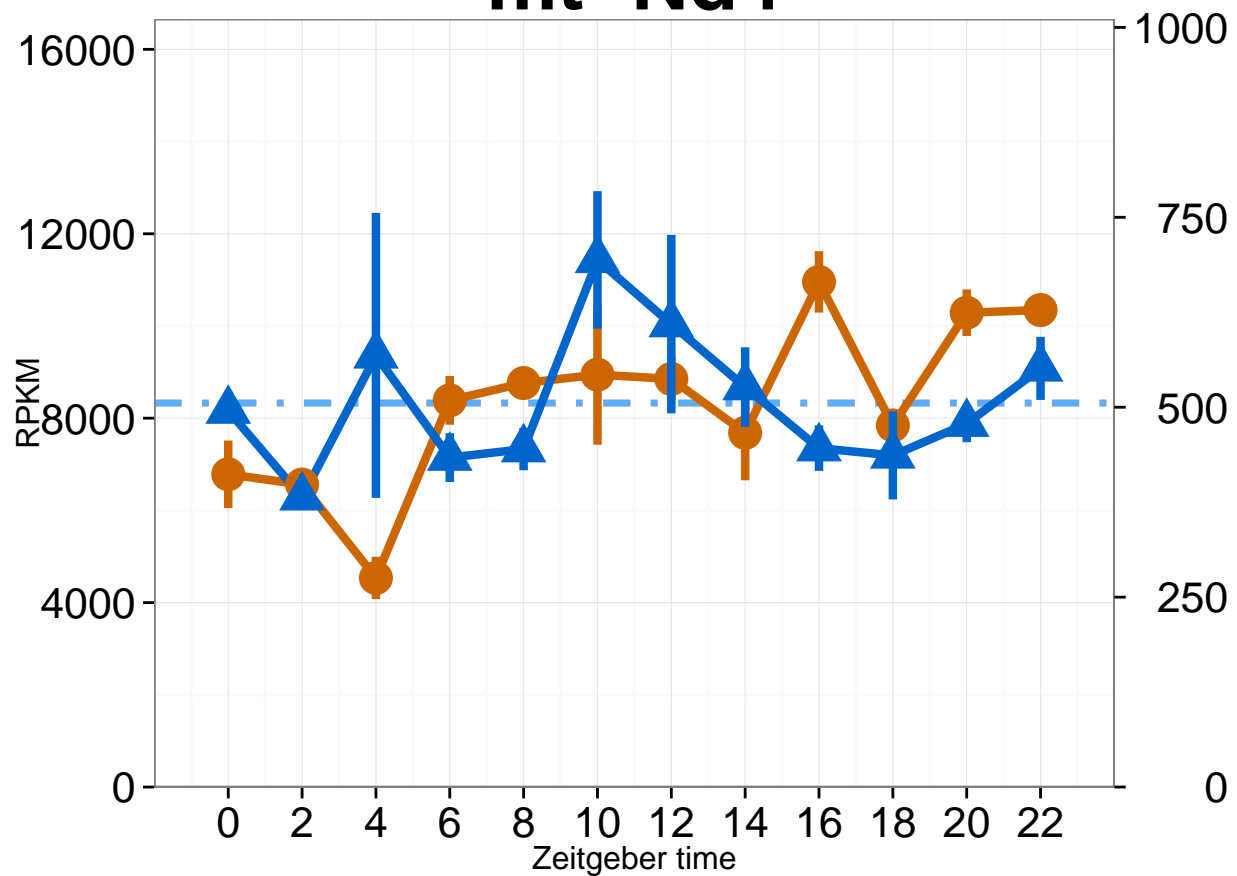

mt-Nd4

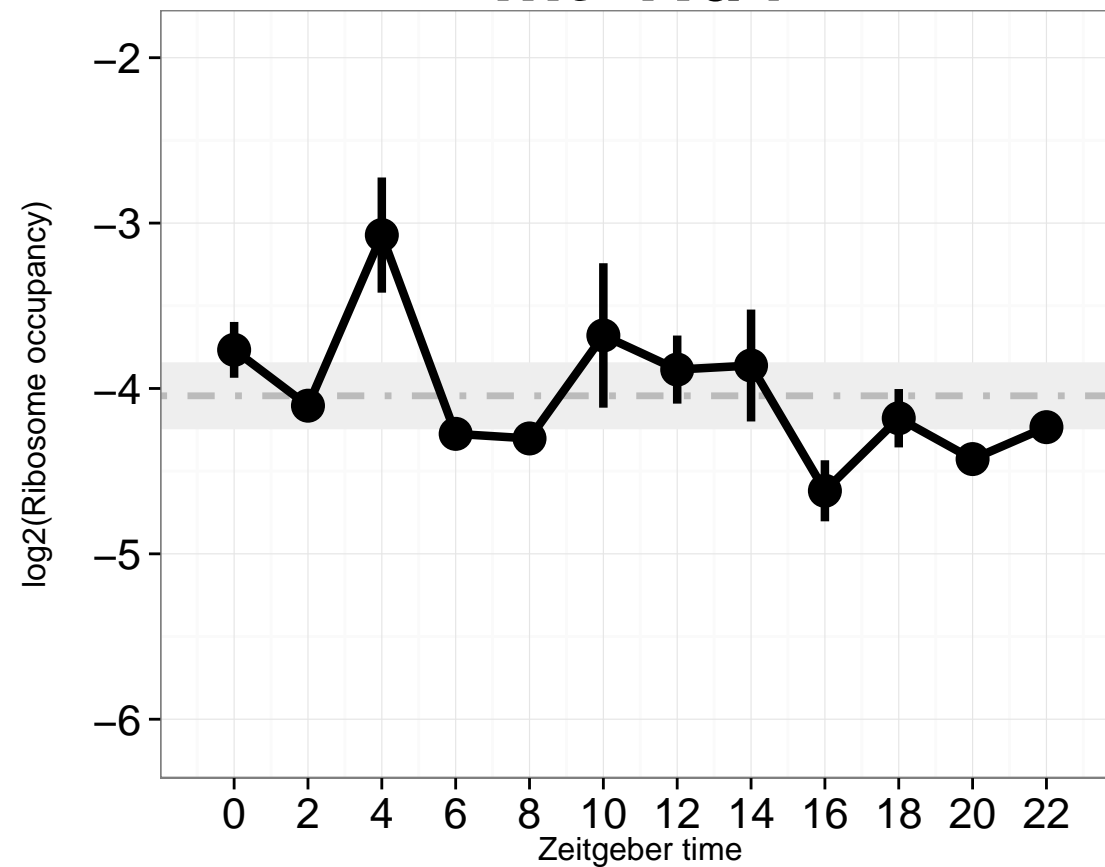

Supplement: Supplementary file 8178 [file 1]

## Utp20

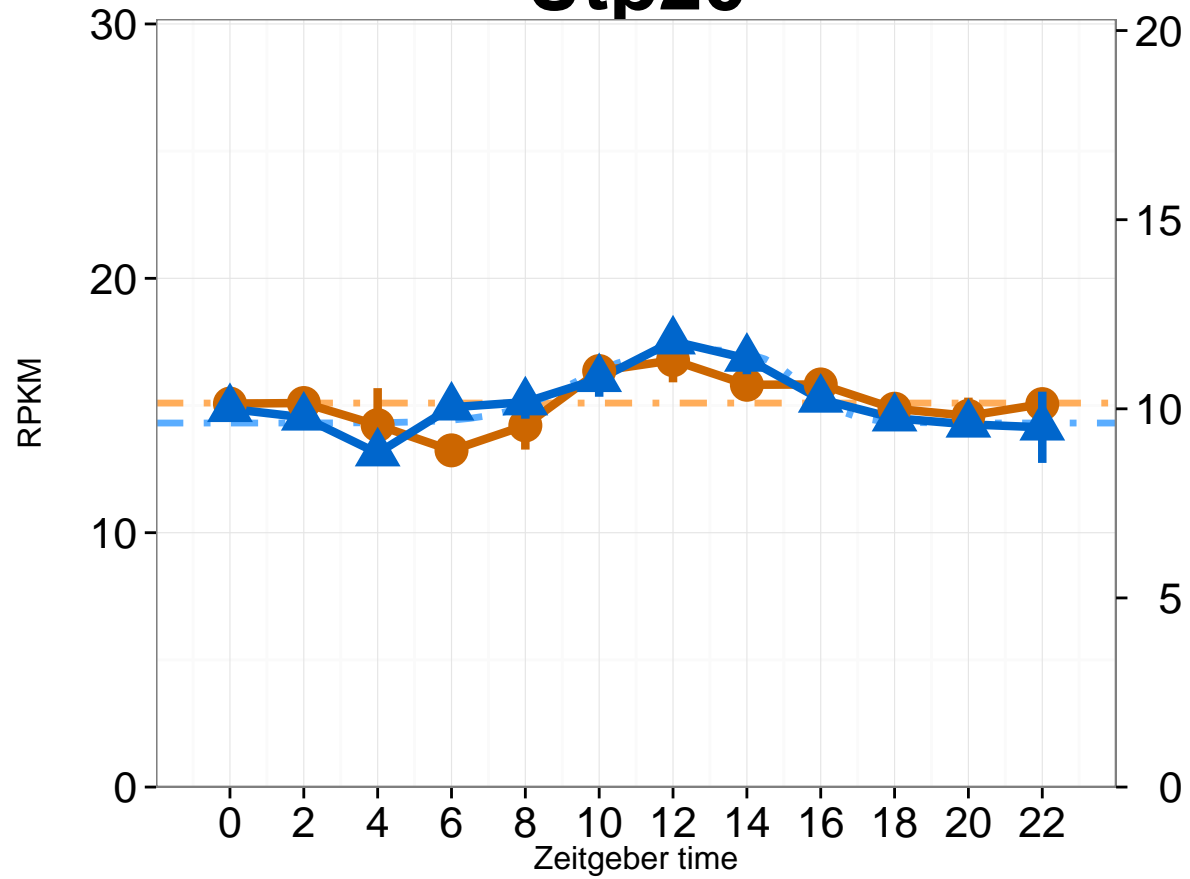

## Utp20

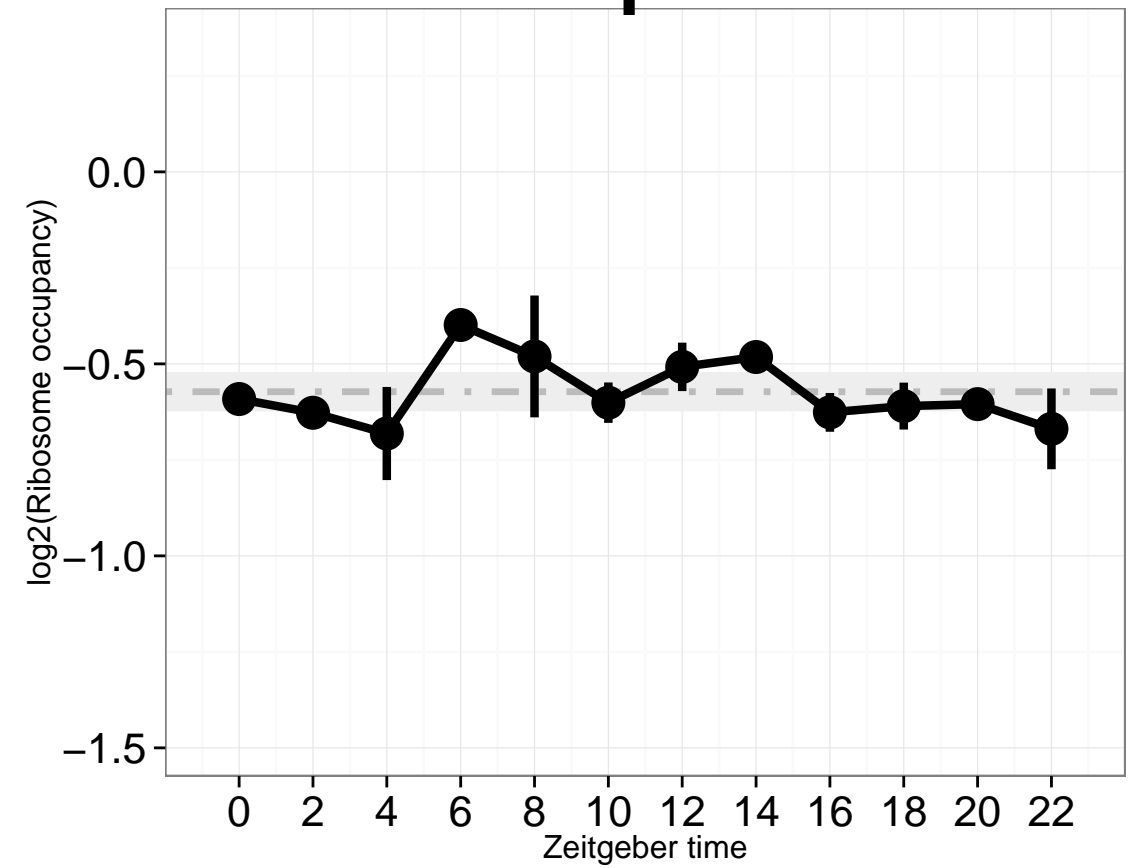

Supplement: Supplementary file 8179 [file 1]

# Pnrc1

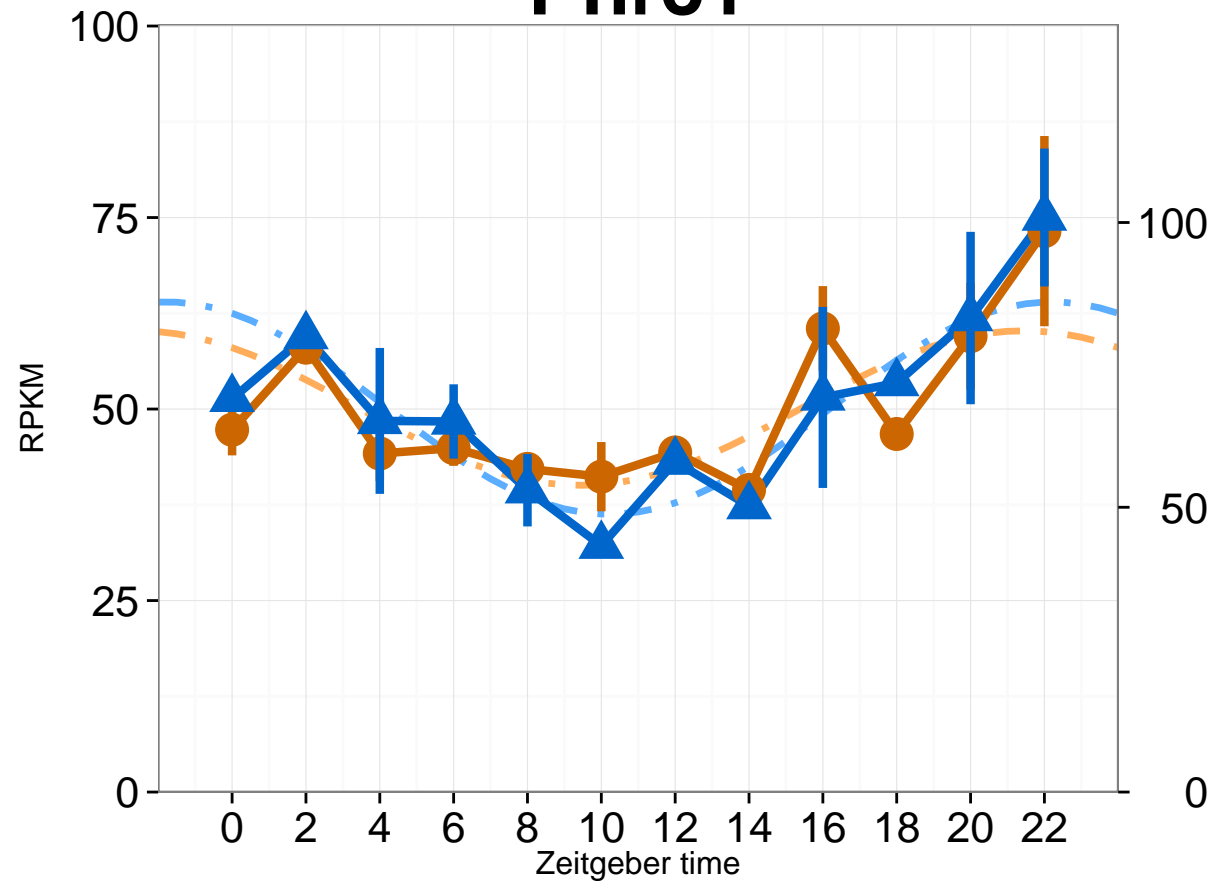

# Pnrc1

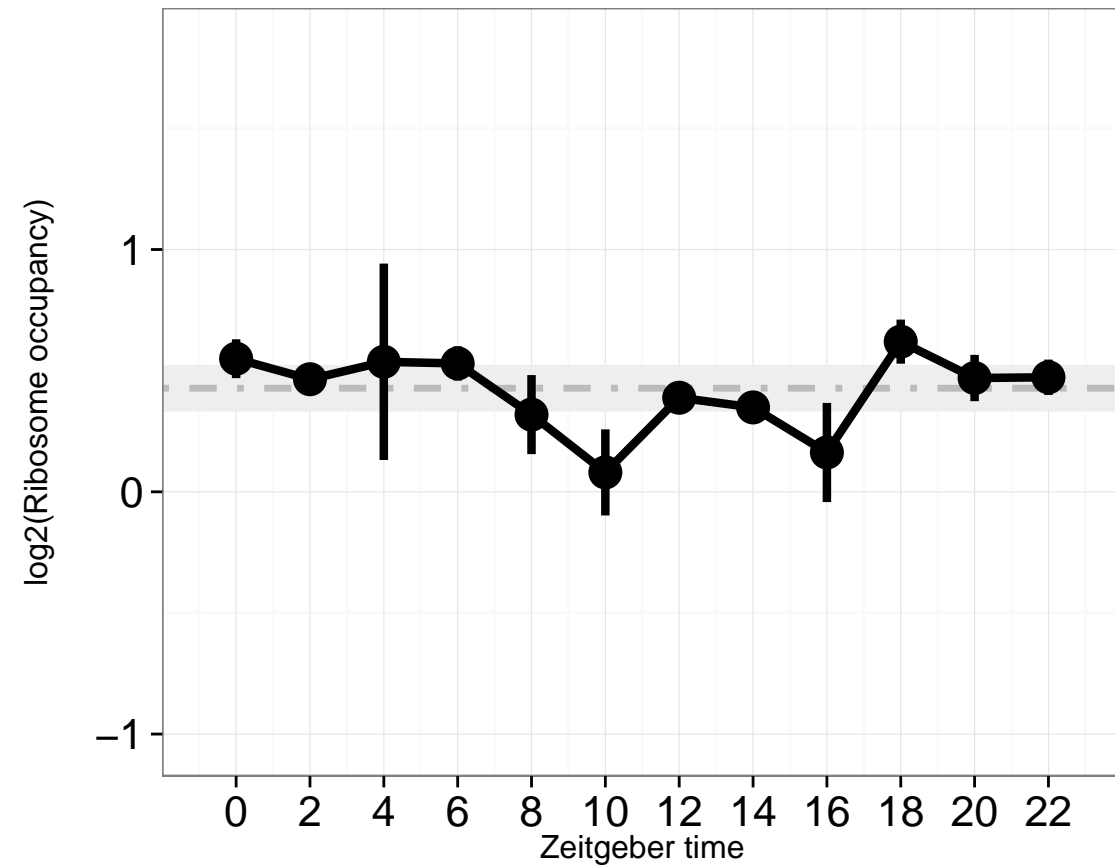

Supplement: Supplementary file 8180 [file 1]

# Stambpl1

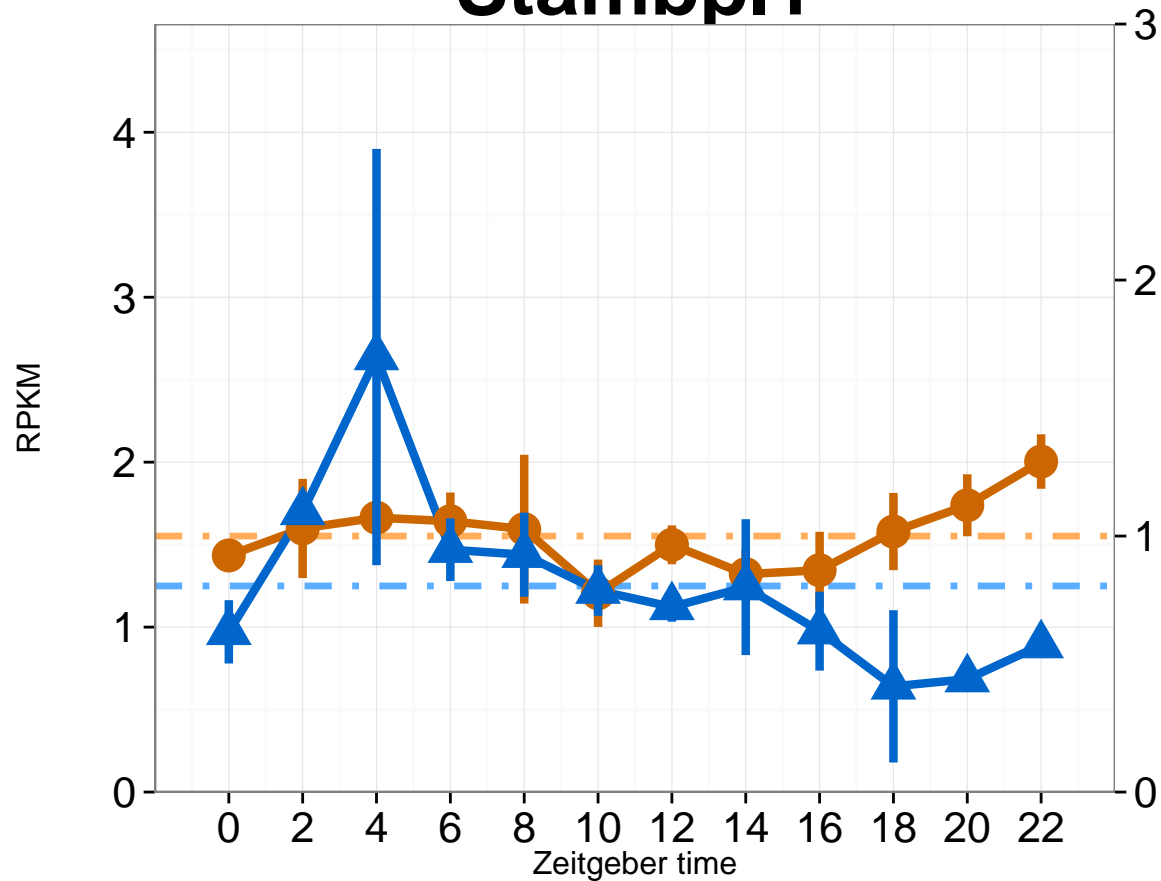

# Stambpl1

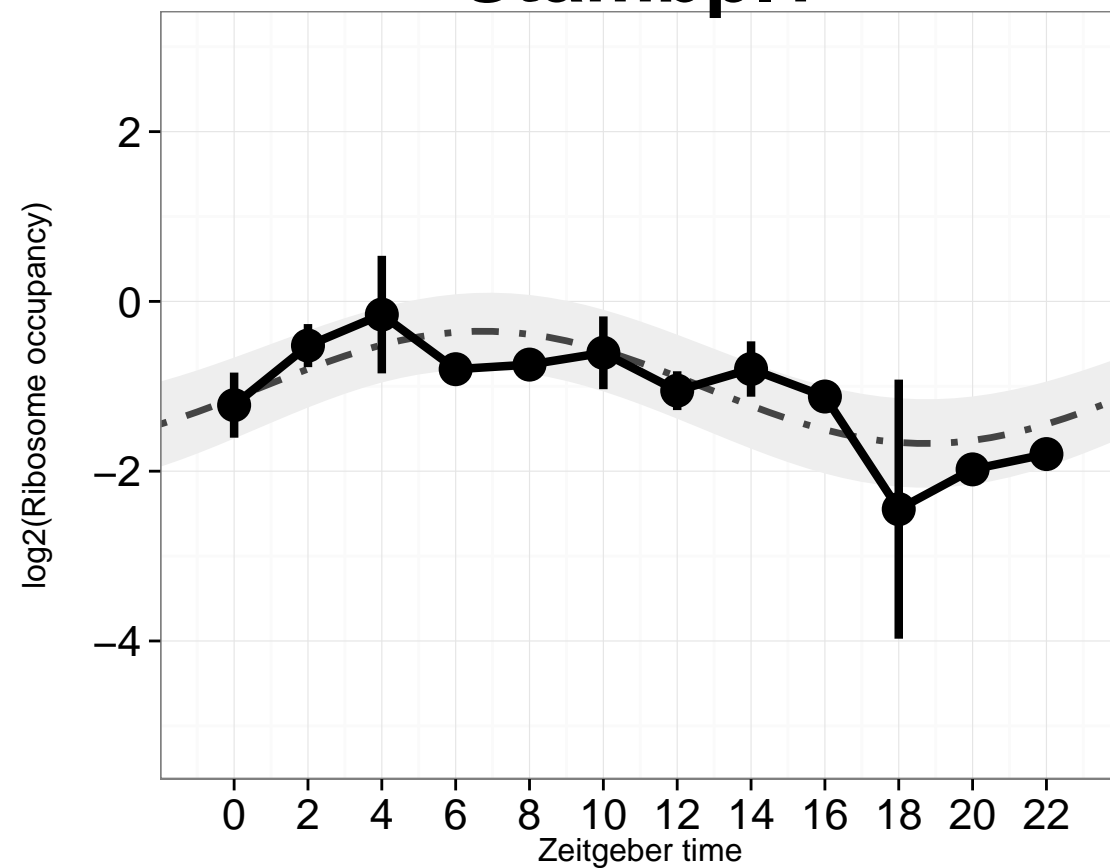

Supplement: Supplementary file 8181 [file 1]

# Zfp553

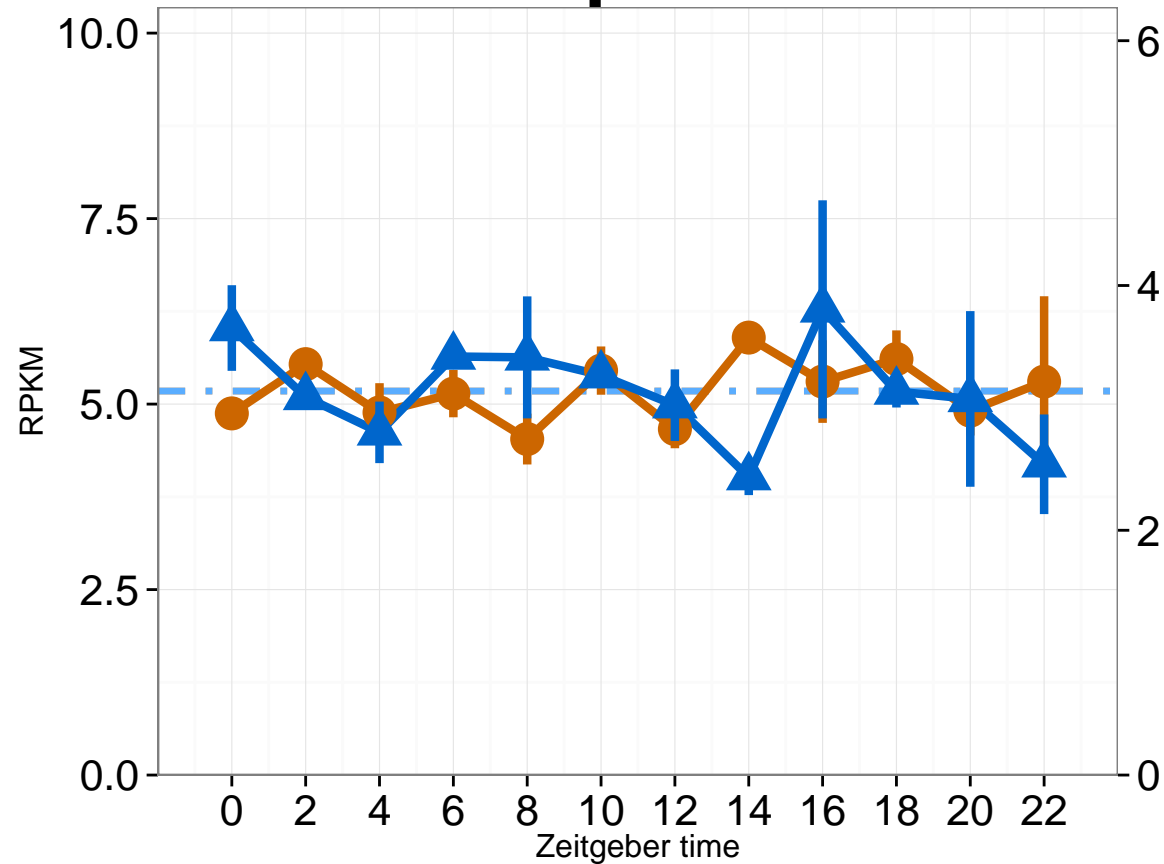

# Zfp553

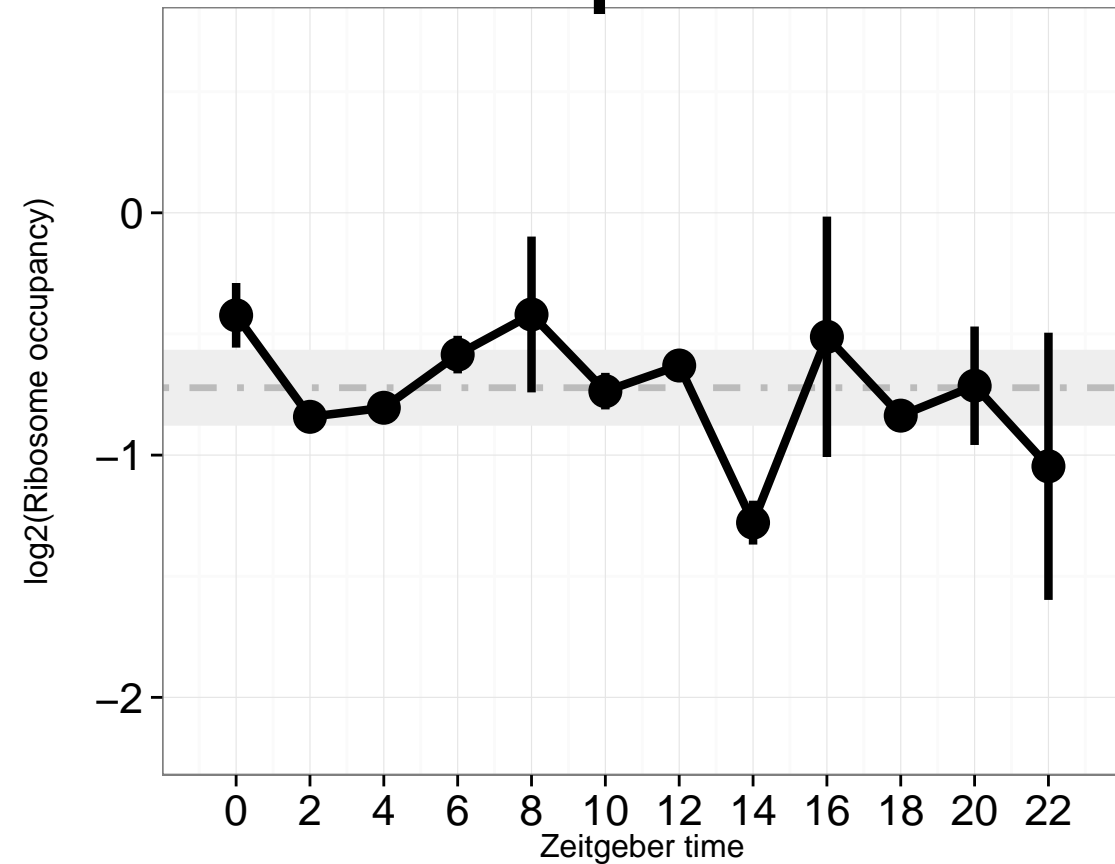

Supplement: Supplementary file 8182 [file 1]

# Pmaip1

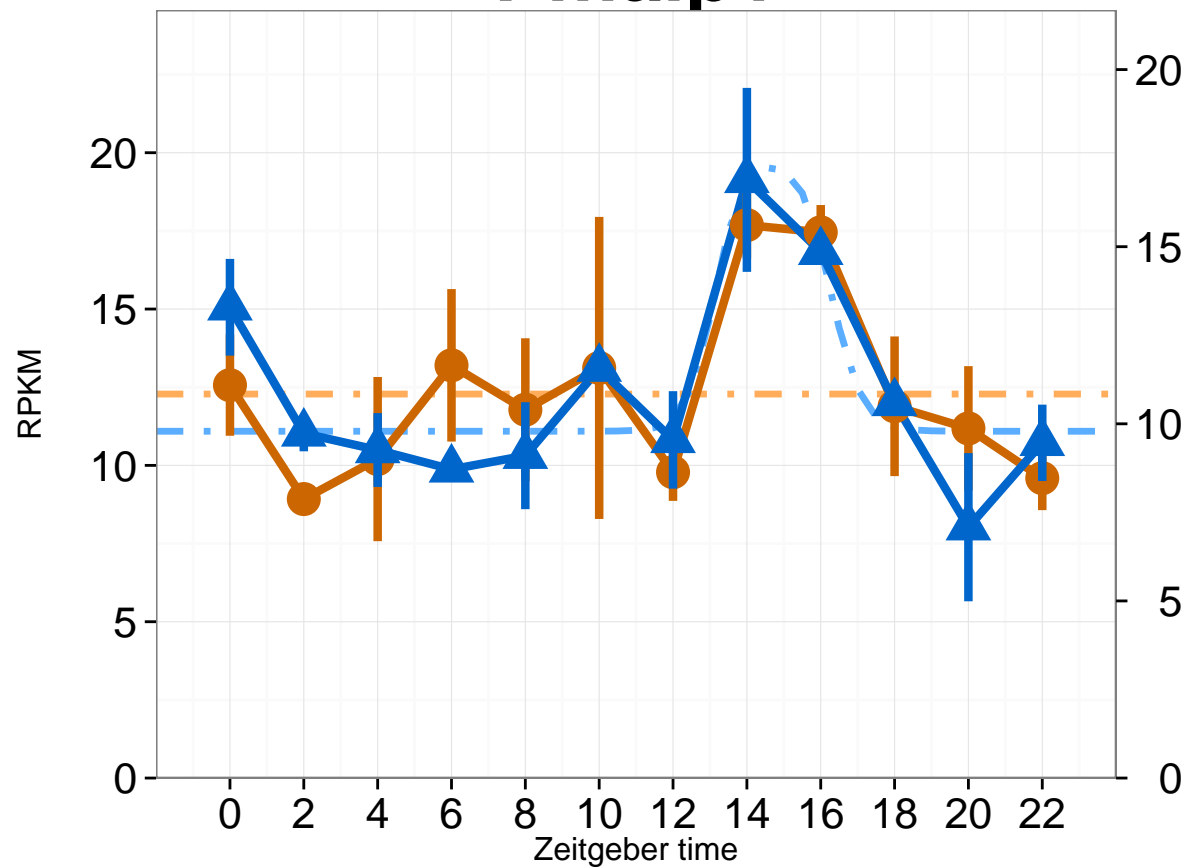

# Pmaip1

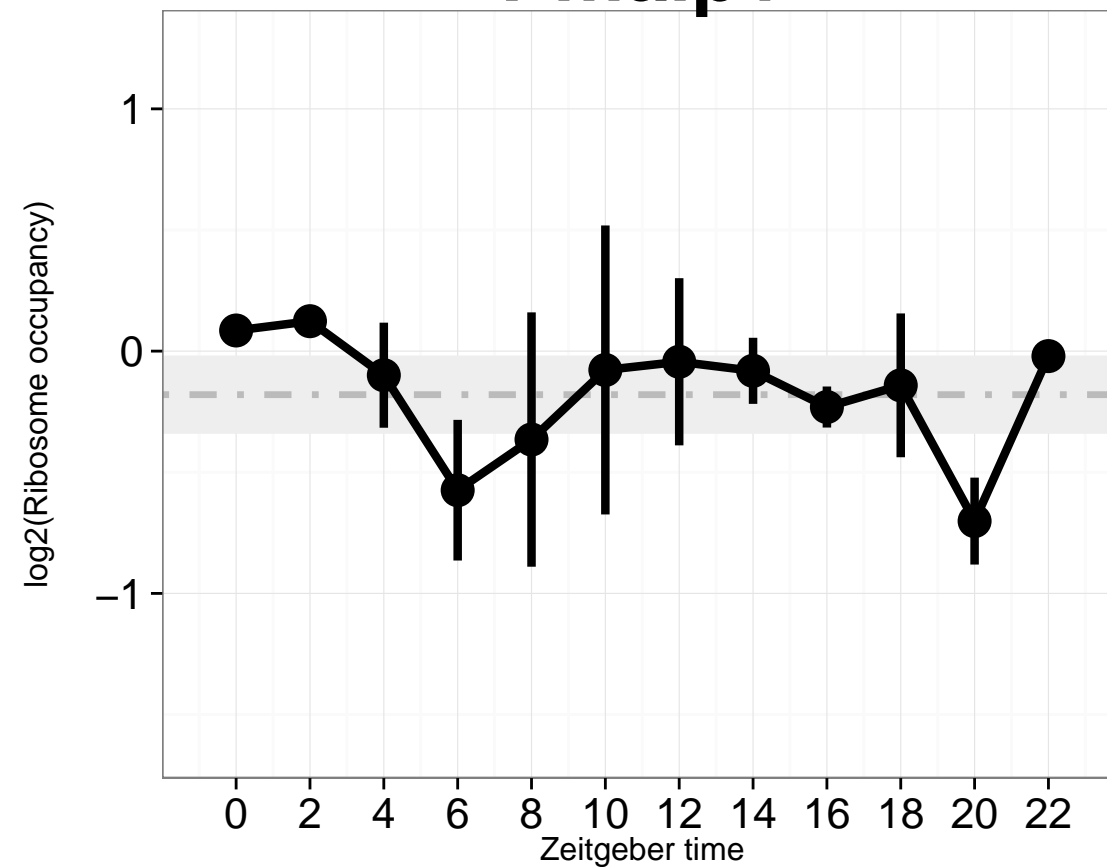

Supplement: Supplementary file 8183 [file 1]

# Ccdc104

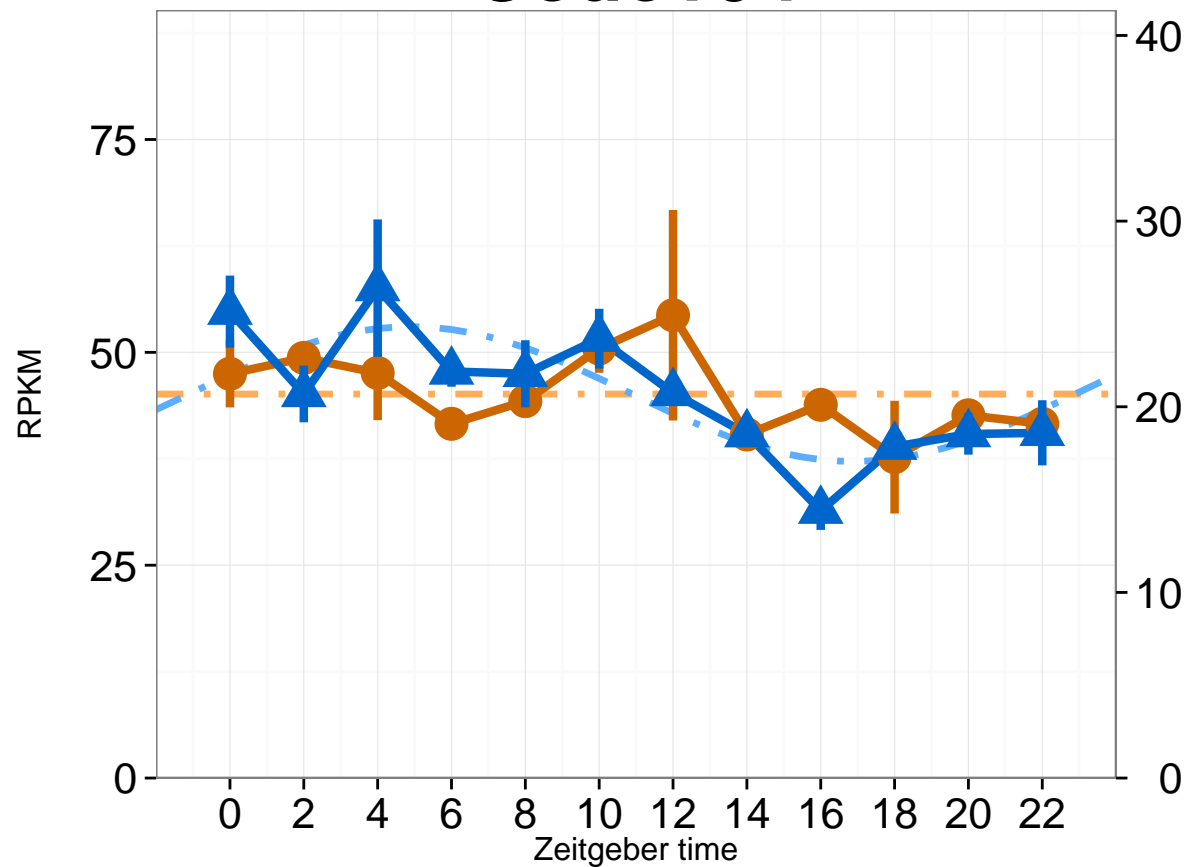

# Ccdc104

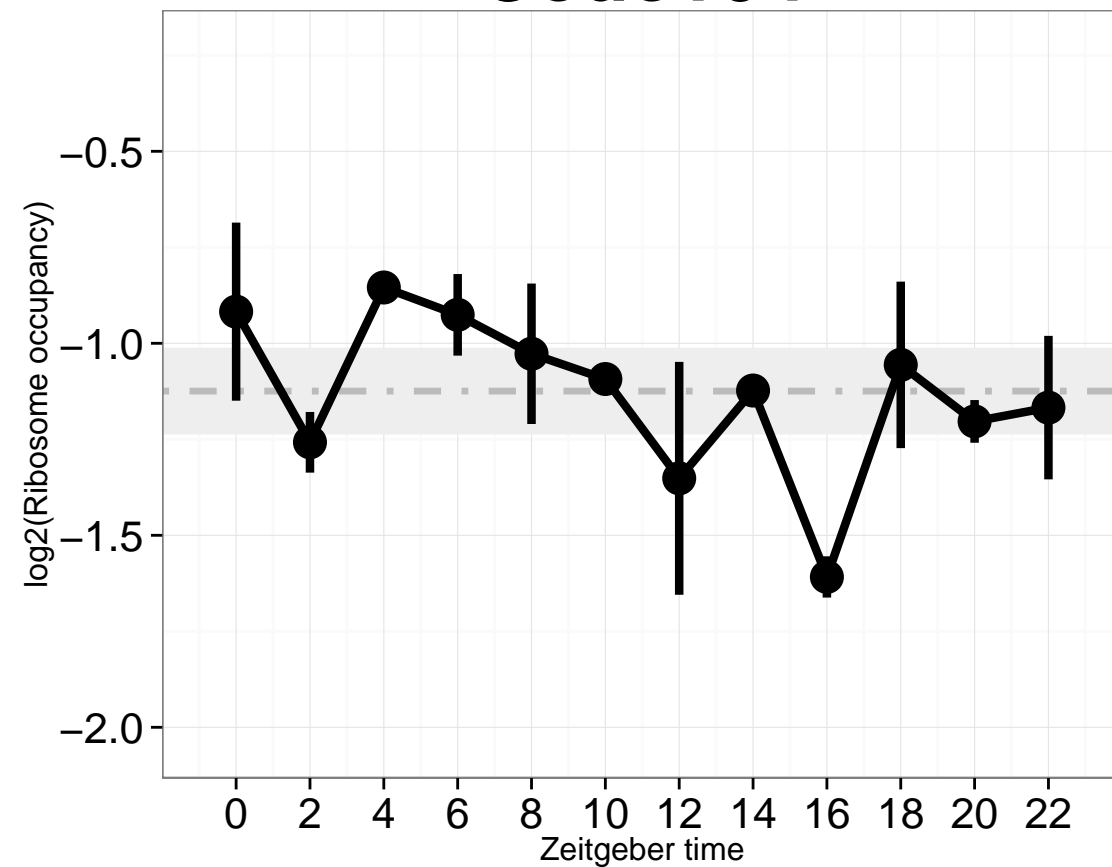

Supplement: Supplementary file 8184 [file 1]

# Dfna5

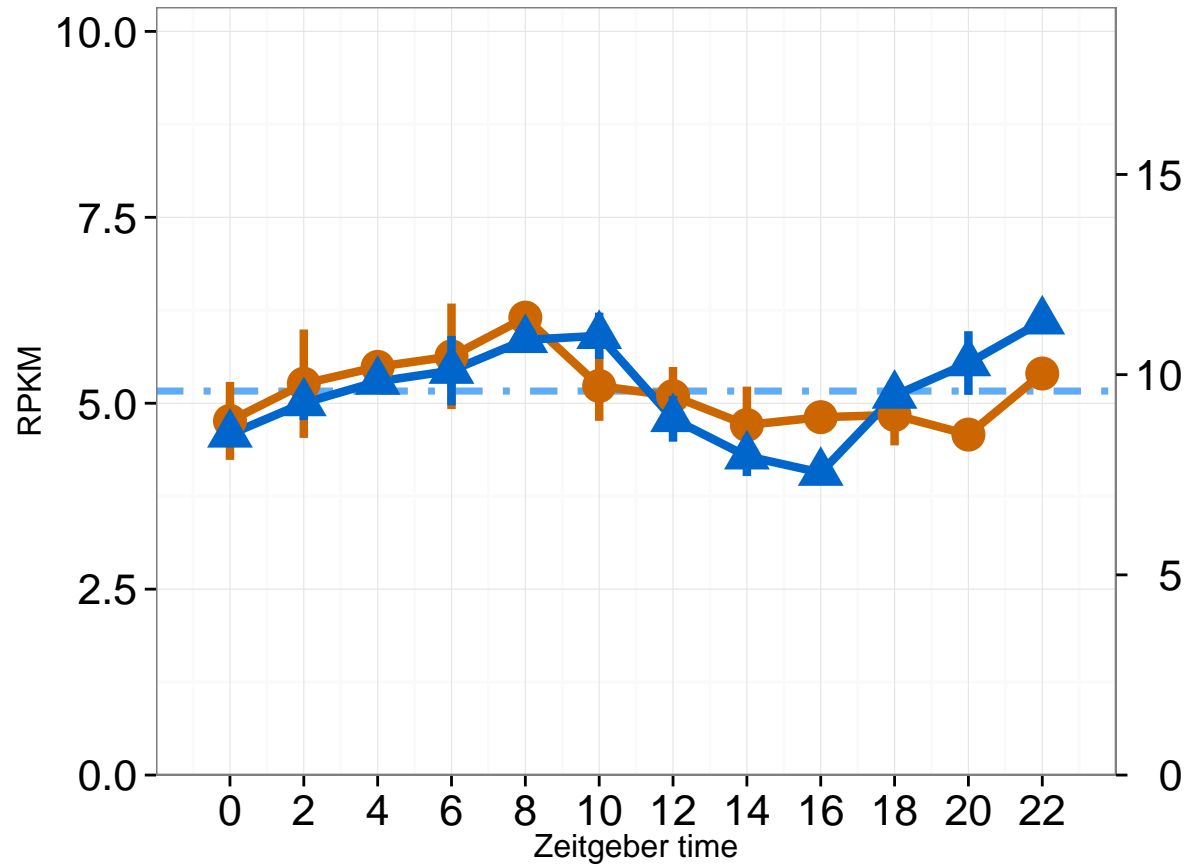

# Dfna5

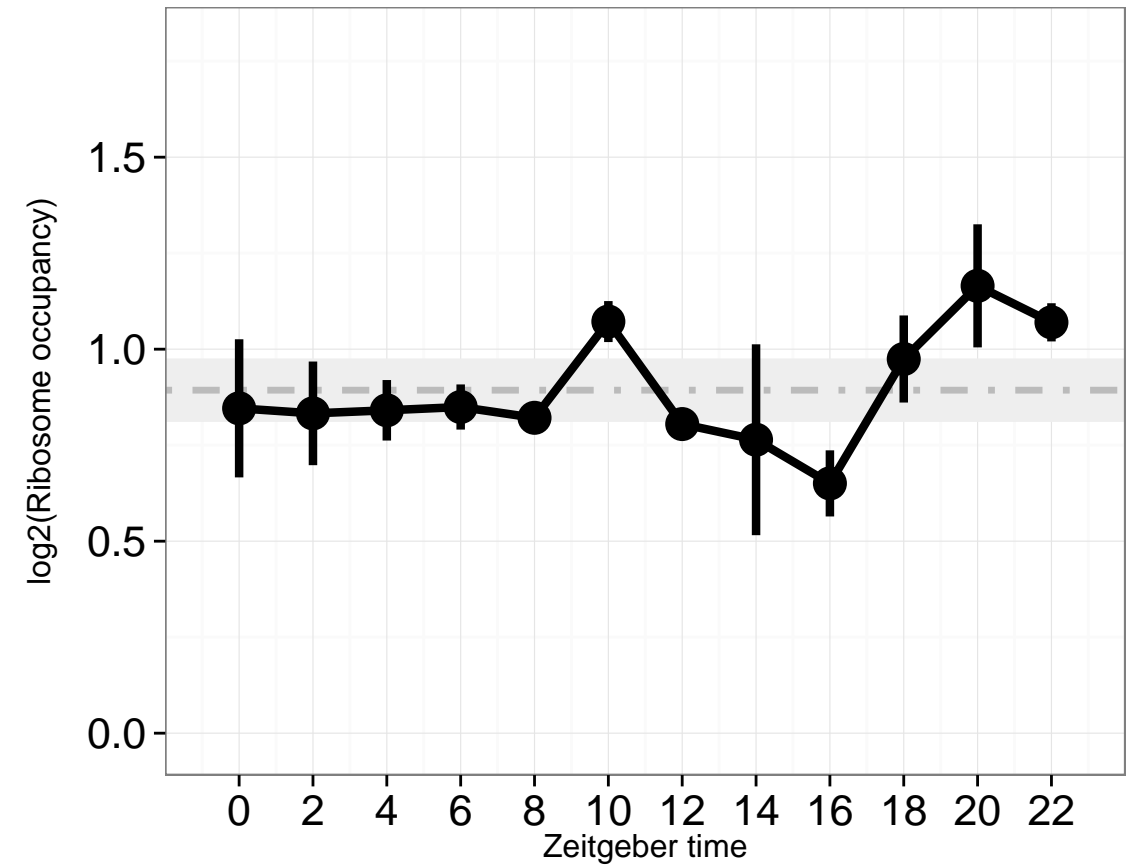

Supplement: Supplementary file 8185 [file 1]

# Slc5a3

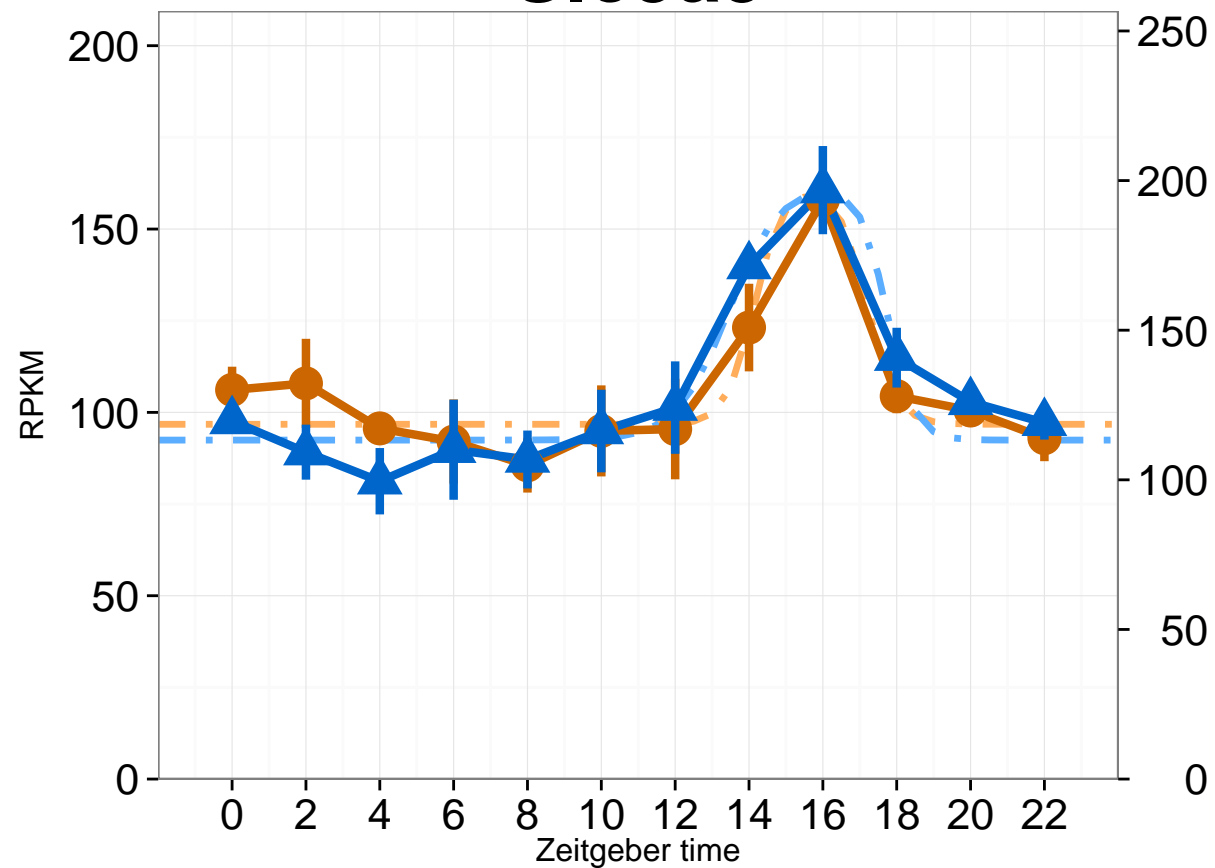

# Slc5a3

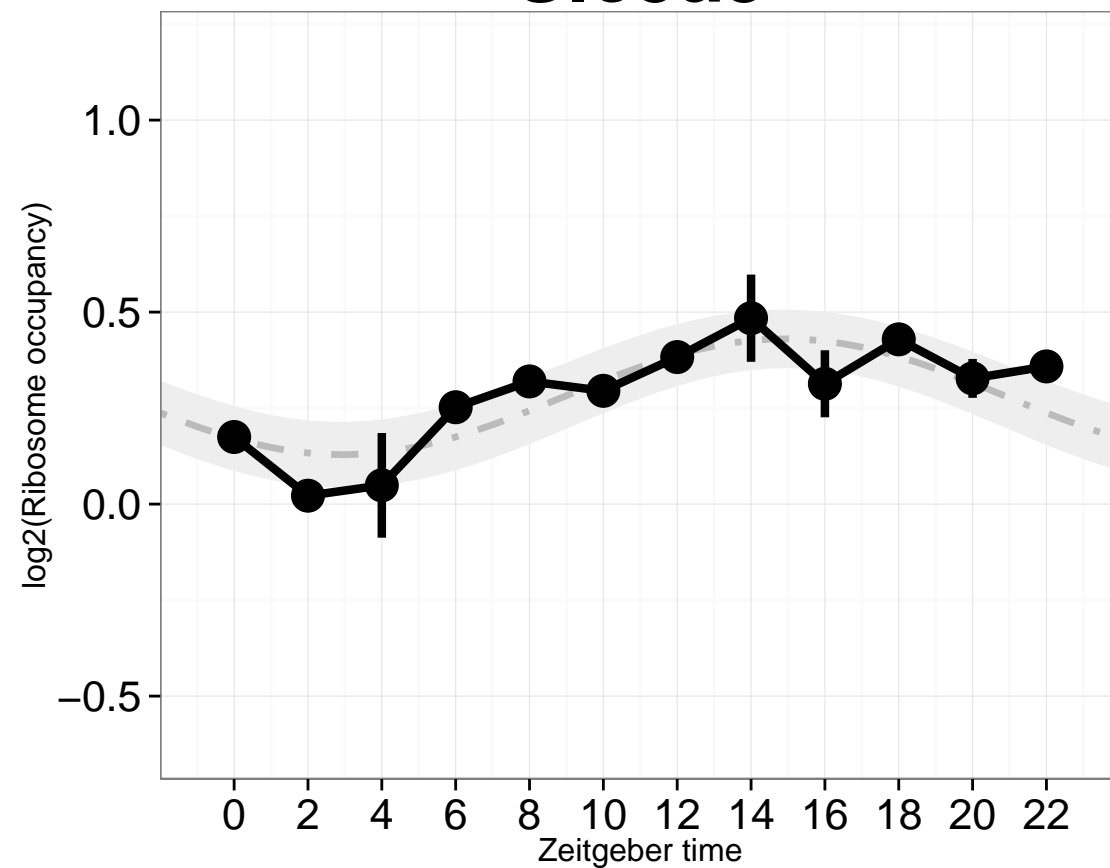

Supplement: Supplementary file 8186 [file 1]

# Cdk5rap2

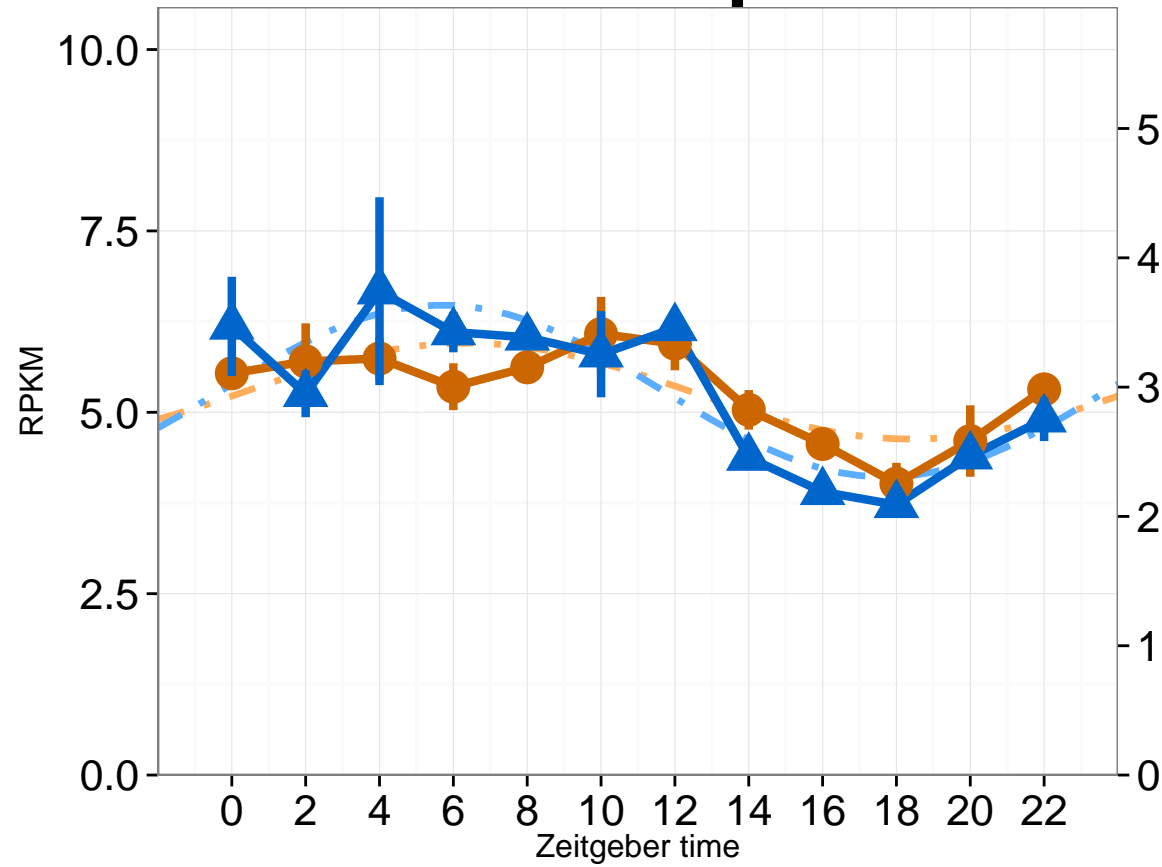

# Cdk5rap2

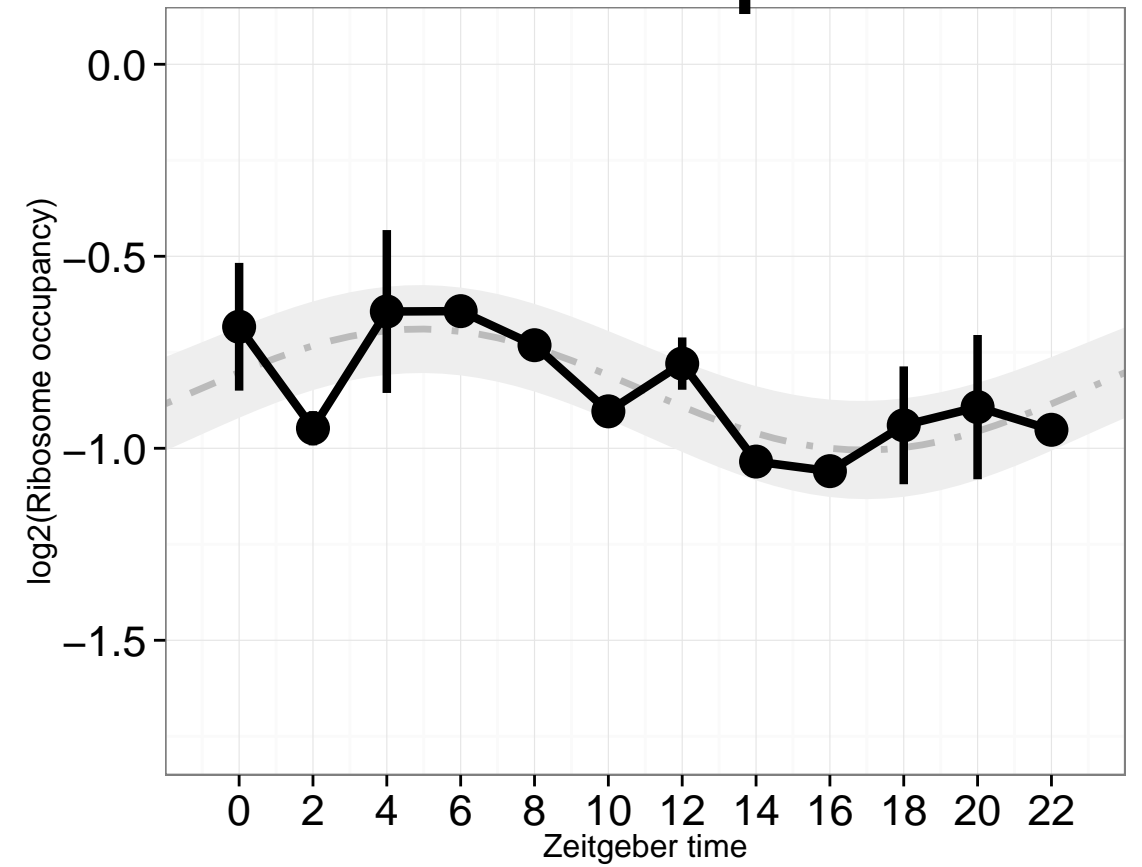

Supplement: Supplementary file 8187 [file 1]

## Dtnbp1

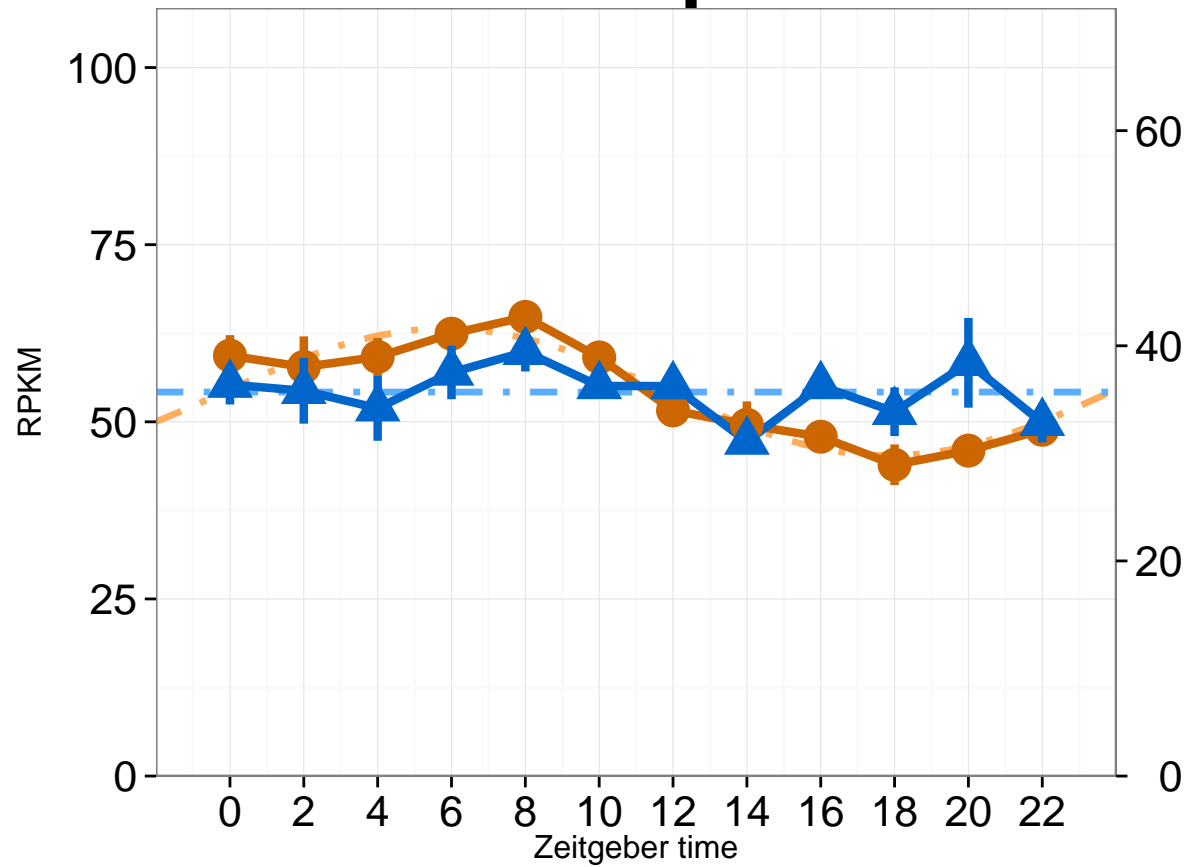

## Dtnbp1

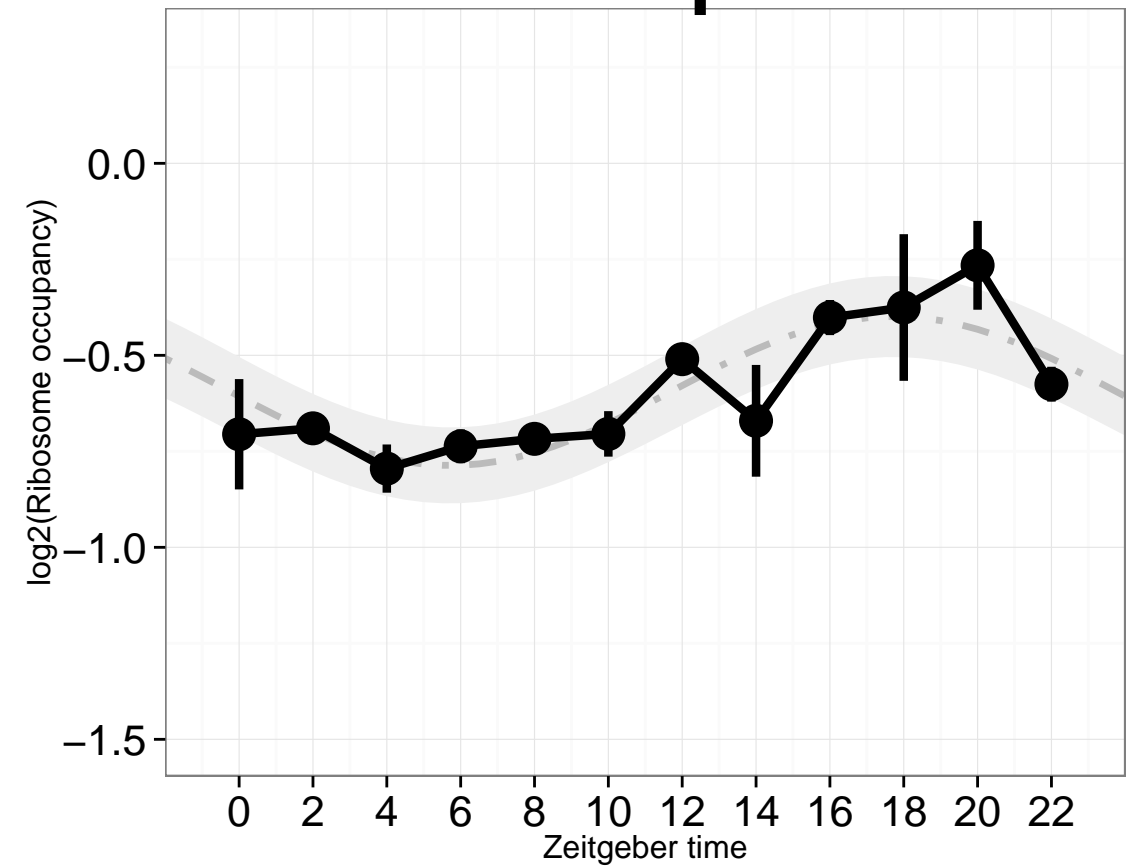

Supplement: Supplementary file 8188 [file 1]

N4bp2l1

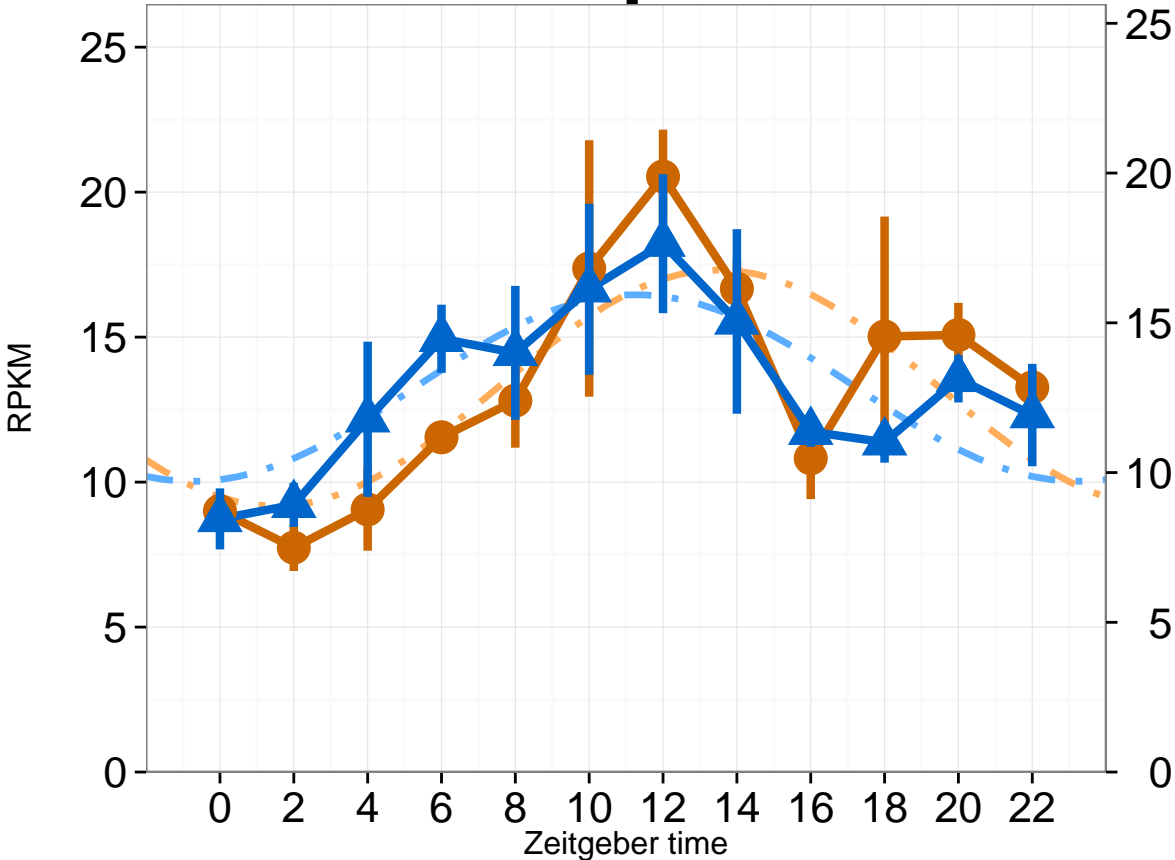

N4bp2l1

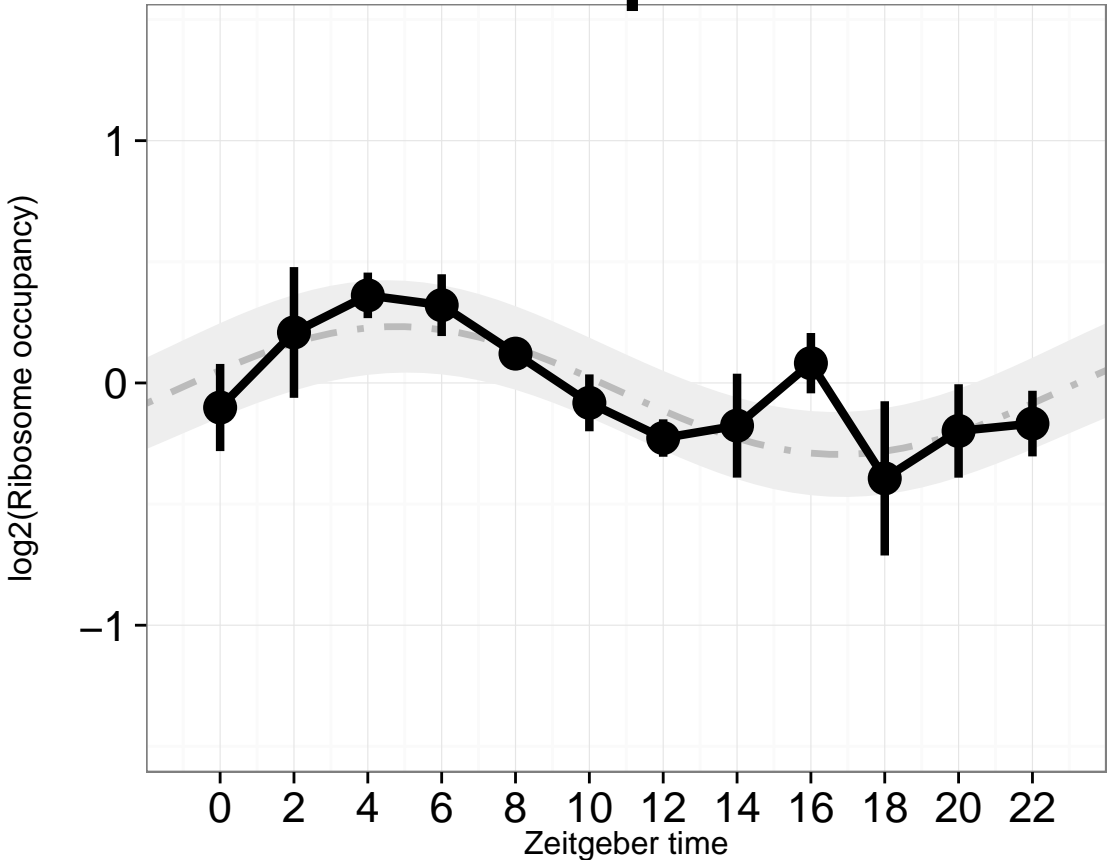

Supplement: Supplementary file 8189 [file 1]

## Retsat

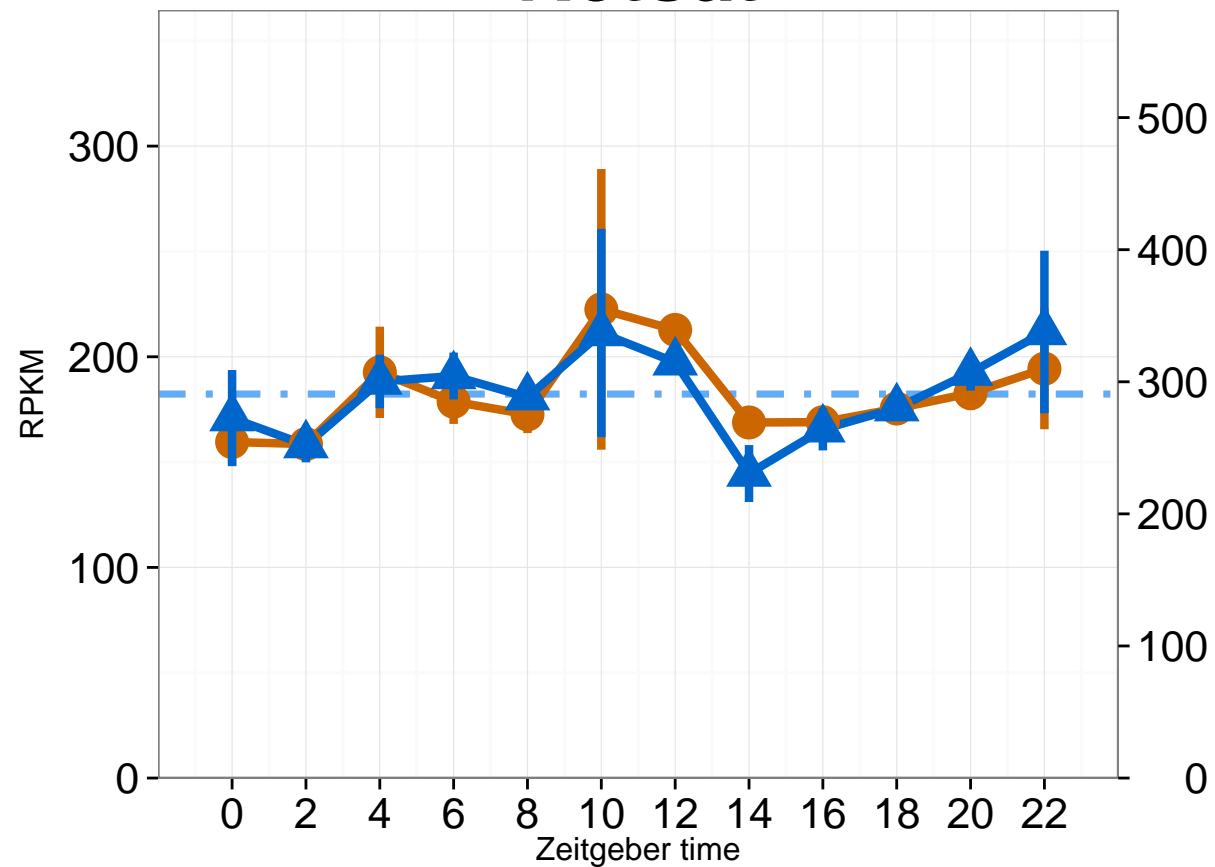

## Retsat

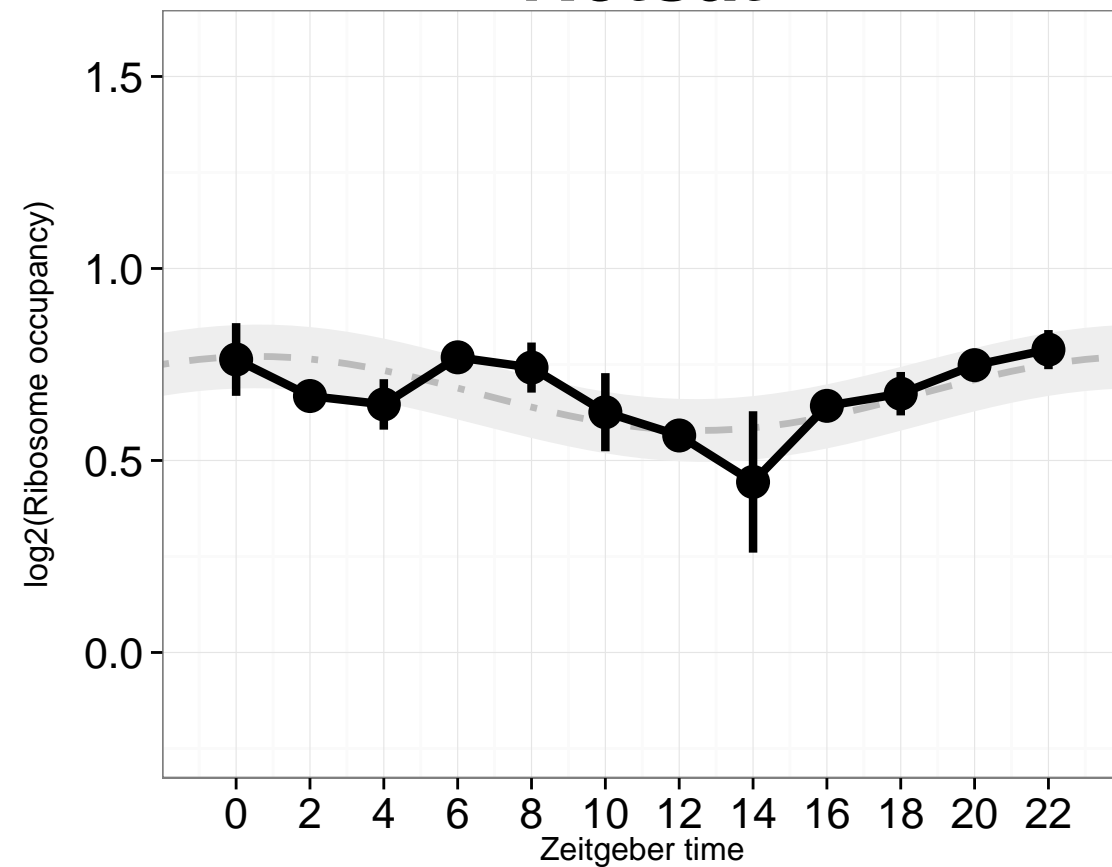

Supplement: Supplementary file 8190 [file 1]

# Robo1

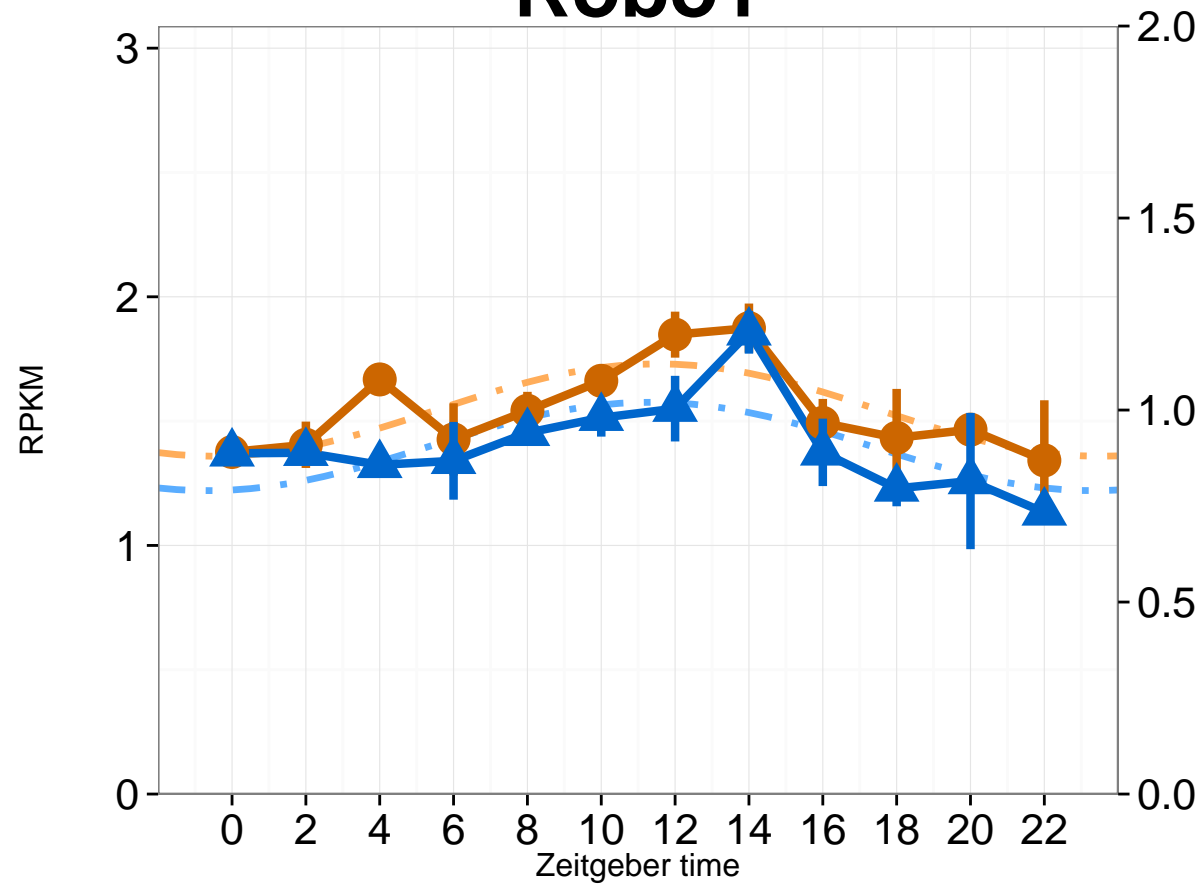

# Robo1

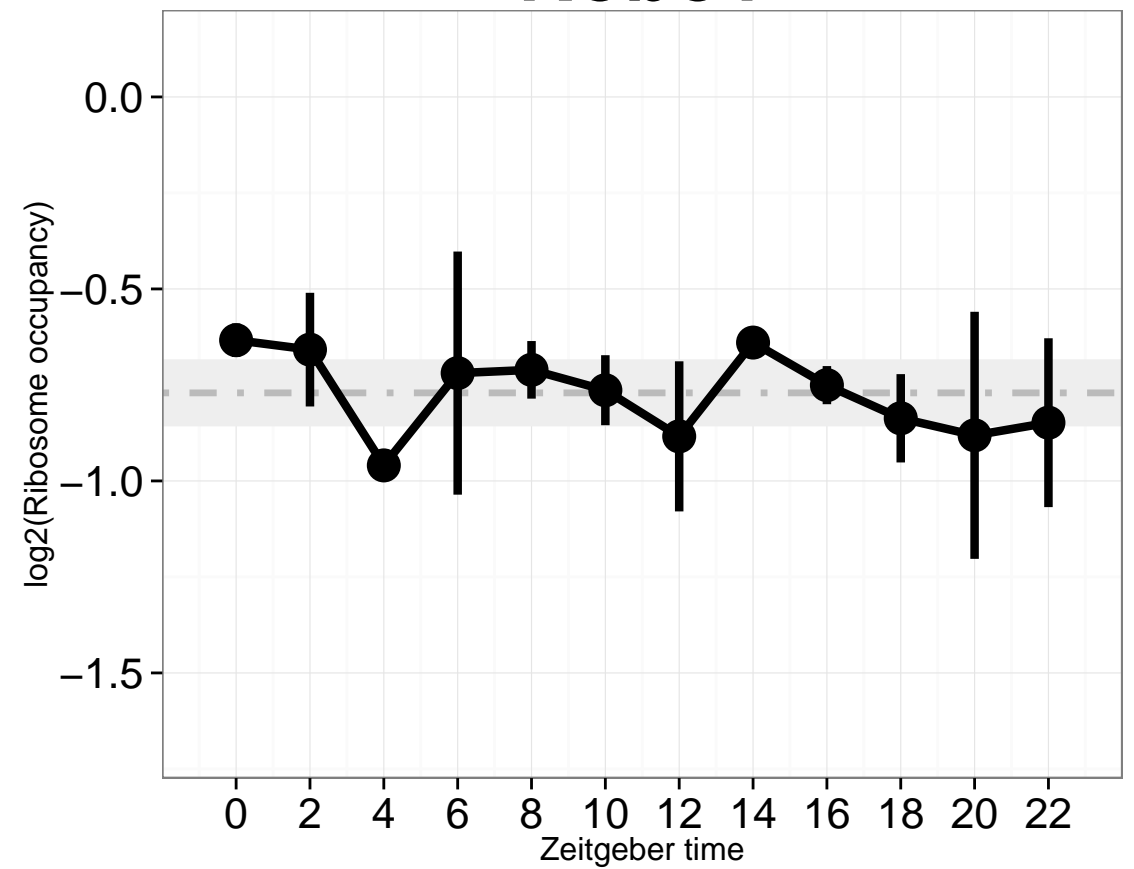

Supplement: Supplementary file 8191 [file 1]

## Insig2

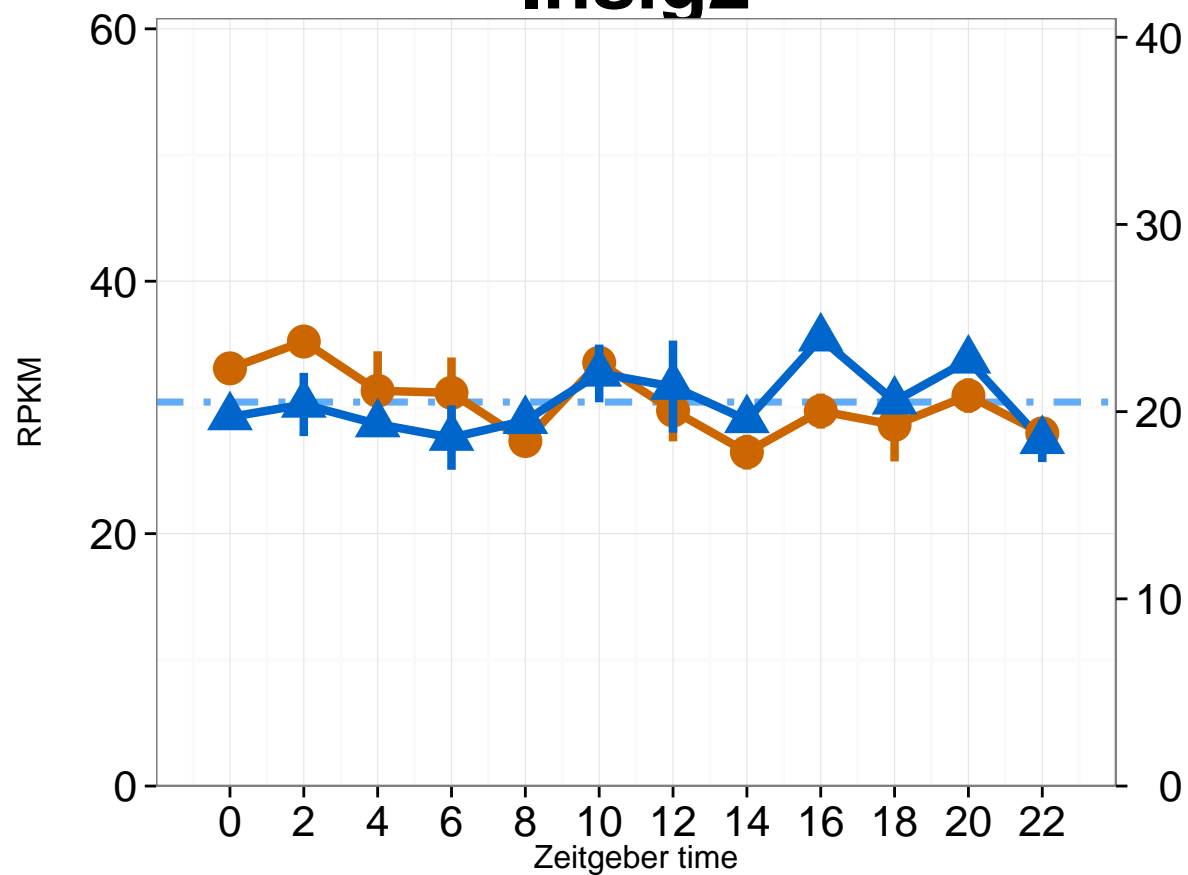

## Insig2

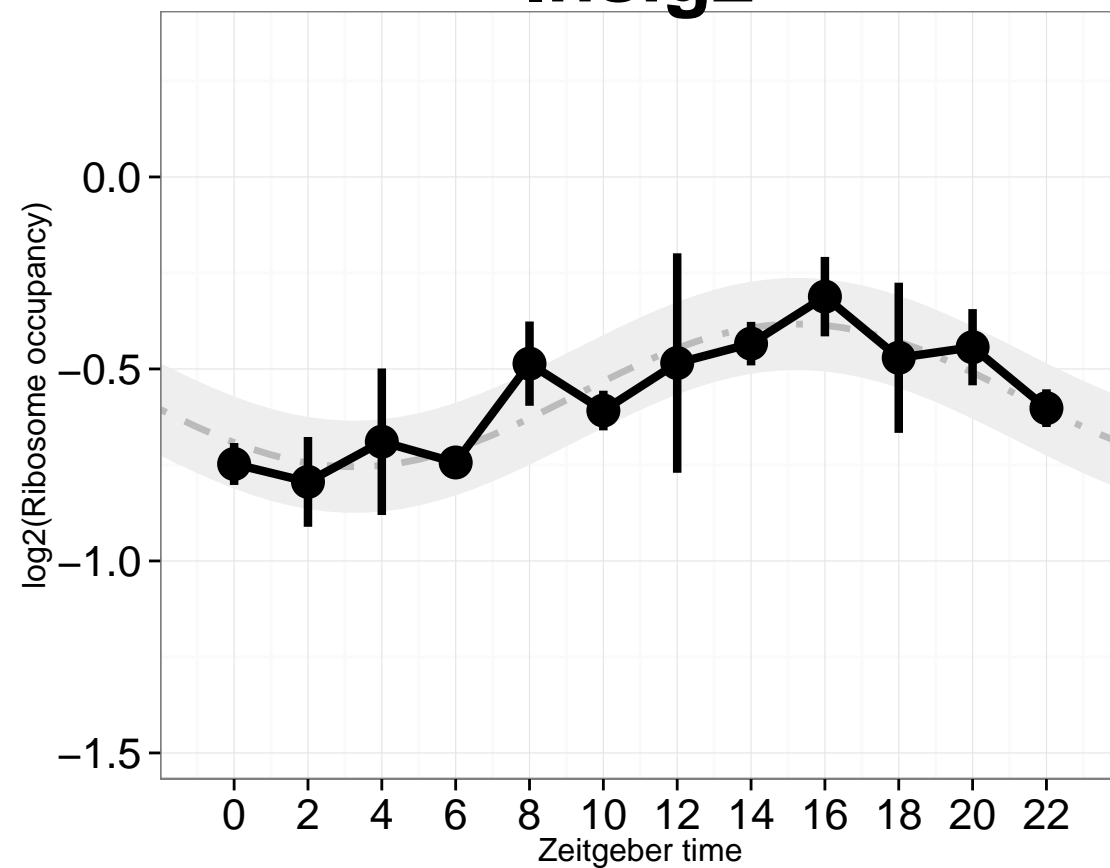

Supplement: Supplementary file 8192 [file 1]

# C8a

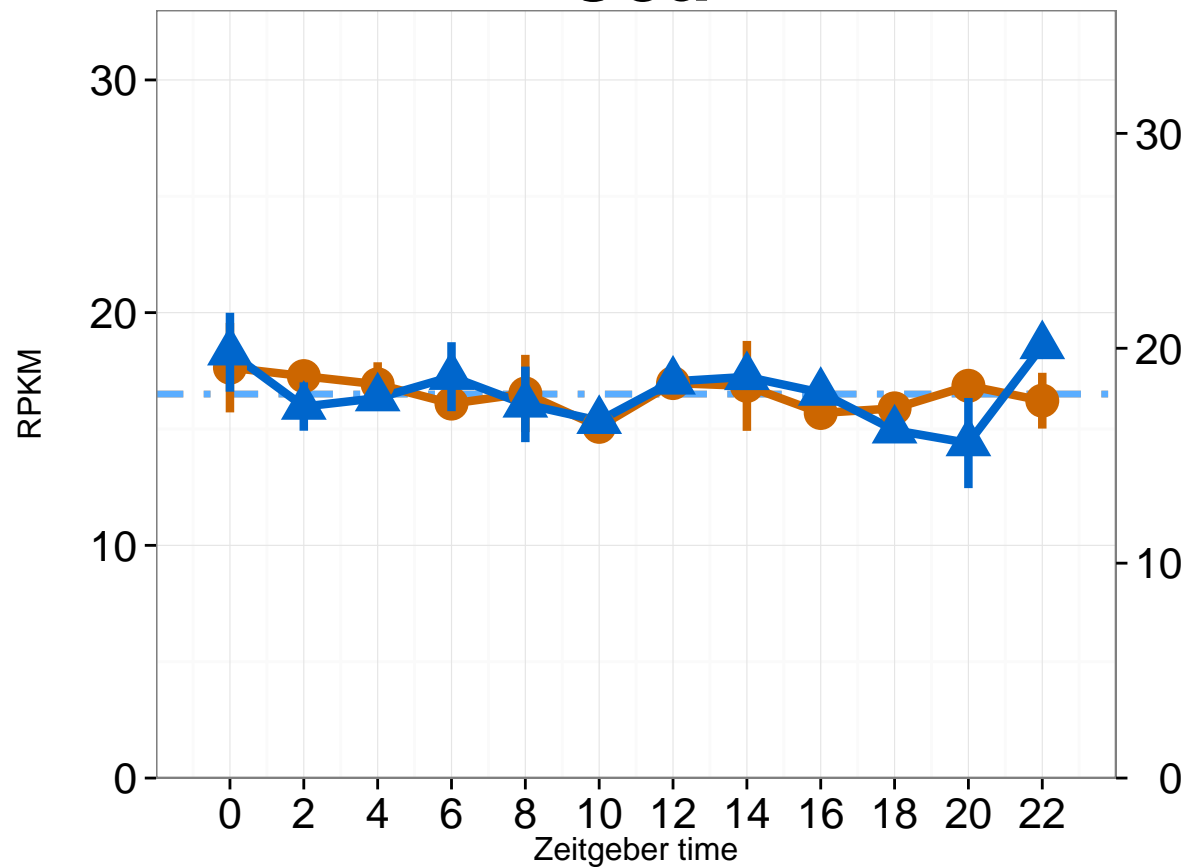

# C8a

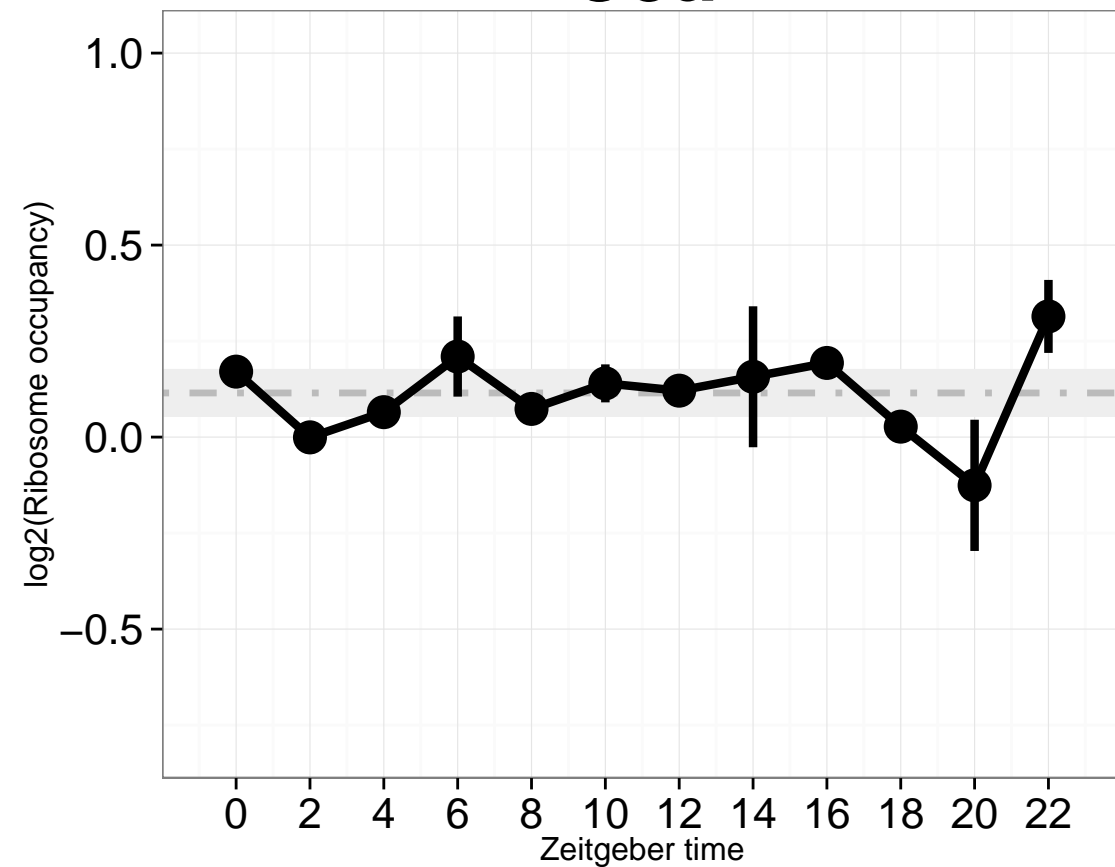

Supplement: Supplementary file 8193 [file 1]

# H2-Q7

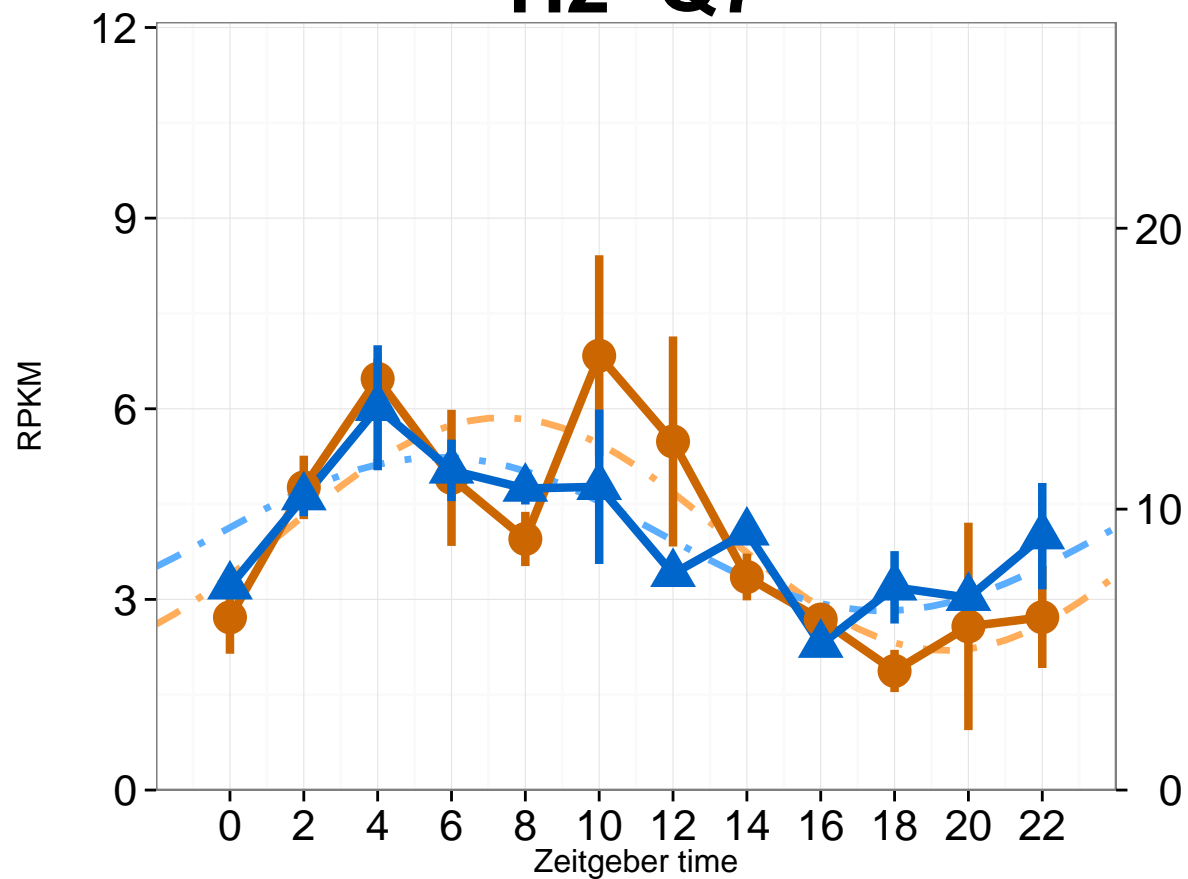

# H2-Q7

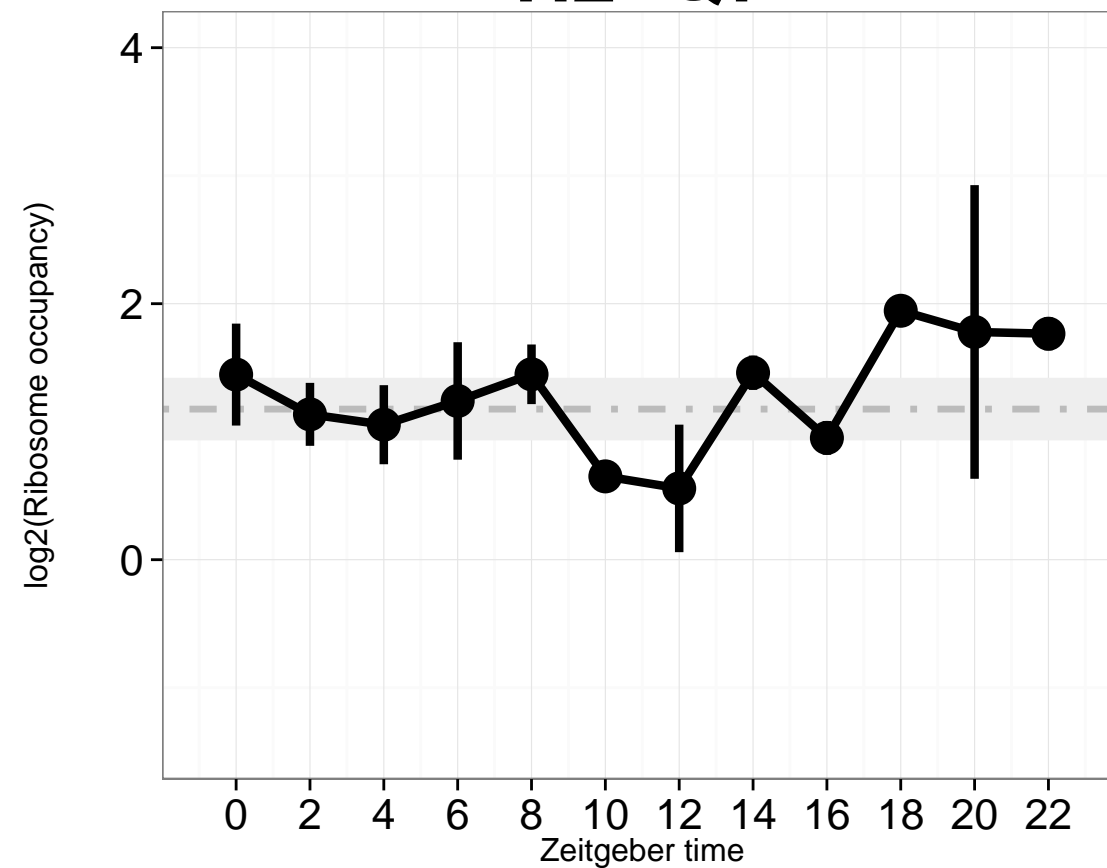

Supplement: Supplementary file 8194 [file 1]

## Yipf5

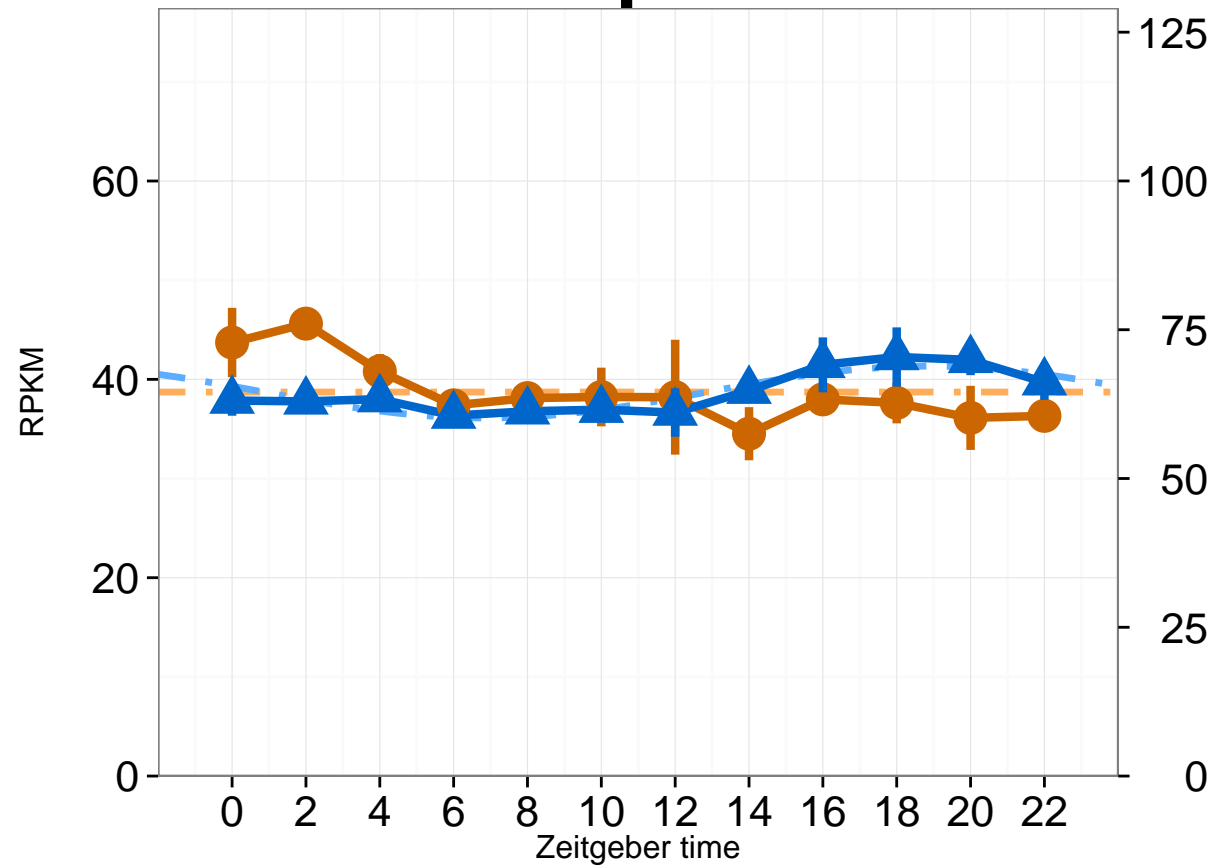

## Yipf5

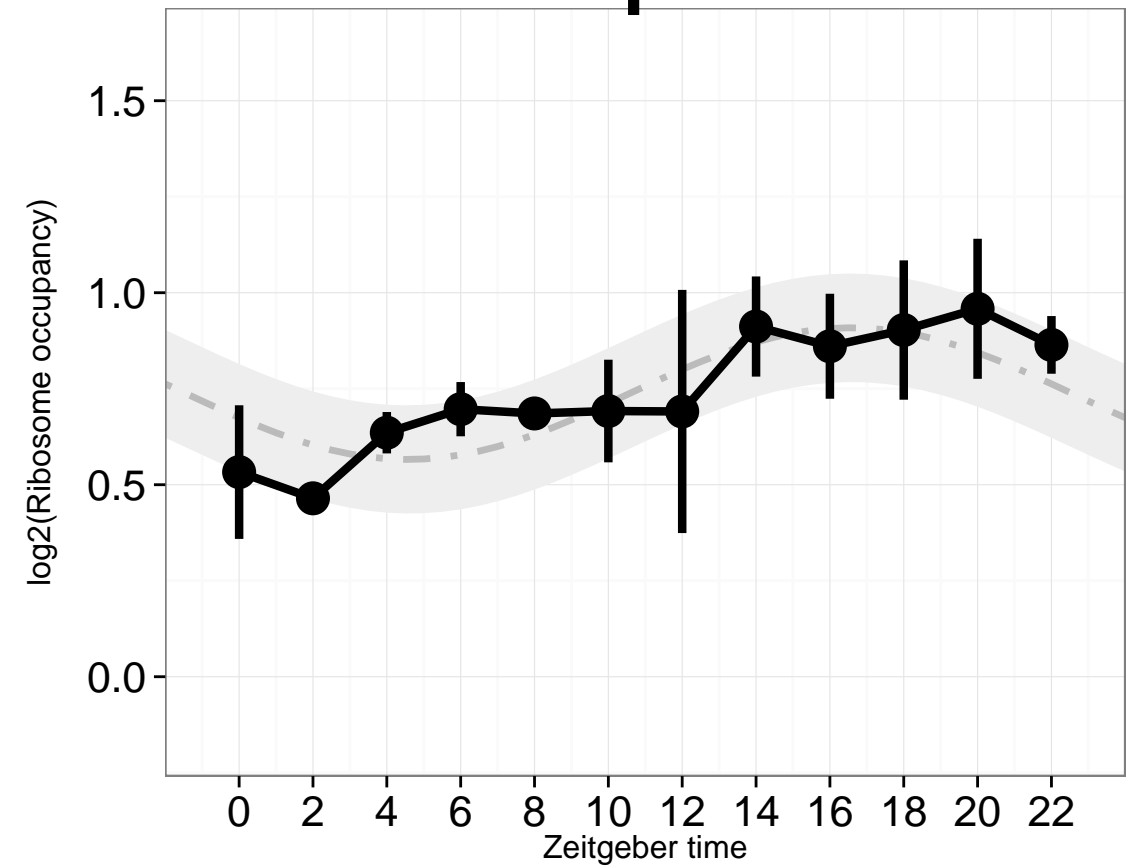

Supplement: Supplementary file 8195 [file 1]

## Uty

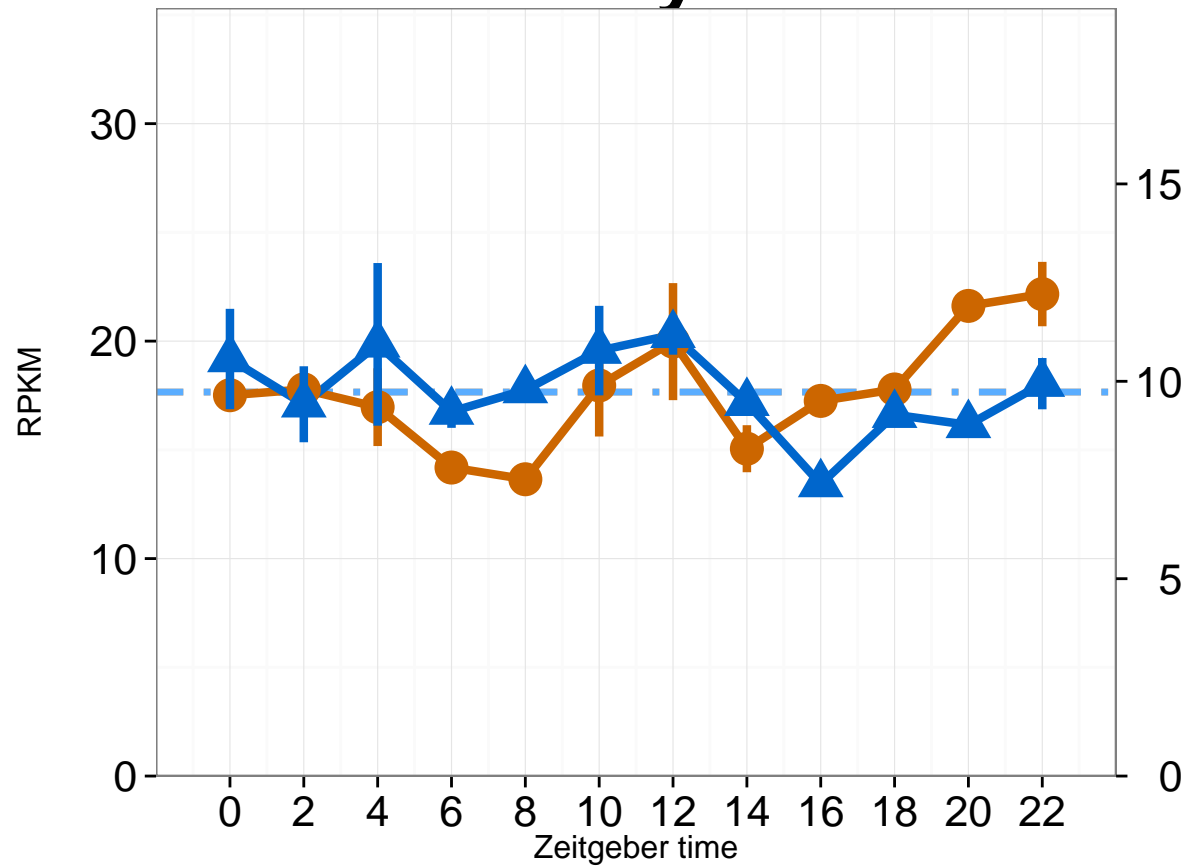

## Uty

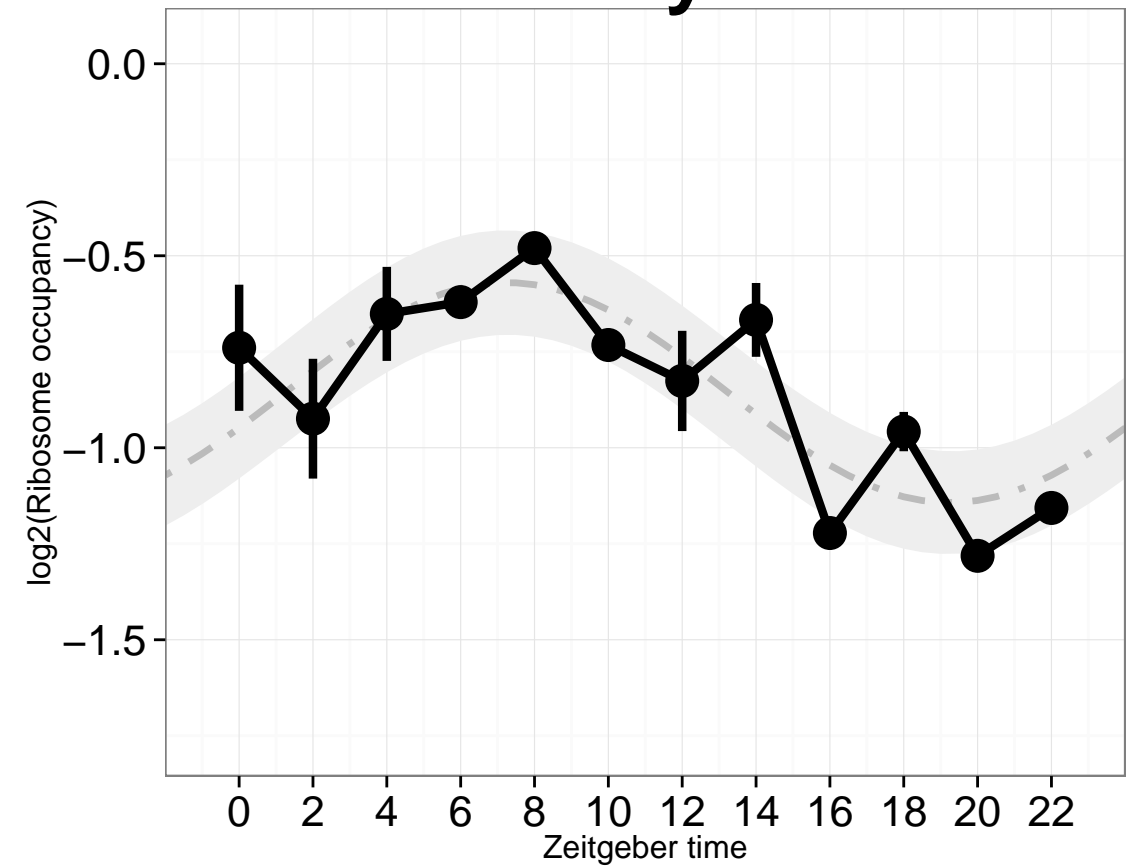

Supplement: Supplementary file 8196 [file 1]

# Hist1h3f

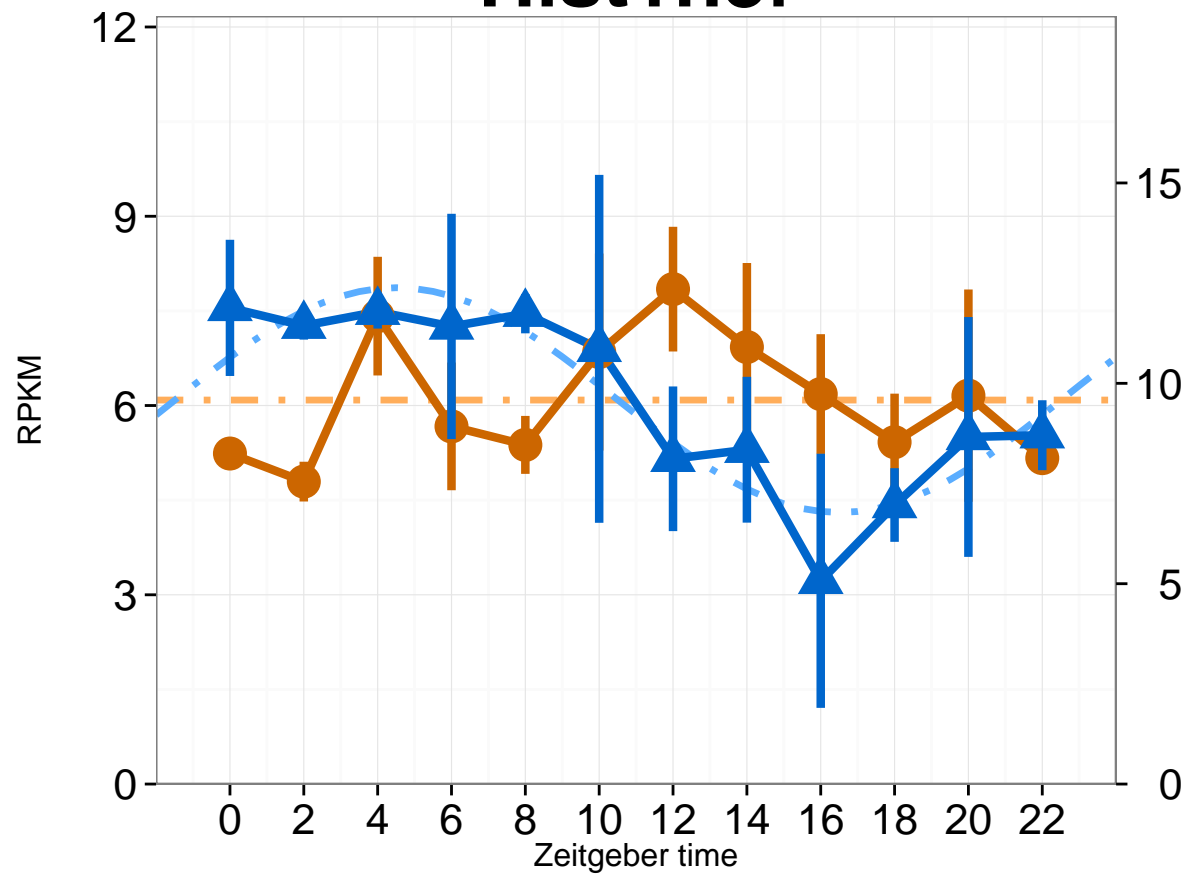

# Hist1h3f

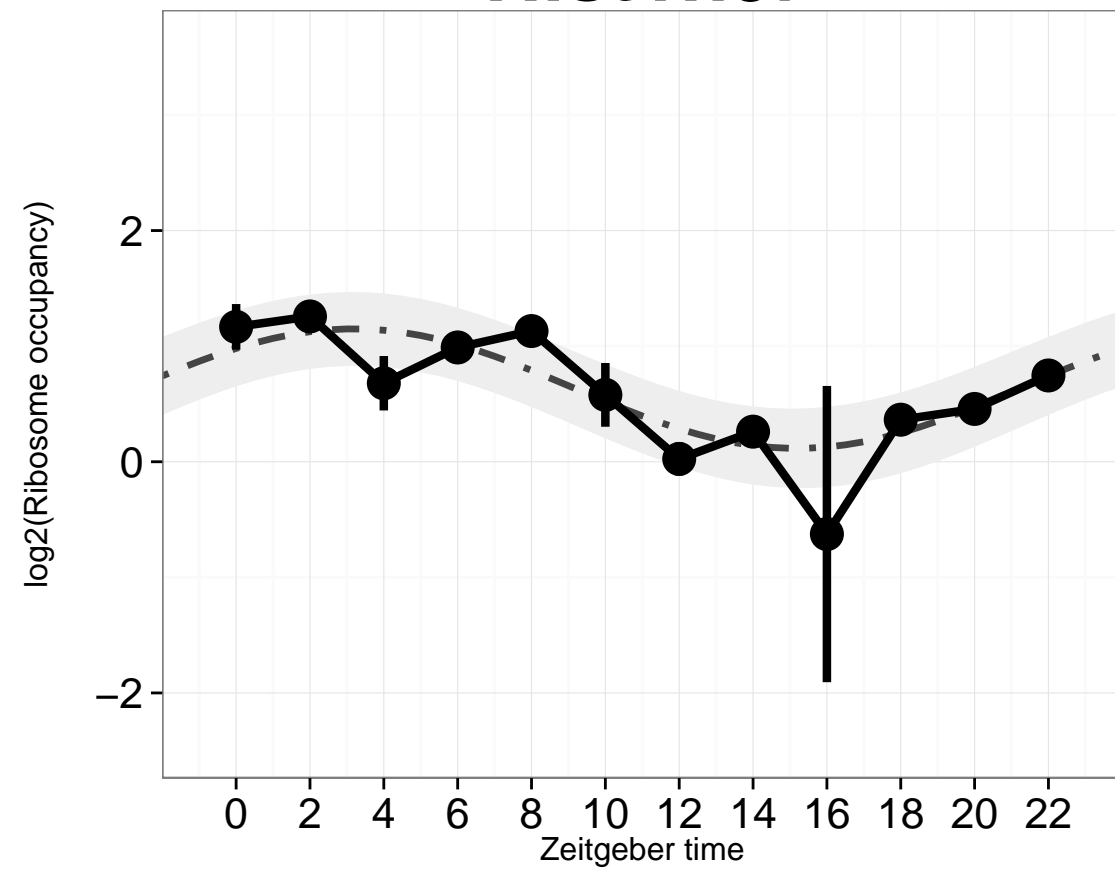

Supplement: Supplementary file 8197 [file 1]

## Gfpt1

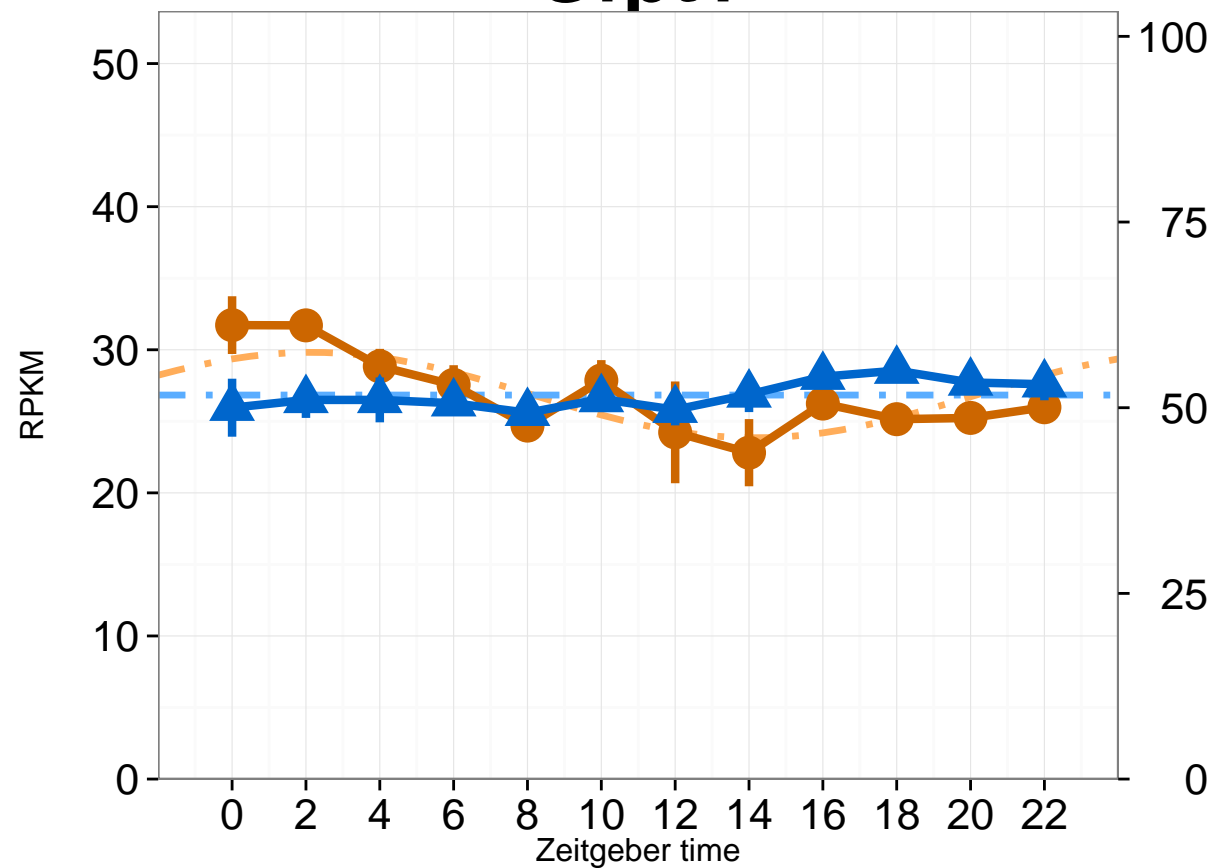

## Gfpt1

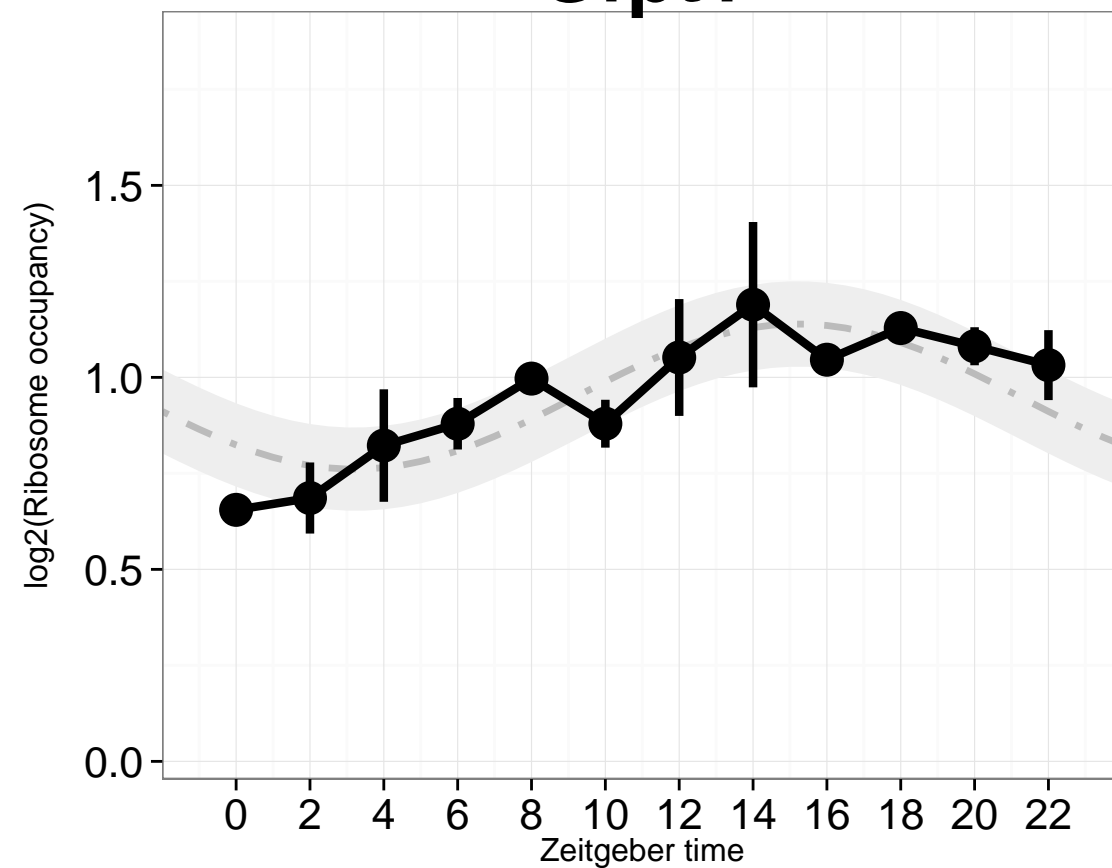

Supplement: Supplementary file 8198 [file 1]

## Ankib1

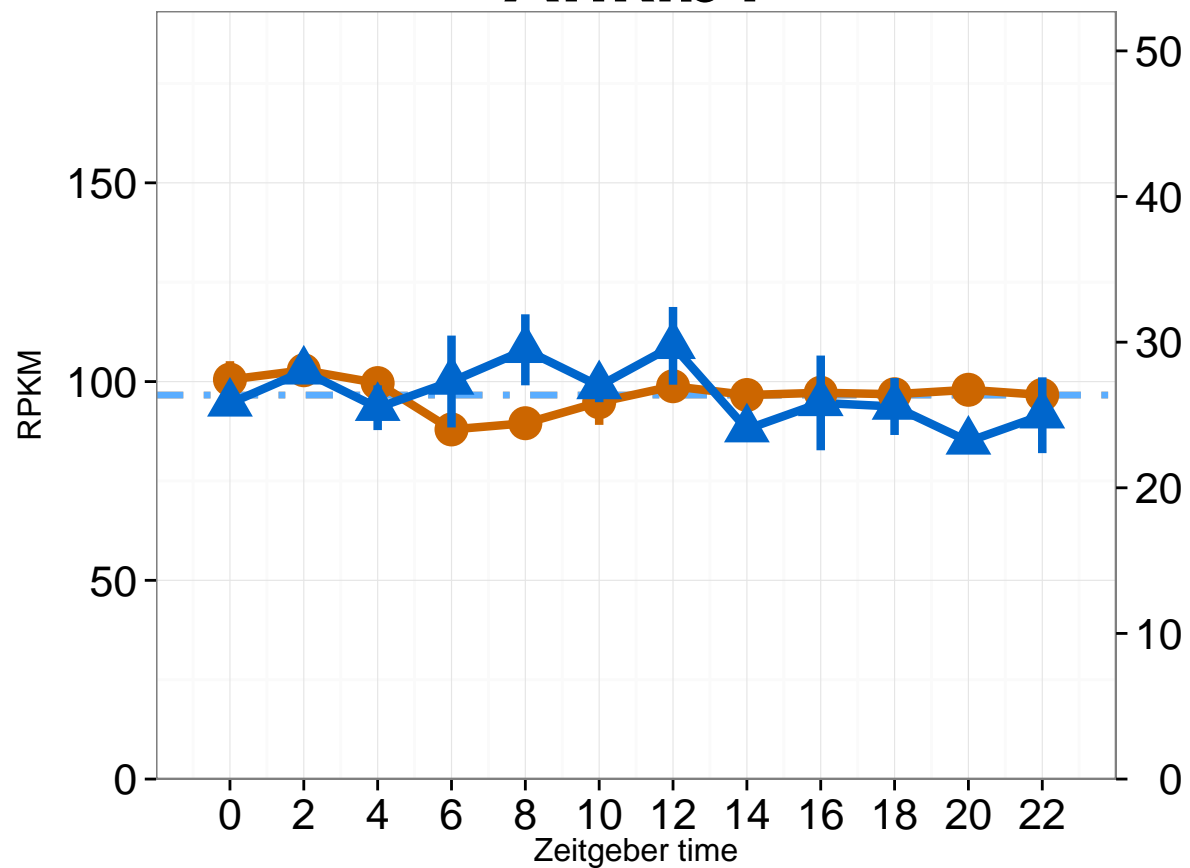

## Ankib1

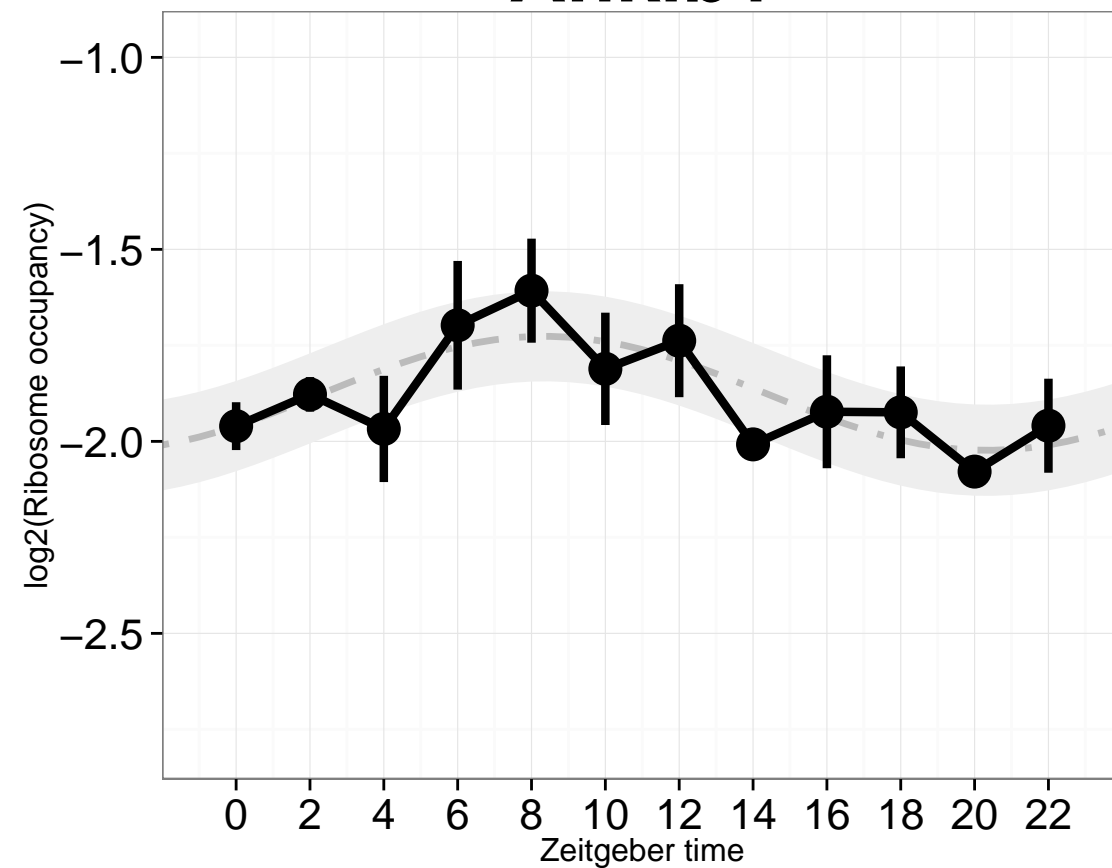

Supplement: Supplementary file 8199 [file 1]

# Gpr56

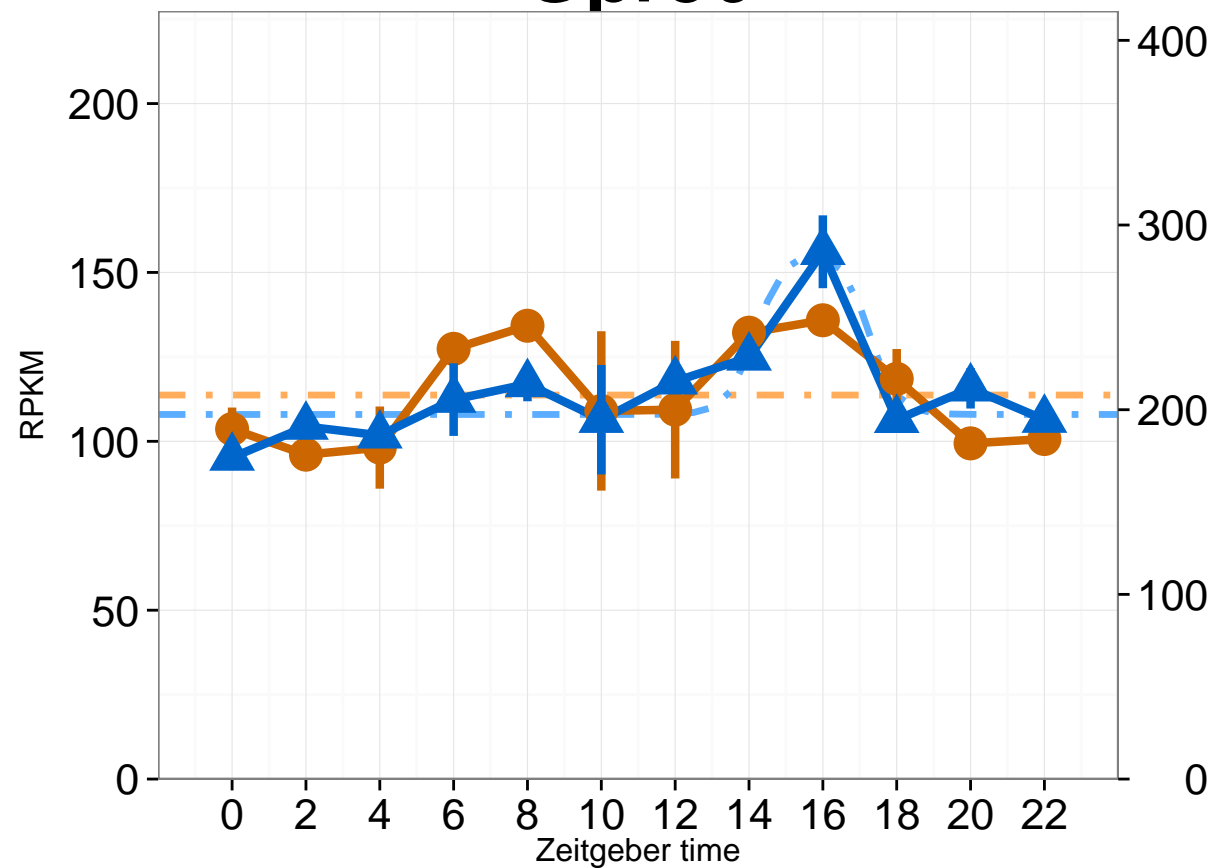

# Gpr56

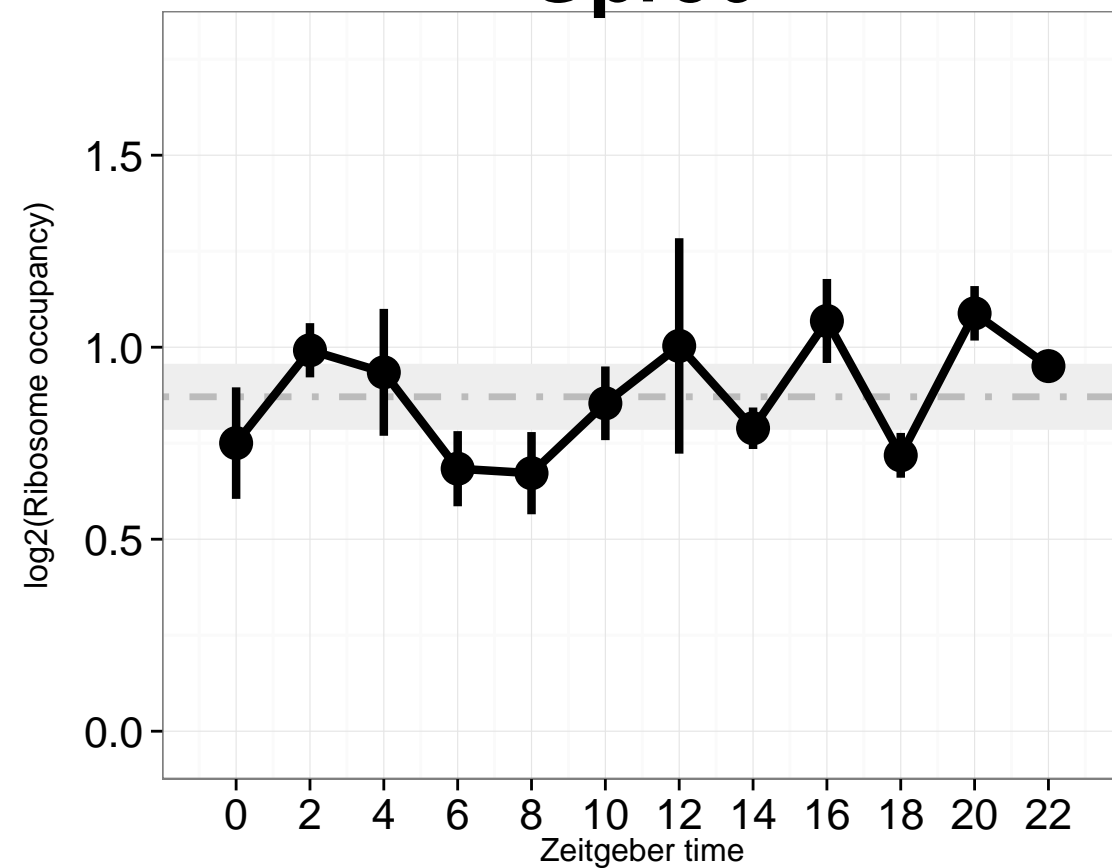

Supplement: Supplementary file 8200 [file 1]

# Nr6a1

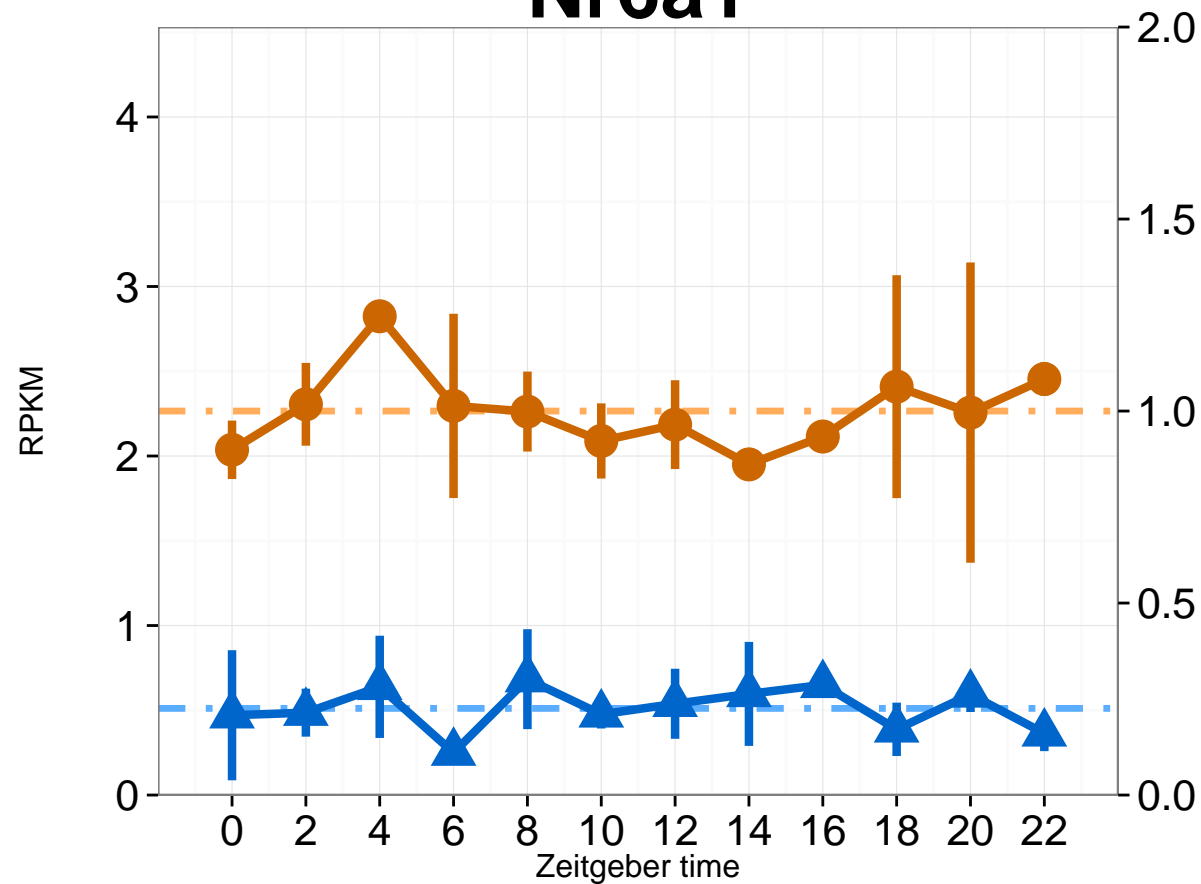

# Nr6a1

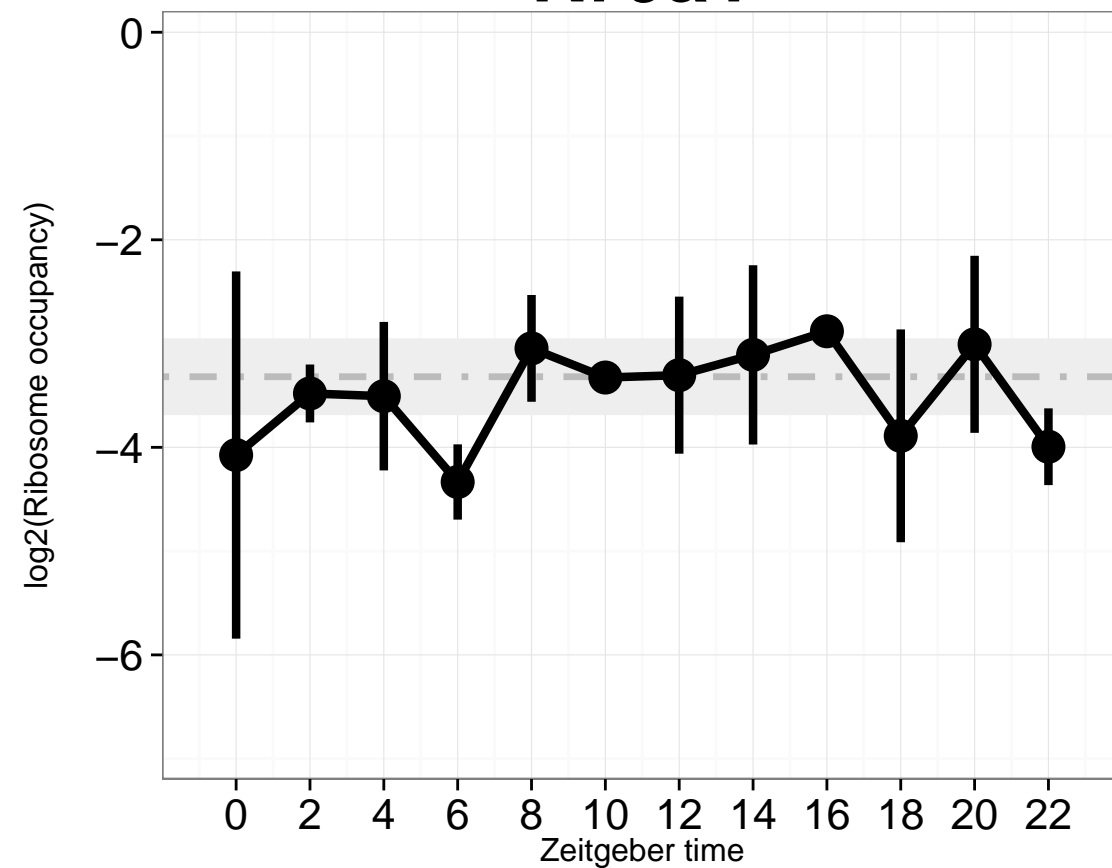

Supplement: Supplementary file 8201 [file 1]

## Rnf8

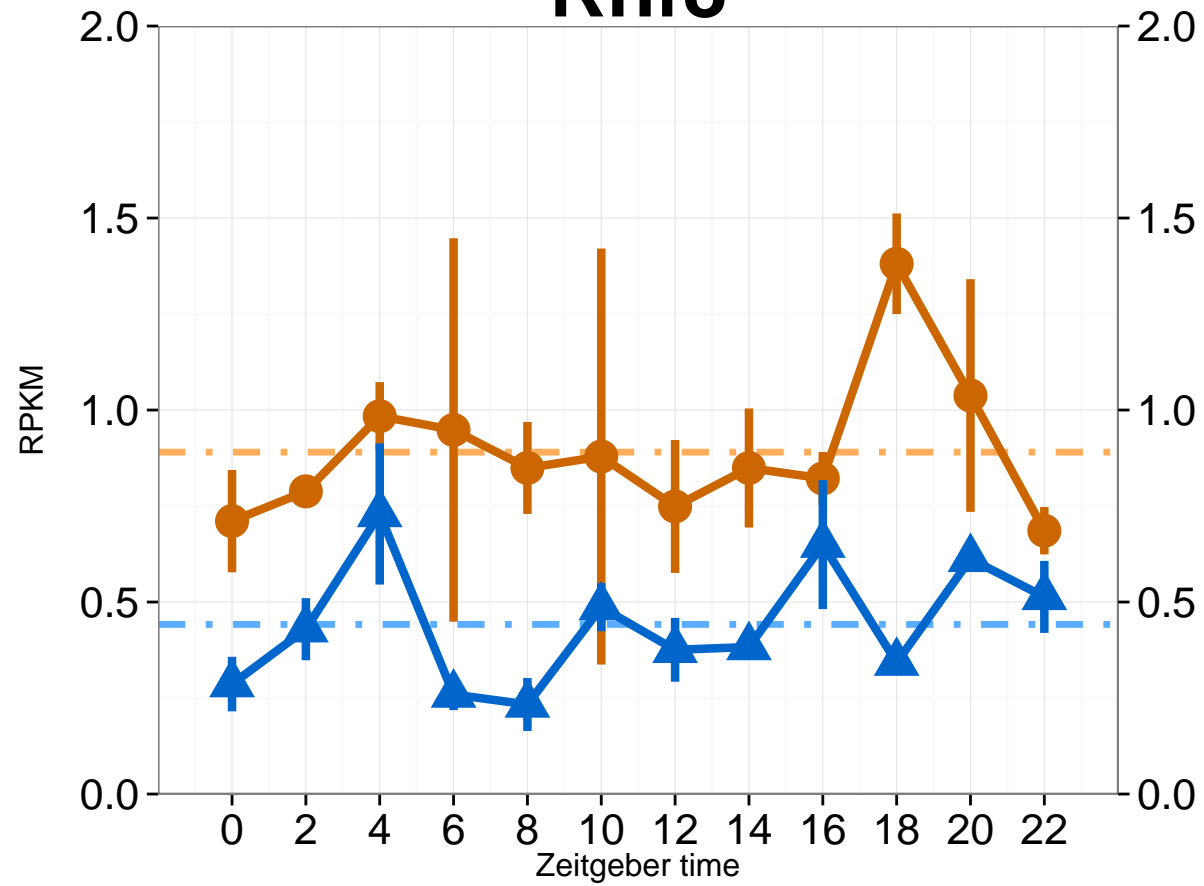

## Rnf8

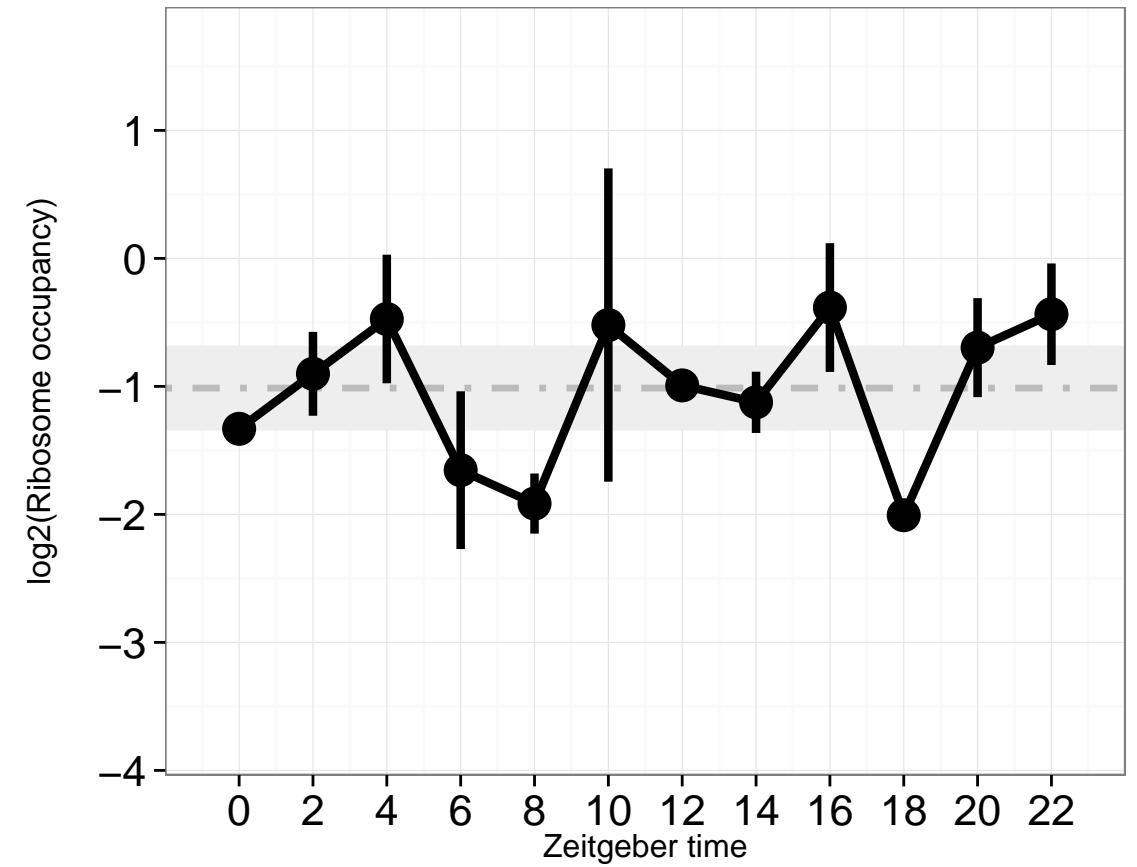

Supplement: Supplementary file 8202 [file 1]

## Ralgapb

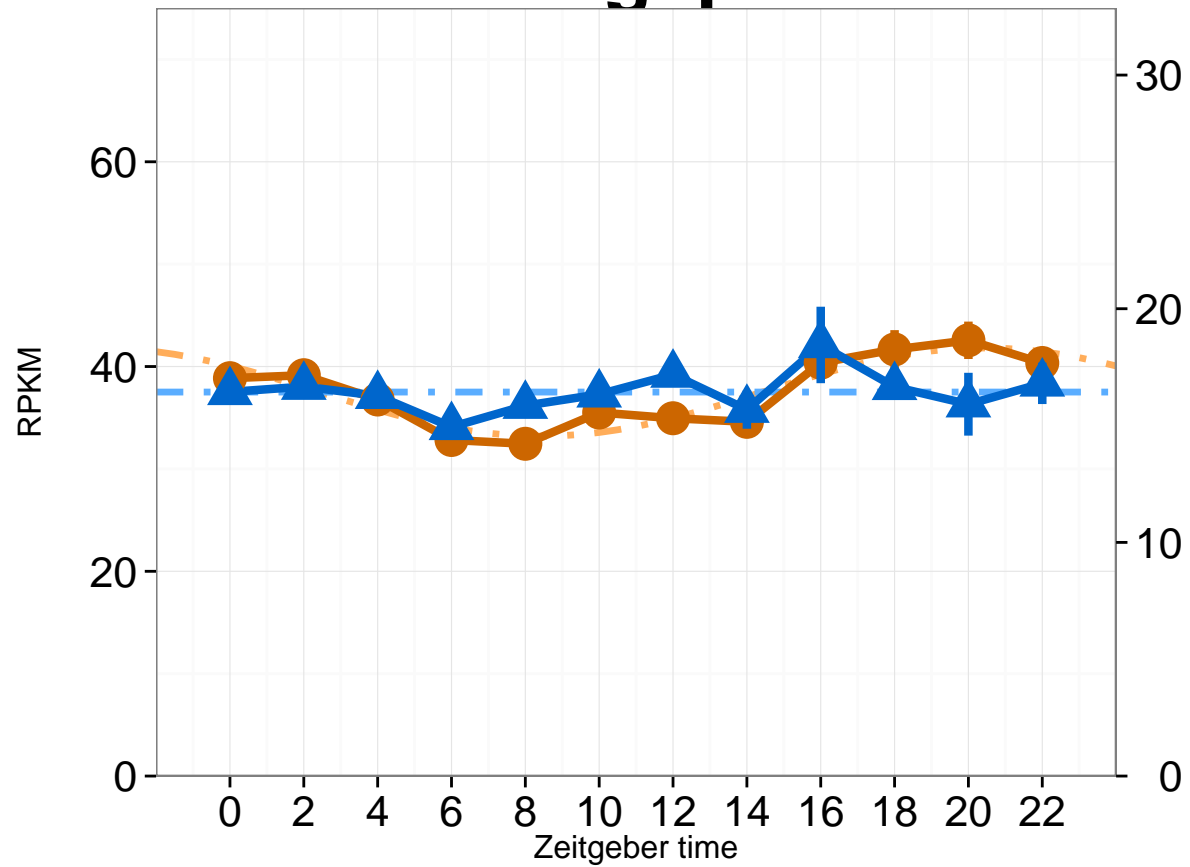

## Ralgapb

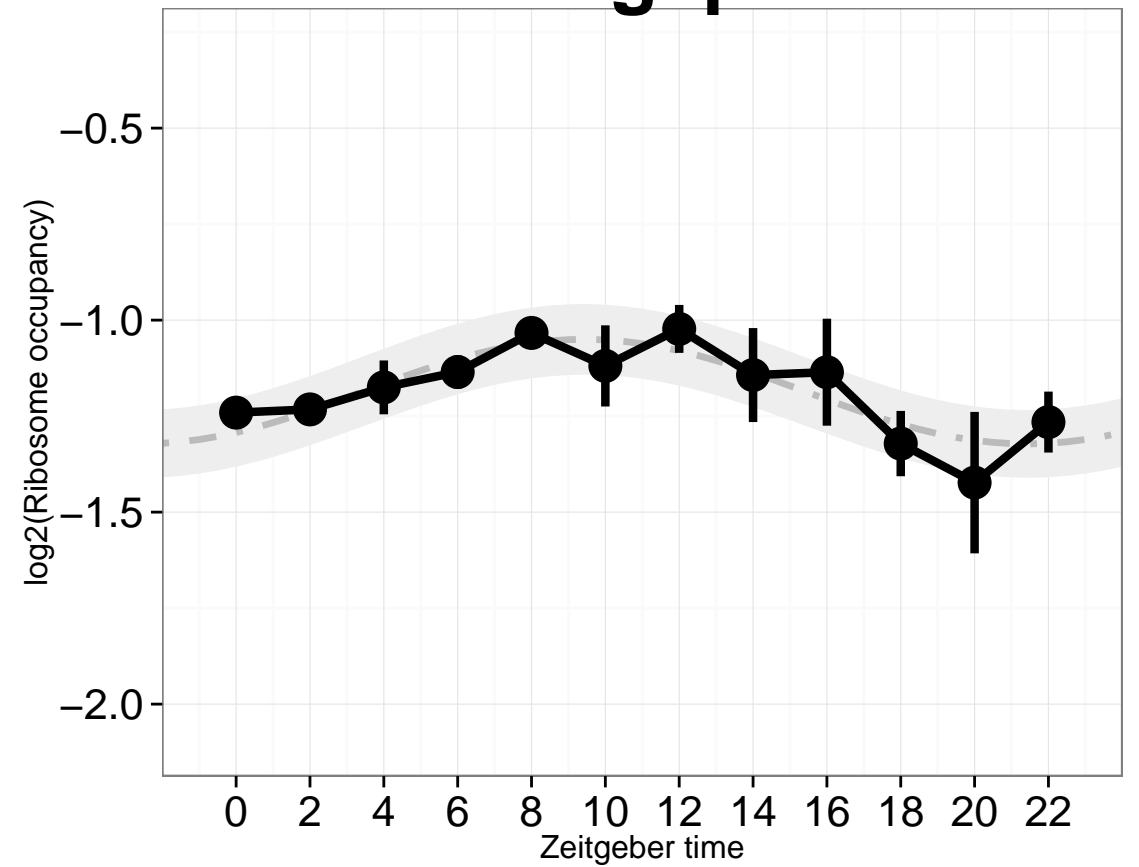

Supplement: Supplementary file 8203 [file 1]

# Qtrt1

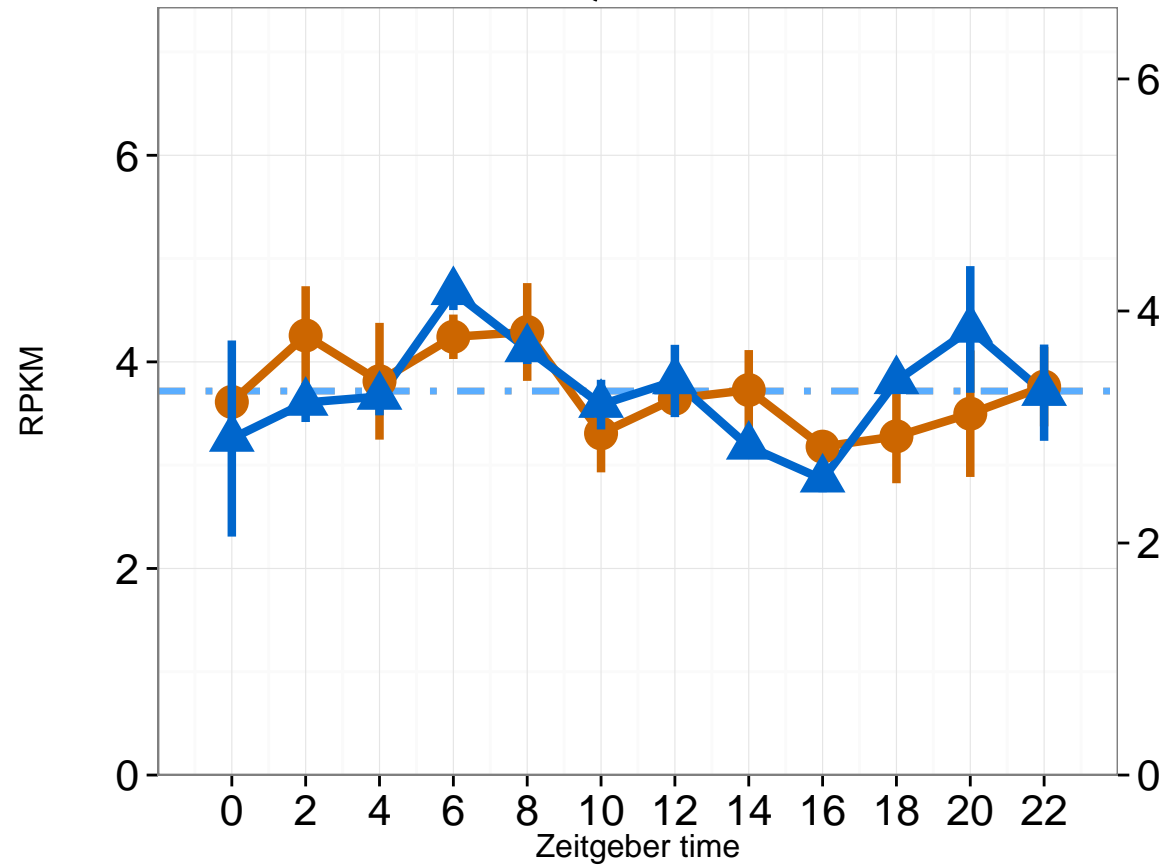

# Qtrt1

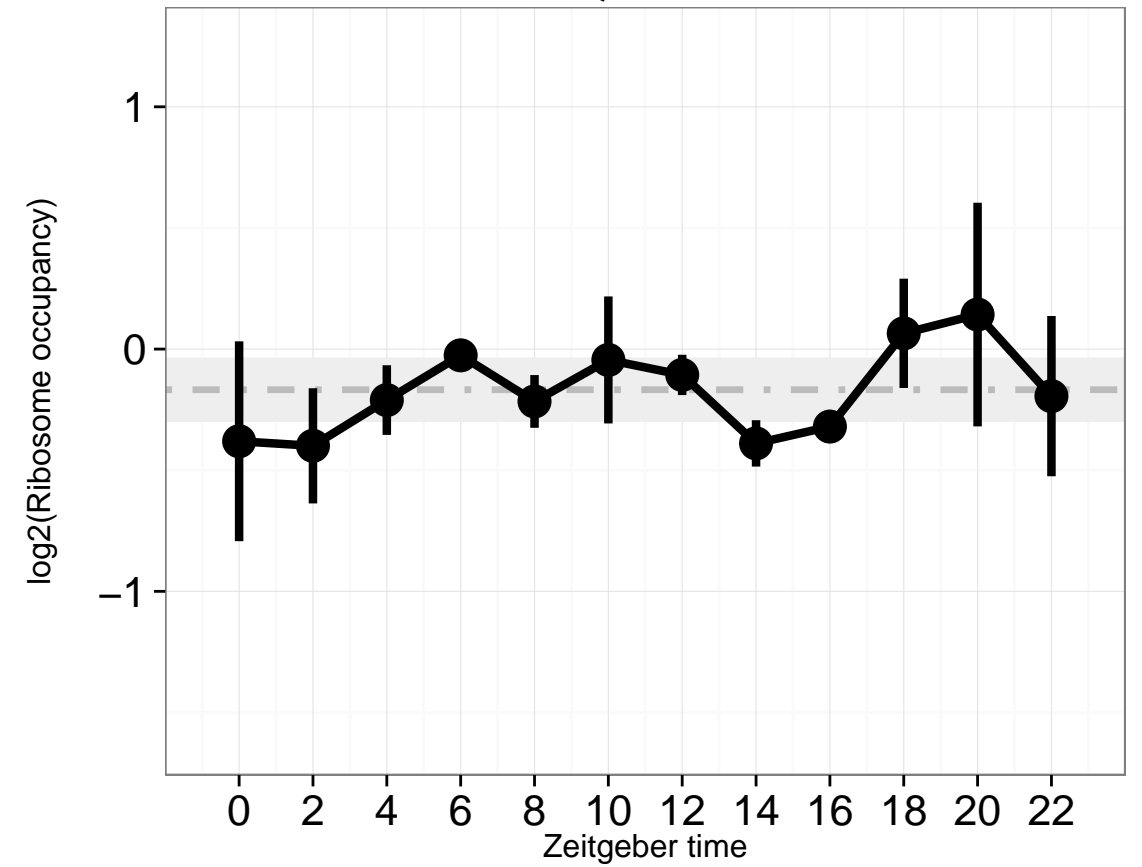

Supplement: Supplementary file 8204 [file 1]

# Isg20l2

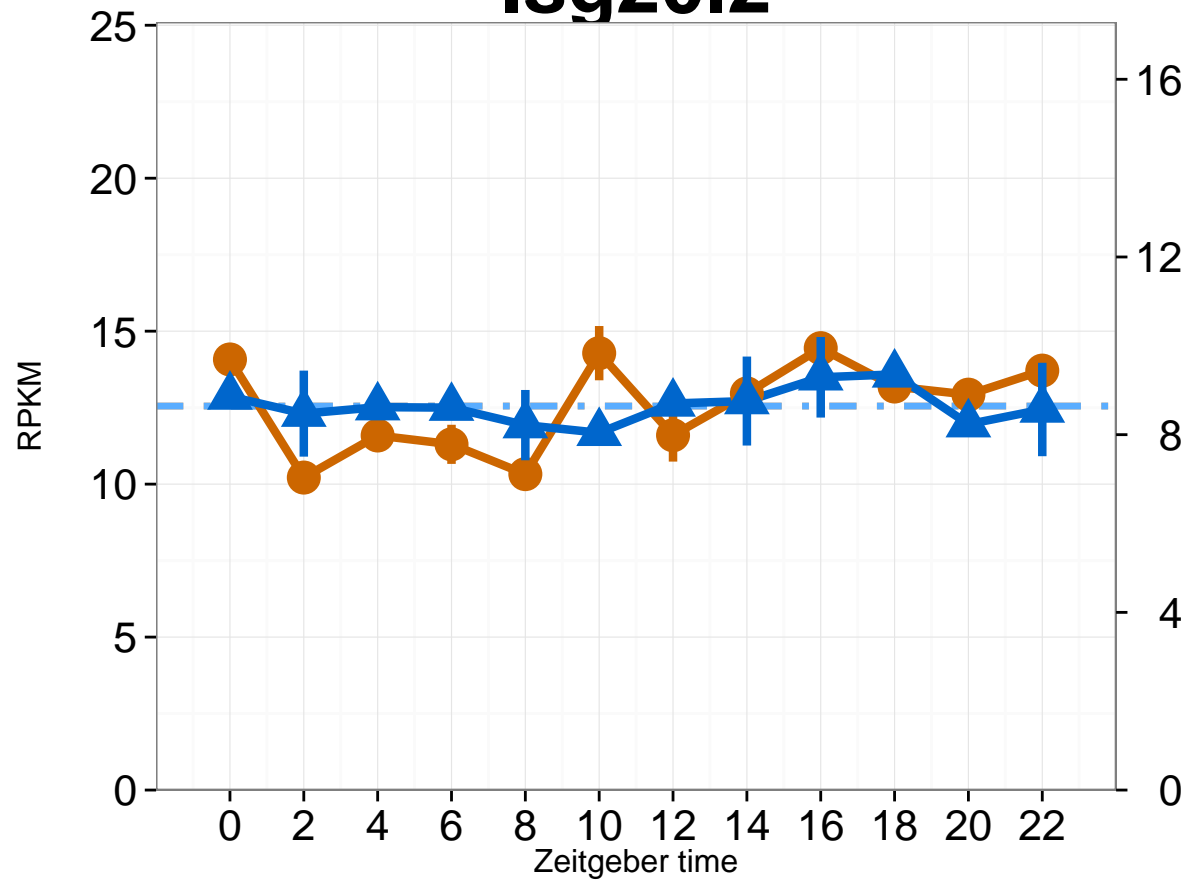

# Isg20l2

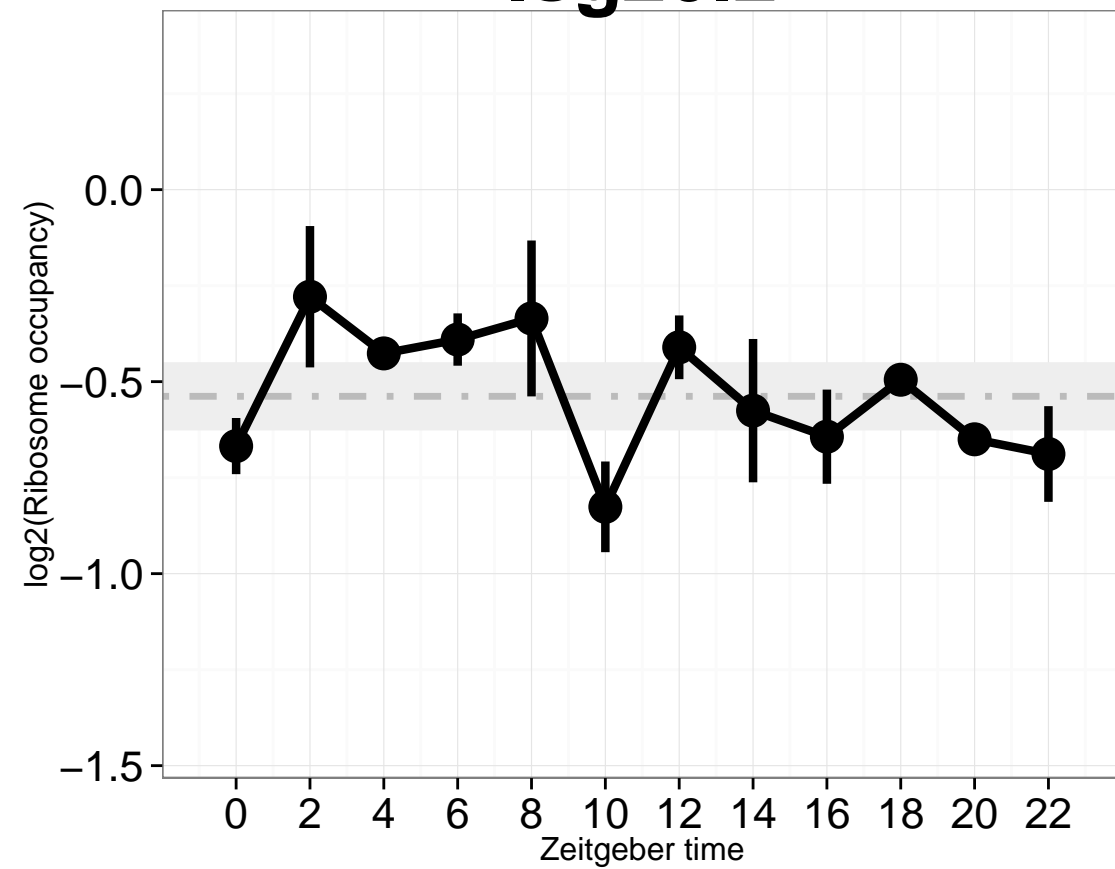

Supplement: Supplementary file 8205 [file 1]

# Igfbp6

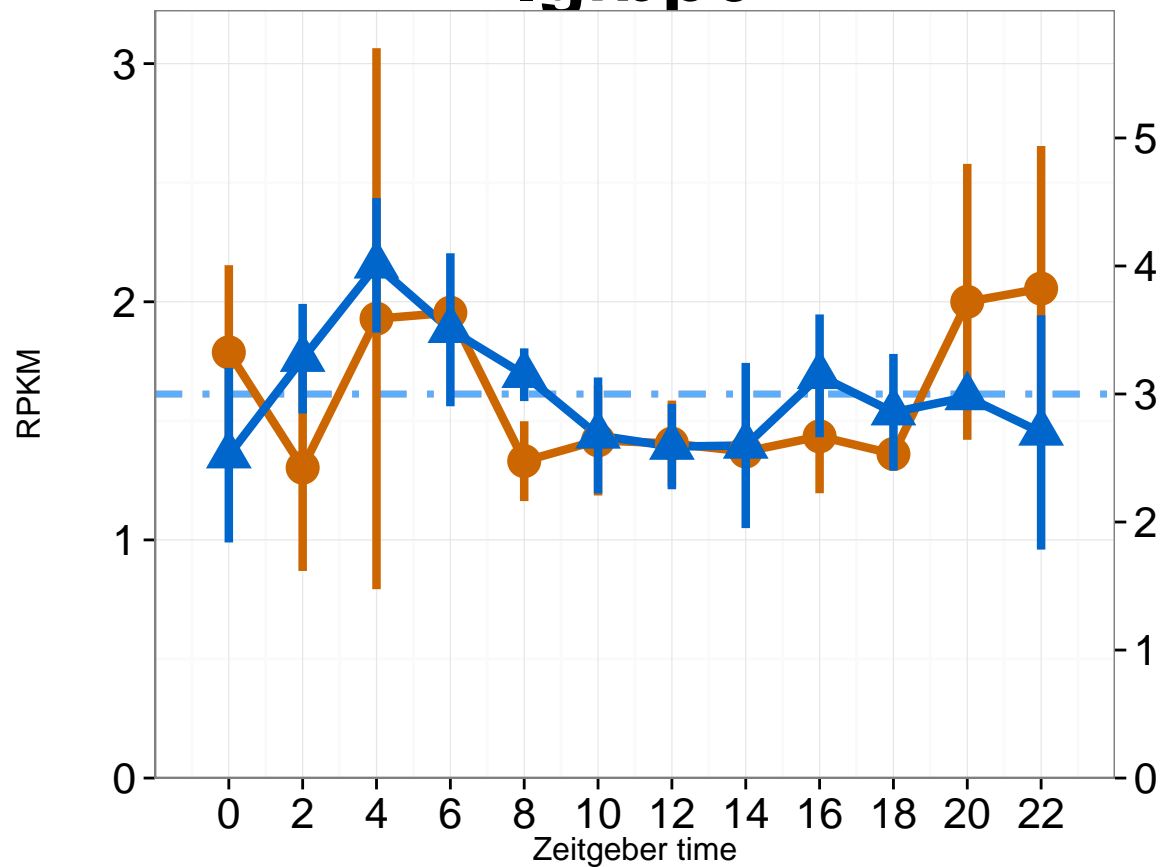

# Igfbp6

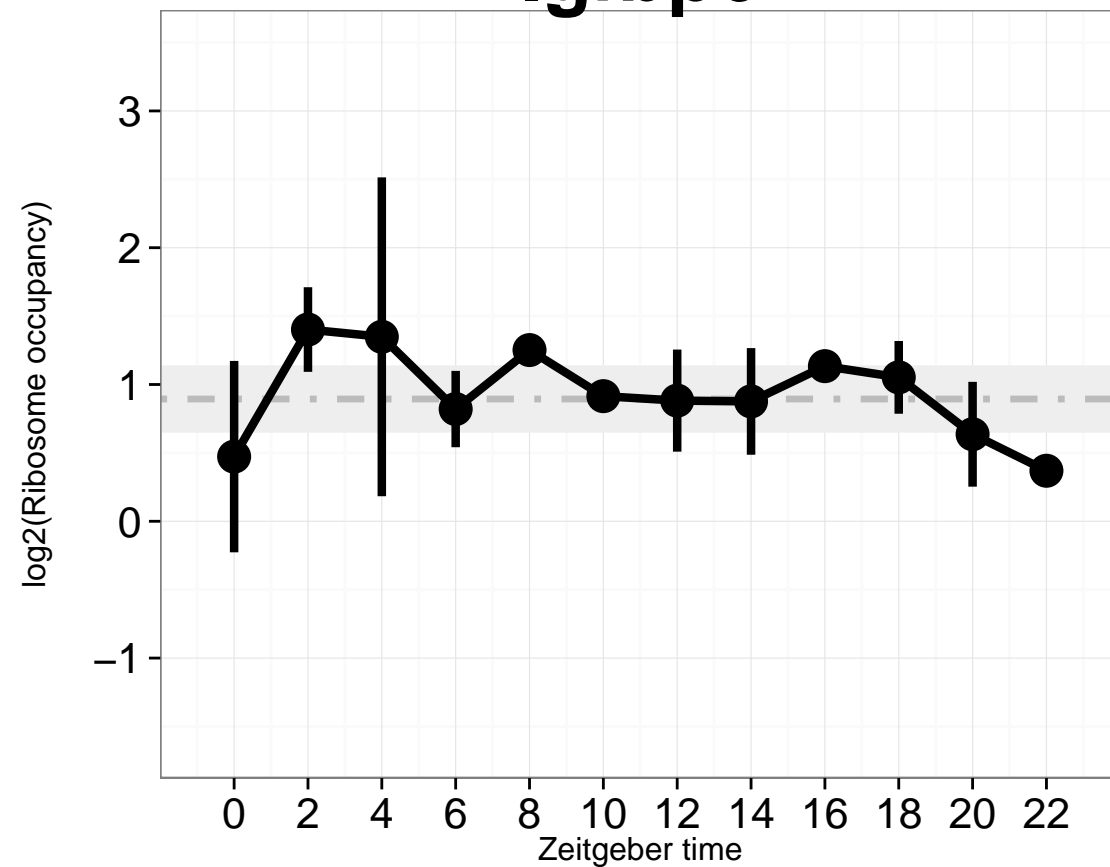

Supplement: Supplementary file 8206 [file 1]

## Me3

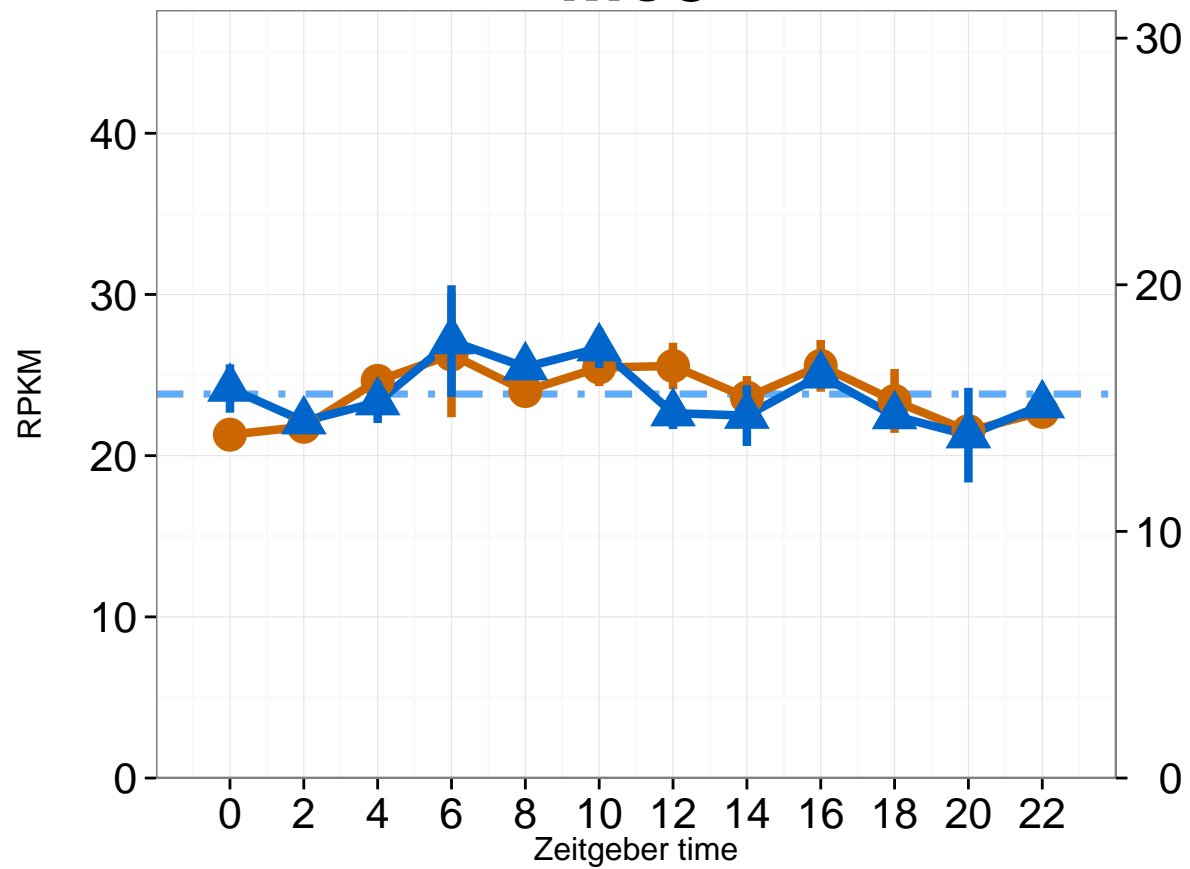

## Me3

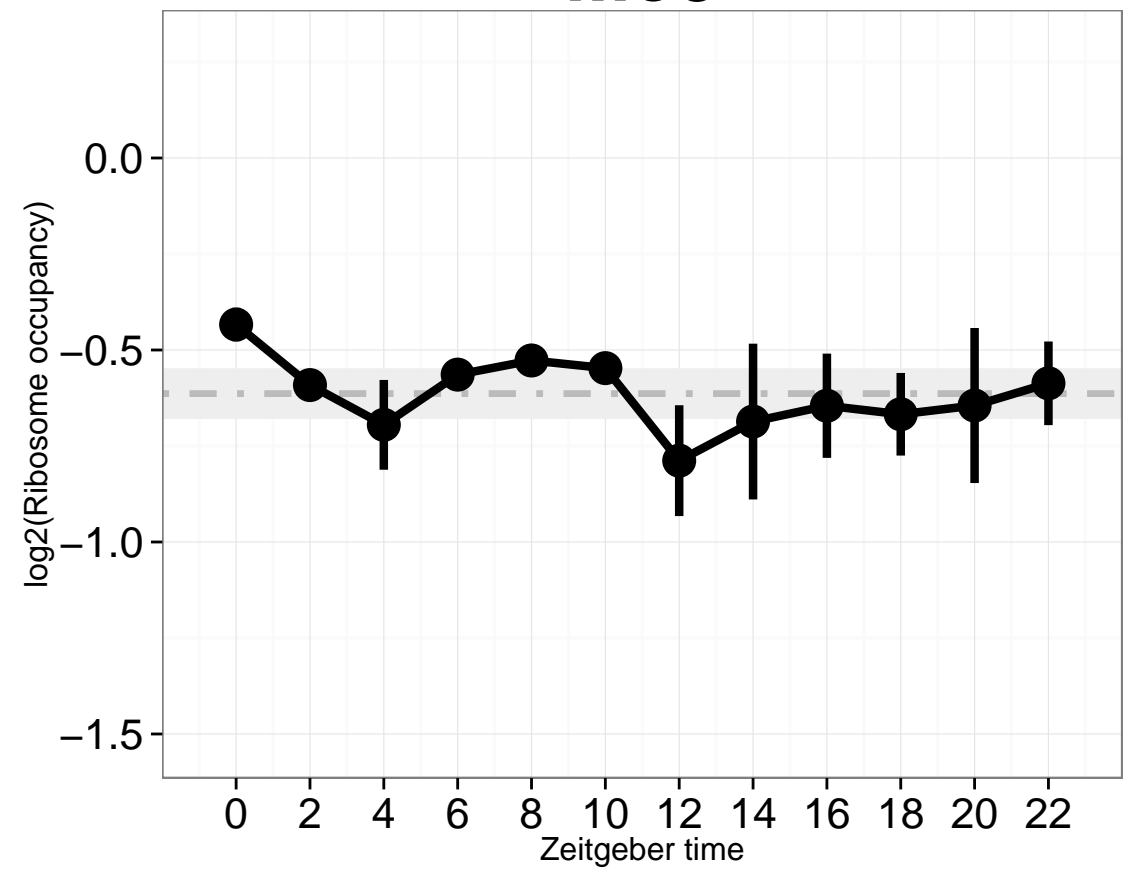

Supplement: Supplementary file 8207 [file 1]

# Timm50

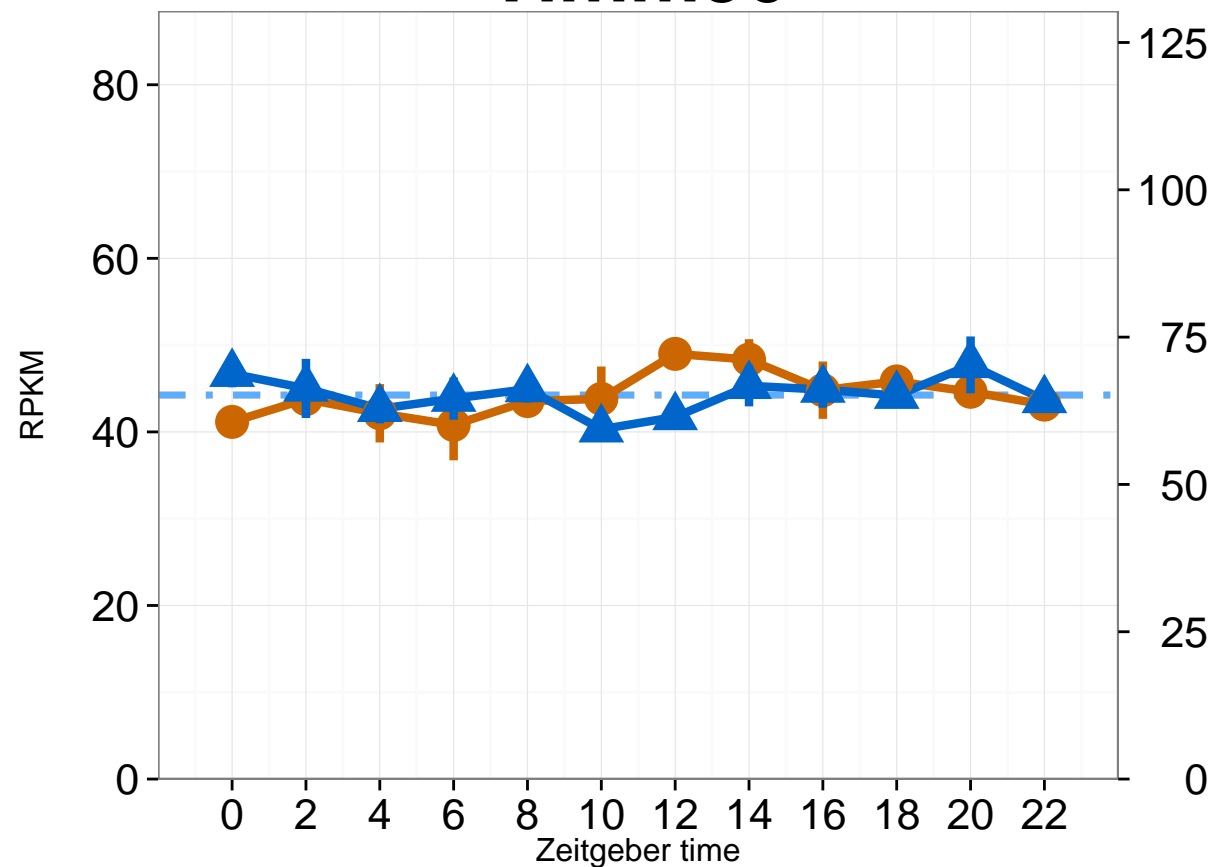

# Timm50

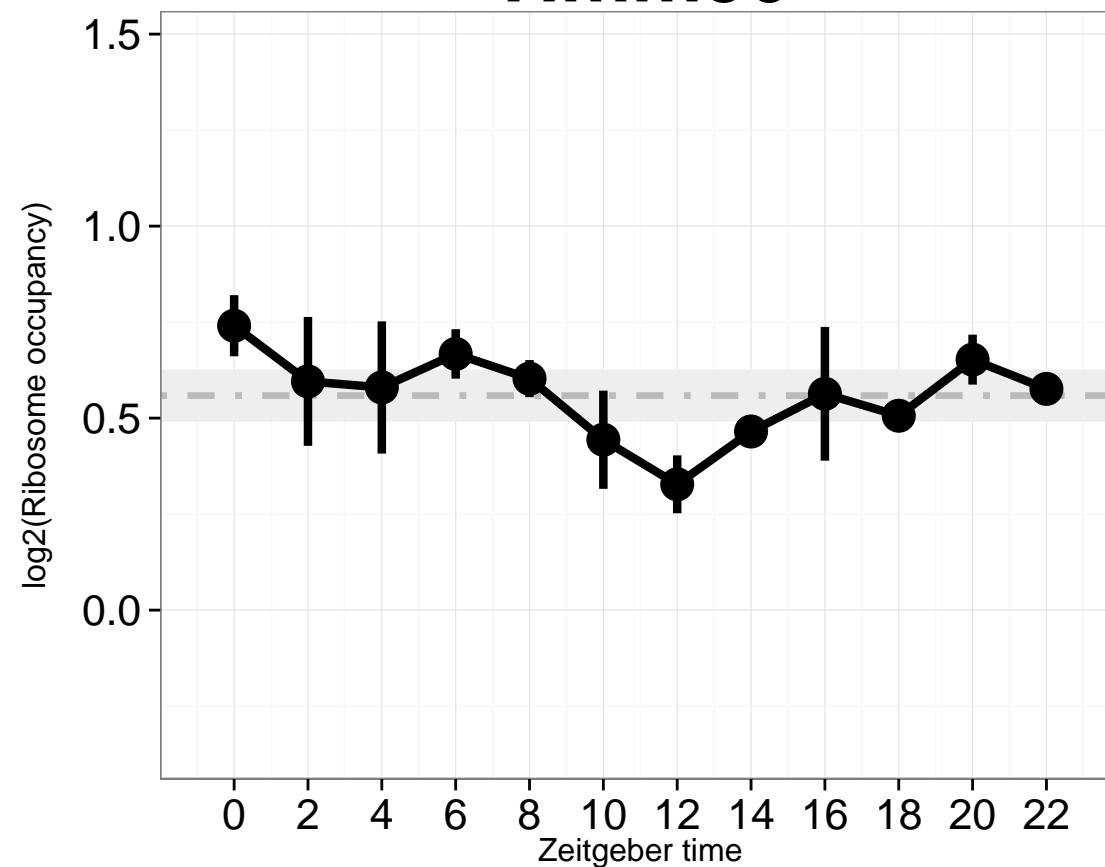

Supplement: Supplementary file 8208 [file 1]

# Tmem194b

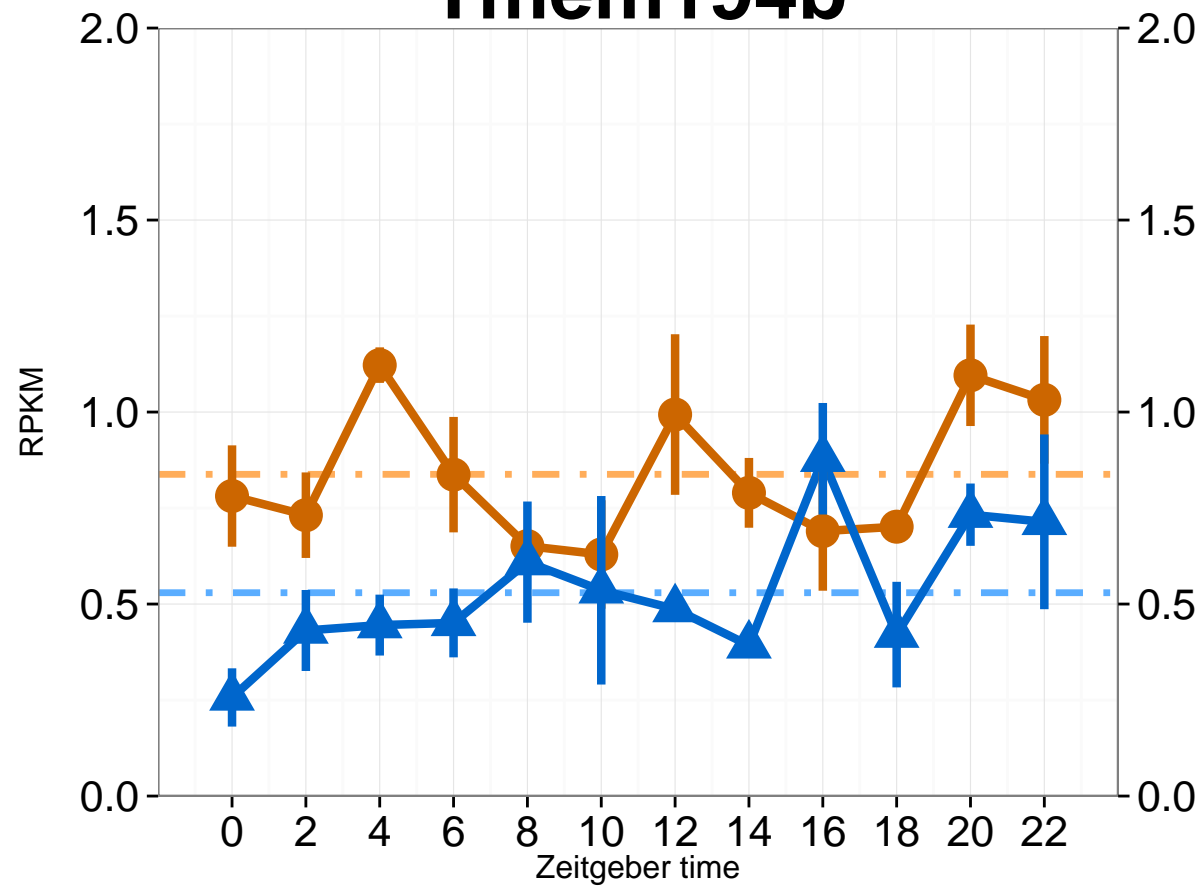

# Tmem194b

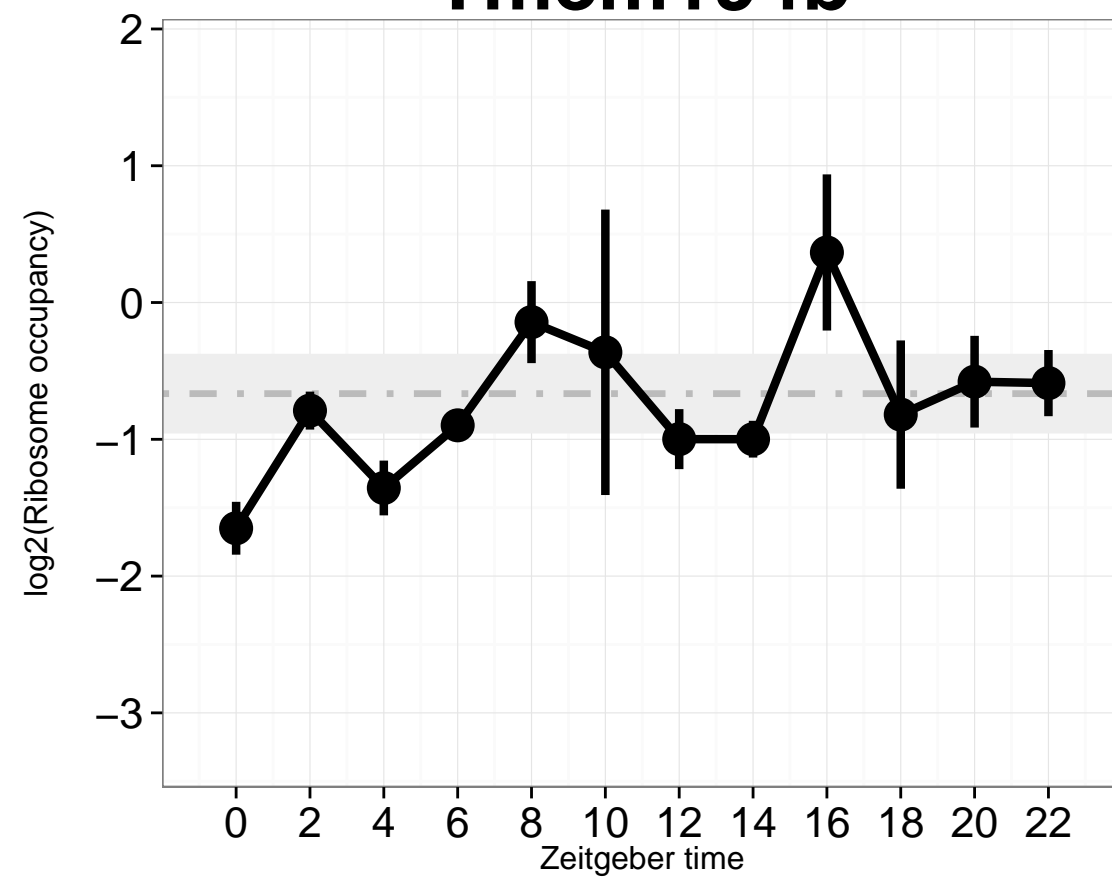

Supplement: Supplementary file 8209 [file 1]

# Rnaseh2a

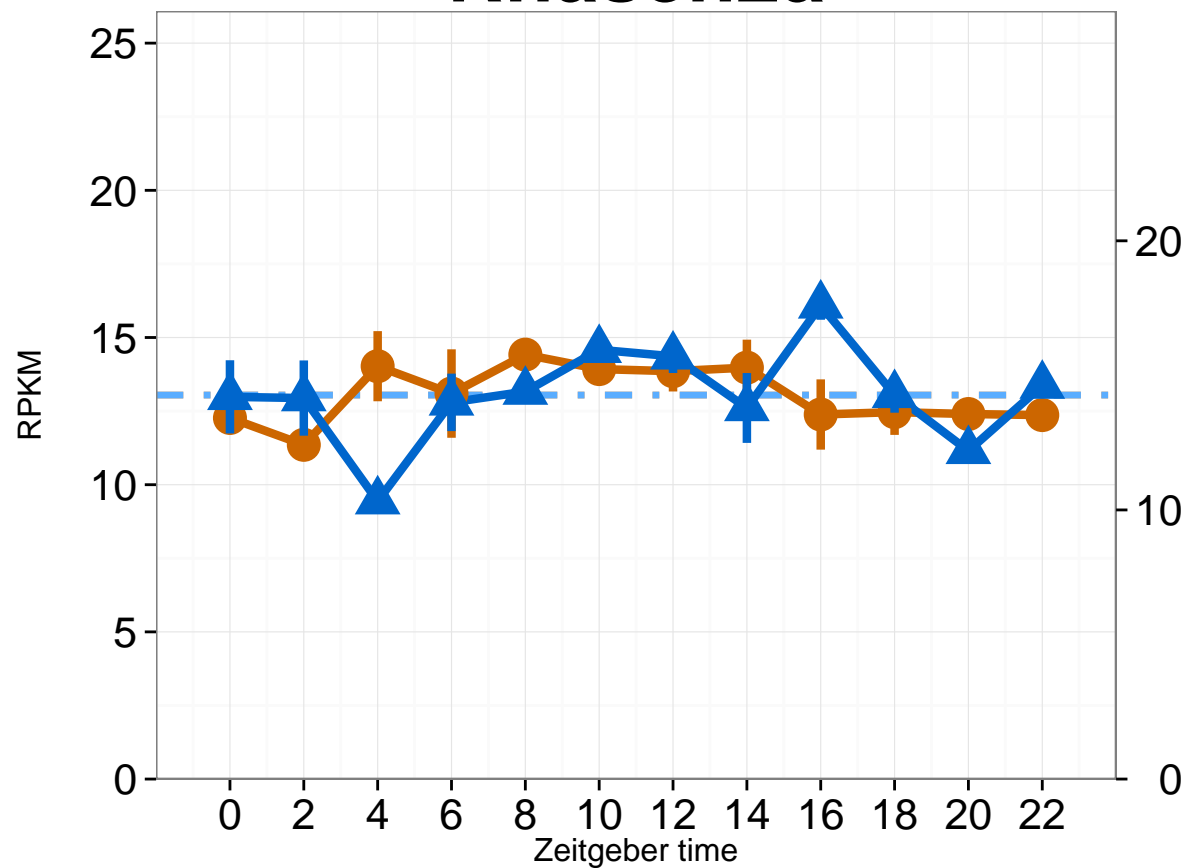

# Rnaseh2a

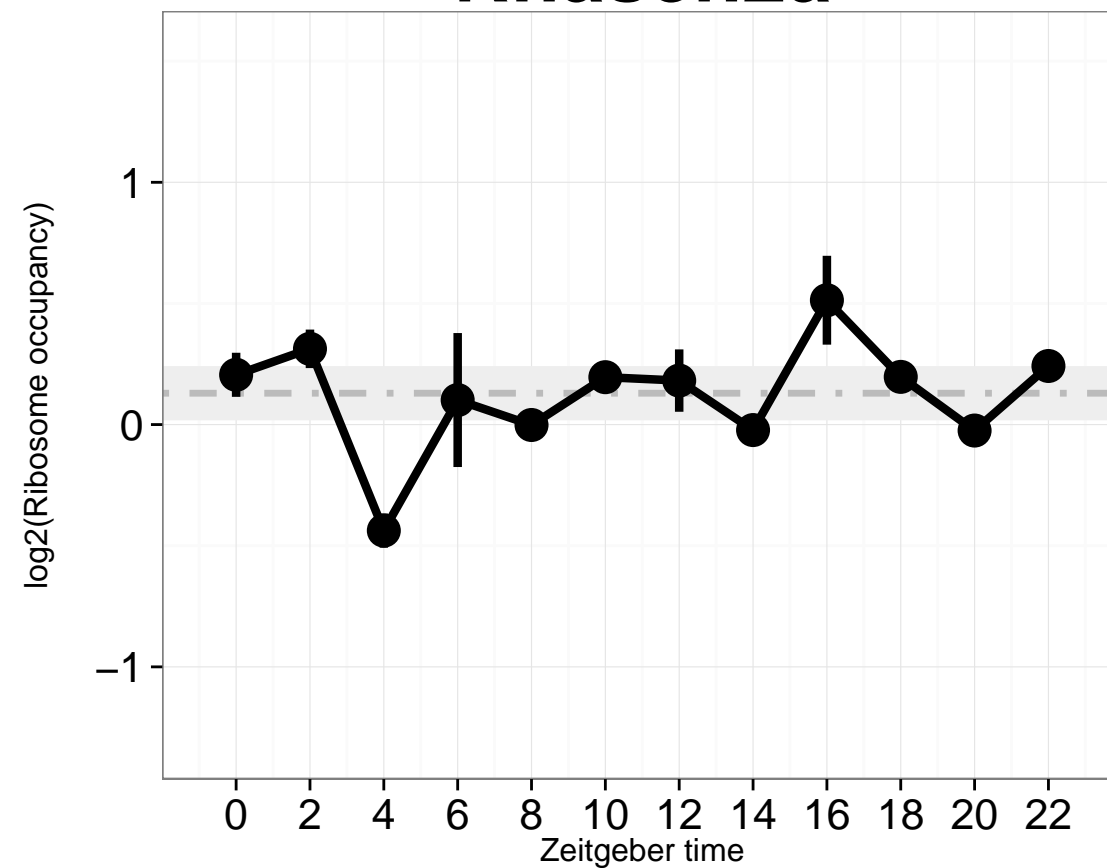

Supplement: Supplementary file 8210 [file 1]

# Car9

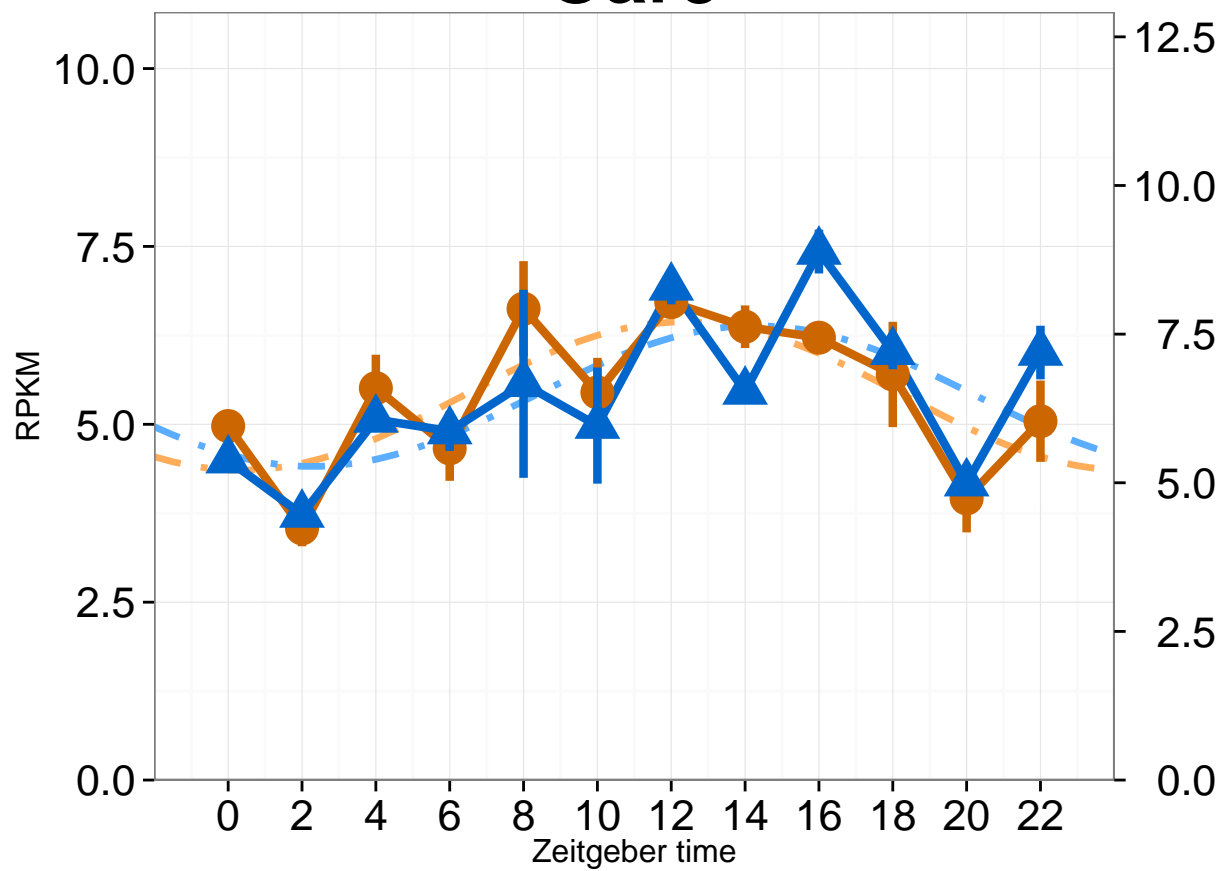

# Car9

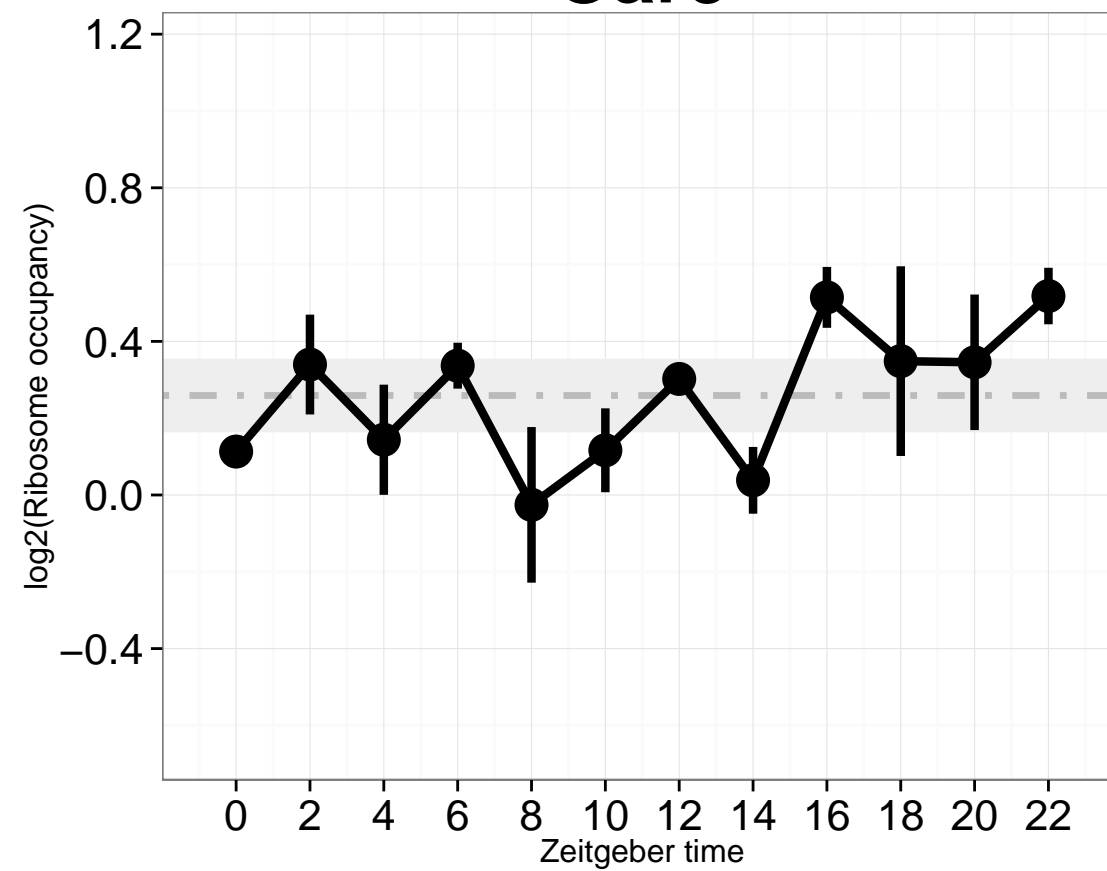

Supplement: Supplementary file 8211 [file 1]

## Tor1b

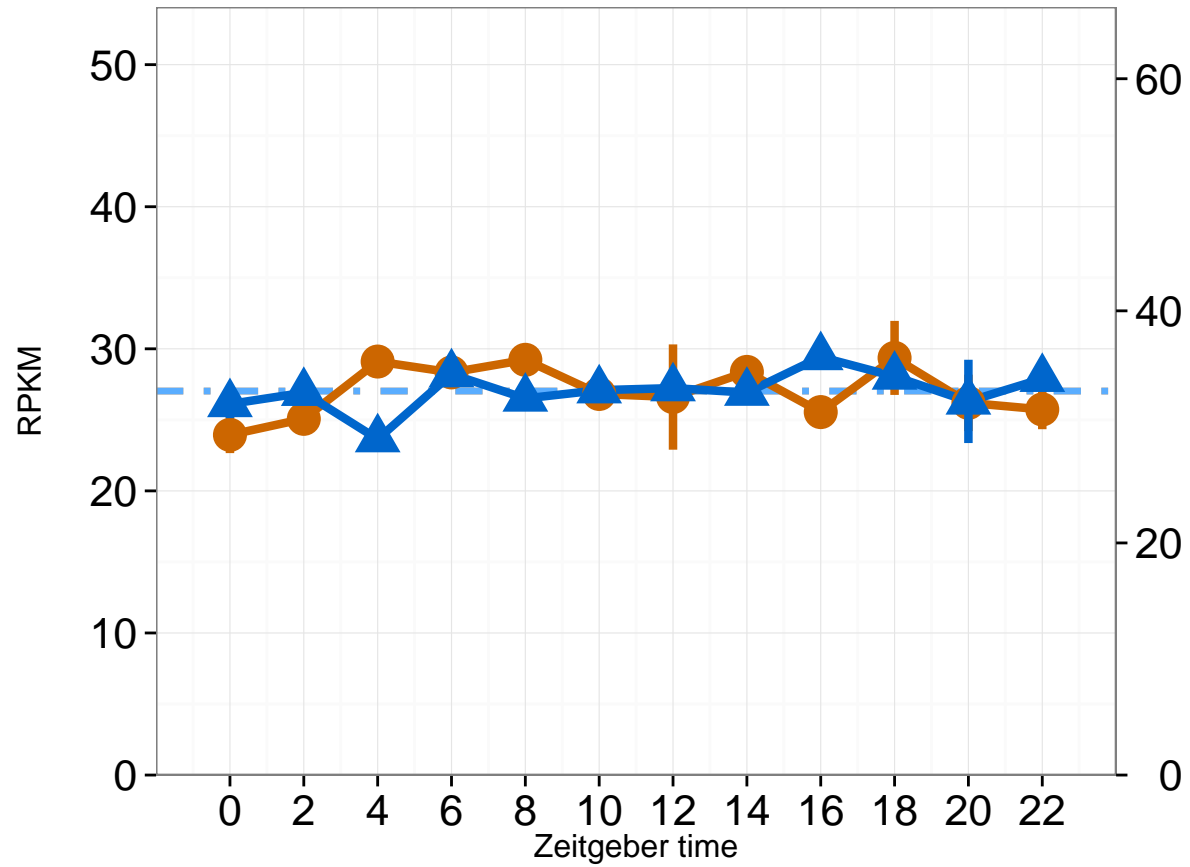

## Tor1b

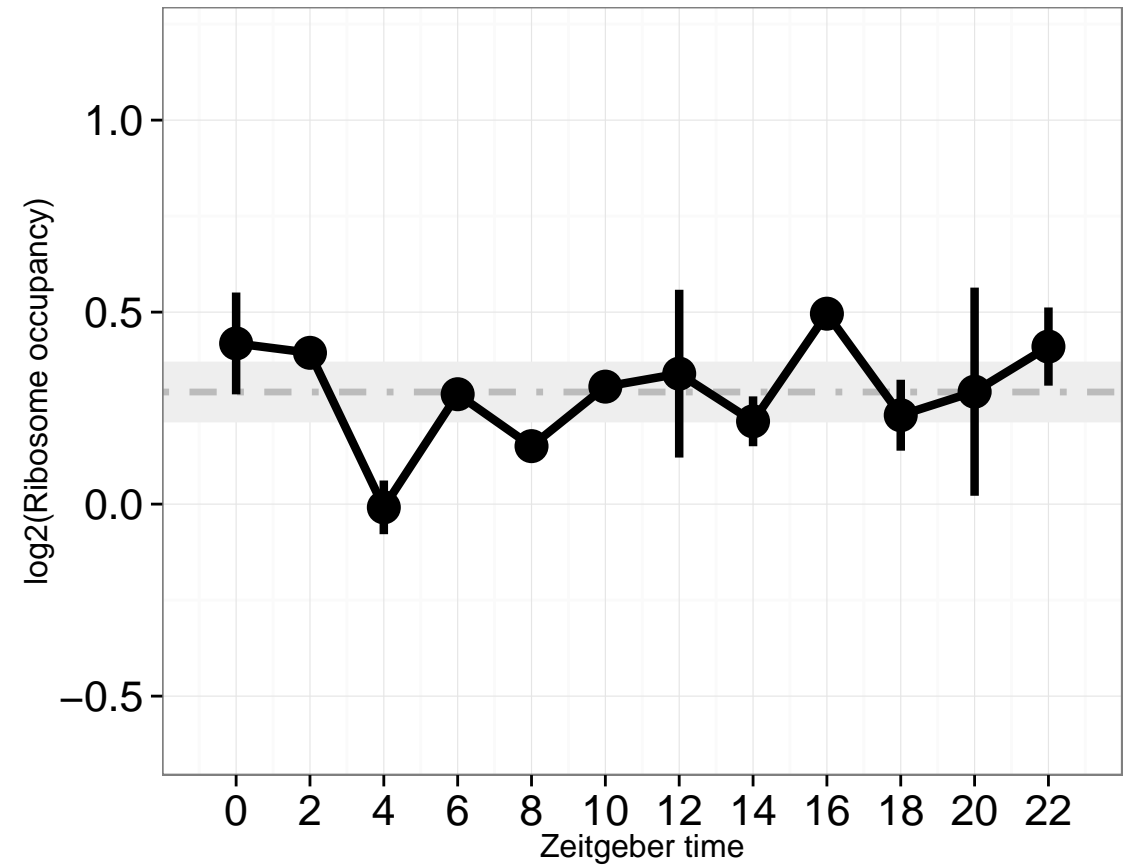

Supplement: Supplementary file 8212 [file 1]

## Kank2

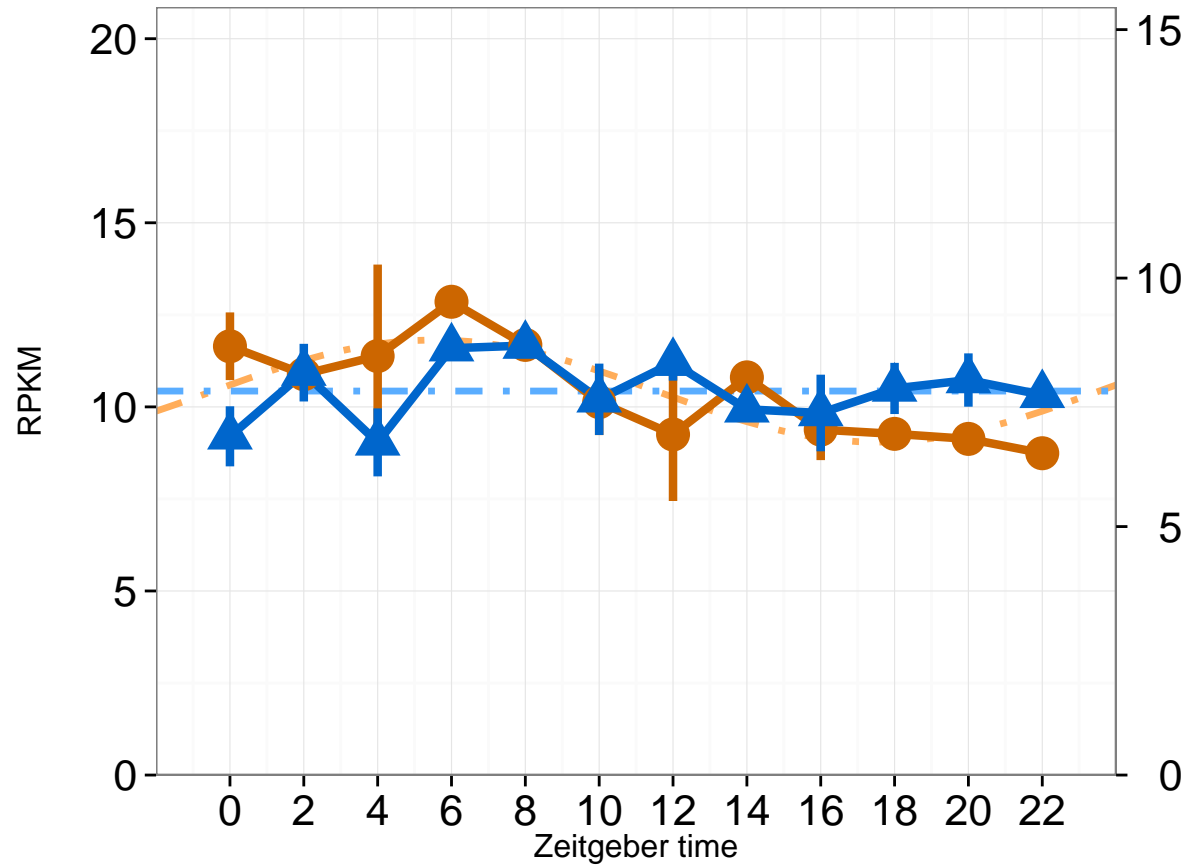

## Kank2

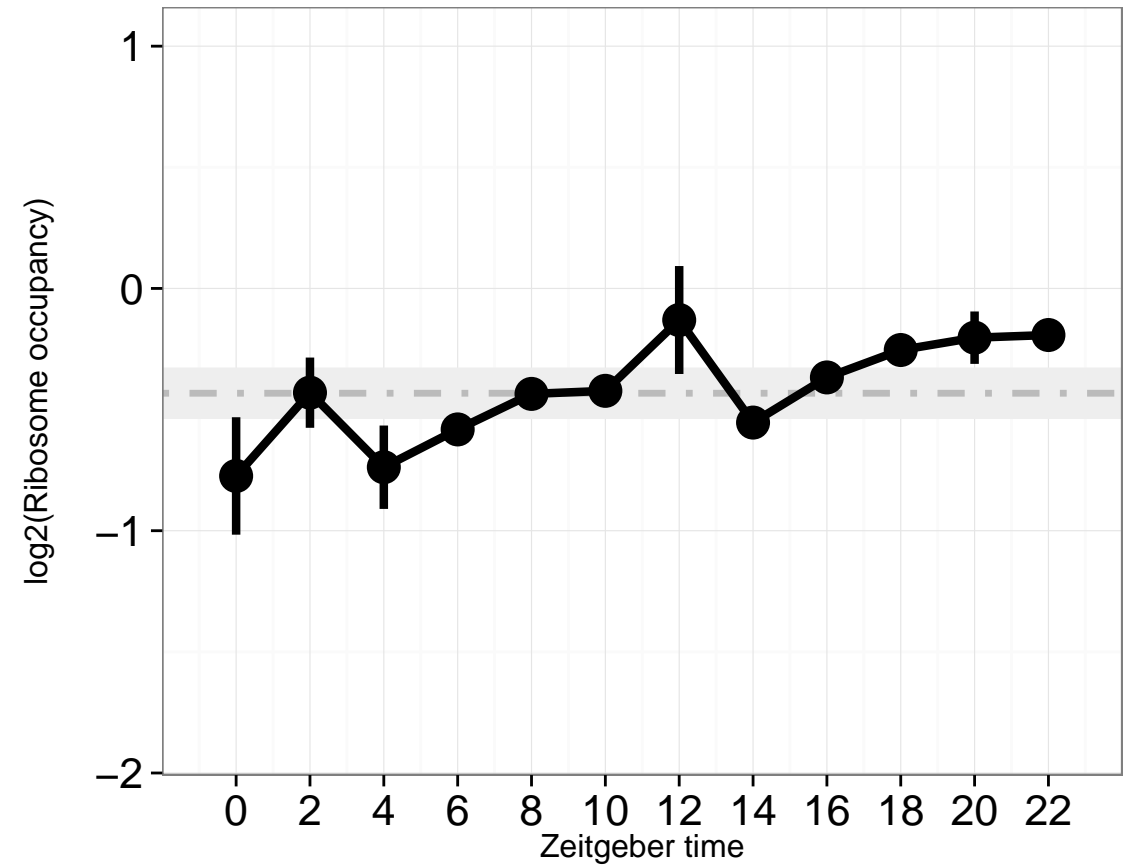

Supplement: Supplementary file 8213 [file 1]

# Trim12a

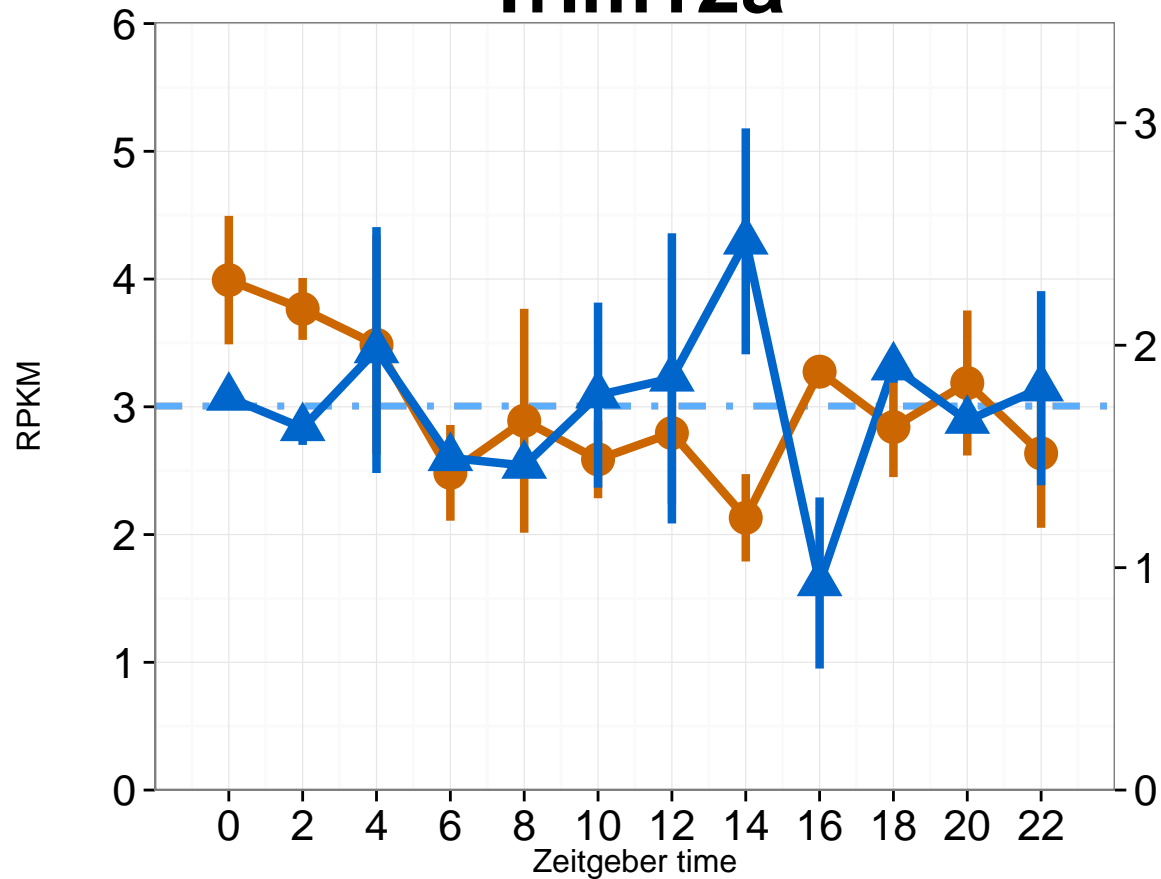

# Trim12a

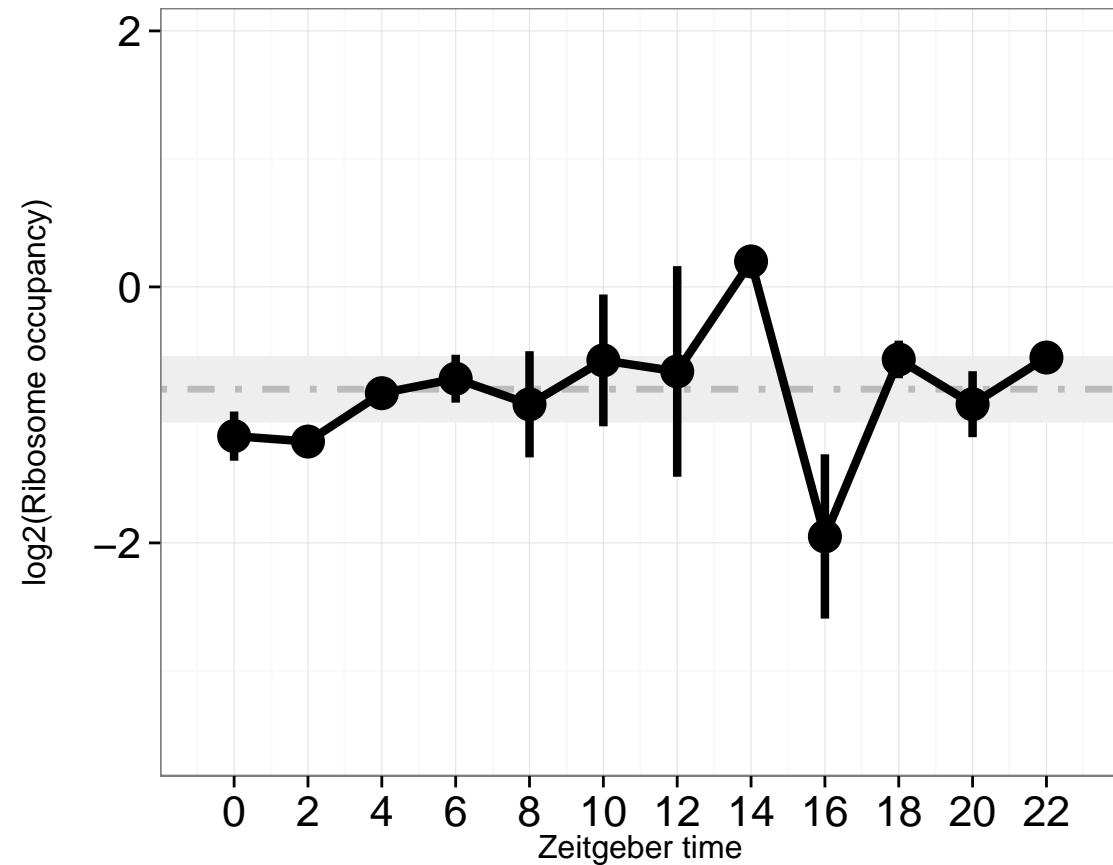

Supplement: Supplementary file 8214 [file 1]

## Psd3

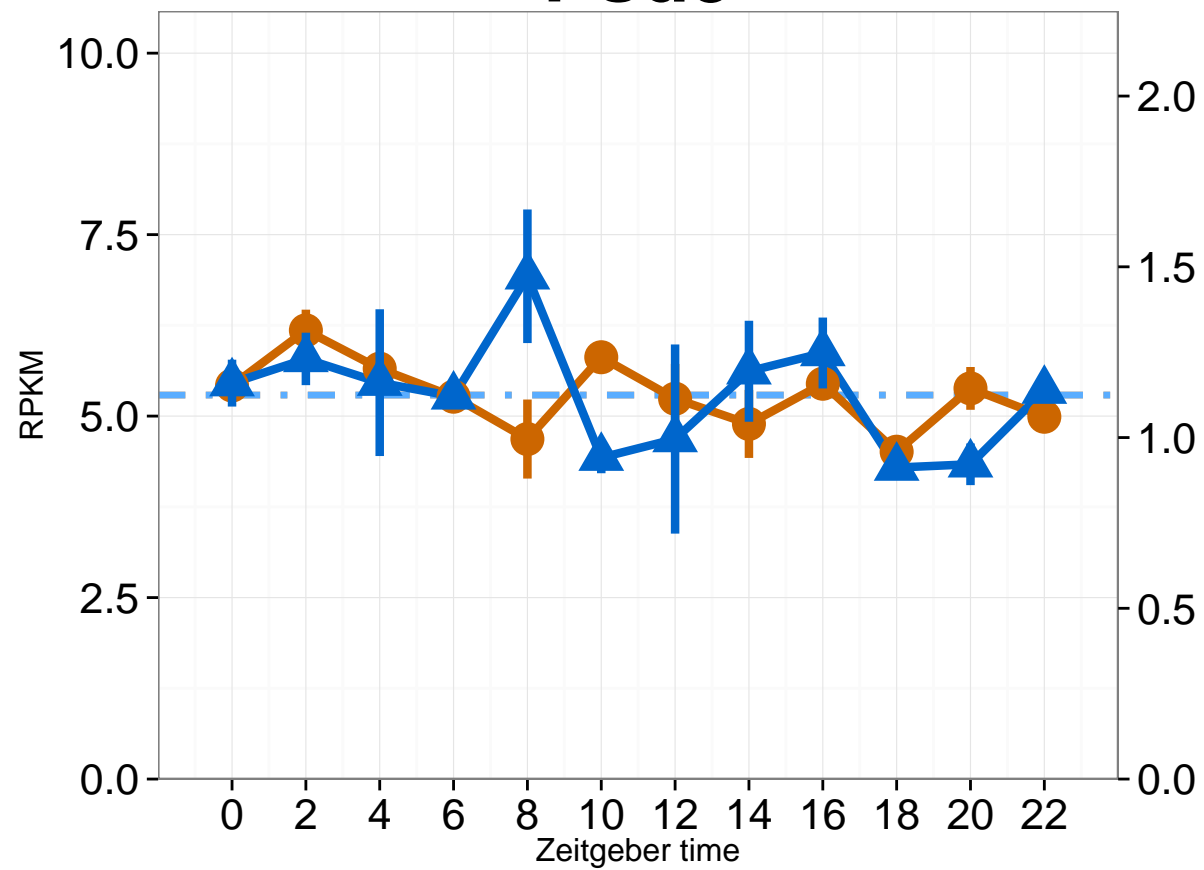

## Psd3

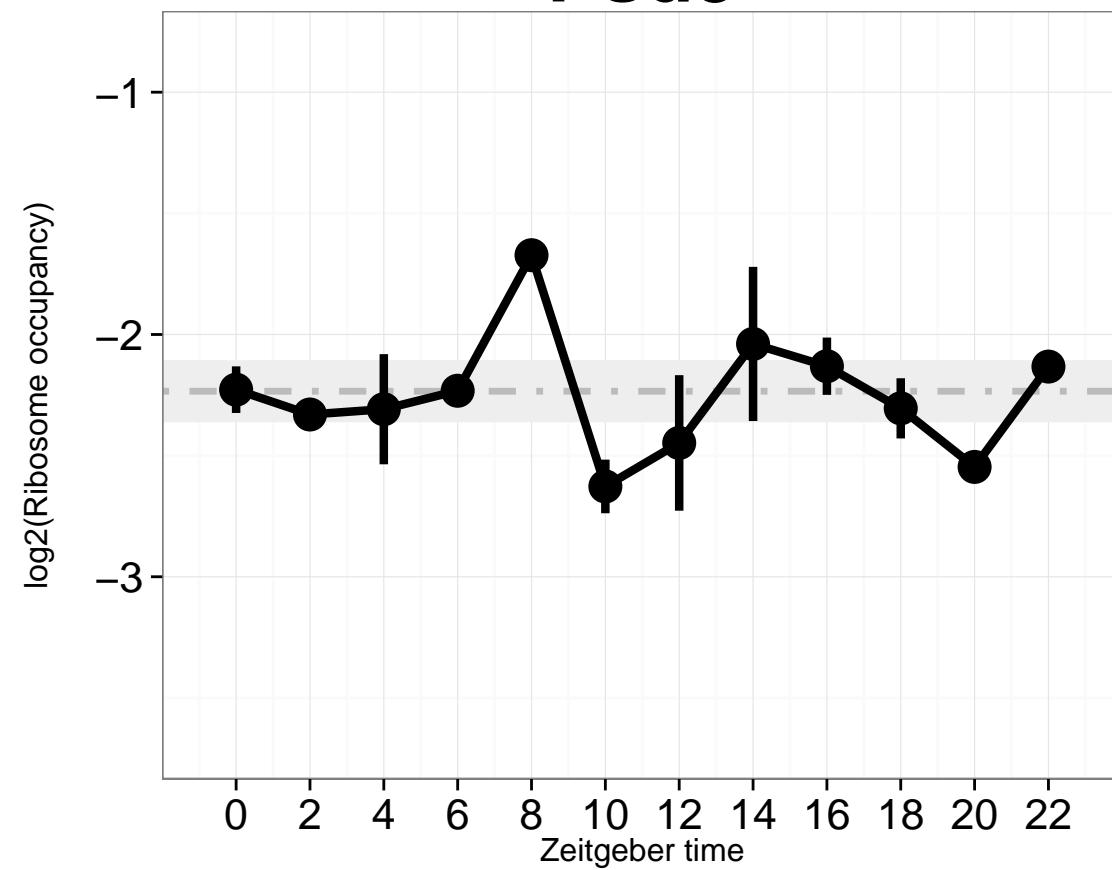

Supplement: Supplementary file 8215 [file 1]

# Sephs1

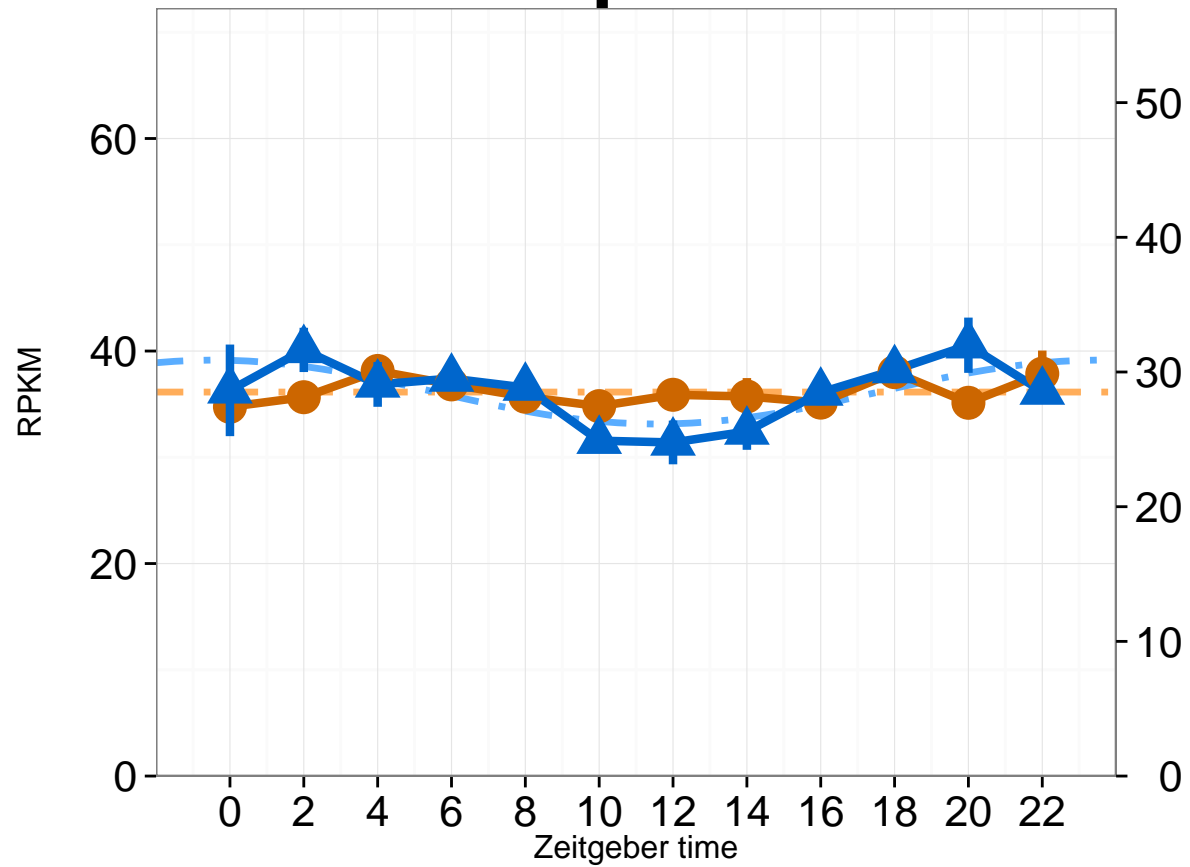

# Sephs1

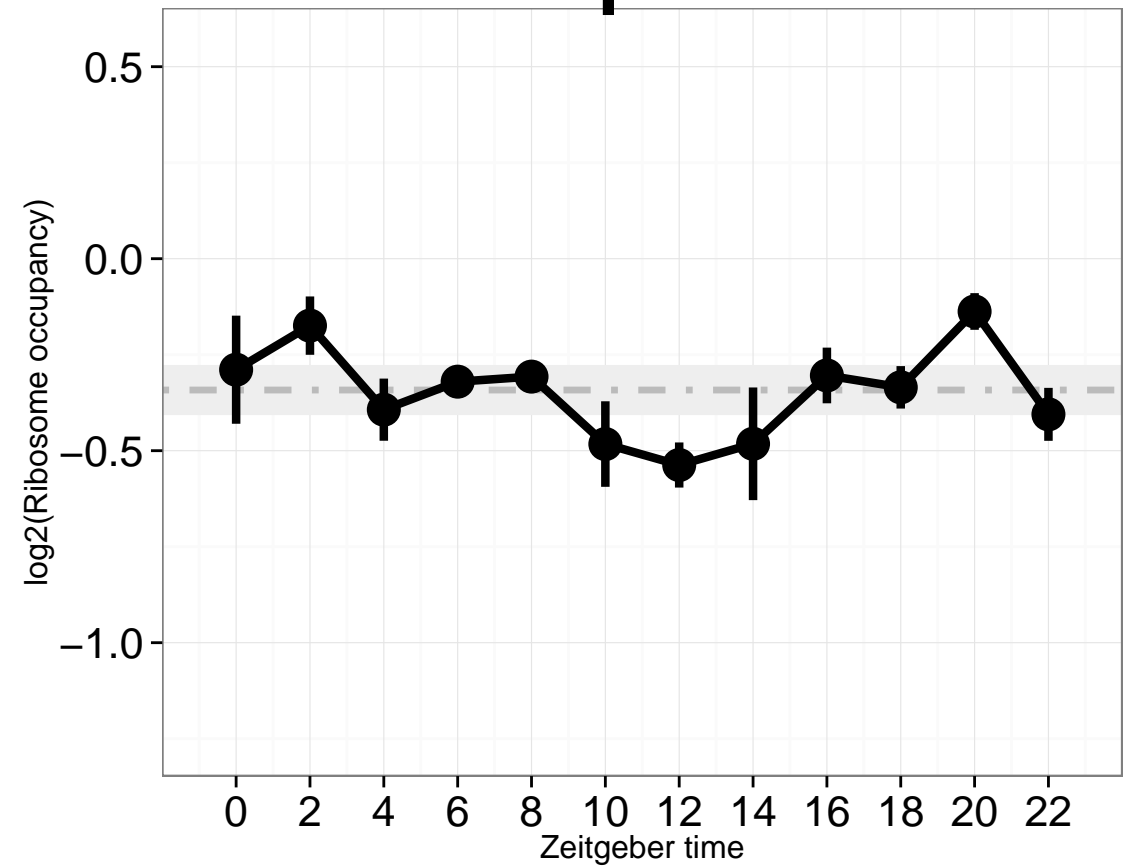

Supplement: Supplementary file 8216 [file 1]

# Ddost

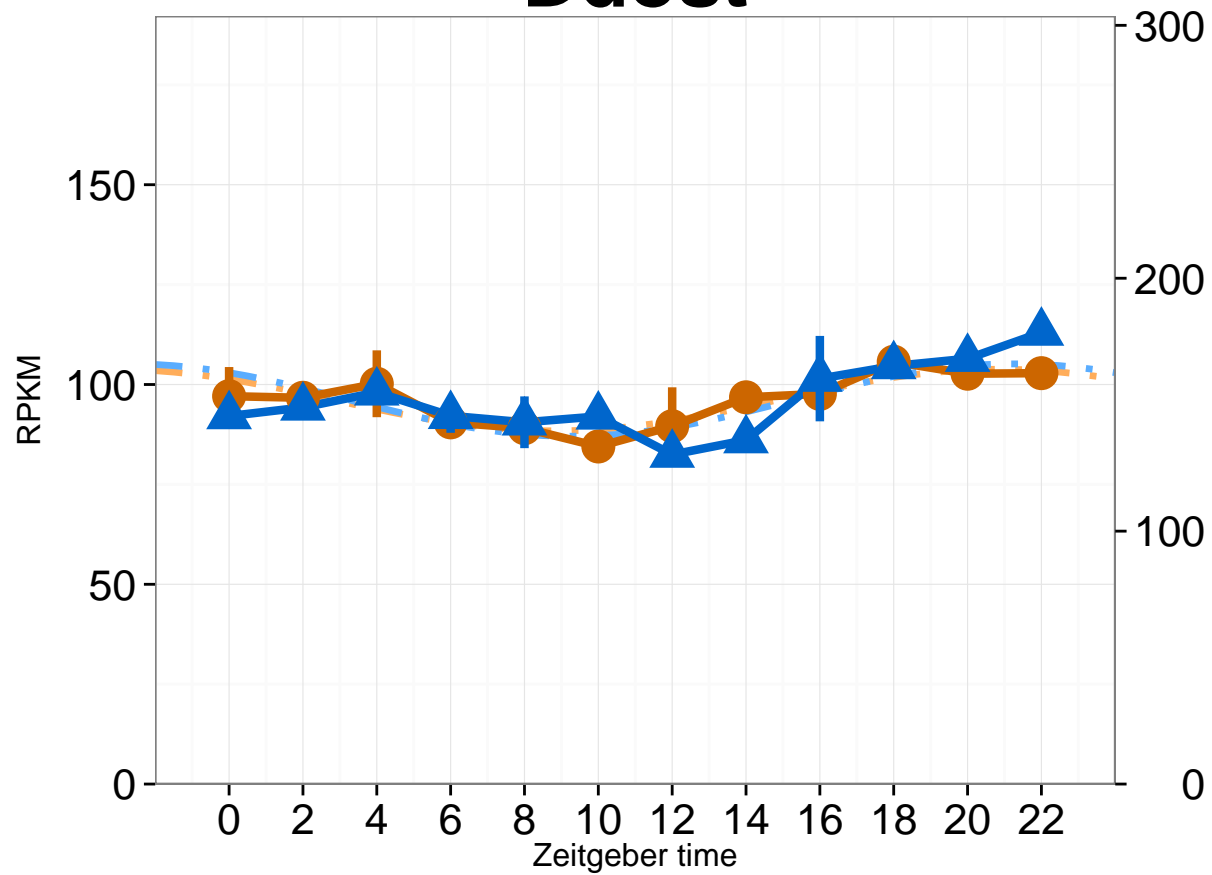

# Ddost

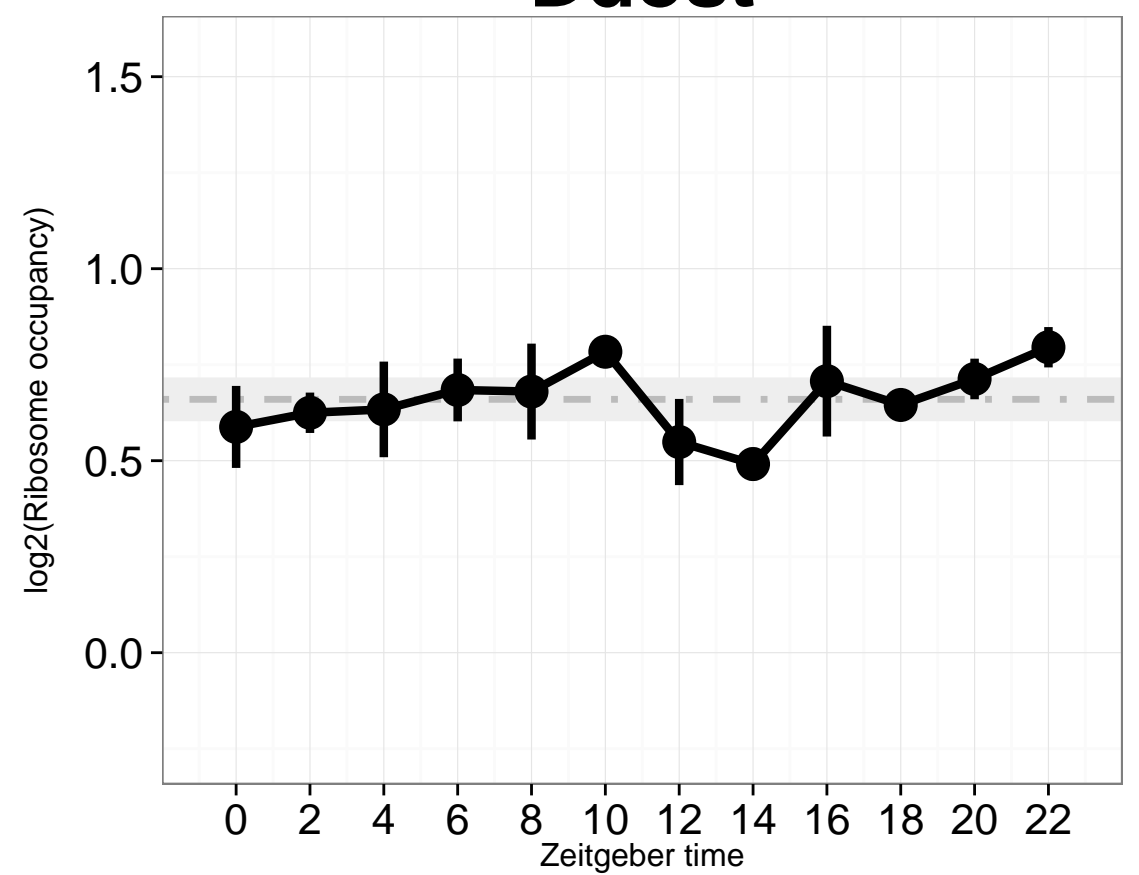

Supplement: Supplementary file 8217 [file 1]

## Rbbp7

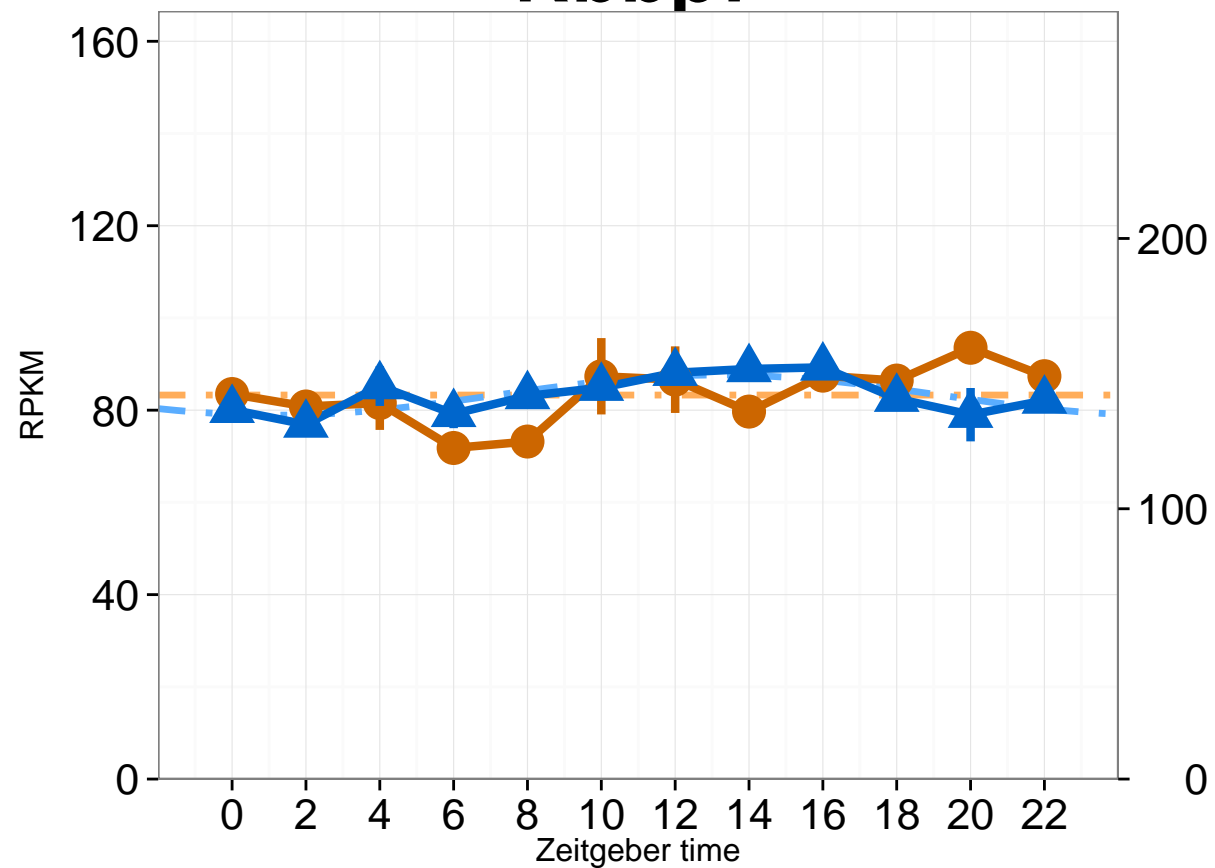

## Rbbp7

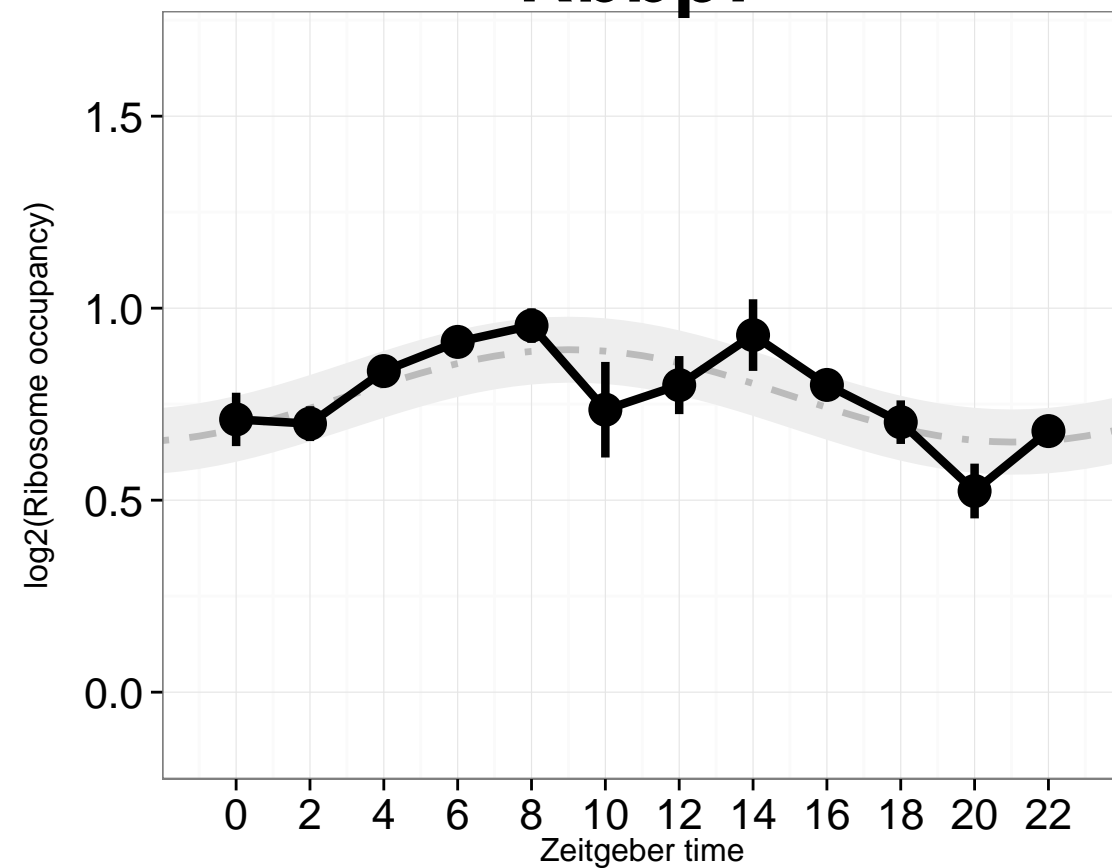

Supplement: Supplementary file 8218 [file 1]

# Cnpy2

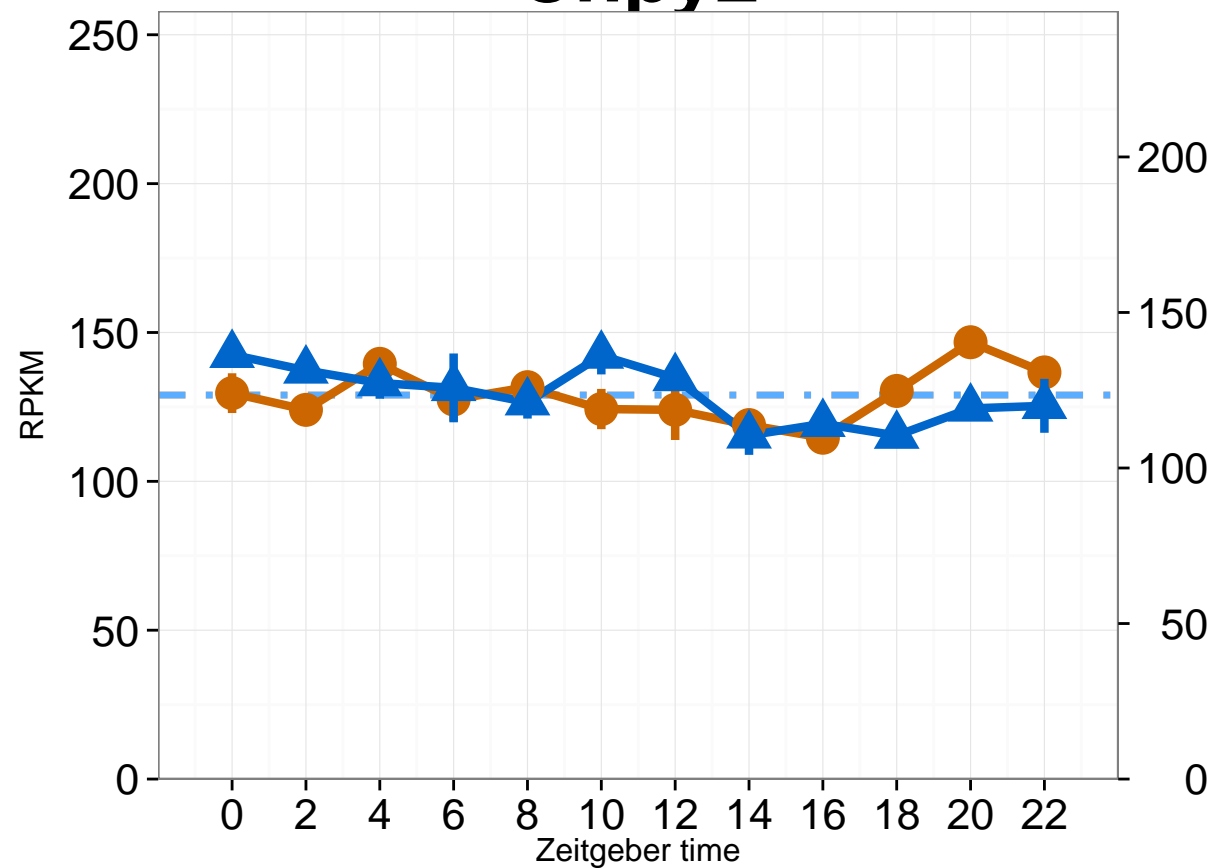

# Cnpy2

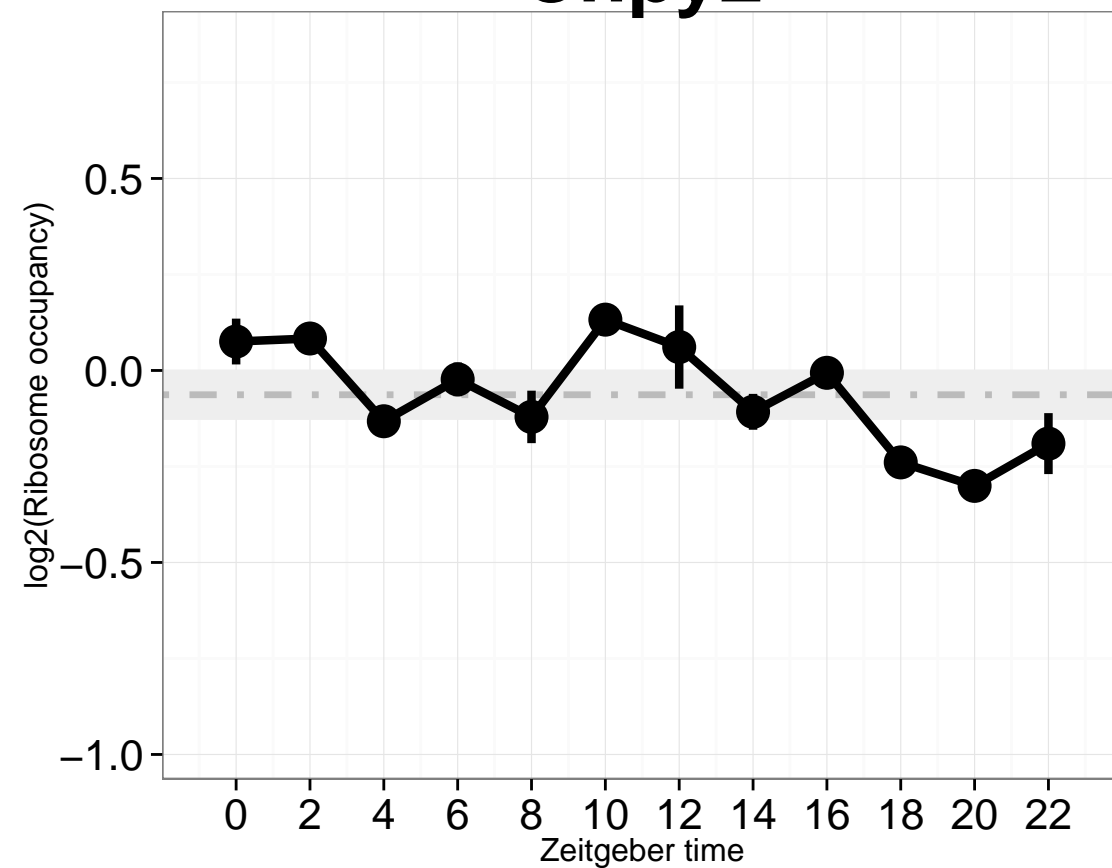

Supplement: Supplementary file 8219 [file 1]

## Med20

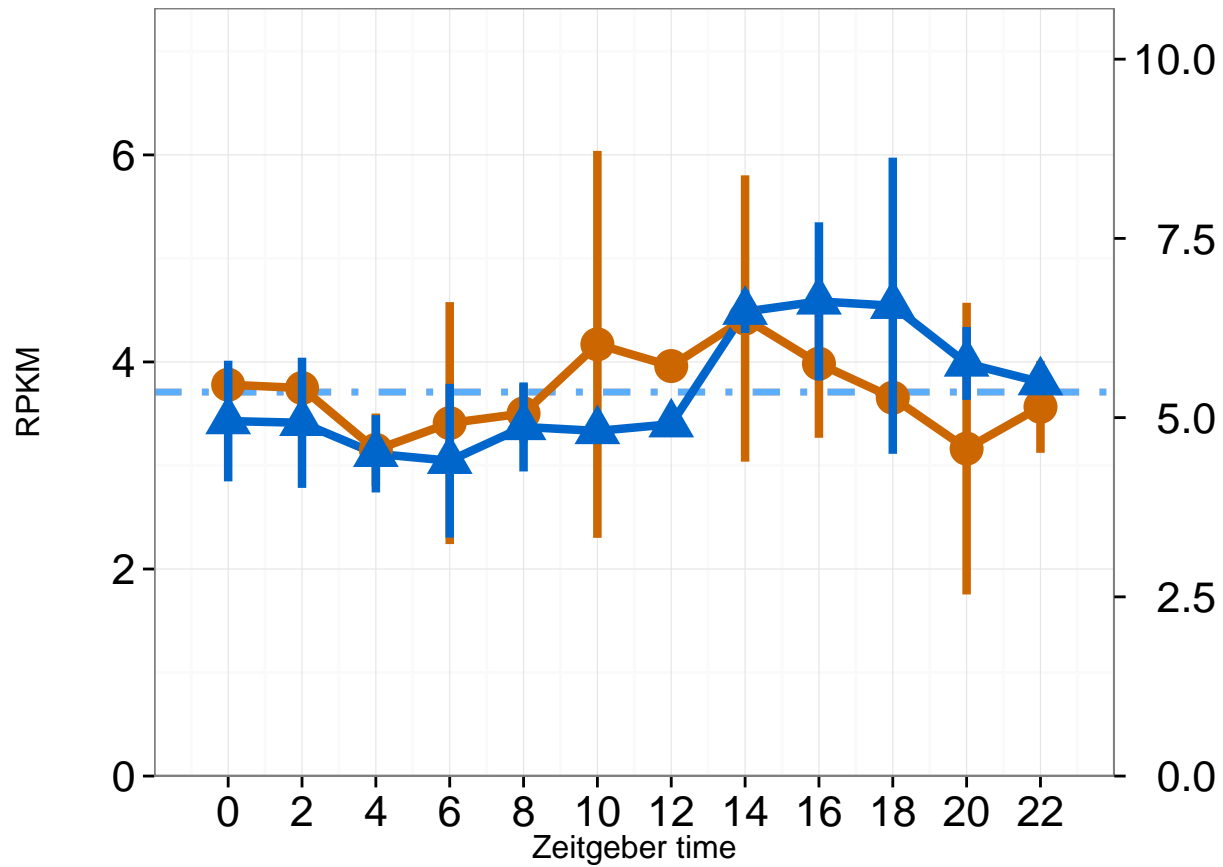

## Med20

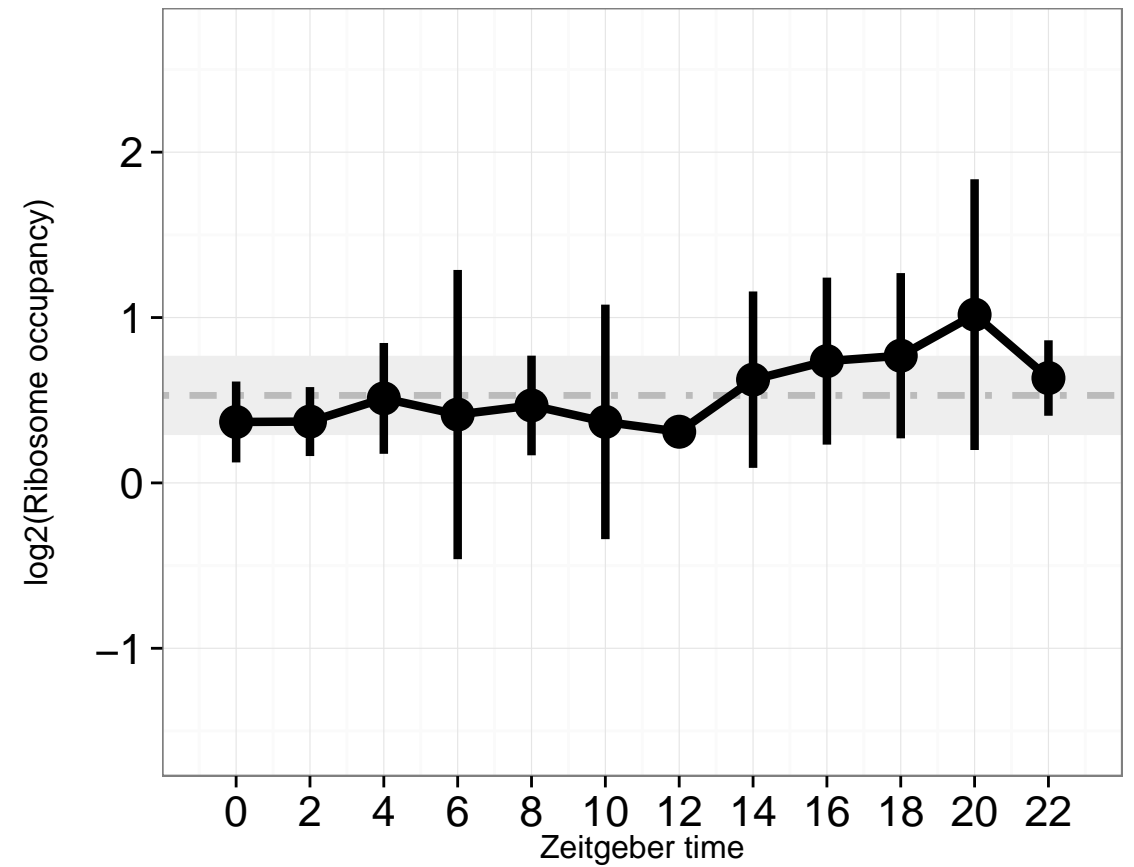

Supplement: Supplementary file 8220 [file 1]

# B3gnt1

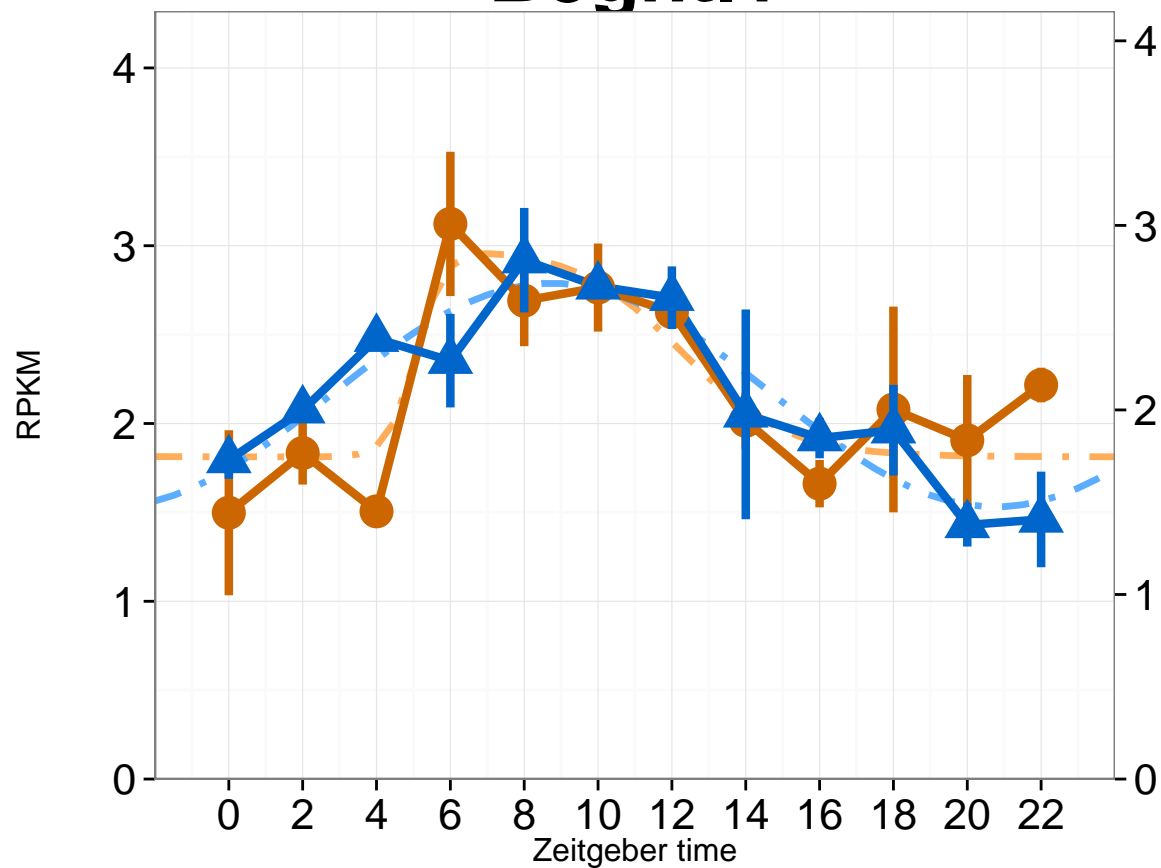

# B3gnt1

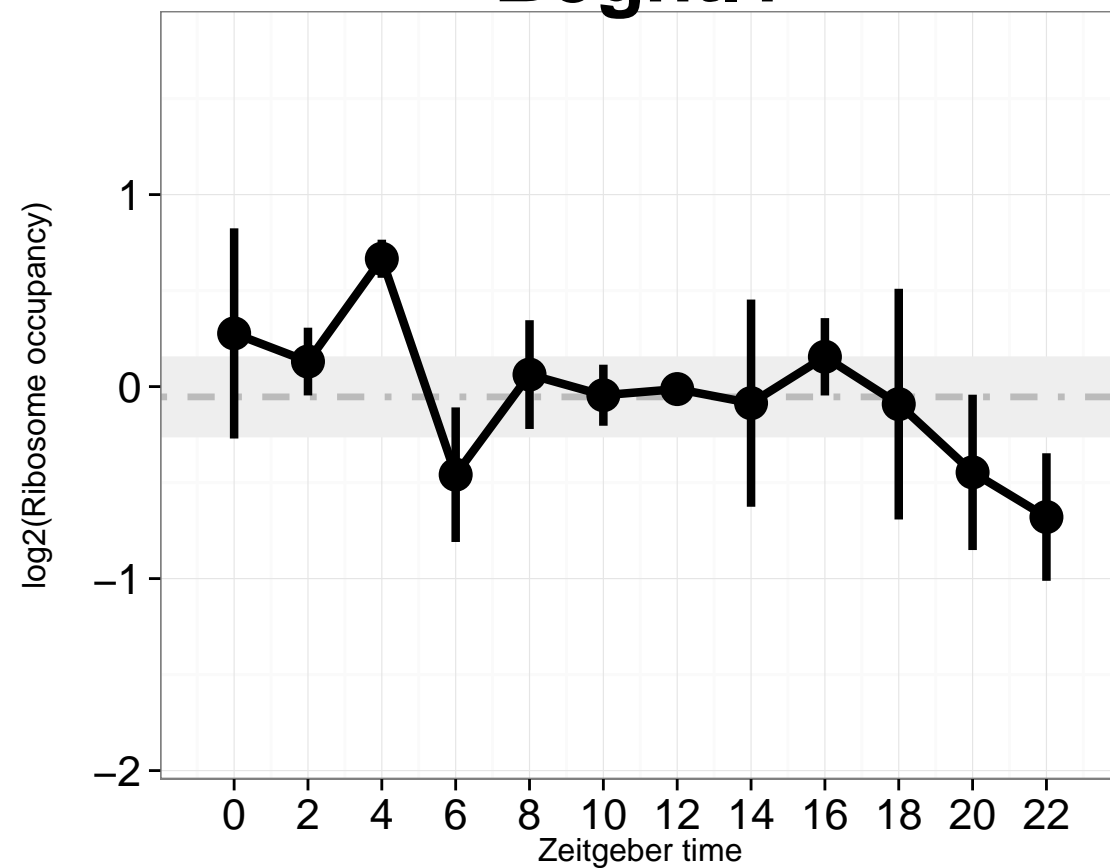

Supplement: Supplementary file 8221 [file 1]

## Acsf2

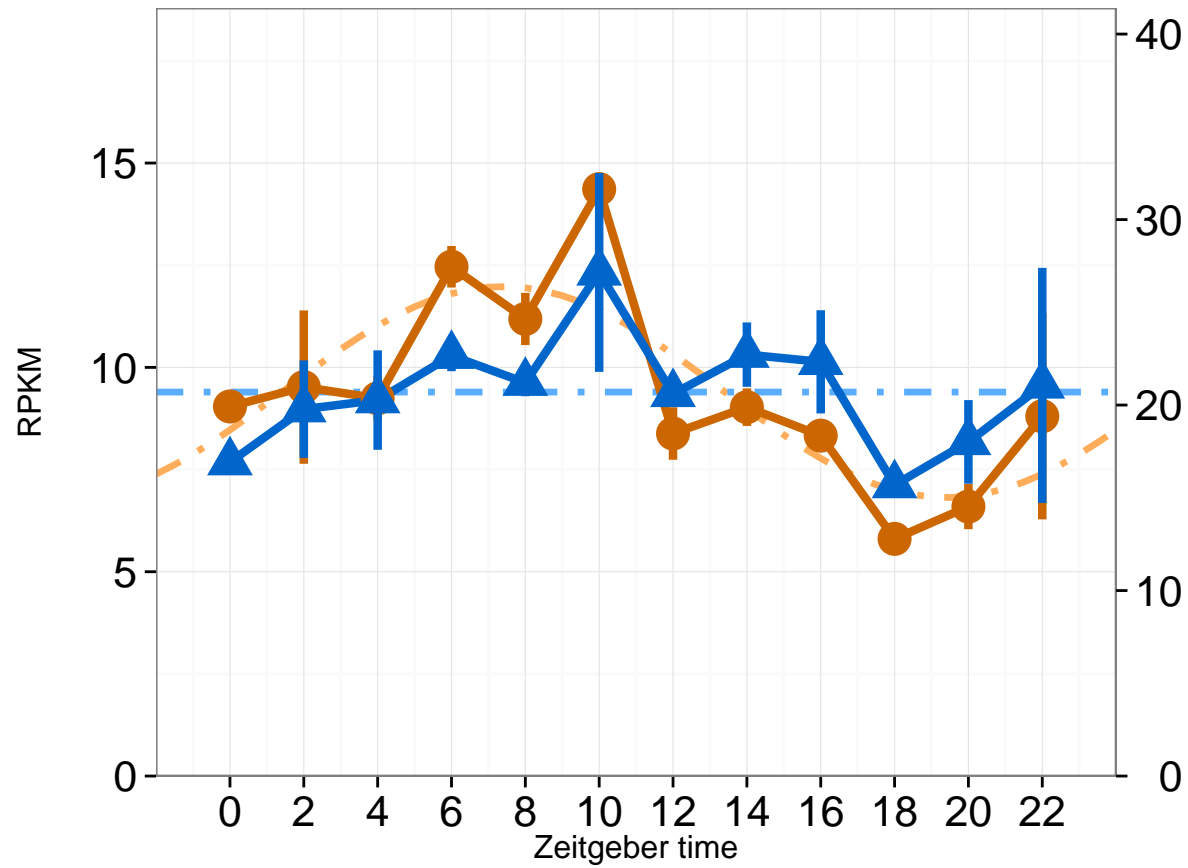

## Acsf2

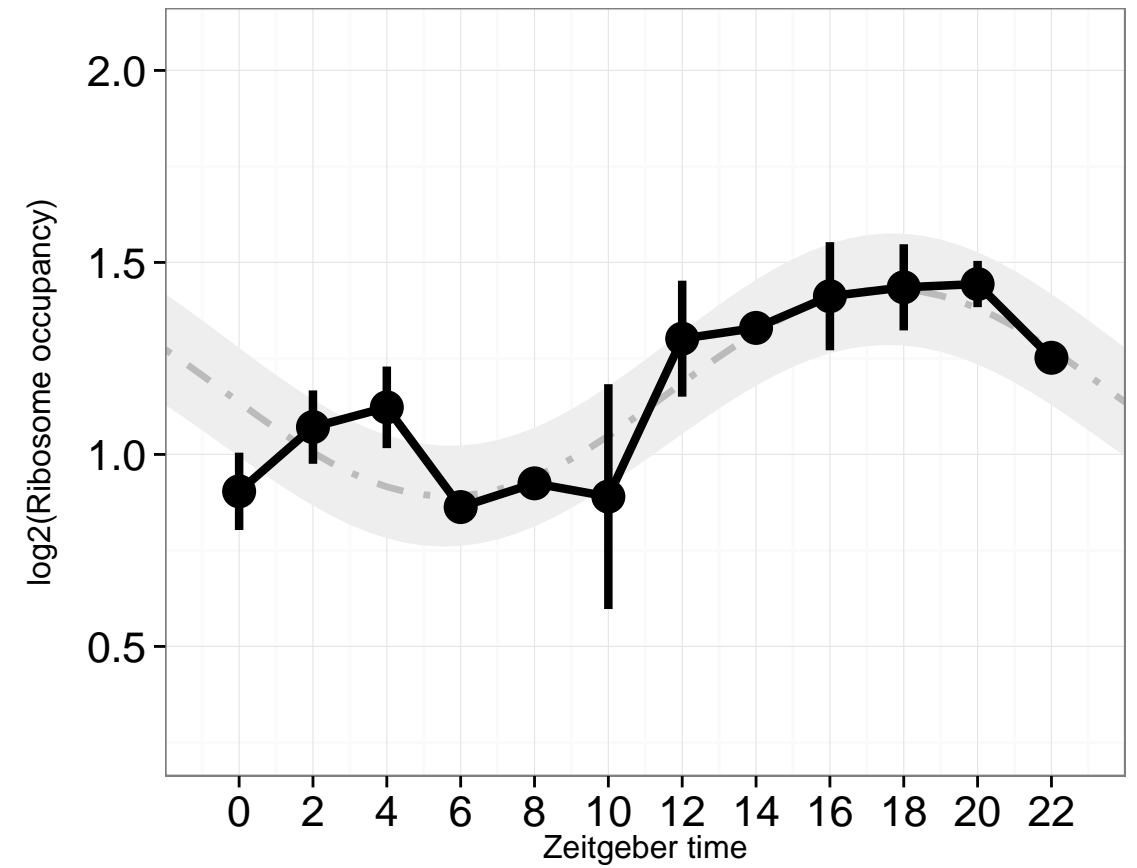

Supplement: Supplementary file 8222 [file 1]

# Atp8b4

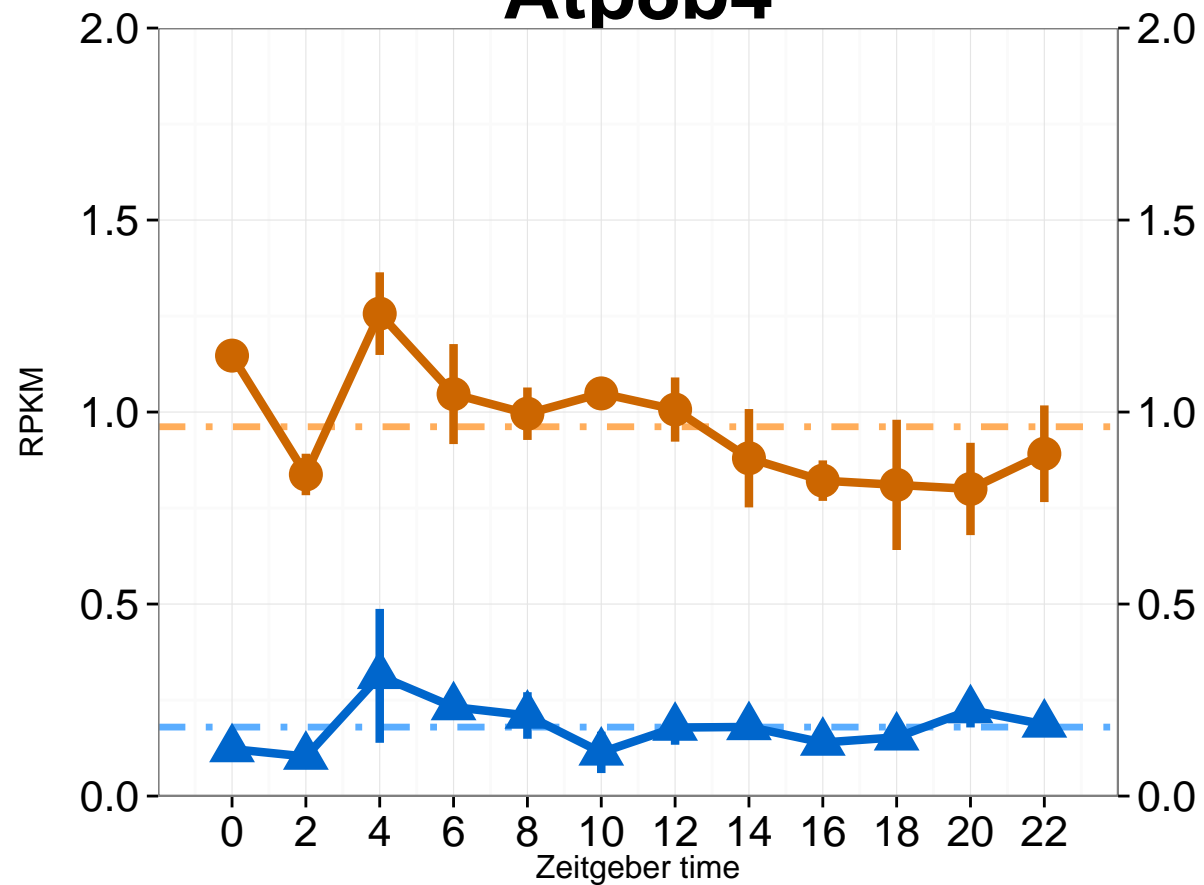

# Atp8b4

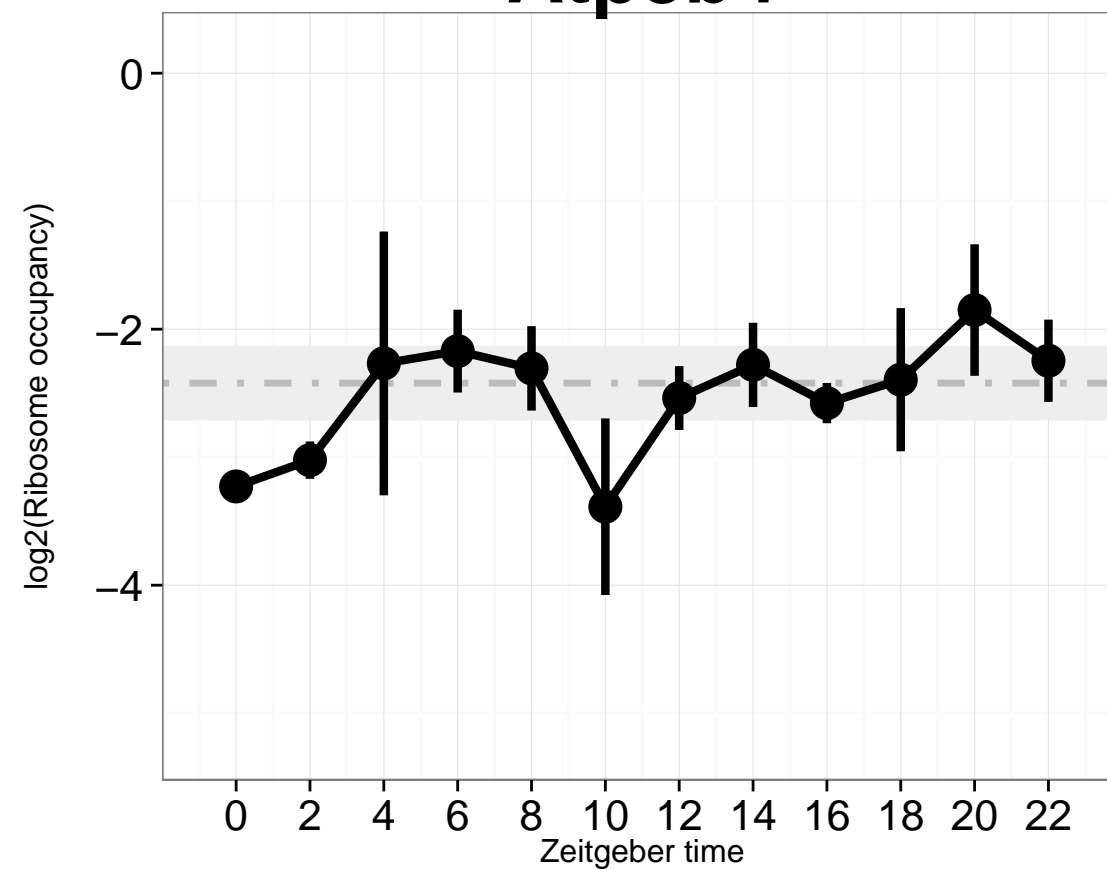

Supplement: Supplementary file 8223 [file 1]

# Itga1

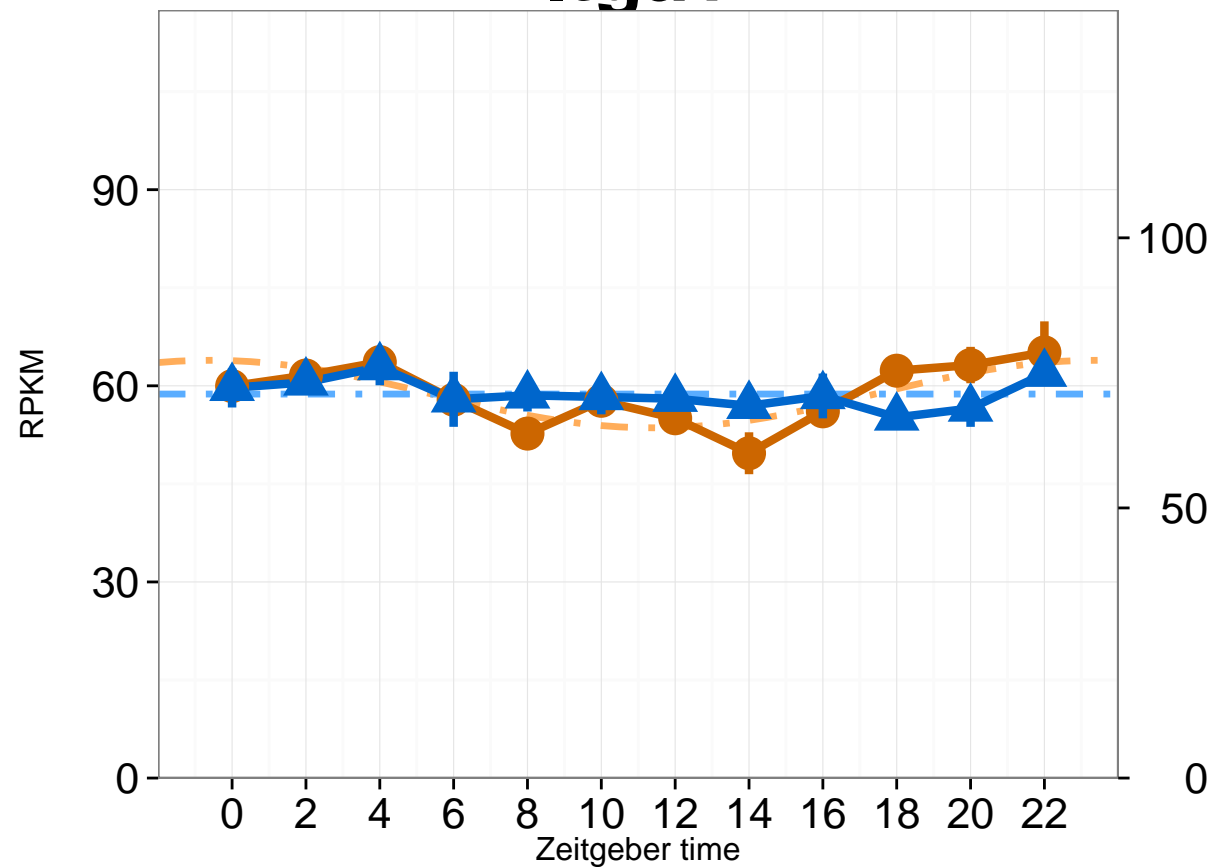

# Itga1

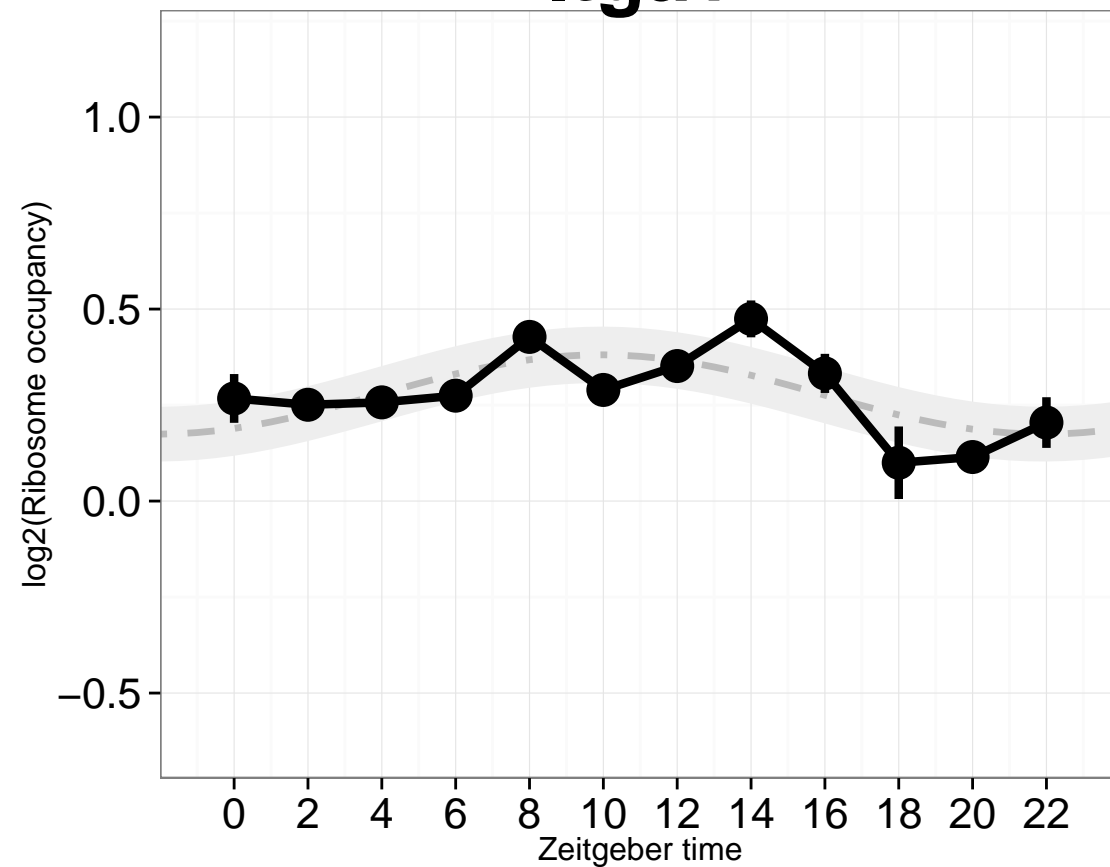

Supplement: Supplementary file 8224 [file 1]

## Olfr221

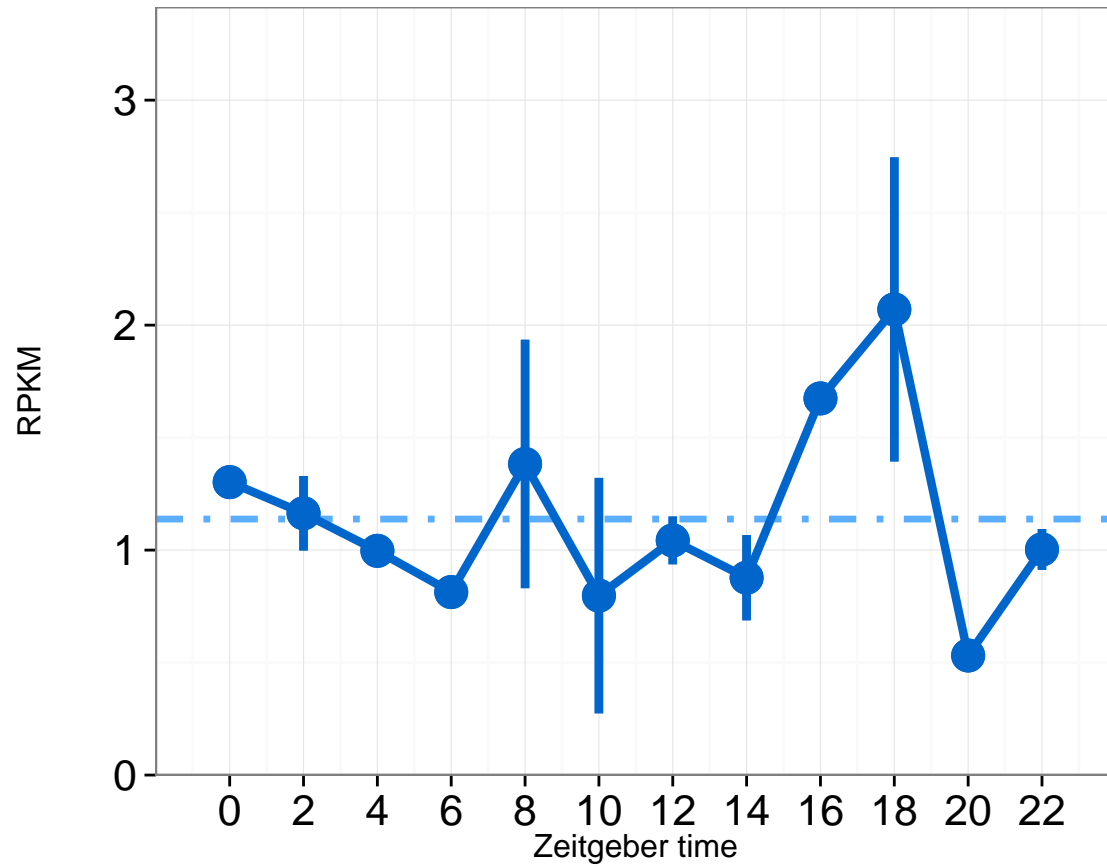

## Olfr221 log2(Ribosome occupancy)

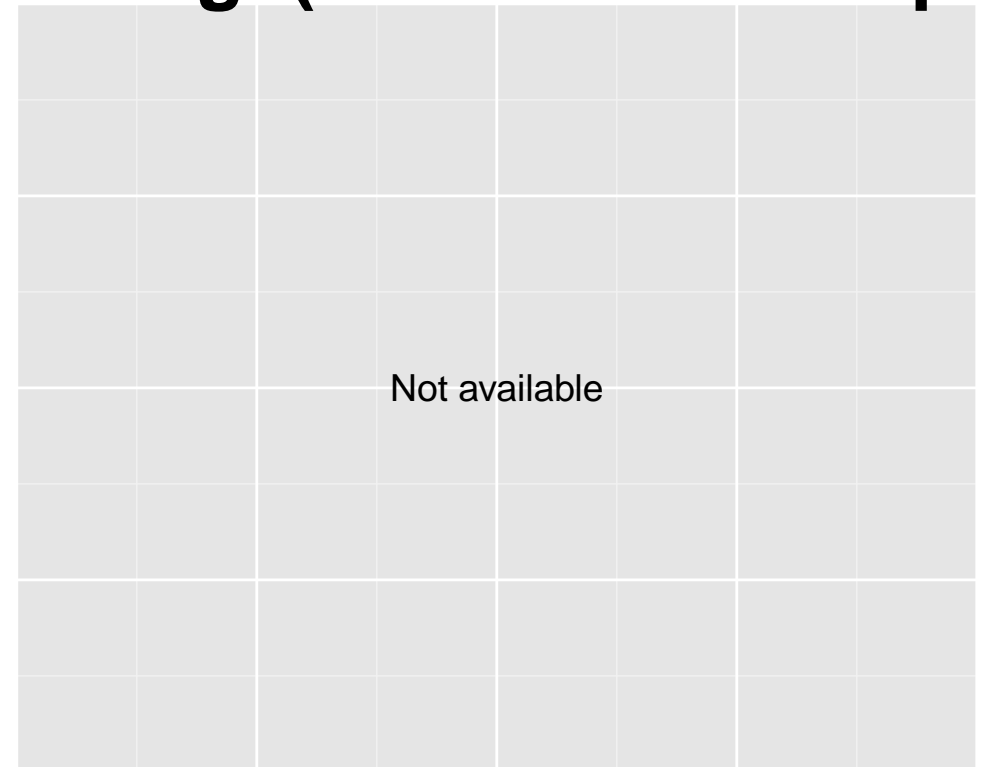

Supplement: Supplementary file 8225 [file 1]

# Il27ra

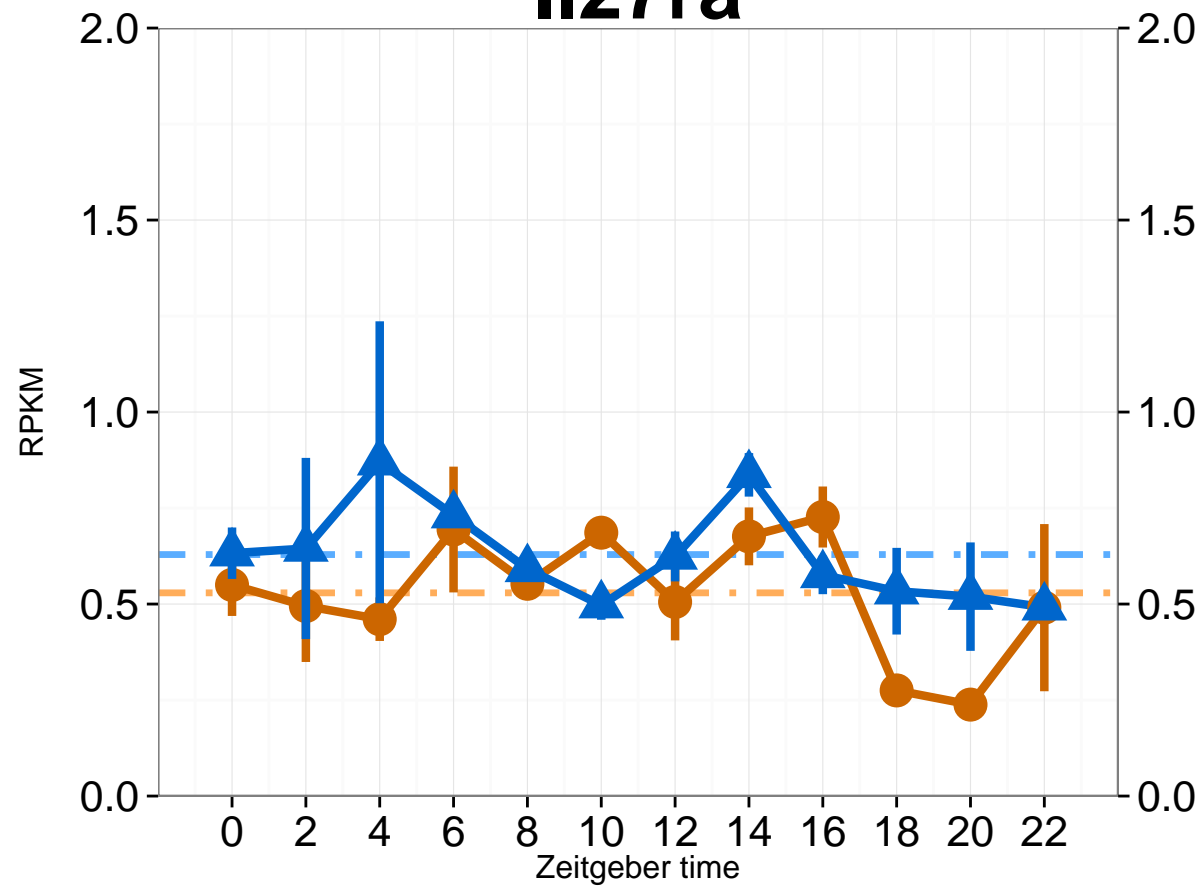

# Il27ra

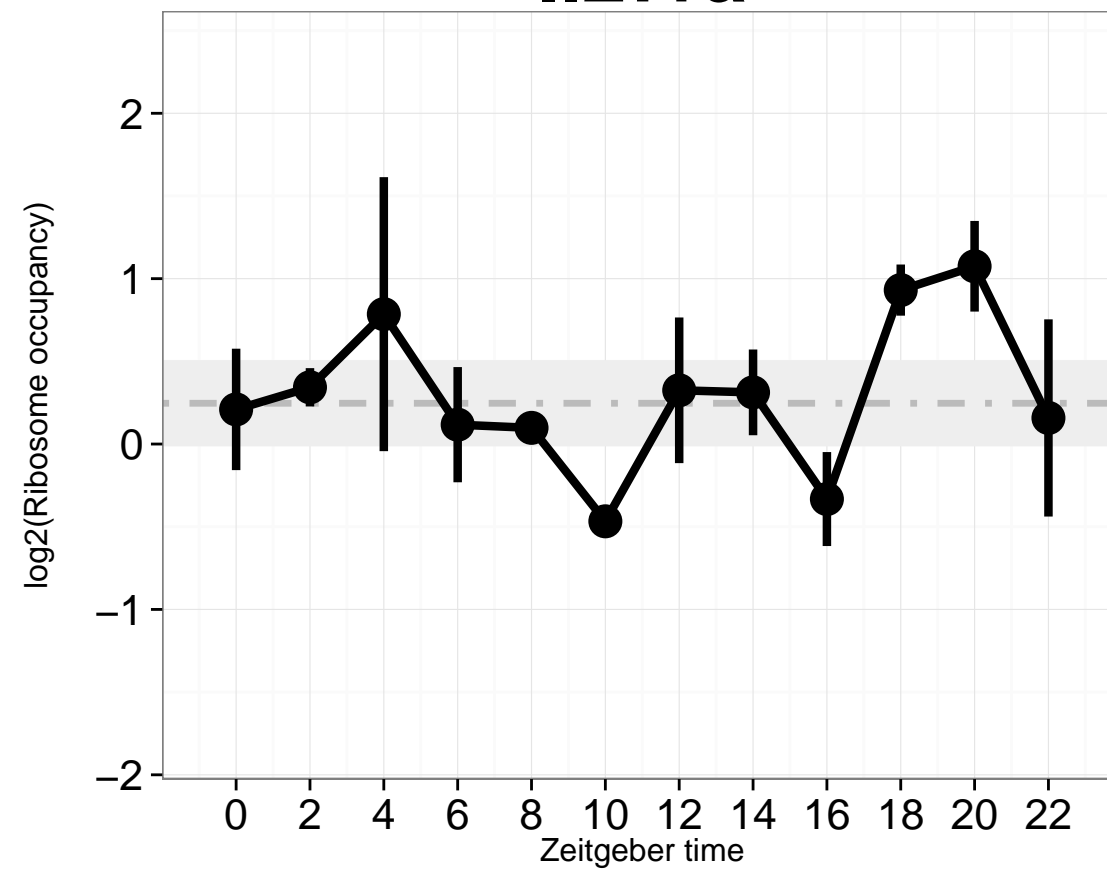

Supplement: Supplementary file 8226 [file 1]

## Med17

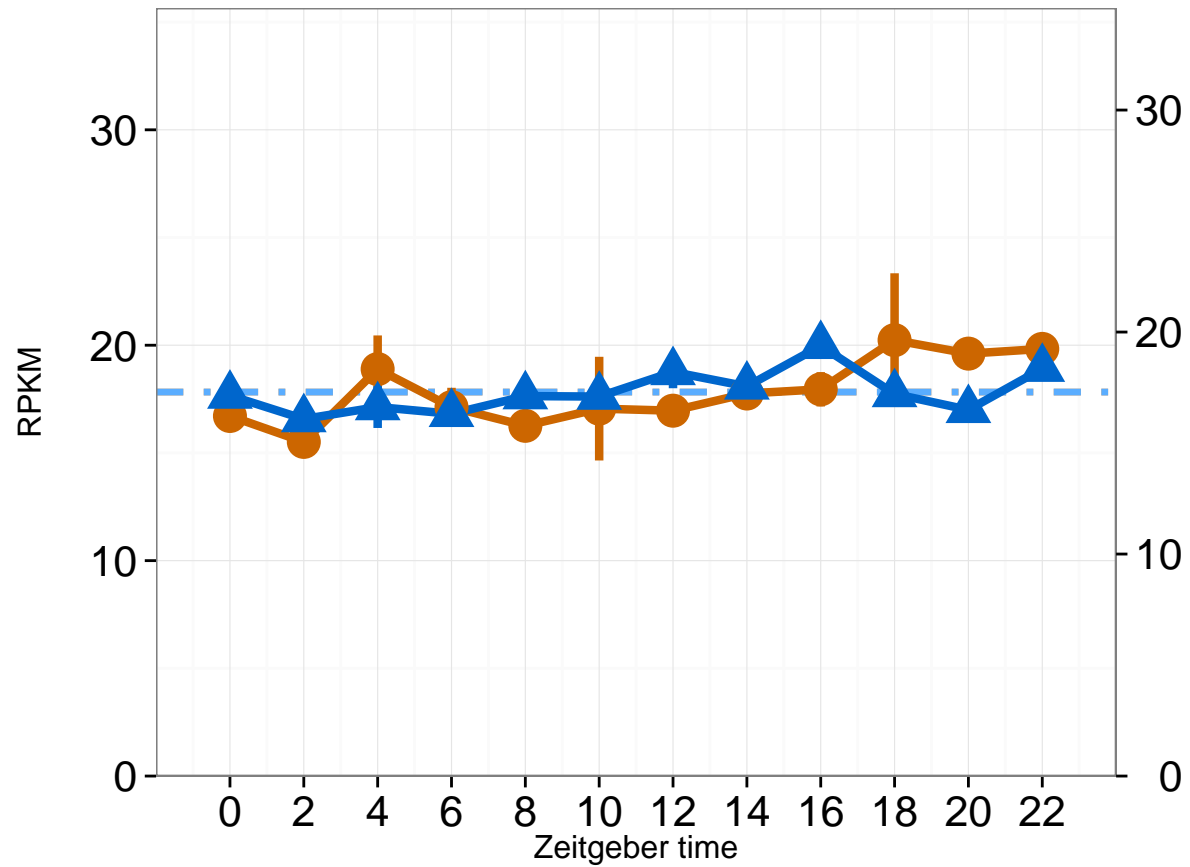

## Med17

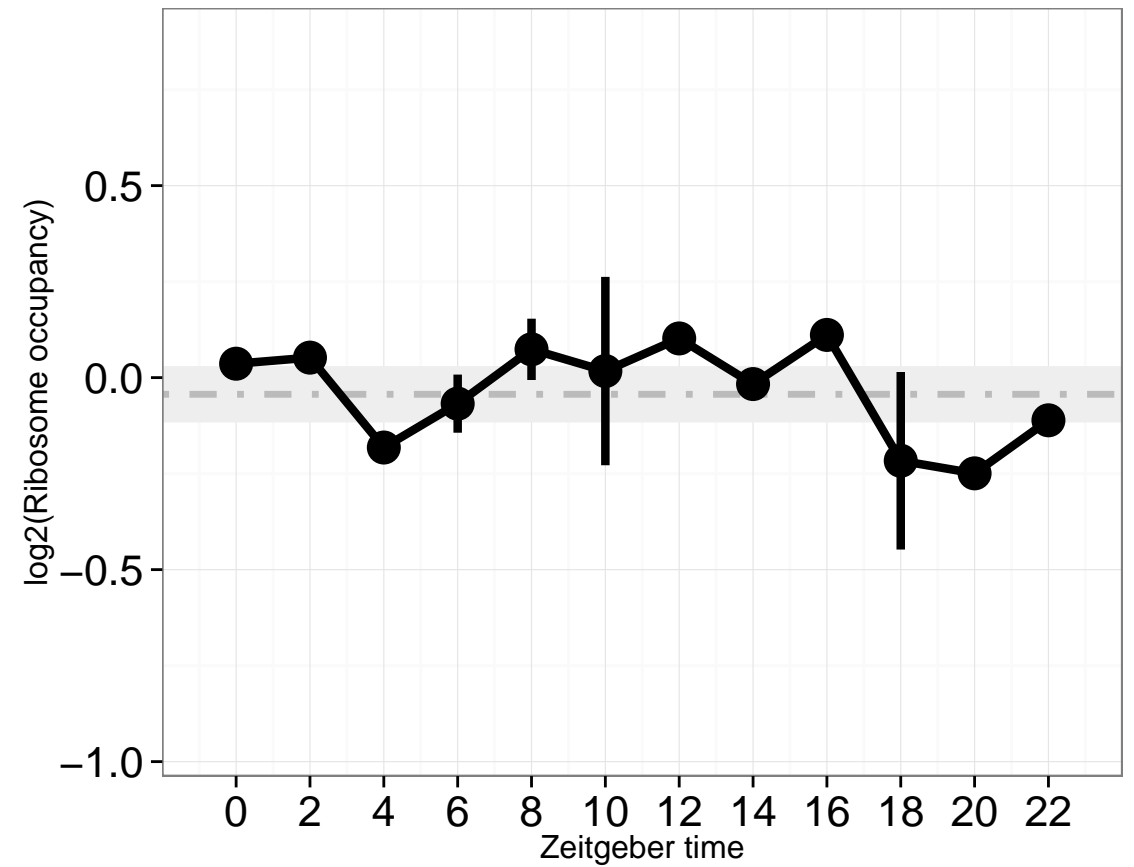

Supplement: Supplementary file 8227 [file 1]

# Sdccag3

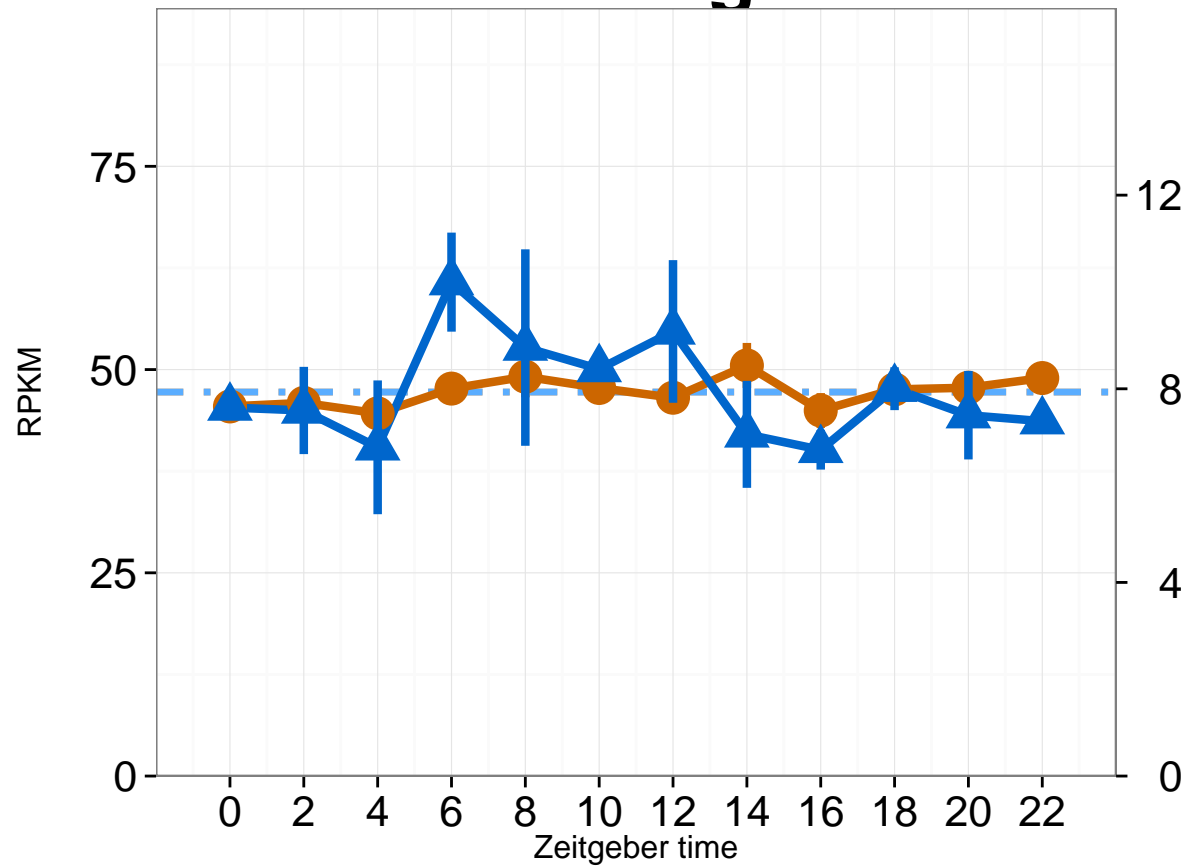

# Sdccag3

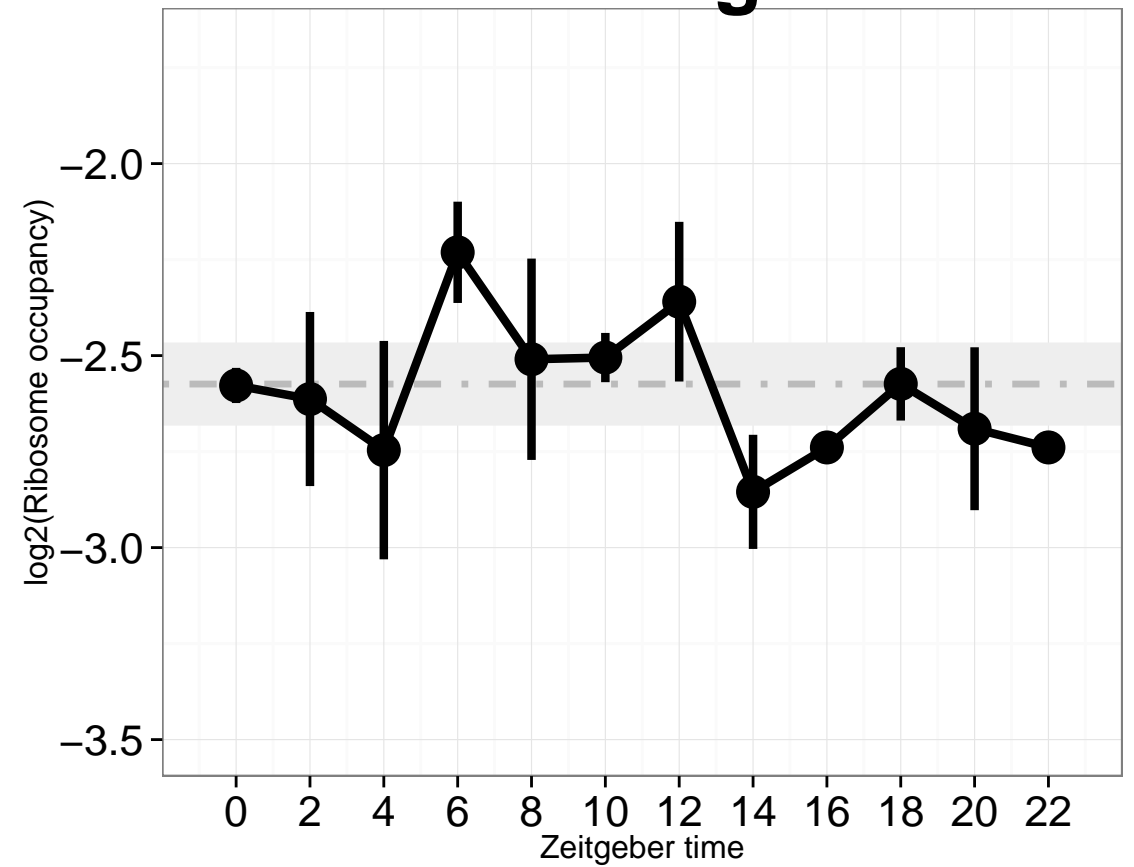

Supplement: Supplementary file 8228 [file 1]
