# Supplementary material (part 83 of 133)
Source: publisher figshare collection journal article supplement (https://springernature.figshare.com/articles/dataset/_/4903193)

## Spin2c

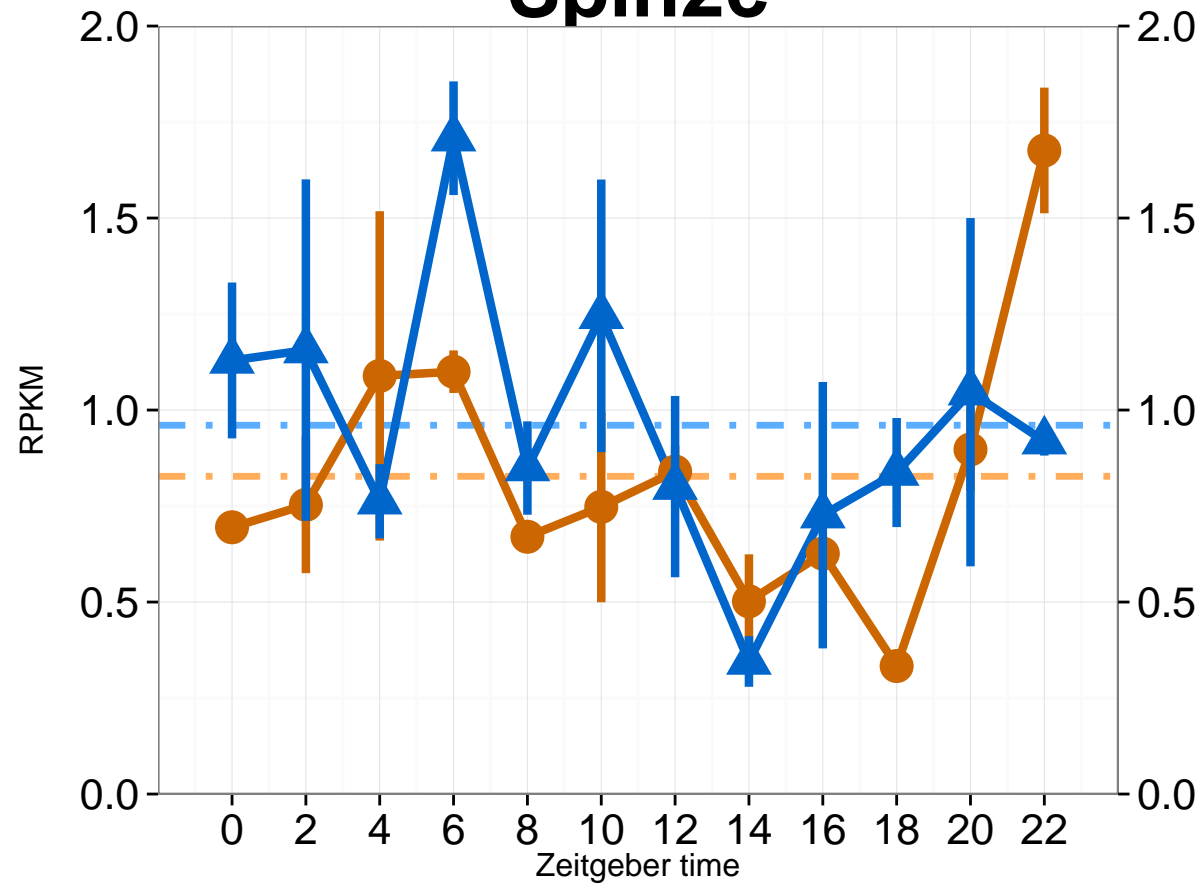

## Spin2c

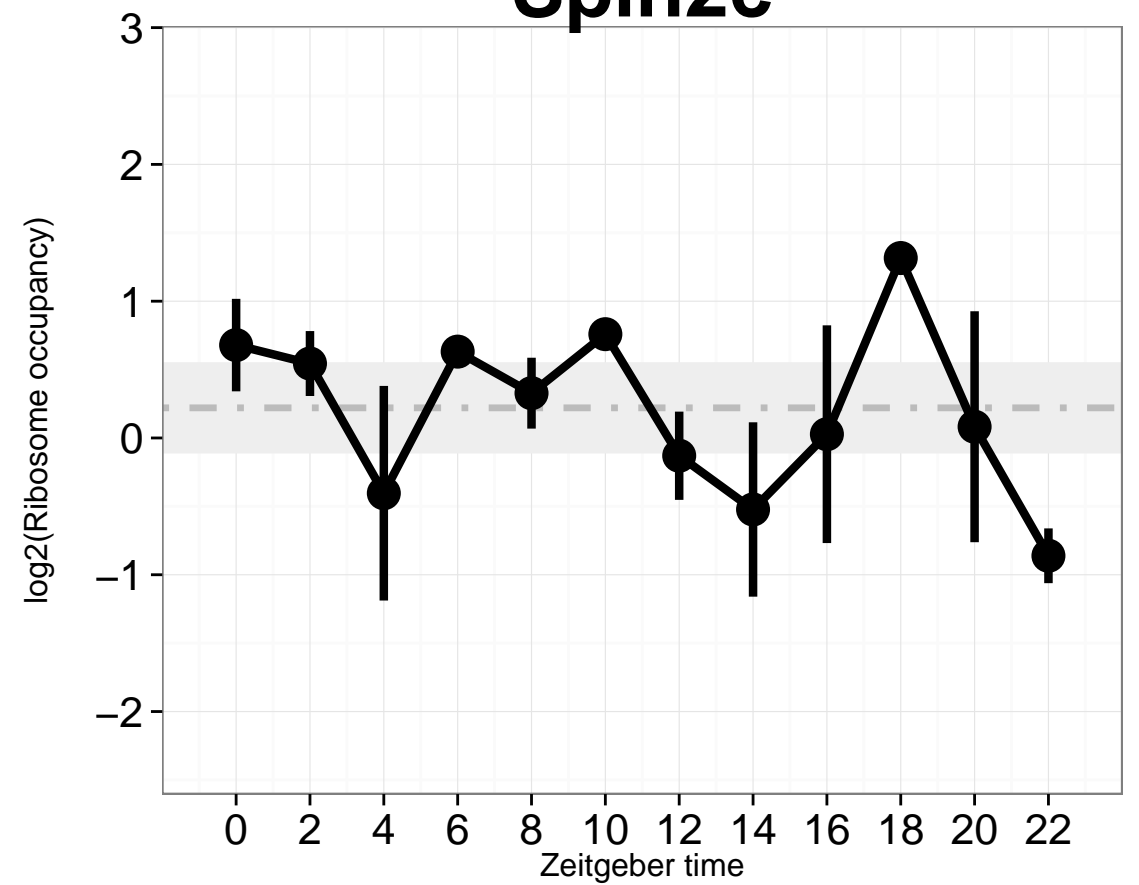

Supplement: Supplementary file 8229 [file 1]

# Fam83h

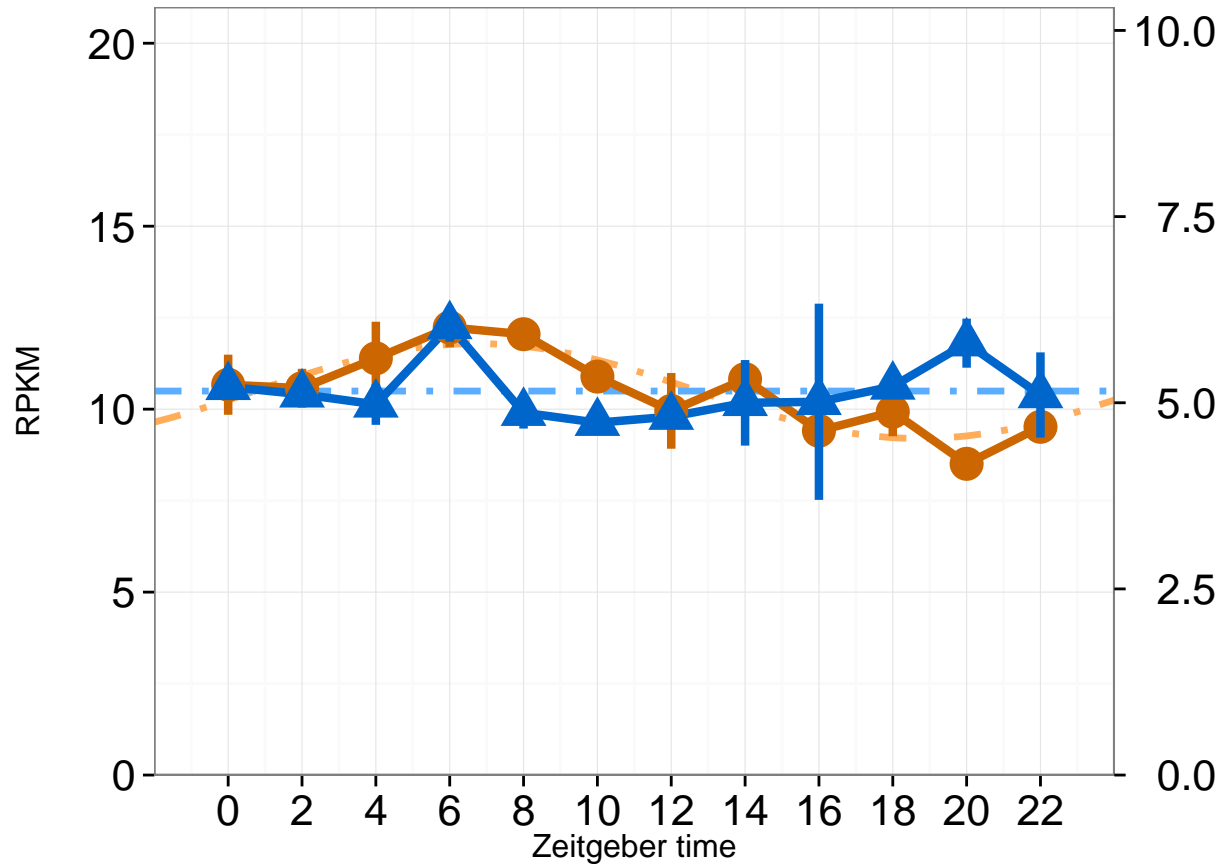

# Fam83h

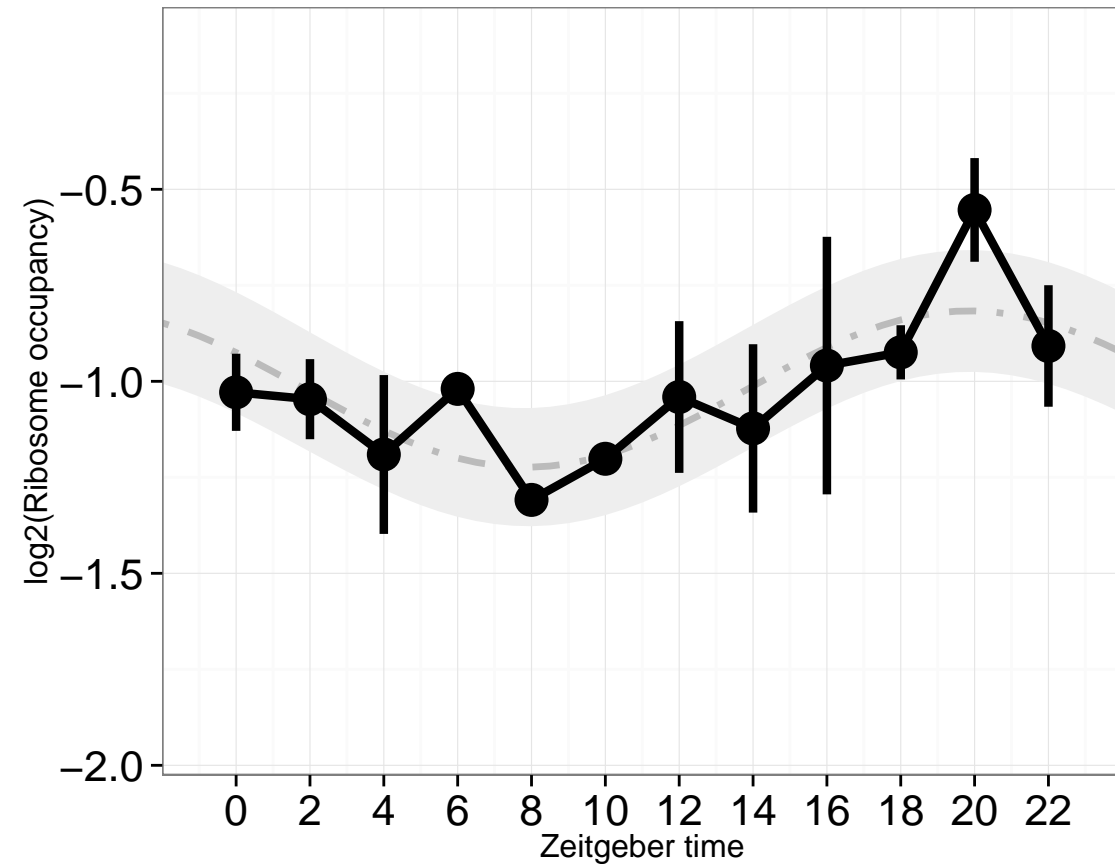

Supplement: Supplementary file 8230 [file 1]

## Nelfb

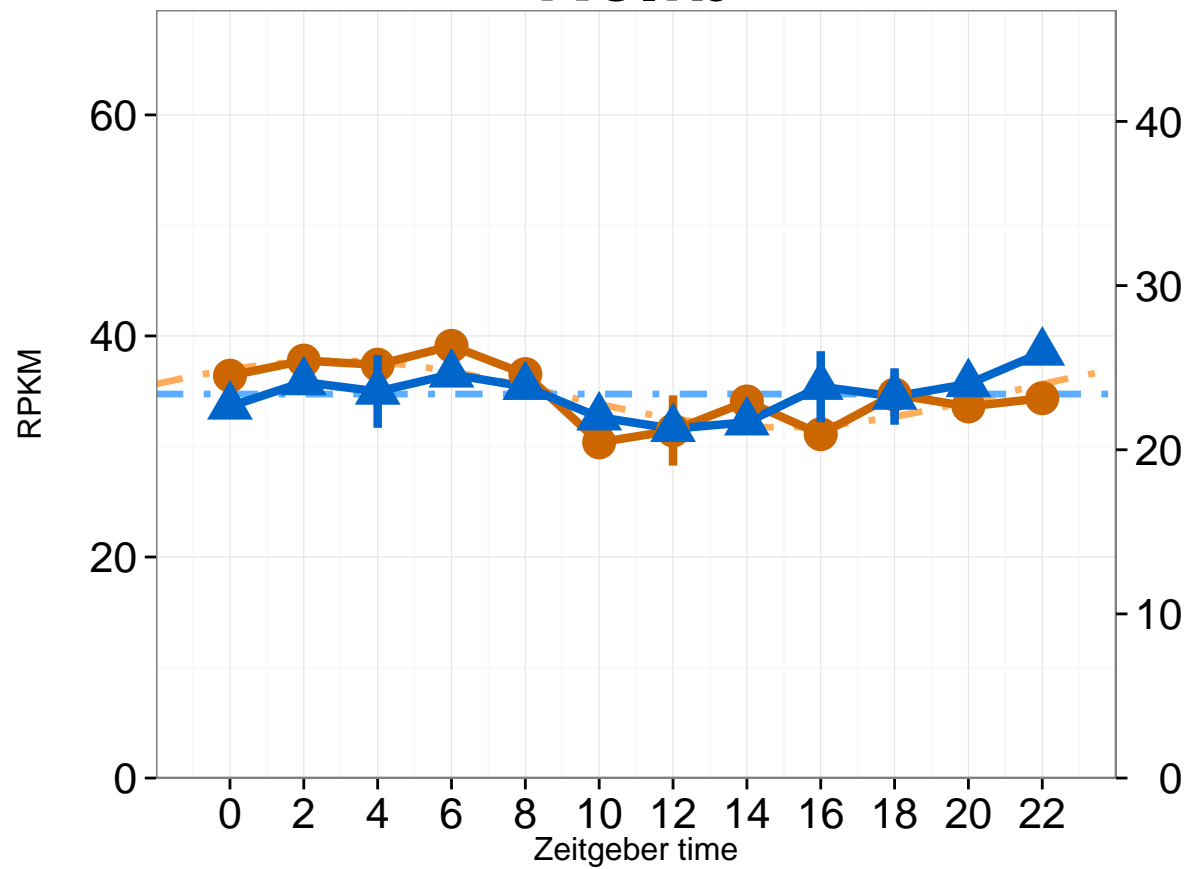

## Nelfb

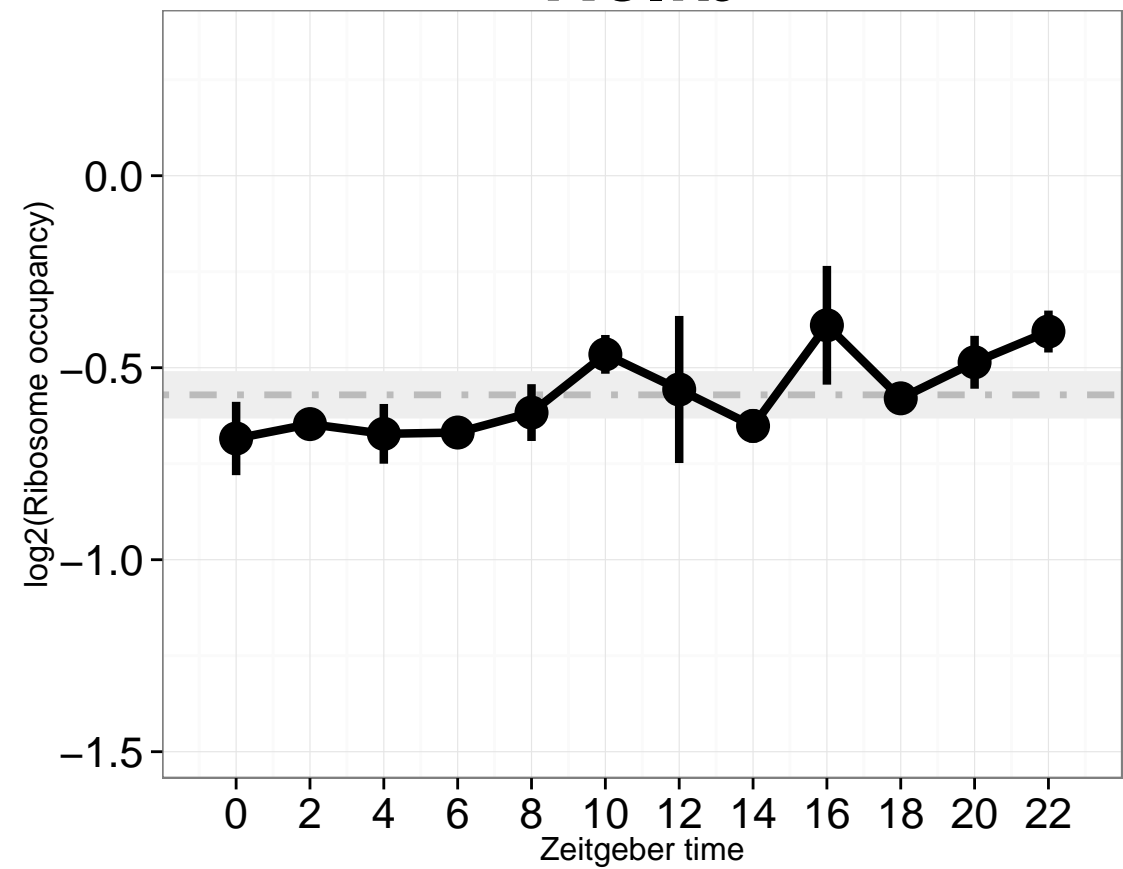

Supplement: Supplementary file 8231 [file 1]

## Mcm8

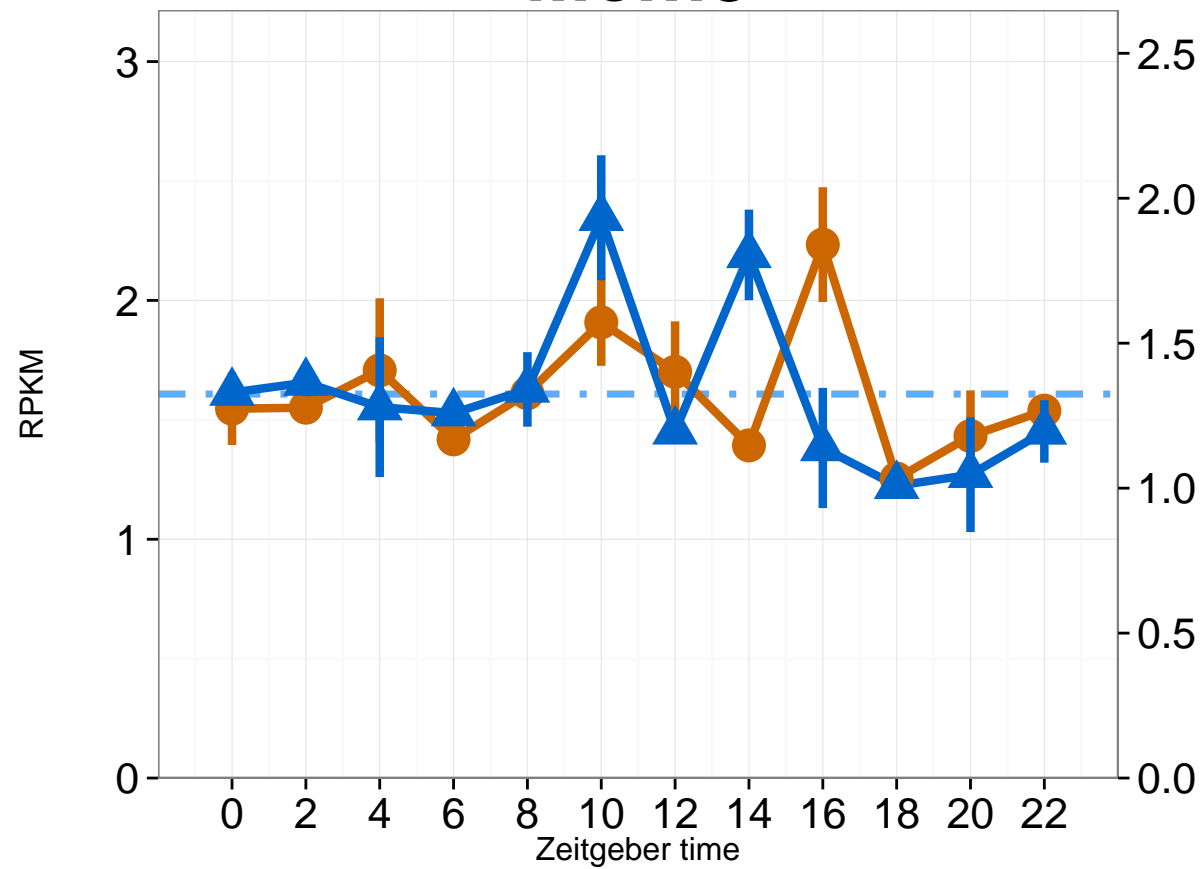

## Mcm8

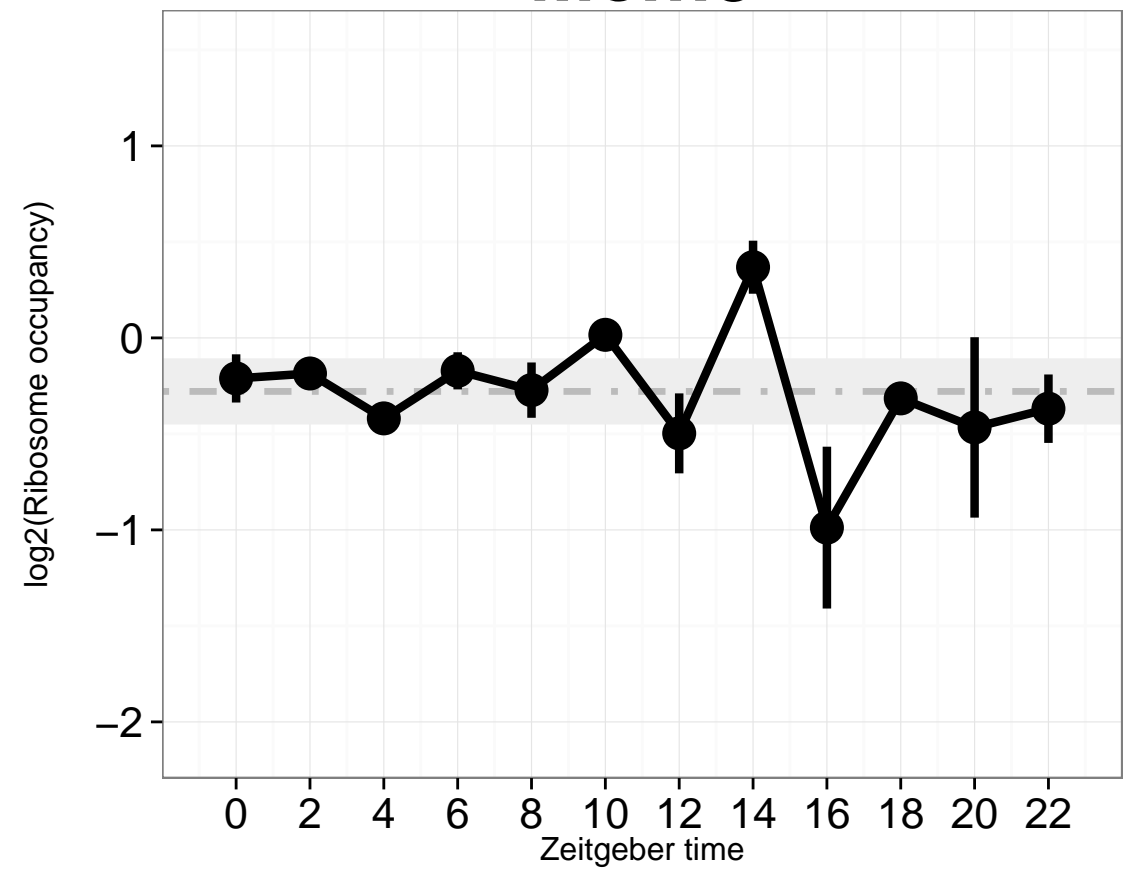

Supplement: Supplementary file 8232 [file 1]

## Ccar2

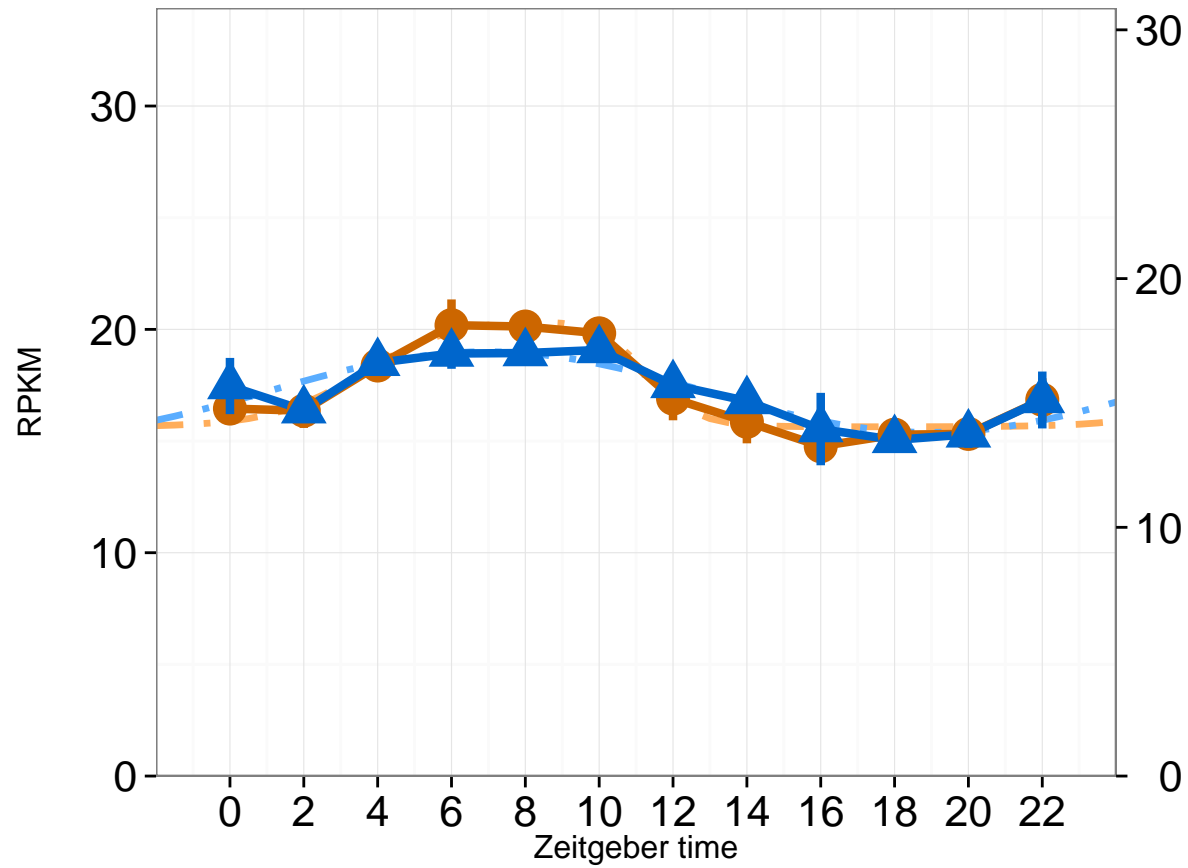

## Ccar2

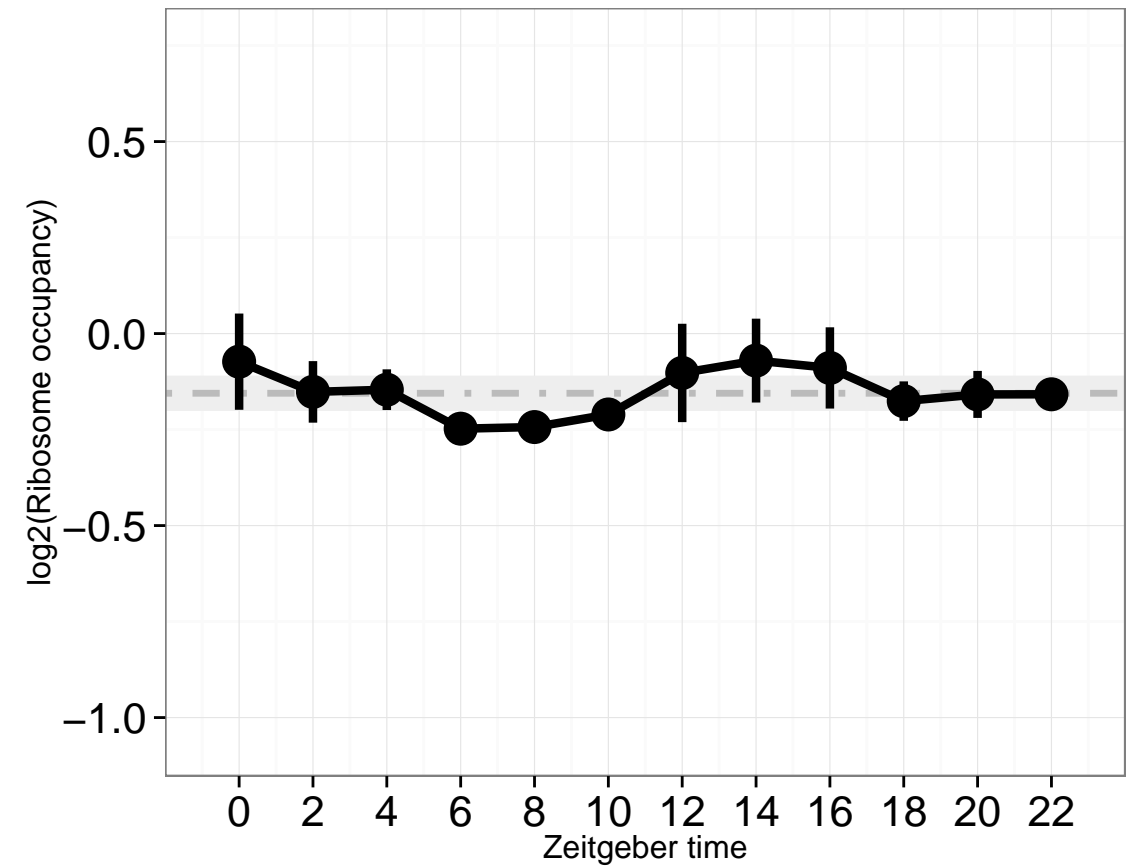

Supplement: Supplementary file 8233 [file 1]

# Tubb4b

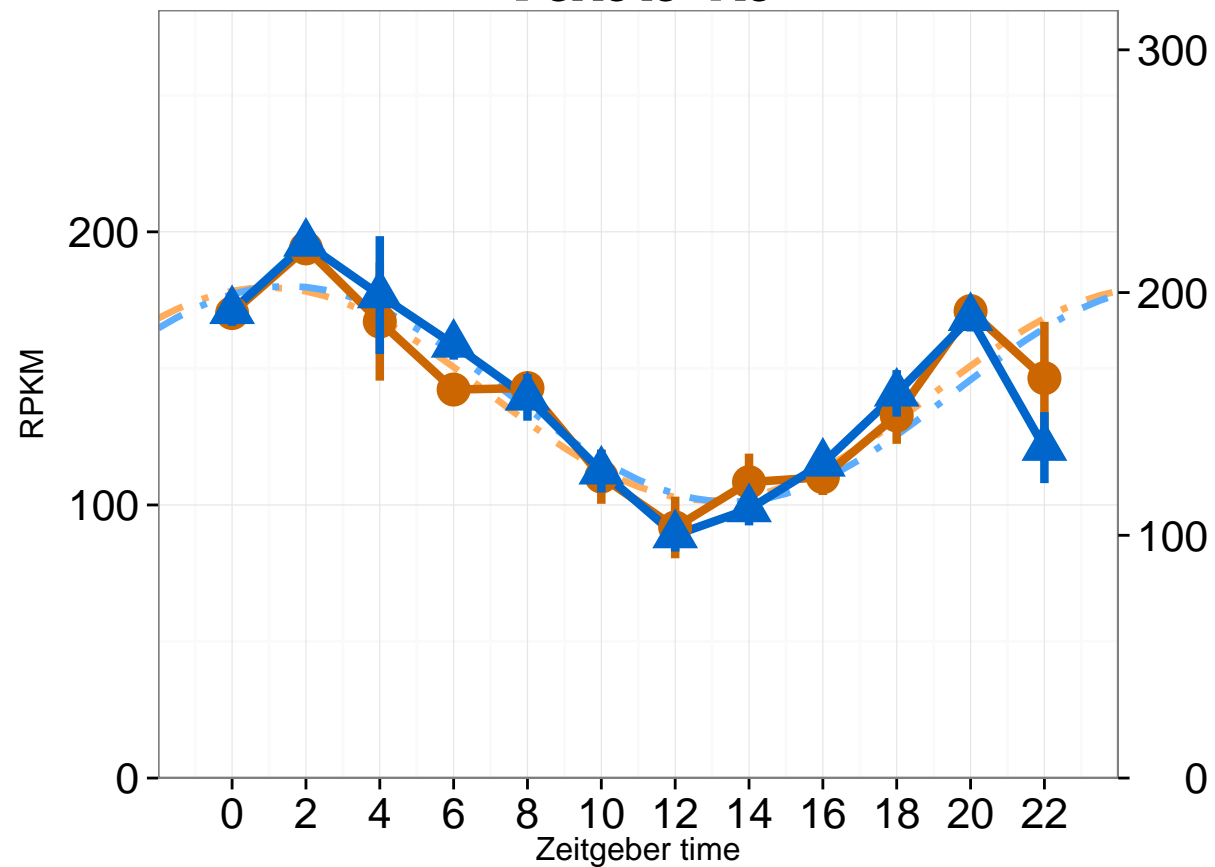

# Tubb4b

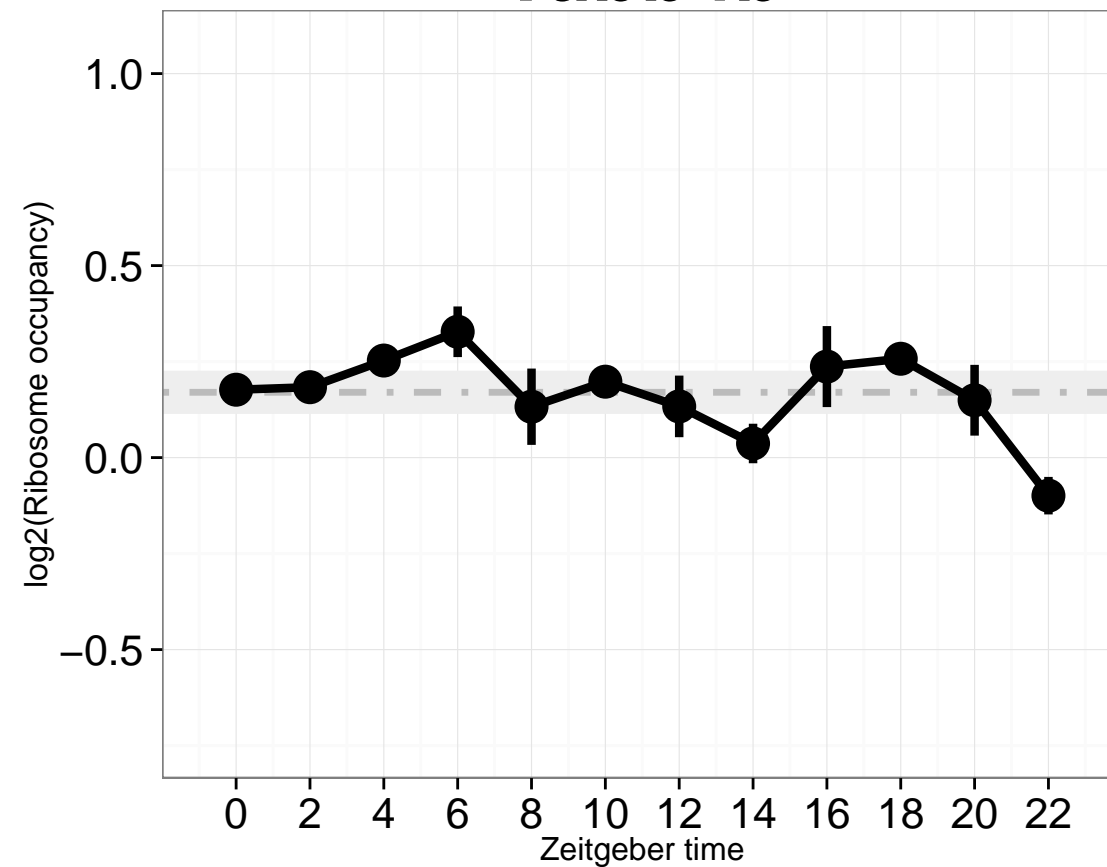

Supplement: Supplementary file 8234 [file 1]

## Stk19

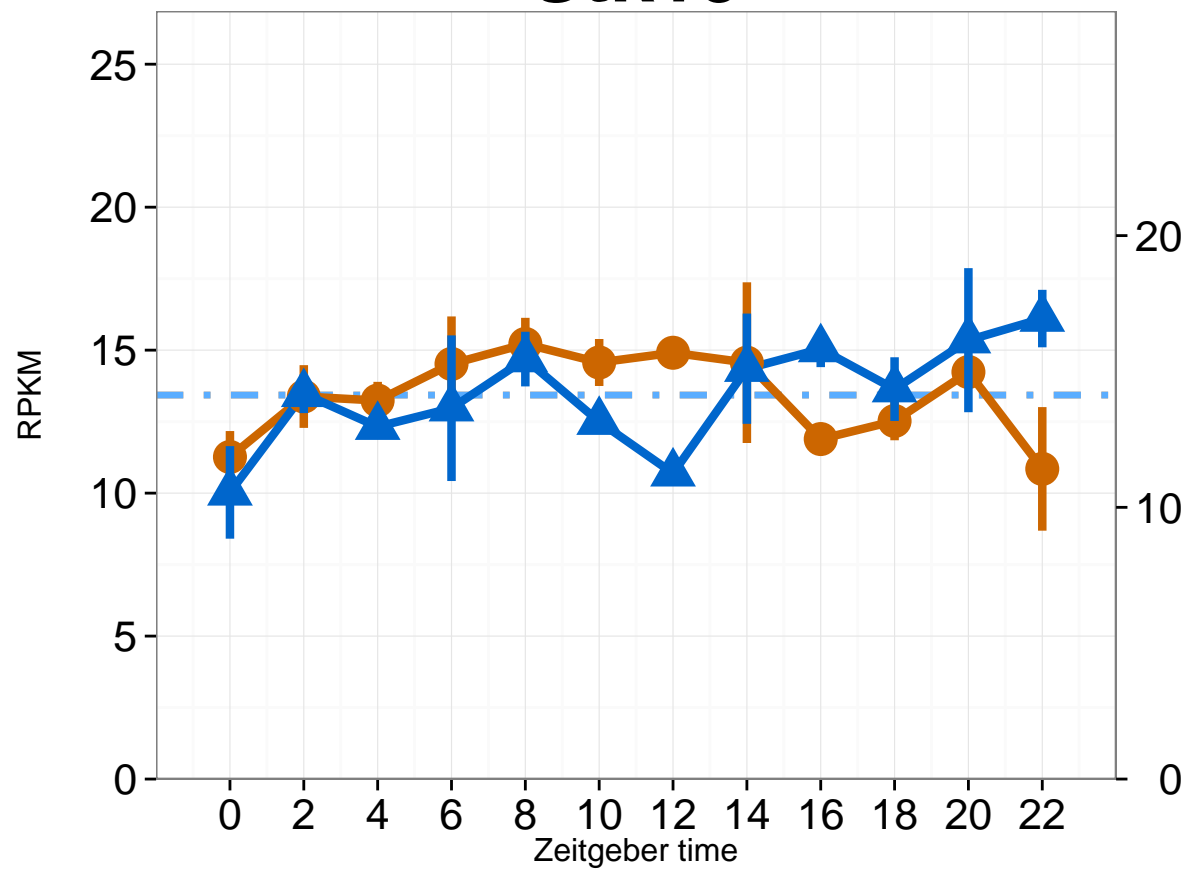

## Stk19

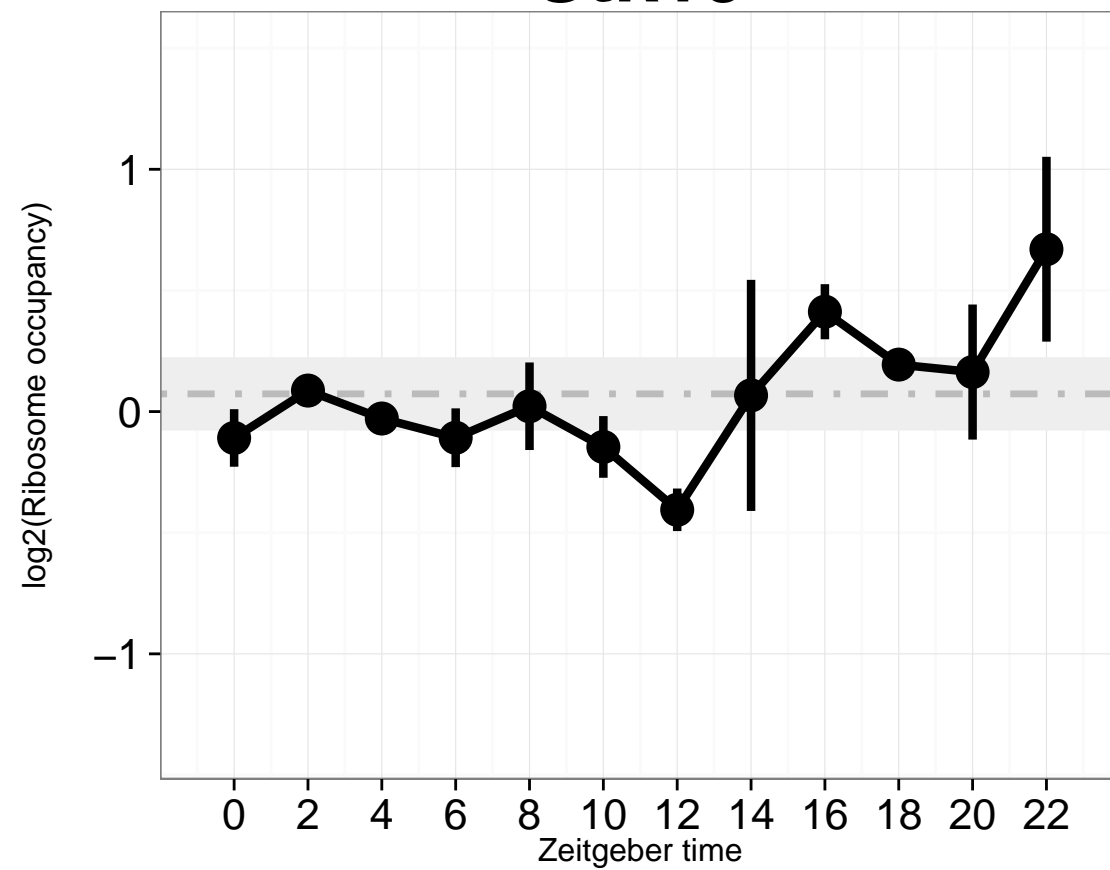

Supplement: Supplementary file 8235 [file 1]

# Tfap2b

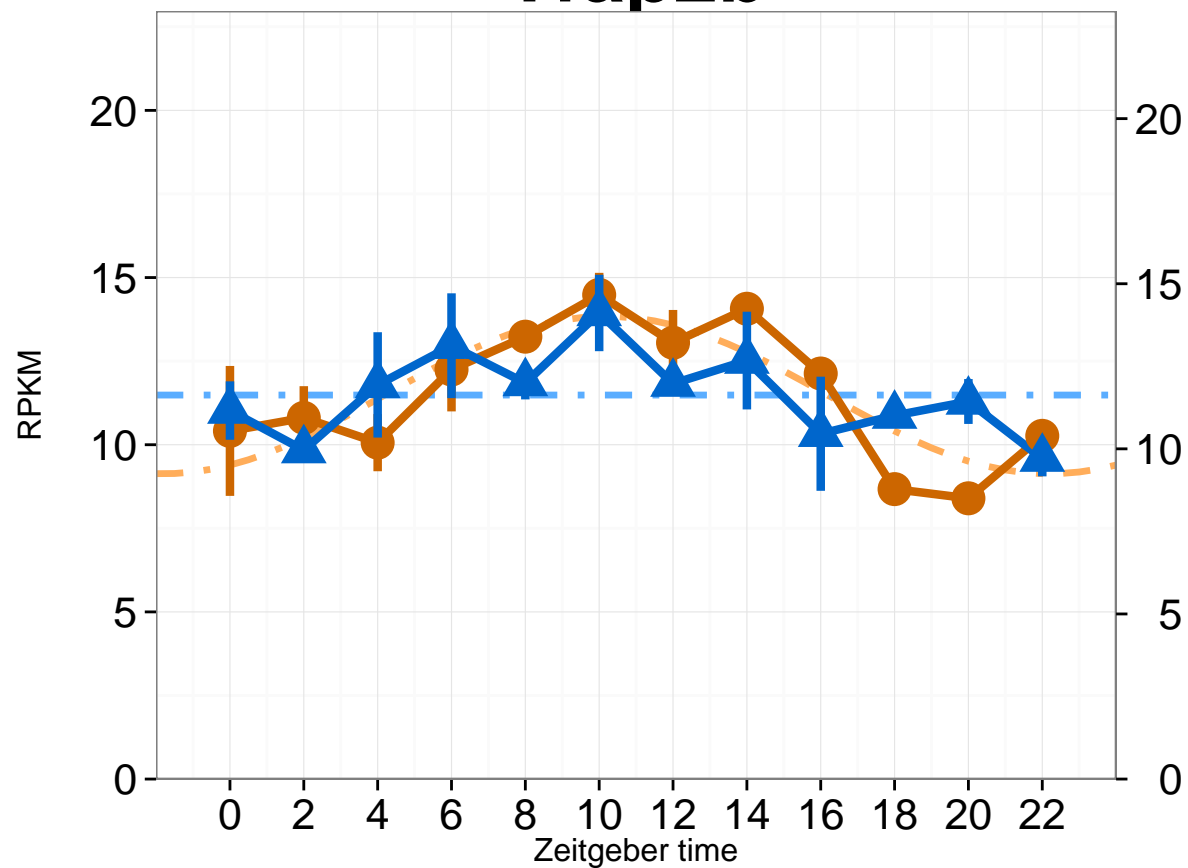

# Tfap2b

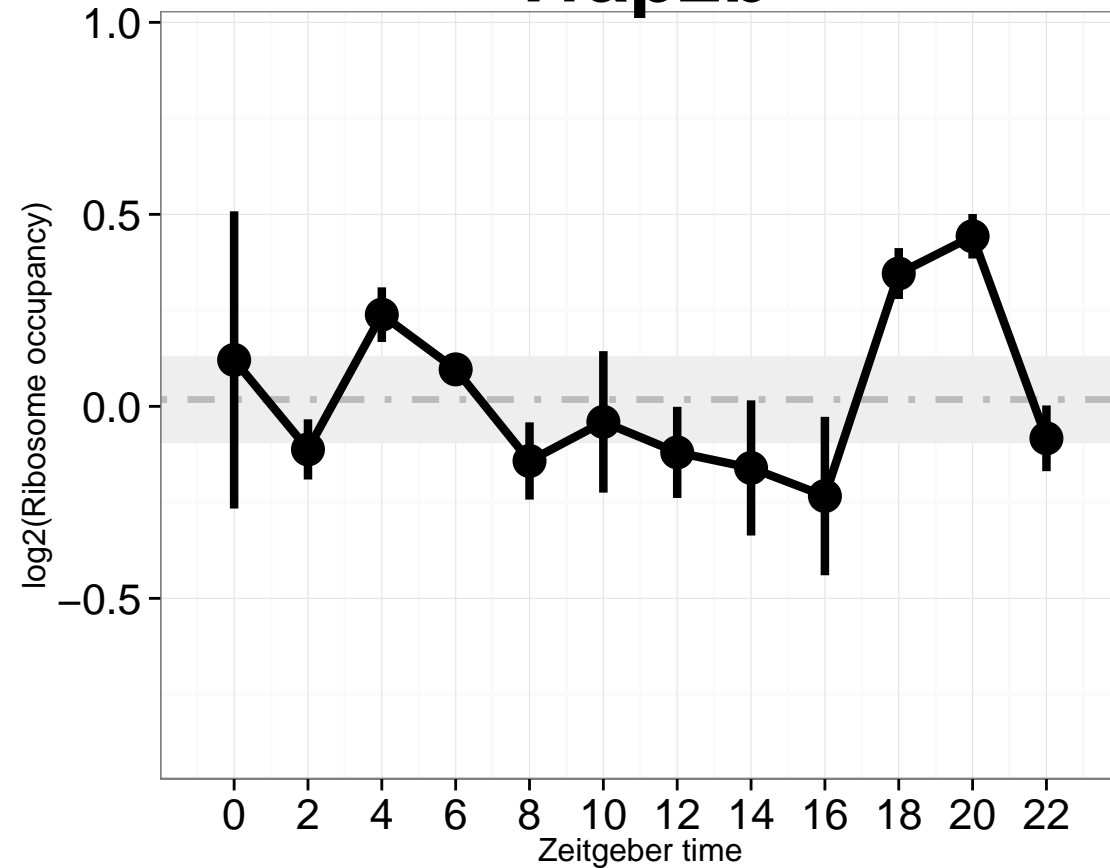

Supplement: Supplementary file 8236 [file 1]

## Defb42

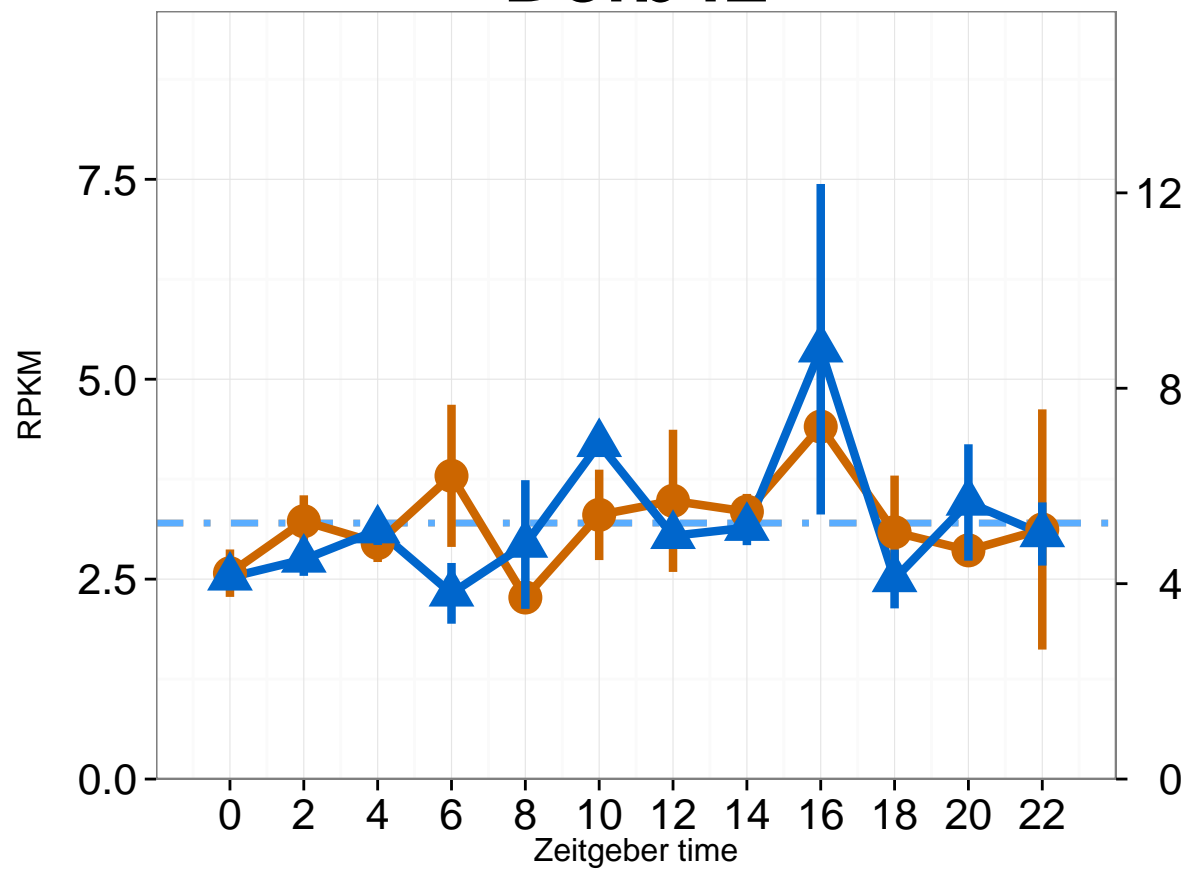

## Defb42

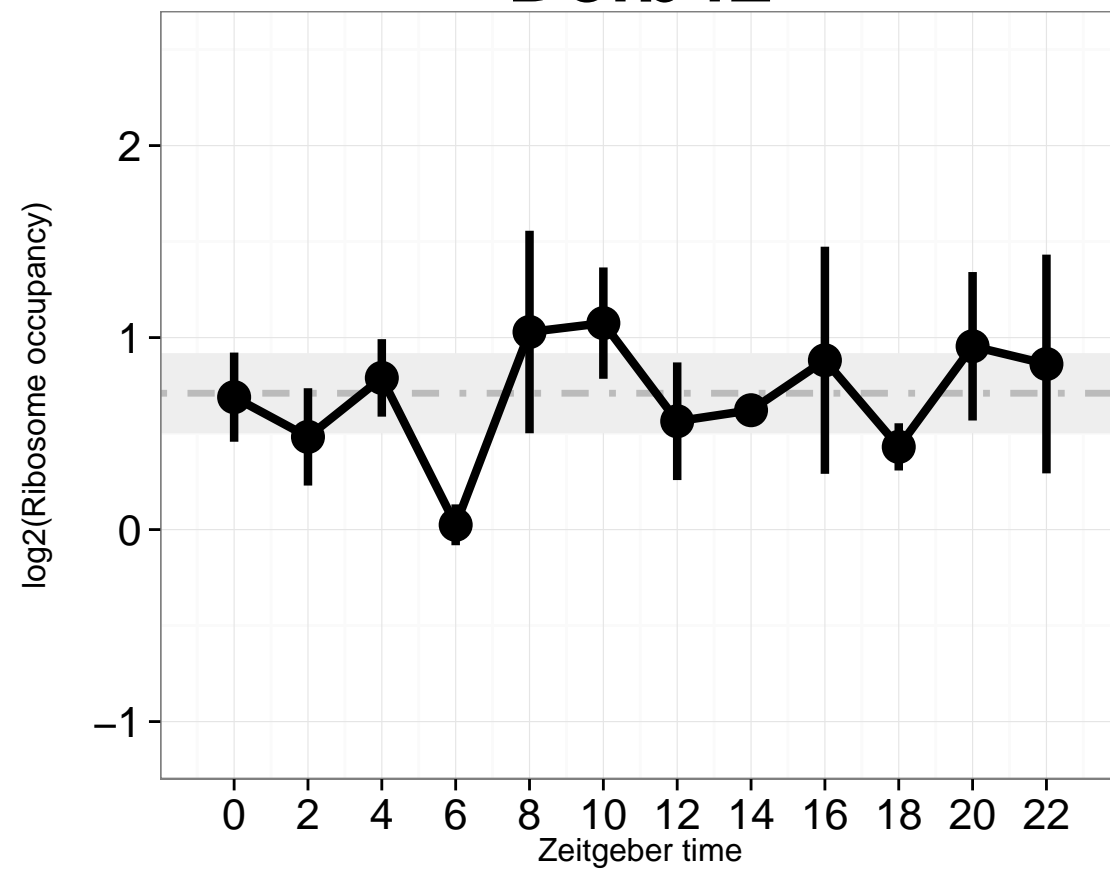

Supplement: Supplementary file 8237 [file 1]

**0610007P14Rik**

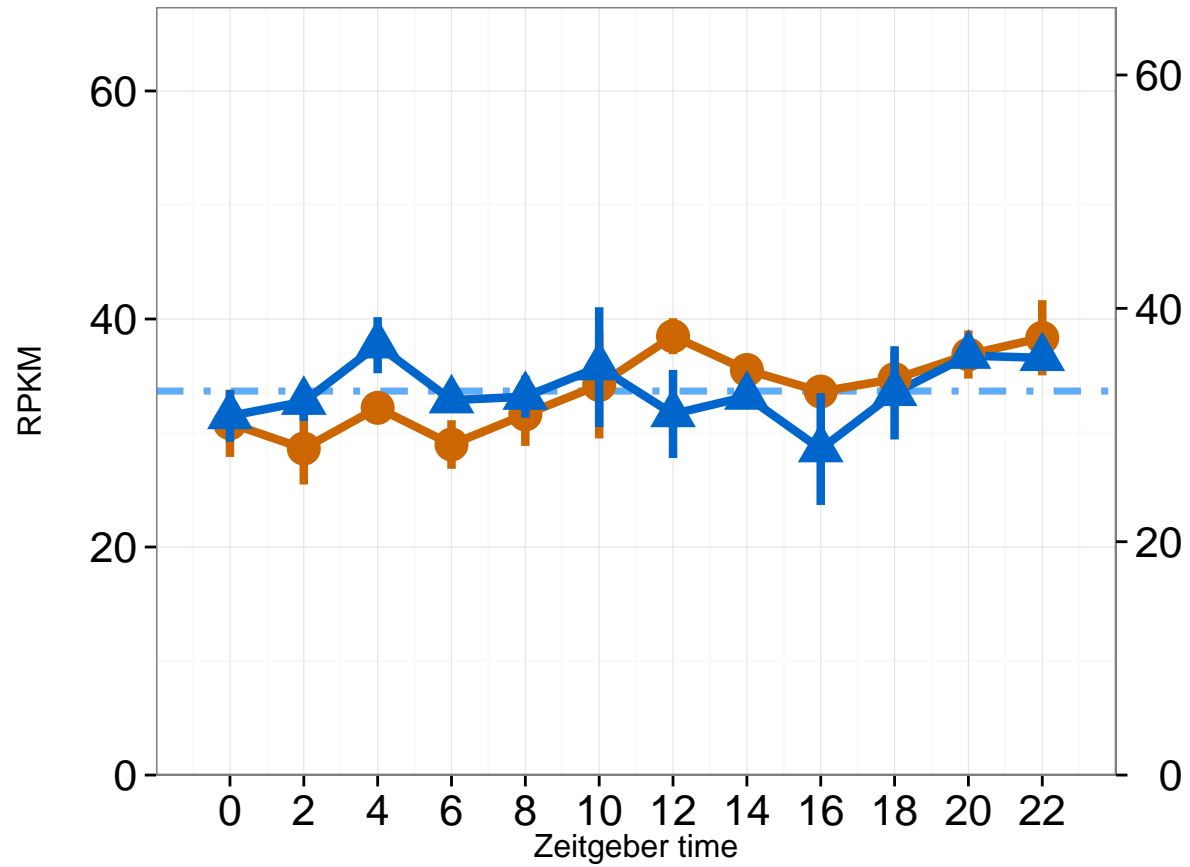

**0610007P14Rik**

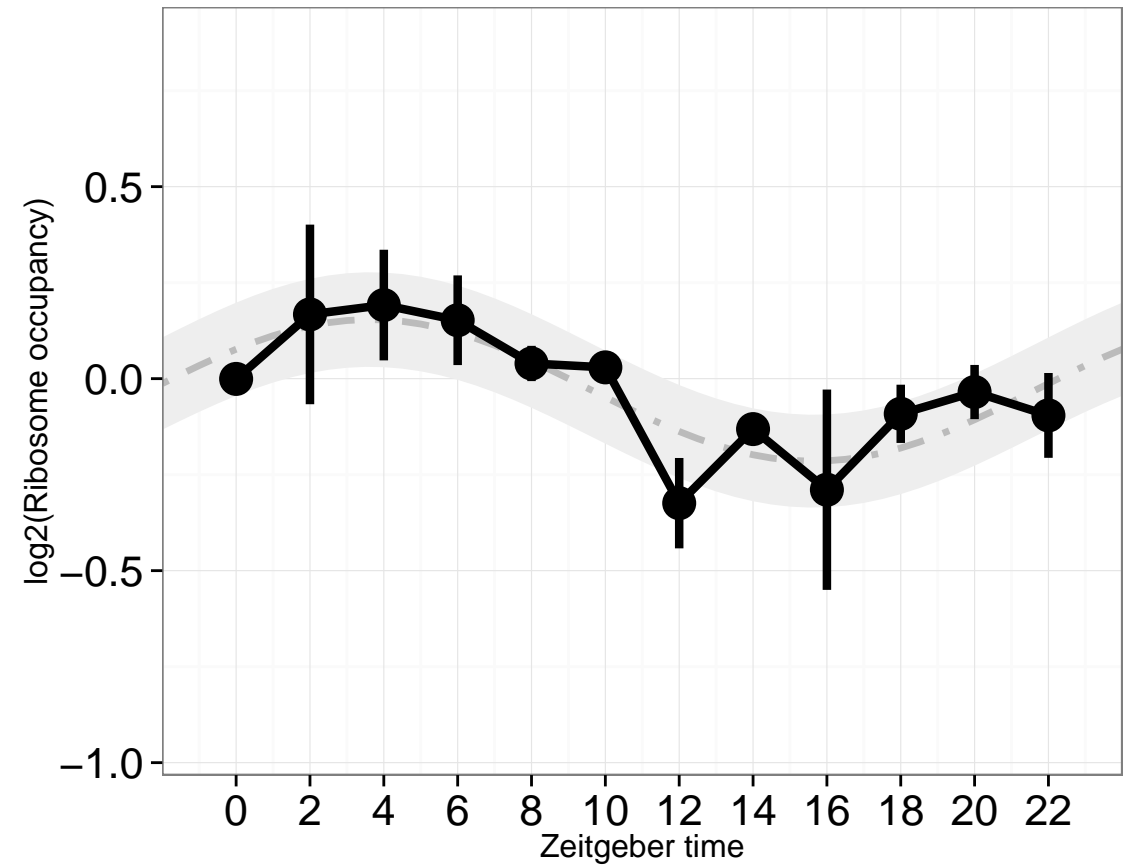

Supplement: Supplementary file 8238 [file 1]

# Coq10a

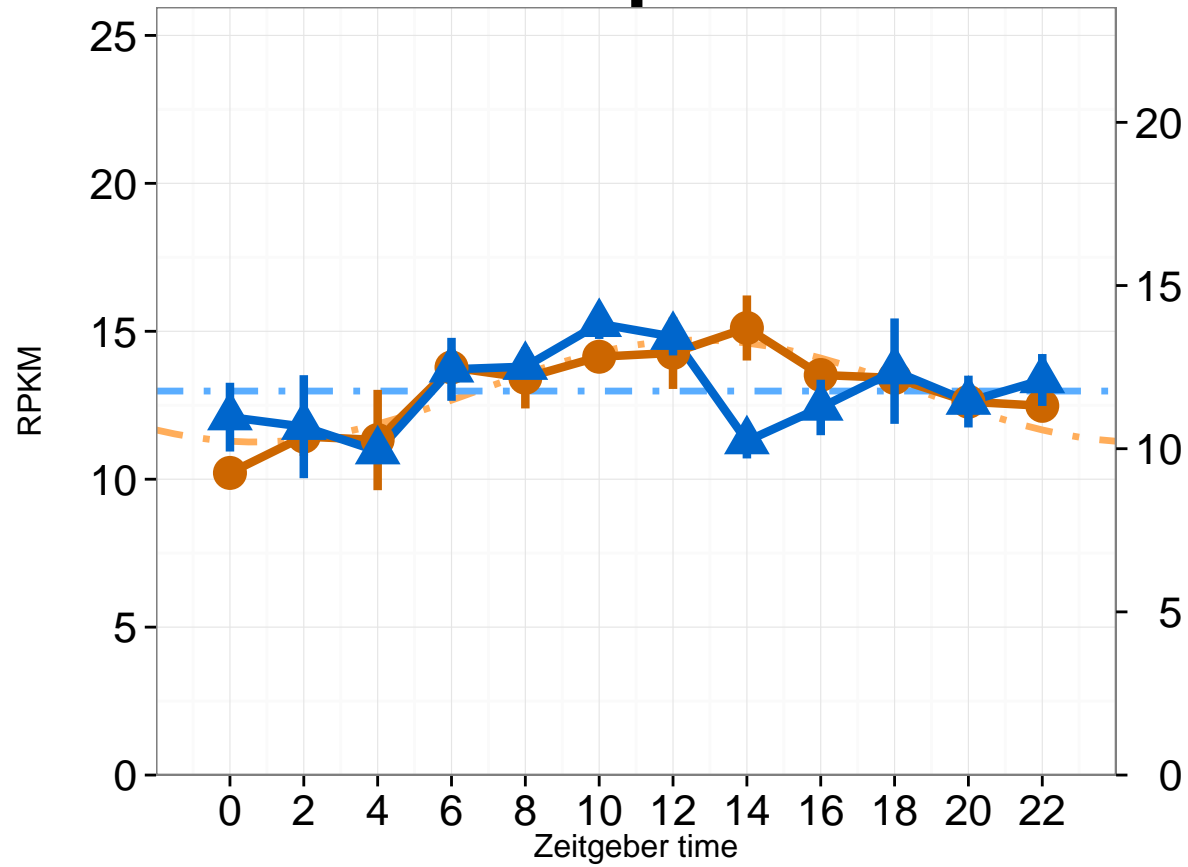

# Coq10a

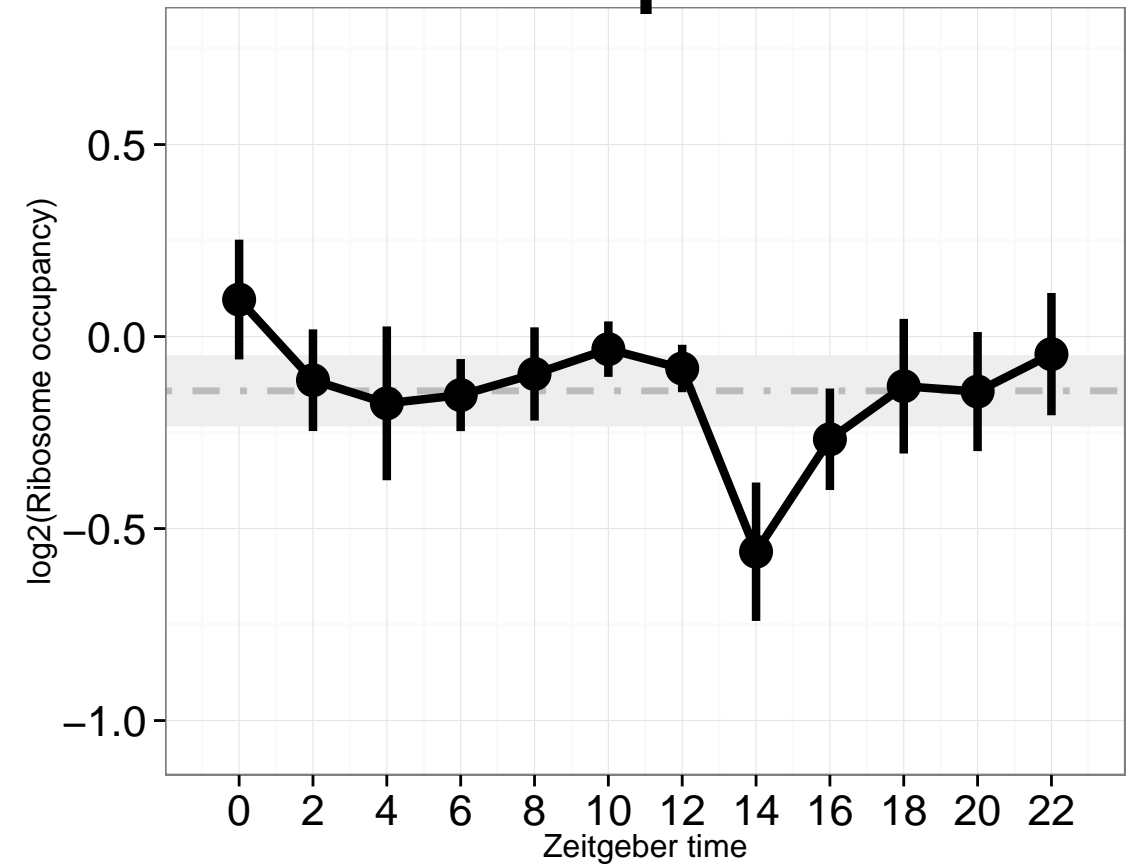

Supplement: Supplementary file 8239 [file 1]

# Pebp1

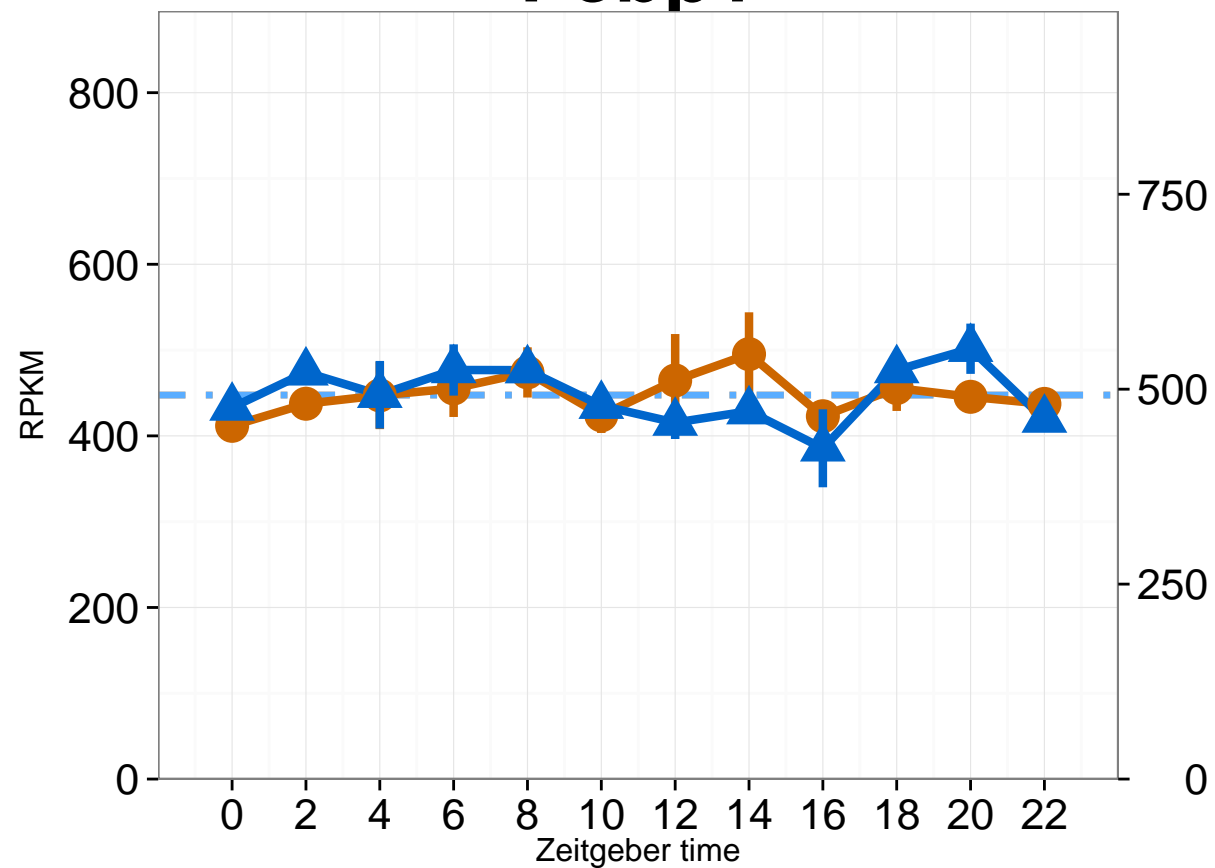

# Pebp1

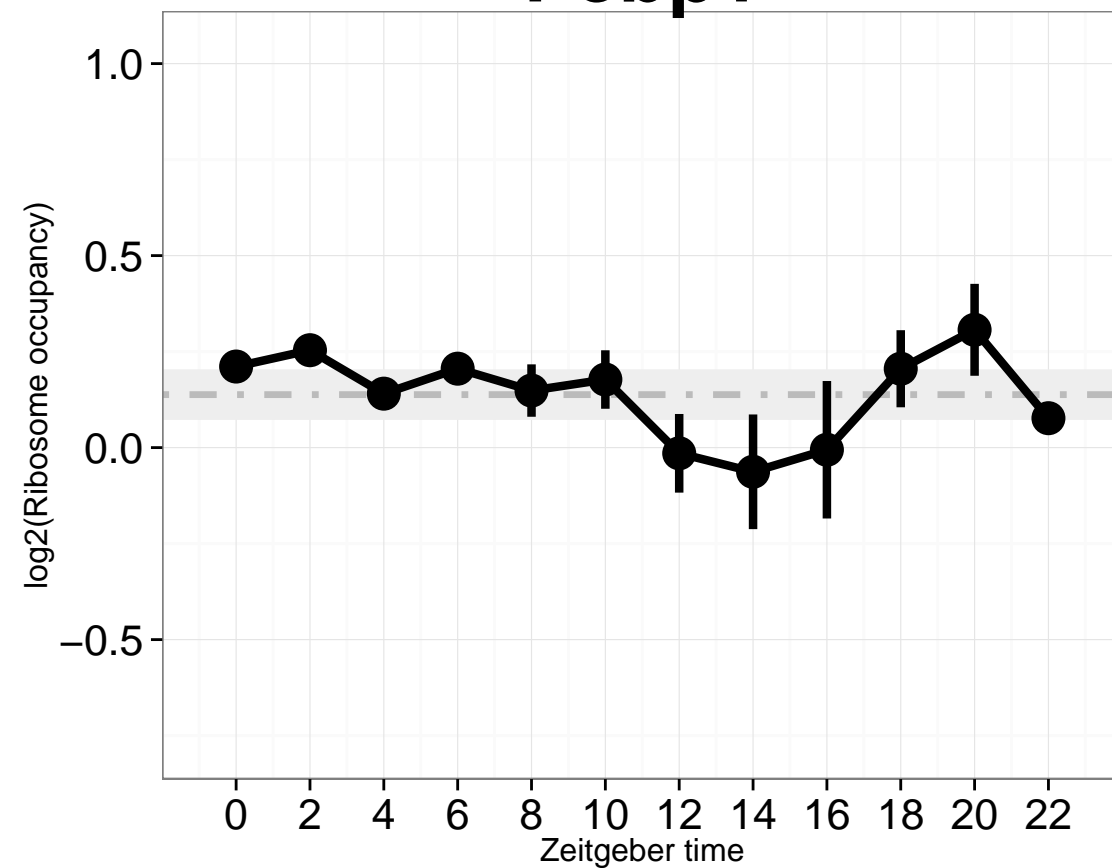

Supplement: Supplementary file 8240 [file 1]

# Tom1l1

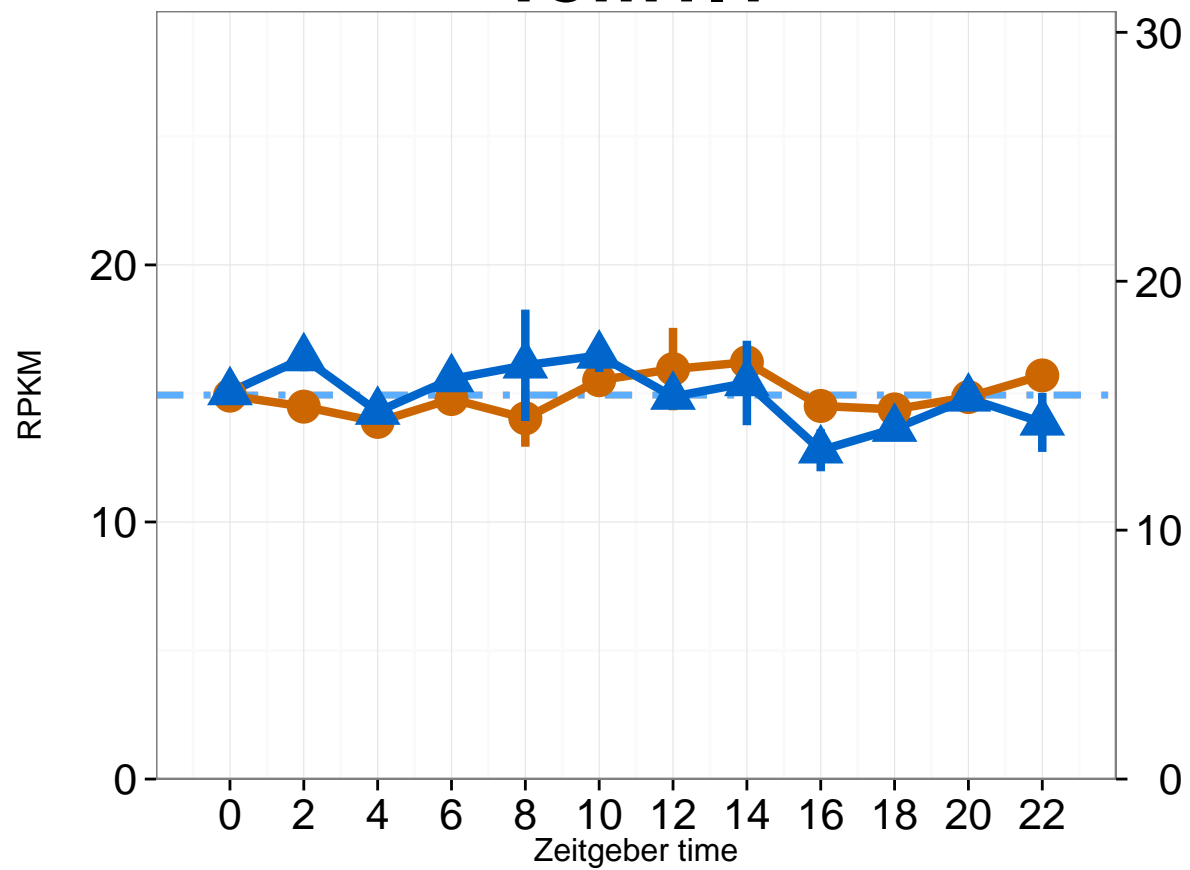

# Tom1l1

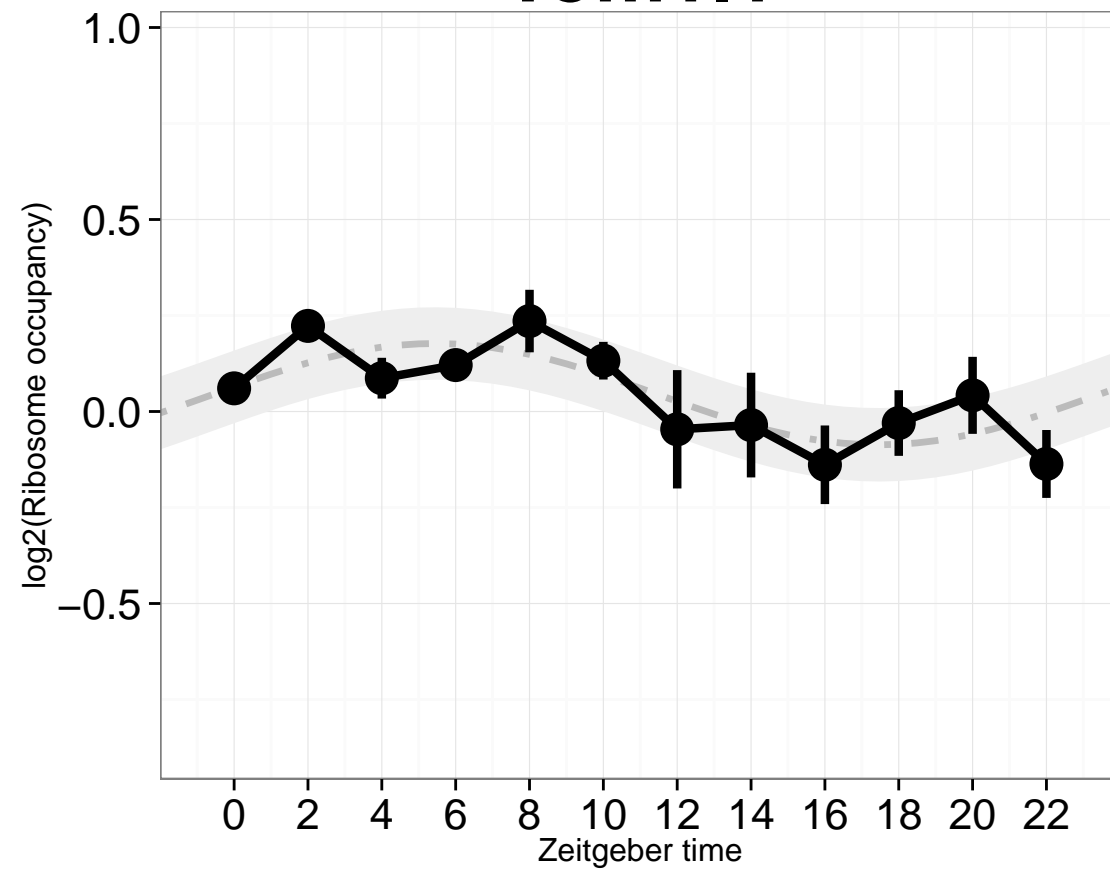

Supplement: Supplementary file 8241 [file 1]

# Pptc7

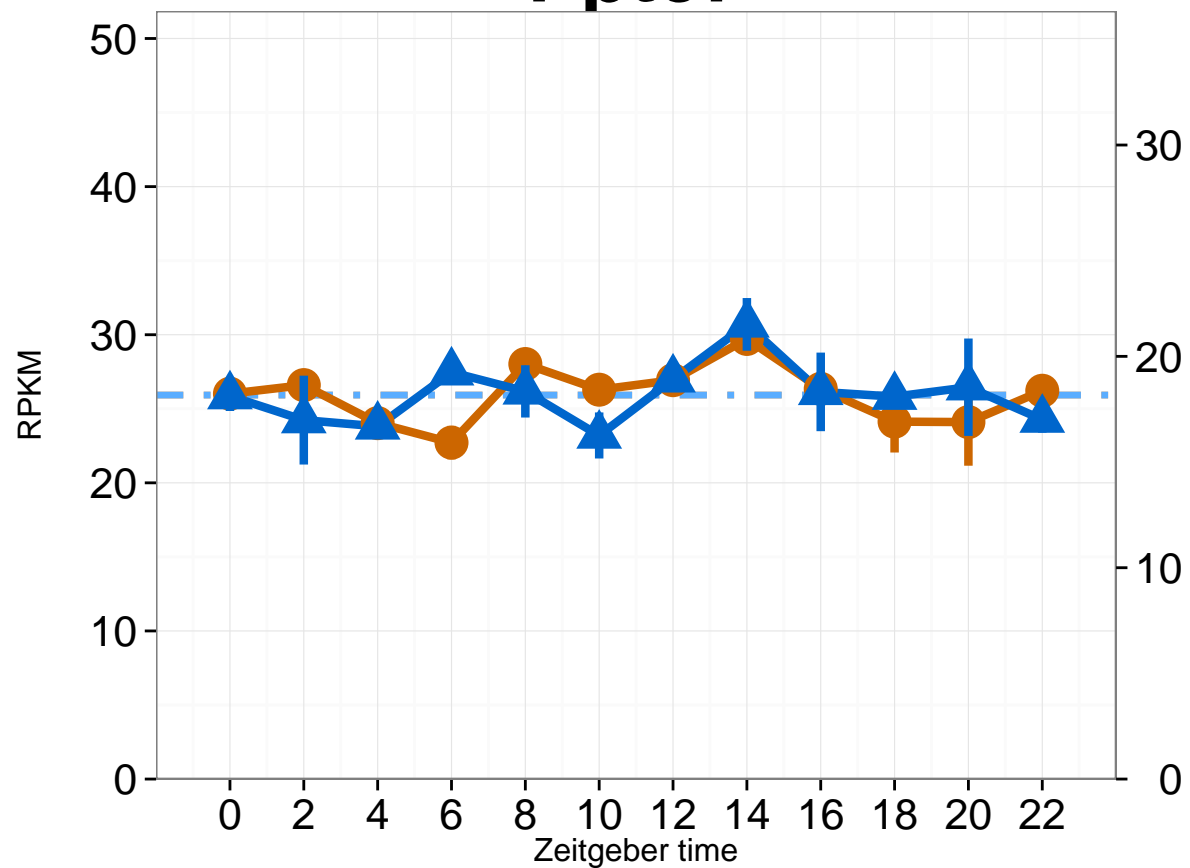

# Pptc7

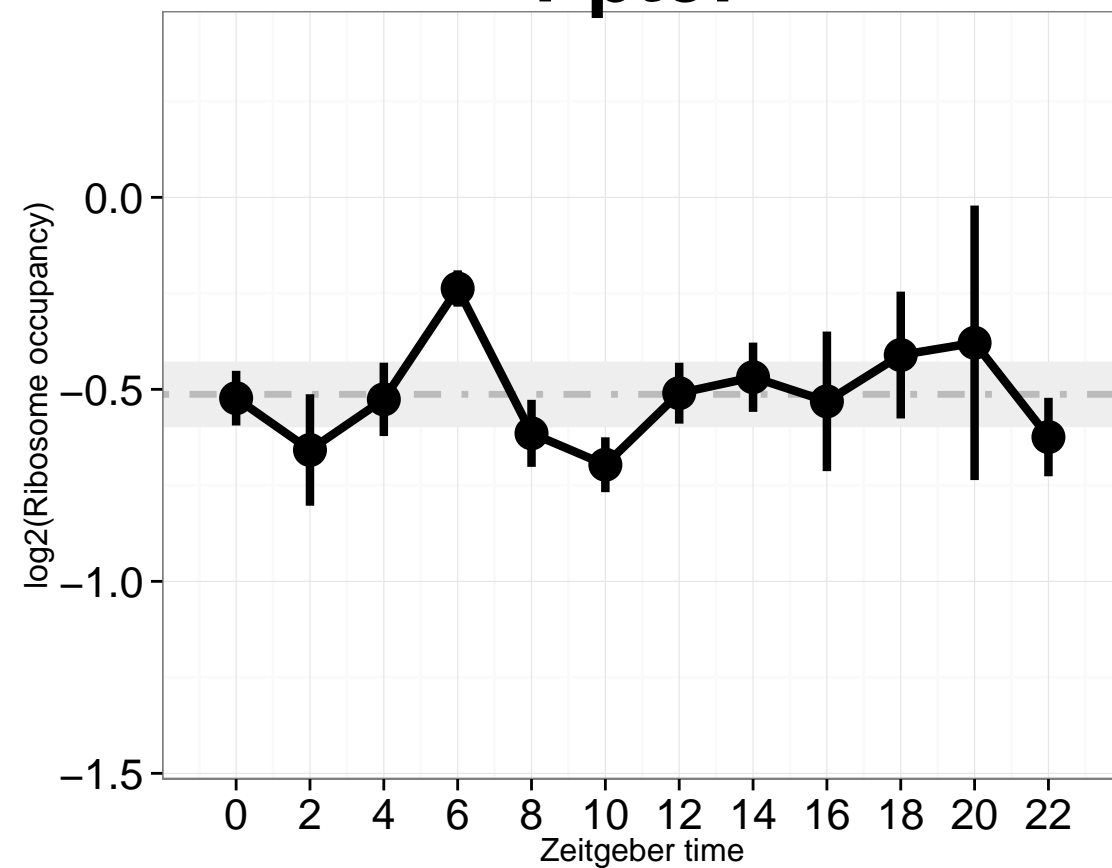

Supplement: Supplementary file 8242 [file 1]

# Endod1

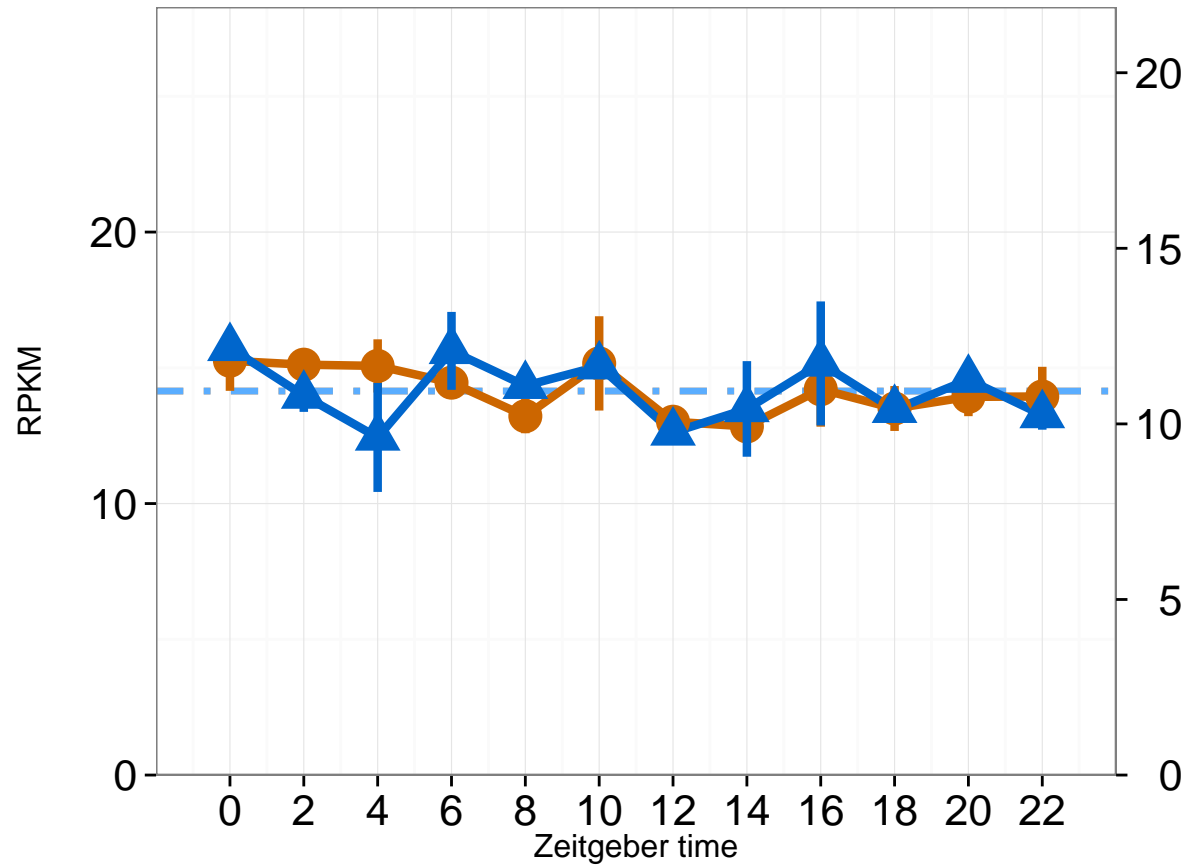

# Endod1

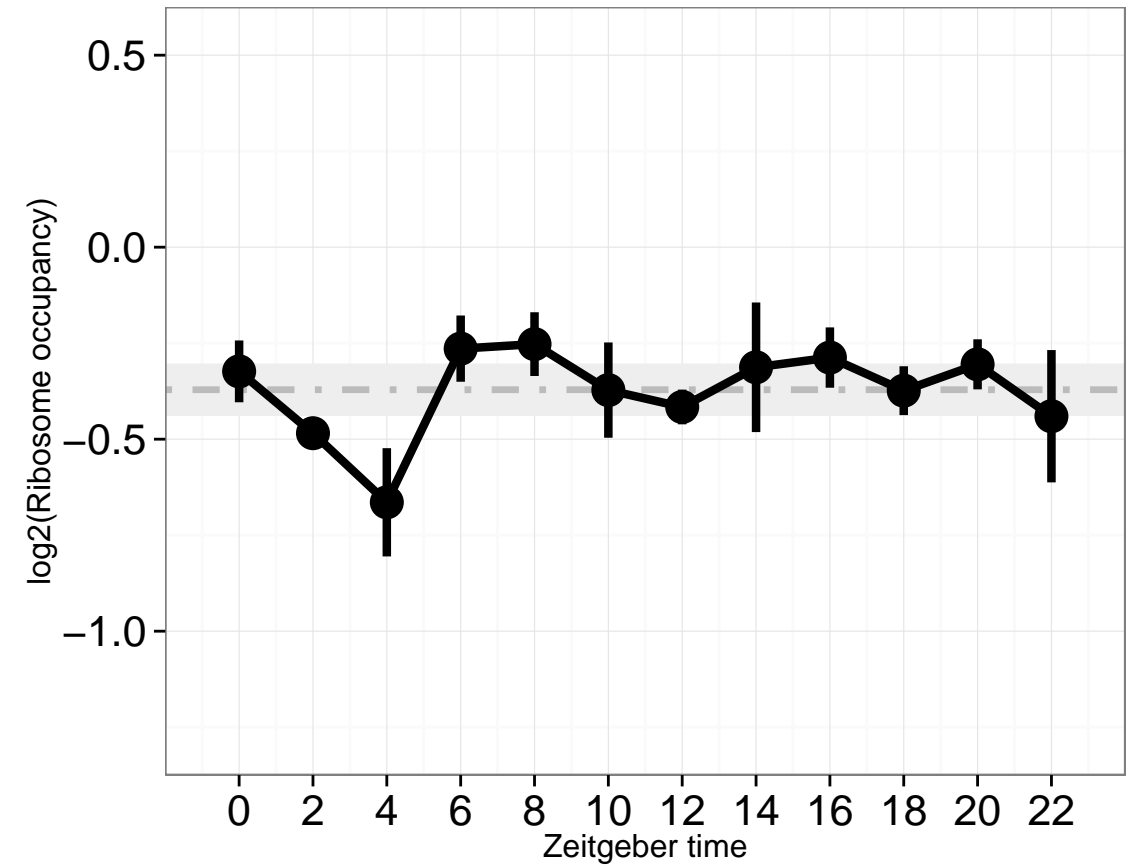

Supplement: Supplementary file 8243 [file 1]

## Pus3

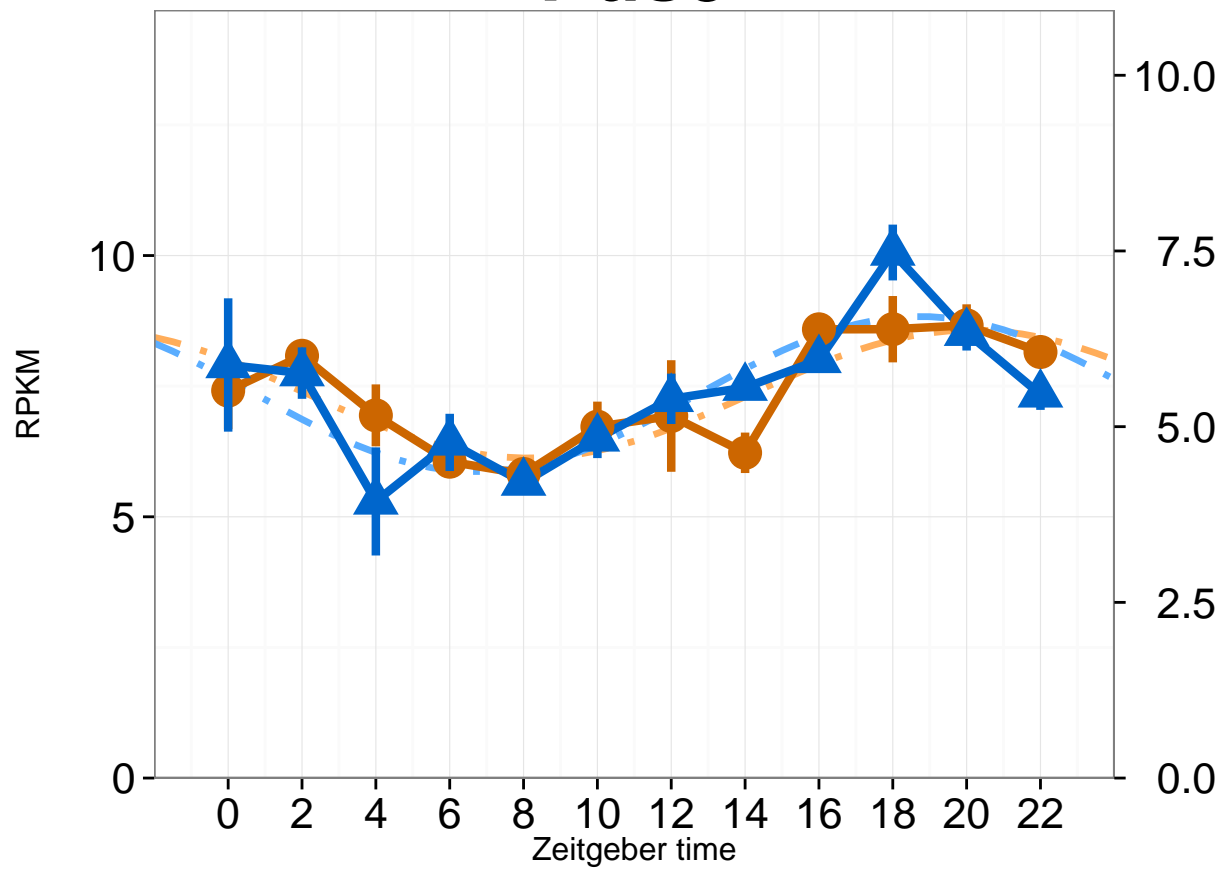

## Pus3

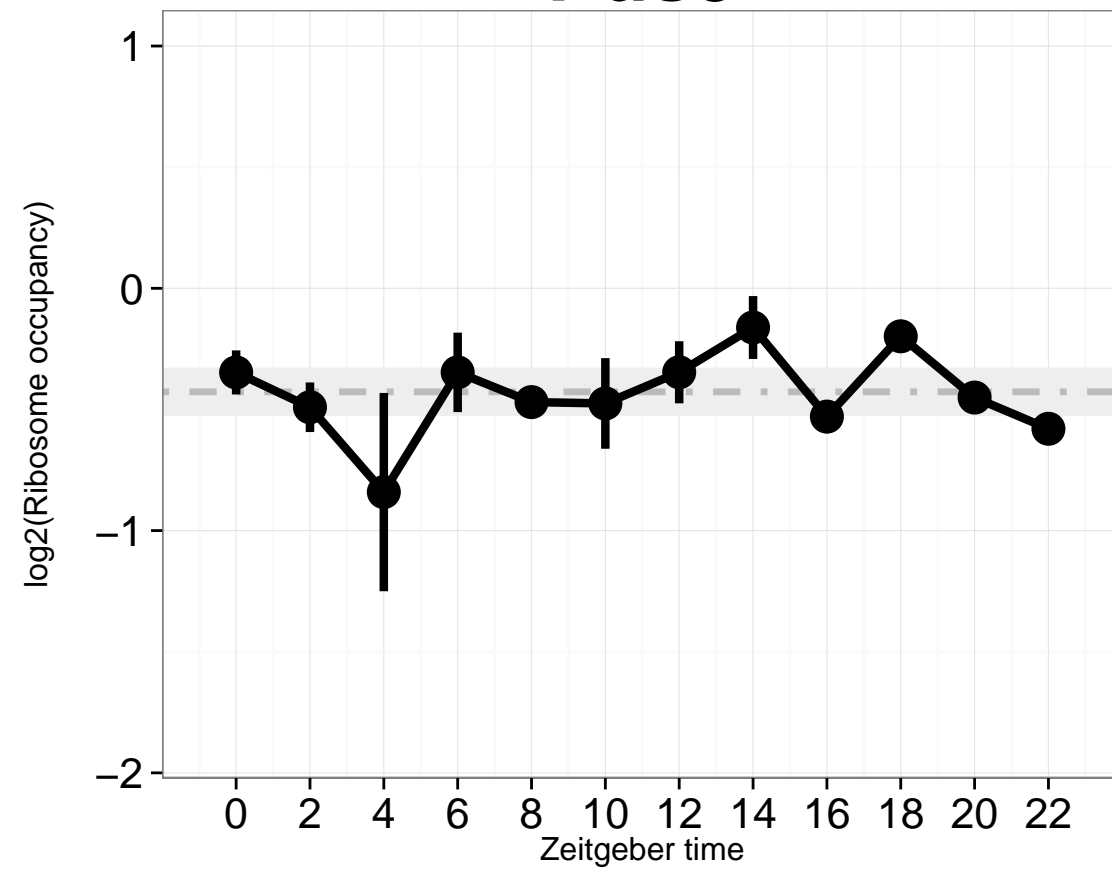

Supplement: Supplementary file 8244 [file 1]

## Odc1

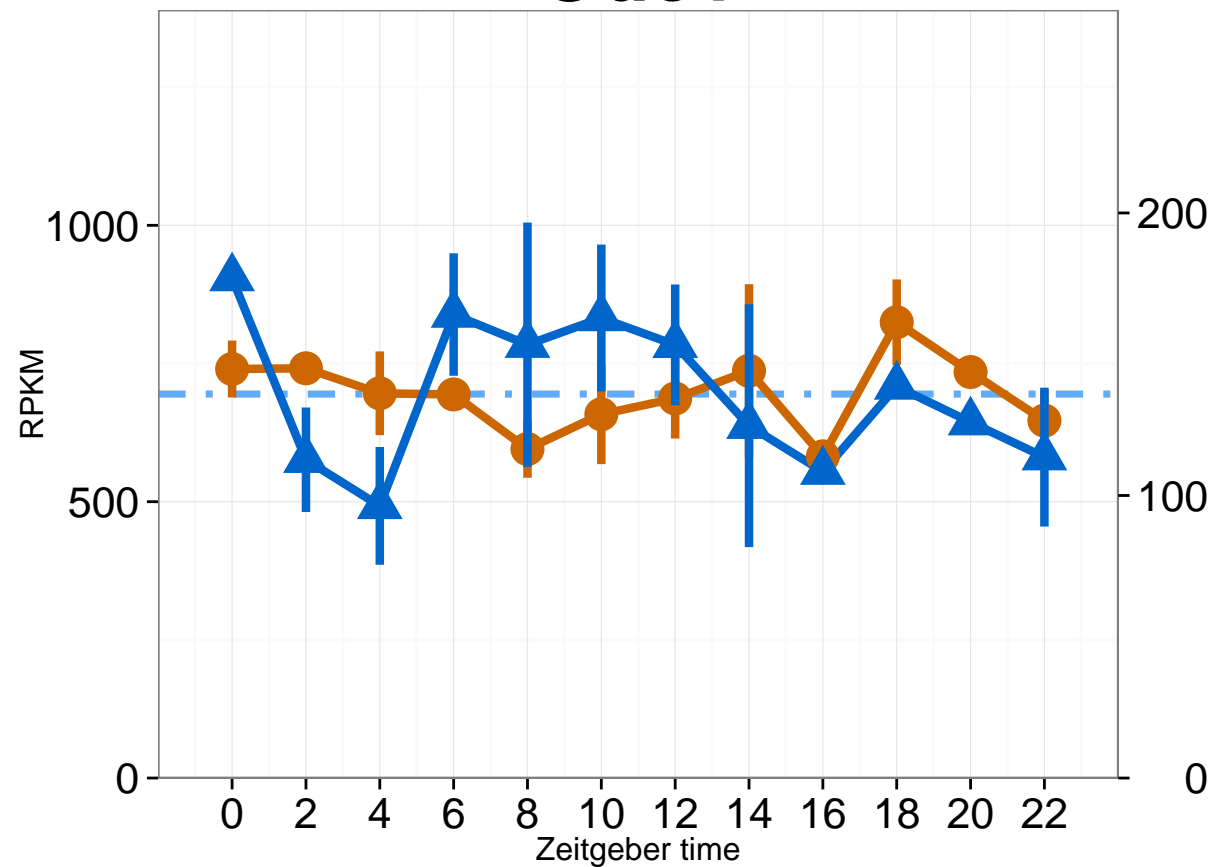

## Odc1

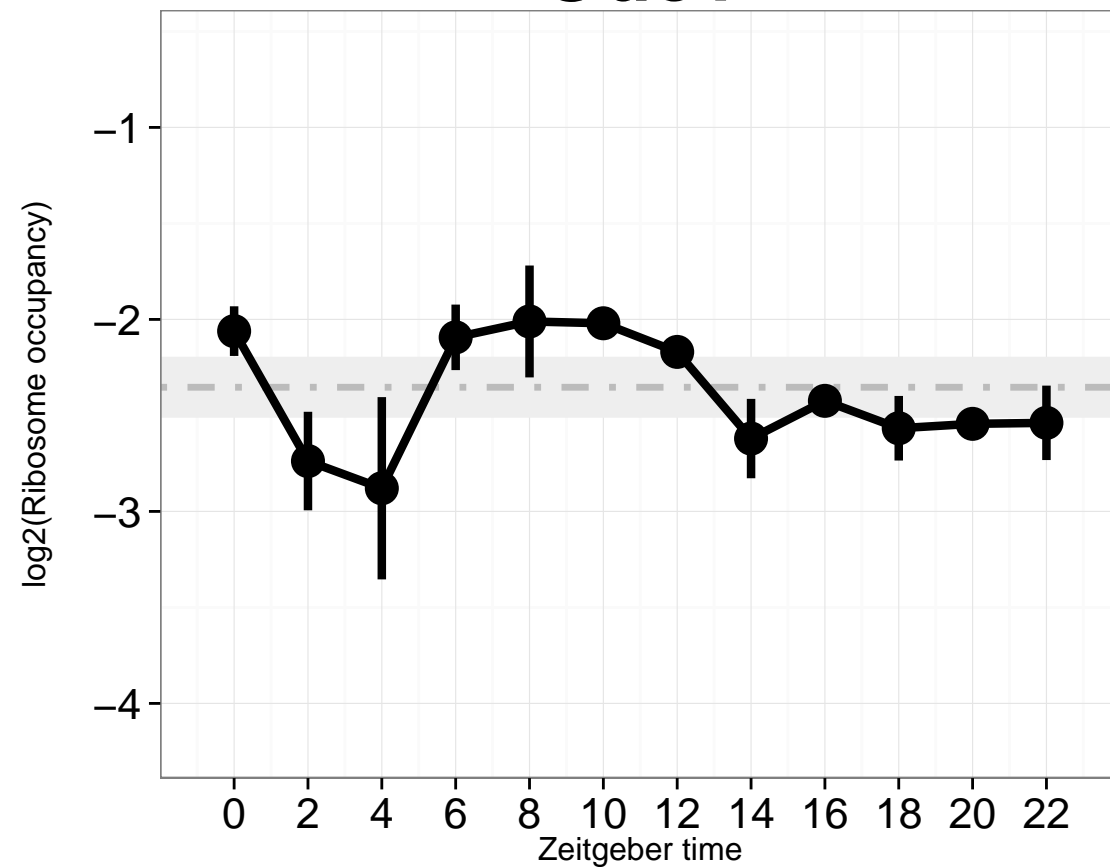

Supplement: Supplementary file 8245 [file 1]

## Actn4

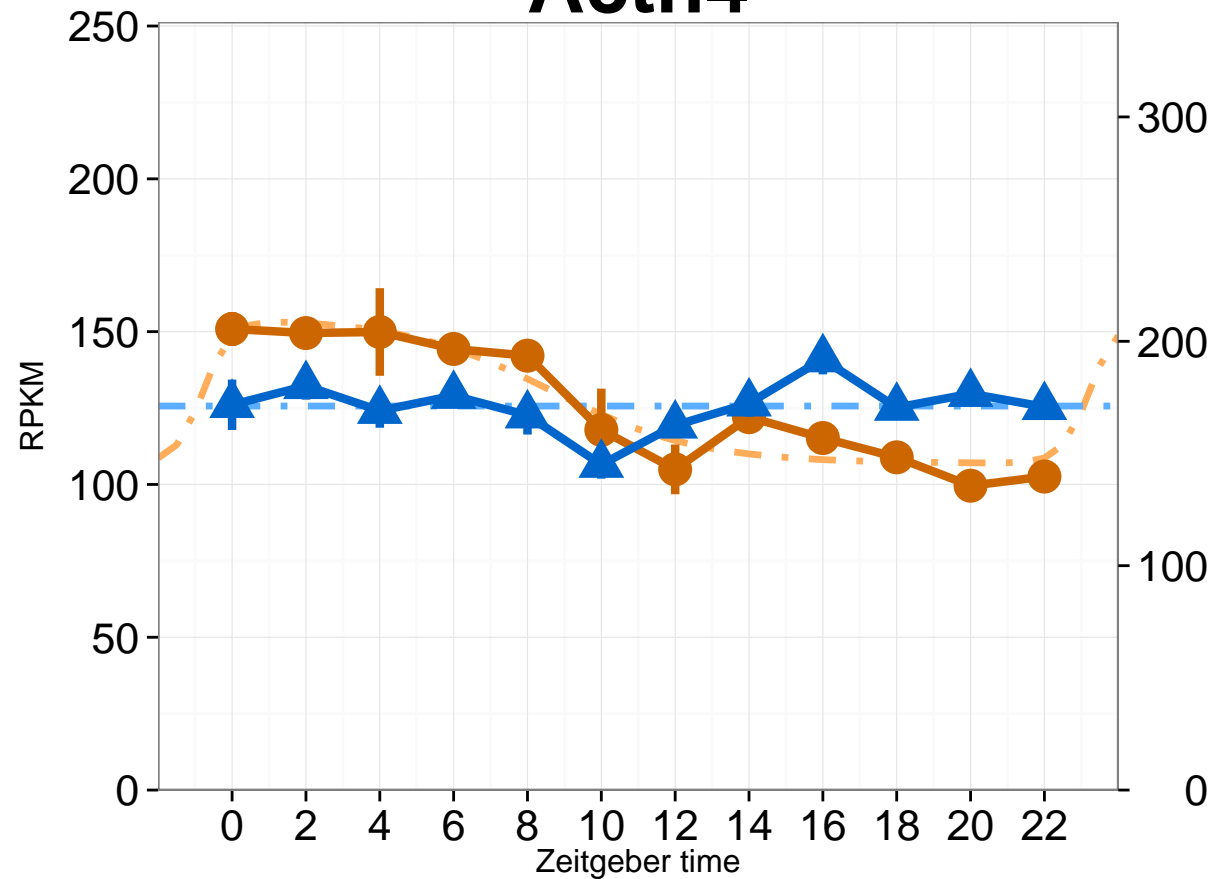

## Actn4

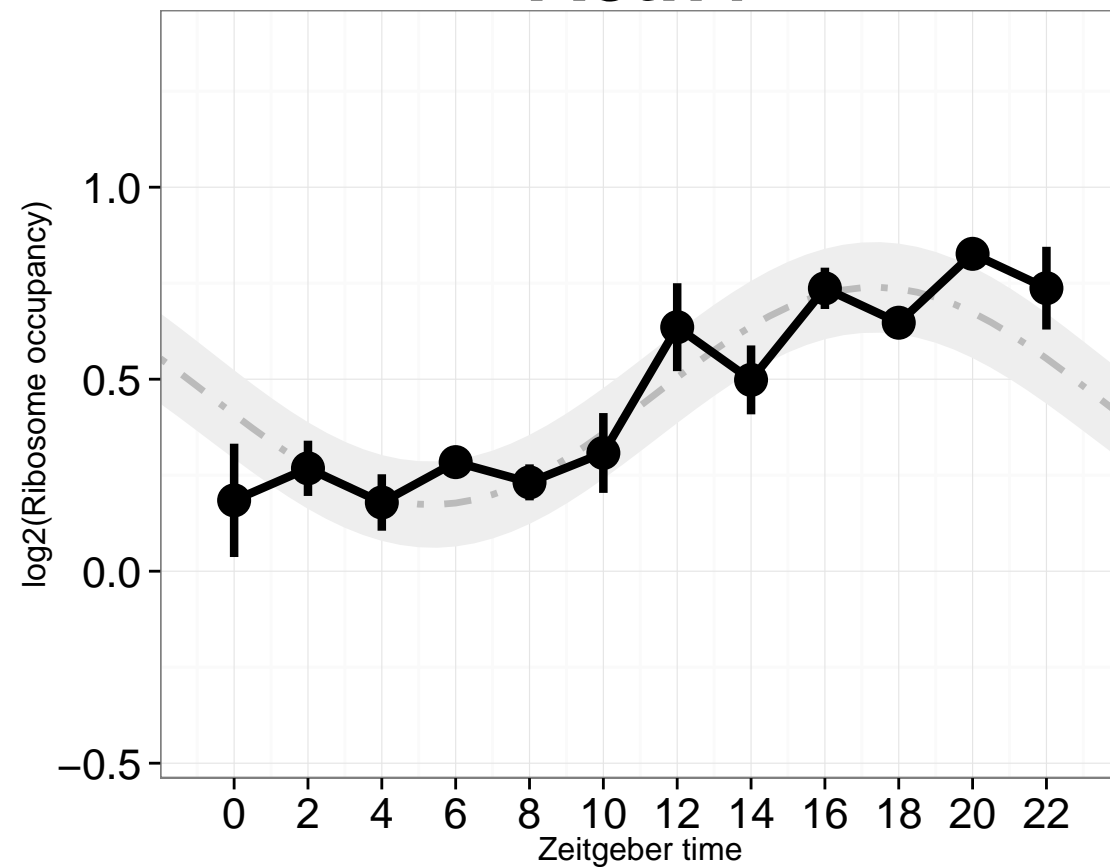

Supplement: Supplementary file 8246 [file 1]

## Ttc9c

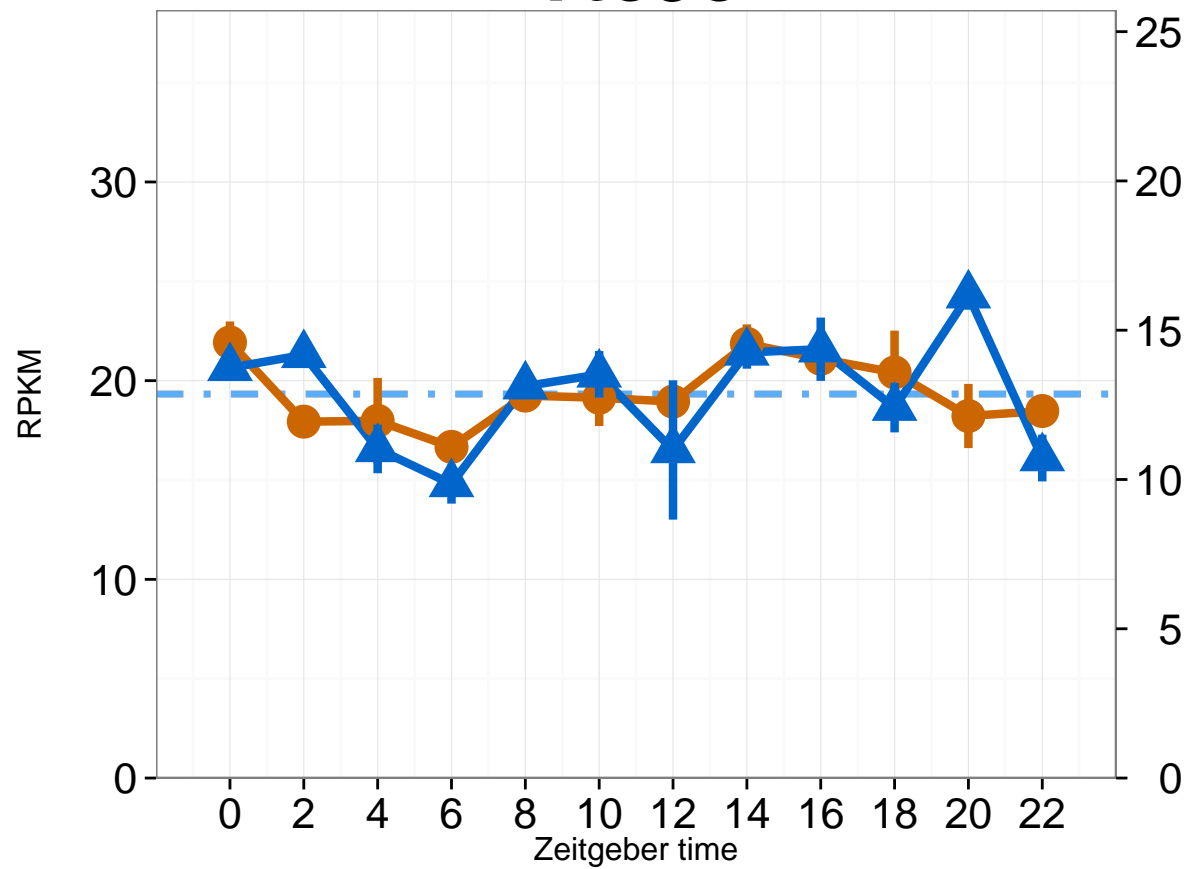

## Ttc9c

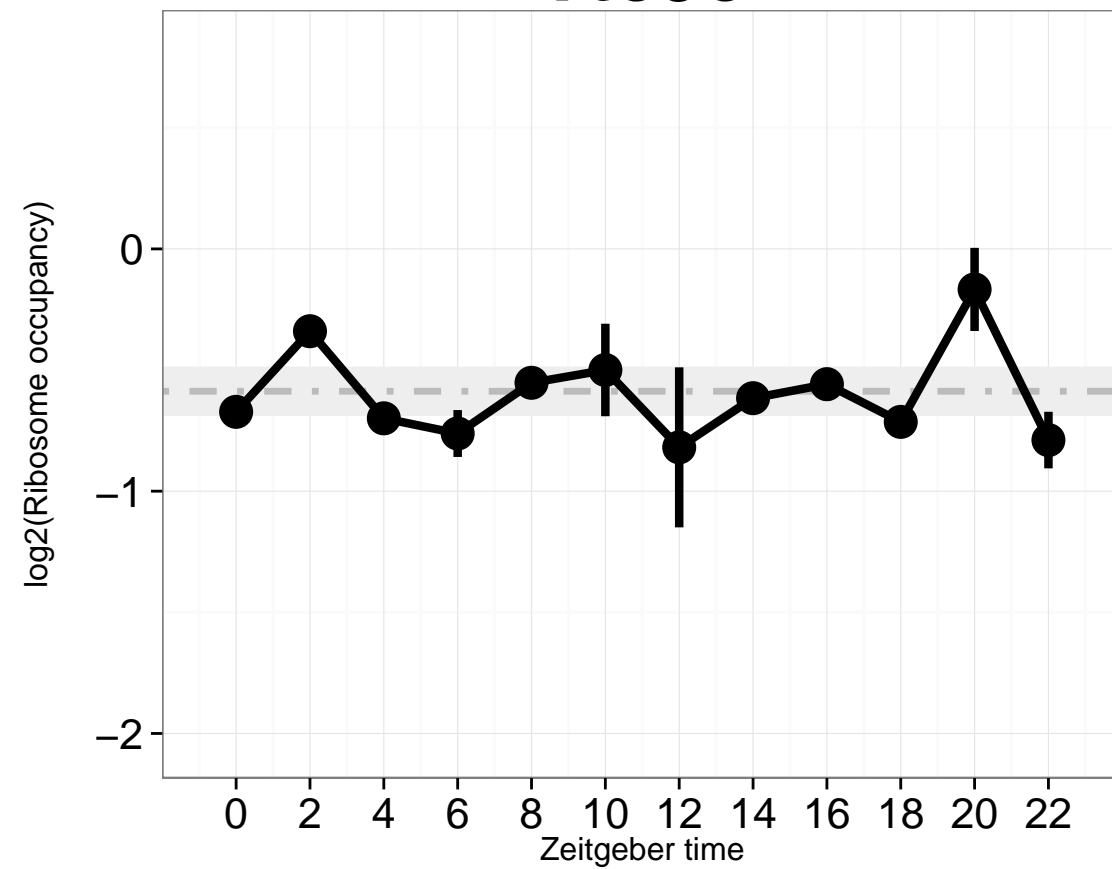

Supplement: Supplementary file 8247 [file 1]

# Zfp954

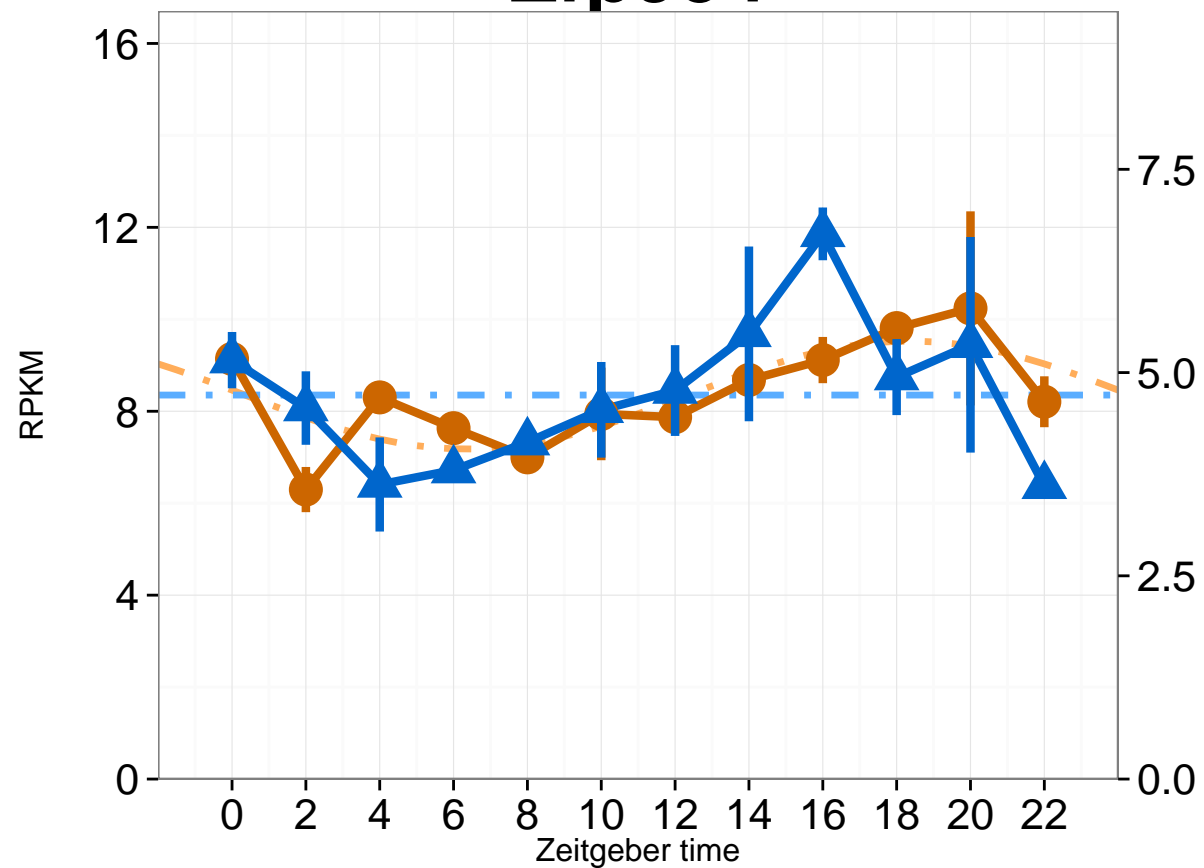

# Zfp954

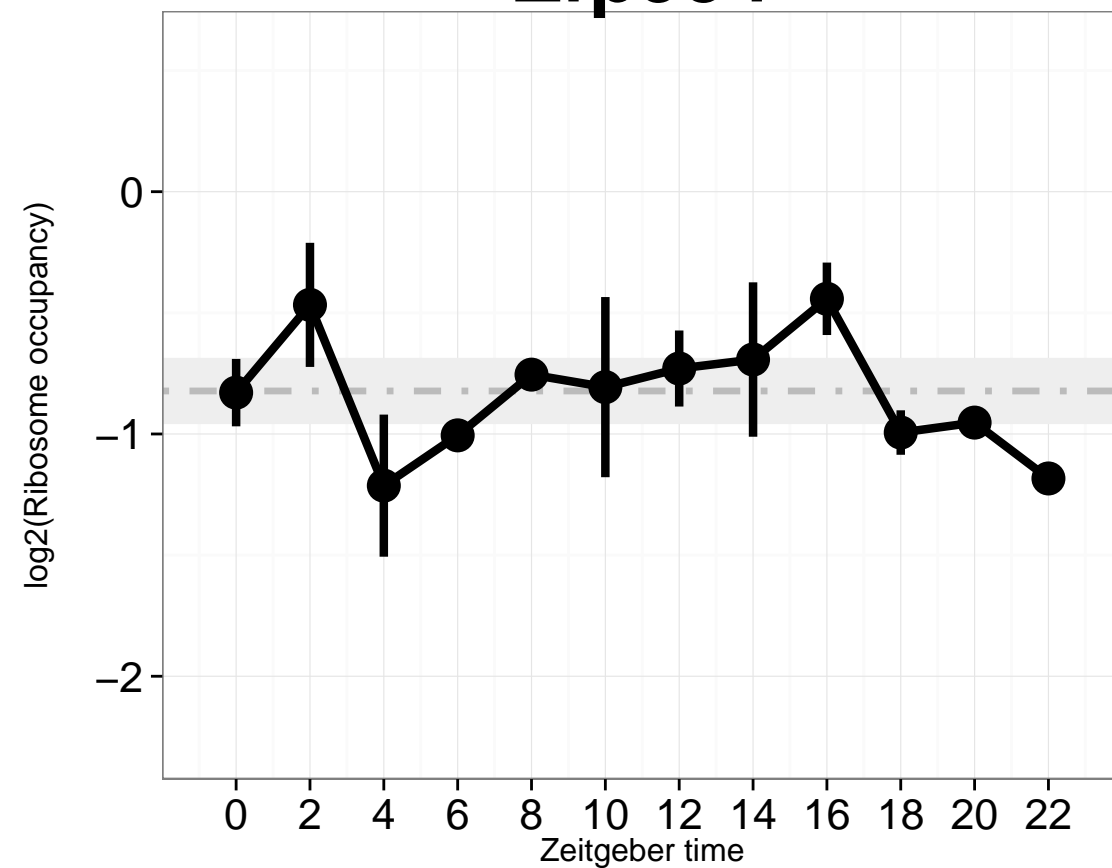

Supplement: Supplementary file 8248 [file 1]

## Slfn3

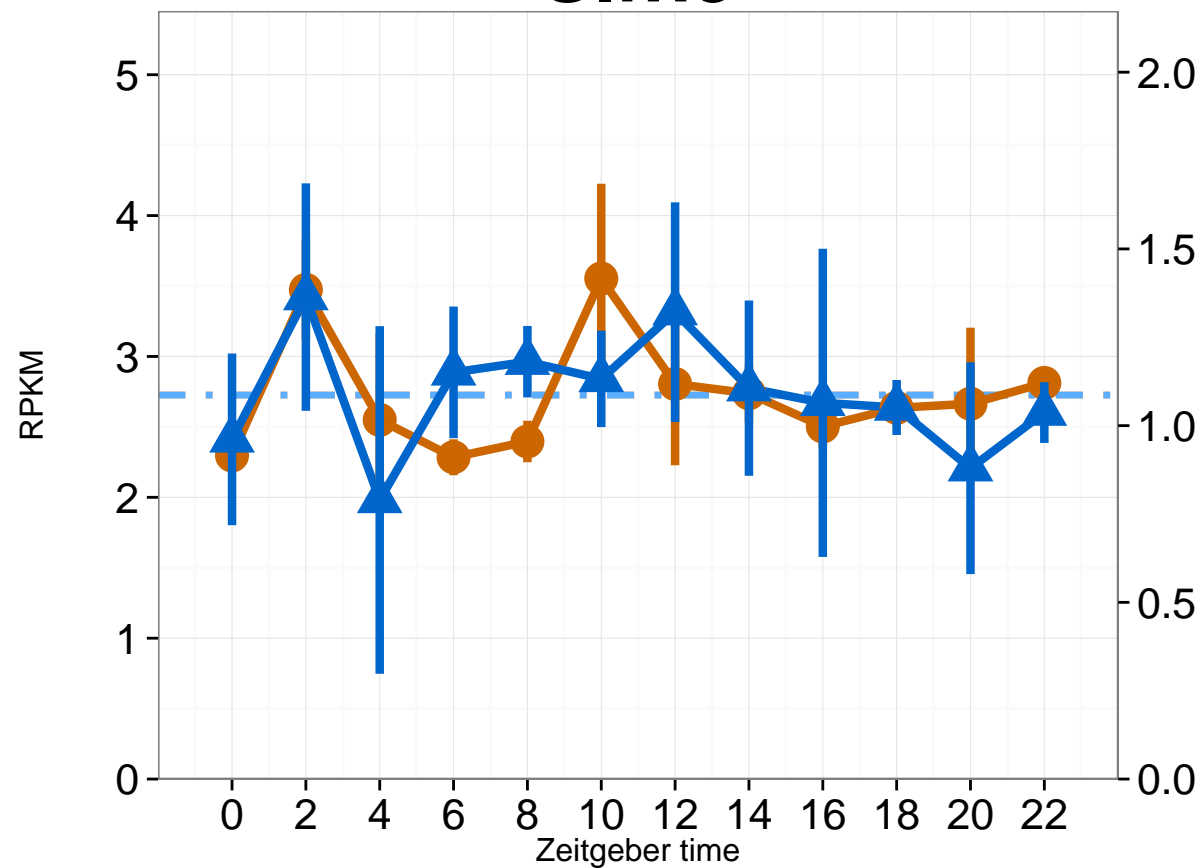

## Slfn3

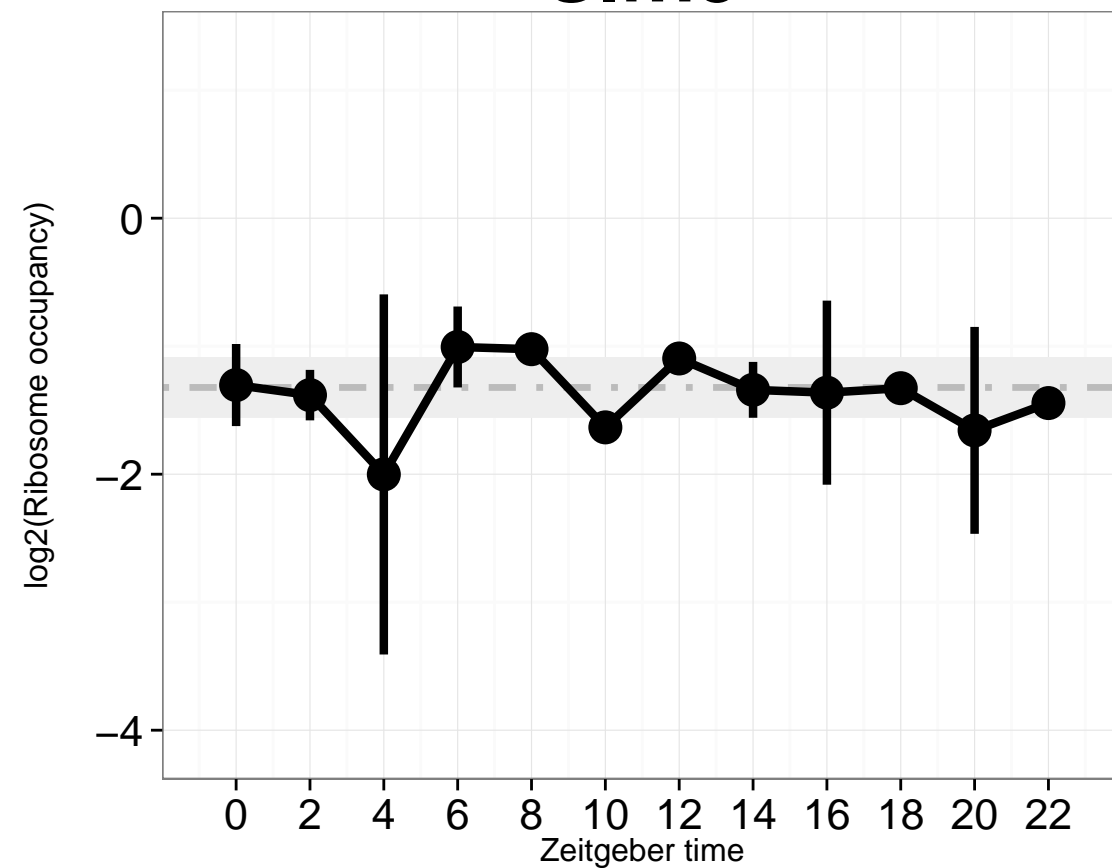

Supplement: Supplementary file 8249 [file 1]

# Metrnl

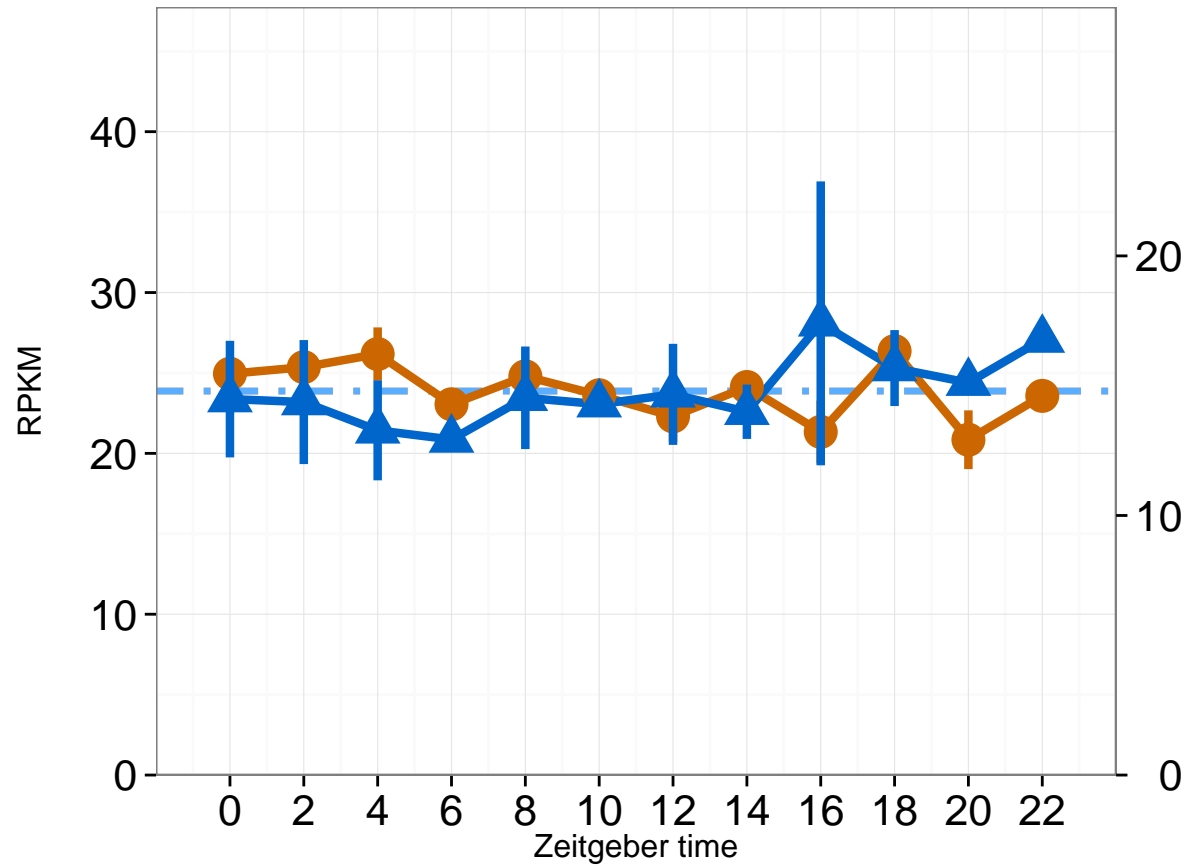

# Metrnl

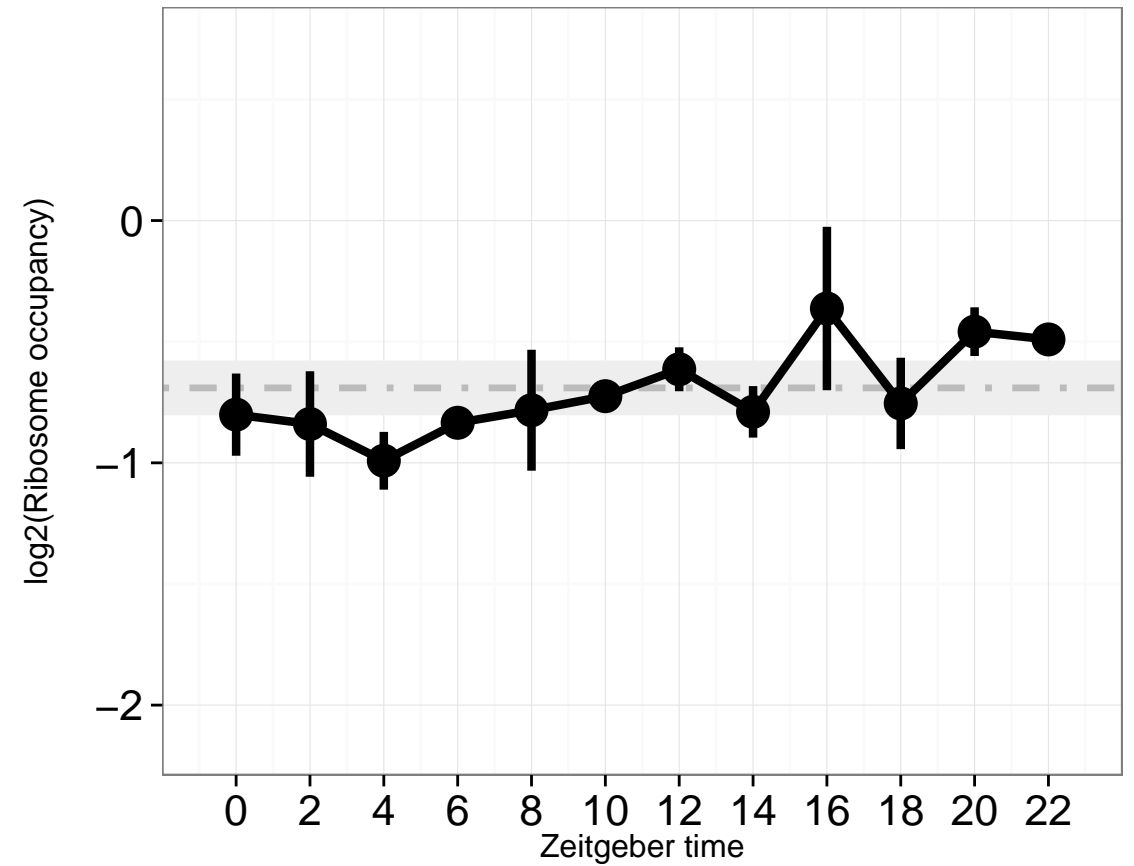

Supplement: Supplementary file 8250 [file 1]

# Pde6d

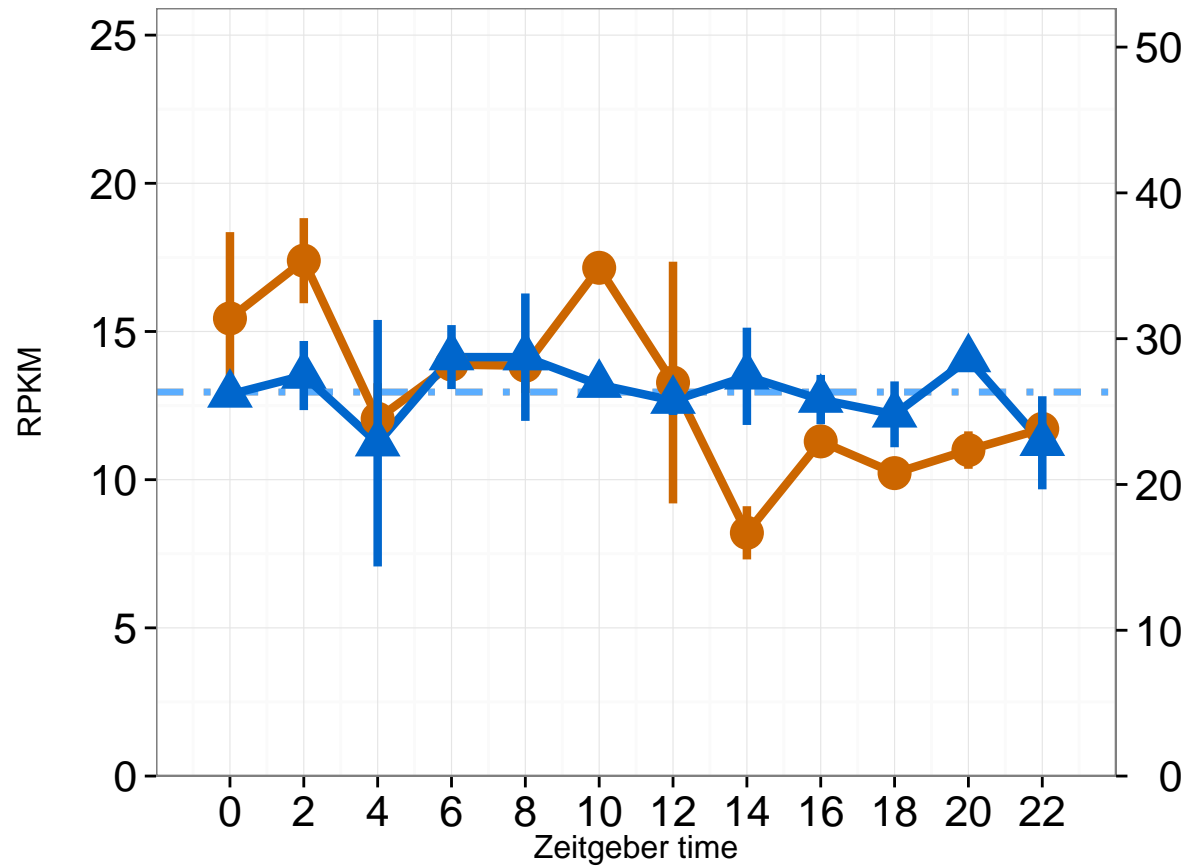

# Pde6d

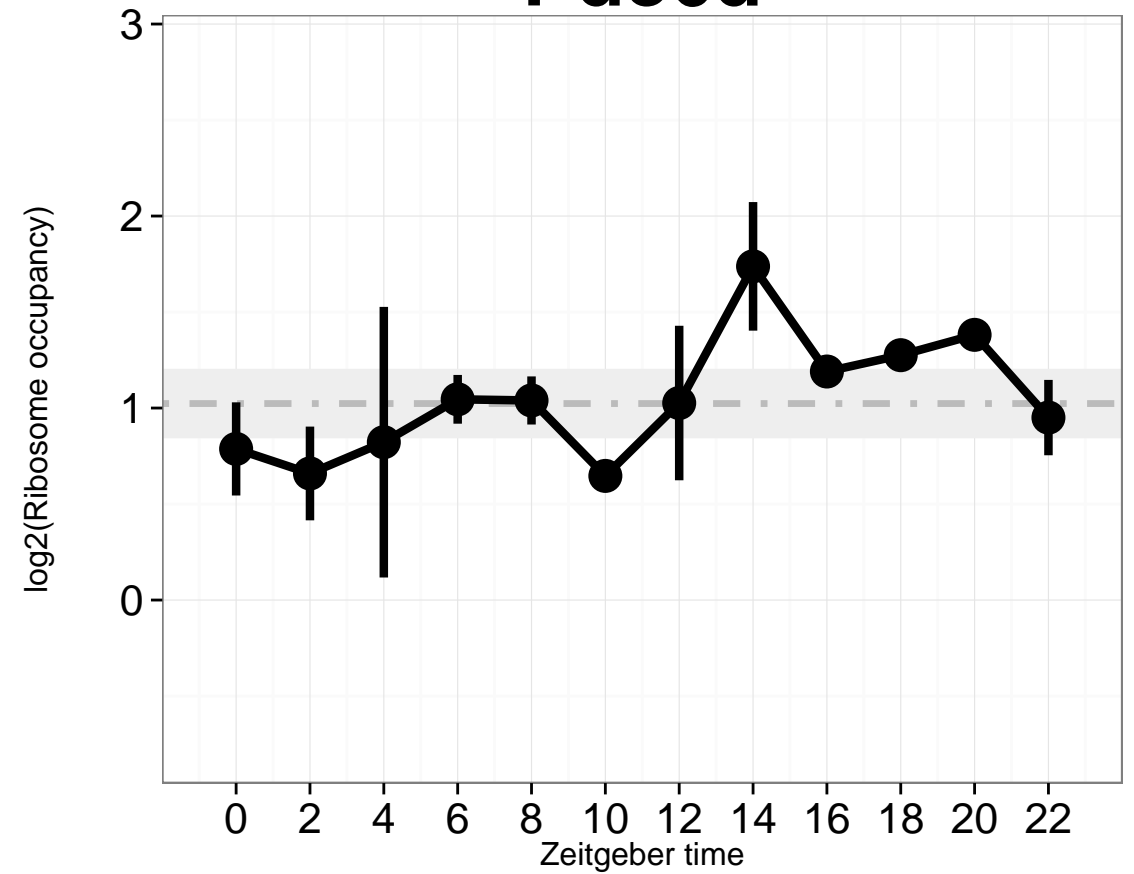

Supplement: Supplementary file 8251 [file 1]

## Cpz

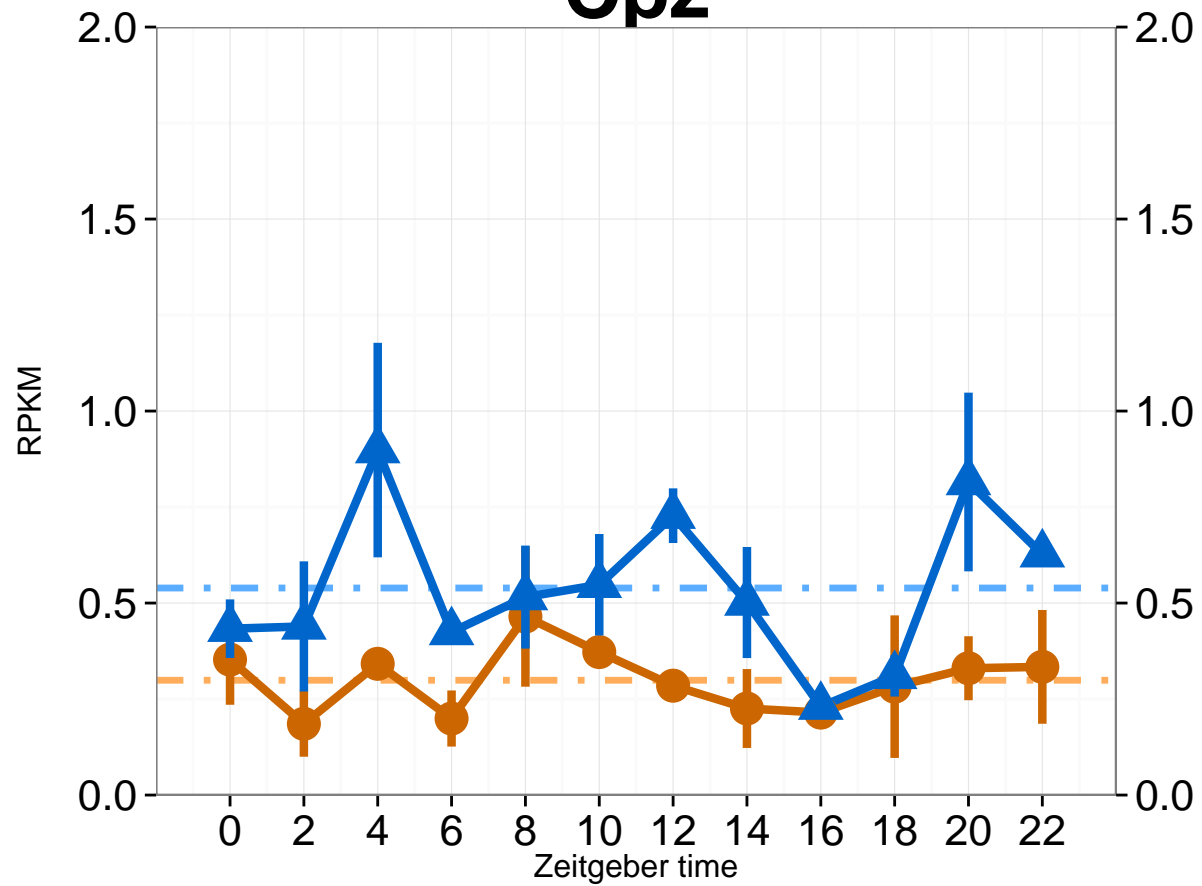

## Cpz

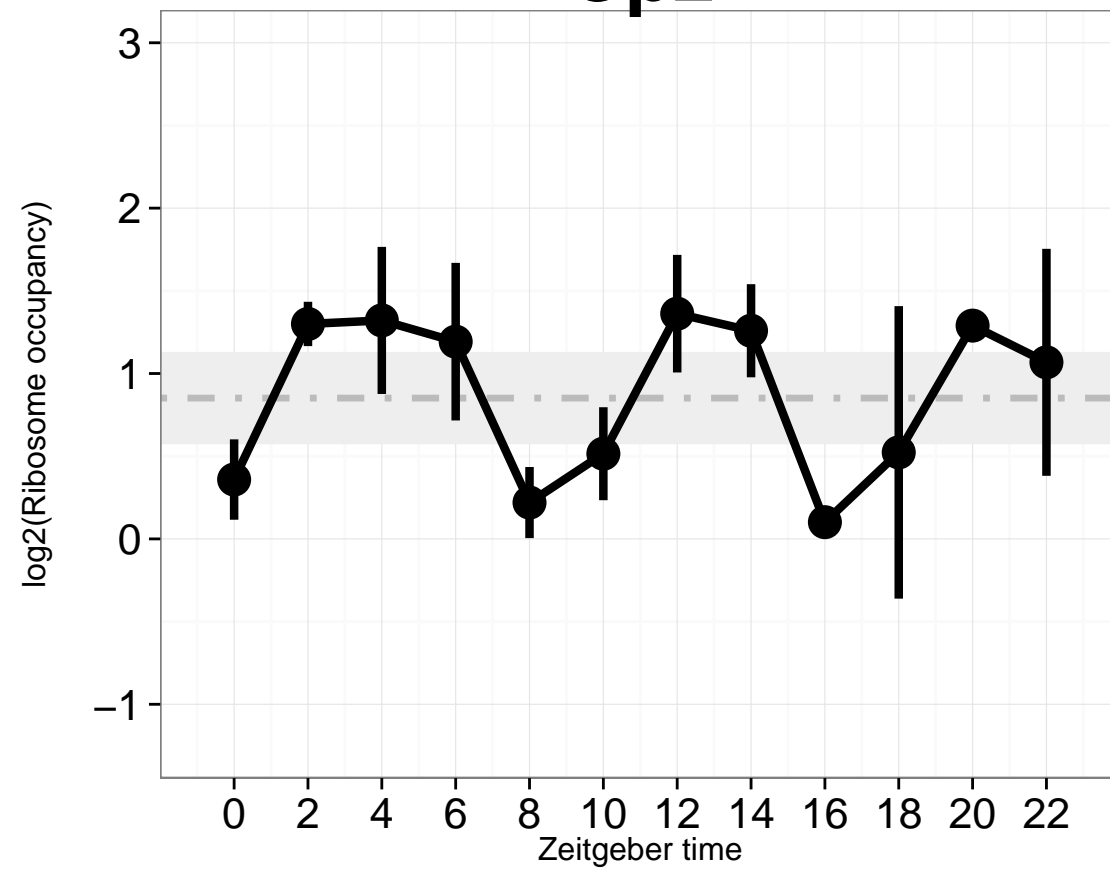

Supplement: Supplementary file 8252 [file 1]

## Cbr3

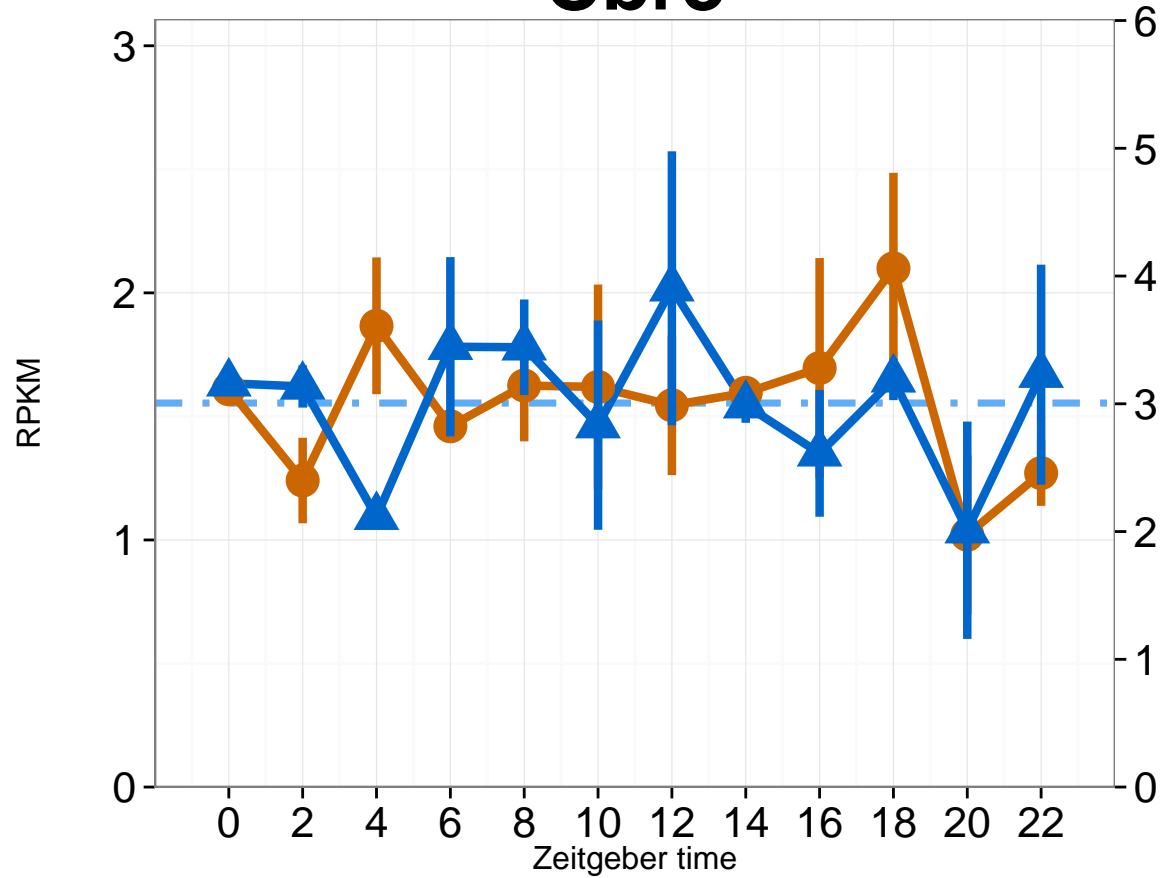

## Cbr3

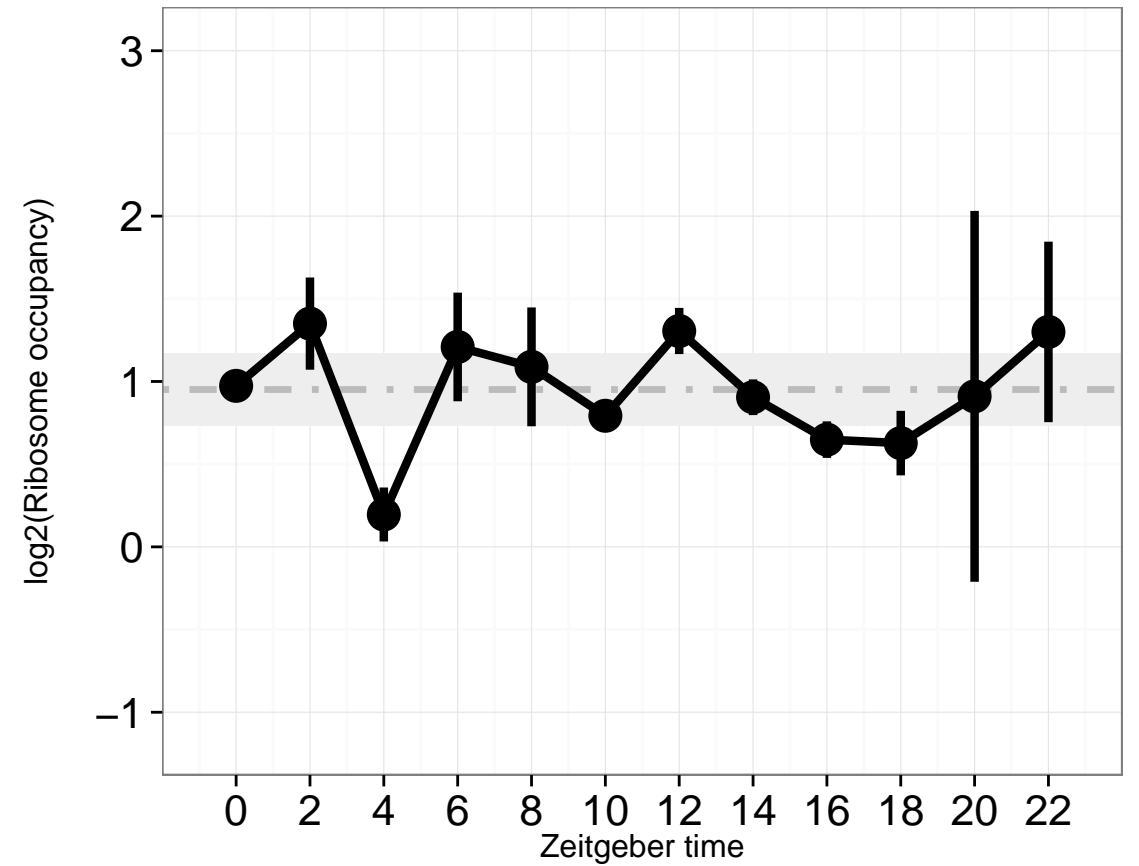

Supplement: Supplementary file 8253 [file 1]

# Cd7 TR

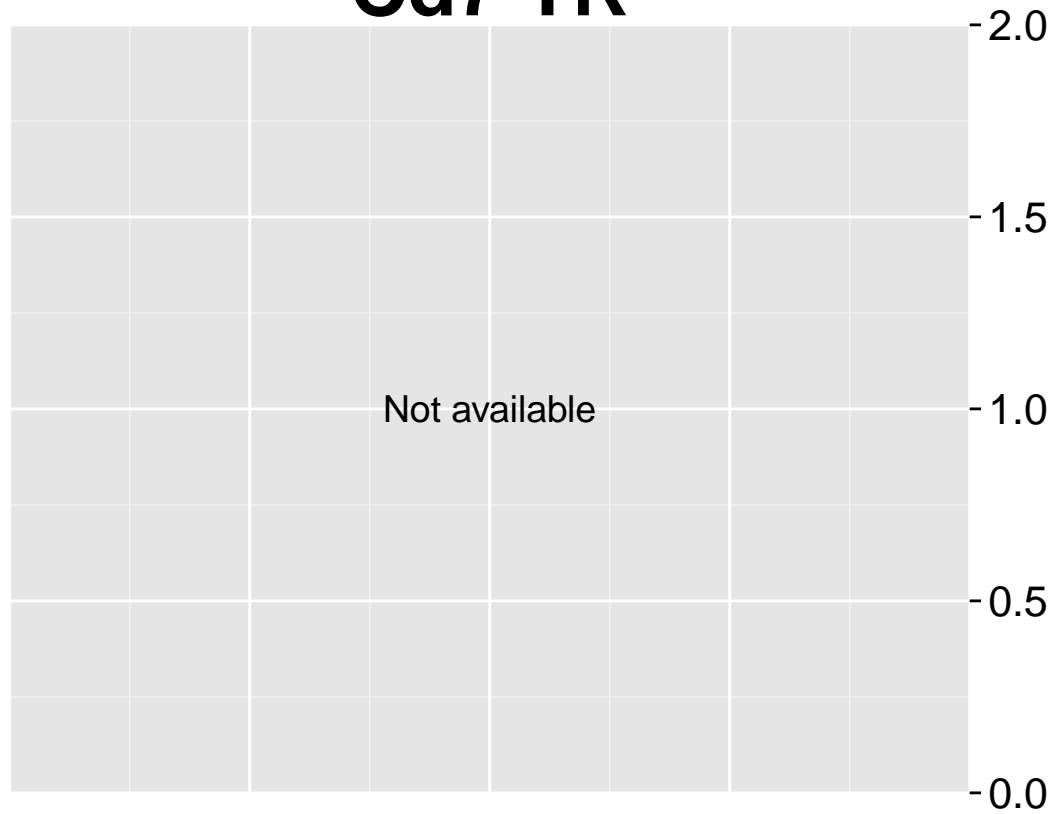

## Cd7 log2(Ribosome occupancy)

Supplement: Supplementary file 8254 [file 1]

## ler2

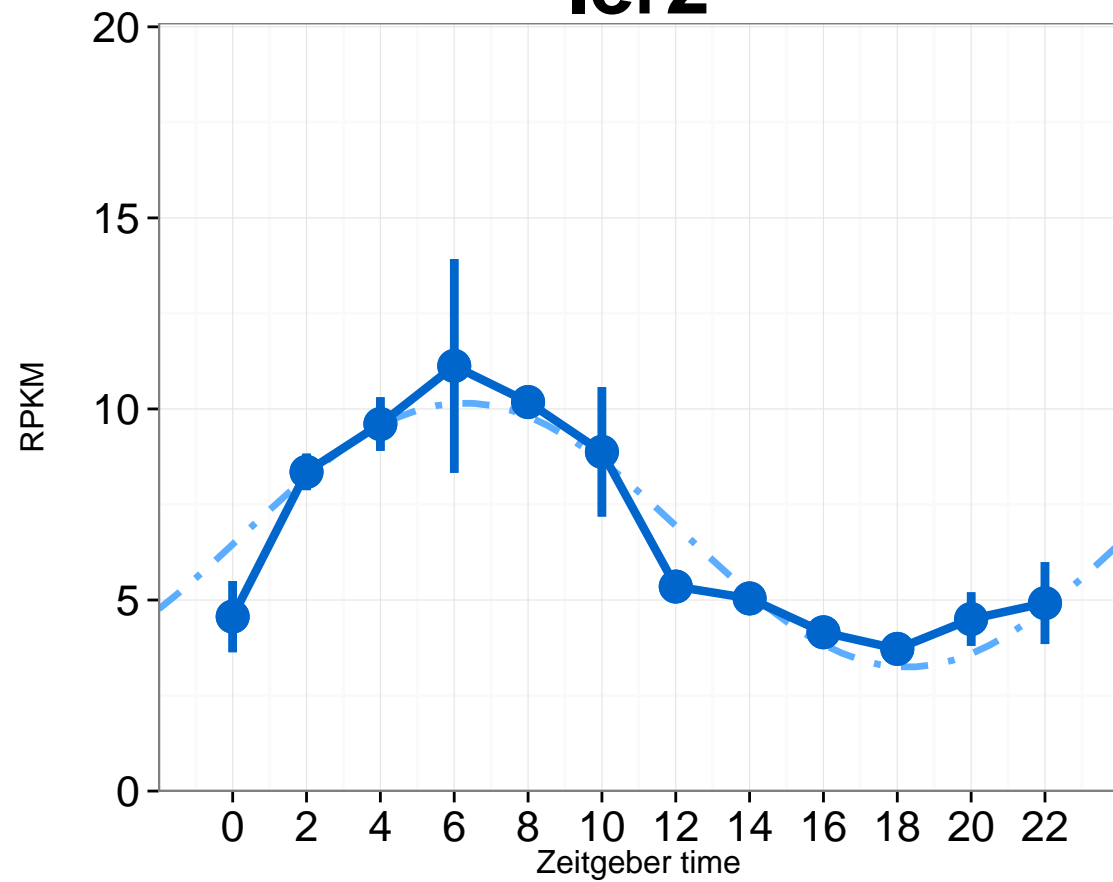

## ler2 log2(Ribosome occupancy)

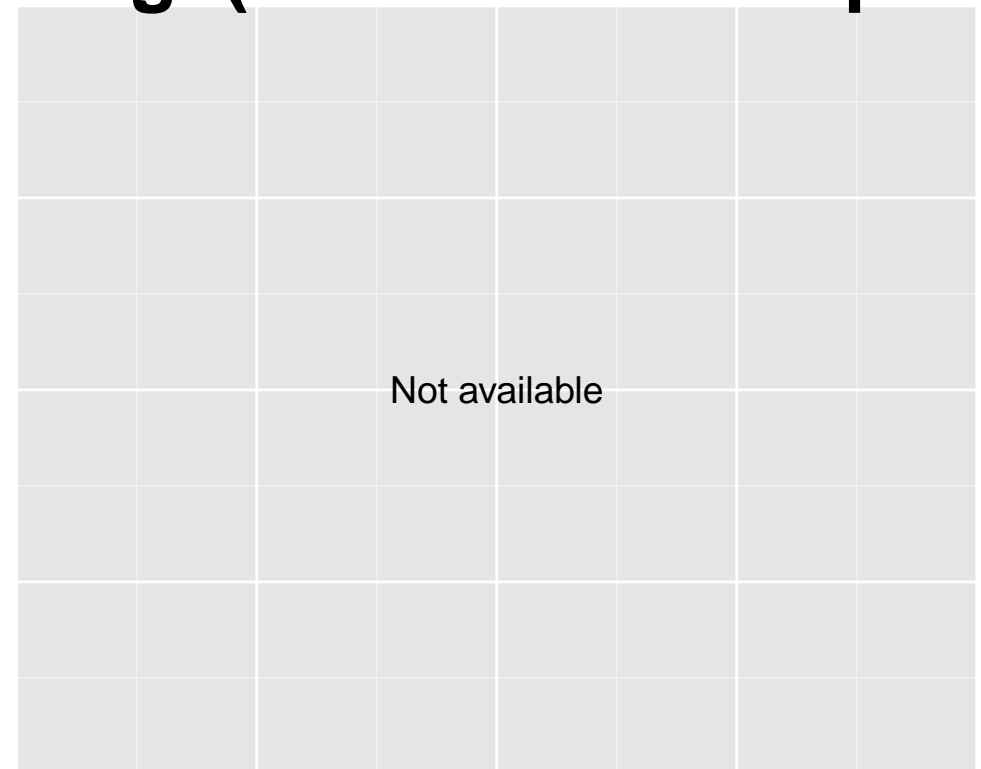

Supplement: Supplementary file 8255 [file 1]

## Lpar2

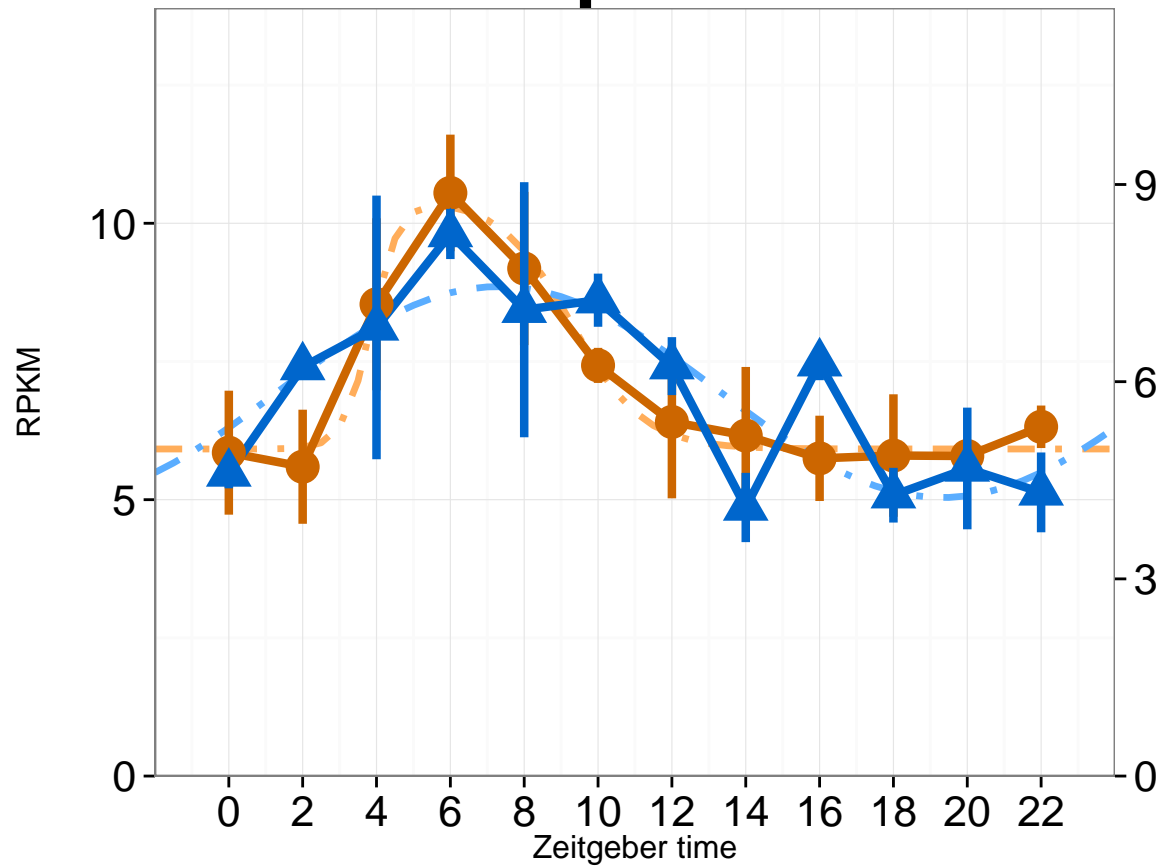

## Lpar2

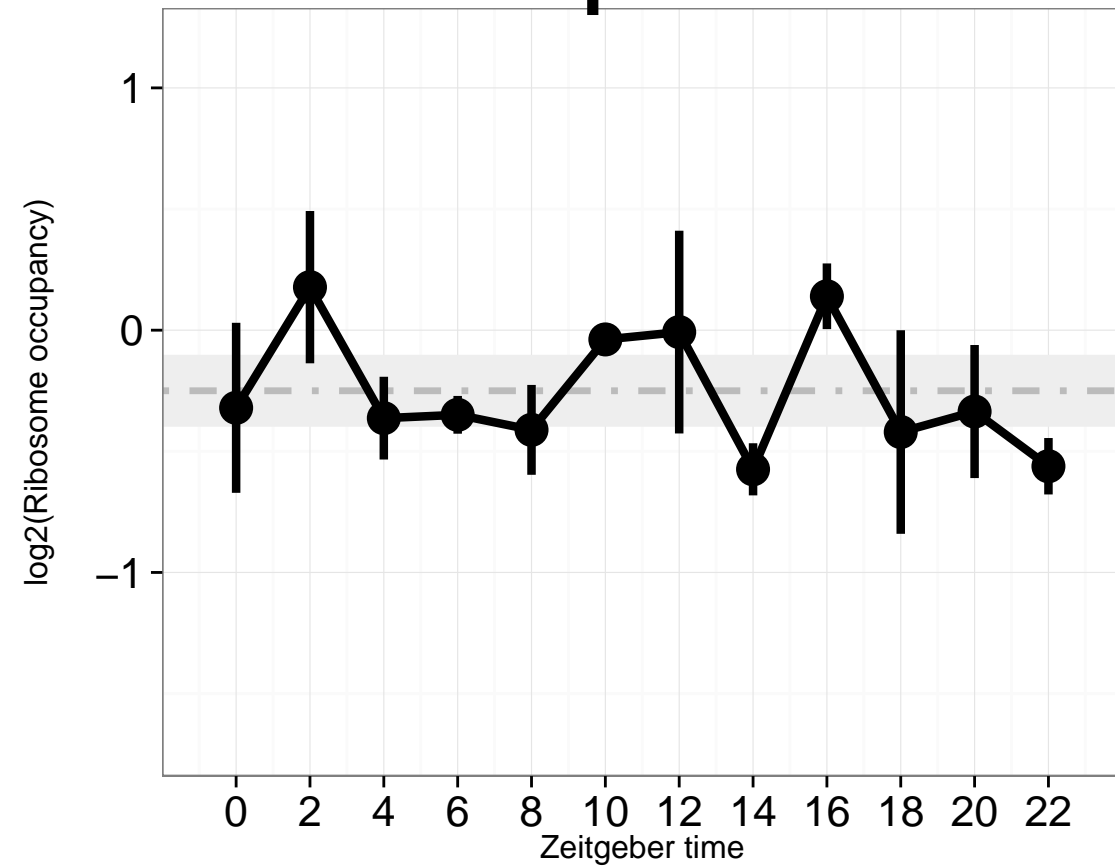

Supplement: Supplementary file 8256 [file 1]

## CamI

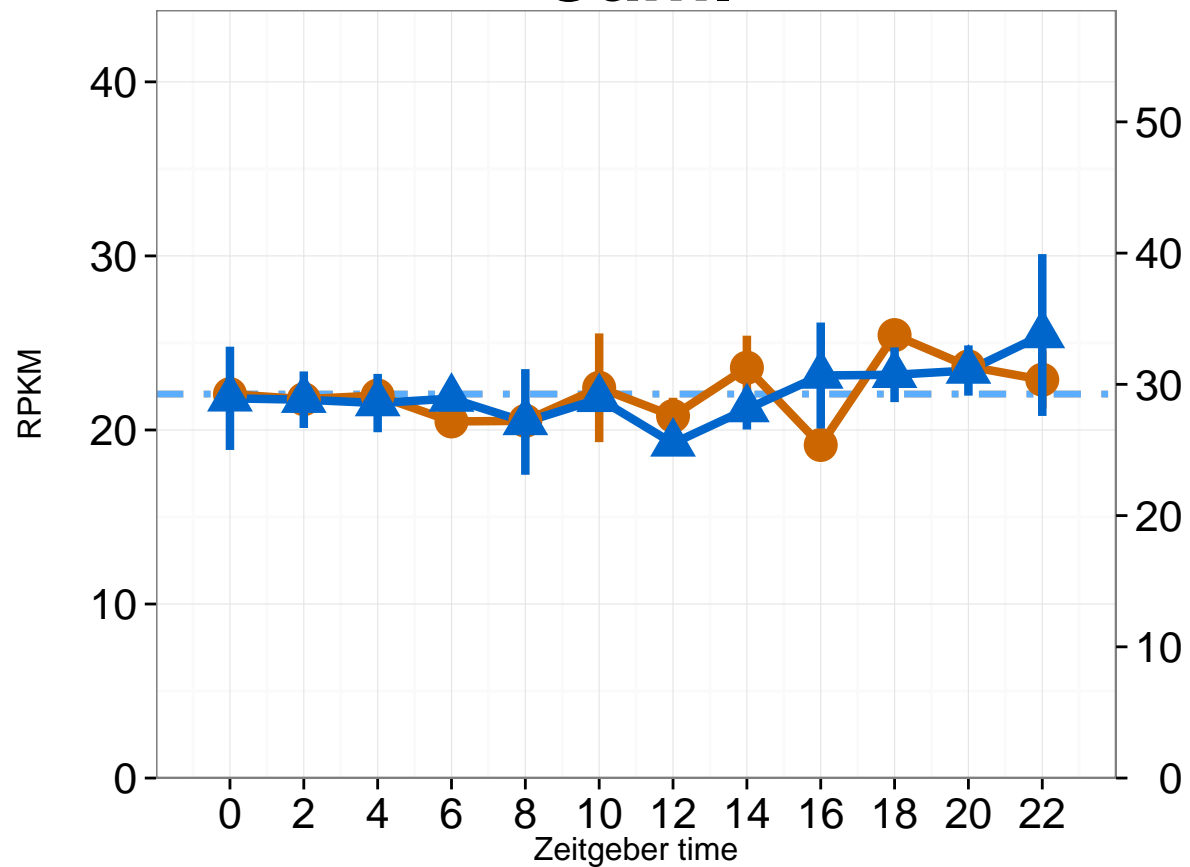

## CamI

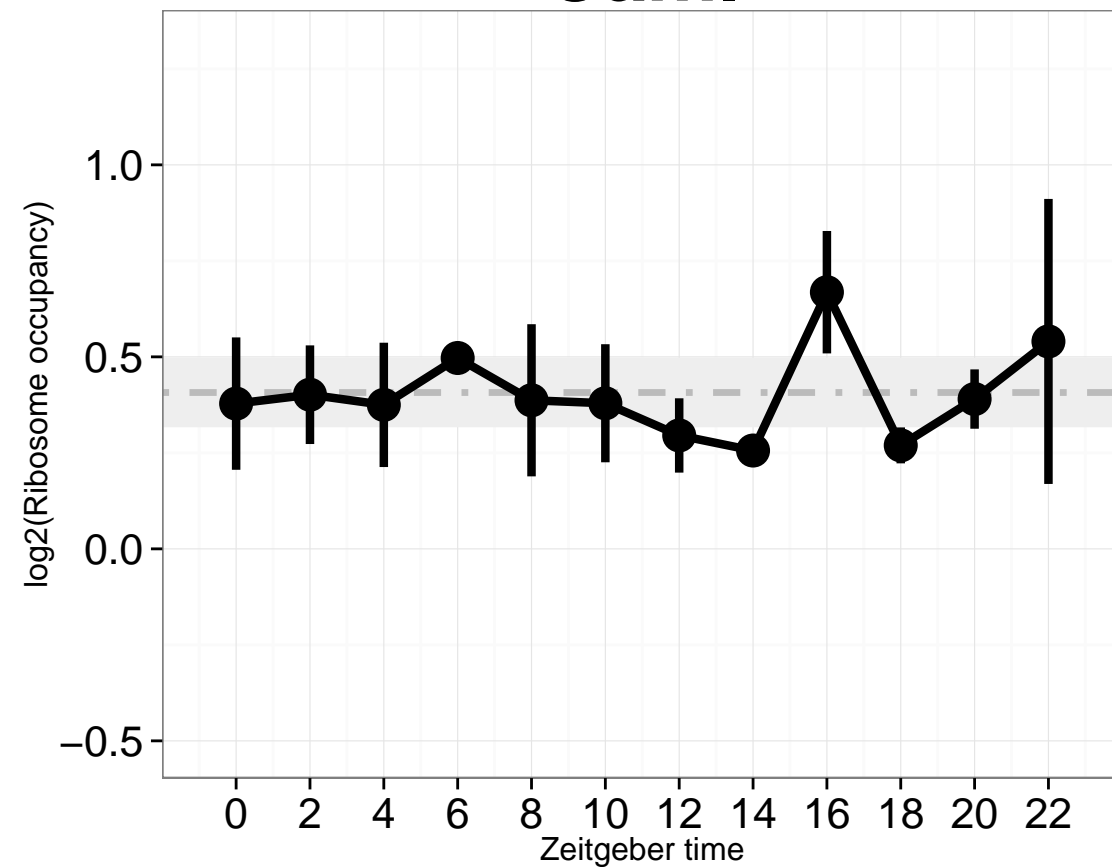

Supplement: Supplementary file 8257 [file 1]

# Josd2

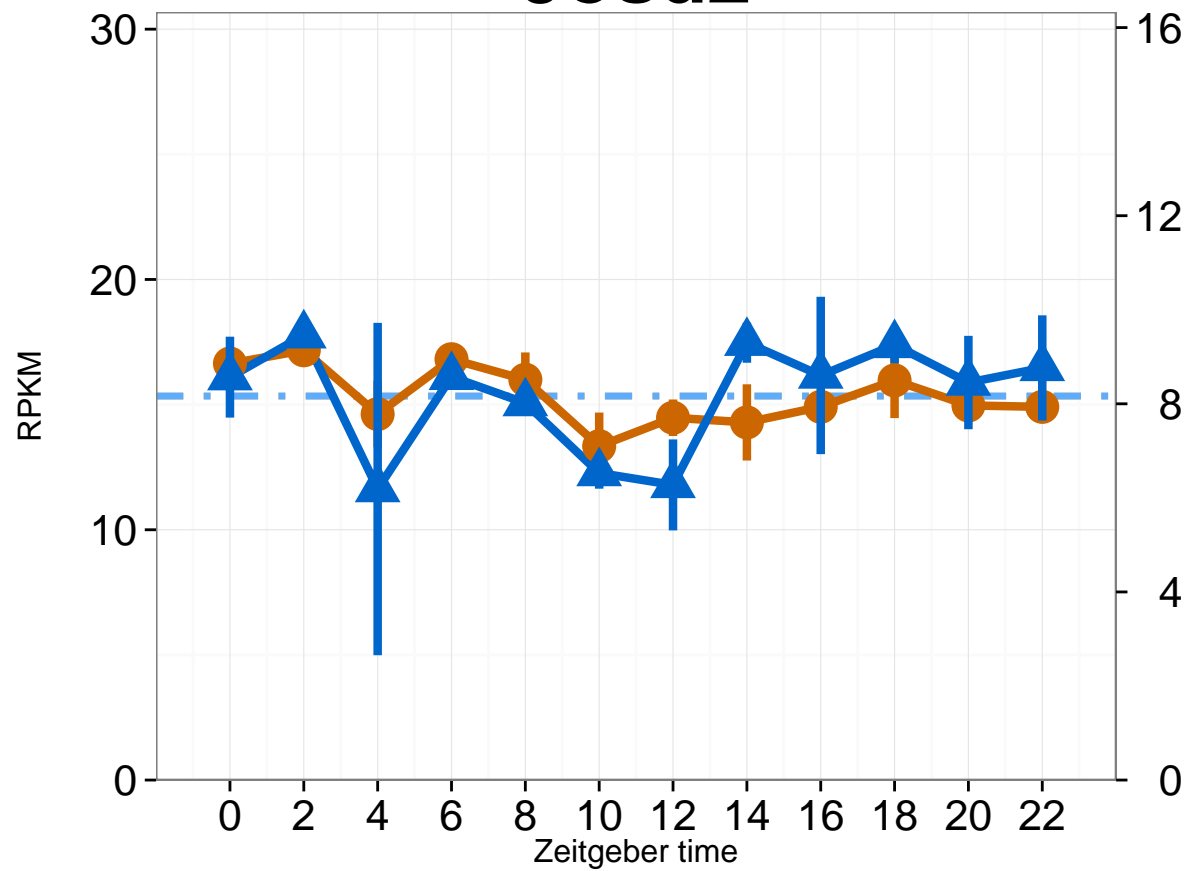

# Josd2

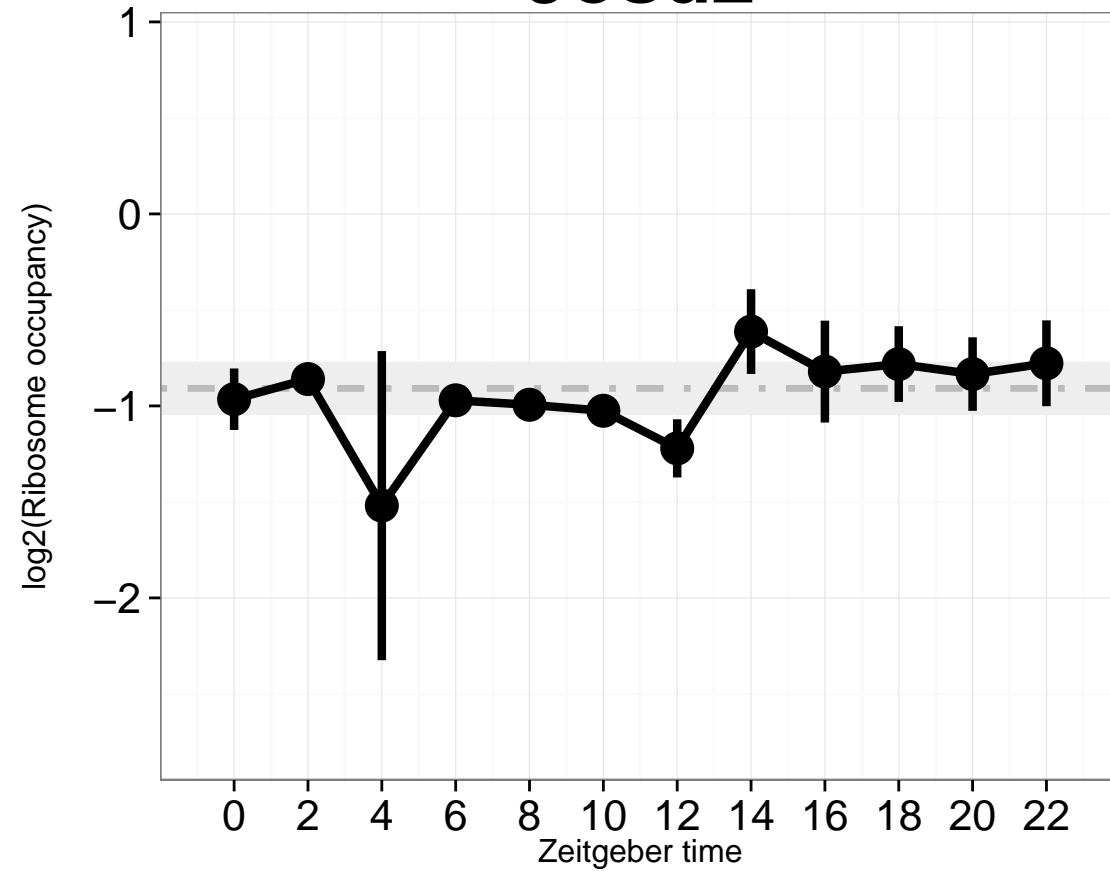

Supplement: Supplementary file 8258 [file 1]

## Brp

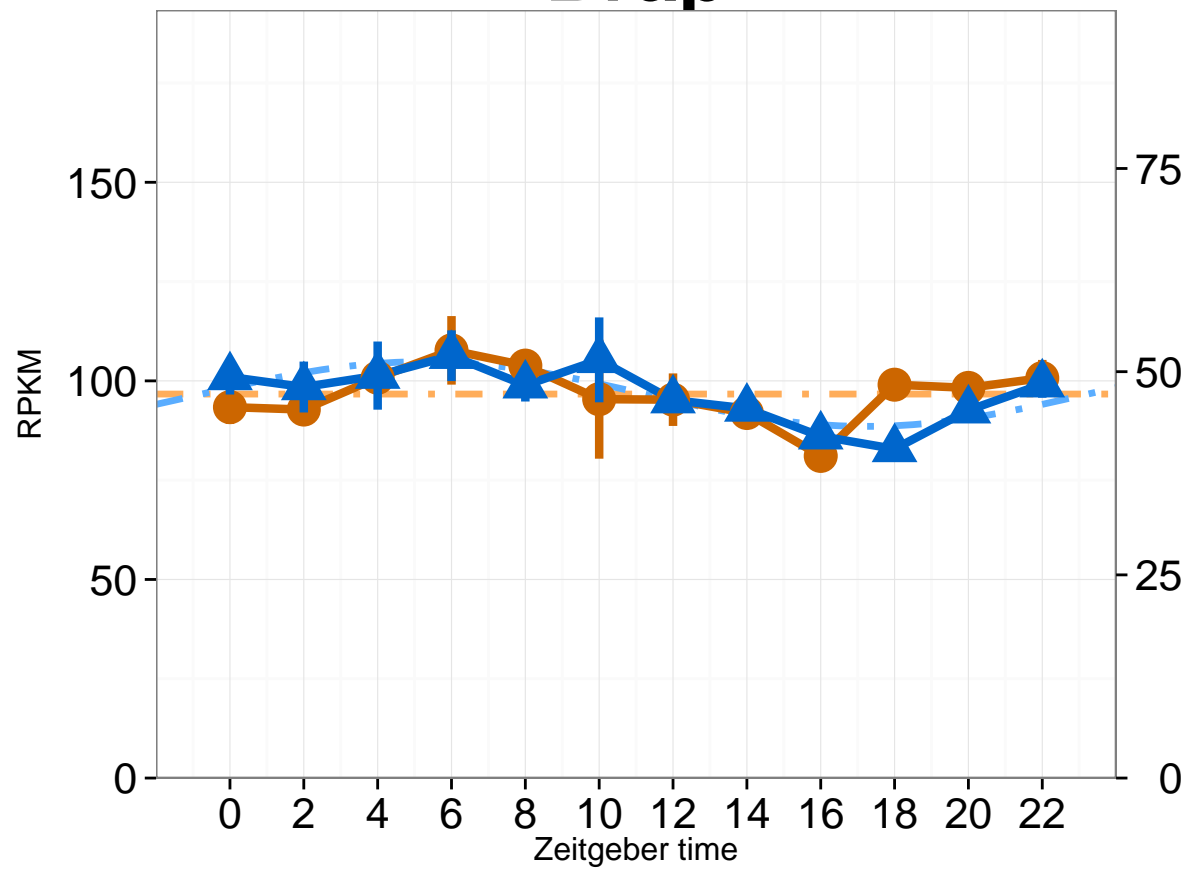

## Brp

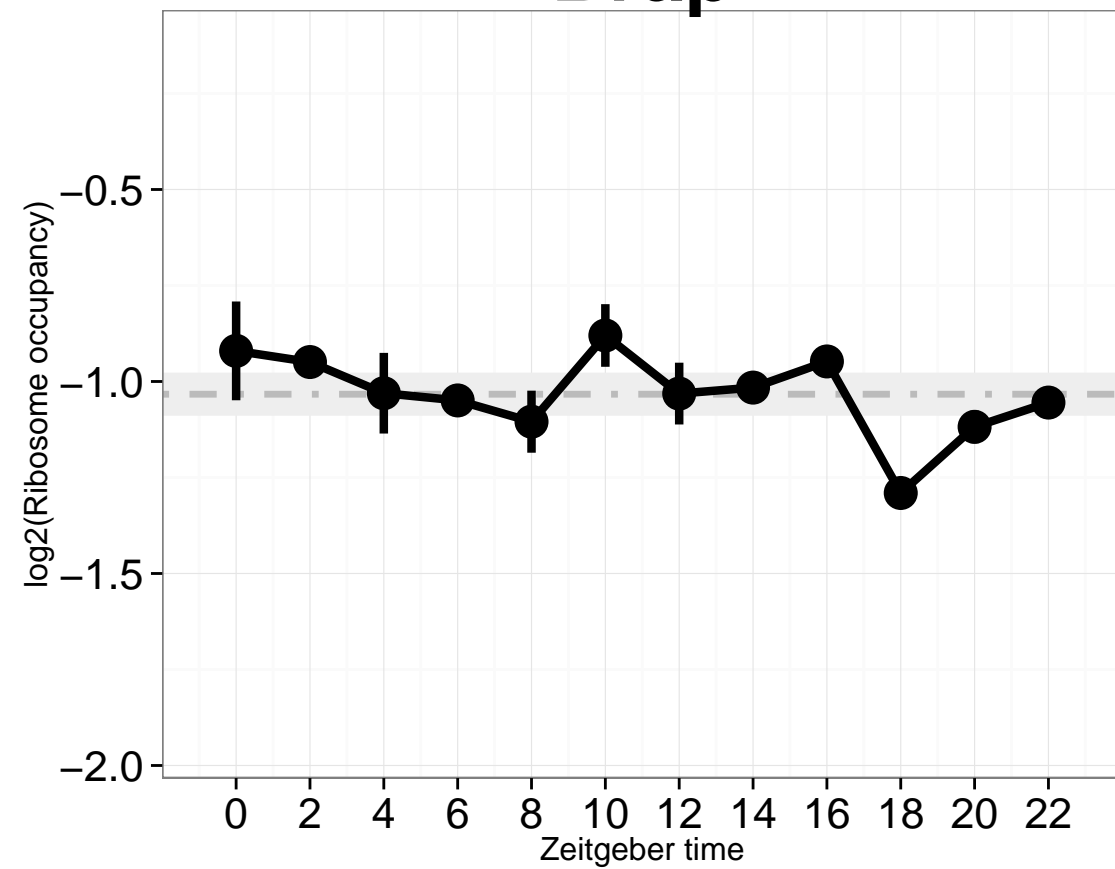

Supplement: Supplementary file 8259 [file 1]

# Rbm5

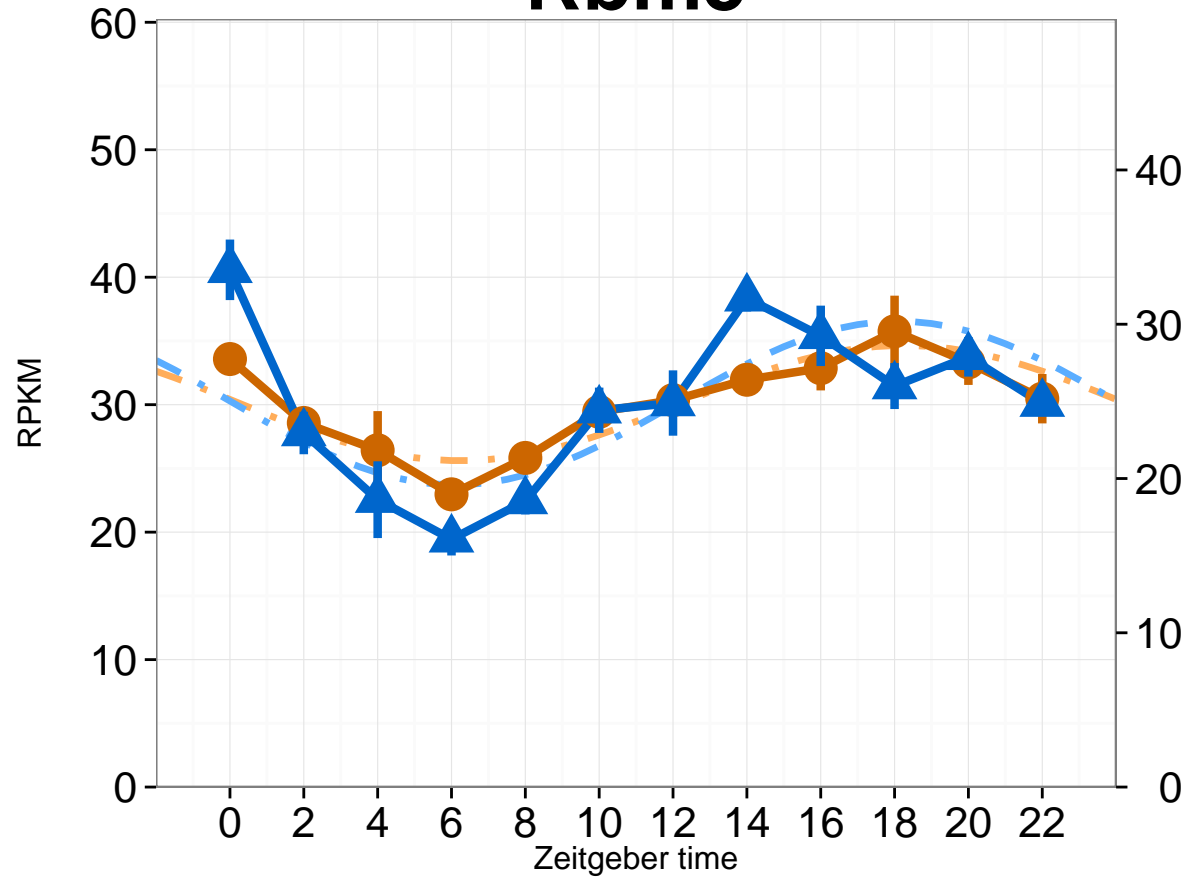

# Rbm5

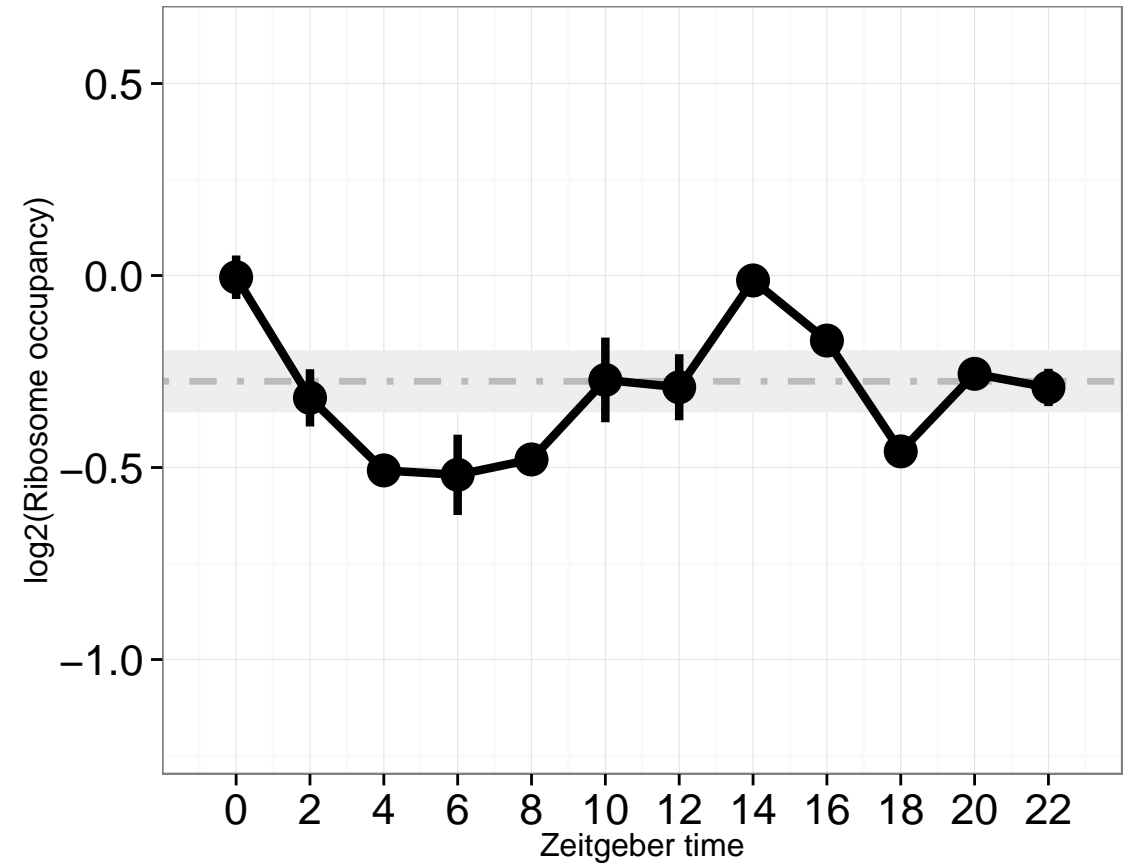

Supplement: Supplementary file 8260 [file 1]

# Vps4b

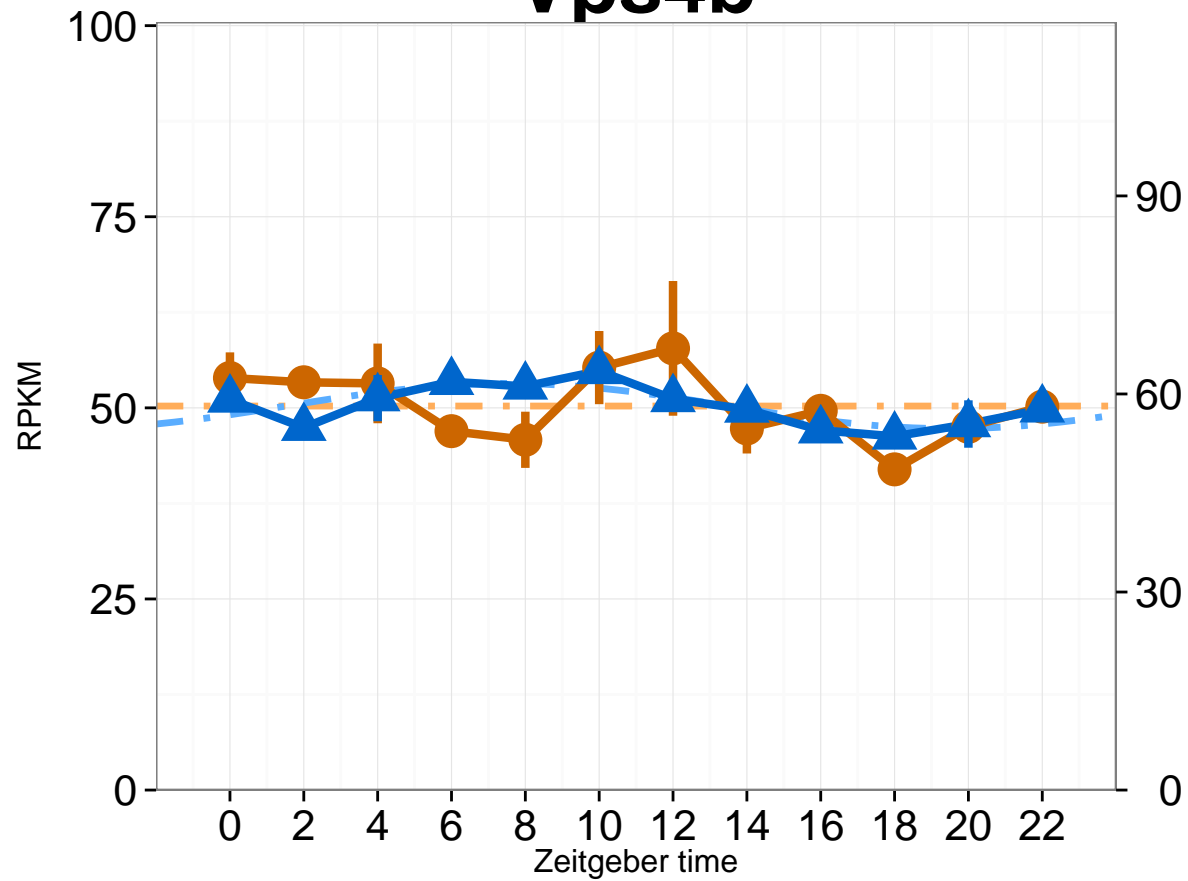

# Vps4b

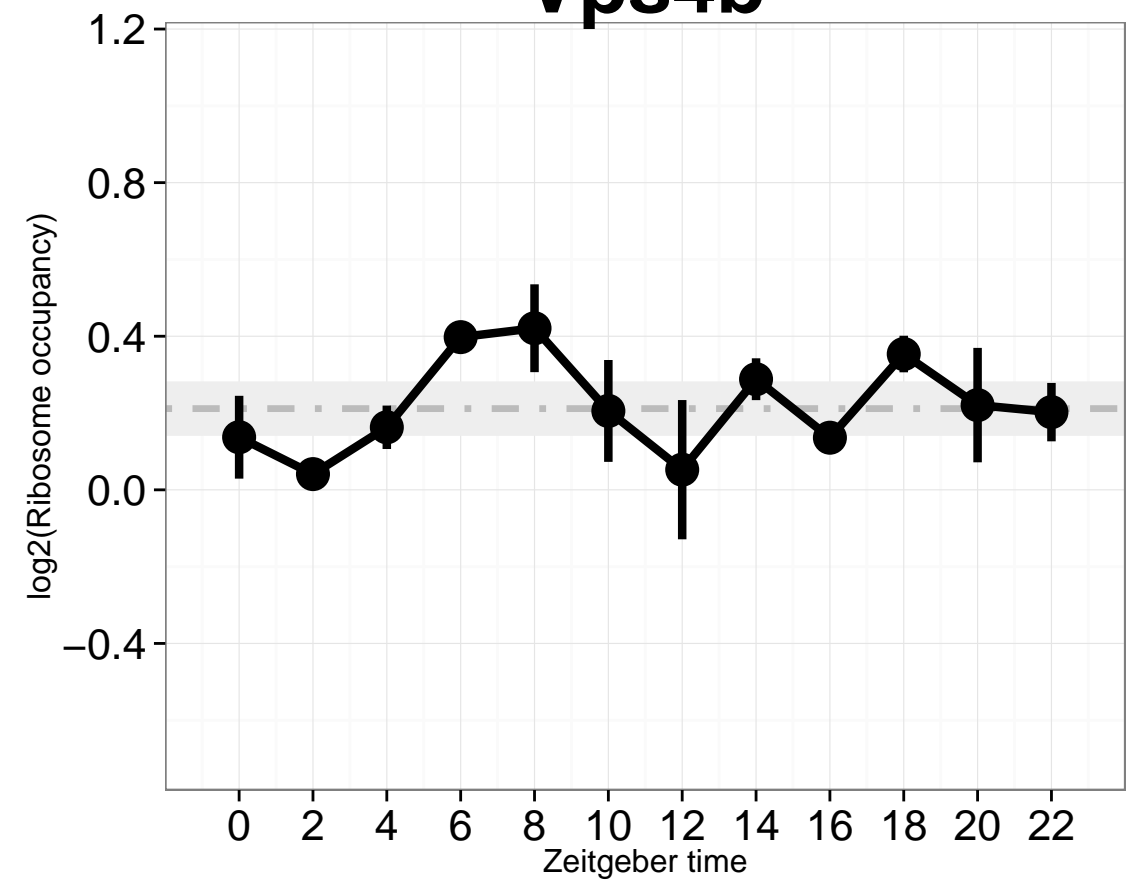

Supplement: Supplementary file 8261 [file 1]

## Dnm3

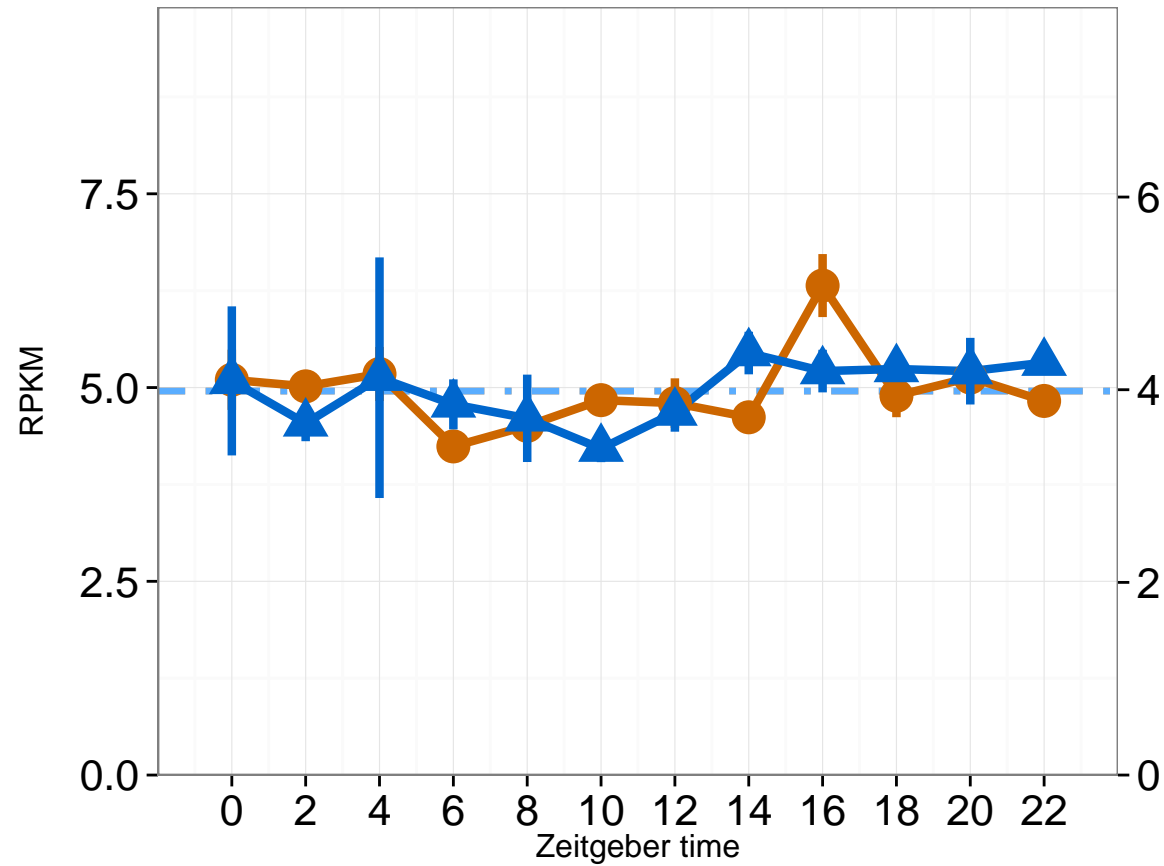

## Dnm3

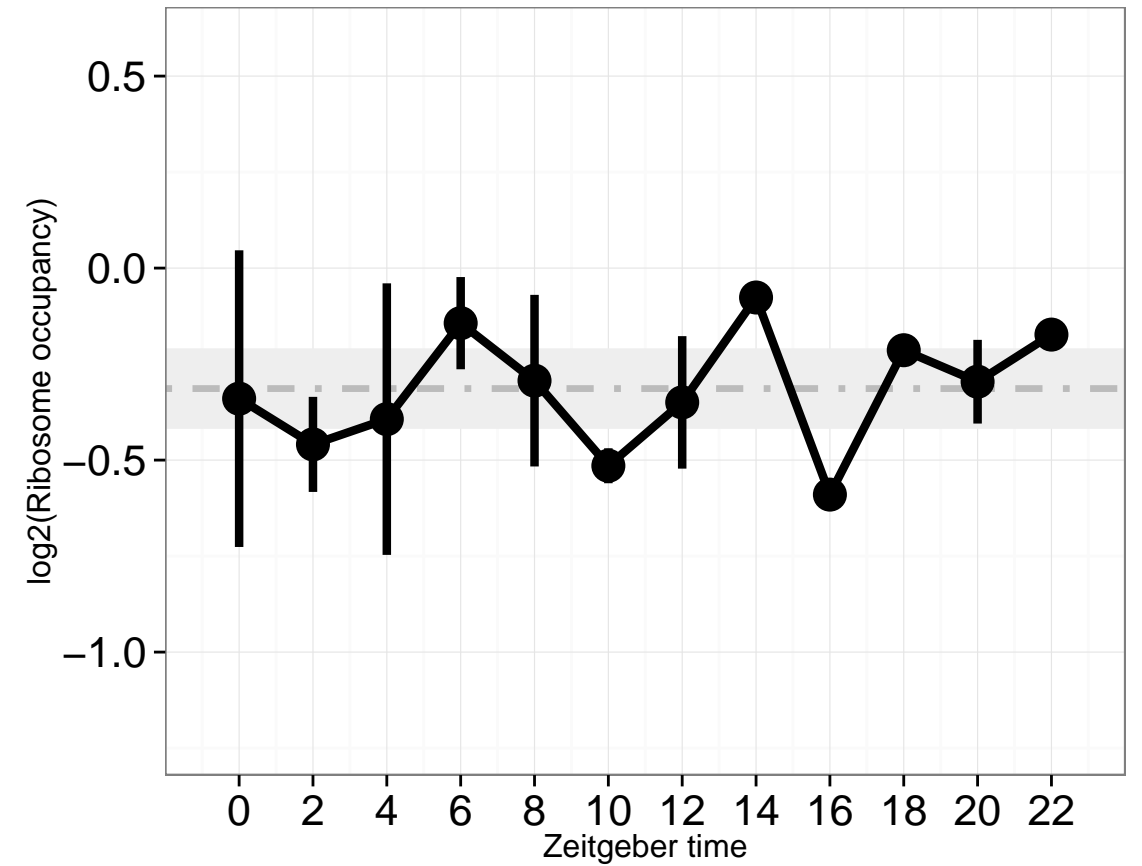

Supplement: Supplementary file 8262 [file 1]

# Trim2

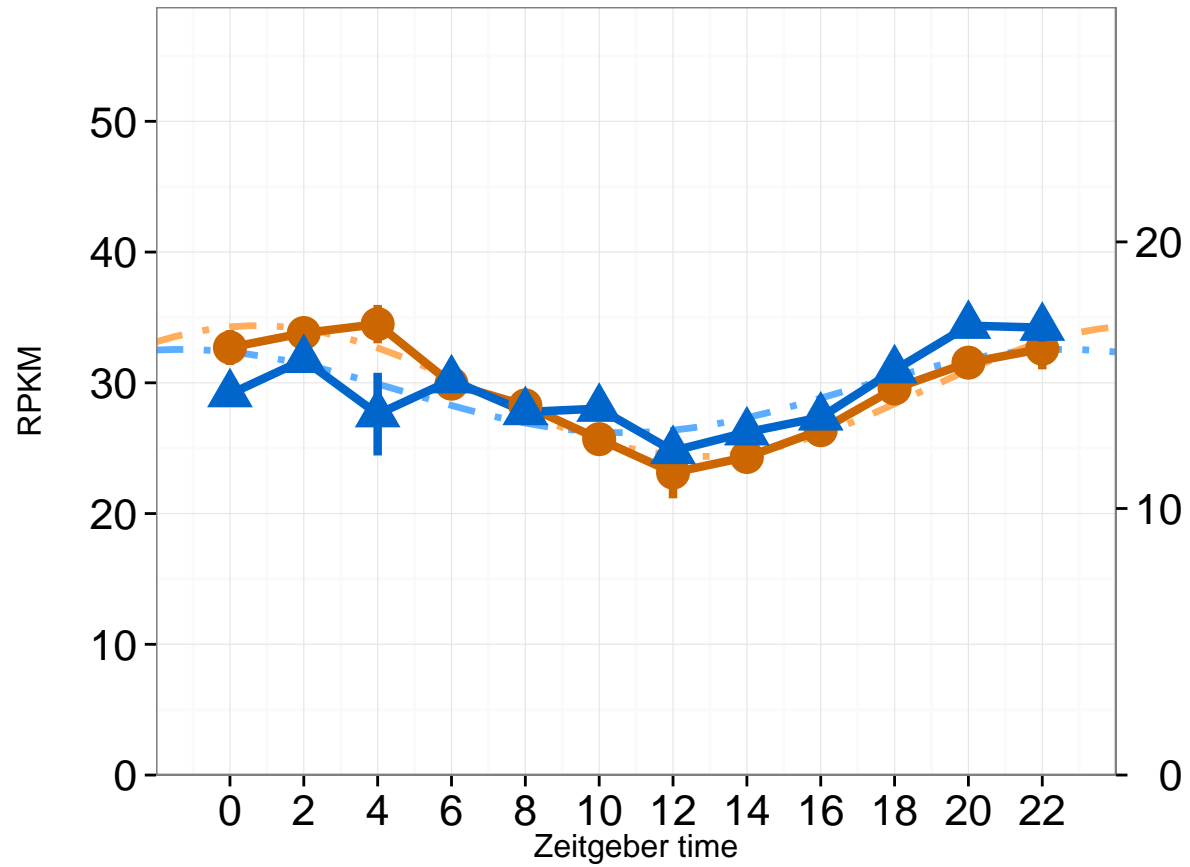

# Trim2

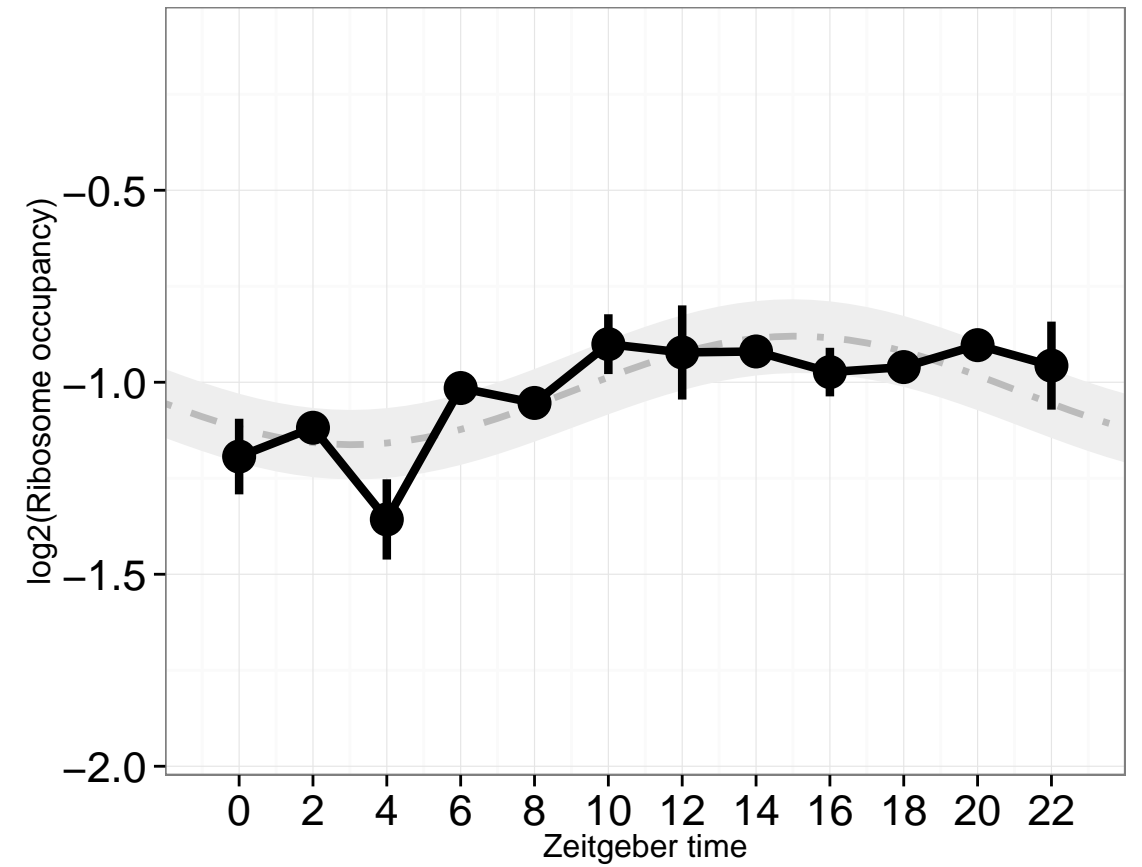

Supplement: Supplementary file 8263 [file 1]

# Mrps33

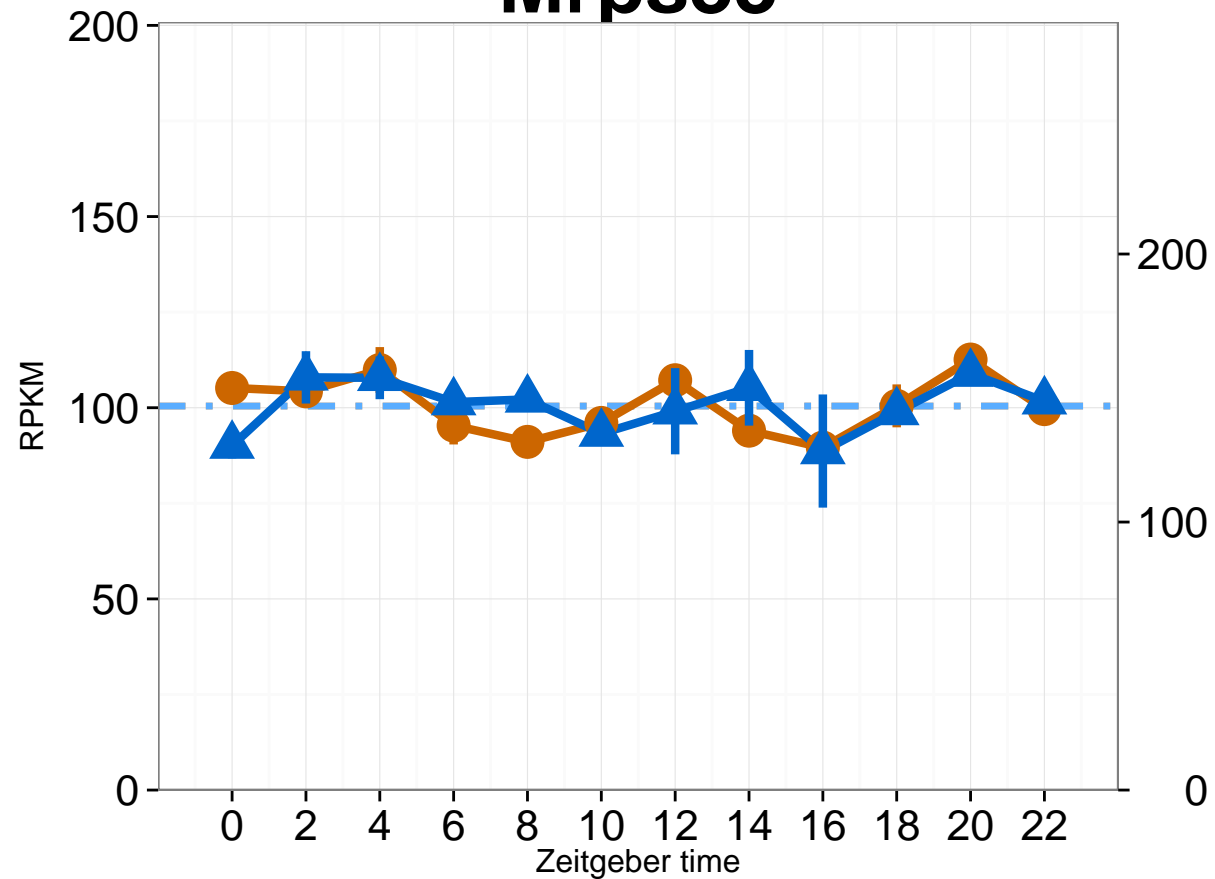

# Mrps33

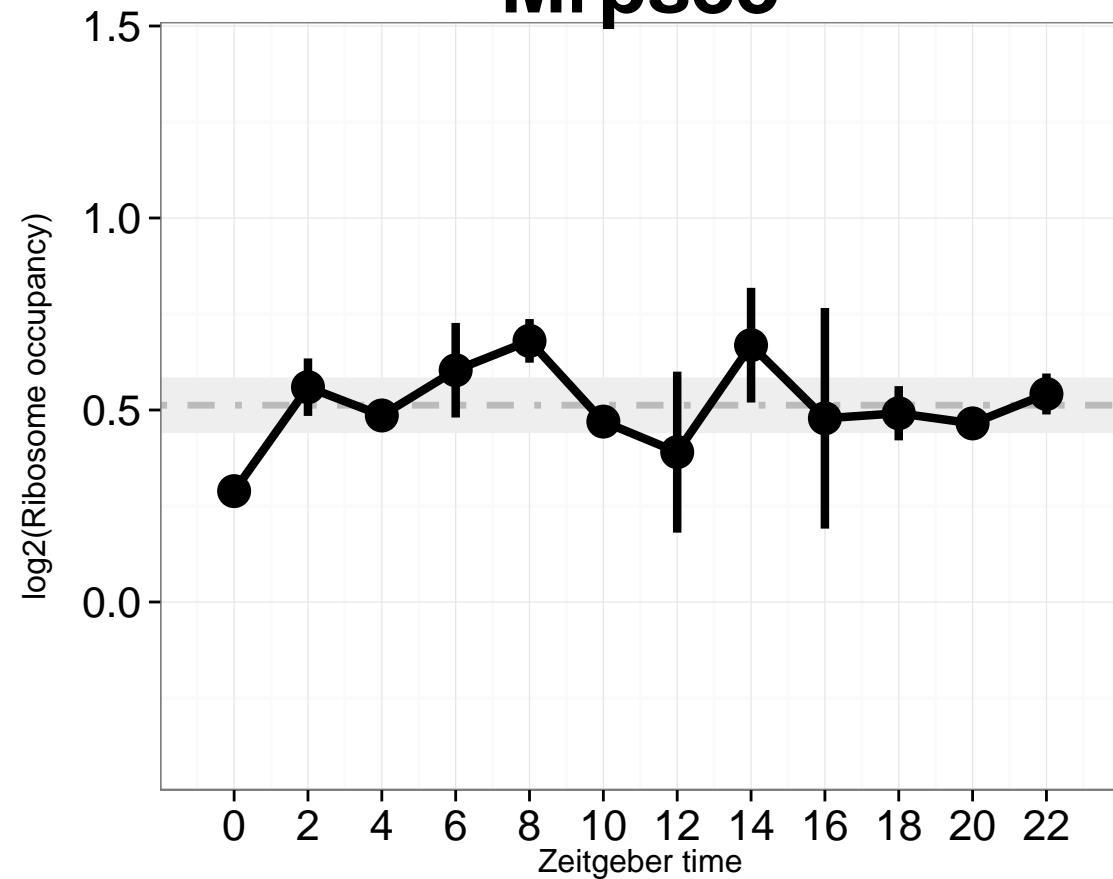

Supplement: Supplementary file 8264 [file 1]

## Rogdi

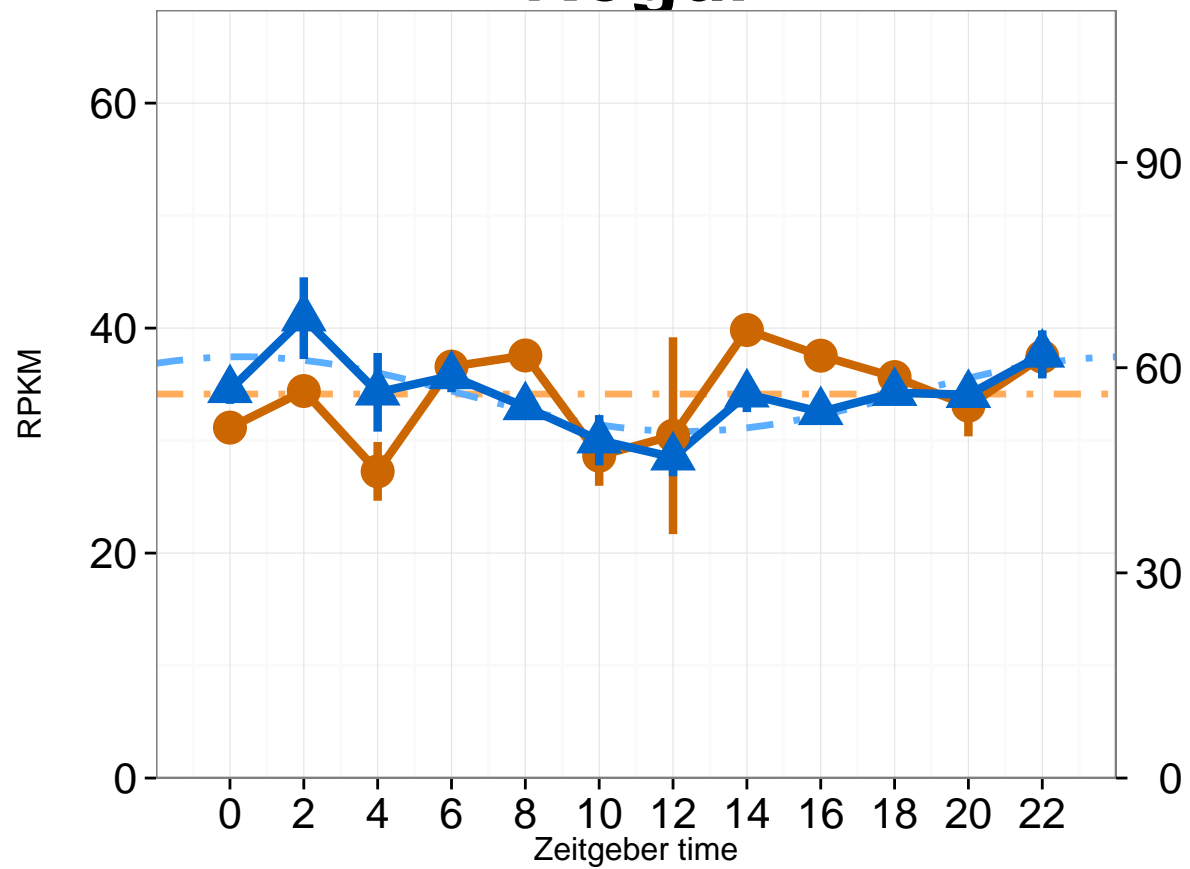

## Rogdi

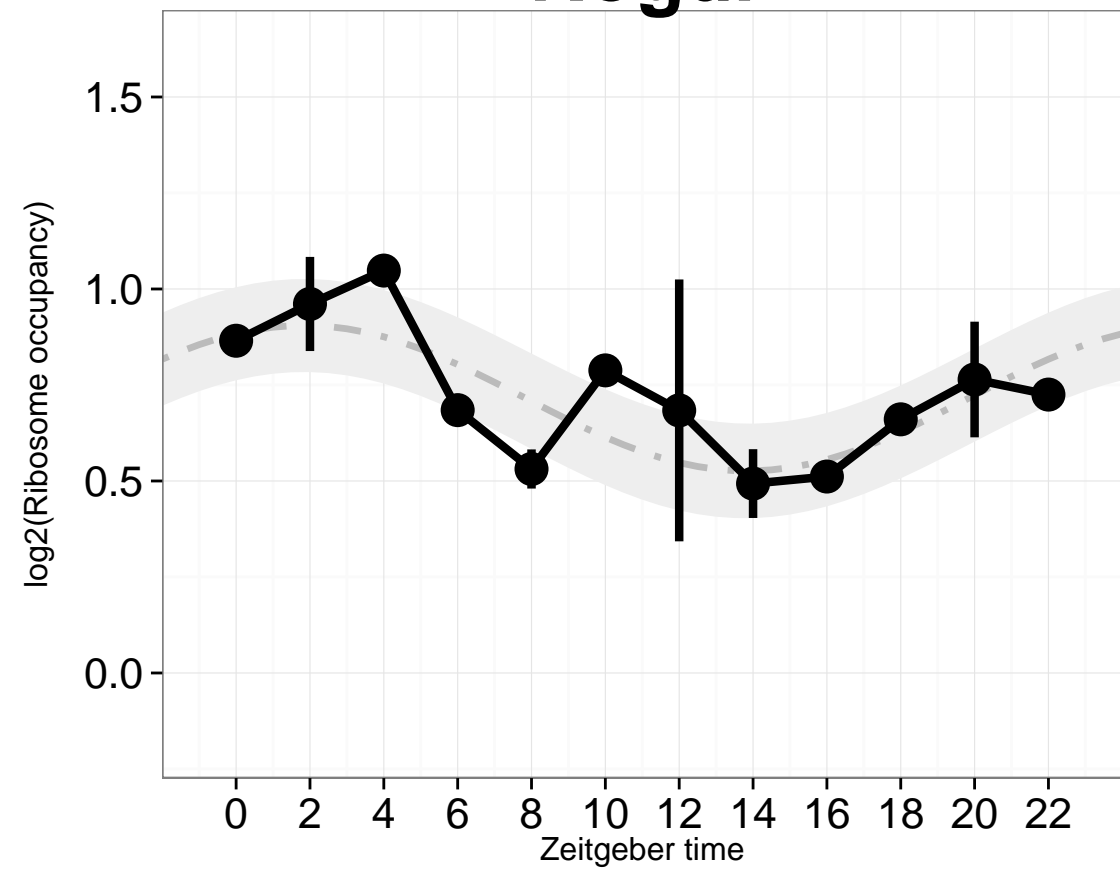

Supplement: Supplementary file 8265 [file 1]

## Cd38

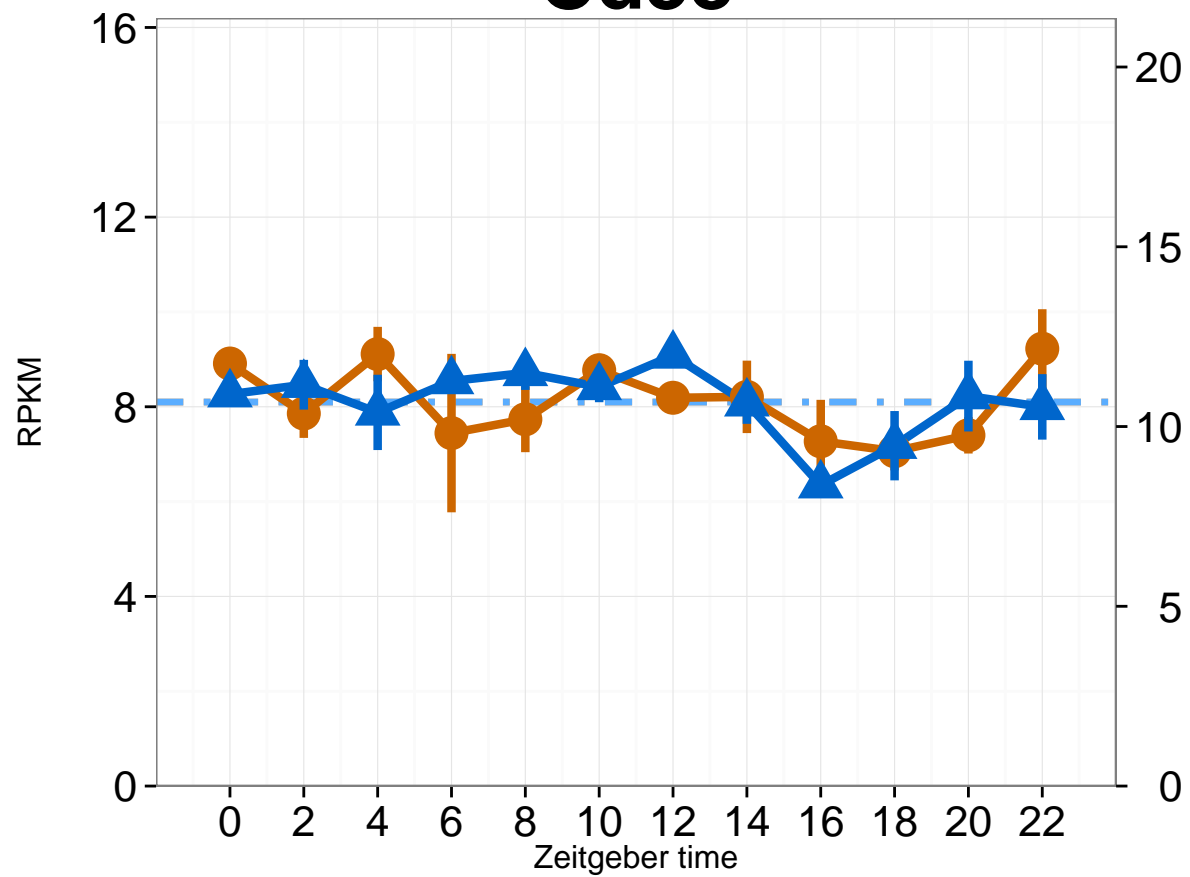

## Cd38

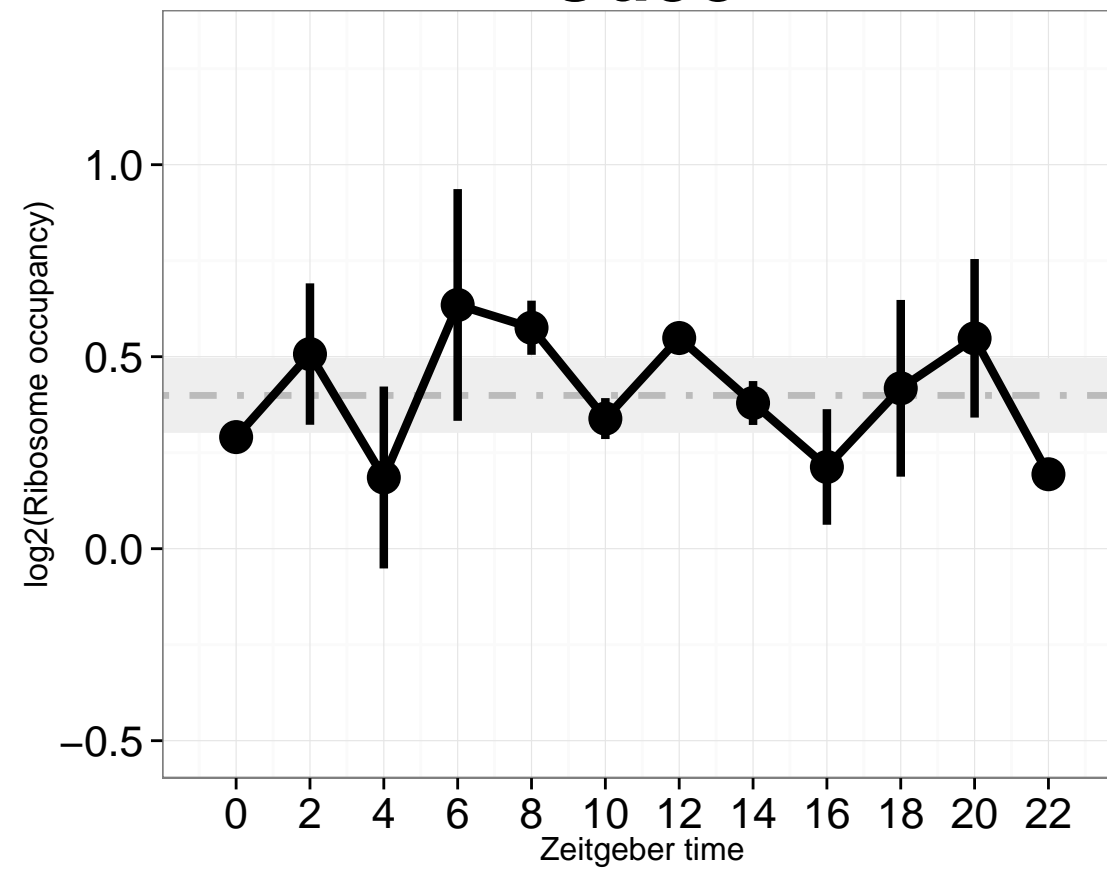

Supplement: Supplementary file 8266 [file 1]

# Srp9

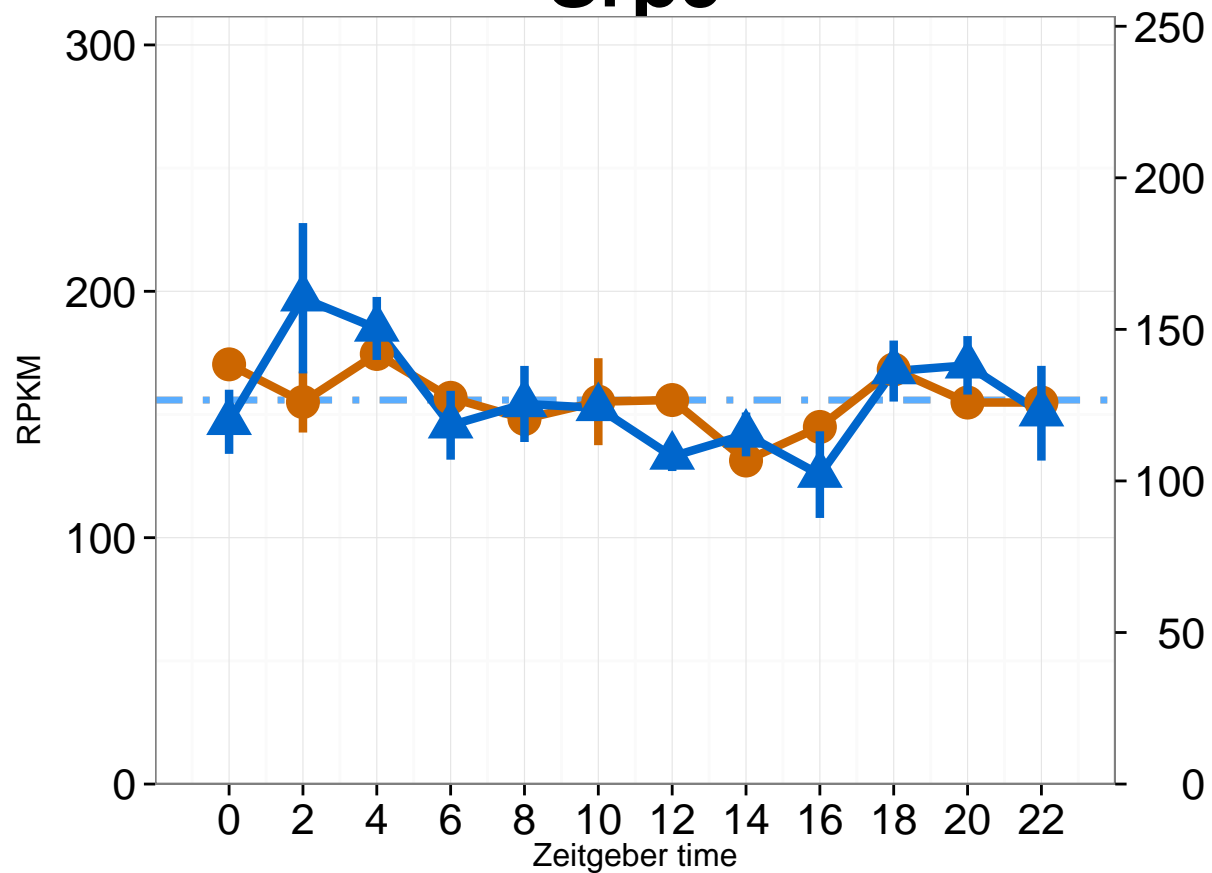

# Srp9

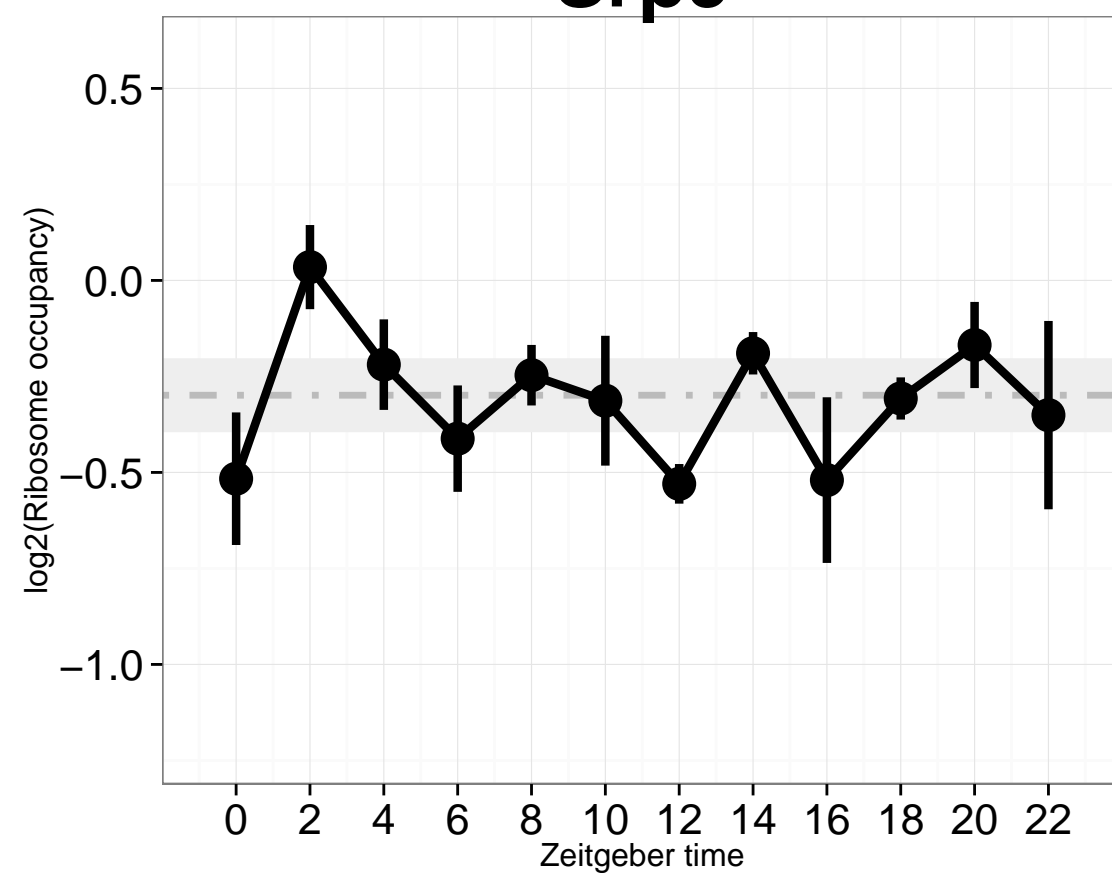

Supplement: Supplementary file 8267 [file 1]

**Fkbp1b TR**

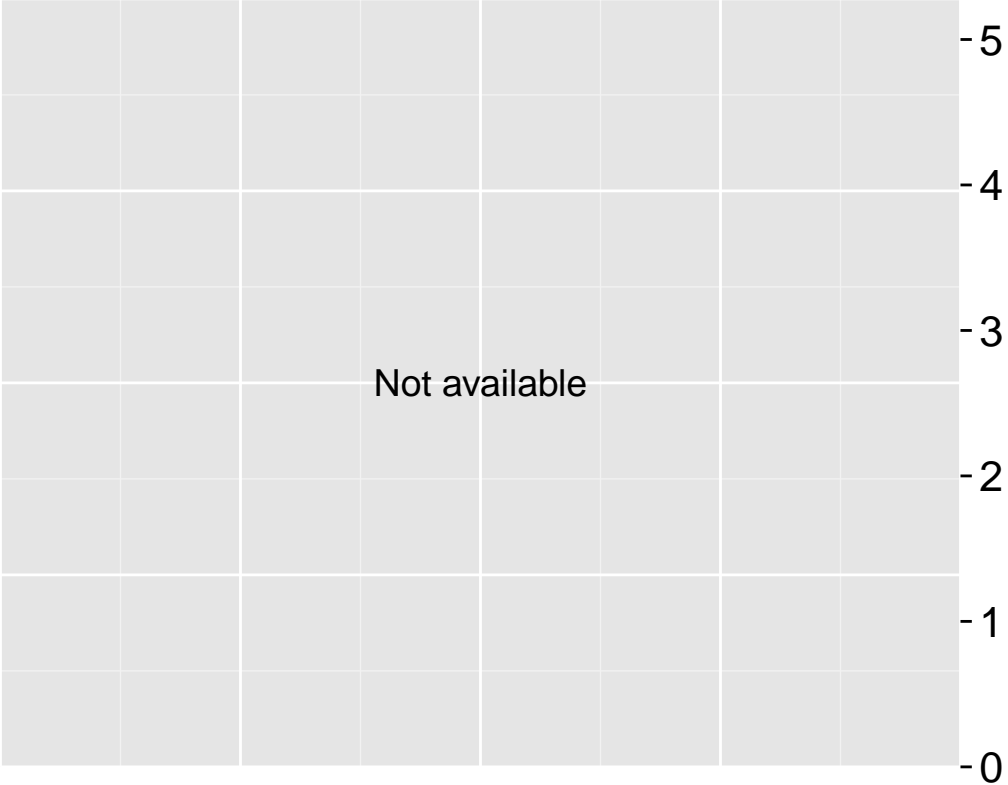

**Fkbp1b log2(Ribosome occupancy**

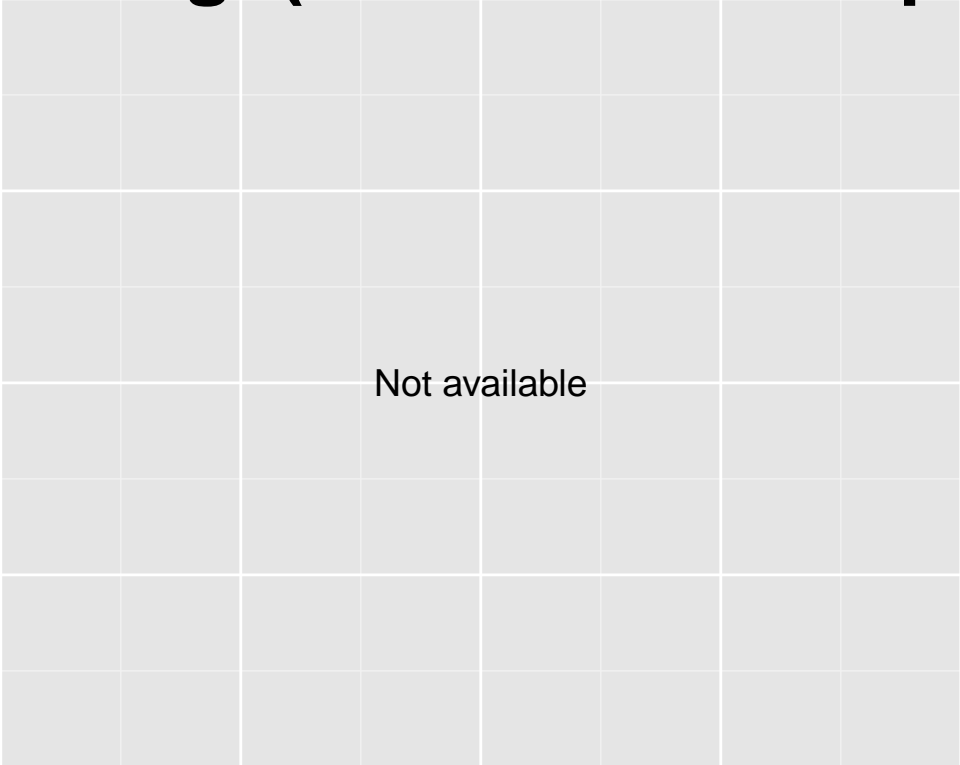

Supplement: Supplementary file 8268 [file 1]

## Nkain1

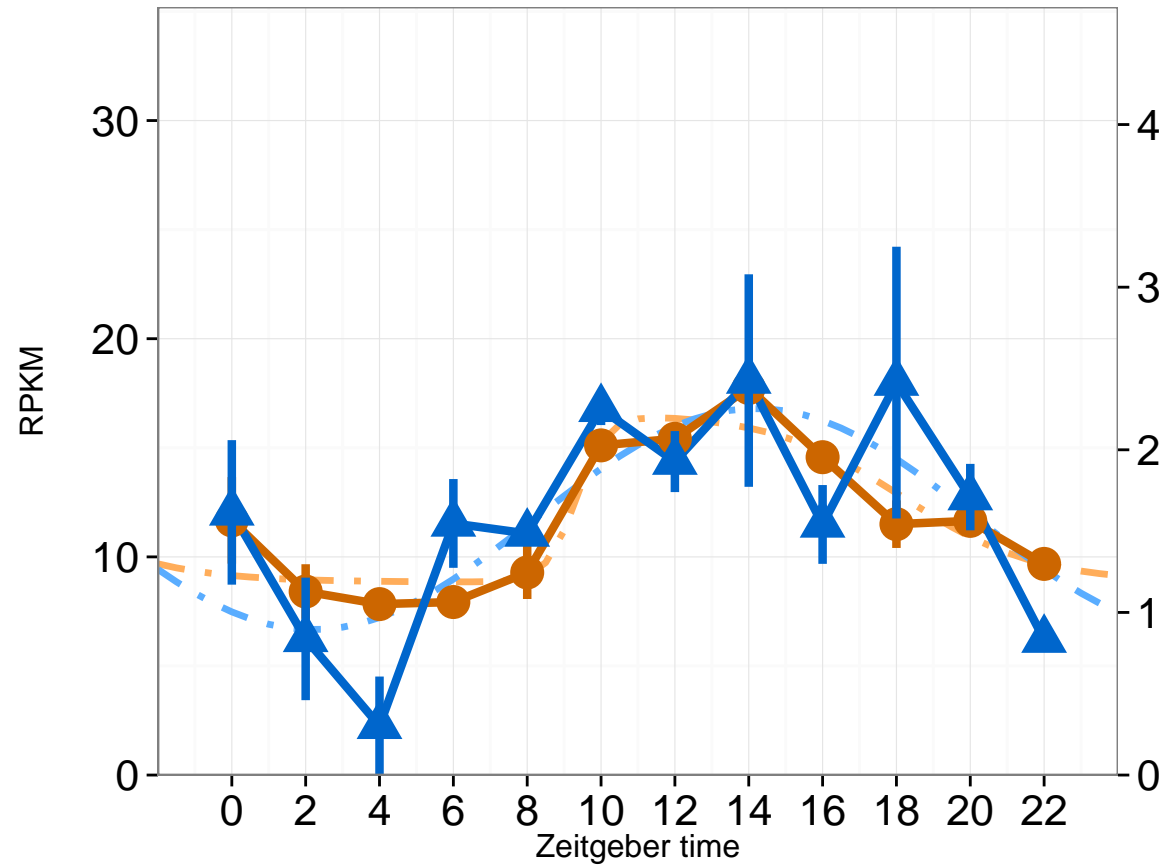

## Nkain1

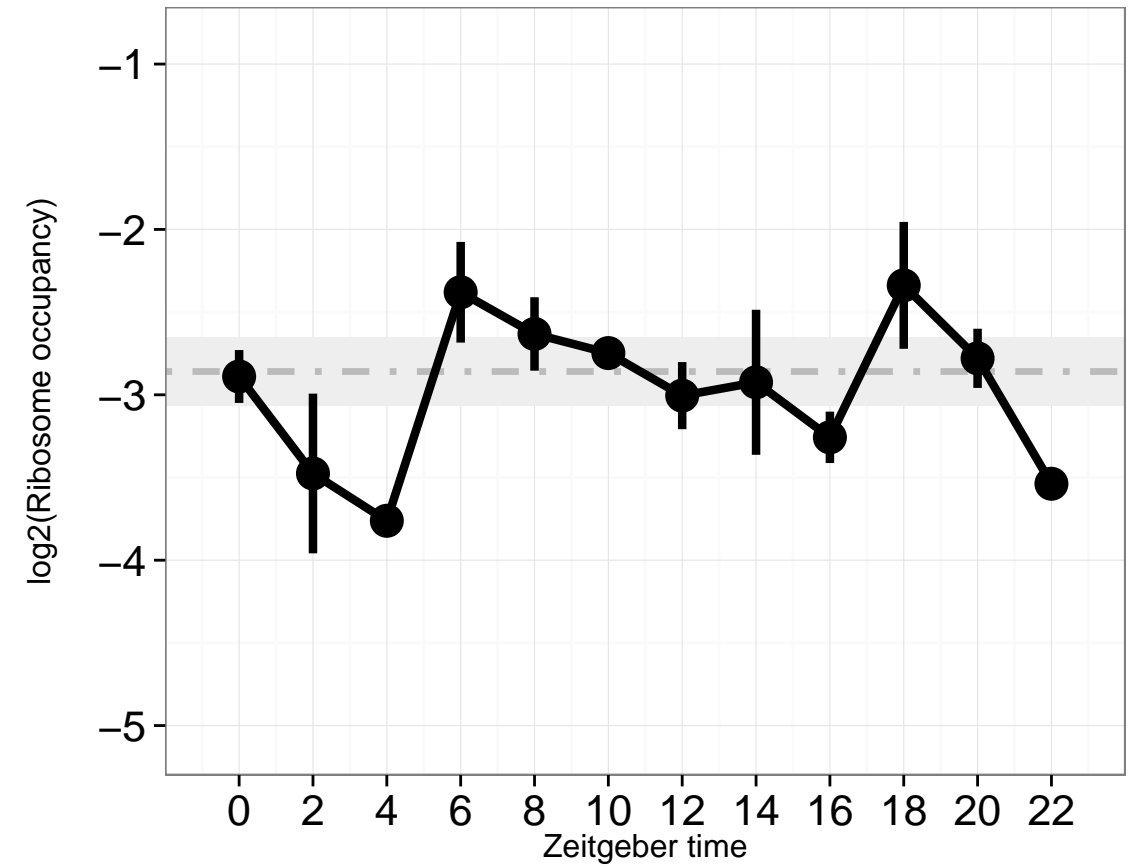

Supplement: Supplementary file 8269 [file 1]

## Plin3

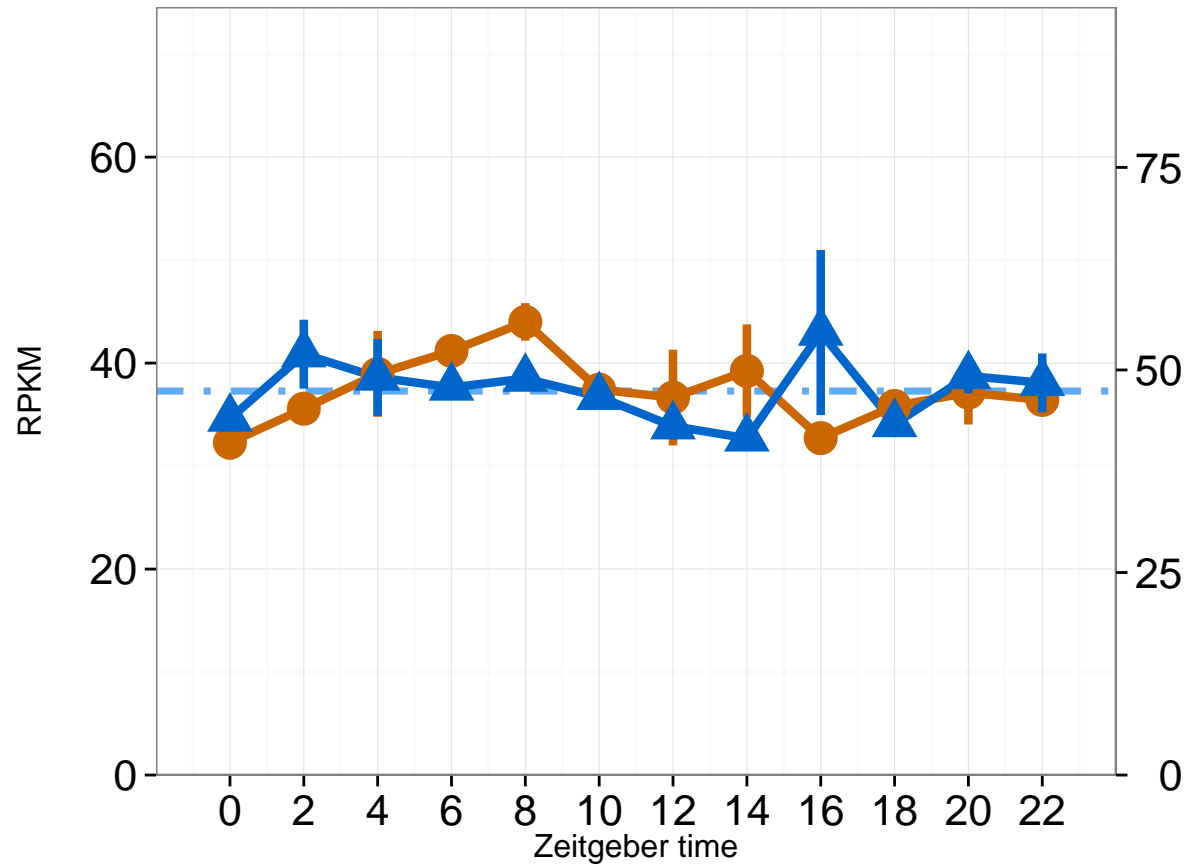

## Plin3

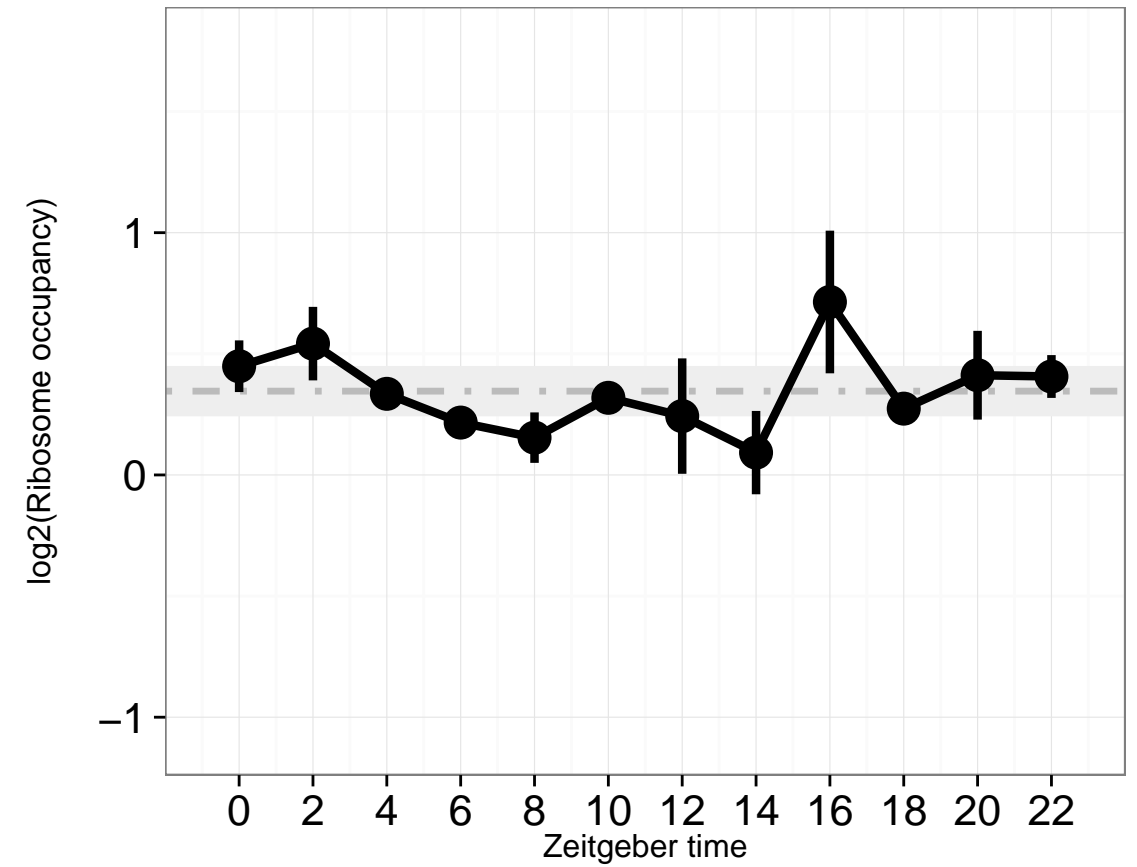

Supplement: Supplementary file 8270 [file 1]

## Ralb

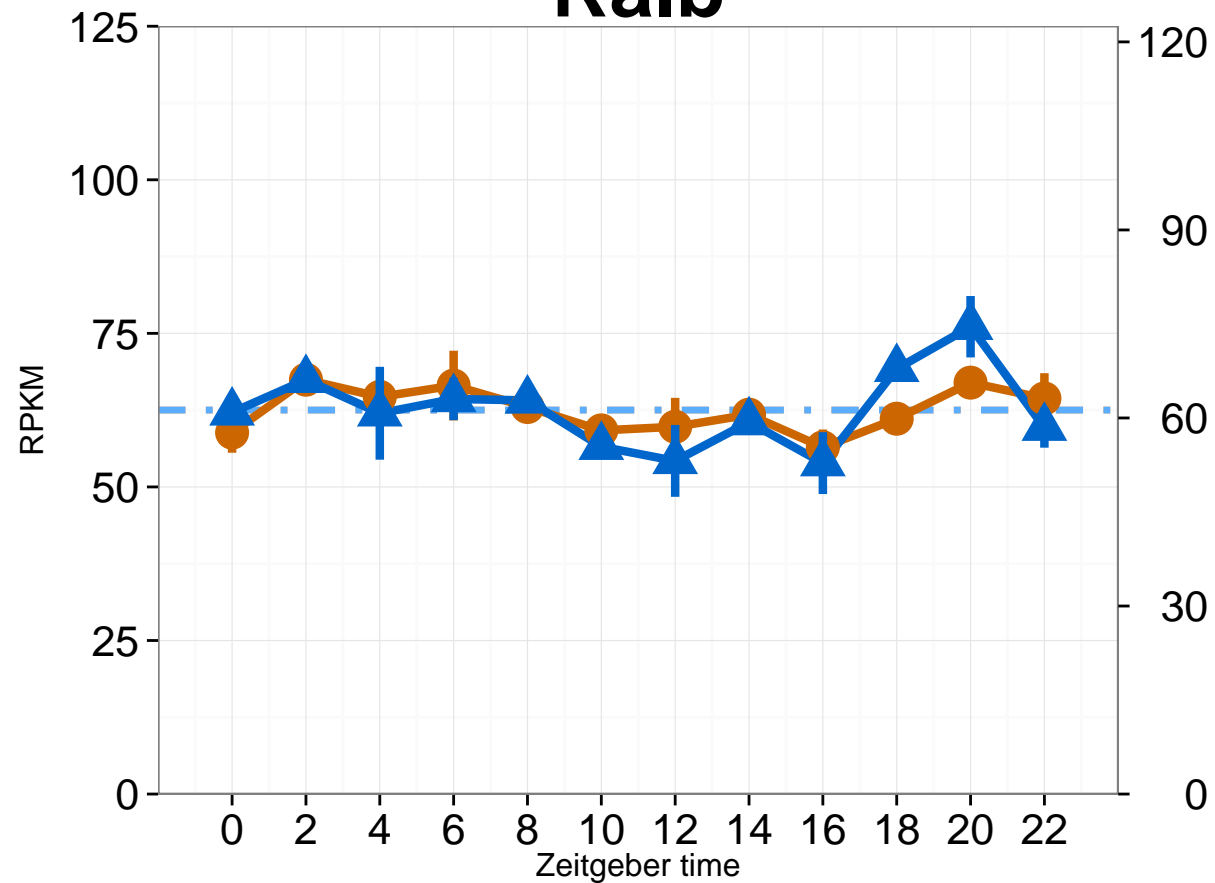

## Ralb

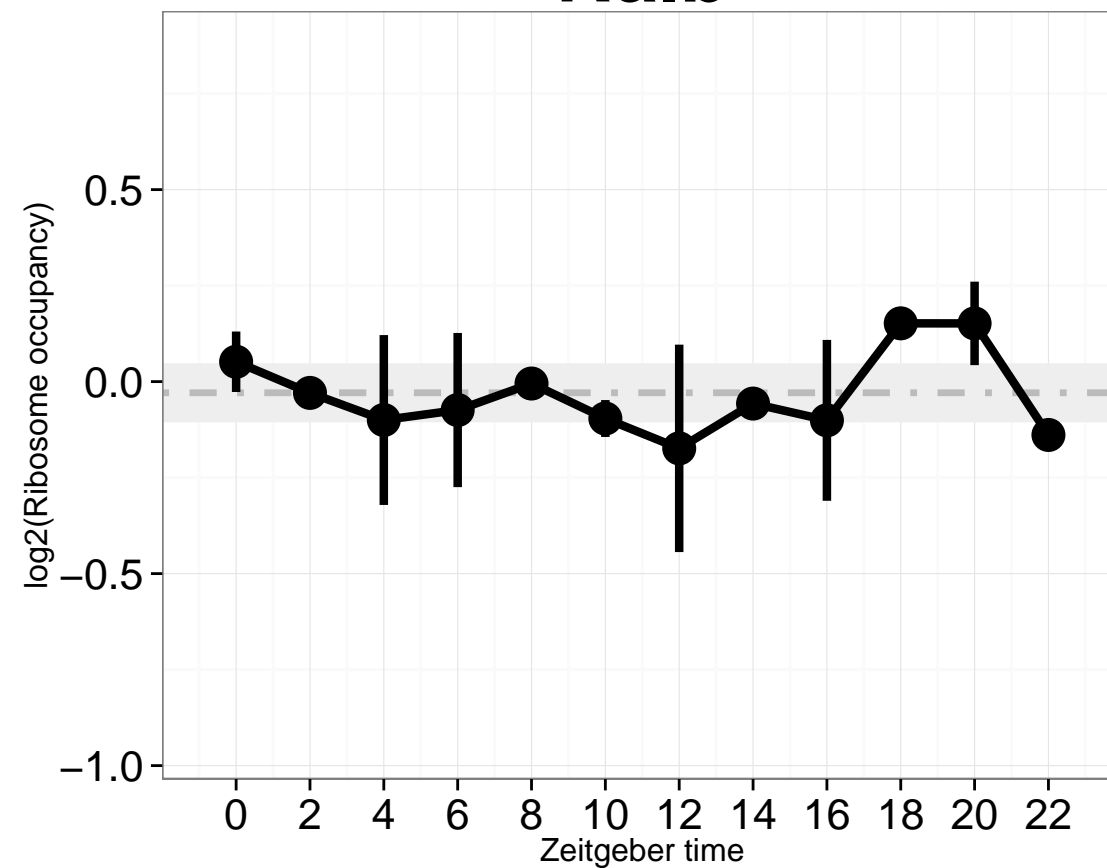

Supplement: Supplementary file 8271 [file 1]

# Gabpb2

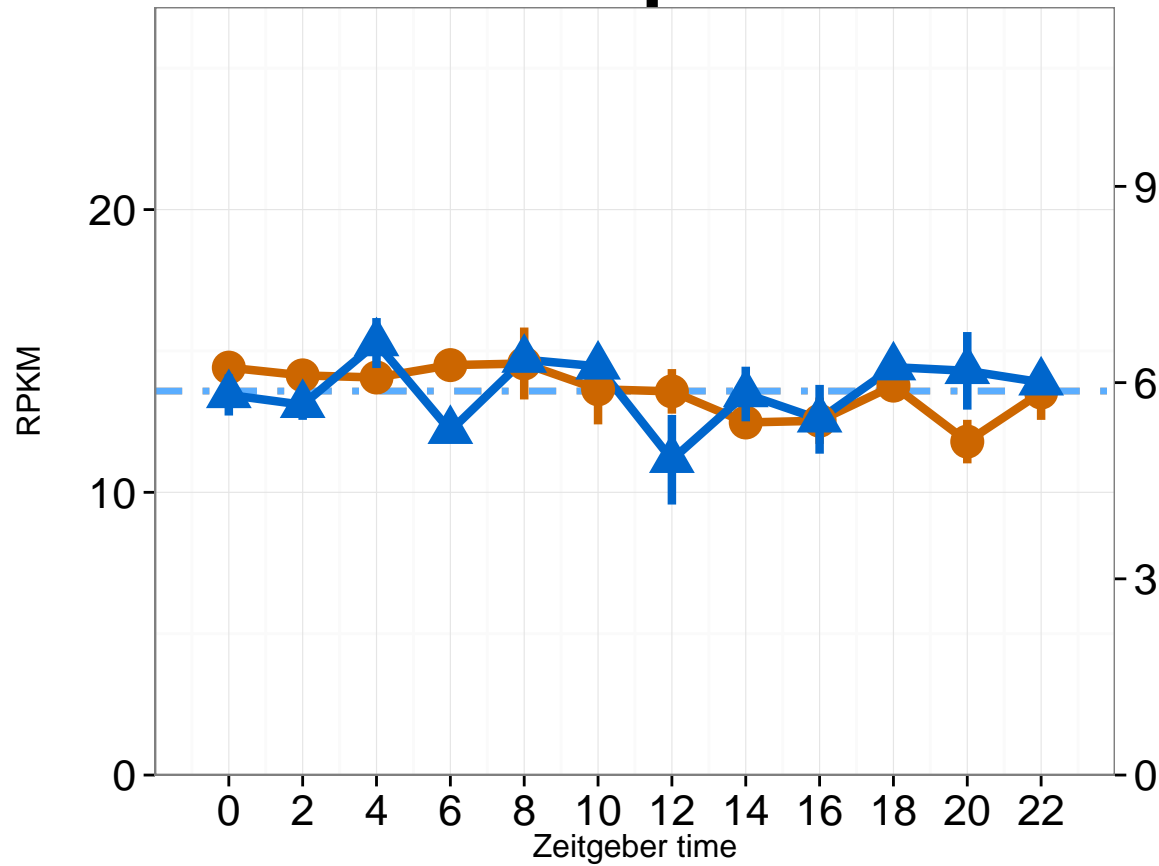

# Gabpb2

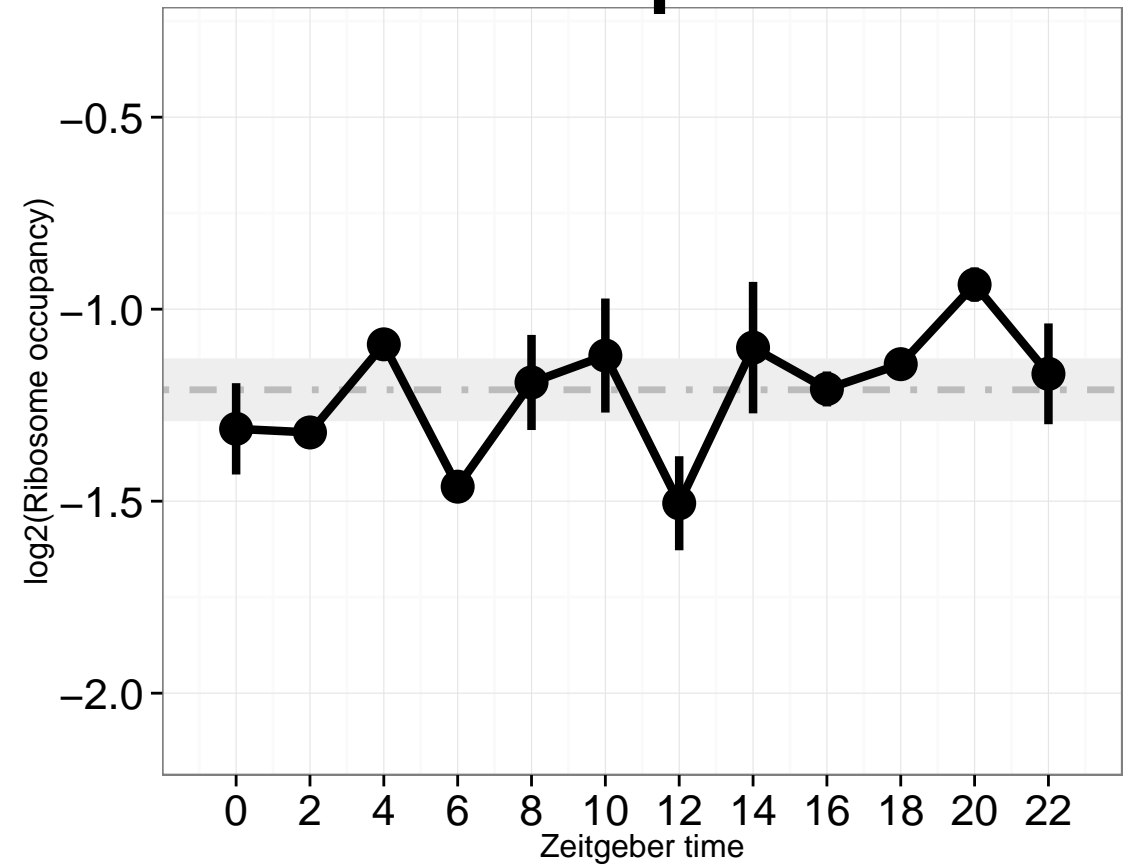

Supplement: Supplementary file 8272 [file 1]

# Tead2

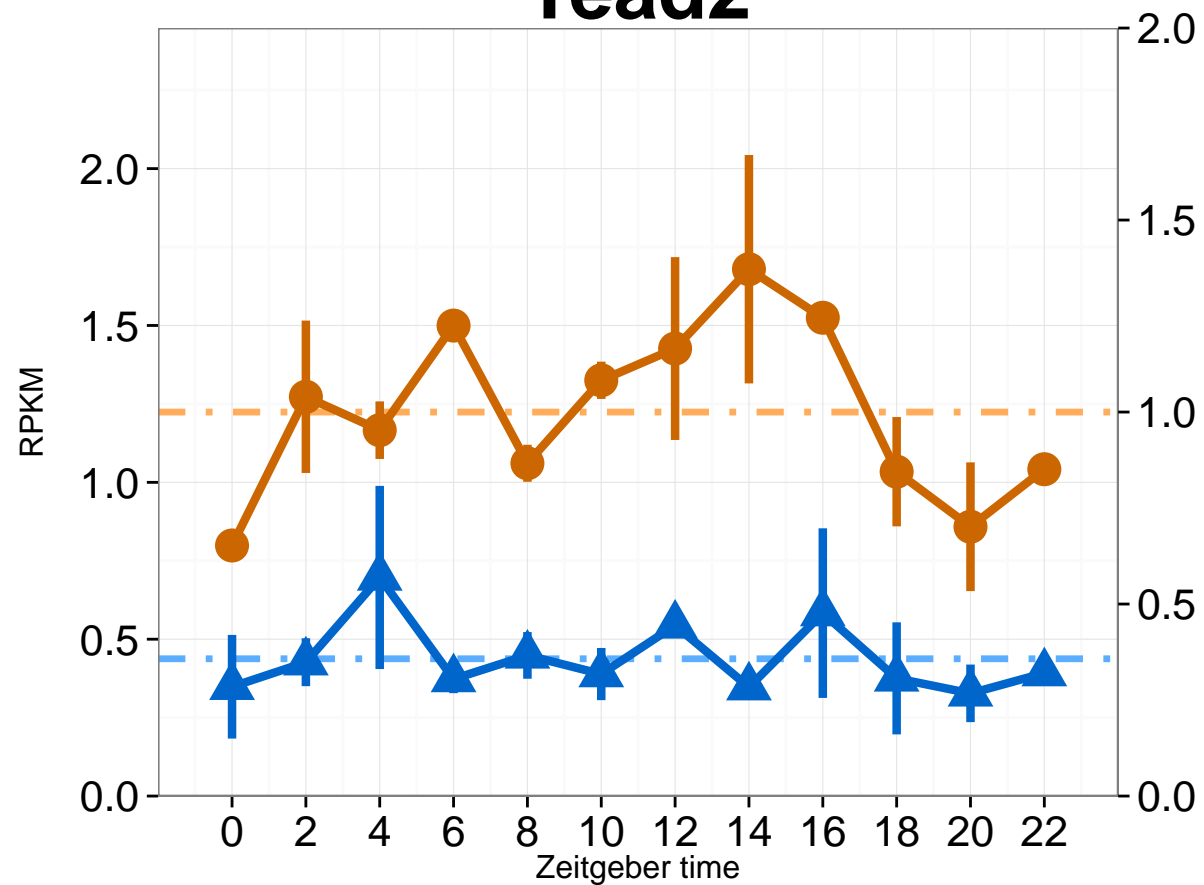

# Tead2

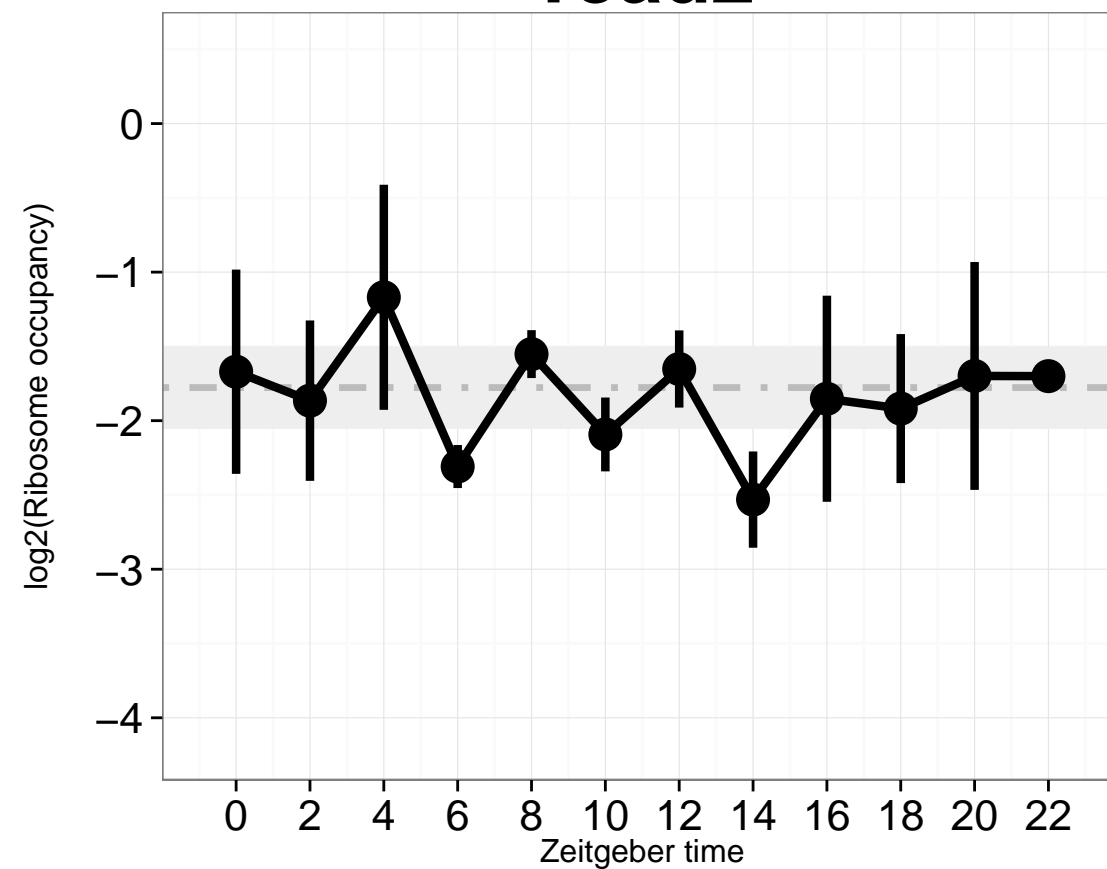

Supplement: Supplementary file 8273 [file 1]

# Mob3a

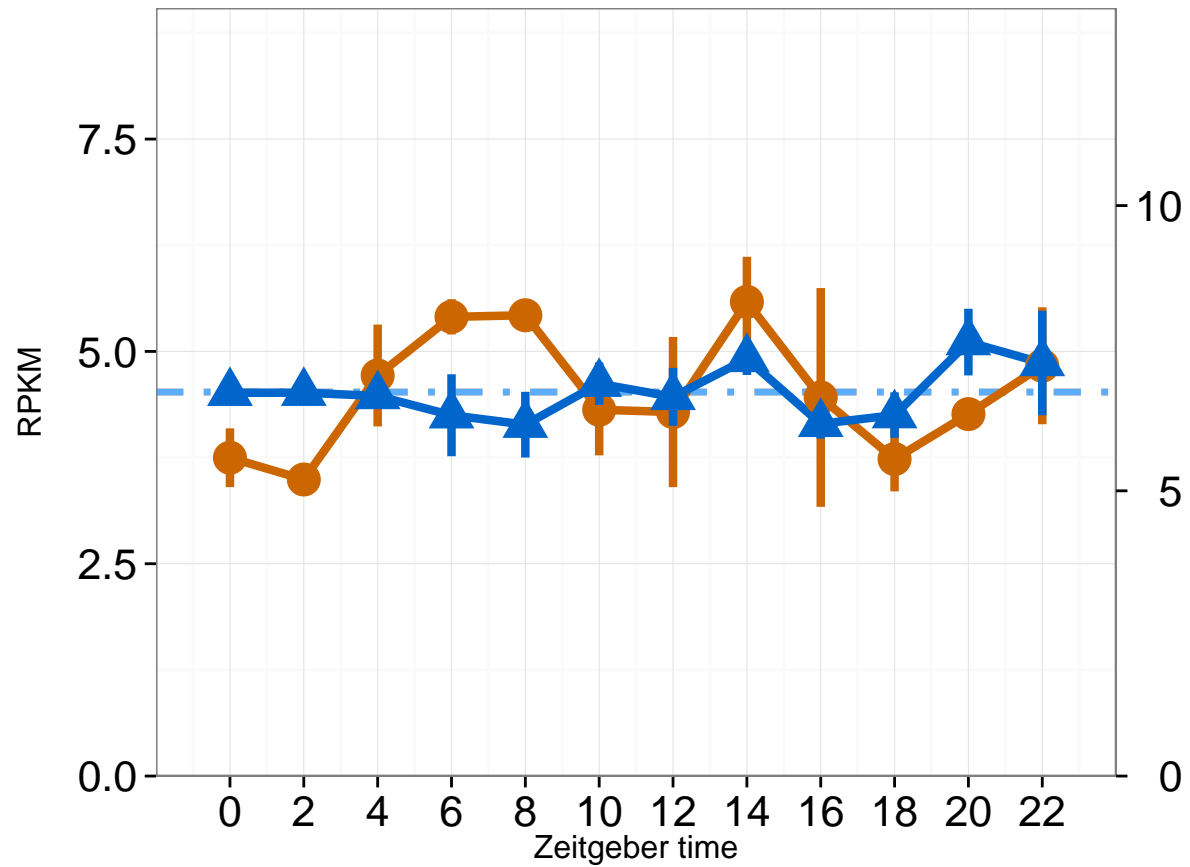

# Mob3a

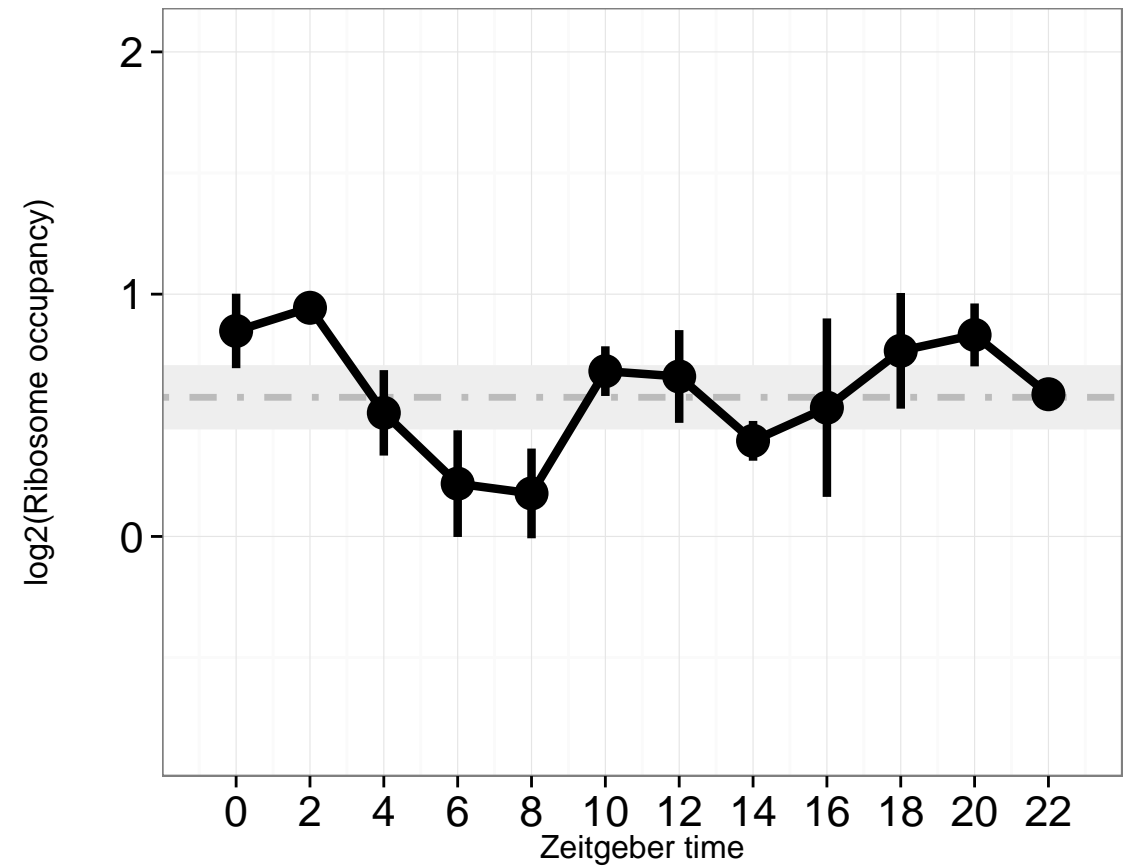

Supplement: Supplementary file 8274 [file 1]

# Kxd1

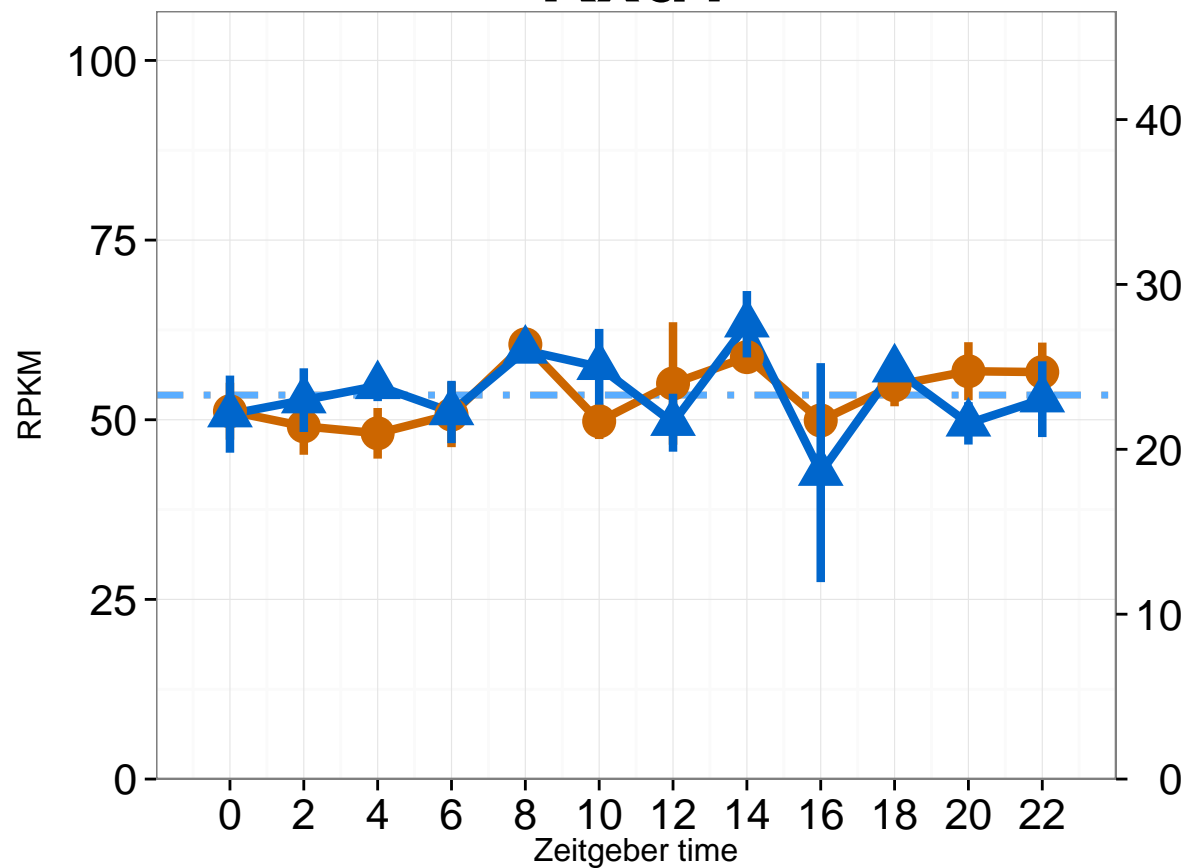

# Kxd1

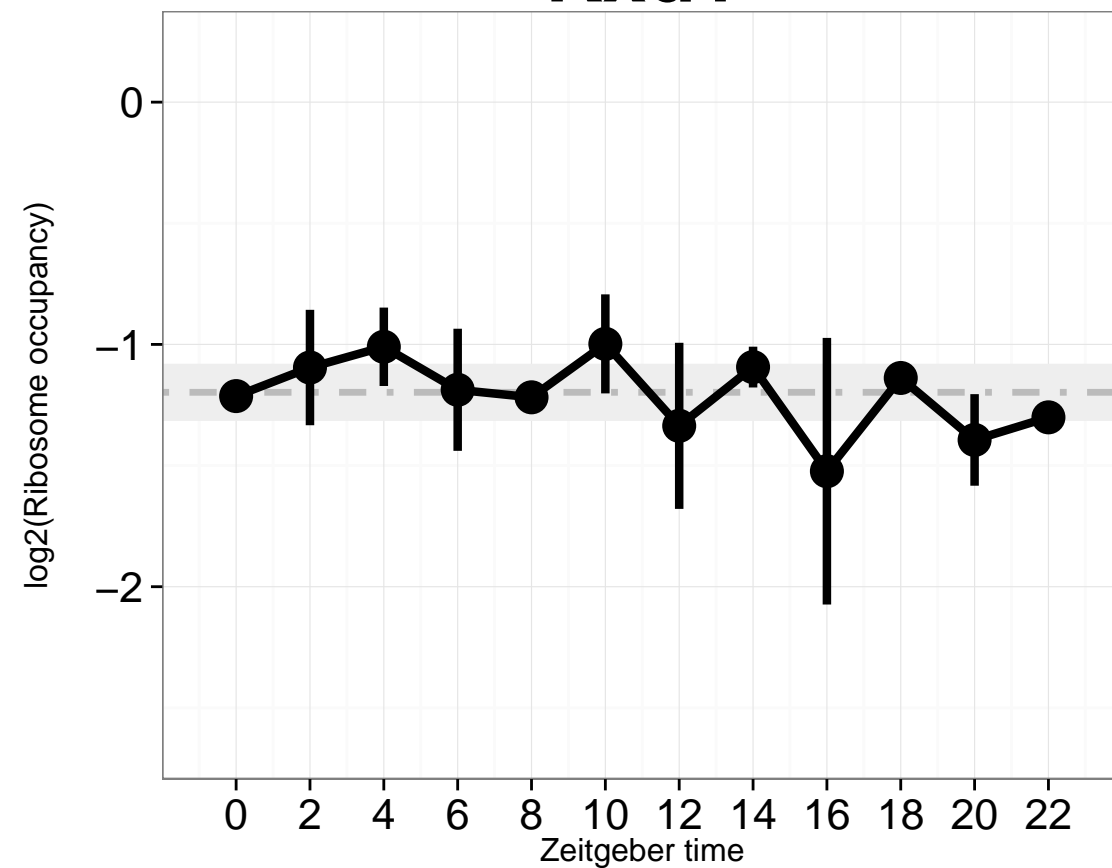

Supplement: Supplementary file 8275 [file 1]

## Upk2

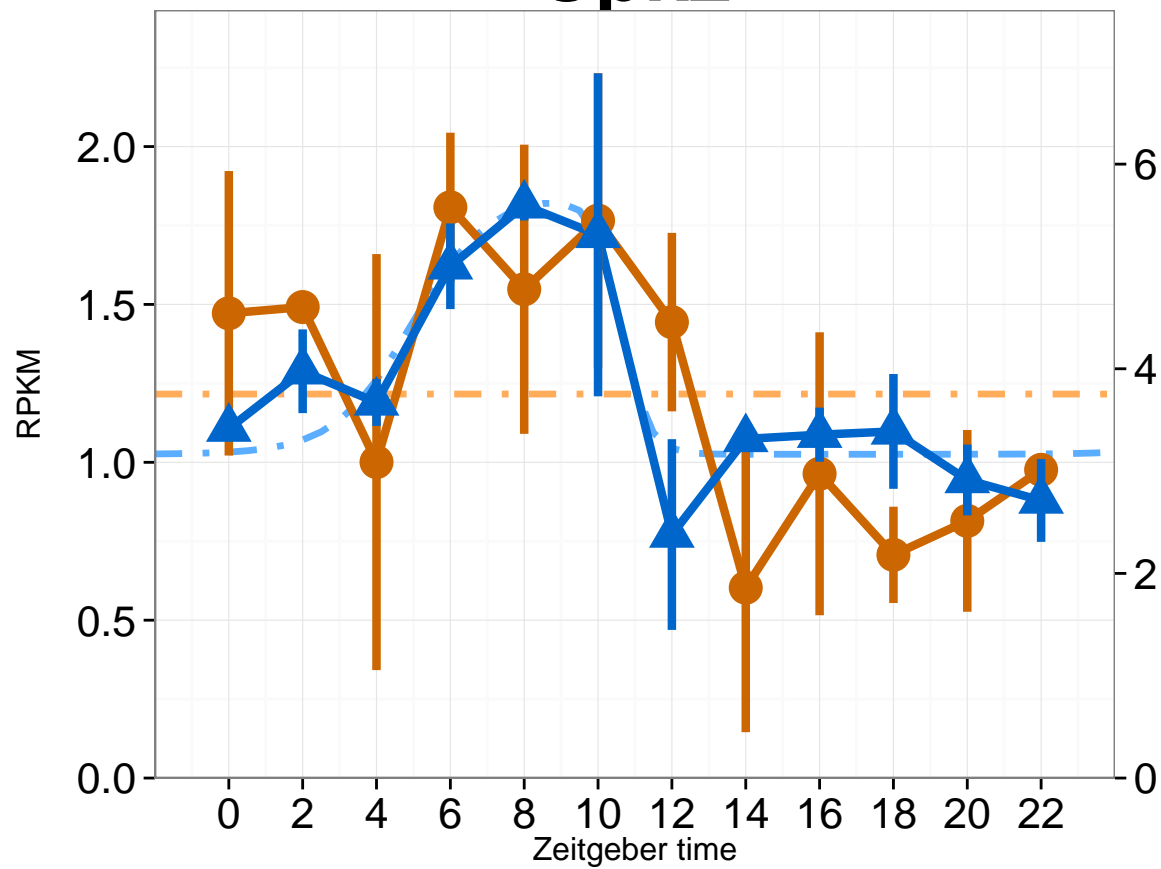

## Upk2

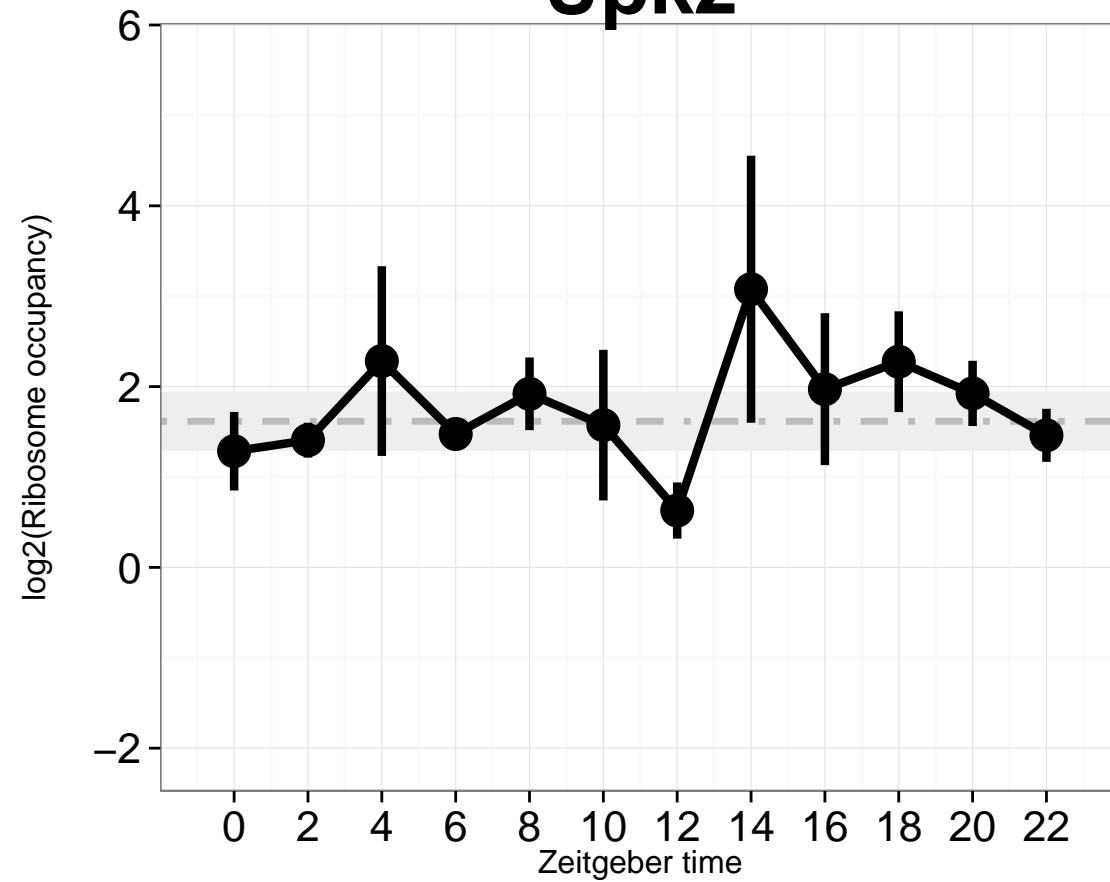

Supplement: Supplementary file 8276 [file 1]

## Mmd

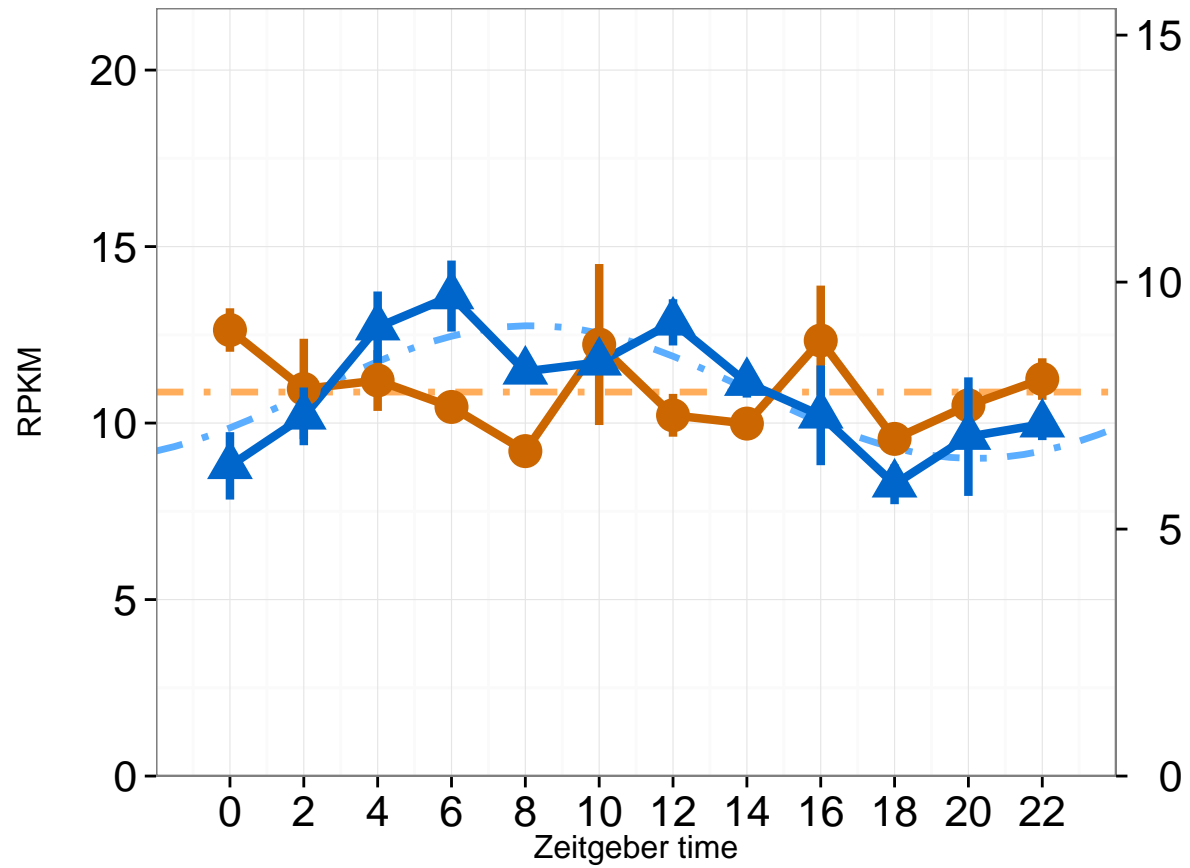

## Mmd

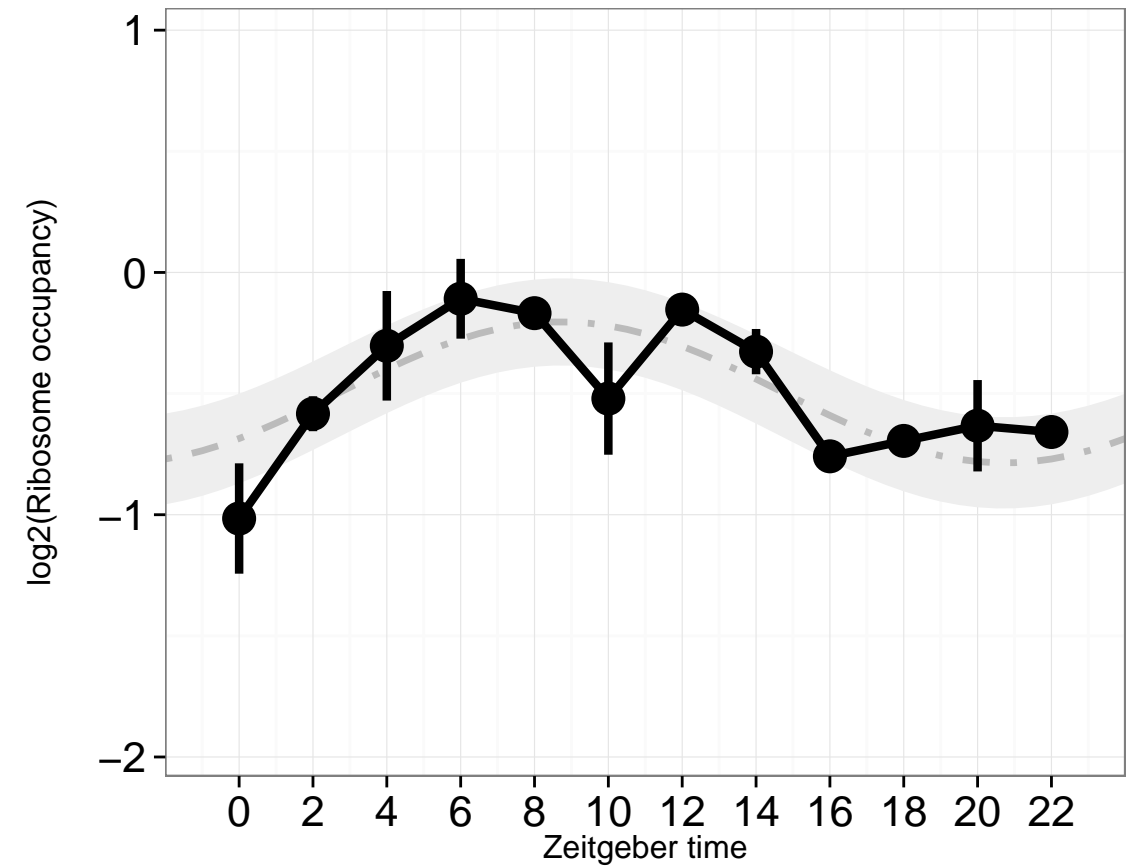

Supplement: Supplementary file 8277 [file 1]

# Cox15

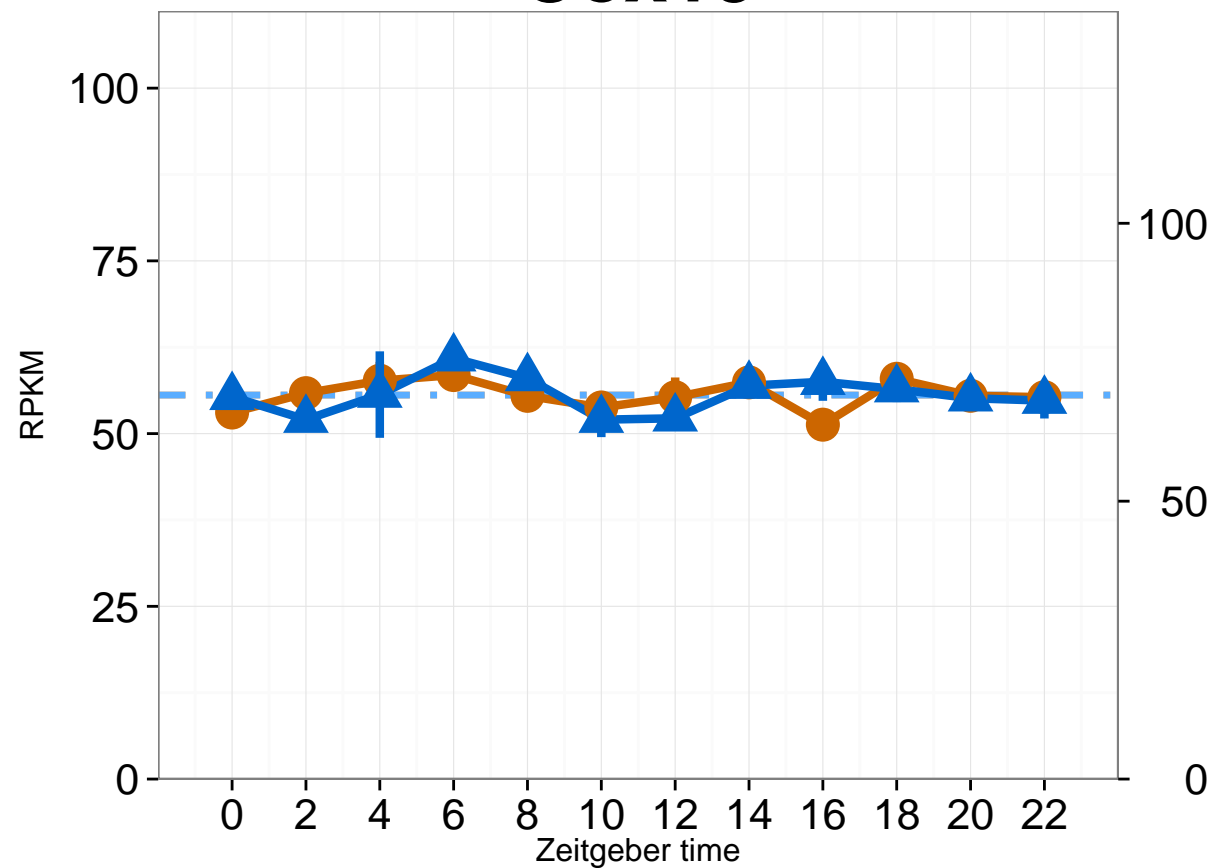

# Cox15

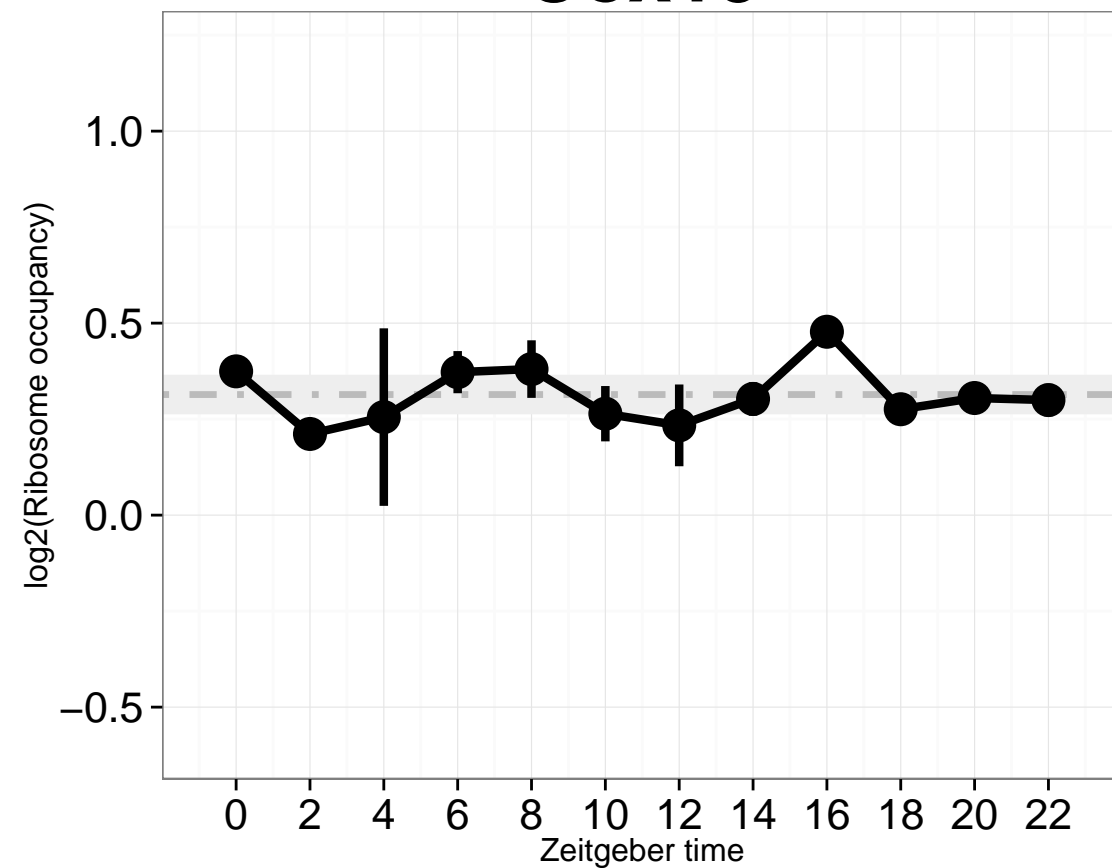

Supplement: Supplementary file 8278 [file 1]

## Apcs

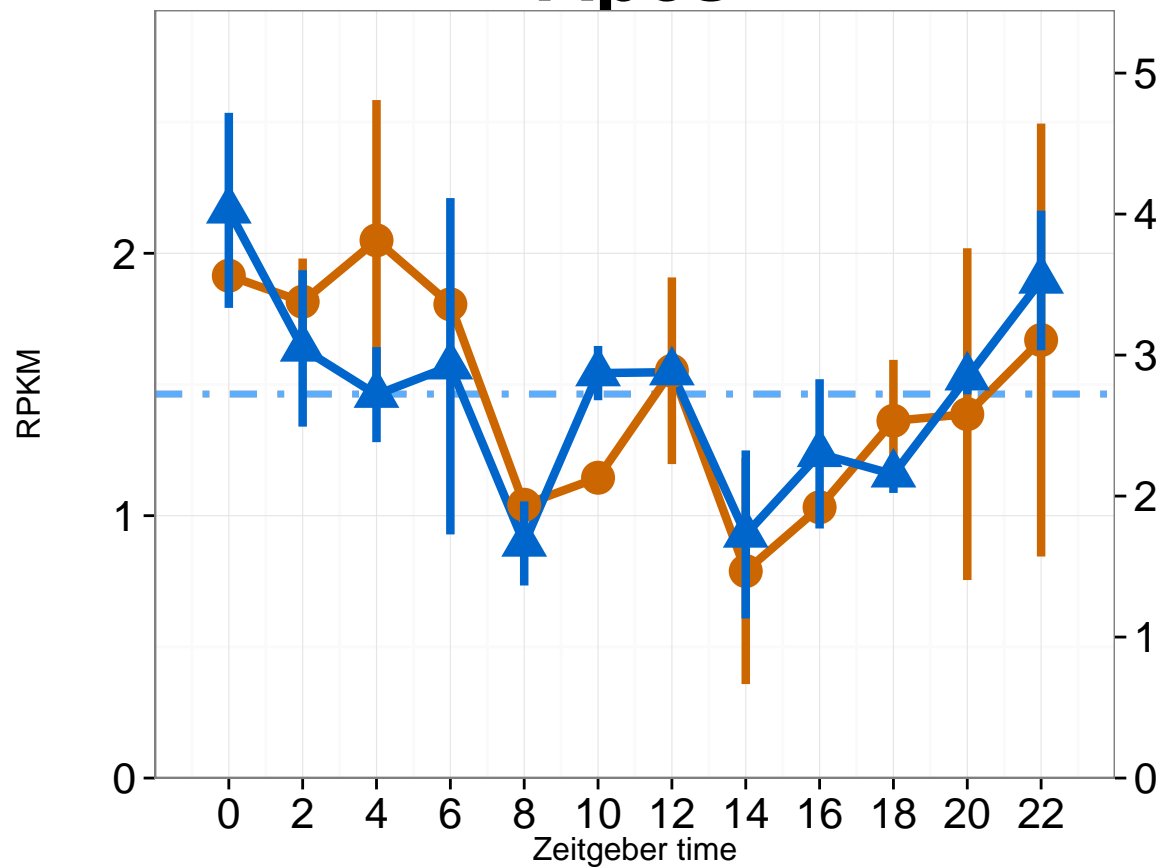

## Apcs

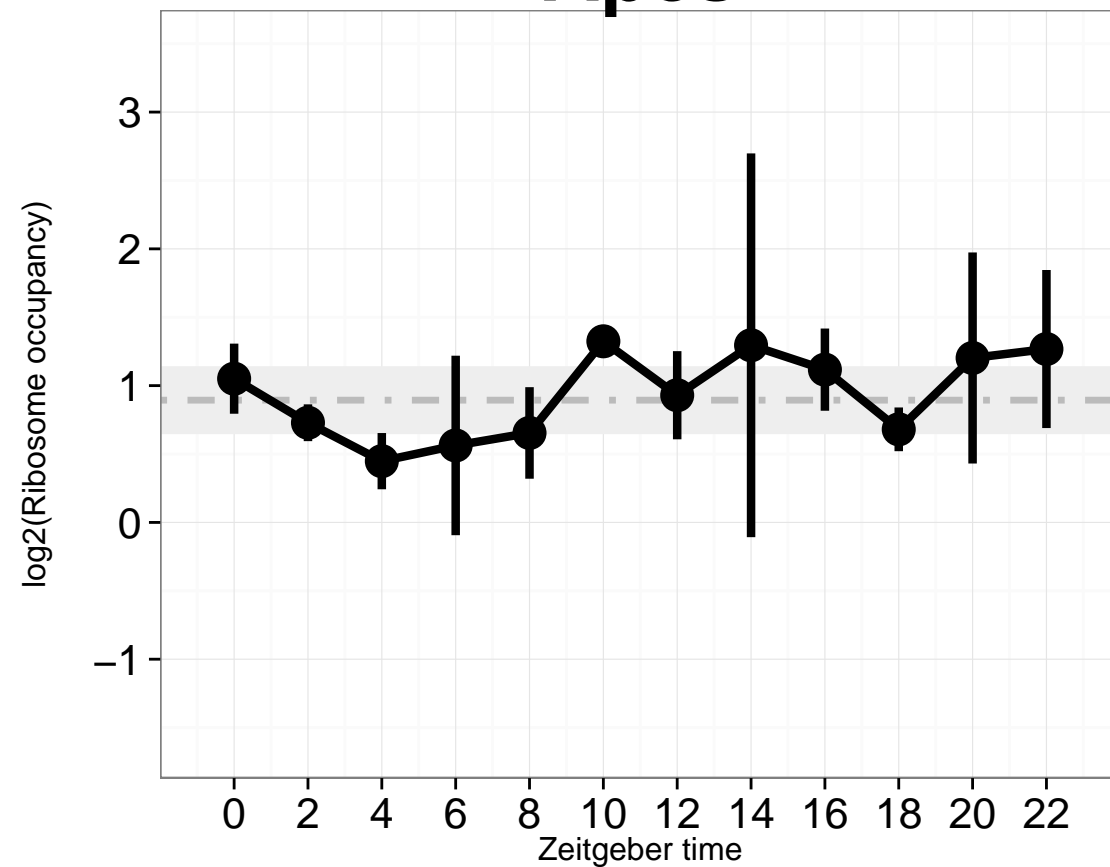

Supplement: Supplementary file 8279 [file 1]

## Siva1

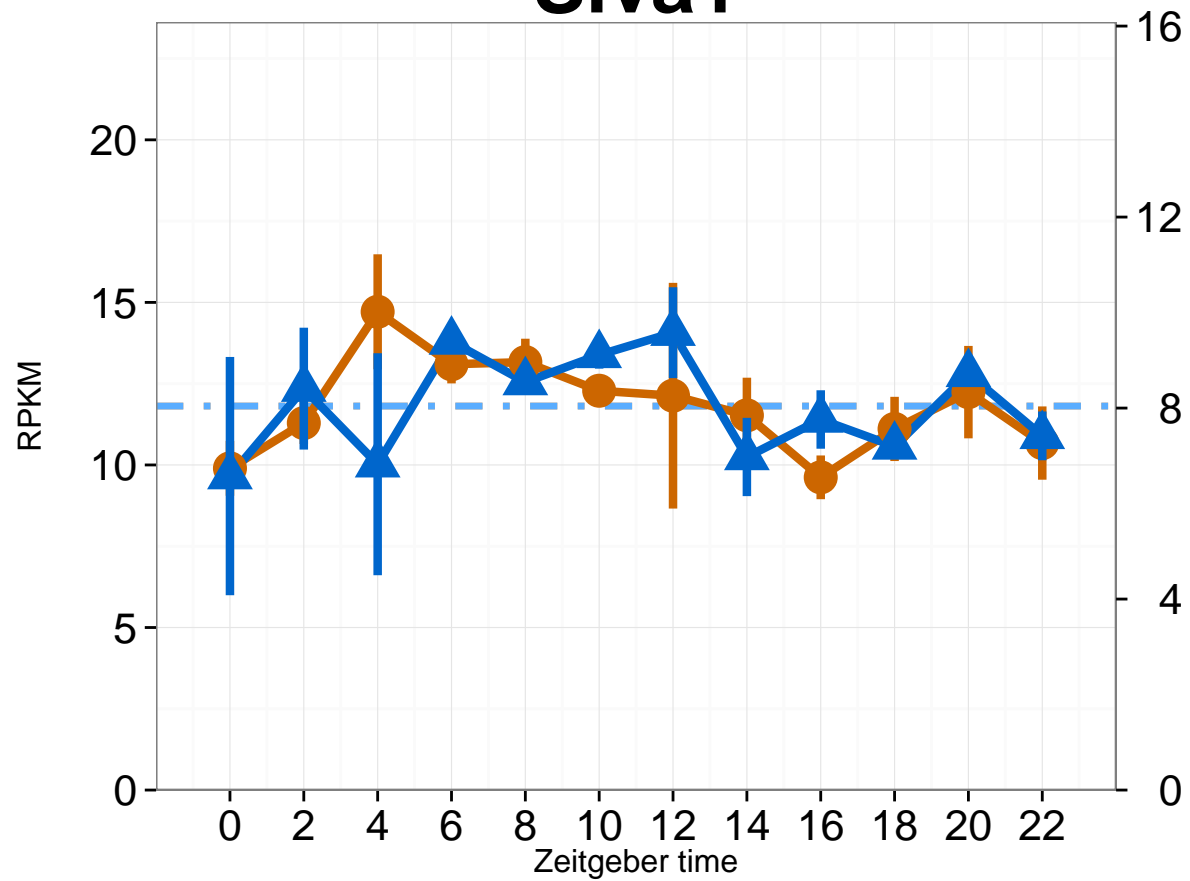

## Siva1

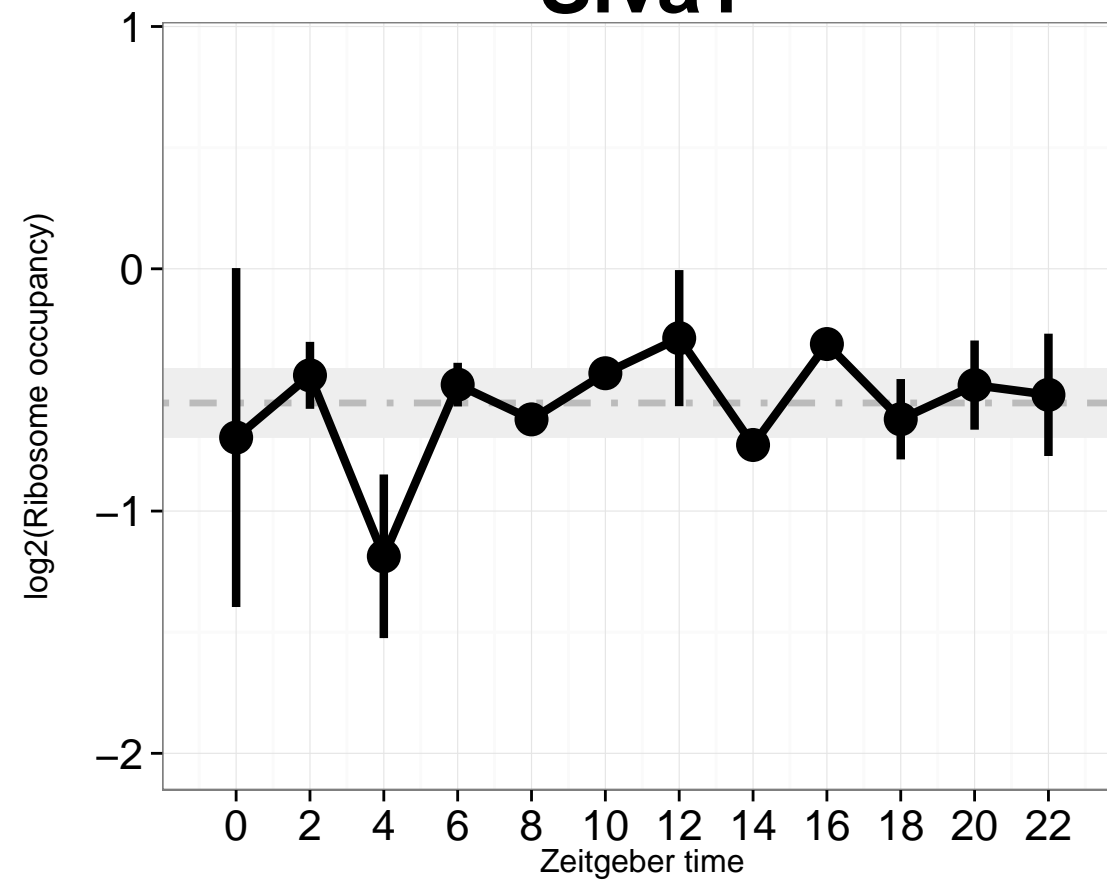

Supplement: Supplementary file 8280 [file 1]

# 2810408M09Rik

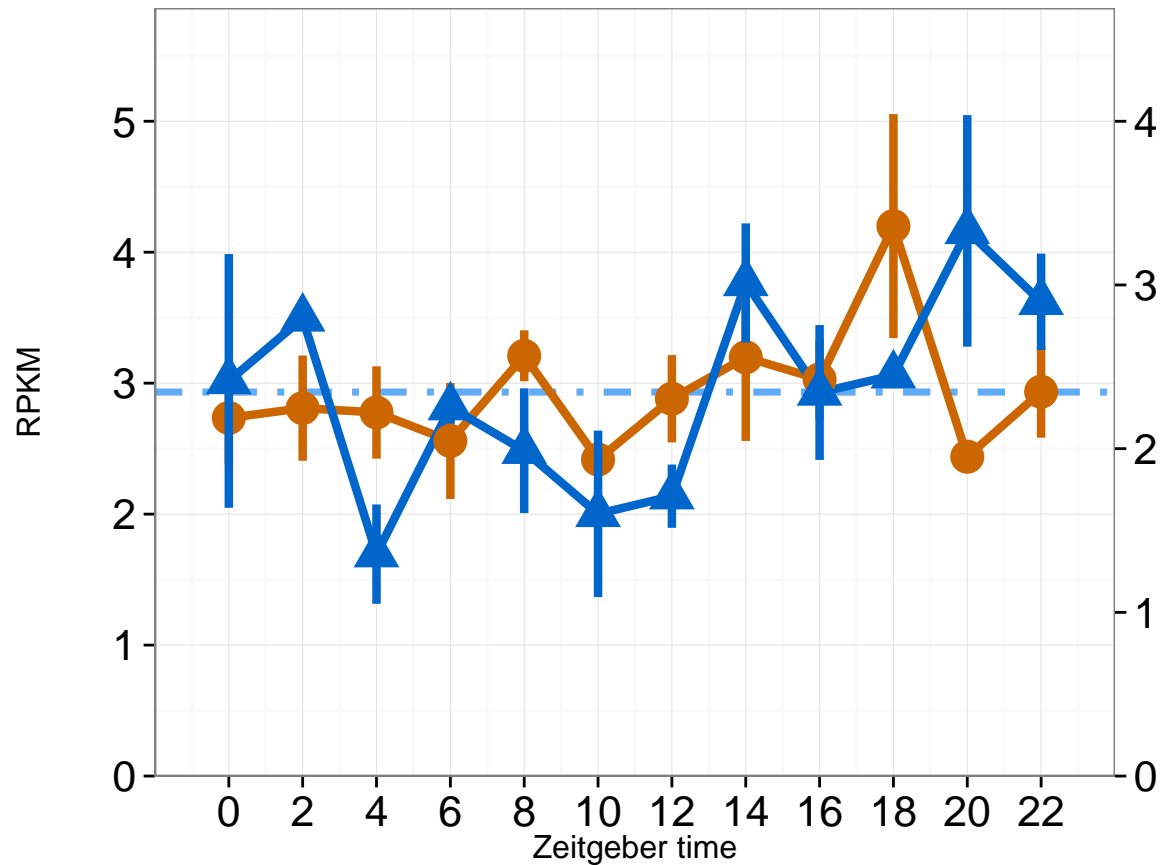

# 2810408M09Rik

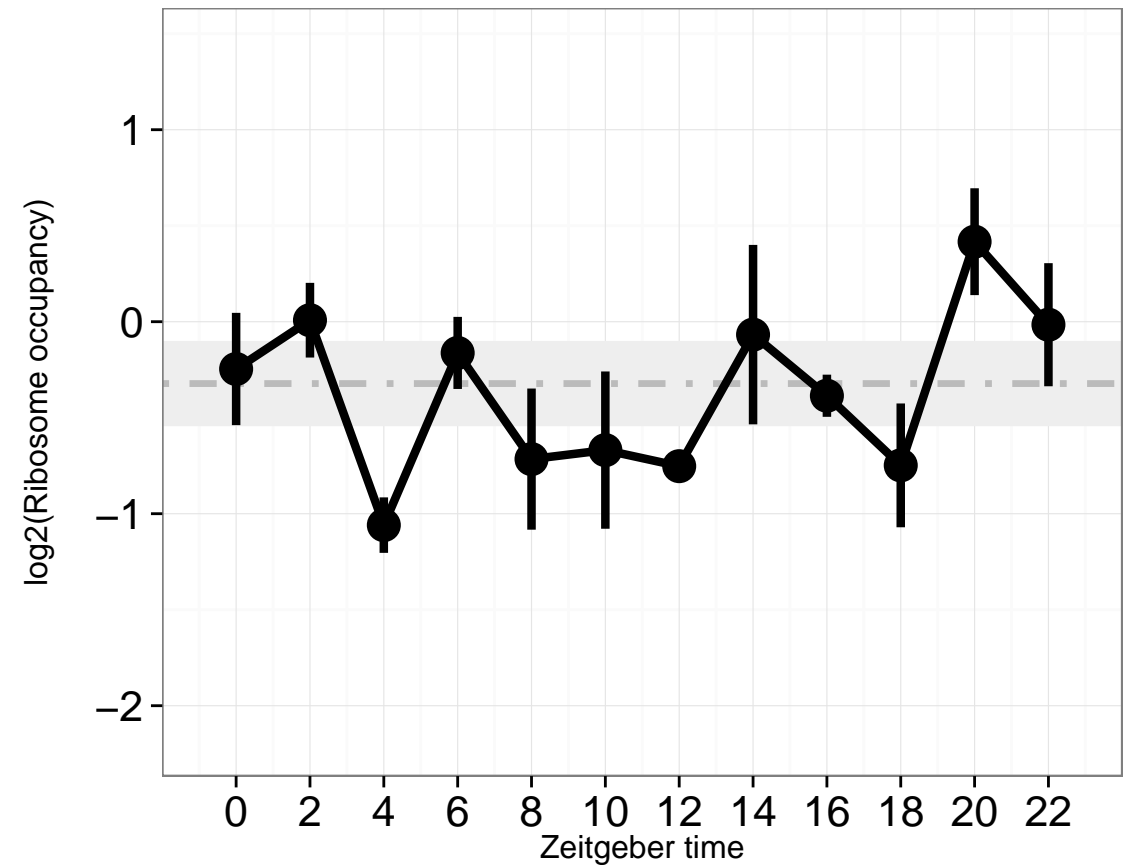

Supplement: Supplementary file 8281 [file 1]

## Arl3

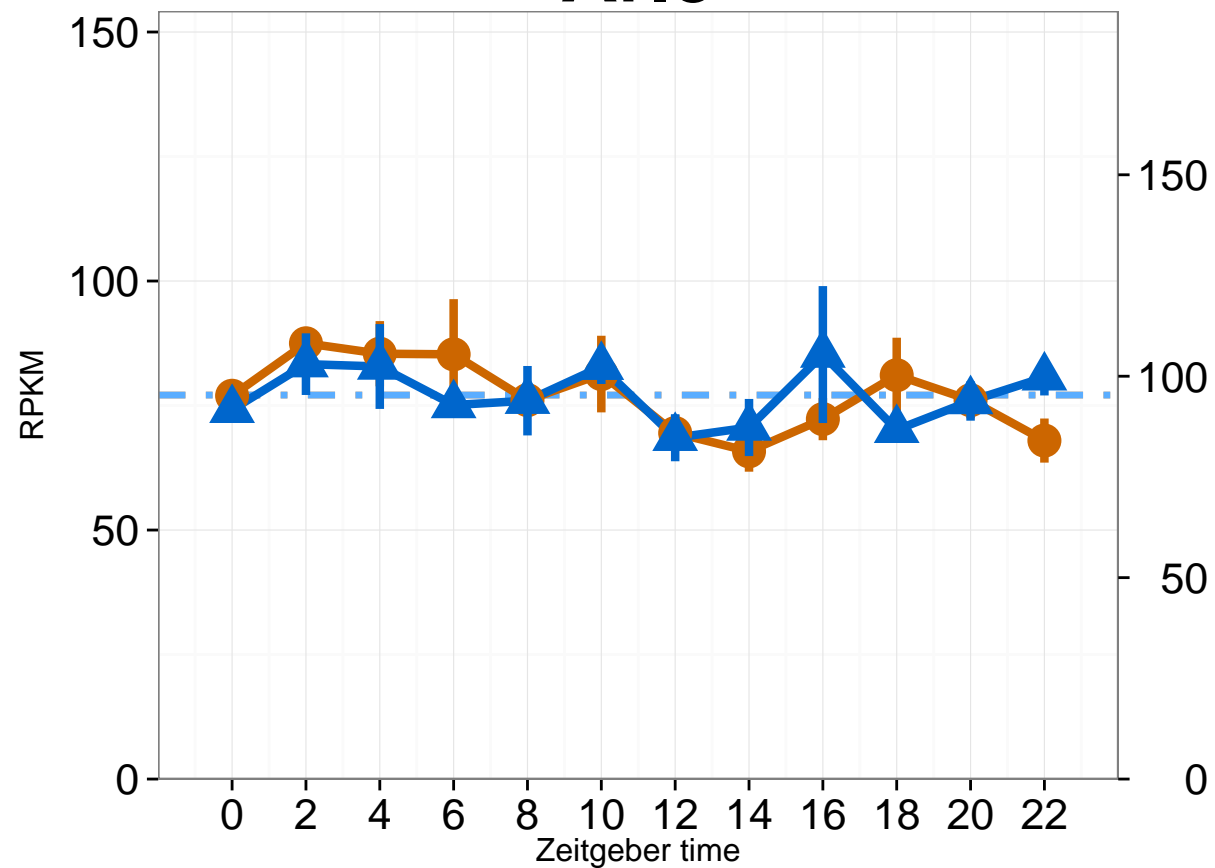

## Arl3

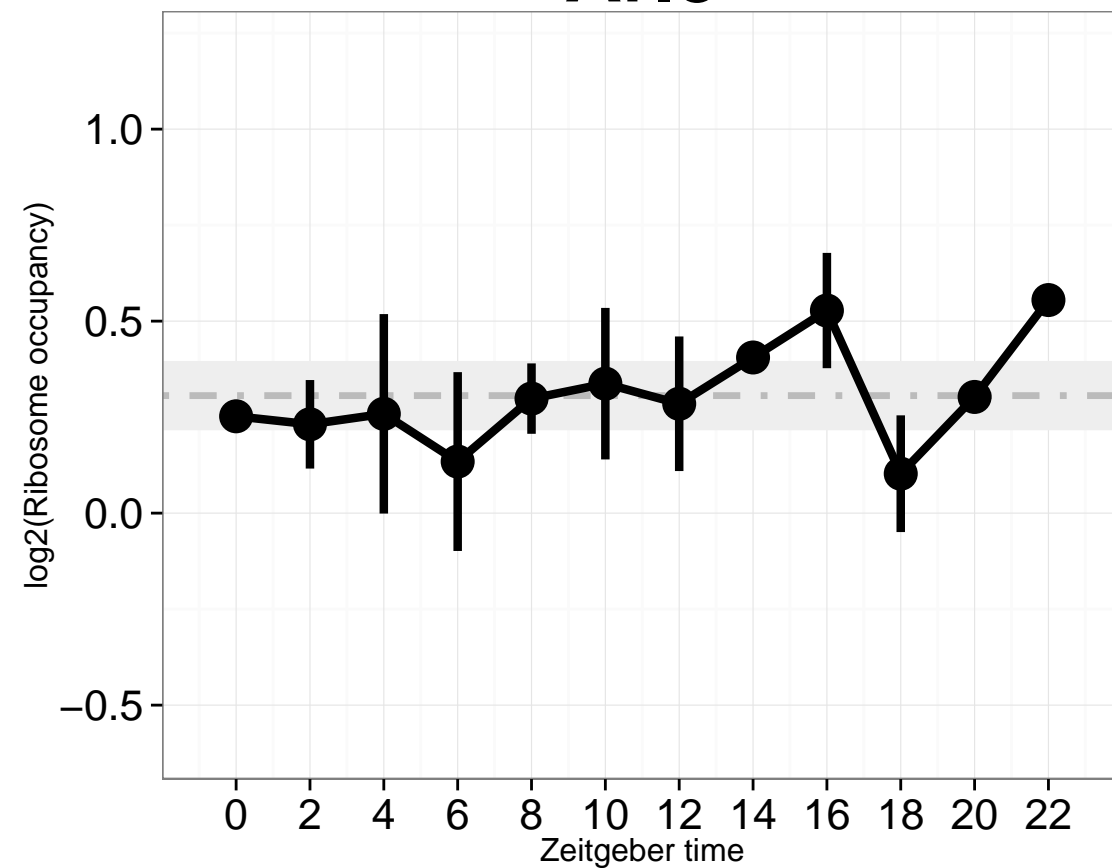

Supplement: Supplementary file 8282 [file 1]

## Abcc2

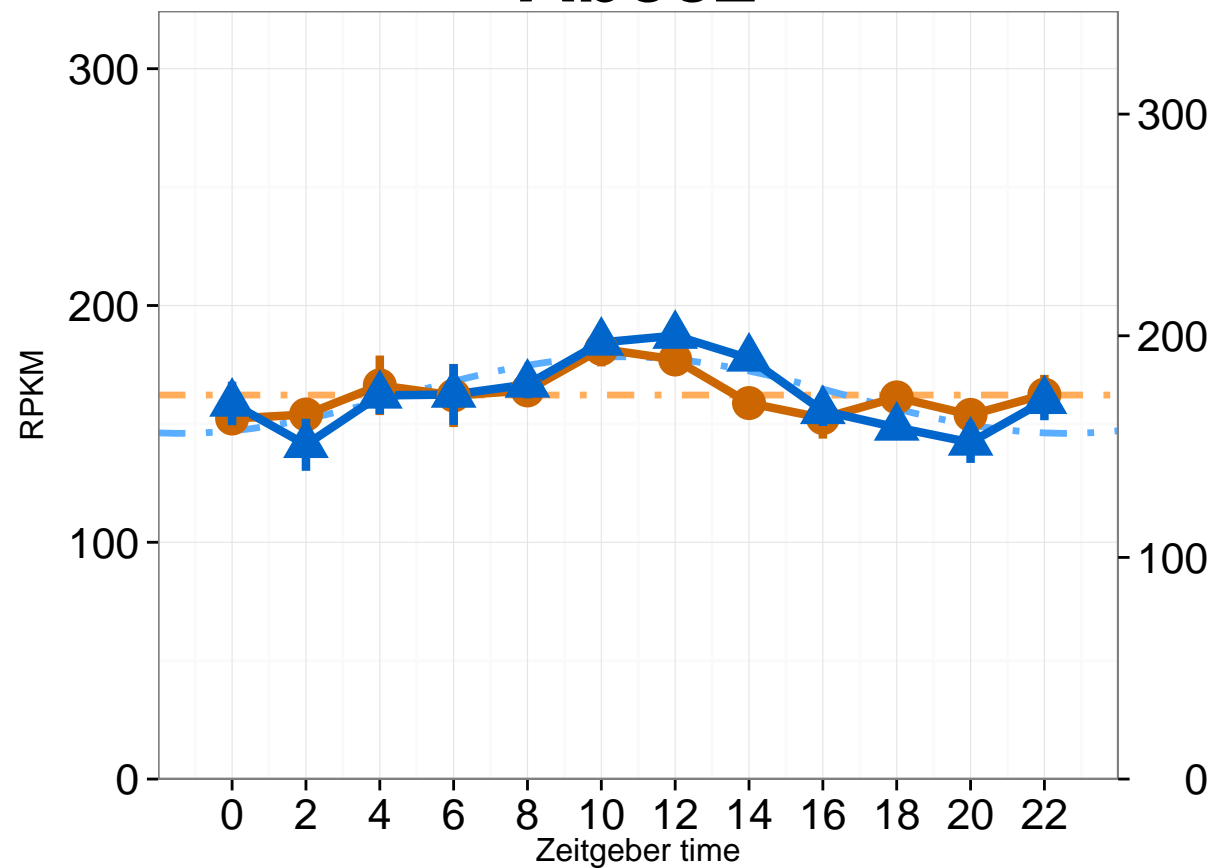

## Abcc2

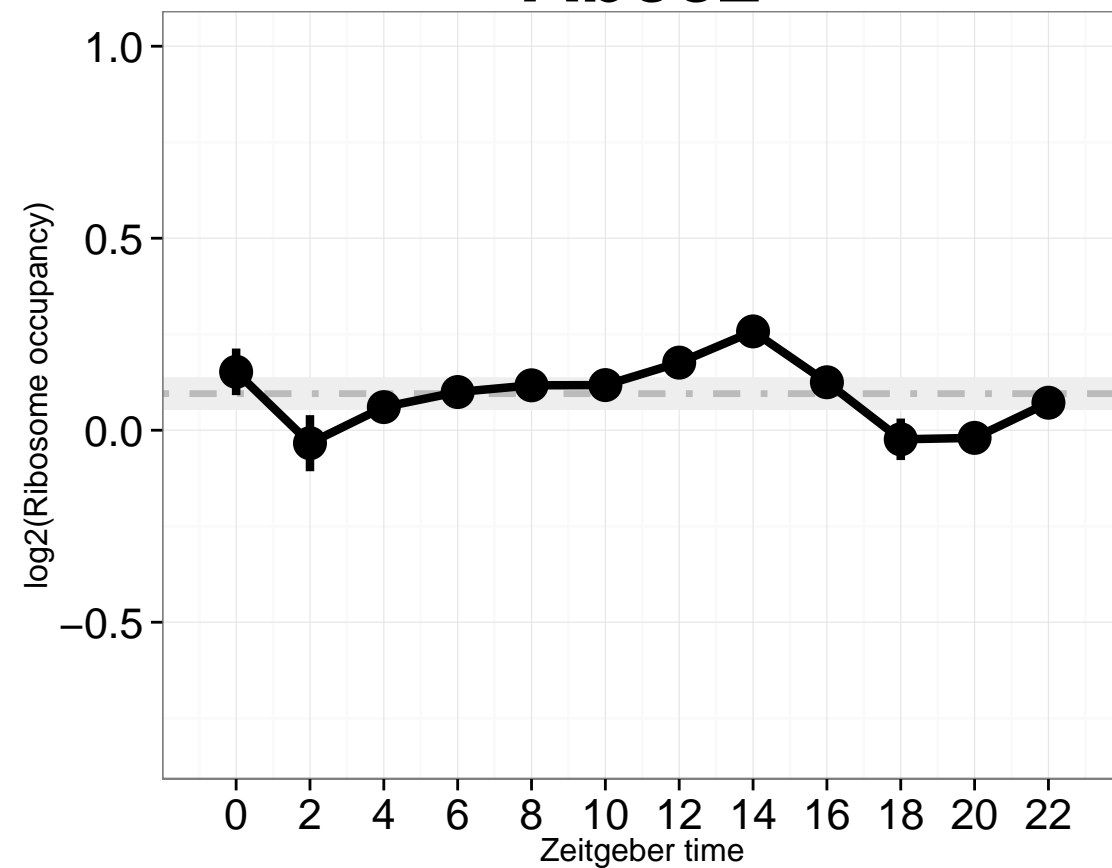

Supplement: Supplementary file 8283 [file 1]

## Commd6

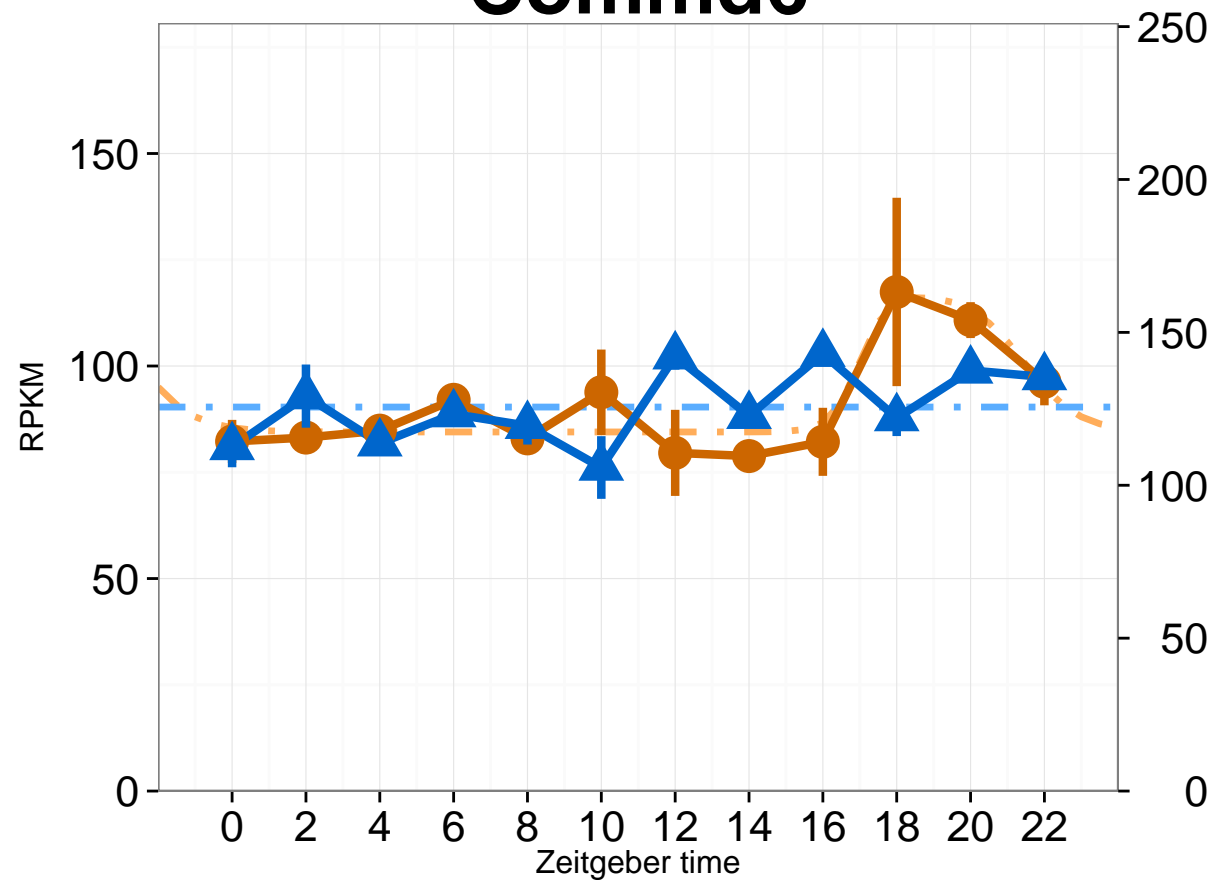

## Commd6

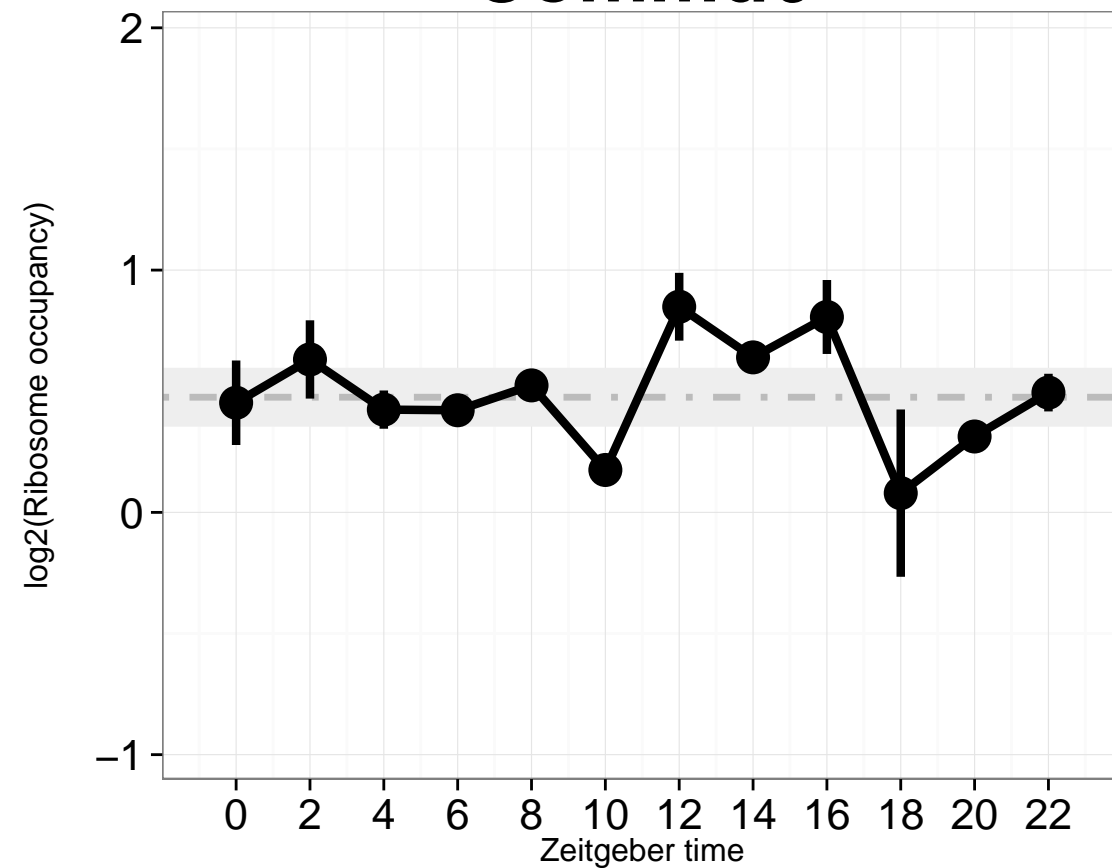

Supplement: Supplementary file 8284 [file 1]

## Aldh1l2

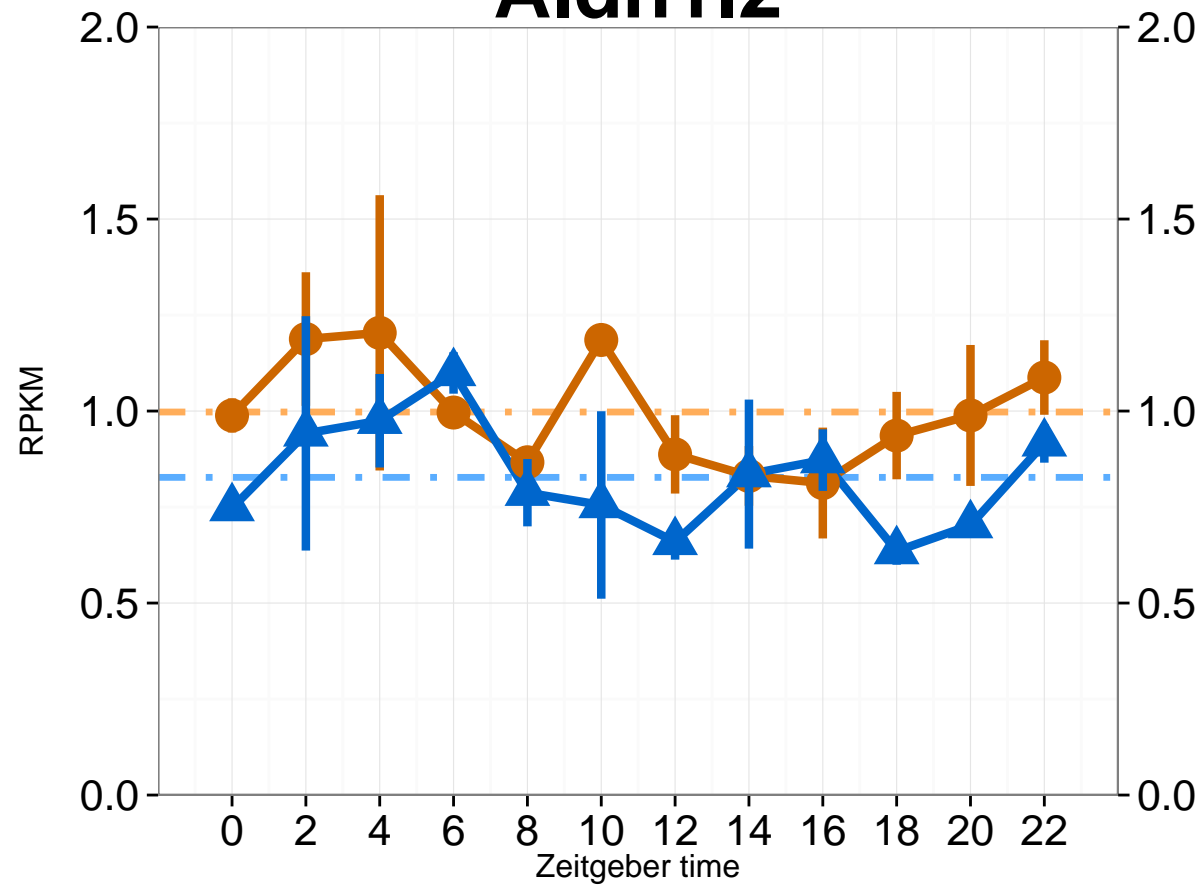

## Aldh1l2

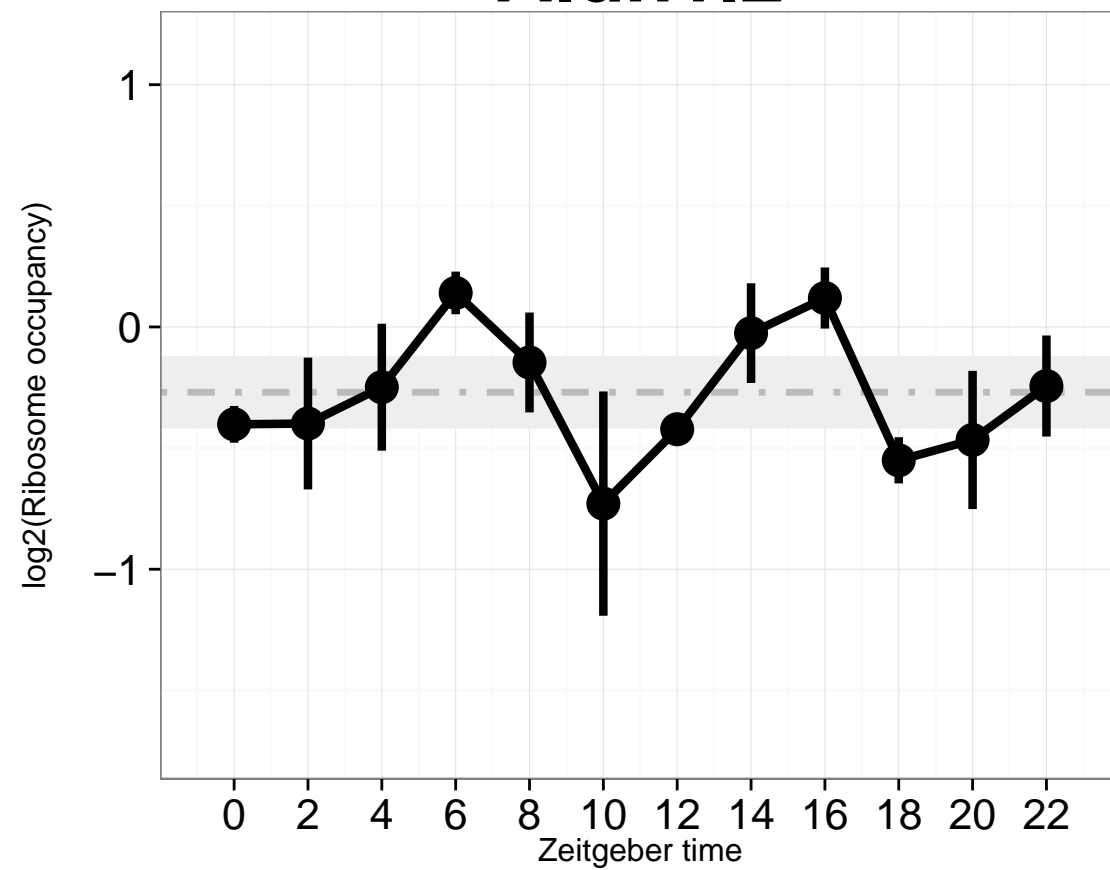

Supplement: Supplementary file 8285 [file 1]

# Nov TR

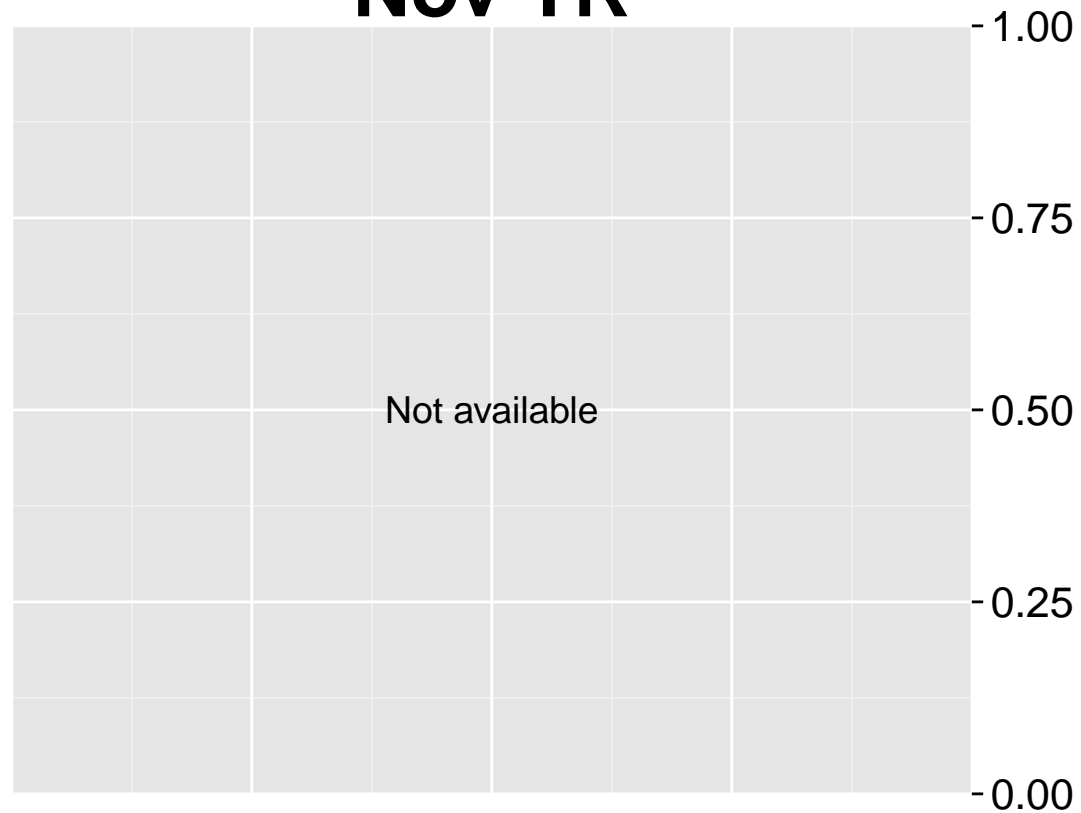

# Nov $\log_2(\text{Ribosome occupancy})$

Supplement: Supplementary file 8286 [file 1]

# Cdc42ep1

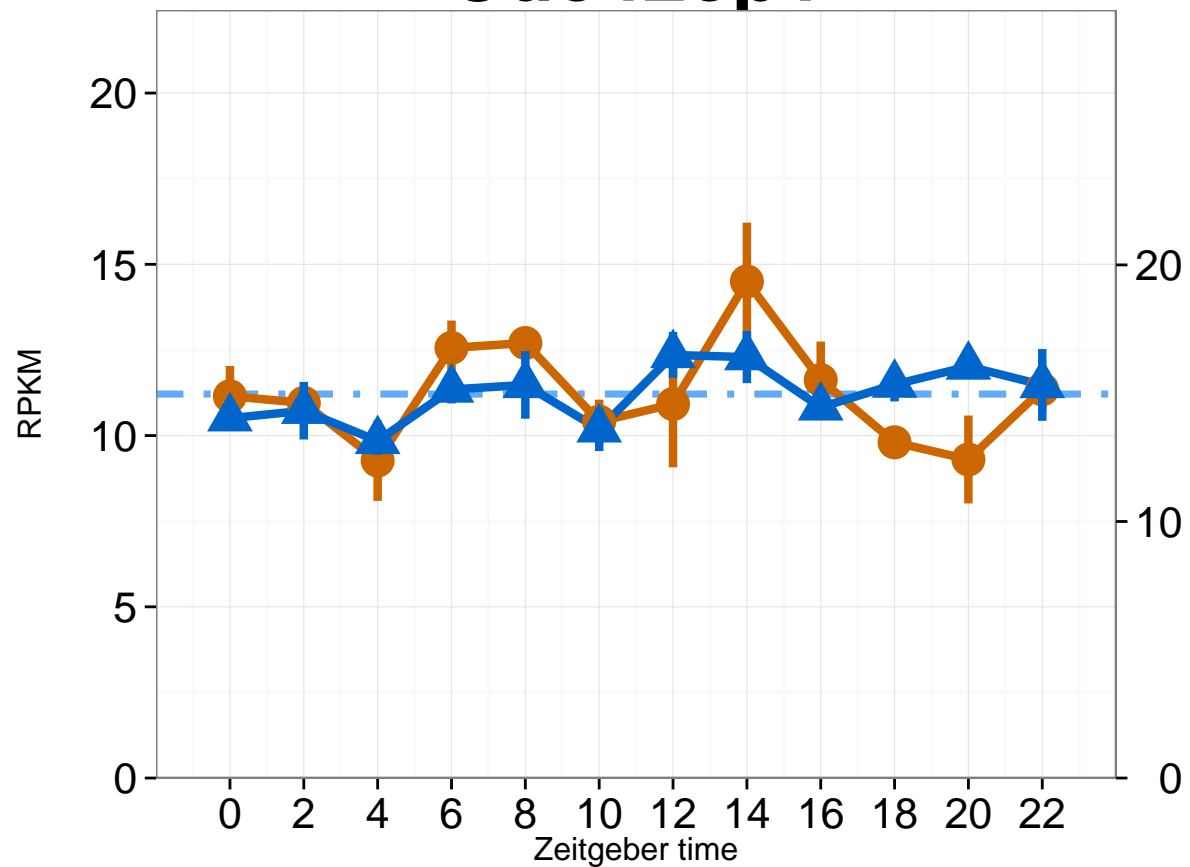

# Cdc42ep1

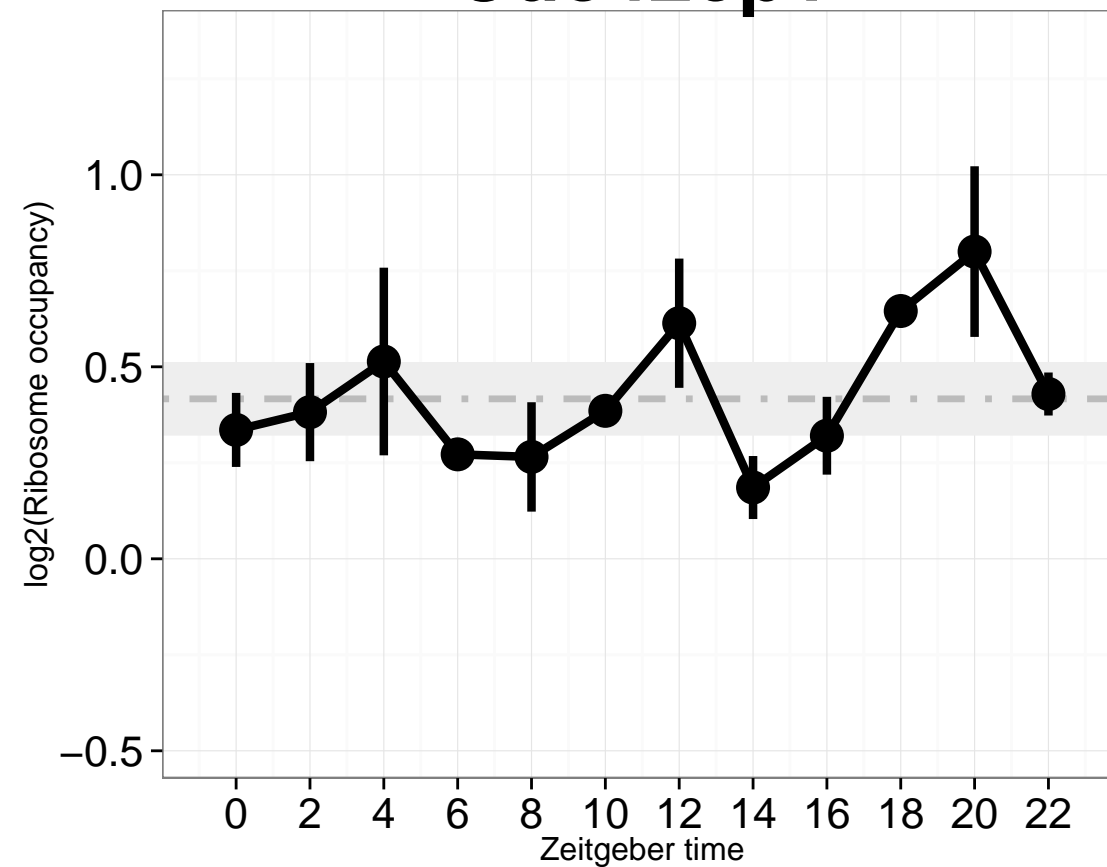

Supplement: Supplementary file 8287 [file 1]

# Phf7

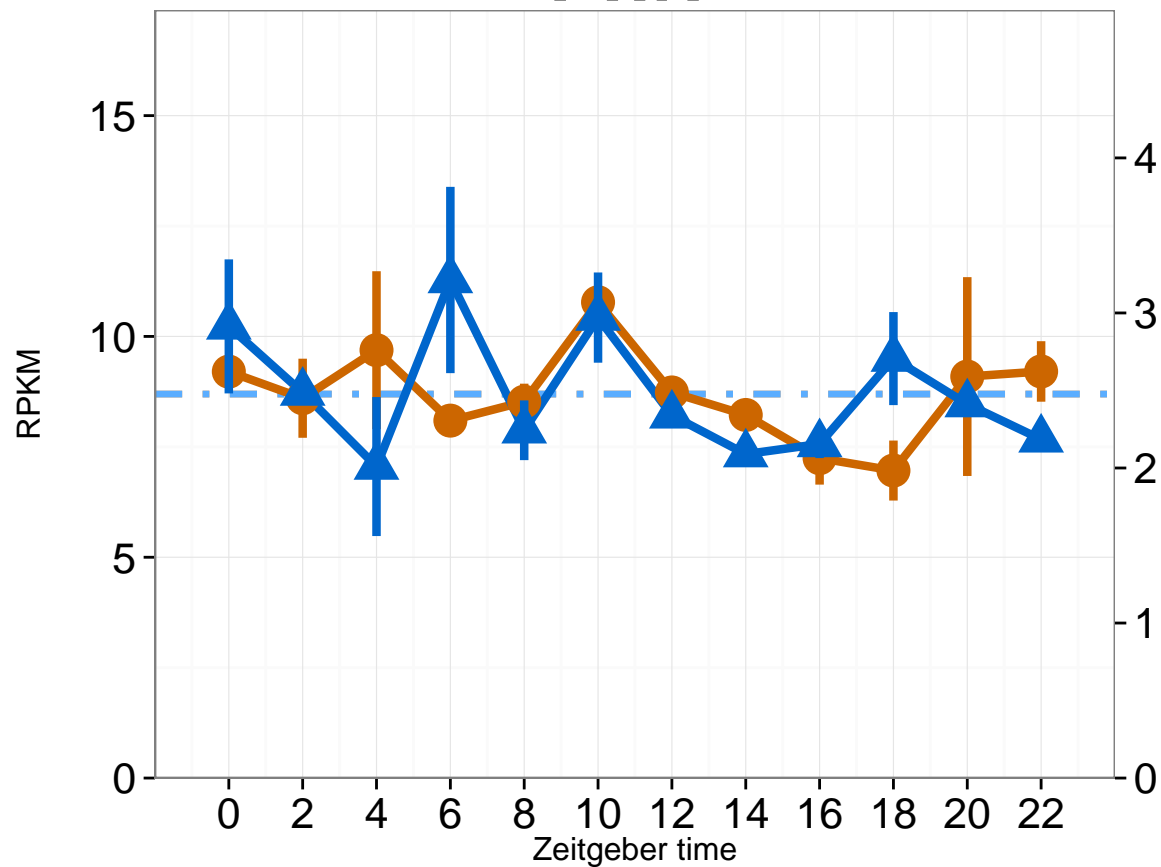

# Phf7

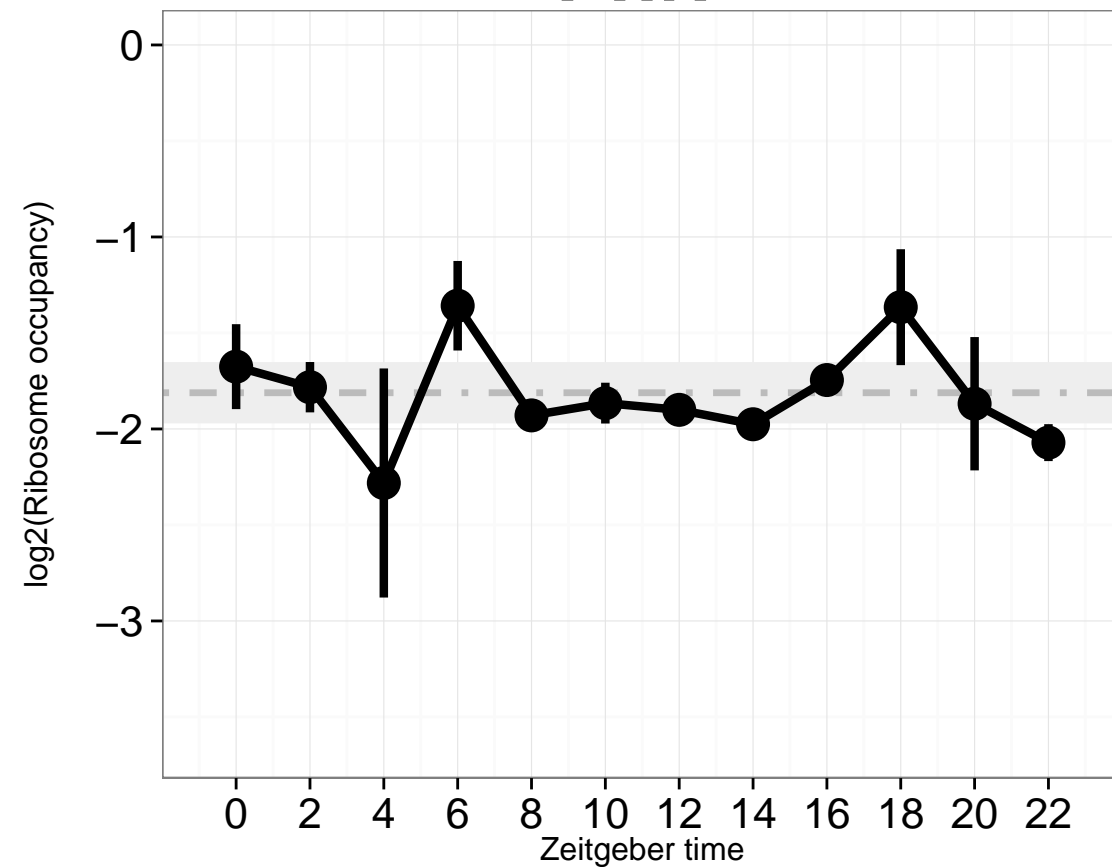

Supplement: Supplementary file 8288 [file 1]

## Nr3c1

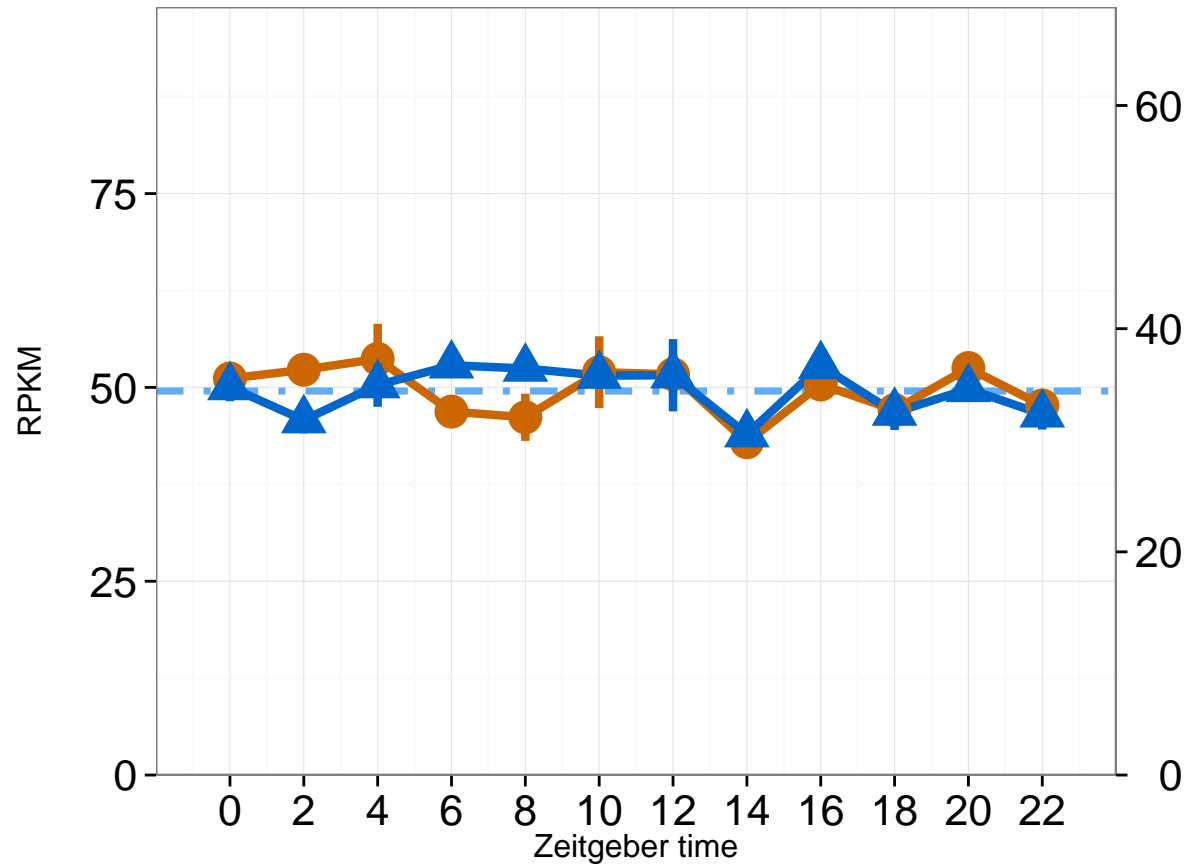

## Nr3c1

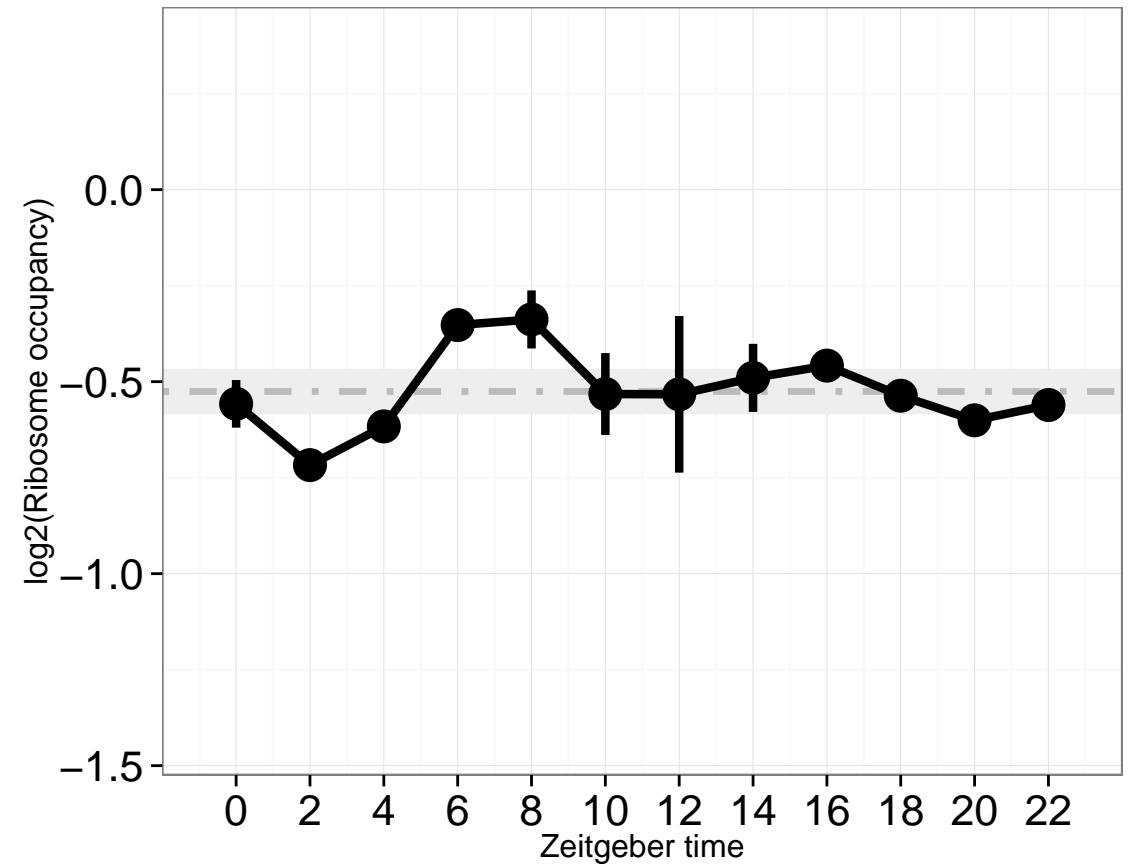

Supplement: Supplementary file 8289 [file 1]

# Stxbp5

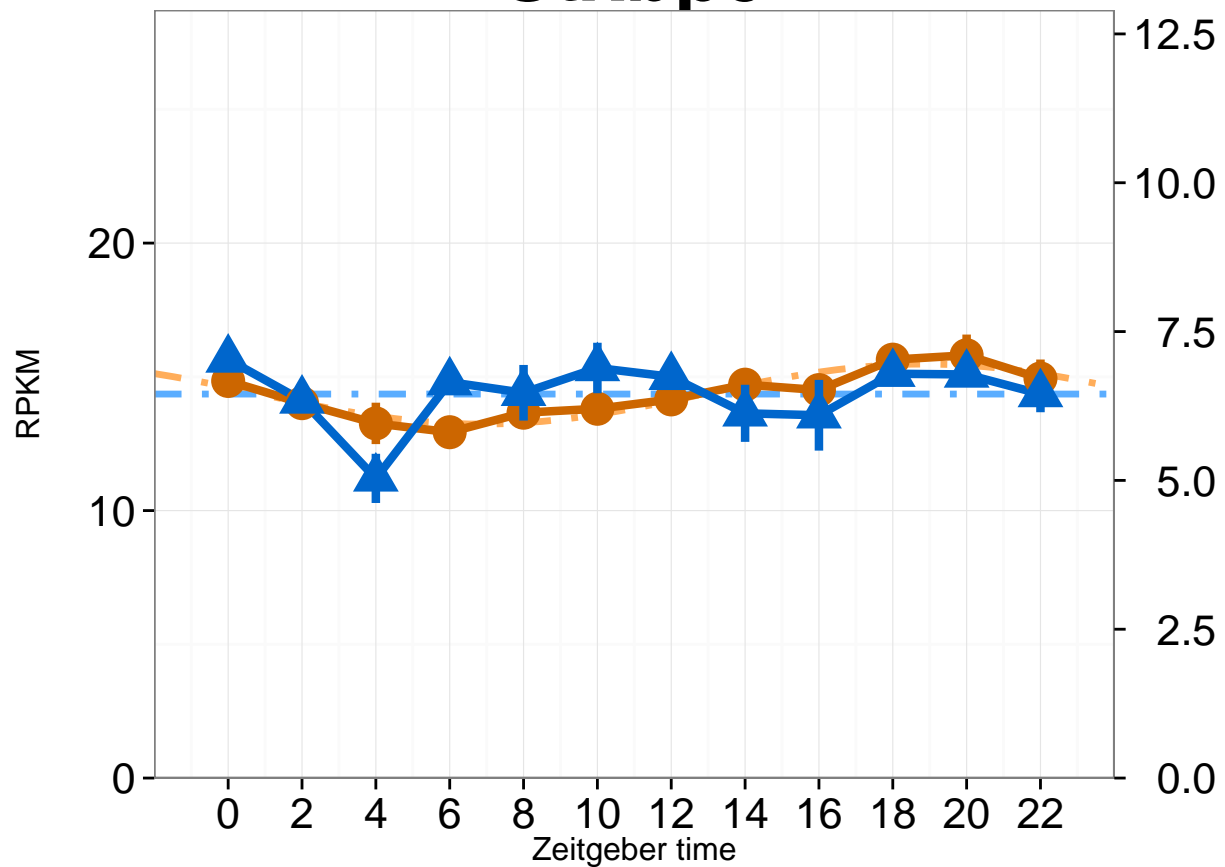

# Stxbp5

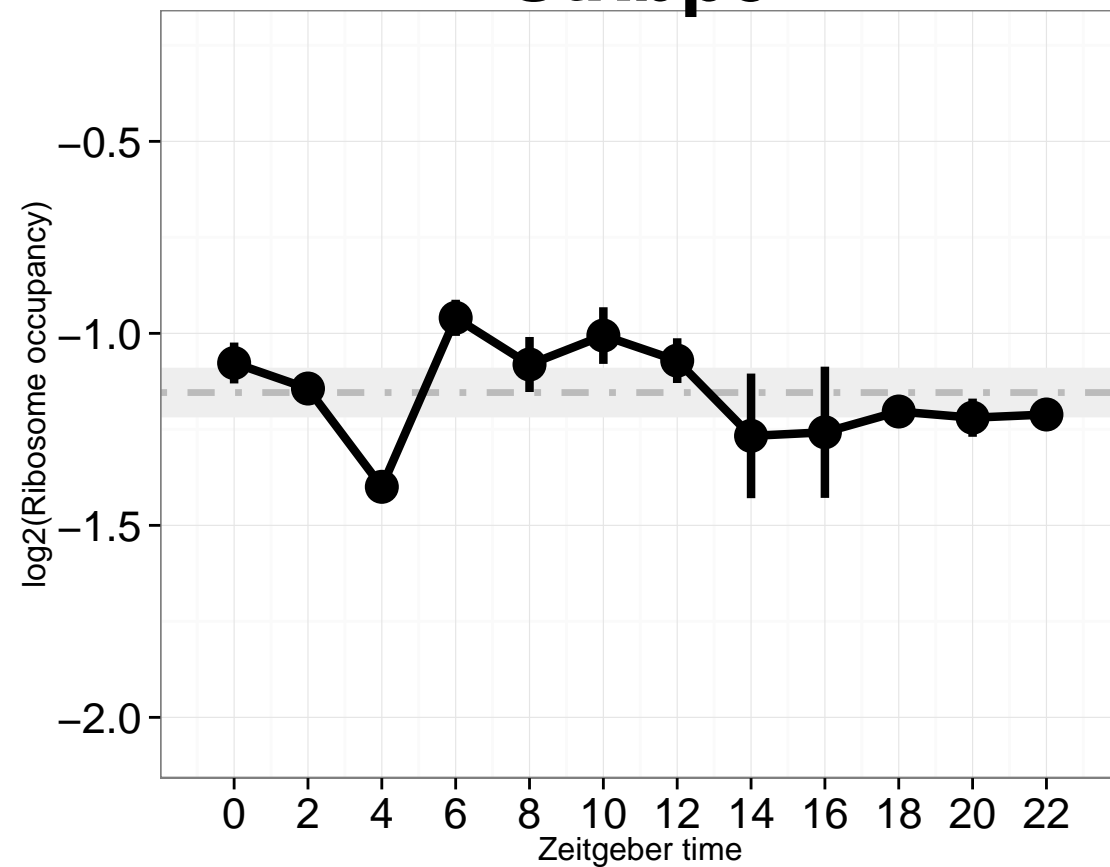

Supplement: Supplementary file 8290 [file 1]

# Zfp141

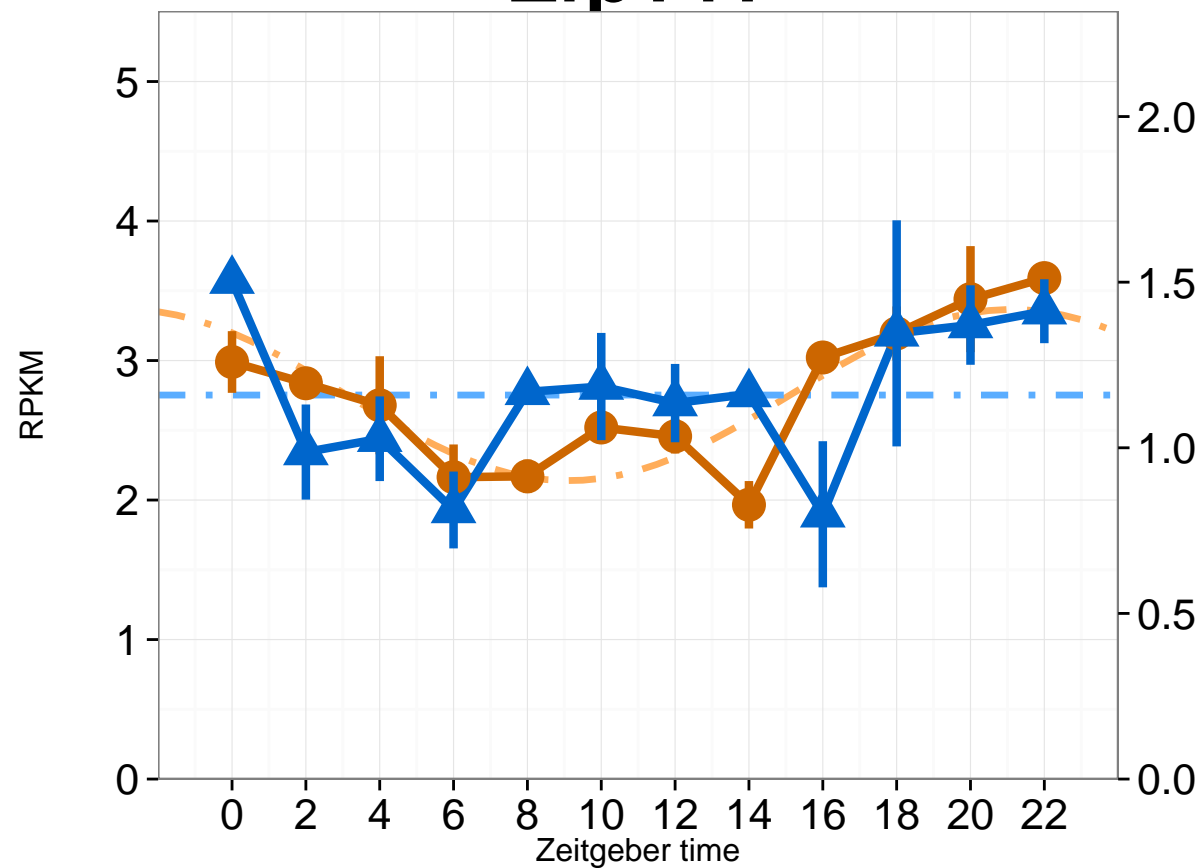

# Zfp141

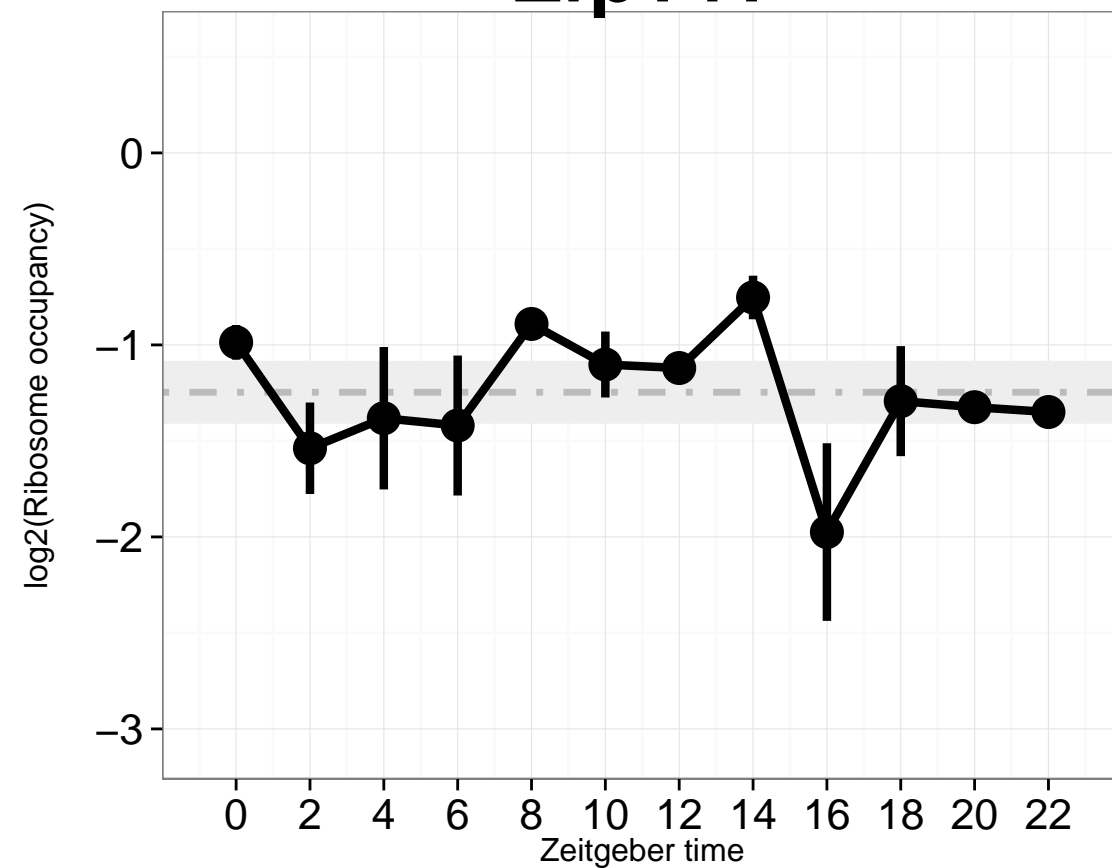

Supplement: Supplementary file 8291 [file 1]

# Ldlrad4

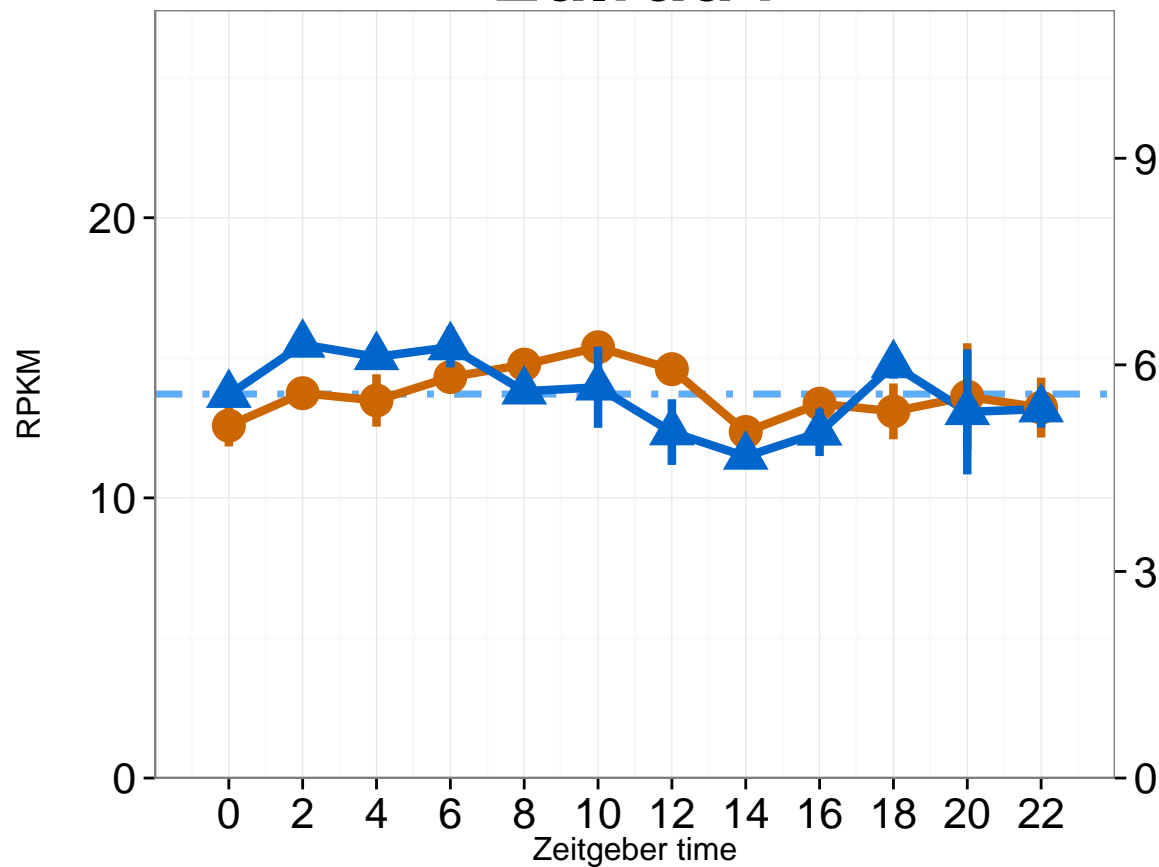

# Ldlrad4

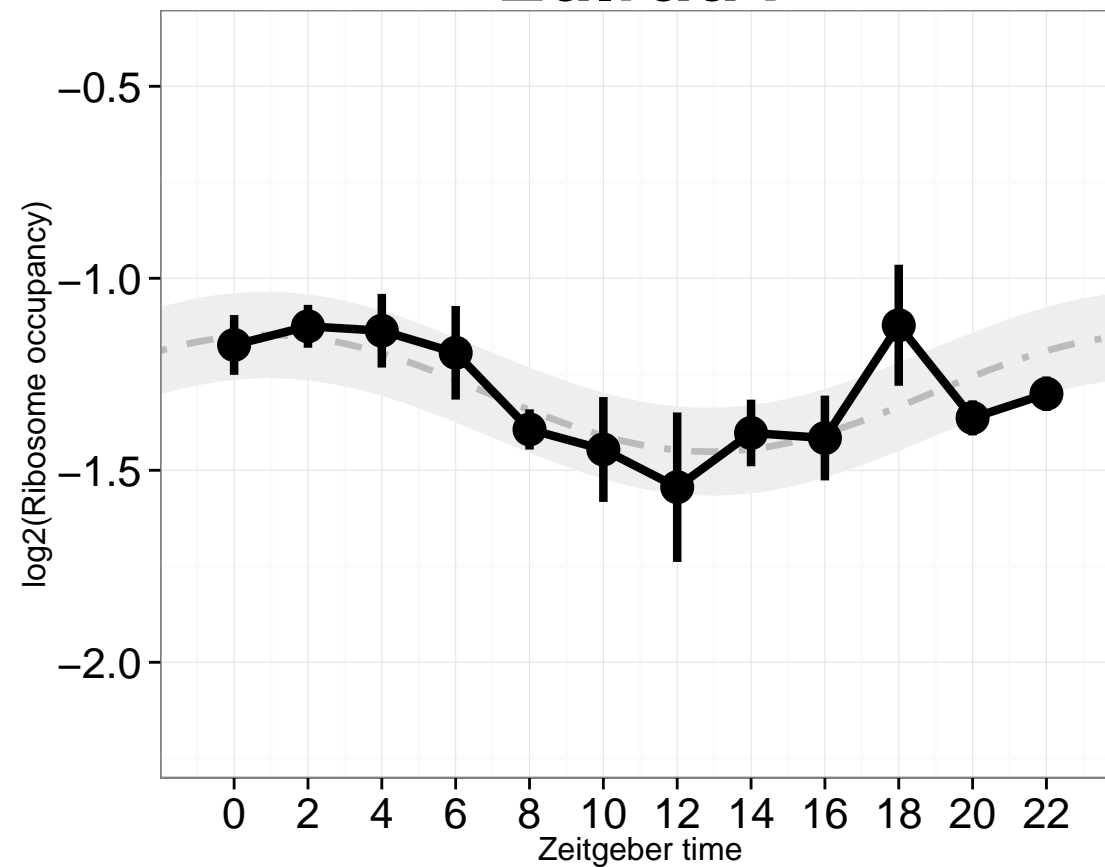

Supplement: Supplementary file 8292 [file 1]

# Tmem171

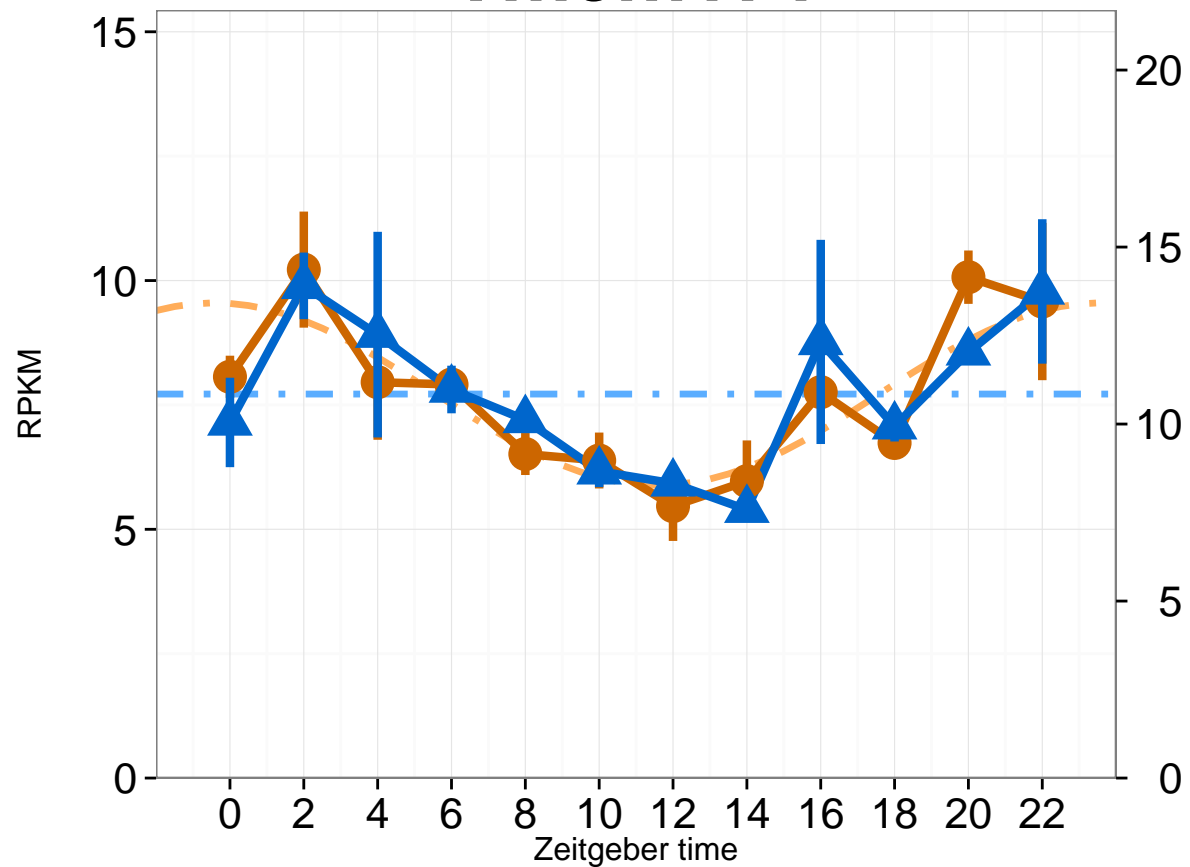

# Tmem171

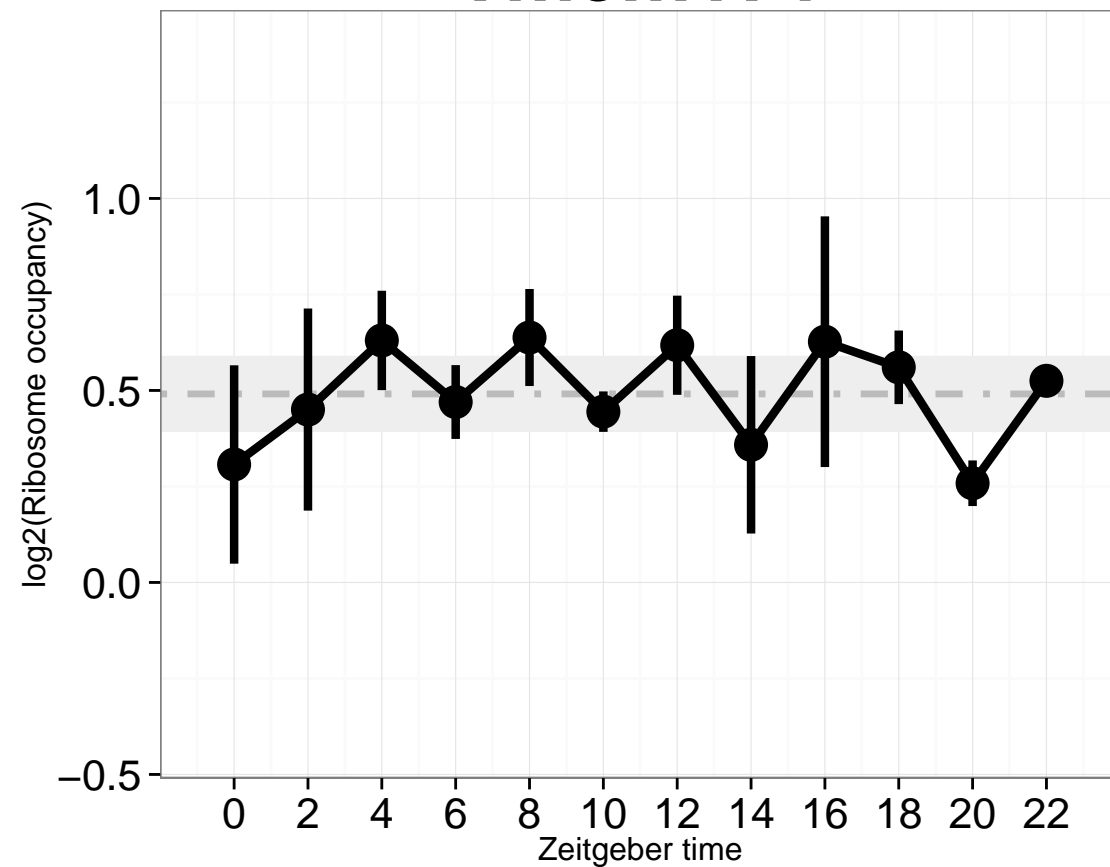

Supplement: Supplementary file 8293 [file 1]

## Prmt10

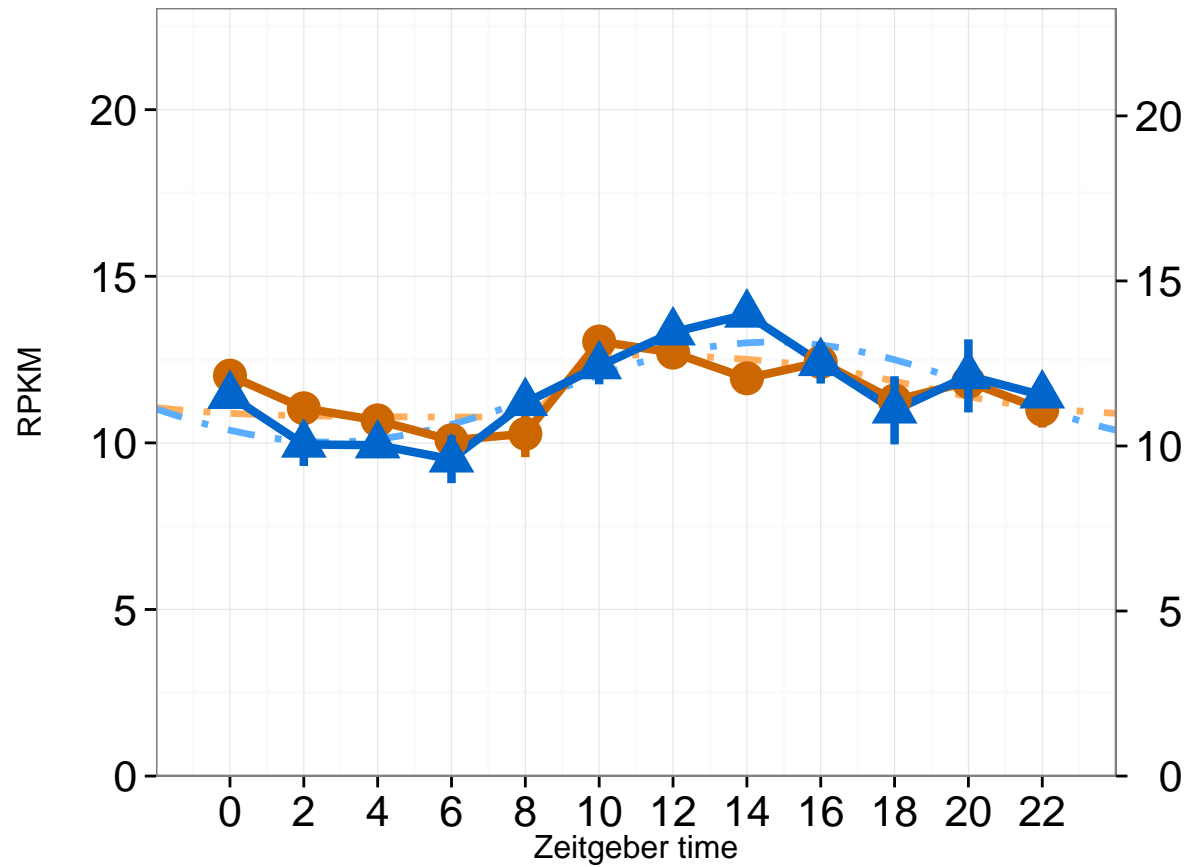

## Prmt10

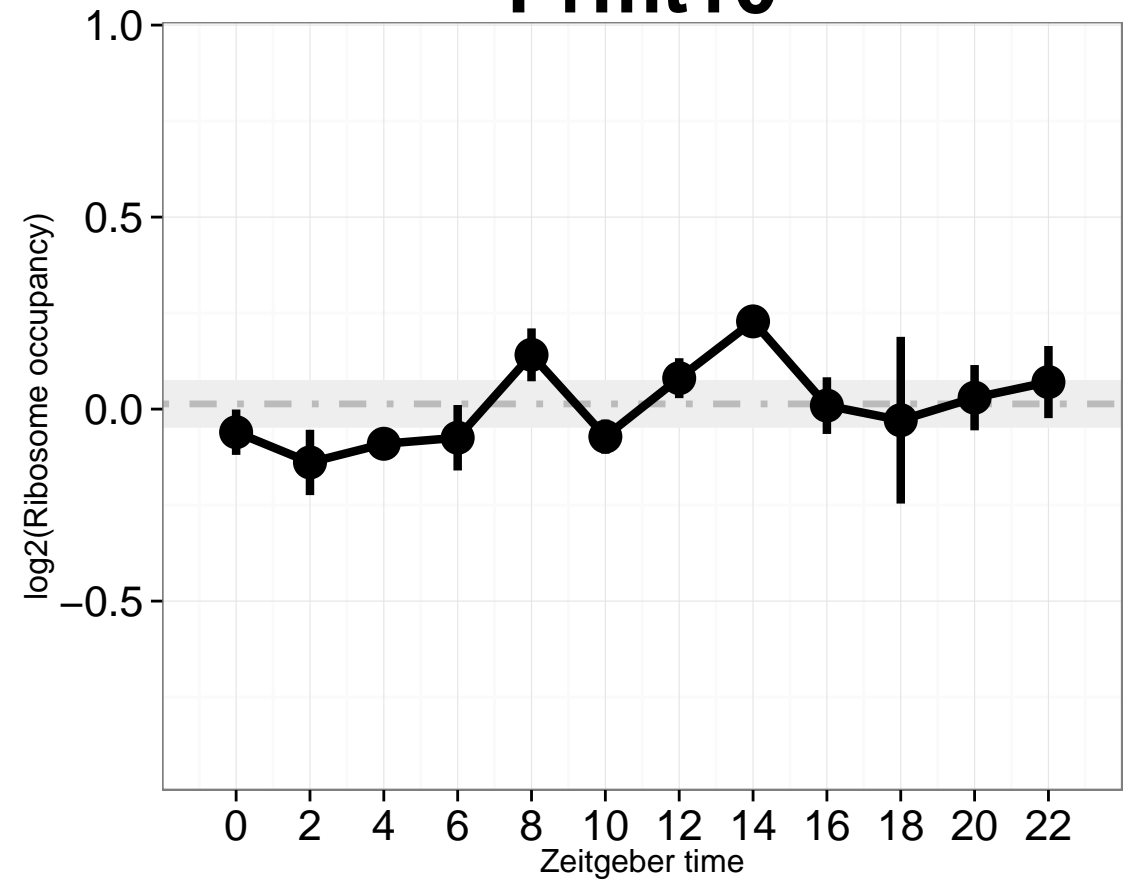

Supplement: Supplementary file 8294 [file 1]

# Pgm1

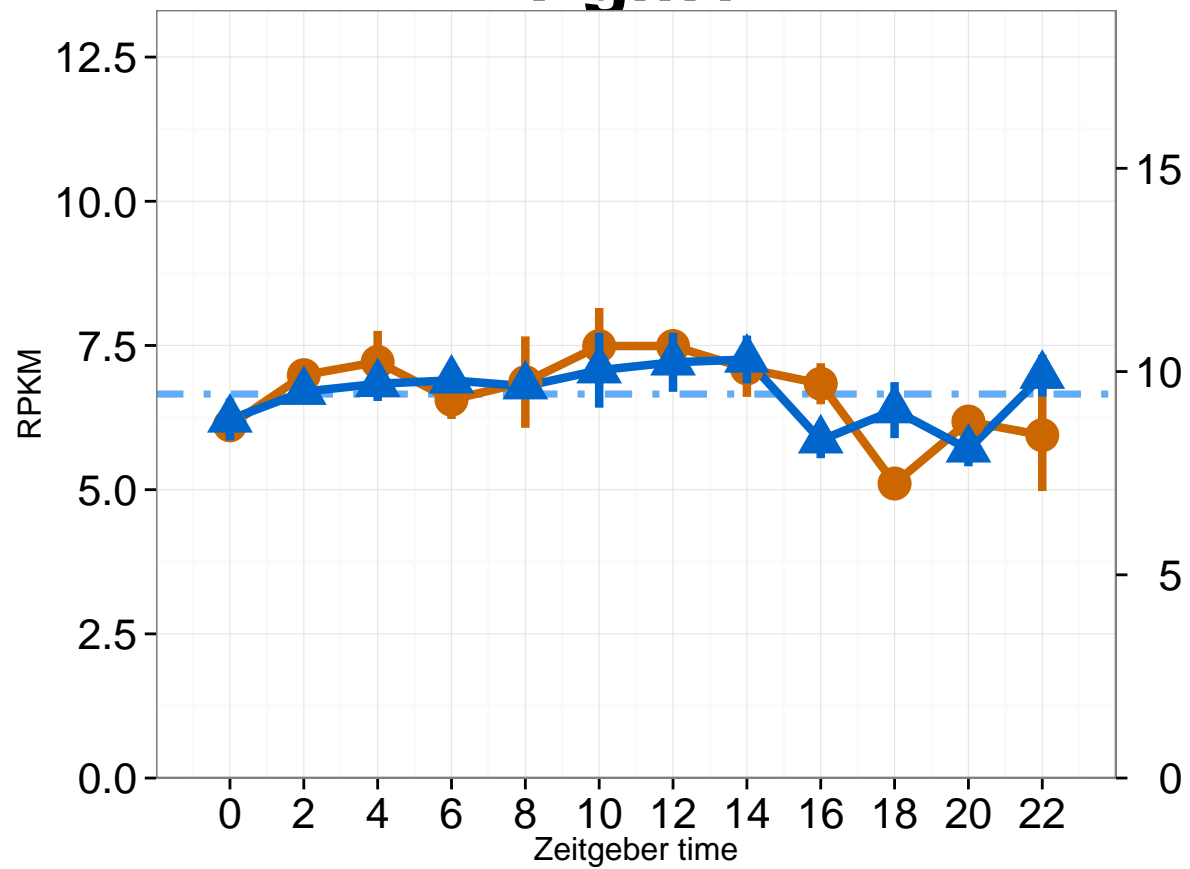

# Pgm1

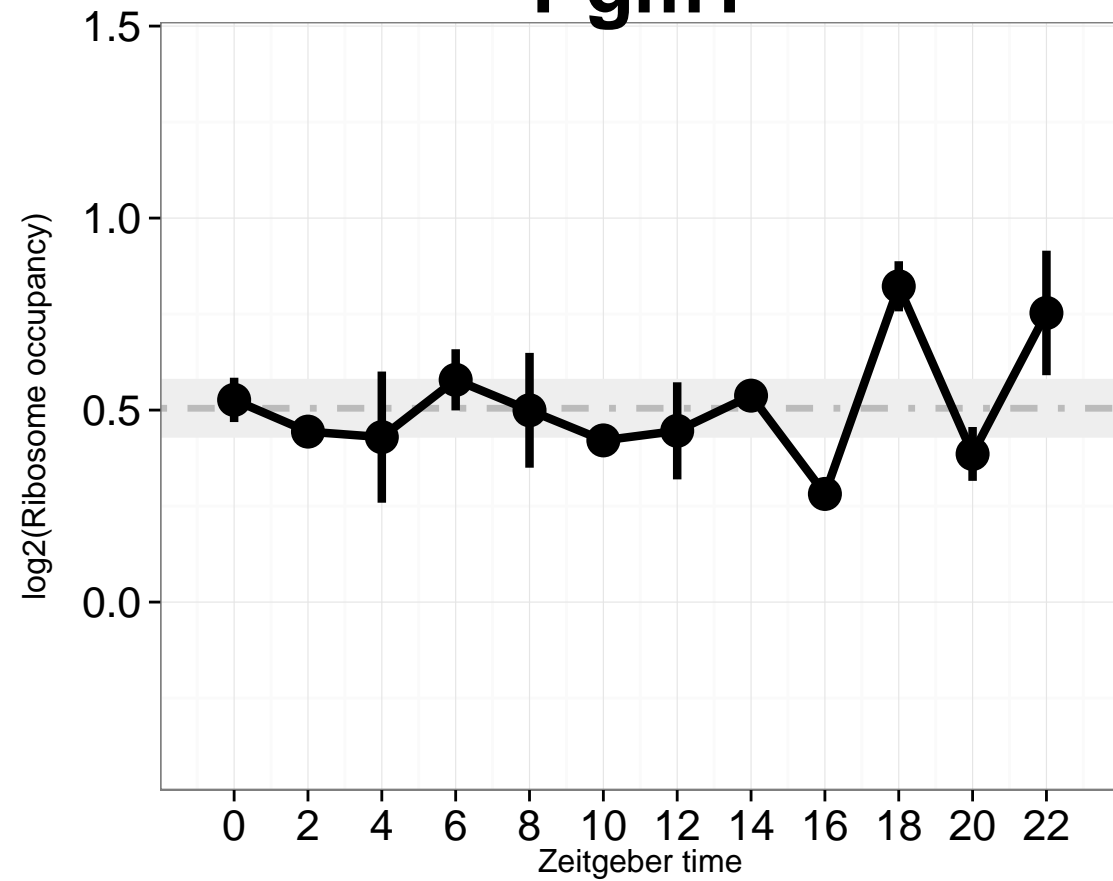

Supplement: Supplementary file 8295 [file 1]

## Vat1

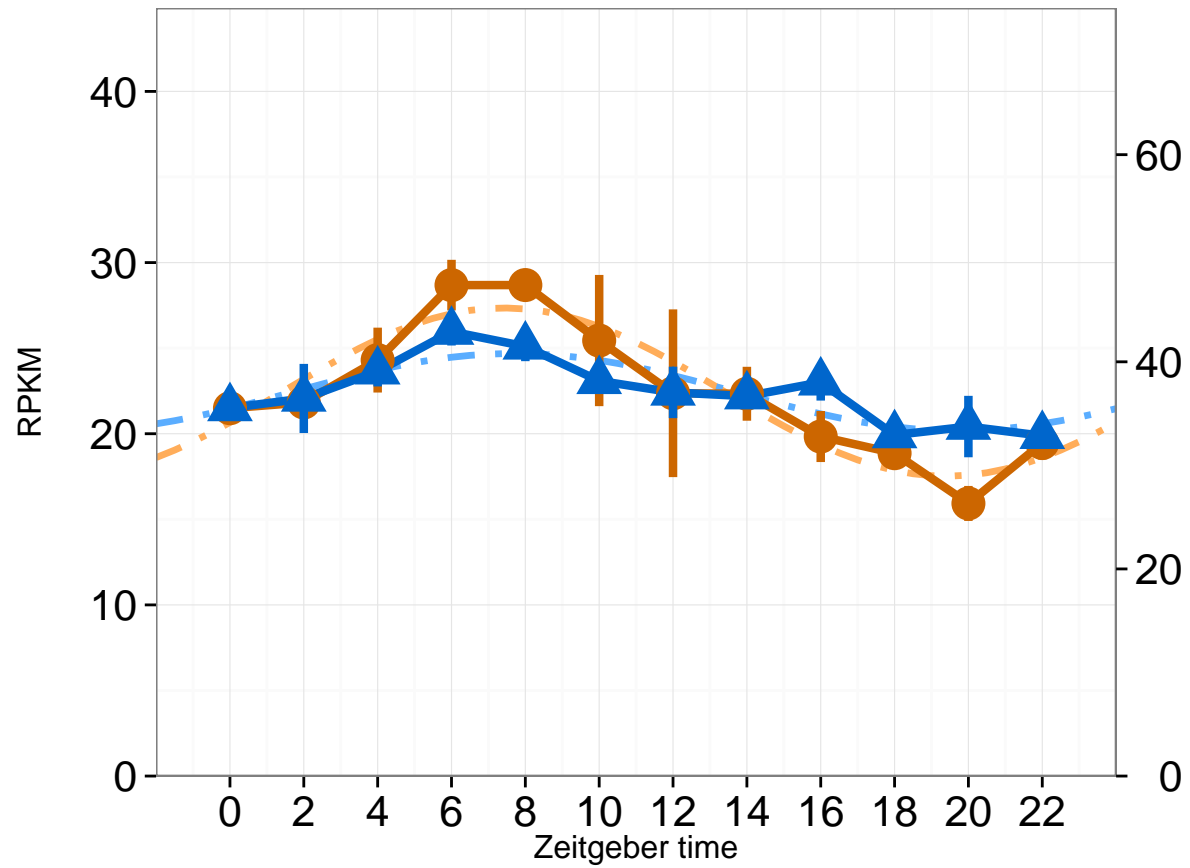

## Vat1

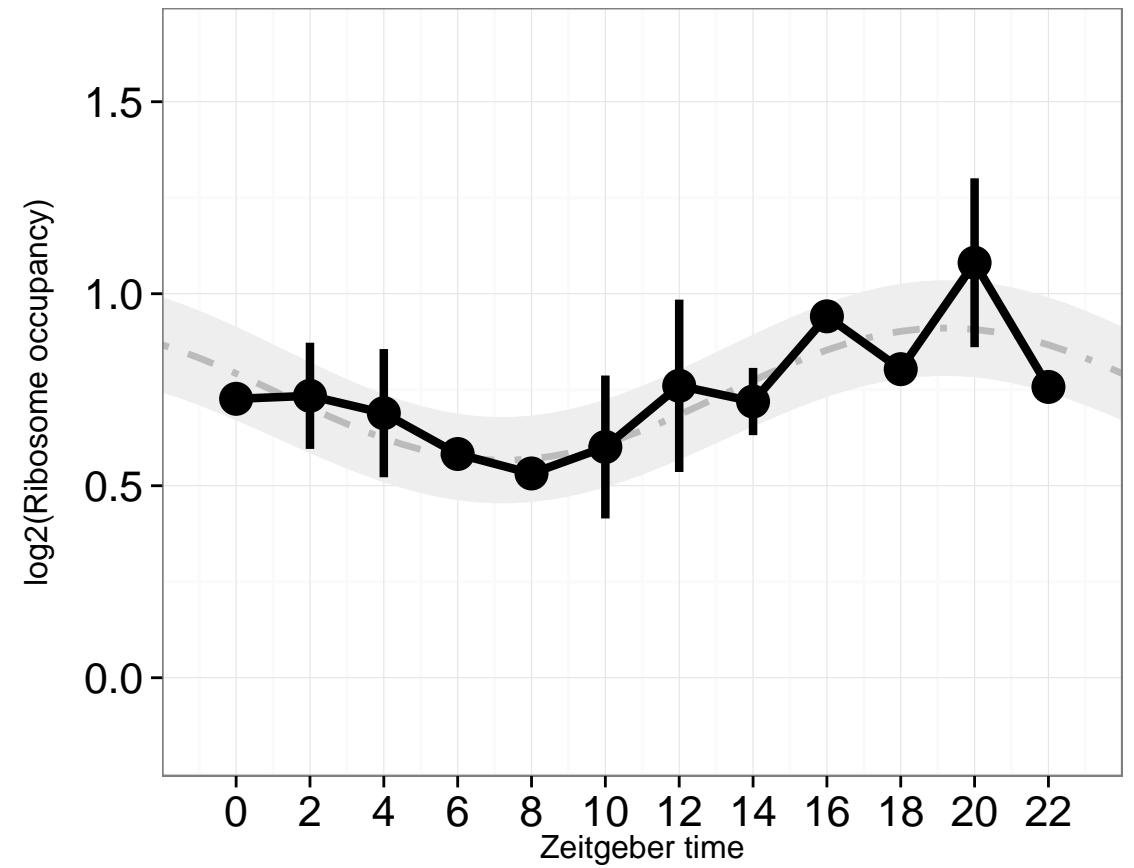

Supplement: Supplementary file 8296 [file 1]

# Slc4a1

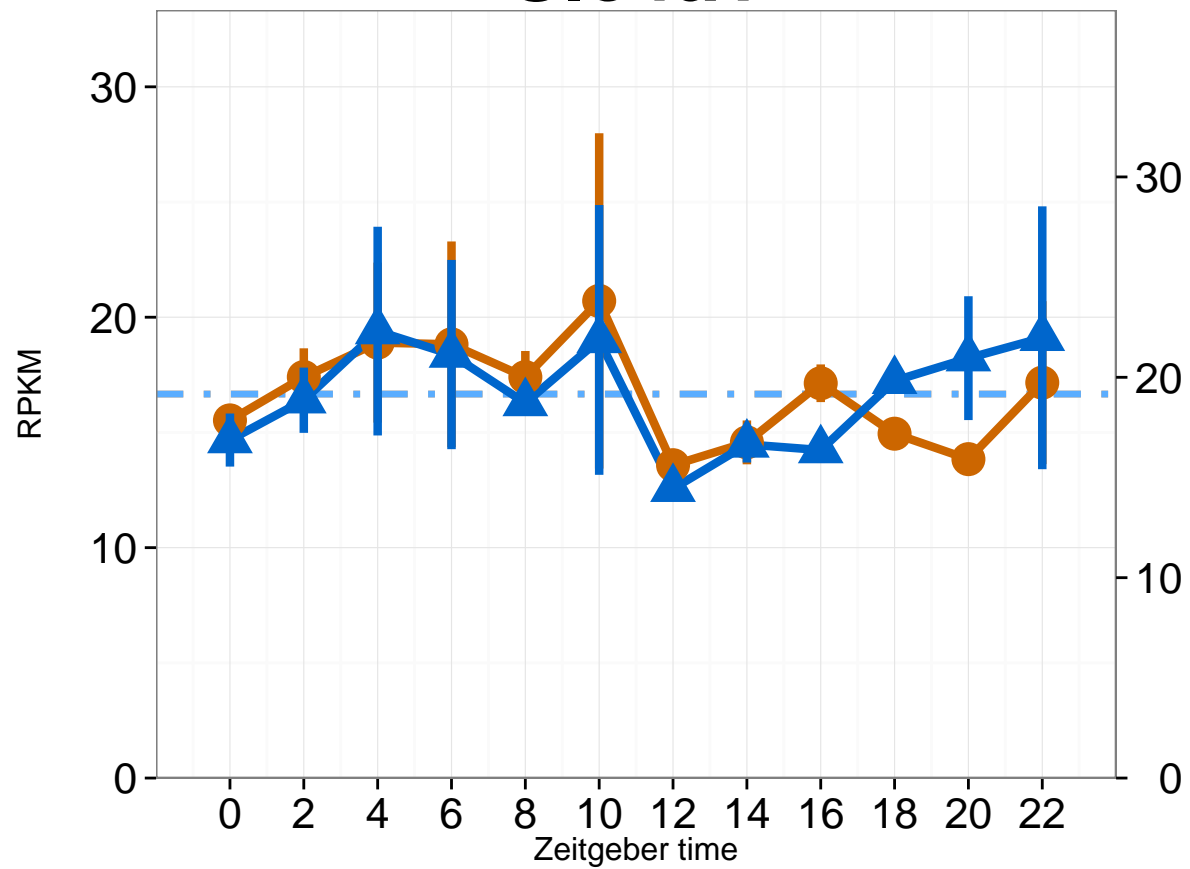

# Slc4a1

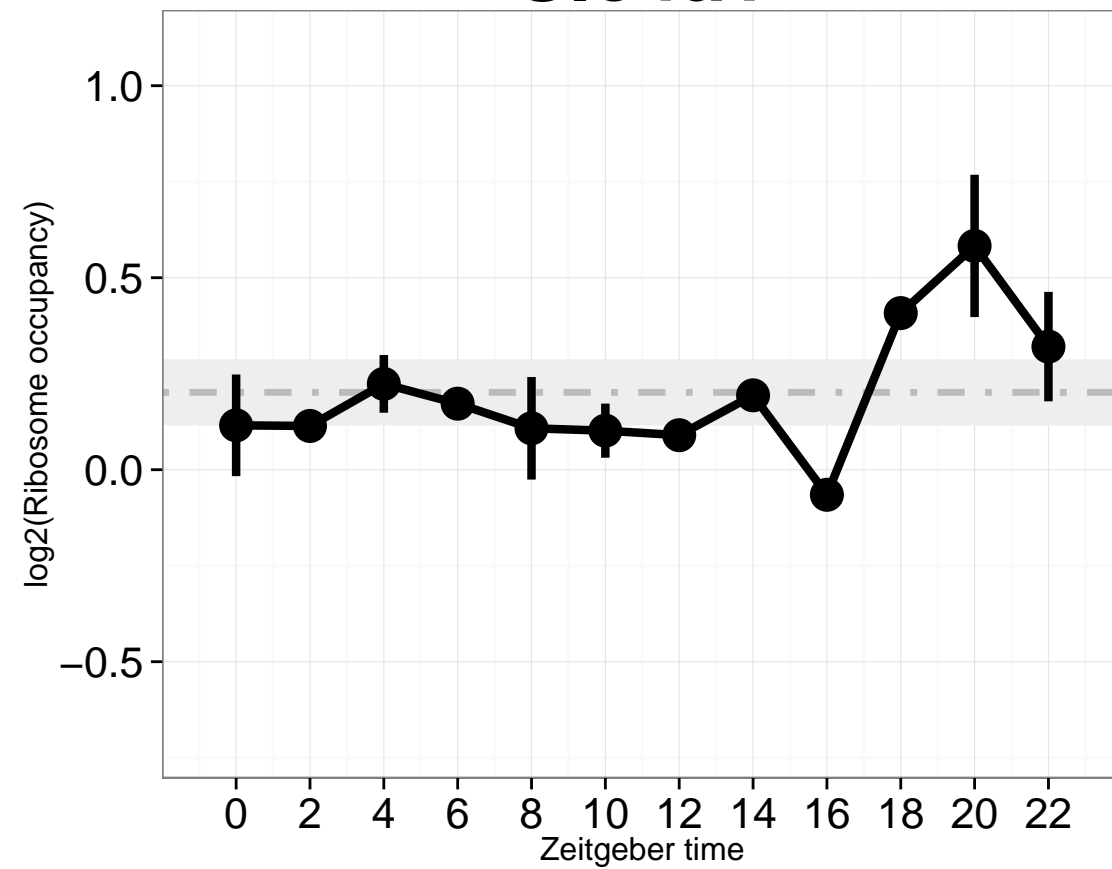

Supplement: Supplementary file 8297 [file 1]

# Arhgap6

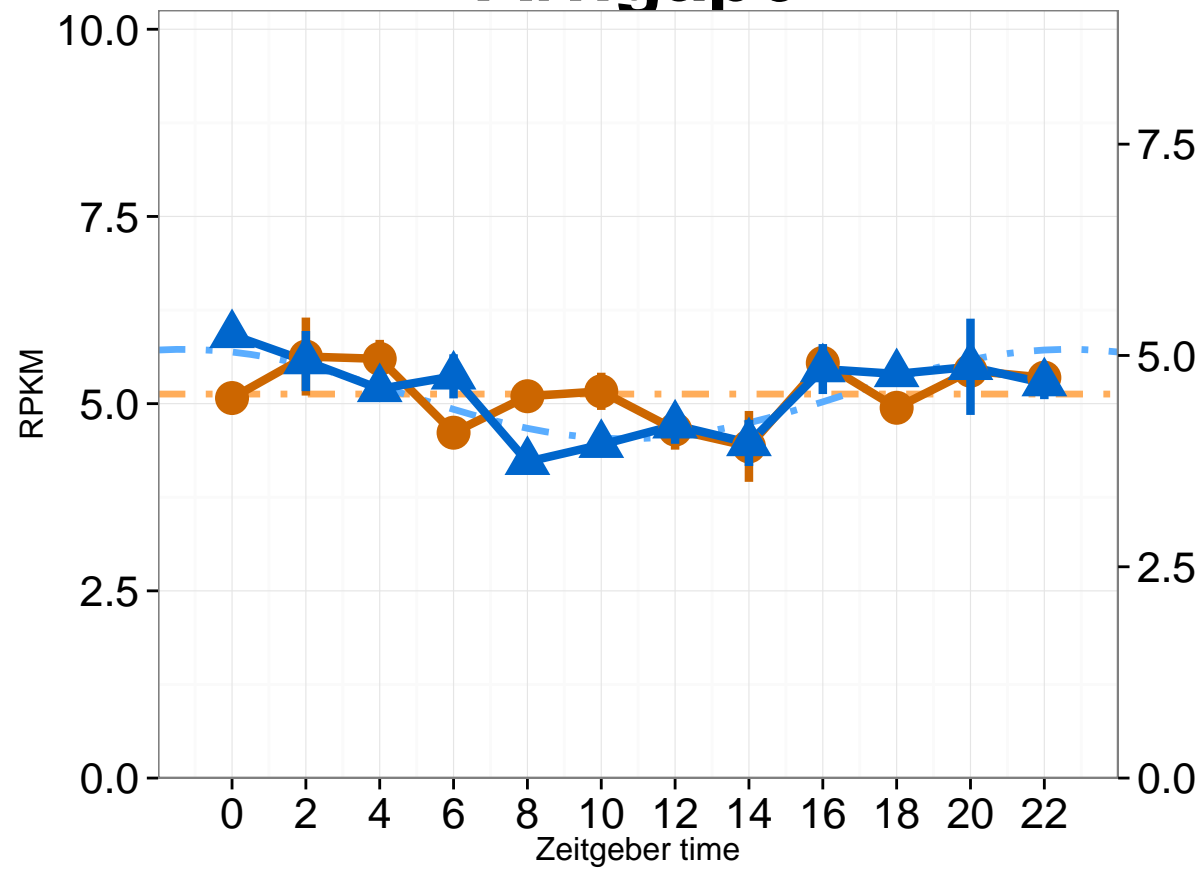

# Arhgap6

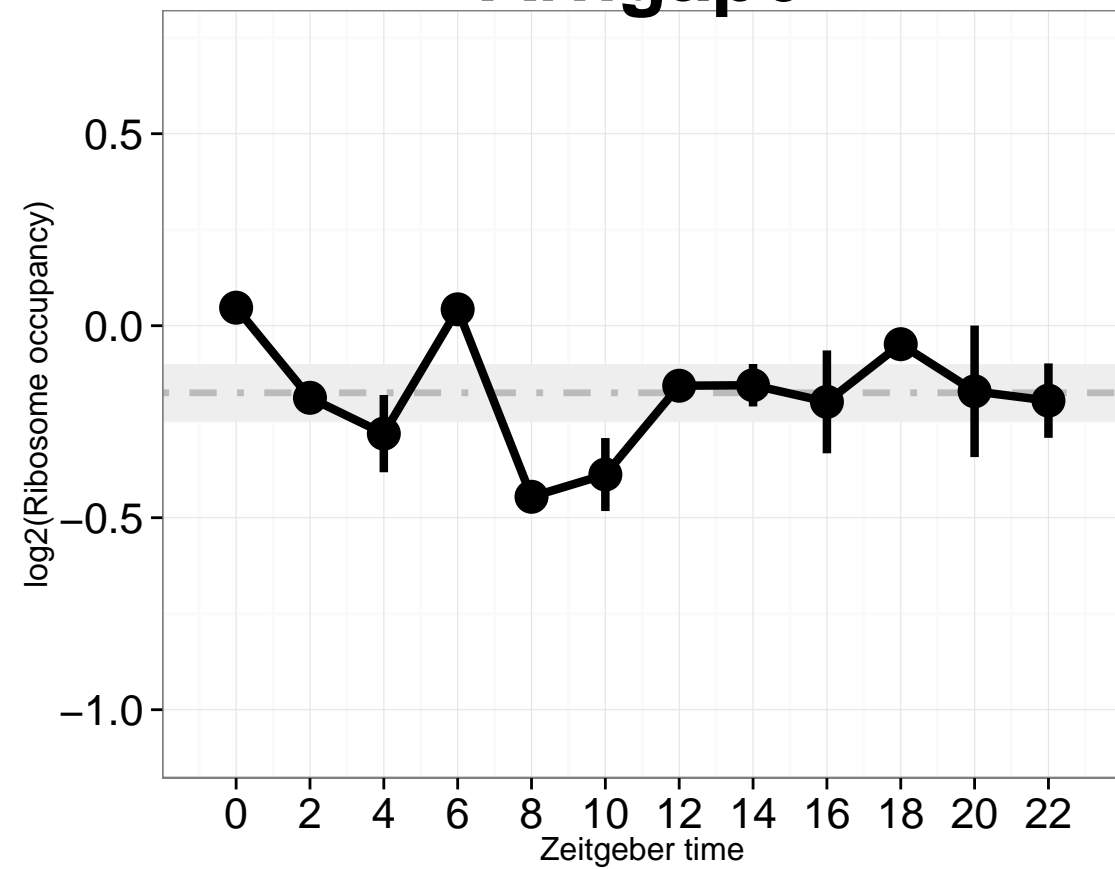

Supplement: Supplementary file 8298 [file 1]

## Mtif3

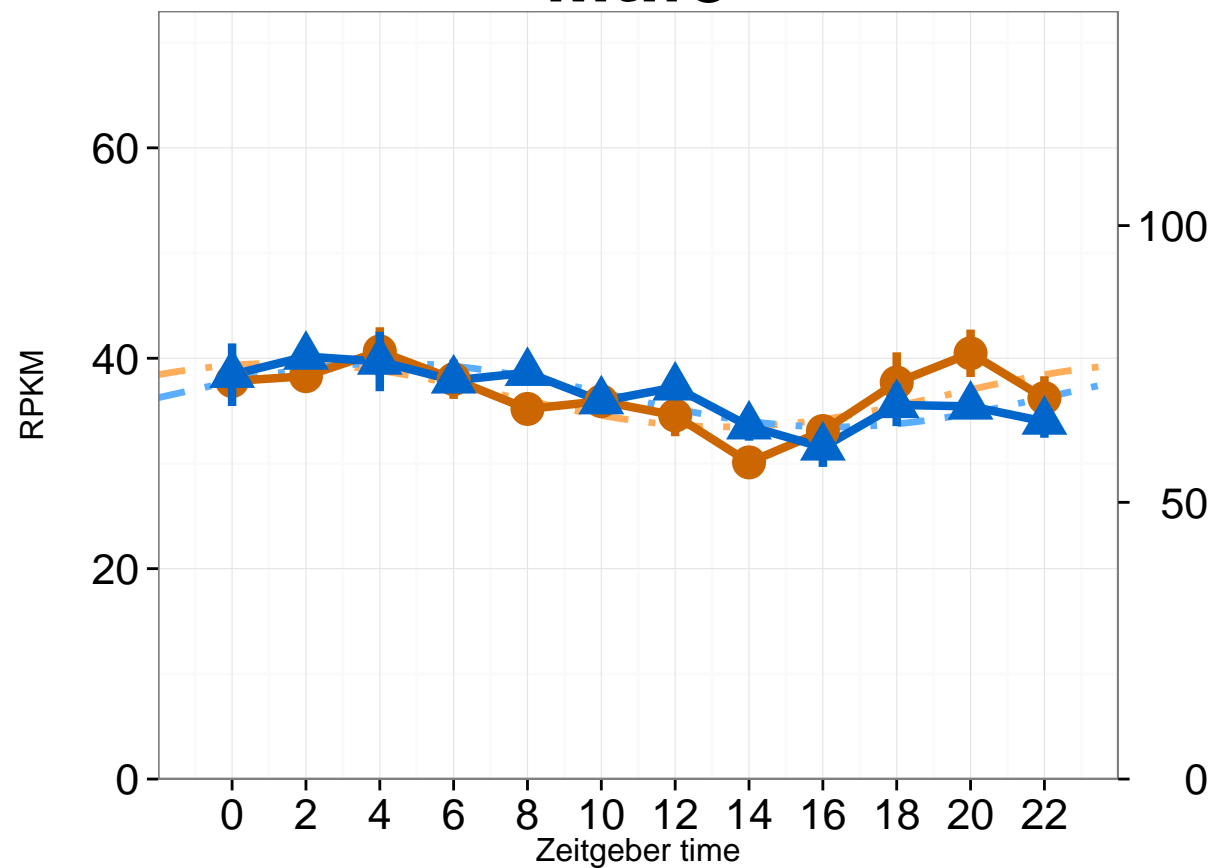

## Mtif3

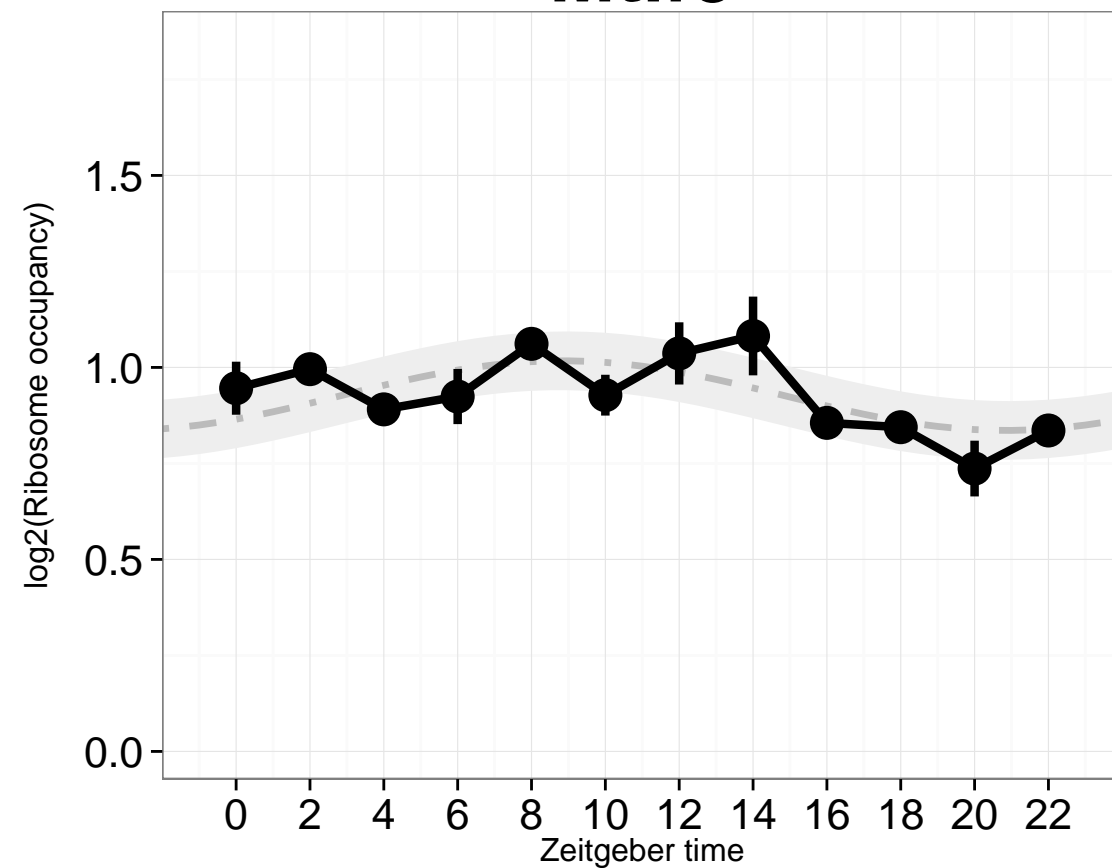

Supplement: Supplementary file 8299 [file 1]

# Ebag9

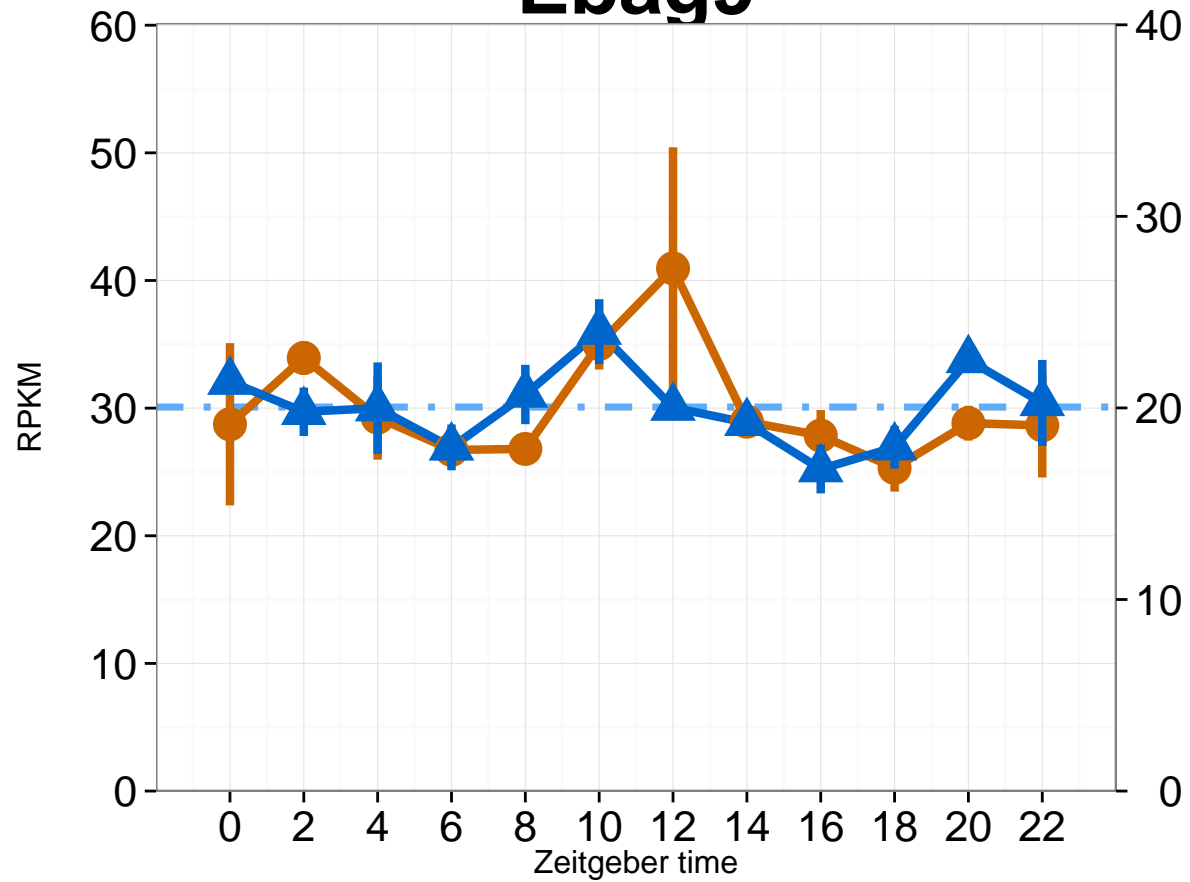

# Ebag9

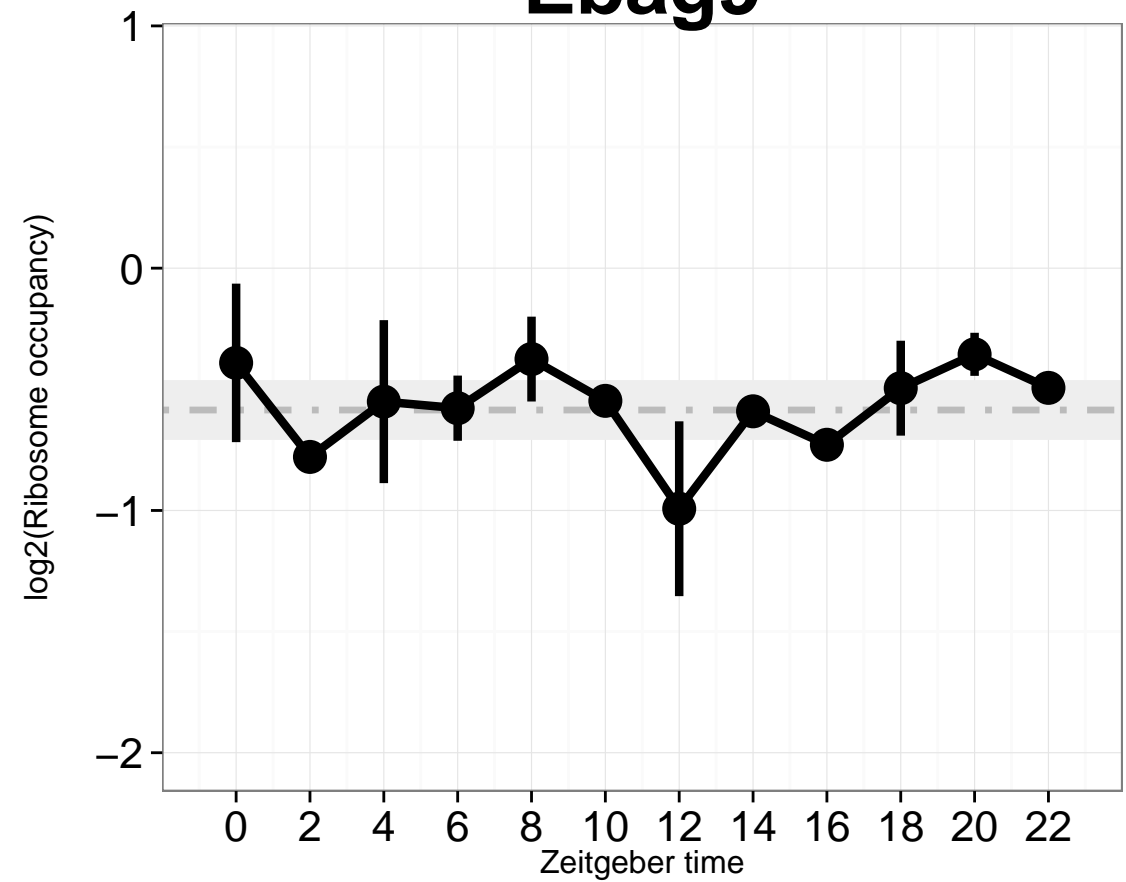

Supplement: Supplementary file 8300 [file 1]

# Eif1b

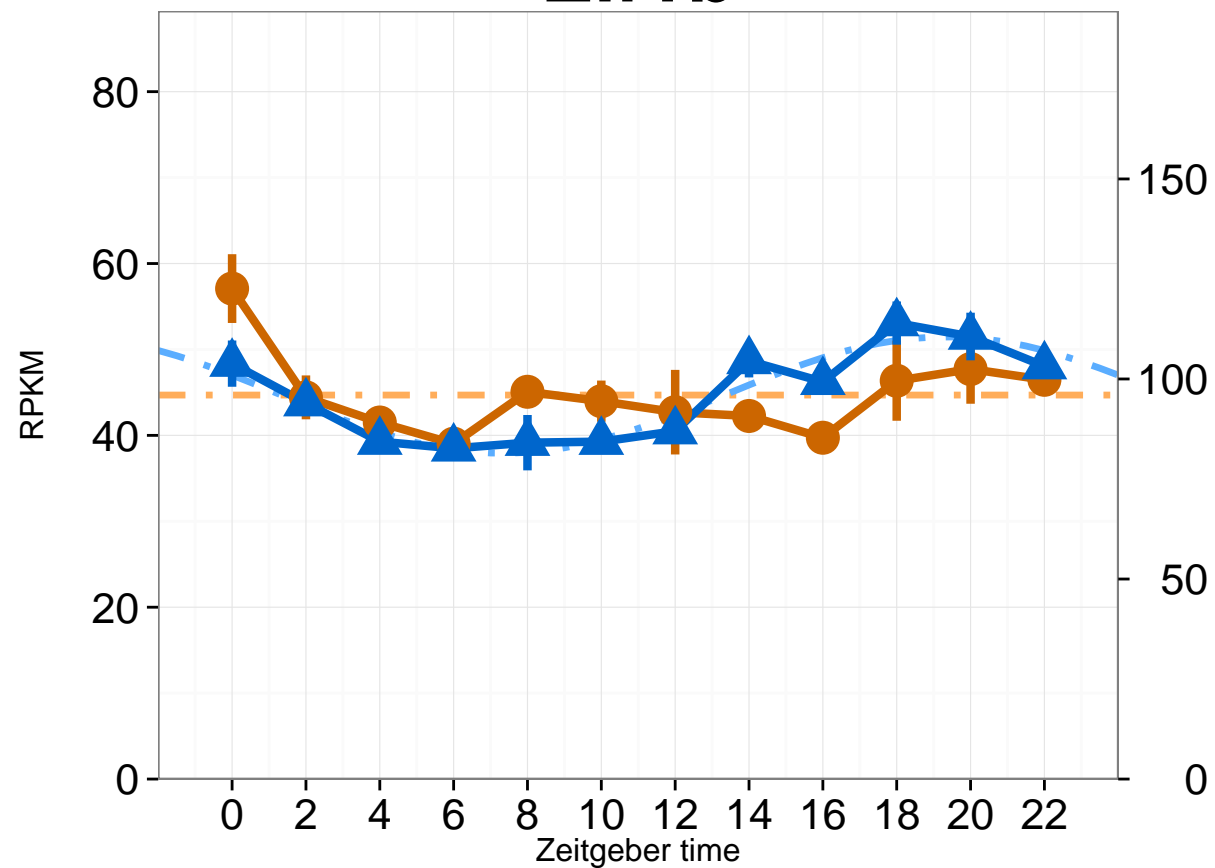

# Eif1b

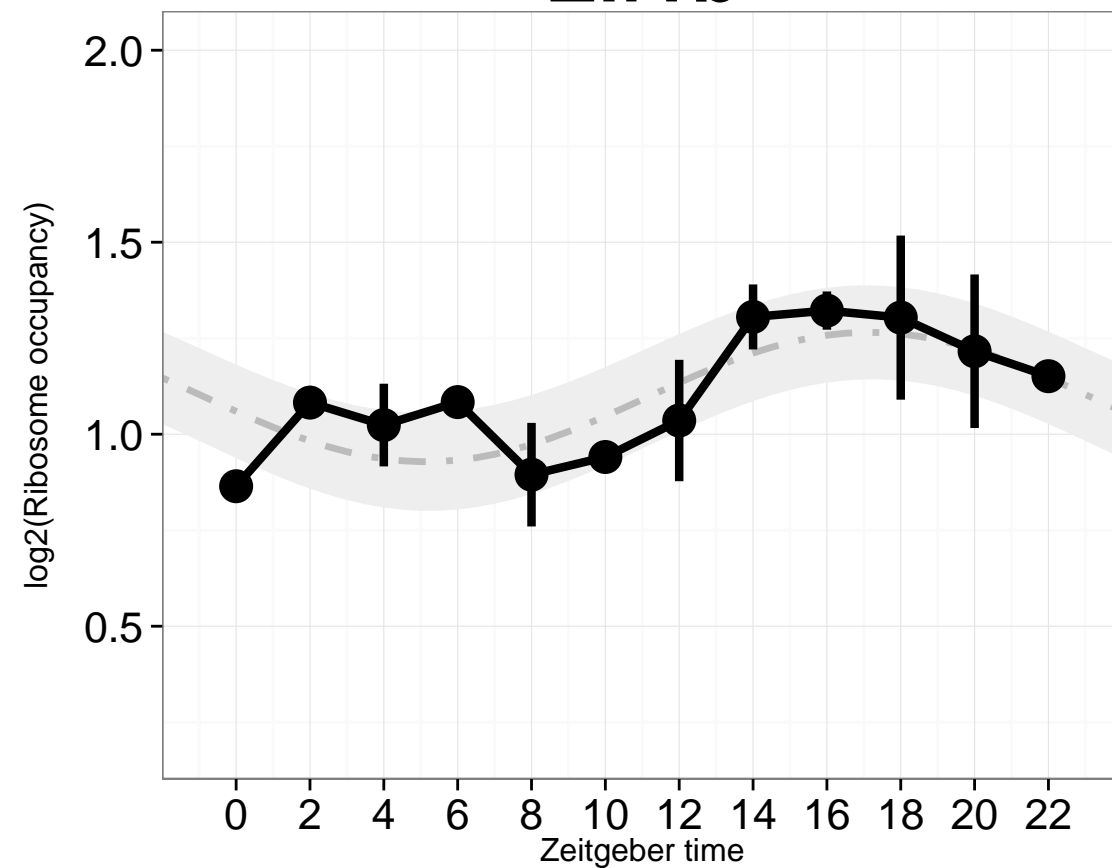

Supplement: Supplementary file 8301 [file 1]

# Cyp7b1

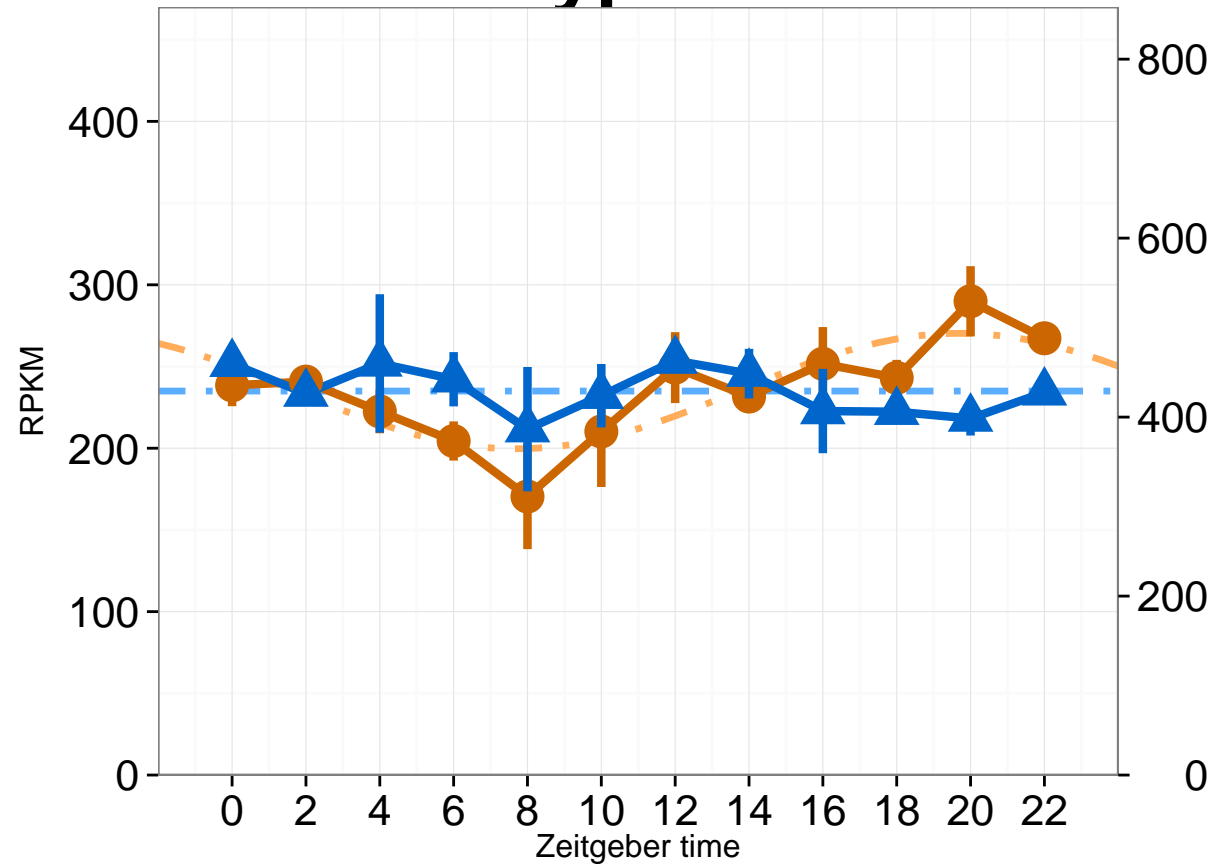

# Cyp7b1

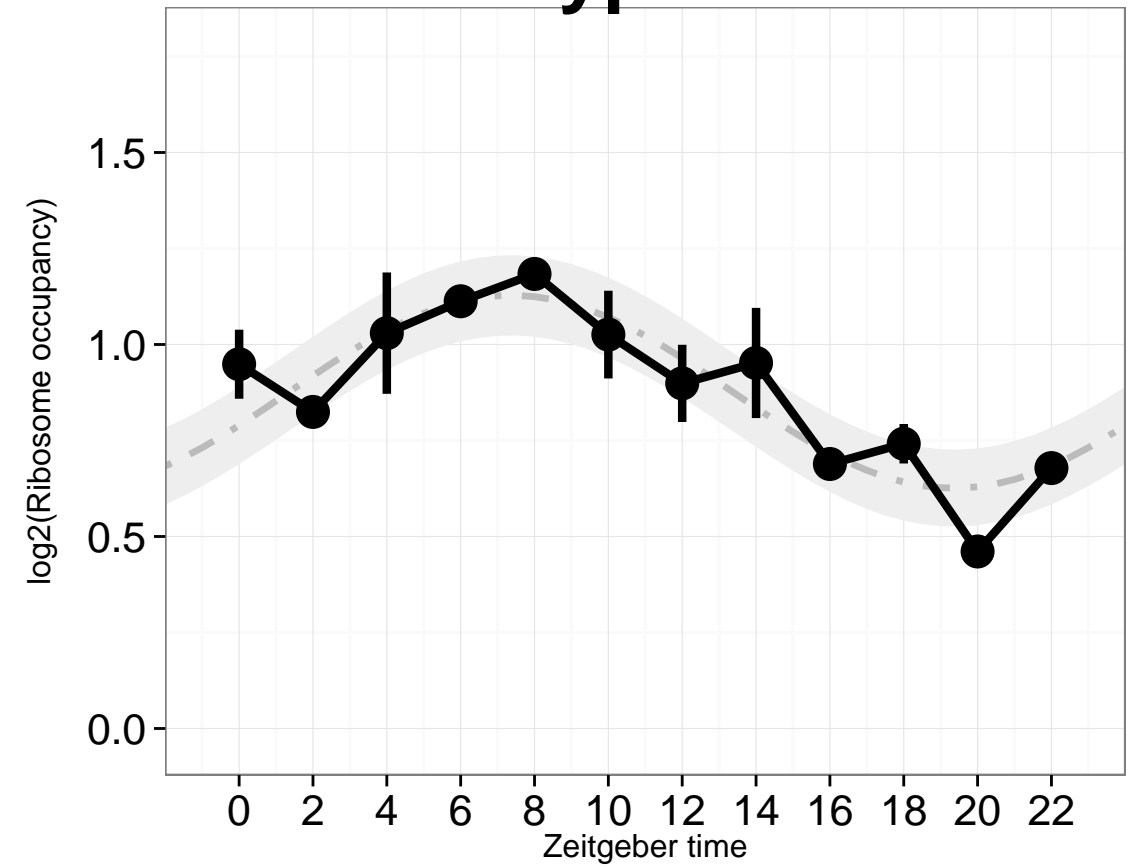

Supplement: Supplementary file 8302 [file 1]

# Rps27l

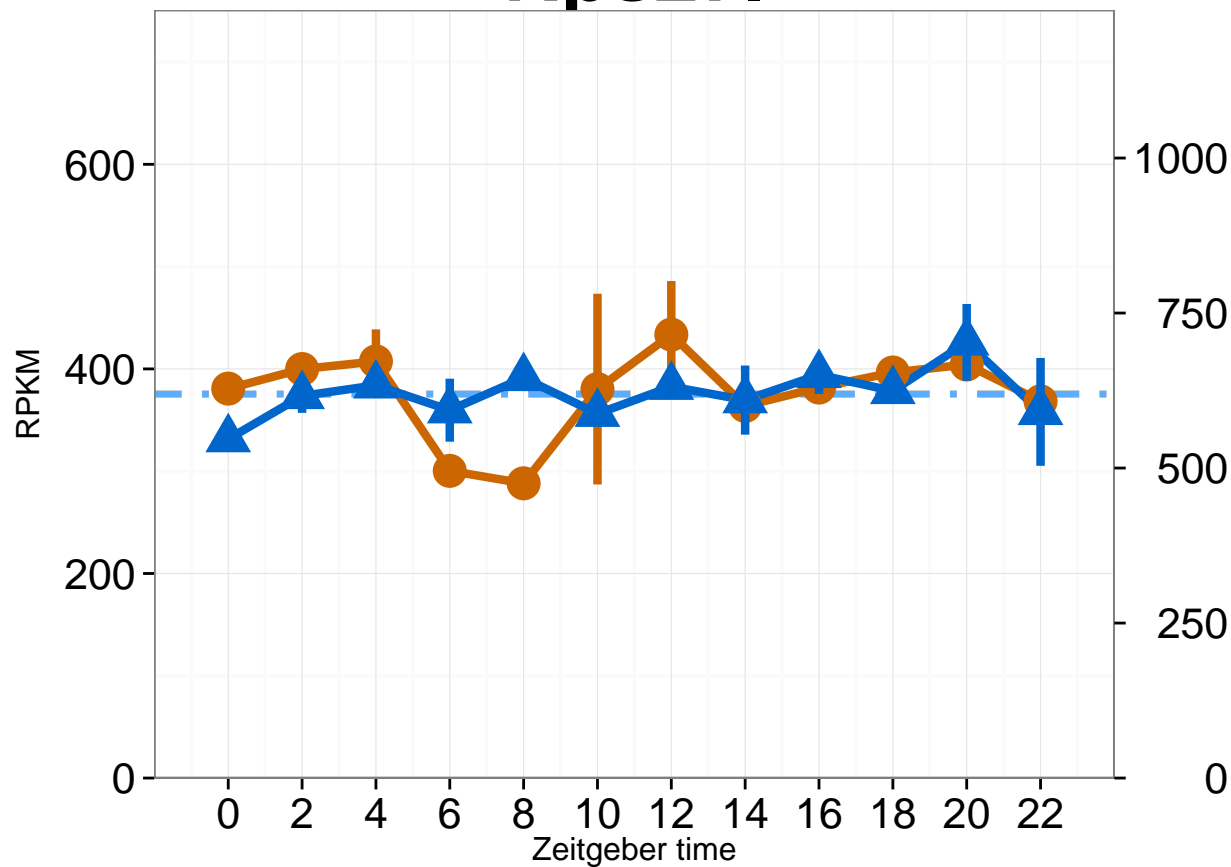

# Rps27l

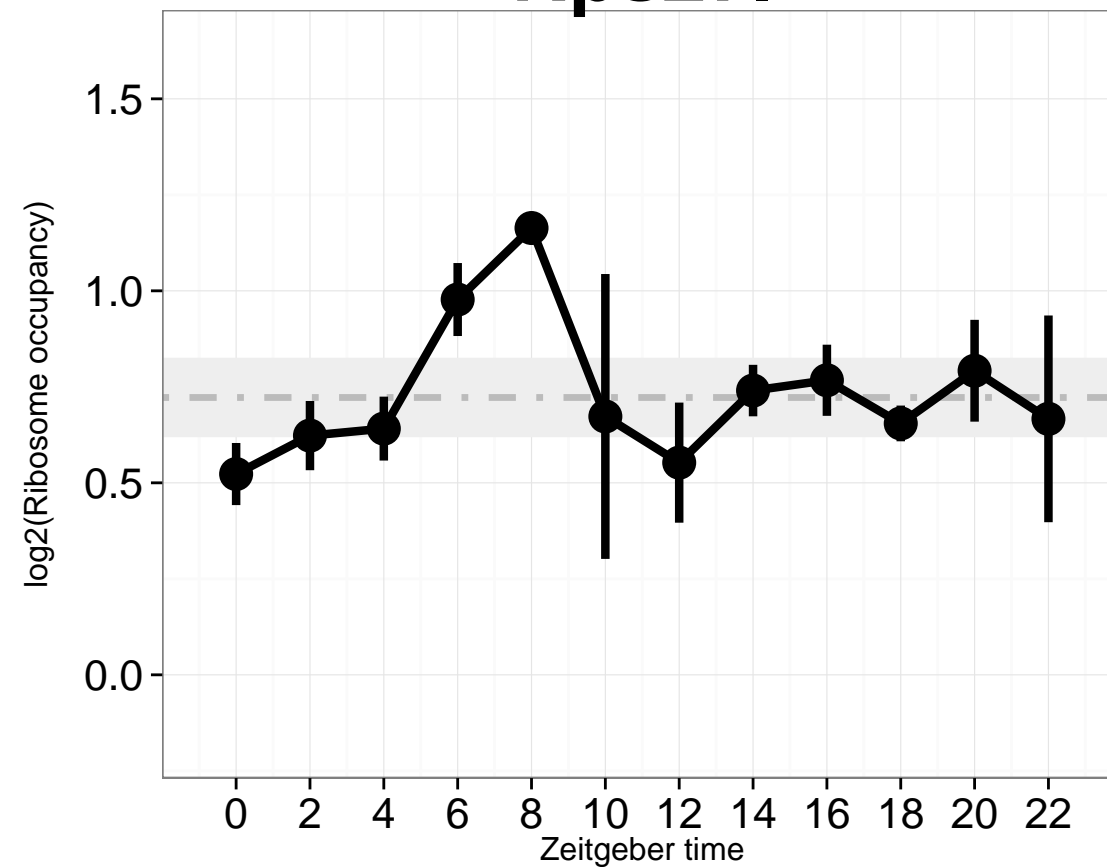

Supplement: Supplementary file 8303 [file 1]

## Ciita

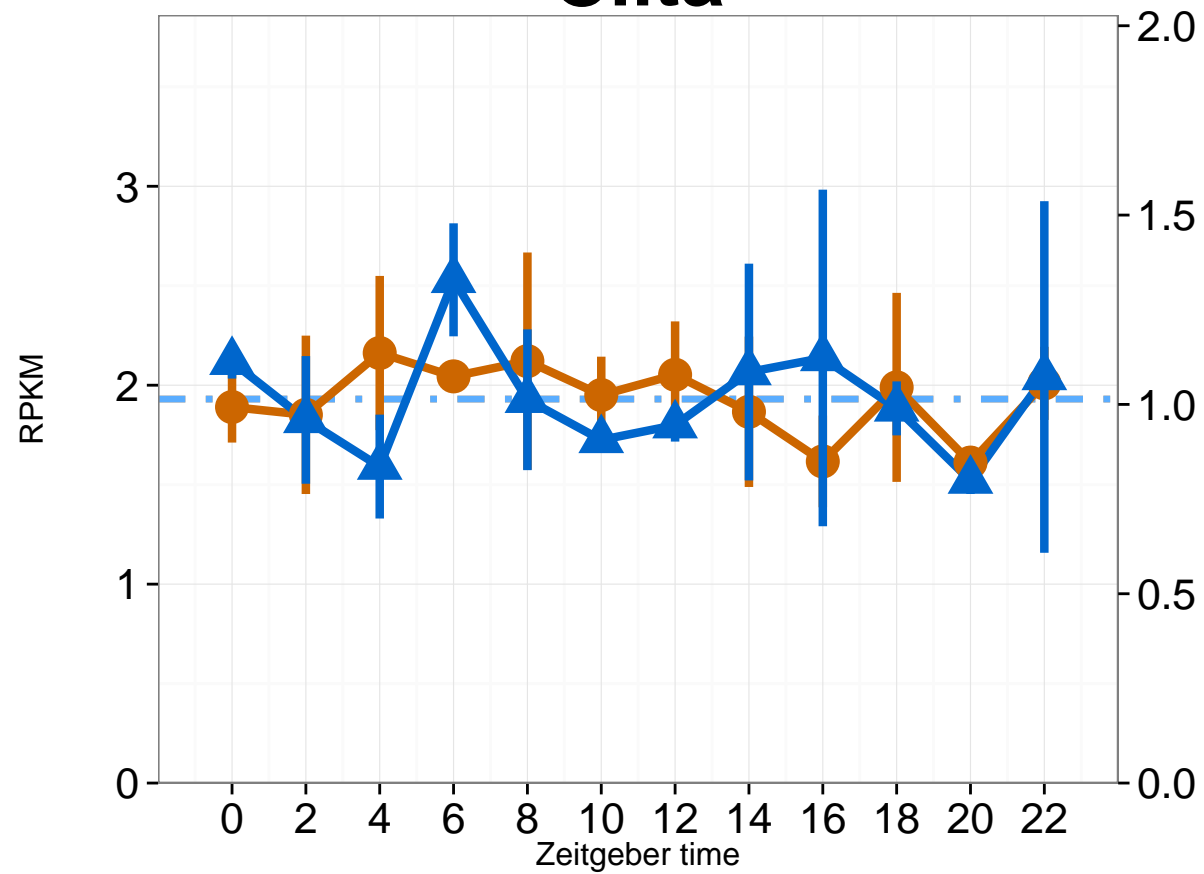

## Ciita

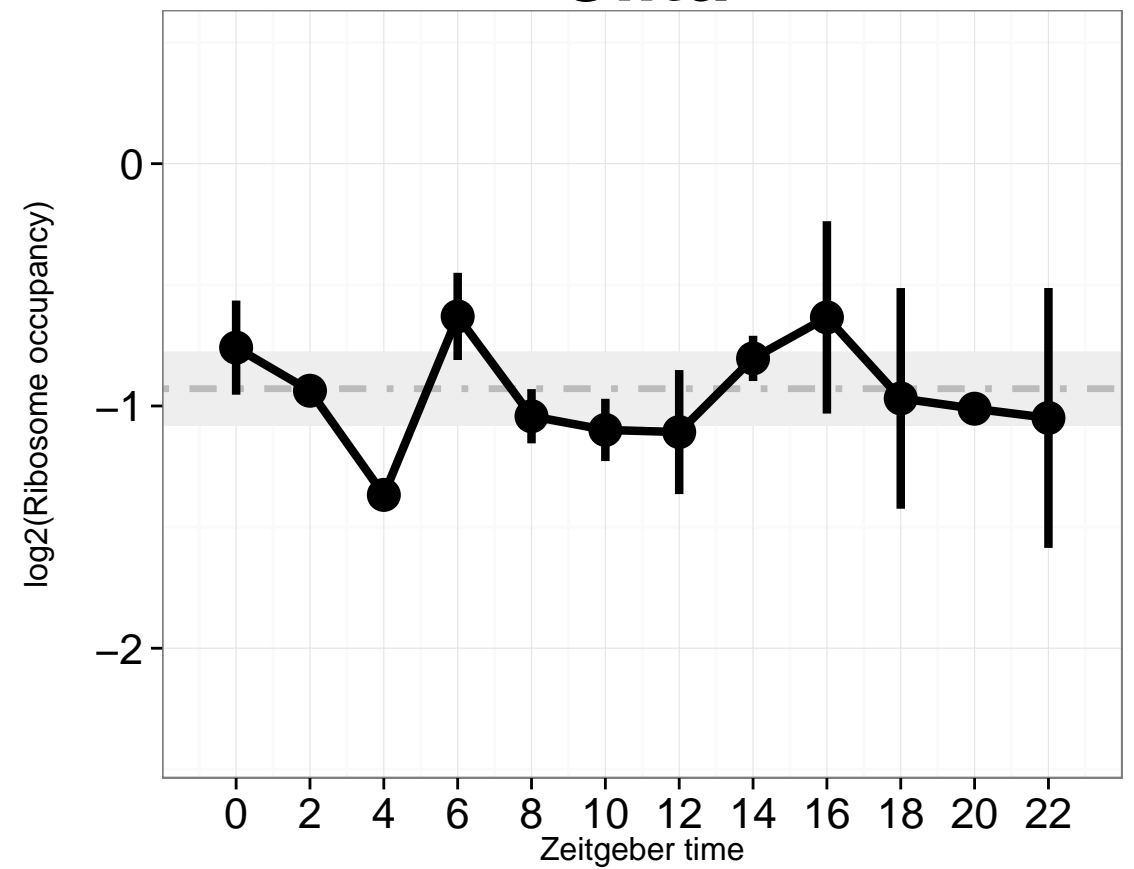

Supplement: Supplementary file 8304 [file 1]

# 6330403L08Rik

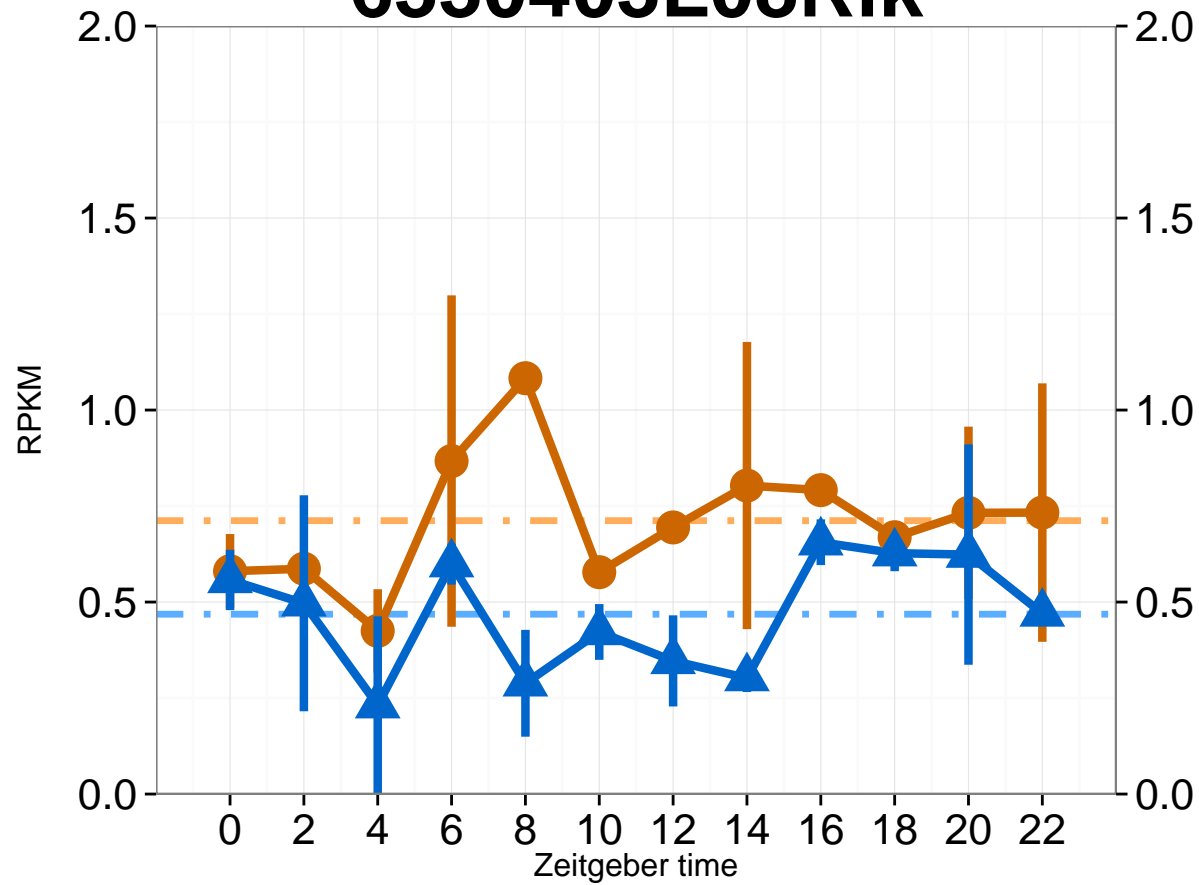

# 6330403L08Rik

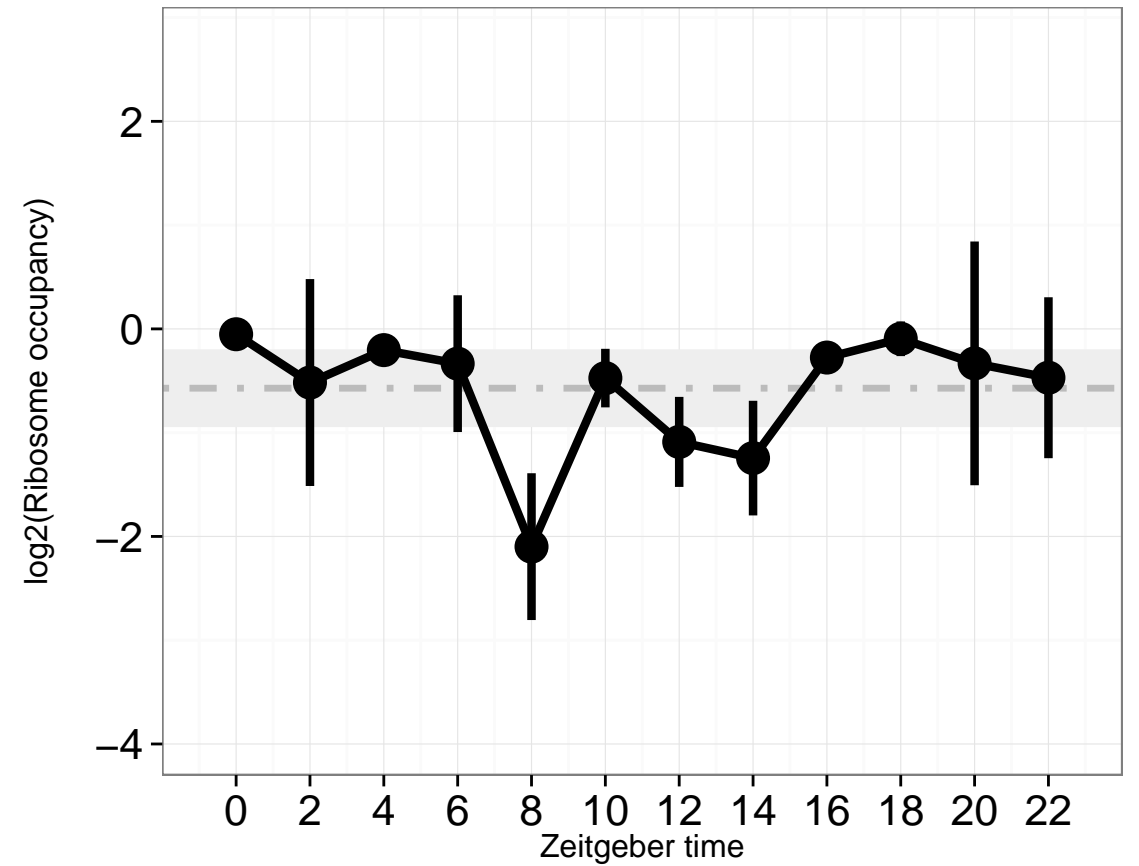

Supplement: Supplementary file 8305 [file 1]

## Polr3f

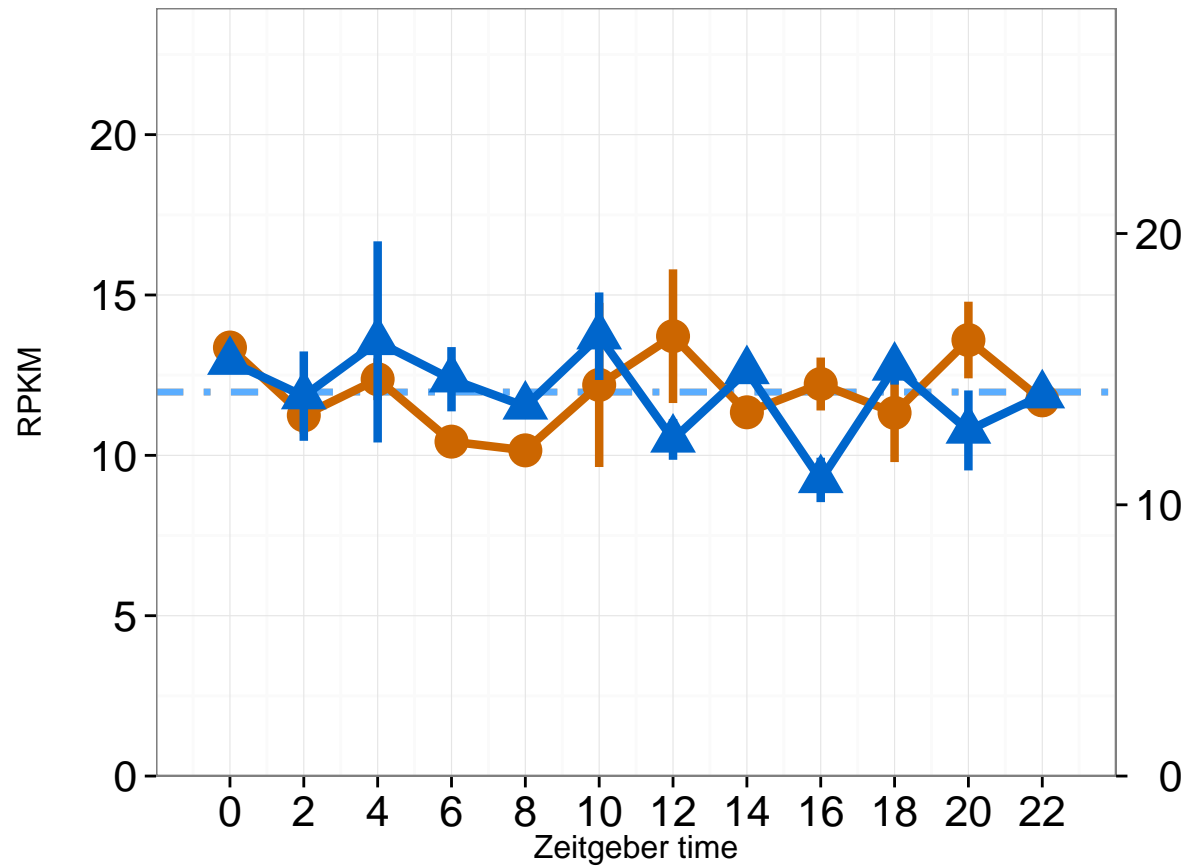

## Polr3f

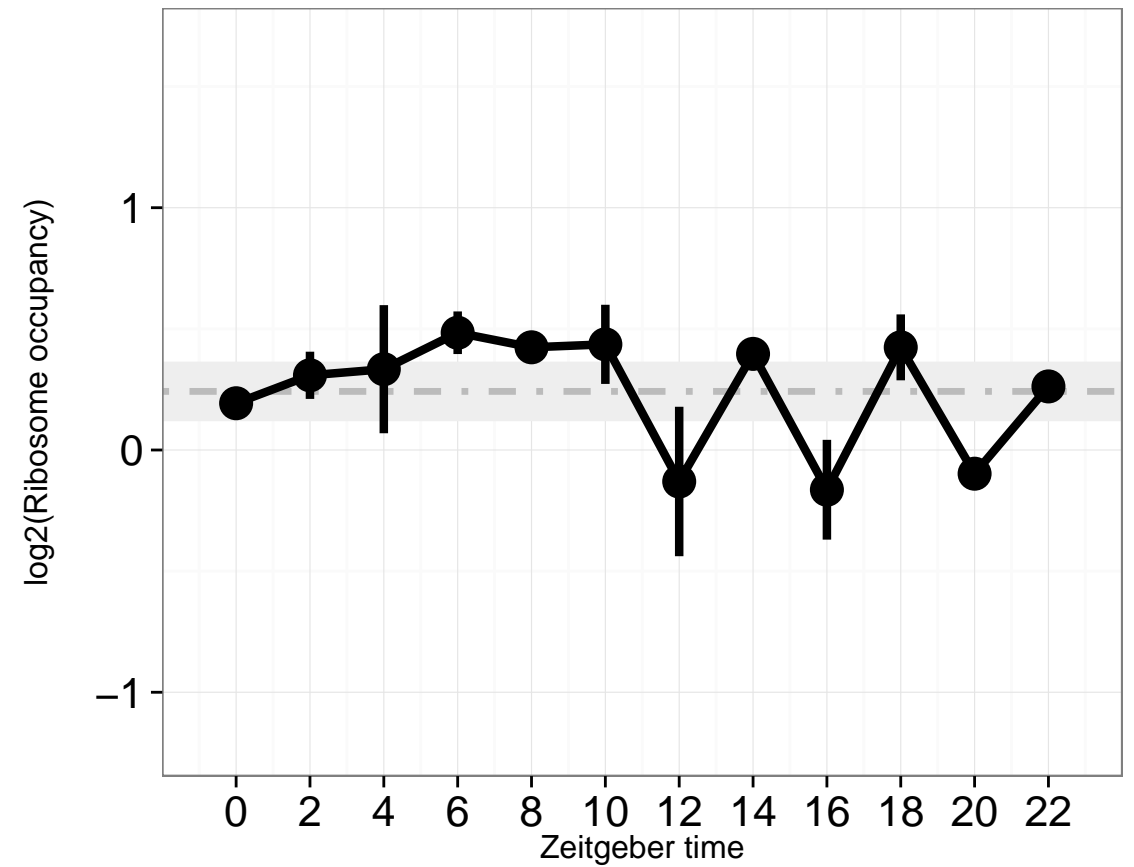

Supplement: Supplementary file 8306 [file 1]

## Mtor

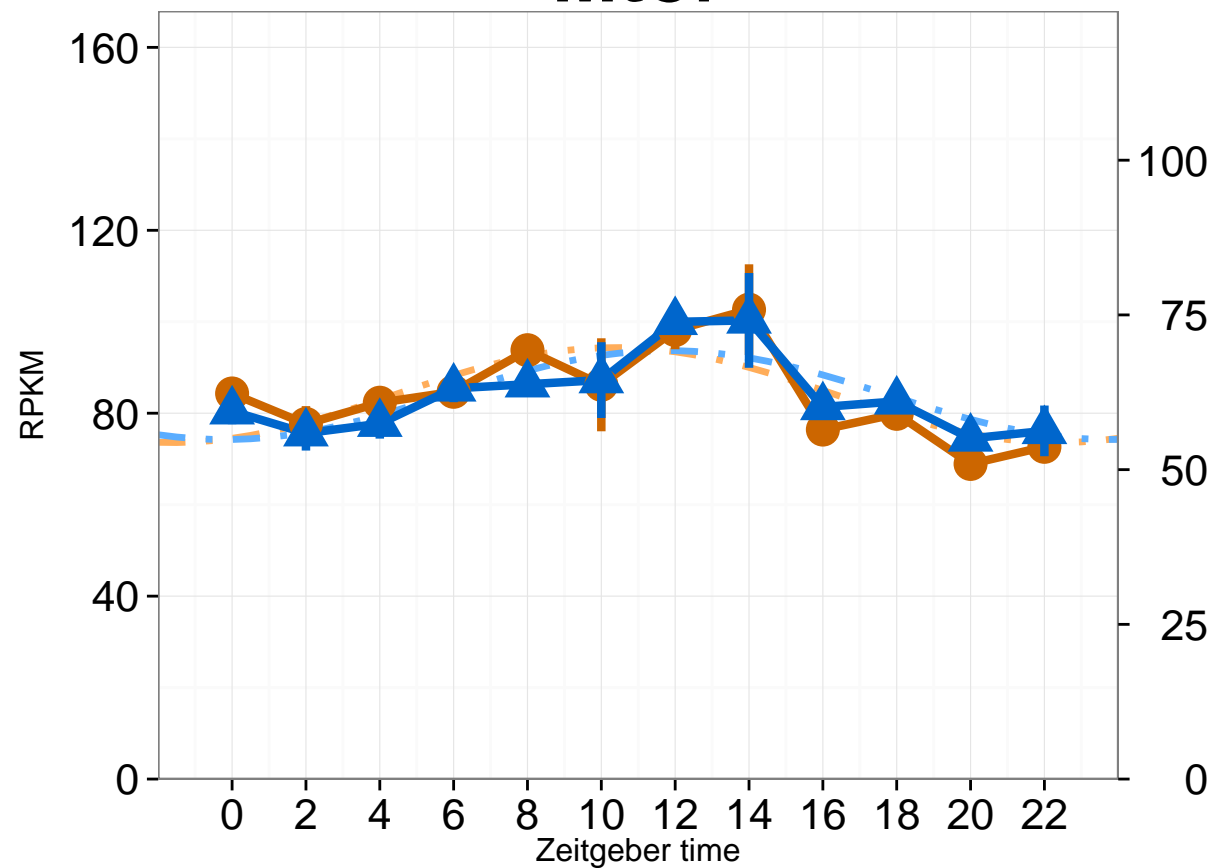

## Mtor

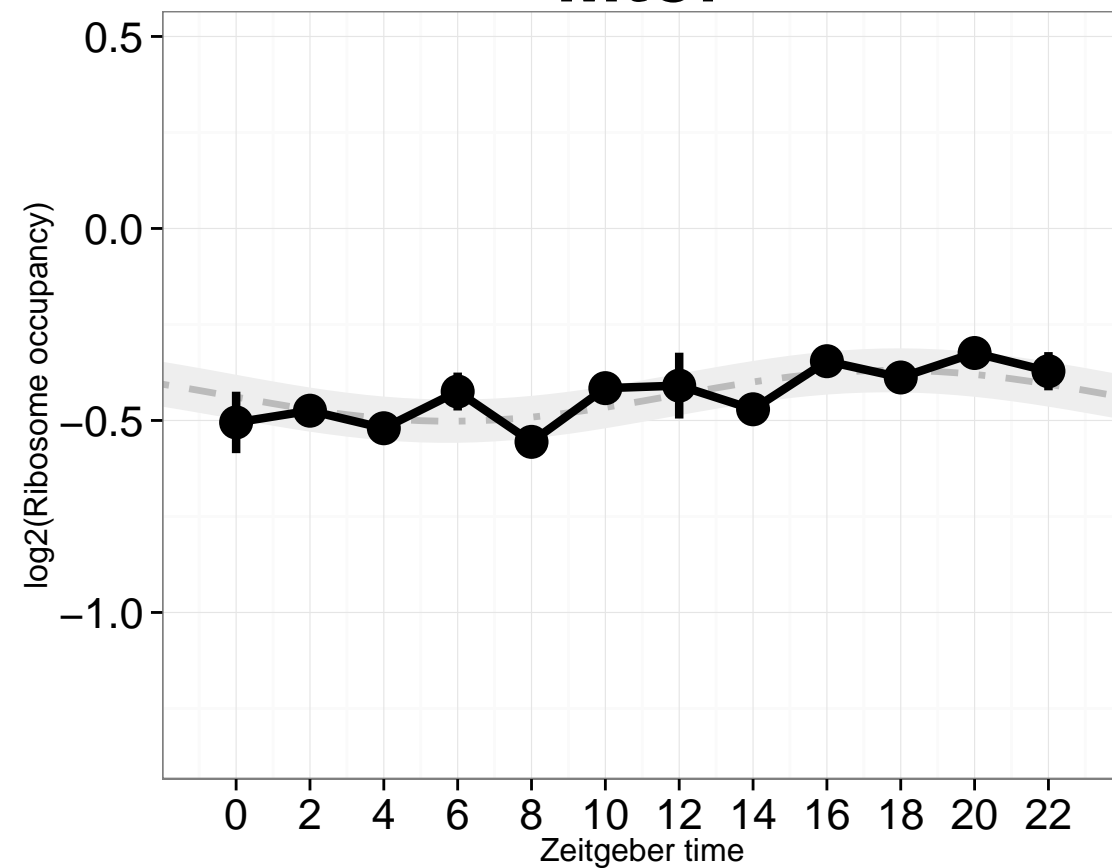

Supplement: Supplementary file 8307 [file 1]

# Tmem136

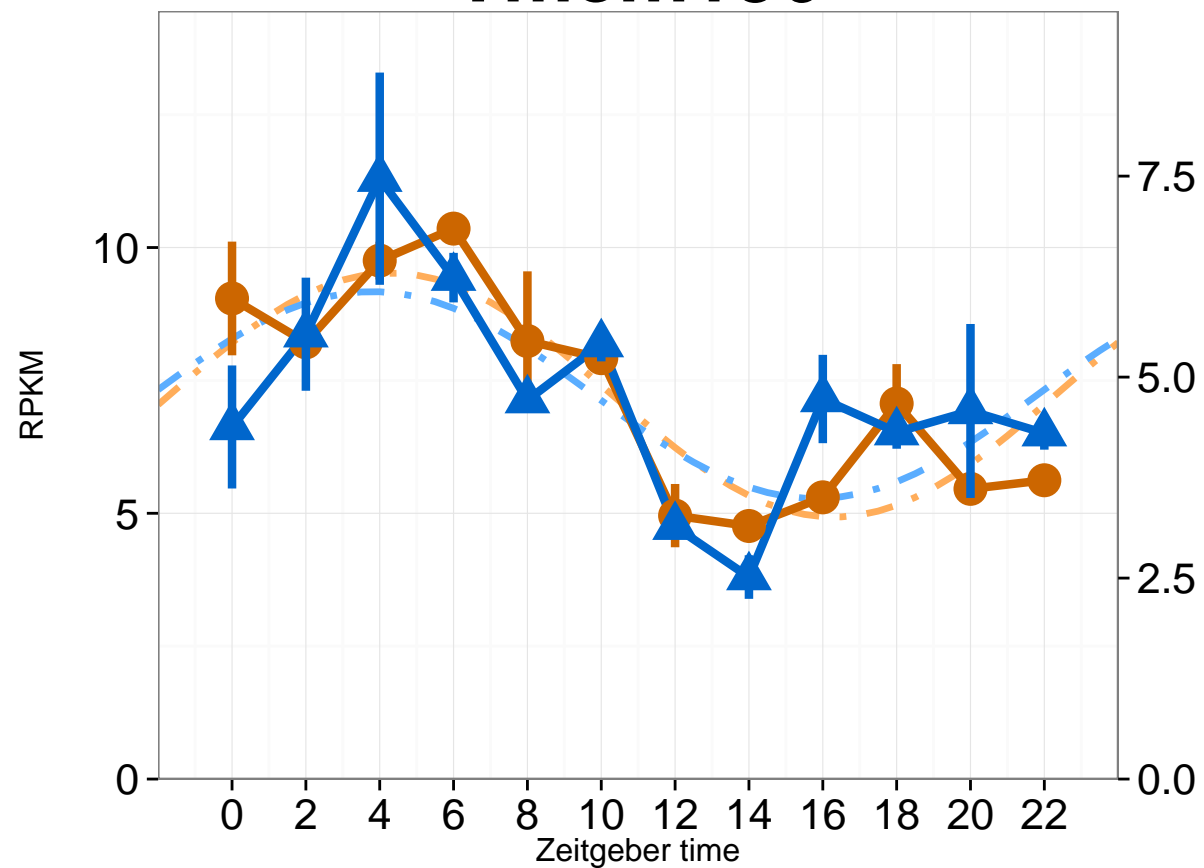

# Tmem136

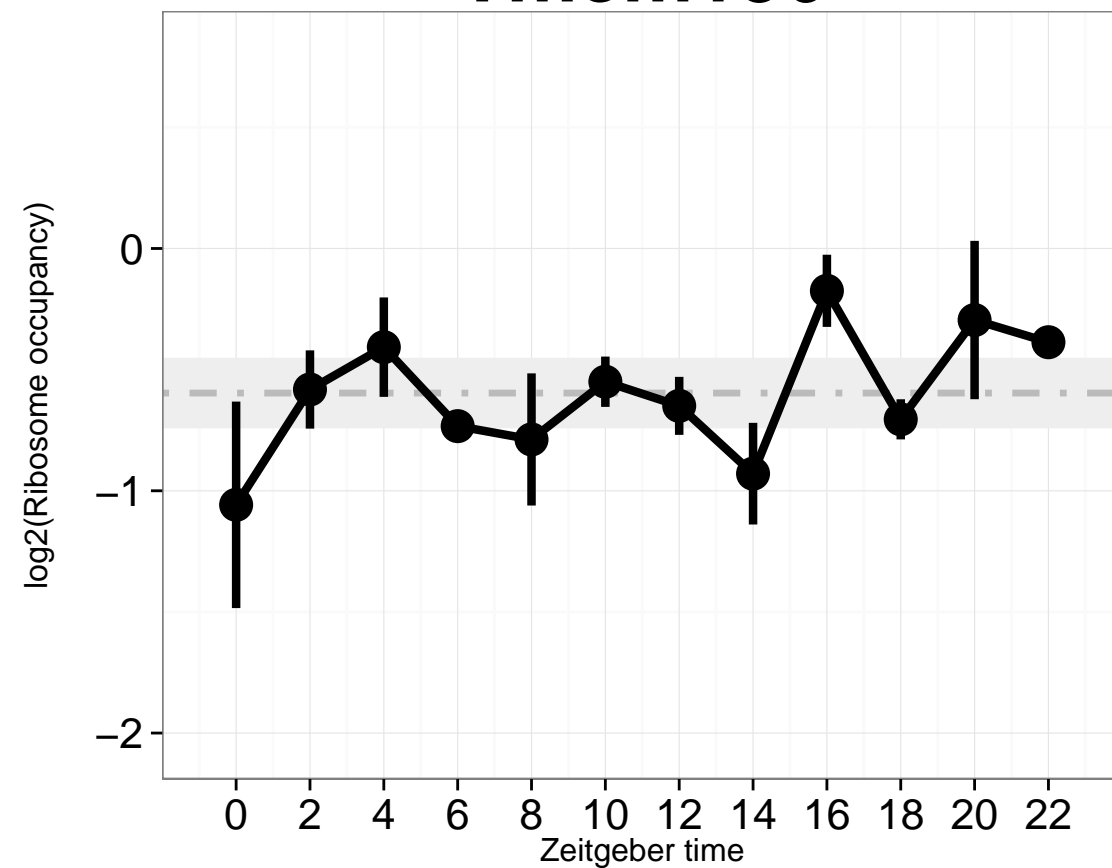

Supplement: Supplementary file 8308 [file 1]

# Mgme1

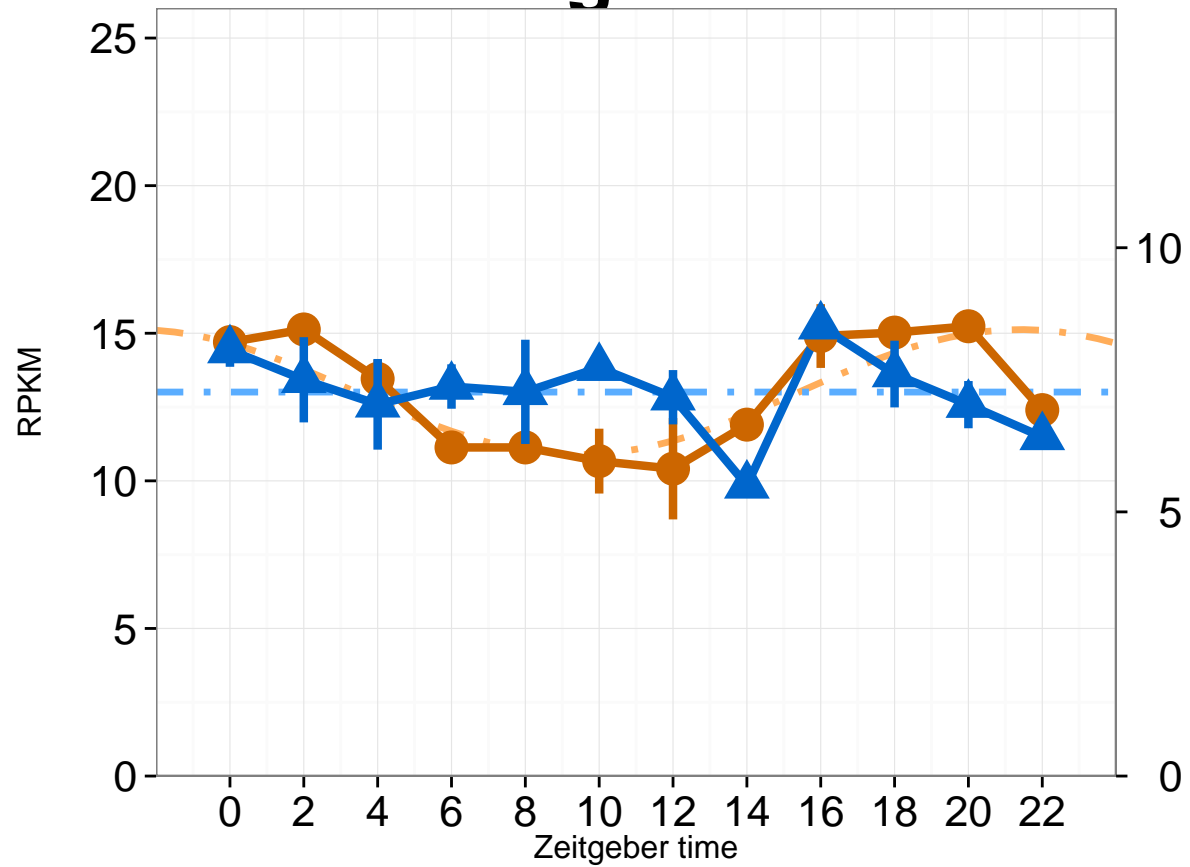

# Mgme1

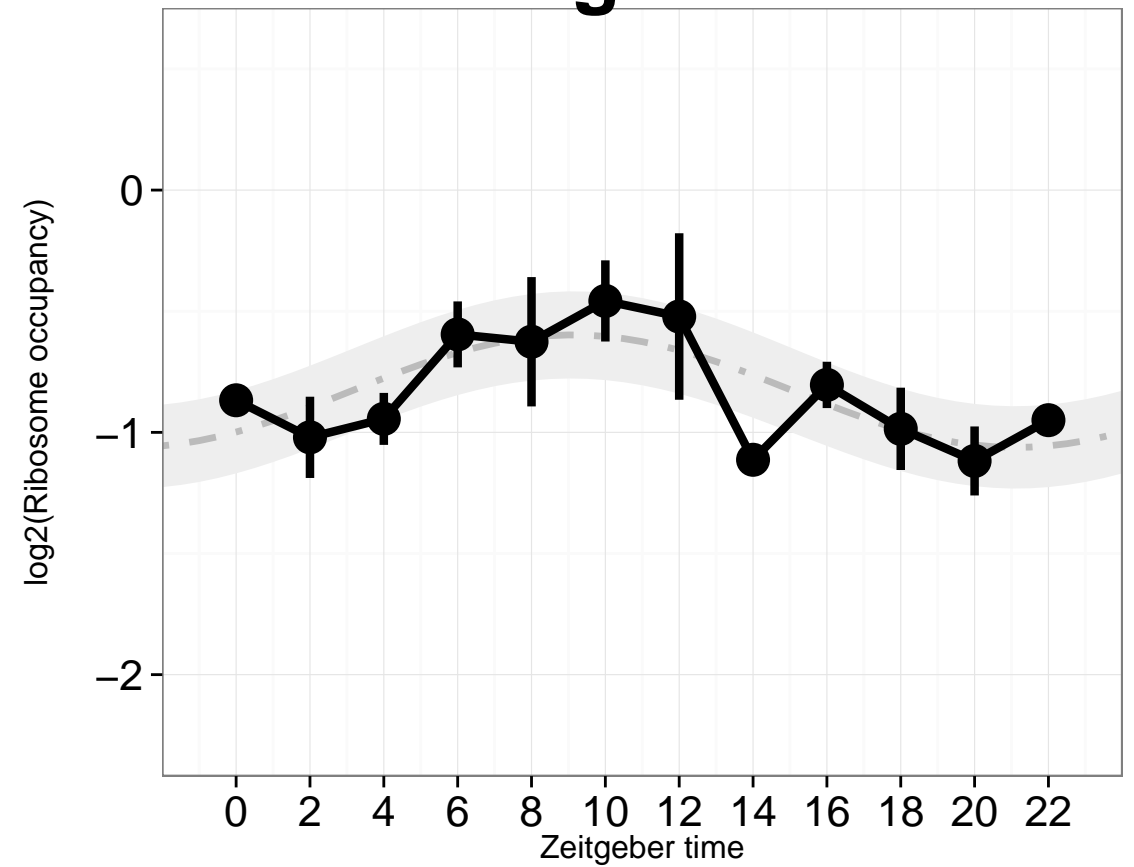

Supplement: Supplementary file 8309 [file 1]

## BC003331

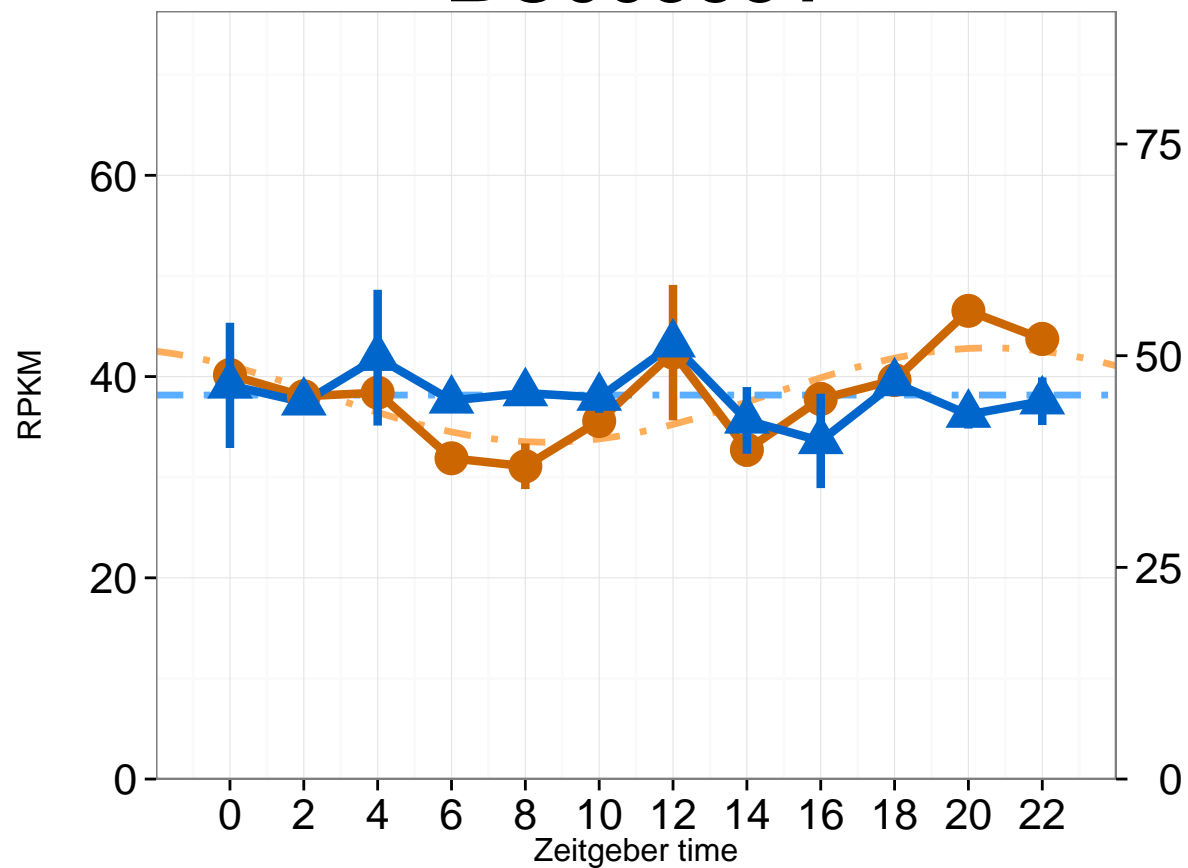

## BC003331

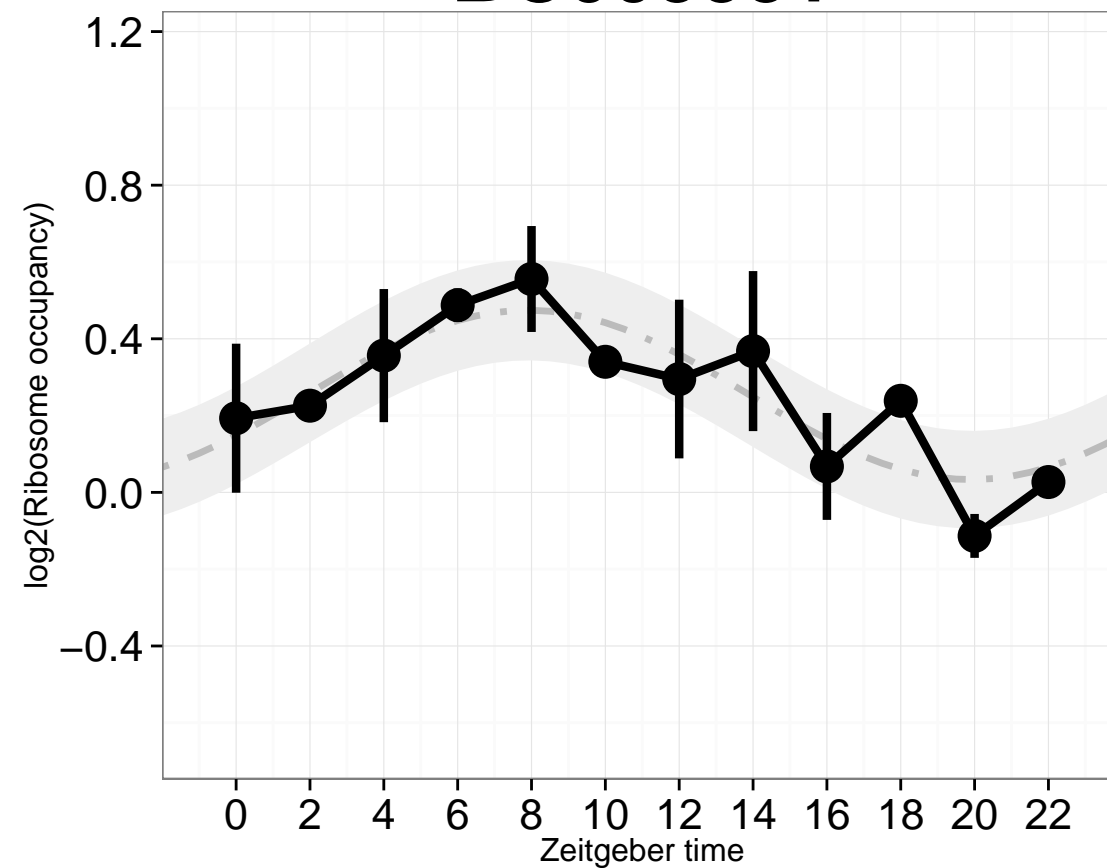

Supplement: Supplementary file 8310 [file 1]

# Xrcc2

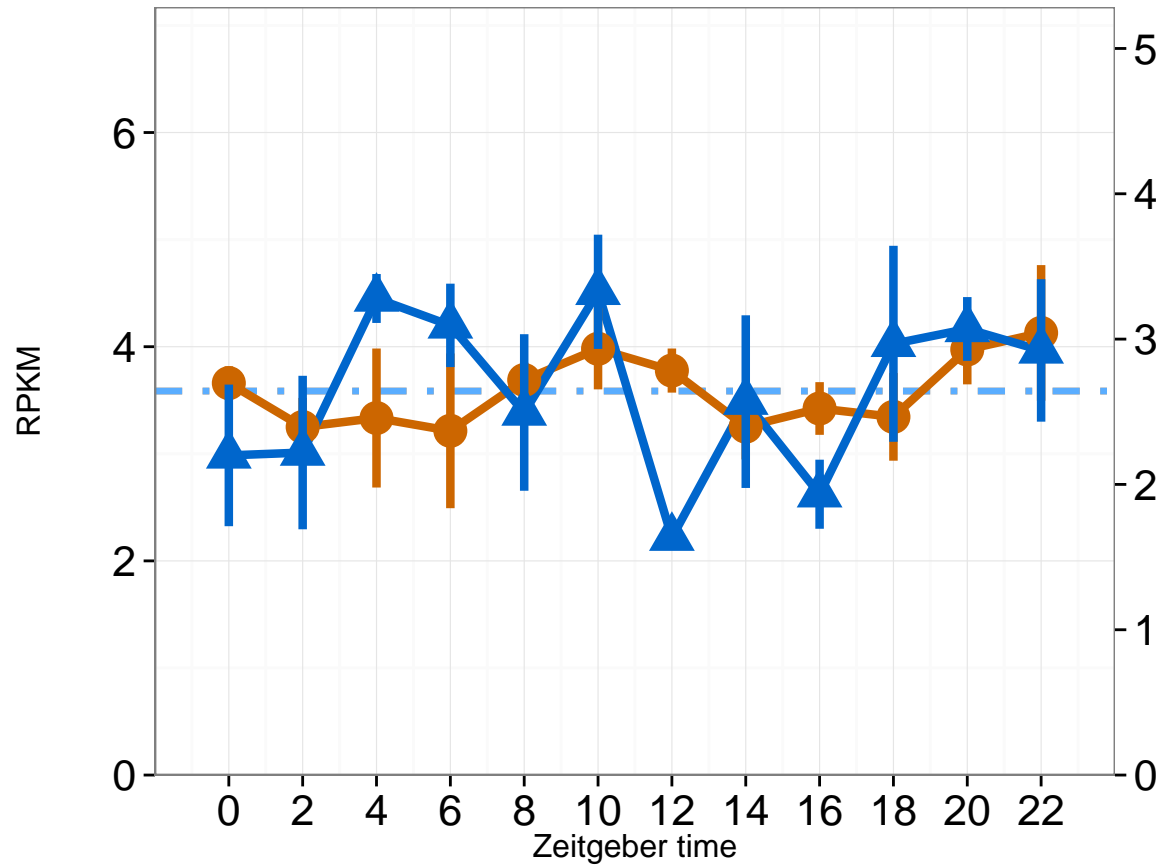

# Xrcc2

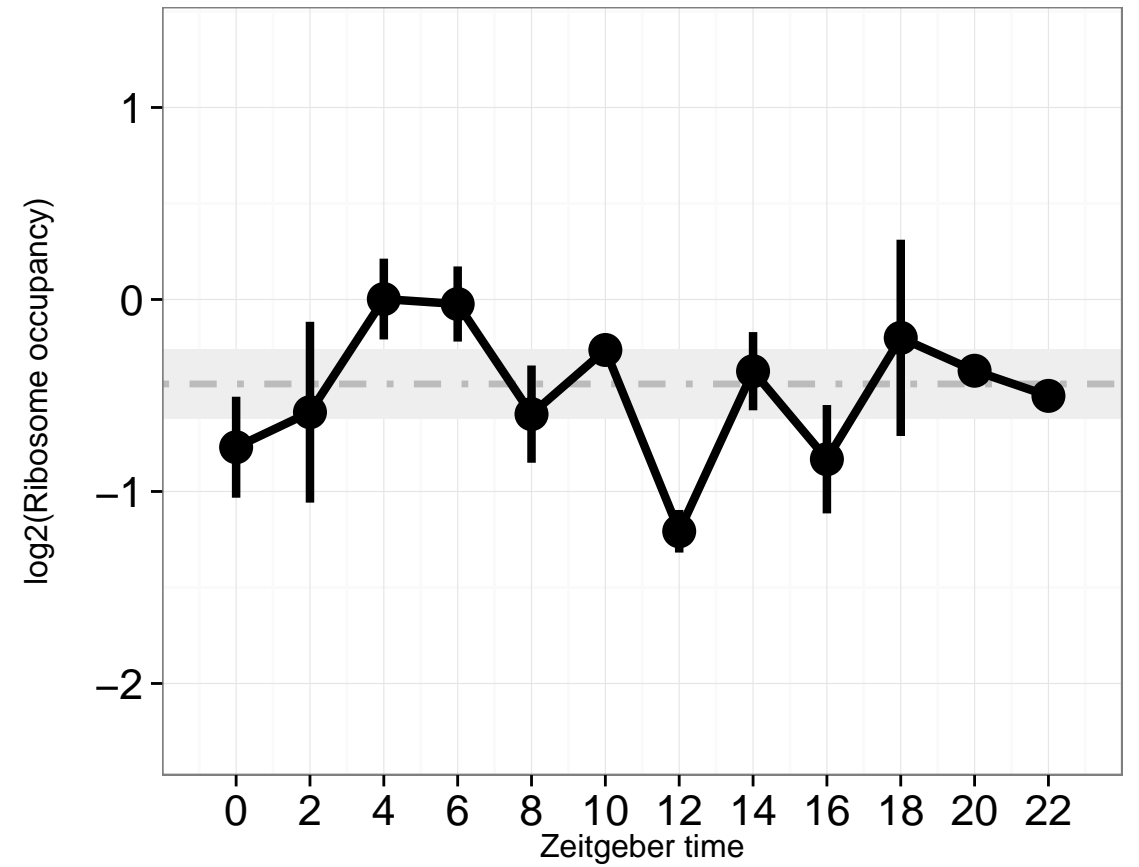

Supplement: Supplementary file 8311 [file 1]

## Atrx

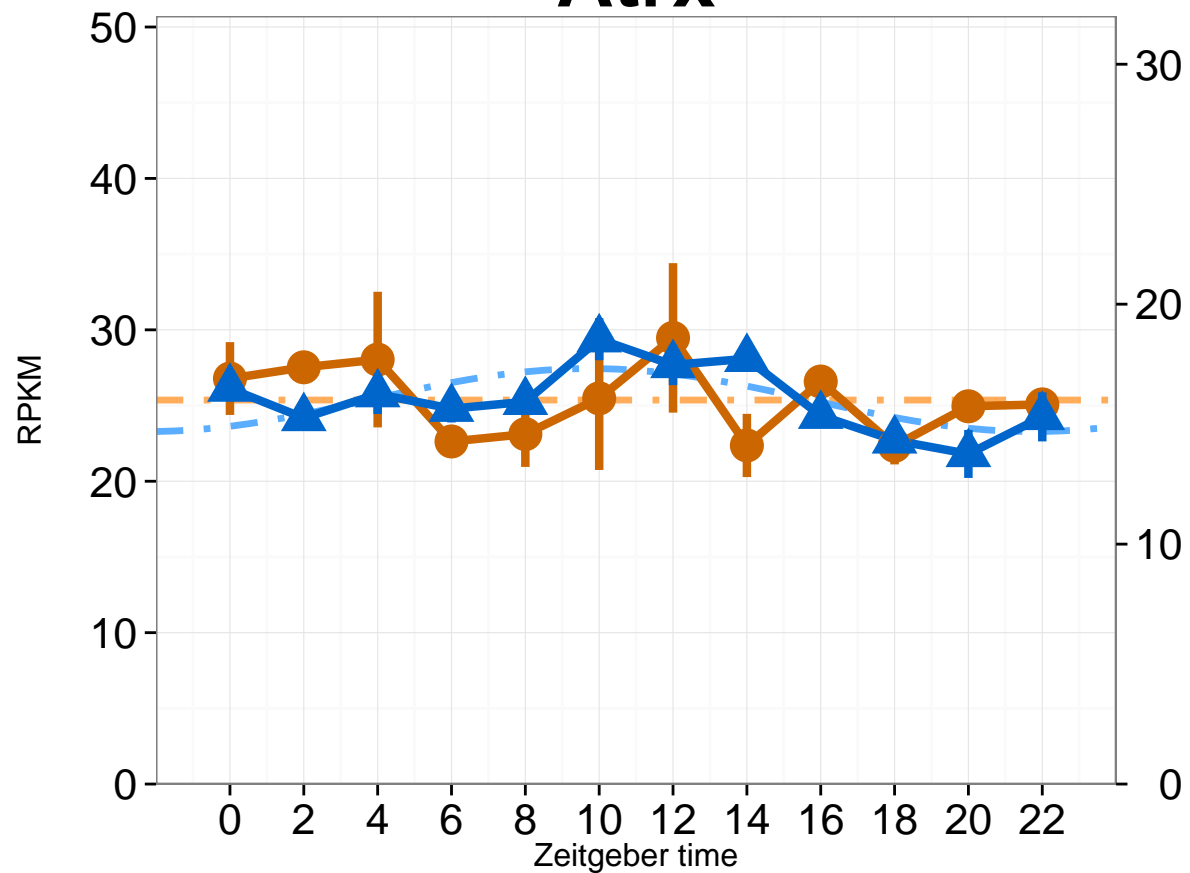

## Atrx

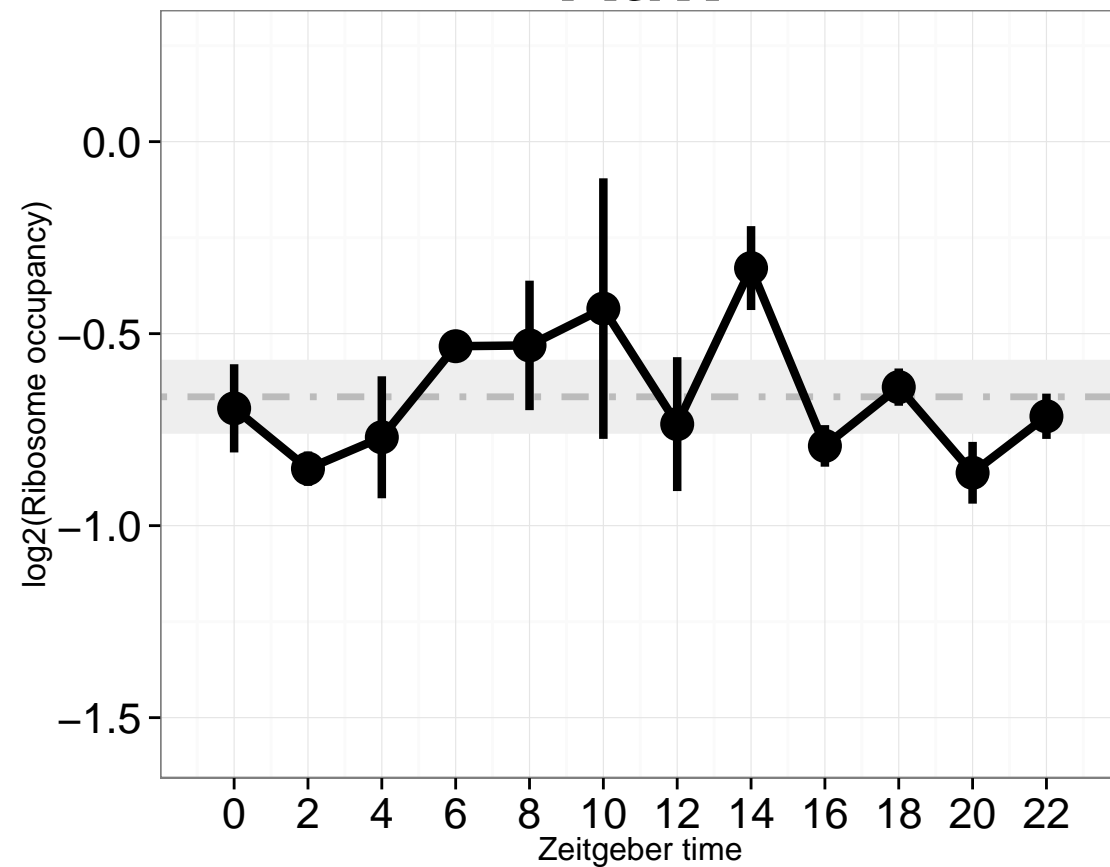

Supplement: Supplementary file 8312 [file 1]

# Bmp15

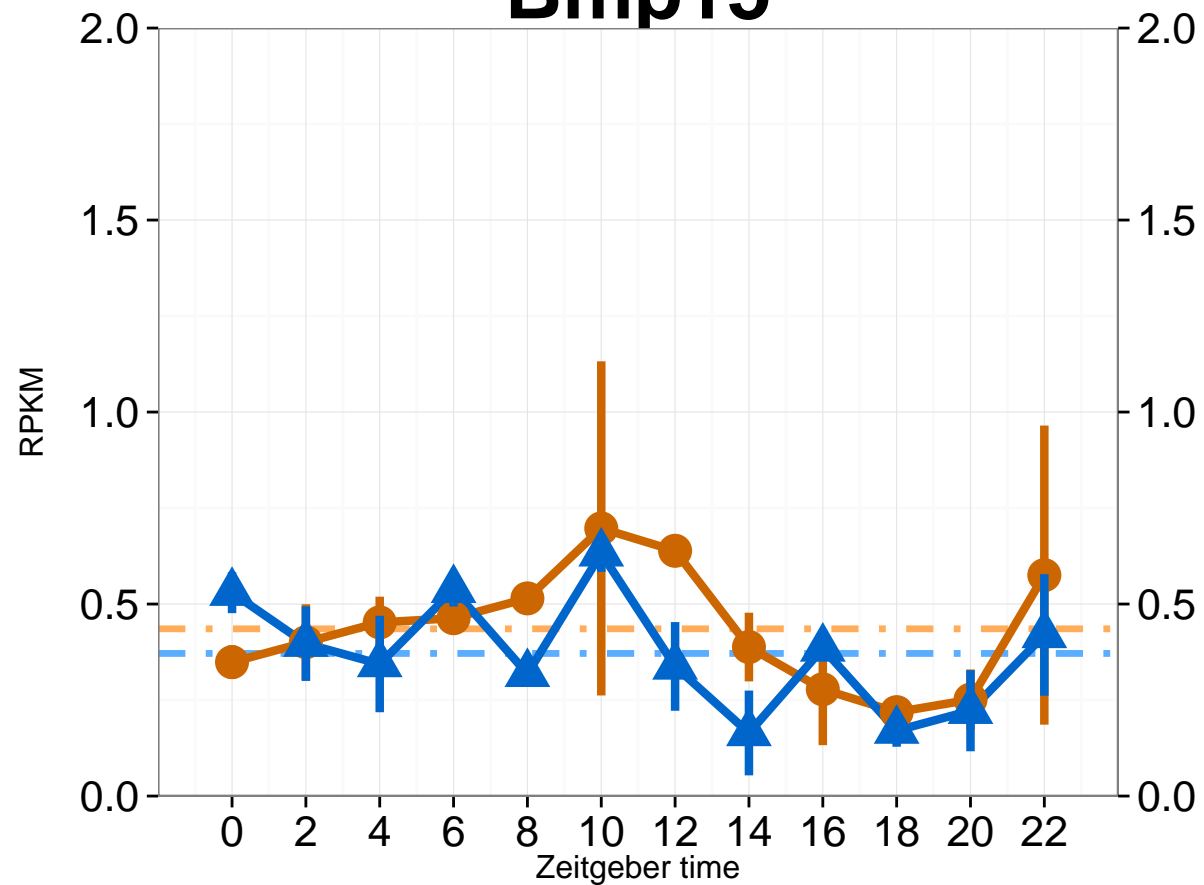

# Bmp15

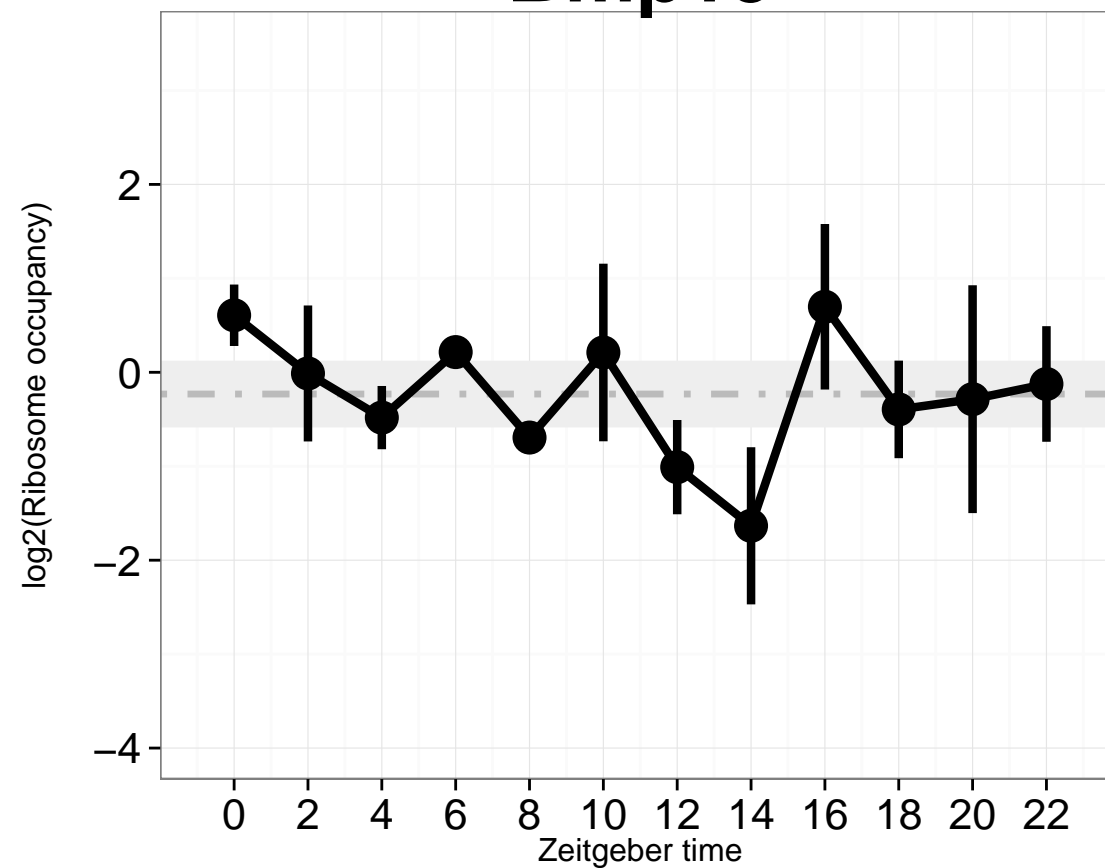

Supplement: Supplementary file 8313 [file 1]

## Mmab

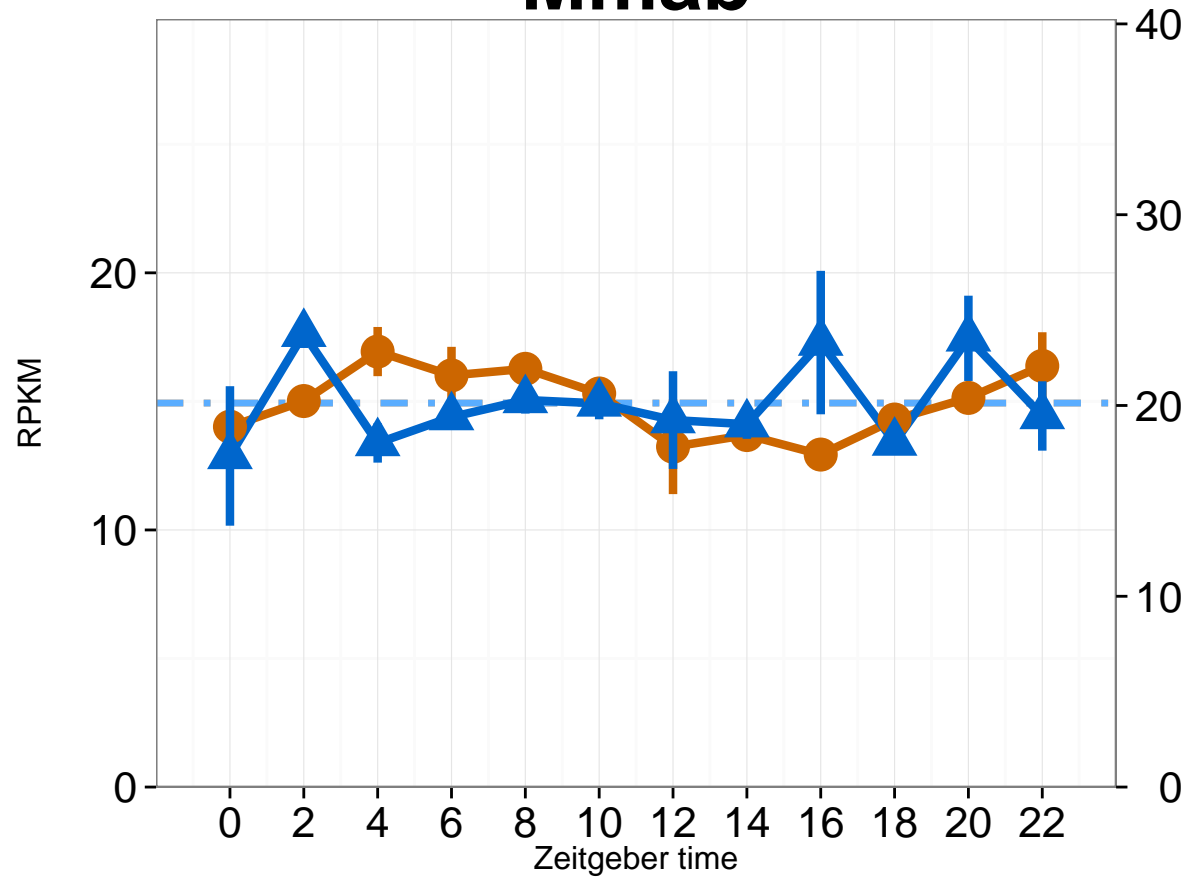

## Mmab

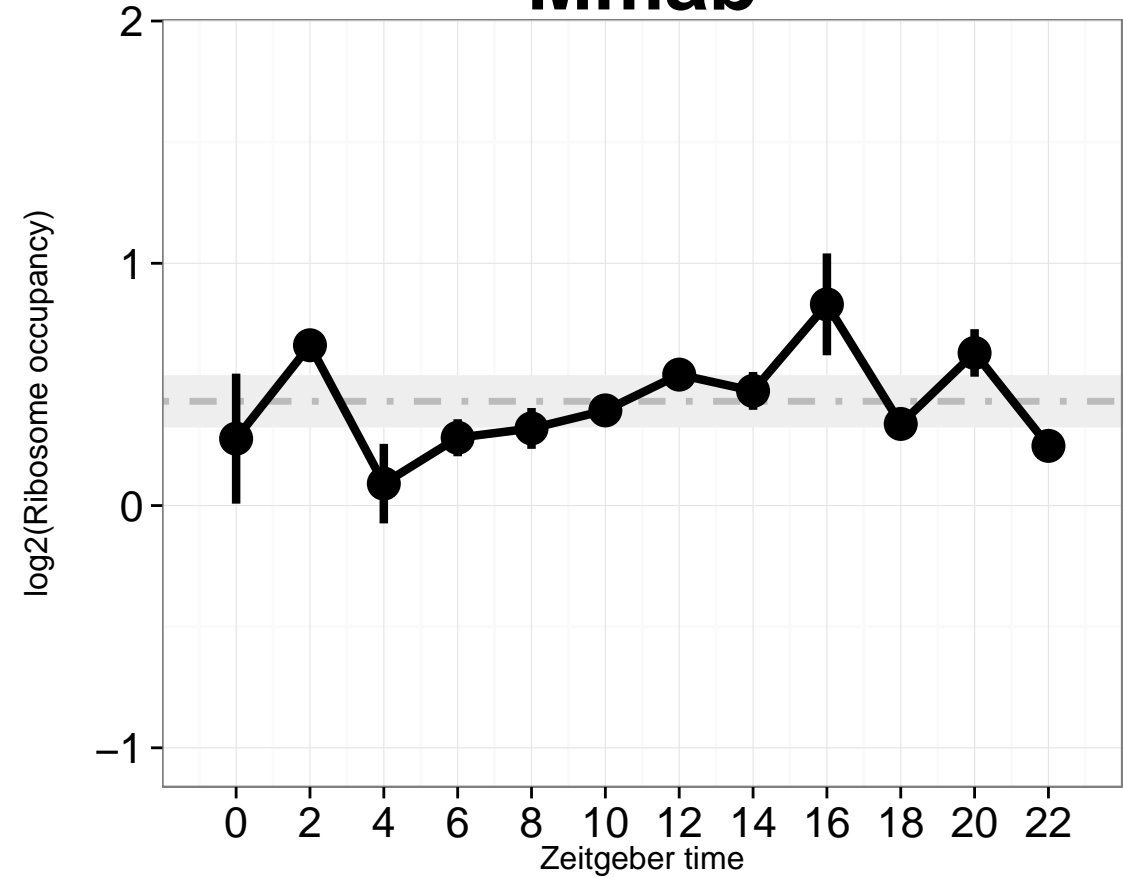

Supplement: Supplementary file 8314 [file 1]

# Hspb2

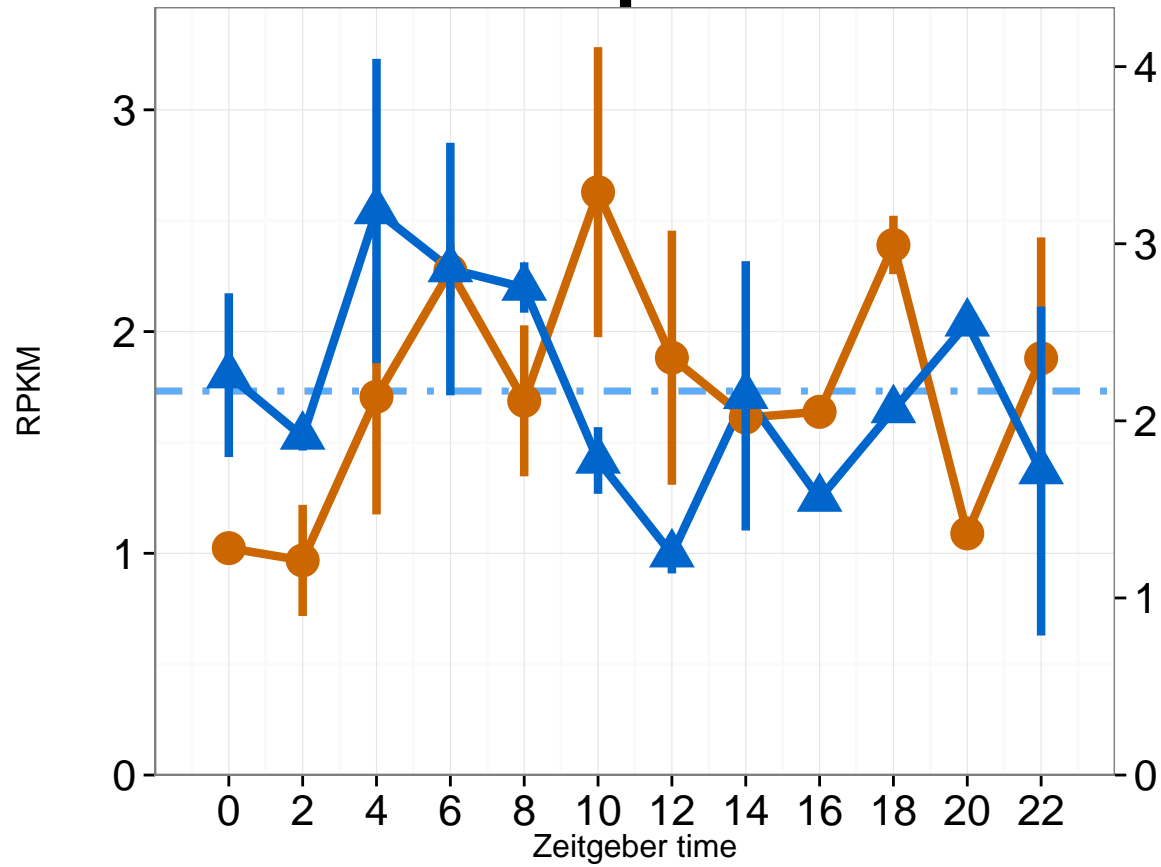

# Hspb2

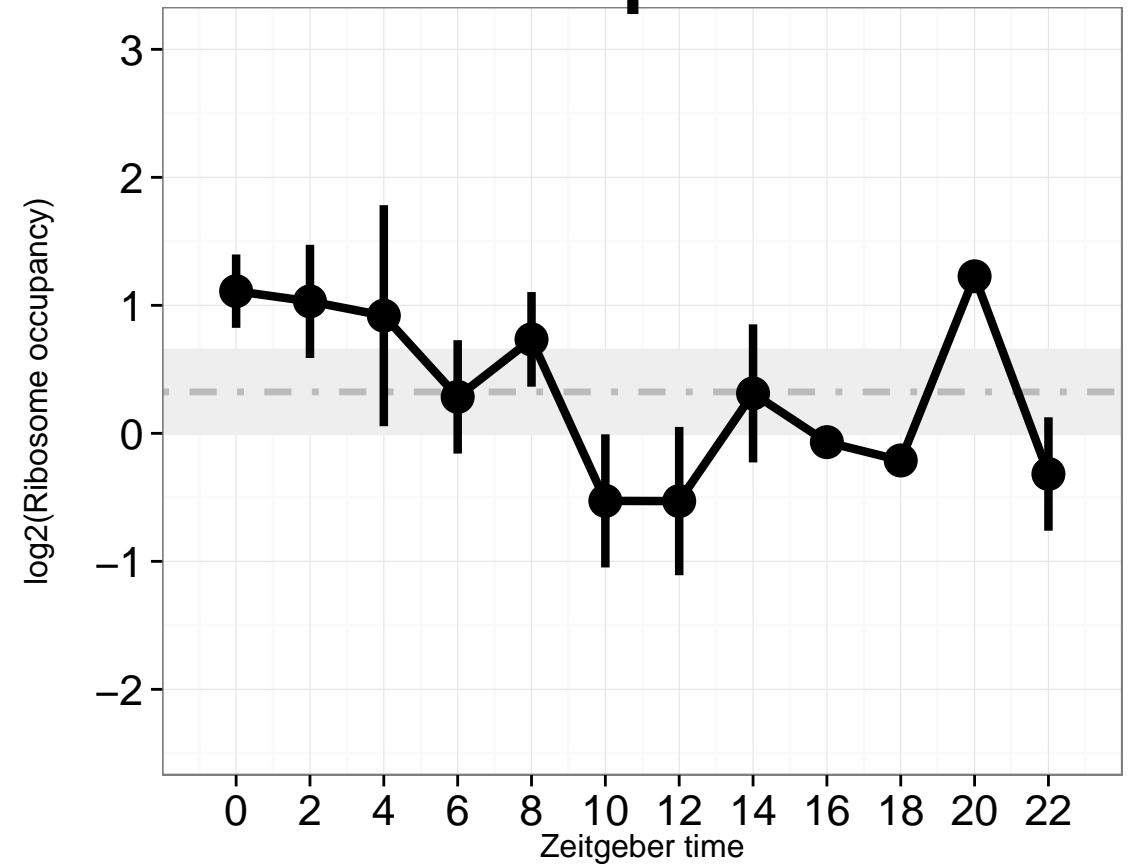

Supplement: Supplementary file 8315 [file 1]

# Pcgf6

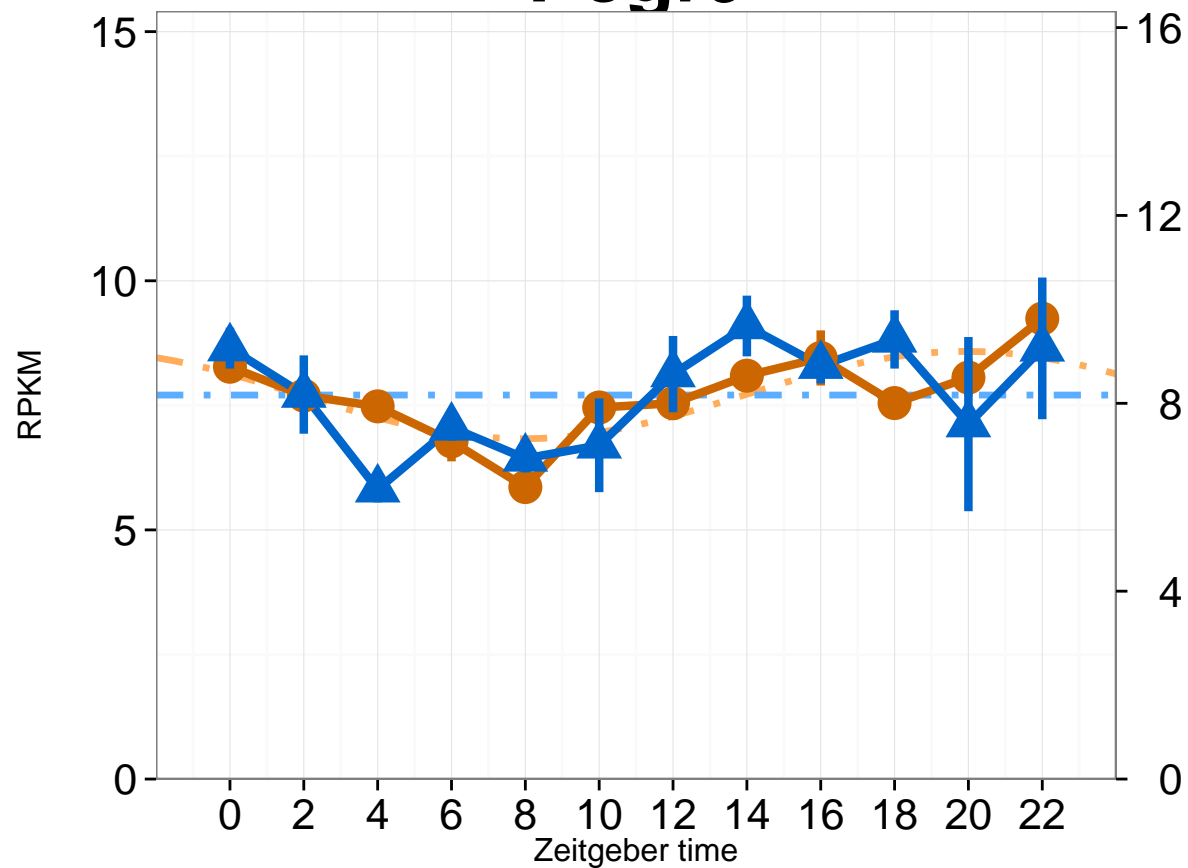

# Pcgf6

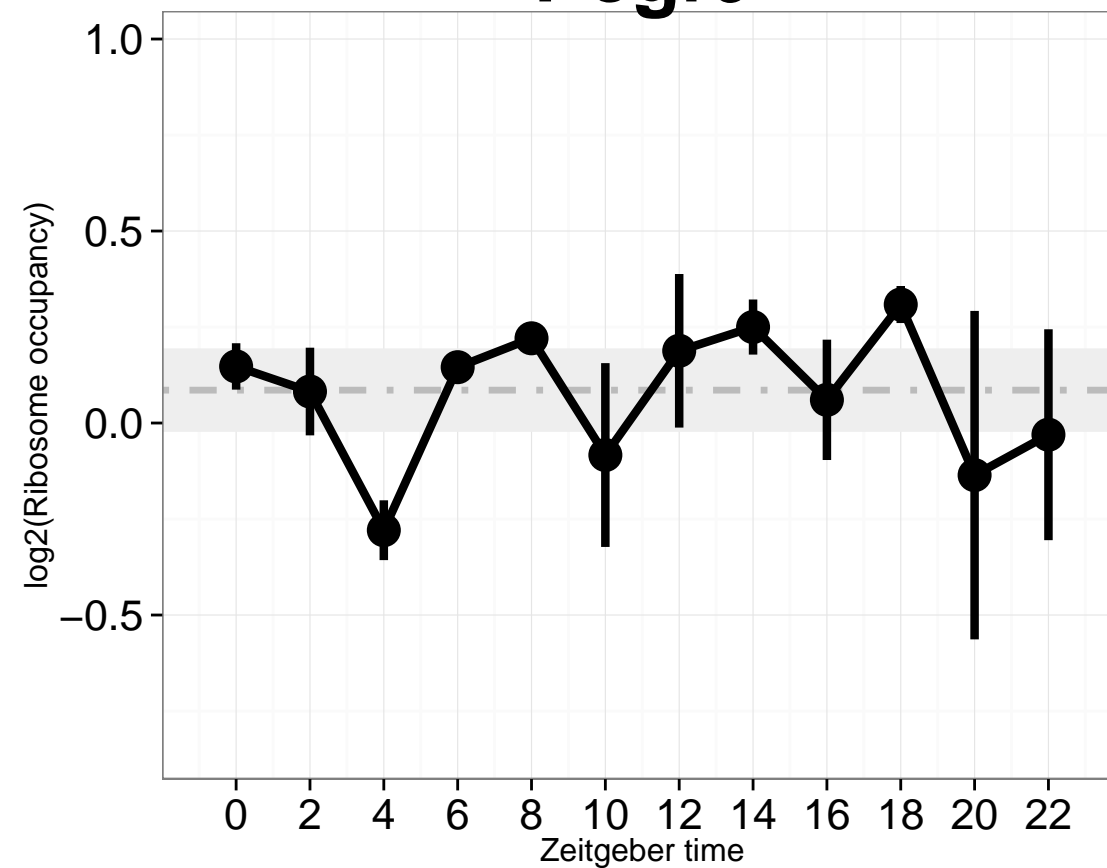

Supplement: Supplementary file 8316 [file 1]

## Edn3

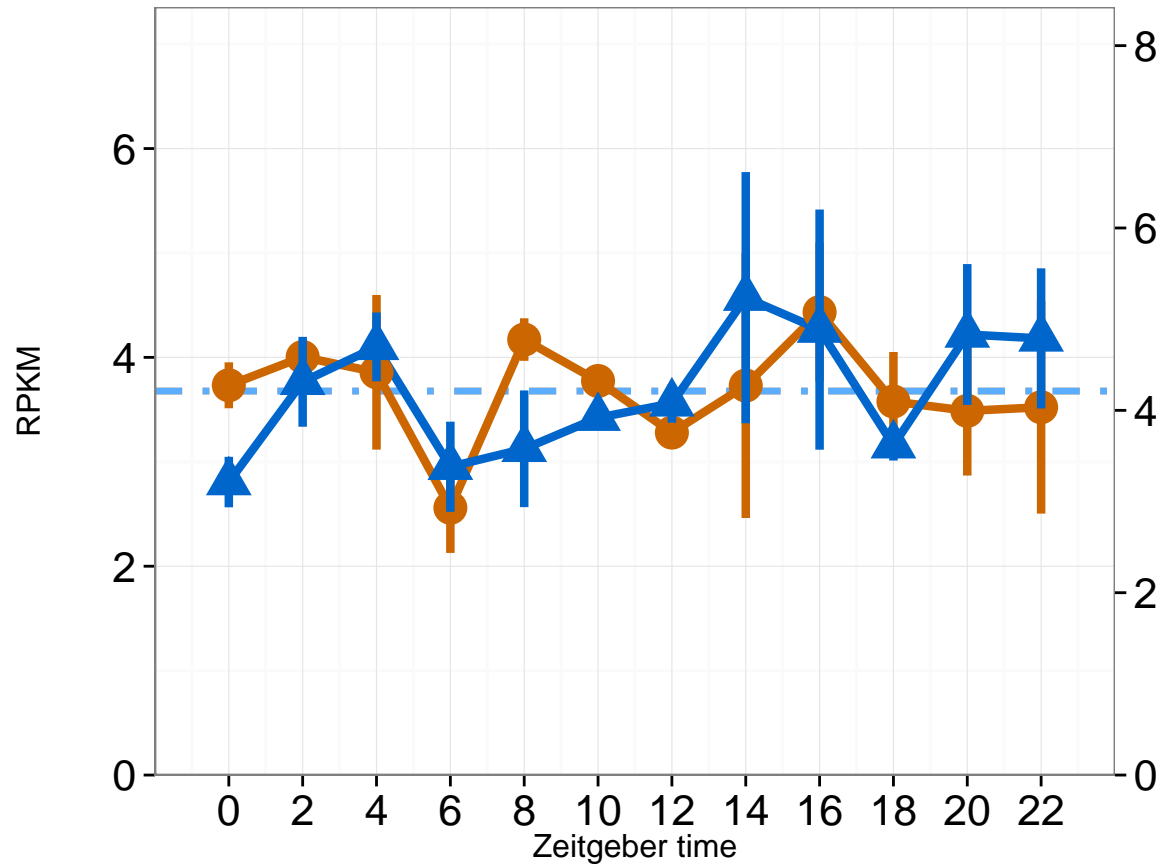

## Edn3

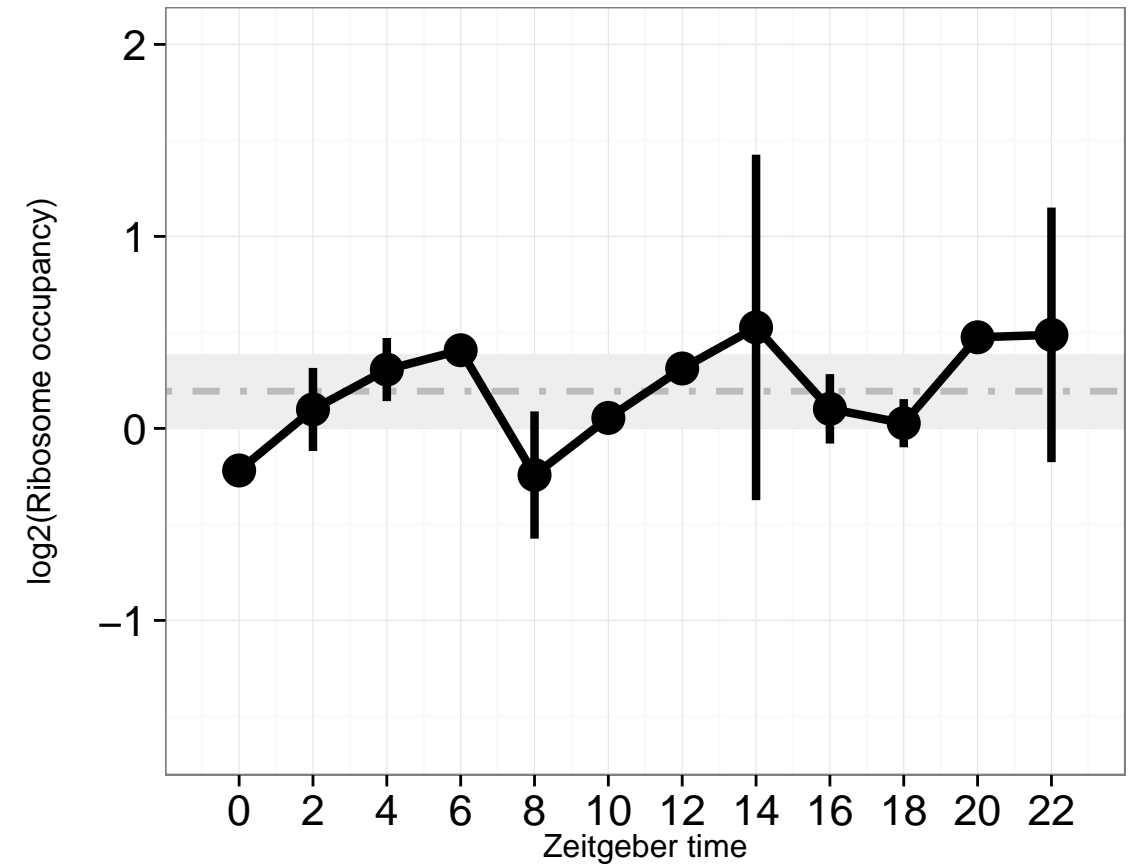

Supplement: Supplementary file 8317 [file 1]

# Hist1h4j

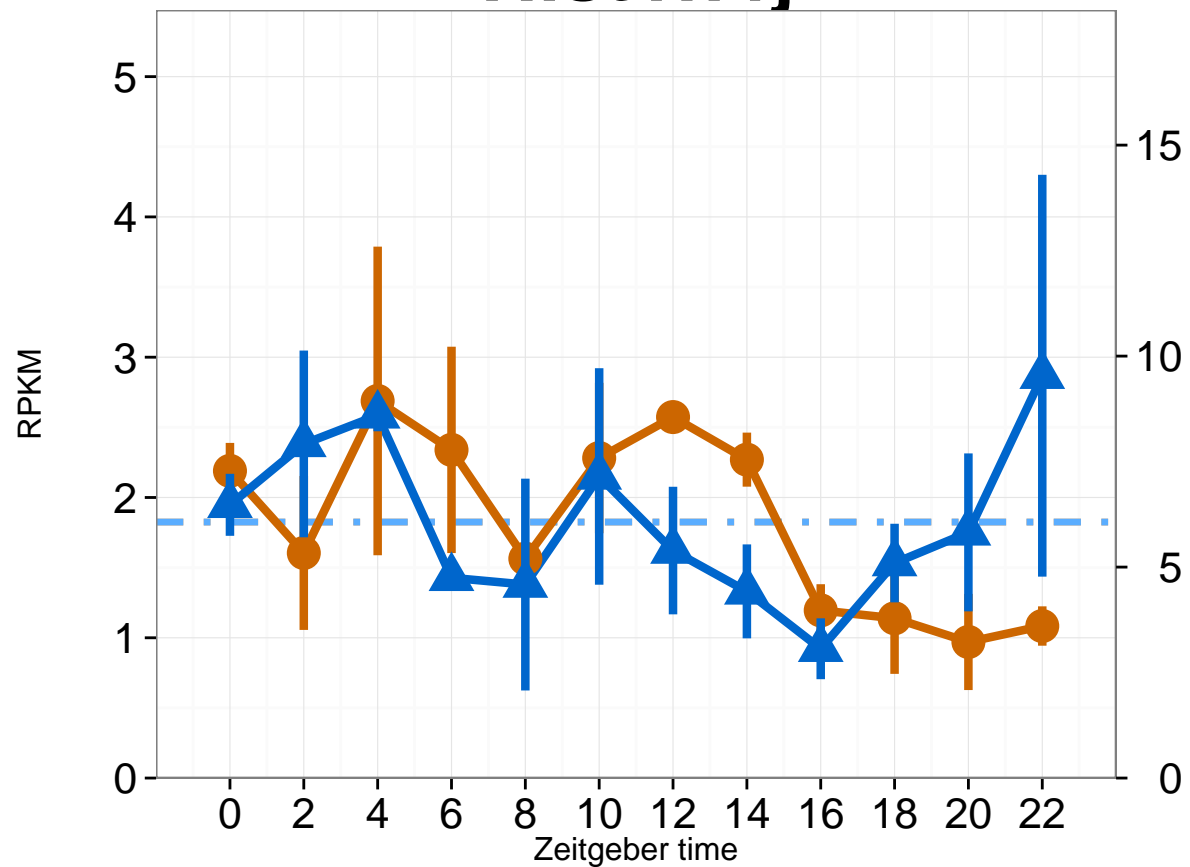

# Hist1h4j

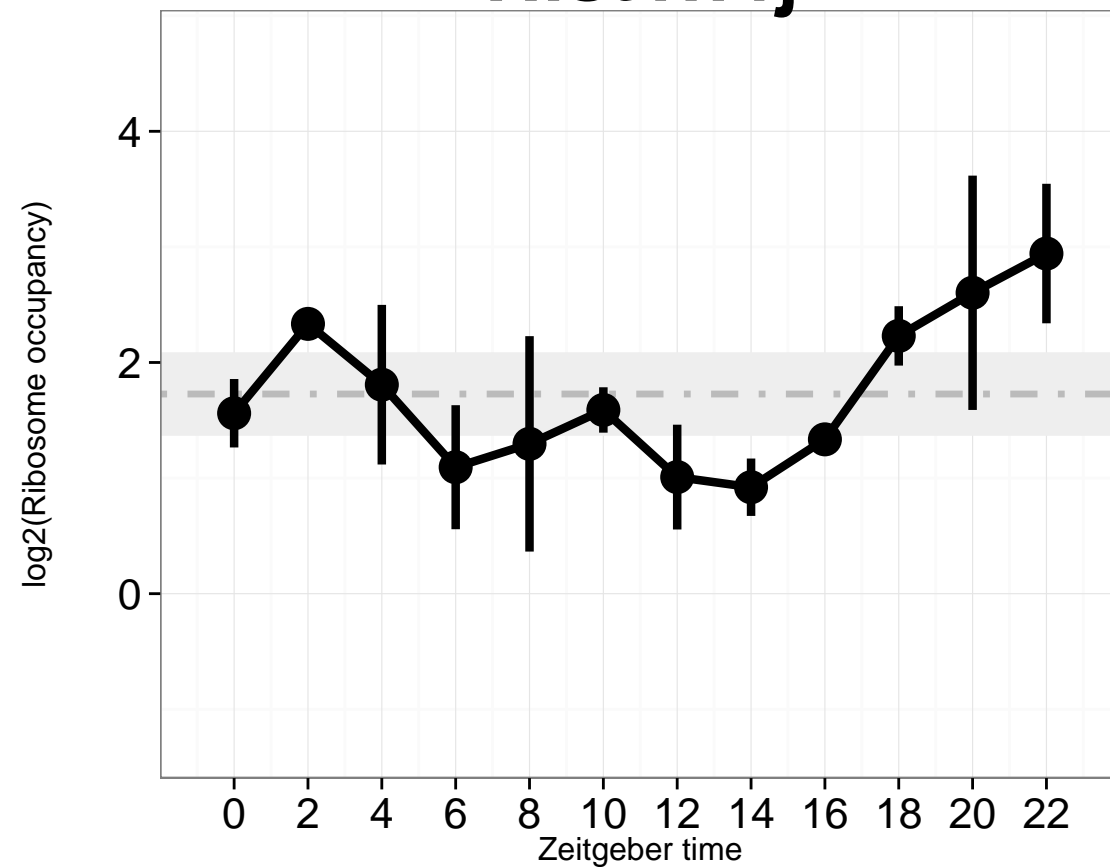

Supplement: Supplementary file 8318 [file 1]

## Ube2w

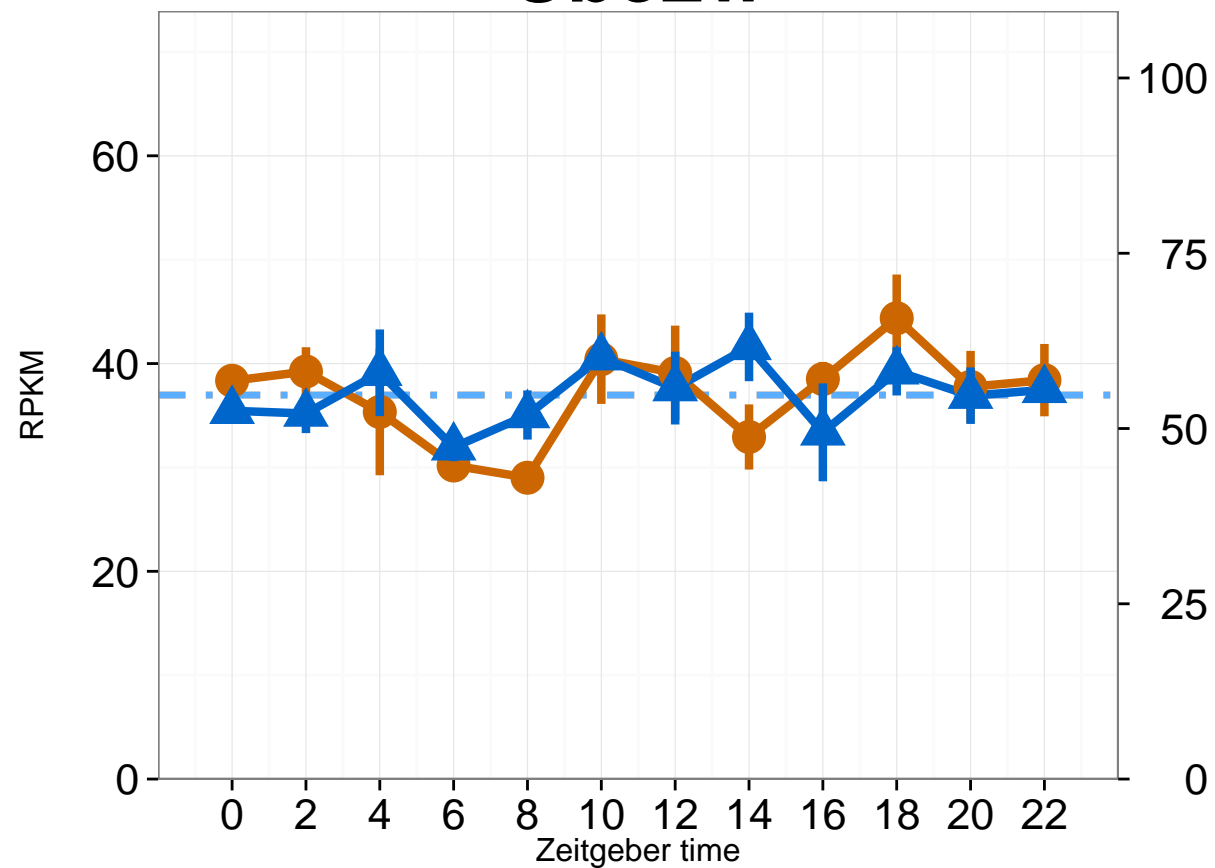

## Ube2w

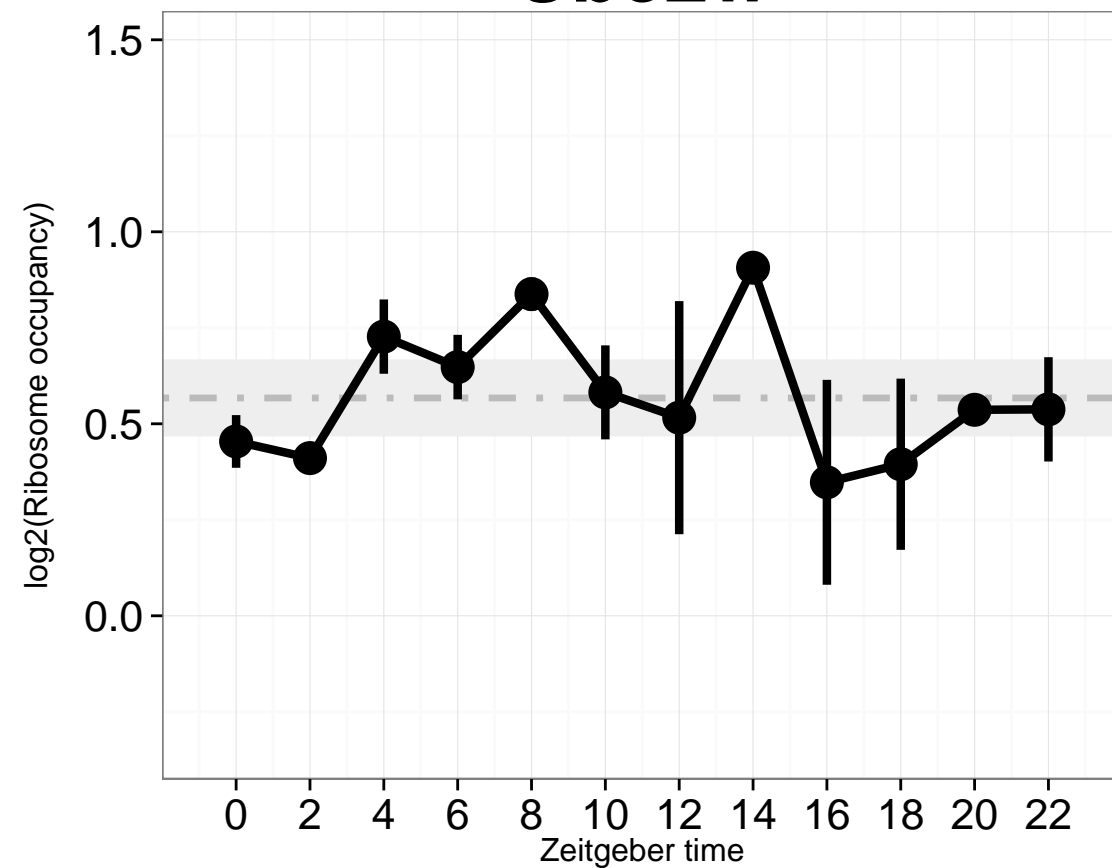

Supplement: Supplementary file 8319 [file 1]

# Tmem144

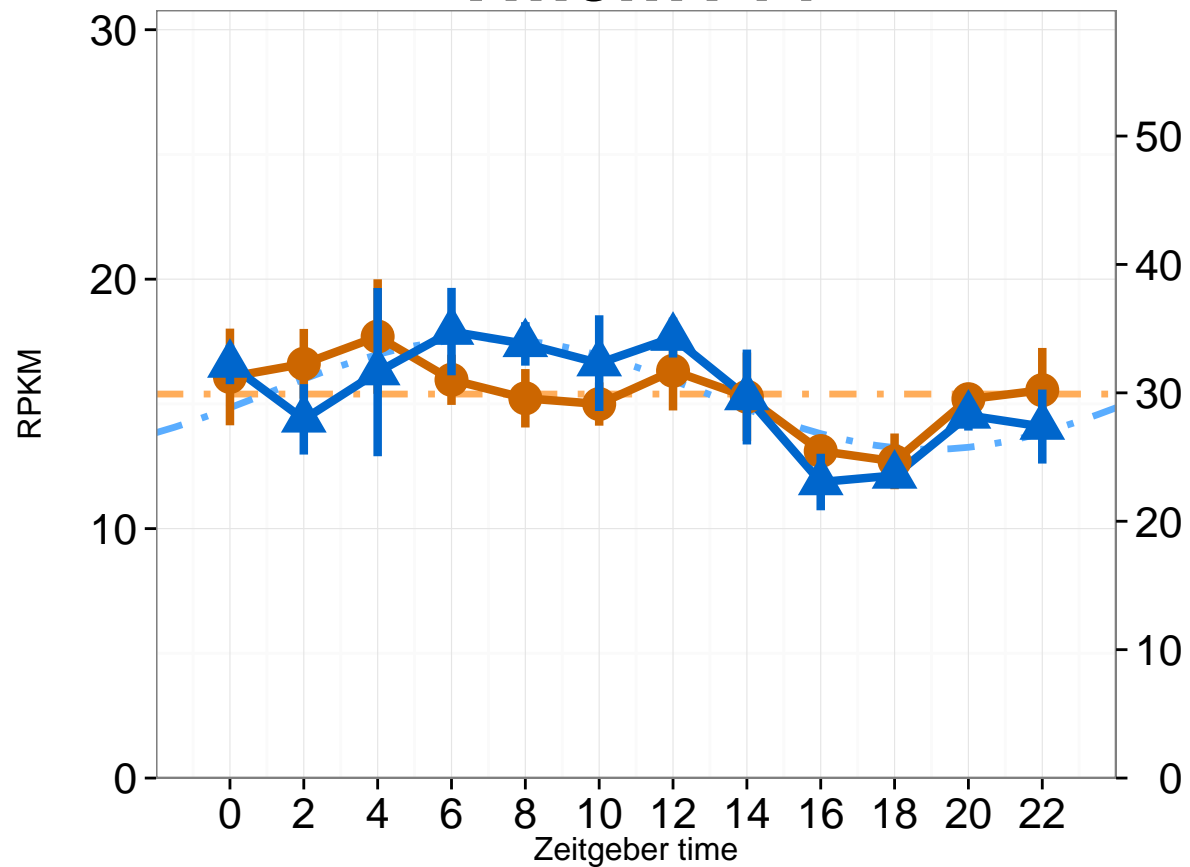

# Tmem144

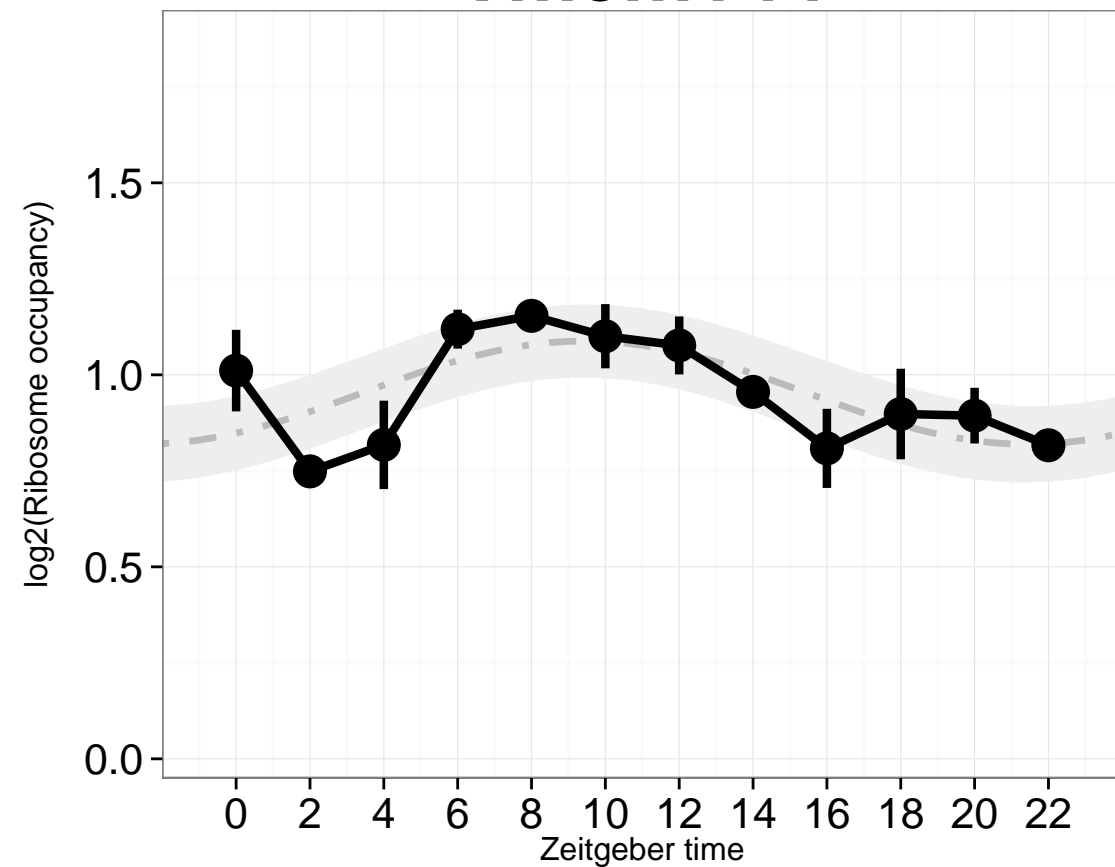

Supplement: Supplementary file 8320 [file 1]

# Slc20a1

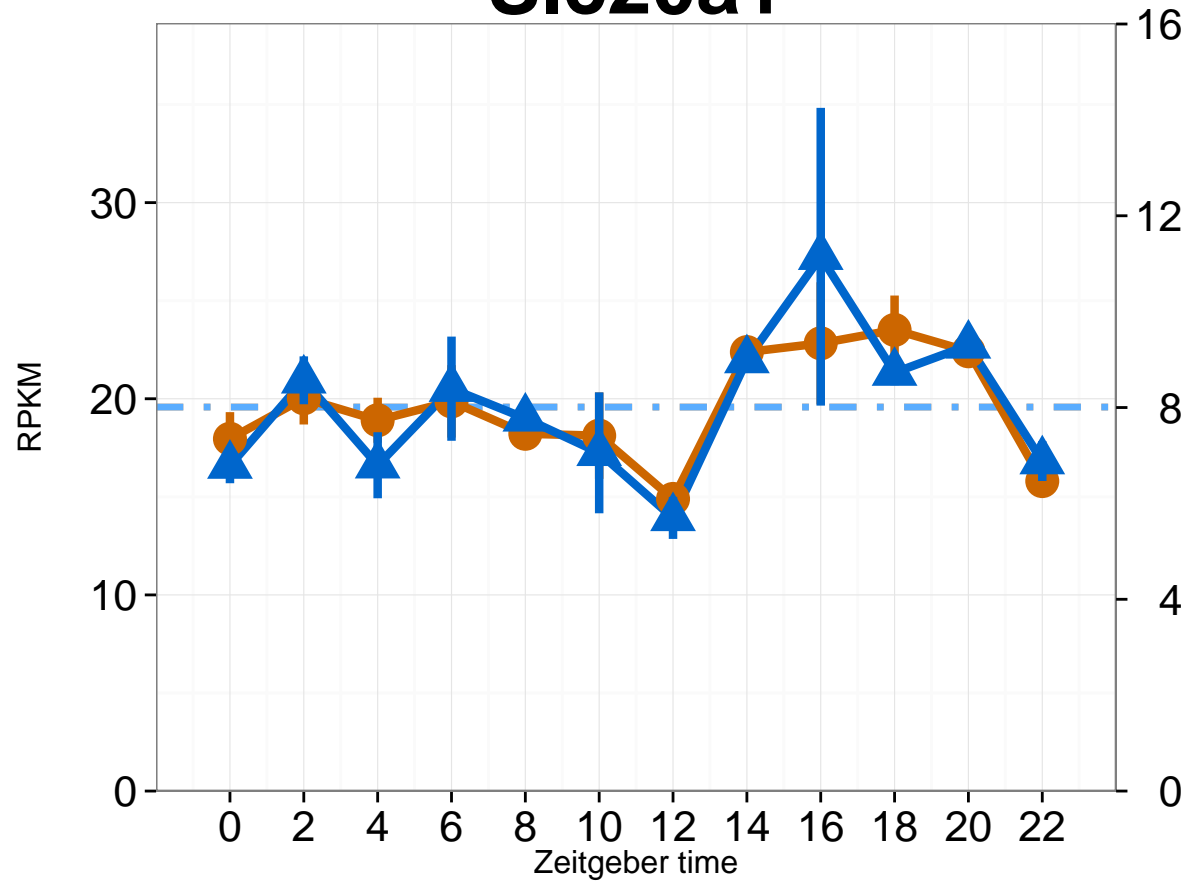

# Slc20a1

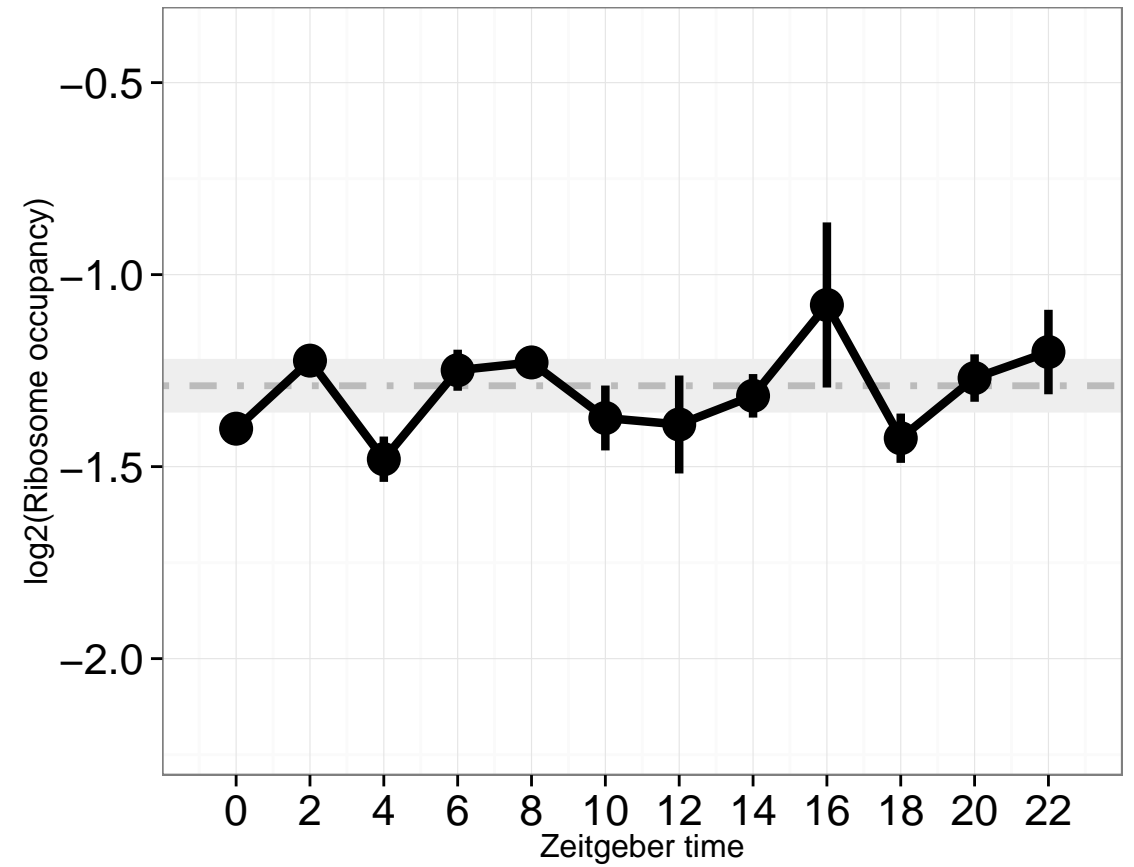

Supplement: Supplementary file 8321 [file 1]

# Zbtb16

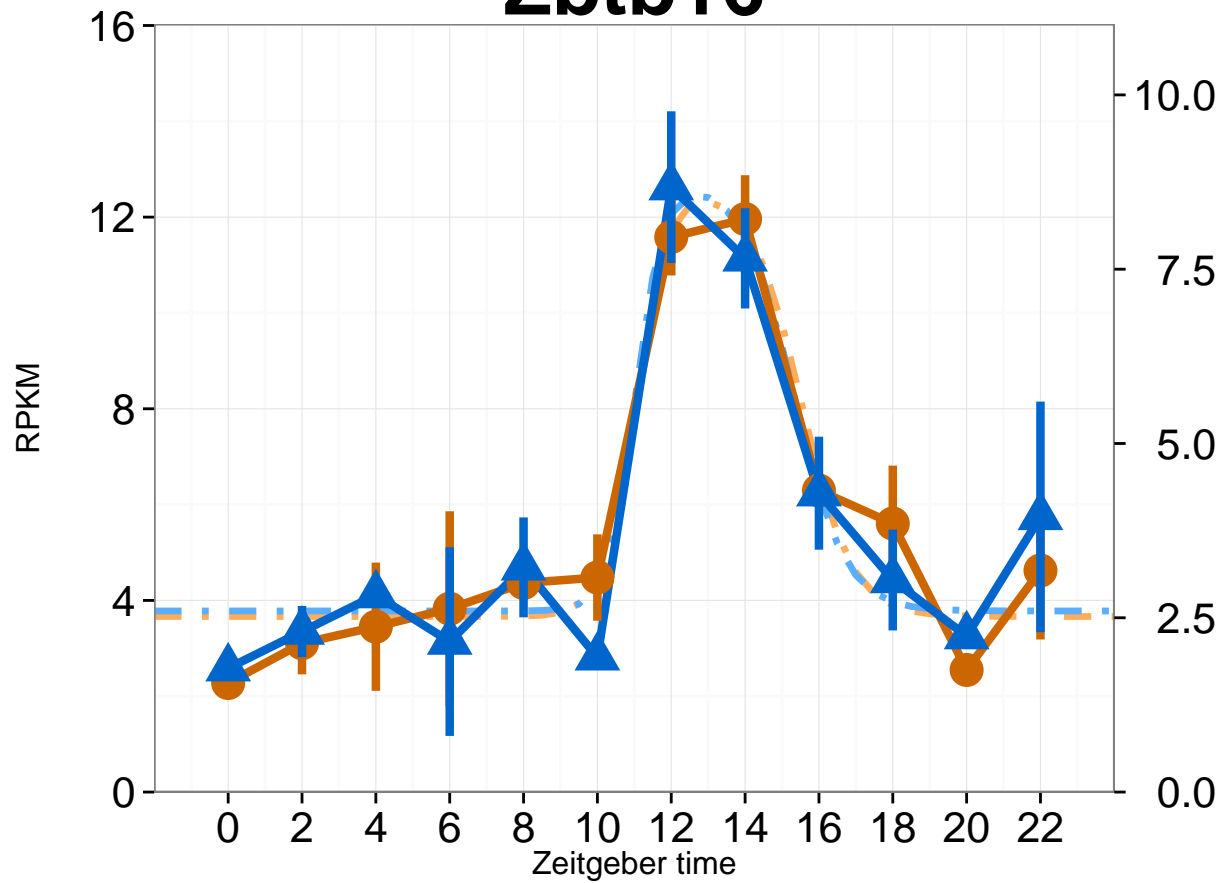

# Zbtb16

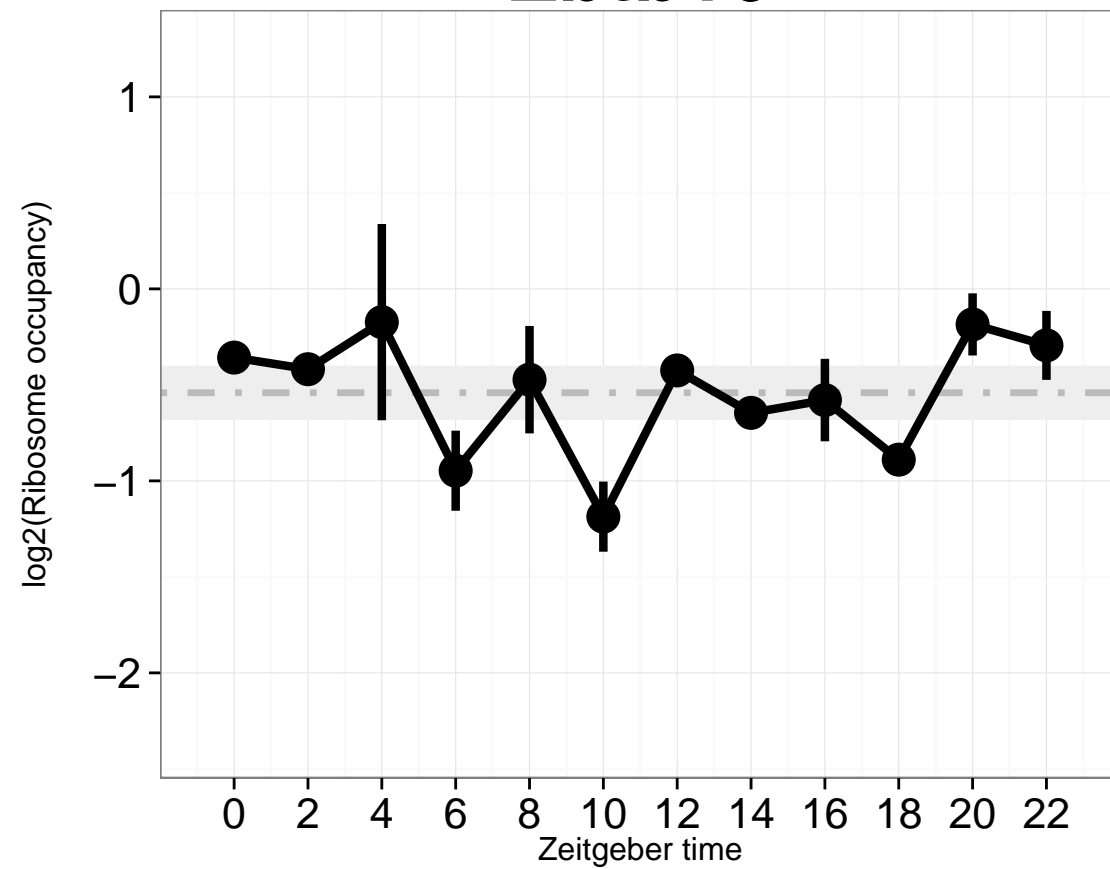

Supplement: Supplementary file 8322 [file 1]

## Rictor

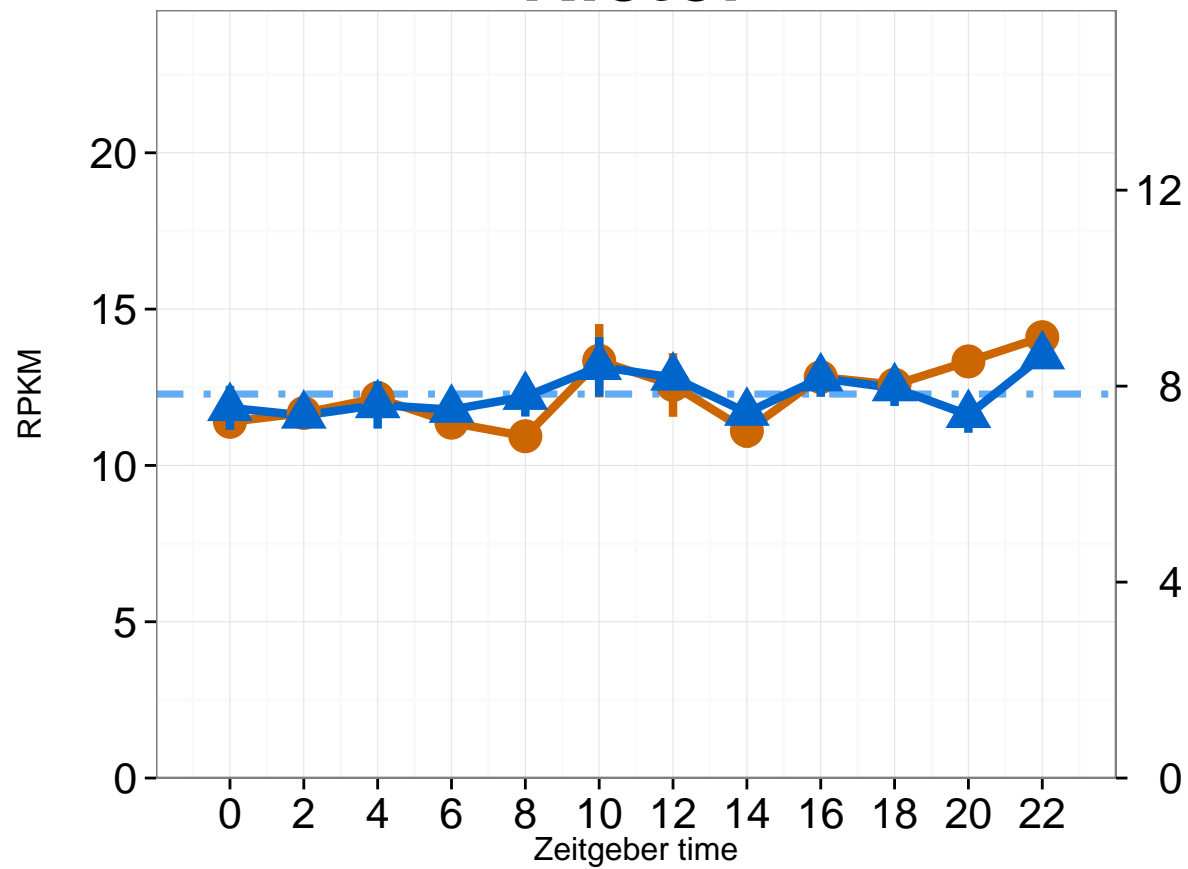

## Rictor

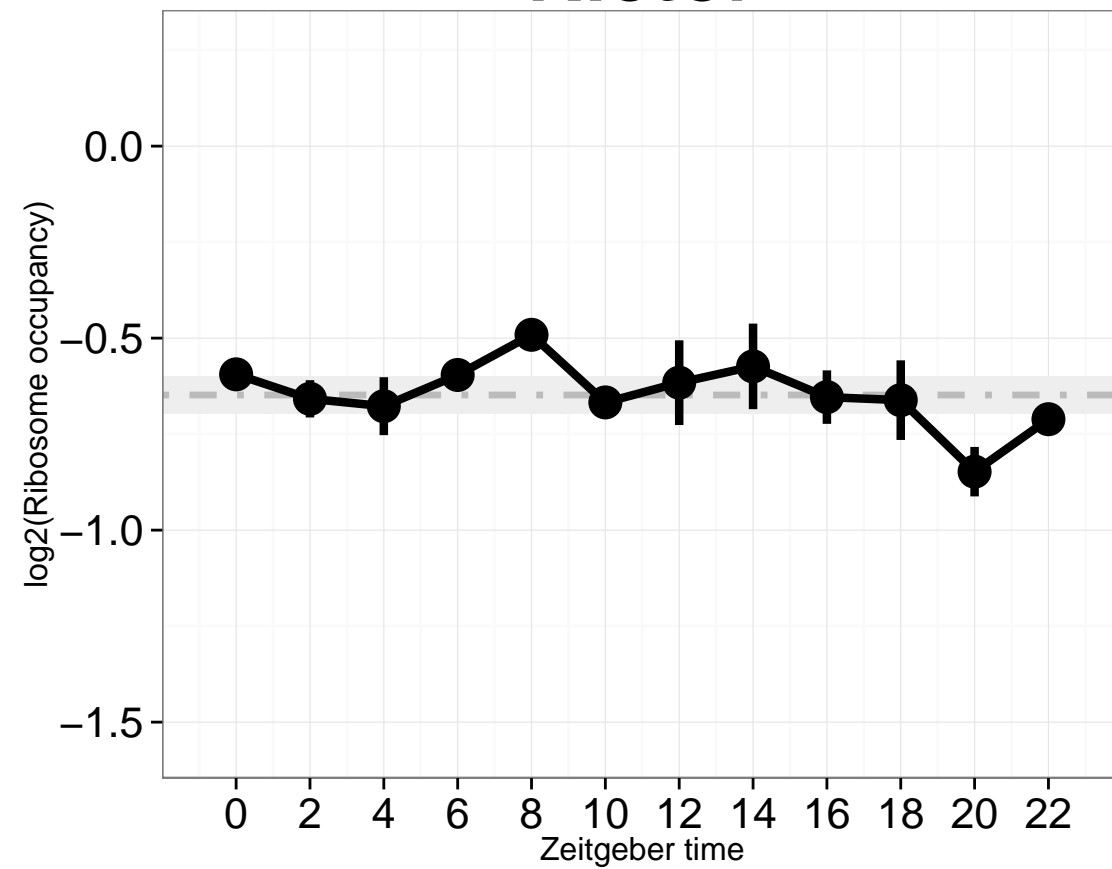

Supplement: Supplementary file 8323 [file 1]

## Slc7a9

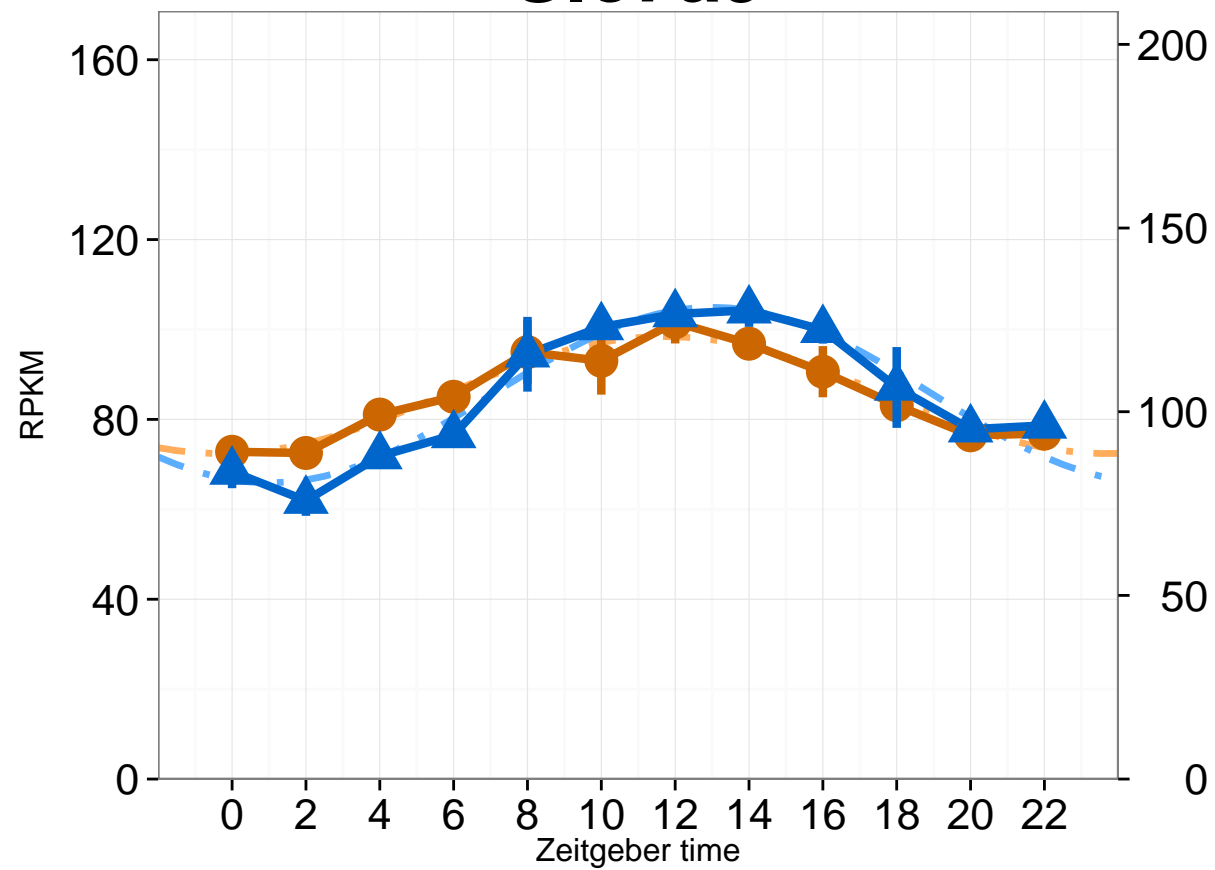

## Slc7a9

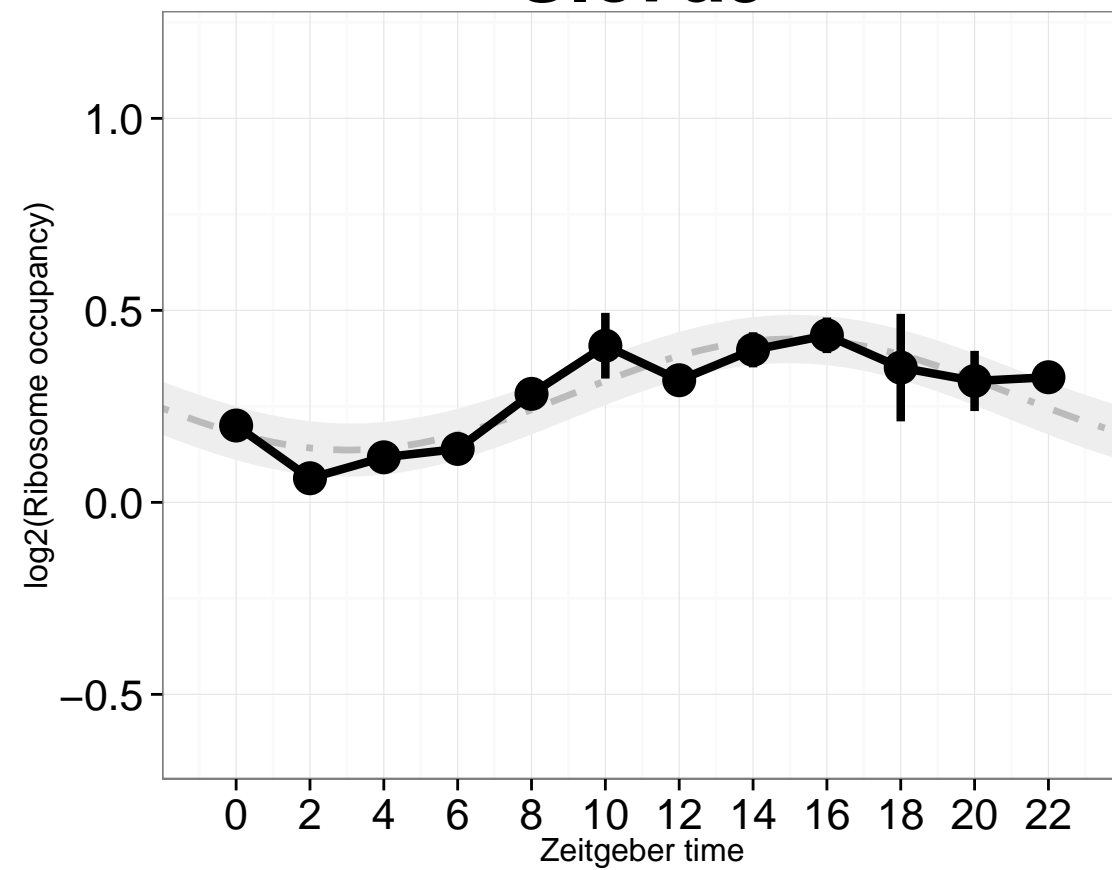

Supplement: Supplementary file 8324 [file 1]

# Cpeb2

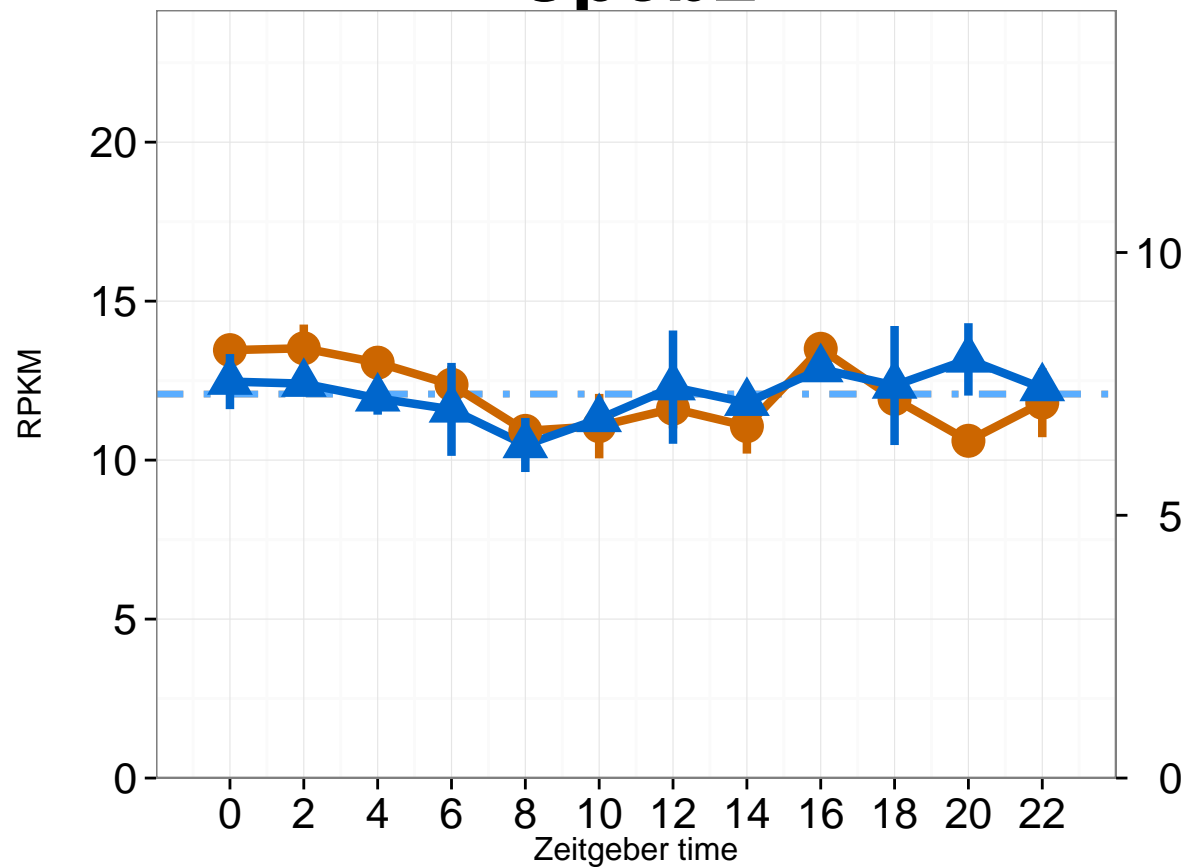

# Cpeb2

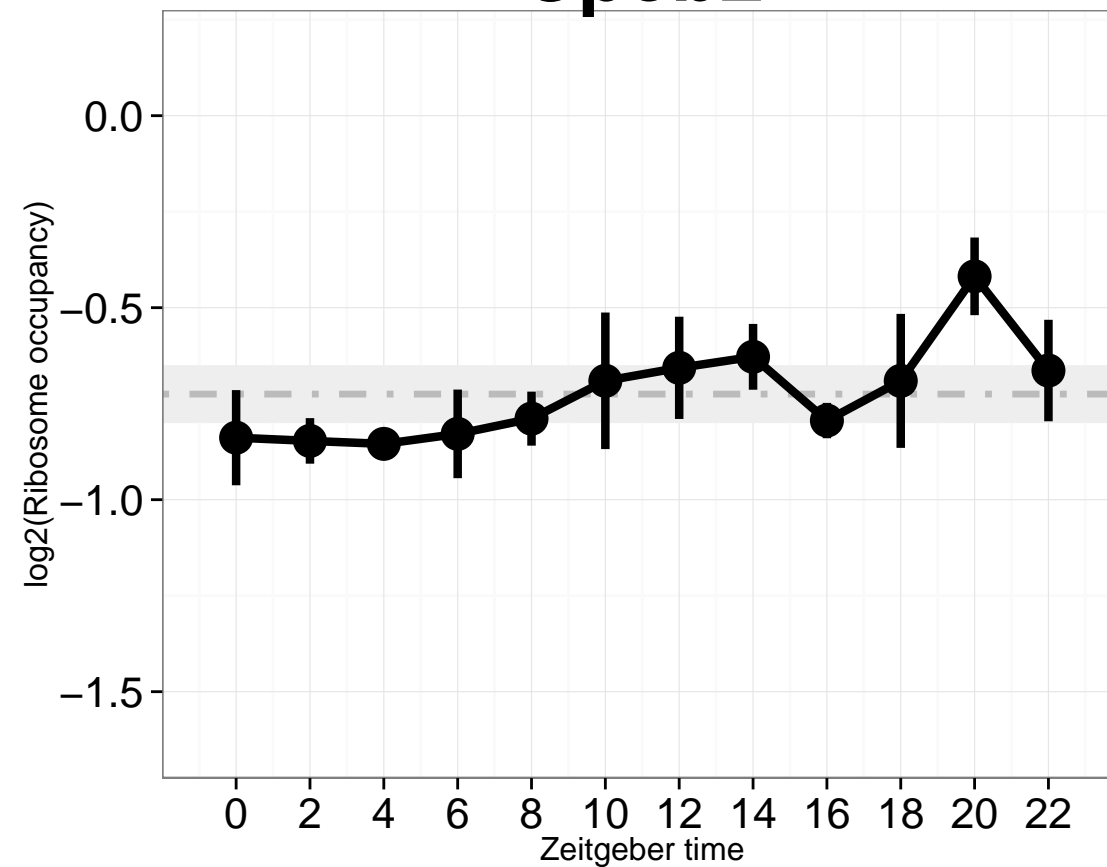

Supplement: Supplementary file 8325 [file 1]

## Commd4

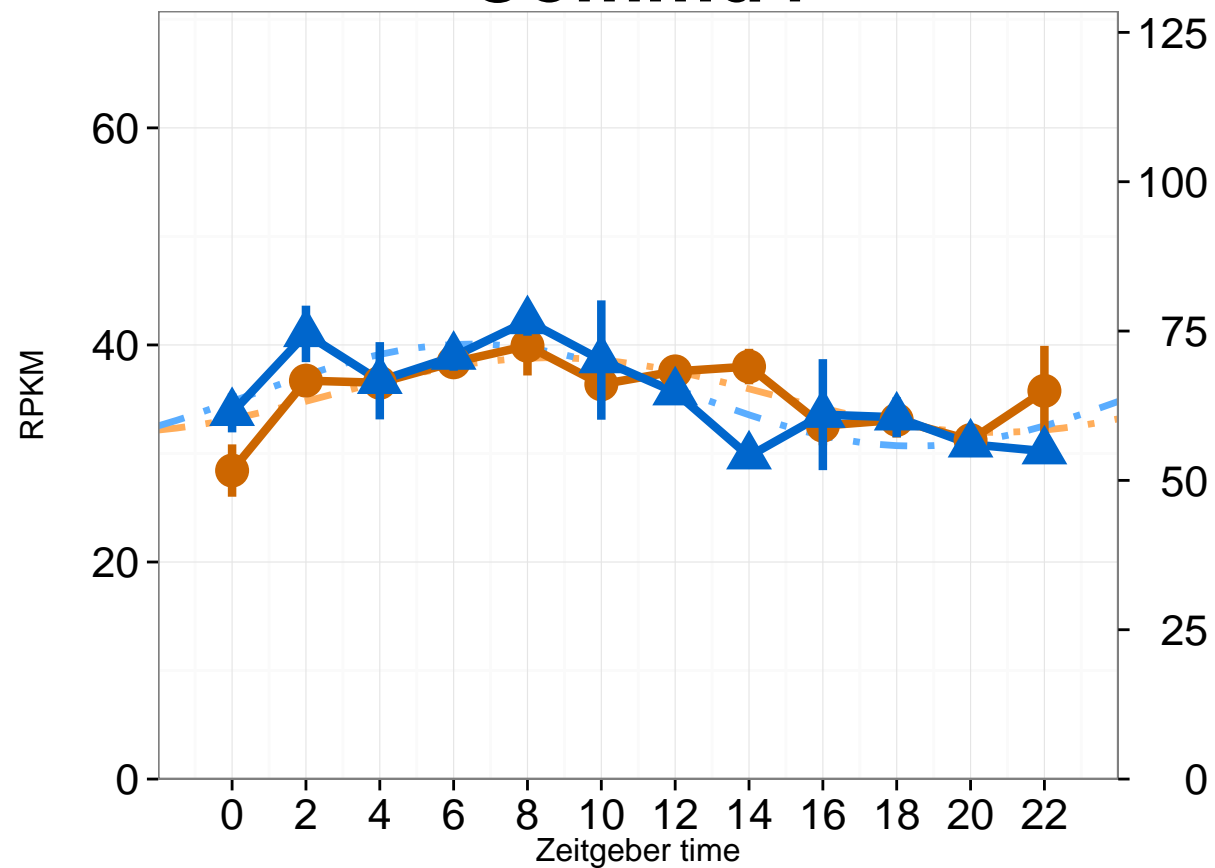

## Commd4

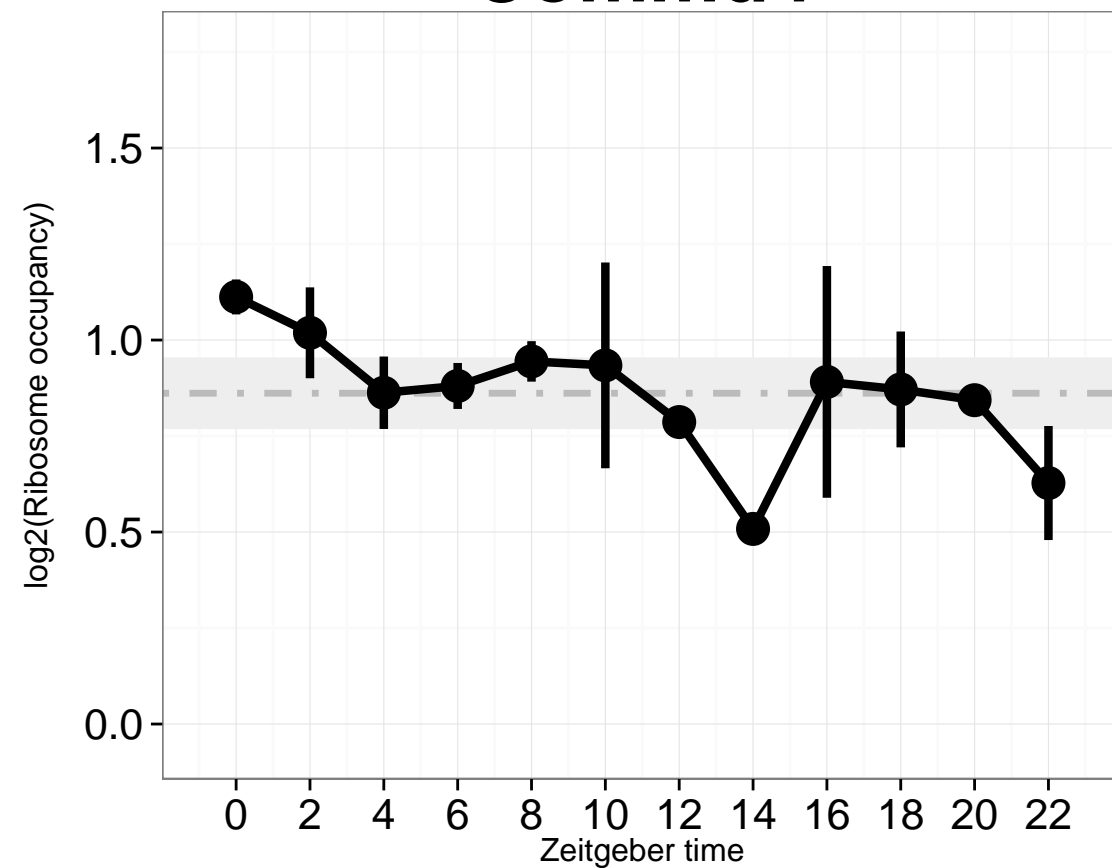

Supplement: Supplementary file 8326 [file 1]

## Gm4952

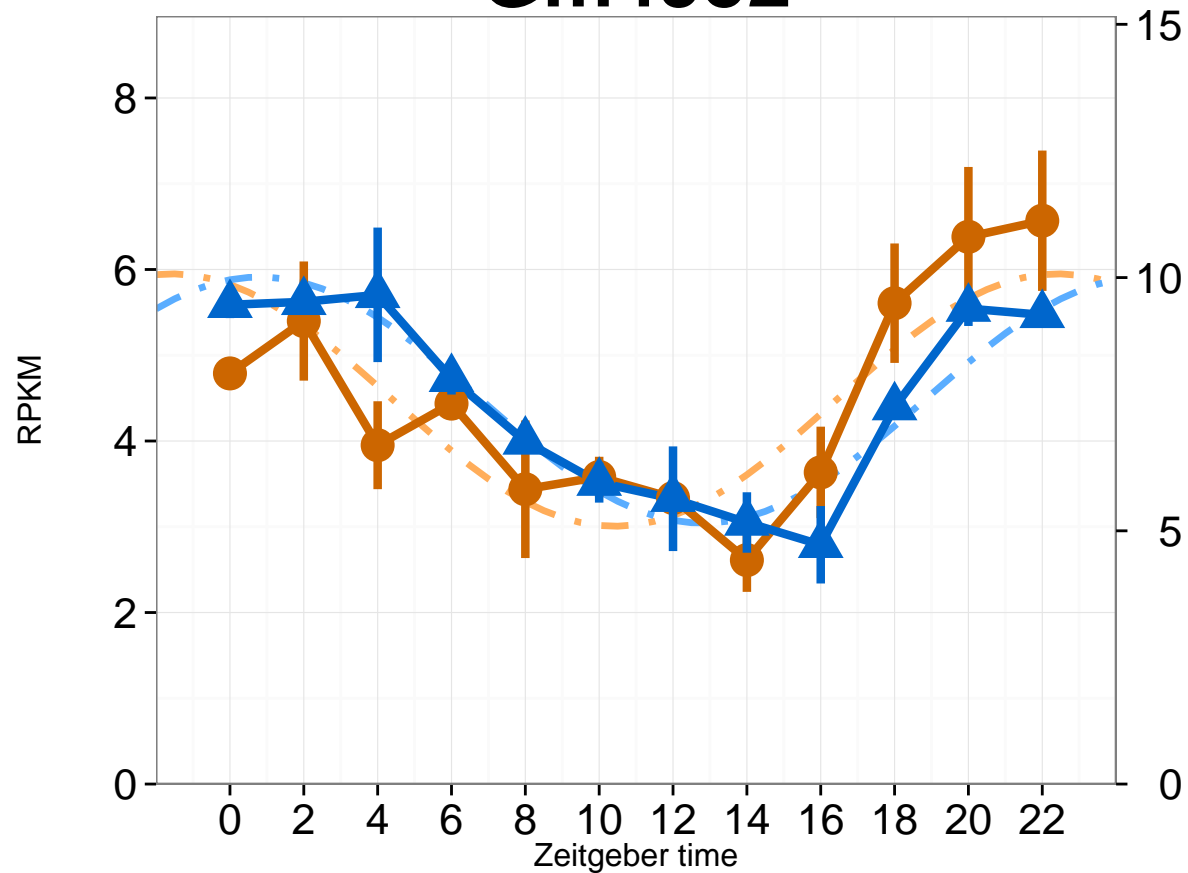

## Gm4952

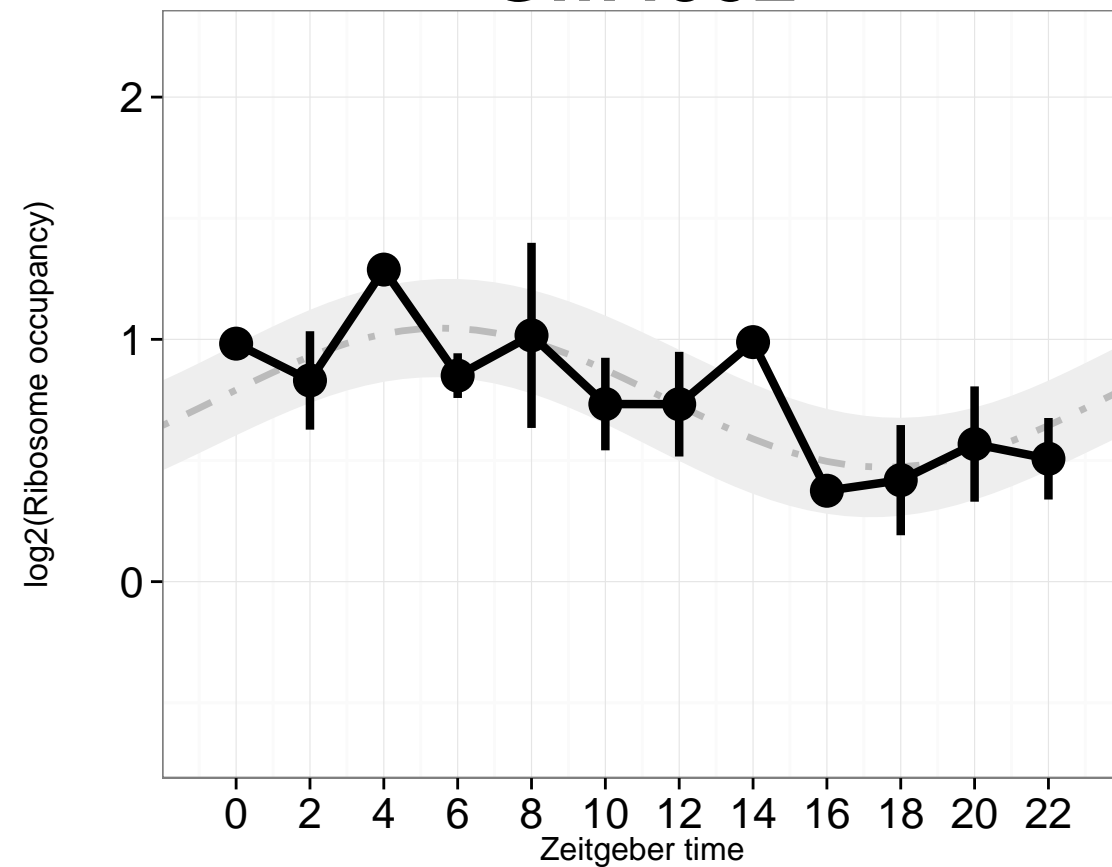

Supplement: Supplementary file 8327 [file 1]

# Prss23

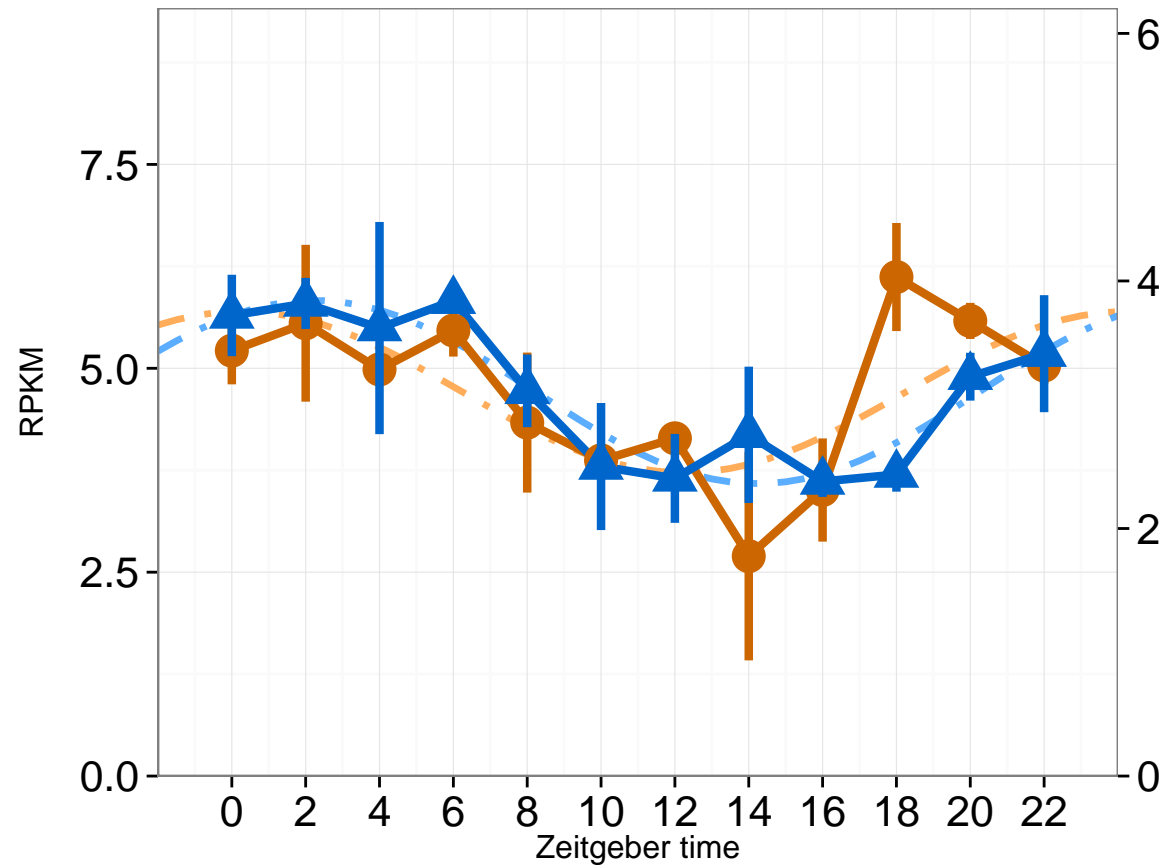

# Prss23

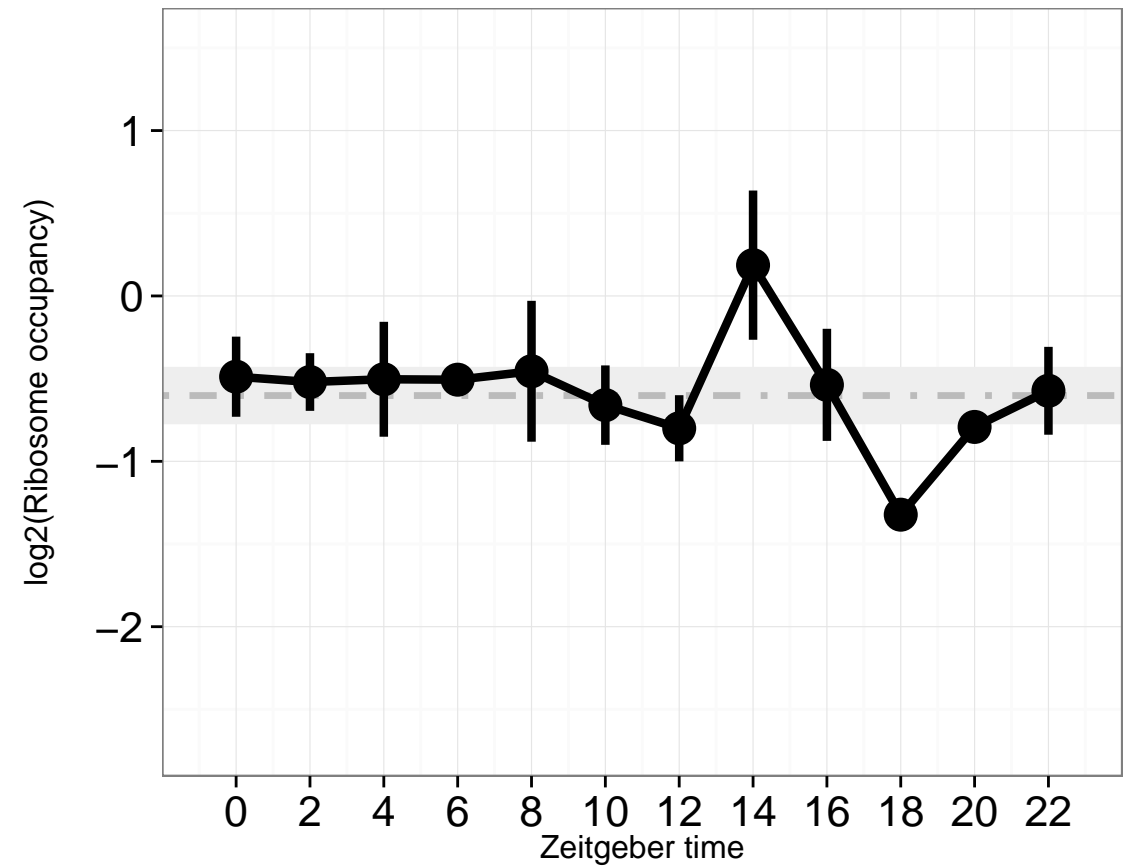

Supplement: Supplementary file 8328 [file 1]
