# Supplementary material (part 84 of 133)
Source: publisher figshare collection journal article supplement (https://springernature.figshare.com/articles/dataset/_/4903193)

## Swt1

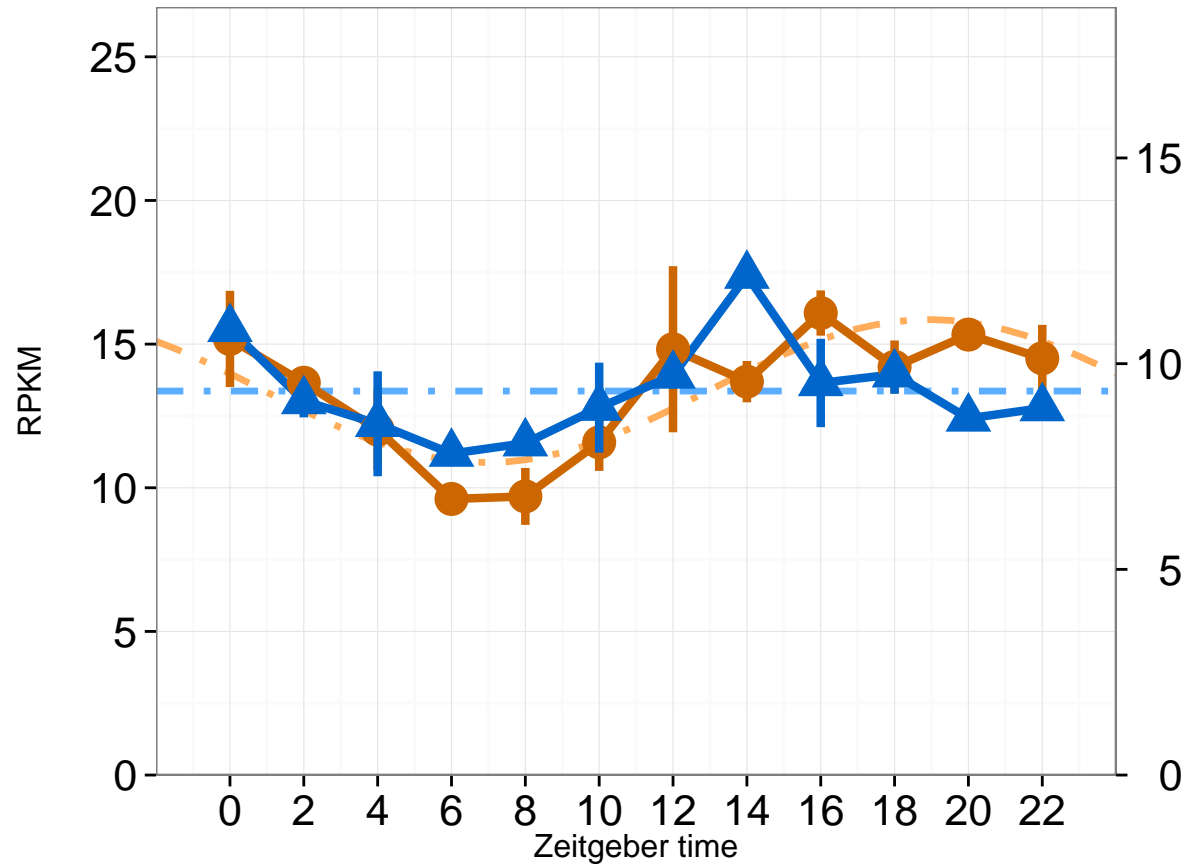

## Swt1

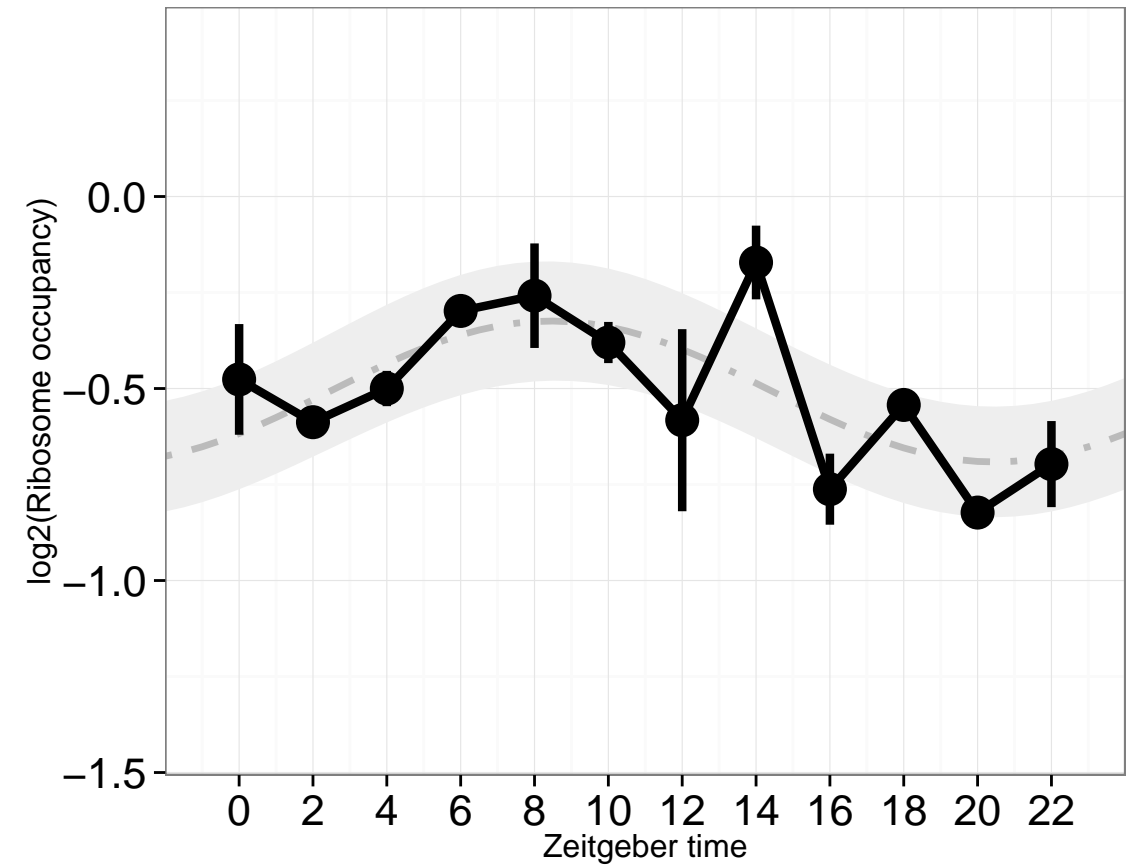

Supplement: Supplementary file 8329 [file 1]

## Ppig

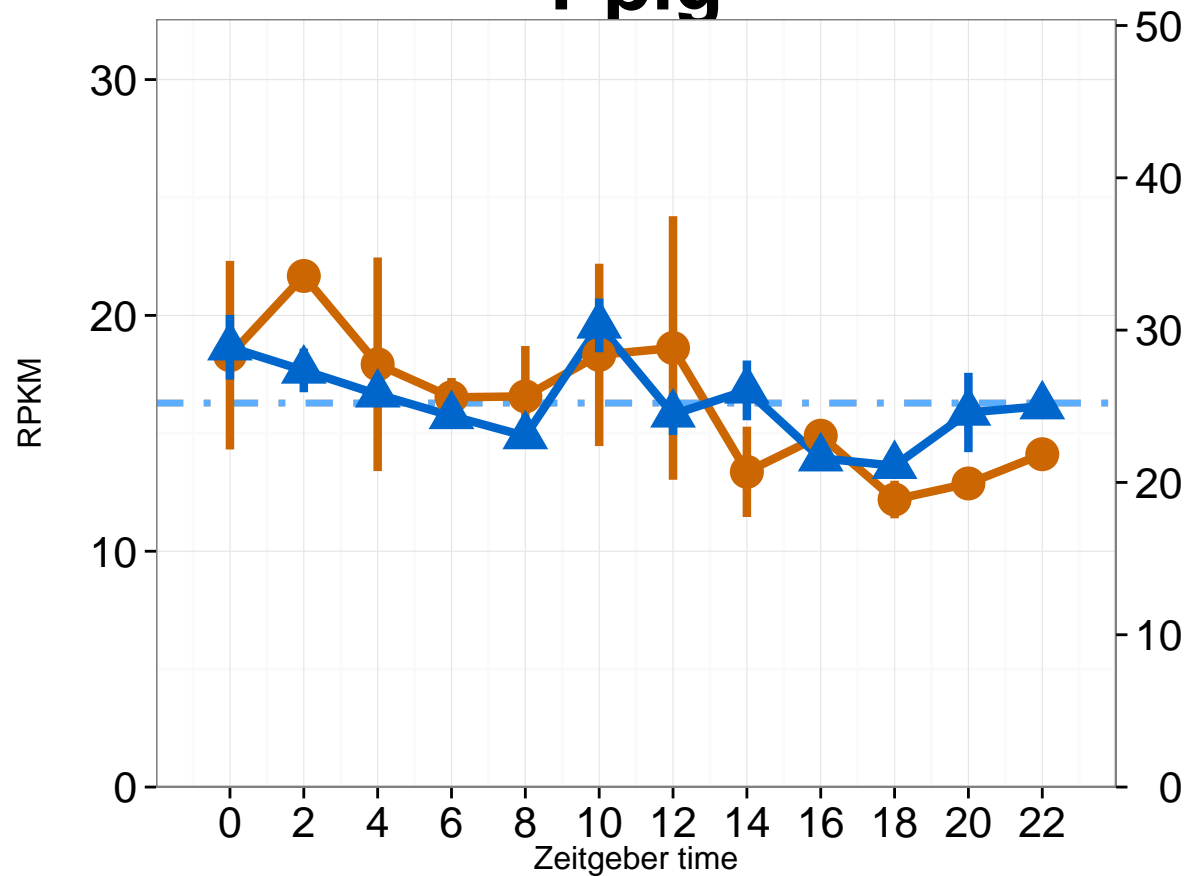

## Ppig

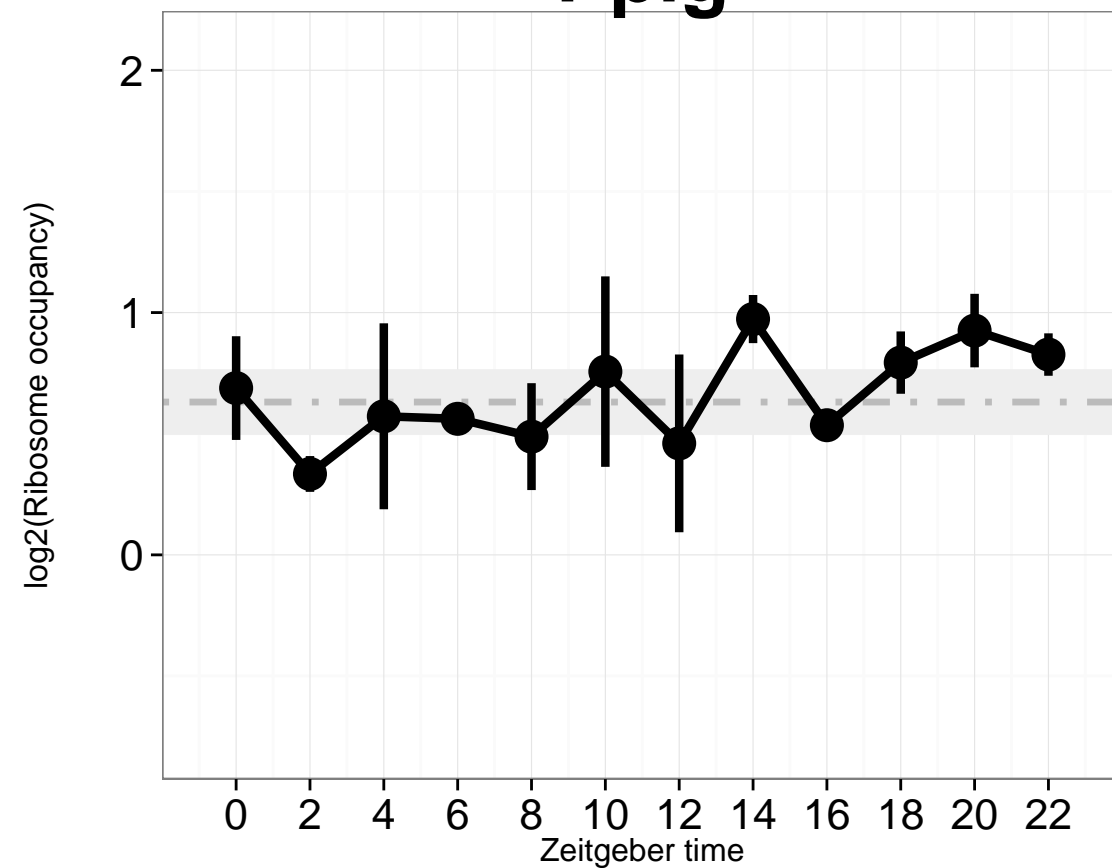

Supplement: Supplementary file 8330 [file 1]

## Accs

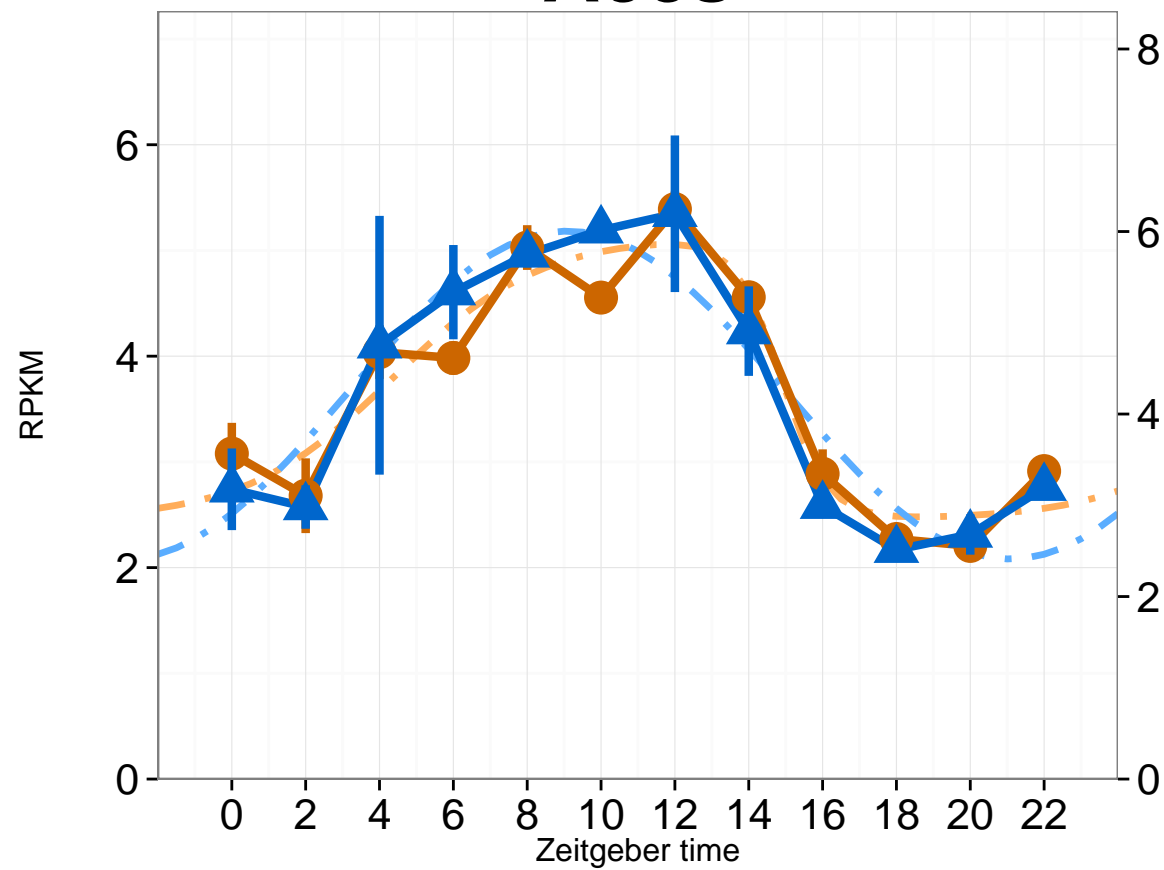

## Accs

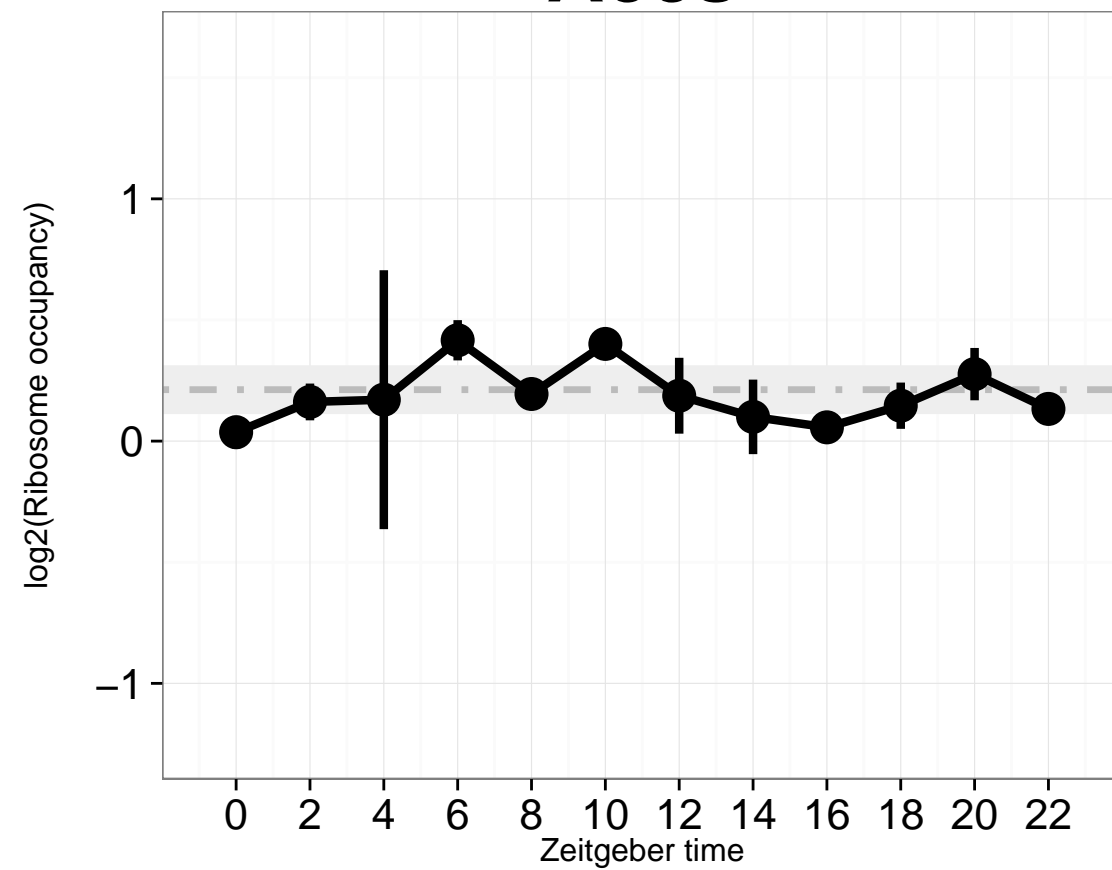

Supplement: Supplementary file 8331 [file 1]

## Sik1

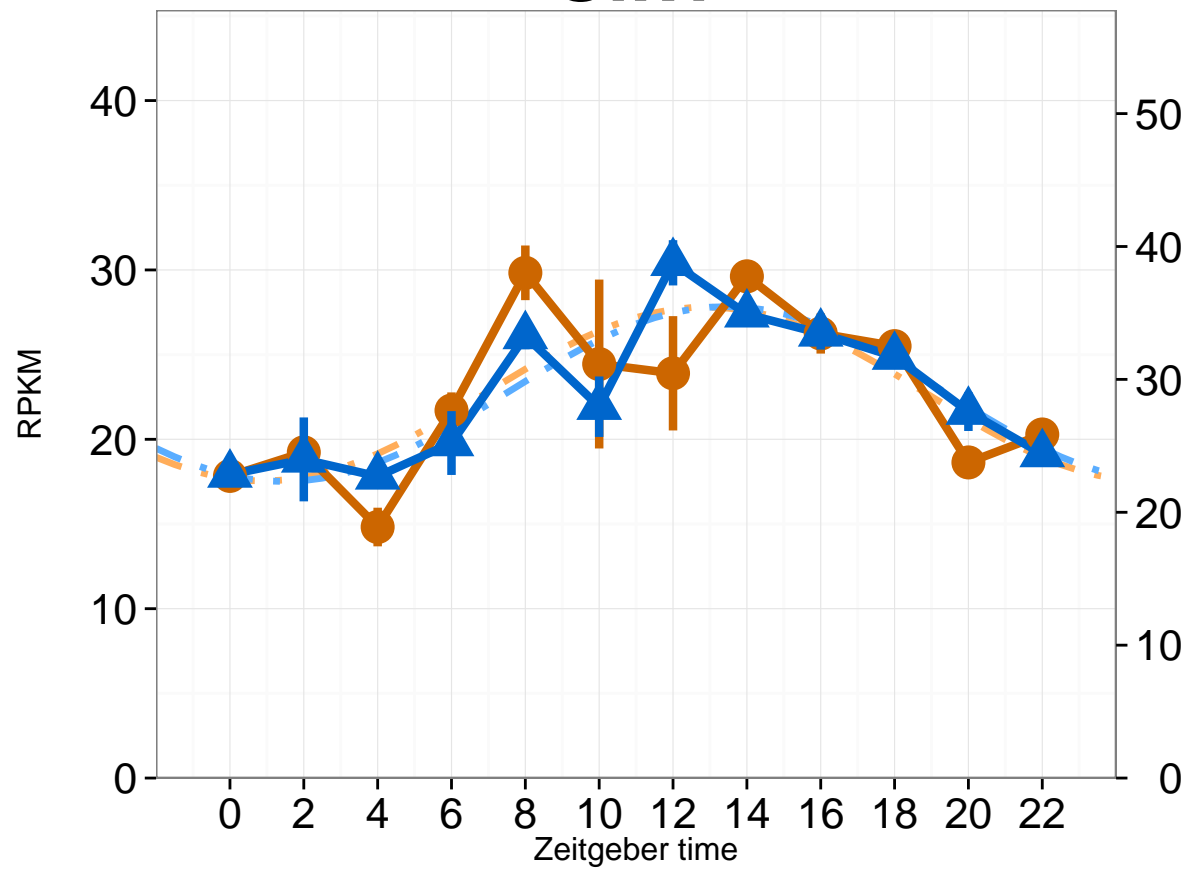

## Sik1

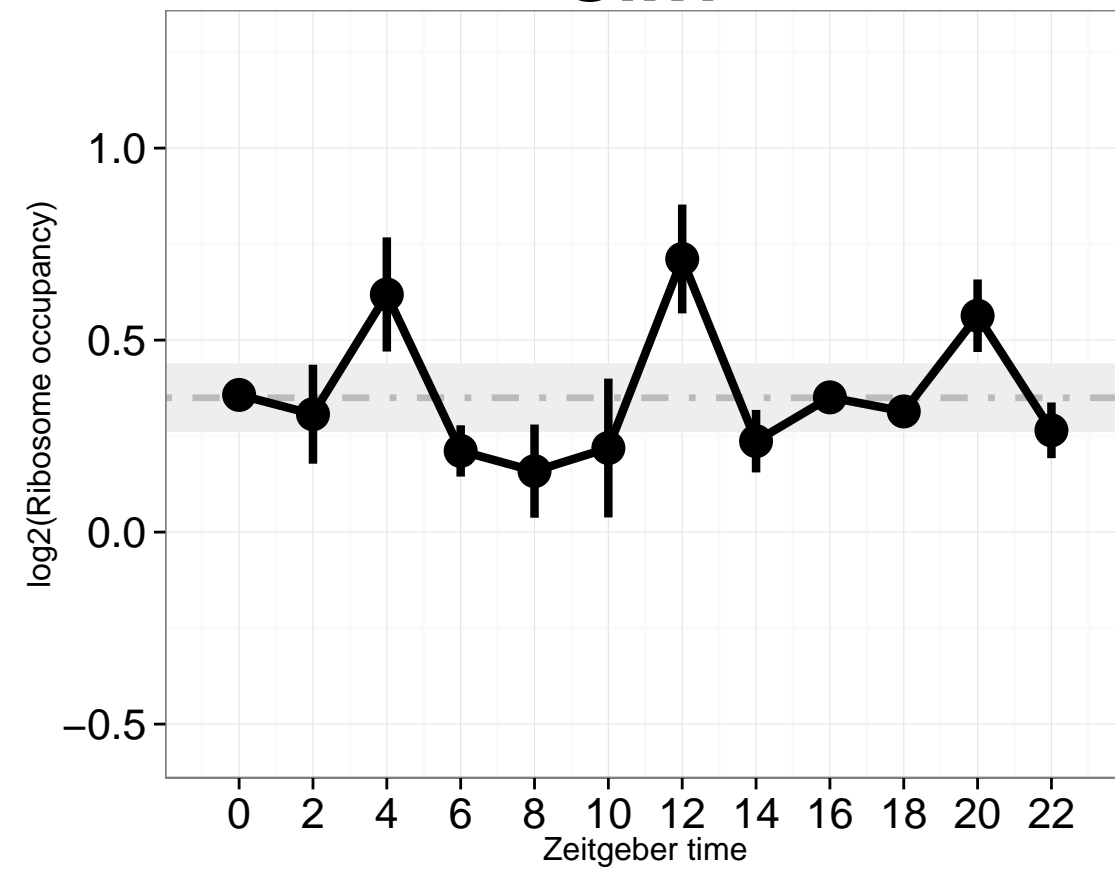

Supplement: Supplementary file 8332 [file 1]

# Alg2

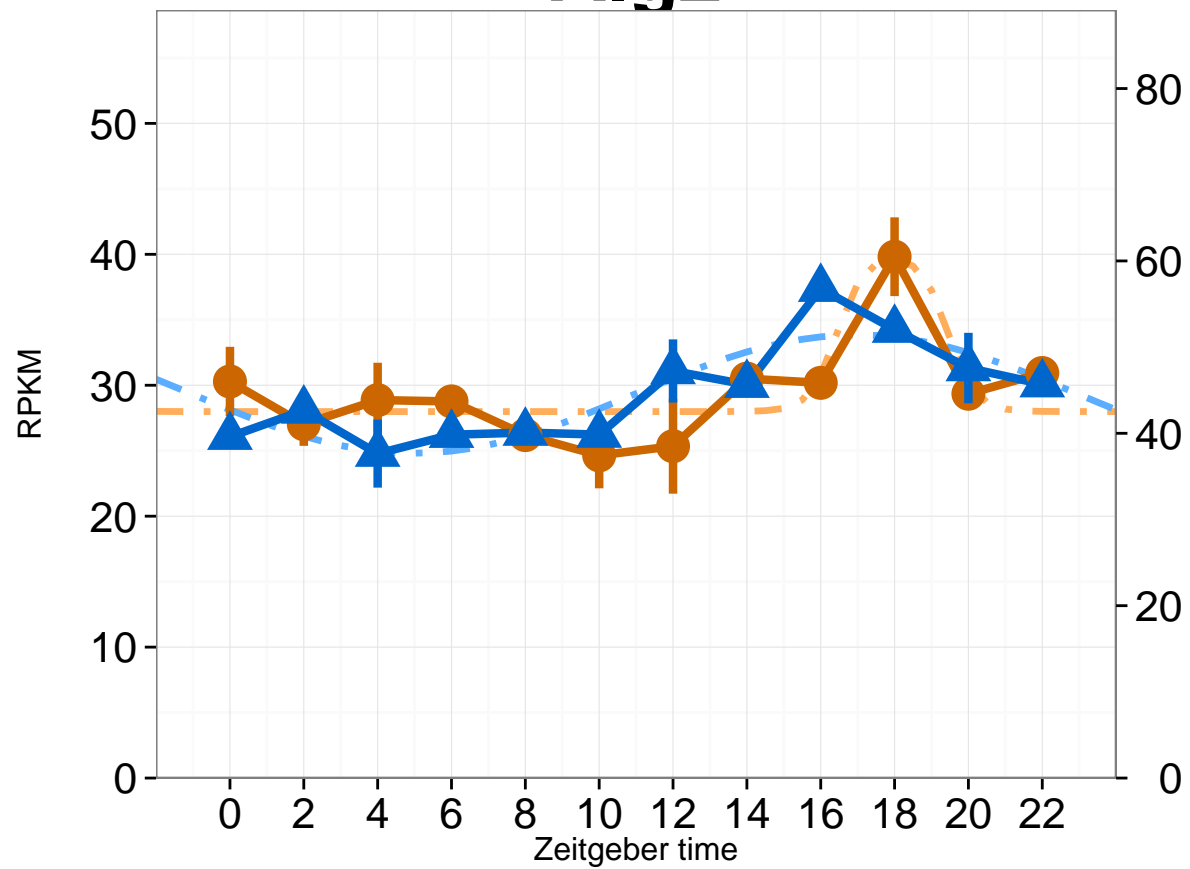

# Alg2

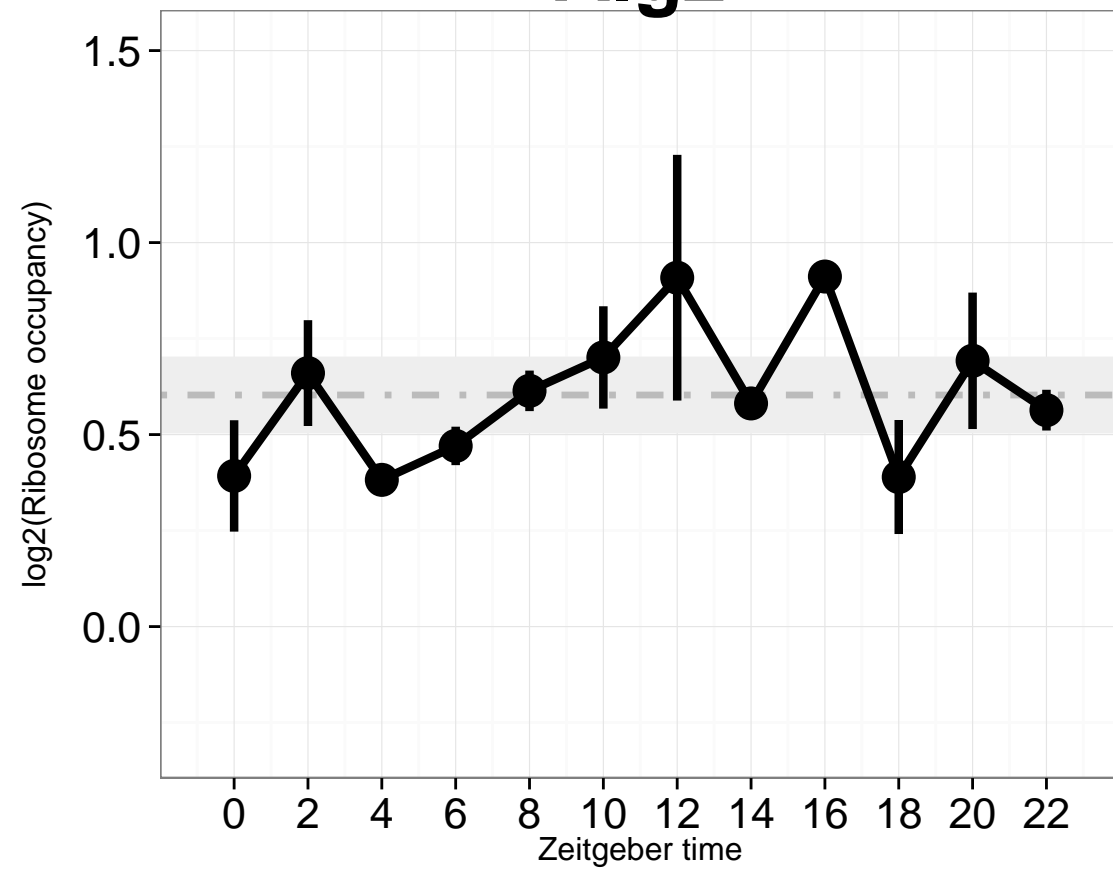

Supplement: Supplementary file 8333 [file 1]

## Lrig3

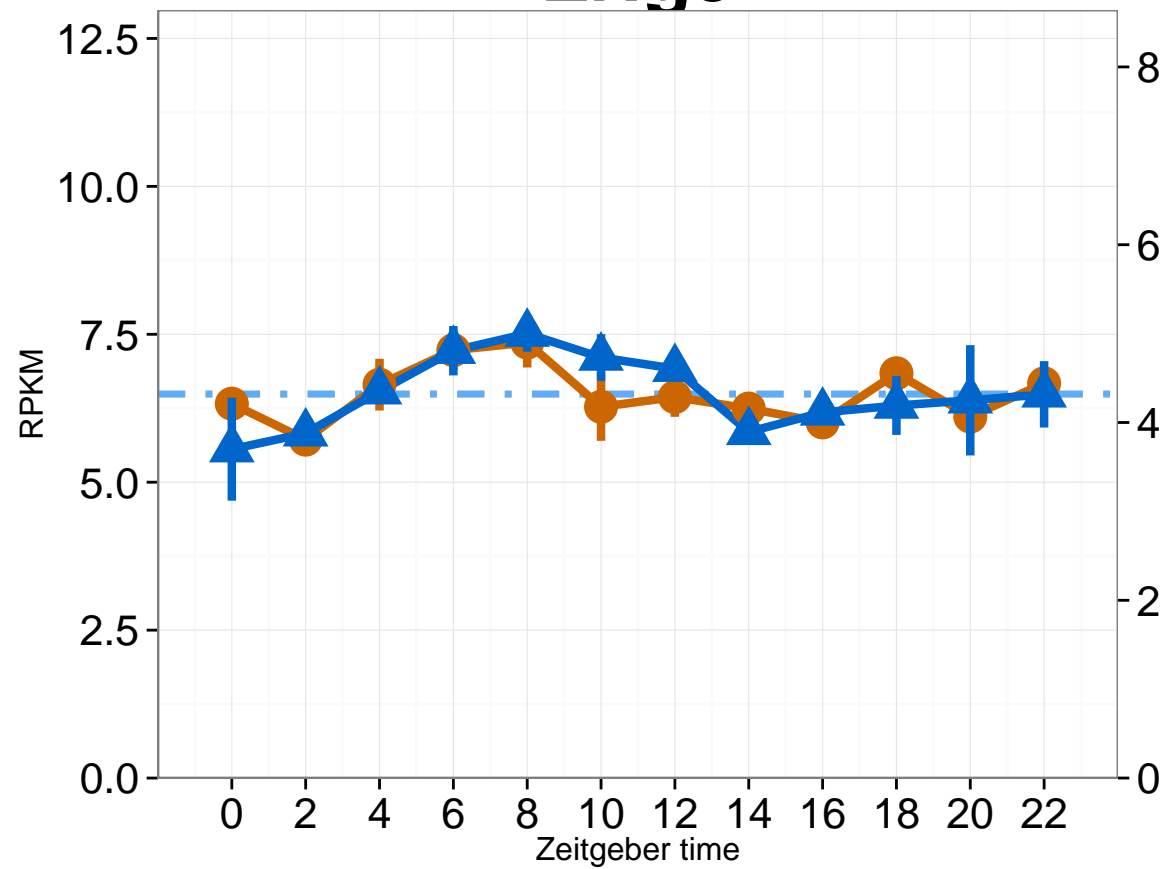

## Lrig3

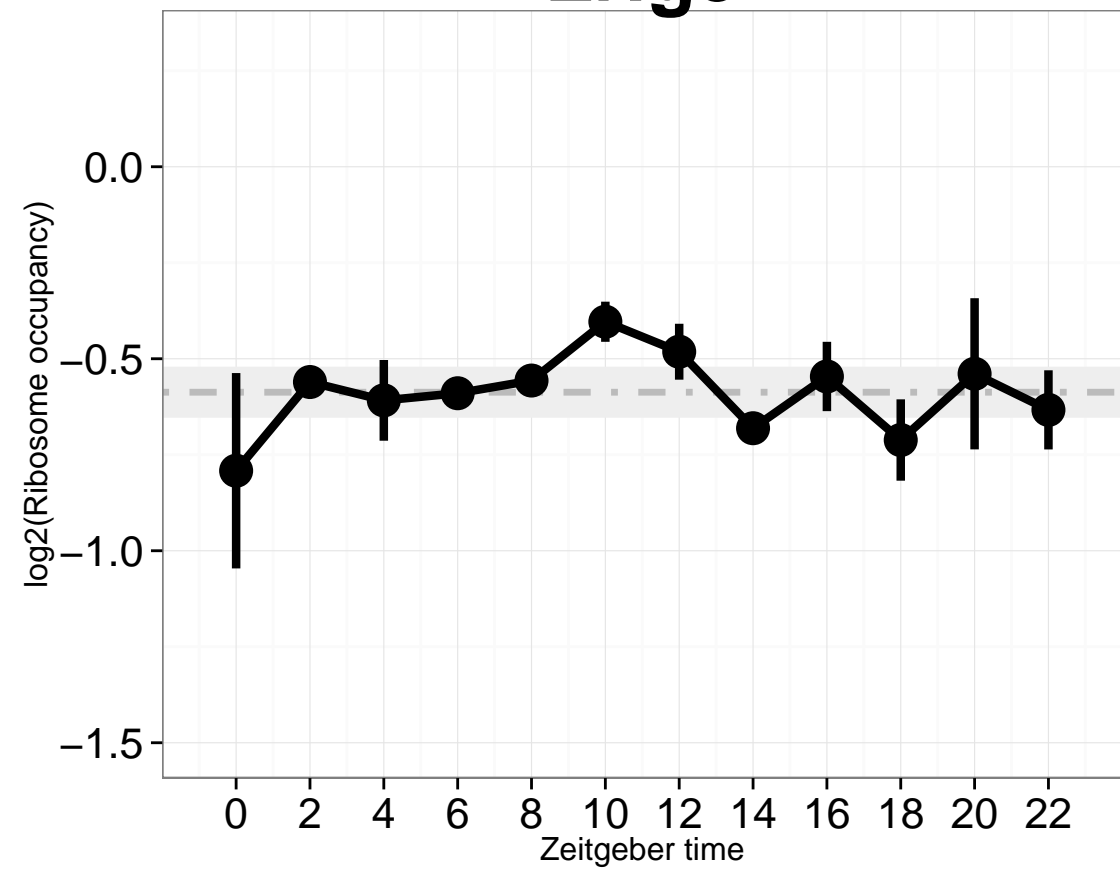

Supplement: Supplementary file 8334 [file 1]

# Fkbp1a

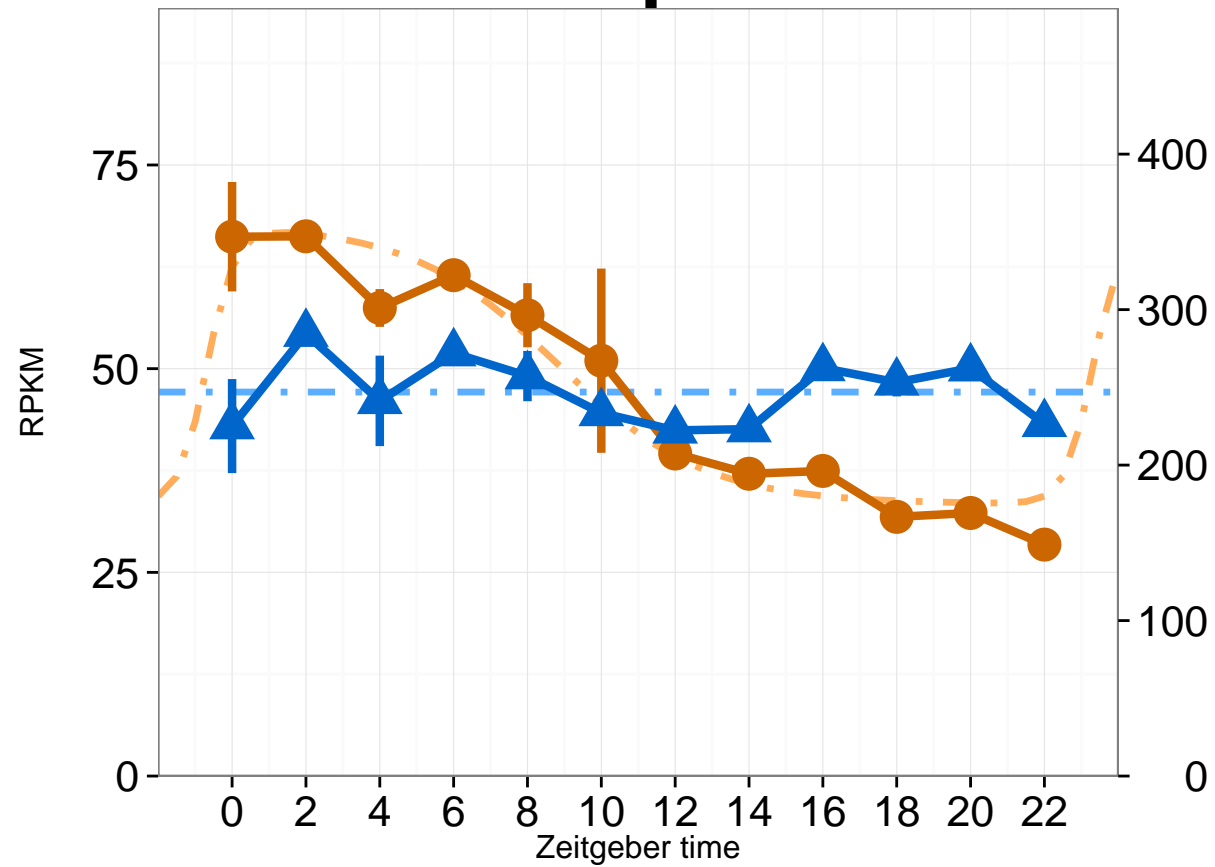

# Fkbp1a

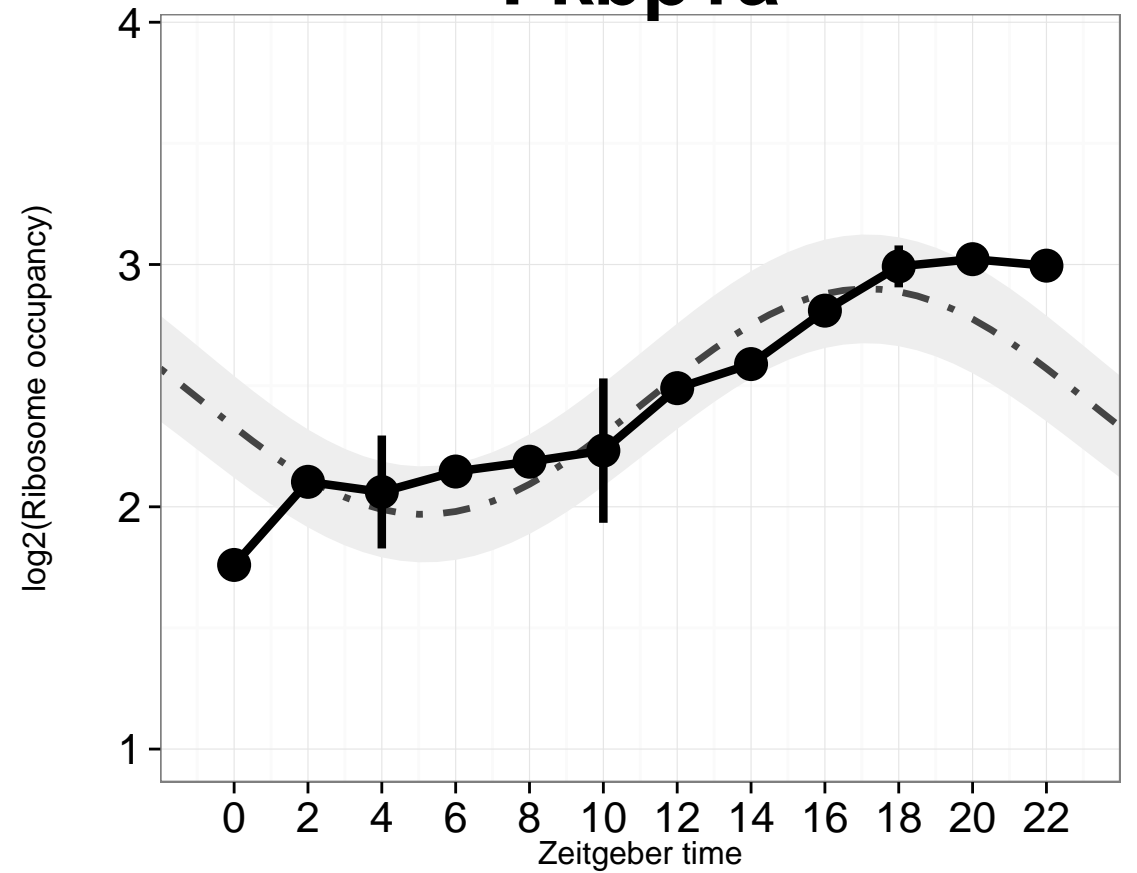

Supplement: Supplementary file 8335 [file 1]

# Fam132a

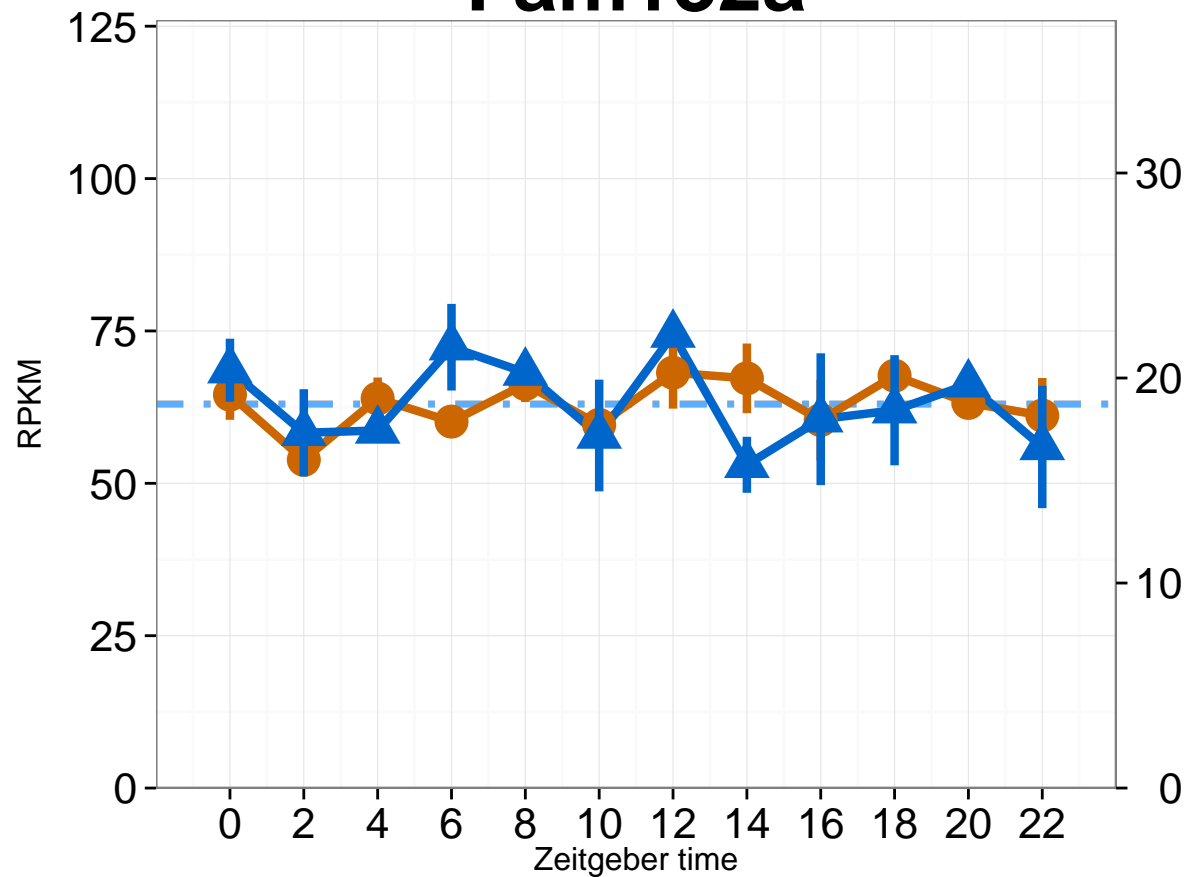

# Fam132a

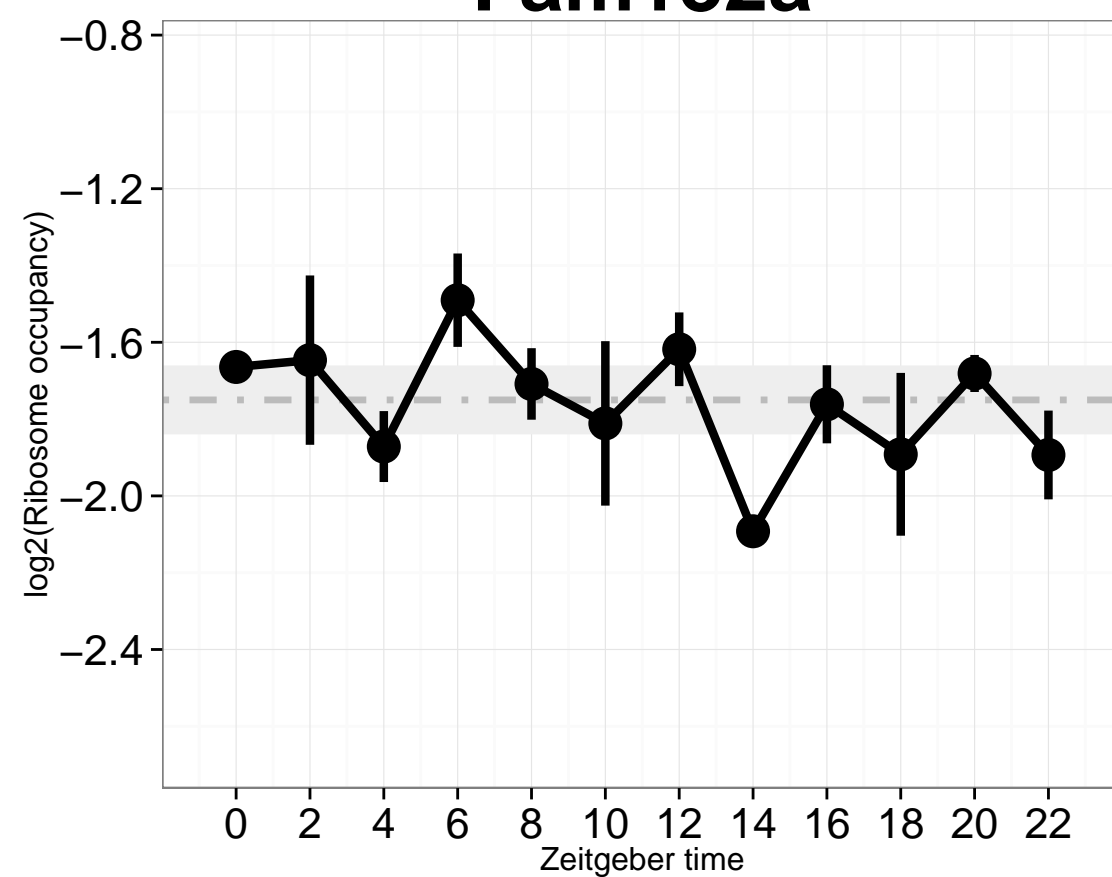

Supplement: Supplementary file 8336 [file 1]

# Pfkfb3

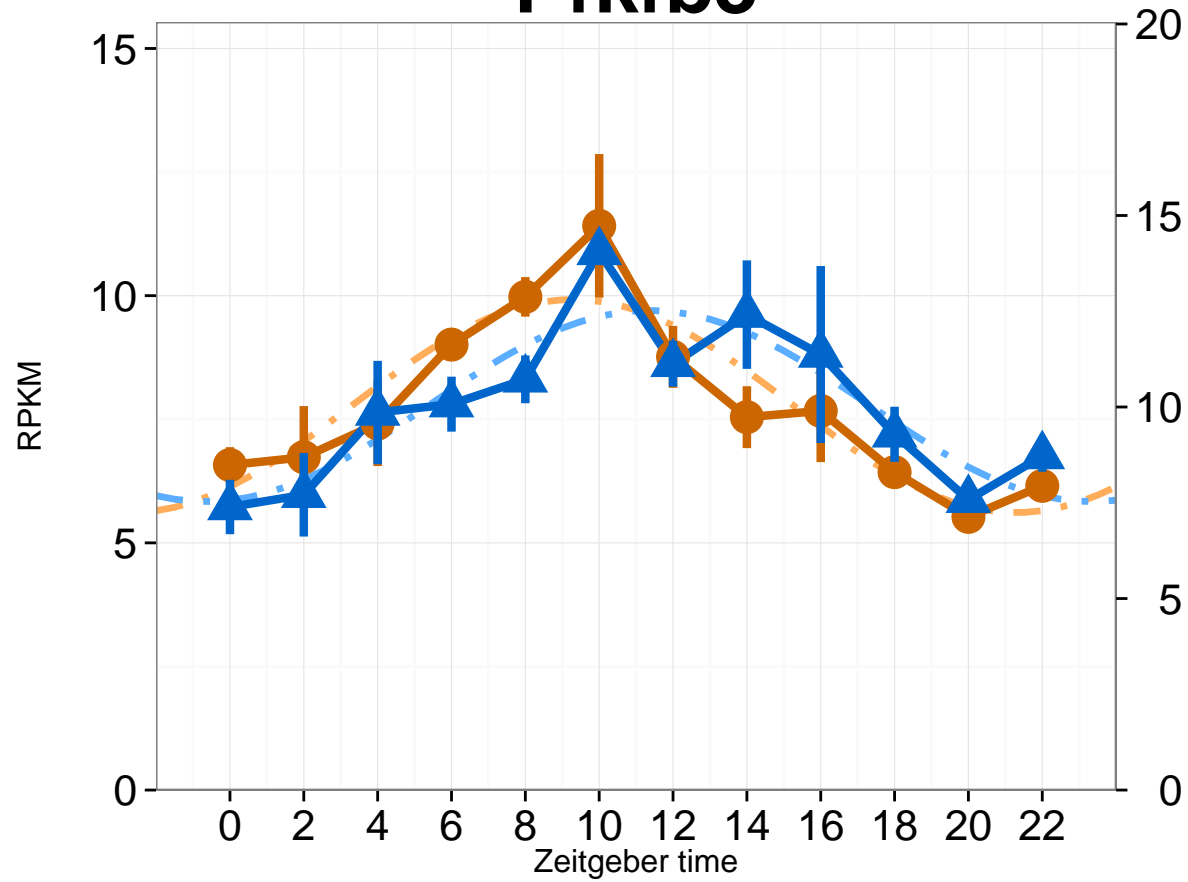

# Pfkfb3

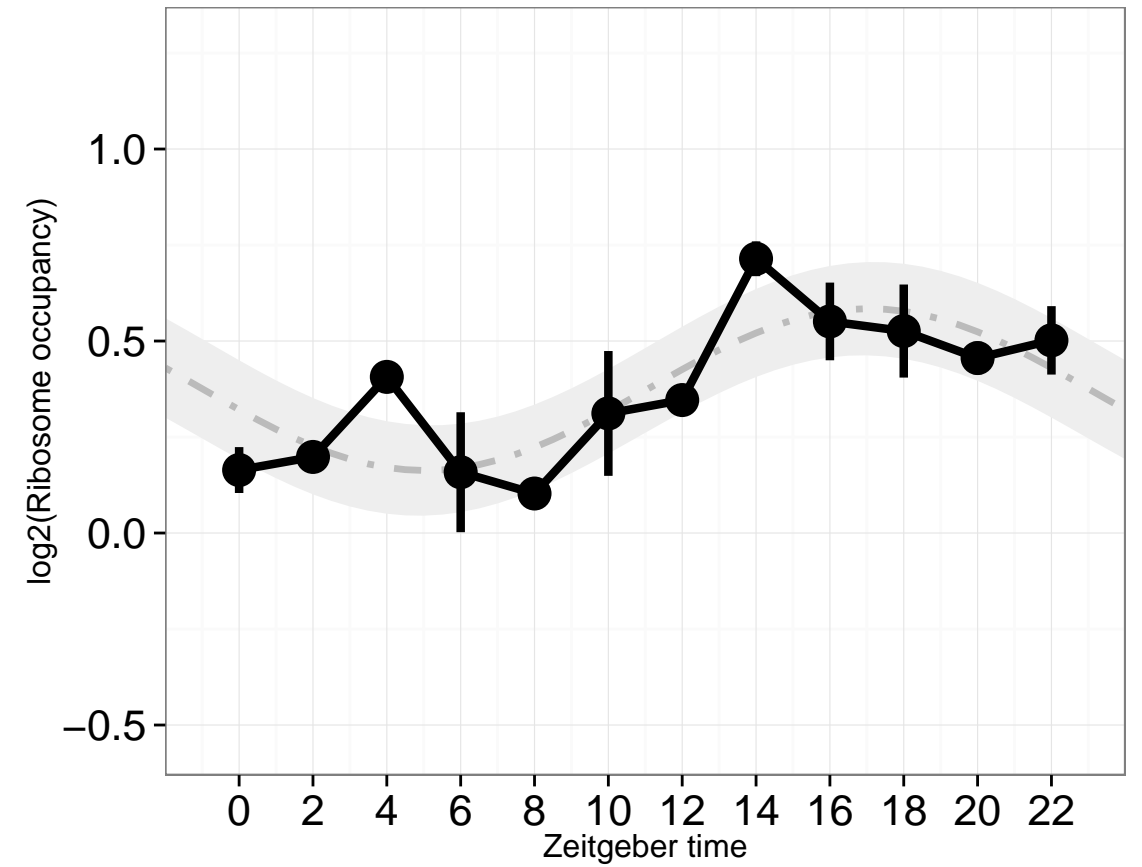

Supplement: Supplementary file 8337 [file 1]

## Etfdh

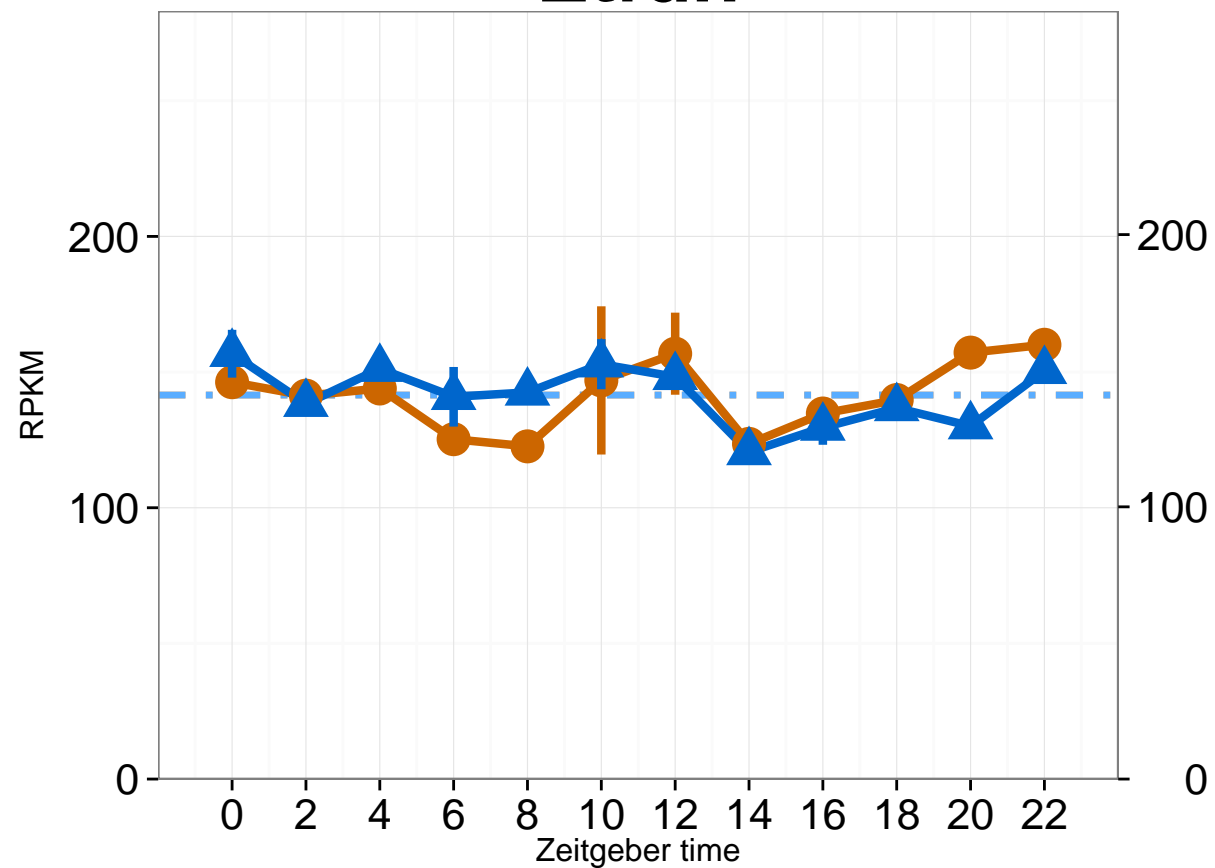

## Etfdh

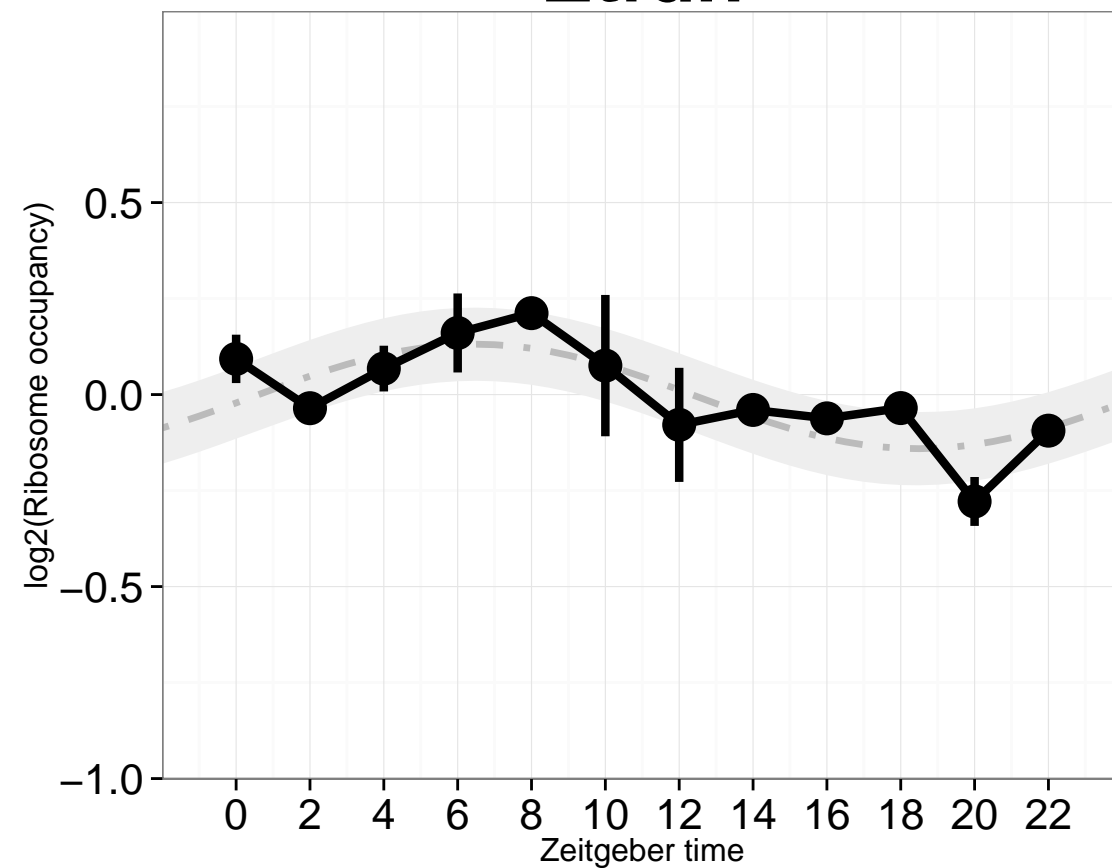

Supplement: Supplementary file 8338 [file 1]

# Rtn4ip1

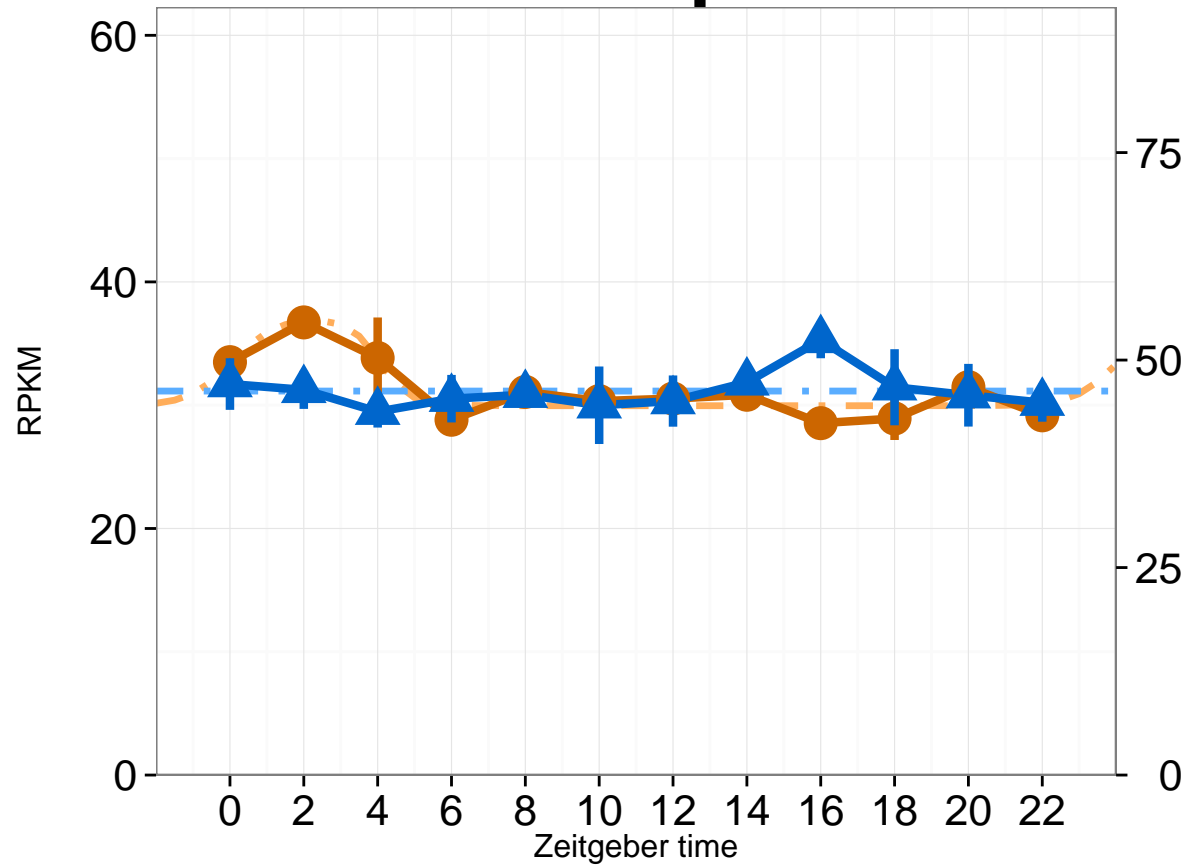

# Rtn4ip1

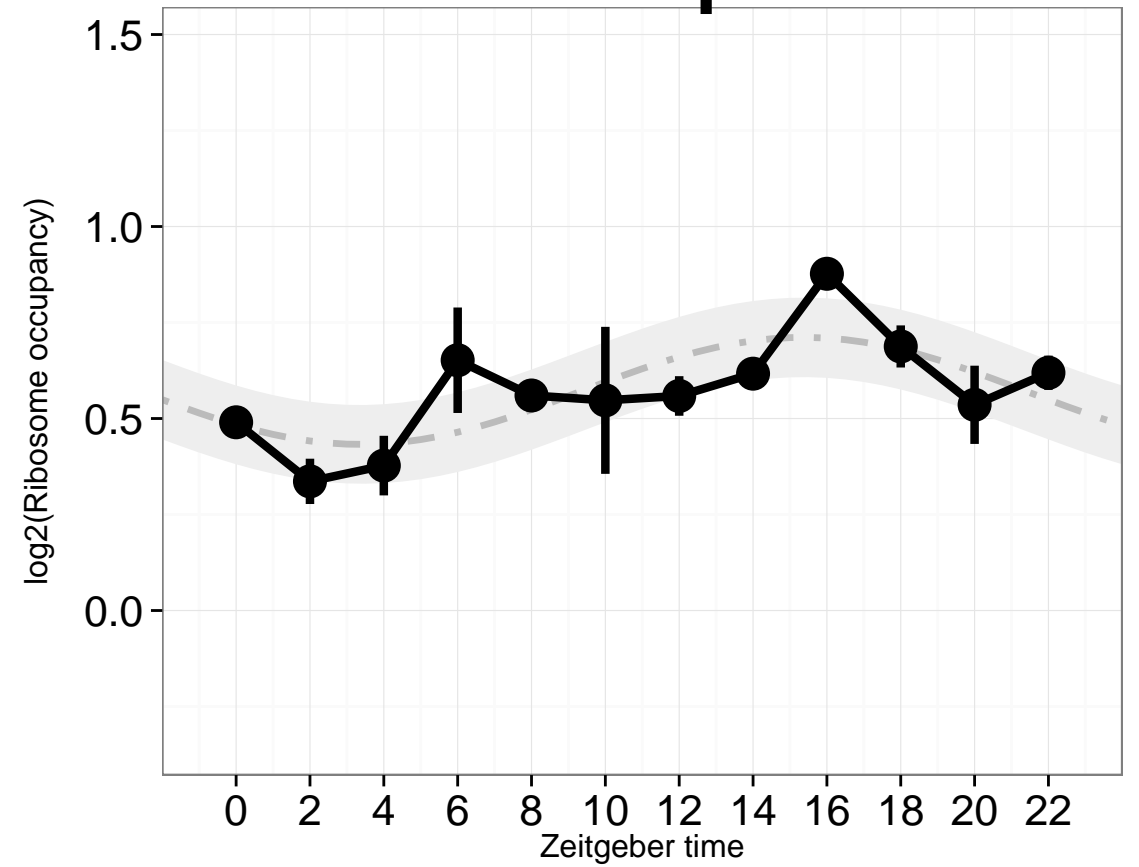

Supplement: Supplementary file 8339 [file 1]

## Snx17

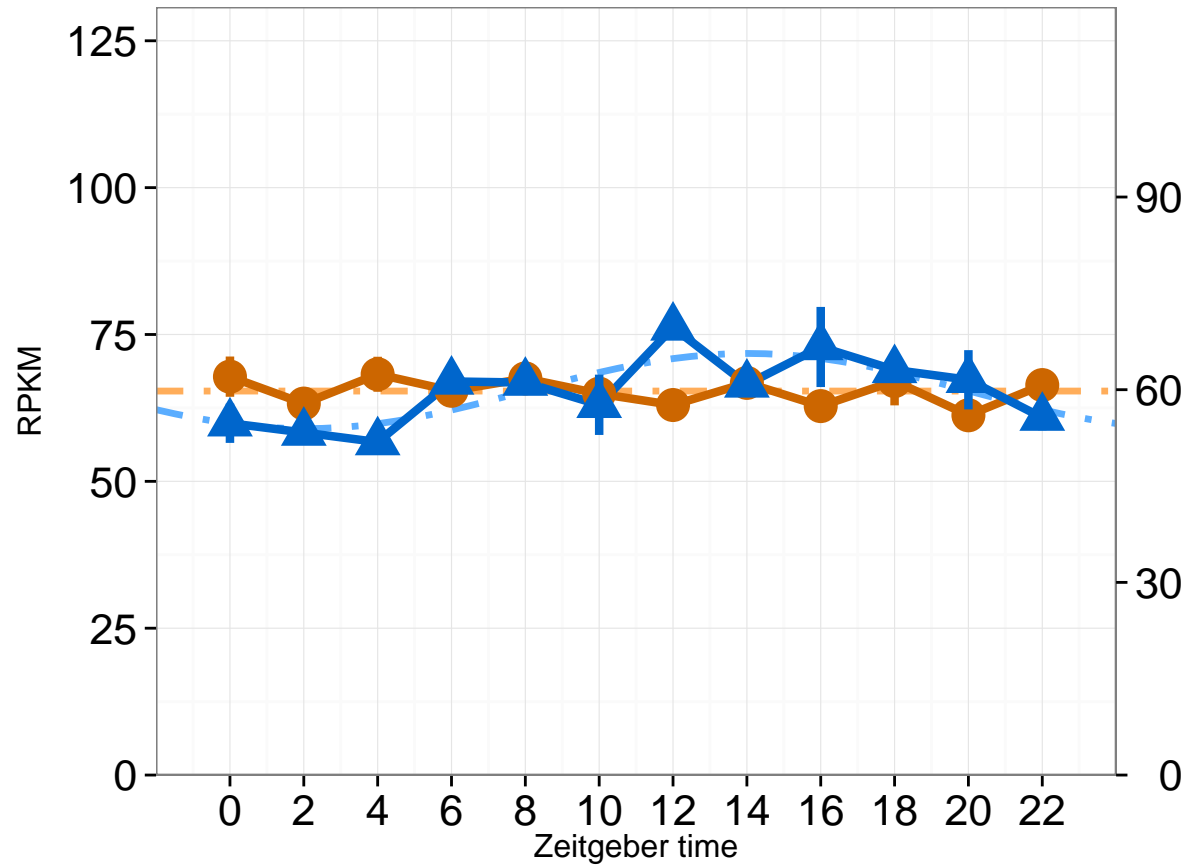

## Snx17

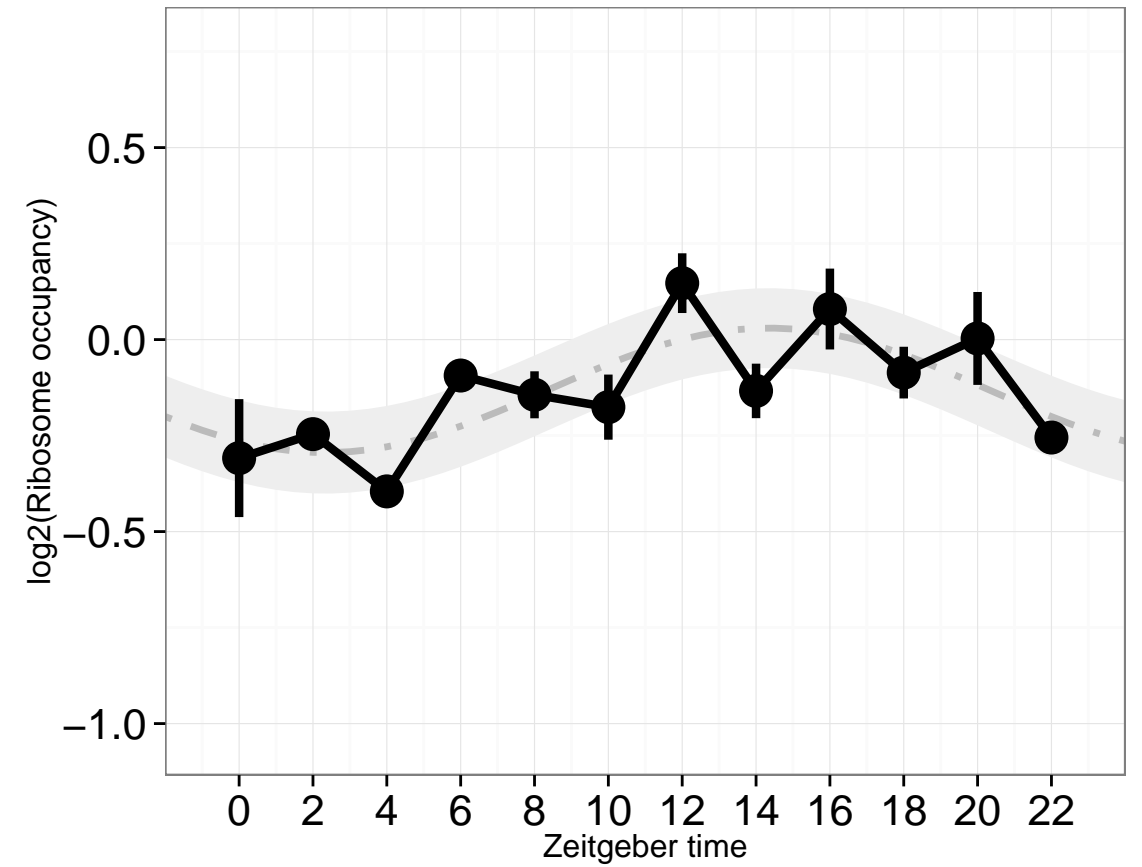

Supplement: Supplementary file 8340 [file 1]

# Pdzrn3

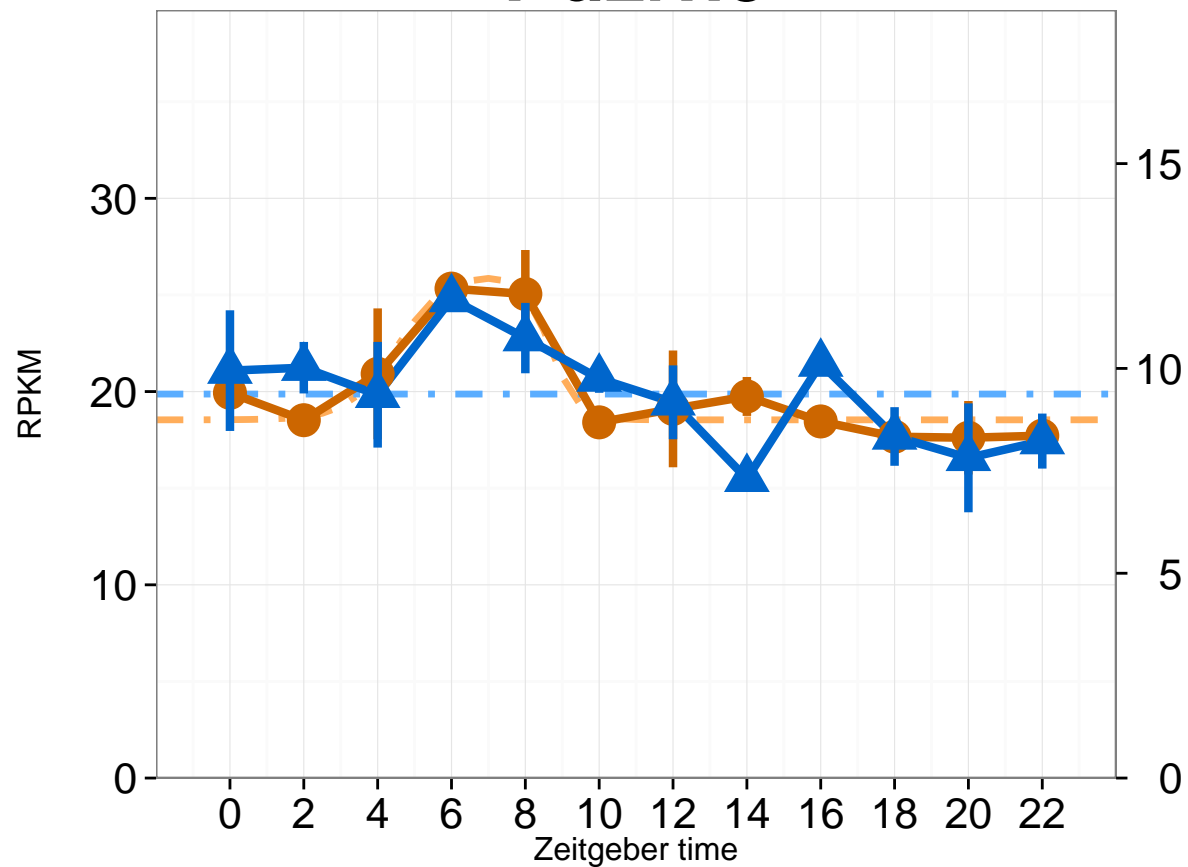

# Pdzrn3

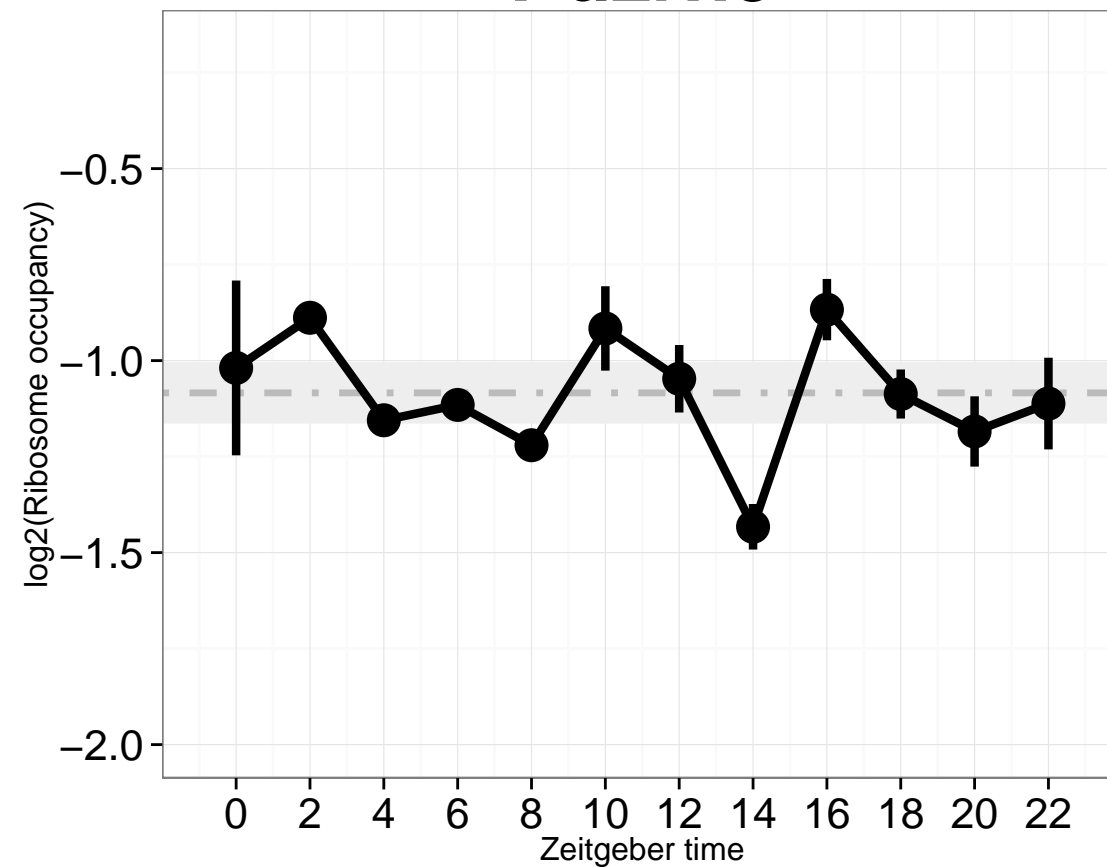

Supplement: Supplementary file 8341 [file 1]

# Dnajc3

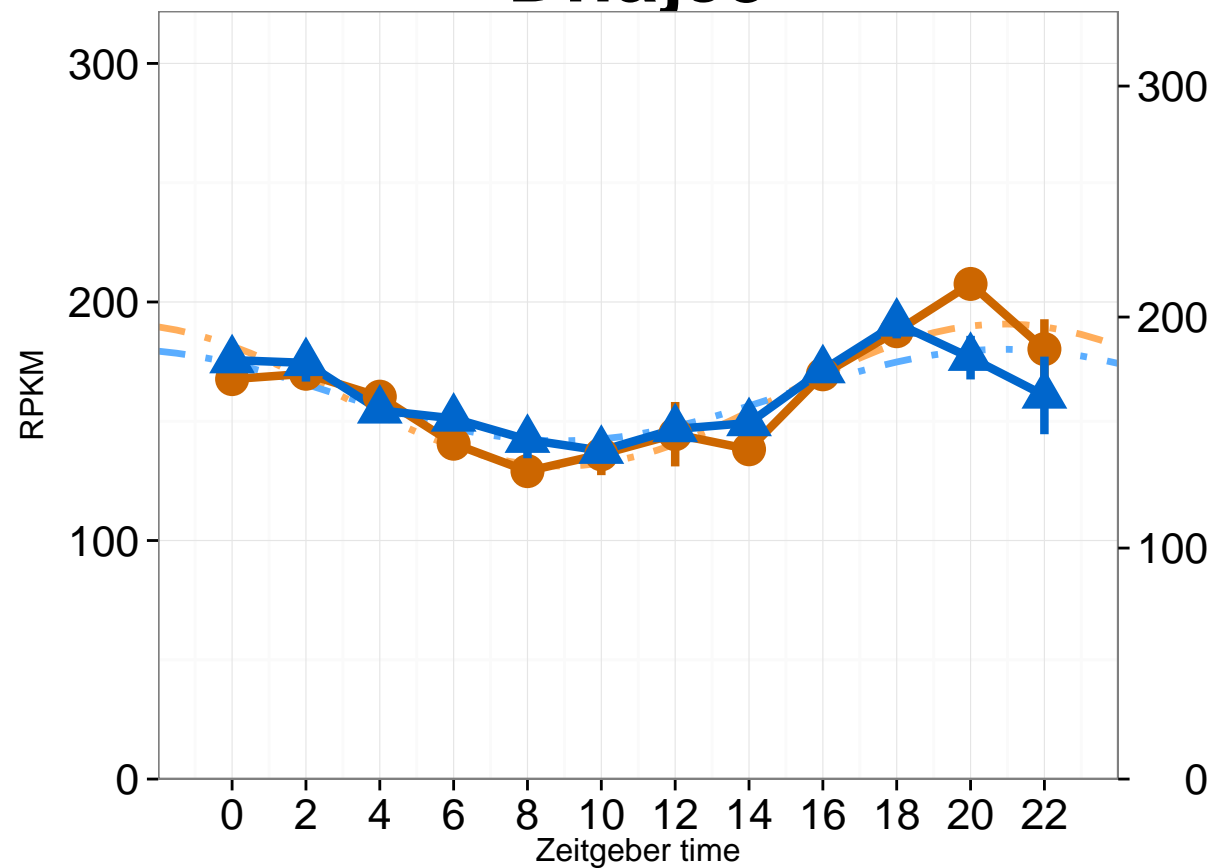

# Dnajc3

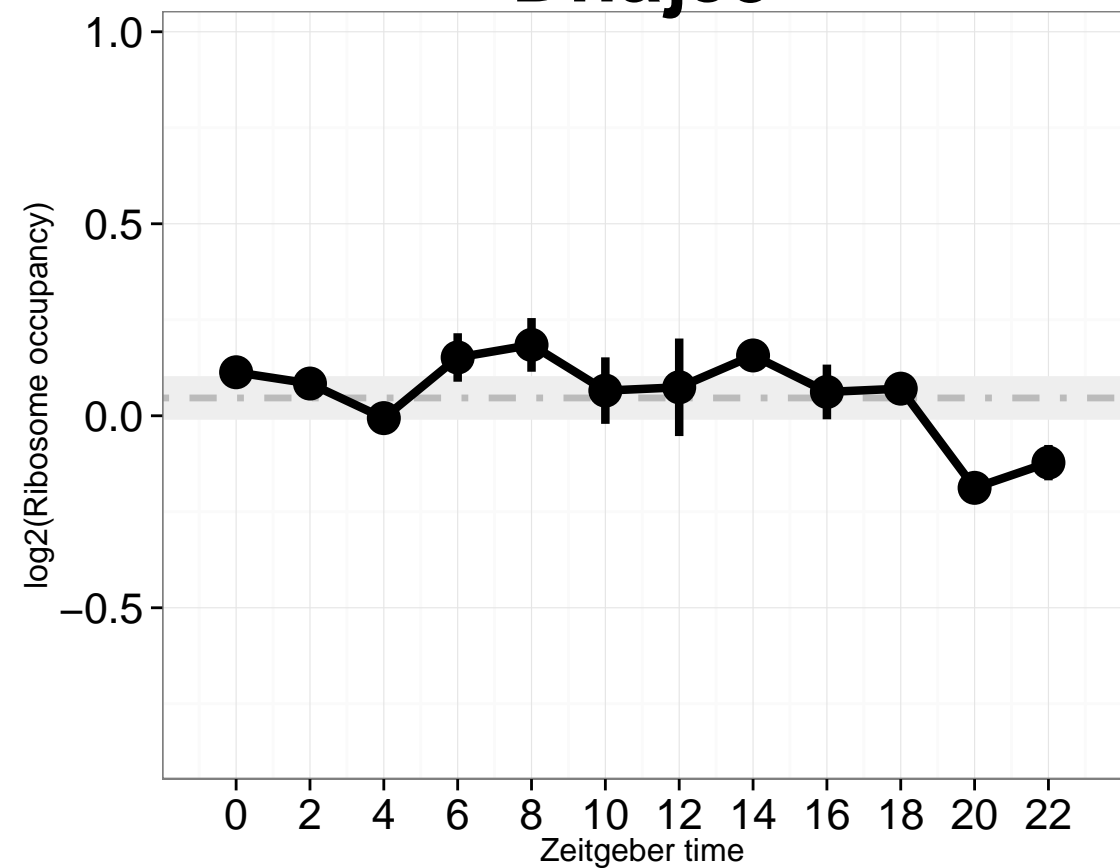

Supplement: Supplementary file 8342 [file 1]

# Cyb5rl

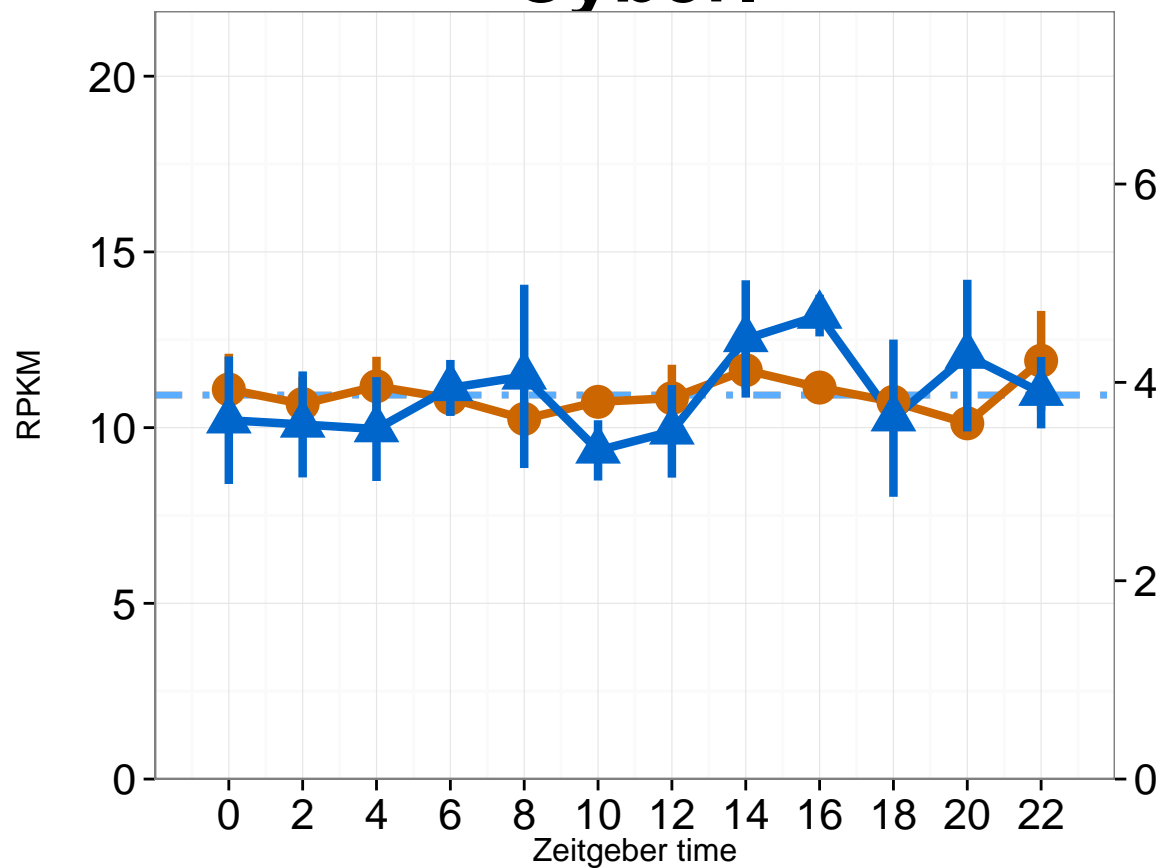

# Cyb5rl

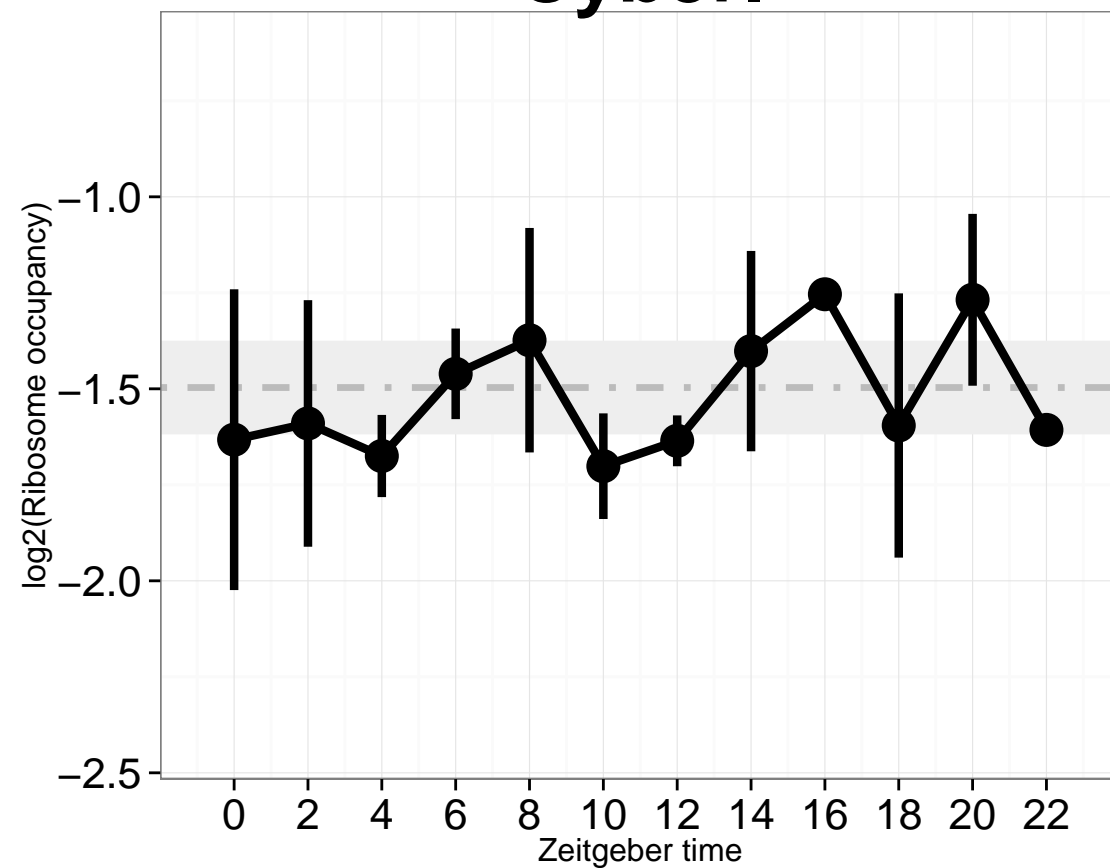

Supplement: Supplementary file 8343 [file 1]

# Dyrk1b

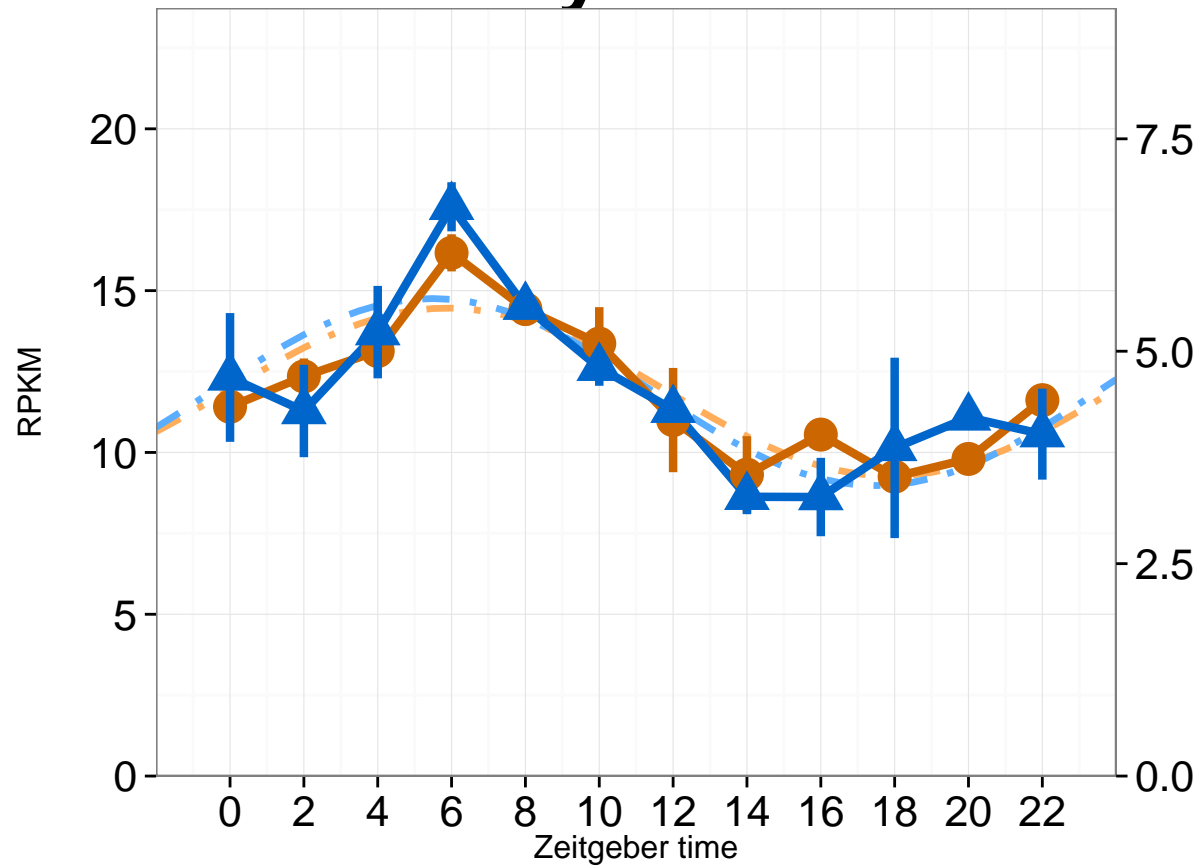

# Dyrk1b

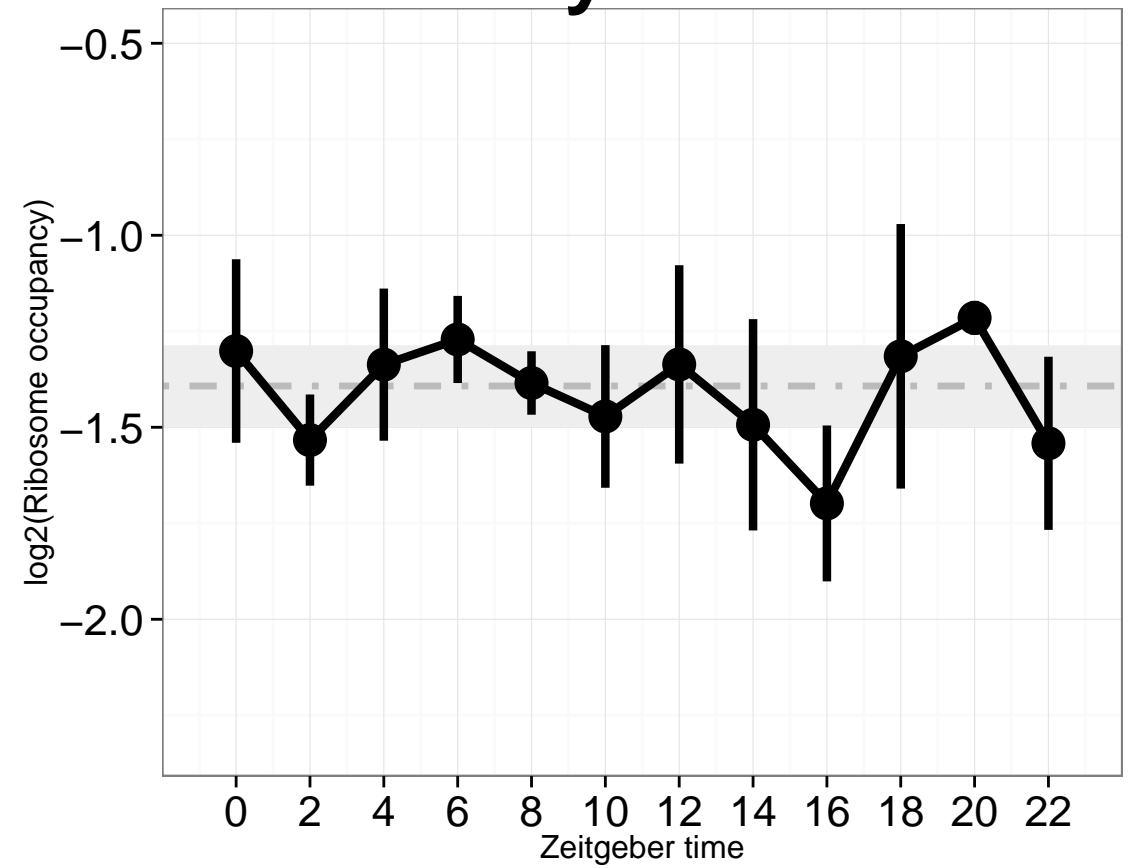

Supplement: Supplementary file 8344 [file 1]

# Trpv4

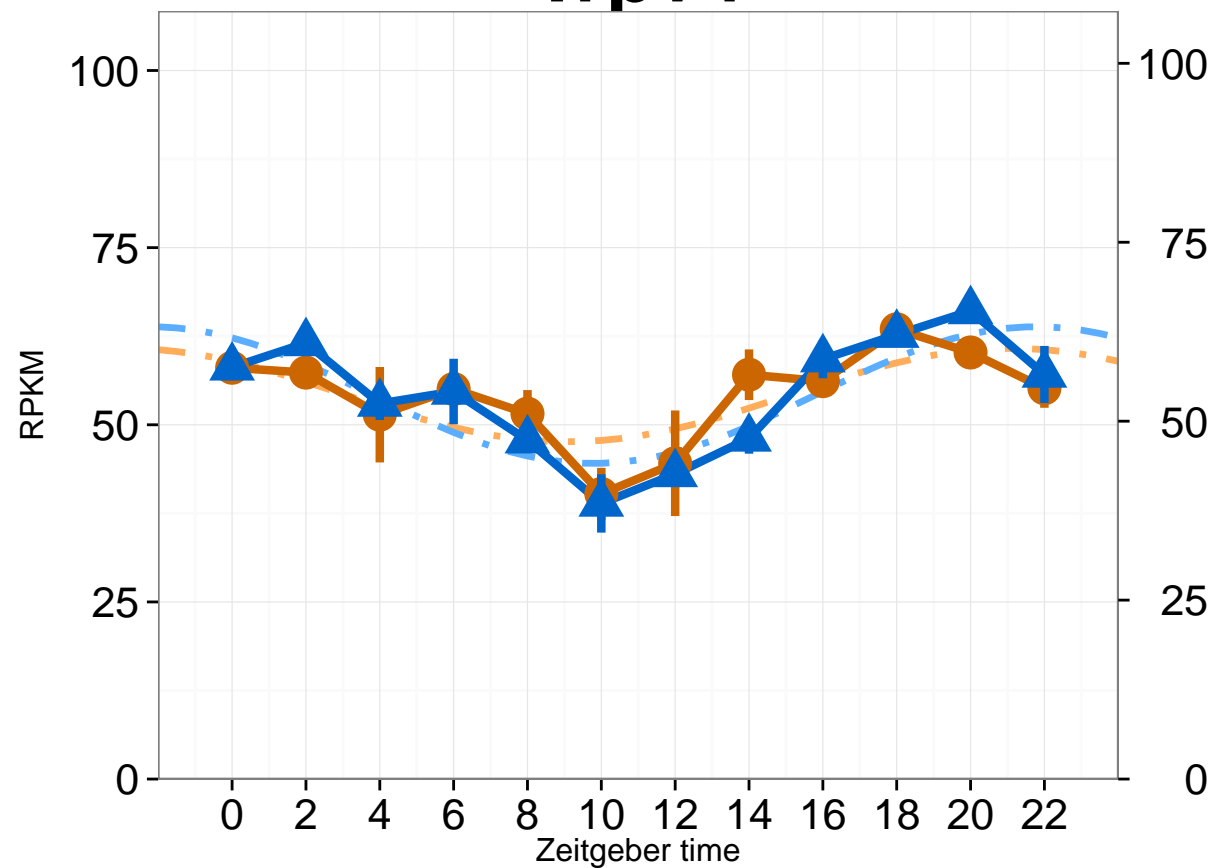

# Trpv4

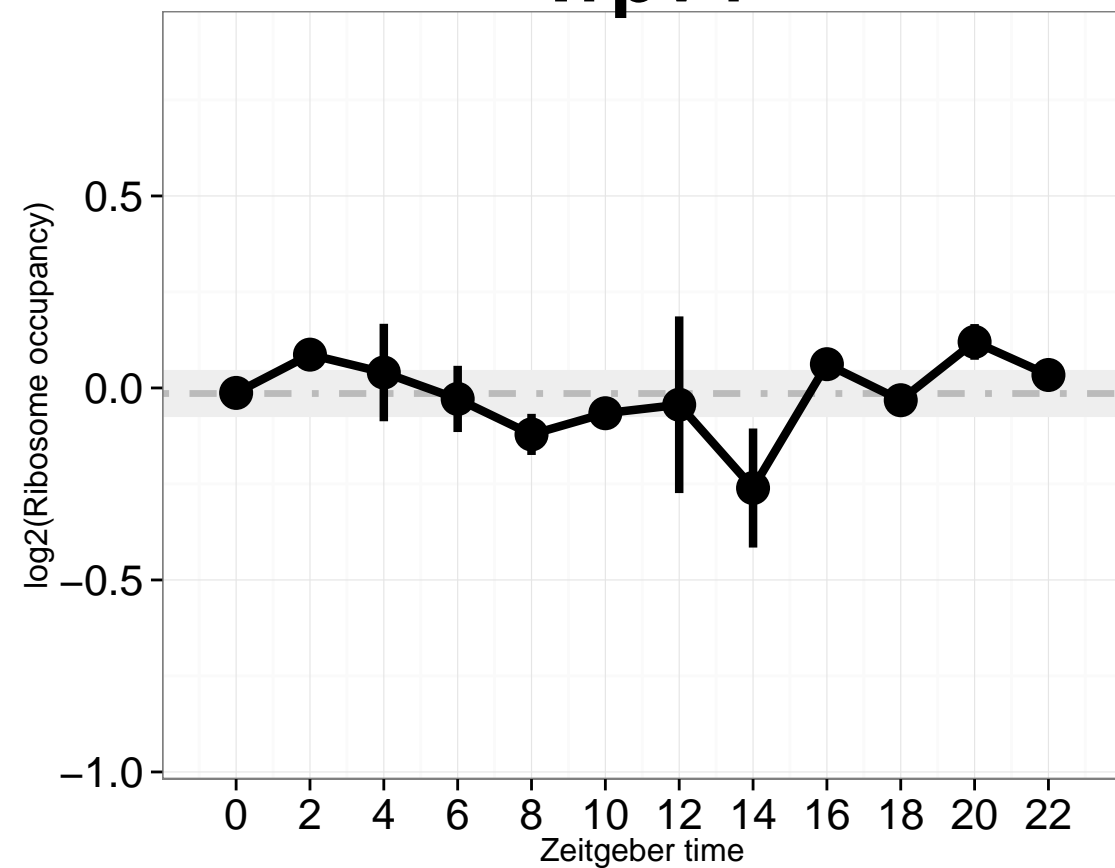

Supplement: Supplementary file 8345 [file 1]

## Smarcd2

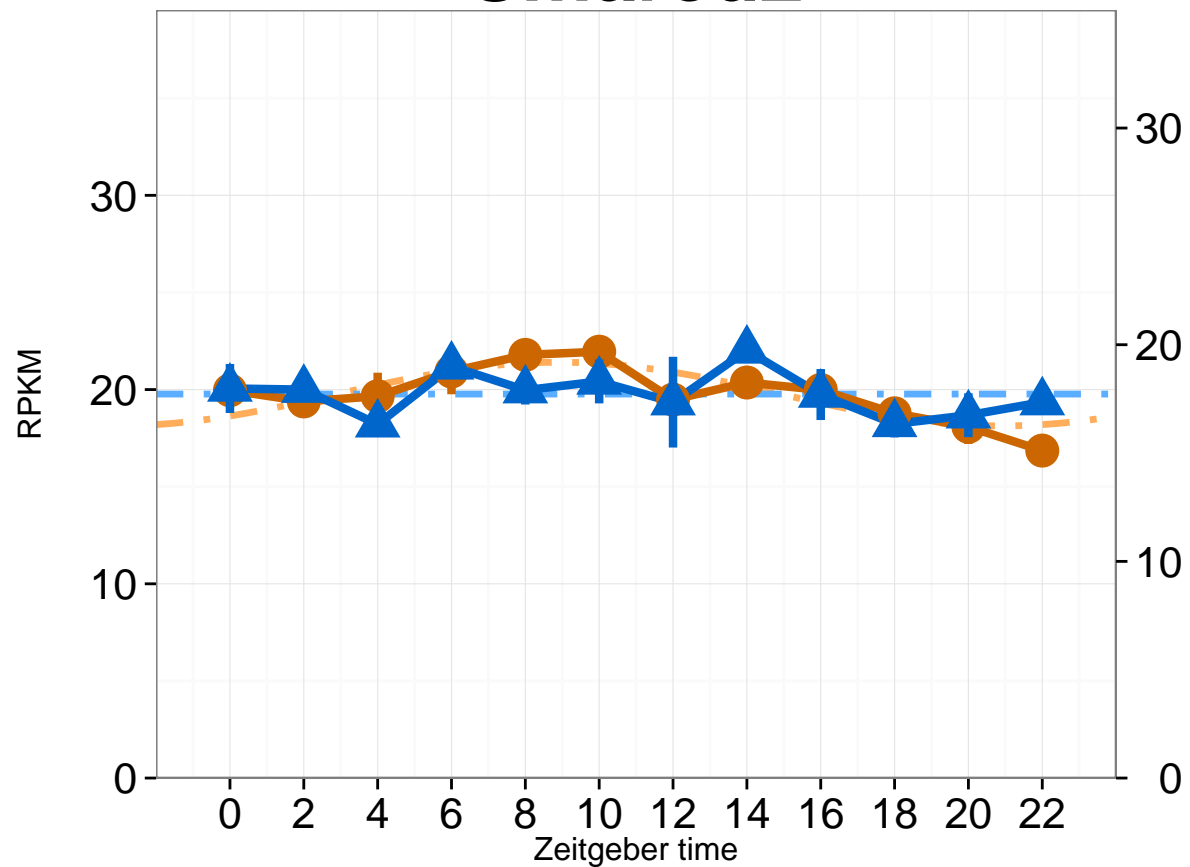

## Smarcd2

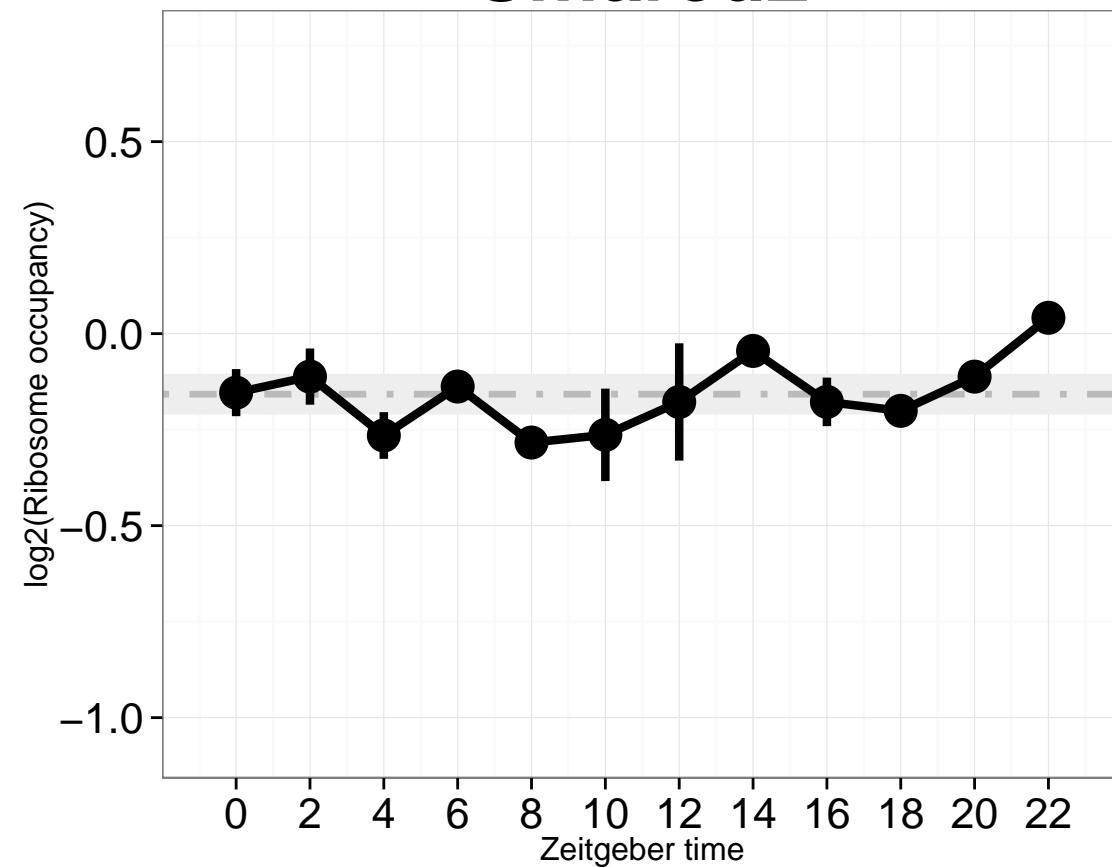

Supplement: Supplementary file 8346 [file 1]

# Hspa8

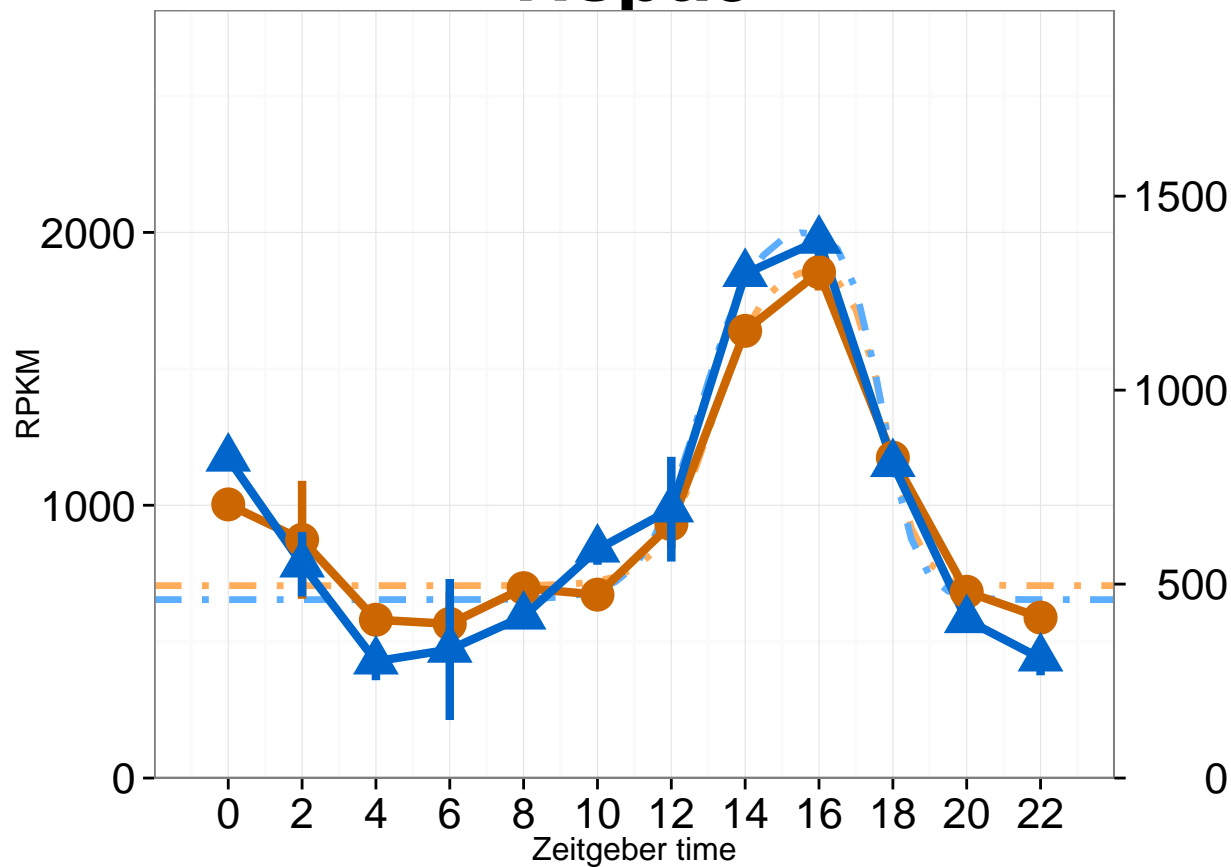

# Hspa8

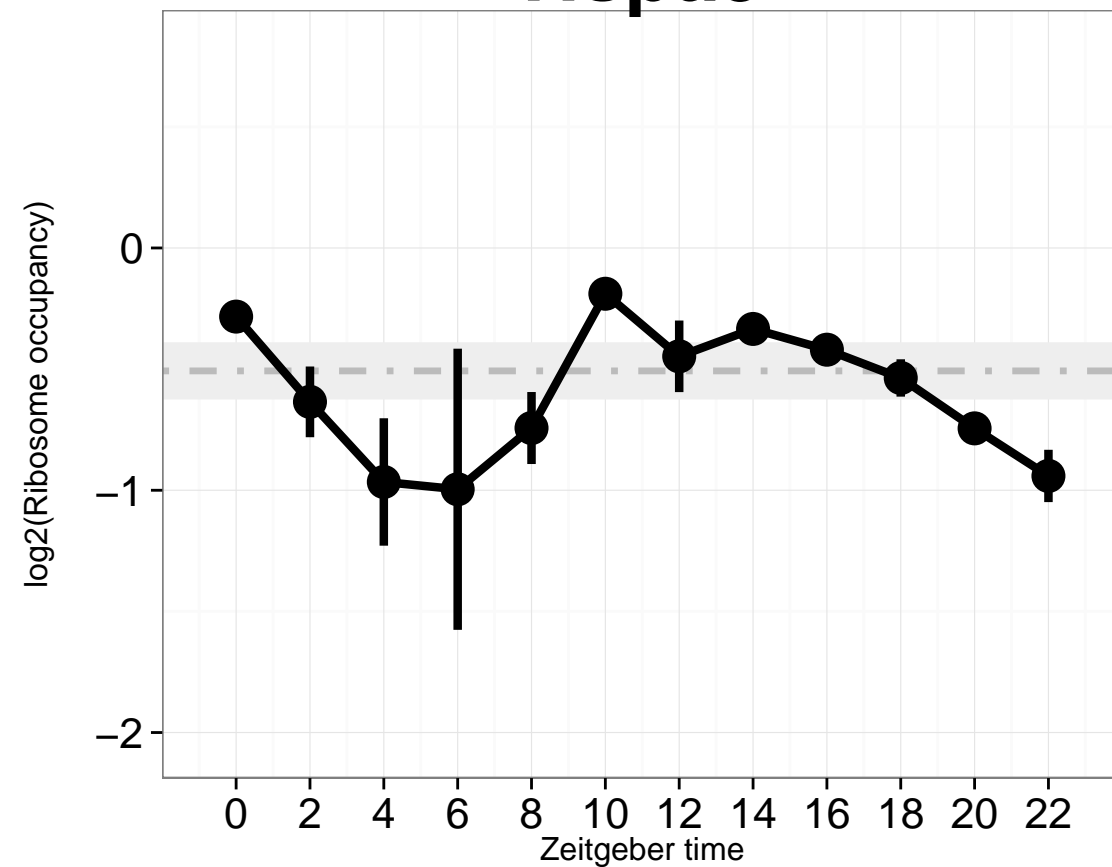

Supplement: Supplementary file 8347 [file 1]

# Kdelr1

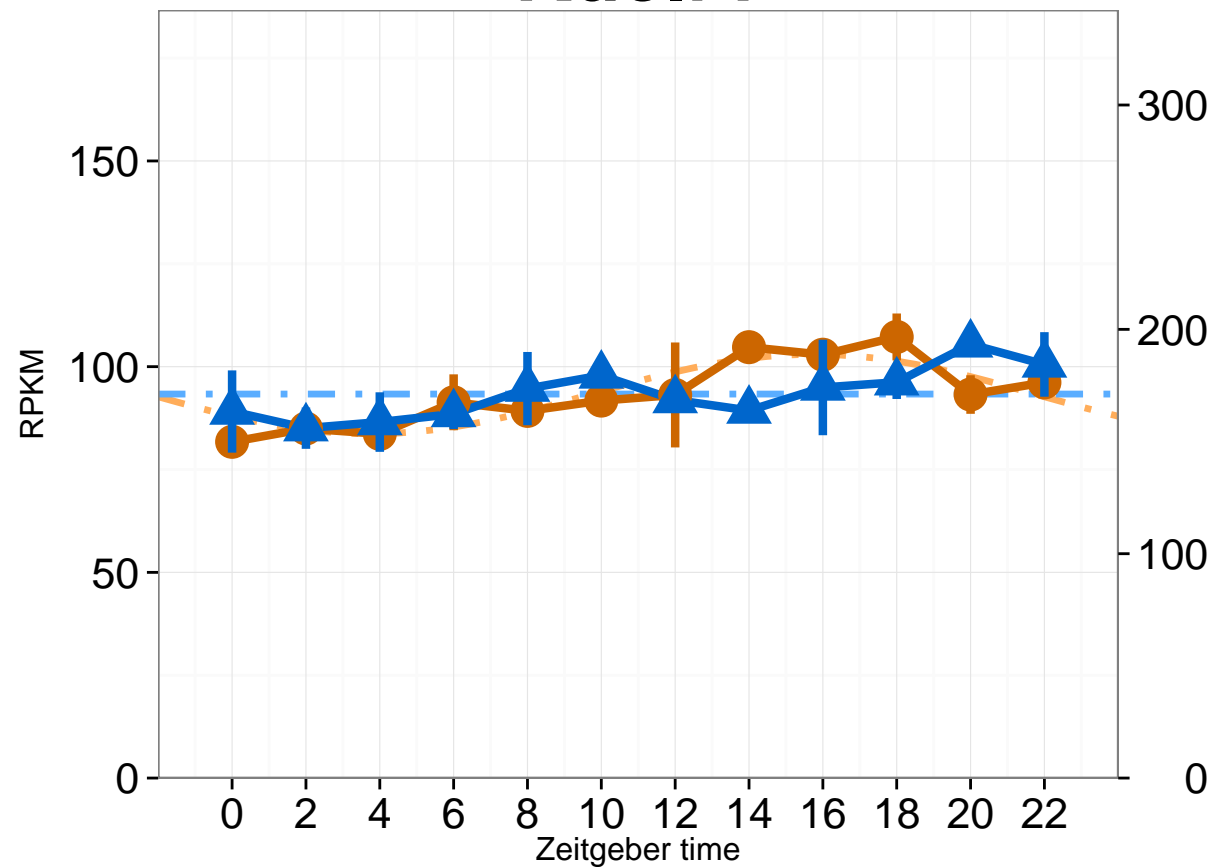

# Kdelr1

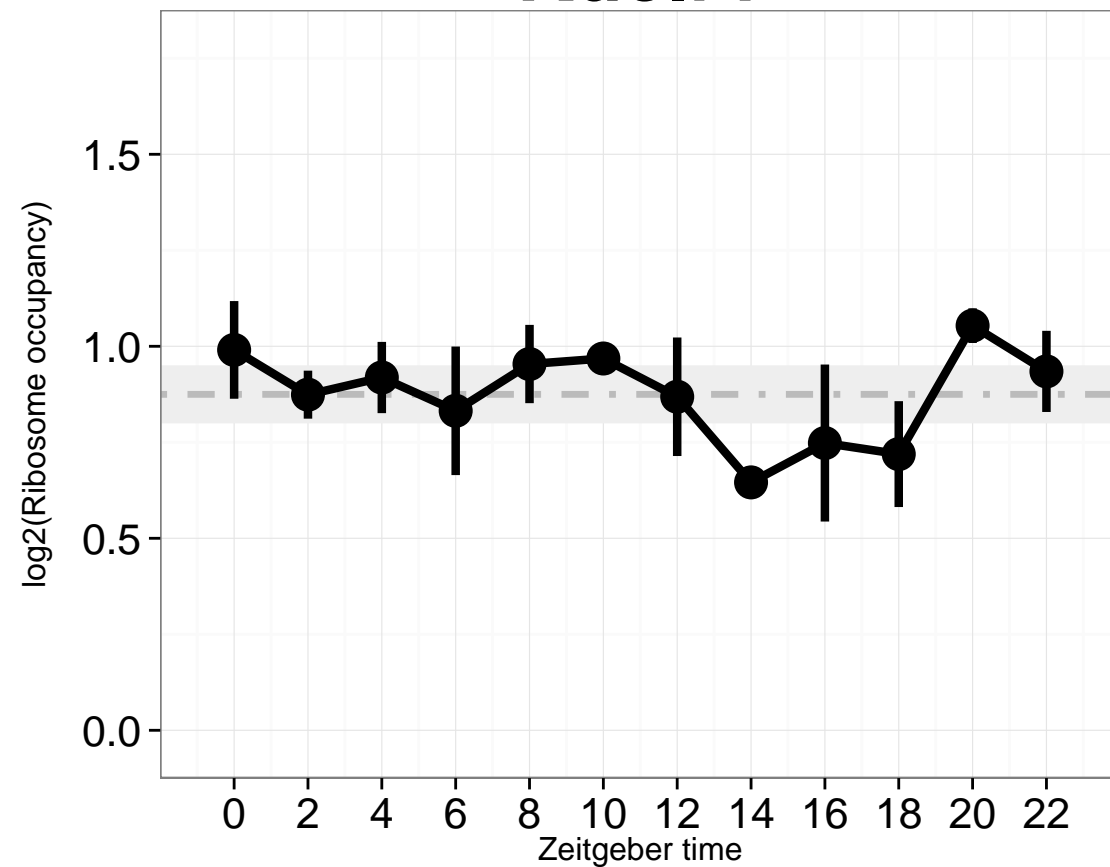

Supplement: Supplementary file 8348 [file 1]

## Cav2

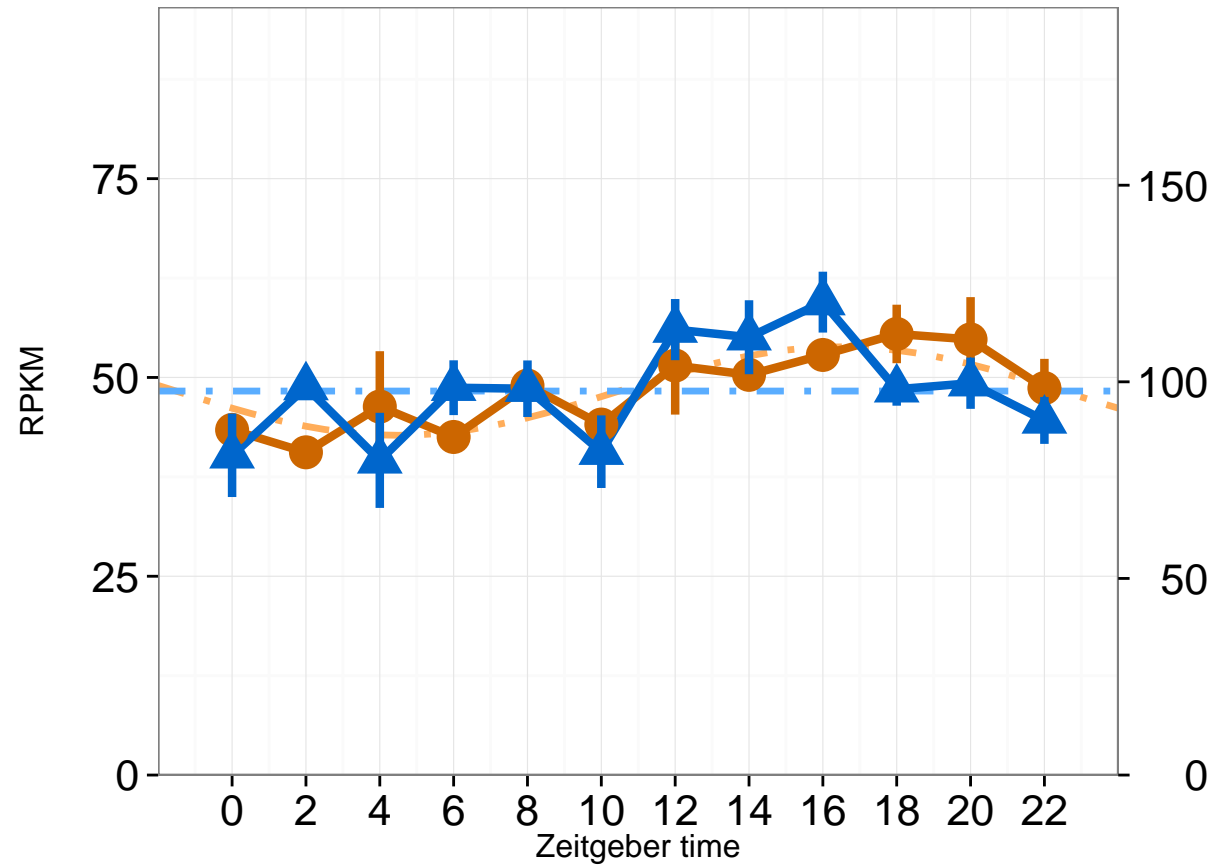

## Cav2

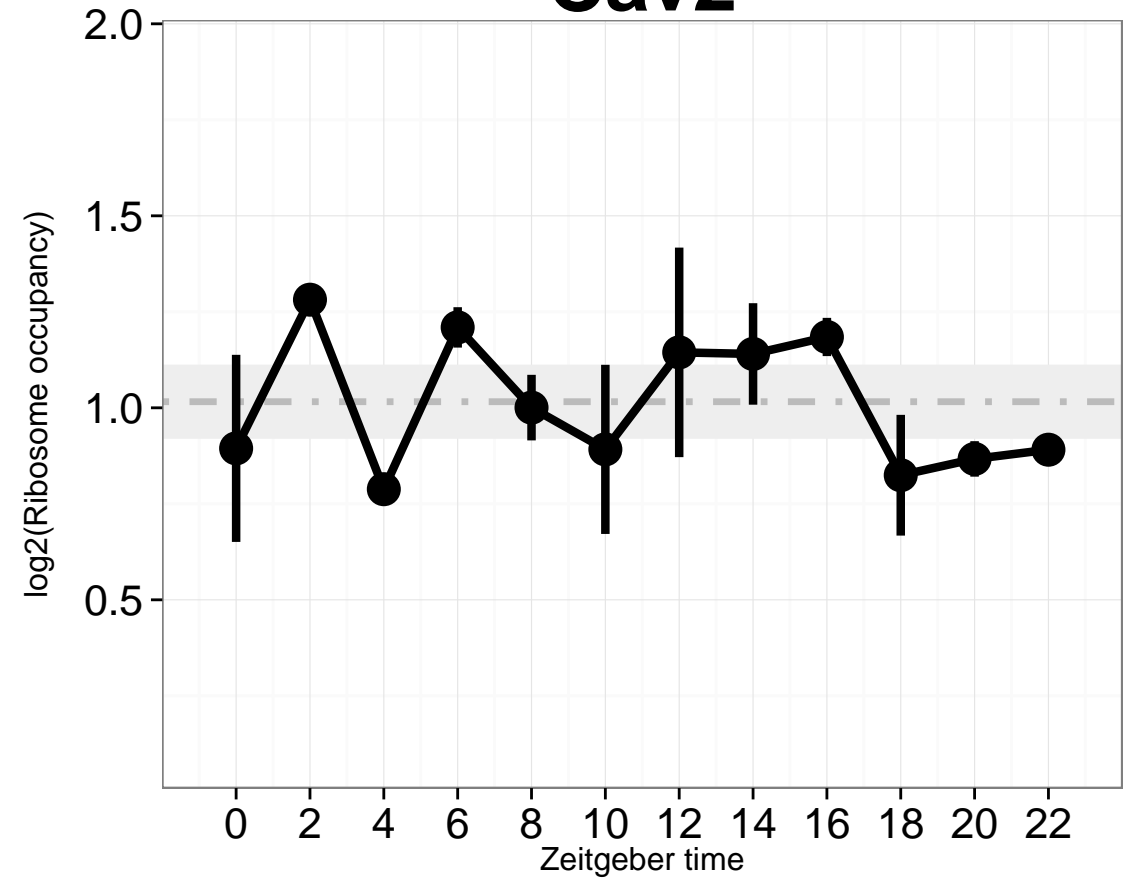

Supplement: Supplementary file 8349 [file 1]

## Ythdf2

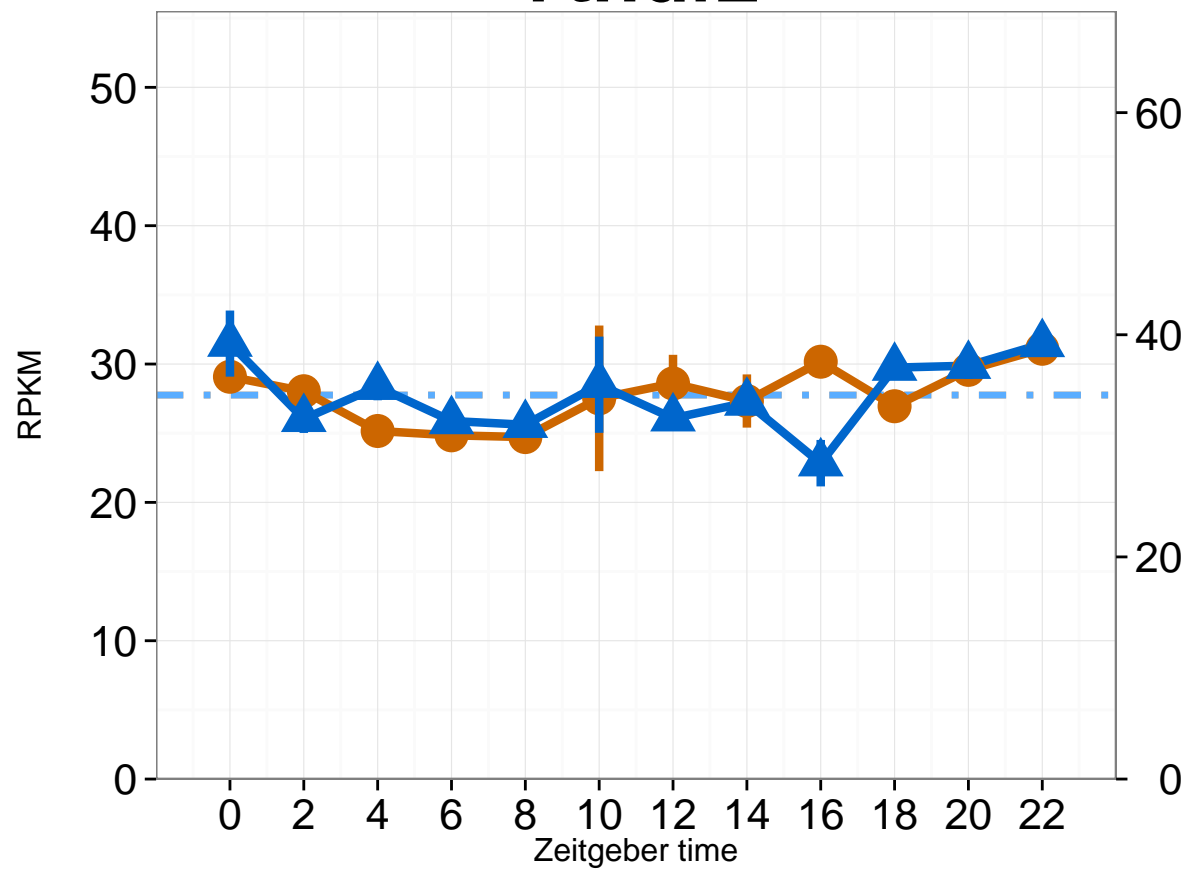

## Ythdf2

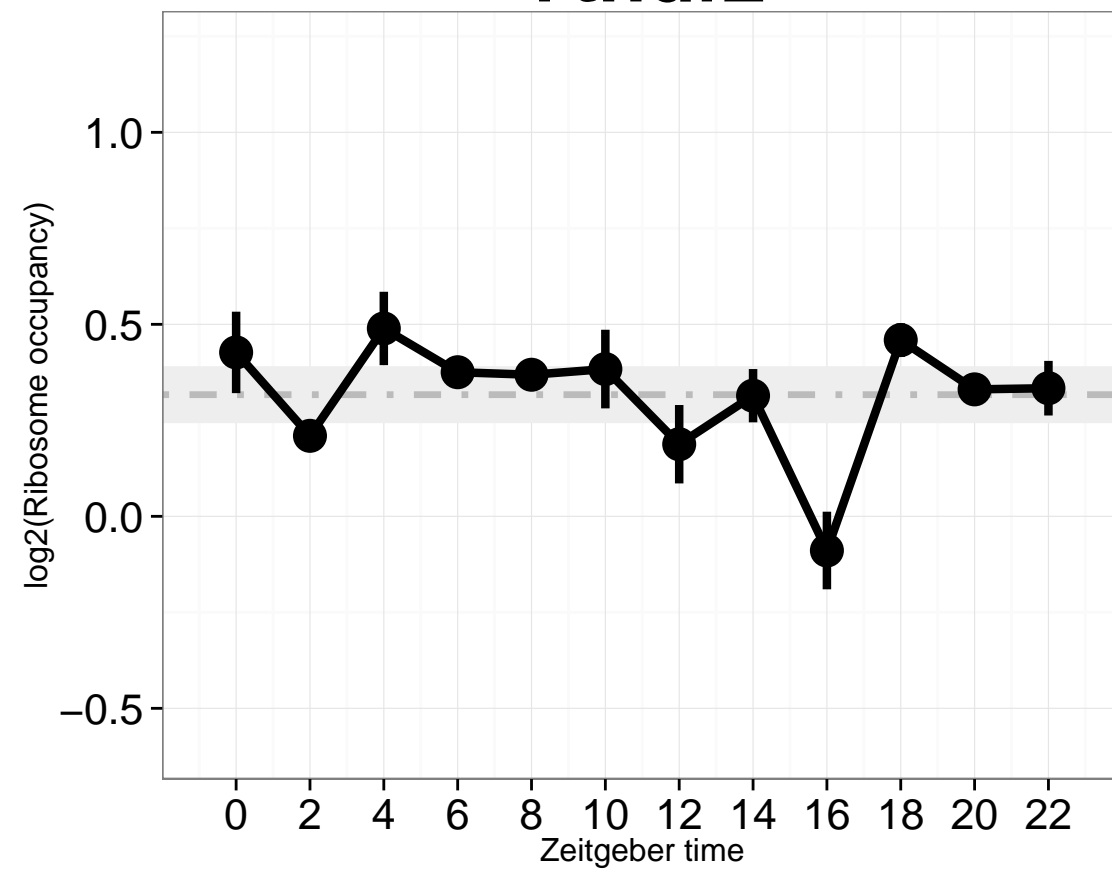

Supplement: Supplementary file 8350 [file 1]

# Dusp23

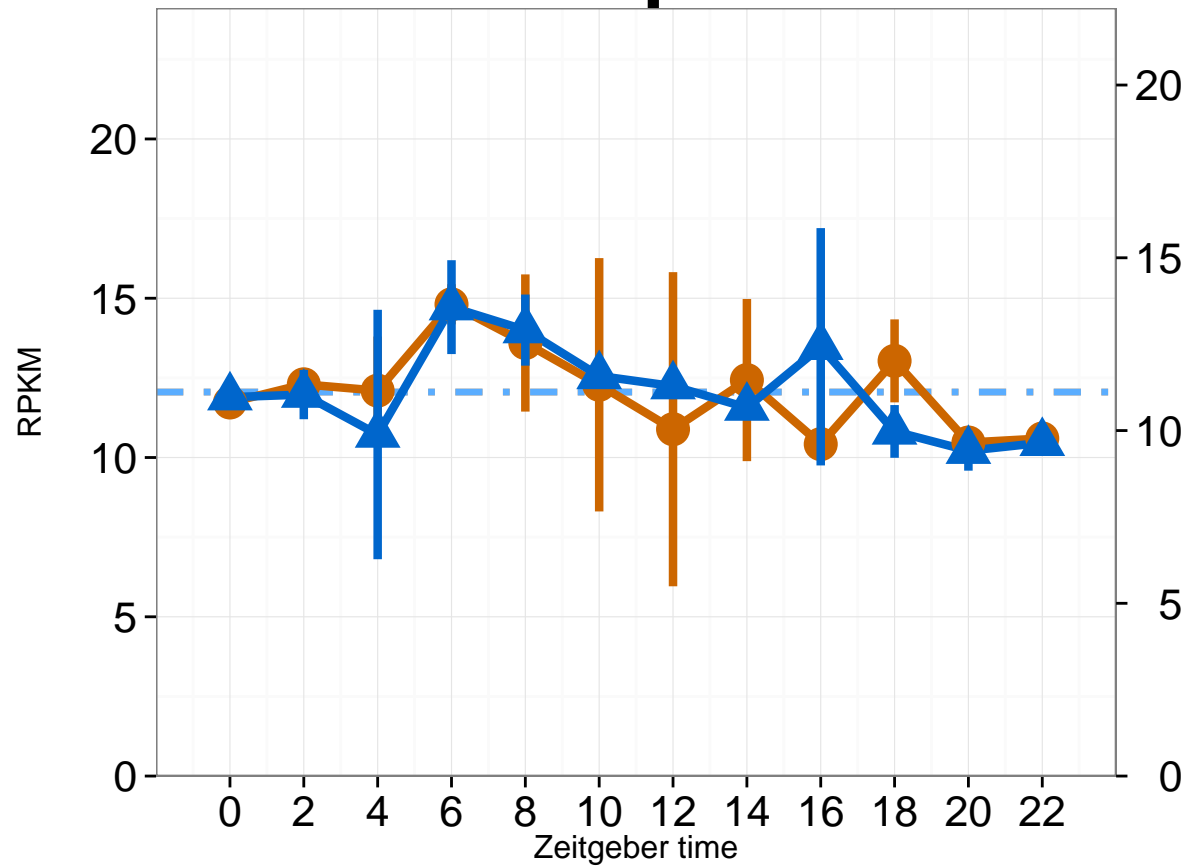

# Dusp23

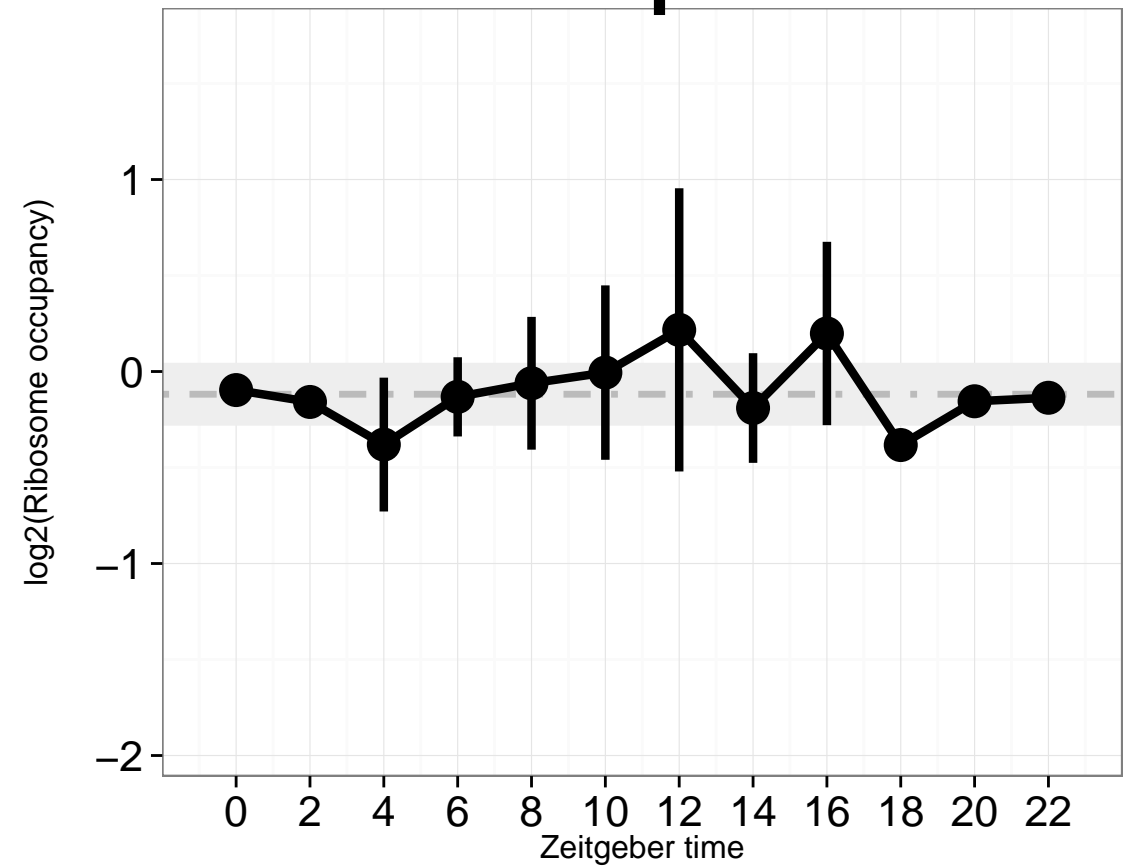

Supplement: Supplementary file 8351 [file 1]

## Nccrp1

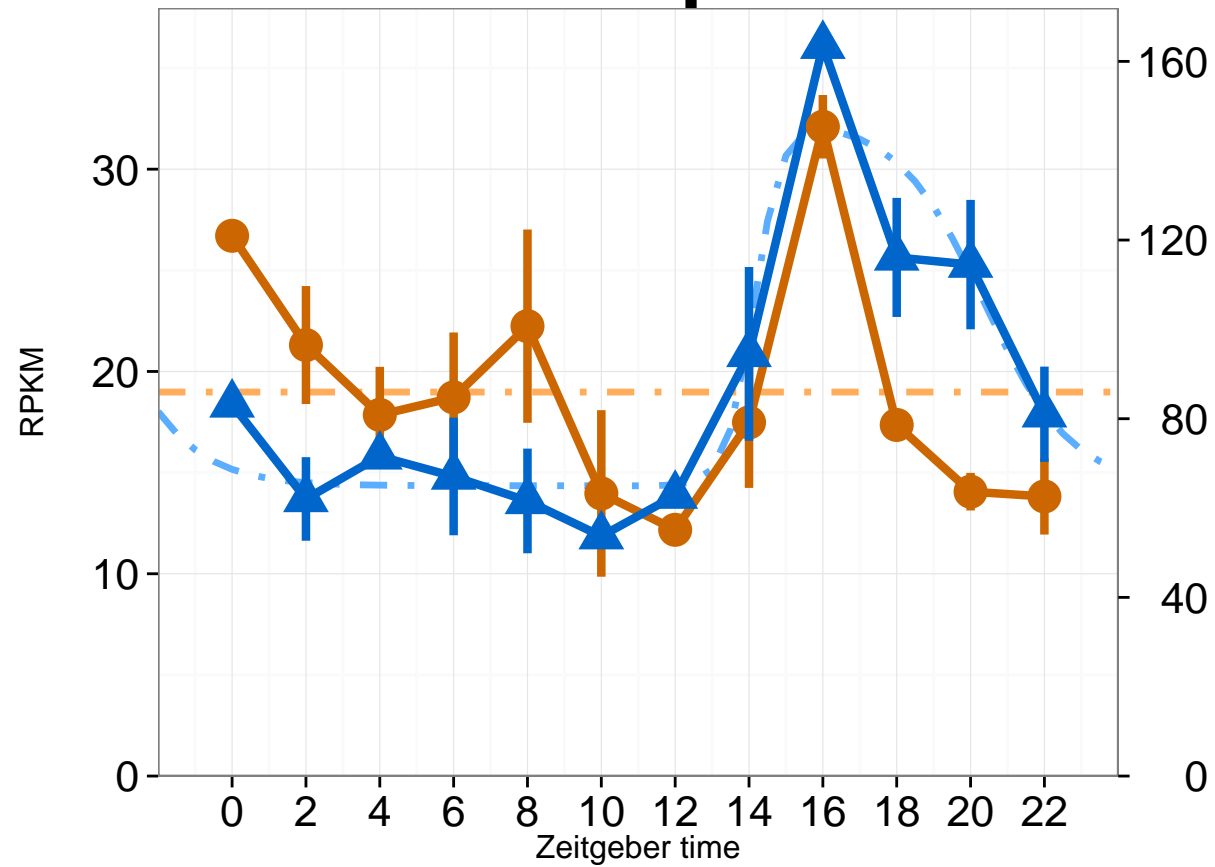

## Nccrp1

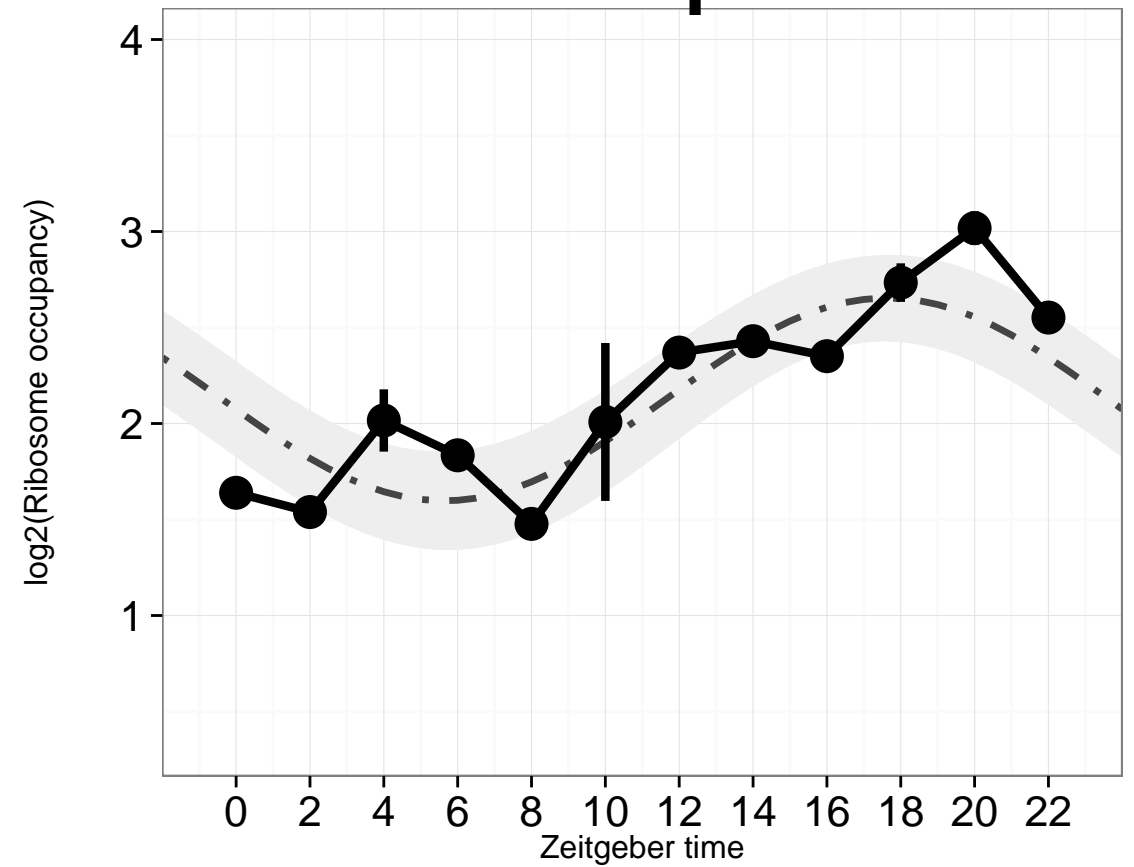

Supplement: Supplementary file 8352 [file 1]

# Rps26

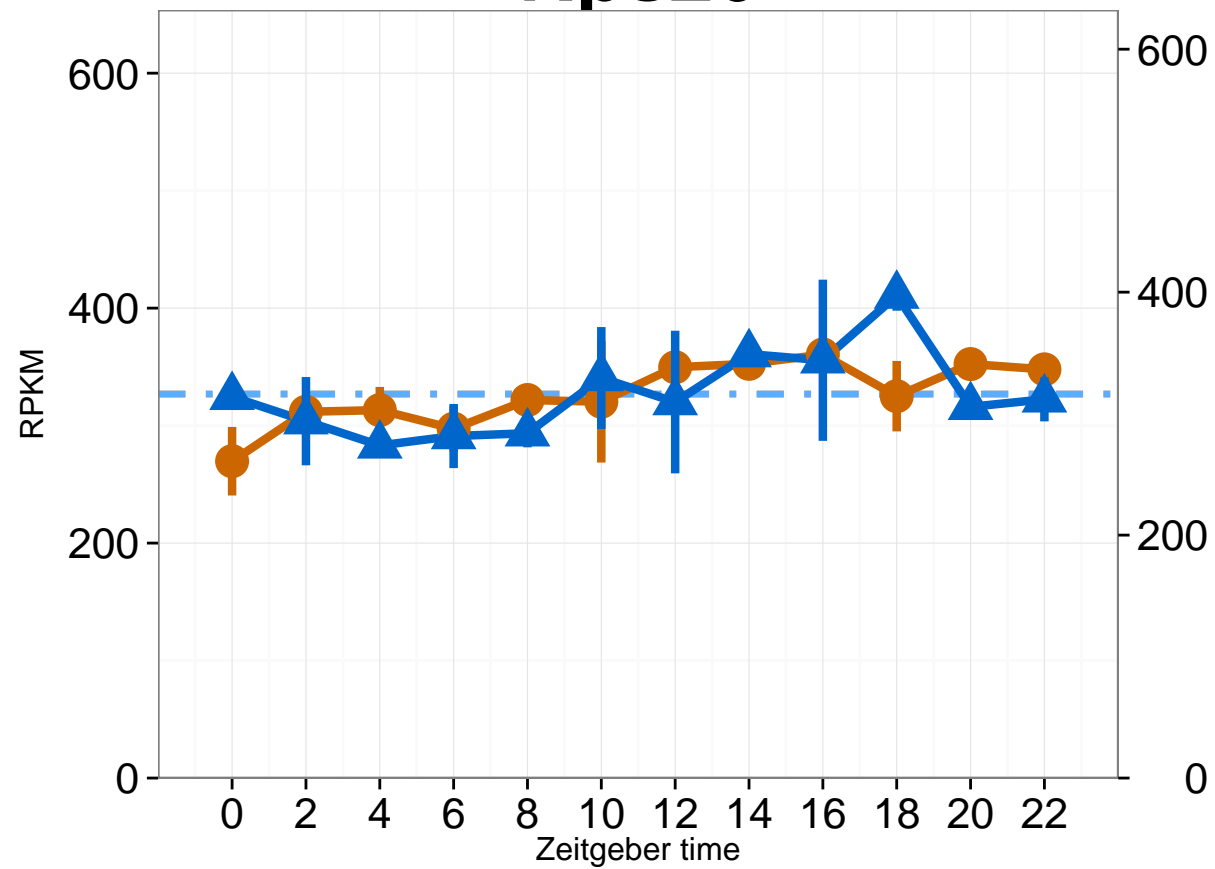

# Rps26

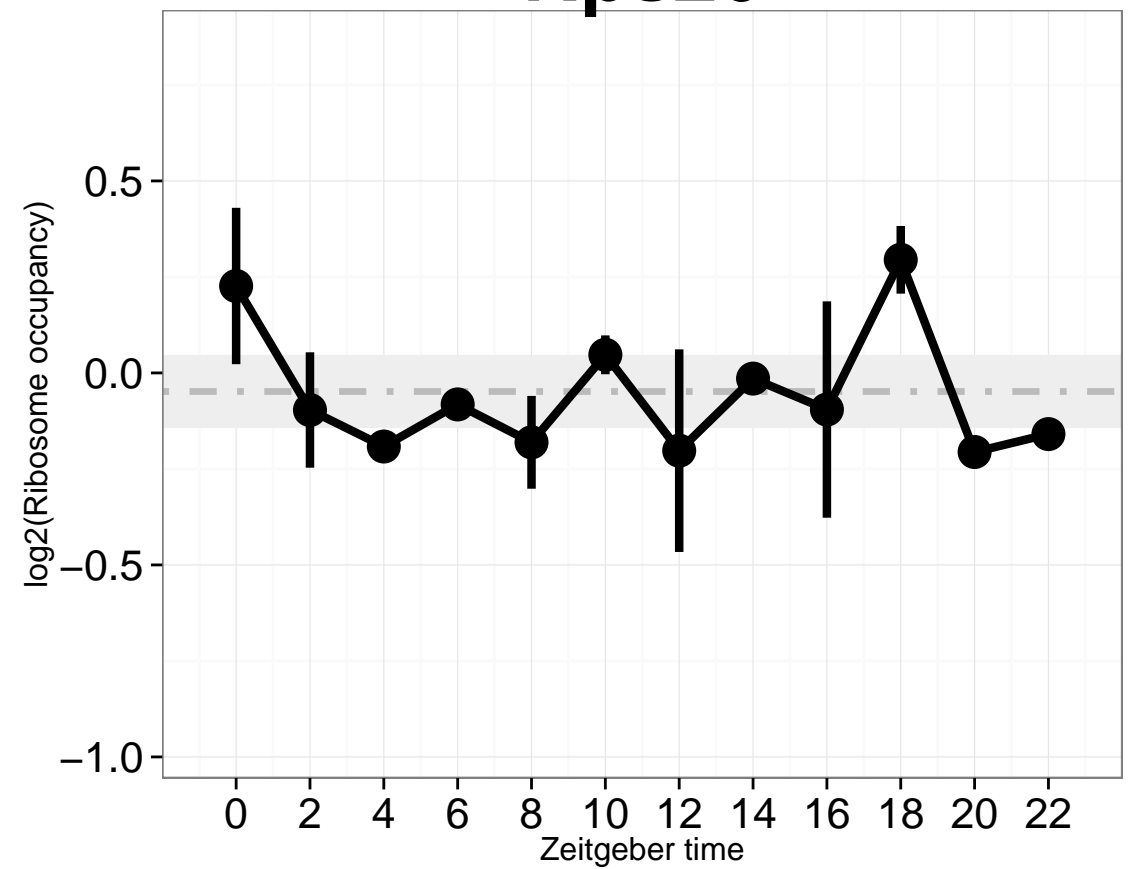

Supplement: Supplementary file 8353 [file 1]

## Tiparp

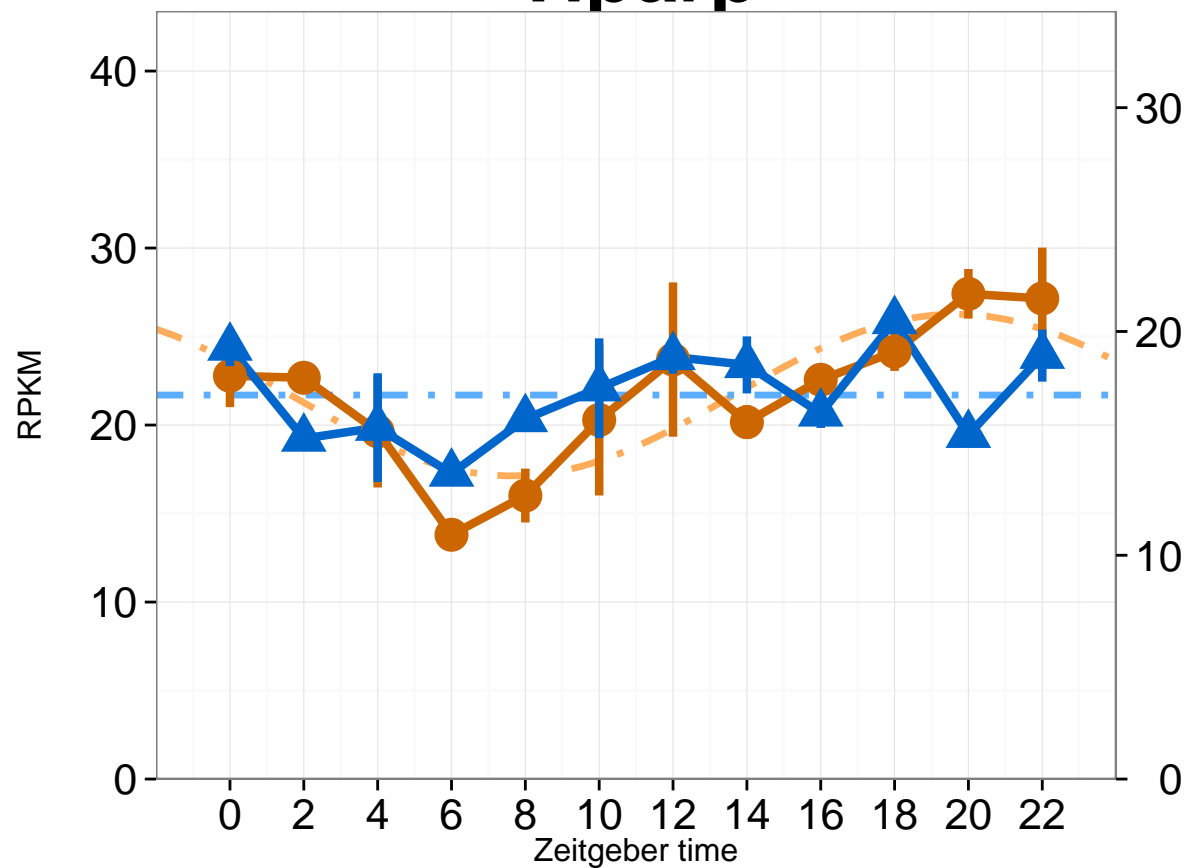

## Tiparp

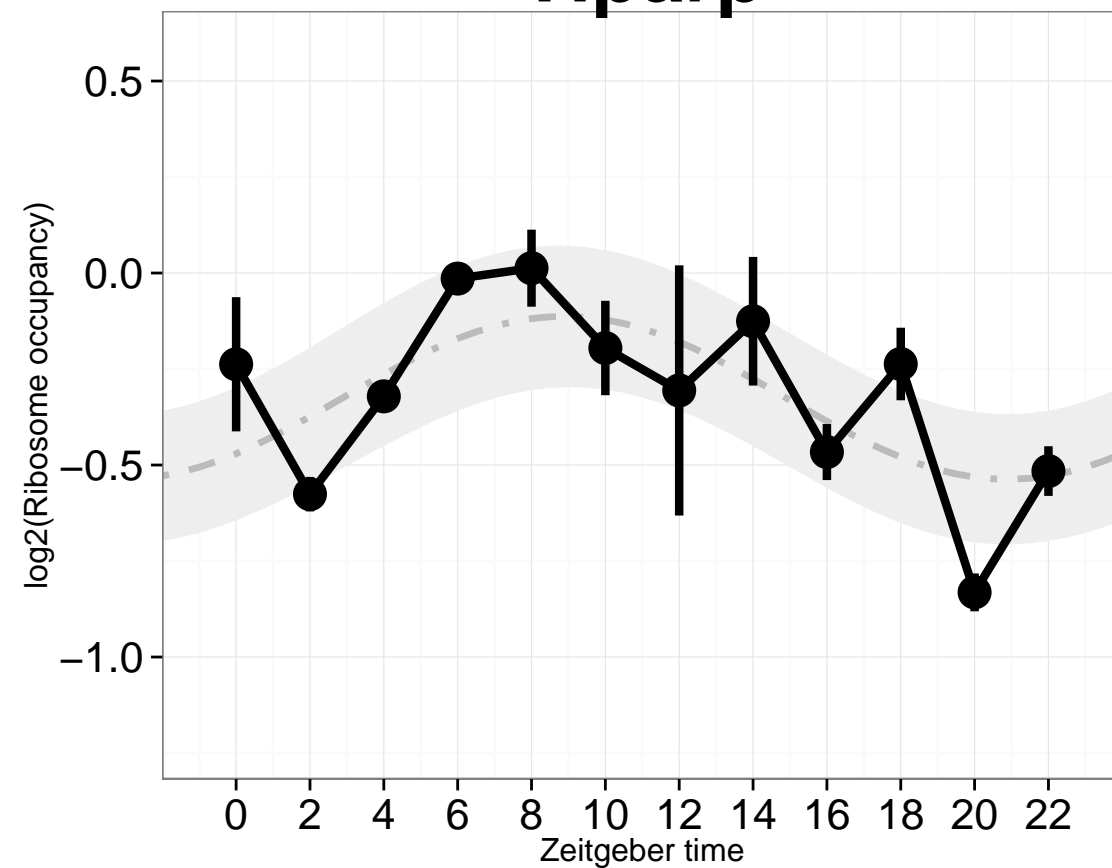

Supplement: Supplementary file 8354 [file 1]

## Armc12

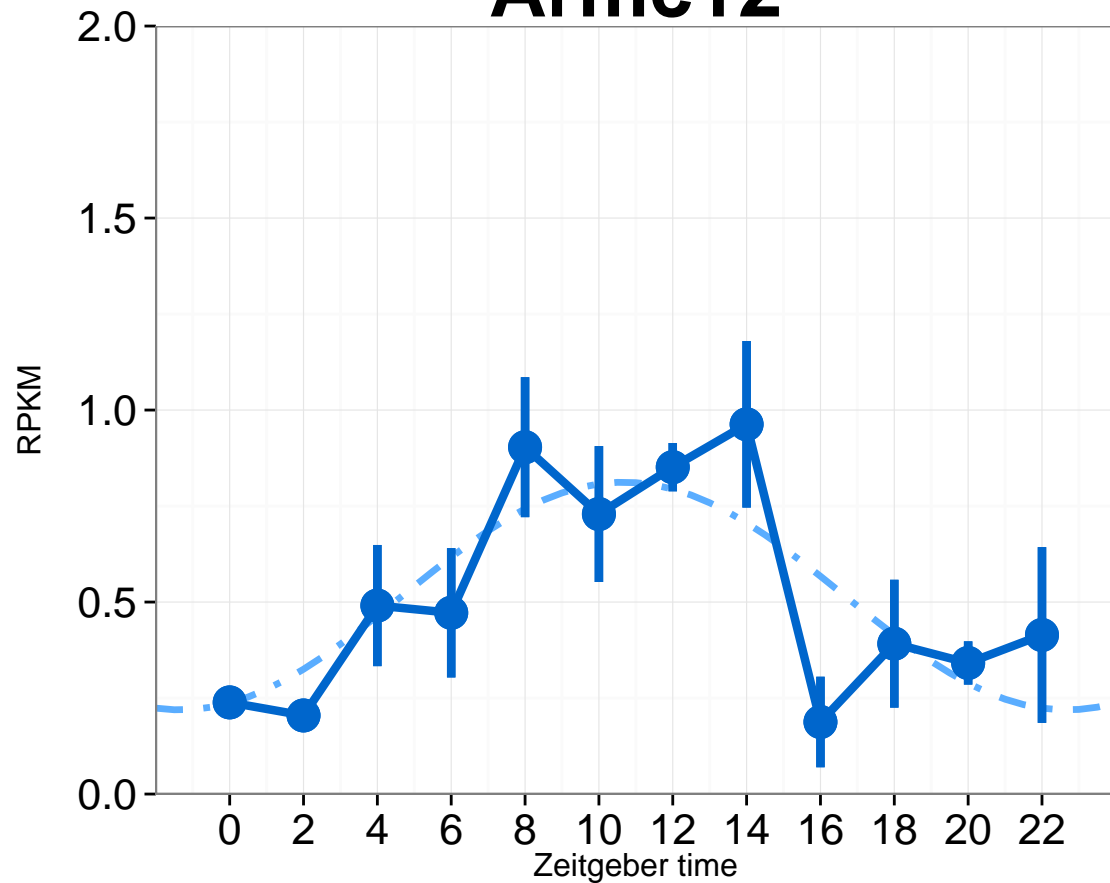

## Armc12 log2(Ribosome occupancy)

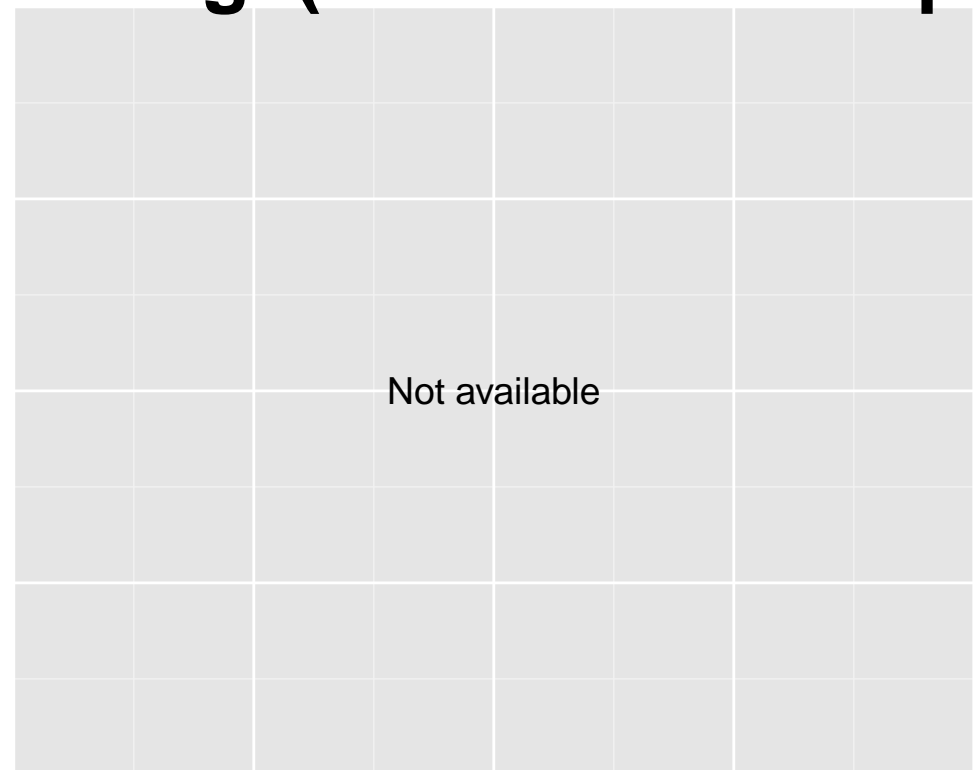

Supplement: Supplementary file 8355 [file 1]

# Gsta4

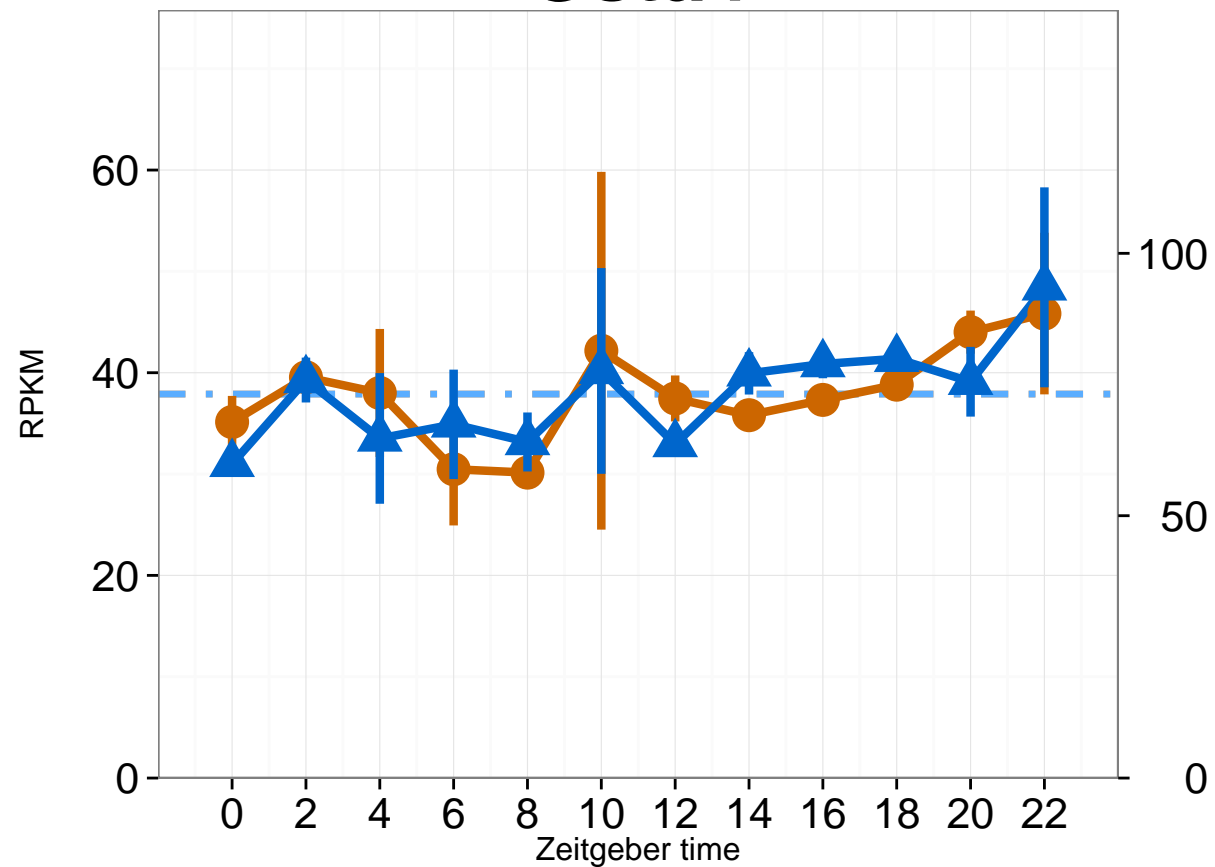

# Gsta4

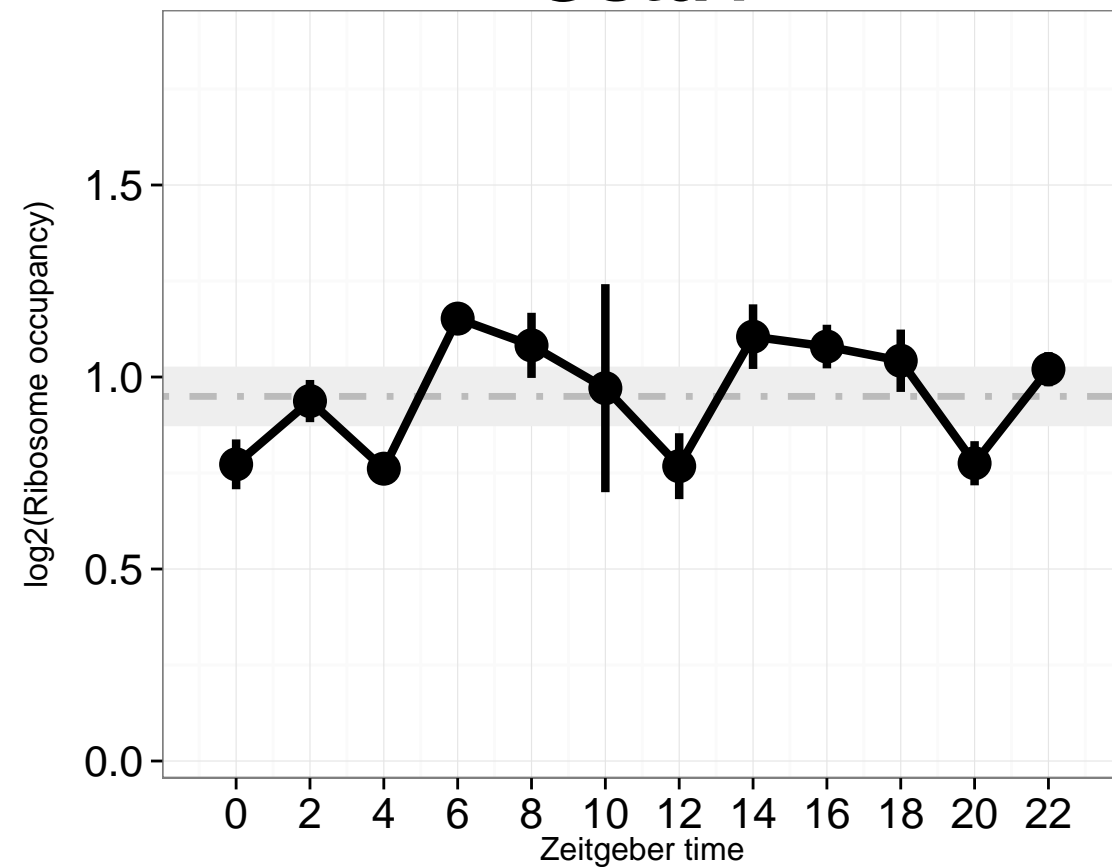

Supplement: Supplementary file 8356 [file 1]

# Map2k5

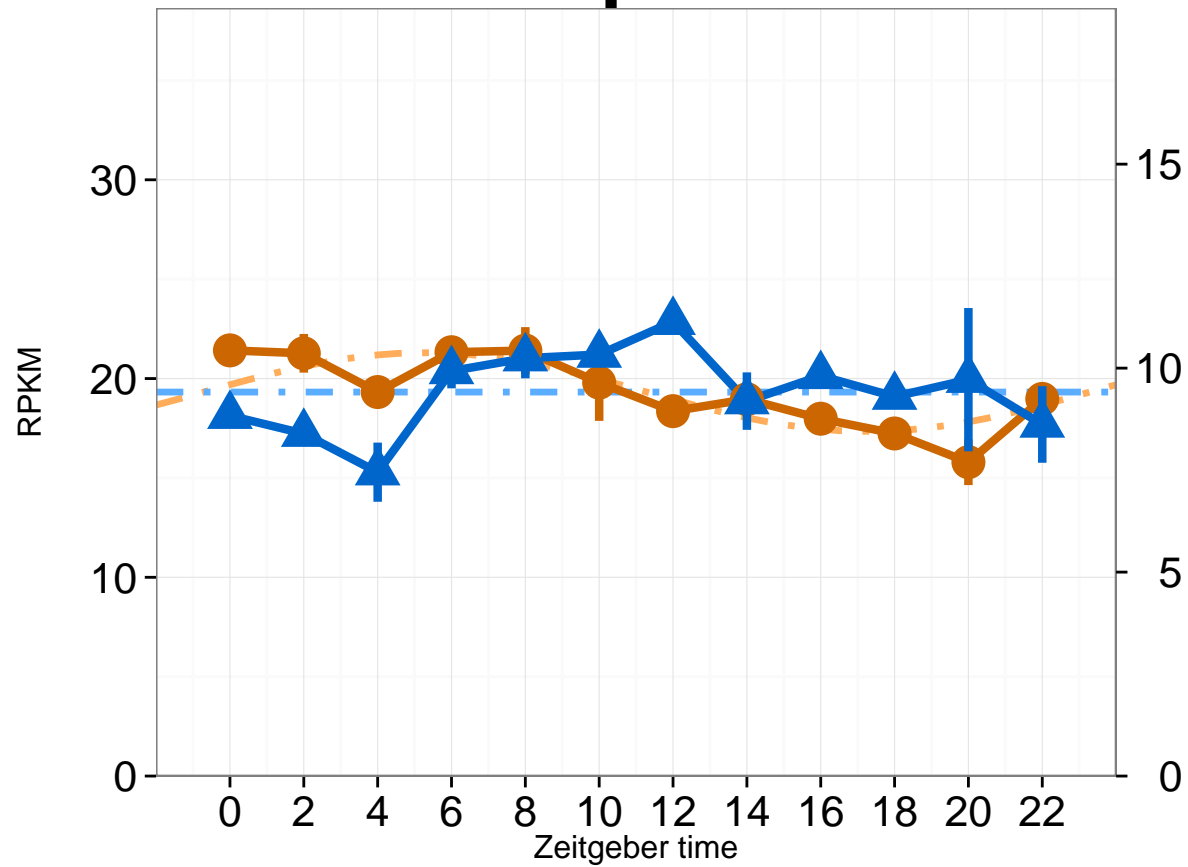

# Map2k5

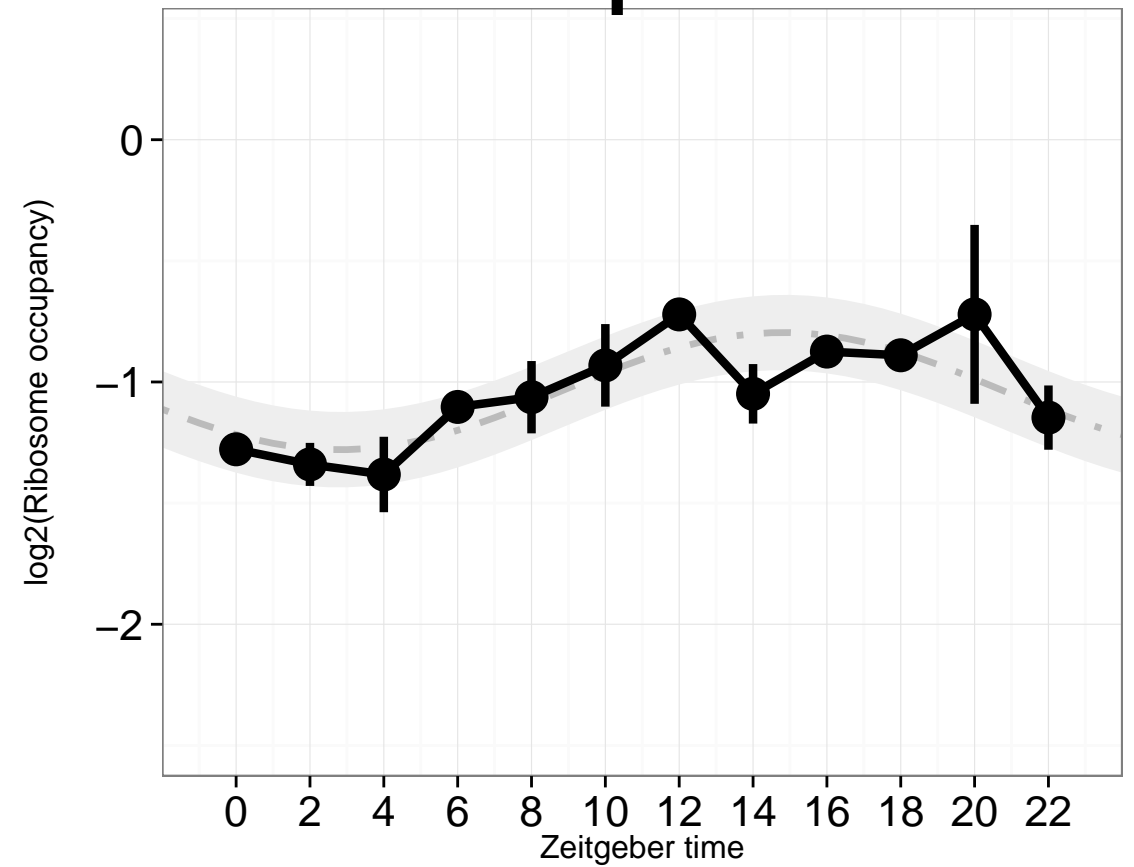

Supplement: Supplementary file 8357 [file 1]

## Mzt2

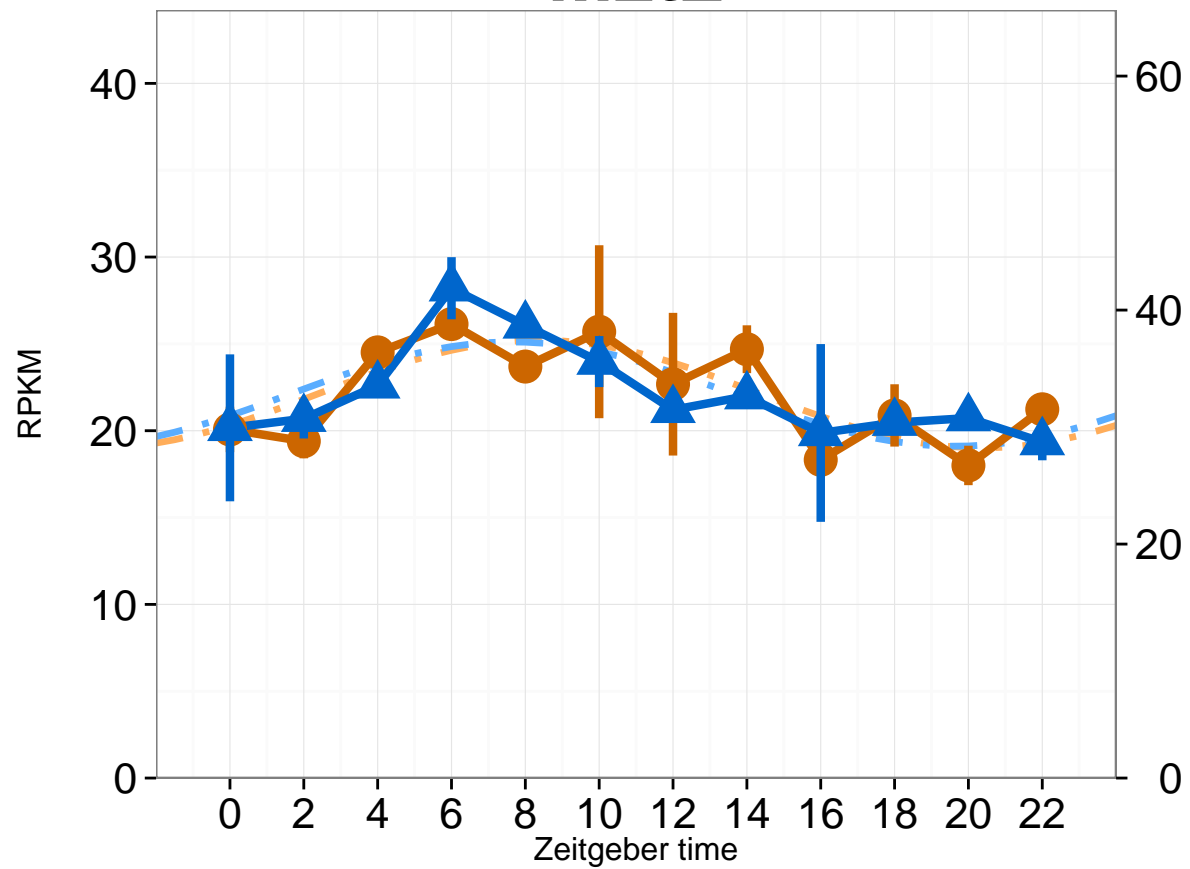

## Mzt2

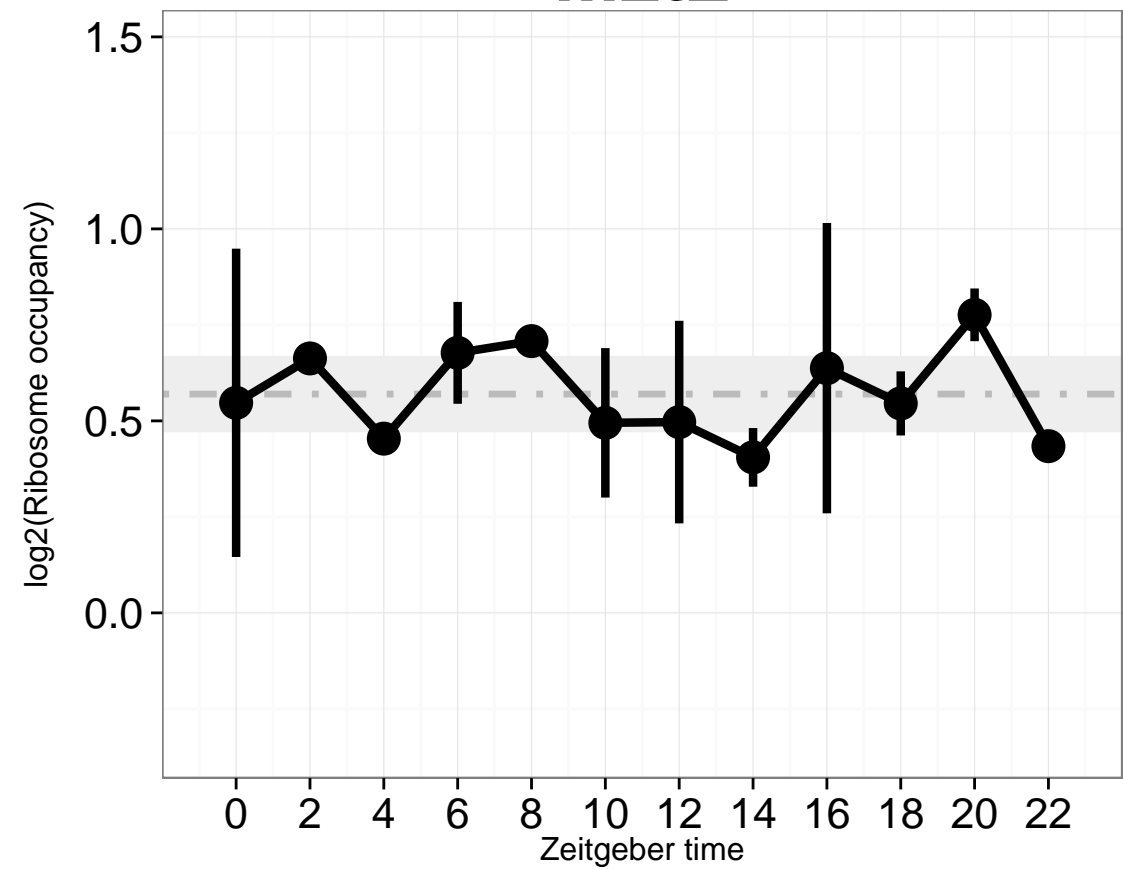

Supplement: Supplementary file 8358 [file 1]

# Fbxo11

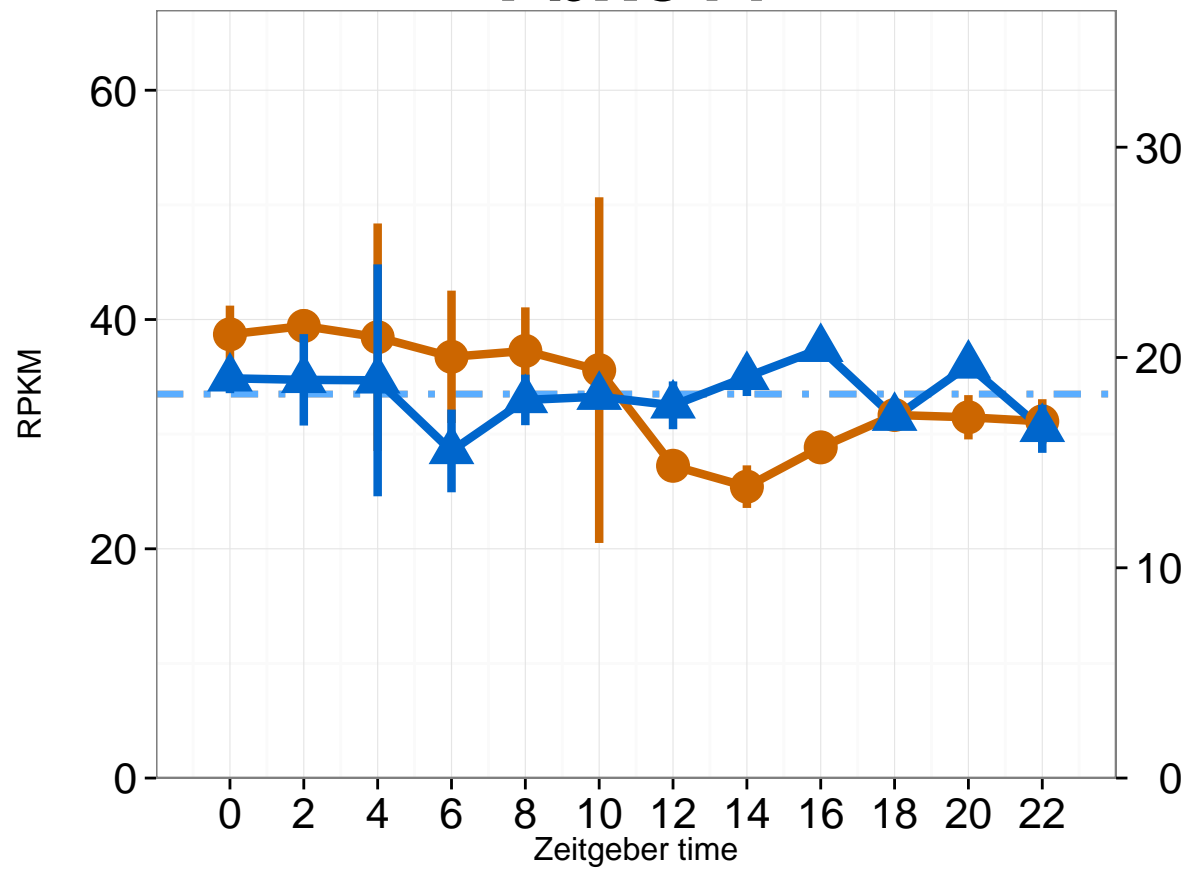

# Fbxo11

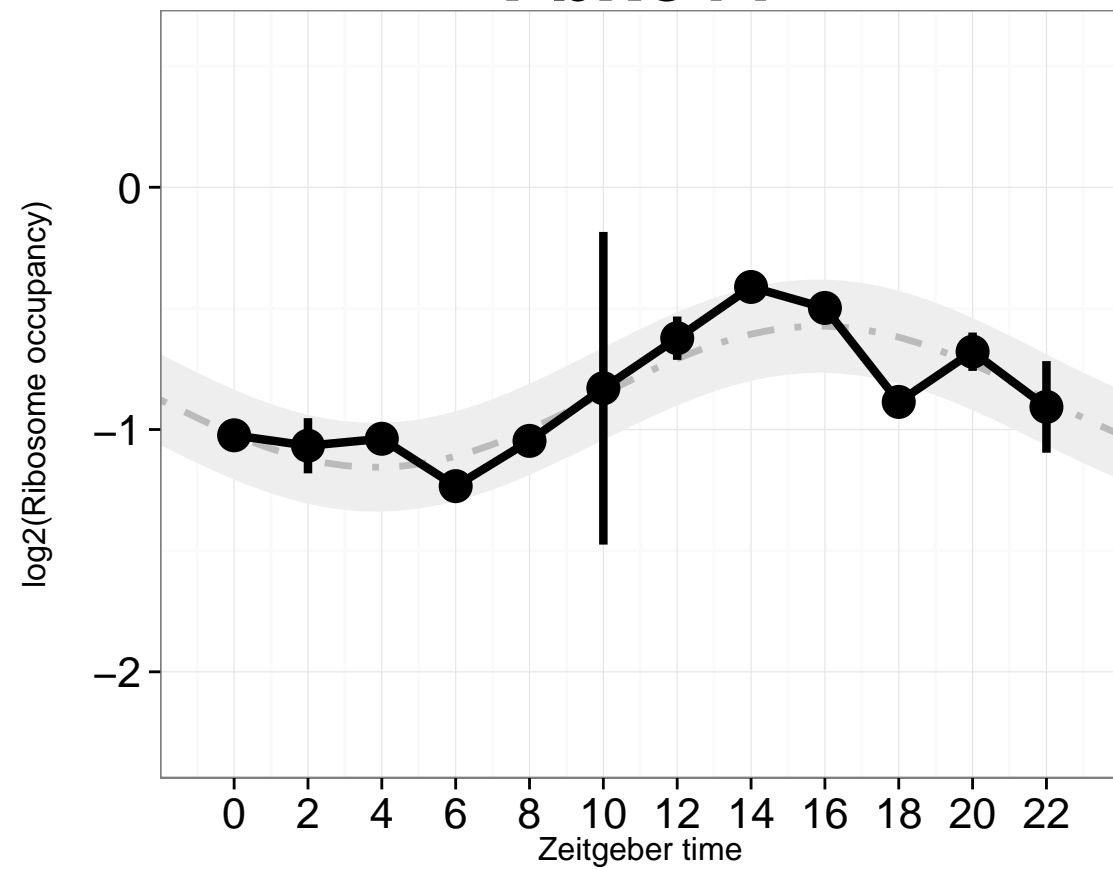

Supplement: Supplementary file 8359 [file 1]

Ccdc148

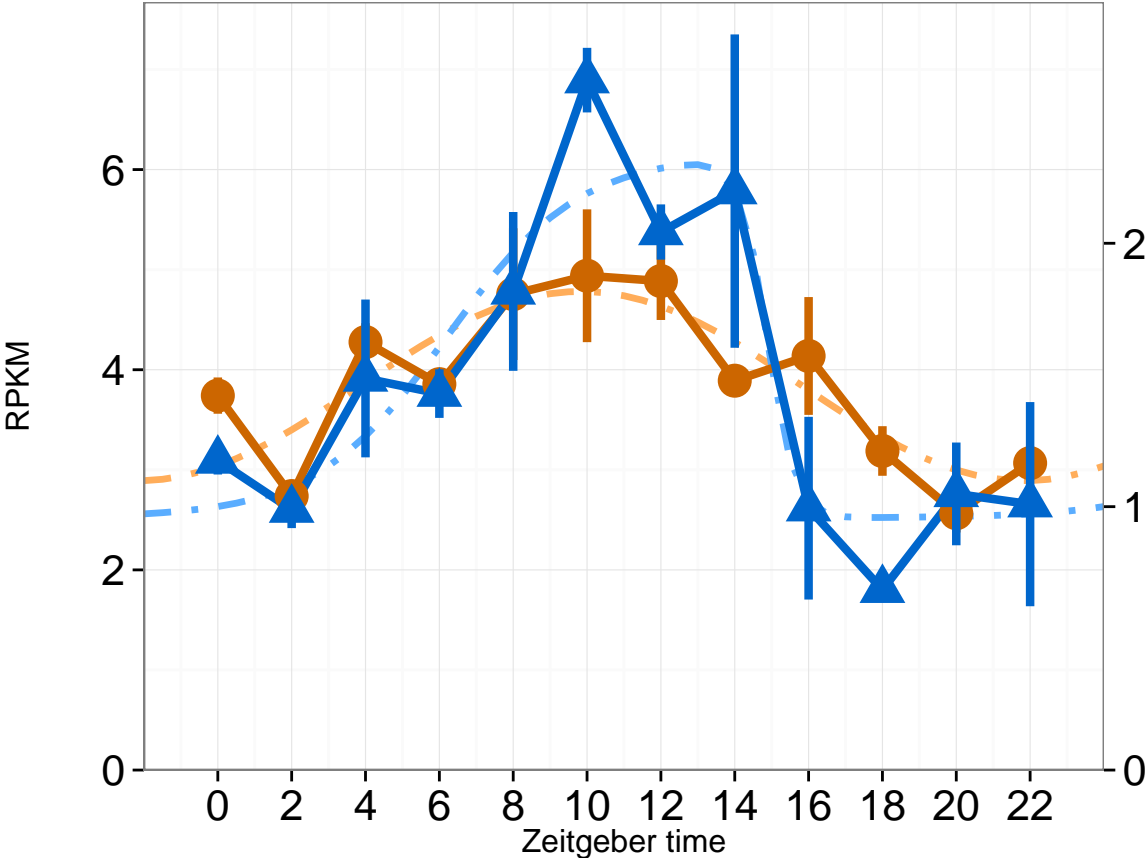

Ccdc148

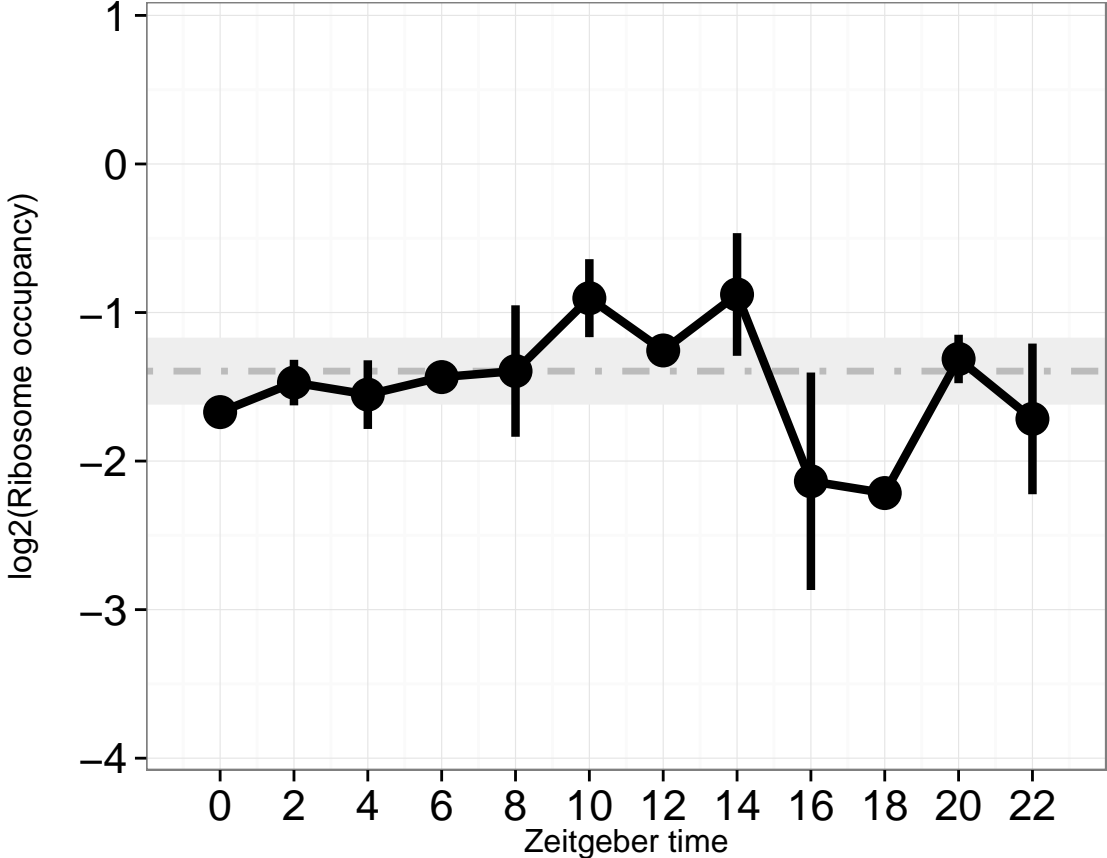

Supplement: Supplementary file 8360 [file 1]

## Pparg

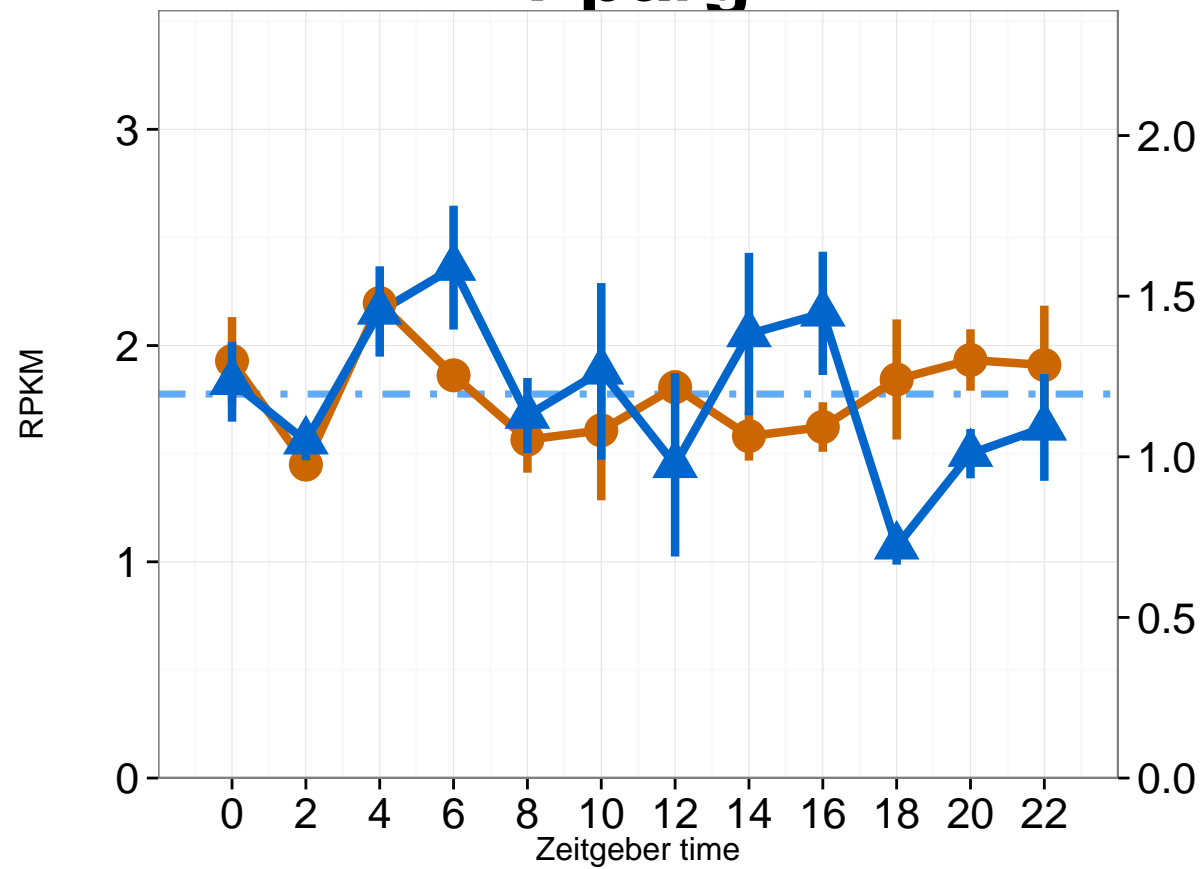

## Pparg

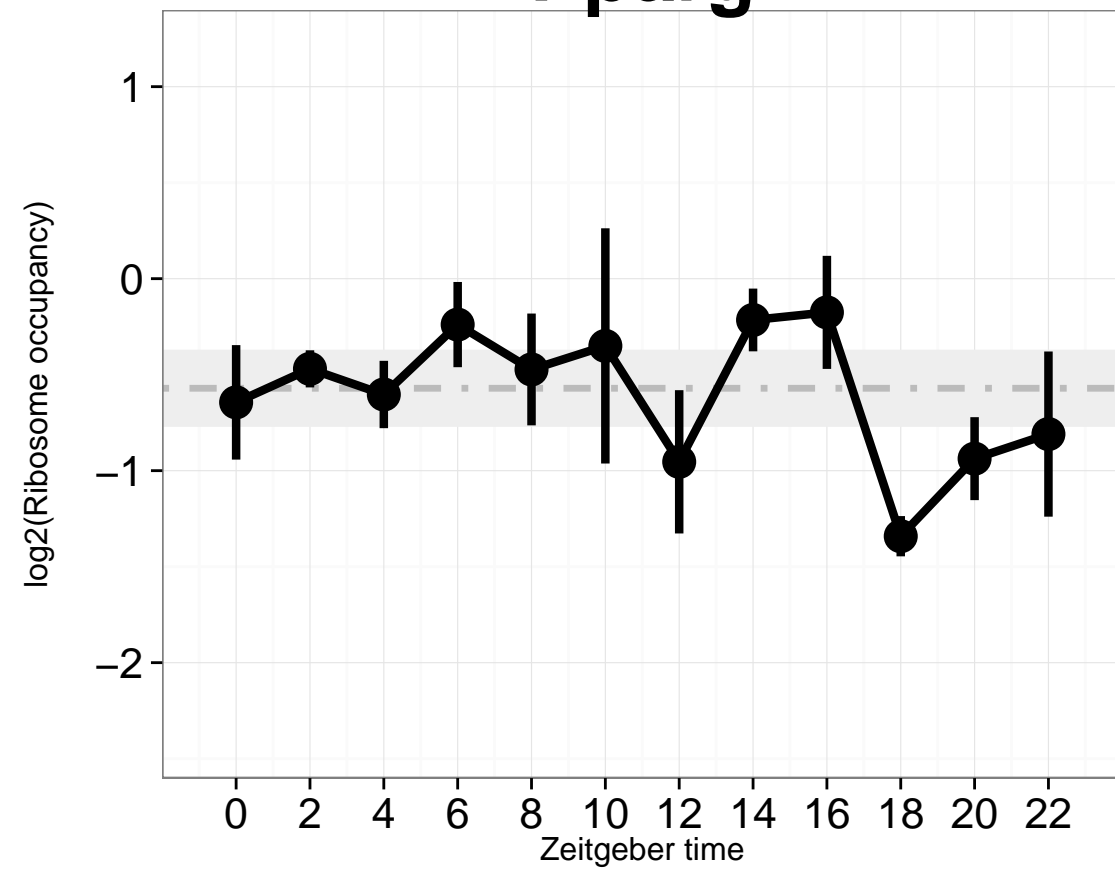

Supplement: Supplementary file 8361 [file 1]

## DynII2

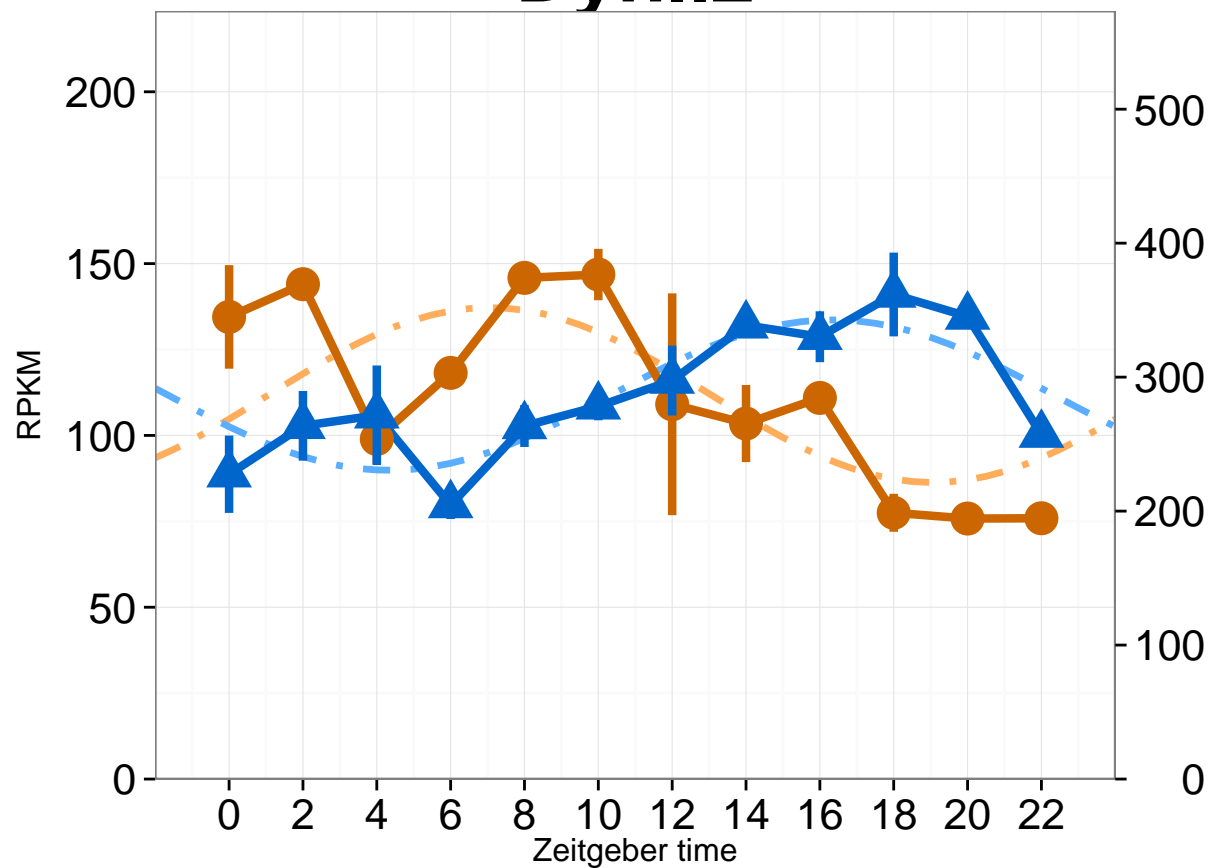

## DynII2

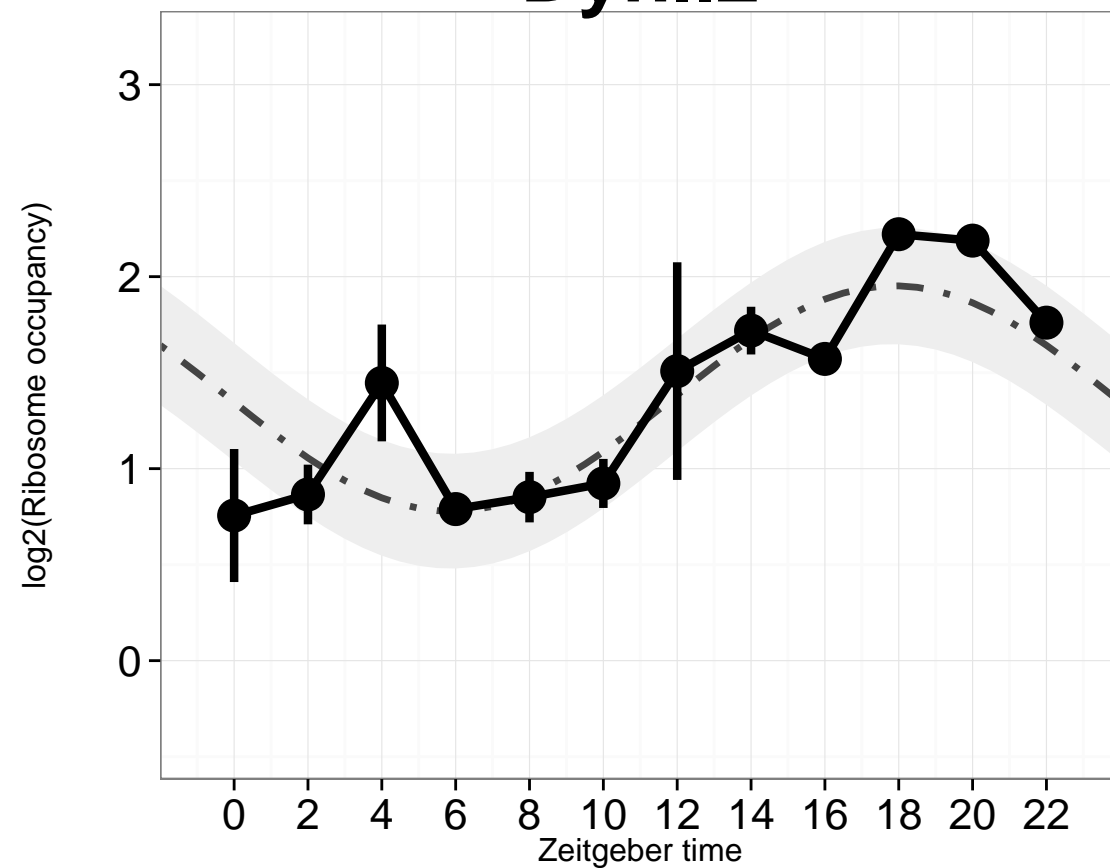

Supplement: Supplementary file 8362 [file 1]

# Senp1

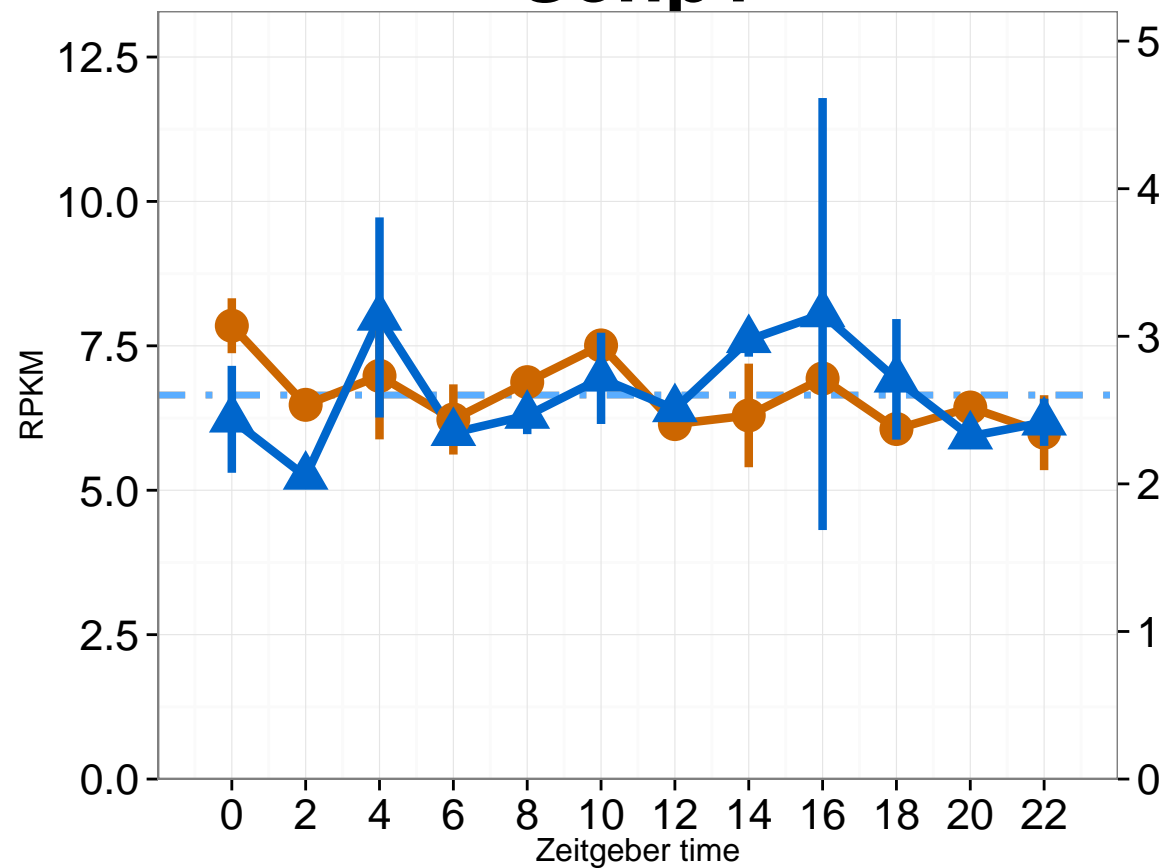

# Senp1

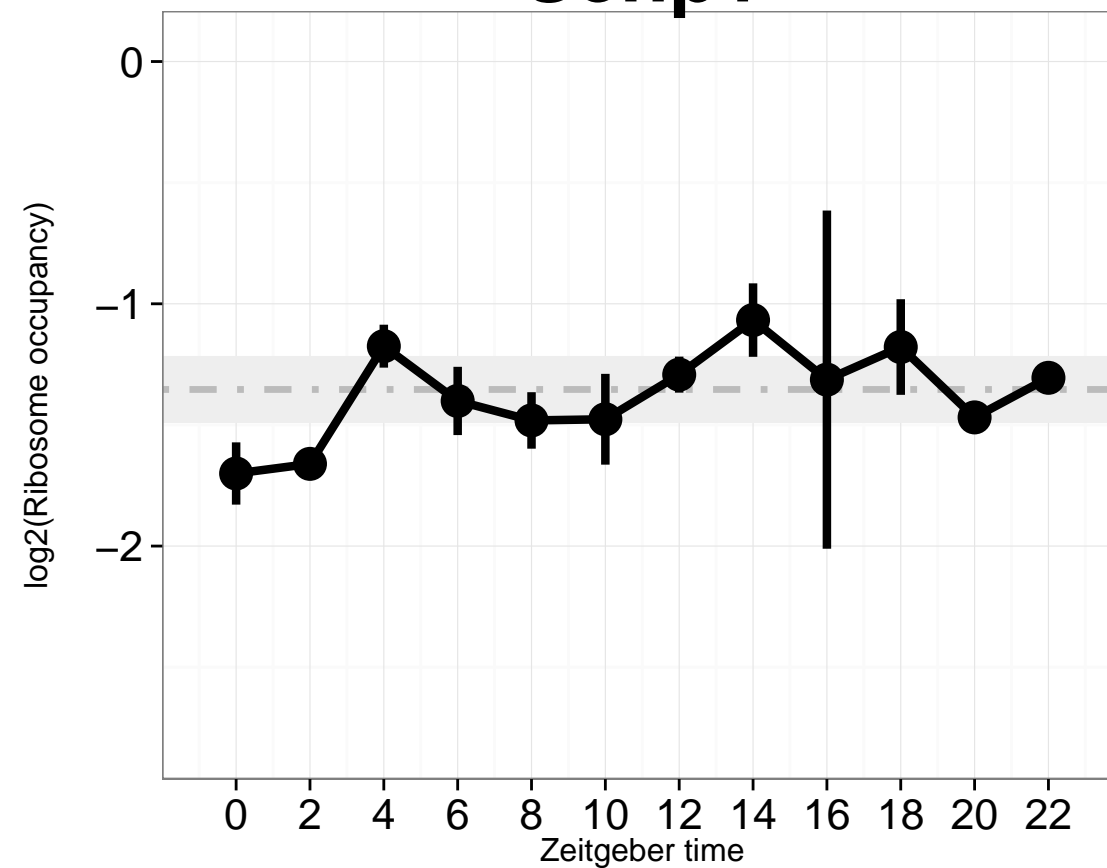

Supplement: Supplementary file 8363 [file 1]

## Rnf219

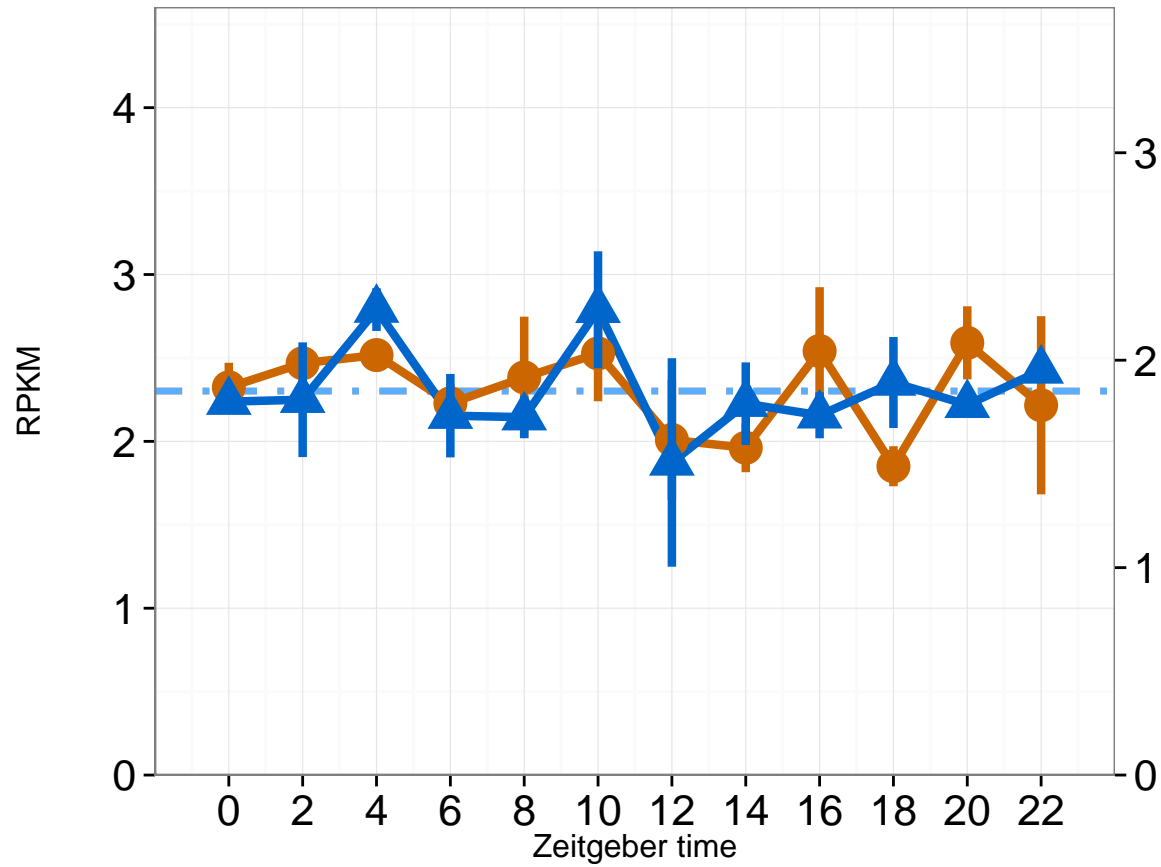

## Rnf219

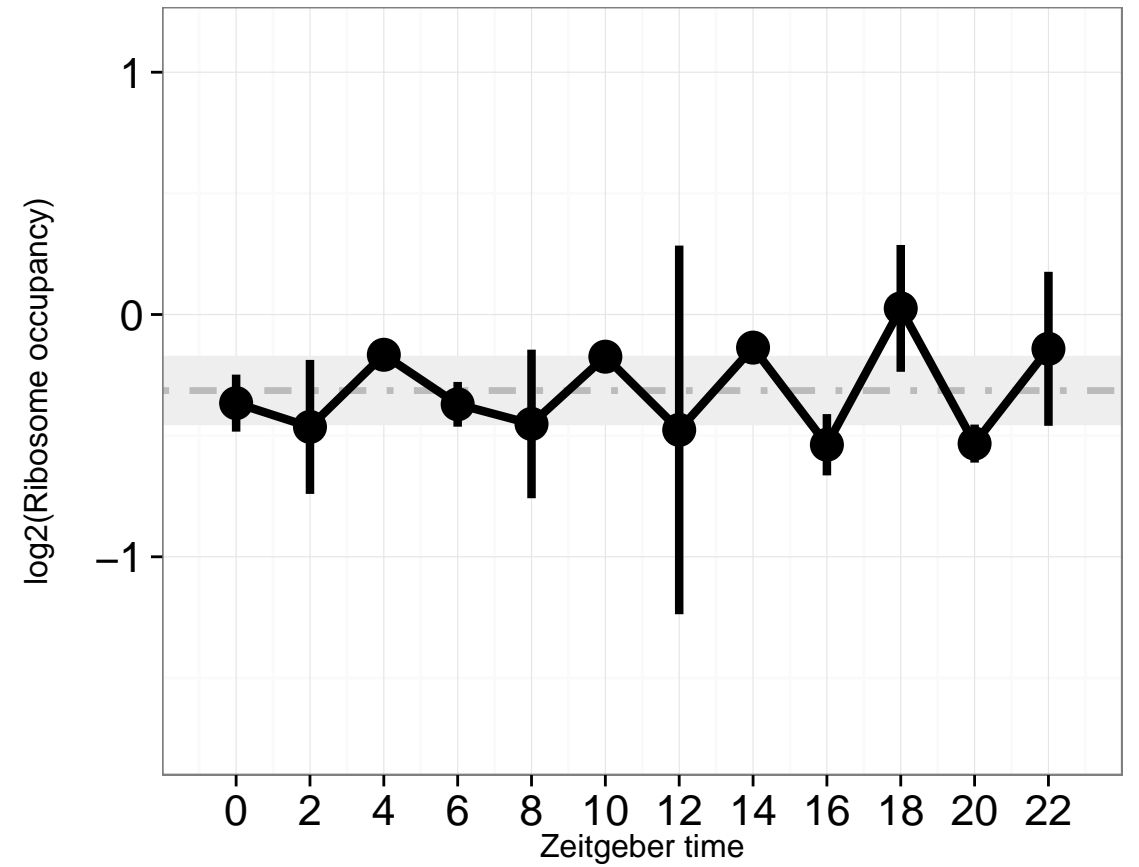

Supplement: Supplementary file 8364 [file 1]

# Pum2

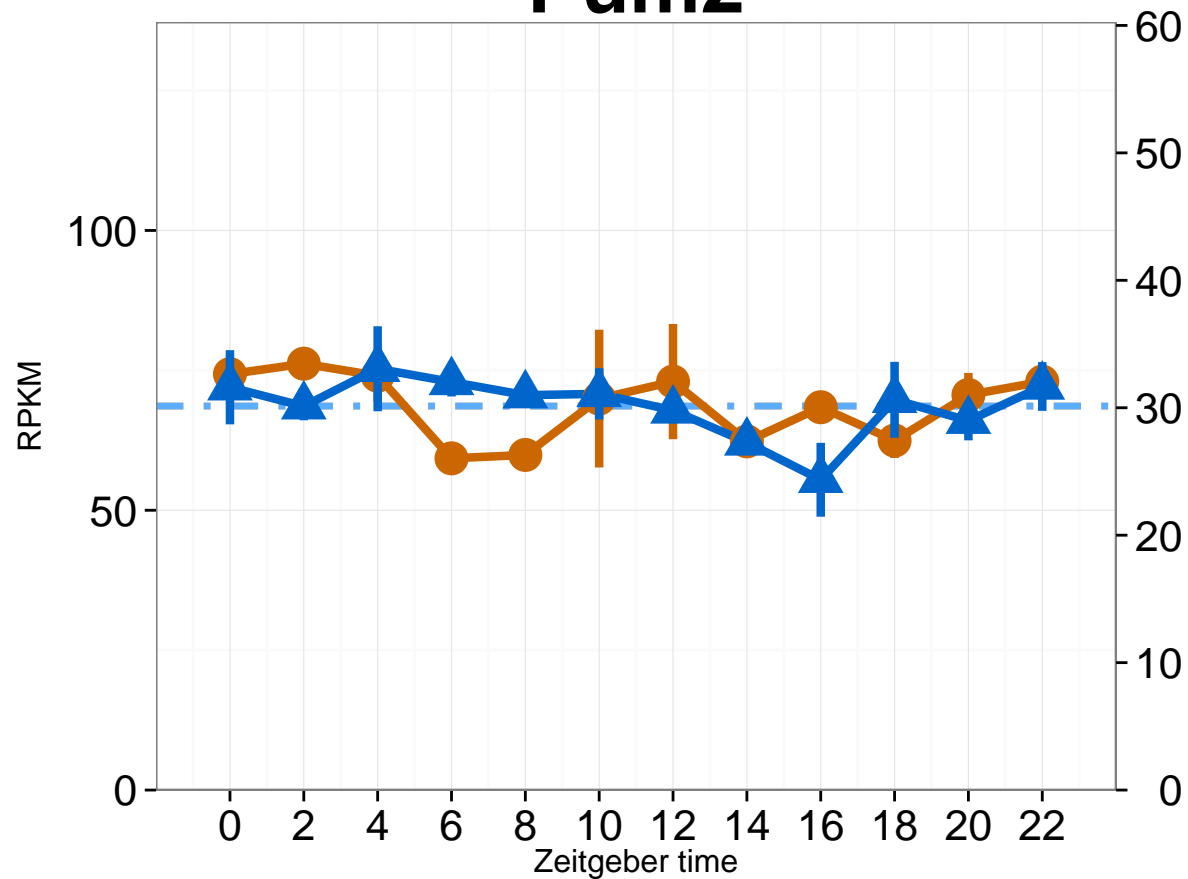

# Pum2

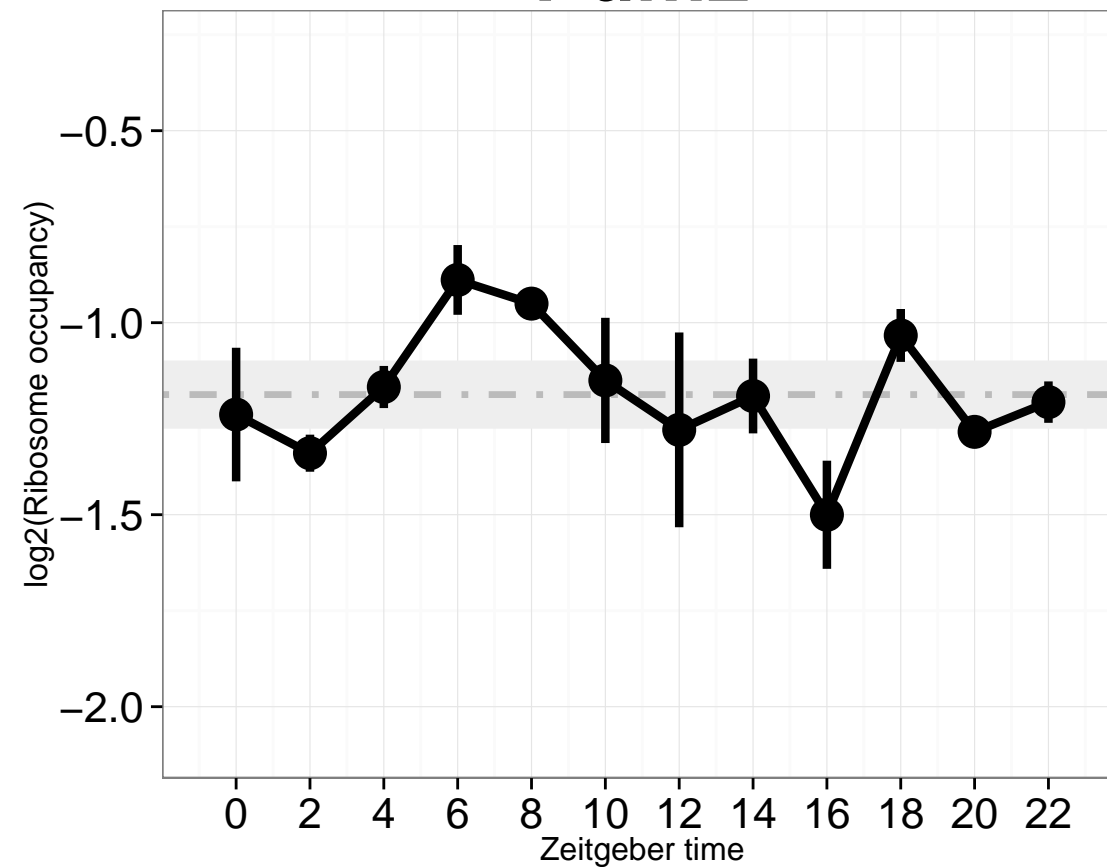

Supplement: Supplementary file 8365 [file 1]

# Arfgap3

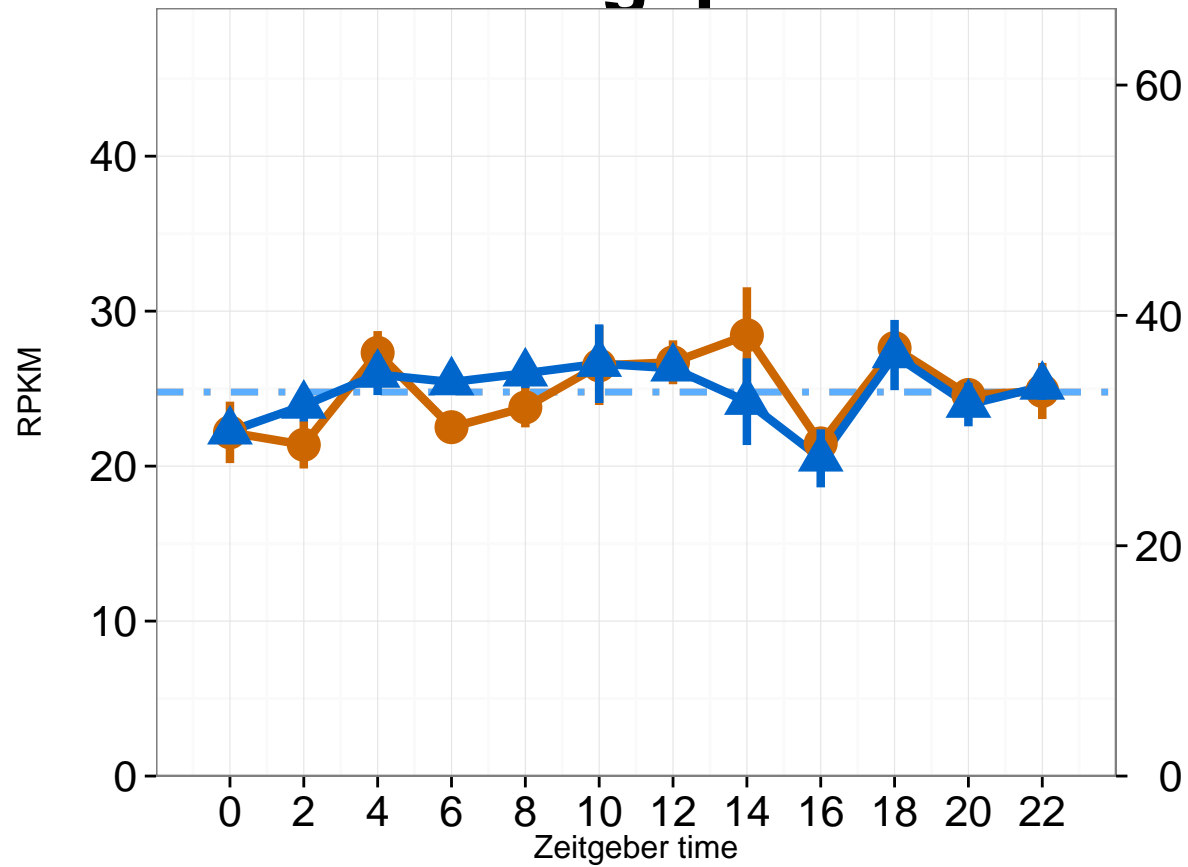

# Arfgap3

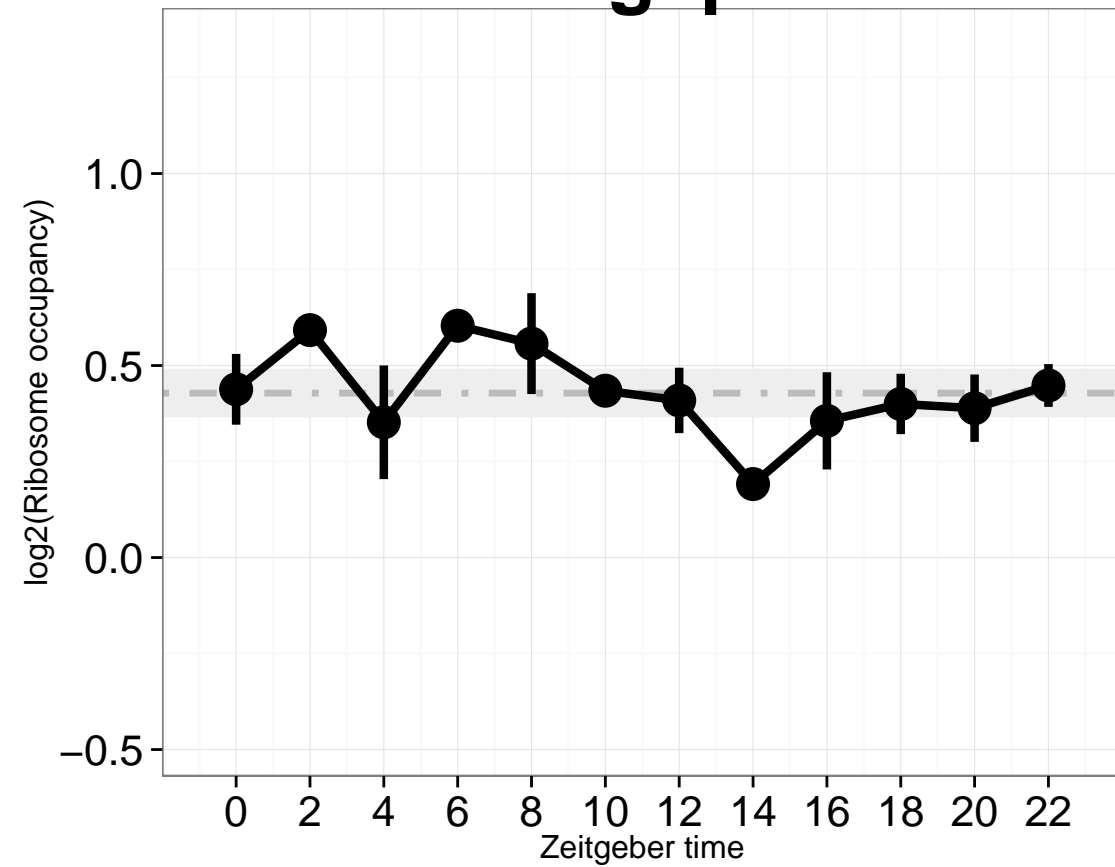

Supplement: Supplementary file 8366 [file 1]

## Eif3g

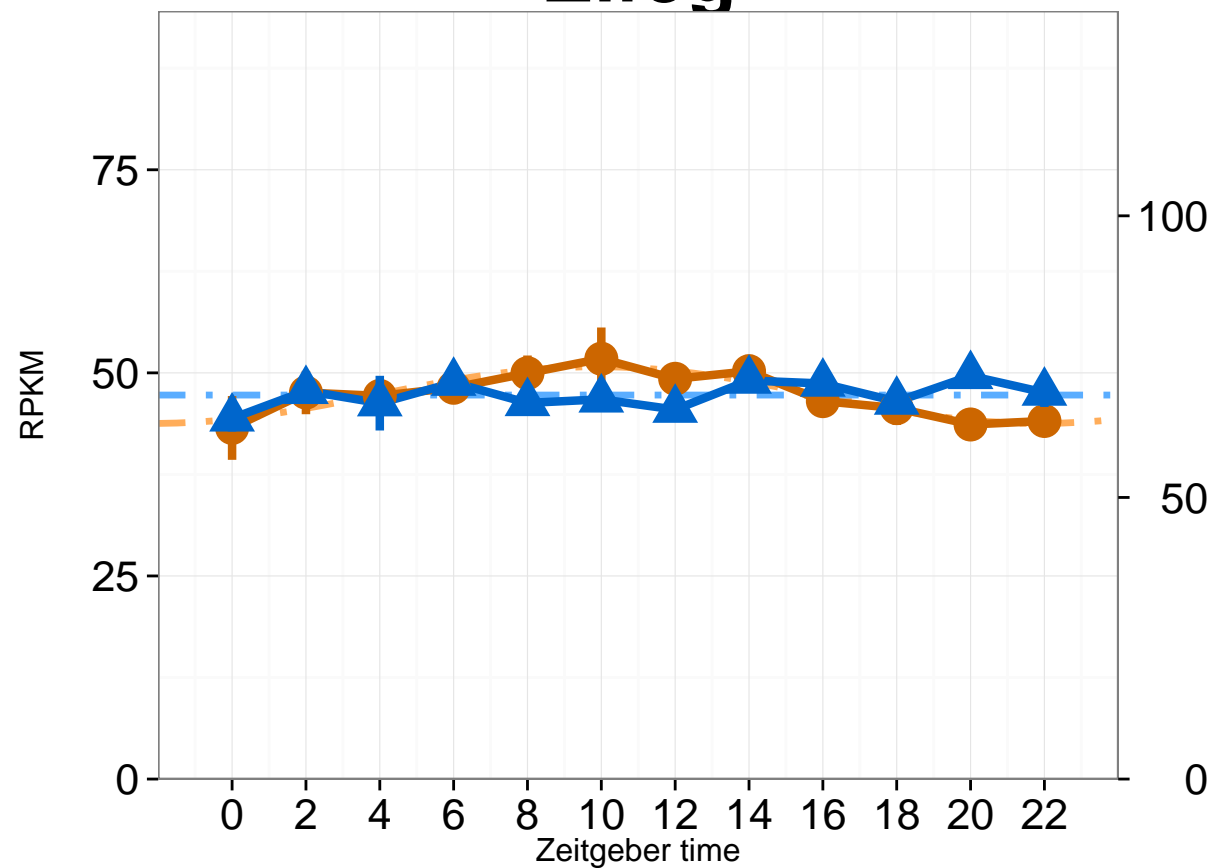

## Eif3g

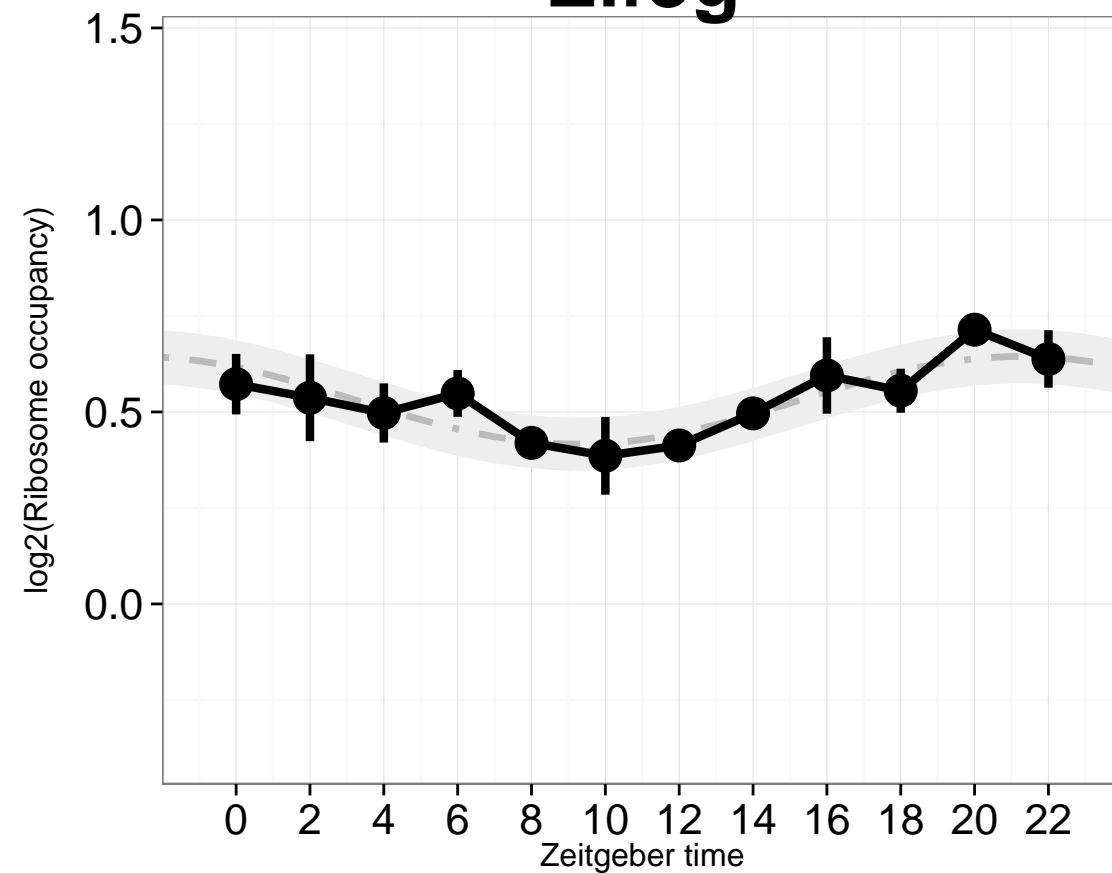

Supplement: Supplementary file 8367 [file 1]

# Nhp2

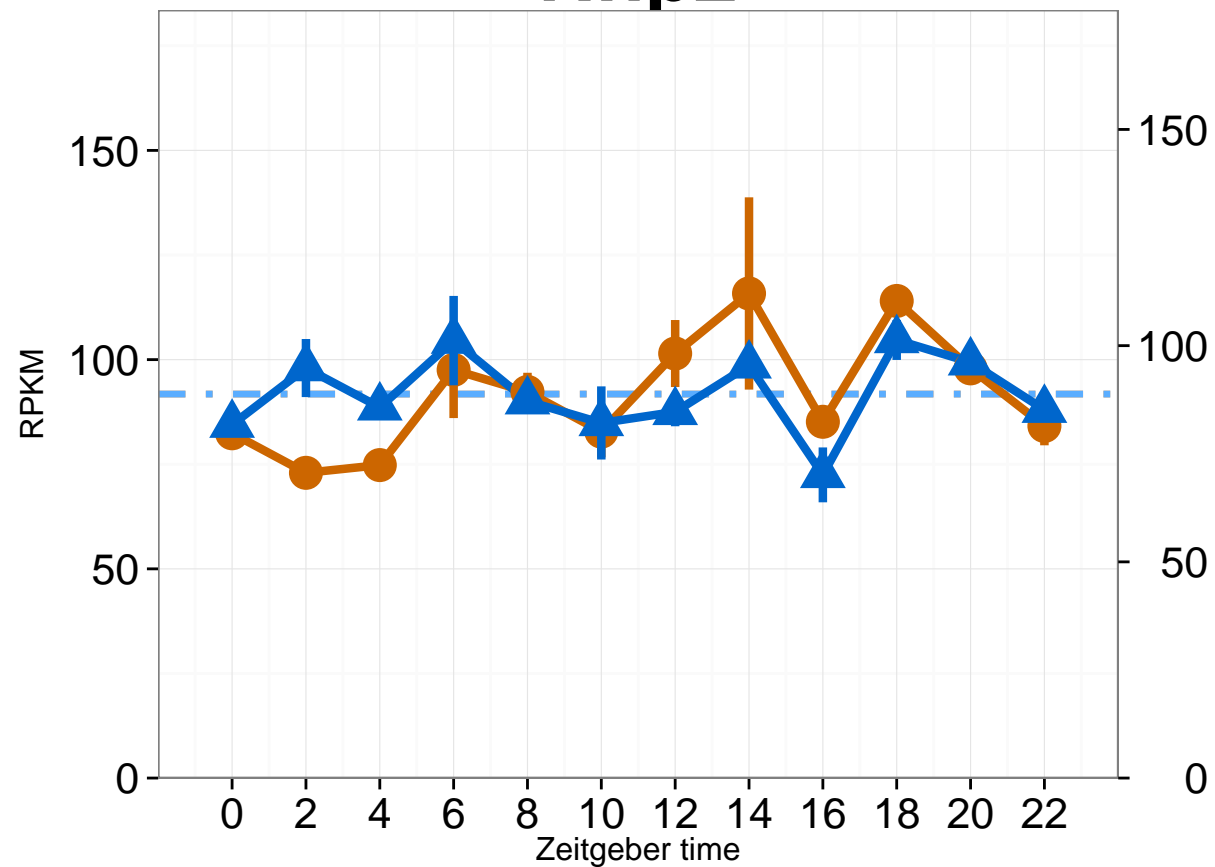

# Nhp2

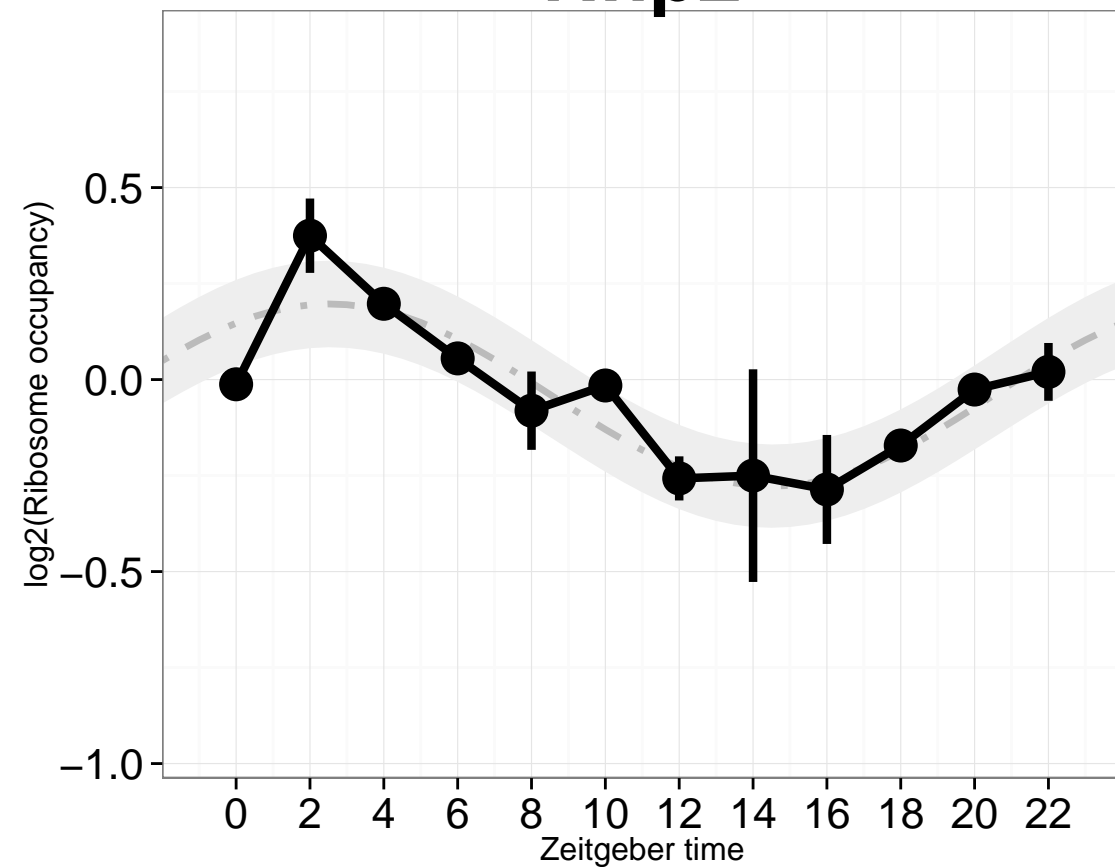

Supplement: Supplementary file 8368 [file 1]

# Cercam

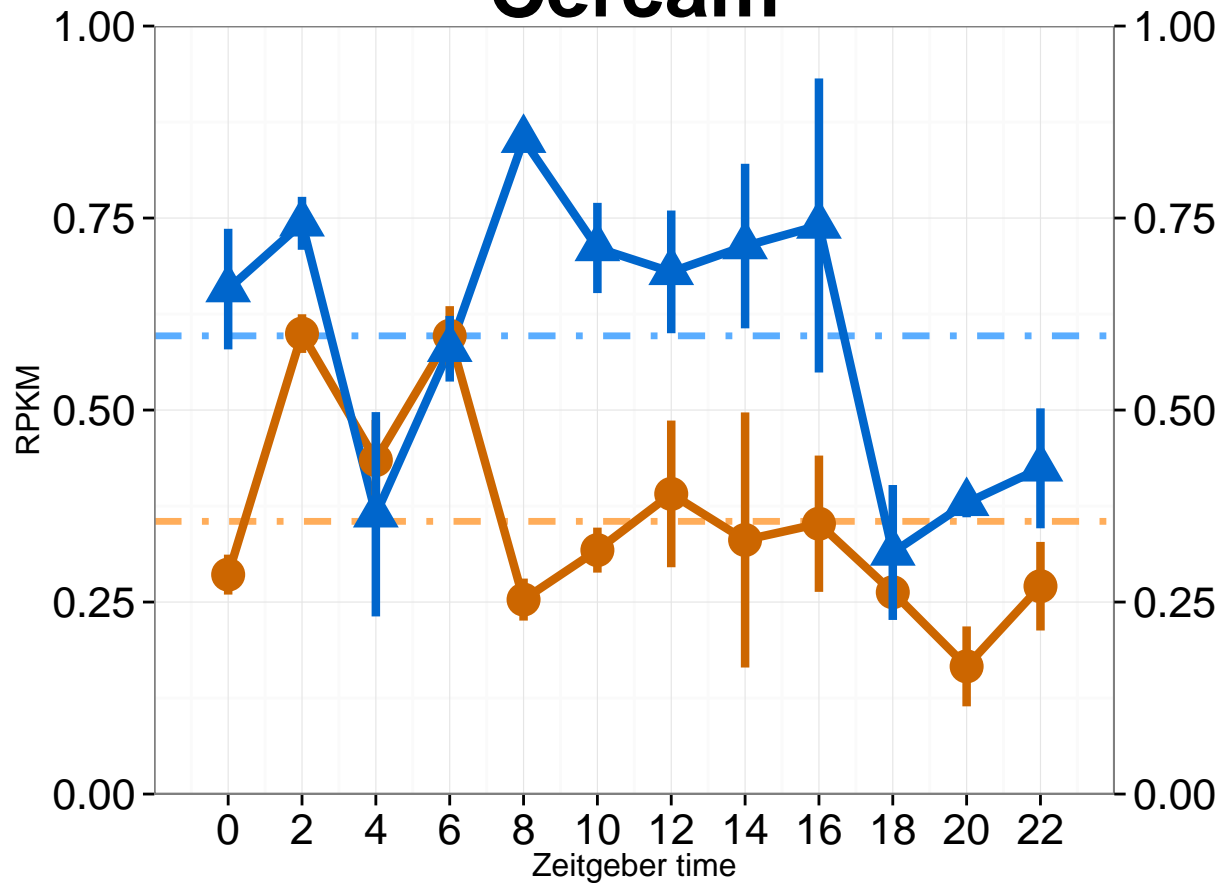

# Cercam

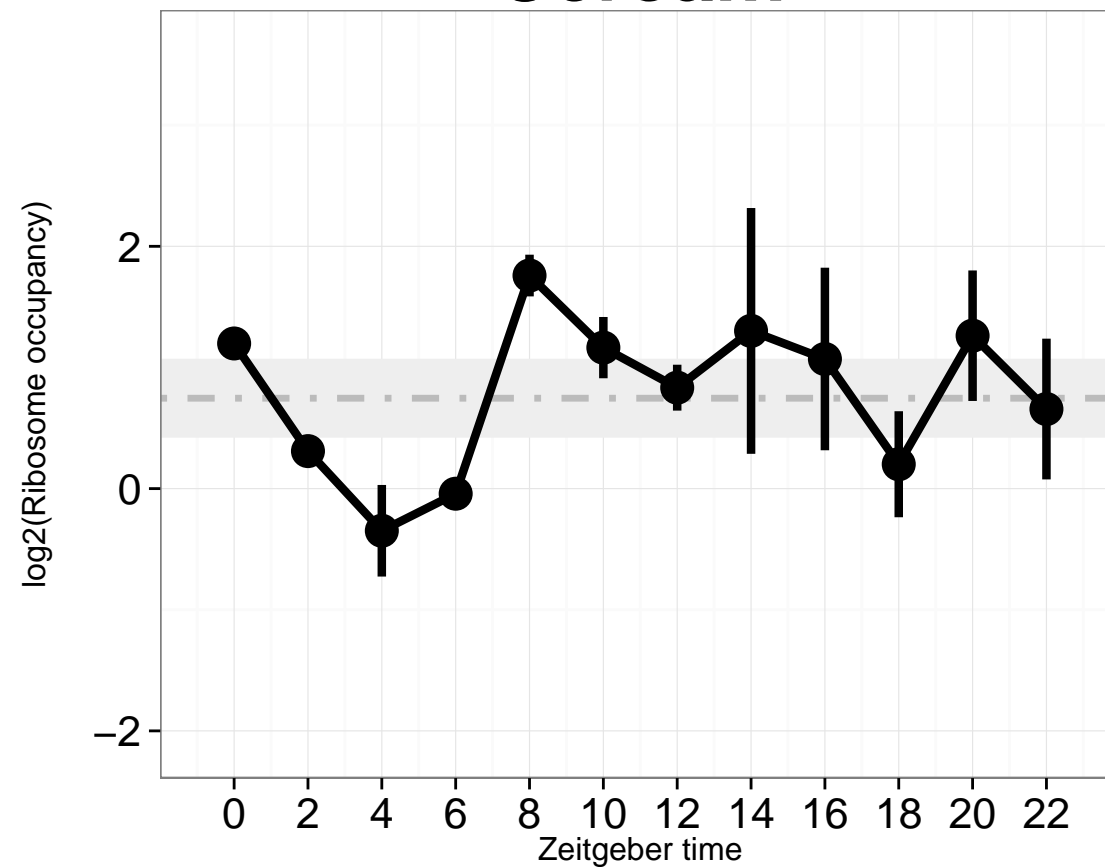

Supplement: Supplementary file 8369 [file 1]

## Cirbp

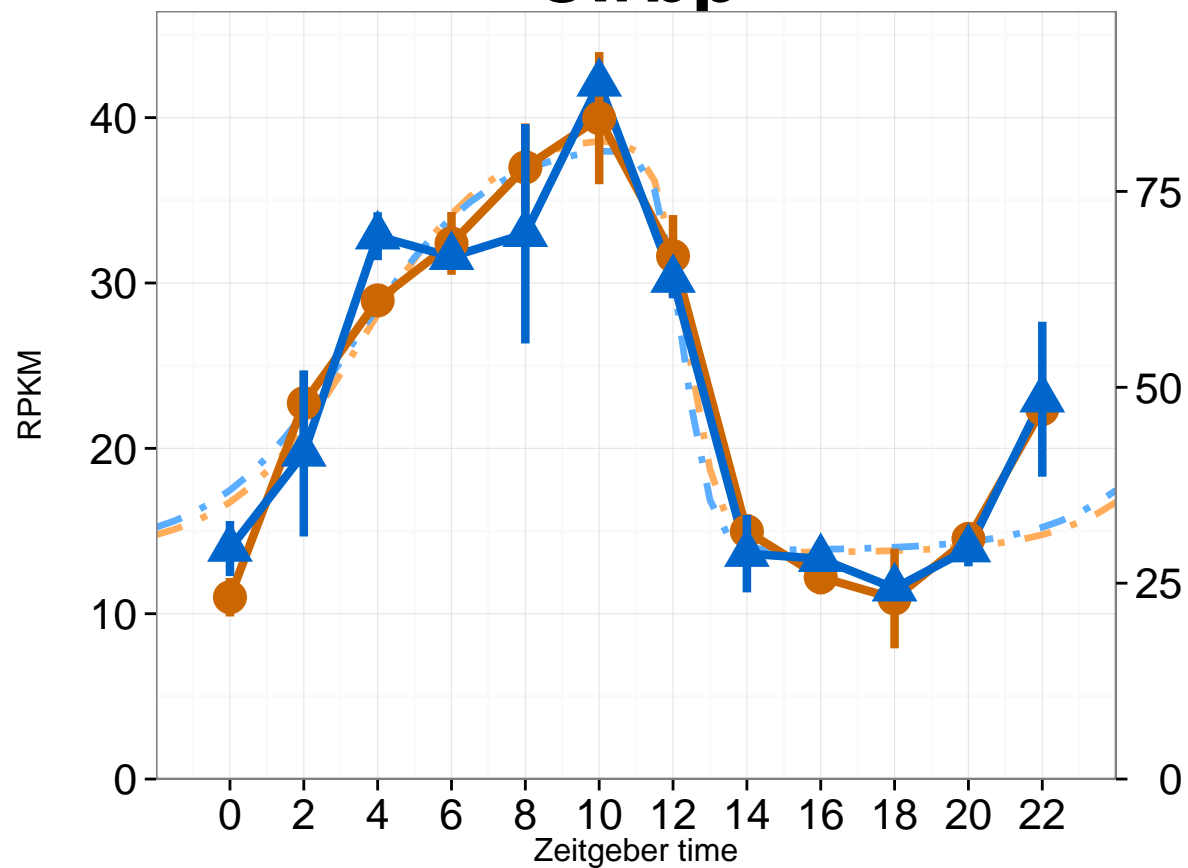

## Cirbp

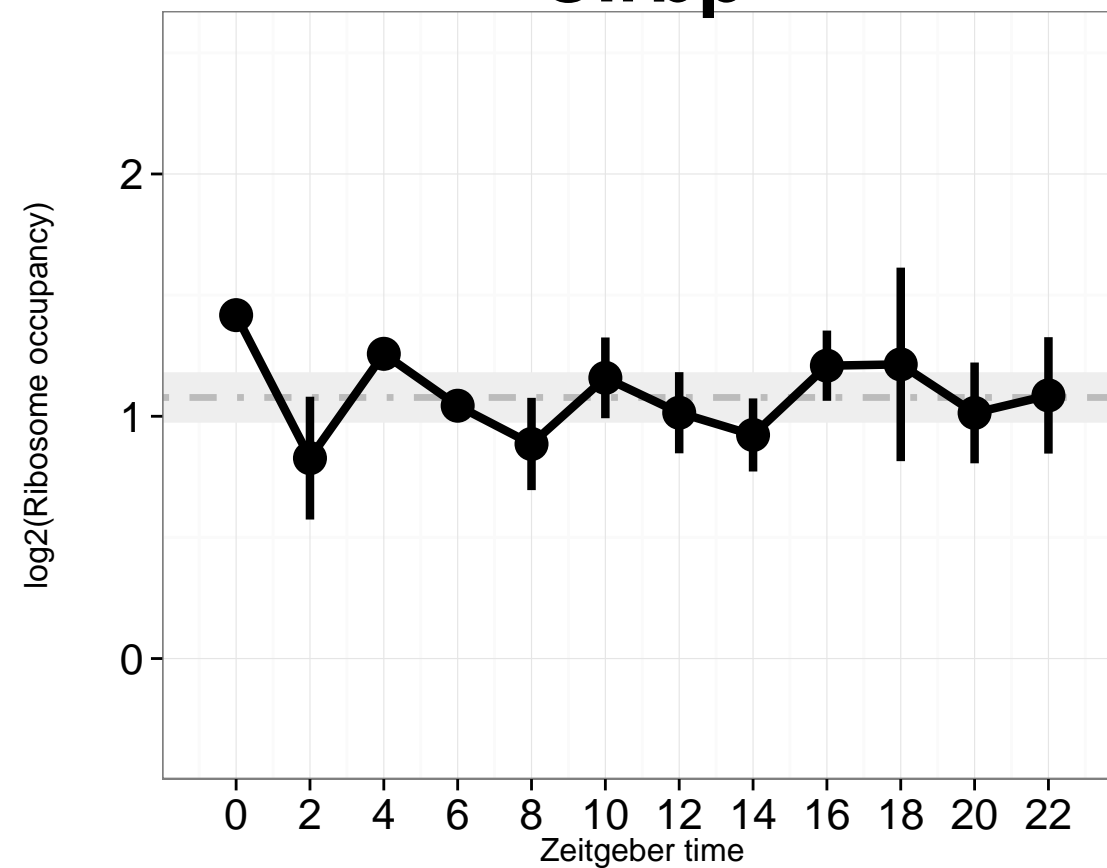

Supplement: Supplementary file 8370 [file 1]

# Slc16a2

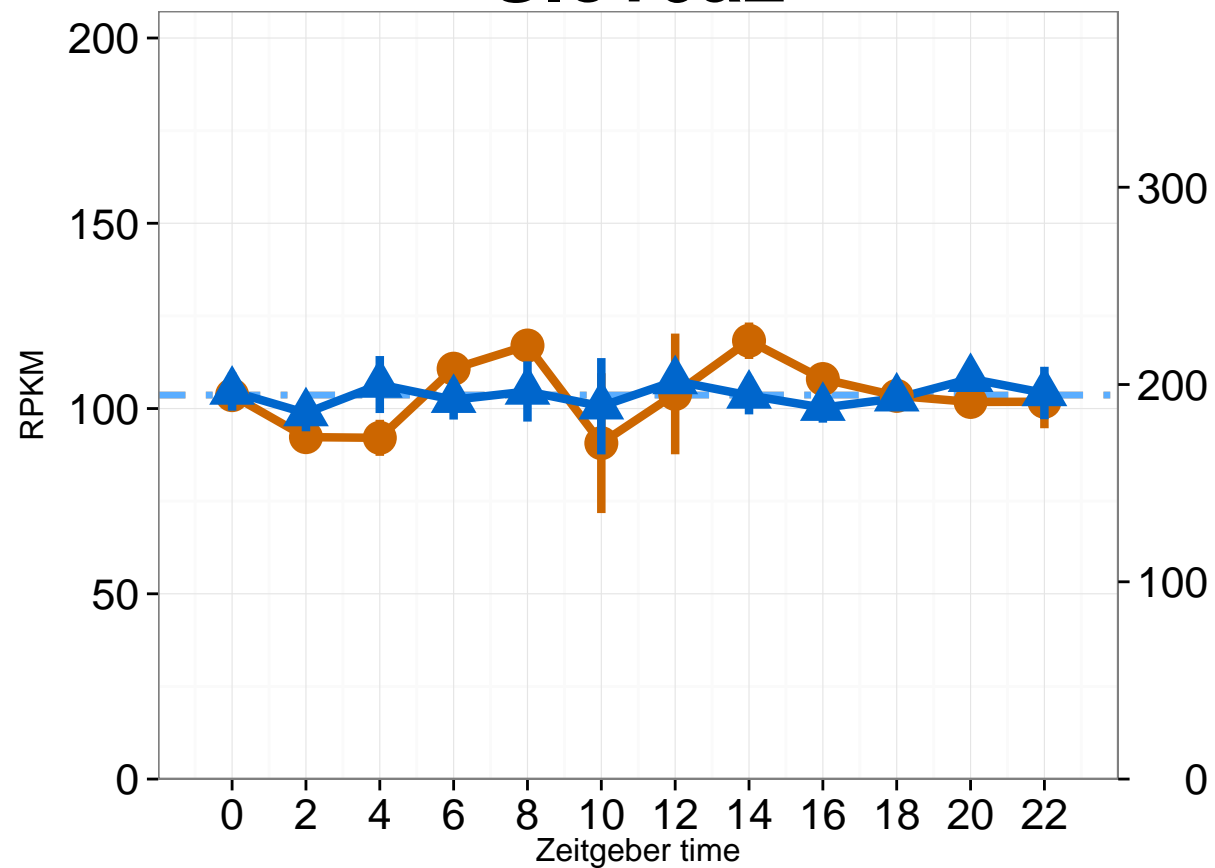

# Slc16a2

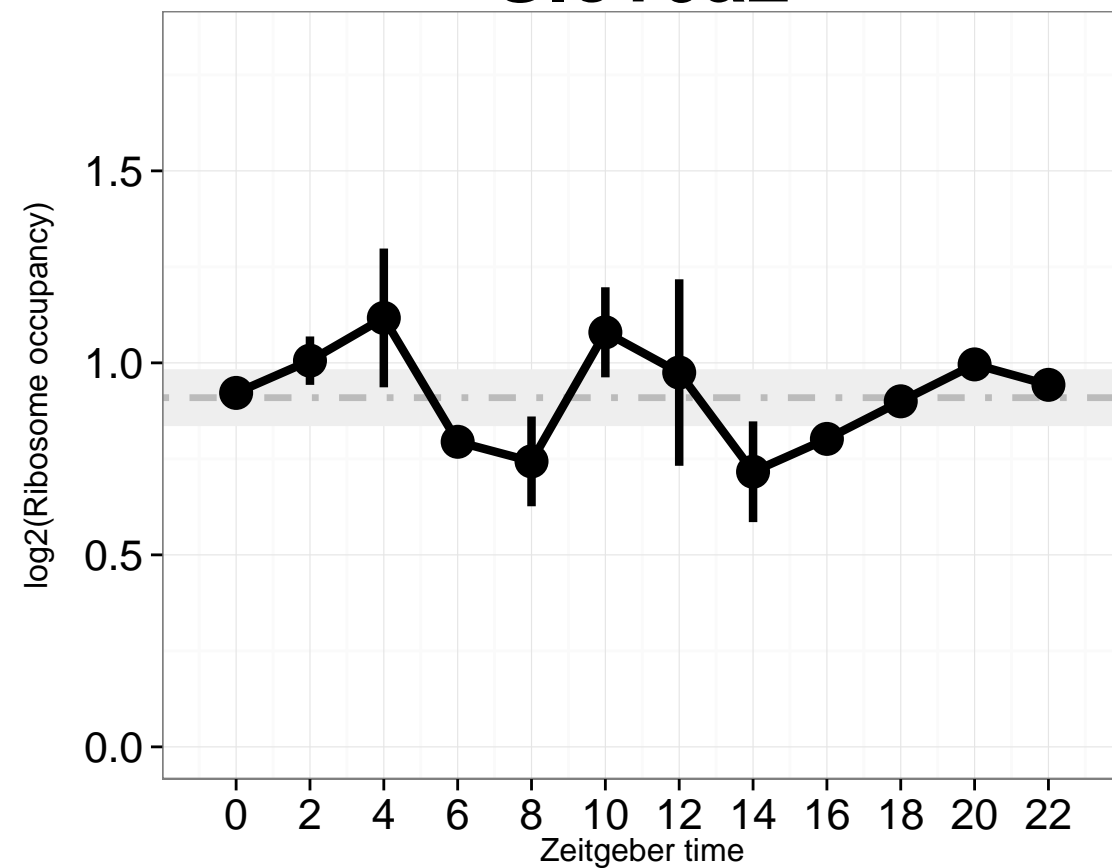

Supplement: Supplementary file 8371 [file 1]

**Ms4a4d TR**

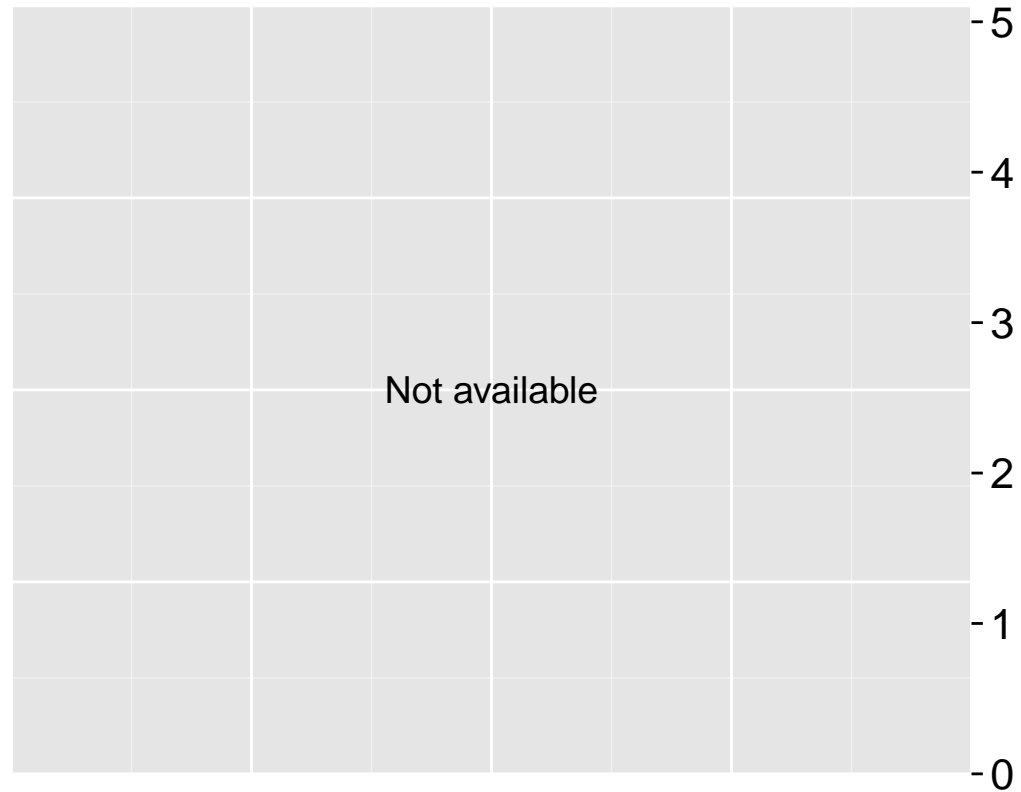

**Ms4a4d log2(Ribosome occupancy**

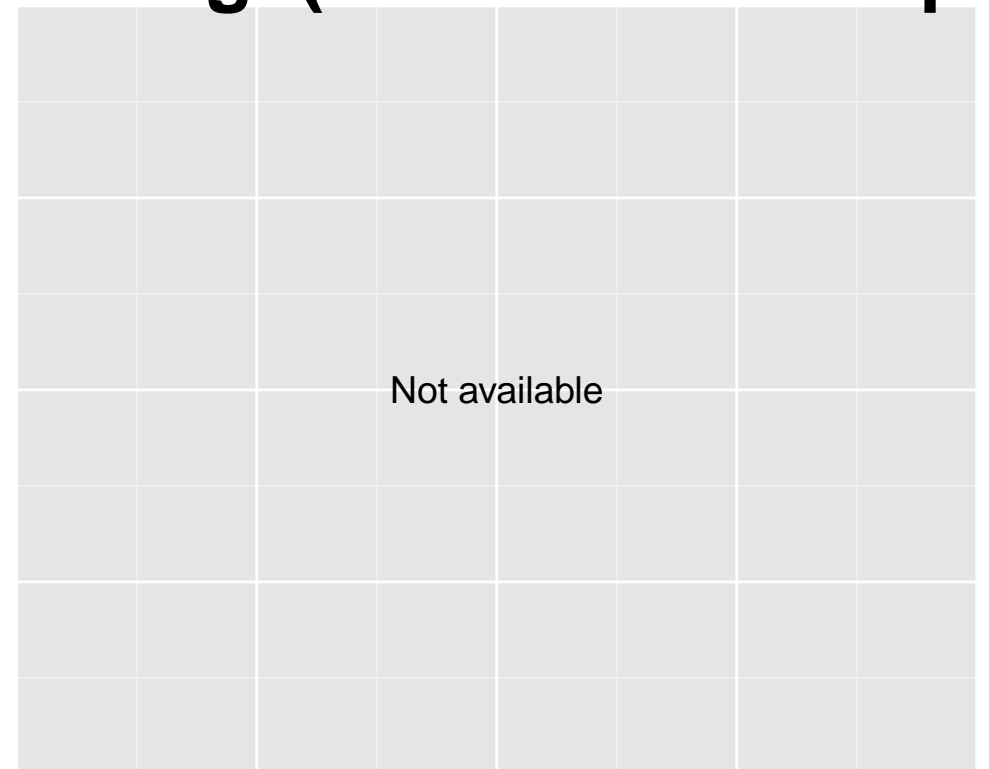

Supplement: Supplementary file 8372 [file 1]

## Hmgb1

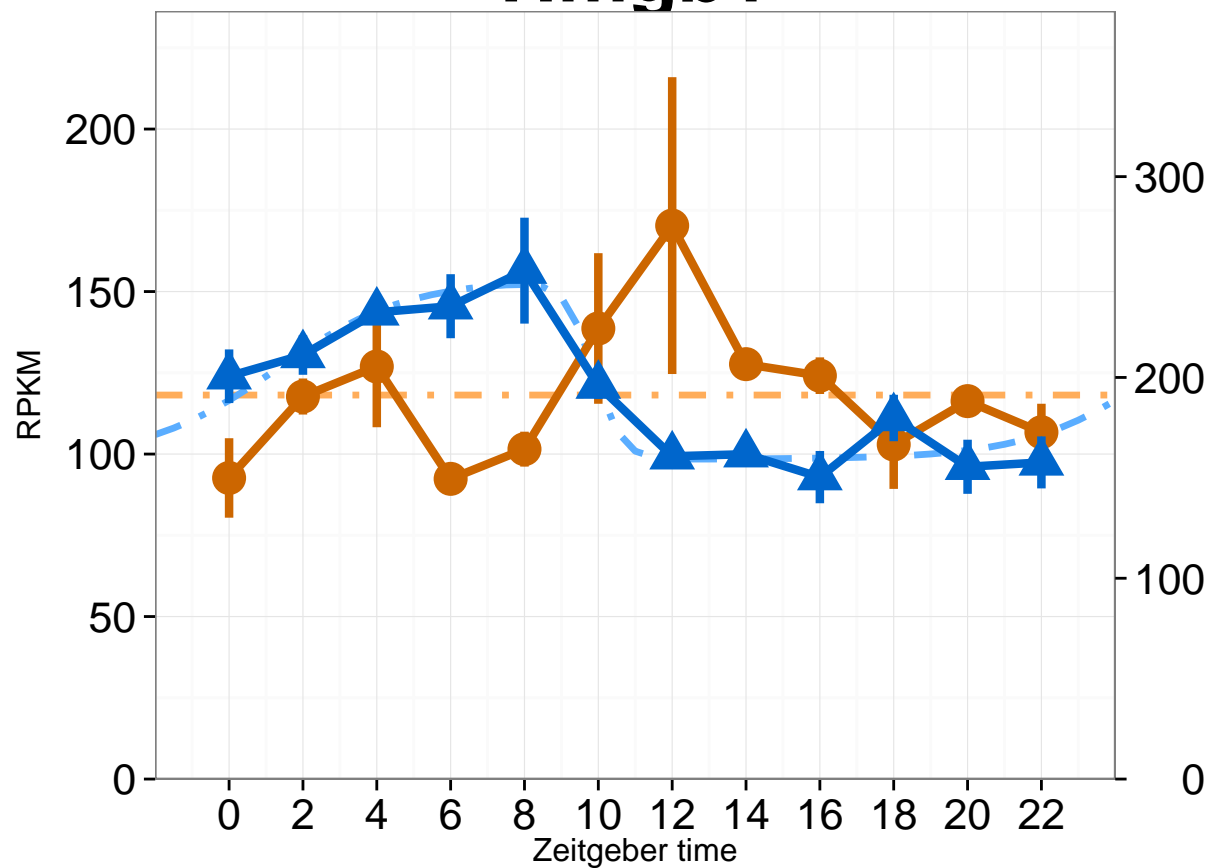

## Hmgb1

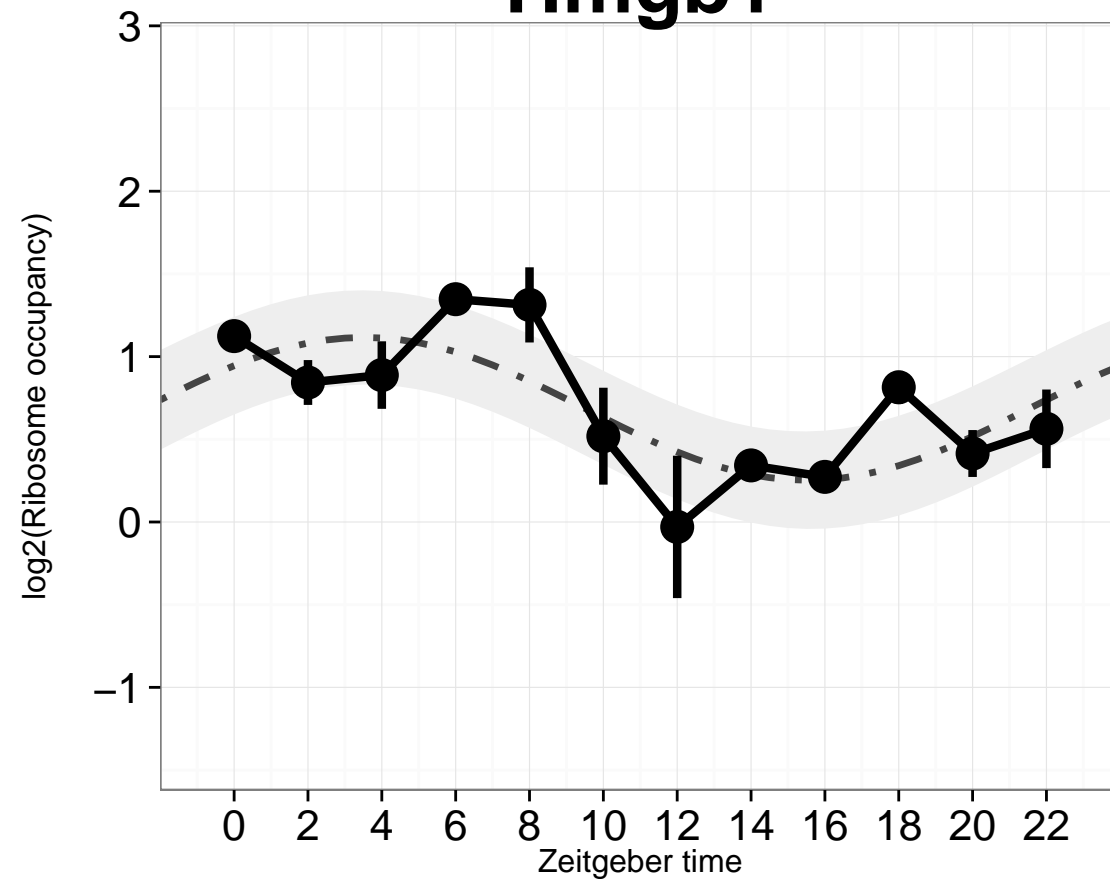

Supplement: Supplementary file 8373 [file 1]

# Gtf2ird2

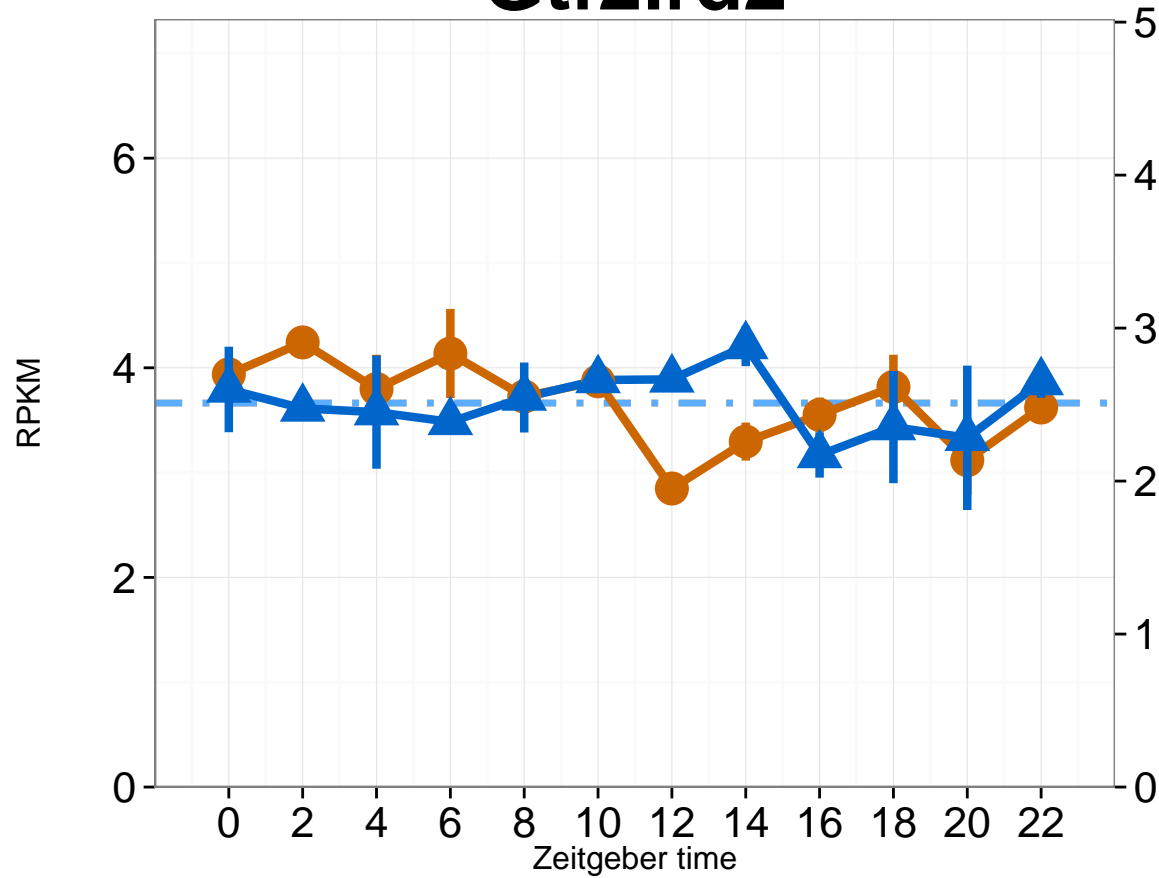

# Gtf2ird2

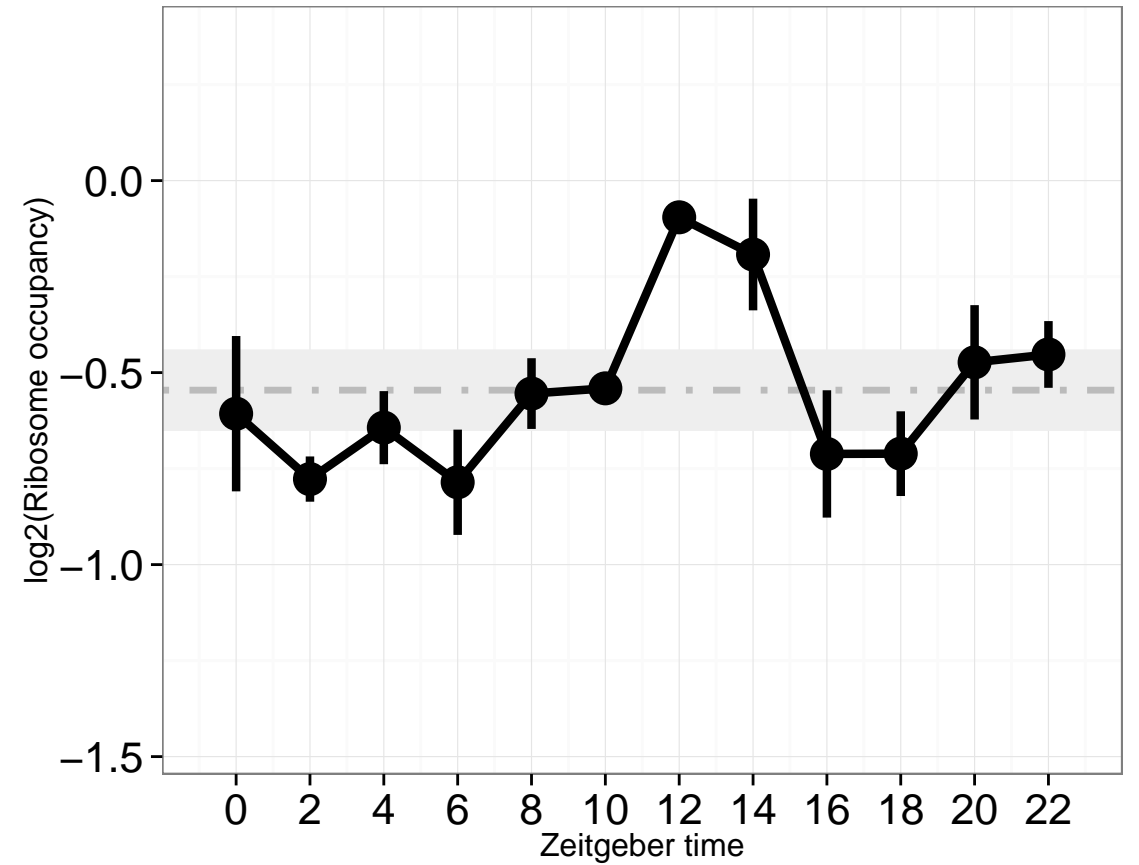

Supplement: Supplementary file 8374 [file 1]

# Ikzf5

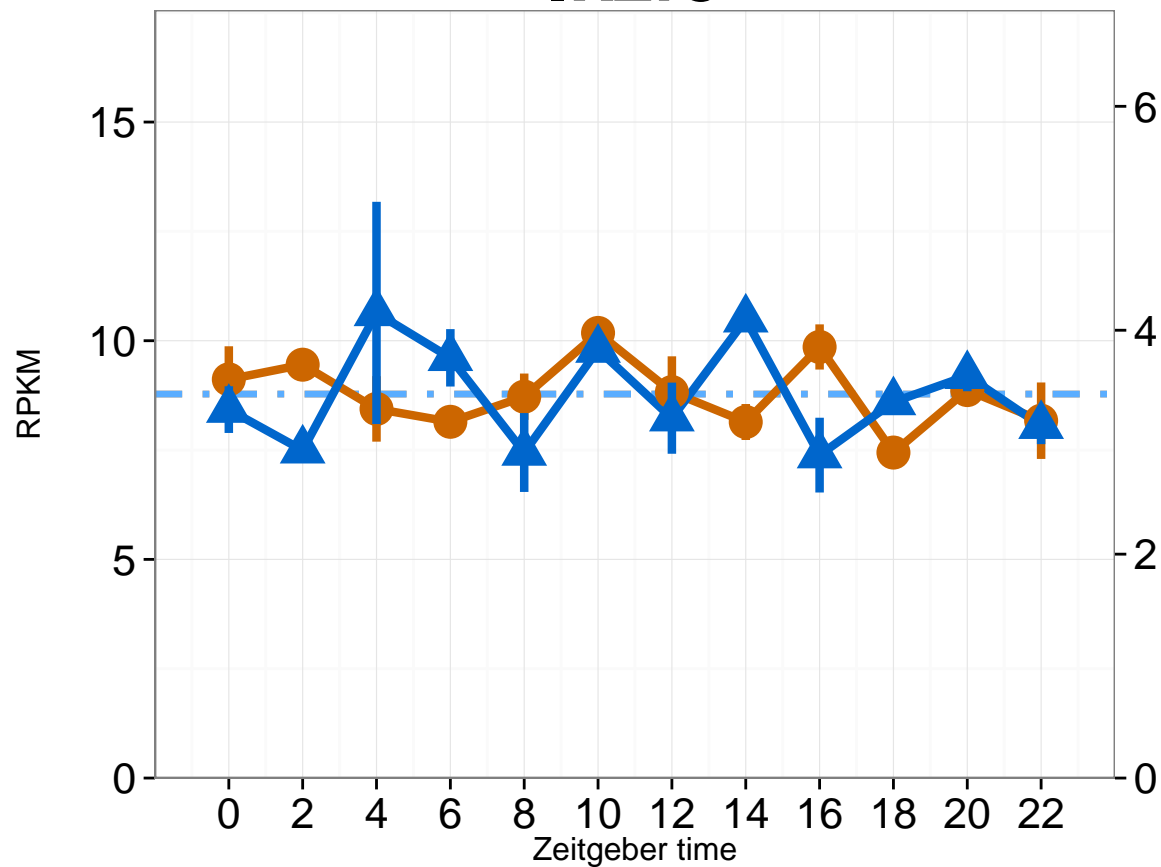

# Ikzf5

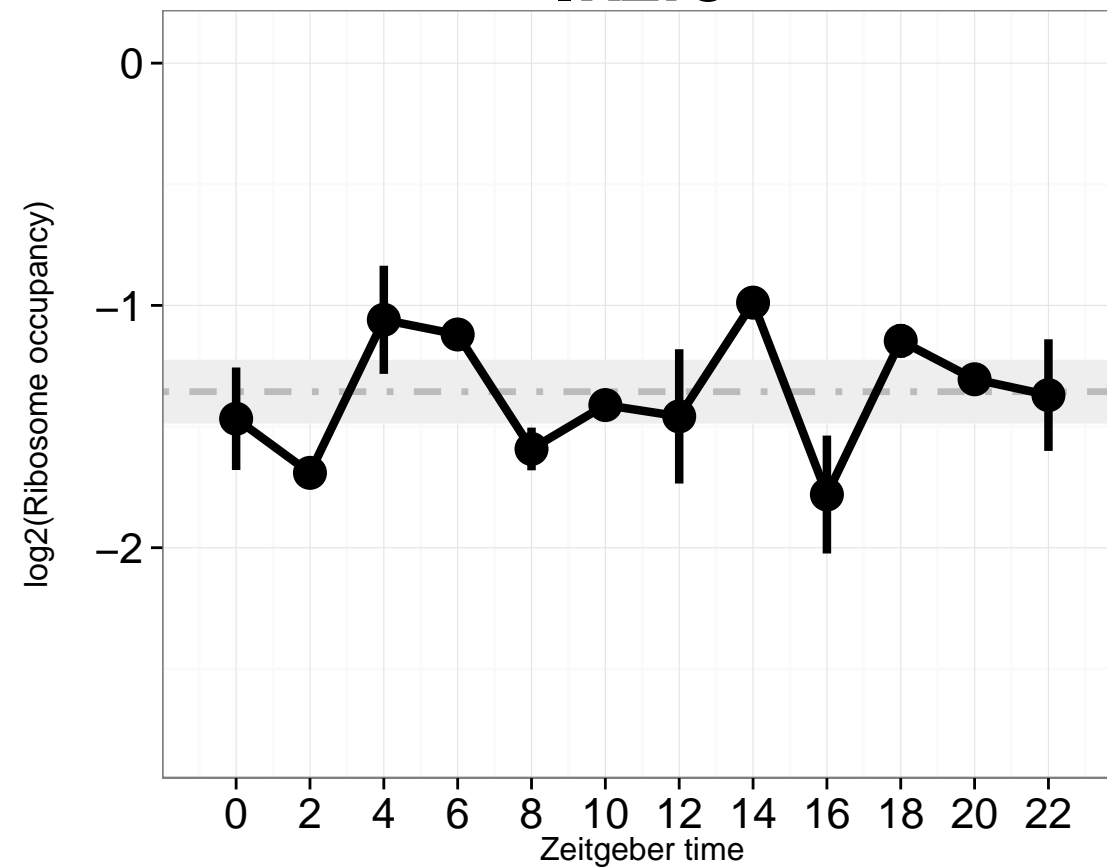

Supplement: Supplementary file 8375 [file 1]

# Mfsd7c

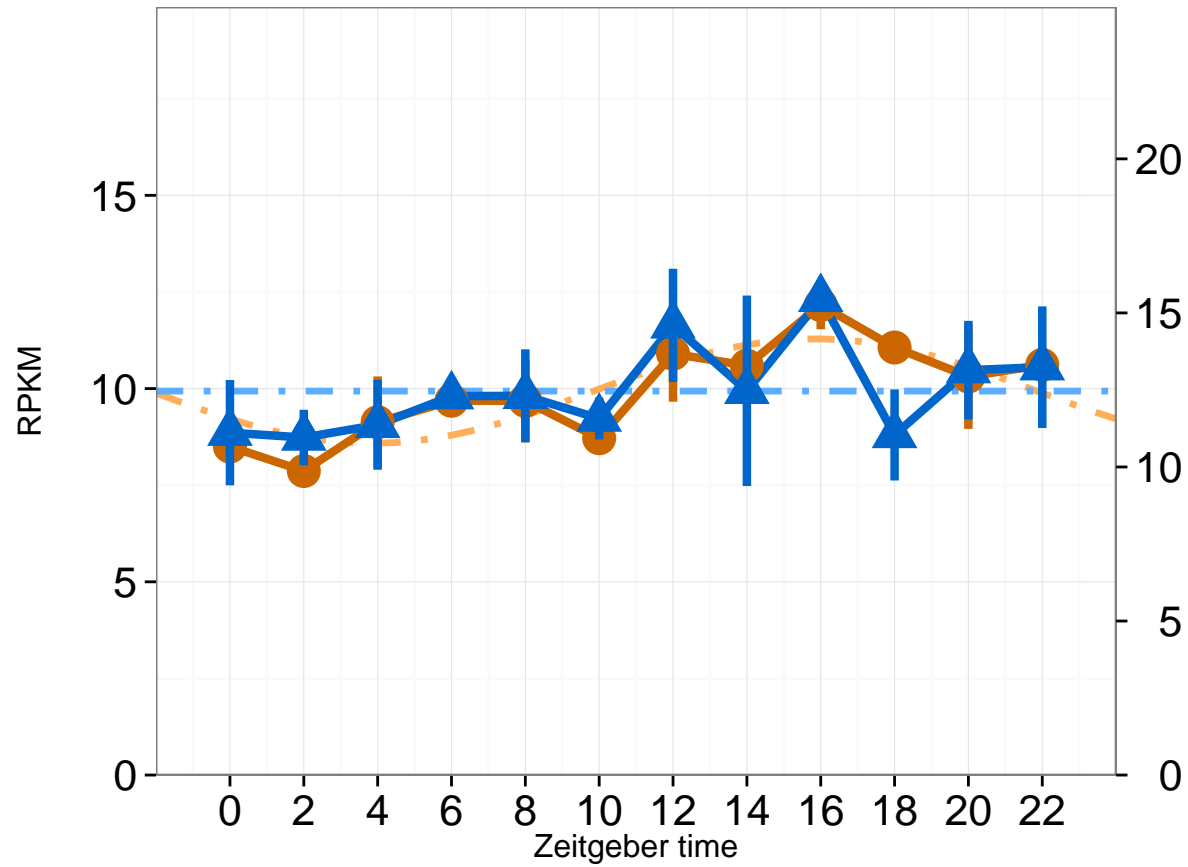

# Mfsd7c

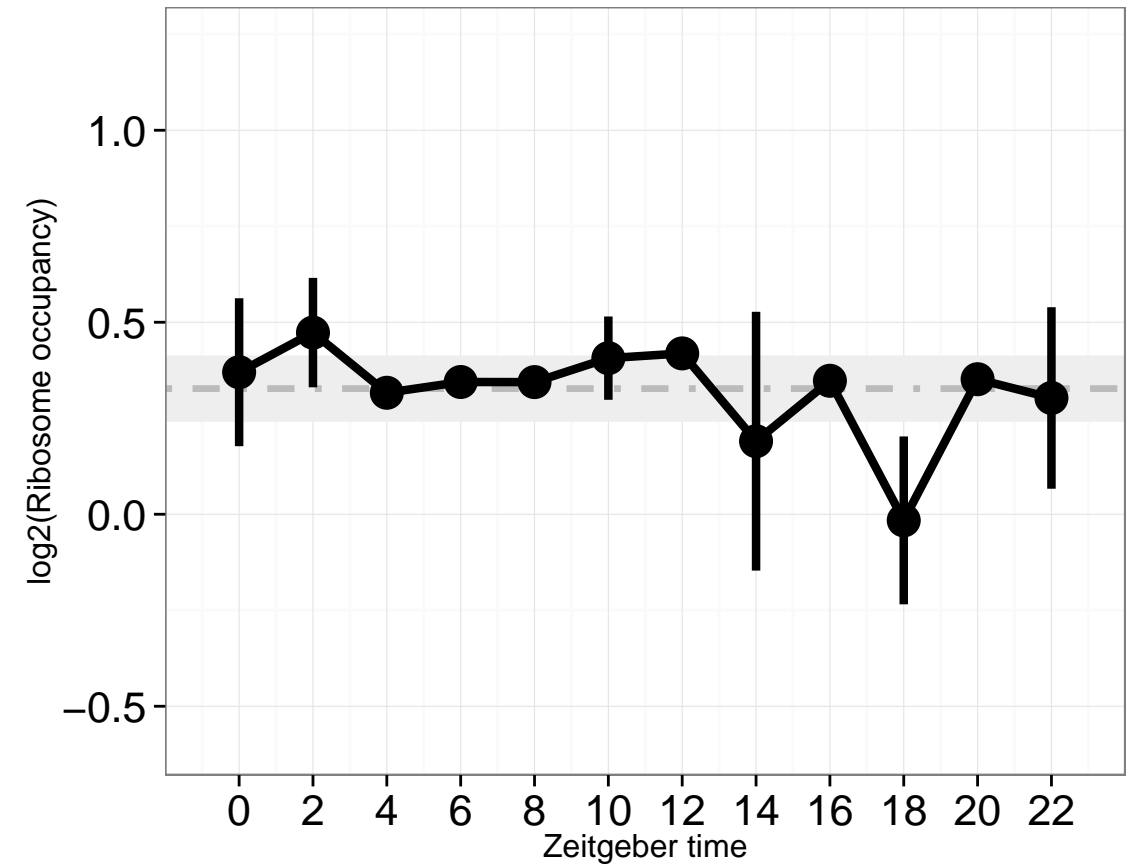

Supplement: Supplementary file 8376 [file 1]

## Vmn1r20

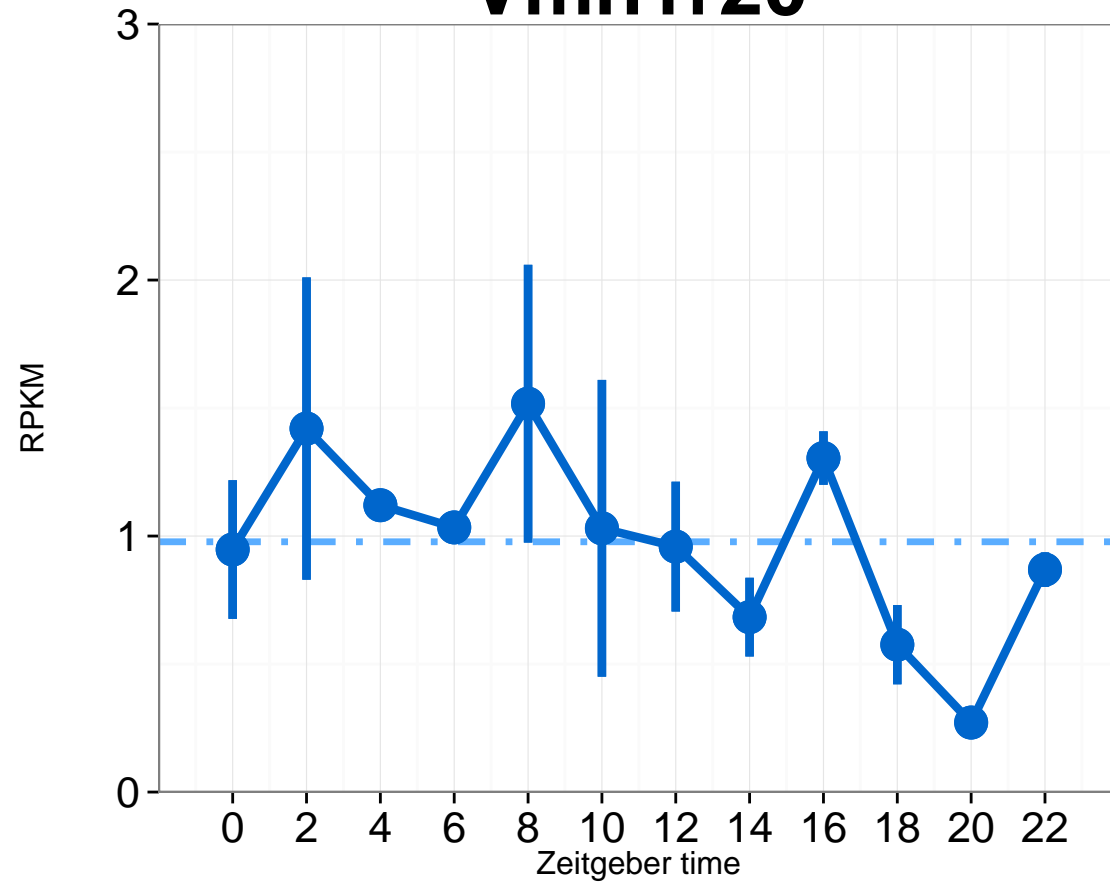

## Vmn1r20 log2(Ribosome occupancy)

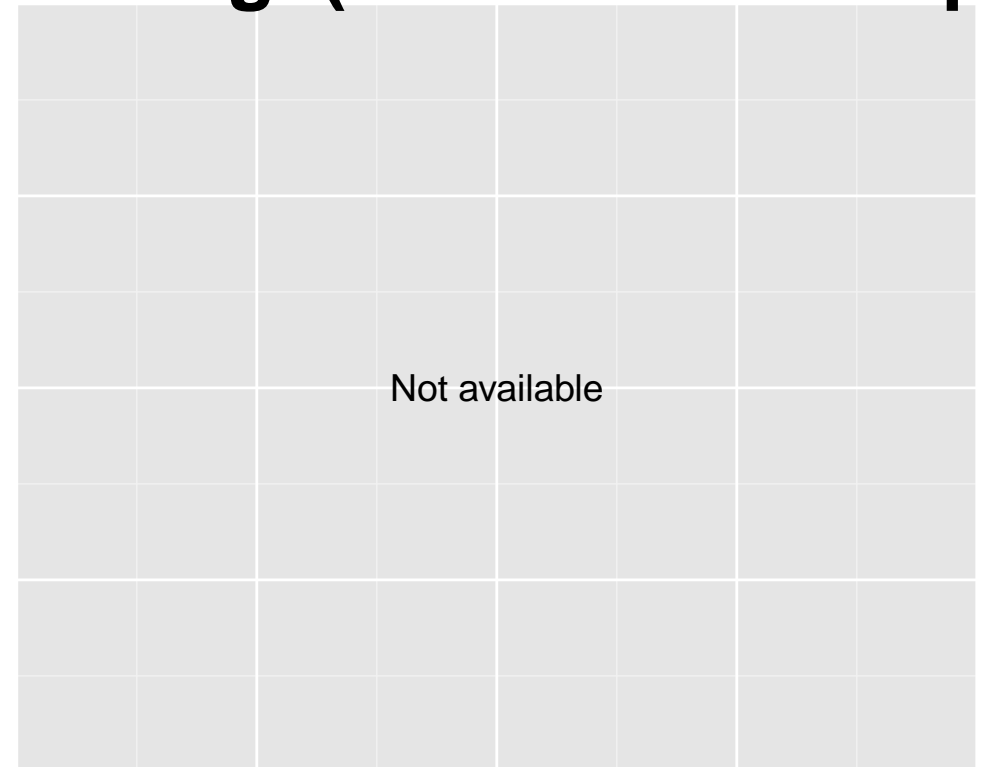

Supplement: Supplementary file 8377 [file 1]

# Dtx4

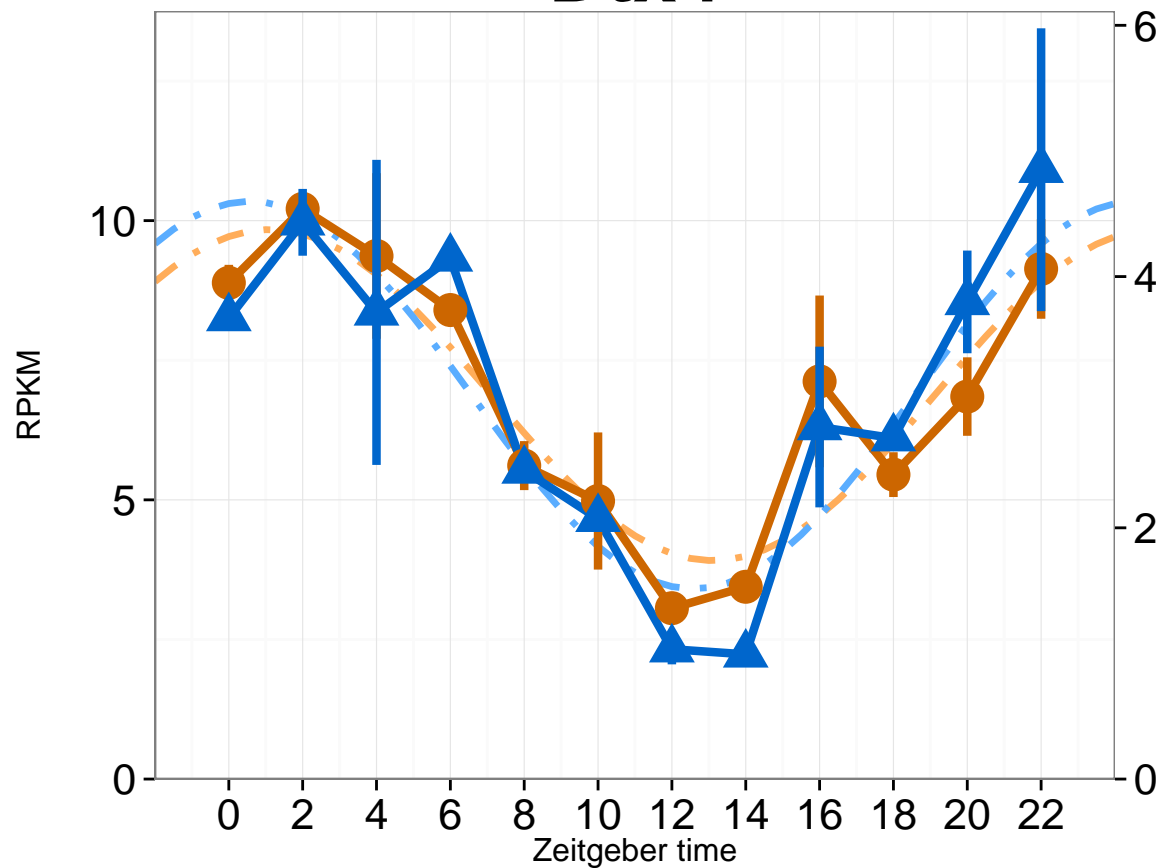

# Dtx4

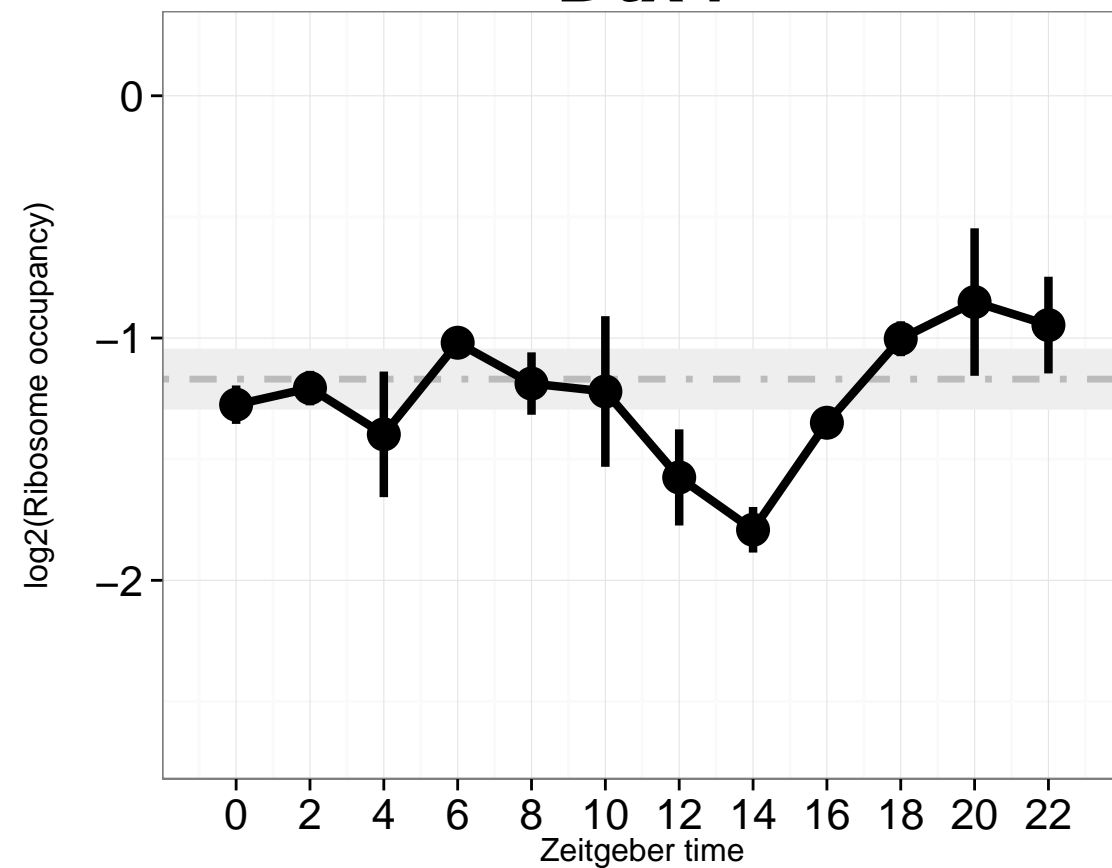

Supplement: Supplementary file 8378 [file 1]

## Msl3

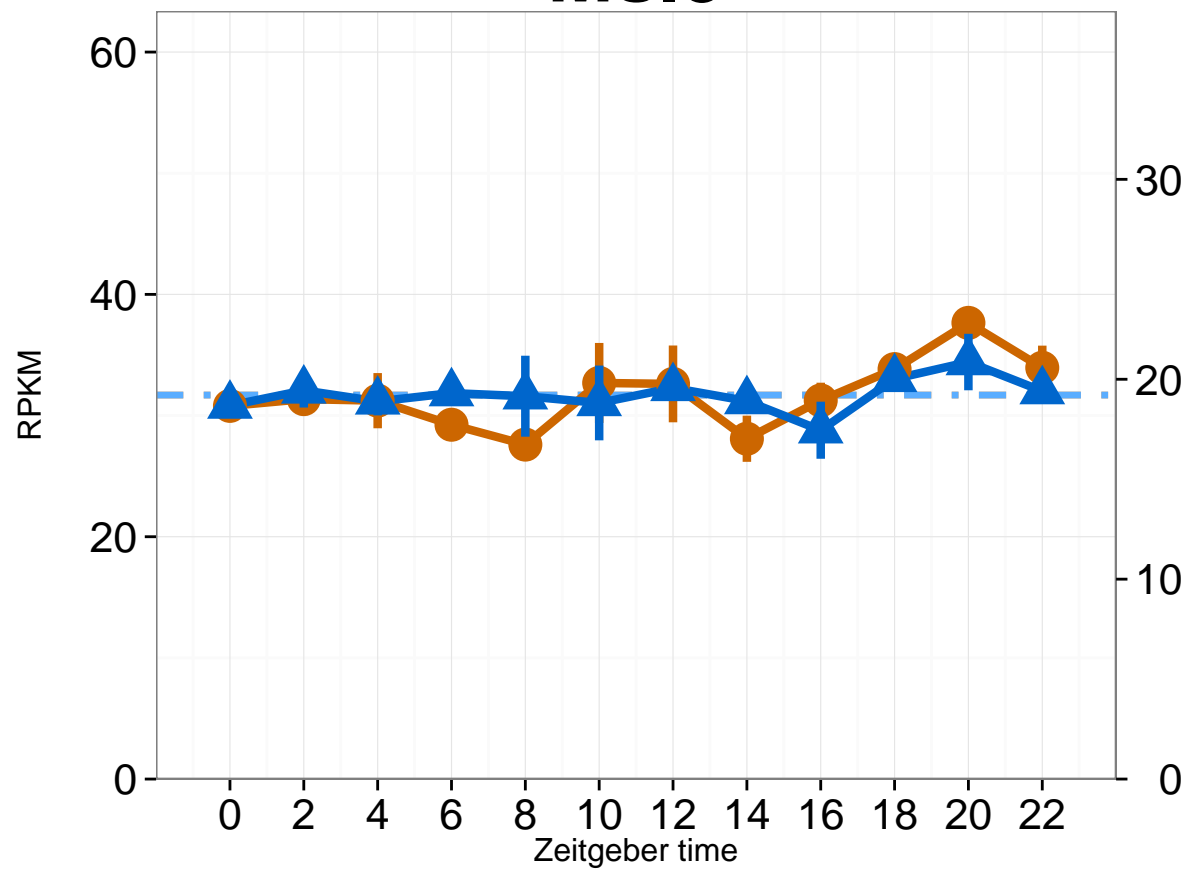

## Msl3

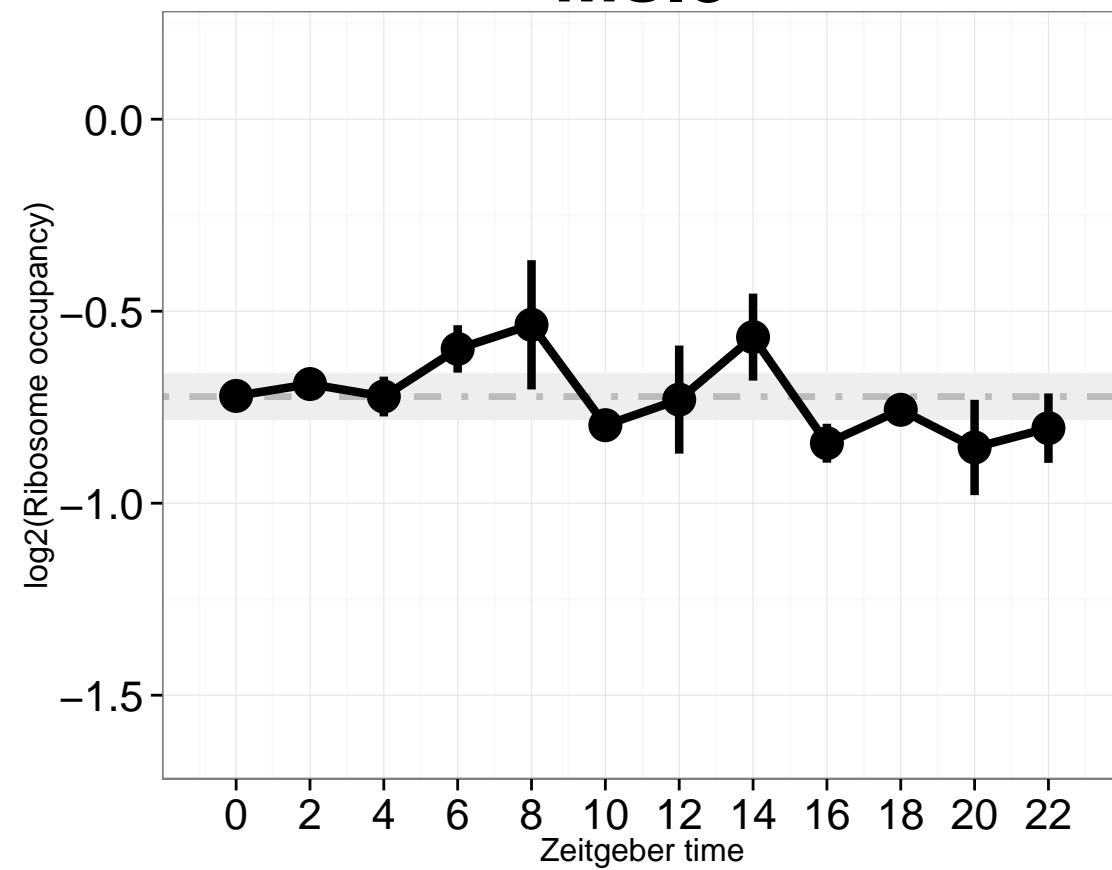

Supplement: Supplementary file 8379 [file 1]

# Entpd7

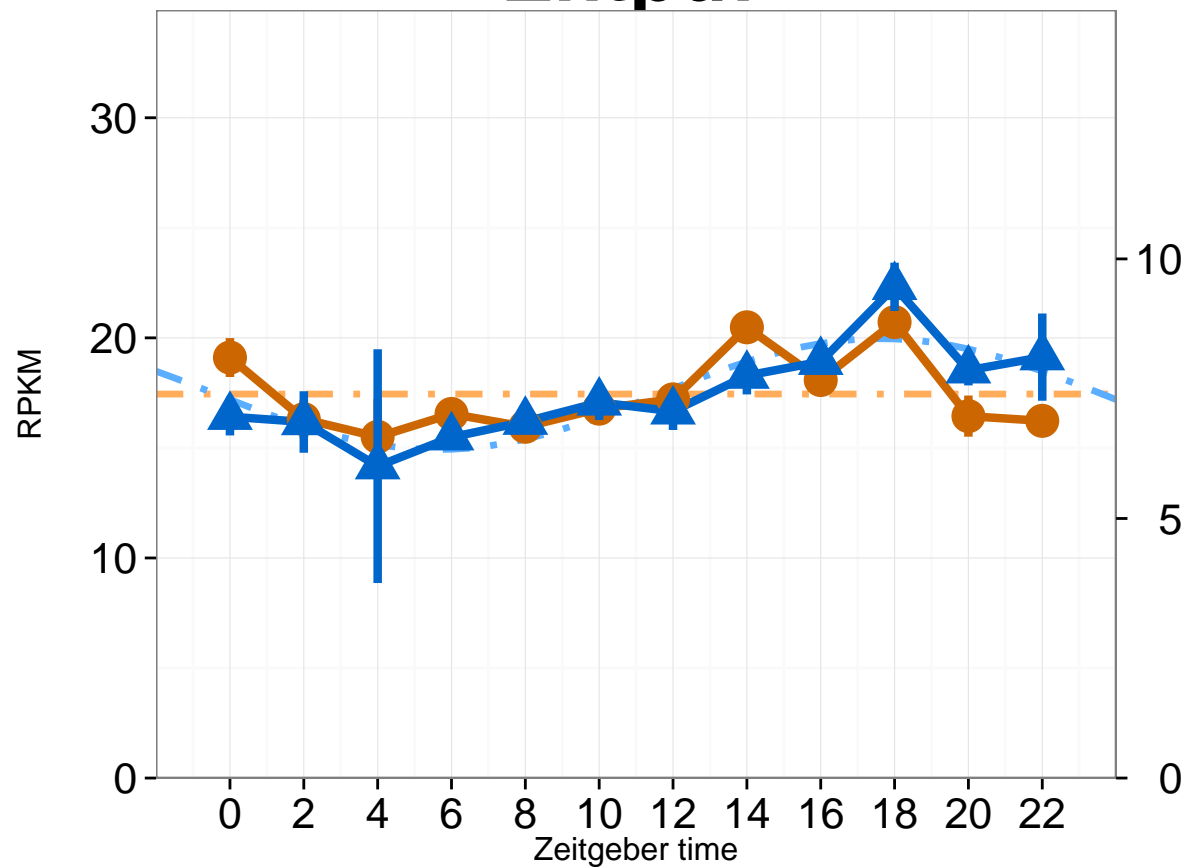

# Entpd7

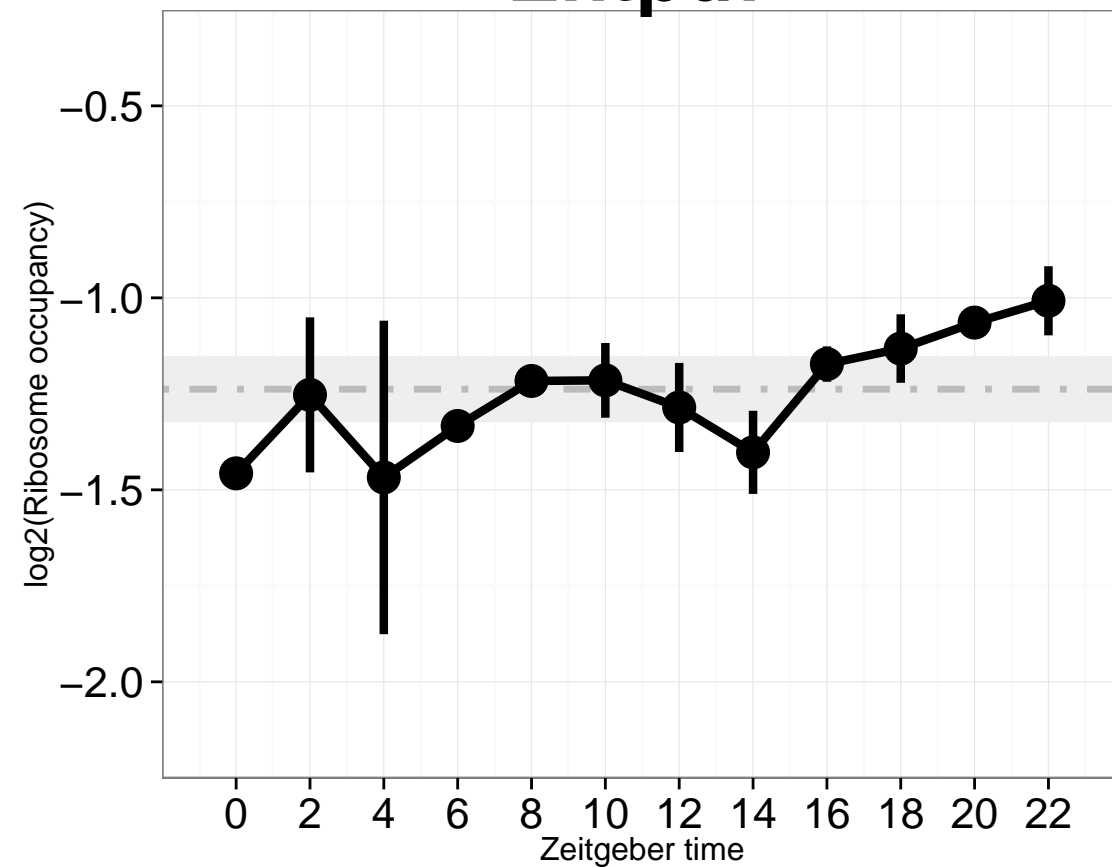

Supplement: Supplementary file 8380 [file 1]

## Tcf4

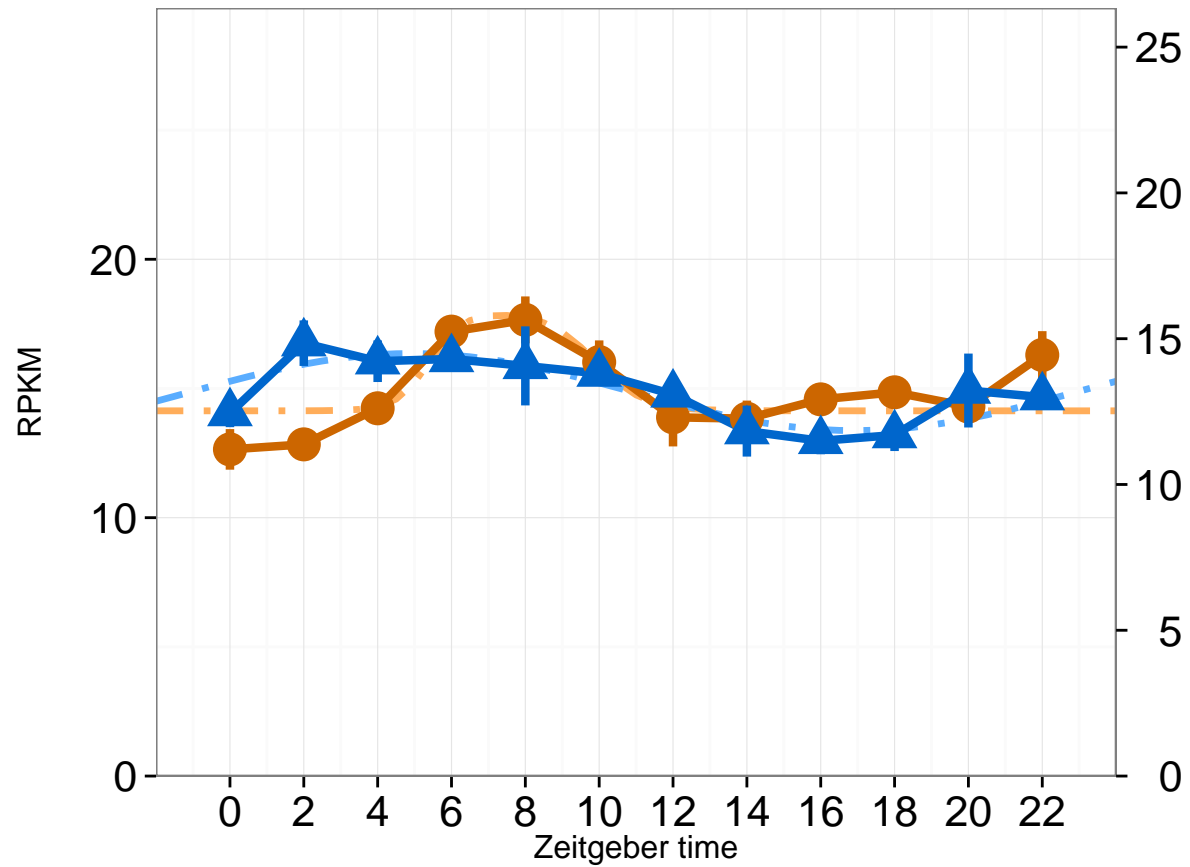

## Tcf4

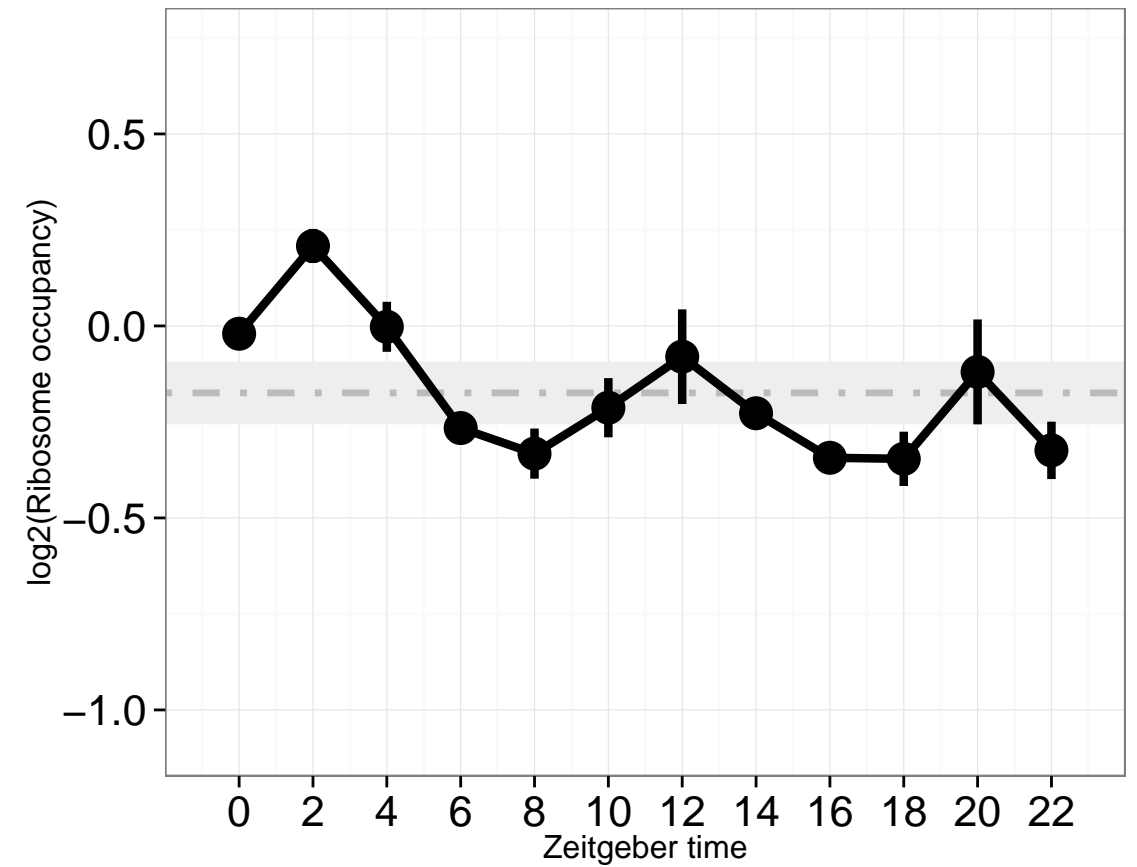

Supplement: Supplementary file 8381 [file 1]

# Swsap1

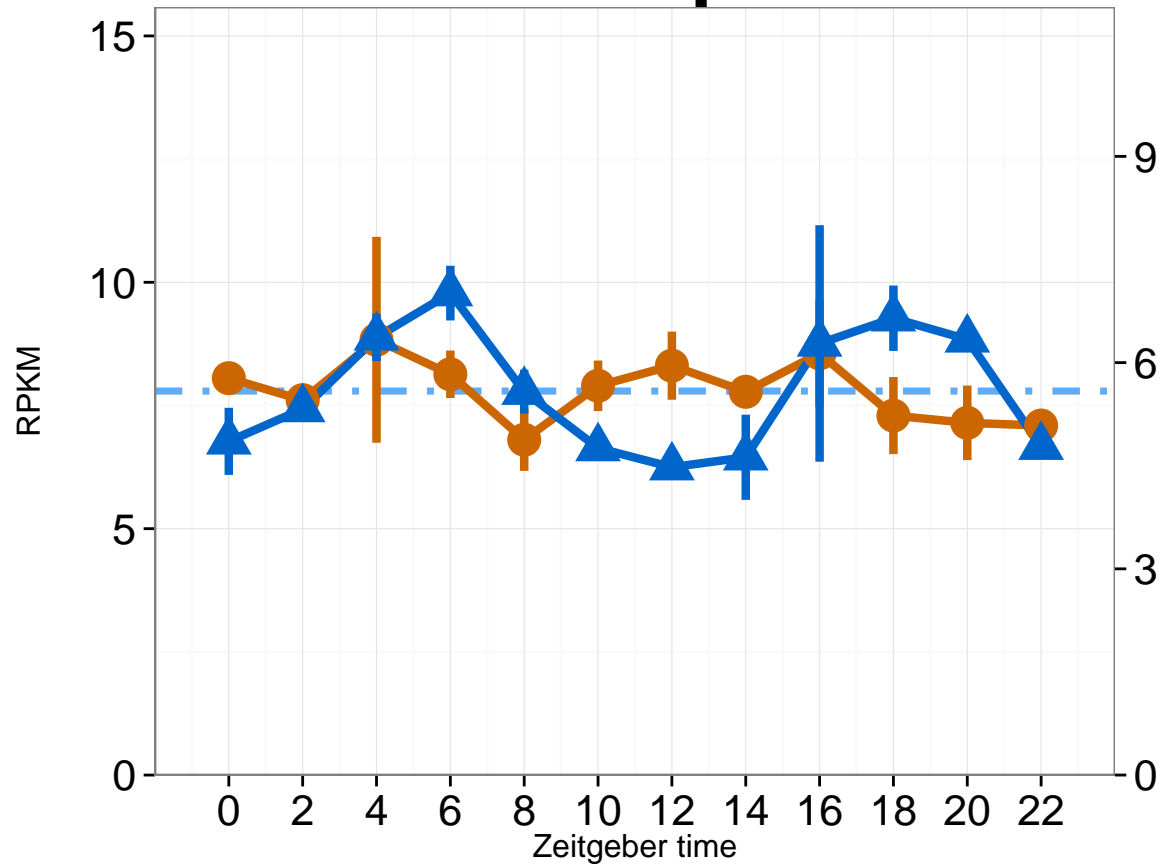

# Swsap1

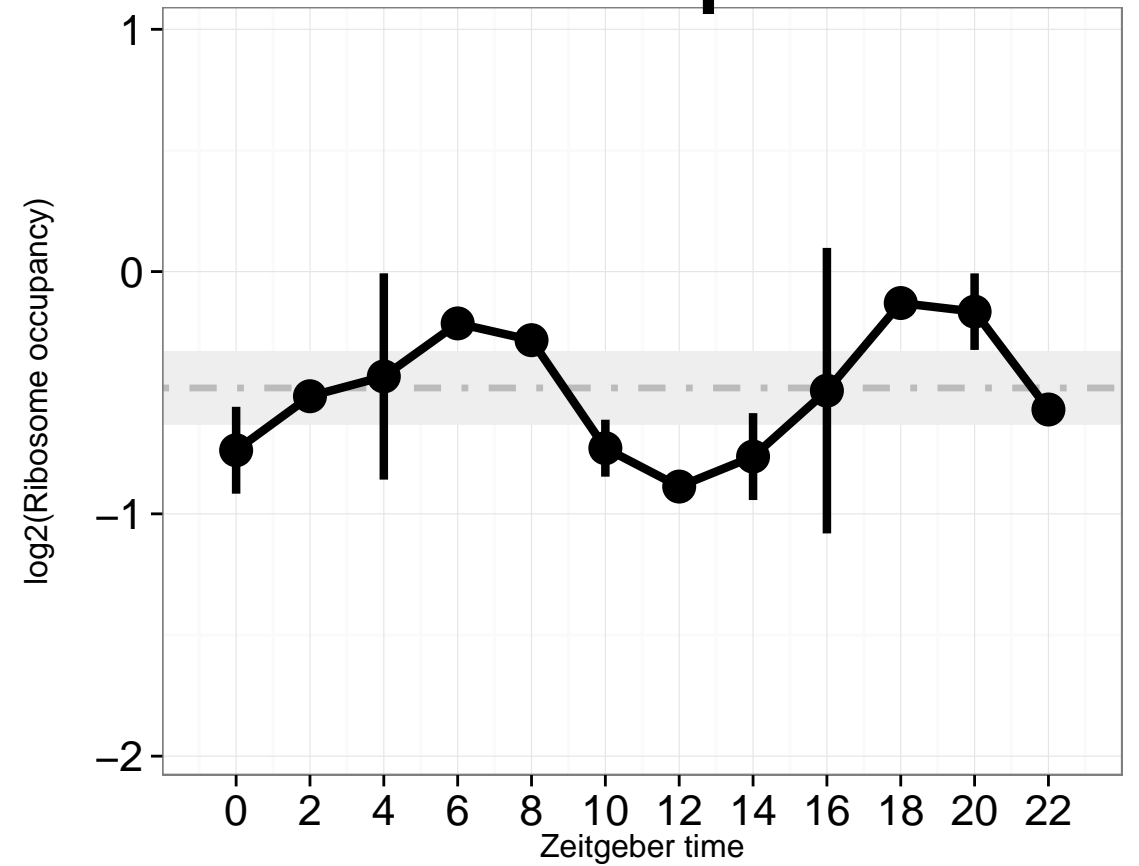

Supplement: Supplementary file 8382 [file 1]

# Cog5

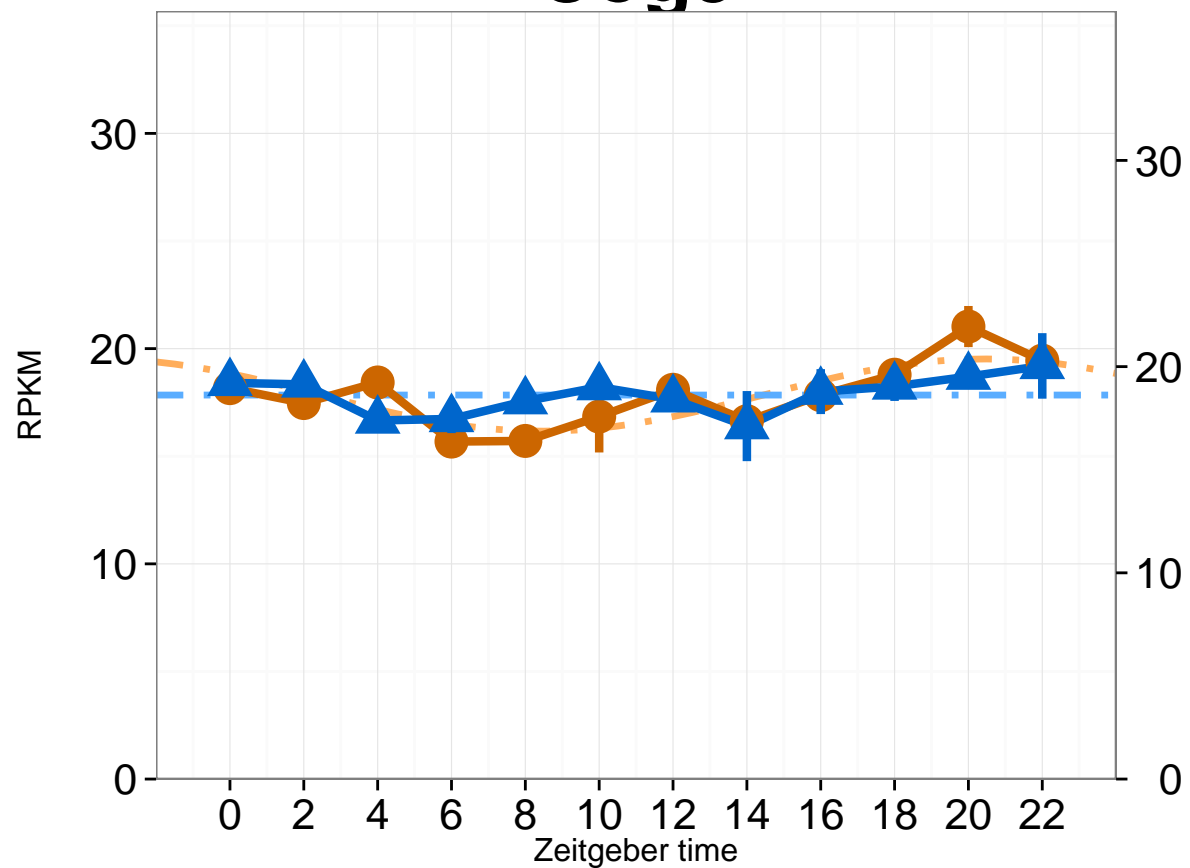

# Cog5

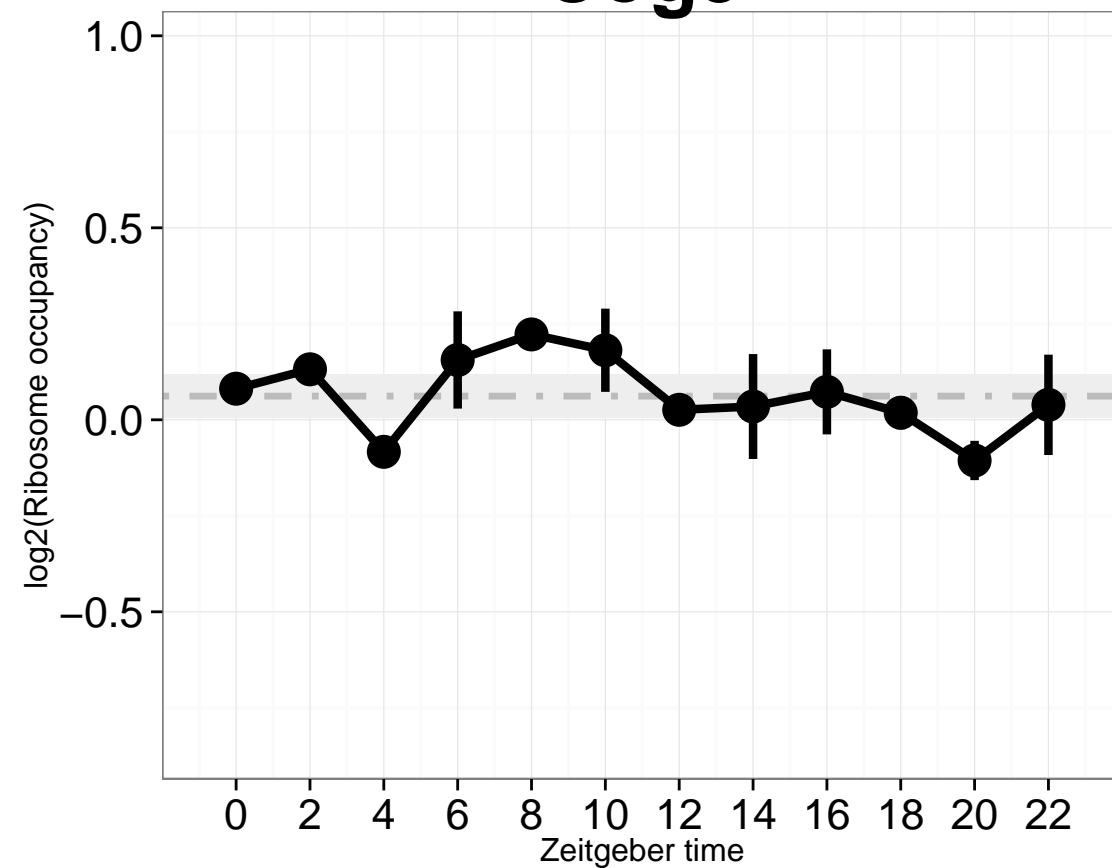

Supplement: Supplementary file 8383 [file 1]

# Osbp19

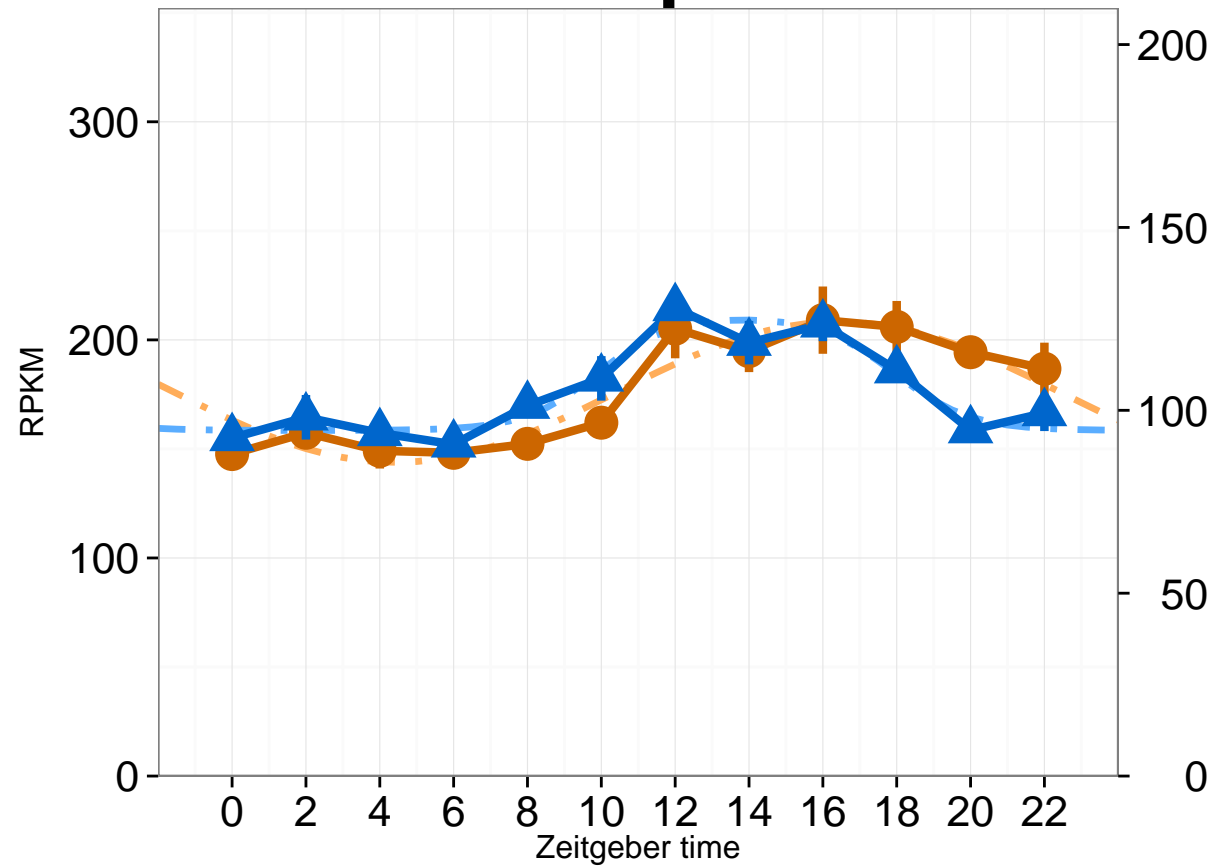

# Osbp19

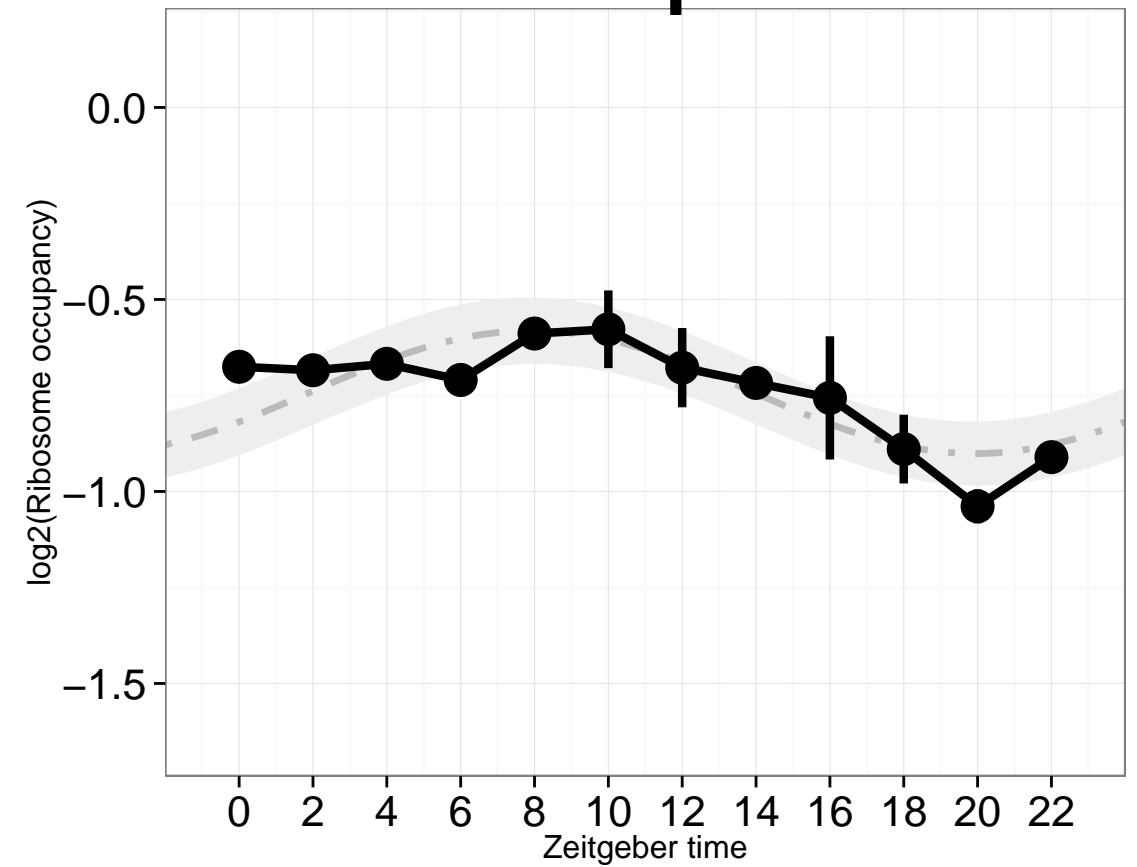

Supplement: Supplementary file 8384 [file 1]

## Nrip3

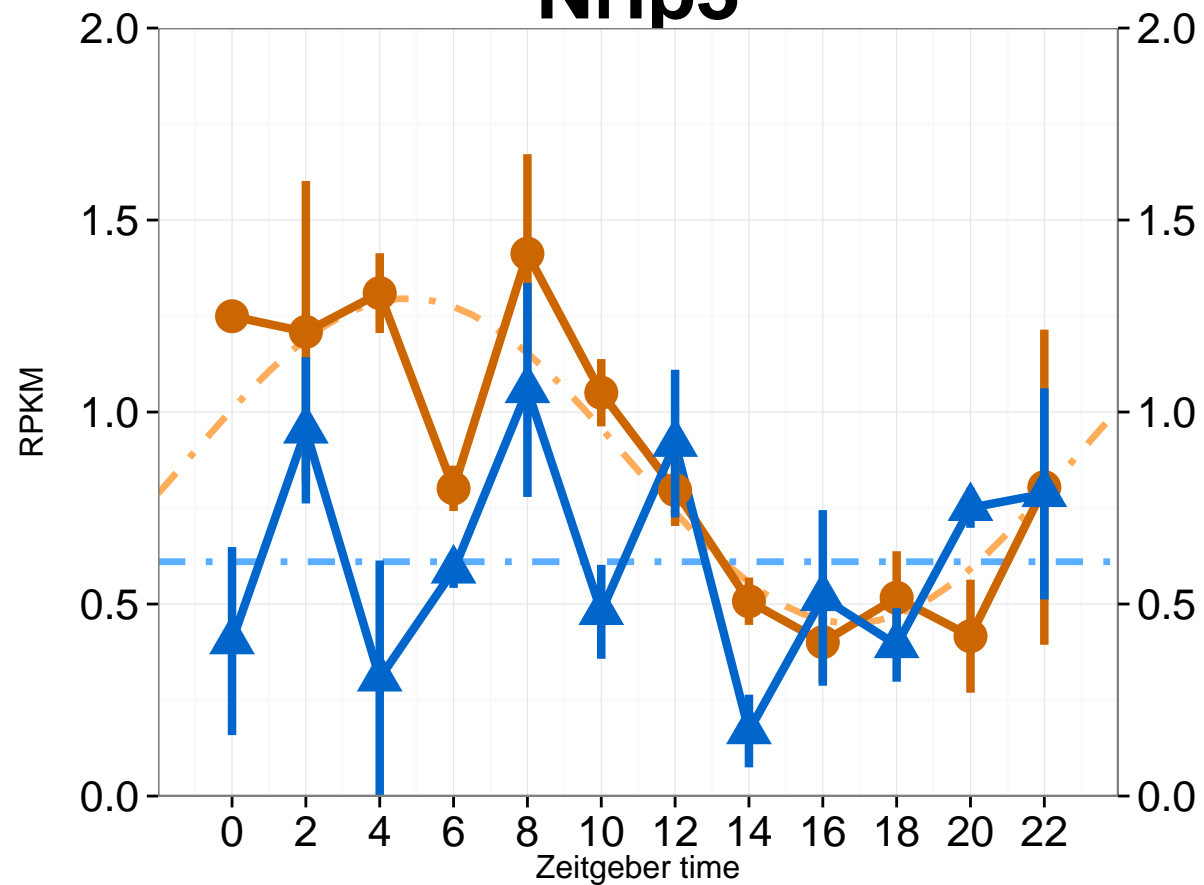

## Nrip3

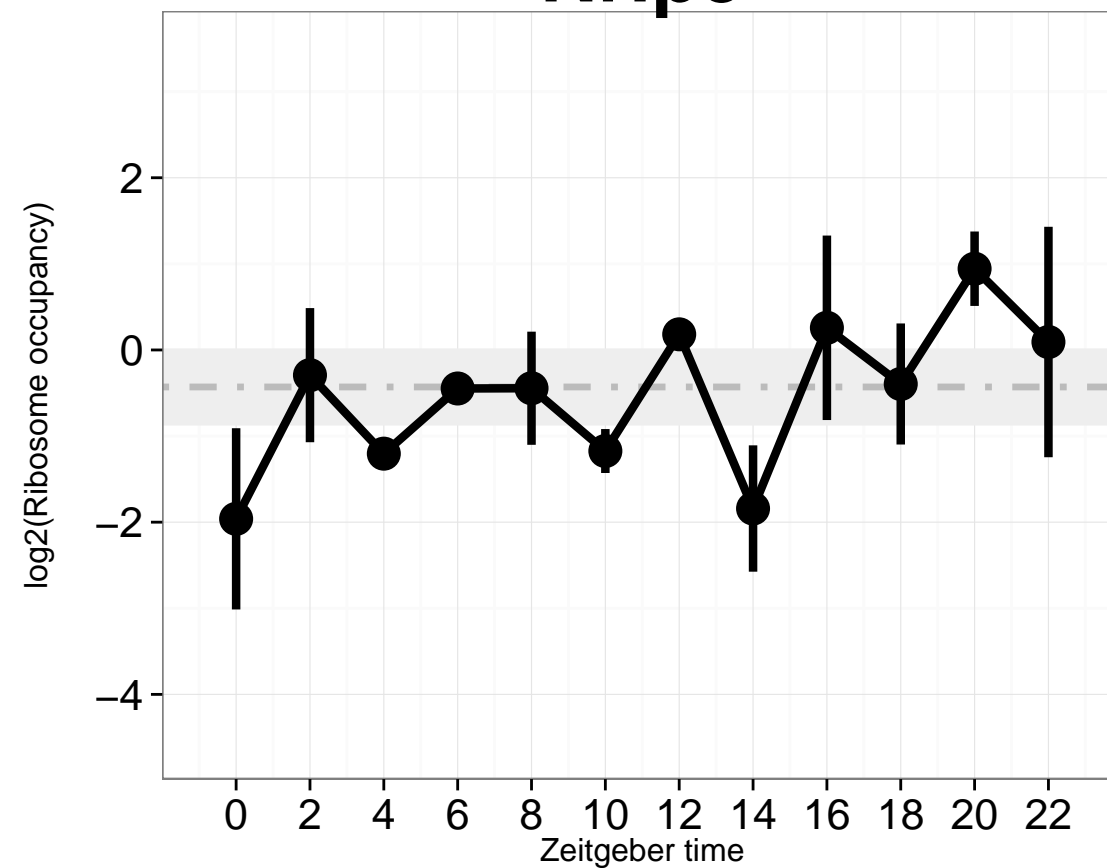

Supplement: Supplementary file 8385 [file 1]

**Smim11**

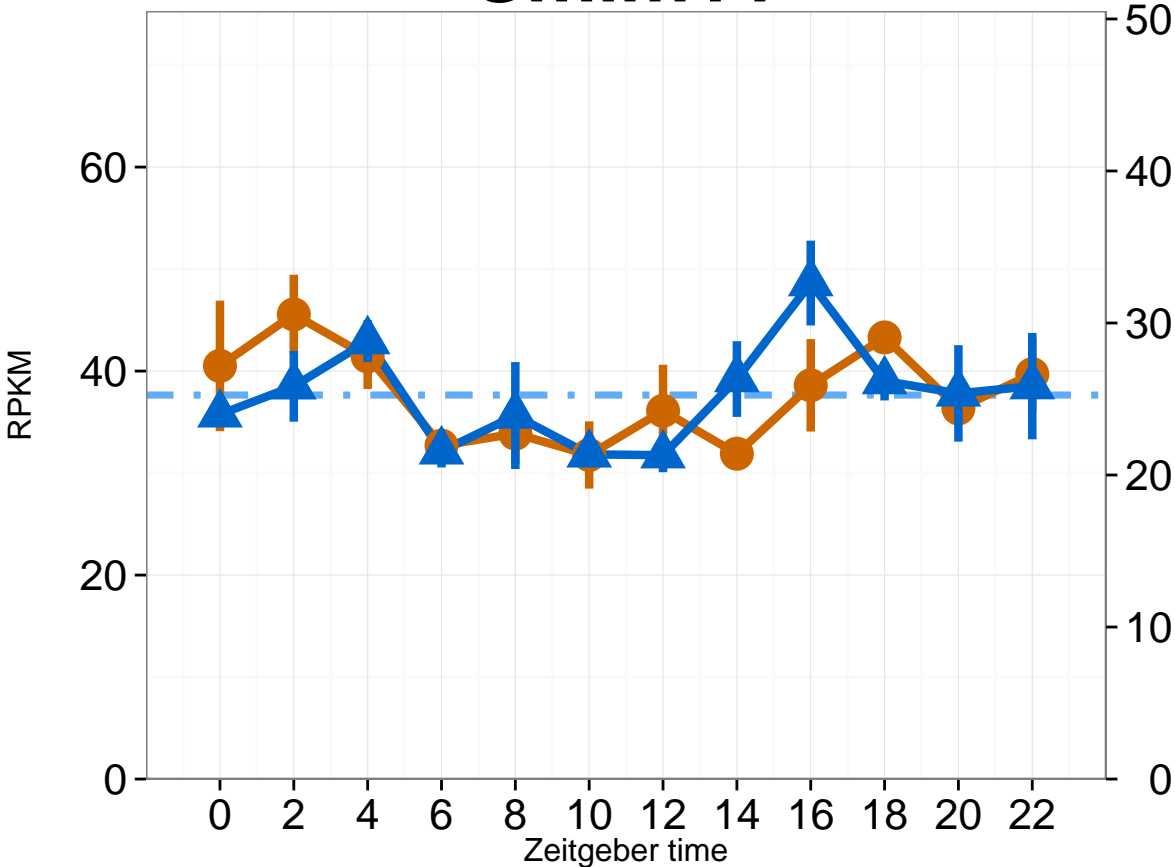

**Smim11**

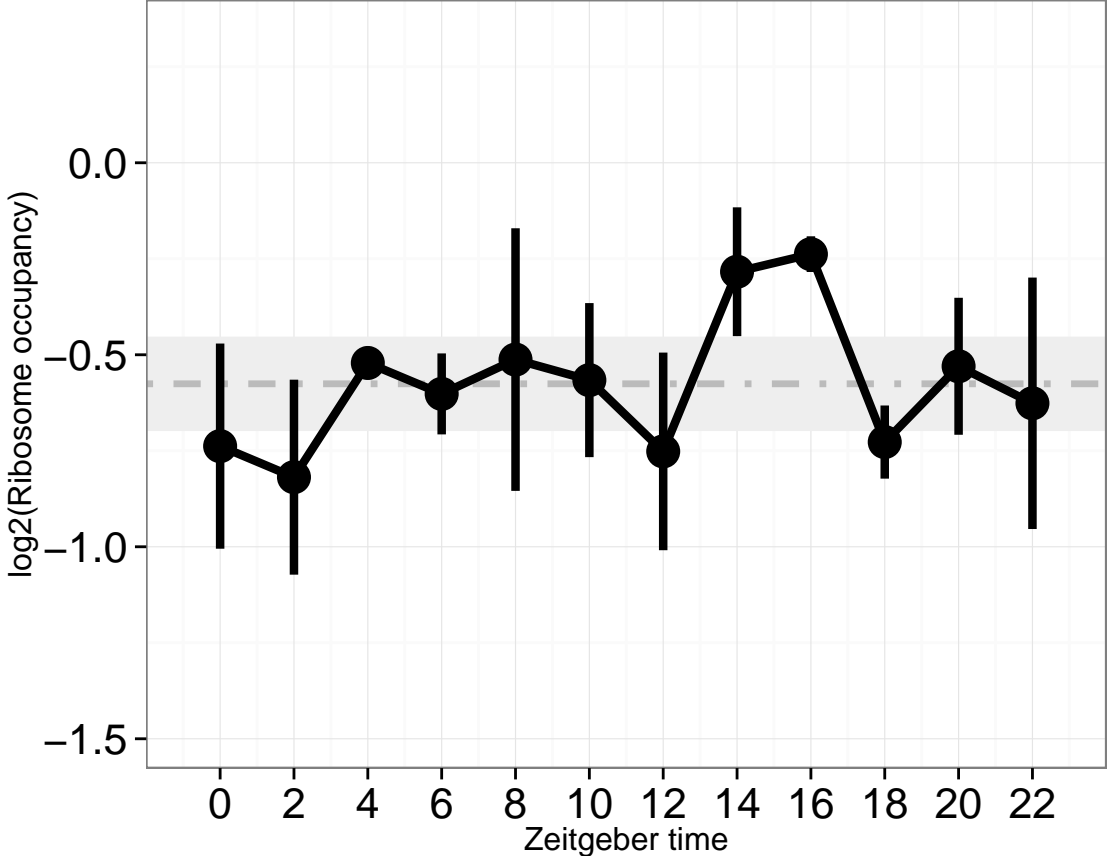

Supplement: Supplementary file 8386 [file 1]

## Raver1

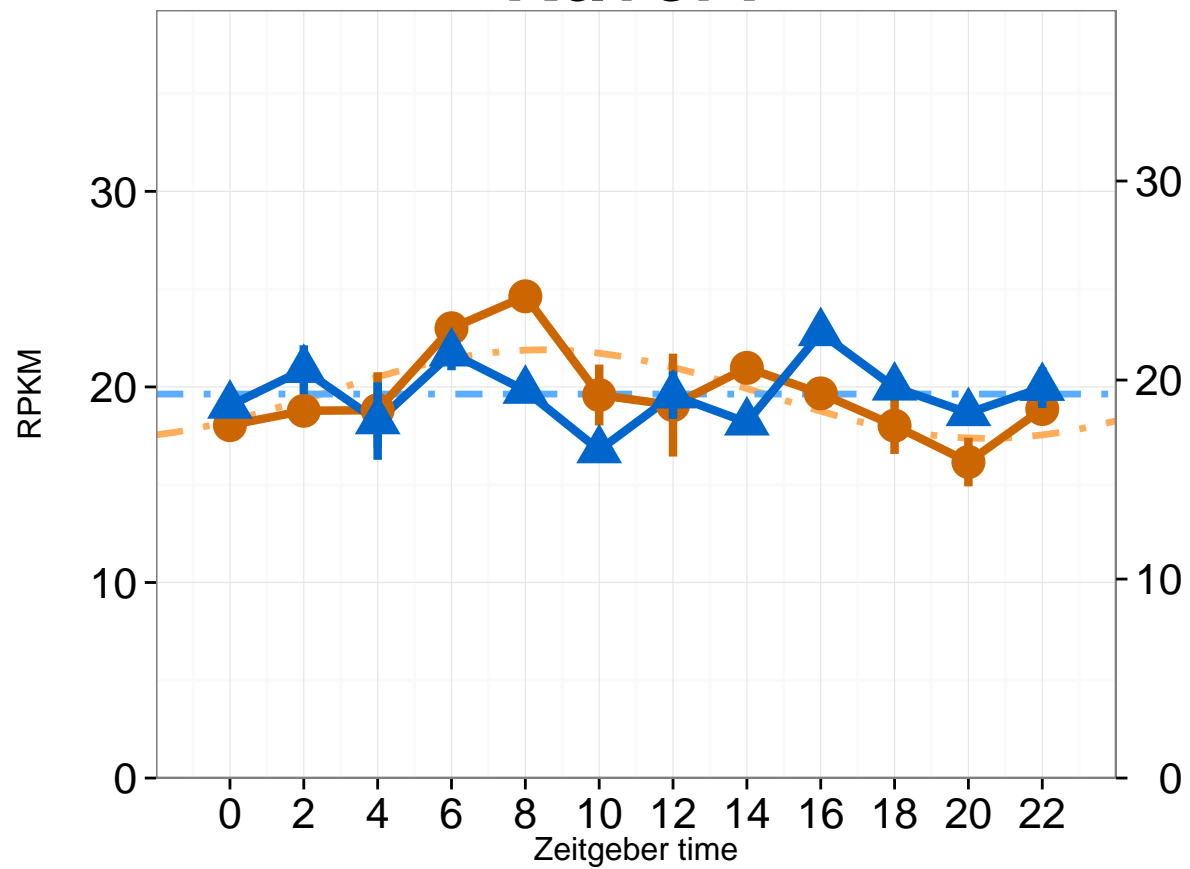

## Raver1

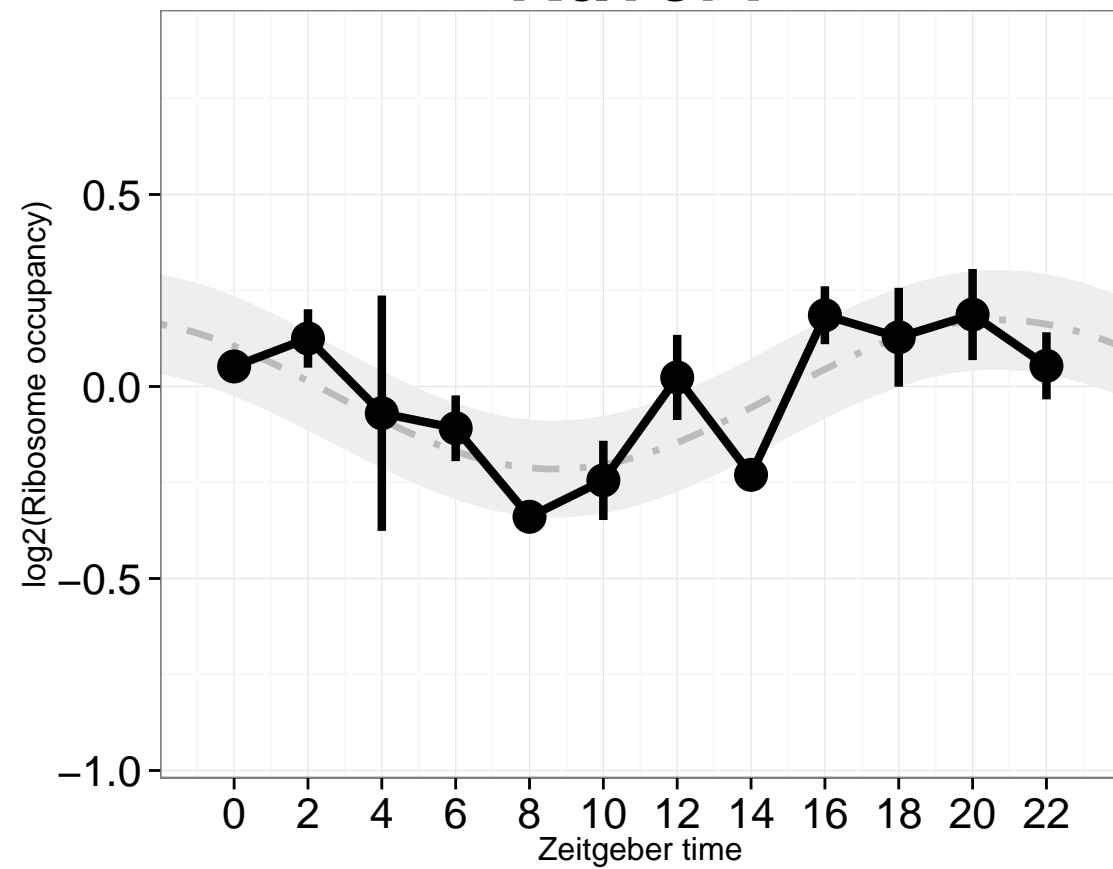

Supplement: Supplementary file 8387 [file 1]

## Kdm1a

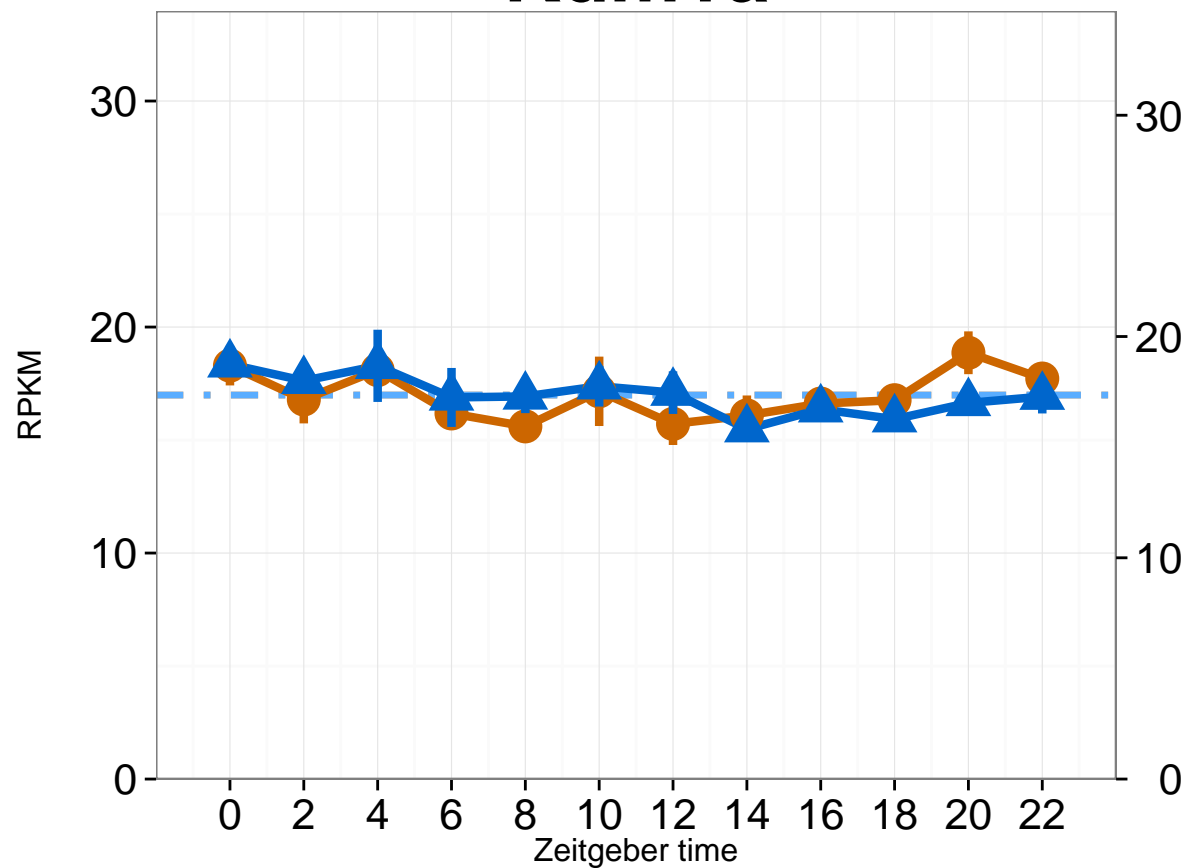

## Kdm1a

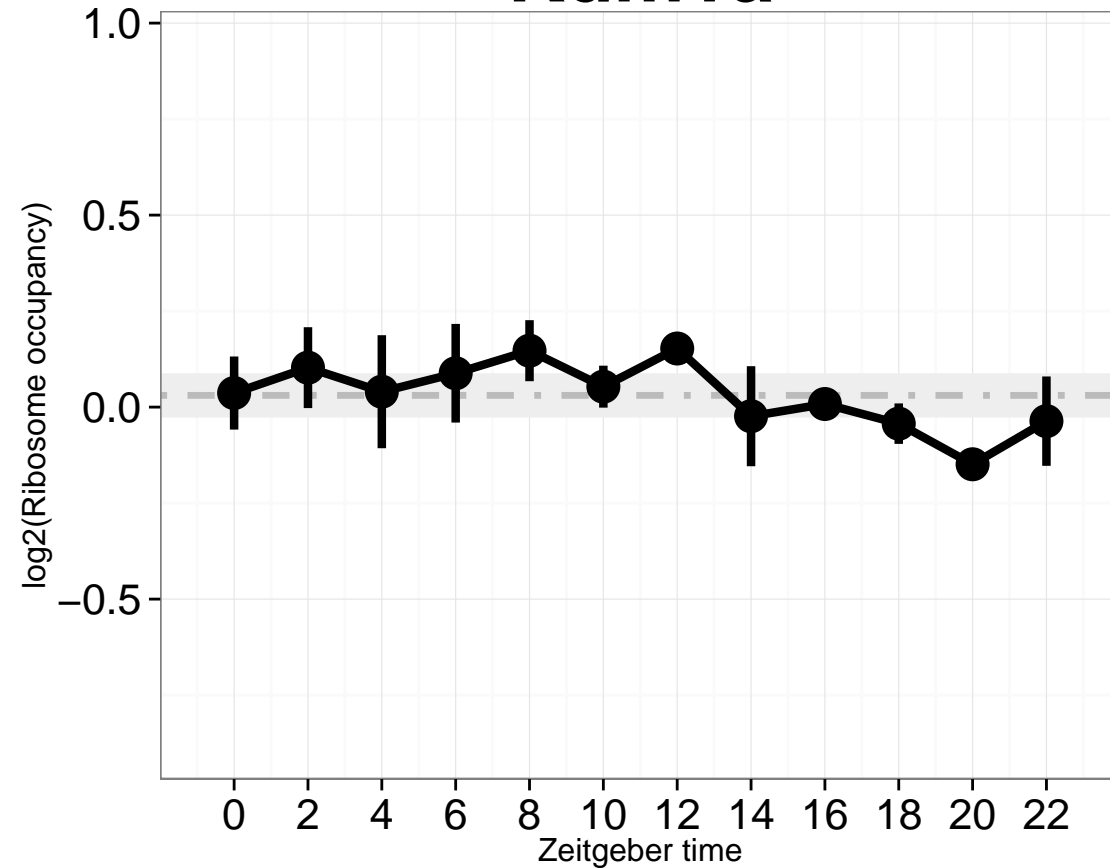

Supplement: Supplementary file 8388 [file 1]

## Sphk1

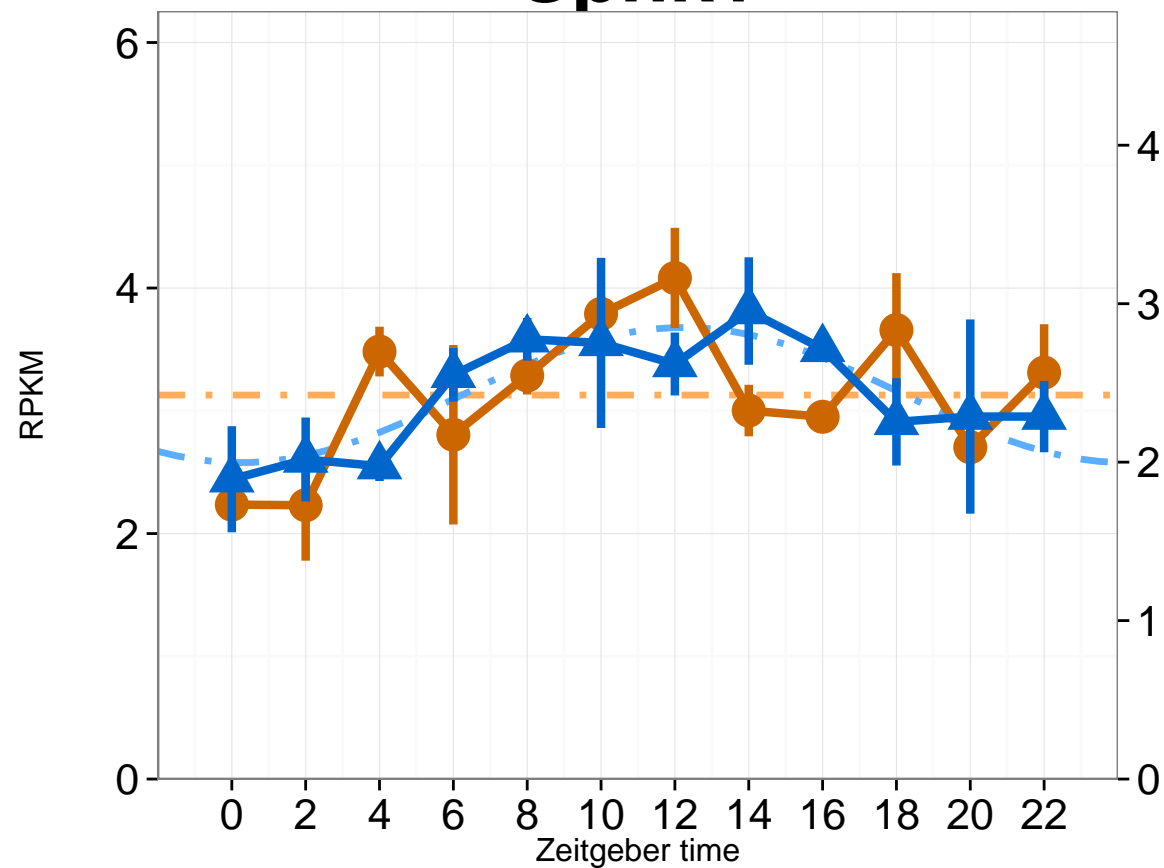

## Sphk1

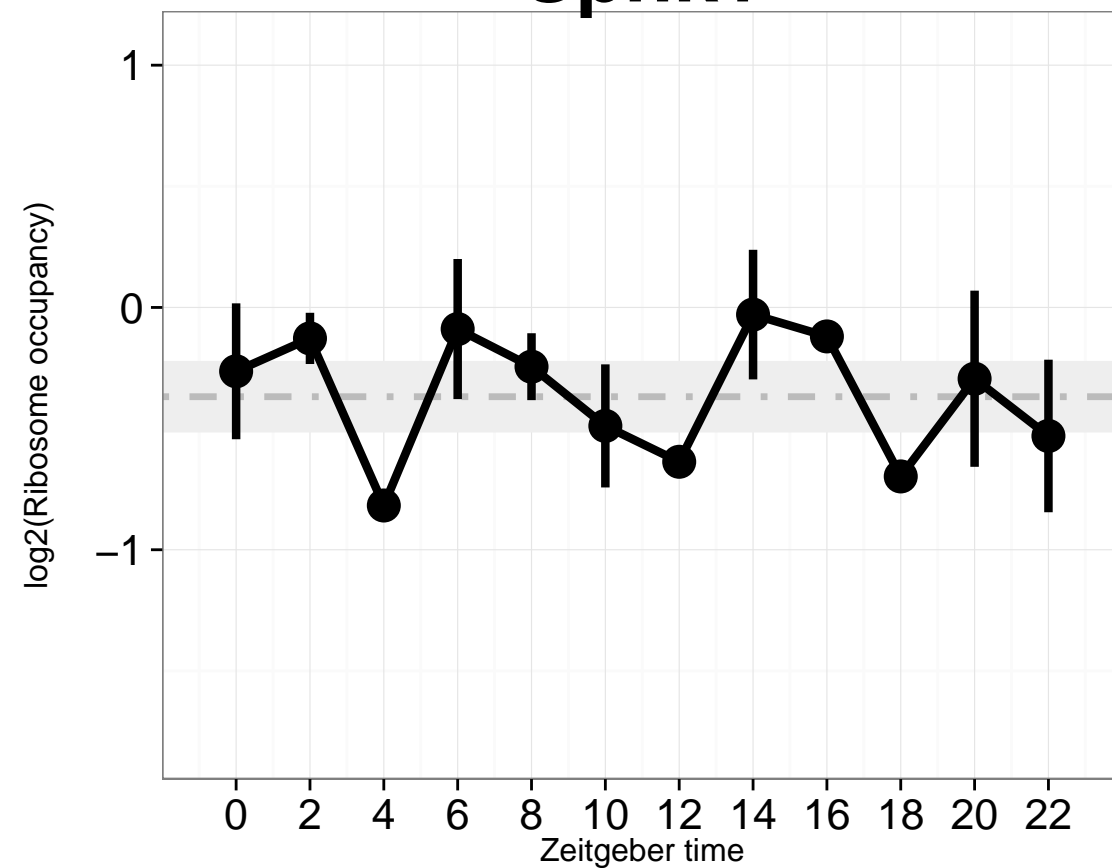

Supplement: Supplementary file 8389 [file 1]

## Wdr25

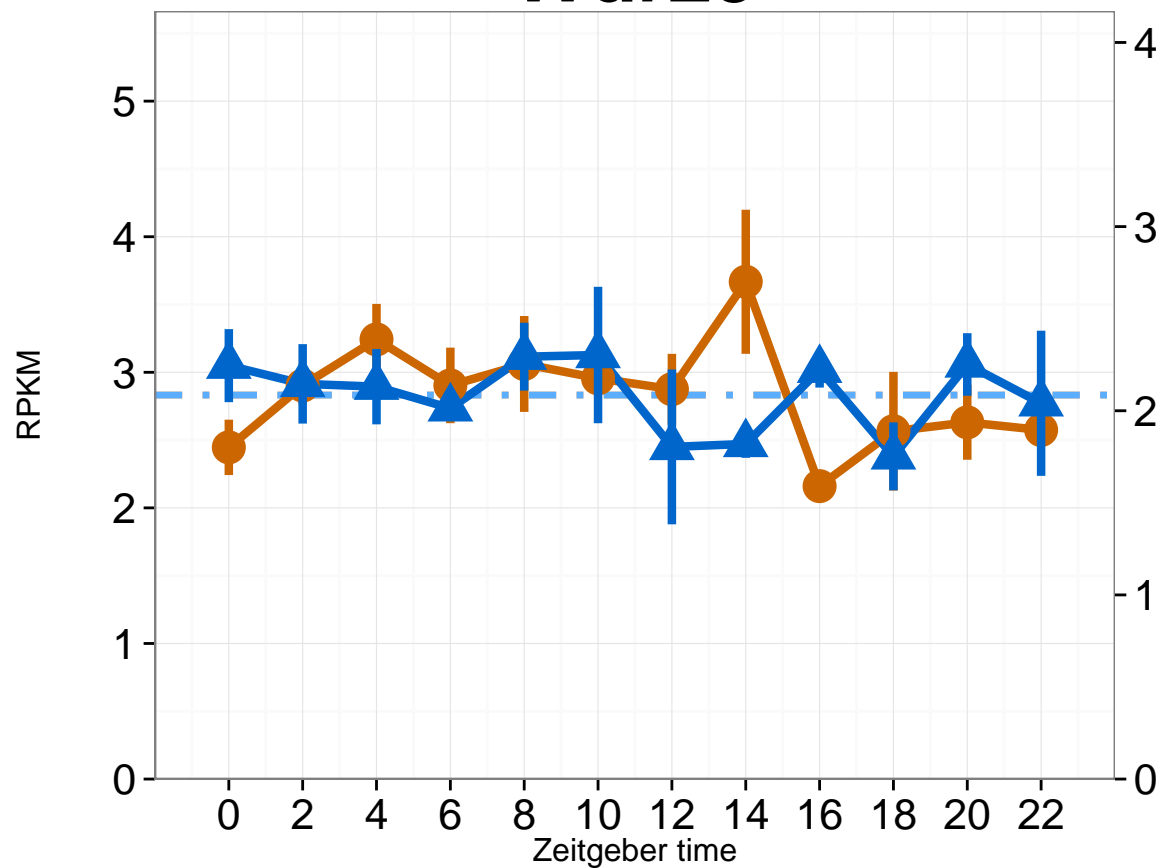

## Wdr25

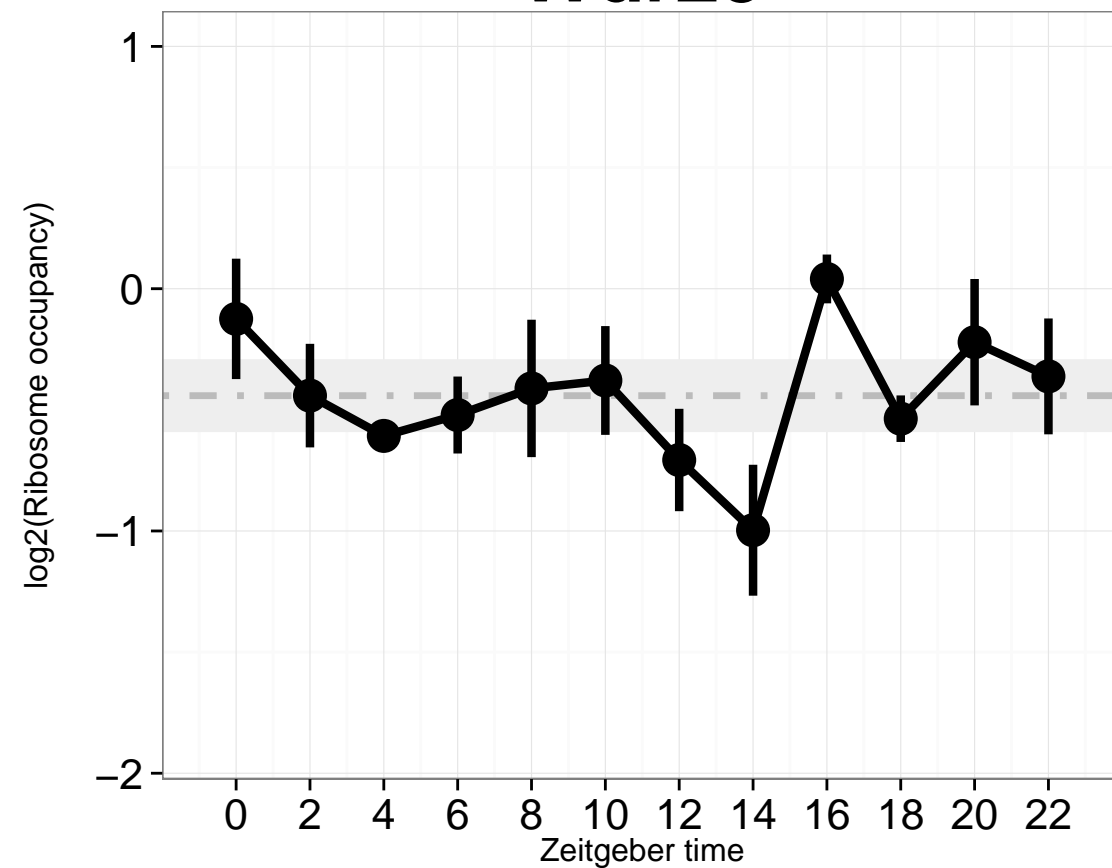

Supplement: Supplementary file 8390 [file 1]

Ccdc112

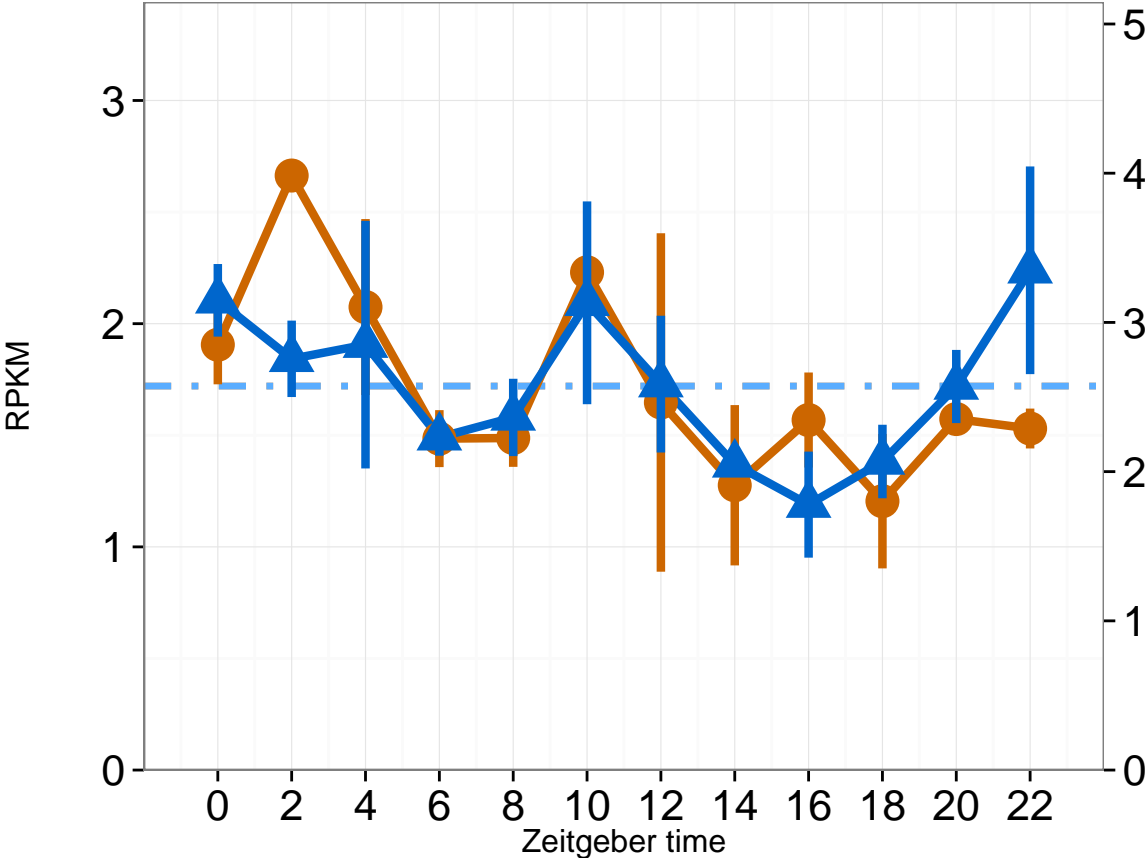

Ccdc112

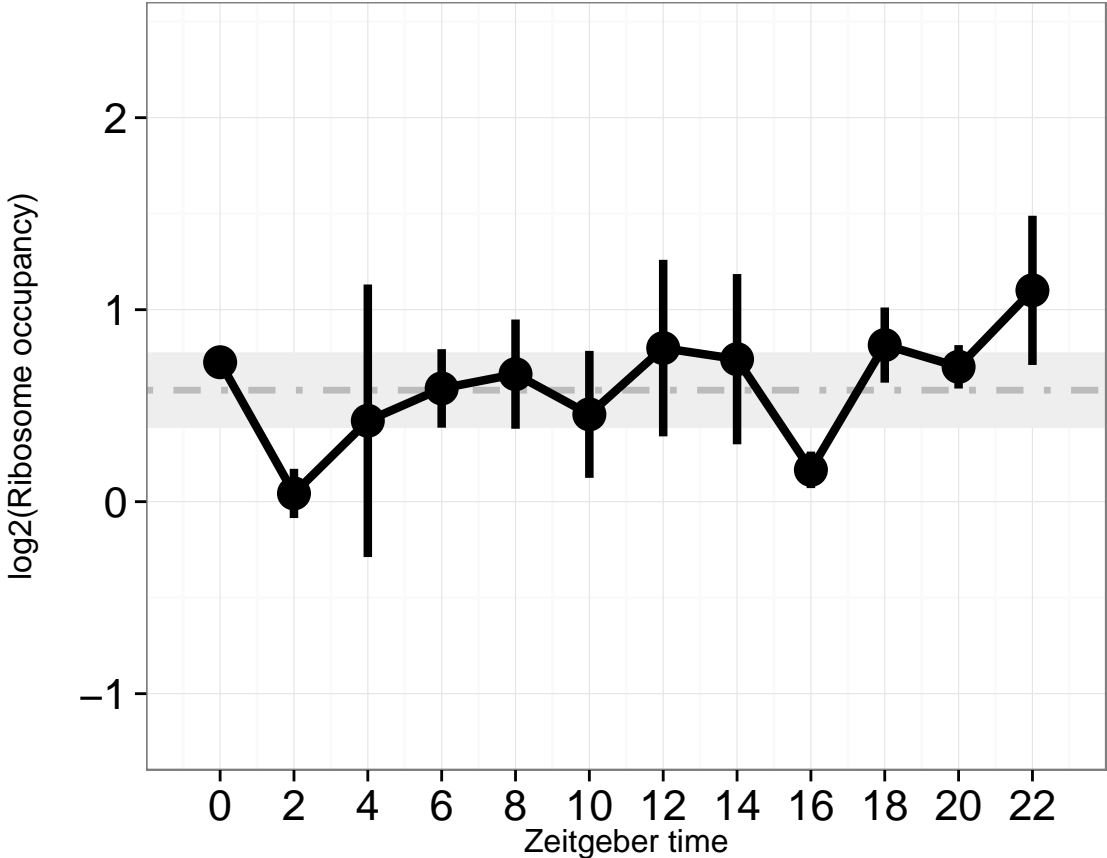

Supplement: Supplementary file 8391 [file 1]

## Arhgef33

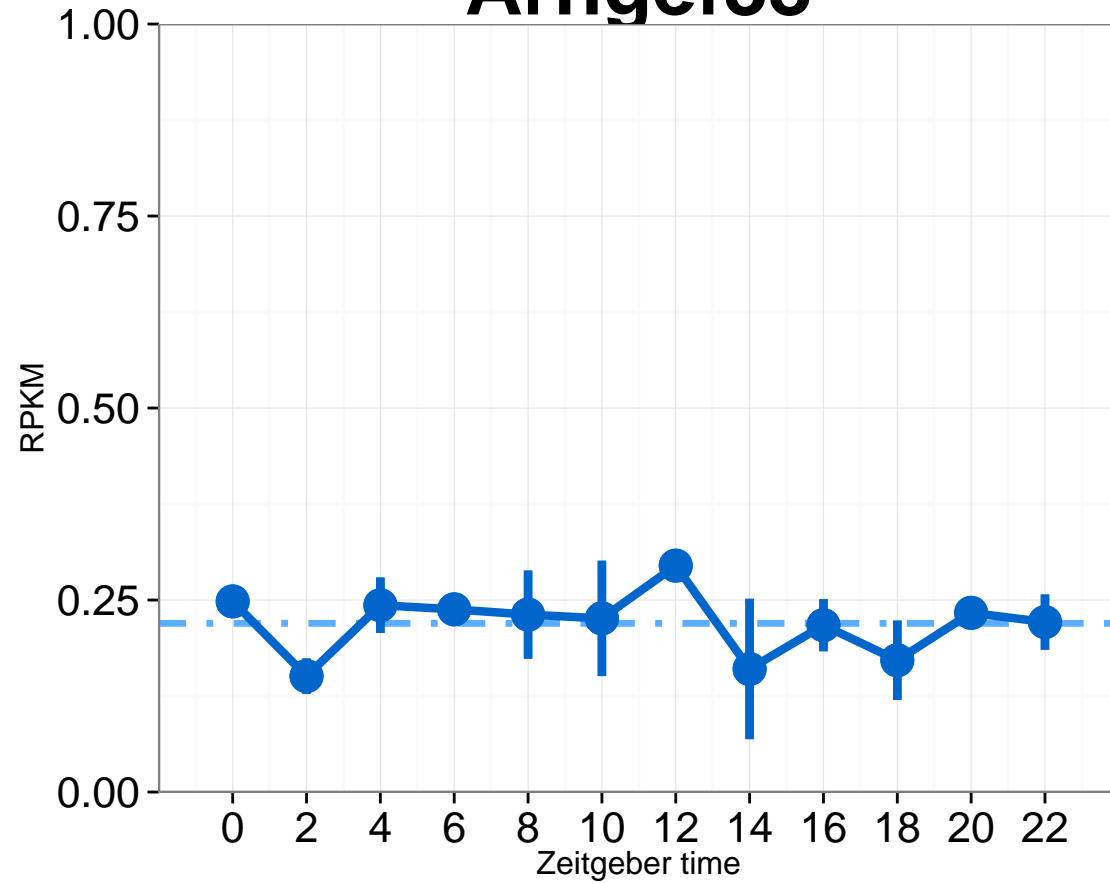

## Arhgef33 log2(Ribosome occupanc

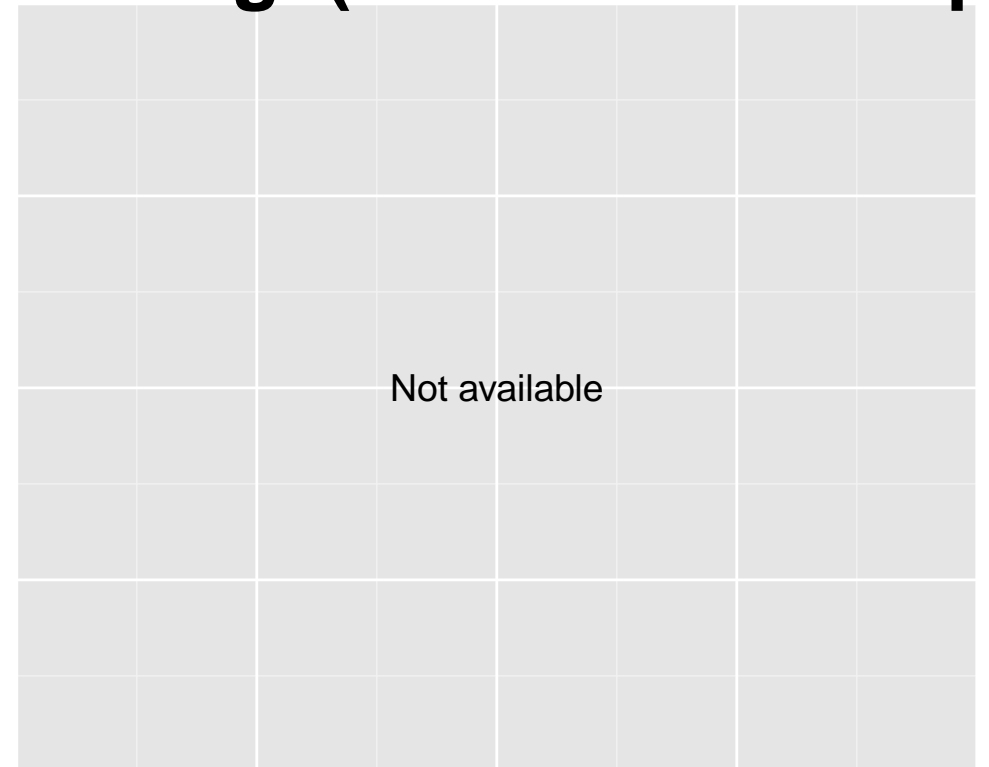

Supplement: Supplementary file 8392 [file 1]

# Mpeg1

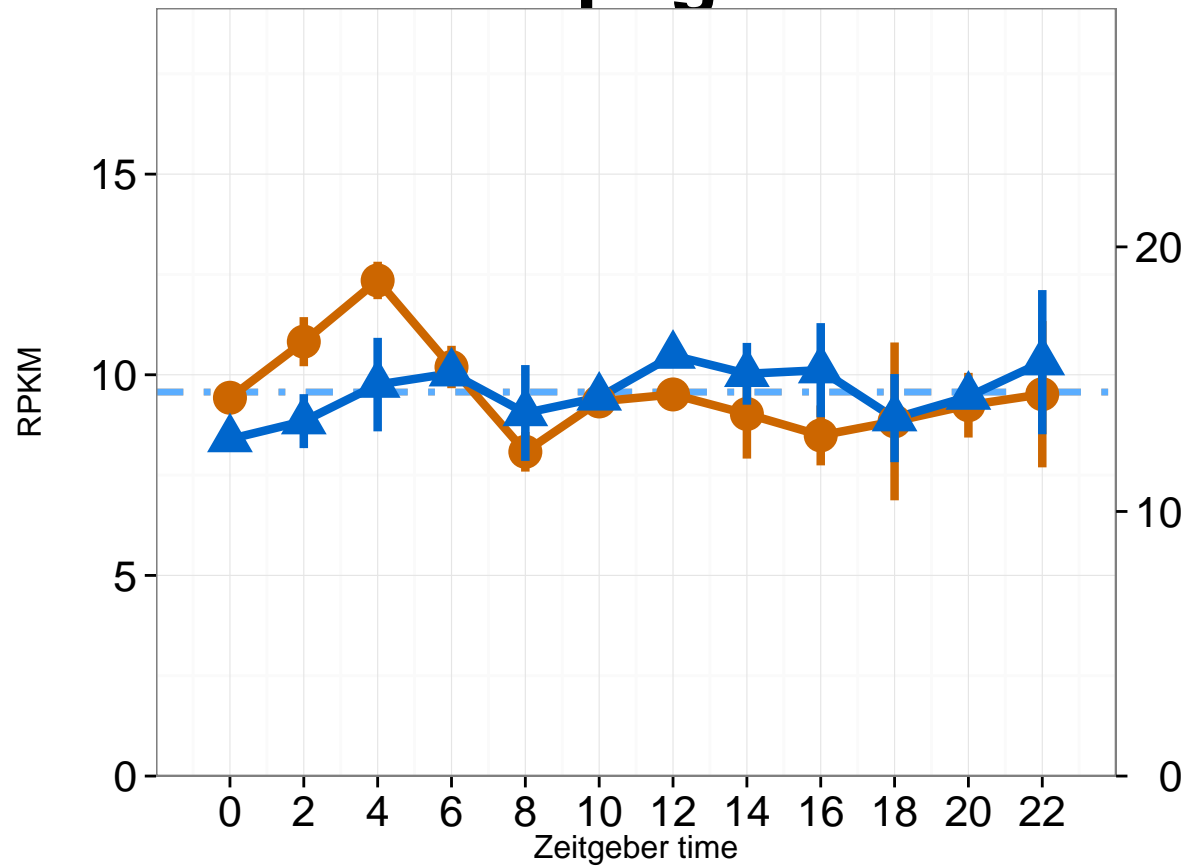

# Mpeg1

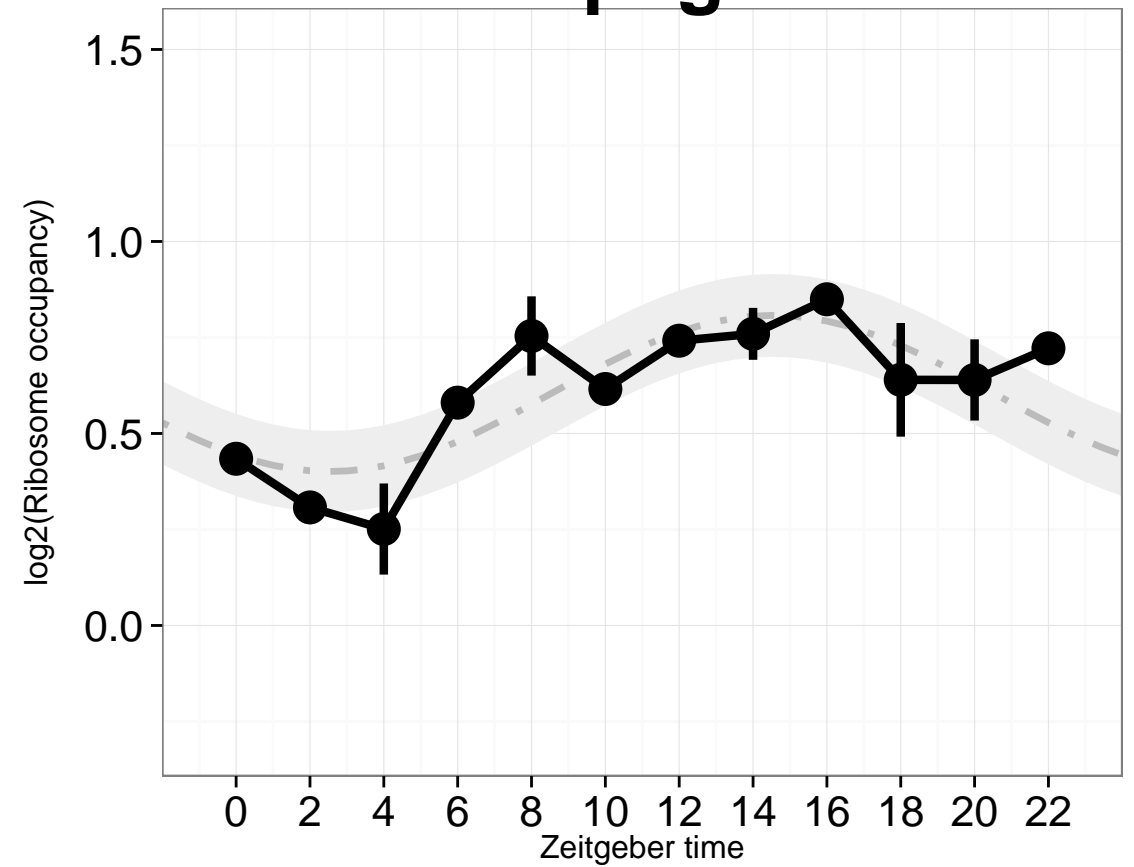

Supplement: Supplementary file 8393 [file 1]

## Sf3b5

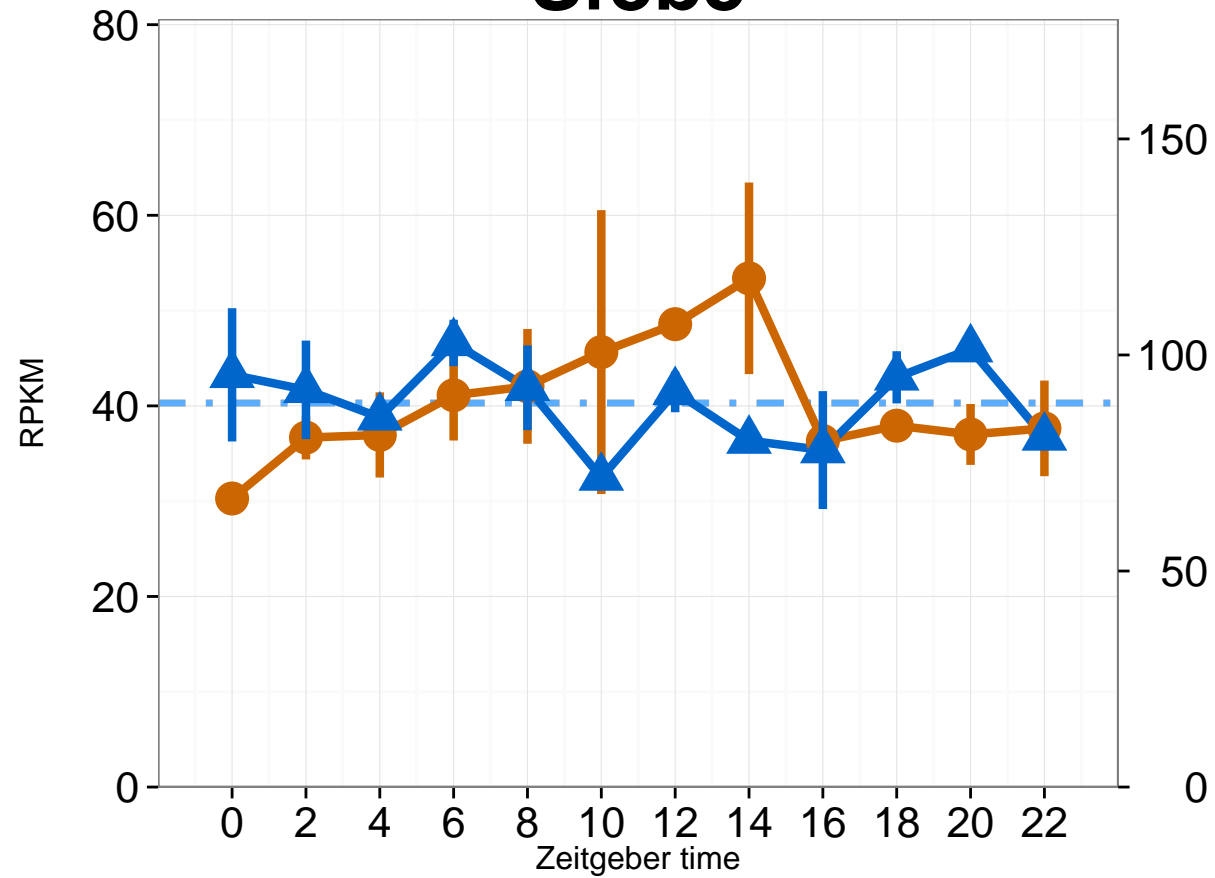

## Sf3b5

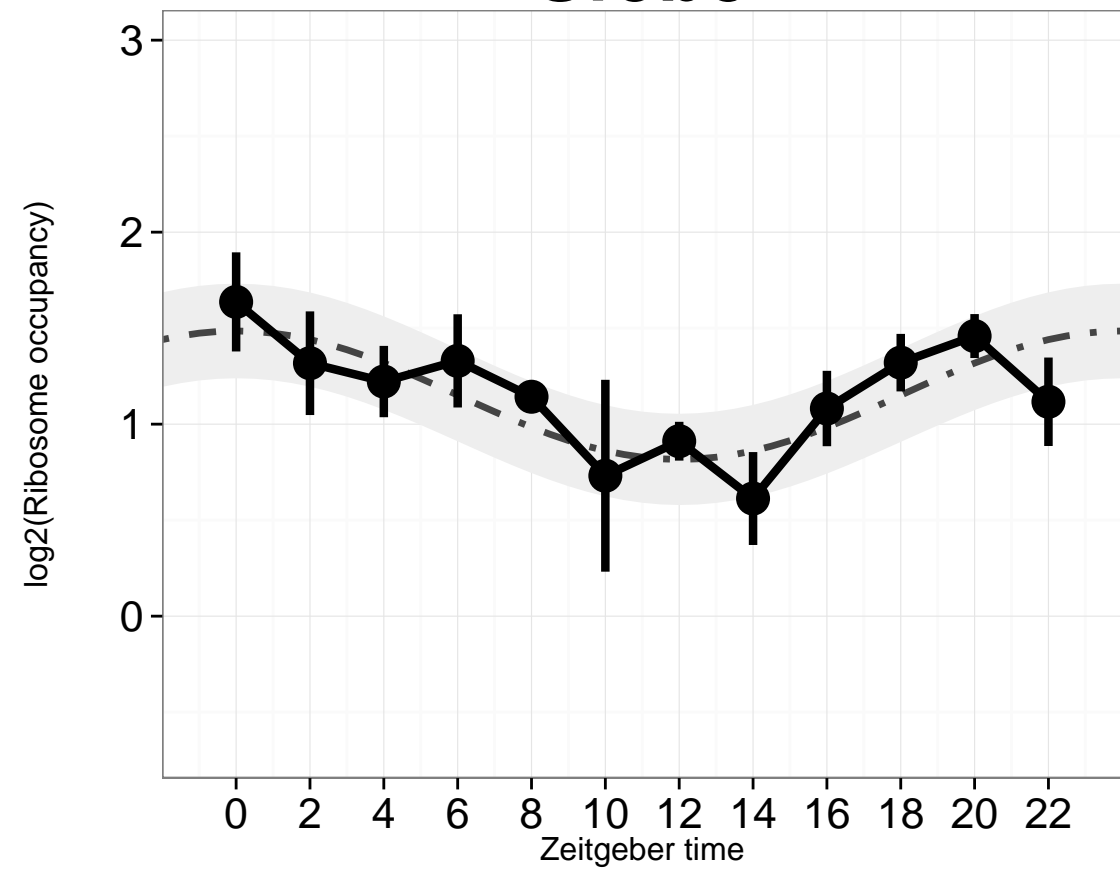

Supplement: Supplementary file 8394 [file 1]

## Naif1

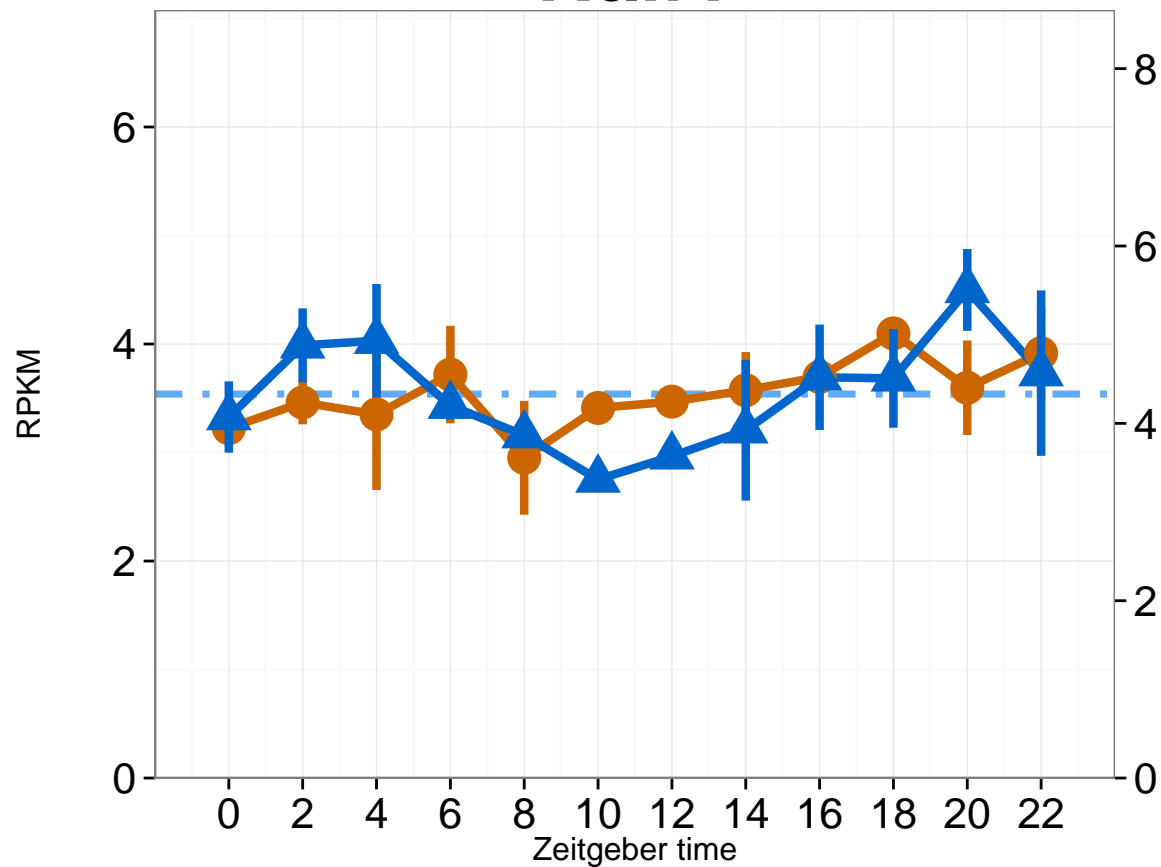

## Naif1

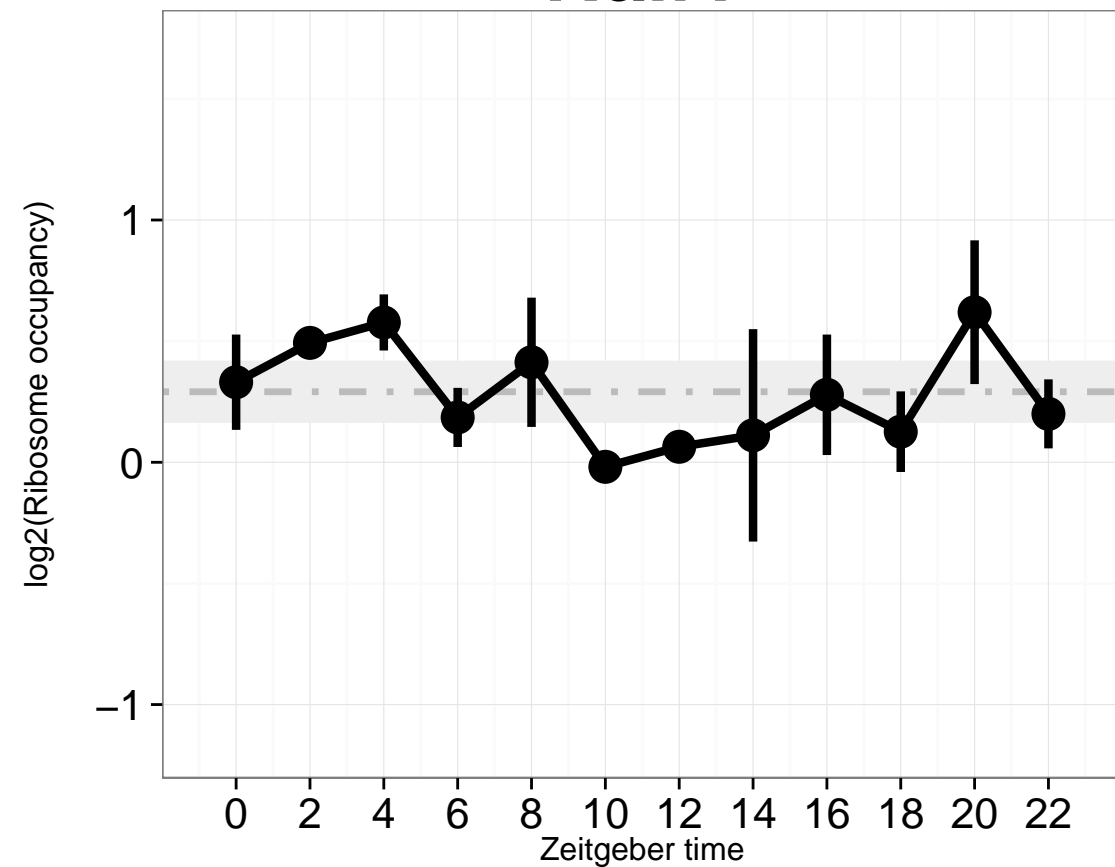

Supplement: Supplementary file 8395 [file 1]

# Zfp944

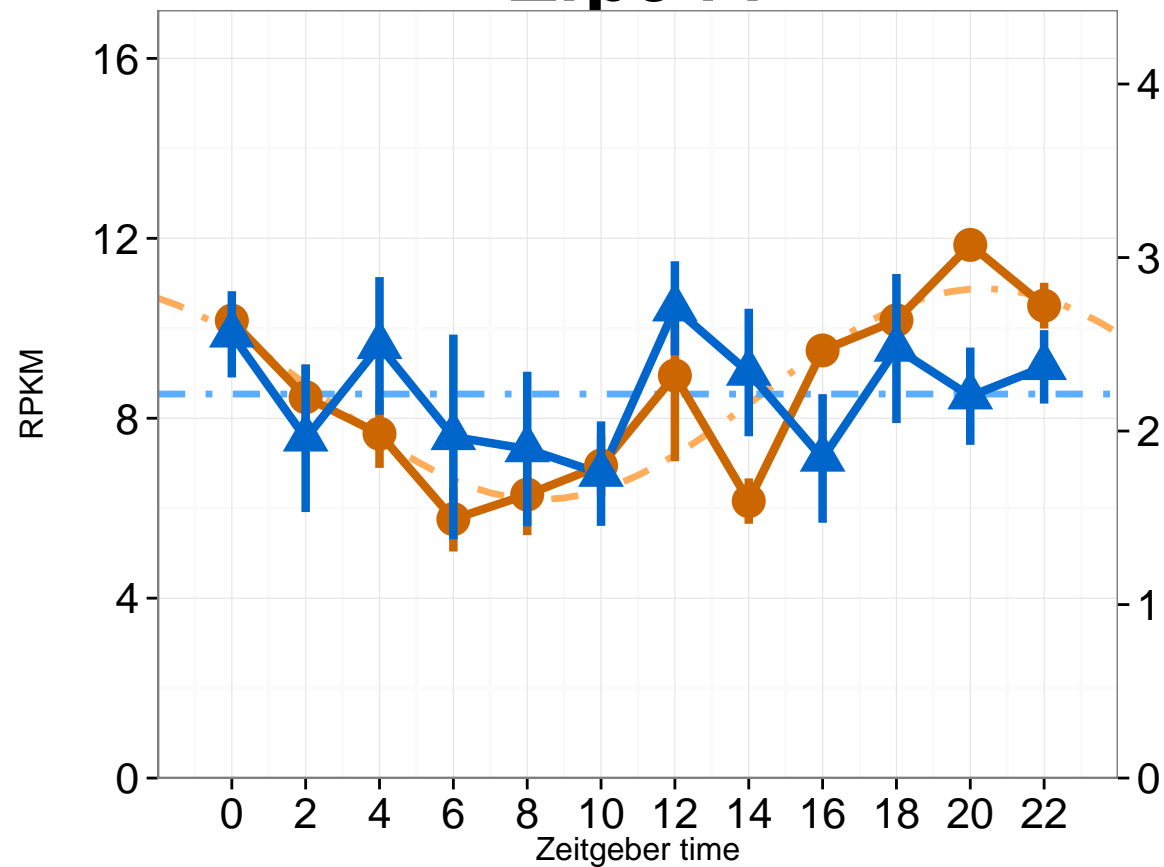

# Zfp944

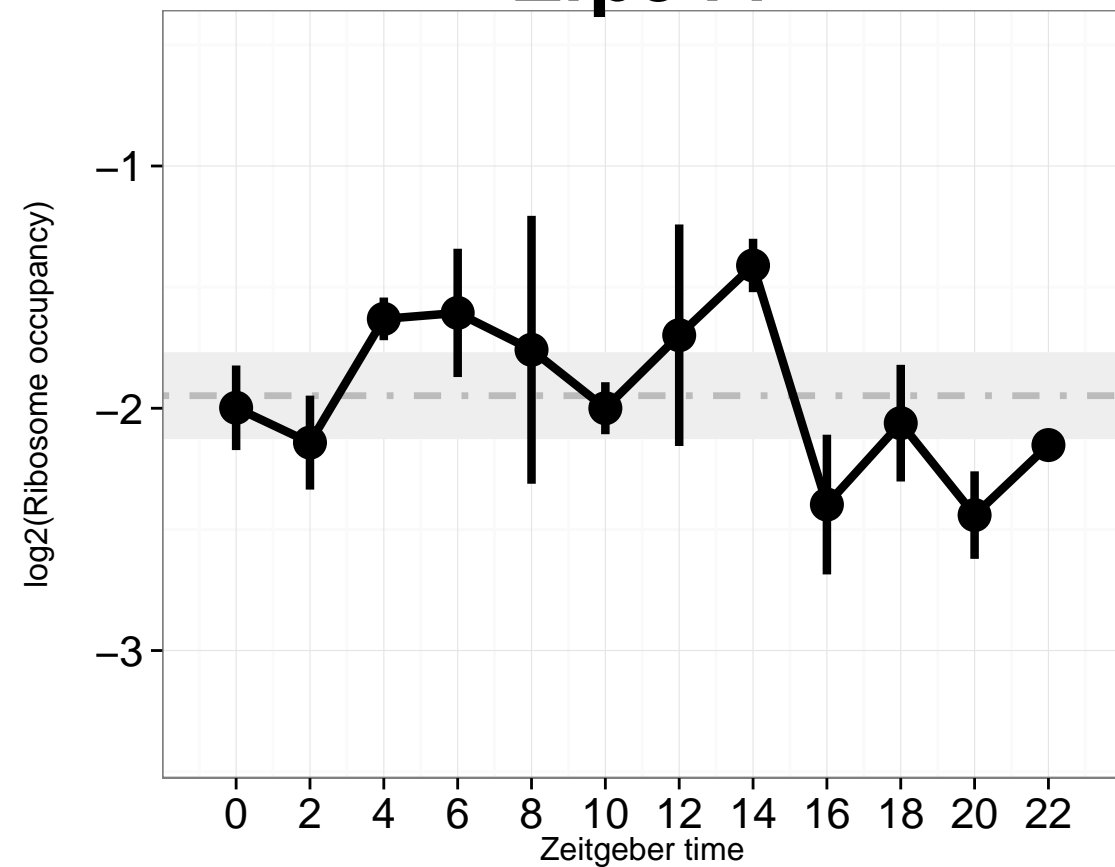

Supplement: Supplementary file 8396 [file 1]

# Tmem104

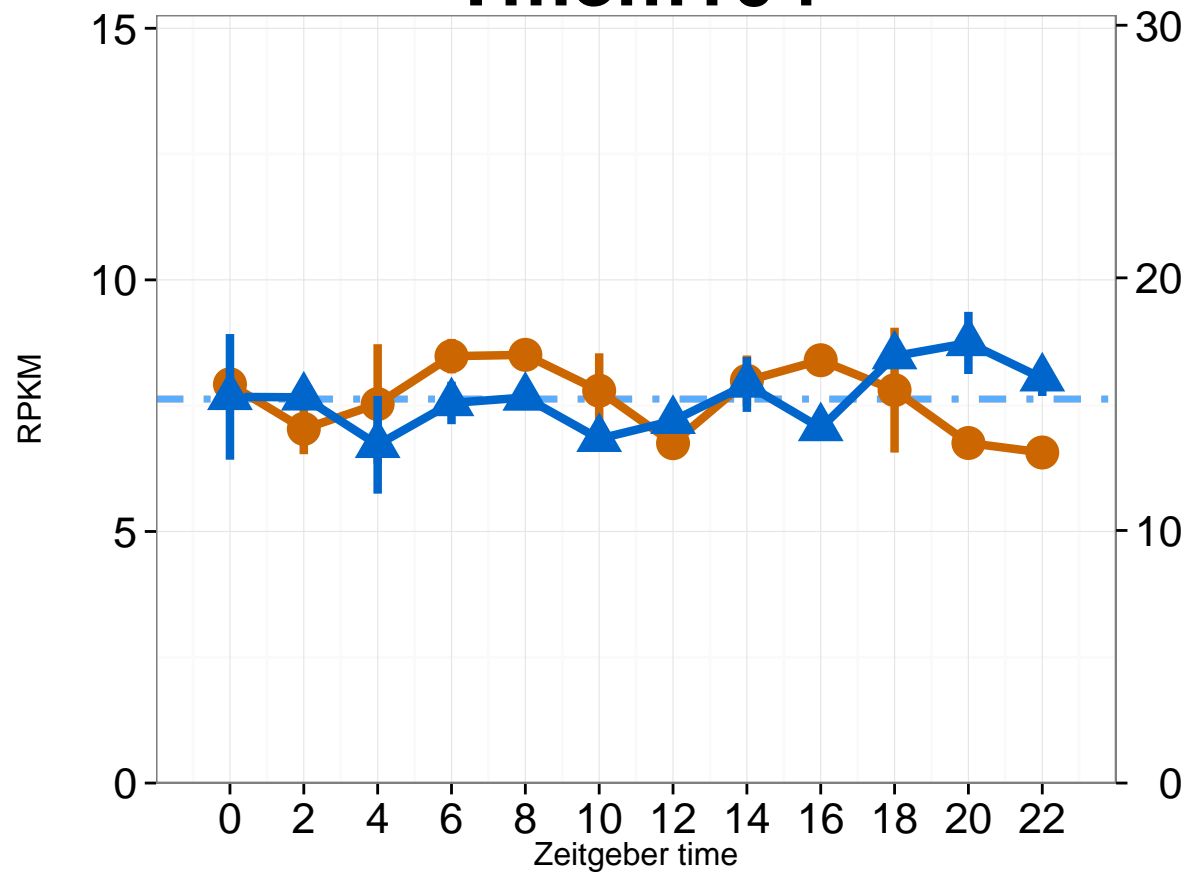

# Tmem104

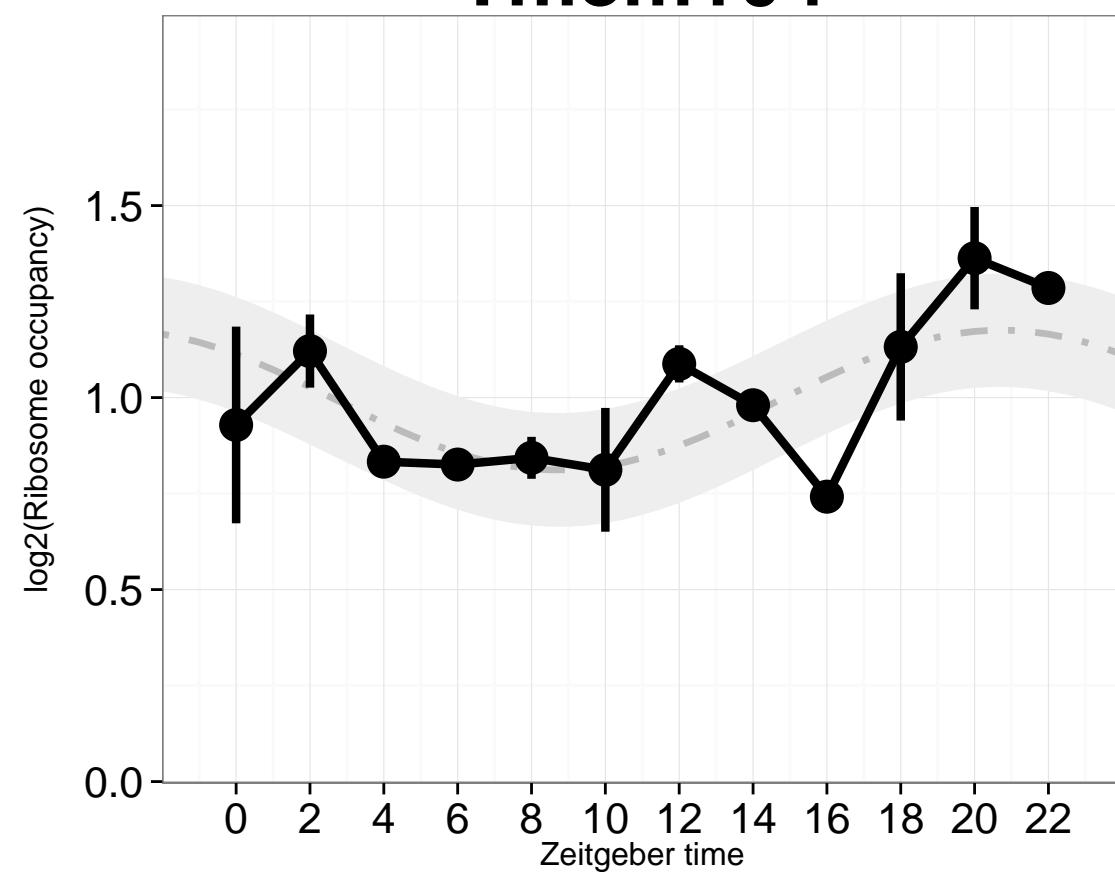

Supplement: Supplementary file 8397 [file 1]

# Ercc6l2

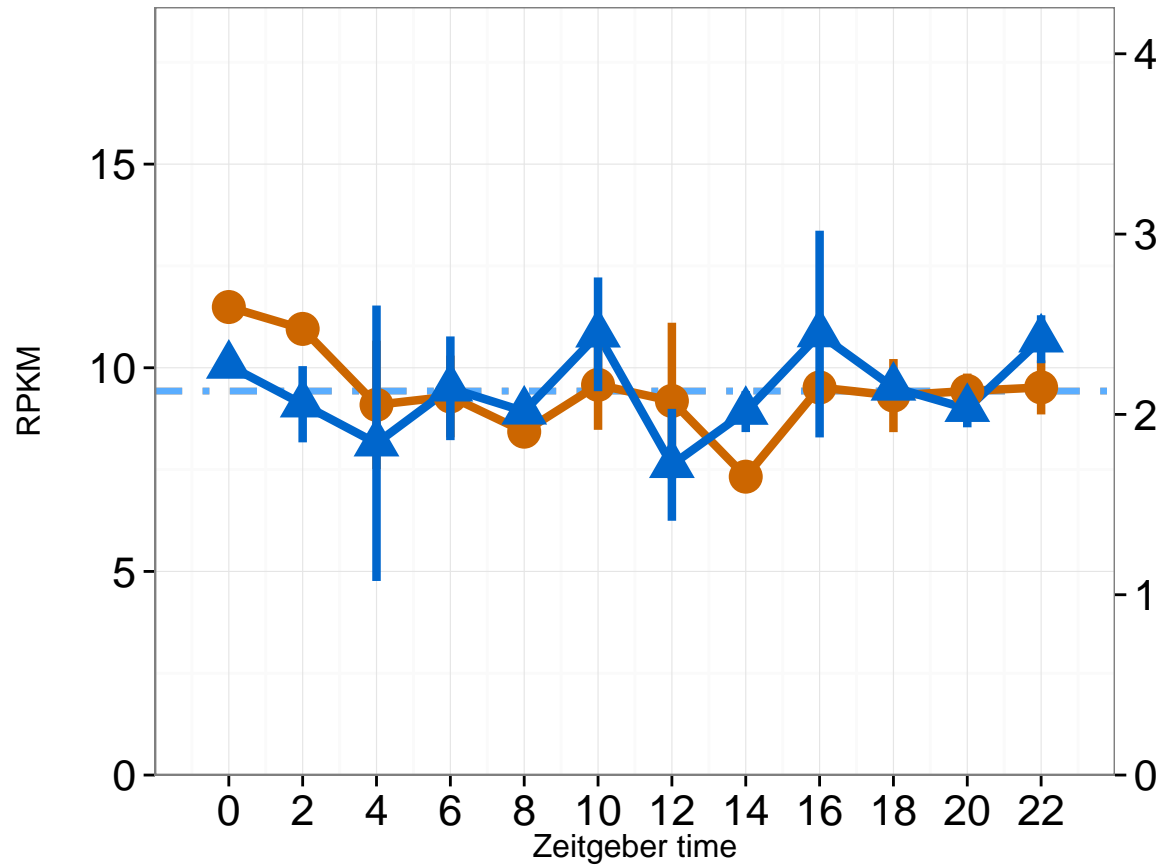

# Ercc6l2

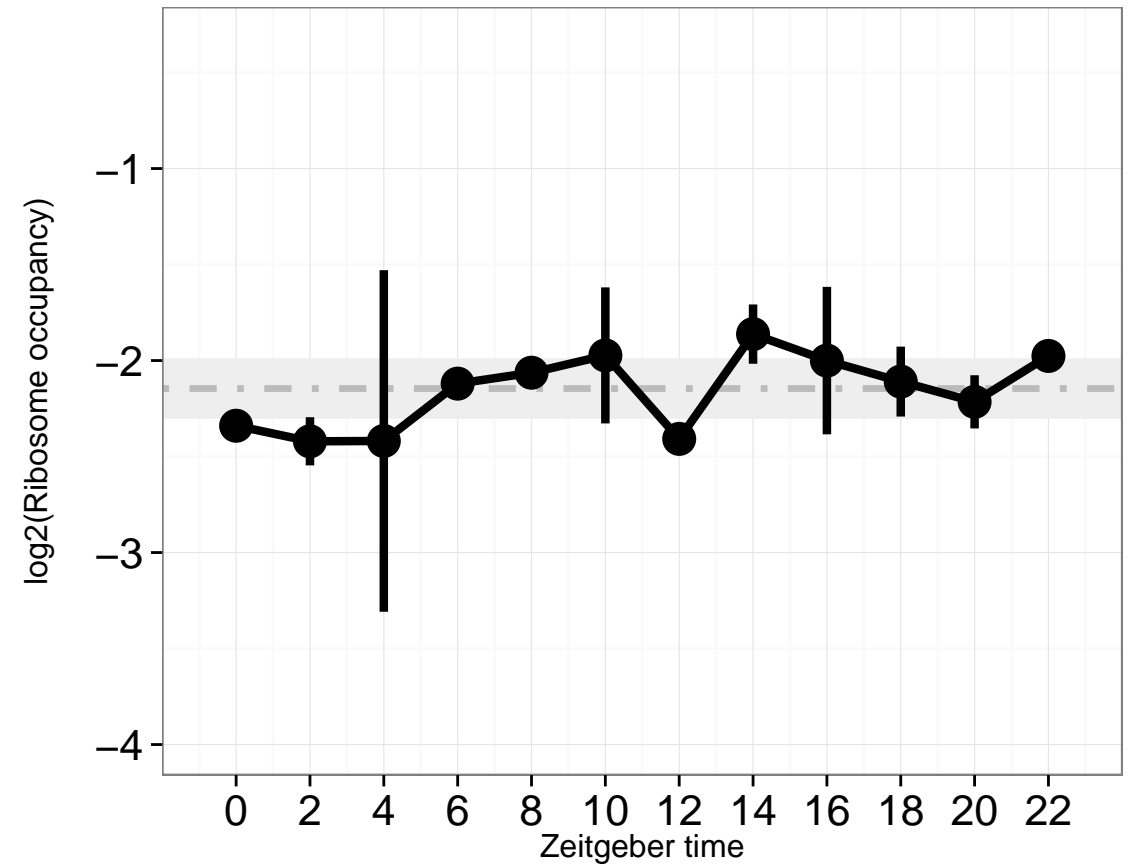

Supplement: Supplementary file 8398 [file 1]

# Gng11

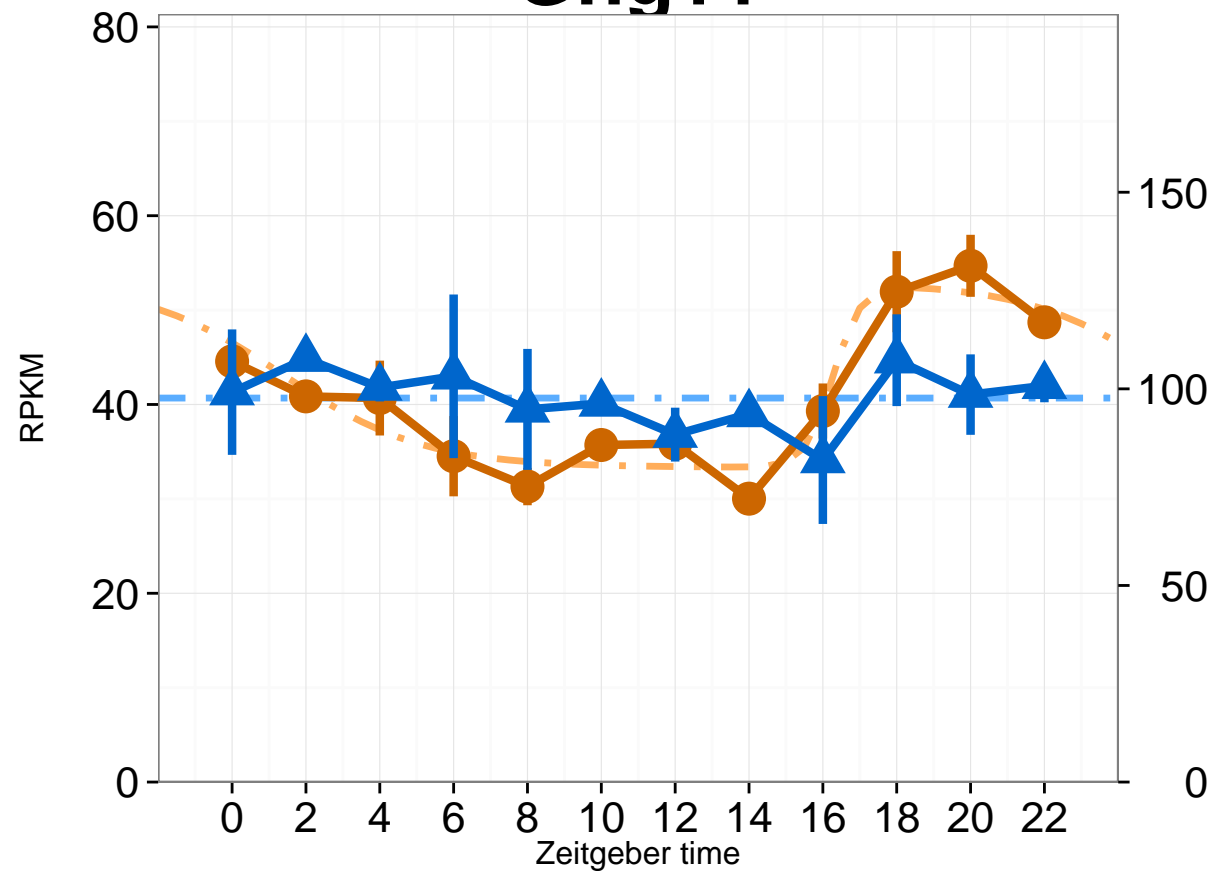

# Gng11

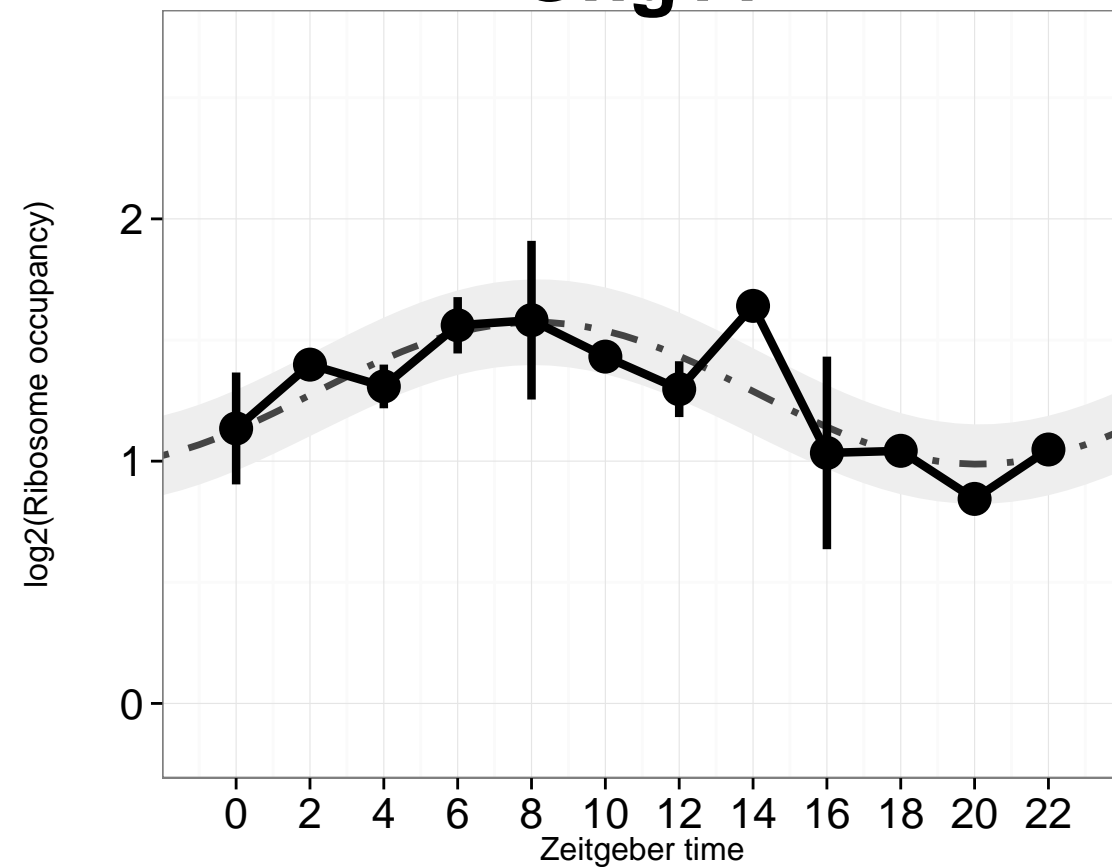

Supplement: Supplementary file 8399 [file 1]

## Fnbp1l

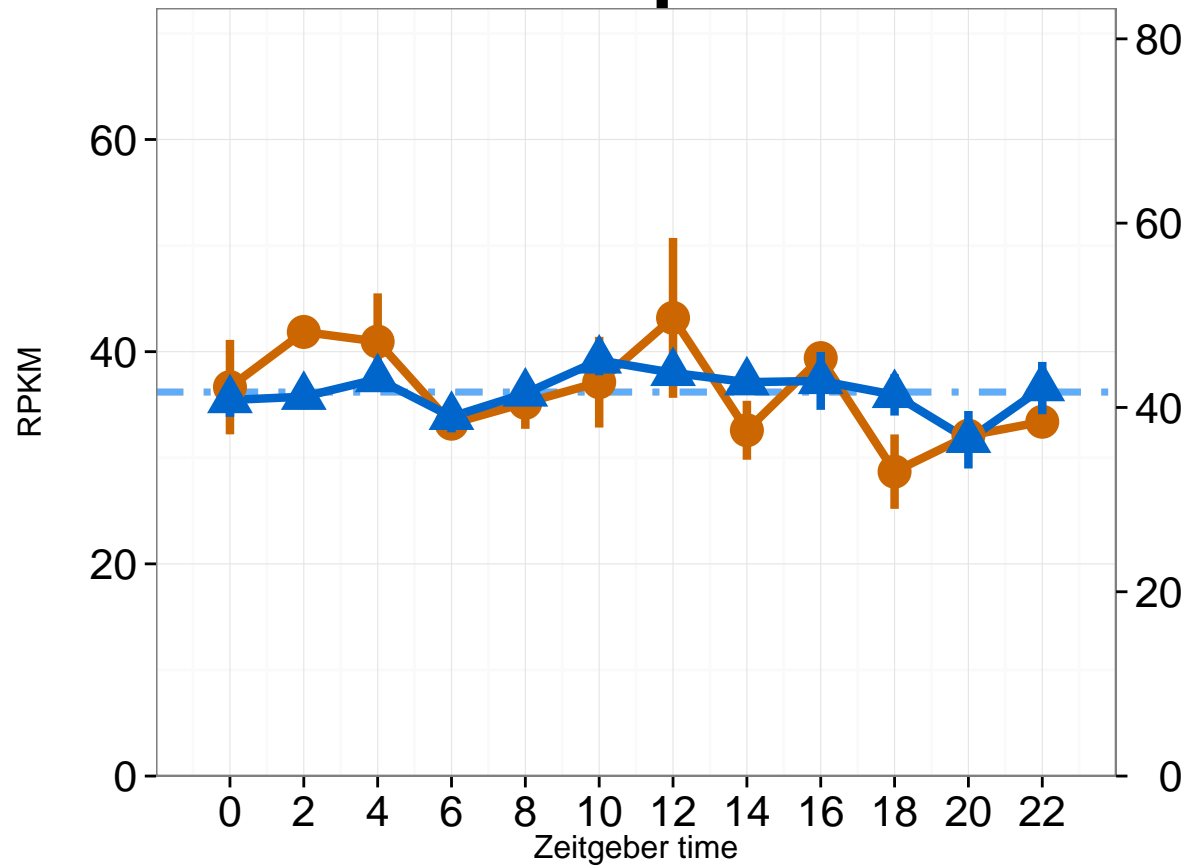

## Fnbp1l

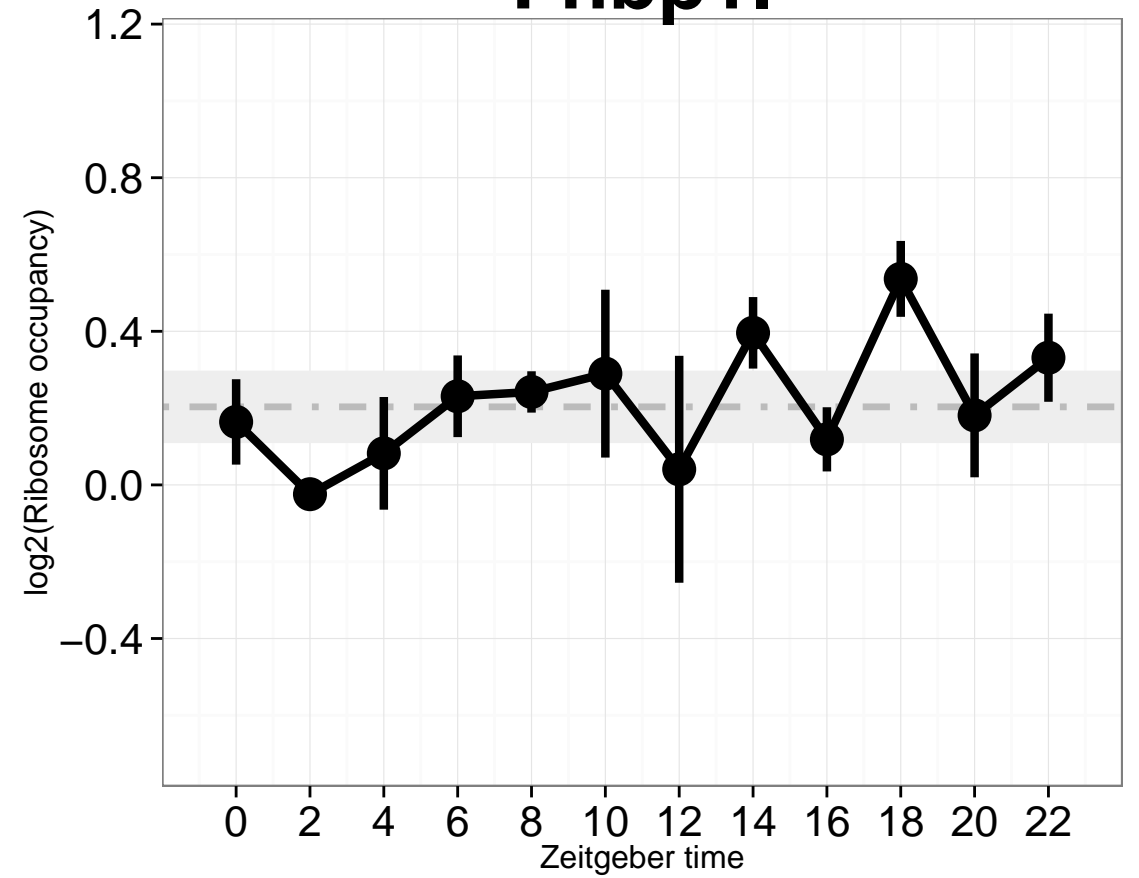

Supplement: Supplementary file 8400 [file 1]

## Ddit3

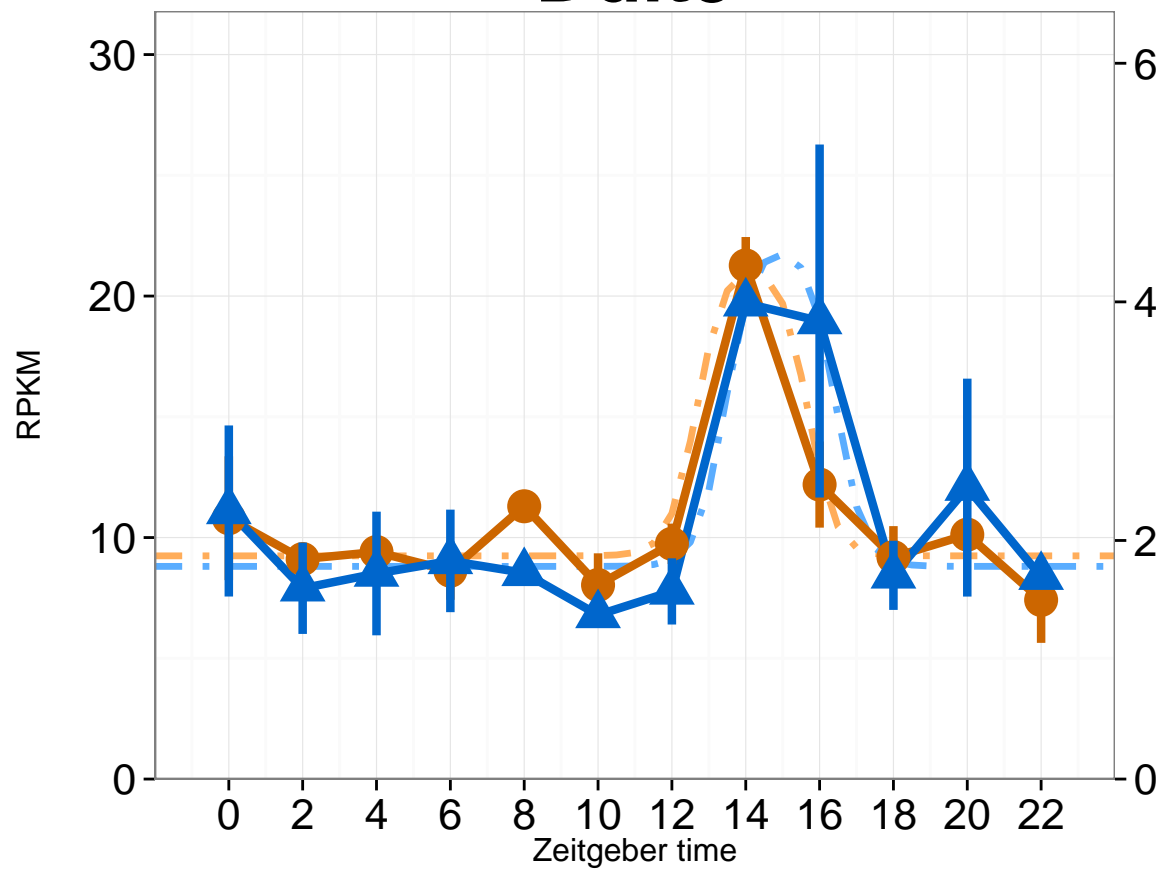

## Ddit3

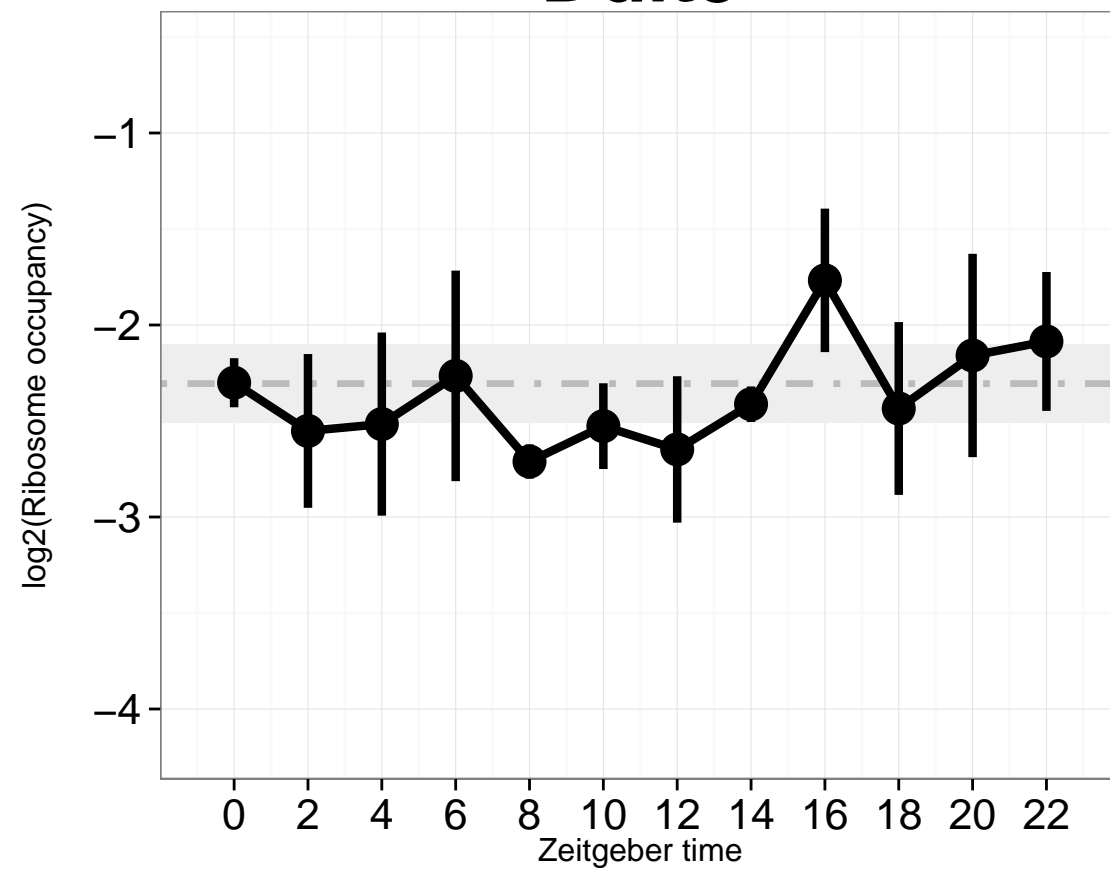

Supplement: Supplementary file 8401 [file 1]

## Pip5k1c

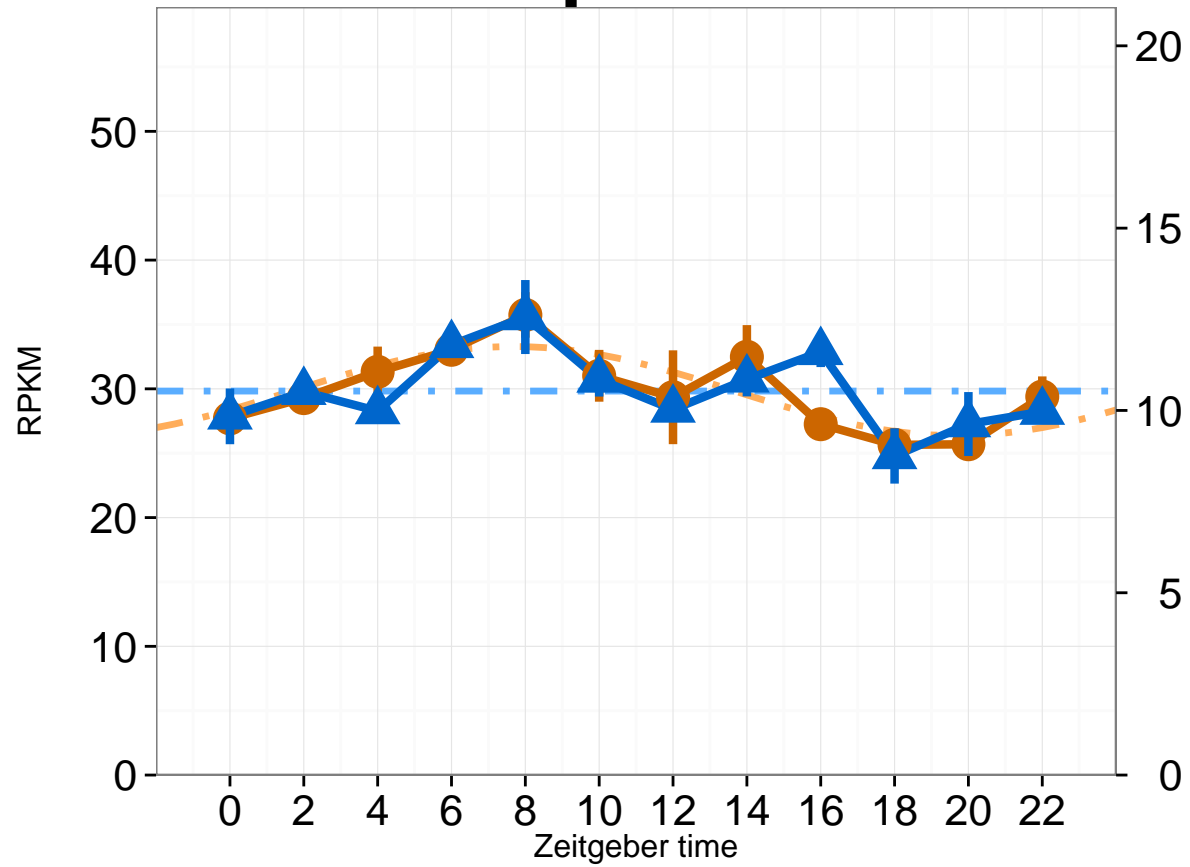

## Pip5k1c

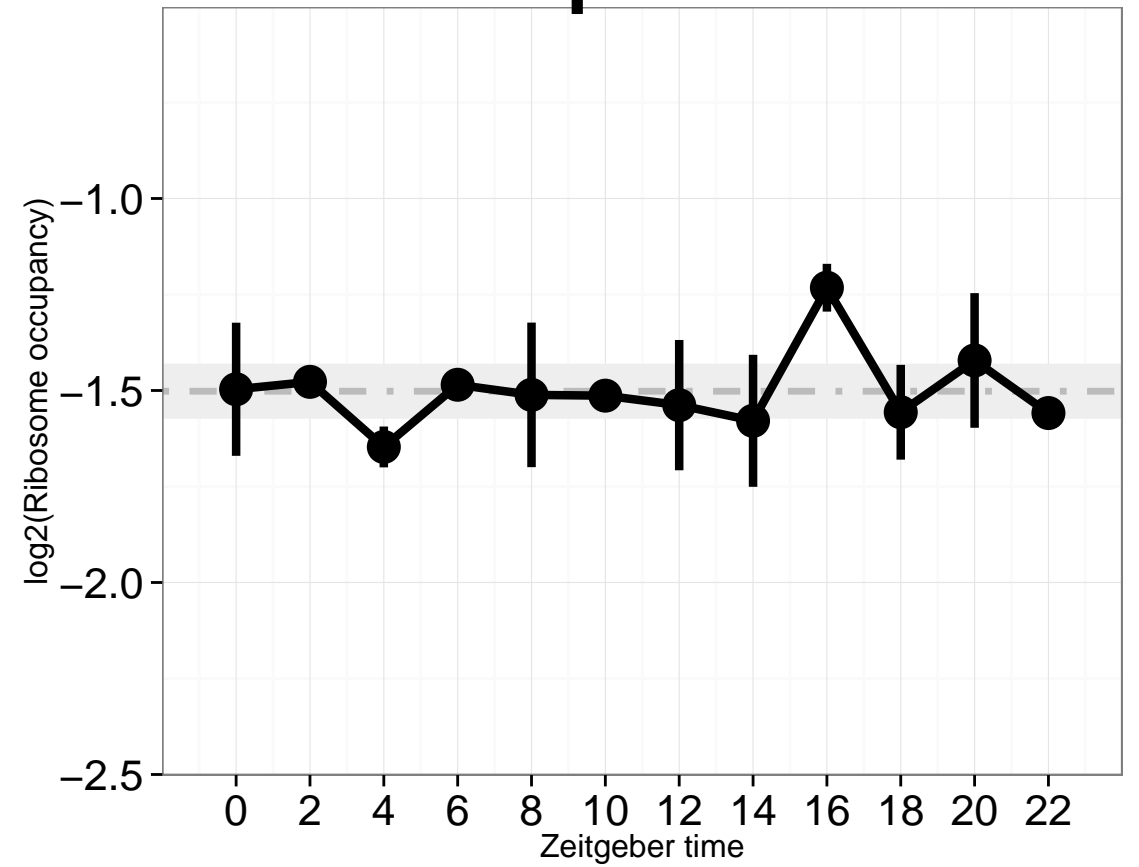

Supplement: Supplementary file 8402 [file 1]

## Rab11b

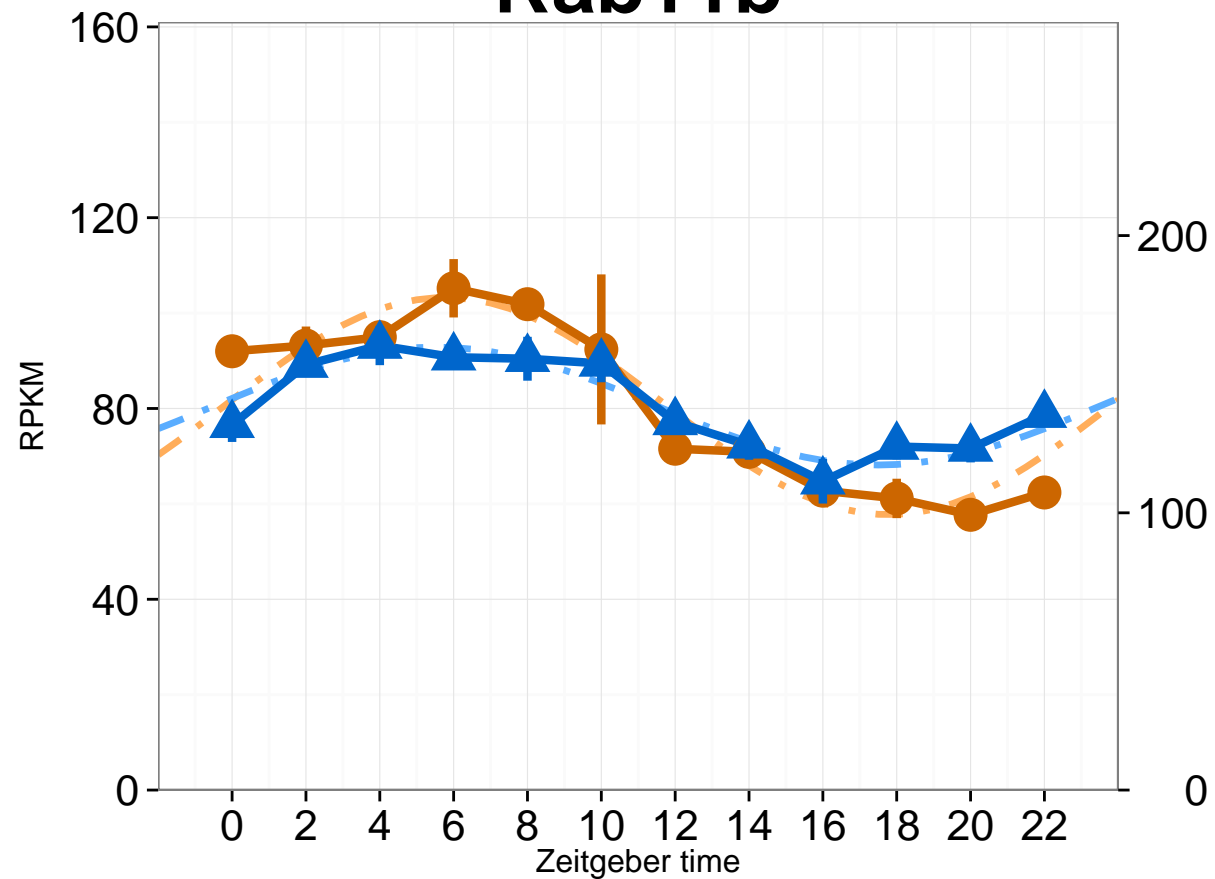

## Rab11b

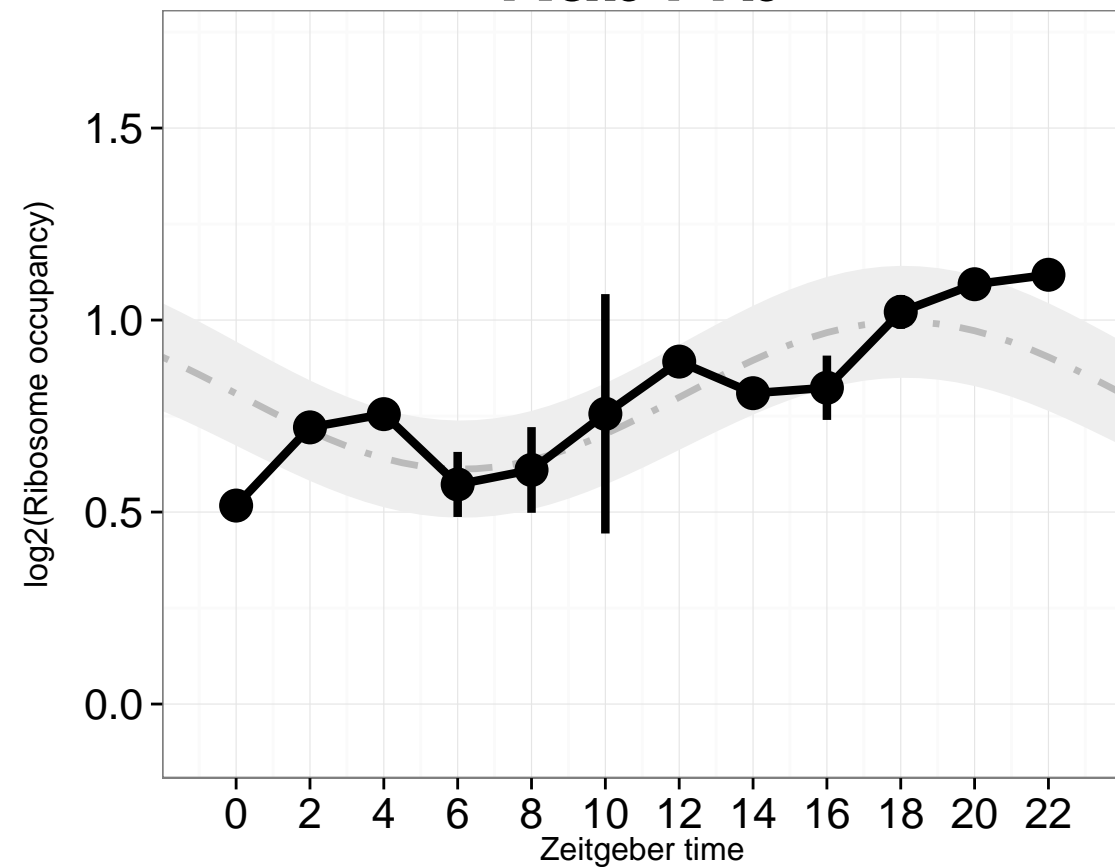

Supplement: Supplementary file 8403 [file 1]

## Dus2l

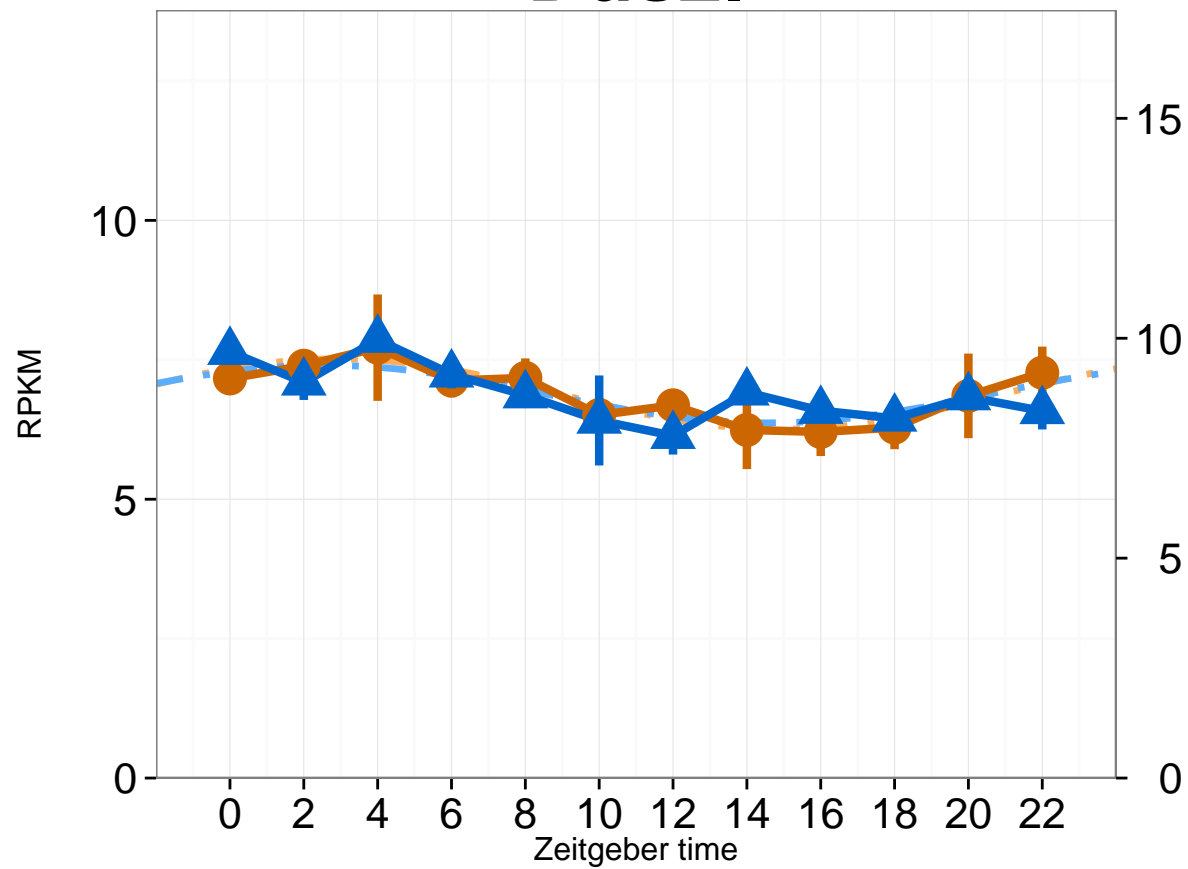

## Dus2l

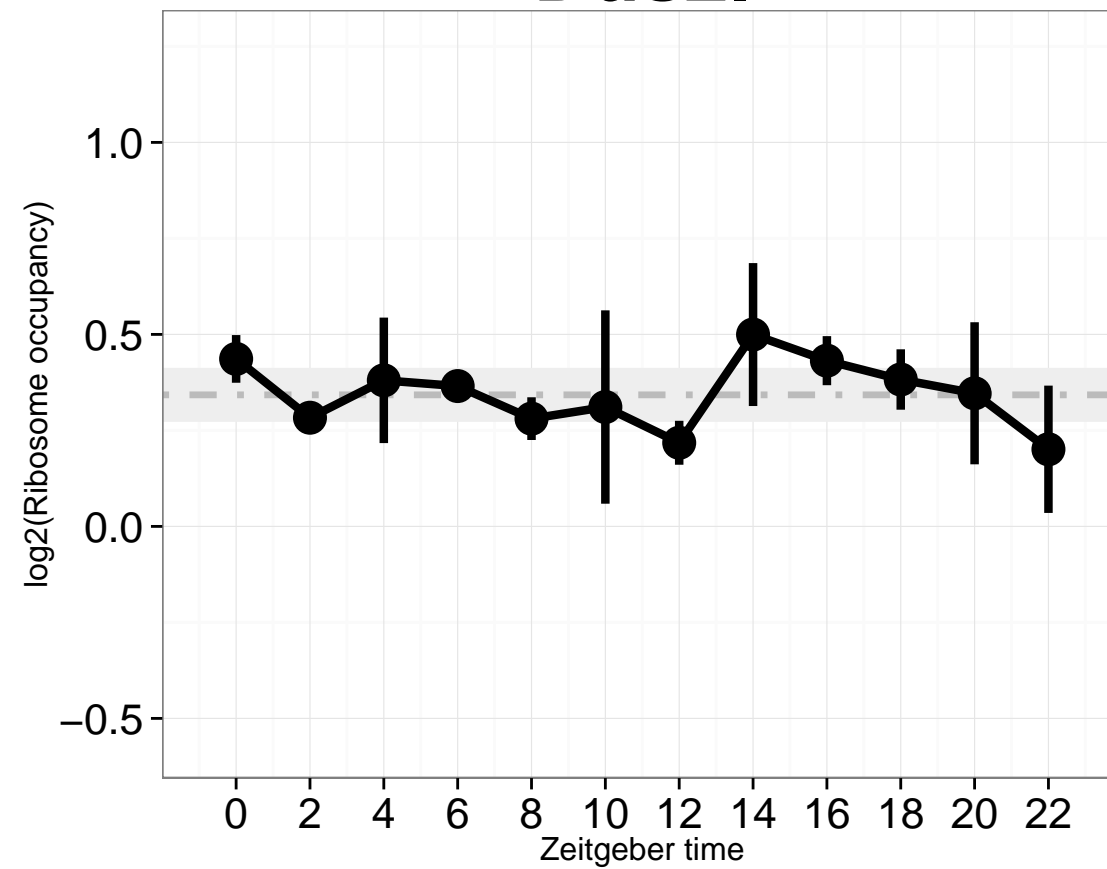

Supplement: Supplementary file 8404 [file 1]

# Lcn2

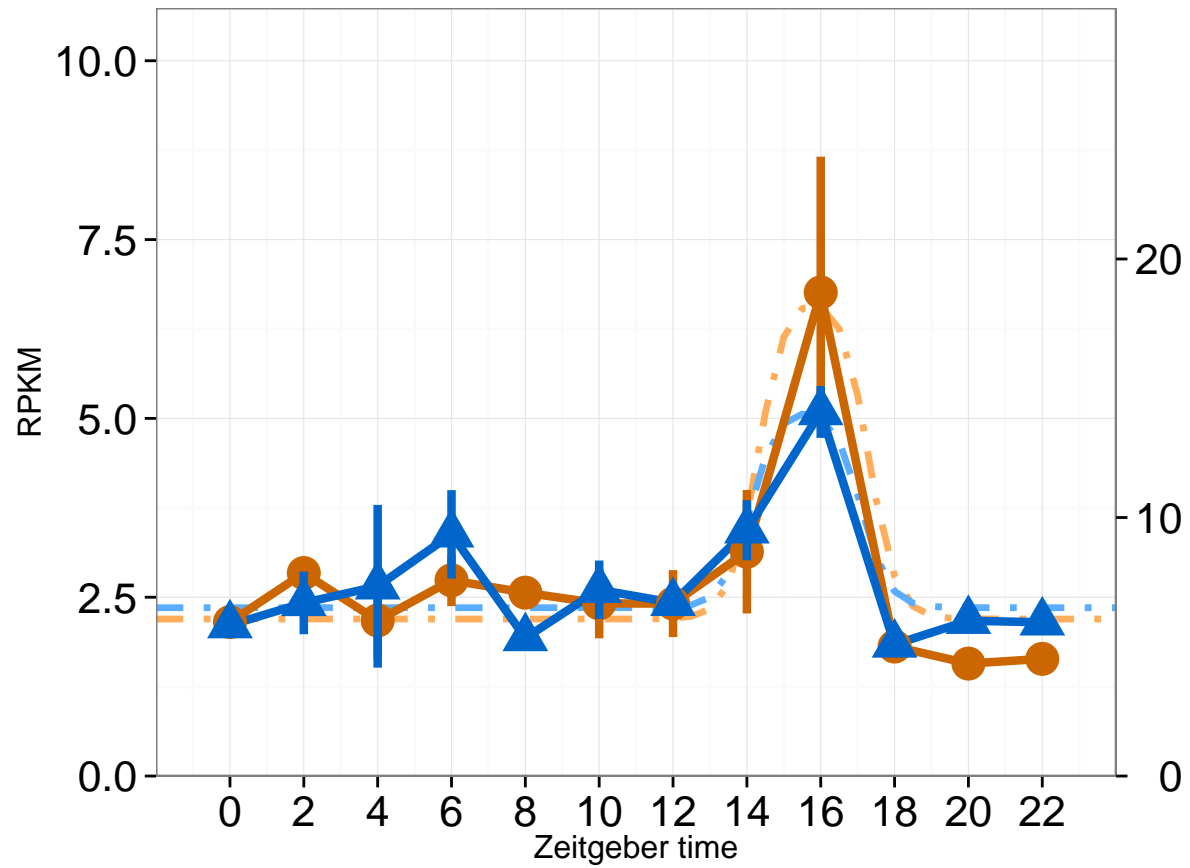

# Lcn2

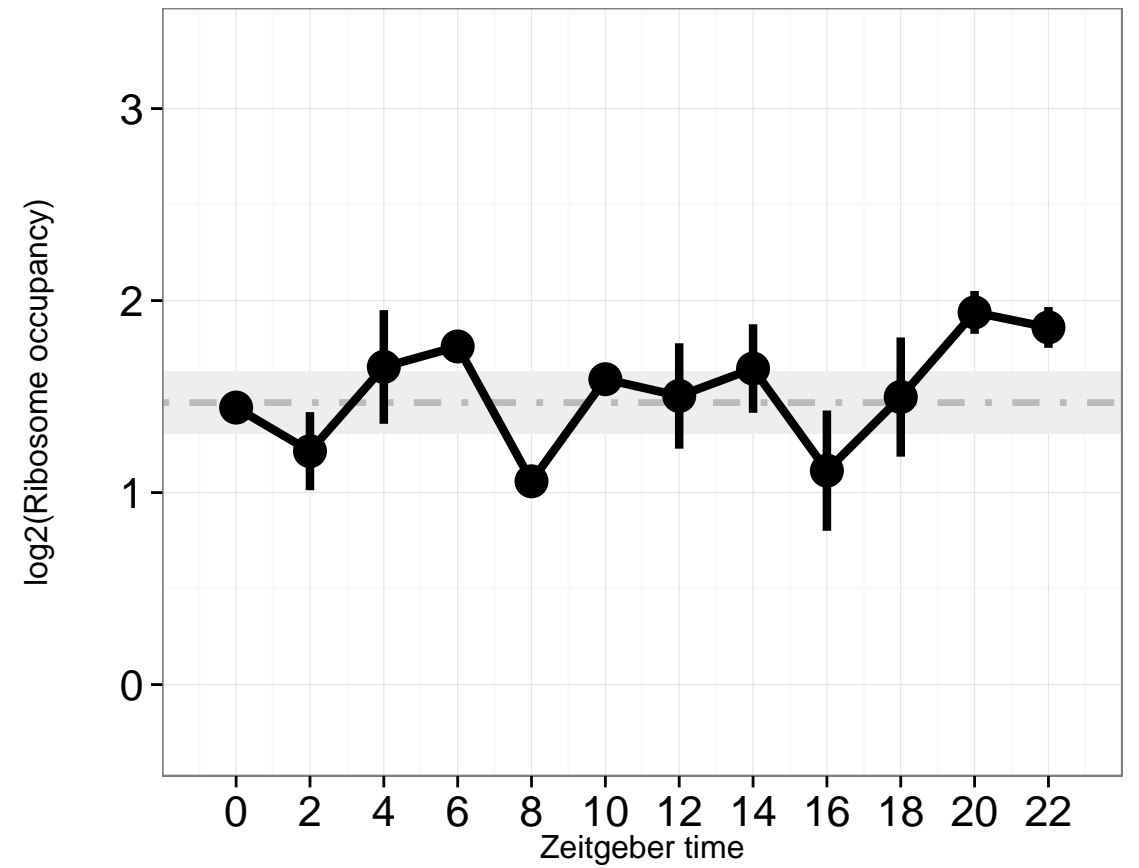

Supplement: Supplementary file 8405 [file 1]

## KIhI26

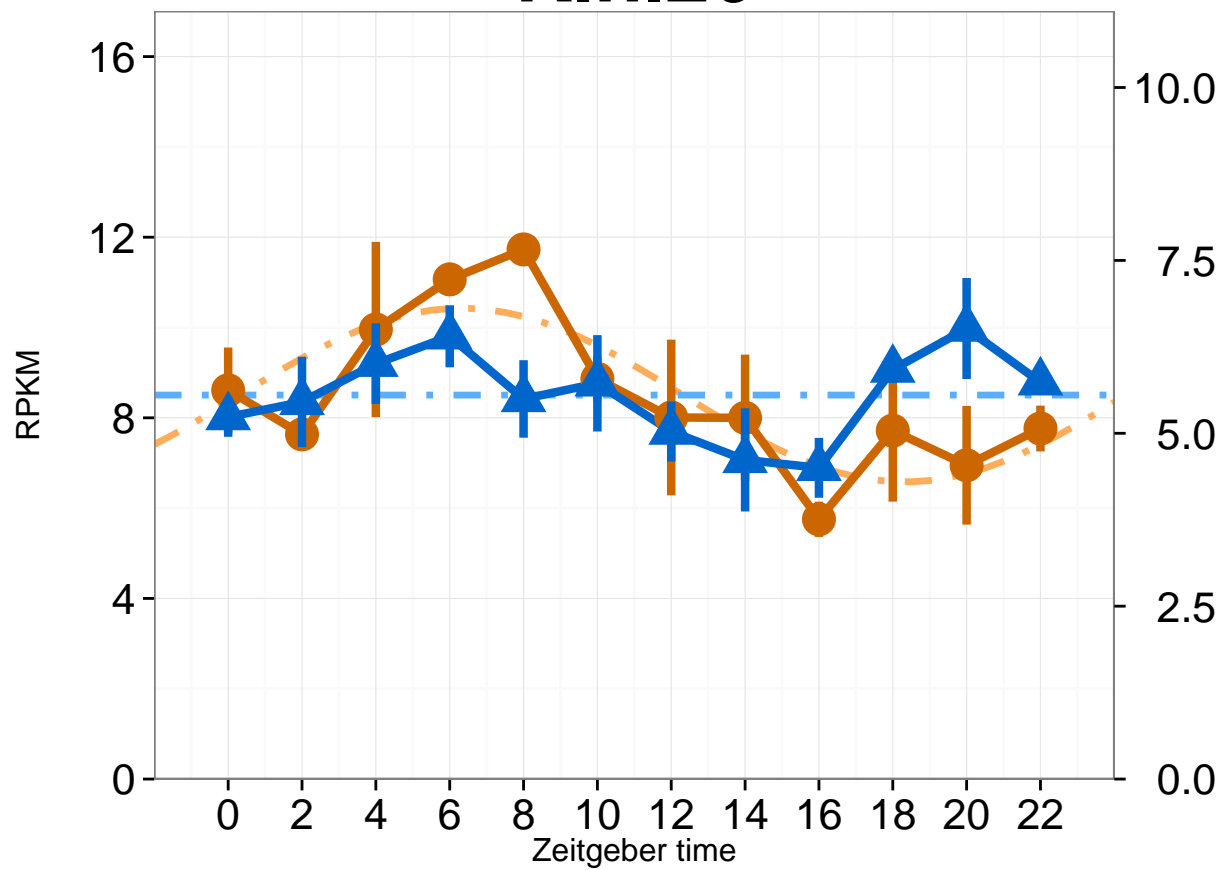

## KIhI26

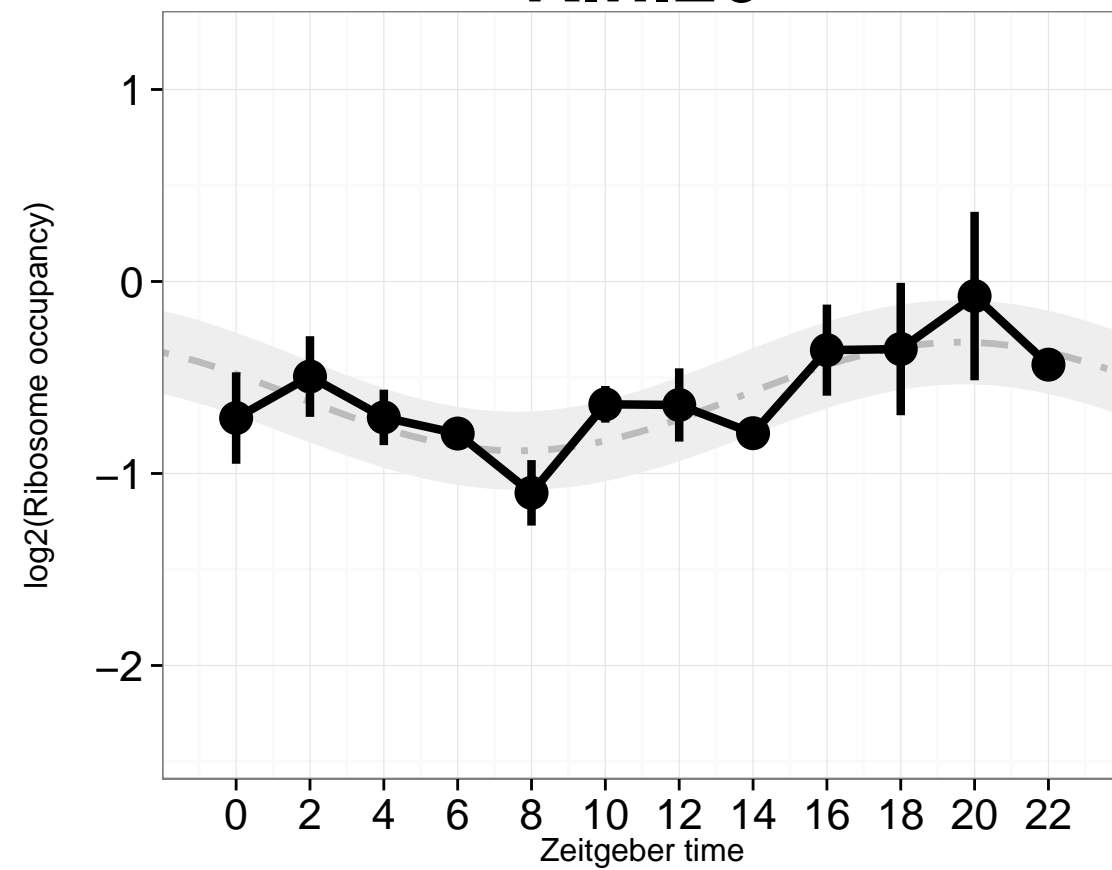

Supplement: Supplementary file 8406 [file 1]

## Rnf146

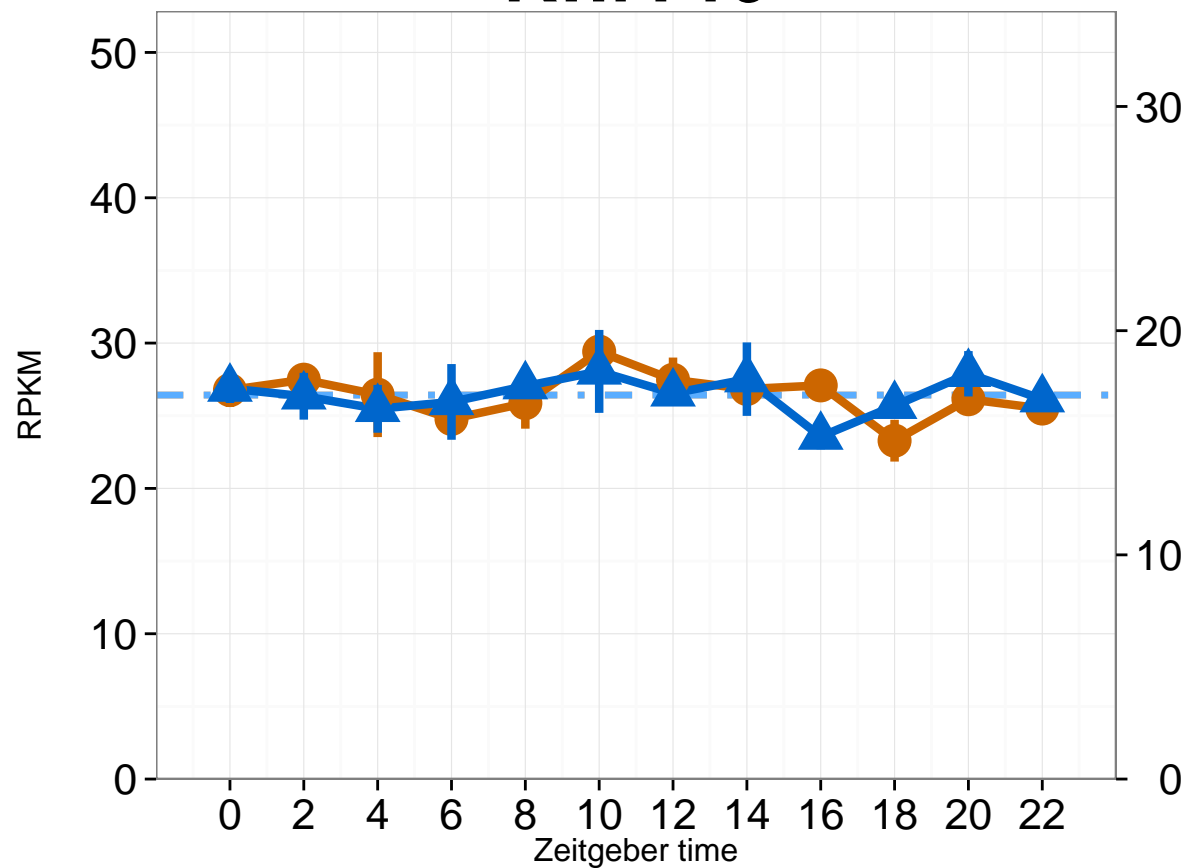

## Rnf146

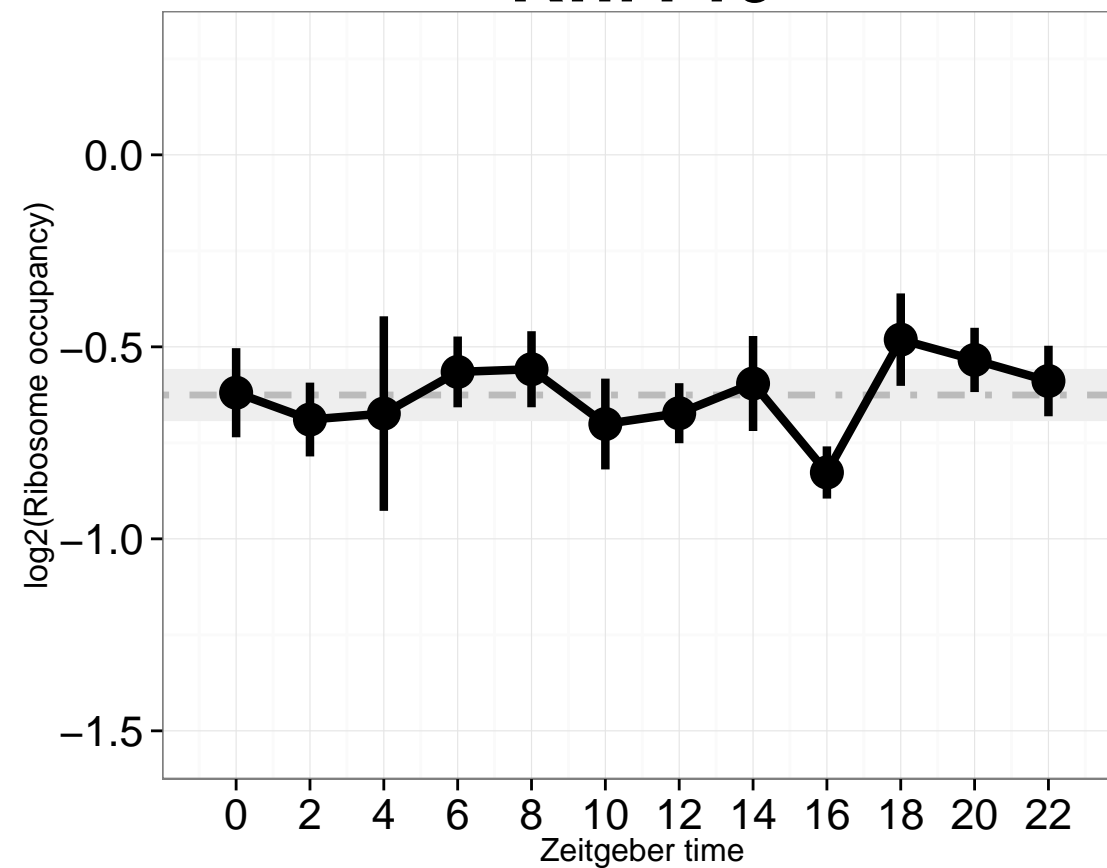

Supplement: Supplementary file 8407 [file 1]

## Serac1

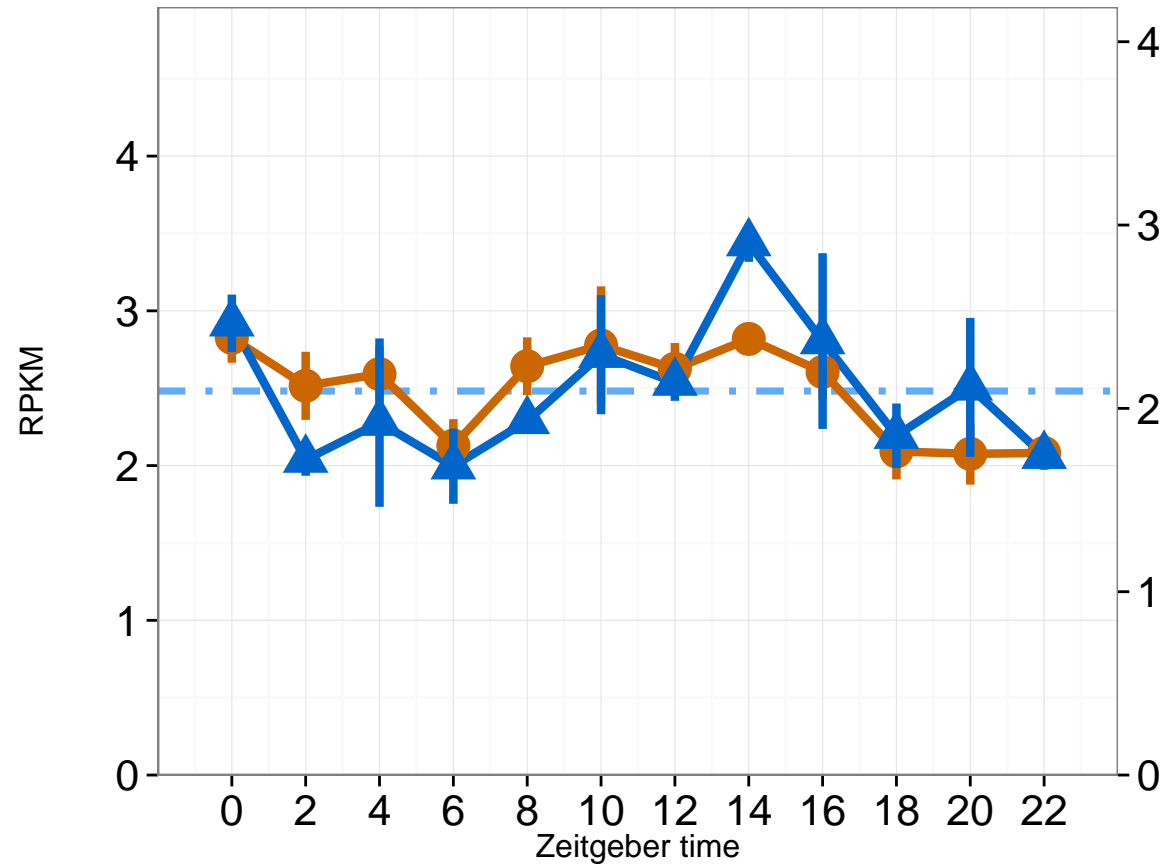

## Serac1

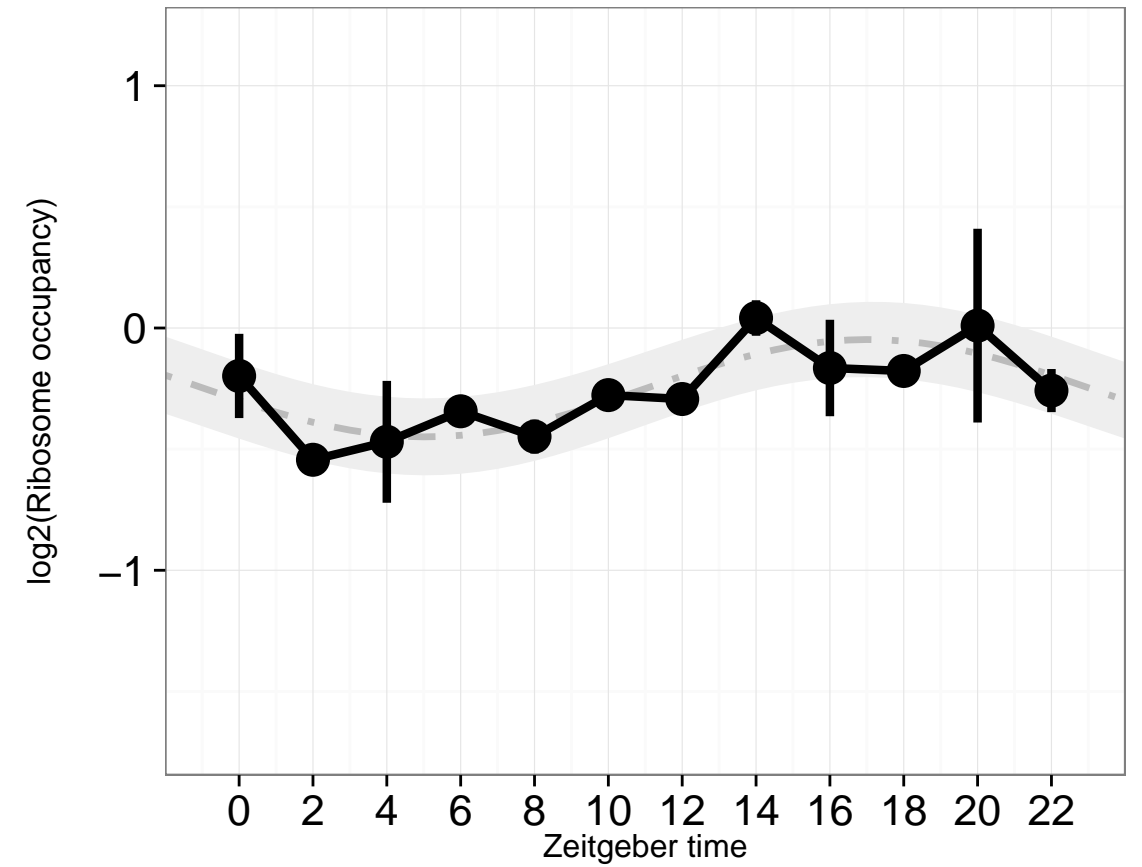

Supplement: Supplementary file 8408 [file 1]

# Efcab12

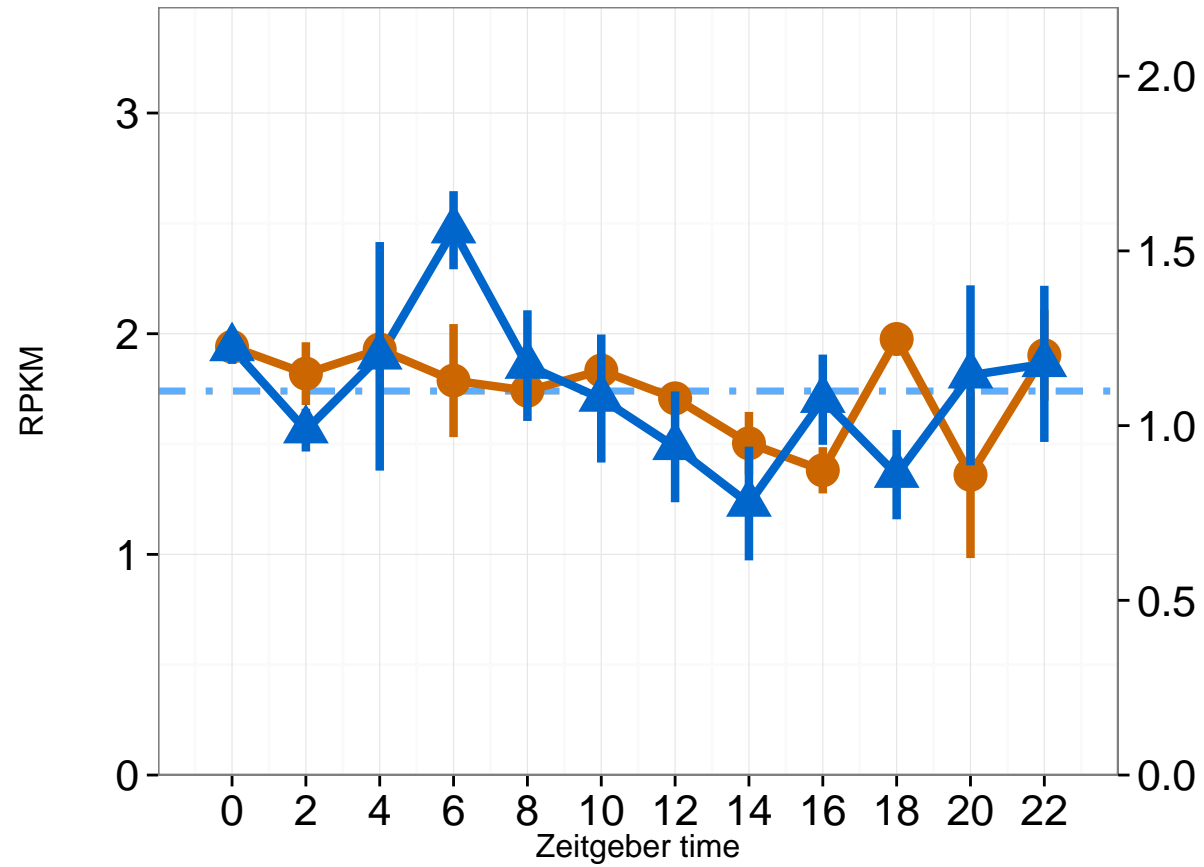

# Efcab12

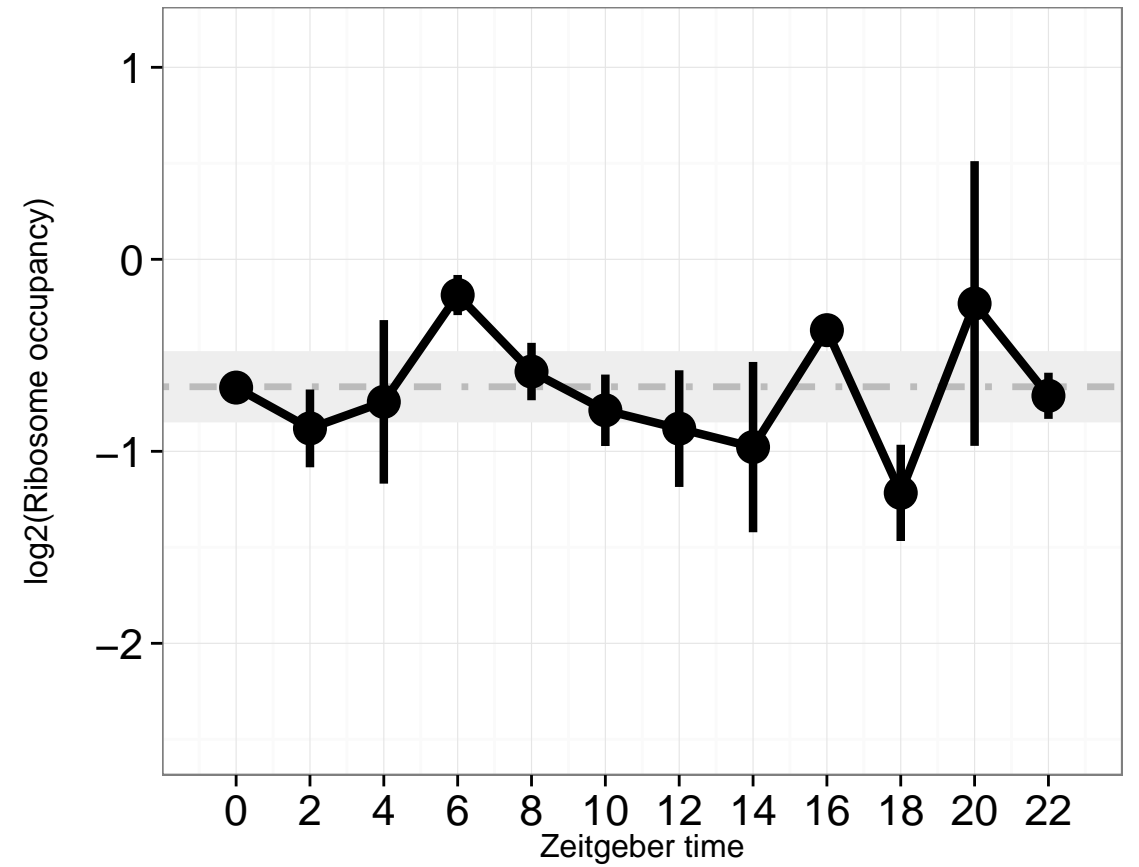

Supplement: Supplementary file 8409 [file 1]

# Krt18

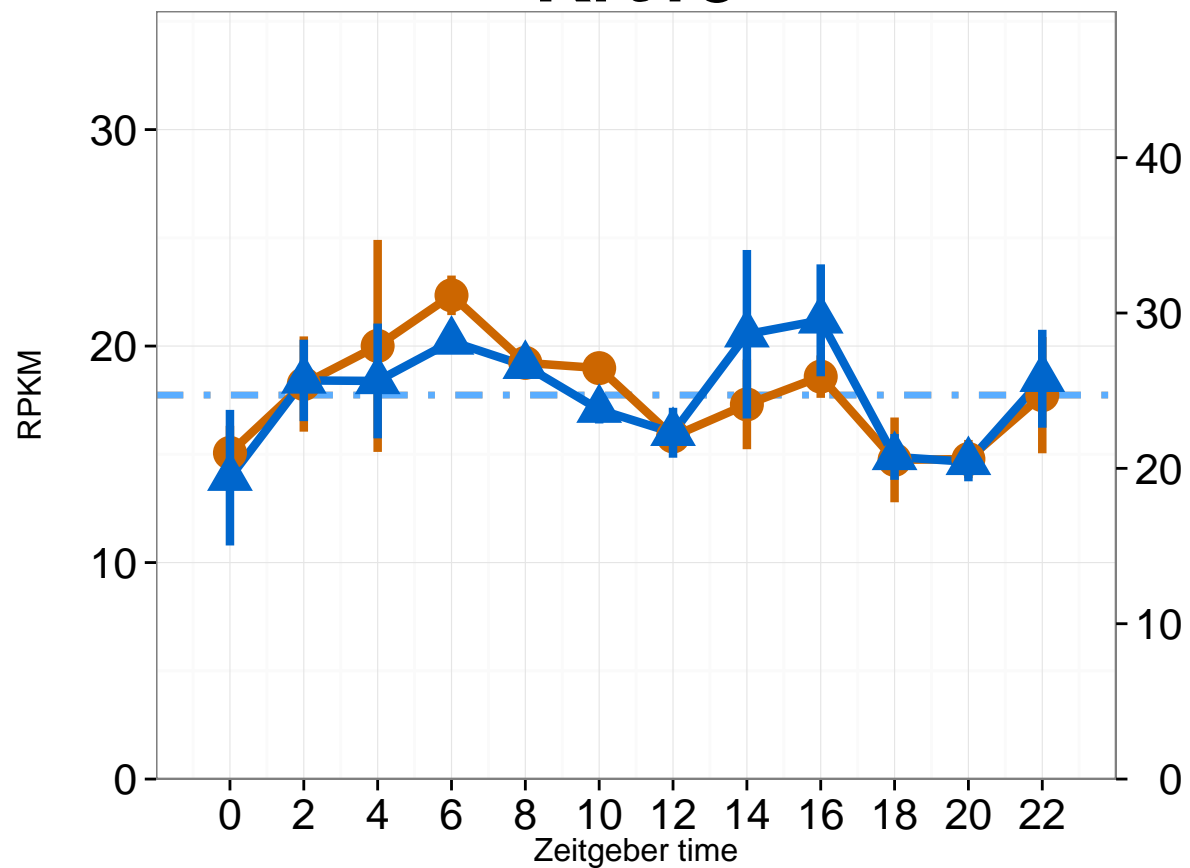

# Krt18

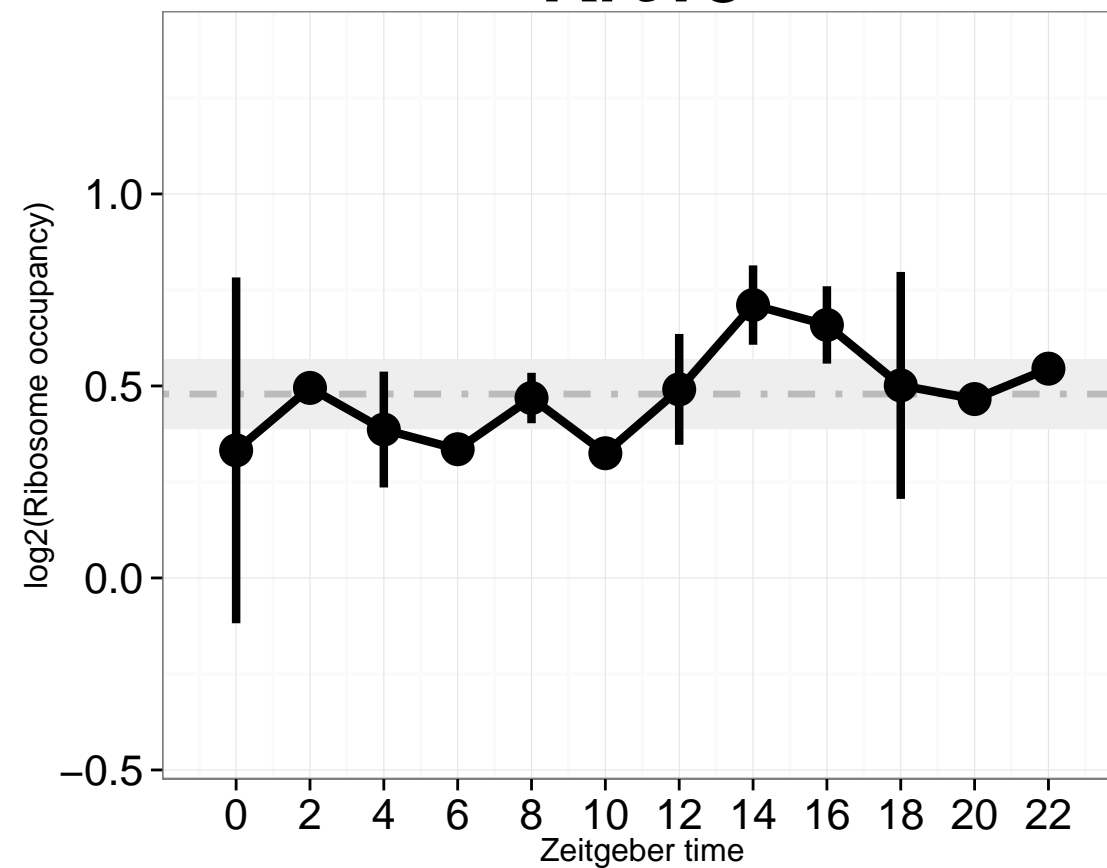

Supplement: Supplementary file 8410 [file 1]

## Rfc5

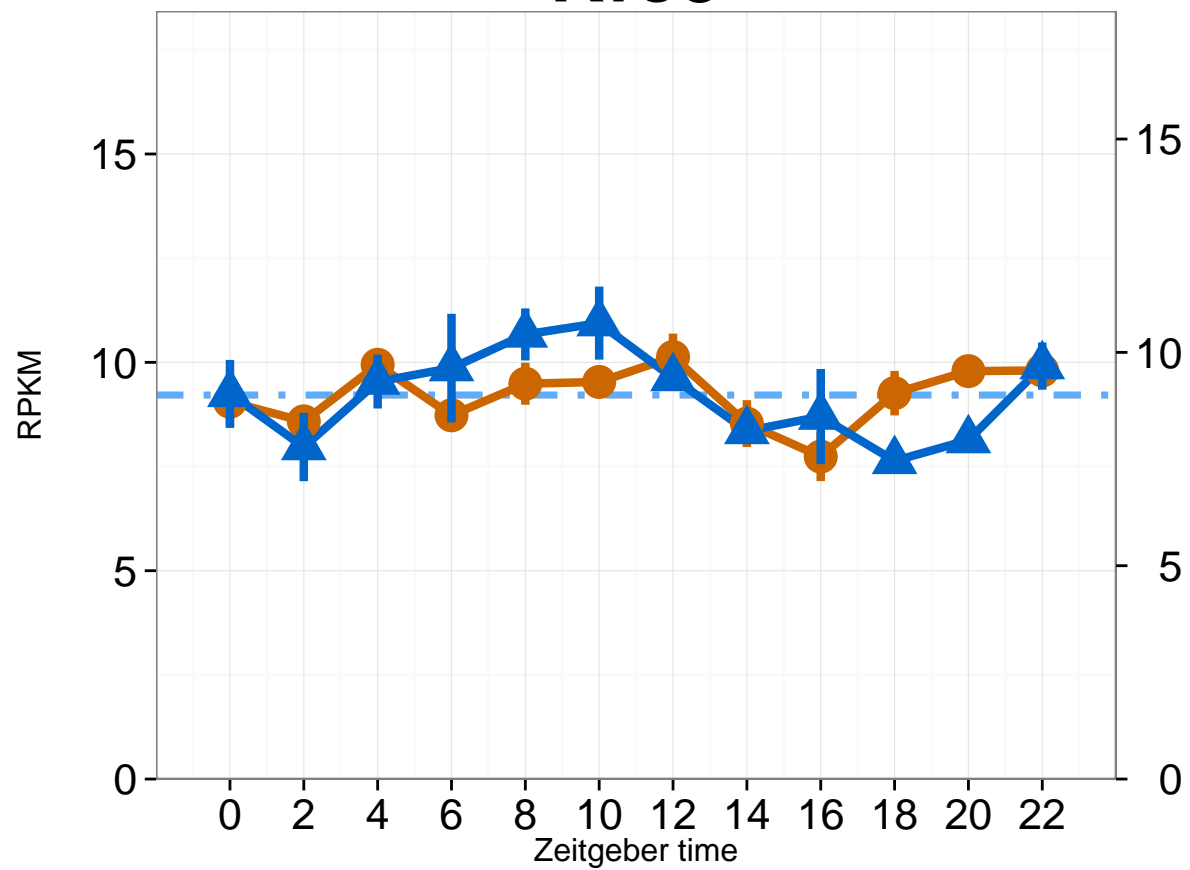

## Rfc5

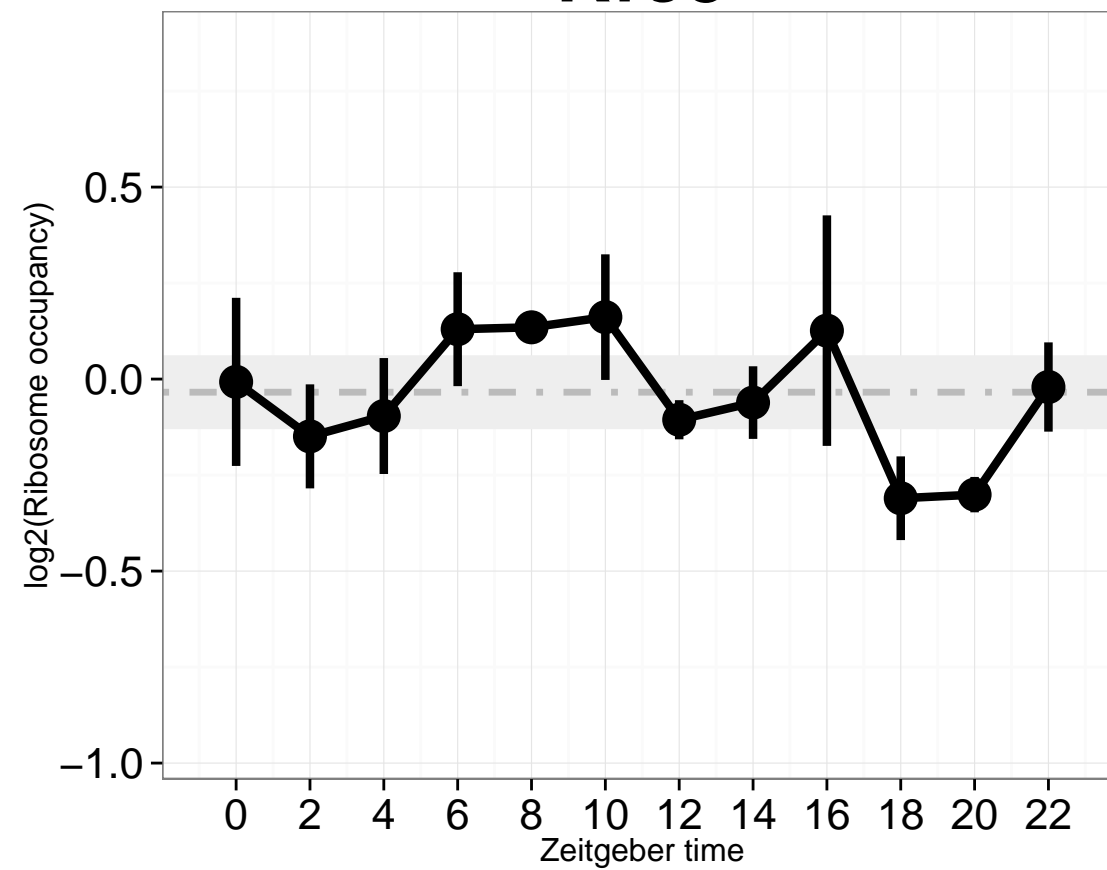

Supplement: Supplementary file 8411 [file 1]

## Mpp7

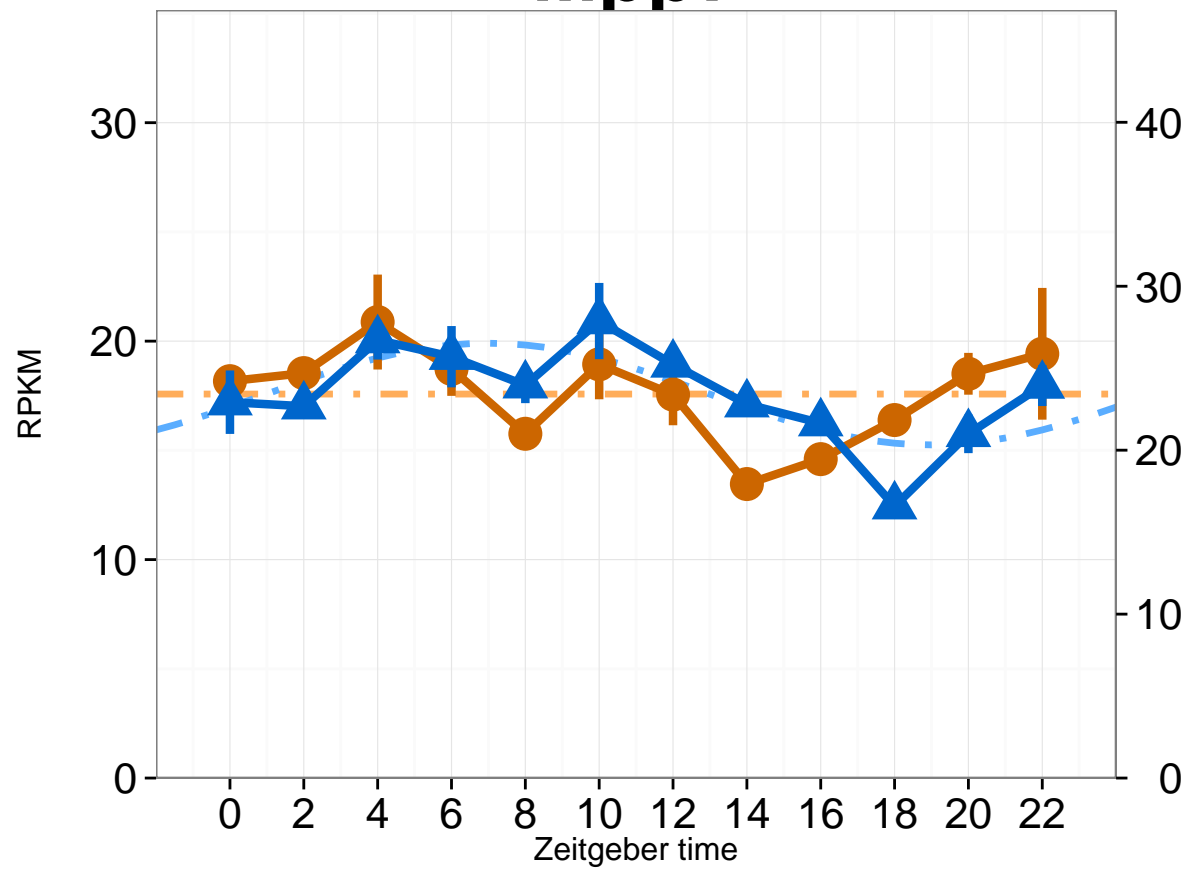

## Mpp7

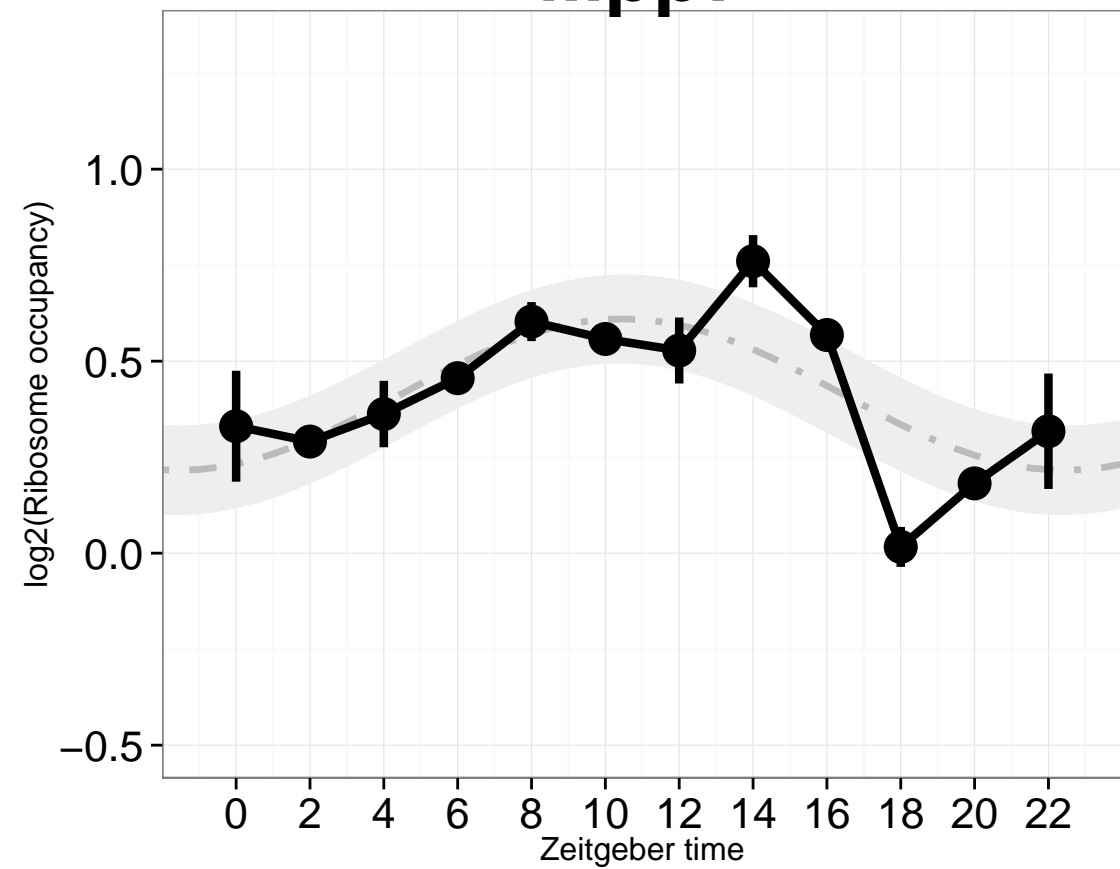

Supplement: Supplementary file 8412 [file 1]

## Gm4980

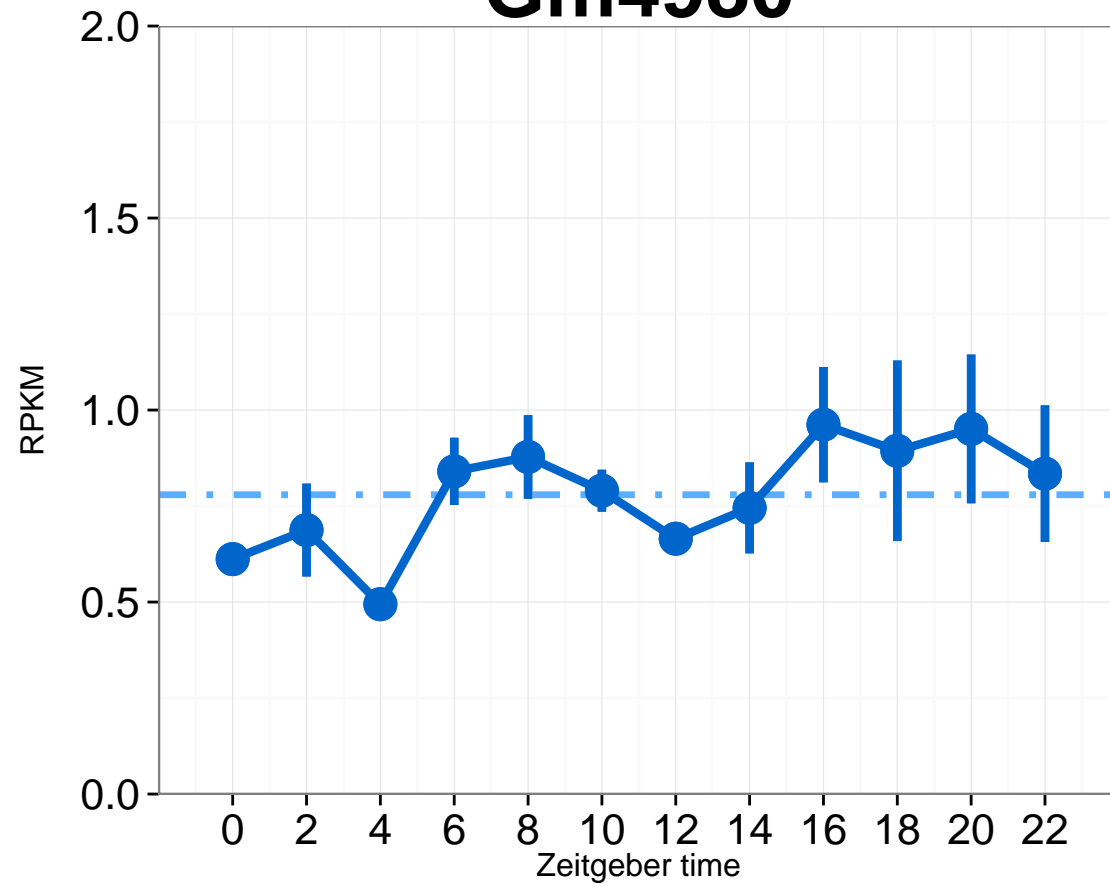

## Gm4980 log2(Ribosome occupanc

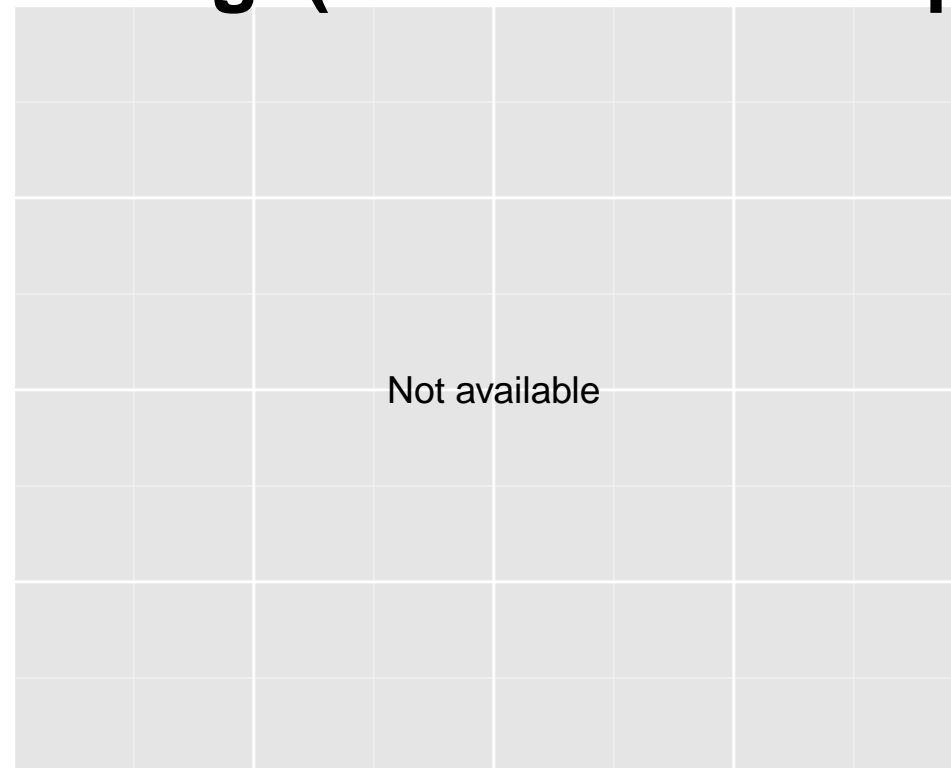

Supplement: Supplementary file 8413 [file 1]

# BC055324

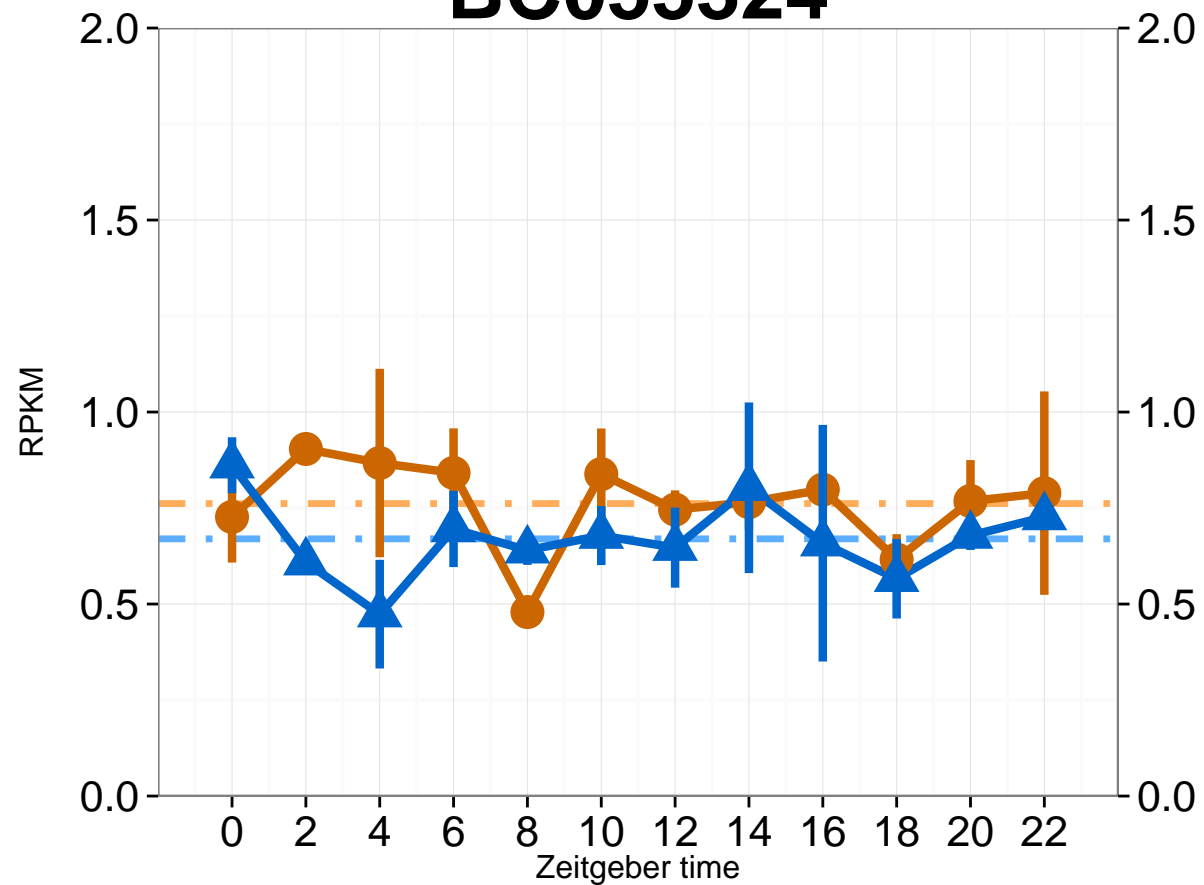

# BC055324

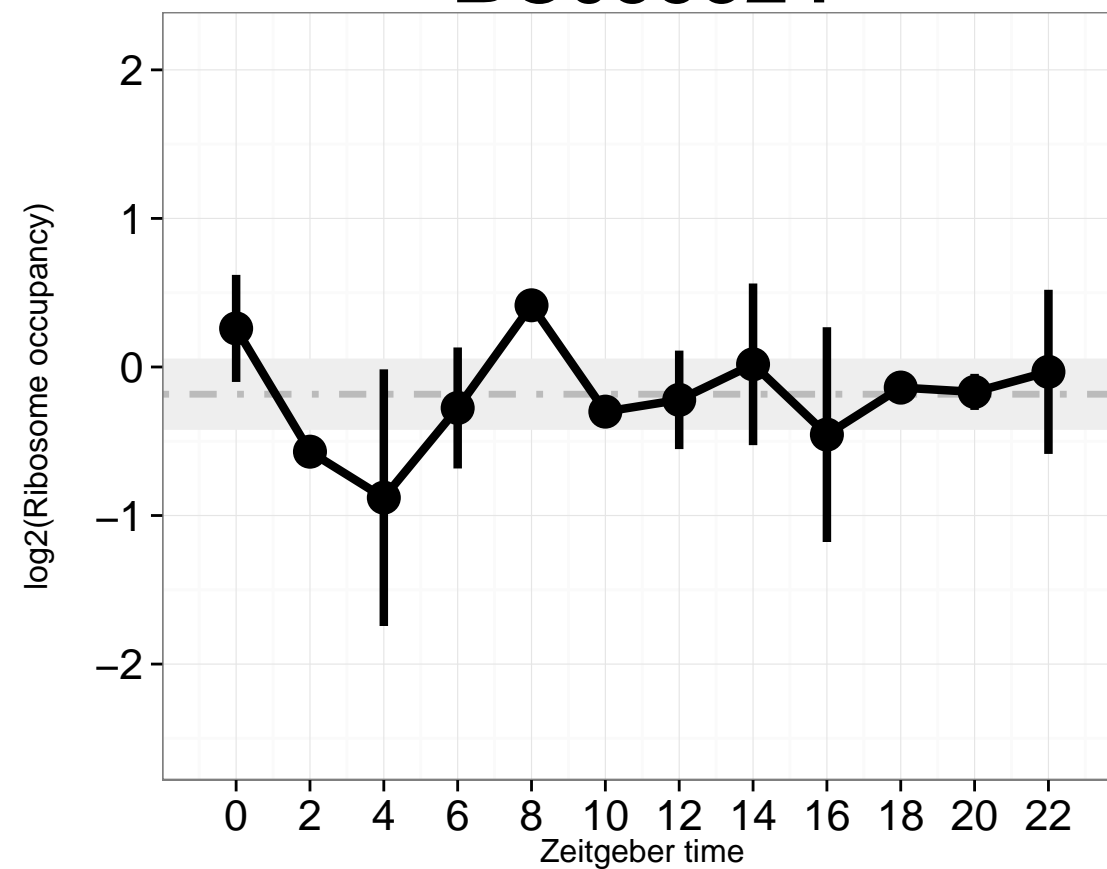

Supplement: Supplementary file 8414 [file 1]

## Copb2

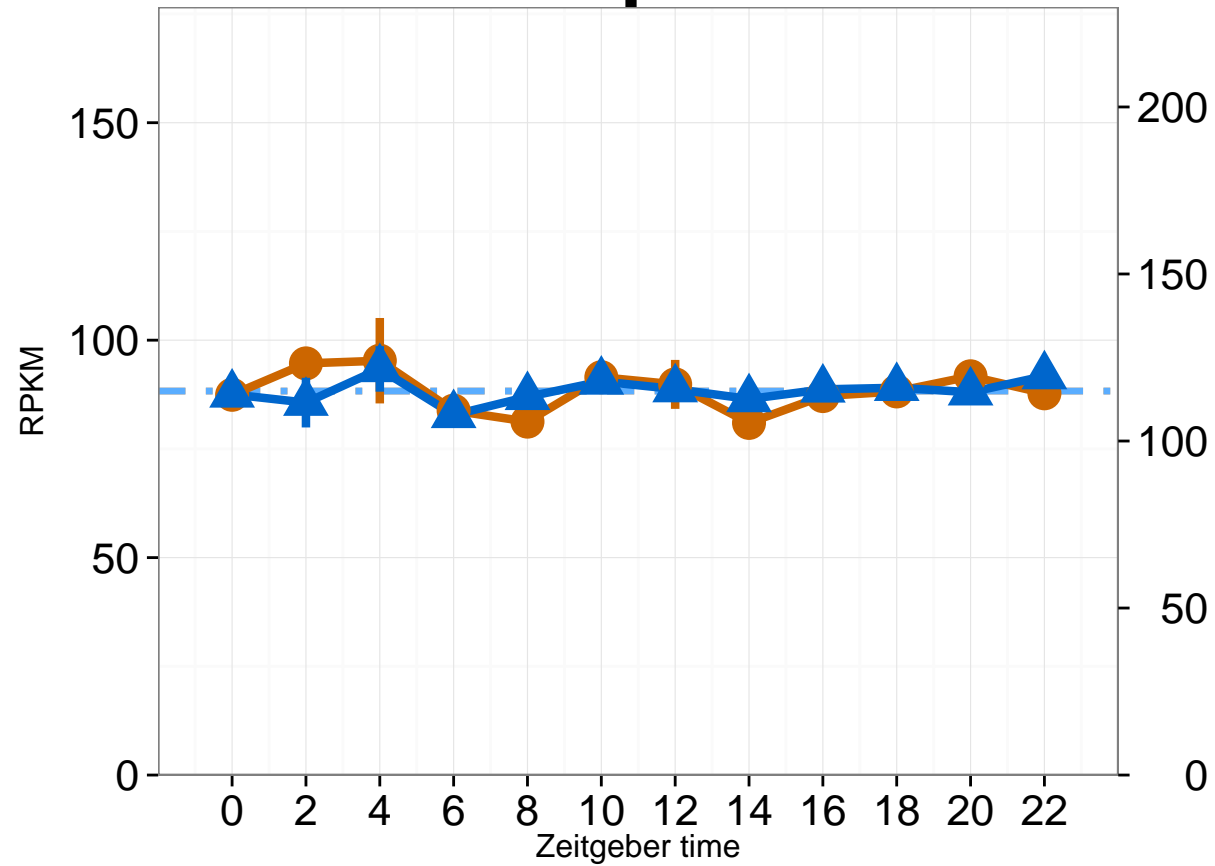

## Copb2

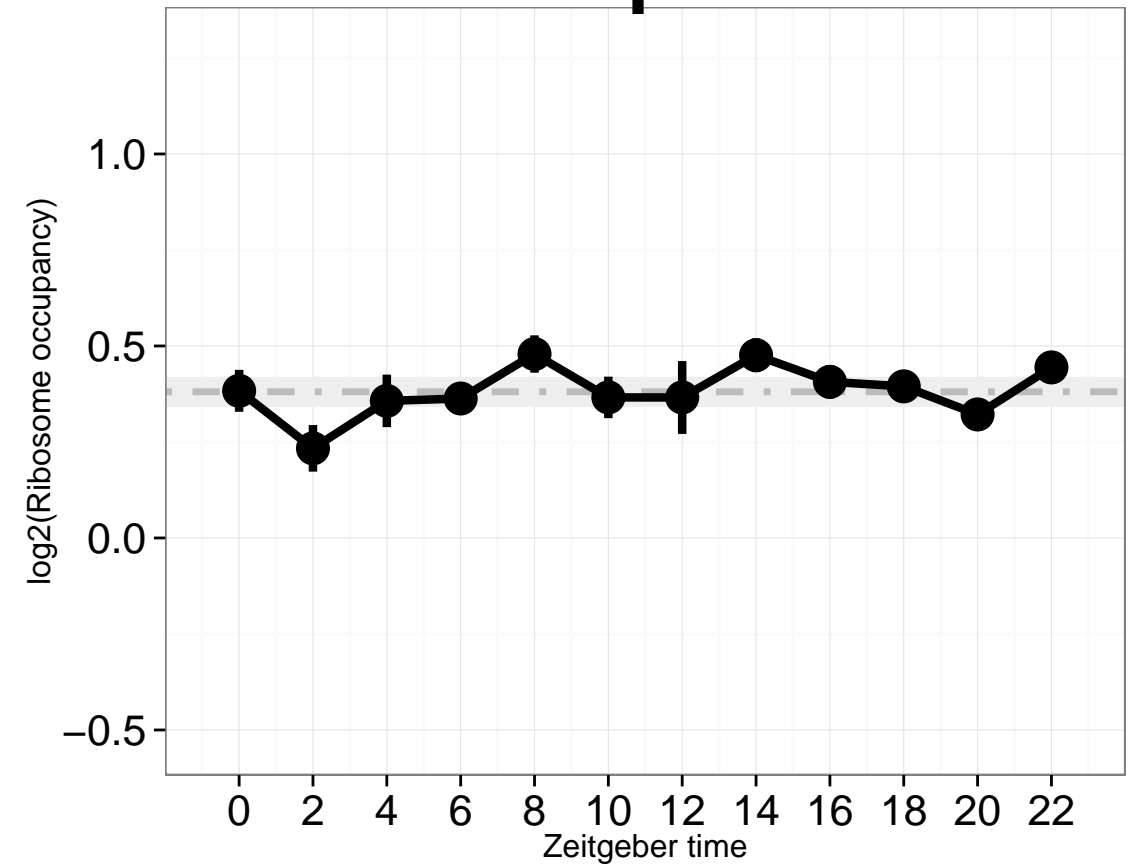

Supplement: Supplementary file 8415 [file 1]

# Kcns3

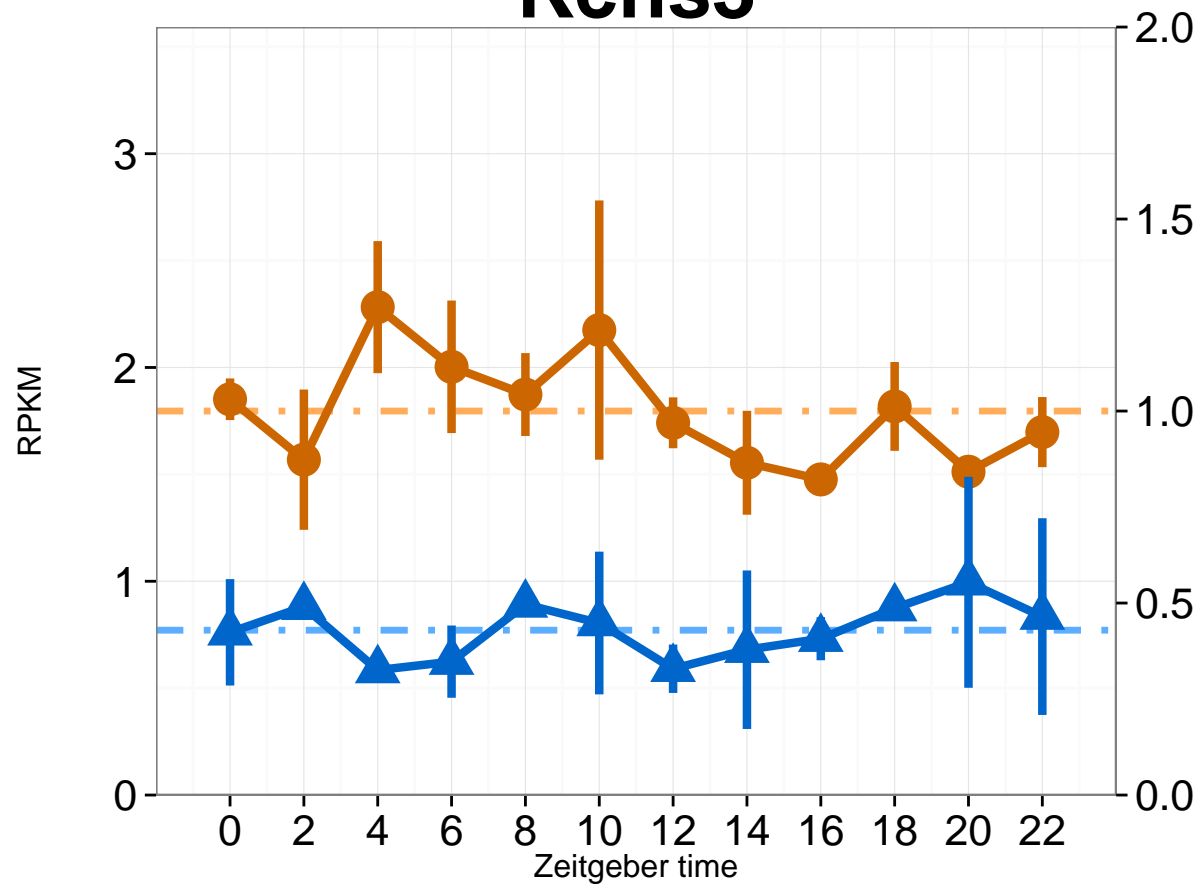

# Kcns3

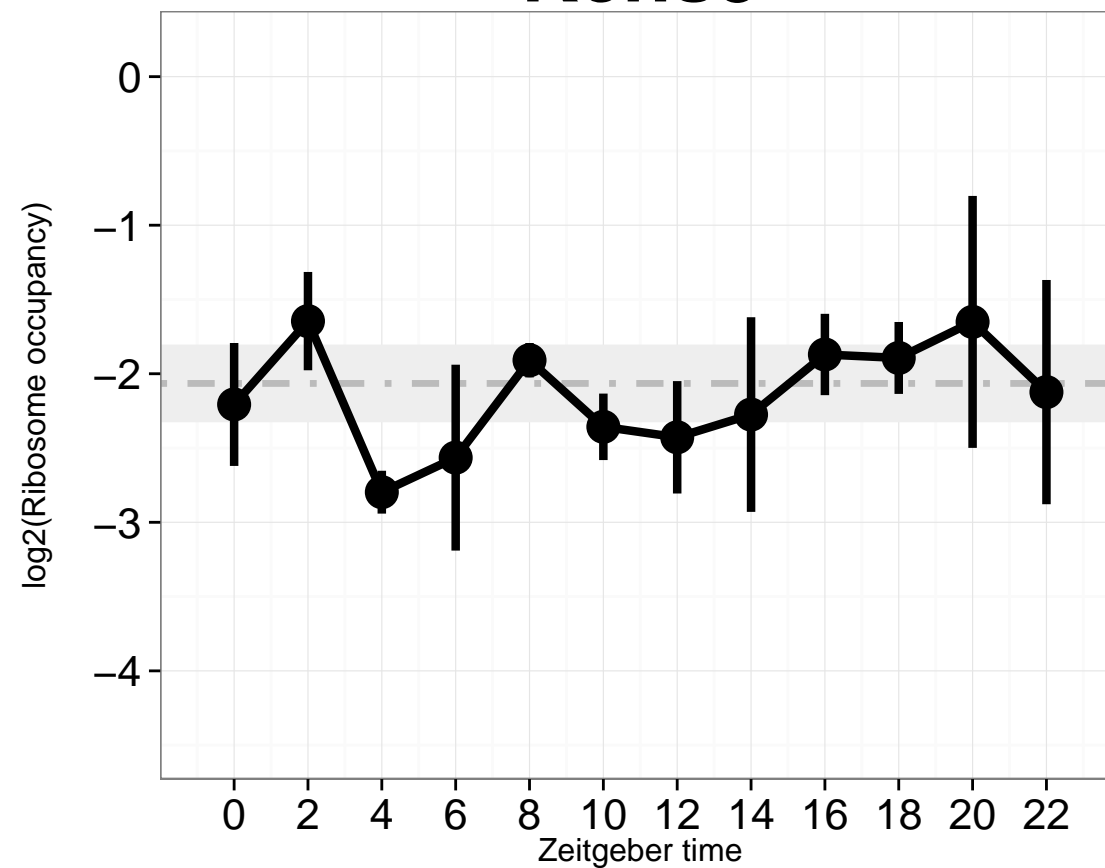

Supplement: Supplementary file 8416 [file 1]

## Zkscan7

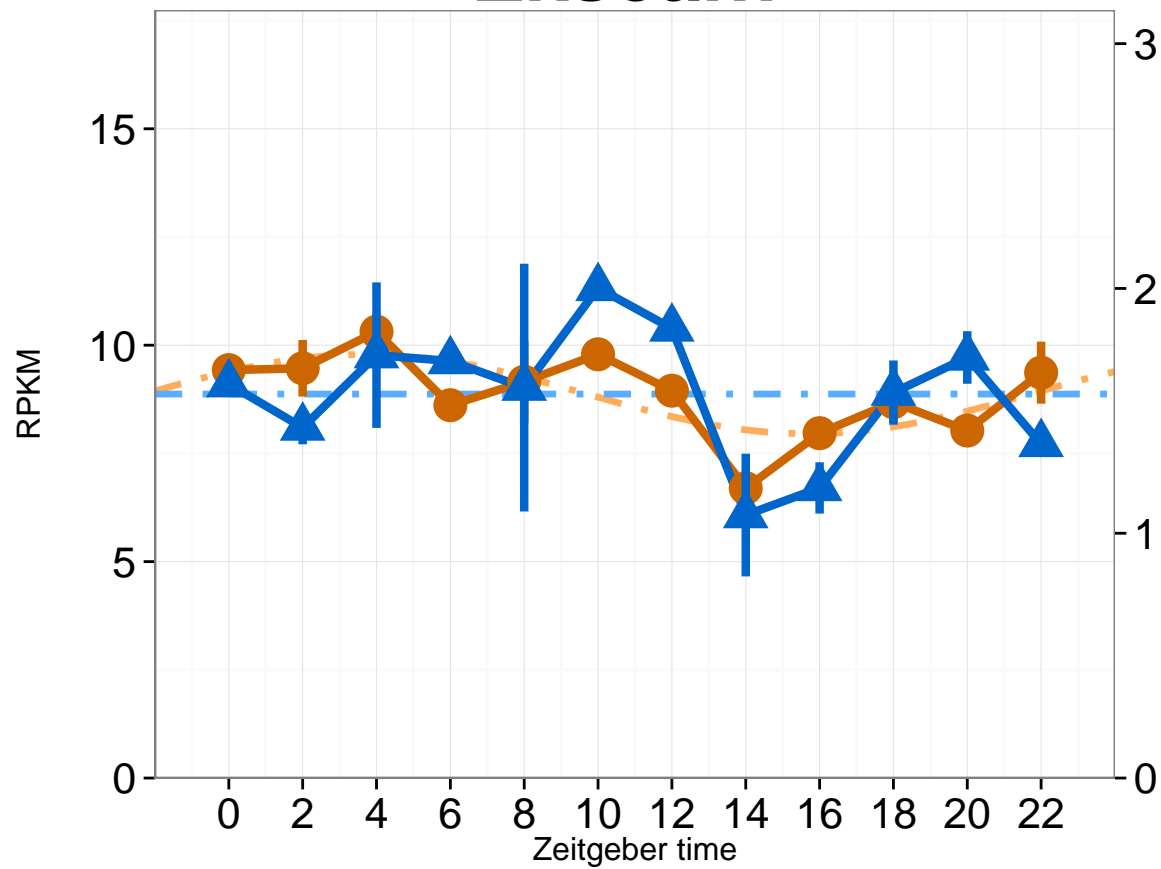

## Zkscan7

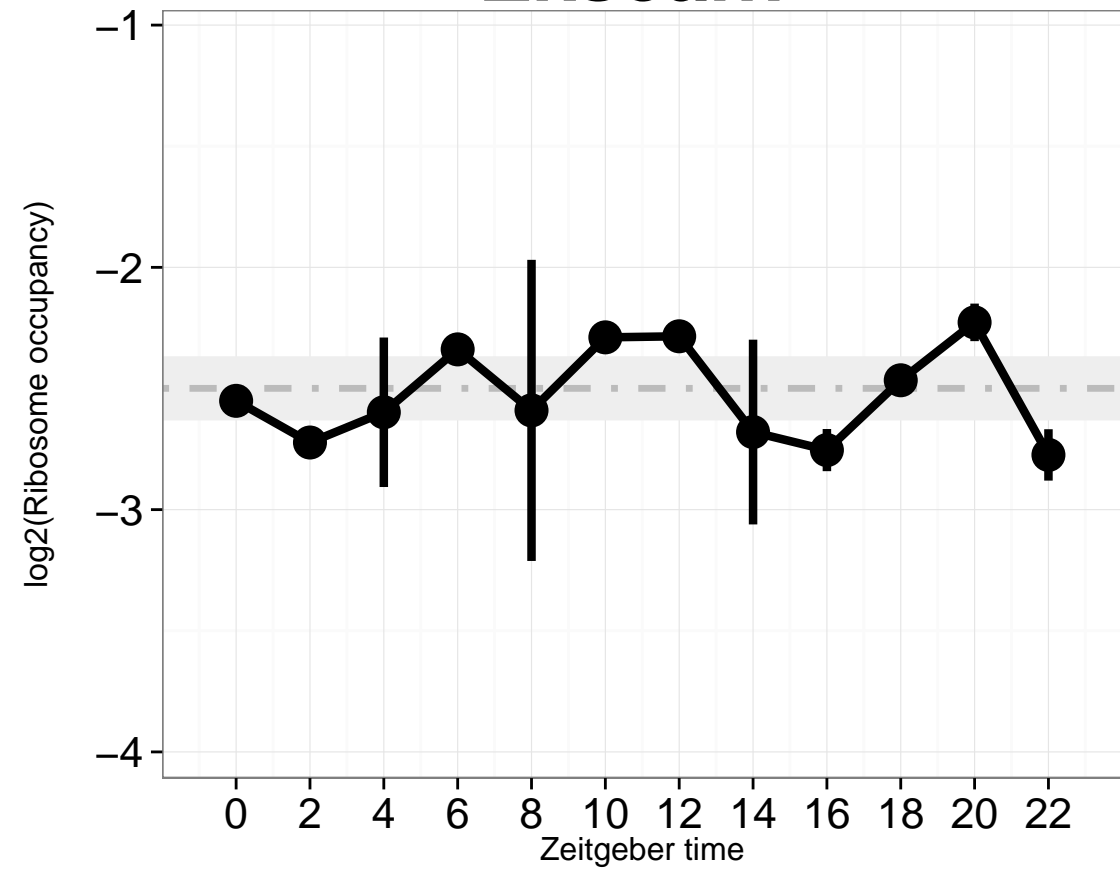

Supplement: Supplementary file 8417 [file 1]

## Ehd3

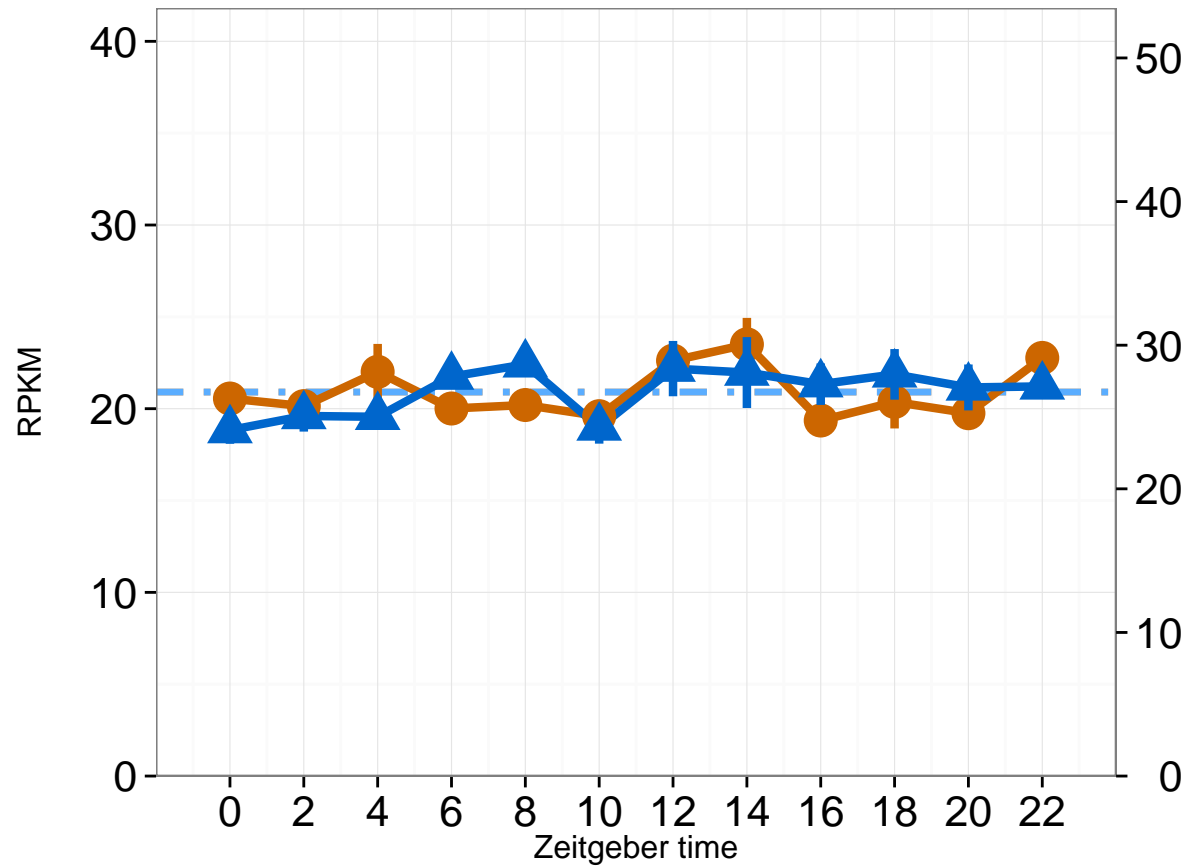

## Ehd3

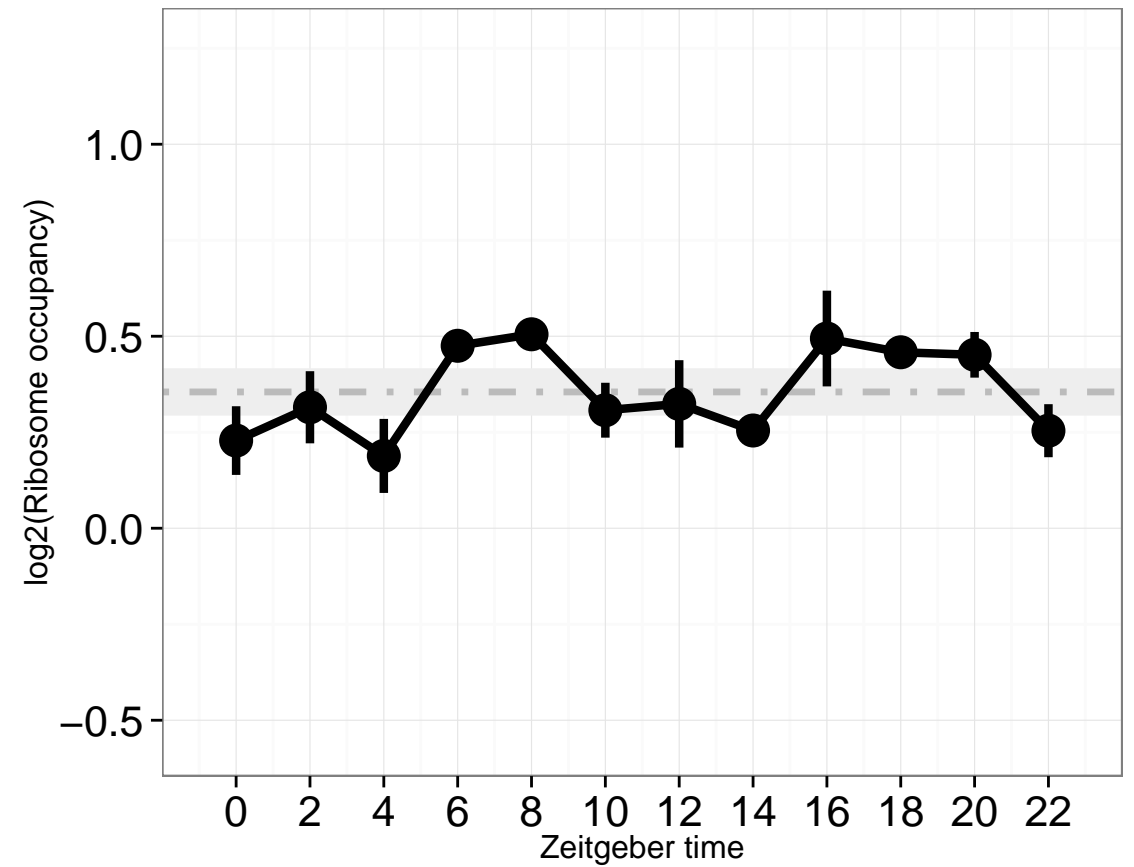

Supplement: Supplementary file 8418 [file 1]

## Rbl1

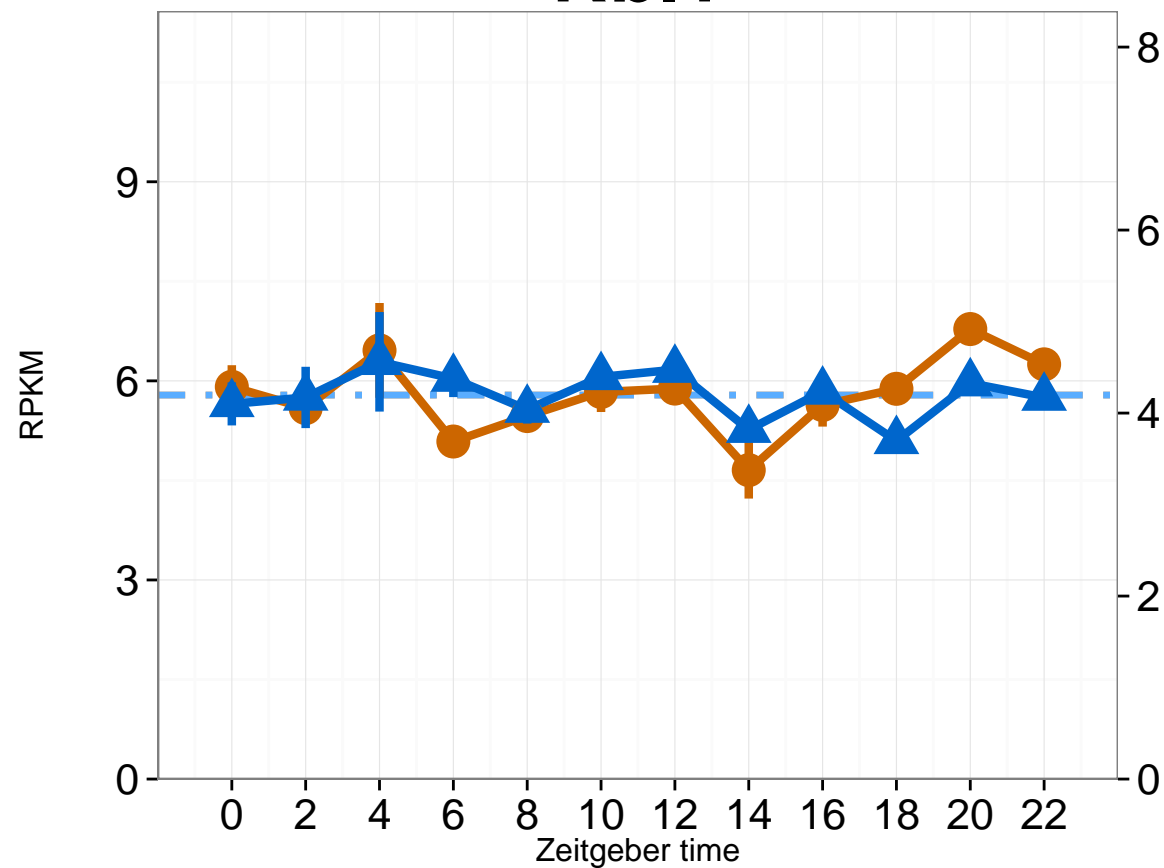

## Rbl1

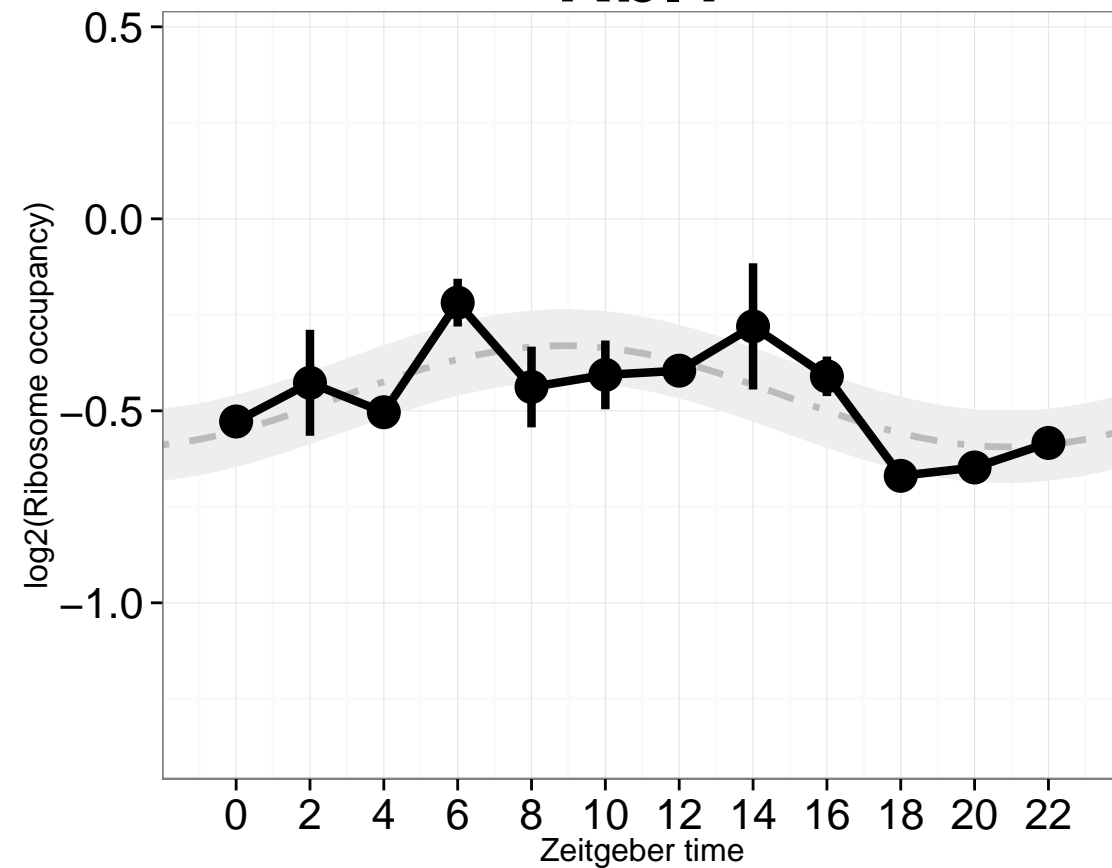

Supplement: Supplementary file 8419 [file 1]

## Ly9

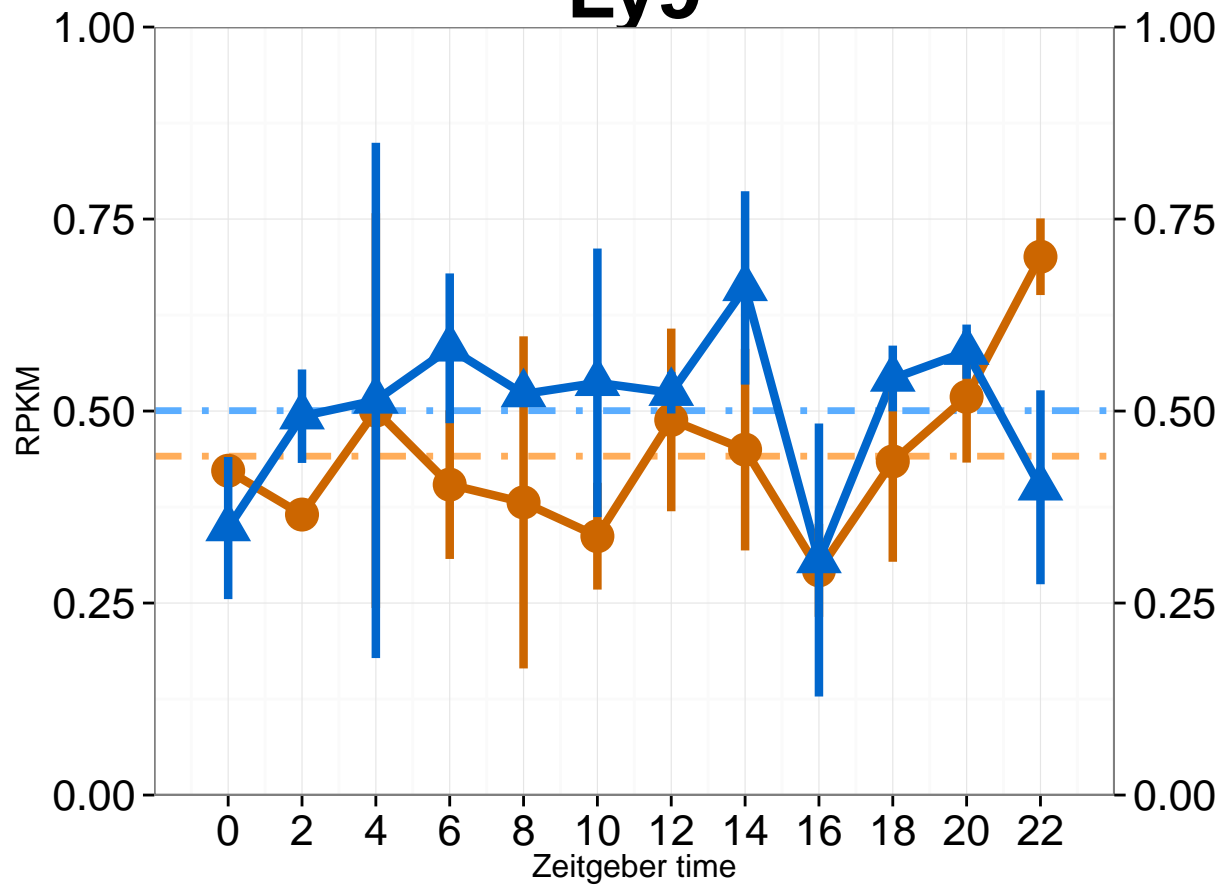

## Ly9

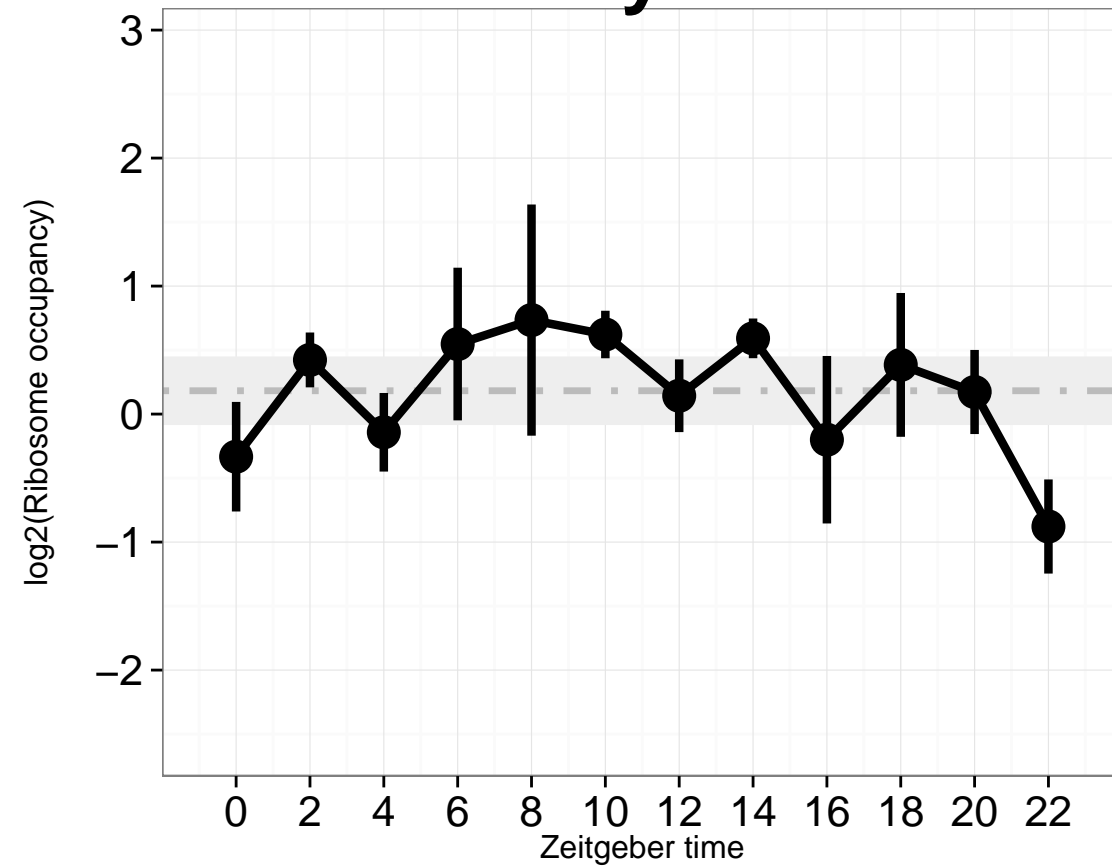

Supplement: Supplementary file 8420 [file 1]

# Dync1i2

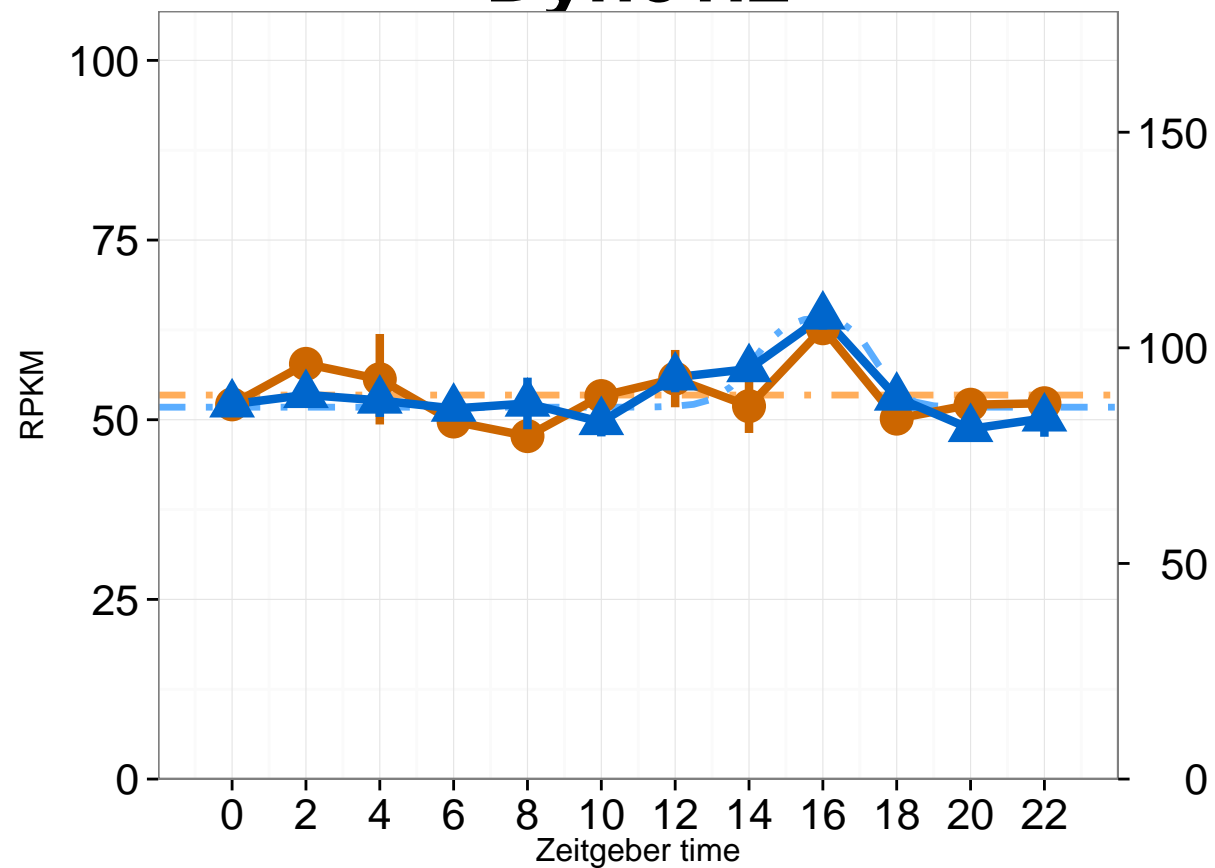

# Dync1i2

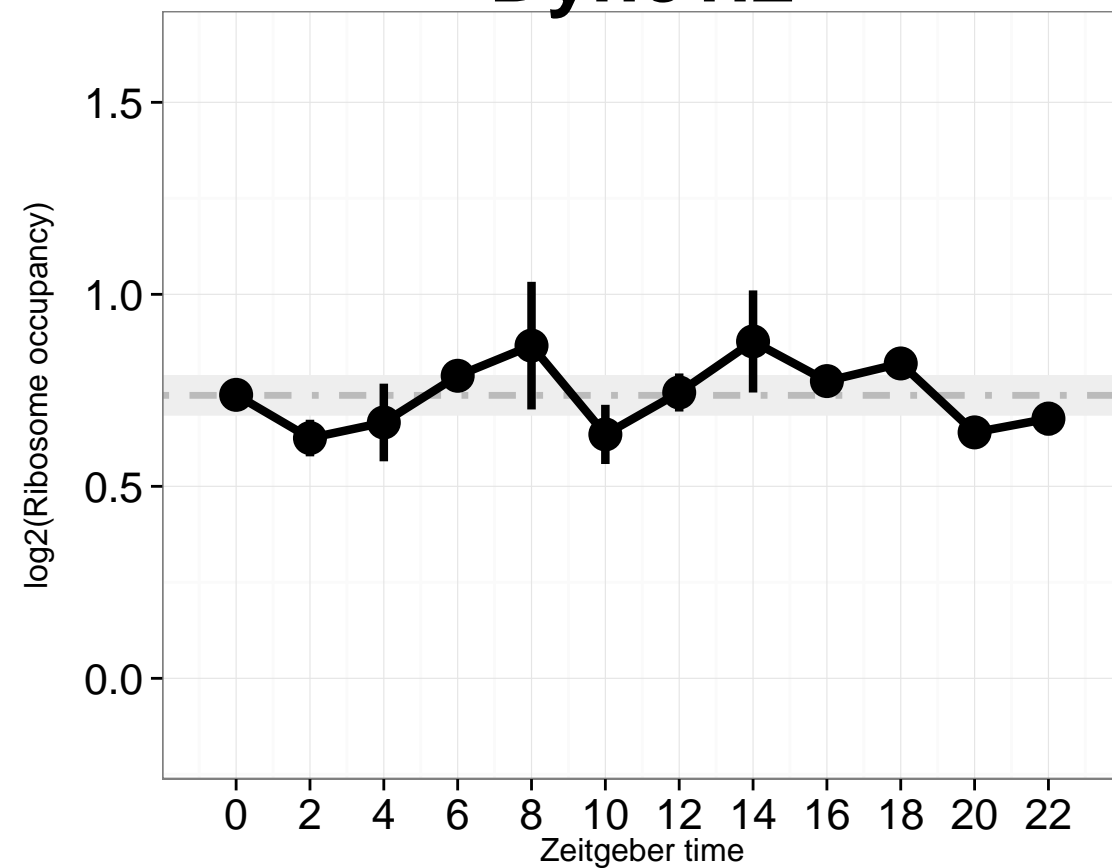

Supplement: Supplementary file 8421 [file 1]

# Atg16l1

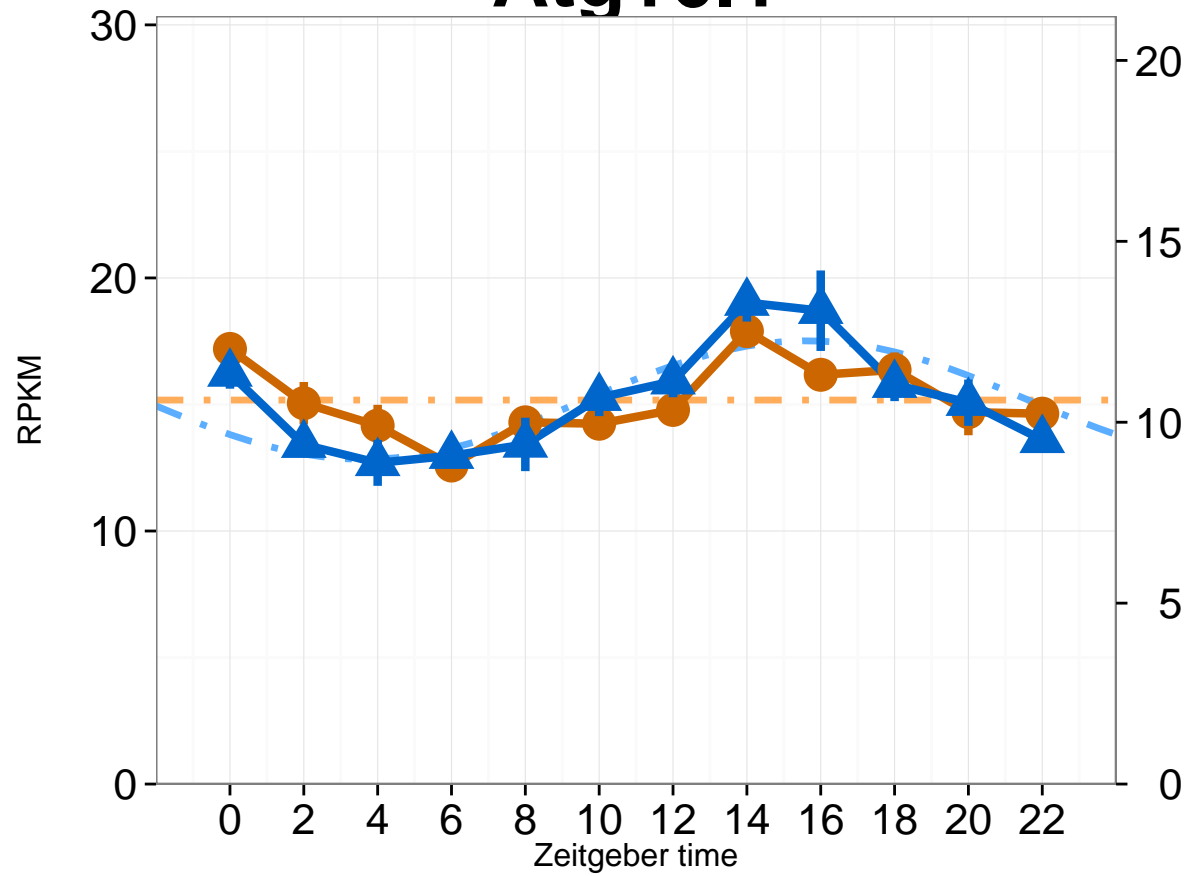

# Atg16l1

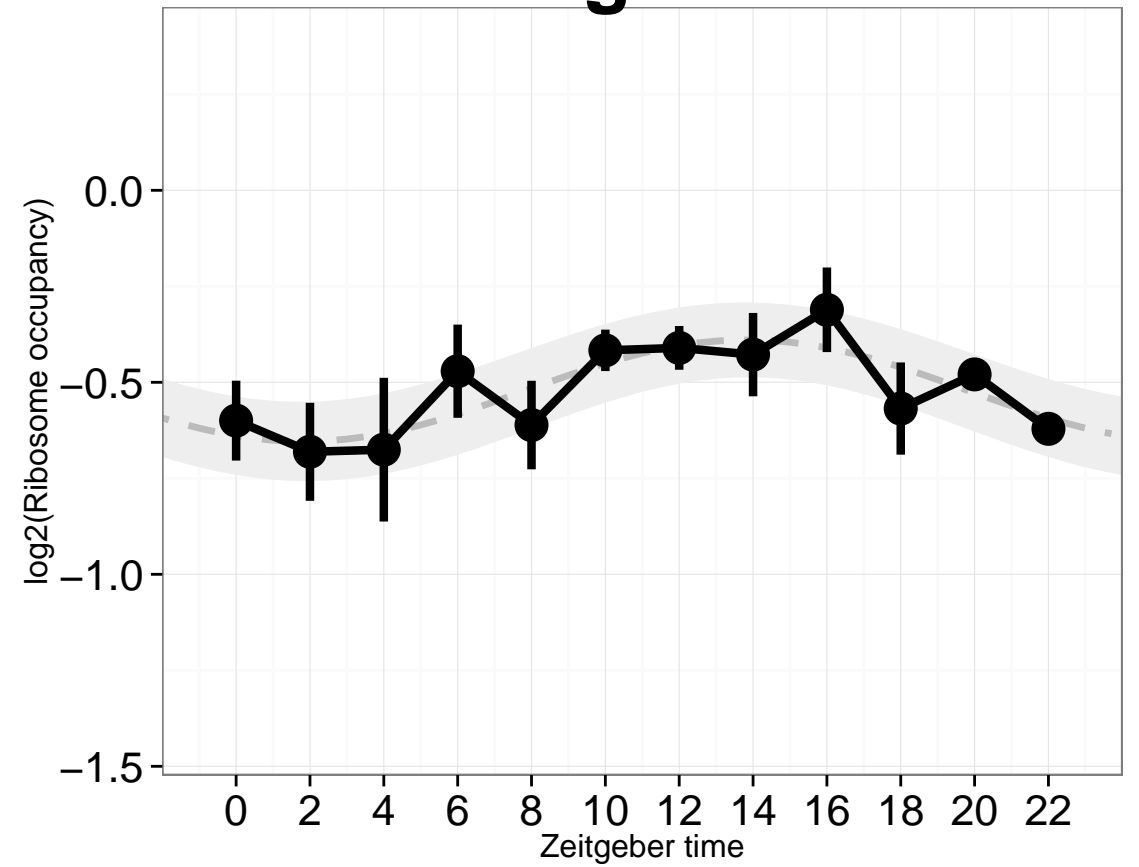

Supplement: Supplementary file 8422 [file 1]

## Ash1l

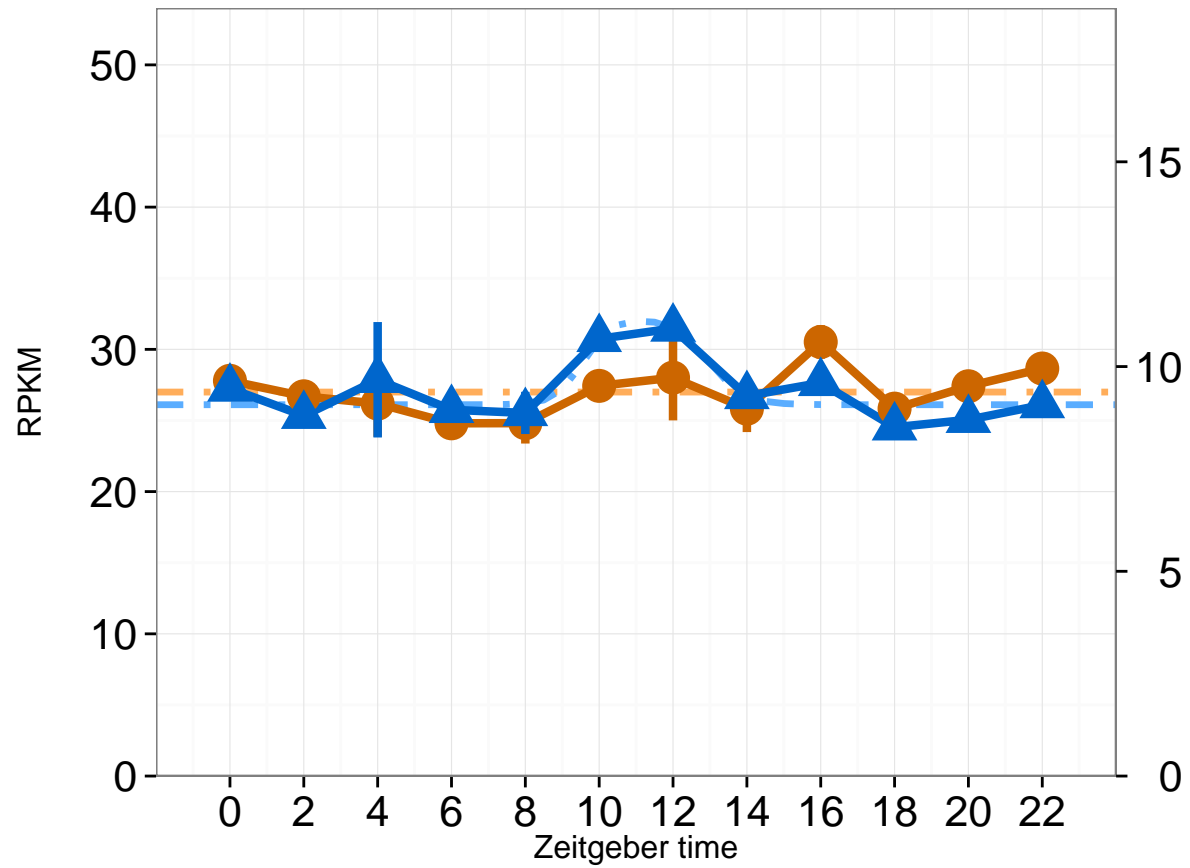

## Ash1l

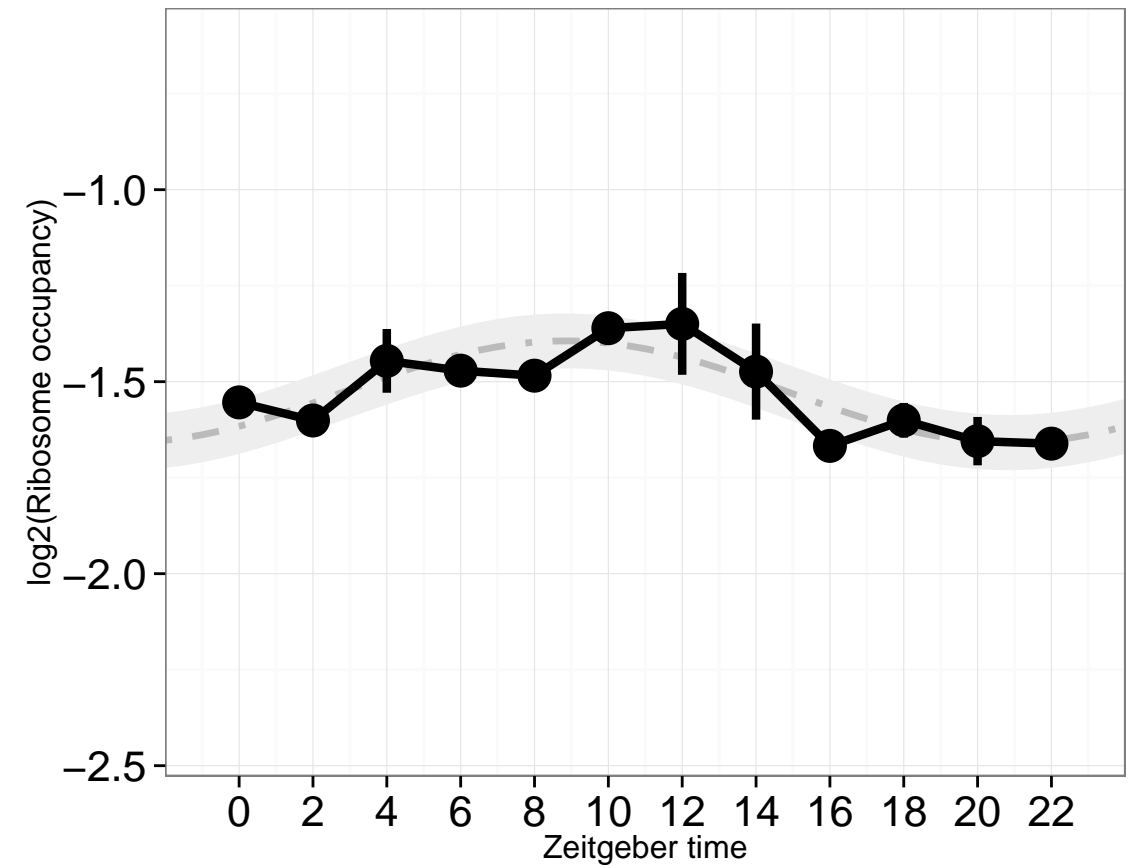

Supplement: Supplementary file 8423 [file 1]

# Cd24a

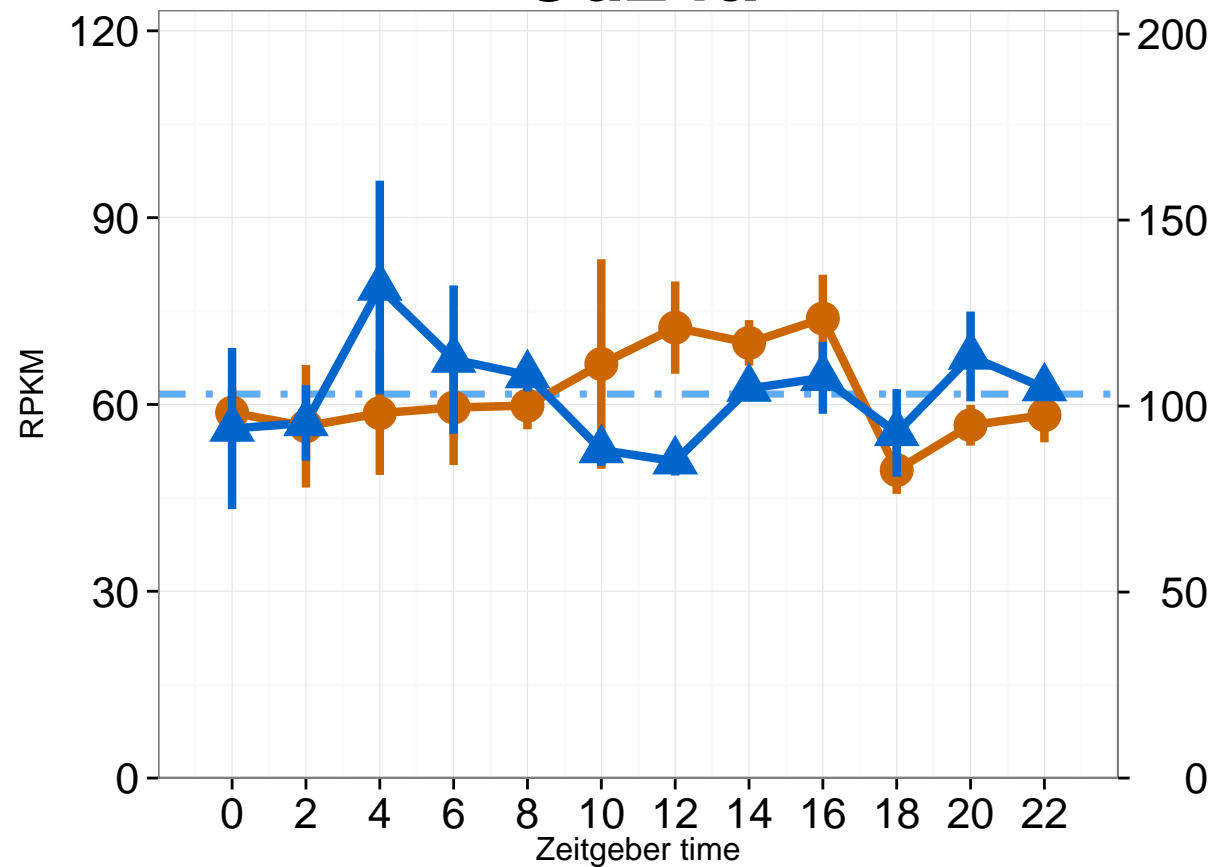

# Cd24a

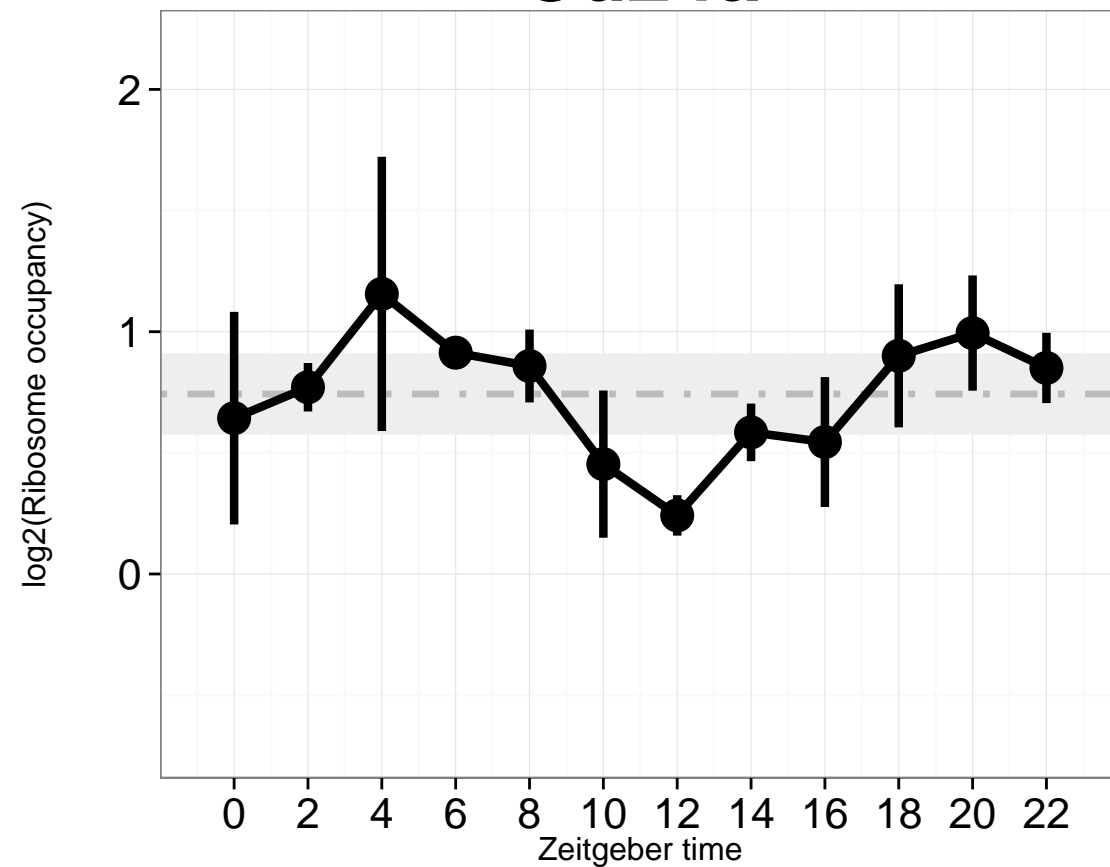

Supplement: Supplementary file 8424 [file 1]

## Gyg

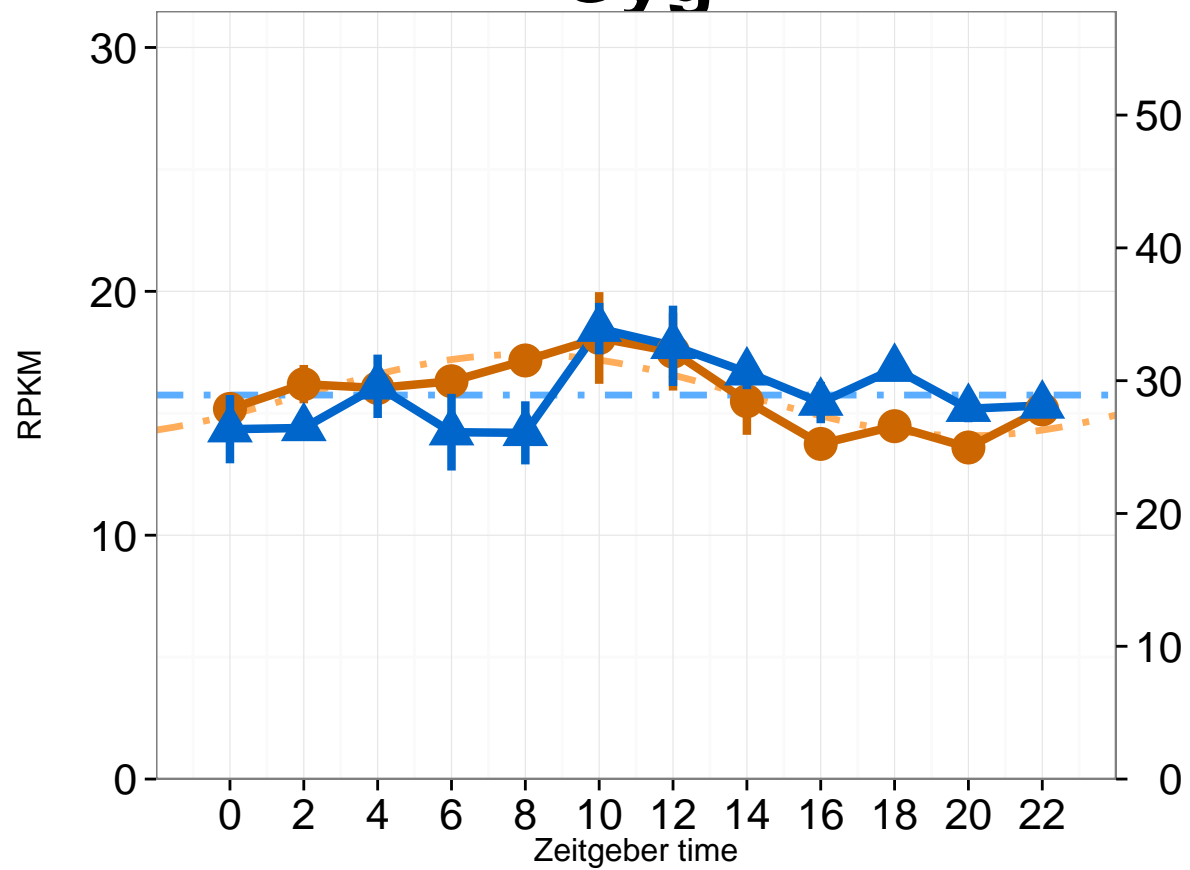

## Gyg

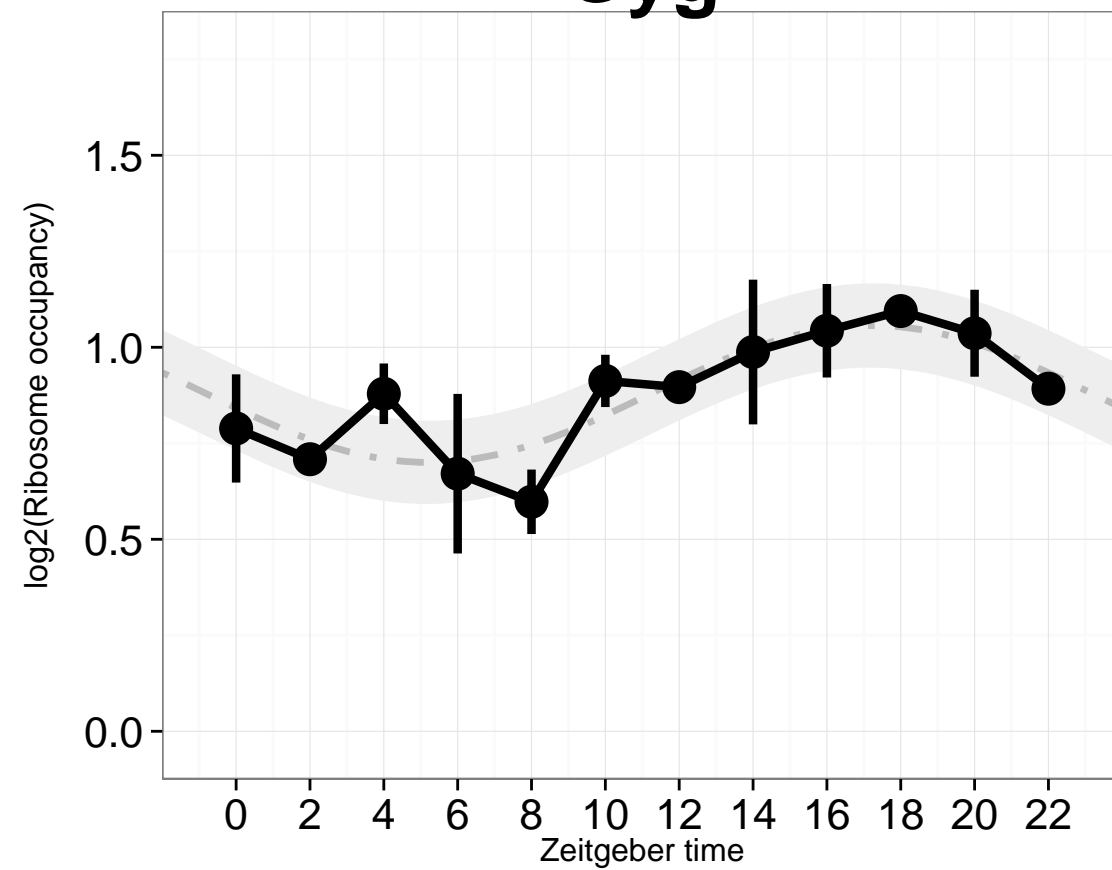

Supplement: Supplementary file 8425 [file 1]

# Ccdc88c

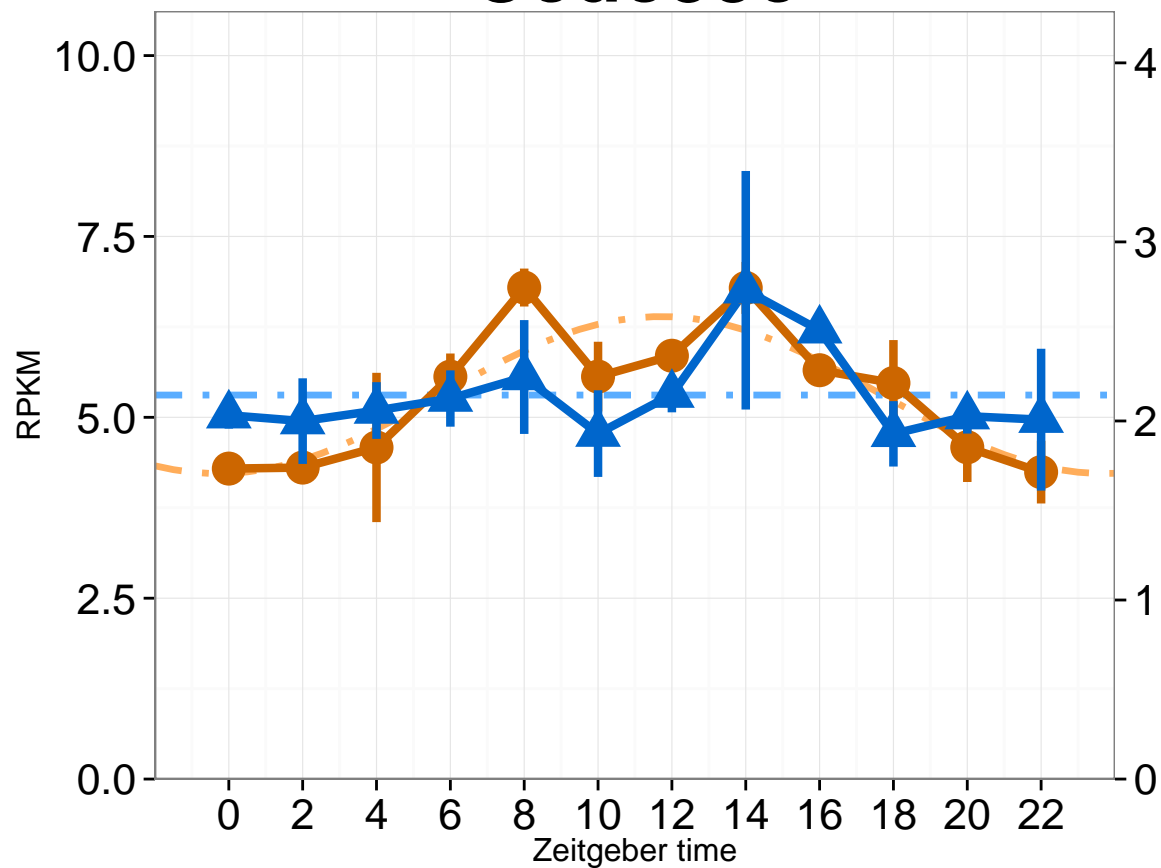

# Ccdc88c

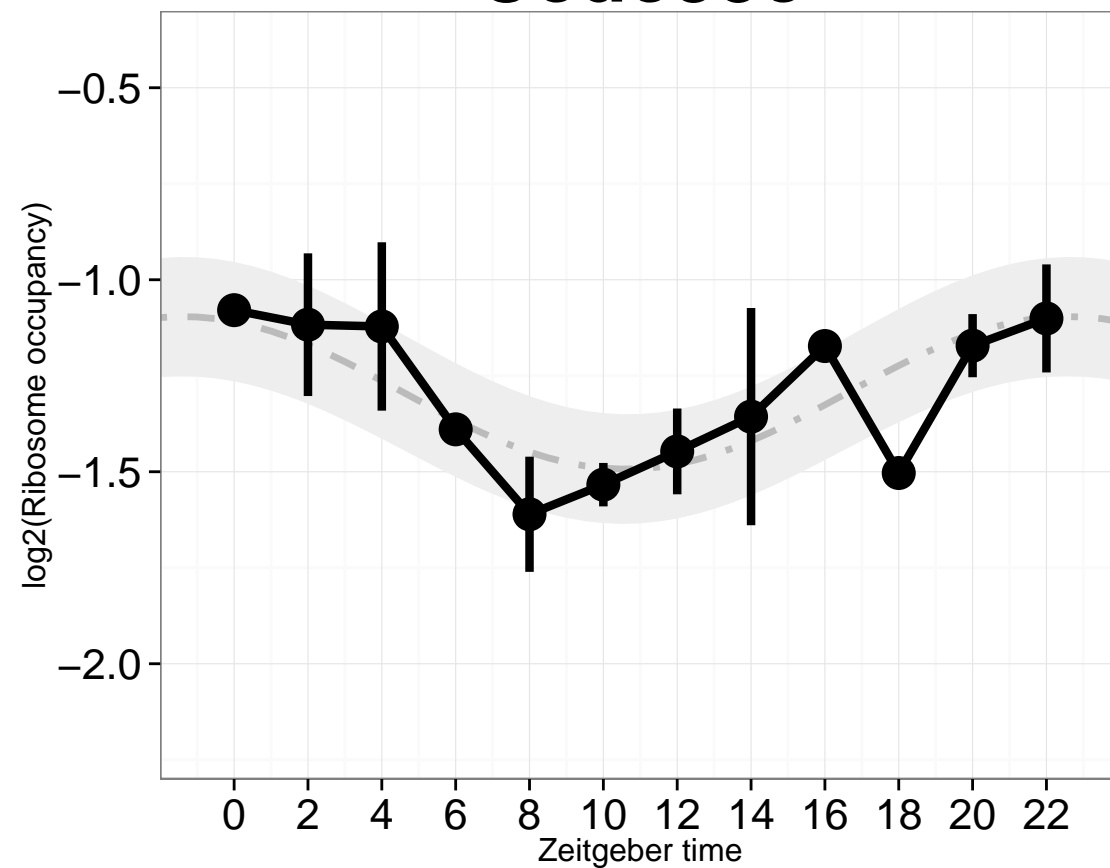

Supplement: Supplementary file 8426 [file 1]

# Rpl26

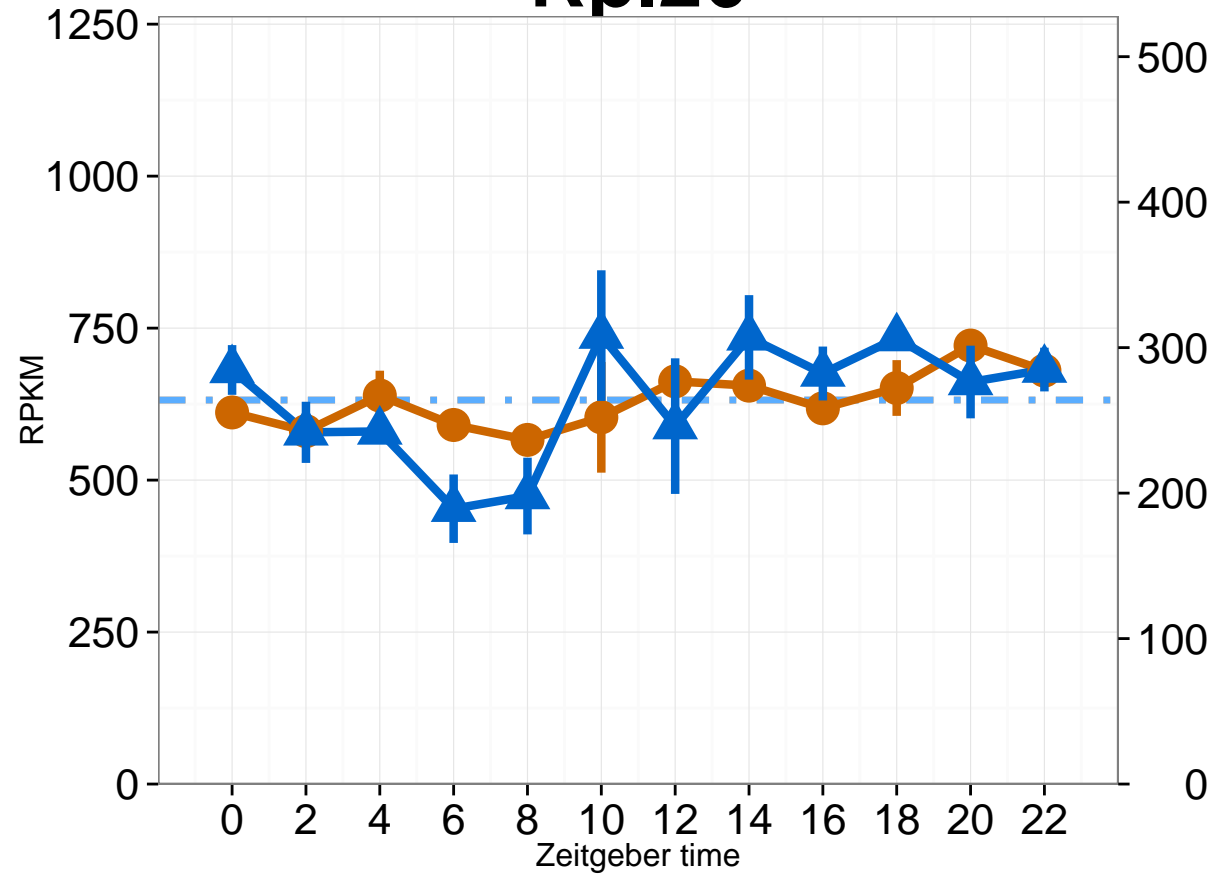

# Rpl26

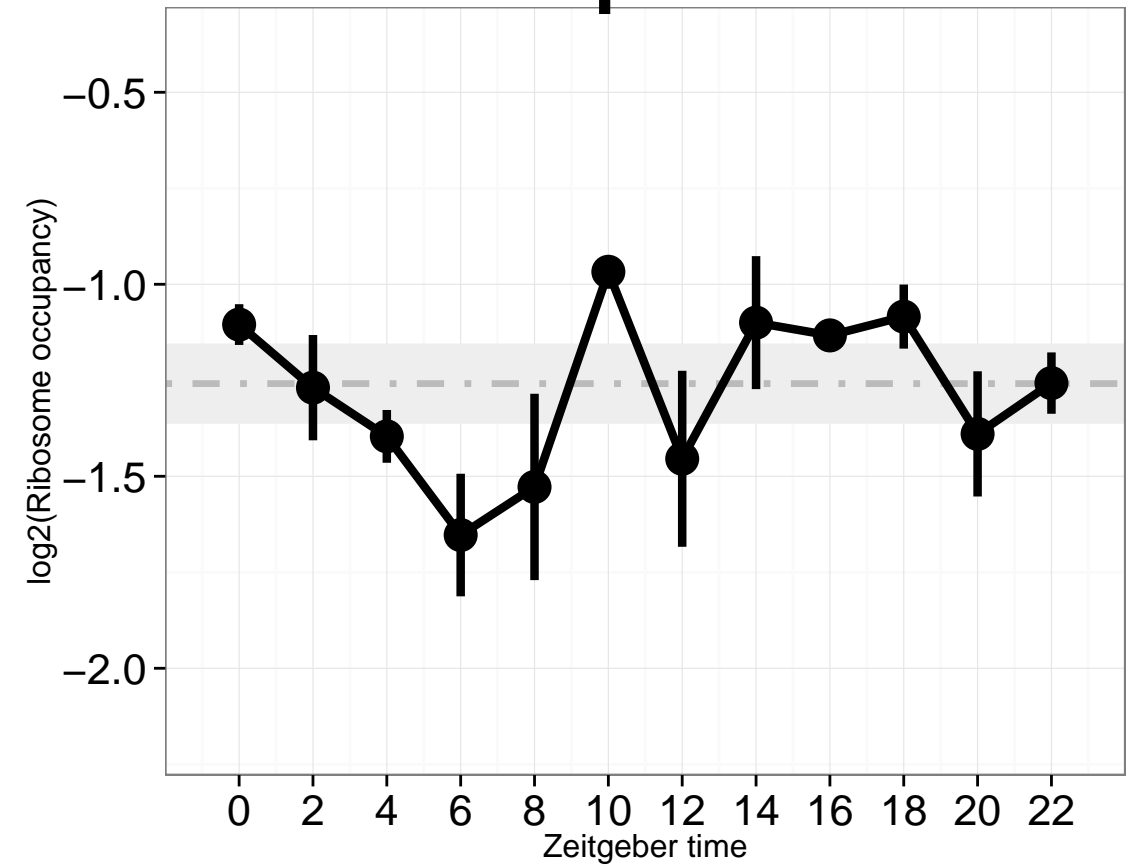

Supplement: Supplementary file 8427 [file 1]

## Kdelc2

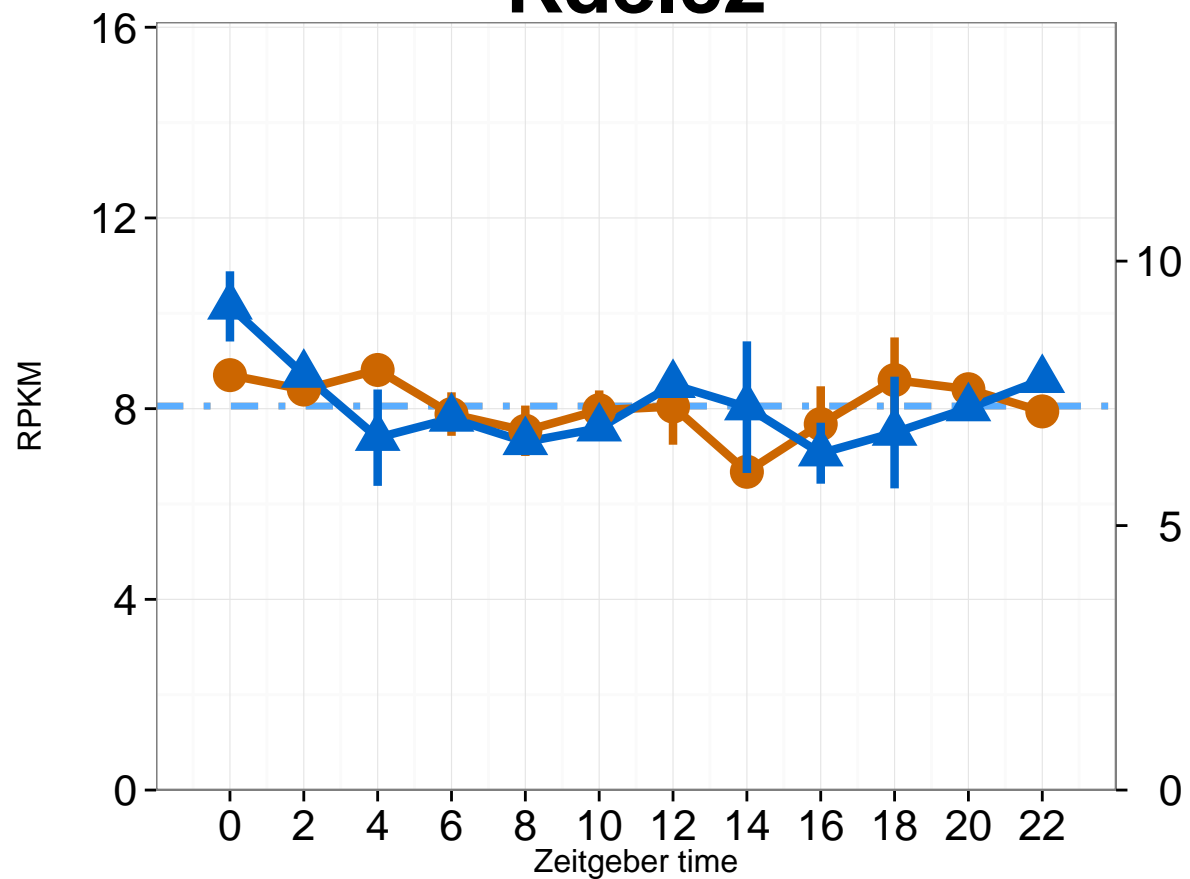

## Kdelc2

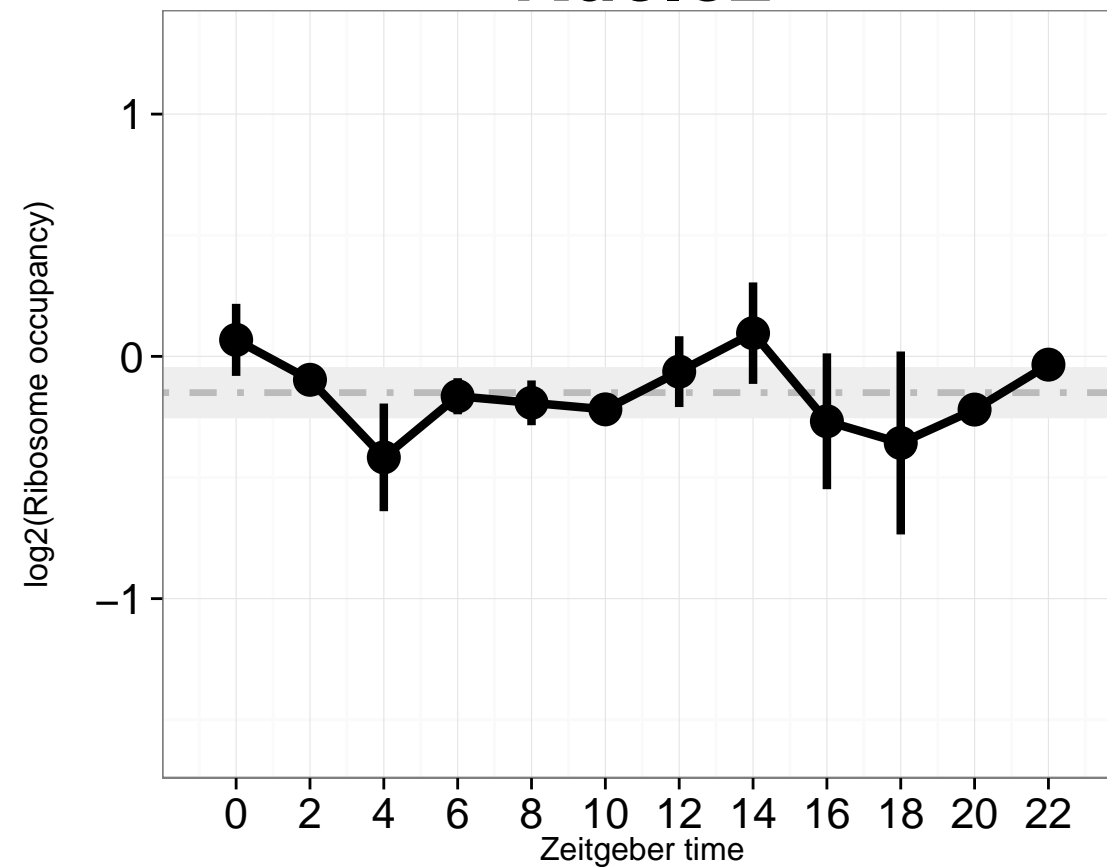

Supplement: Supplementary file 8428 [file 1]
