# Supplementary material (part 85 of 133)
Source: publisher figshare collection journal article supplement (https://springernature.figshare.com/articles/dataset/_/4903193)

## Eif2ak4

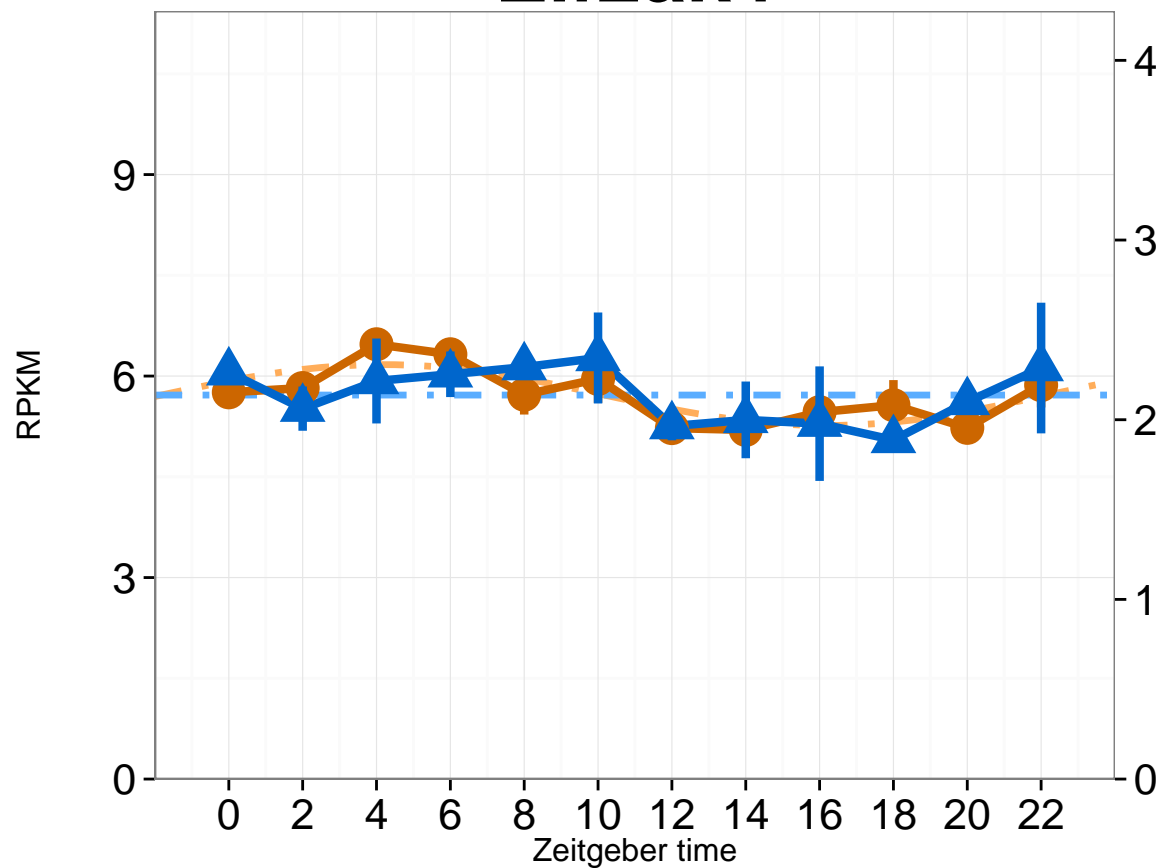

## Eif2ak4

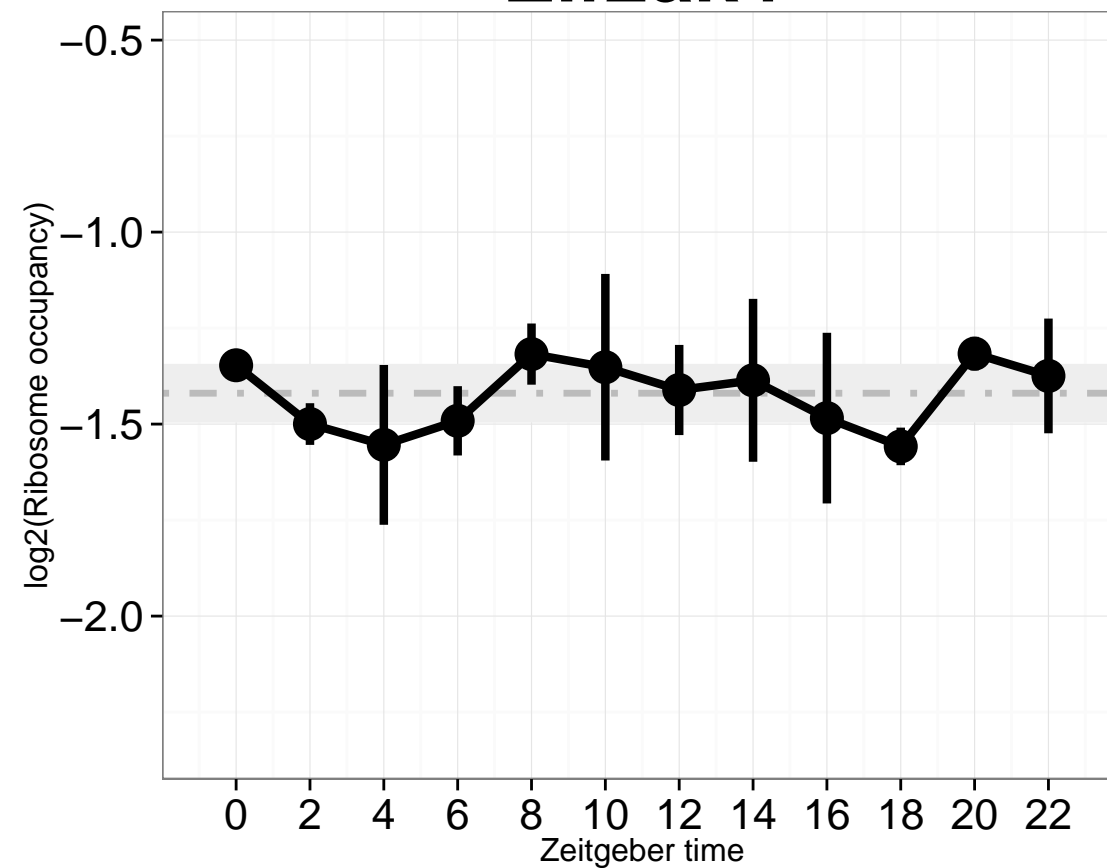

Supplement: Supplementary file 8429 [file 1]

# Mtrf1

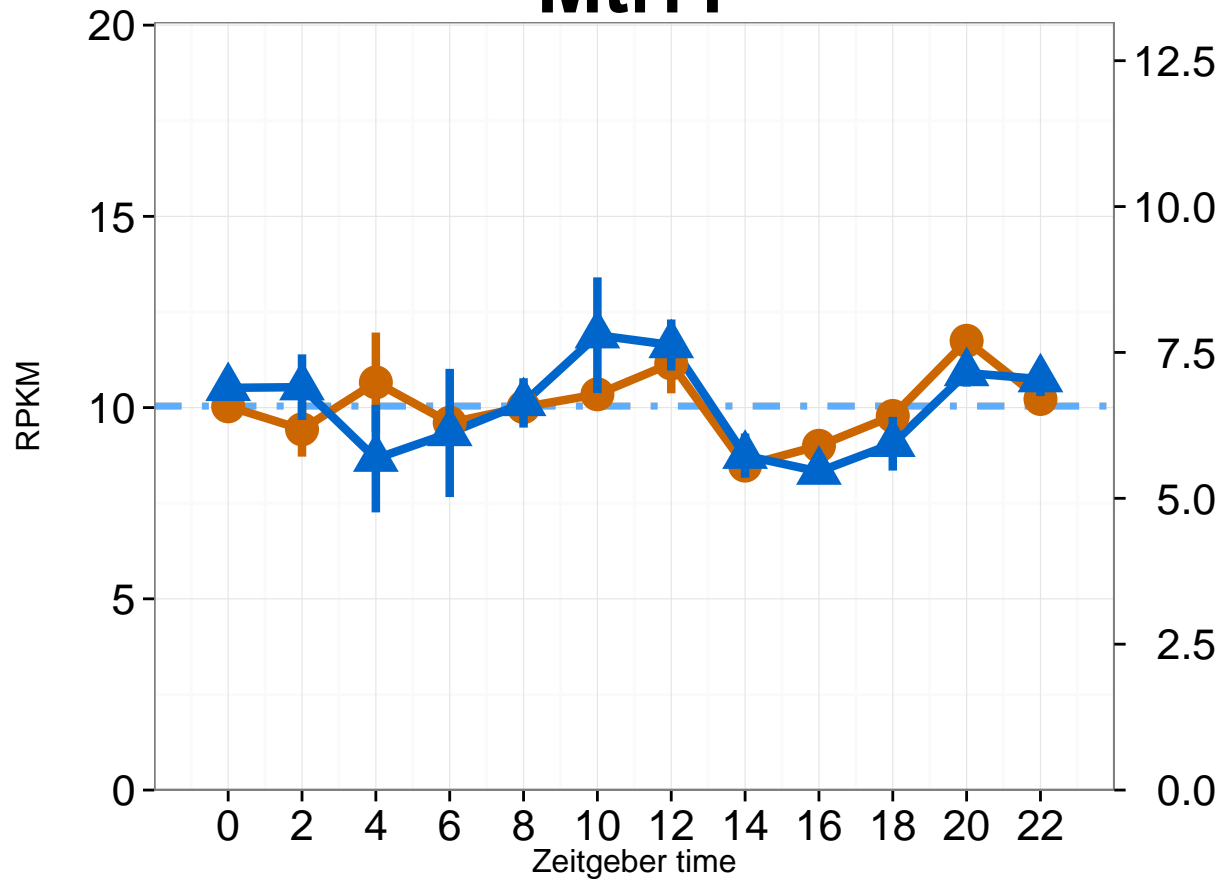

# Mtrf1

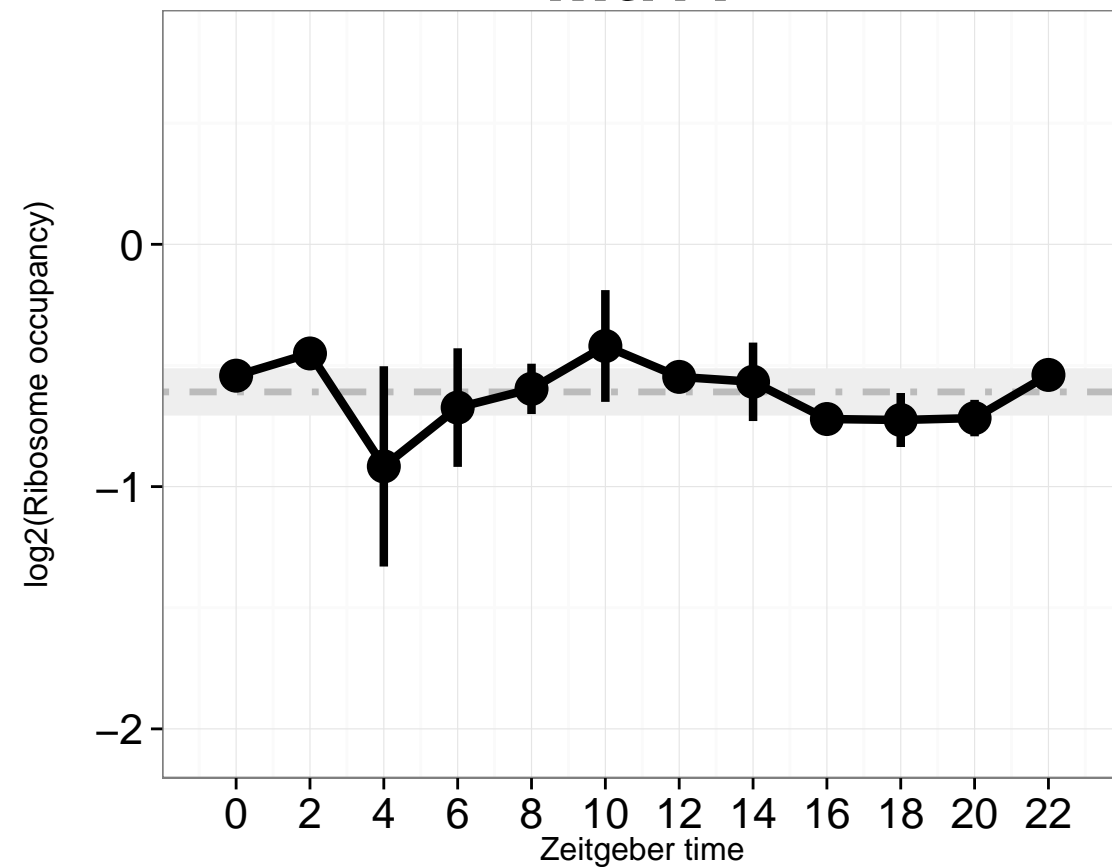

Supplement: Supplementary file 8430 [file 1]

## Kansl2

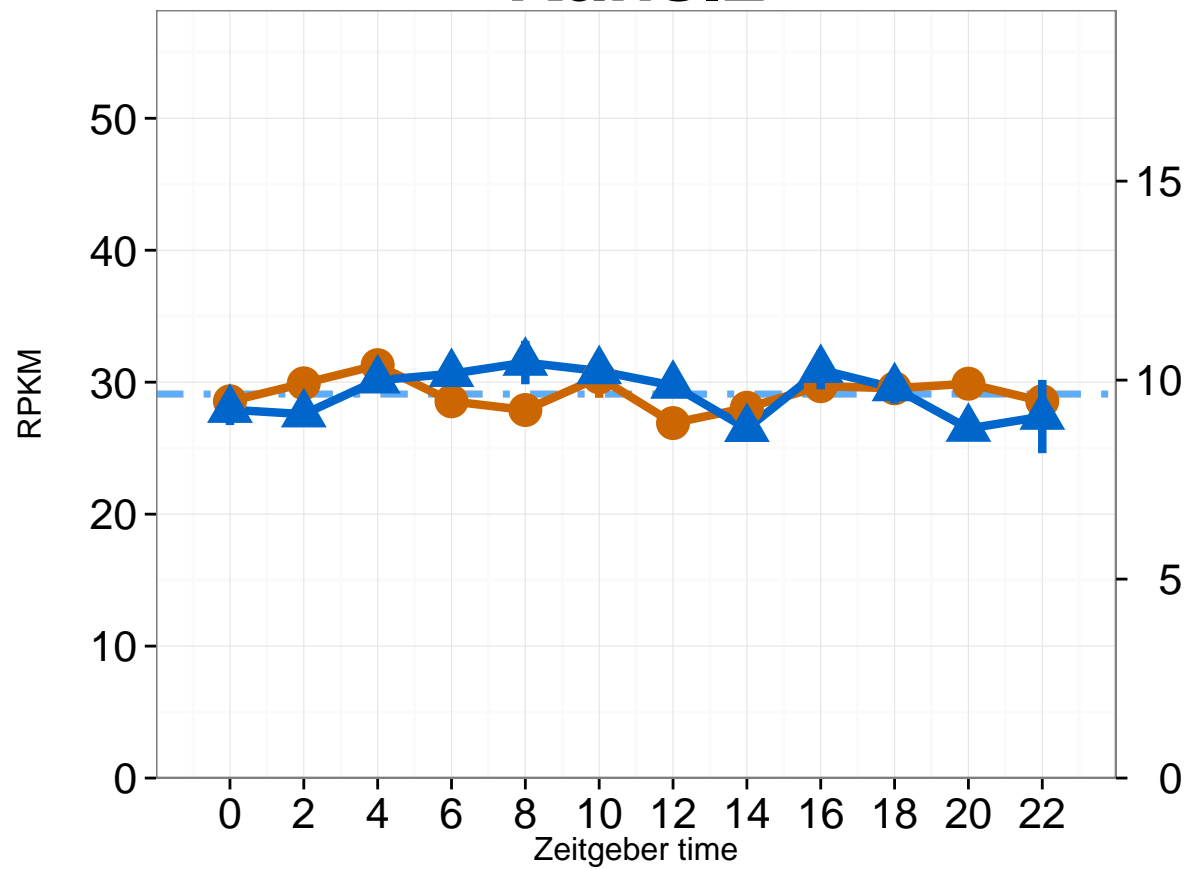

## Kansl2

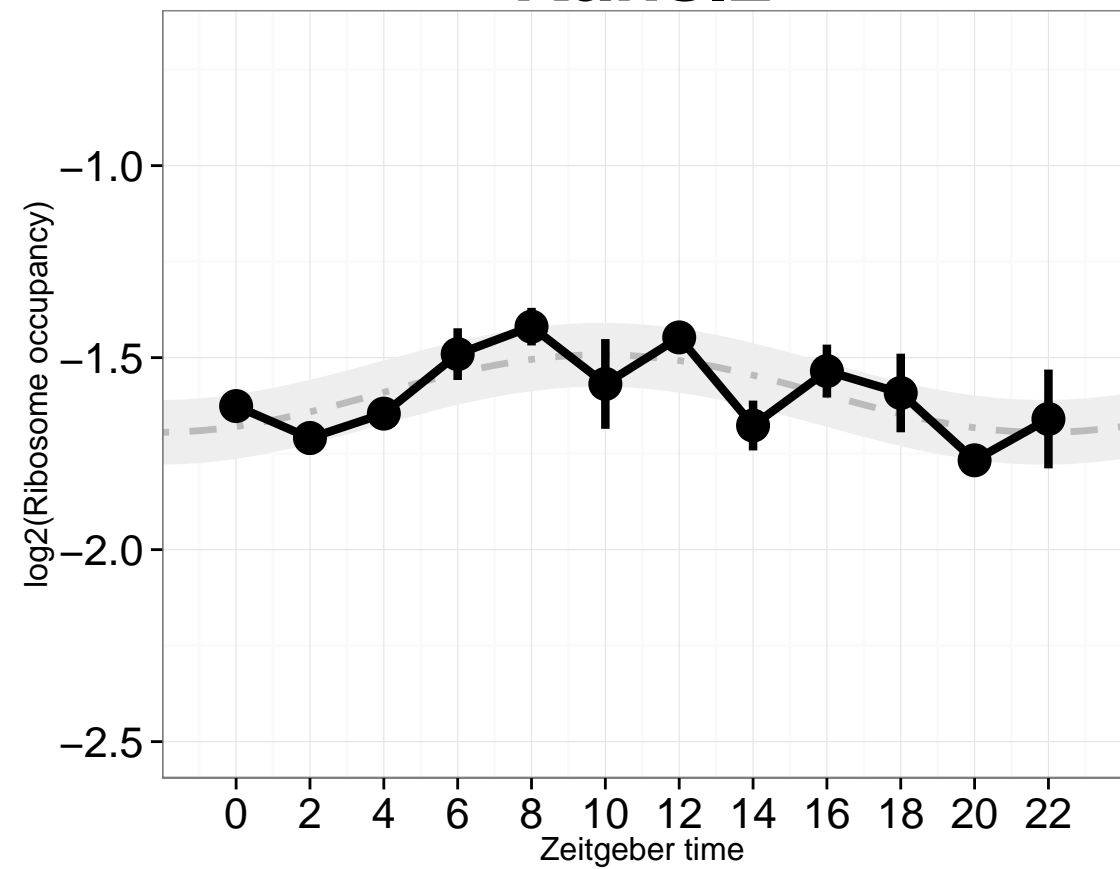

Supplement: Supplementary file 8431 [file 1]

## Tsc2

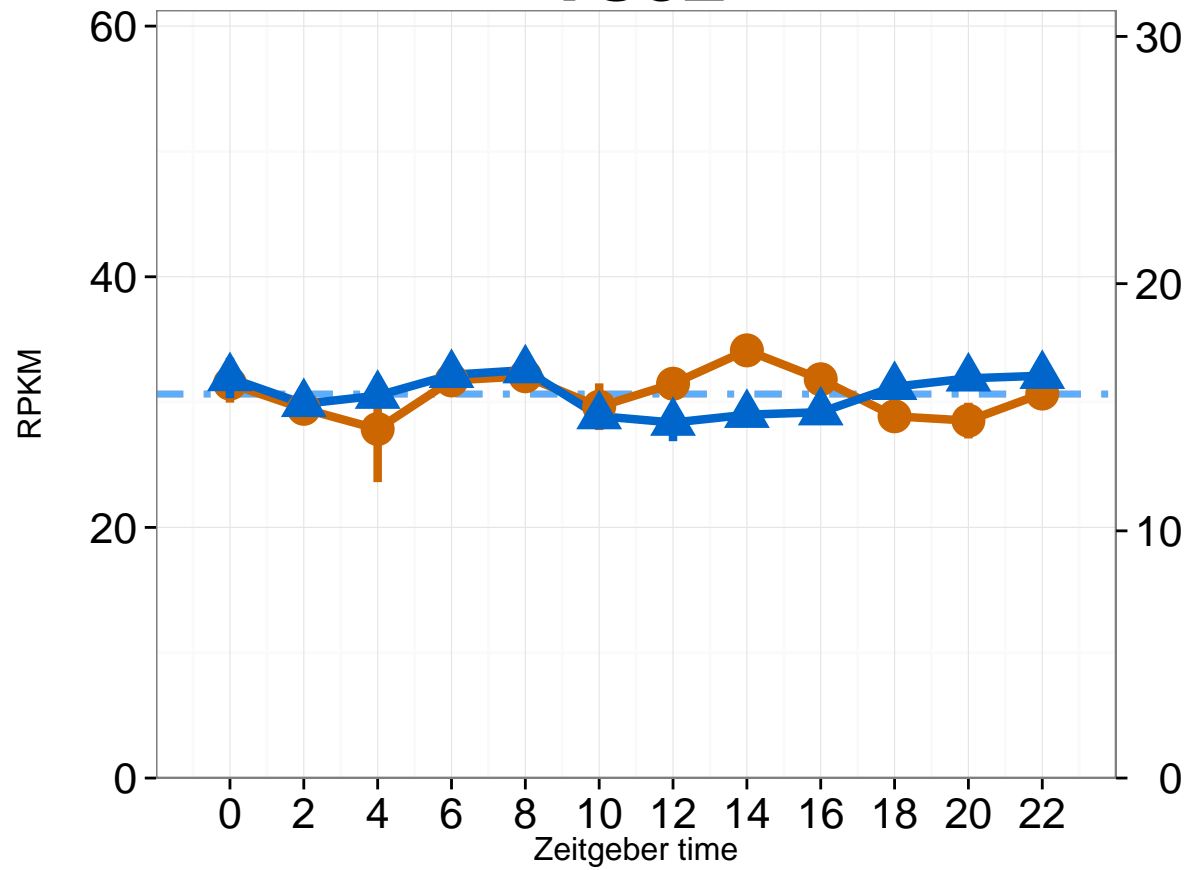

## Tsc2

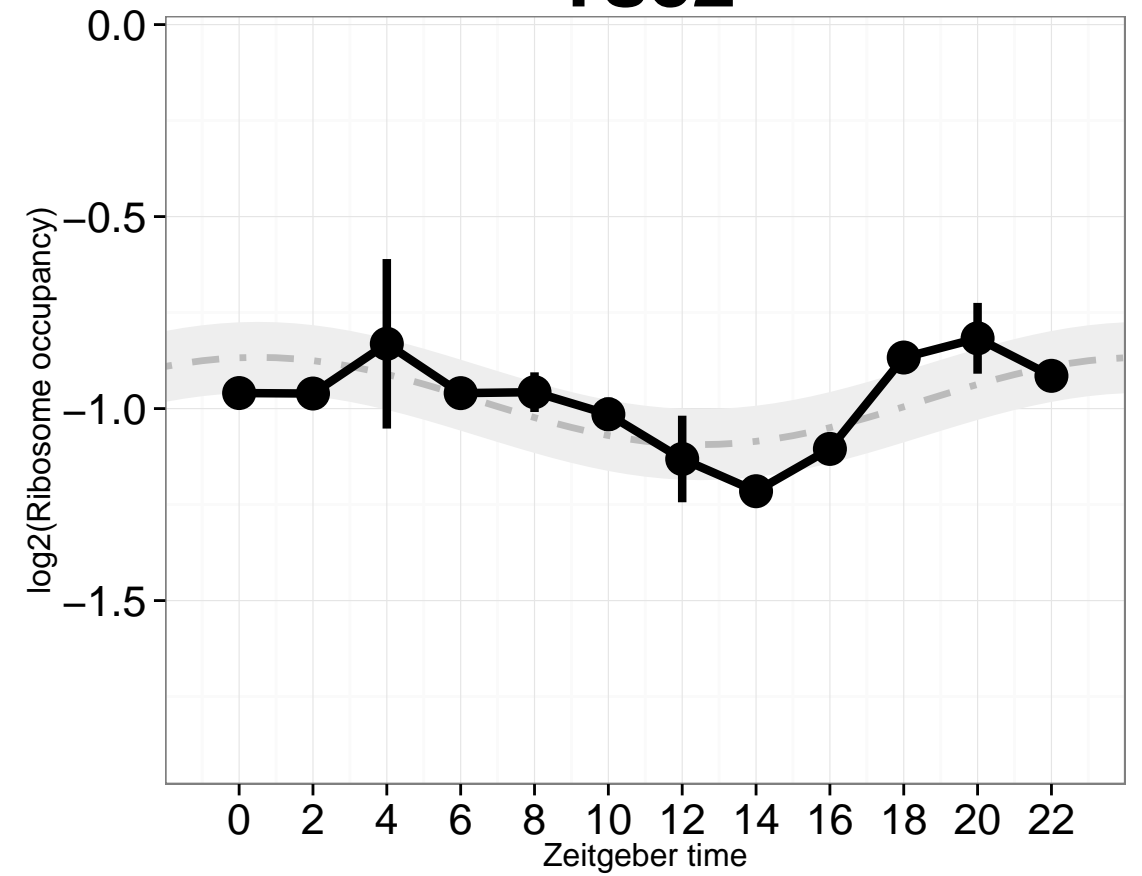

Supplement: Supplementary file 8432 [file 1]

## Etv5

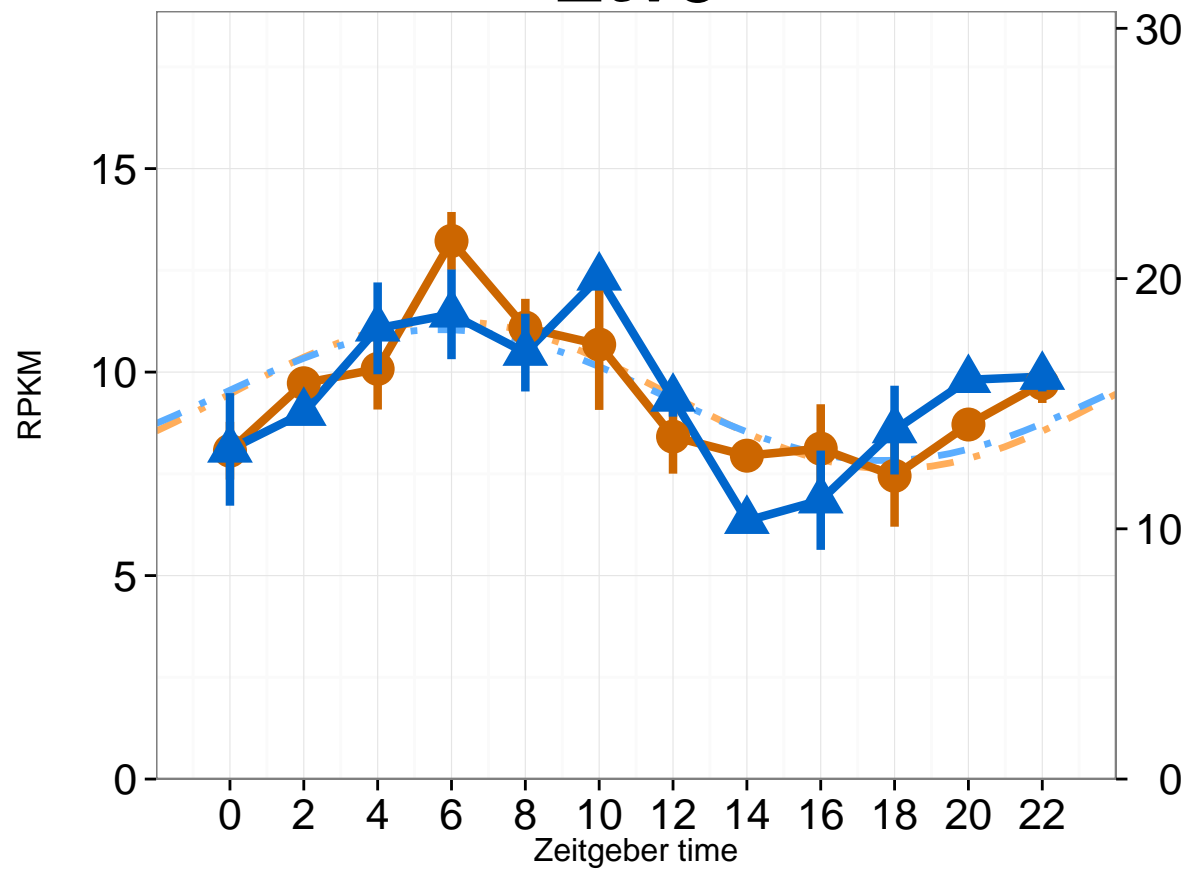

## Etv5

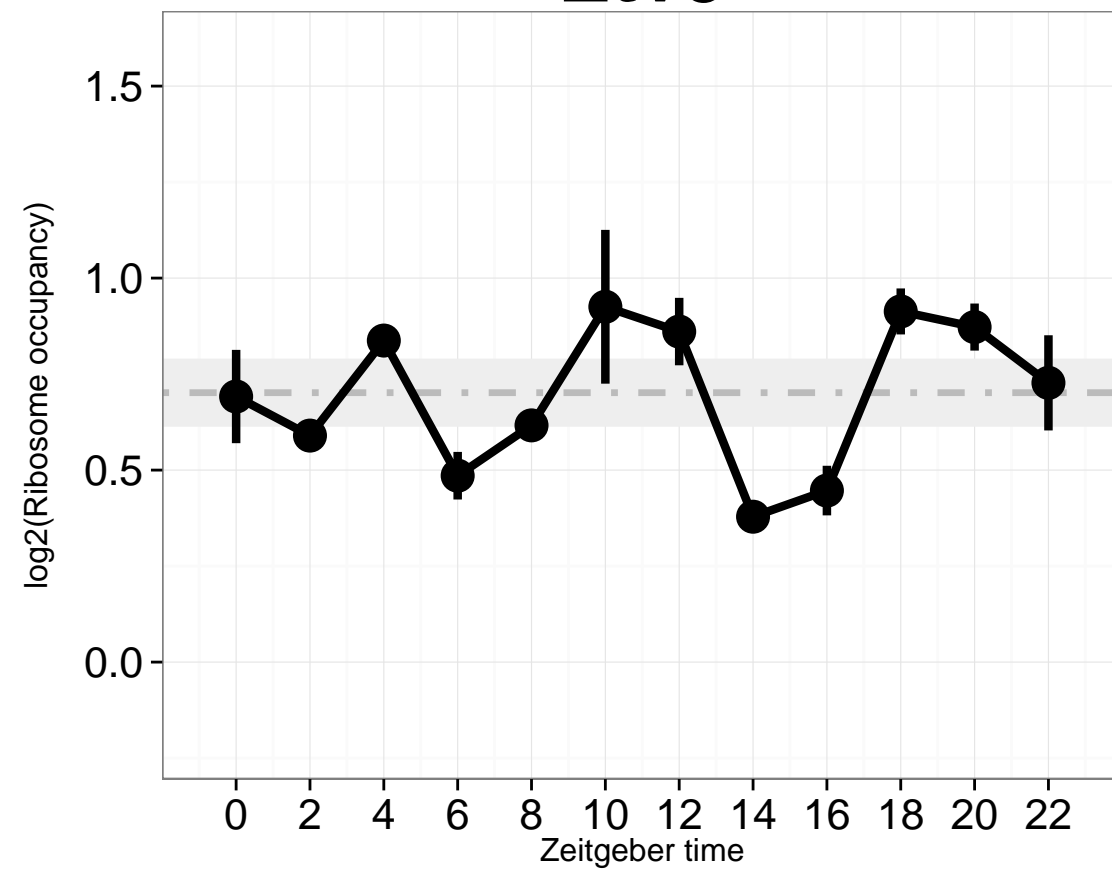

Supplement: Supplementary file 8433 [file 1]

## Yy2

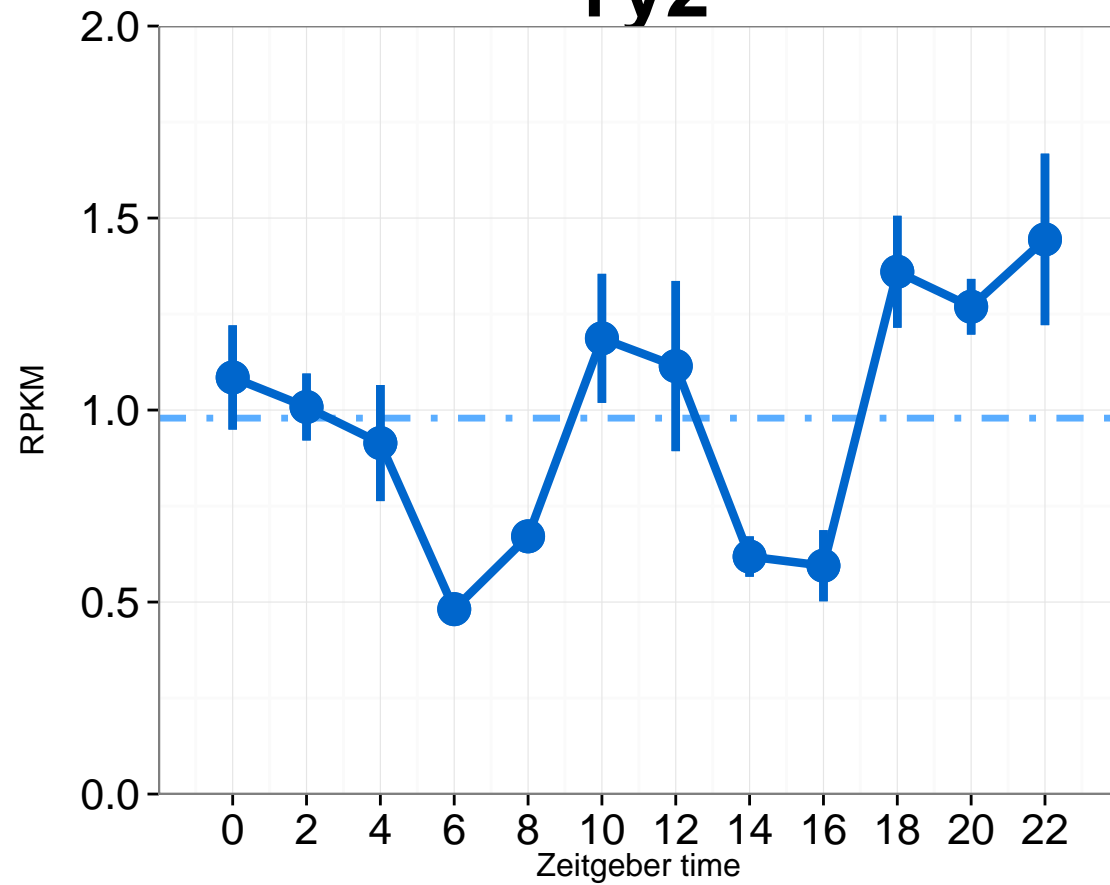

## Yy2 log2(Ribosome occupancy)

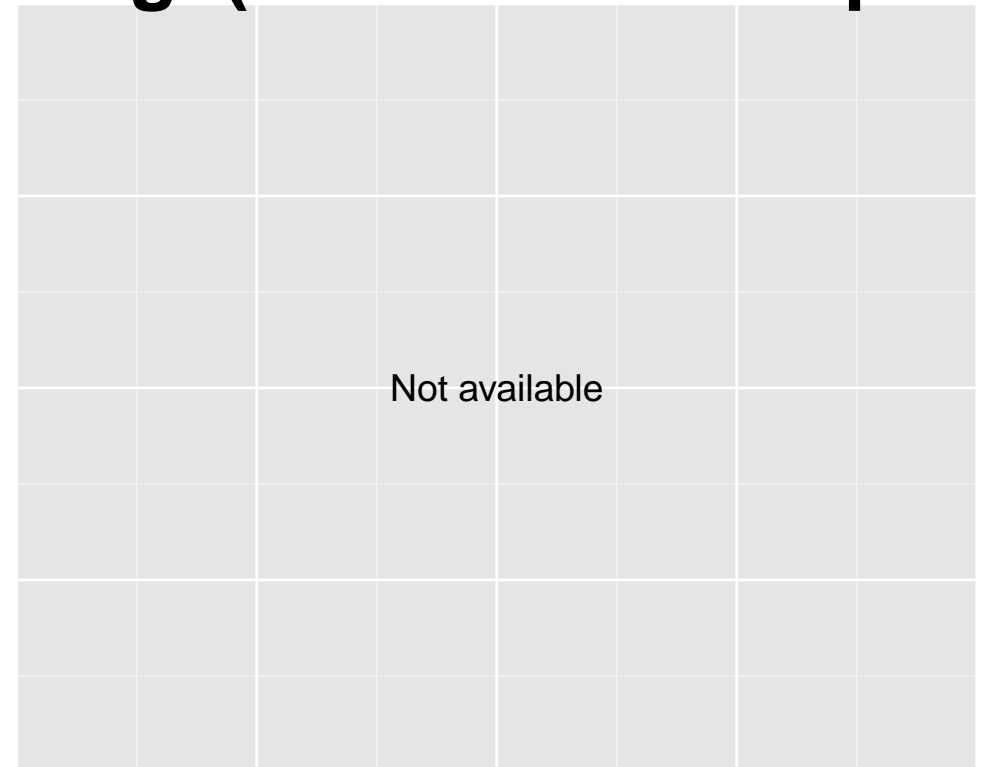

Supplement: Supplementary file 8434 [file 1]

## Manf

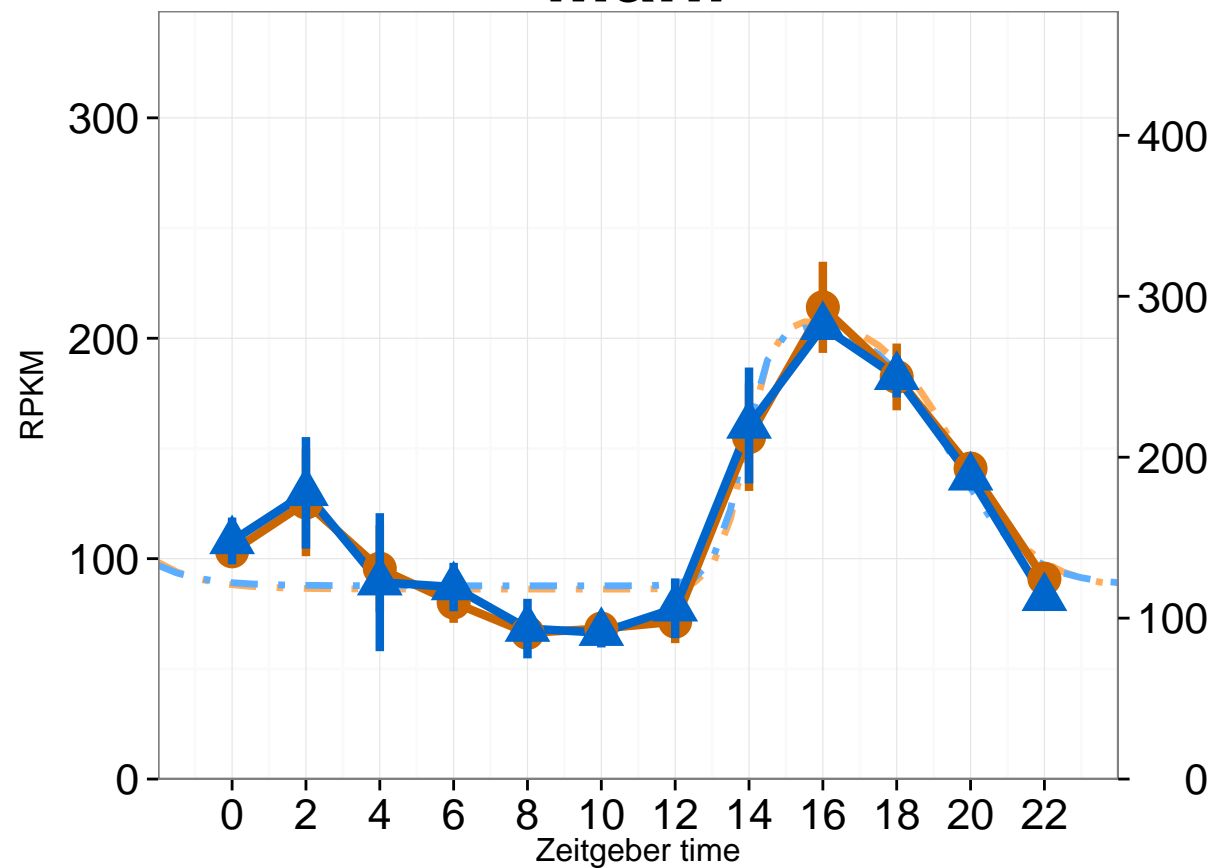

## Manf

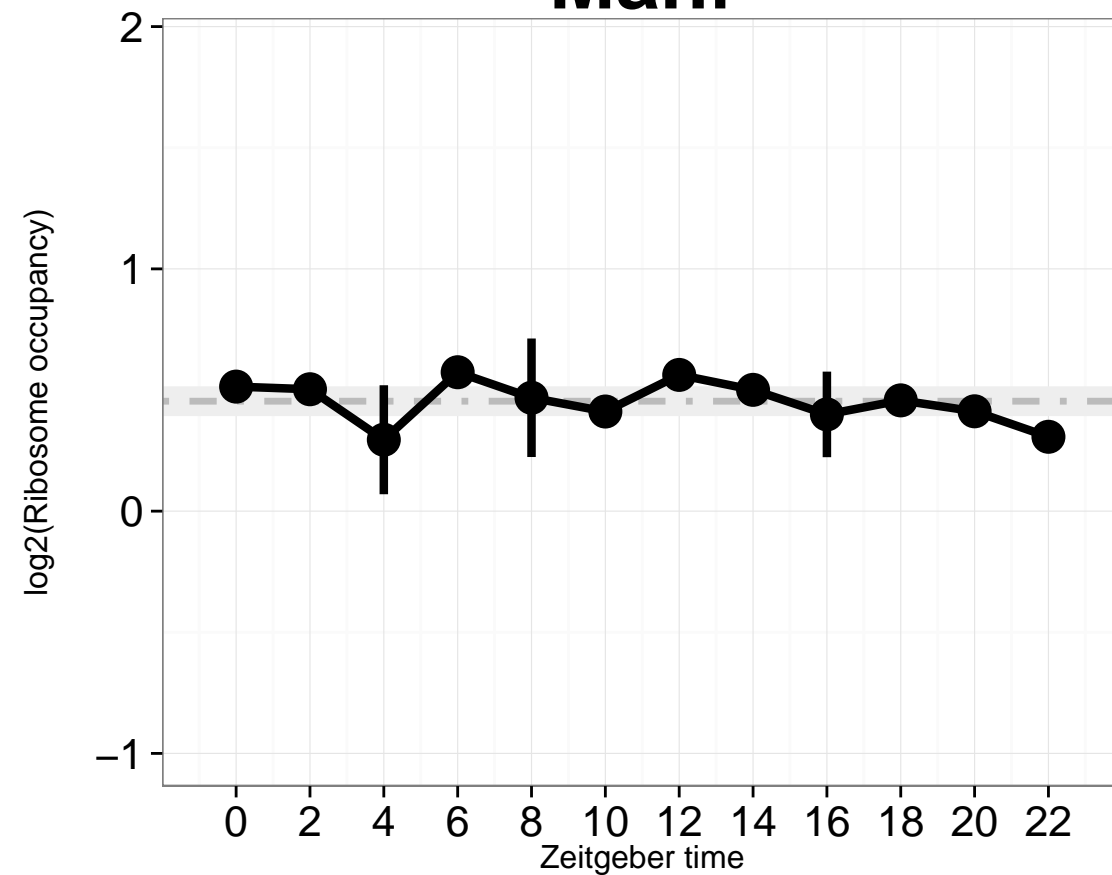

Supplement: Supplementary file 8435 [file 1]

# Bop1

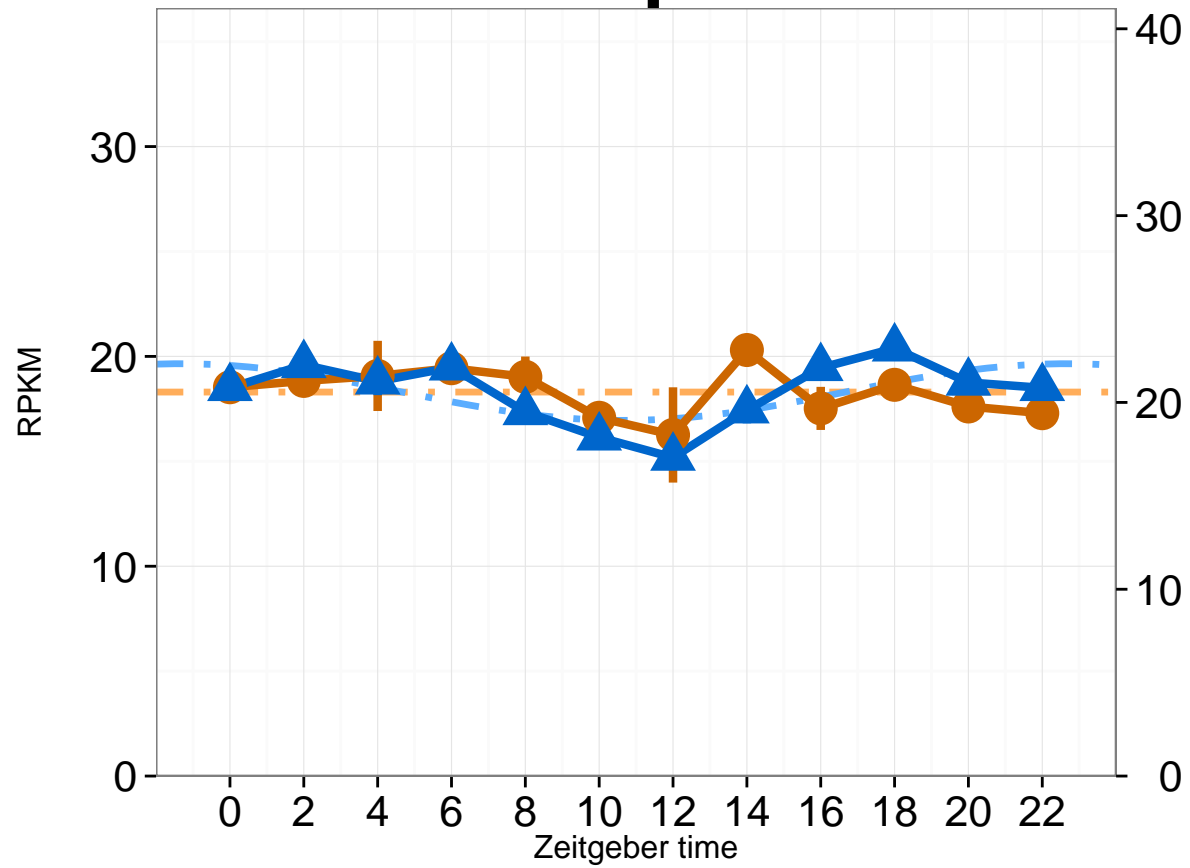

# Bop1

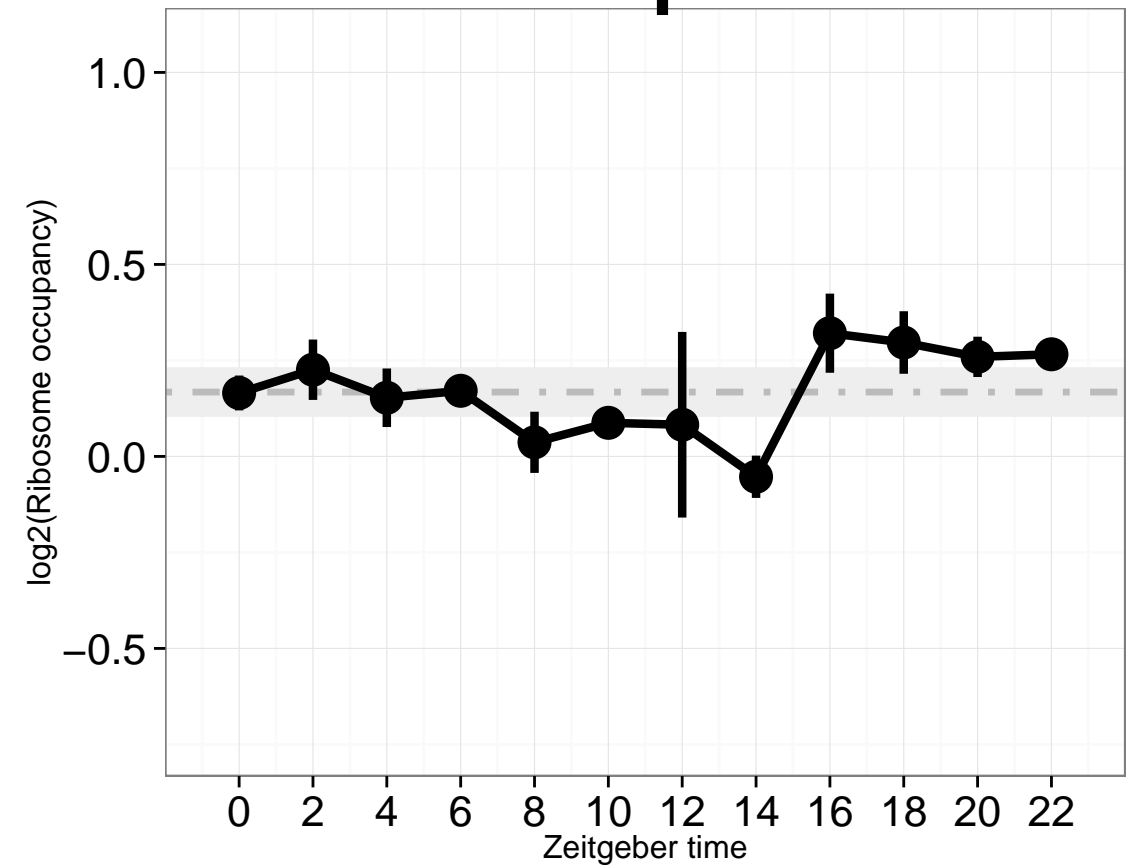

Supplement: Supplementary file 8436 [file 1]

# Supt3

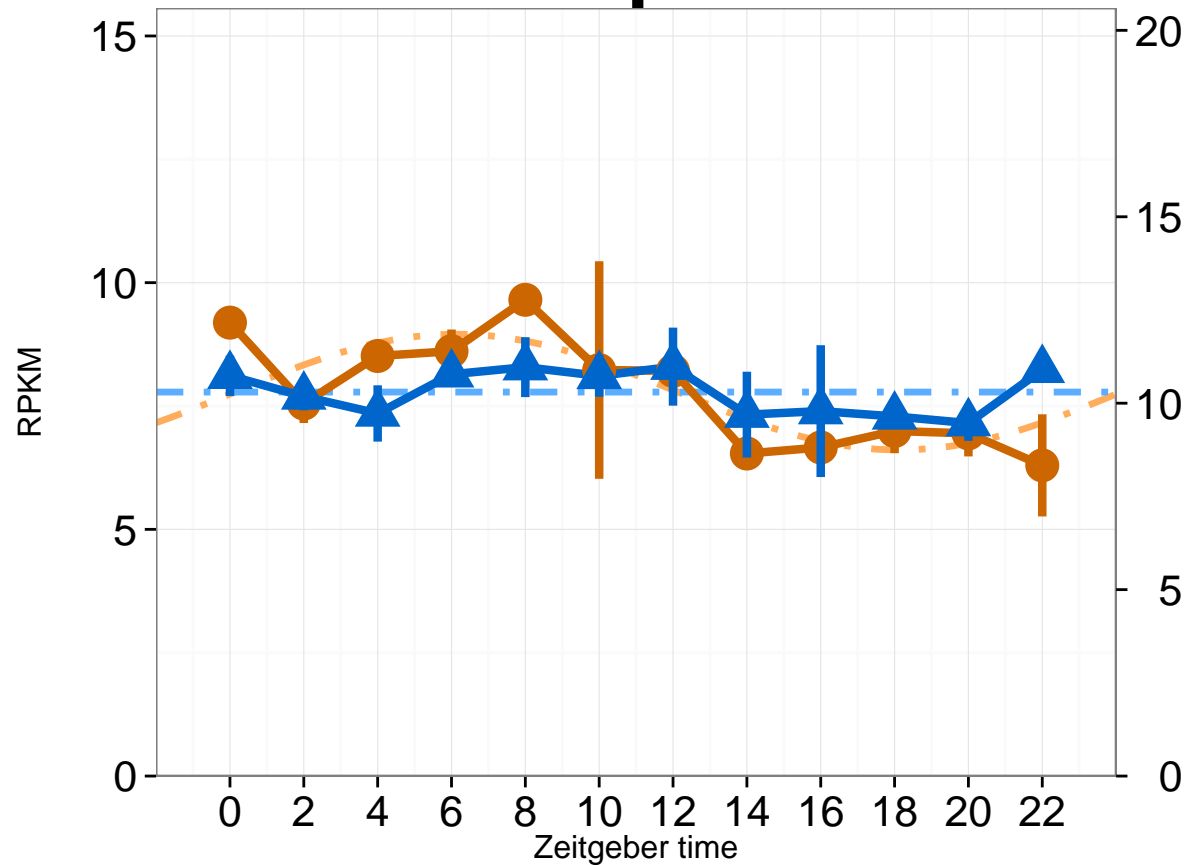

# Supt3

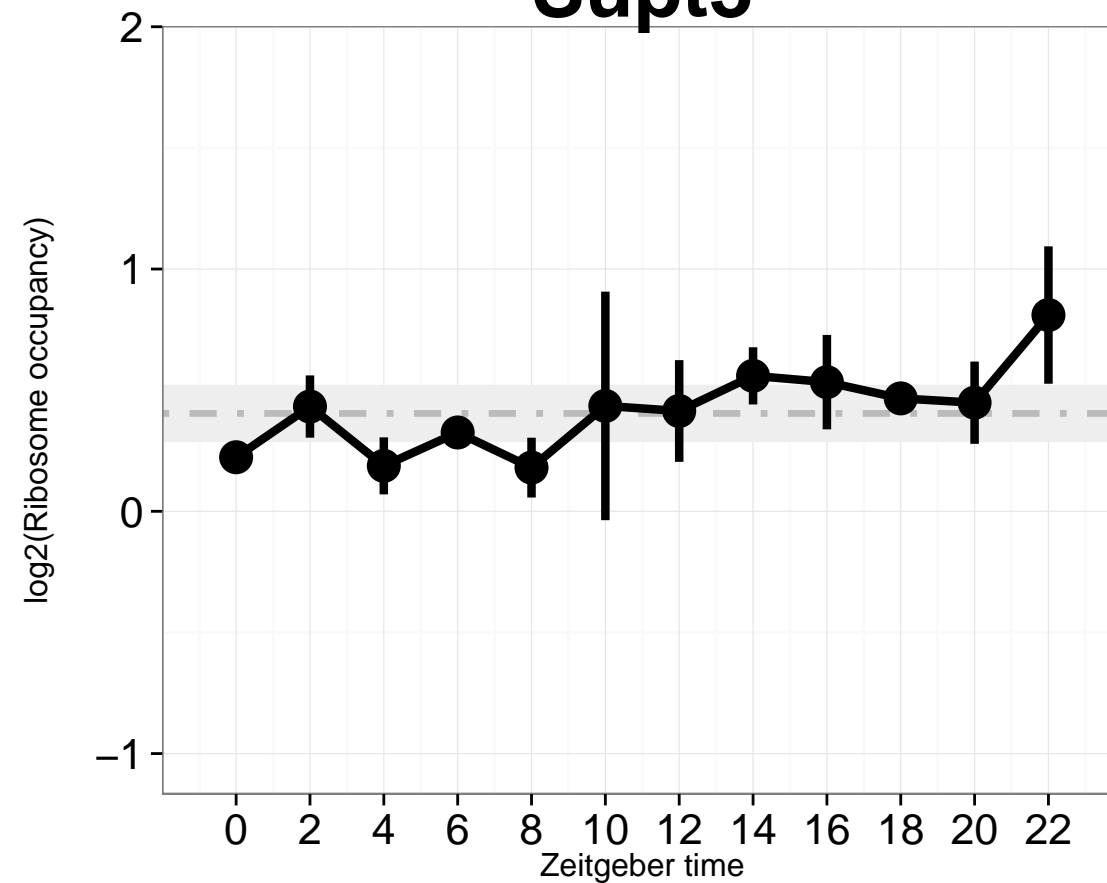

Supplement: Supplementary file 8437 [file 1]

## Kctd5

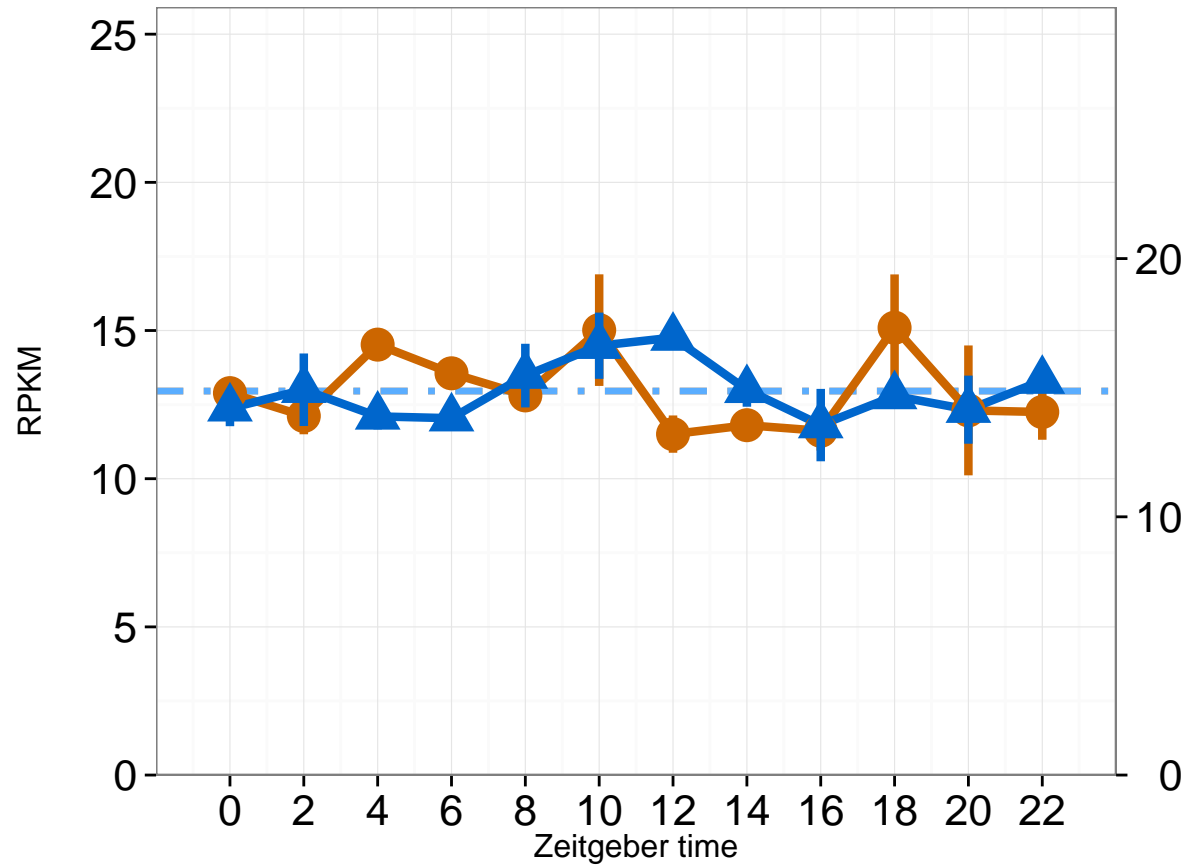

## Kctd5

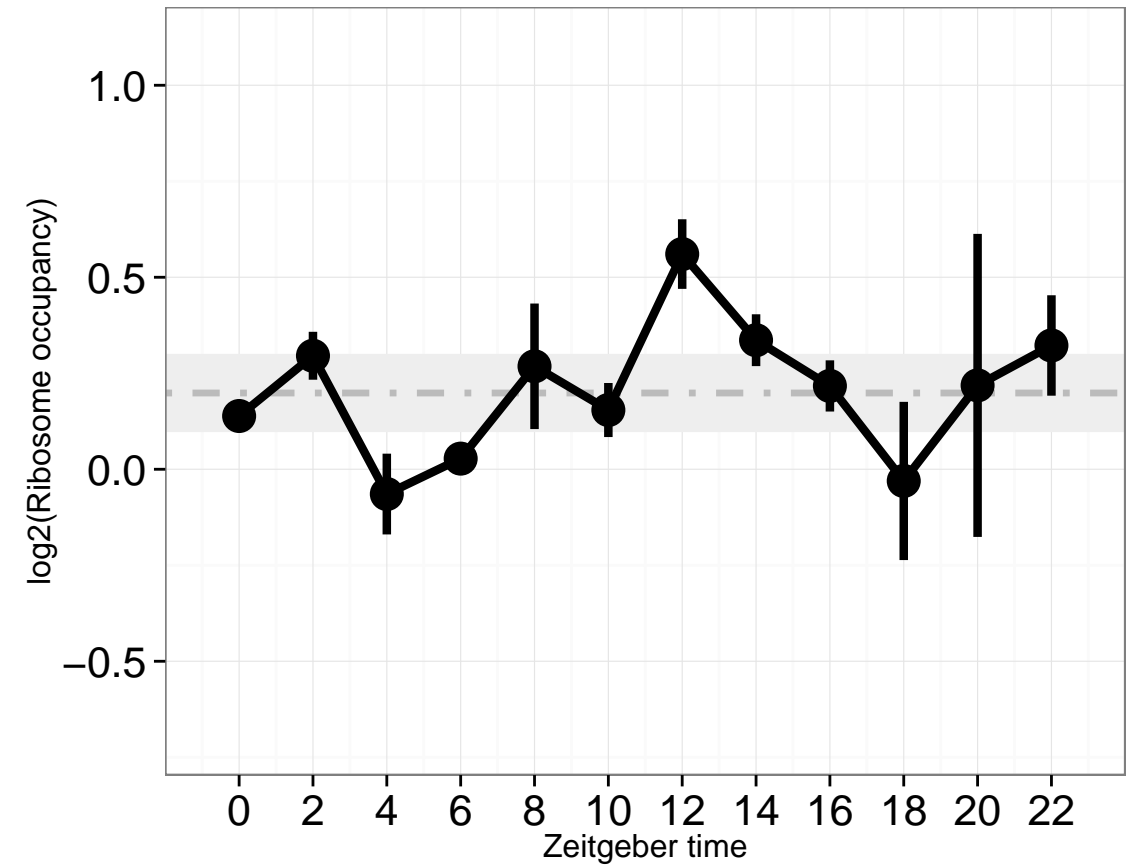

Supplement: Supplementary file 8438 [file 1]

## Rnf24

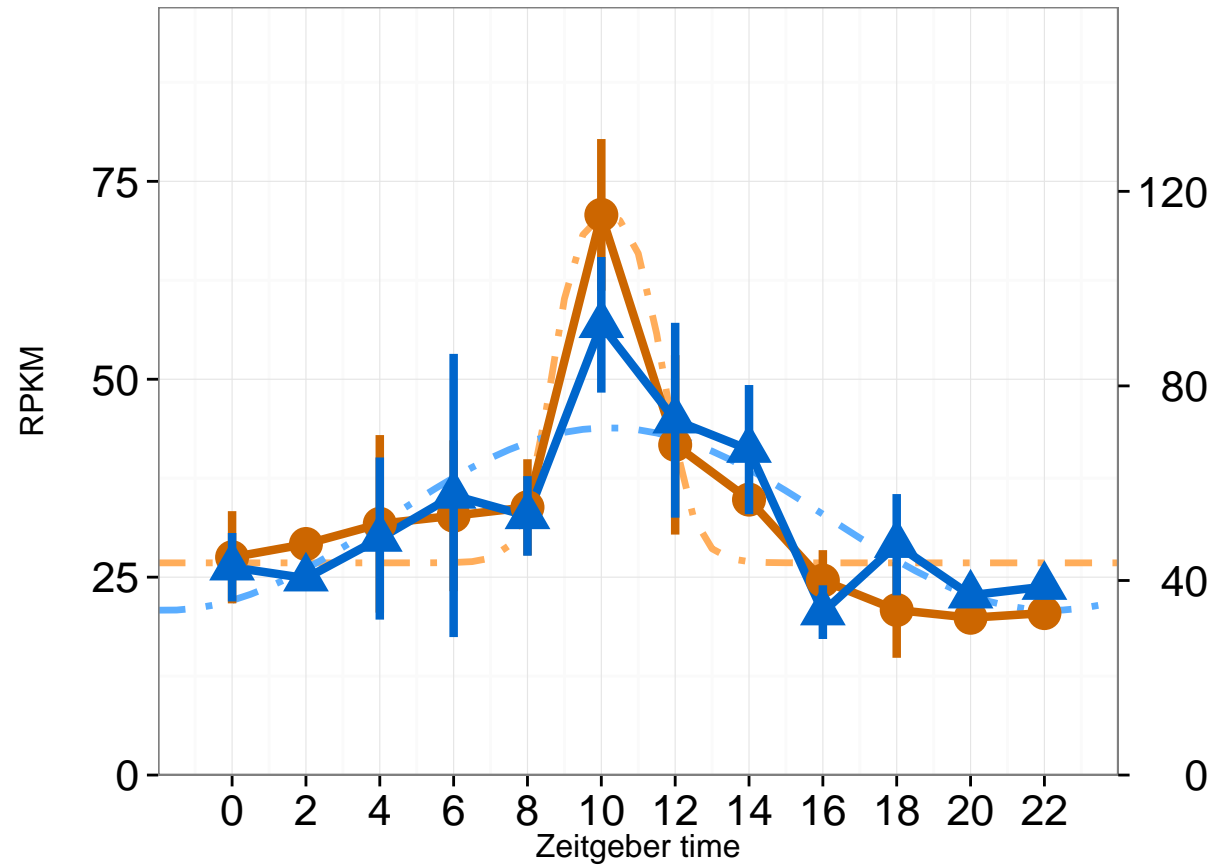

## Rnf24

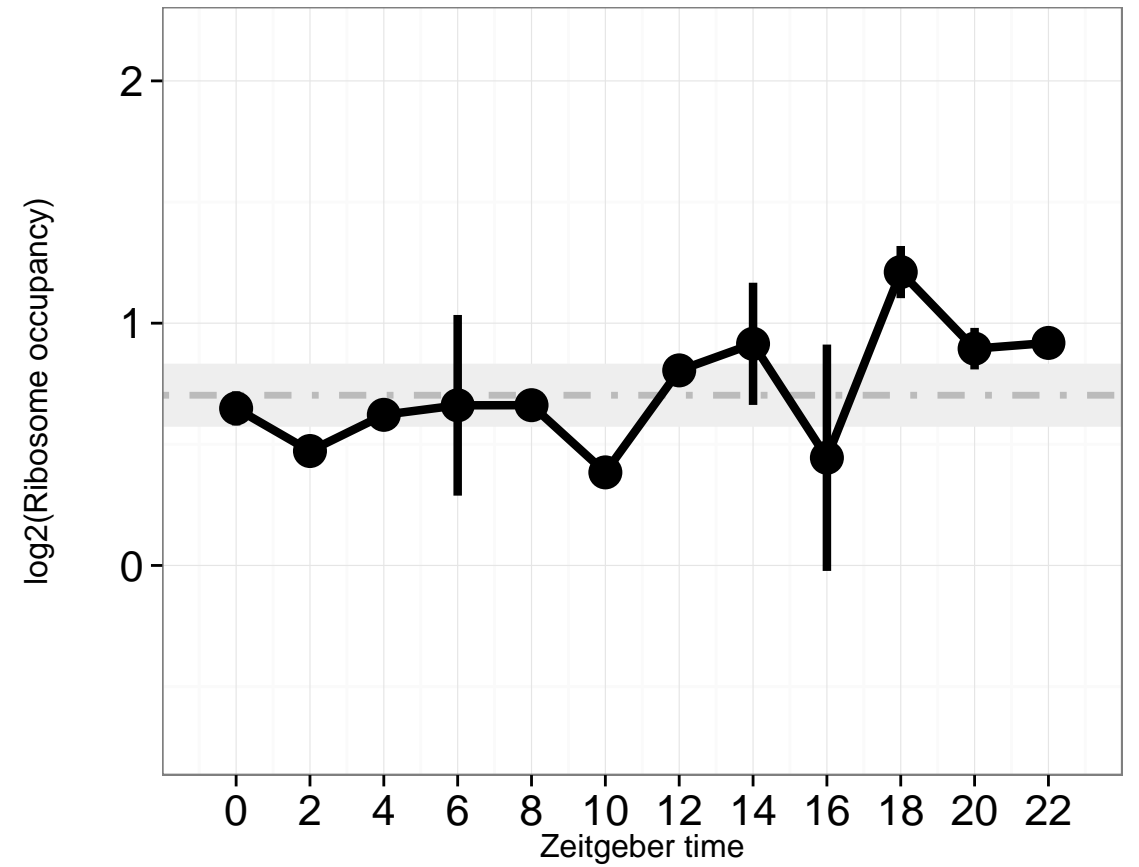

Supplement: Supplementary file 8439 [file 1]

## Zbtb44

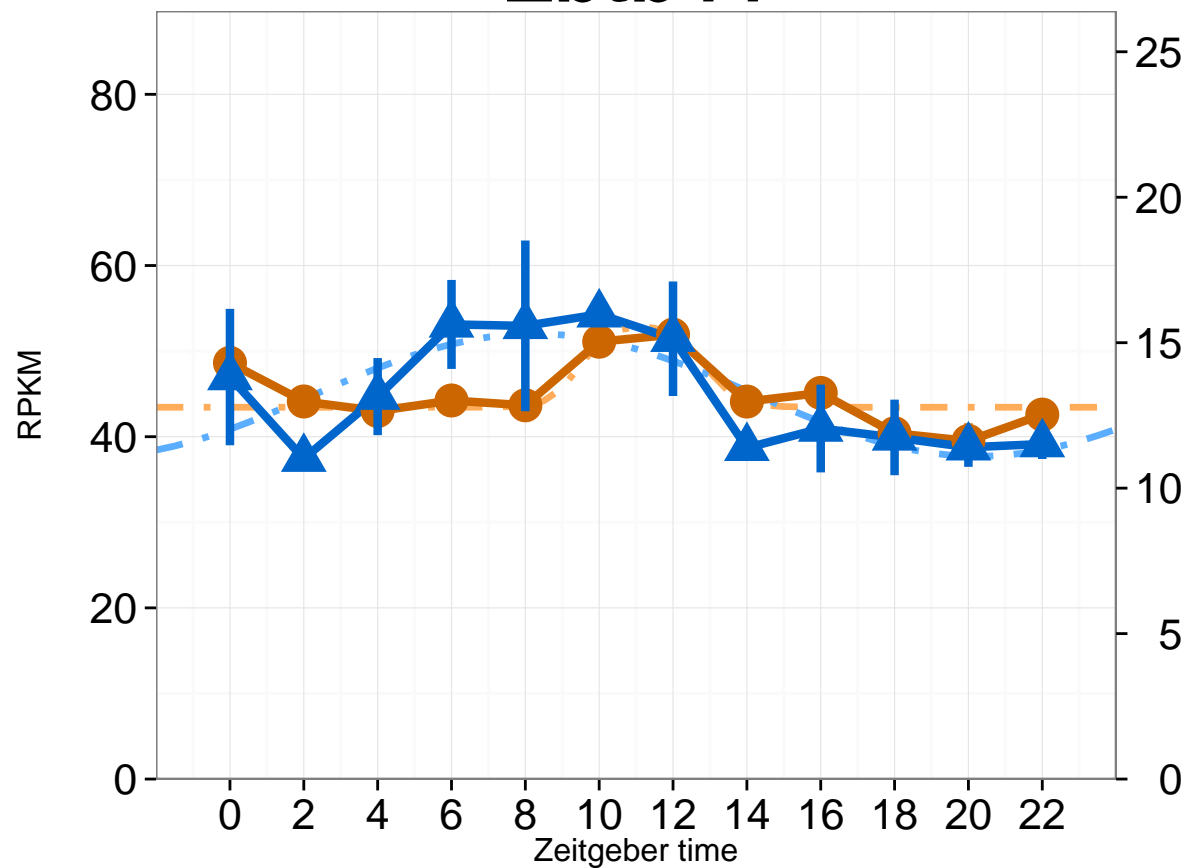

## Zbtb44

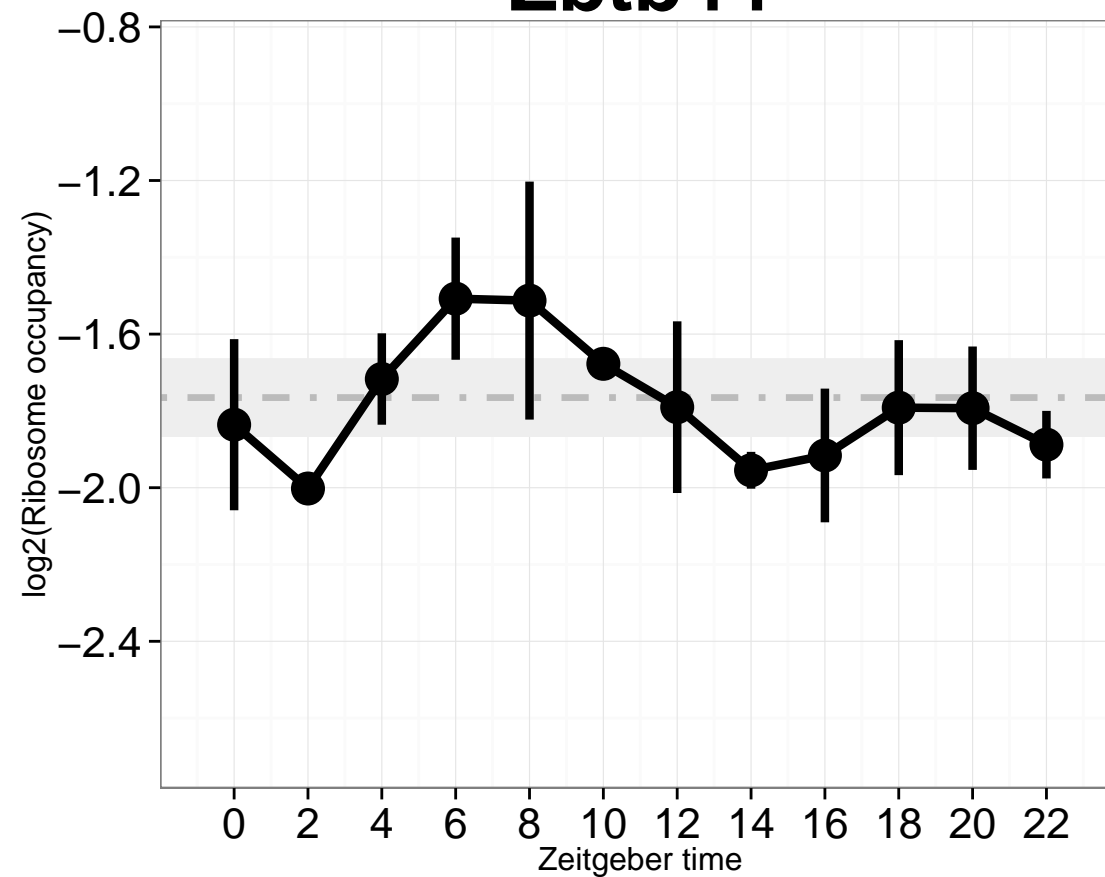

Supplement: Supplementary file 8440 [file 1]

## Nup37

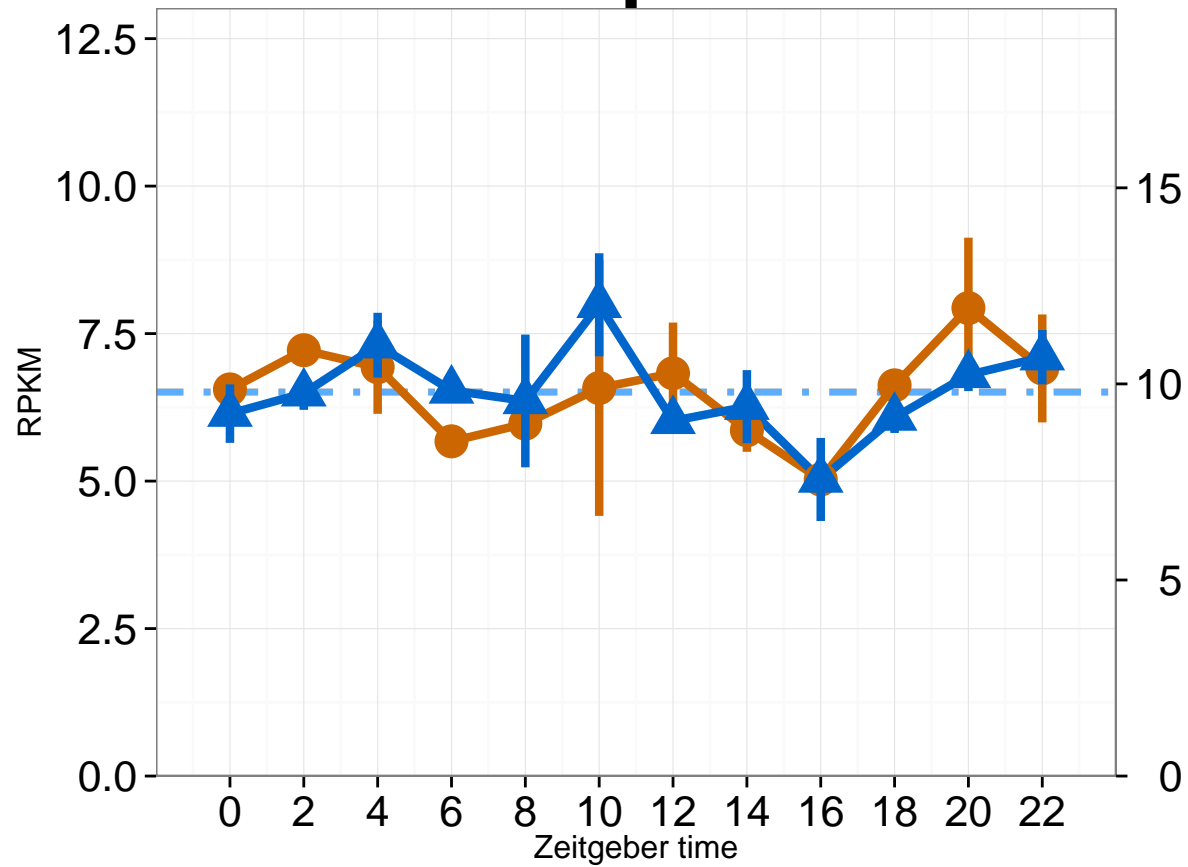

## Nup37

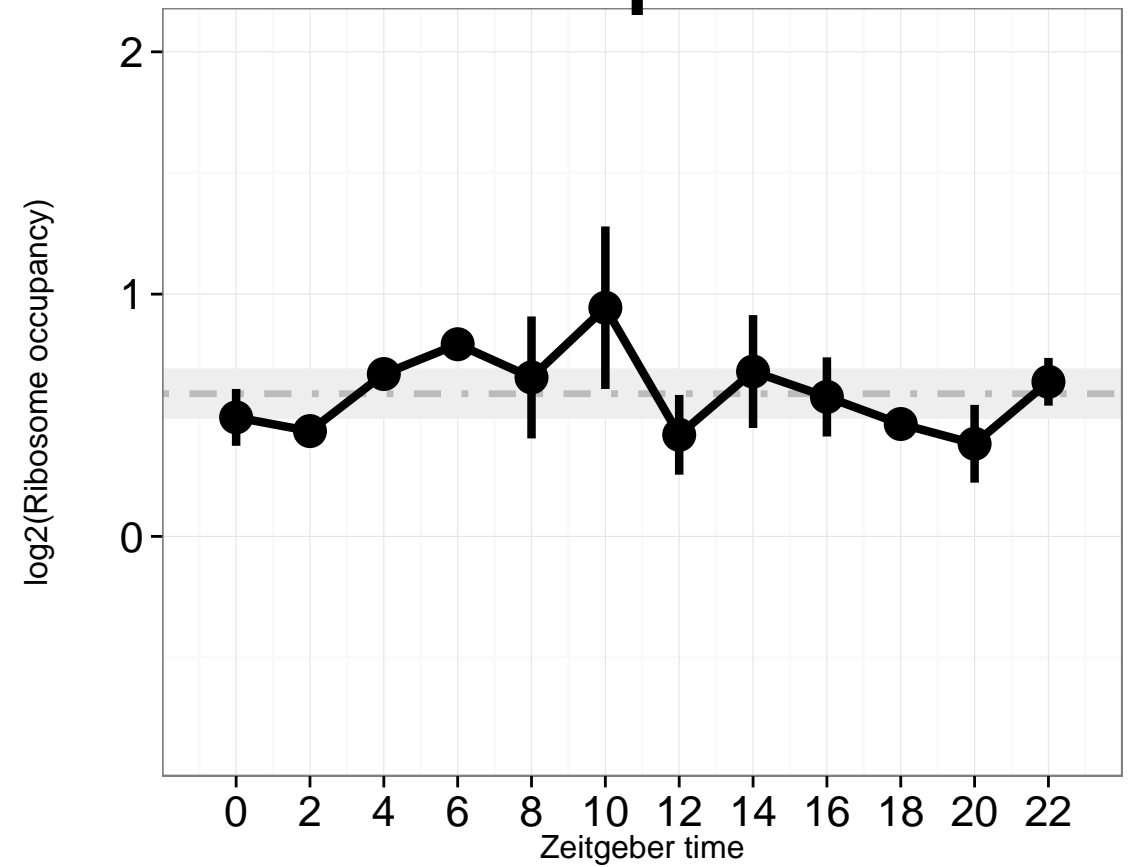

Supplement: Supplementary file 8441 [file 1]

# Tspan4

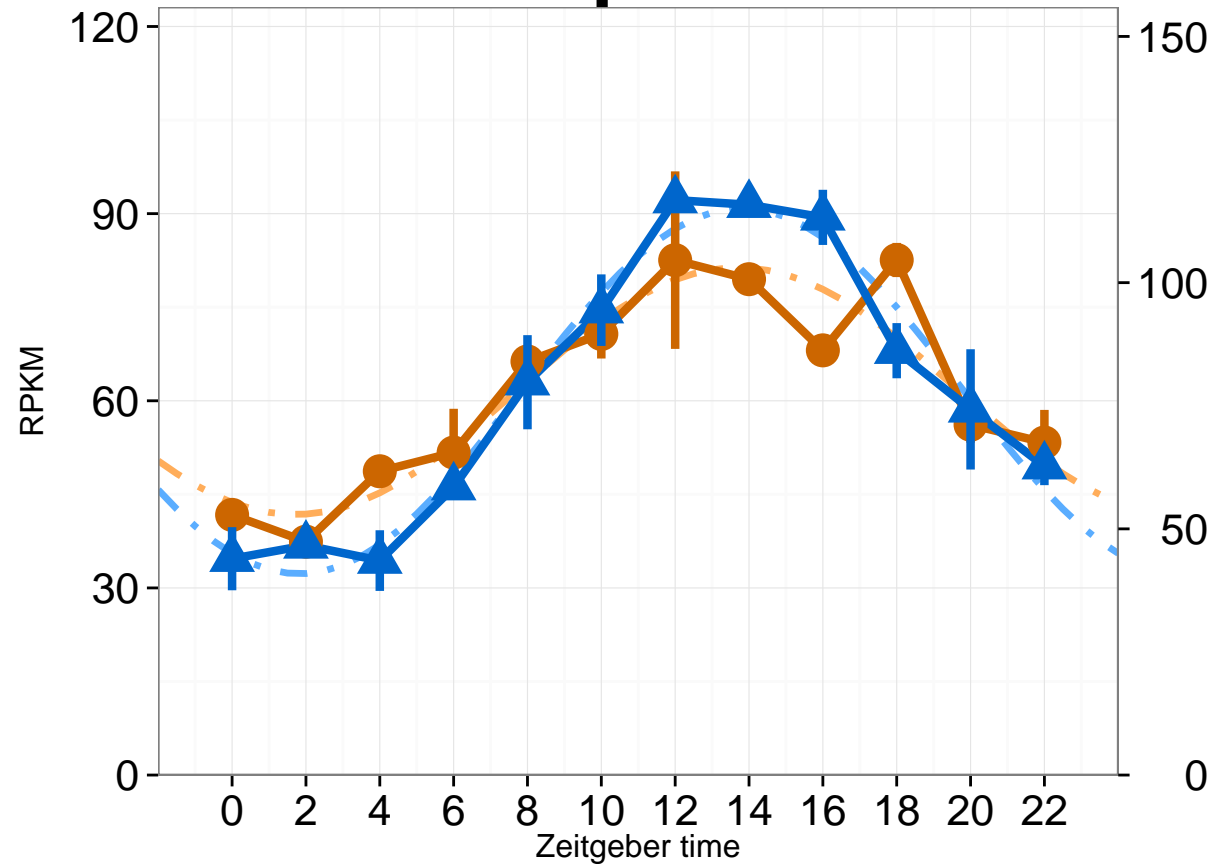

# Tspan4

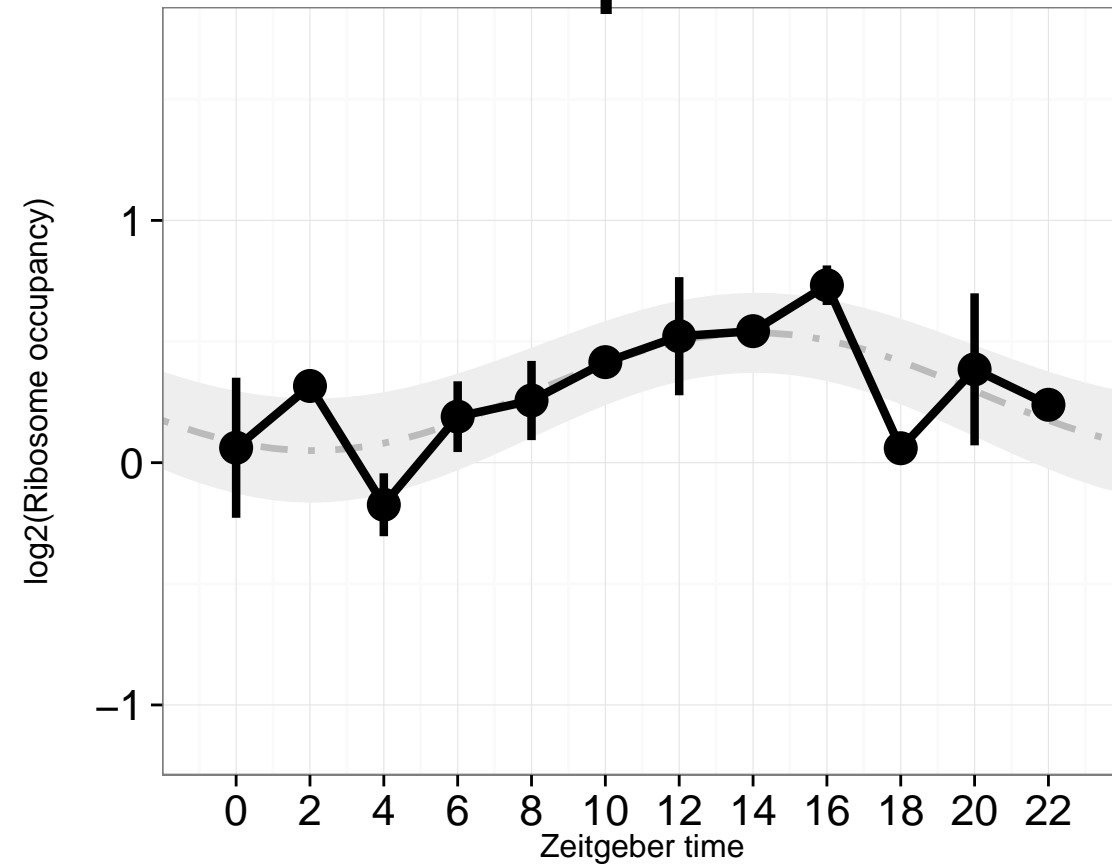

Supplement: Supplementary file 8442 [file 1]

## Naga

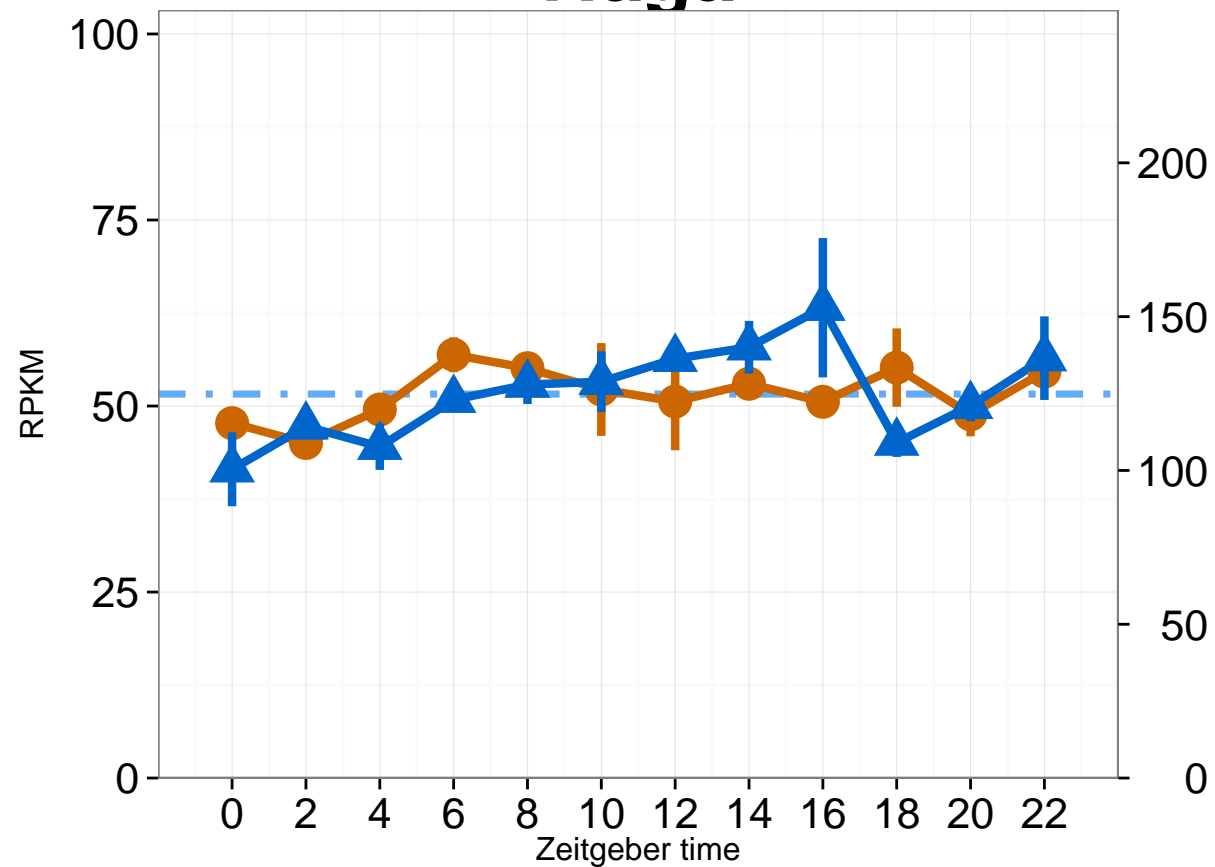

## Naga

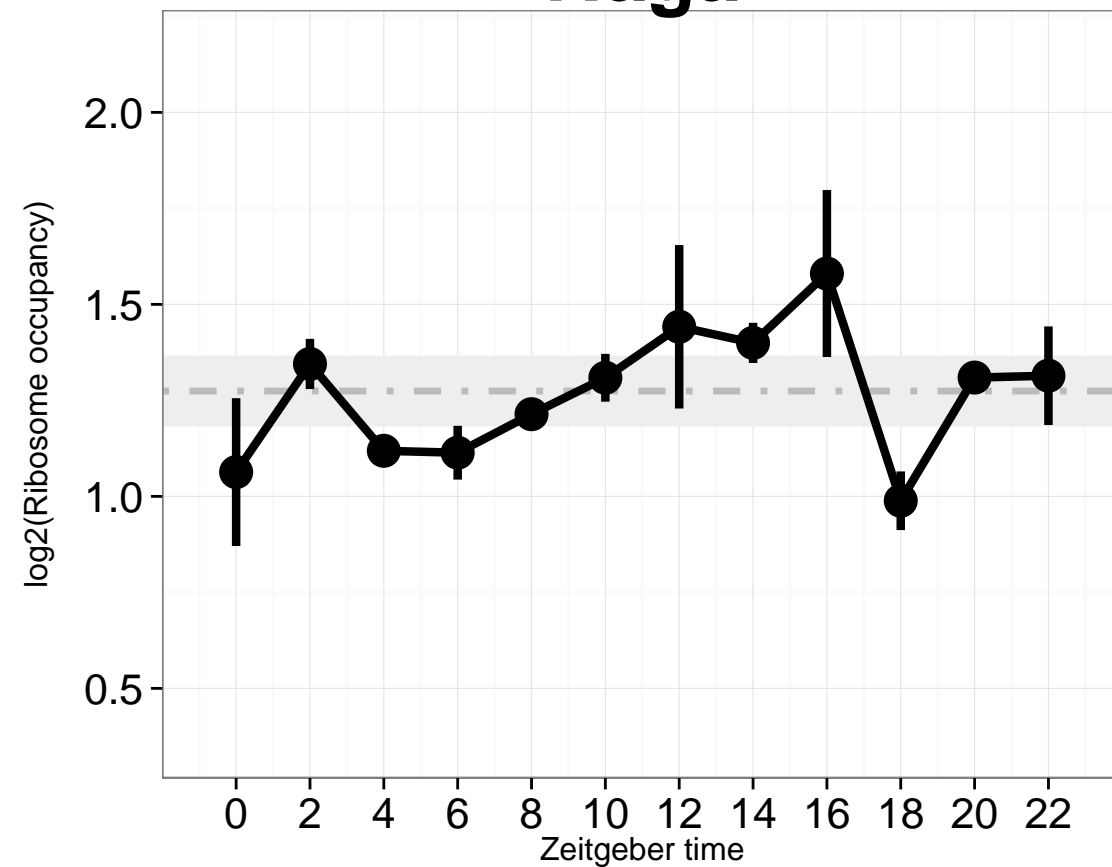

Supplement: Supplementary file 8443 [file 1]

## Cd2bp2

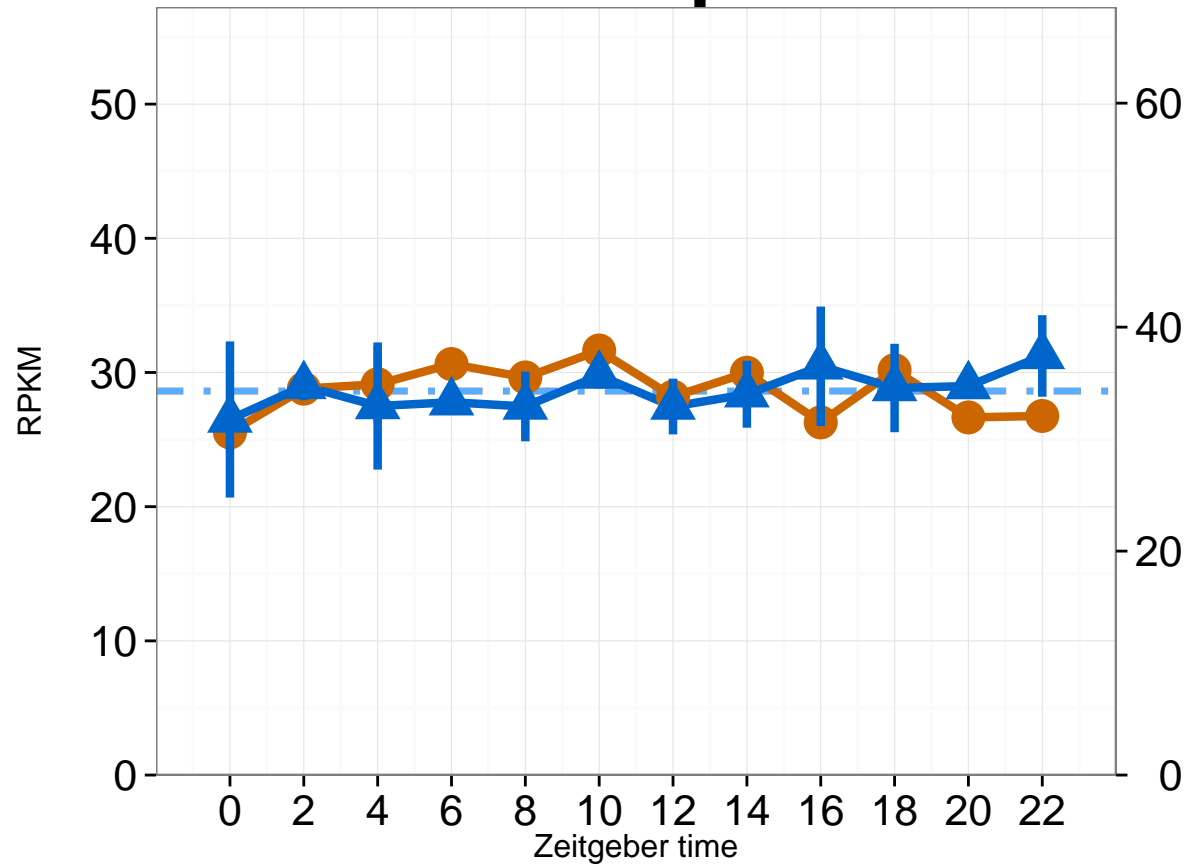

## Cd2bp2

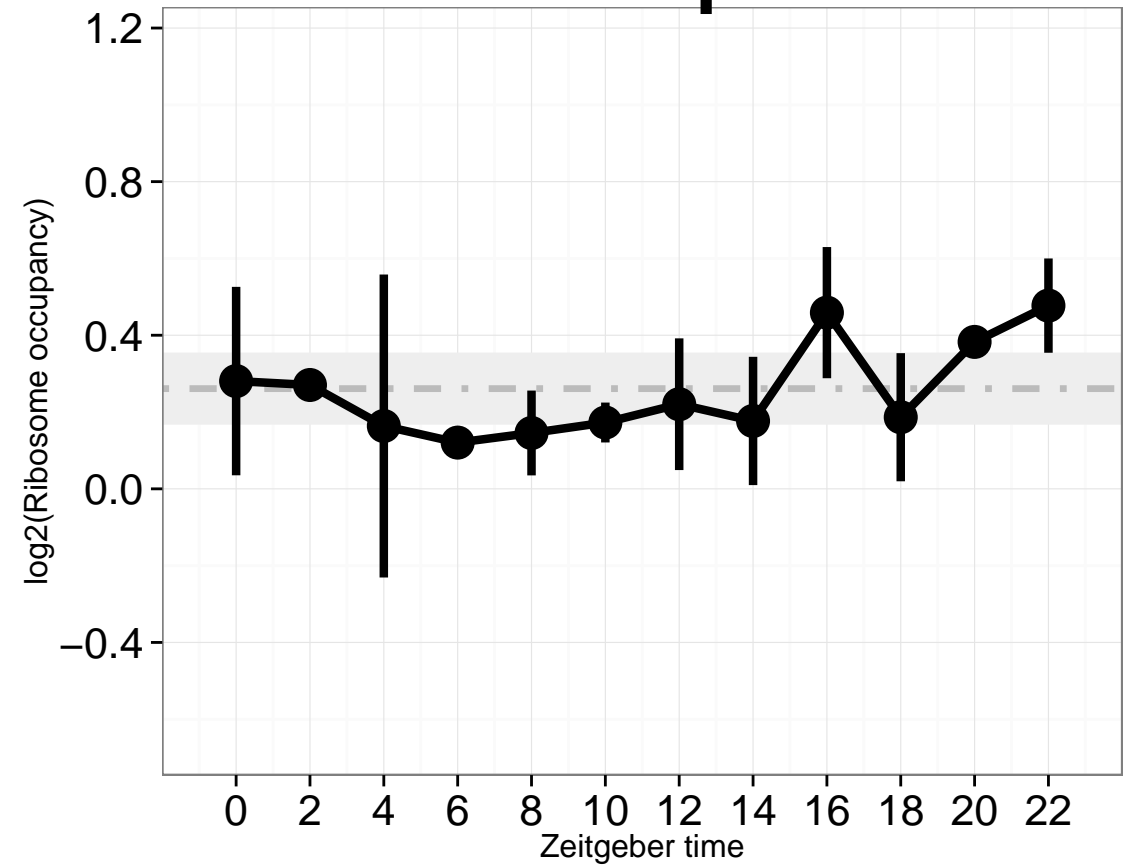

Supplement: Supplementary file 8444 [file 1]

# Csgalnact1

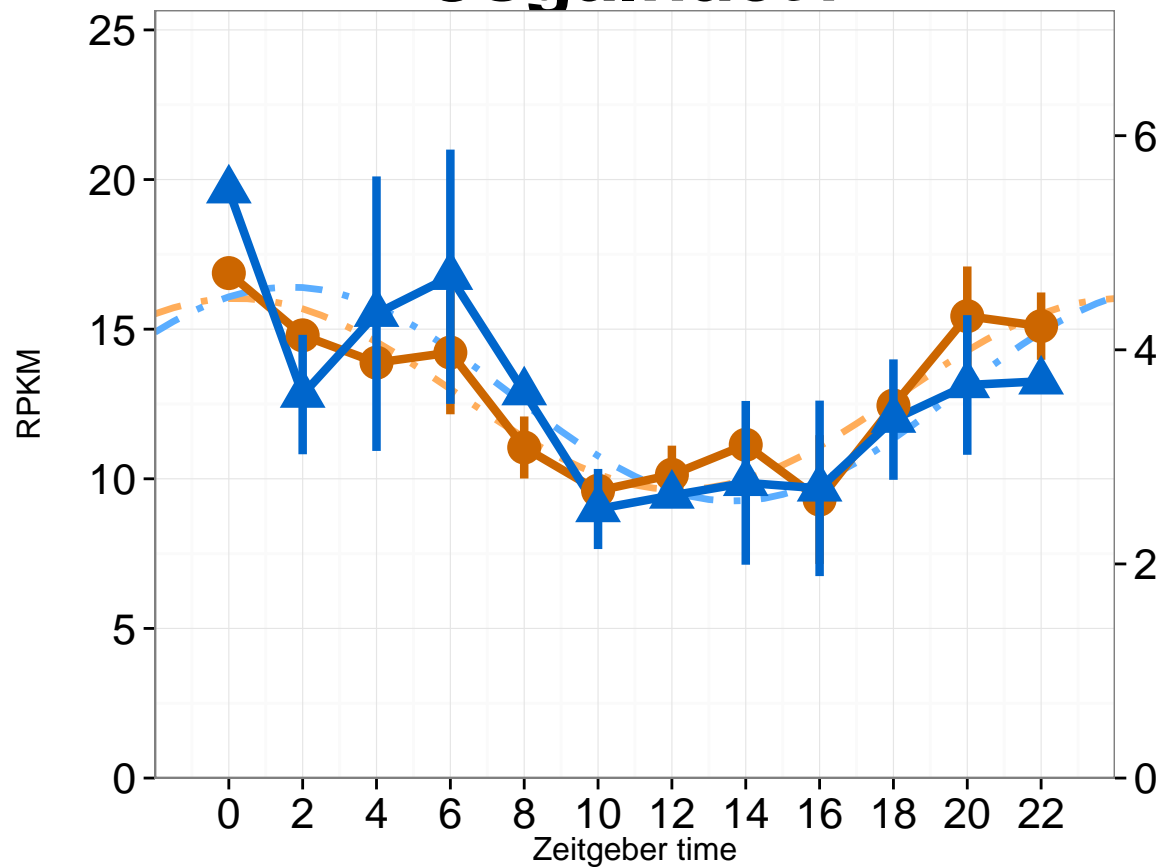

# Csgalnact1

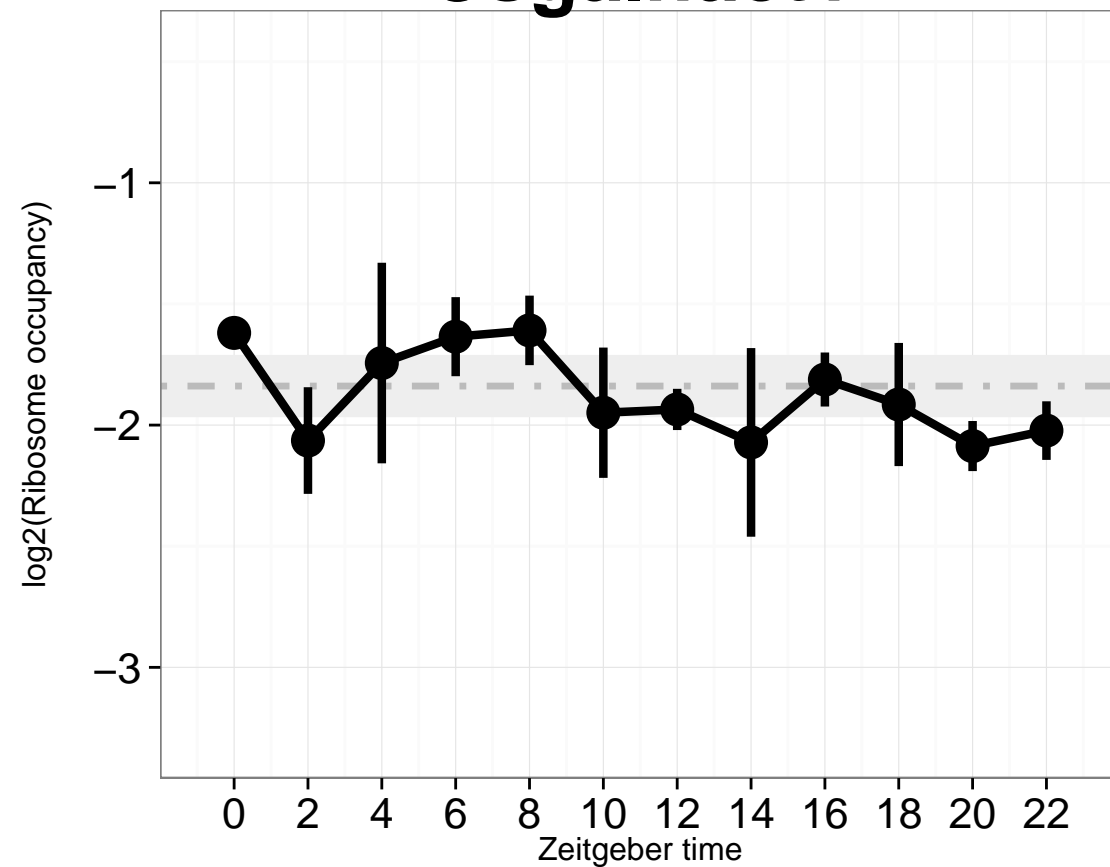

Supplement: Supplementary file 8445 [file 1]

## Slc9a1

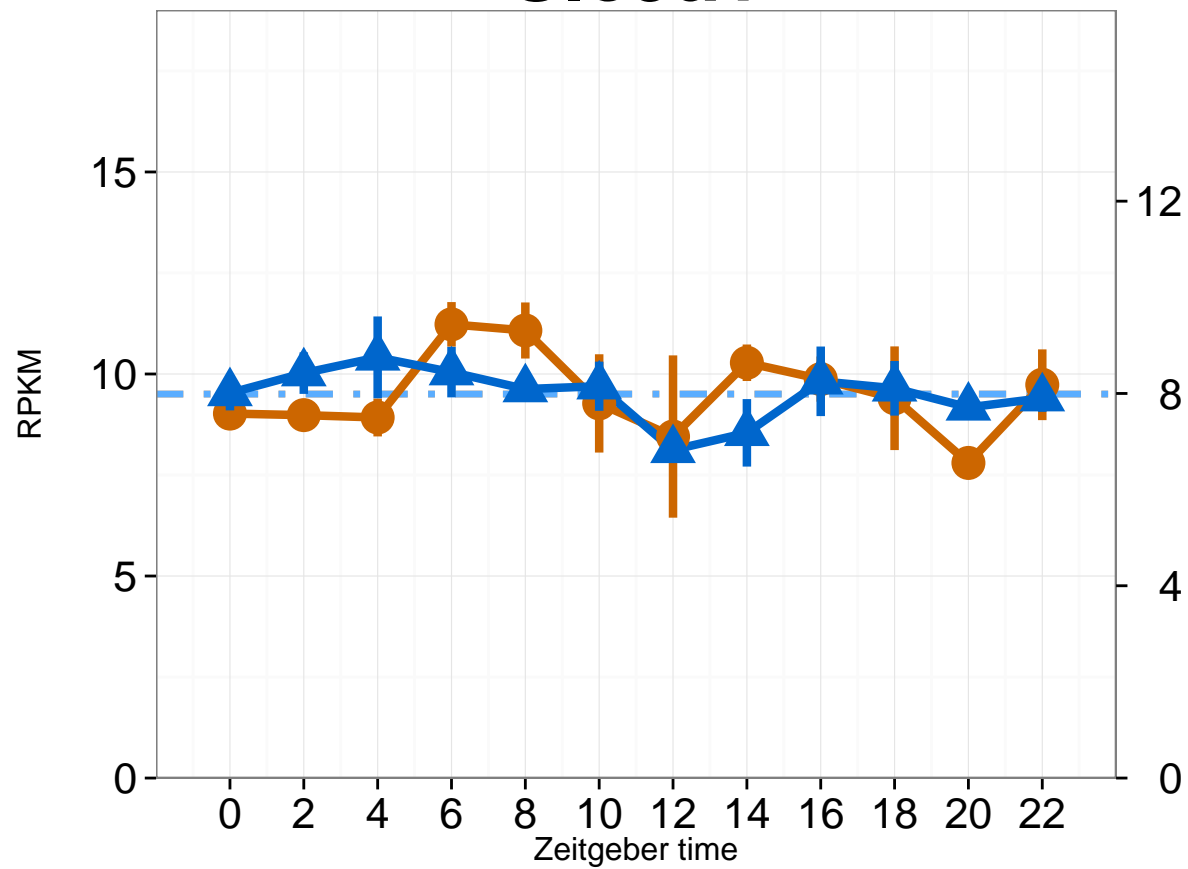

## Slc9a1

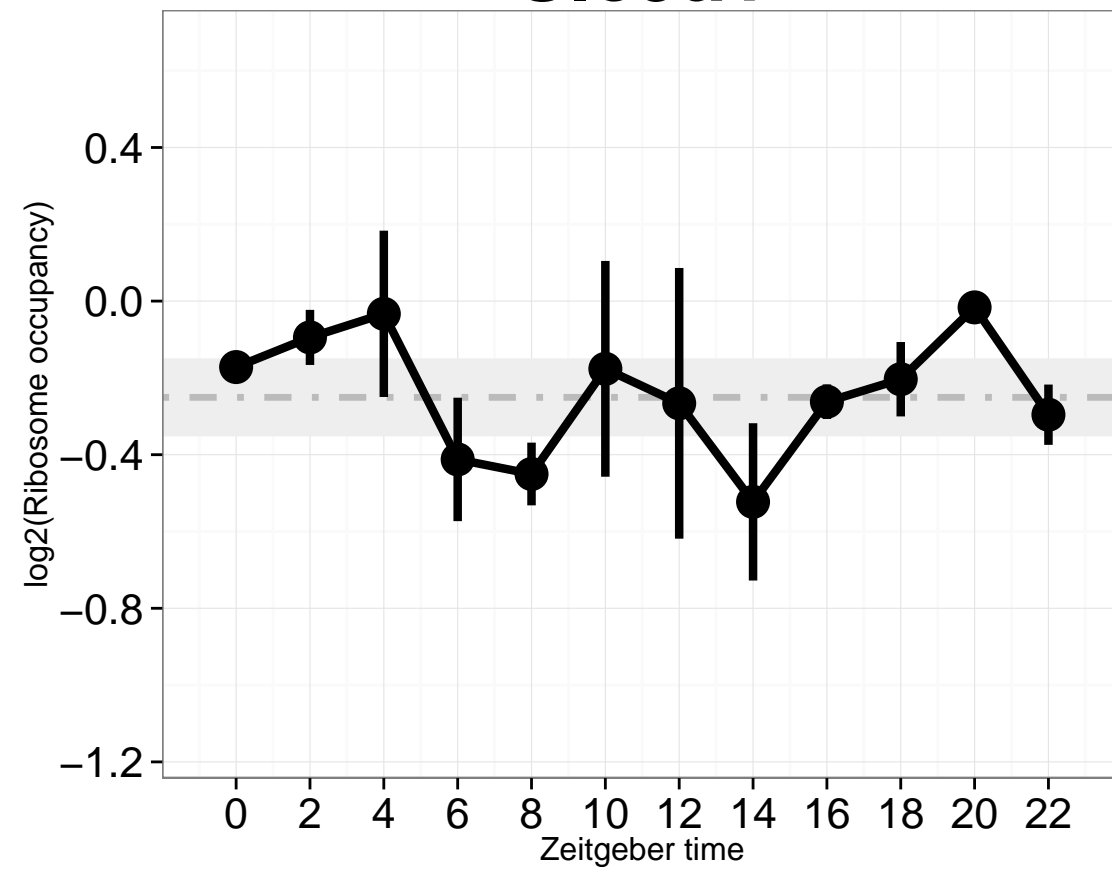

Supplement: Supplementary file 8446 [file 1]

## Mdk

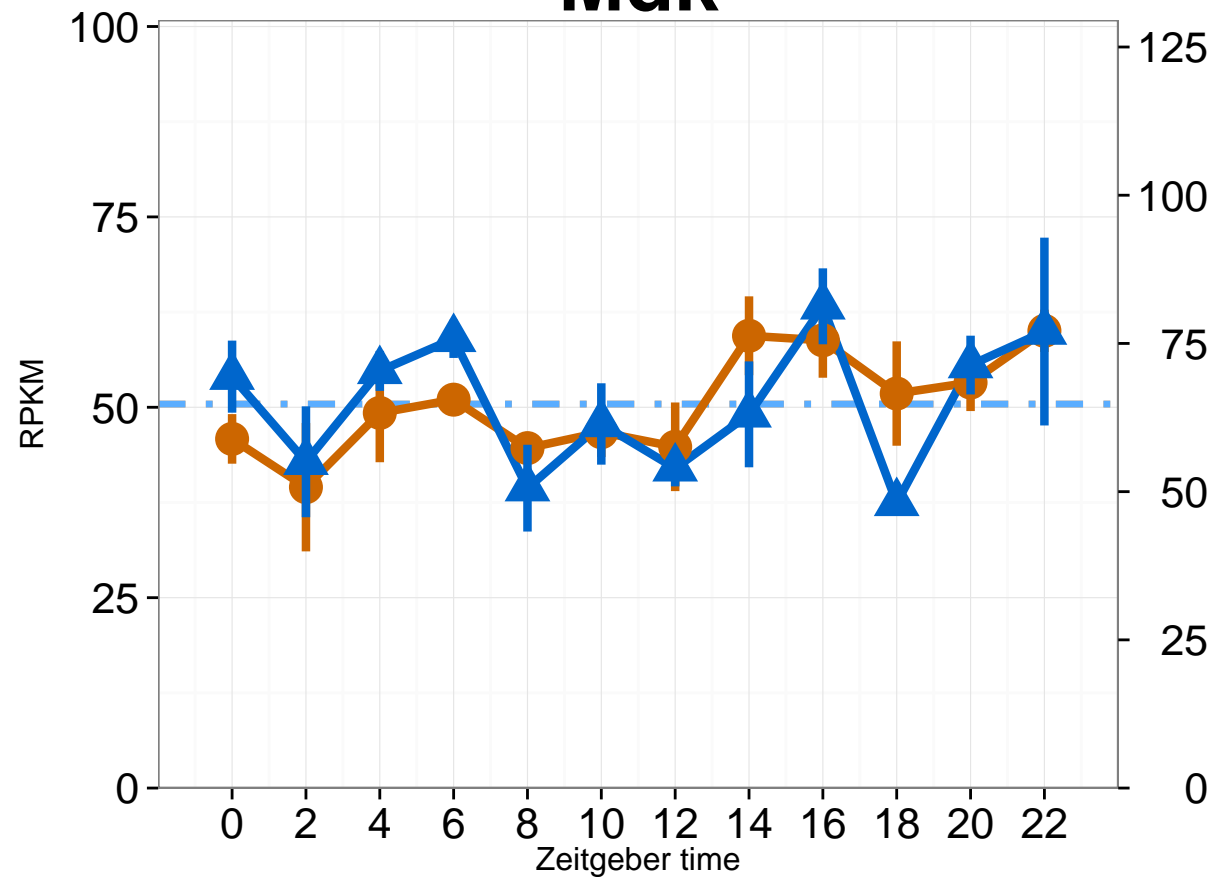

## Mdk

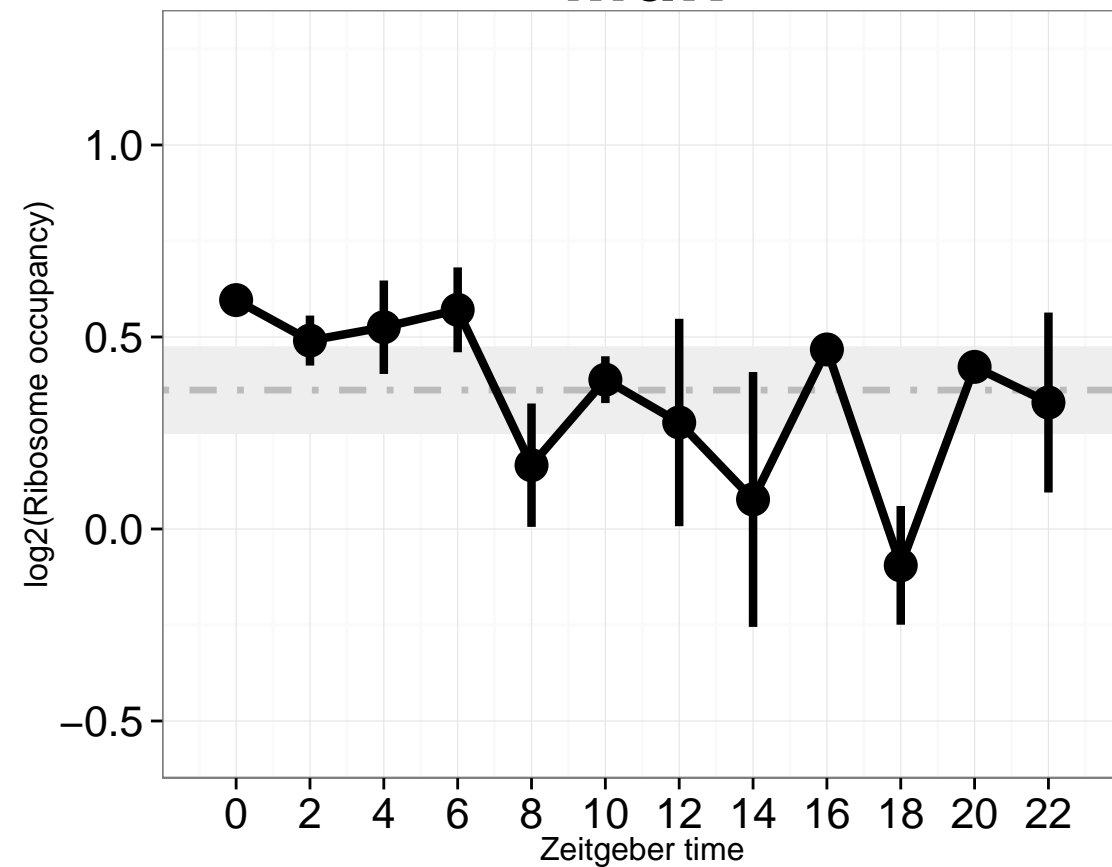

Supplement: Supplementary file 8447 [file 1]

## Sord

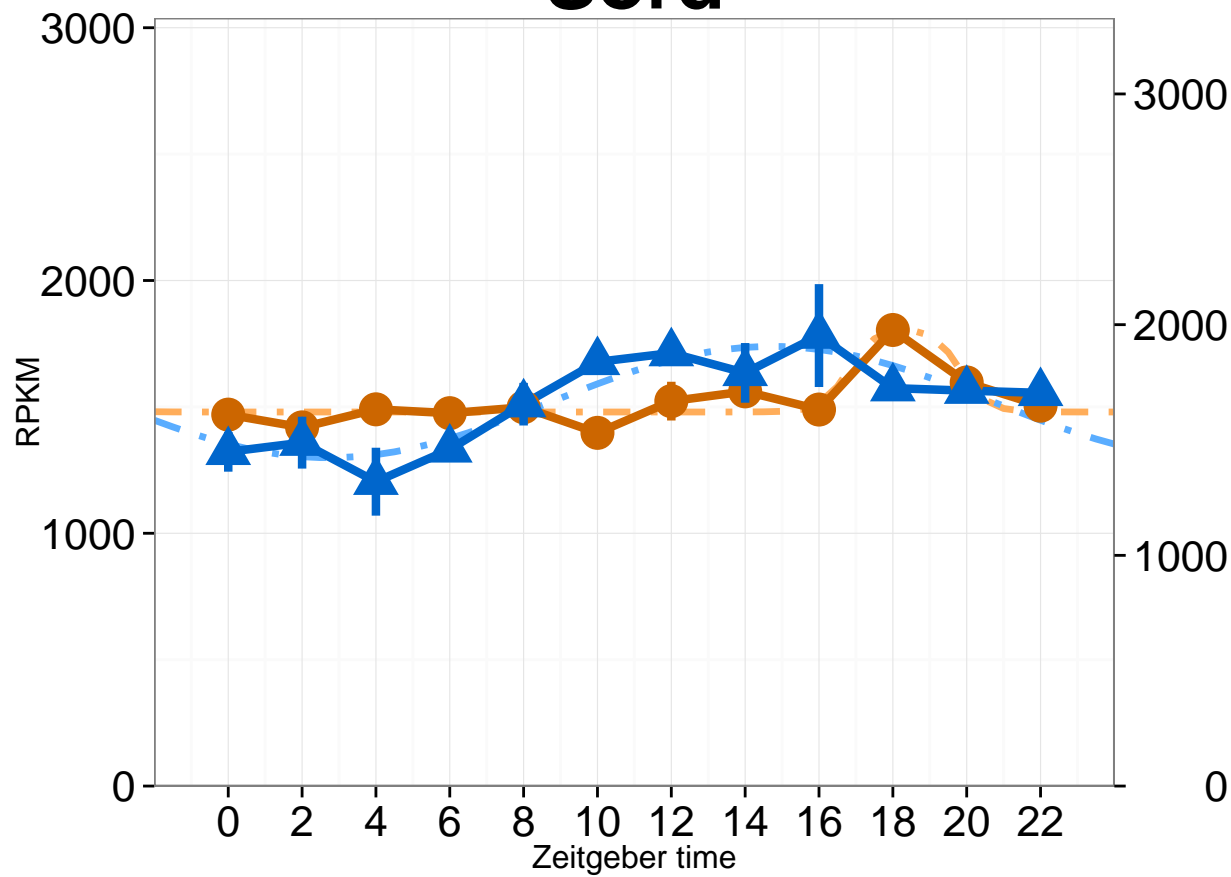

## Sord

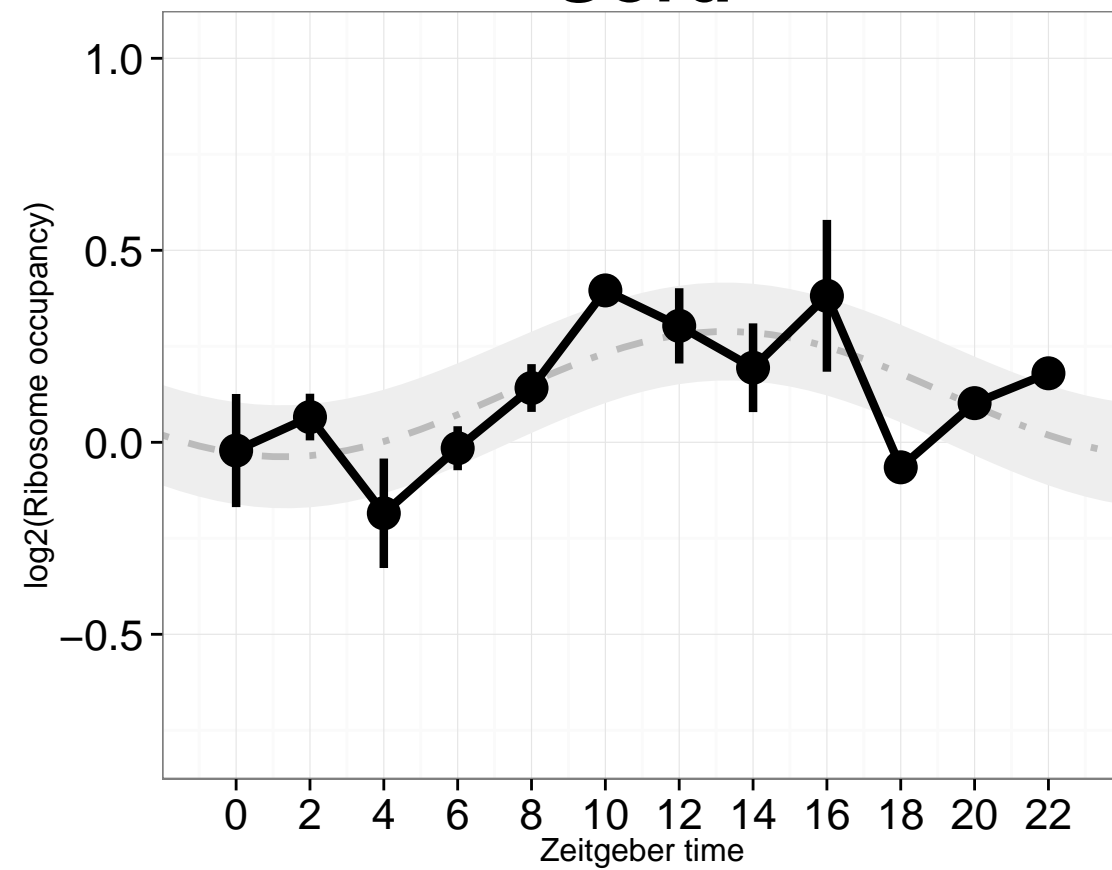

Supplement: Supplementary file 8448 [file 1]

## Akap10

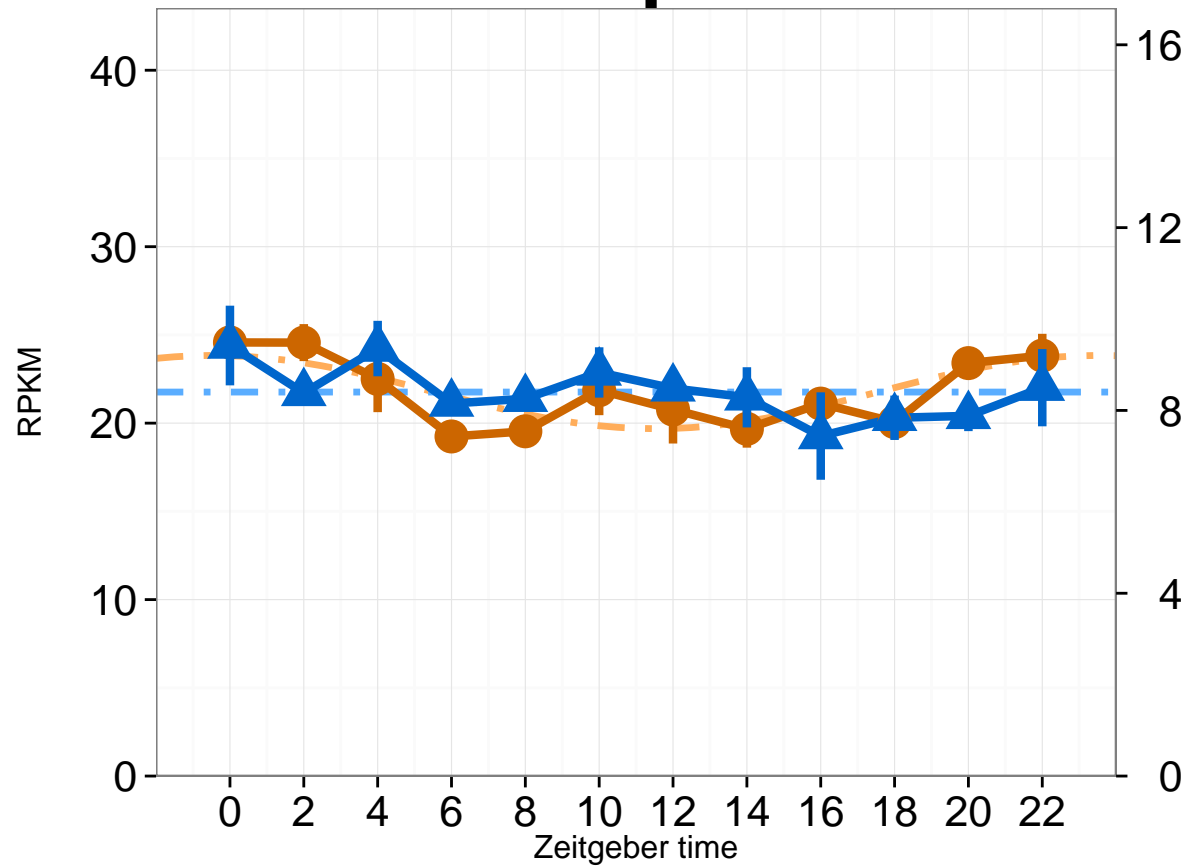

## Akap10

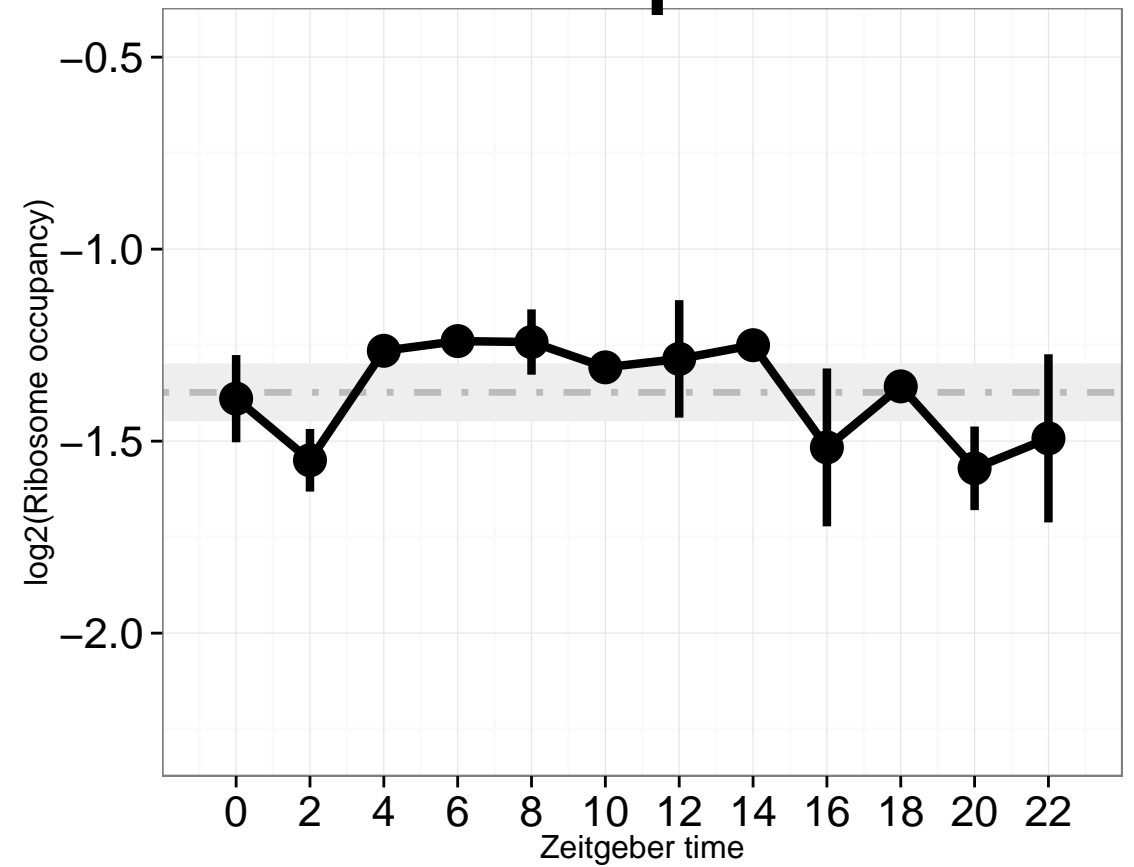

Supplement: Supplementary file 8449 [file 1]

# Kiss1r

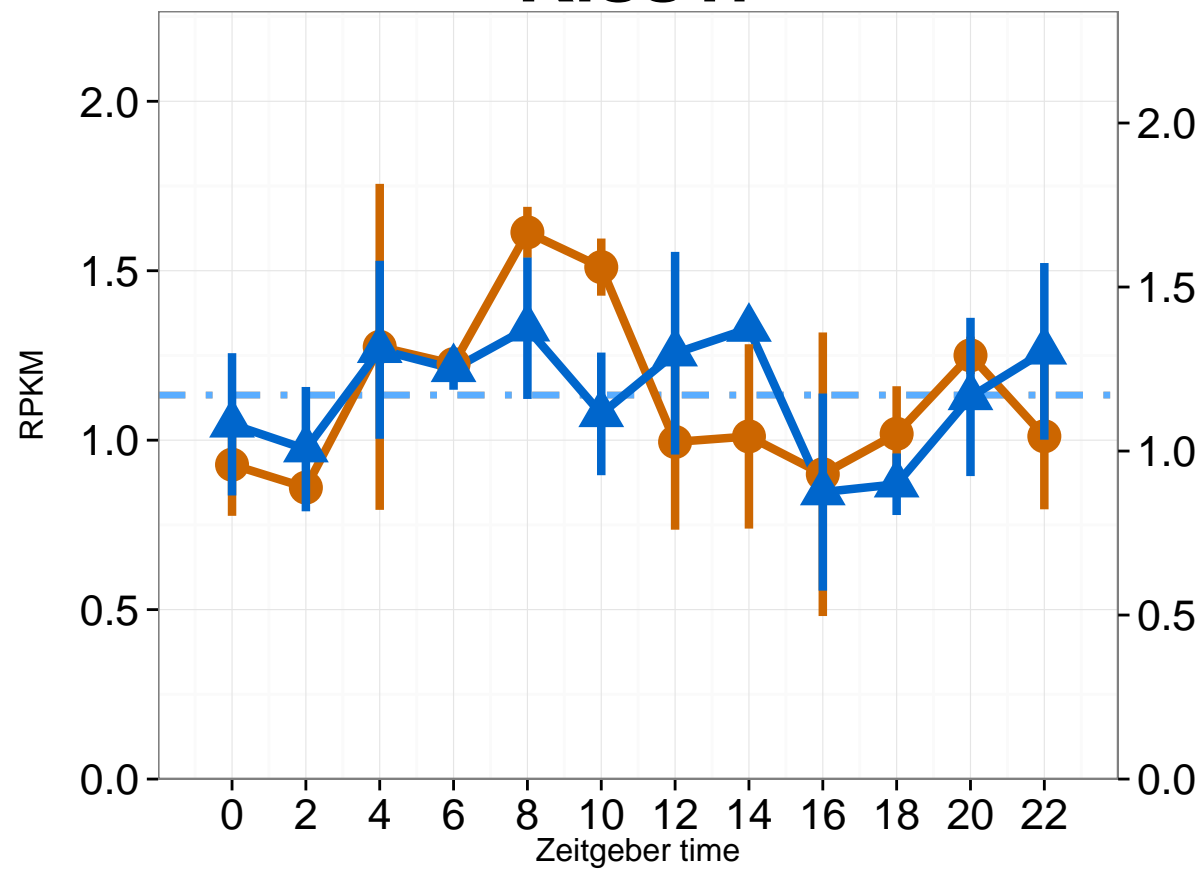

# Kiss1r

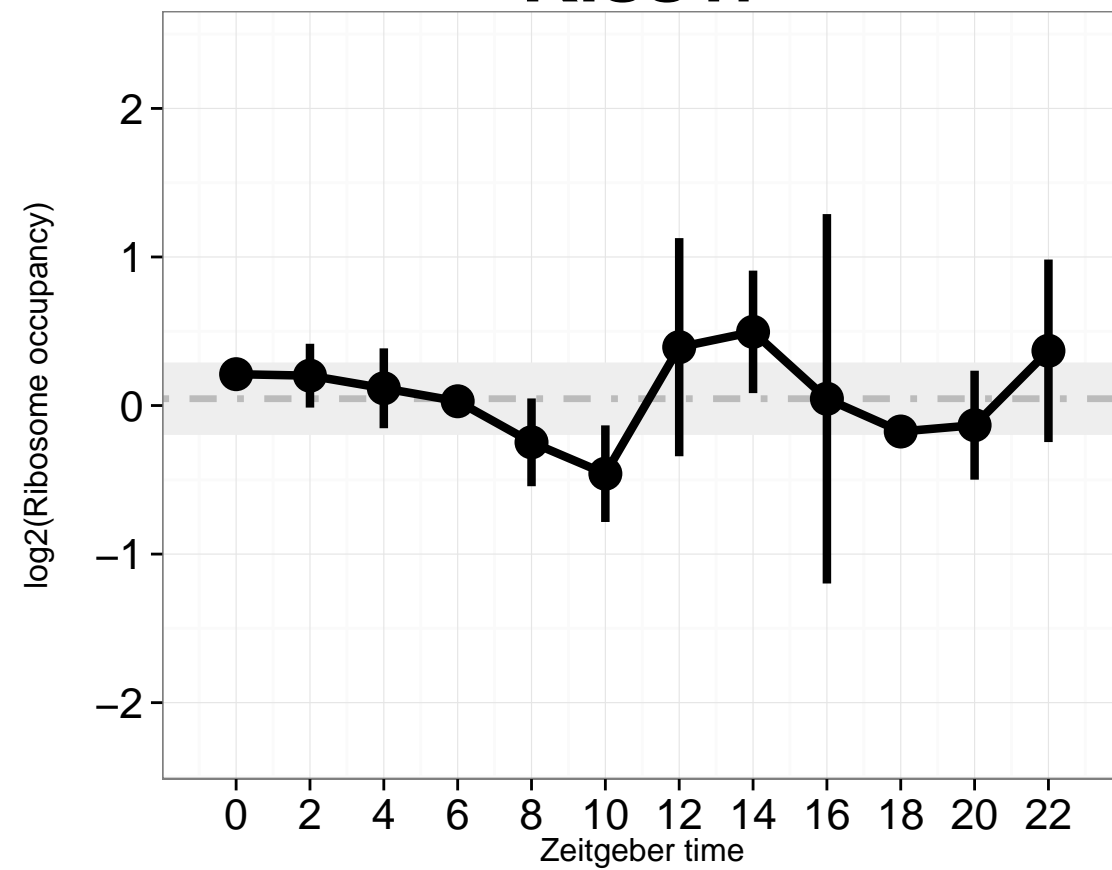

Supplement: Supplementary file 8450 [file 1]

# Id3

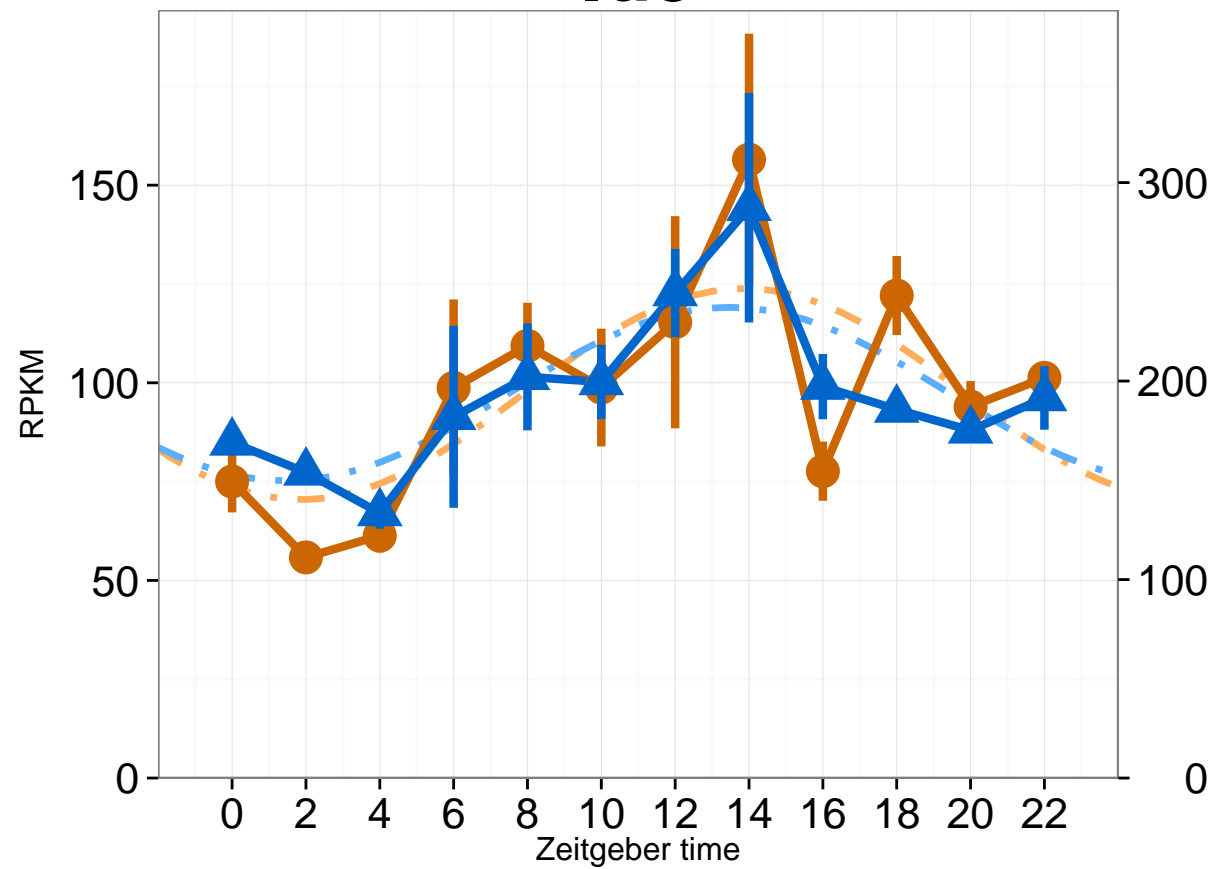

# Id3

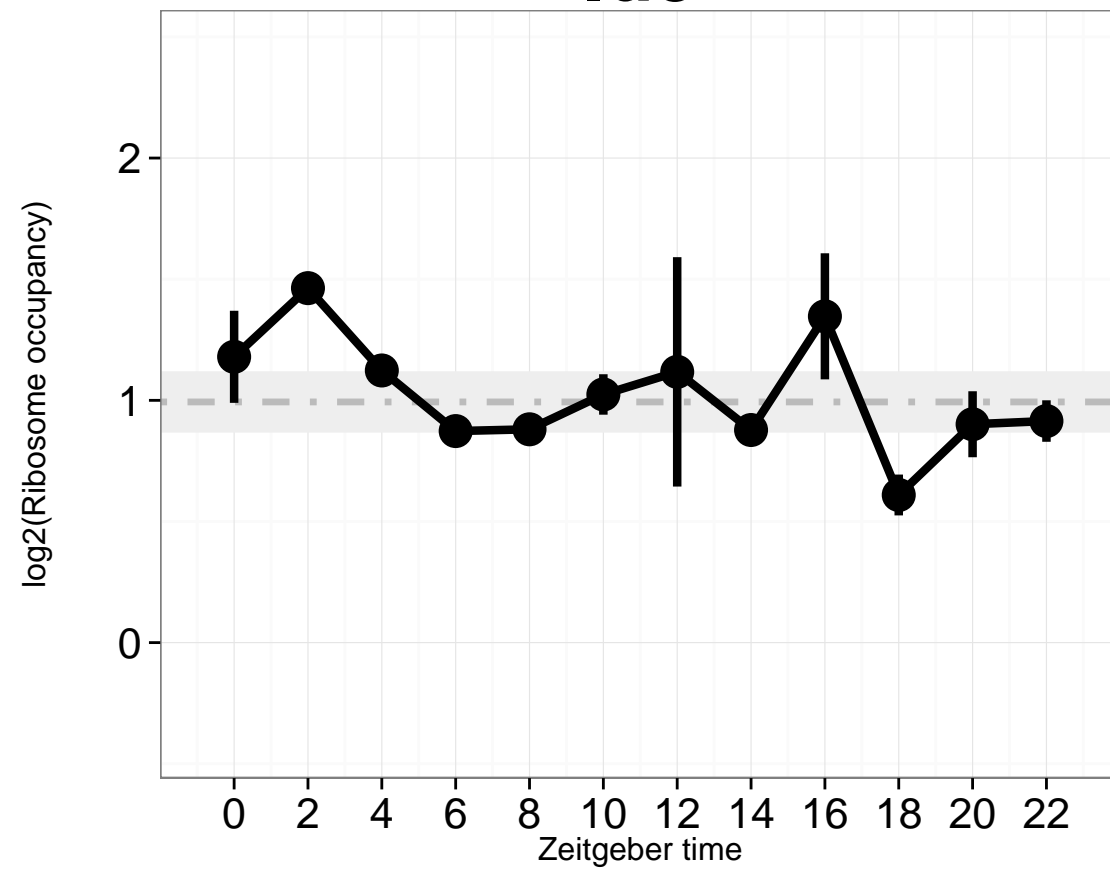

Supplement: Supplementary file 8451 [file 1]

# Phf5a

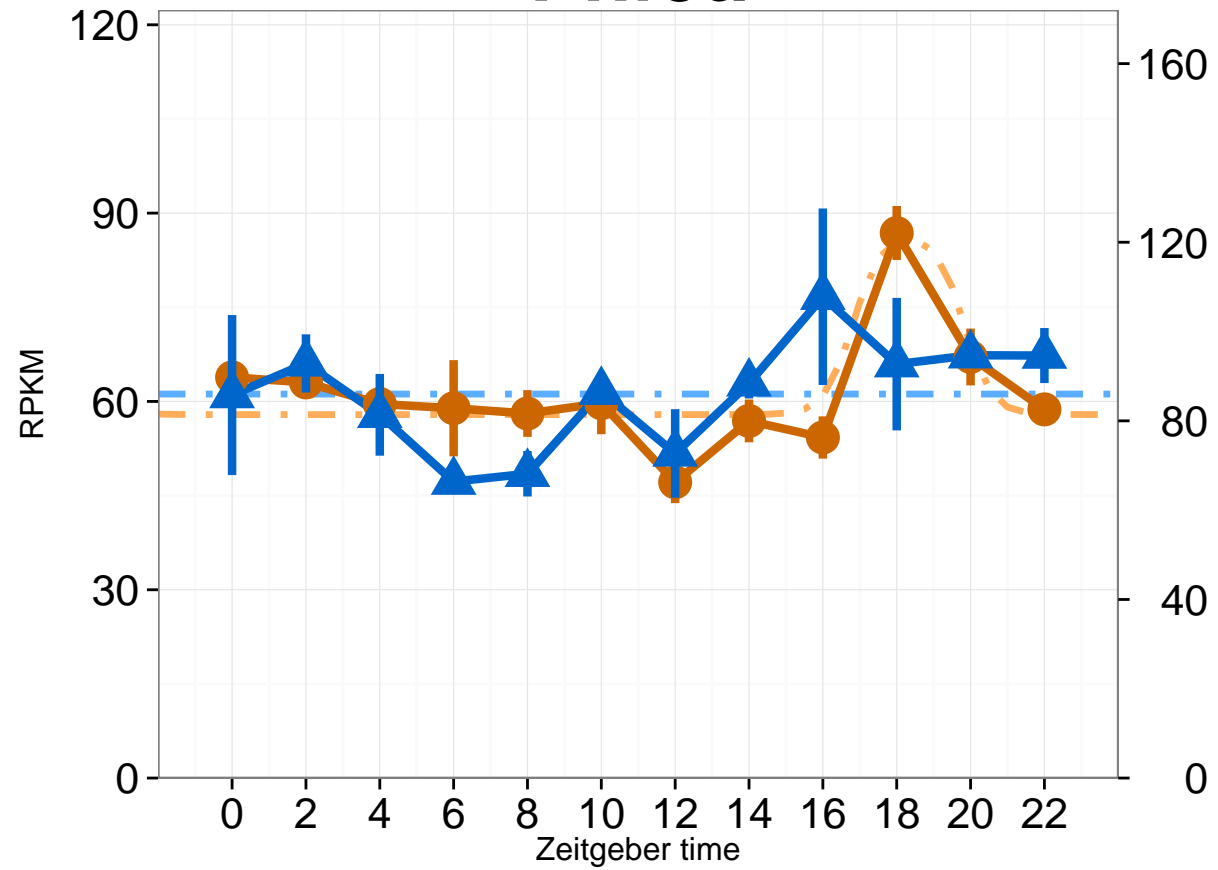

# Phf5a

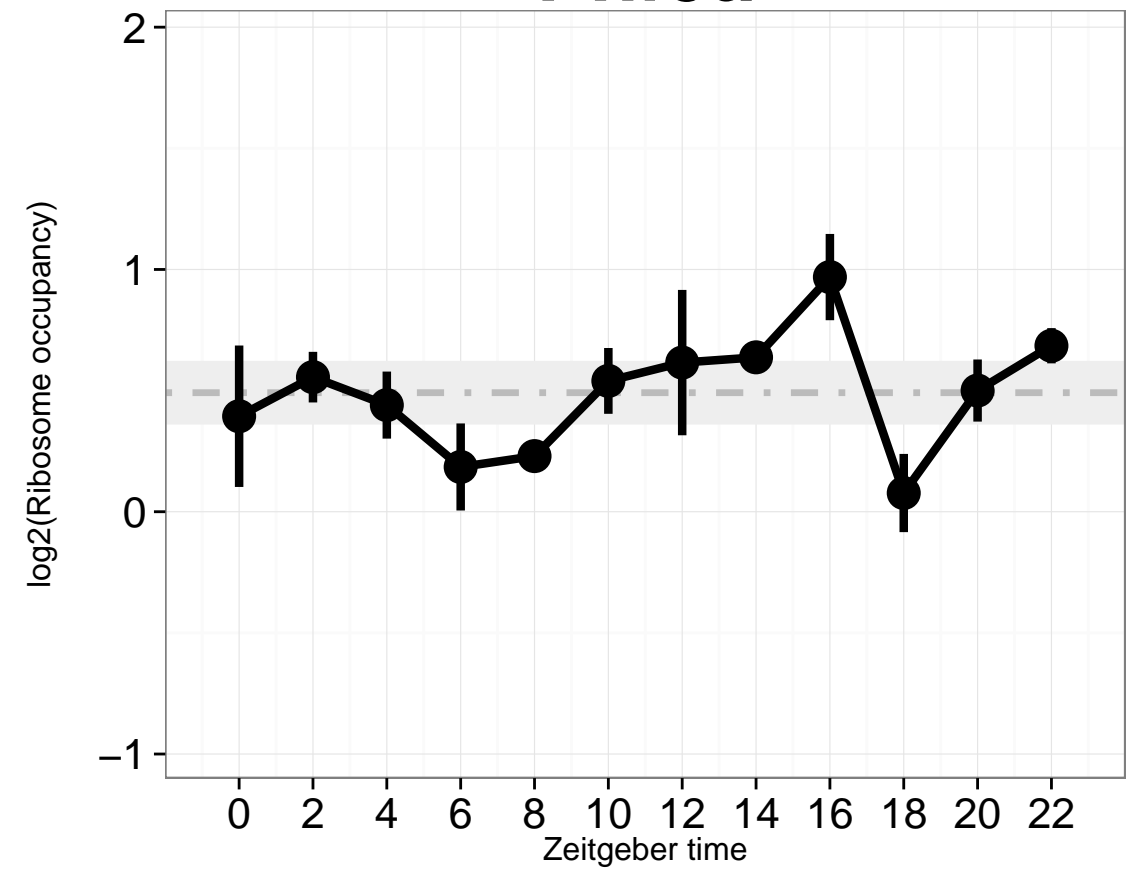

Supplement: Supplementary file 8452 [file 1]

# Cxxc5

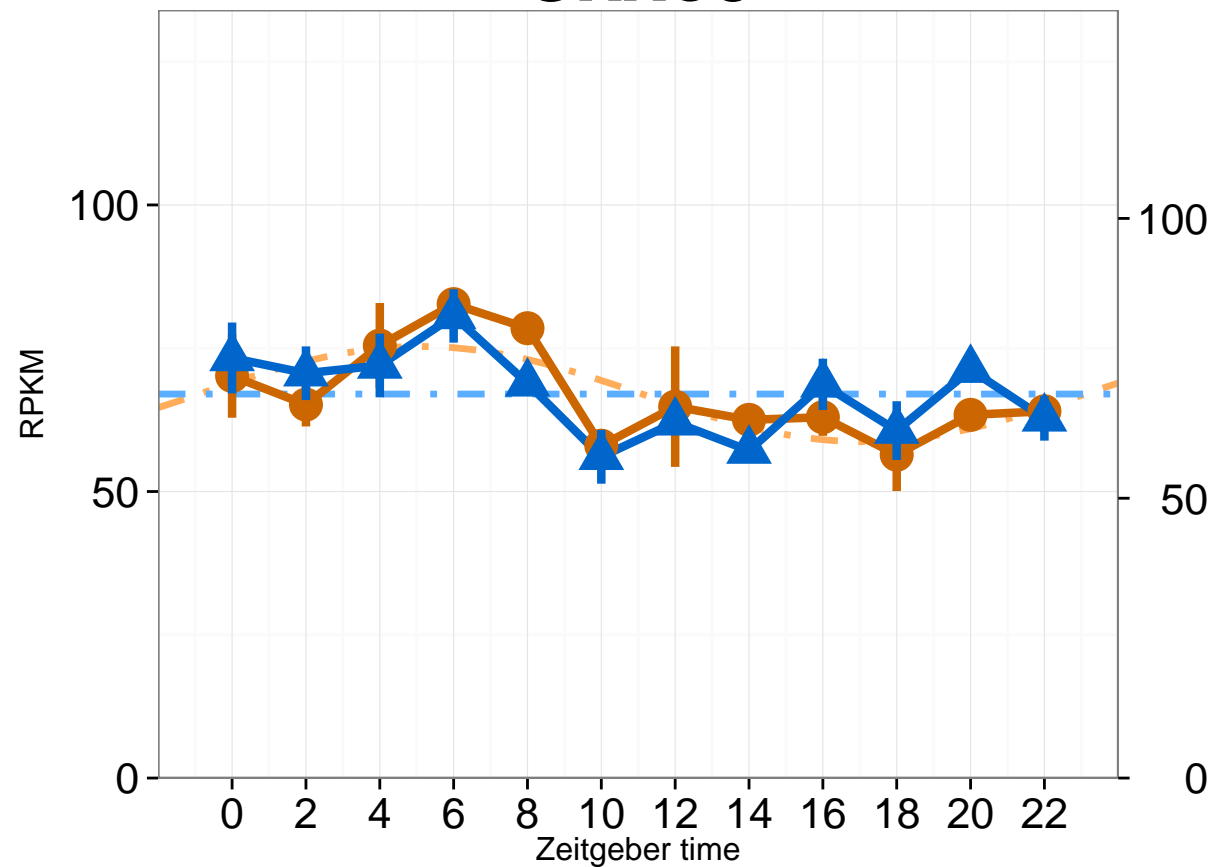

# Cxxc5

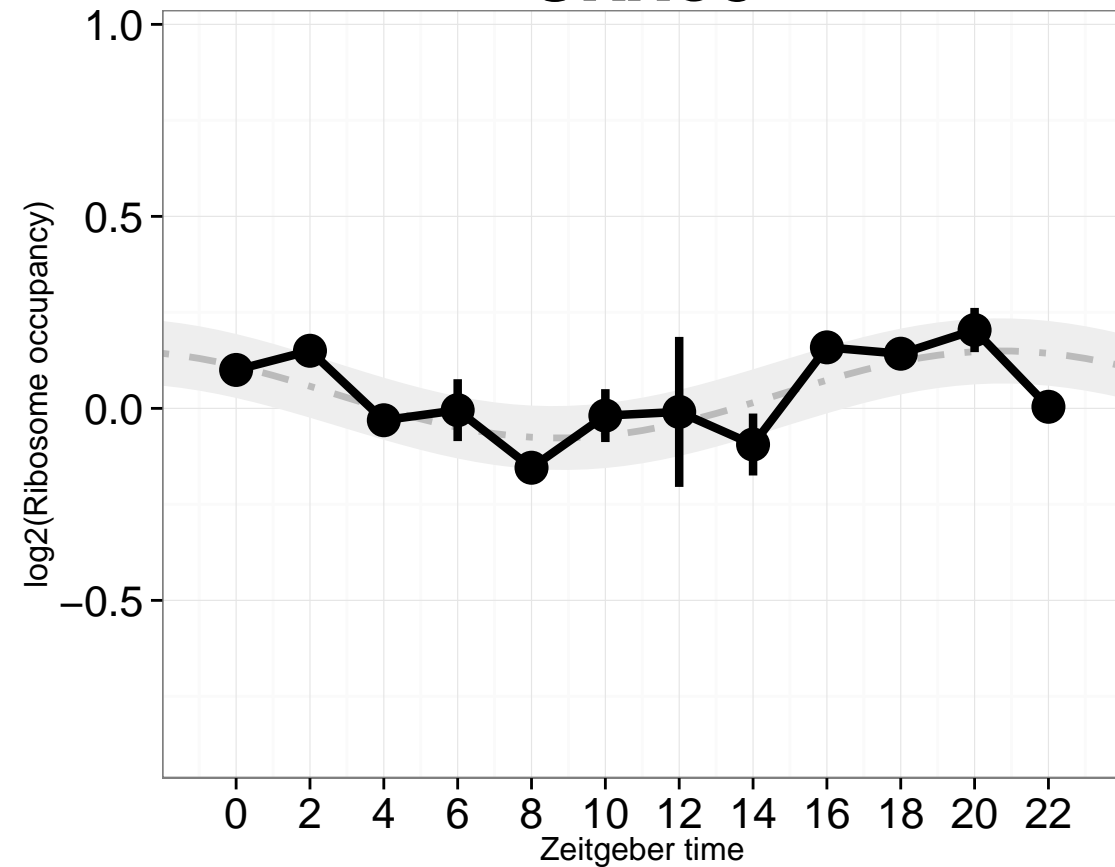

Supplement: Supplementary file 8453 [file 1]

# Clip2

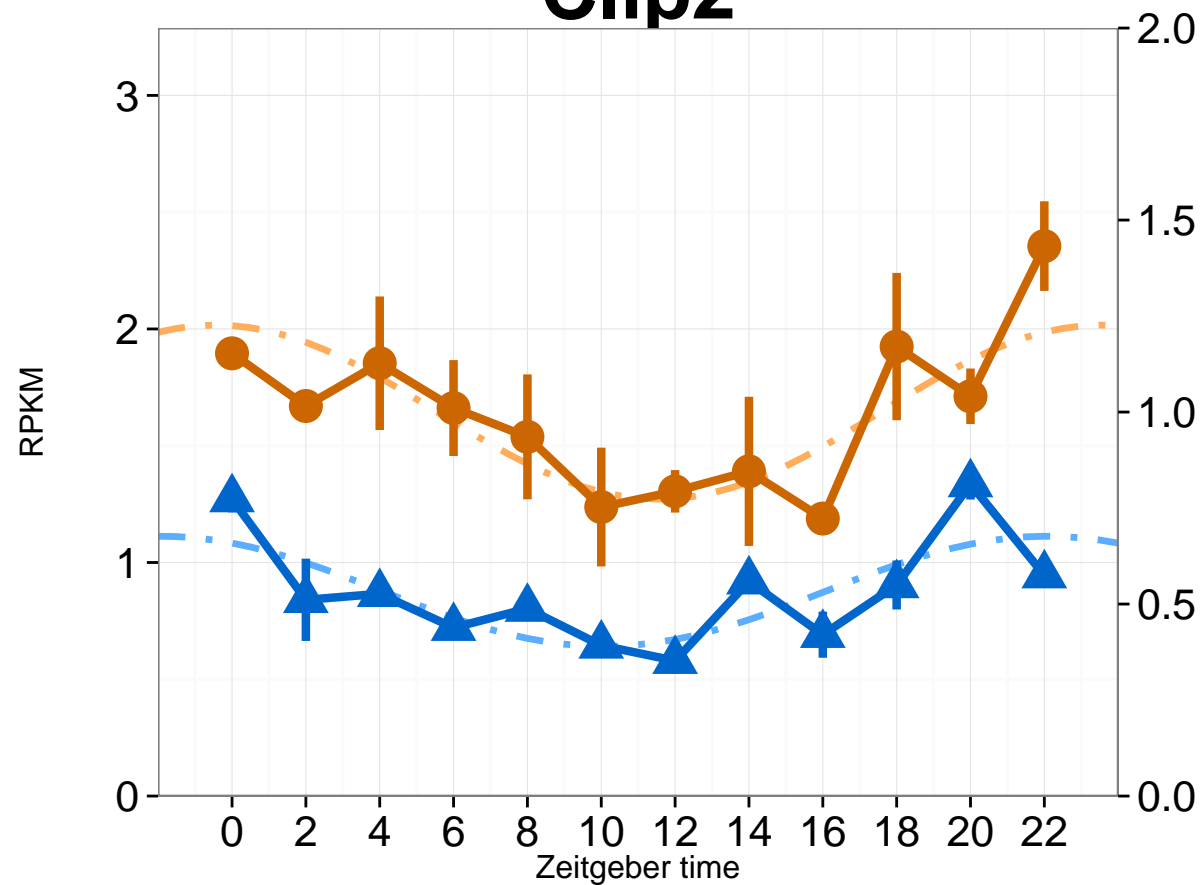

# Clip2

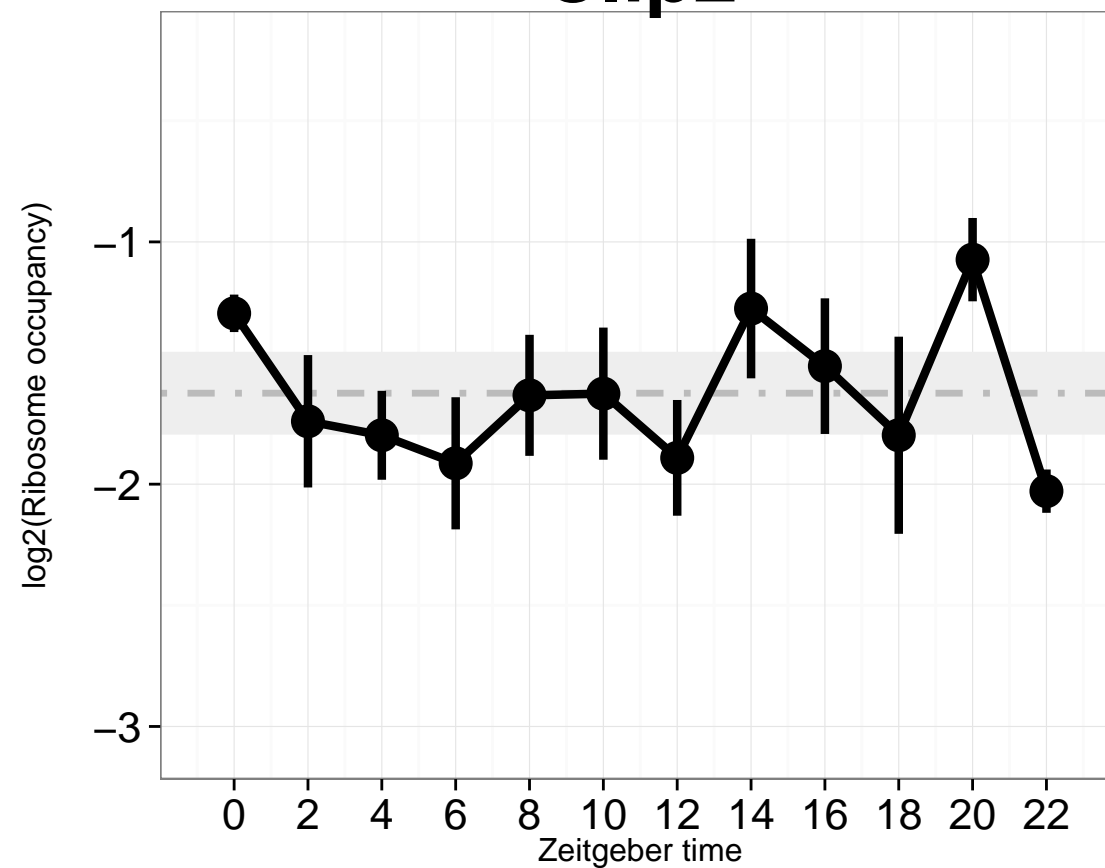

Supplement: Supplementary file 8454 [file 1]

# Mad2l1 bp

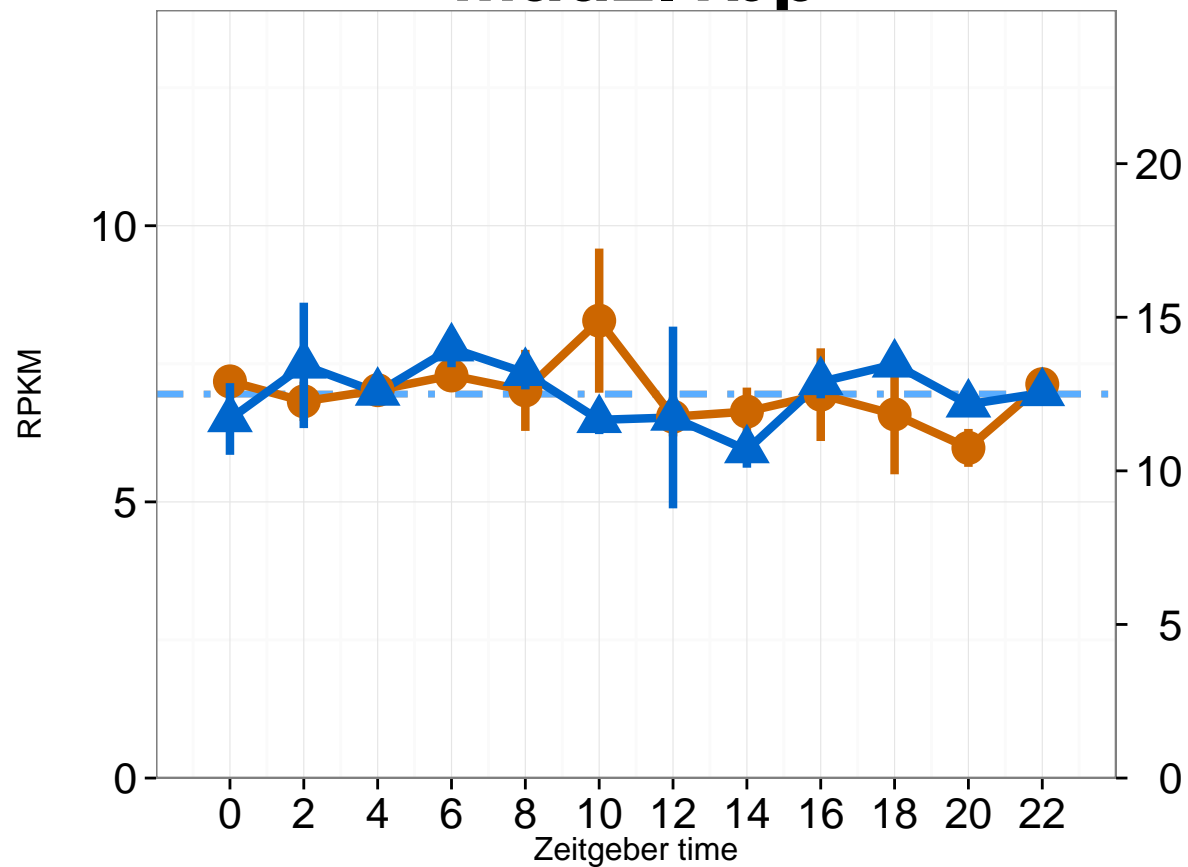

# Mad2l1 bp

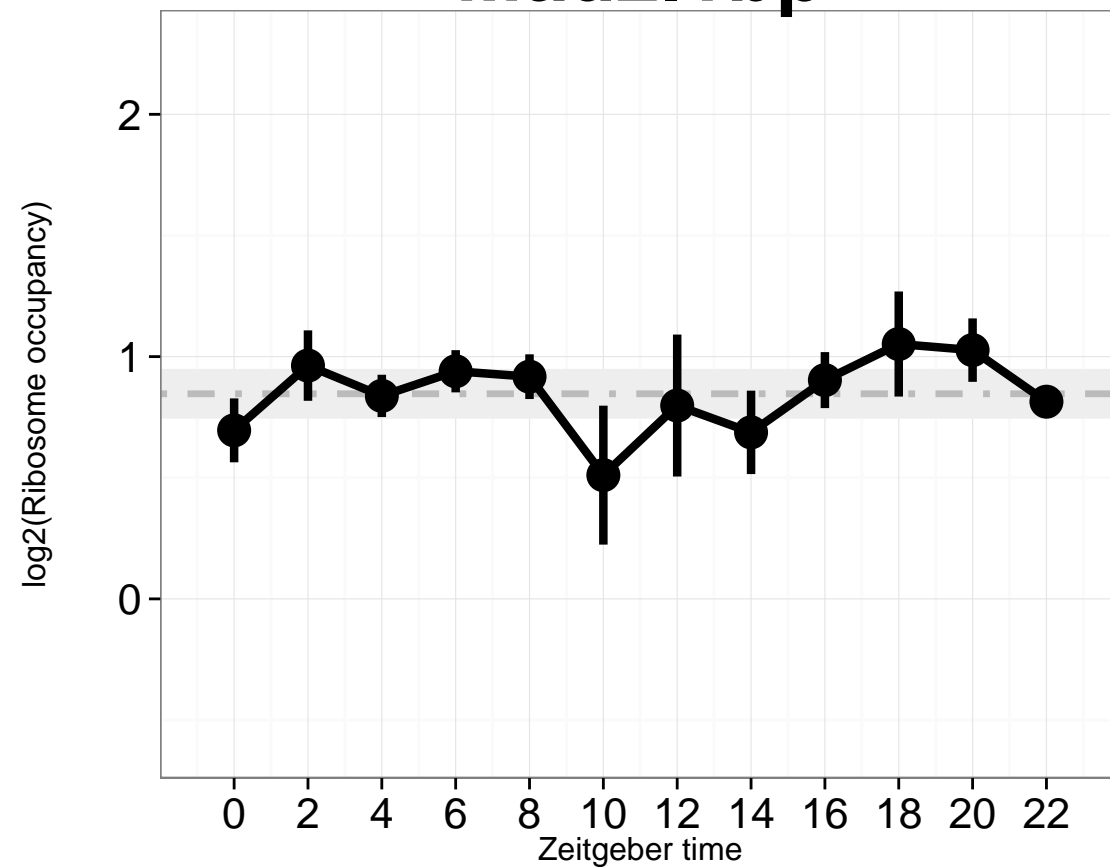

Supplement: Supplementary file 8455 [file 1]

# Ces1g

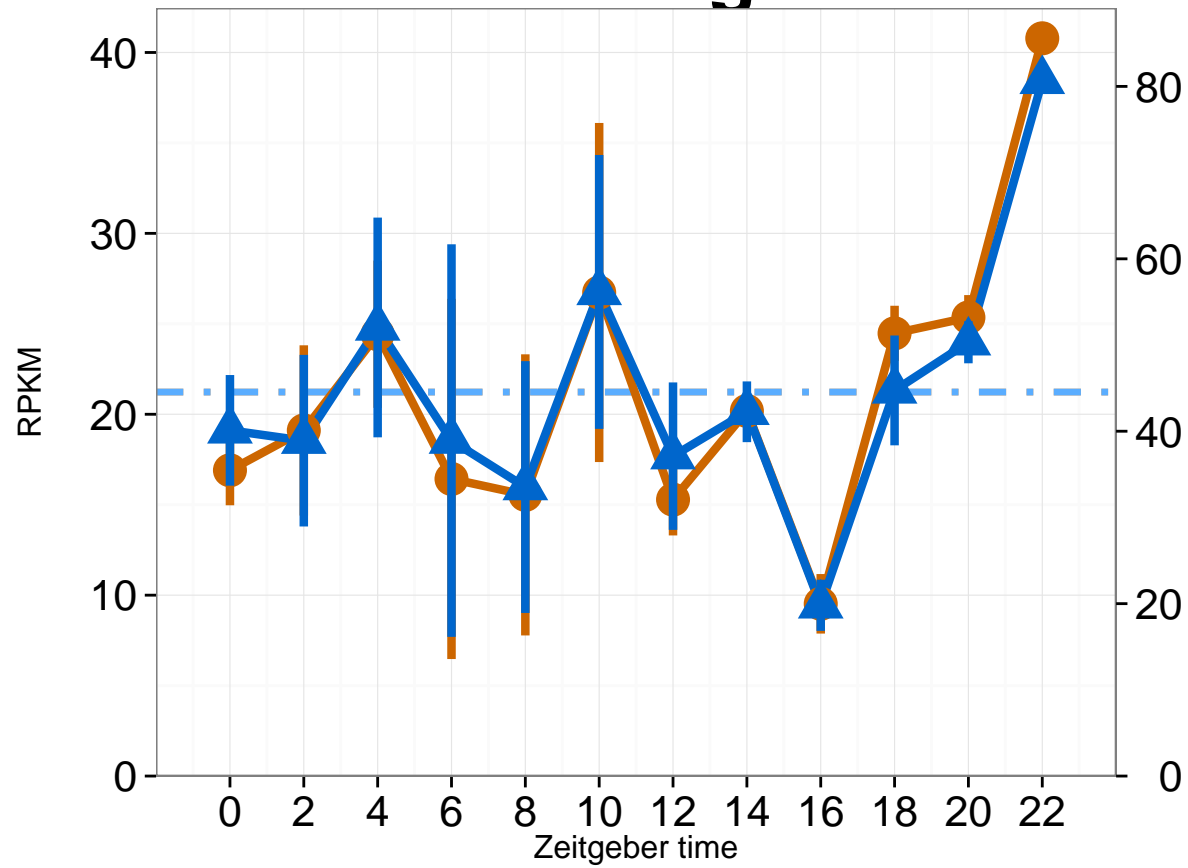

# Ces1g

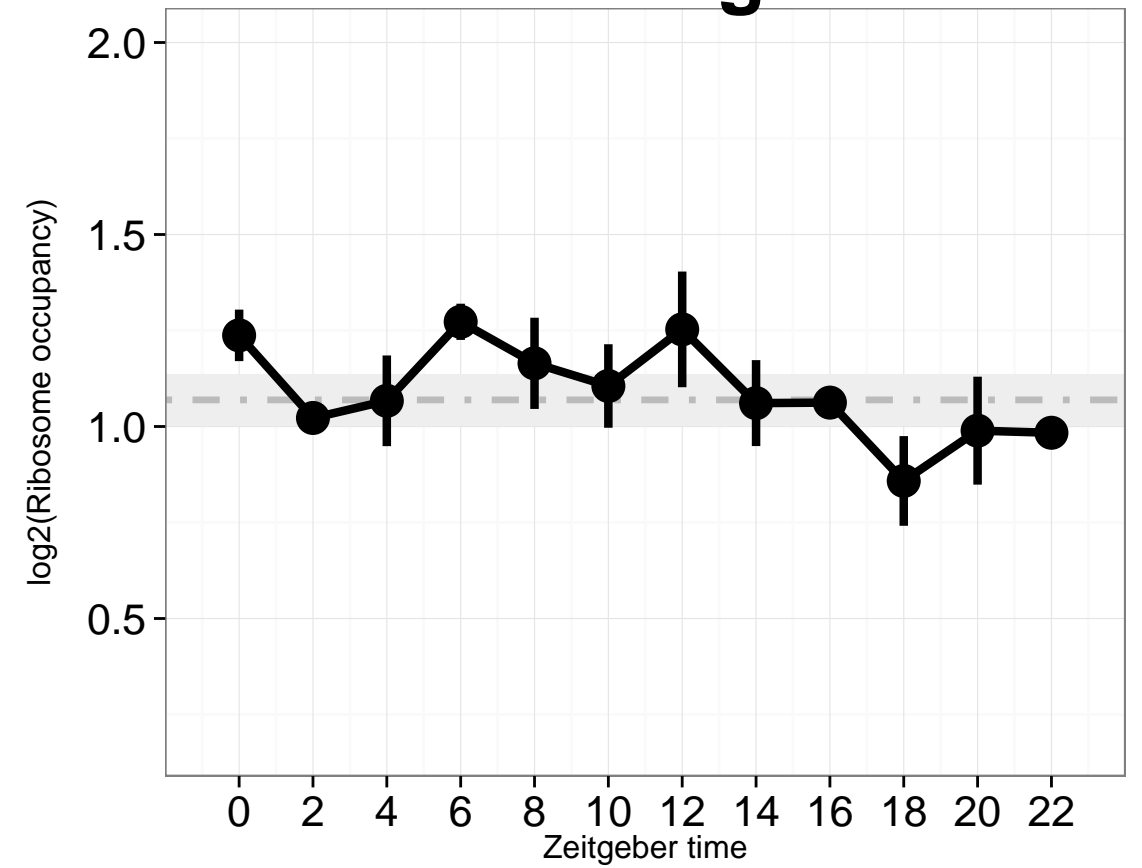

Supplement: Supplementary file 8456 [file 1]

## Tyk2

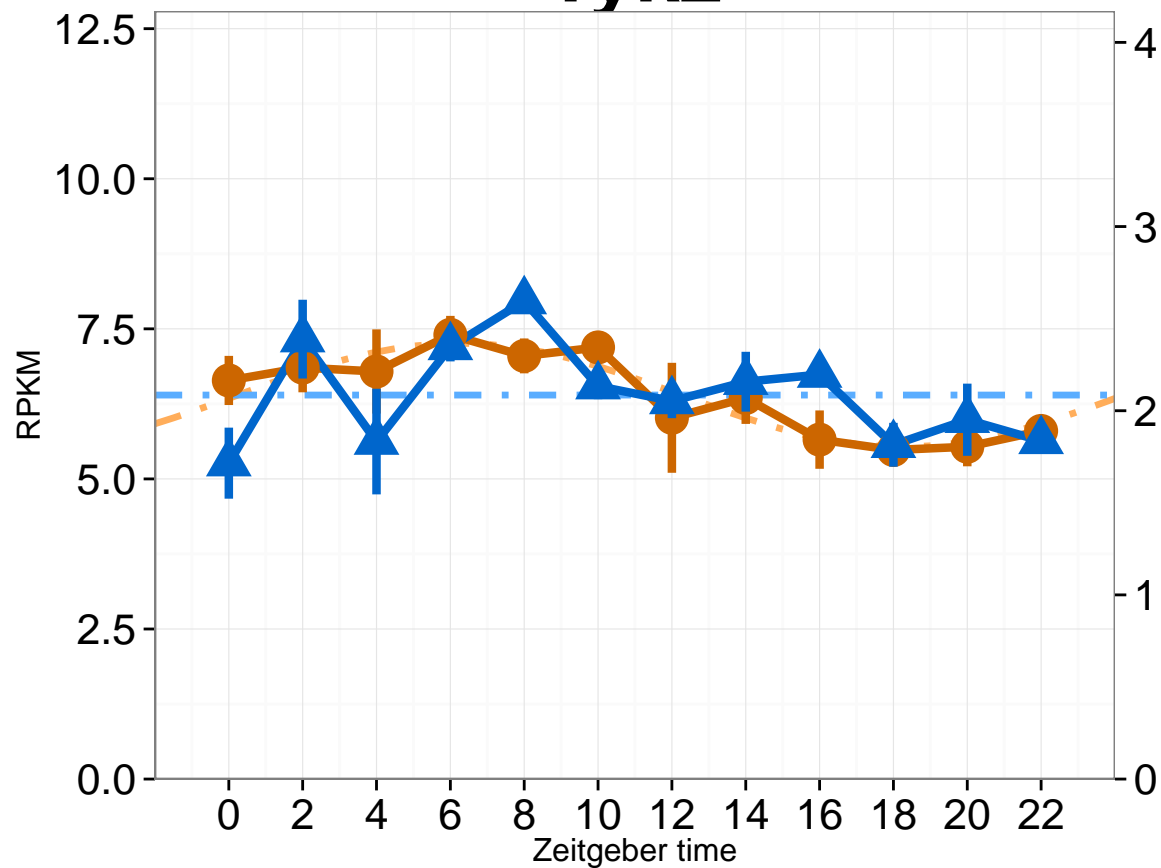

## Tyk2

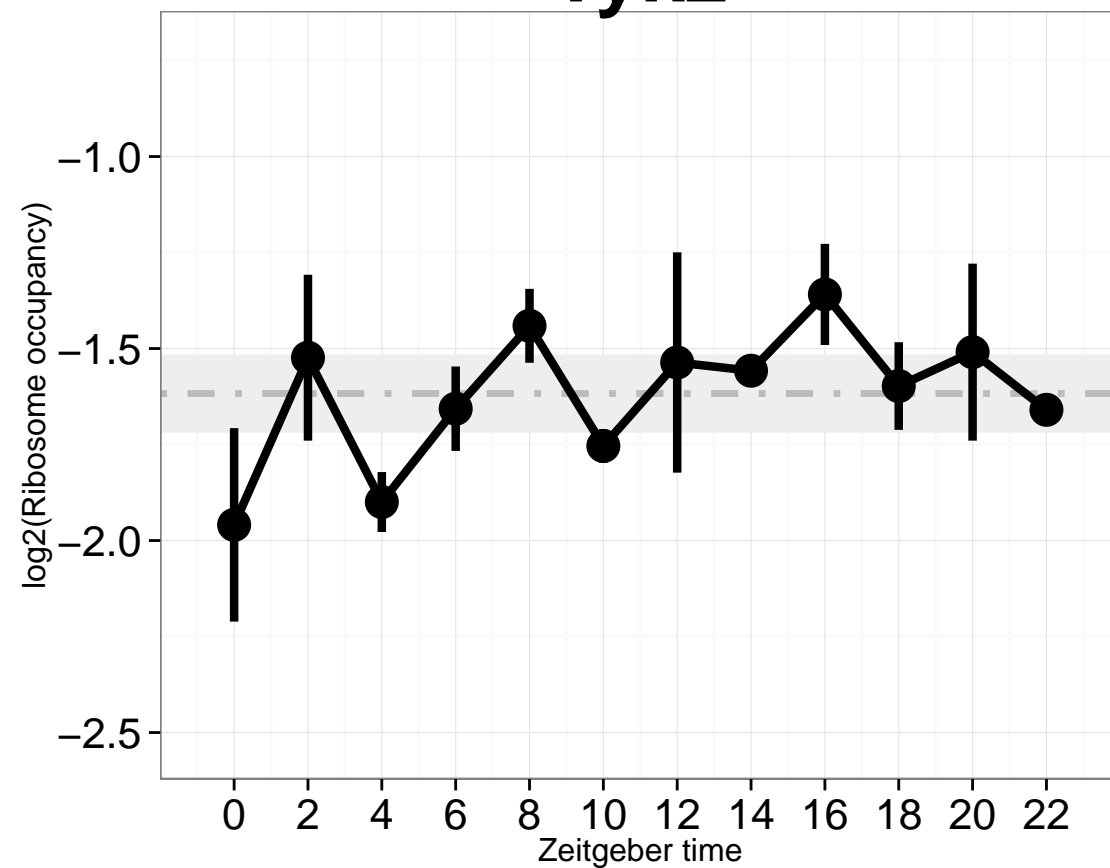

Supplement: Supplementary file 8457 [file 1]

# Srp68

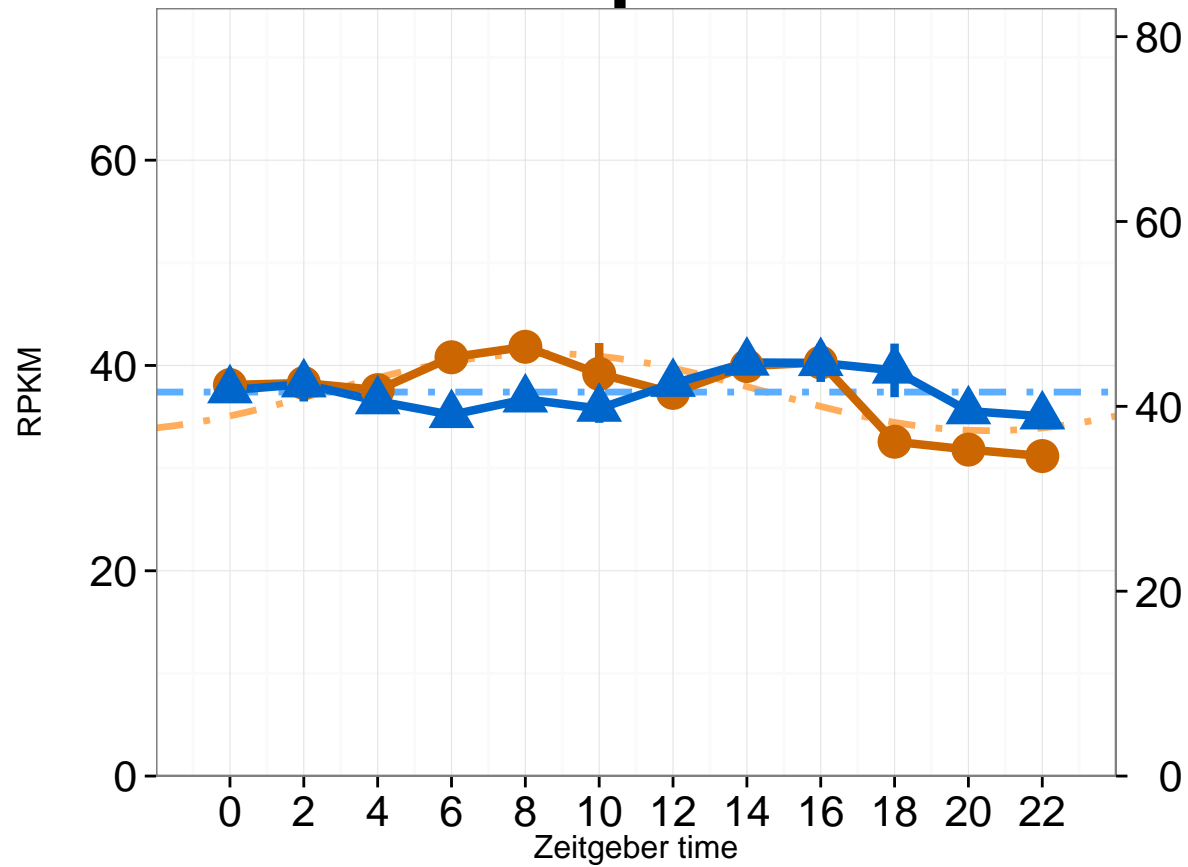

# Srp68

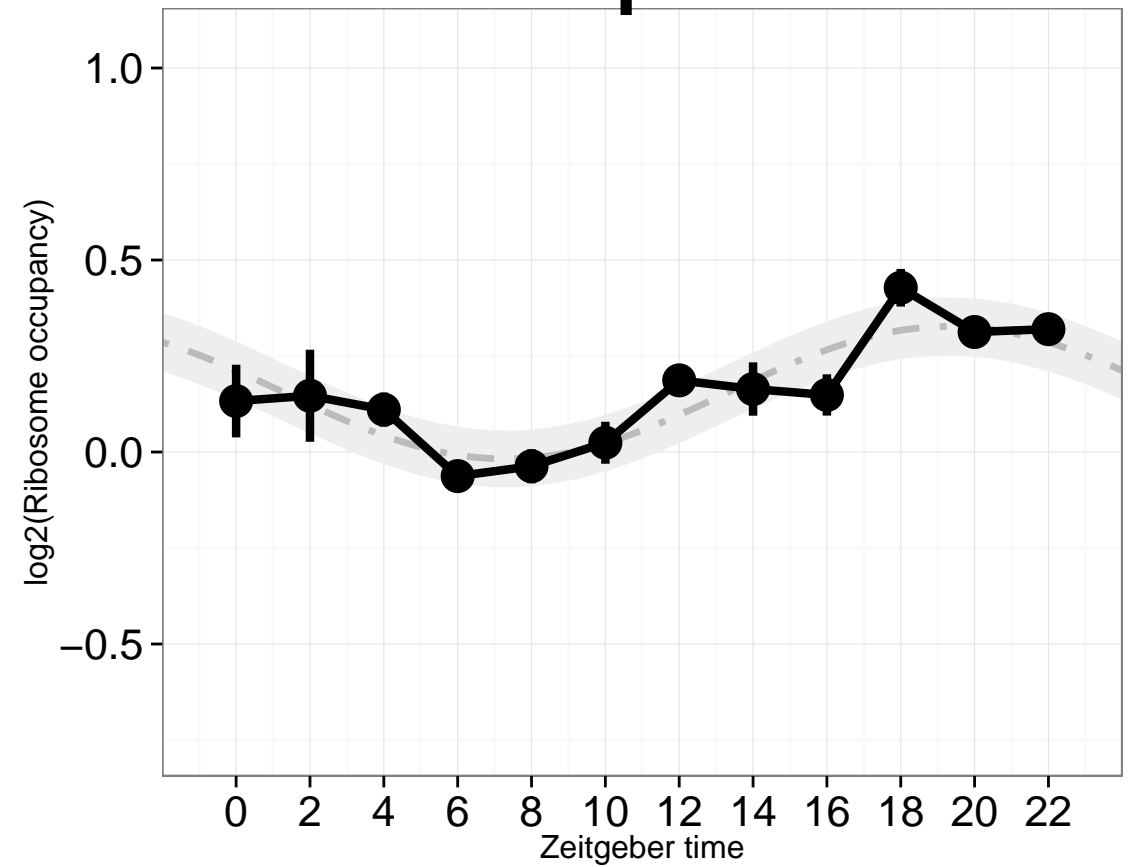

Supplement: Supplementary file 8458 [file 1]

**Pxn**

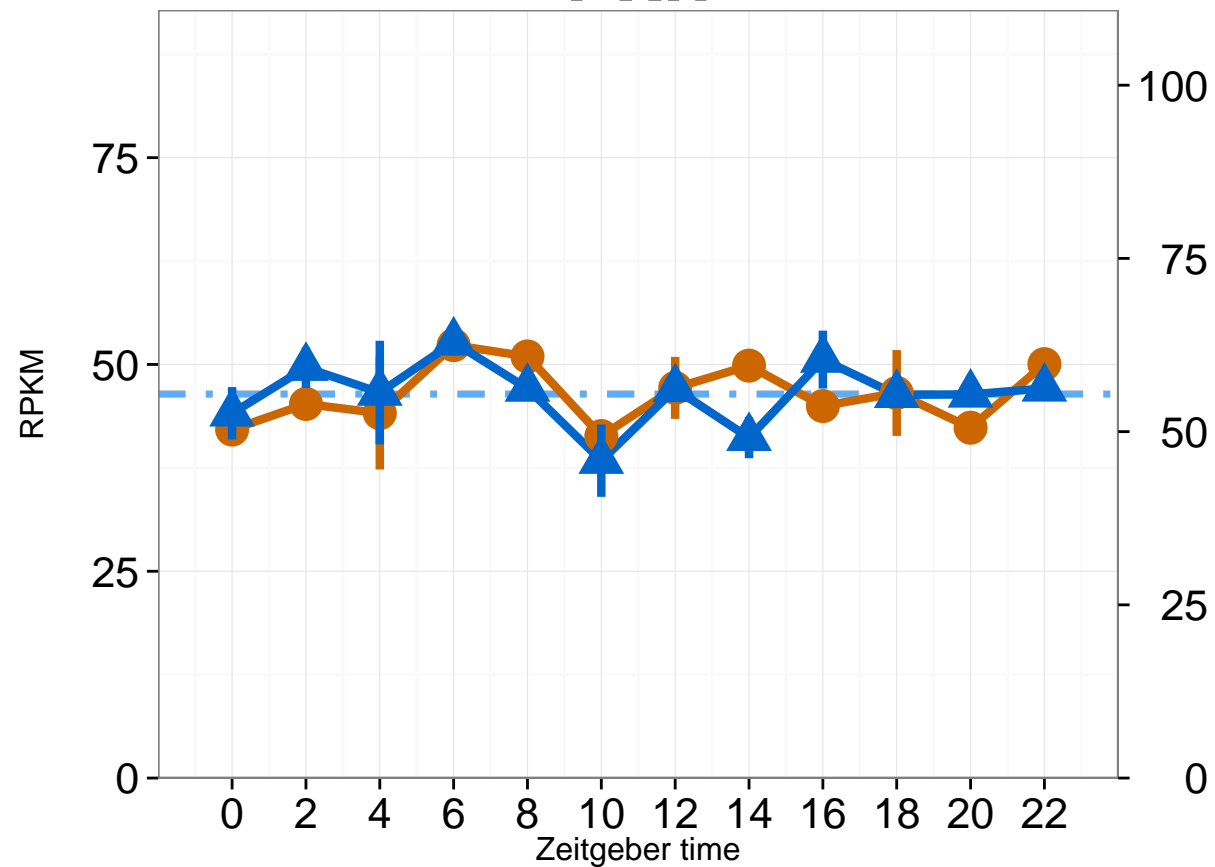

**Pxn**

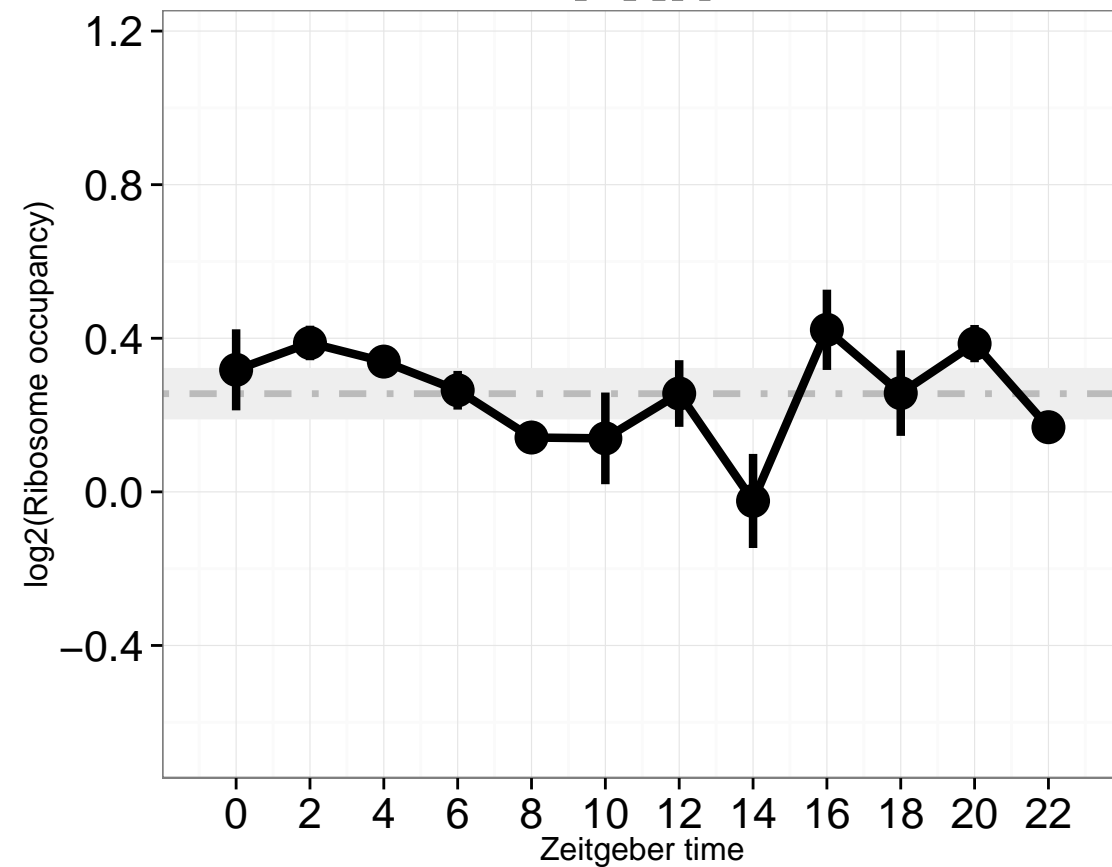

Supplement: Supplementary file 8459 [file 1]

## Bbip1

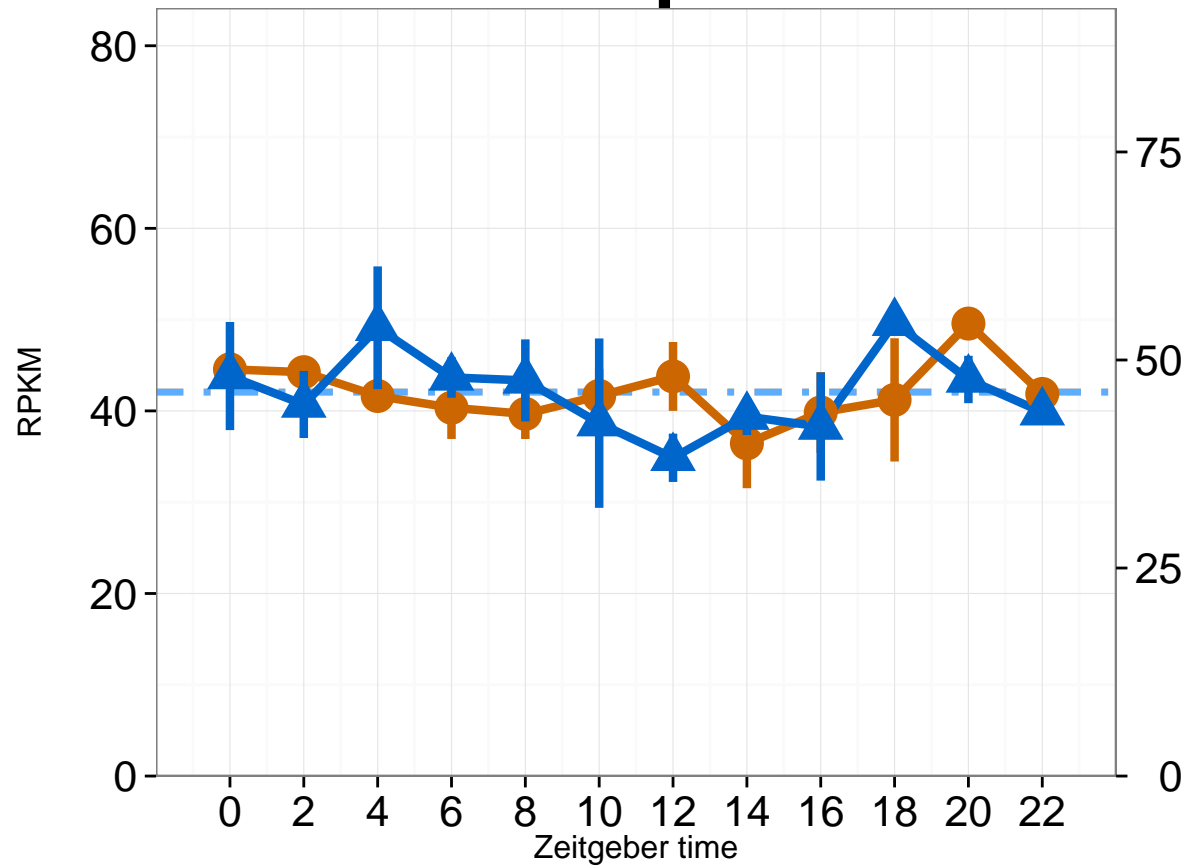

## Bbip1

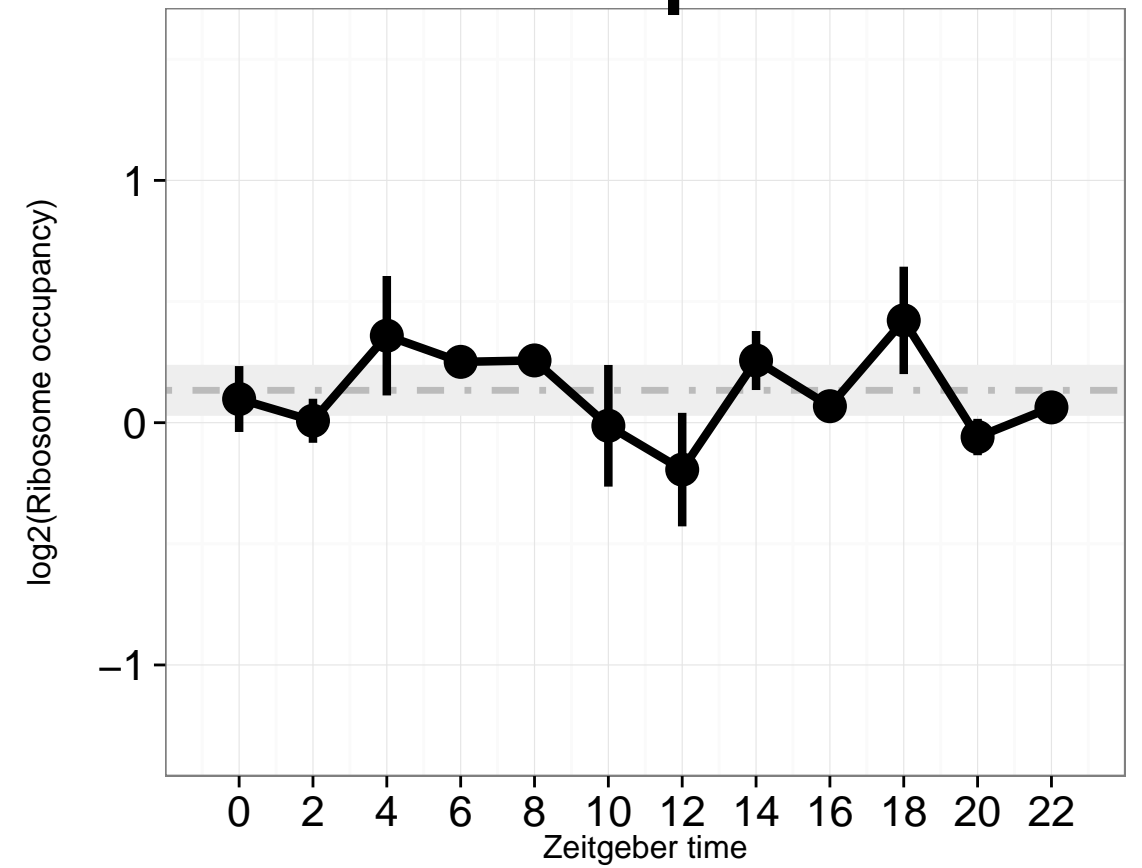

Supplement: Supplementary file 8460 [file 1]

# Nr4a1

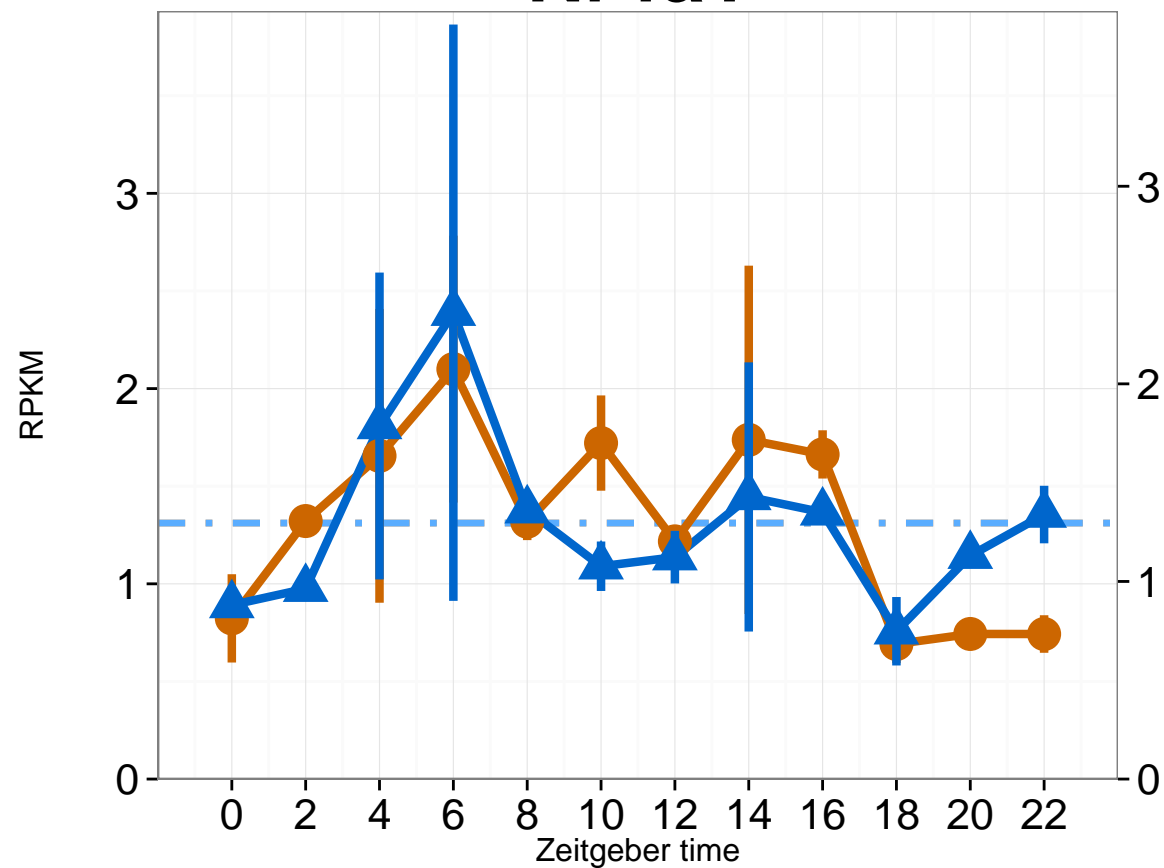

# Nr4a1

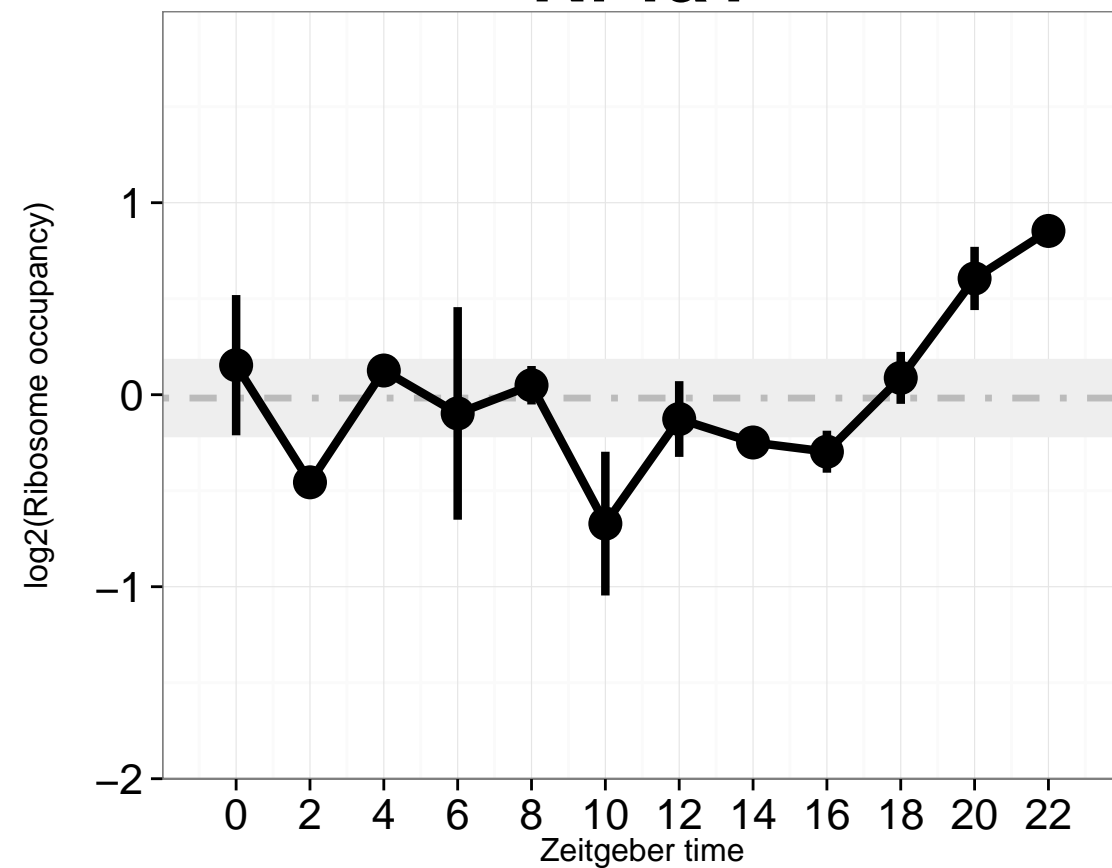

Supplement: Supplementary file 8461 [file 1]

# 1110034G24Rik

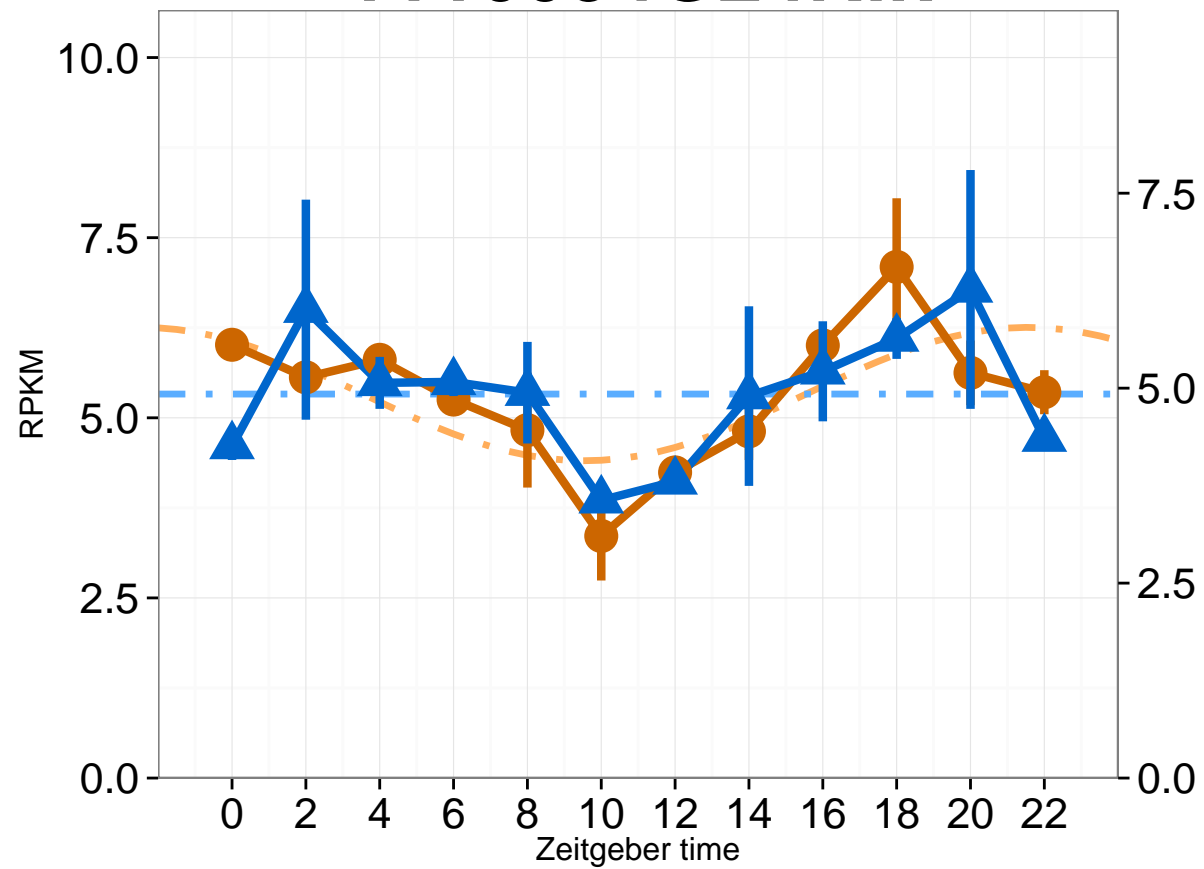

# 1110034G24Rik

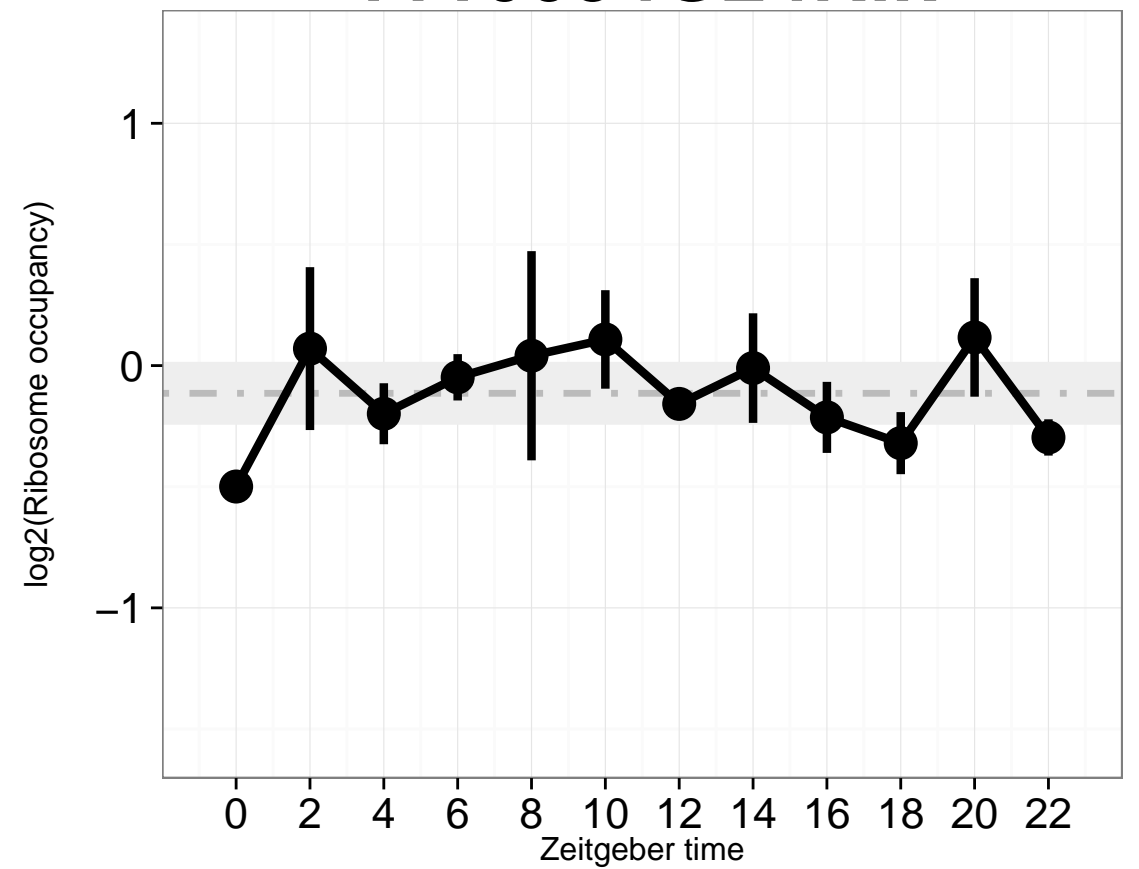

Supplement: Supplementary file 8462 [file 1]

# Pgrmc1

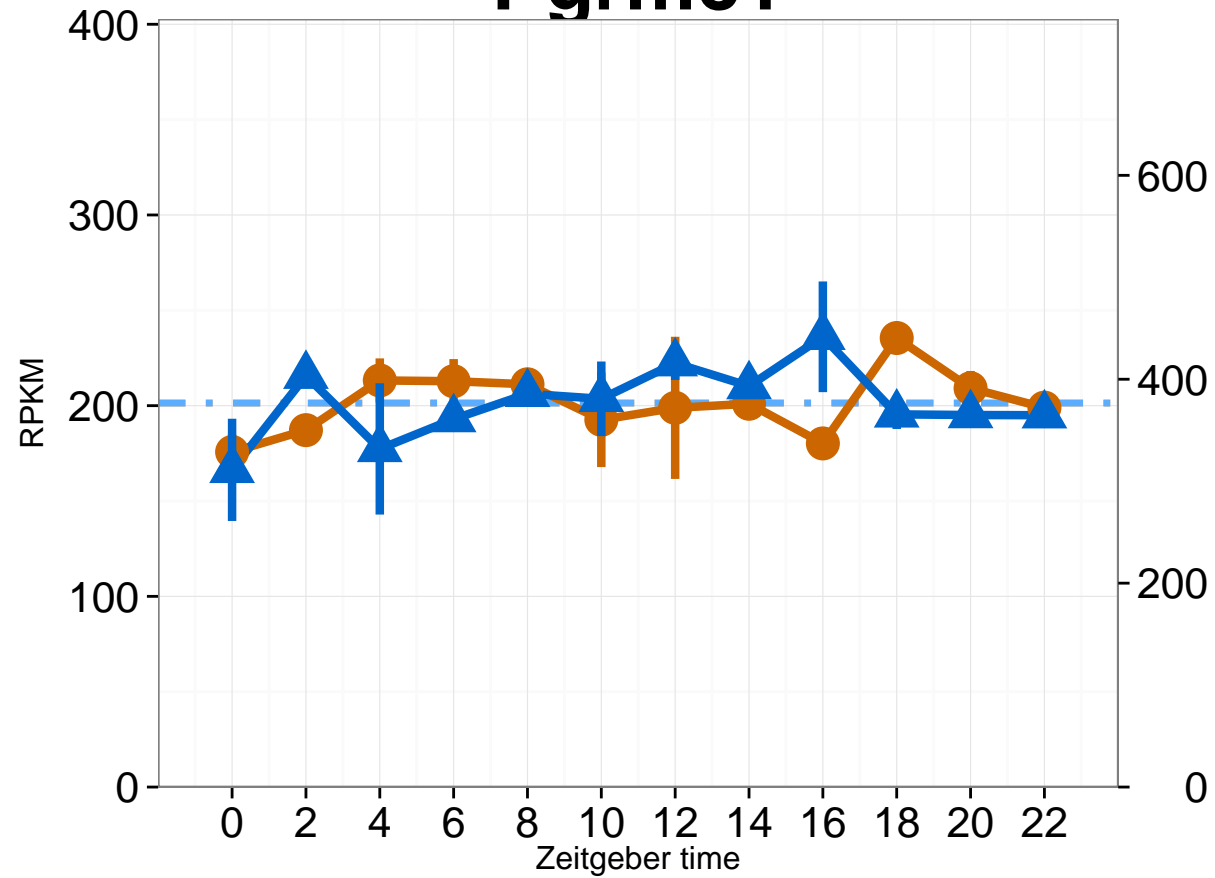

# Pgrmc1

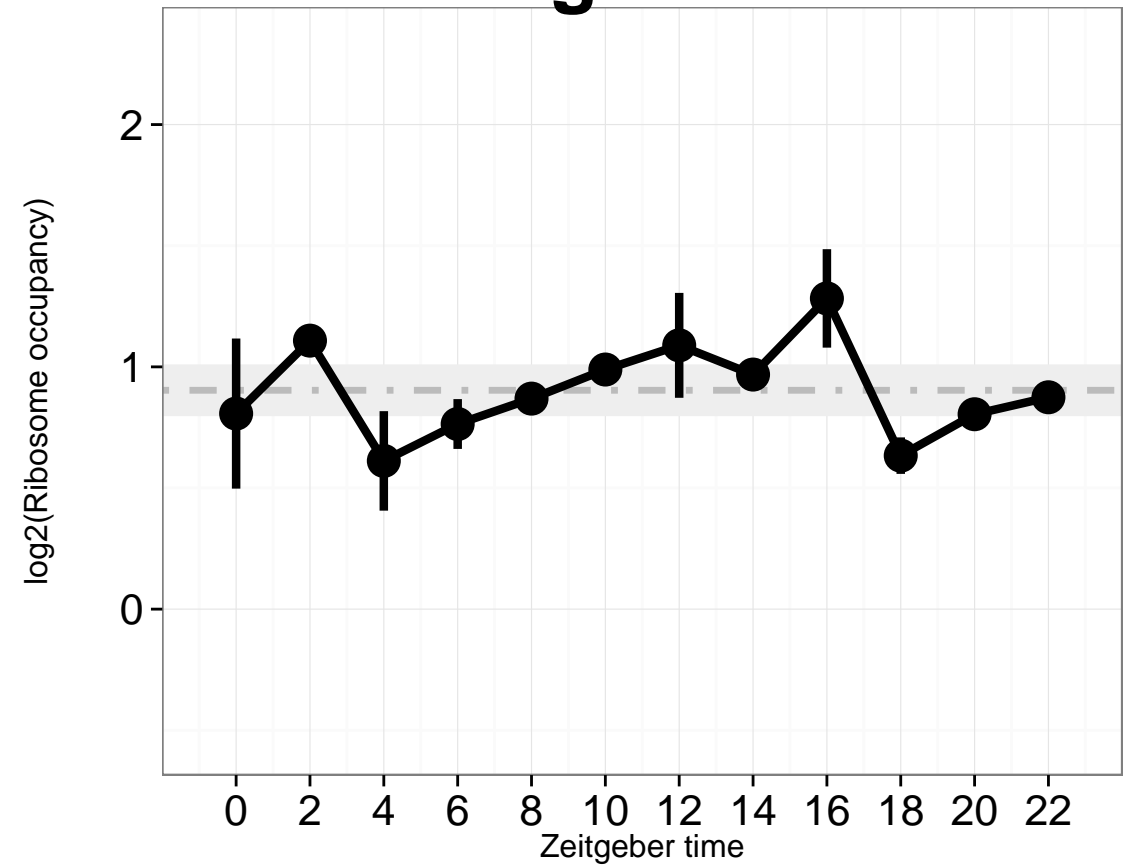

Supplement: Supplementary file 8463 [file 1]

## Slc9a3

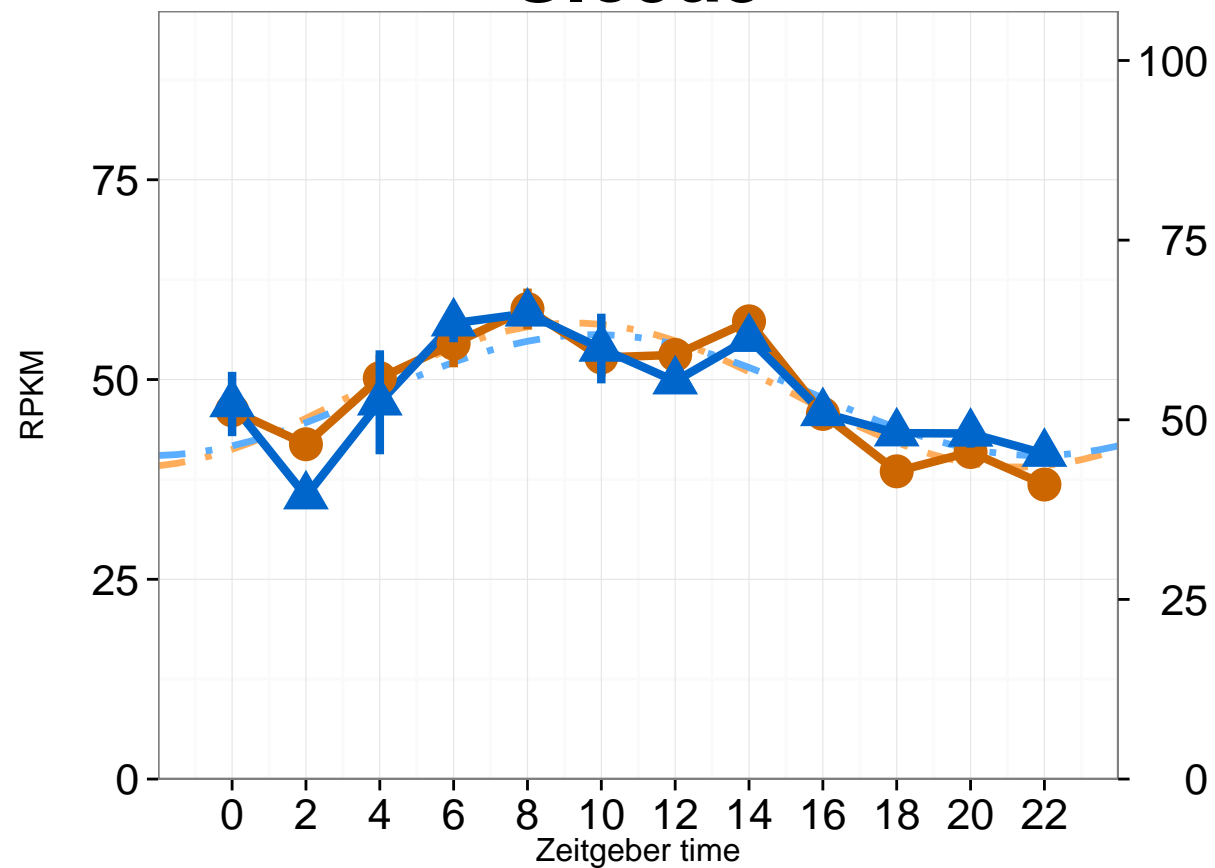

## Slc9a3

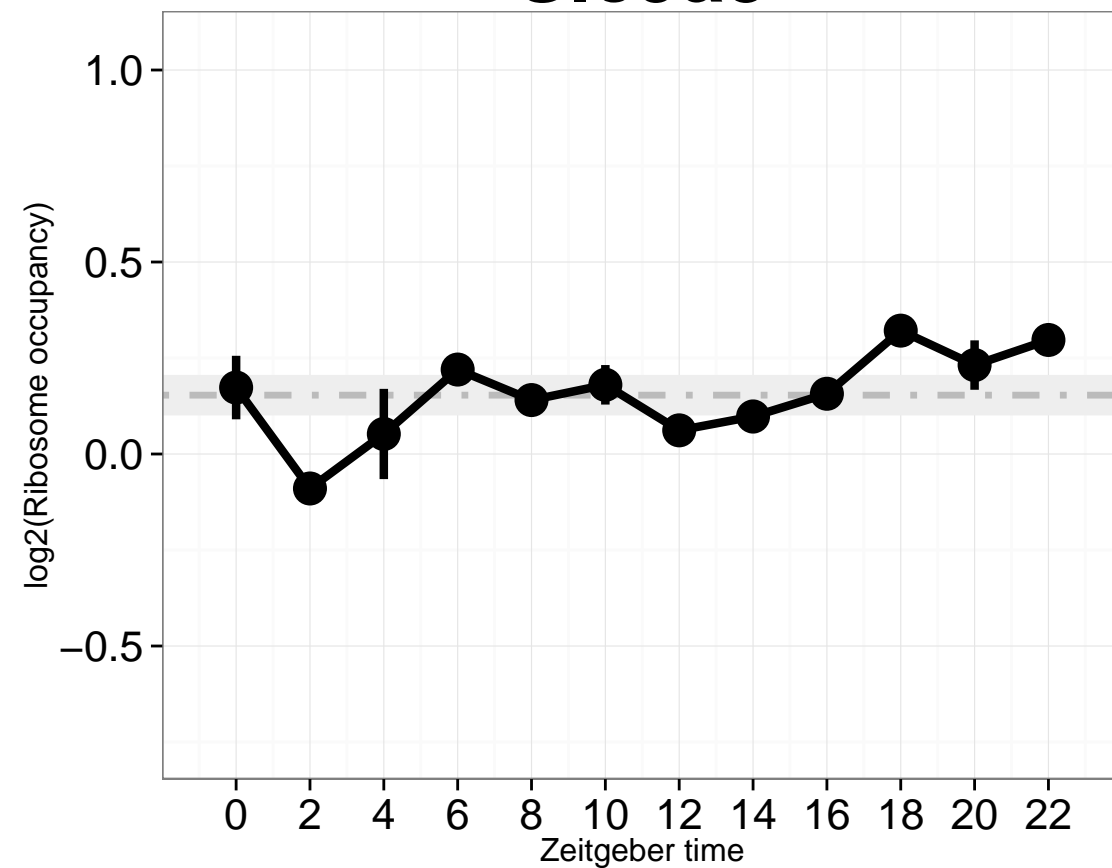

Supplement: Supplementary file 8464 [file 1]

## Casp9

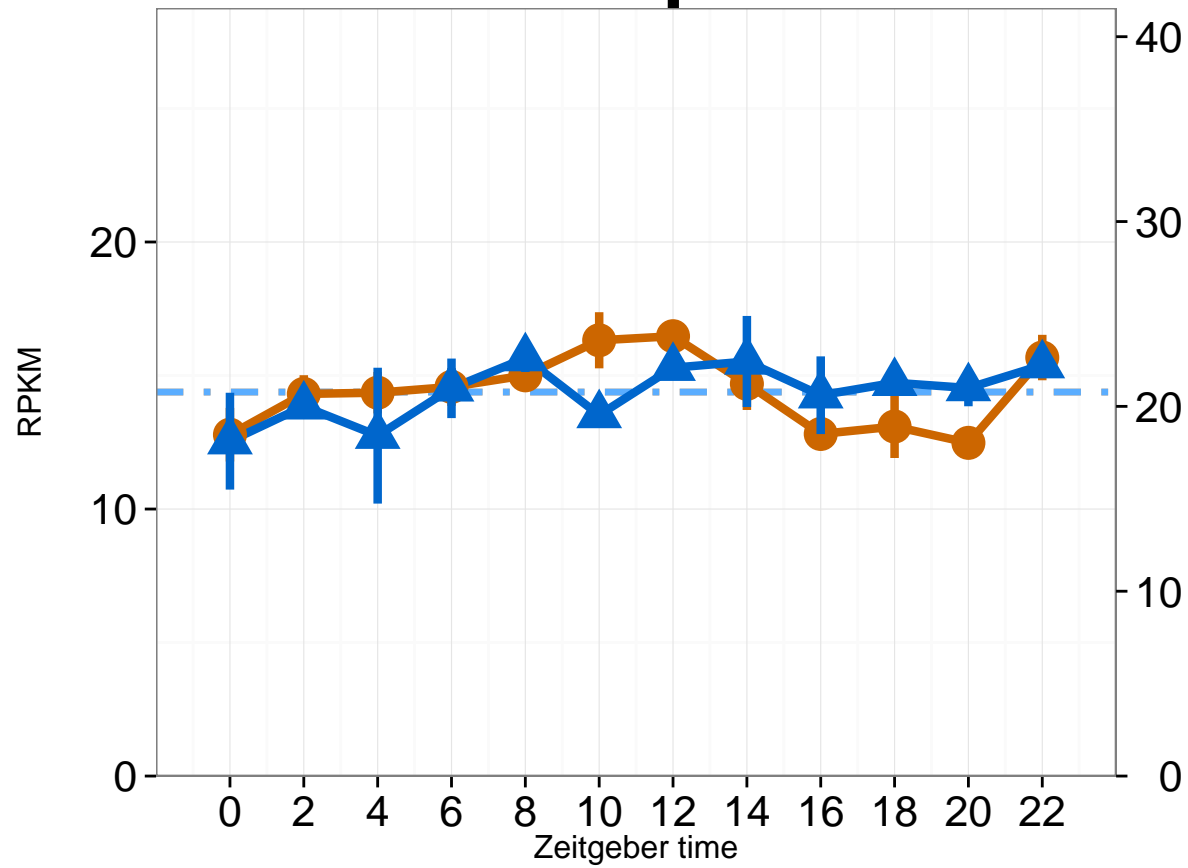

## Casp9

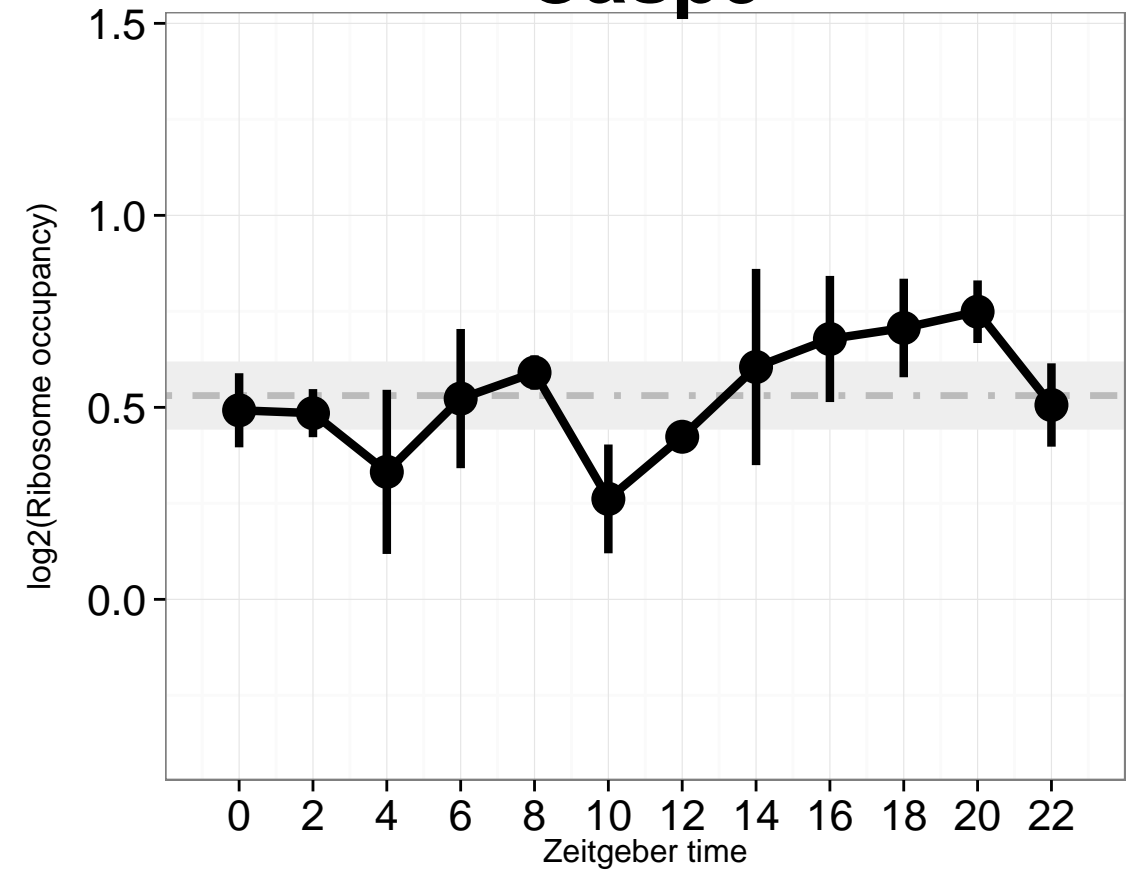

Supplement: Supplementary file 8465 [file 1]

# Cep250

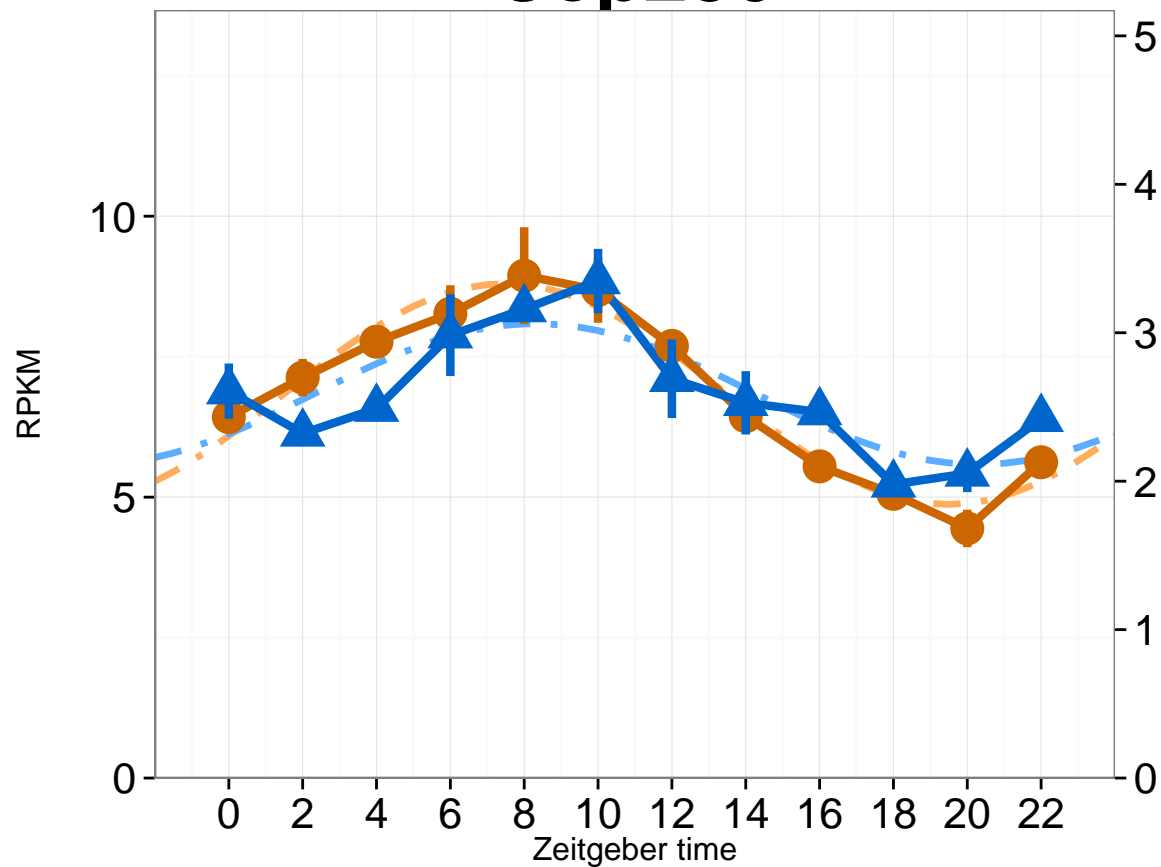

# Cep250

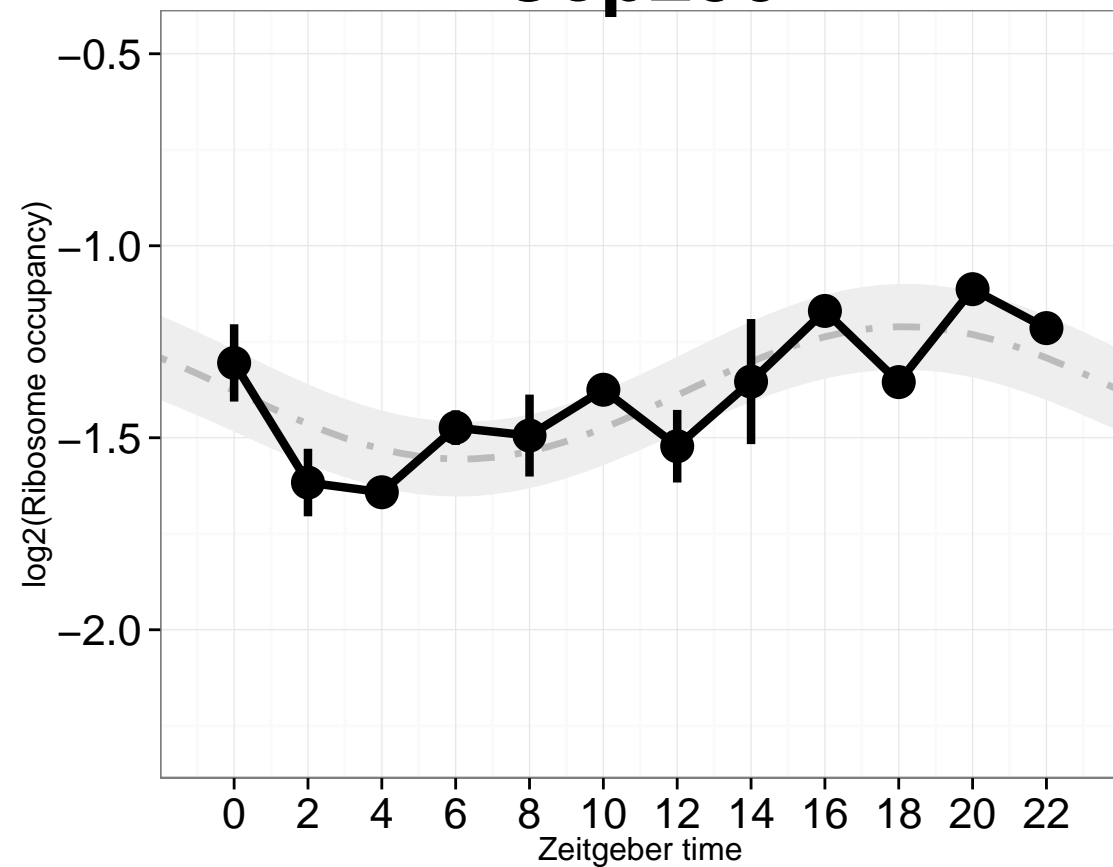

Supplement: Supplementary file 8466 [file 1]

# Dimt1

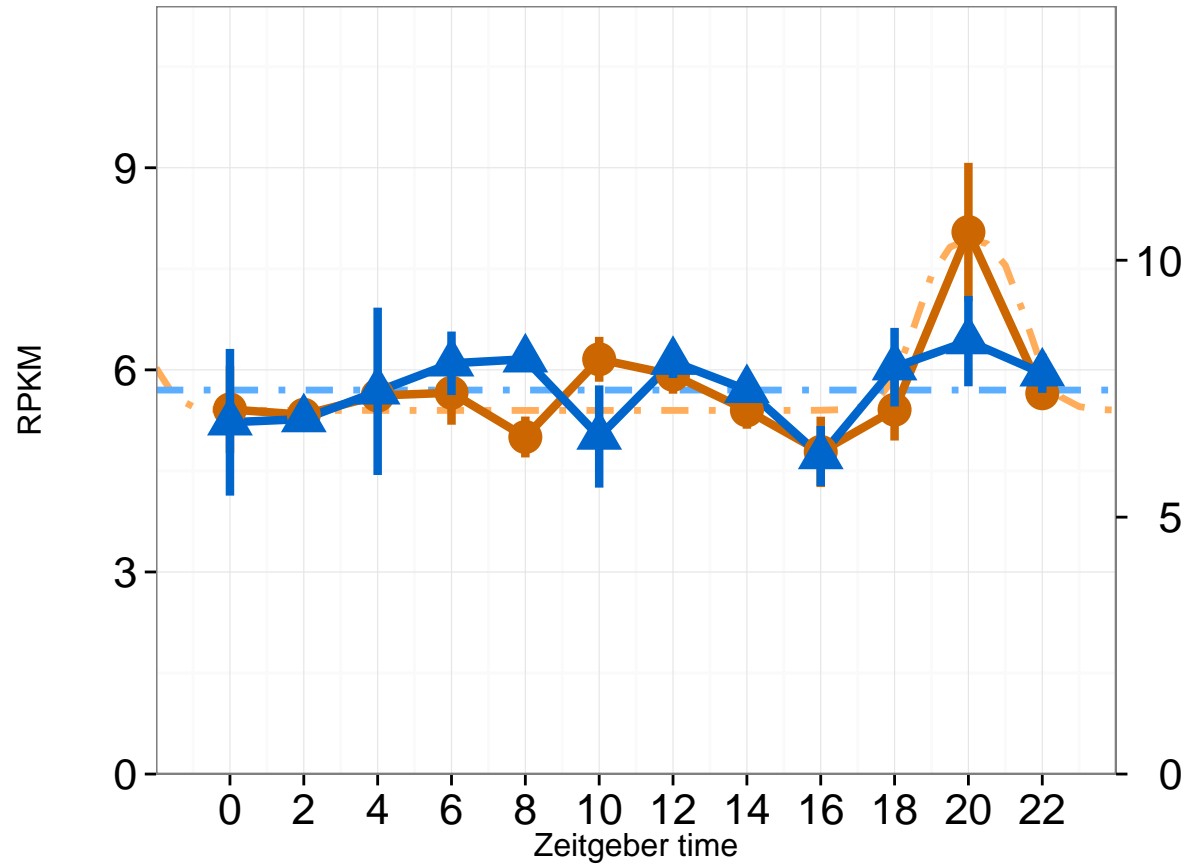

# Dimt1

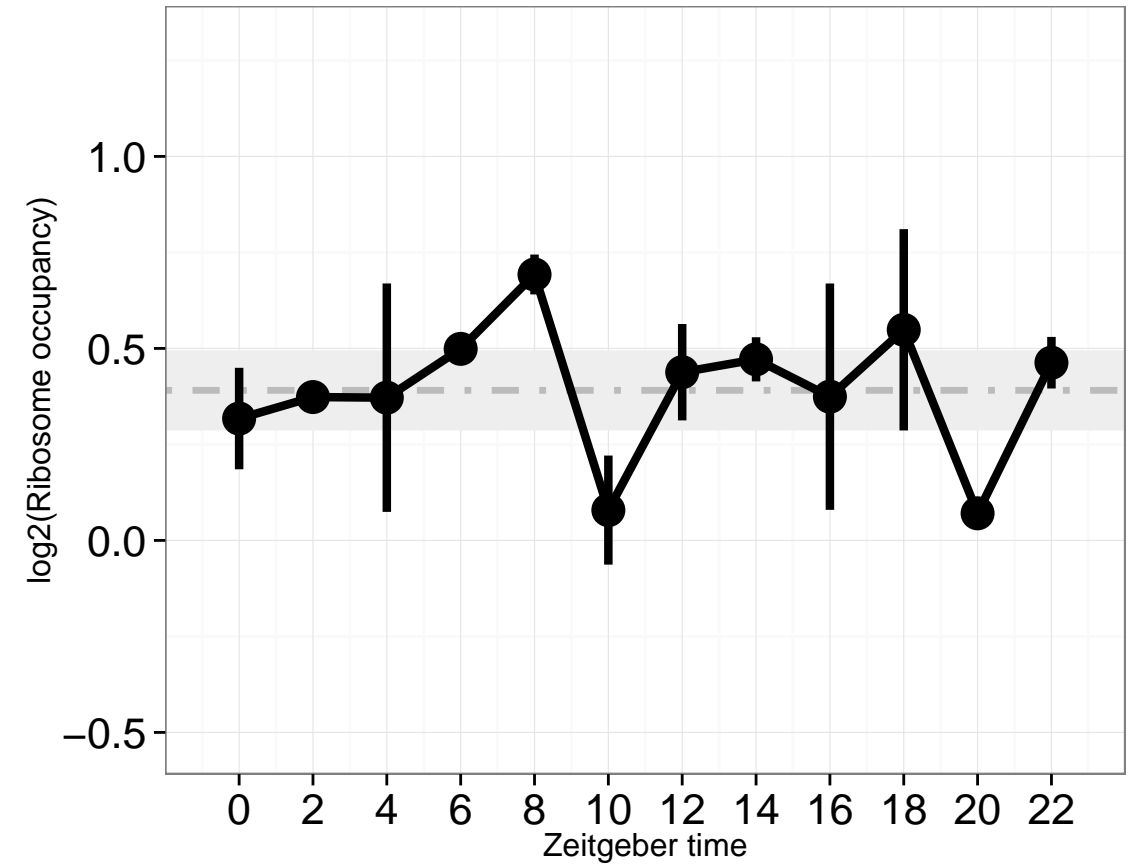

Supplement: Supplementary file 8467 [file 1]

# Fam211a

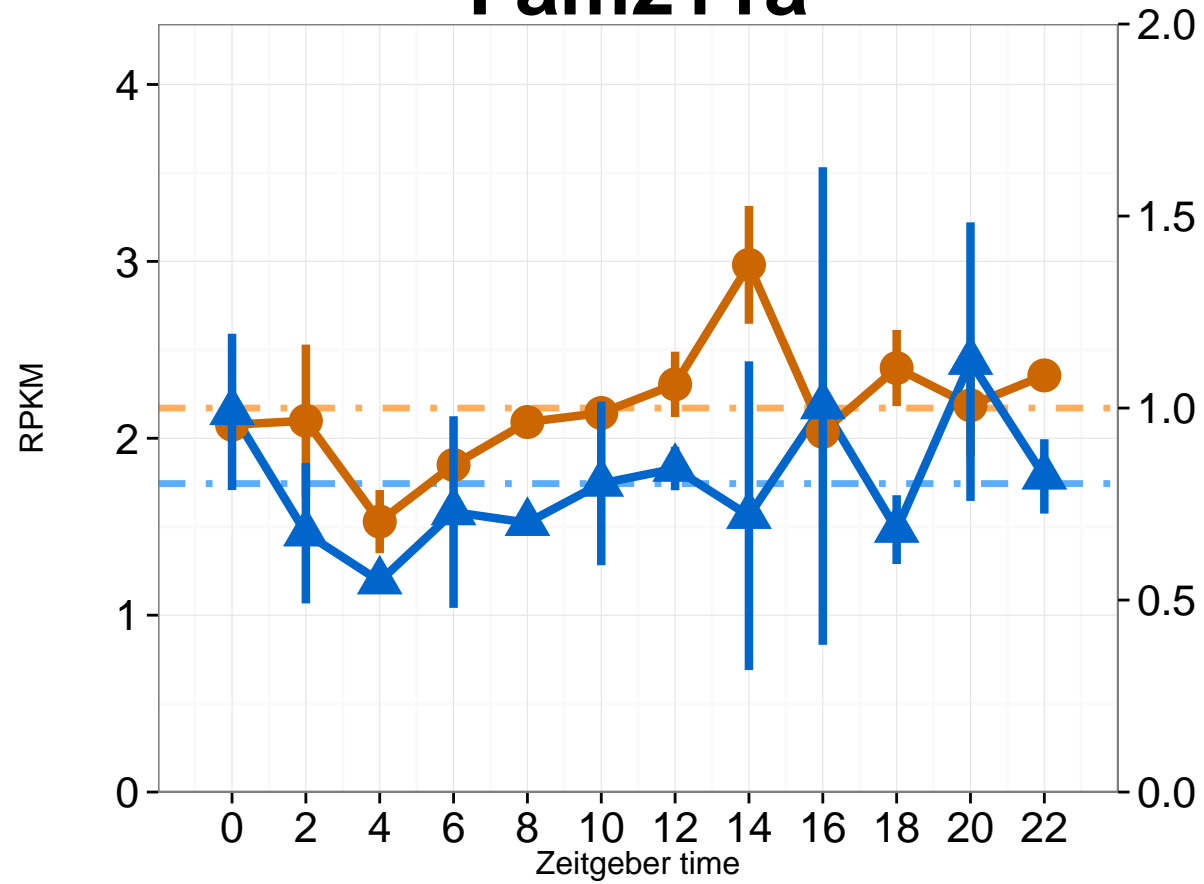

# Fam211a

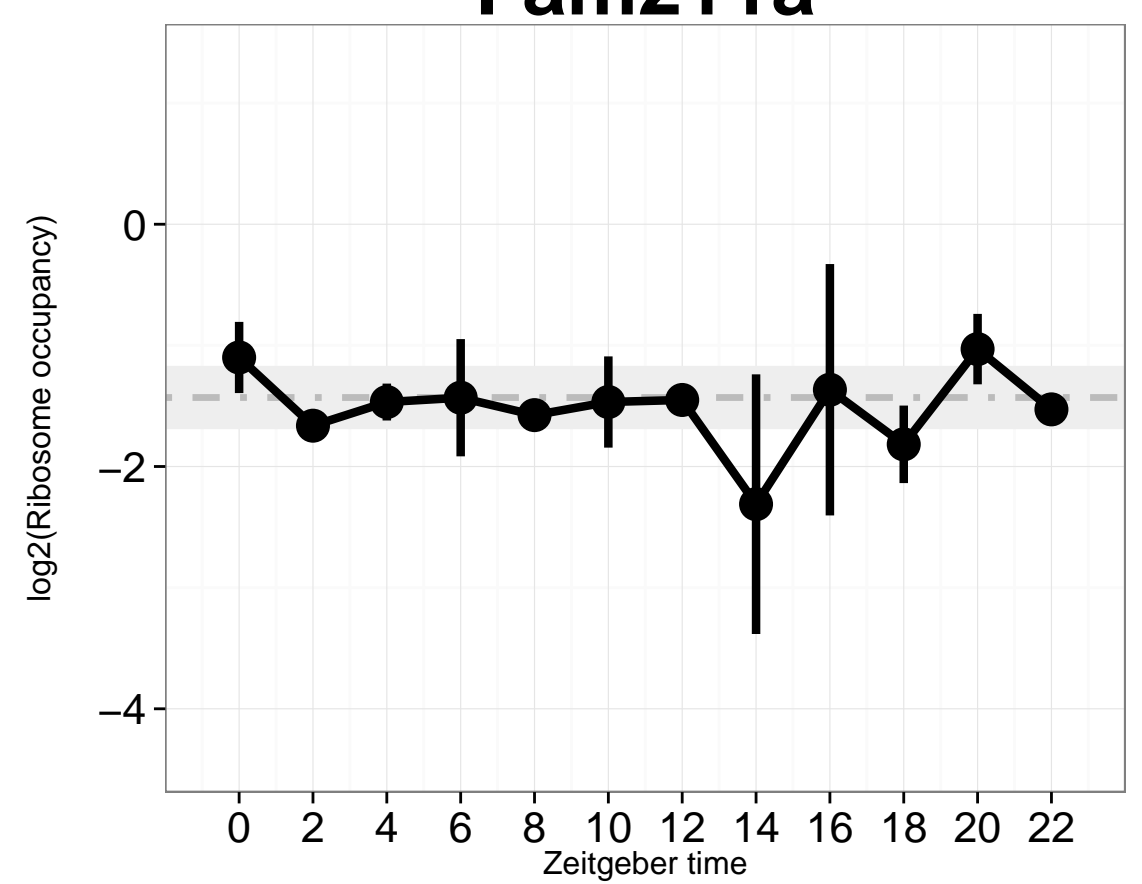

Supplement: Supplementary file 8468 [file 1]

## Med25

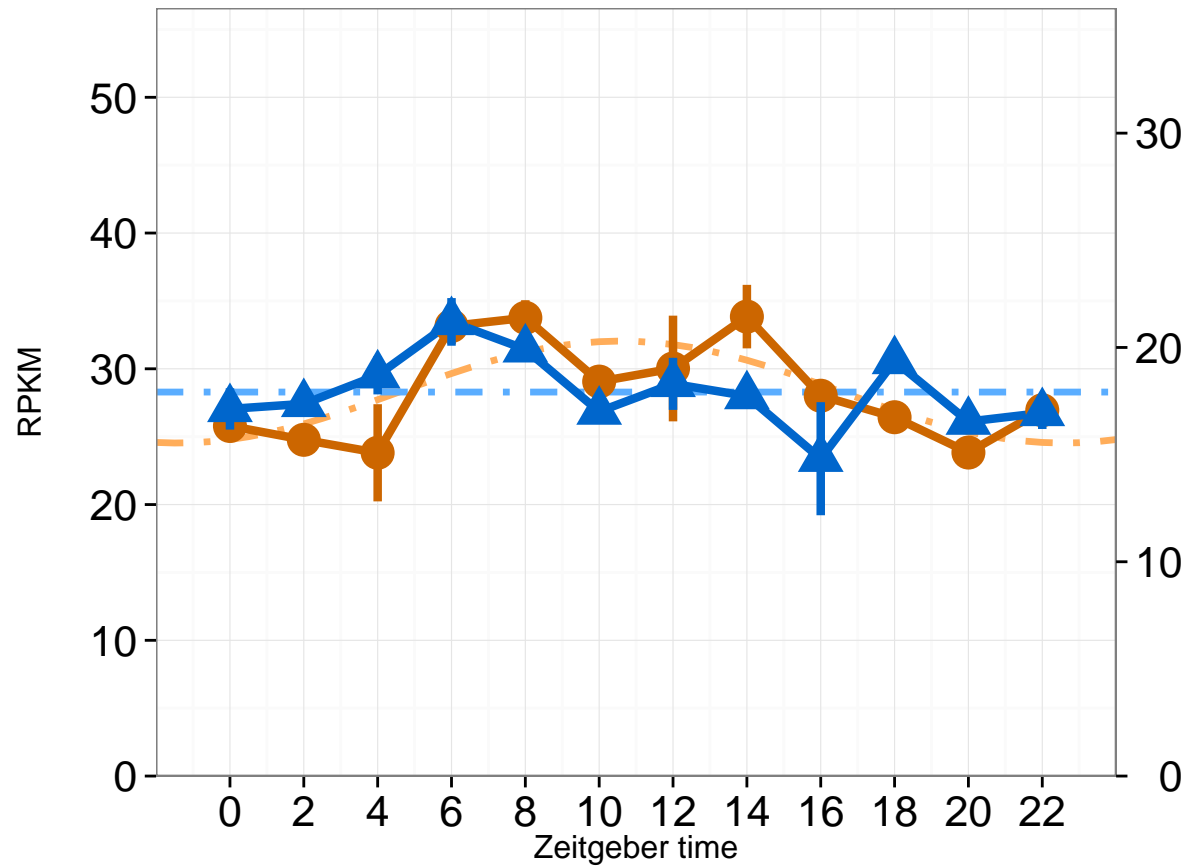

## Med25

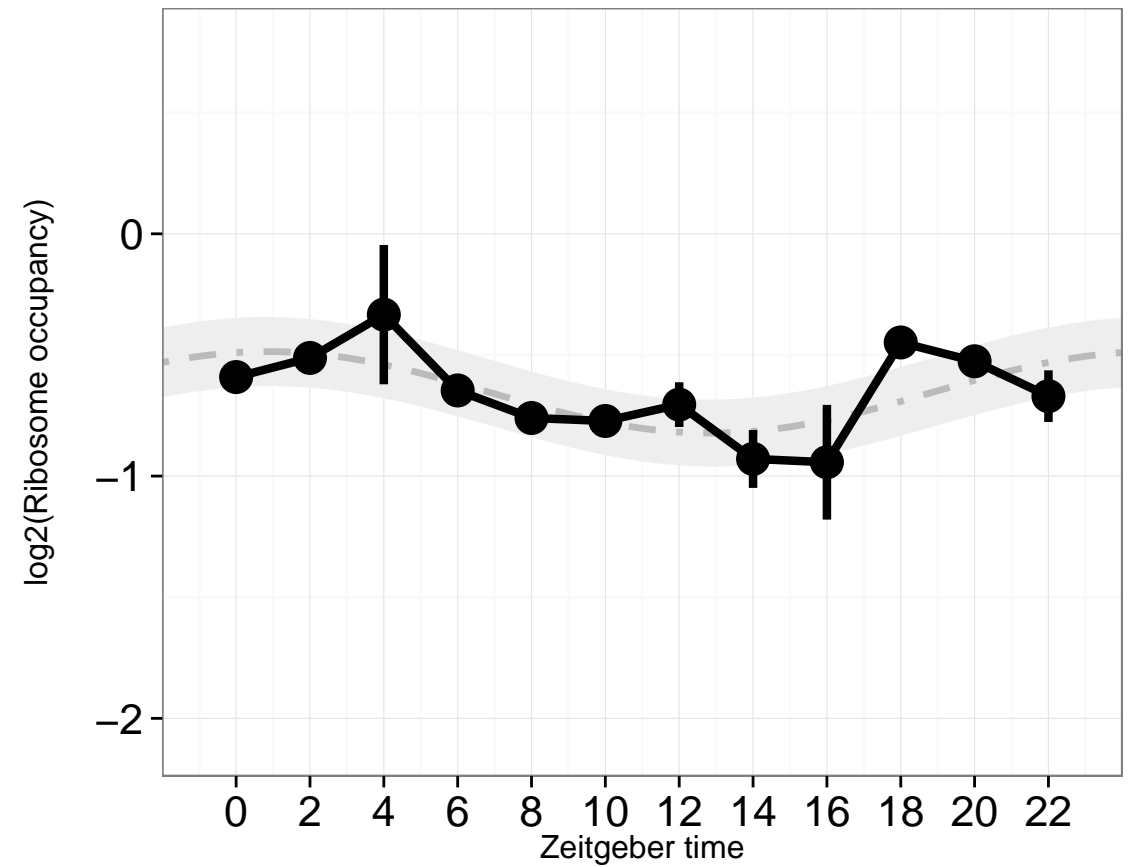

Supplement: Supplementary file 8469 [file 1]

## Shcbp1

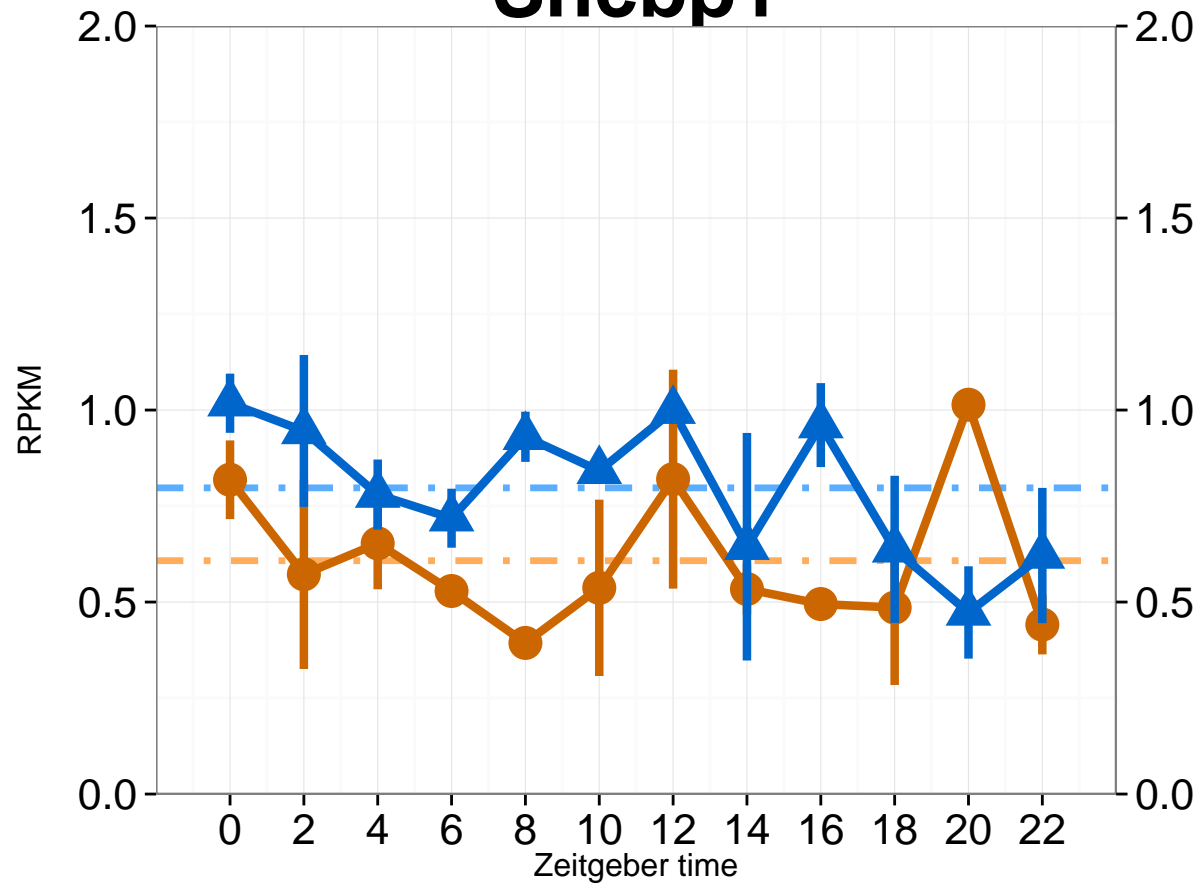

## Shcbp1

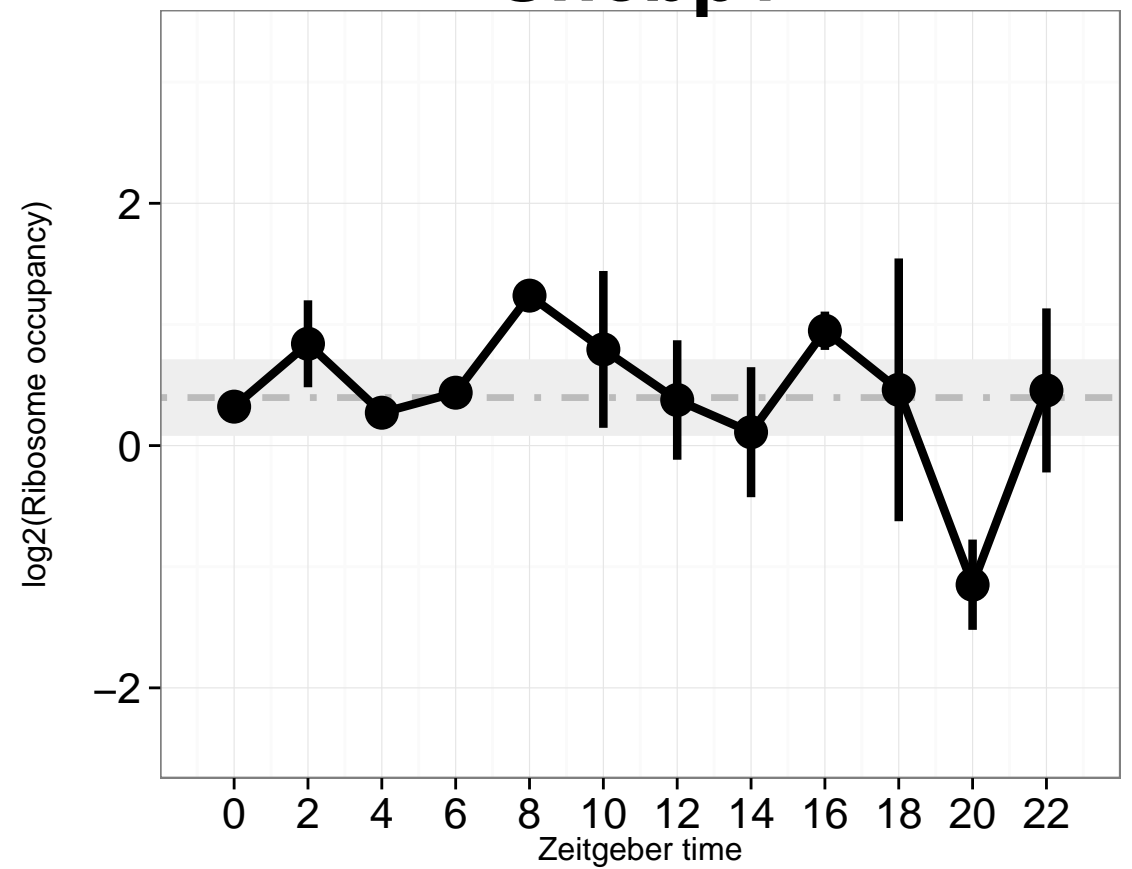

Supplement: Supplementary file 8470 [file 1]

## Wdpcp

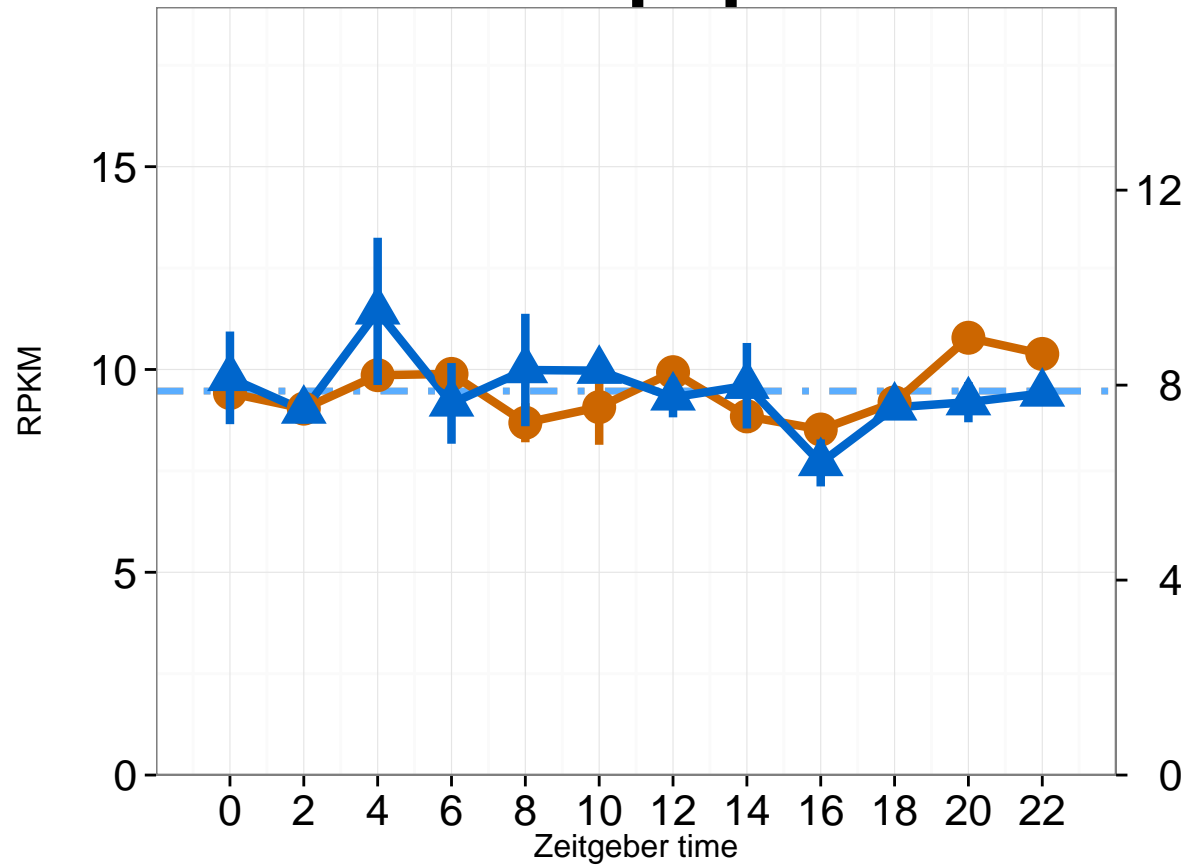

## Wdpcp

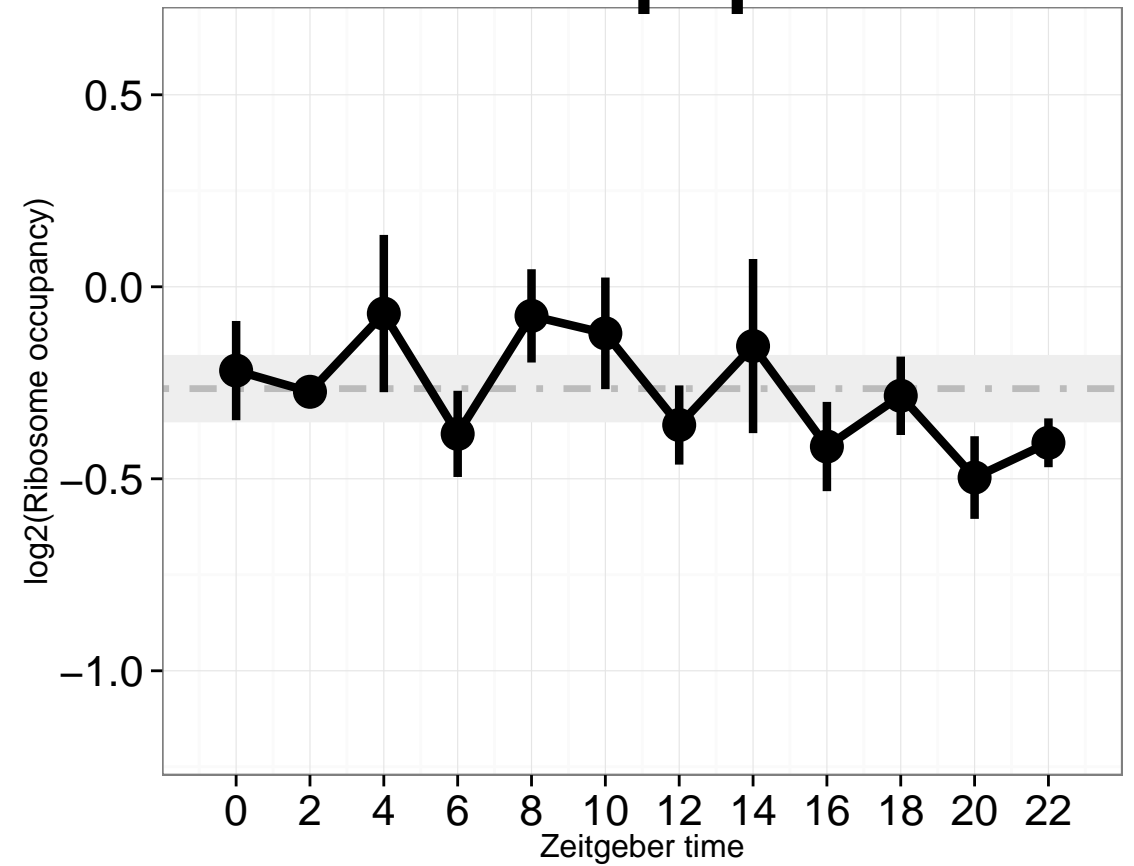

Supplement: Supplementary file 8471 [file 1]

## Pi15

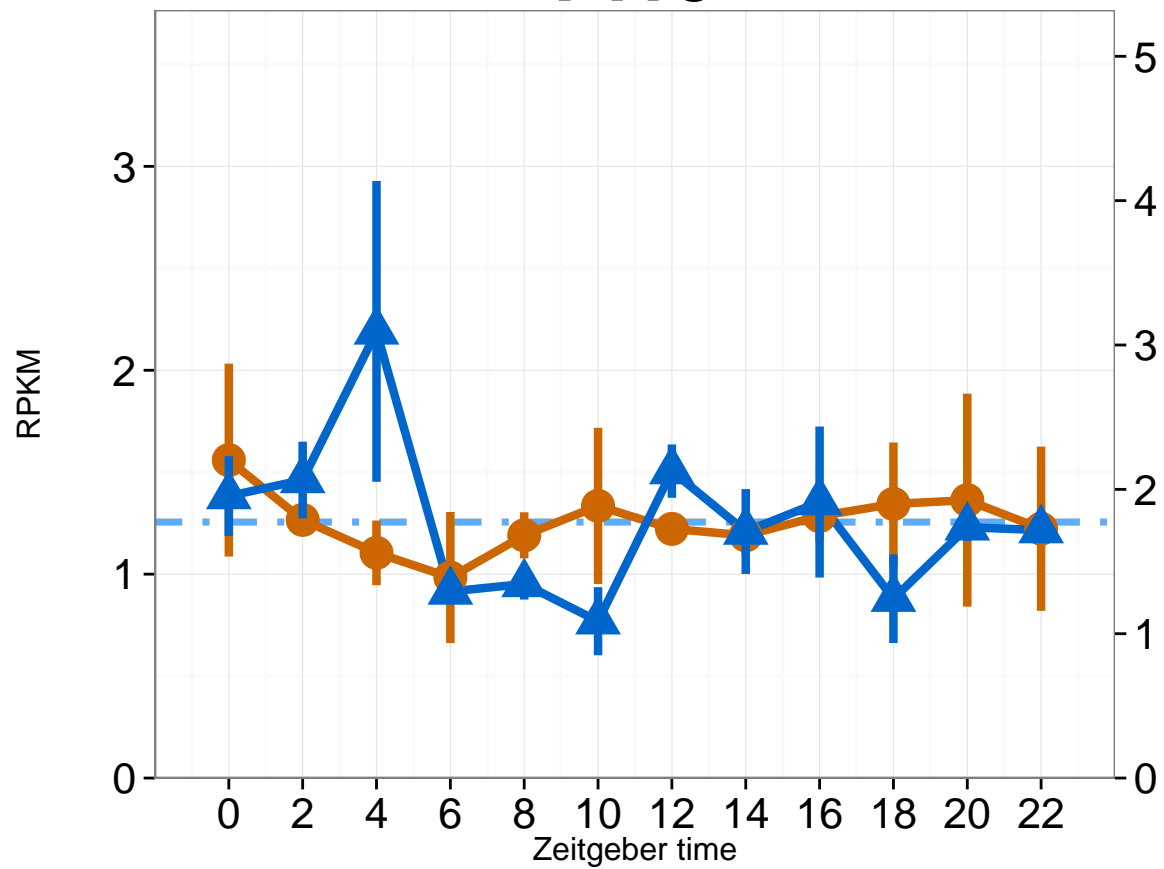

## Pi15

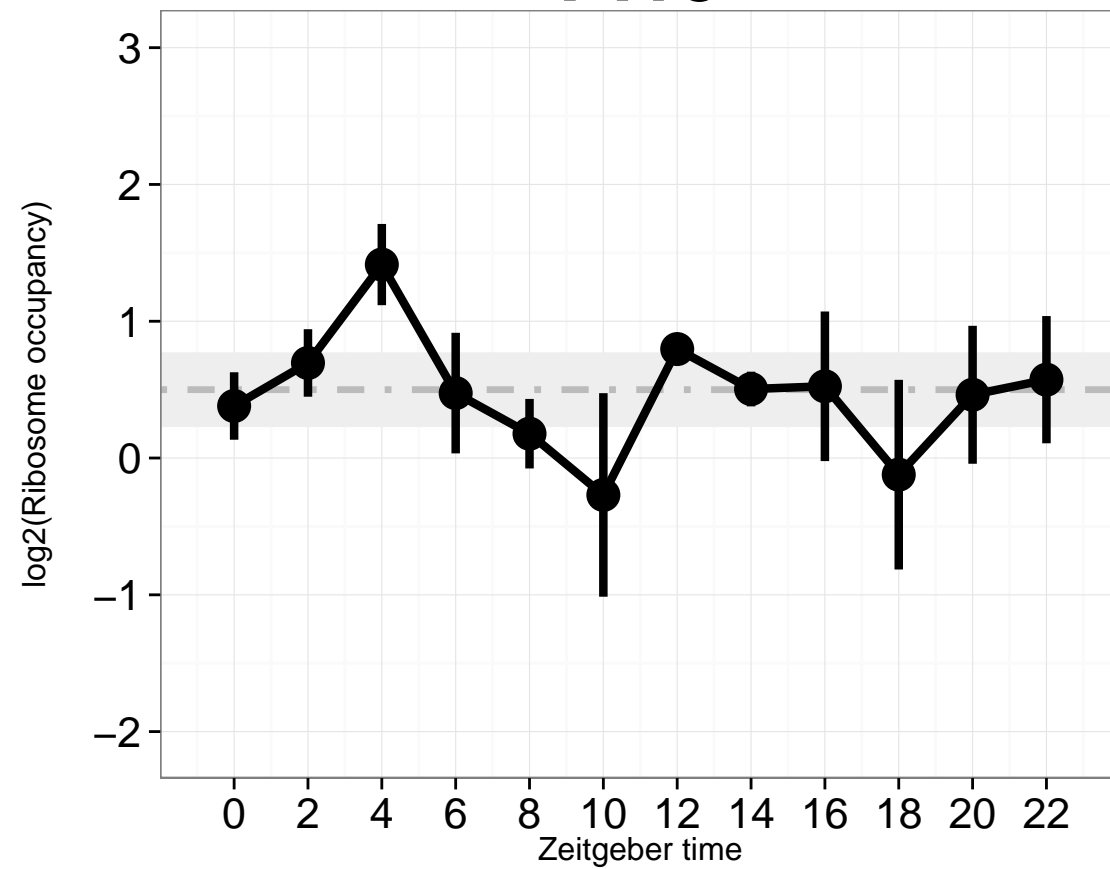

Supplement: Supplementary file 8472 [file 1]

# Specc1

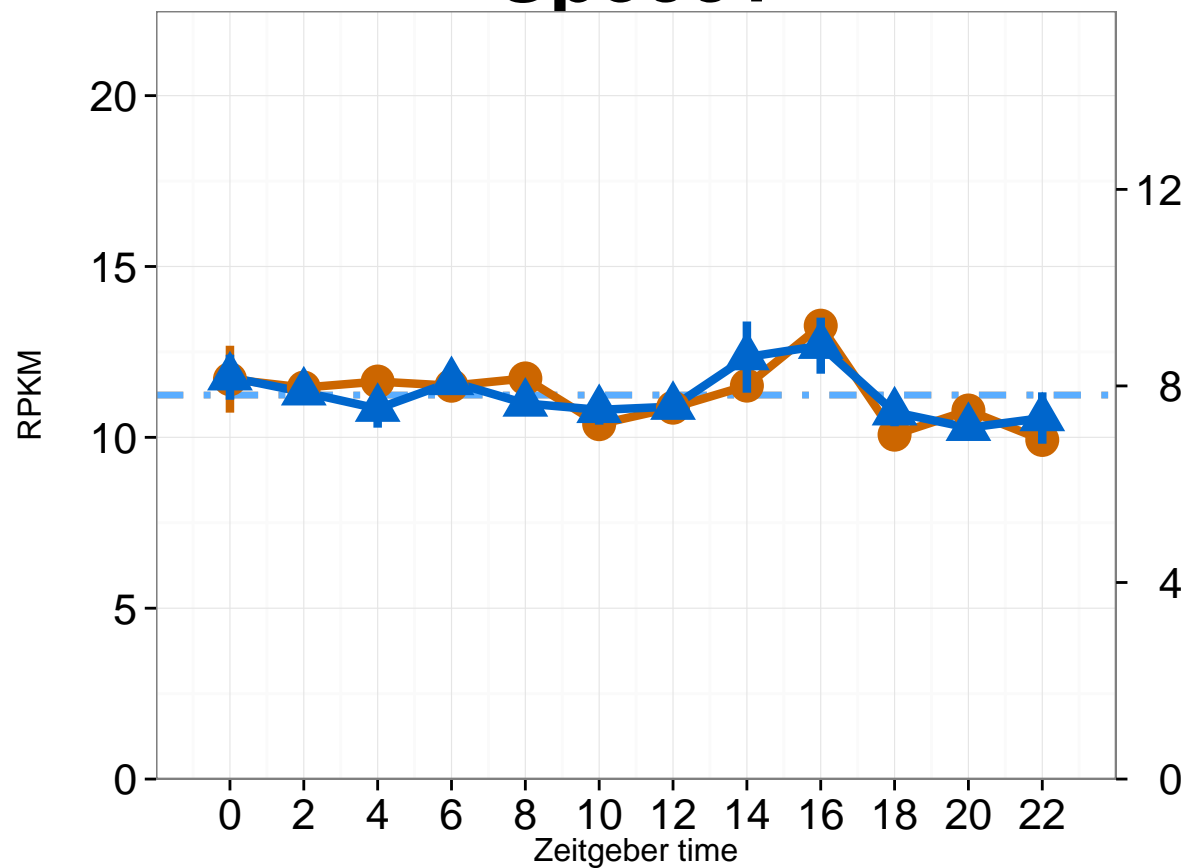

# Specc1

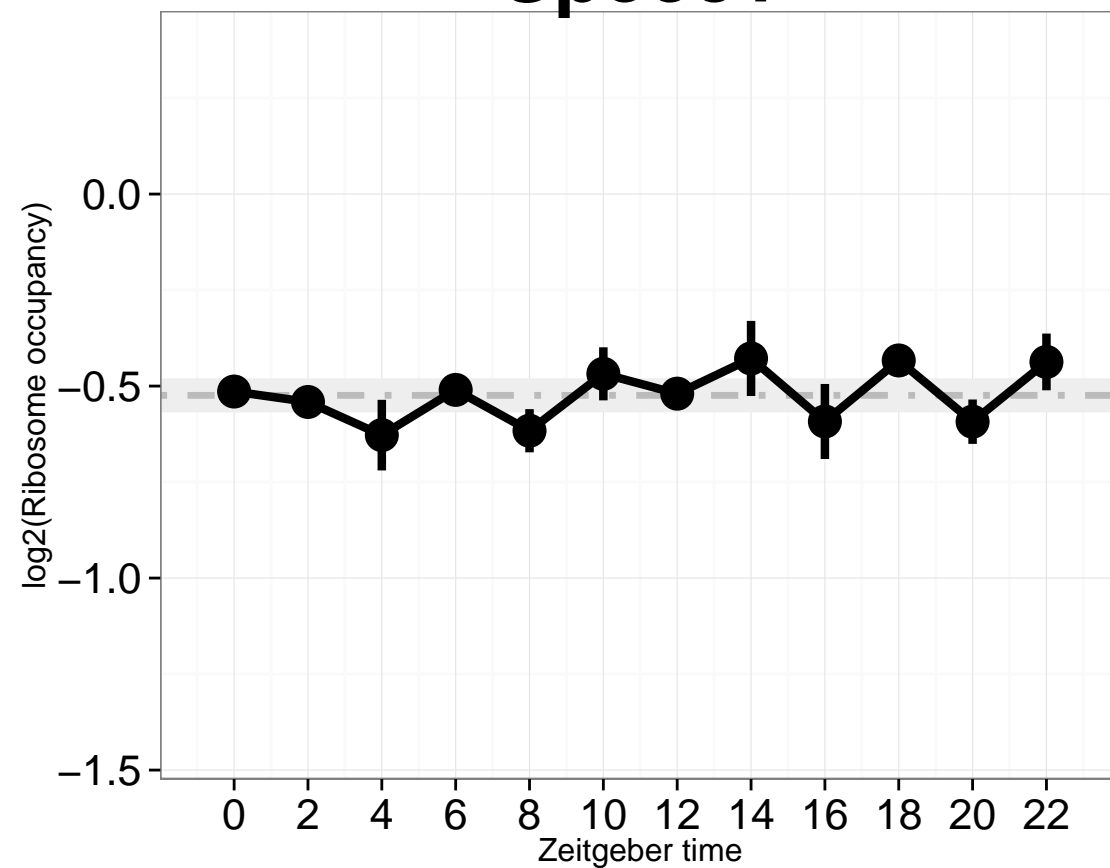

Supplement: Supplementary file 8473 [file 1]

## Fbxl7

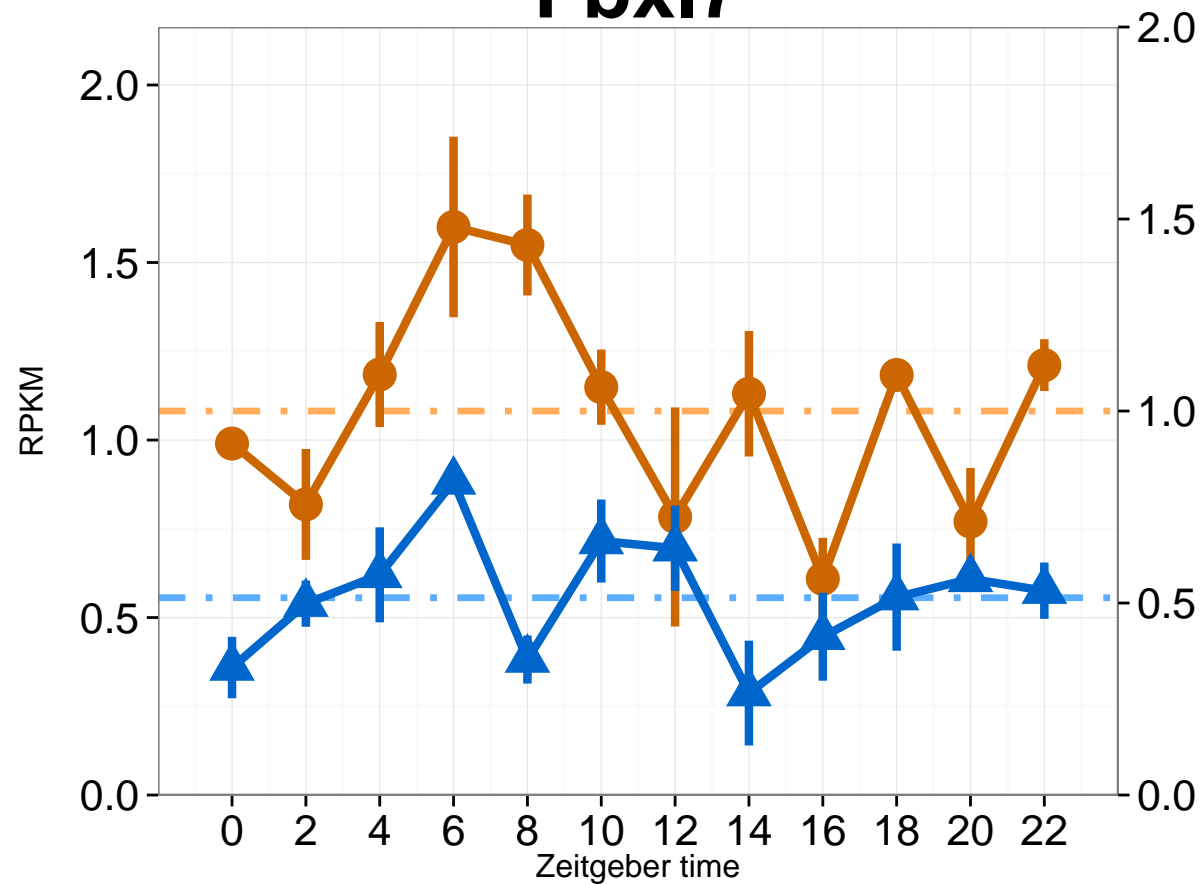

## Fbxl7

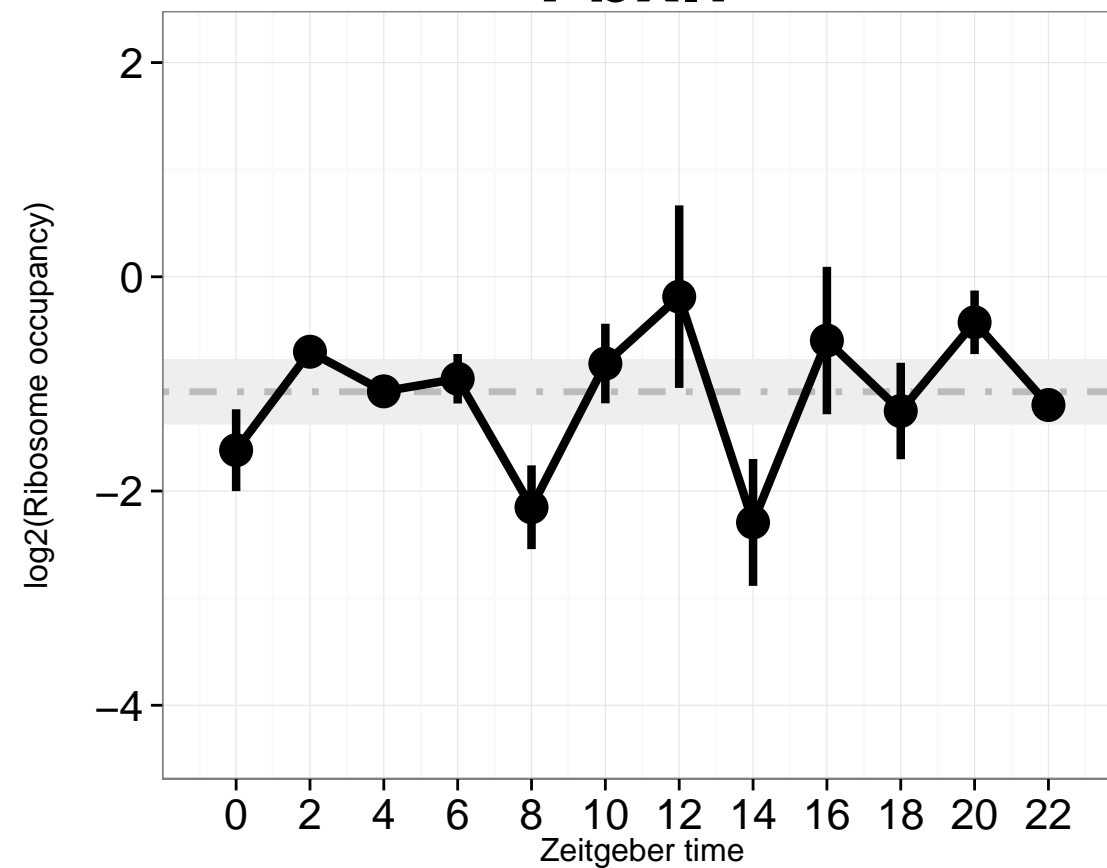

Supplement: Supplementary file 8474 [file 1]

## Ubxn4

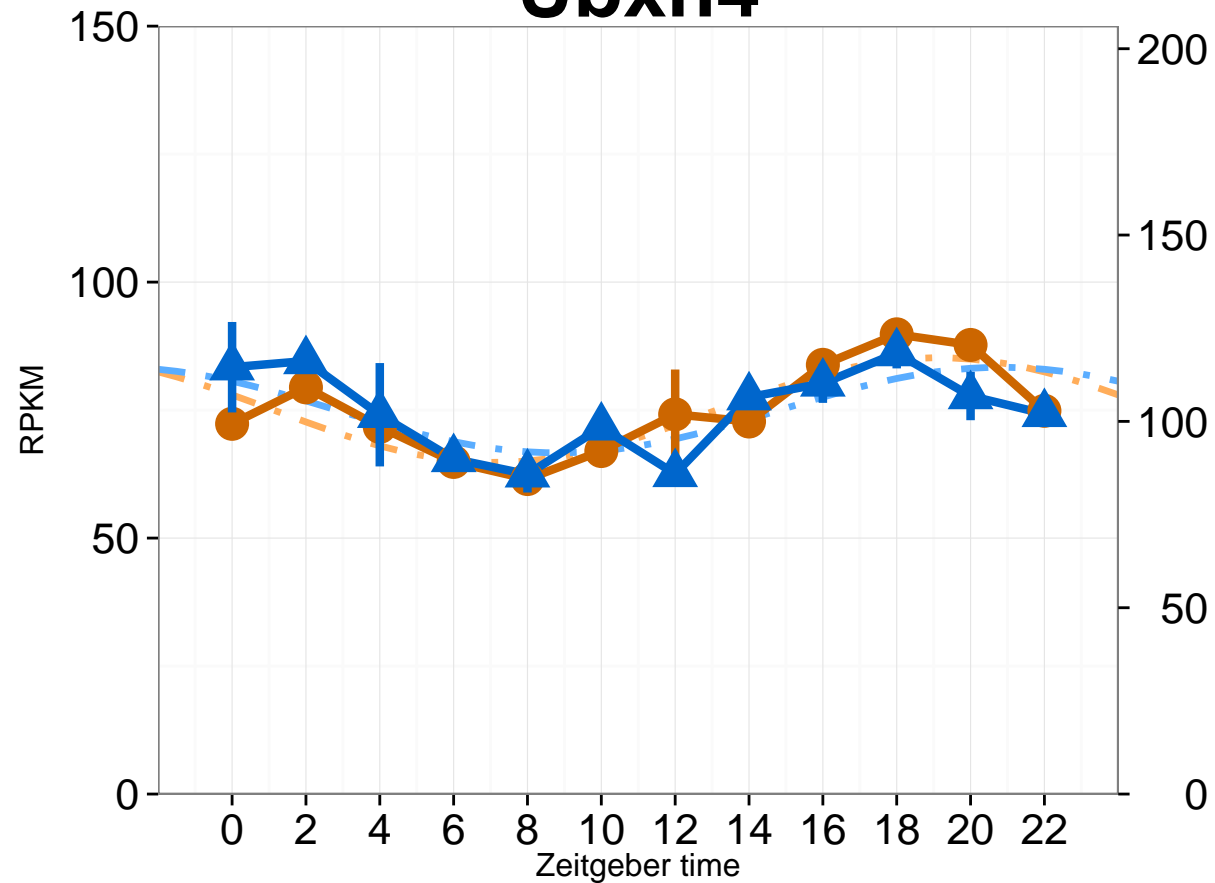

## Ubxn4

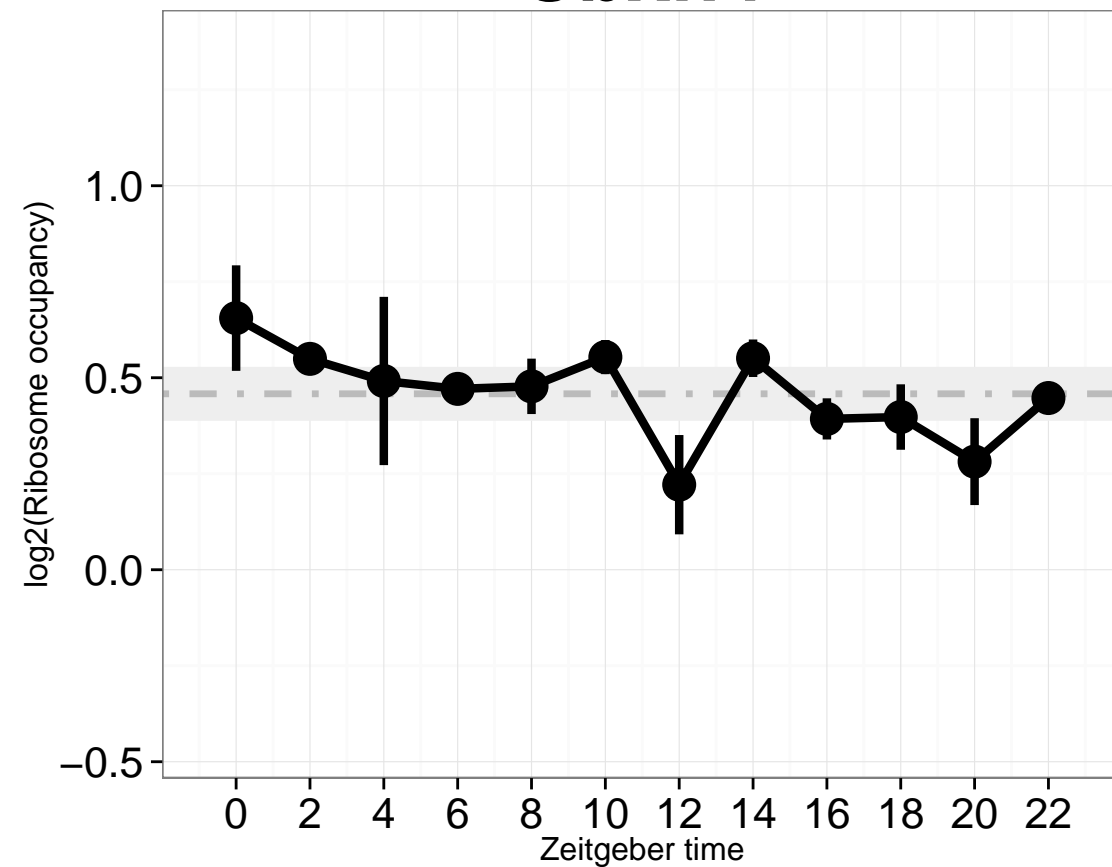

Supplement: Supplementary file 8475 [file 1]

# Hic1

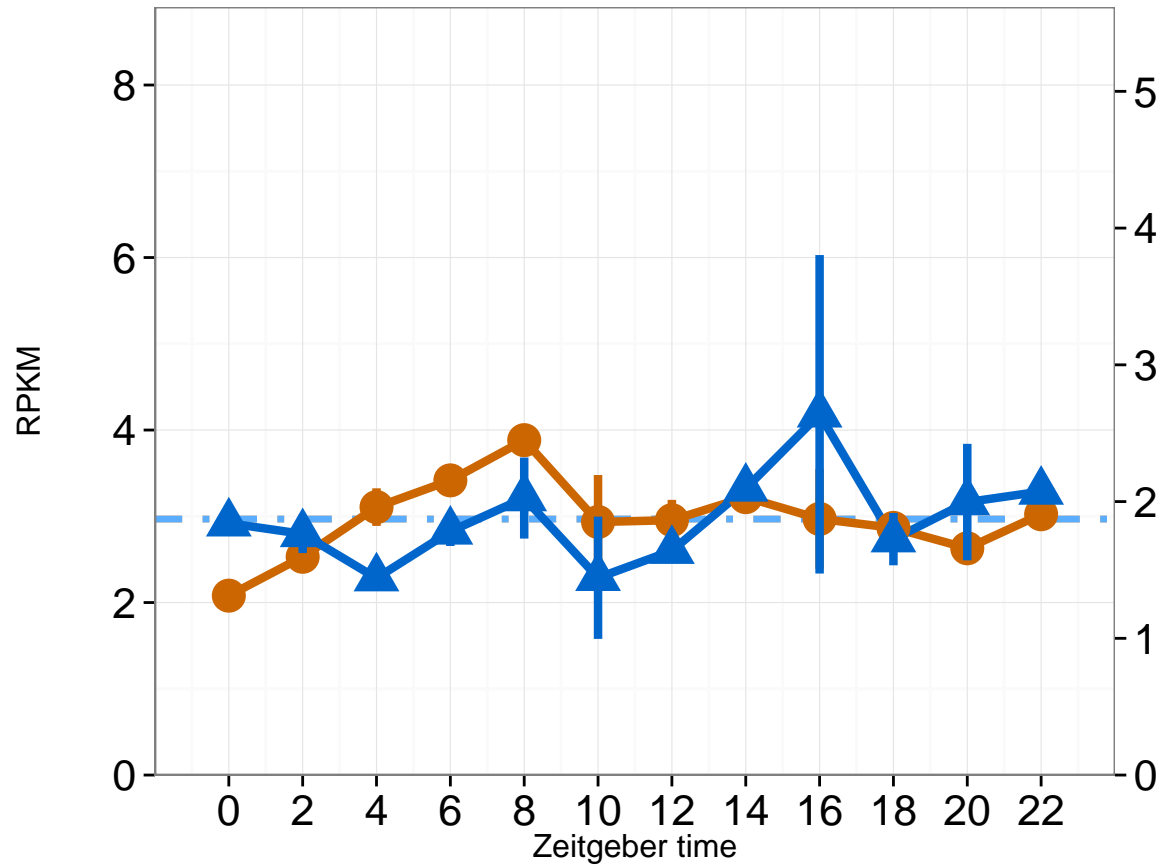

# Hic1

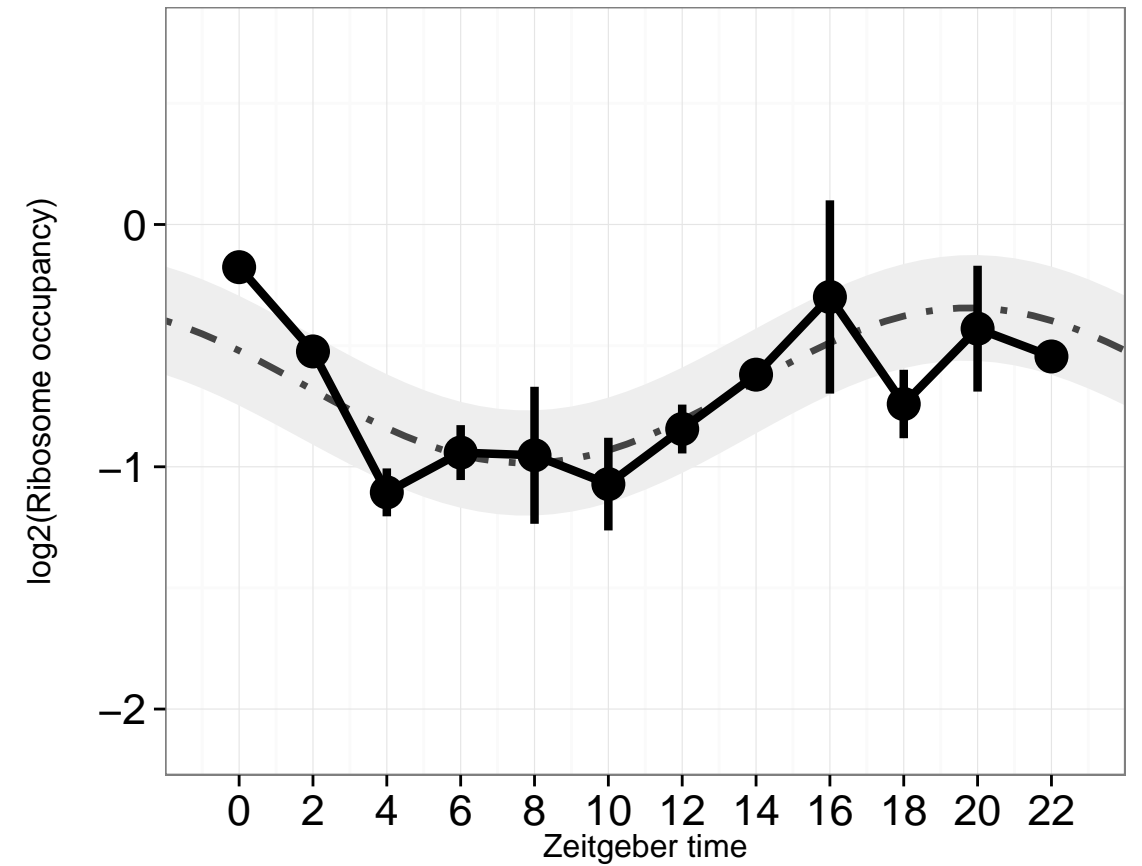

Supplement: Supplementary file 8476 [file 1]

## Pdlim5

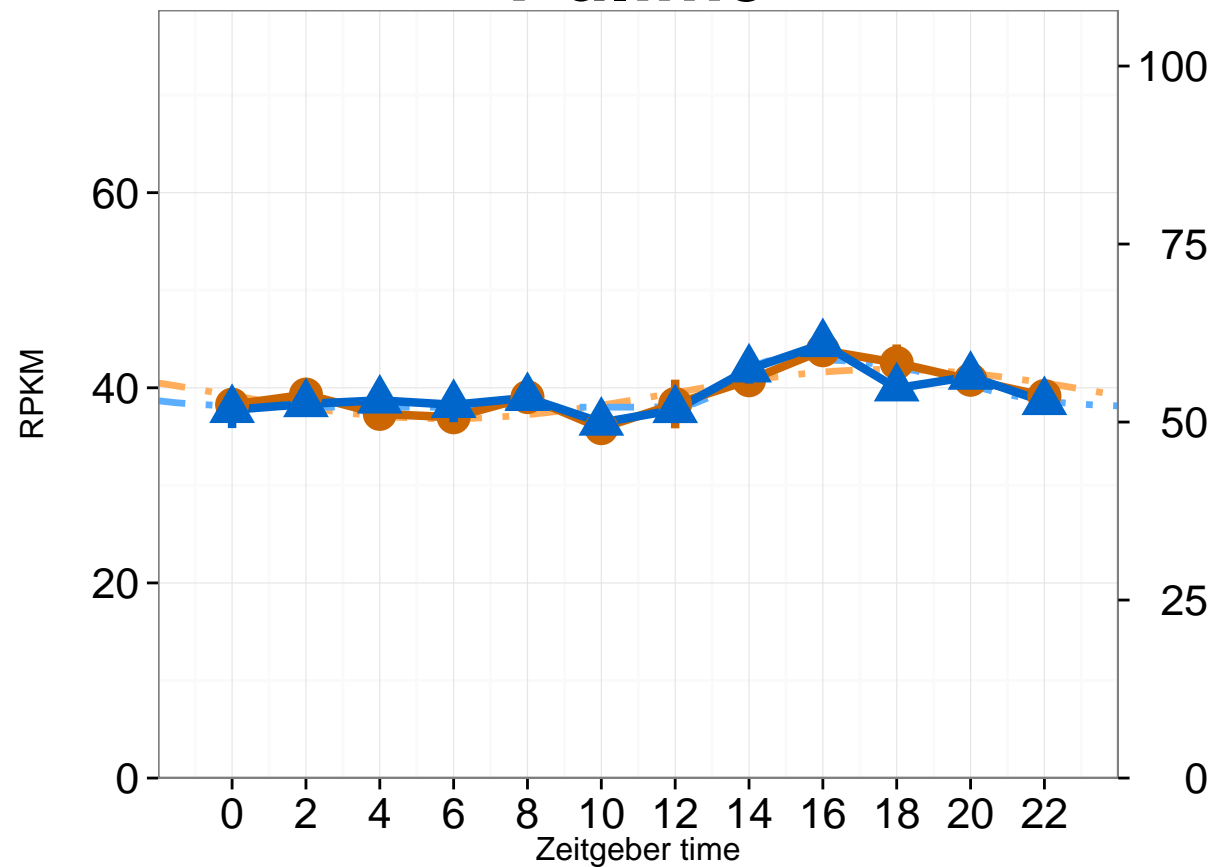

## Pdlim5

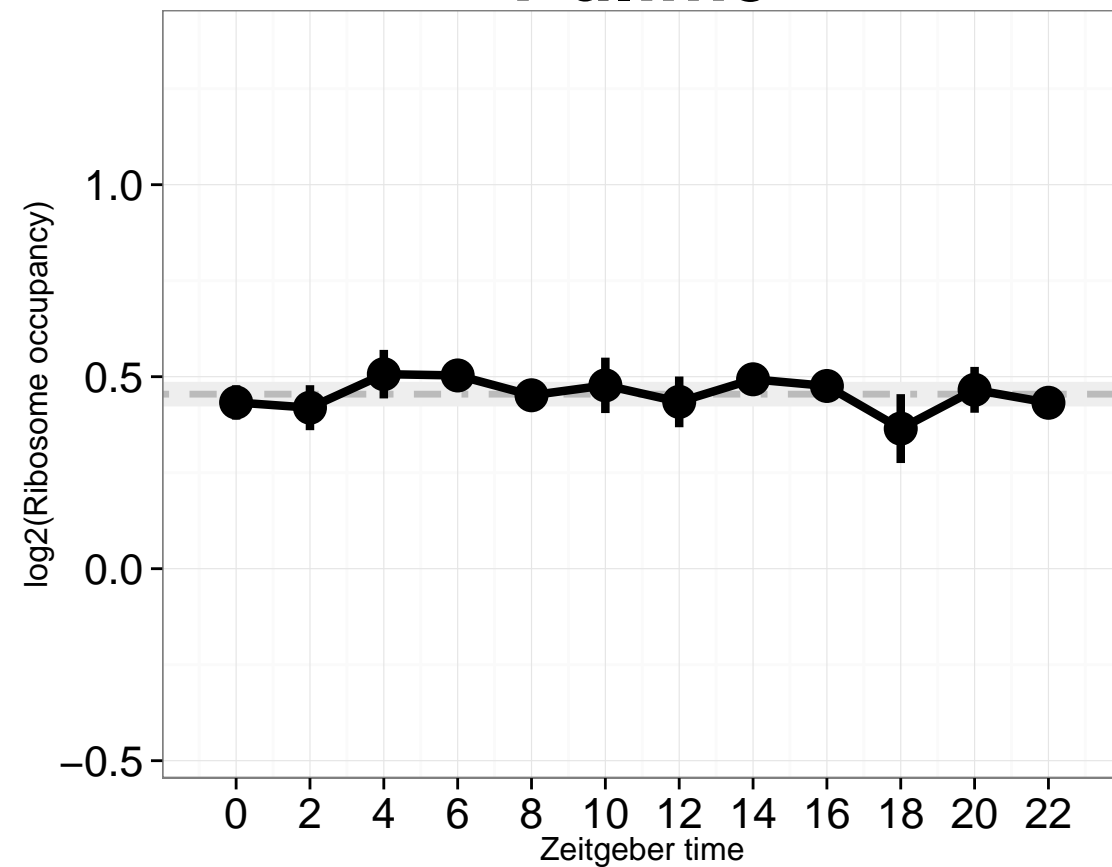

Supplement: Supplementary file 8477 [file 1]

# Zfp764

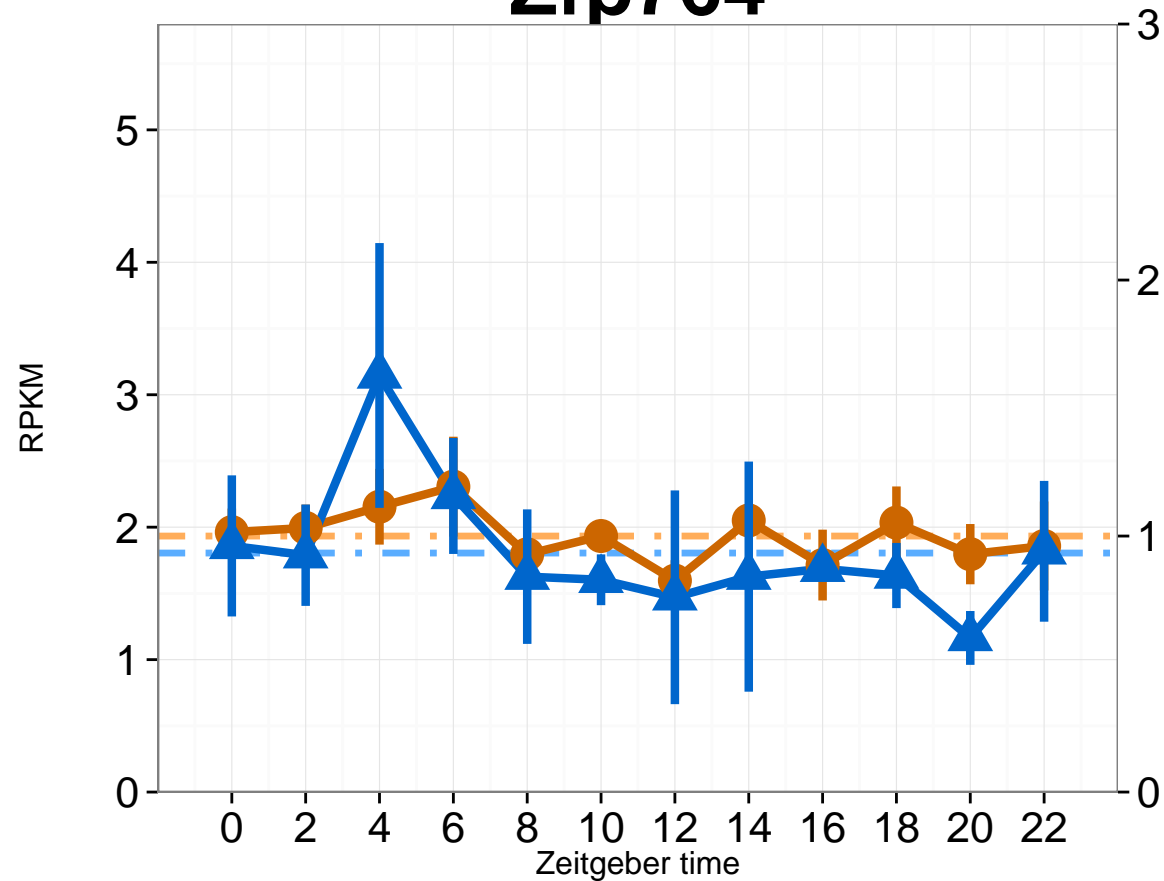

# Zfp764

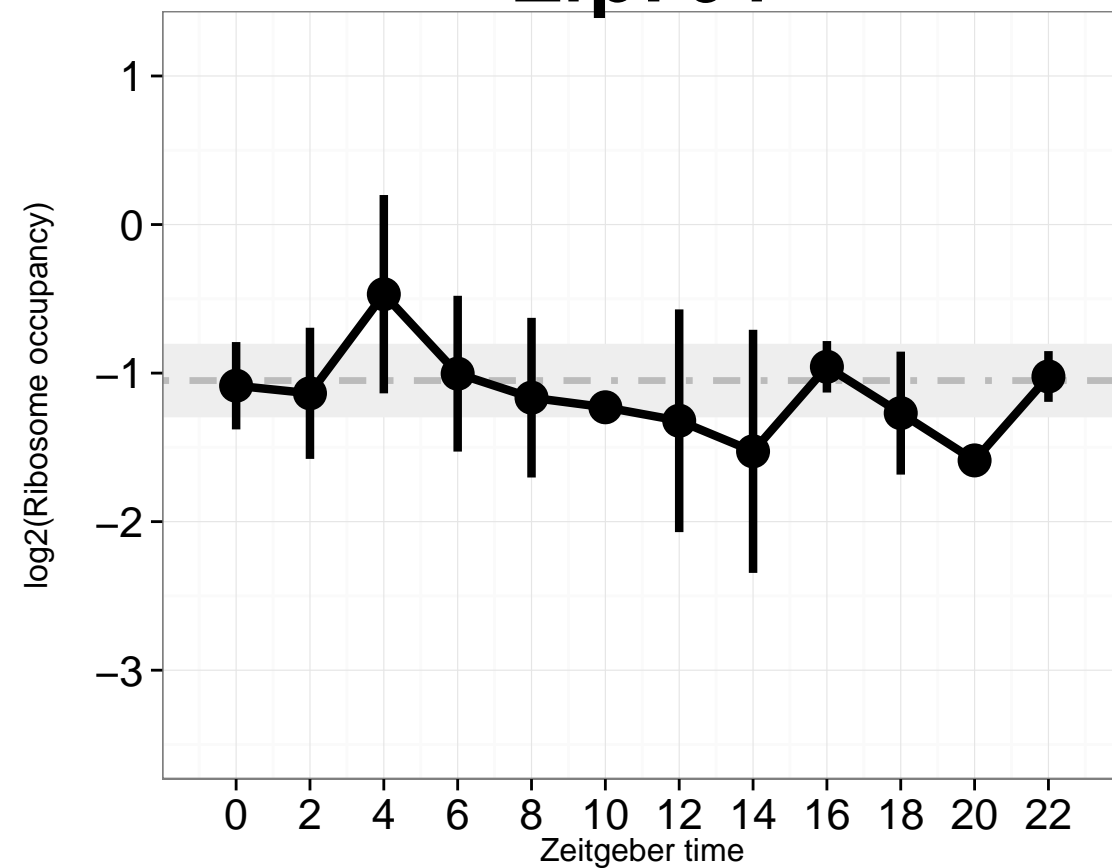

Supplement: Supplementary file 8478 [file 1]

# Scara5

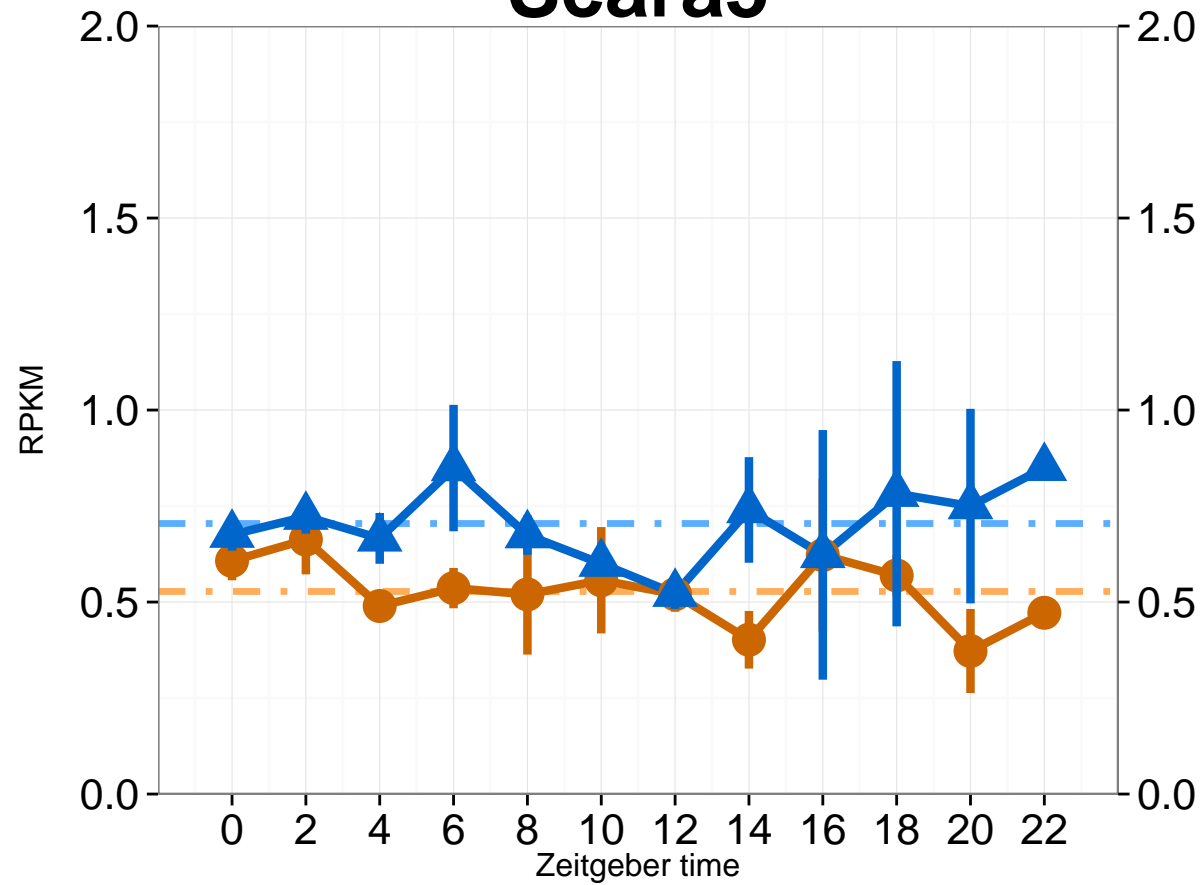

# Scara5

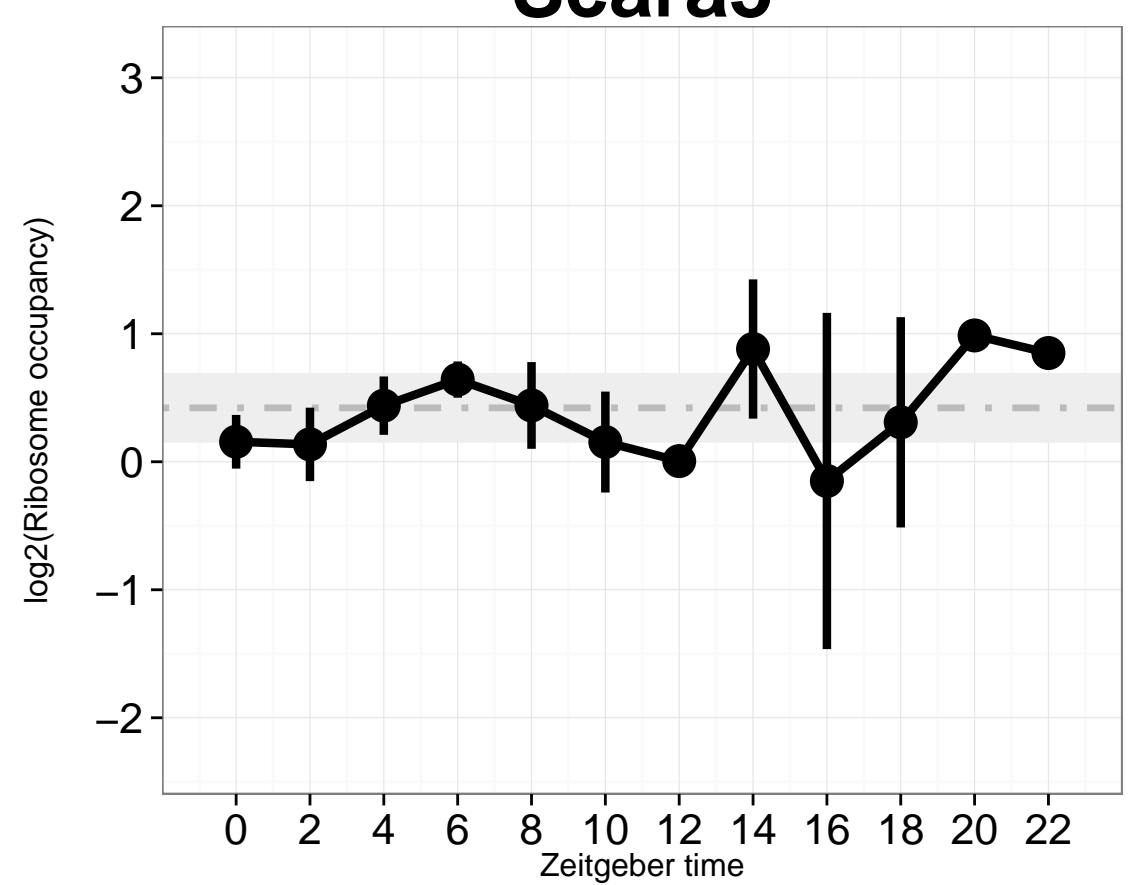

Supplement: Supplementary file 8479 [file 1]

## Ahsa2

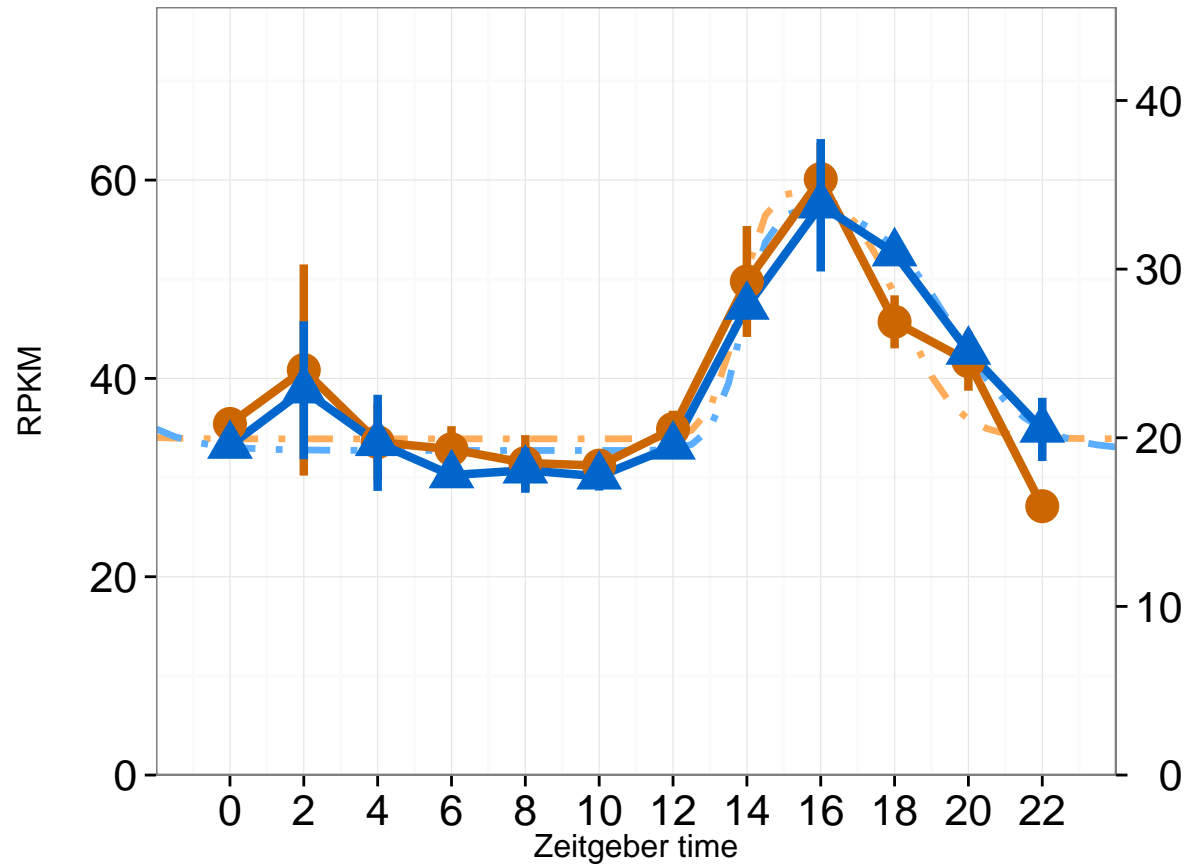

## Ahsa2

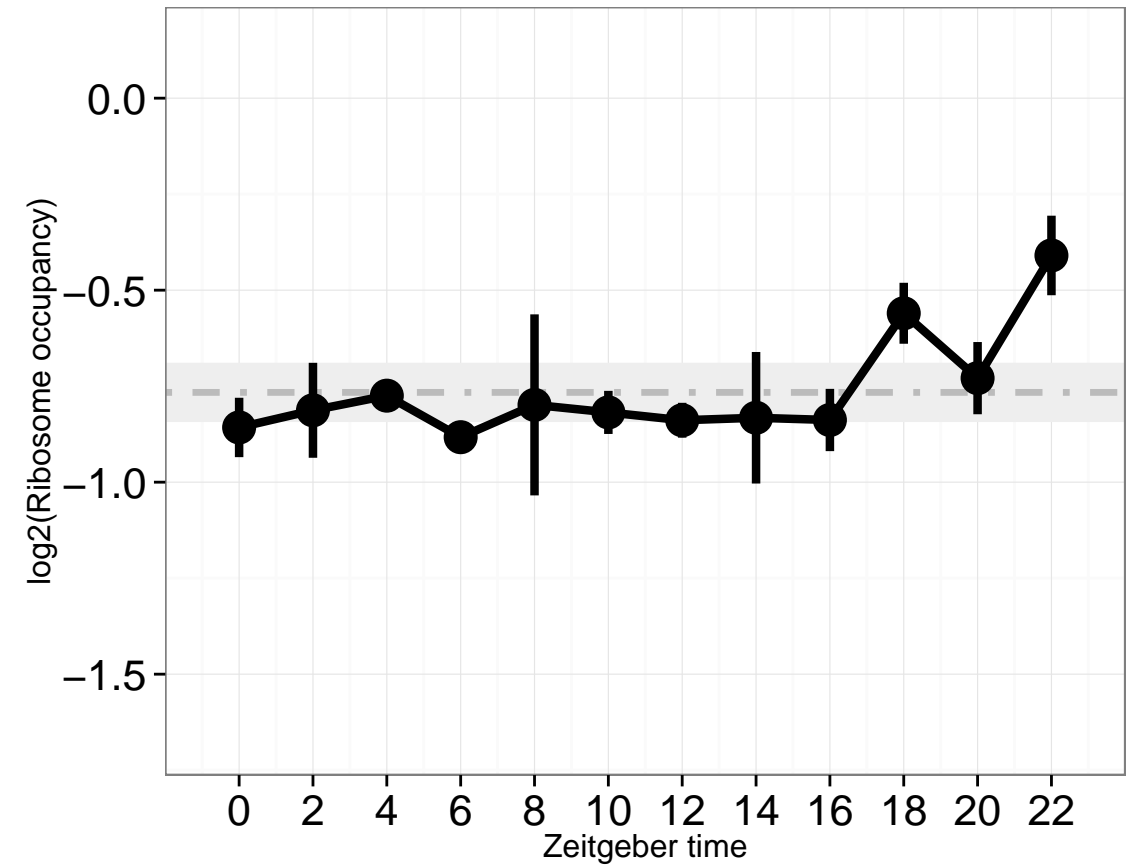

Supplement: Supplementary file 8480 [file 1]

## Cml2

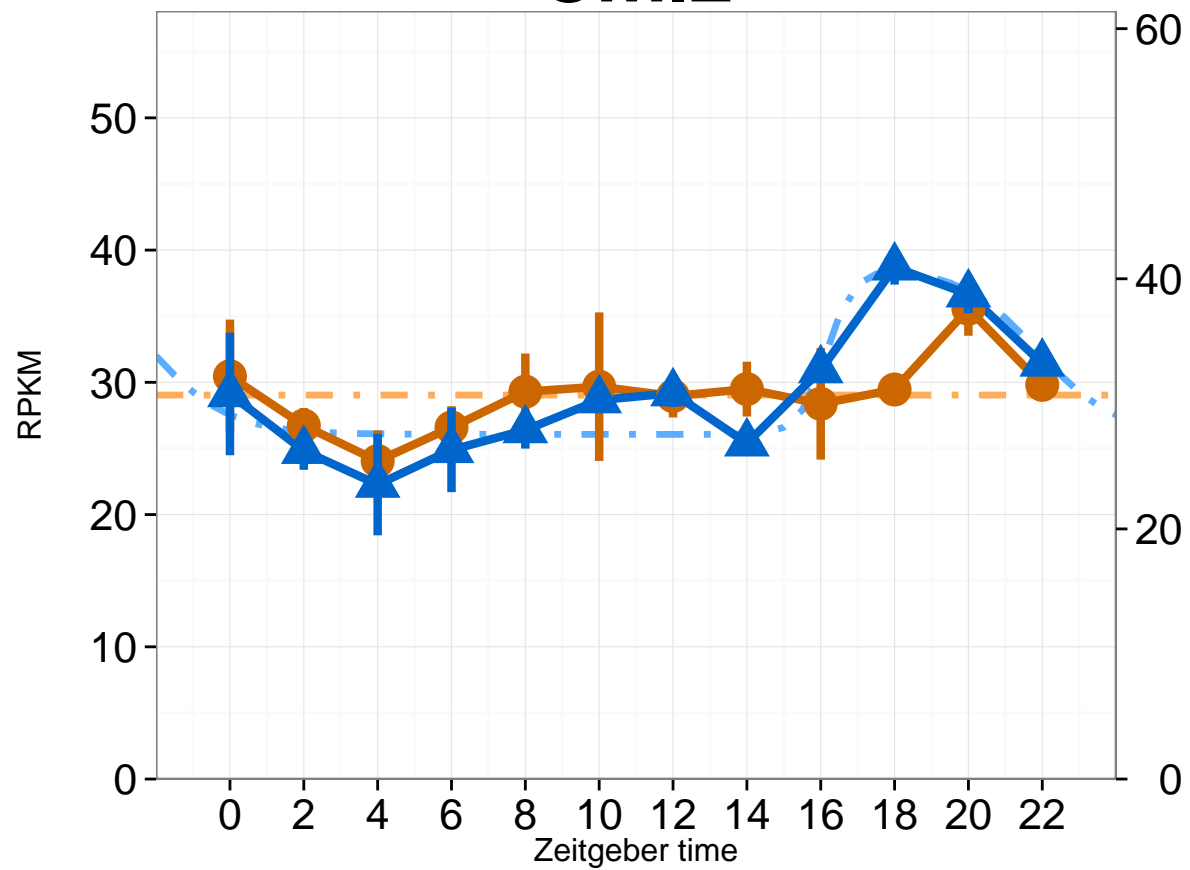

## Cml2

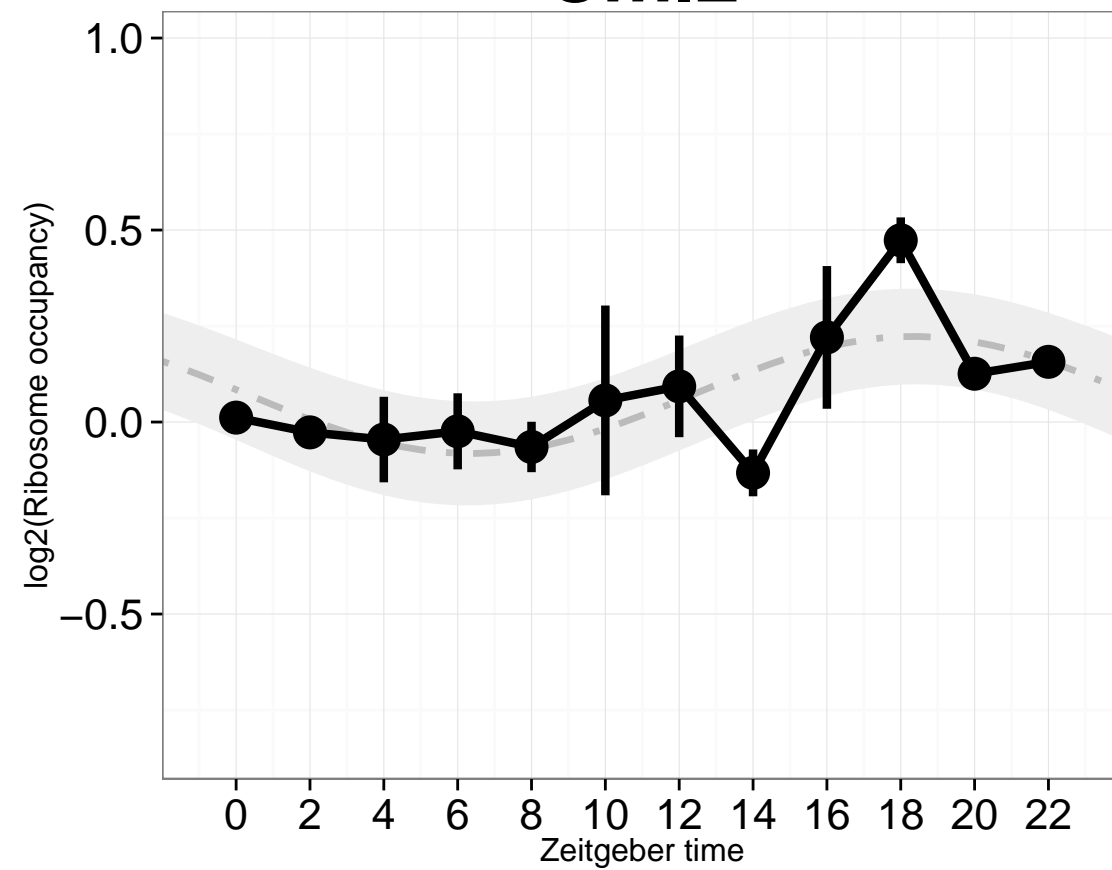

Supplement: Supplementary file 8481 [file 1]

# Tob2

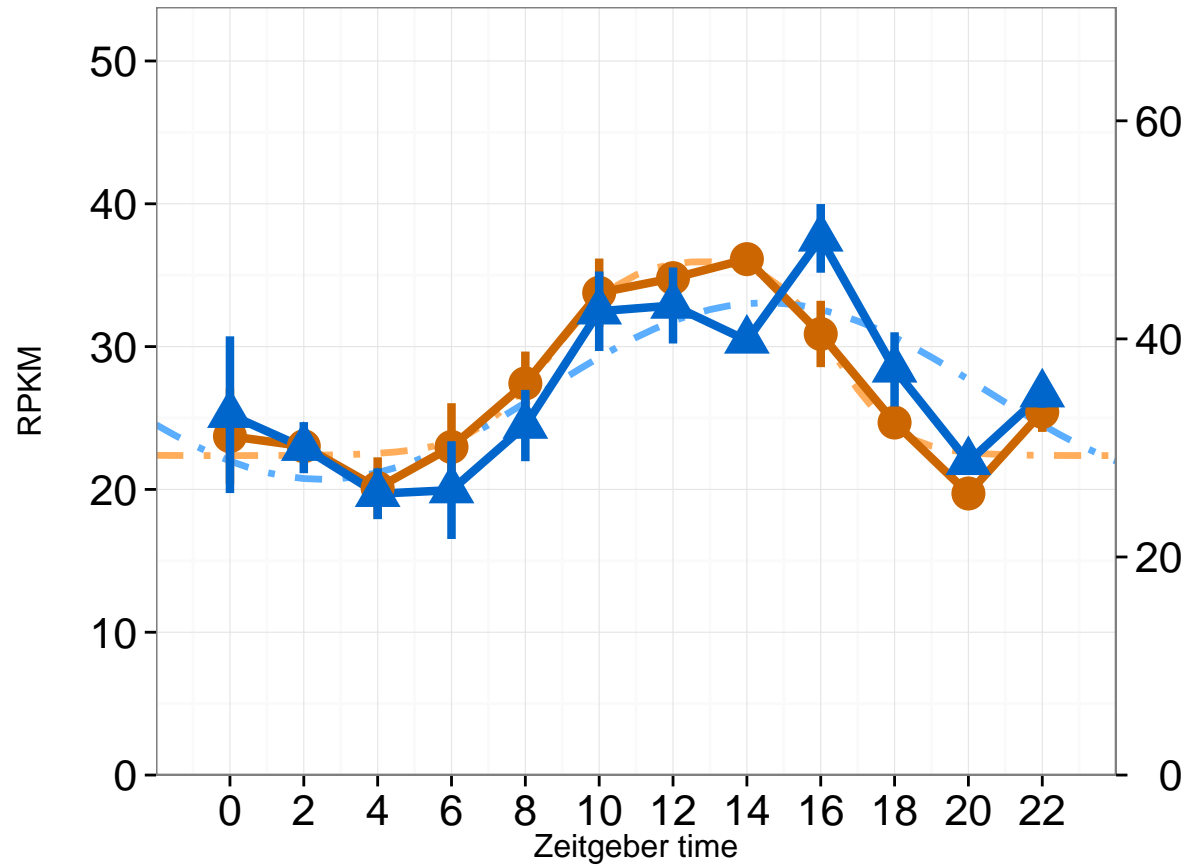

# Tob2

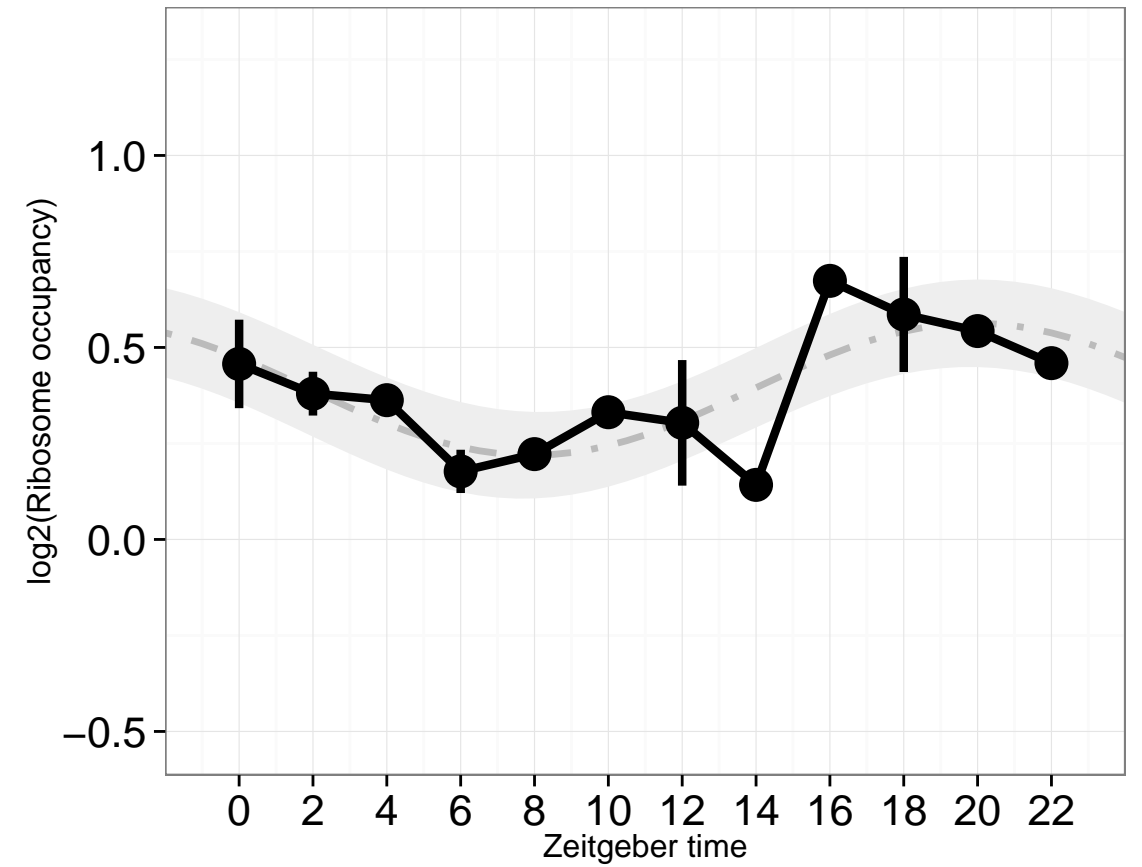

Supplement: Supplementary file 8482 [file 1]

## Zfp825

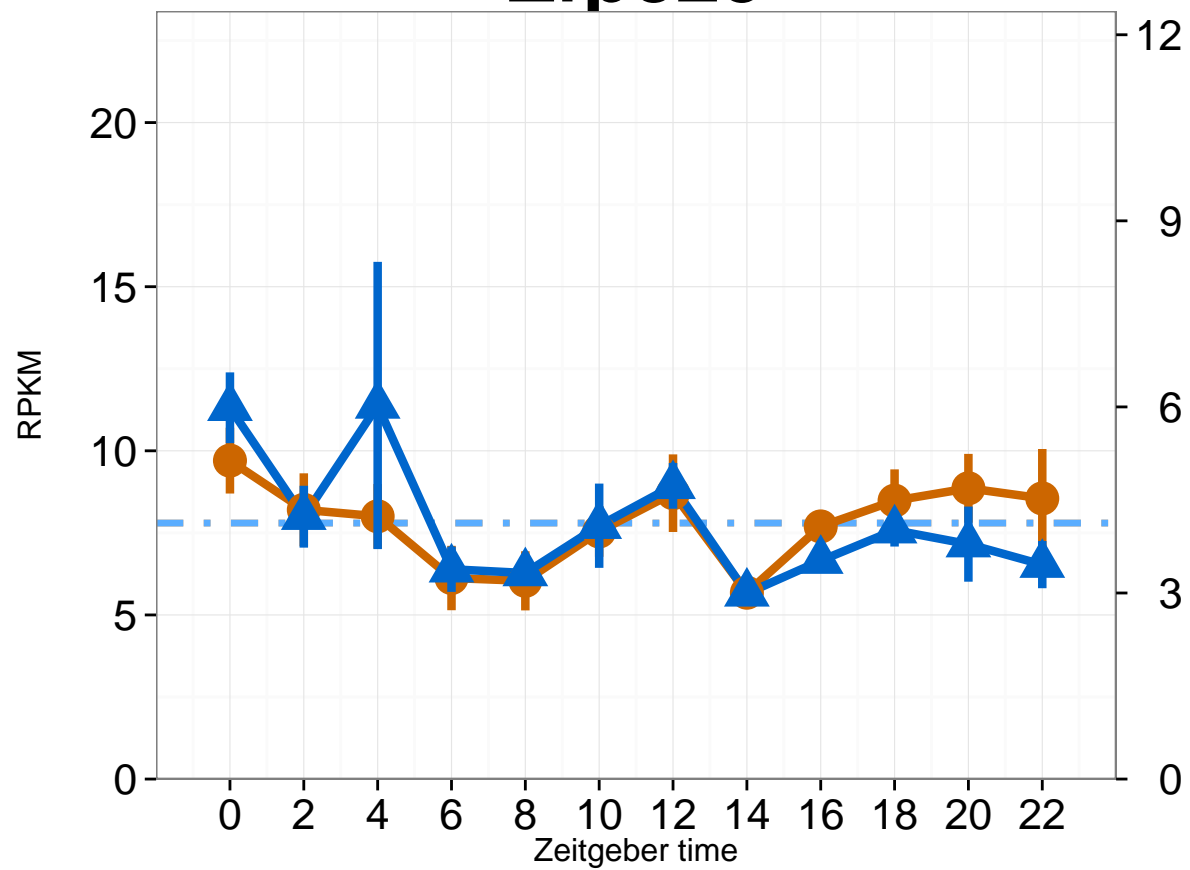

## Zfp825

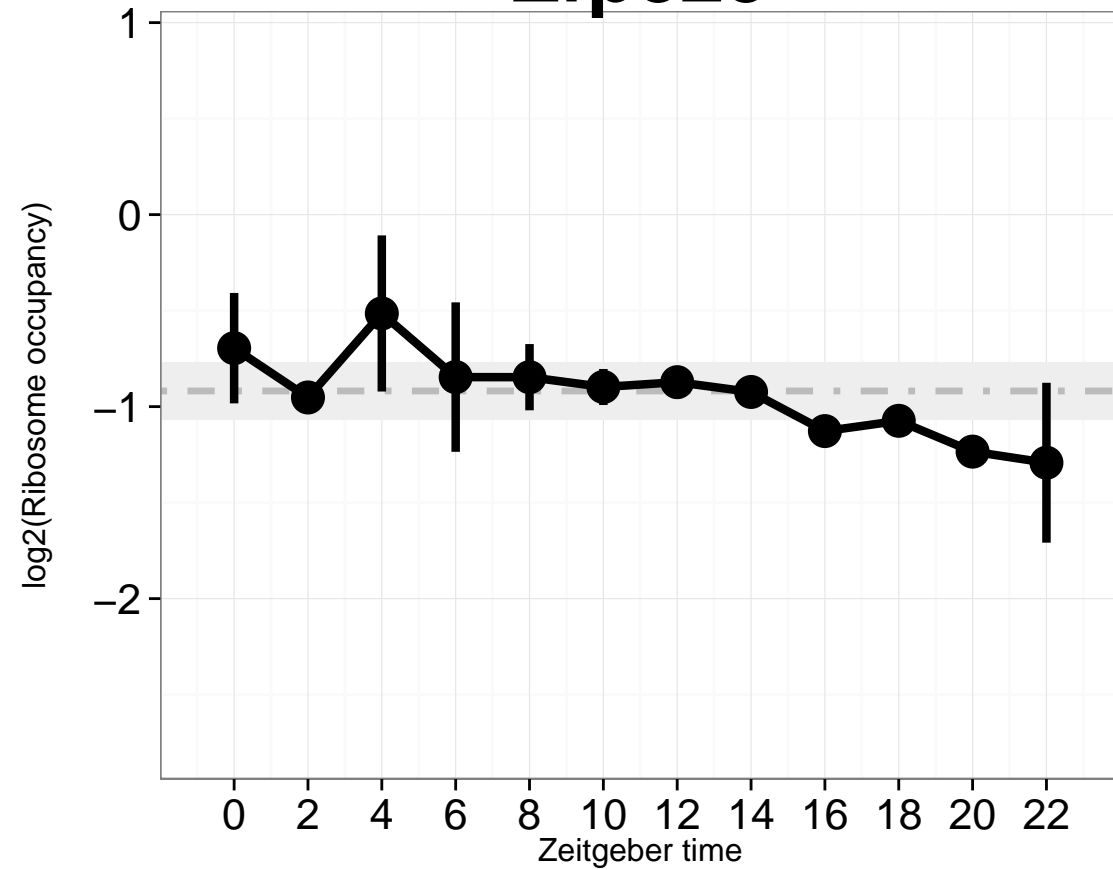

Supplement: Supplementary file 8483 [file 1]

## Trim3

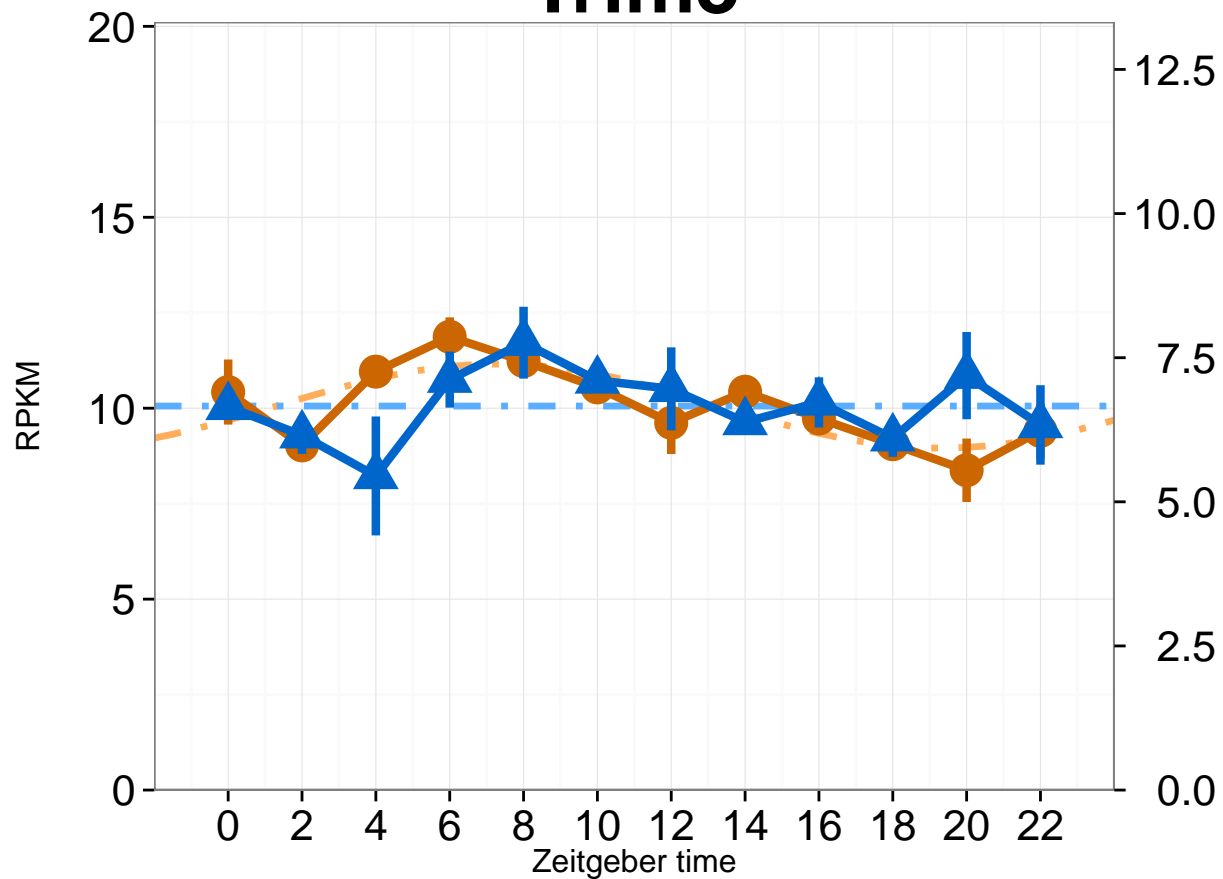

## Trim3

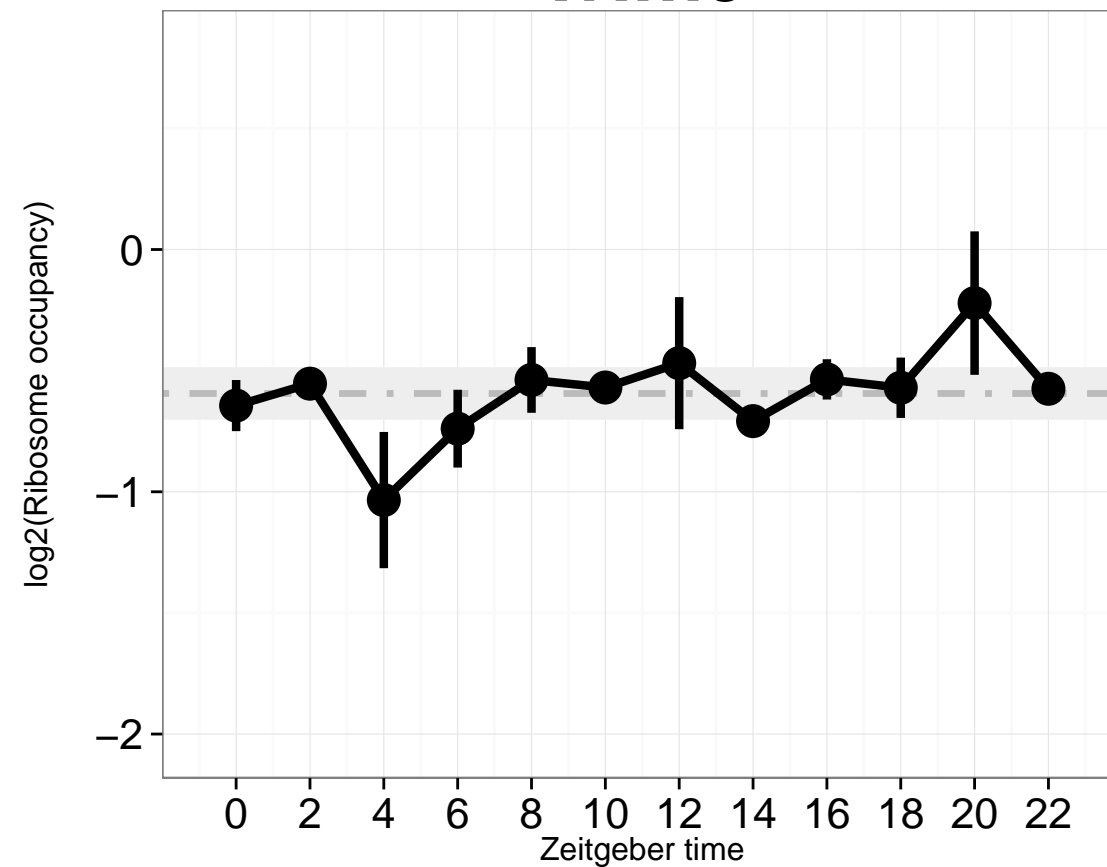

Supplement: Supplementary file 8484 [file 1]

# Ccne1

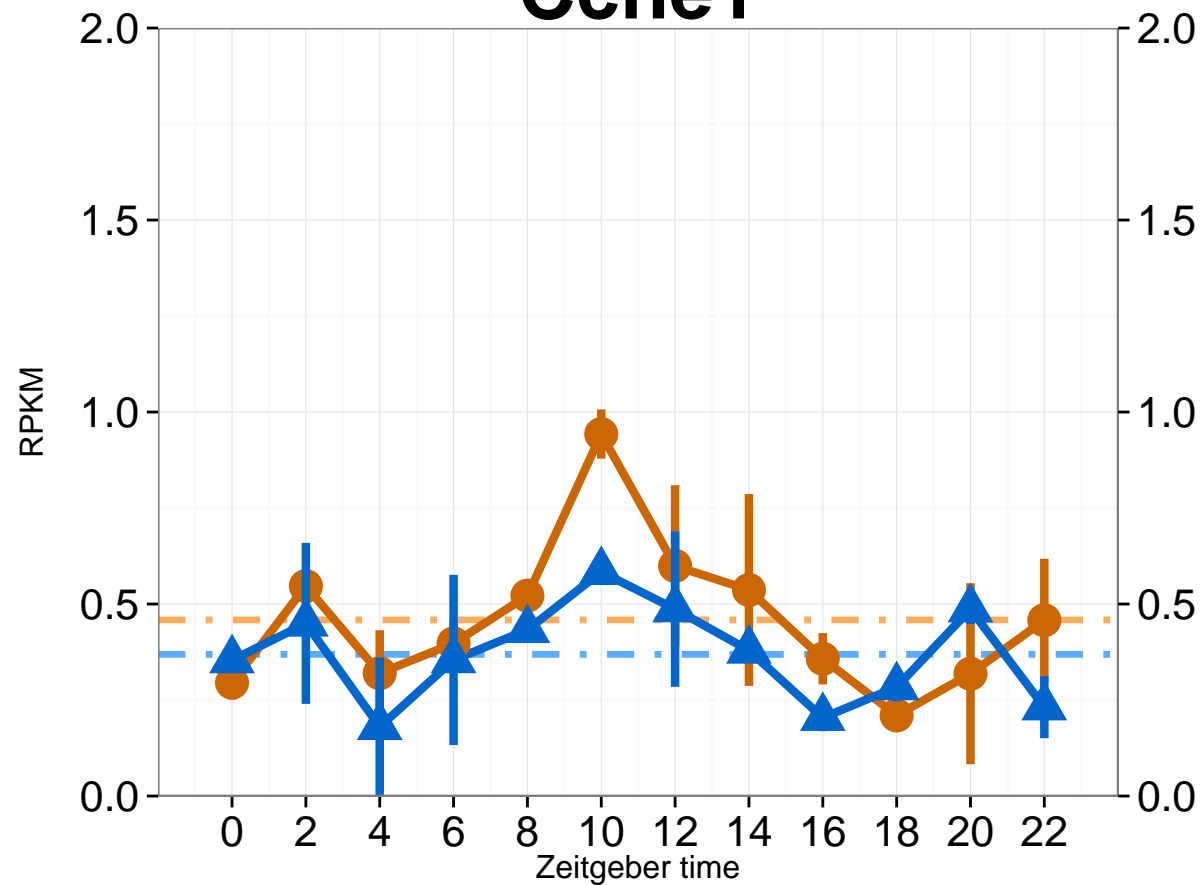

# Ccne1

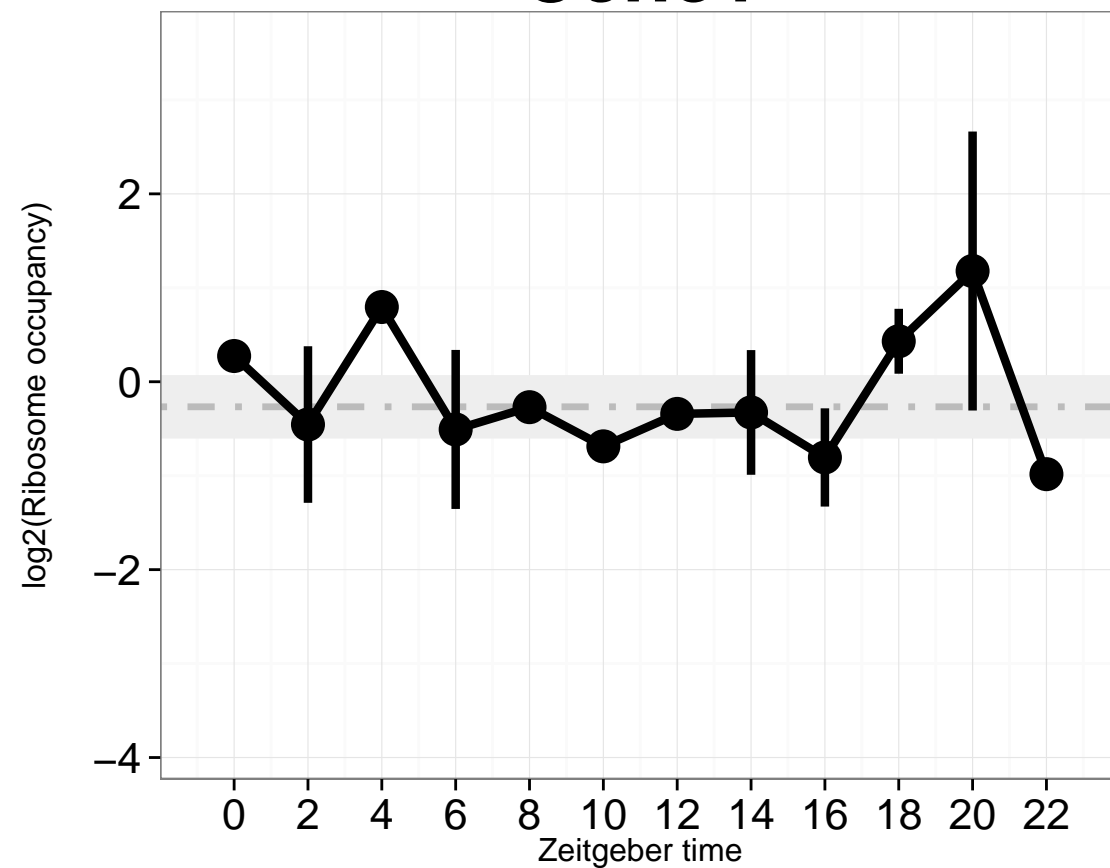

Supplement: Supplementary file 8485 [file 1]

## Gpd1l

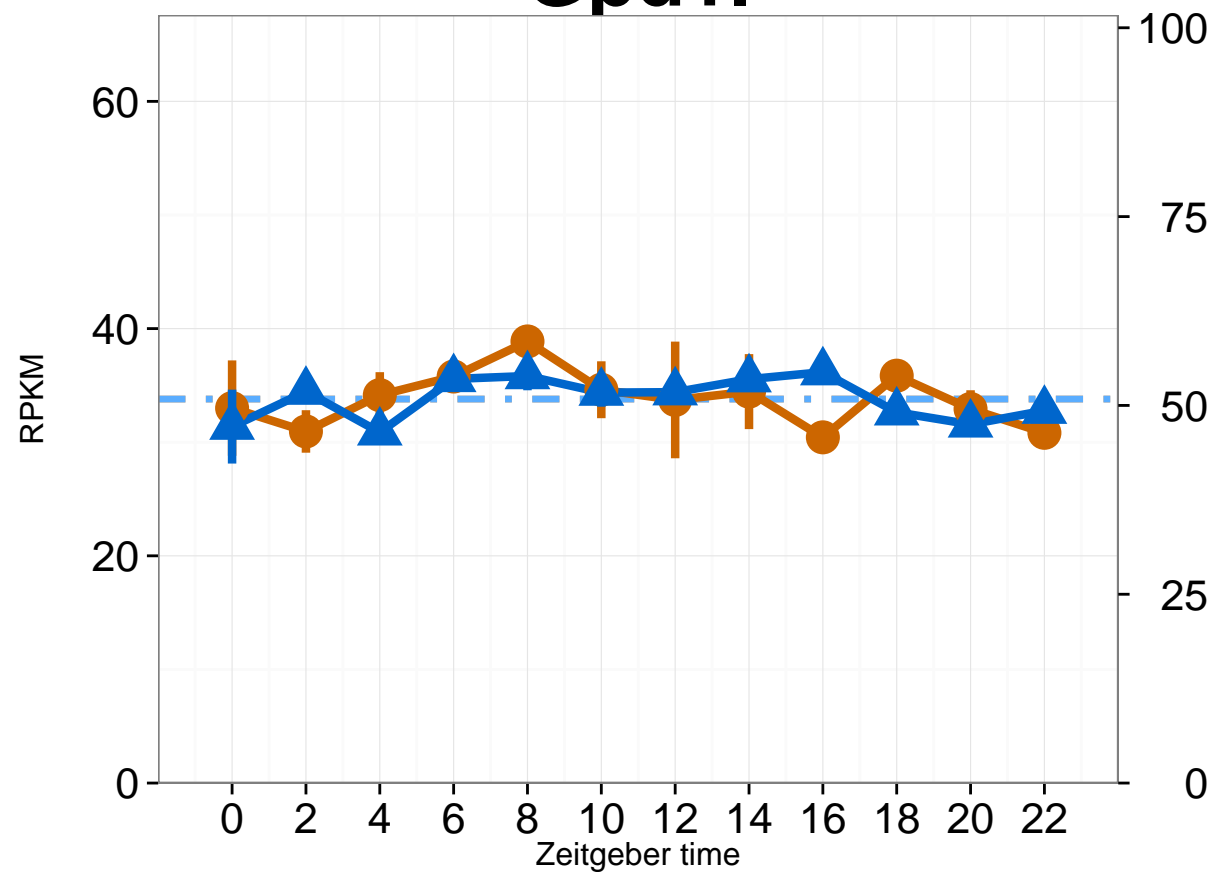

## Gpd1l

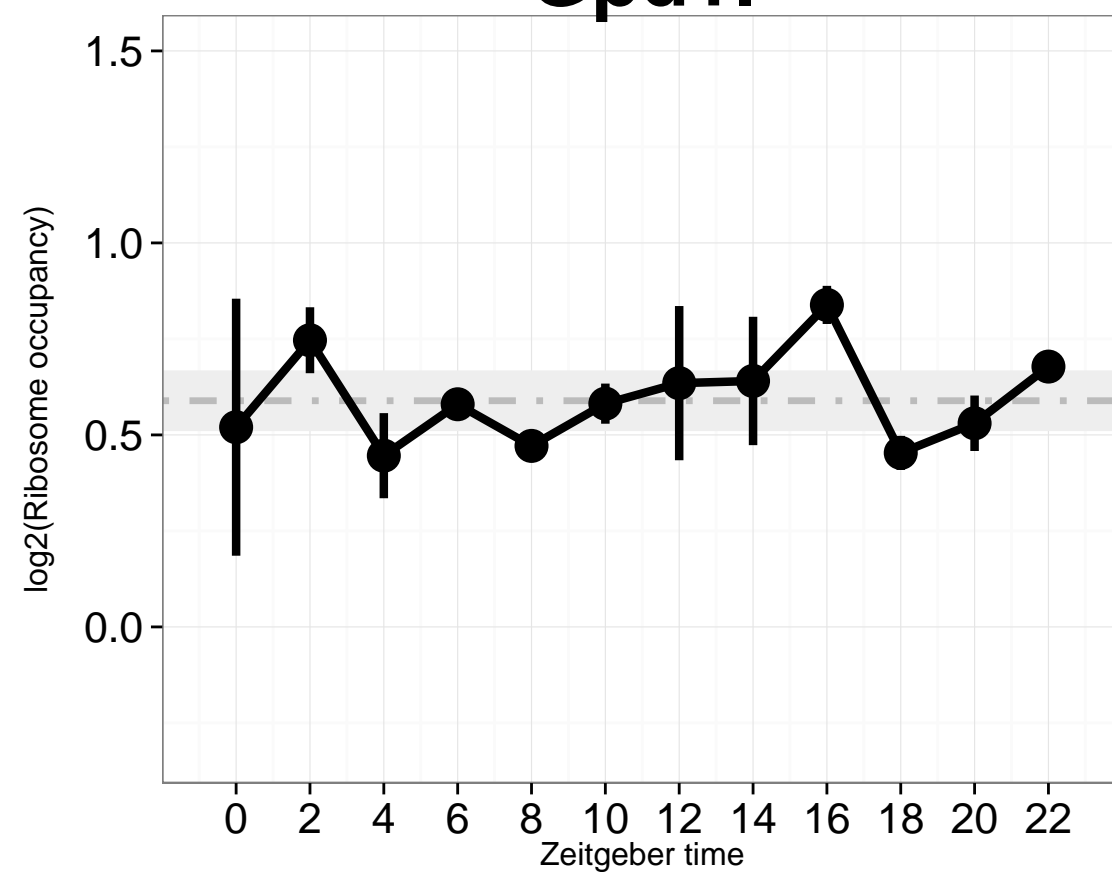

Supplement: Supplementary file 8486 [file 1]

## Btaf1

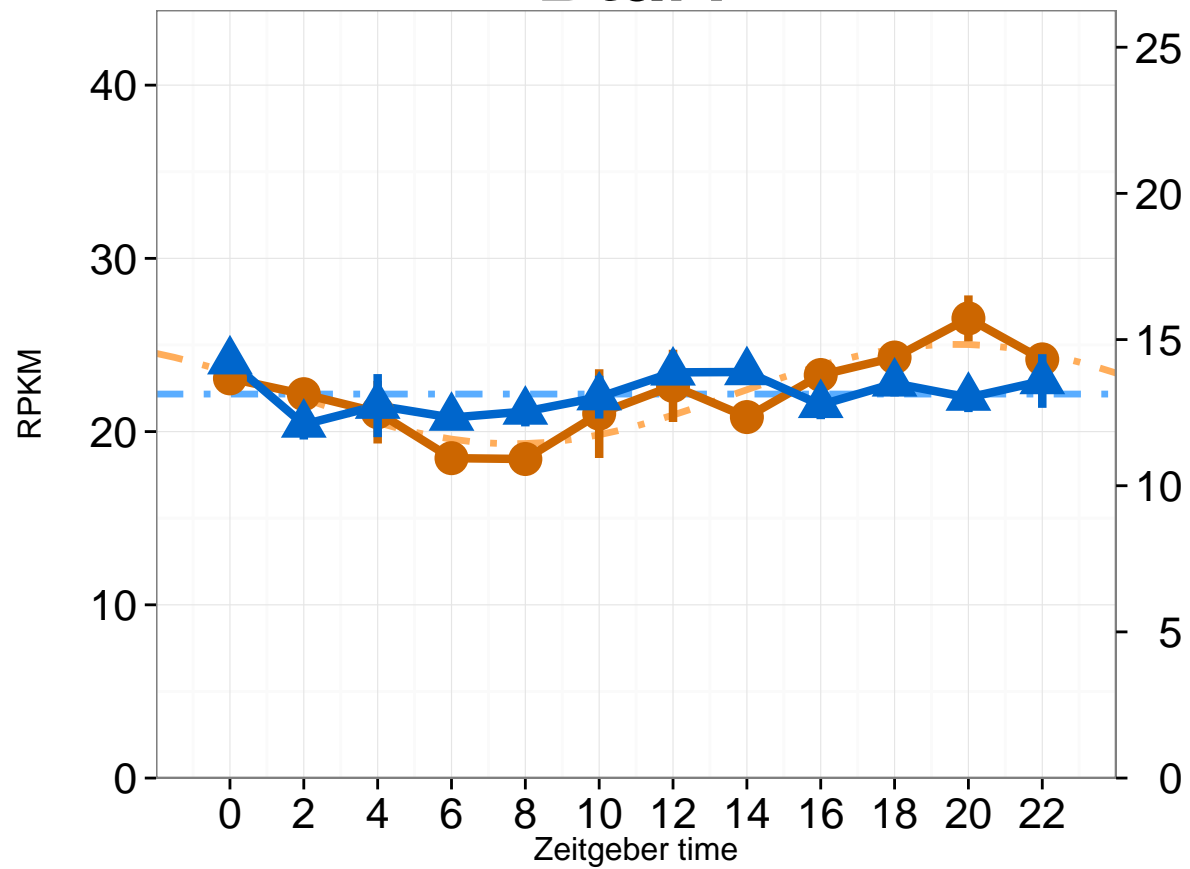

## Btaf1

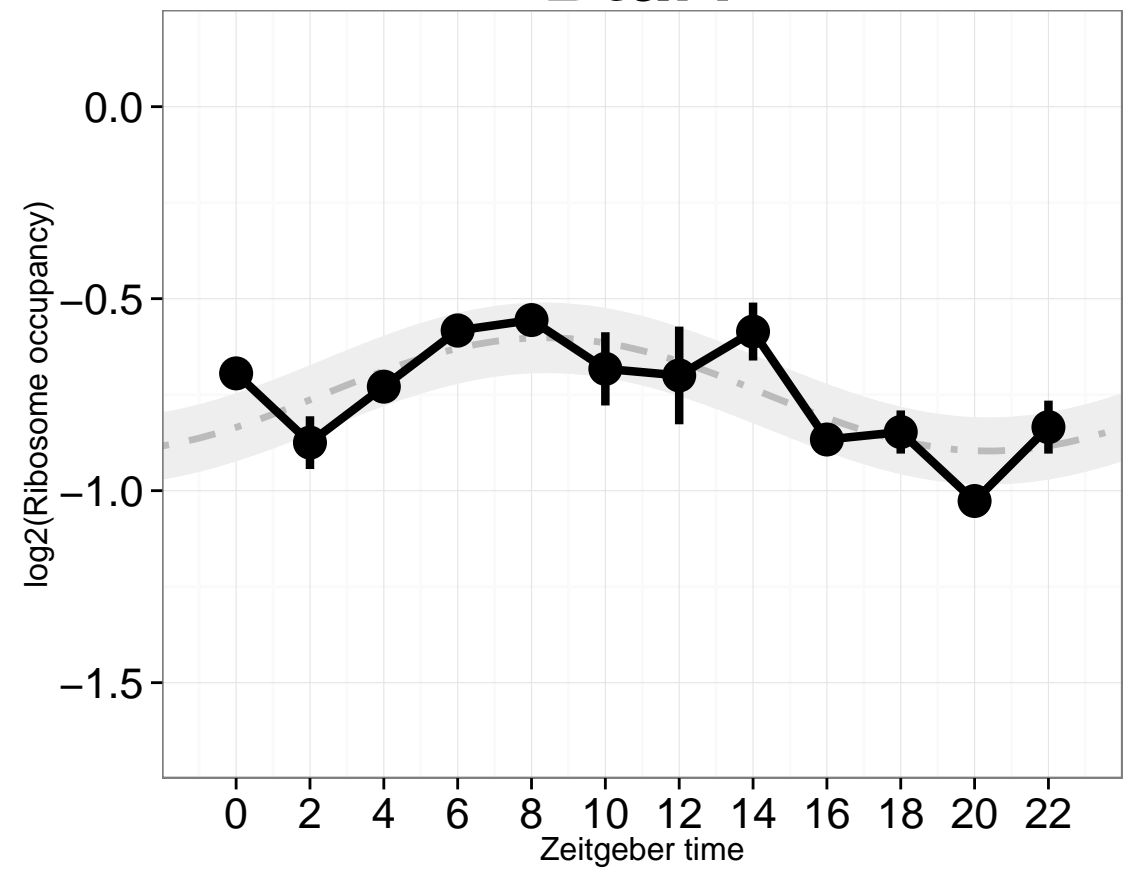

Supplement: Supplementary file 8487 [file 1]

## Plin1

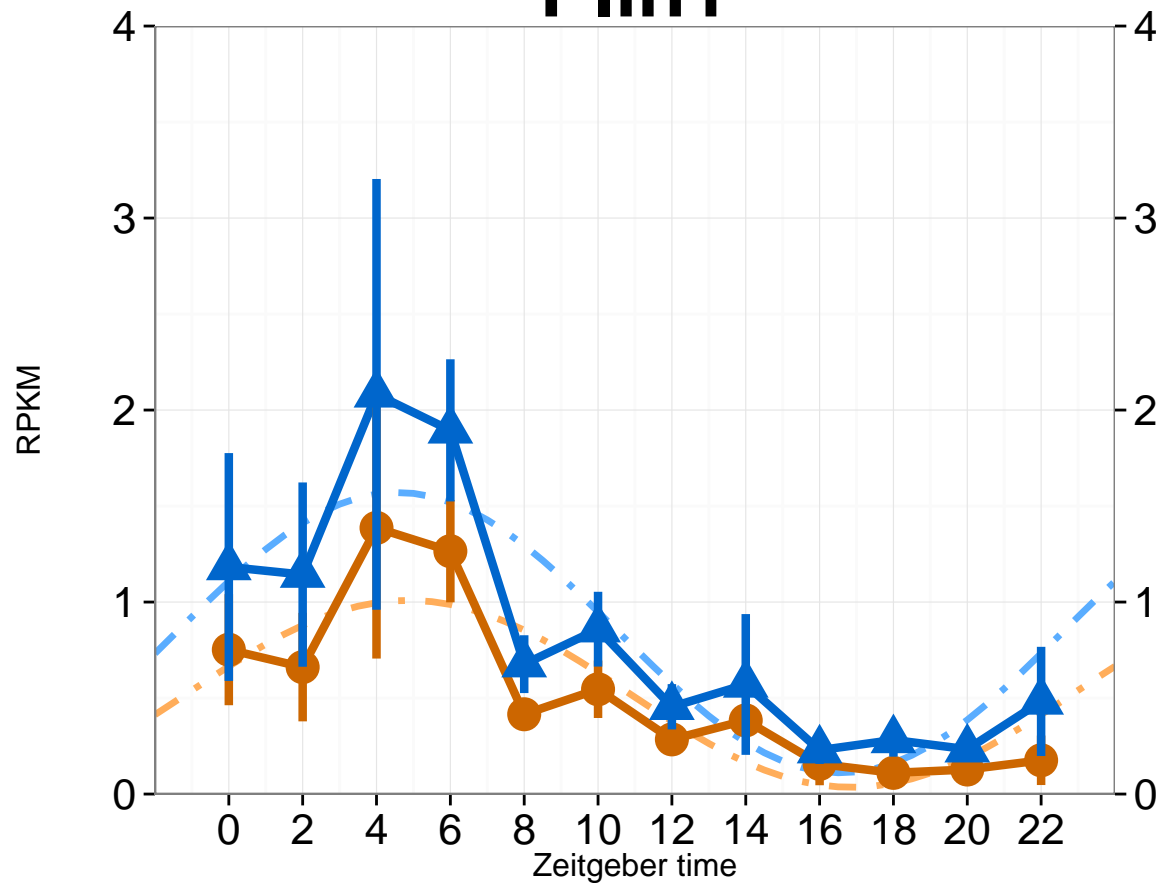

## Plin1

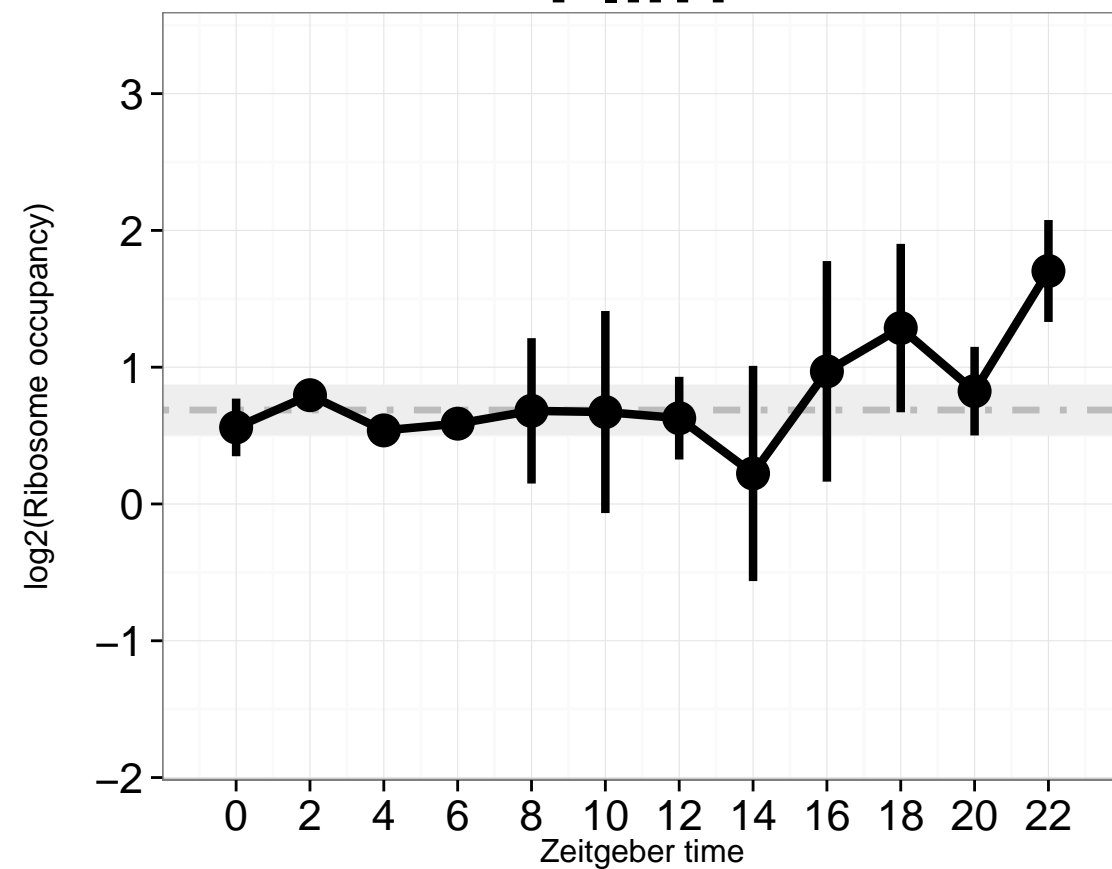

Supplement: Supplementary file 8488 [file 1]

## Cachd1

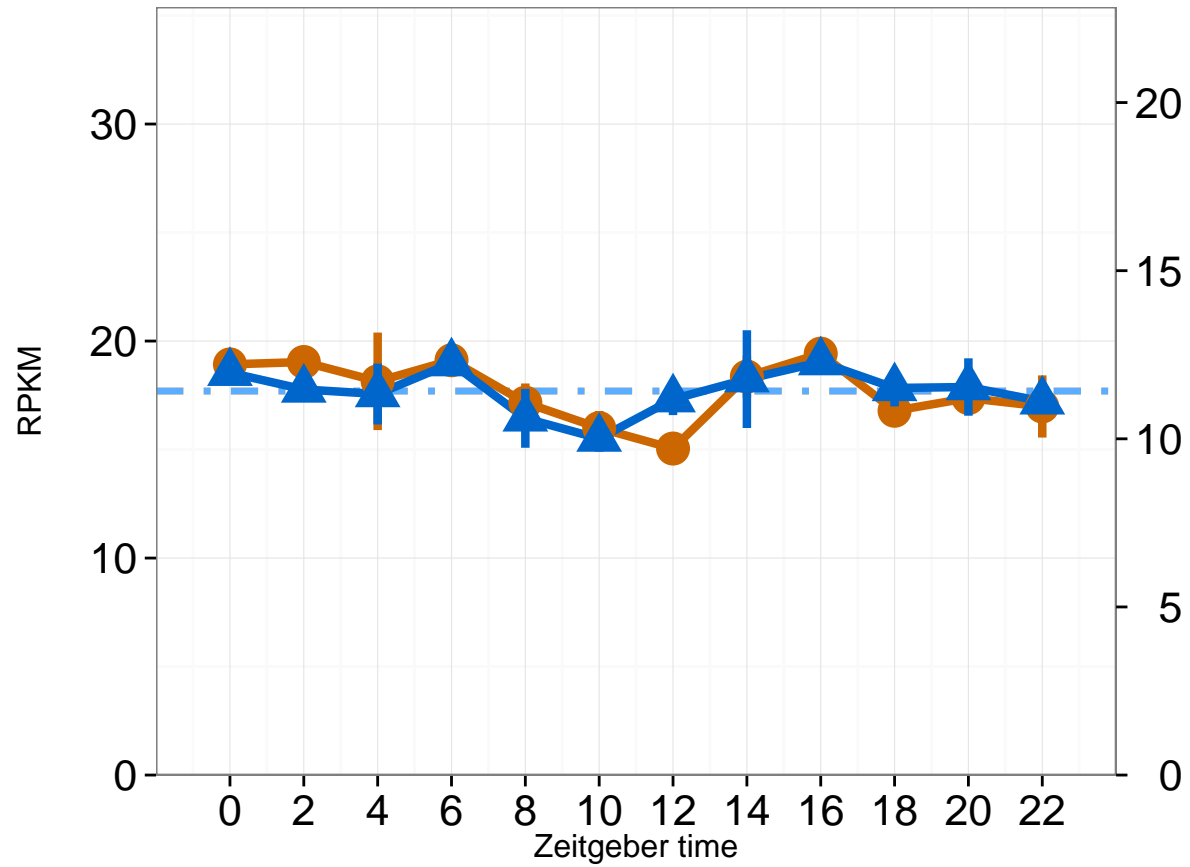

## Cachd1

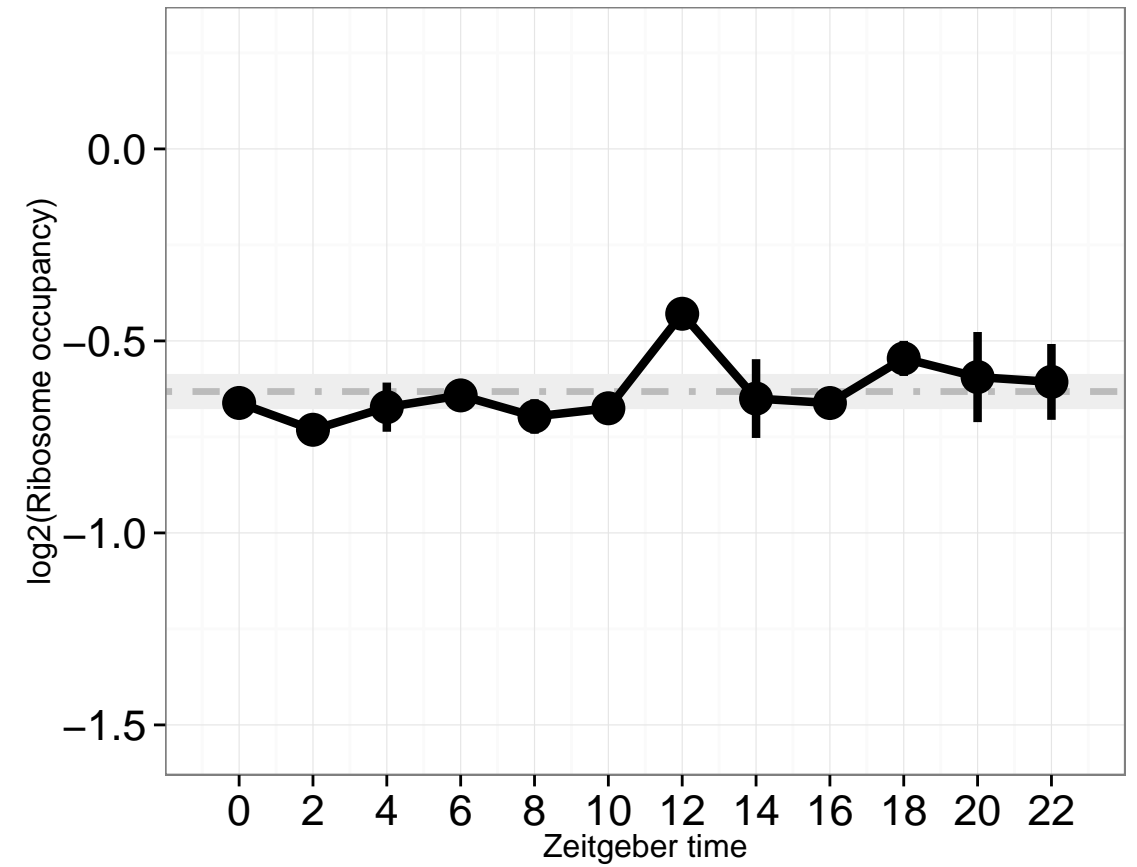

Supplement: Supplementary file 8489 [file 1]

## Cenpn

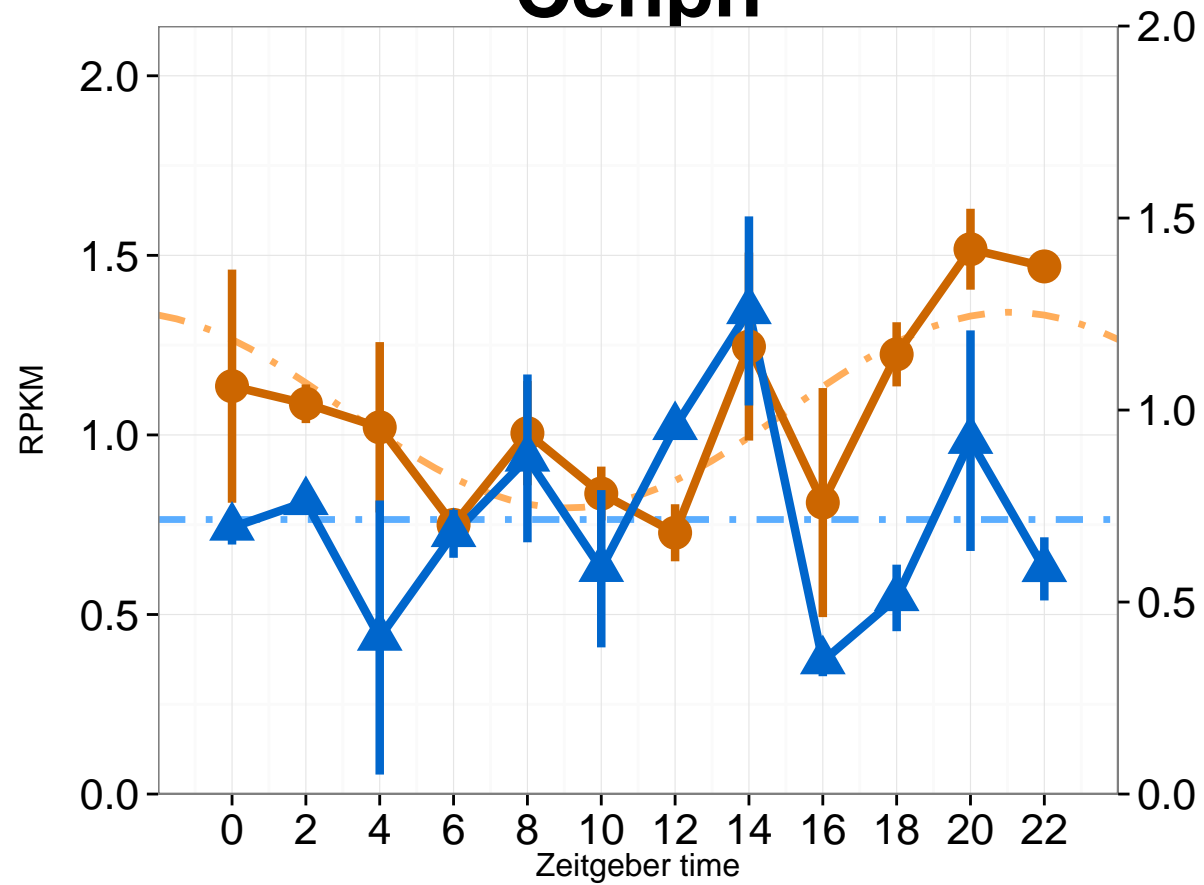

## Cenpn

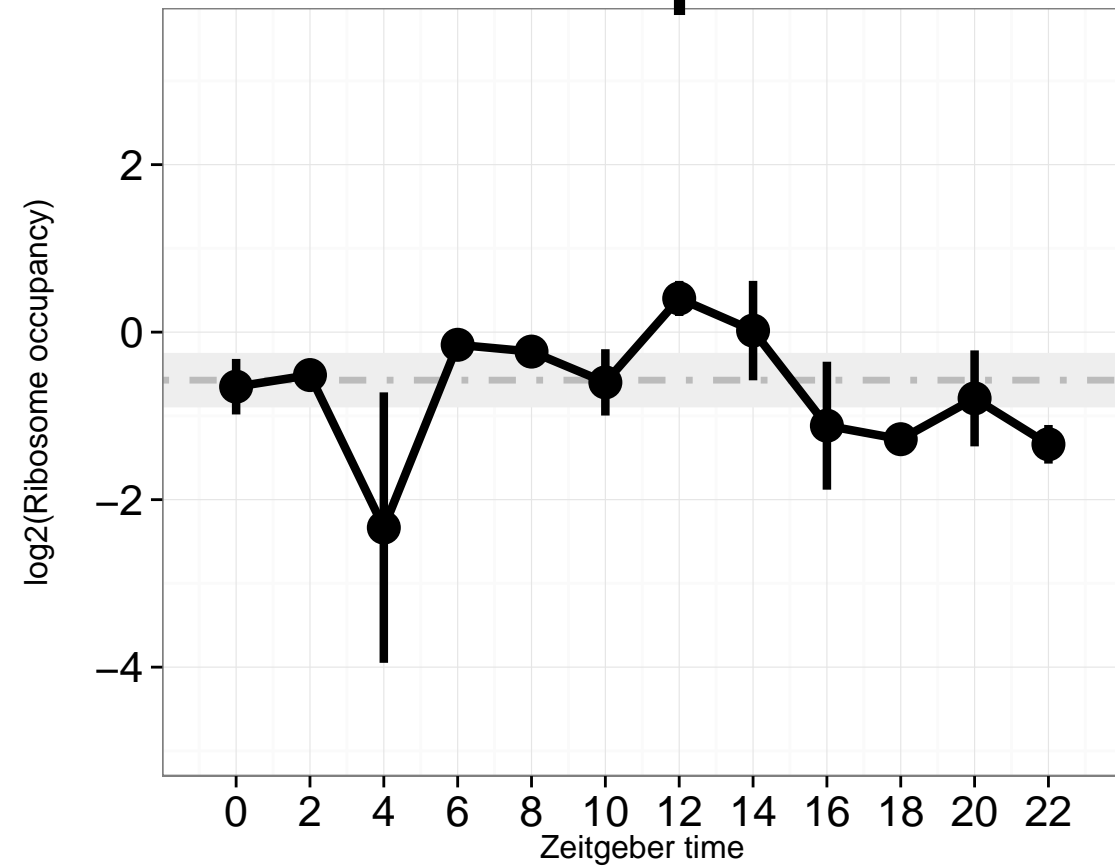

Supplement: Supplementary file 8490 [file 1]

## Bysl

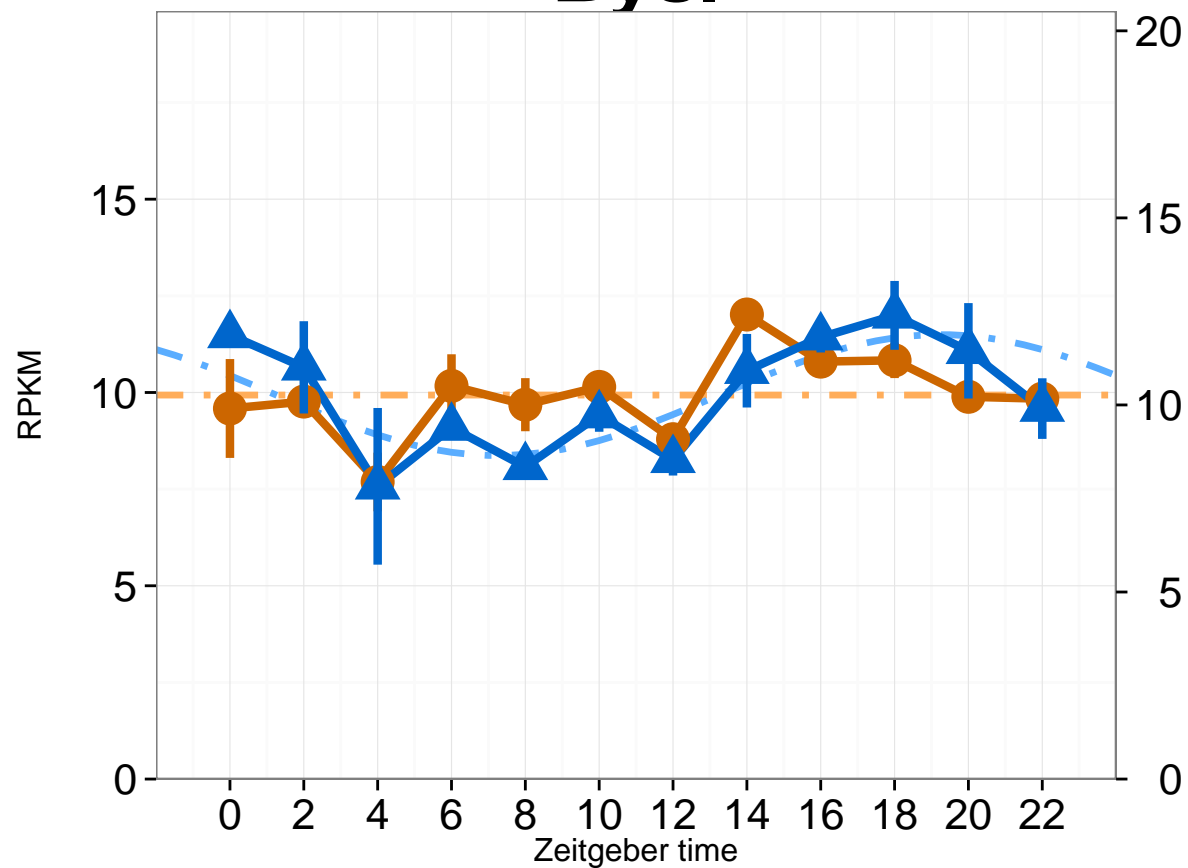

## Bysl

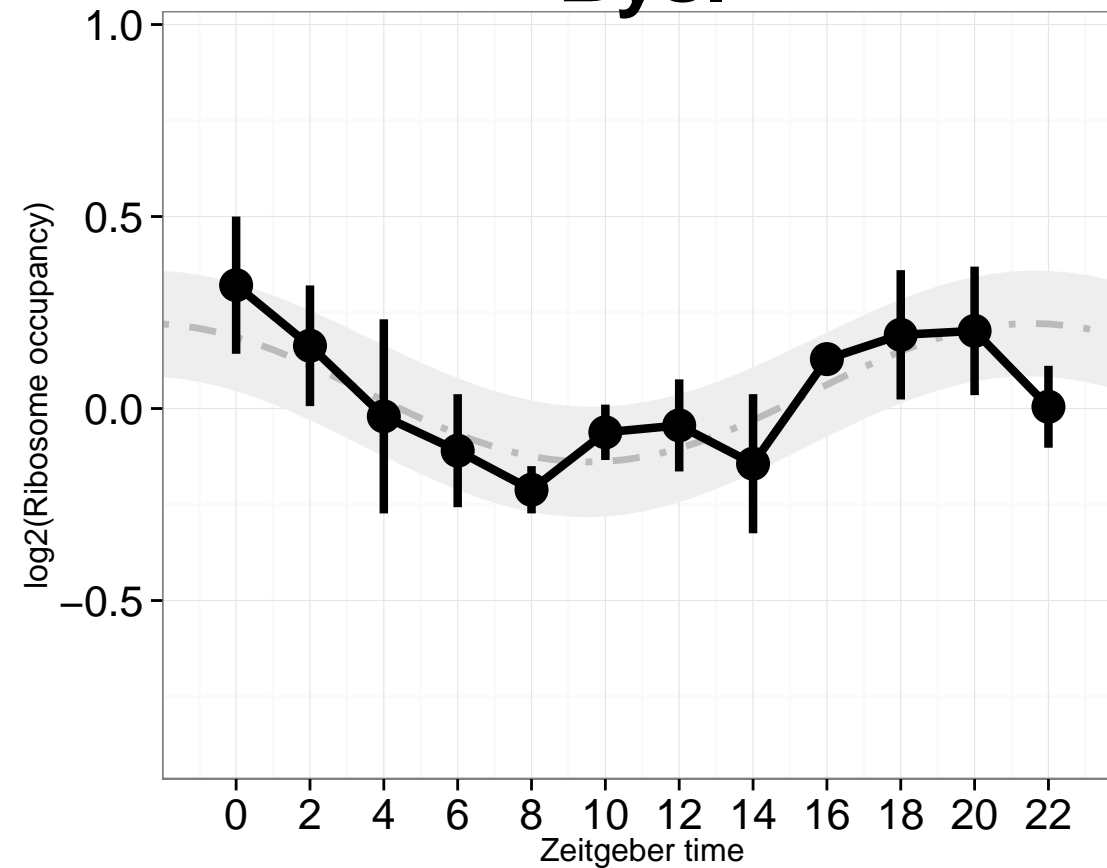

Supplement: Supplementary file 8491 [file 1]

## Epha1

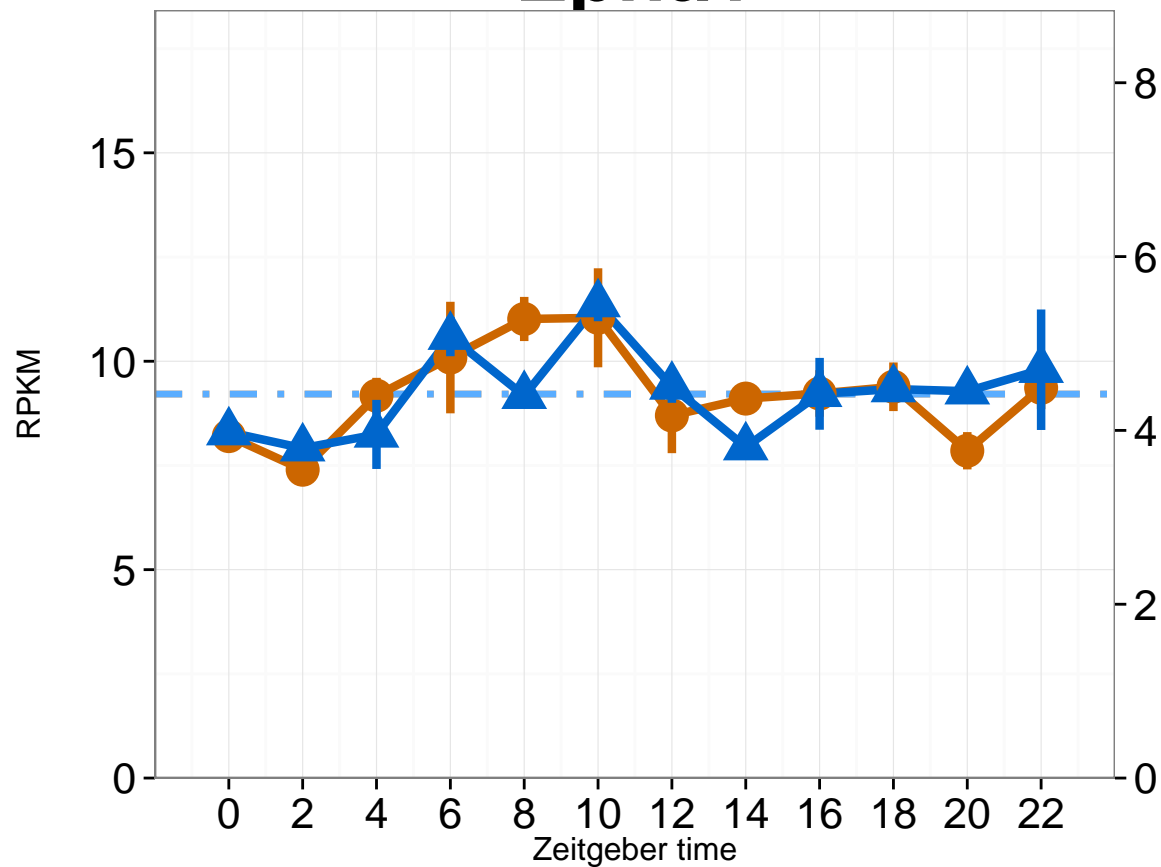

## Epha1

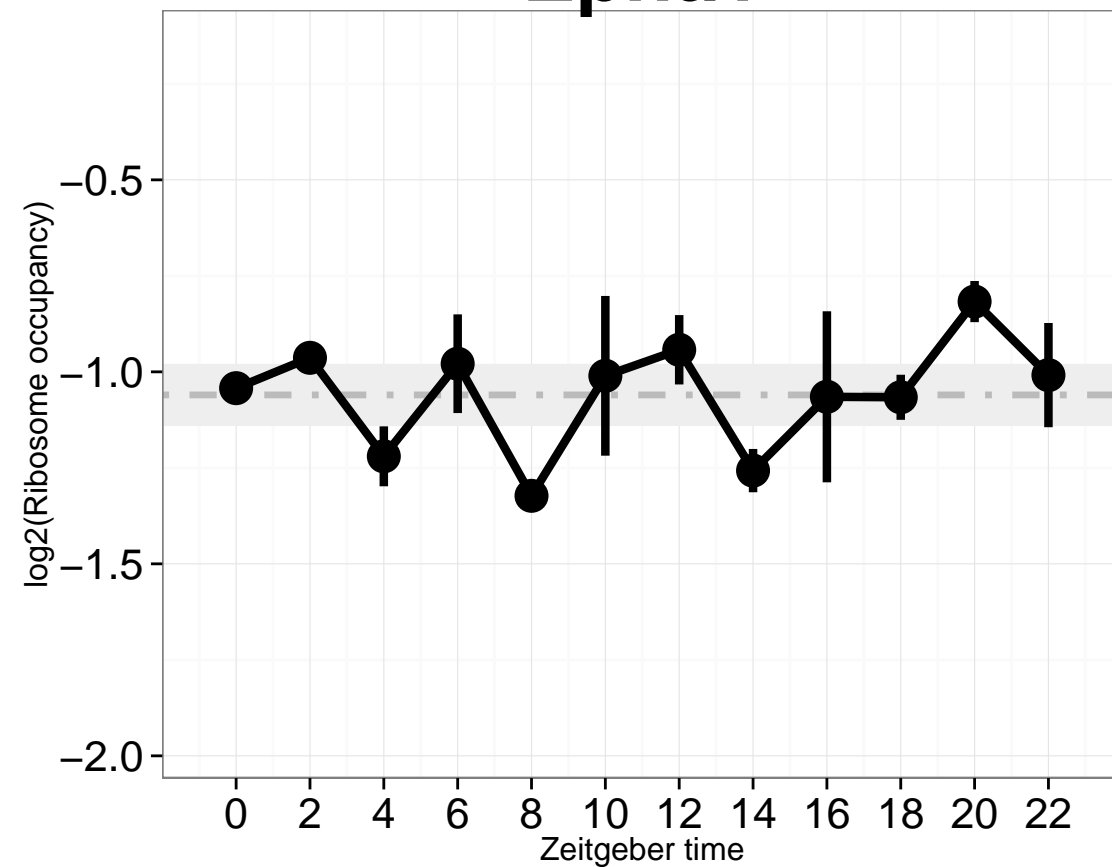

Supplement: Supplementary file 8492 [file 1]

## Spcs3

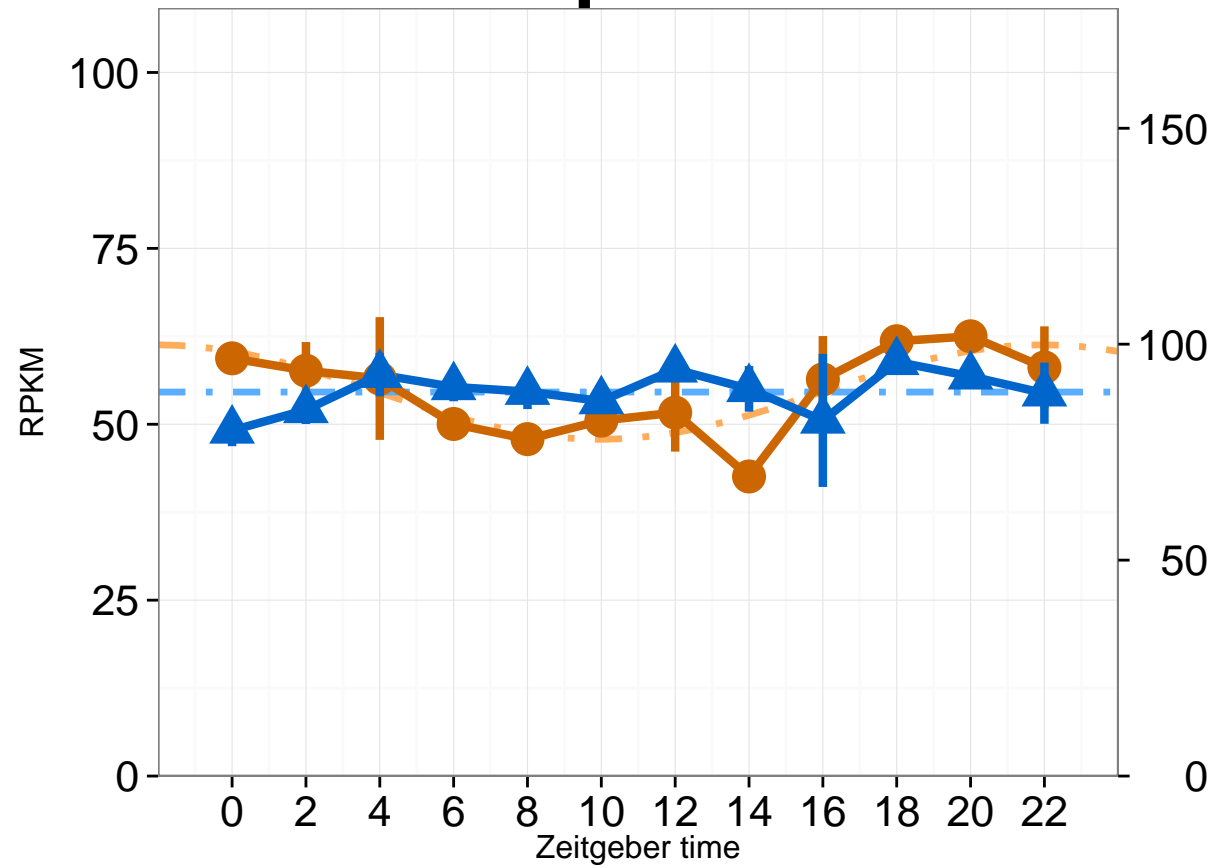

## Spcs3

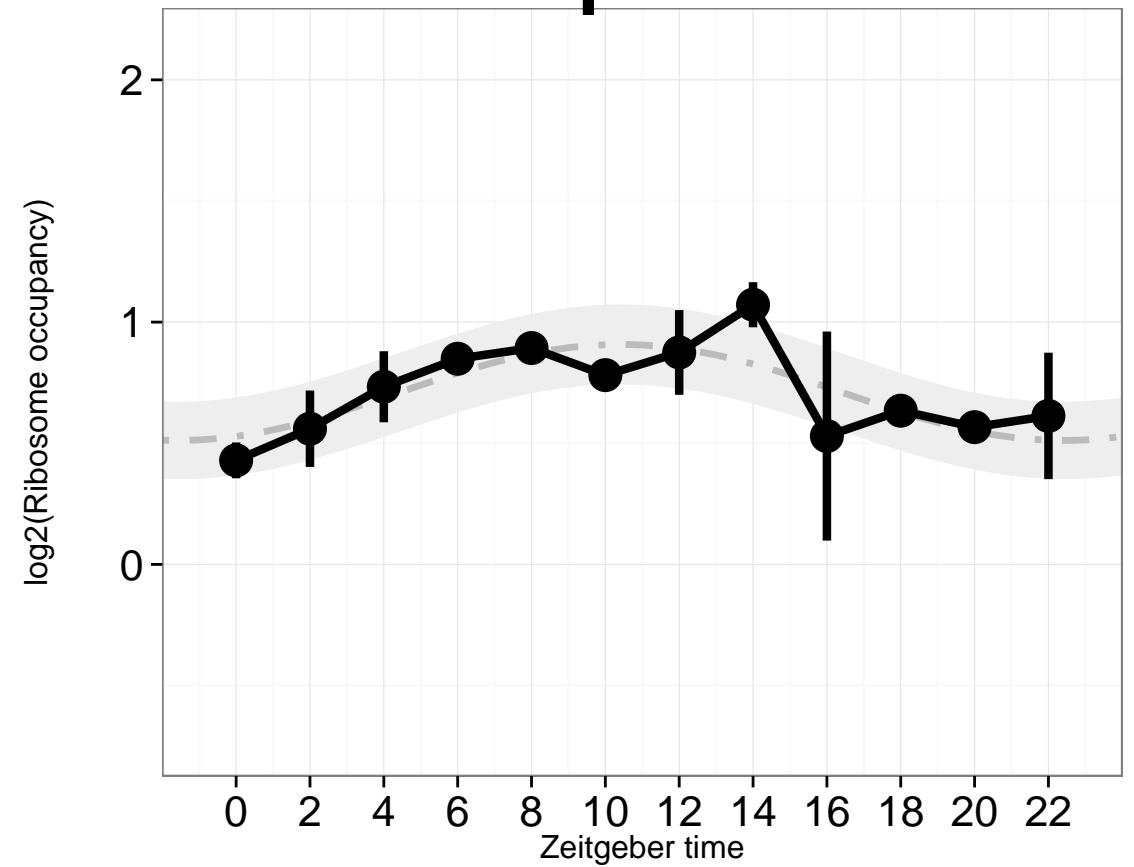

Supplement: Supplementary file 8493 [file 1]

# Ptrhd1

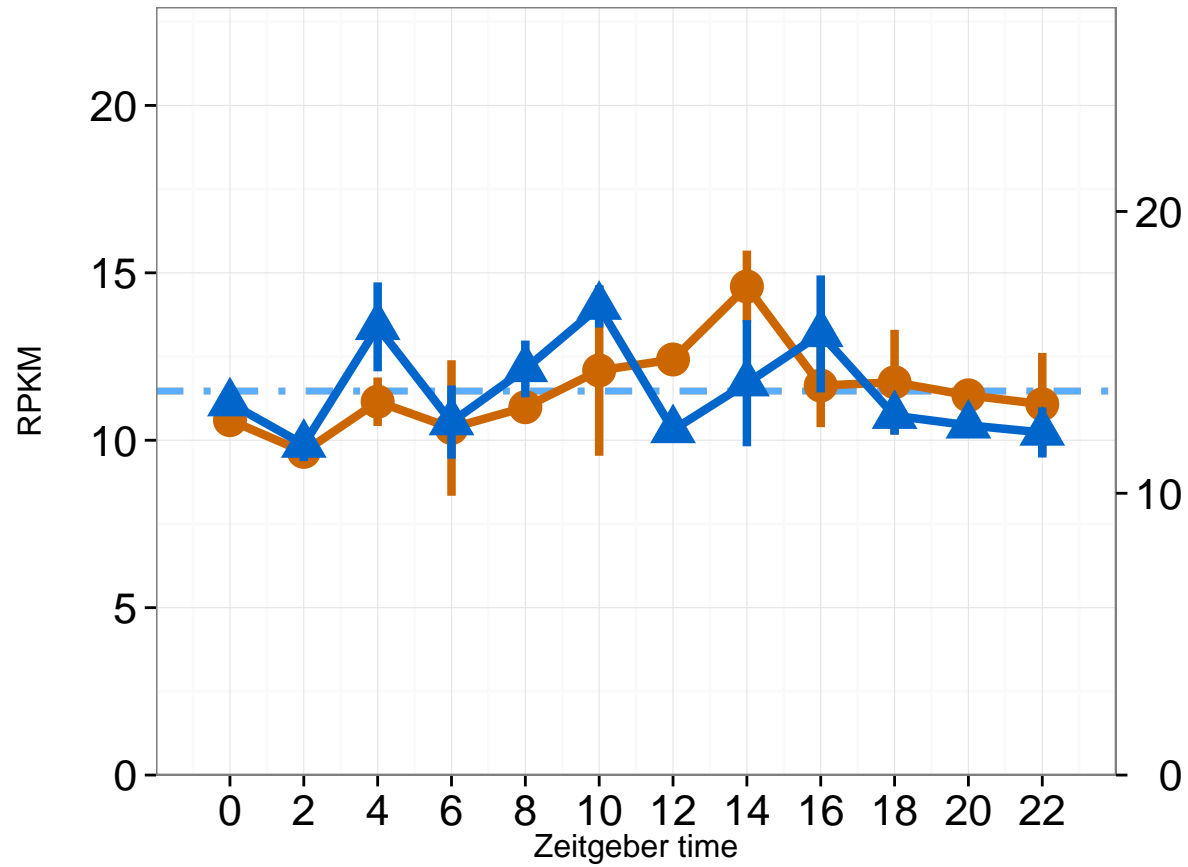

# Ptrhd1

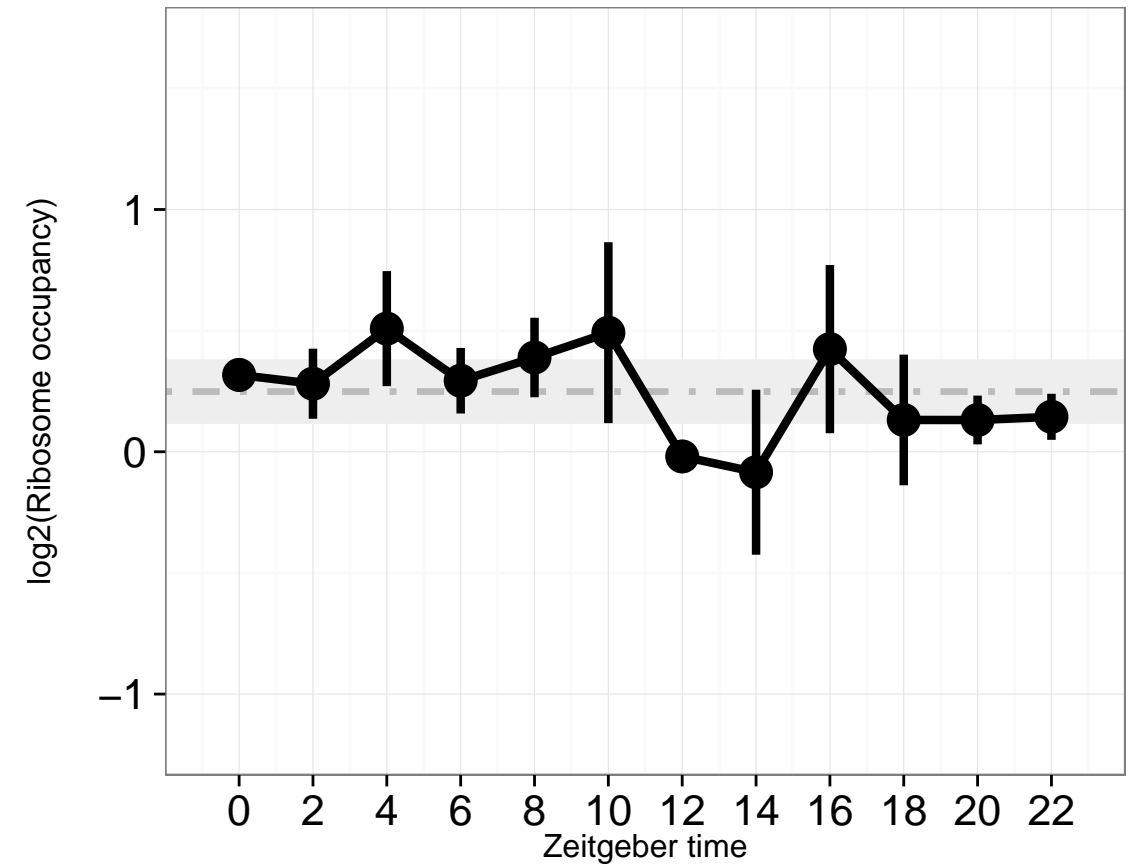

Supplement: Supplementary file 8494 [file 1]

# Smim1

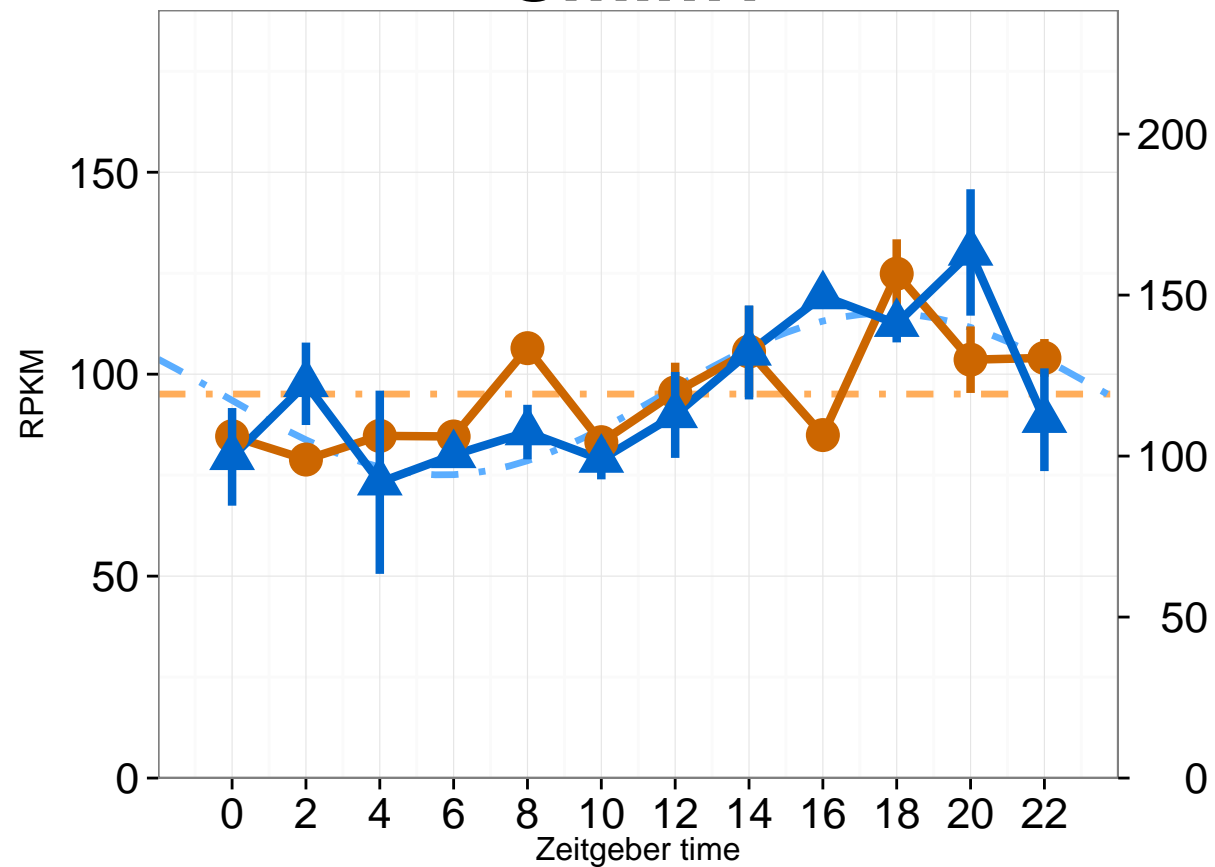

# Smim1

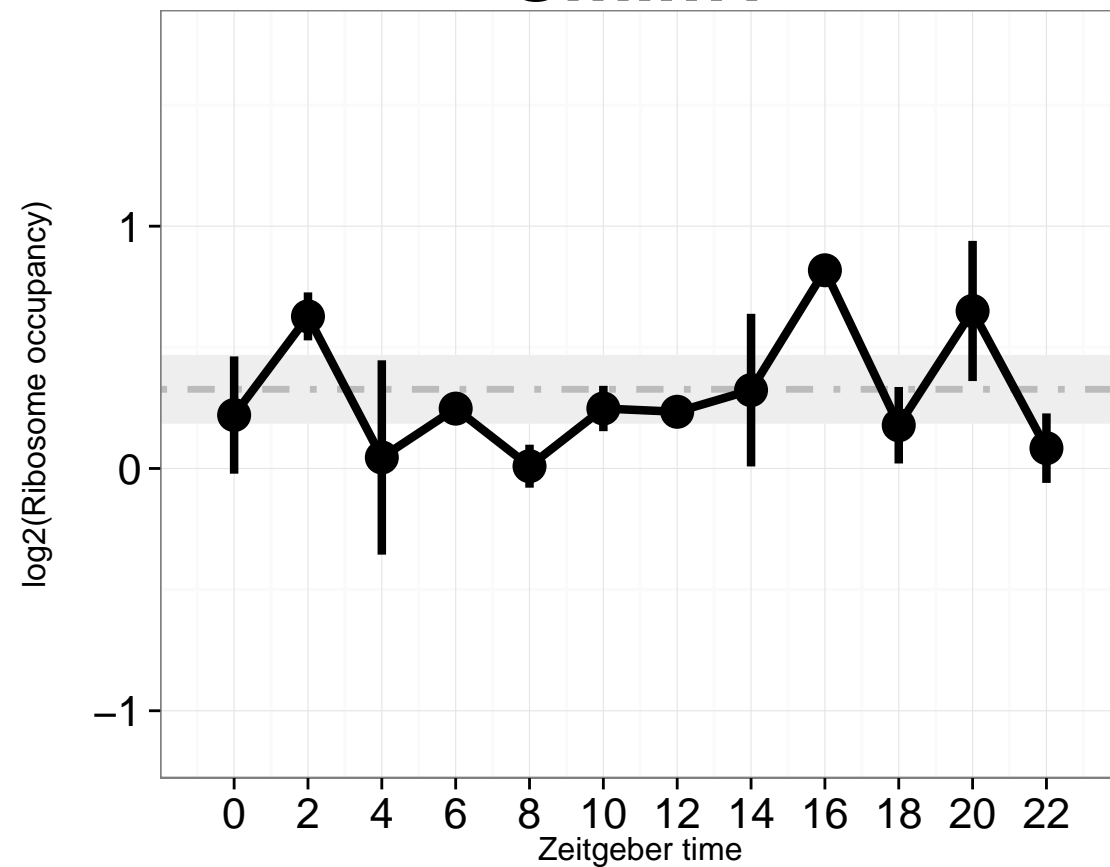

Supplement: Supplementary file 8495 [file 1]

## Smc3

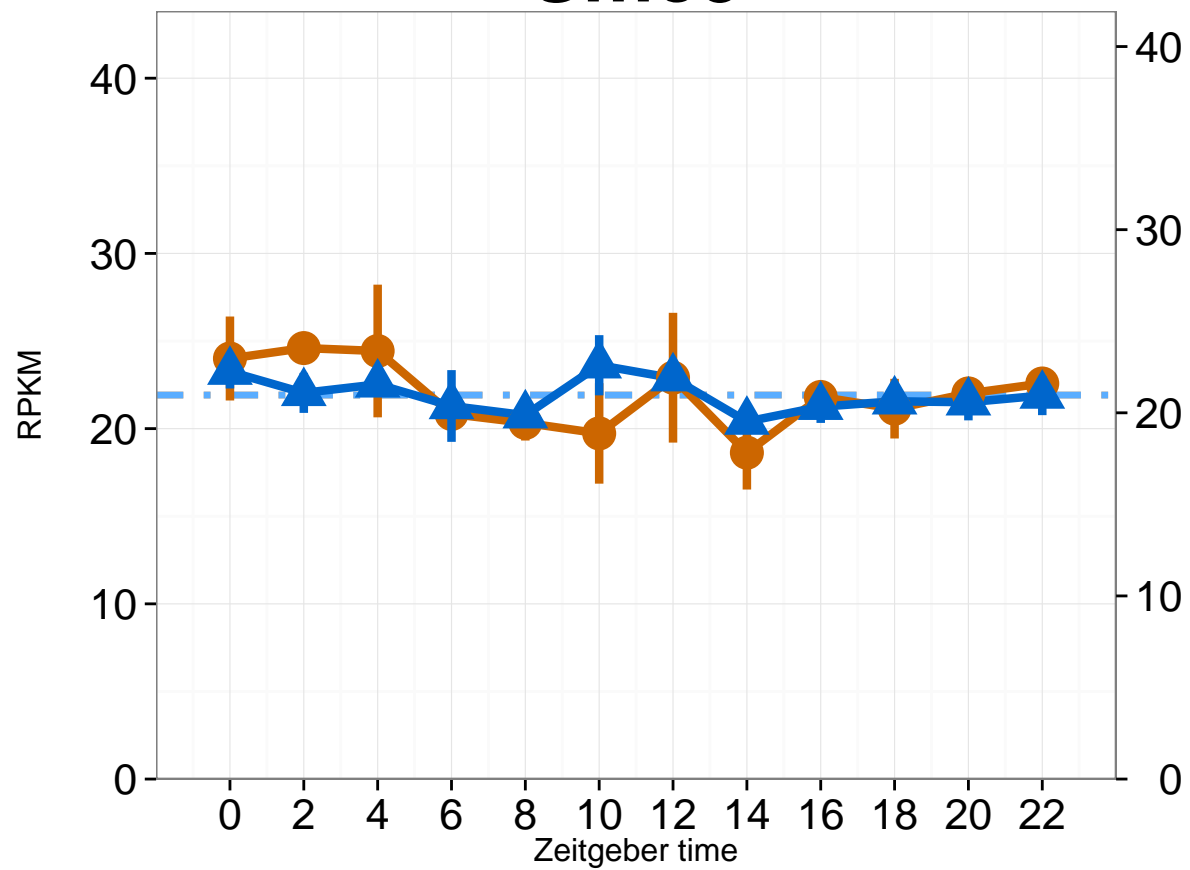

## Smc3

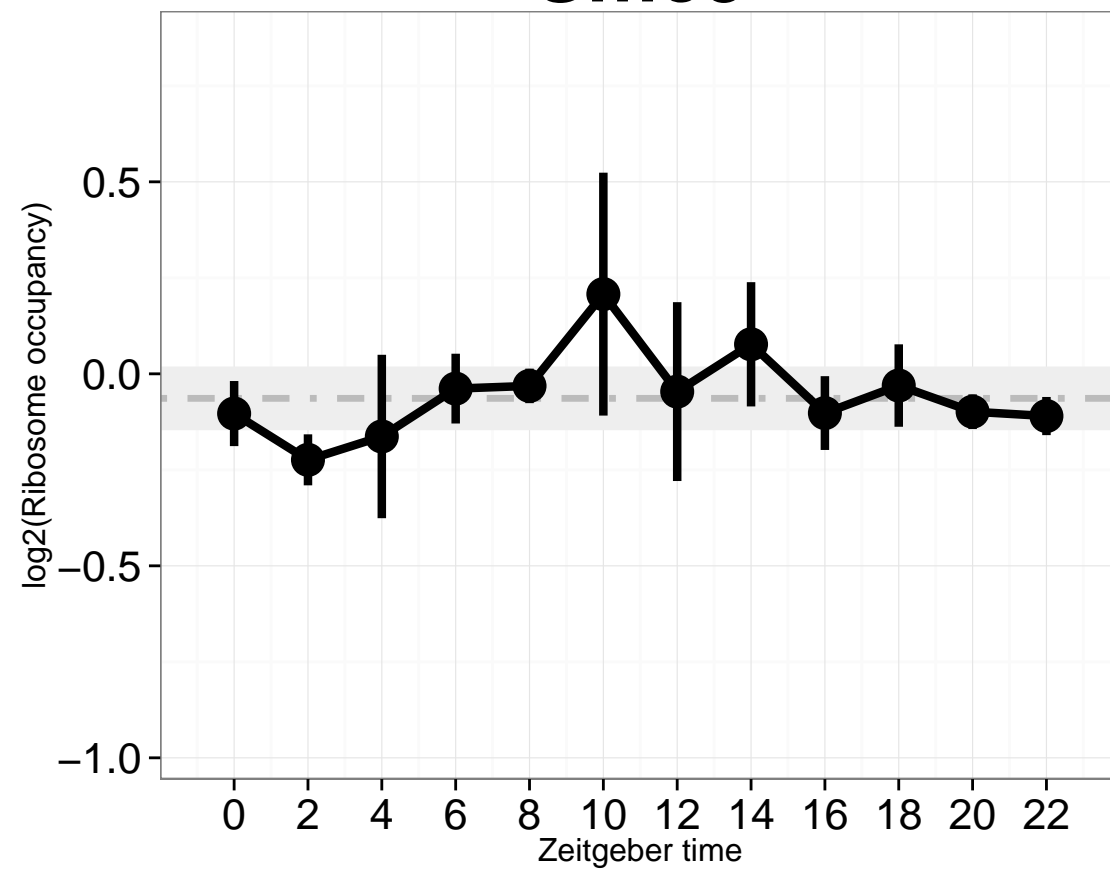

Supplement: Supplementary file 8496 [file 1]

# C1qtnf4

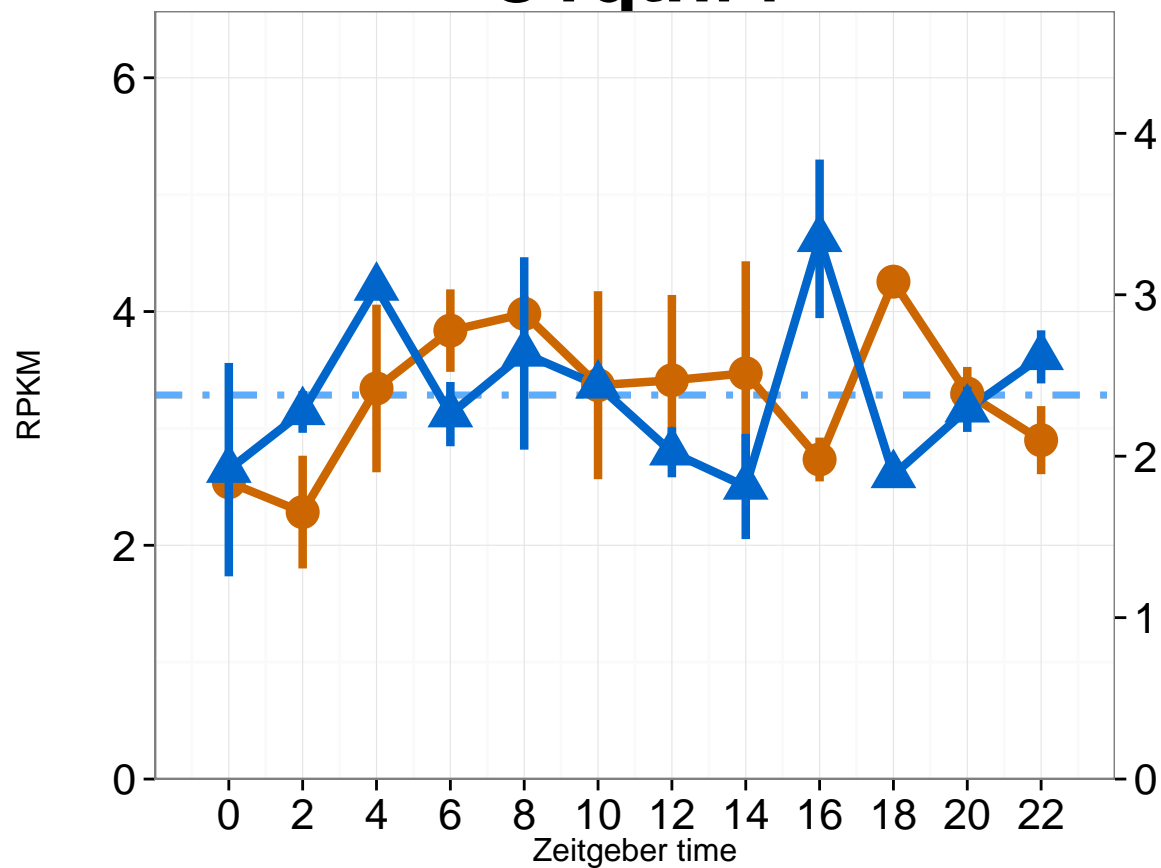

# C1qtnf4

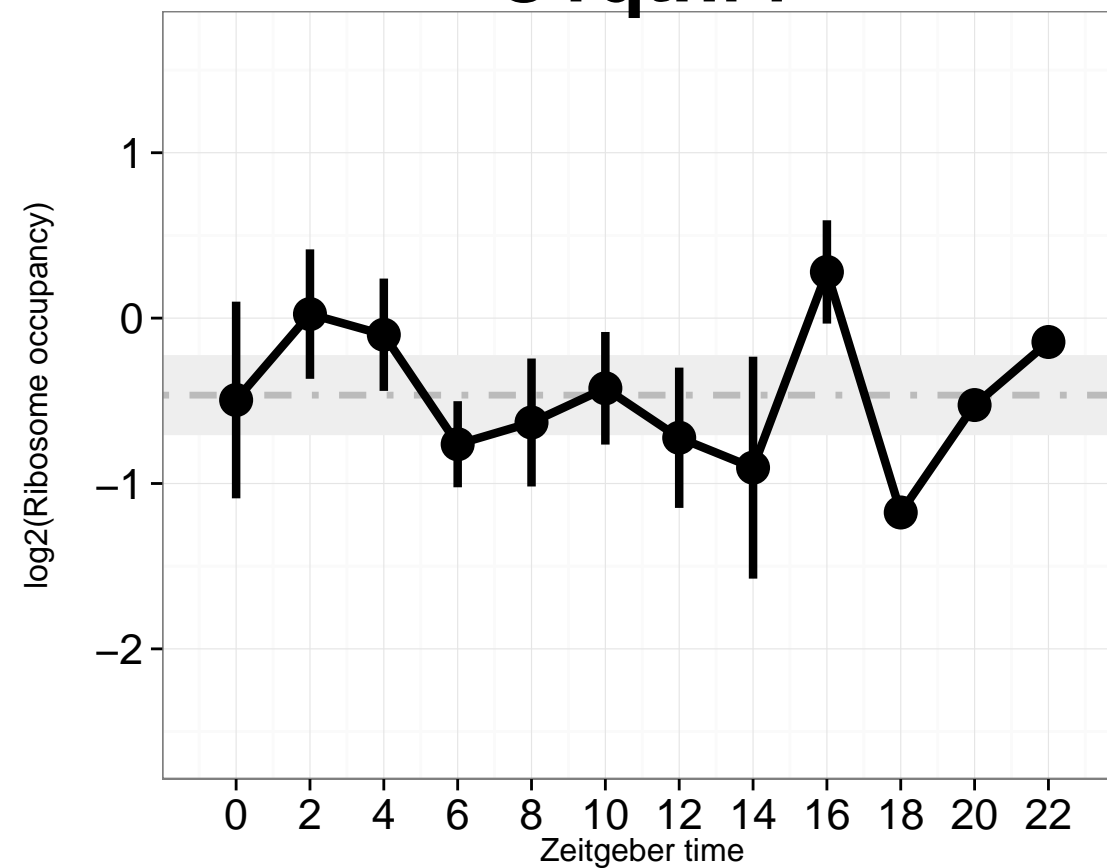

Supplement: Supplementary file 8497 [file 1]

# Cct2

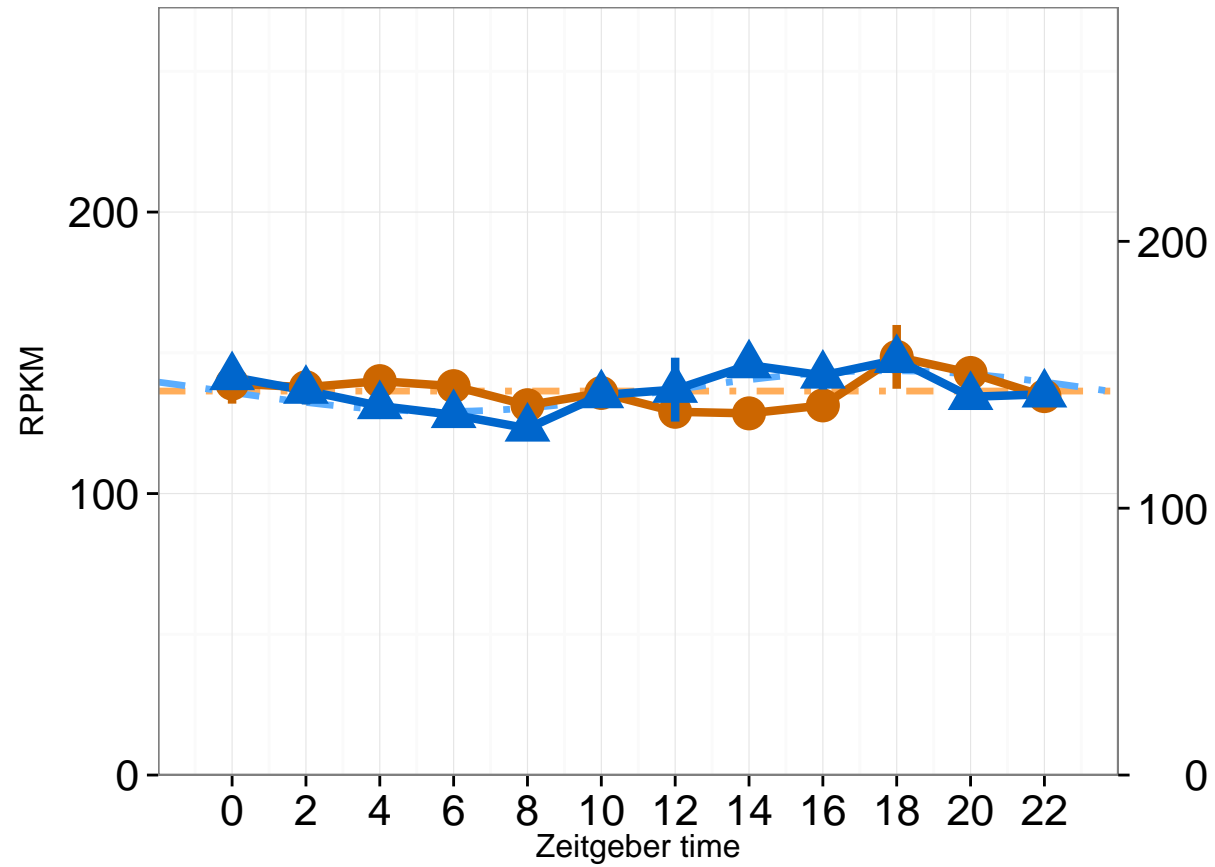

# Cct2

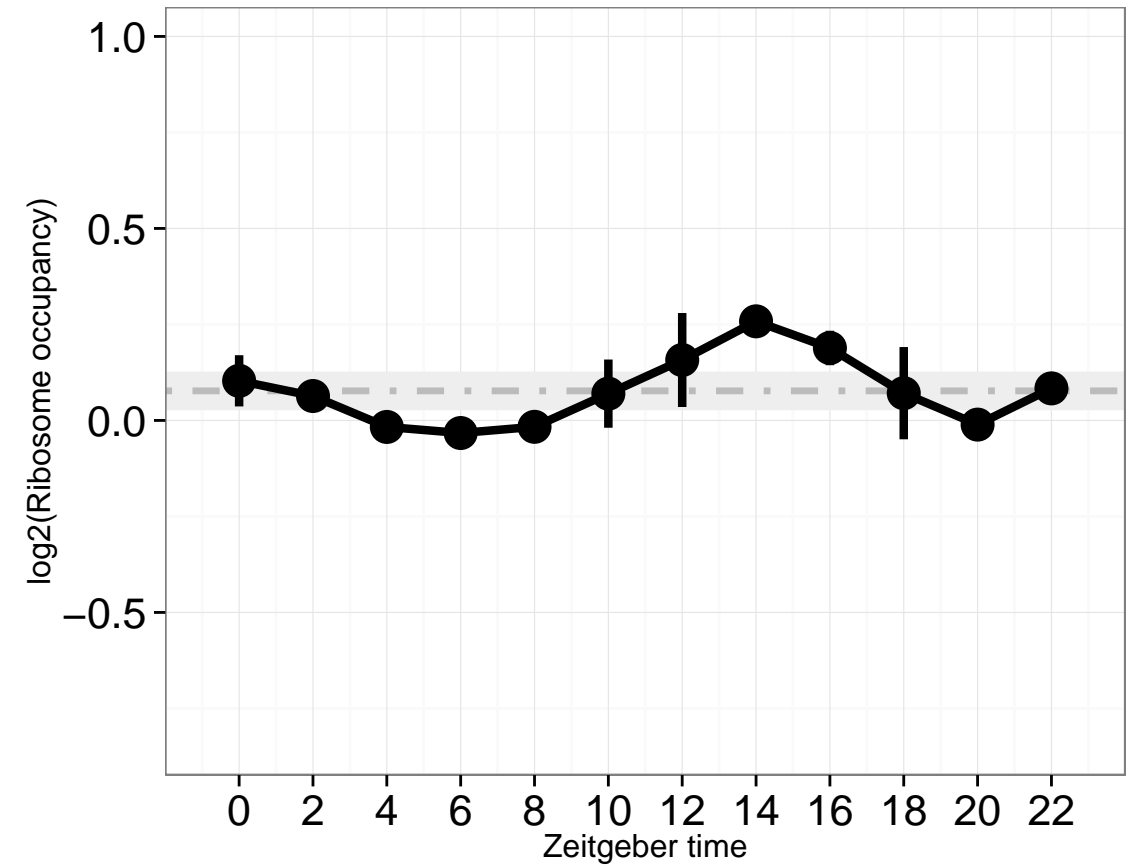

Supplement: Supplementary file 8498 [file 1]

## Vcpip1

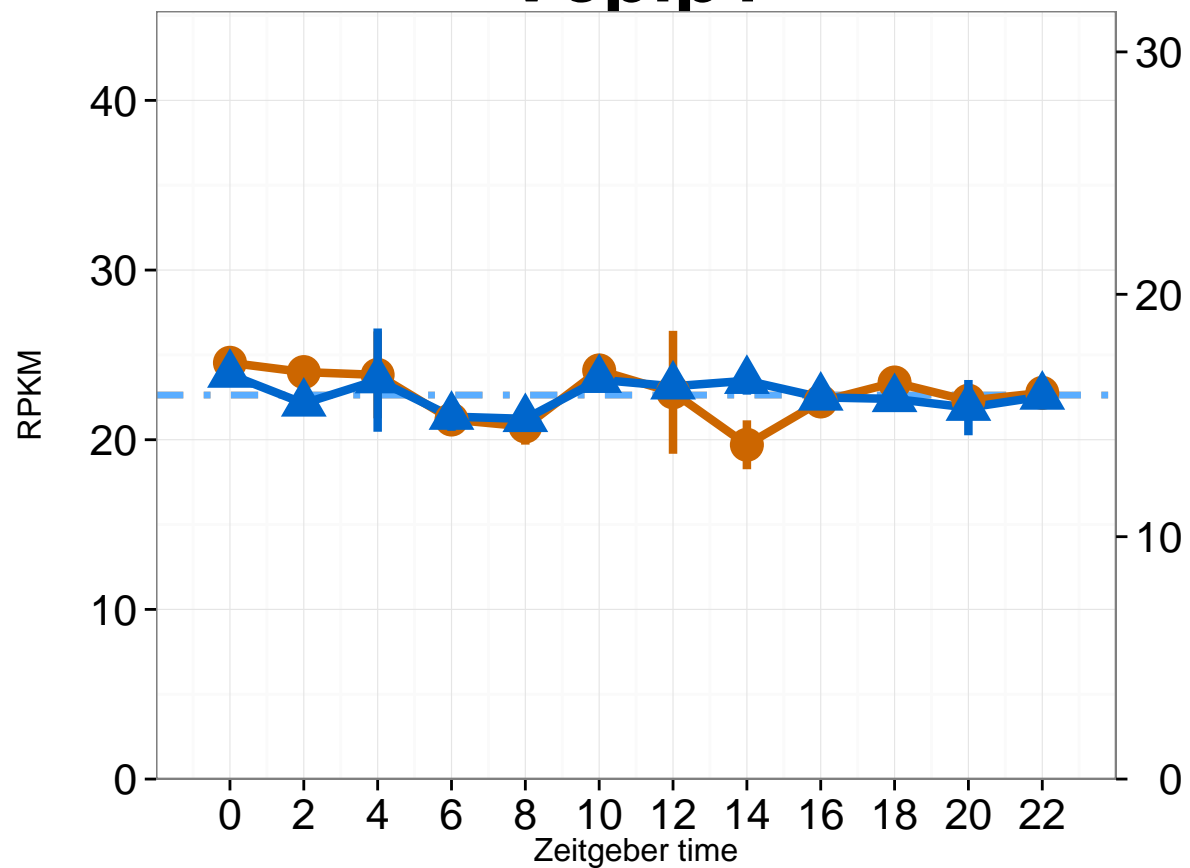

## Vcpip1

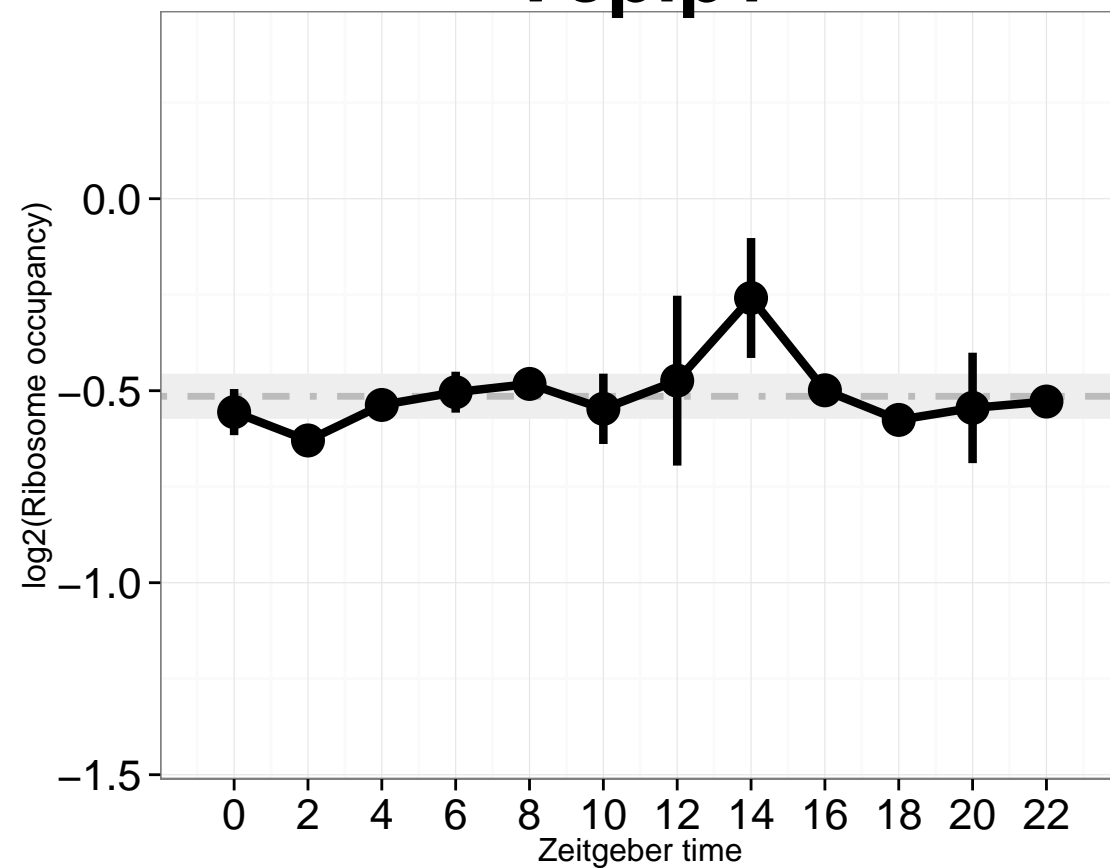

Supplement: Supplementary file 8499 [file 1]

# Isca1

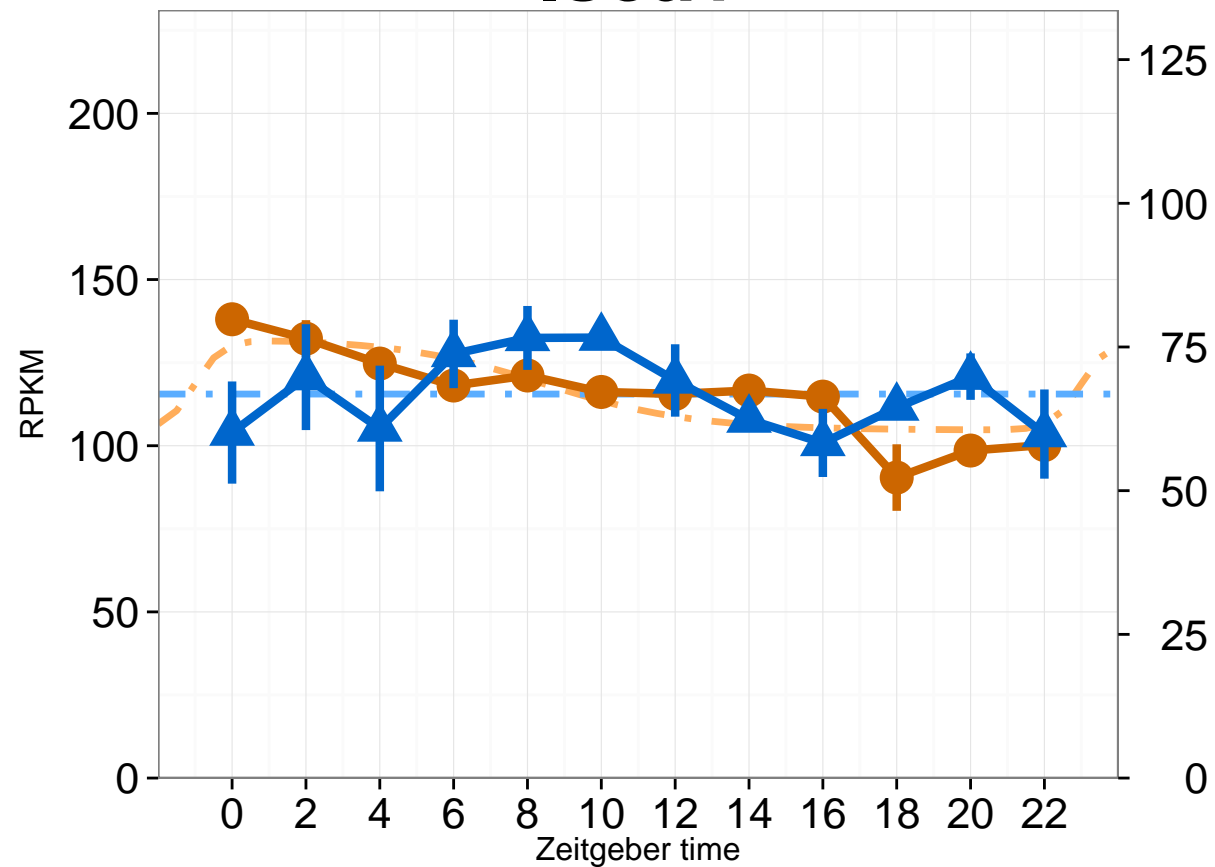

# Isca1

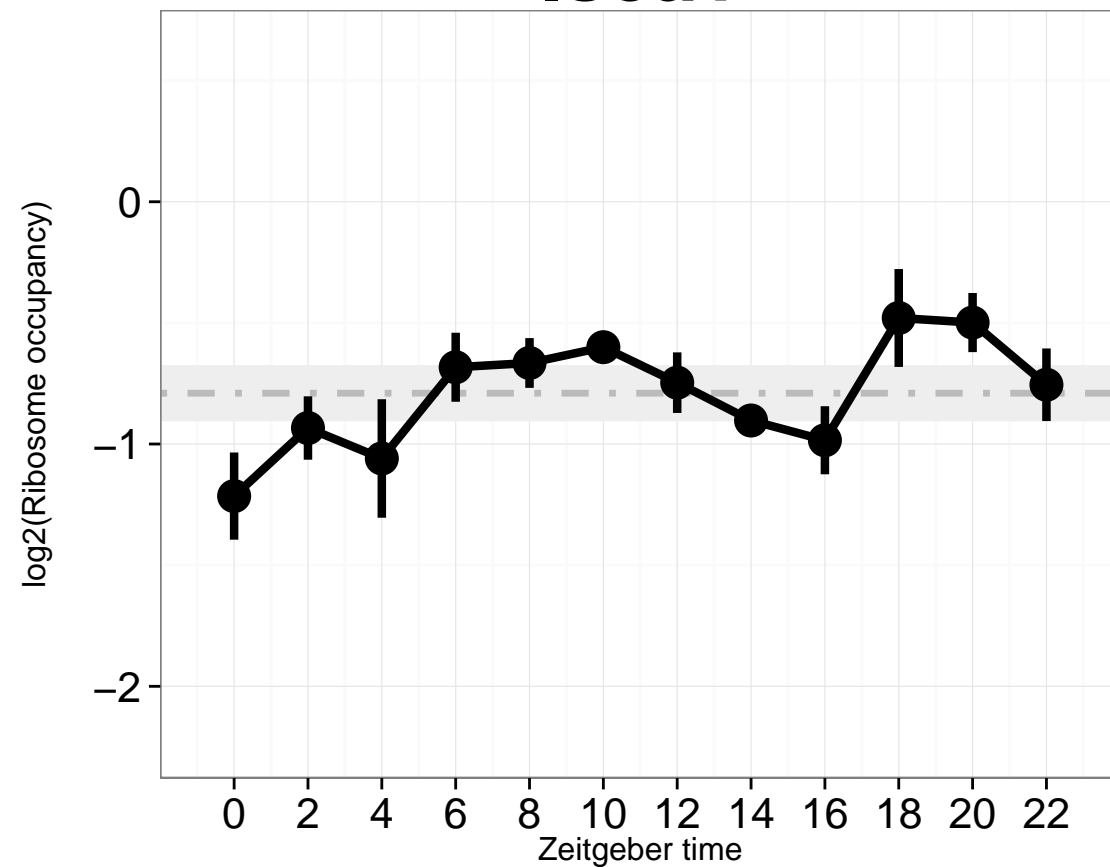

Supplement: Supplementary file 8500 [file 1]

## Plekha3

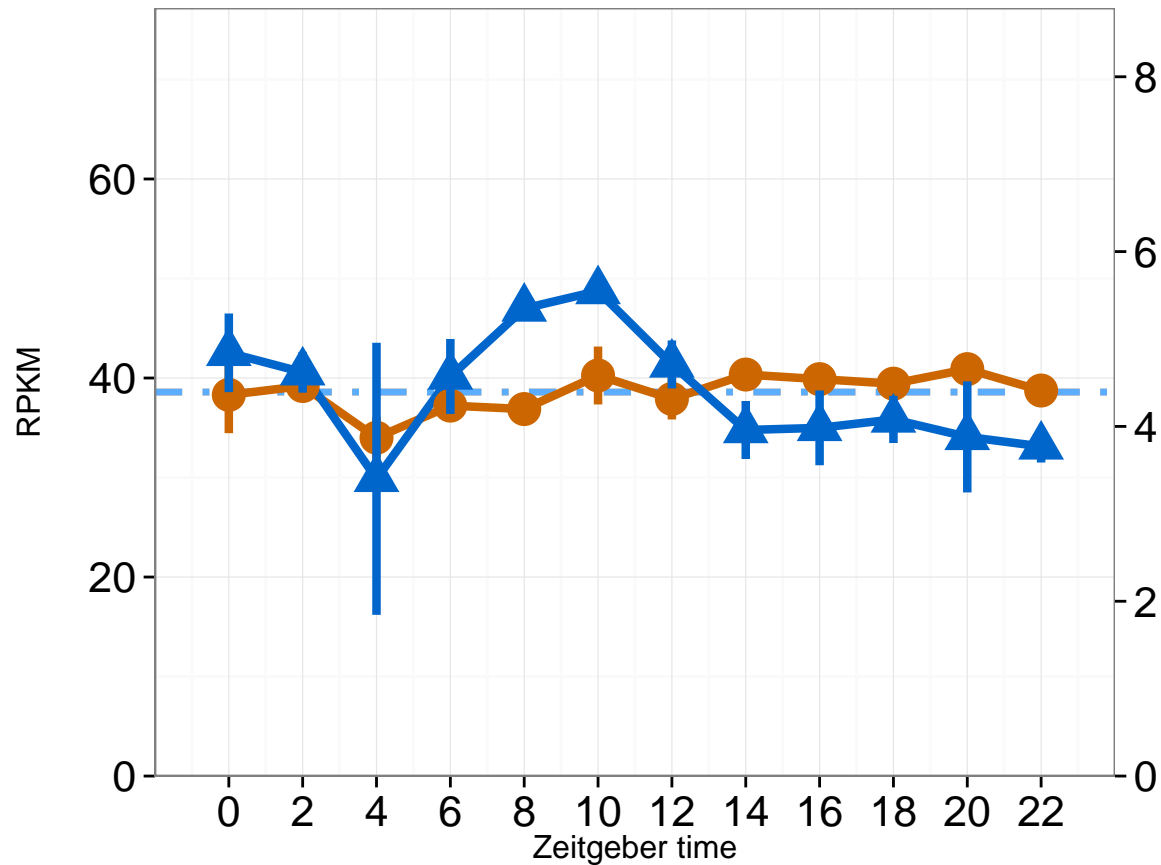

## Plekha3

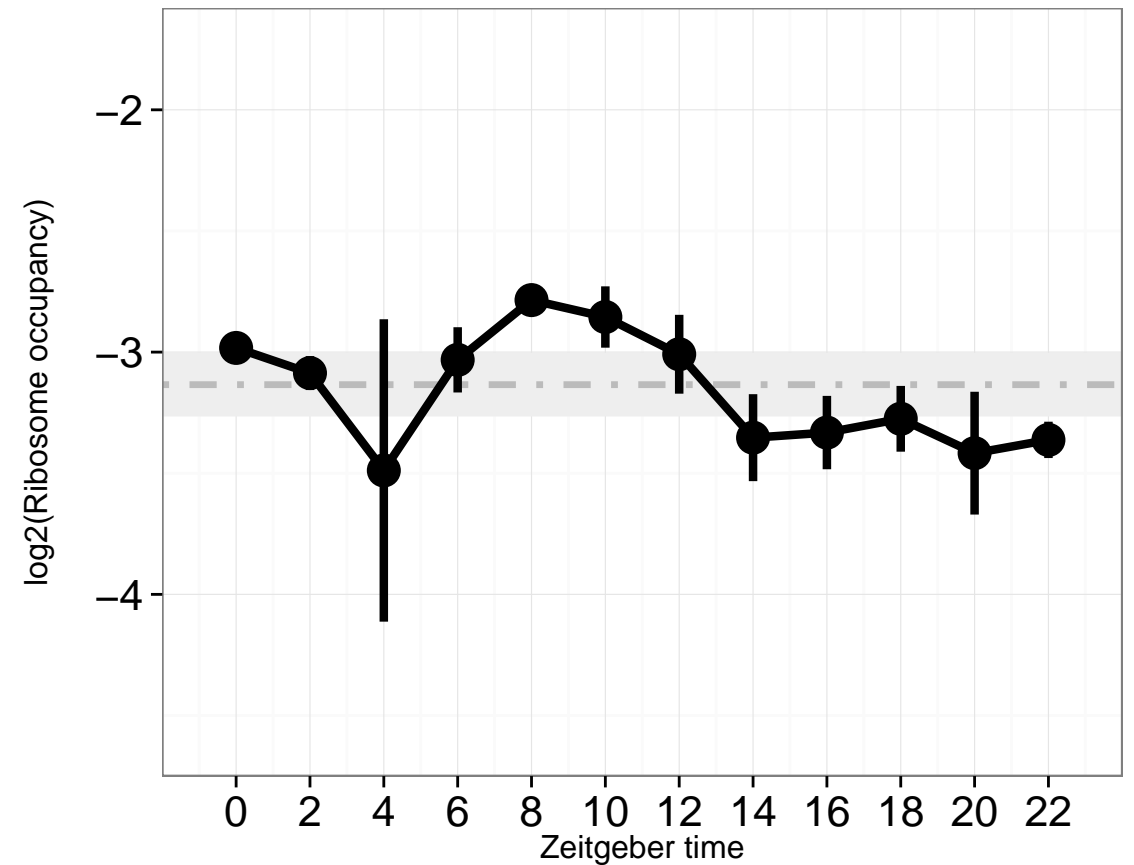

Supplement: Supplementary file 8501 [file 1]

## Zscan2

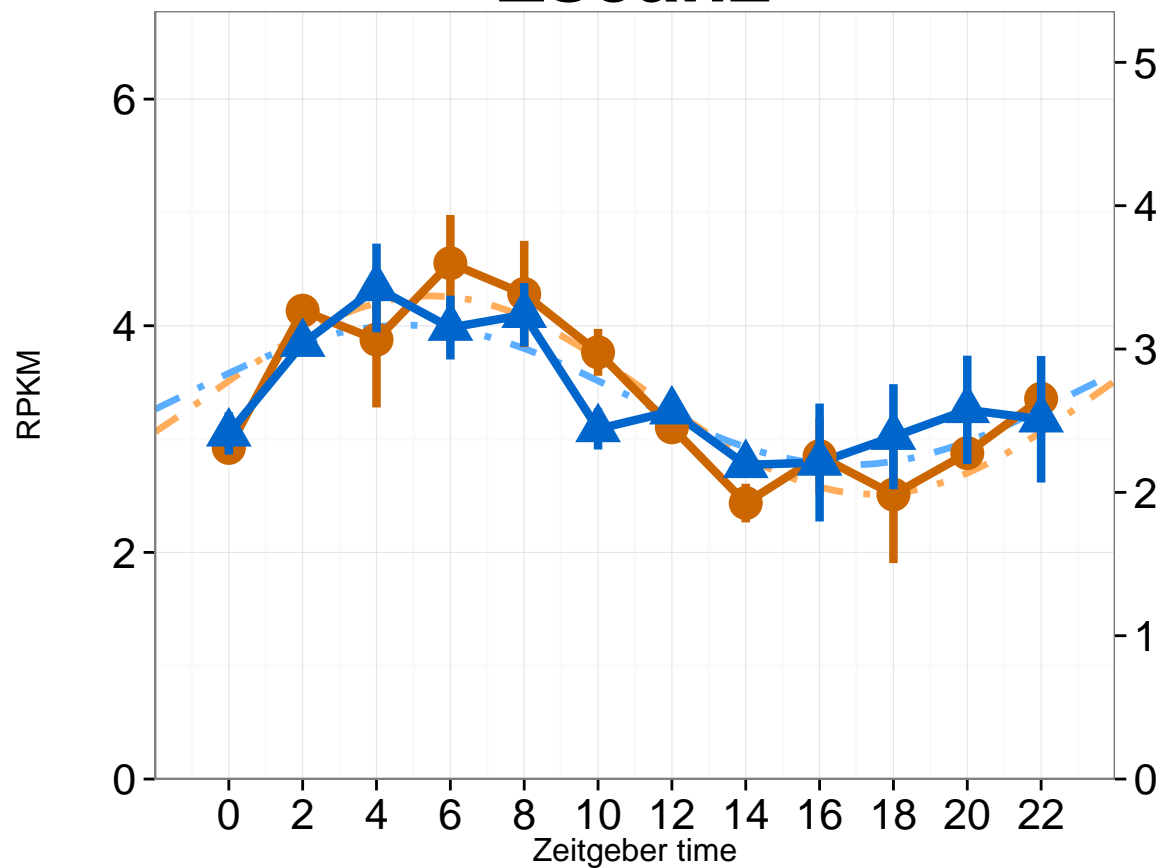

## Zscan2

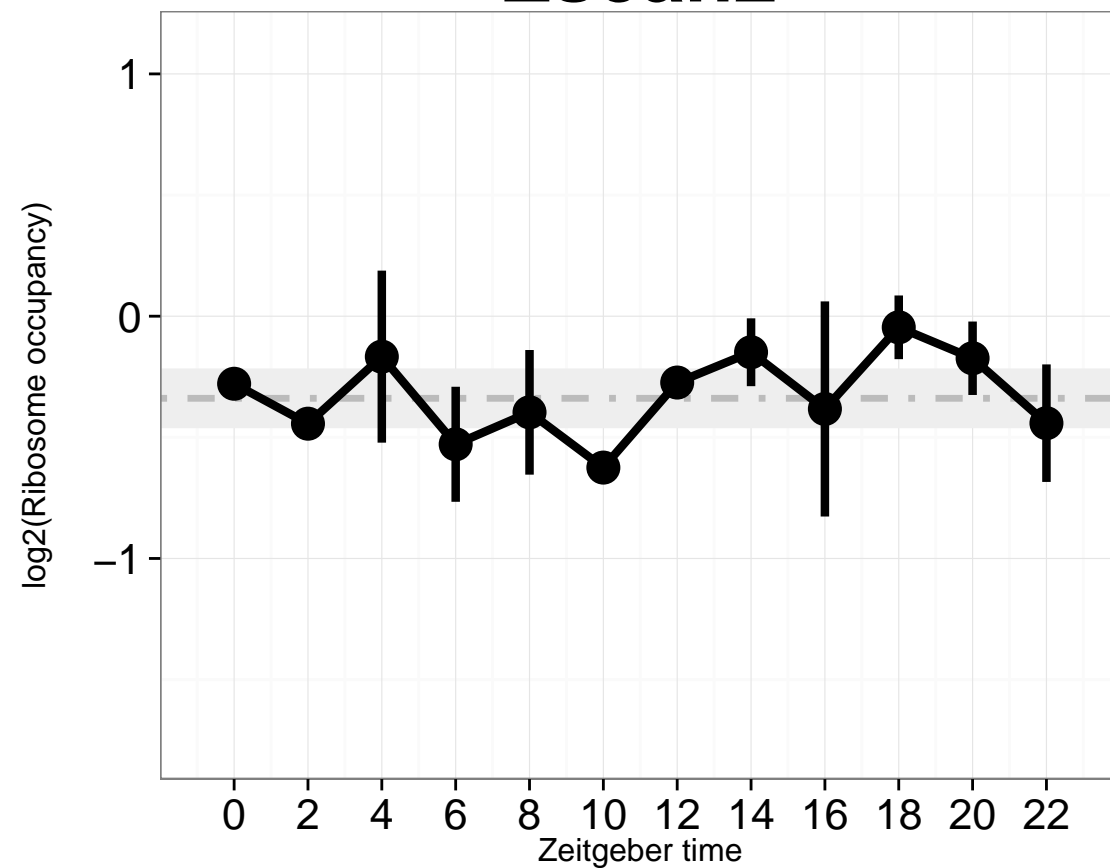

Supplement: Supplementary file 8502 [file 1]

# Sf3b4

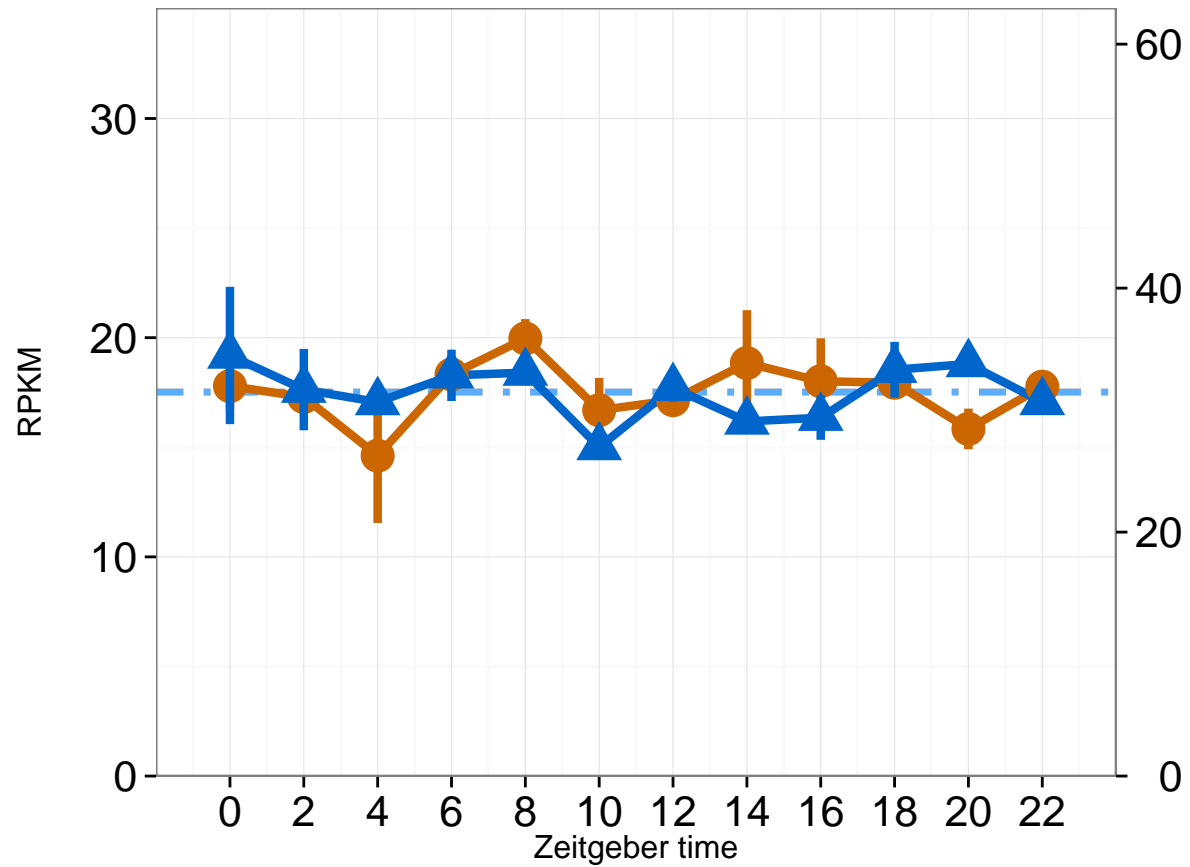

# Sf3b4

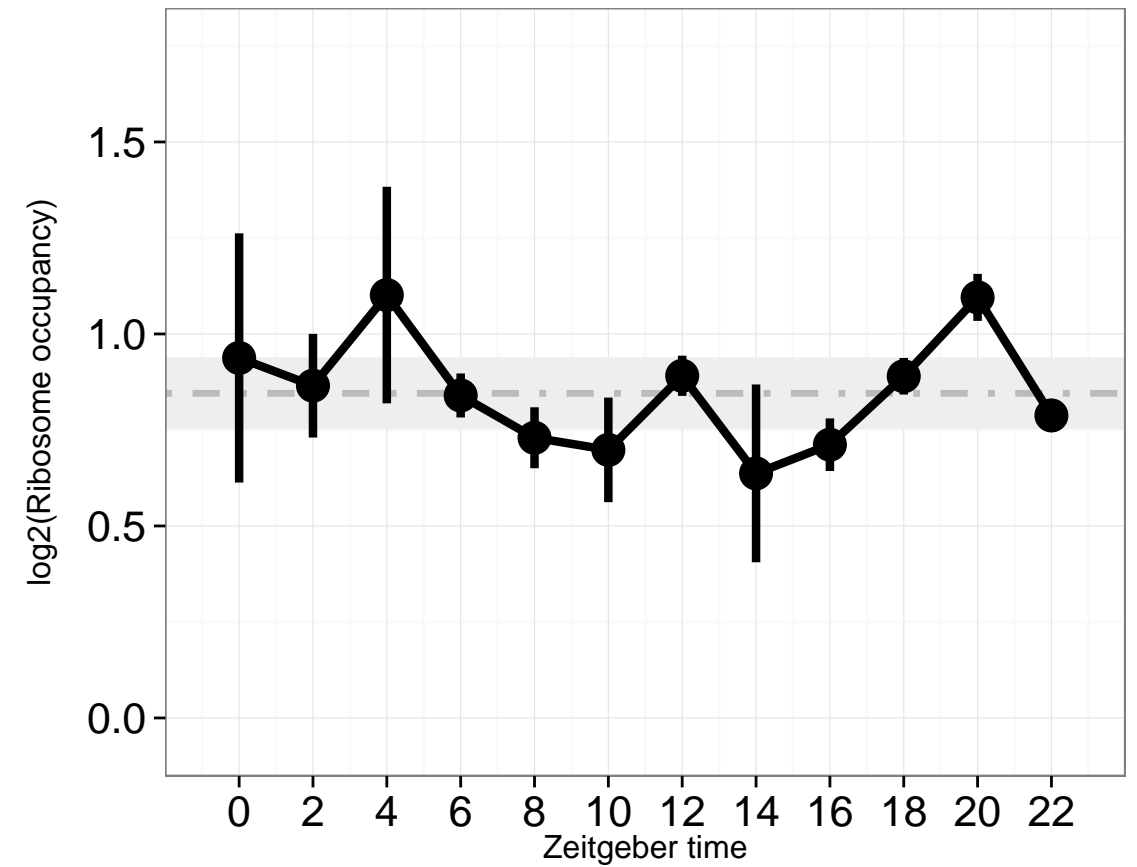

Supplement: Supplementary file 8503 [file 1]

# Nup54

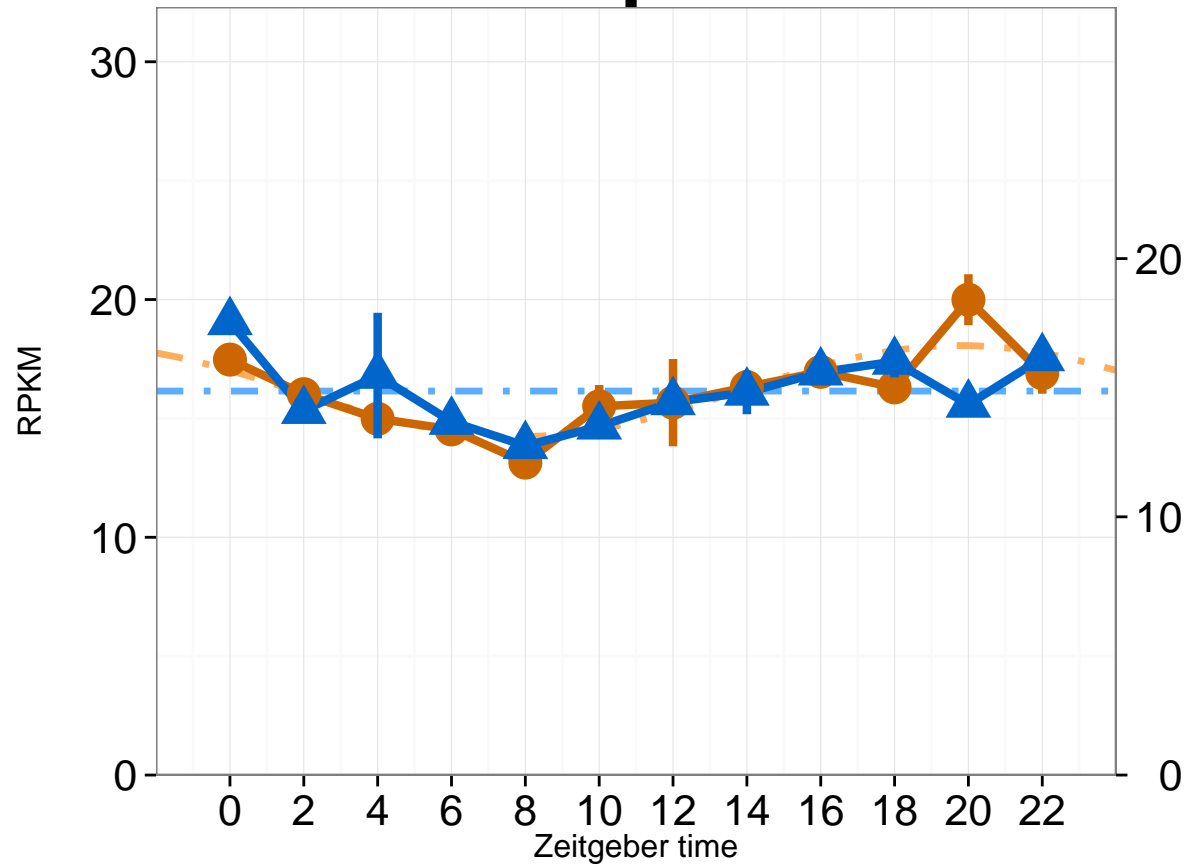

# Nup54

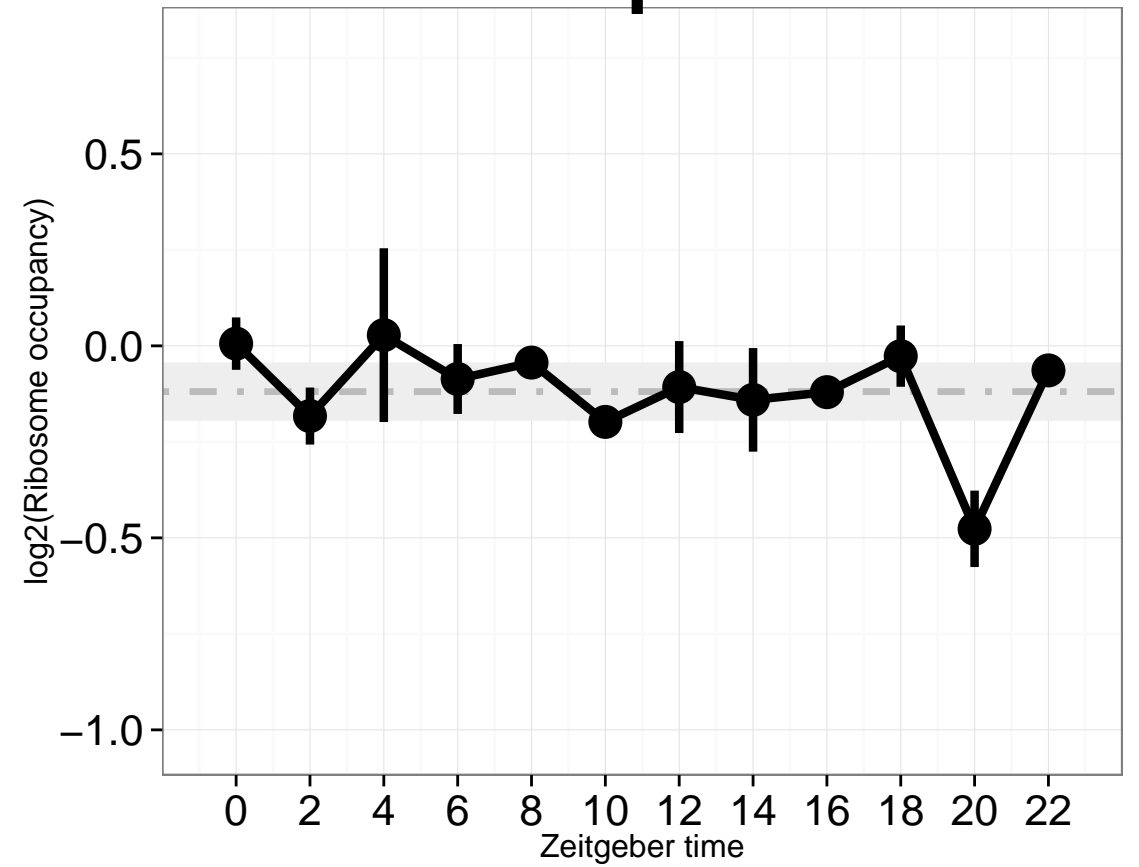

Supplement: Supplementary file 8504 [file 1]

# Mfsd7a

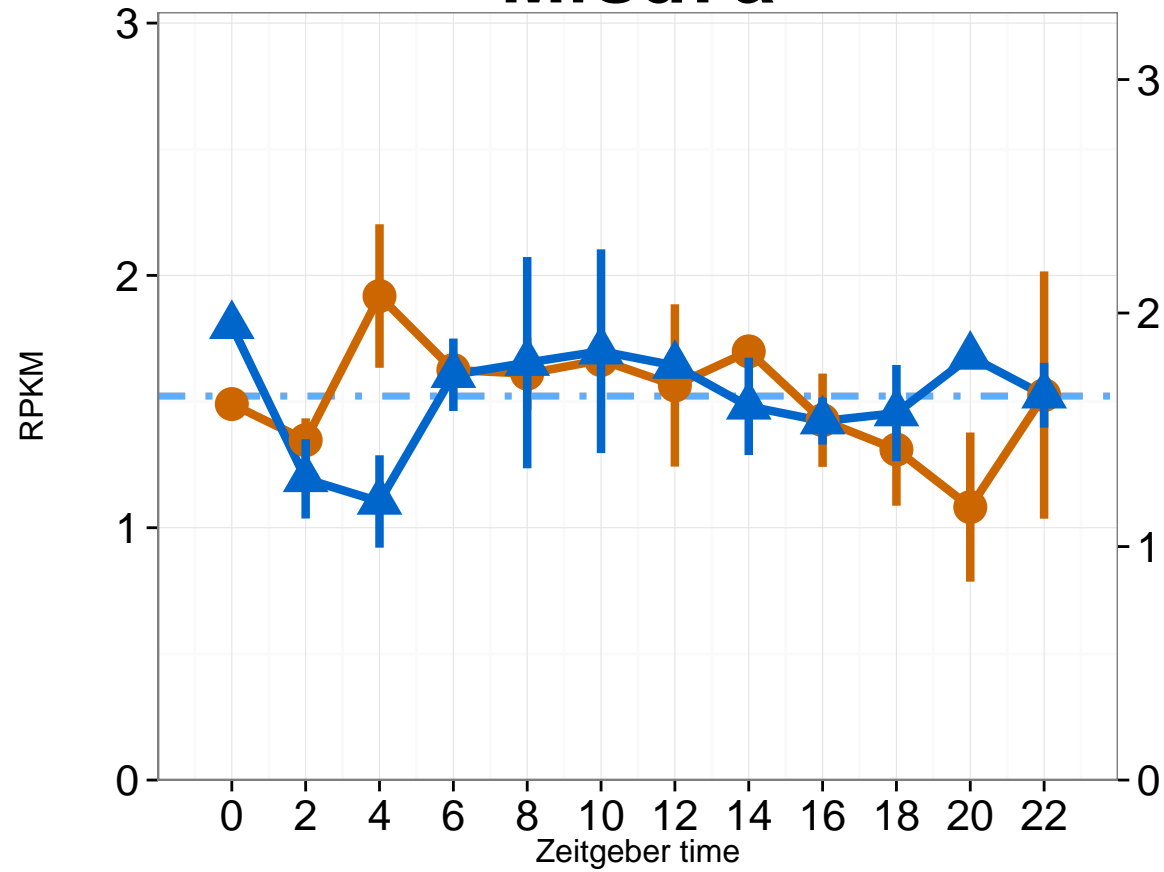

# Mfsd7a

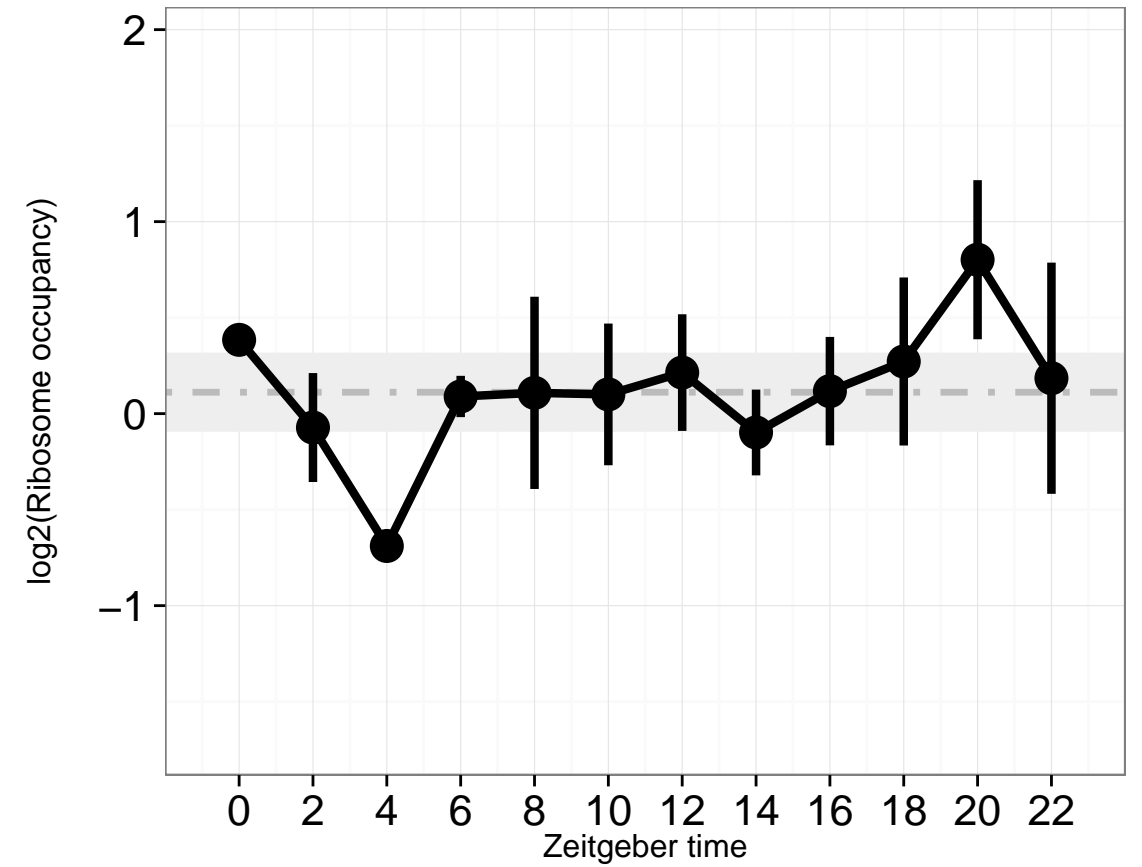

Supplement: Supplementary file 8505 [file 1]

## Eif3j1

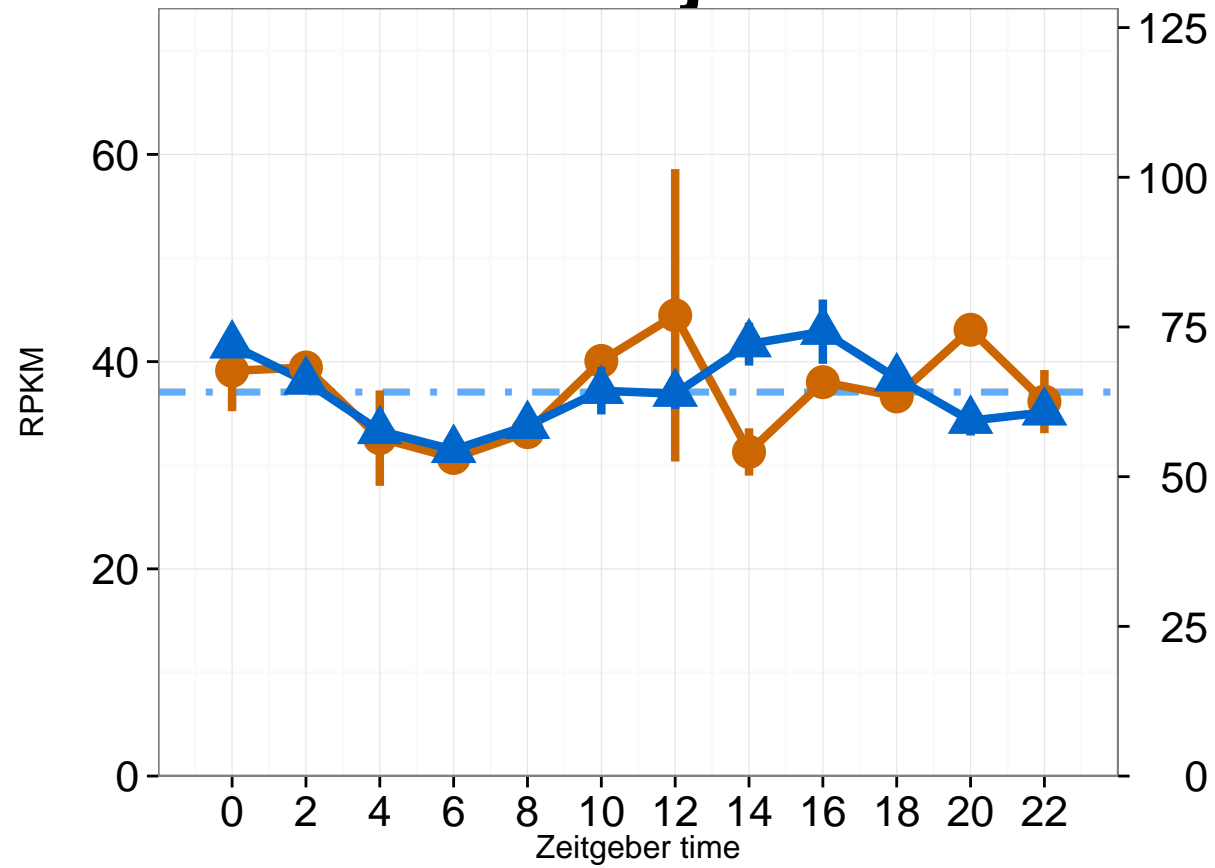

## Eif3j1

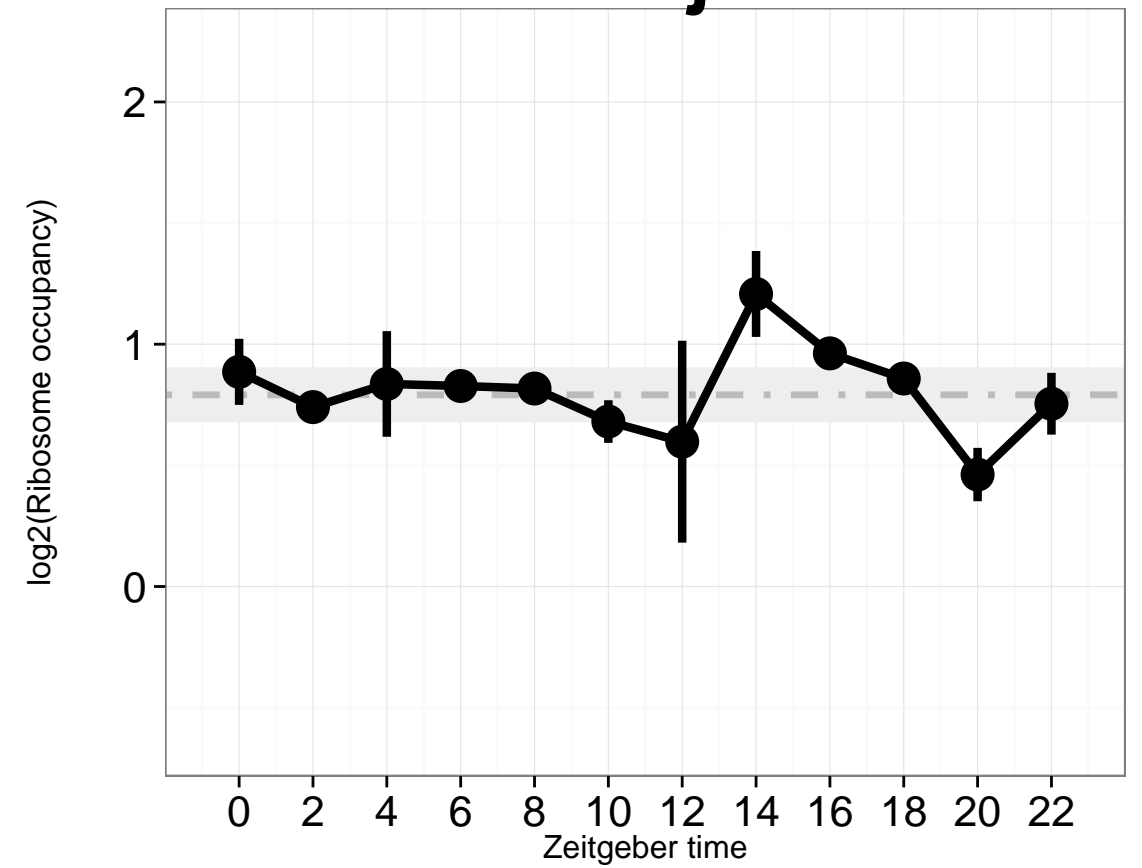

Supplement: Supplementary file 8506 [file 1]

## Chmp5

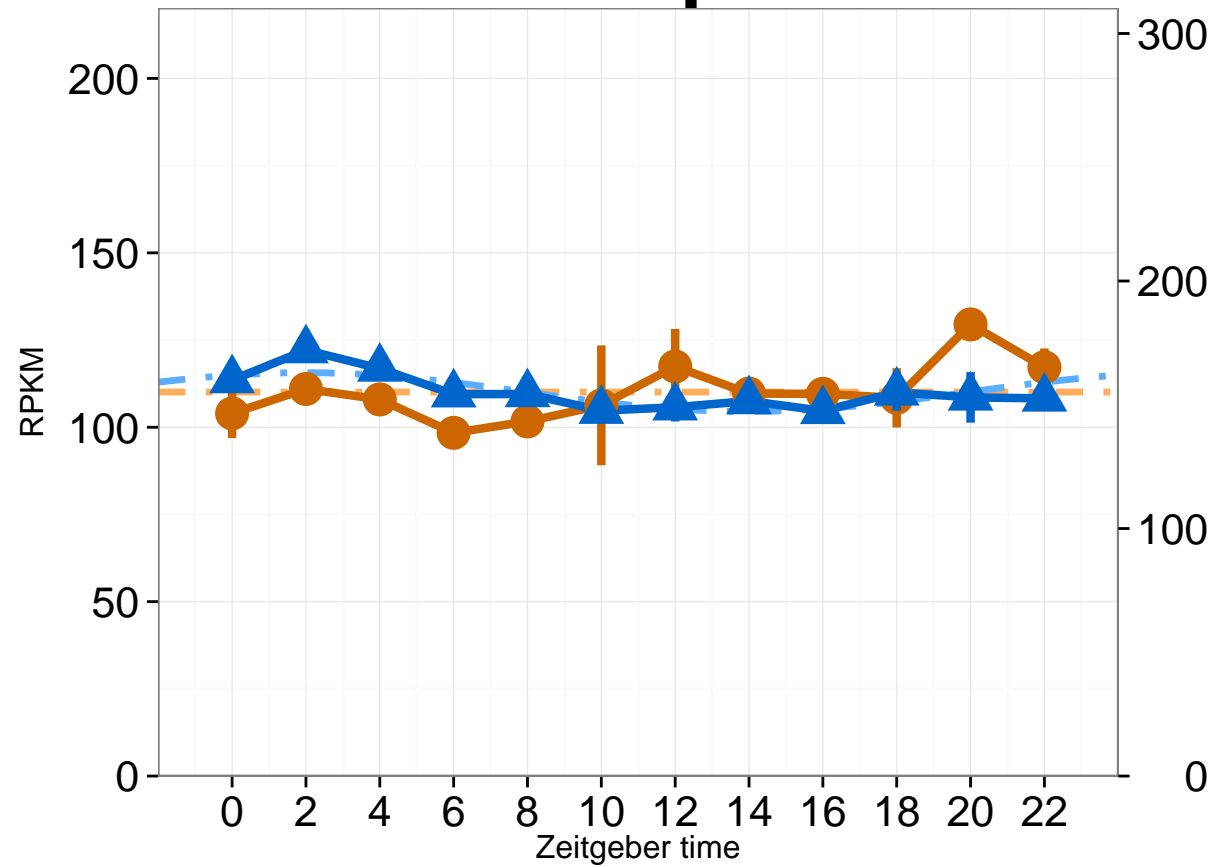

## Chmp5

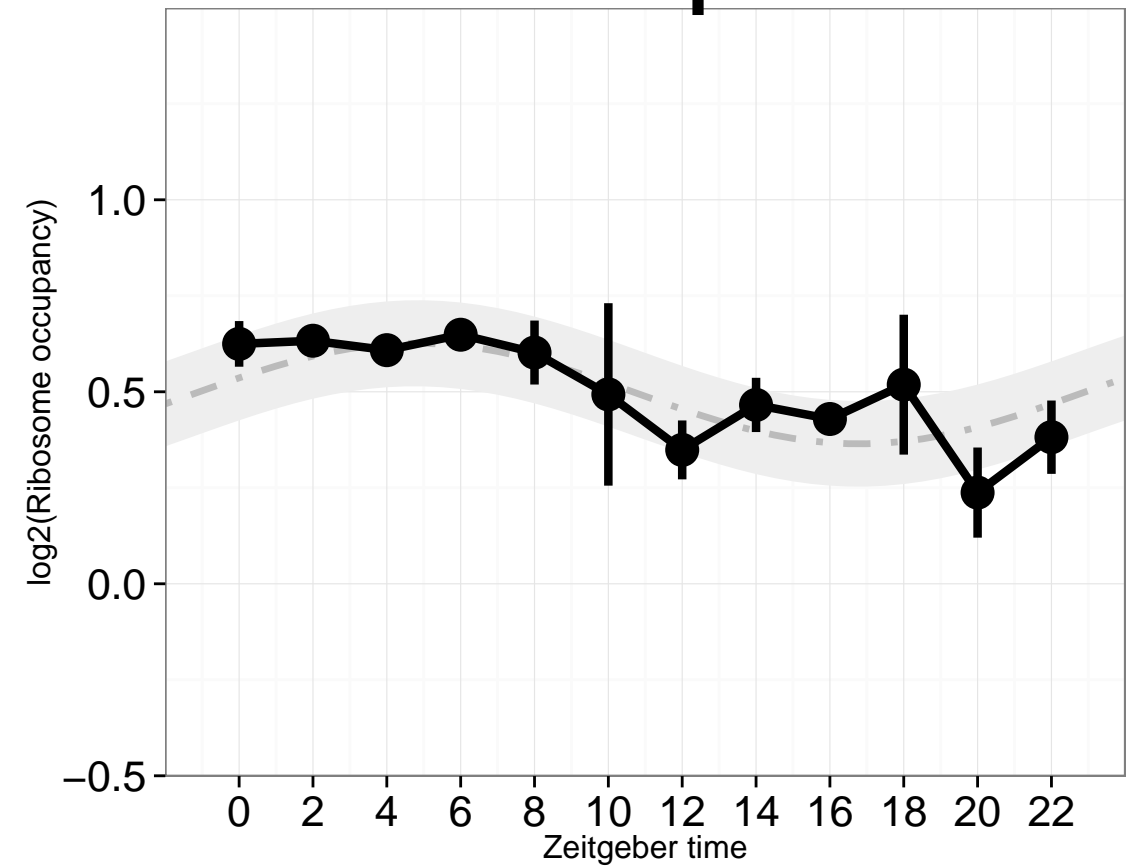

Supplement: Supplementary file 8507 [file 1]

## Lin7c

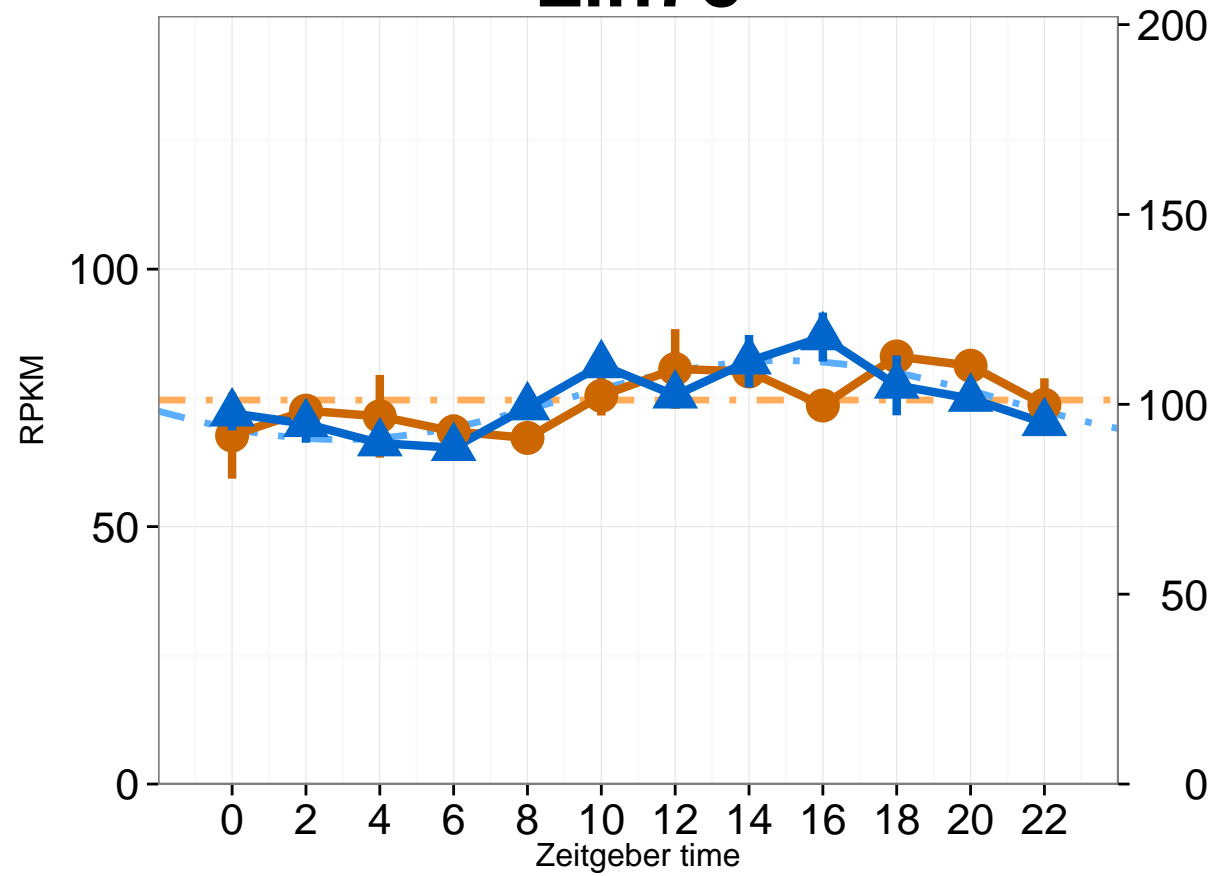

## Lin7c

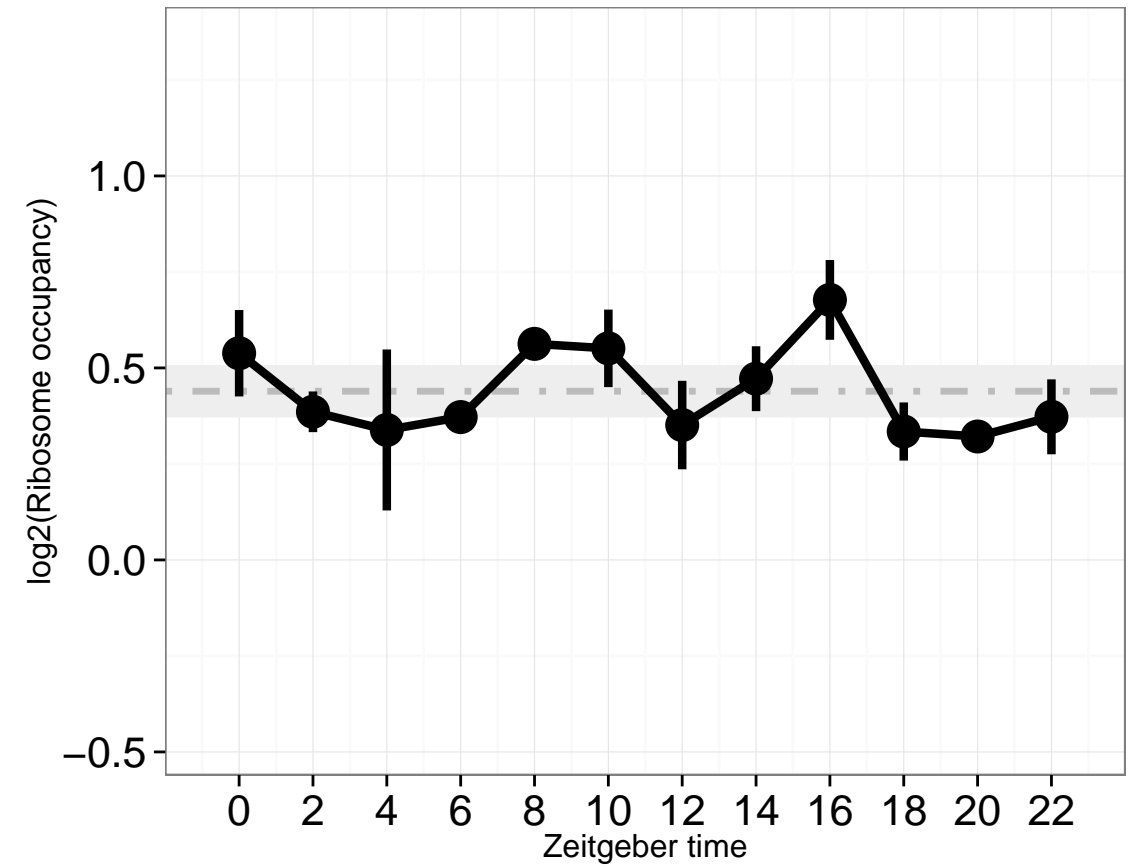

Supplement: Supplementary file 8508 [file 1]

# Plin5

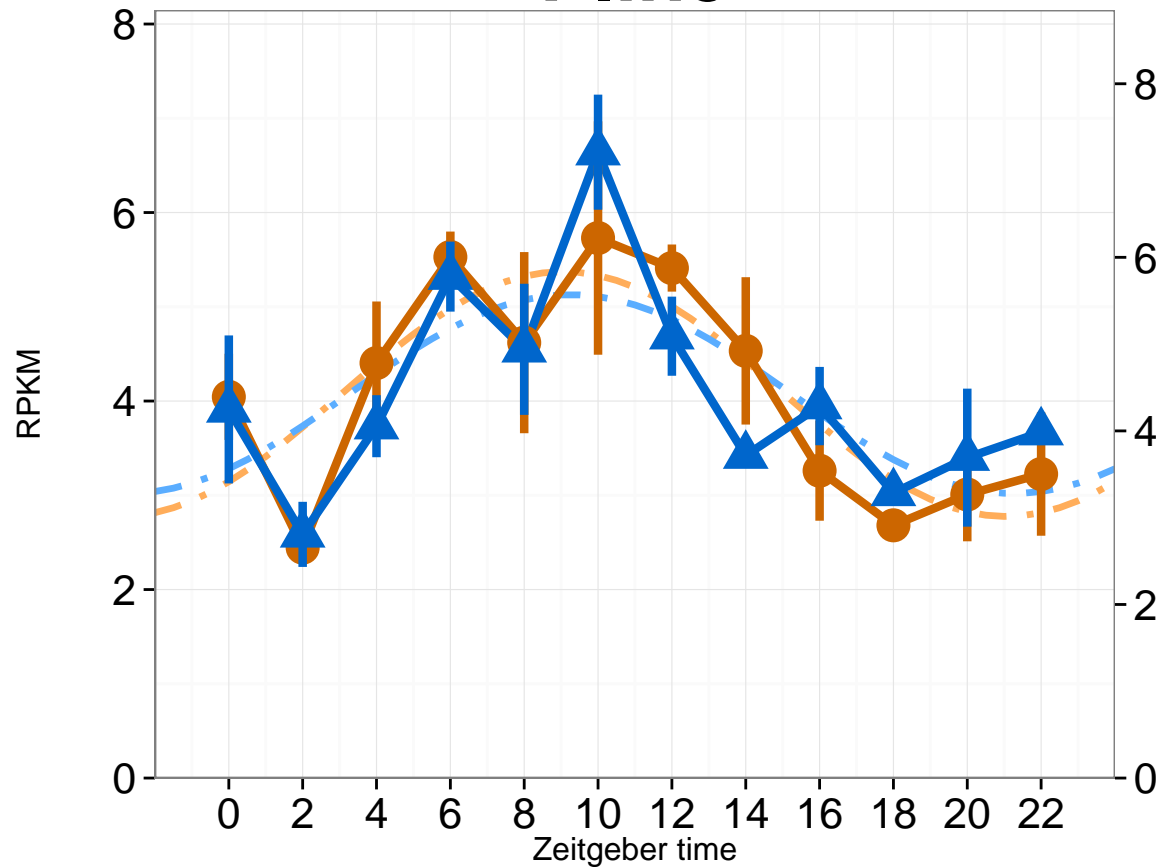

# Plin5

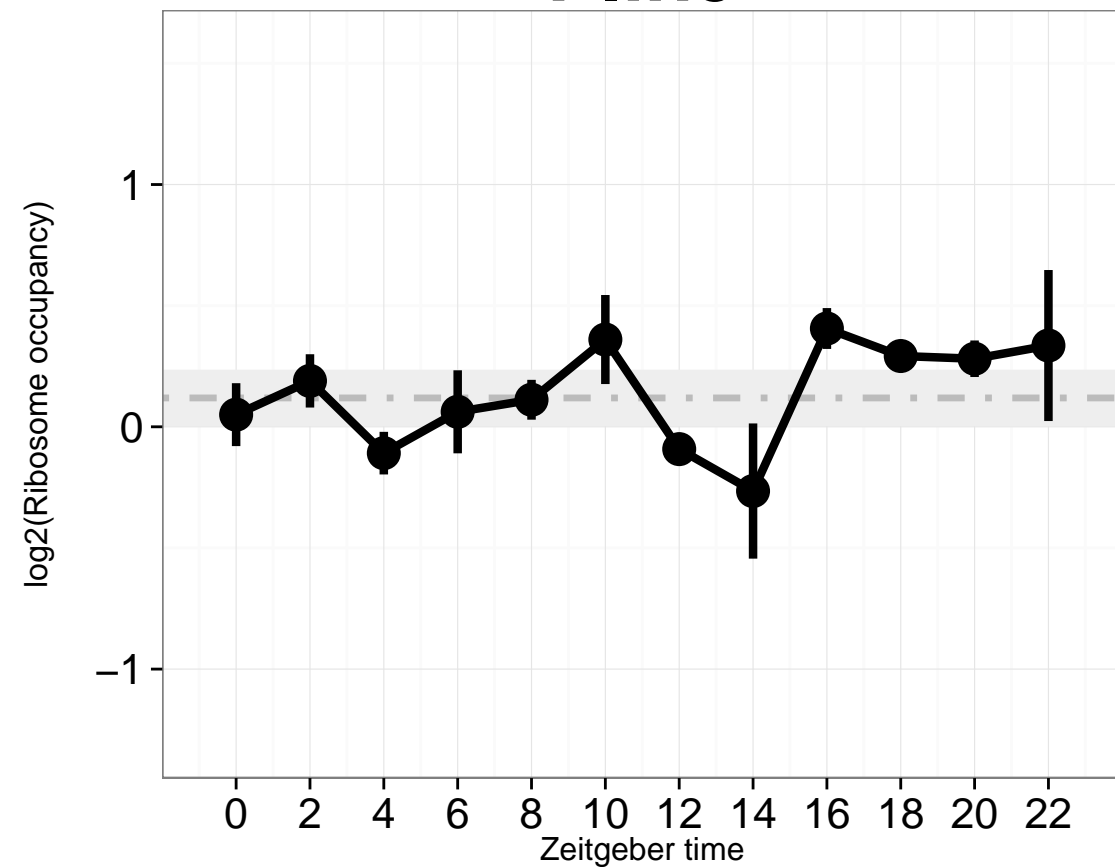

Supplement: Supplementary file 8509 [file 1]

# Hist1h3c

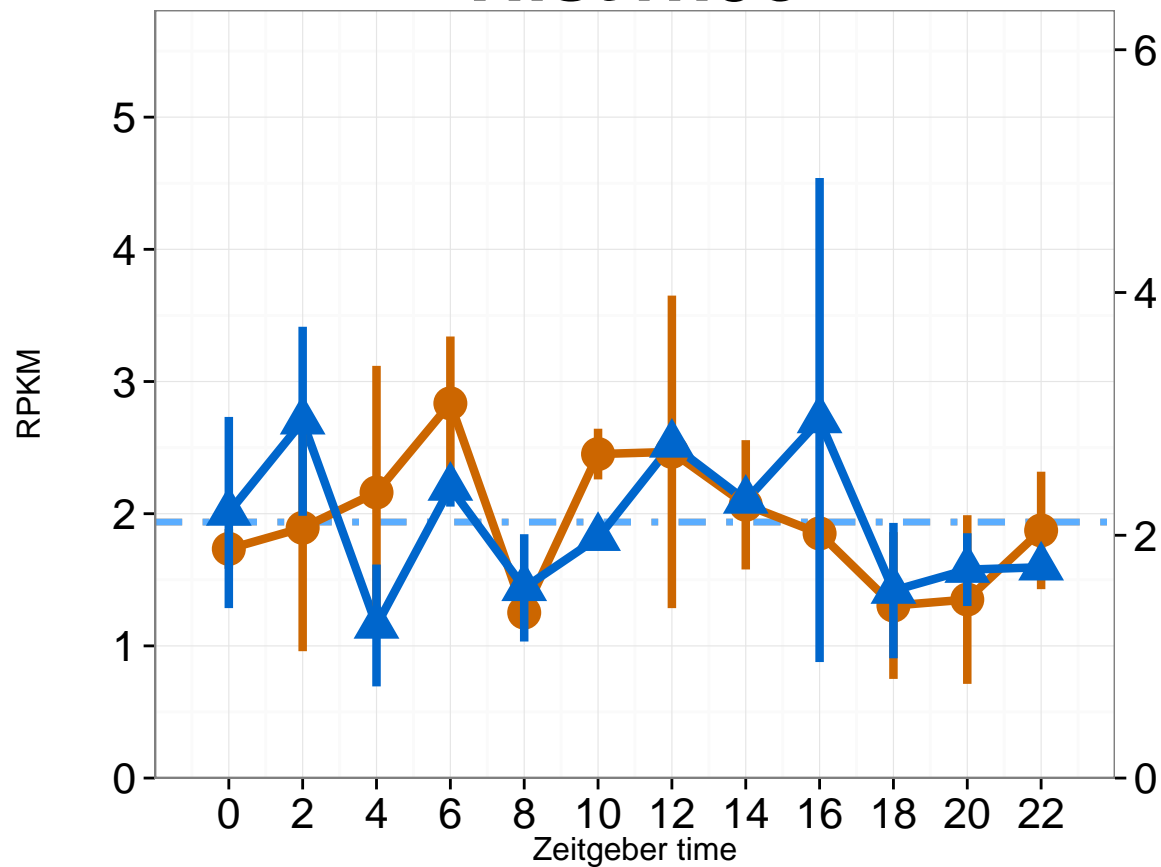

# Hist1h3c

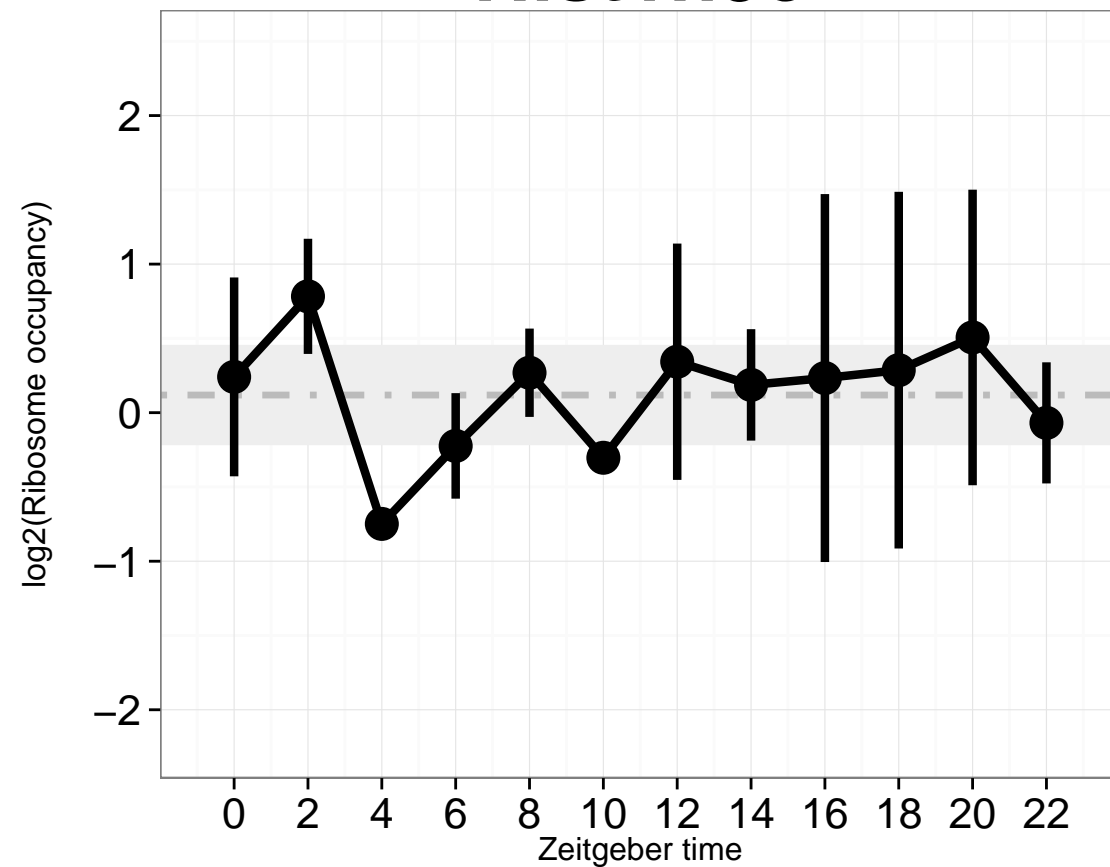

Supplement: Supplementary file 8510 [file 1]

## Pdxdc1

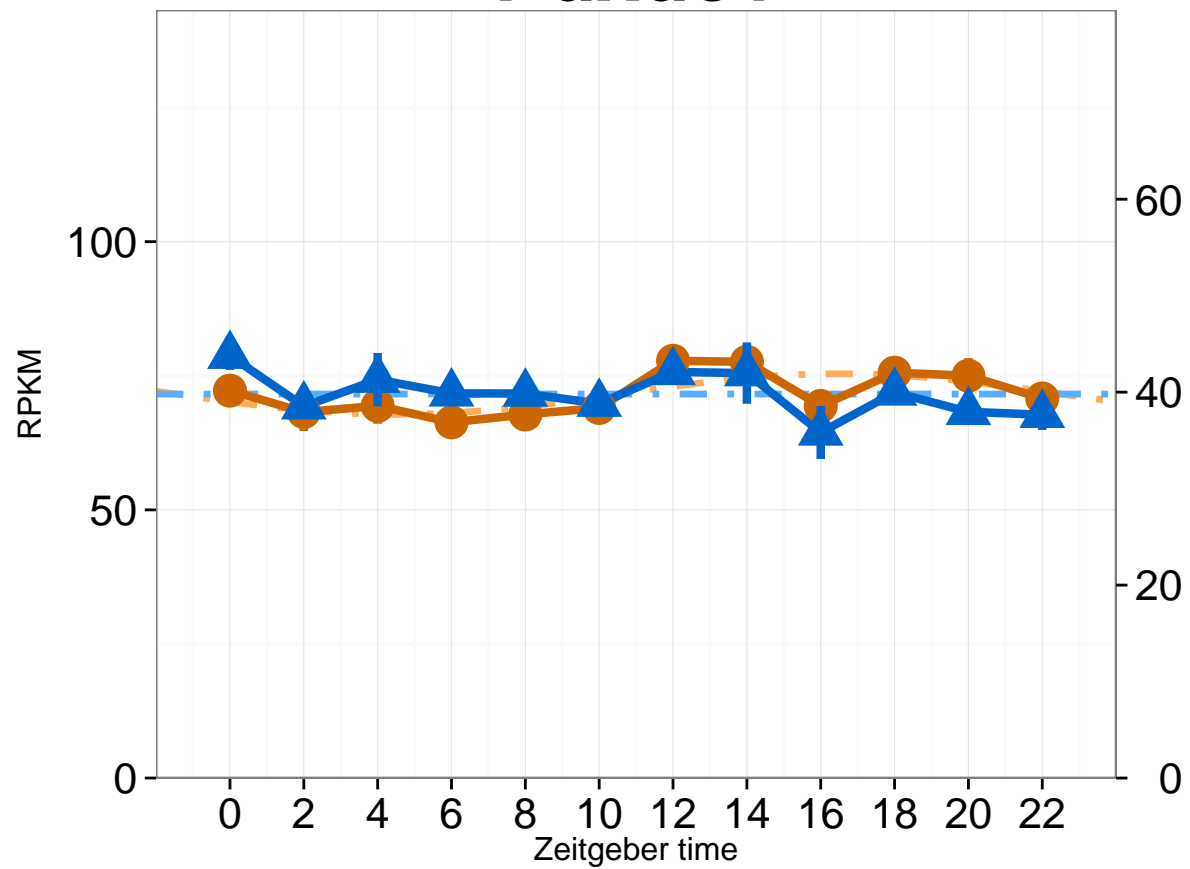

## Pdxdc1

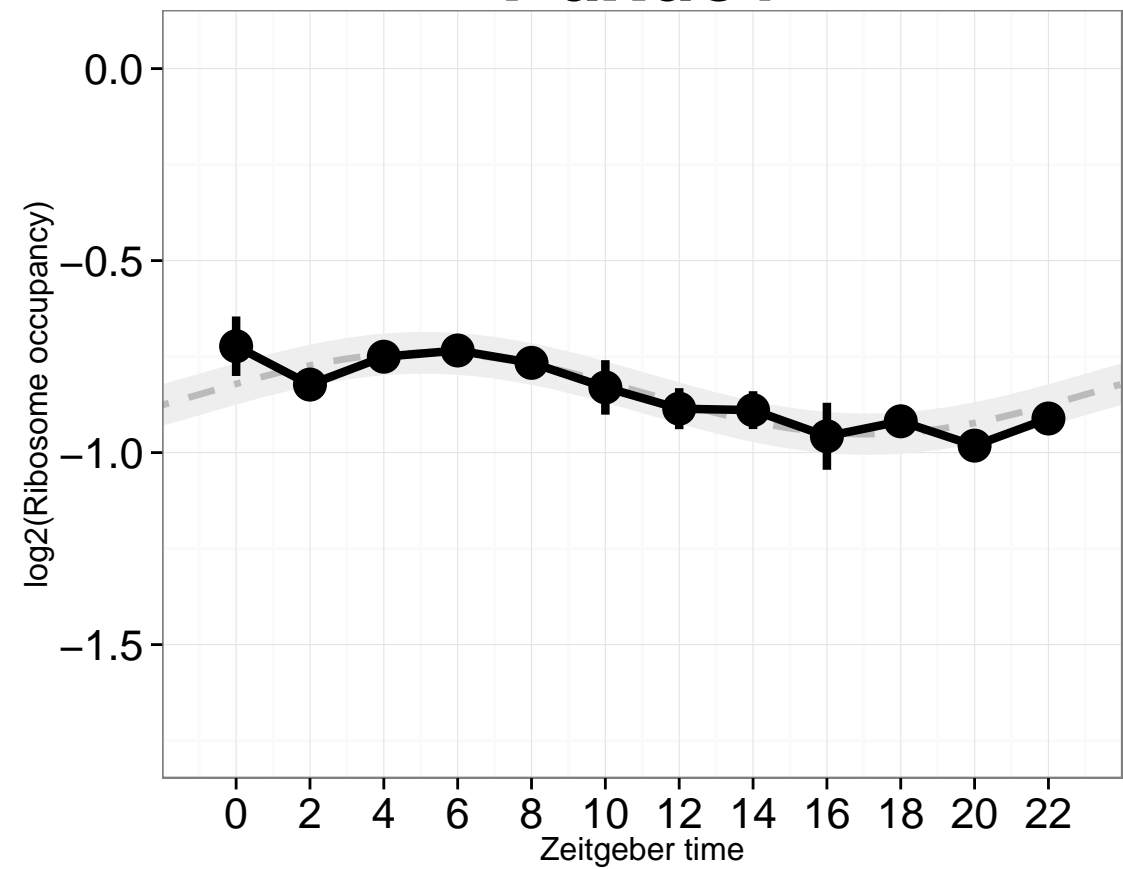

Supplement: Supplementary file 8511 [file 1]

## Pik3c3

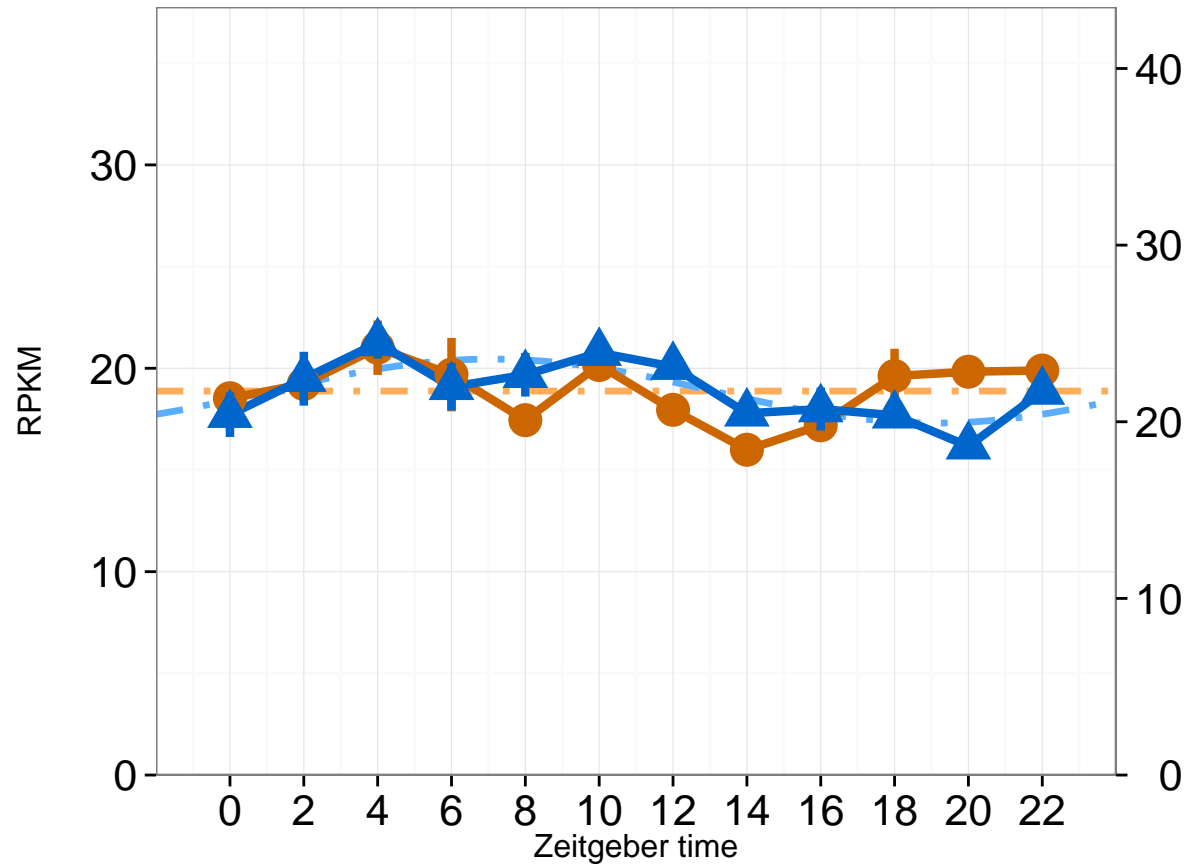

## Pik3c3

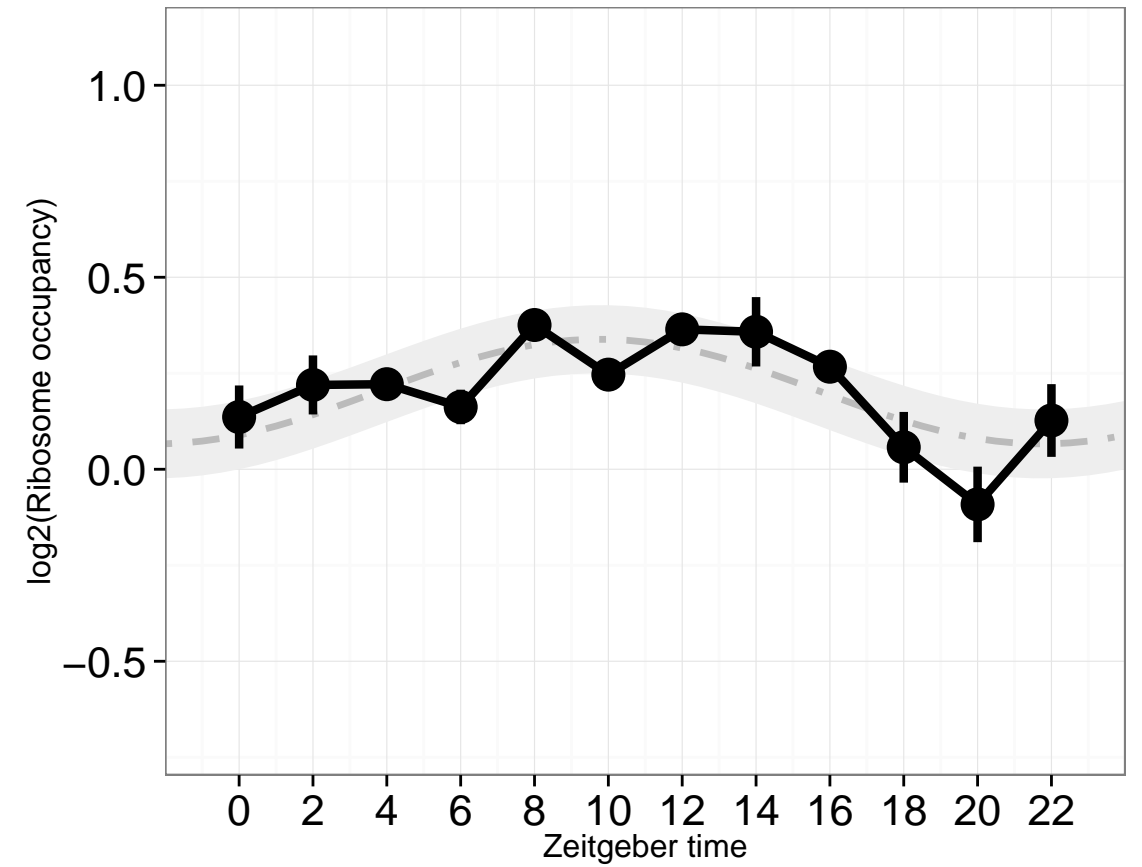

Supplement: Supplementary file 8512 [file 1]

## Bsnd

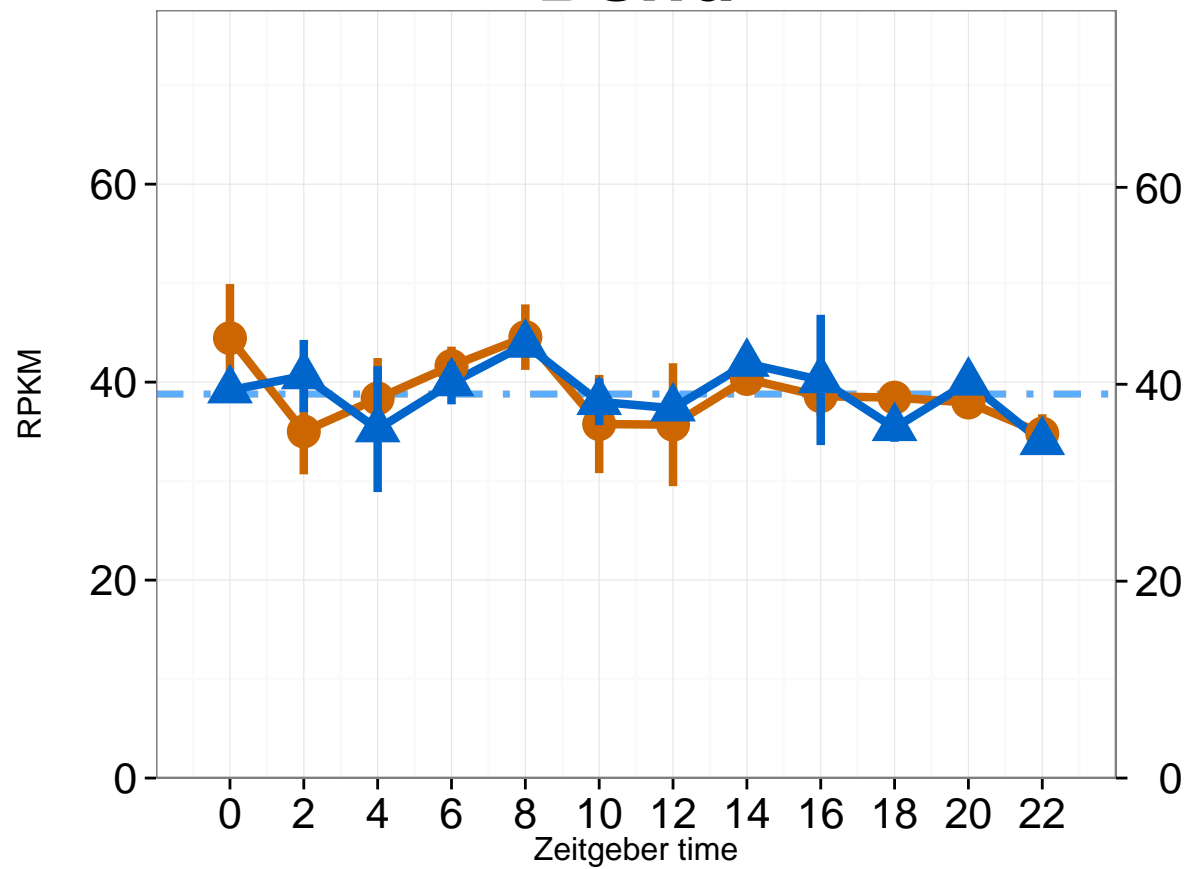

## Bsnd

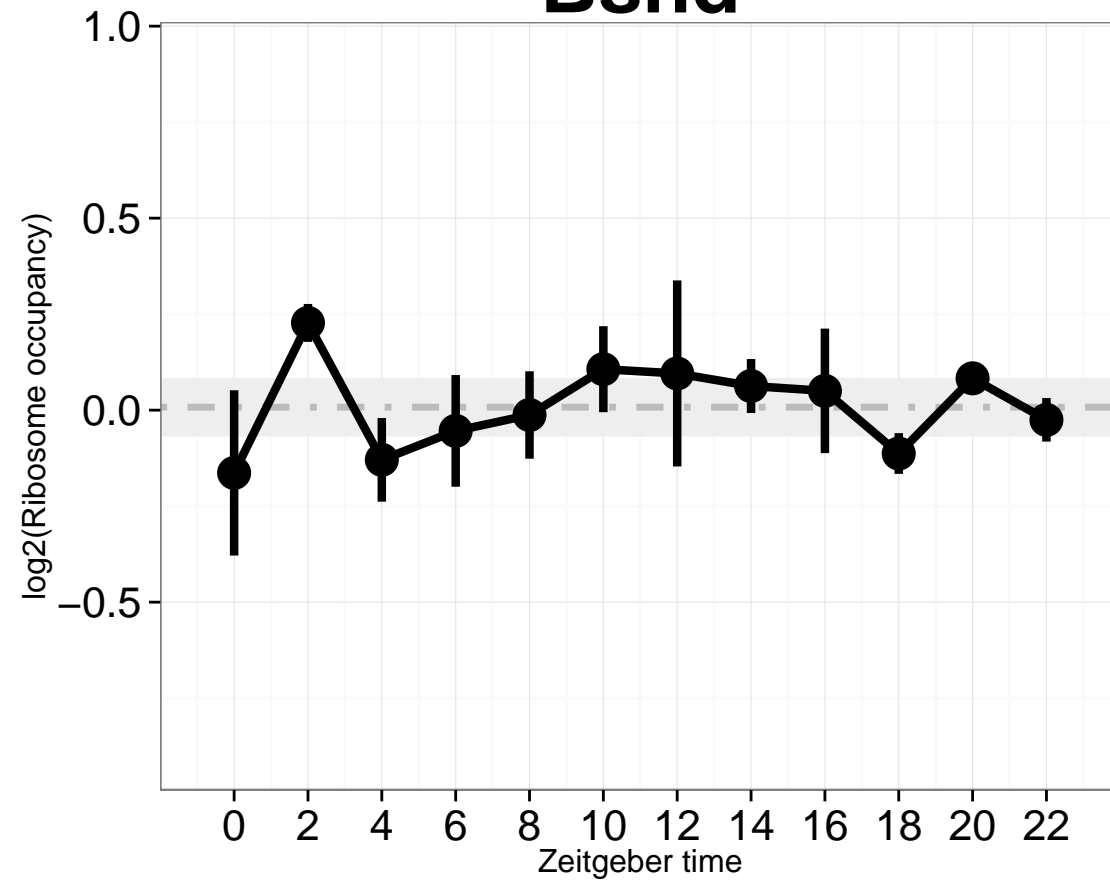

Supplement: Supplementary file 8513 [file 1]

# Emg1

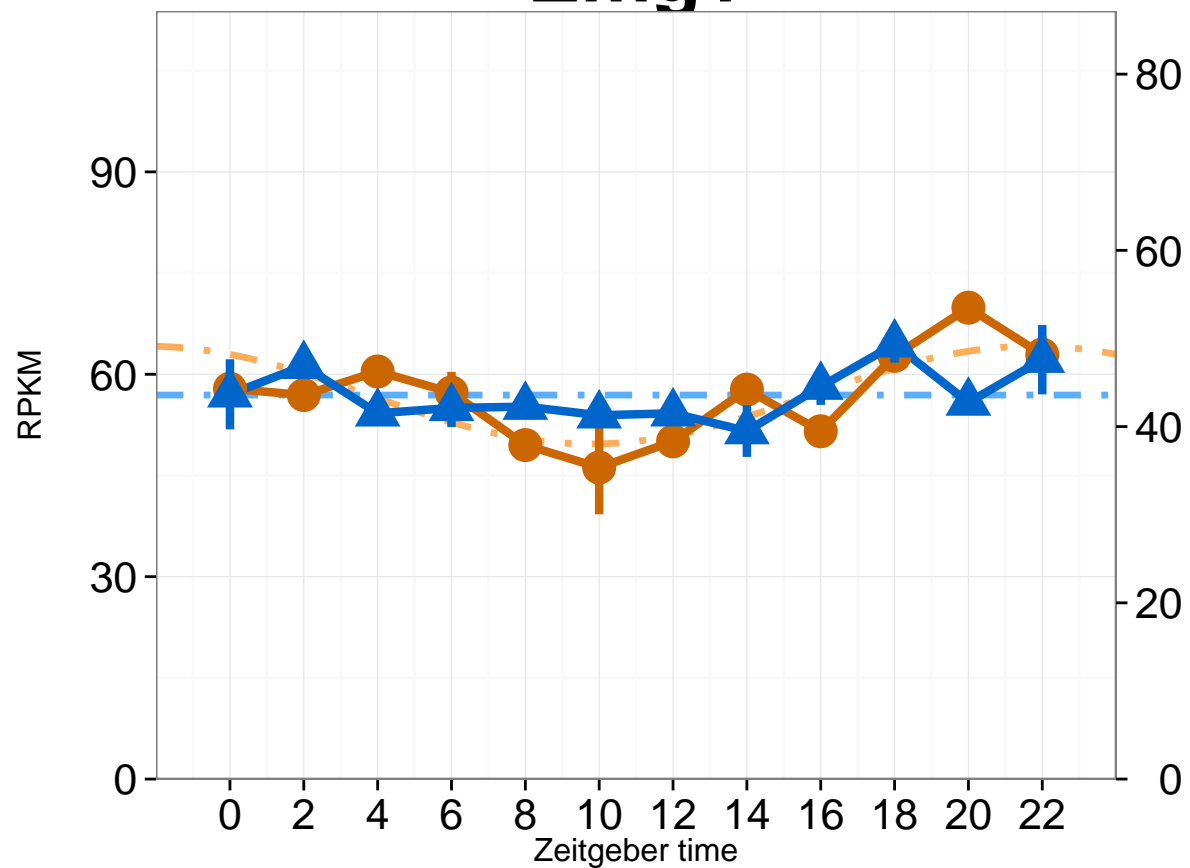

# Emg1

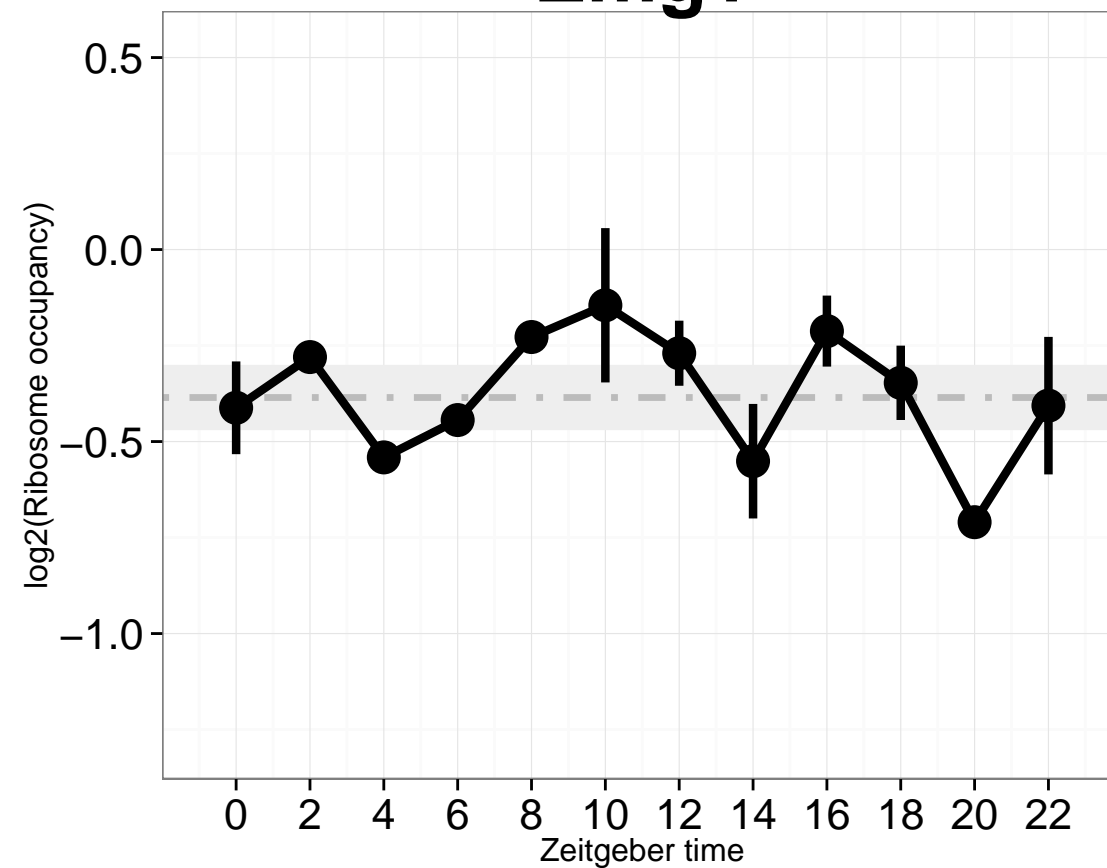

Supplement: Supplementary file 8514 [file 1]

# ltpkc

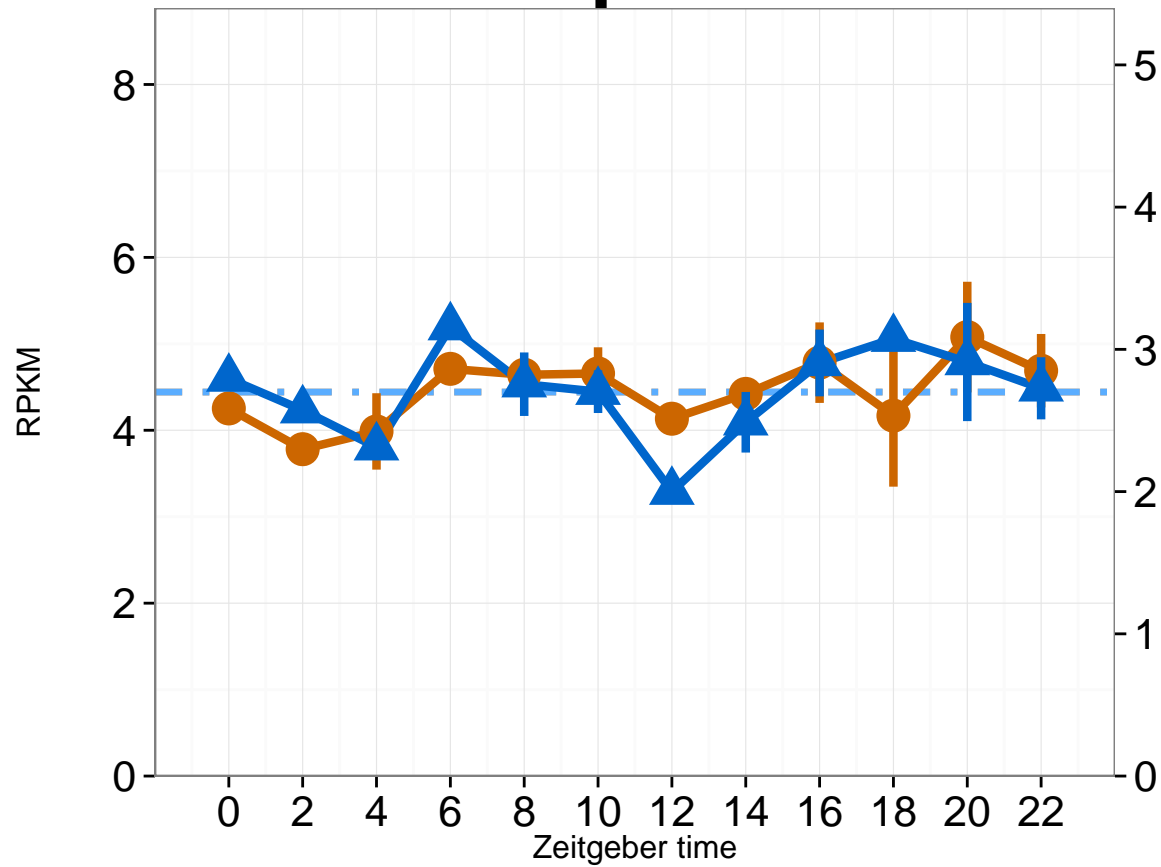

# ltpkc

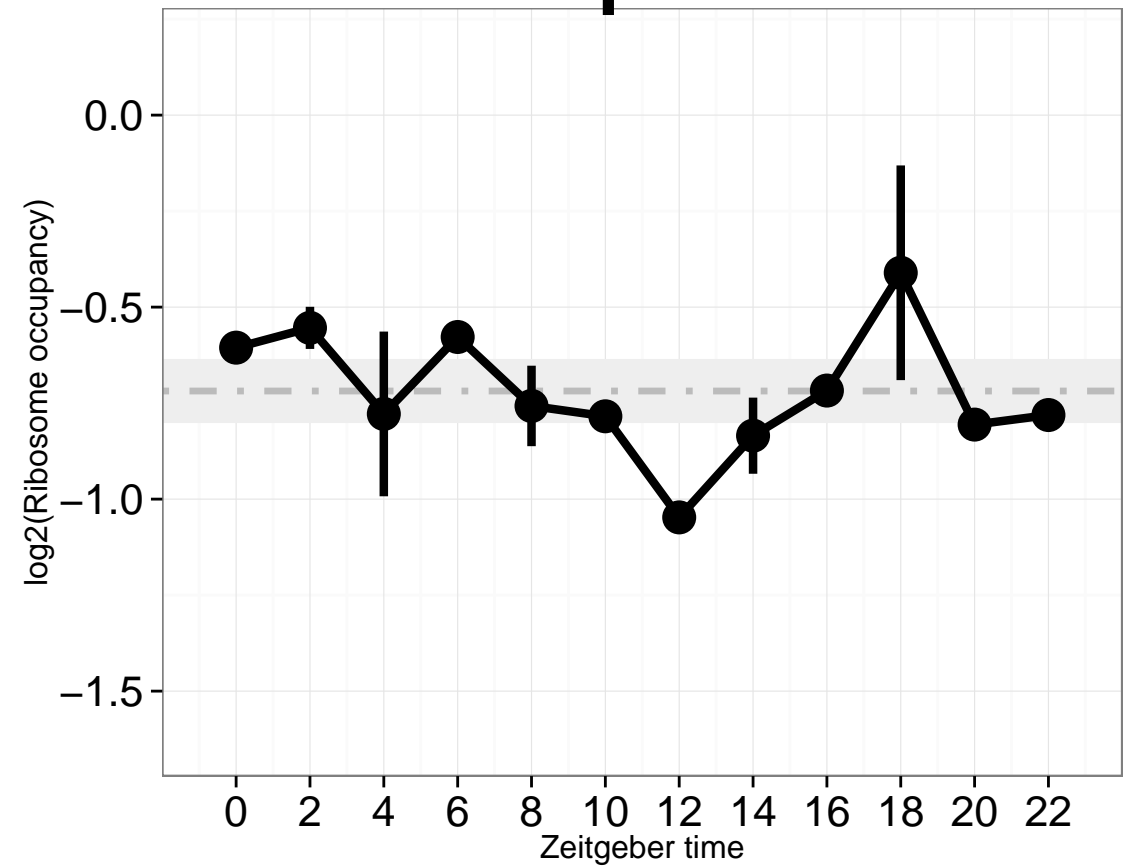

Supplement: Supplementary file 8515 [file 1]

## Abhd13

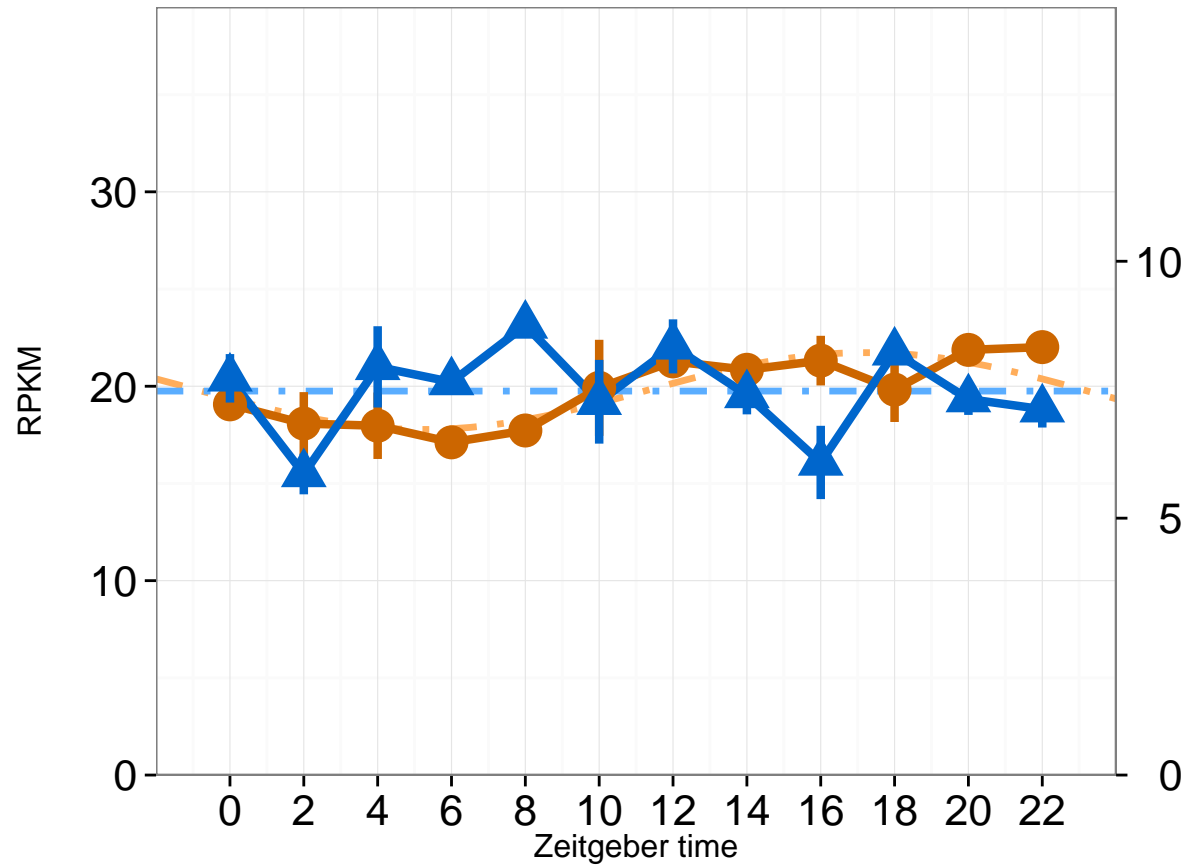

## Abhd13

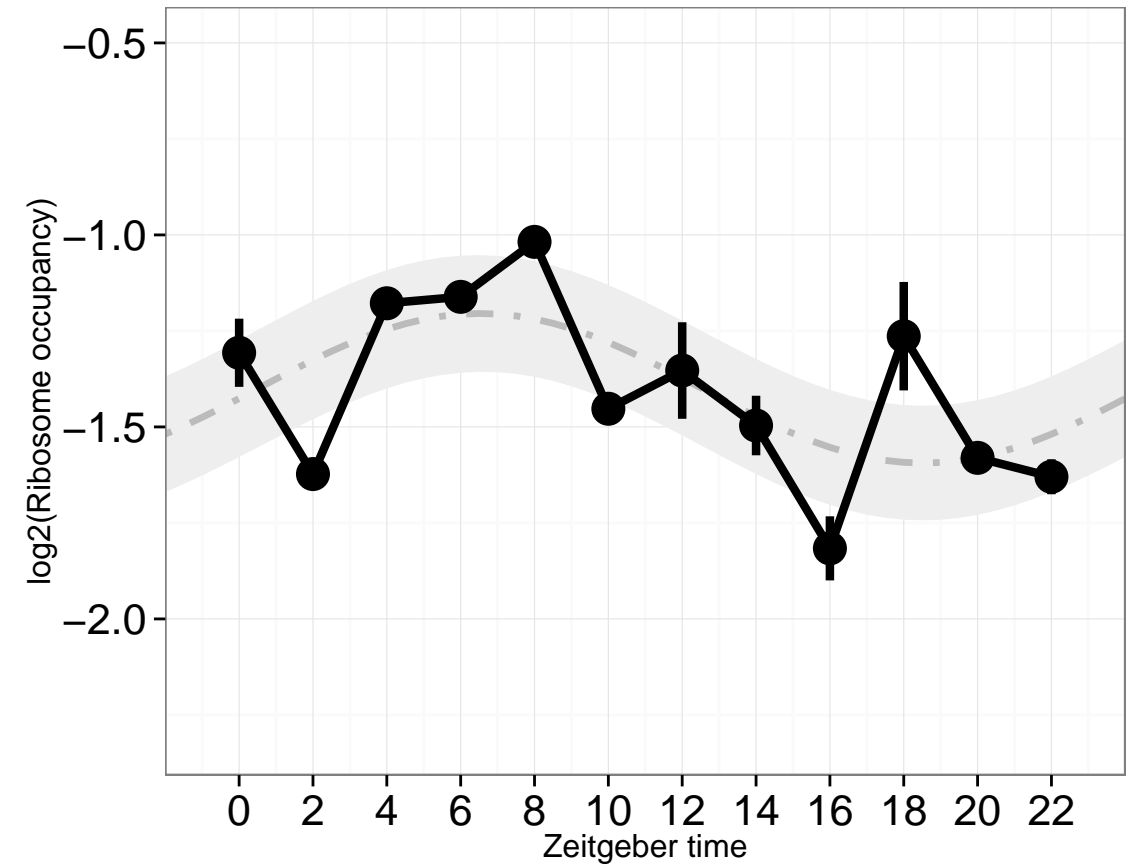

Supplement: Supplementary file 8516 [file 1]

# Hmgxb4

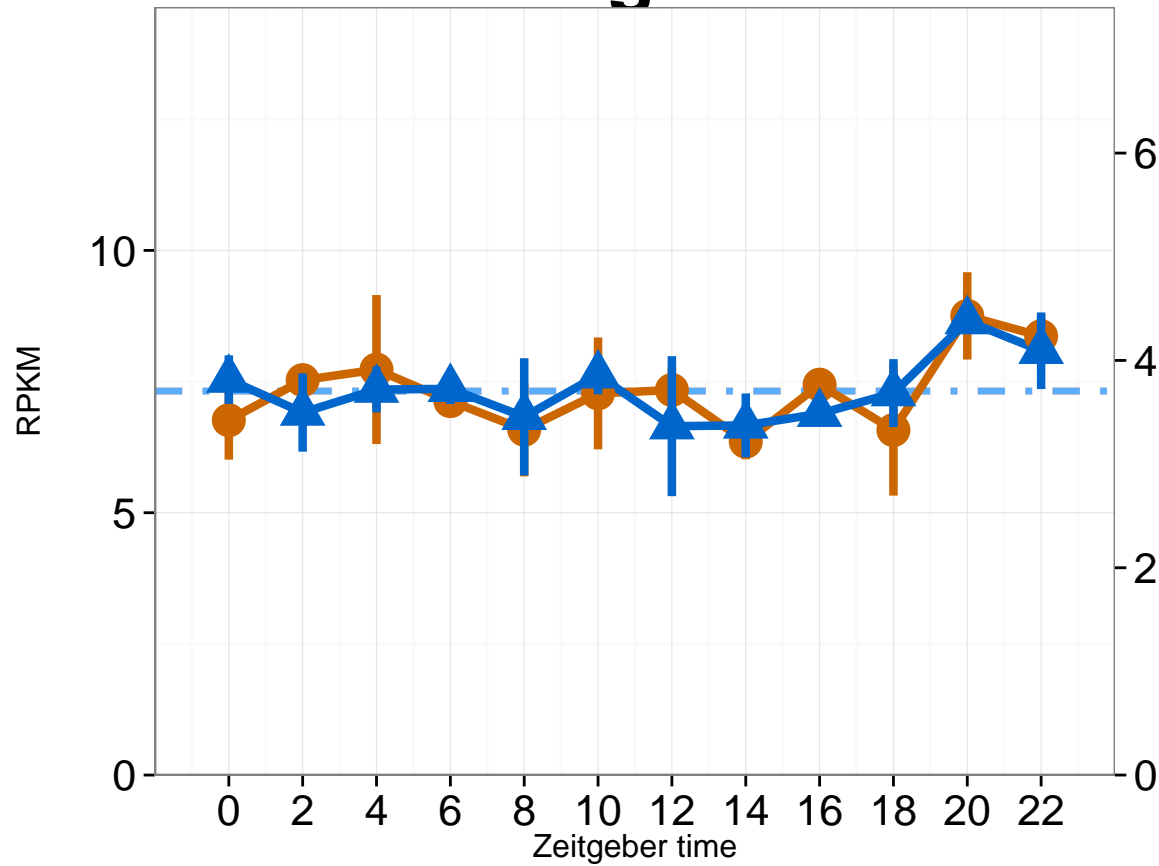

# Hmgxb4

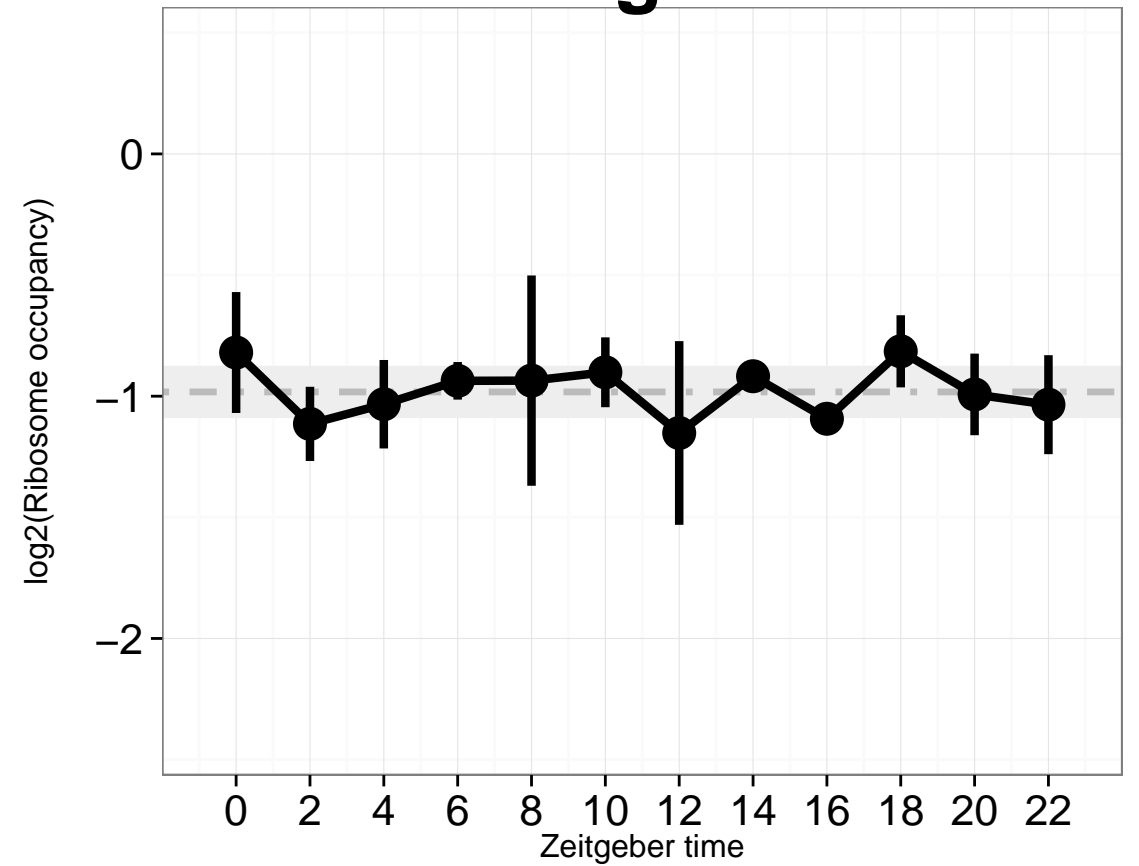

Supplement: Supplementary file 8517 [file 1]

# Gadd45b

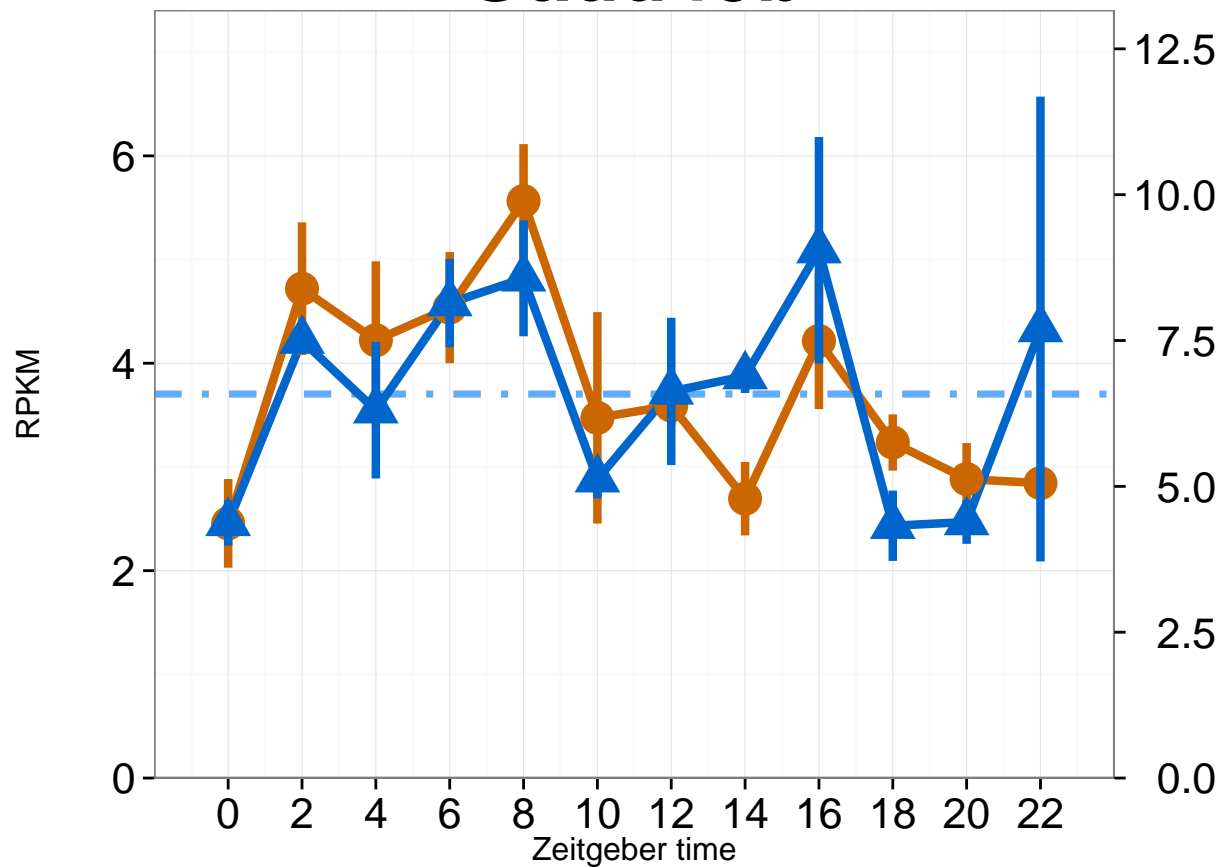

# Gadd45b

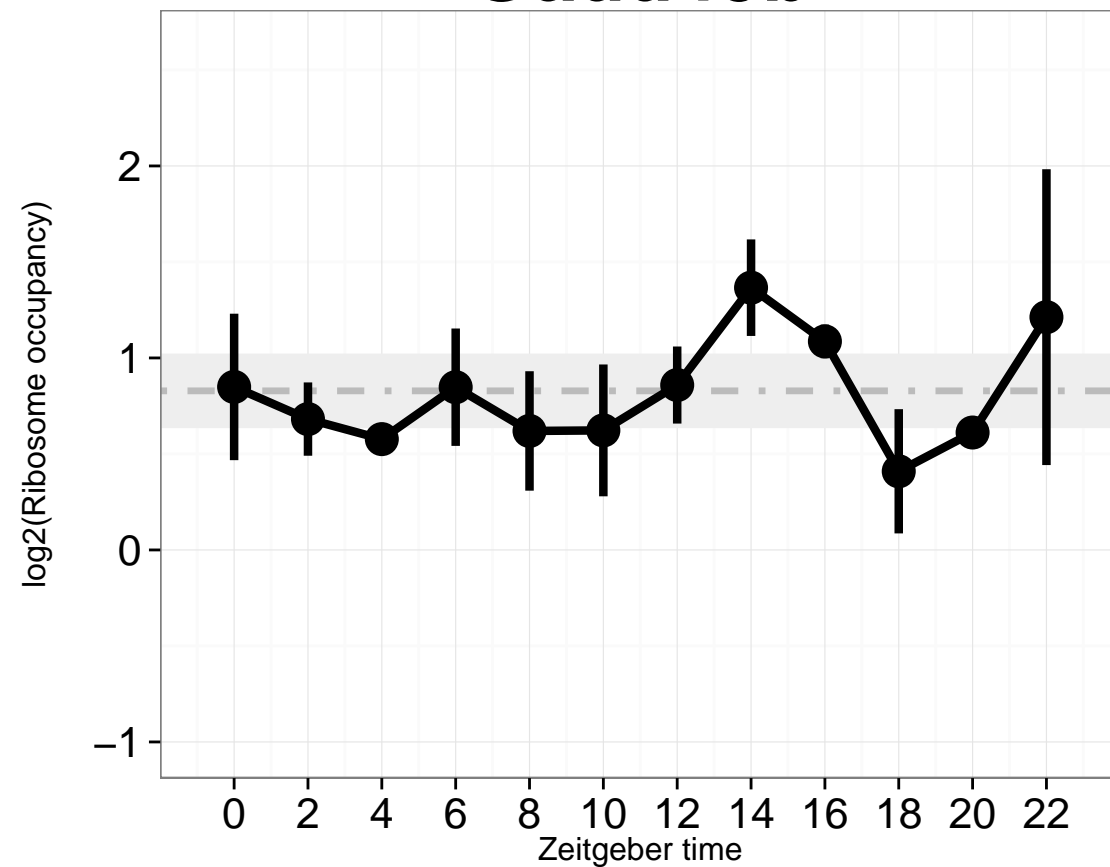

Supplement: Supplementary file 8518 [file 1]

# Slco4a1

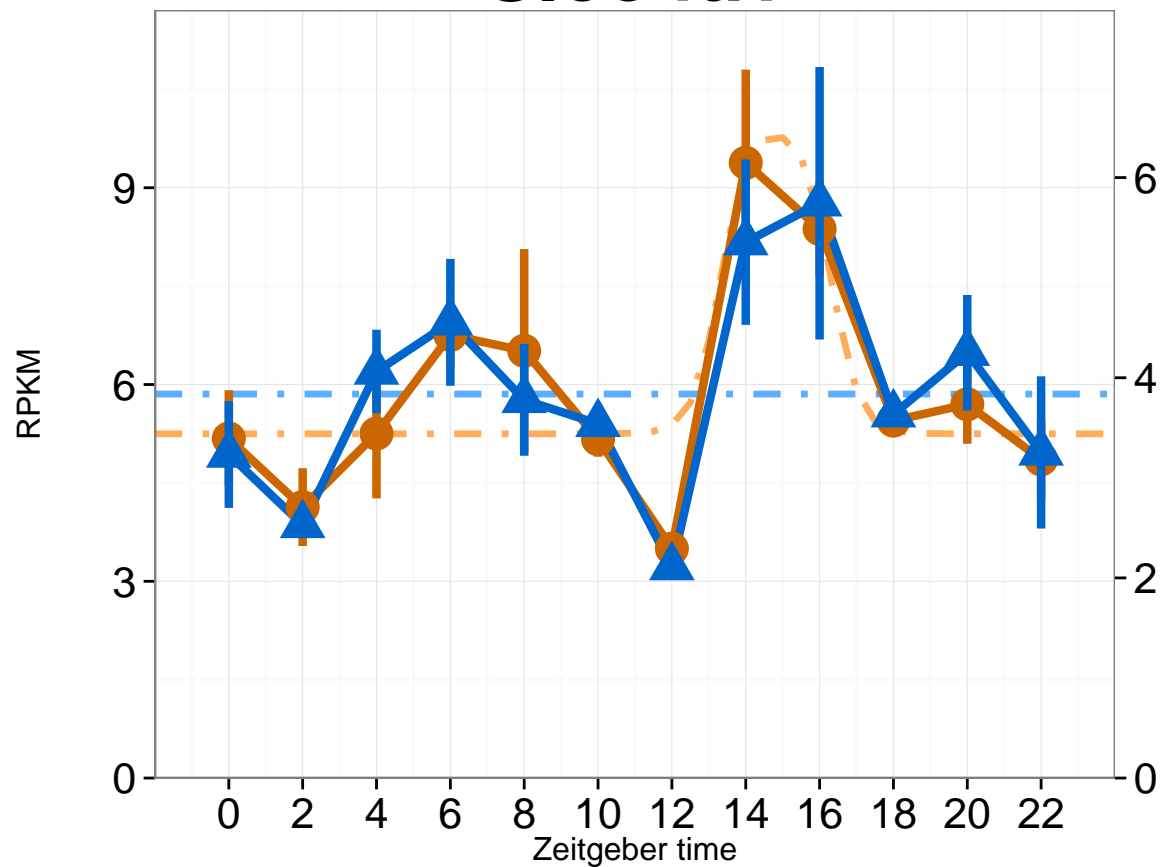

# Slco4a1

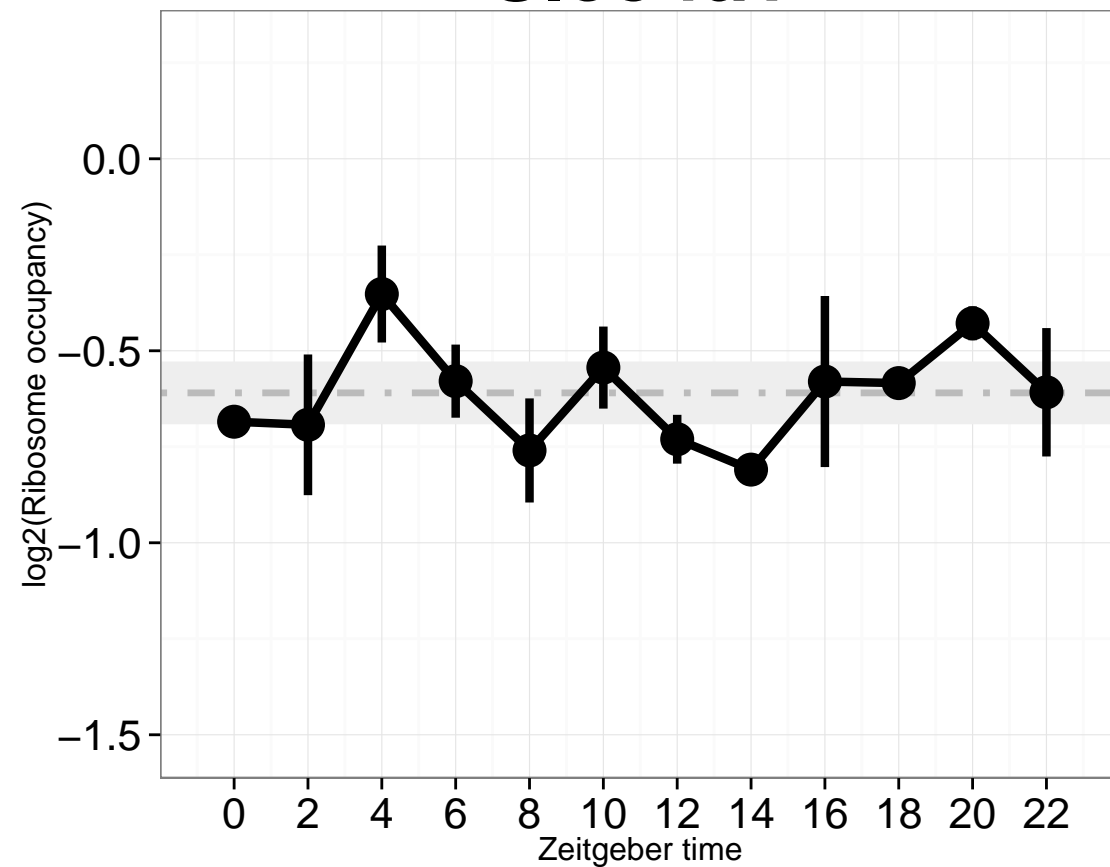

Supplement: Supplementary file 8519 [file 1]

# Hsp90aa1

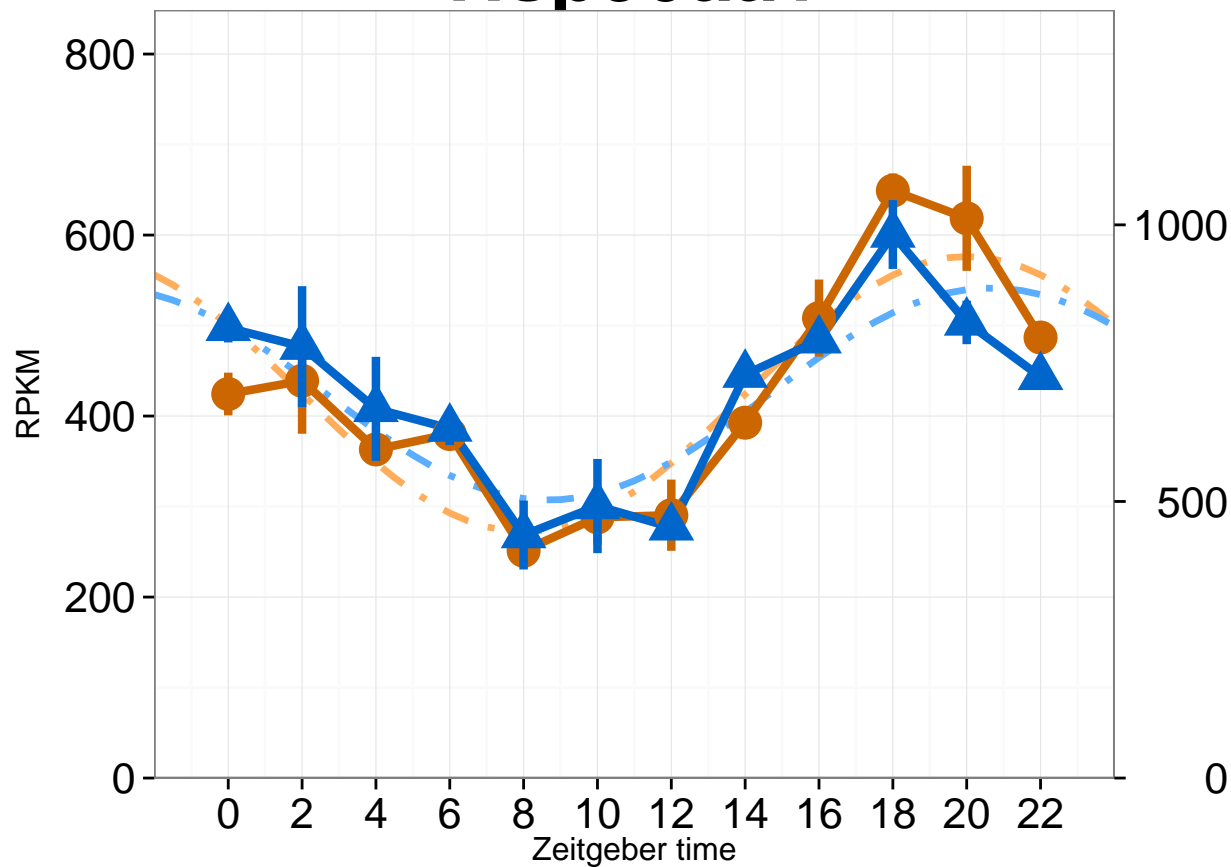

# Hsp90aa1

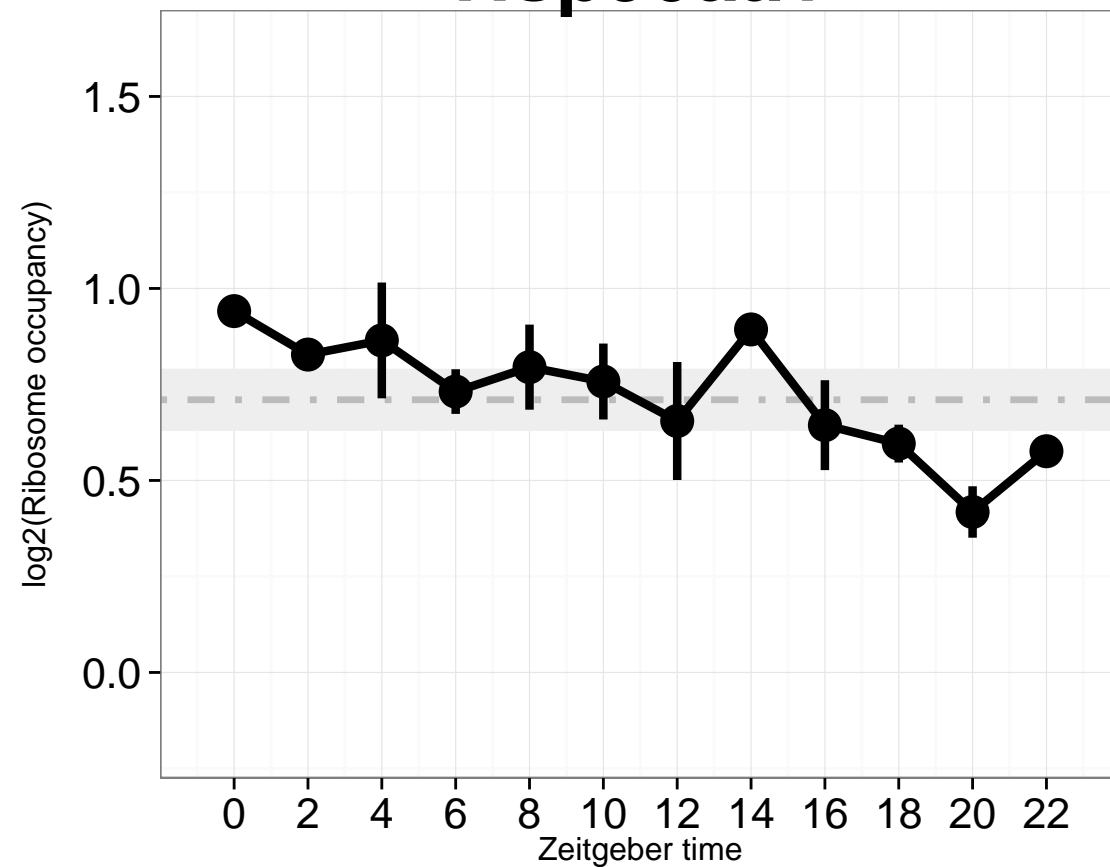

Supplement: Supplementary file 8520 [file 1]

## Fmod

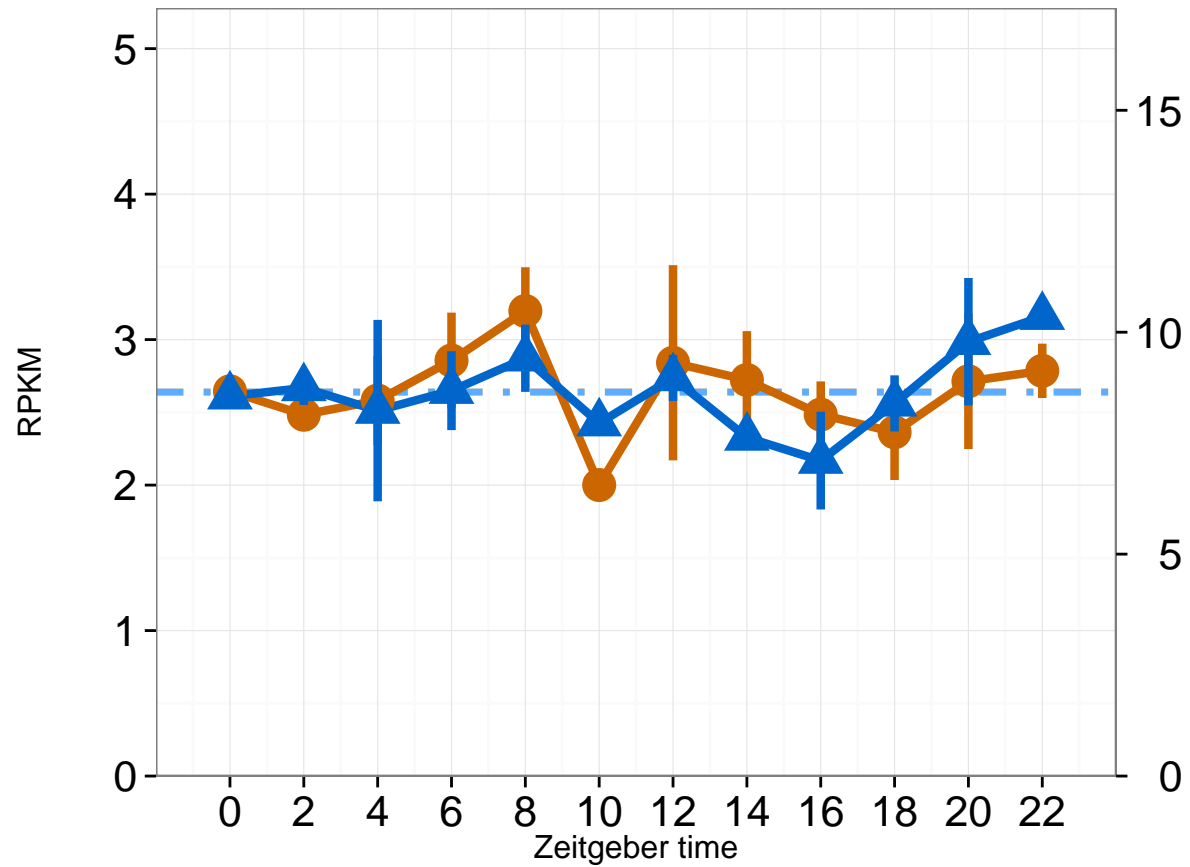

## Fmod

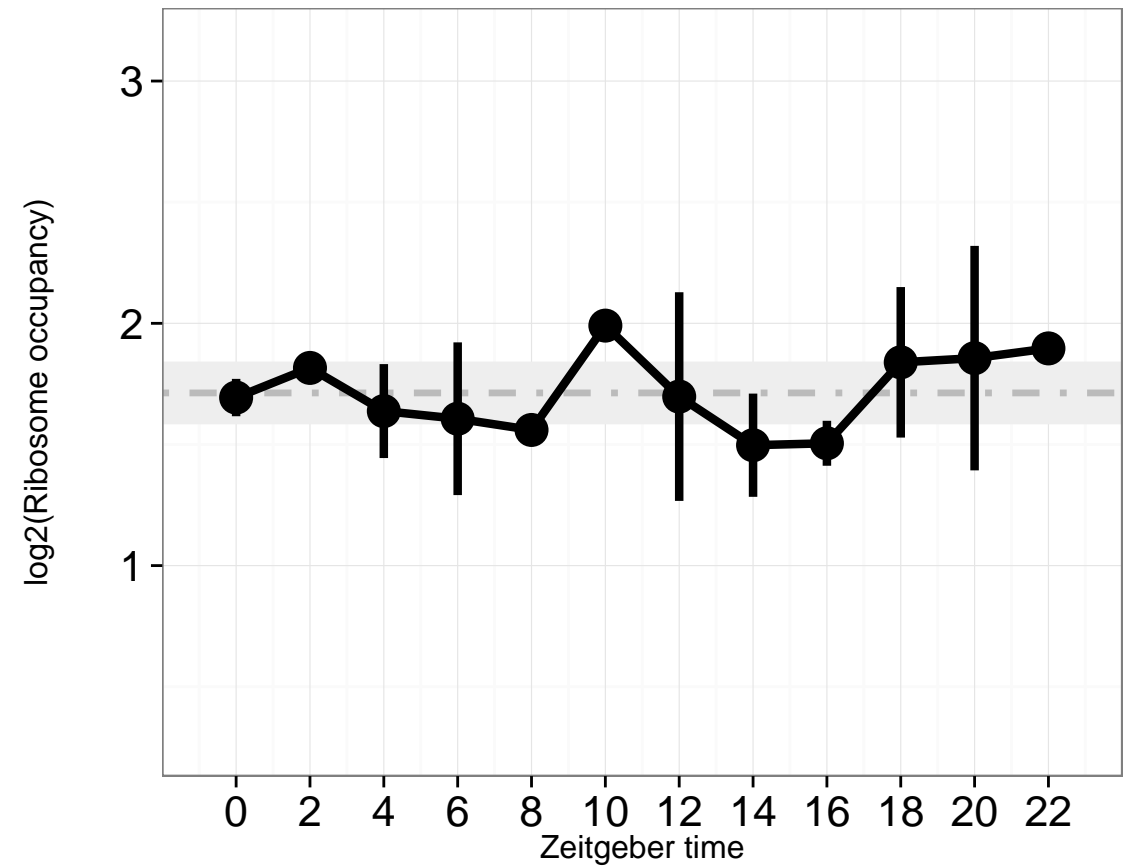

Supplement: Supplementary file 8521 [file 1]

## Chchd7

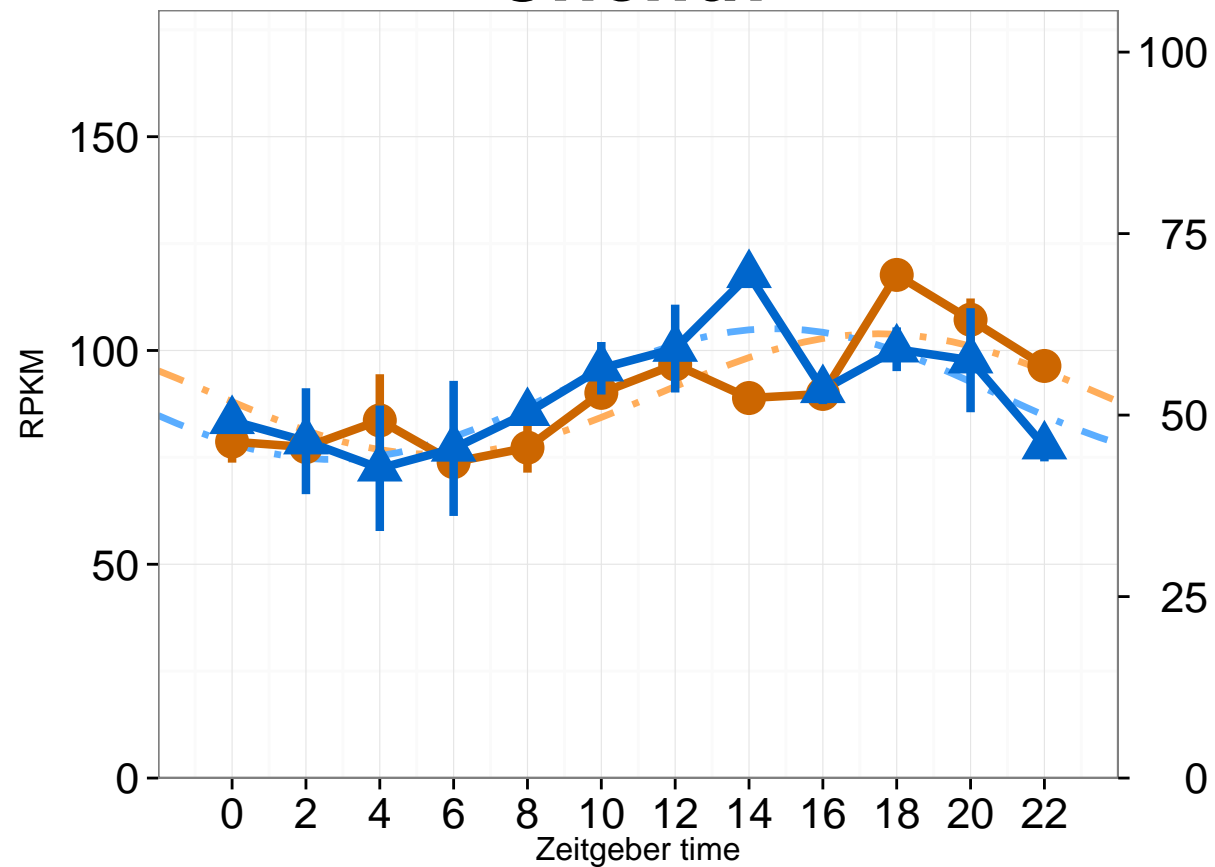

## Chchd7

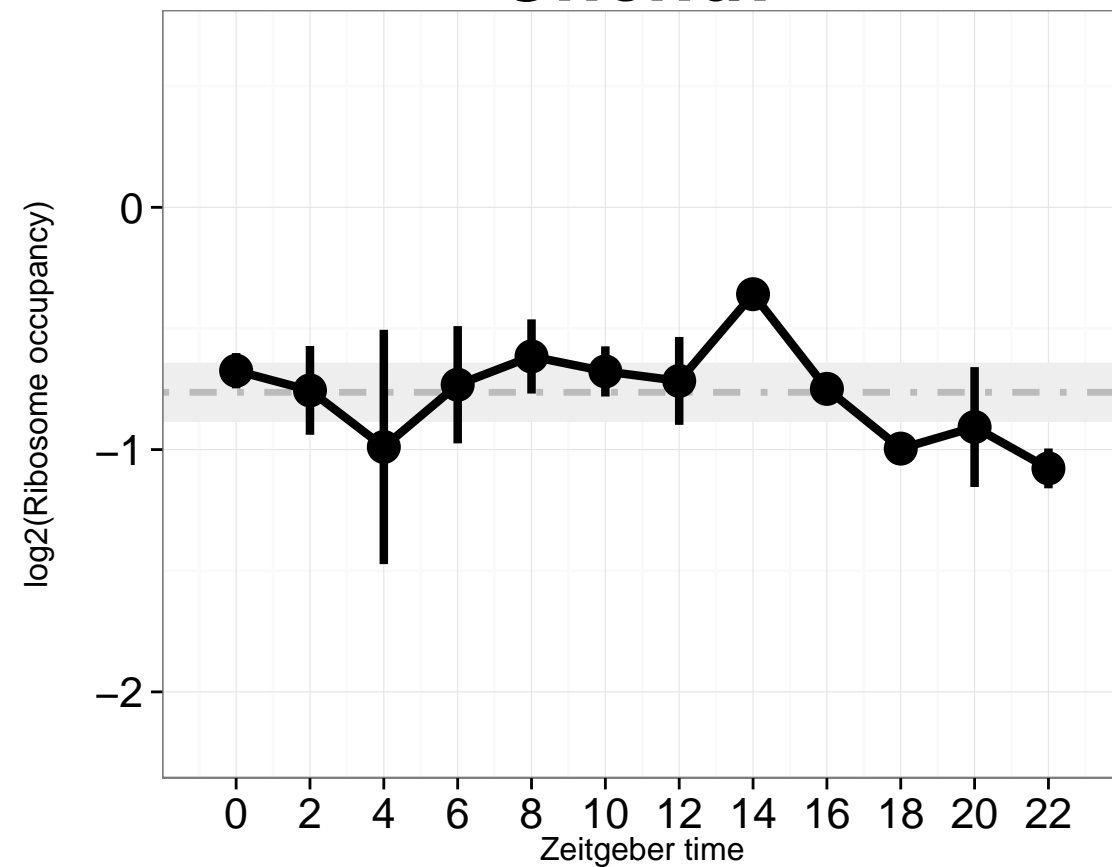

Supplement: Supplementary file 8522 [file 1]

## Ftcd

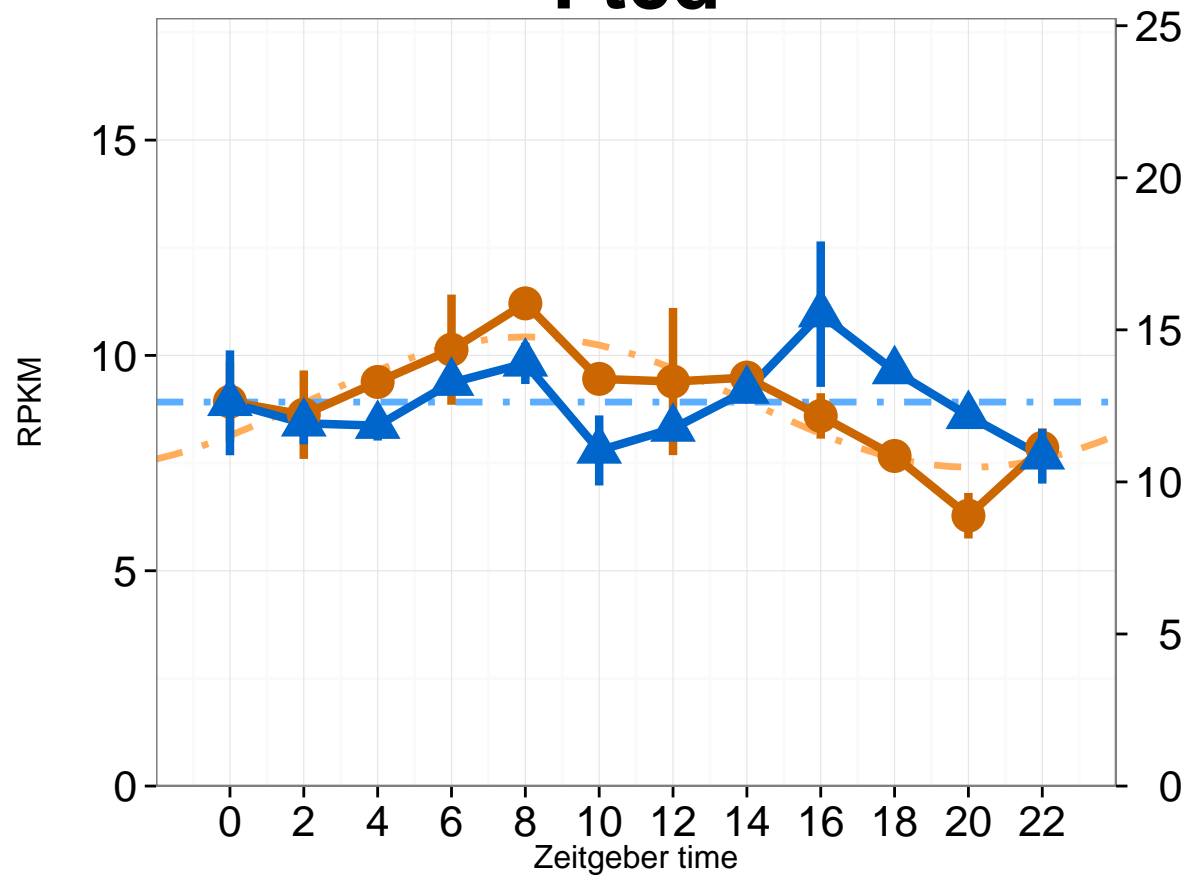

## Ftcd

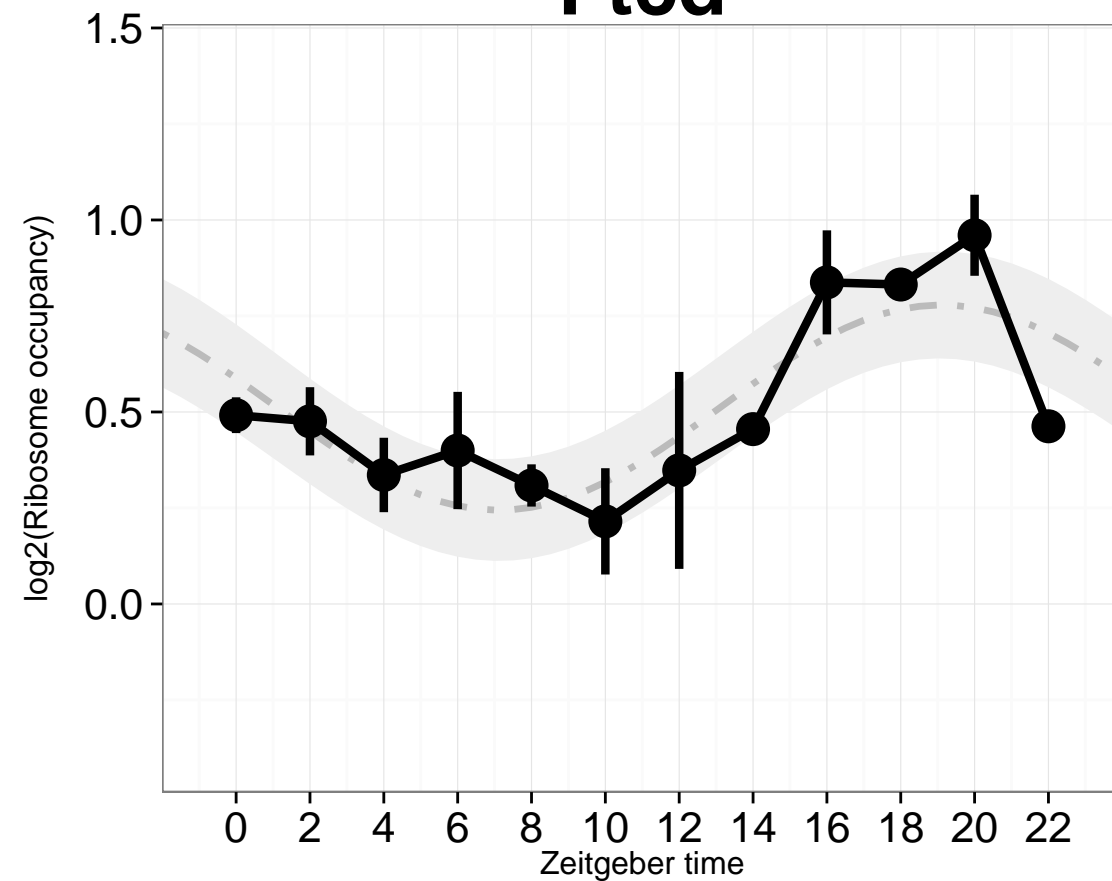

Supplement: Supplementary file 8523 [file 1]

## Cml3

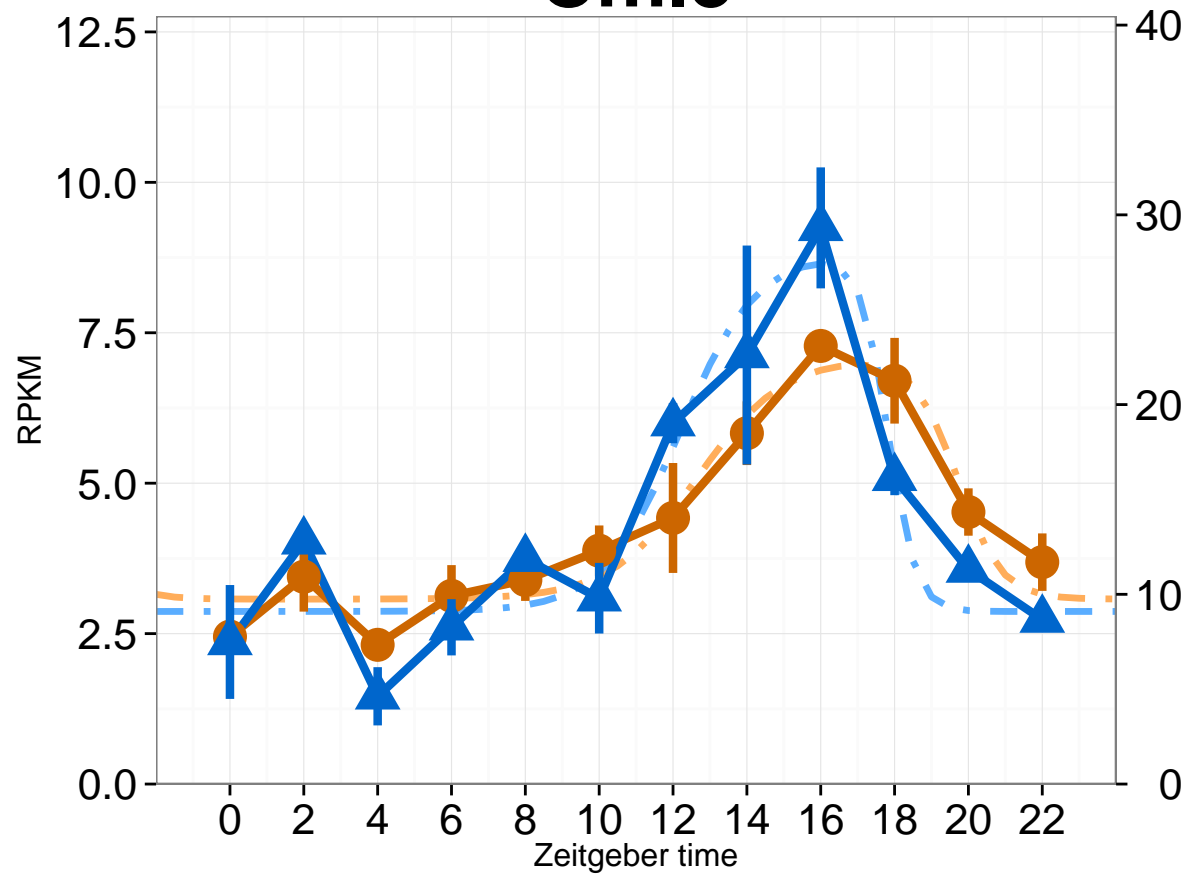

## Cml3

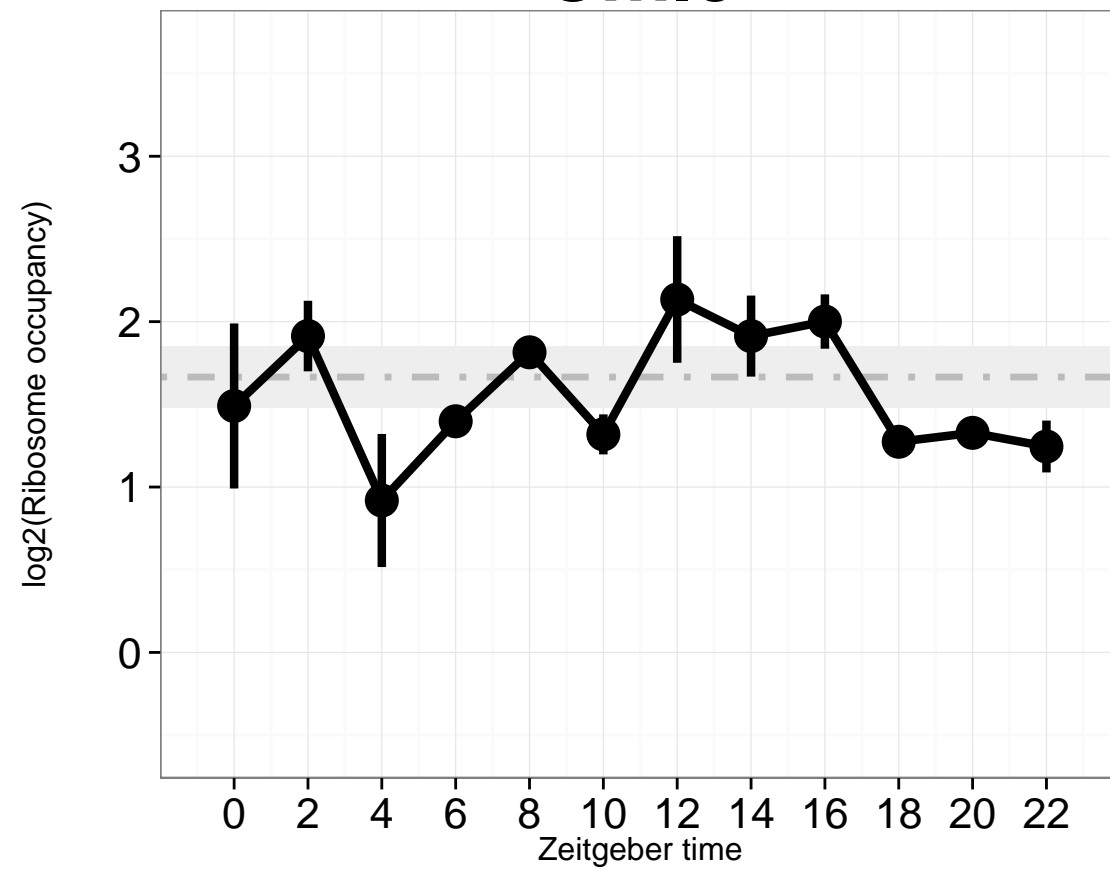

Supplement: Supplementary file 8524 [file 1]

# Chchd6

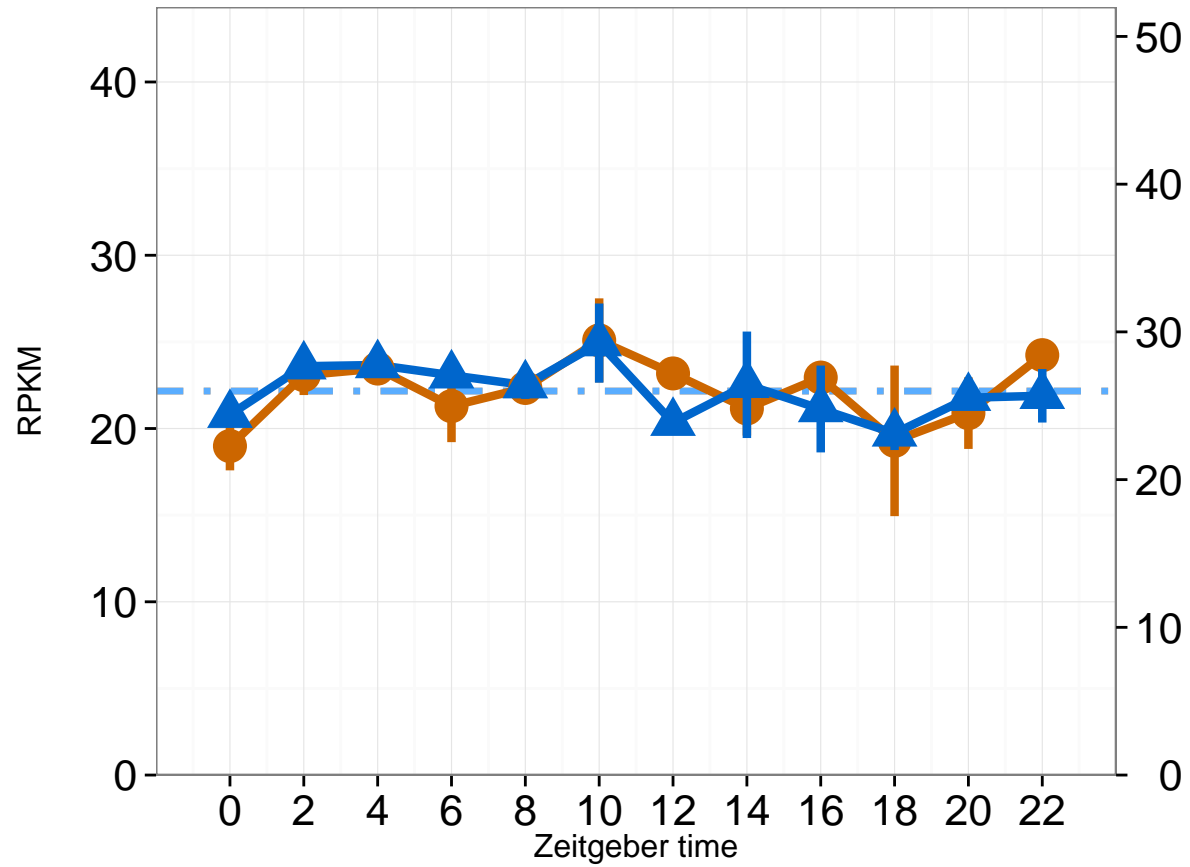

# Chchd6

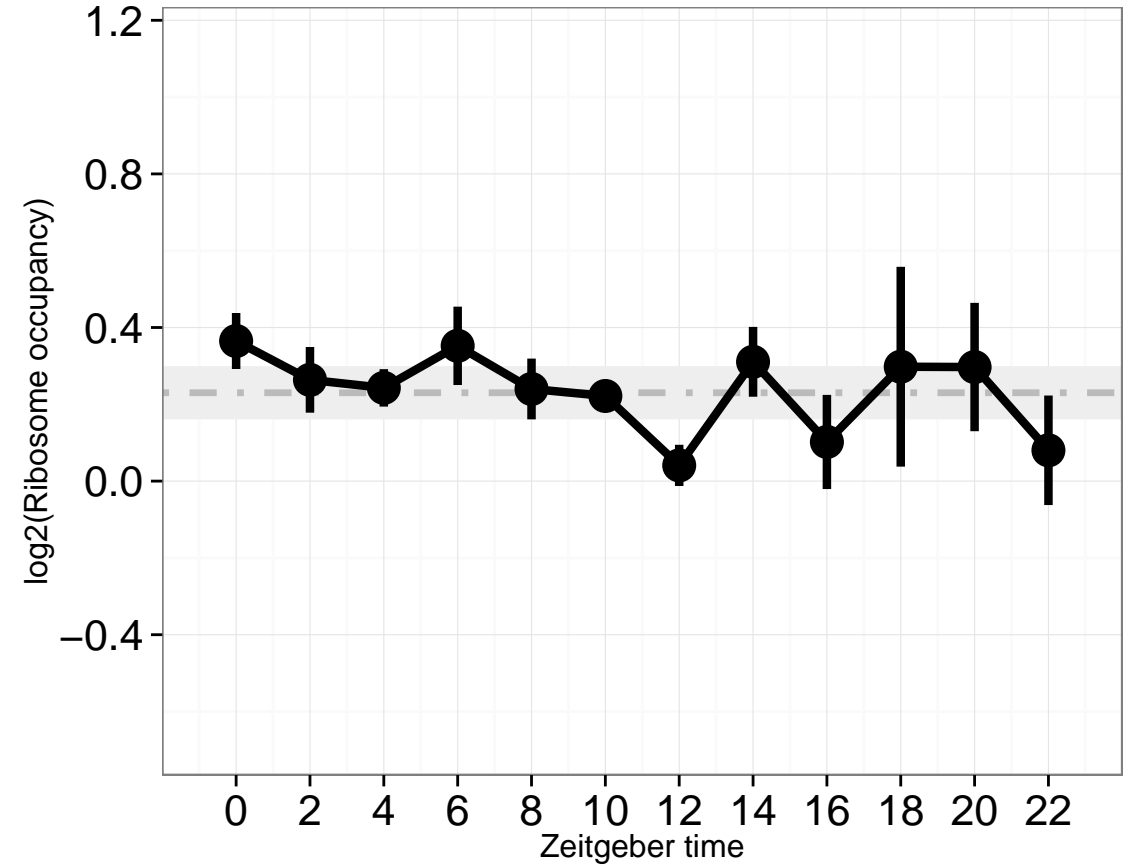

Supplement: Supplementary file 8525 [file 1]

## Smc2

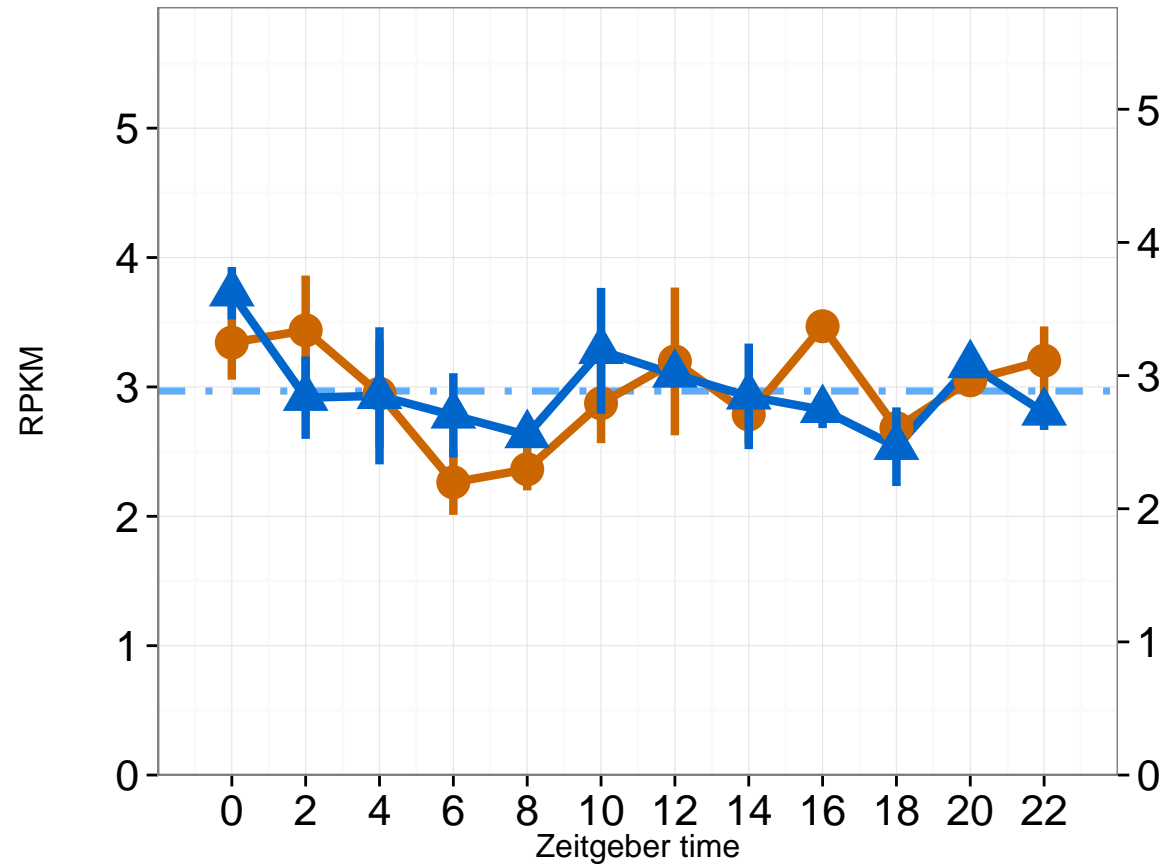

## Smc2

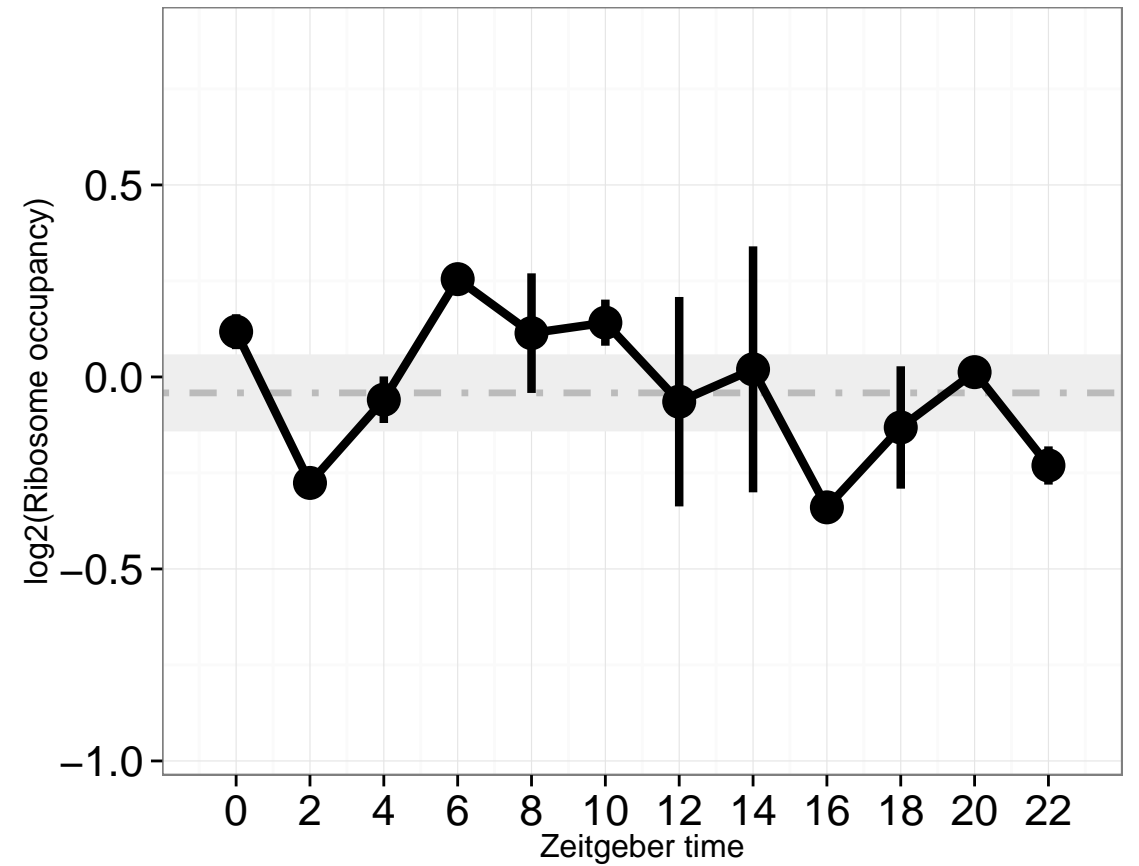

Supplement: Supplementary file 8526 [file 1]

## Rcc1

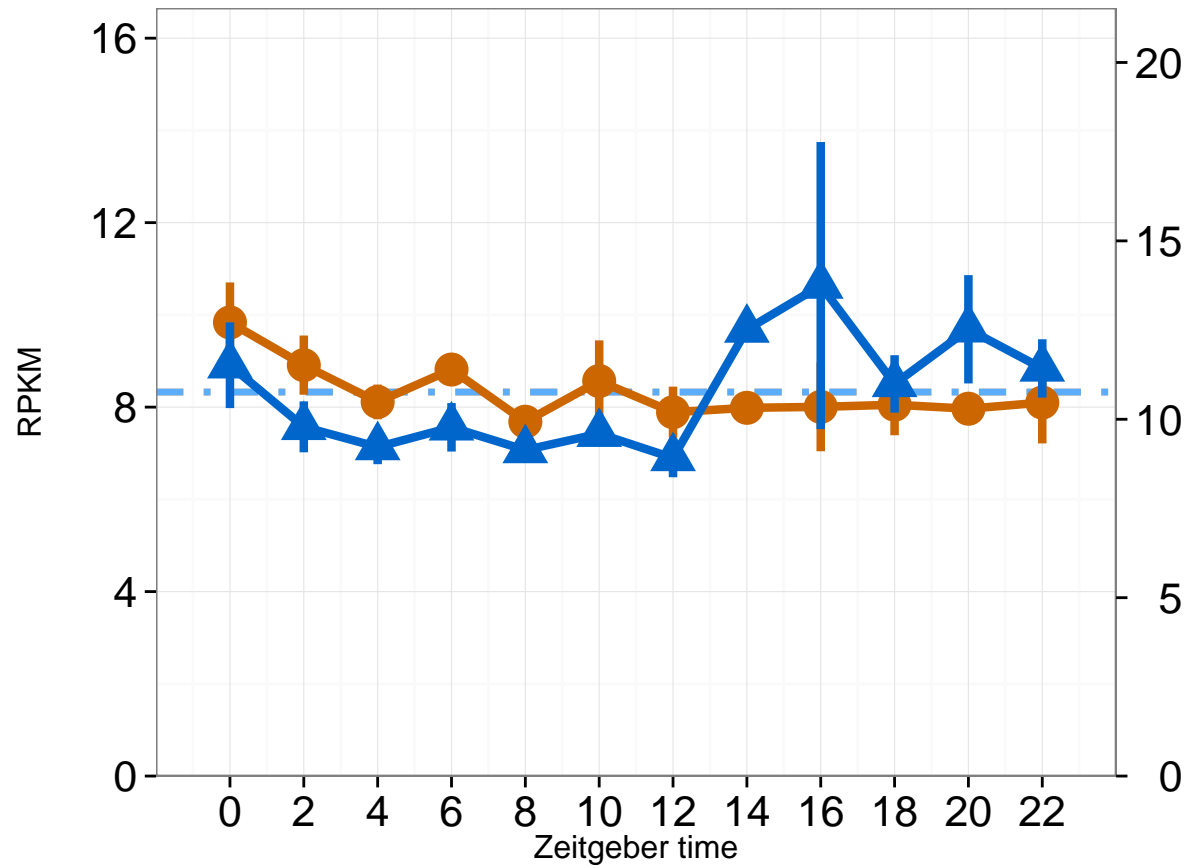

## Rcc1

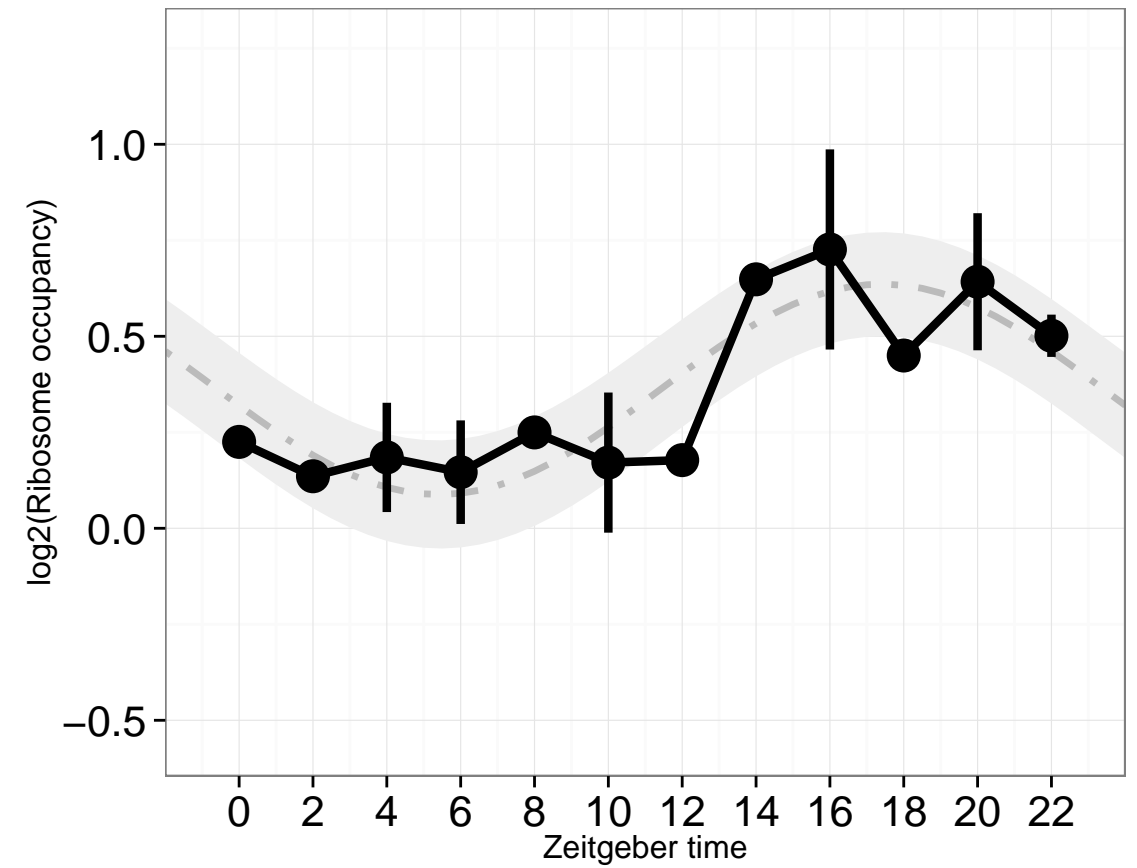

Supplement: Supplementary file 8527 [file 1]

## Diexf

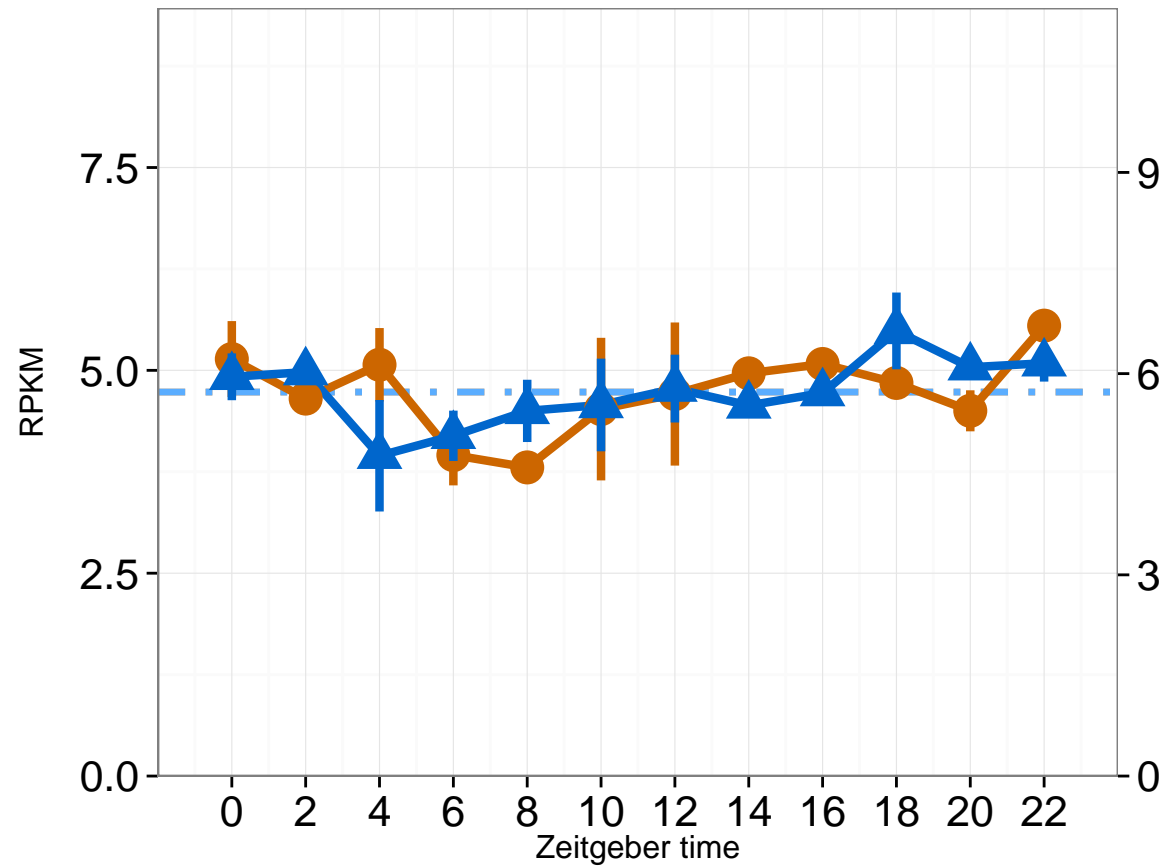

## Diexf

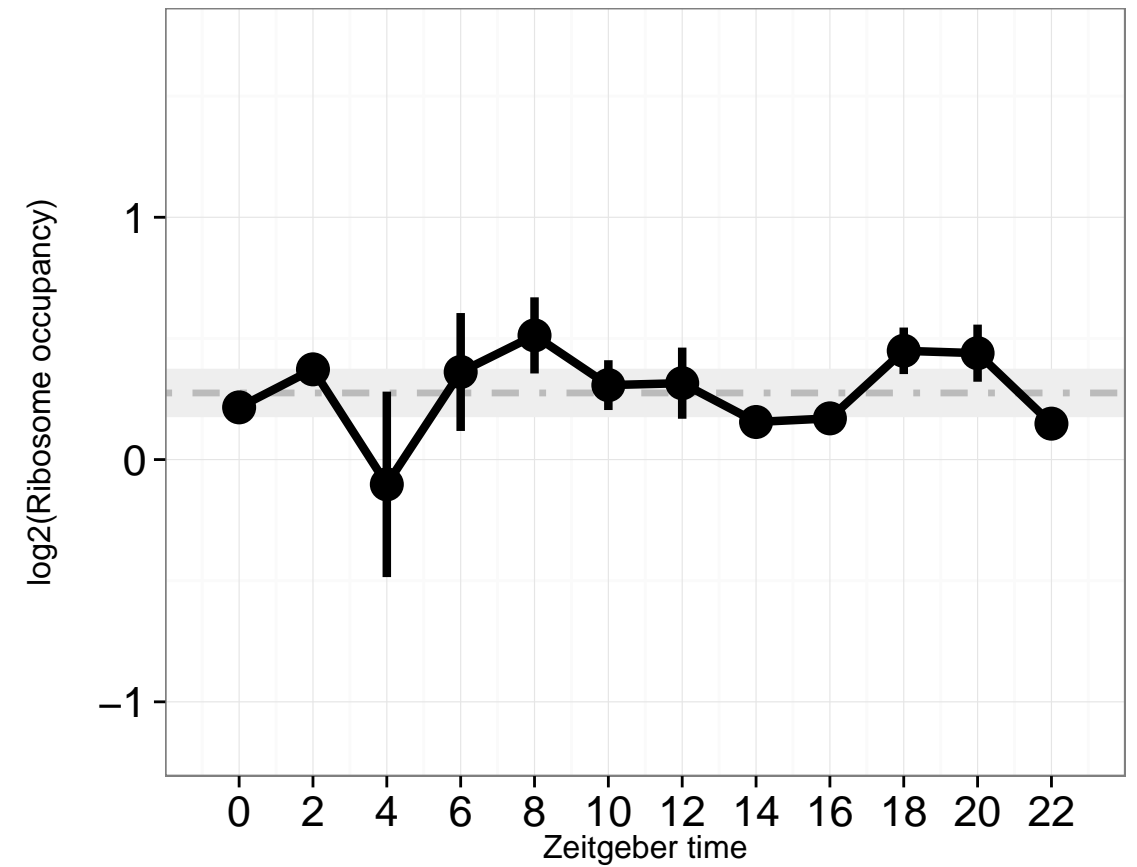

Supplement: Supplementary file 8528 [file 1]
