# Supplementary material (part 86 of 133)
Source: publisher figshare collection journal article supplement (https://springernature.figshare.com/articles/dataset/_/4903193)

# Cyp4f16

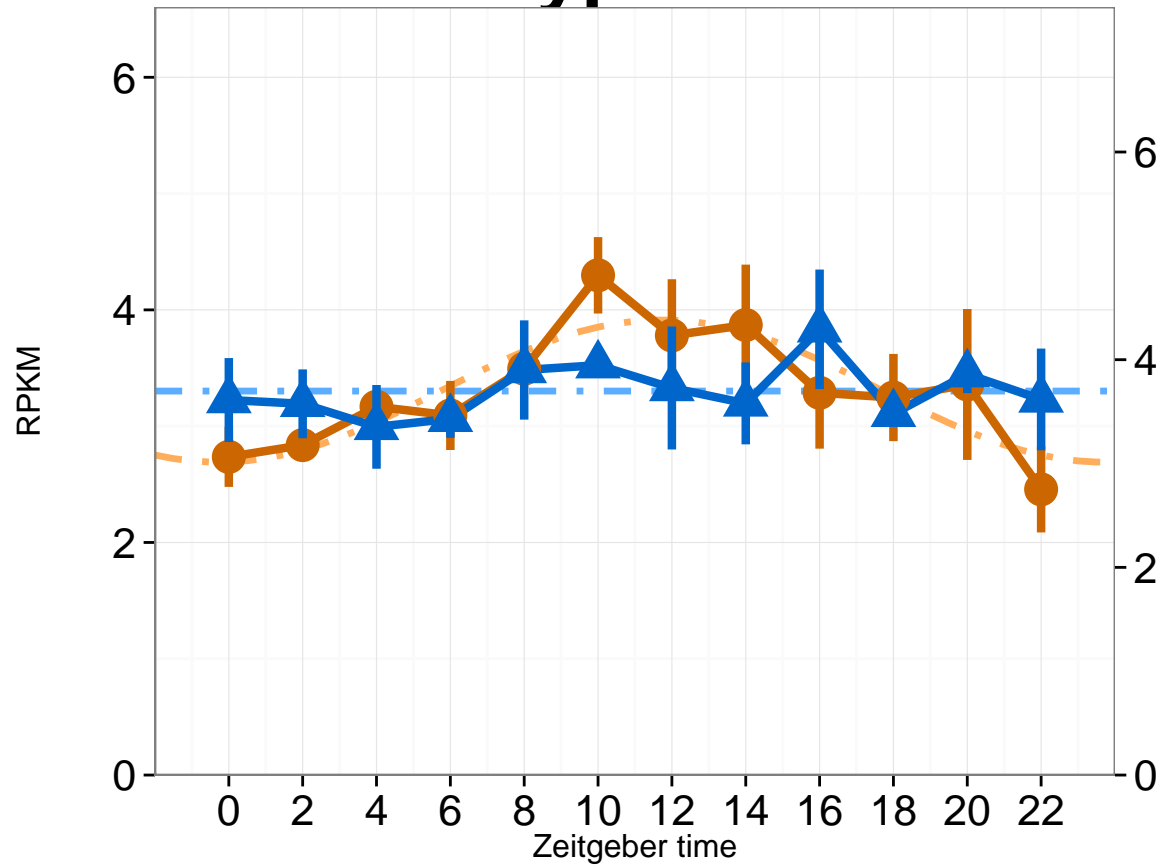

# Cyp4f16

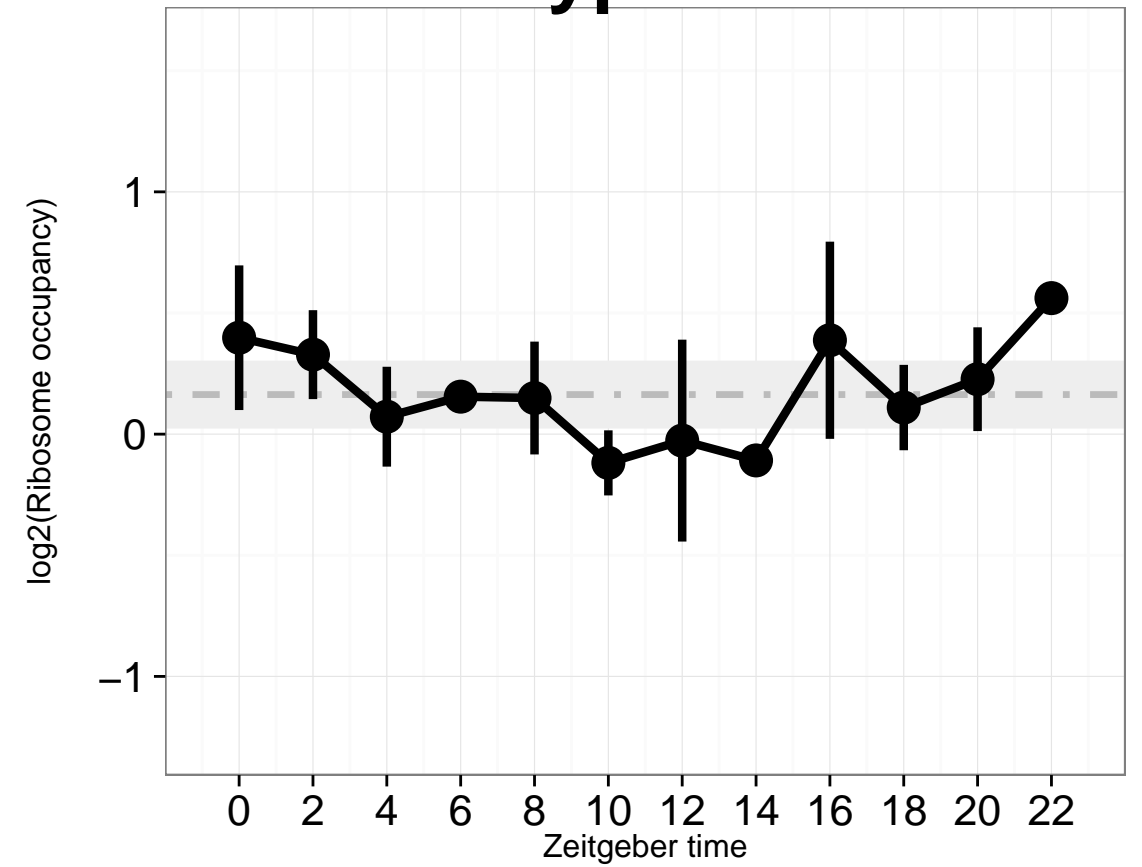

Supplement: Supplementary file 8529 [file 1]

## Numa1

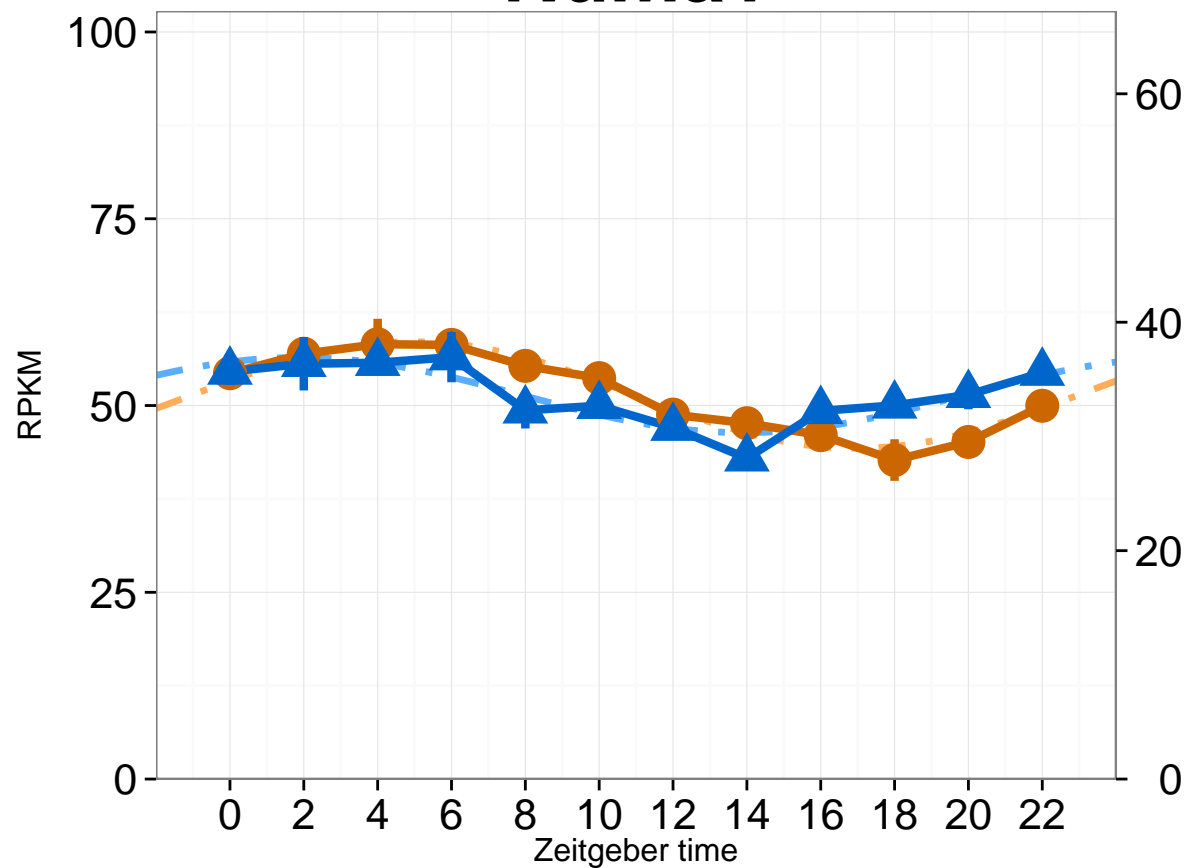

## Numa1

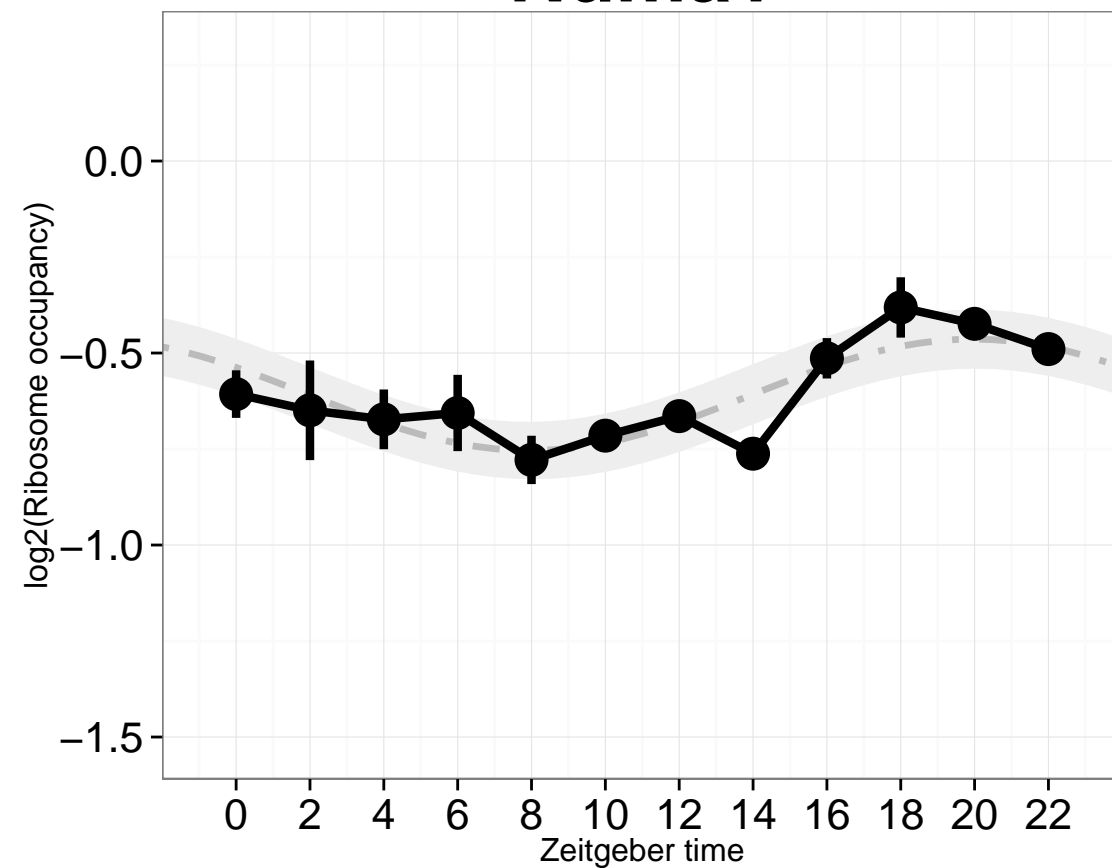

Supplement: Supplementary file 8530 [file 1]

# Ptpn22

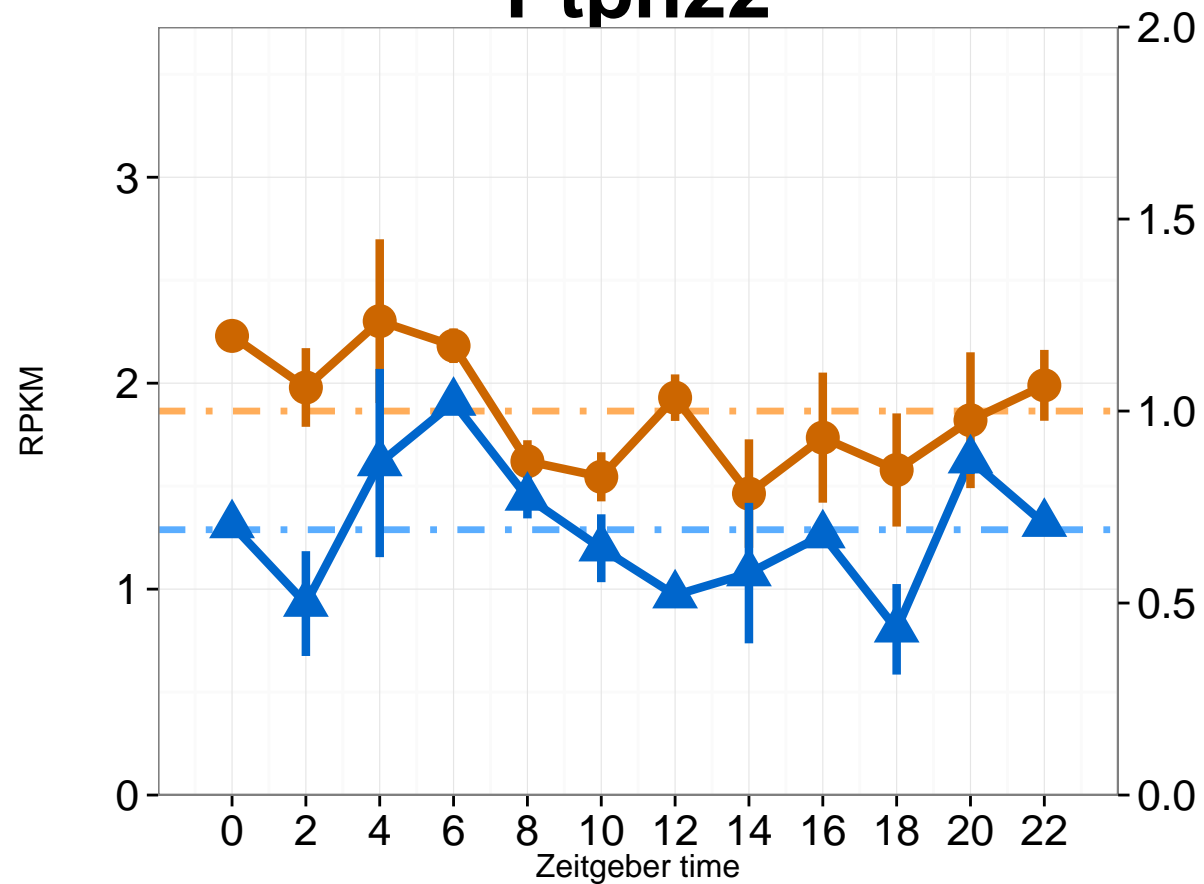

# Ptpn22

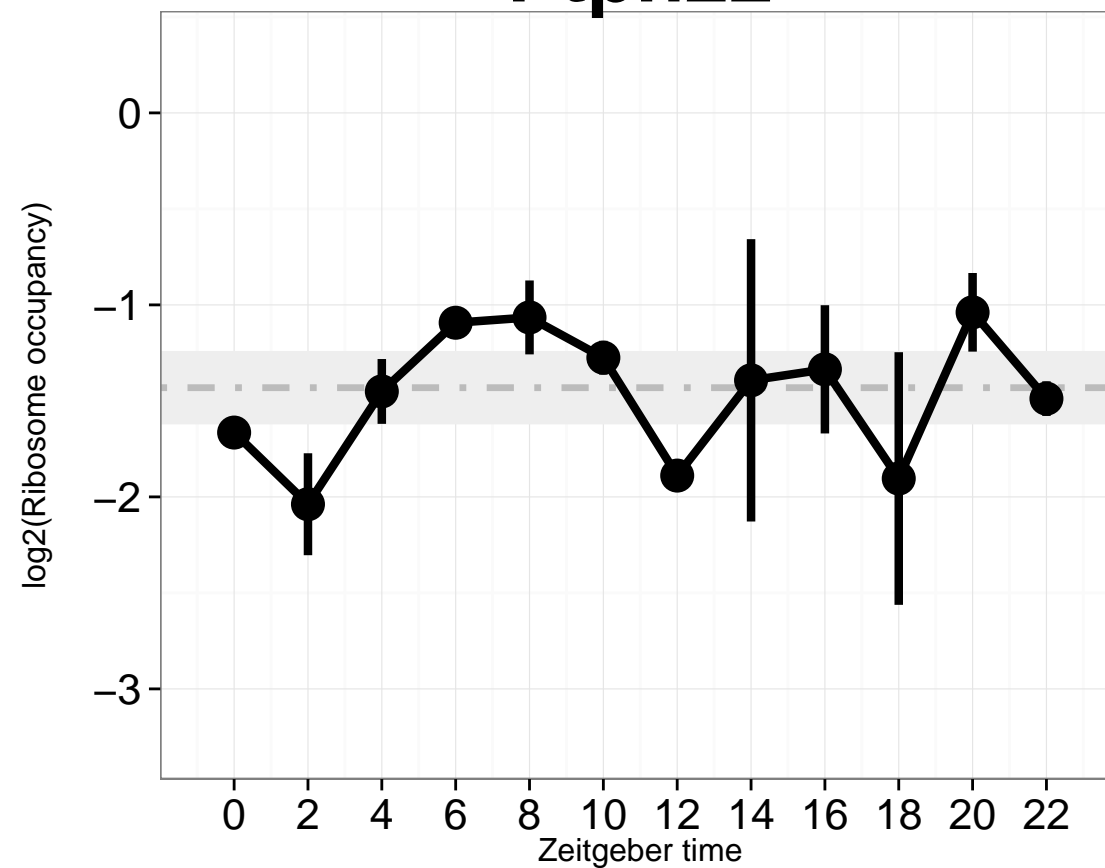

Supplement: Supplementary file 8531 [file 1]

# Hook1

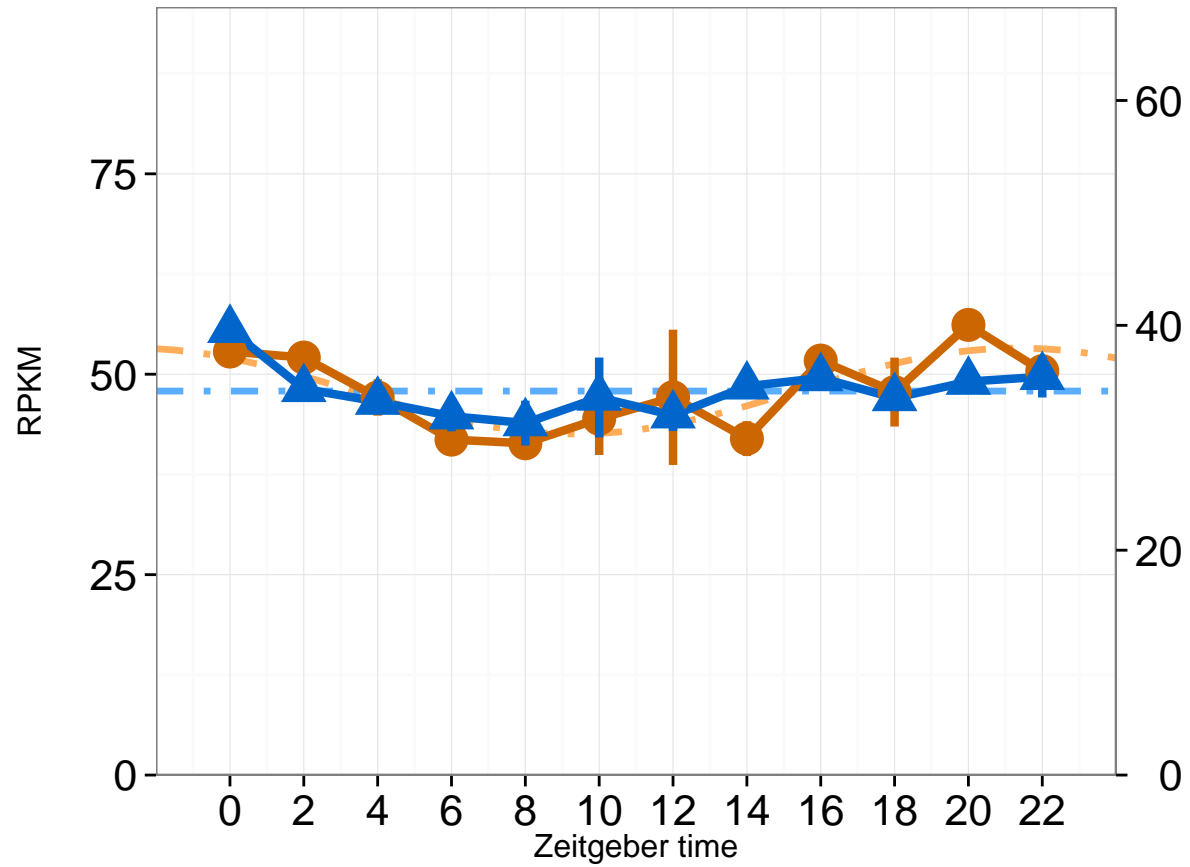

# Hook1

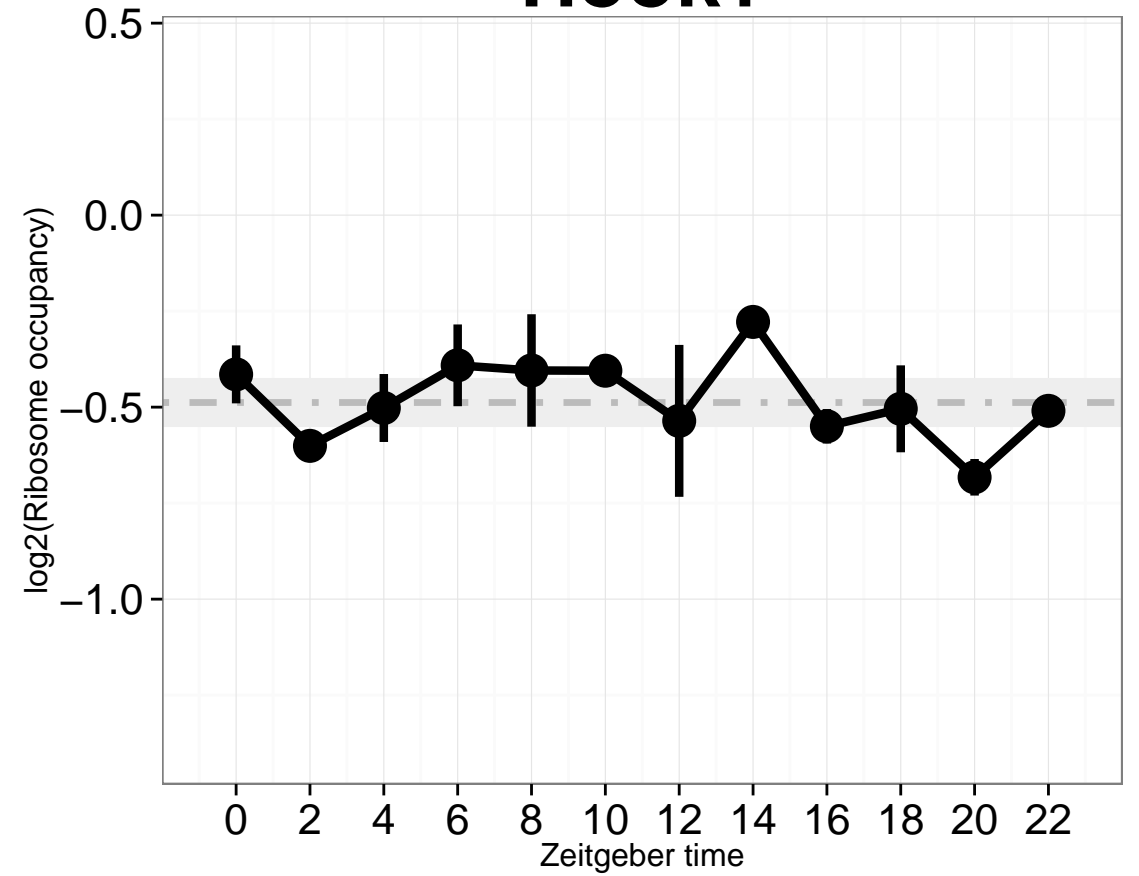

Supplement: Supplementary file 8532 [file 1]

# Neu1

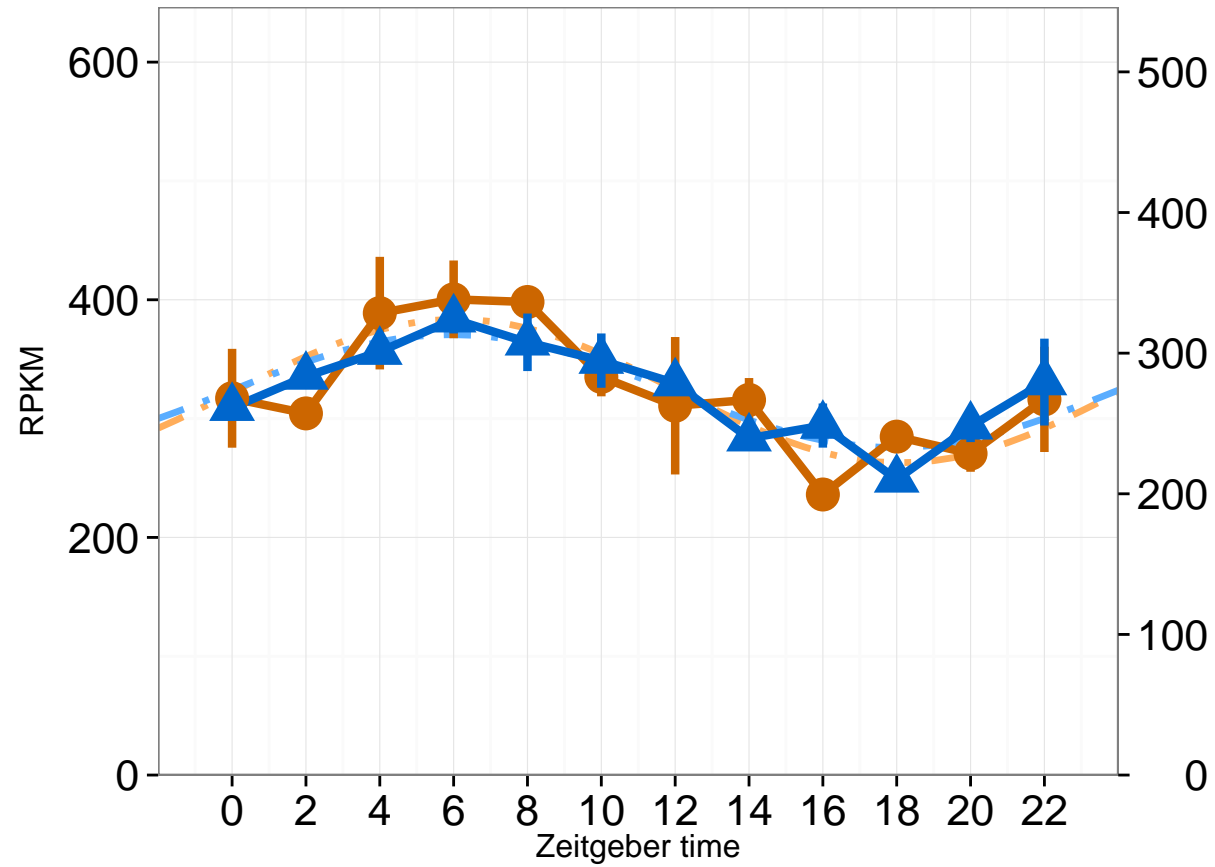

# Neu1

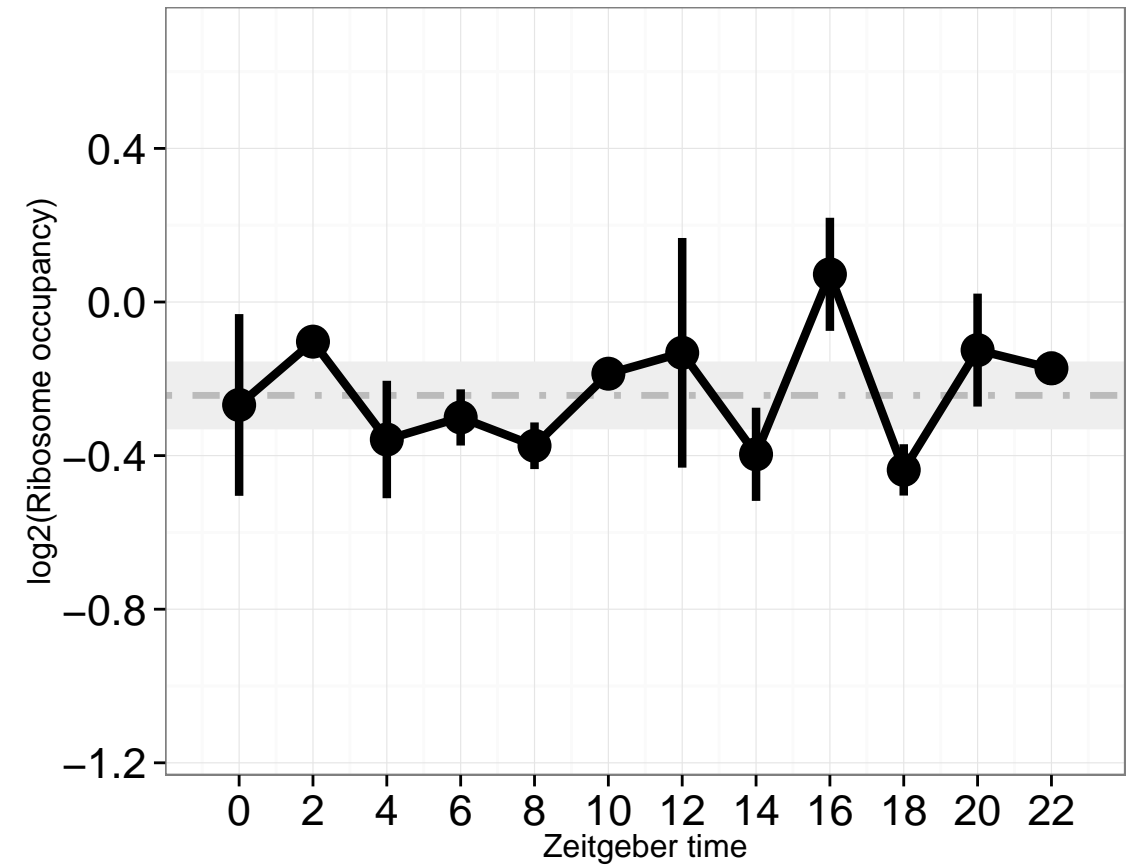

Supplement: Supplementary file 8533 [file 1]

# Csf2rb2

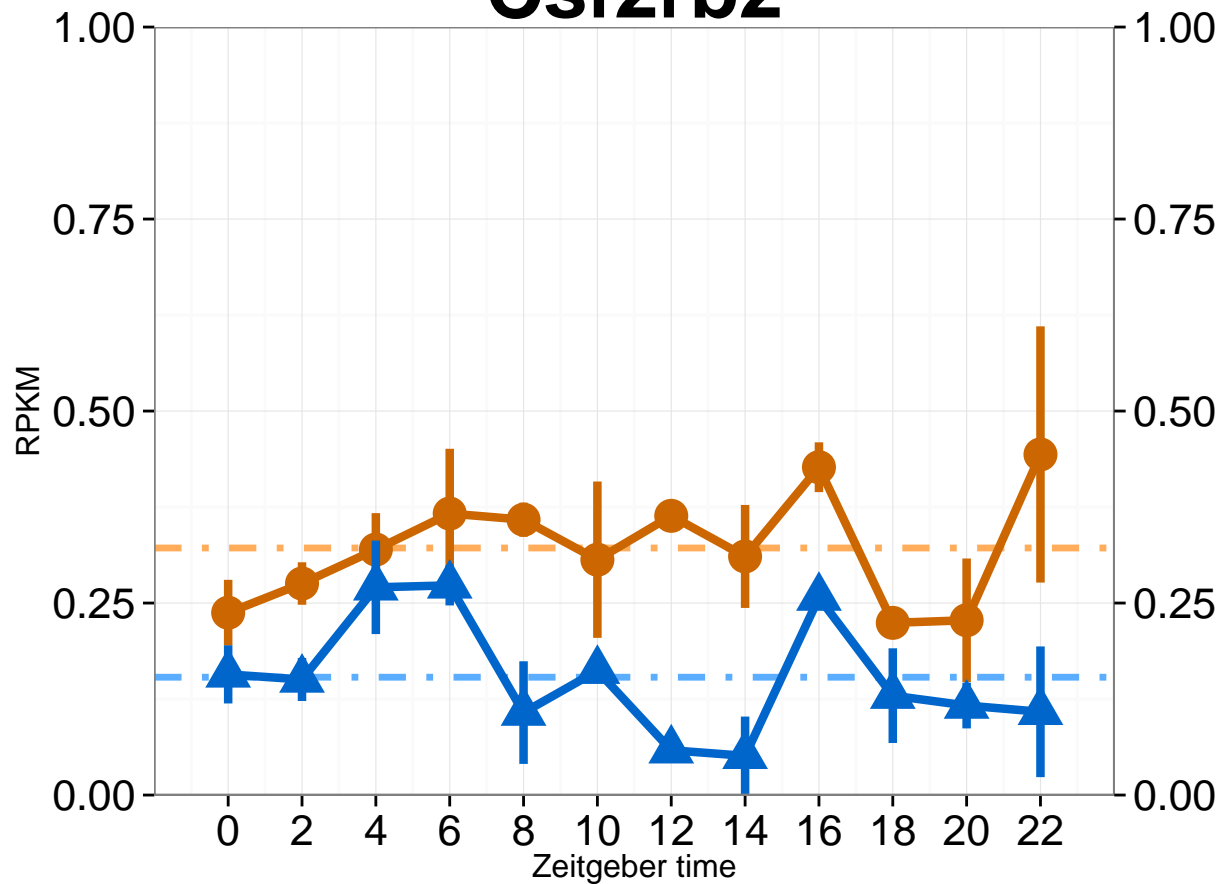

# Csf2rb2

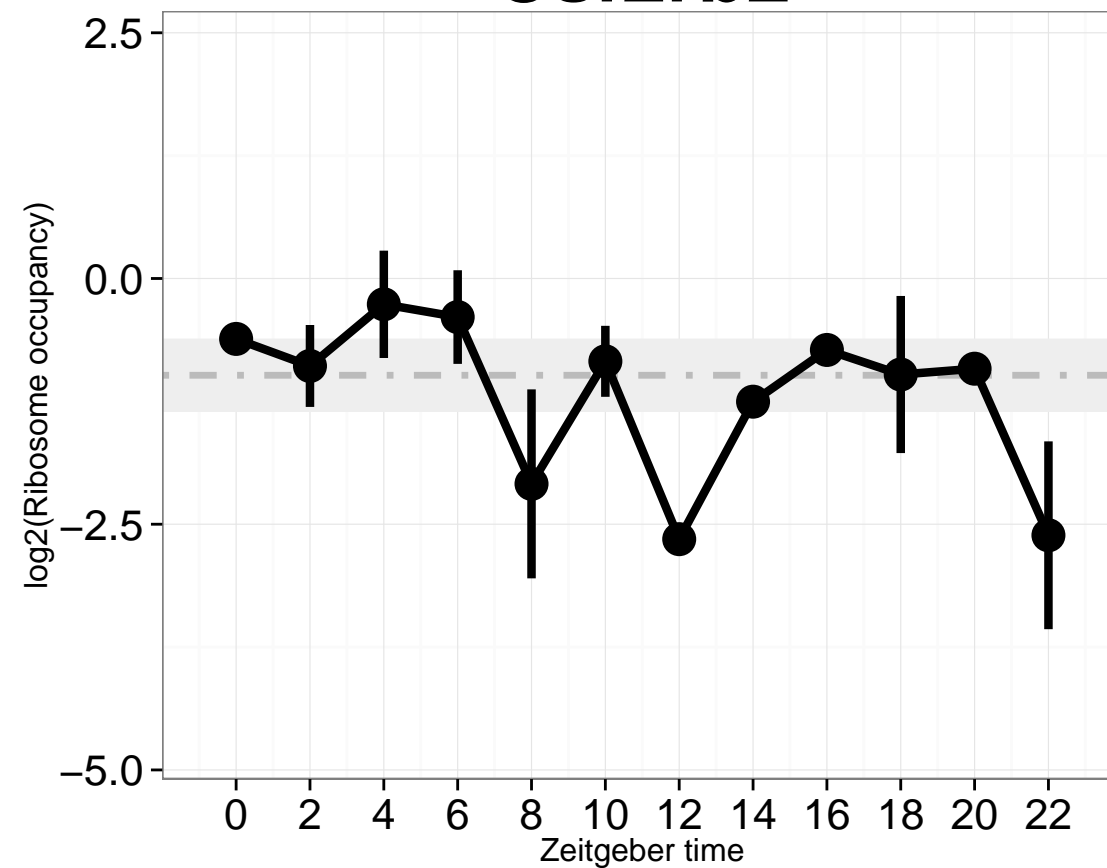

Supplement: Supplementary file 8534 [file 1]

# Rai1

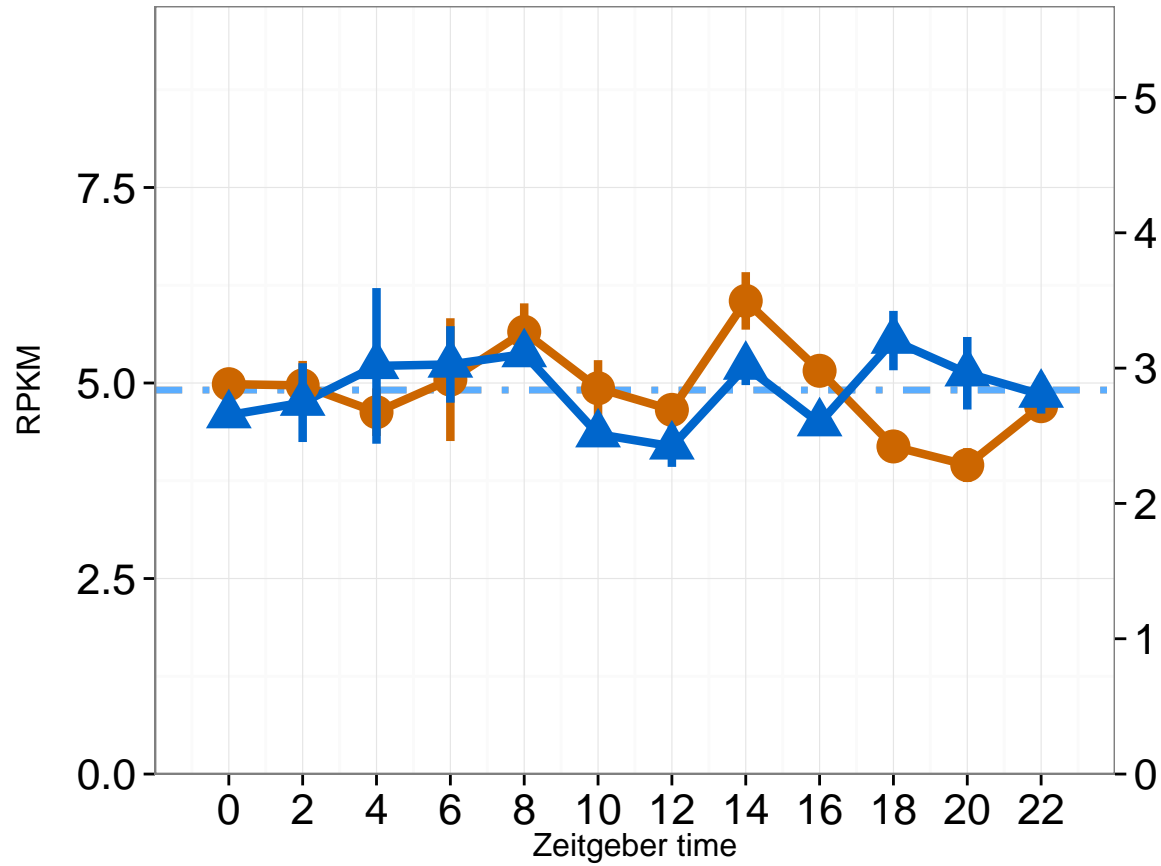

# Rai1

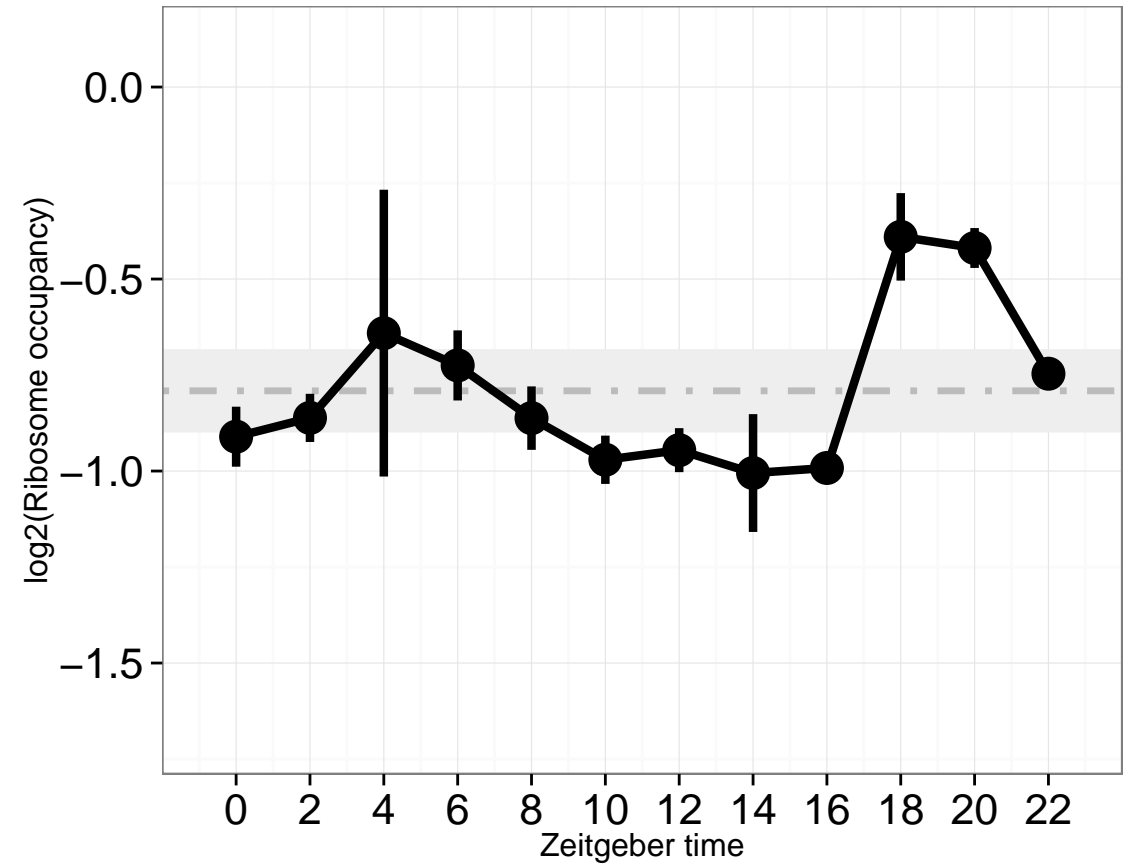

Supplement: Supplementary file 8535 [file 1]

## Hyou1

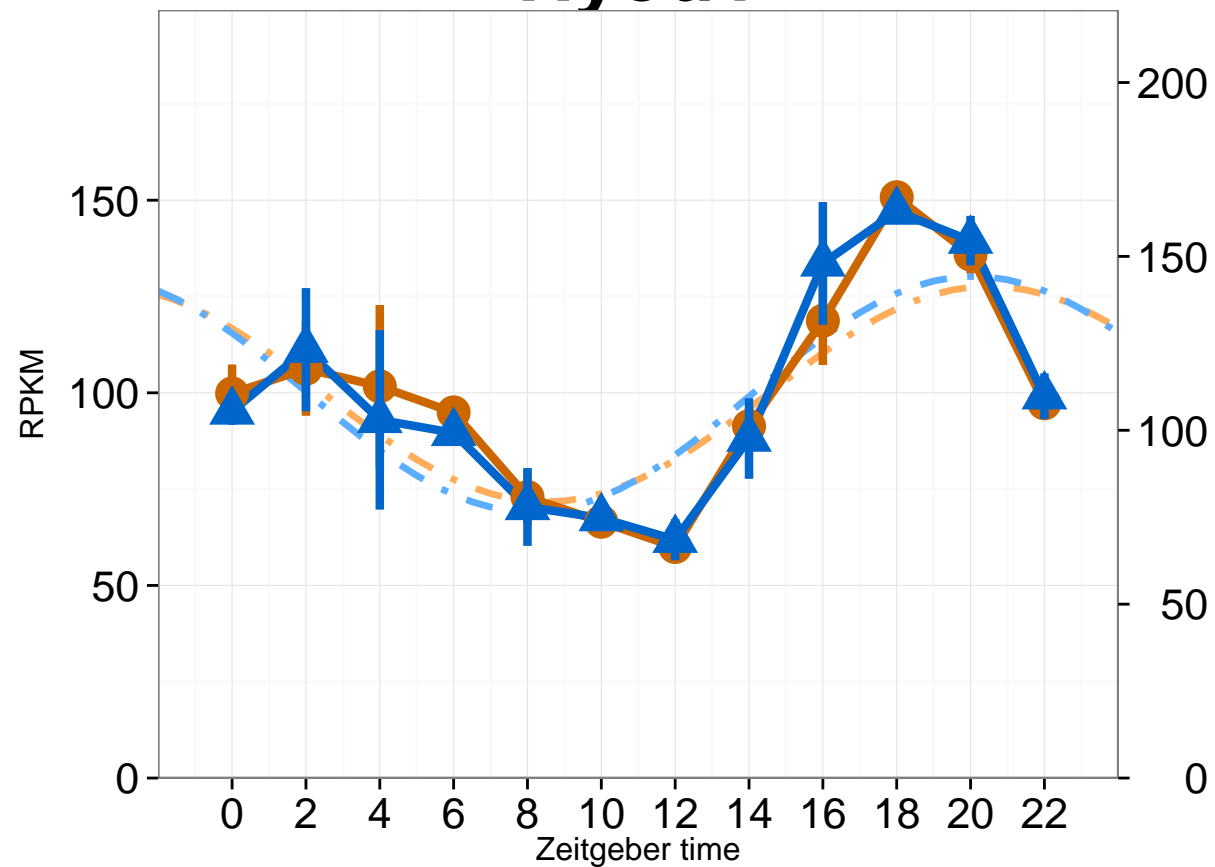

## Hyou1

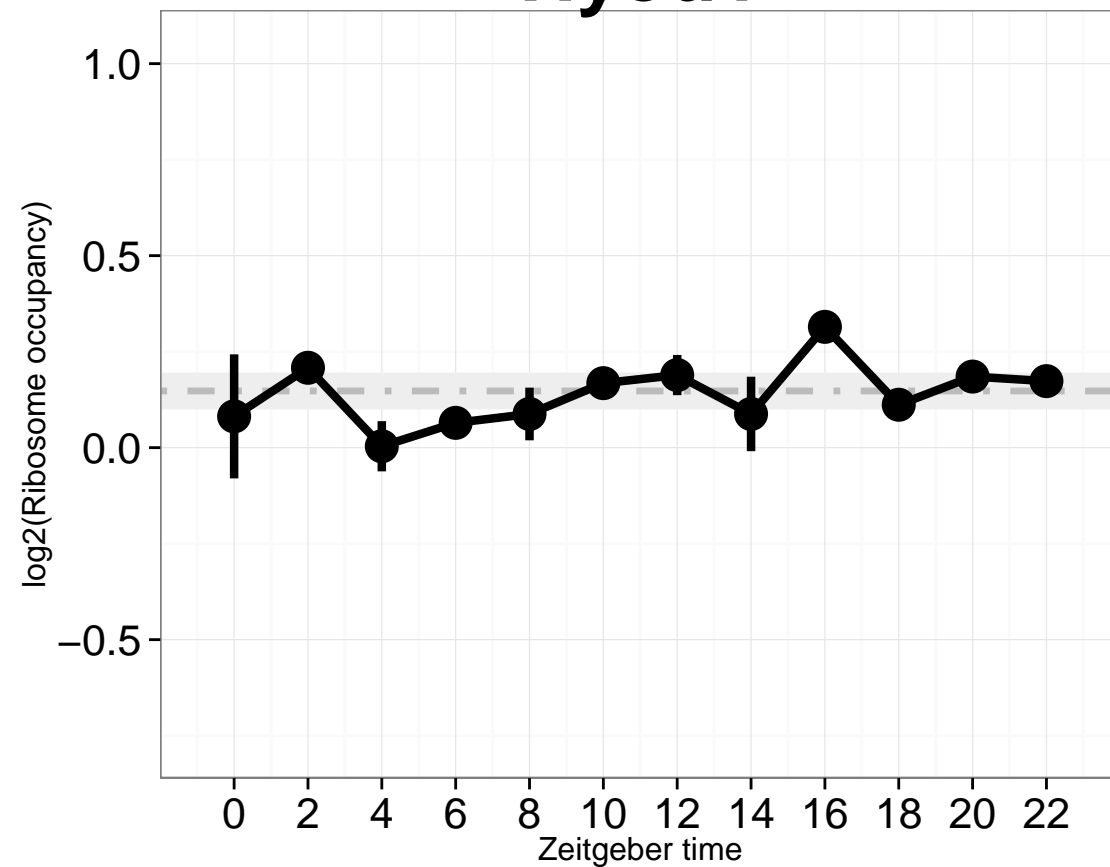

Supplement: Supplementary file 8536 [file 1]

# Zbtb43

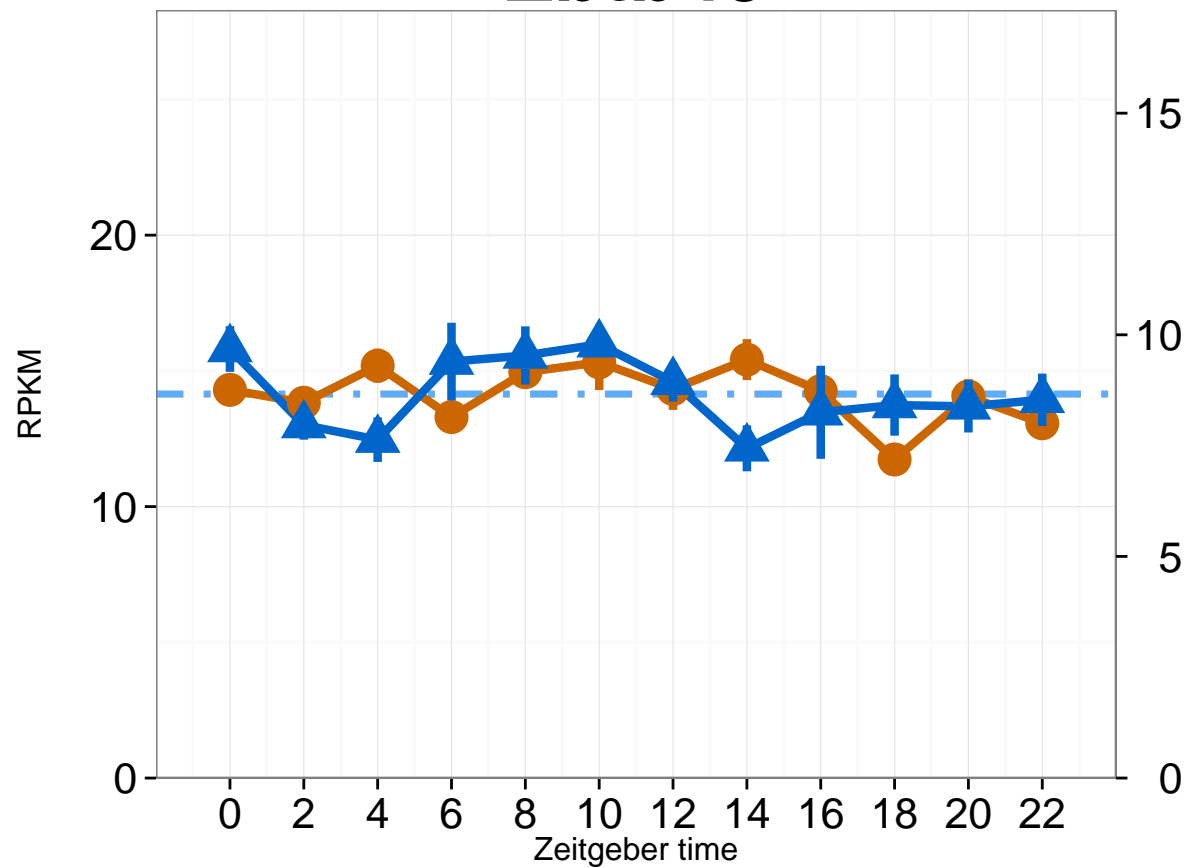

# Zbtb43

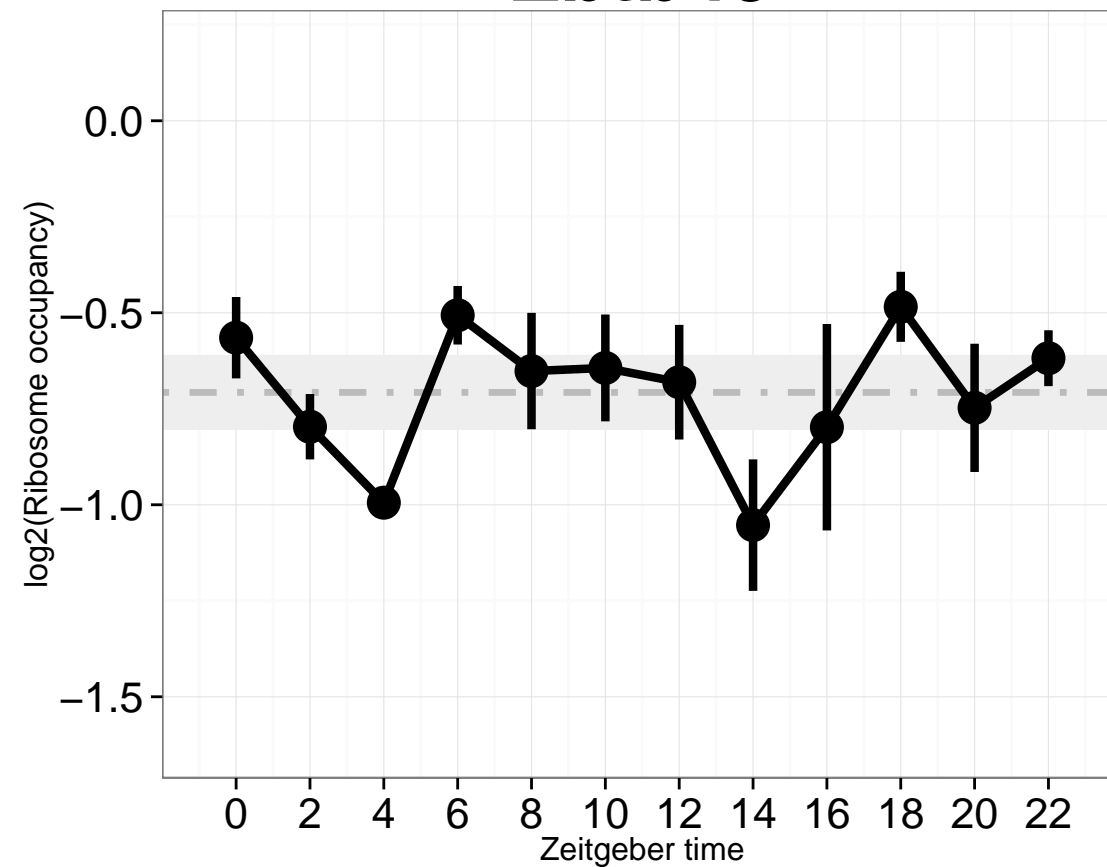

Supplement: Supplementary file 8537 [file 1]

# St3gal4

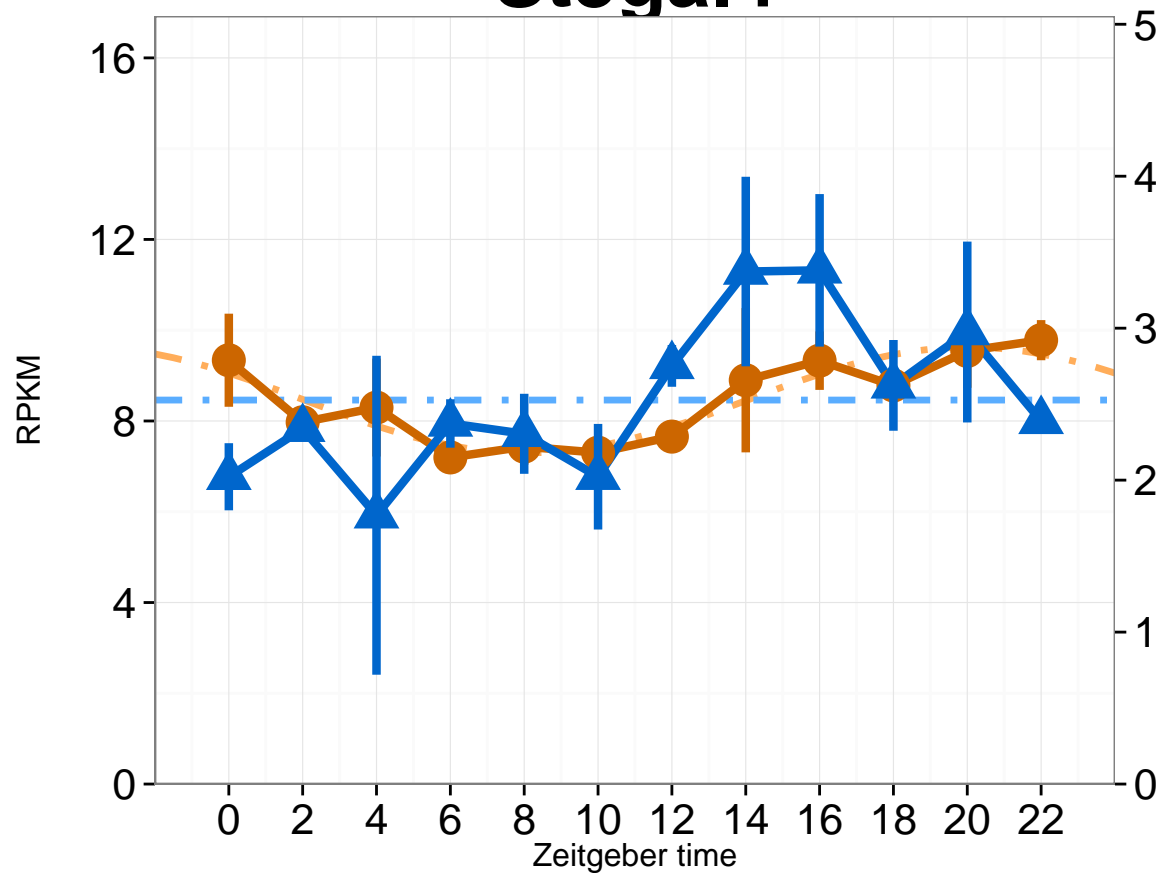

# St3gal4

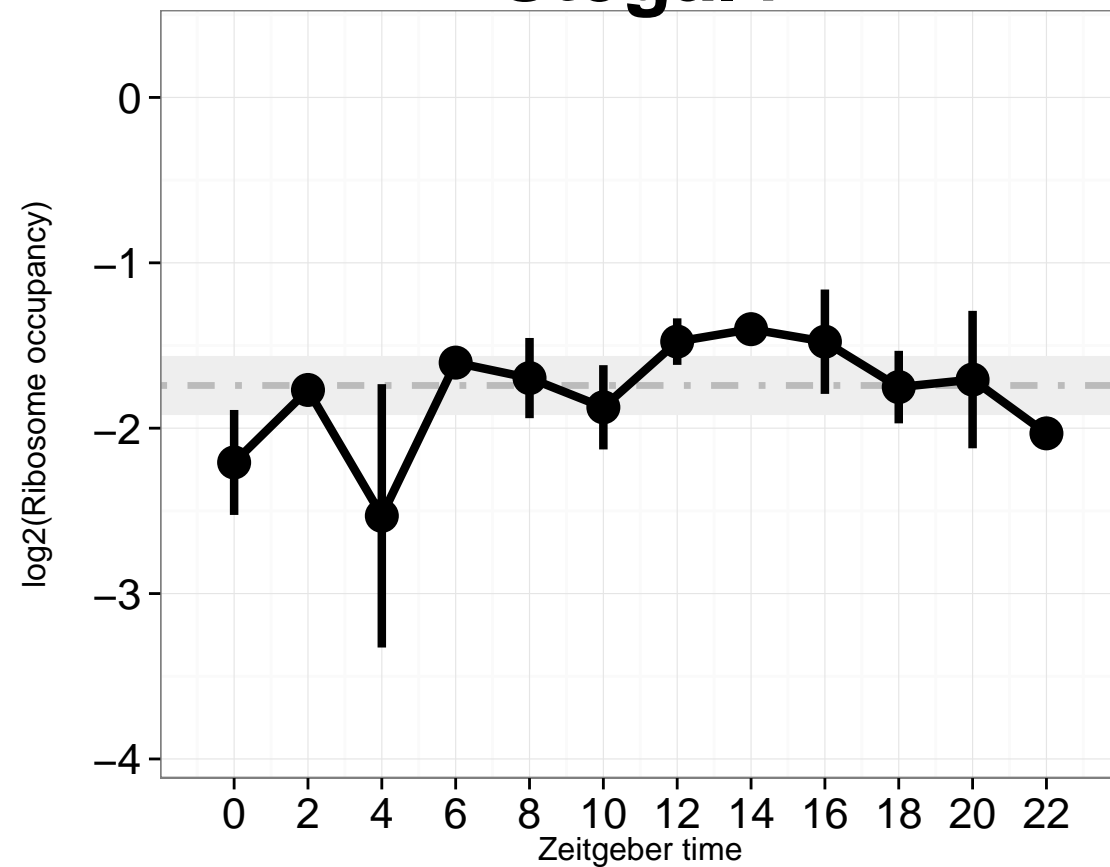

Supplement: Supplementary file 8538 [file 1]

## Pign

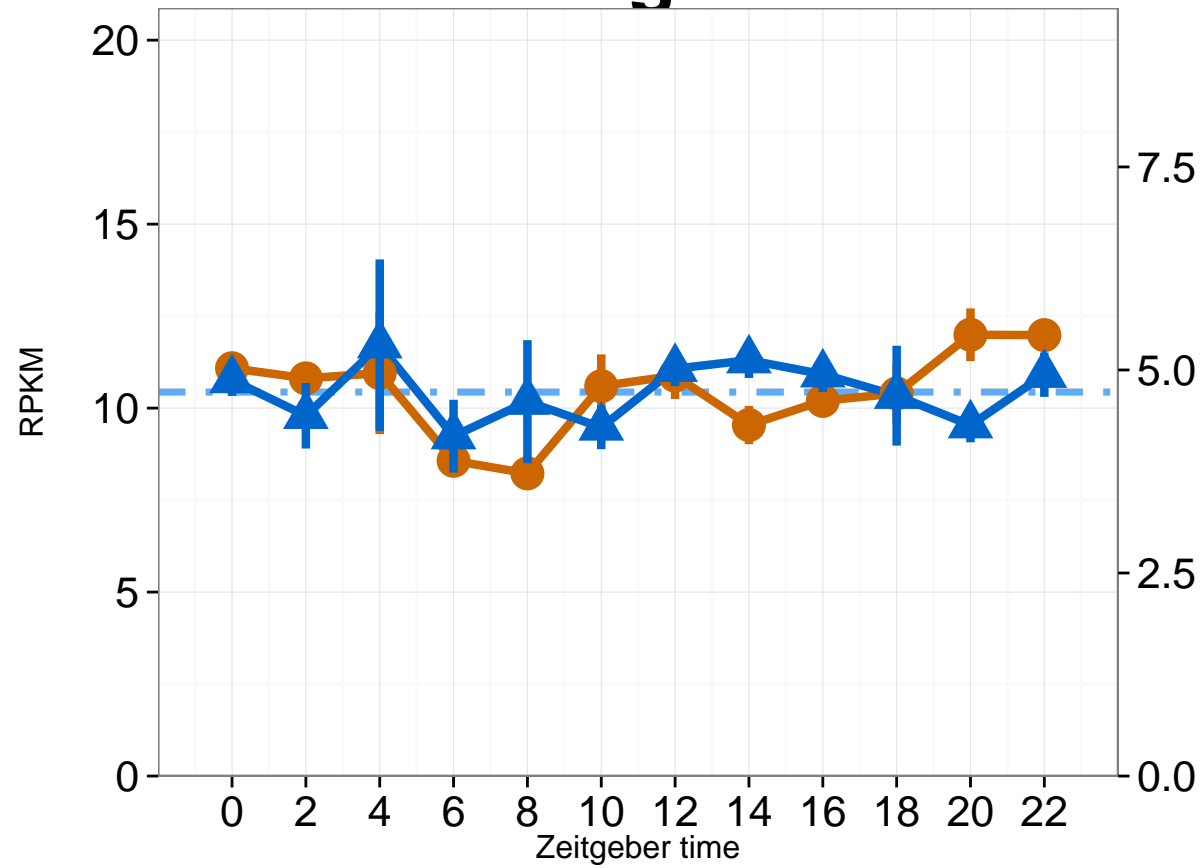

## Pign

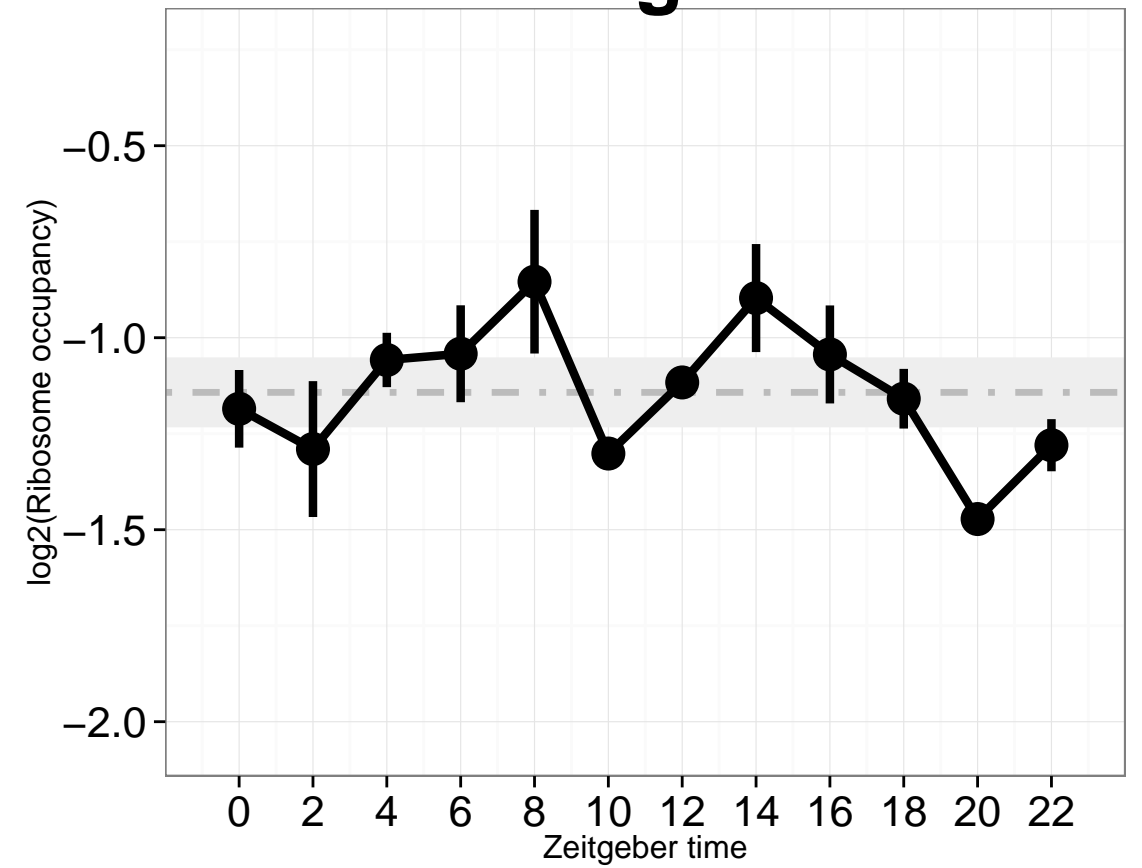

Supplement: Supplementary file 8539 [file 1]

# Hspb6

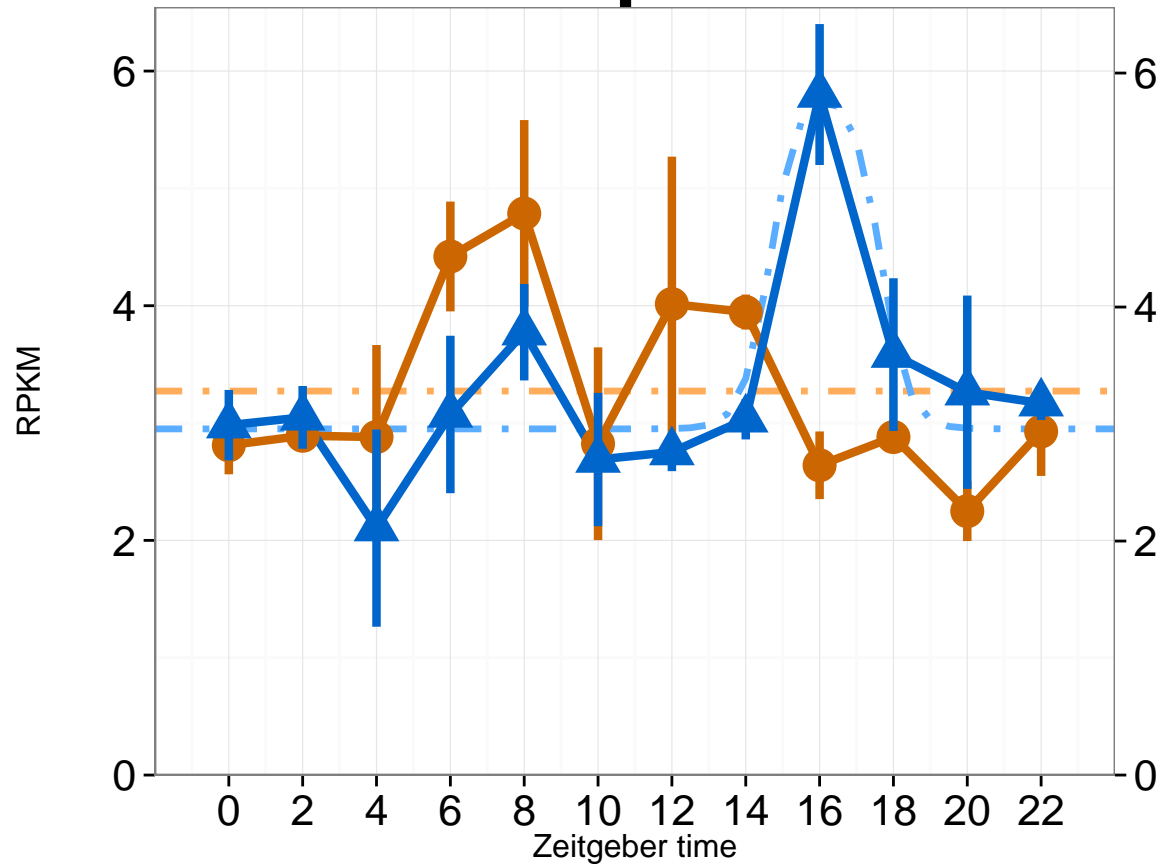

# Hspb6

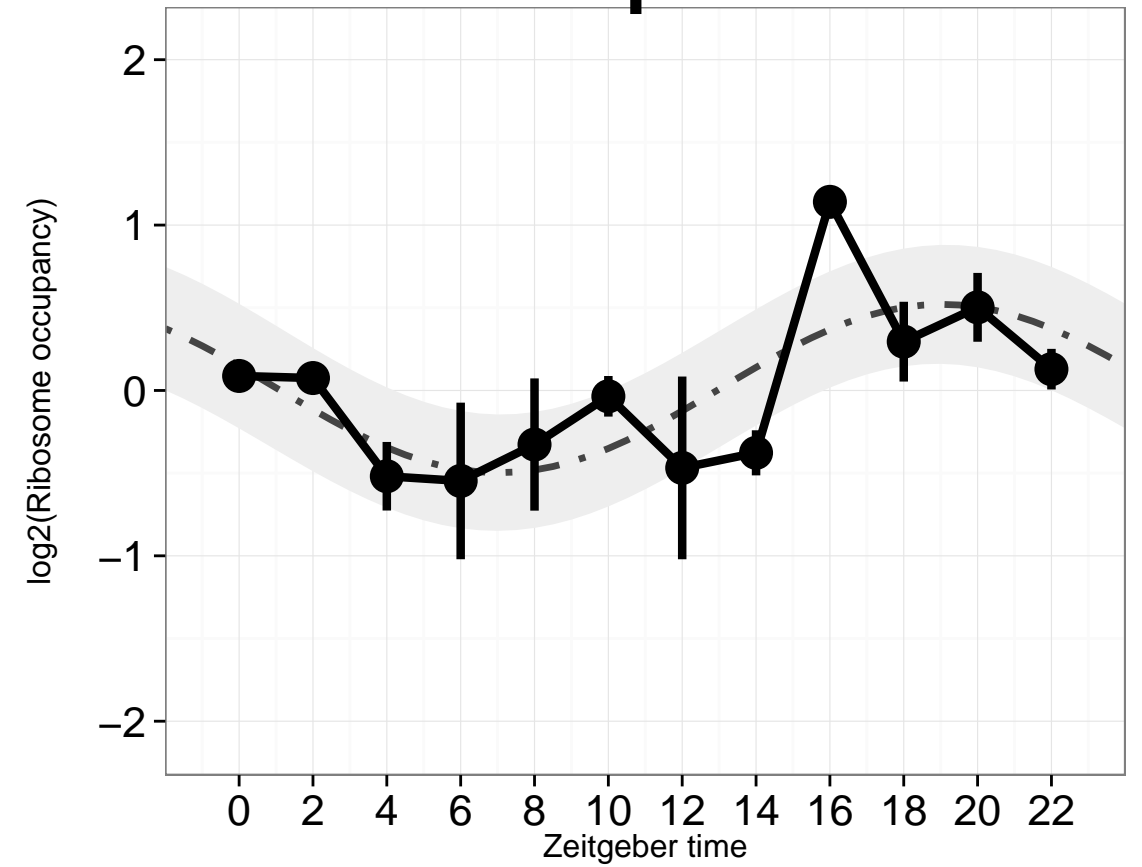

Supplement: Supplementary file 8540 [file 1]

# R3hdm1

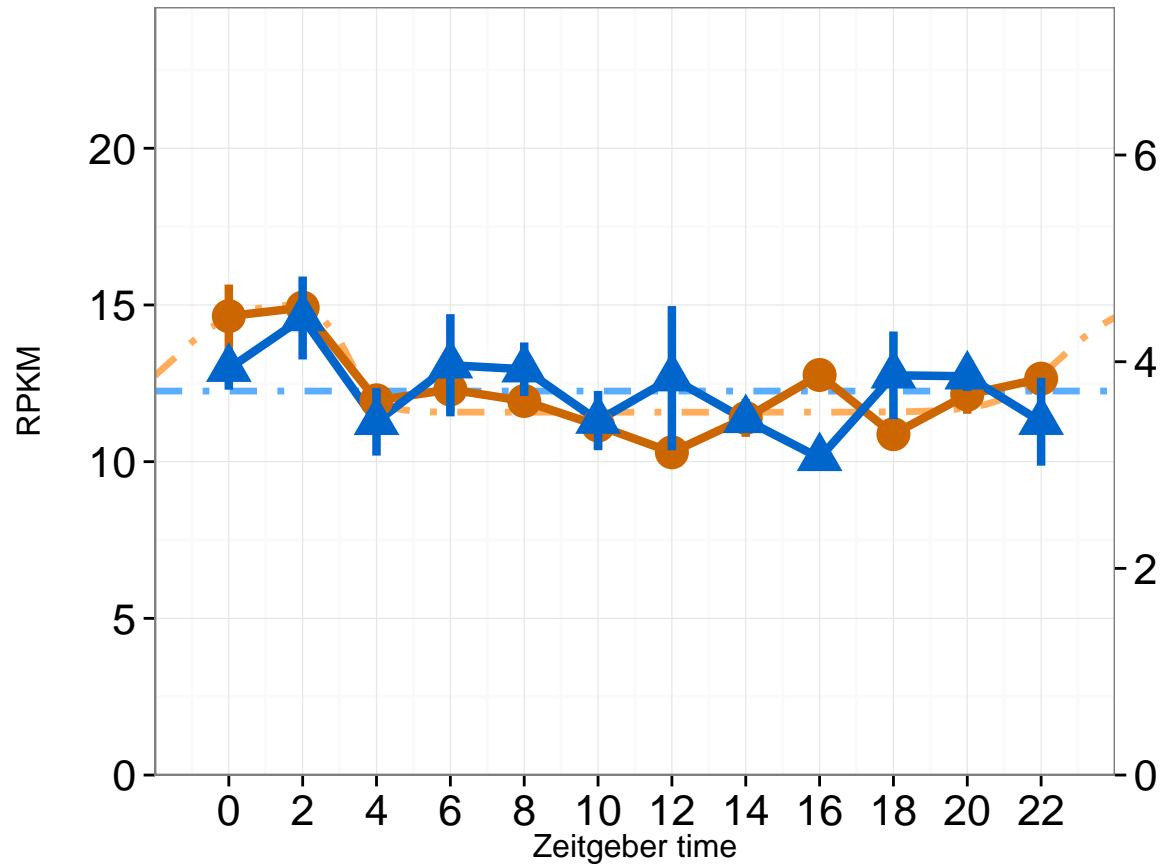

# R3hdm1

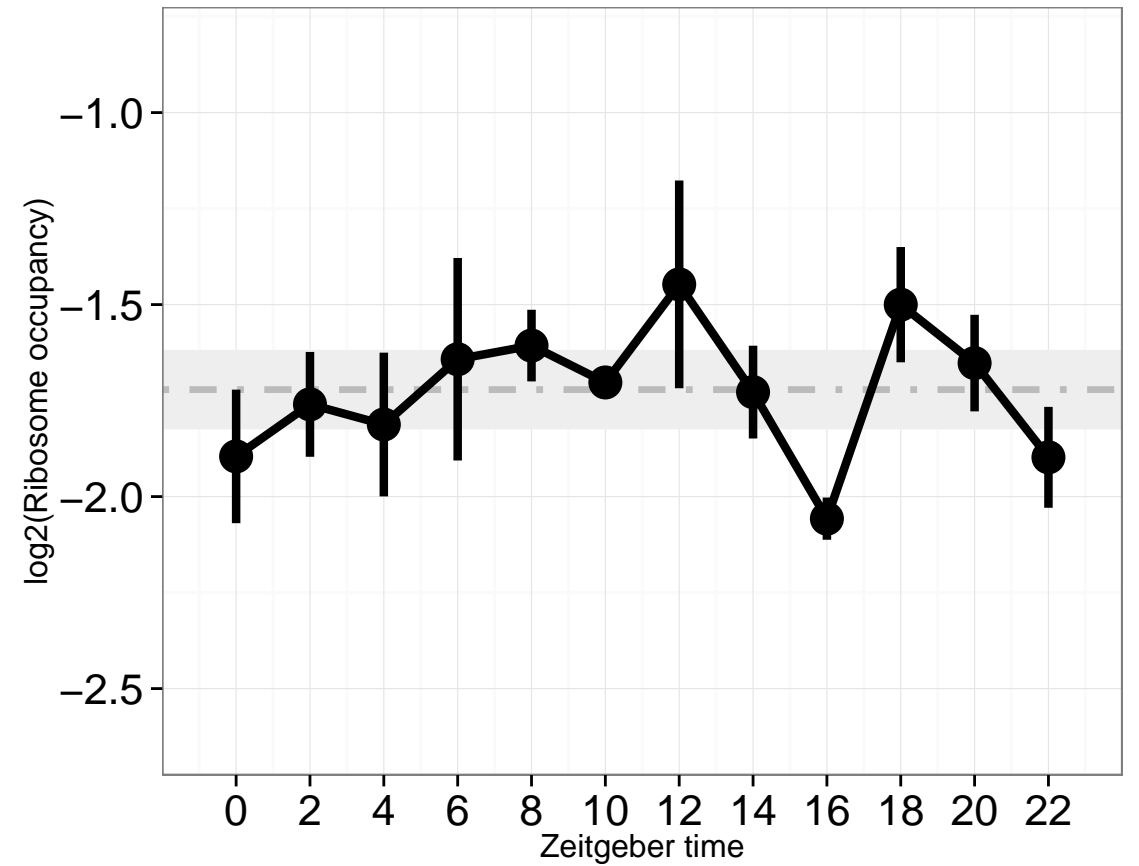

Supplement: Supplementary file 8541 [file 1]

## Mamdc4

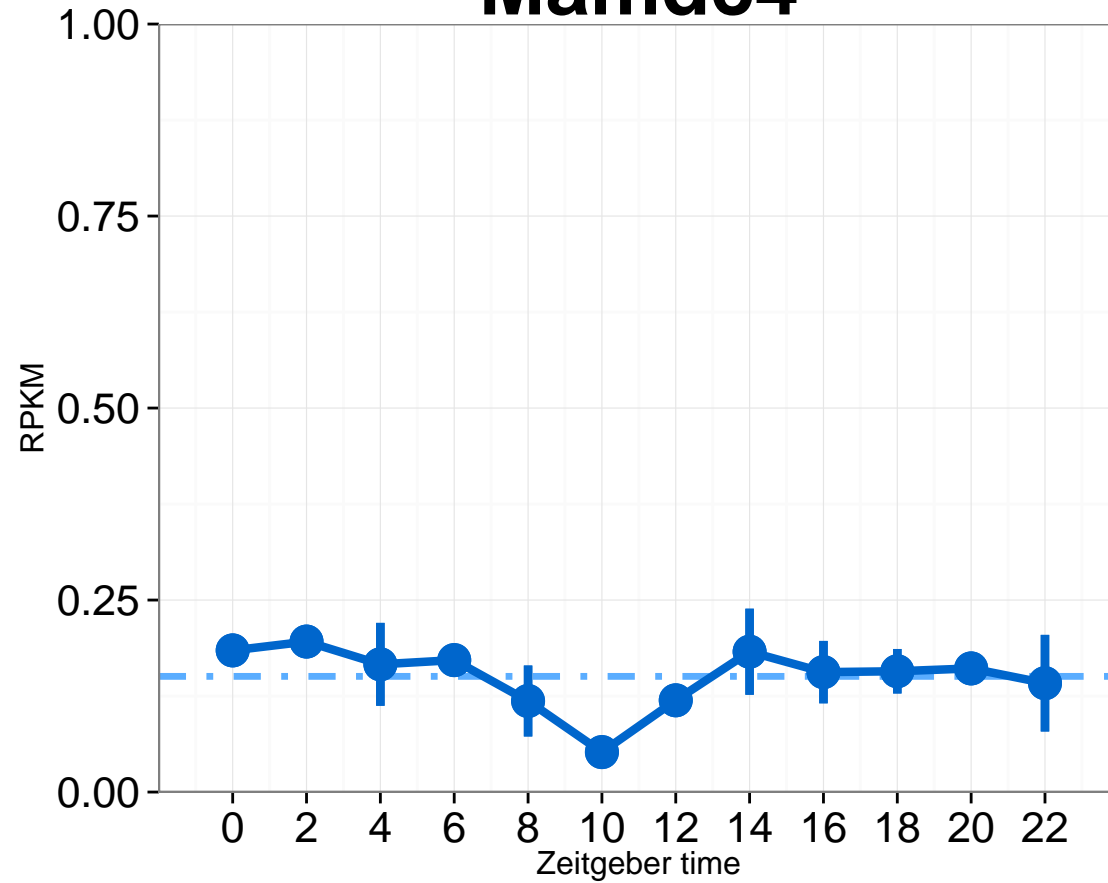

## Mamdc4 log2(Ribosome occupanc

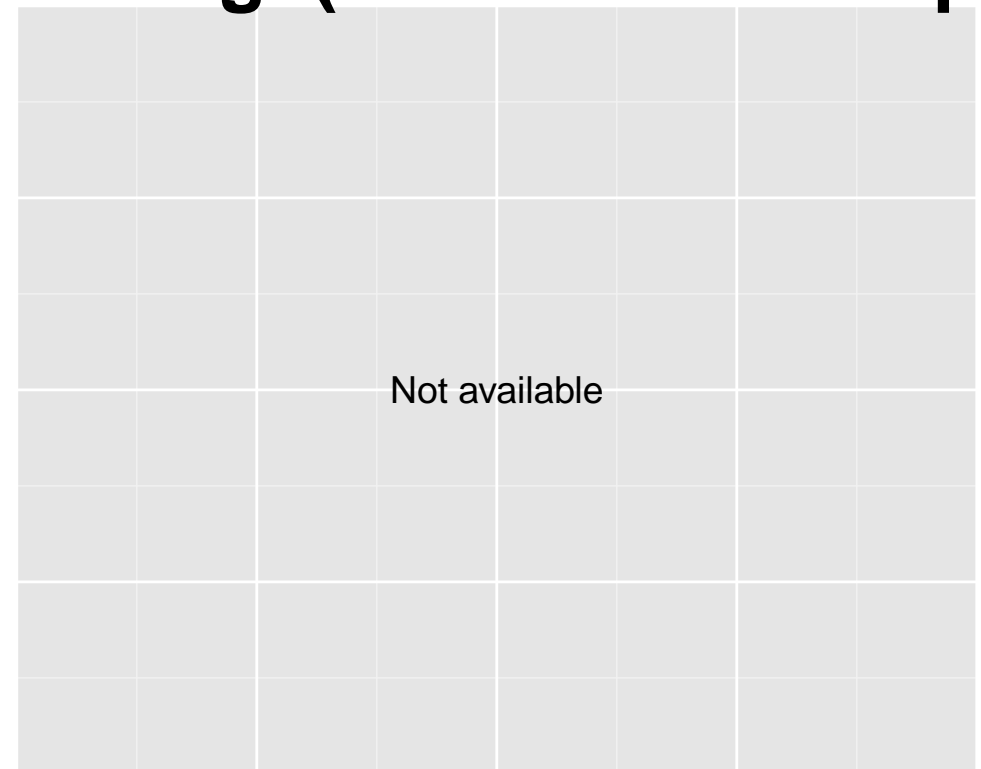

Supplement: Supplementary file 8542 [file 1]

## Rdx

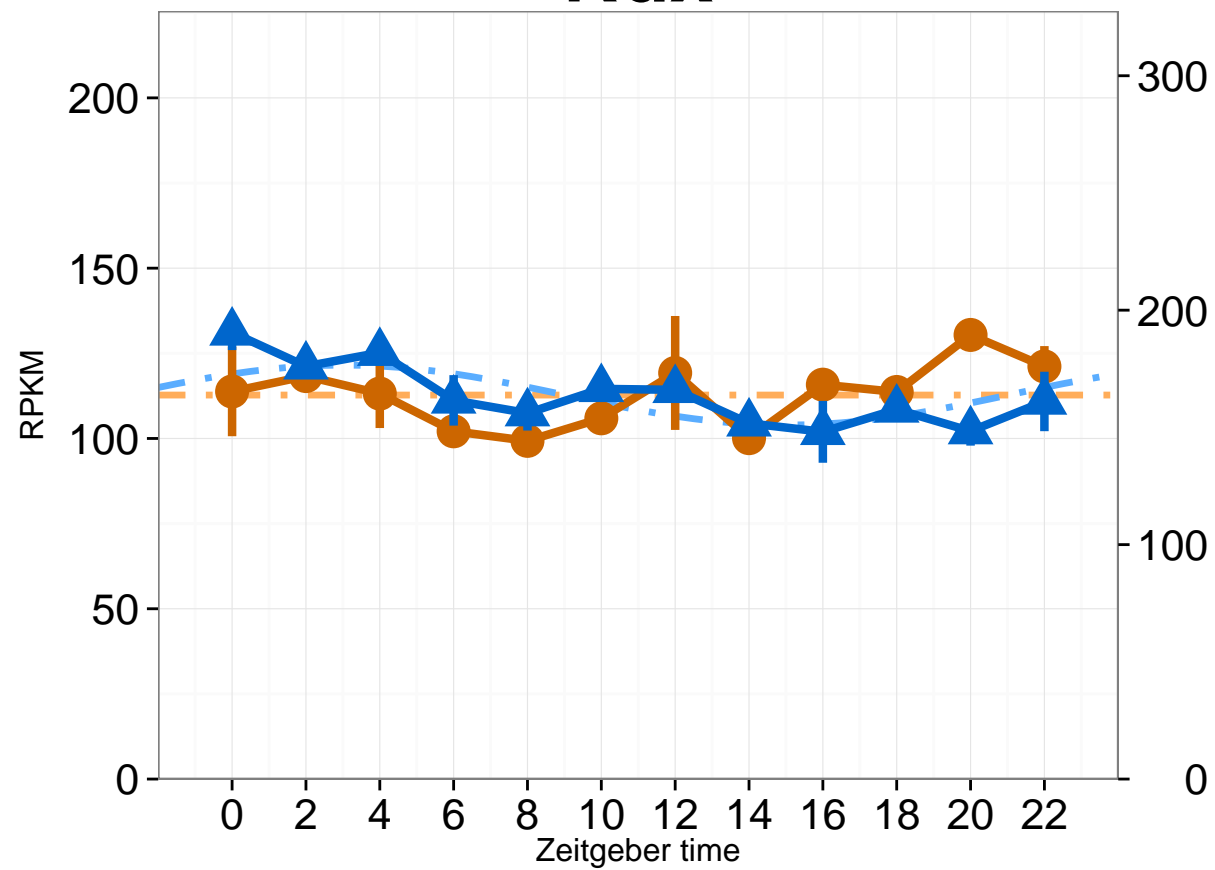

## Rdx

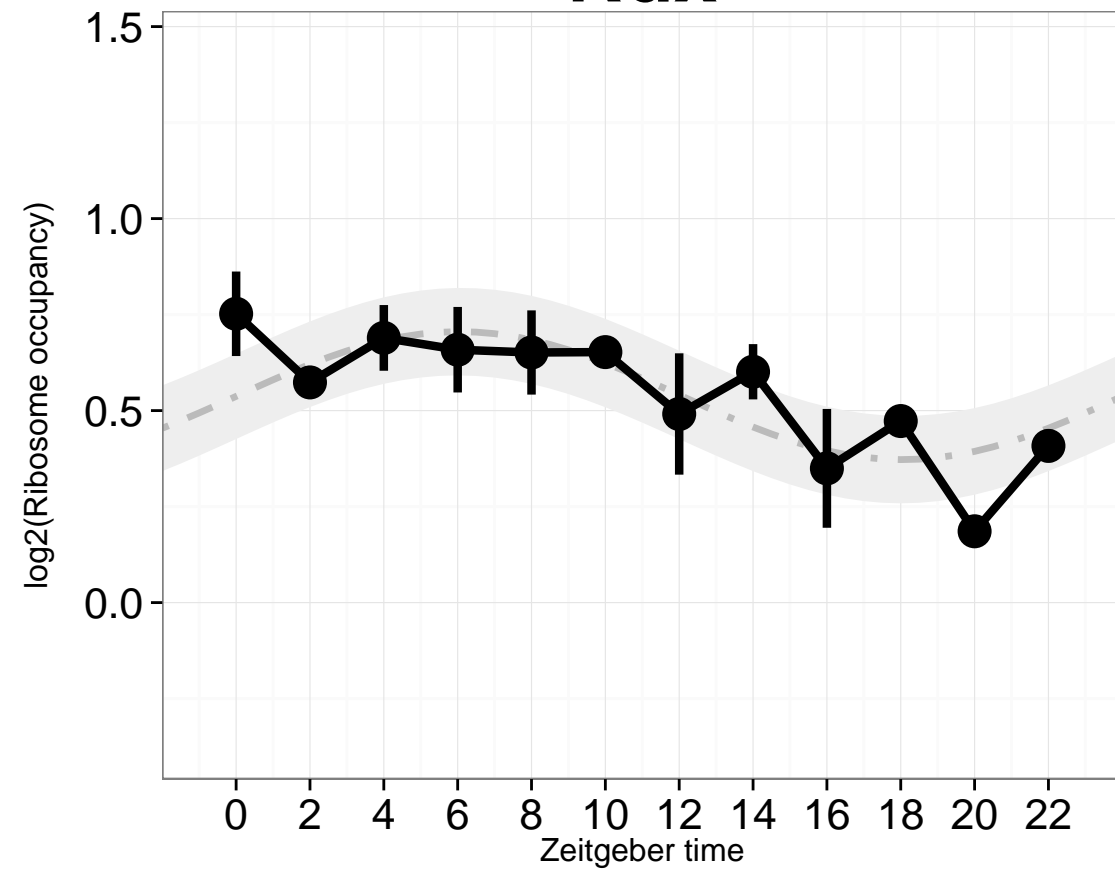

Supplement: Supplementary file 8543 [file 1]

## Crot

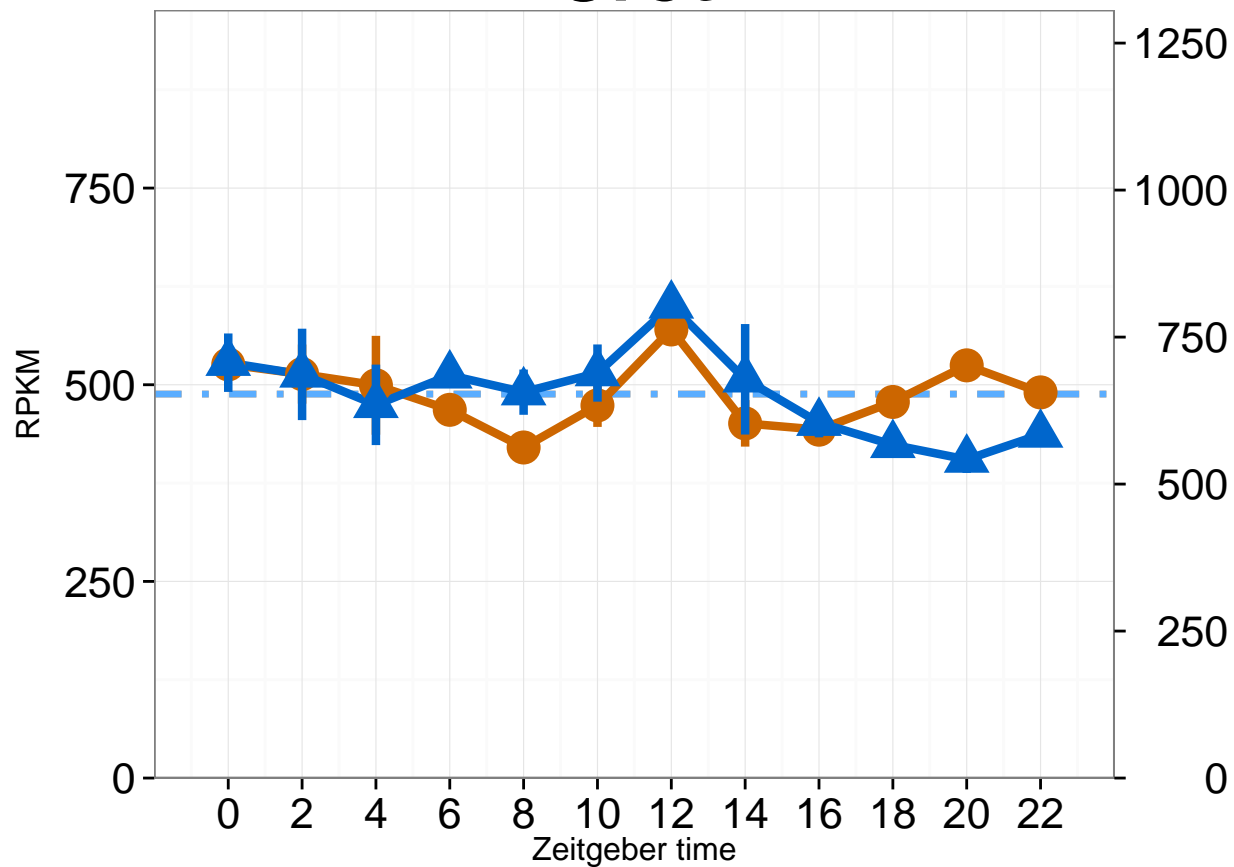

## Crot

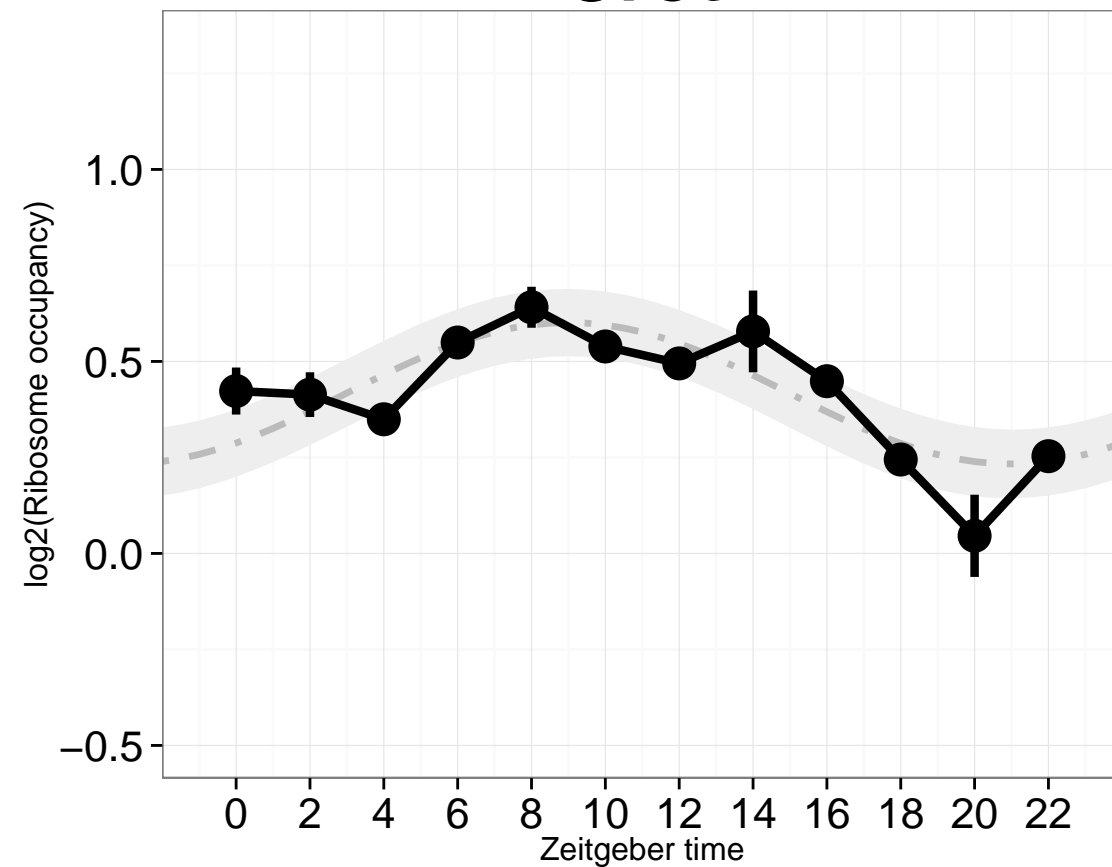

Supplement: Supplementary file 8544 [file 1]

# Mapk1

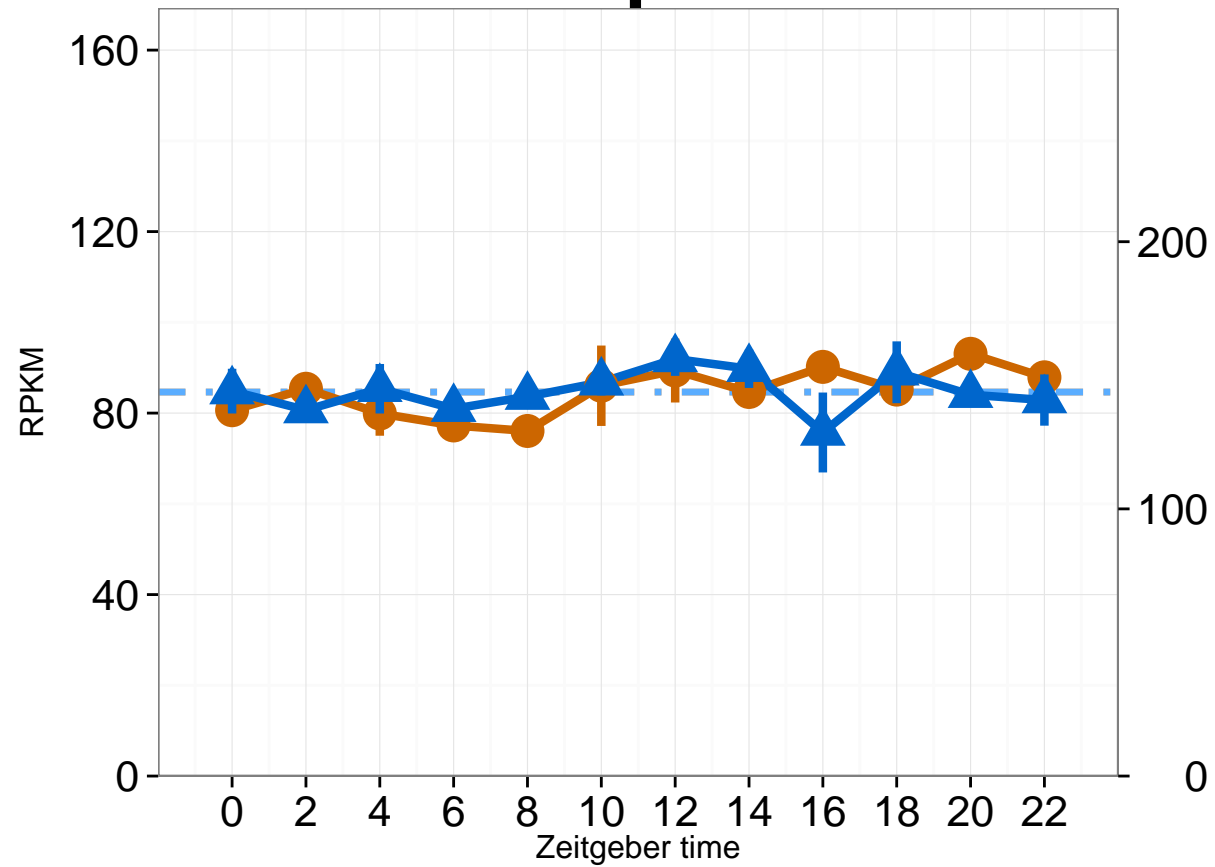

# Mapk1

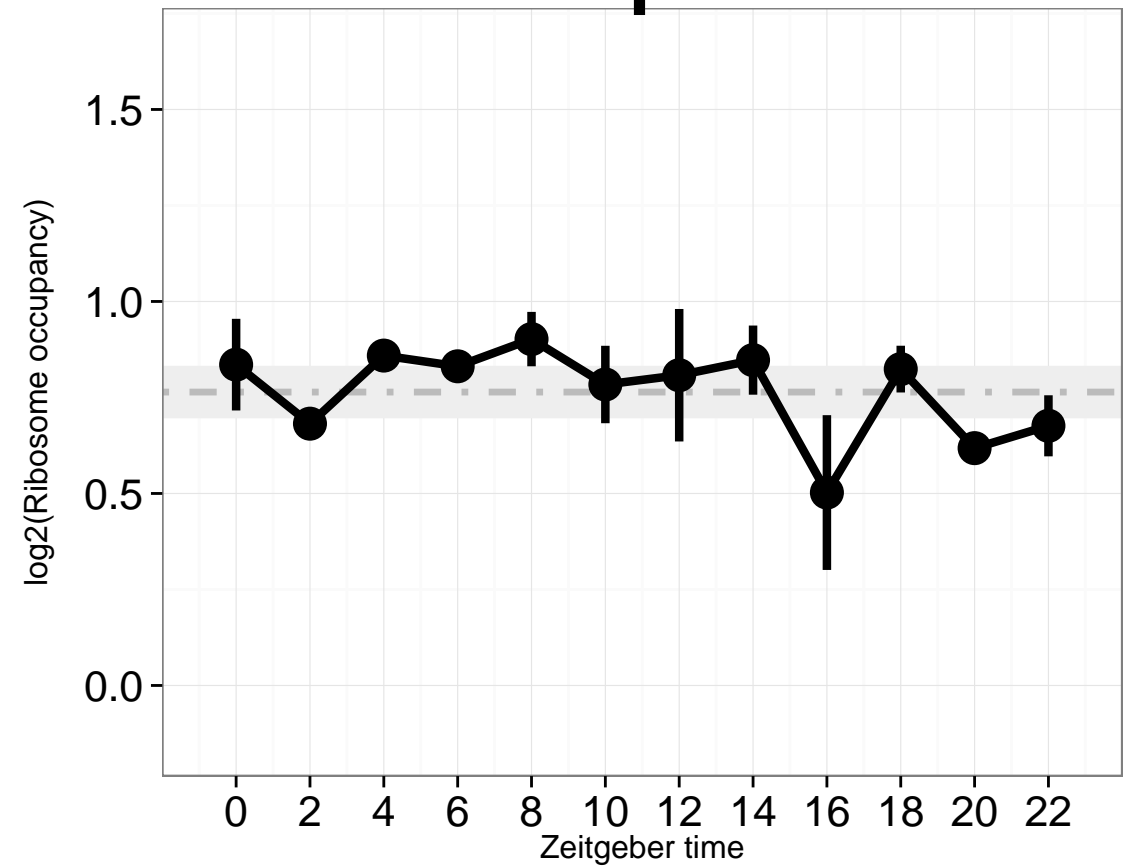

Supplement: Supplementary file 8545 [file 1]

## Tuft1

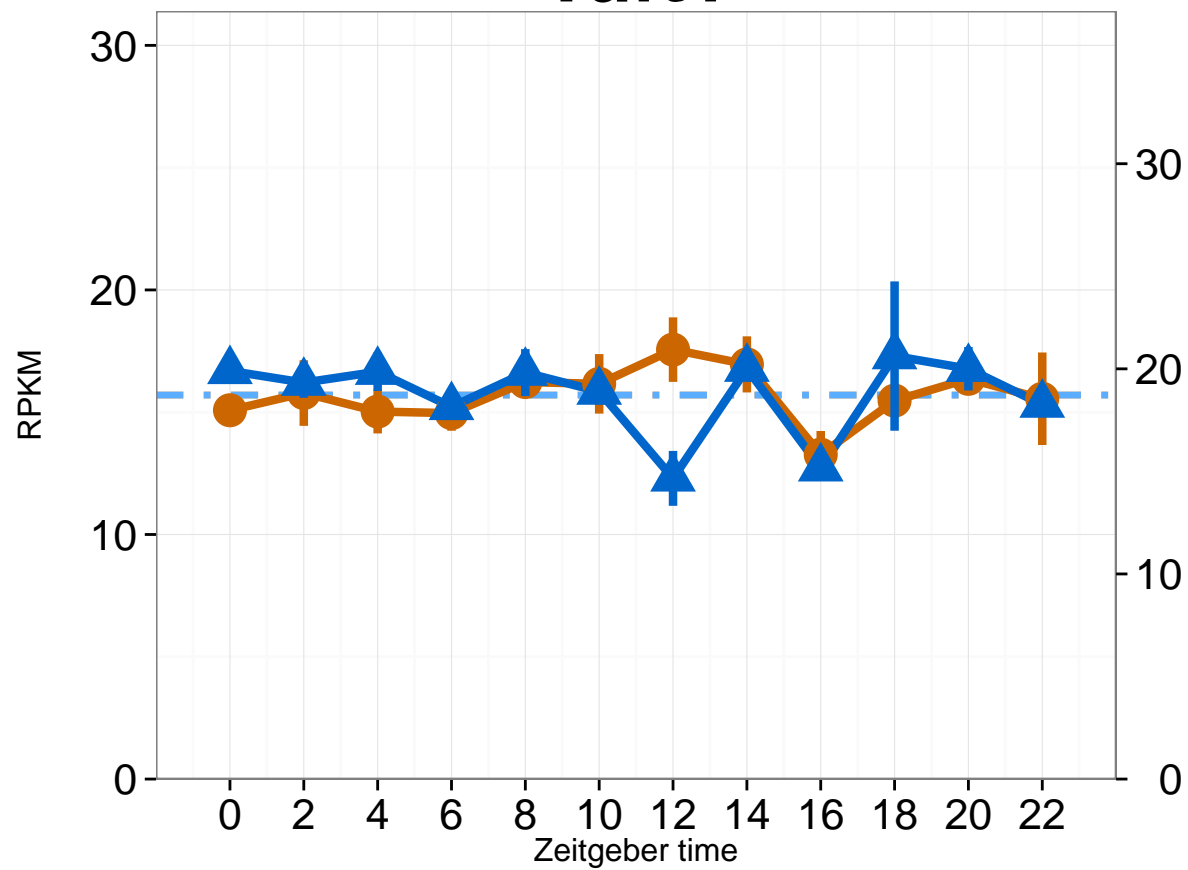

## Tuft1

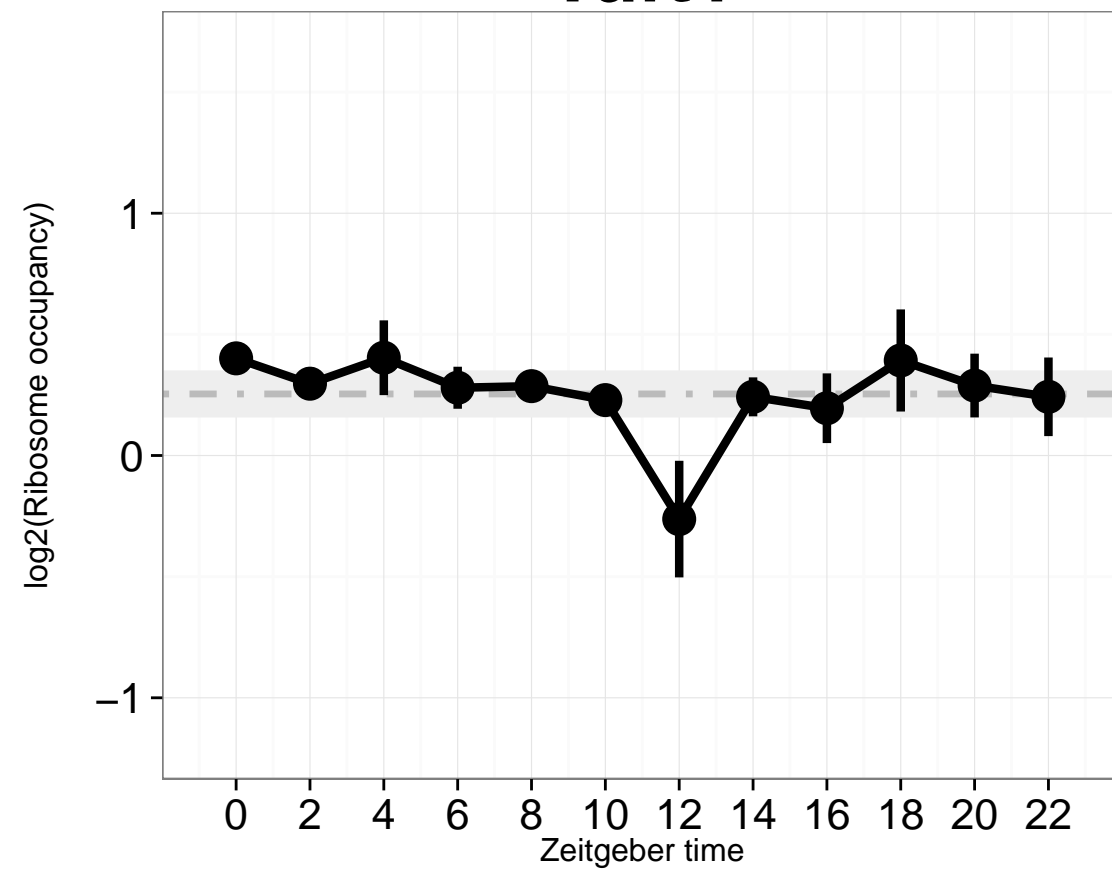

Supplement: Supplementary file 8546 [file 1]

## lvd

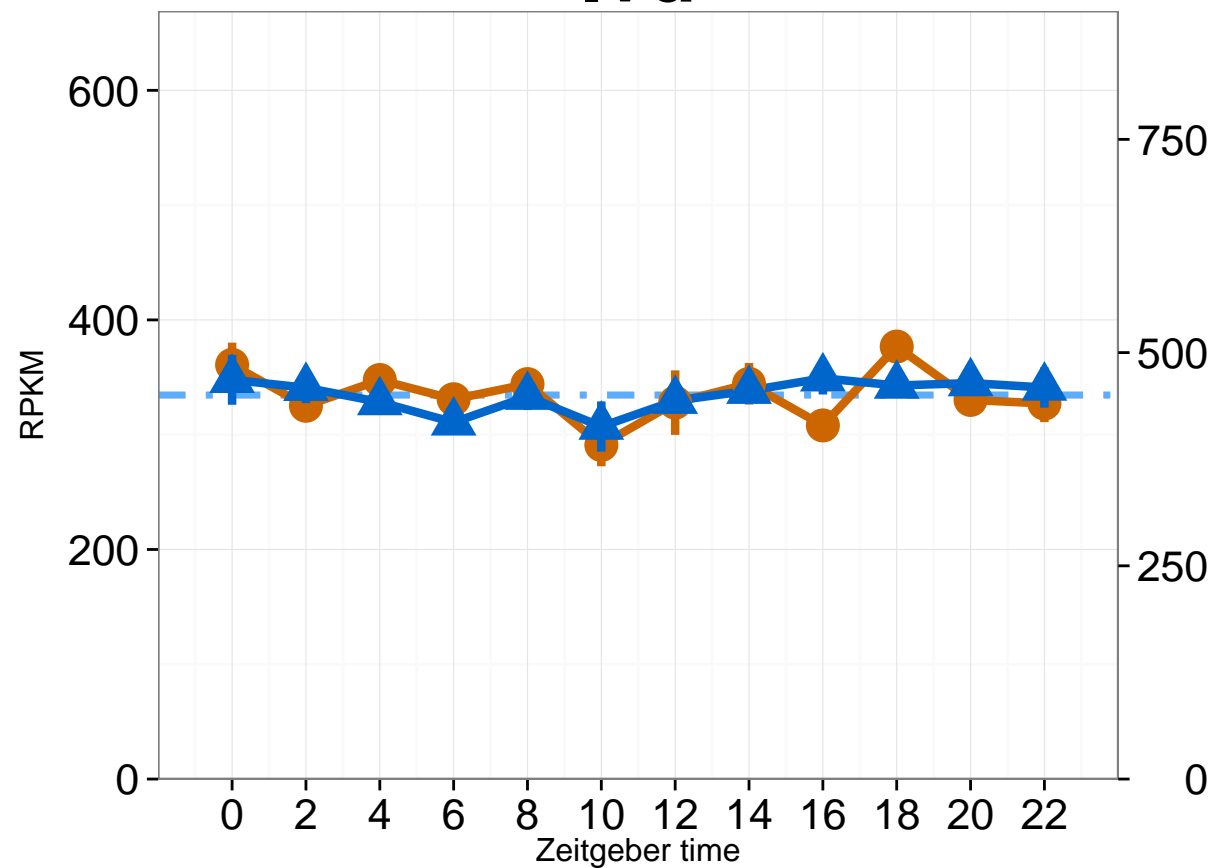

## lvd

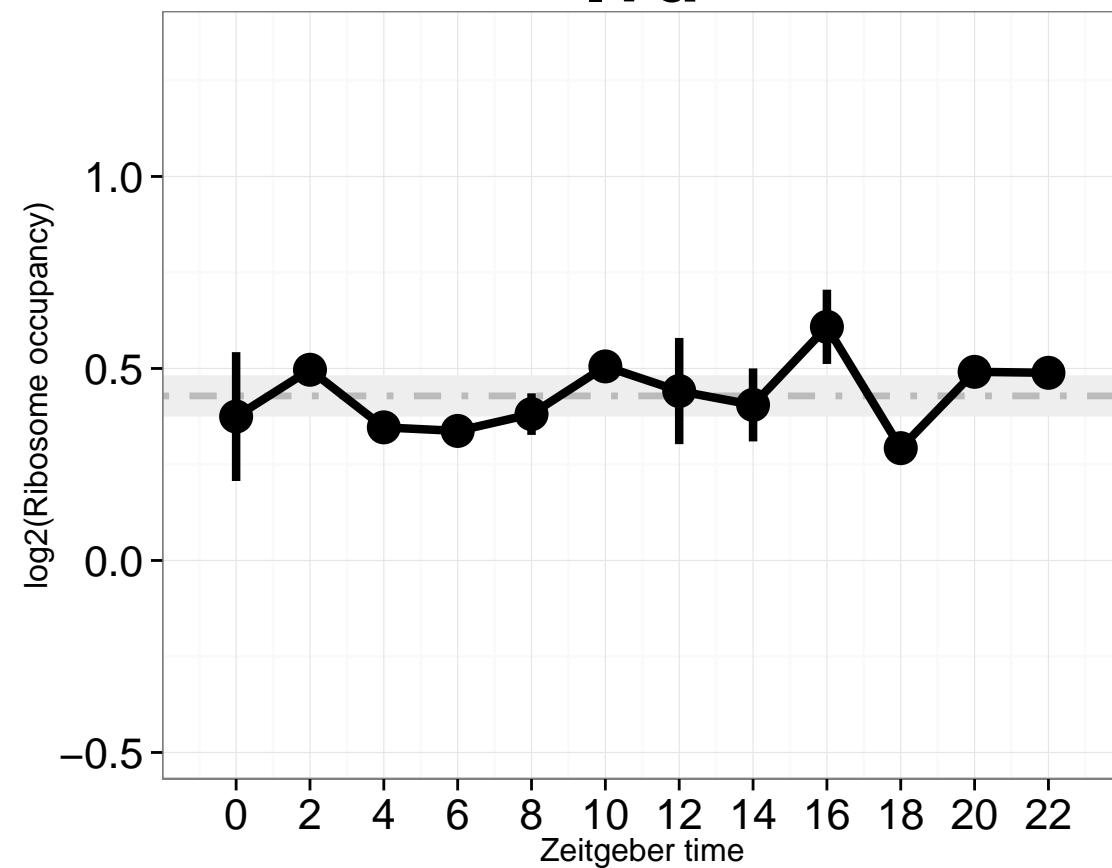

Supplement: Supplementary file 8547 [file 1]

## Arhgef11

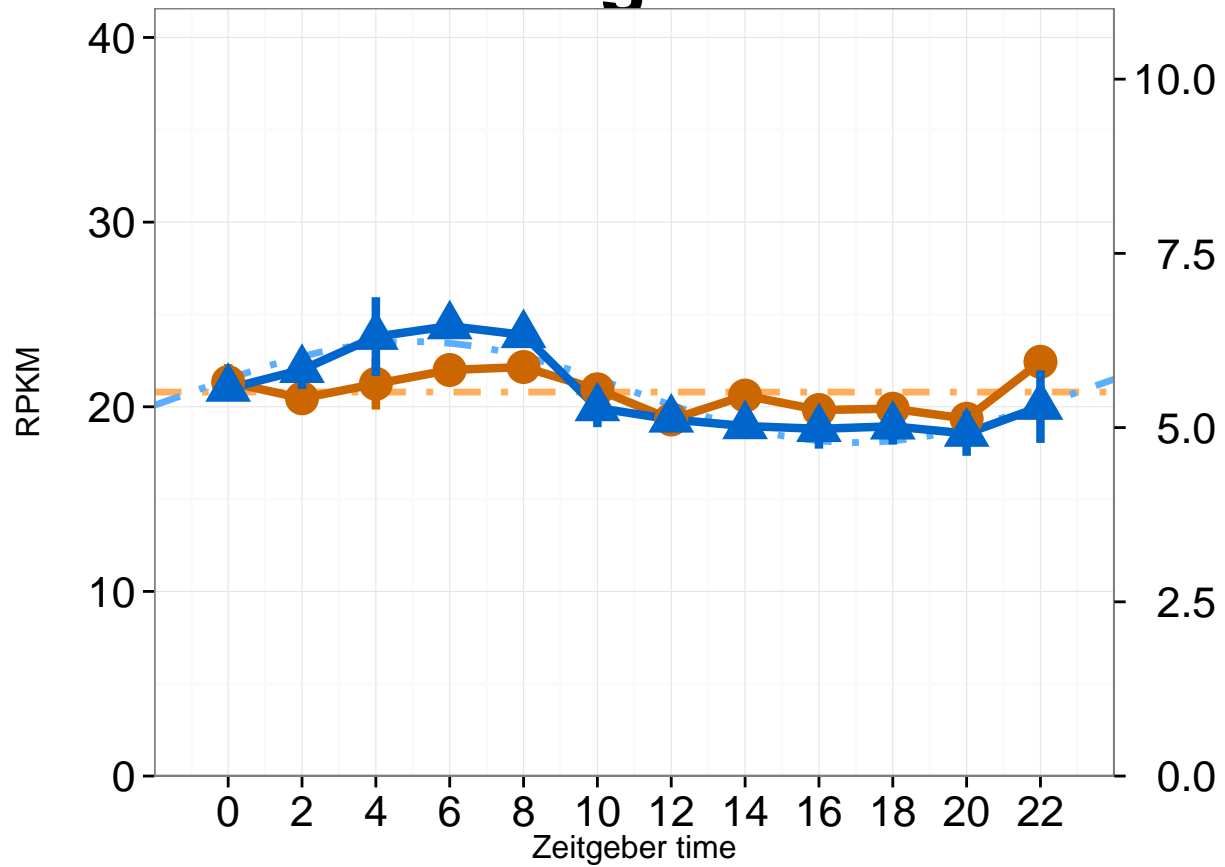

## Arhgef11

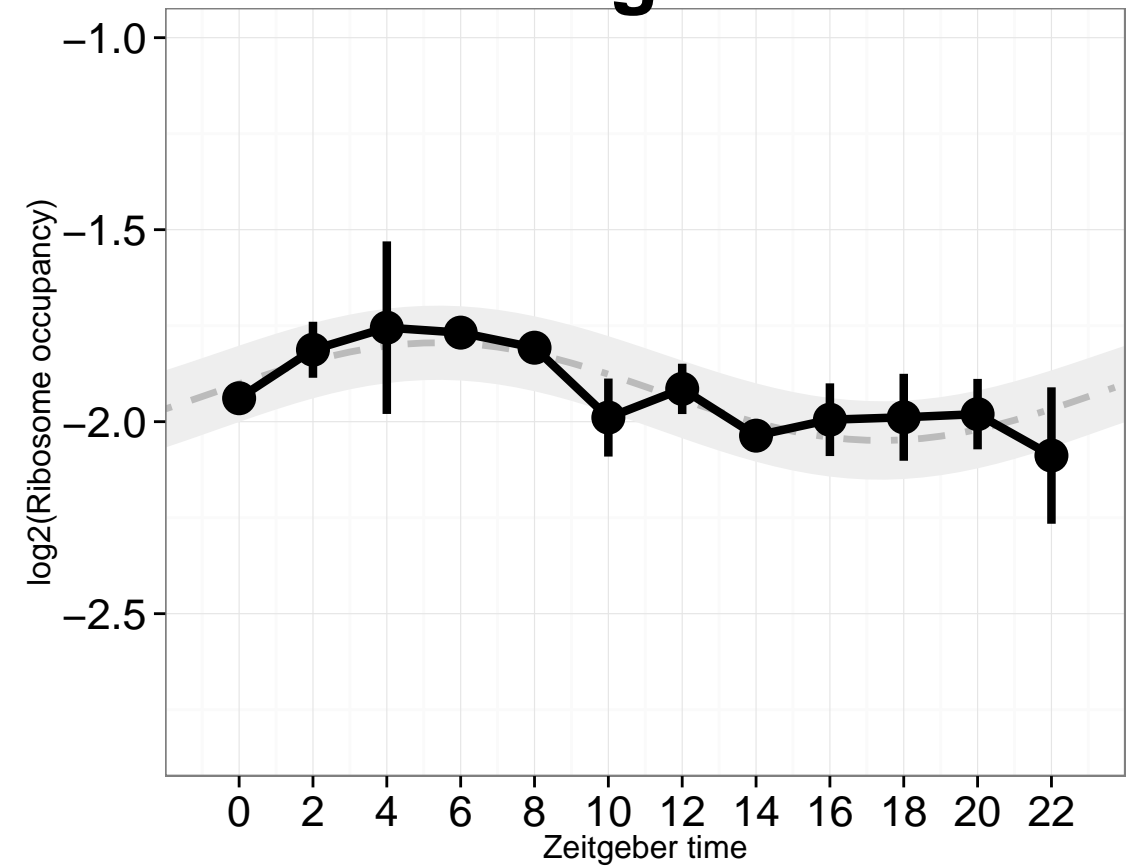

Supplement: Supplementary file 8548 [file 1]

## Pon3

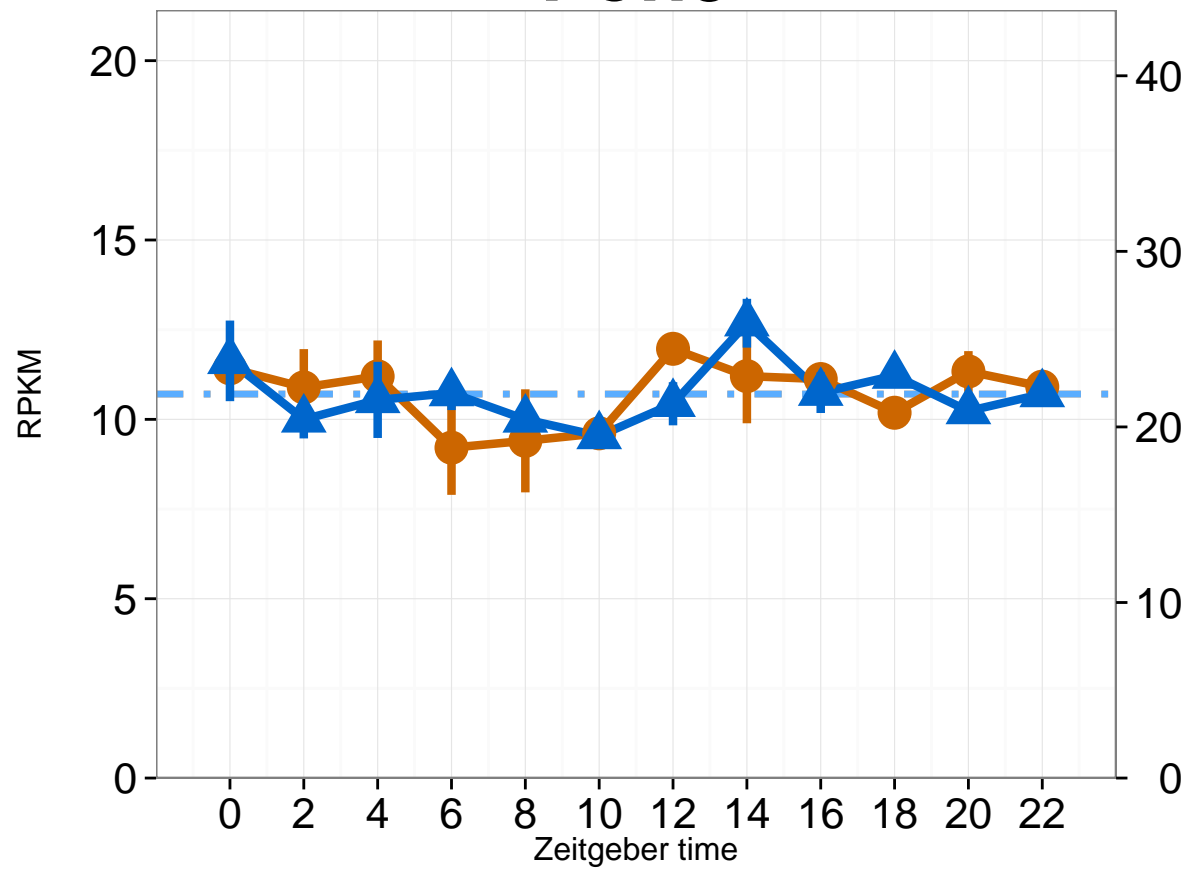

## Pon3

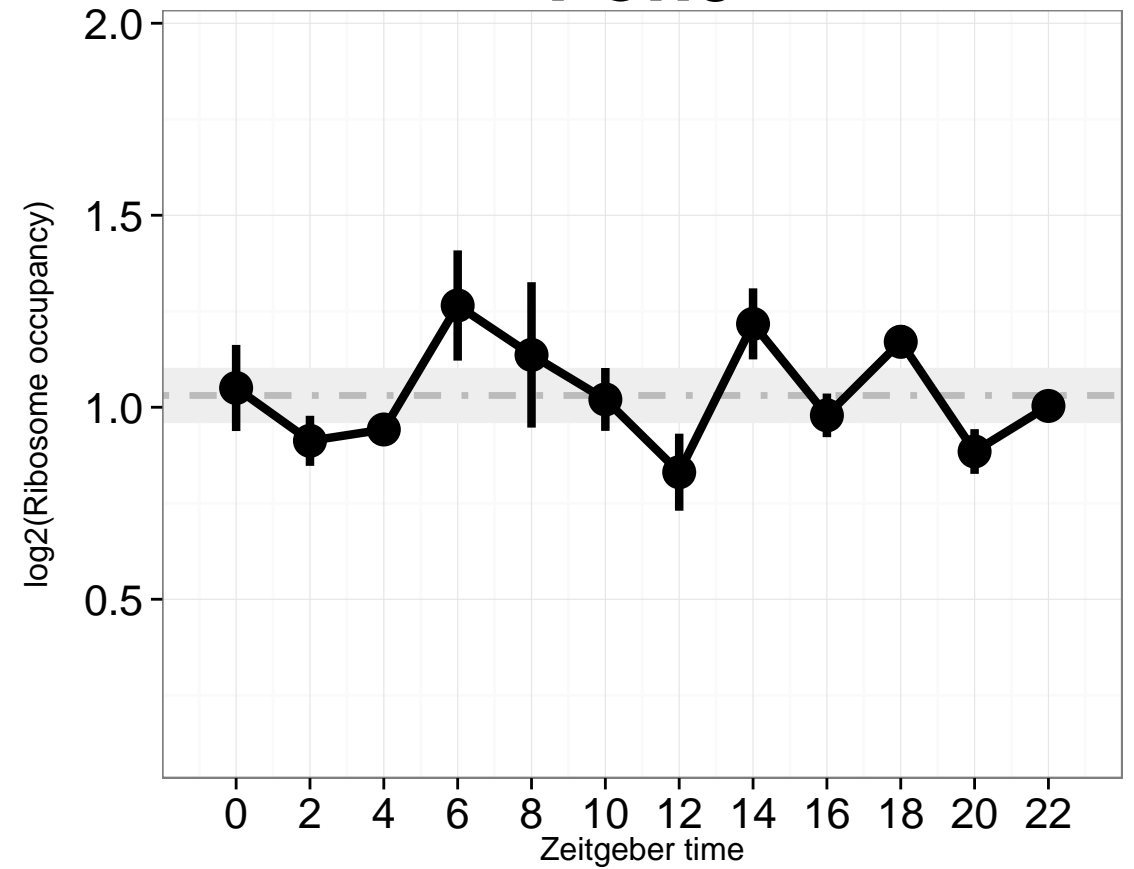

Supplement: Supplementary file 8549 [file 1]

# Ergic1

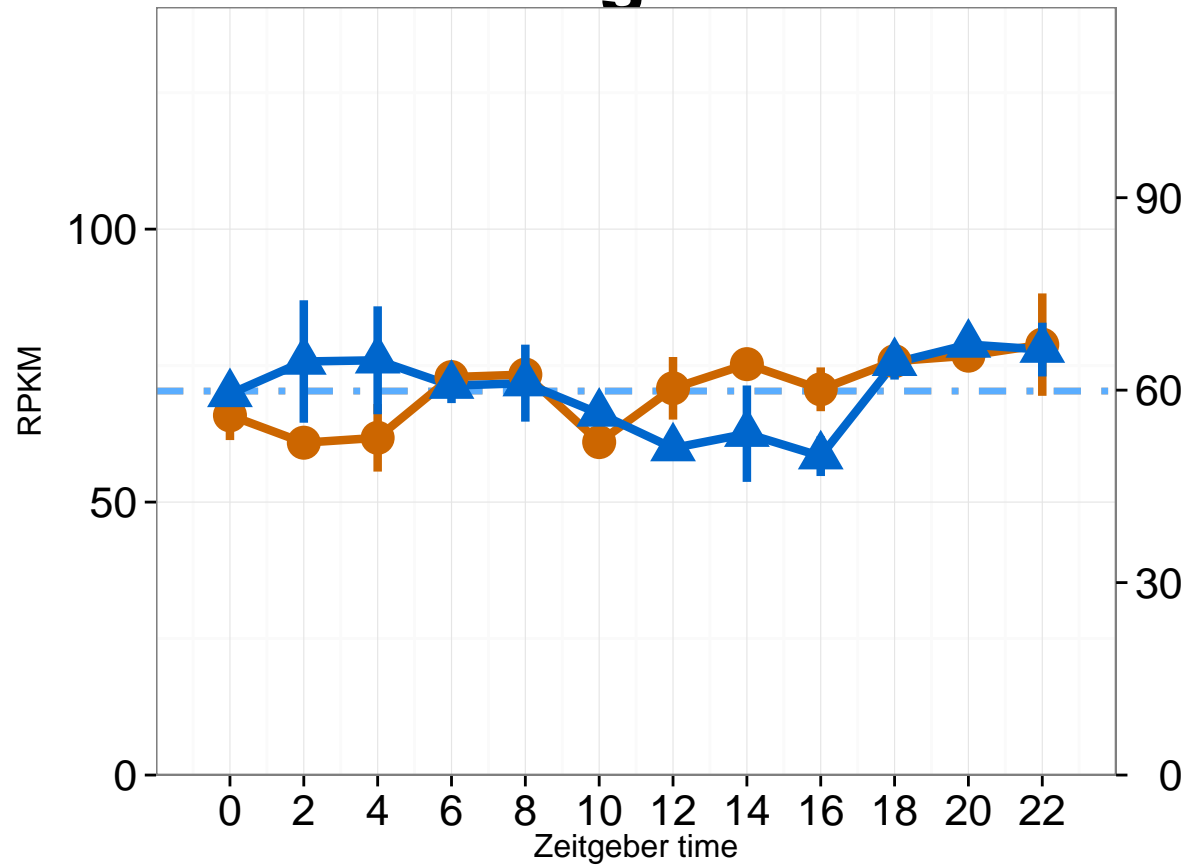

# Ergic1

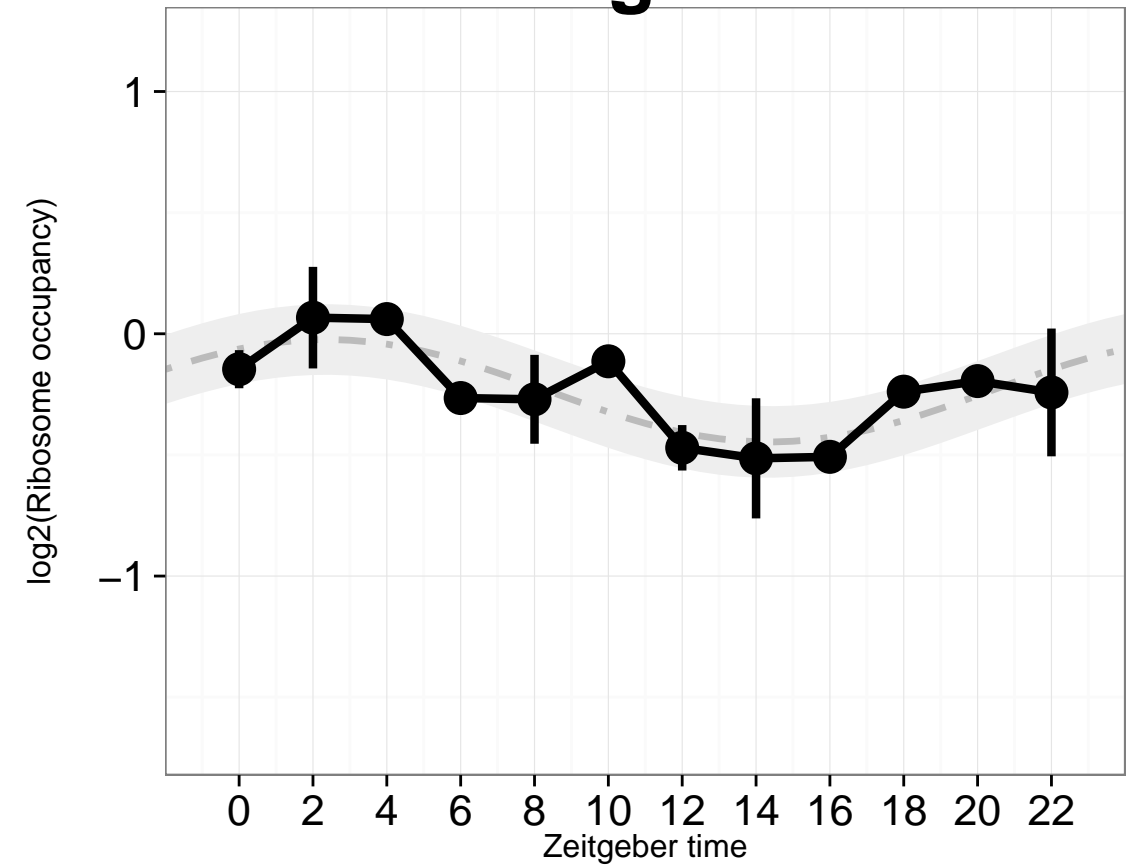

Supplement: Supplementary file 8550 [file 1]

## Dpp8

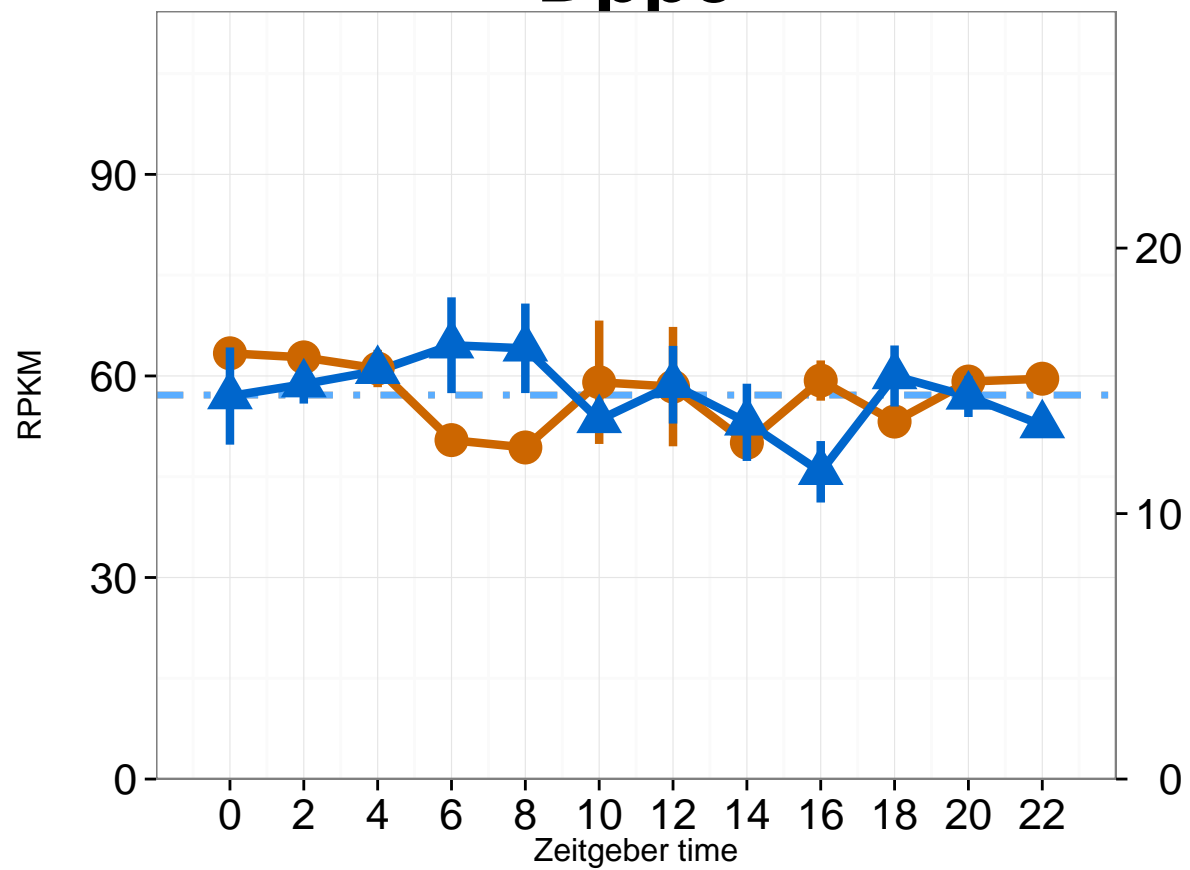

## Dpp8

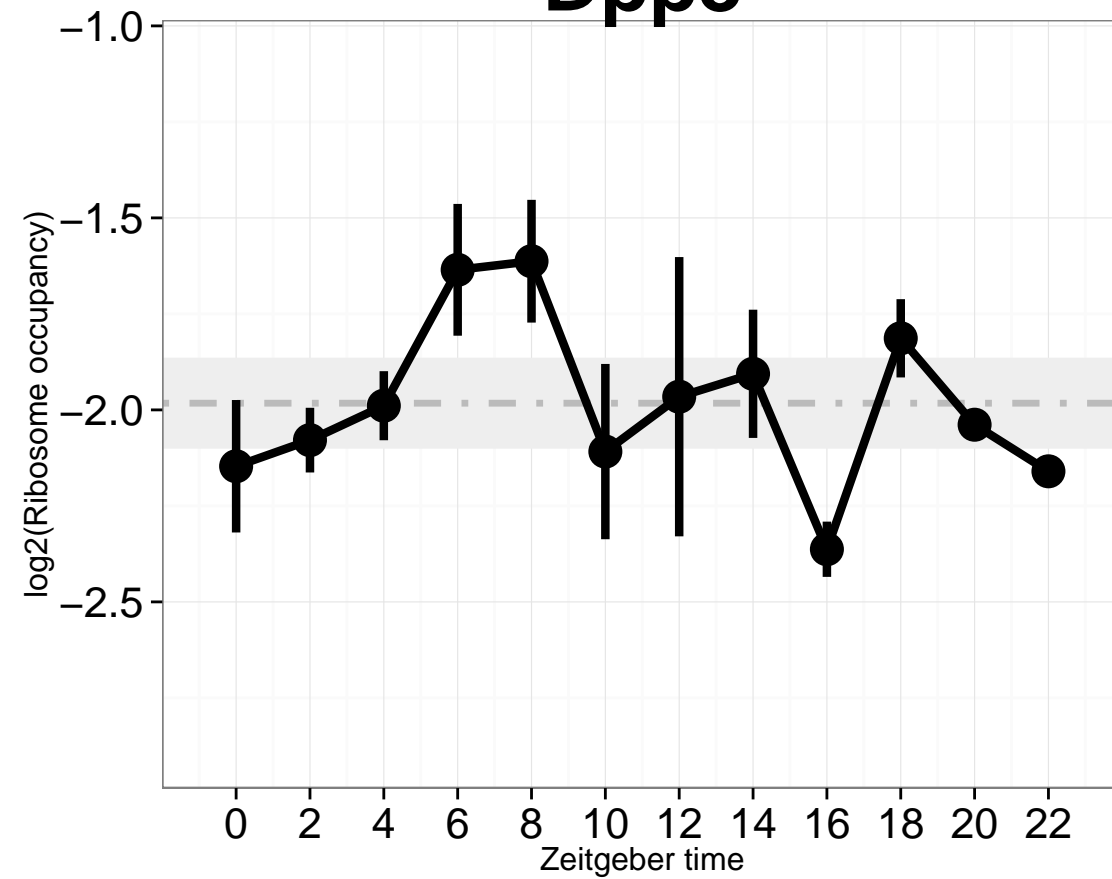

Supplement: Supplementary file 8551 [file 1]

# Erp29

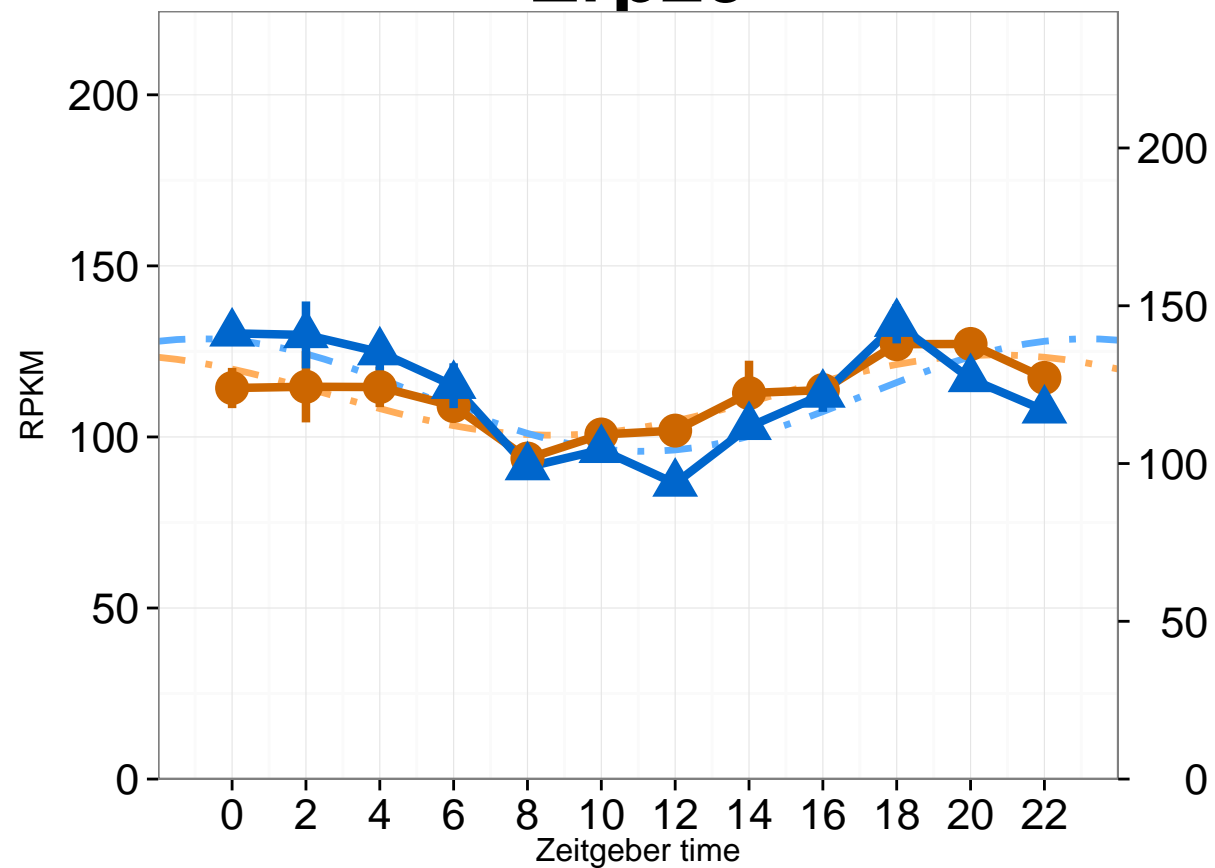

# Erp29

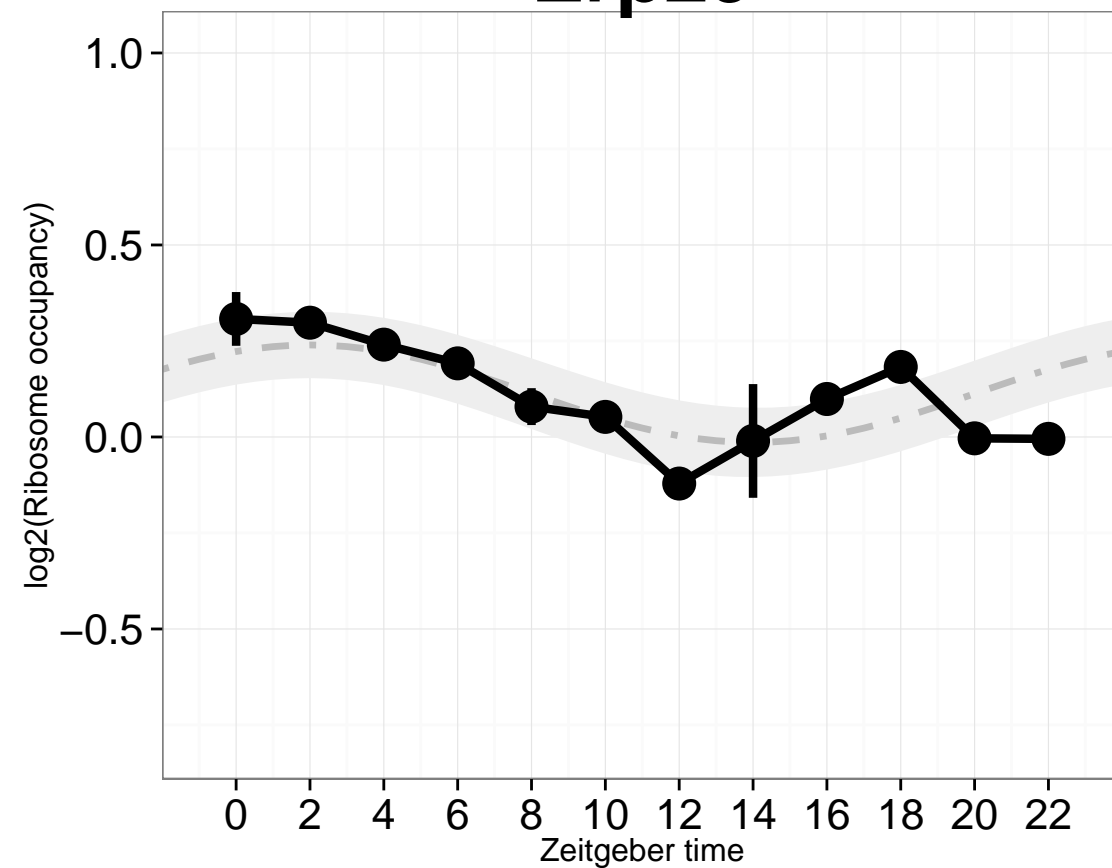

Supplement: Supplementary file 8552 [file 1]

# Timm9

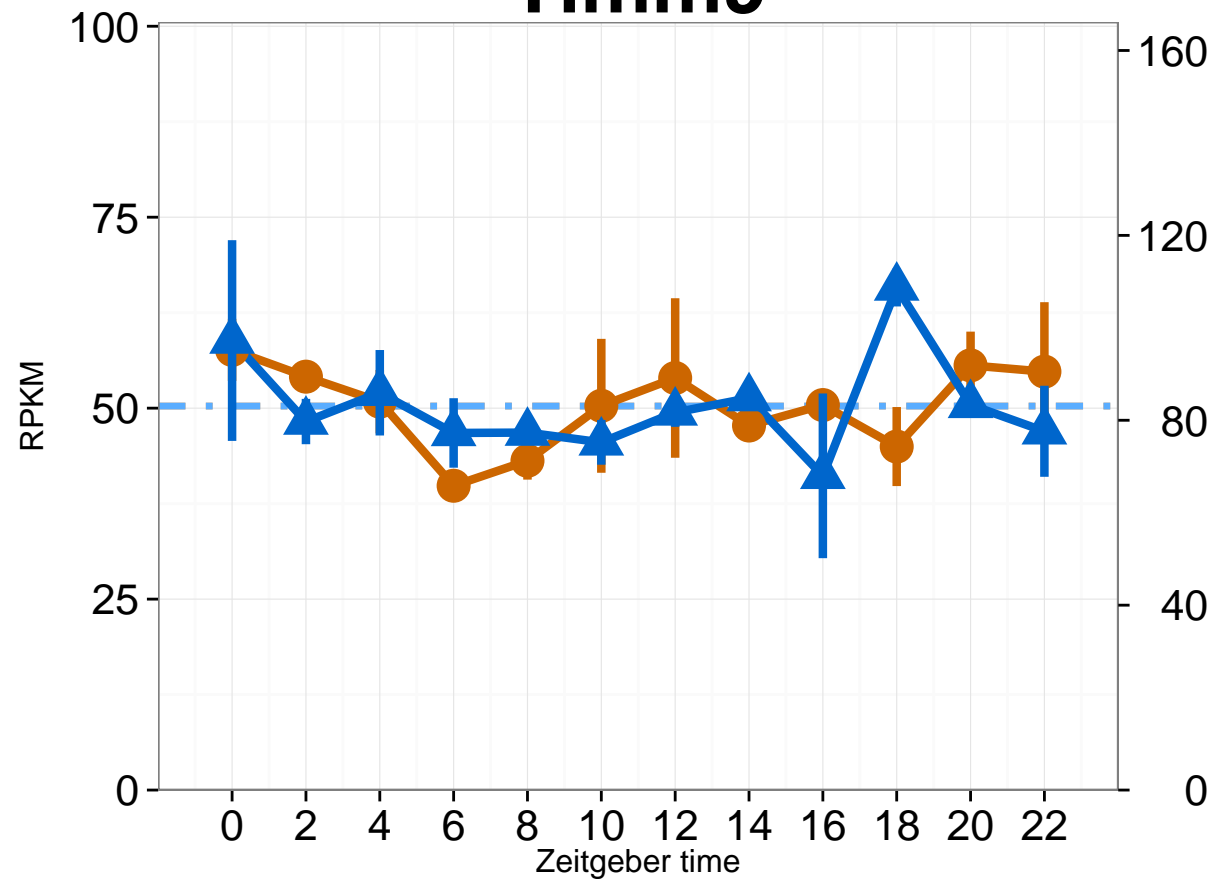

# Timm9

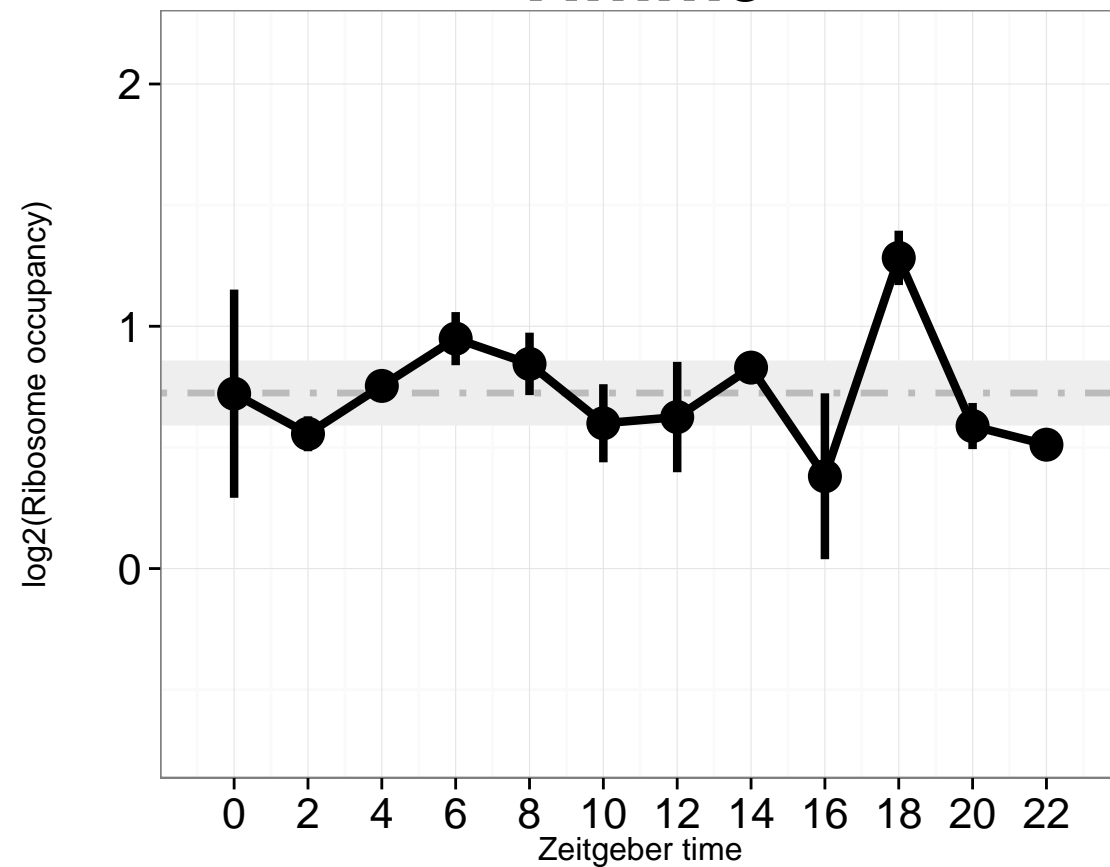

Supplement: Supplementary file 8553 [file 1]

# Scmh1

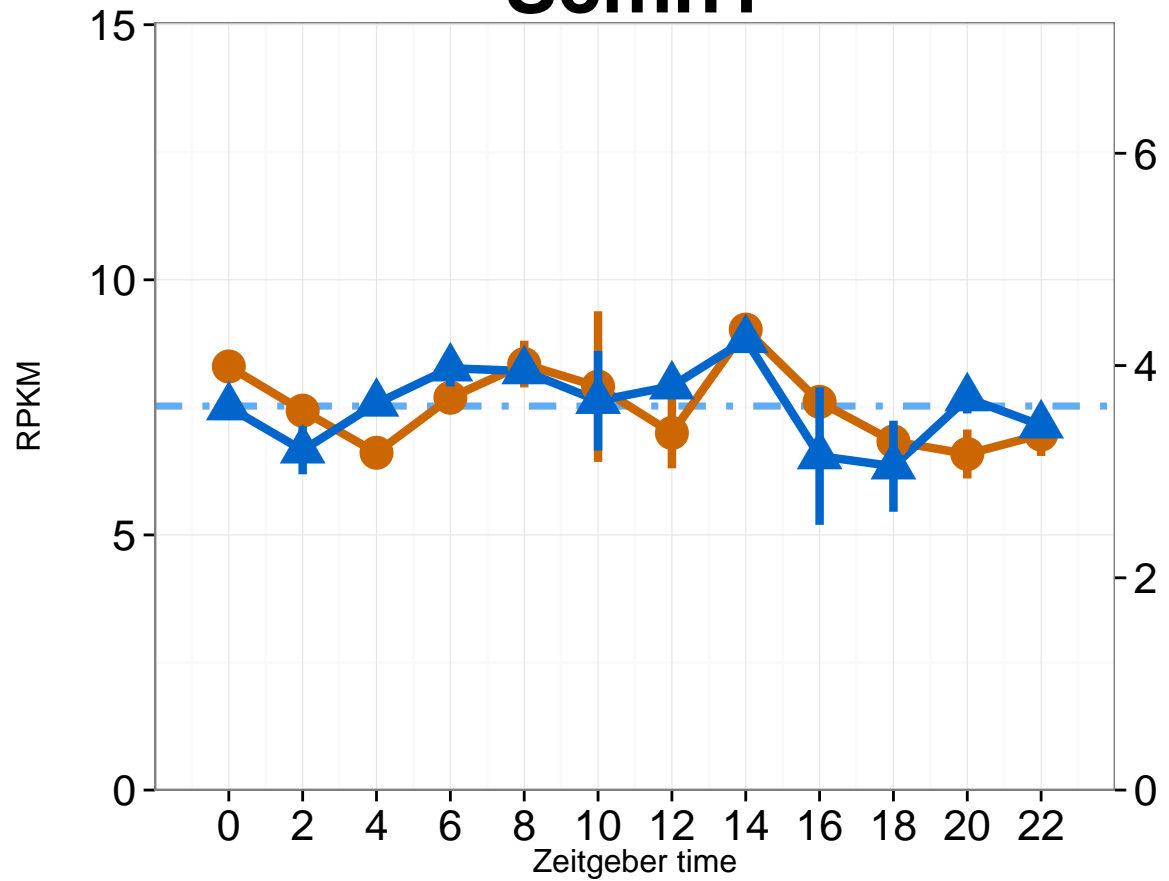

# Scmh1

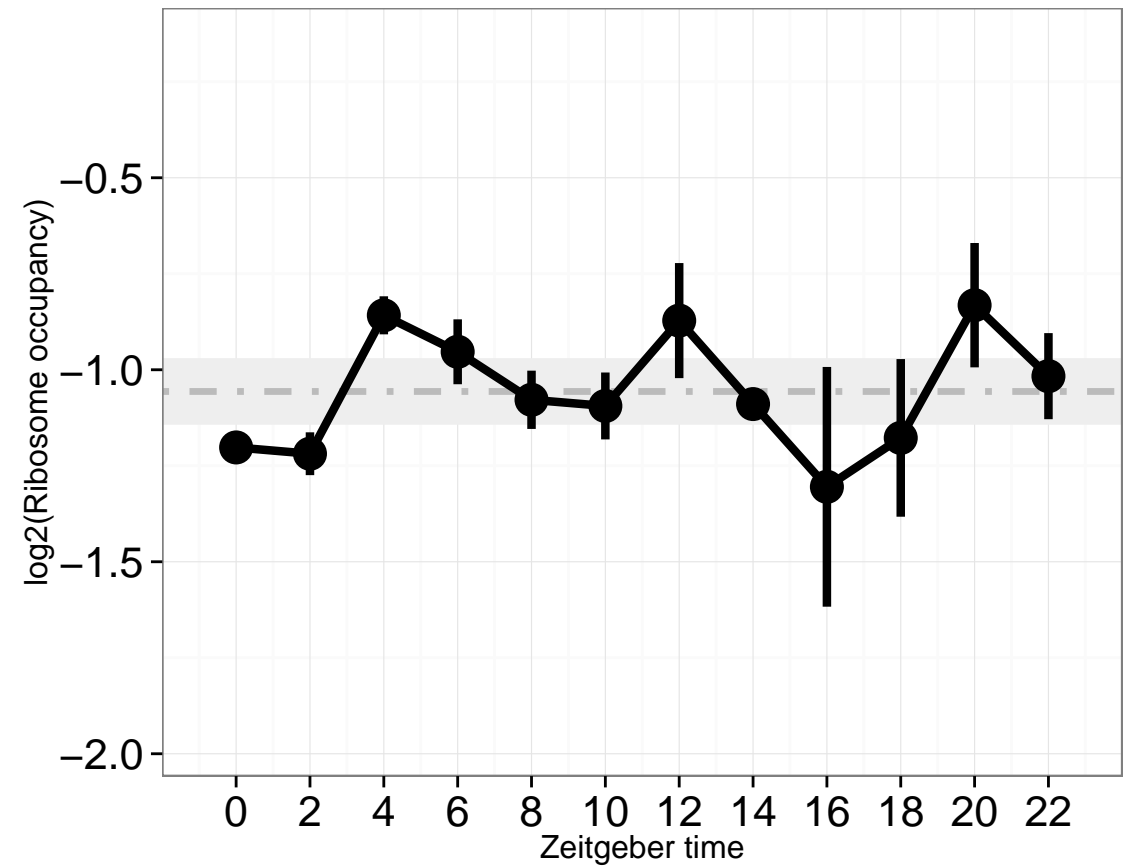

Supplement: Supplementary file 8554 [file 1]

# Tubb2b

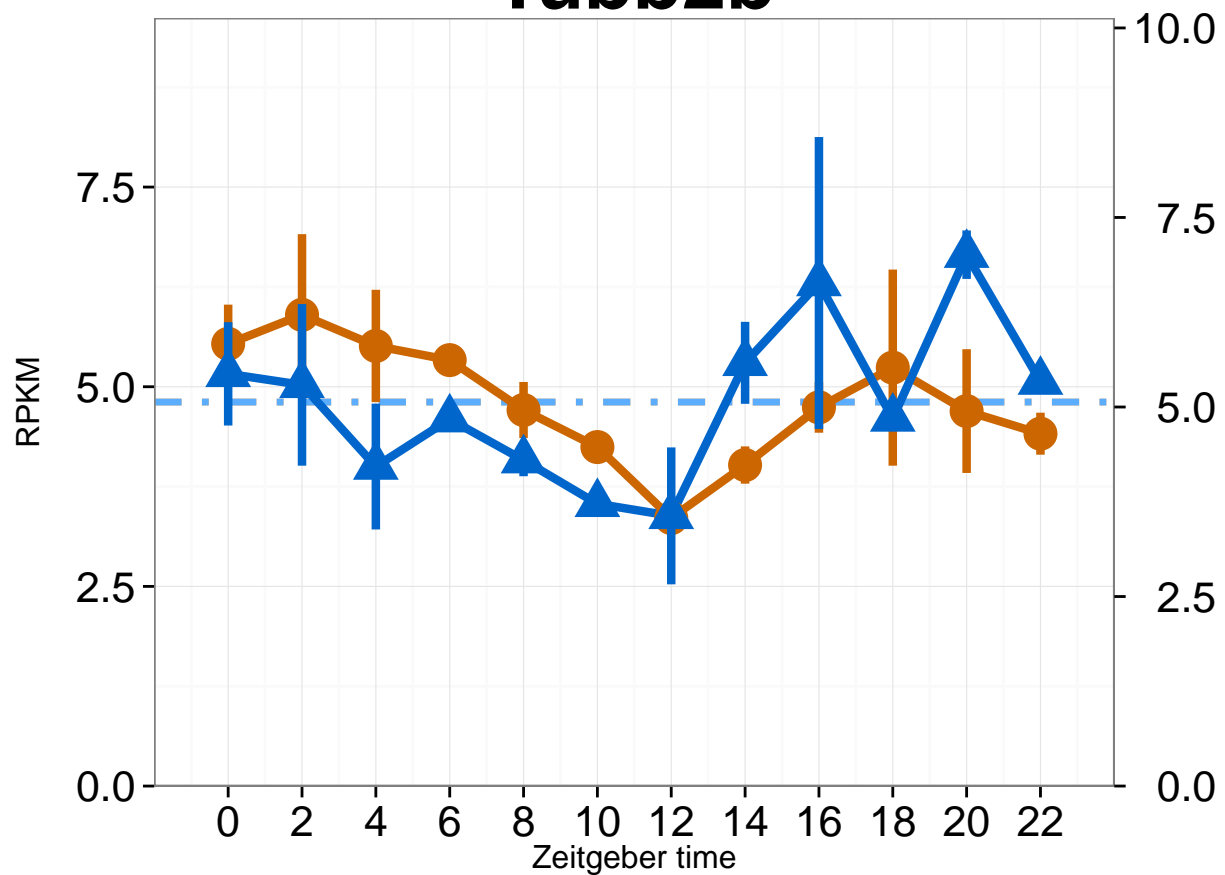

# Tubb2b

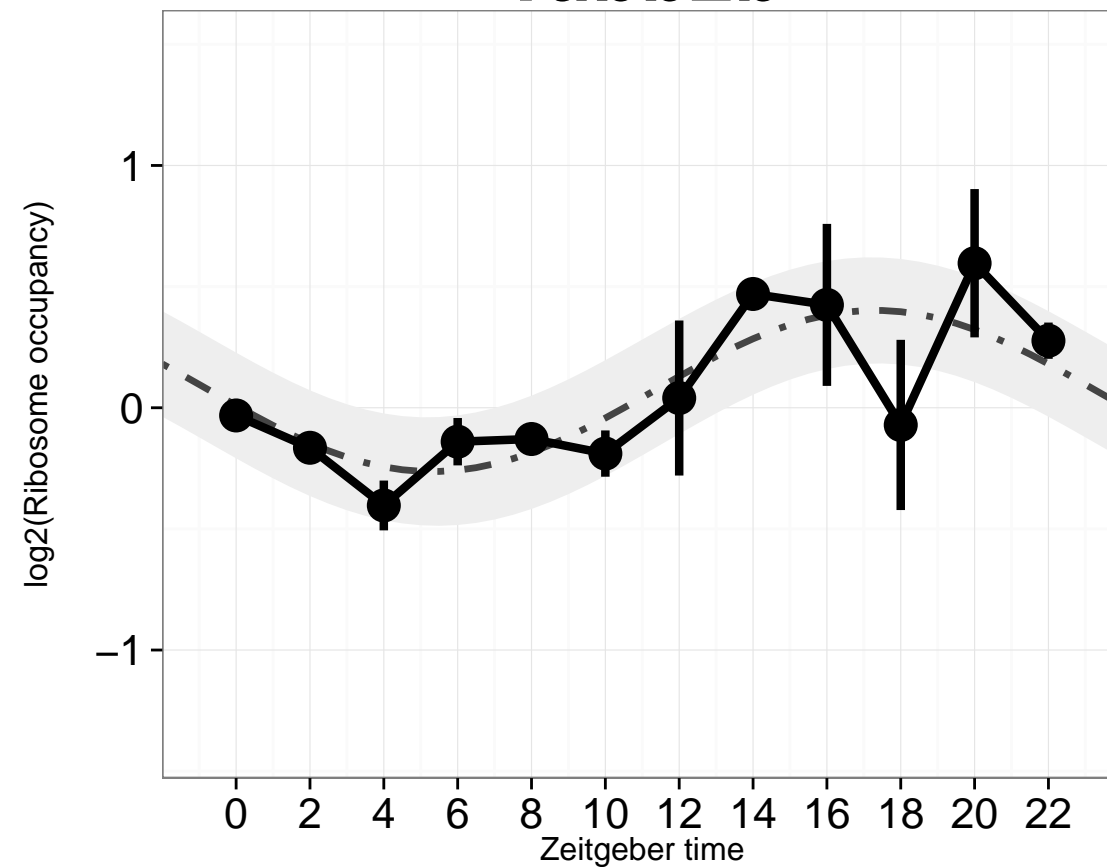

Supplement: Supplementary file 8555 [file 1]

## Cadps2

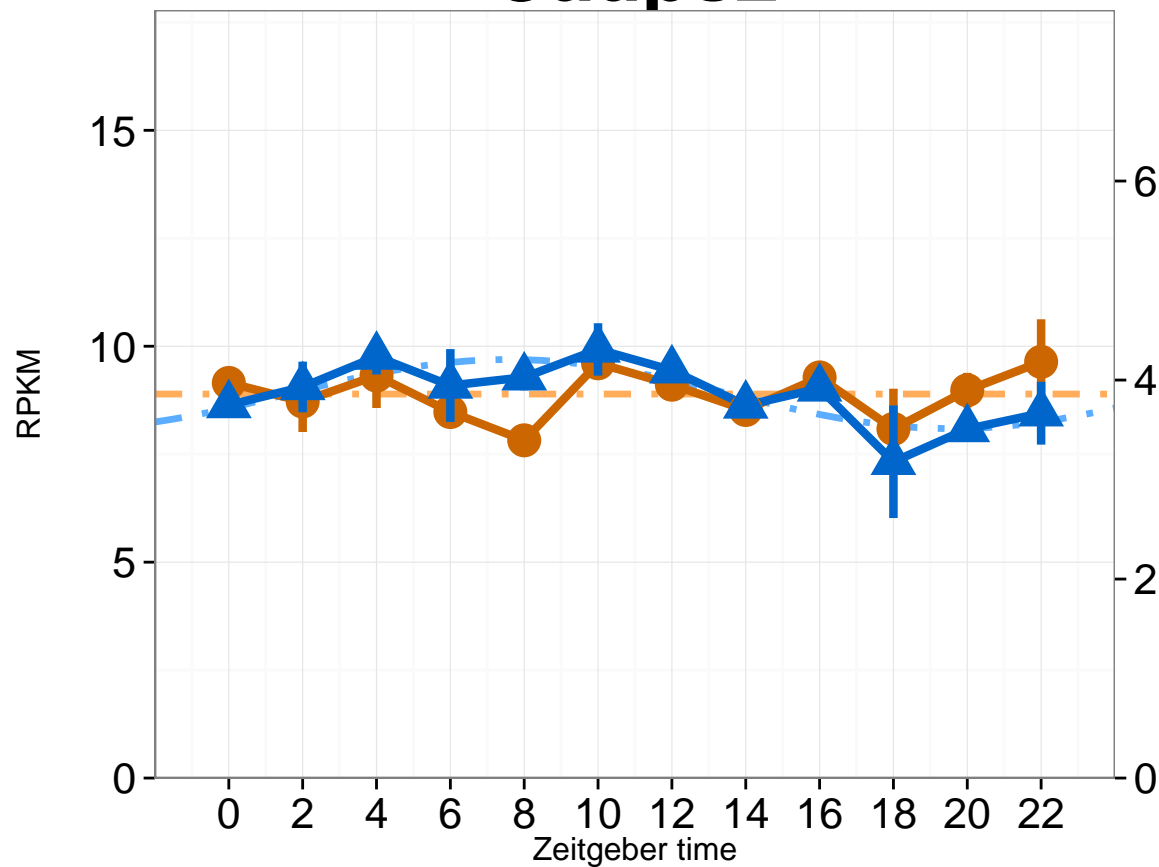

## Cadps2

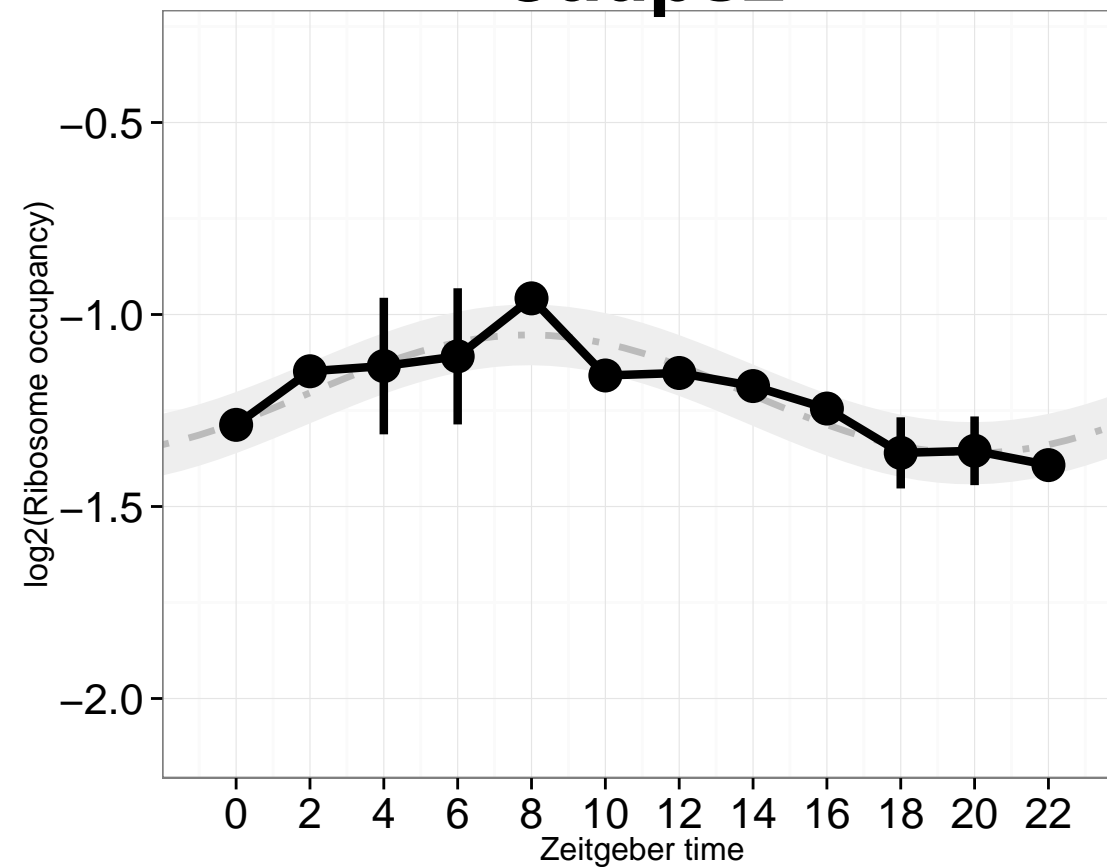

Supplement: Supplementary file 8556 [file 1]

# AU022252

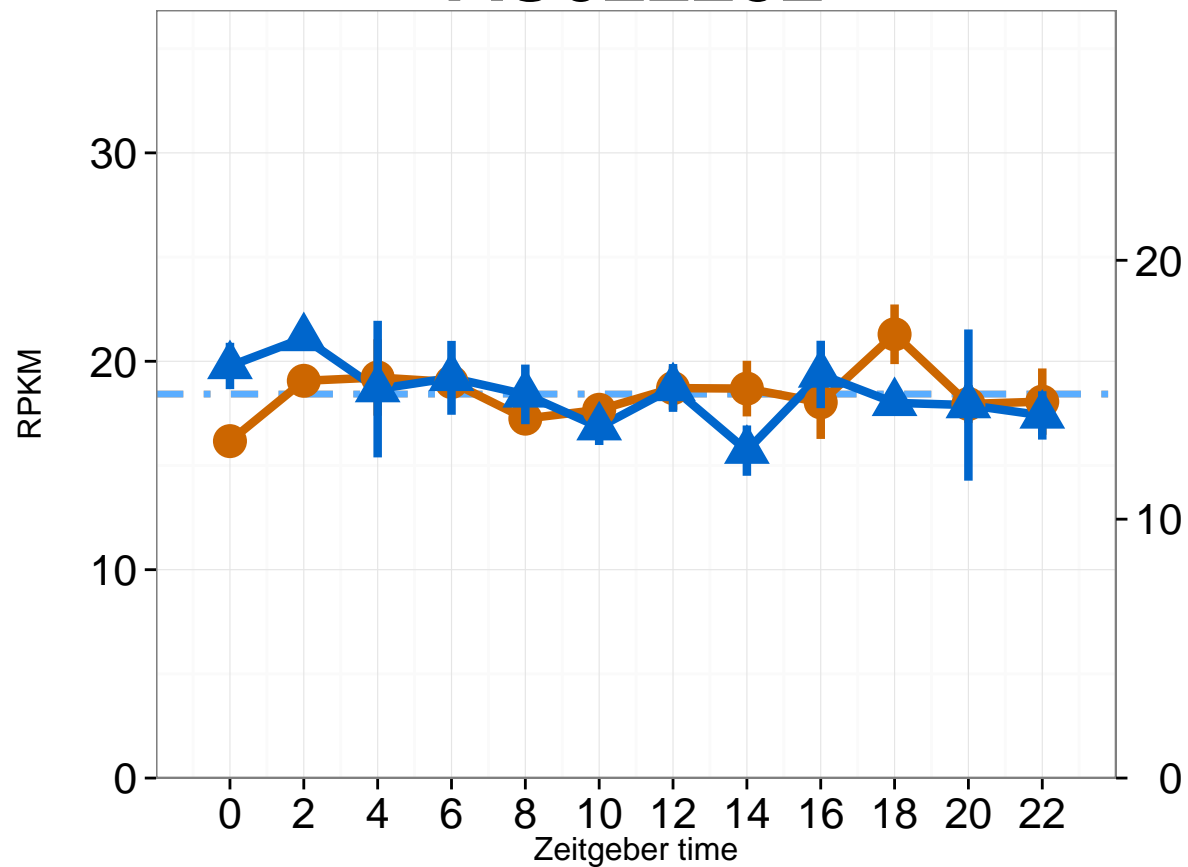

# AU022252

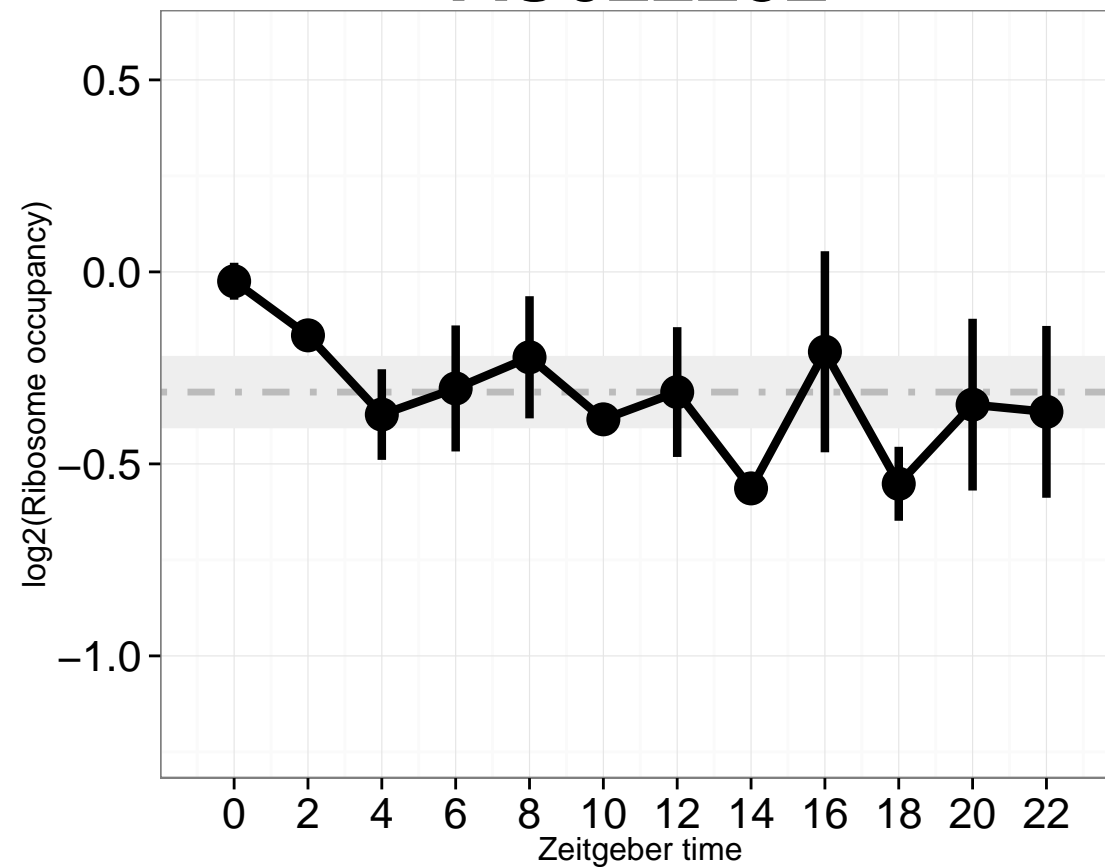

Supplement: Supplementary file 8557 [file 1]

# Corin

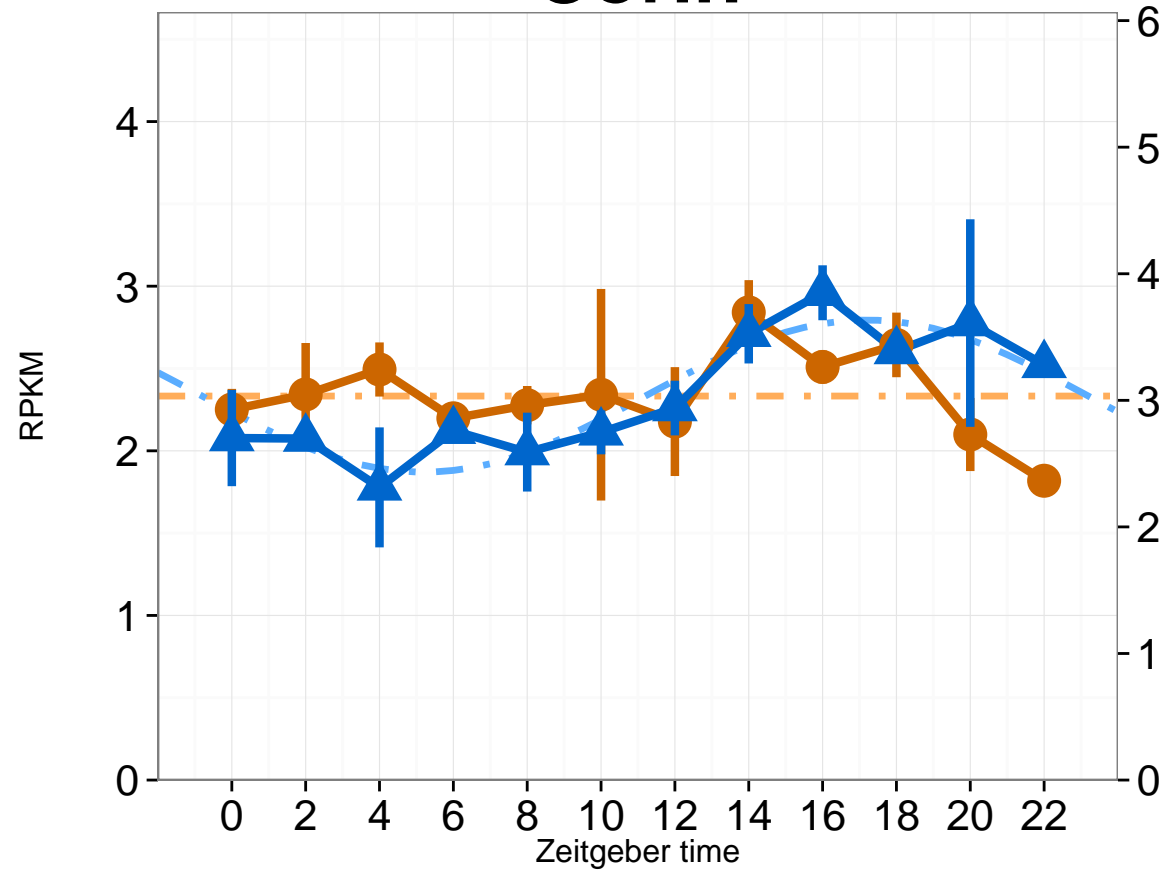

# Corin

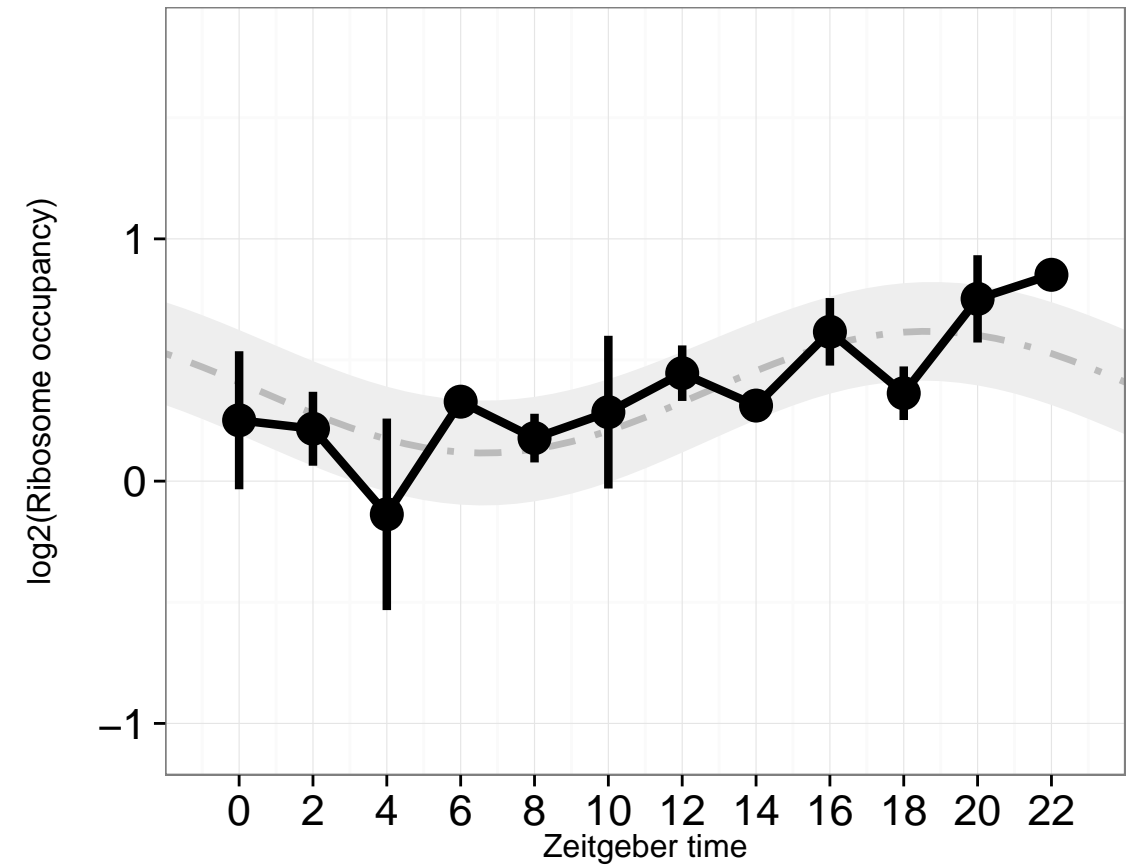

Supplement: Supplementary file 8558 [file 1]

## Cpsf7

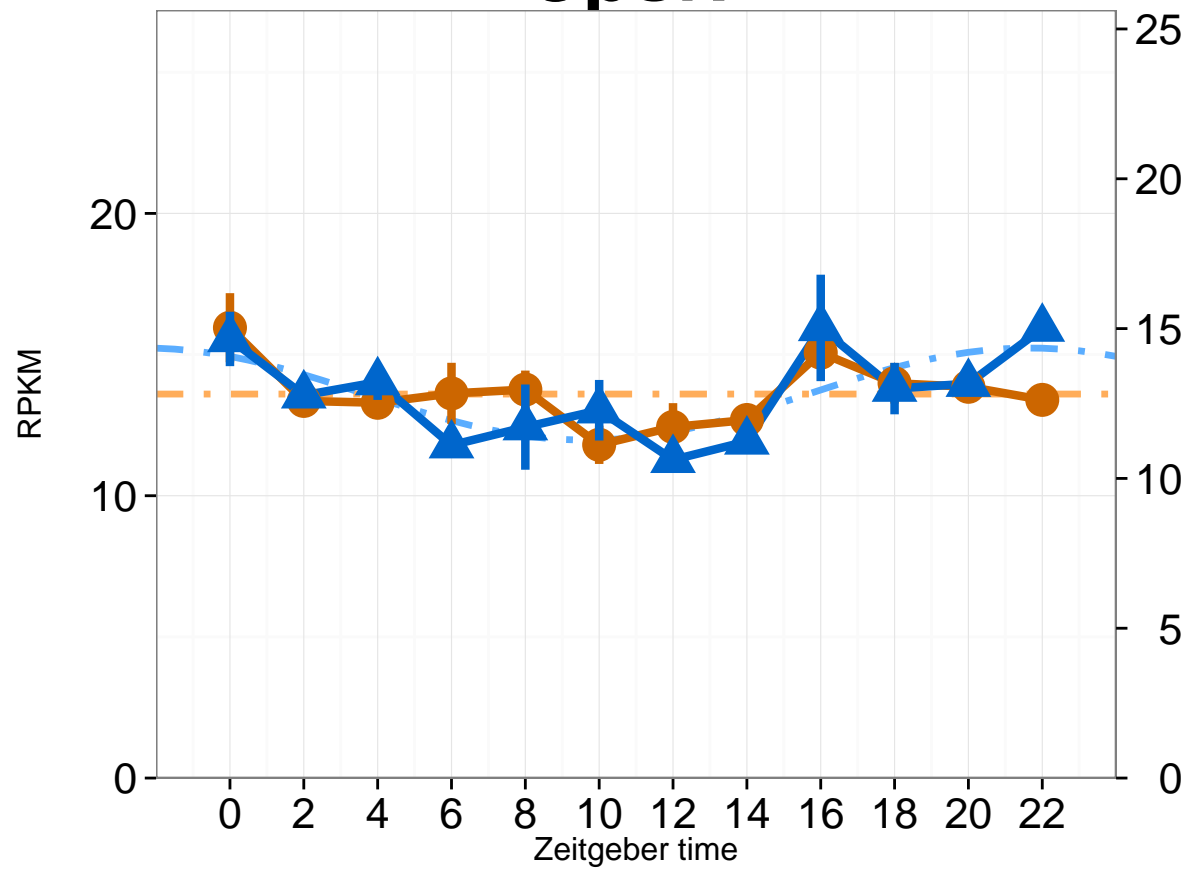

## Cpsf7

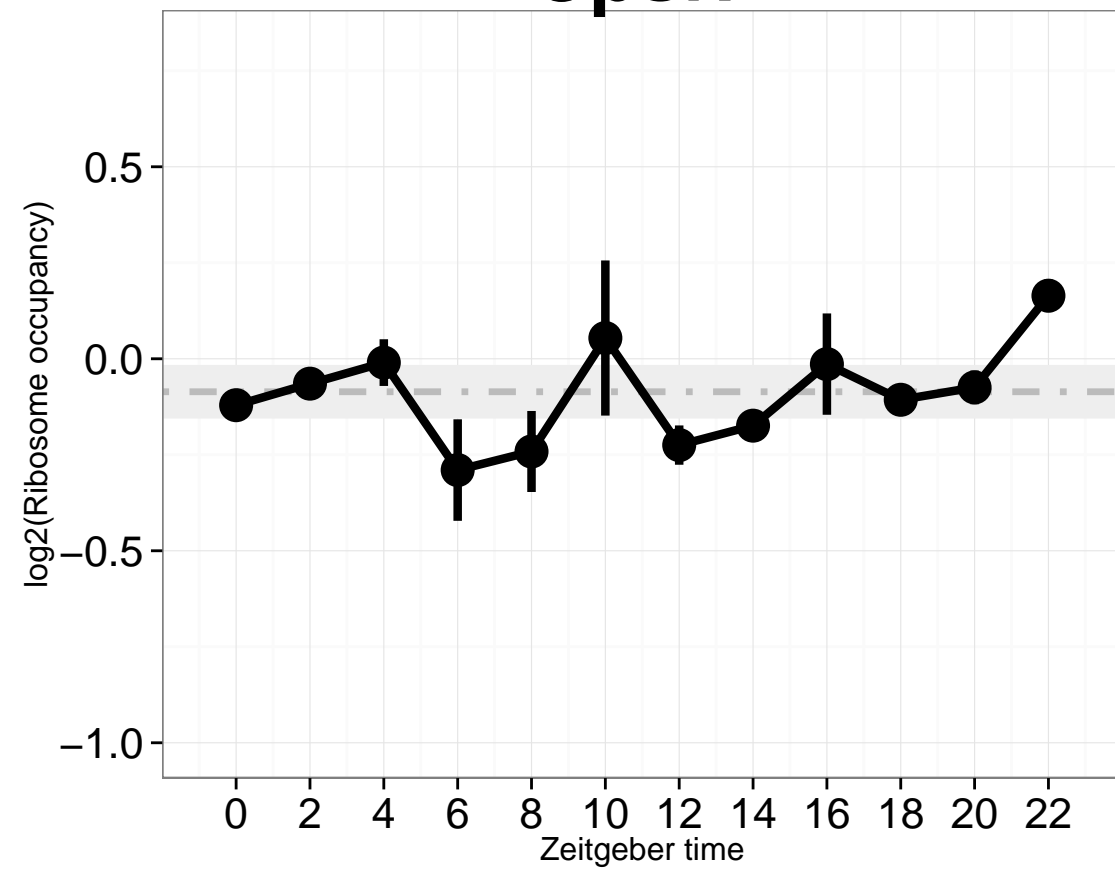

Supplement: Supplementary file 8559 [file 1]

# Ndufa6

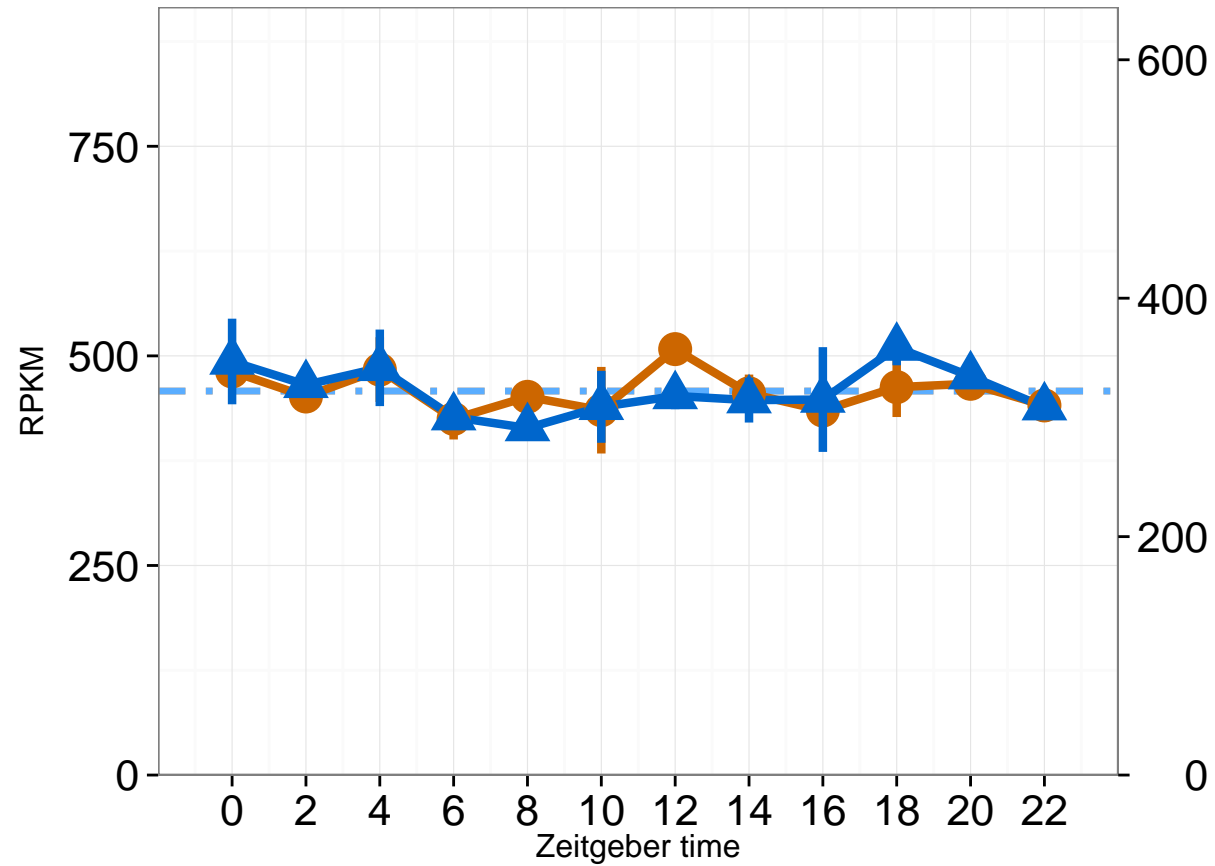

# Ndufa6

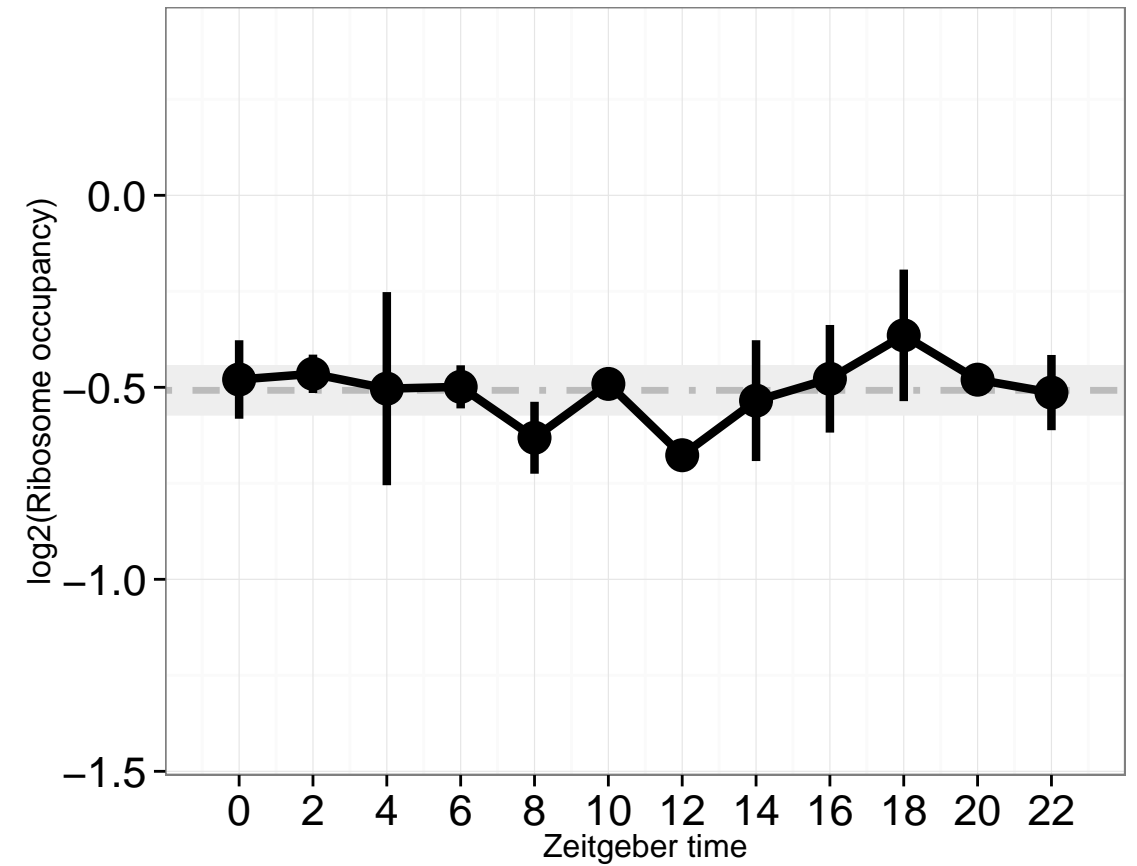

Supplement: Supplementary file 8560 [file 1]

# Hist1h4a

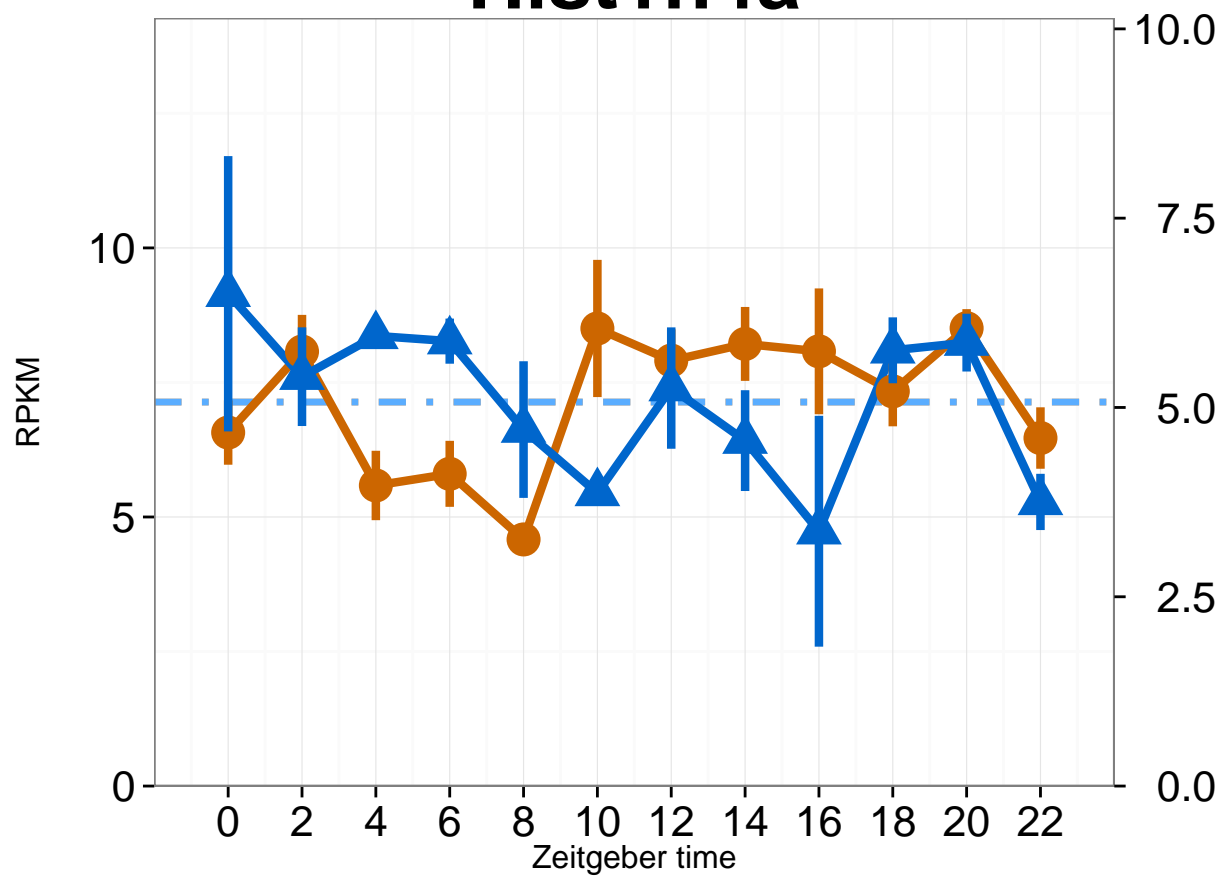

# Hist1h4a

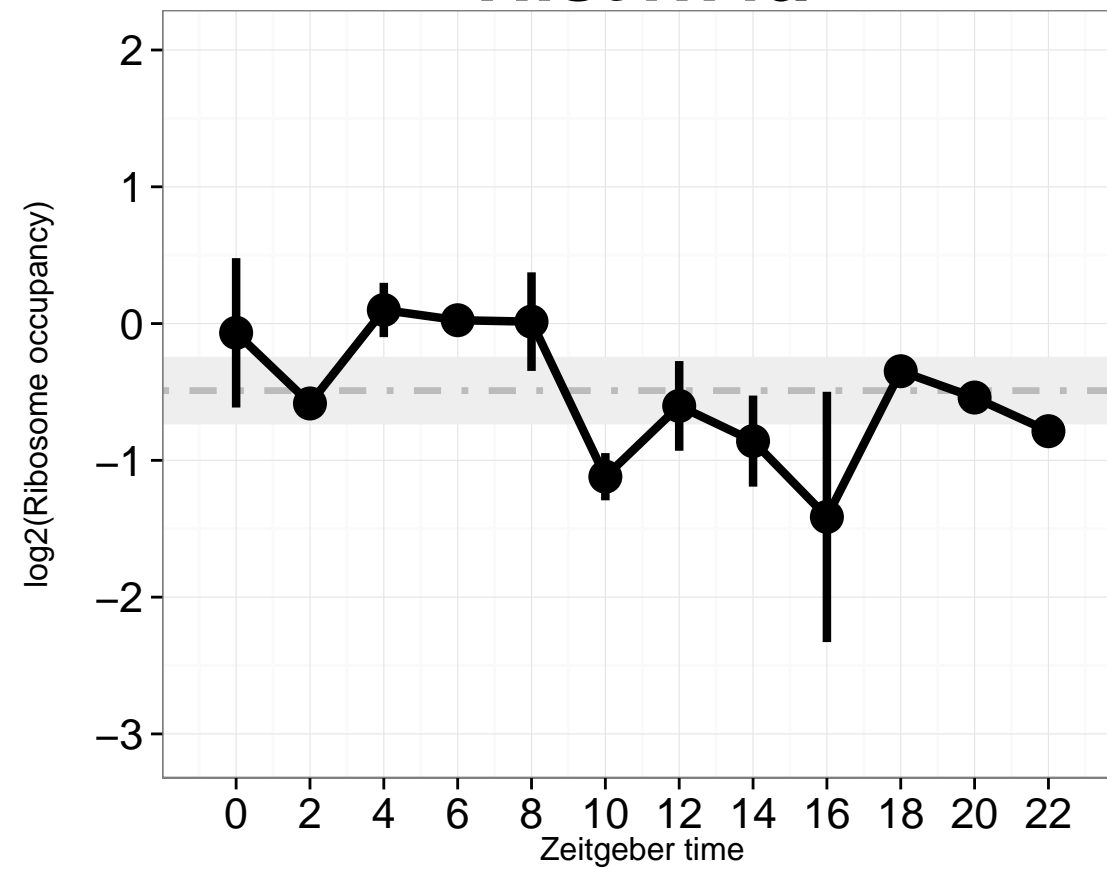

Supplement: Supplementary file 8561 [file 1]

# Gpr137

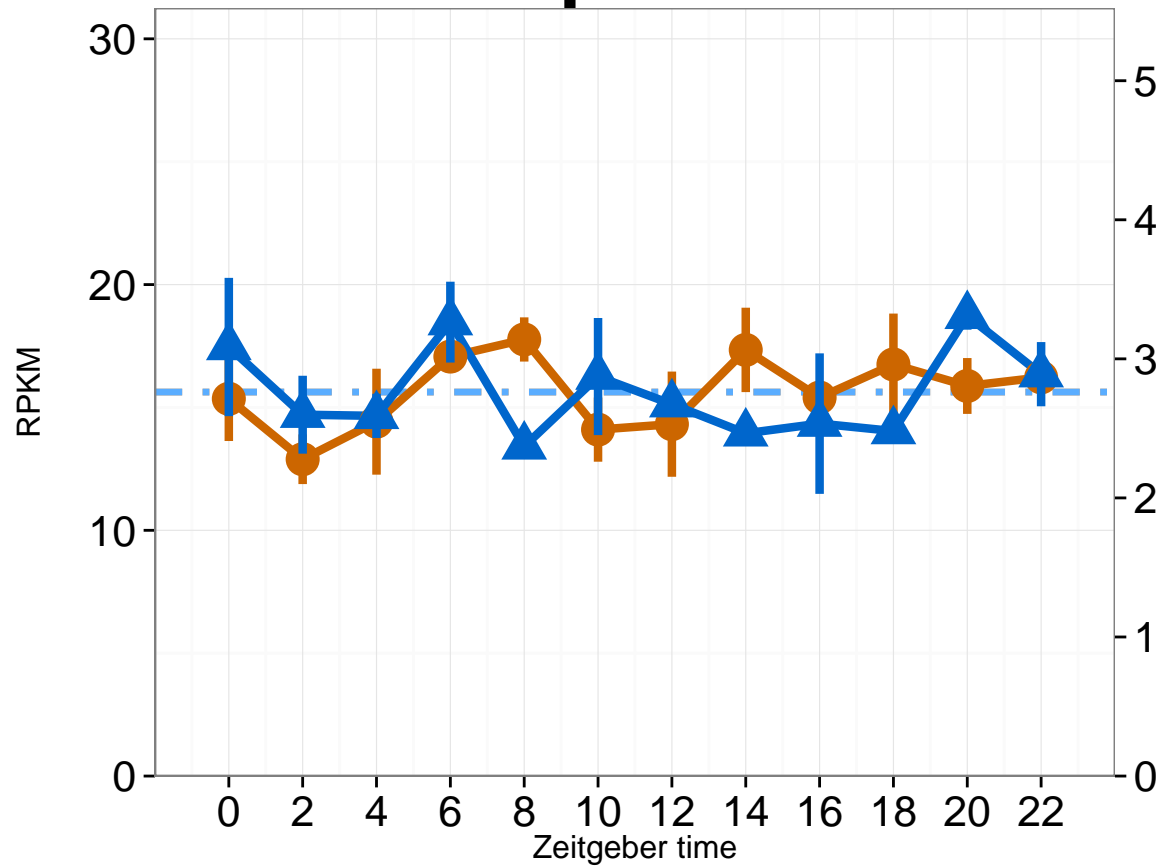

# Gpr137

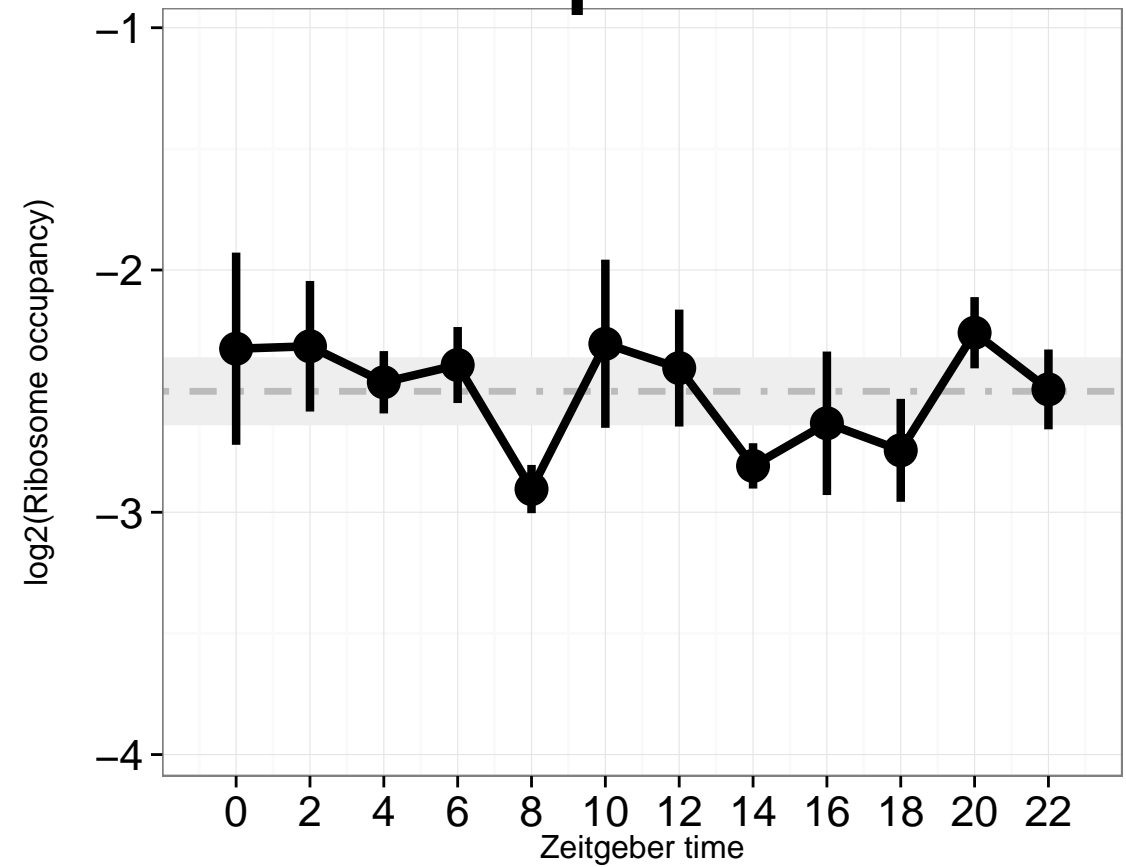

Supplement: Supplementary file 8562 [file 1]

# Rbm38

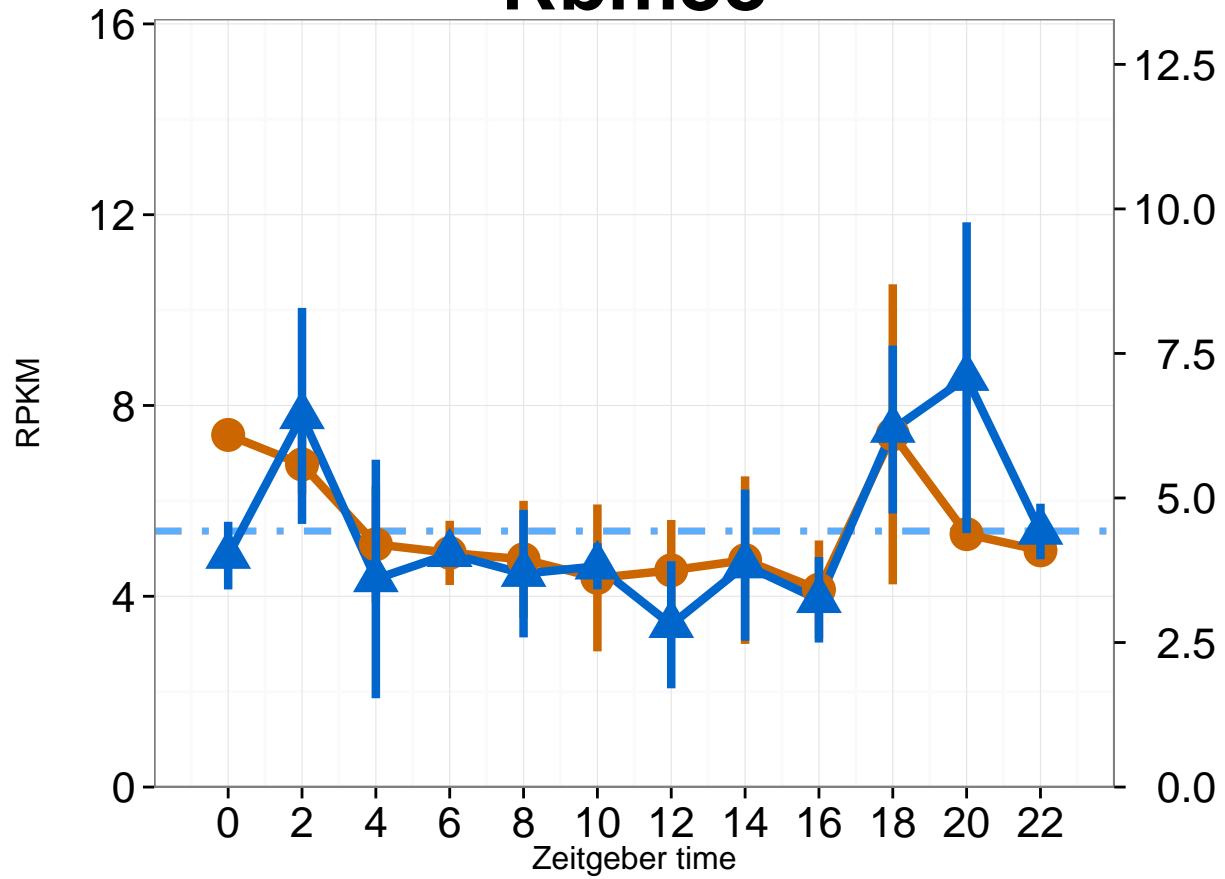

# Rbm38

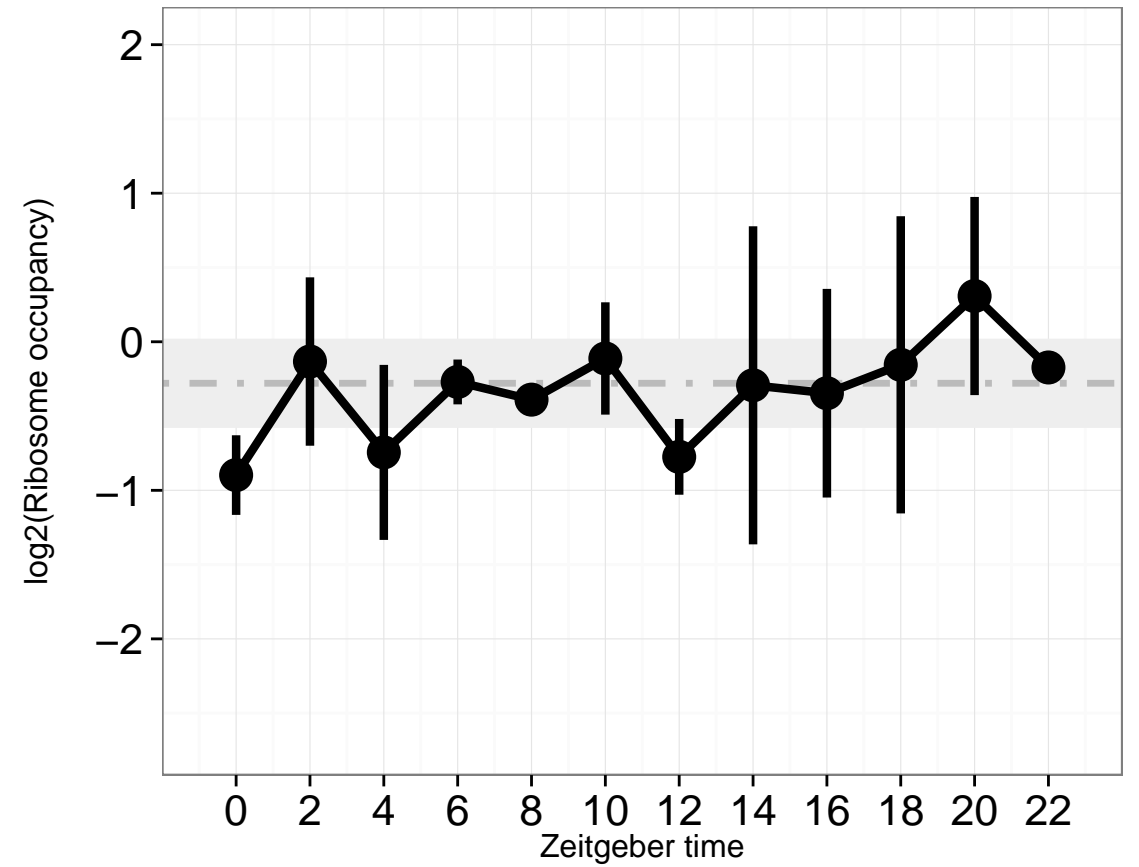

Supplement: Supplementary file 8563 [file 1]

## Rdh11

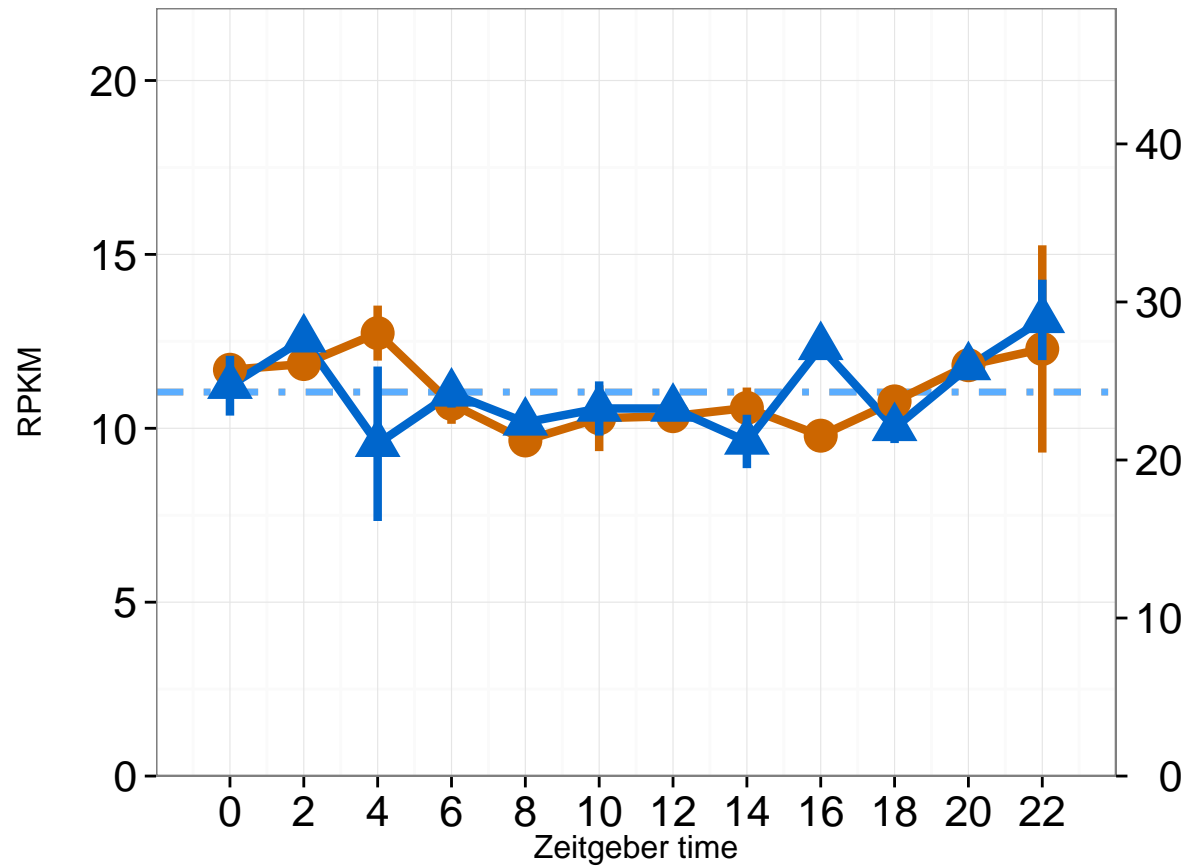

## Rdh11

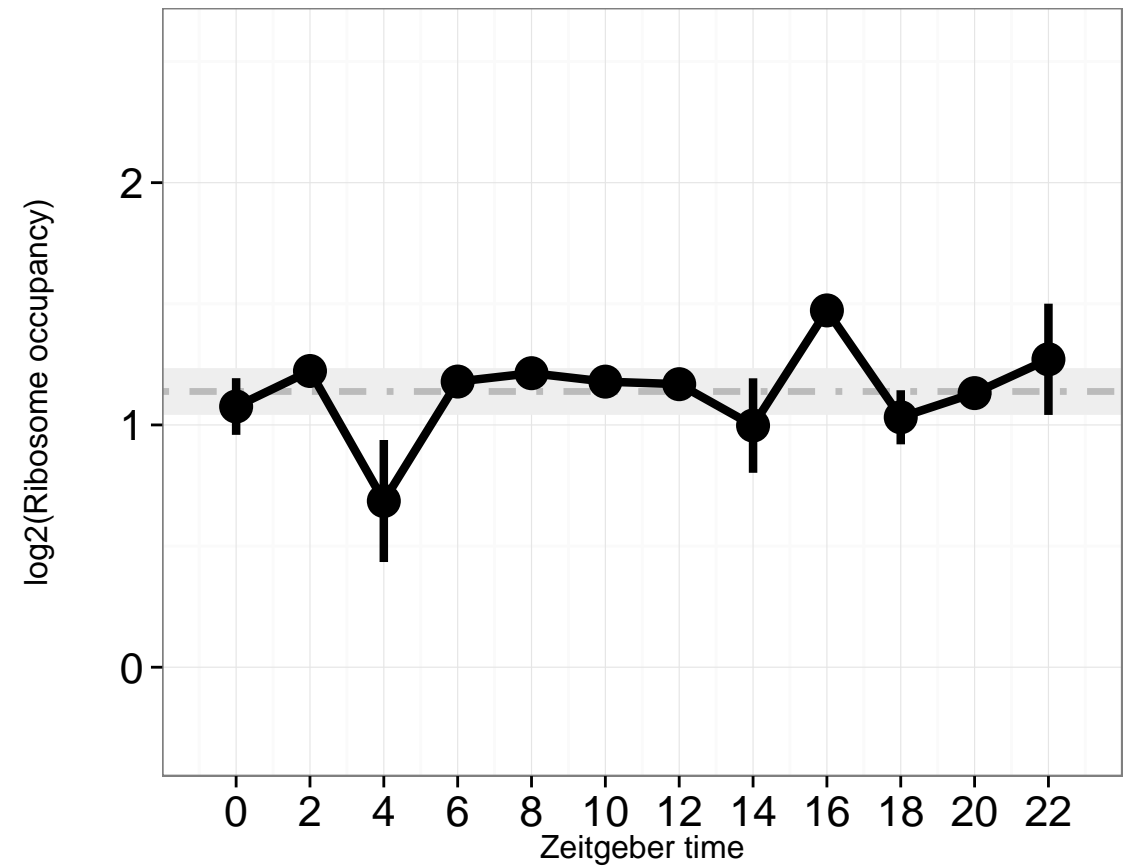

Supplement: Supplementary file 8565 [file 1]

# Coro1c

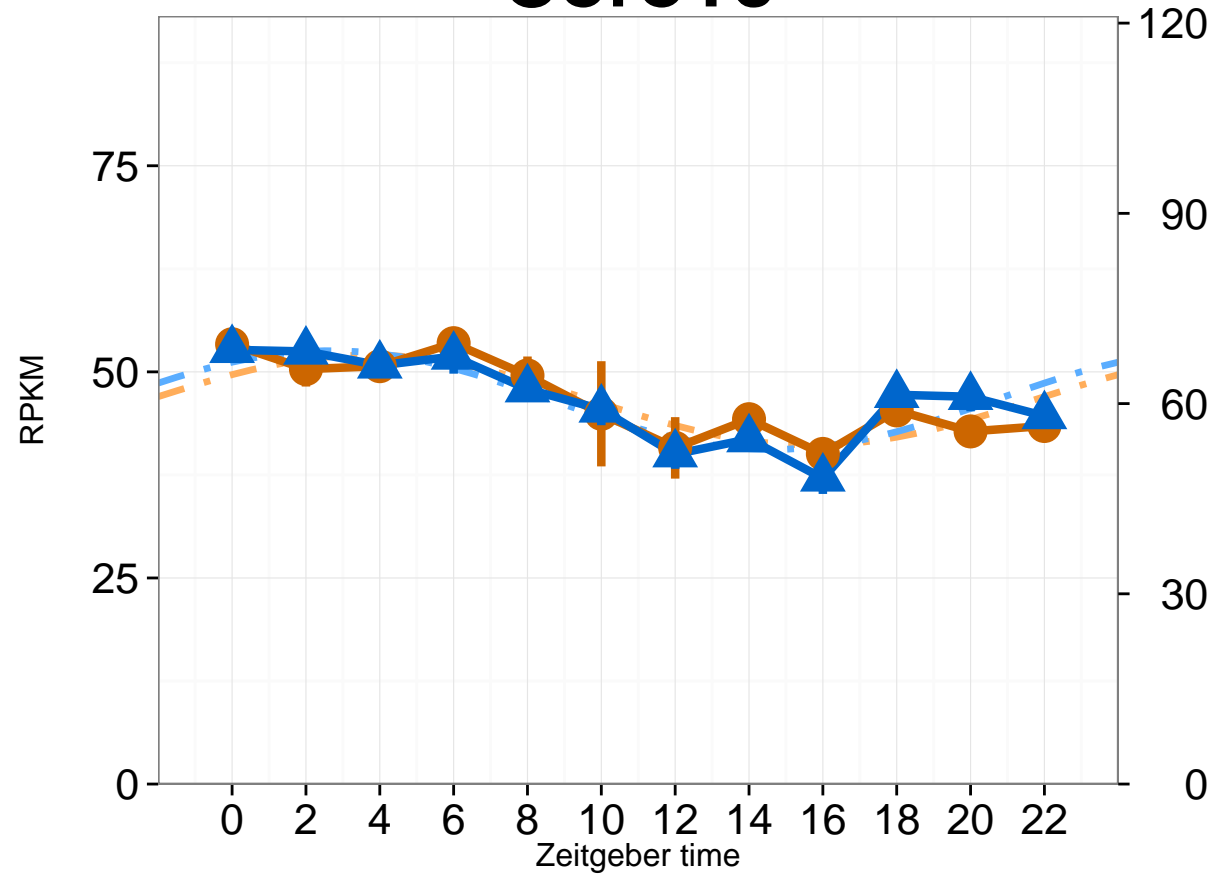

# Coro1c

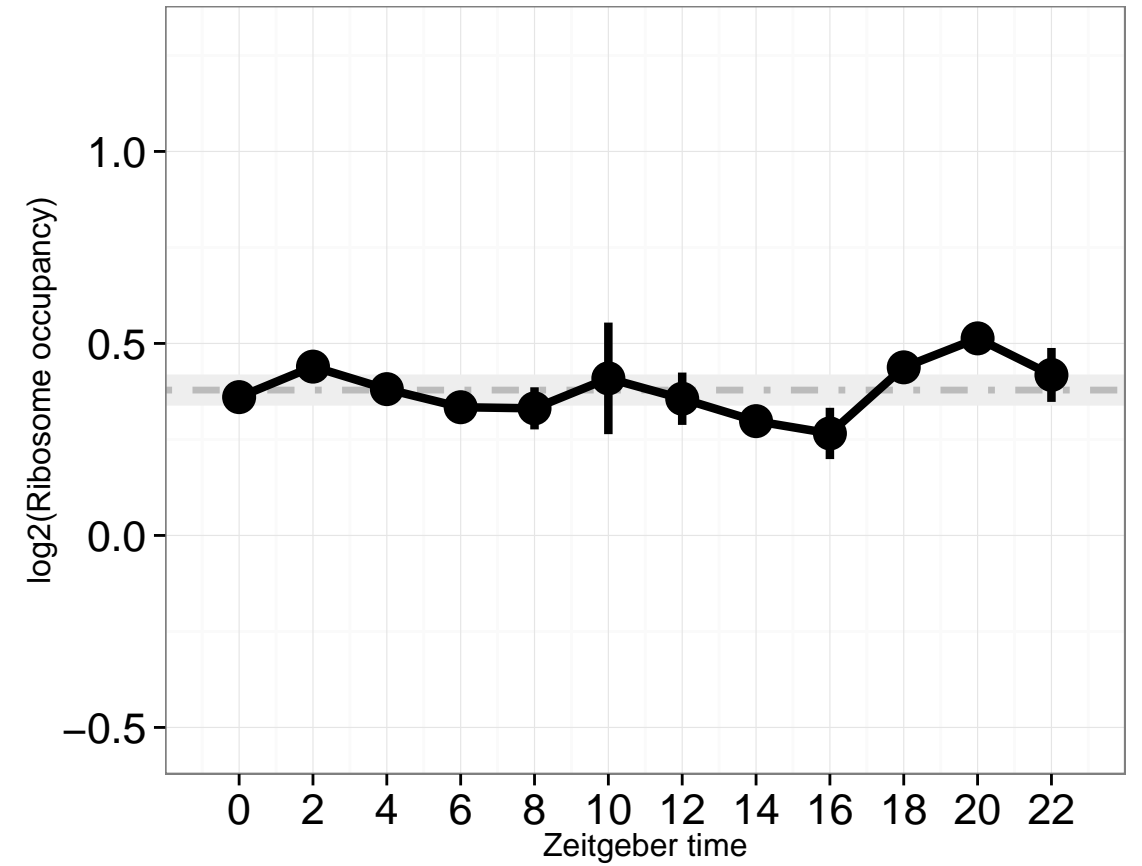

Supplement: Supplementary file 8566 [file 1]

## Rabep2

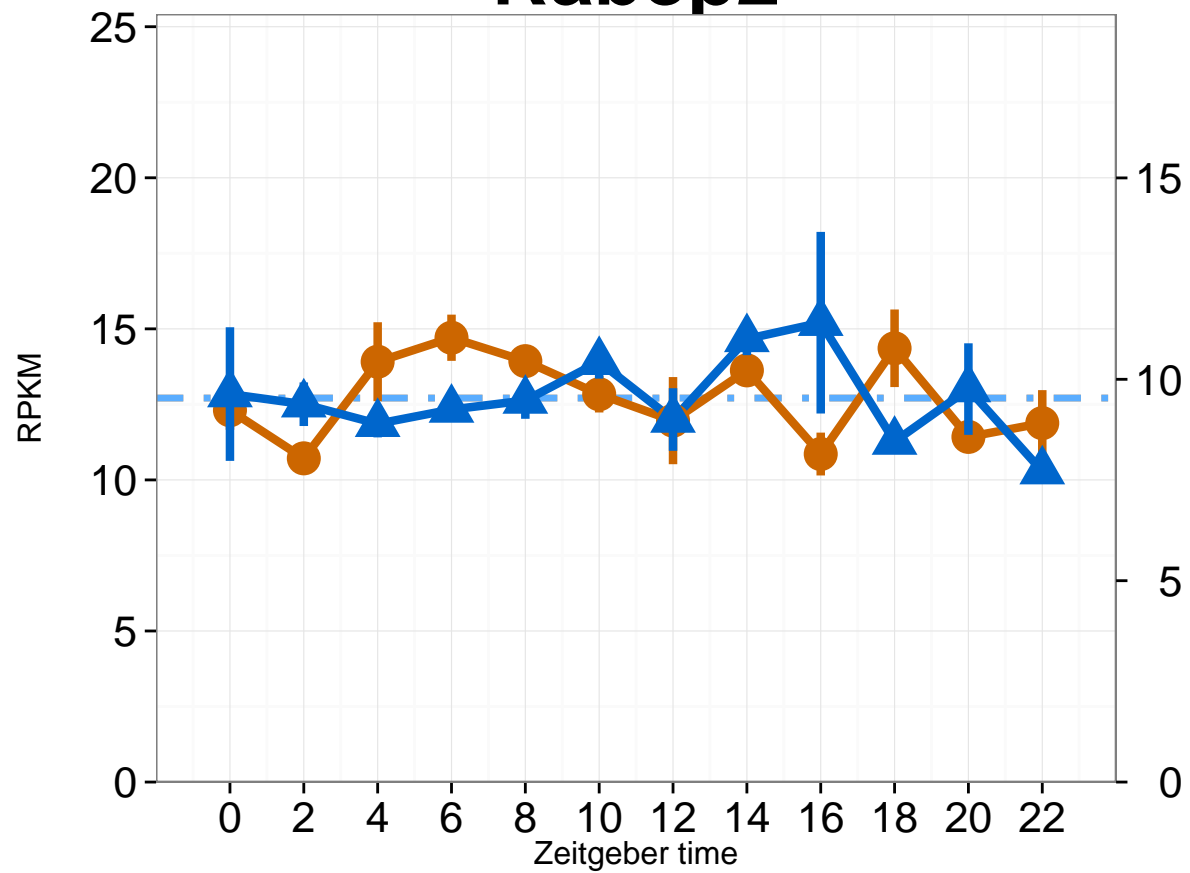

## Rabep2

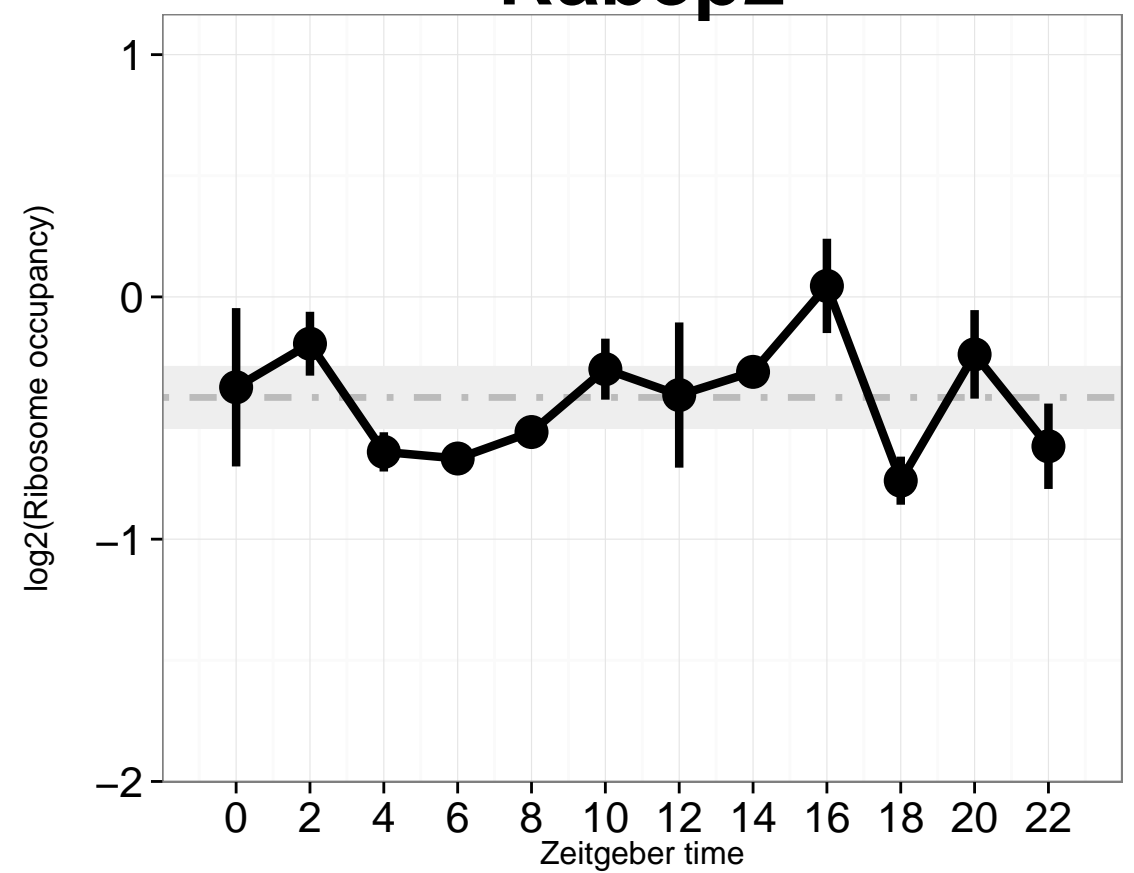

Supplement: Supplementary file 8567 [file 1]

# Ccdc151

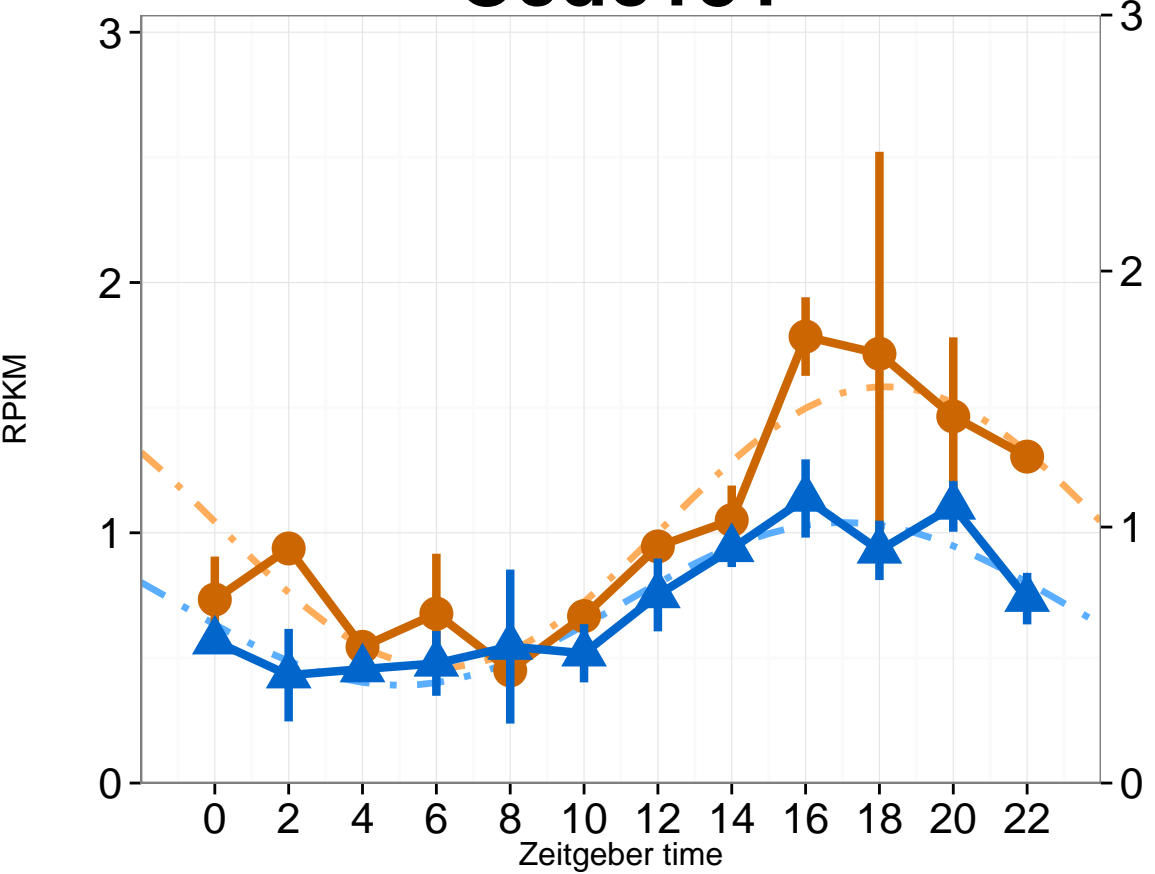

# Ccdc151

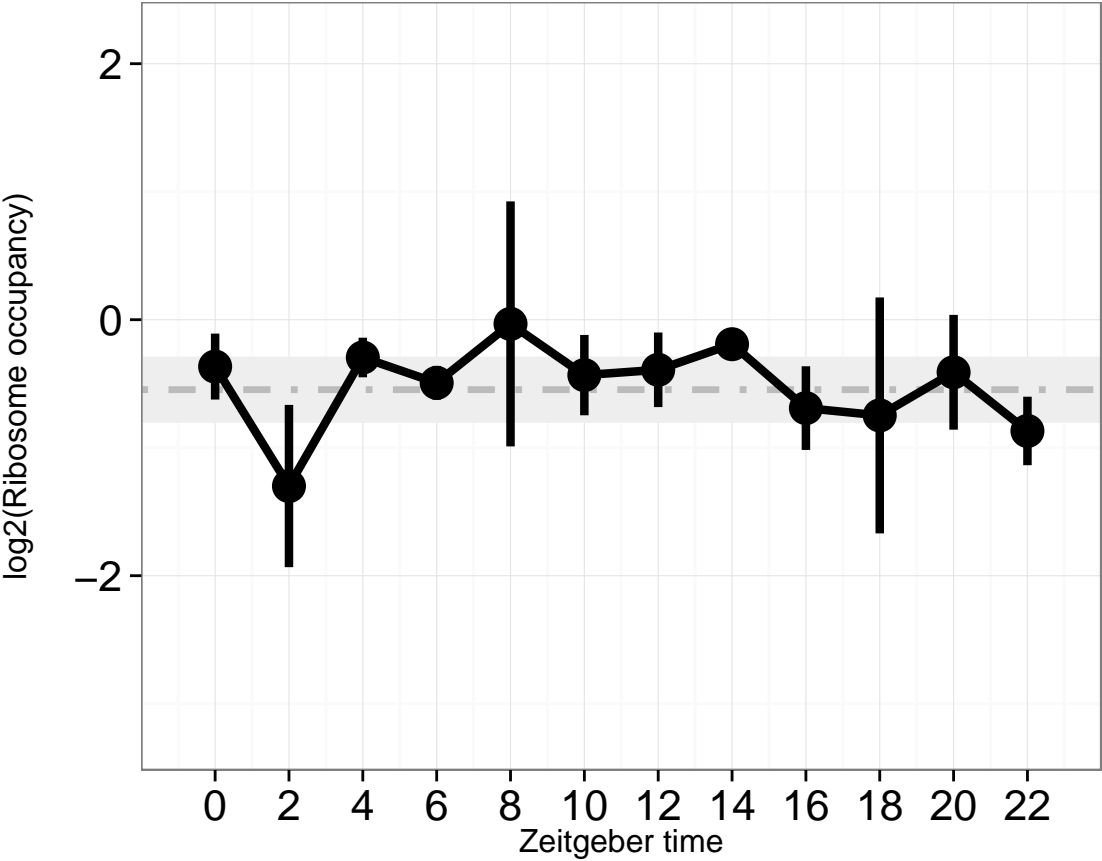

Supplement: Supplementary file 8568 [file 1]

**Pcdhb4 TR**

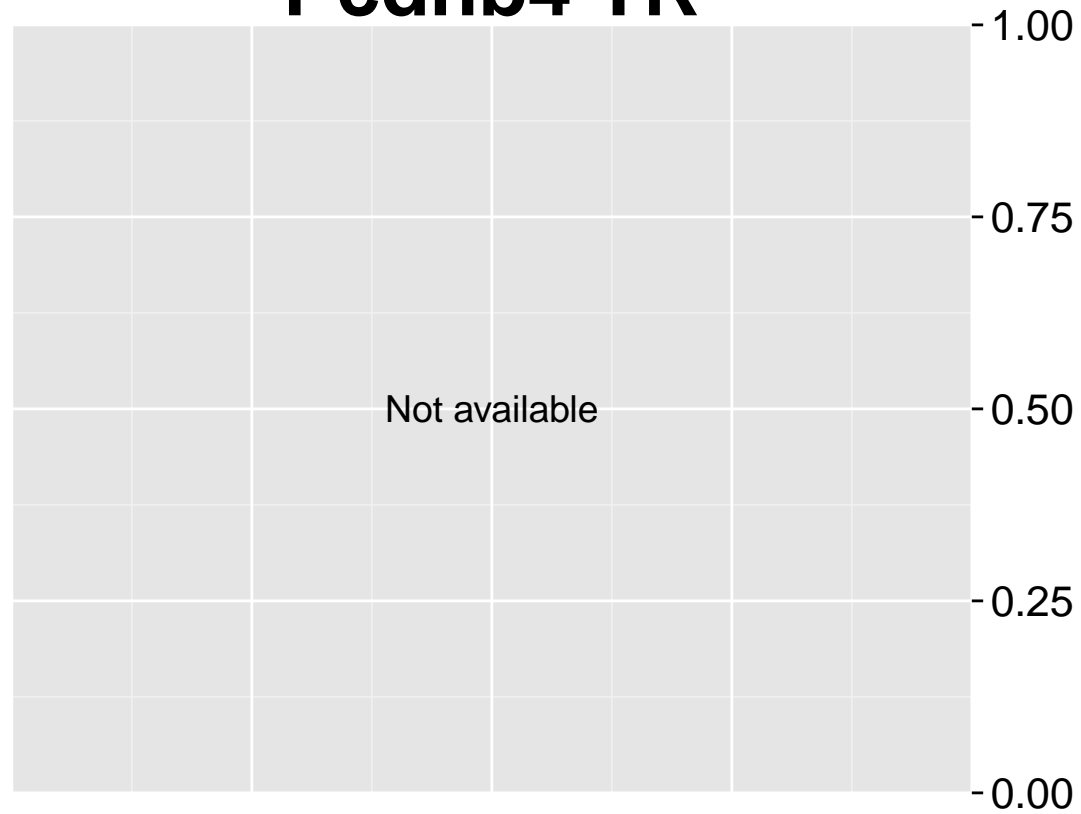

**Pcdhb4 log2(Ribosome occupancy**

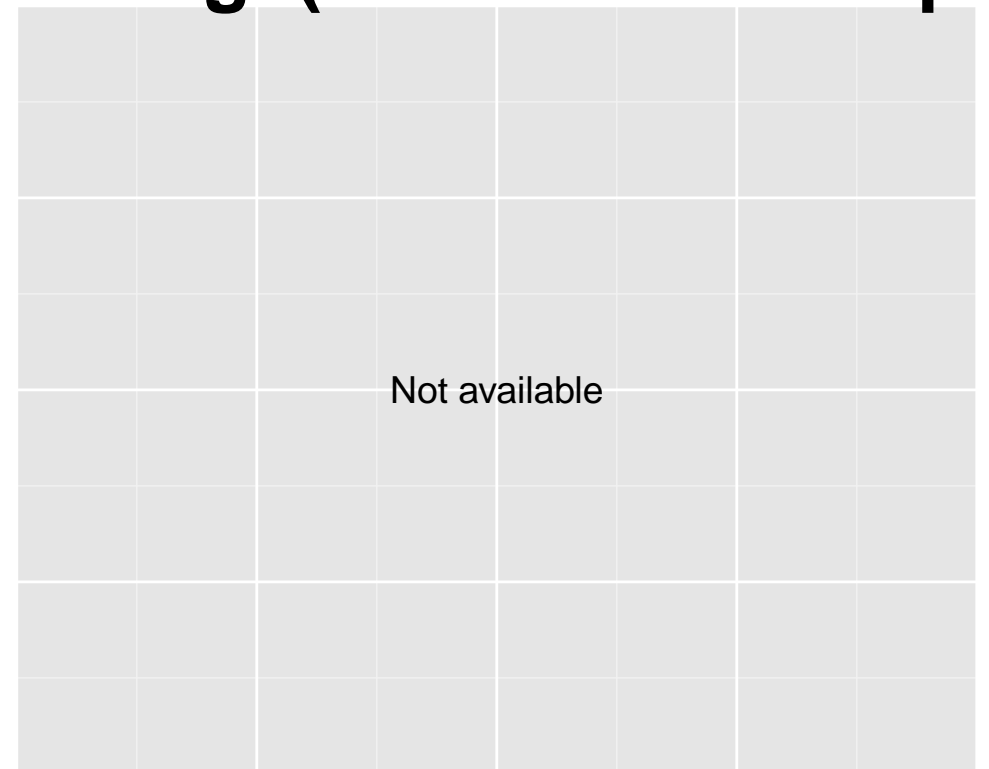

Supplement: Supplementary file 8569 [file 1]

## Rhov

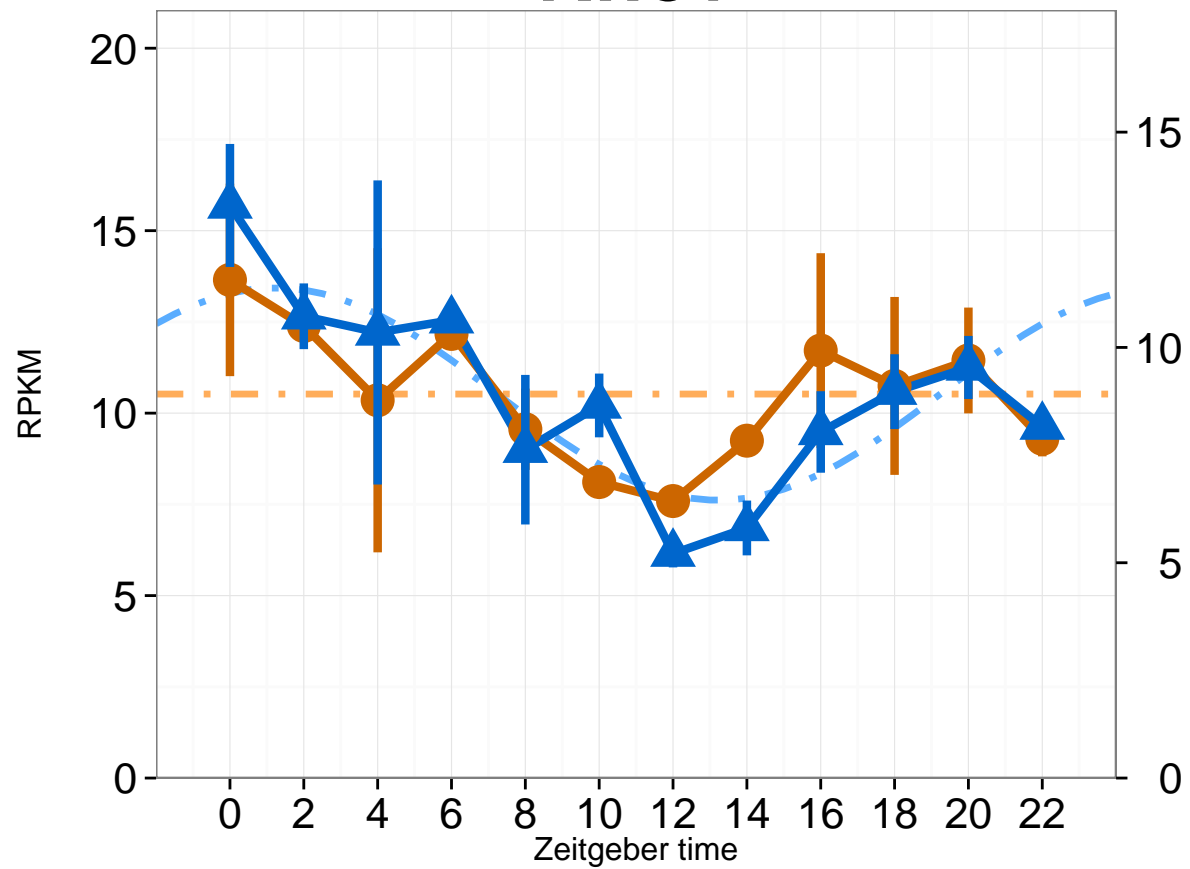

## Rhov

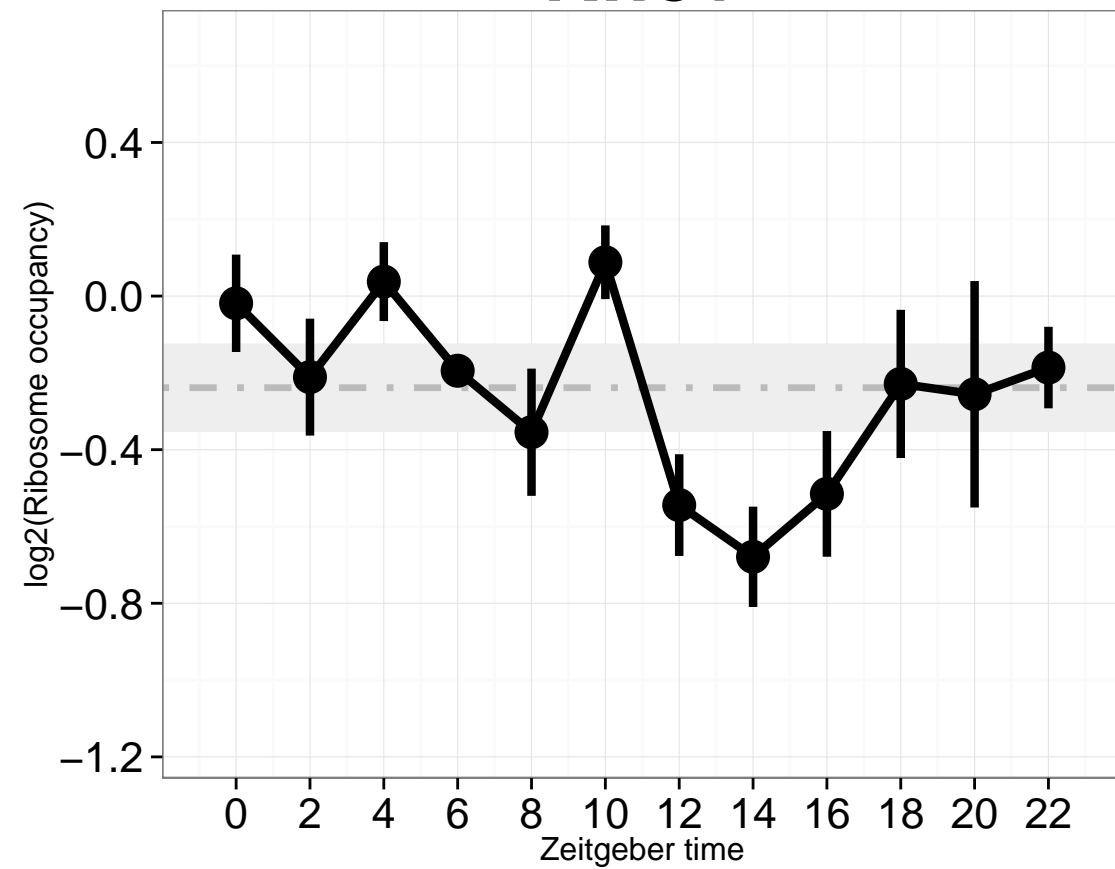

Supplement: Supplementary file 8570 [file 1]

## Klhdc3

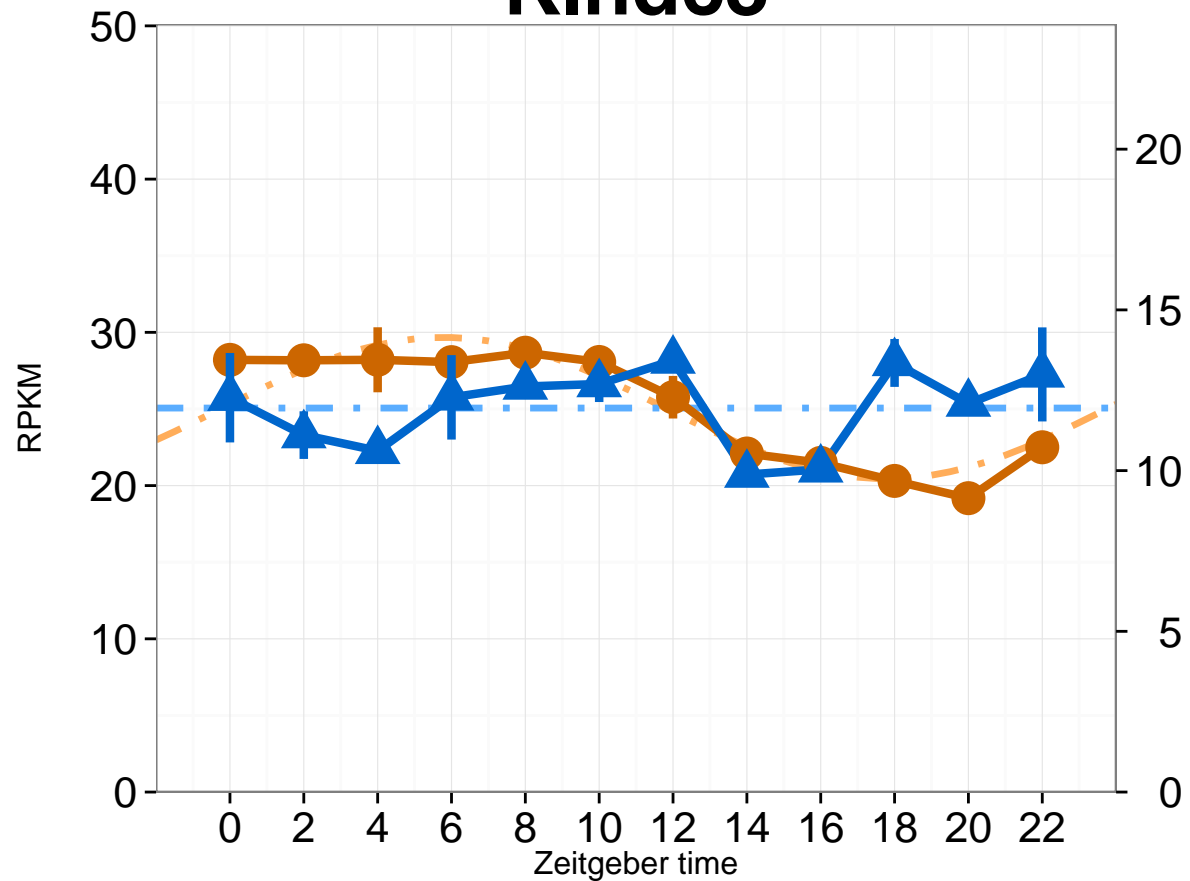

## Klhdc3

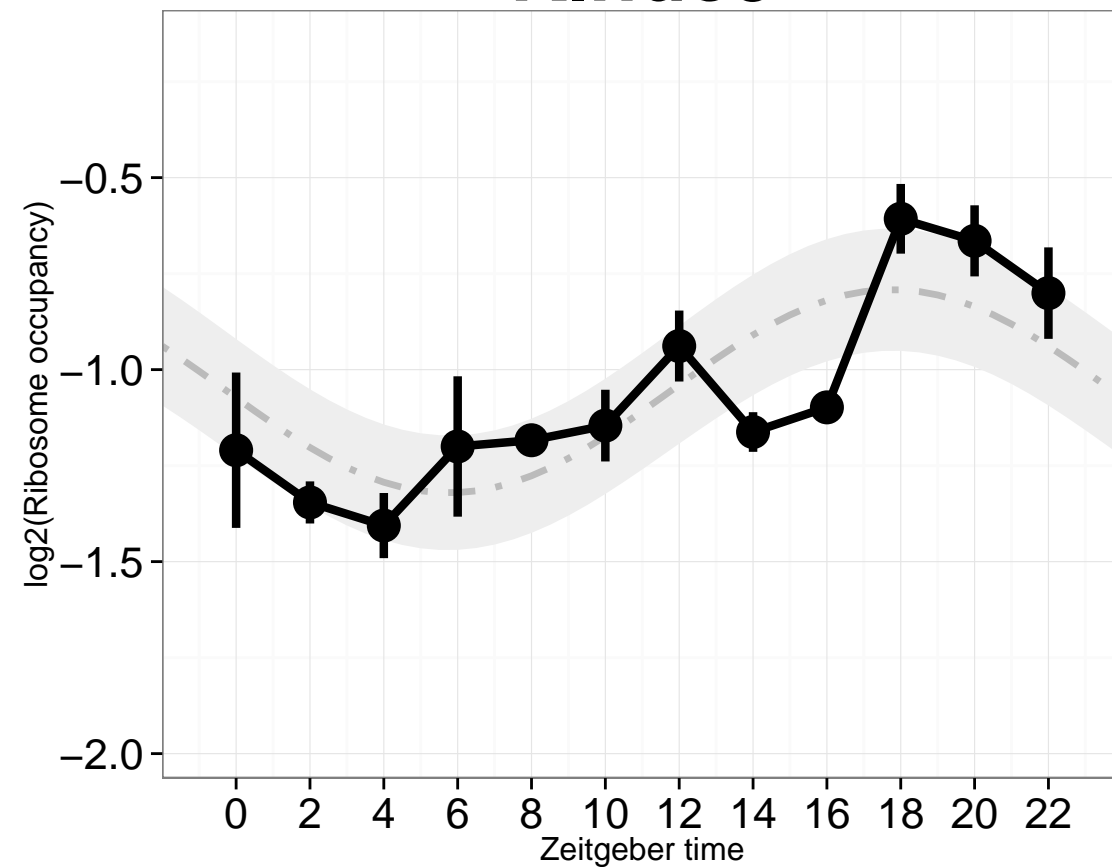

Supplement: Supplementary file 8571 [file 1]

# H13

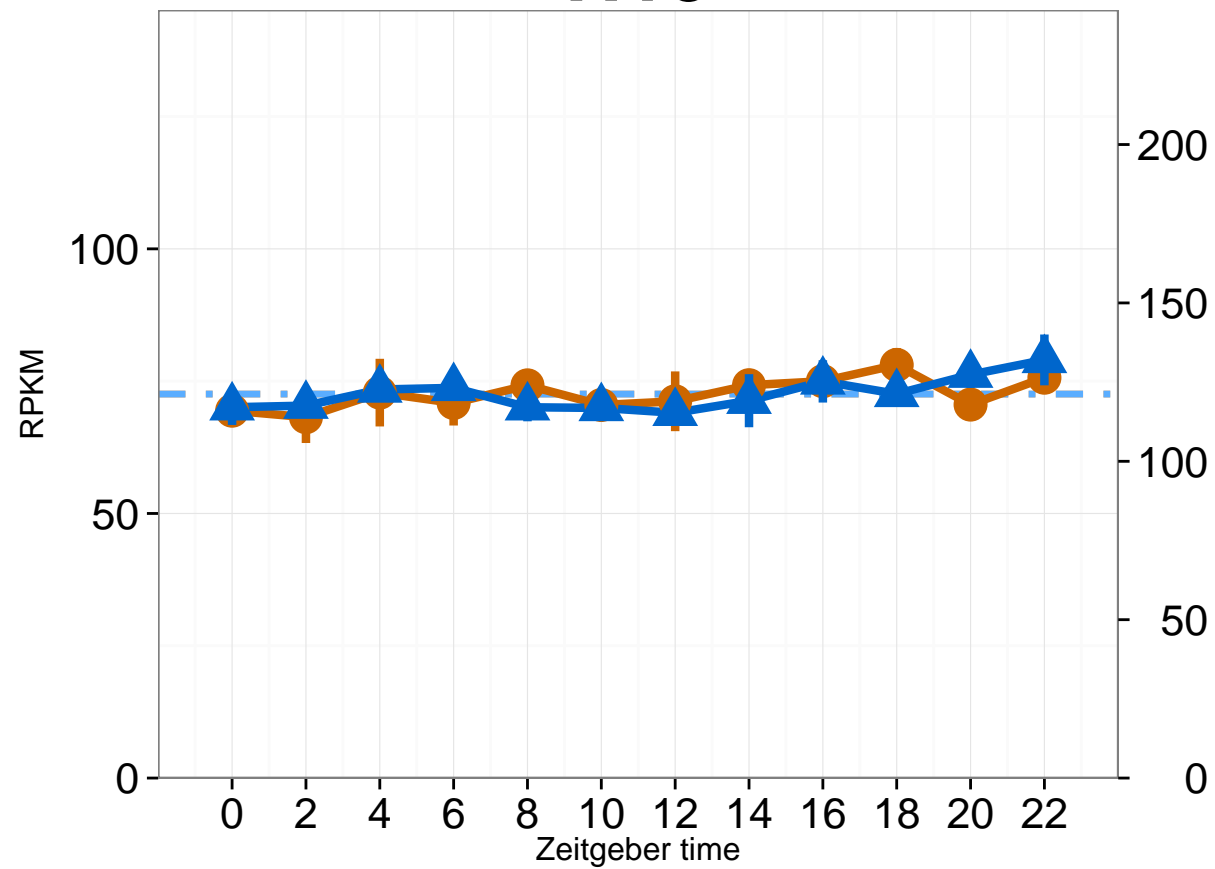

# H13

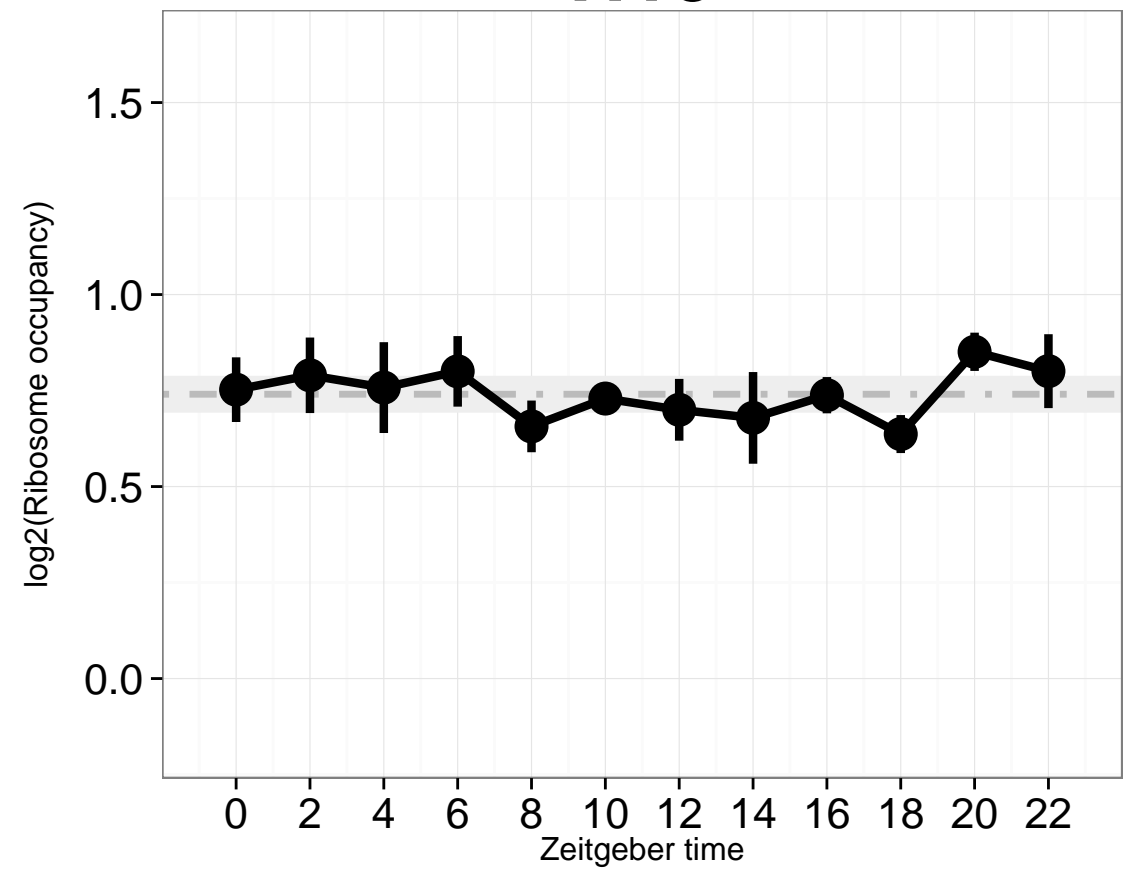

Supplement: Supplementary file 8572 [file 1]

# Ctf1

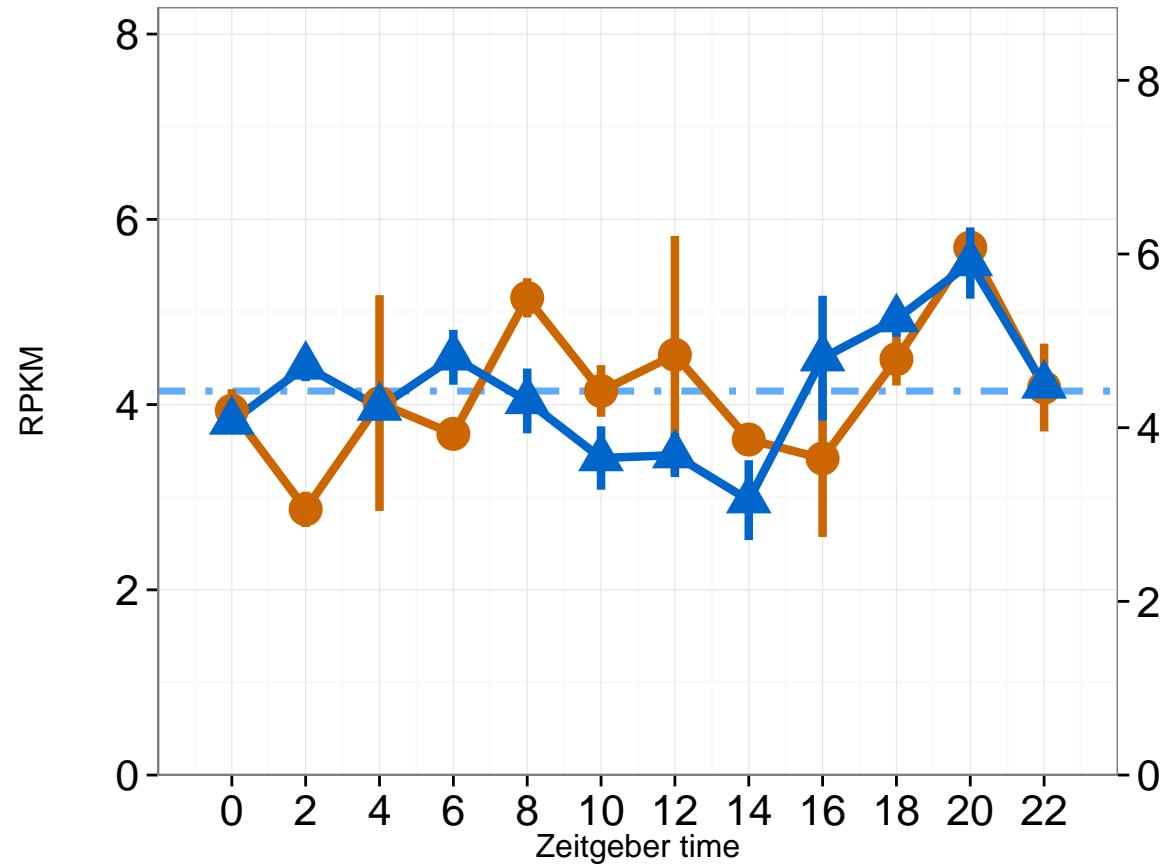

# Ctf1

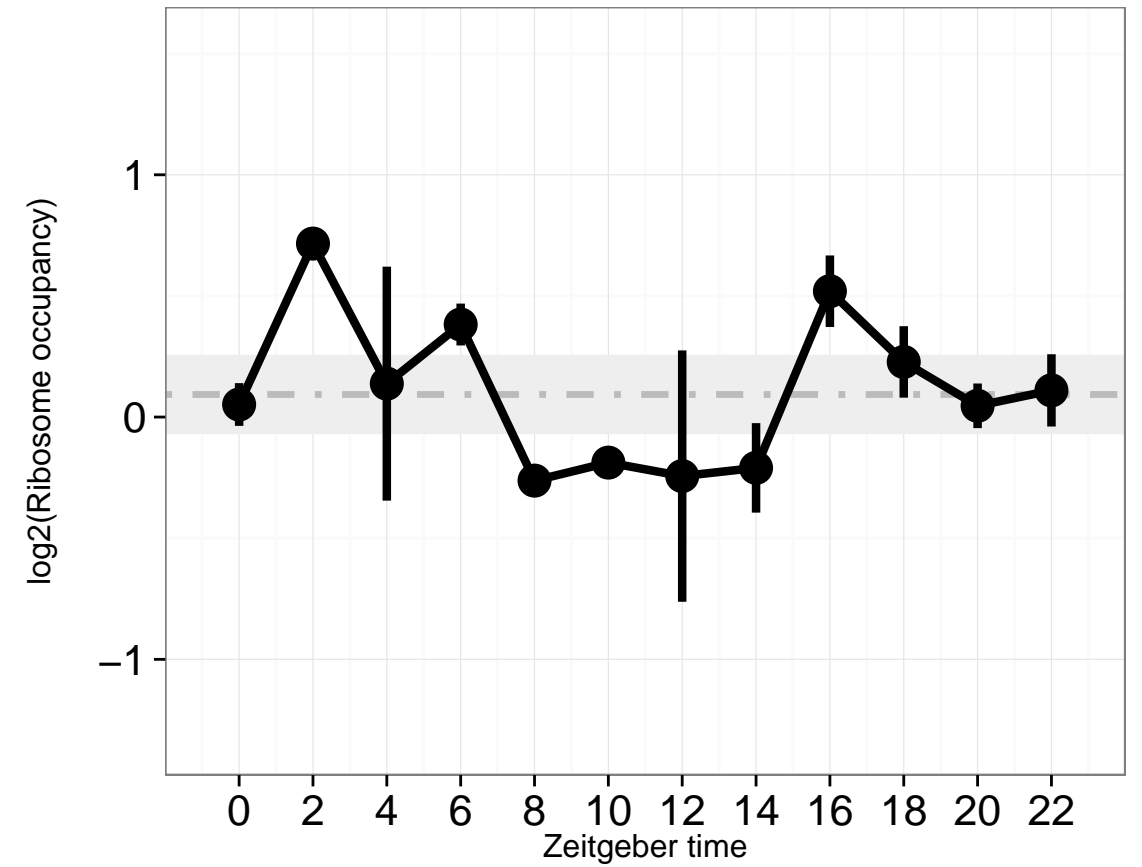

Supplement: Supplementary file 8573 [file 1]

# Basp1

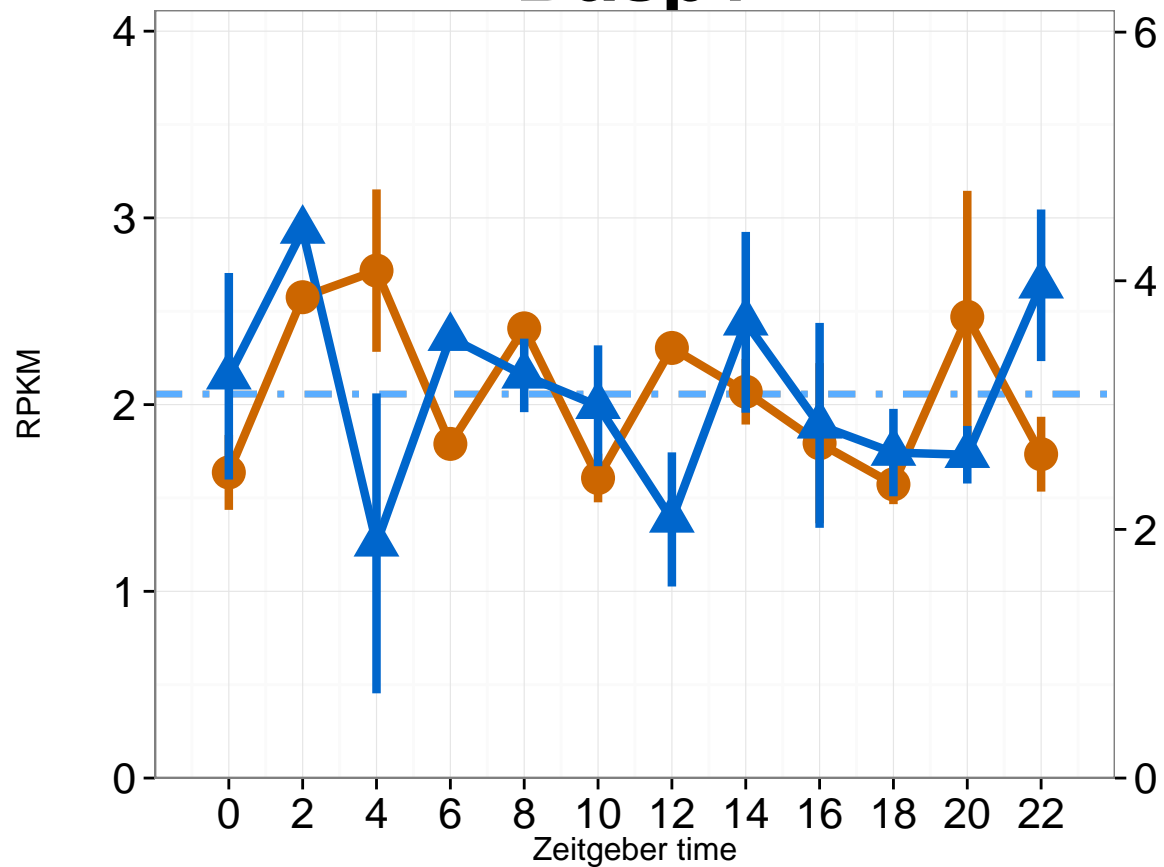

# Basp1

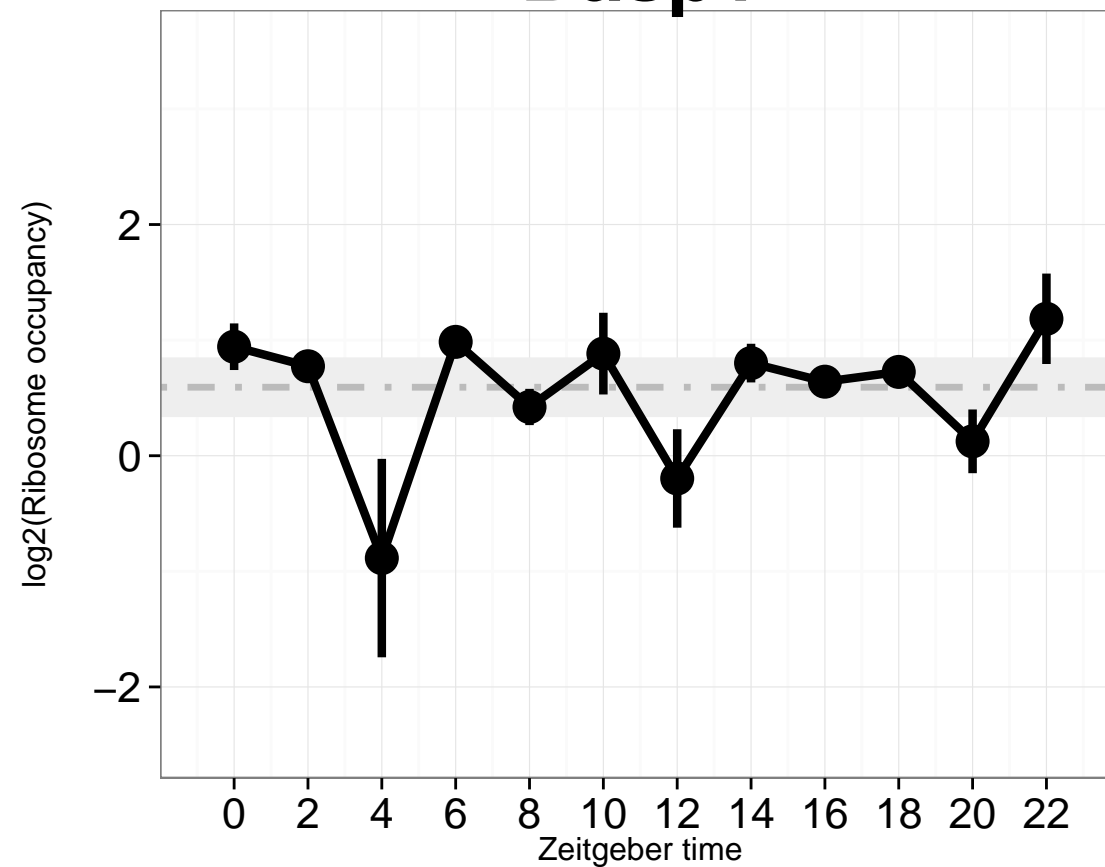

Supplement: Supplementary file 8574 [file 1]

# Tmem131

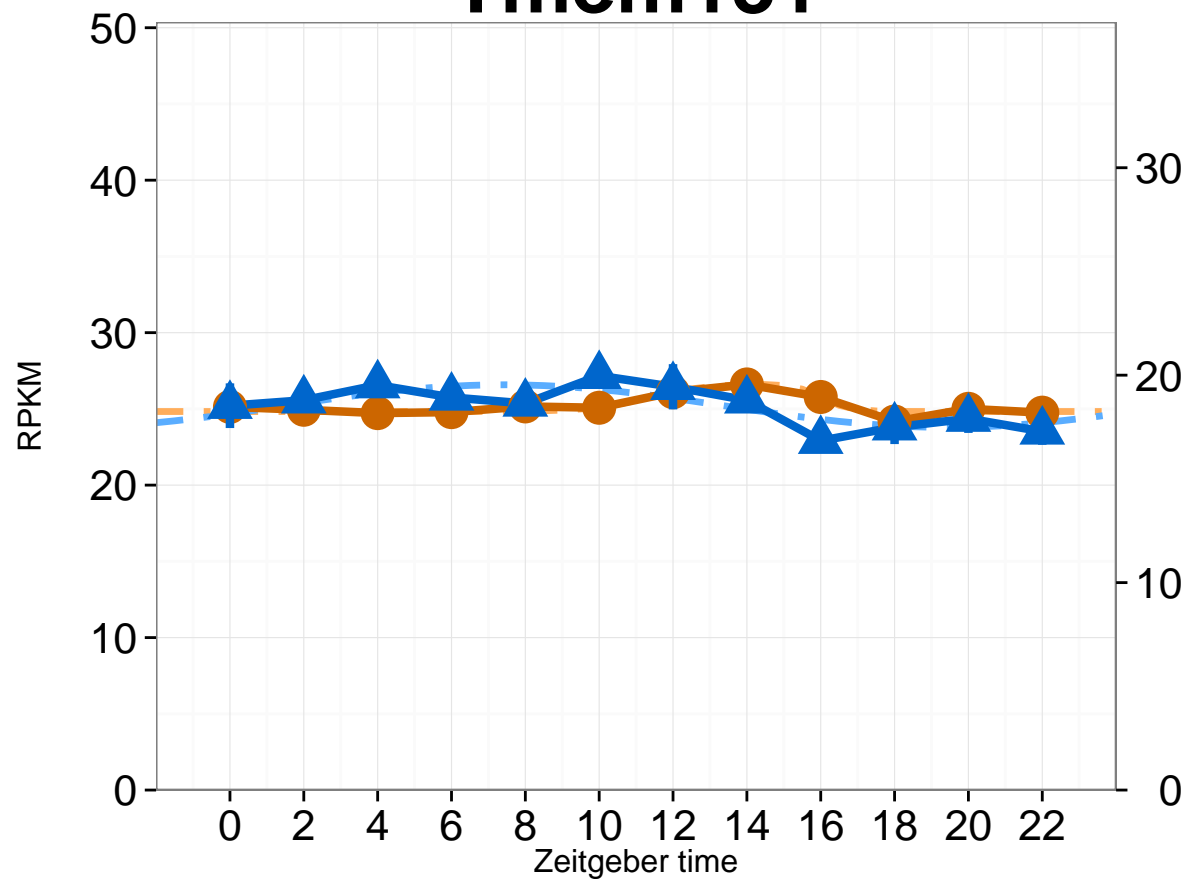

# Tmem131

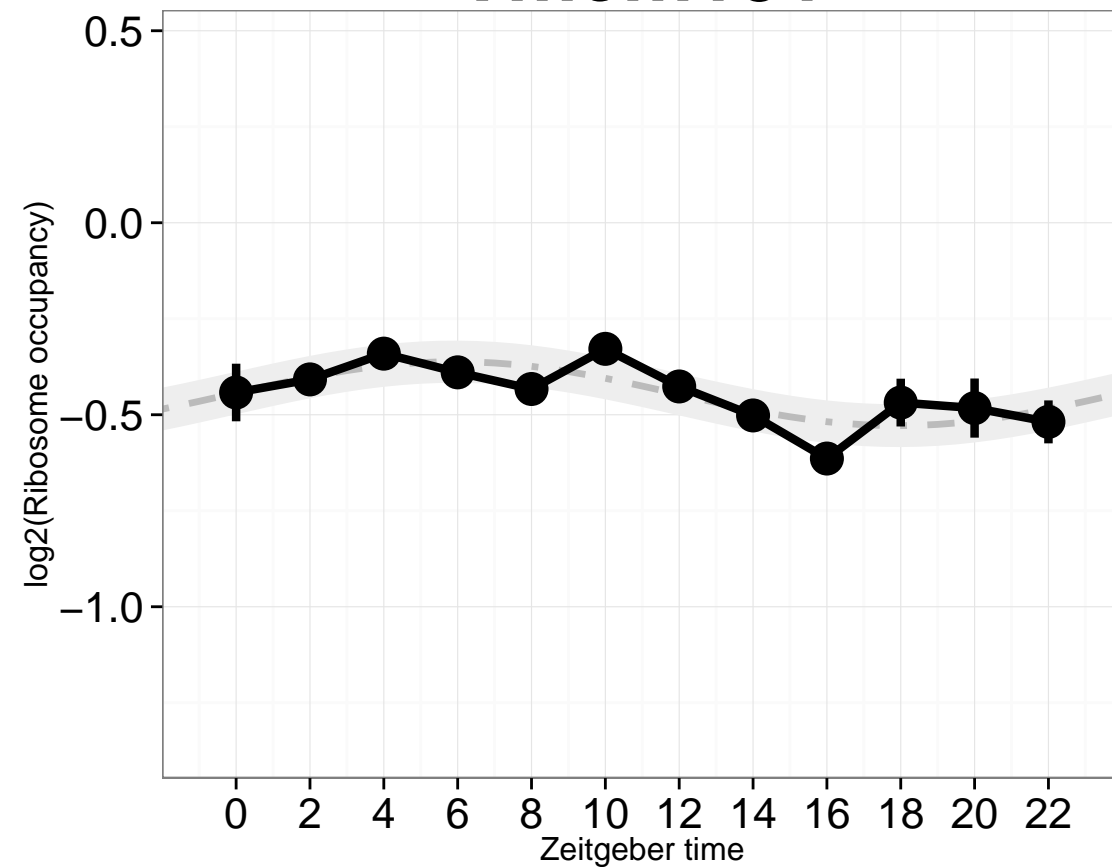

Supplement: Supplementary file 8575 [file 1]

## Prom2

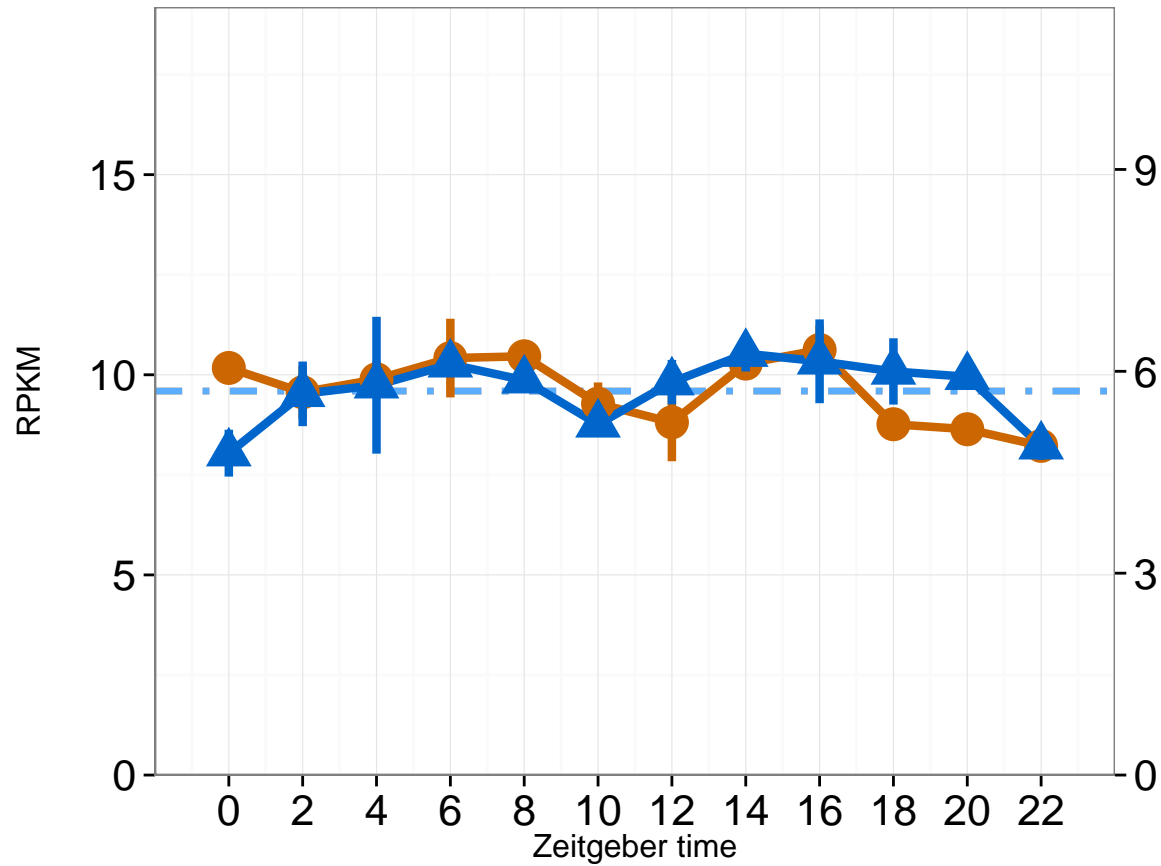

## Prom2

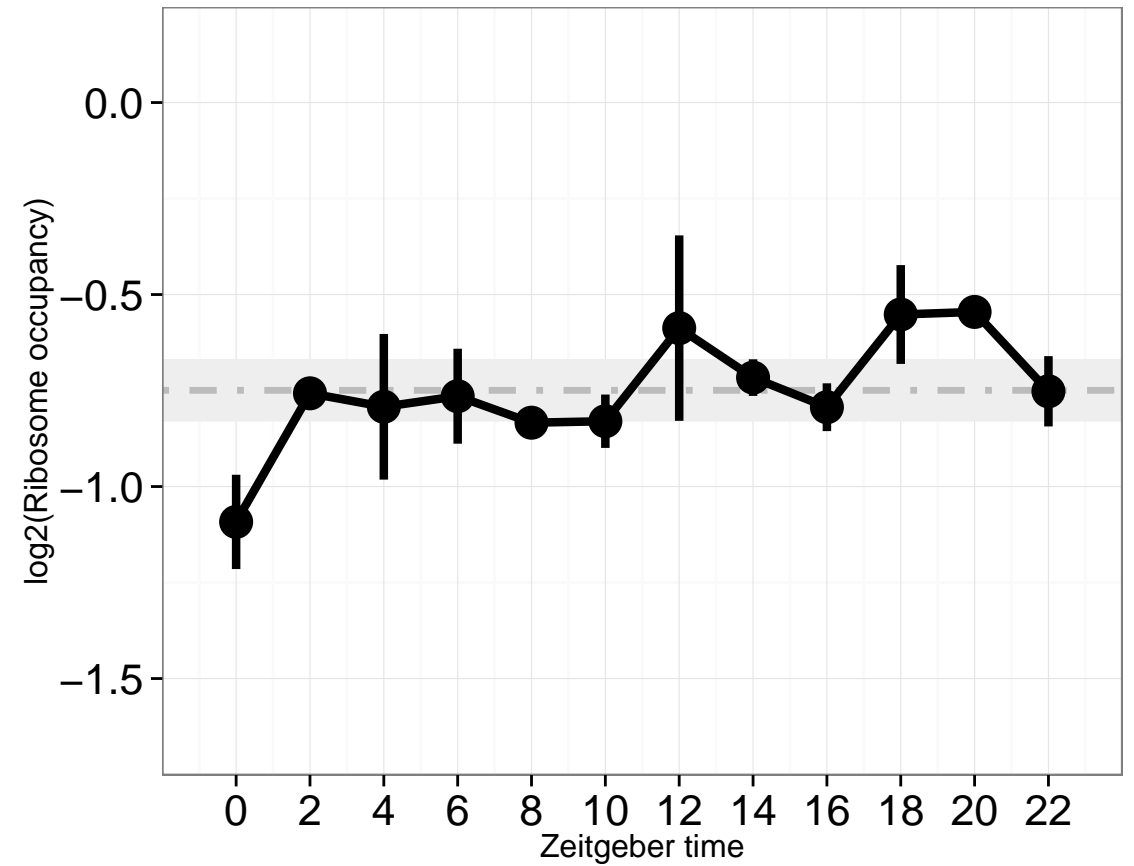

Supplement: Supplementary file 8576 [file 1]

## Glb1l

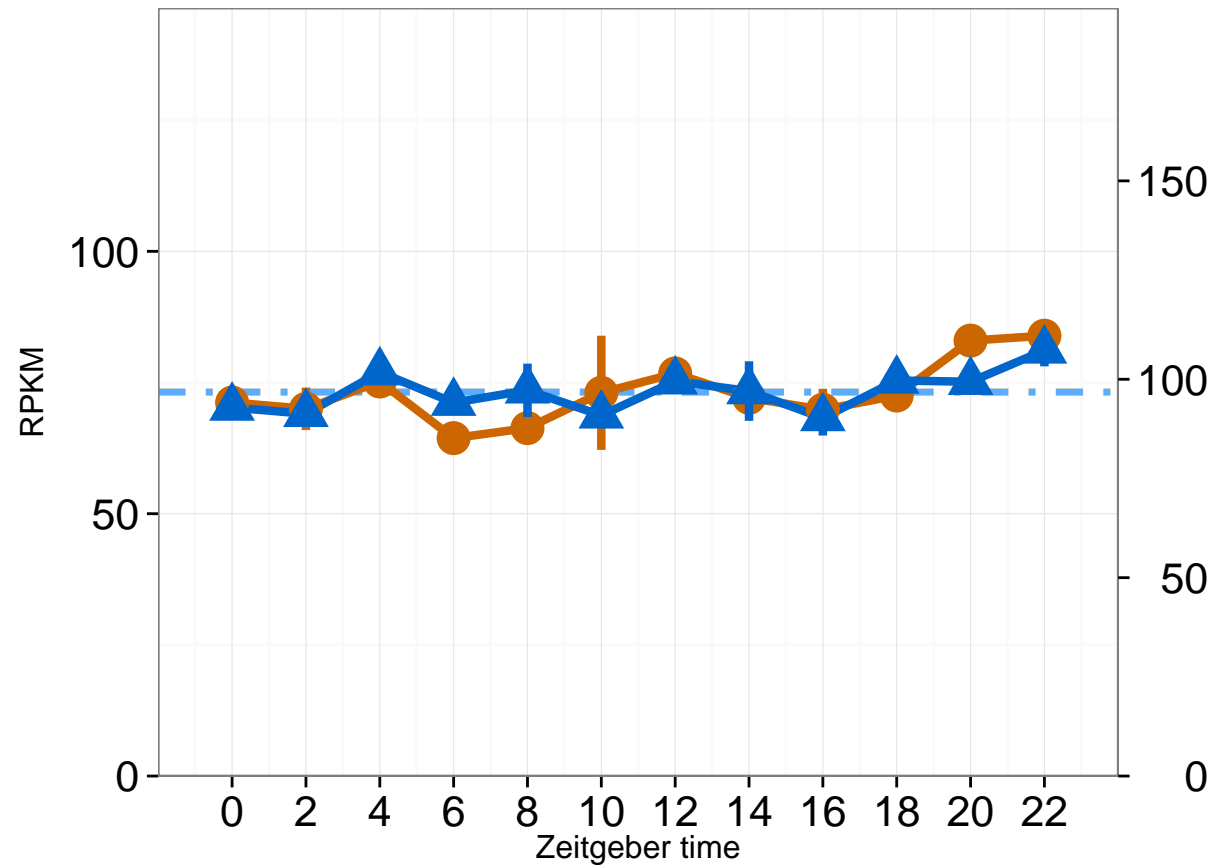

## Glb1l

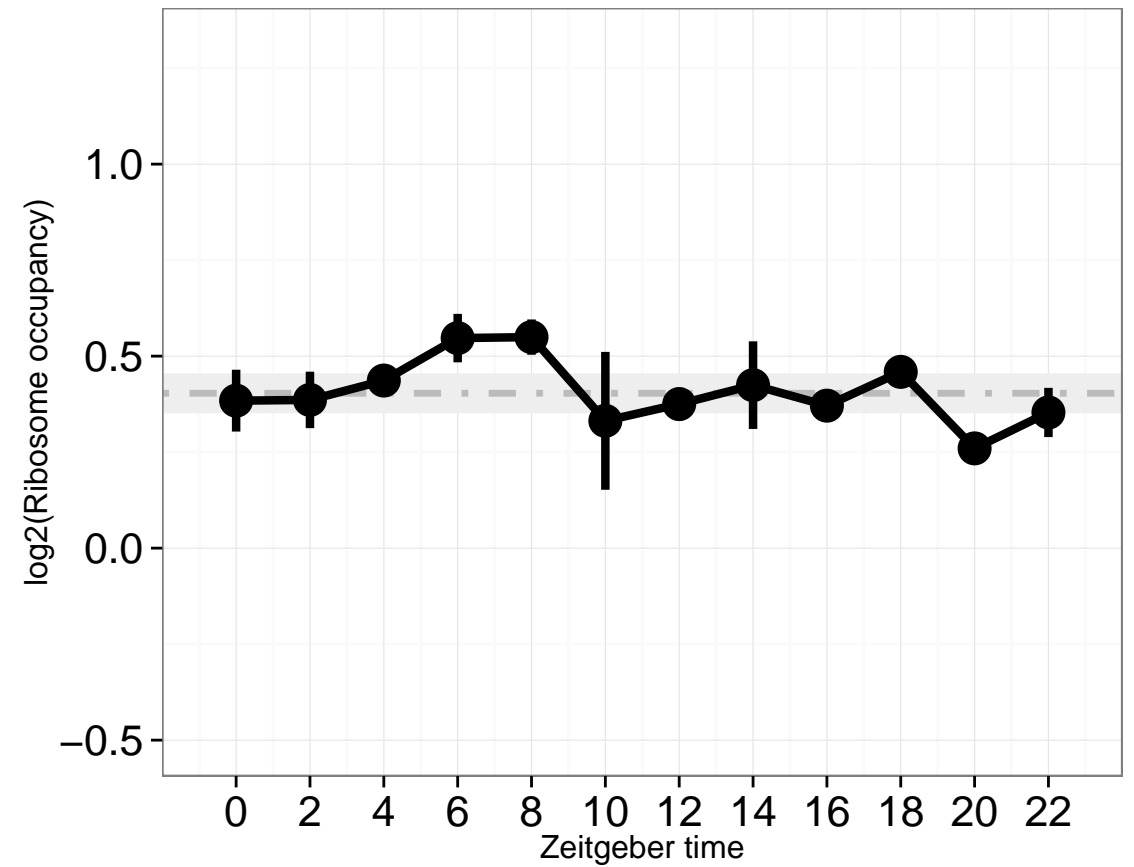

Supplement: Supplementary file 8577 [file 1]

# BC002059

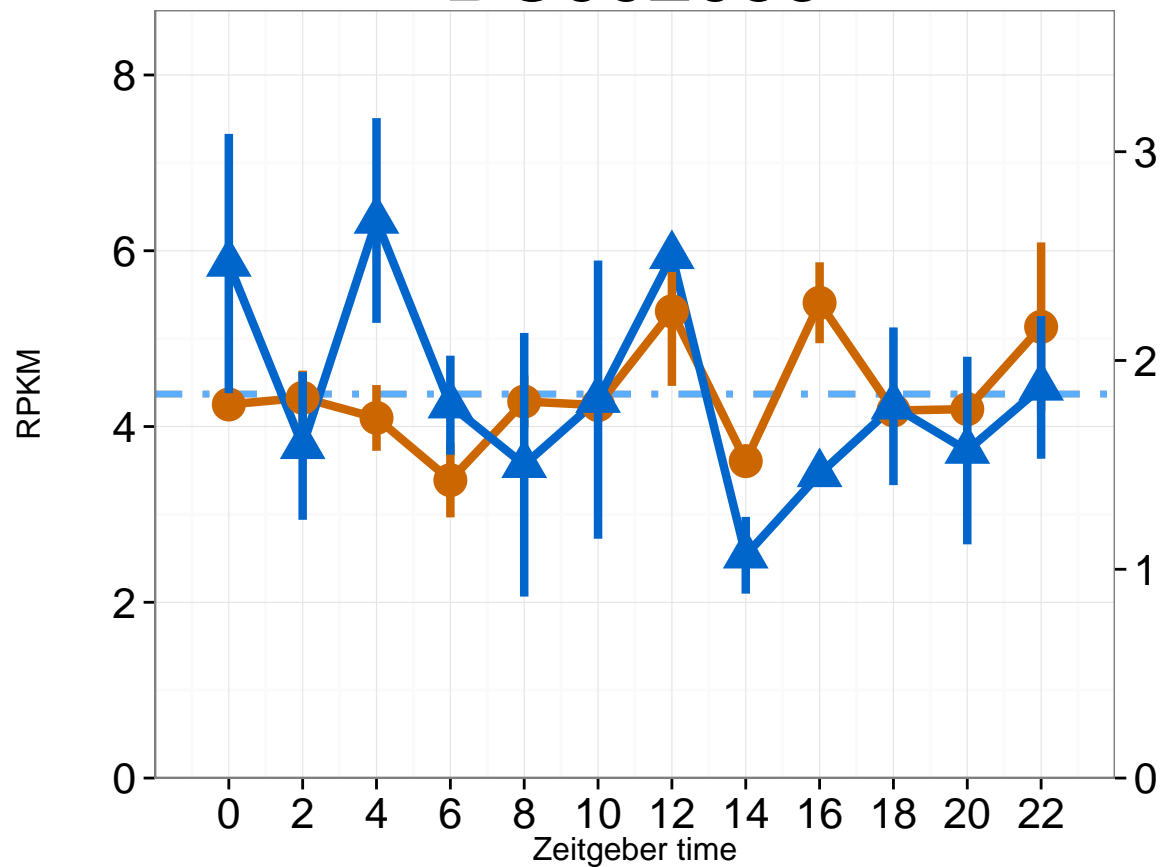

# BC002059

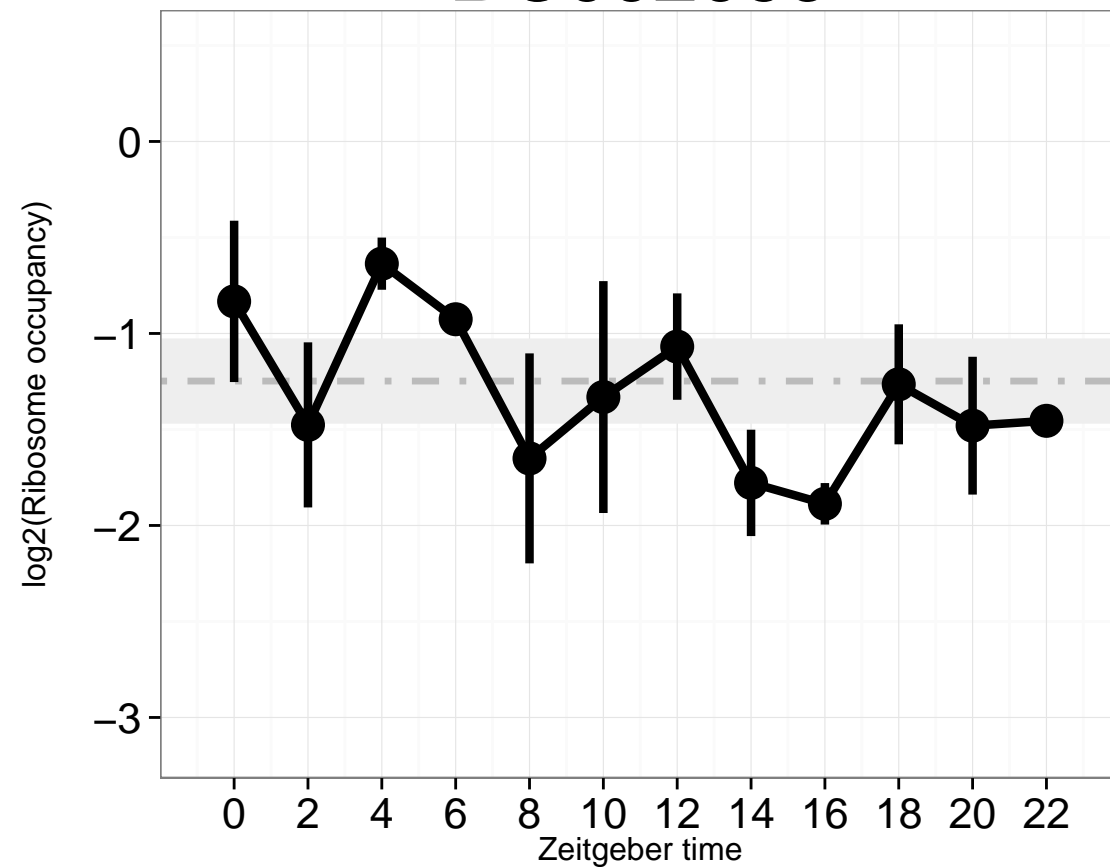

Supplement: Supplementary file 8578 [file 1]

## Bspry

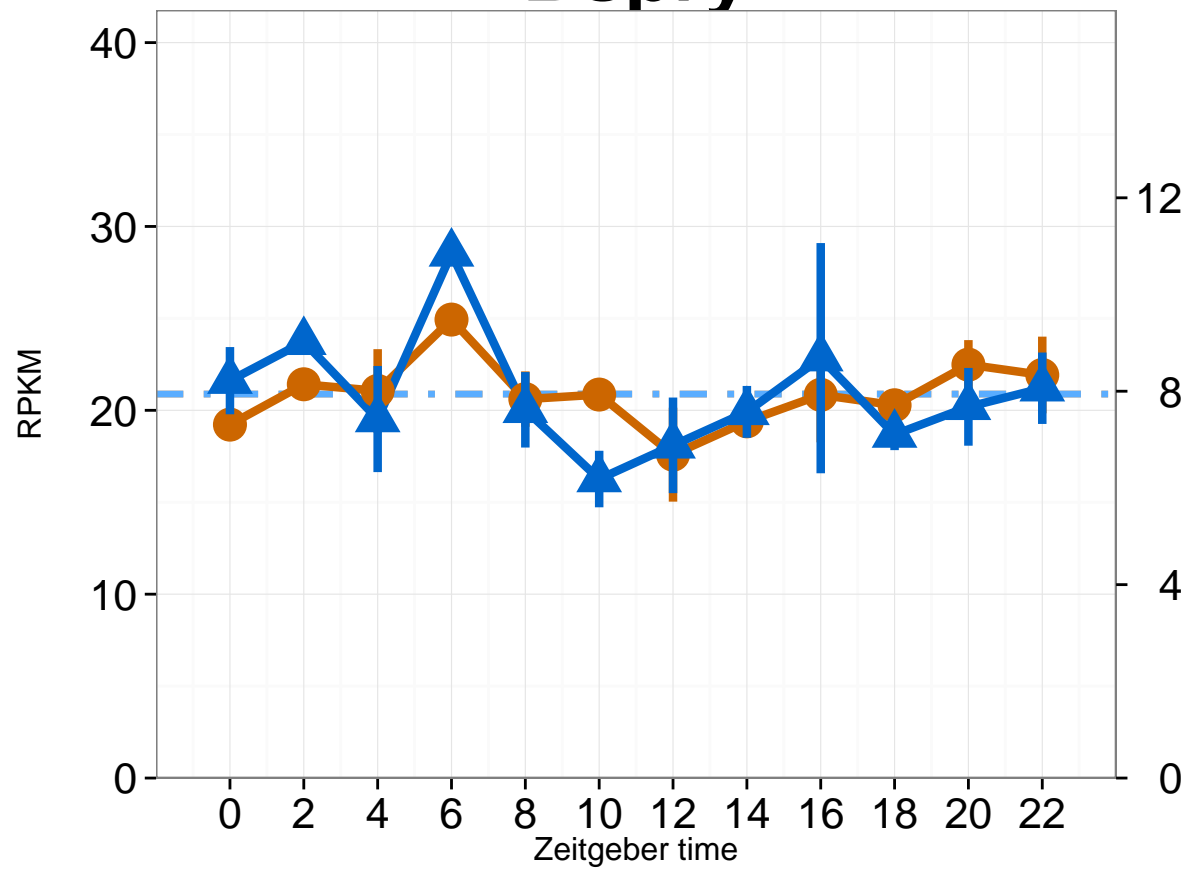

## Bspry

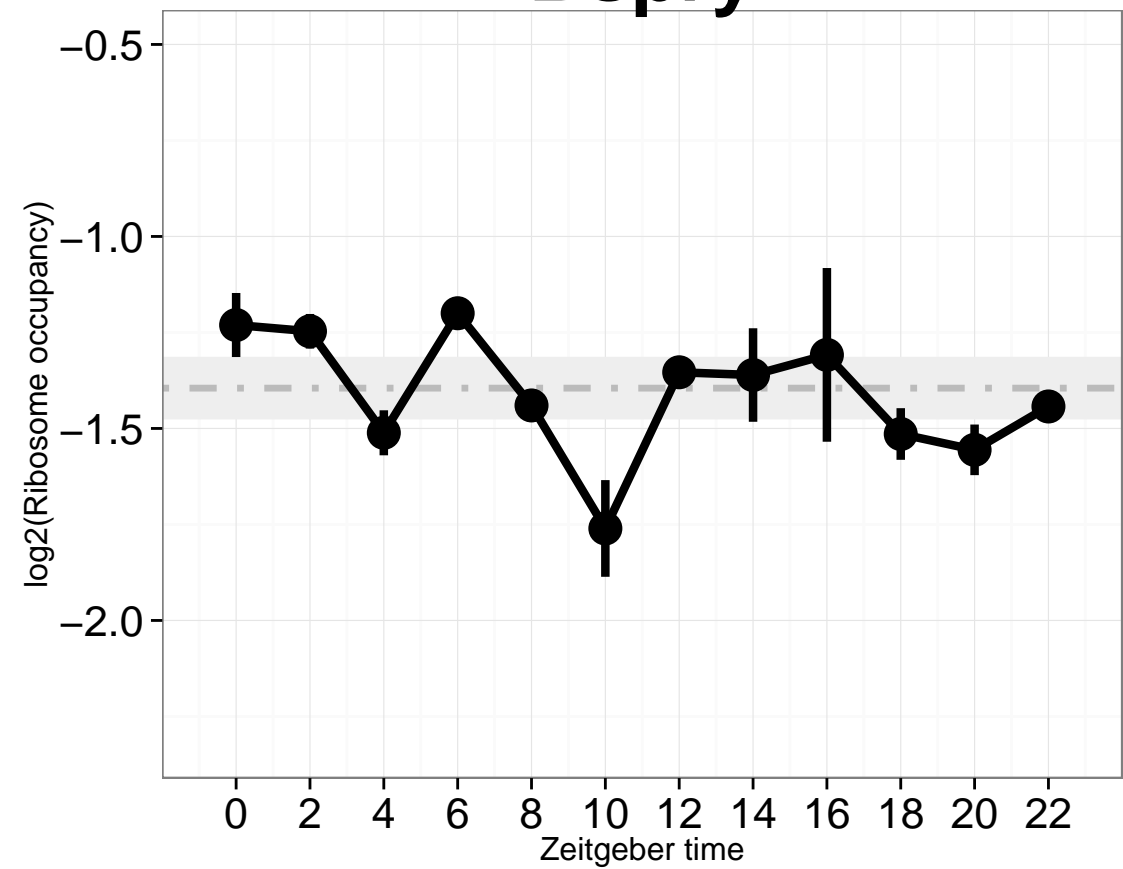

Supplement: Supplementary file 8579 [file 1]

# Srl

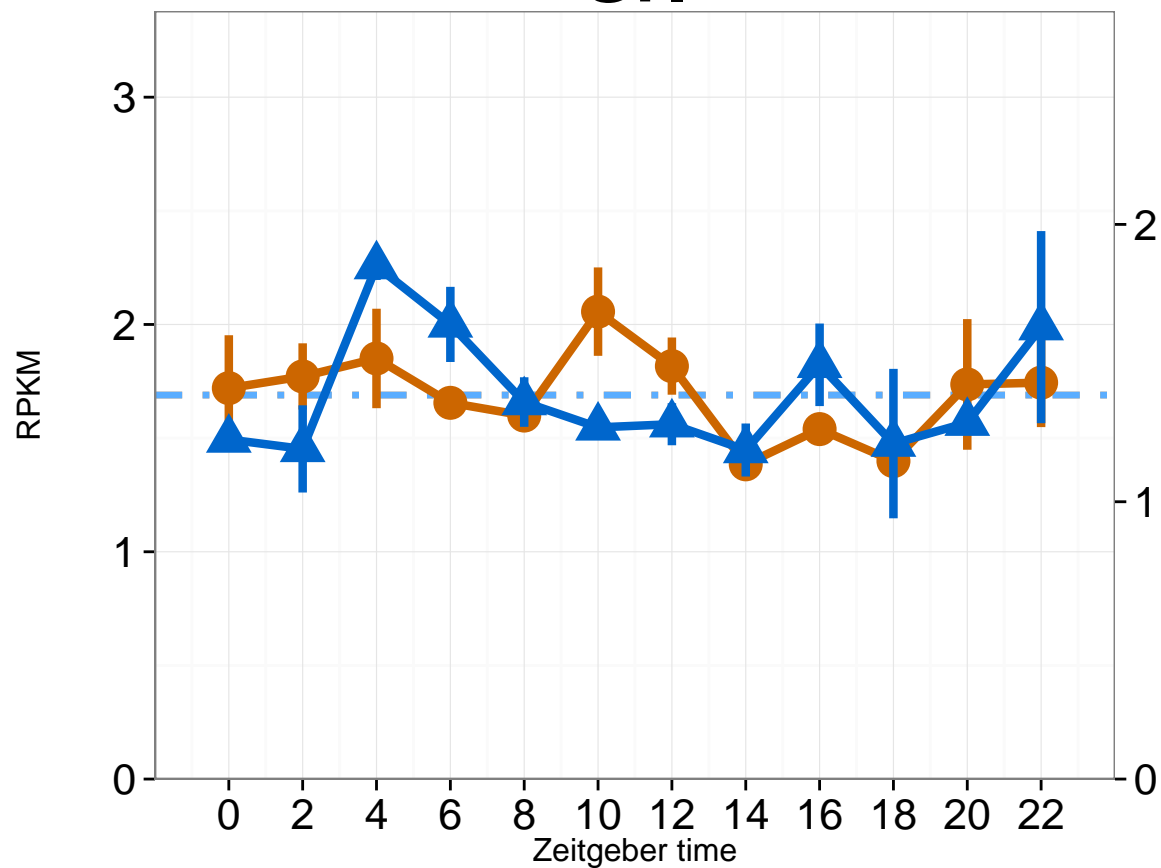

# Srl

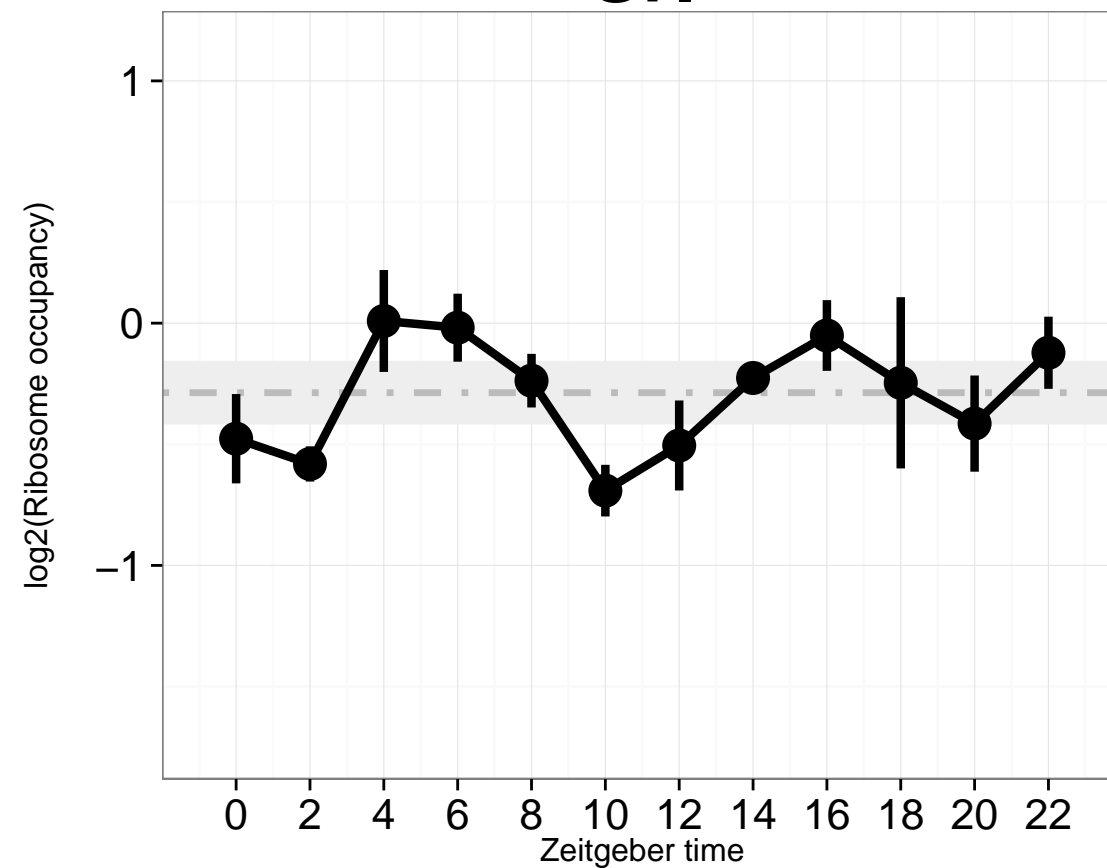

Supplement: Supplementary file 8580 [file 1]

# Slc9a7

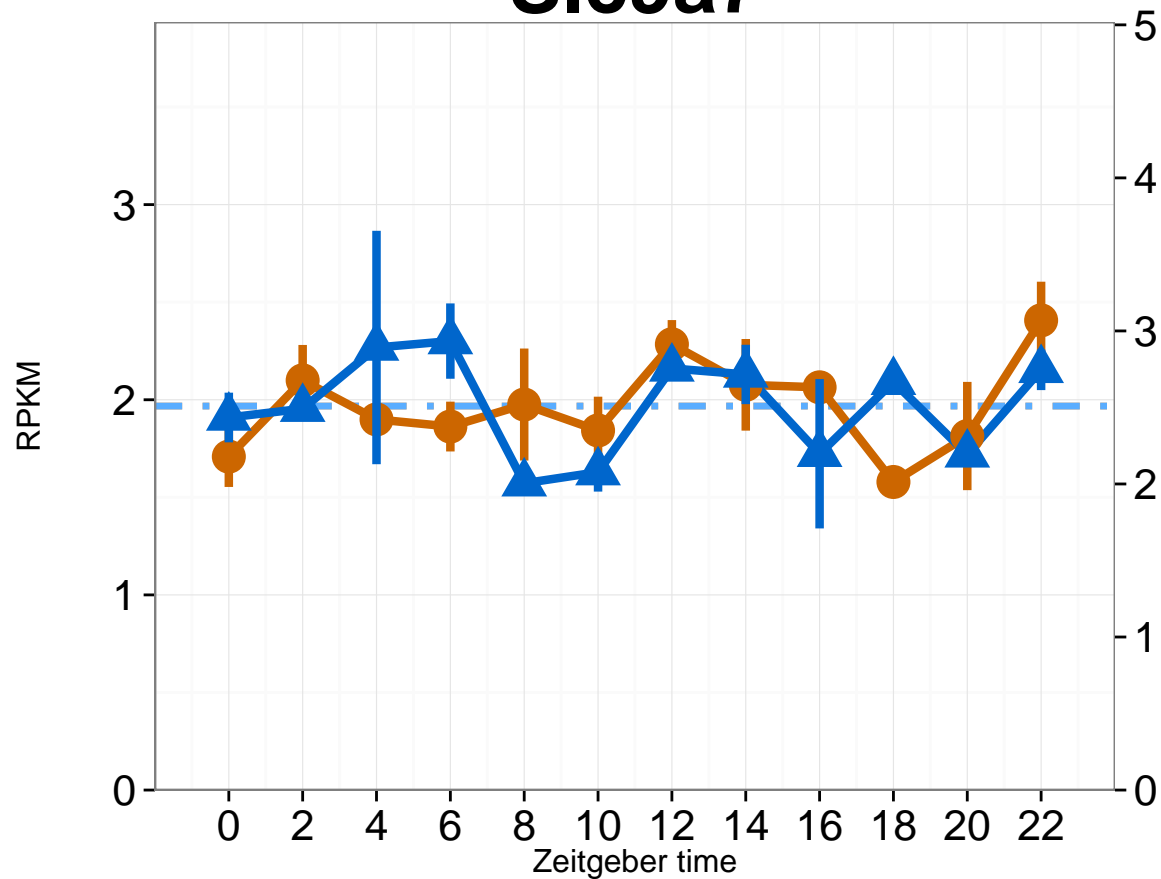

# Slc9a7

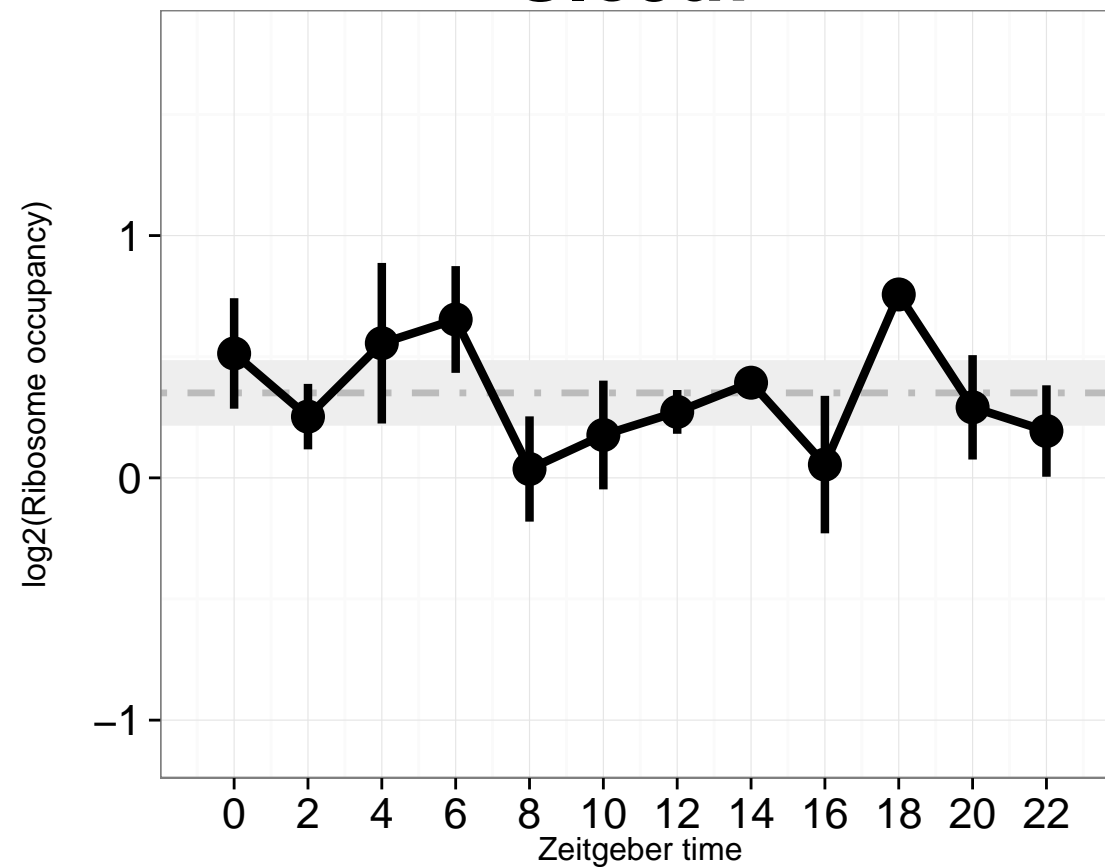

Supplement: Supplementary file 8581 [file 1]

## Tnc

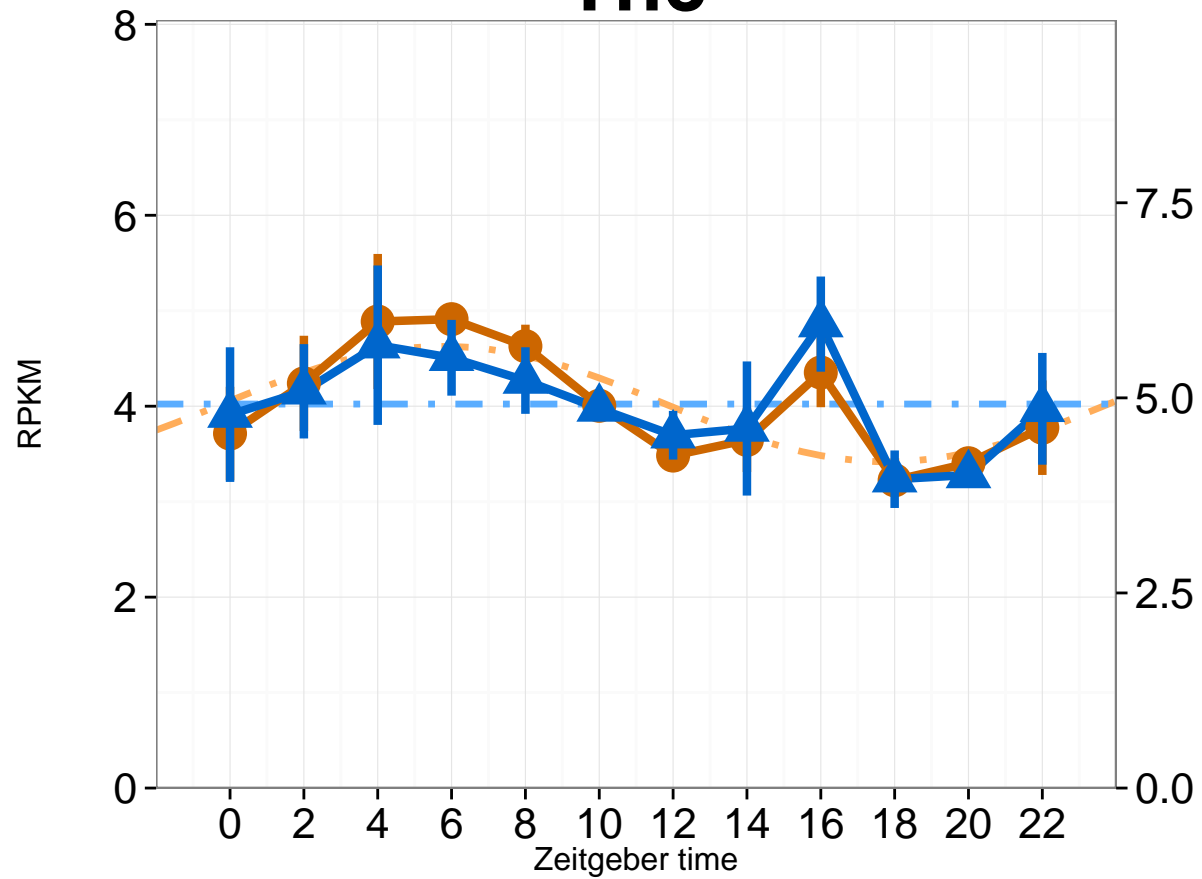

## Tnc

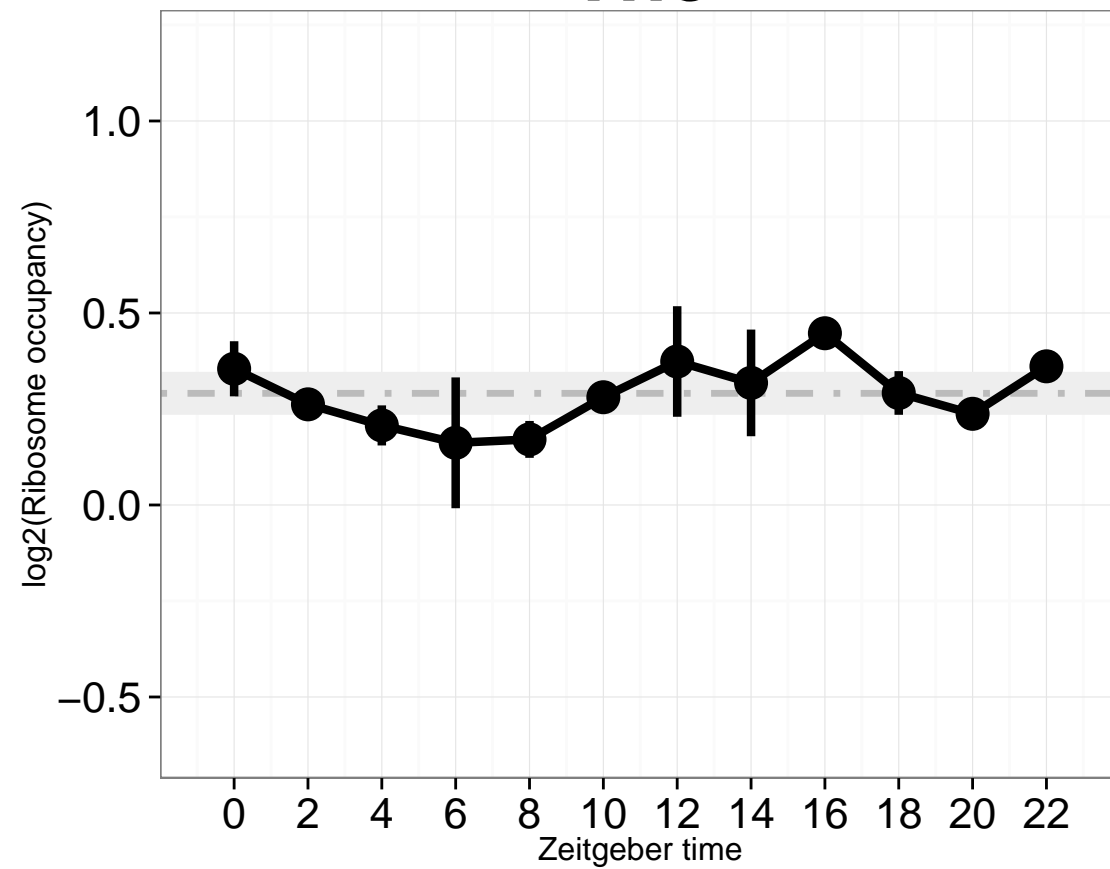

Supplement: Supplementary file 8582 [file 1]

# Mapk7

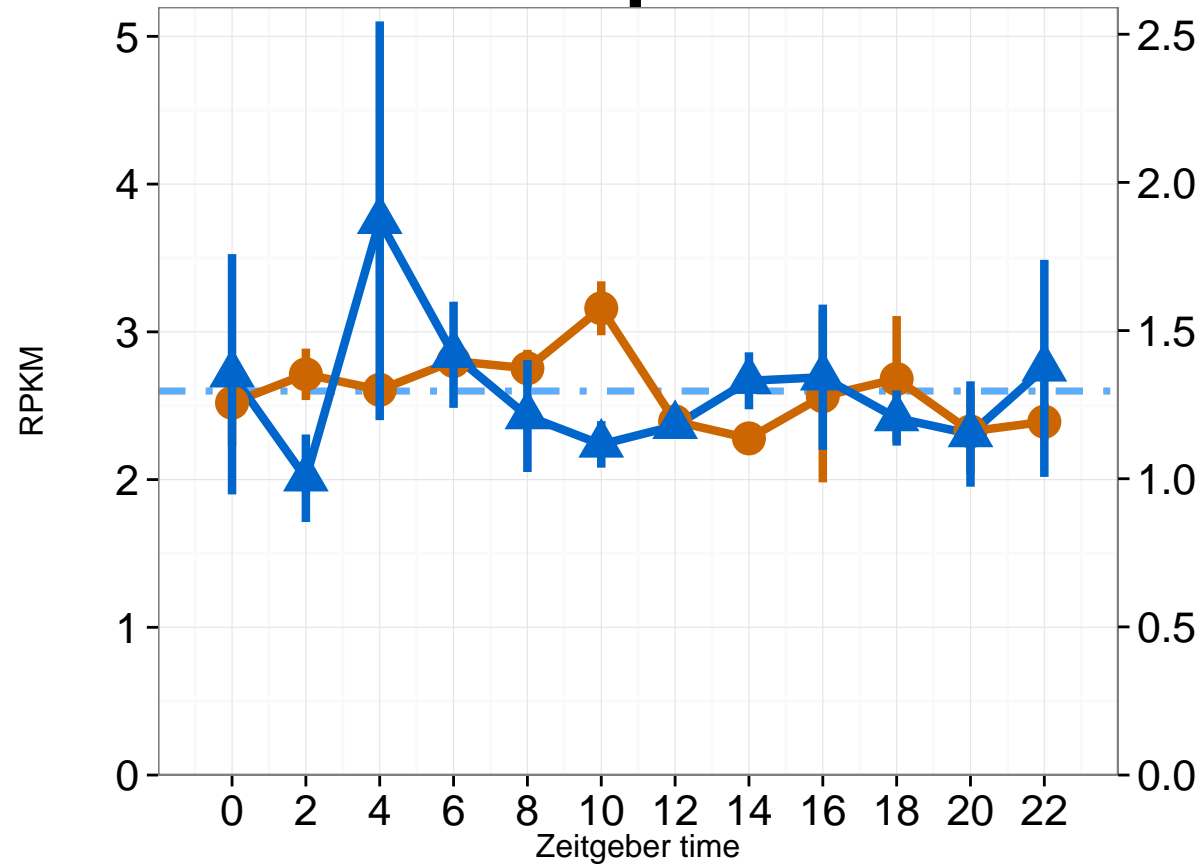

# Mapk7

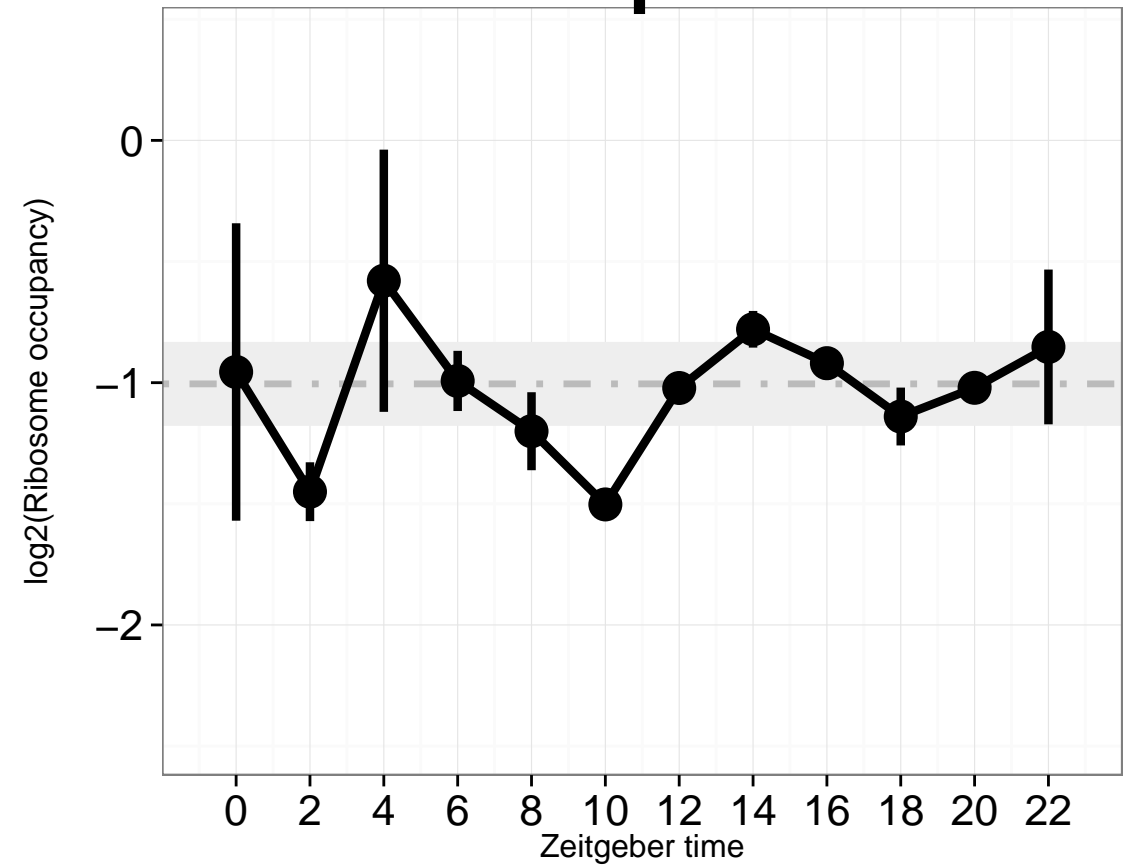

Supplement: Supplementary file 8583 [file 1]

## Phb2

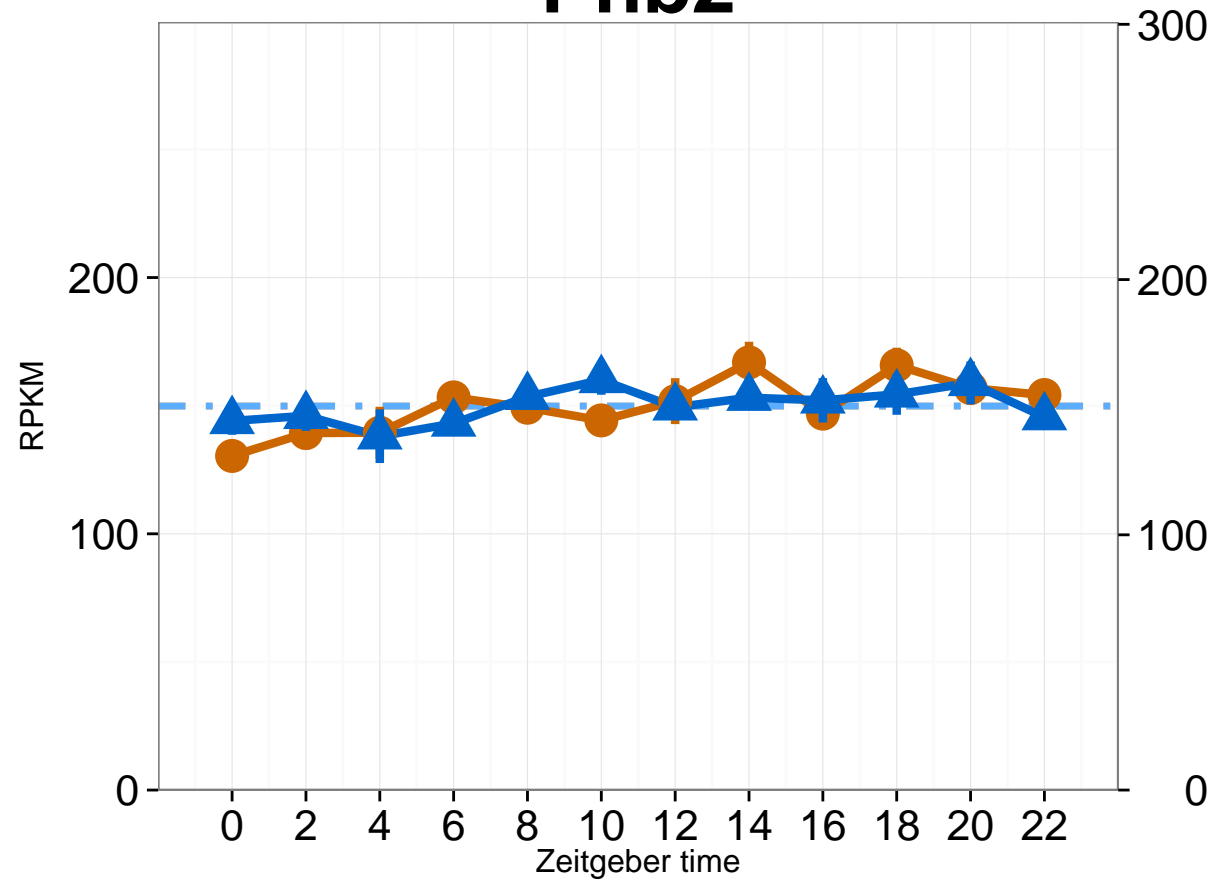

## Phb2

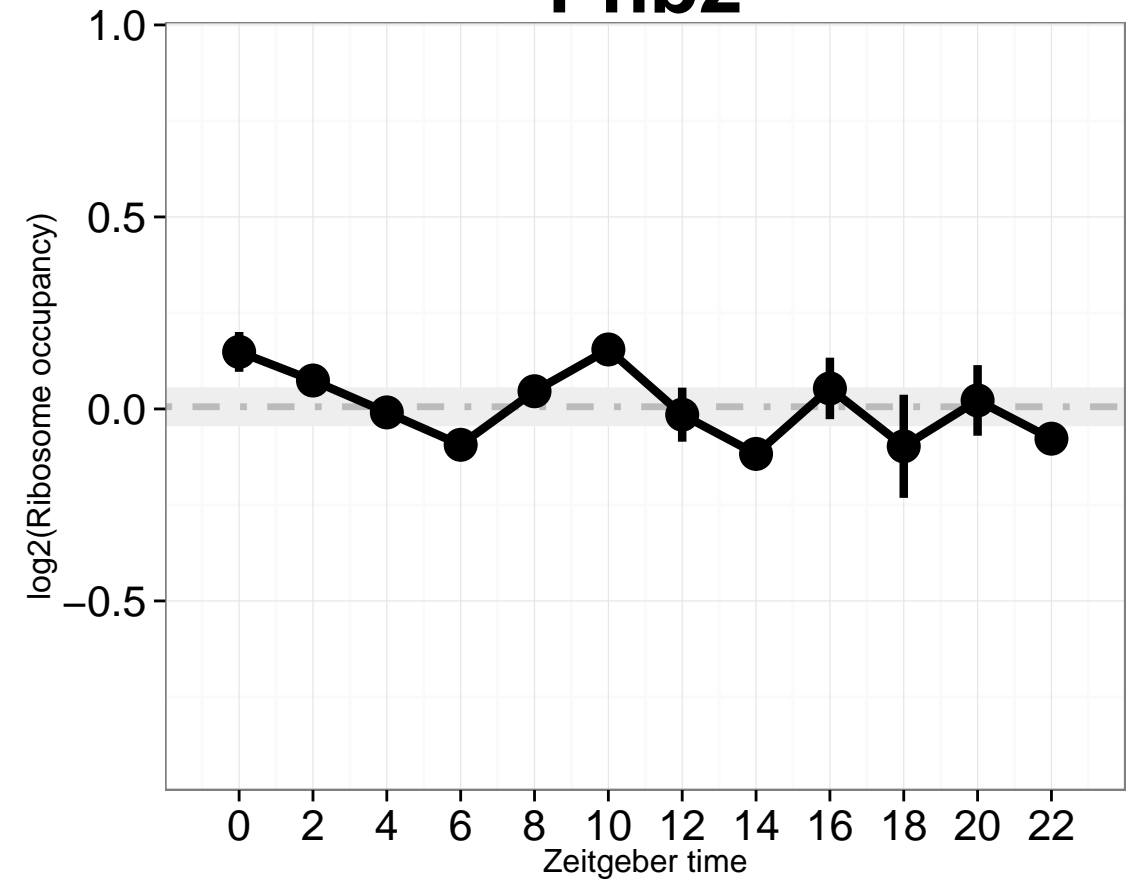

Supplement: Supplementary file 8584 [file 1]

# Zfp26

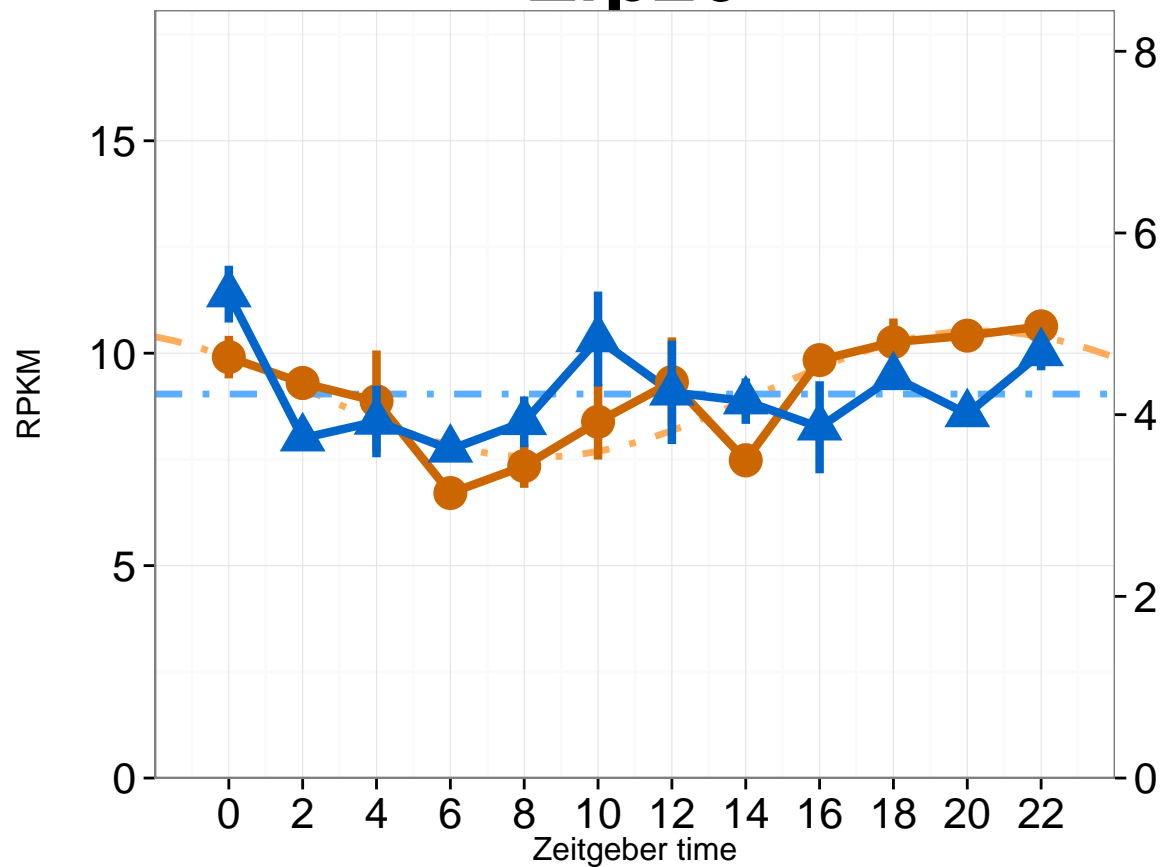

# Zfp26

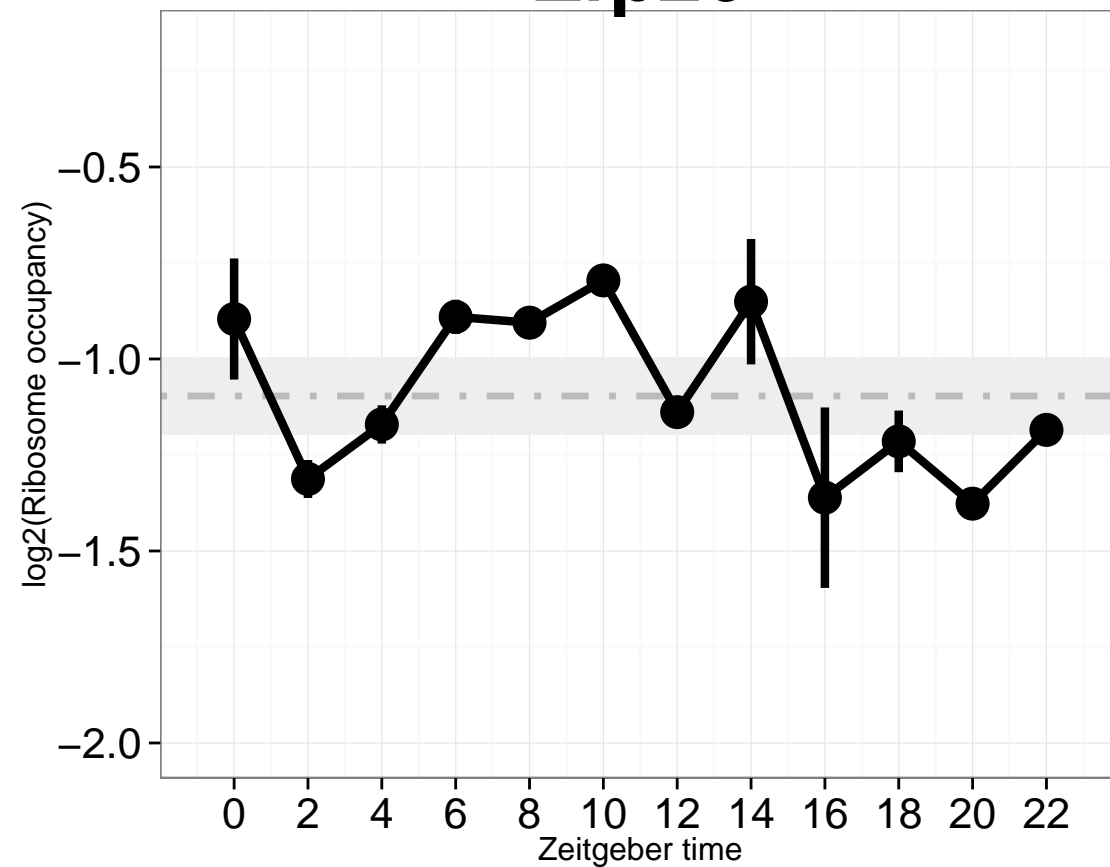

Supplement: Supplementary file 8585 [file 1]

# Pgap2

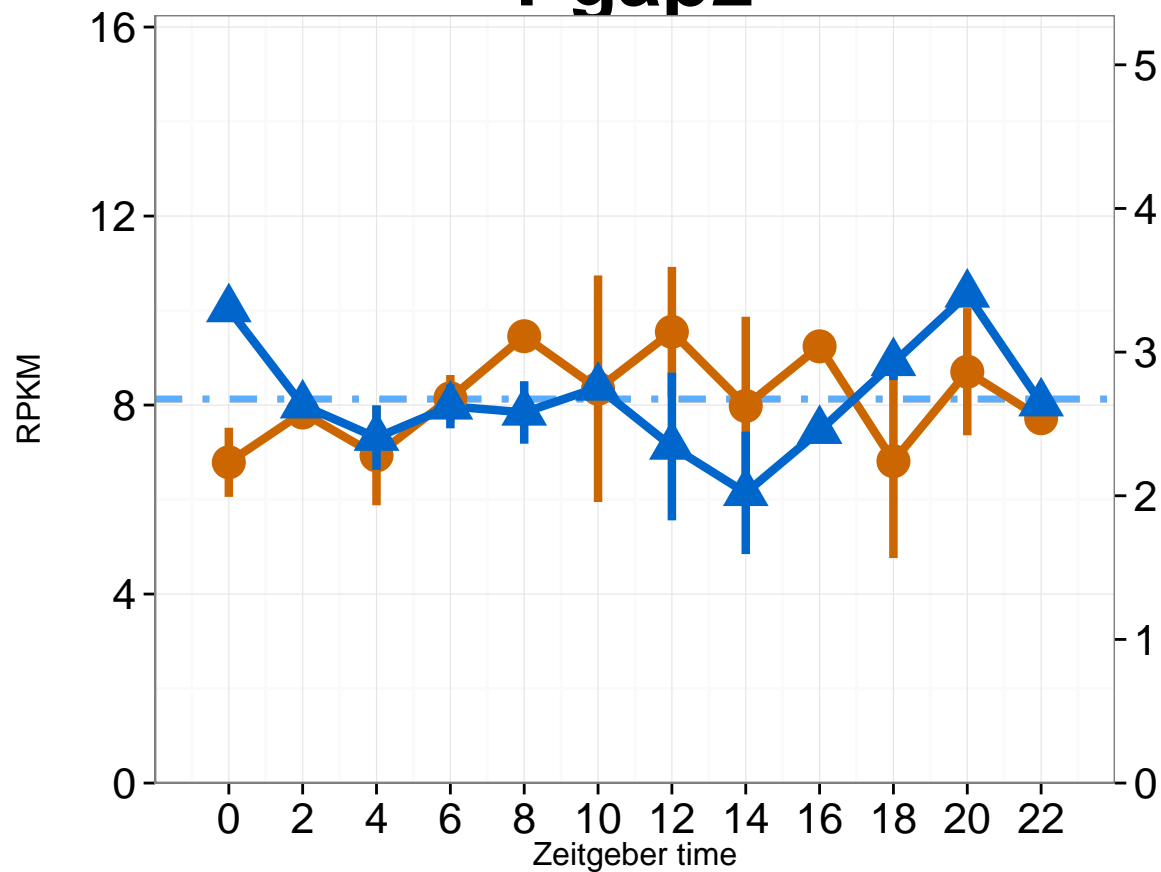

# Pgap2

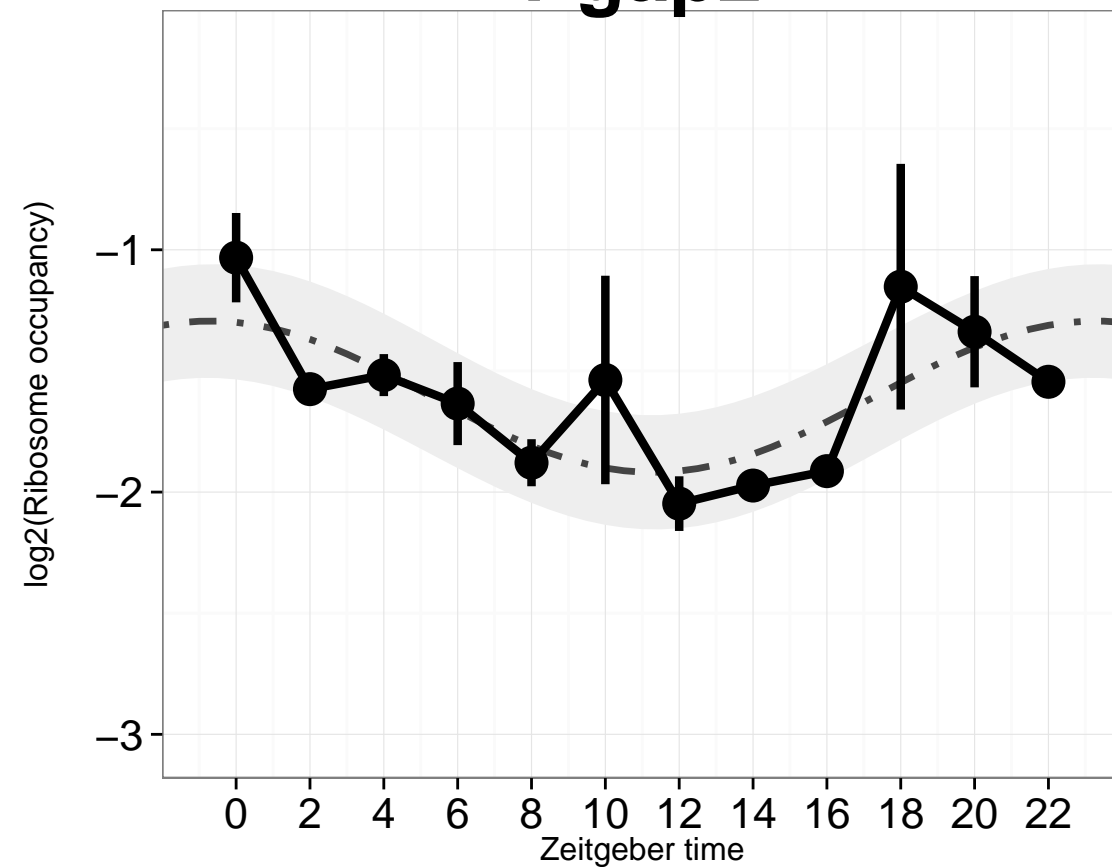

Supplement: Supplementary file 8586 [file 1]

# Bag1

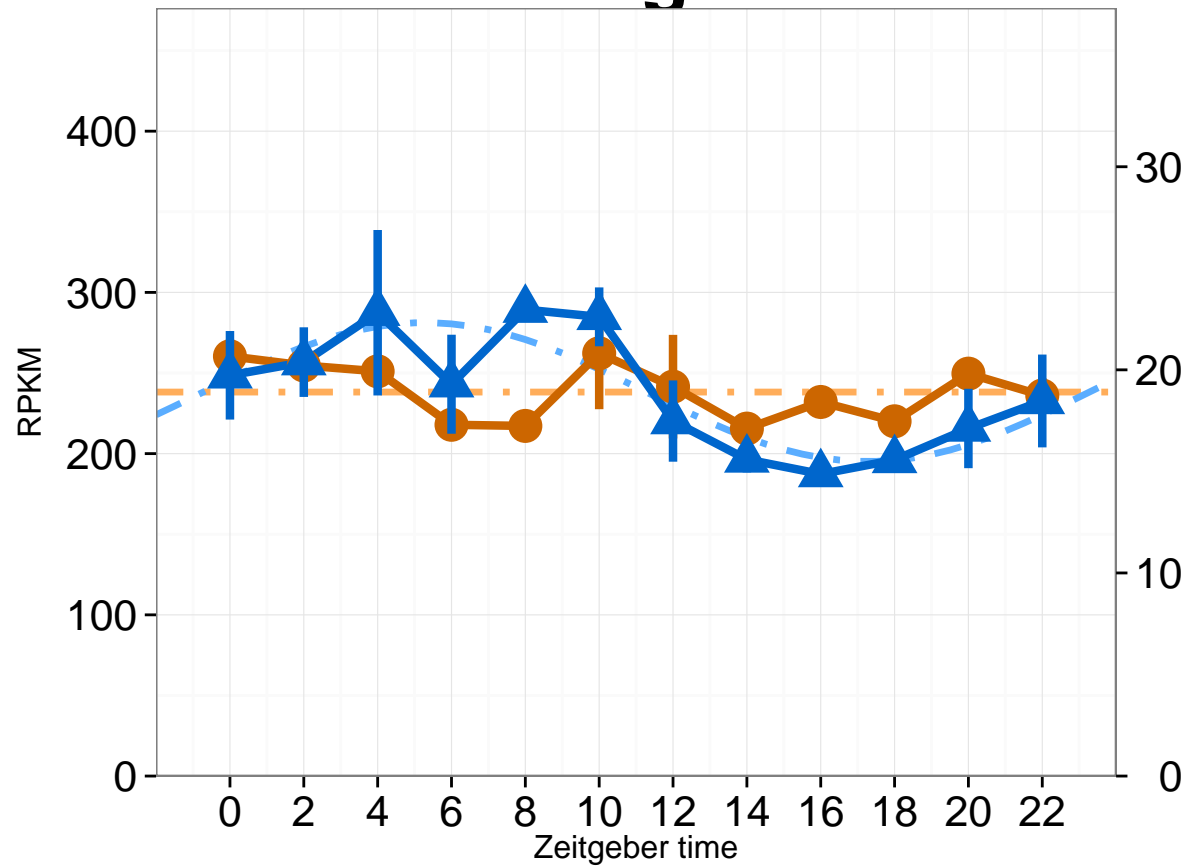

# Bag1

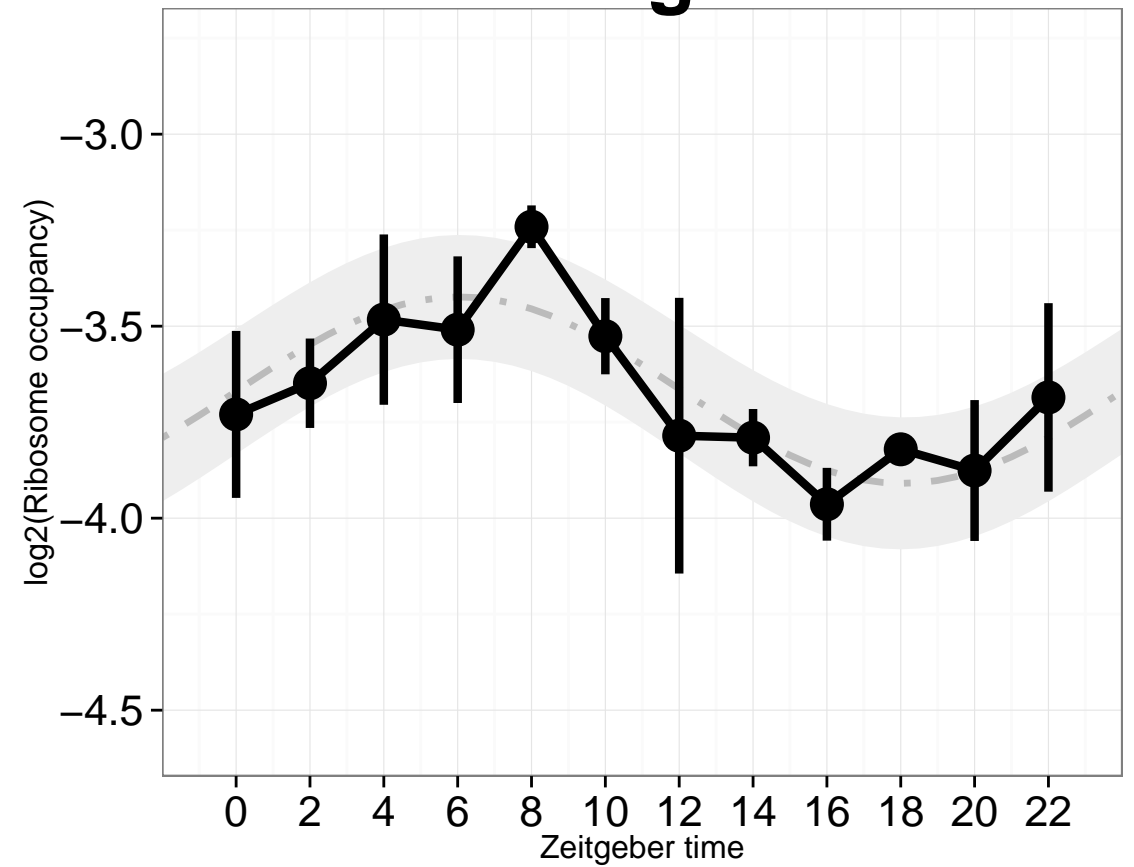

Supplement: Supplementary file 8587 [file 1]

## Ulk3

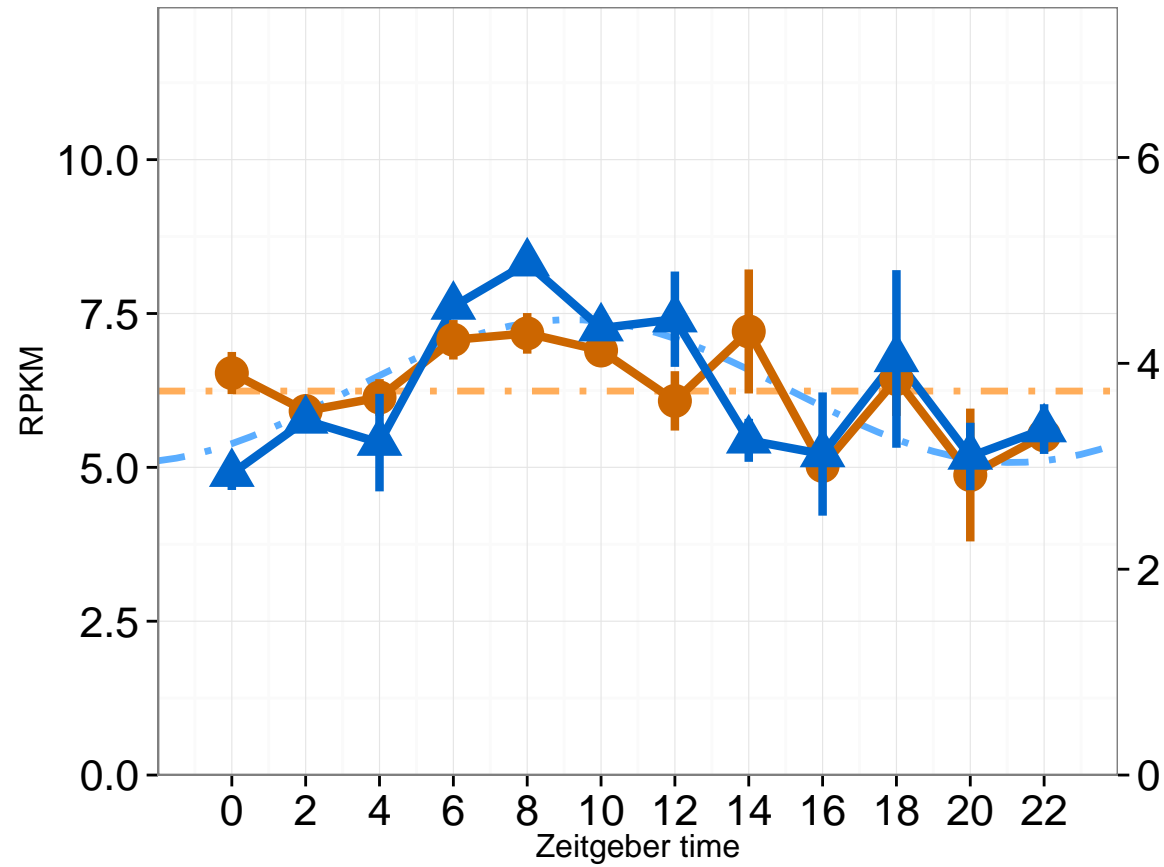

## Ulk3

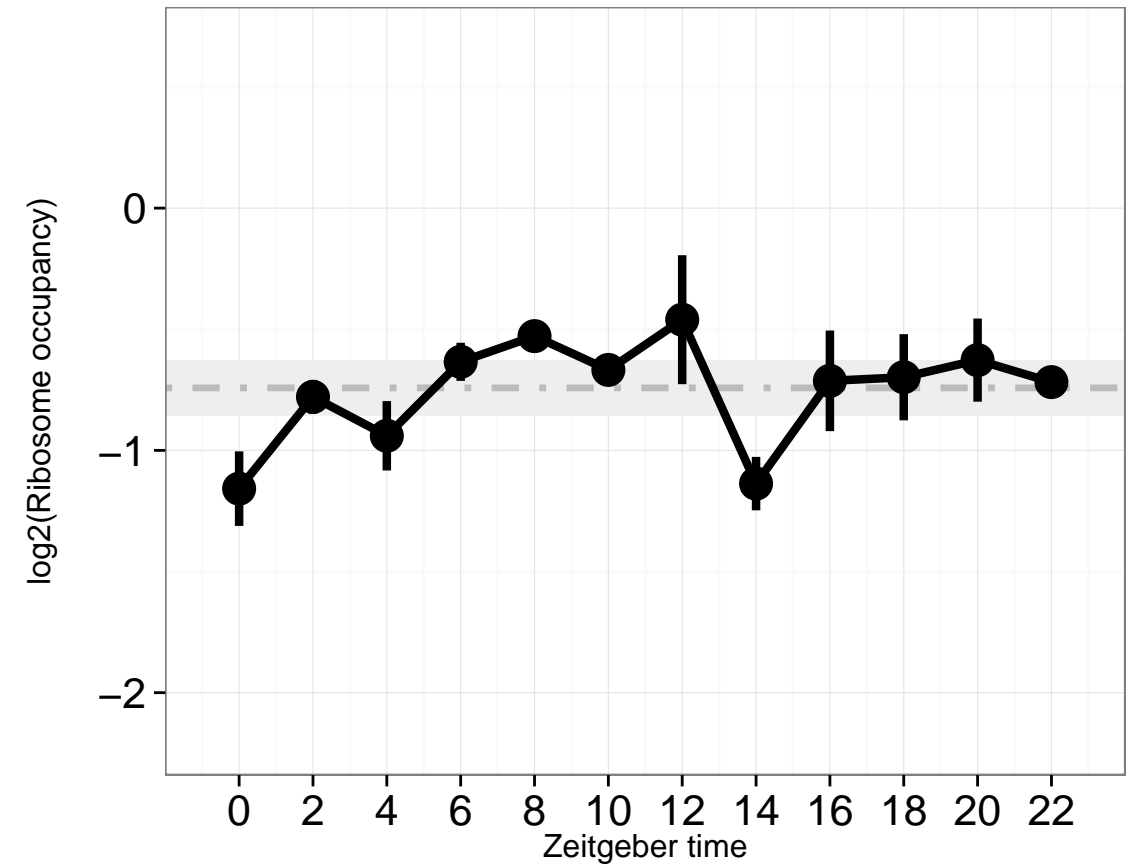

Supplement: Supplementary file 8588 [file 1]

## Wdr89

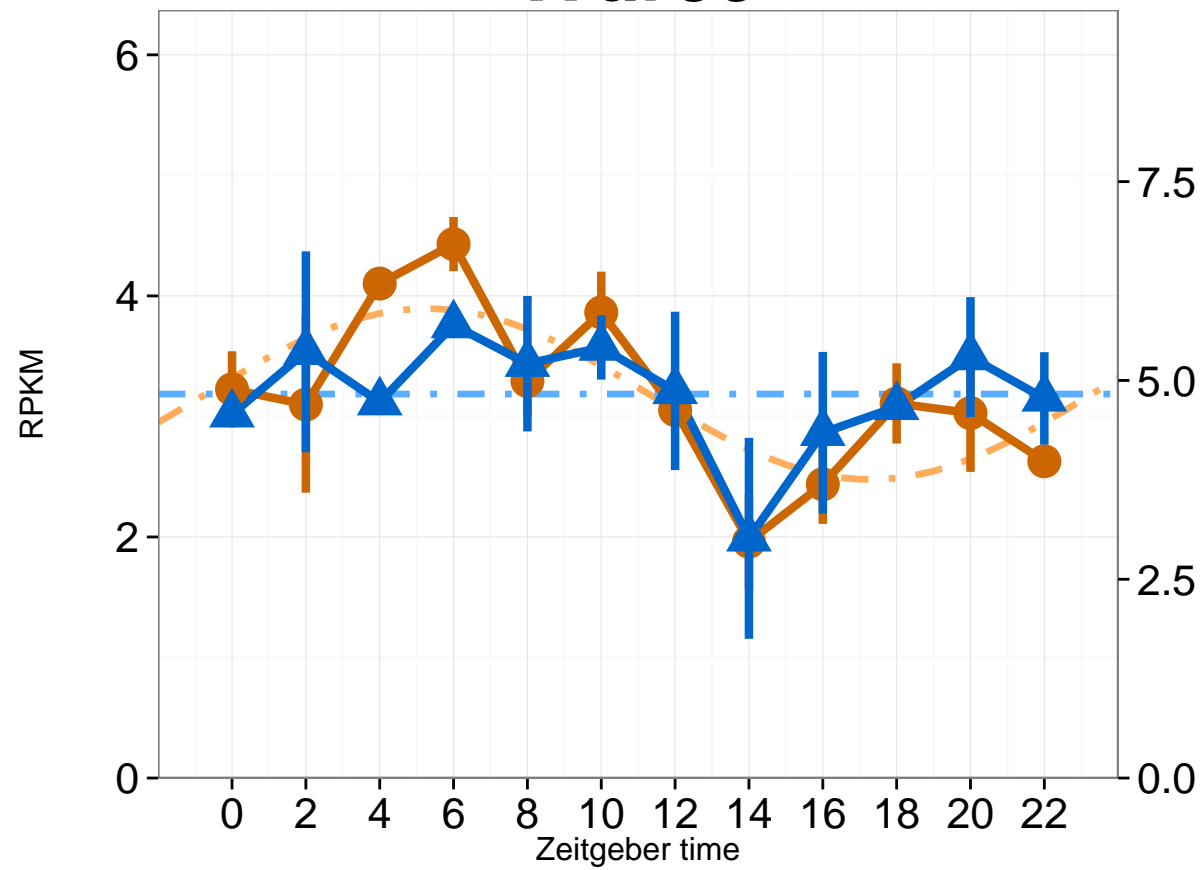

## Wdr89

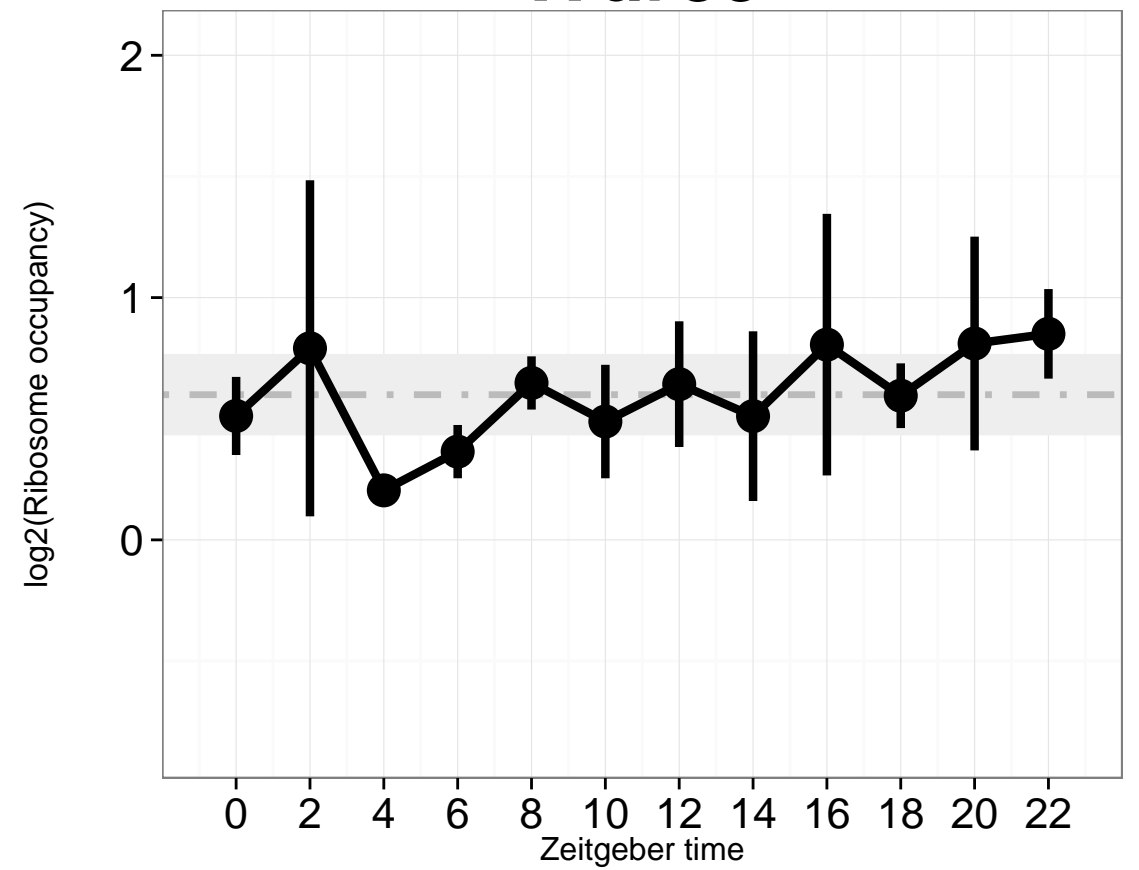

Supplement: Supplementary file 8589 [file 1]

# Fam207a

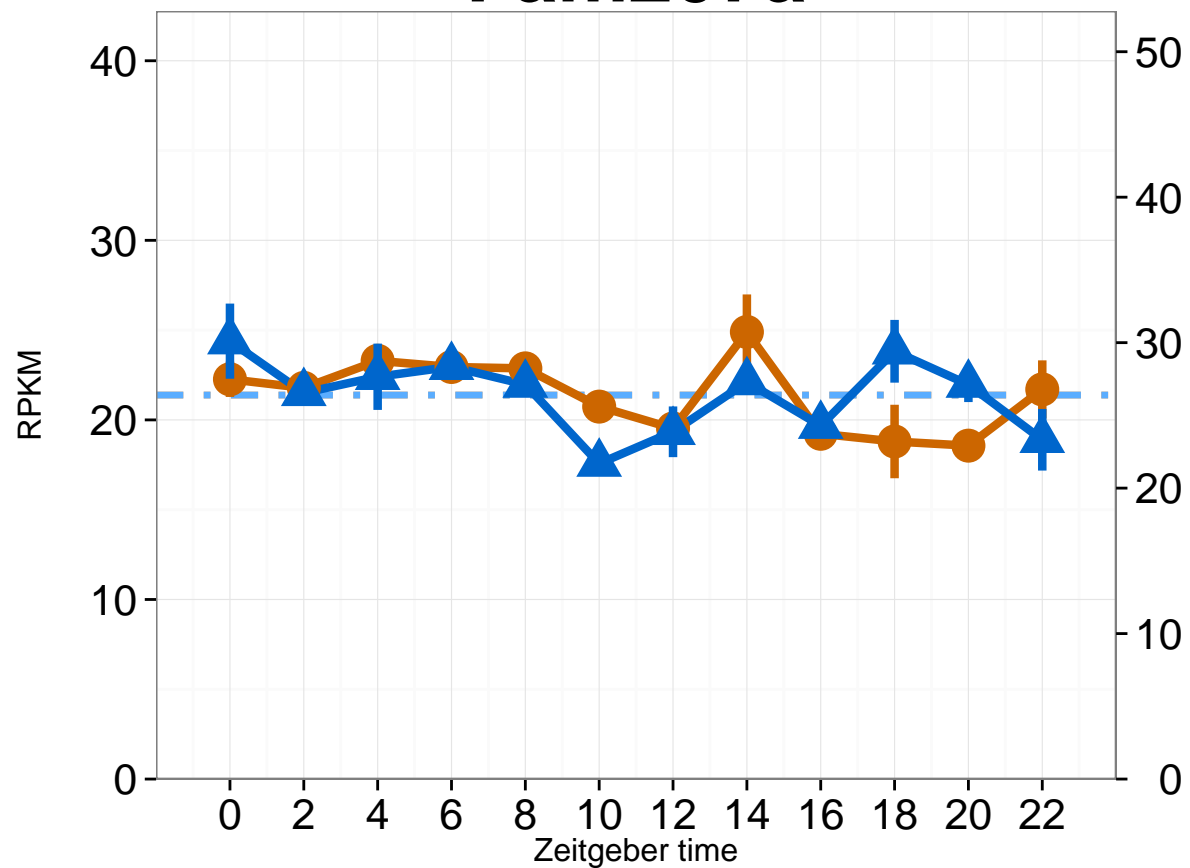

# Fam207a

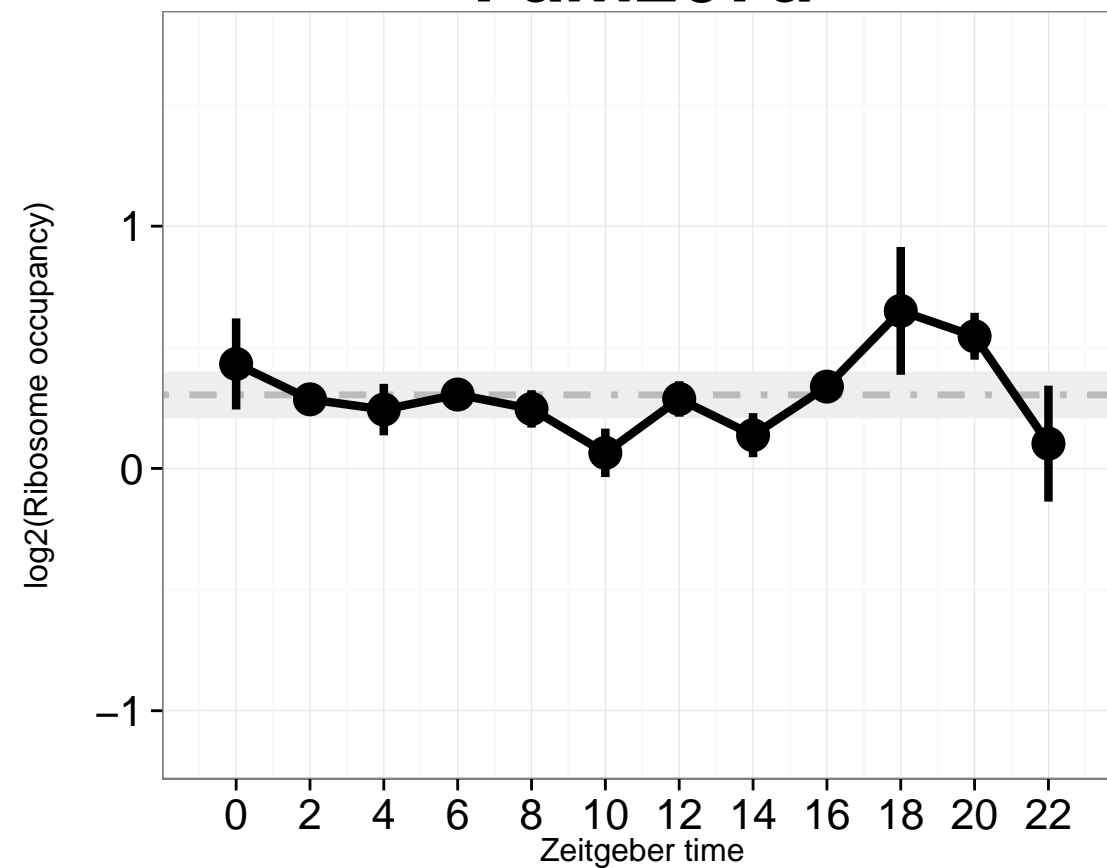

Supplement: Supplementary file 8590 [file 1]

# TtII10

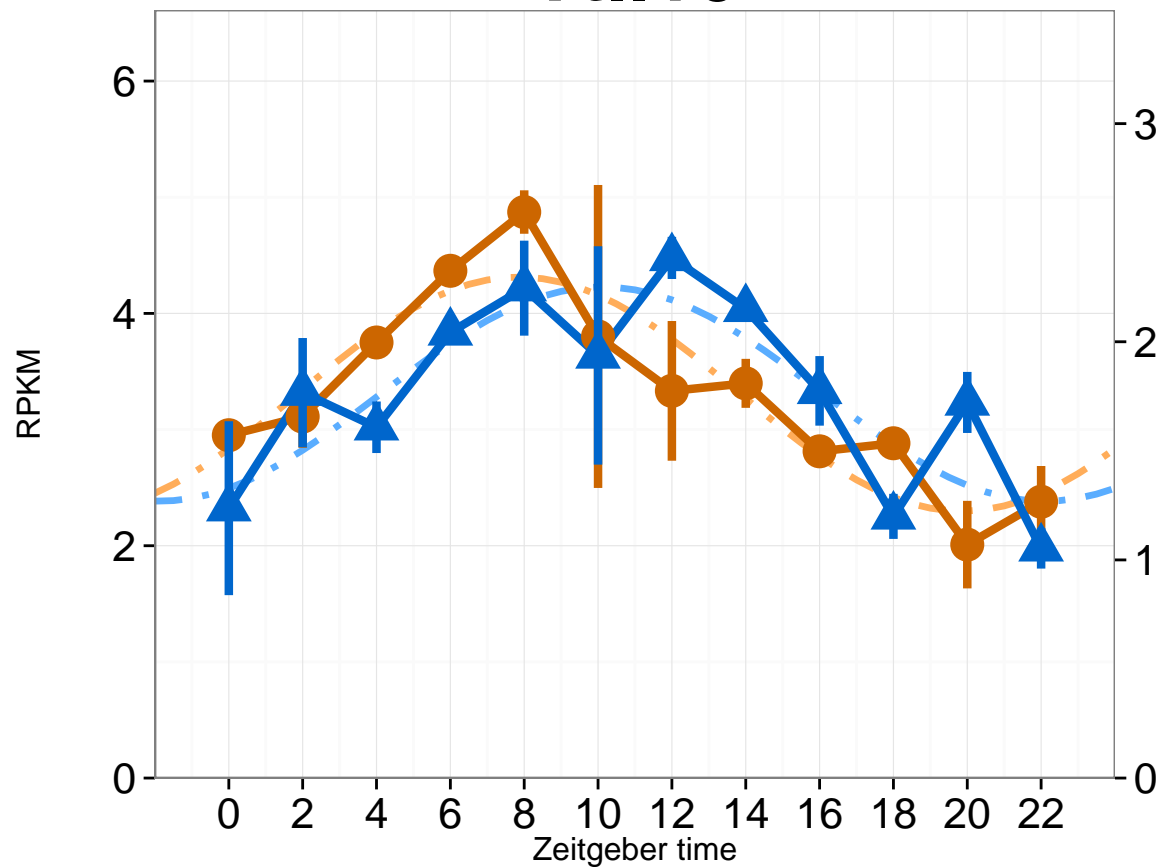

# TtII10

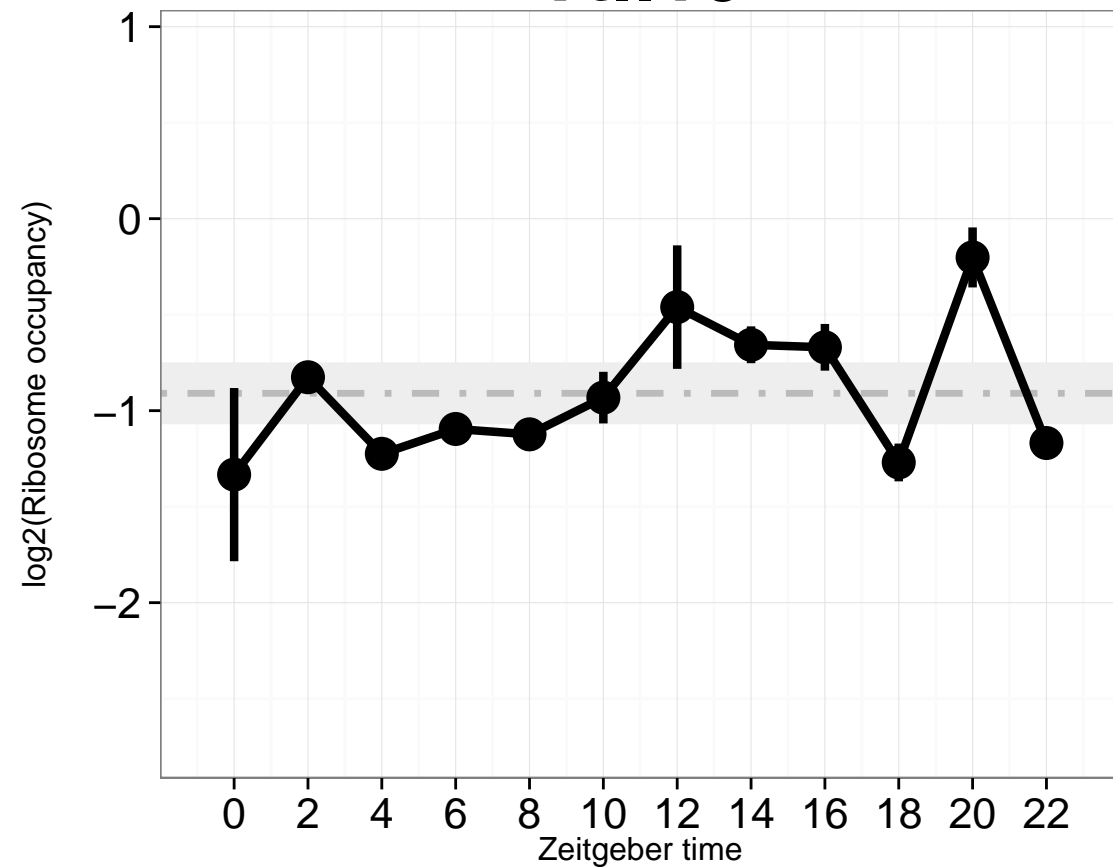

Supplement: Supplementary file 8591 [file 1]

# Mettl7b

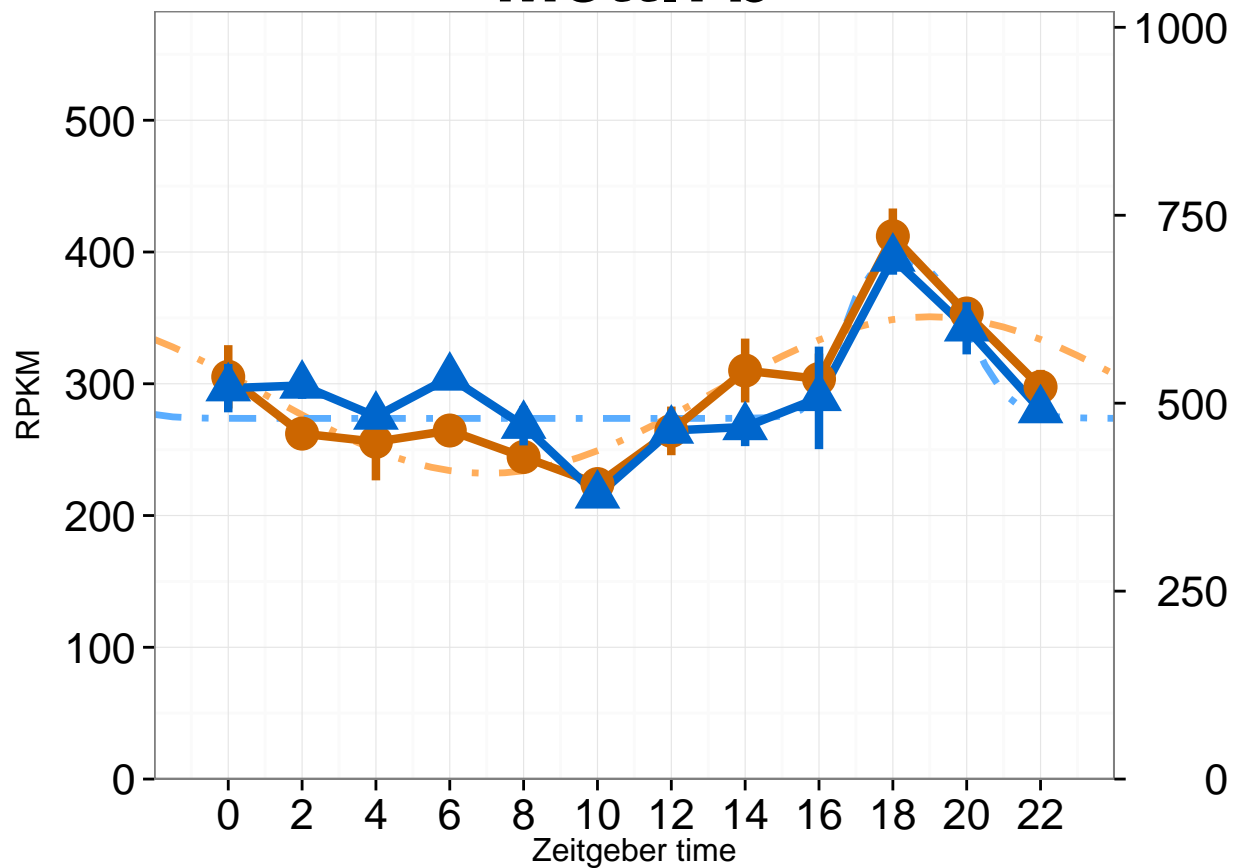

# Mettl7b

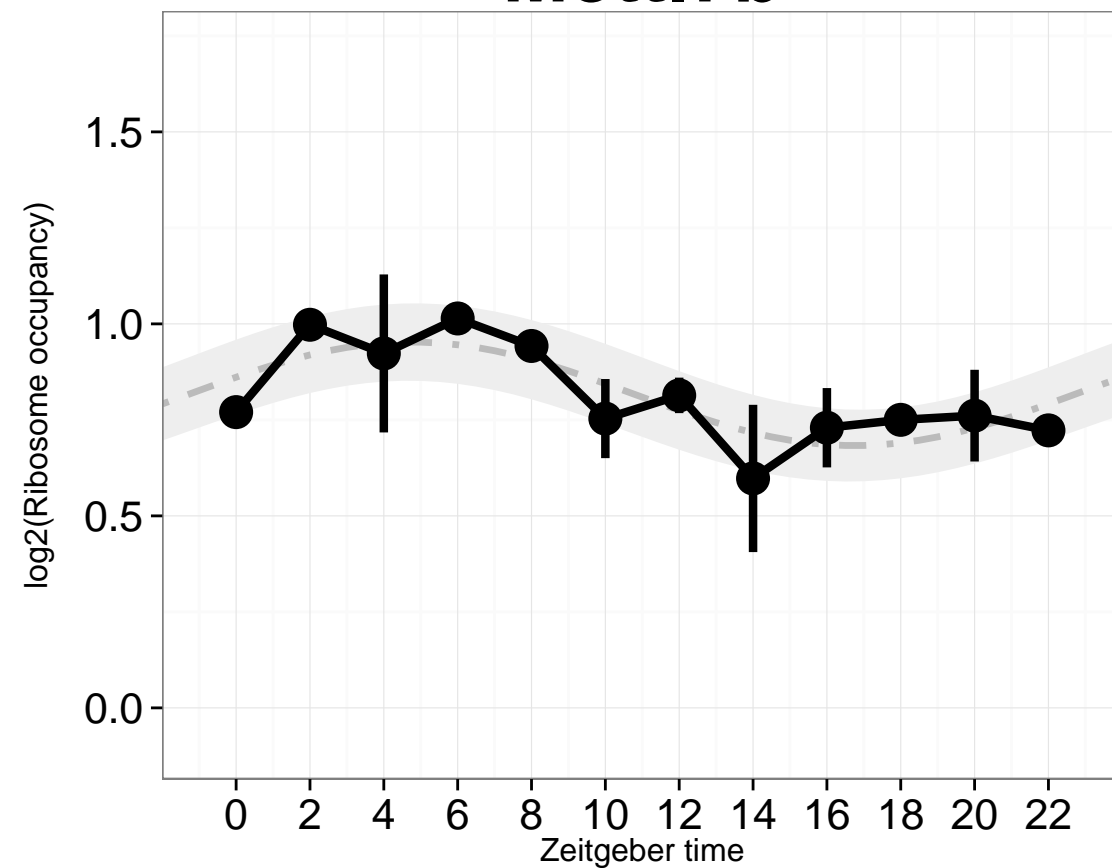

Supplement: Supplementary file 8592 [file 1]

# Tmco3

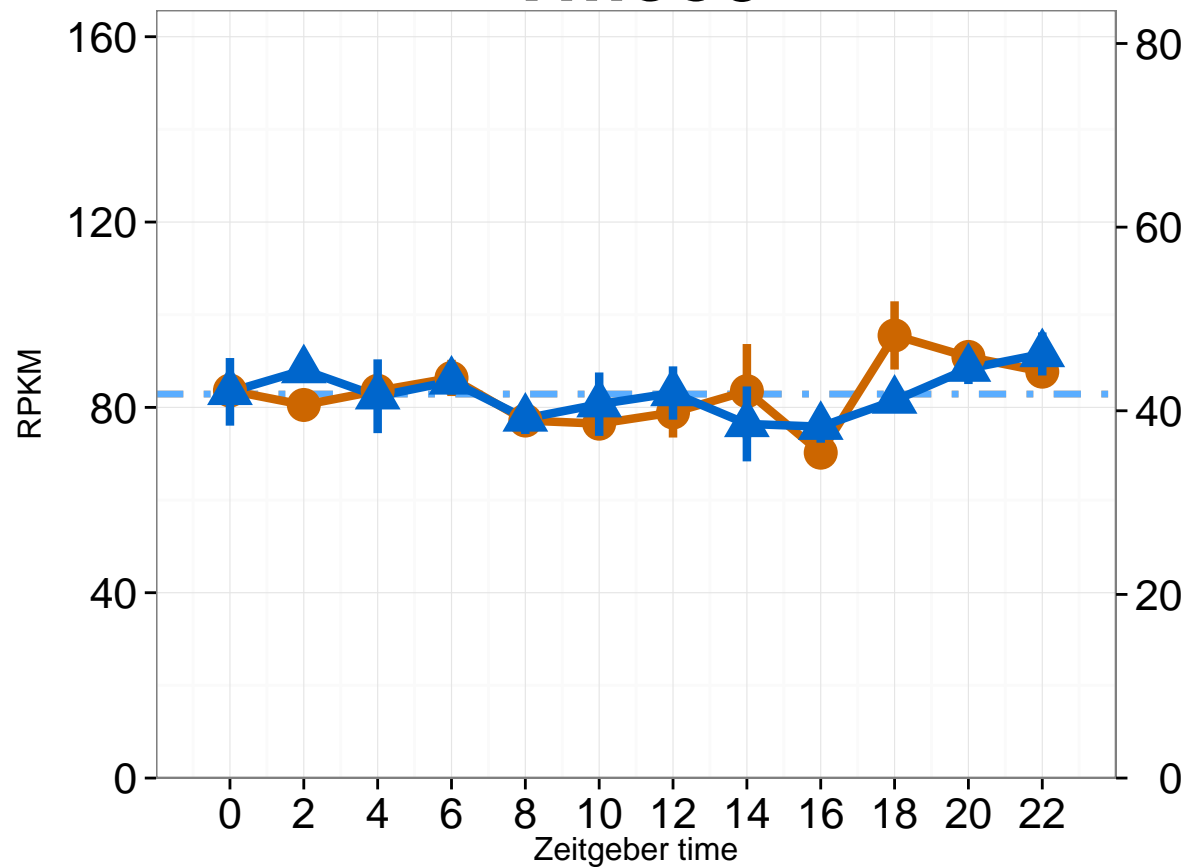

# Tmco3

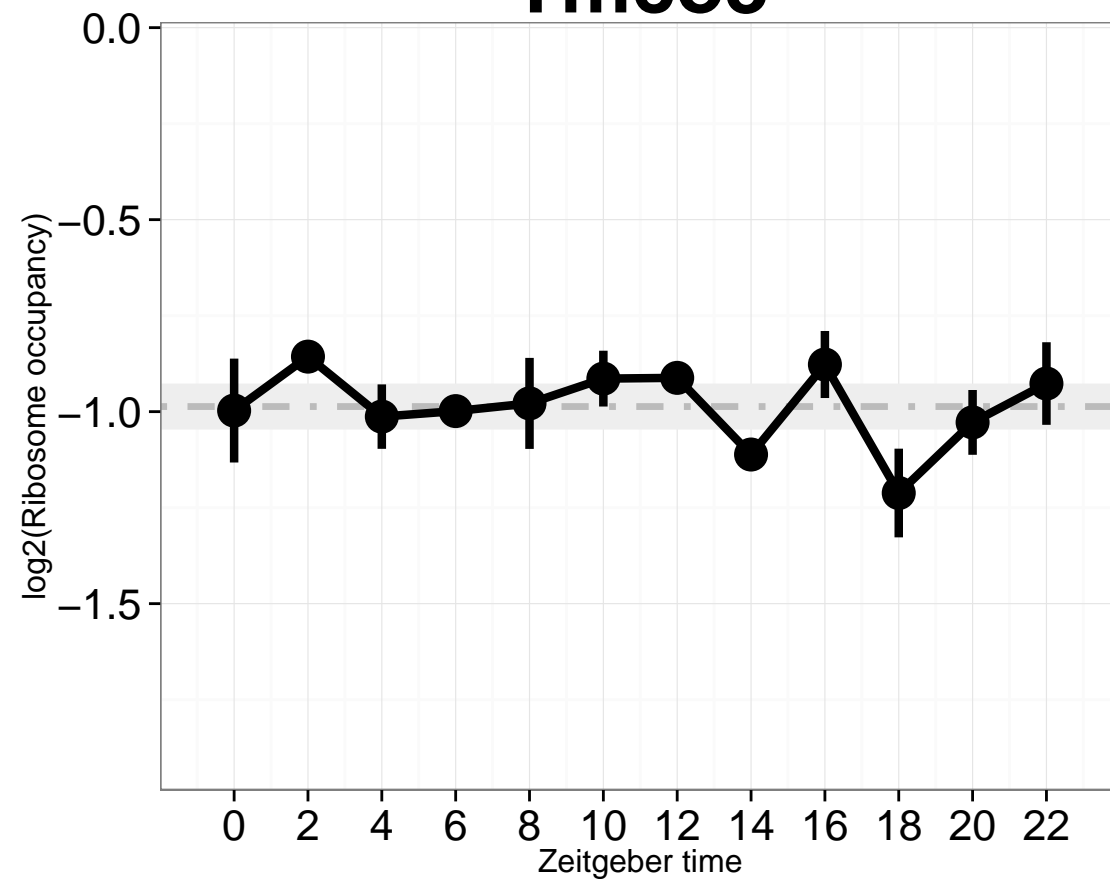

Supplement: Supplementary file 8593 [file 1]

## Rhbdf1

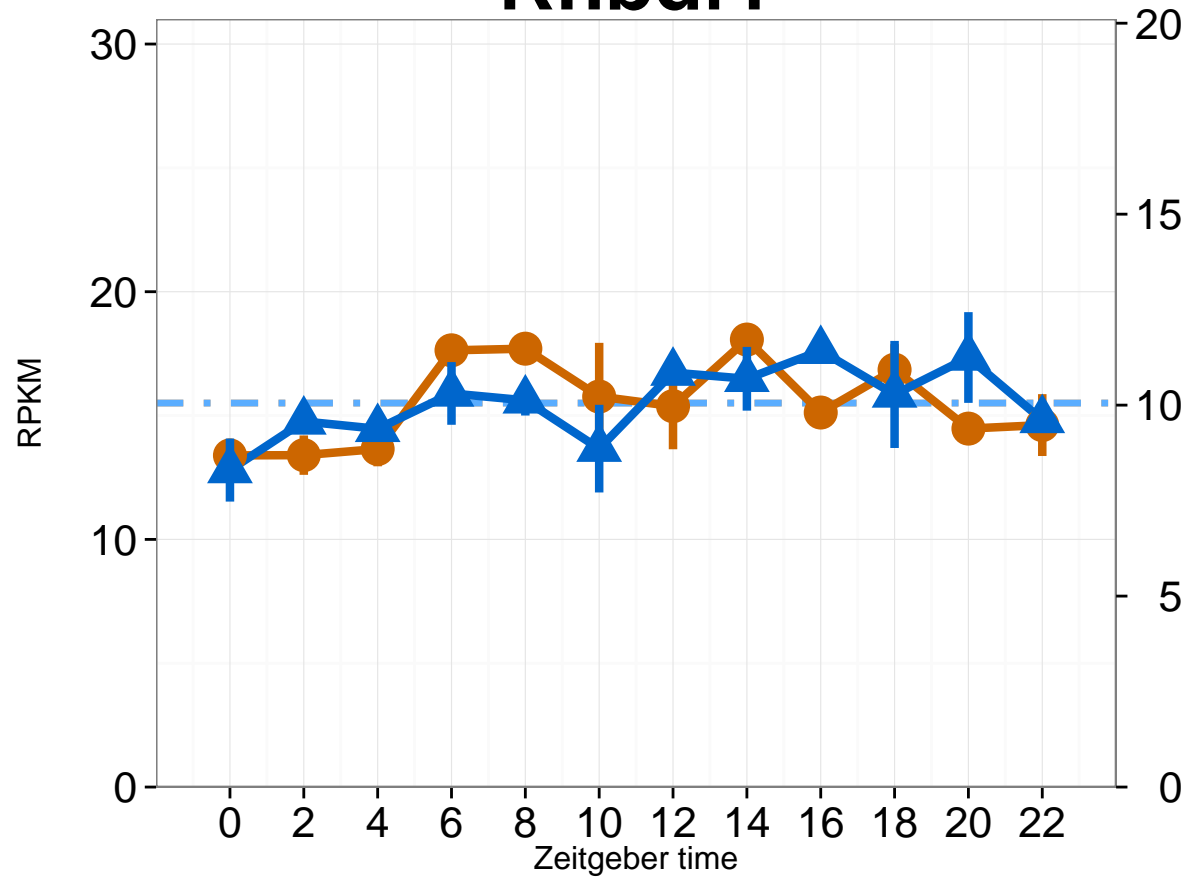

## Rhbdf1

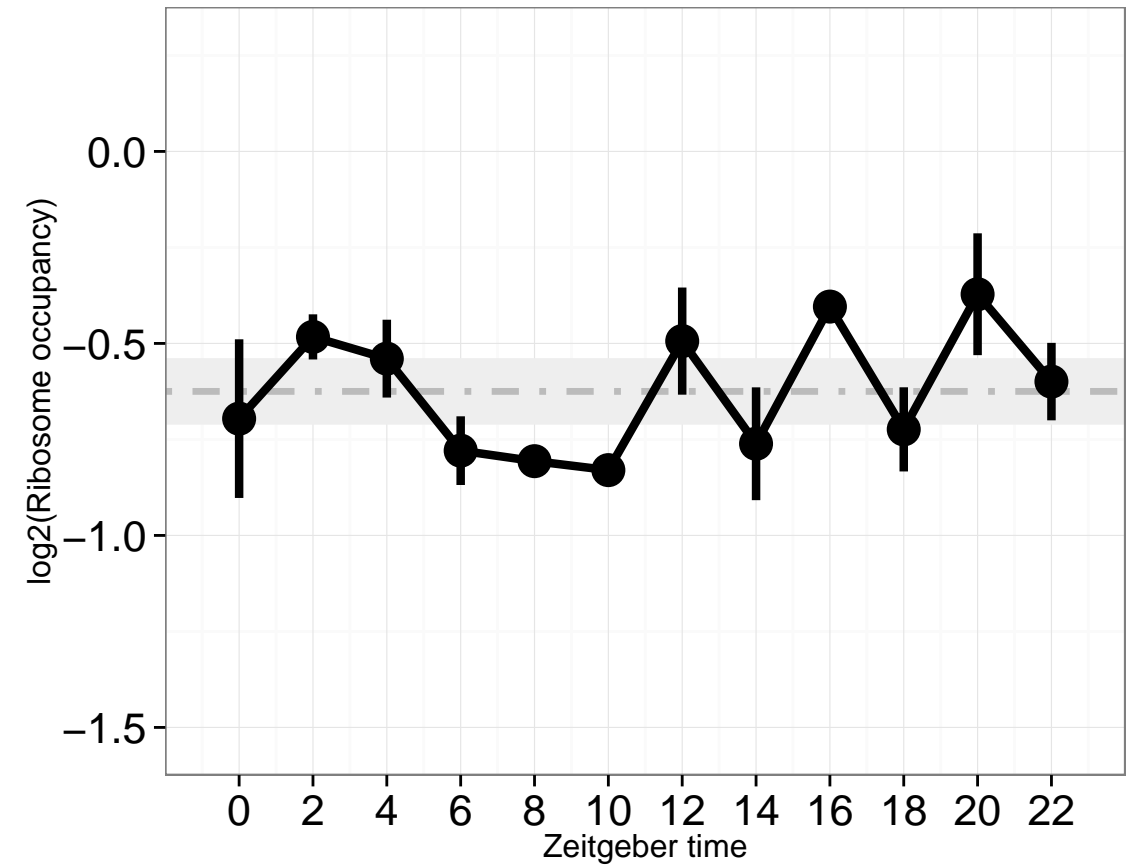

Supplement: Supplementary file 8594 [file 1]

## Mfap3l

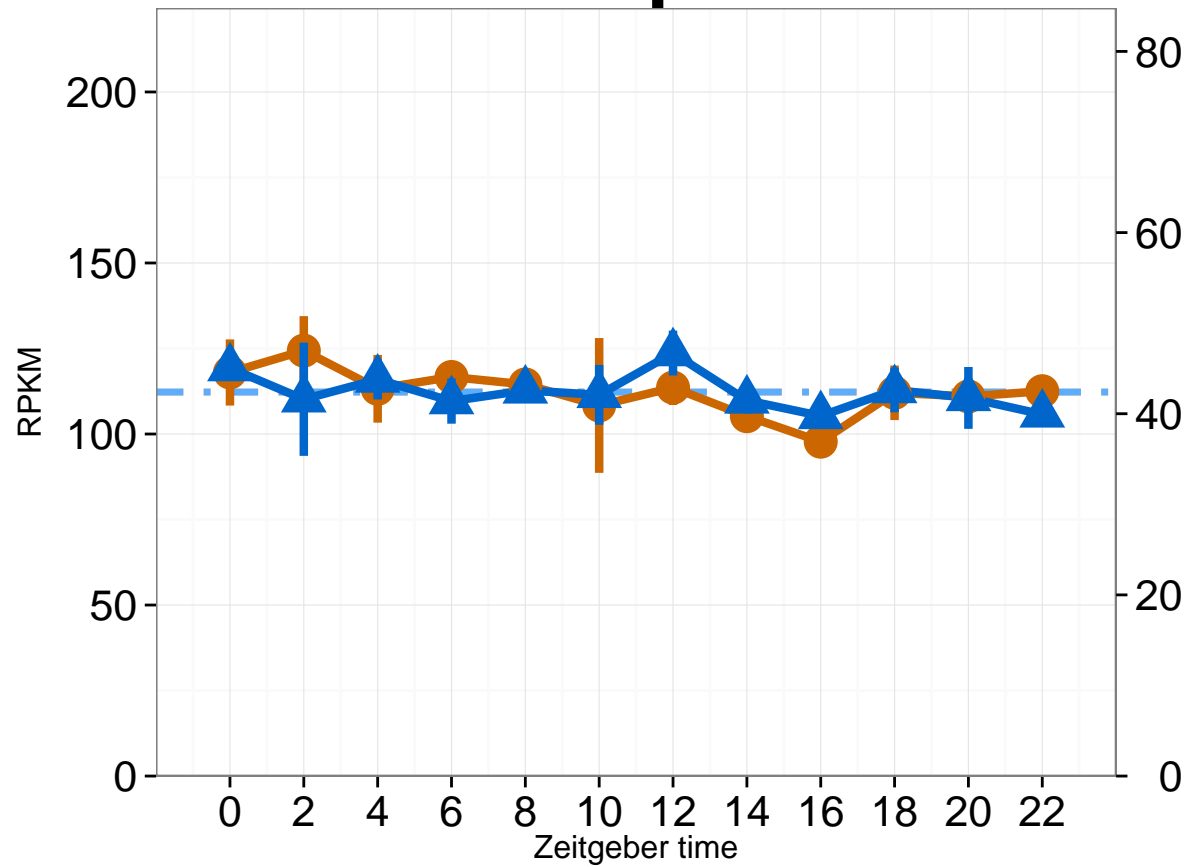

## Mfap3l

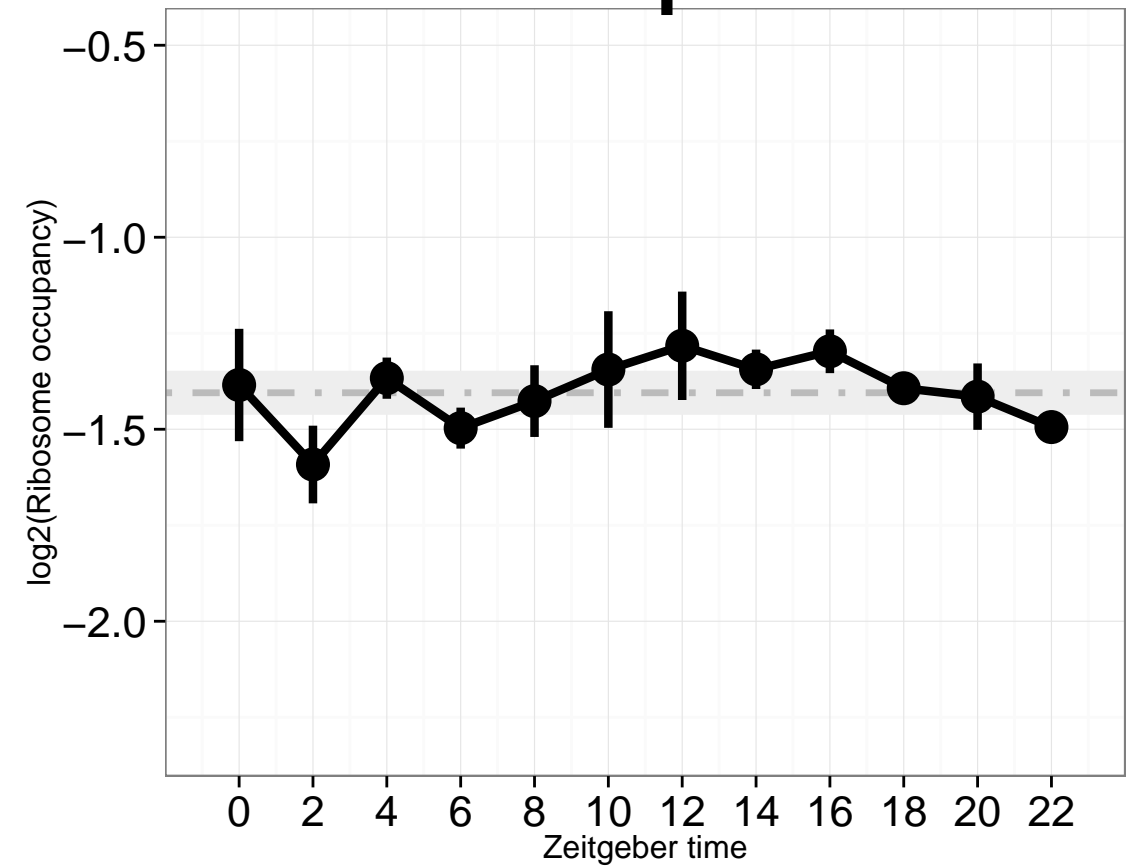

Supplement: Supplementary file 8595 [file 1]

# Atxn3

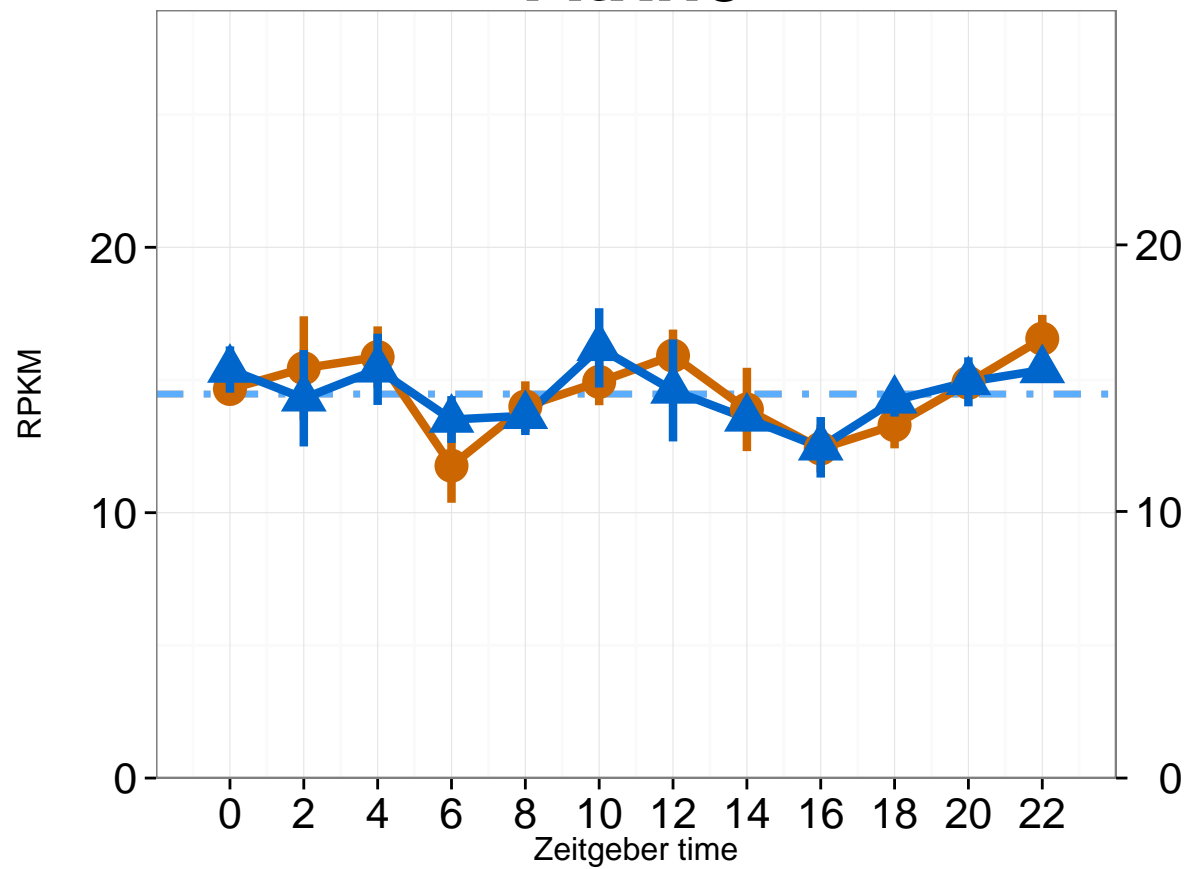

# Atxn3

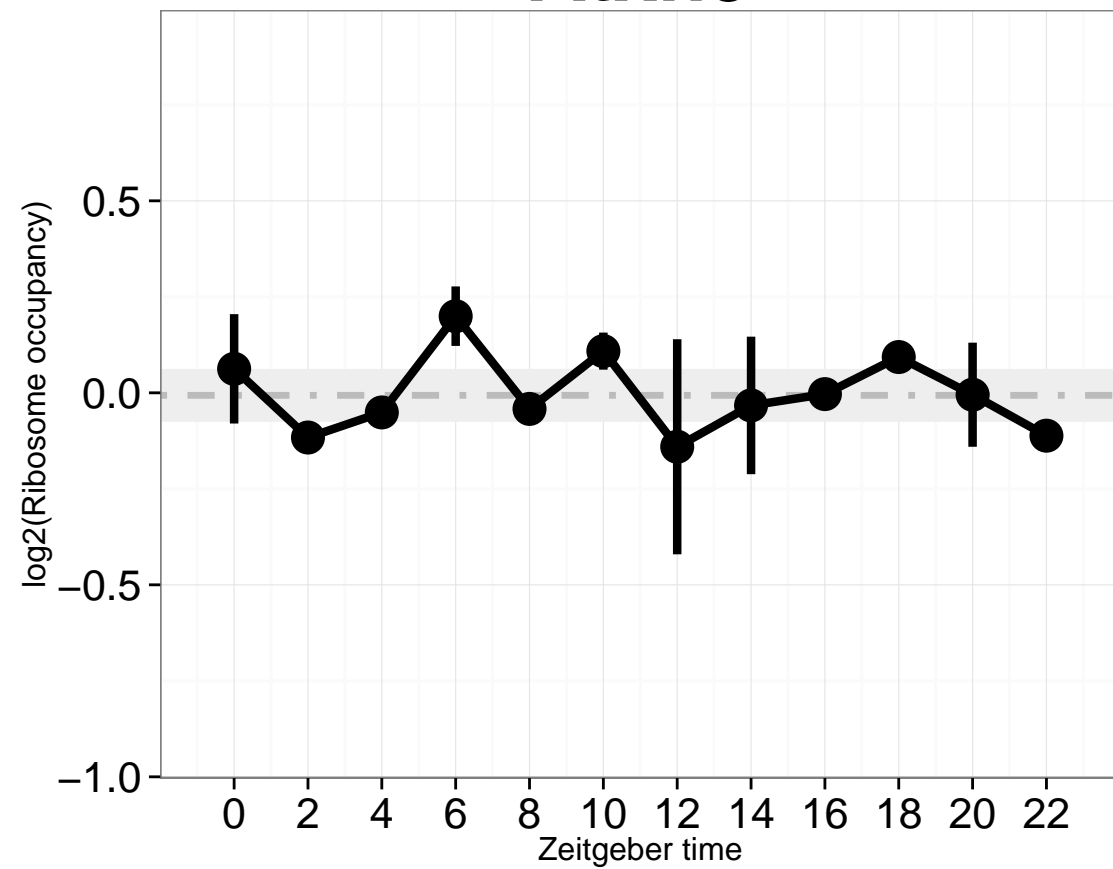

Supplement: Supplementary file 8596 [file 1]

# Cacna1a

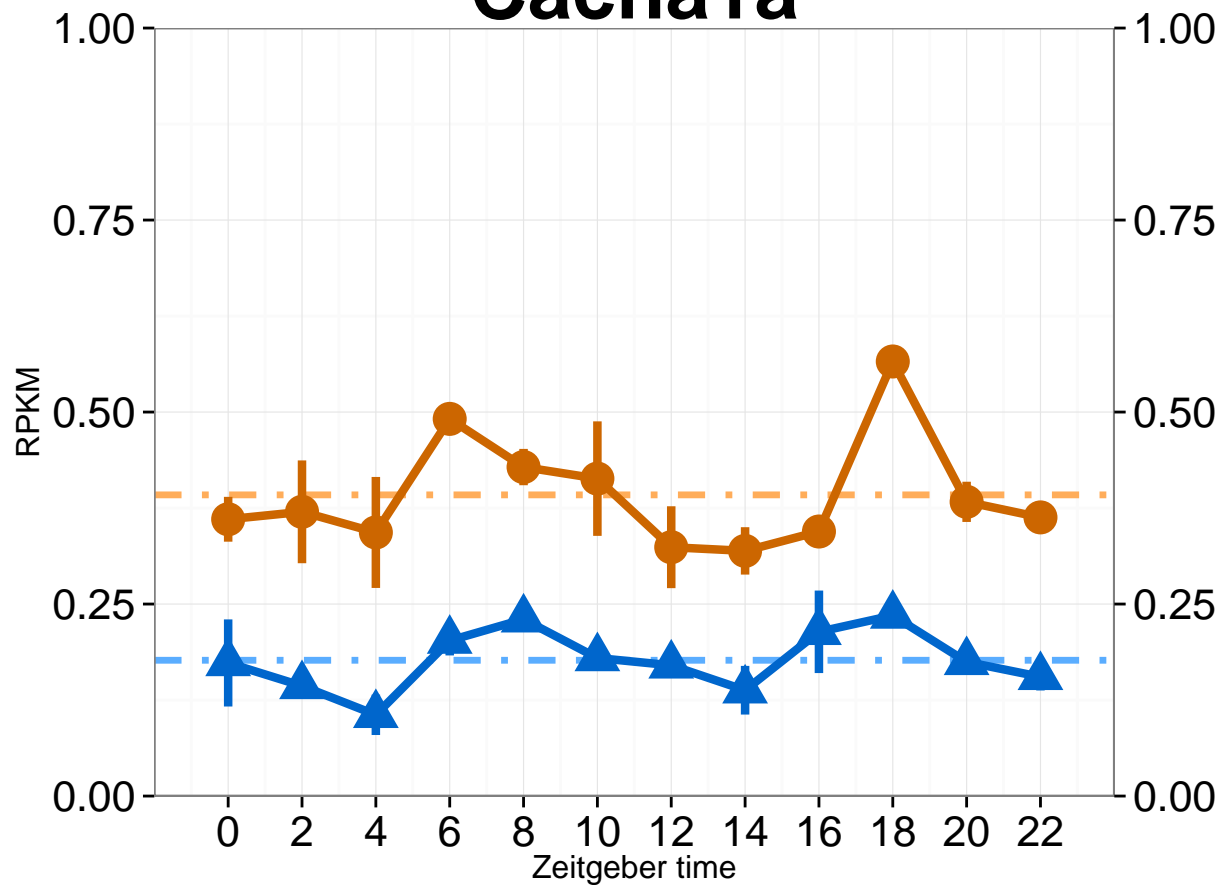

# Cacna1a

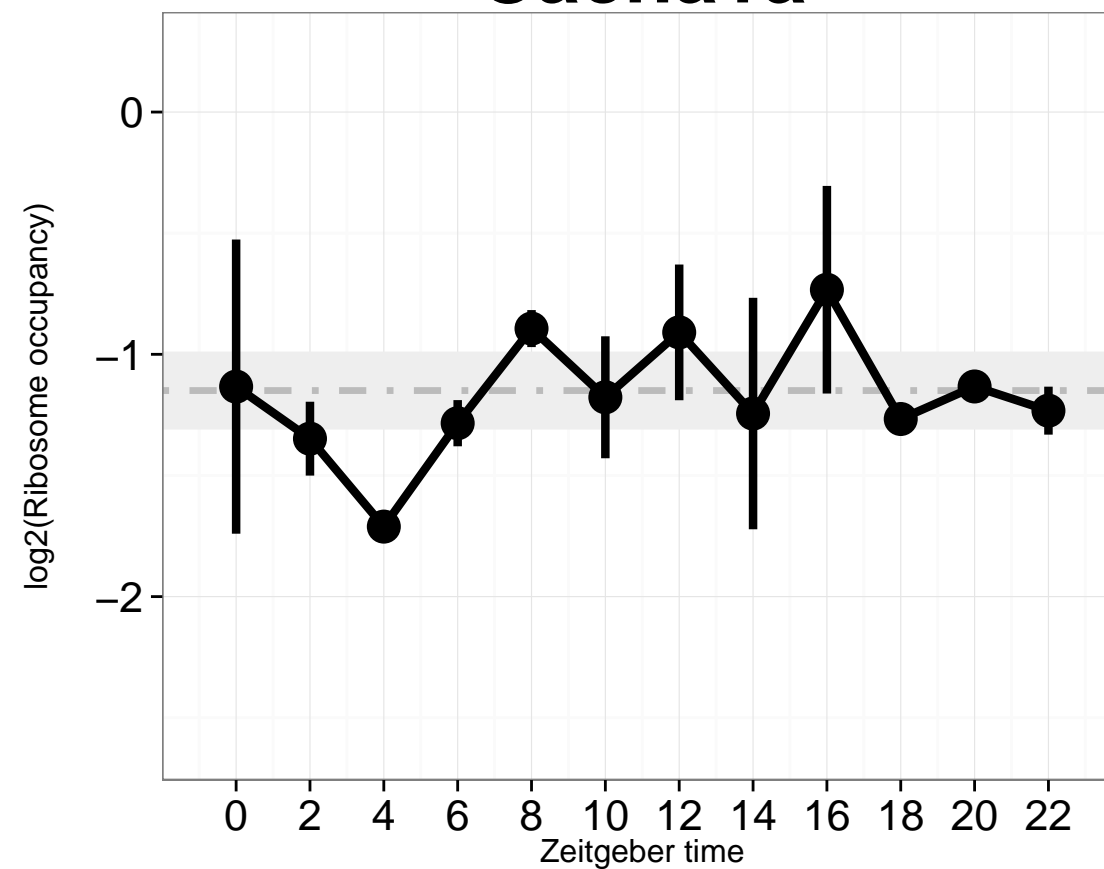

Supplement: Supplementary file 8597 [file 1]

## Zscan21

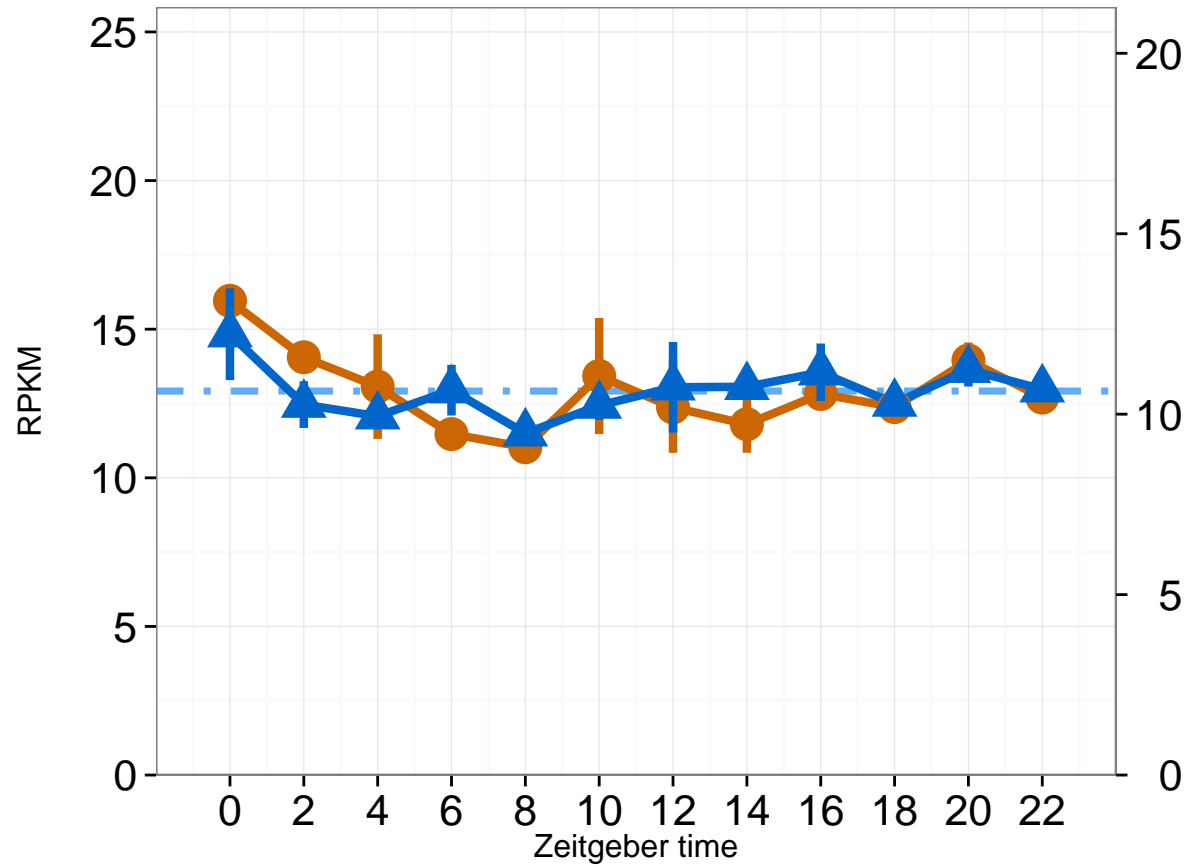

## Zscan21

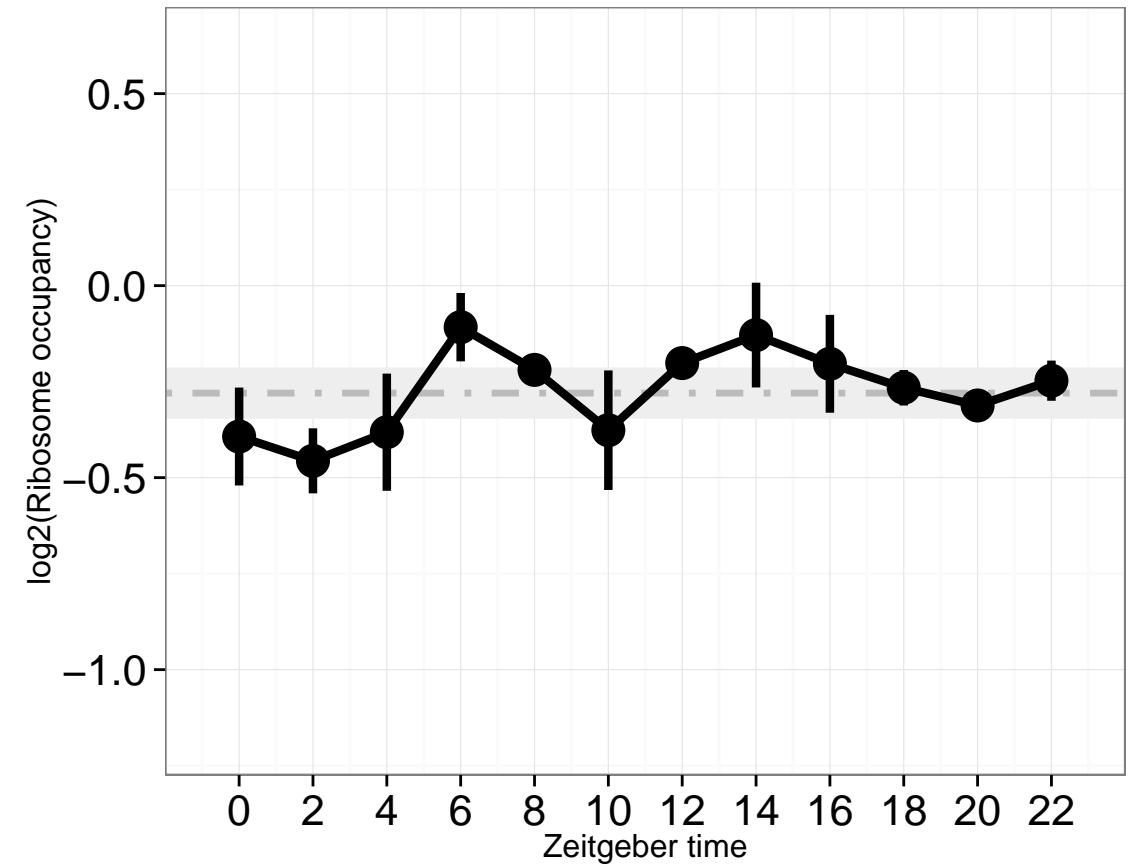

Supplement: Supplementary file 8598 [file 1]

# Rgs19

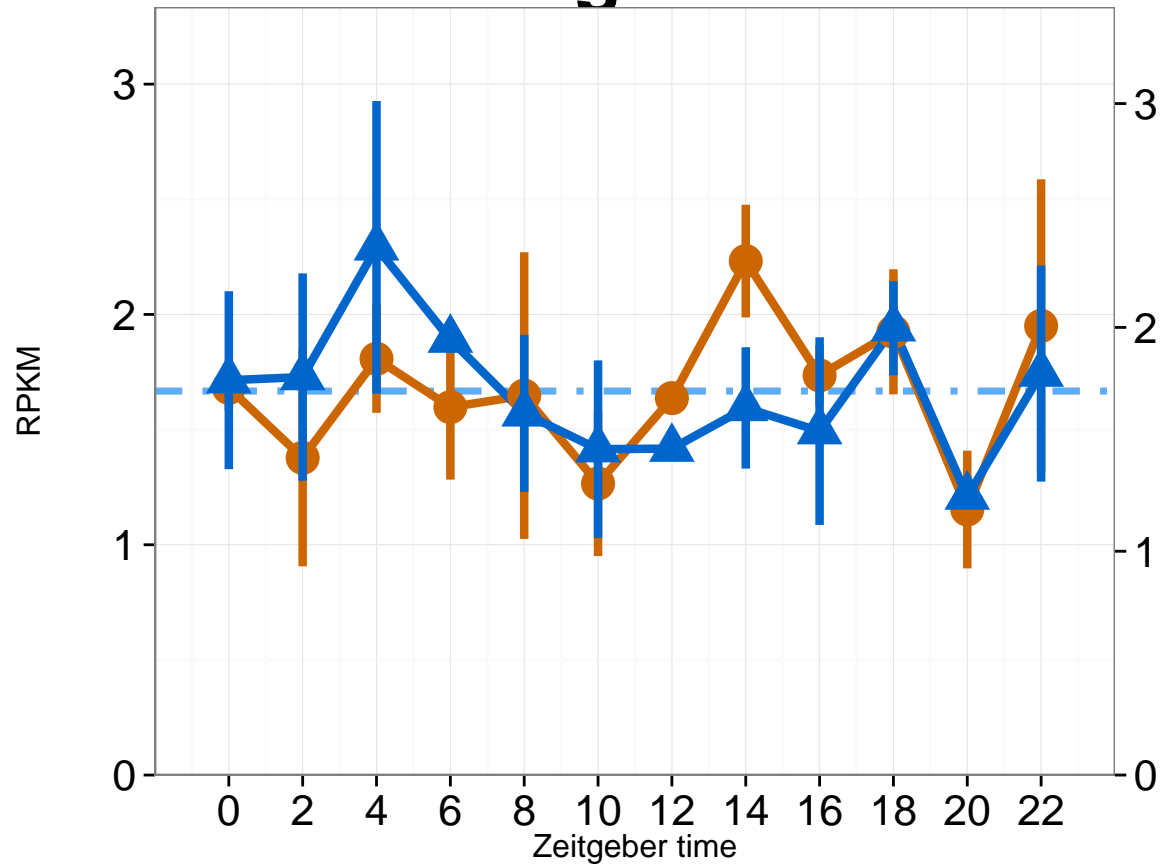

# Rgs19

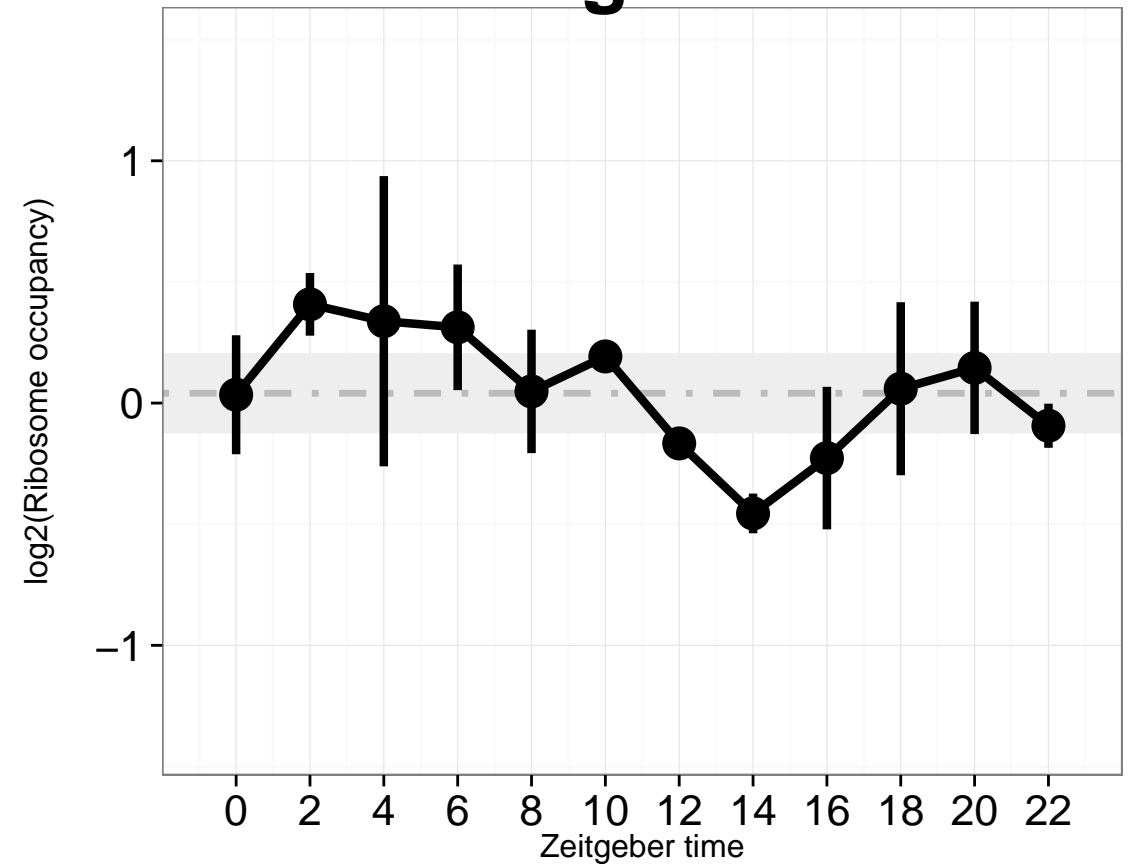

Supplement: Supplementary file 8599 [file 1]

## Zcchc3

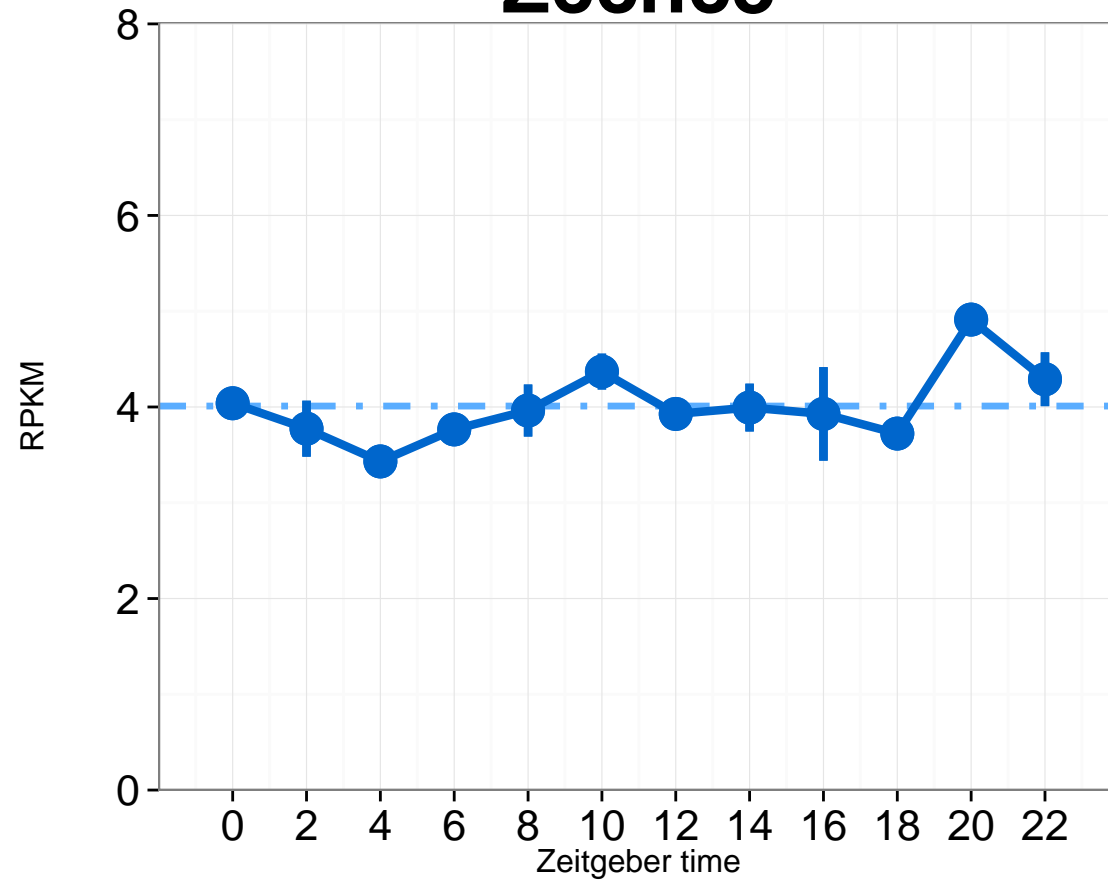

## Zcchc3 log2(Ribosome occupancy)

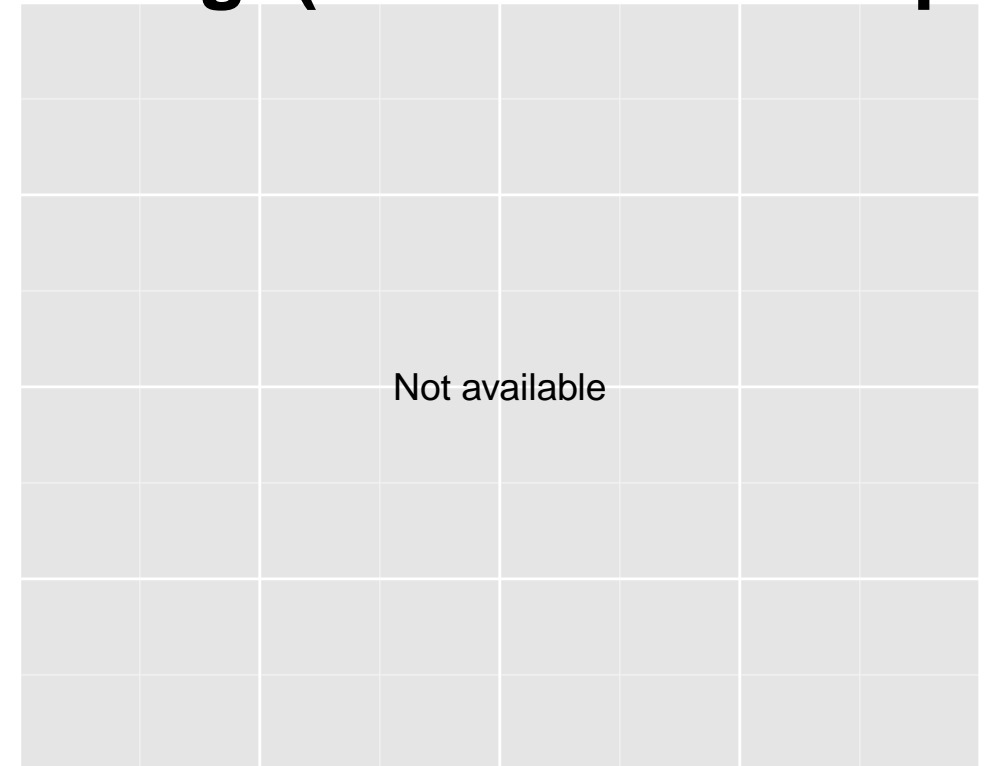

Supplement: Supplementary file 8600 [file 1]

## Rhcg

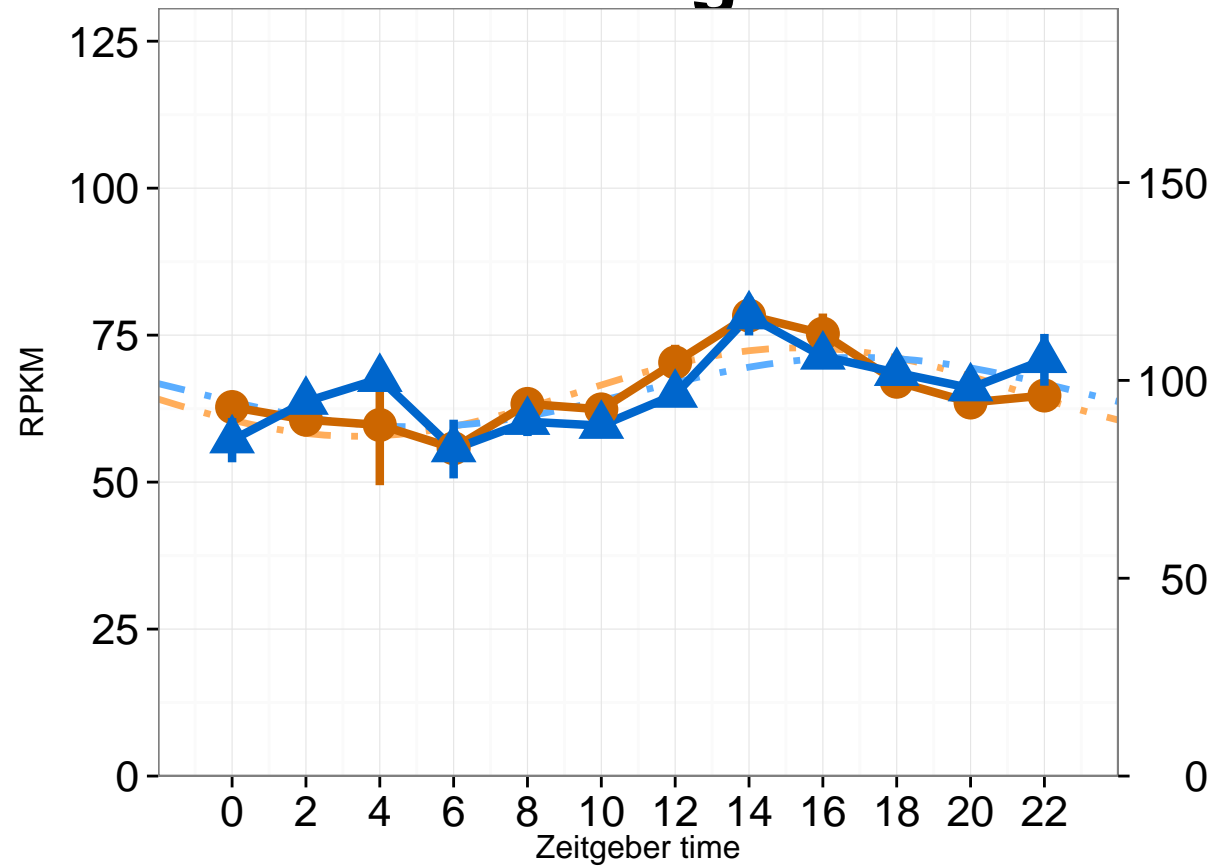

## Rhcg

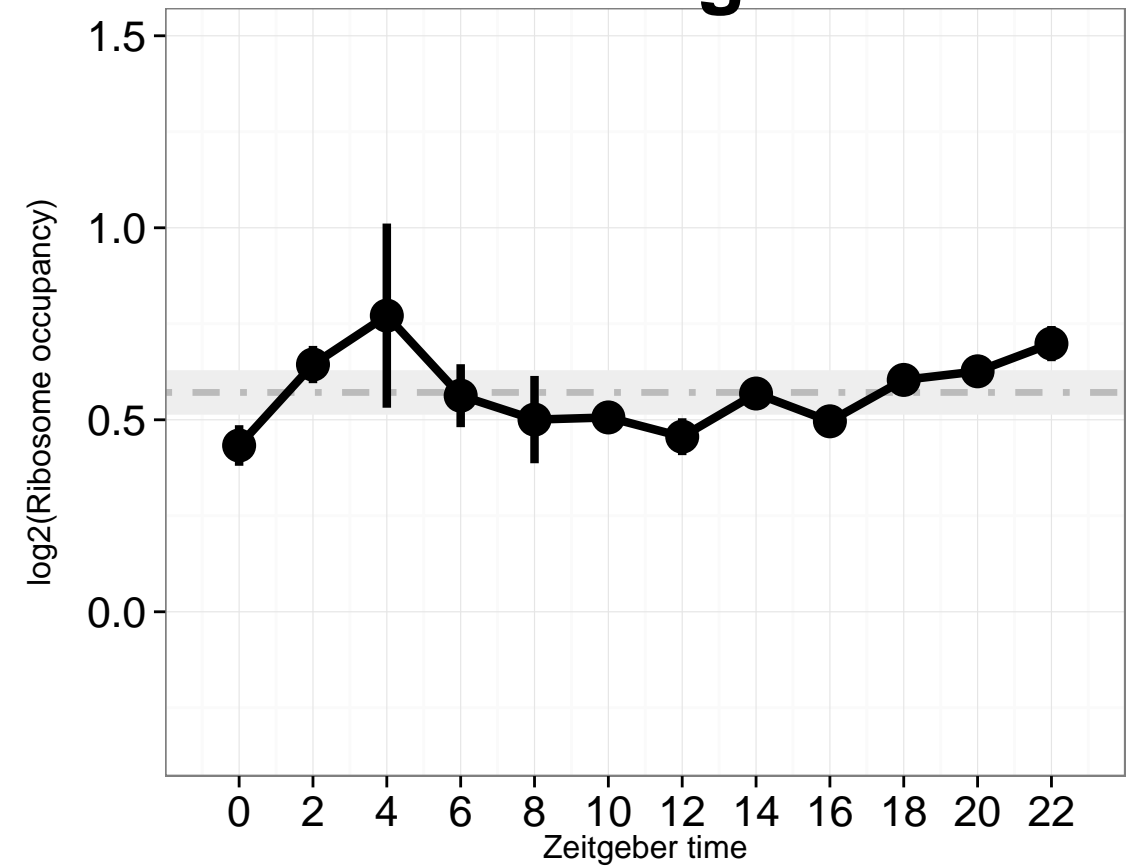

Supplement: Supplementary file 8601 [file 1]

## Slc2a5

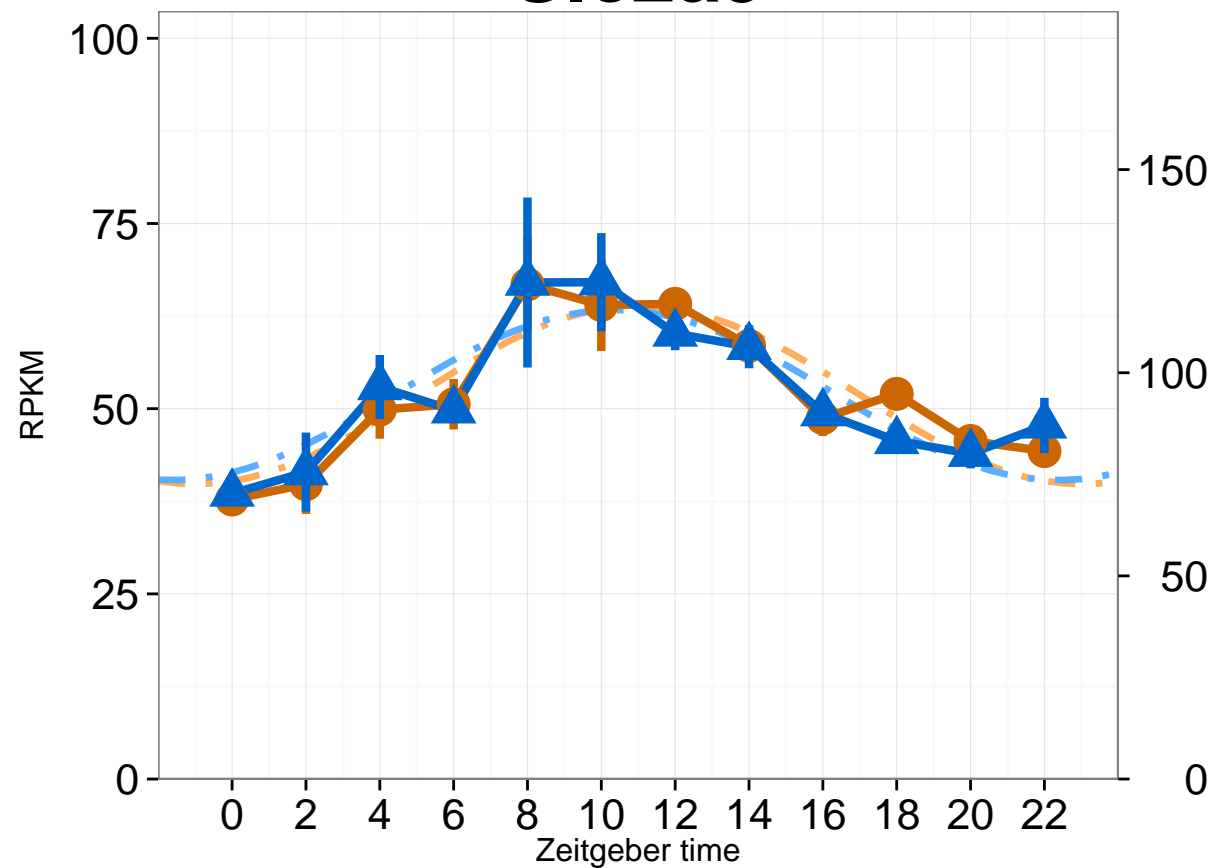

## Slc2a5

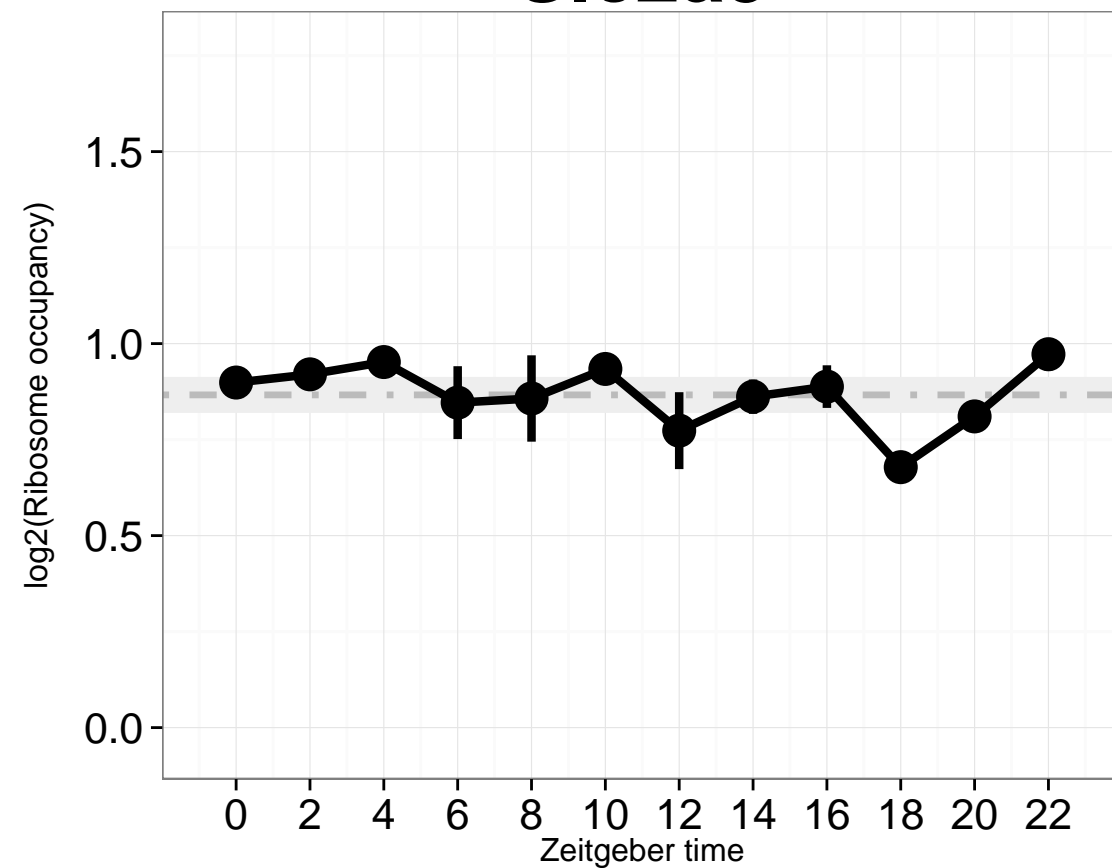

Supplement: Supplementary file 8602 [file 1]

## Pigo

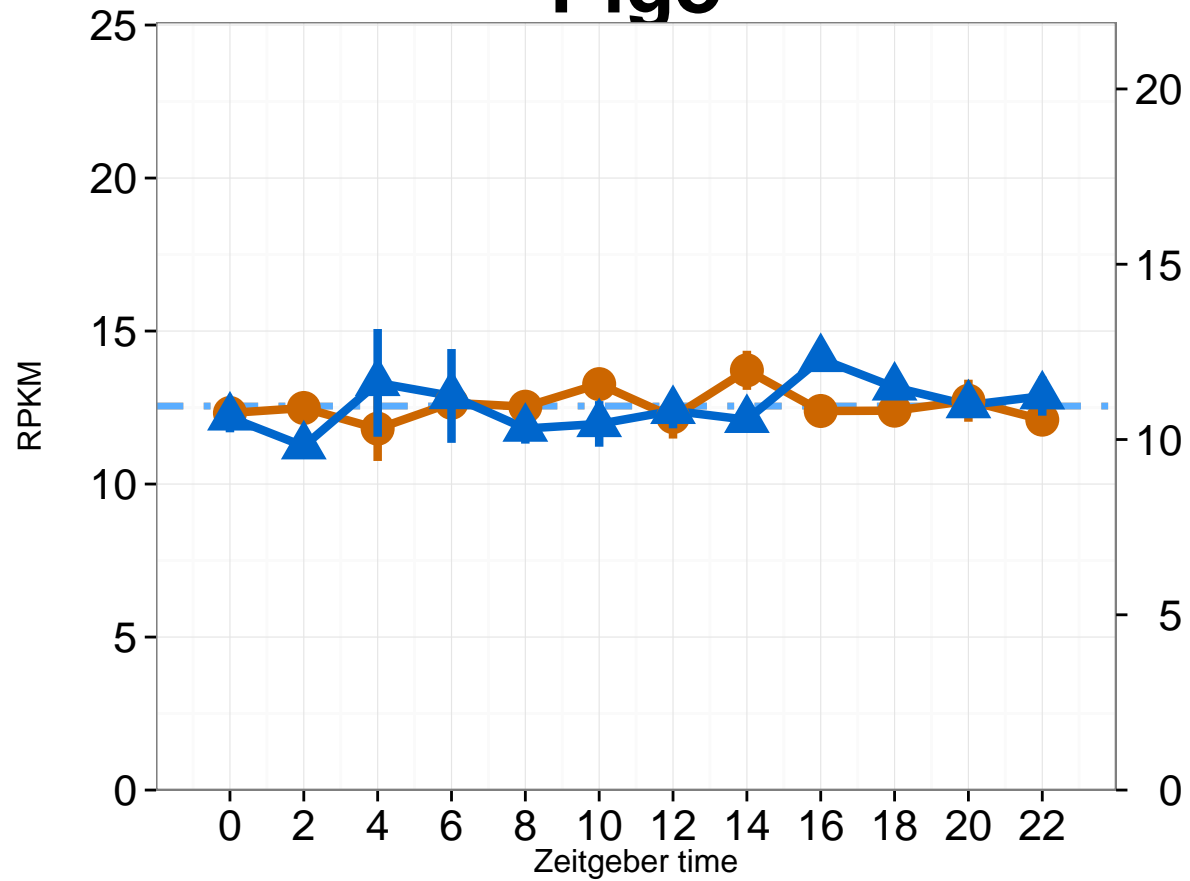

## Pigo

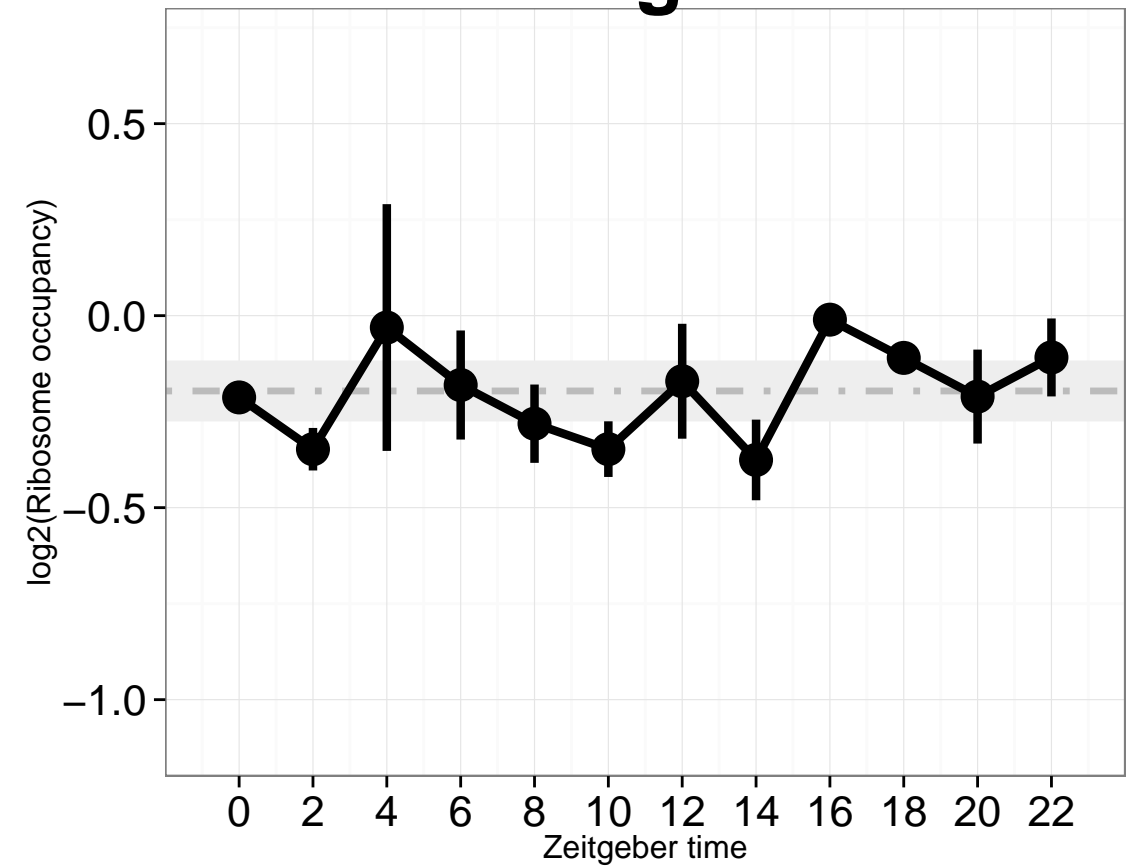

Supplement: Supplementary file 8603 [file 1]

## Agt

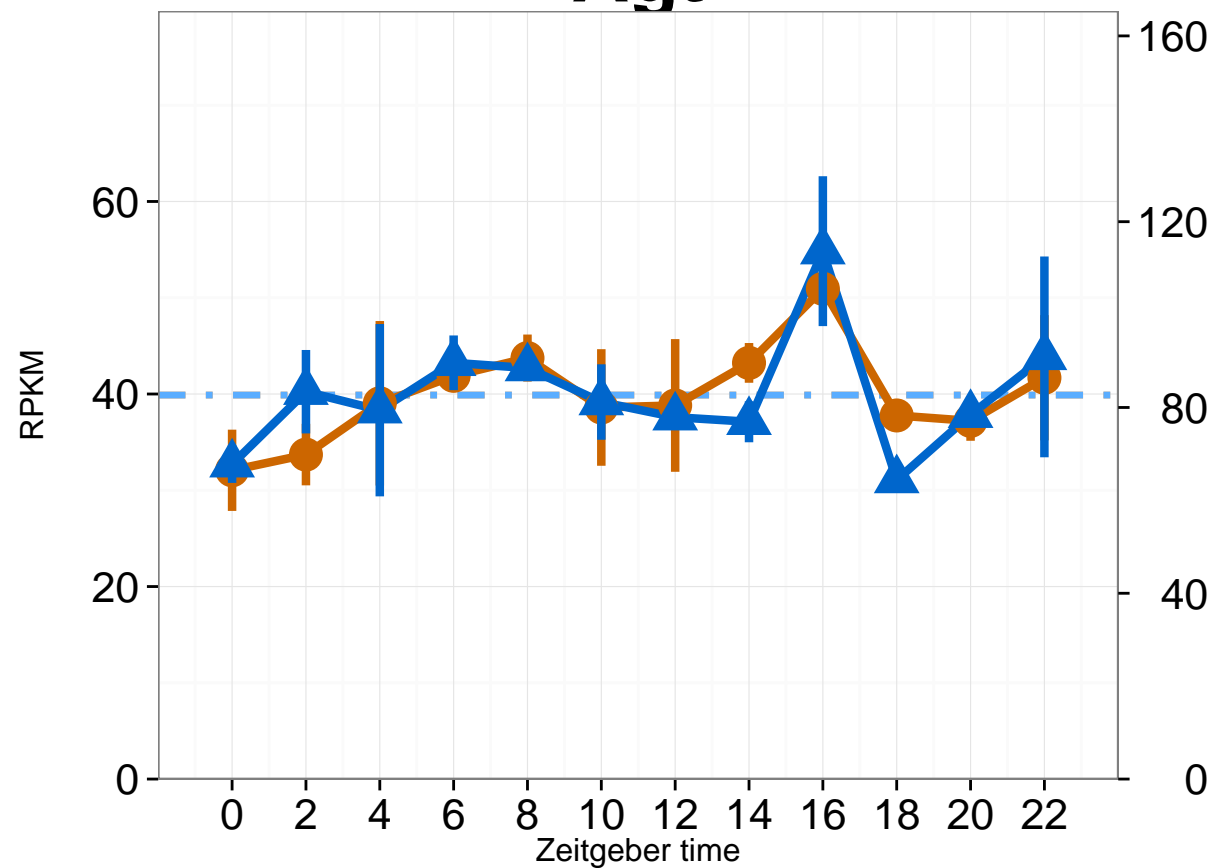

## Agt

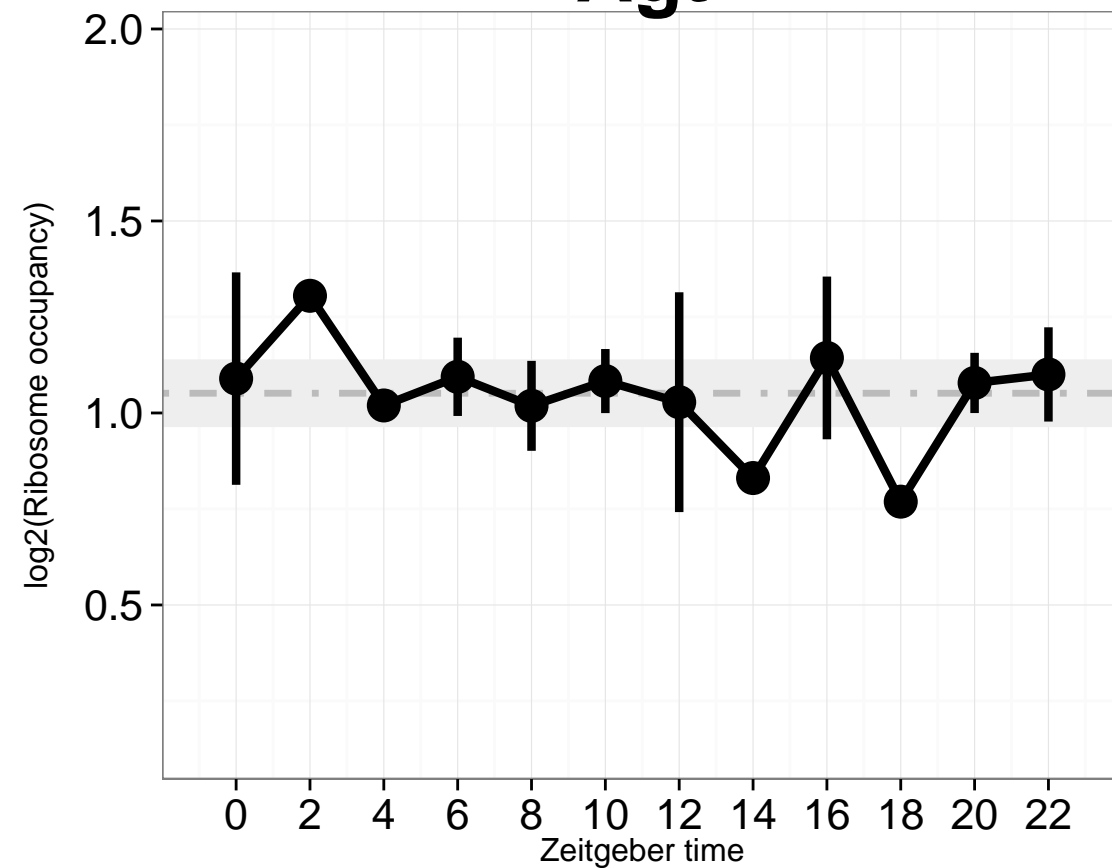

Supplement: Supplementary file 8604 [file 1]

## Mprip

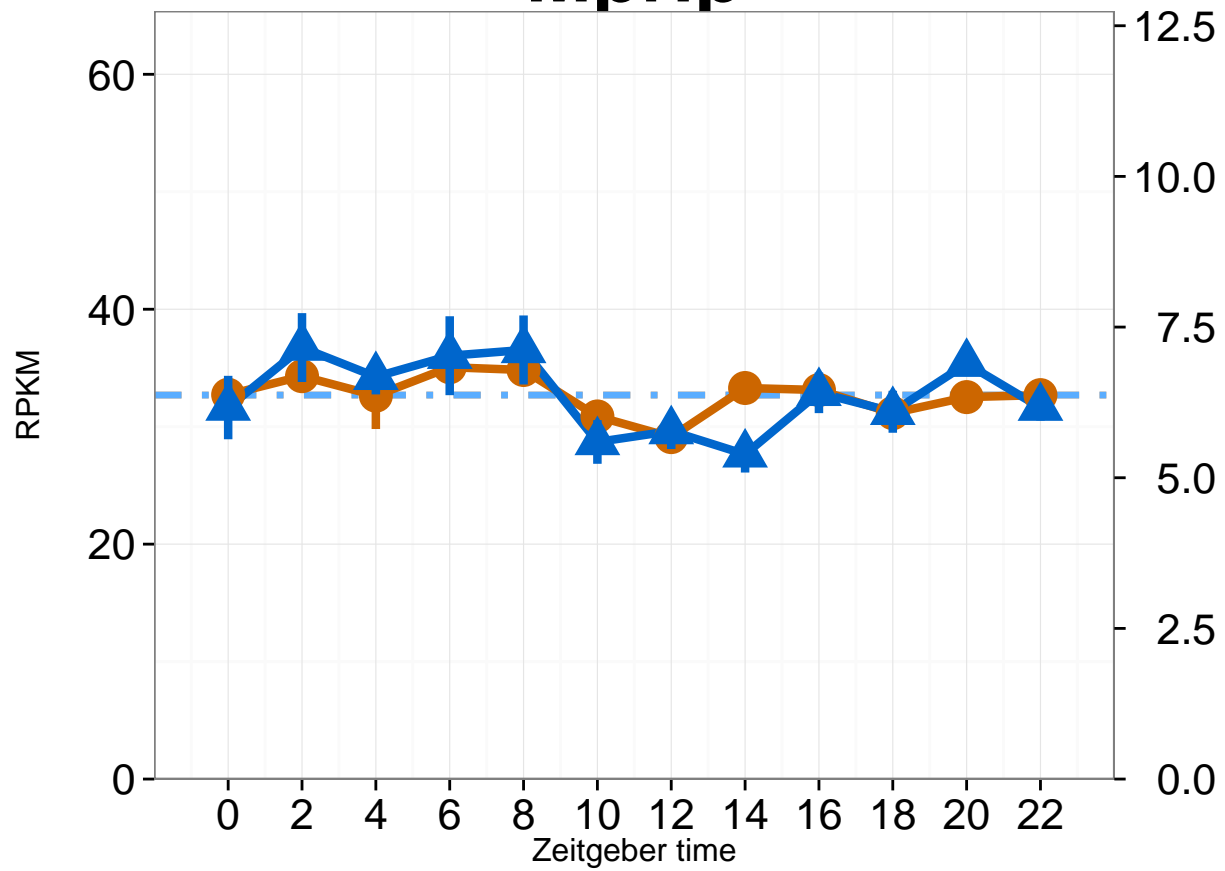

## Mprip

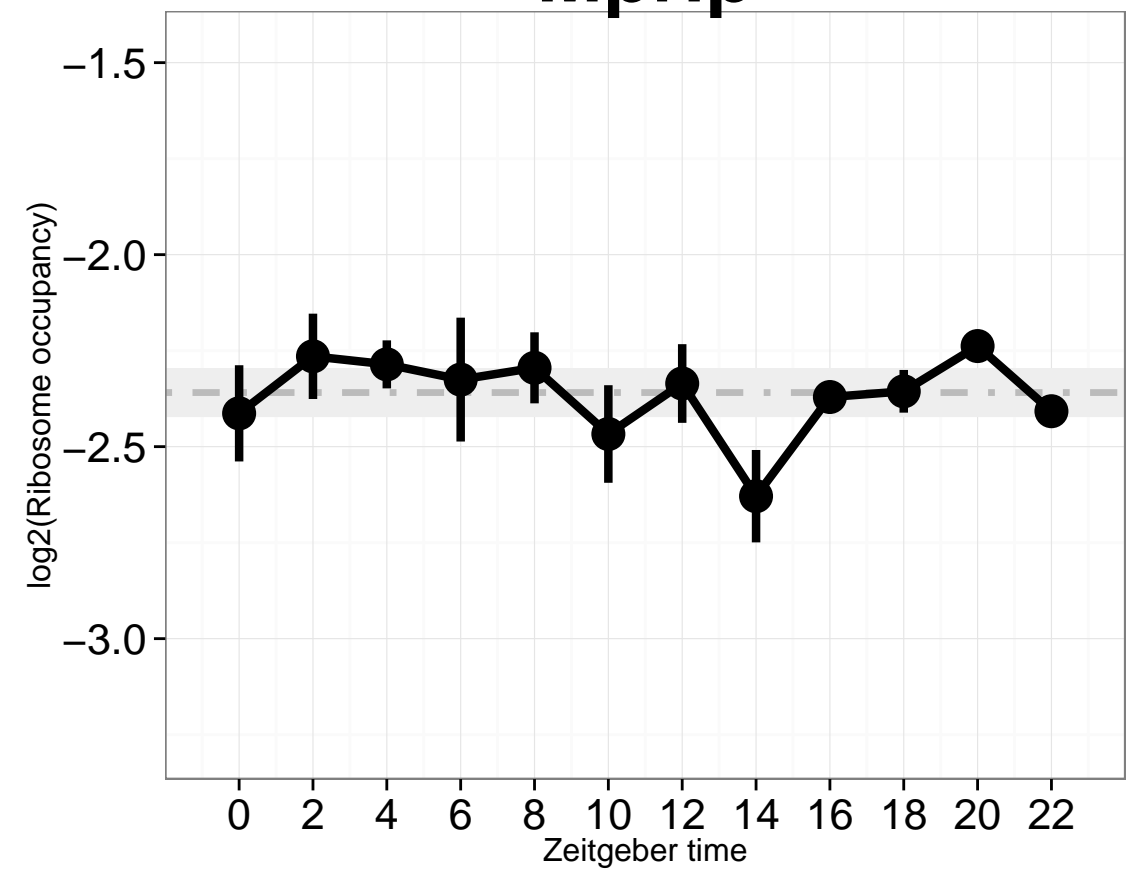

Supplement: Supplementary file 8605 [file 1]

## Farp1

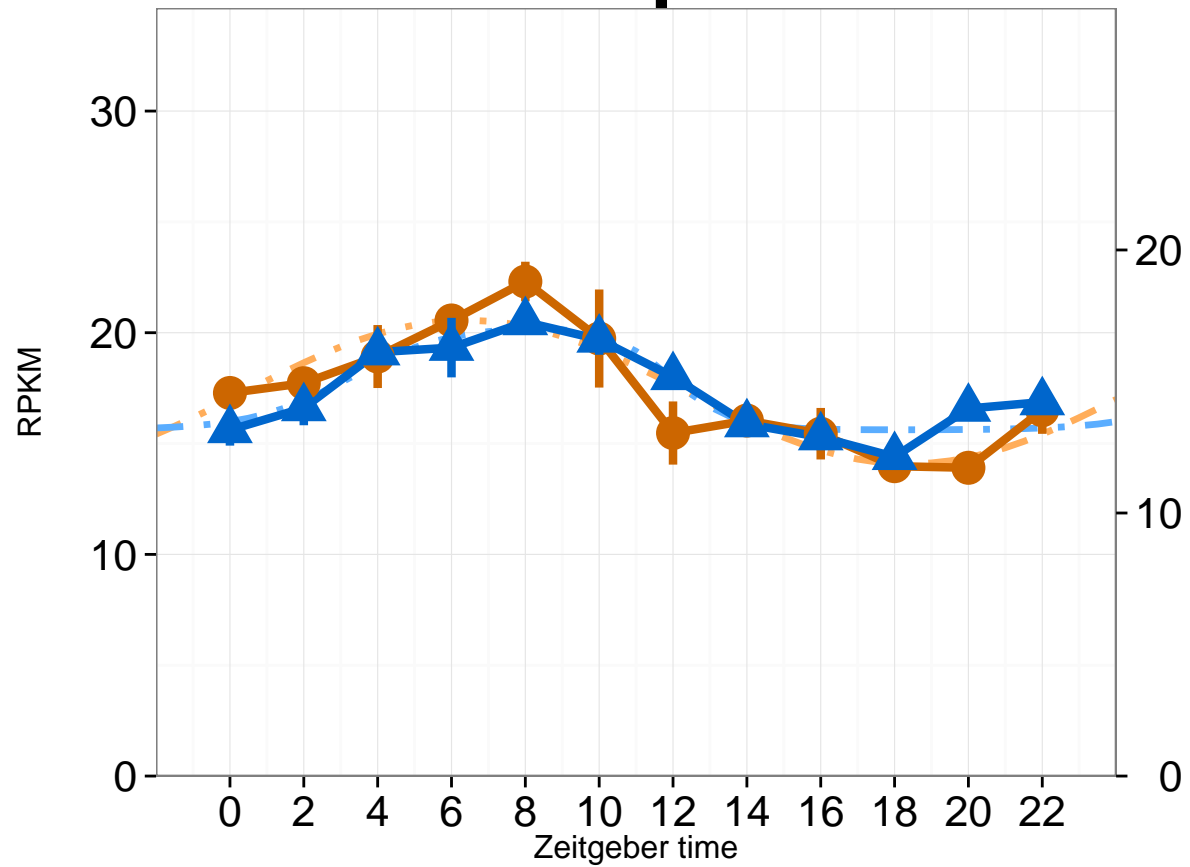

## Farp1

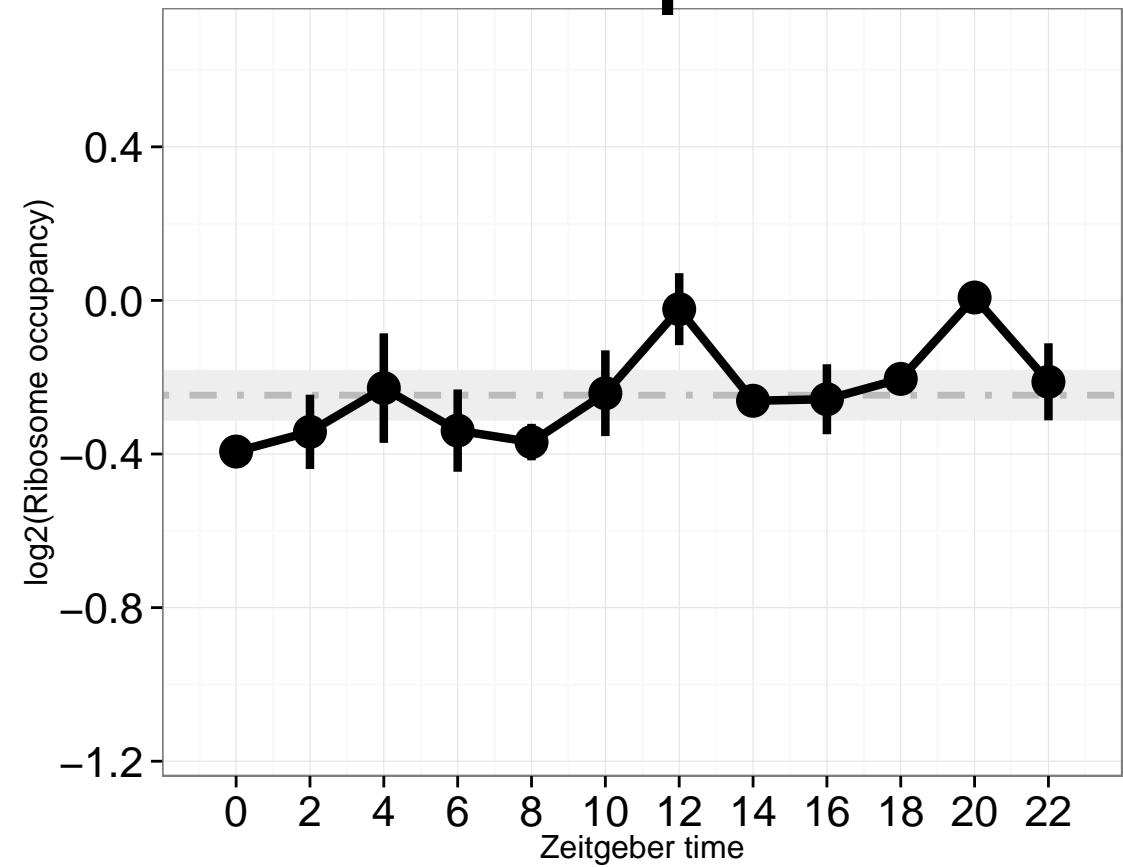

Supplement: Supplementary file 8606 [file 1]

# Psma4

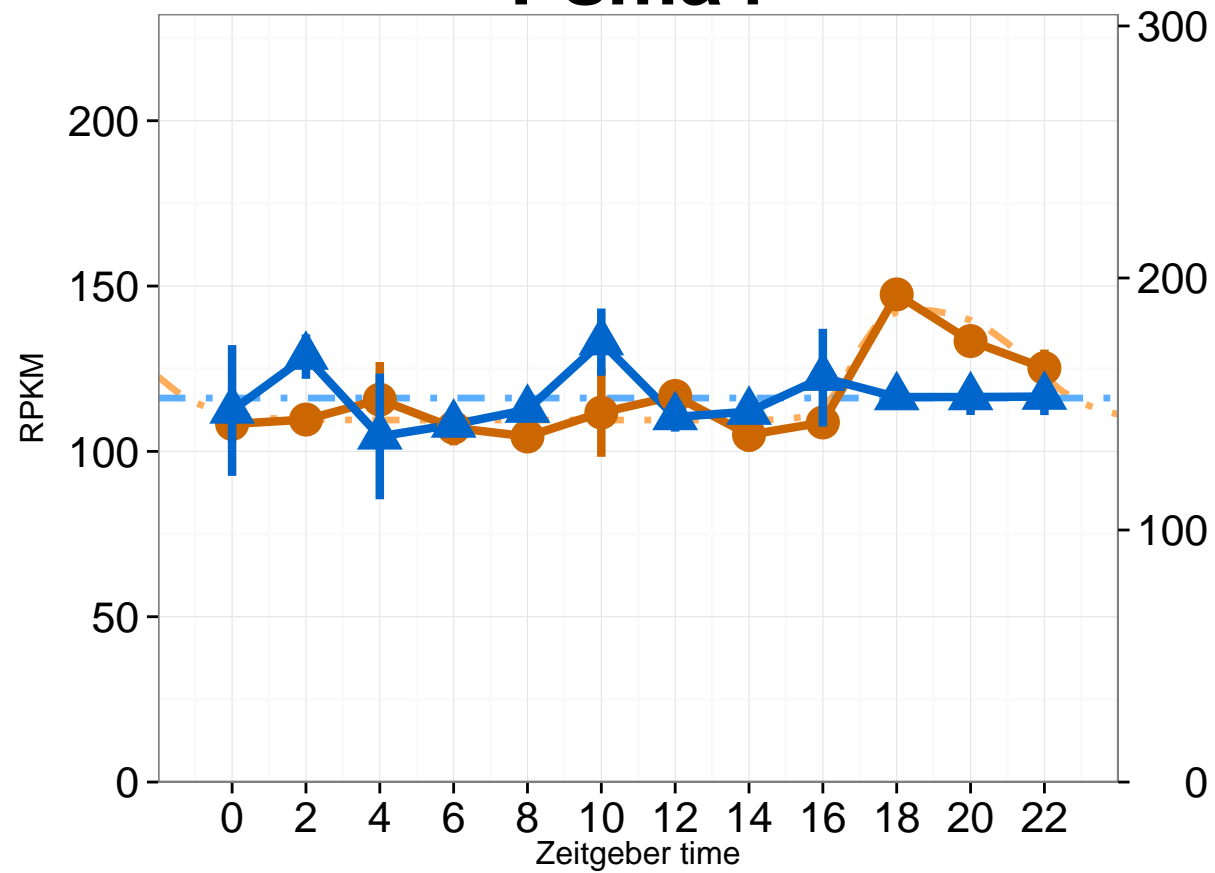

# Psma4

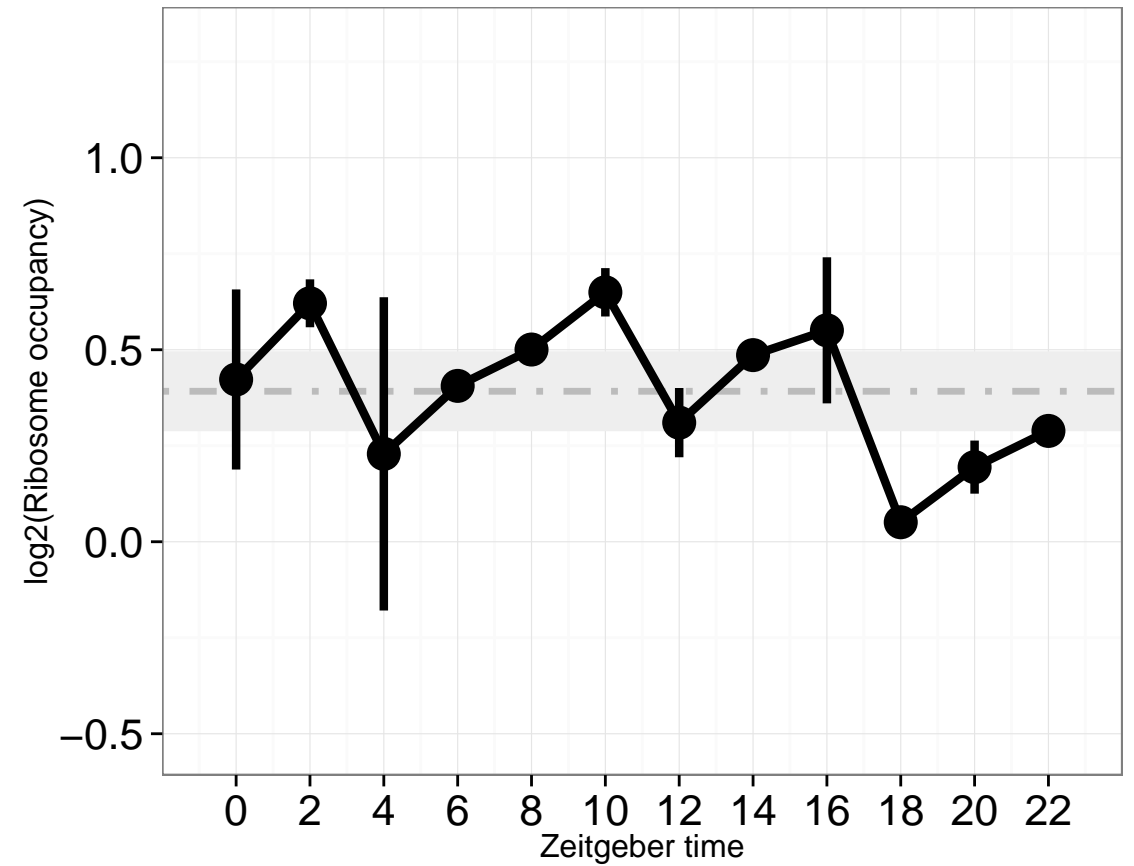

Supplement: Supplementary file 8607 [file 1]

# Hsd11b1

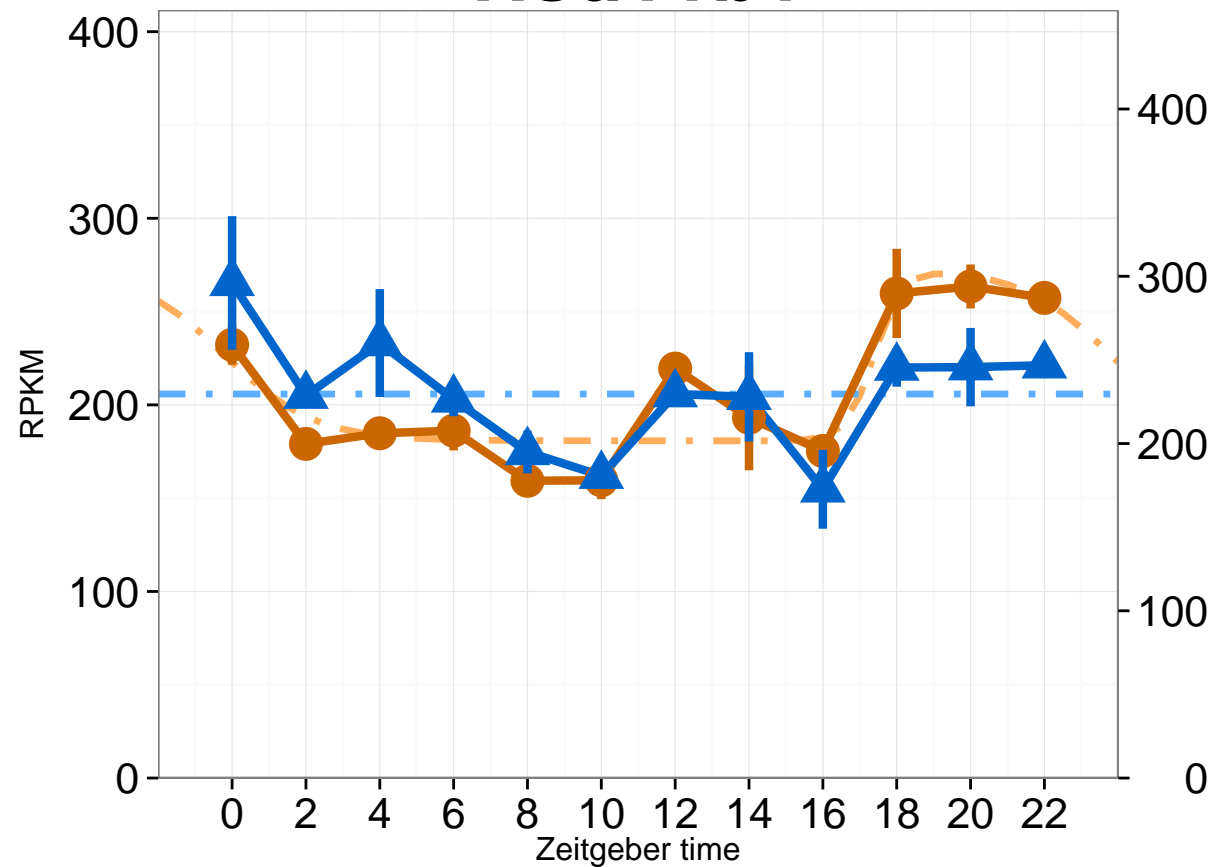

# Hsd11b1

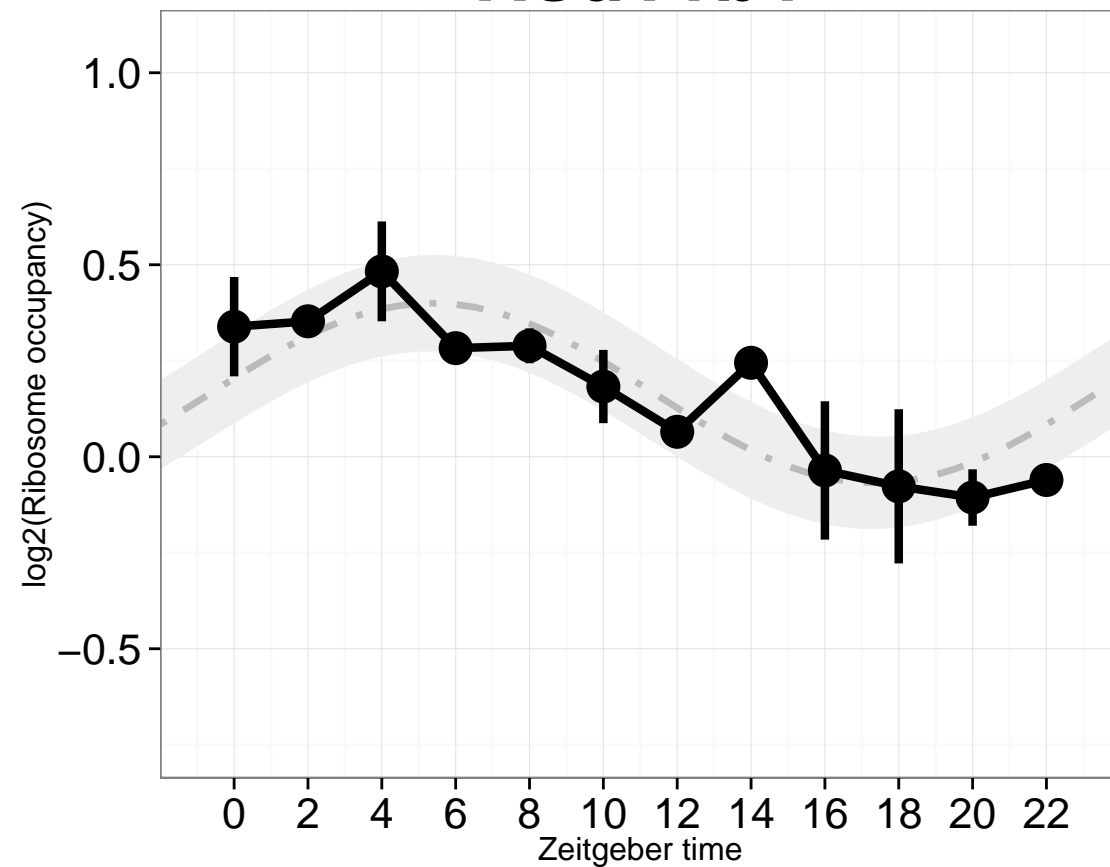

Supplement: Supplementary file 8608 [file 1]

Dnajc27

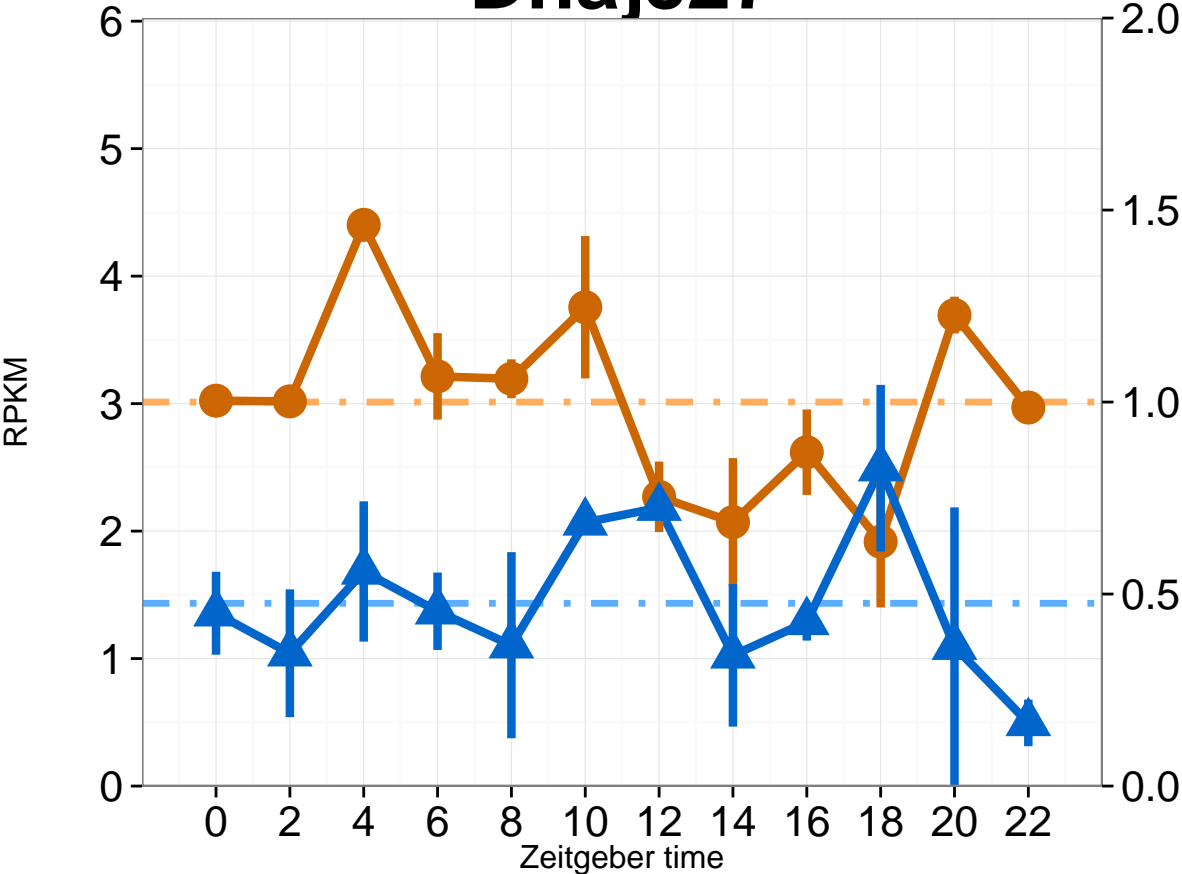

Dnajc27

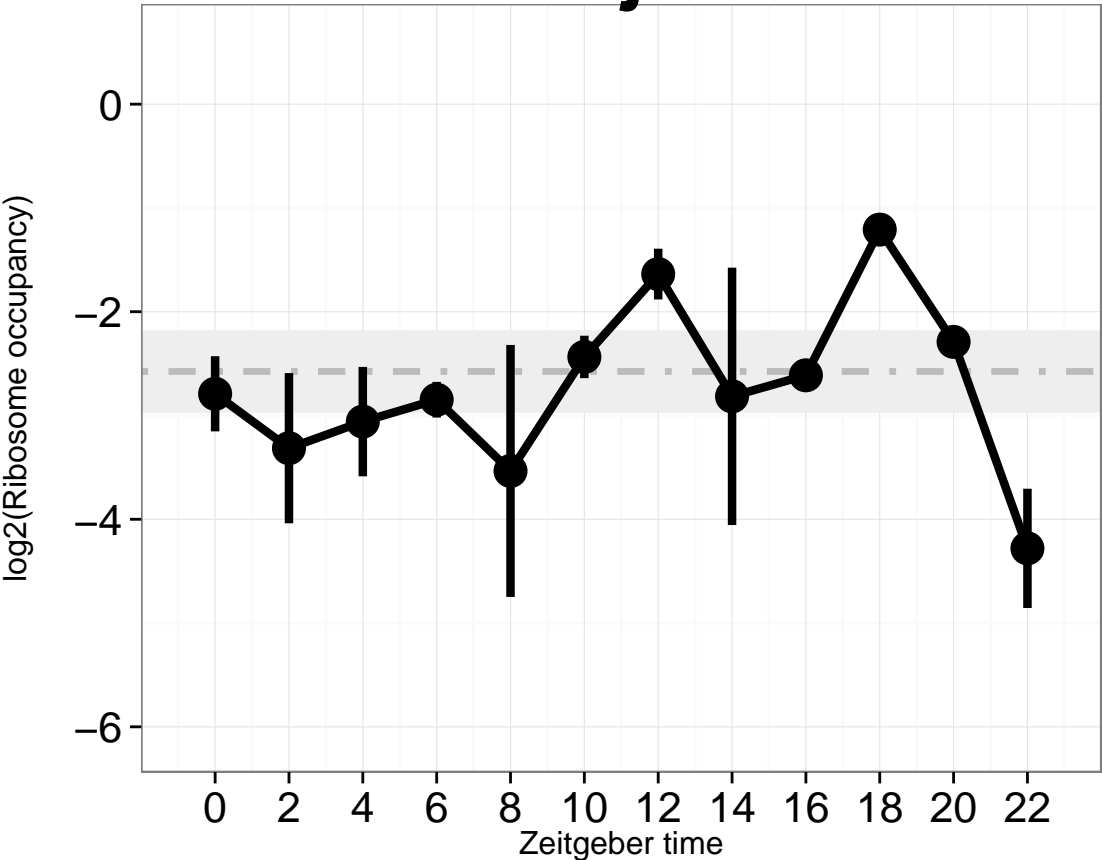

Supplement: Supplementary file 8609 [file 1]

## Serhl

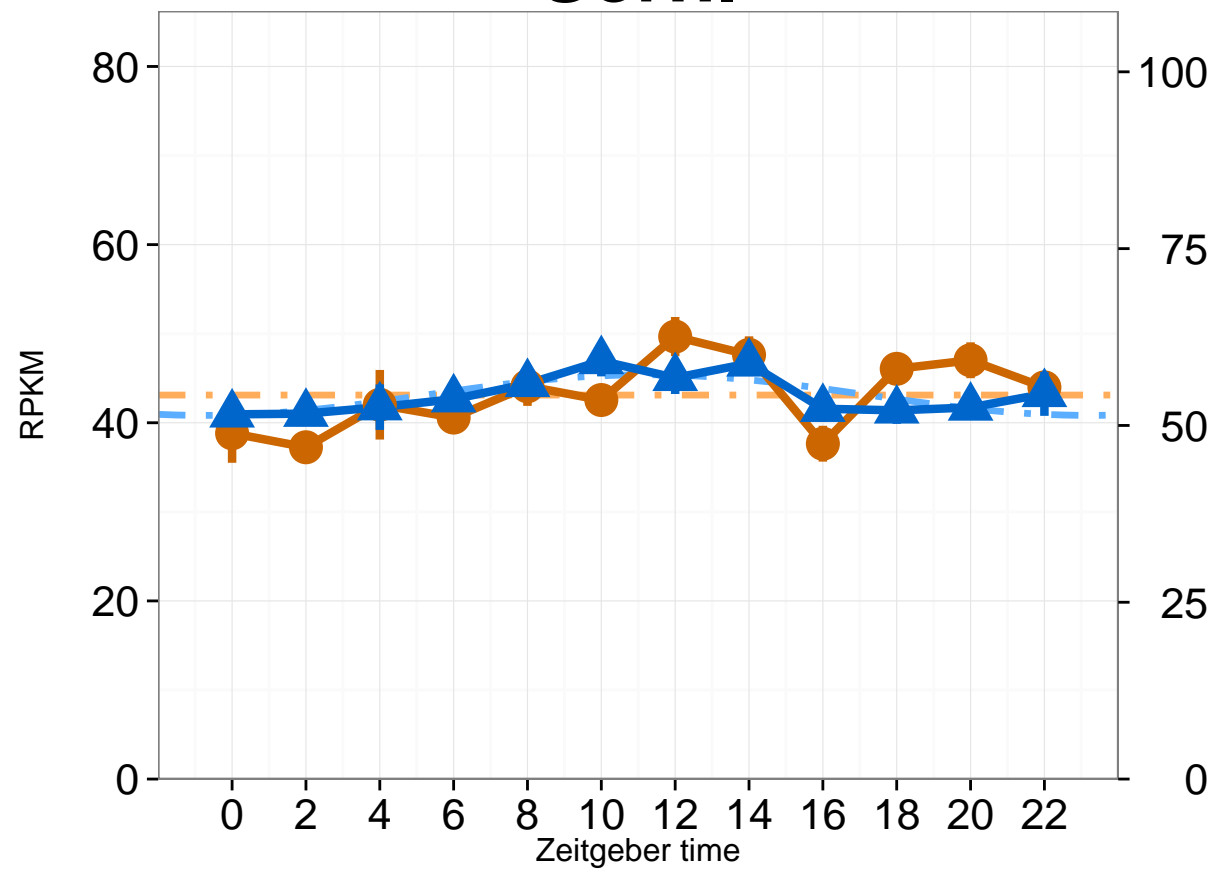

## Serhl

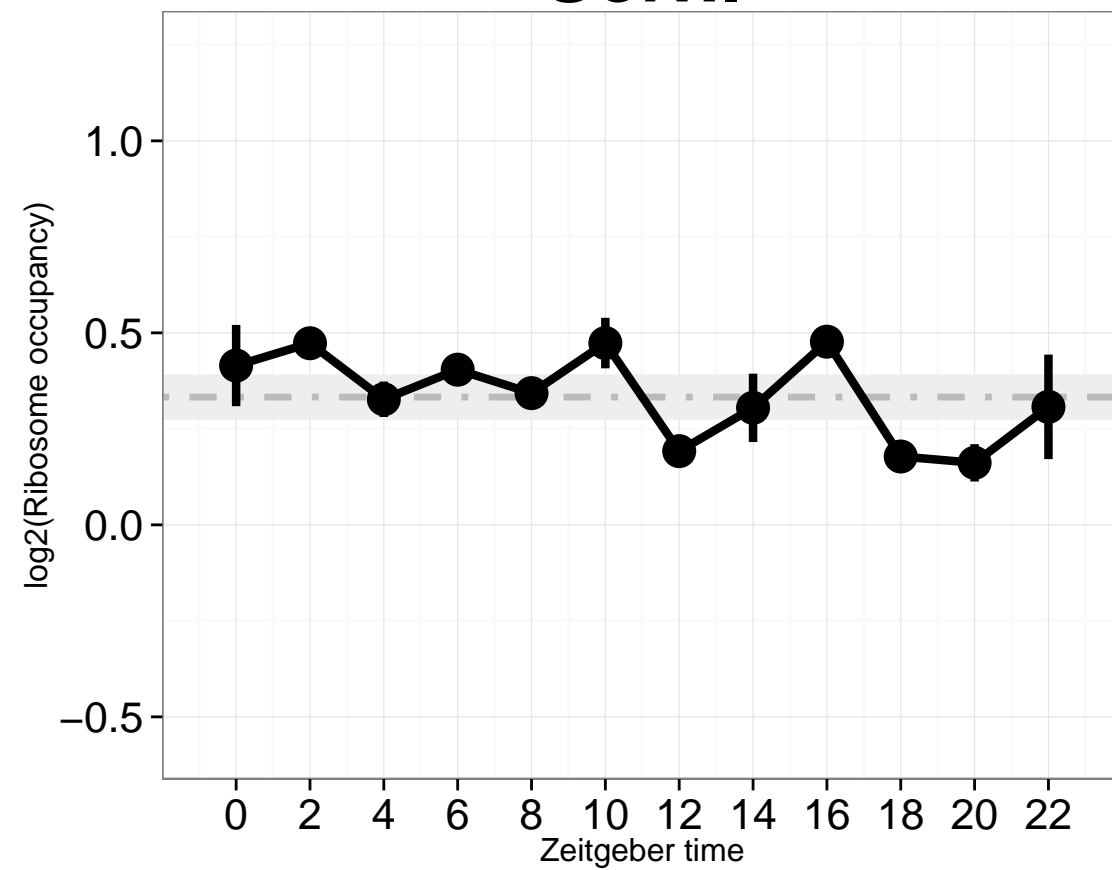

Supplement: Supplementary file 8610 [file 1]

## Epas1

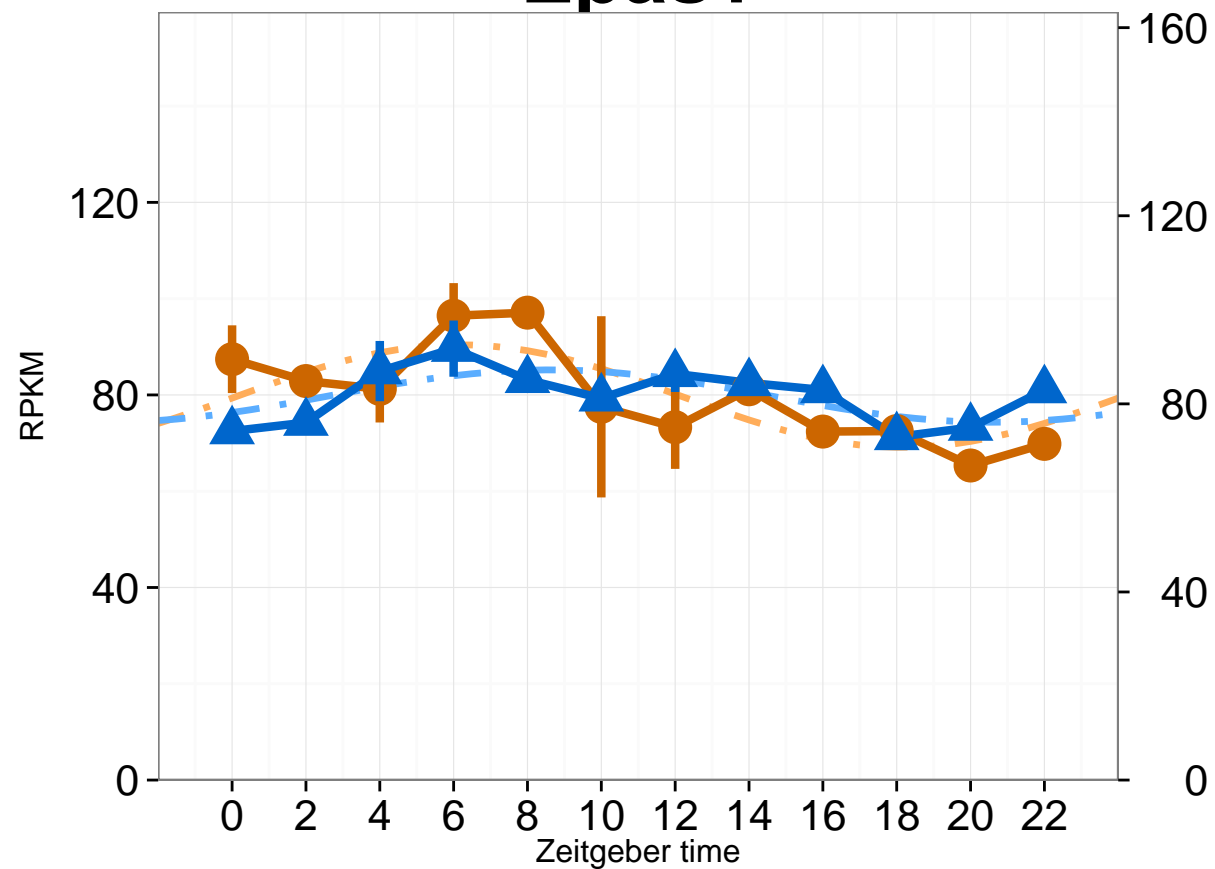

## Epas1

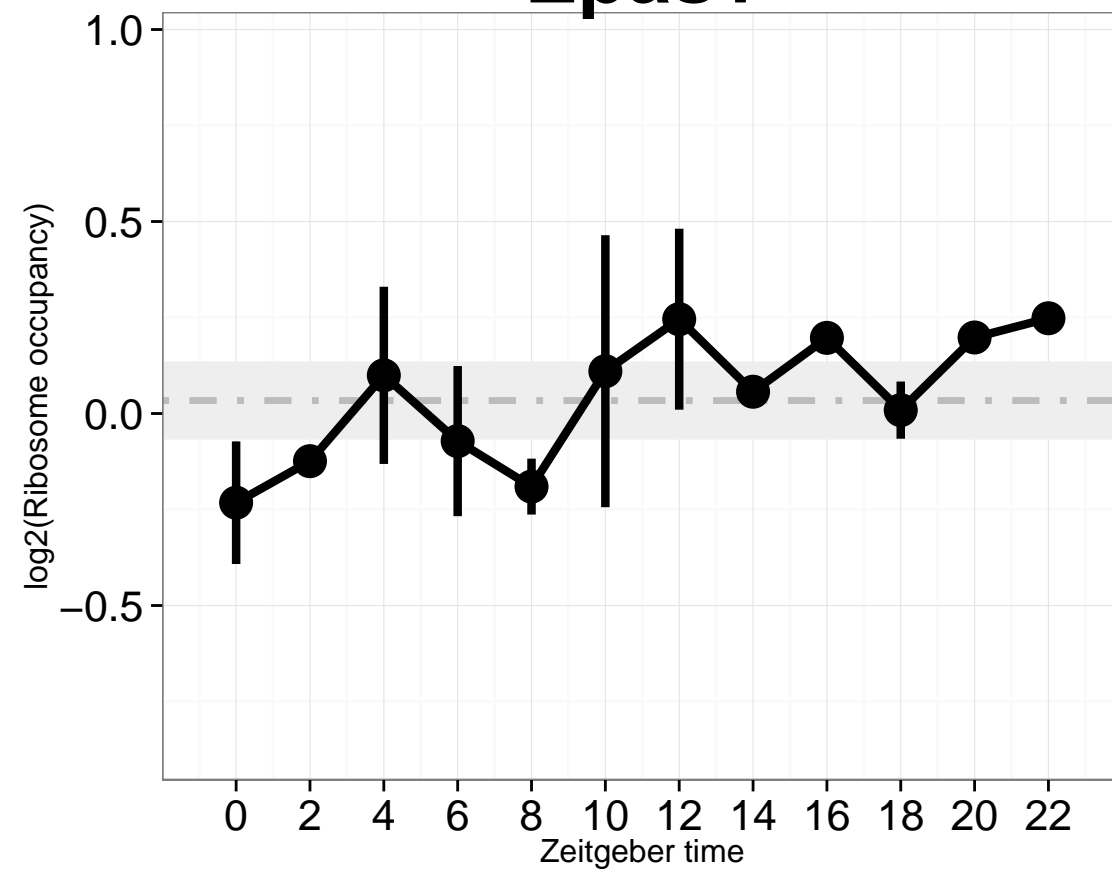

Supplement: Supplementary file 8611 [file 1]

## Ppih

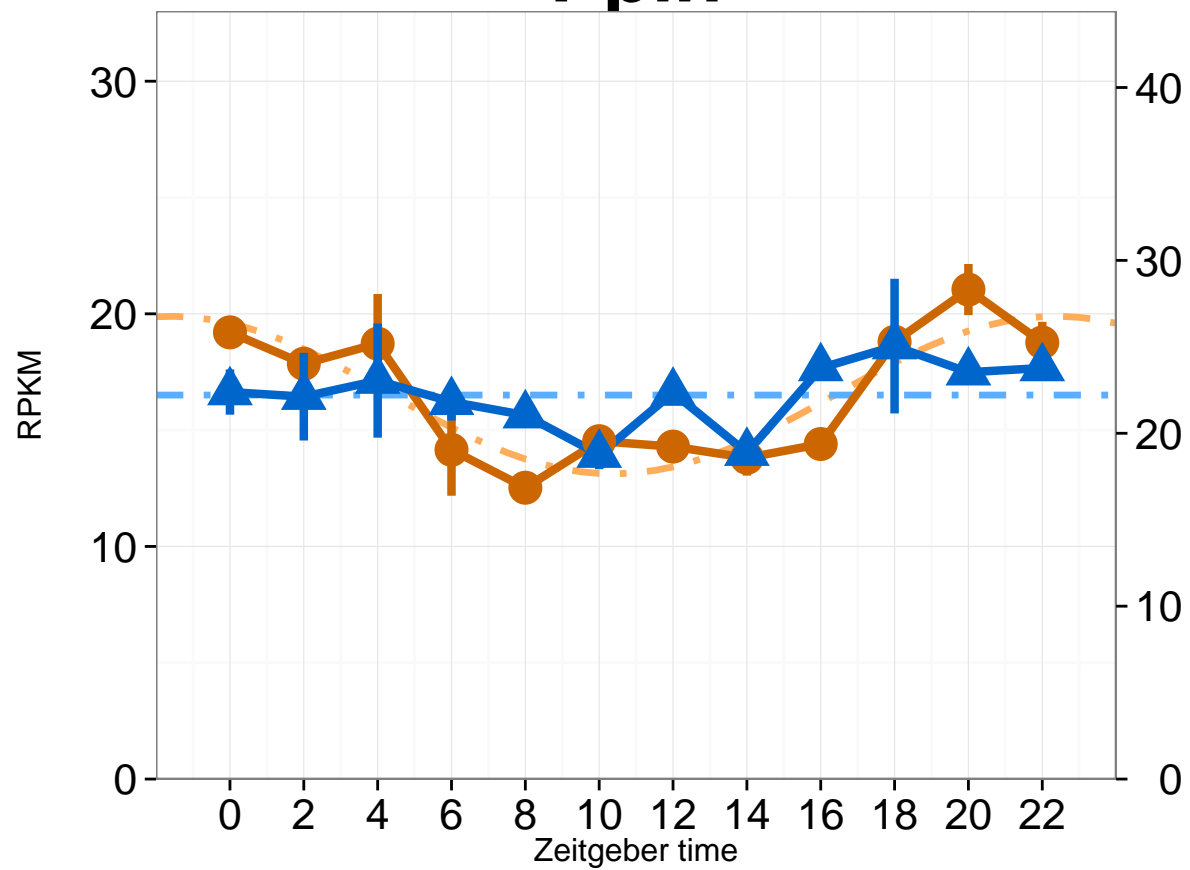

## Ppih

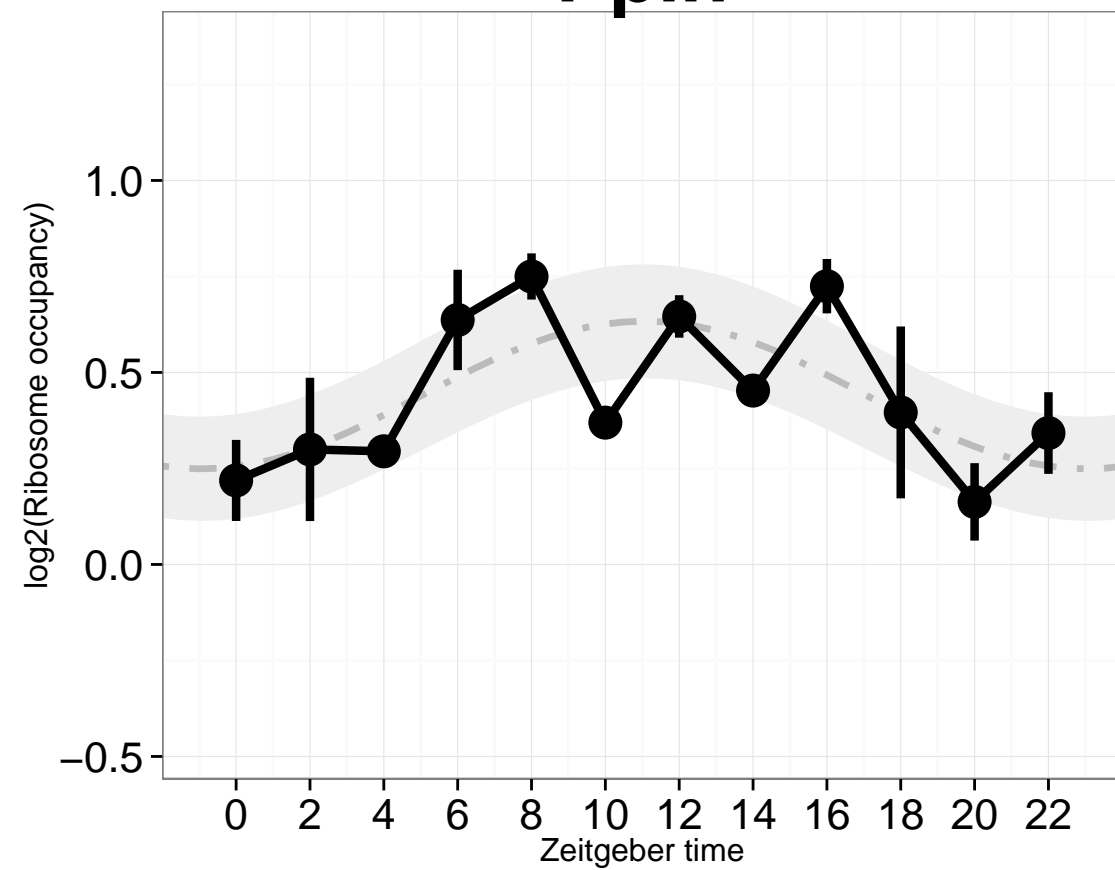

Supplement: Supplementary file 8612 [file 1]

## Chd1

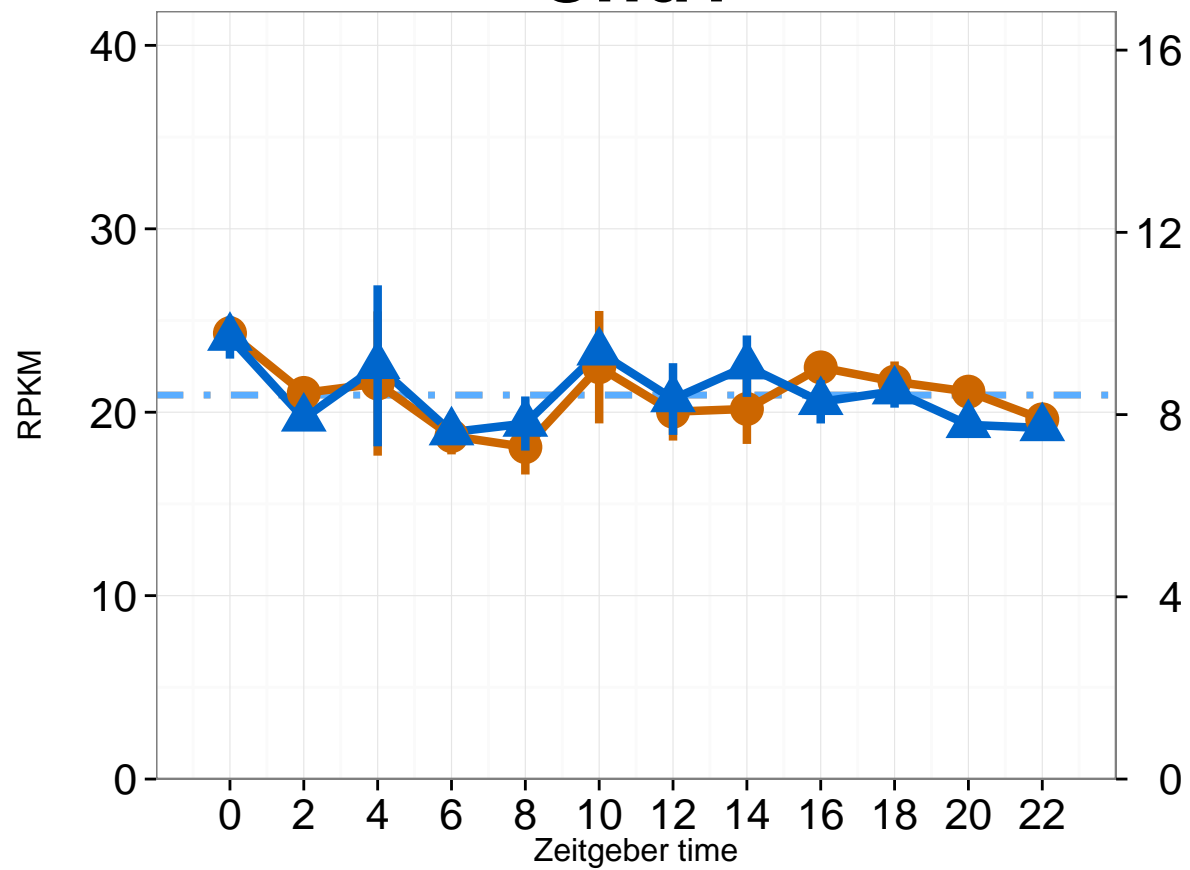

## Chd1

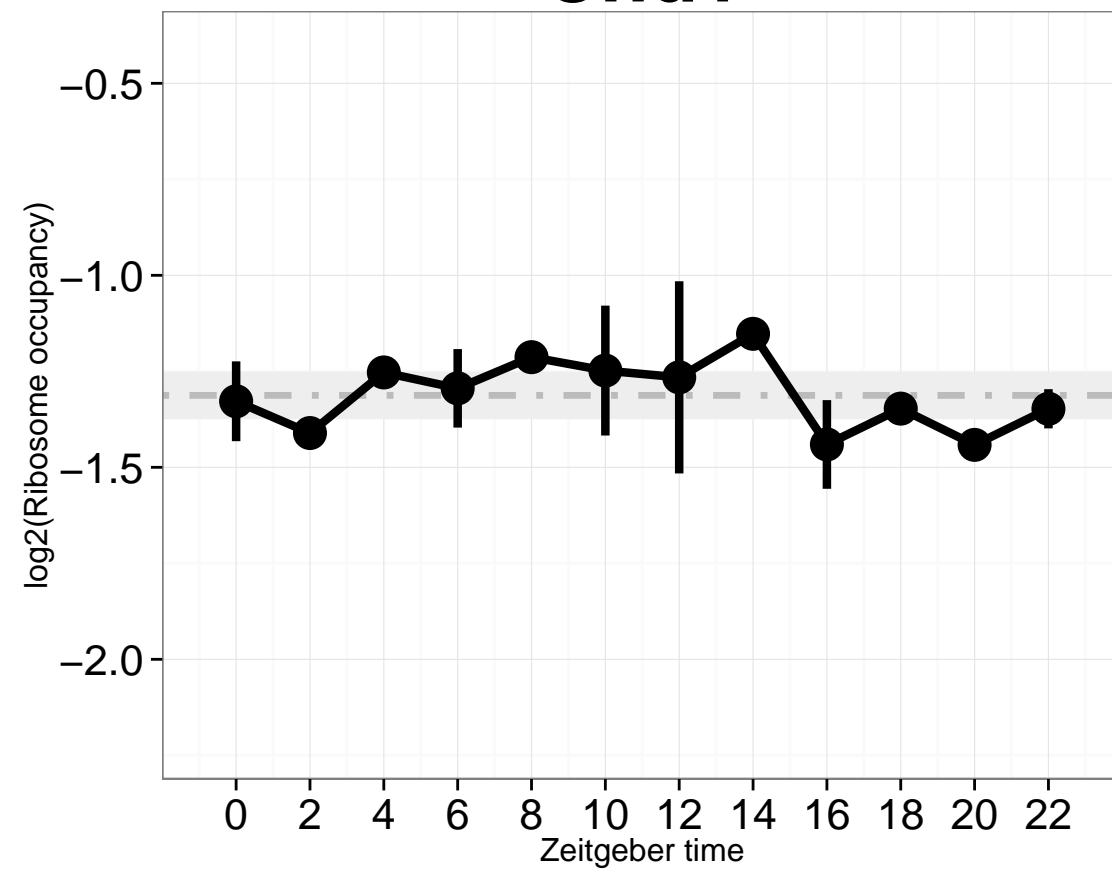

Supplement: Supplementary file 8613 [file 1]

## Rnd2

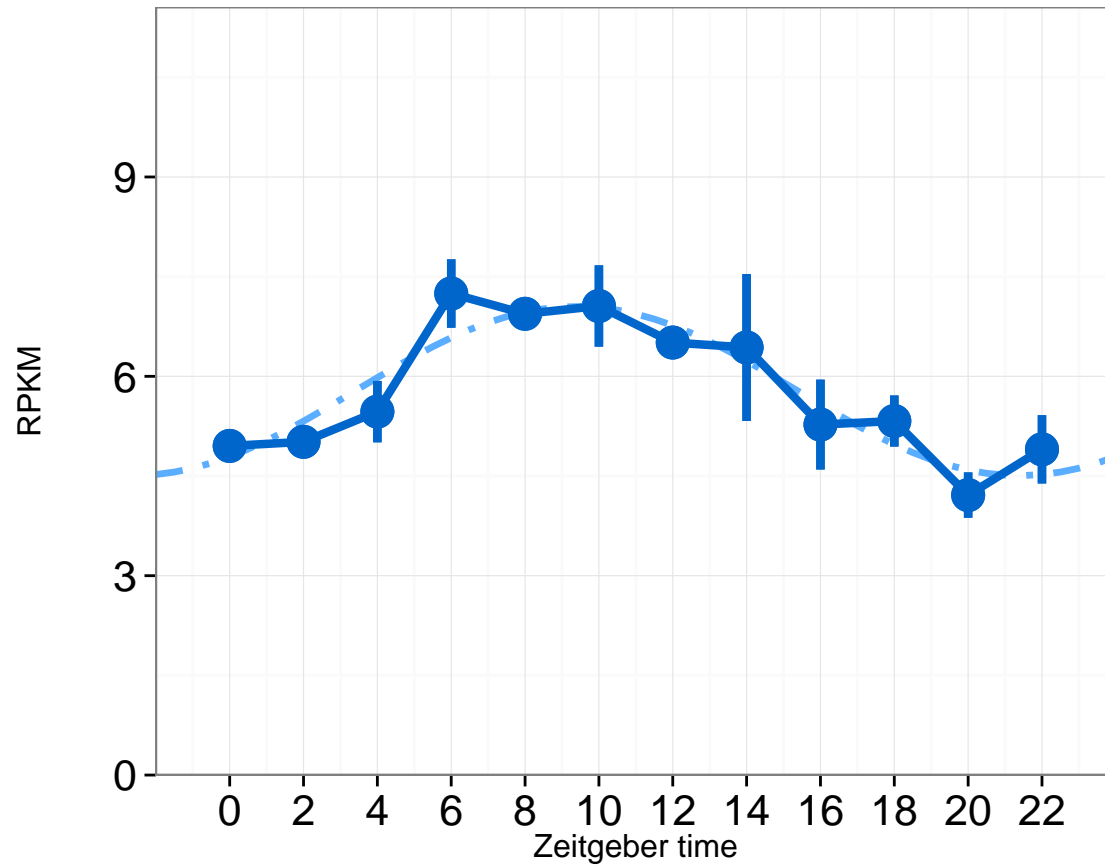

## Rnd2 log2(Ribosome occupancy)

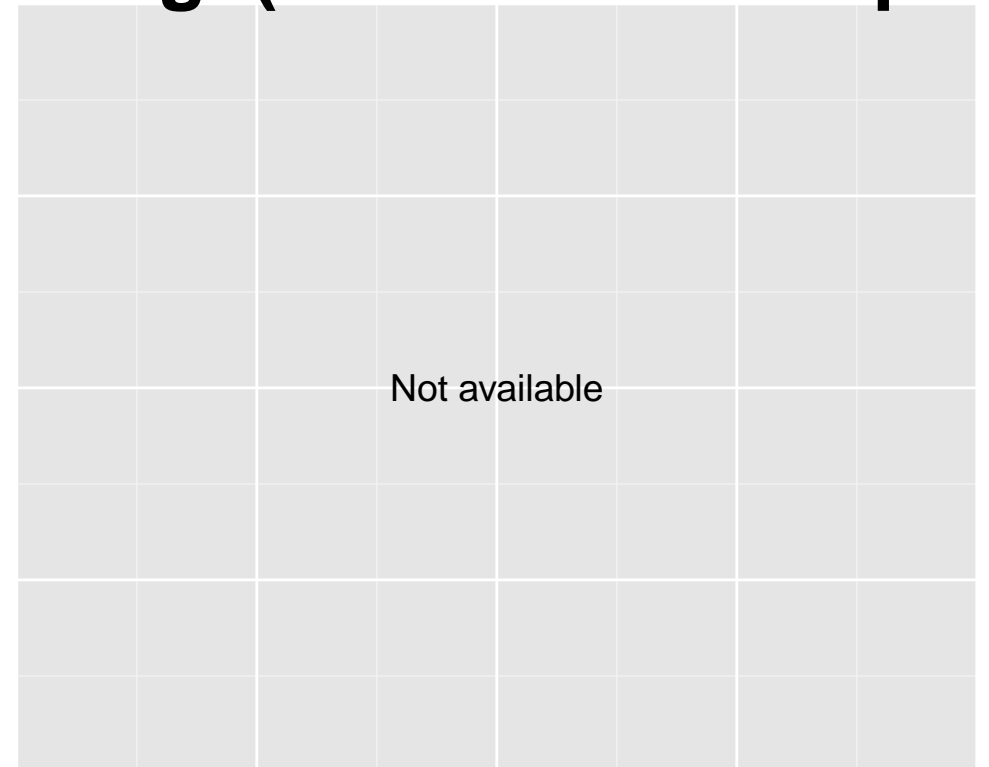

Supplement: Supplementary file 8614 [file 1]

# Tsen34

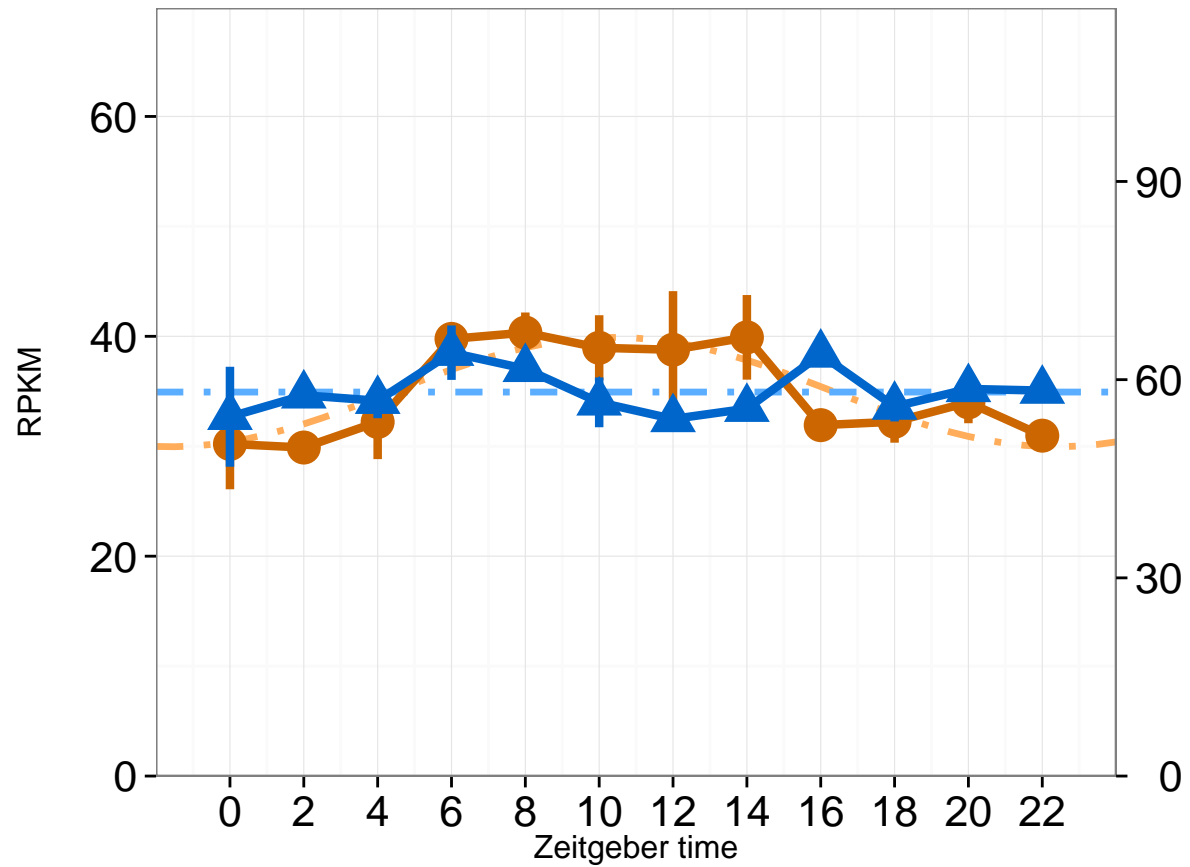

# Tsen34

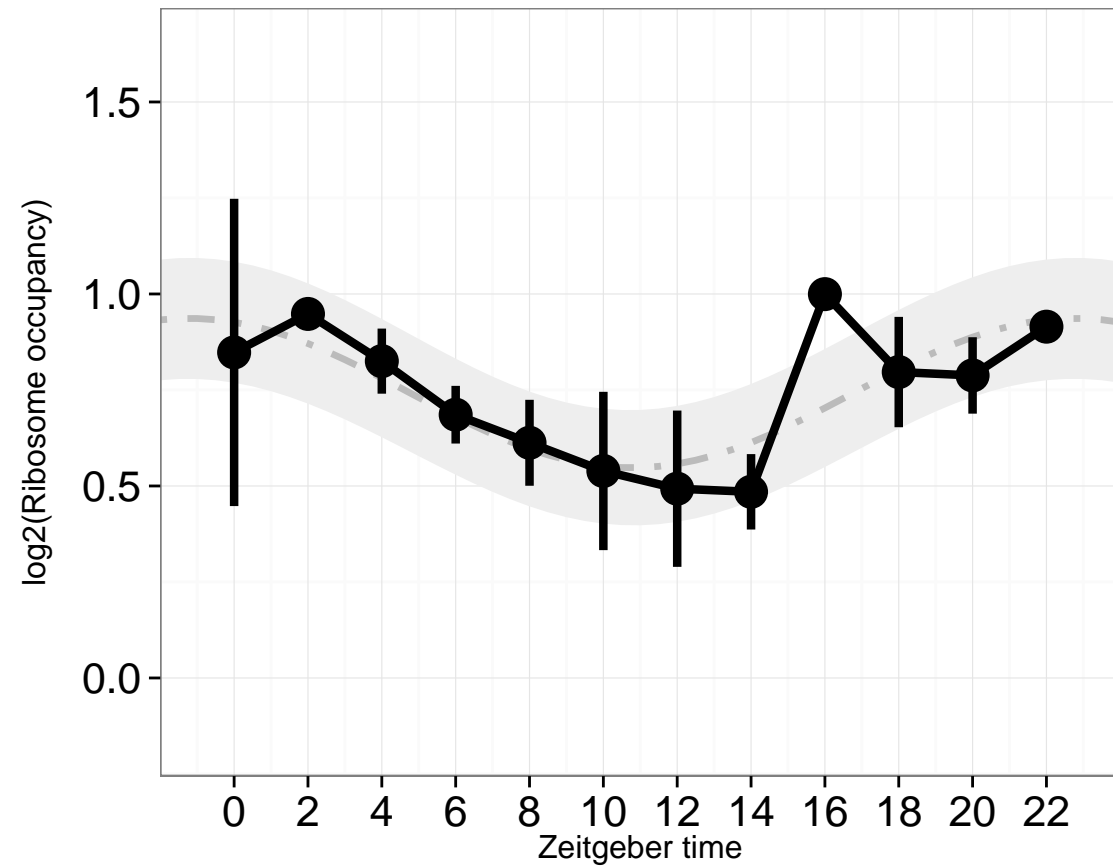

Supplement: Supplementary file 8615 [file 1]

# Srd5a2

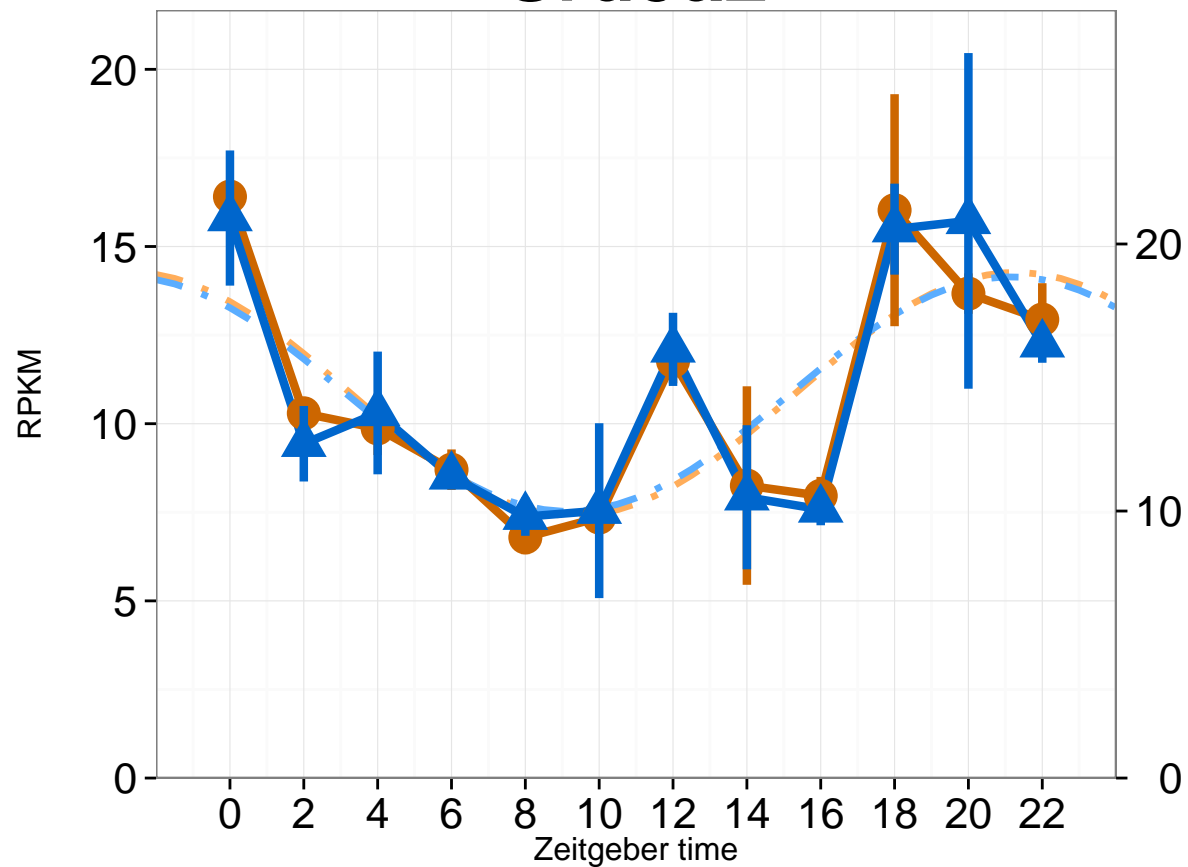

# Srd5a2

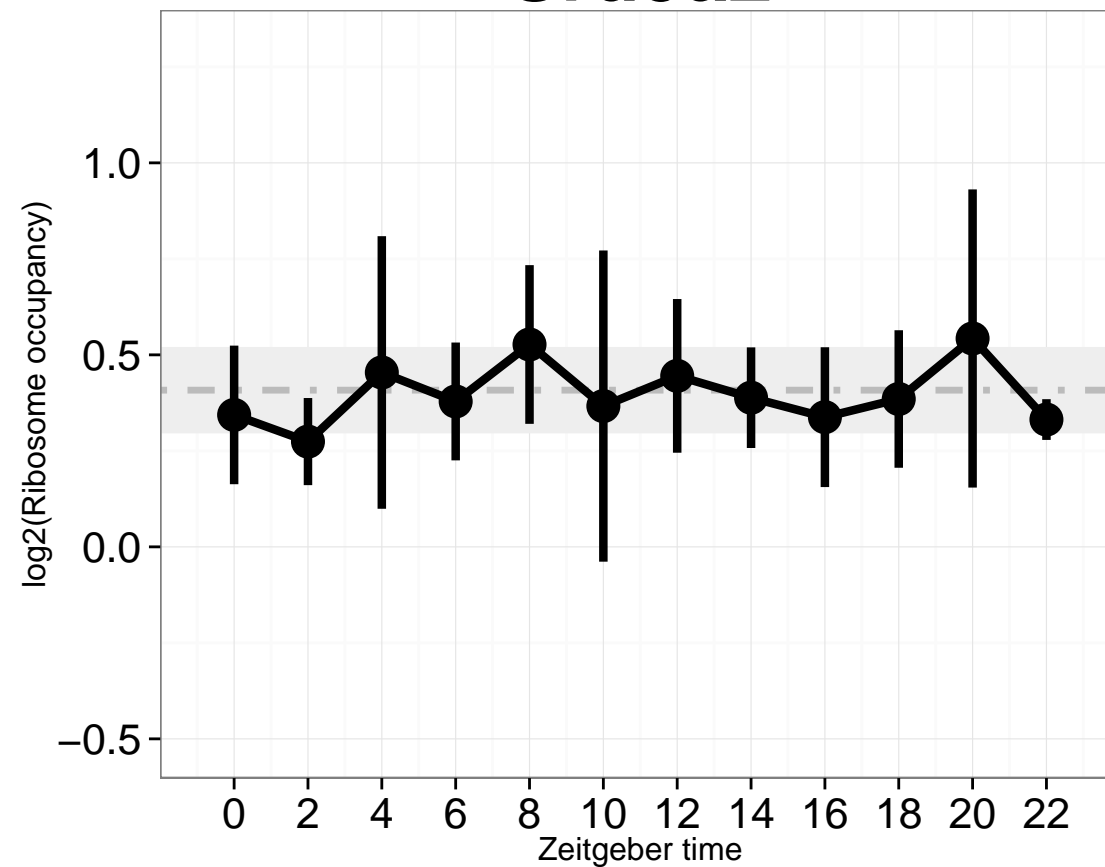

Supplement: Supplementary file 8616 [file 1]

## Thumpd1

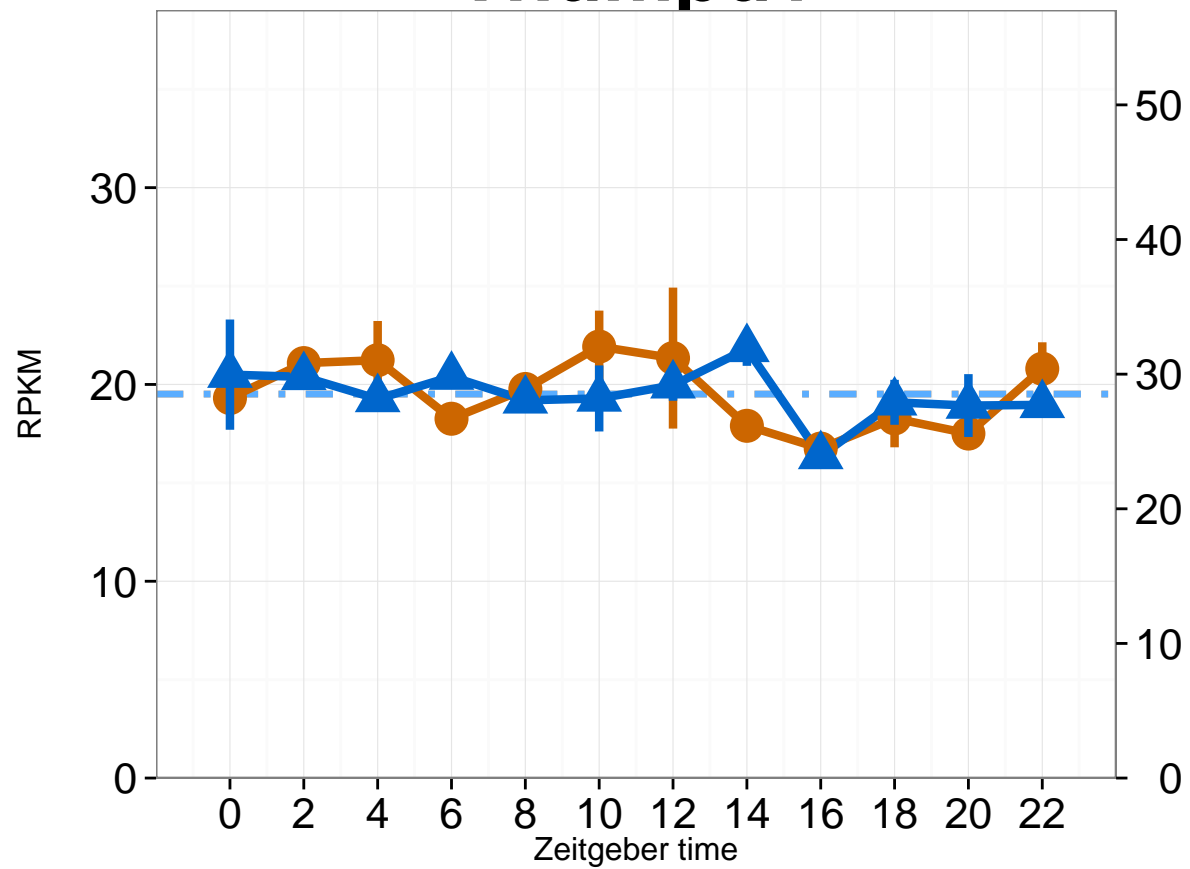

## Thumpd1

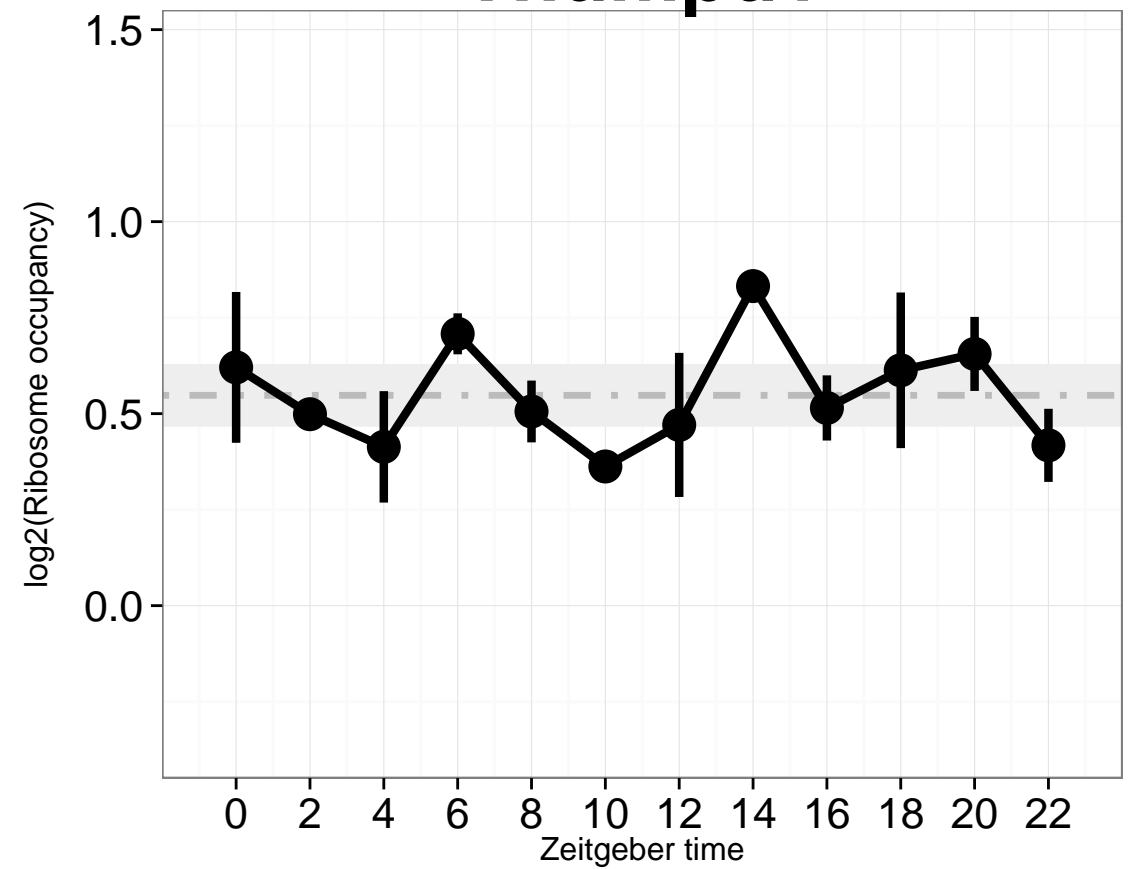

Supplement: Supplementary file 8617 [file 1]

## Ptgfrn

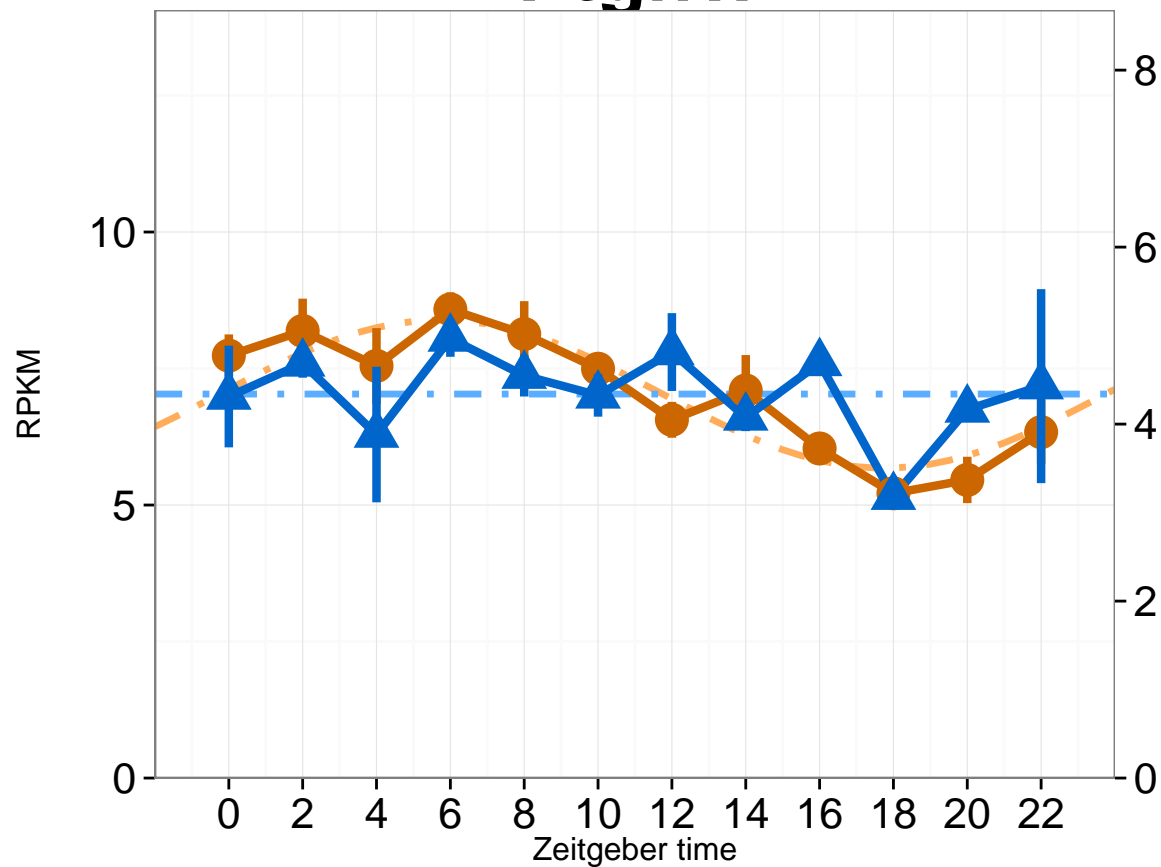

## Ptgfrn

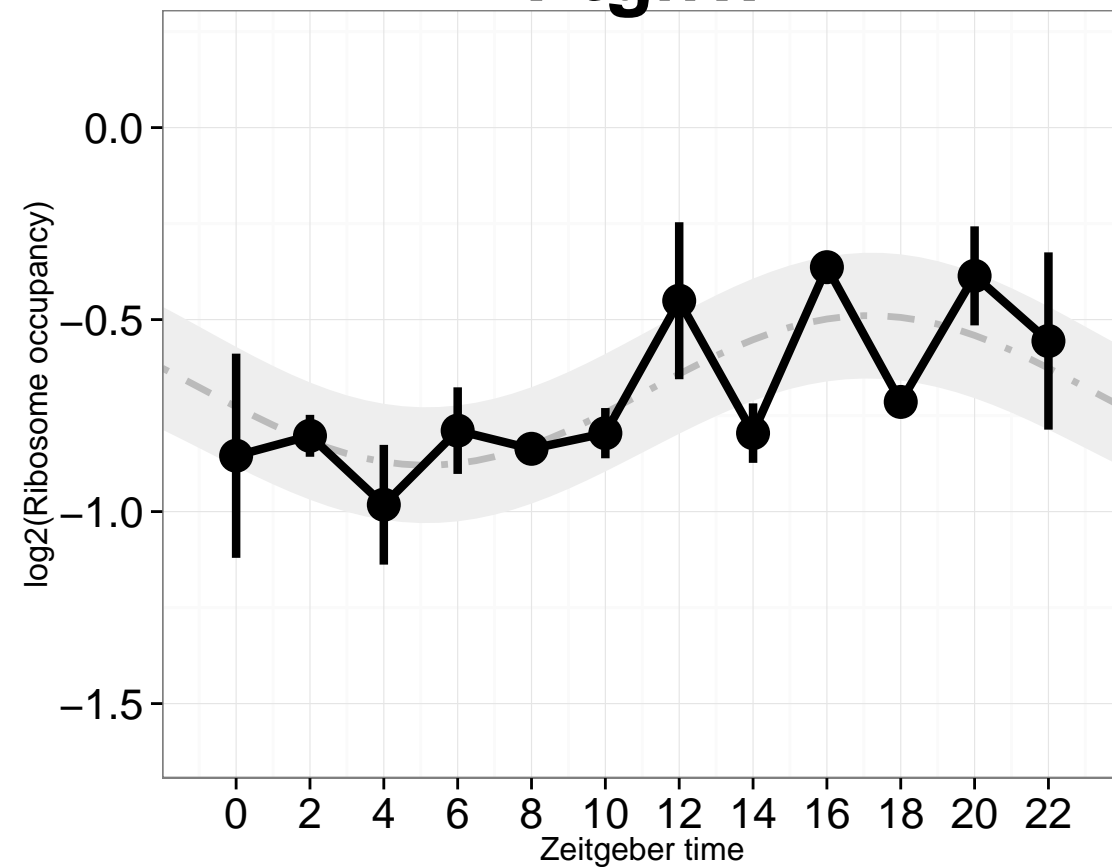

Supplement: Supplementary file 8618 [file 1]

# Ptpn9

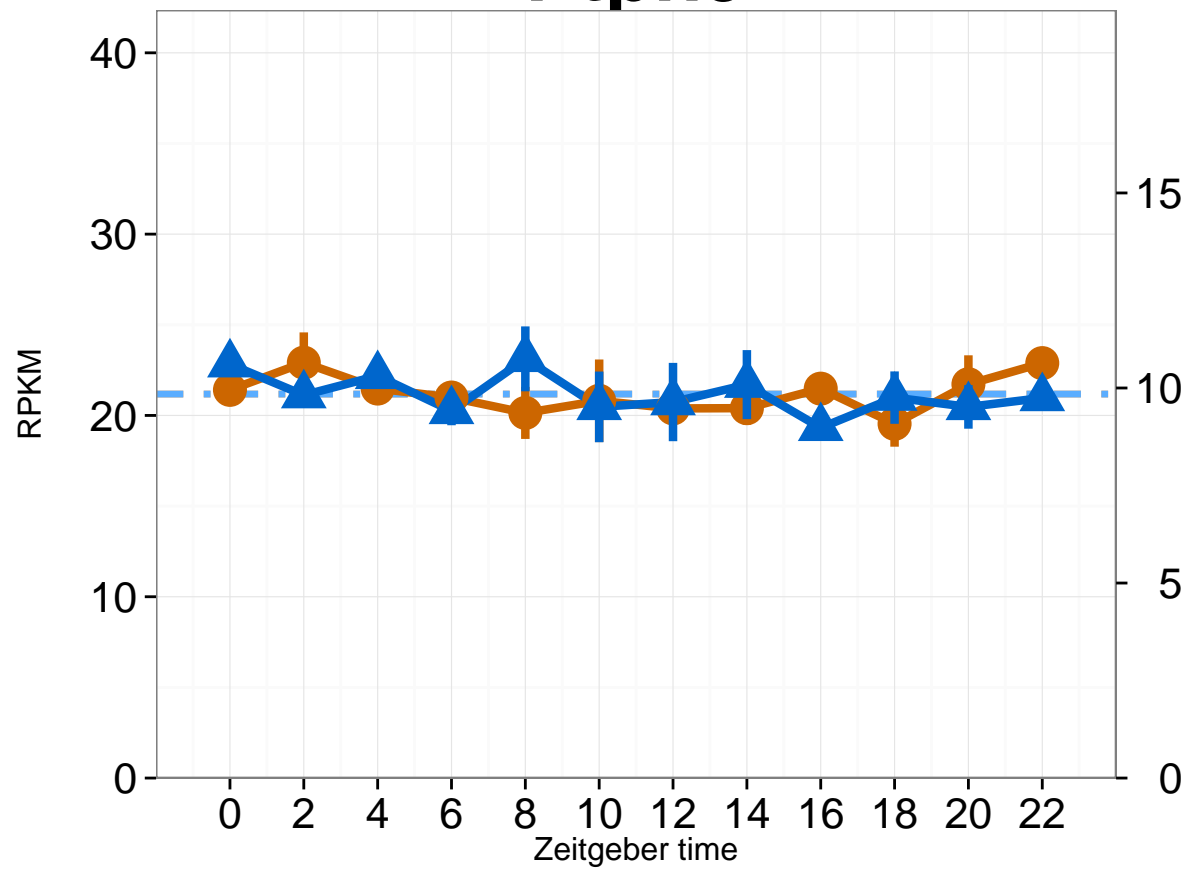

# Ptpn9

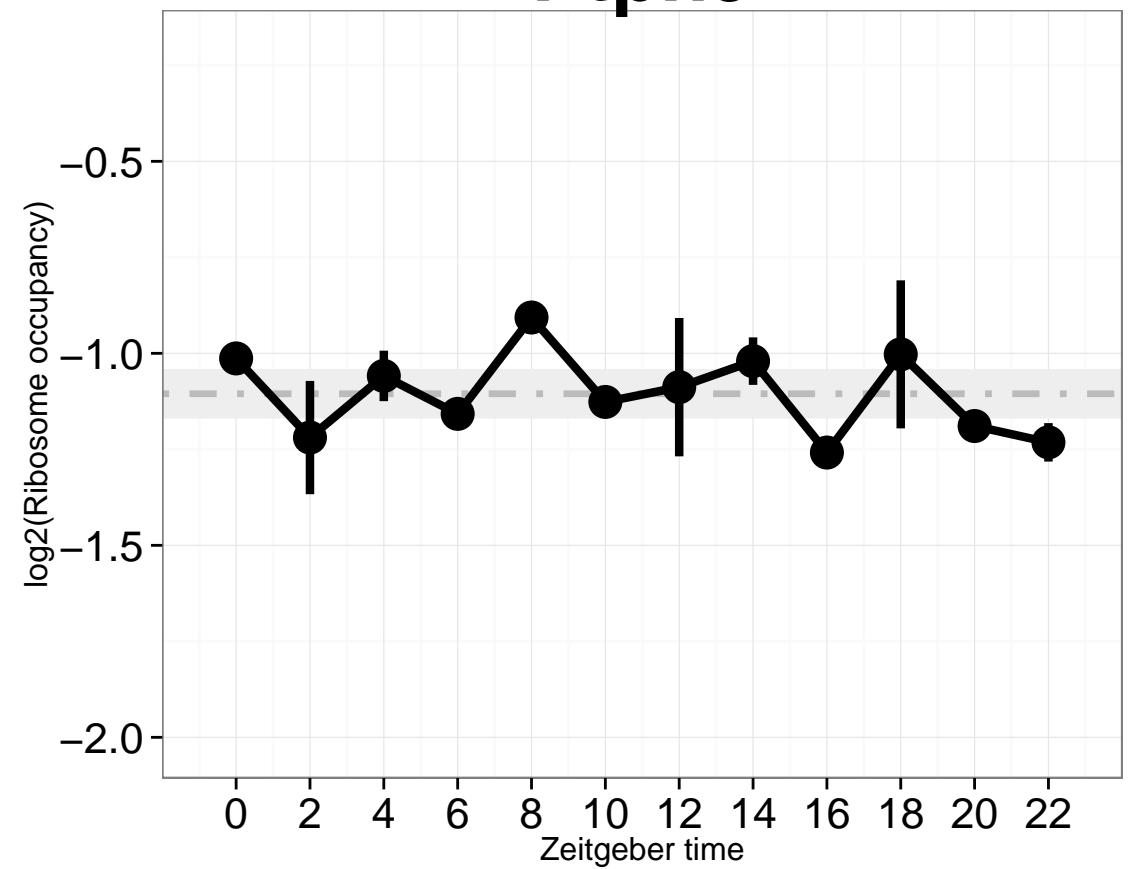

Supplement: Supplementary file 8619 [file 1]

# Dnajc16

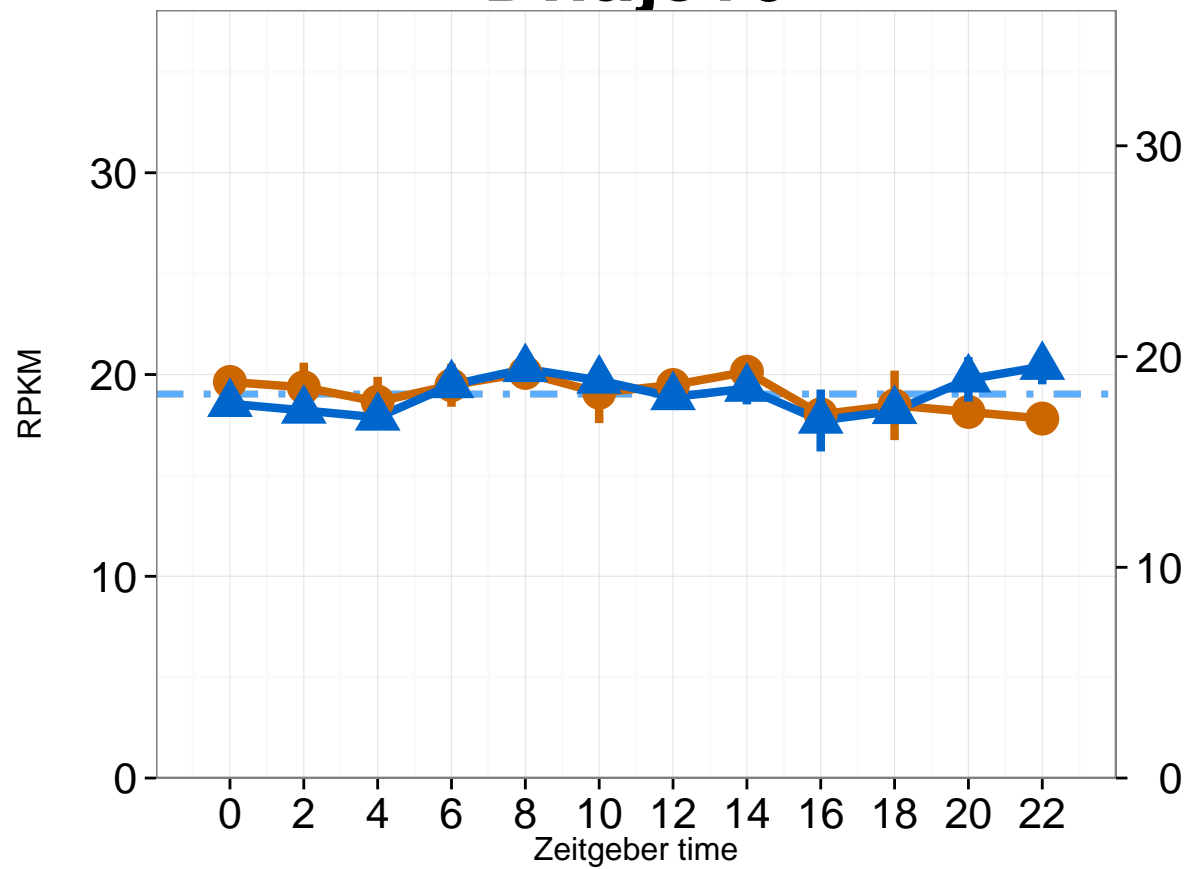

# Dnajc16

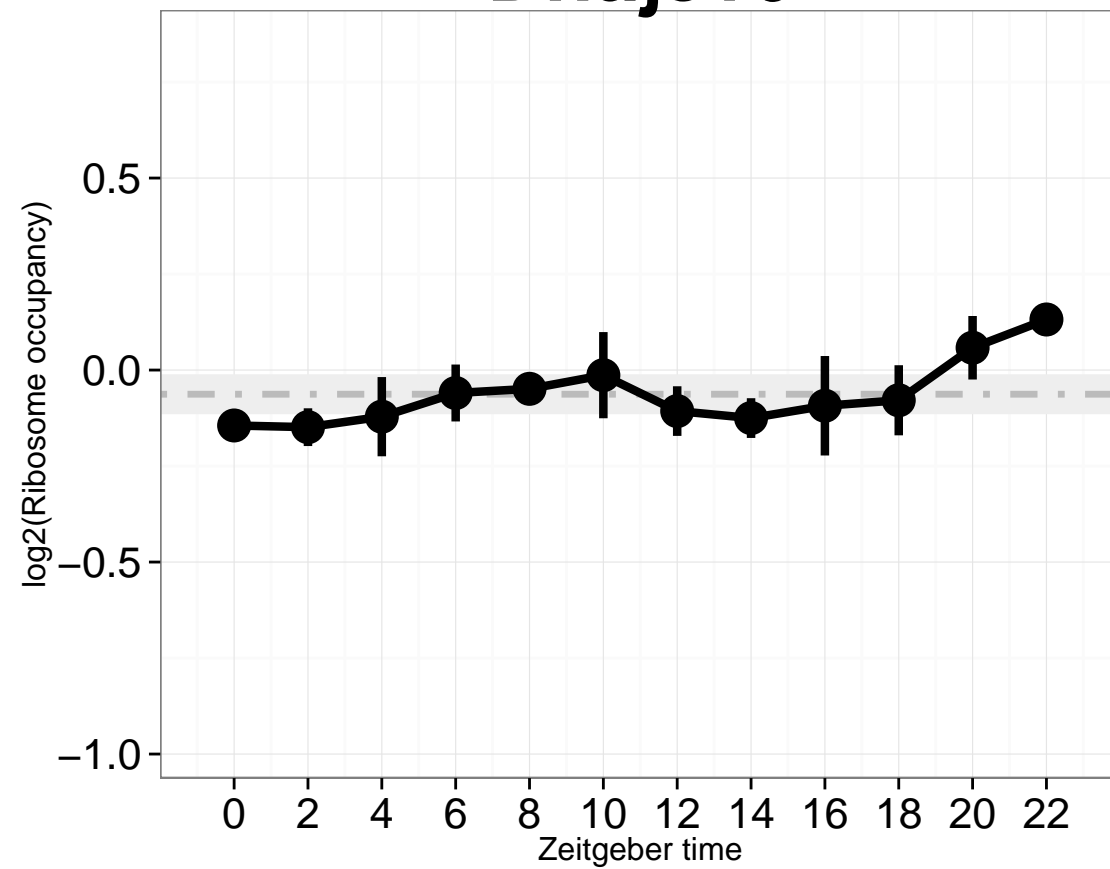

Supplement: Supplementary file 8620 [file 1]

# Mrpl17

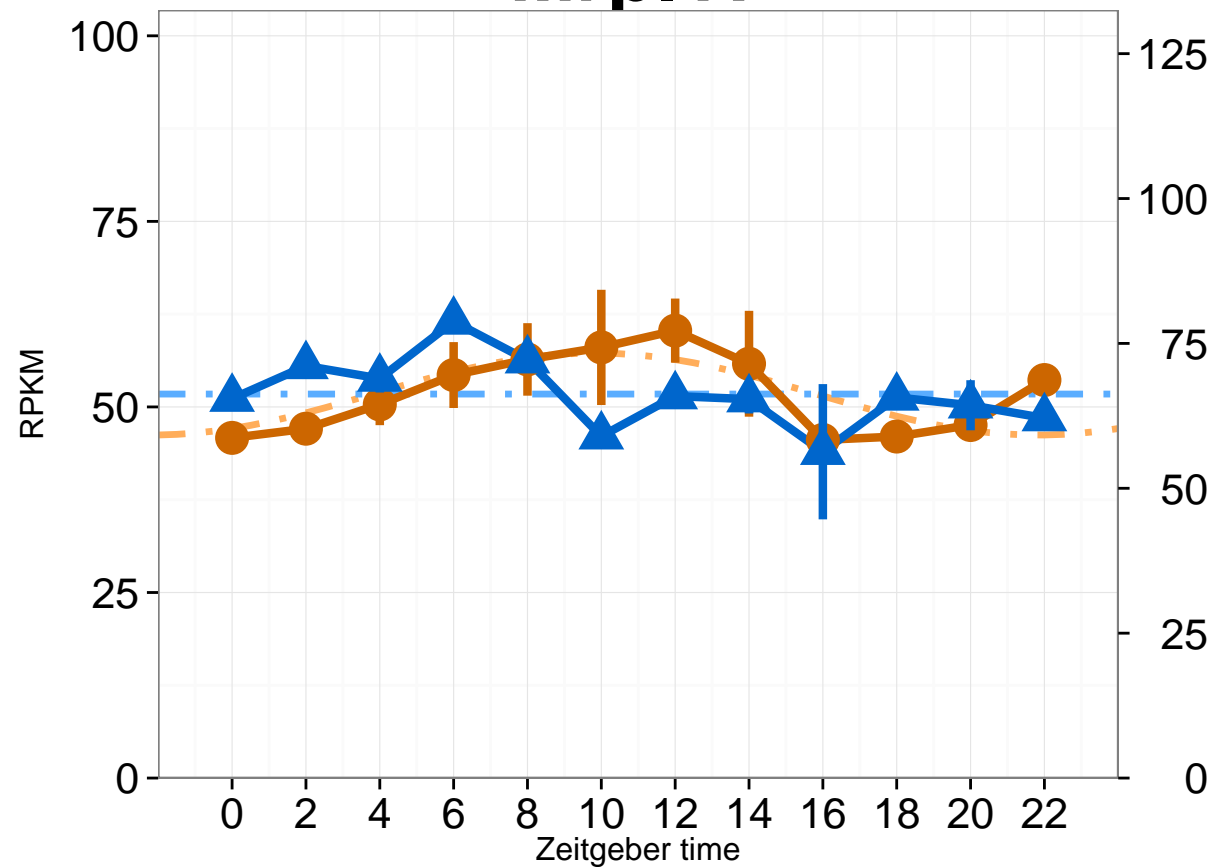

# Mrpl17

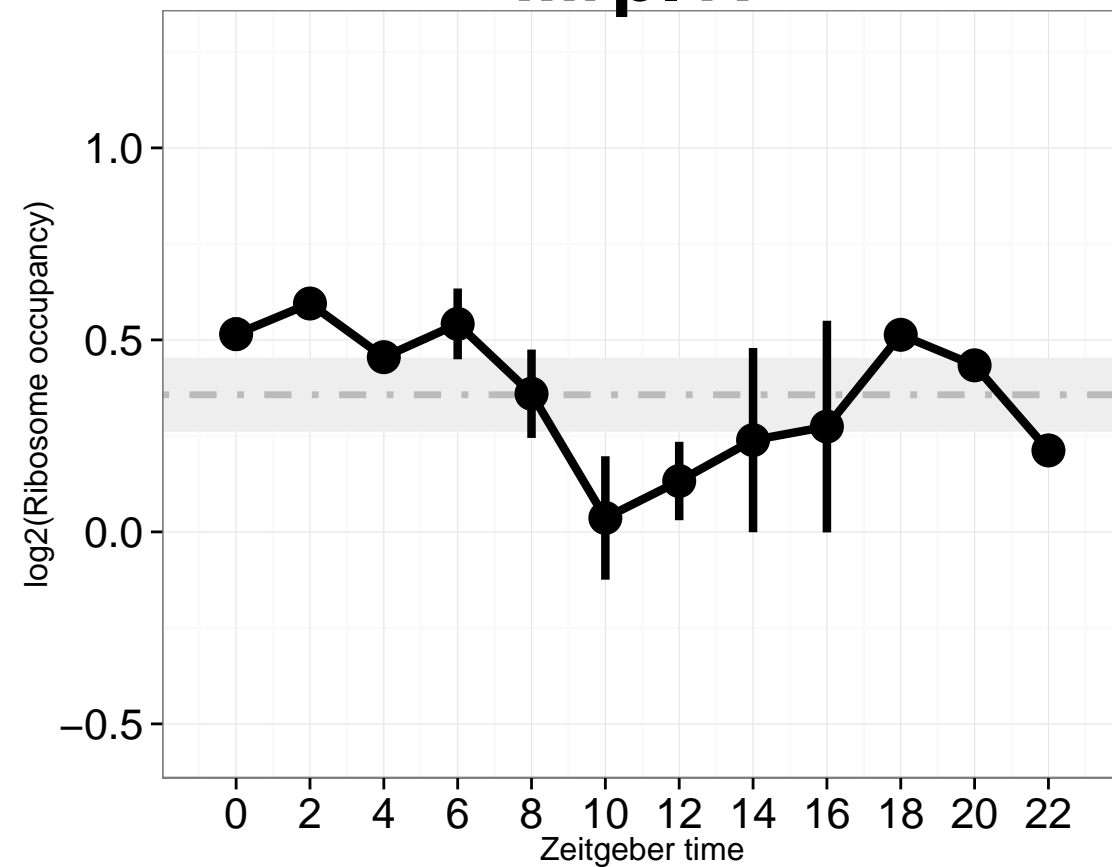

Supplement: Supplementary file 8621 [file 1]

# Akr1c14

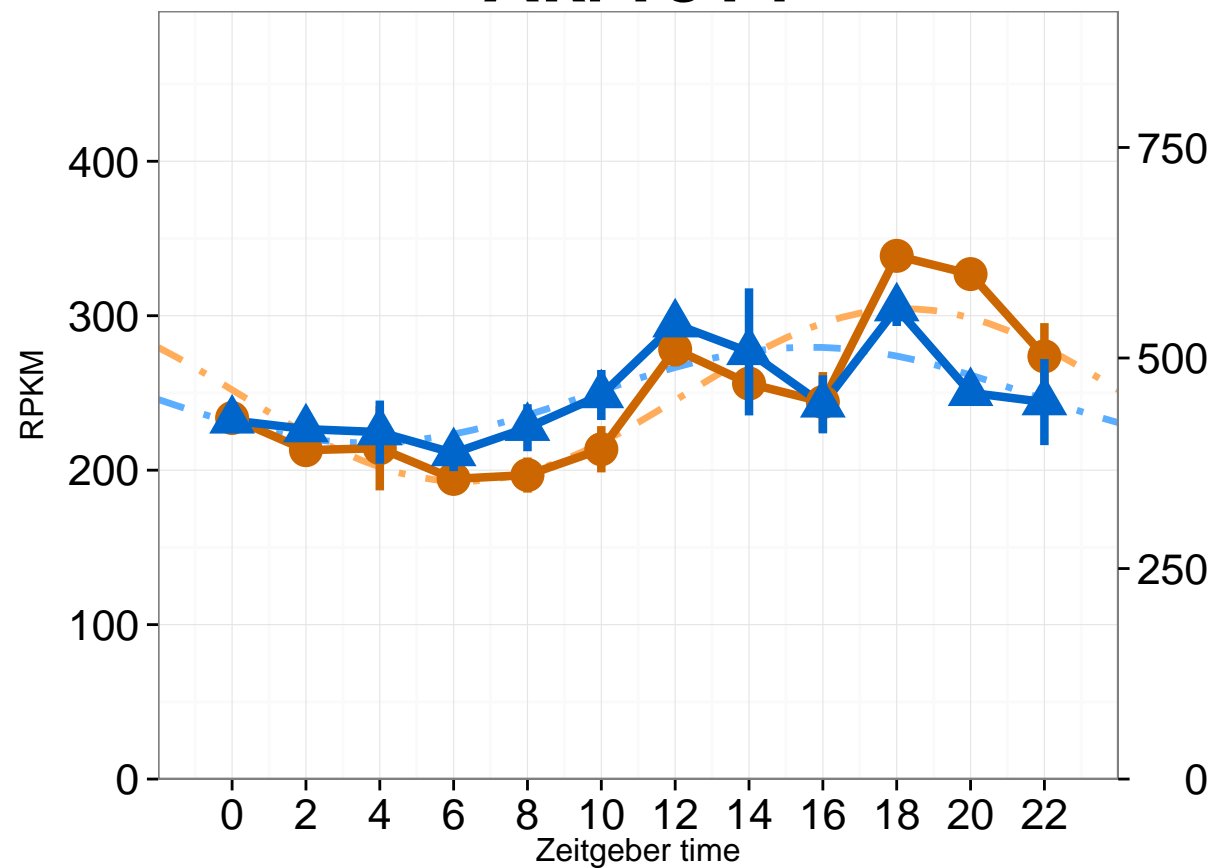

# Akr1c14

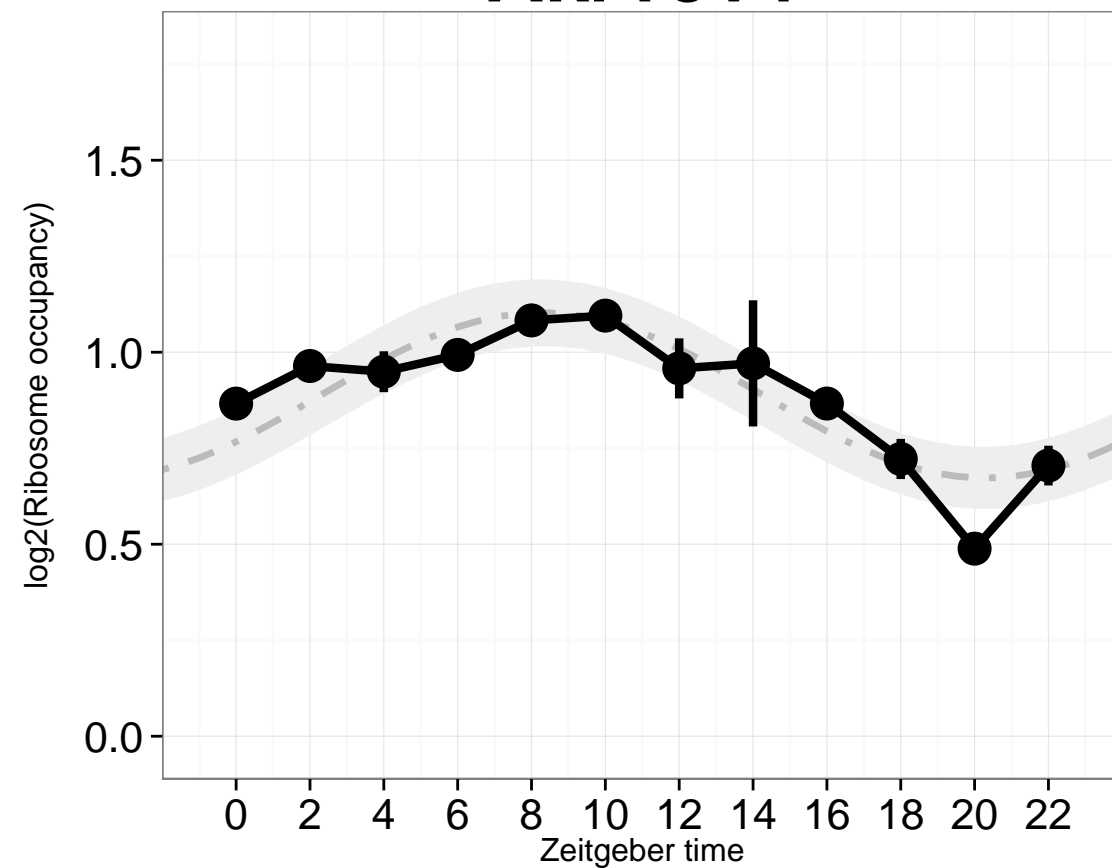

Supplement: Supplementary file 8622 [file 1]

## Brsk1

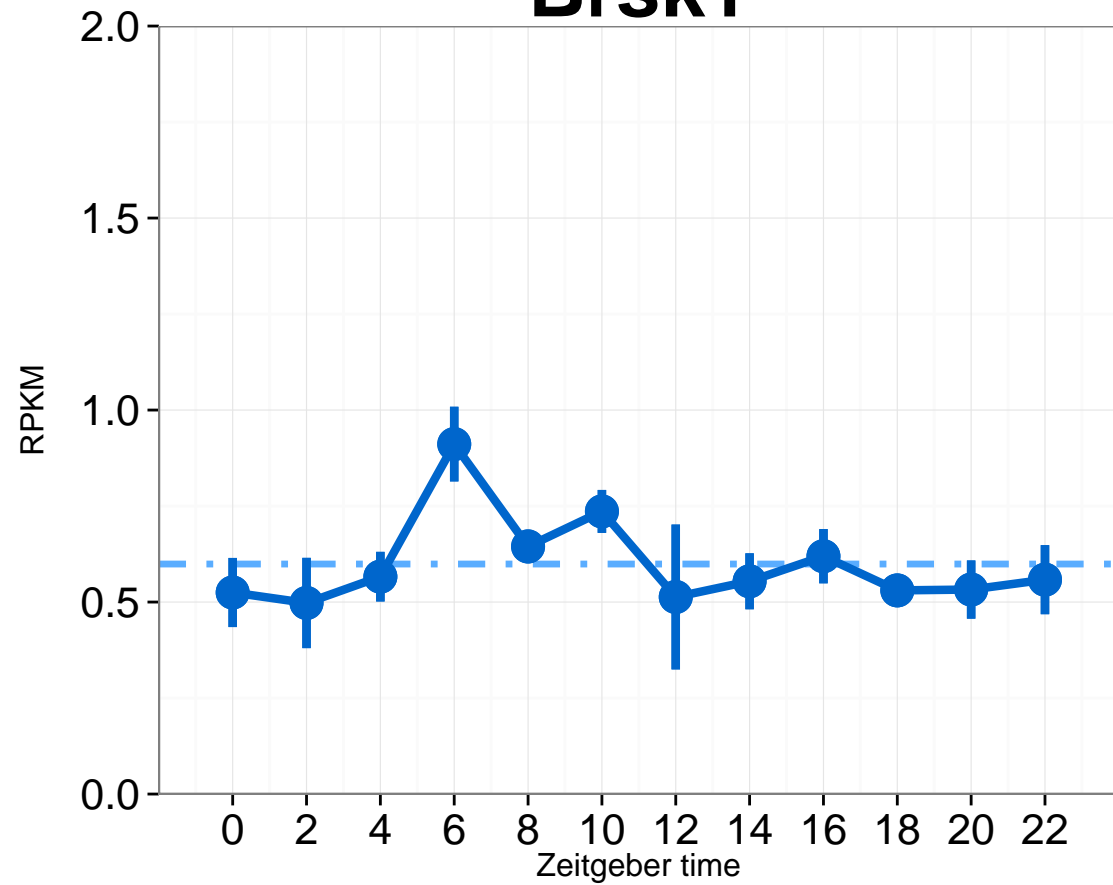

## Brsk1 log2(Ribosome occupancy

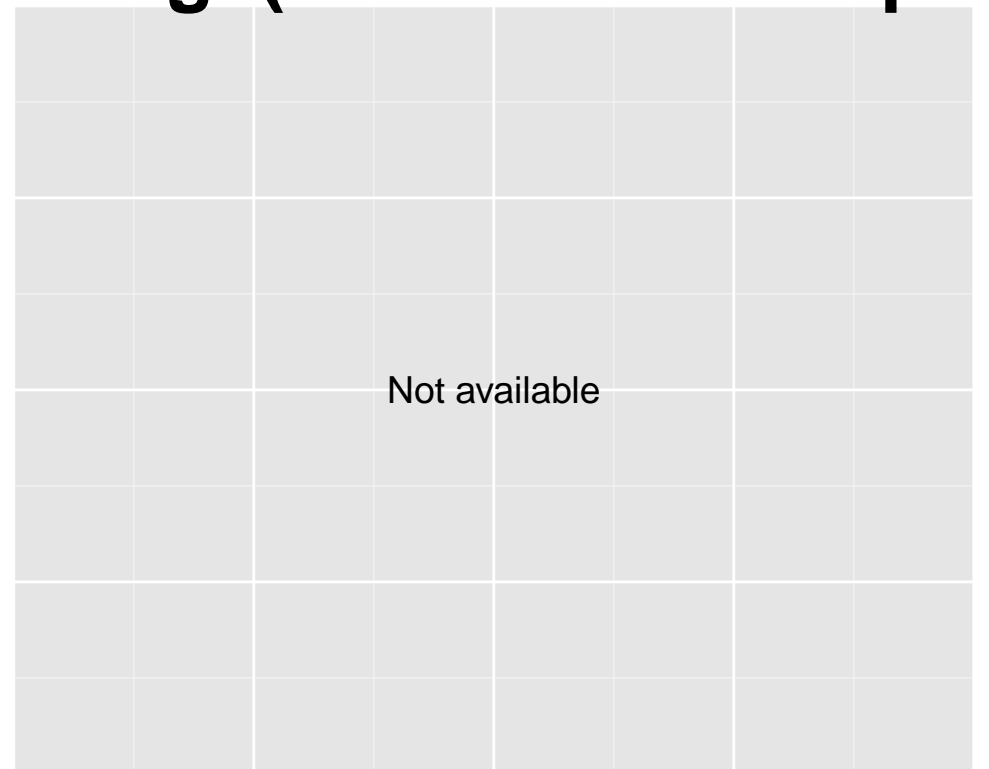

Supplement: Supplementary file 8623 [file 1]

## Pdcd6ip

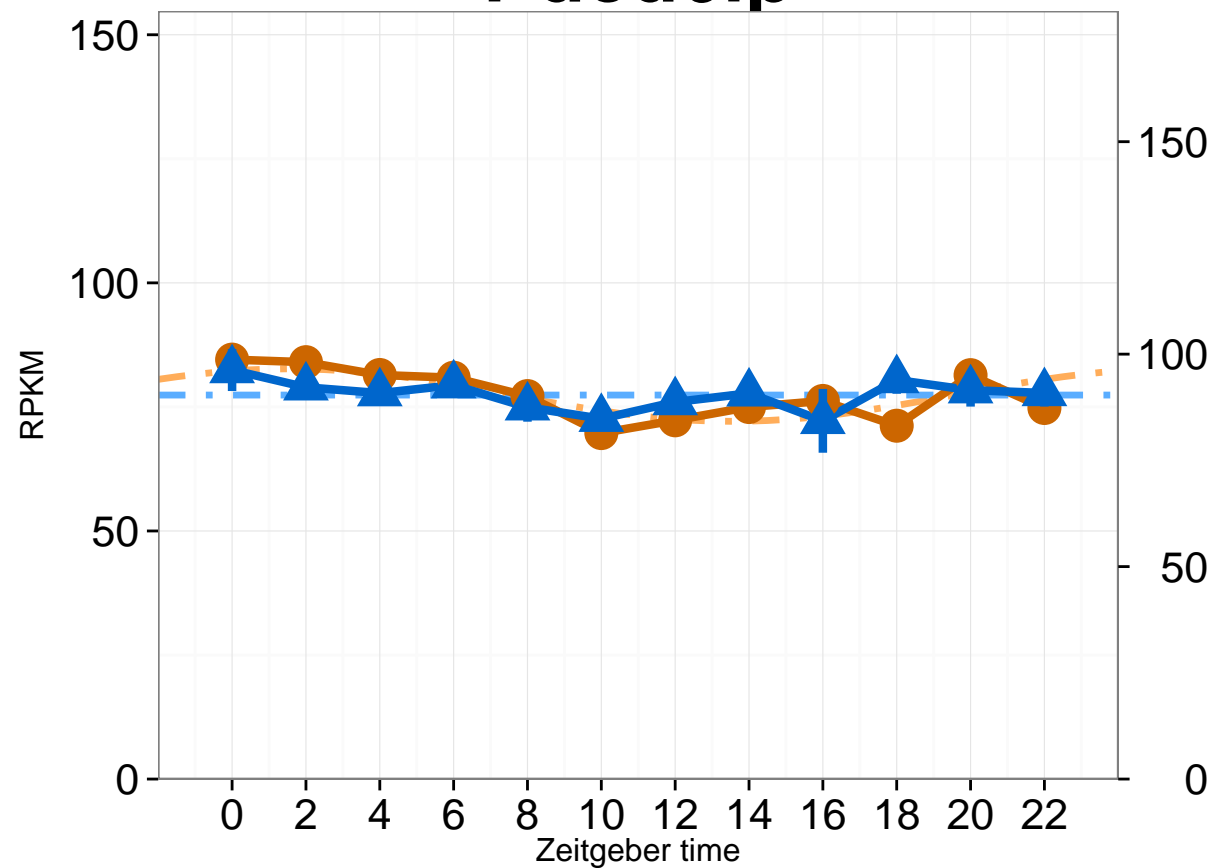

## Pdcd6ip

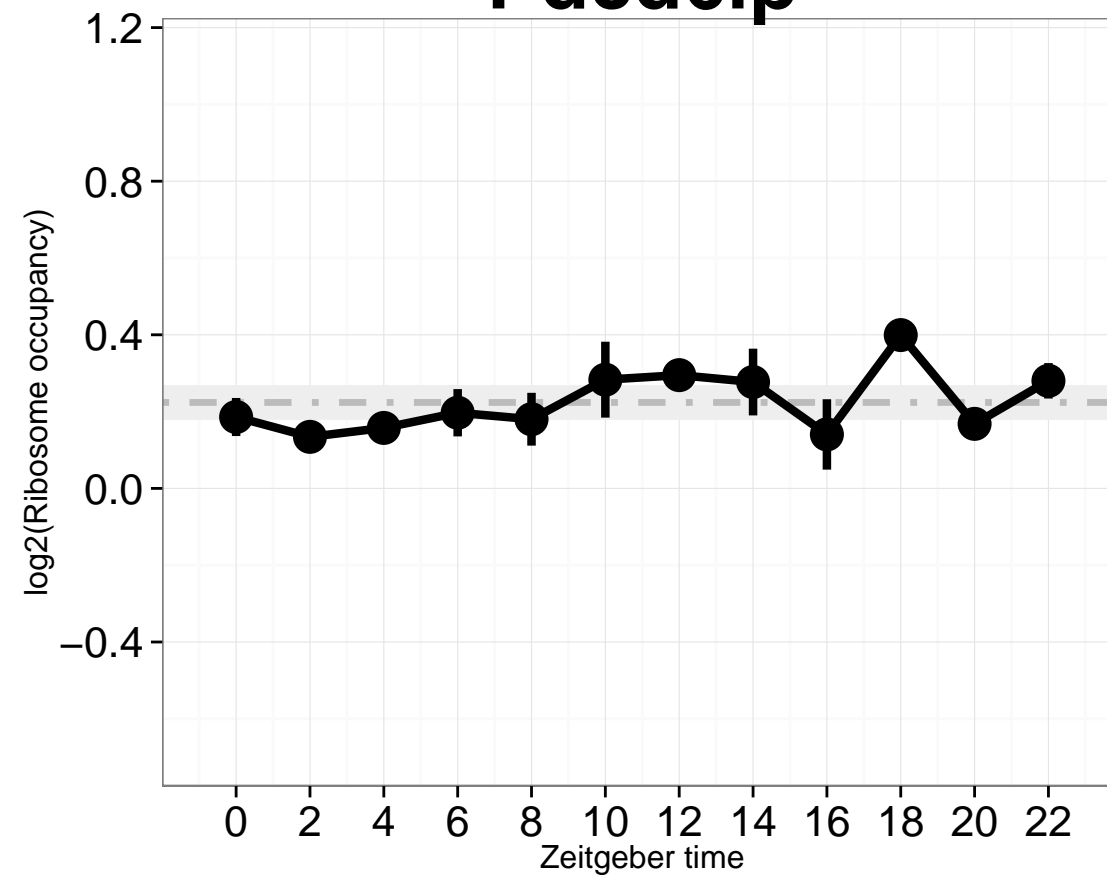

Supplement: Supplementary file 8624 [file 1]

# 1700088E04Rik

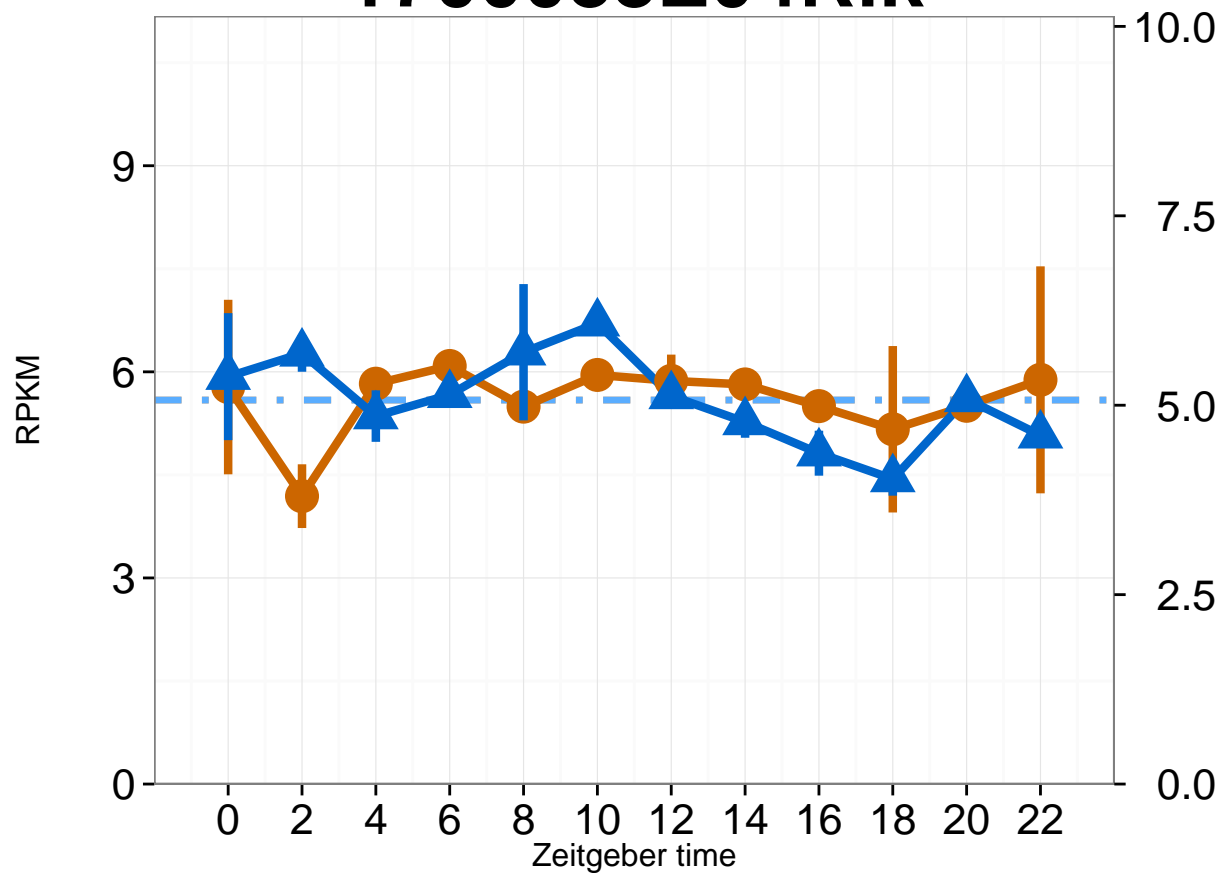

# 1700088E04Rik

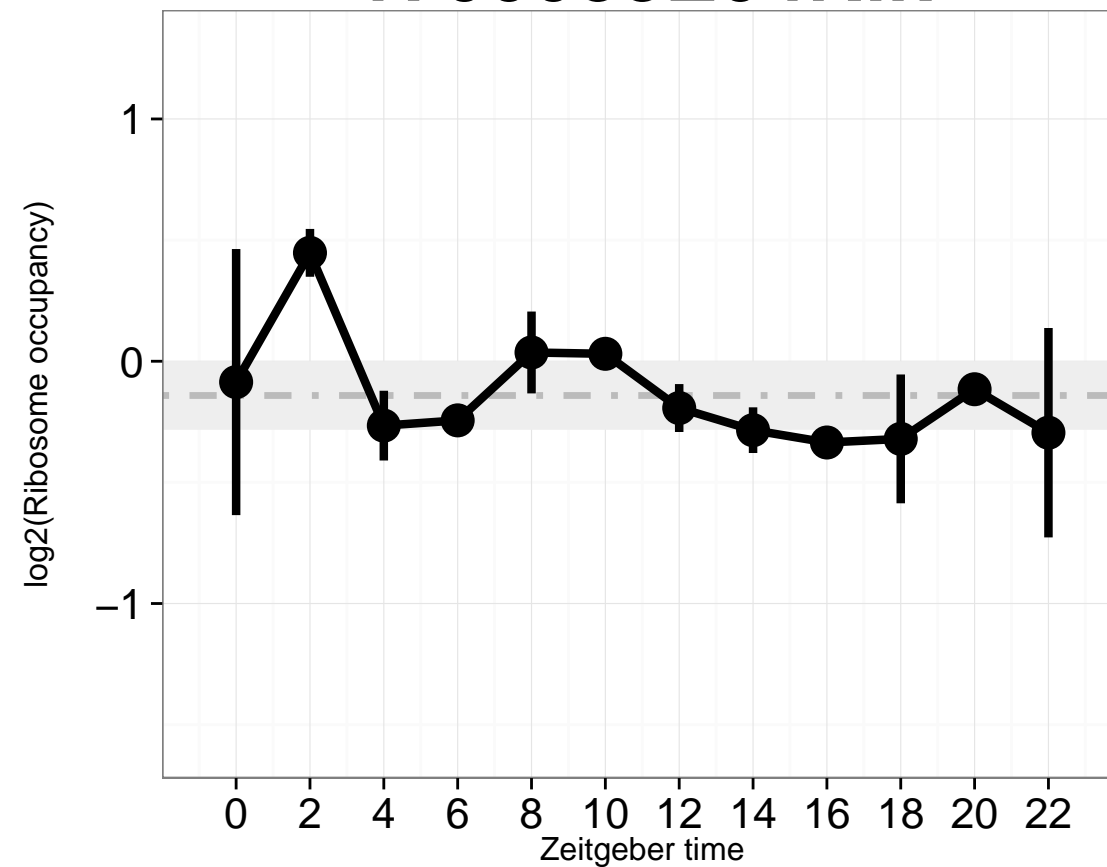

Supplement: Supplementary file 8625 [file 1]

# Sfxn1

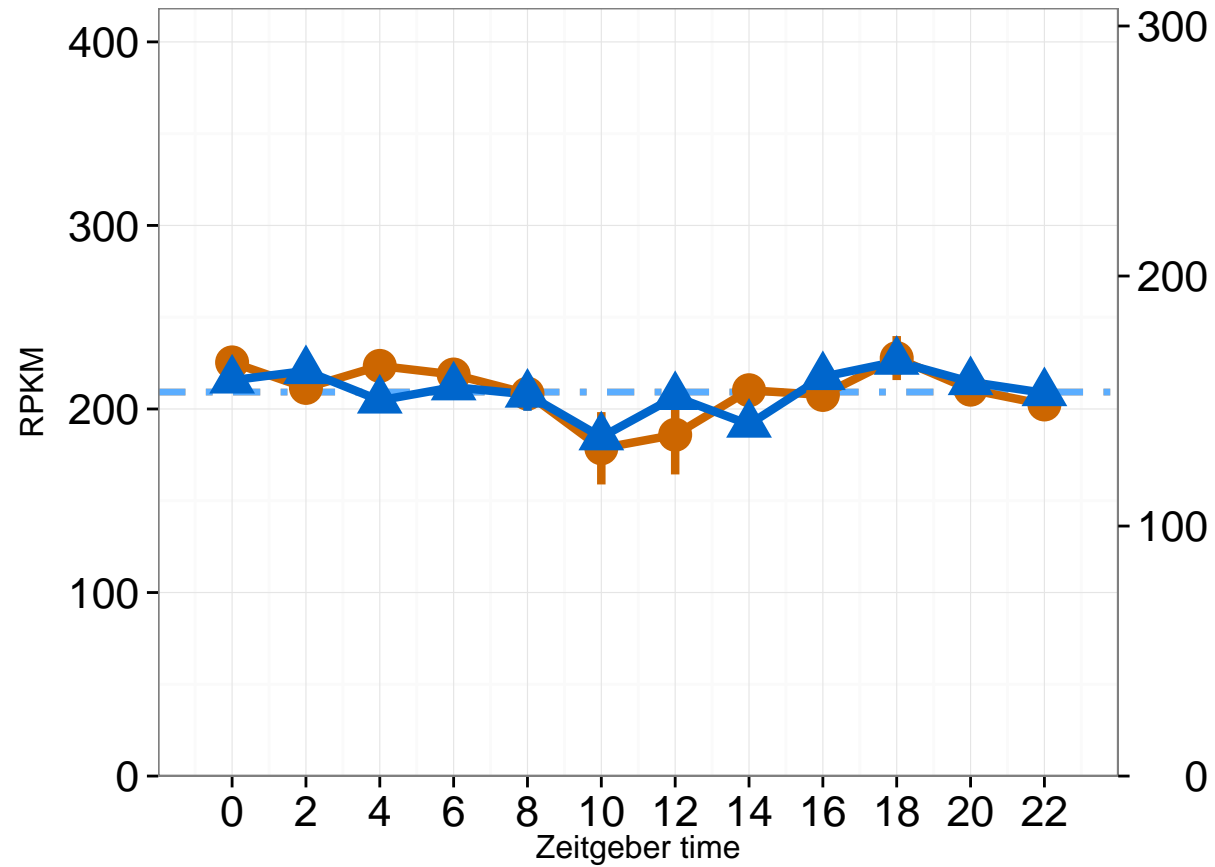

# Sfxn1

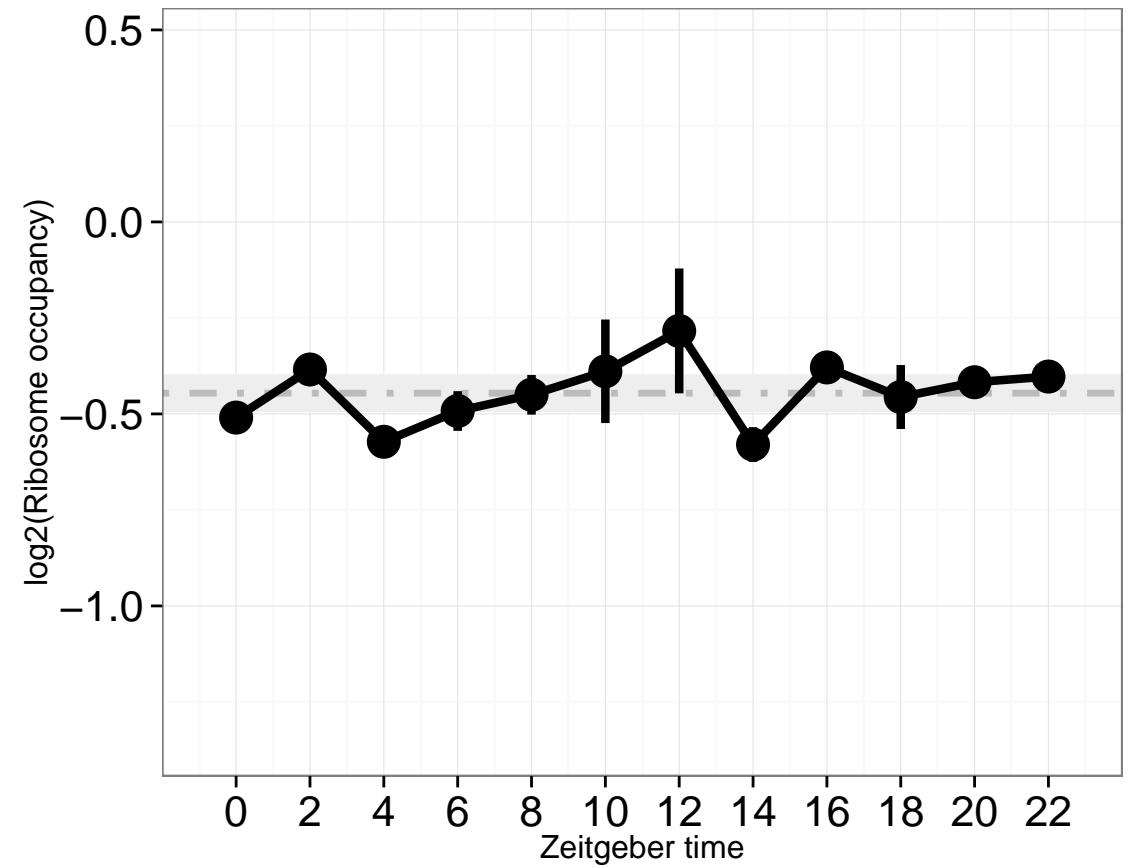

Supplement: Supplementary file 8626 [file 1]

# Tmem50a

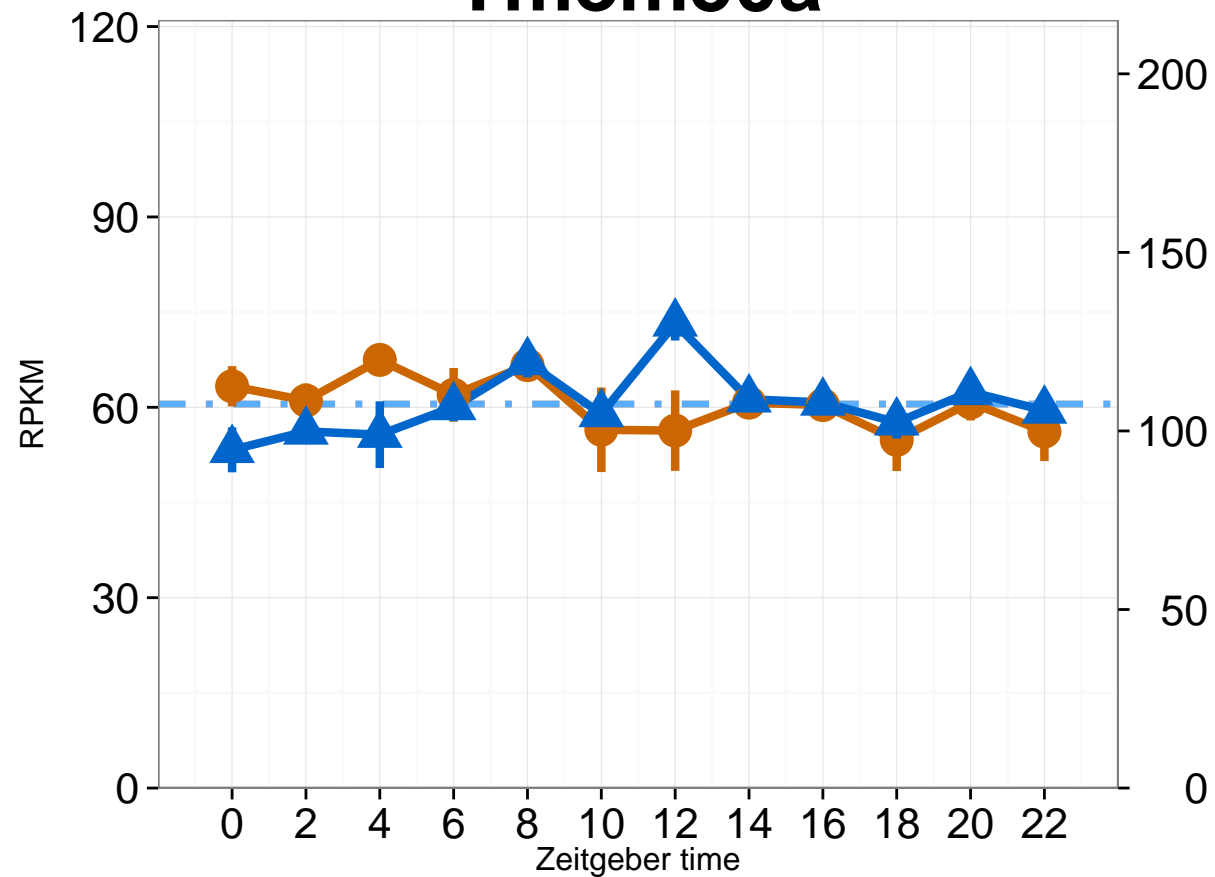

# Tmem50a

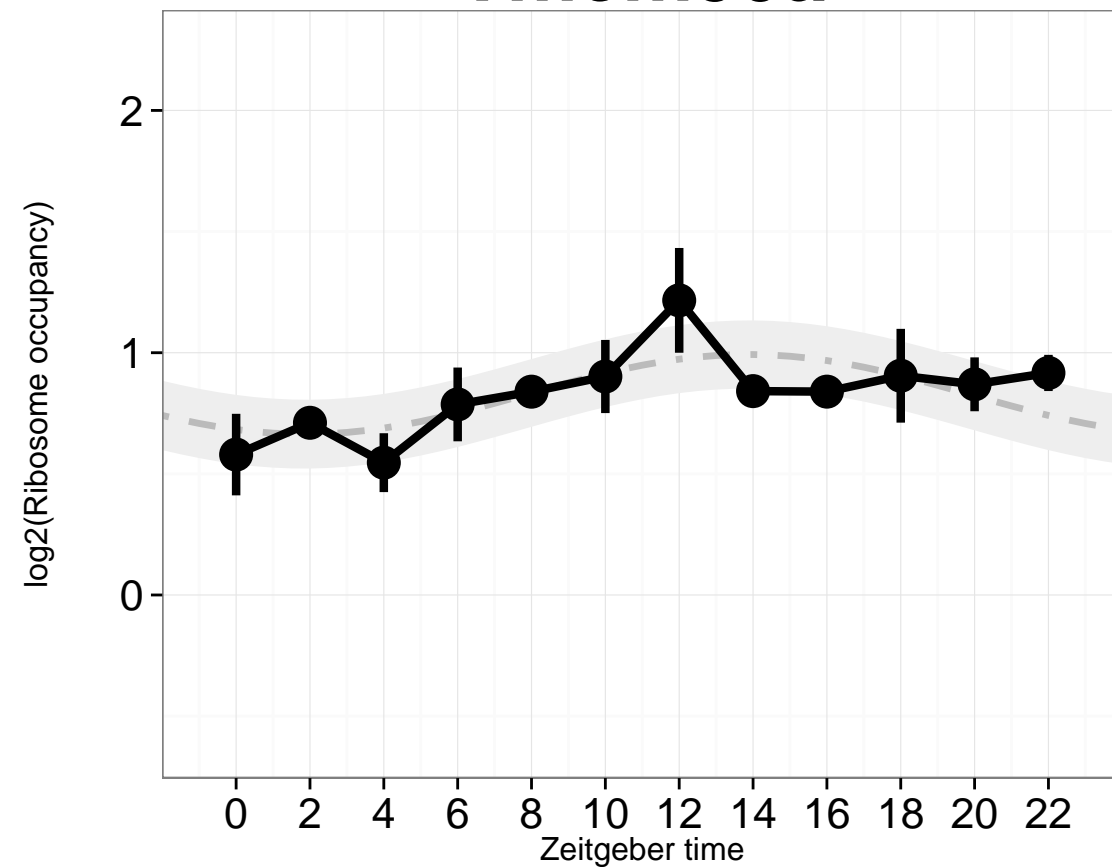

Supplement: Supplementary file 8627 [file 1]

# Mgst3

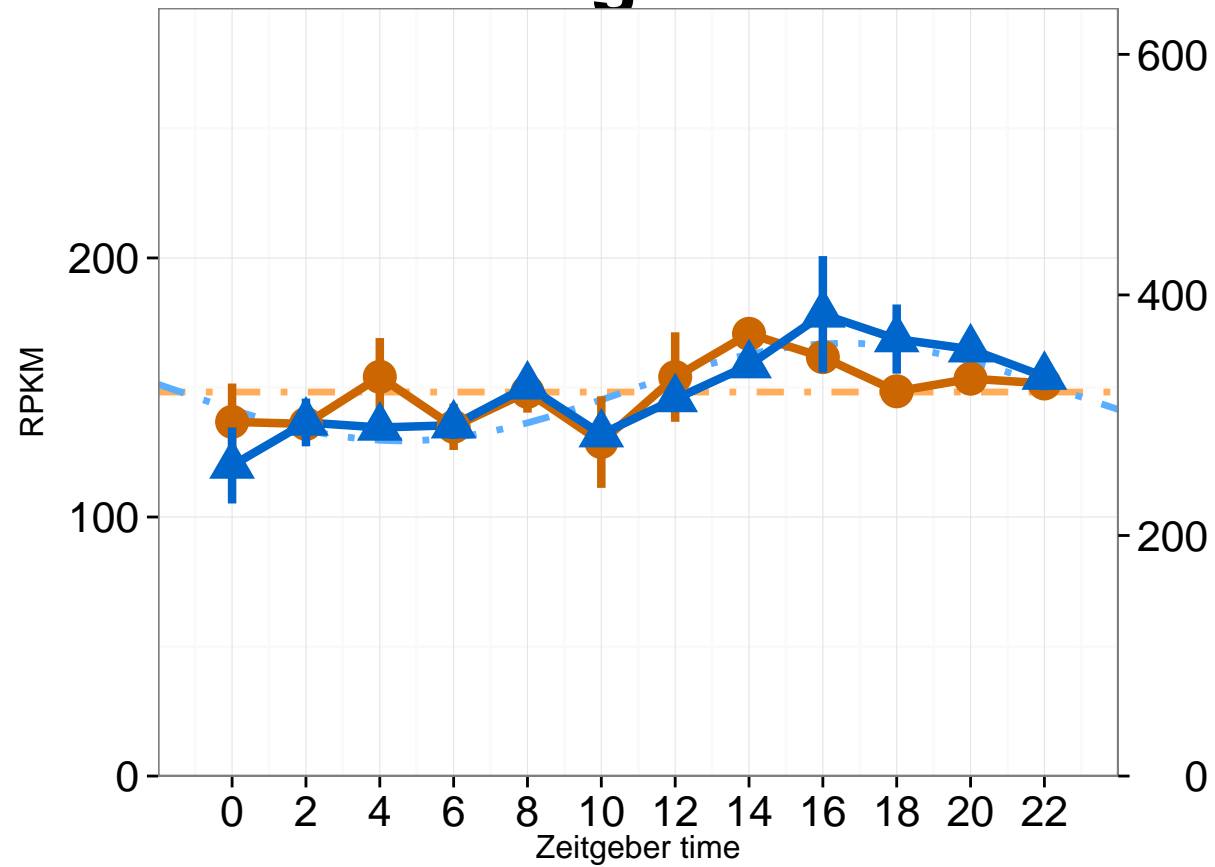

# Mgst3

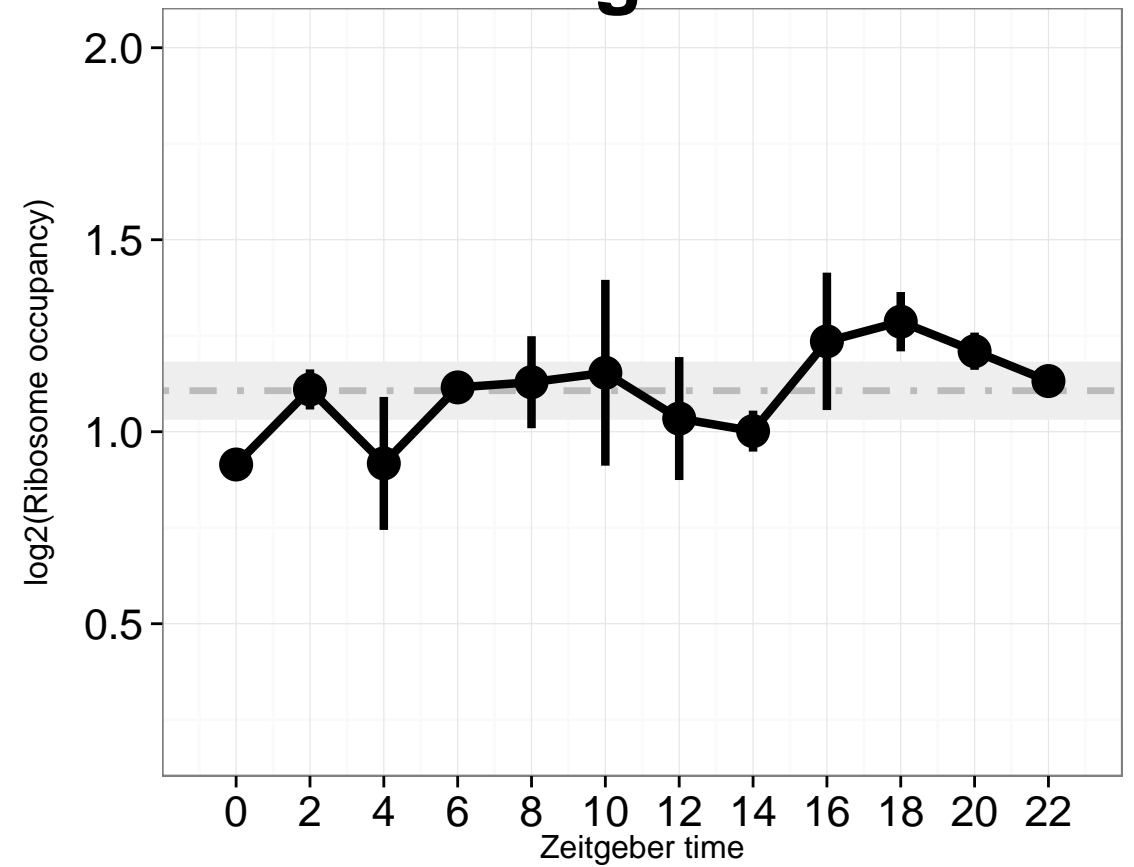

Supplement: Supplementary file 8628 [file 1]

## Atf6

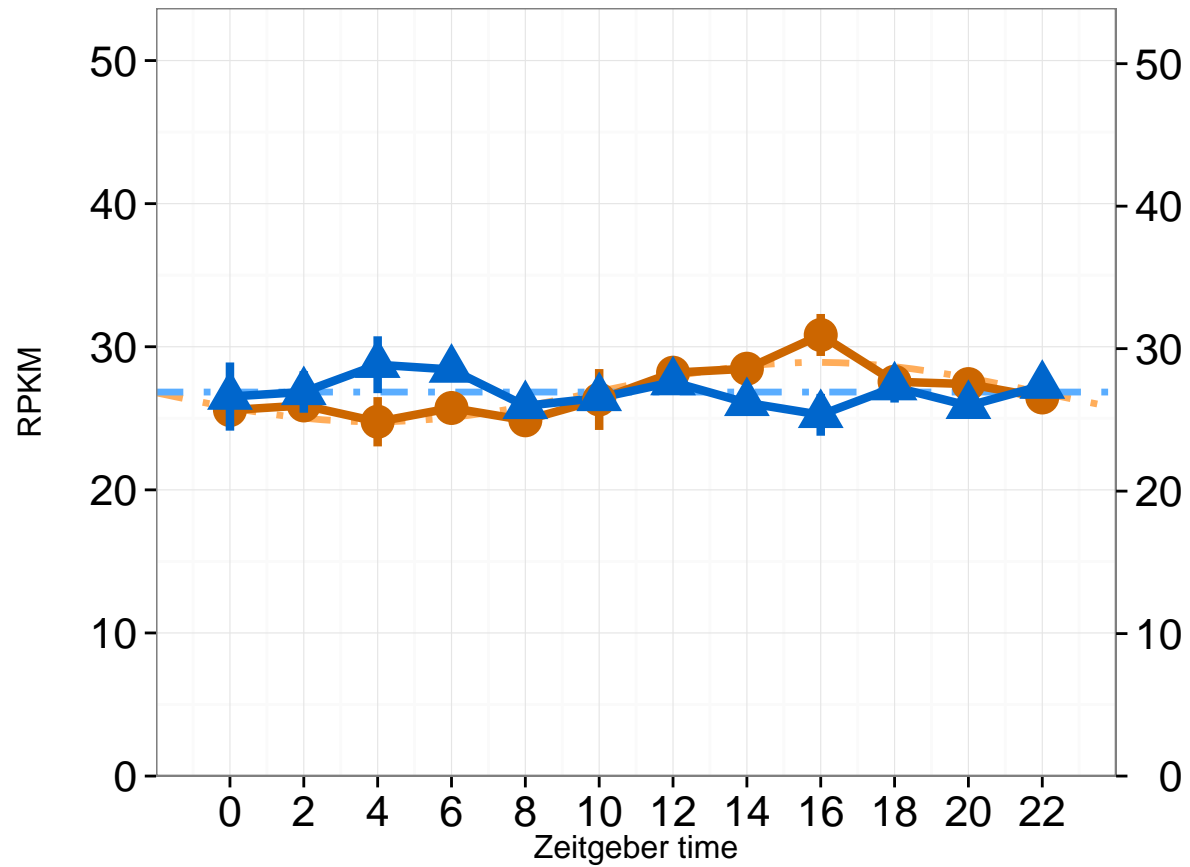

## Atf6

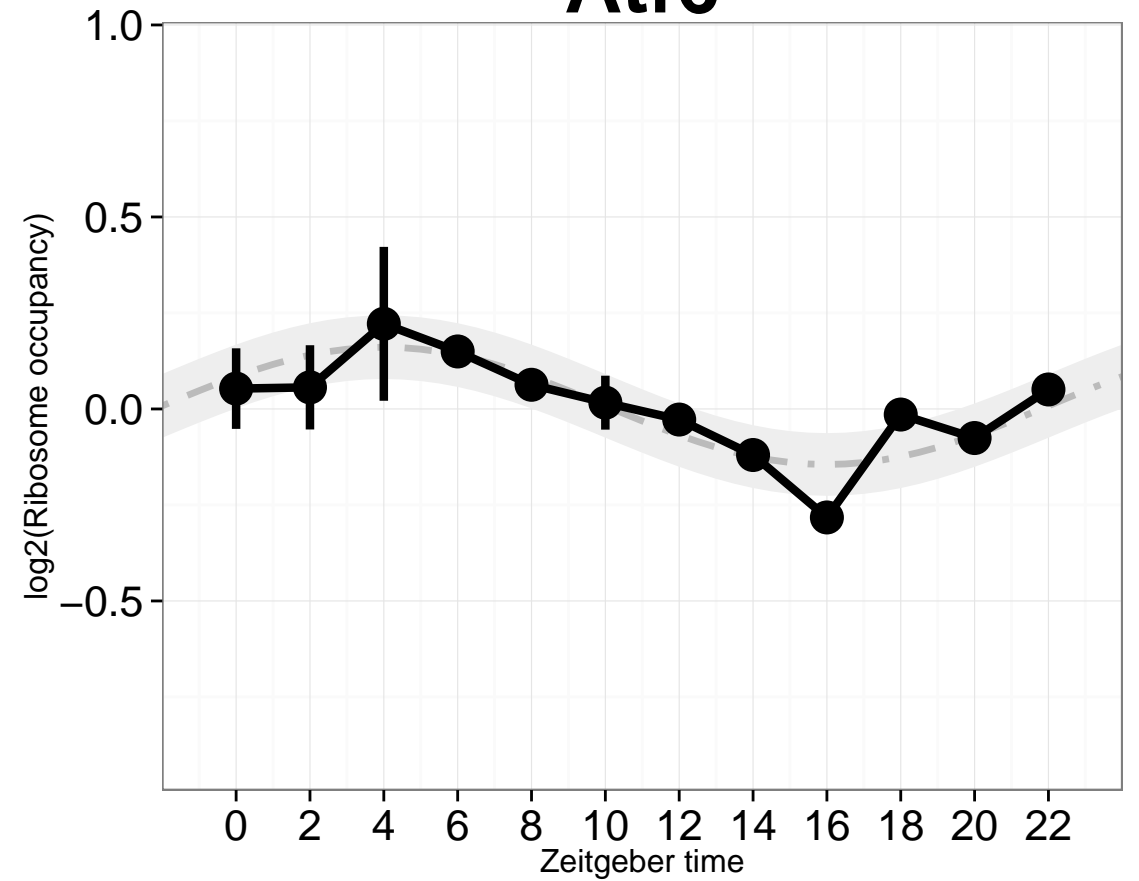

Supplement: Supplementary file 8629 [file 1]
