# Supplementary material (part 87 of 133)
Source: publisher figshare collection journal article supplement (https://springernature.figshare.com/articles/dataset/_/4903193)

# Hsph1

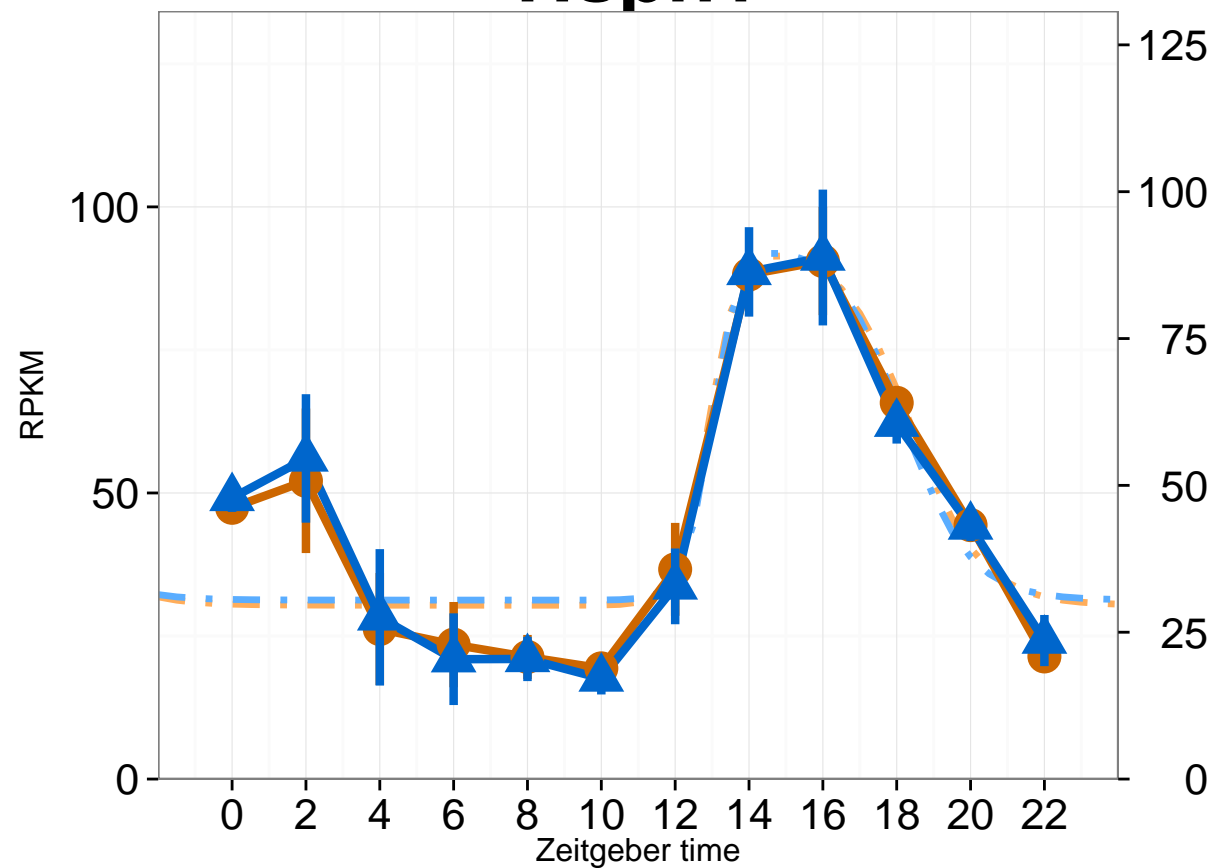

# Hsph1

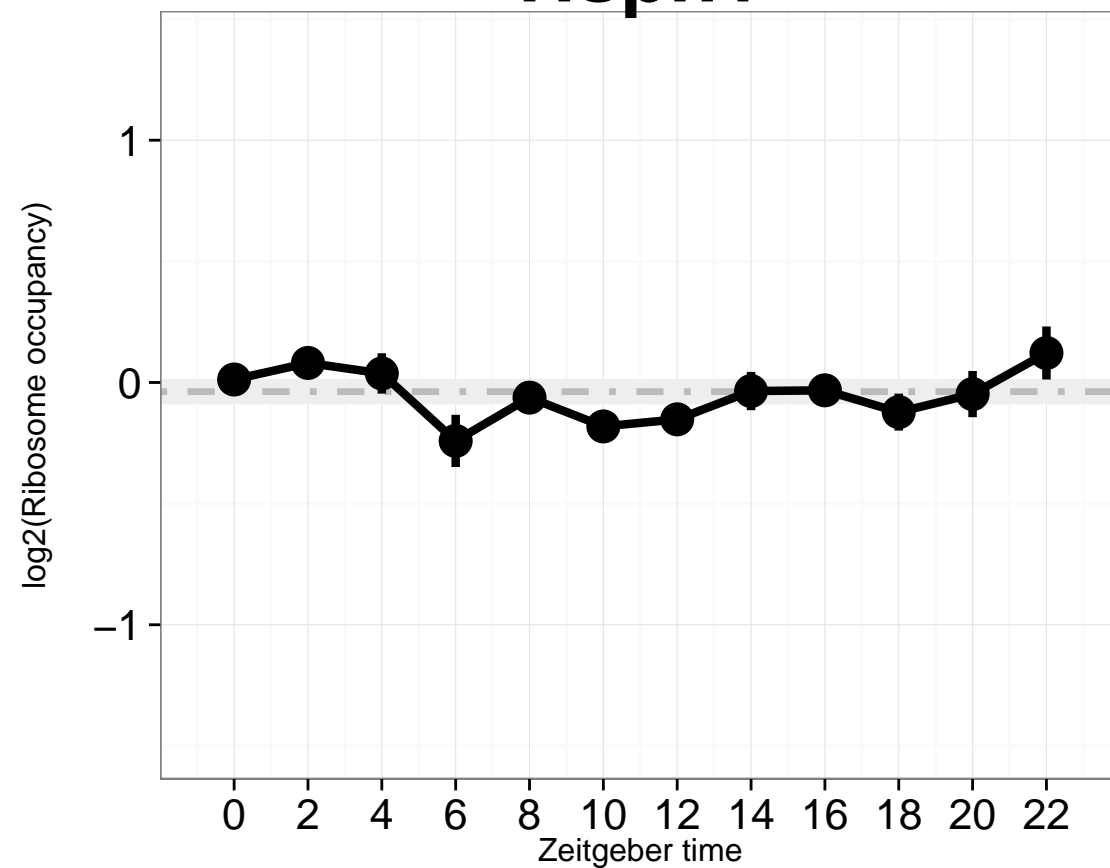

Supplement: Supplementary file 8630 [file 1]

## Ost4

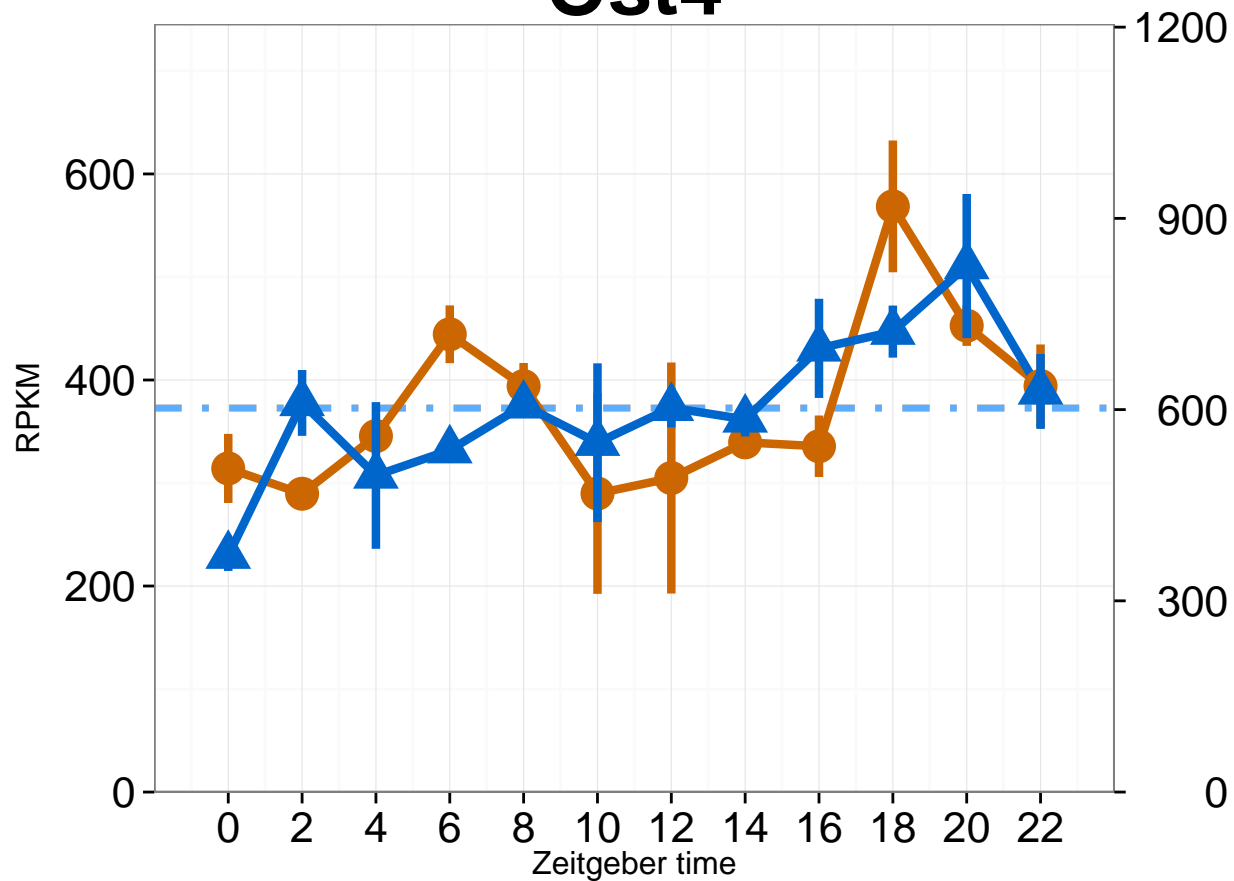

## Ost4

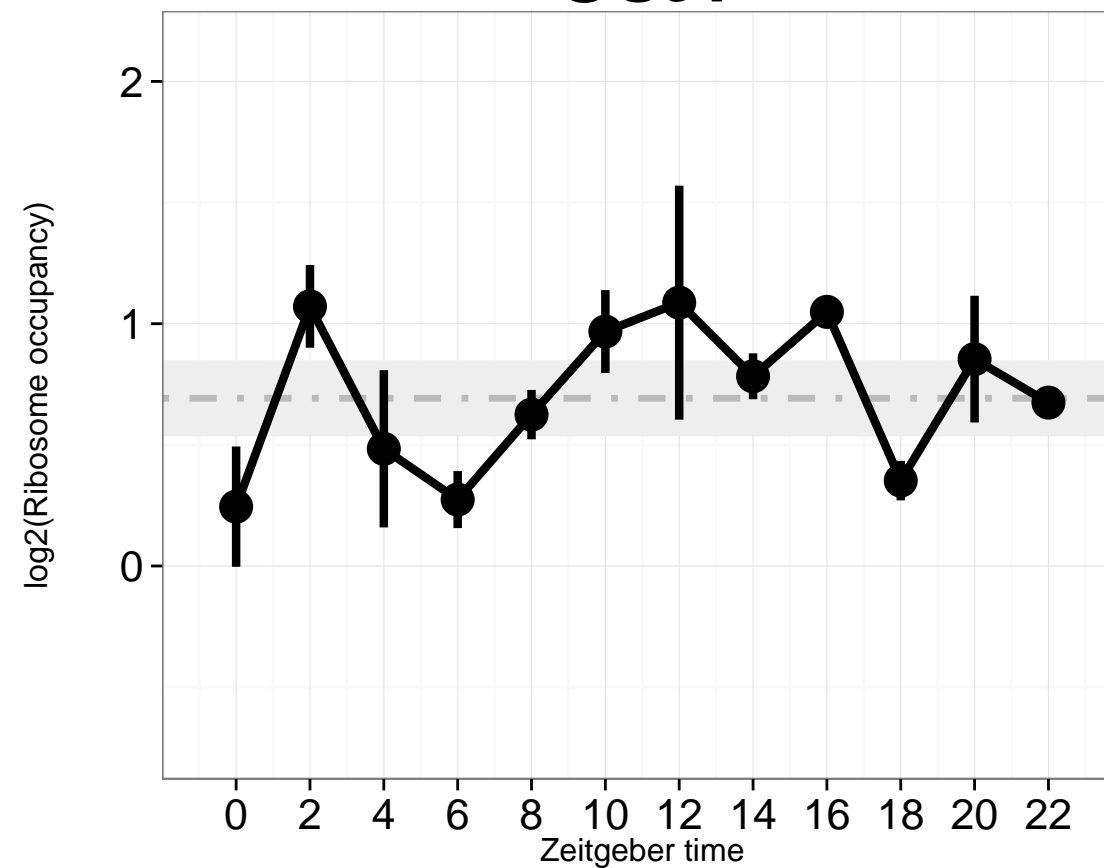

Supplement: Supplementary file 8631 [file 1]

## Rassf1

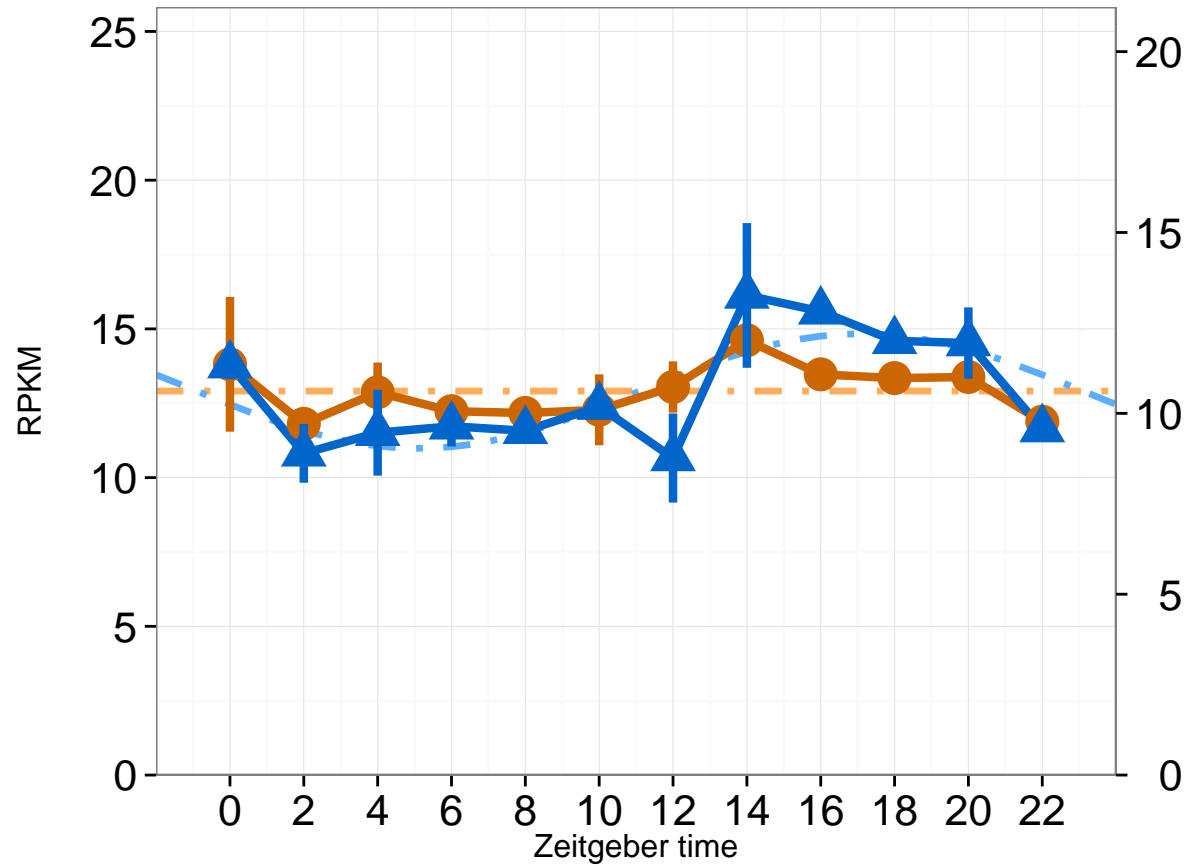

## Rassf1

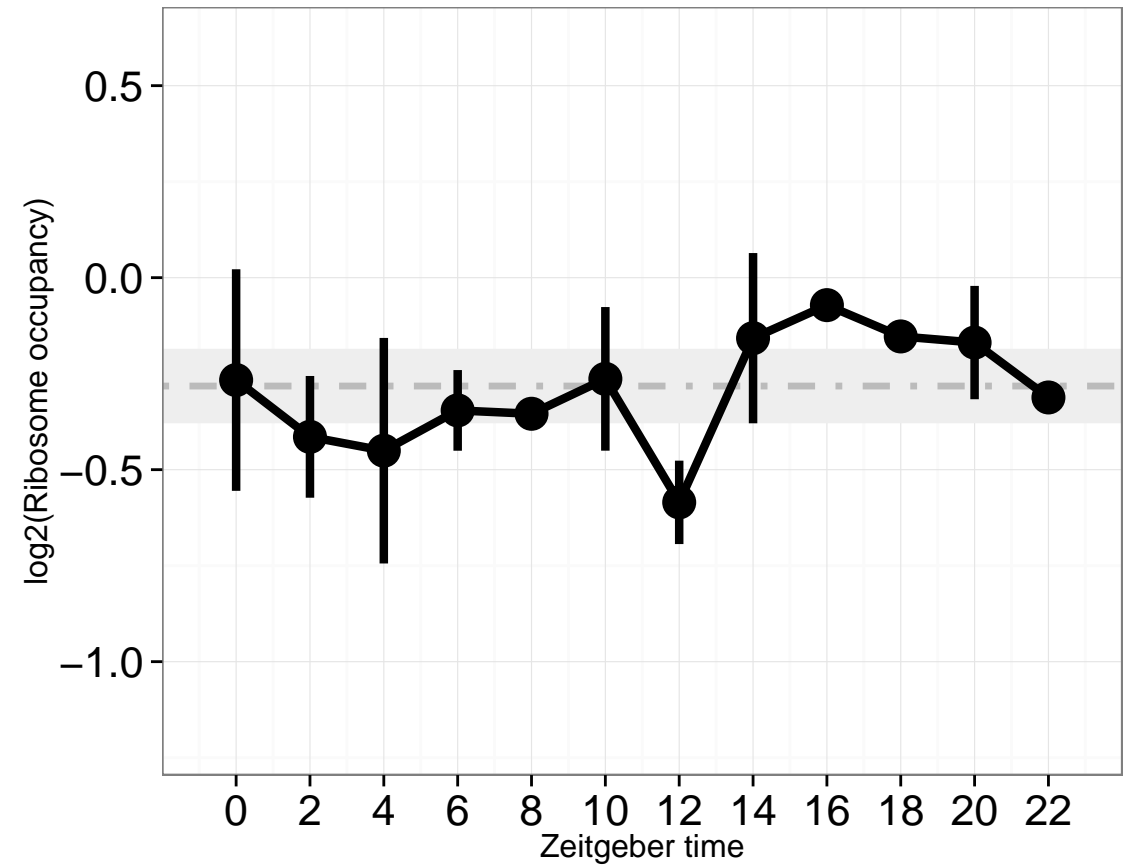

Supplement: Supplementary file 8632 [file 1]

## Knstrn

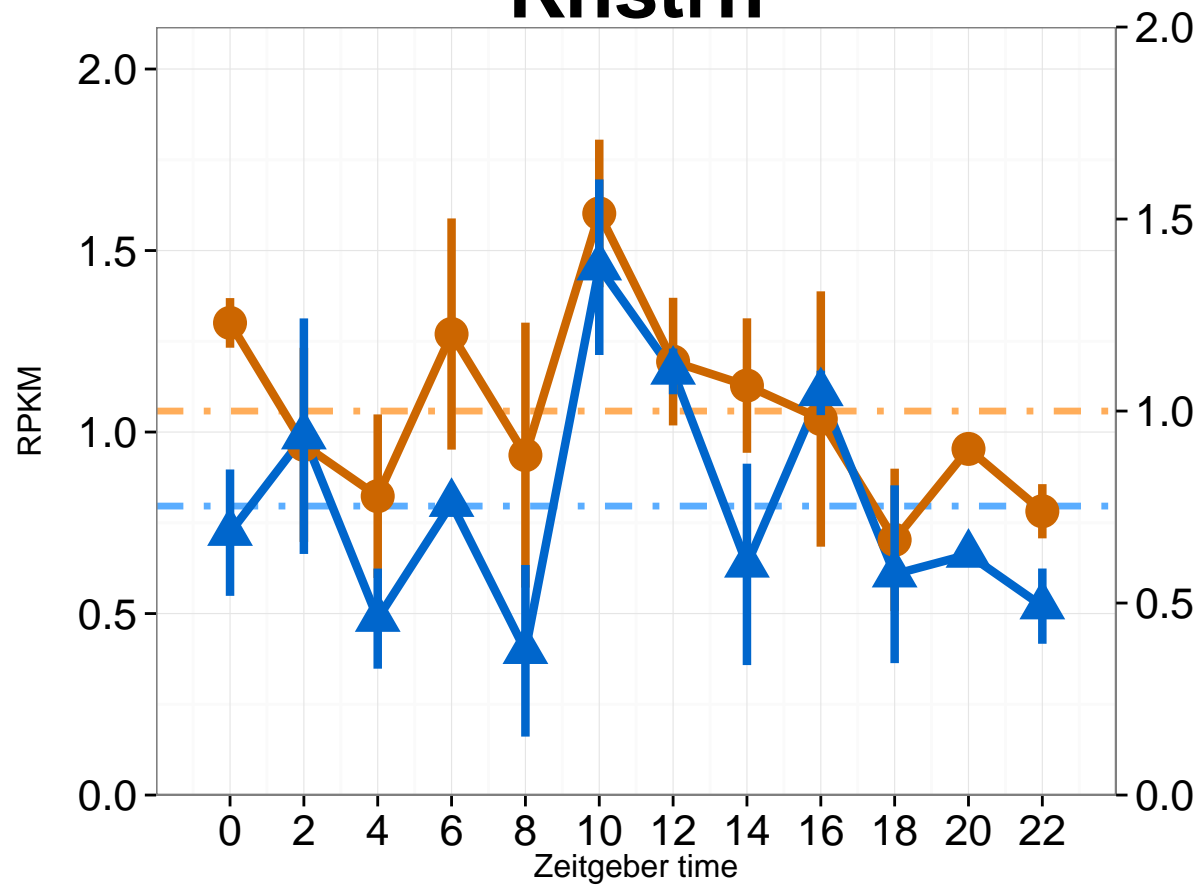

## Knstrn

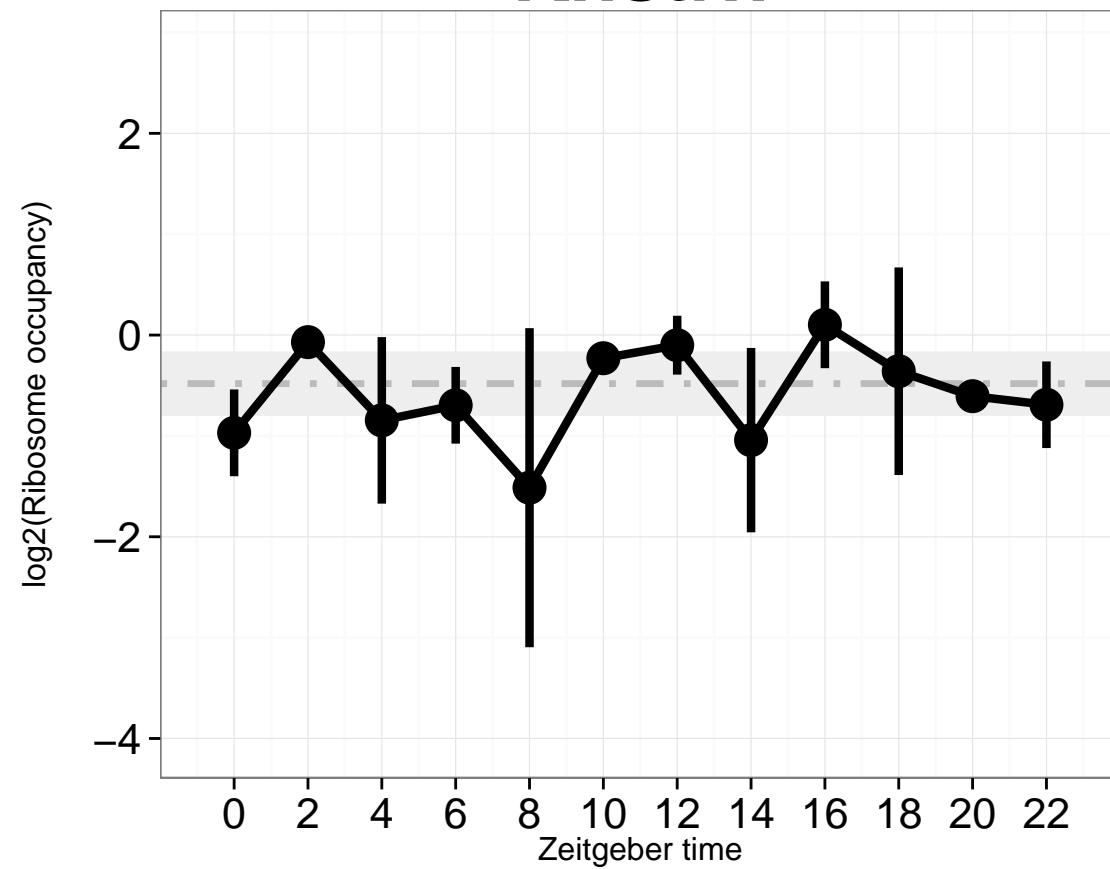

Supplement: Supplementary file 8633 [file 1]

## Ifi203

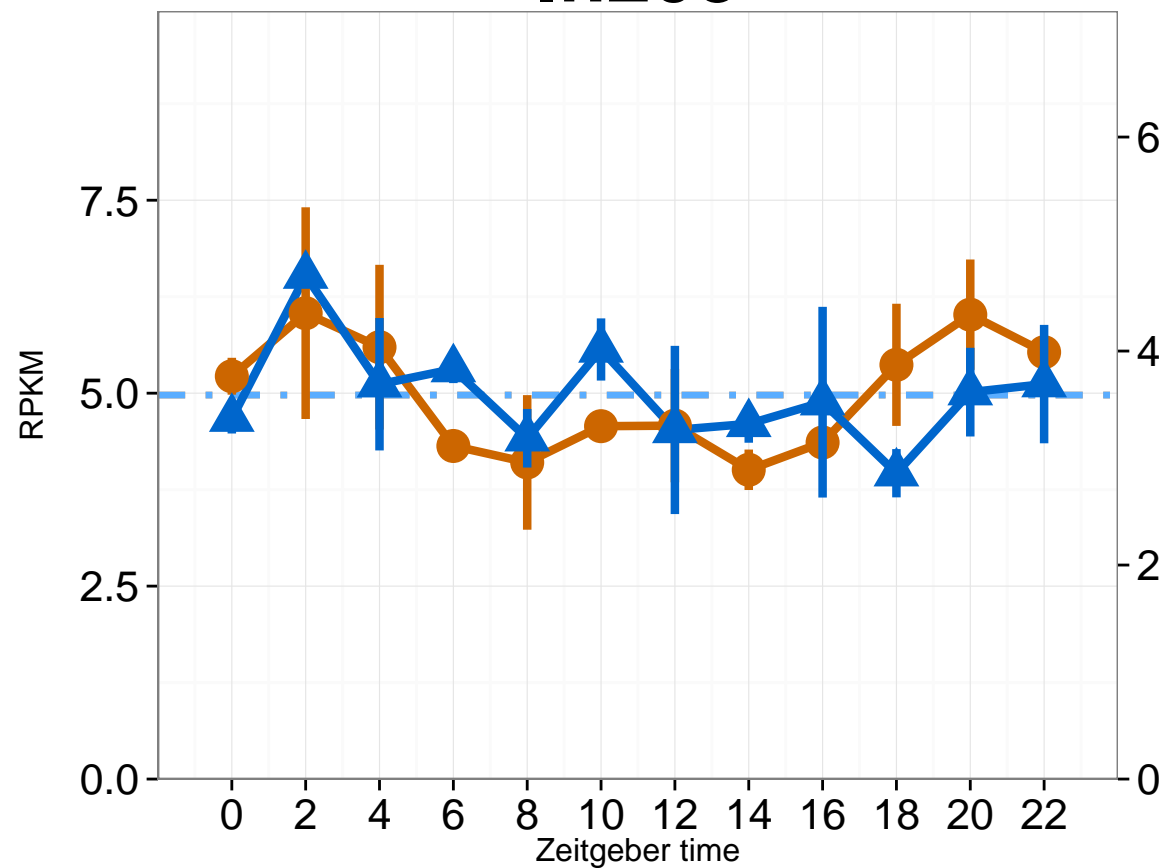

## Ifi203

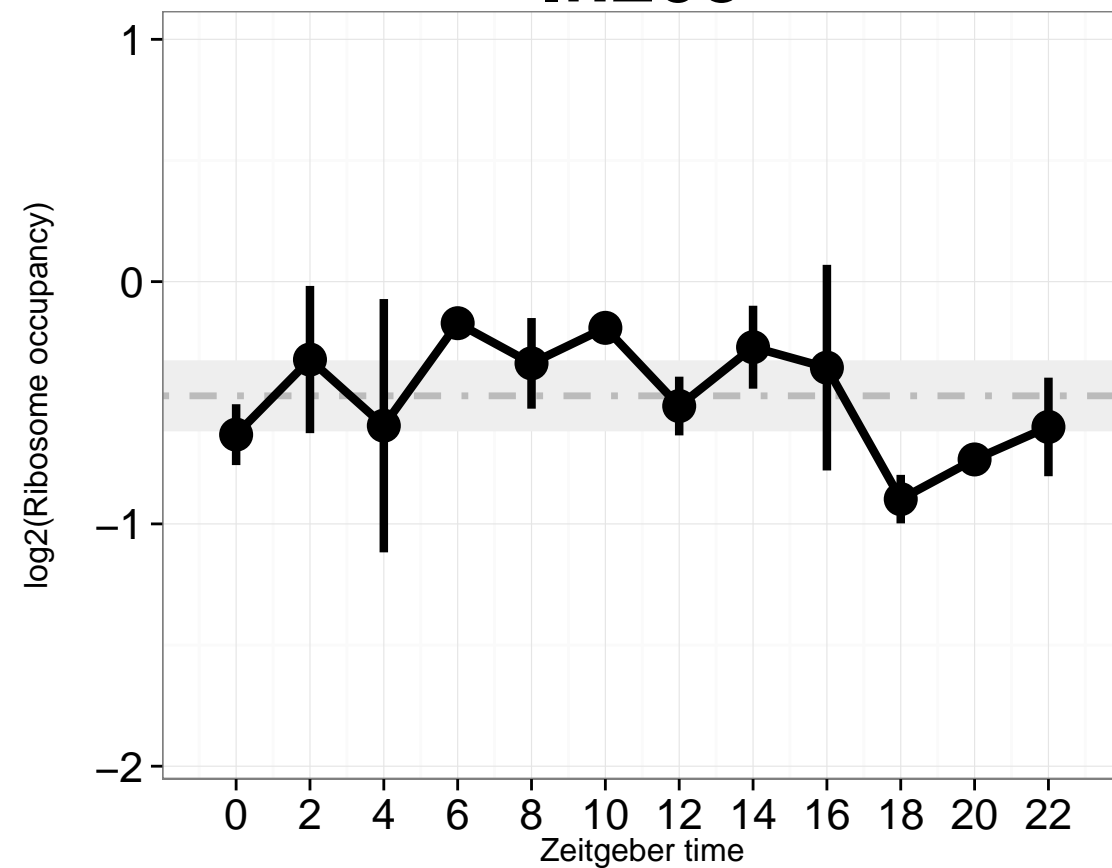

Supplement: Supplementary file 8634 [file 1]

# Gucy1a2

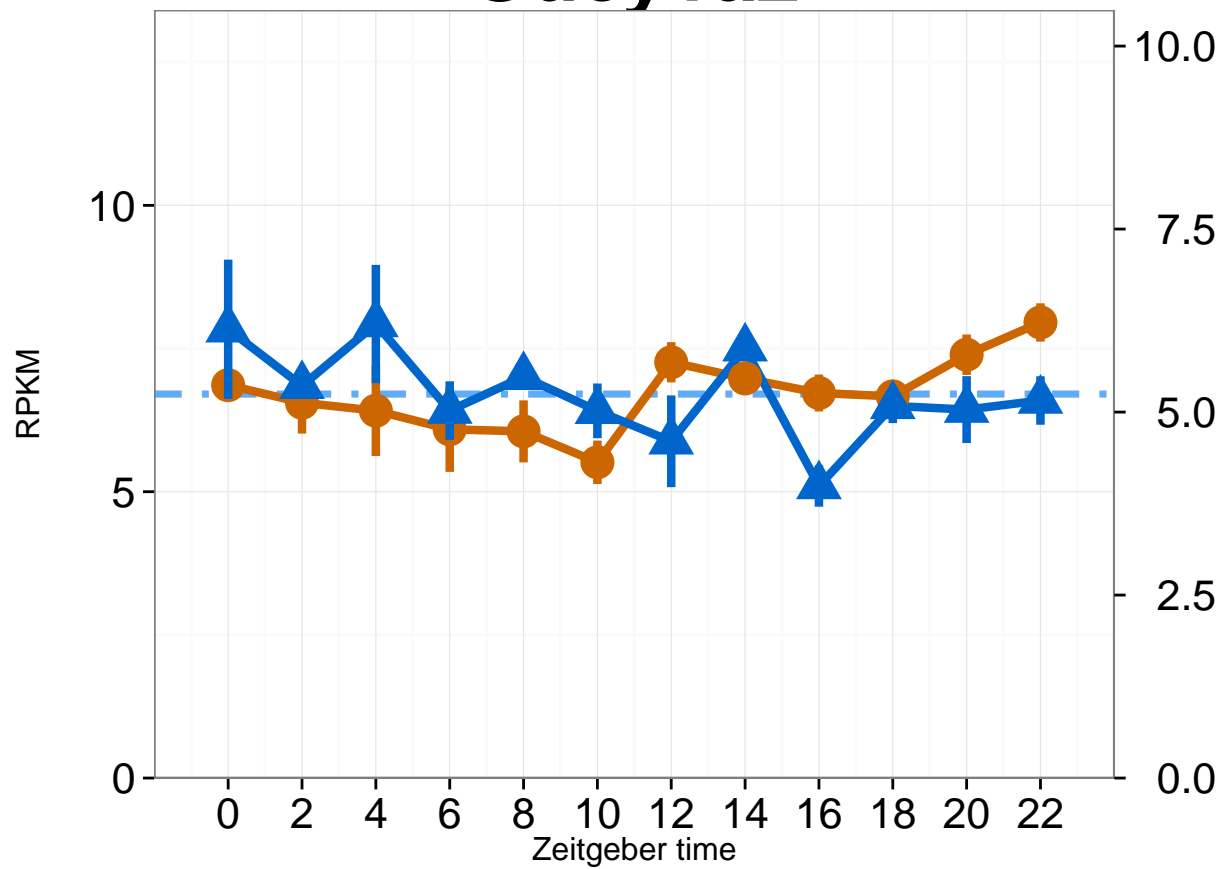

# Gucy1a2

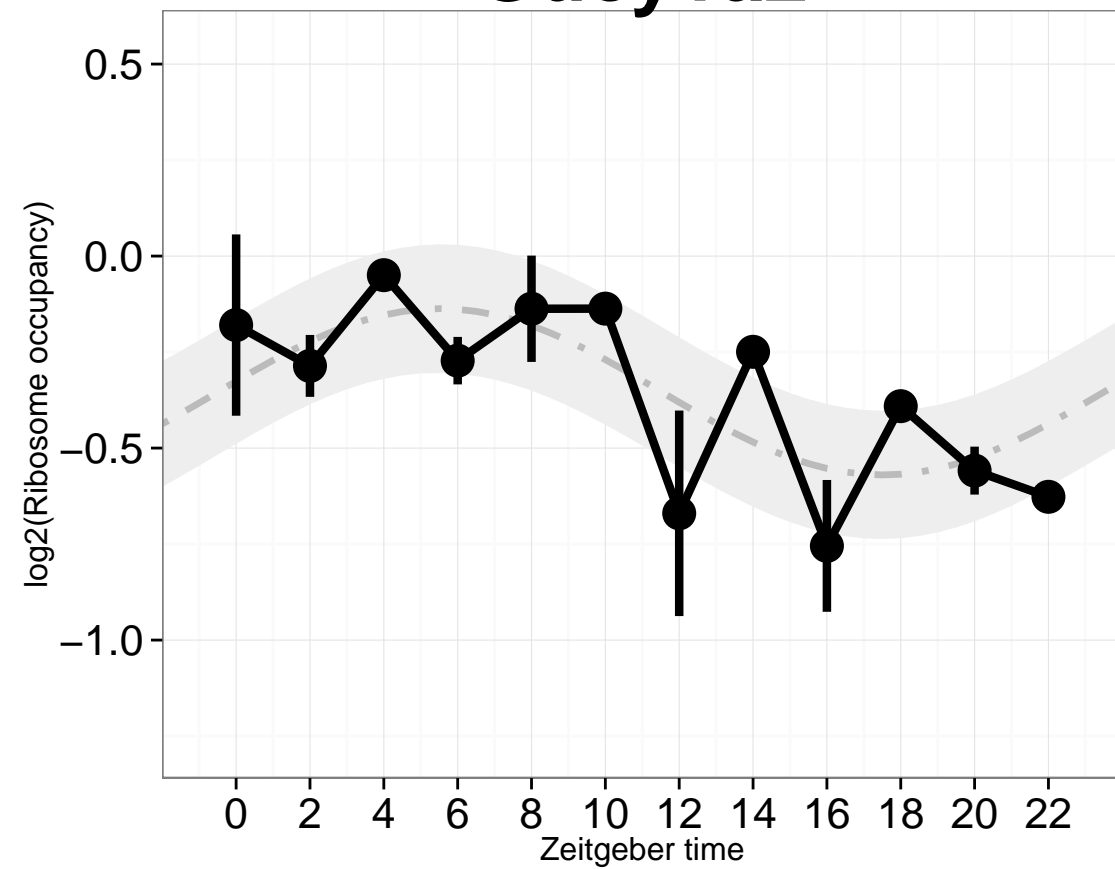

Supplement: Supplementary file 8635 [file 1]

# Zfyve27

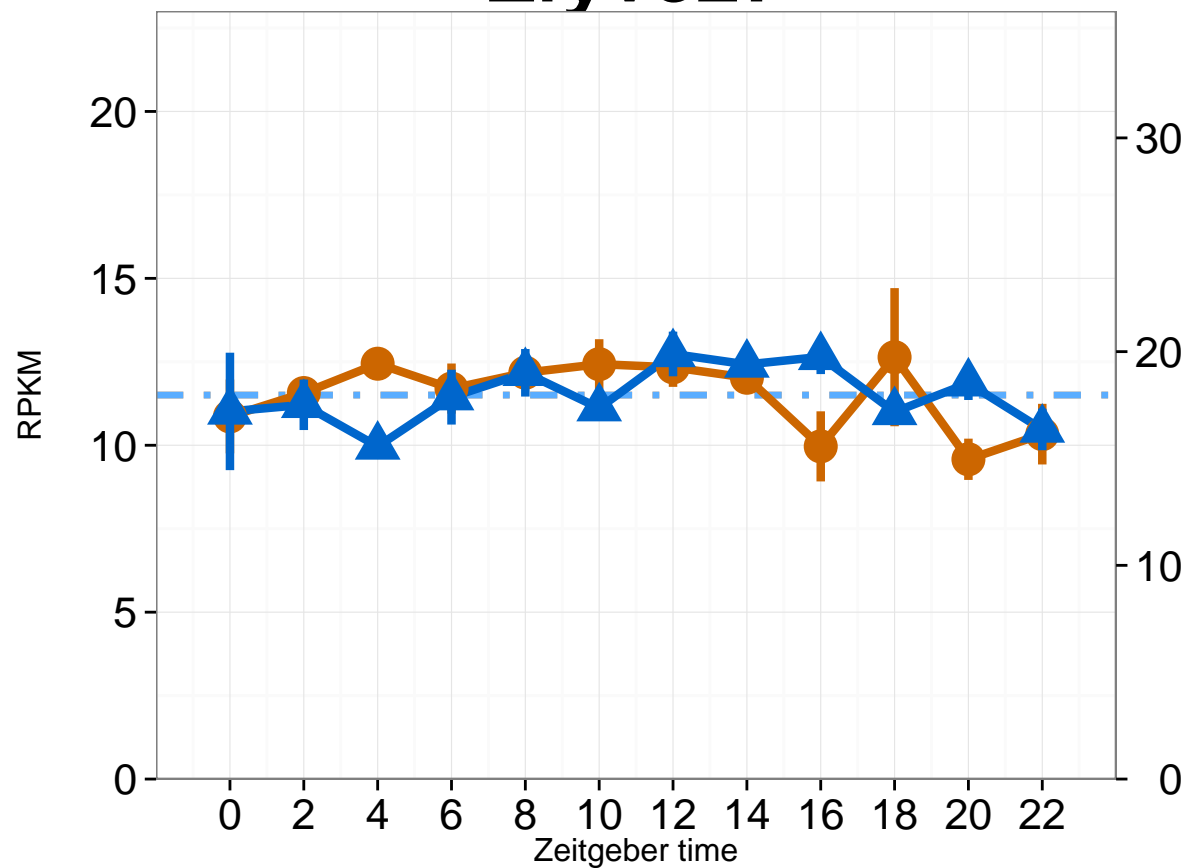

# Zfyve27

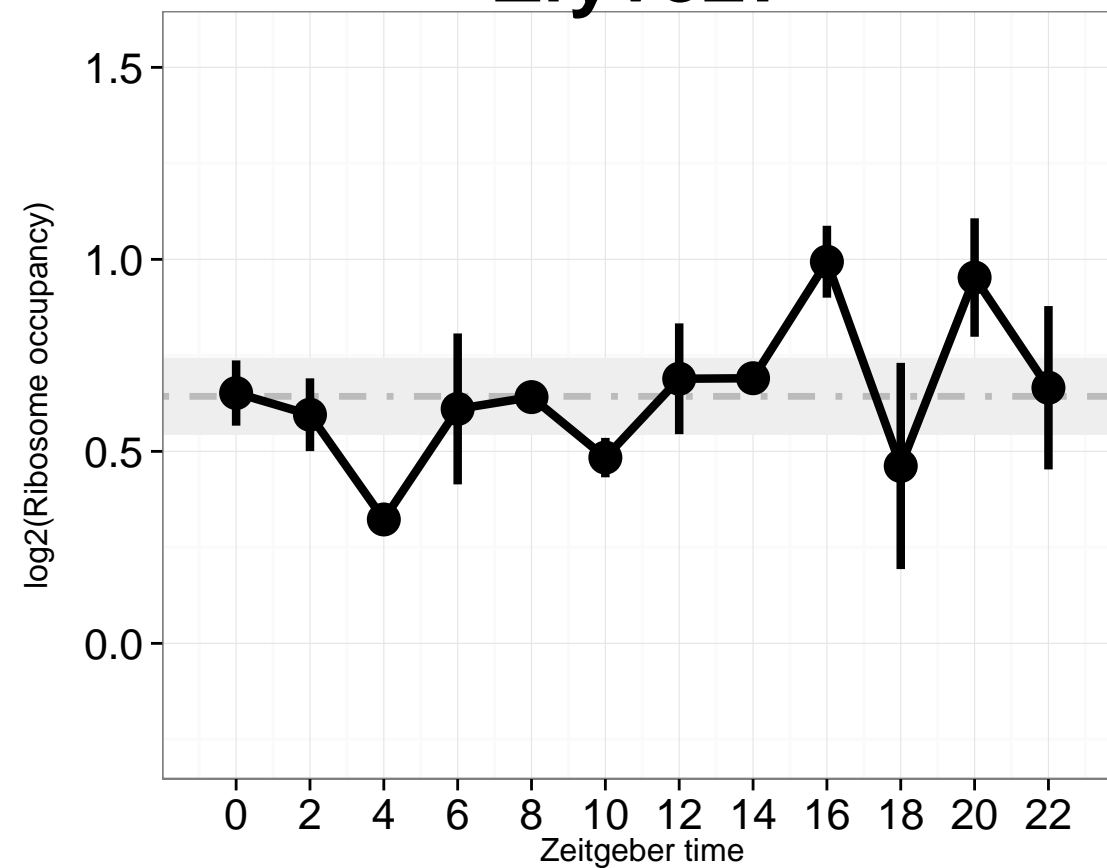

Supplement: Supplementary file 8636 [file 1]

## Poldip2

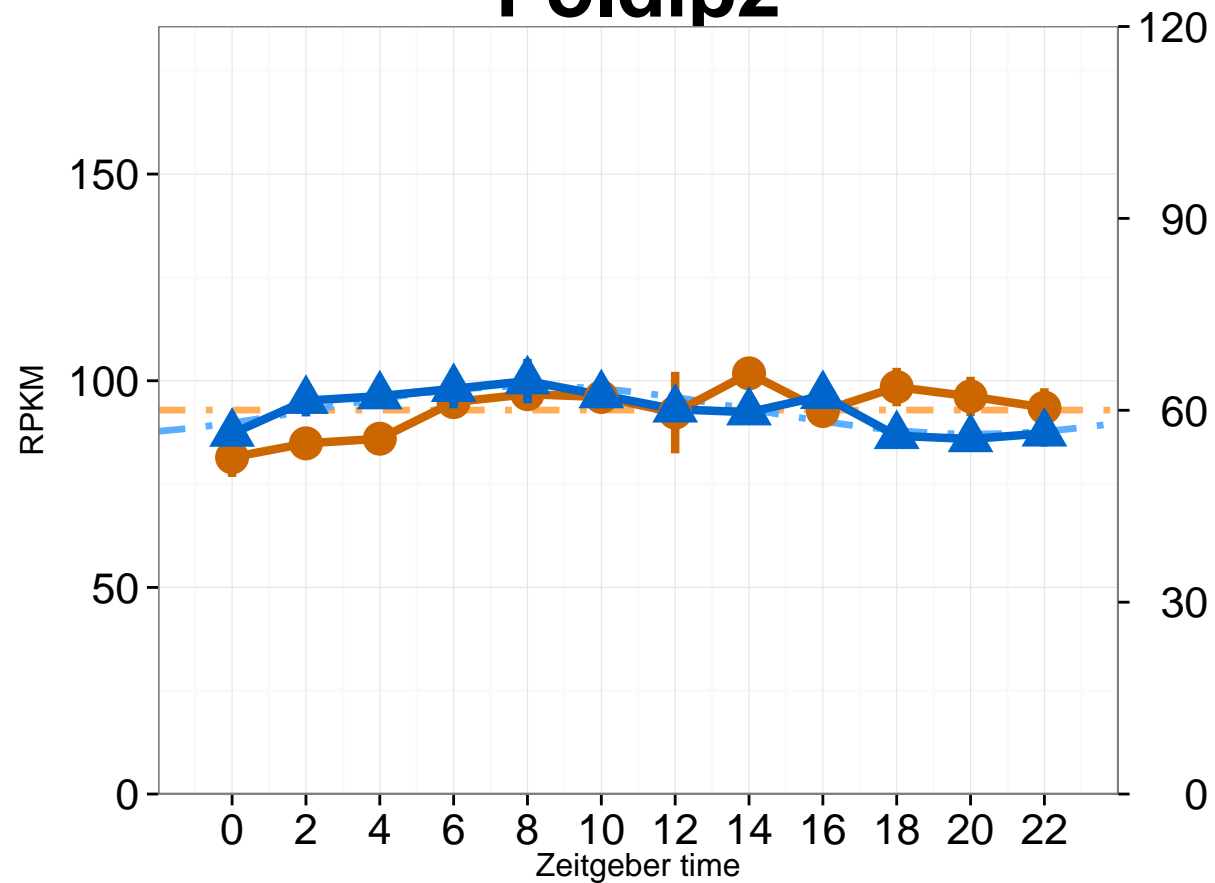

## Poldip2

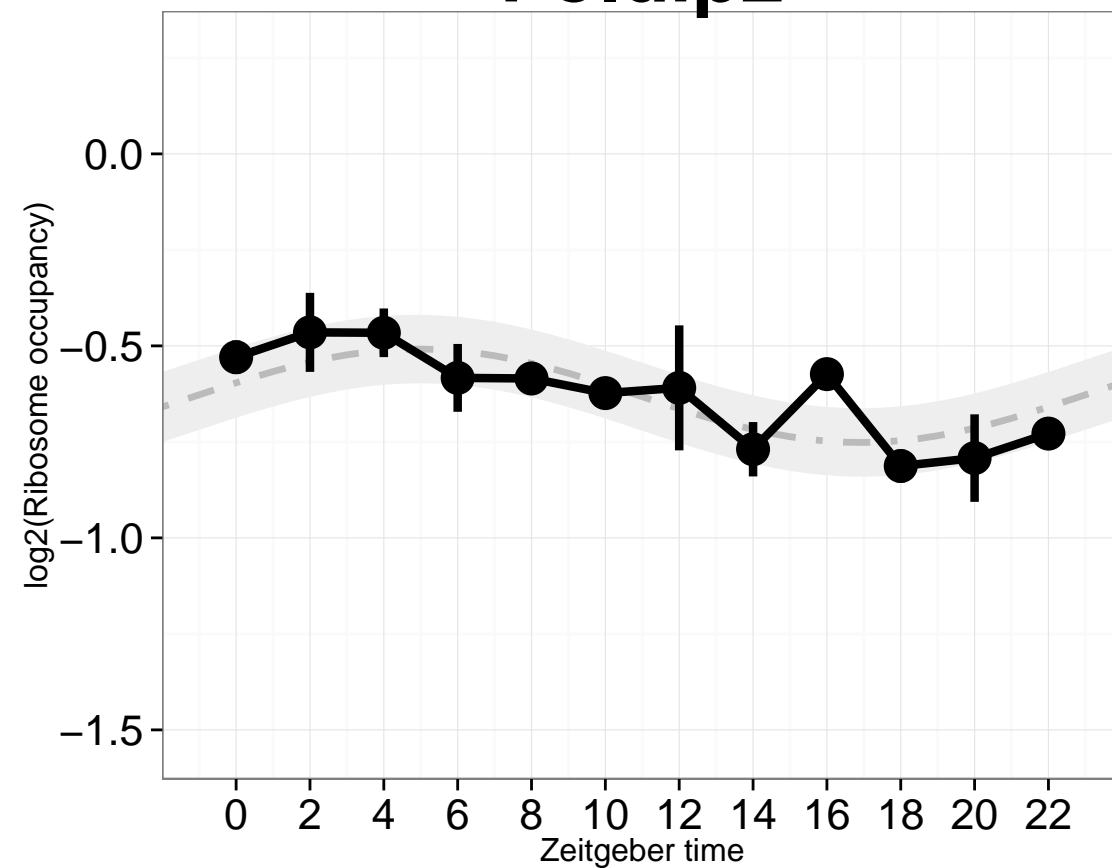

Supplement: Supplementary file 8637 [file 1]

# Gramd3

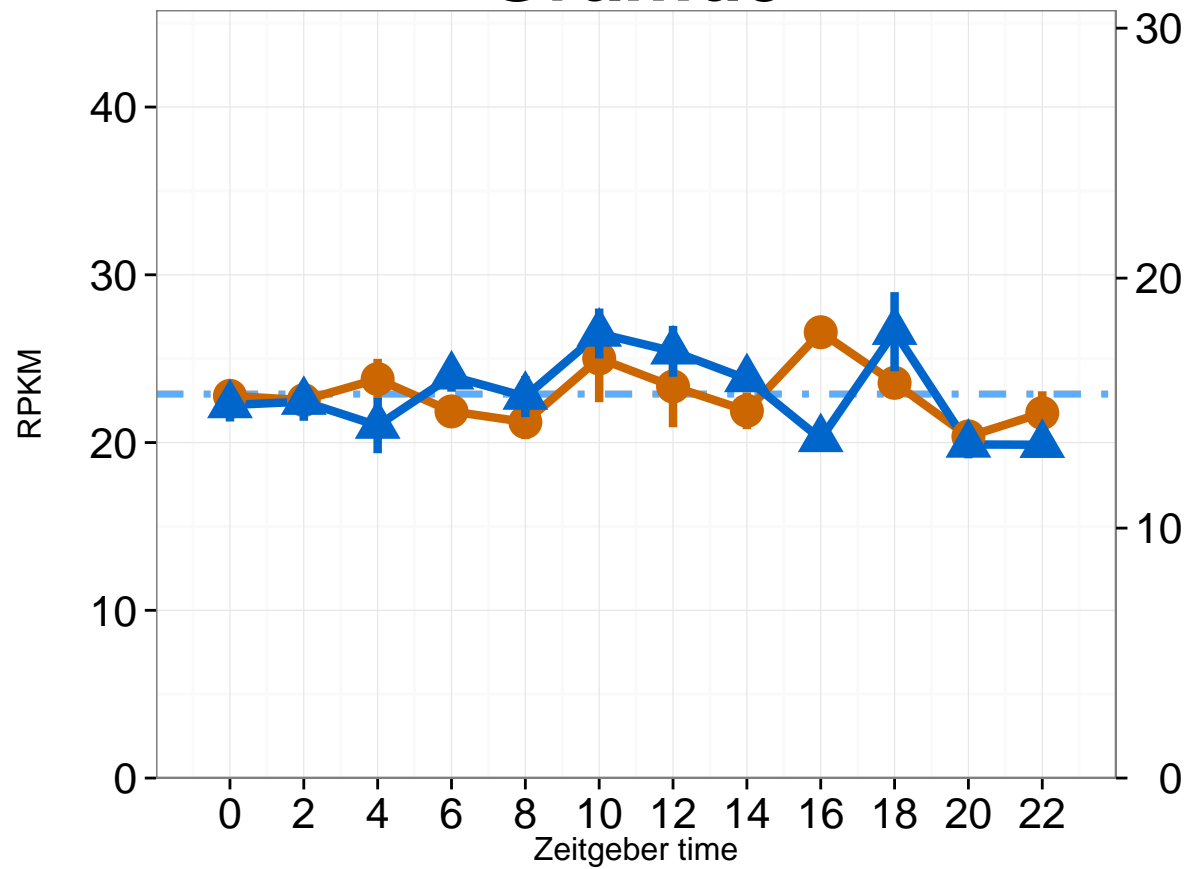

# Gramd3

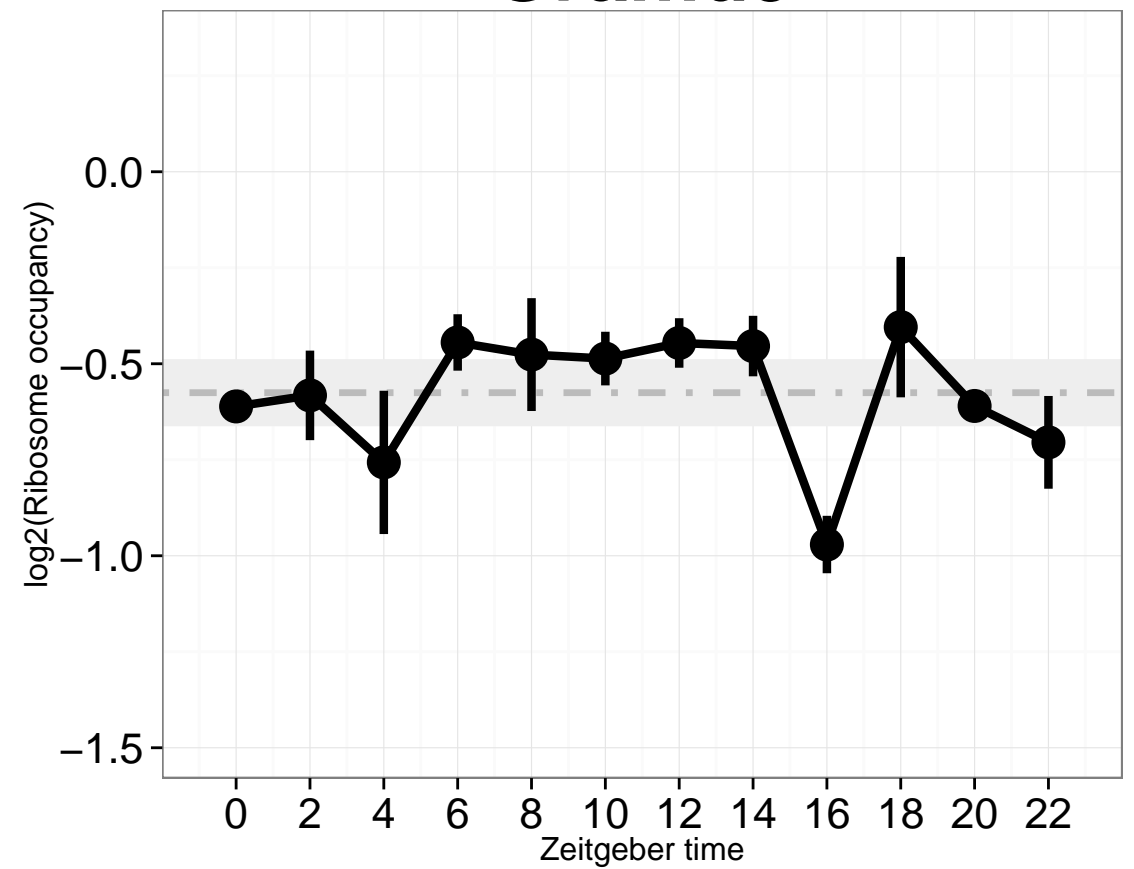

Supplement: Supplementary file 8638 [file 1]

# Tmem108

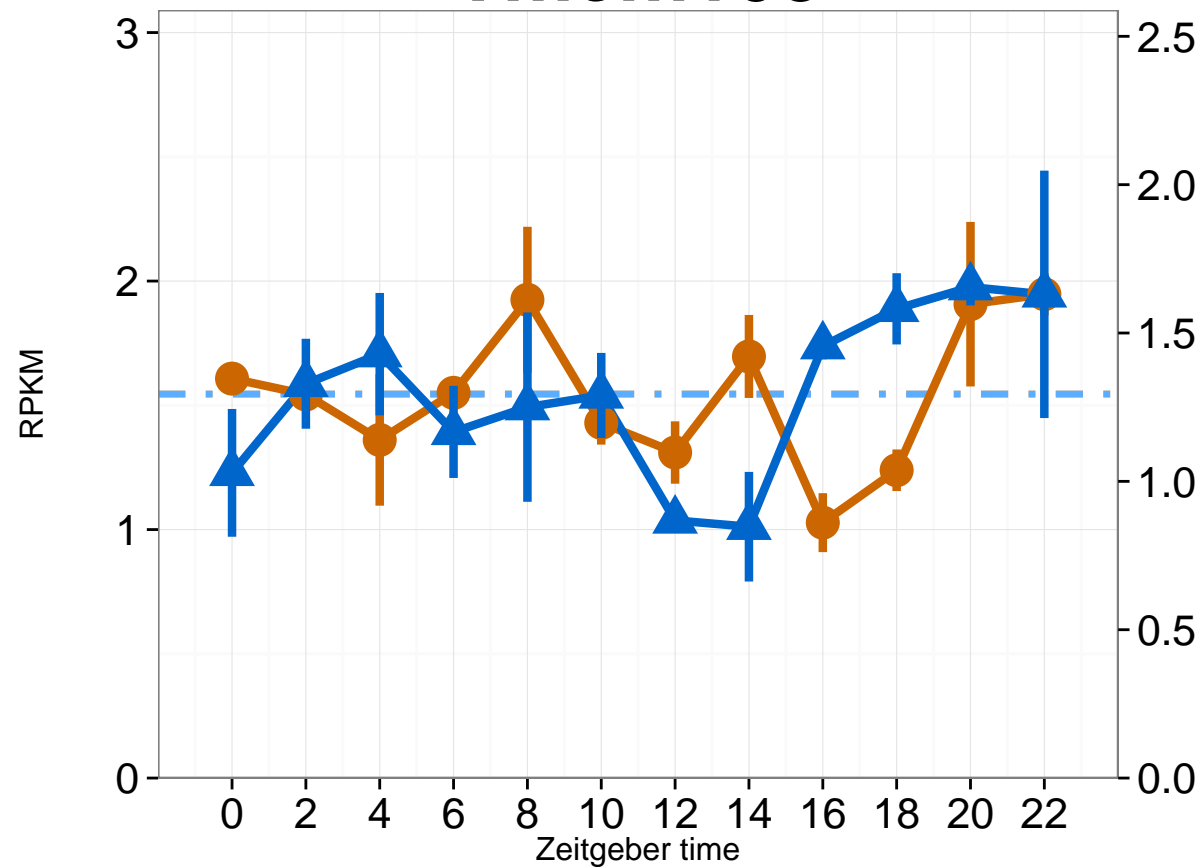

# Tmem108

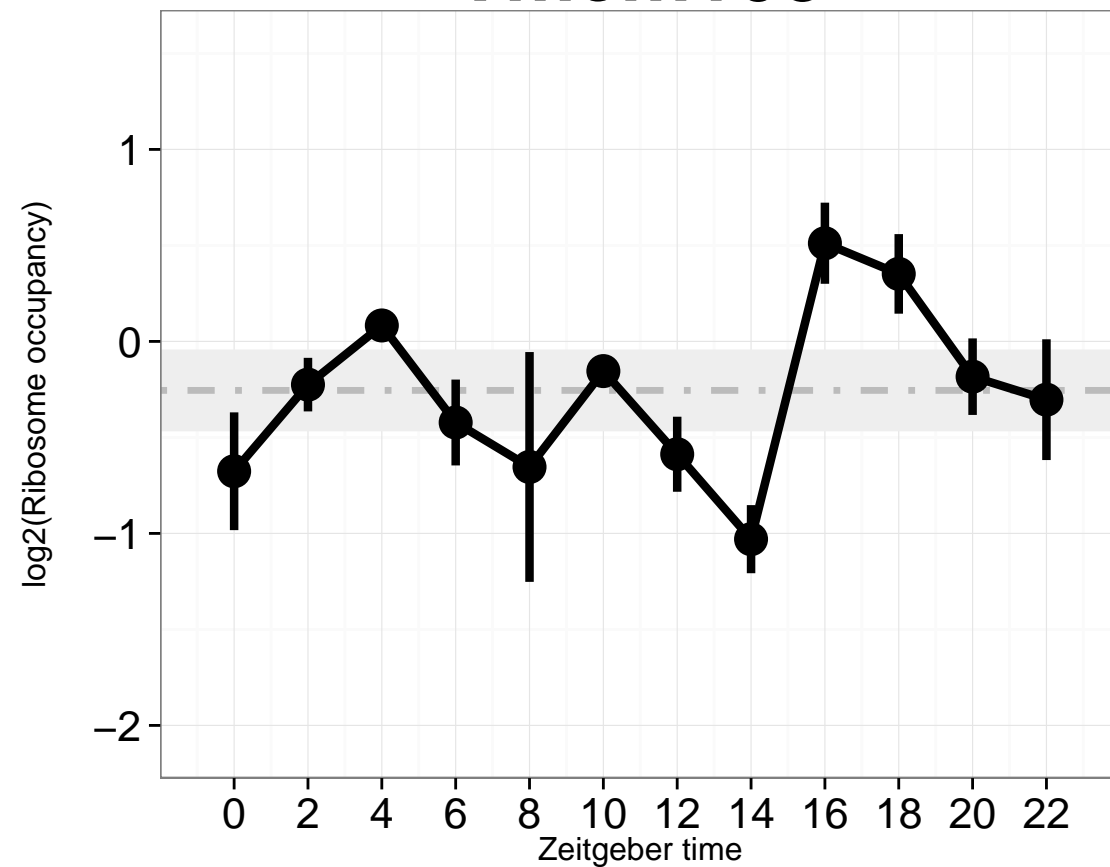

Supplement: Supplementary file 8639 [file 1]

# Ppp1r14a

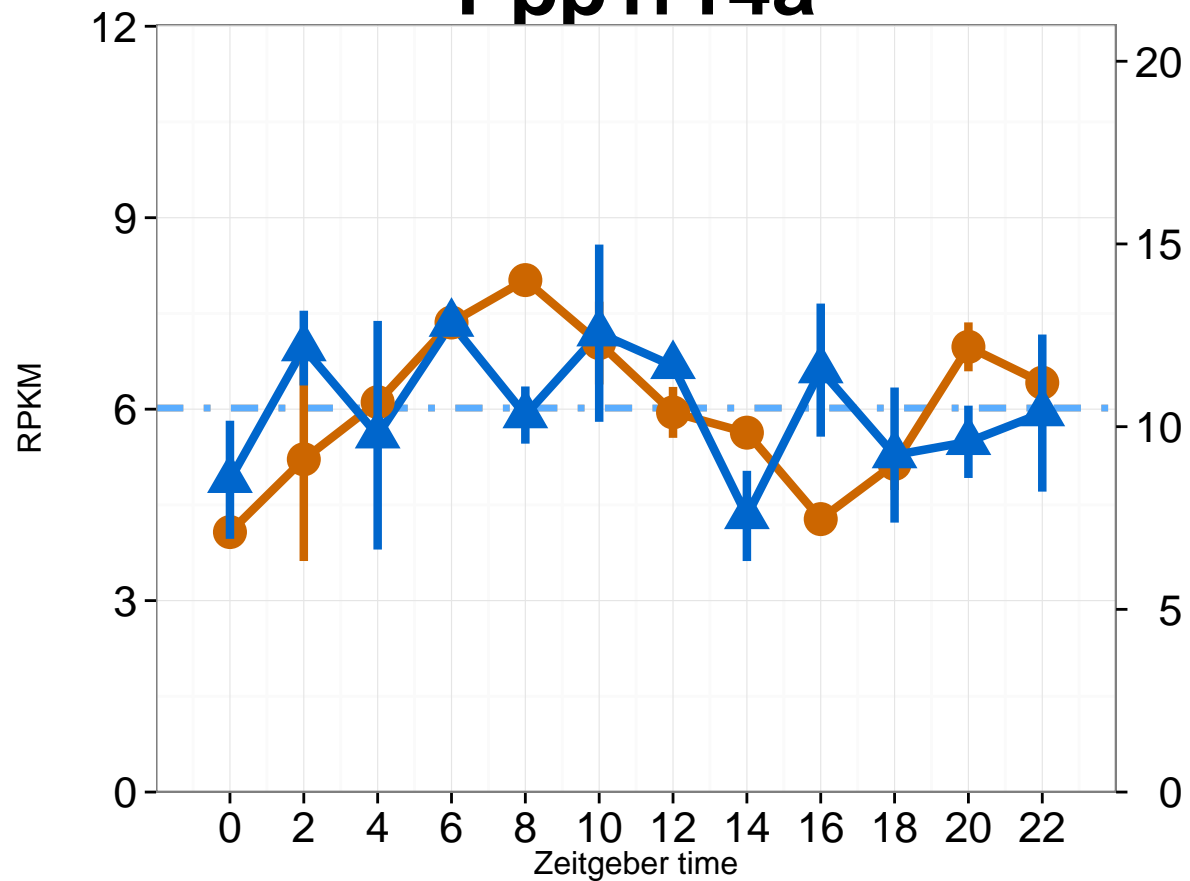

# Ppp1r14a

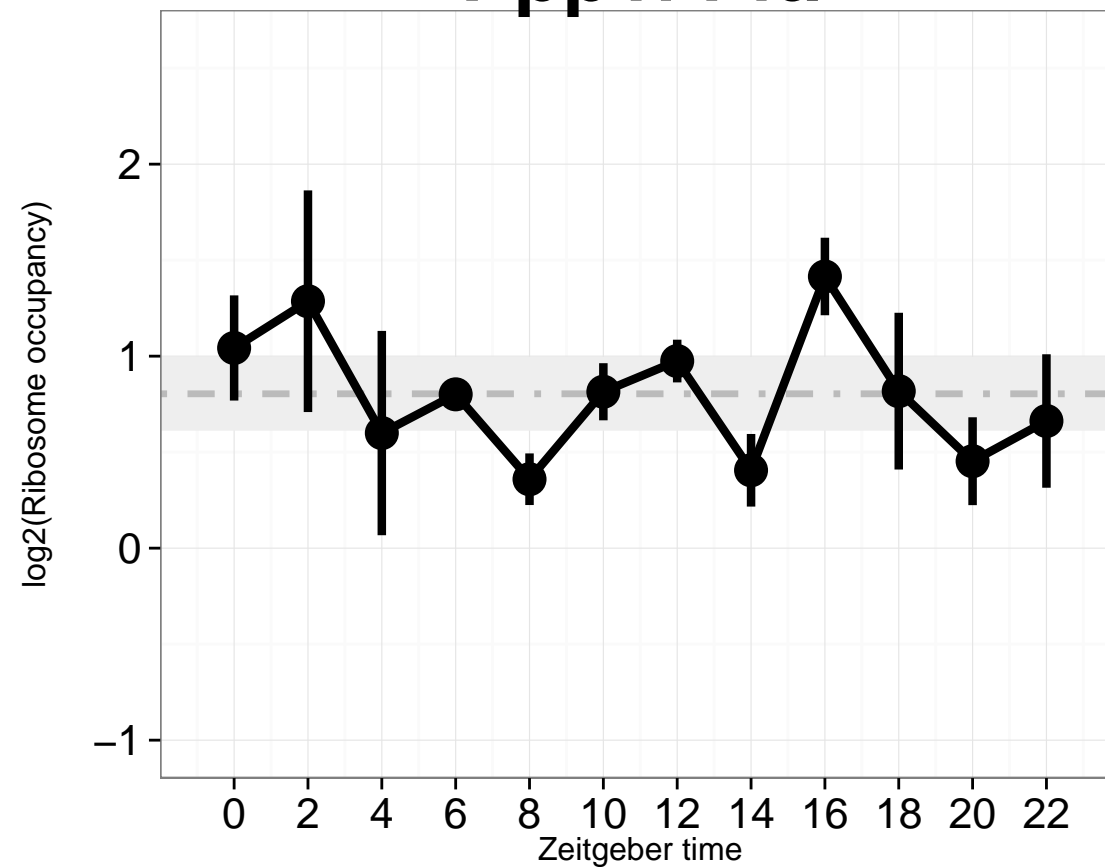

Supplement: Supplementary file 8640 [file 1]

# Fgfr4

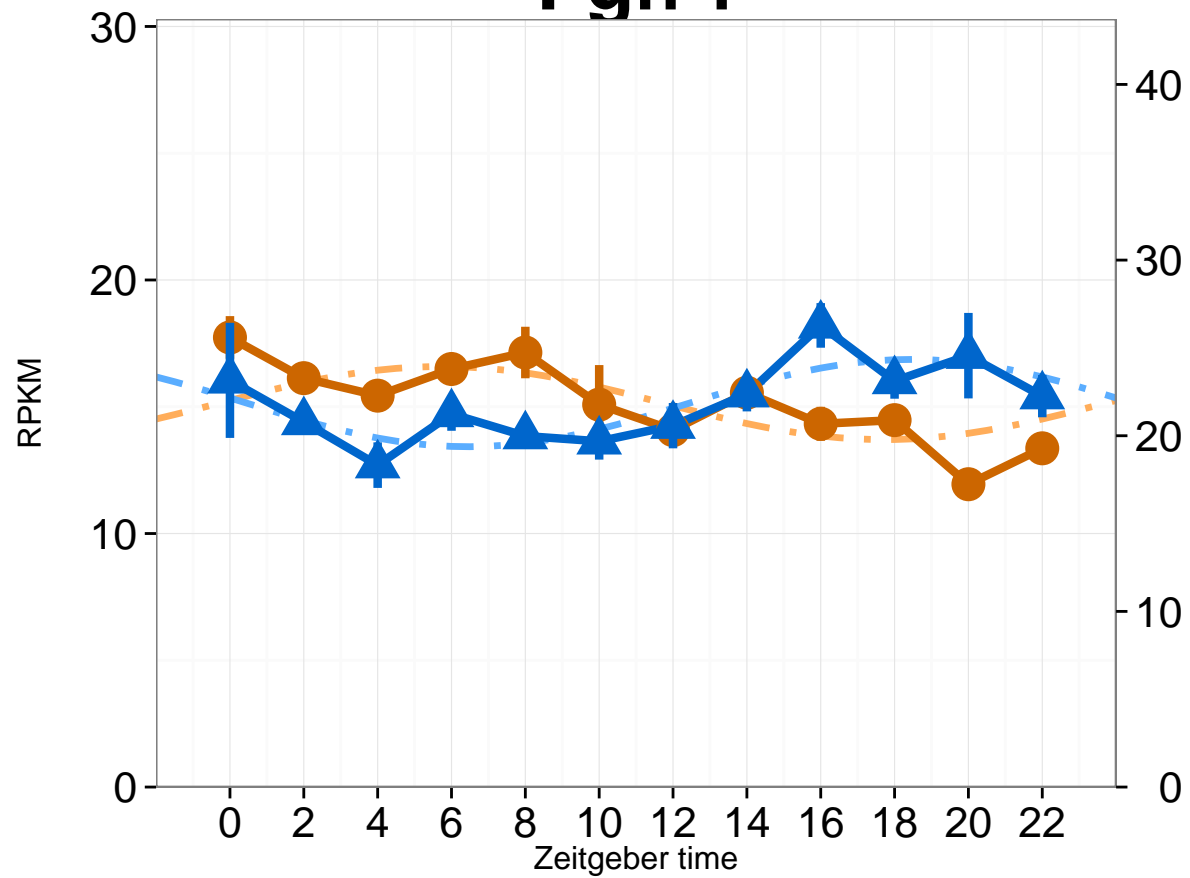

# Fgfr4

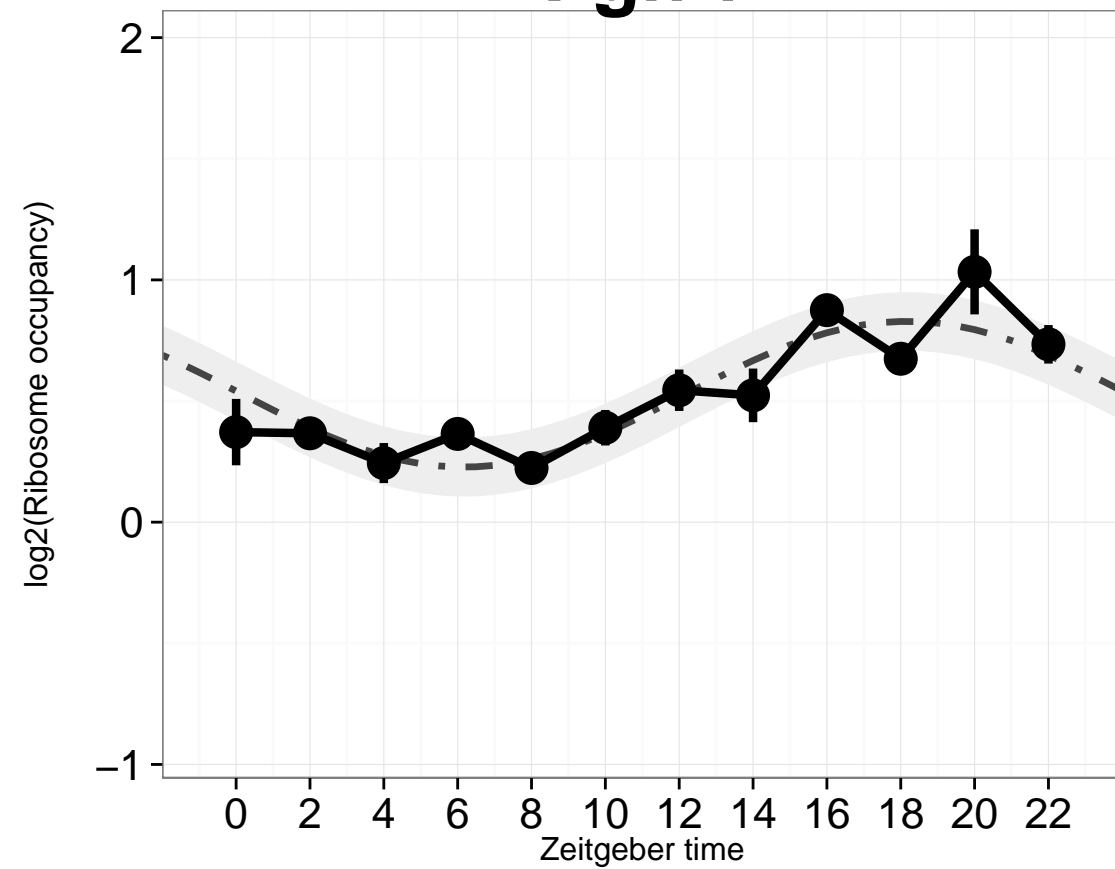

Supplement: Supplementary file 8641 [file 1]

# Oscp1

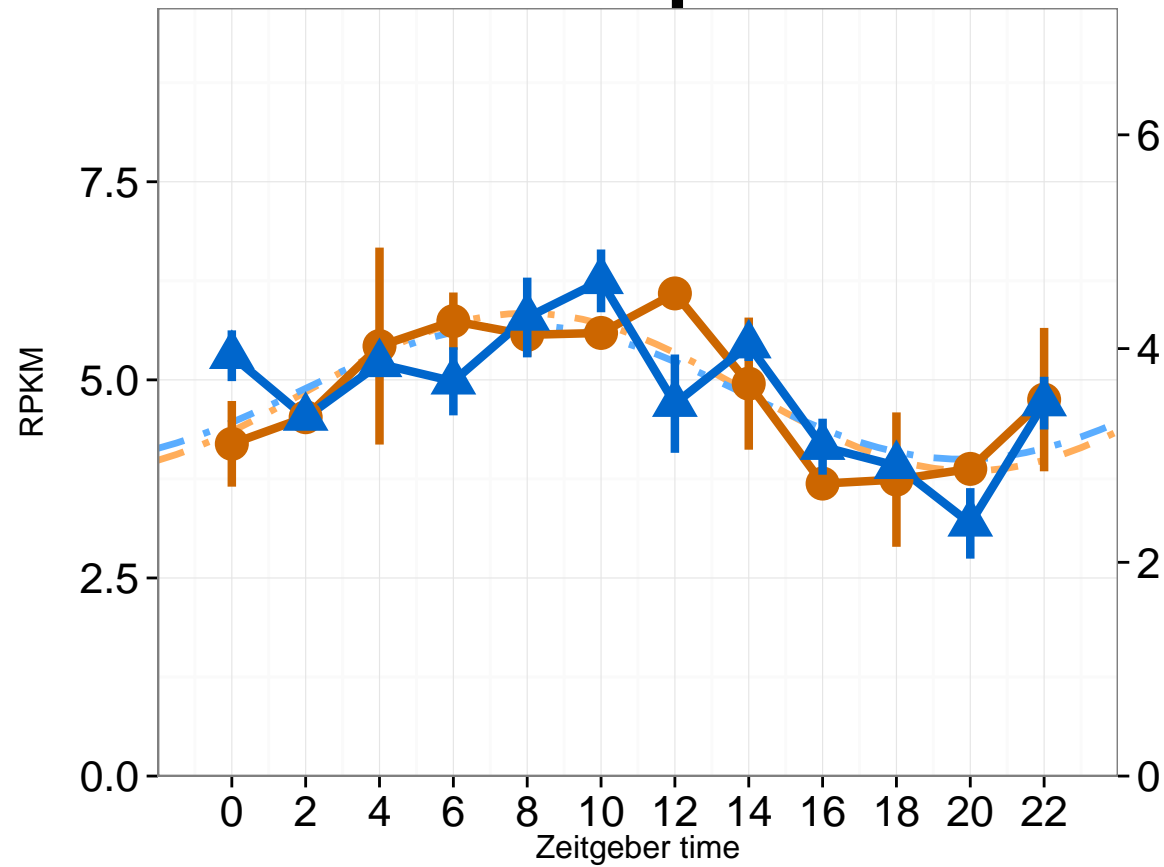

# Oscp1

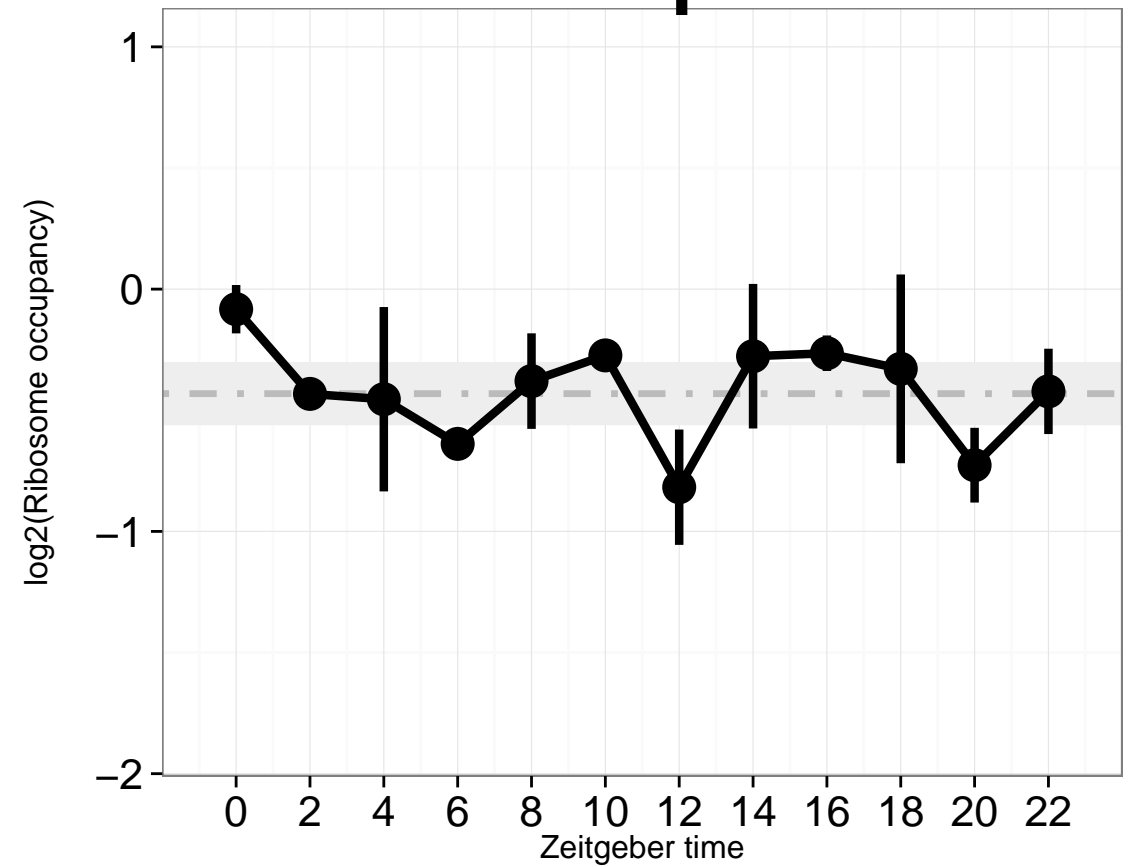

Supplement: Supplementary file 8642 [file 1]

# Ccne2

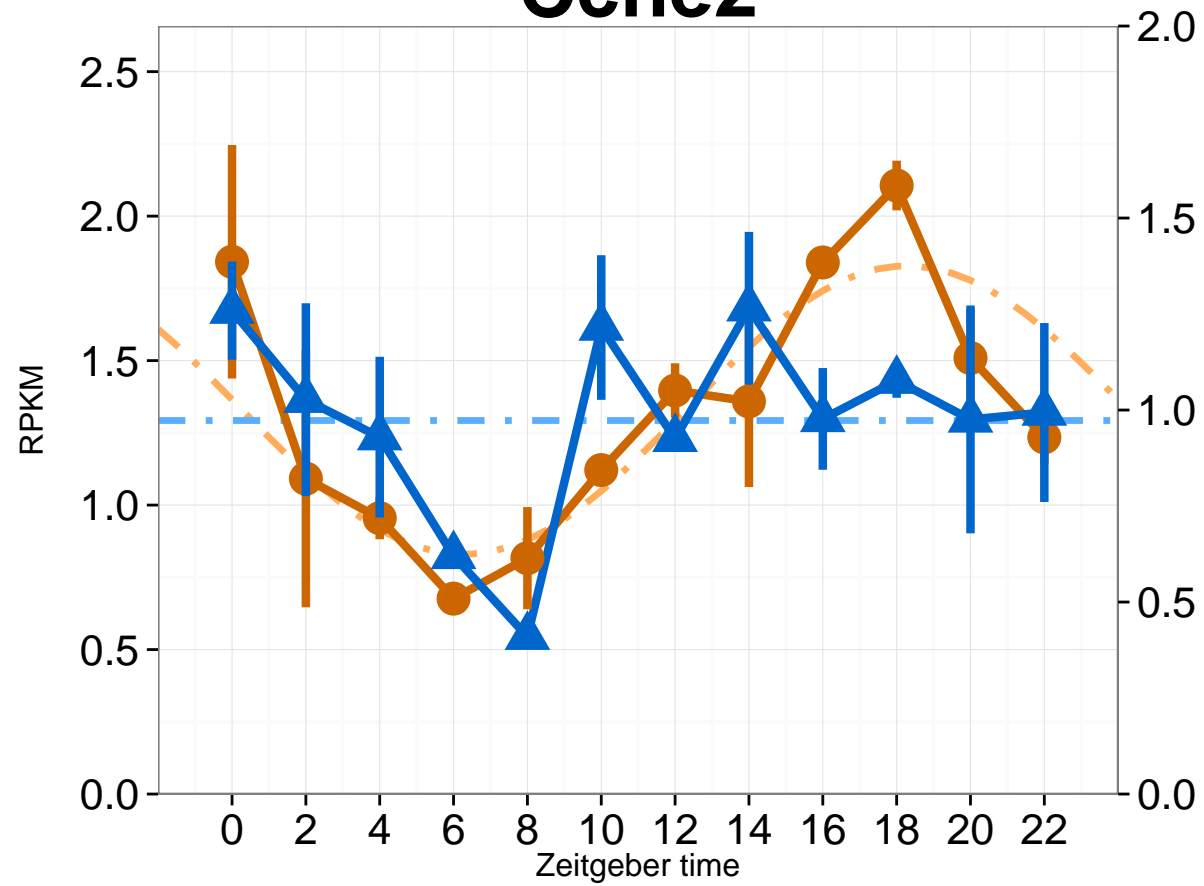

# Ccne2

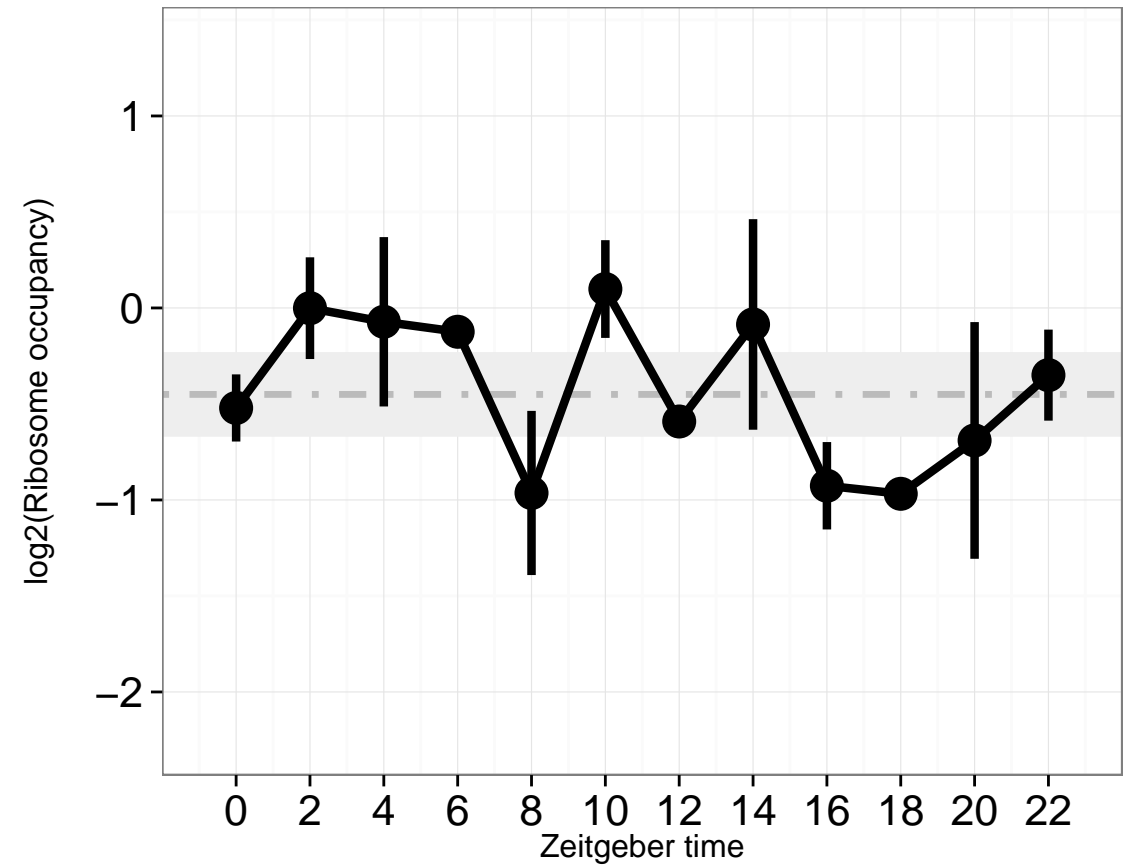

Supplement: Supplementary file 8643 [file 1]

# Lrrc8e

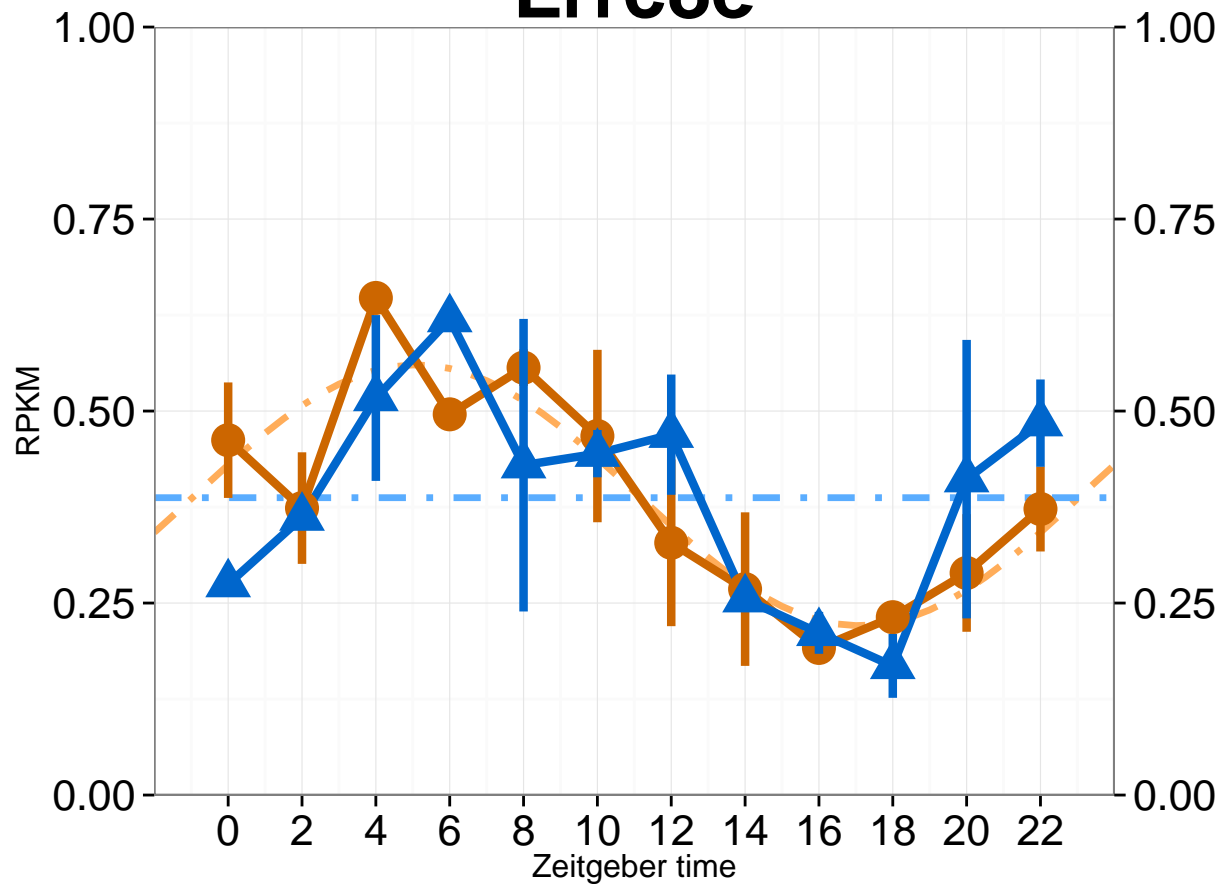

# Lrrc8e

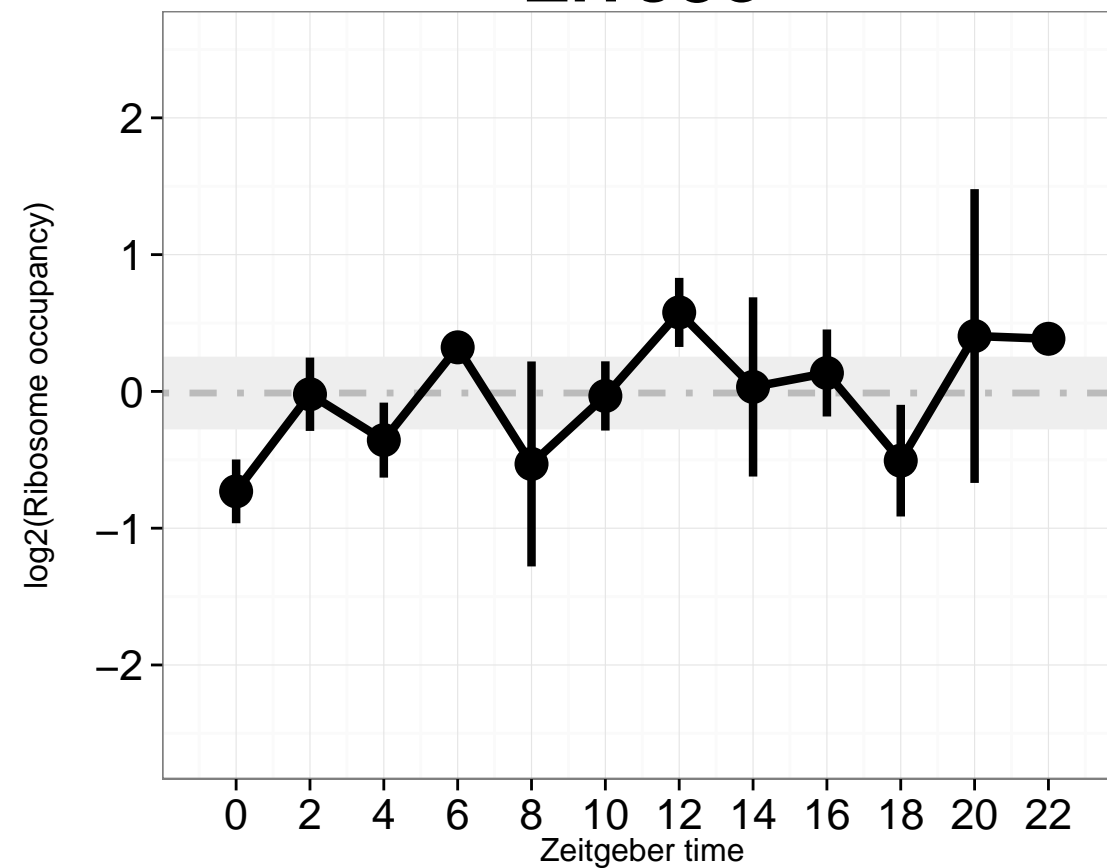

Supplement: Supplementary file 8644 [file 1]

# Pdrg1

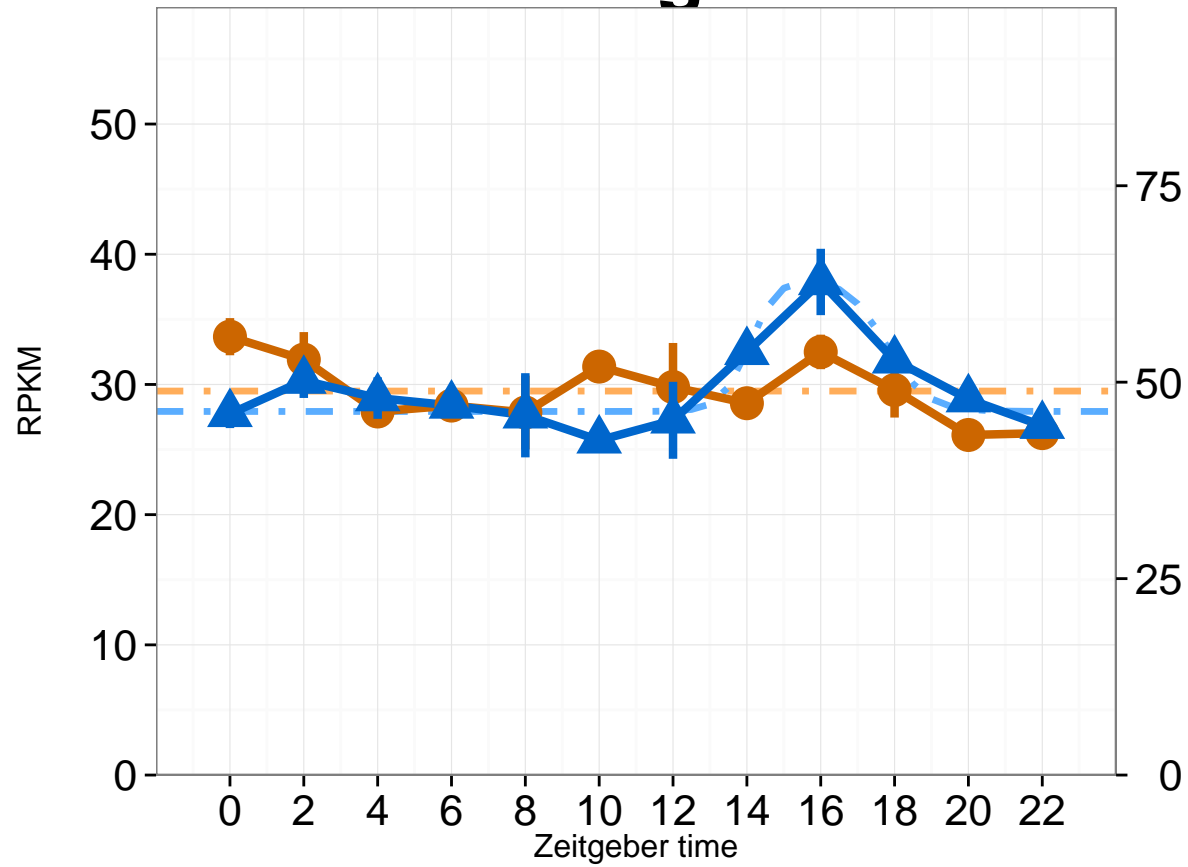

# Pdrg1

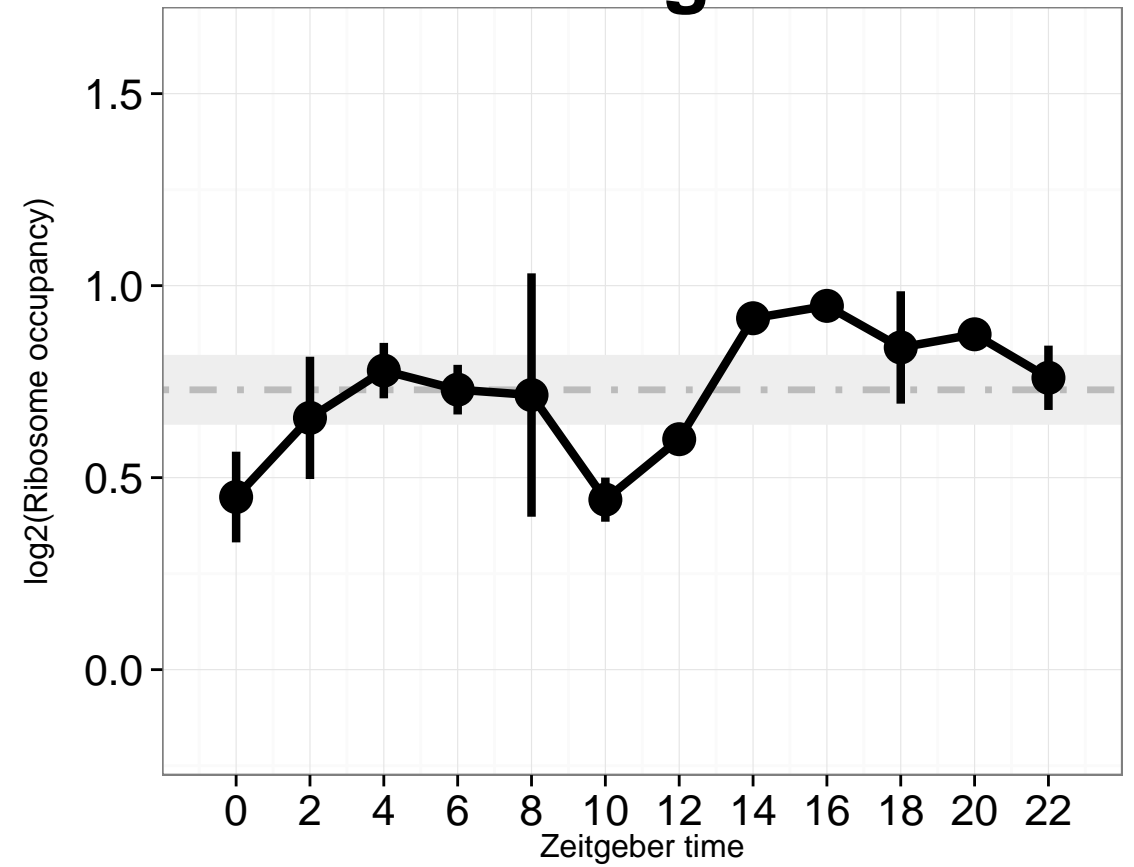

Supplement: Supplementary file 8645 [file 1]

# Gm4540

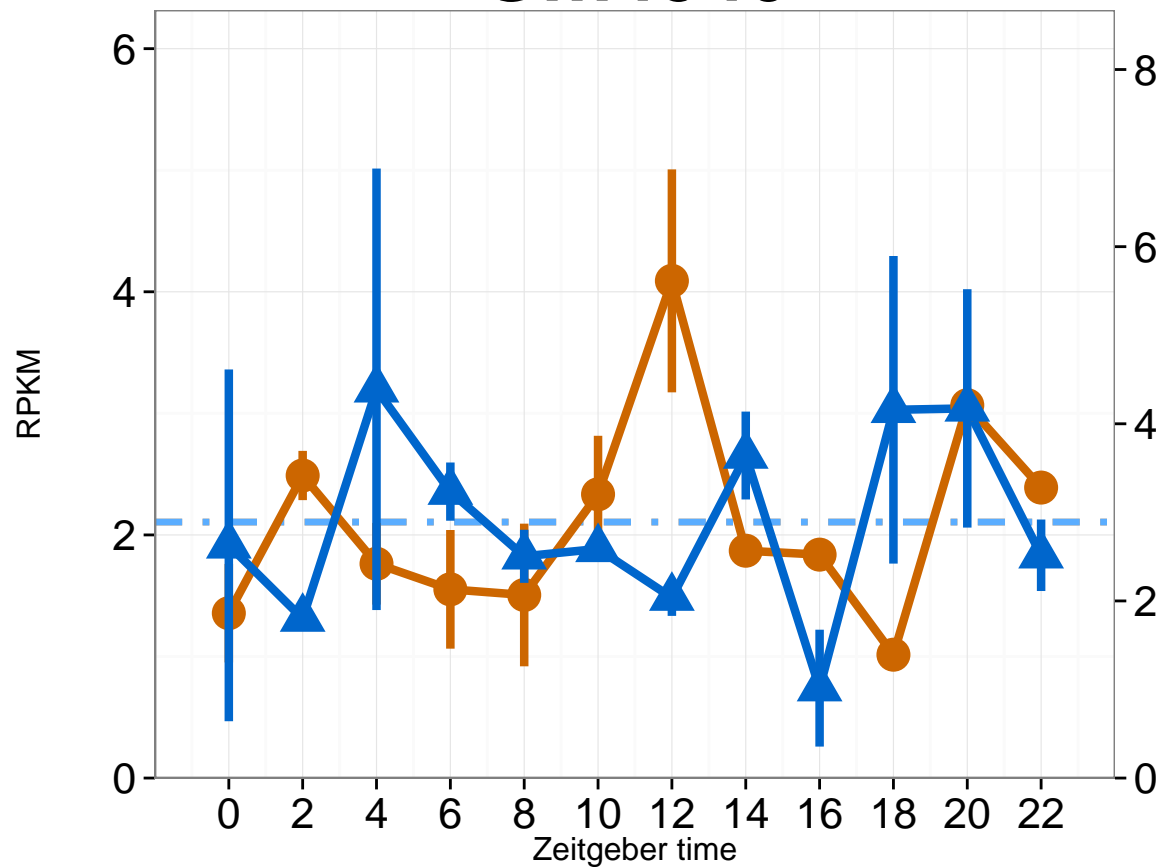

# Gm4540

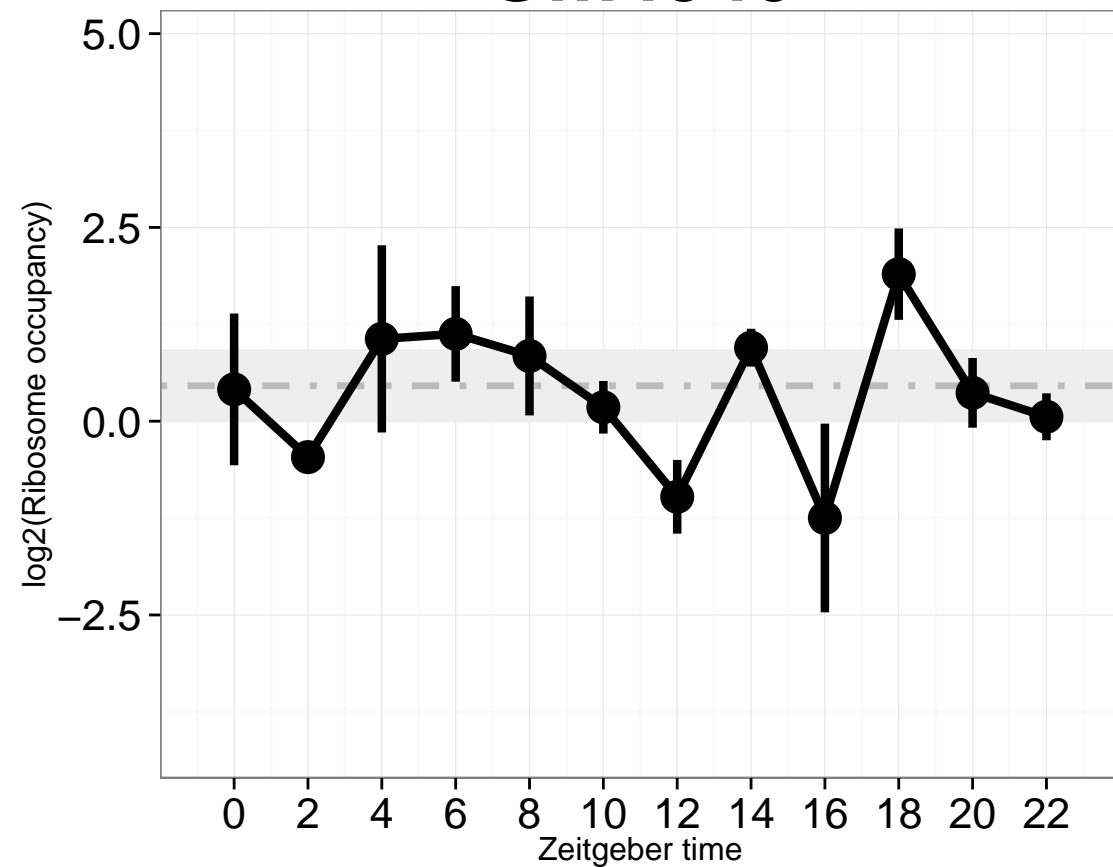

Supplement: Supplementary file 8646 [file 1]

## Tmem251

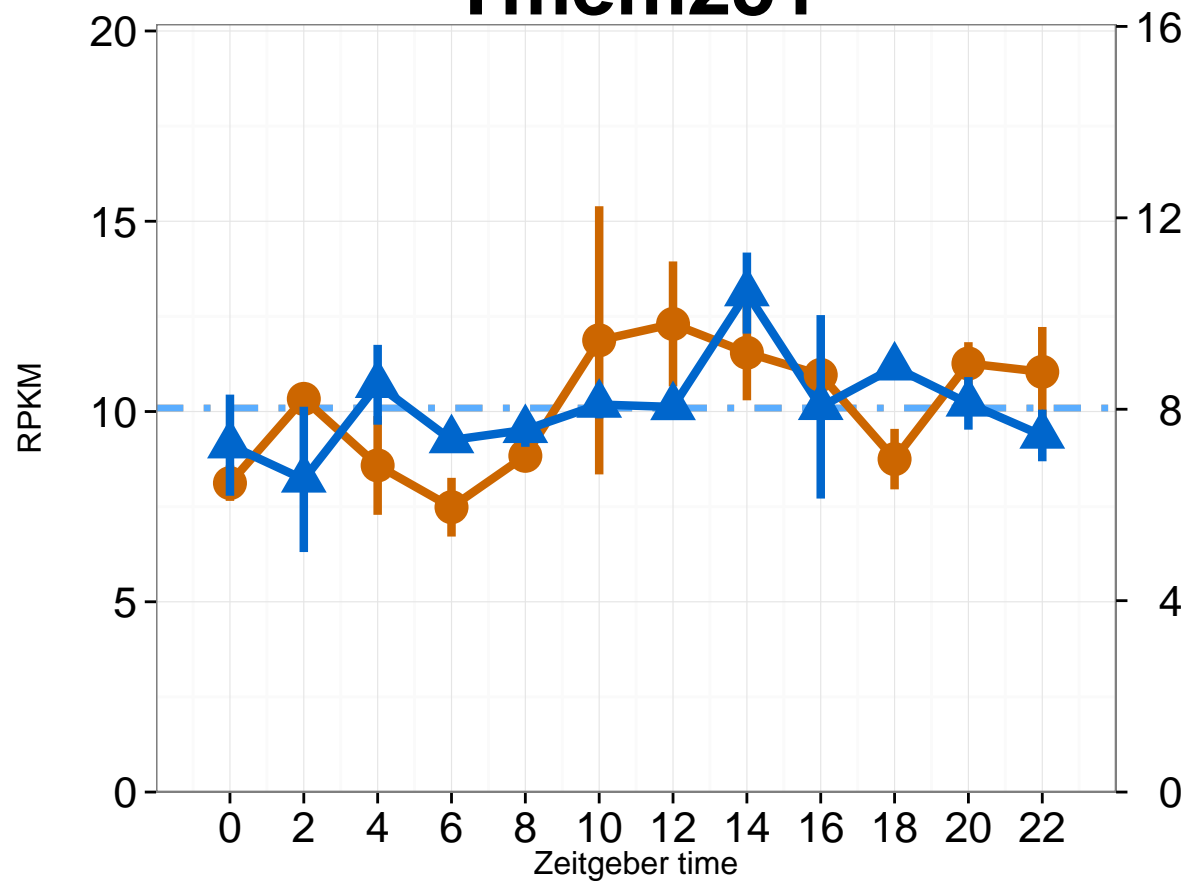

## Tmem251

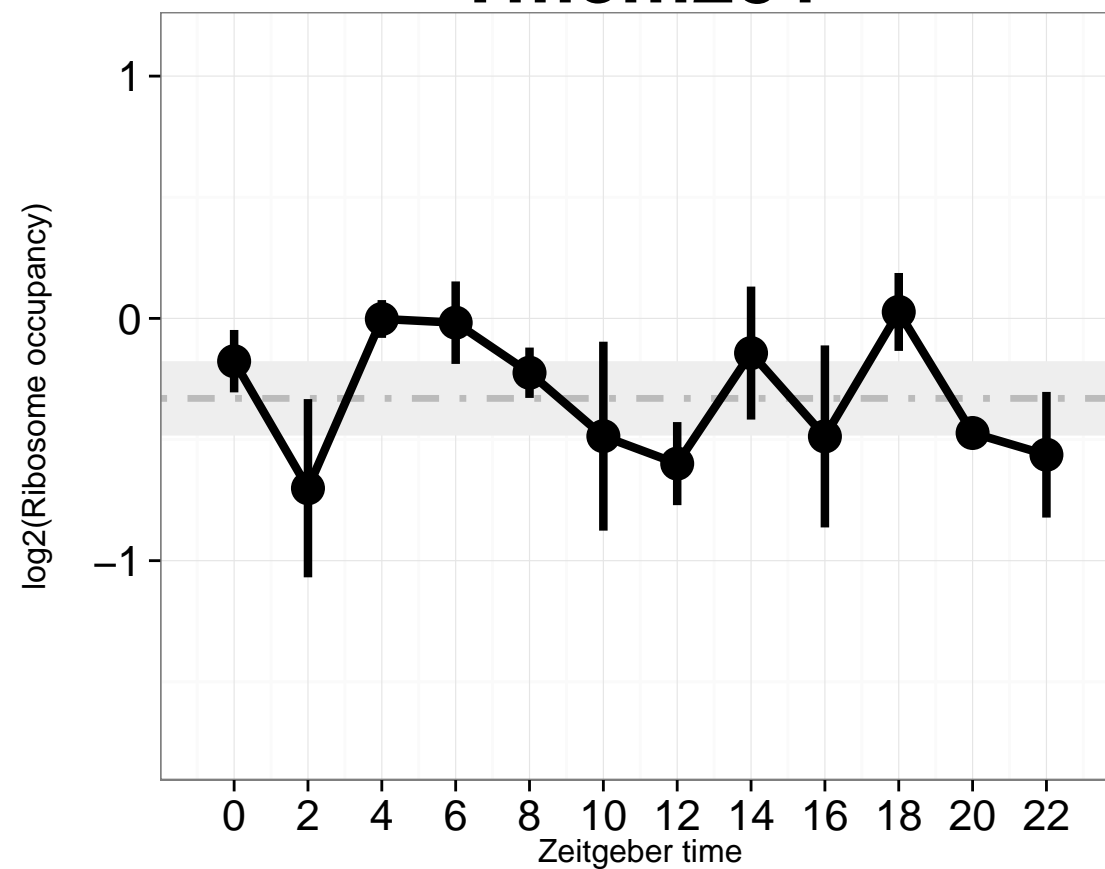

Supplement: Supplementary file 8647 [file 1]

# Cysltr1

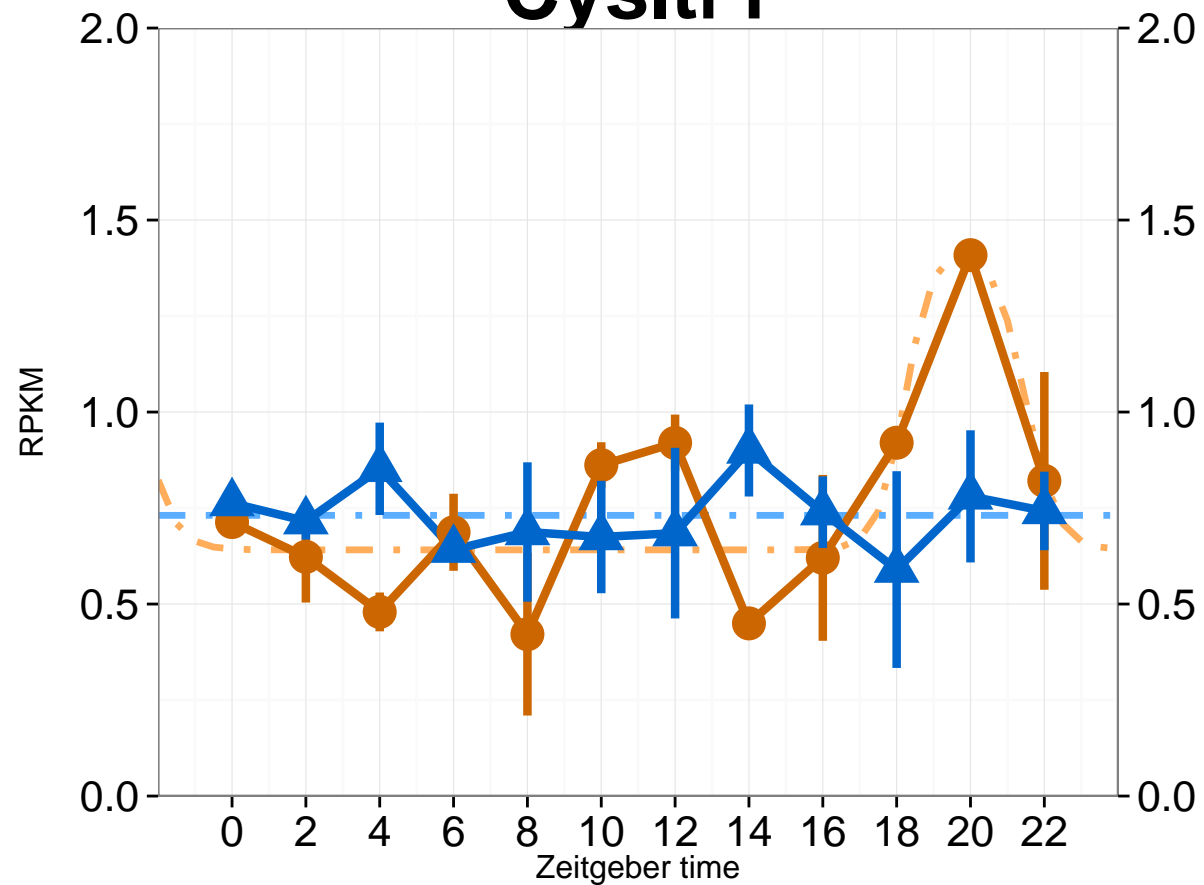

# Cysltr1

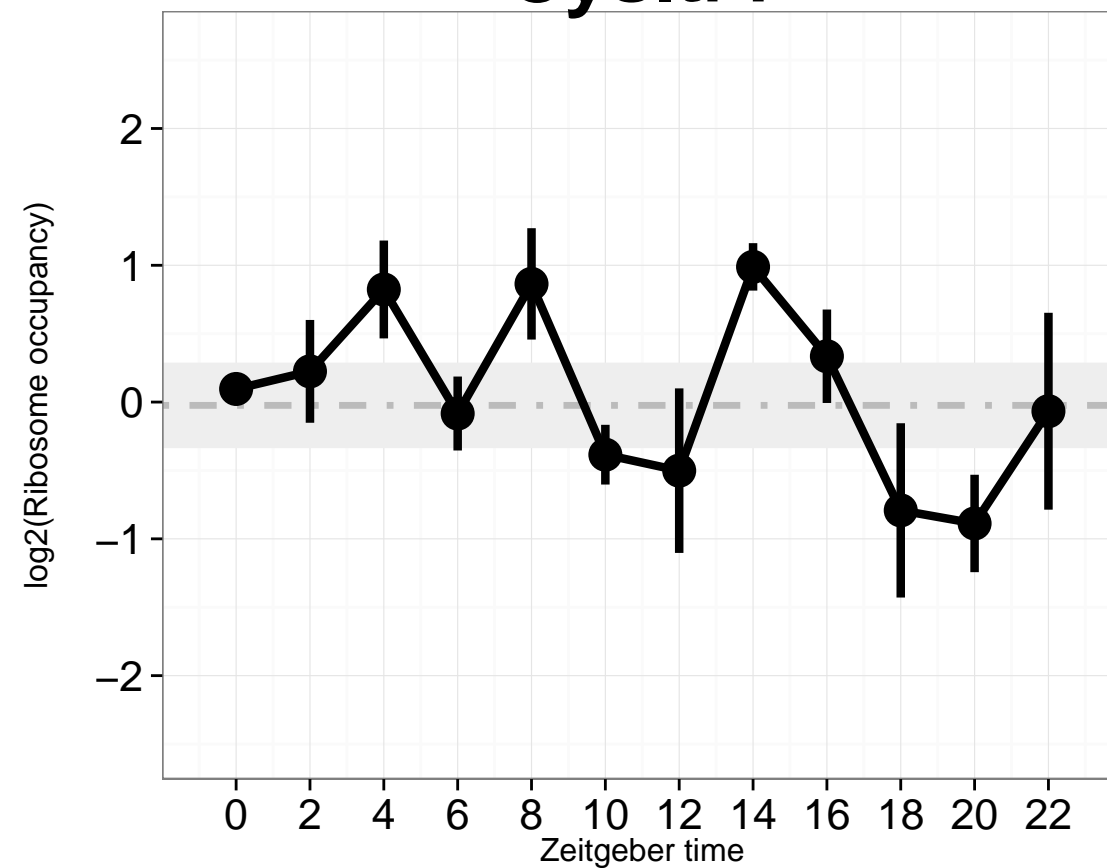

Supplement: Supplementary file 8648 [file 1]

## Cd163

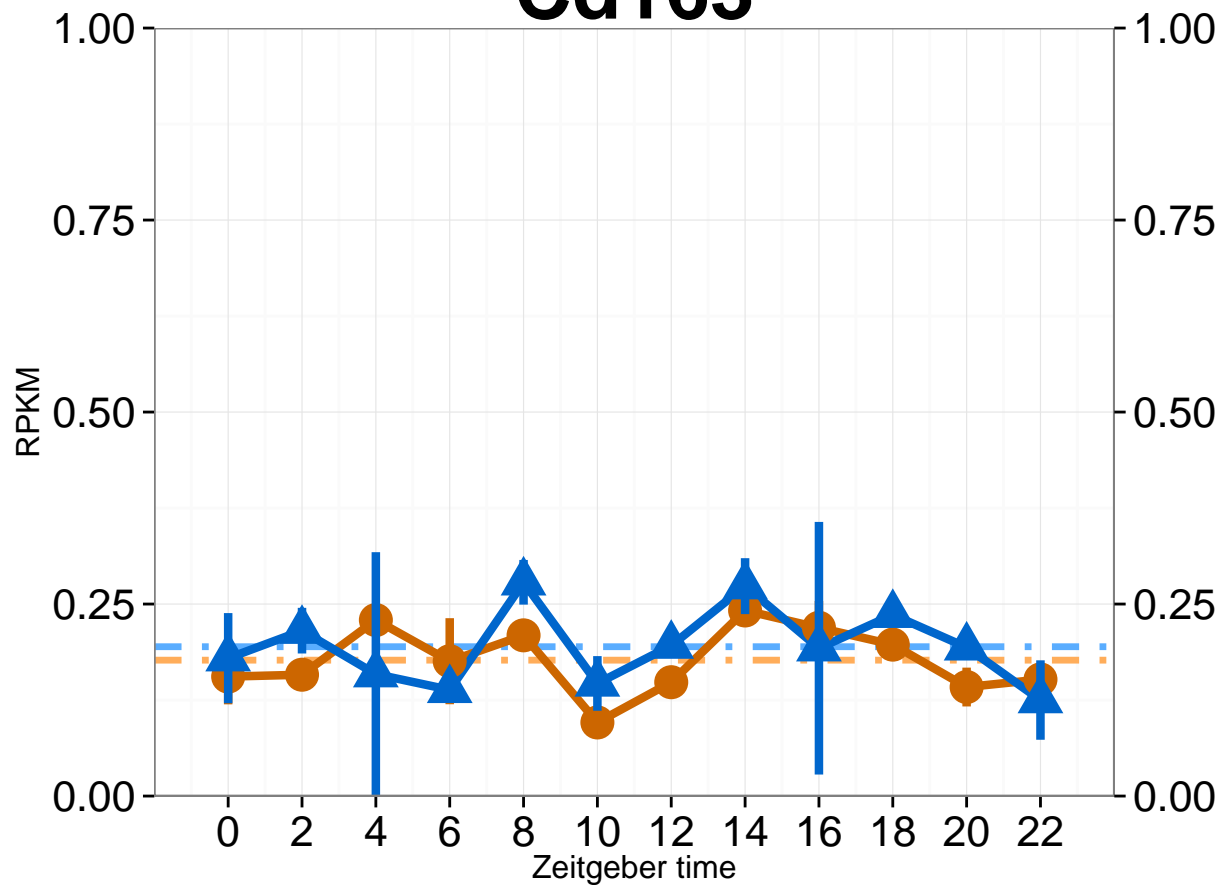

## Cd163

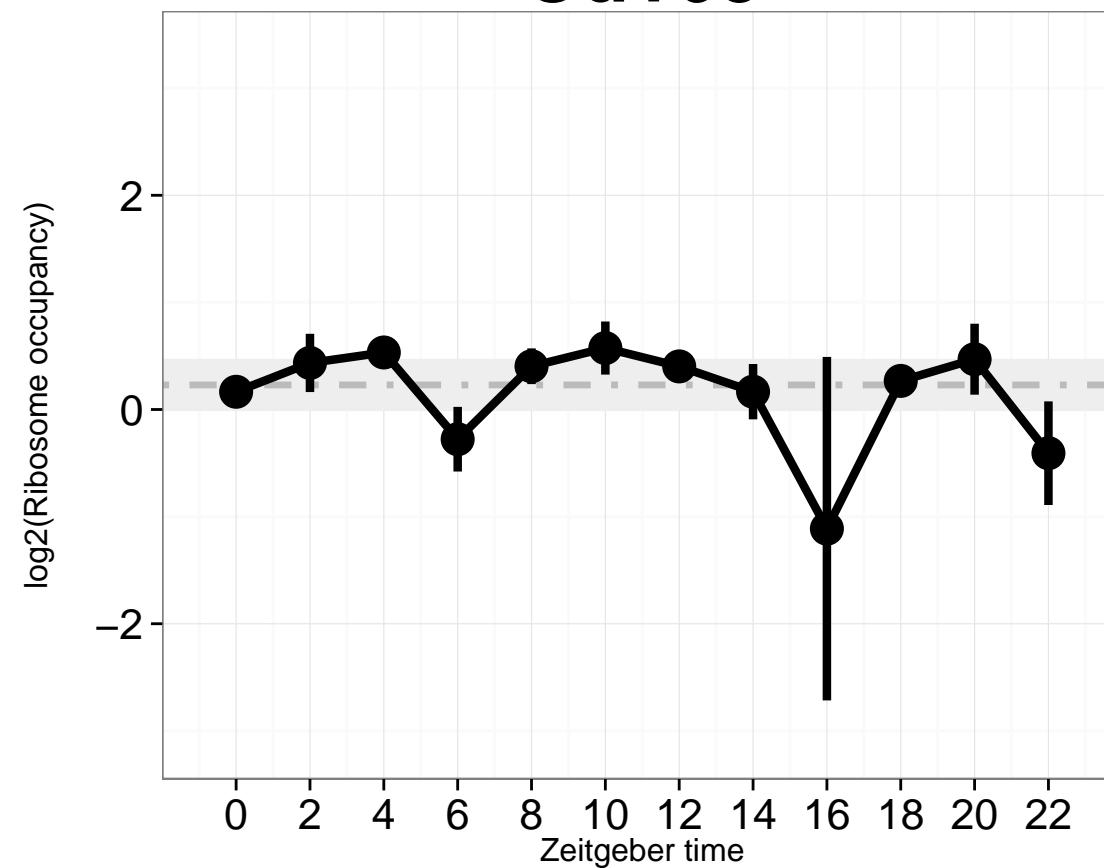

Supplement: Supplementary file 8649 [file 1]

## Dbn1

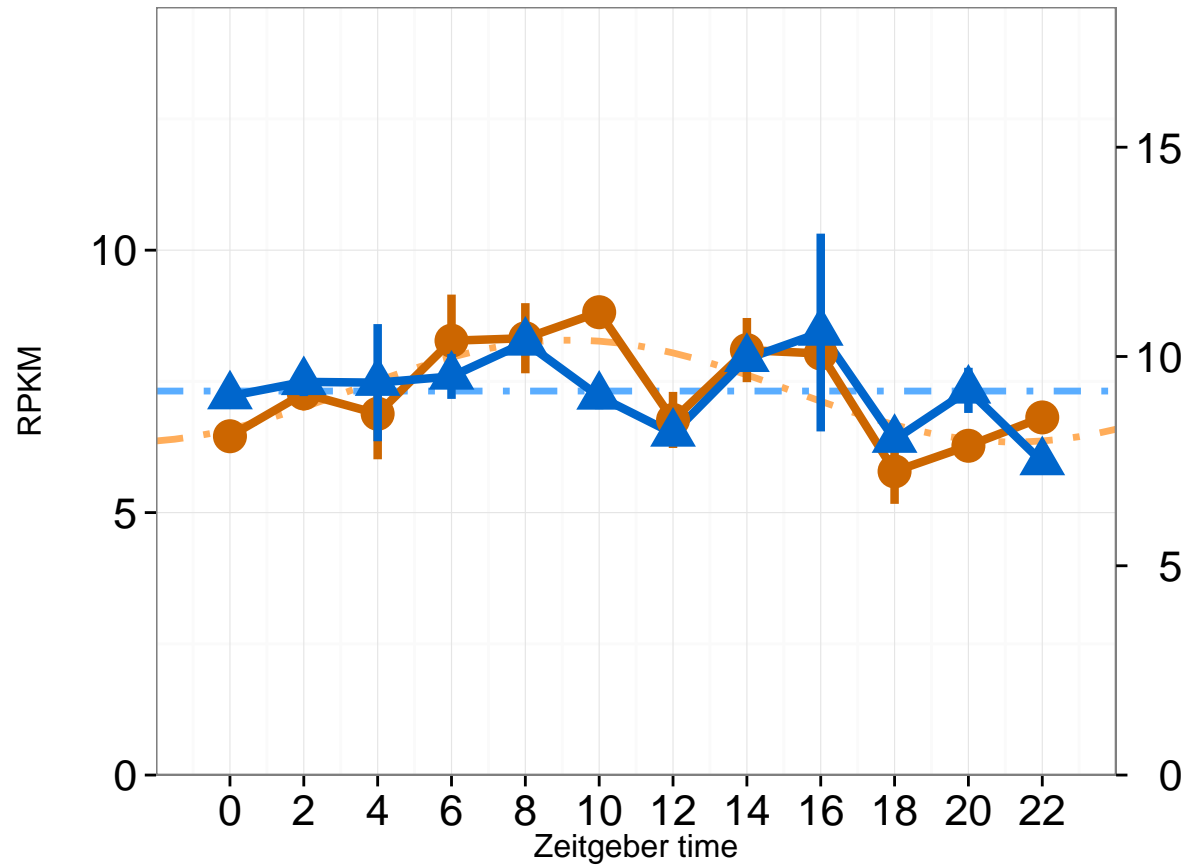

## Dbn1

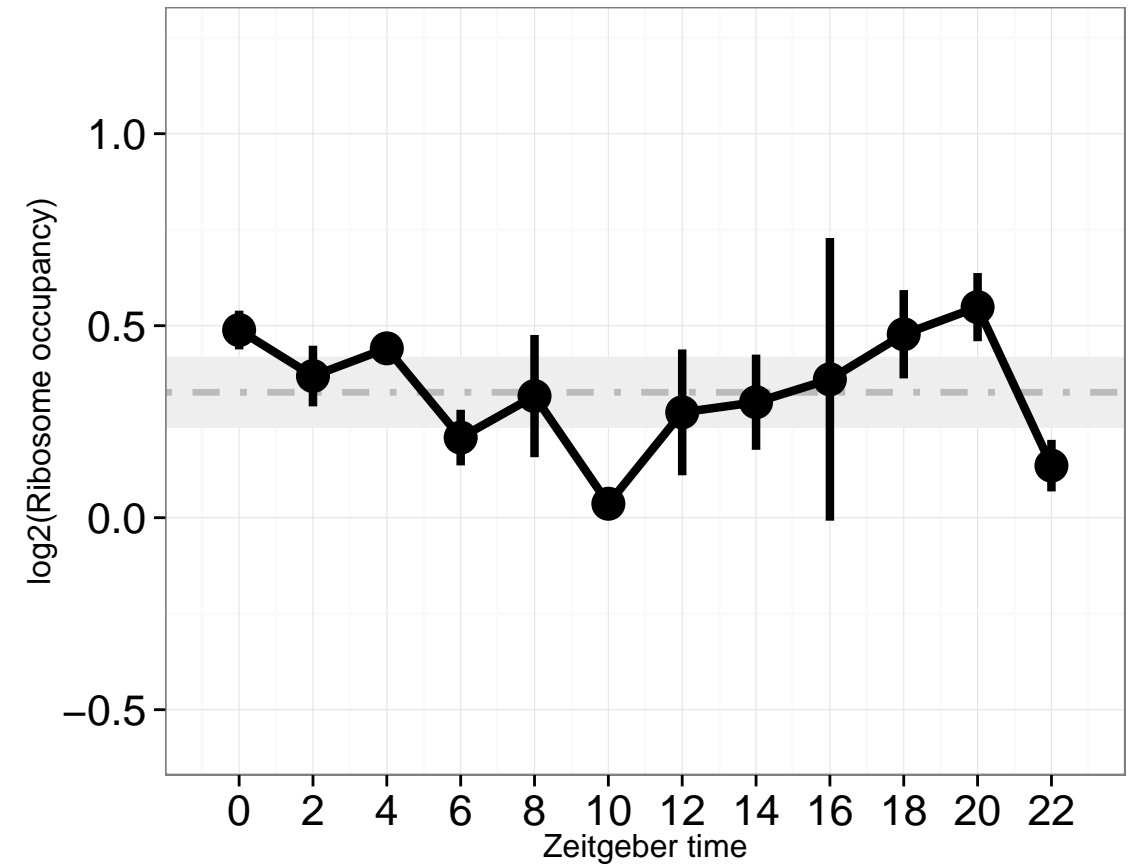

Supplement: Supplementary file 8650 [file 1]

## Galnt14

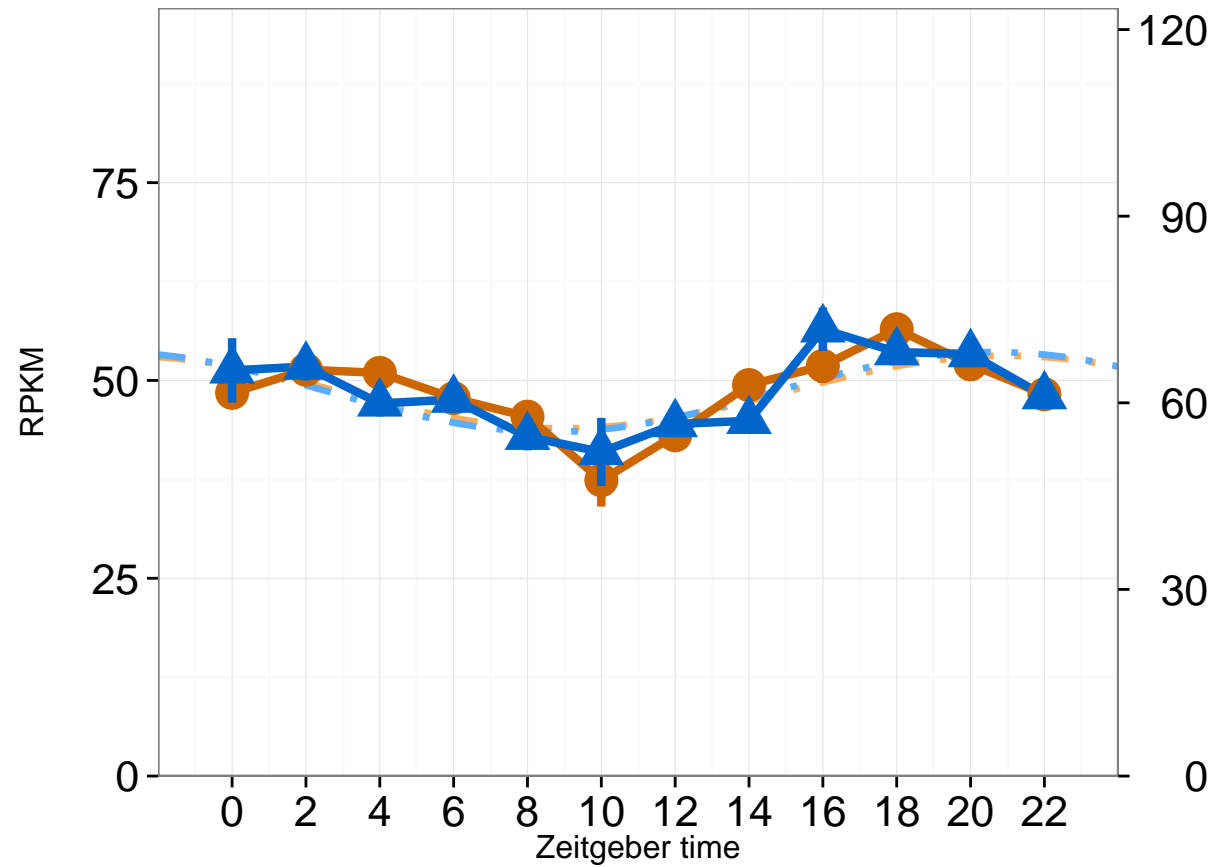

## Galnt14

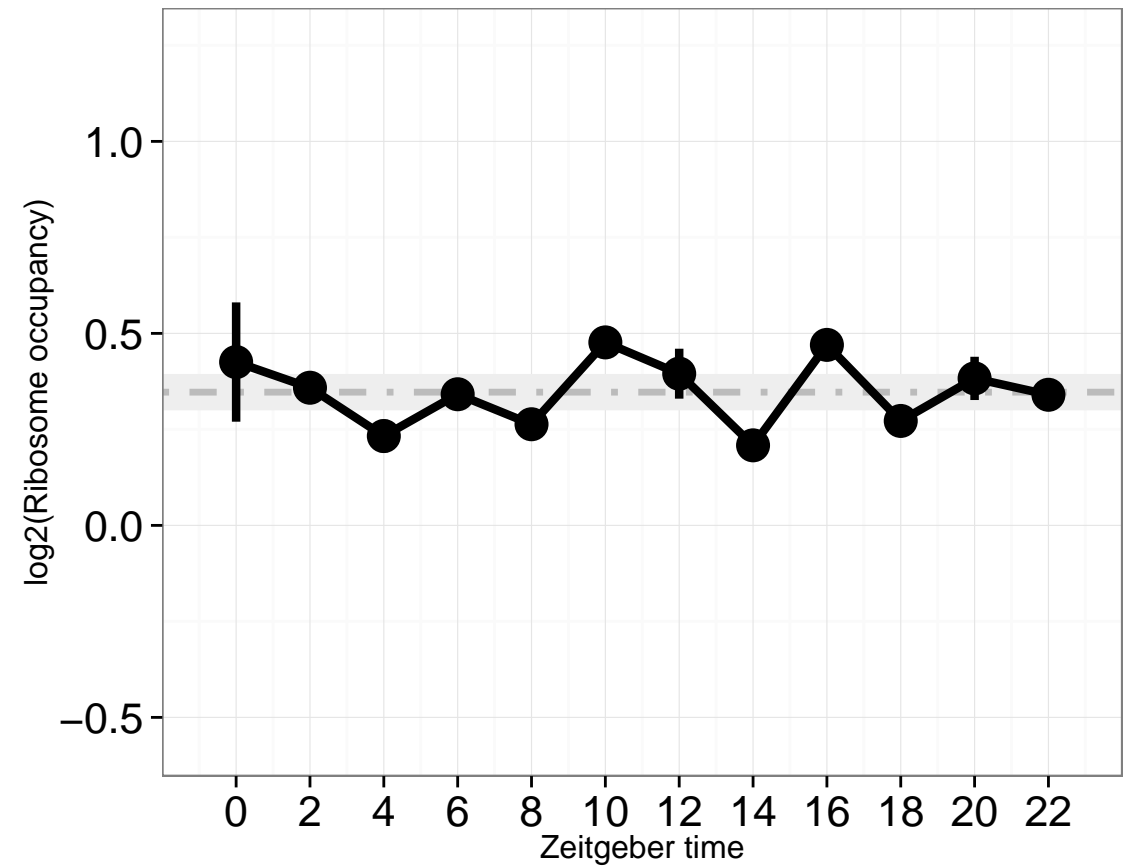

Supplement: Supplementary file 8651 [file 1]

# A1cf

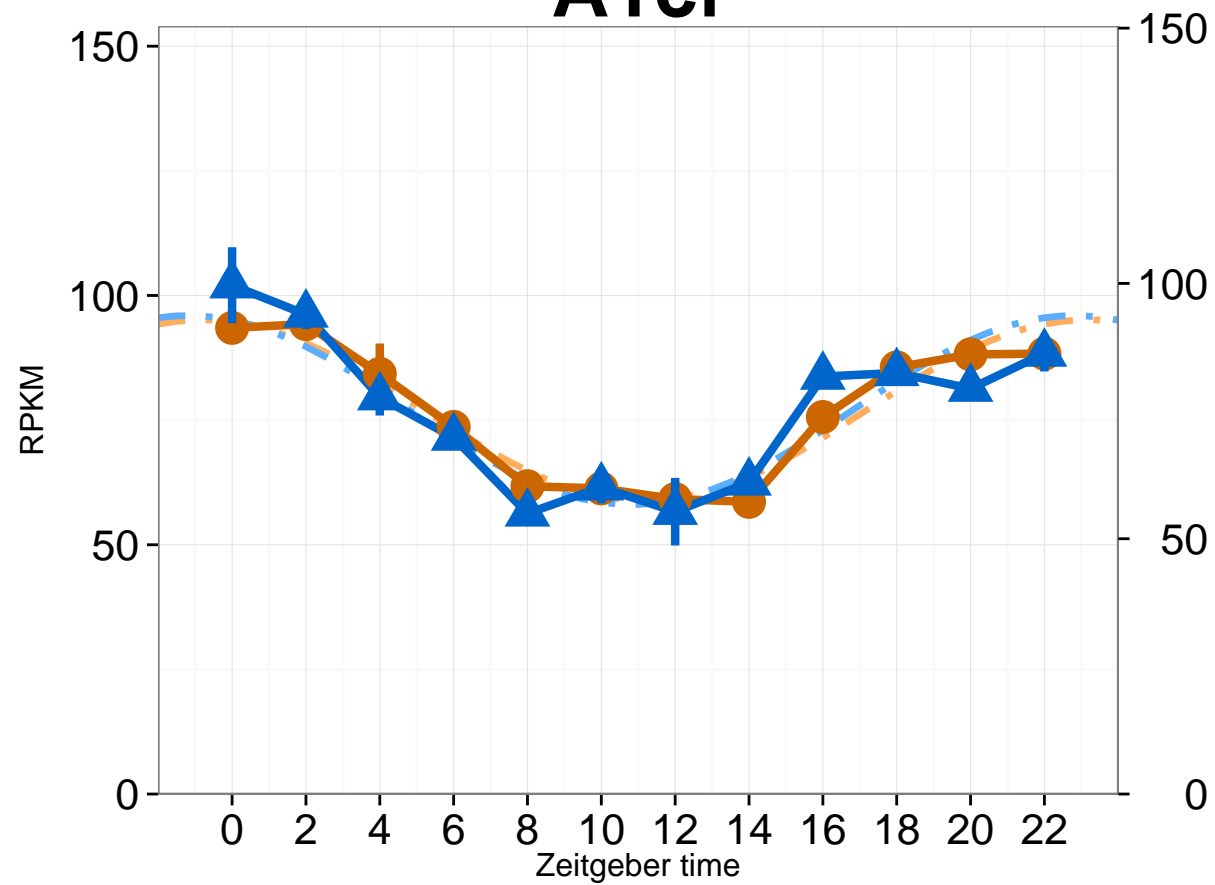

# A1cf

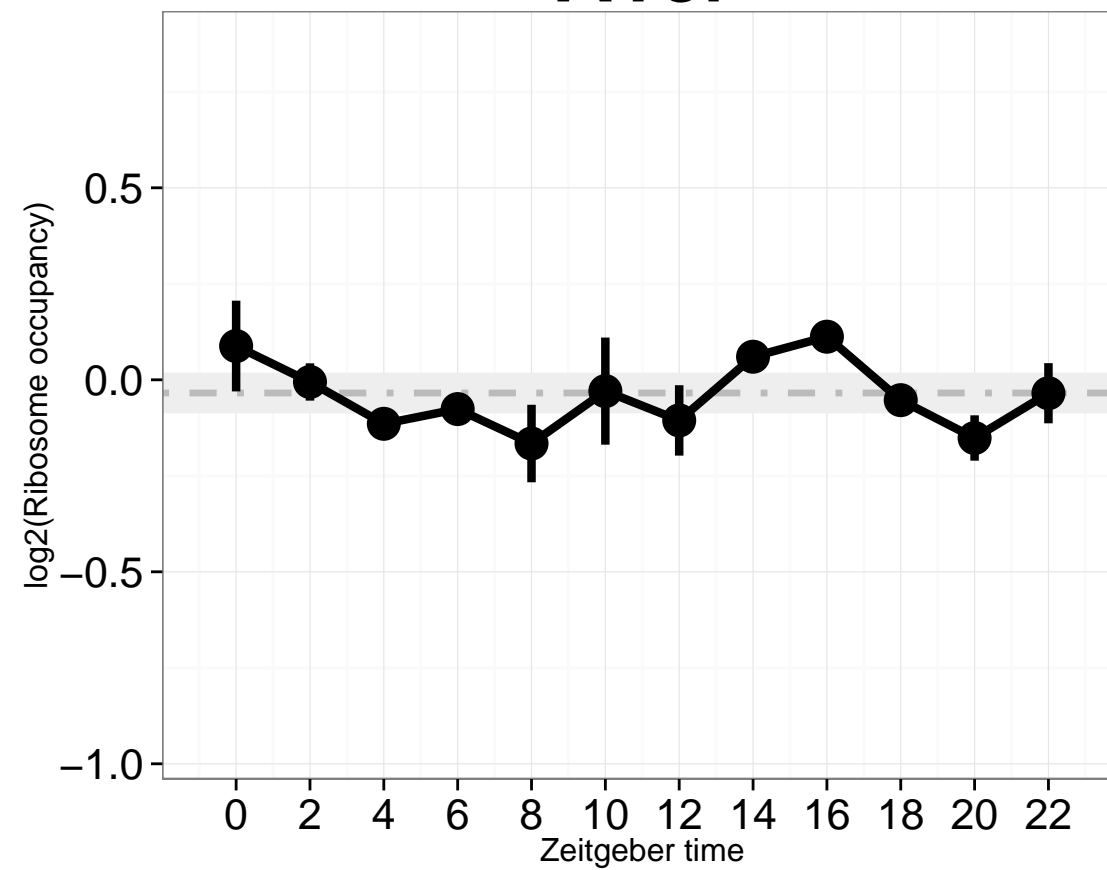

Supplement: Supplementary file 8652 [file 1]

## Otub1

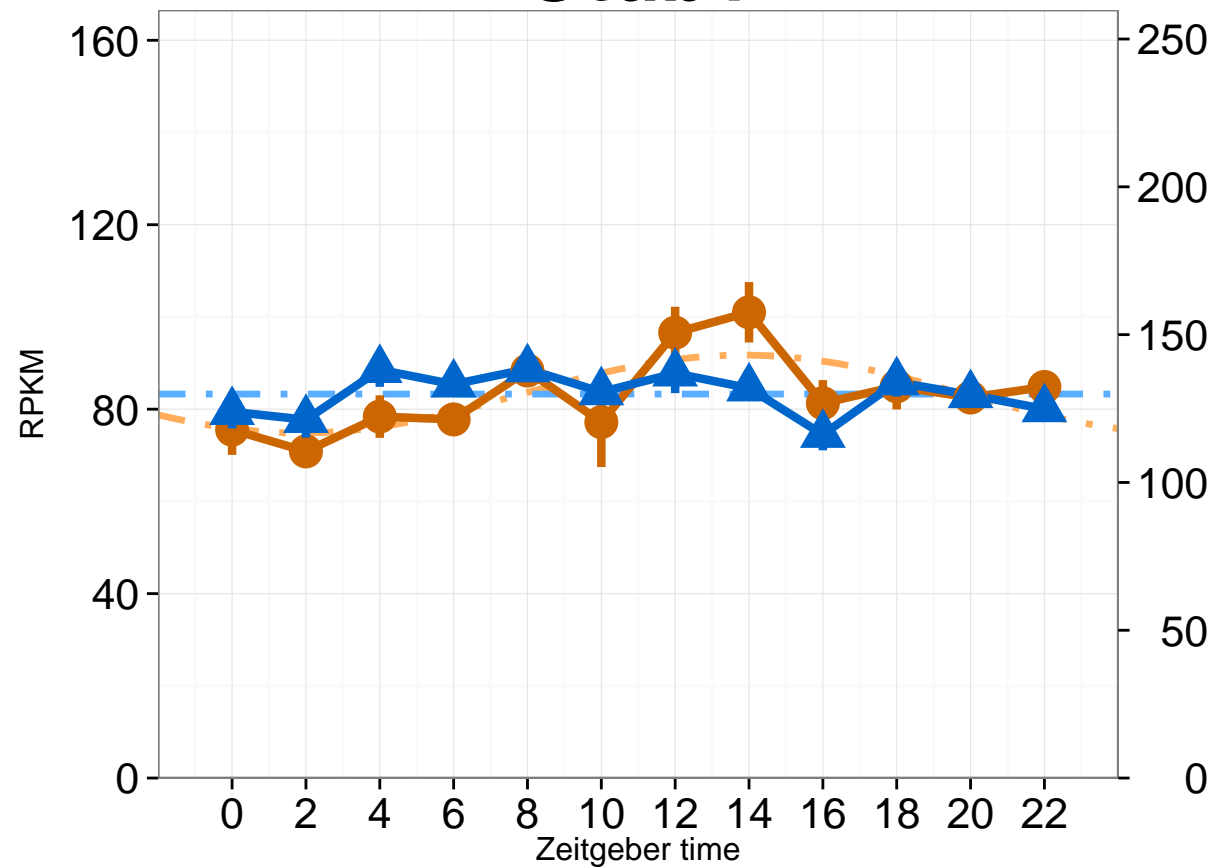

## Otub1

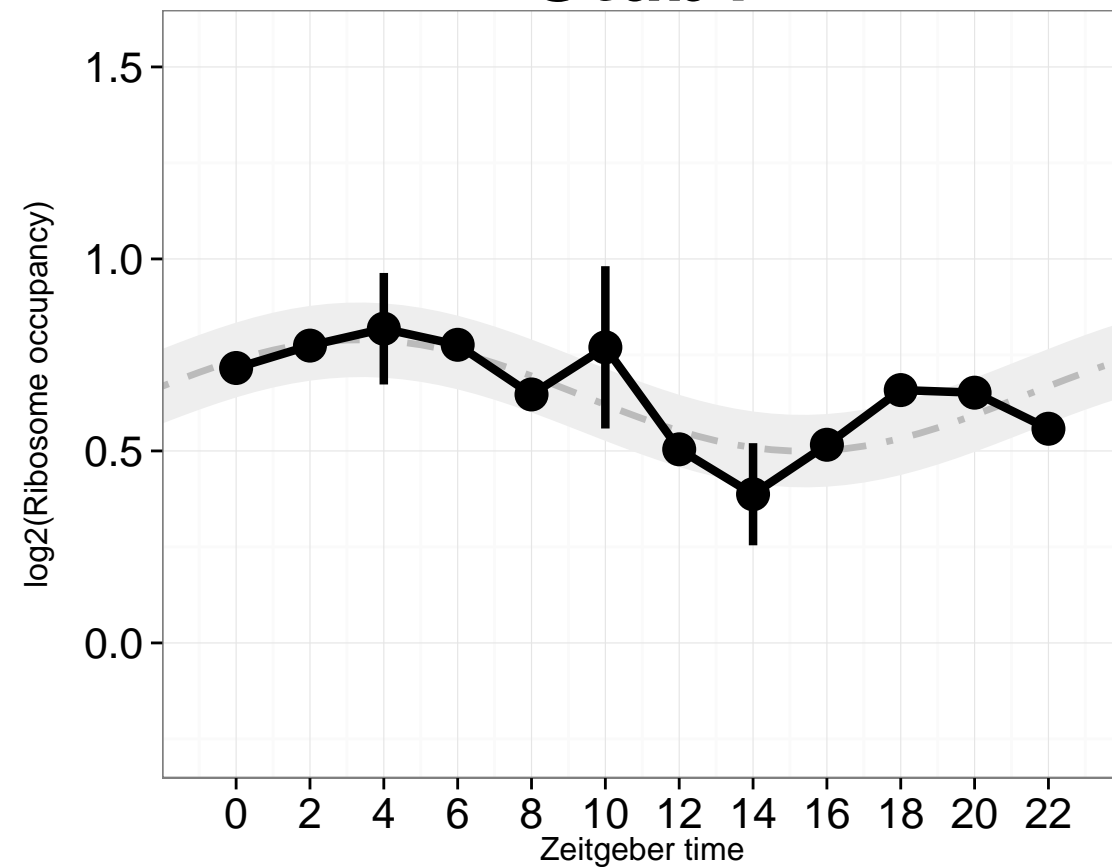

Supplement: Supplementary file 8653 [file 1]

## Zwint

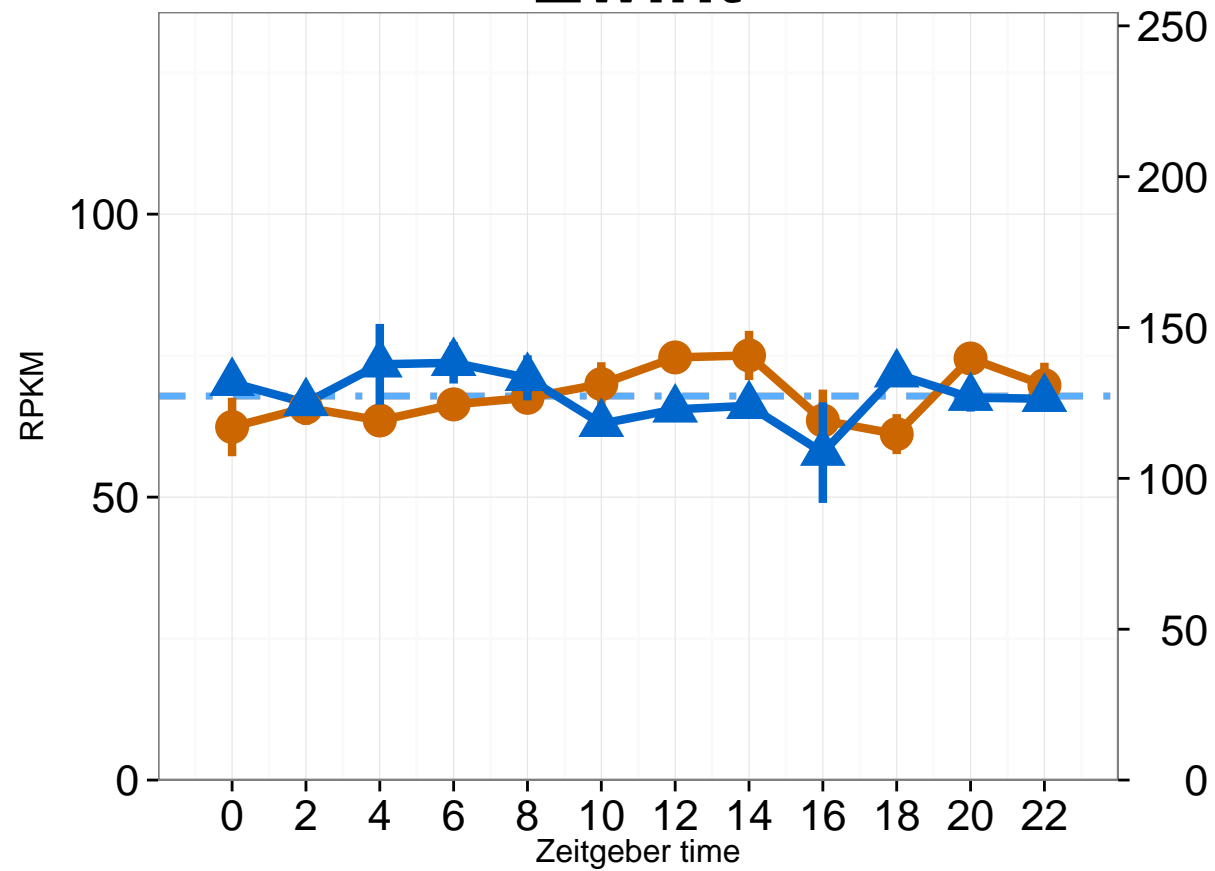

## Zwint

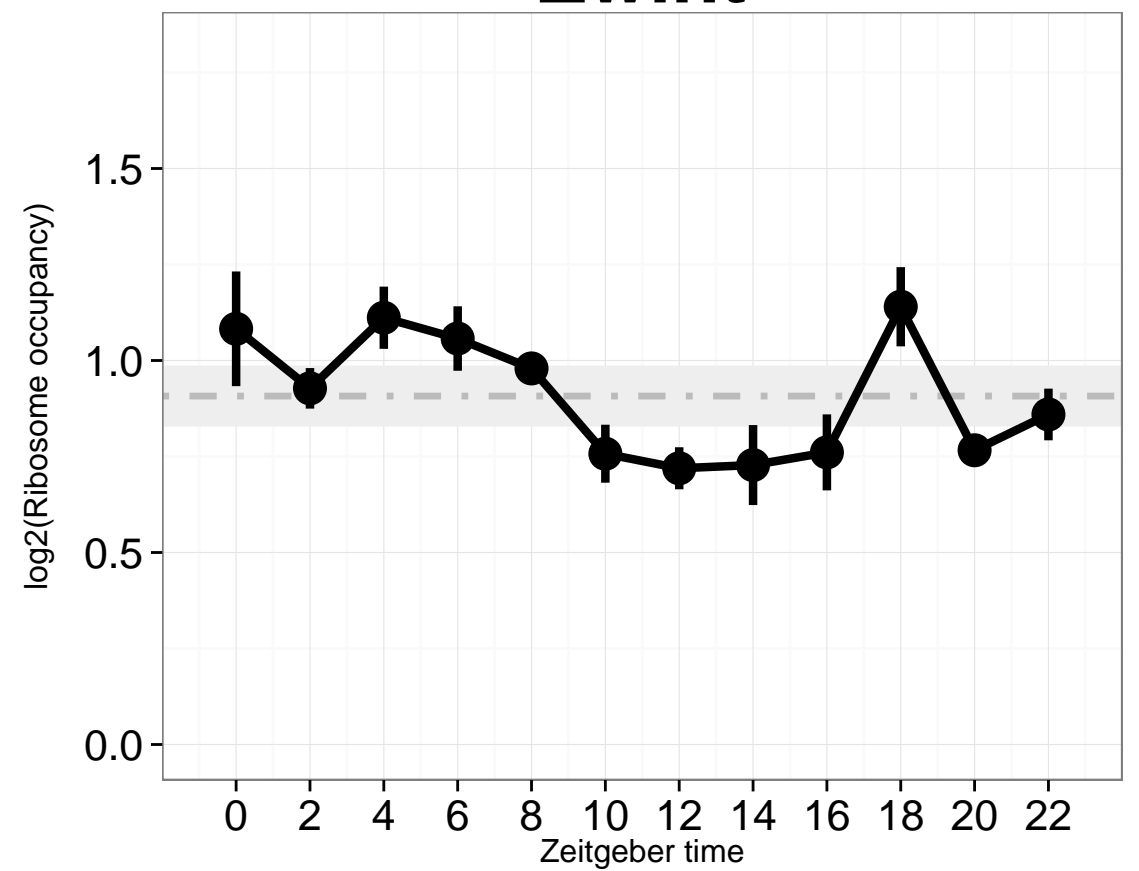

Supplement: Supplementary file 8654 [file 1]

## Mum1l1

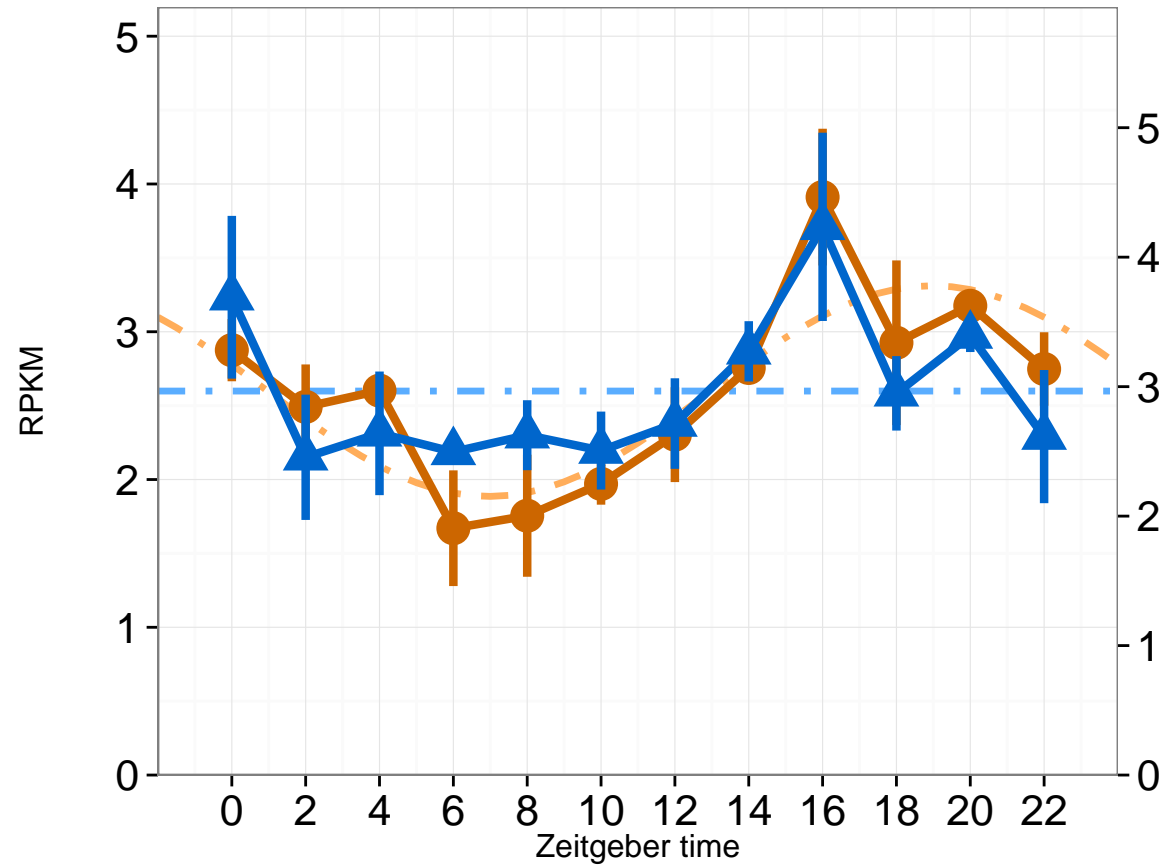

## Mum1l1

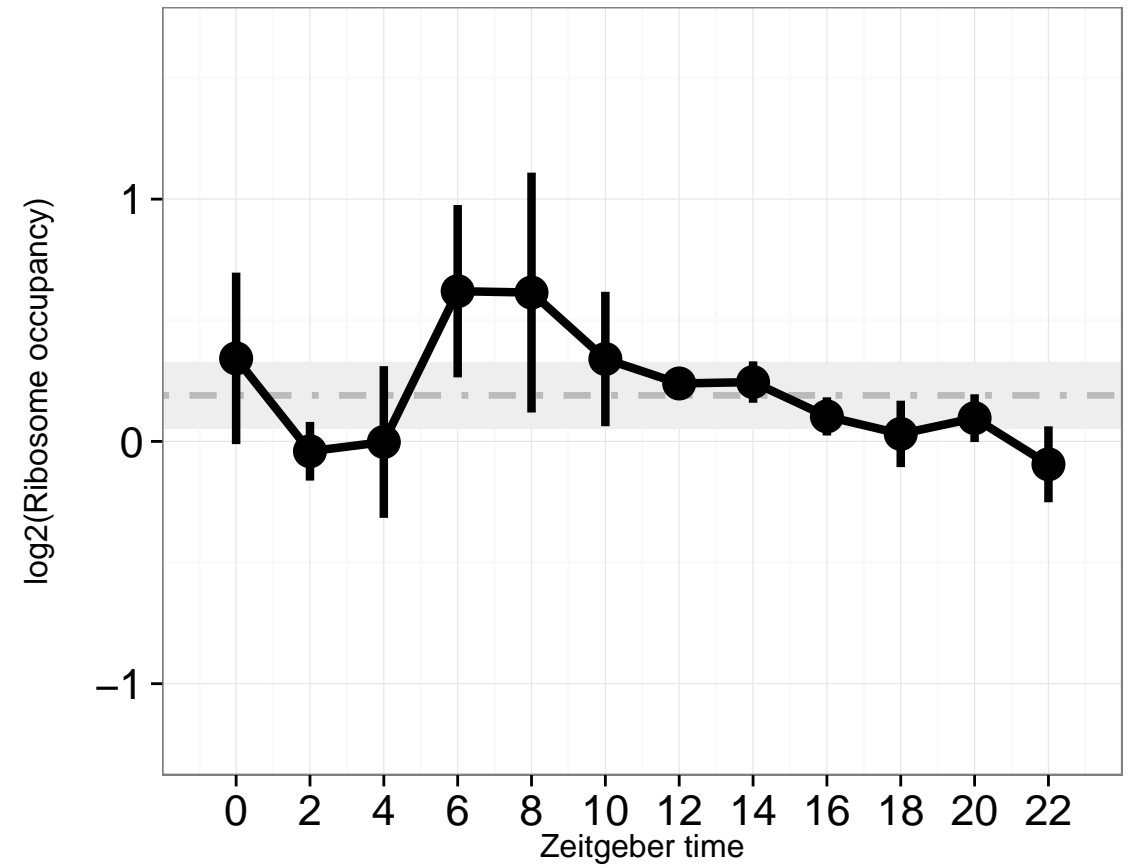

Supplement: Supplementary file 8655 [file 1]

# 2810403A07Rik

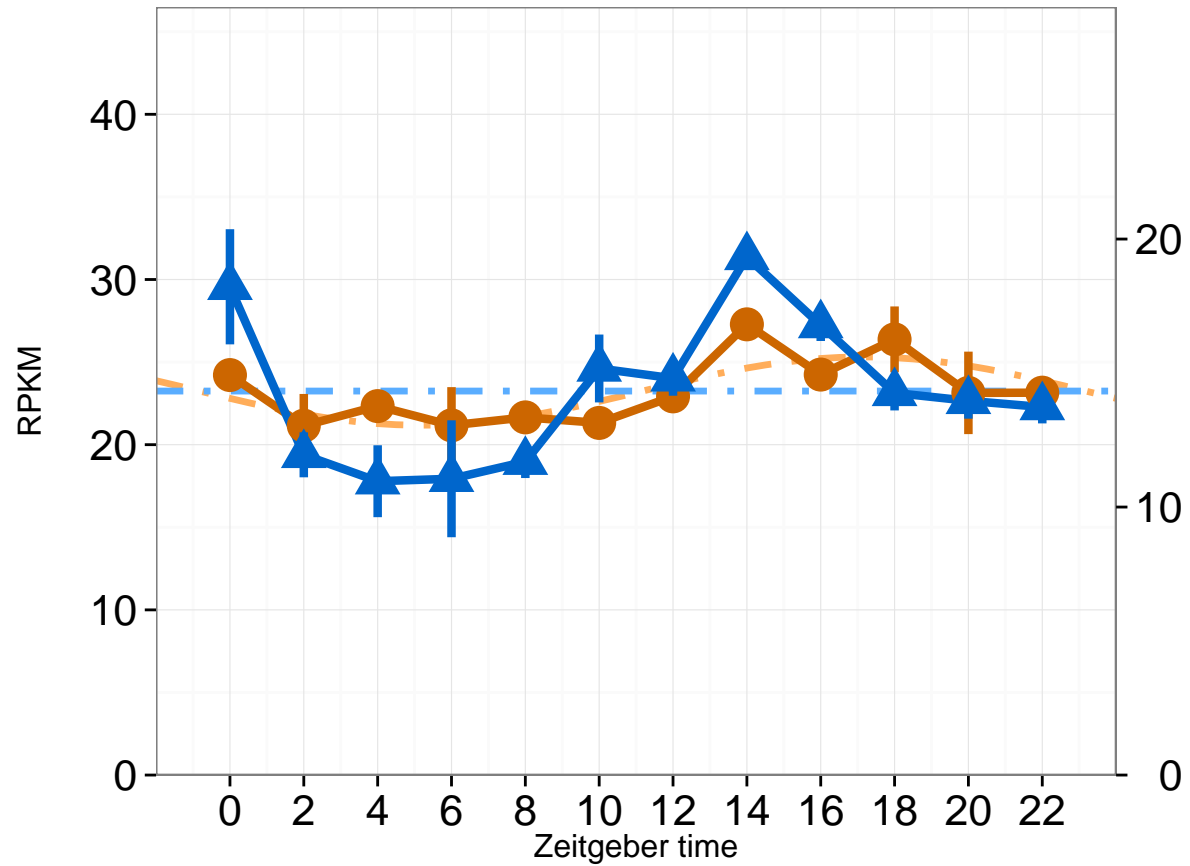

# 2810403A07Rik

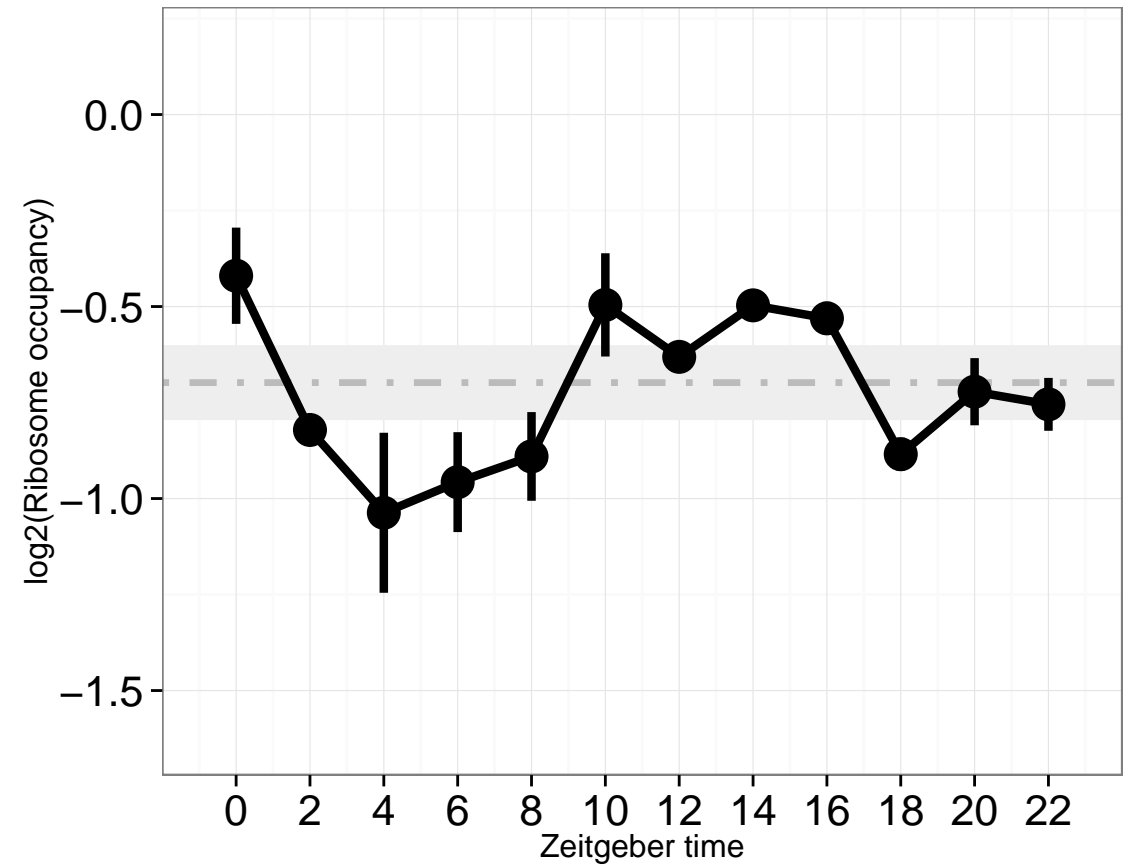

Supplement: Supplementary file 8656 [file 1]

## Ankrd54

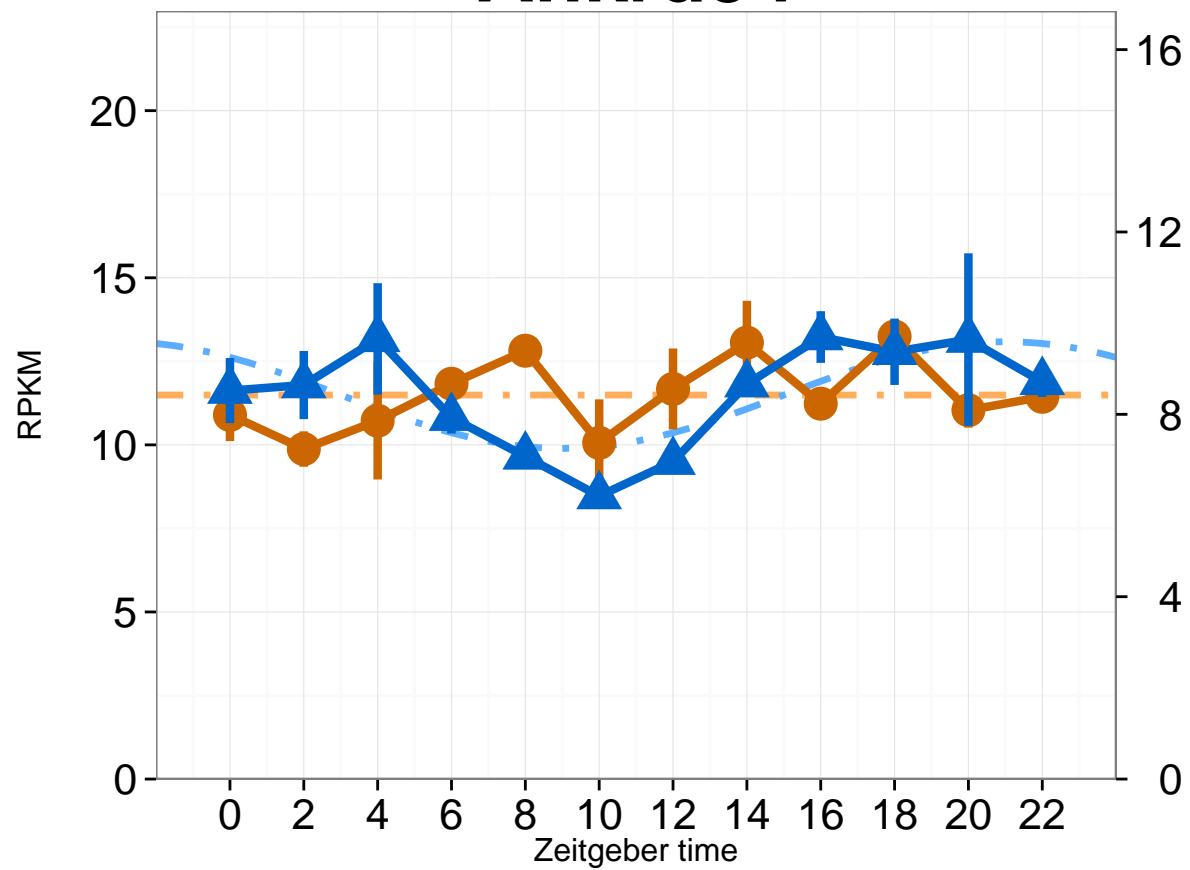

## Ankrd54

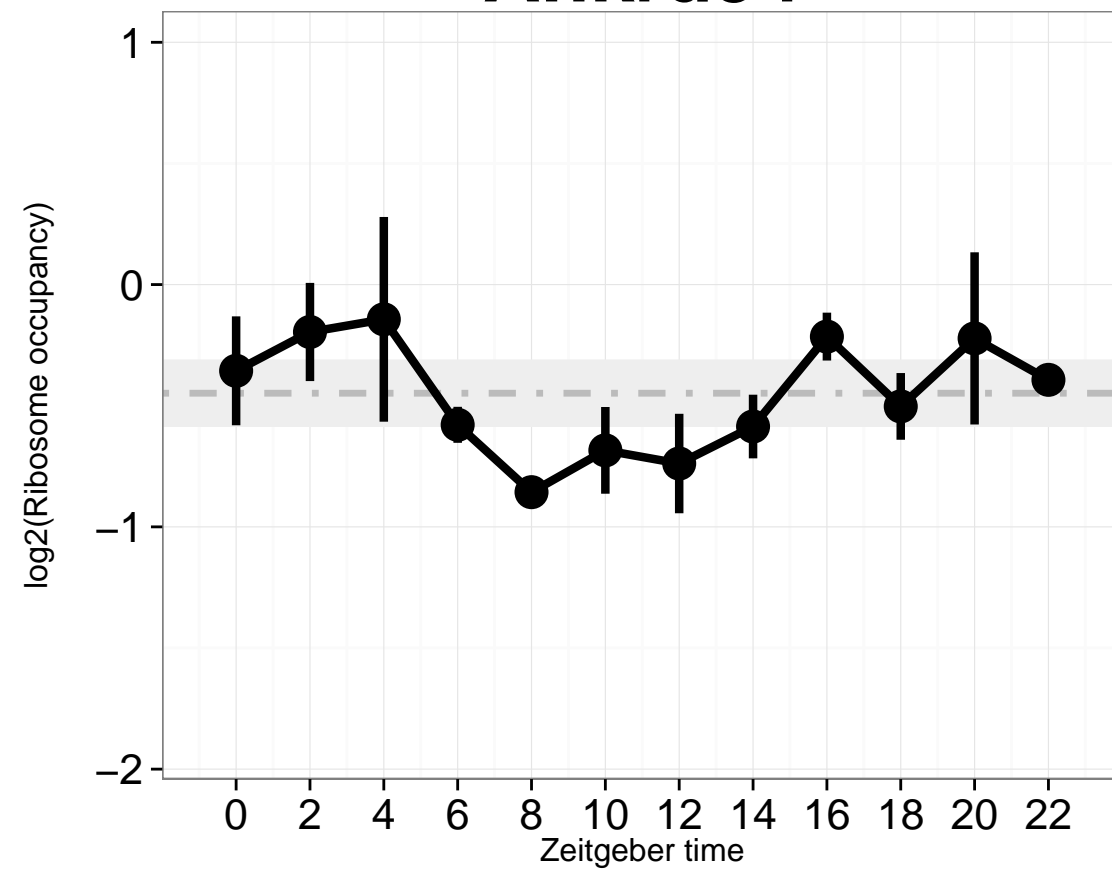

Supplement: Supplementary file 8657 [file 1]

# Ndufa1

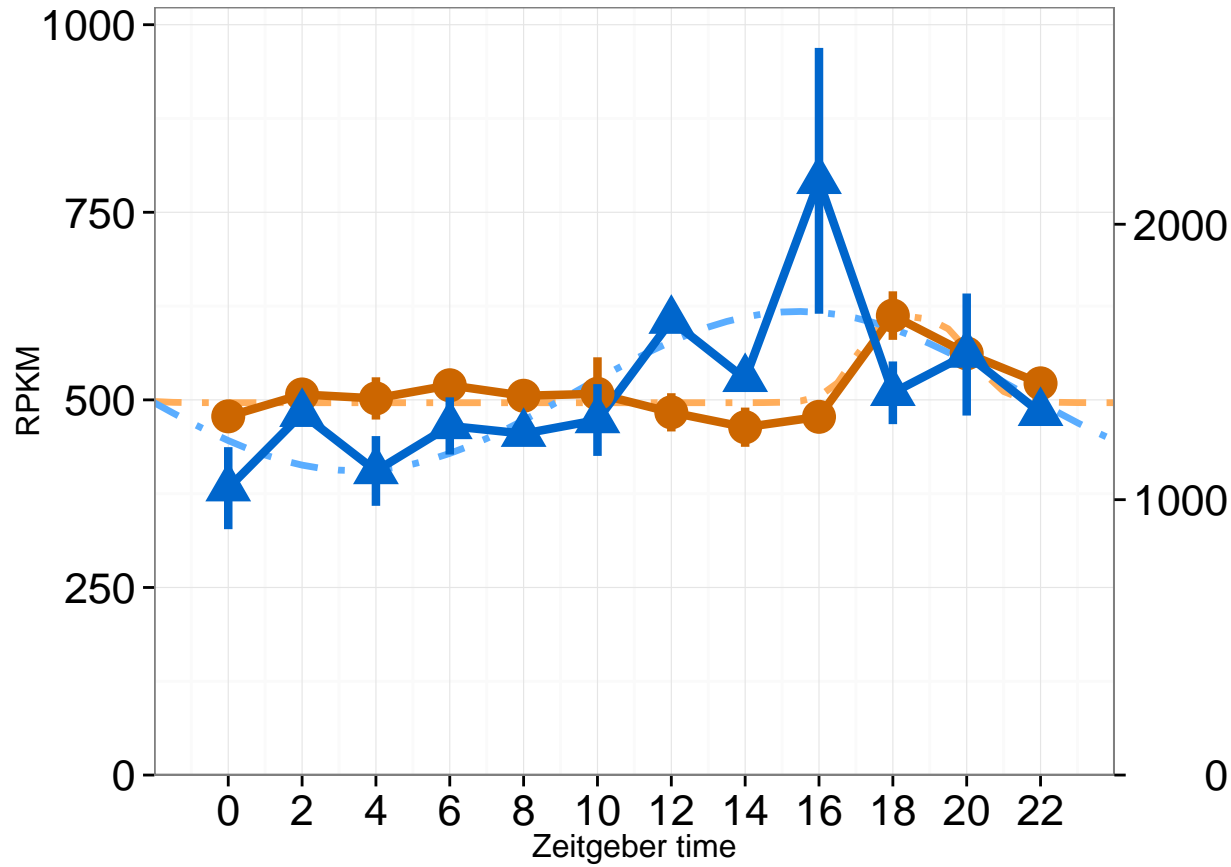

# Ndufa1

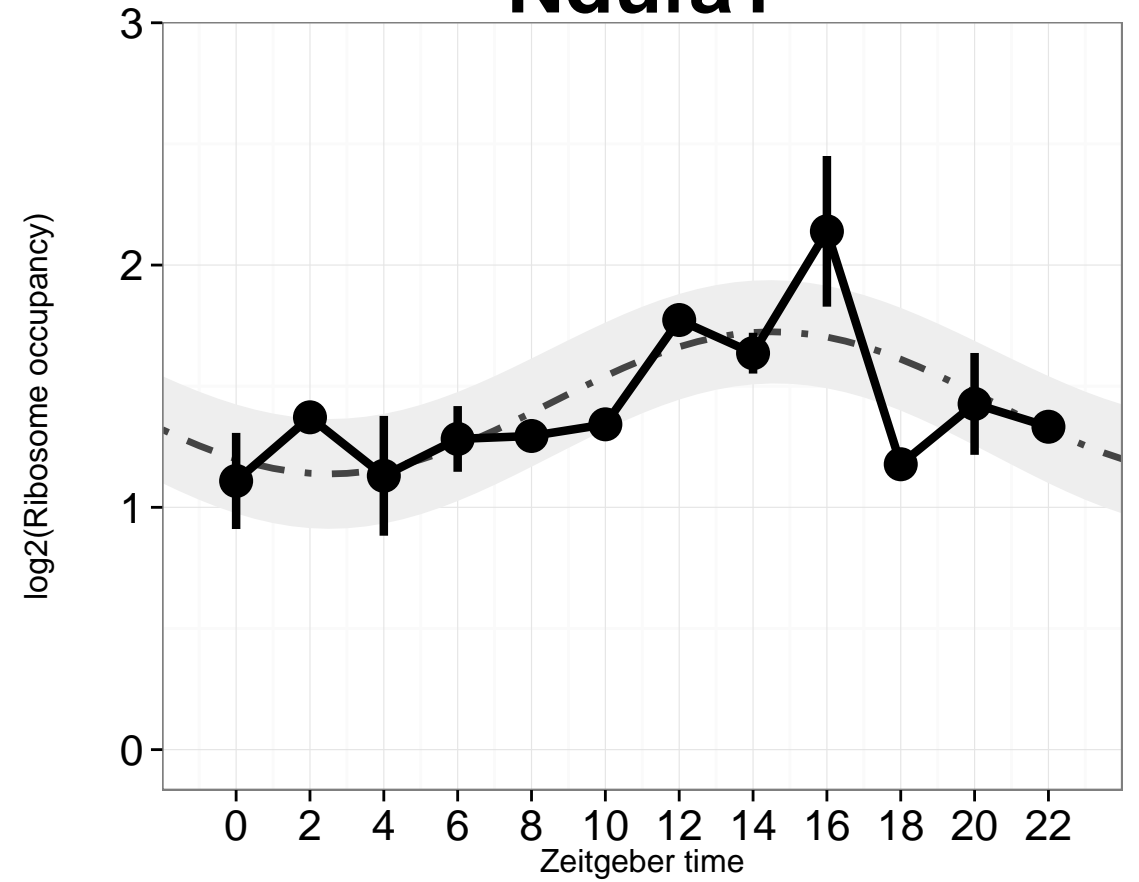

Supplement: Supplementary file 8658 [file 1]

## Sdc4

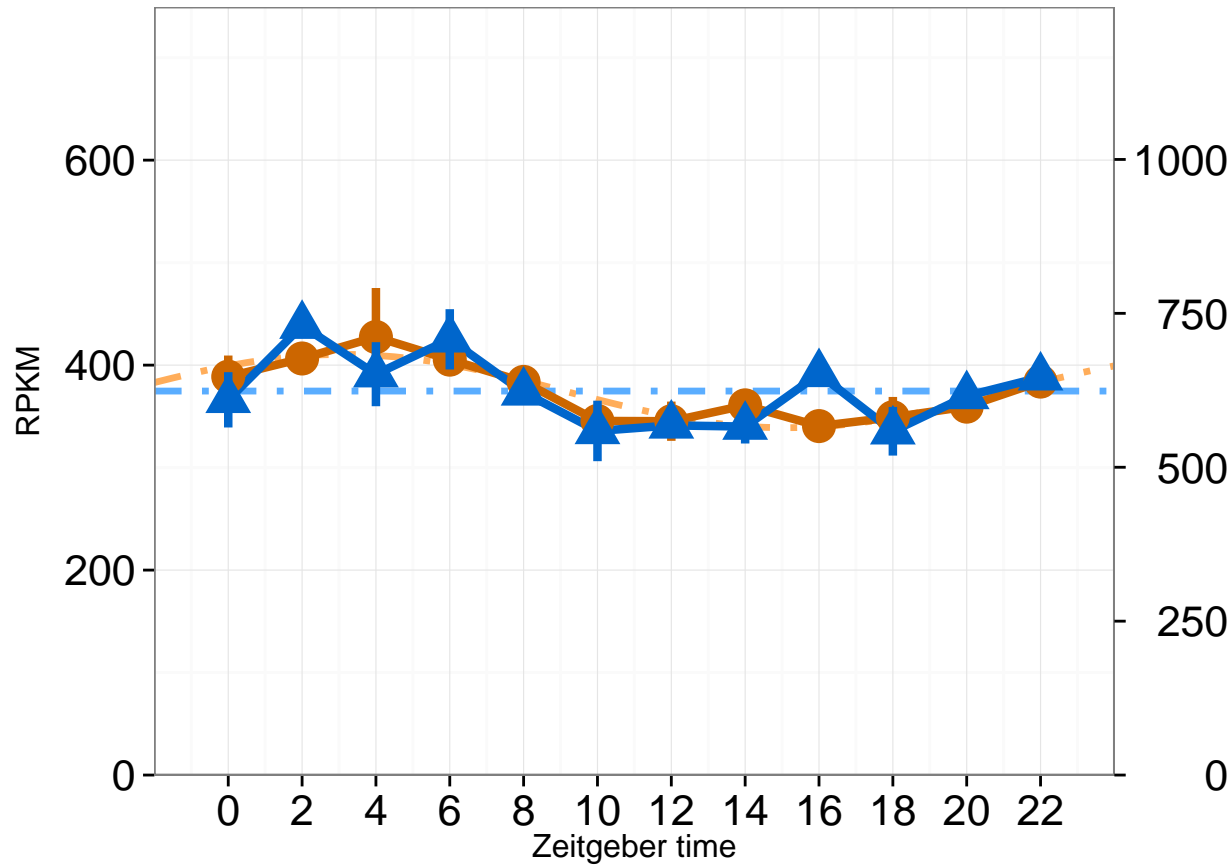

## Sdc4

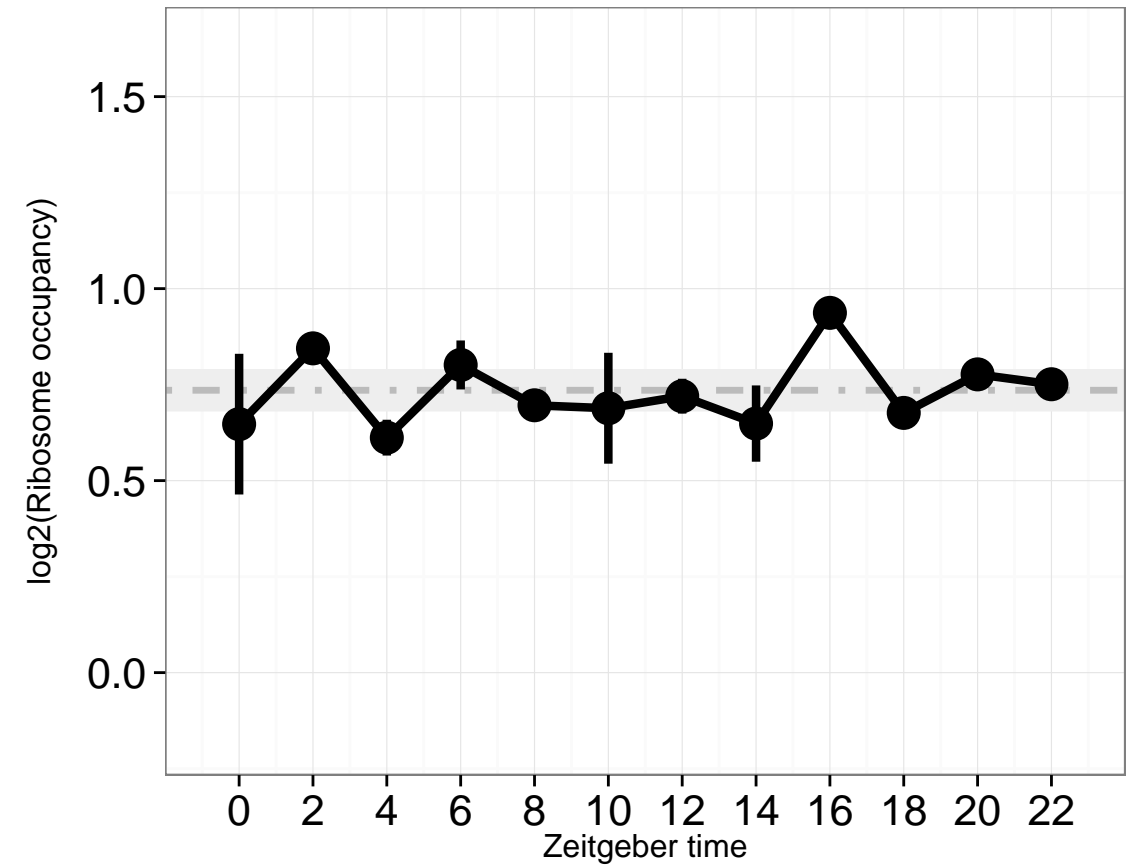

Supplement: Supplementary file 8659 [file 1]

## Usp42

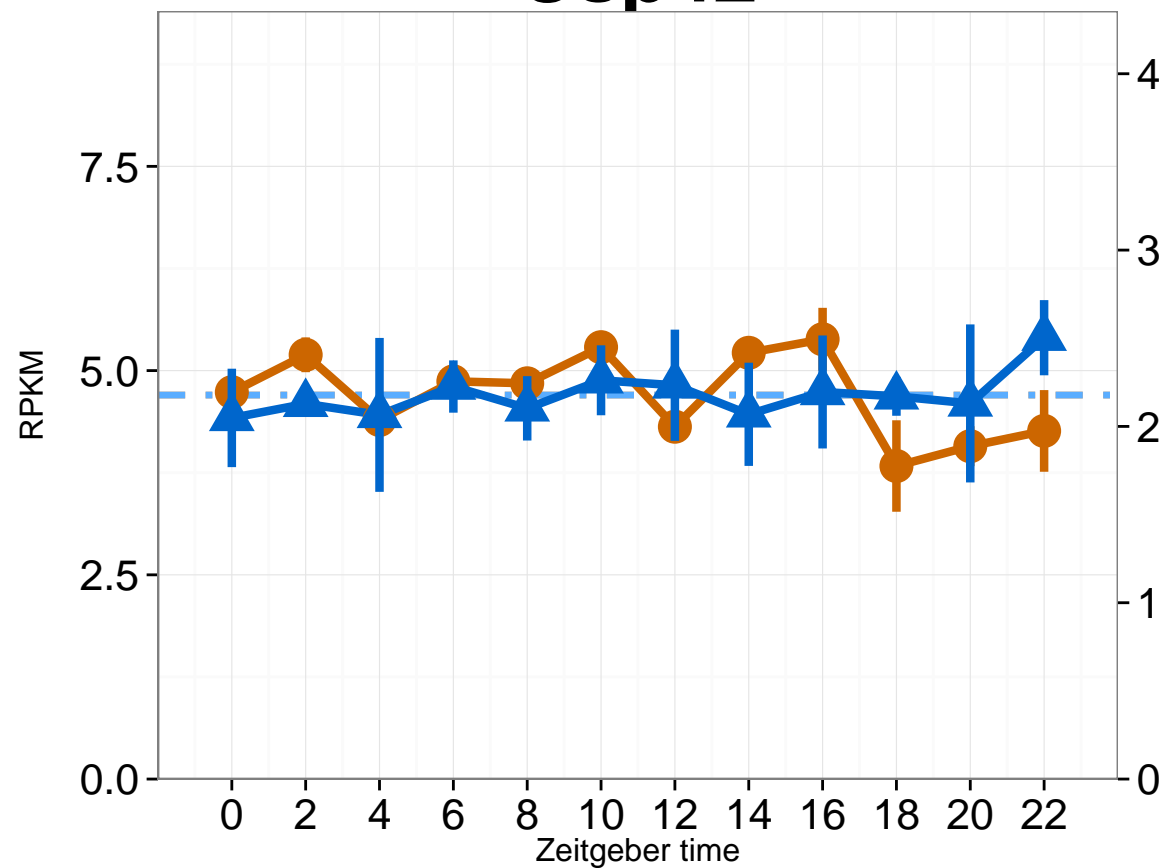

## Usp42

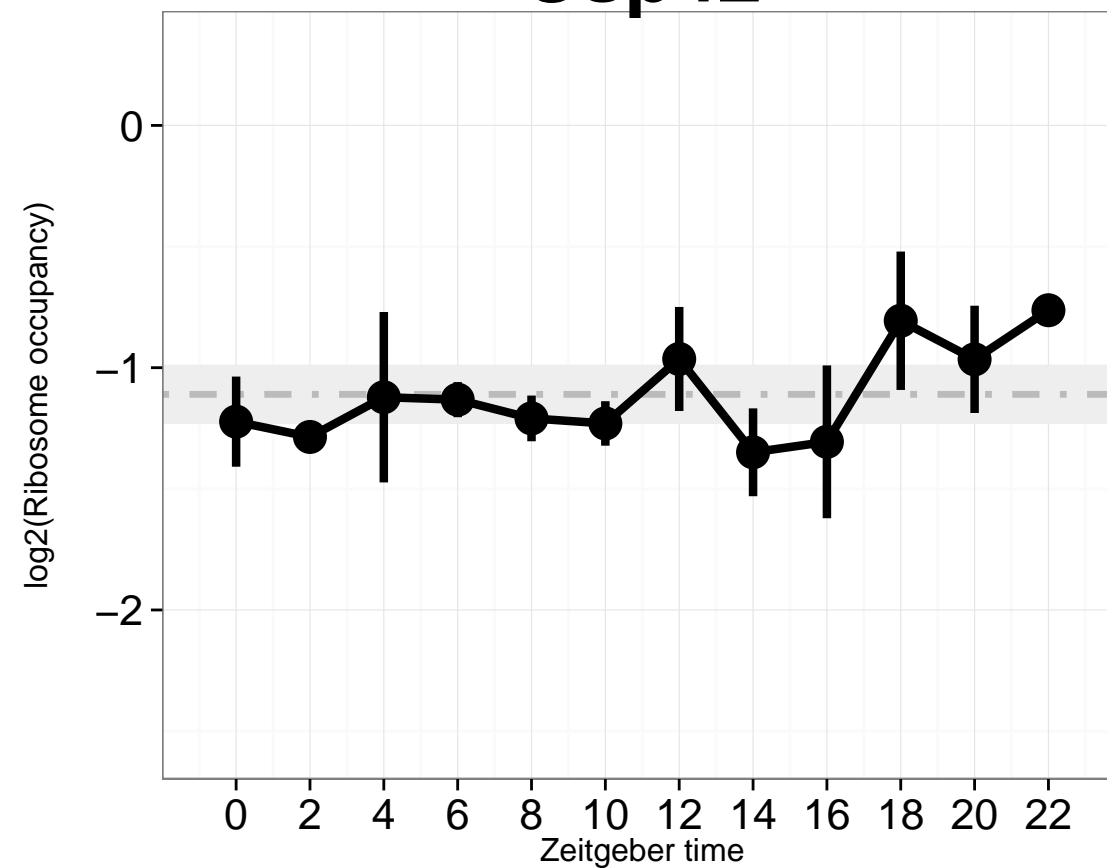

Supplement: Supplementary file 8660 [file 1]

## Ern1

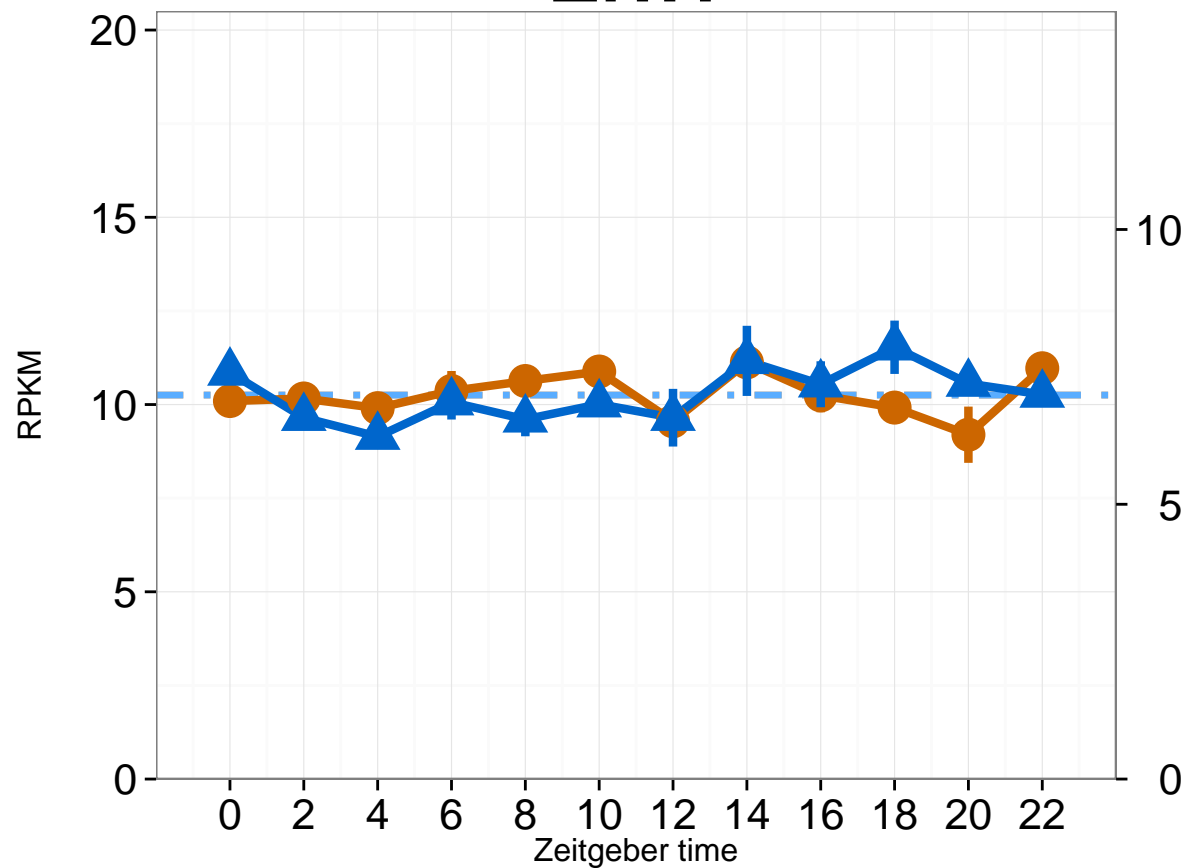

## Ern1

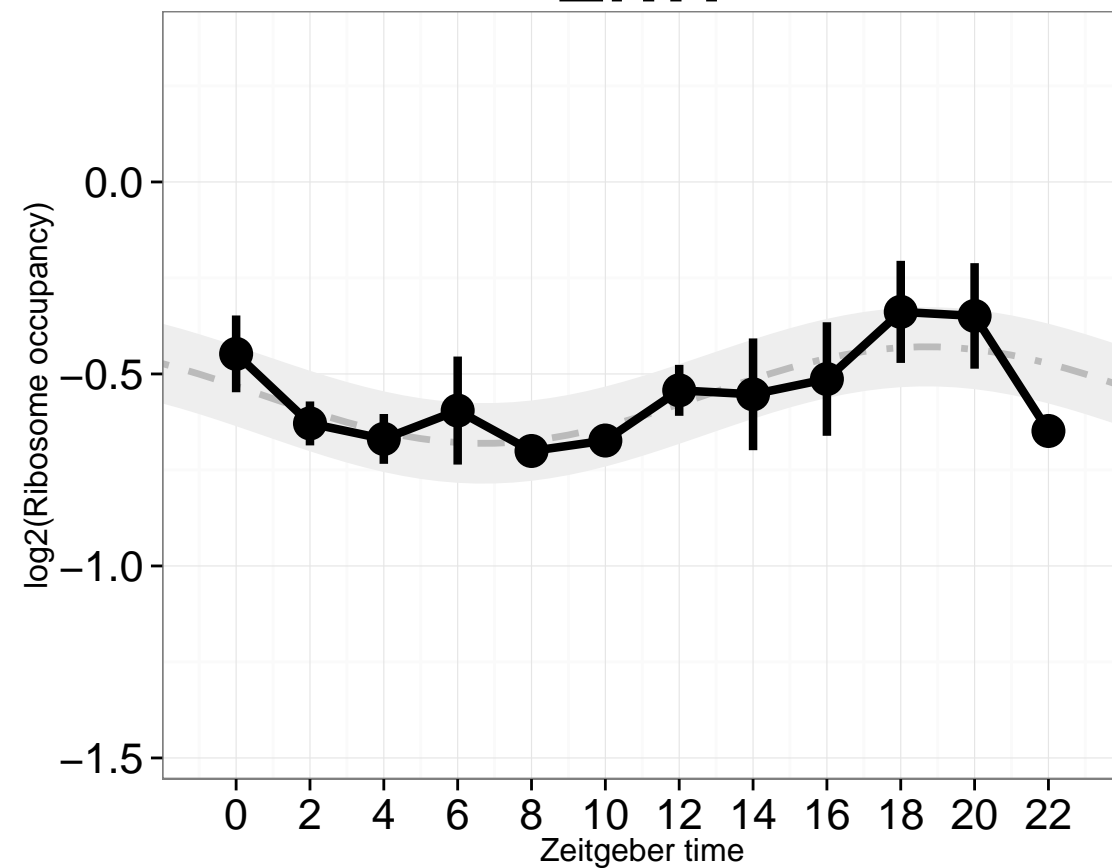

Supplement: Supplementary file 8661 [file 1]

## Usp19

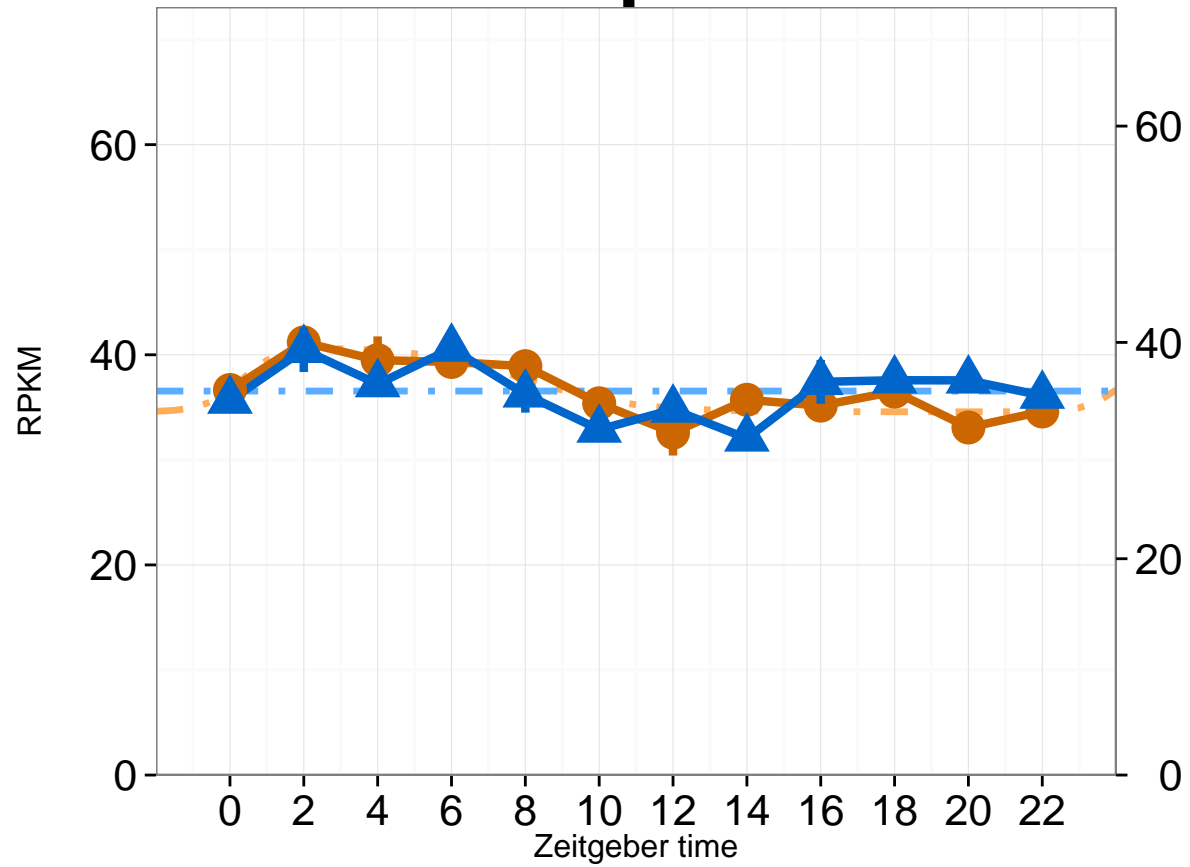

## Usp19

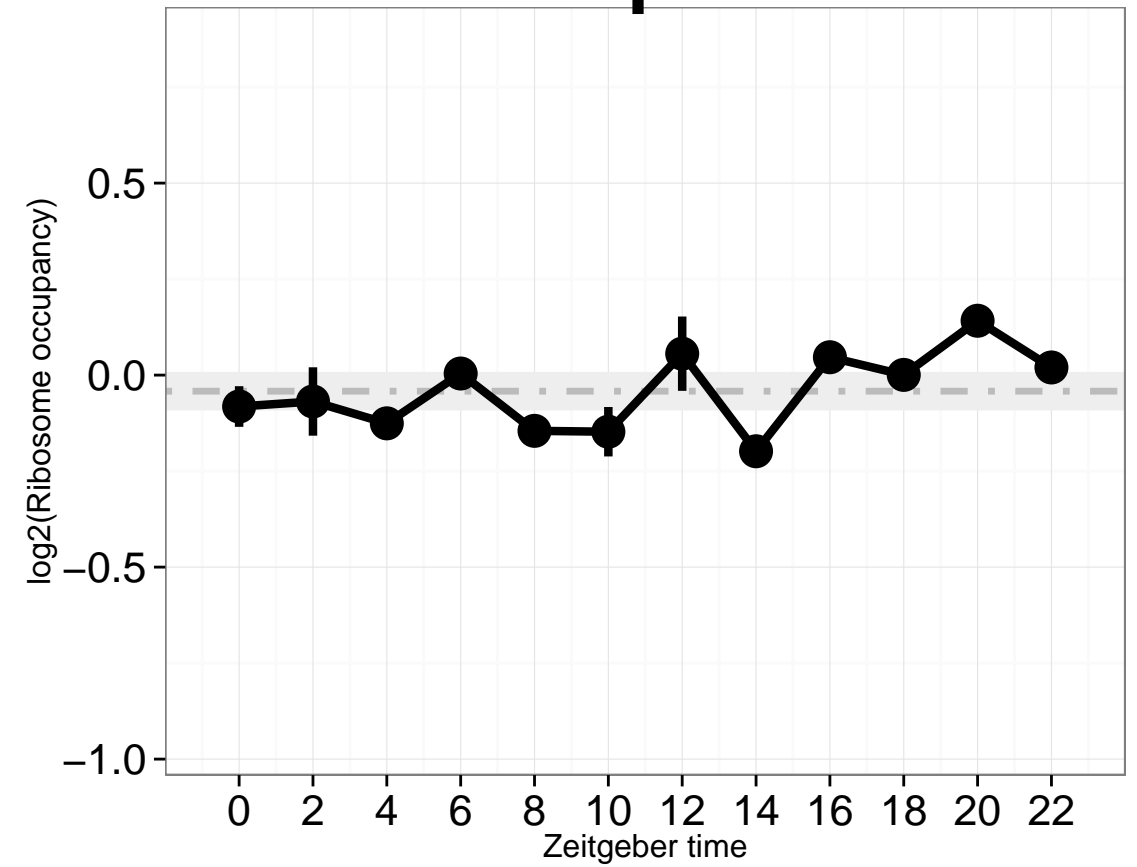

Supplement: Supplementary file 8662 [file 1]

# Tmem161a

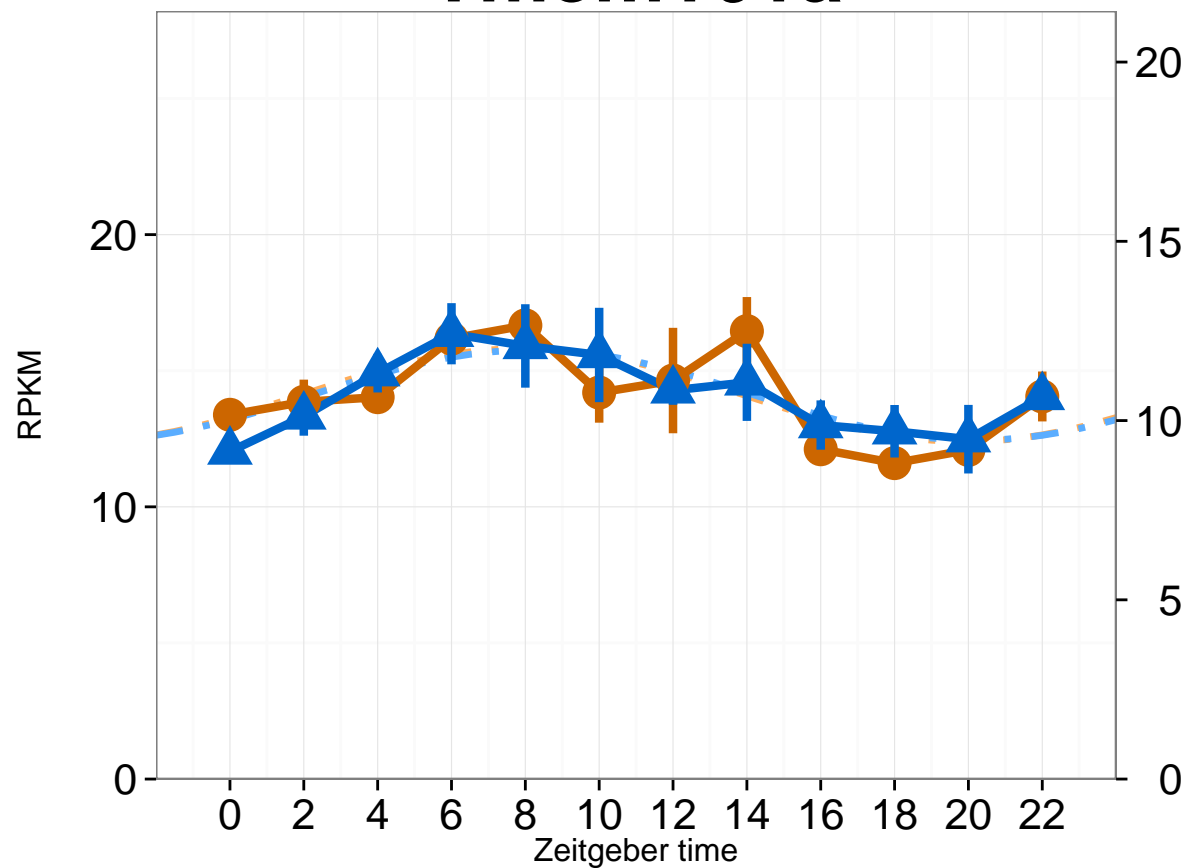

# Tmem161a

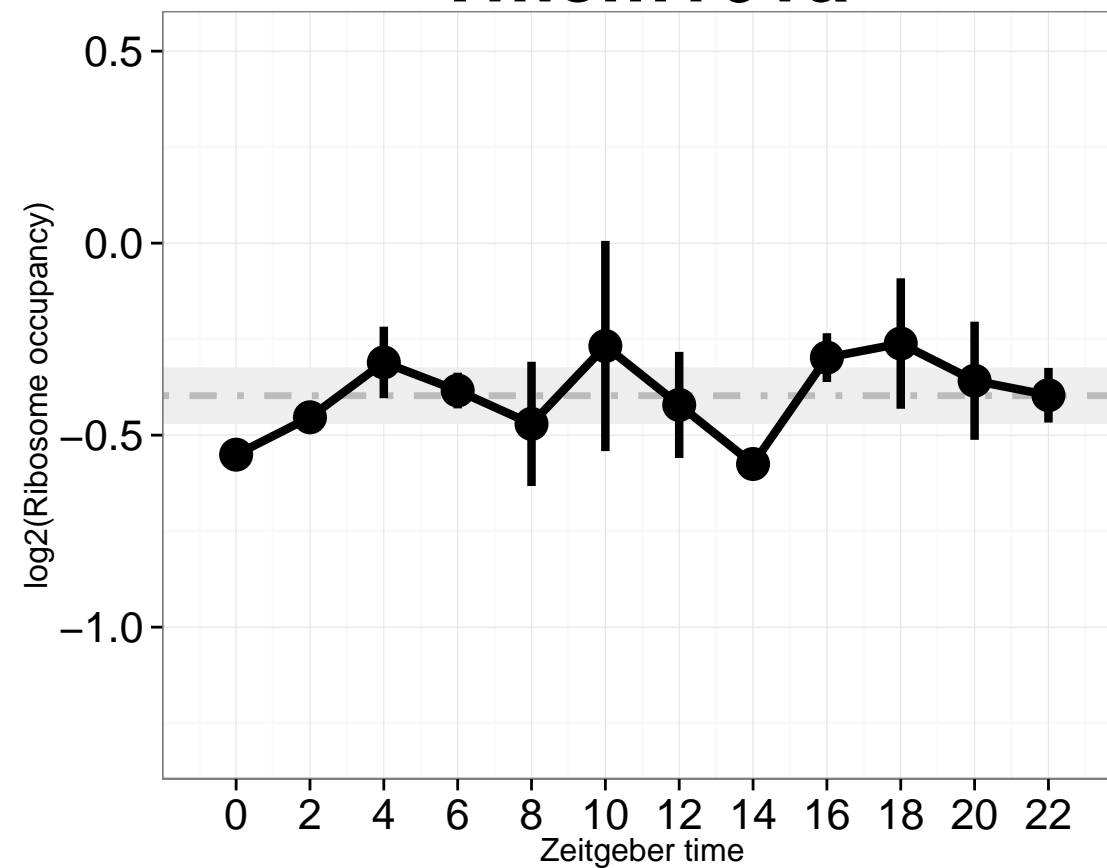

Supplement: Supplementary file 8663 [file 1]

## Chrn2

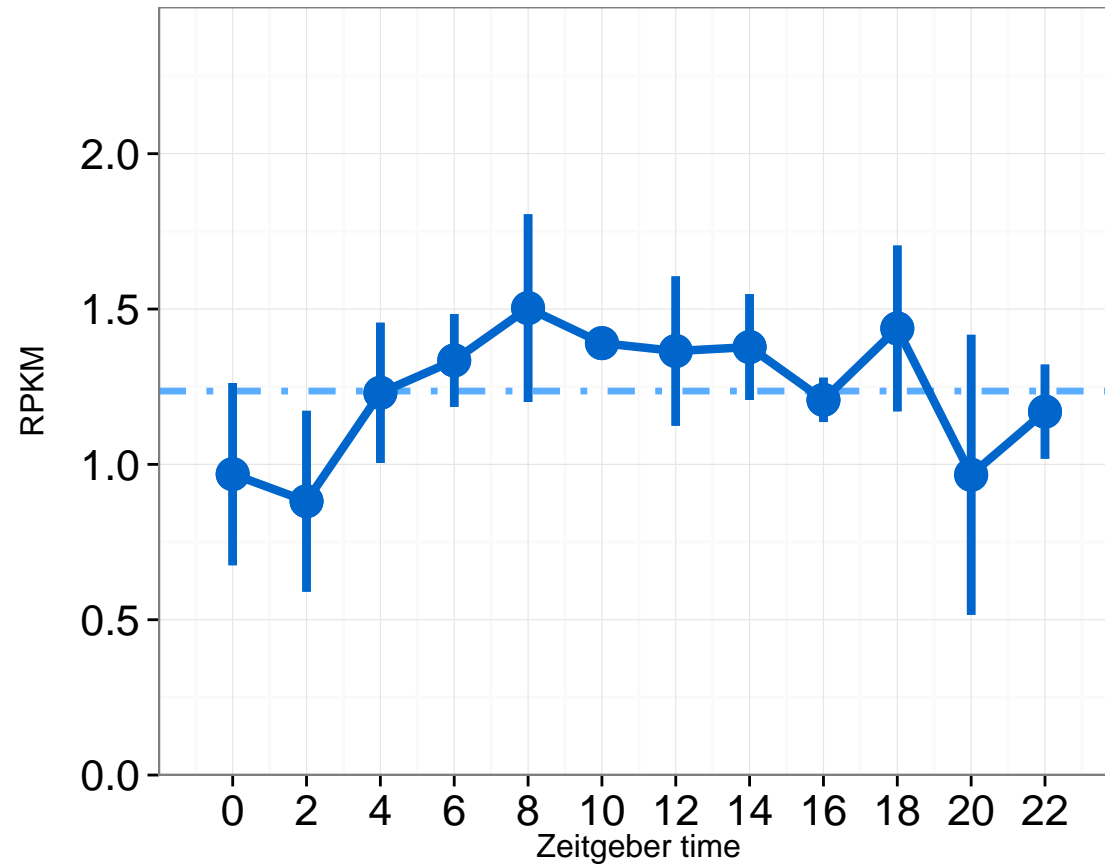

## Chrn2 log2(Ribosome occupancy)

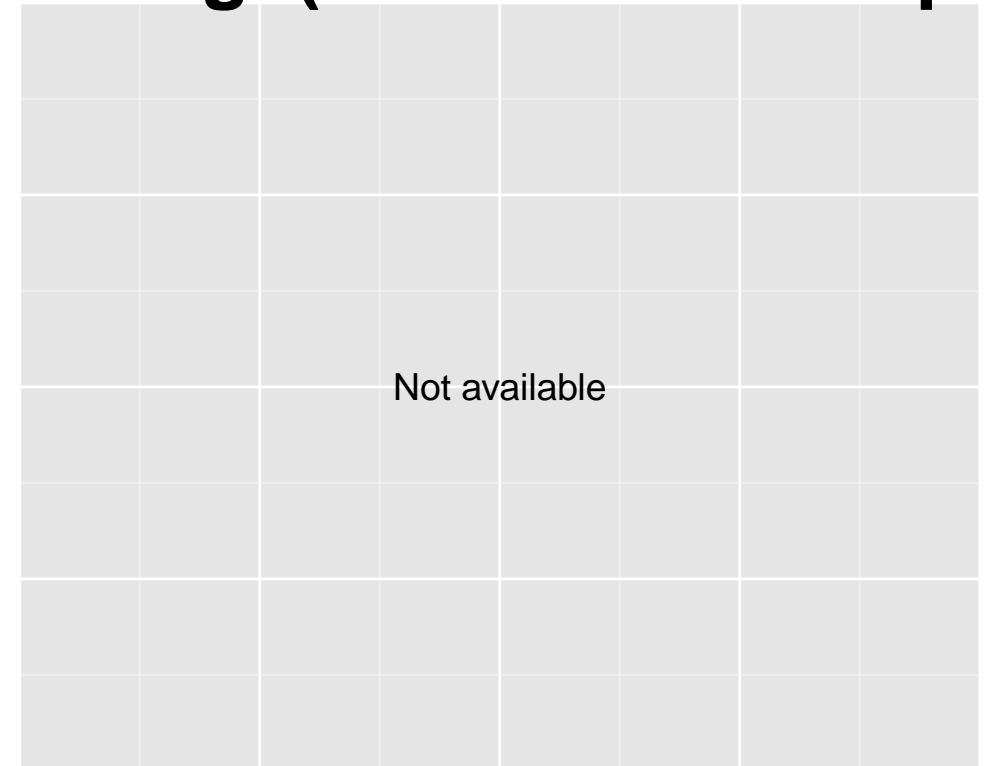

Supplement: Supplementary file 8664 [file 1]

## Abcc6

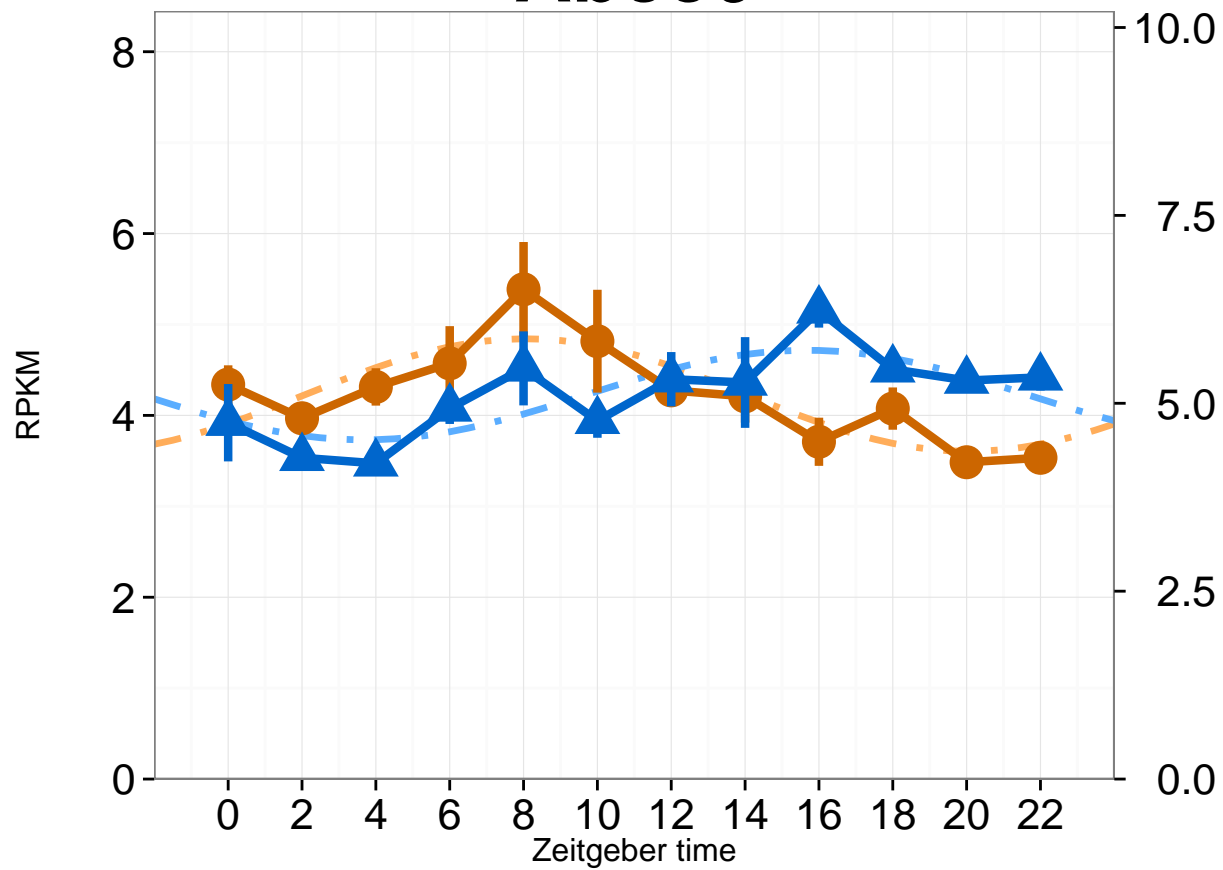

## Abcc6

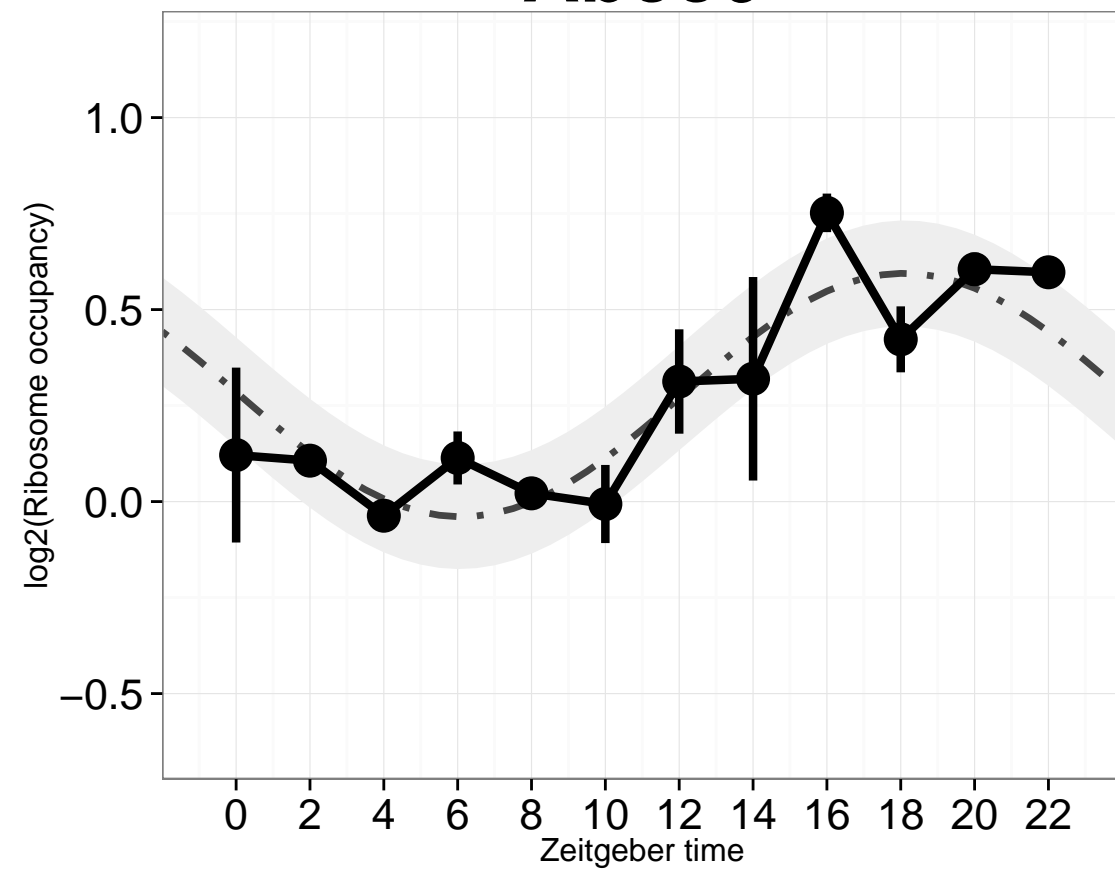

Supplement: Supplementary file 8665 [file 1]

## Cast

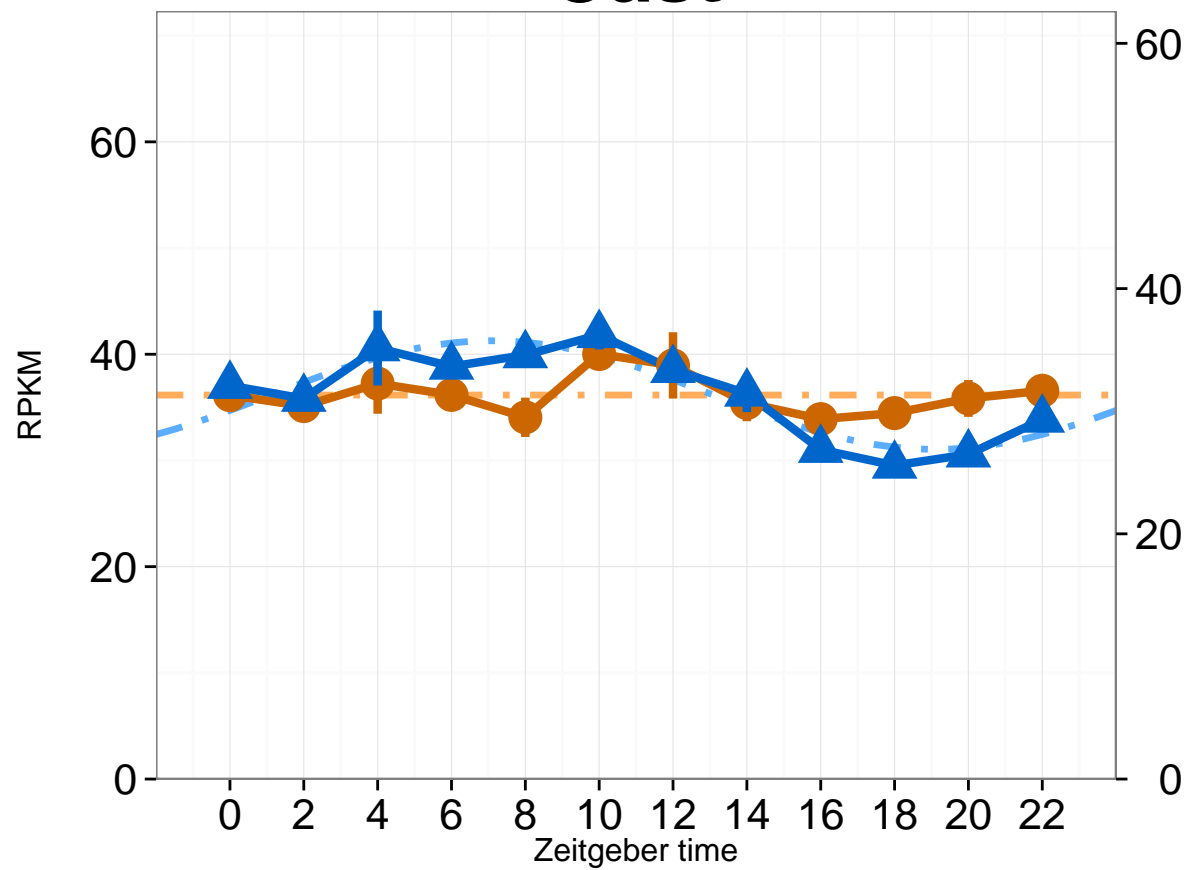

## Cast

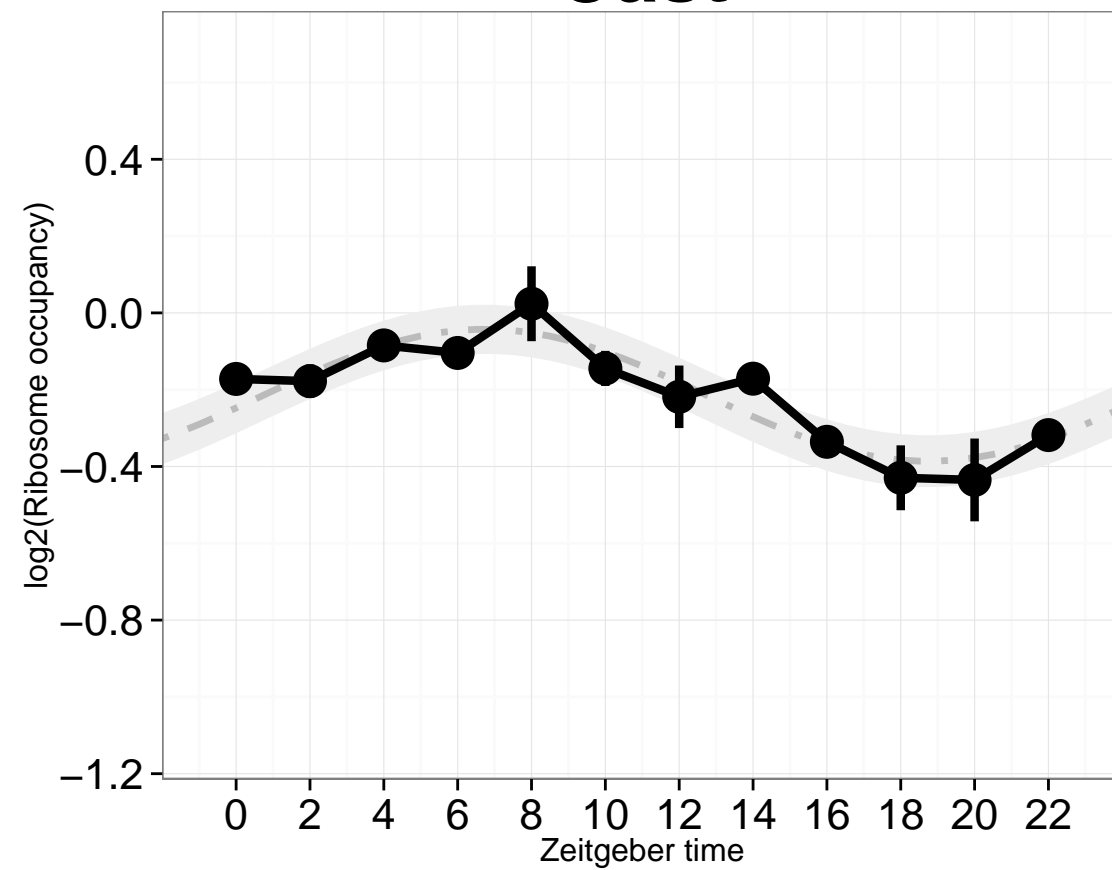

Supplement: Supplementary file 8666 [file 1]

## 8430419L09Rik

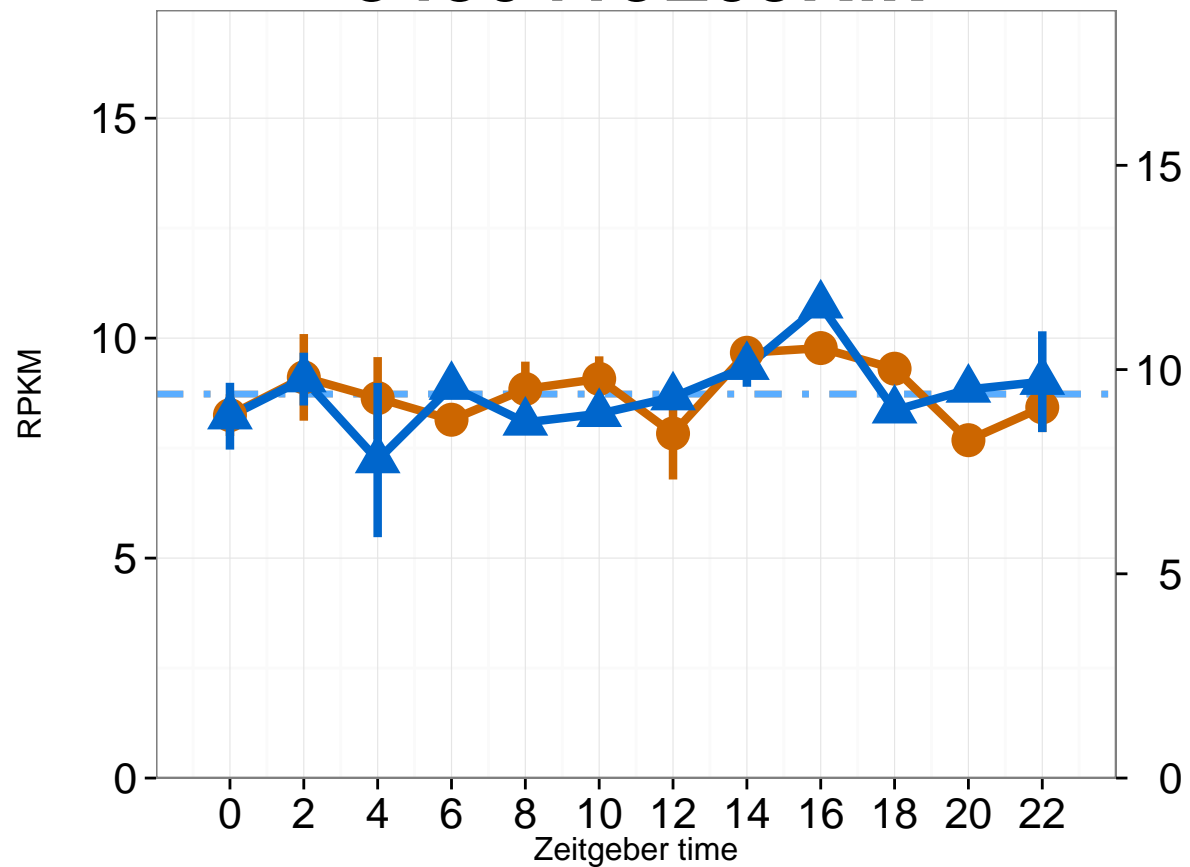

## 8430419L09Rik

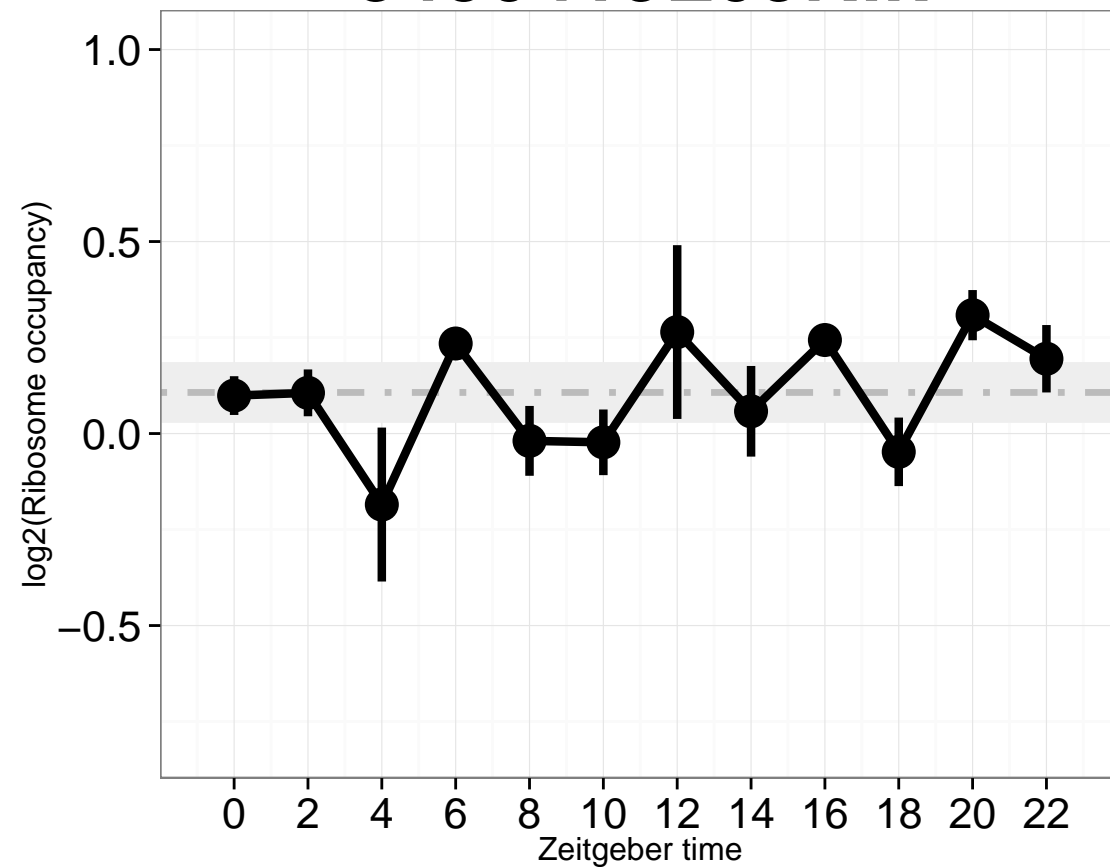

Supplement: Supplementary file 8667 [file 1]

# Pou2f1

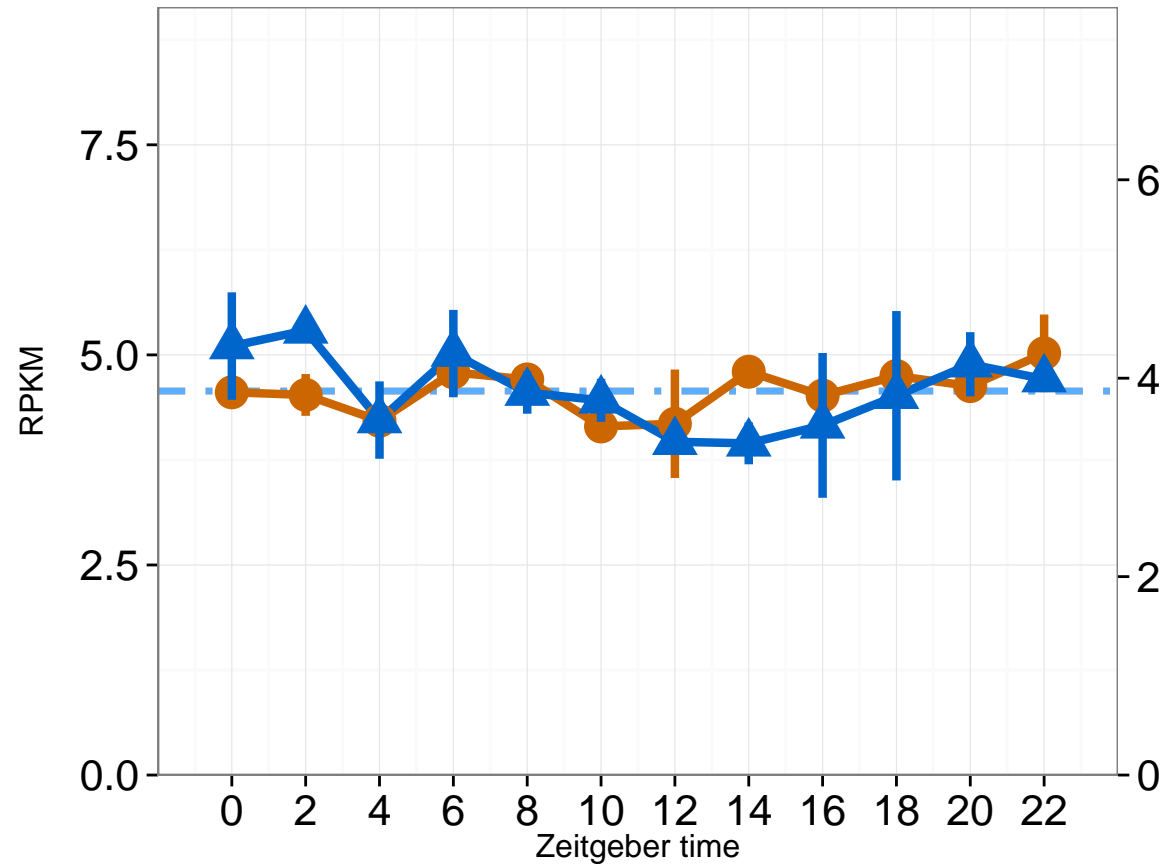

# Pou2f1

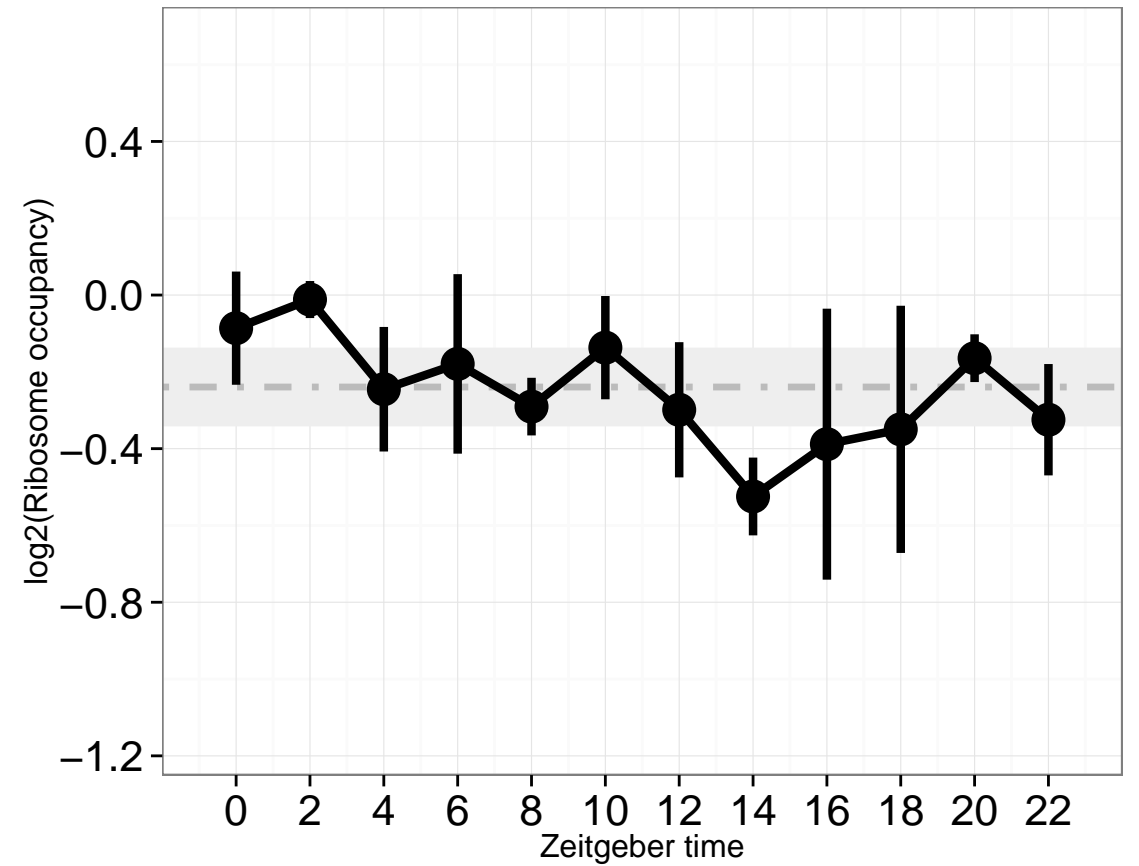

Supplement: Supplementary file 8668 [file 1]

## Ldb2

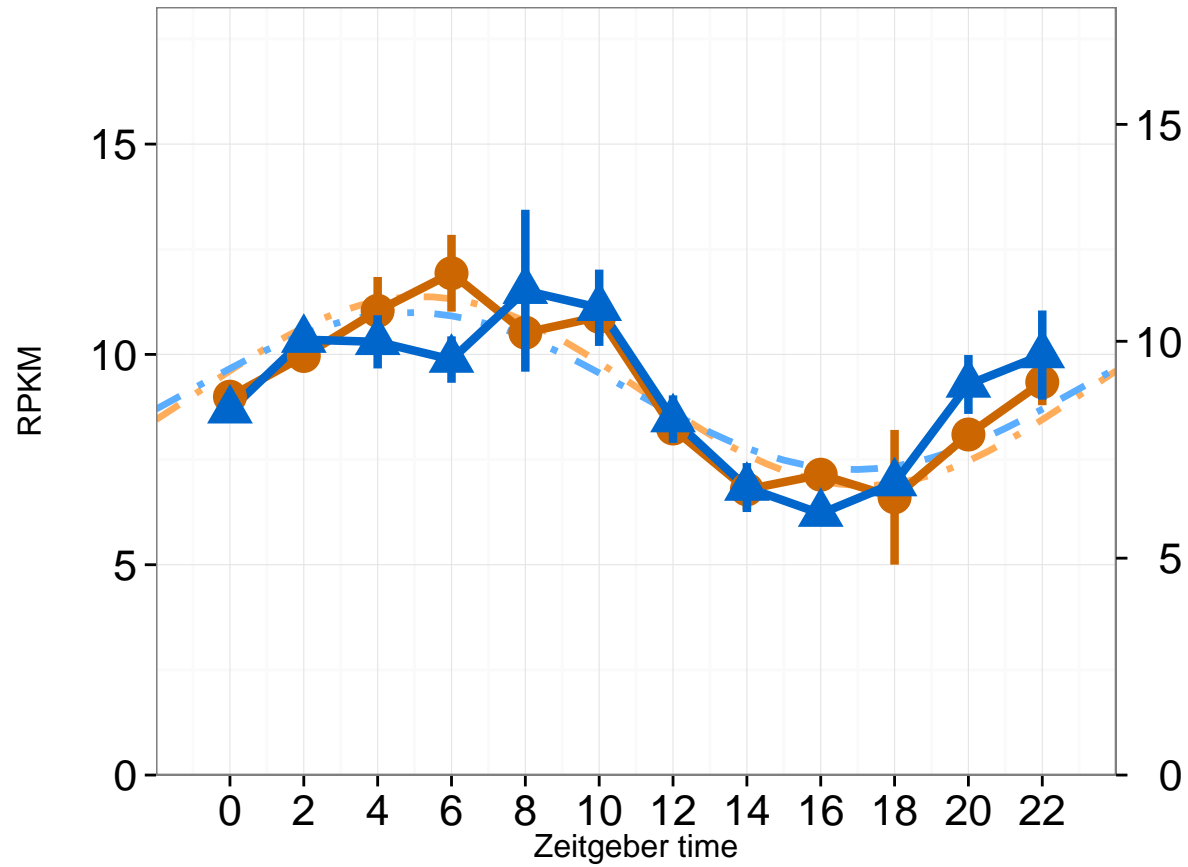

## Ldb2

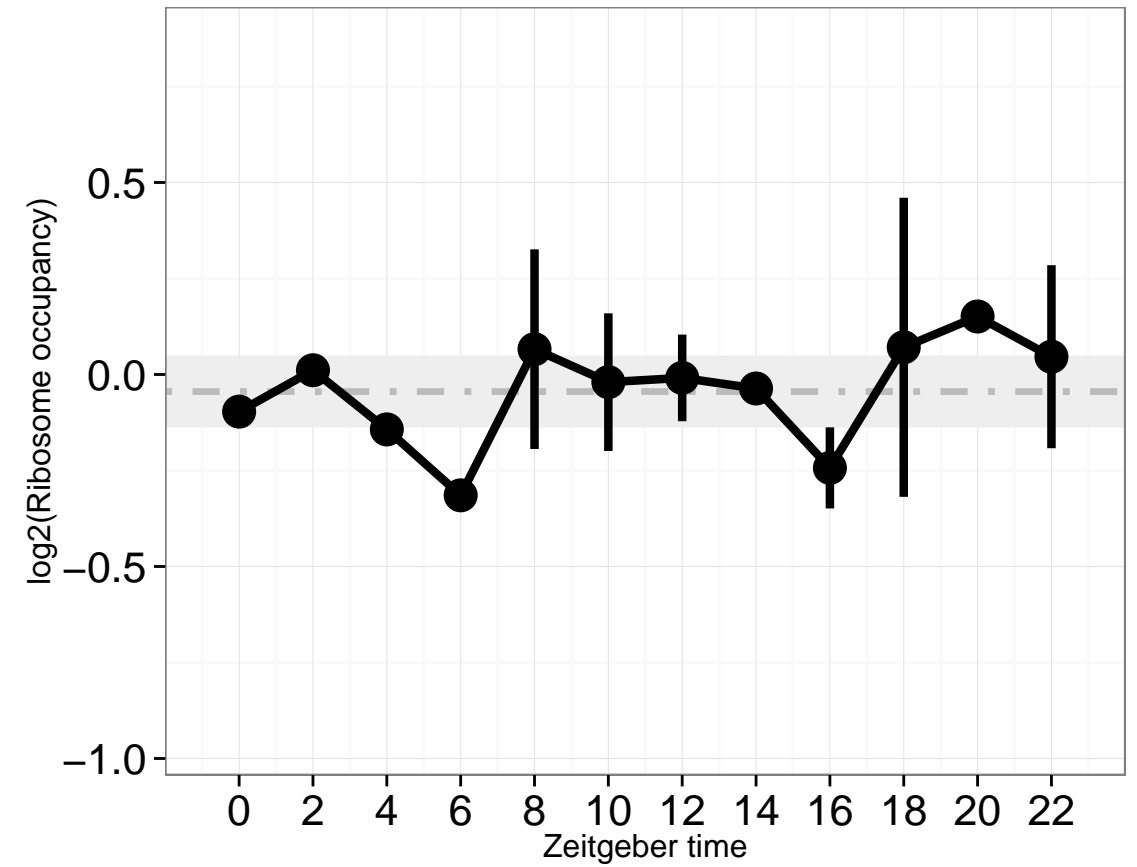

Supplement: Supplementary file 8669 [file 1]

# Ckap5

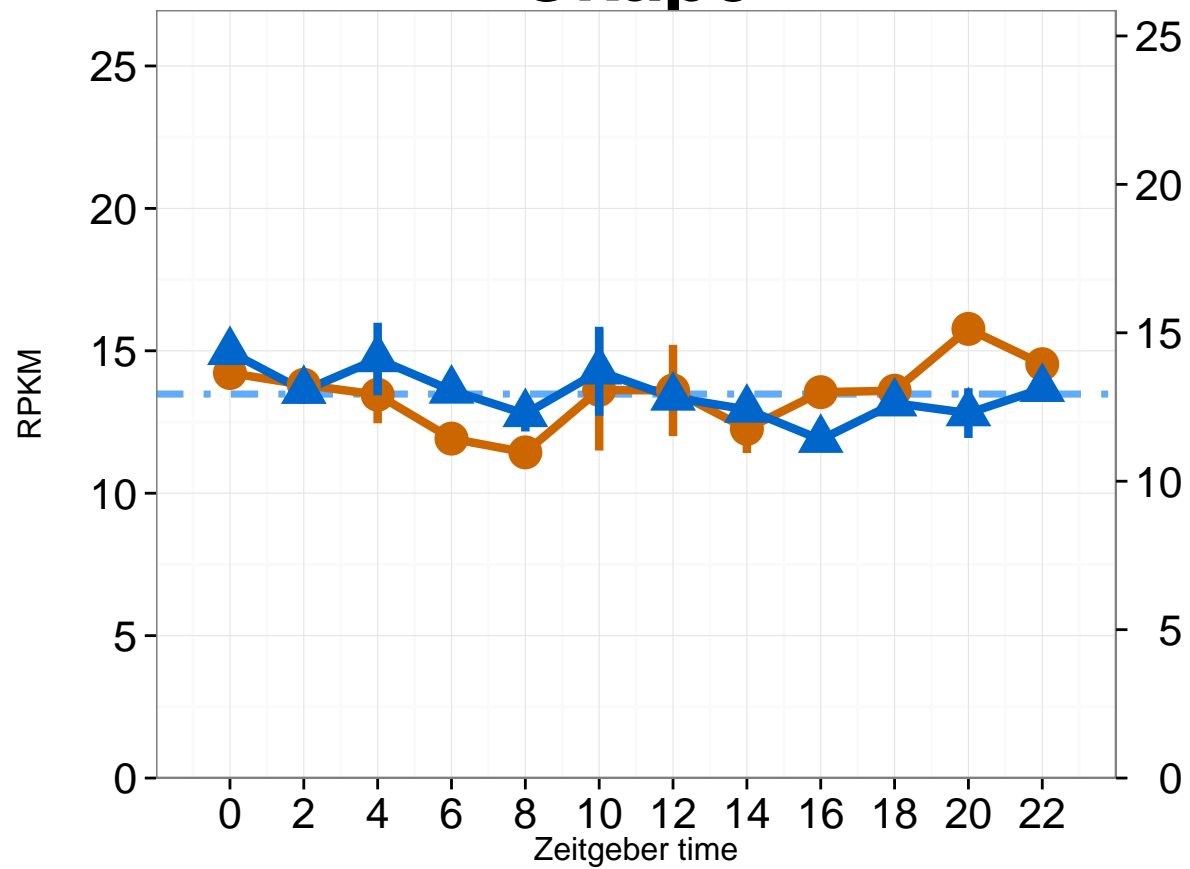

# Ckap5

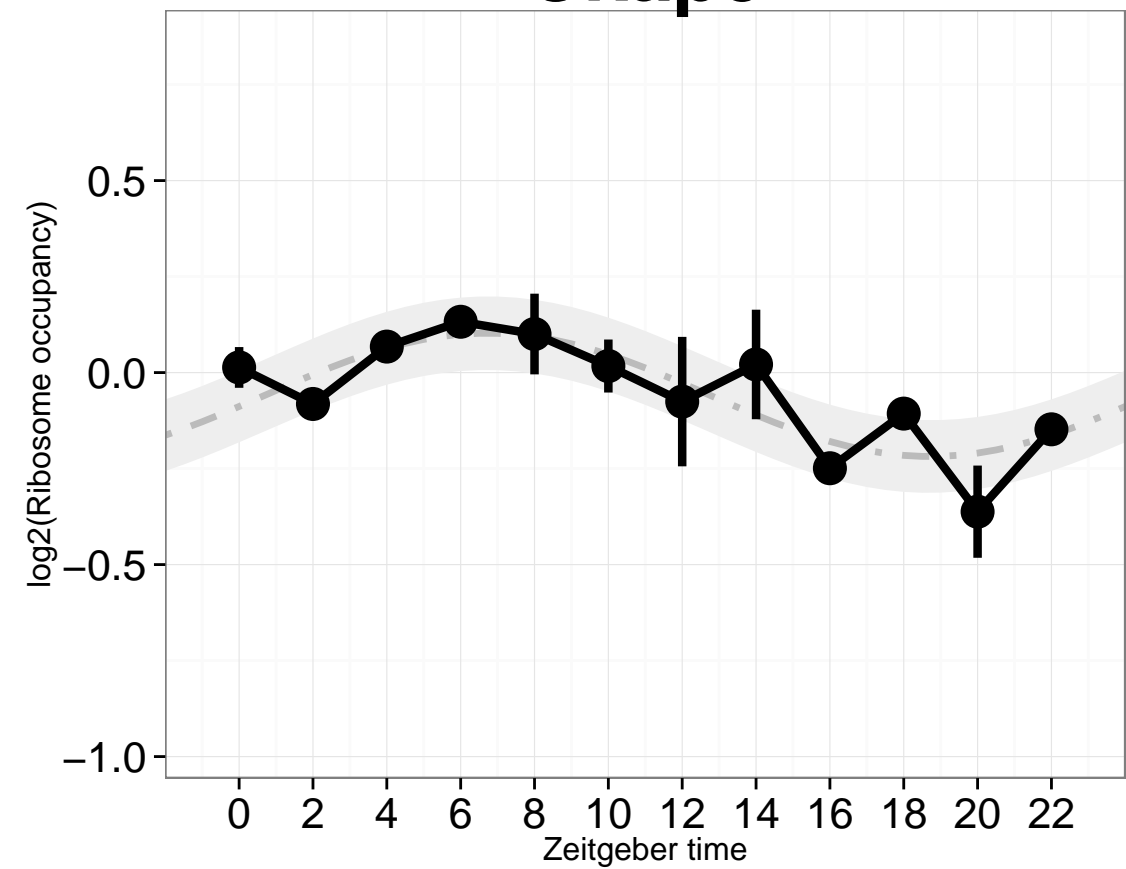

Supplement: Supplementary file 8670 [file 1]

## Pmp22

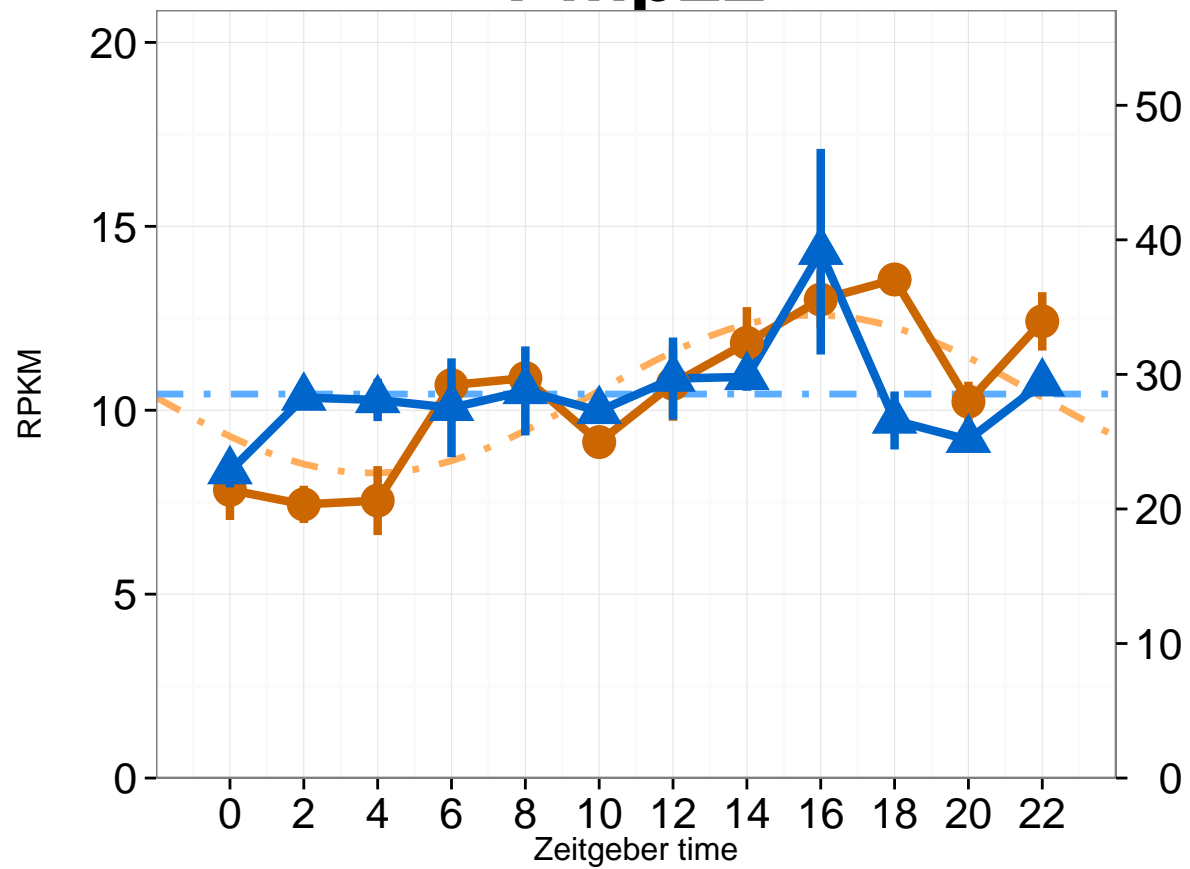

## Pmp22

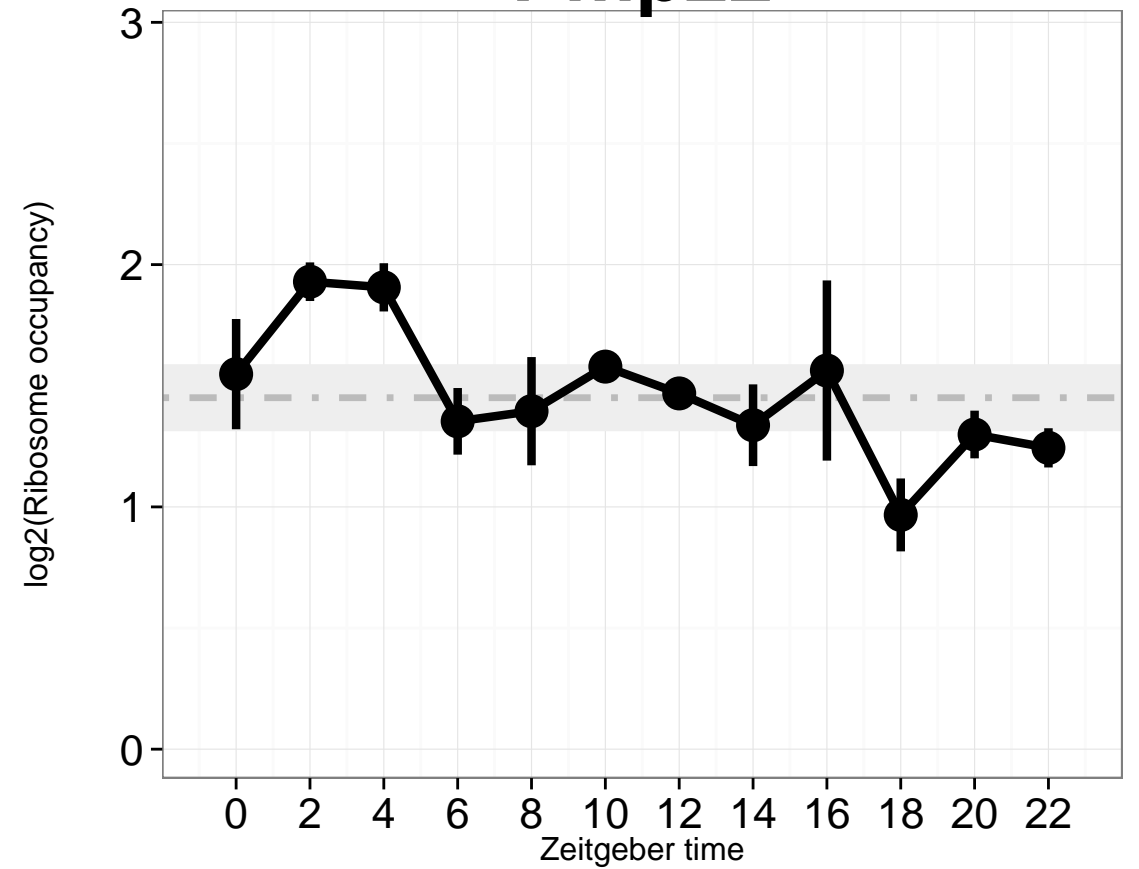

Supplement: Supplementary file 8671 [file 1]

# Zfp658

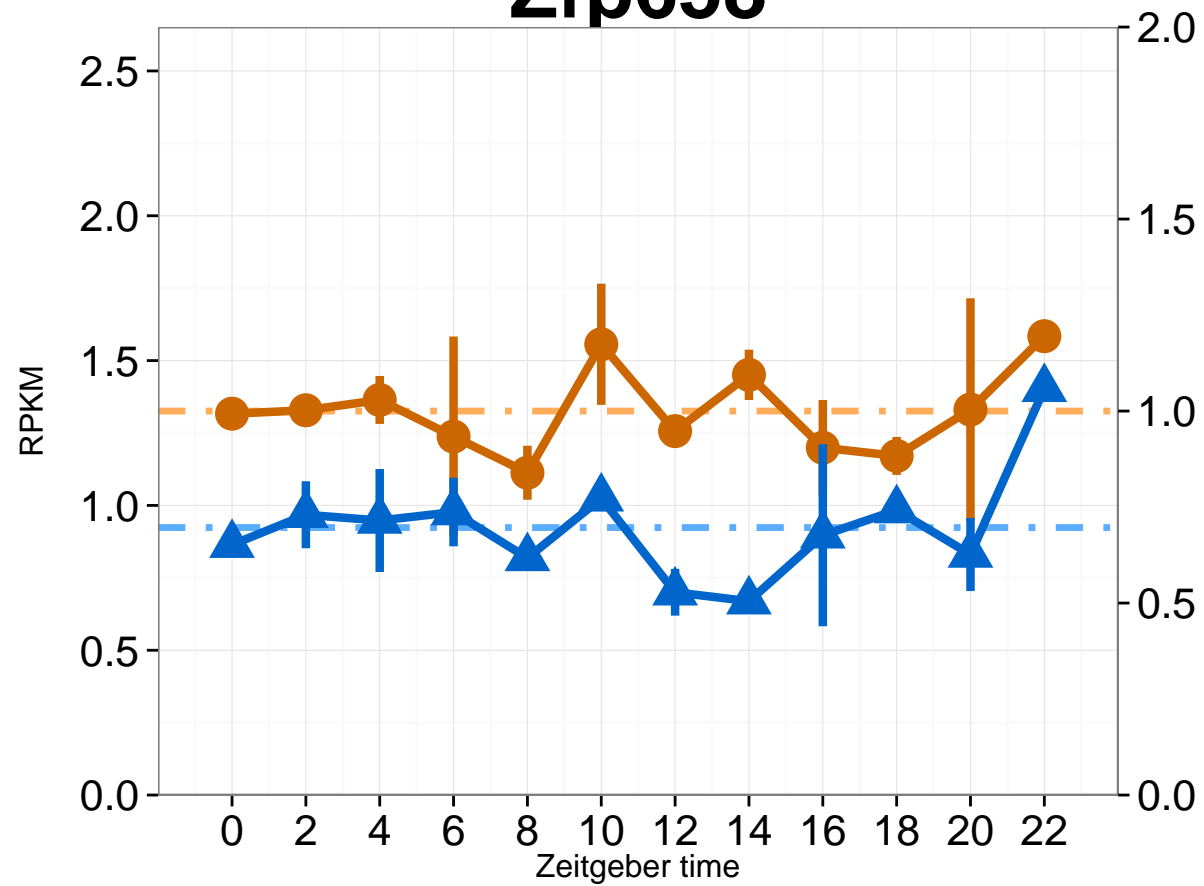

# Zfp658

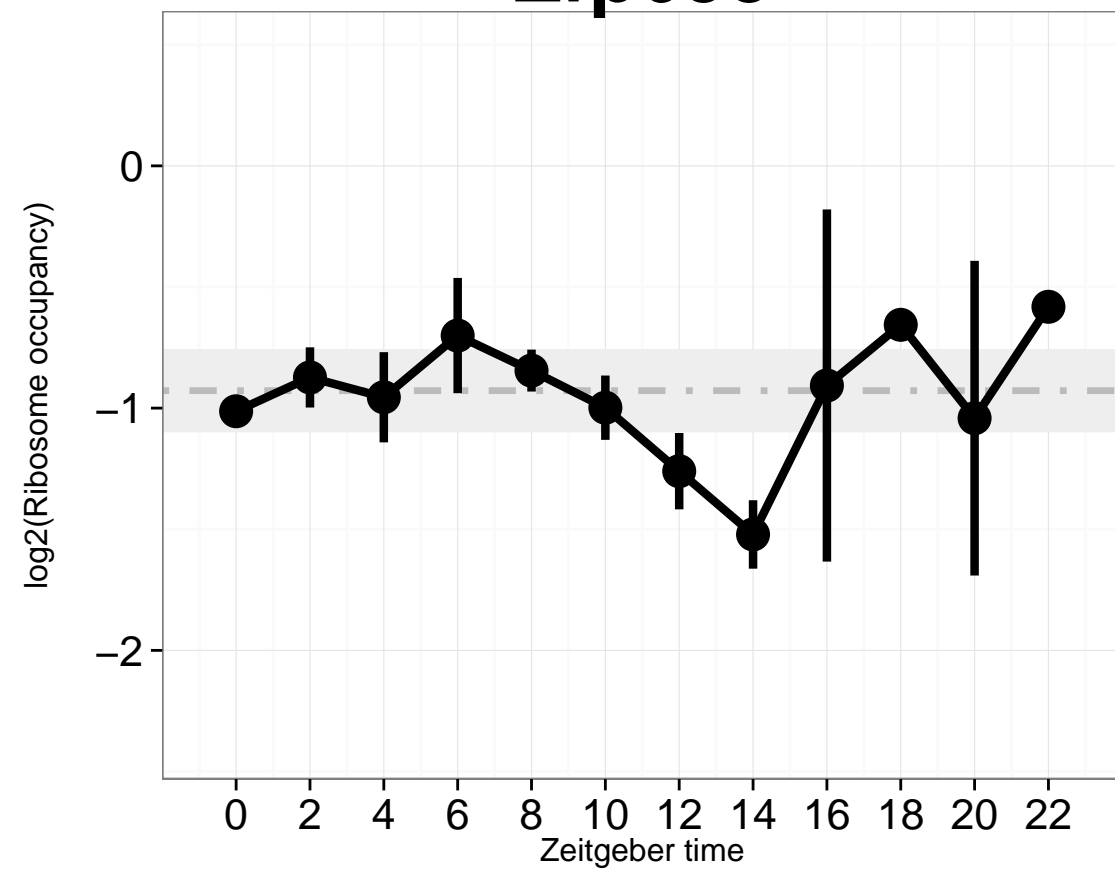

Supplement: Supplementary file 8672 [file 1]

# 1110037F02Rik

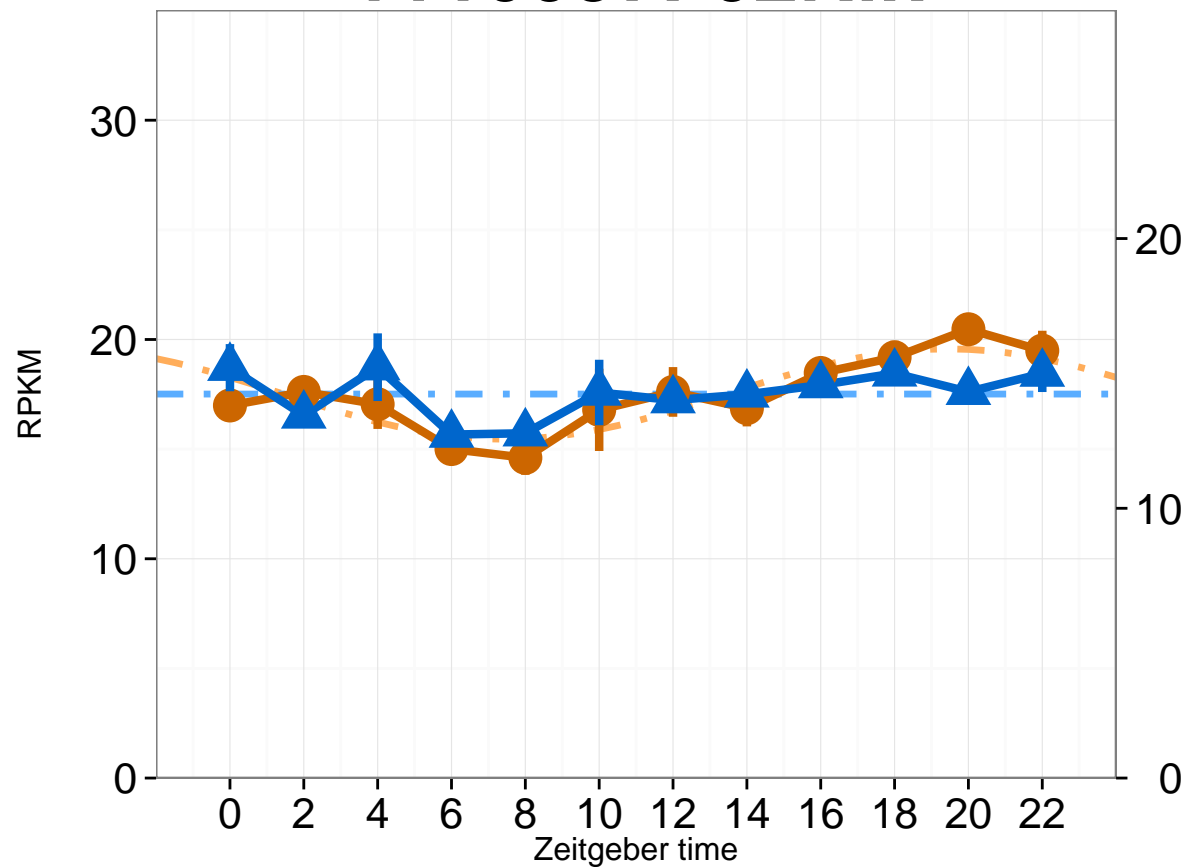

# 1110037F02Rik

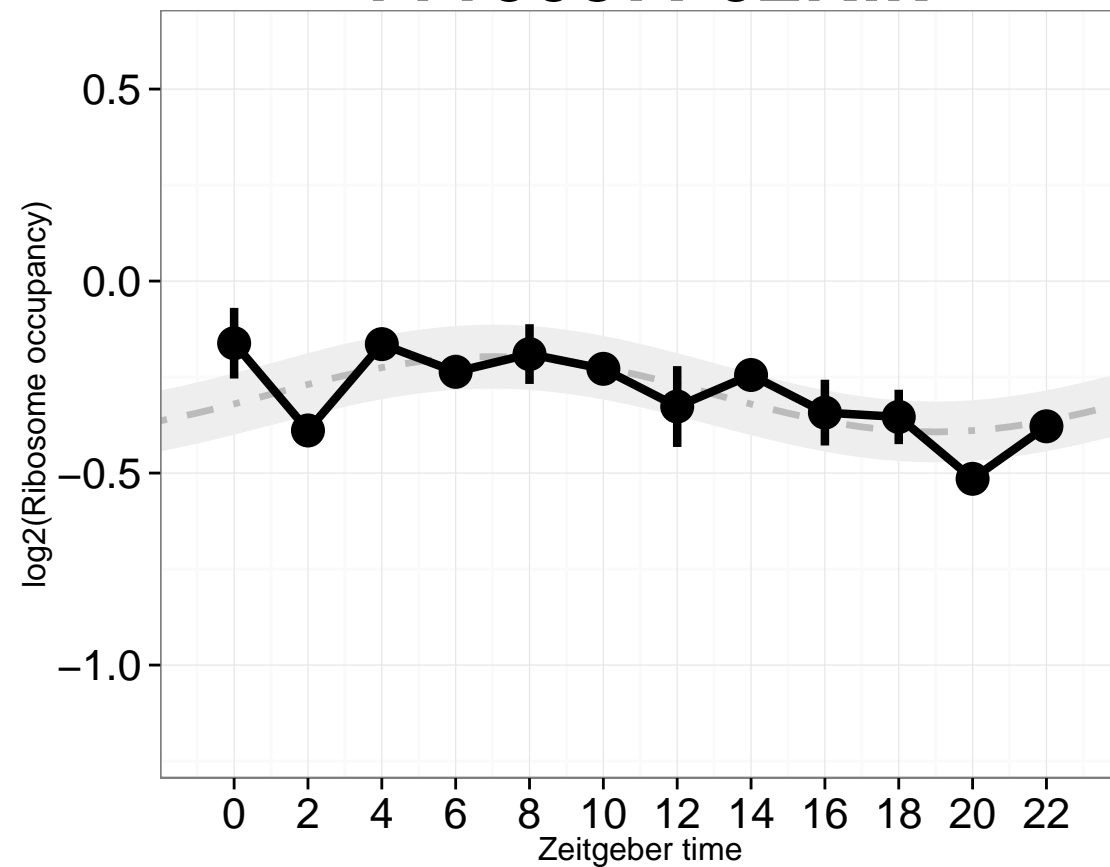

Supplement: Supplementary file 8673 [file 1]

## Cep95

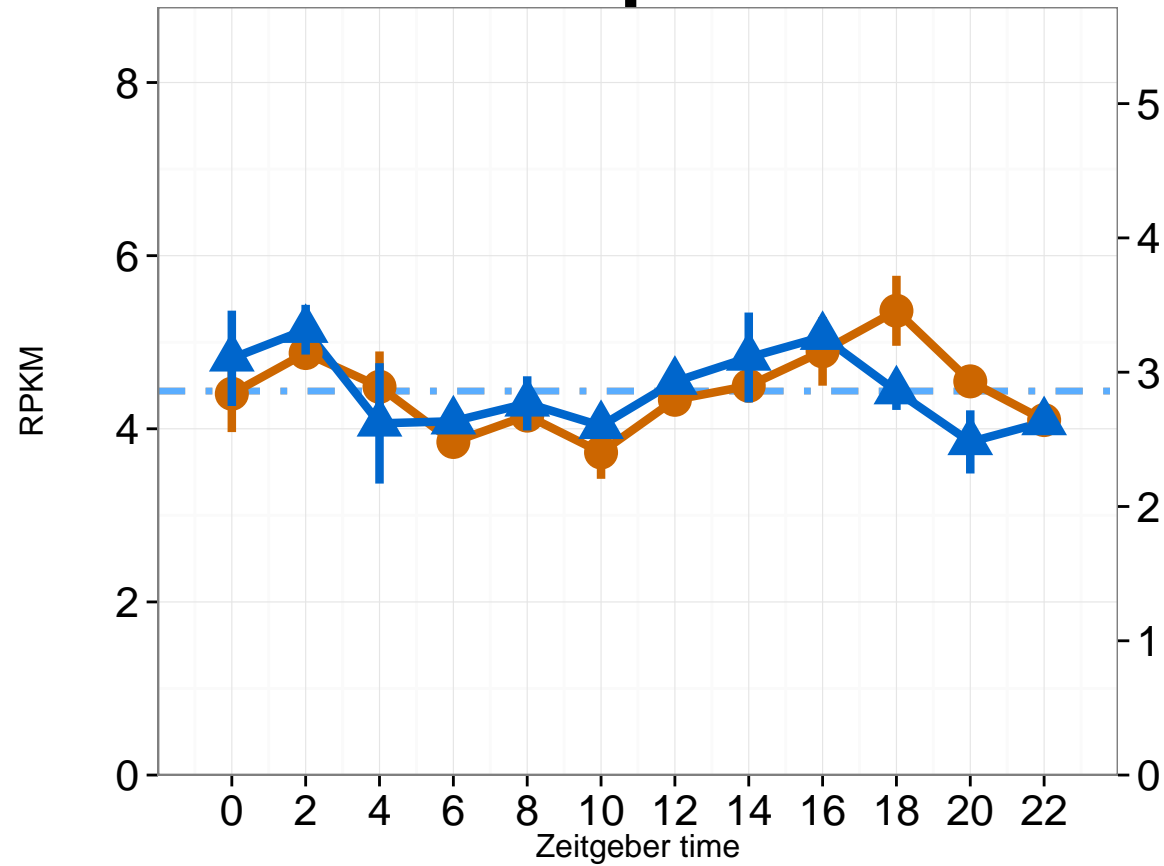

## Cep95

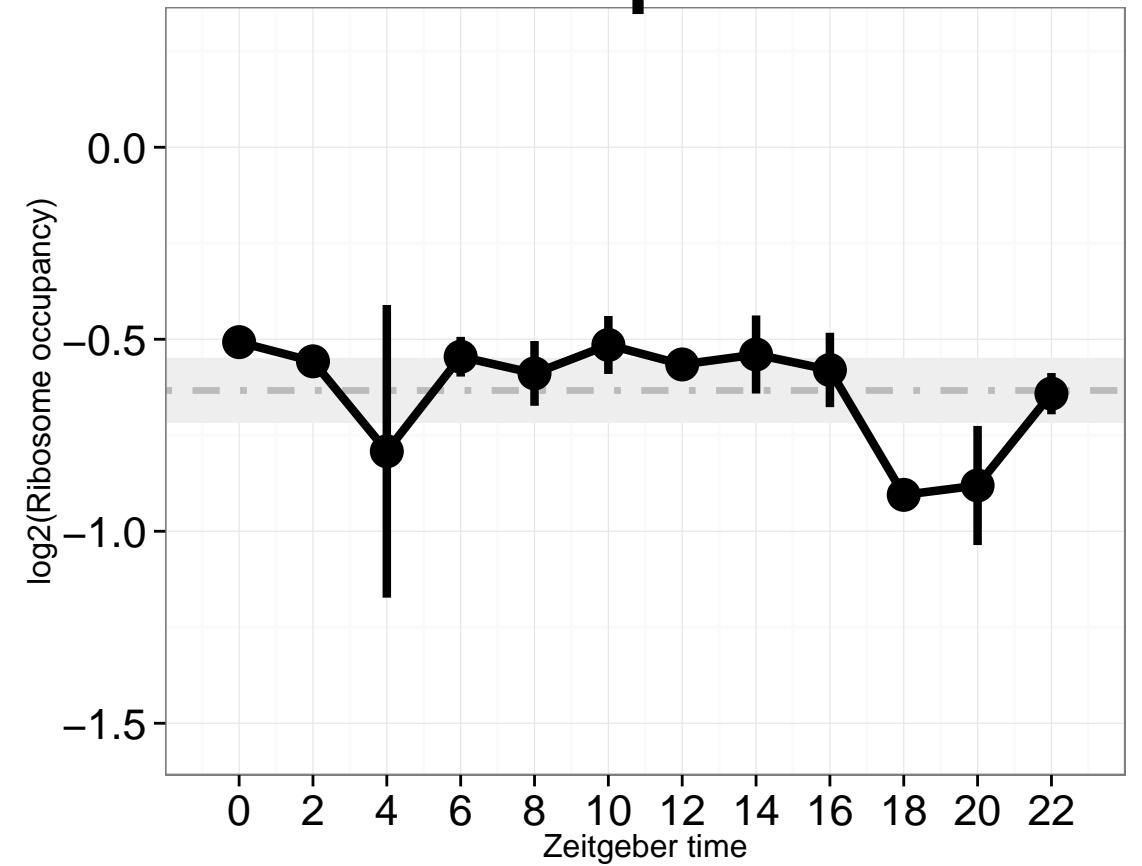

Supplement: Supplementary file 8674 [file 1]

# Mrps31

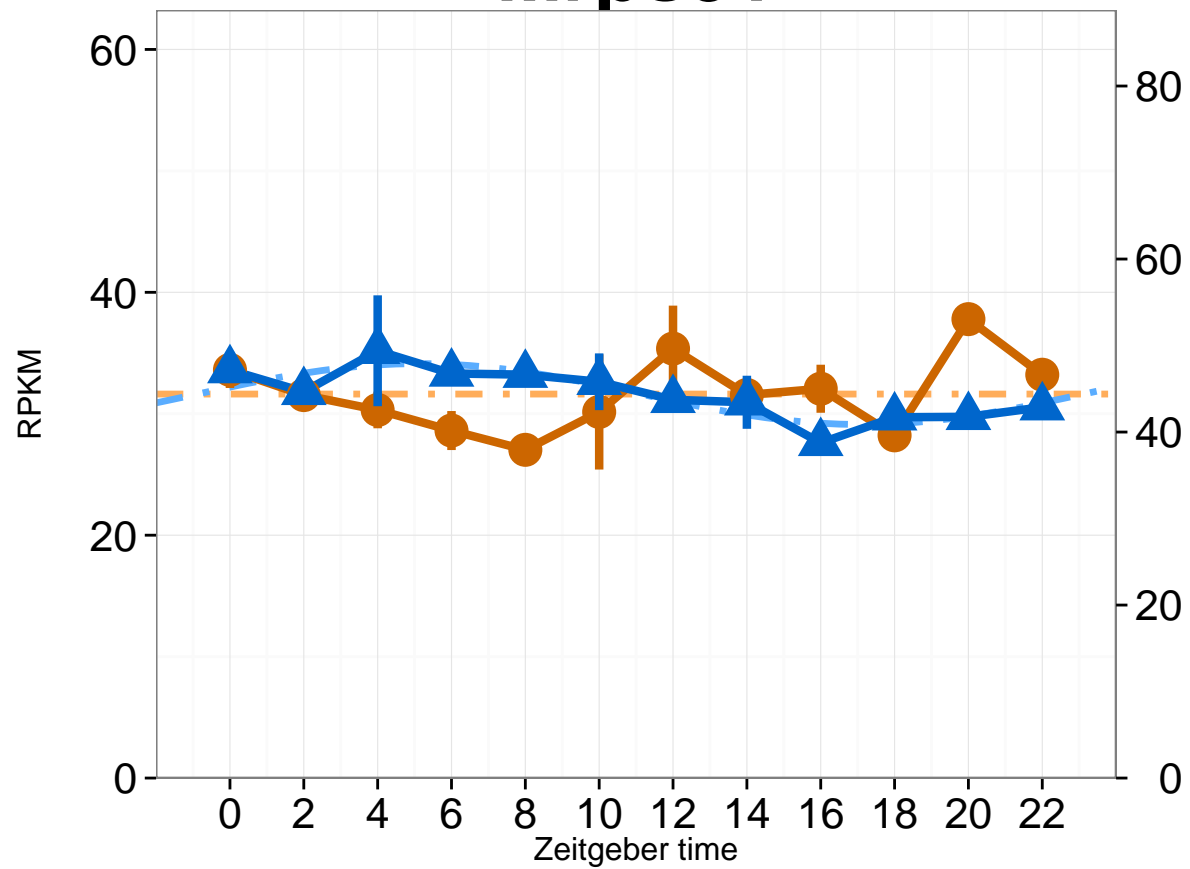

# Mrps31

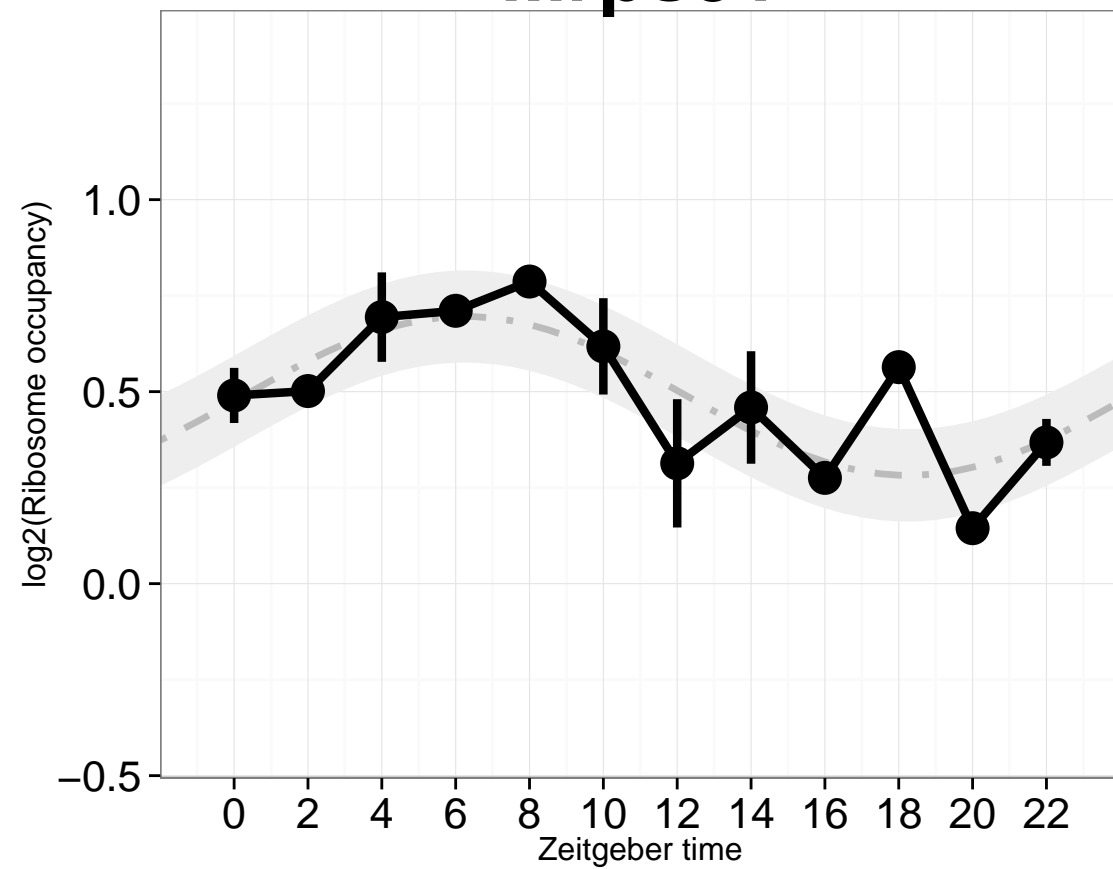

Supplement: Supplementary file 8675 [file 1]

## Pask

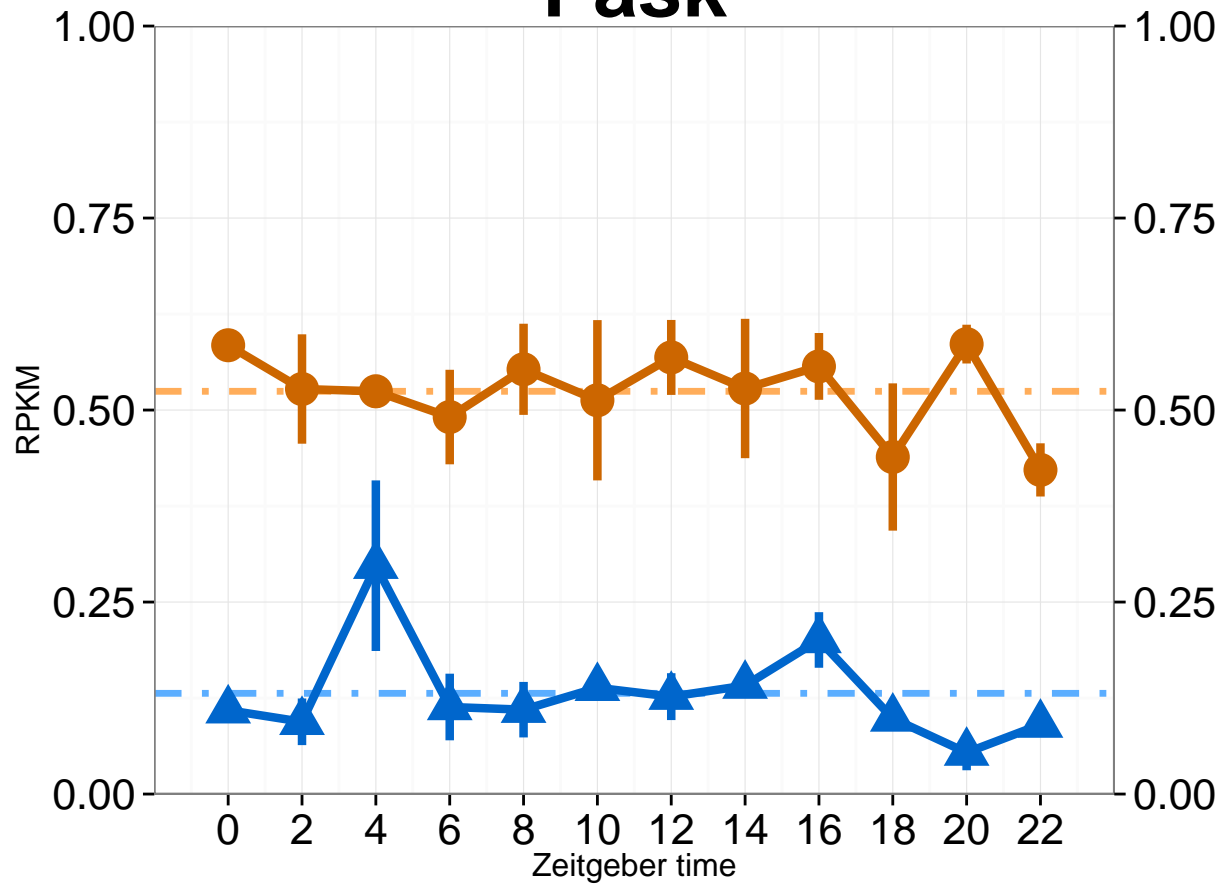

## Pask

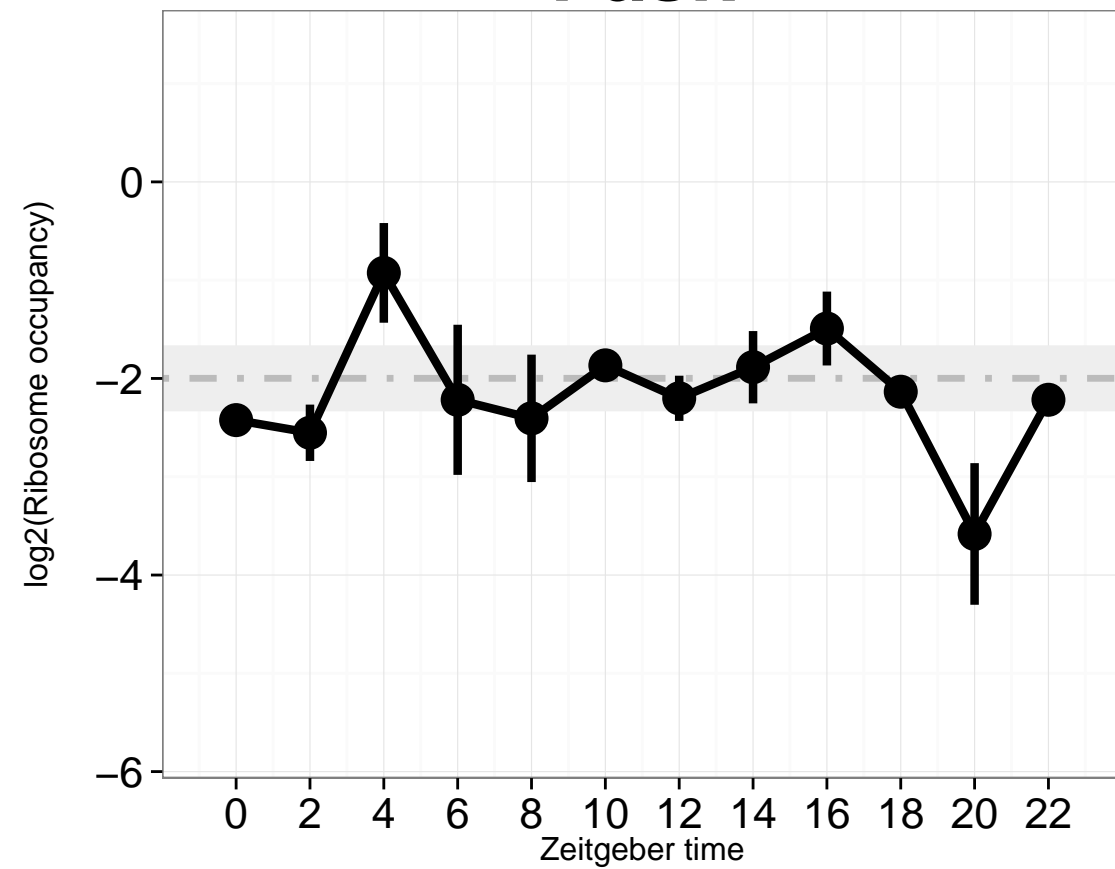

Supplement: Supplementary file 8676 [file 1]

# Serp1

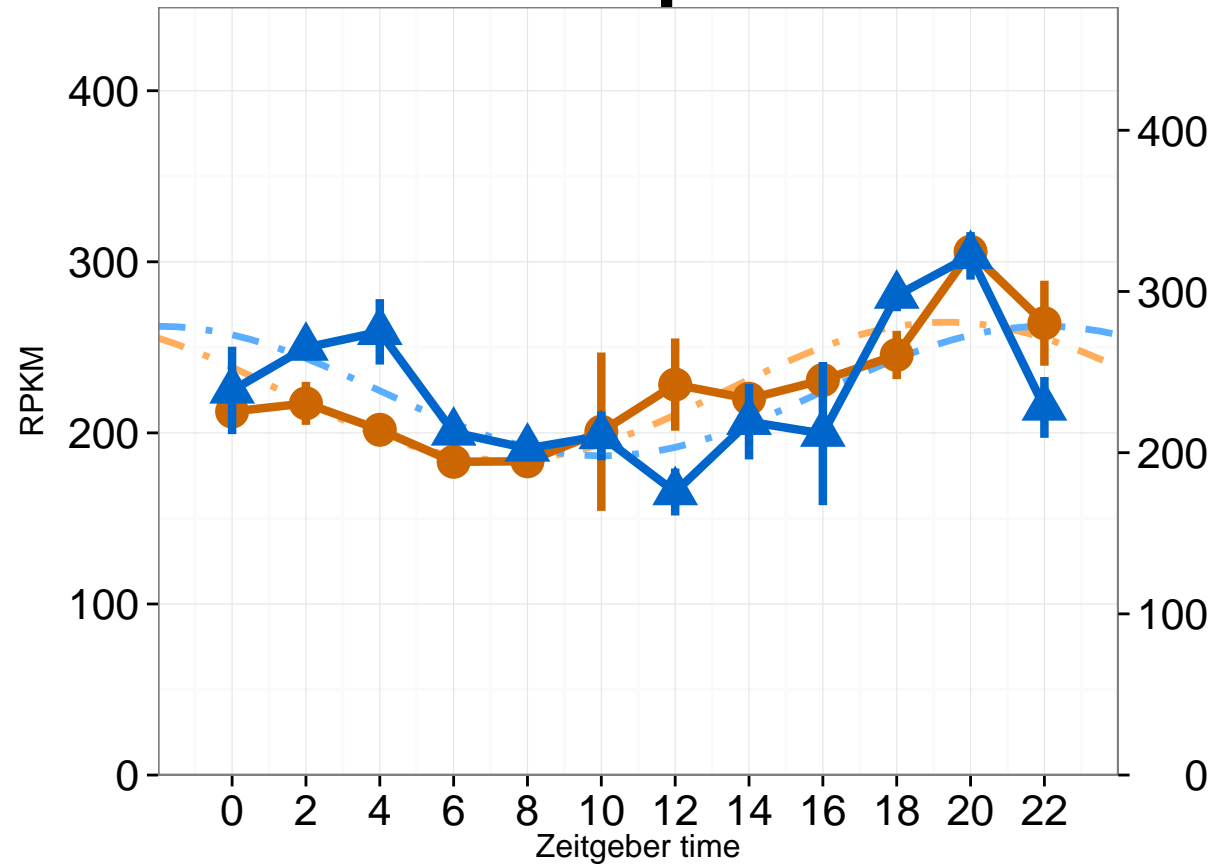

# Serp1

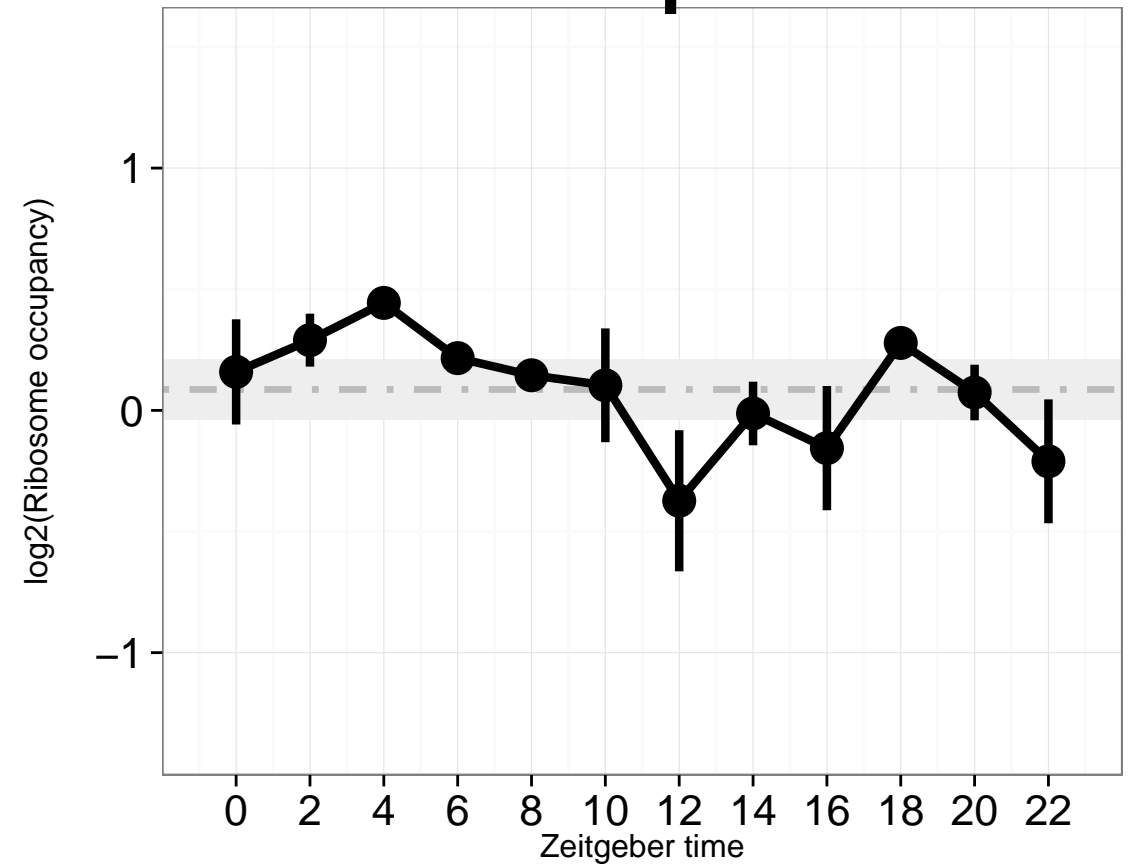

Supplement: Supplementary file 8677 [file 1]

## Ercc4

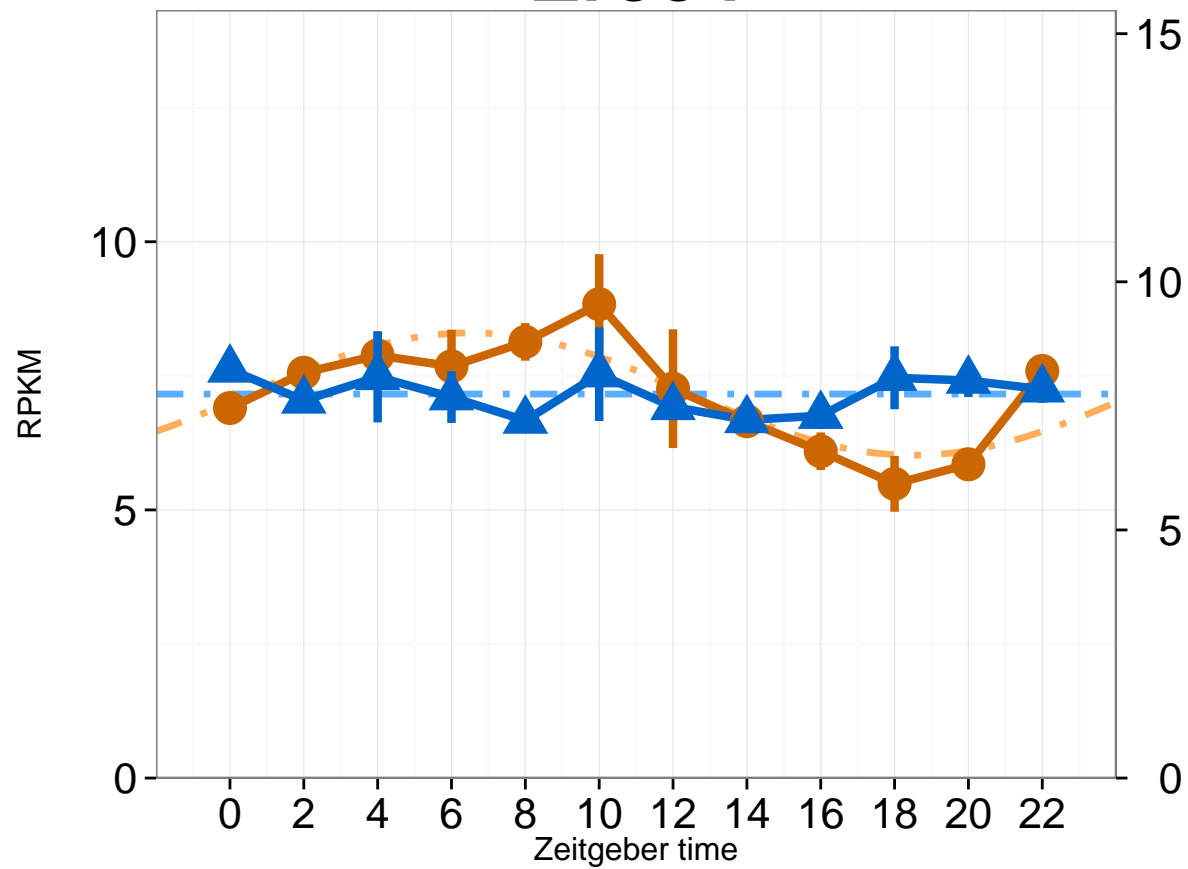

## Ercc4

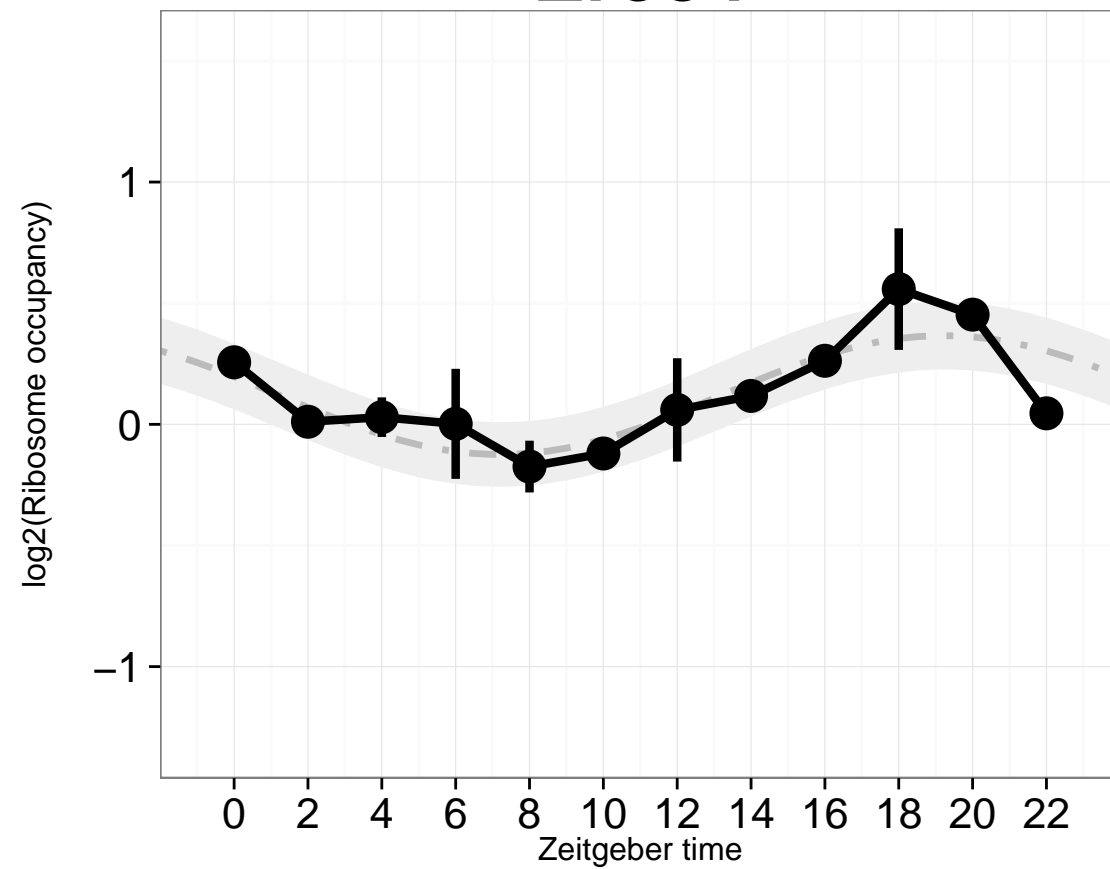

Supplement: Supplementary file 8678 [file 1]

# Kpna3

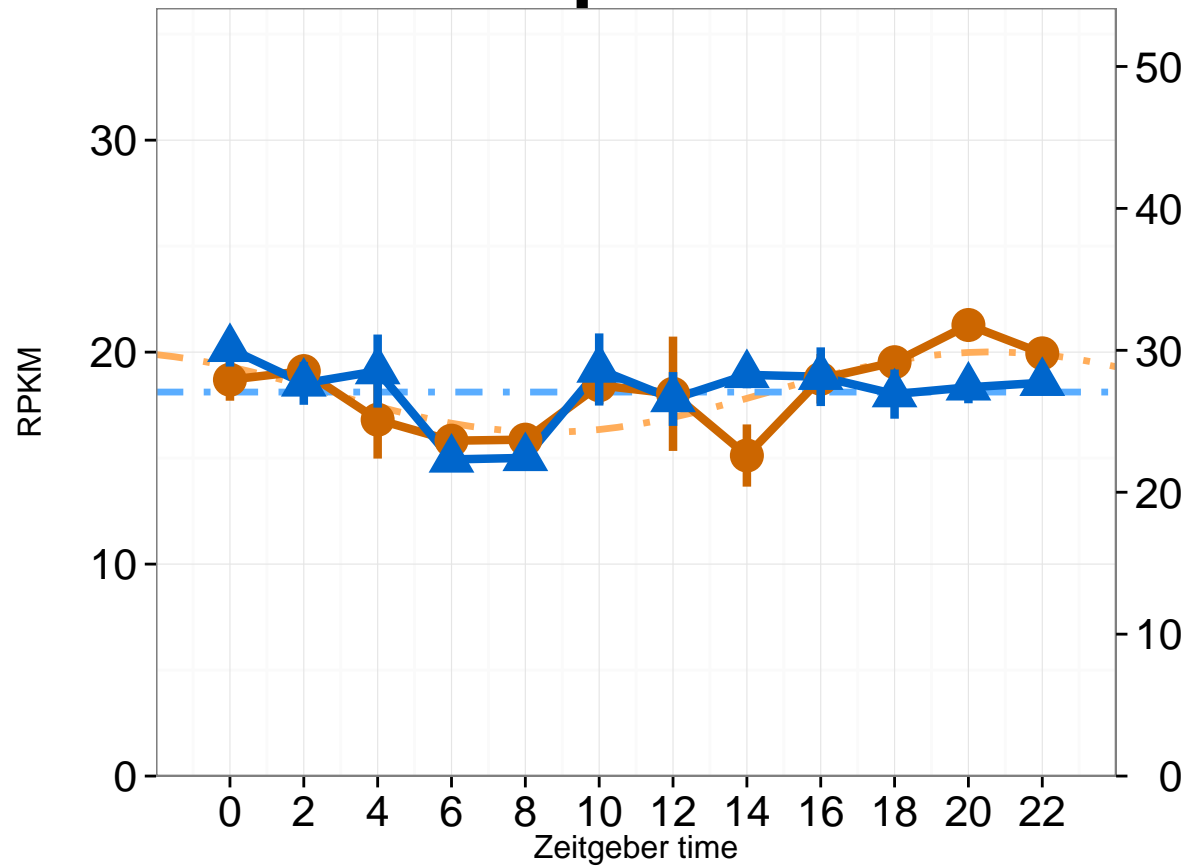

# Kpna3

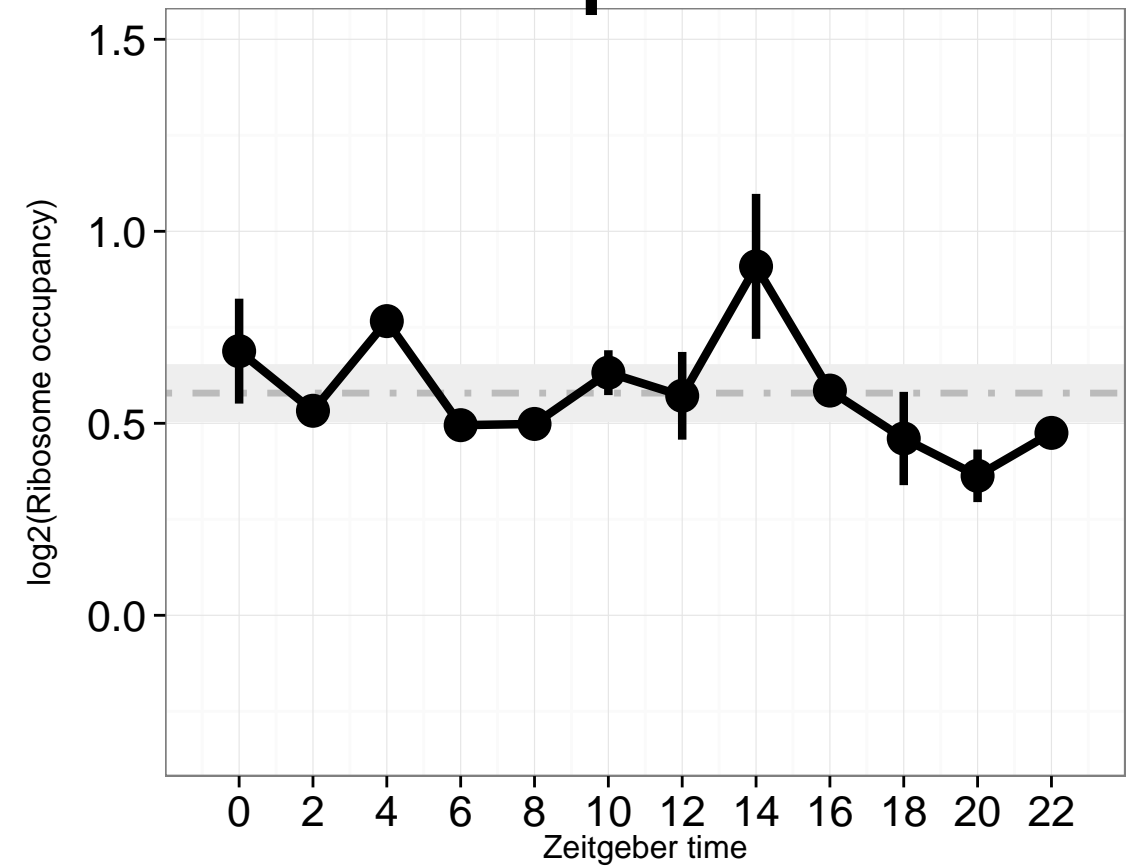

Supplement: Supplementary file 8679 [file 1]

## Wisp1

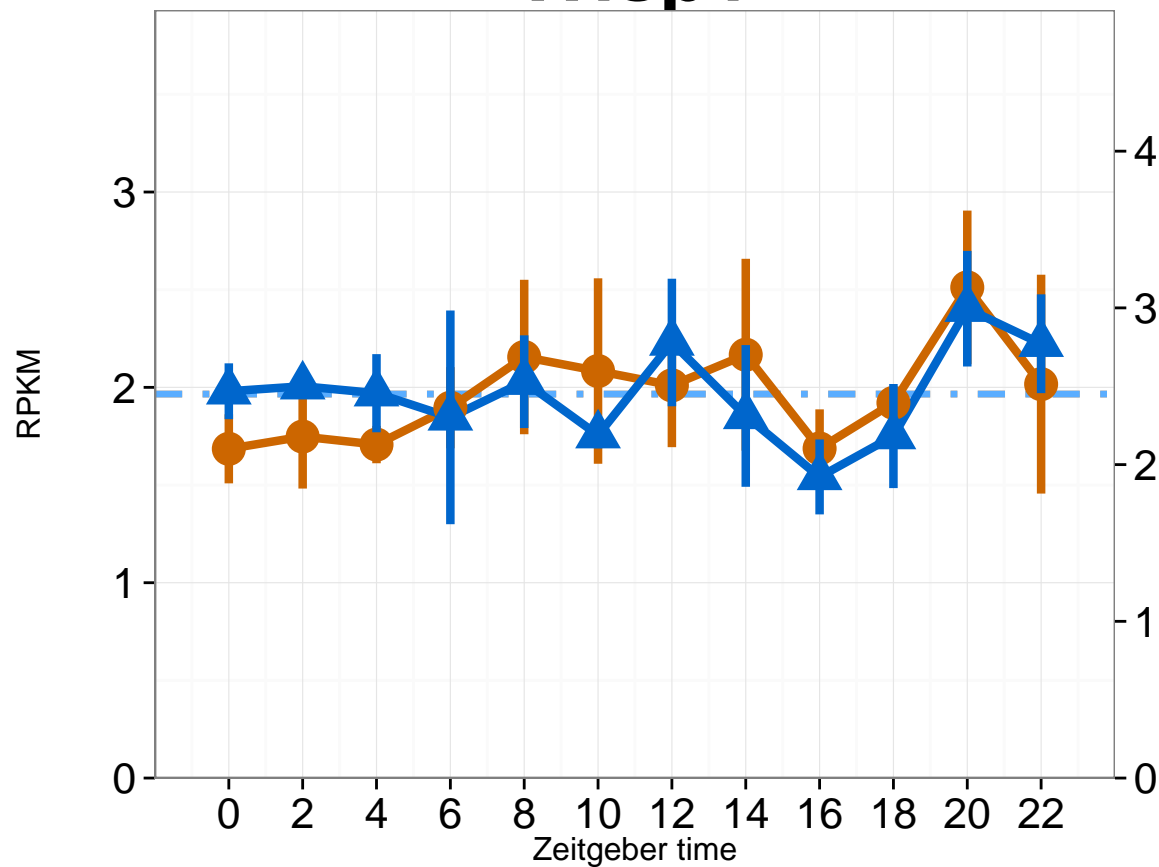

## Wisp1

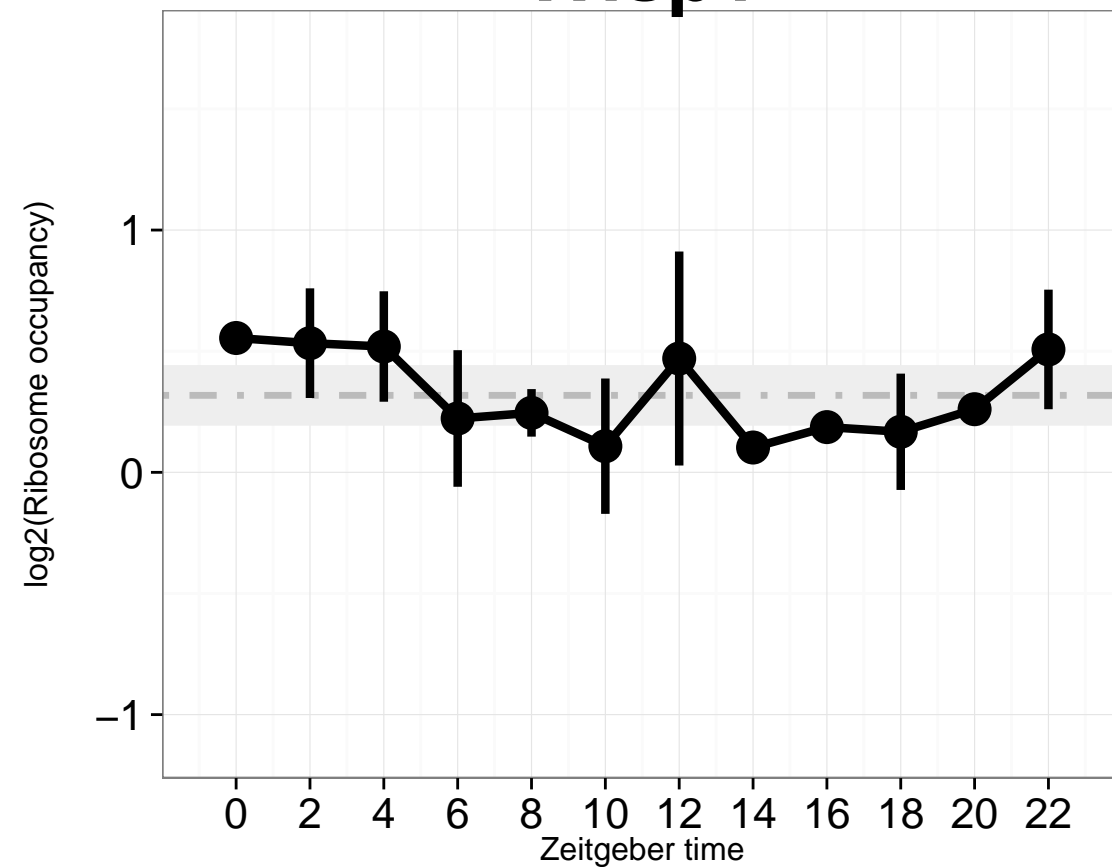

Supplement: Supplementary file 8680 [file 1]

# Actg1

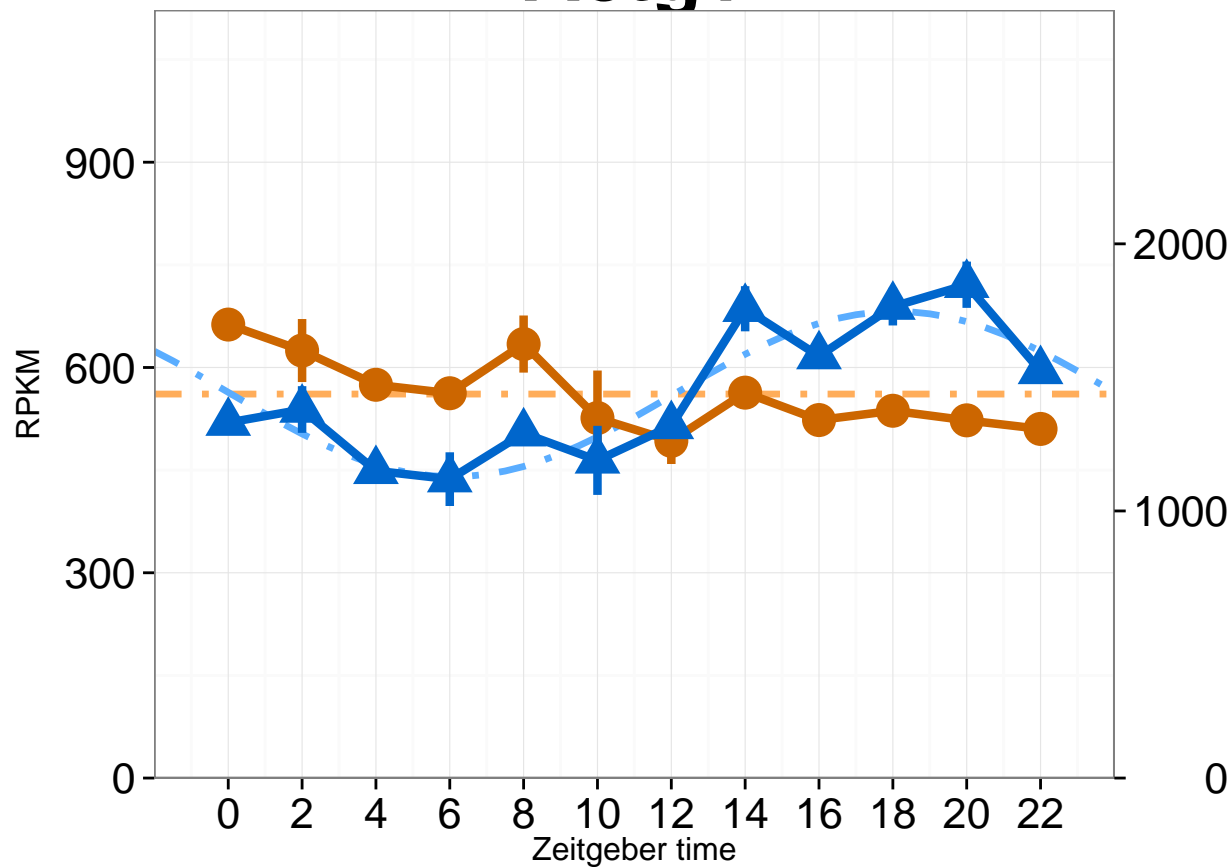

# Actg1

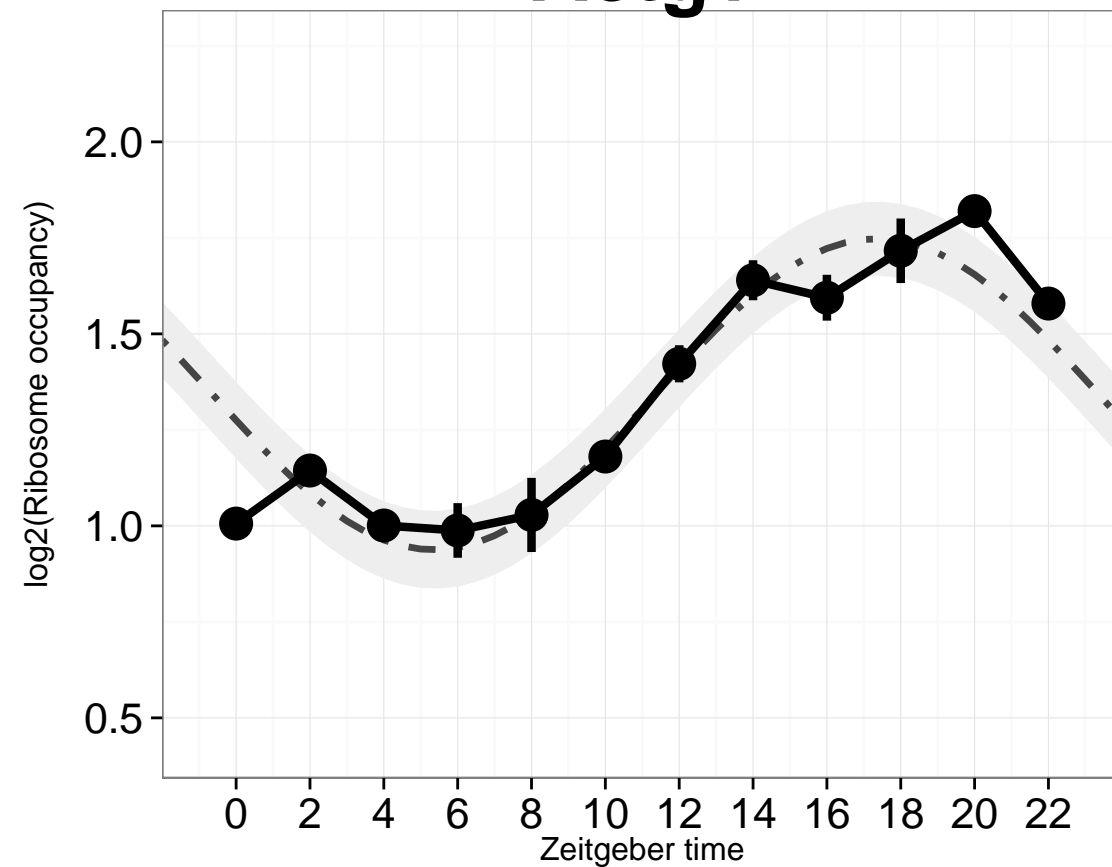

Supplement: Supplementary file 8681 [file 1]

## Slc2a4

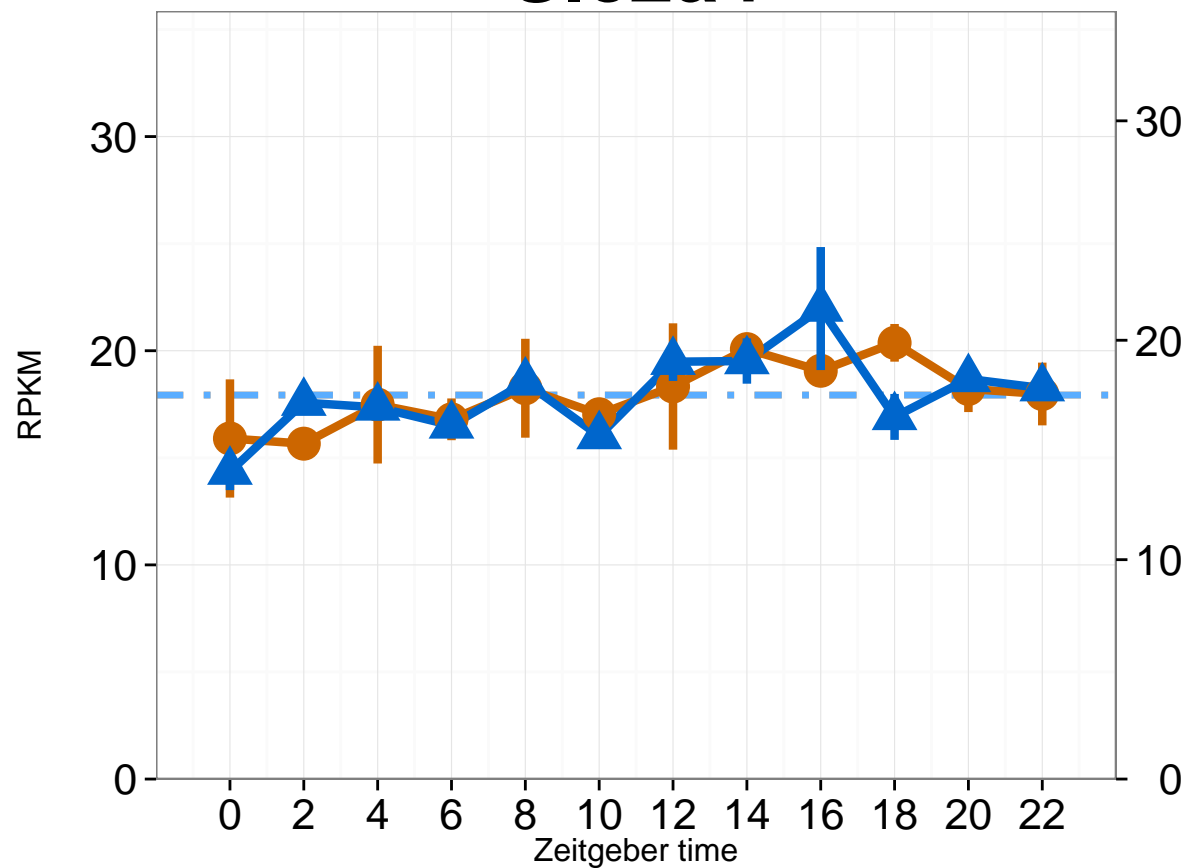

## Slc2a4

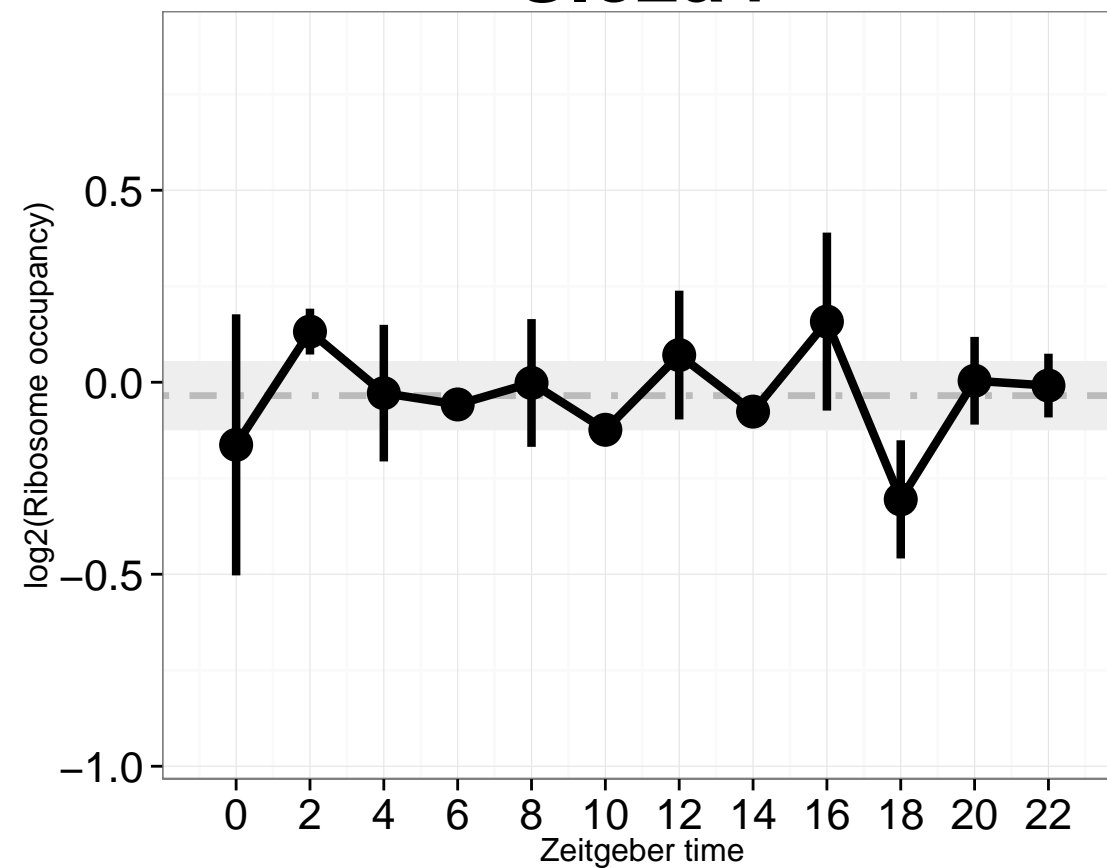

Supplement: Supplementary file 8682 [file 1]

# Eif5a2

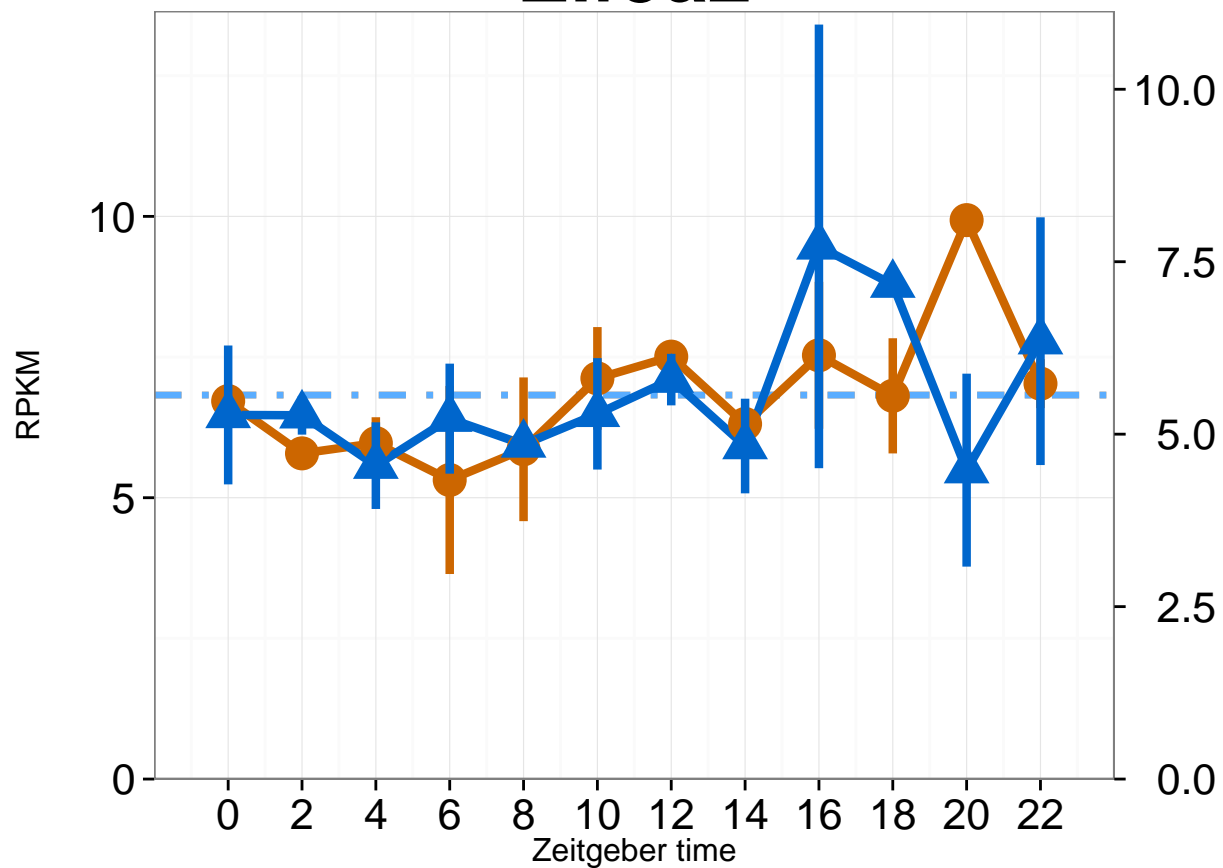

# Eif5a2

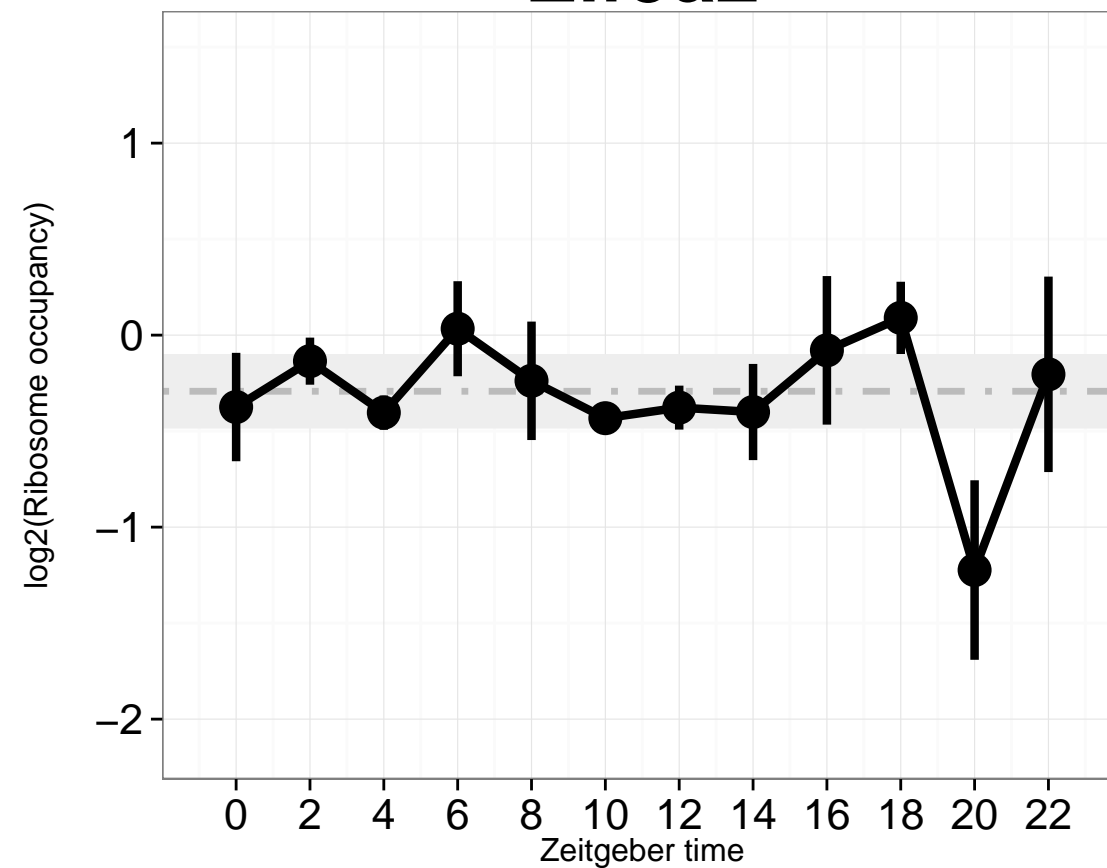

Supplement: Supplementary file 8683 [file 1]

## Ccp110

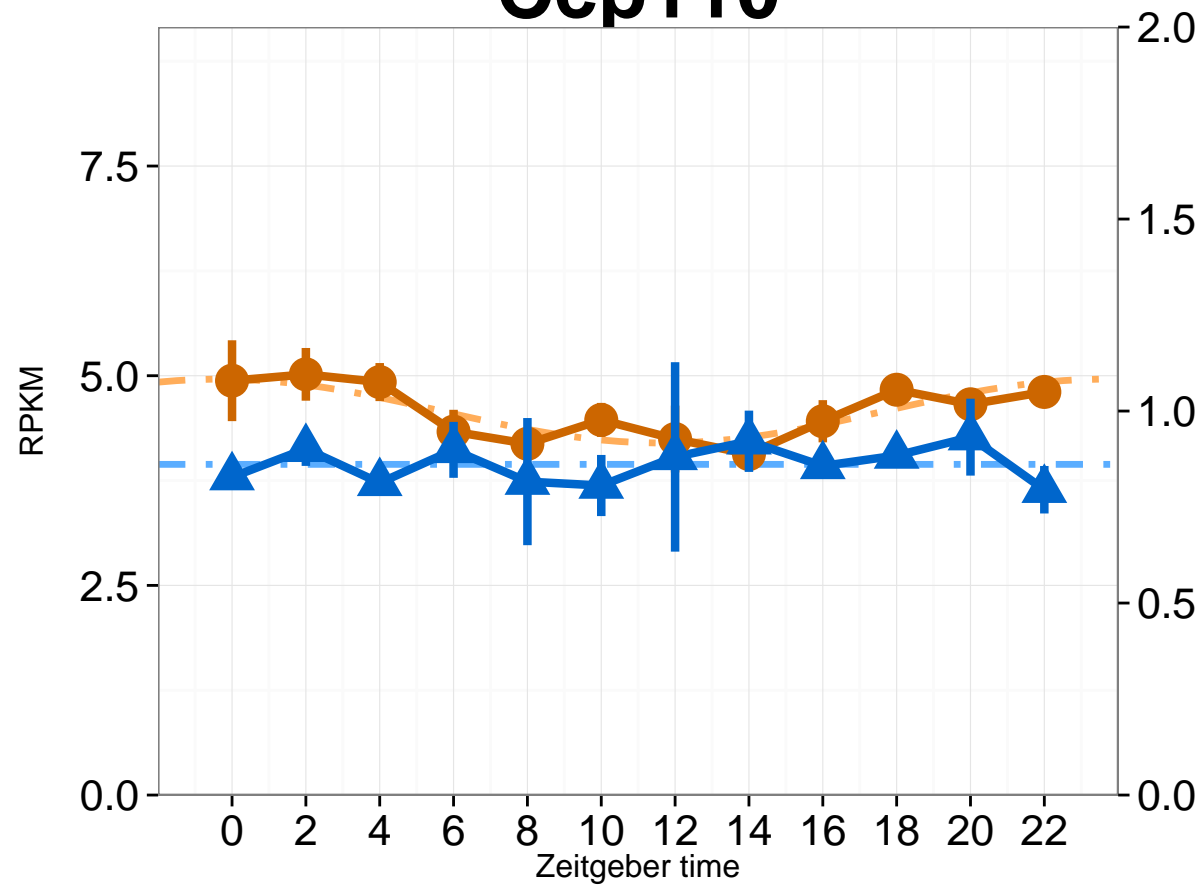

## Ccp110

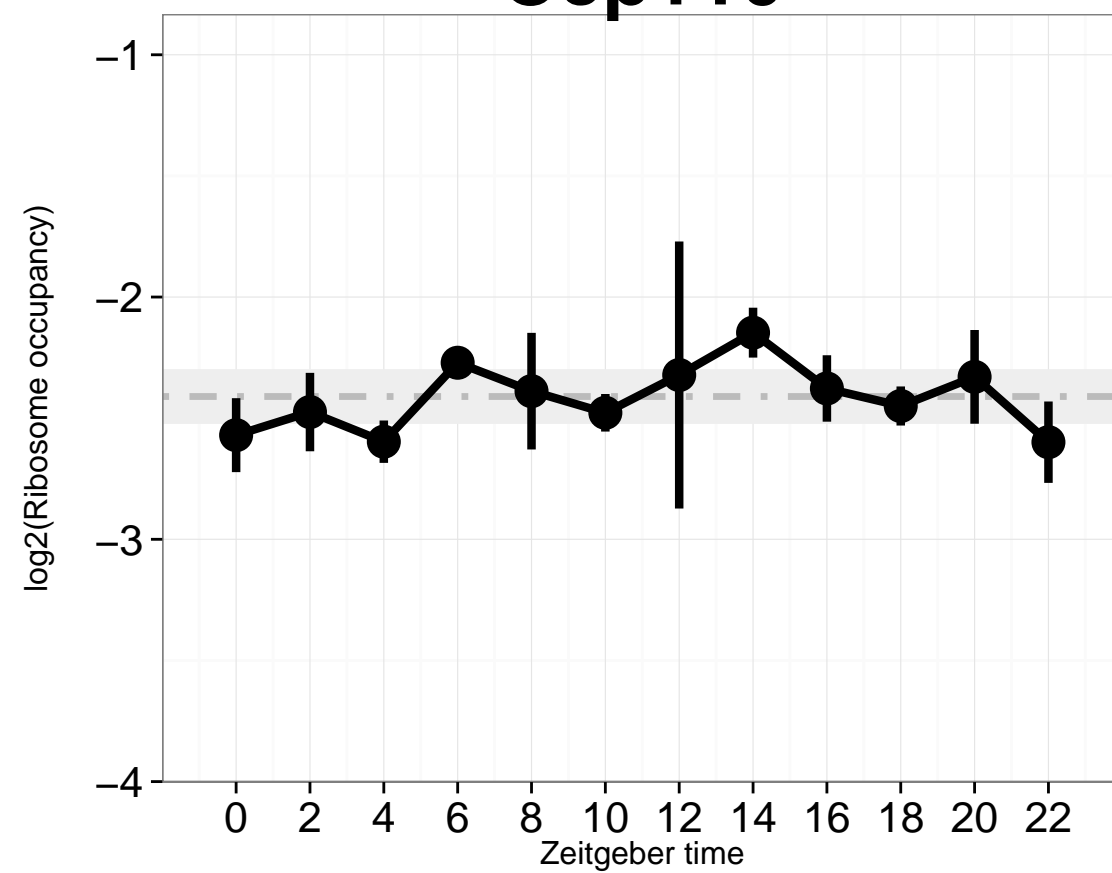

Supplement: Supplementary file 8684 [file 1]

## Rgs12

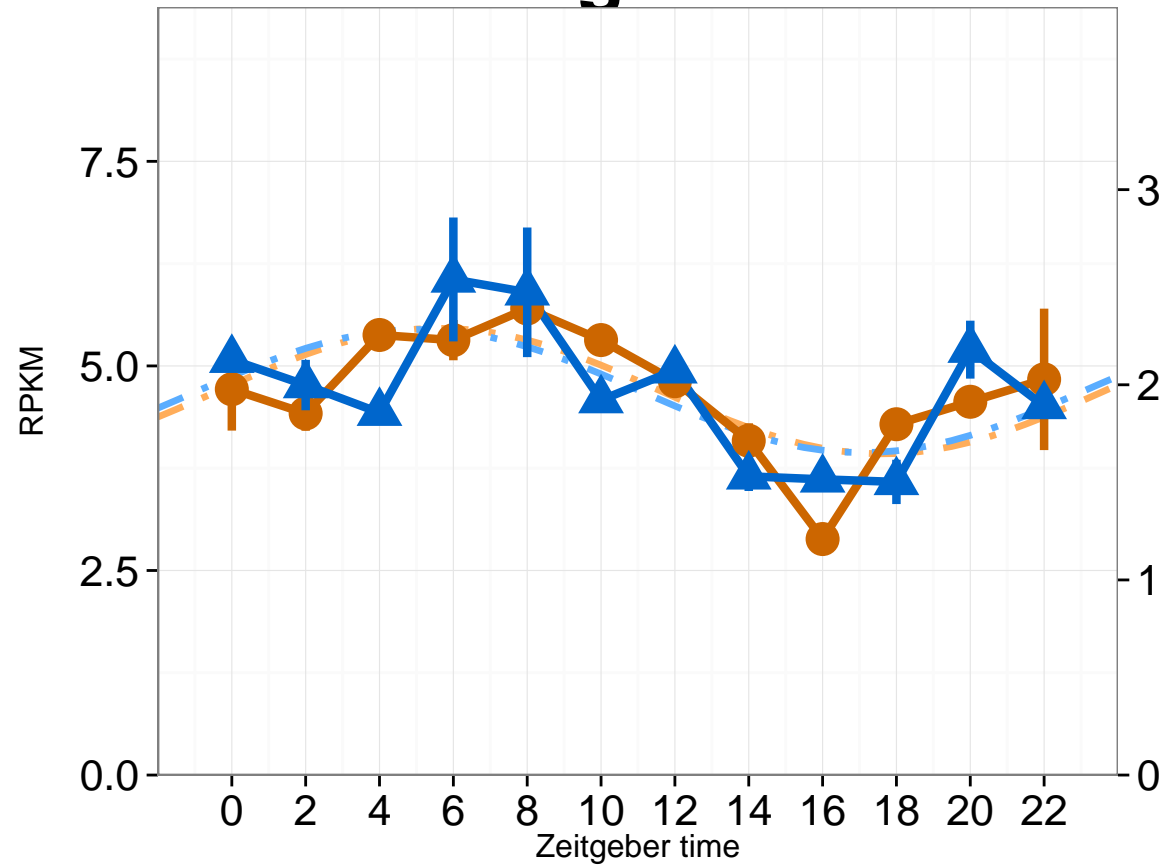

## Rgs12

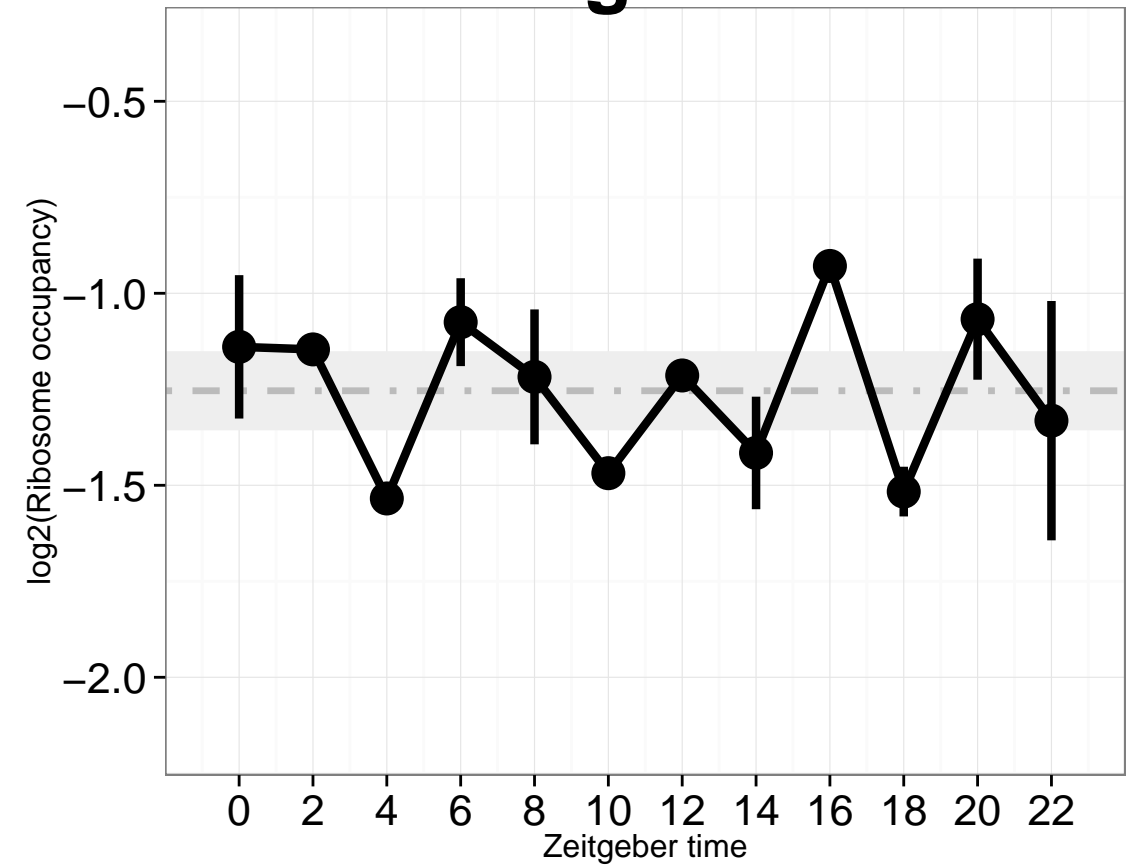

Supplement: Supplementary file 8685 [file 1]

## 4930562C15Rik

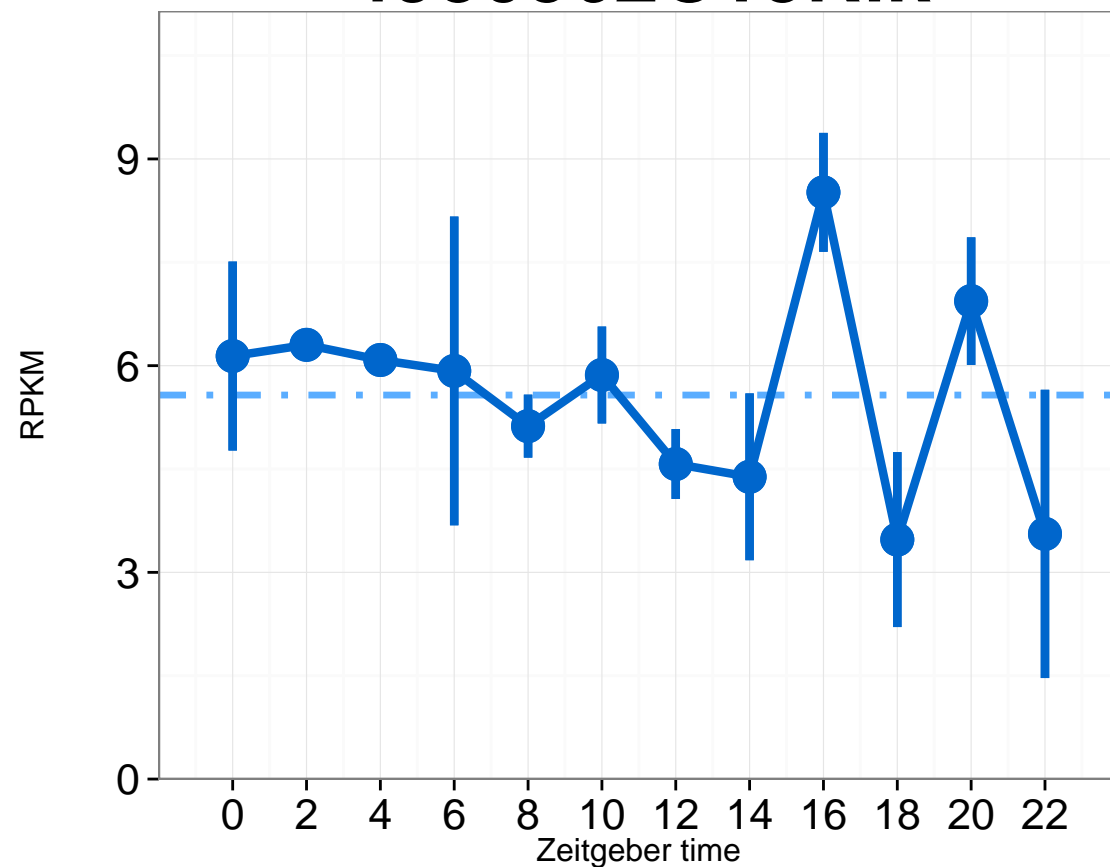

## 4930562C15Rik log2(Ribosome occup

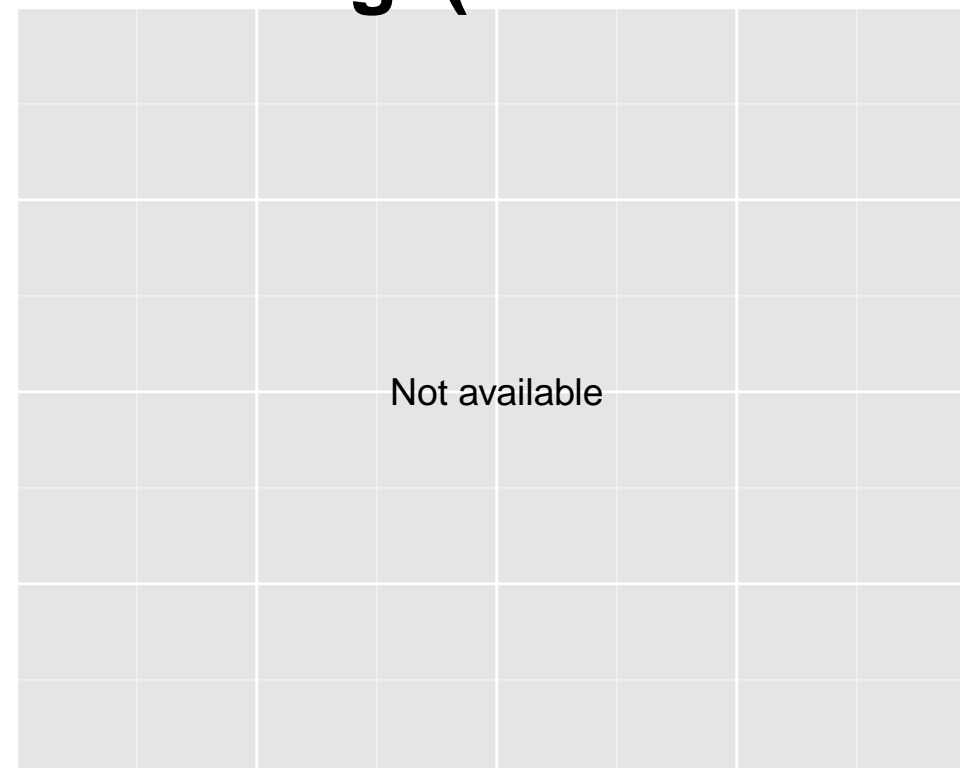

Supplement: Supplementary file 8686 [file 1]

## Psmd5

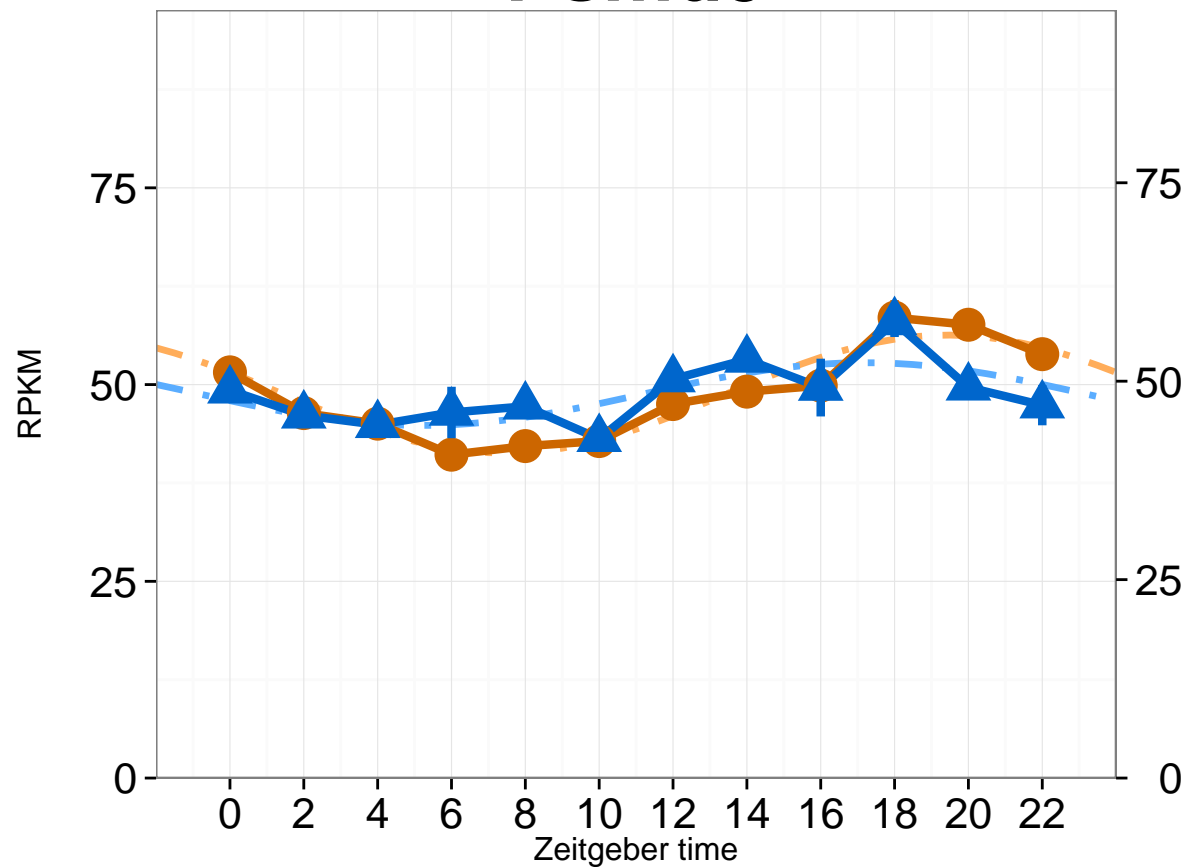

## Psmd5

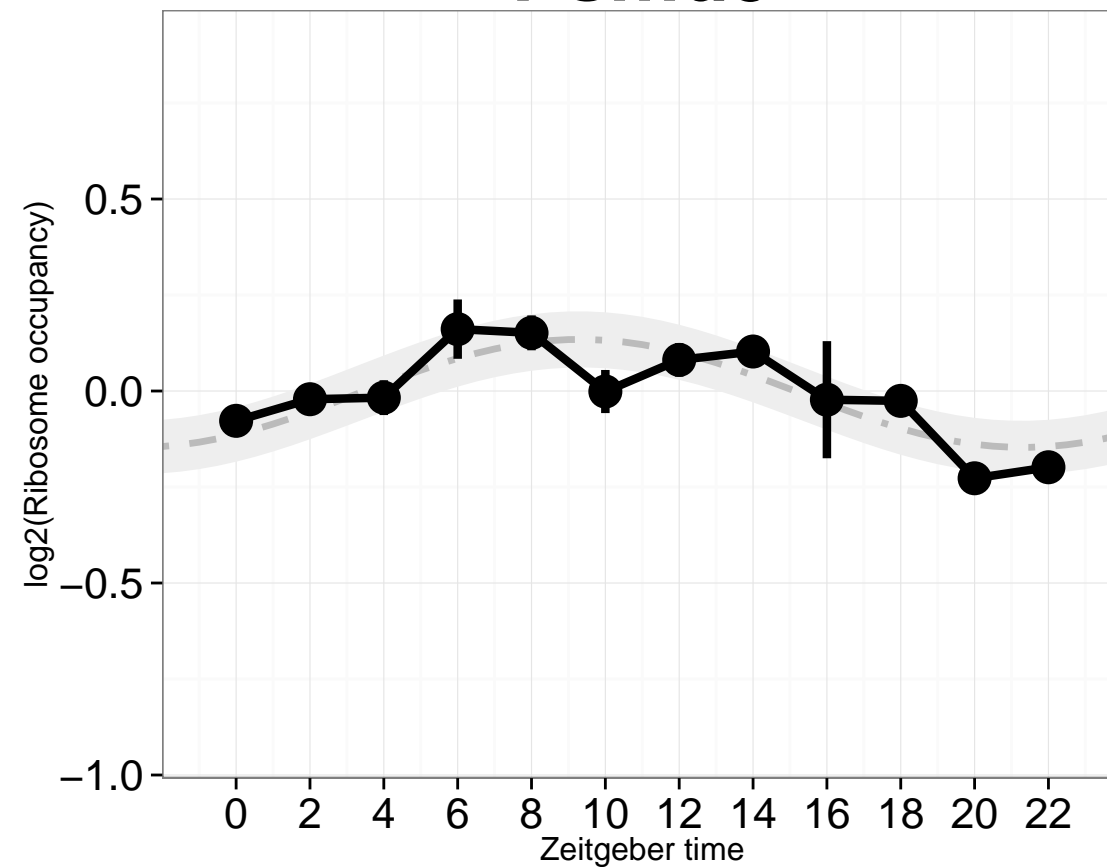

Supplement: Supplementary file 8687 [file 1]

# Tpm1

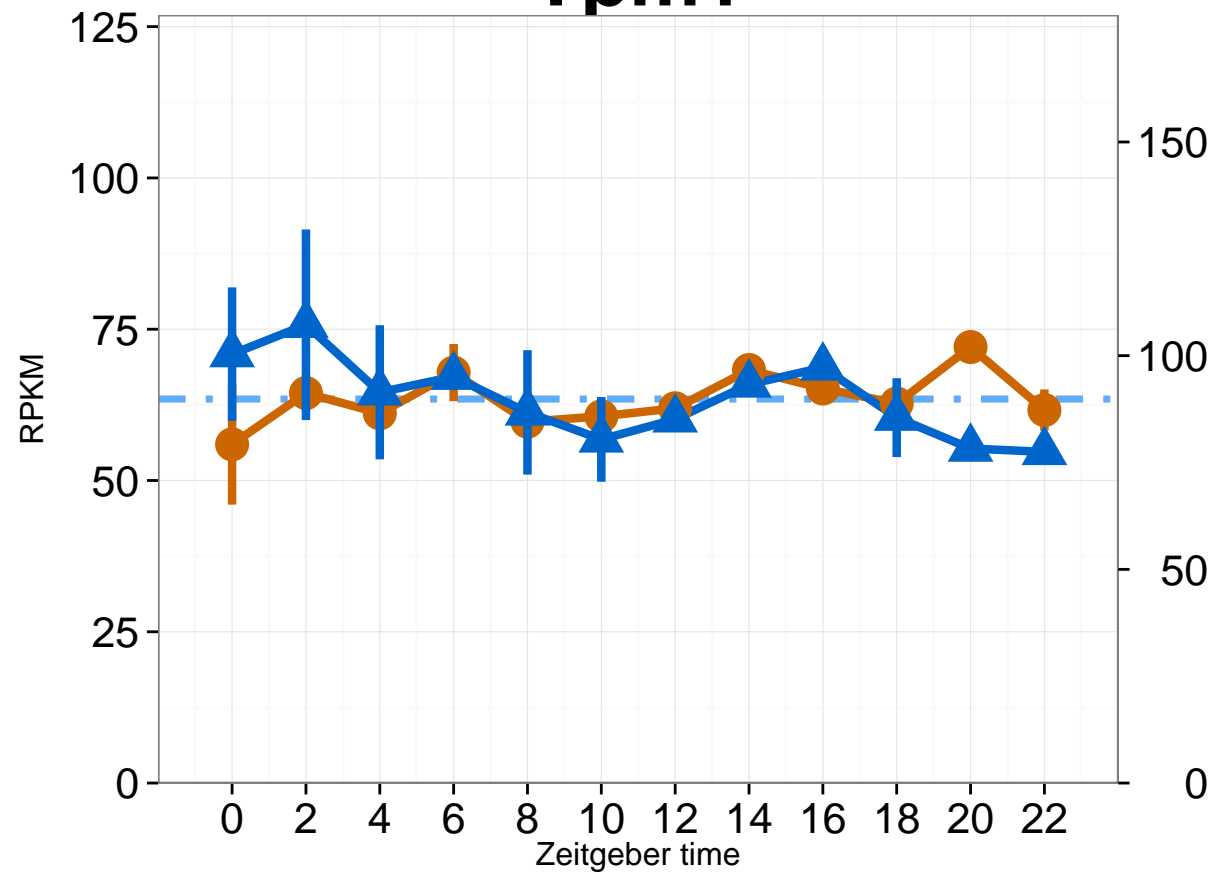

# Tpm1

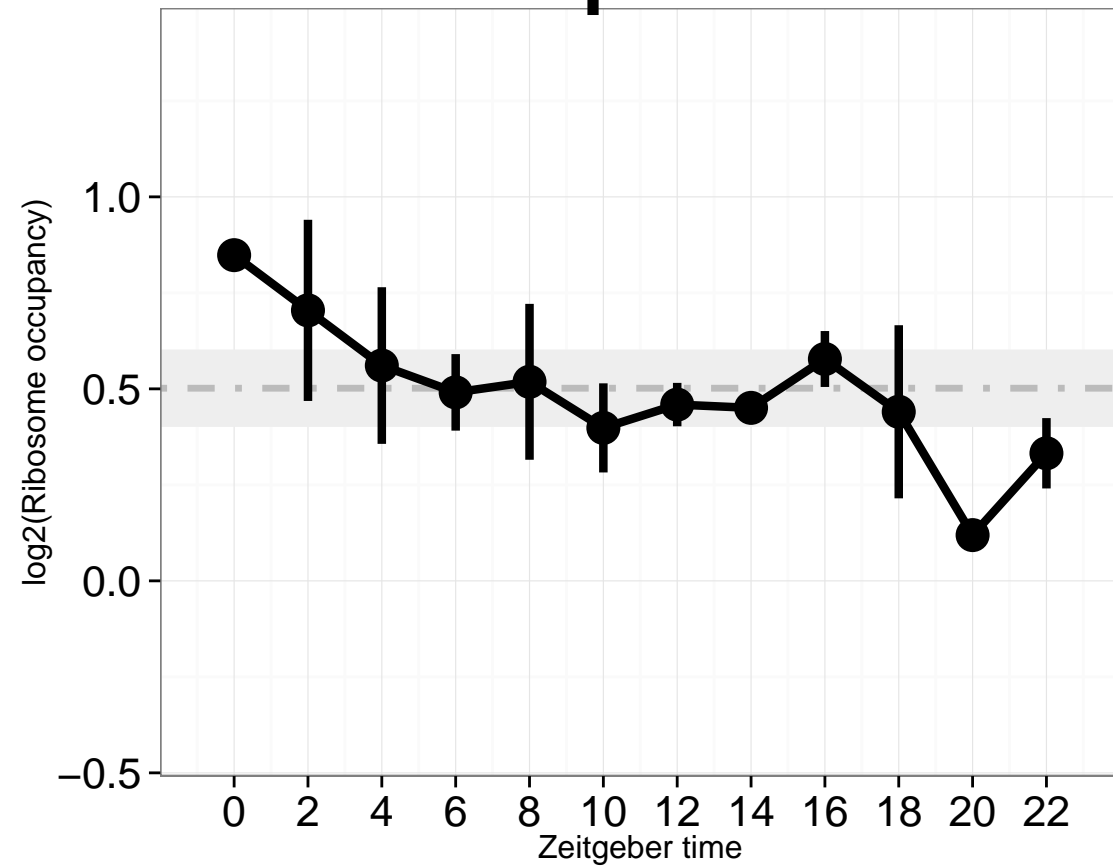

Supplement: Supplementary file 8688 [file 1]

# Larp1b

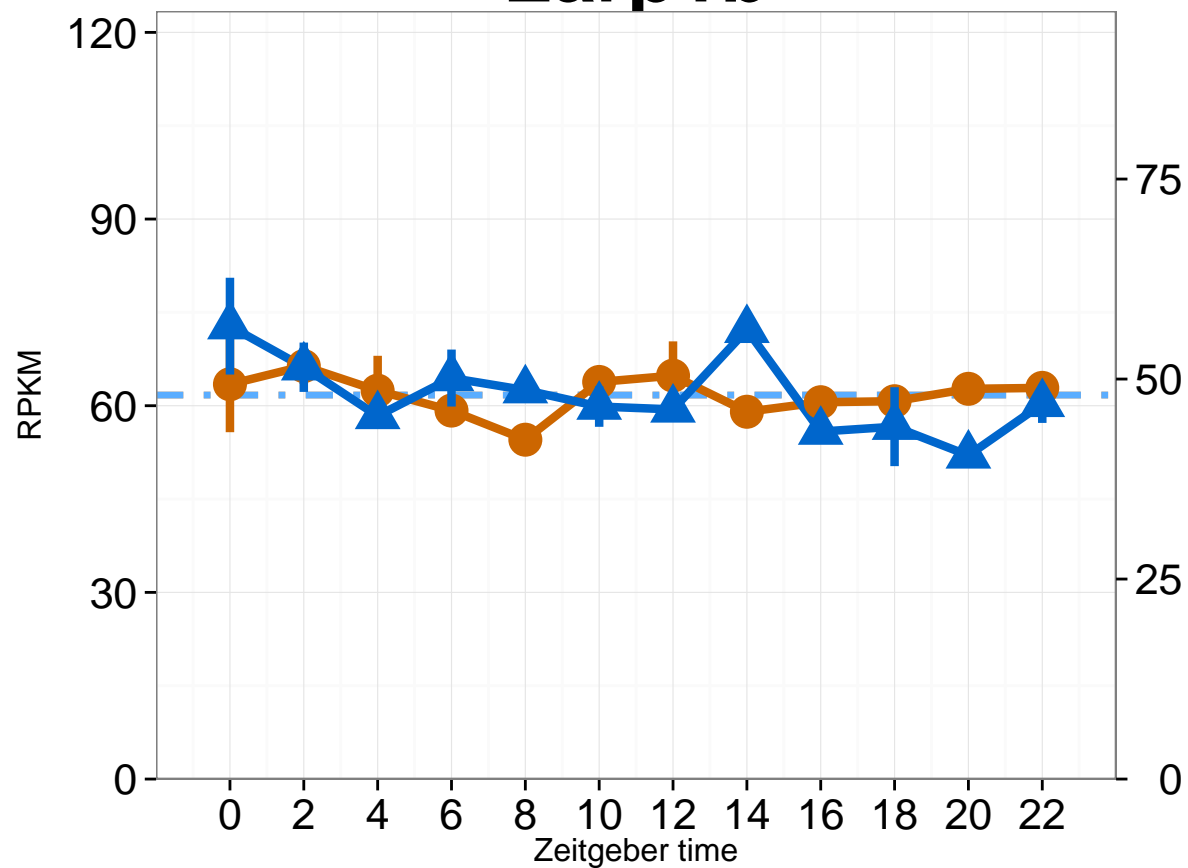

# Larp1b

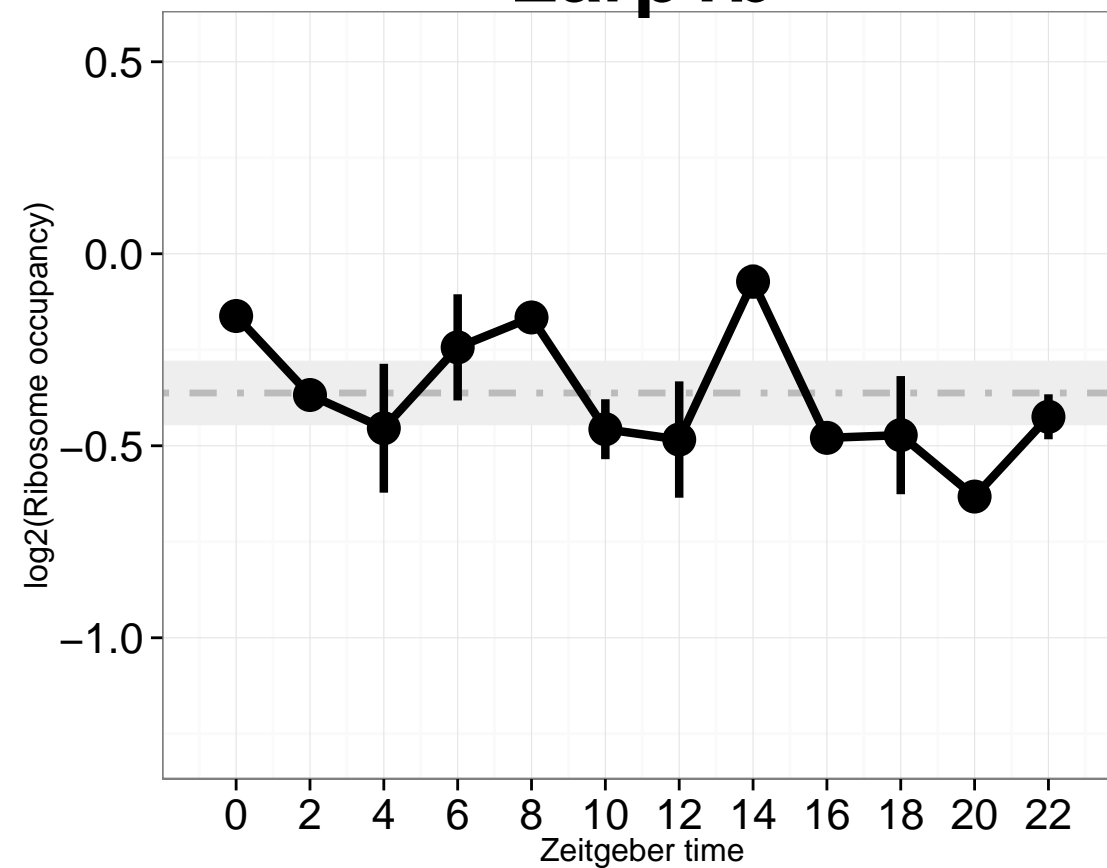

Supplement: Supplementary file 8689 [file 1]

# Akr1b3

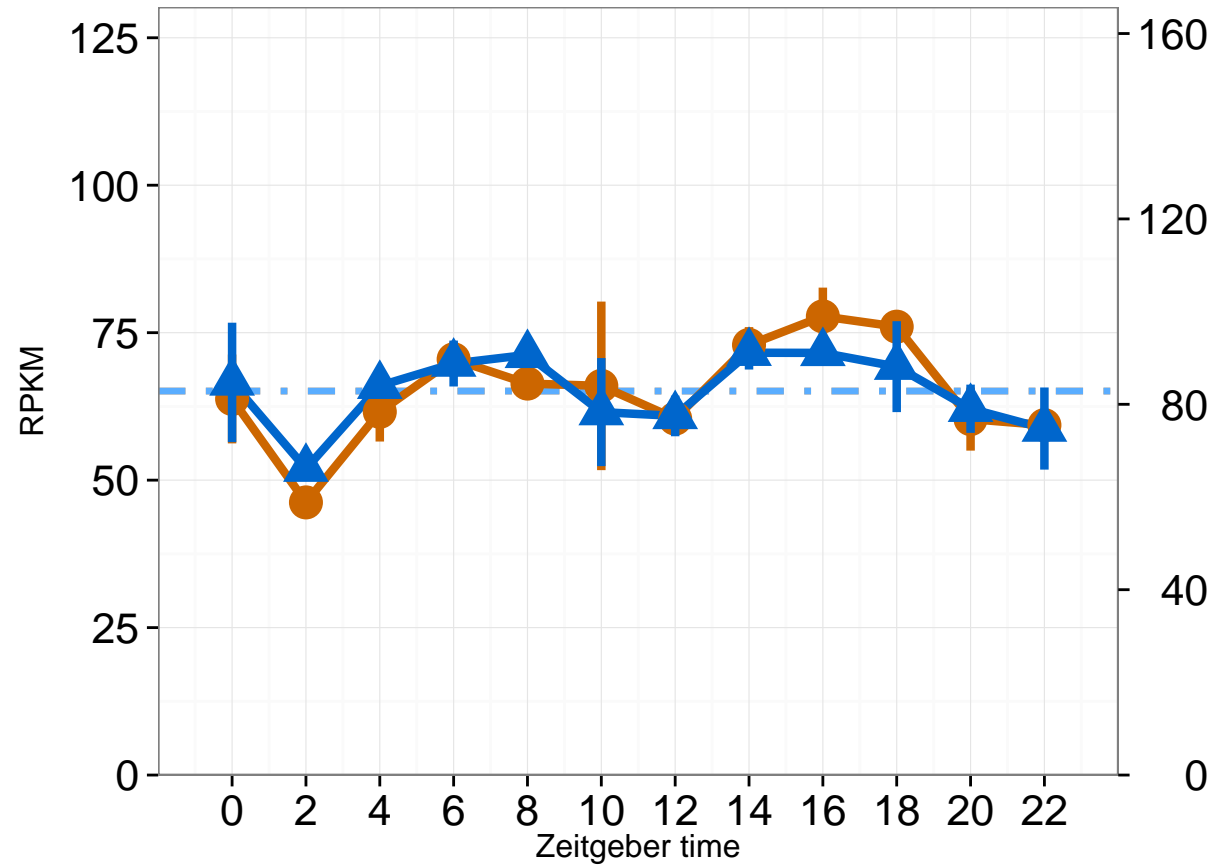

# Akr1b3

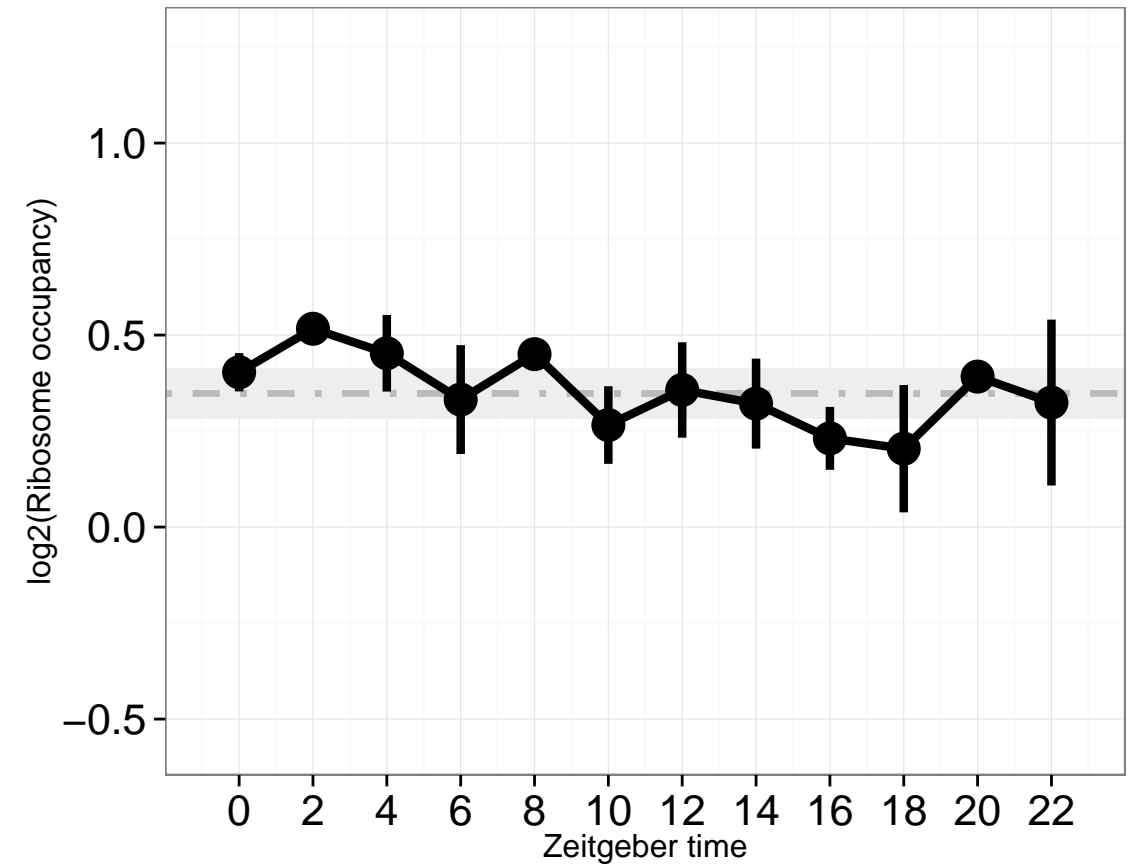

Supplement: Supplementary file 8690 [file 1]

# Pacrg

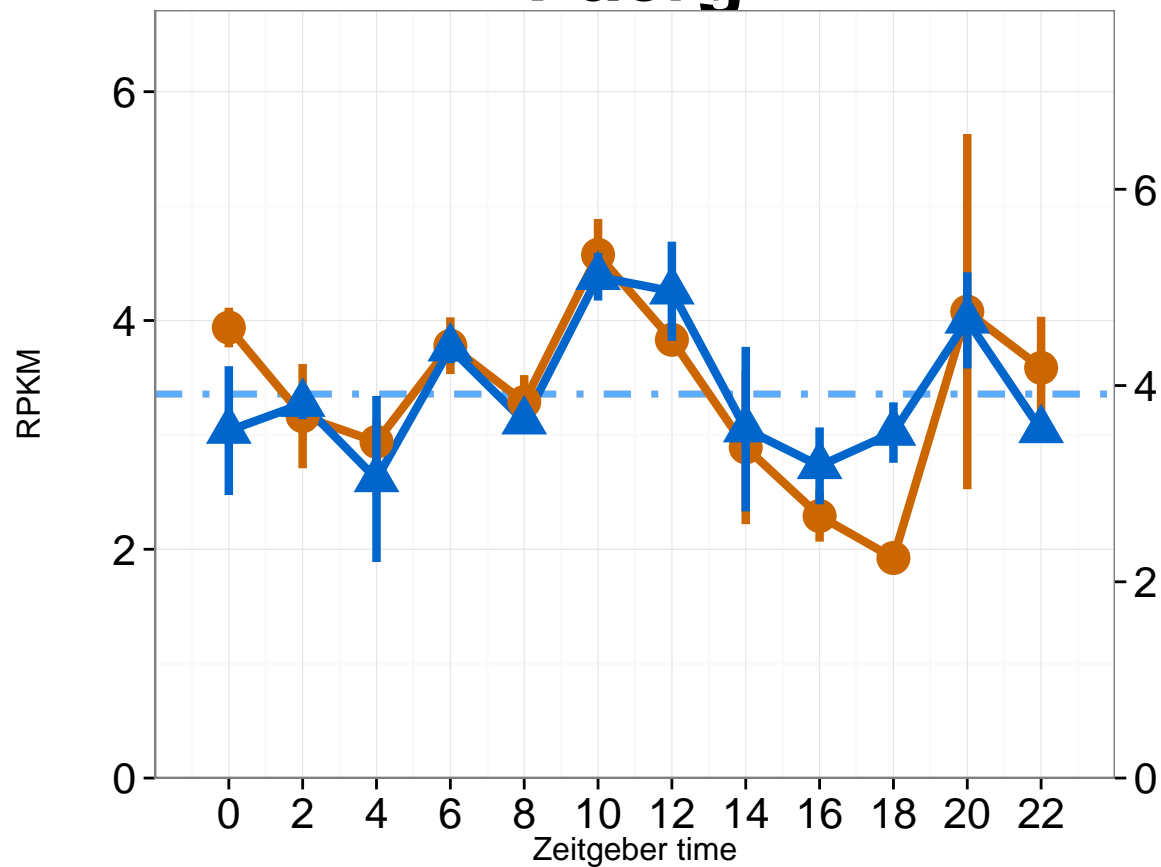

# Pacrg

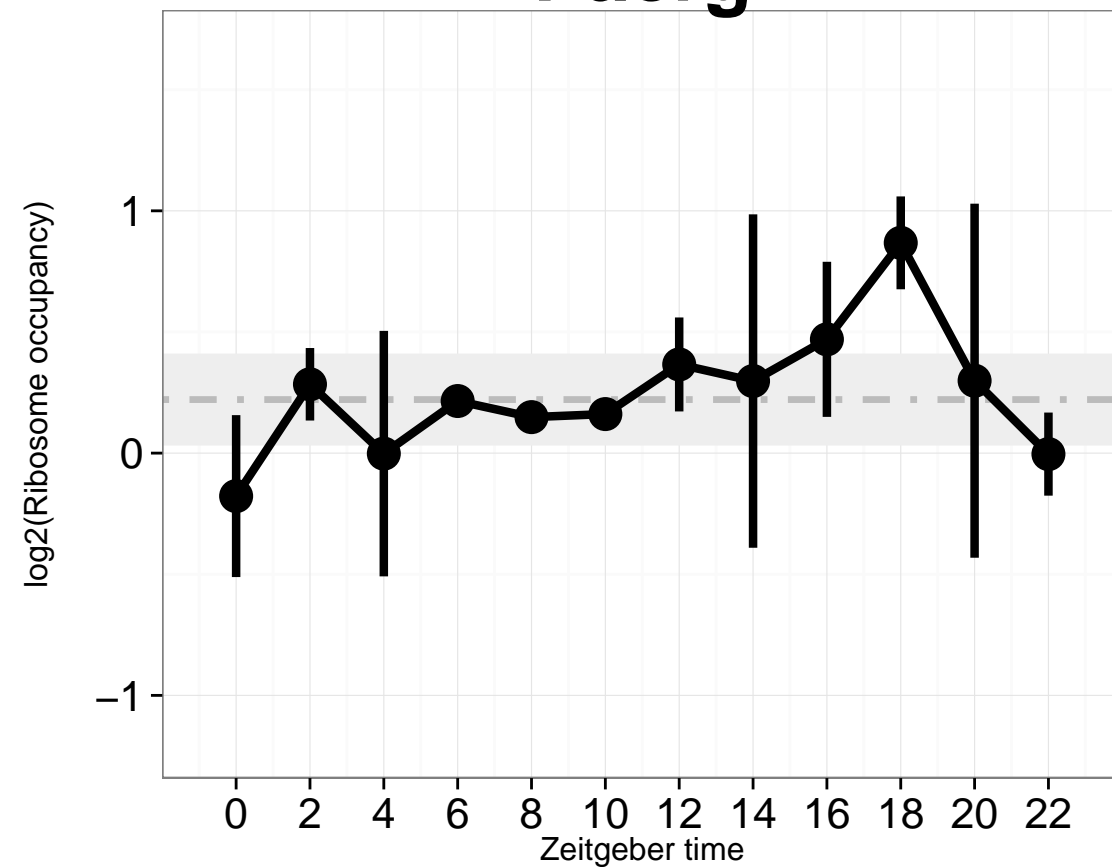

Supplement: Supplementary file 8691 [file 1]

# Stt3a

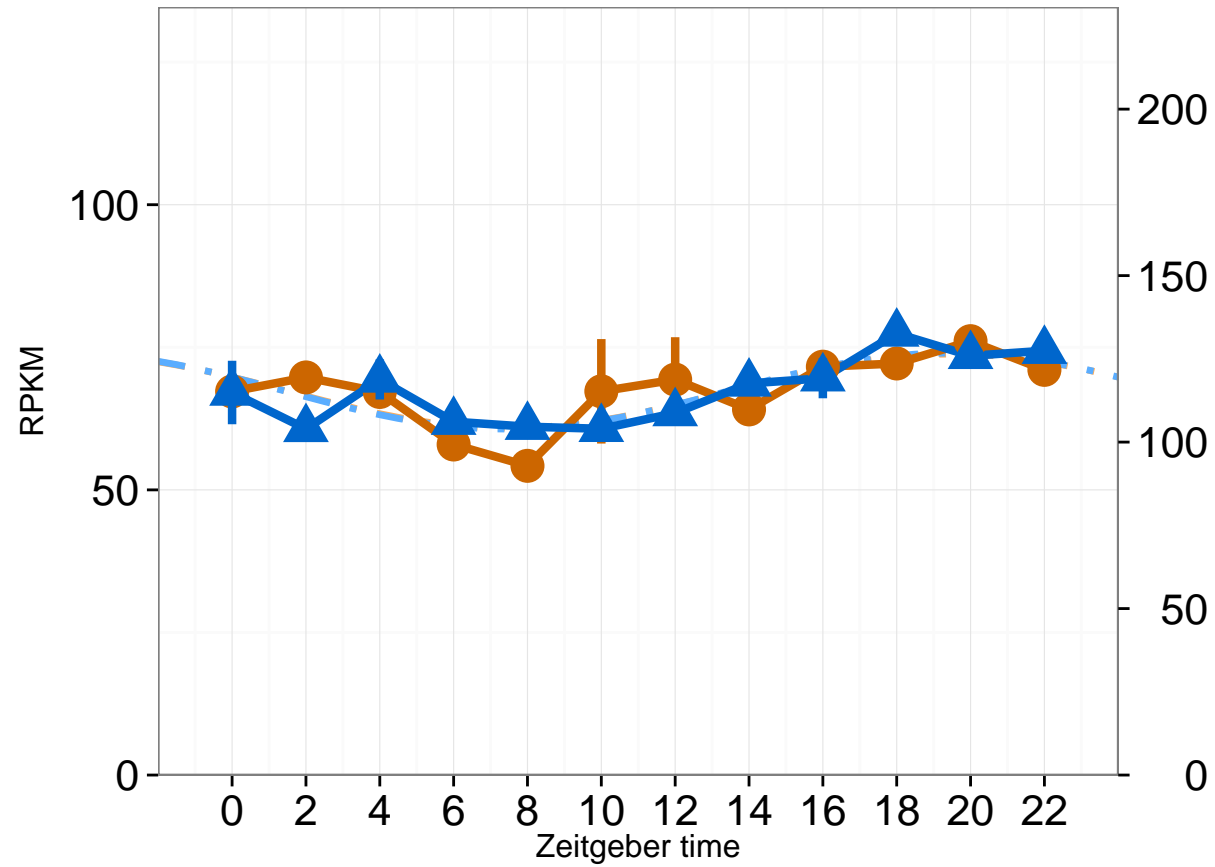

# Stt3a

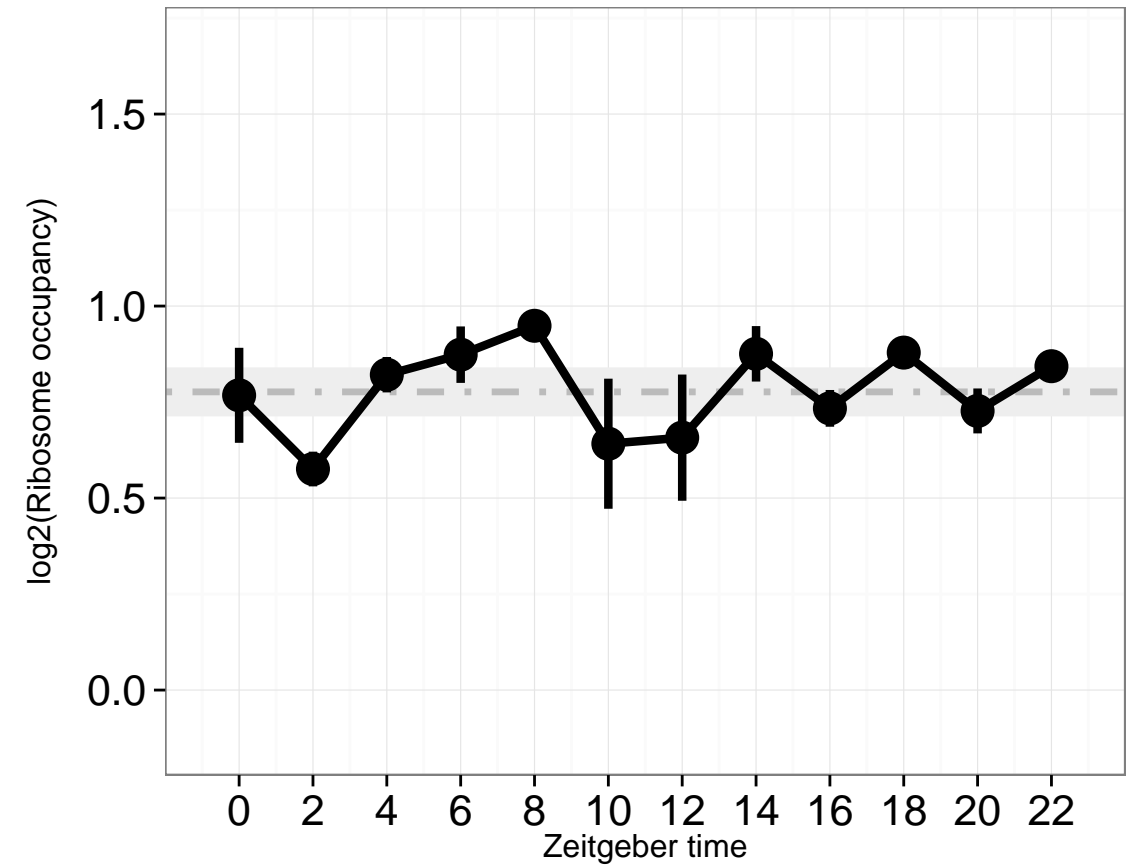

Supplement: Supplementary file 8692 [file 1]

# Atp6ap2

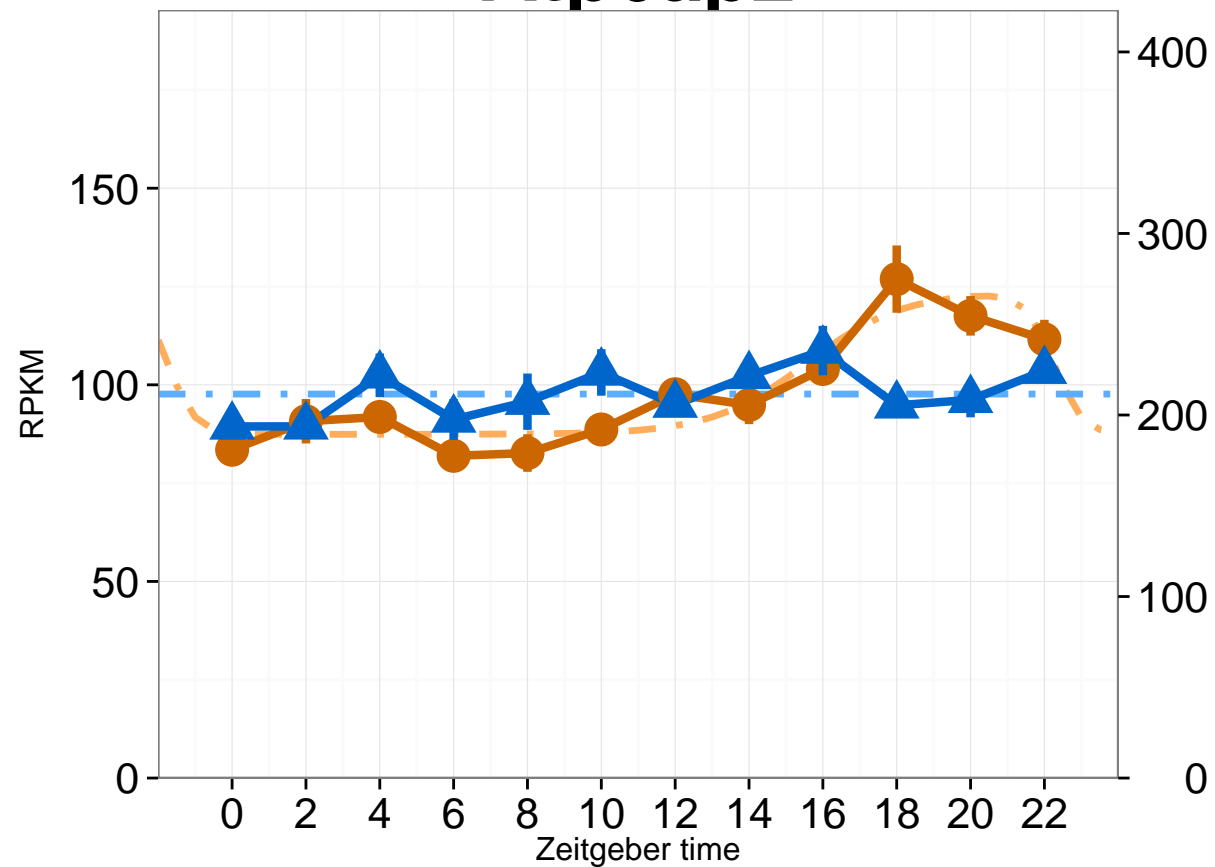

# Atp6ap2

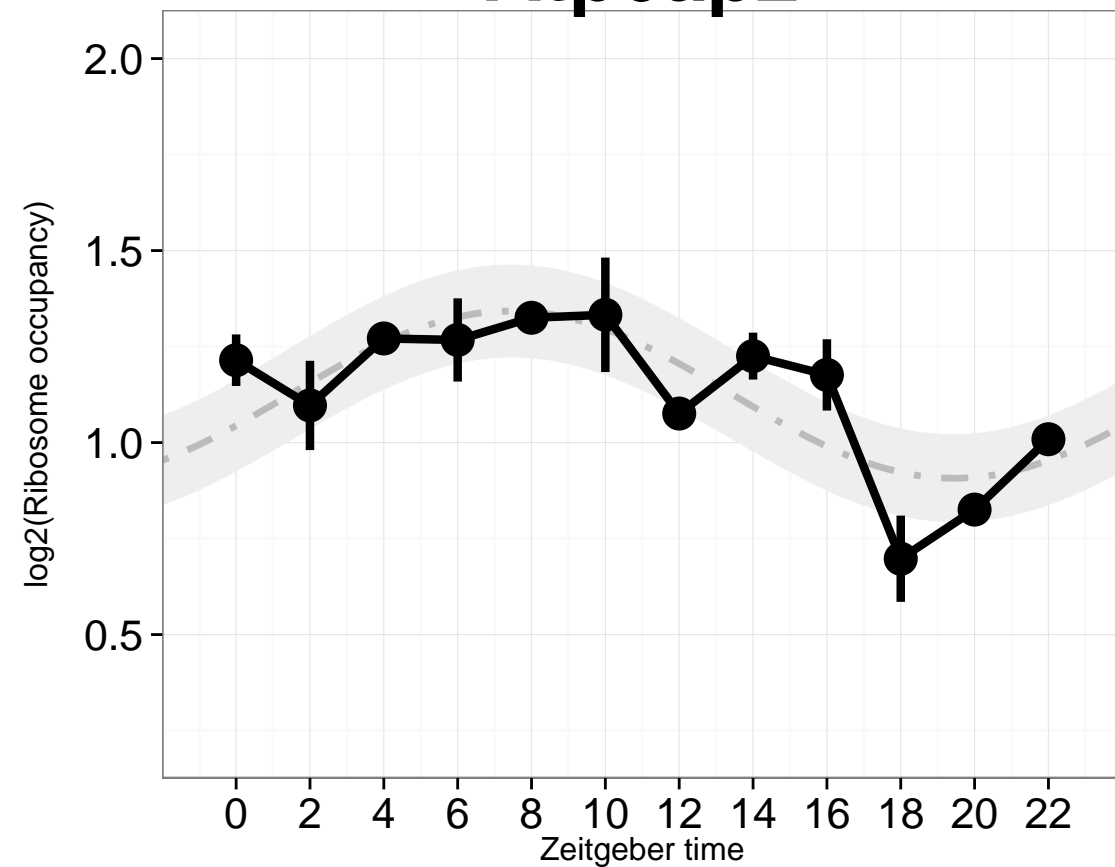

Supplement: Supplementary file 8693 [file 1]

# Pa2g4

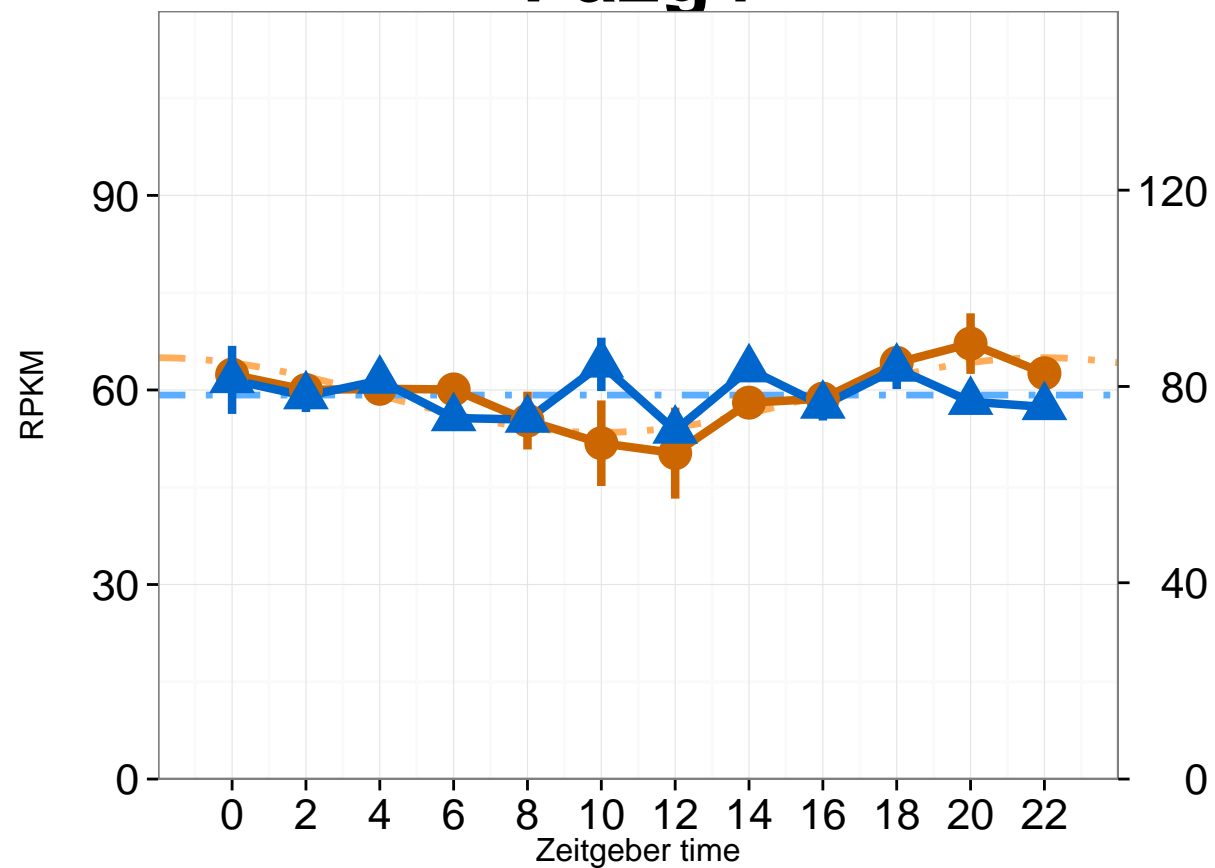

# Pa2g4

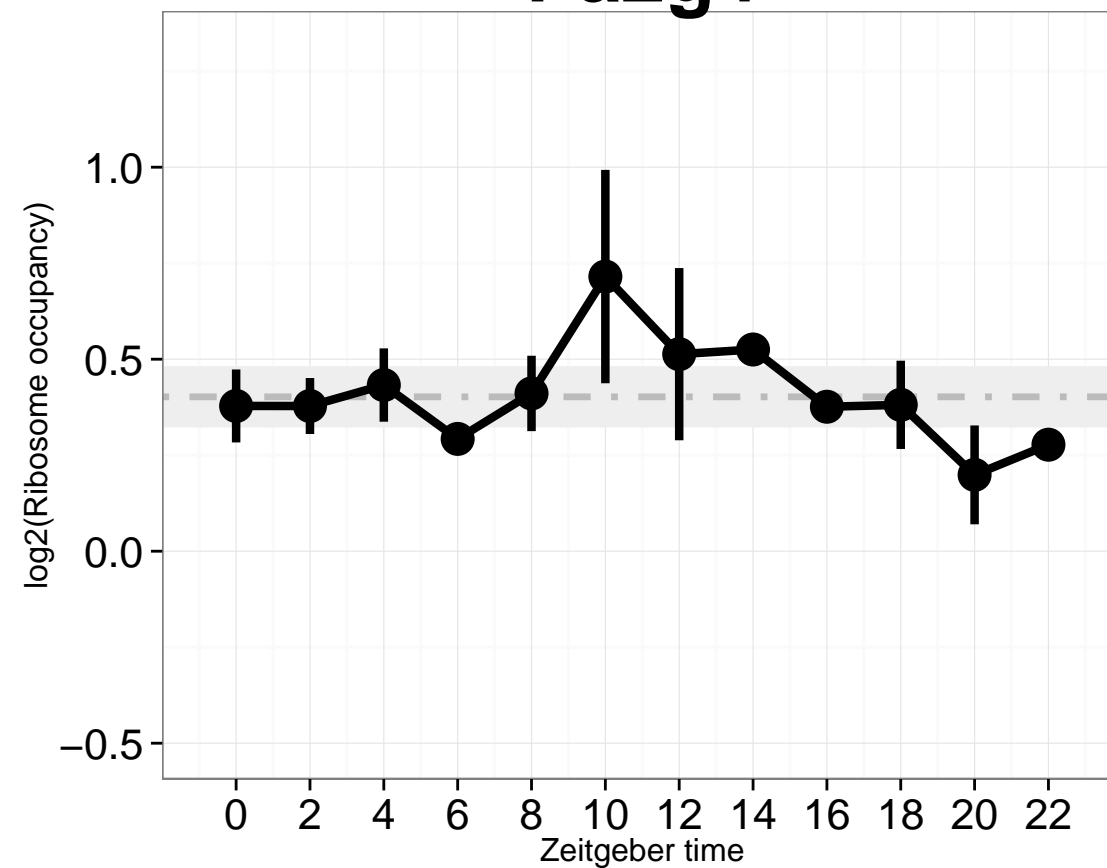

Supplement: Supplementary file 8694 [file 1]

# D10Bwg1379e

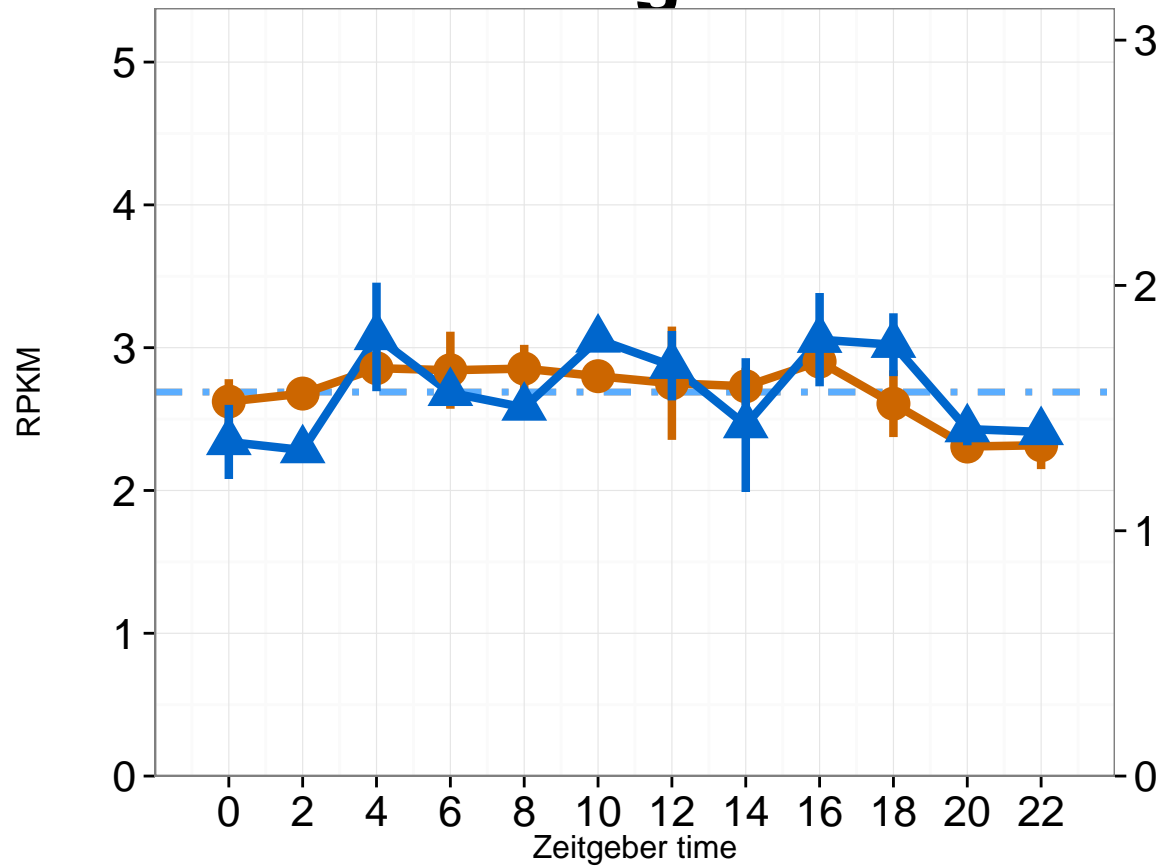

# D10Bwg1379e

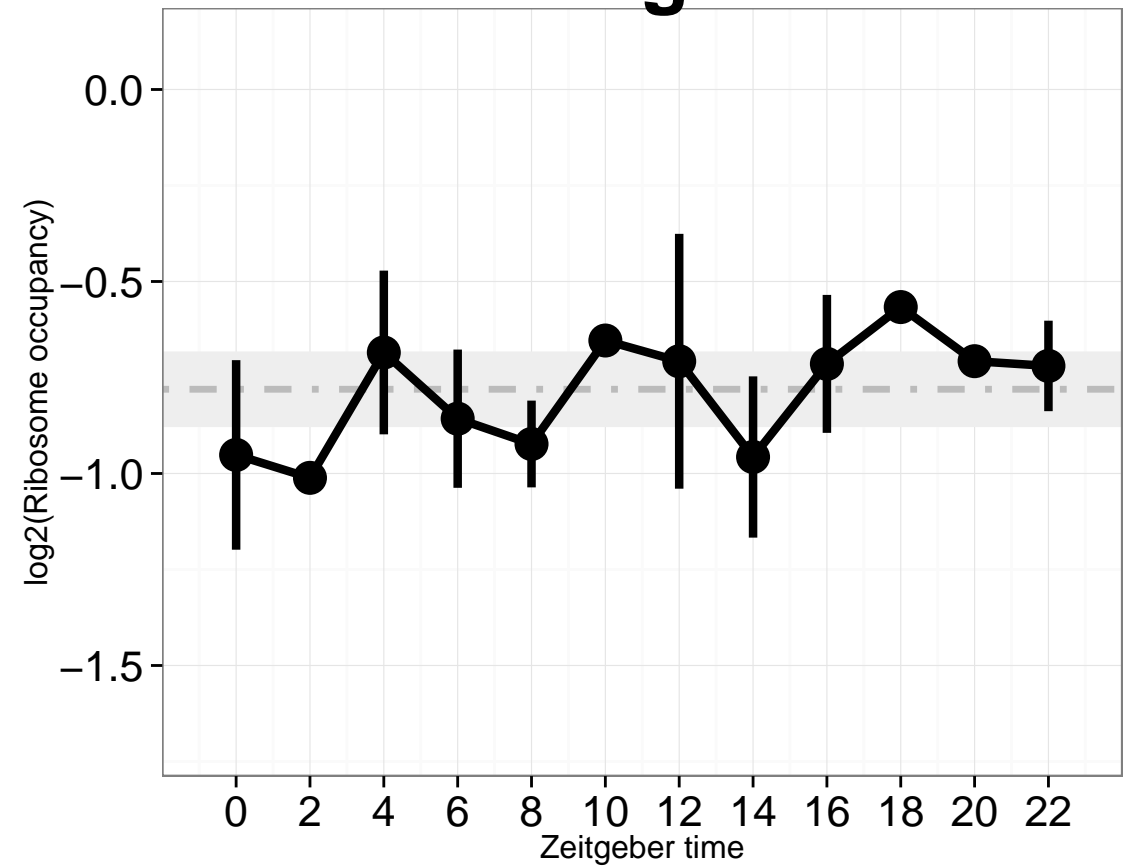

Supplement: Supplementary file 8695 [file 1]

# Slc29a1

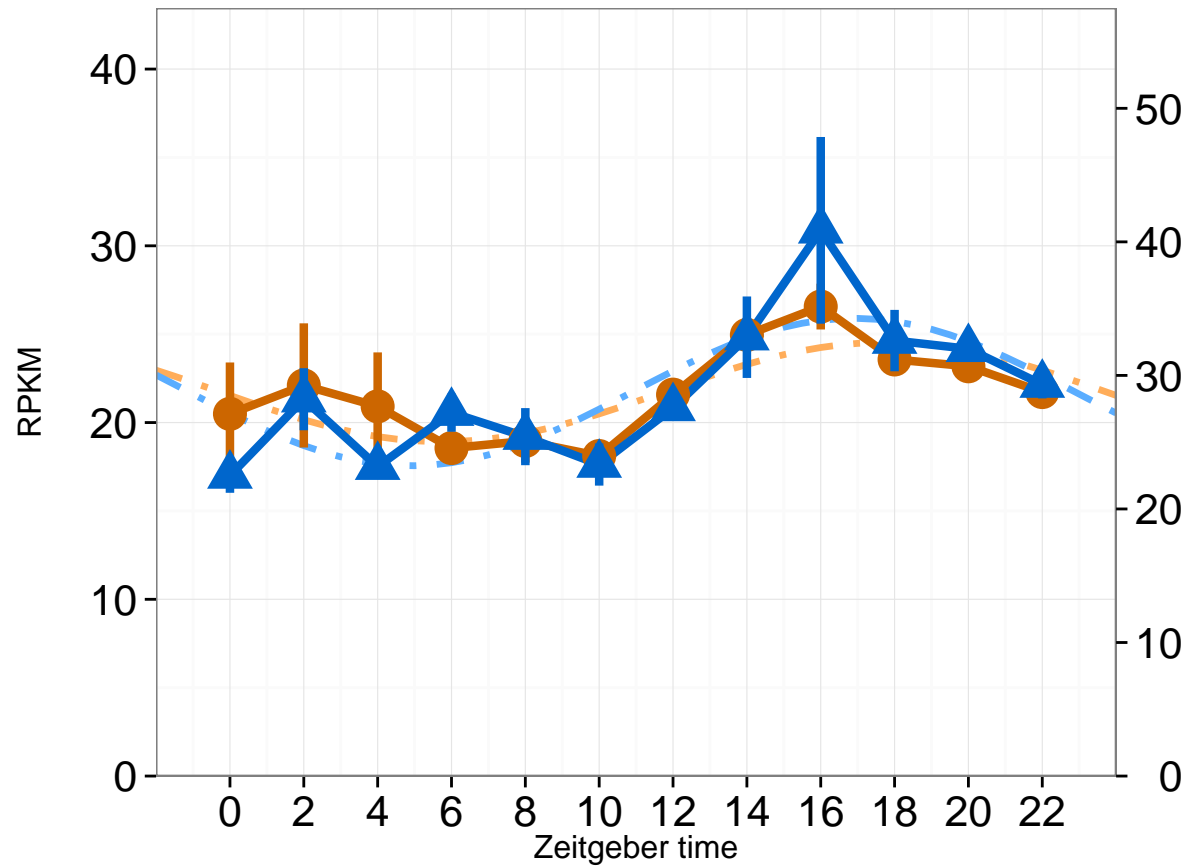

# Slc29a1

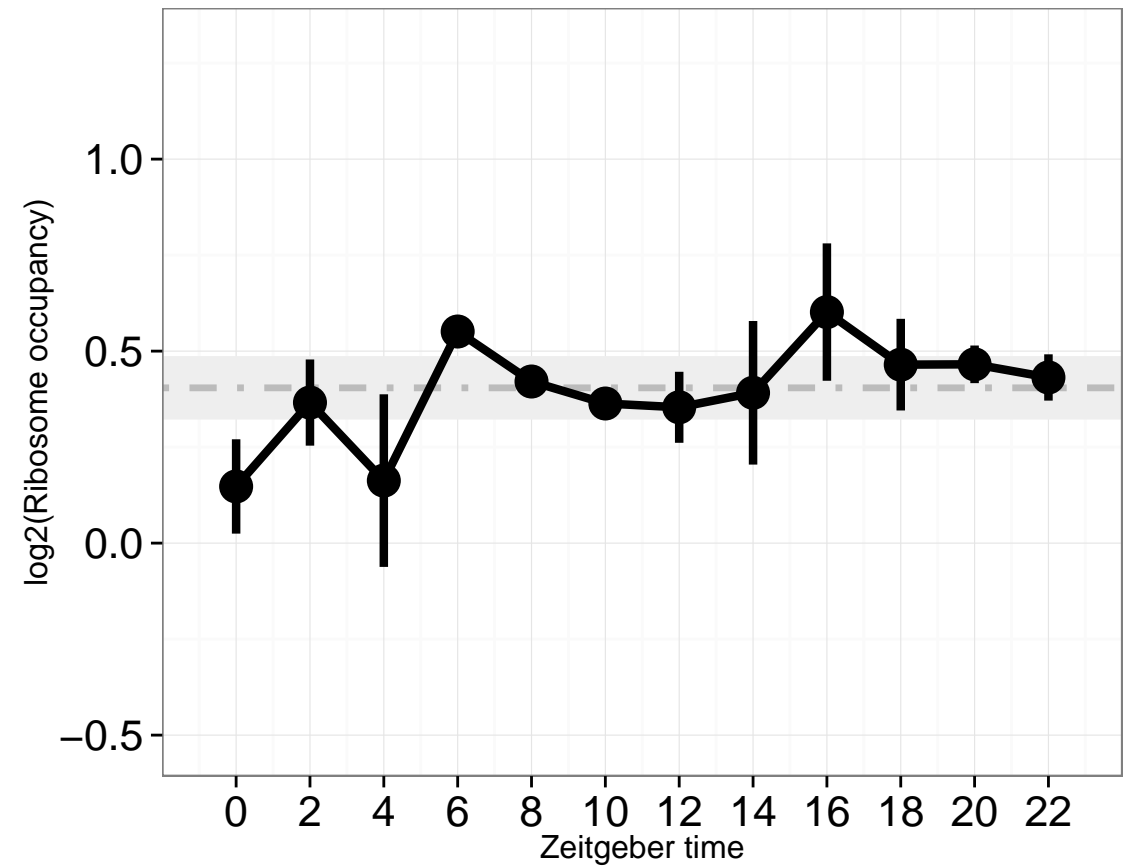

Supplement: Supplementary file 8696 [file 1]

## Arf1

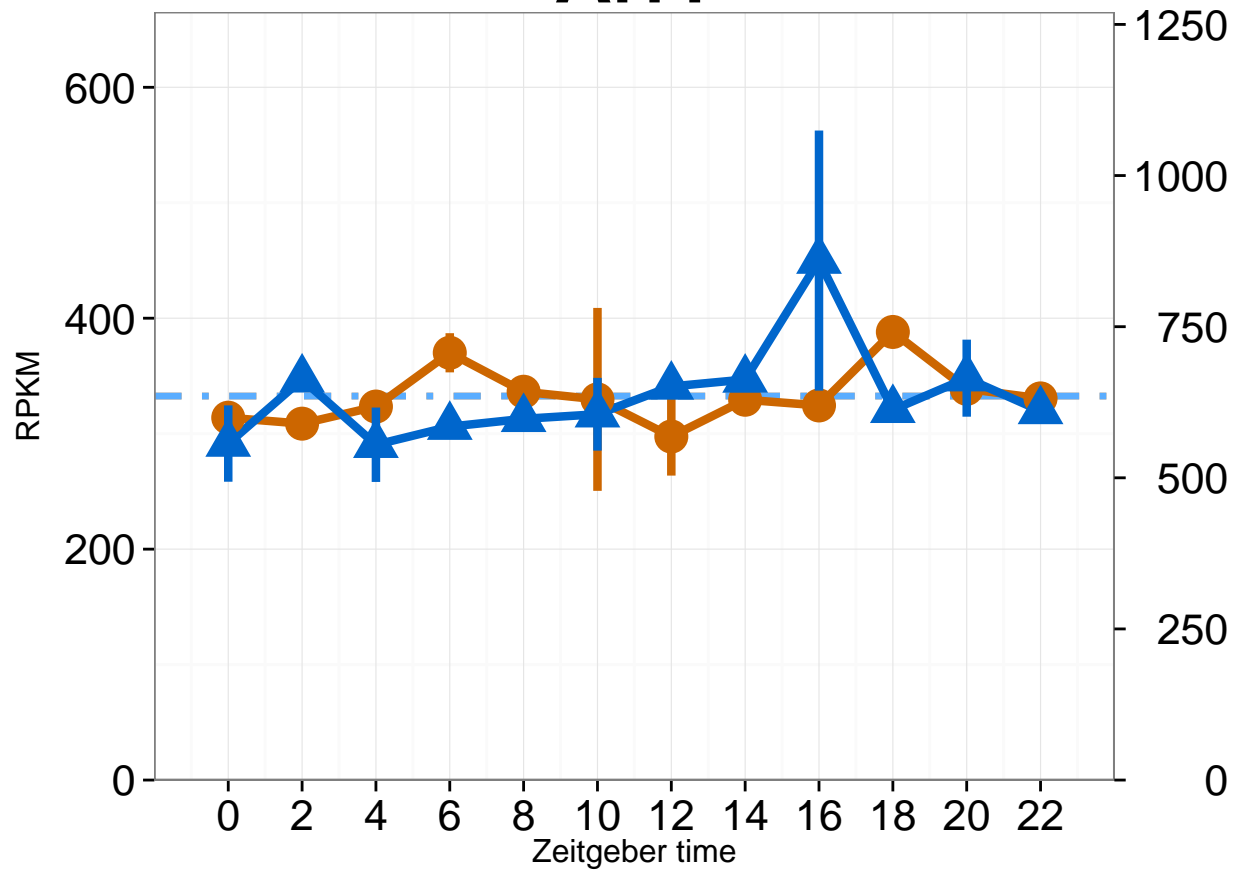

## Arf1

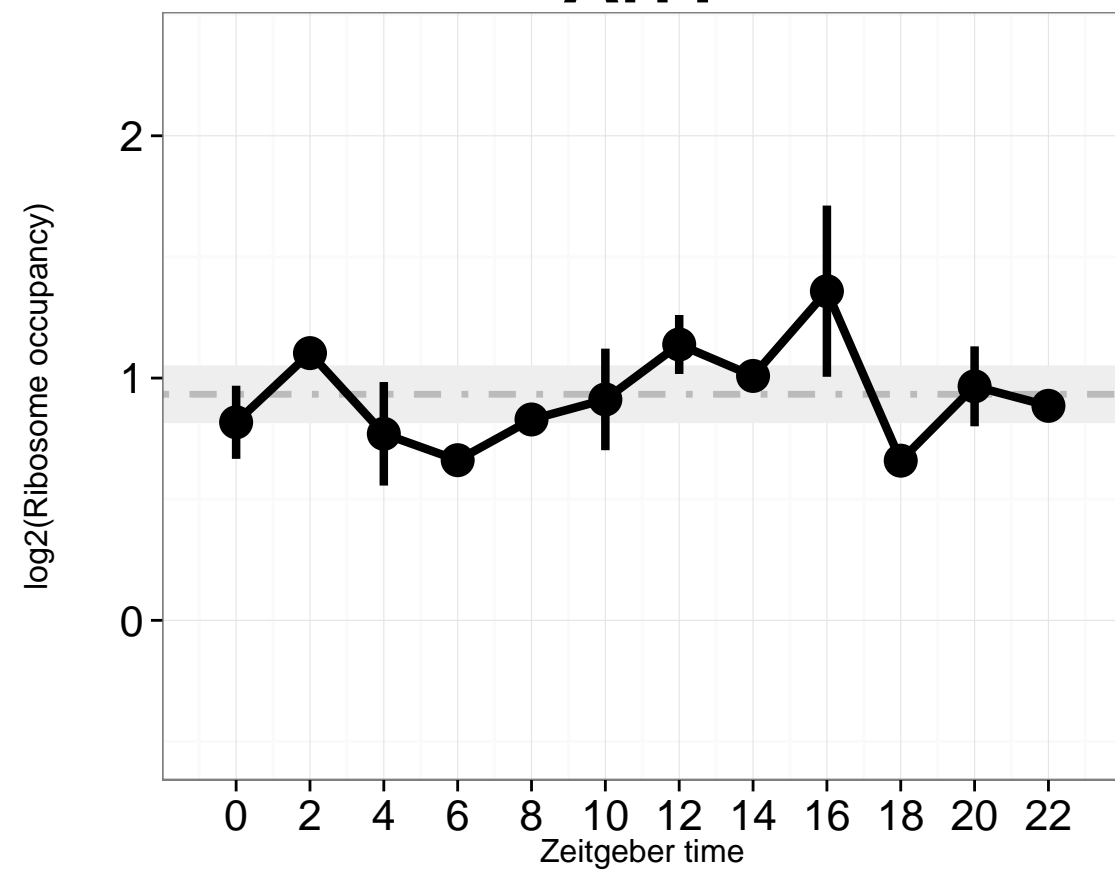

Supplement: Supplementary file 8697 [file 1]

## Cgn

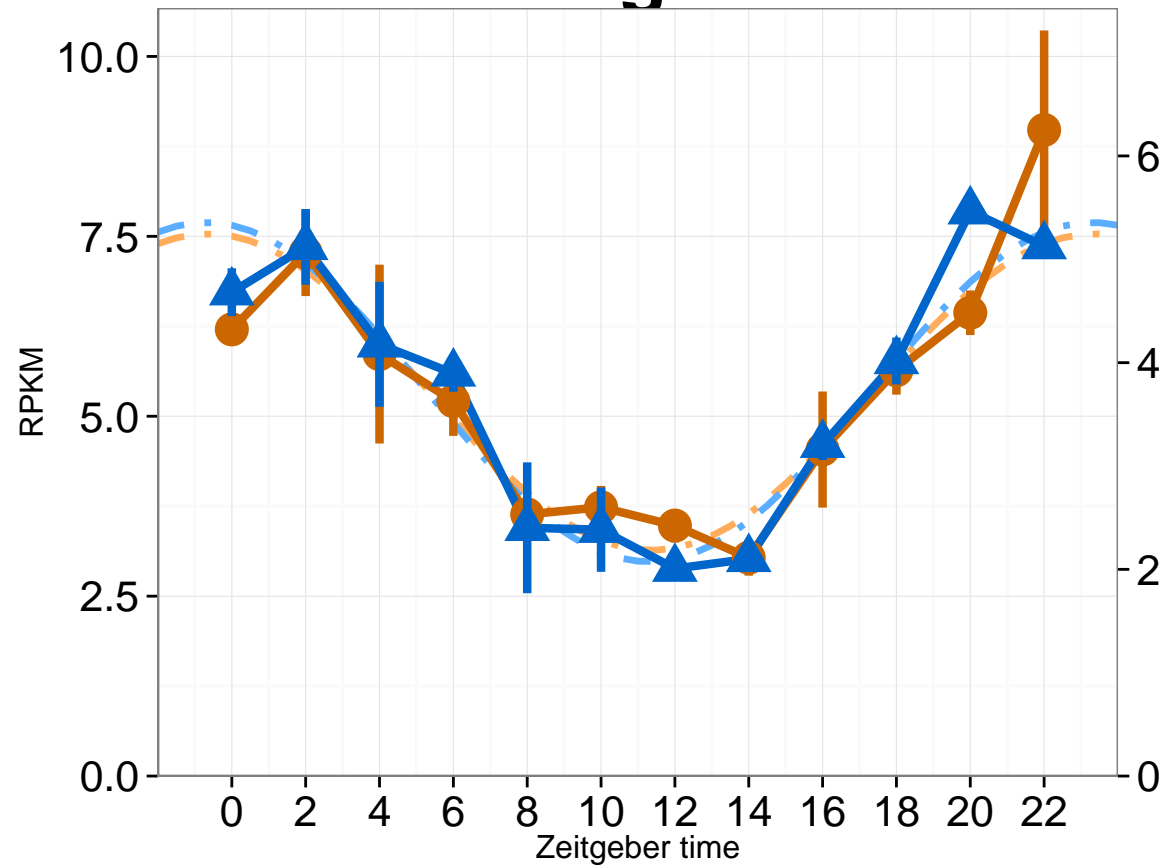

## Cgn

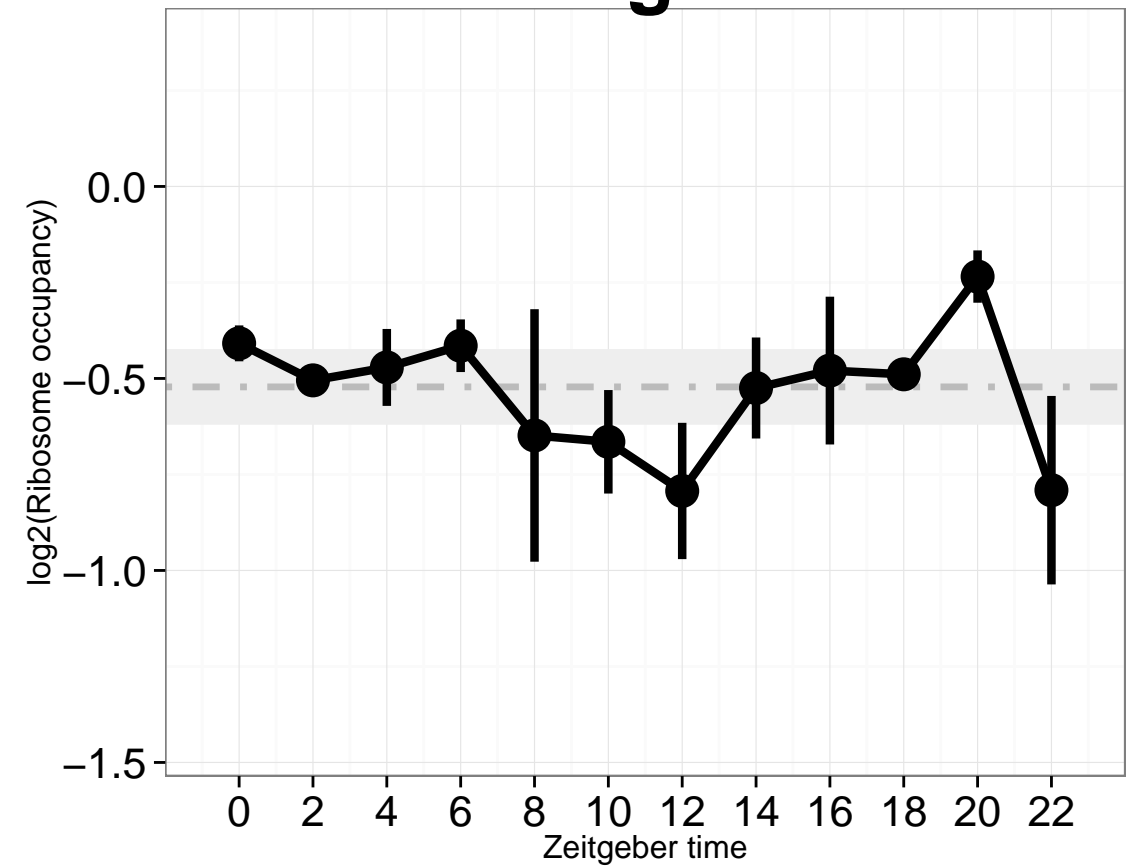

Supplement: Supplementary file 8698 [file 1]

## Parp12

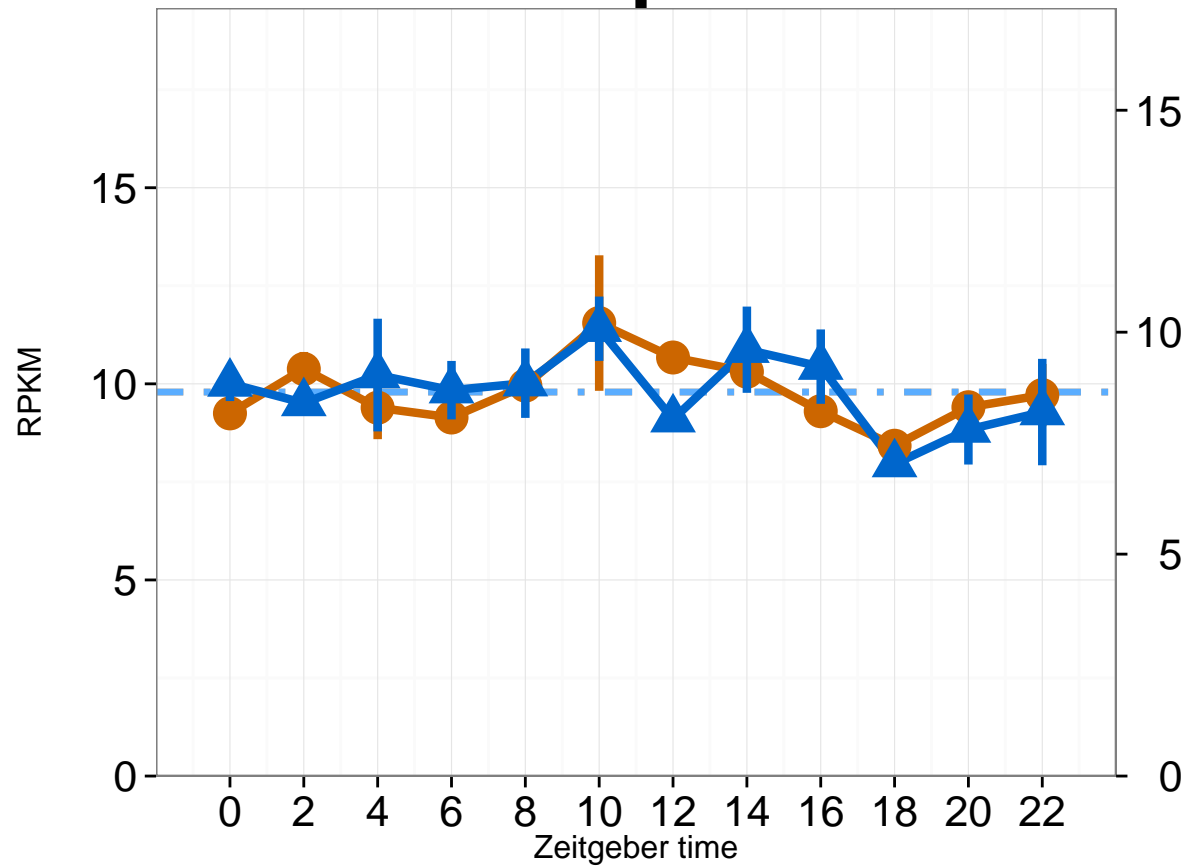

## Parp12

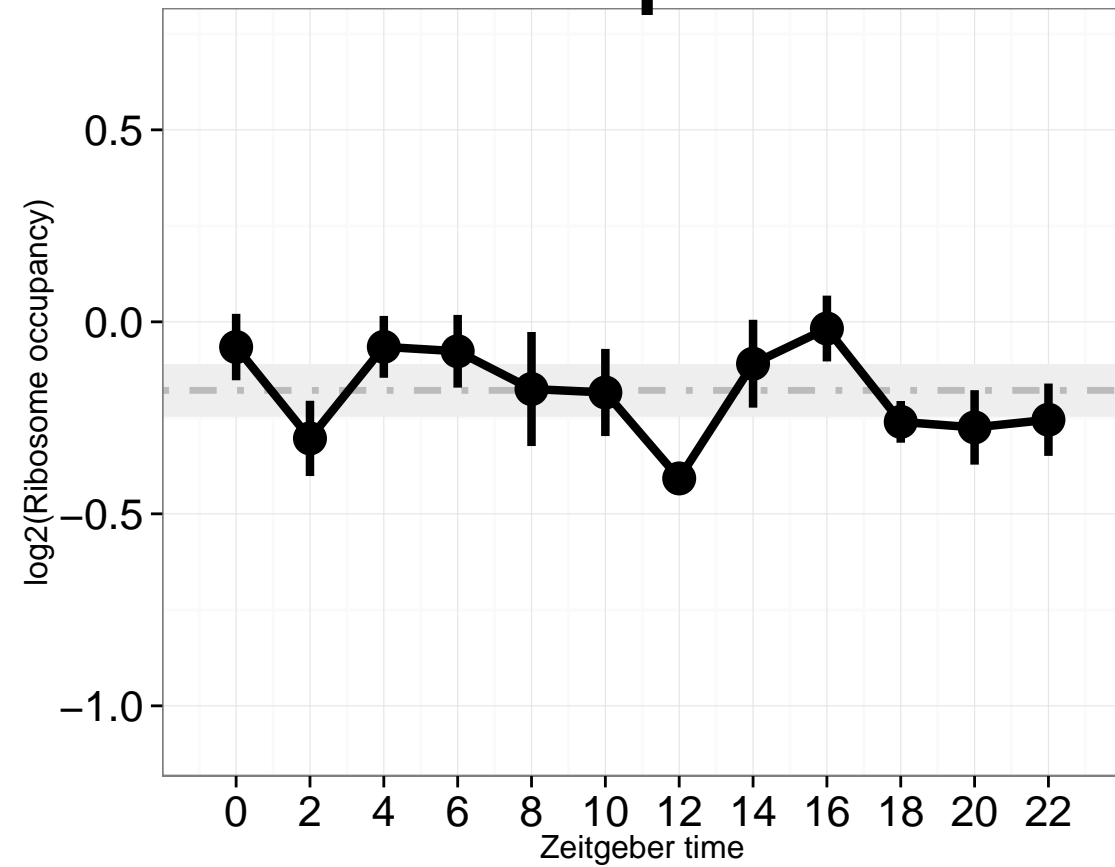

Supplement: Supplementary file 8699 [file 1]

## 2610528J11Rik

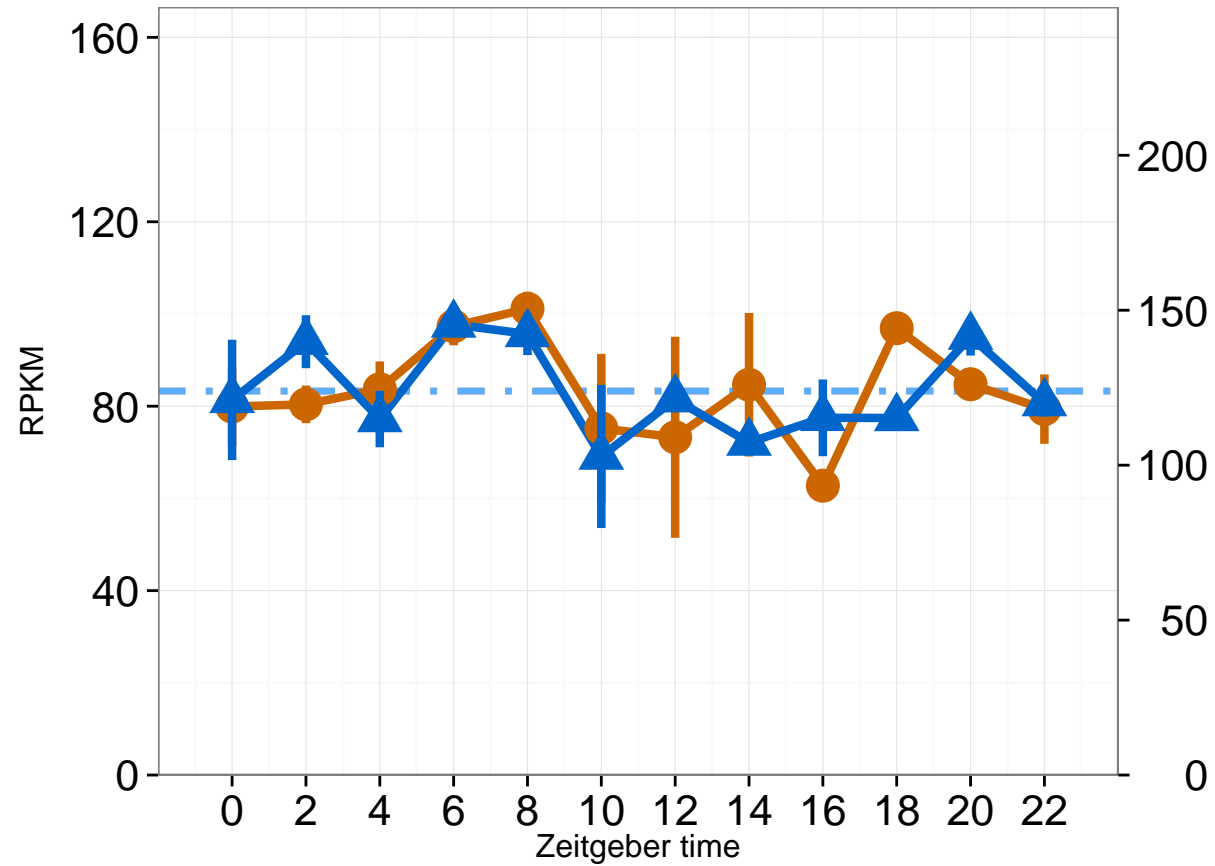

## 2610528J11Rik

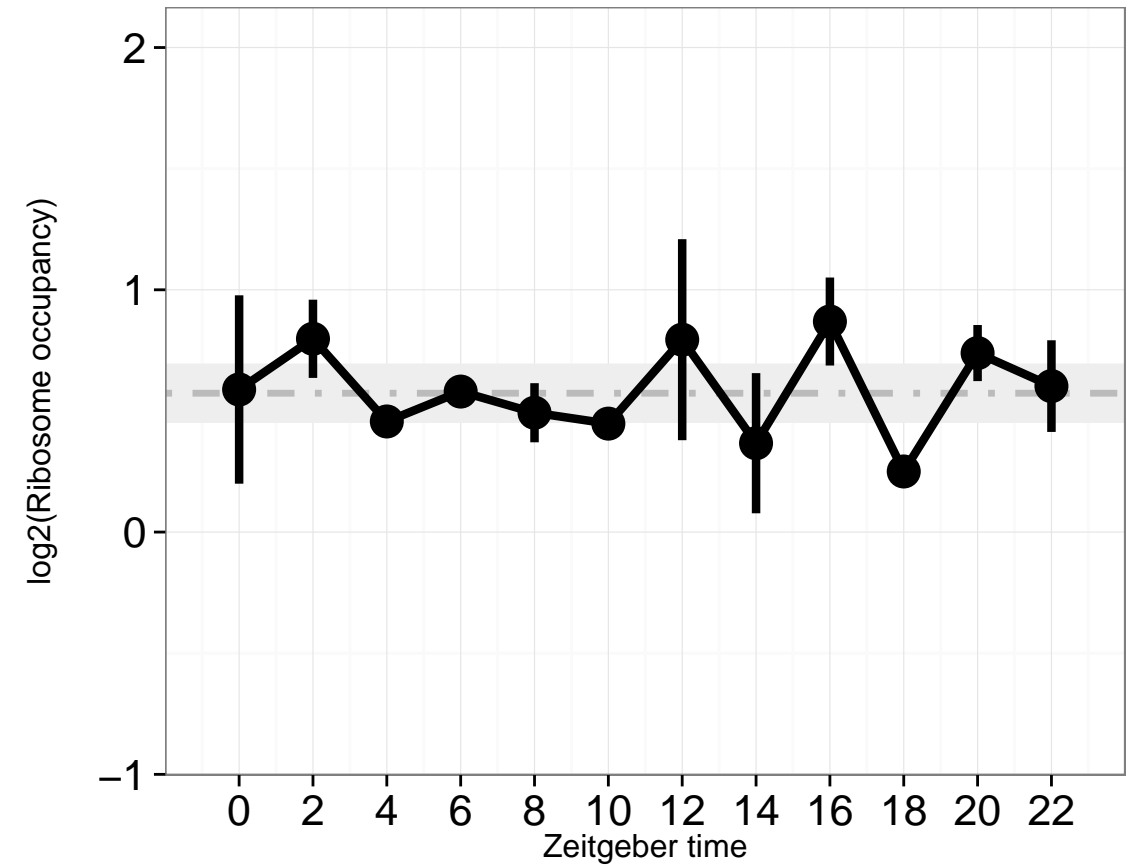

Supplement: Supplementary file 8700 [file 1]

## Exo5

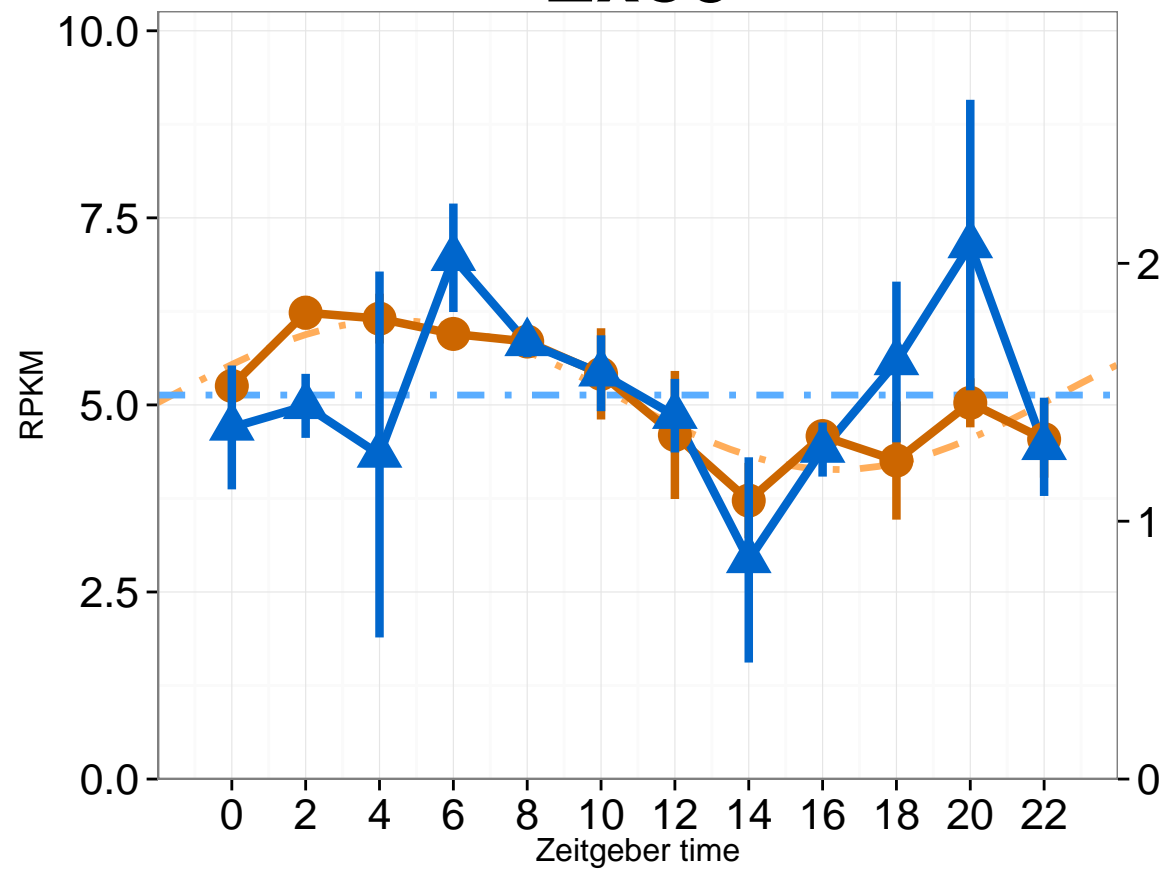

## Exo5

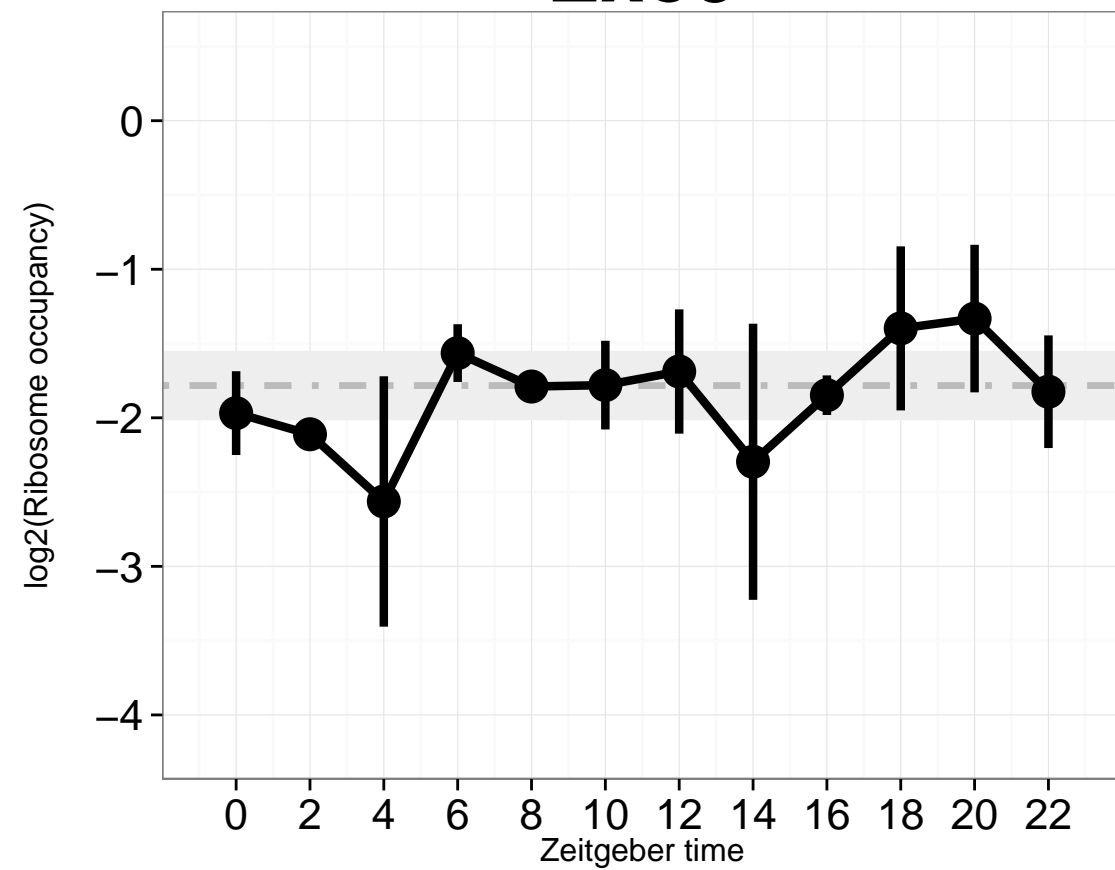

Supplement: Supplementary file 8701 [file 1]

# Cage1

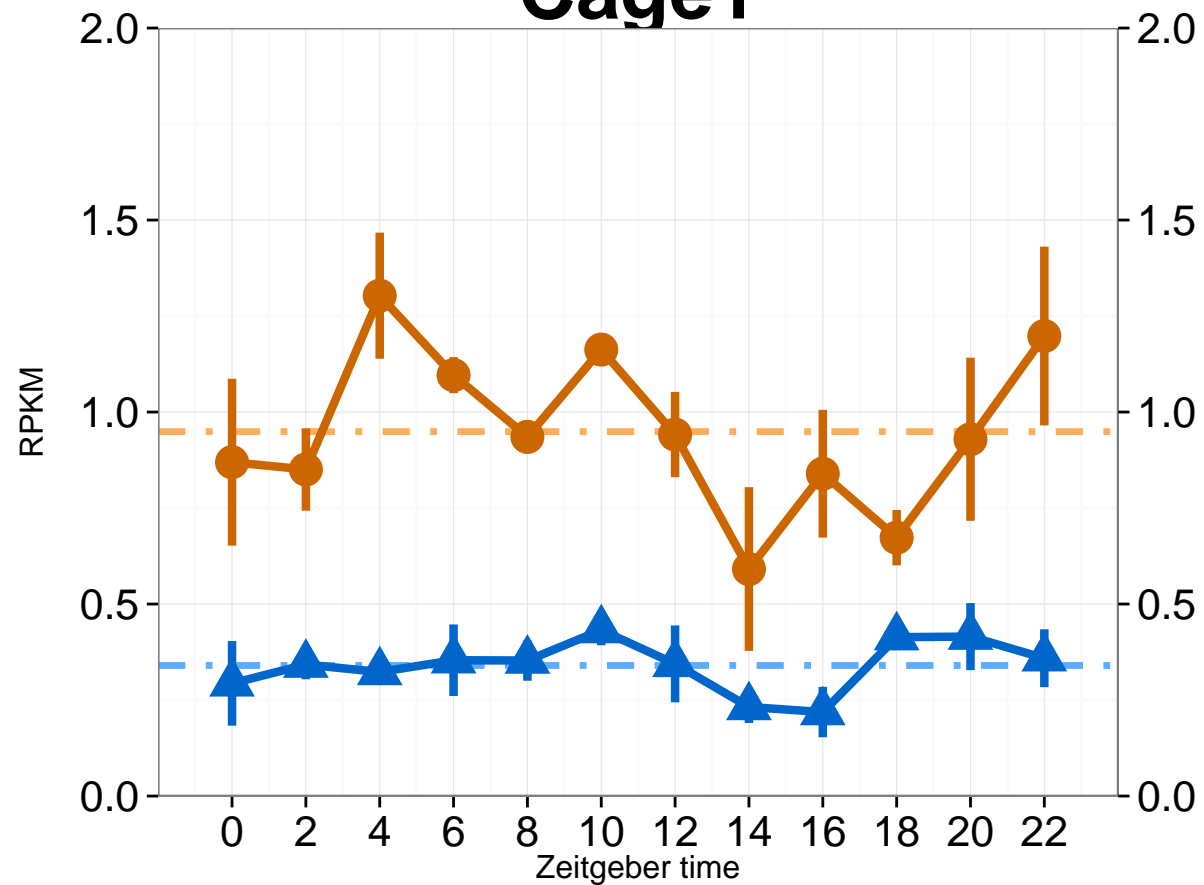

# Cage1

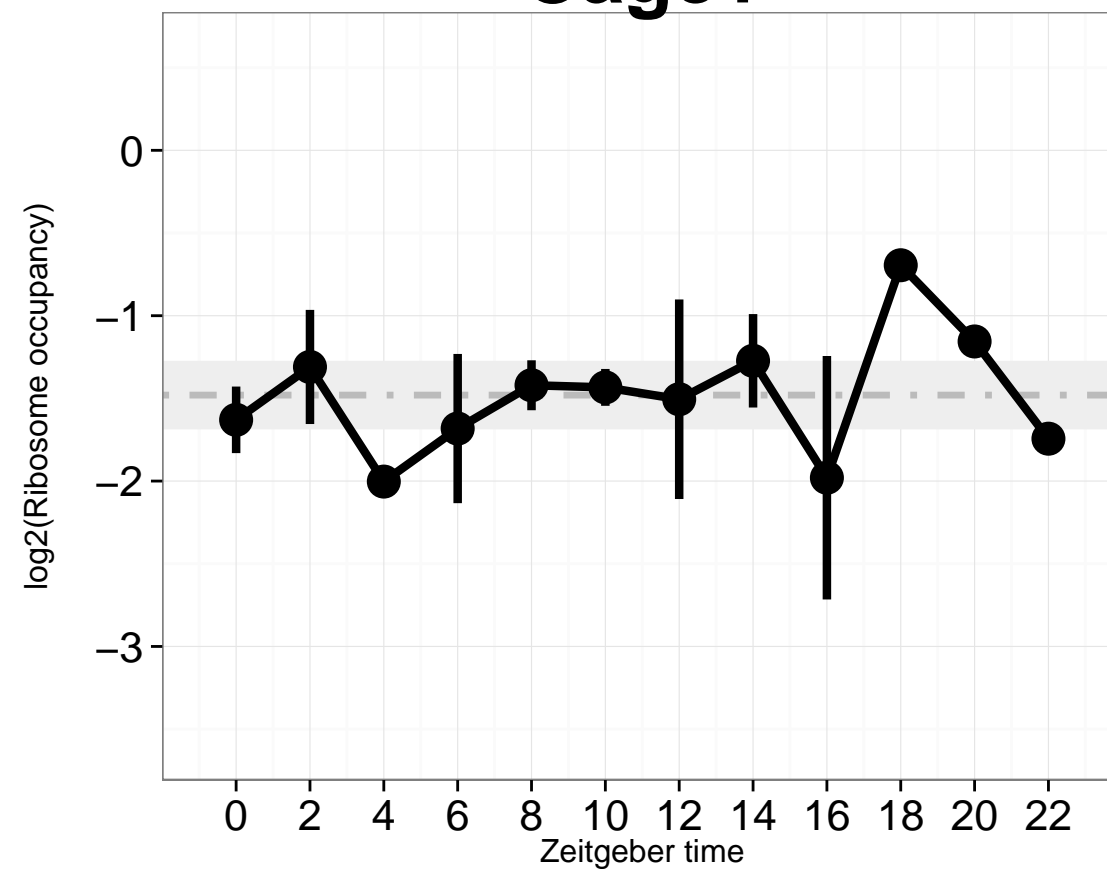

Supplement: Supplementary file 8702 [file 1]

# Tldc1

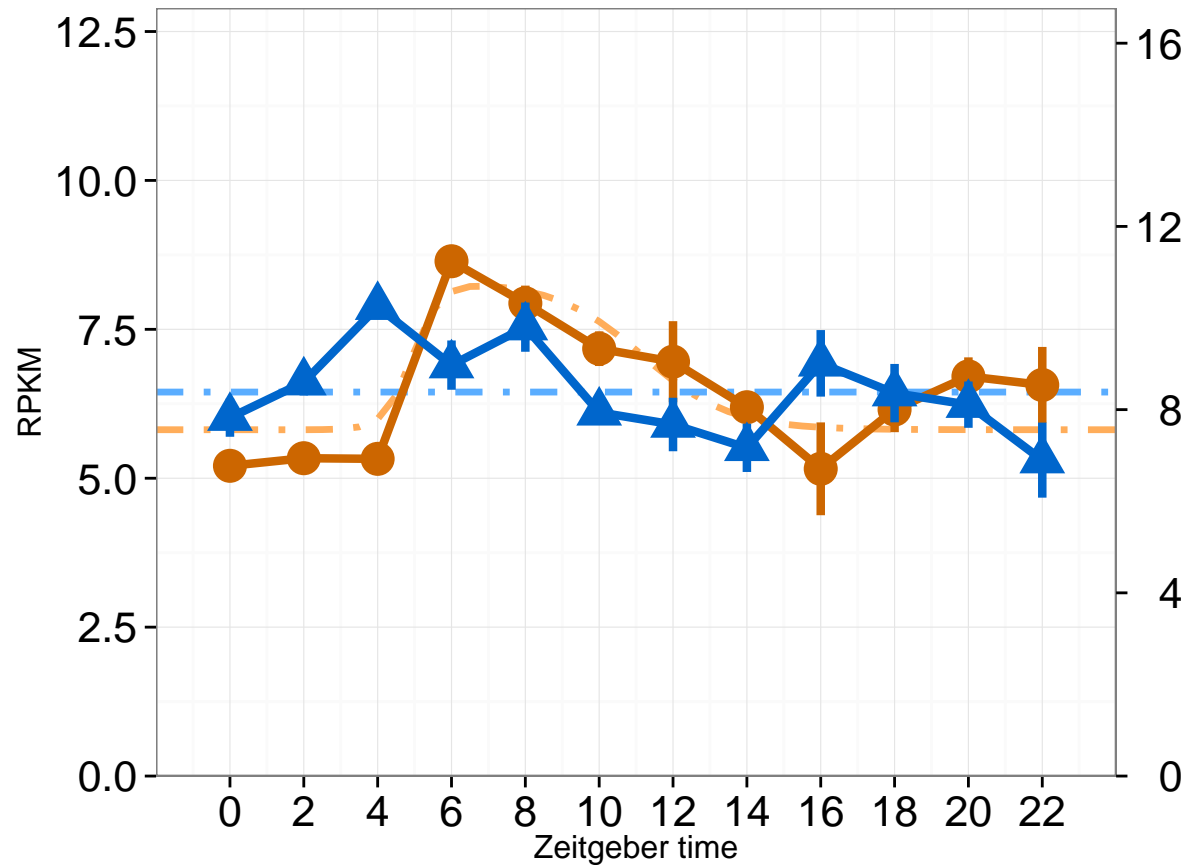

# Tldc1

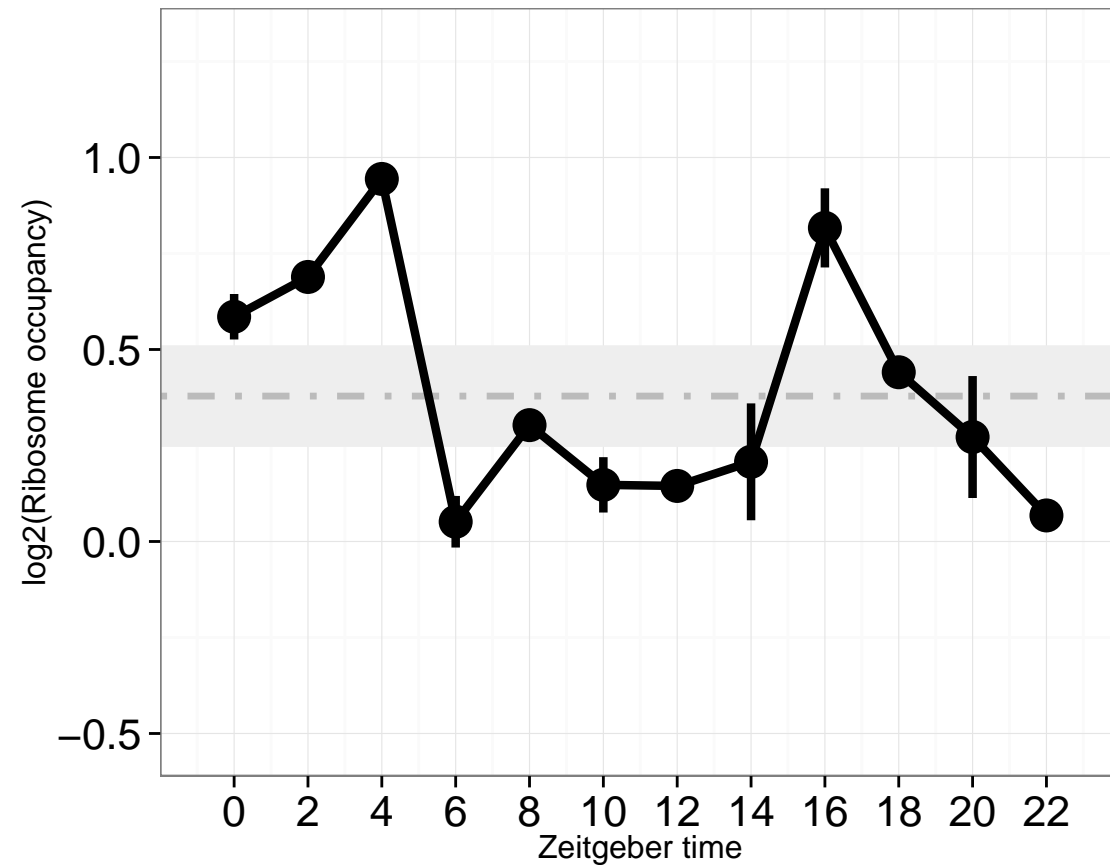

Supplement: Supplementary file 8703 [file 1]

## Gm21833

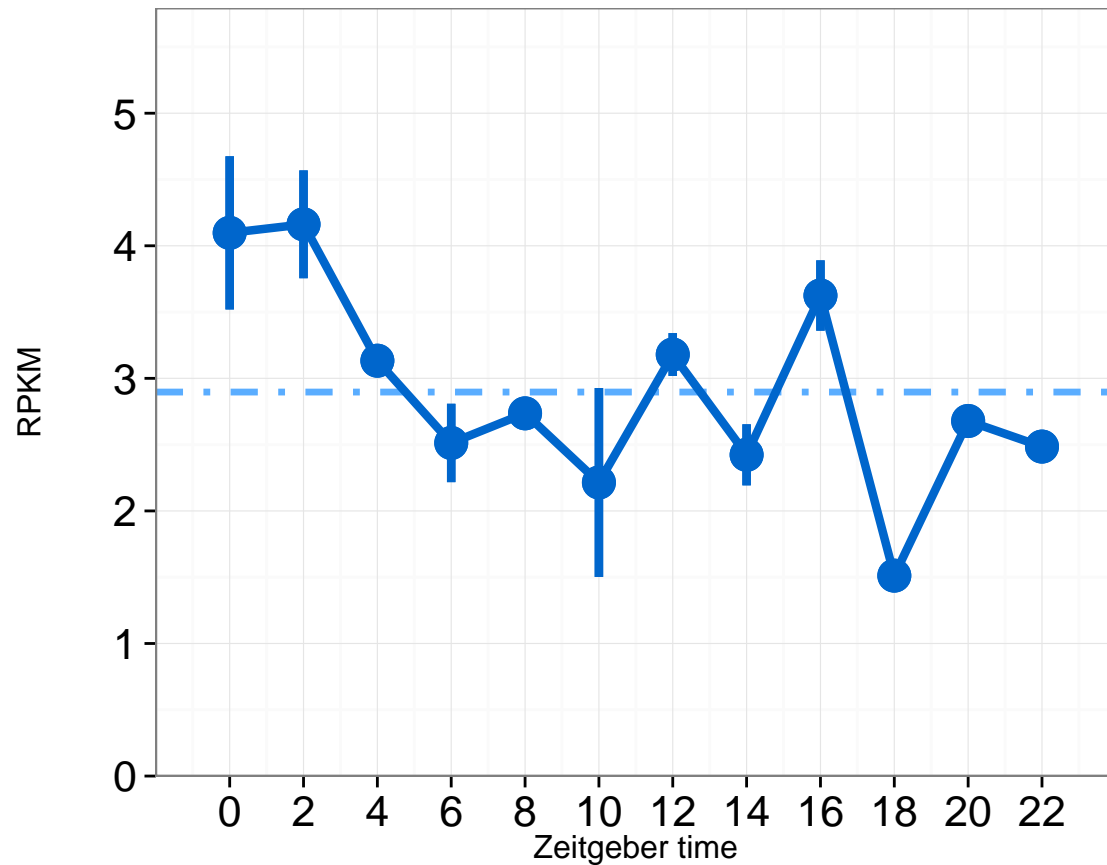

## Gm21833 log2(Ribosome occupanc

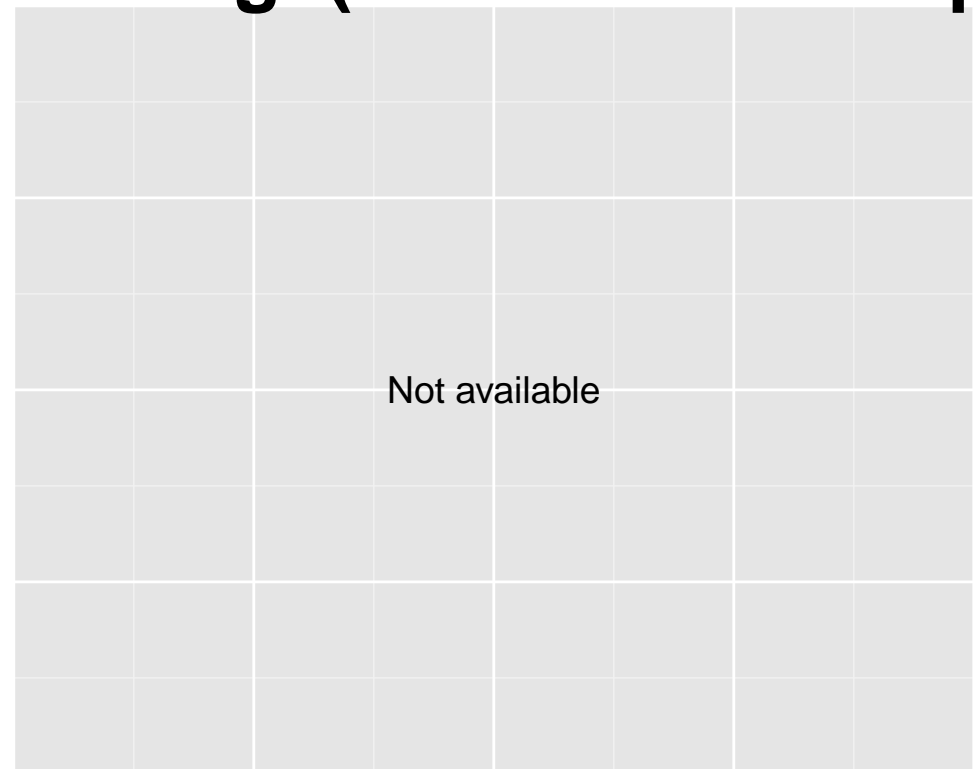

Supplement: Supplementary file 8704 [file 1]

## Scarf2

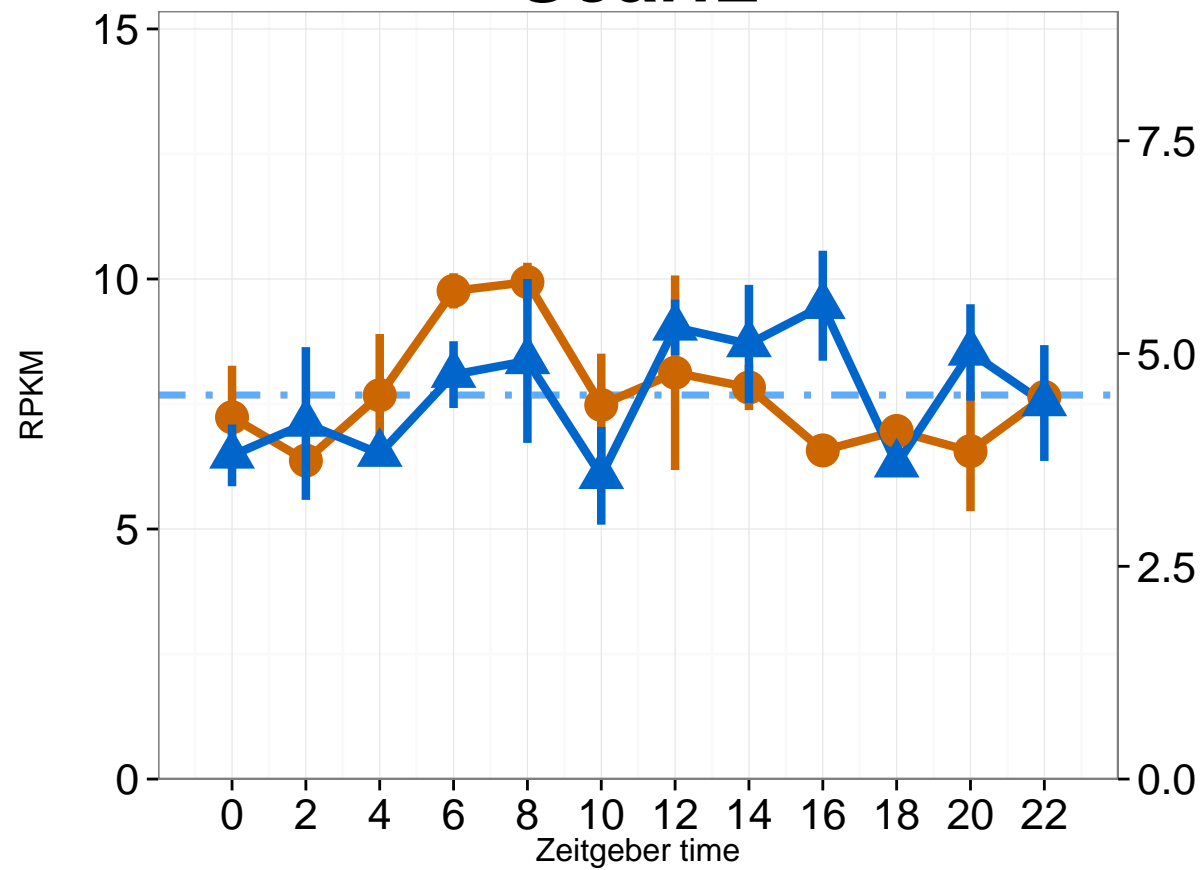

## Scarf2

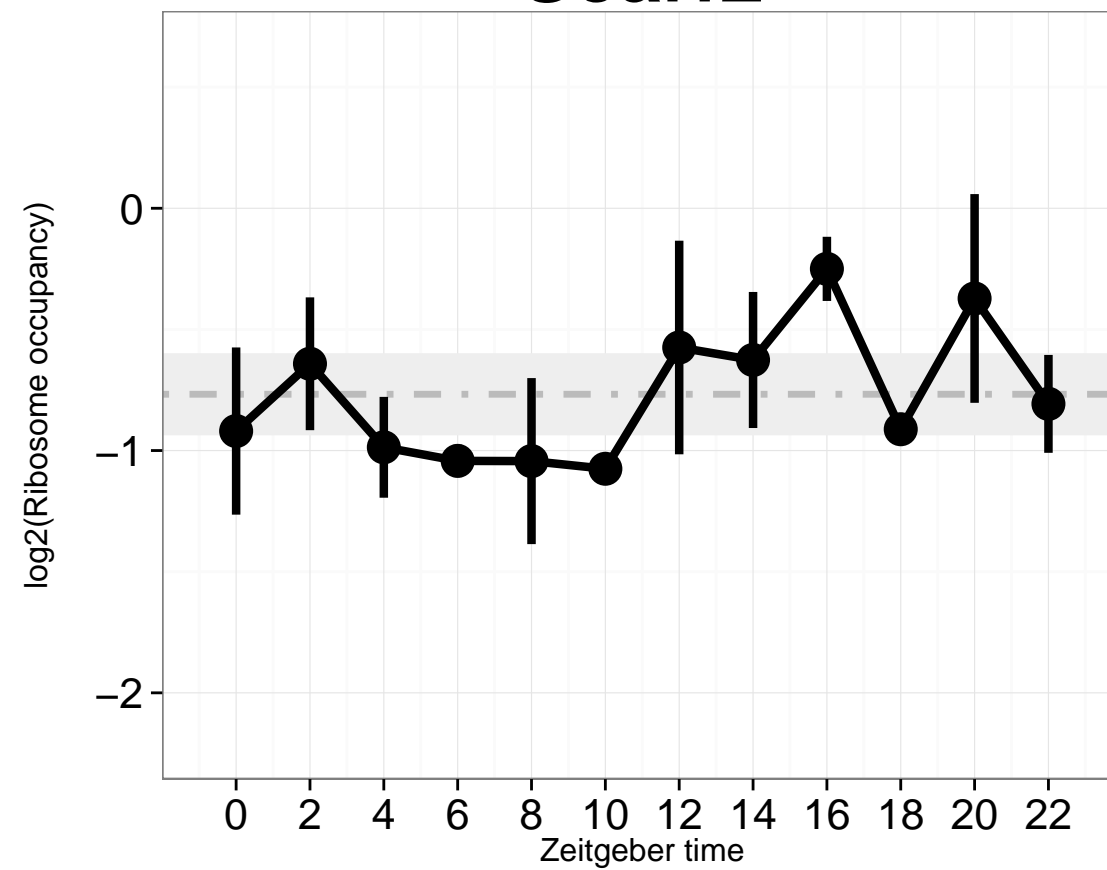

Supplement: Supplementary file 8705 [file 1]

## Snx12

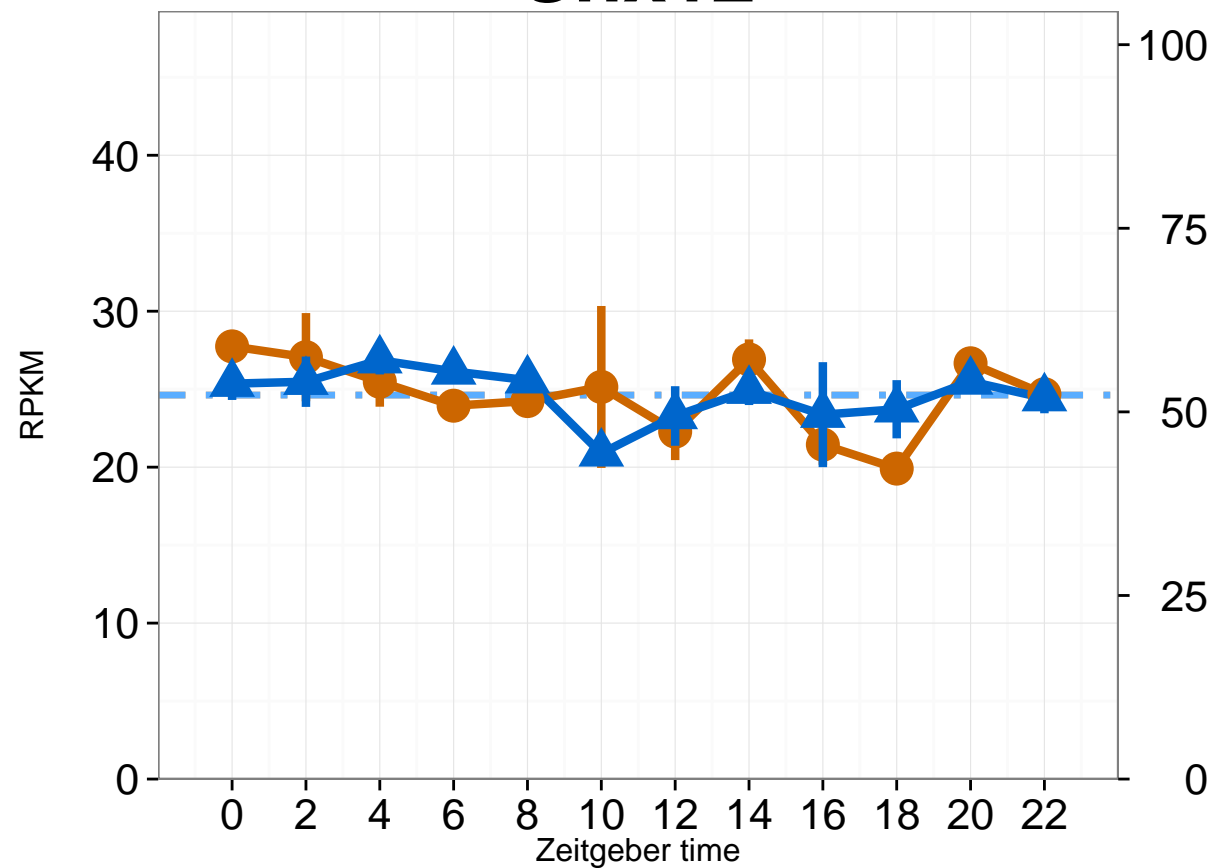

## Snx12

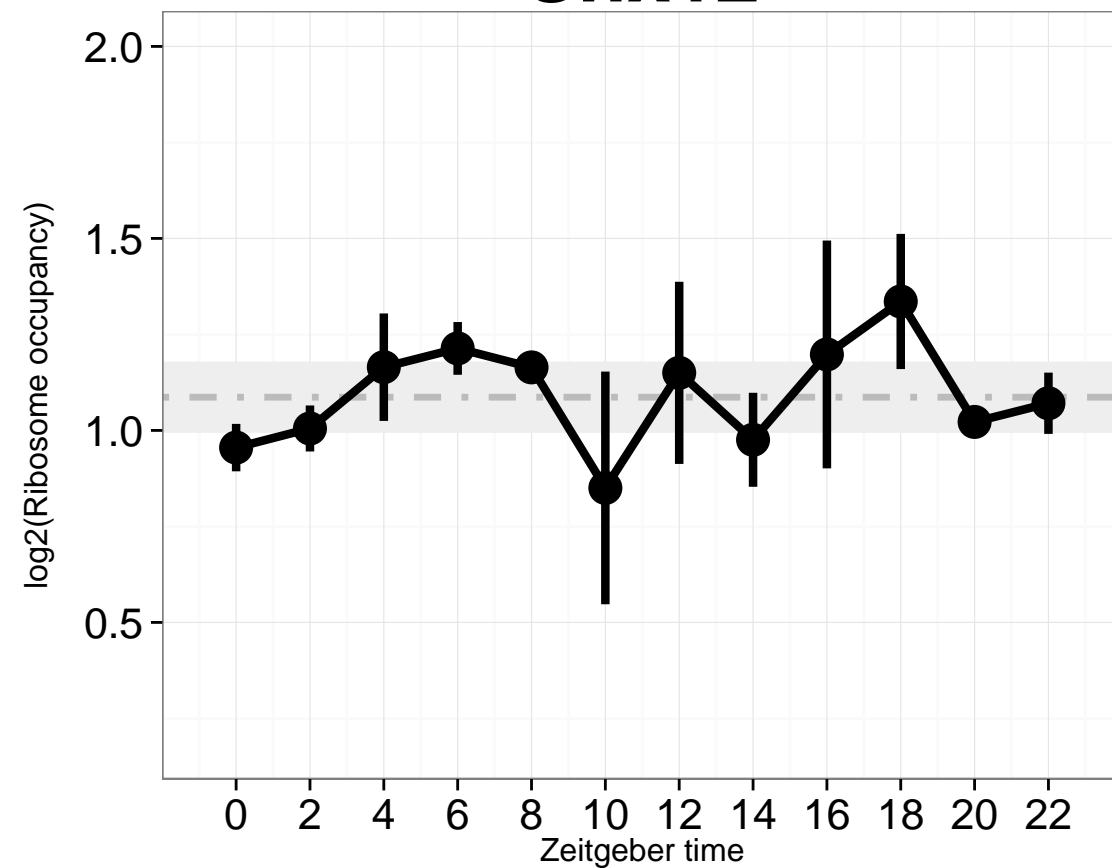

Supplement: Supplementary file 8706 [file 1]

## Zfp1

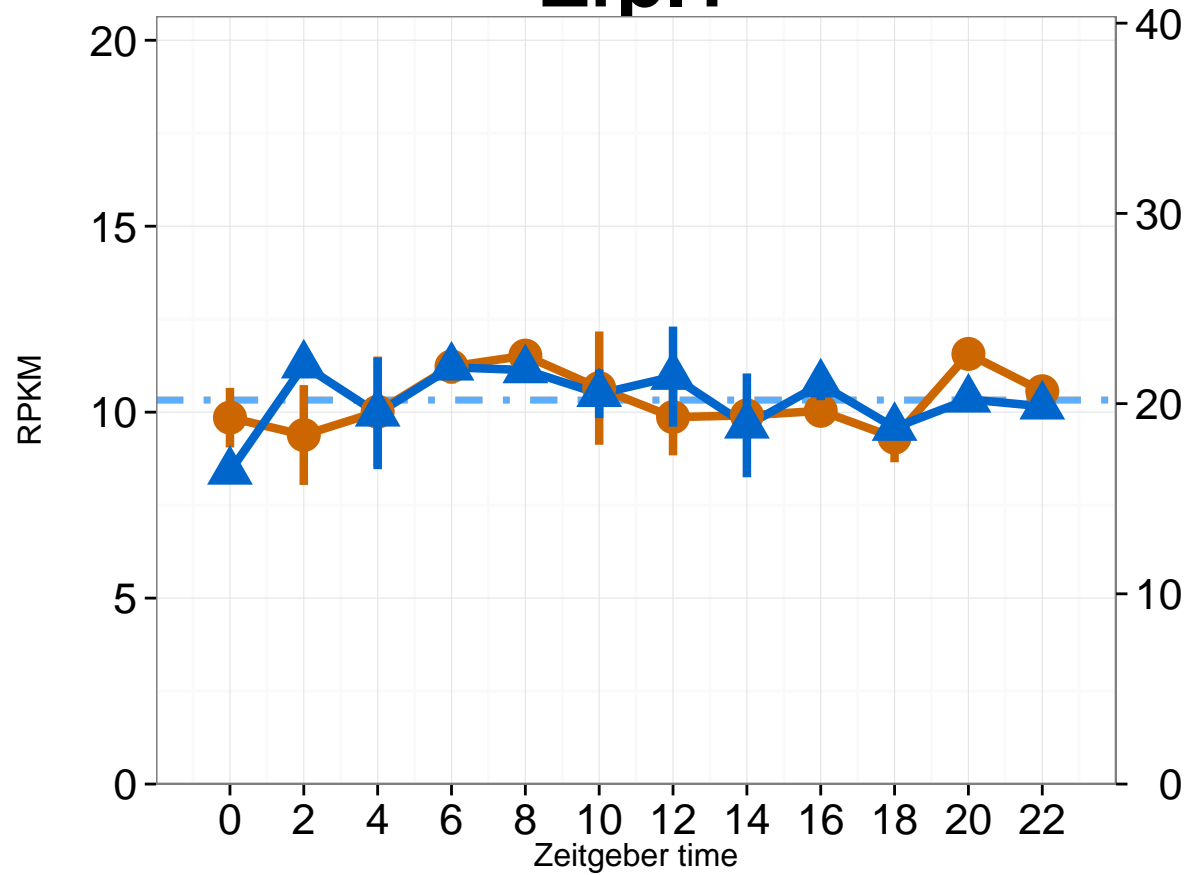

## Zfp1

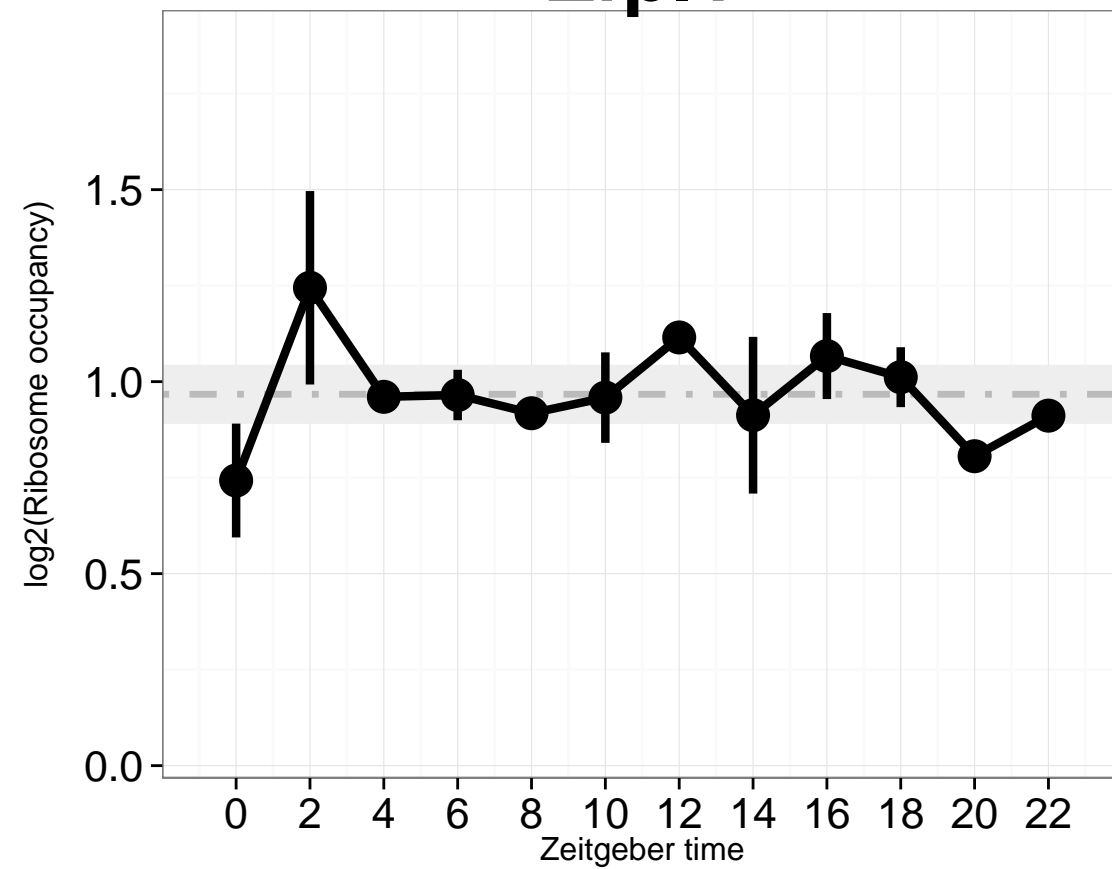

Supplement: Supplementary file 8707 [file 1]

## Eif3i

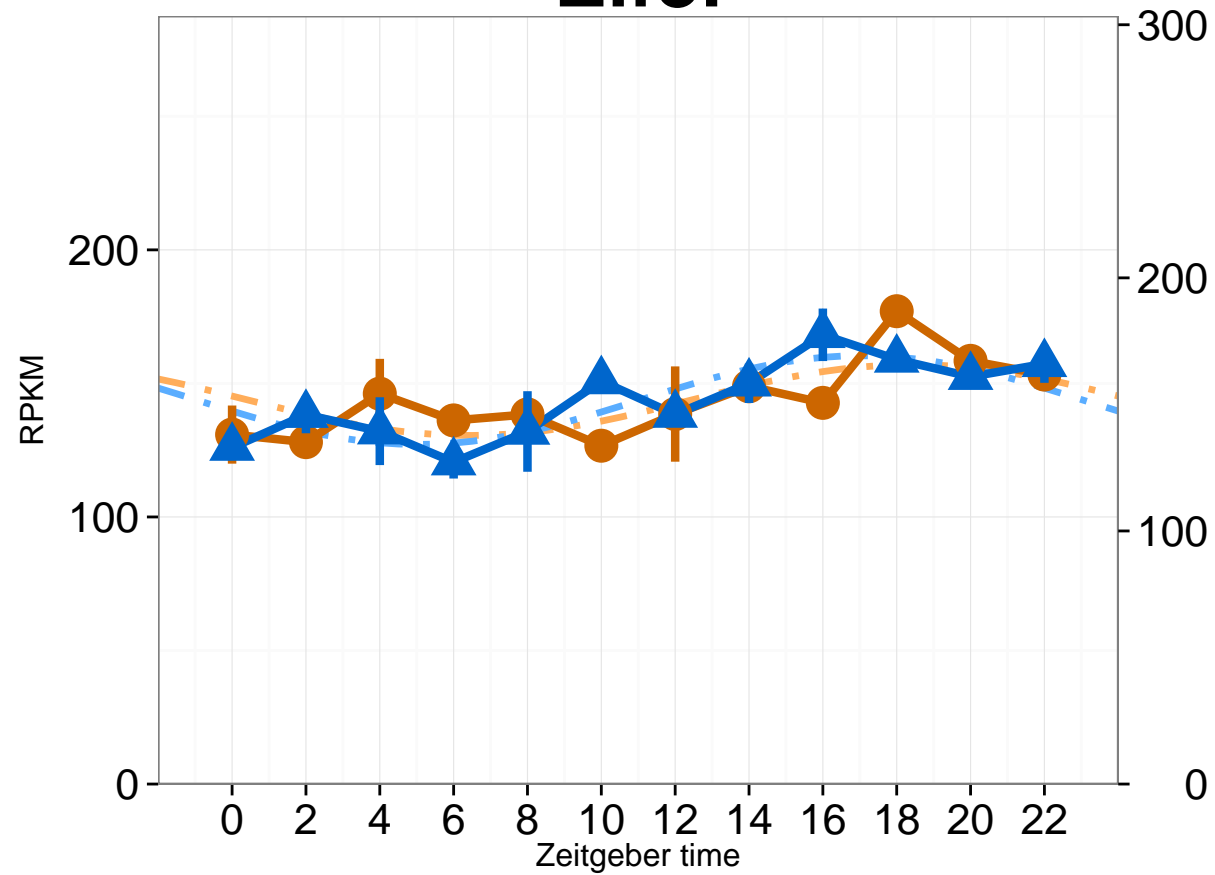

## Eif3i

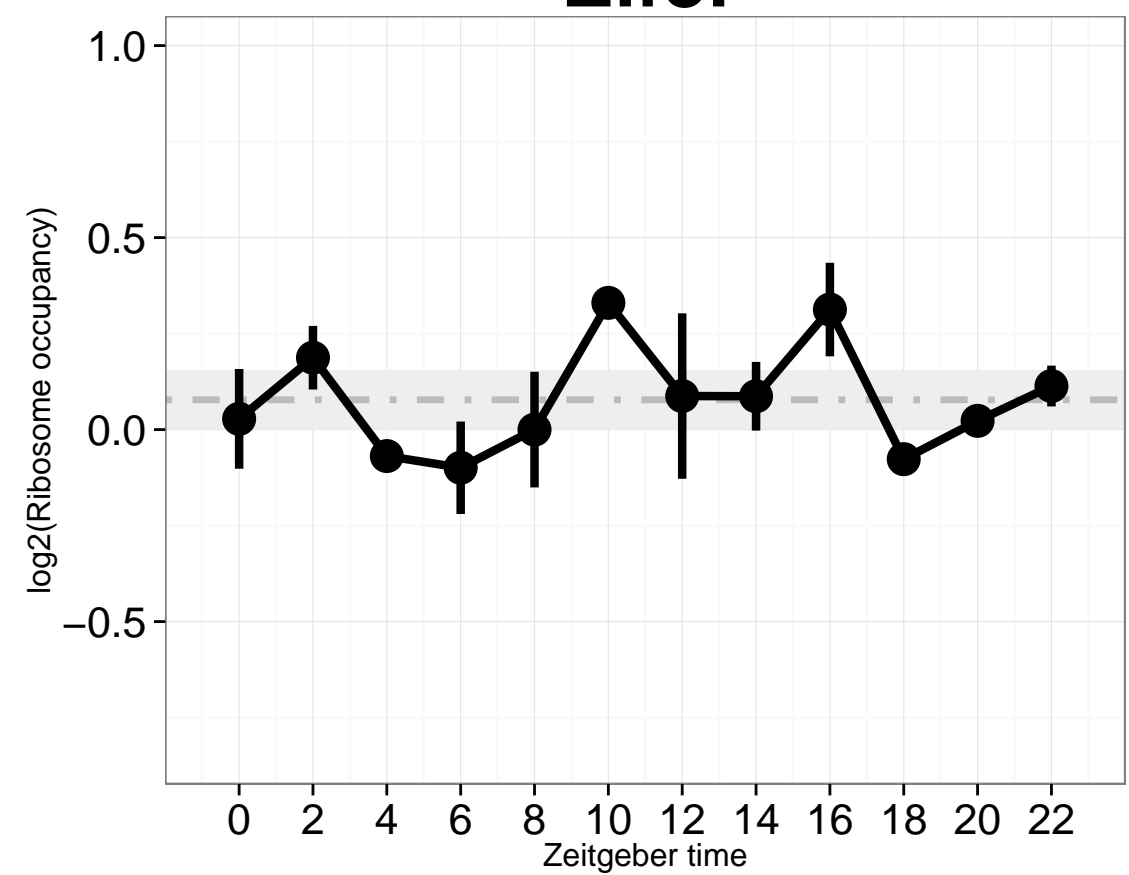

Supplement: Supplementary file 8708 [file 1]

# Hist1h2bb

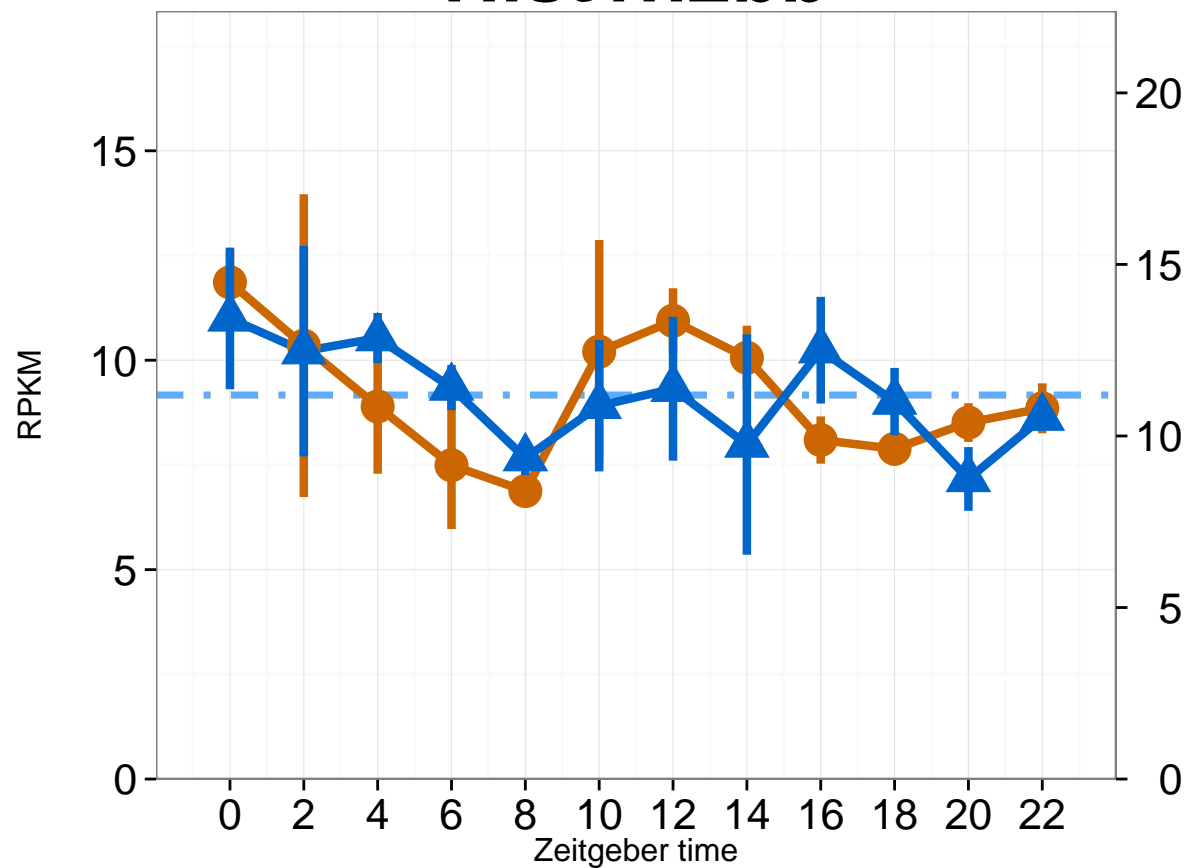

# Hist1h2bb

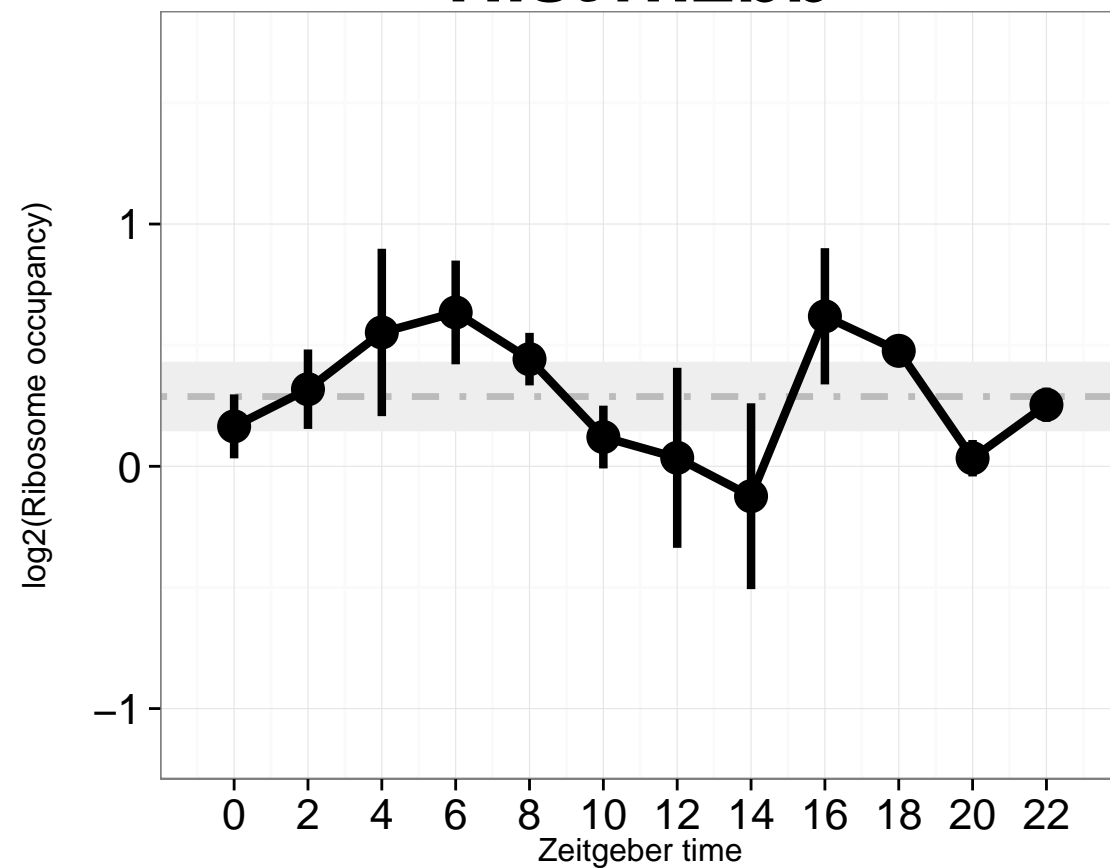

Supplement: Supplementary file 8709 [file 1]

# Eif4b

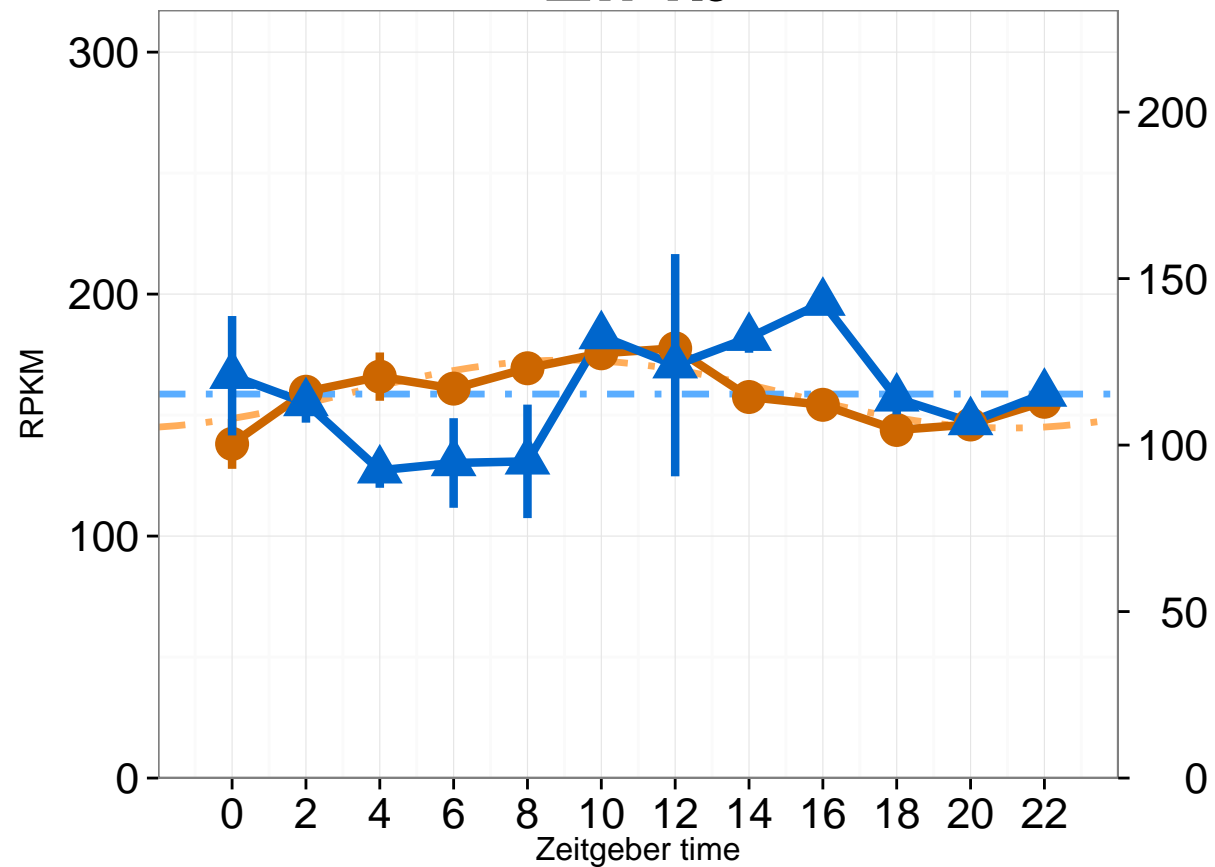

# Eif4b

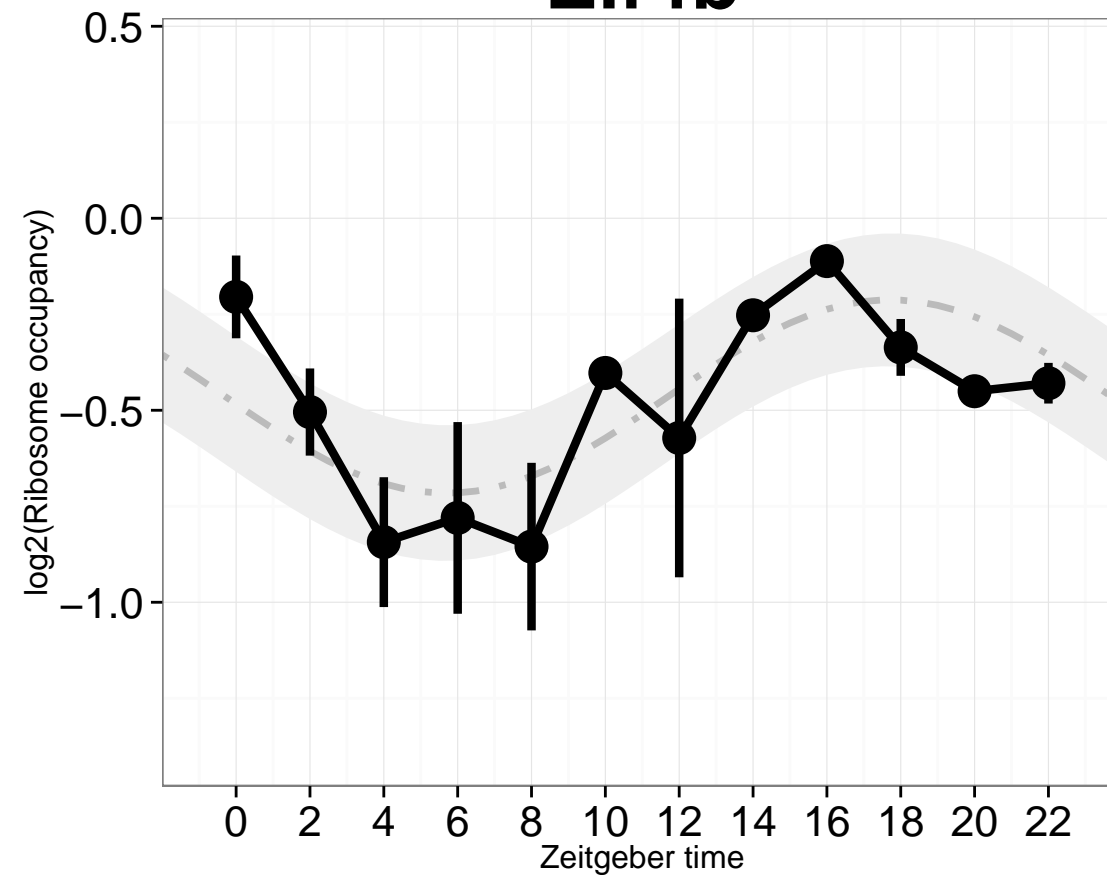

Supplement: Supplementary file 8710 [file 1]

## Msi2

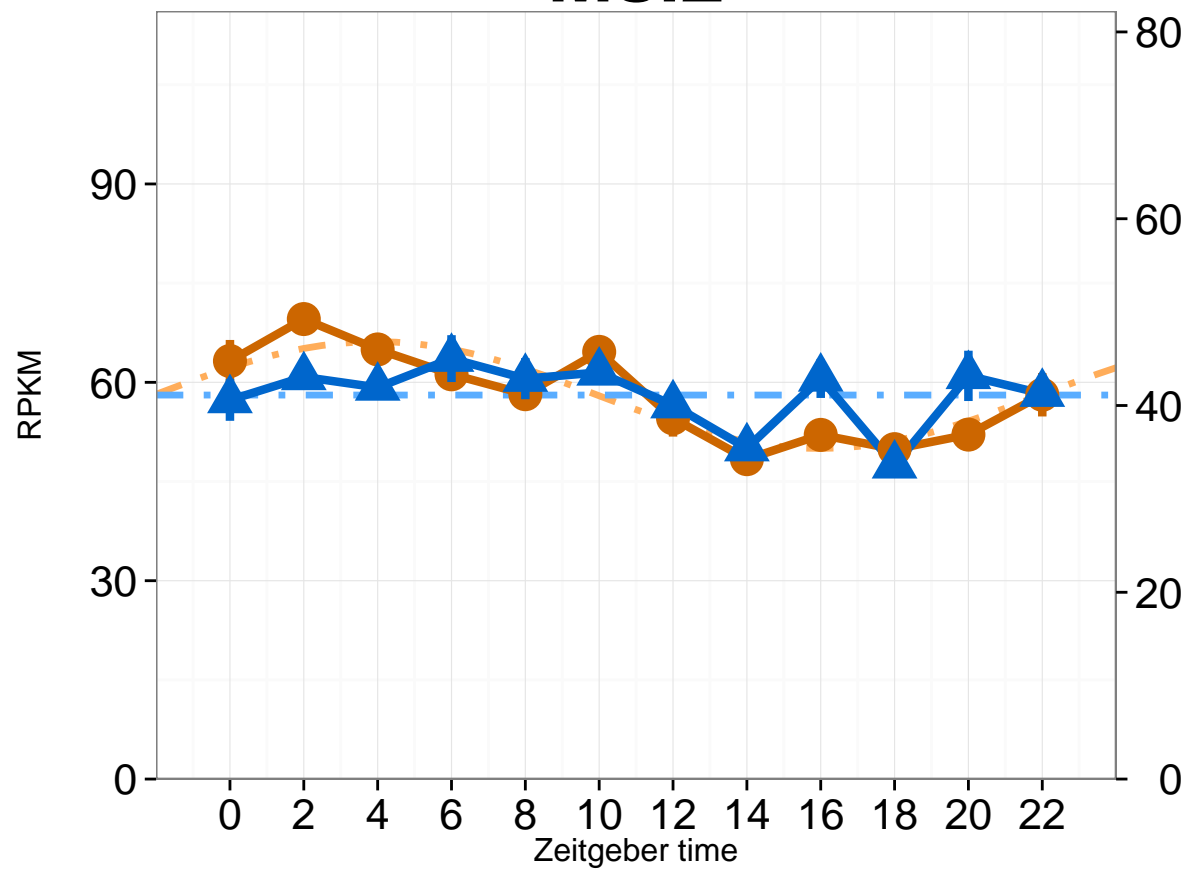

## Msi2

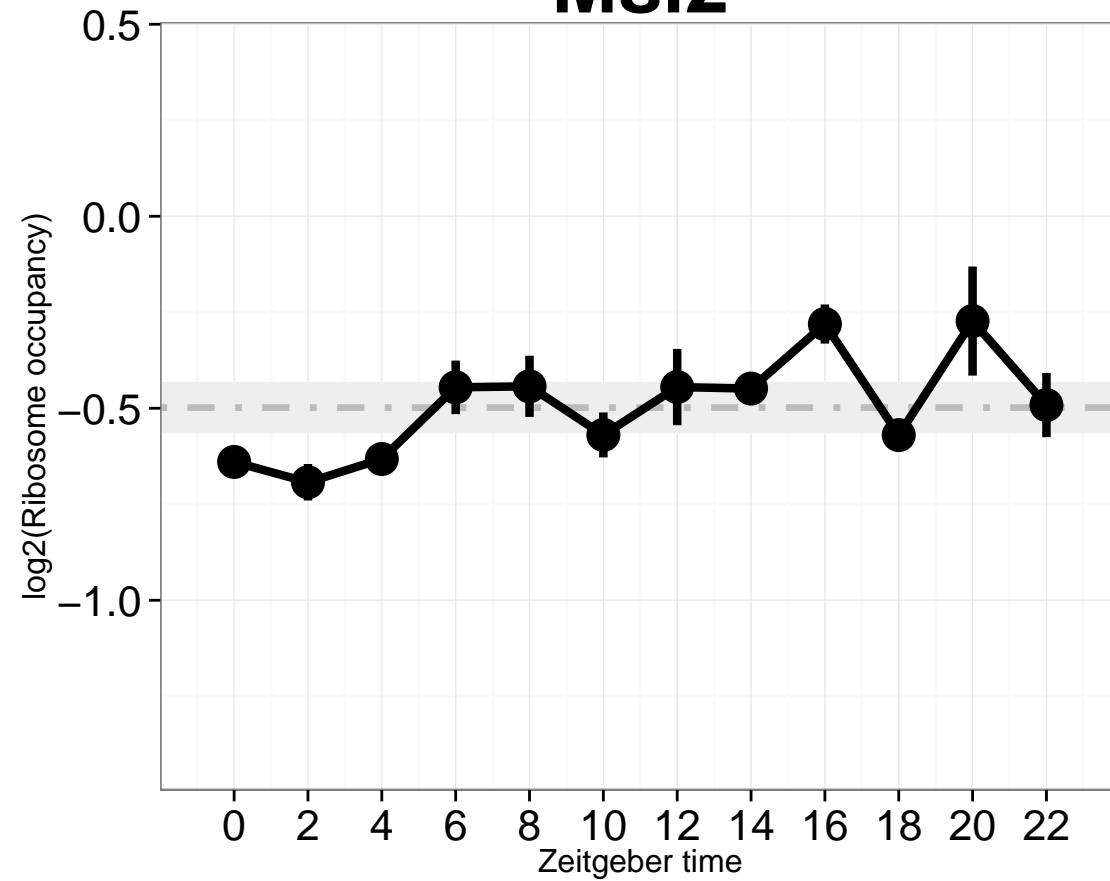

Supplement: Supplementary file 8711 [file 1]

## Robo3

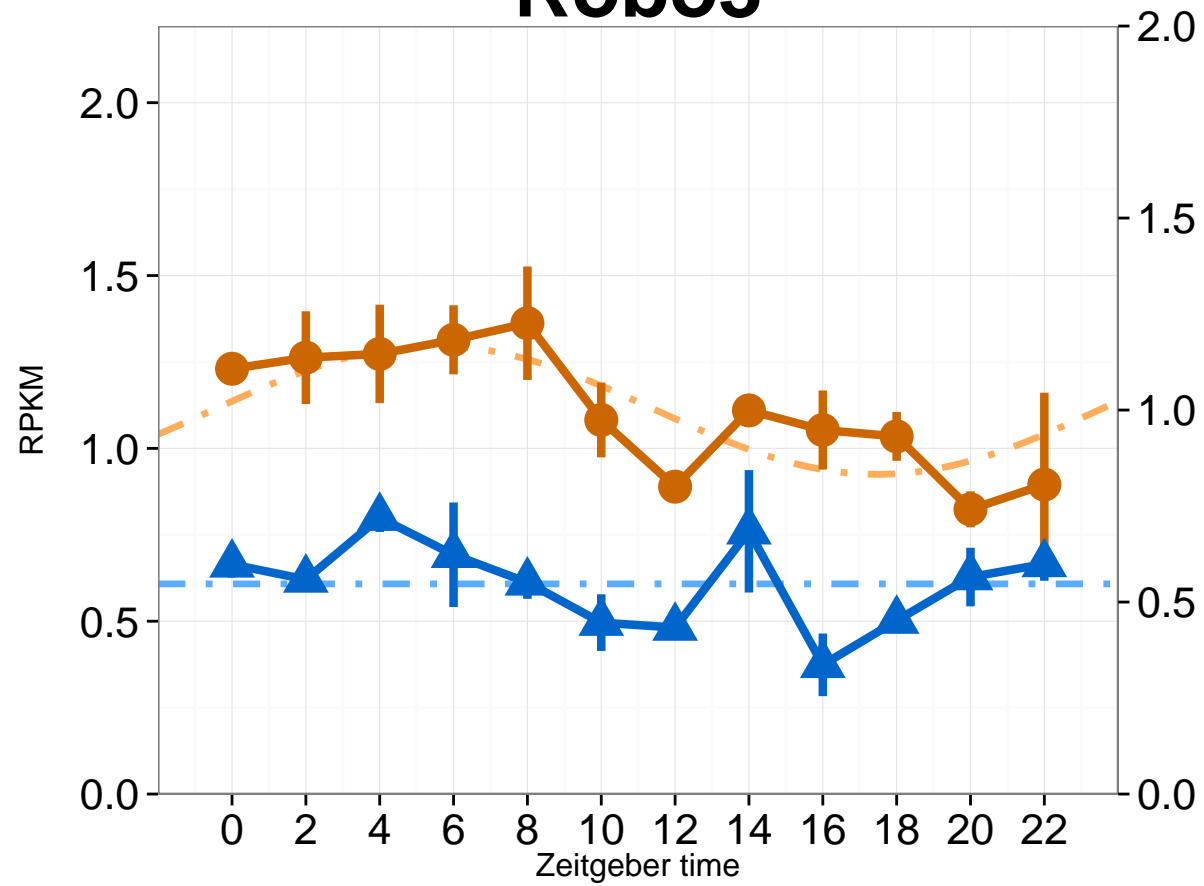

## Robo3

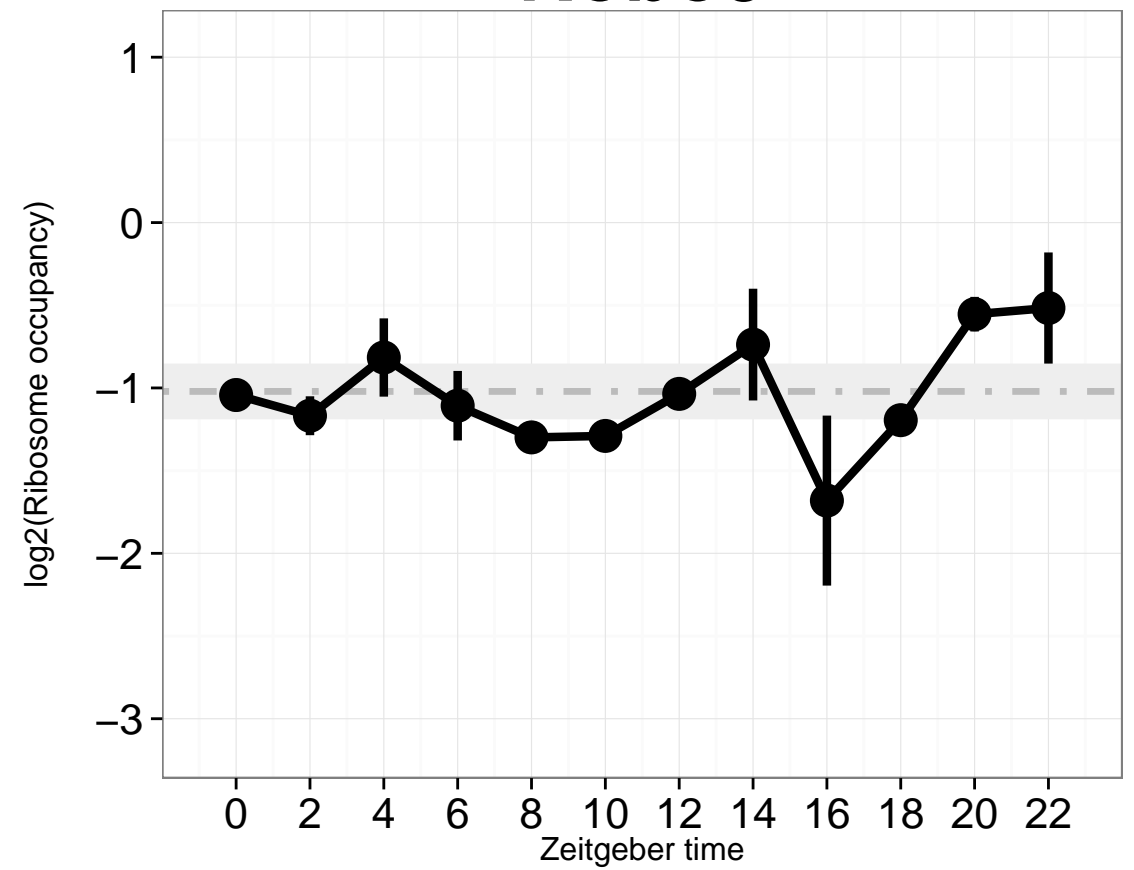

Supplement: Supplementary file 8712 [file 1]

# Atp6v1a

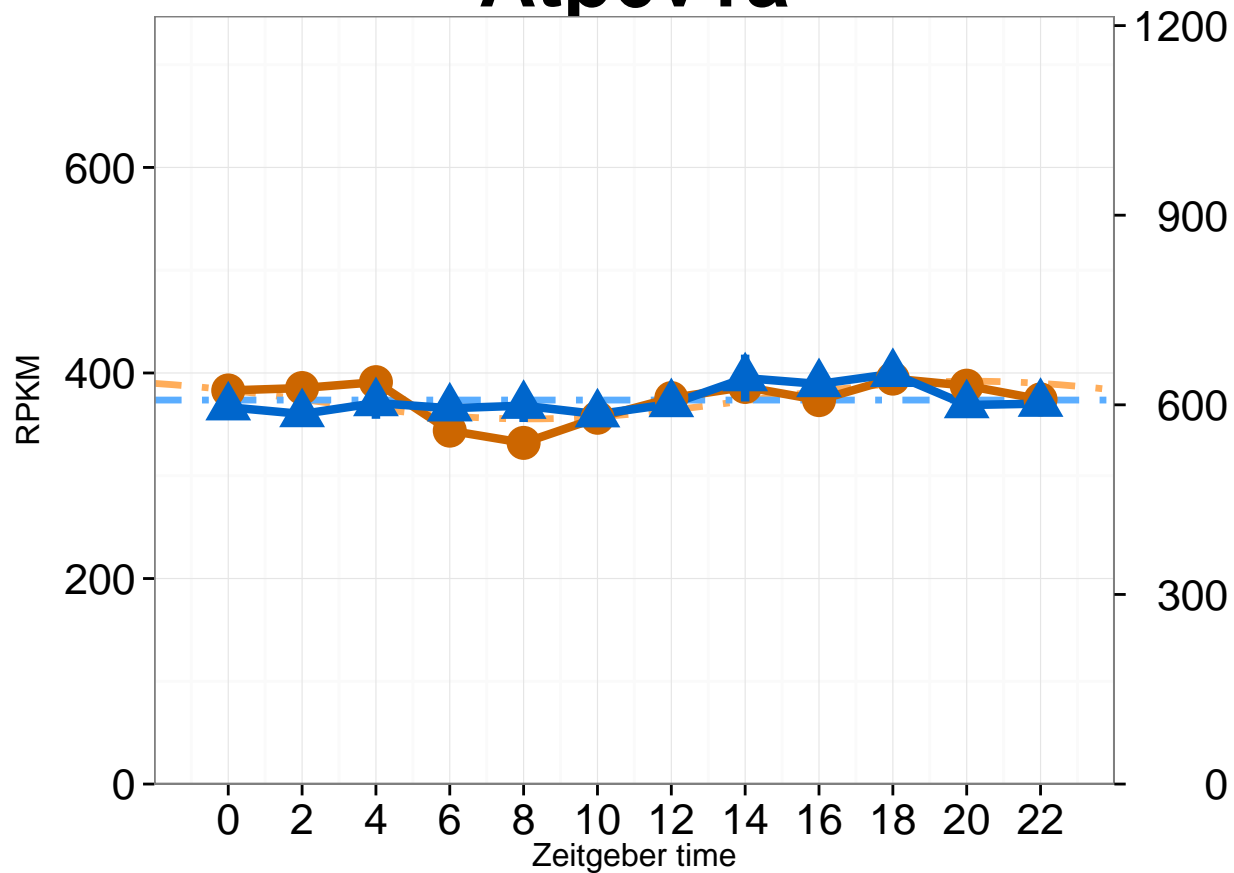

# Atp6v1a

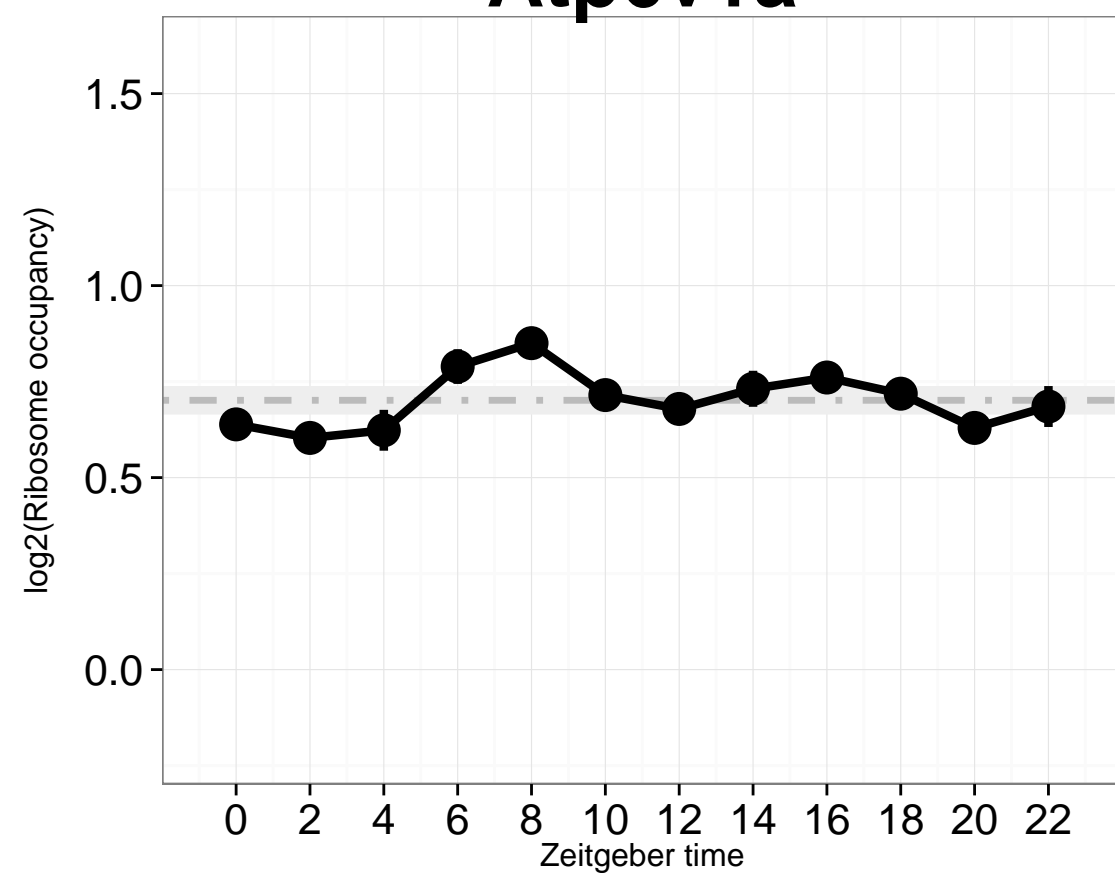

Supplement: Supplementary file 8713 [file 1]

## Ldhb

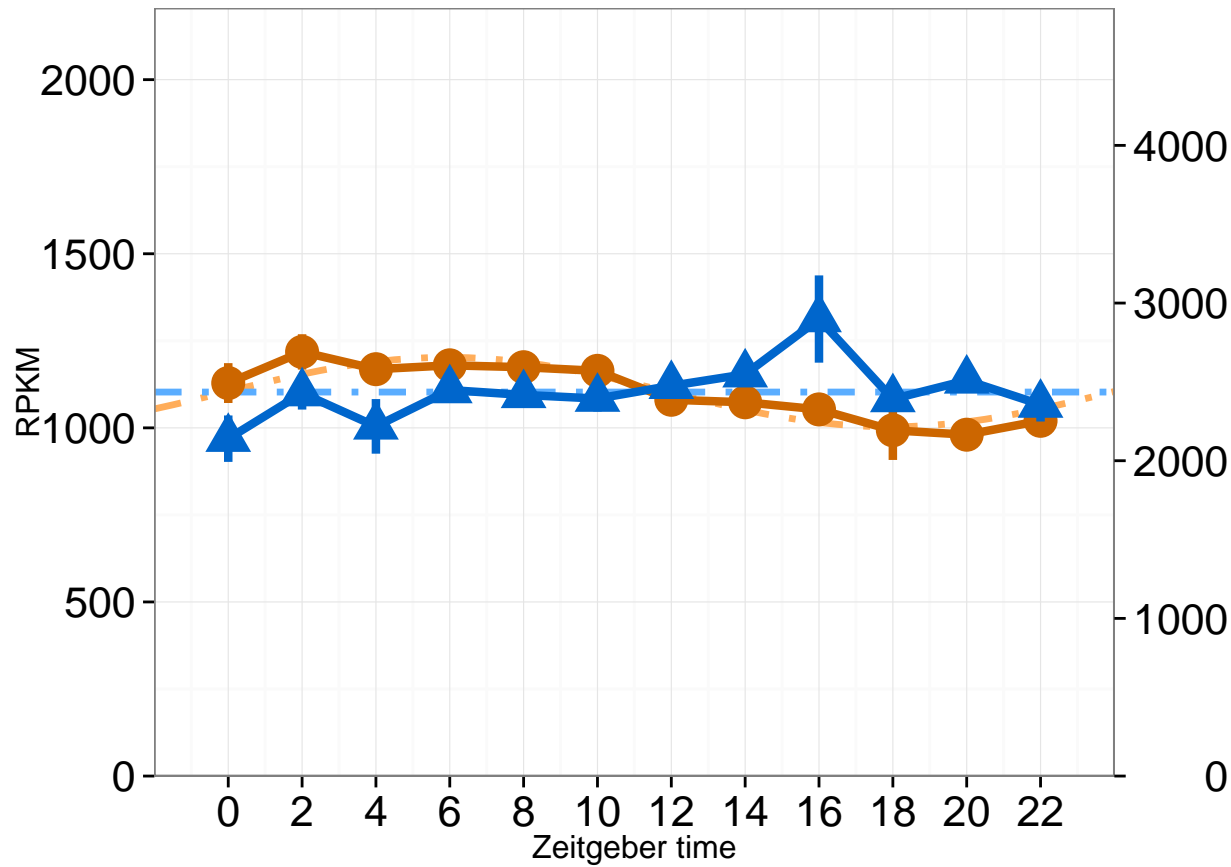

## Ldhb

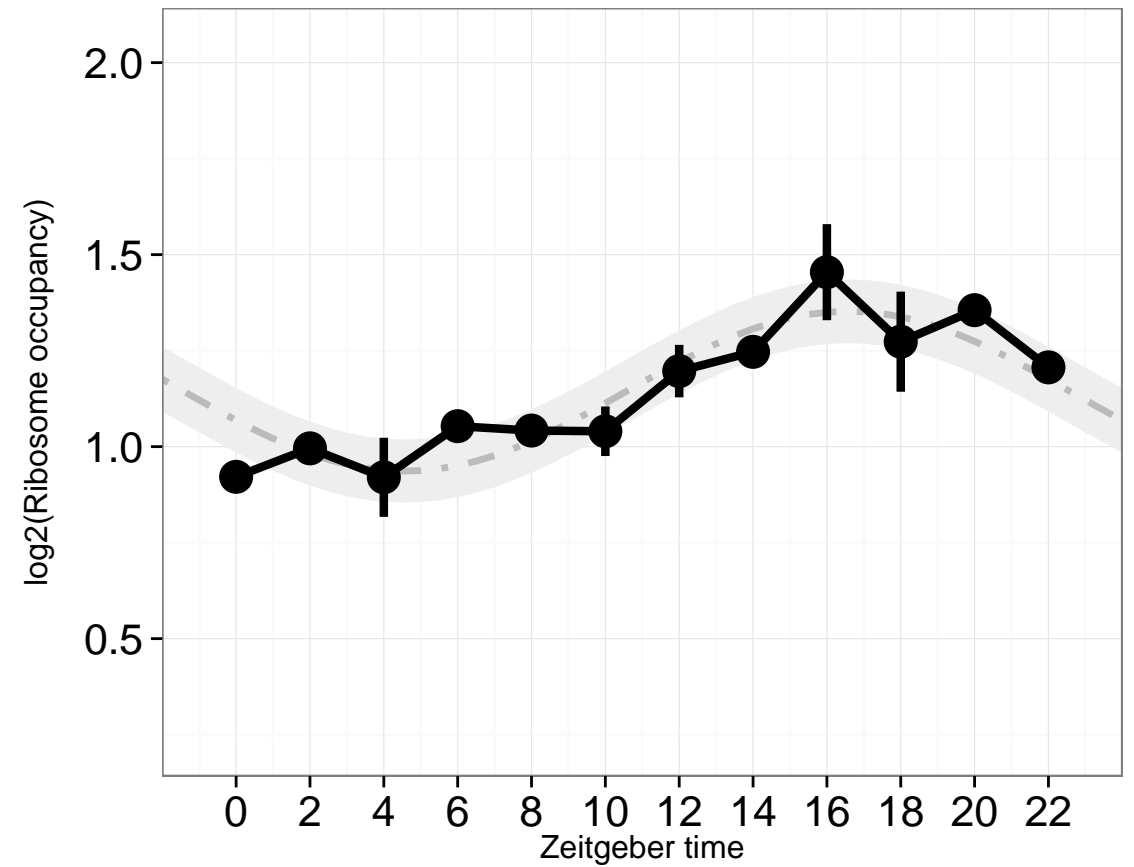

Supplement: Supplementary file 8714 [file 1]

## Ccdc80

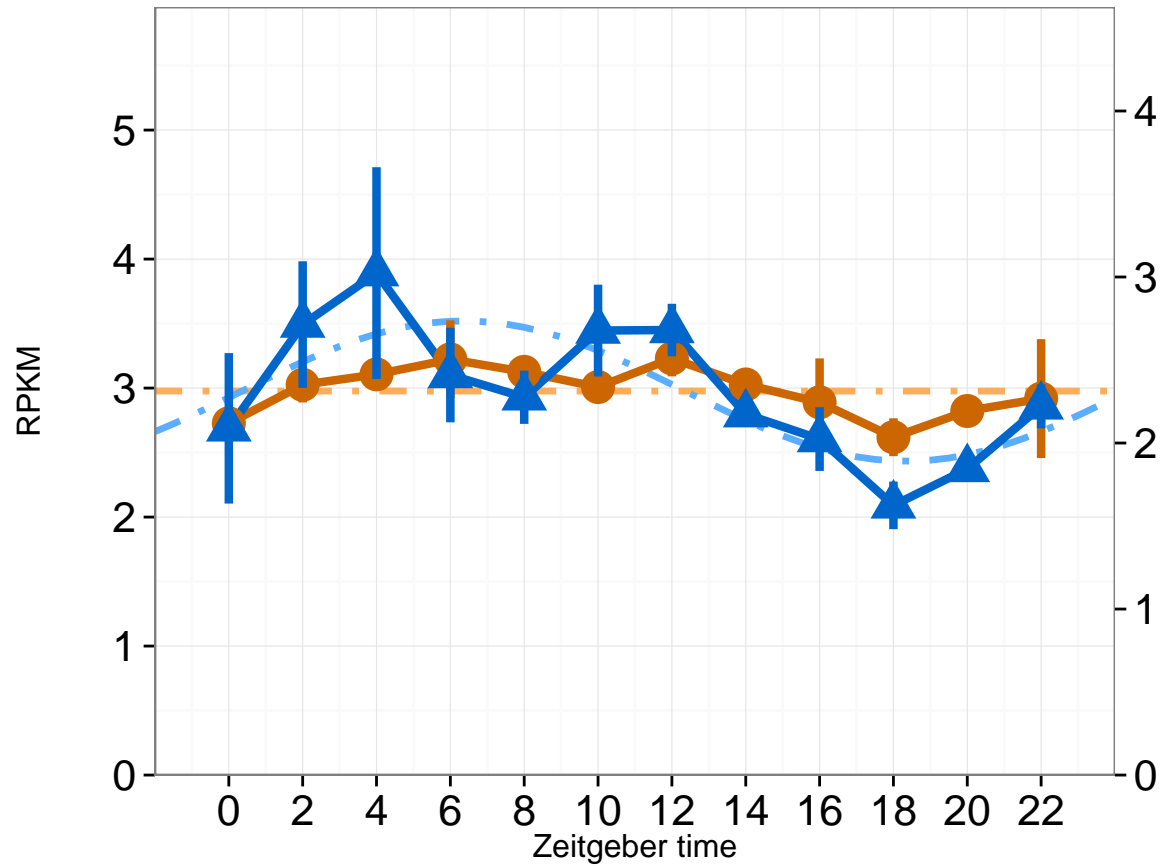

## Ccdc80

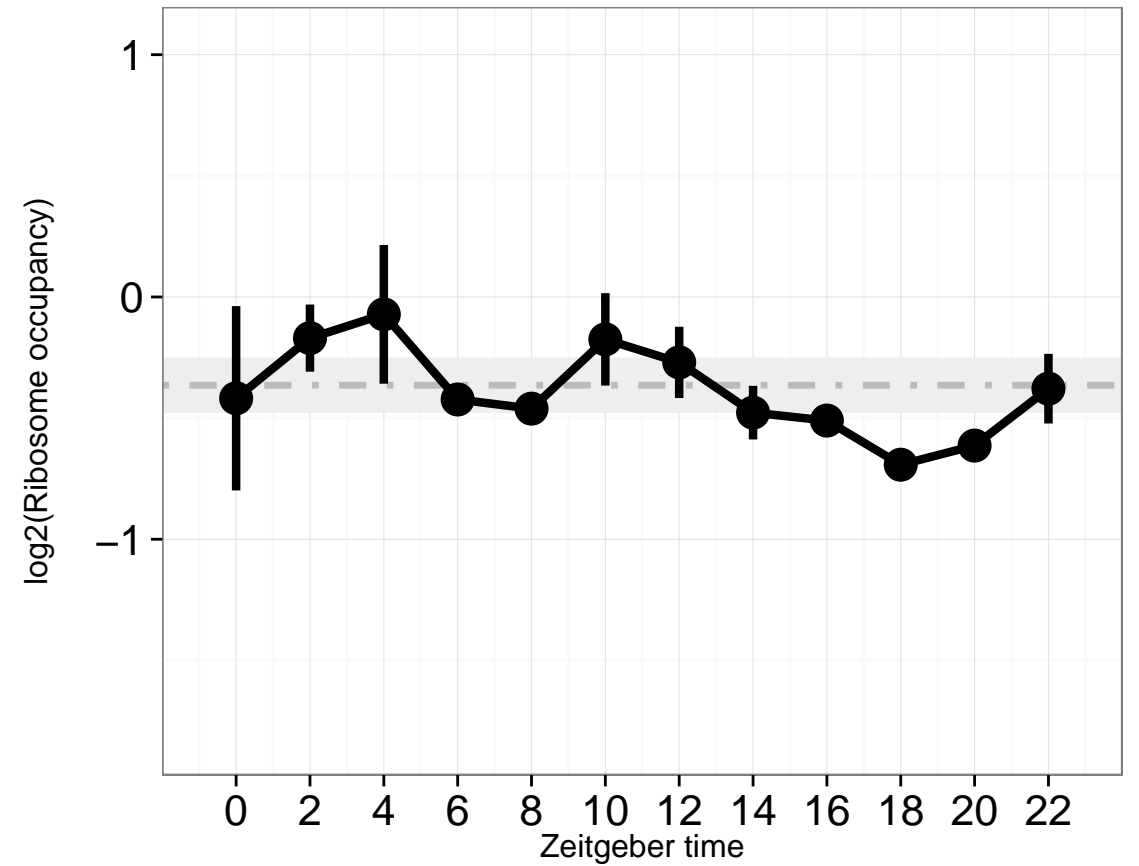

Supplement: Supplementary file 8715 [file 1]

## Aqp4

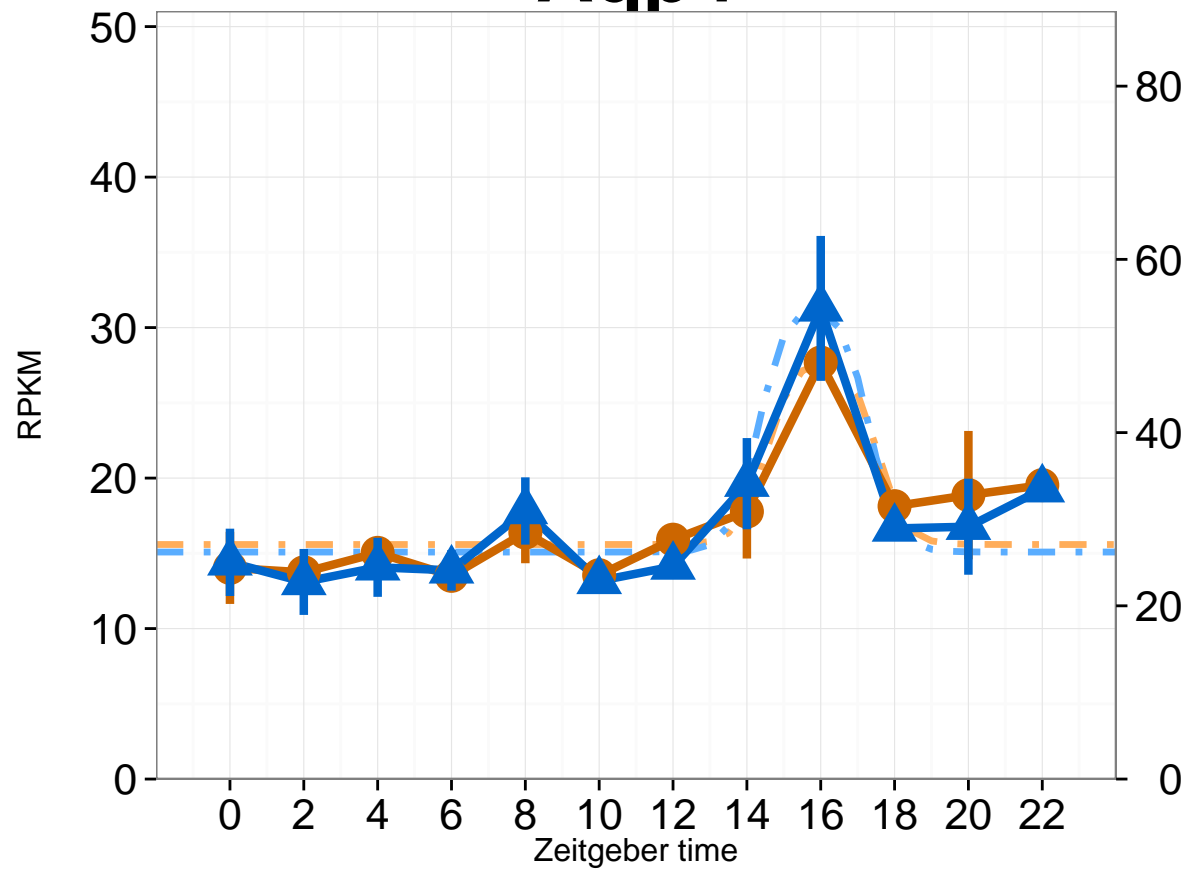

## Aqp4

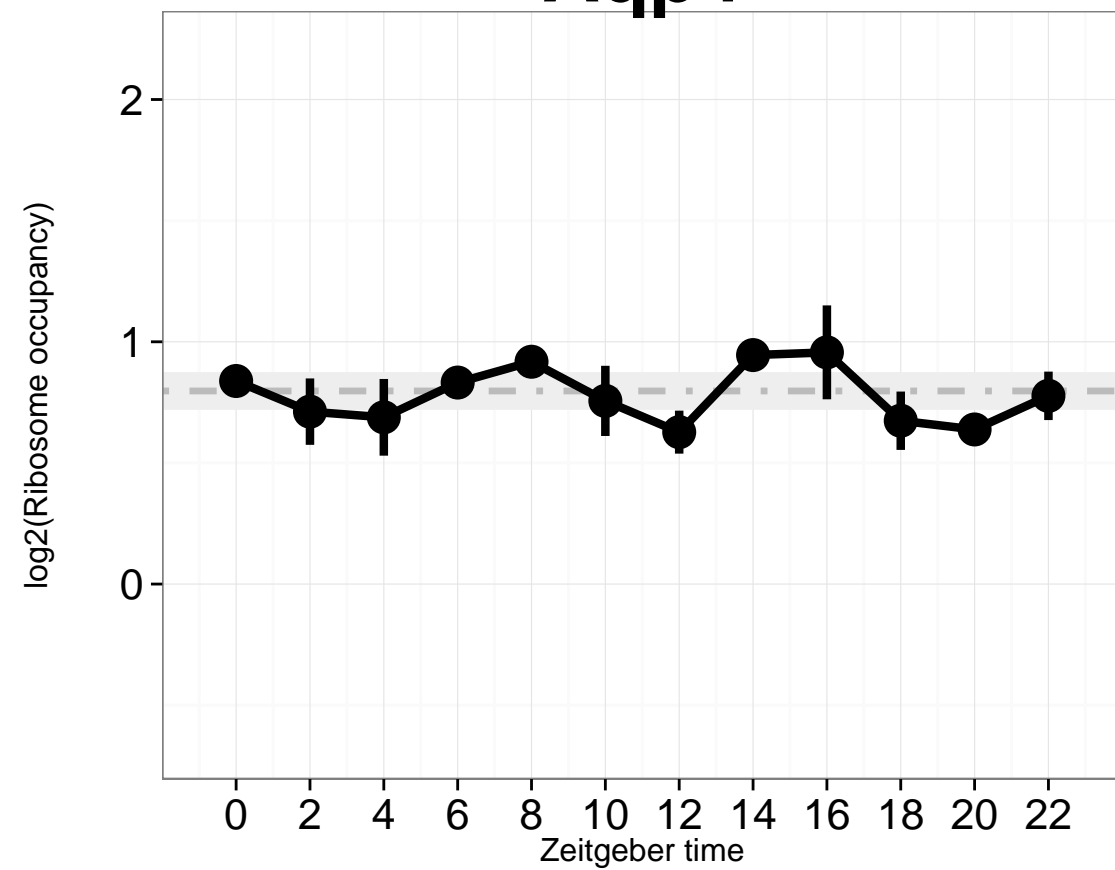

Supplement: Supplementary file 8716 [file 1]

# P2ry1

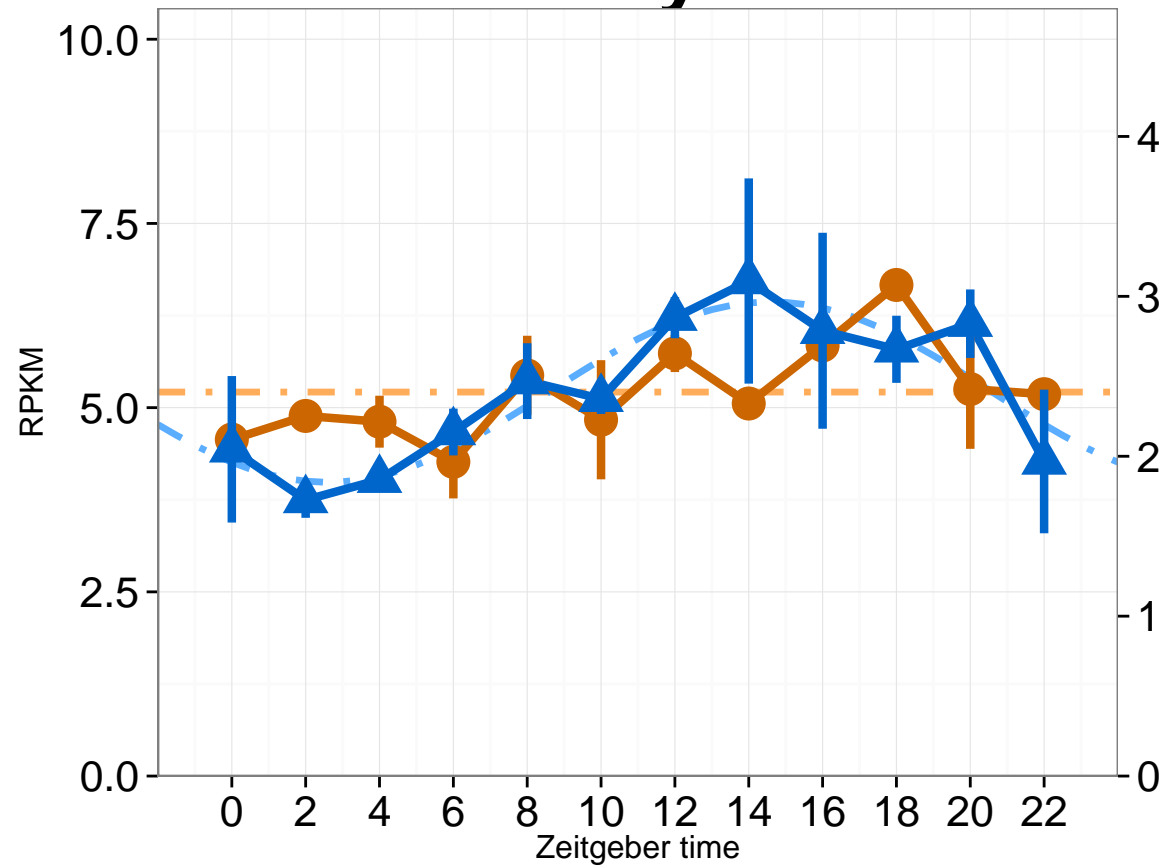

# P2ry1

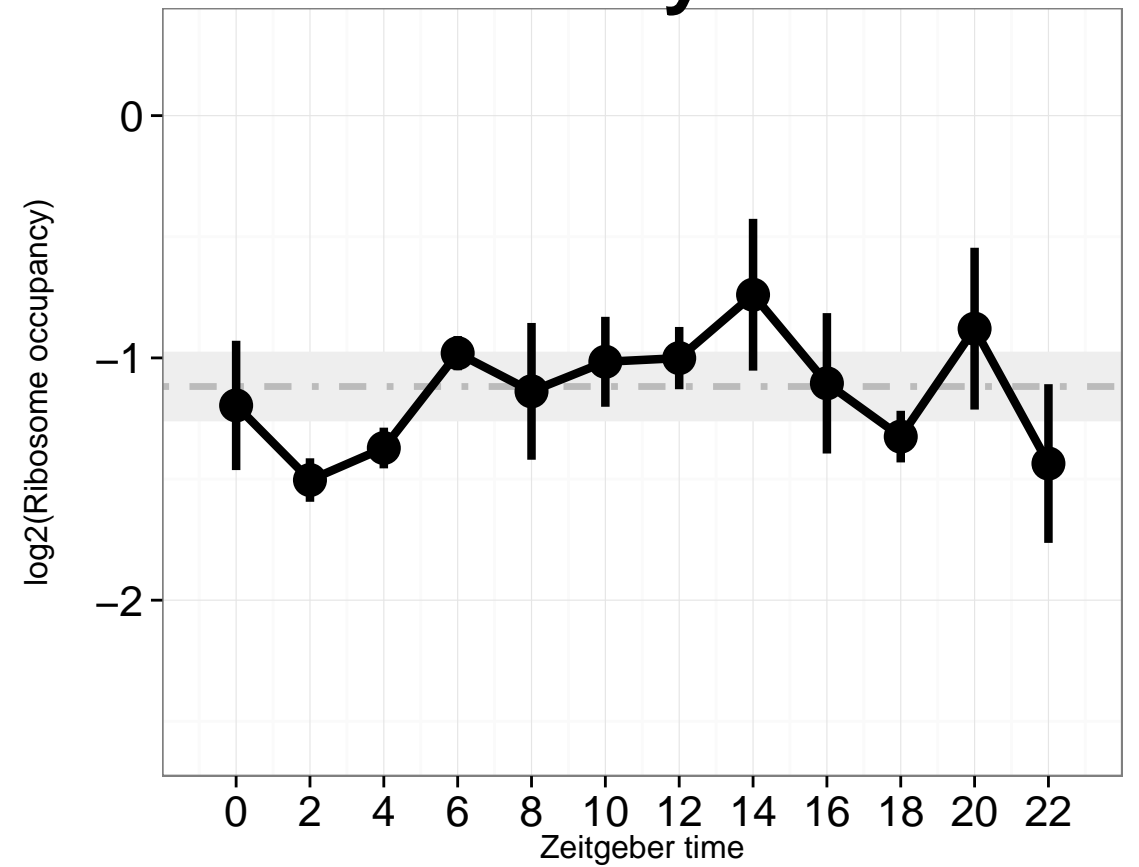

Supplement: Supplementary file 8717 [file 1]

## Hbegf

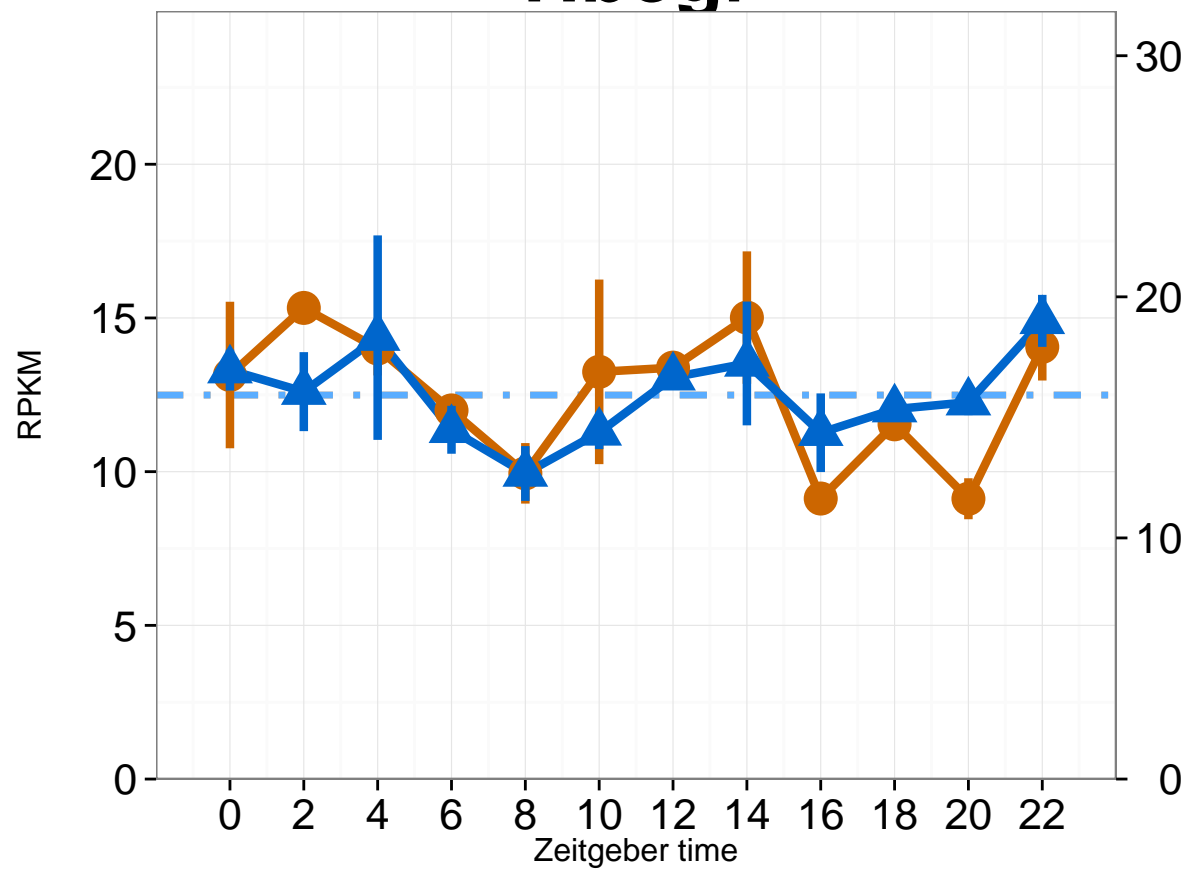

## Hbegf

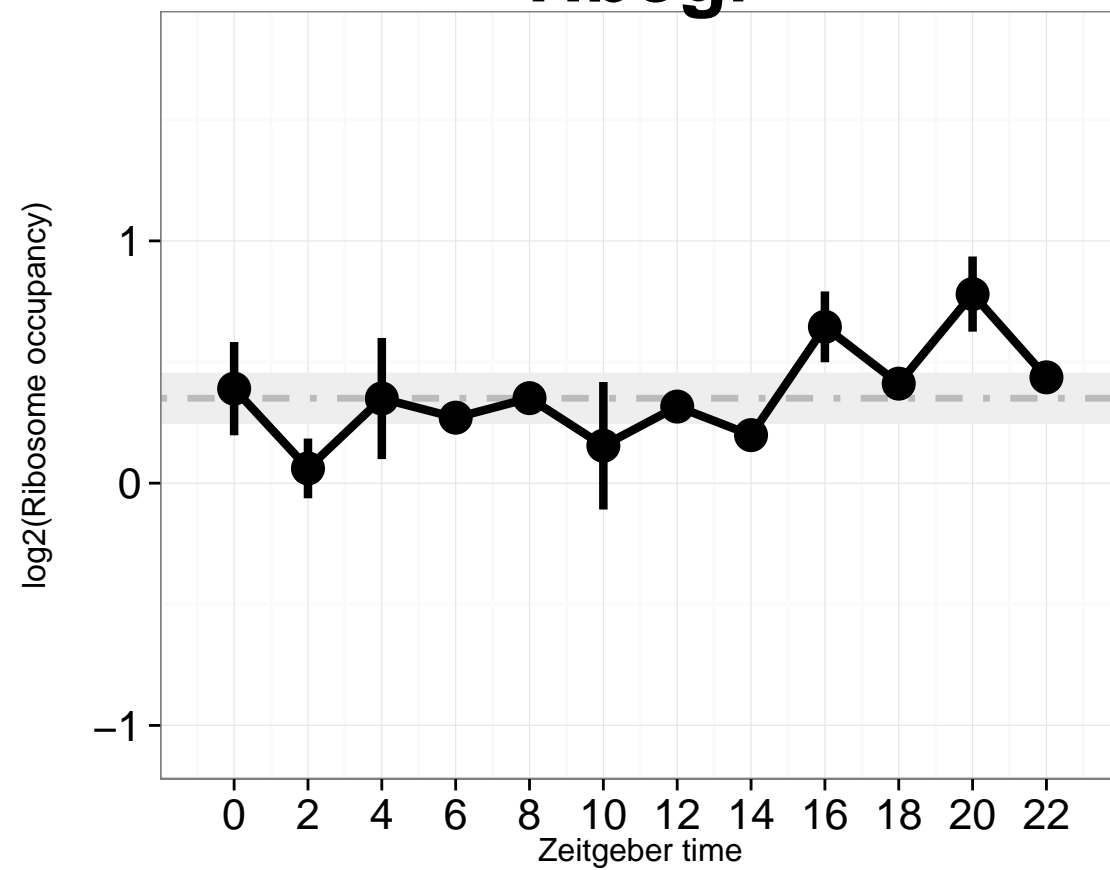

Supplement: Supplementary file 8718 [file 1]

# Zfp148

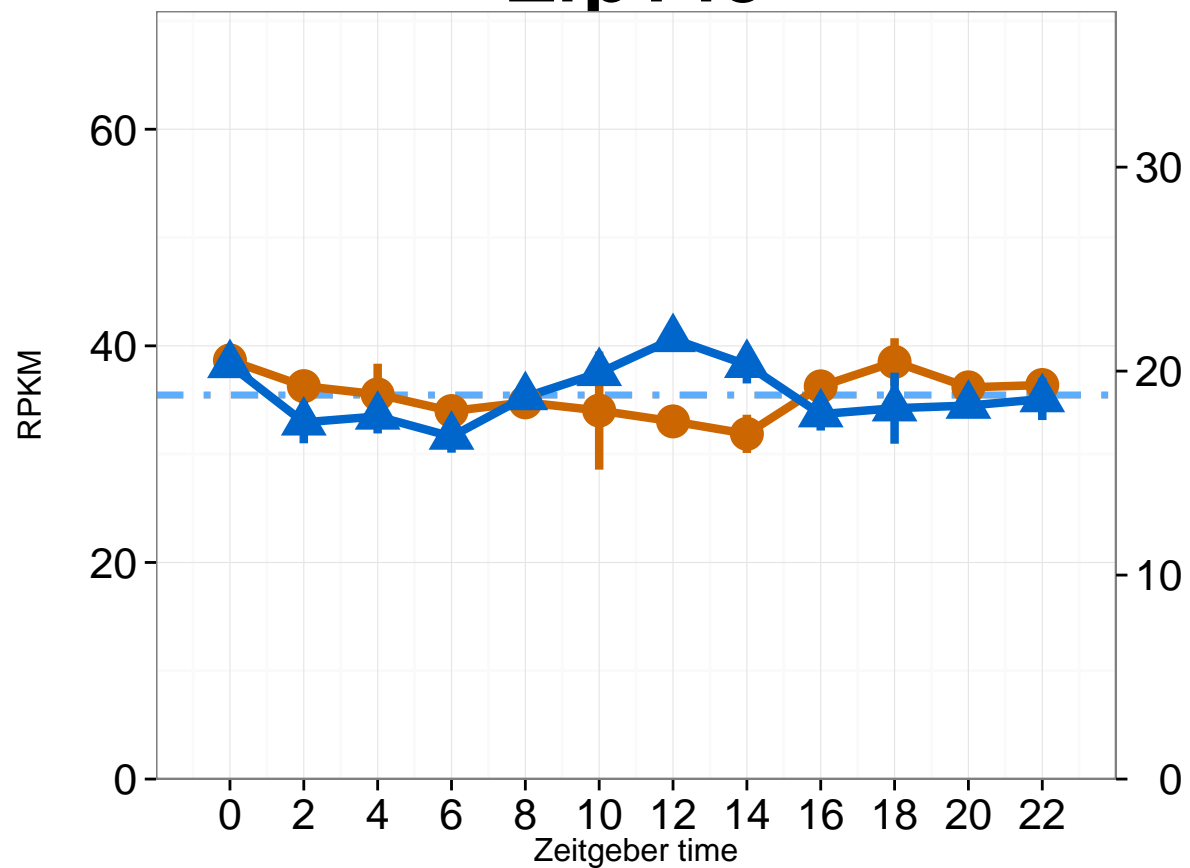

# Zfp148

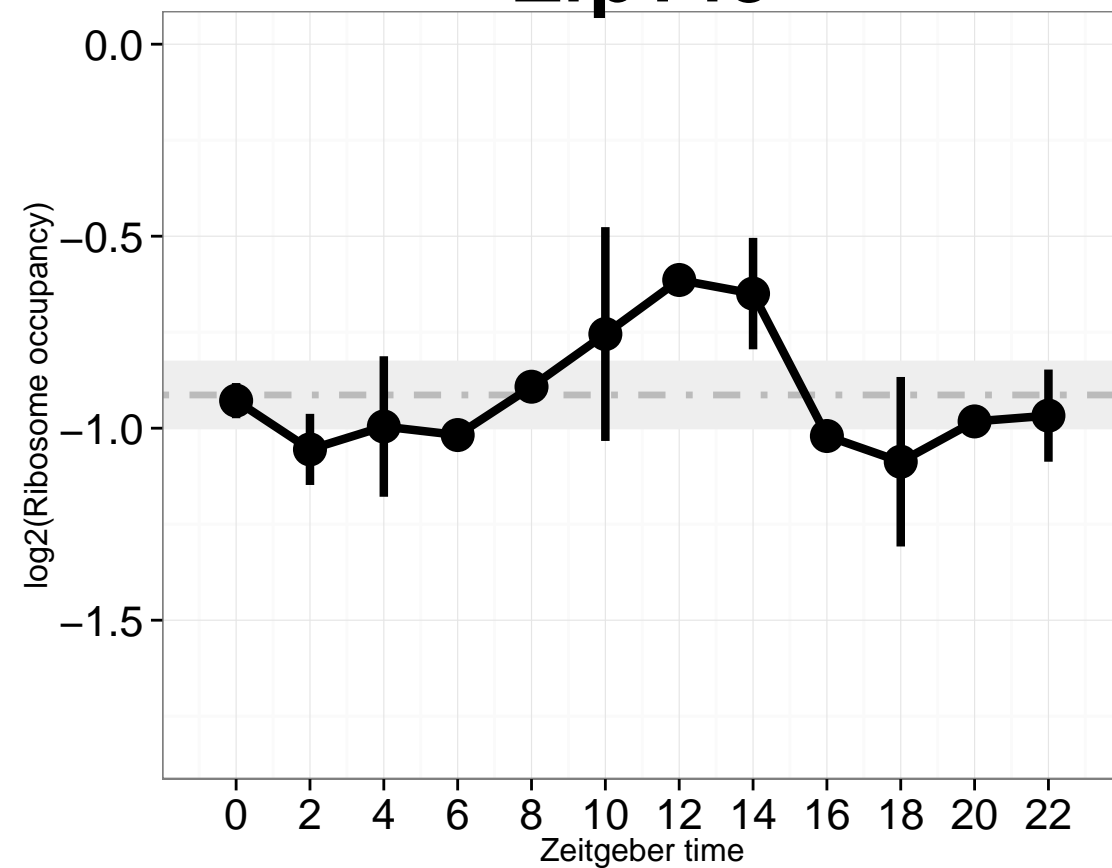

Supplement: Supplementary file 8719 [file 1]

## Rnps1

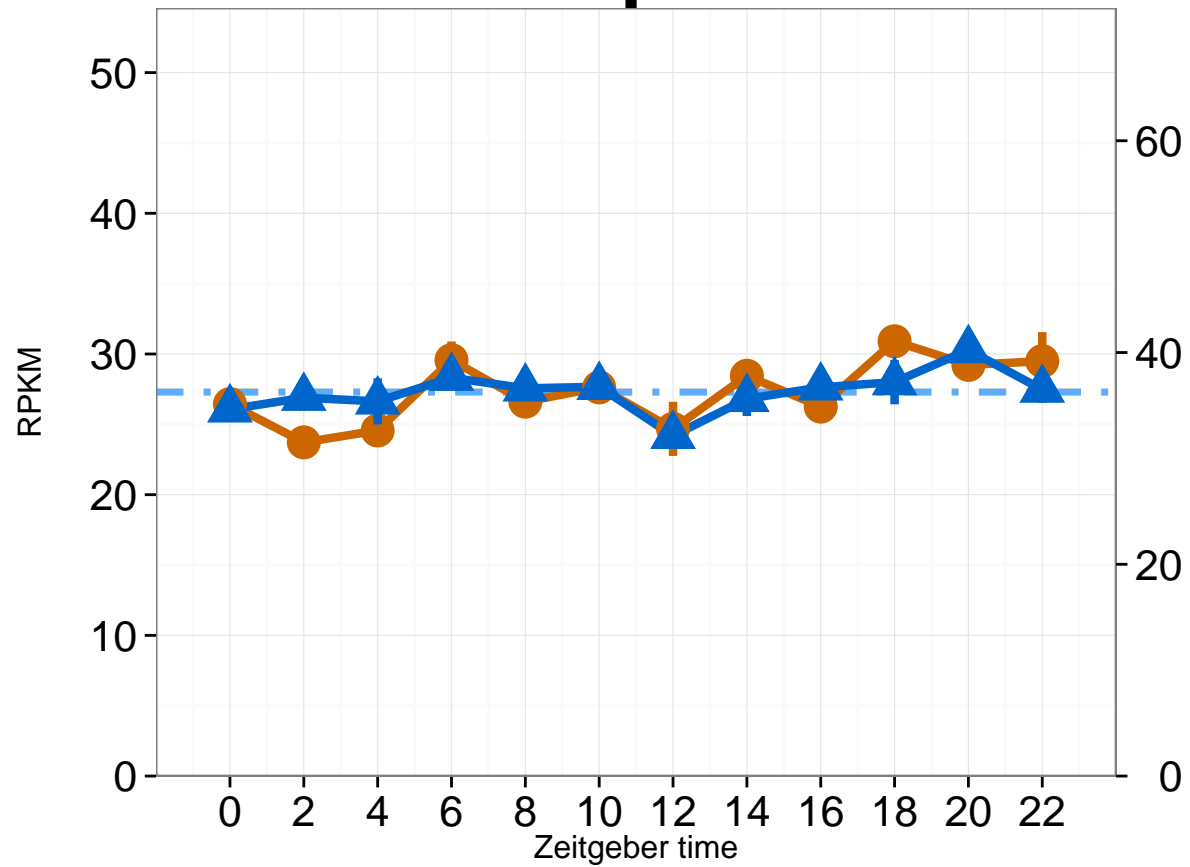

## Rnps1

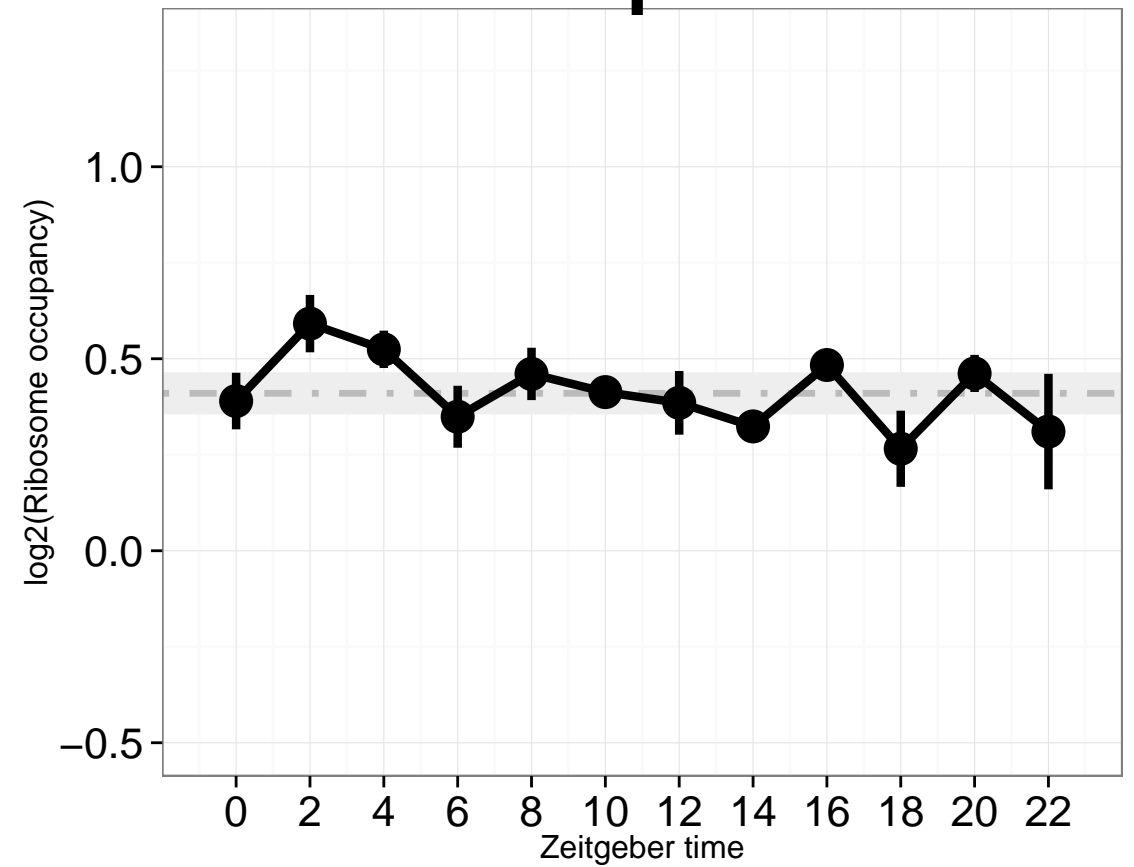

Supplement: Supplementary file 8720 [file 1]

## Fbxo28

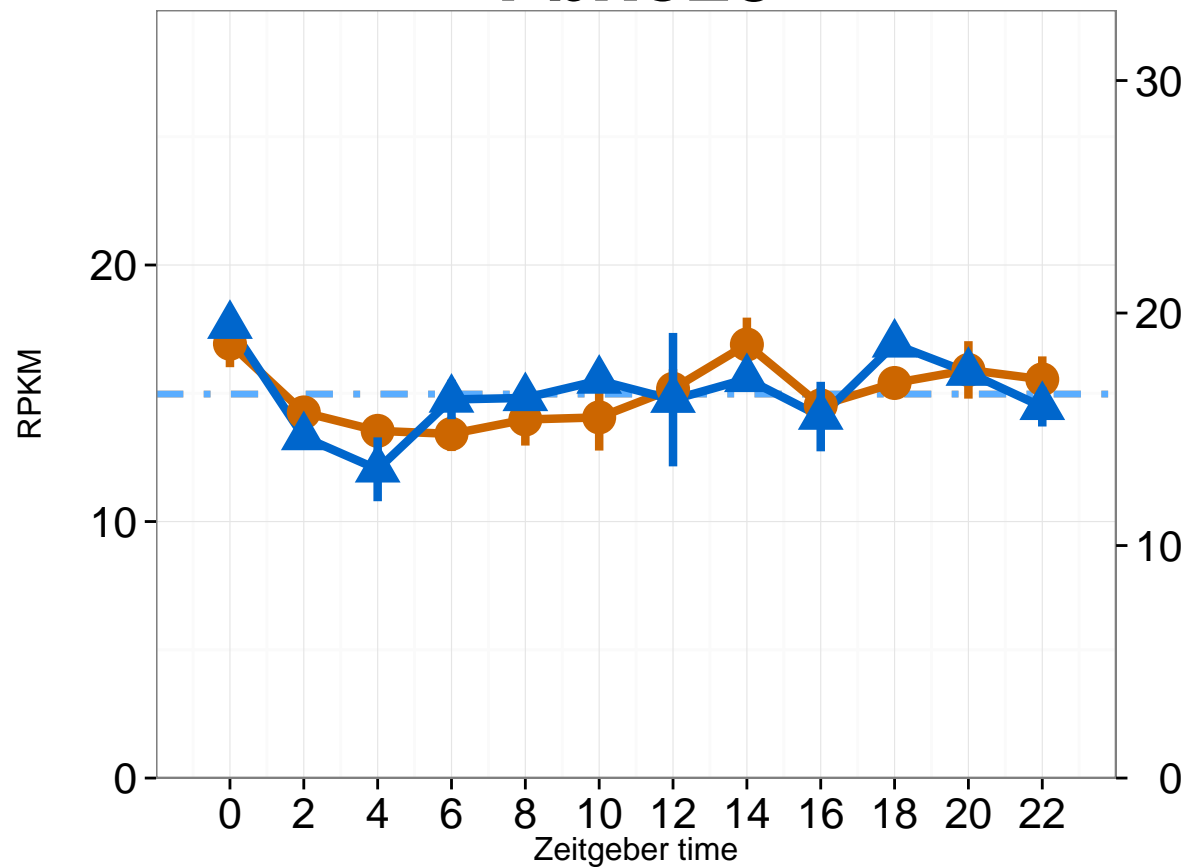

## Fbxo28

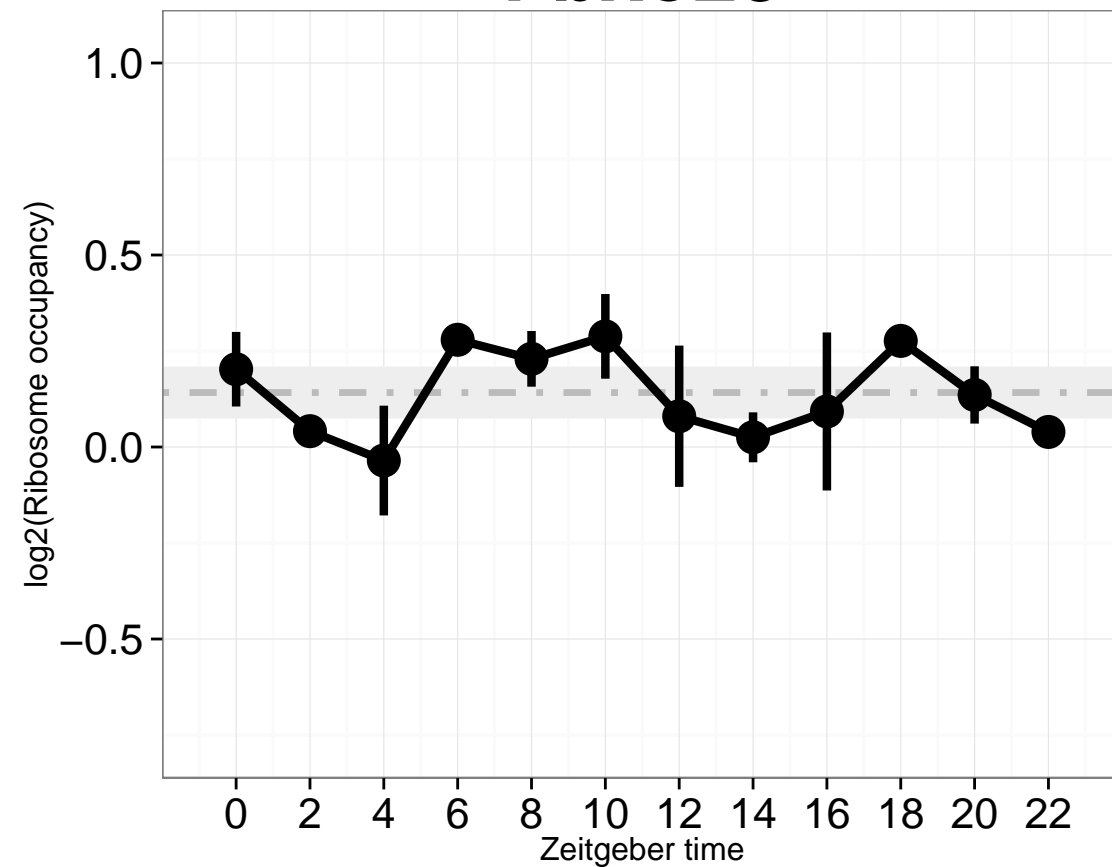

Supplement: Supplementary file 8721 [file 1]

## Gem

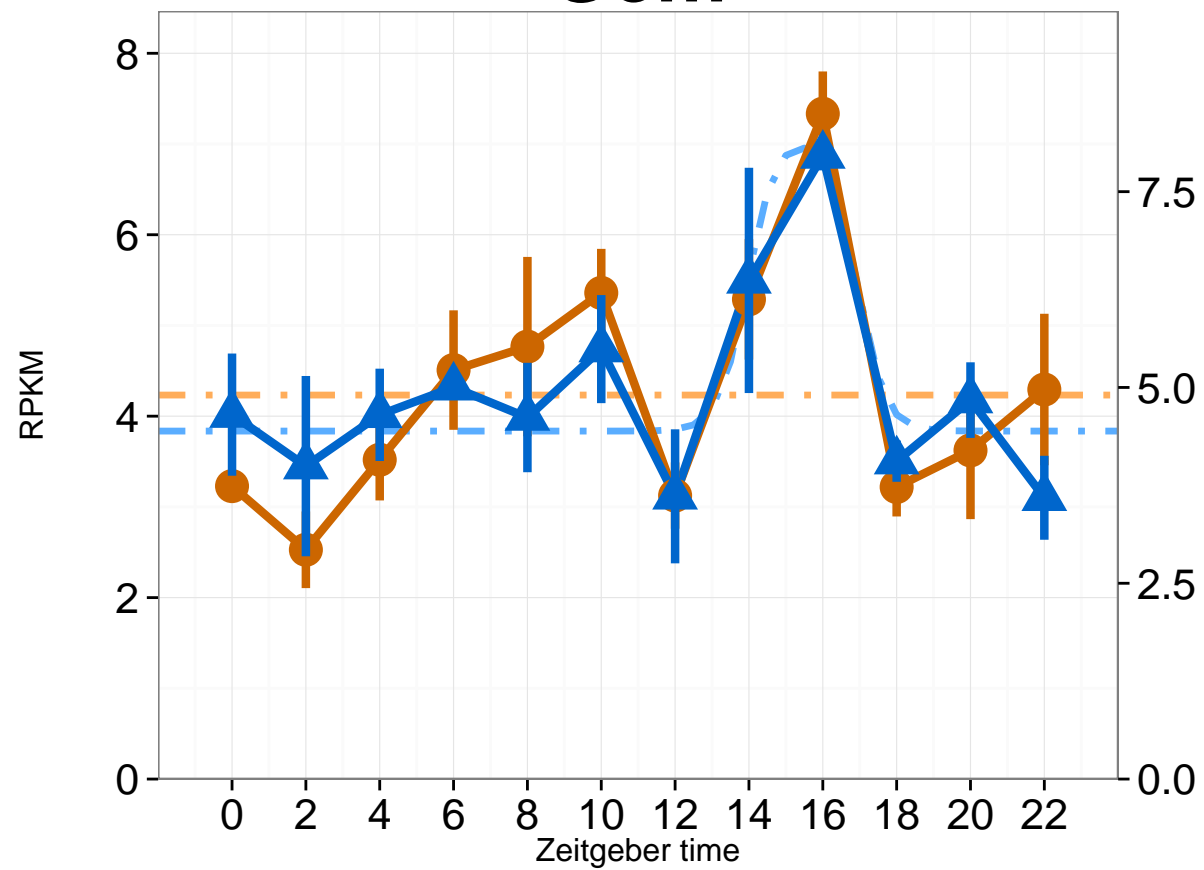

## Gem

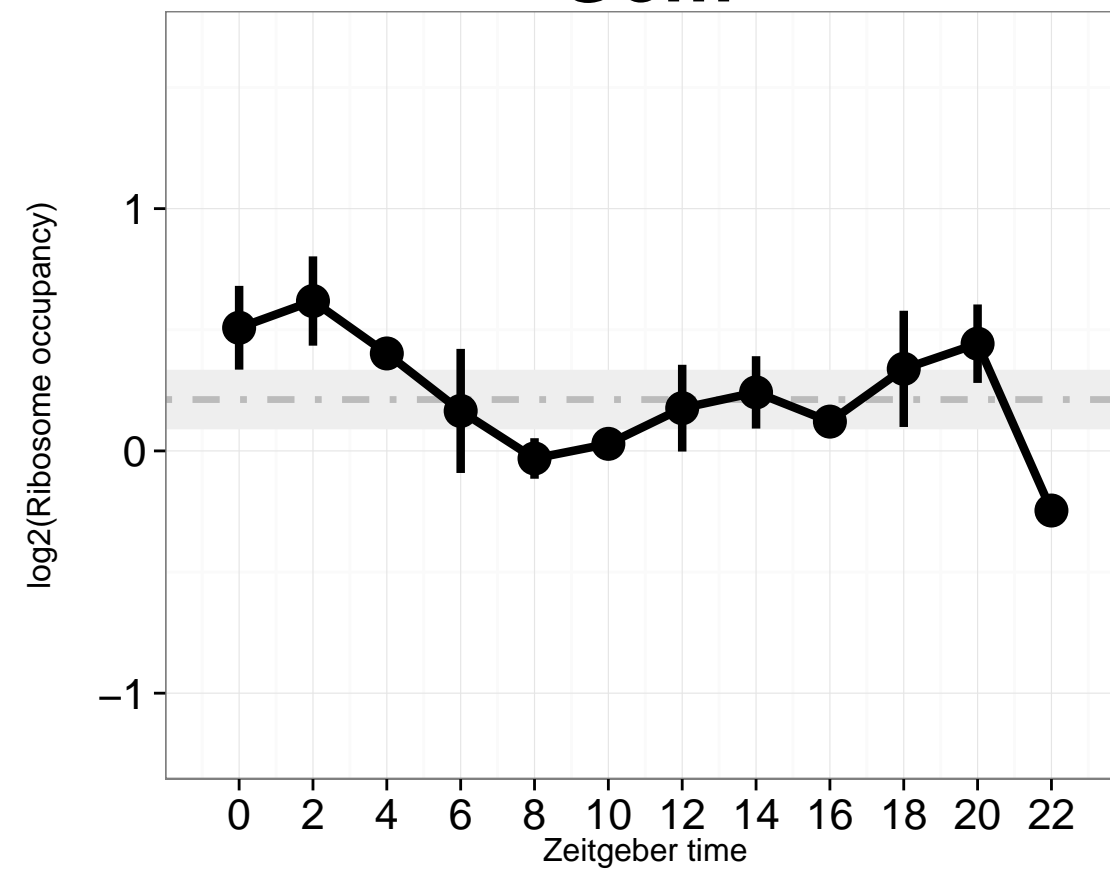

Supplement: Supplementary file 8722 [file 1]

## Gm15319

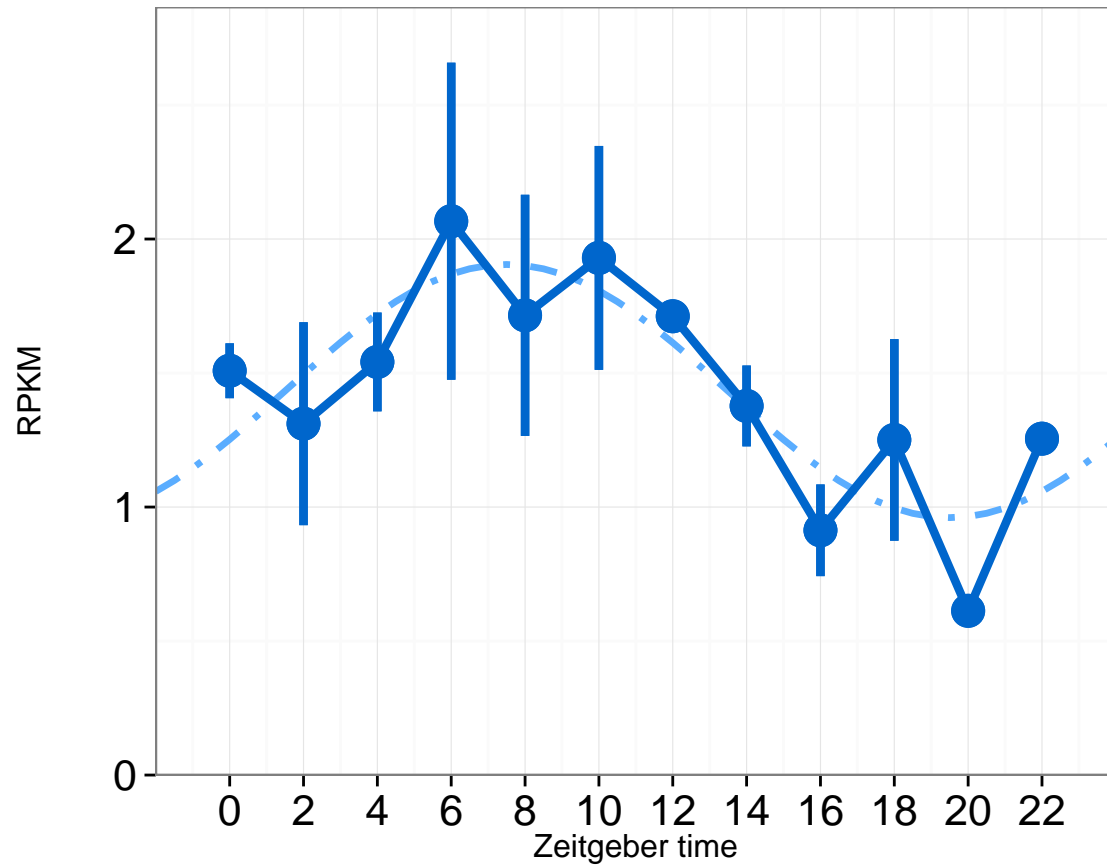

## Gm15319 log2(Ribosome occupanc

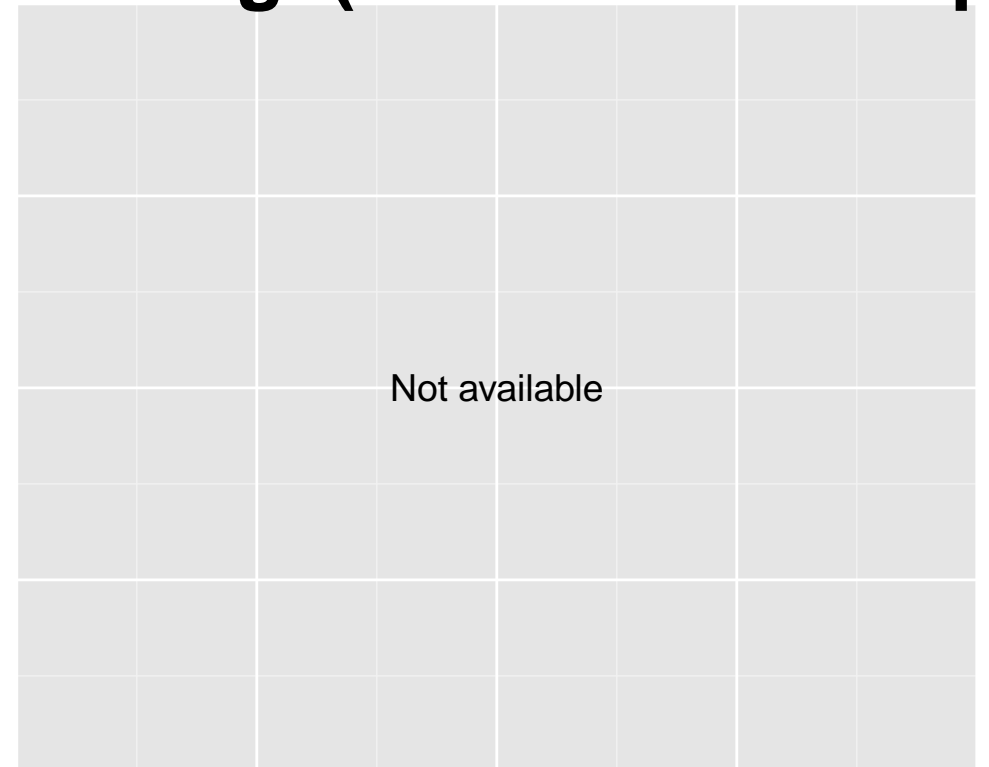

Supplement: Supplementary file 8723 [file 1]

## Cirbp

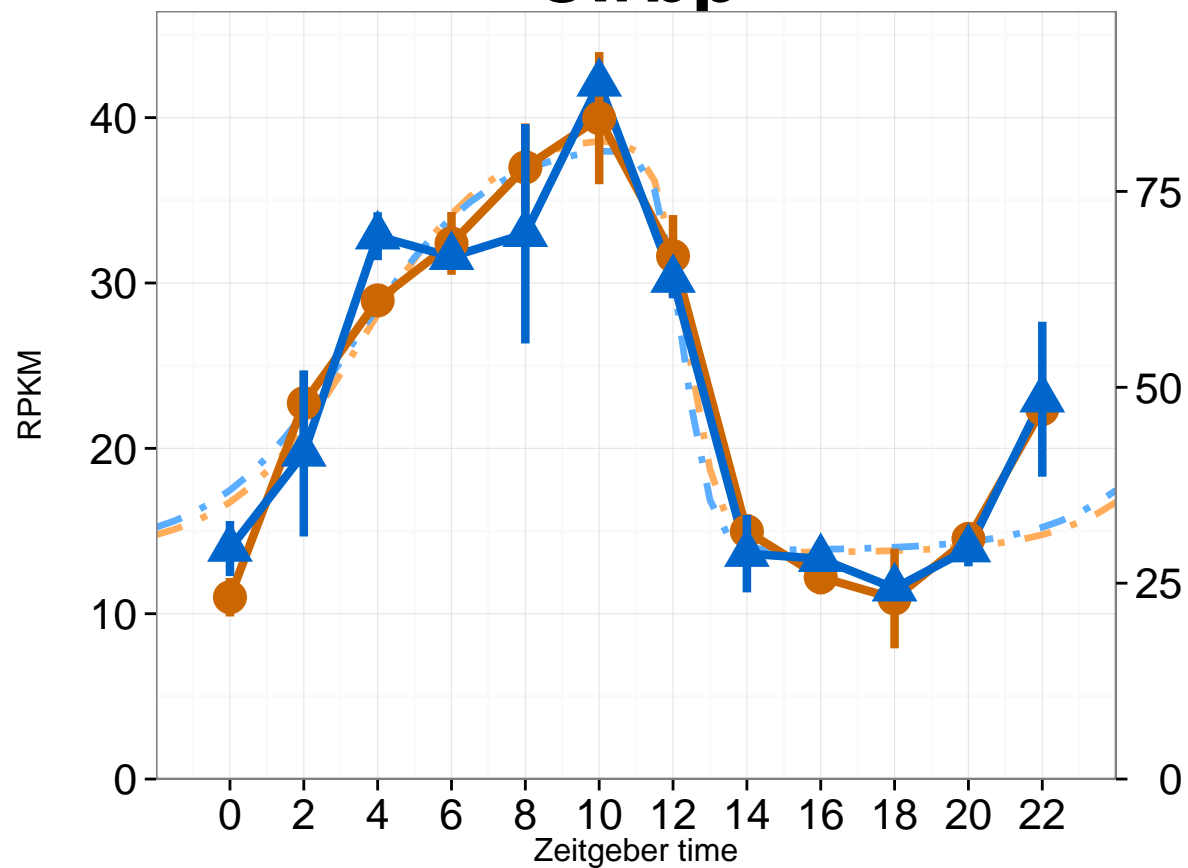

## Cirbp

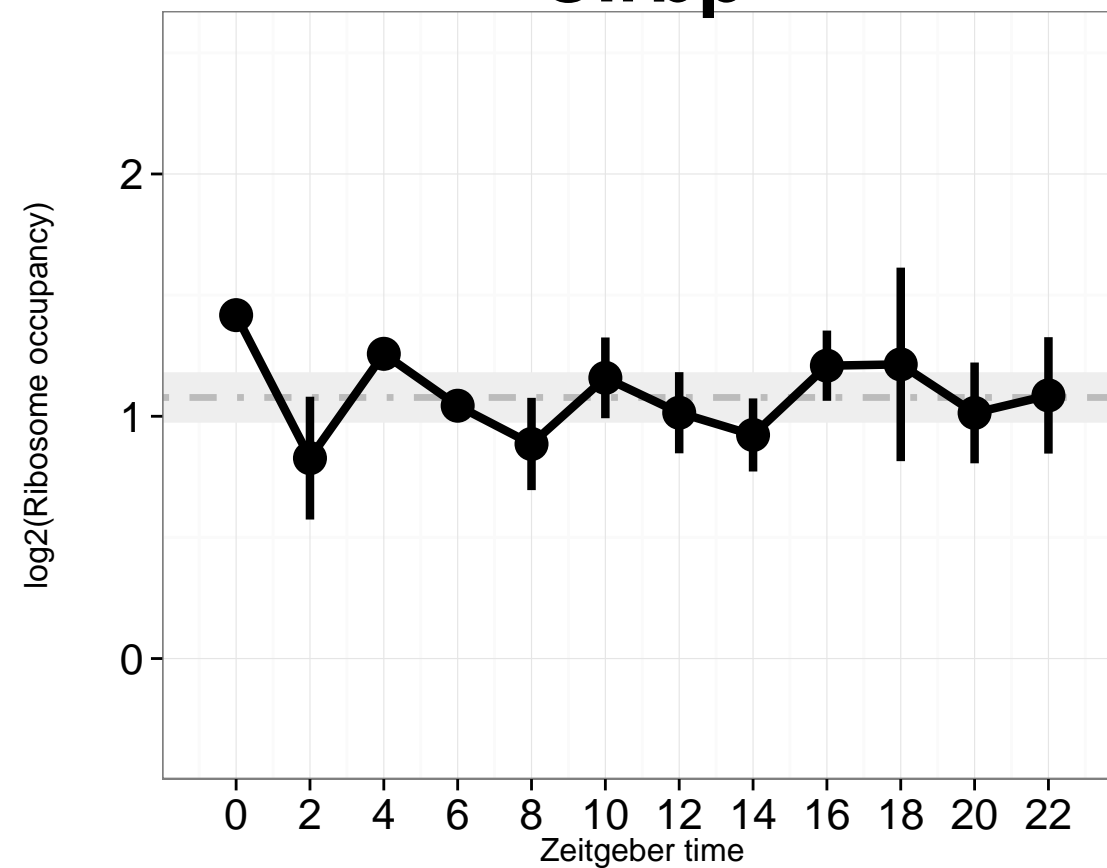

Supplement: Supplementary file 8724 [file 1]

# Dnajb4

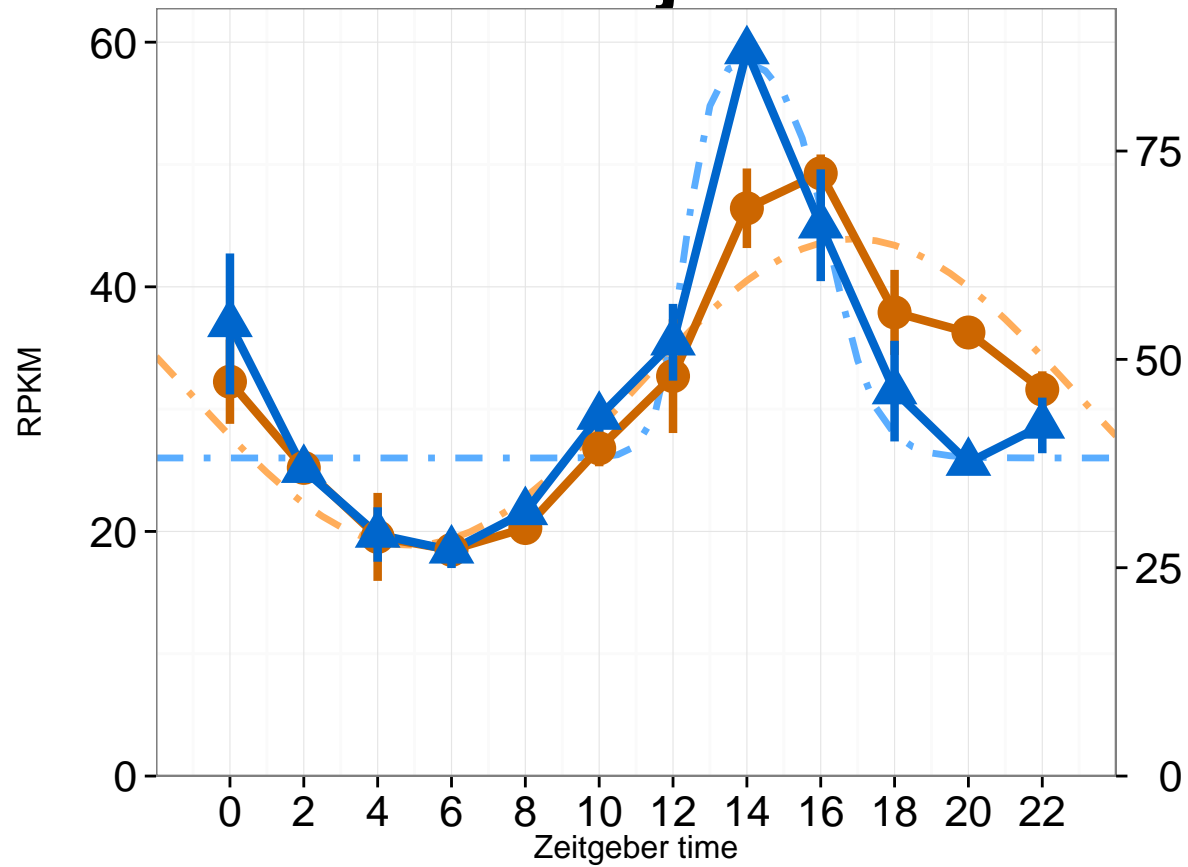

# Dnajb4

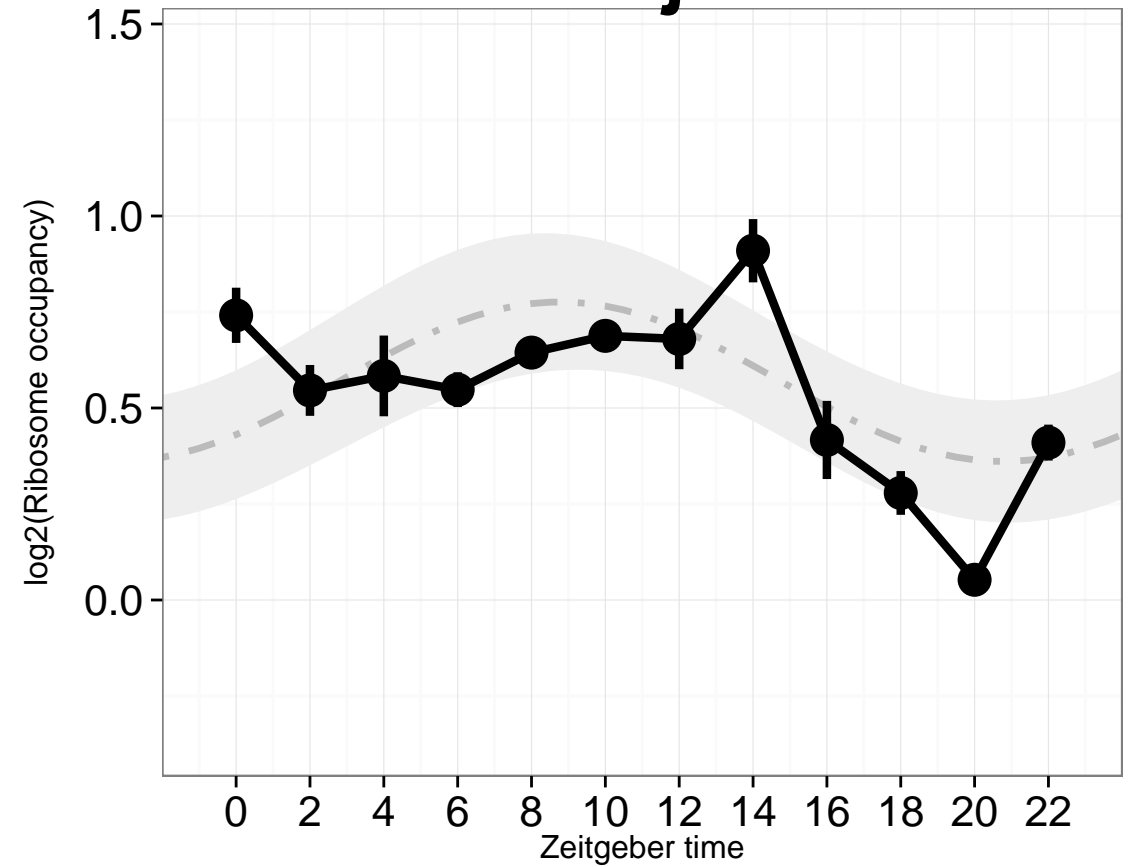

Supplement: Supplementary file 8725 [file 1]

**Sema3b**

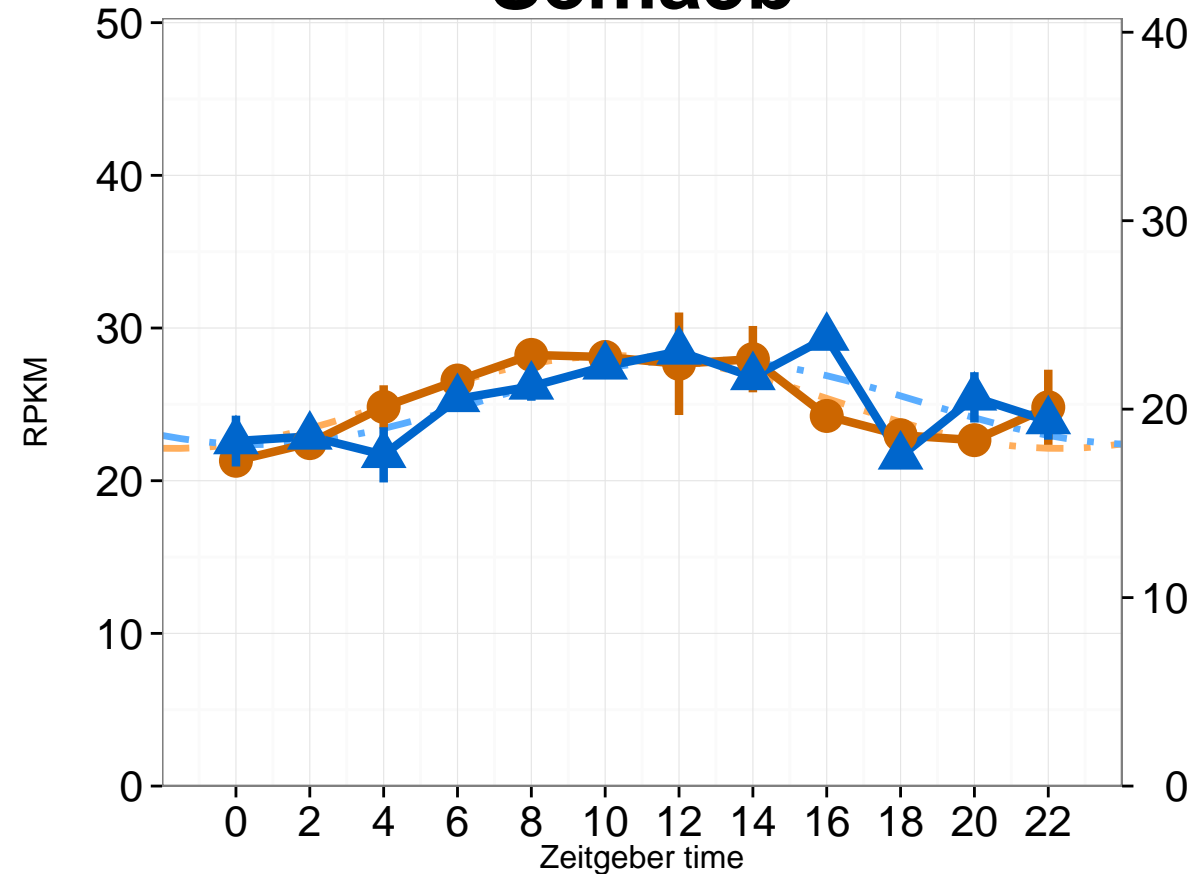

**Sema3b**

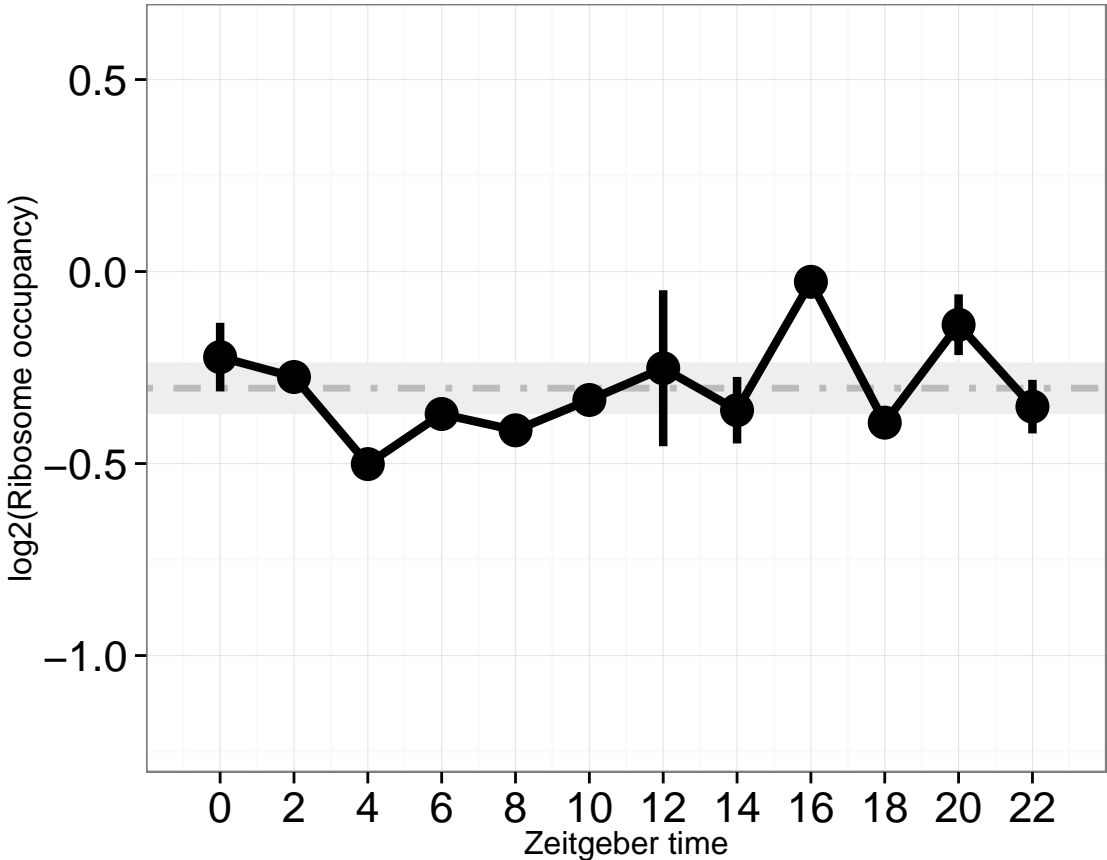

Supplement: Supplementary file 8726 [file 1]

## Htr3a

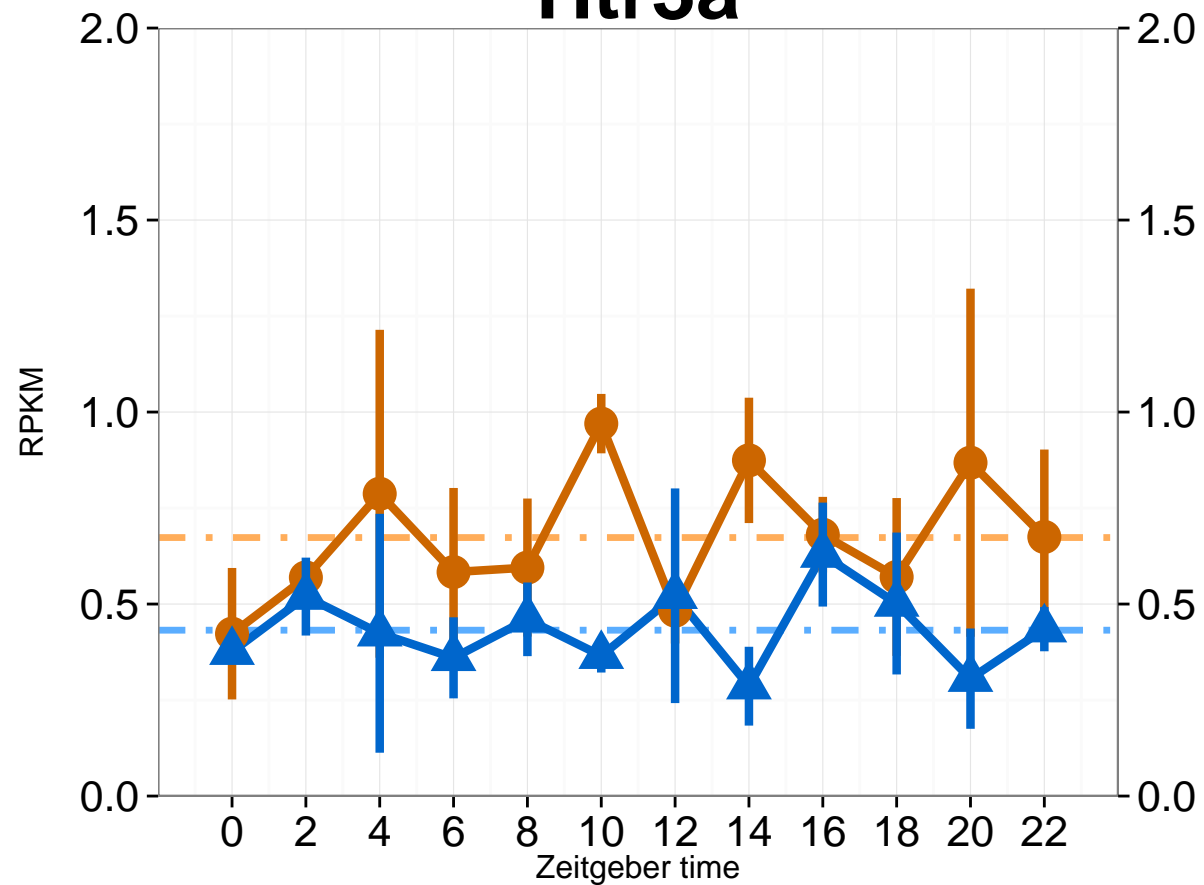

## Htr3a

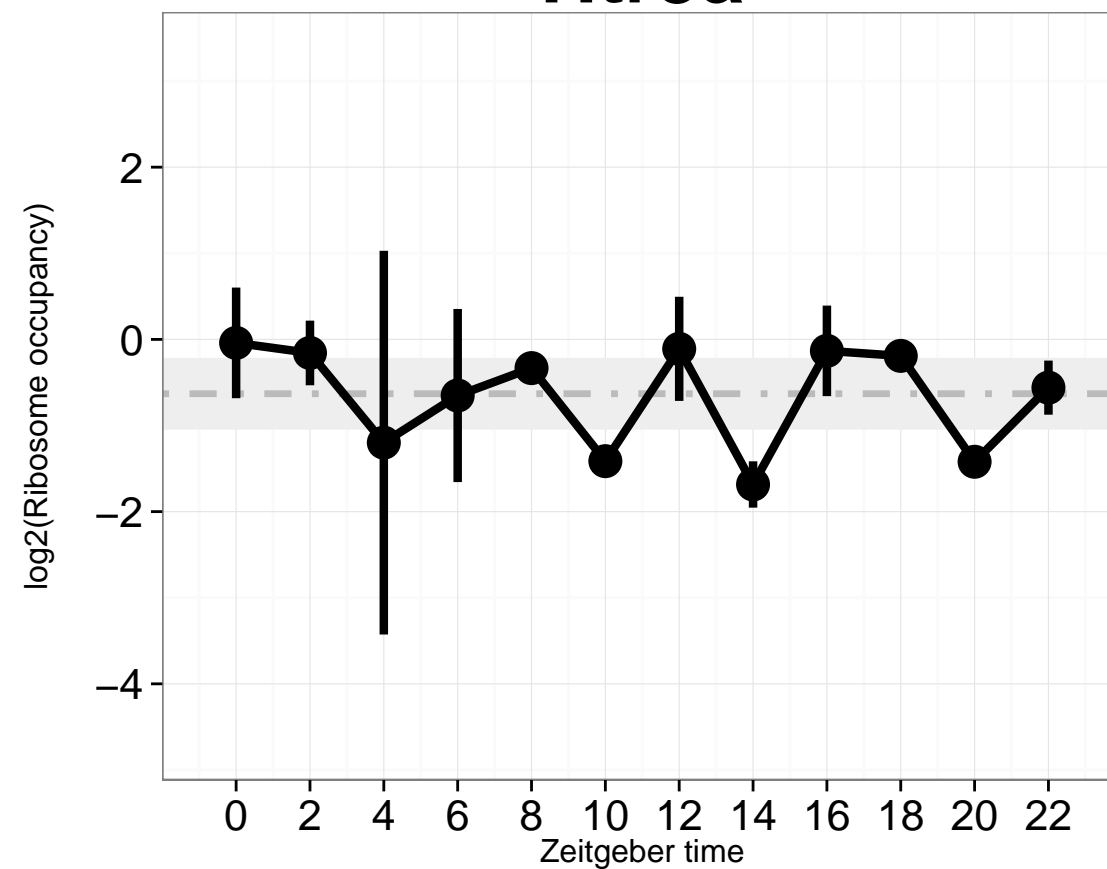

Supplement: Supplementary file 8727 [file 1]

# Gm10681

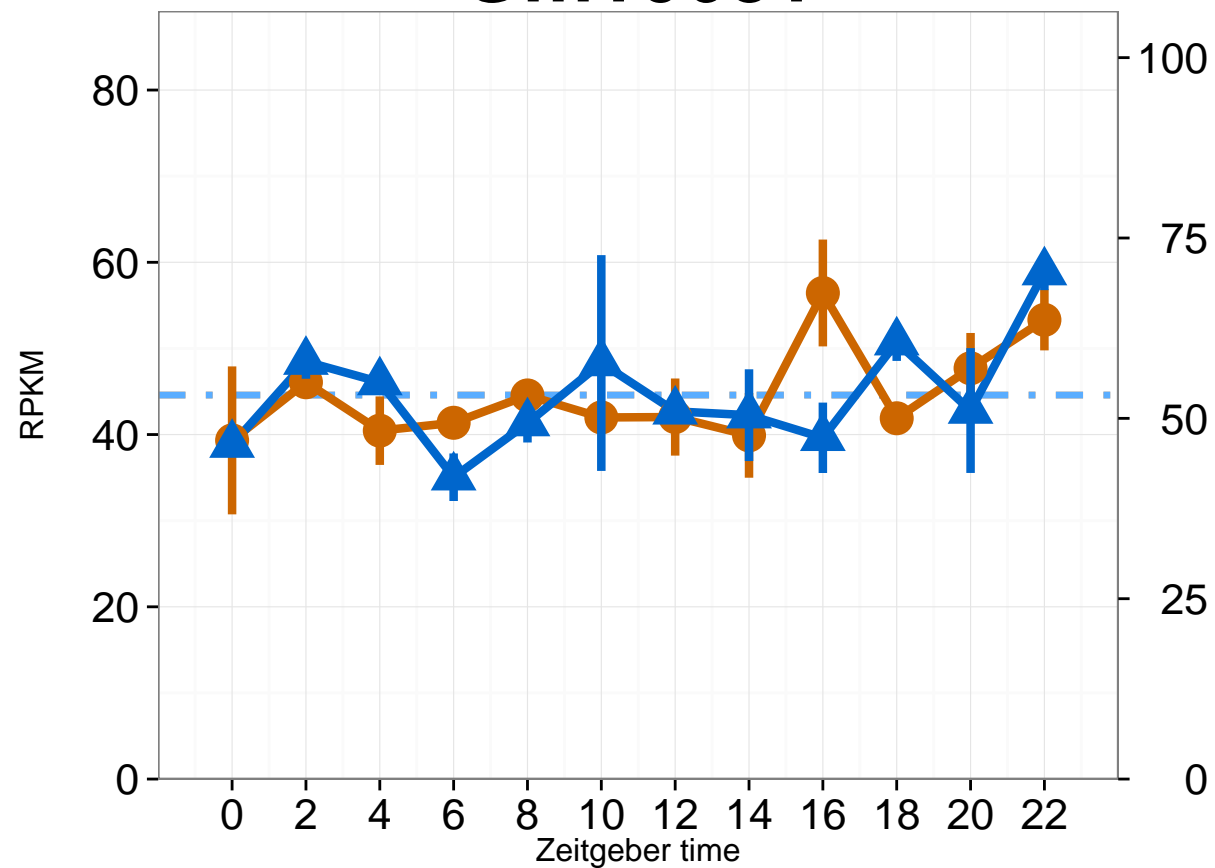

# Gm10681

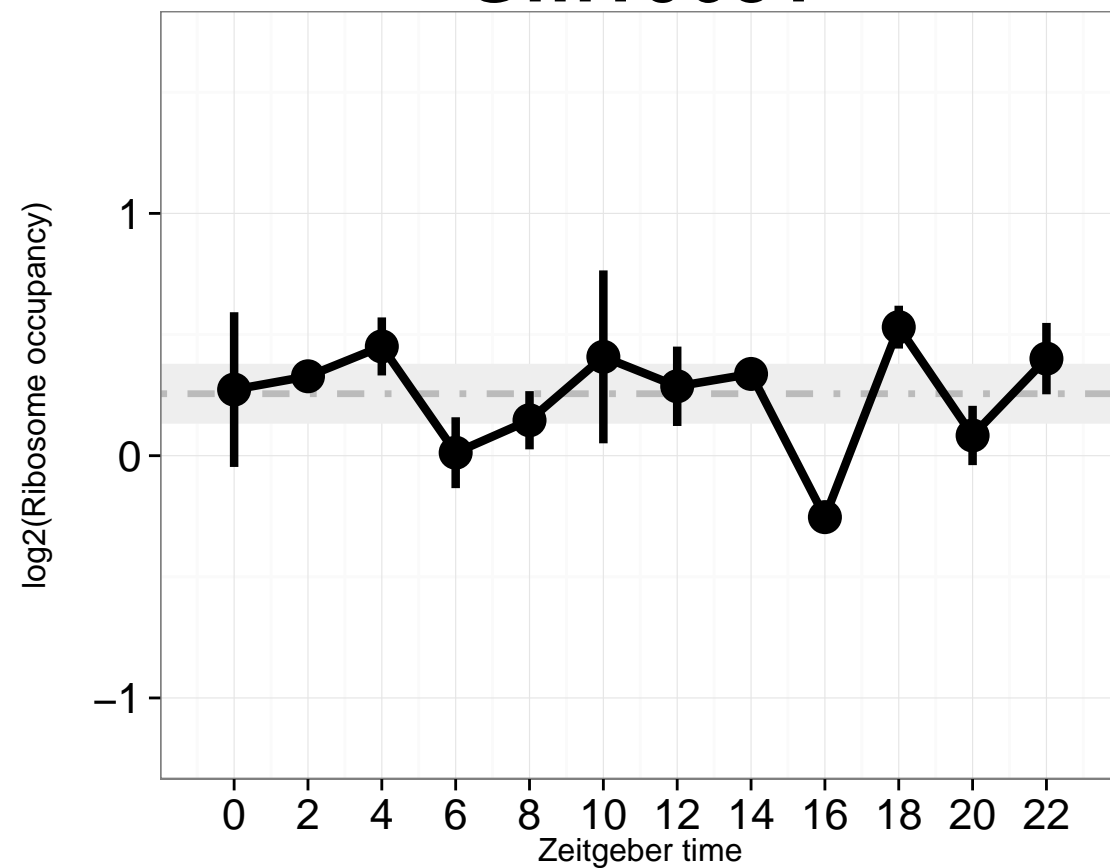

Supplement: Supplementary file 8728 [file 1]

# 1110004F10Rik

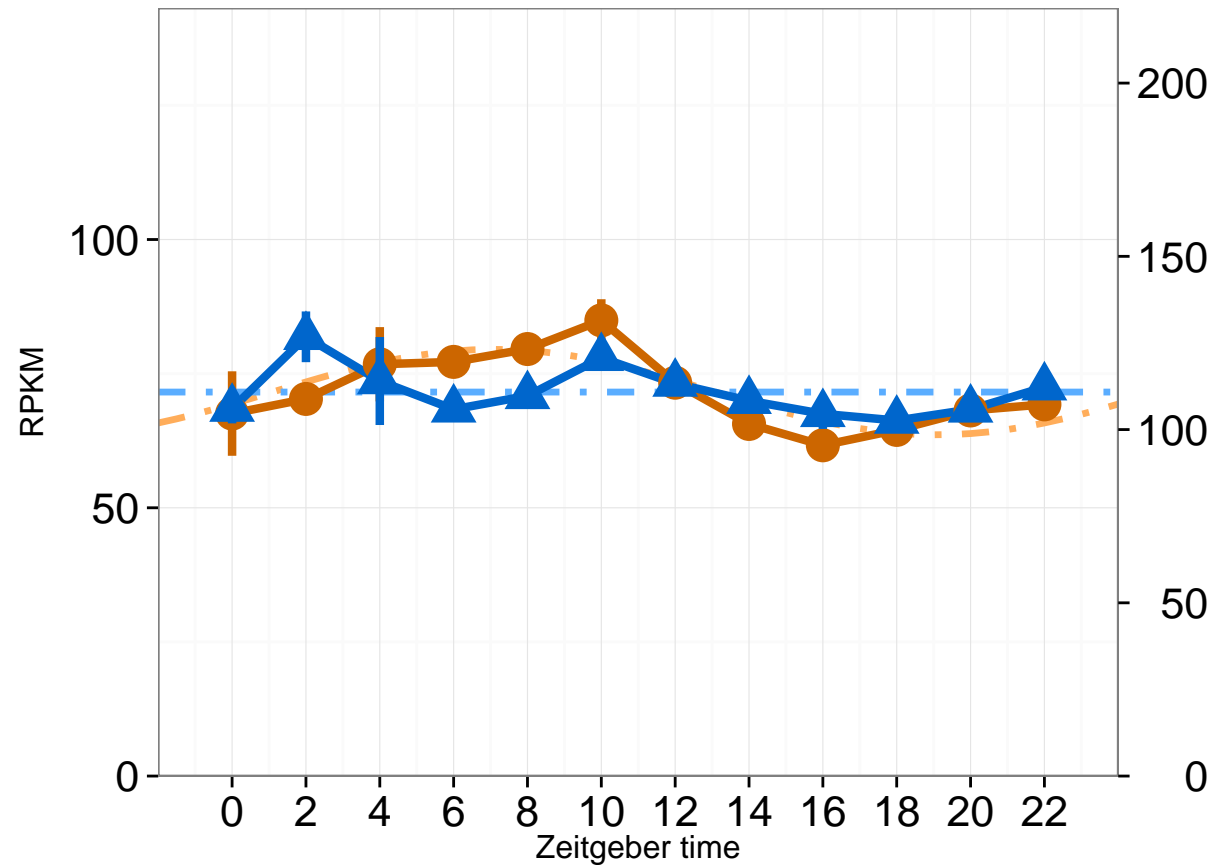

# 1110004F10Rik

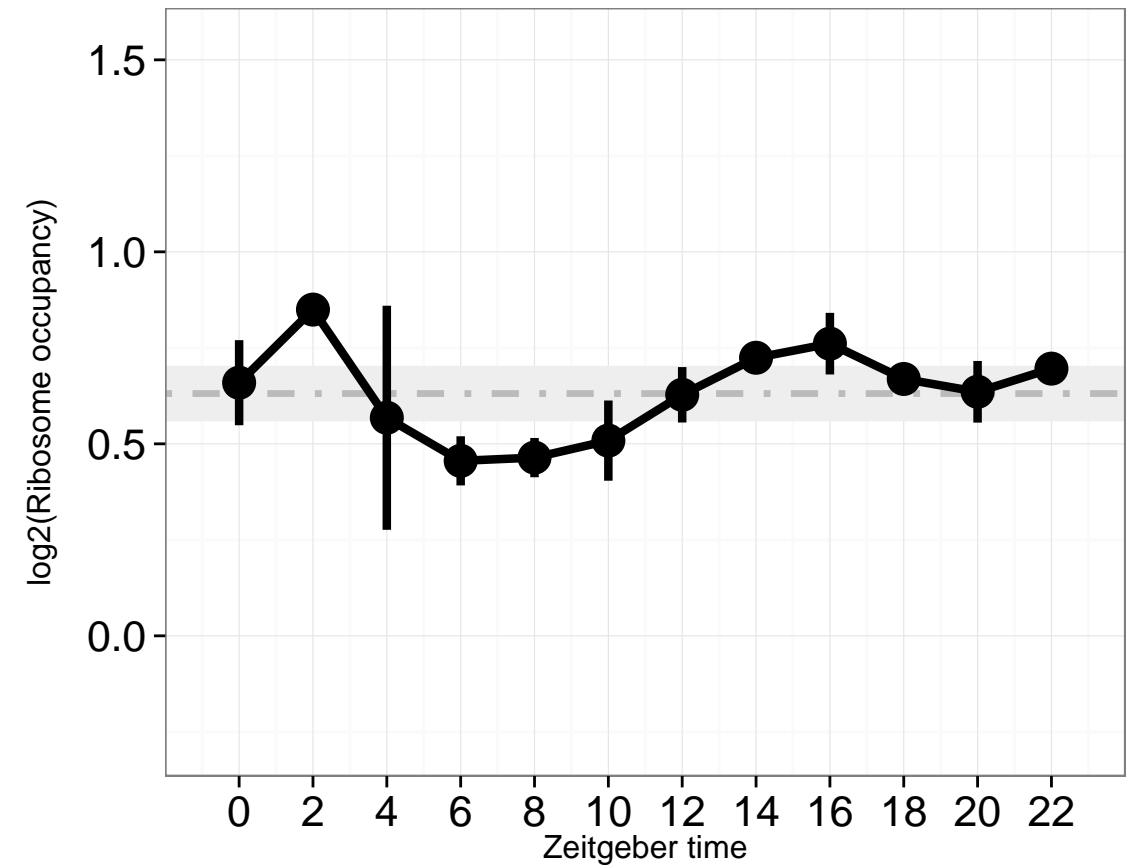

Supplement: Supplementary file 8729 [file 1]
