# Supplementary material (part 88 of 133)
Source: publisher figshare collection journal article supplement (https://springernature.figshare.com/articles/dataset/_/4903193)

# Tmem8b

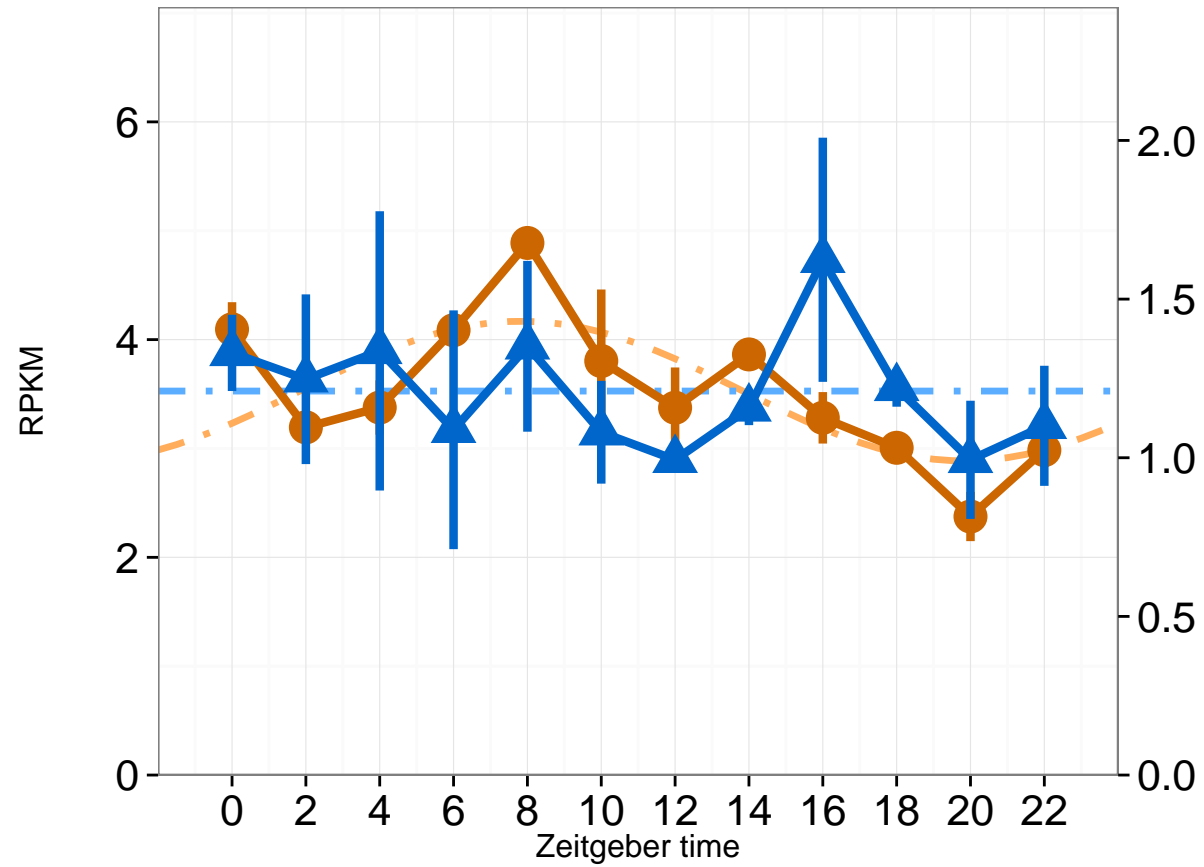

# Tmem8b

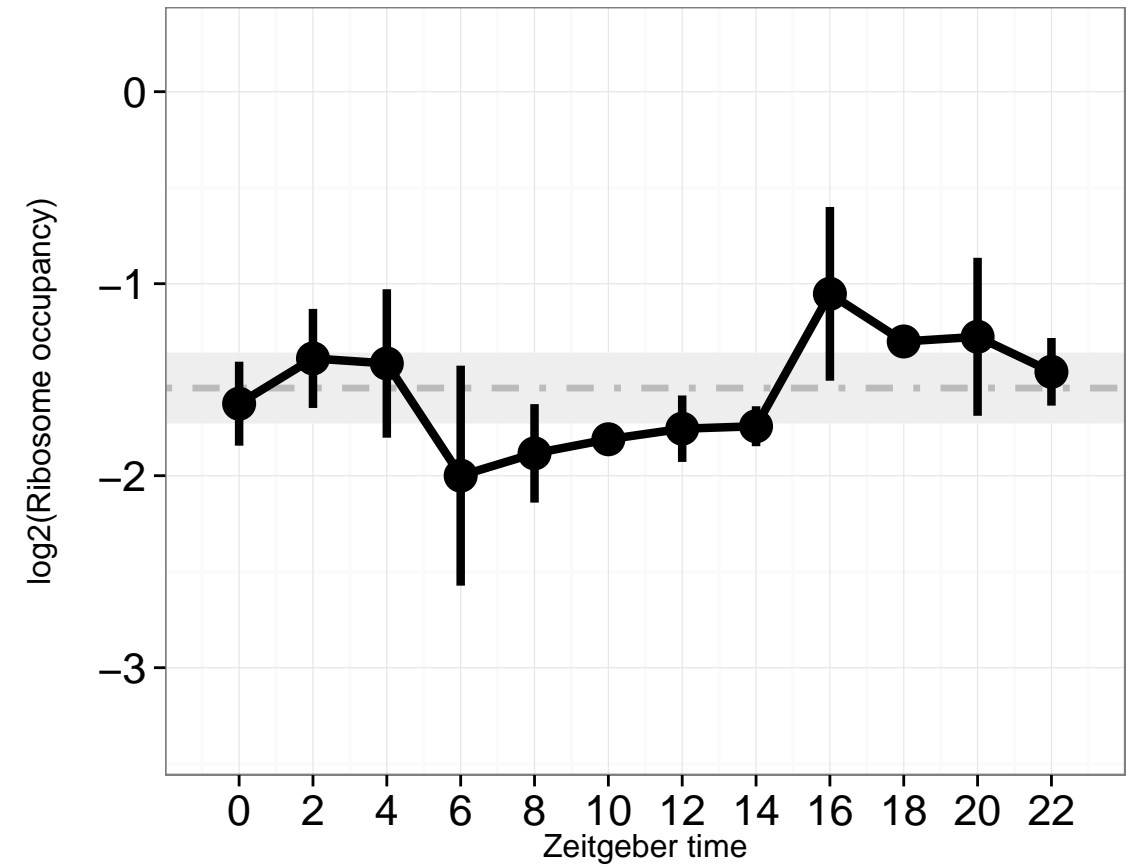

Supplement: Supplementary file 8730 [file 1]

## Noc3l

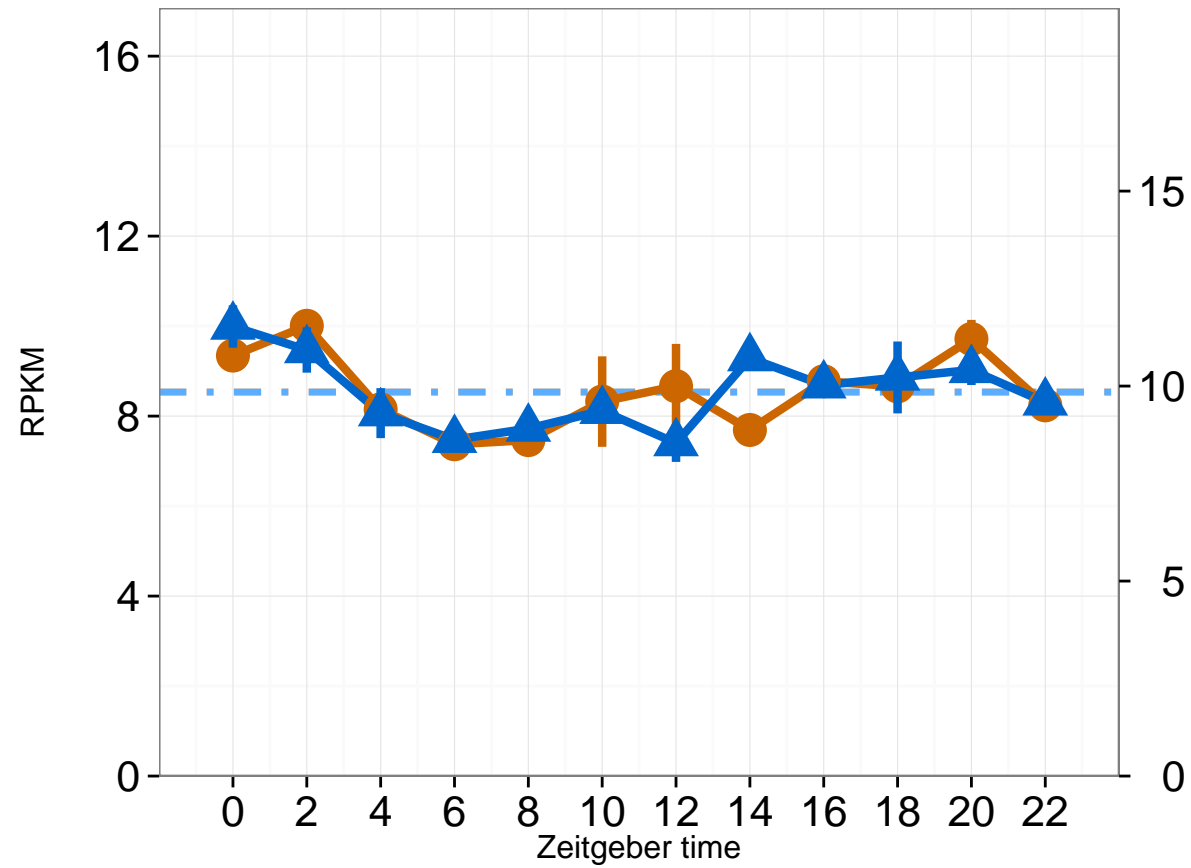

## Noc3l

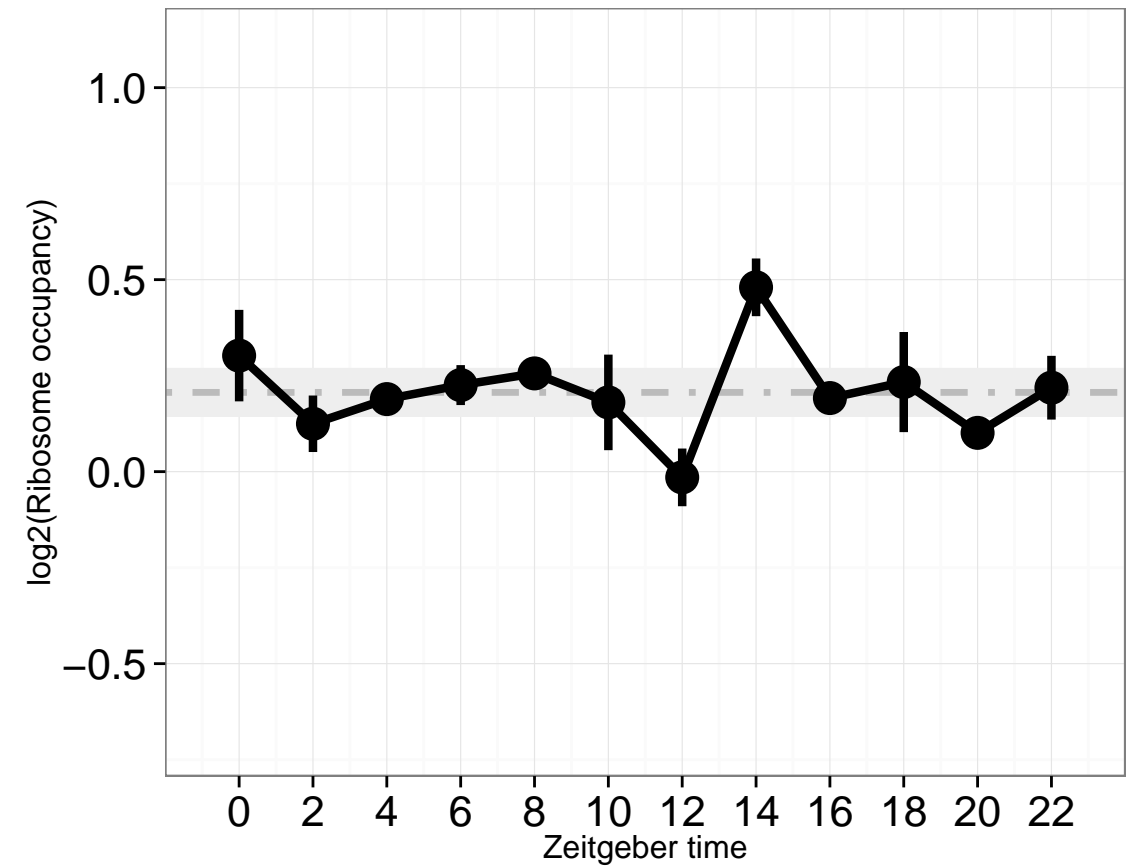

Supplement: Supplementary file 8731 [file 1]

# Ap1s1

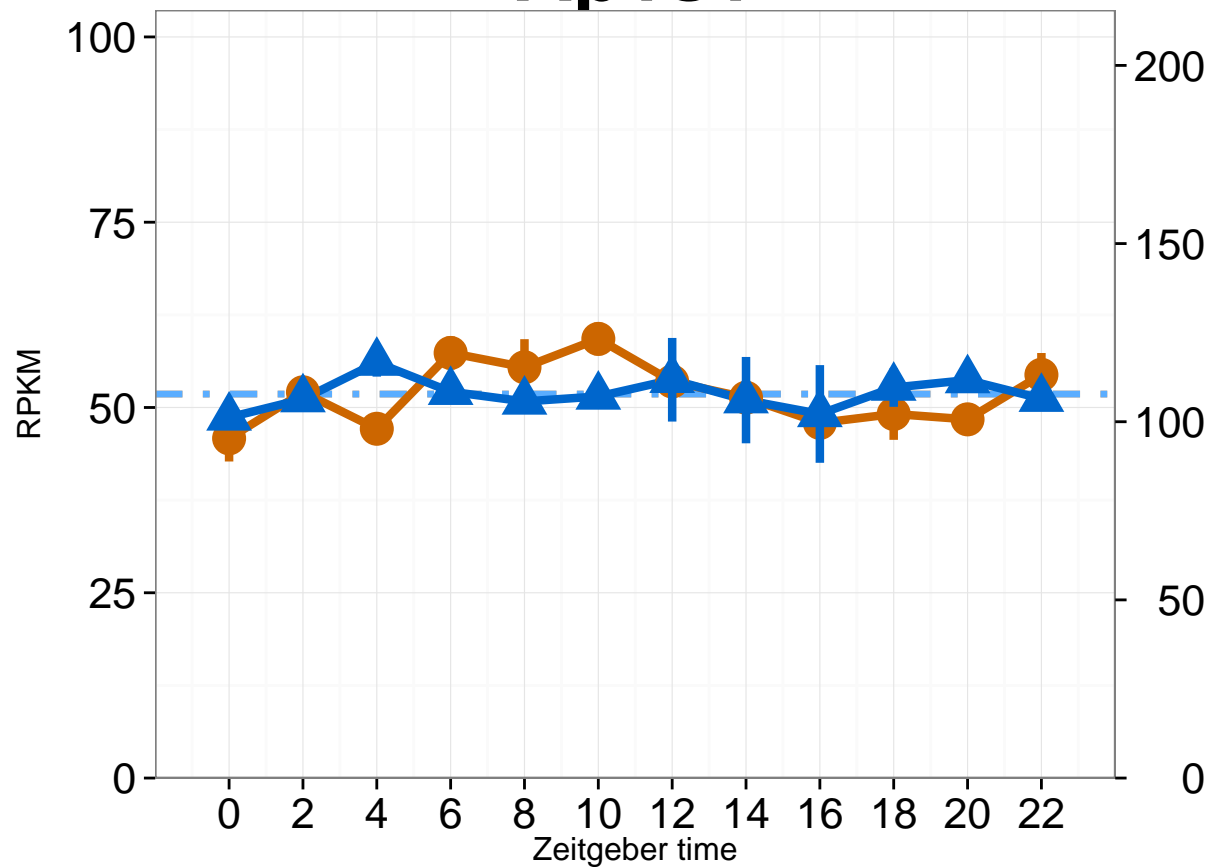

# Ap1s1

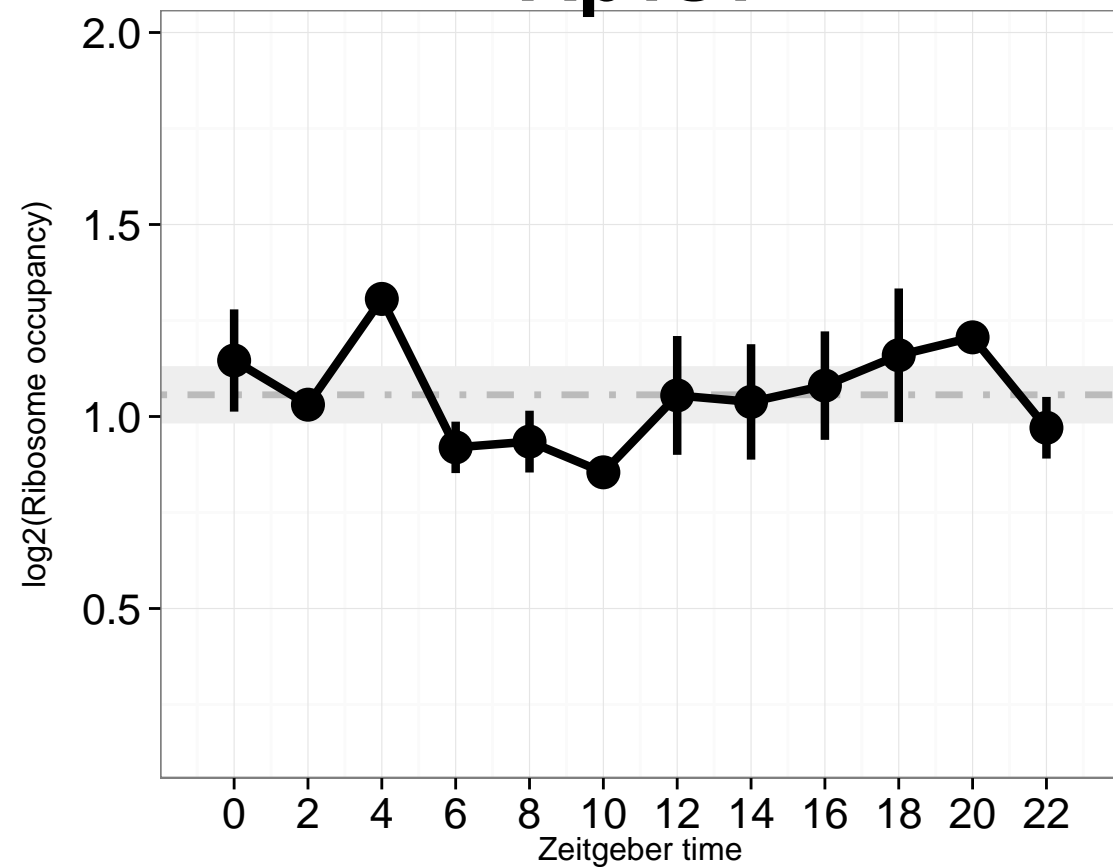

Supplement: Supplementary file 8732 [file 1]

# Nt5c1a

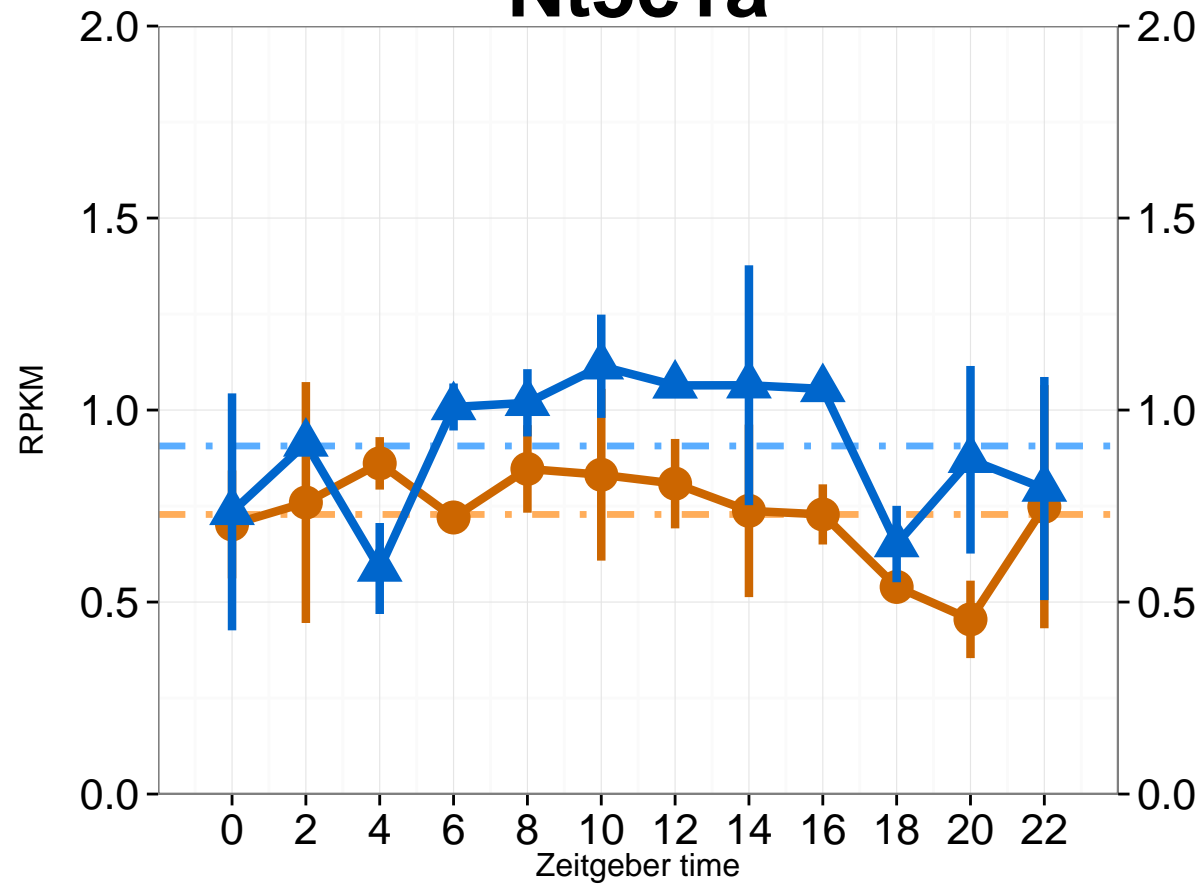

# Nt5c1a

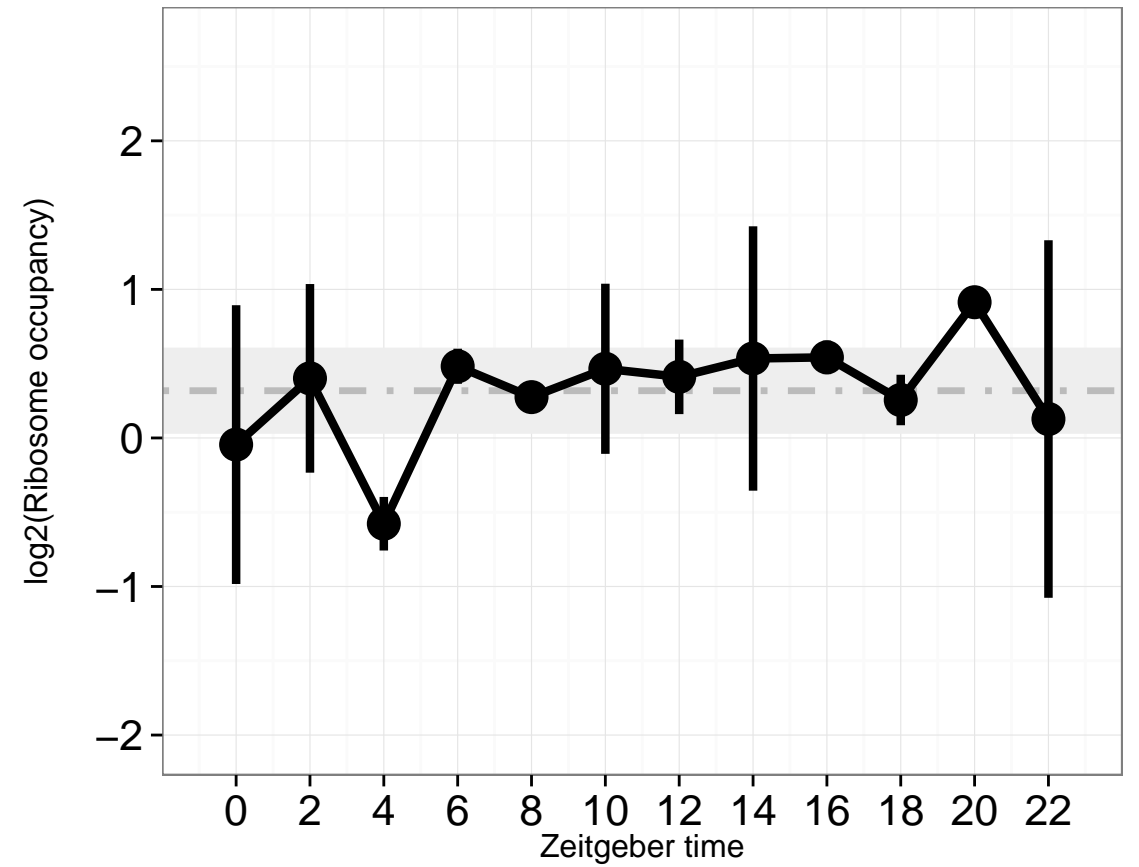

Supplement: Supplementary file 8733 [file 1]

## Creb1

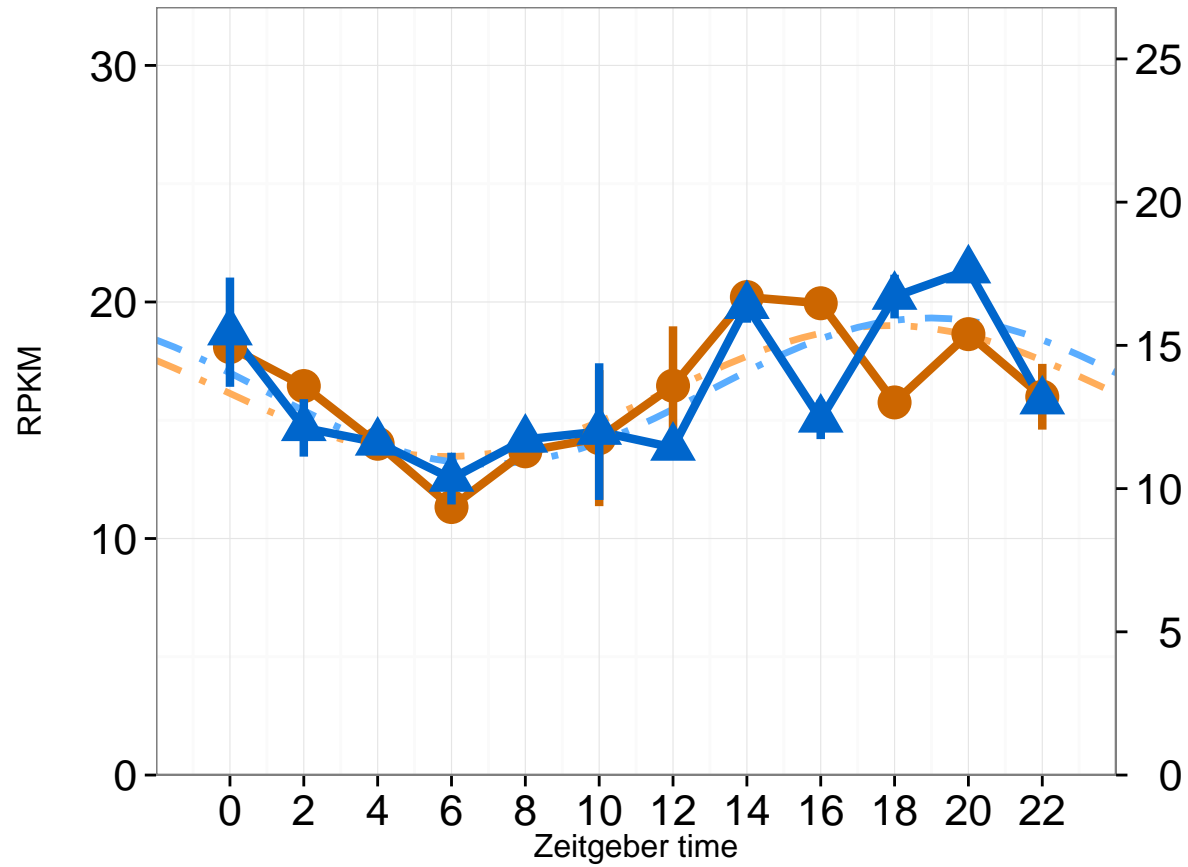

## Creb1

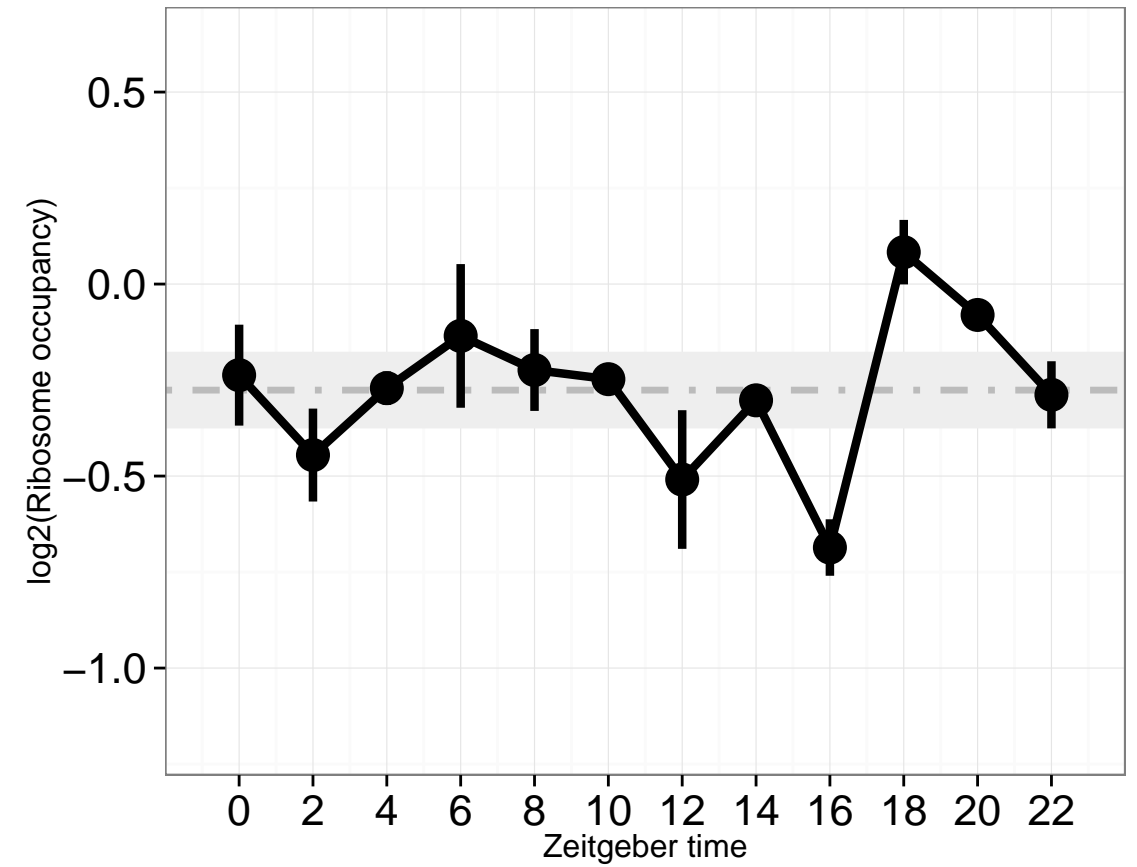

Supplement: Supplementary file 8734 [file 1]

## Raf1

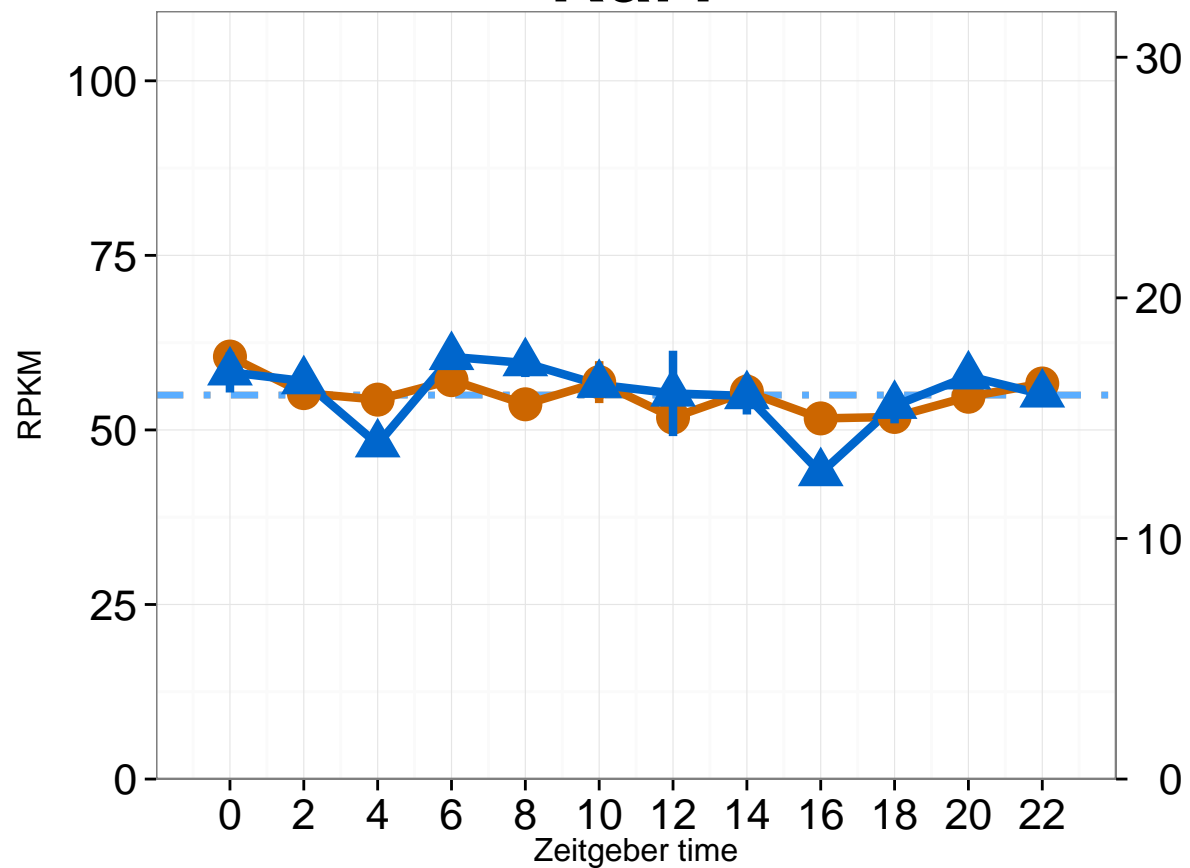

## Raf1

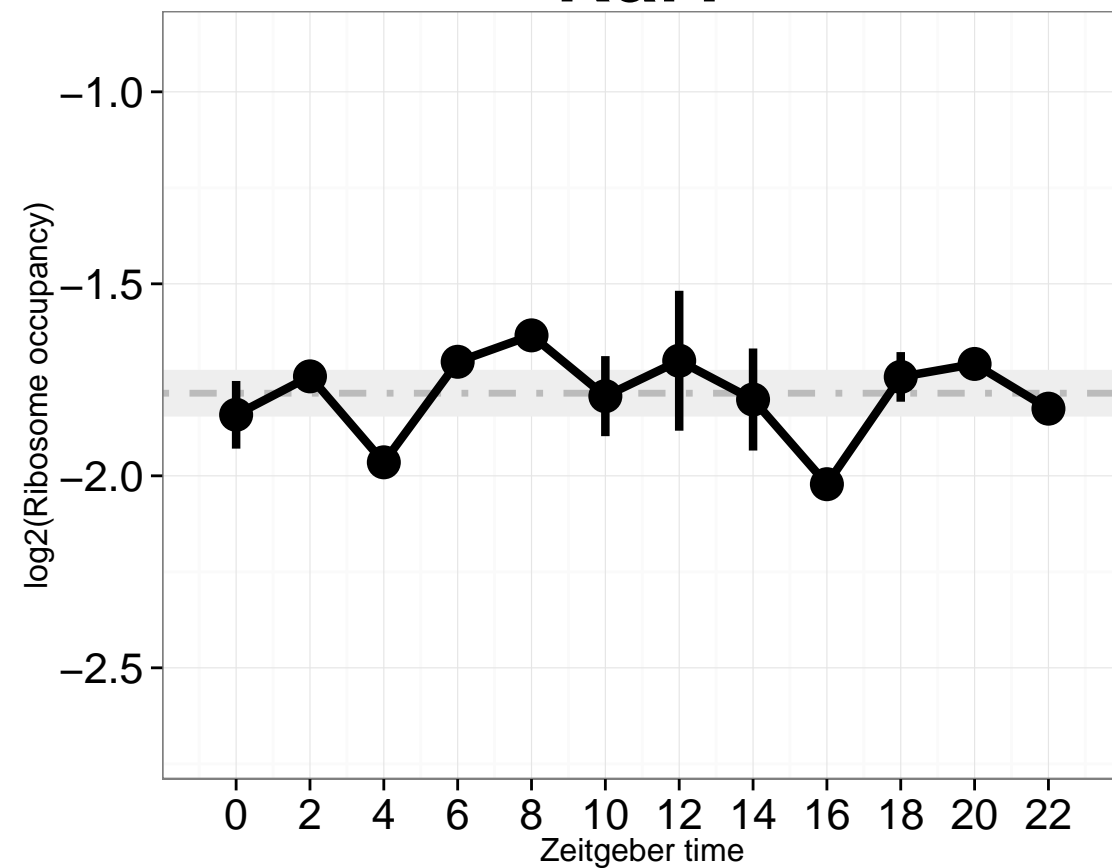

Supplement: Supplementary file 8735 [file 1]

## Vps18

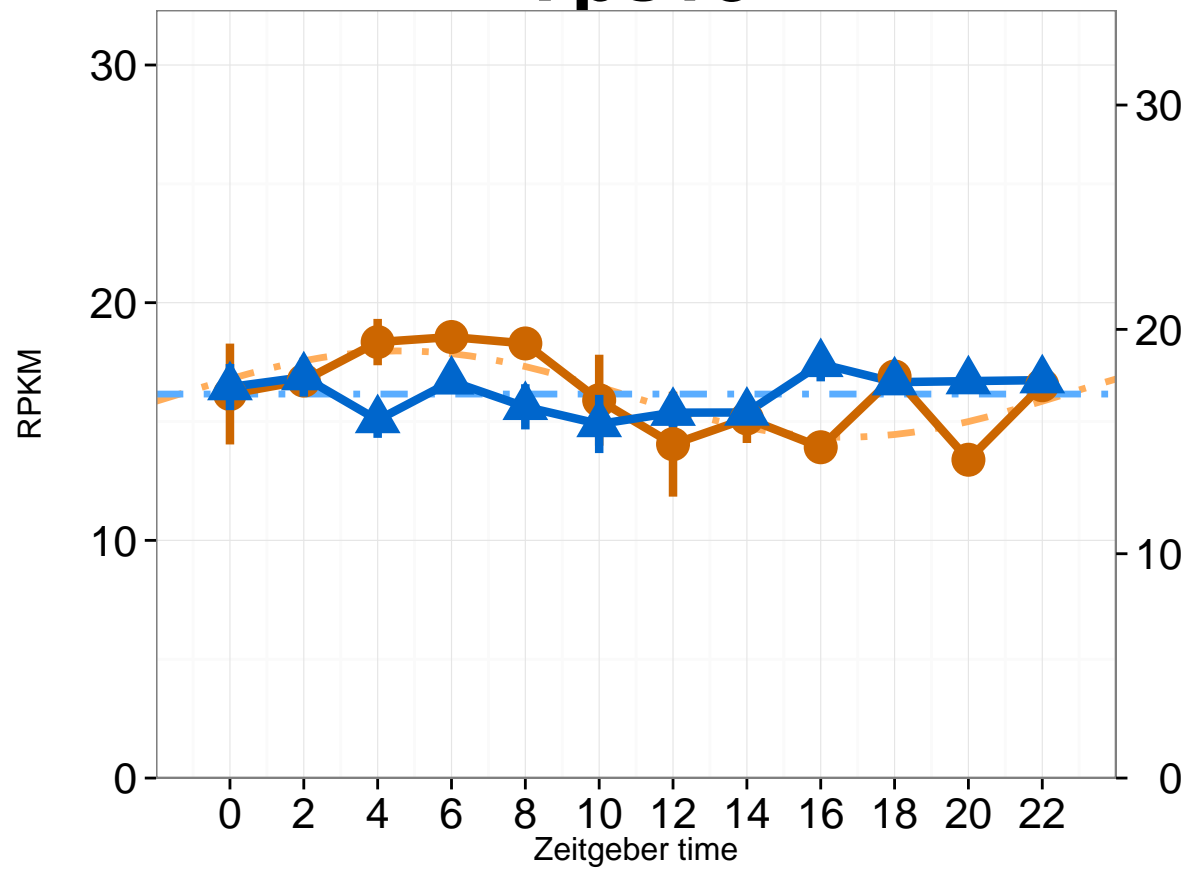

## Vps18

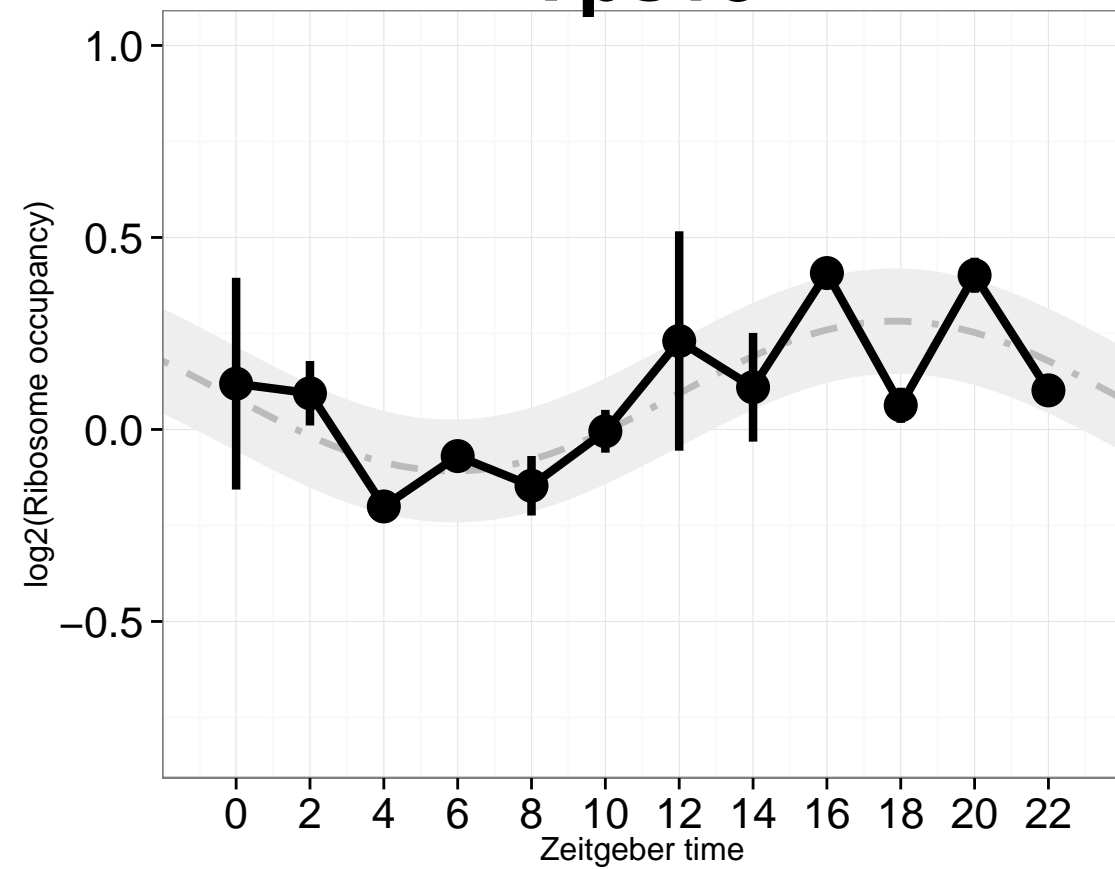

Supplement: Supplementary file 8736 [file 1]

## Osbpl3

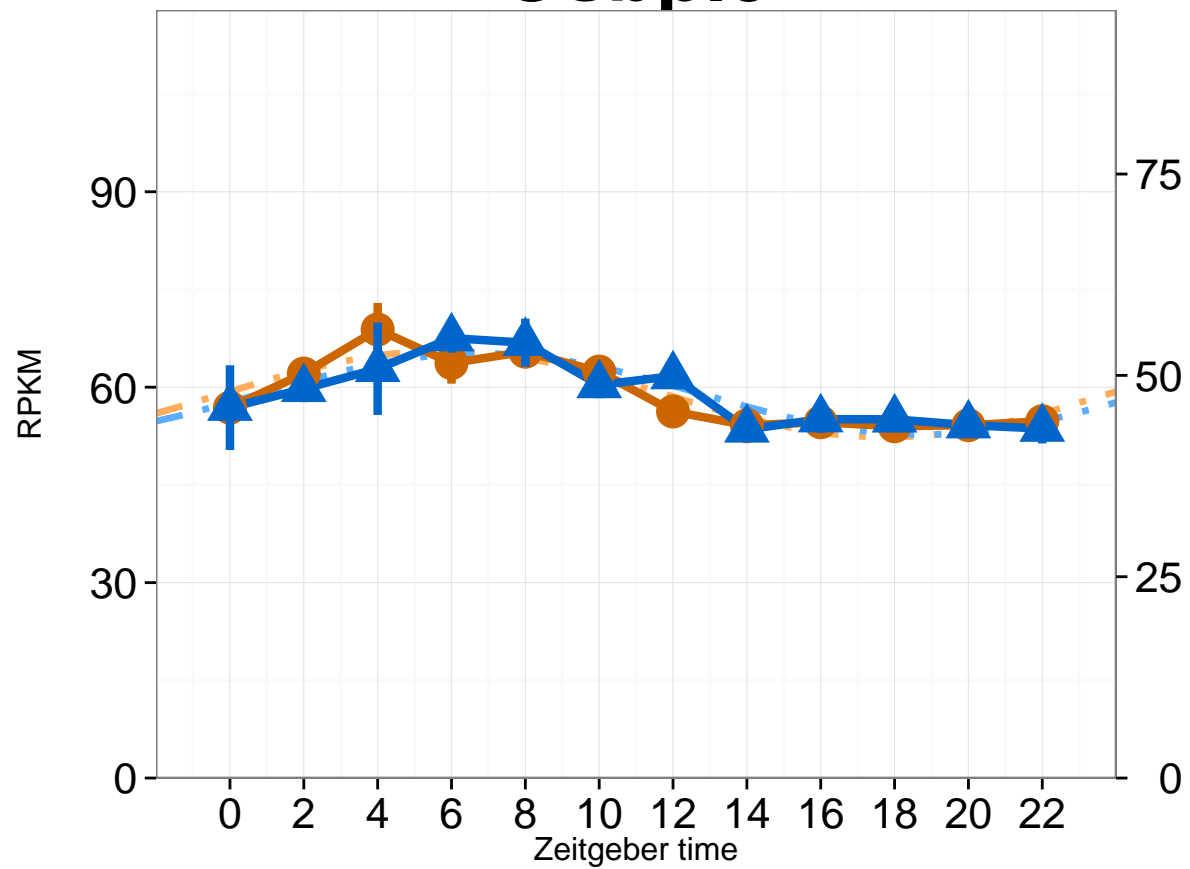

## Osbpl3

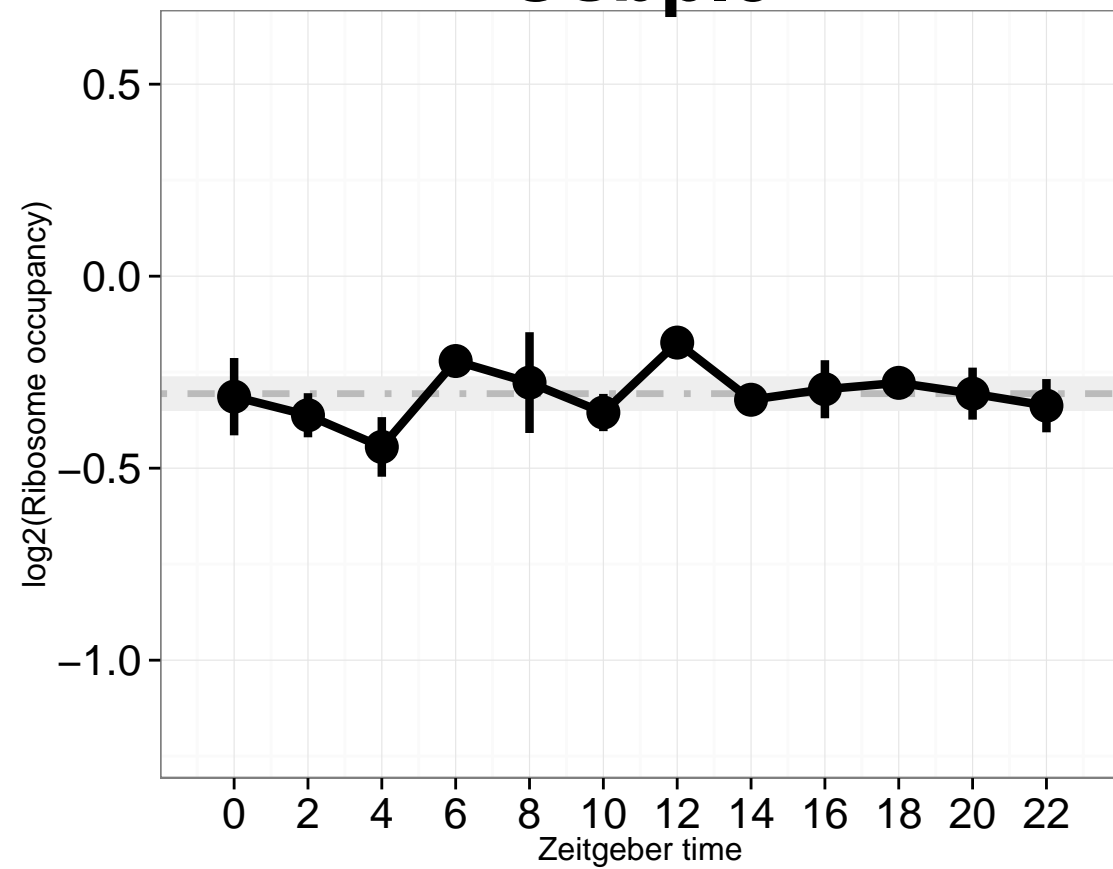

Supplement: Supplementary file 8737 [file 1]

## Sfswap

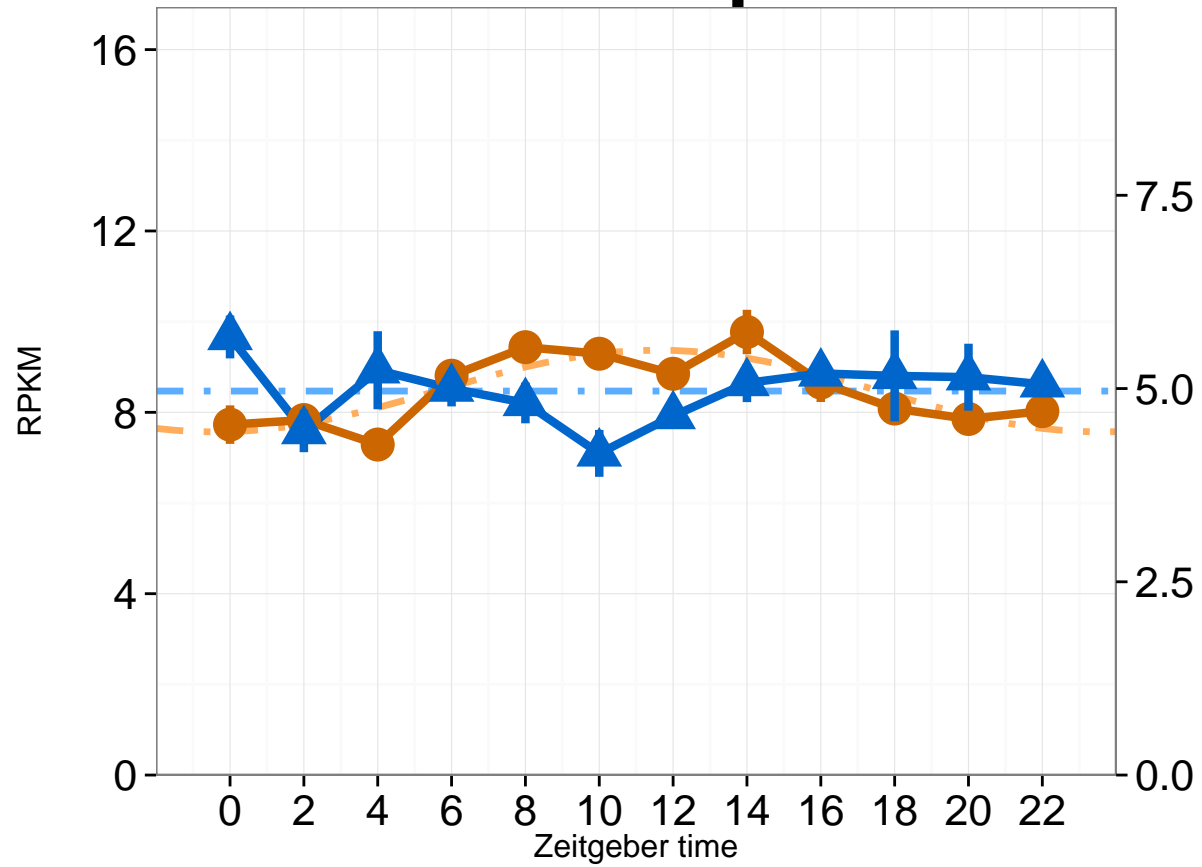

## Sfswap

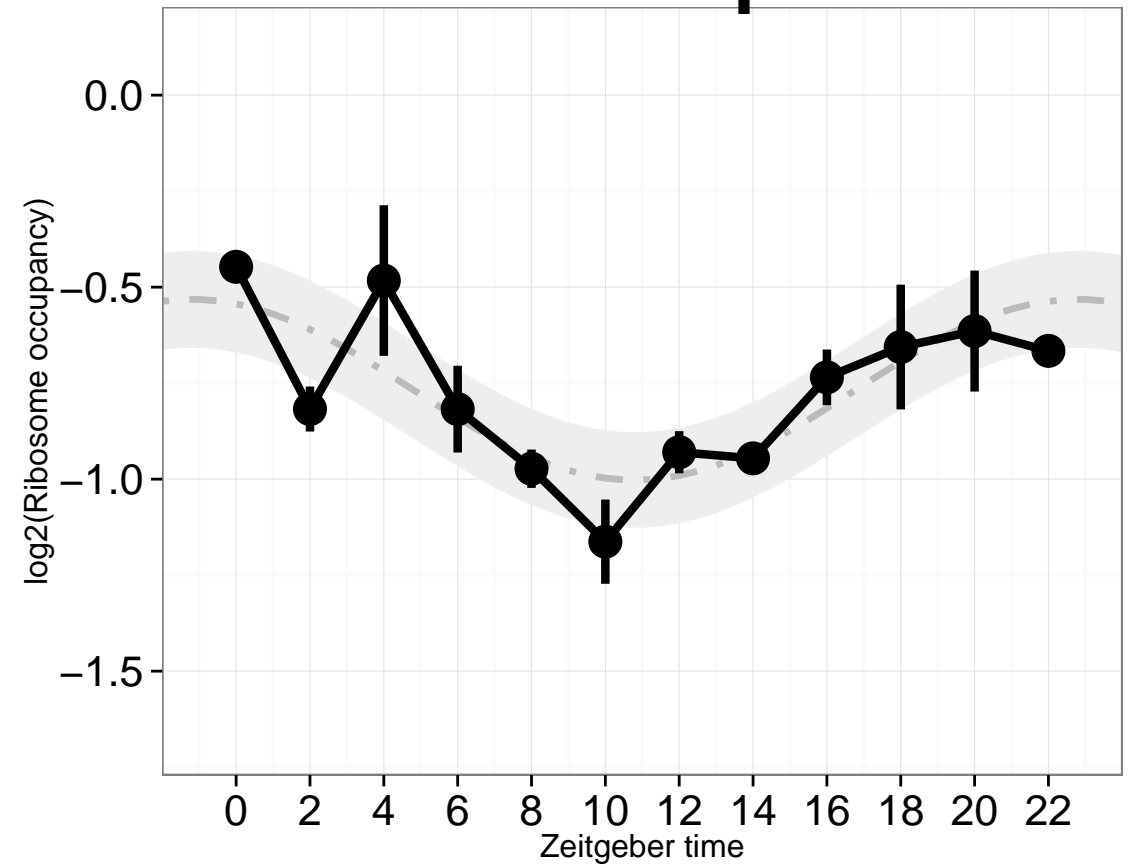

Supplement: Supplementary file 8738 [file 1]

# Csnk1g3

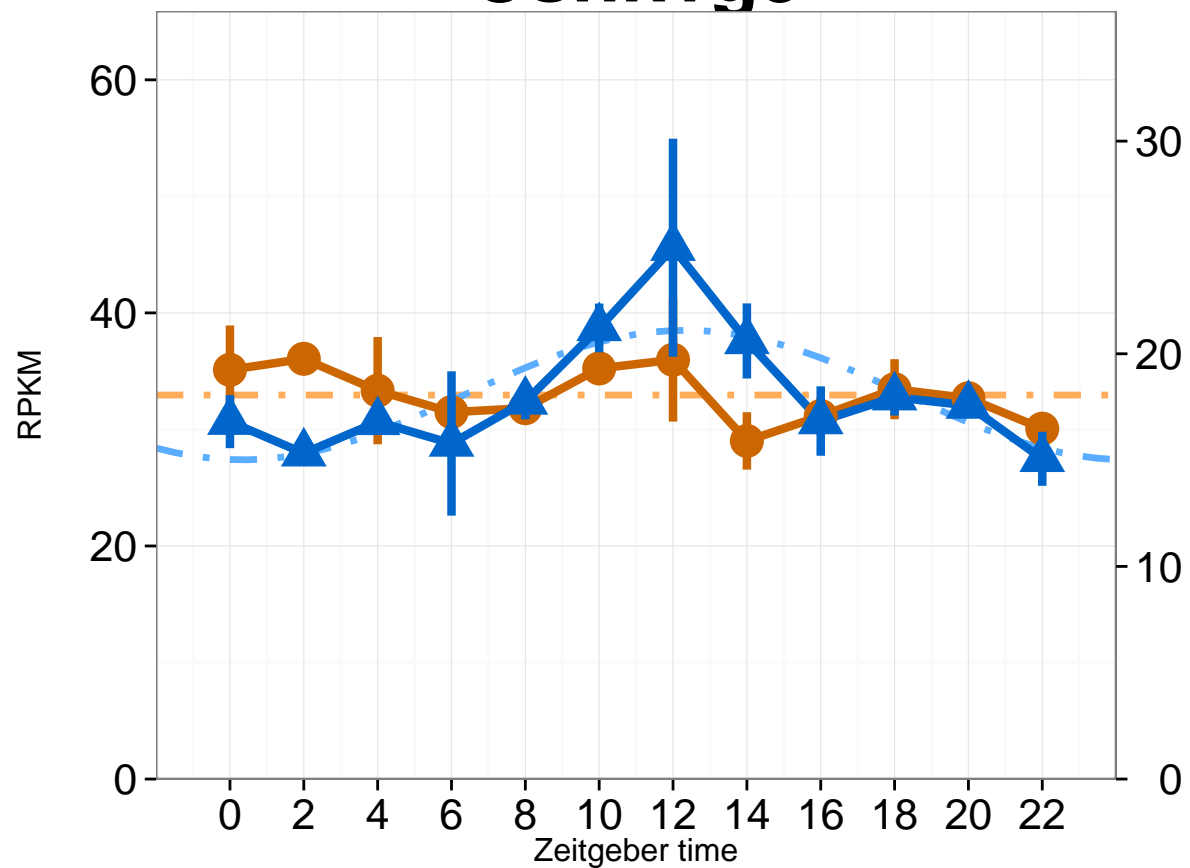

# Csnk1g3

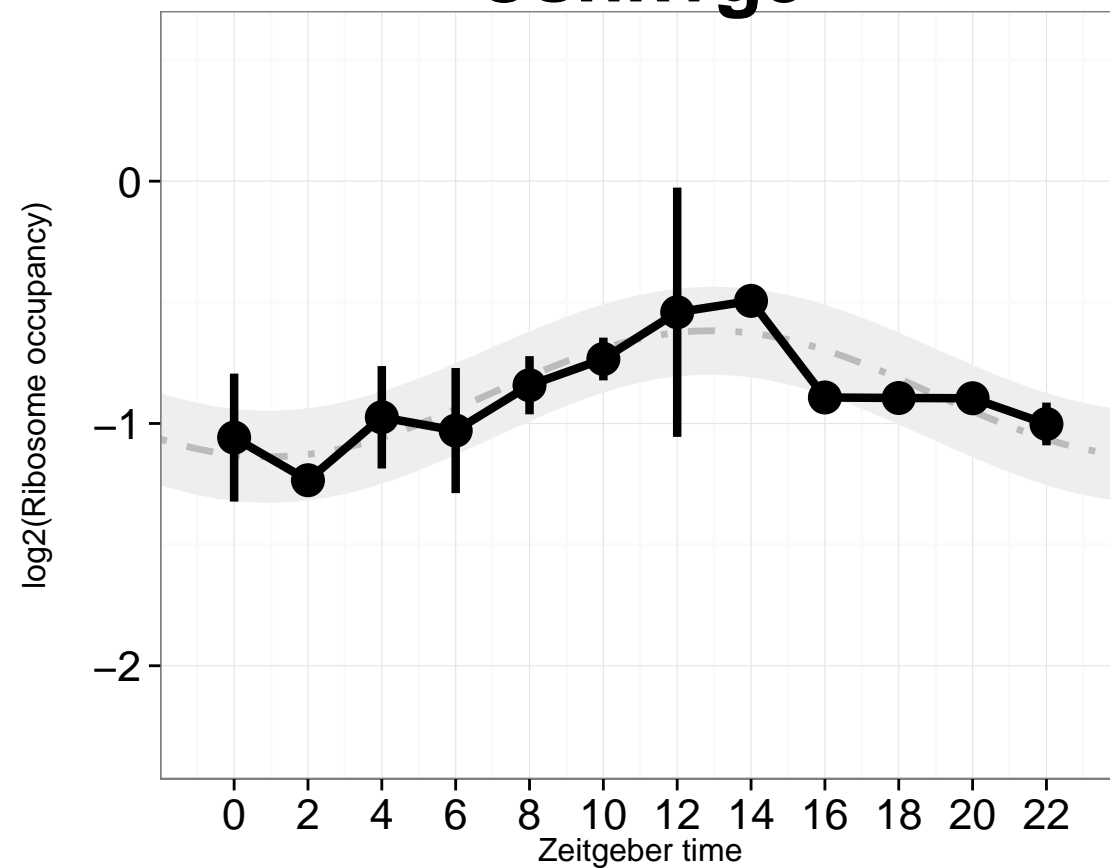

Supplement: Supplementary file 8739 [file 1]

# Prickle1

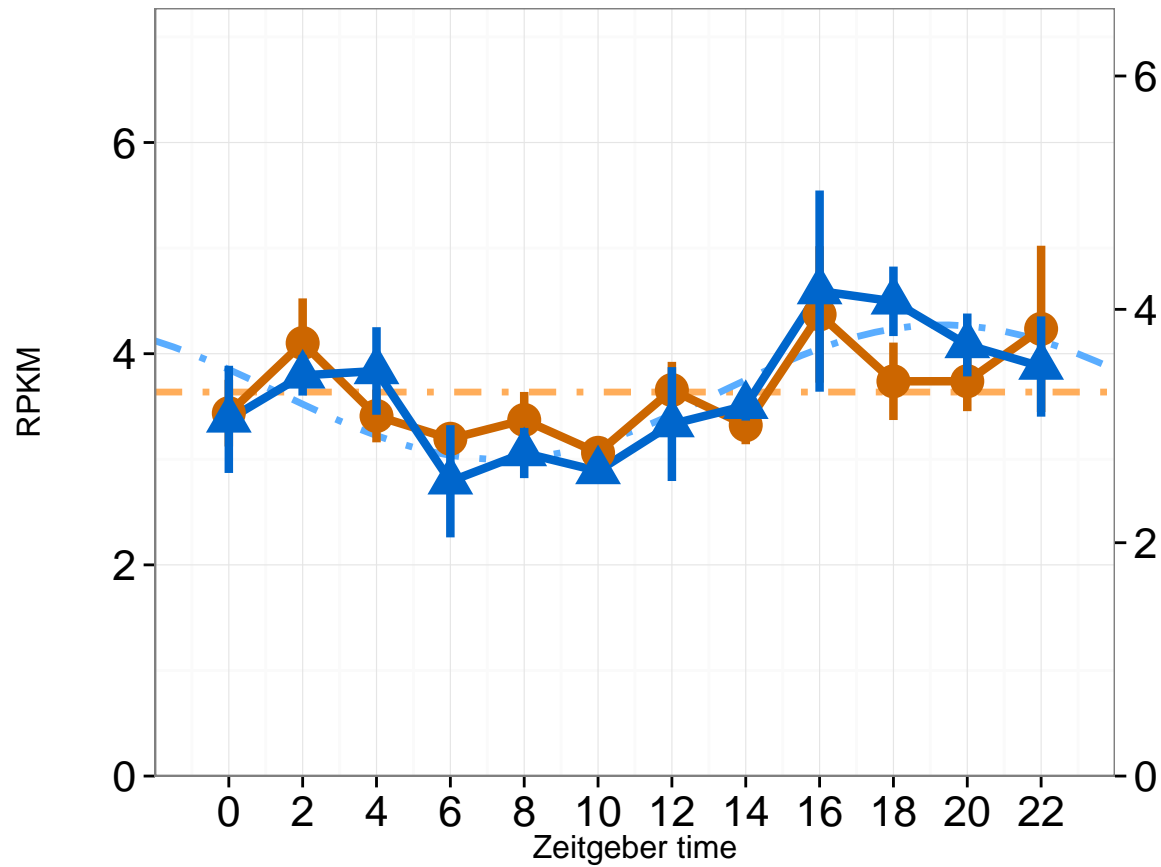

# Prickle1

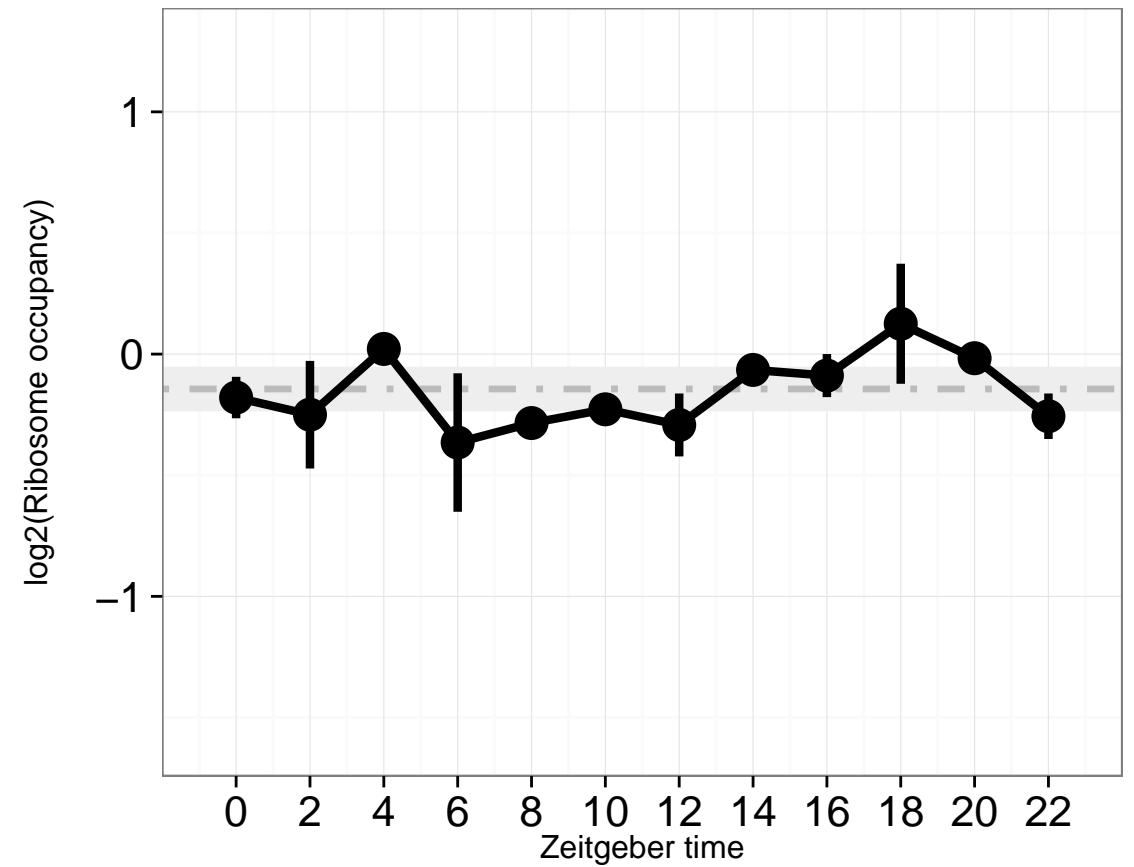

Supplement: Supplementary file 8740 [file 1]

# Rps24

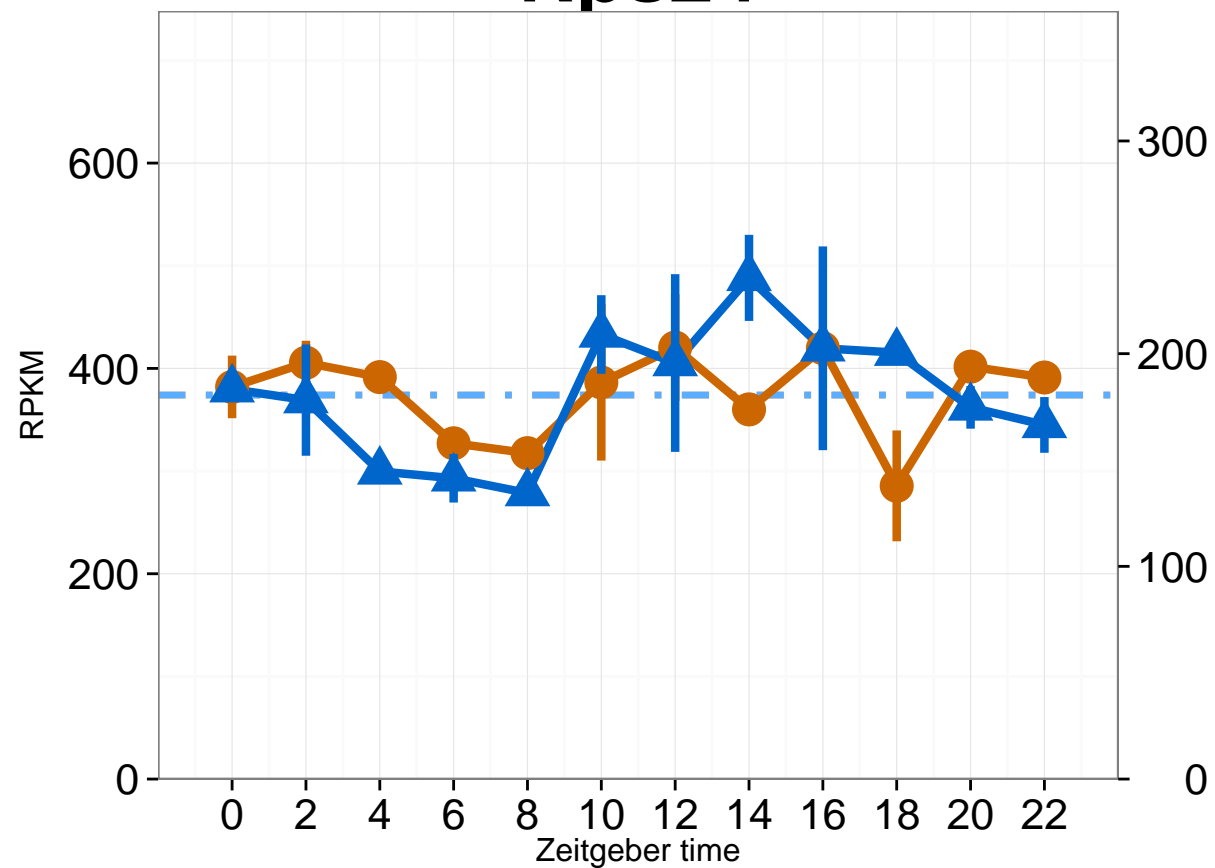

# Rps24

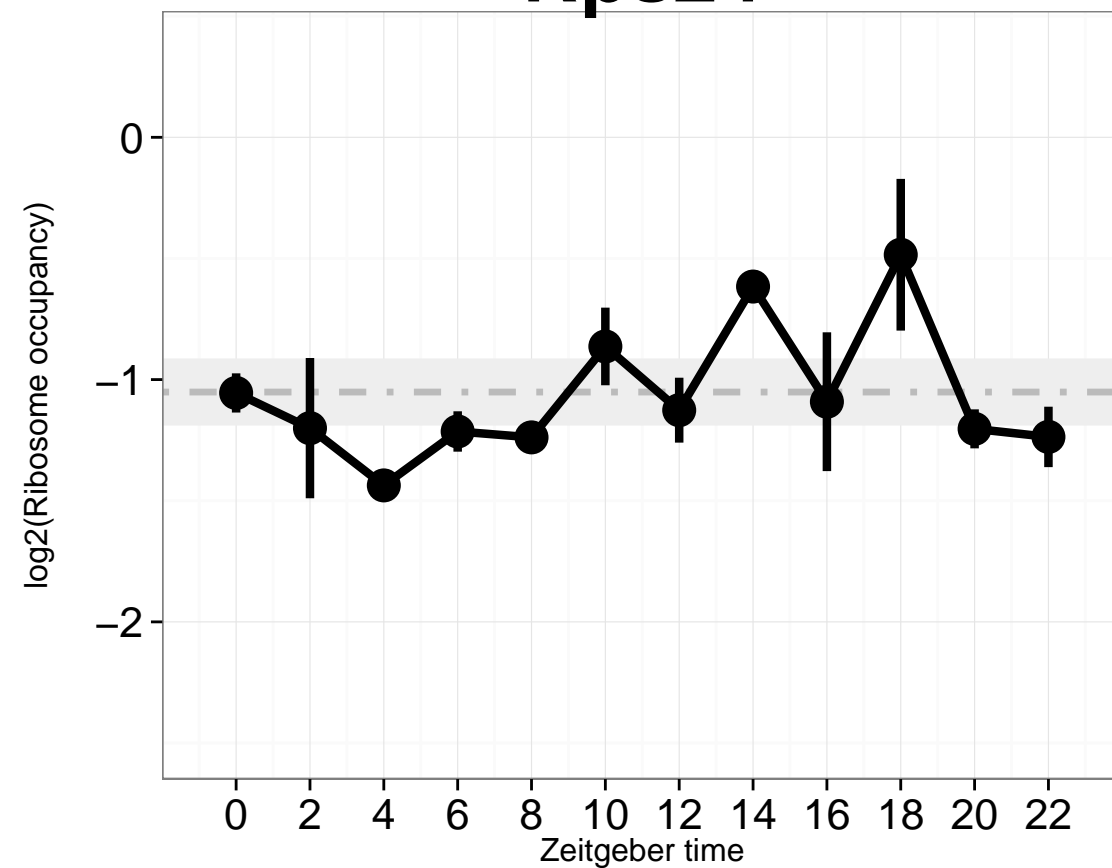

Supplement: Supplementary file 8741 [file 1]

## Dohh

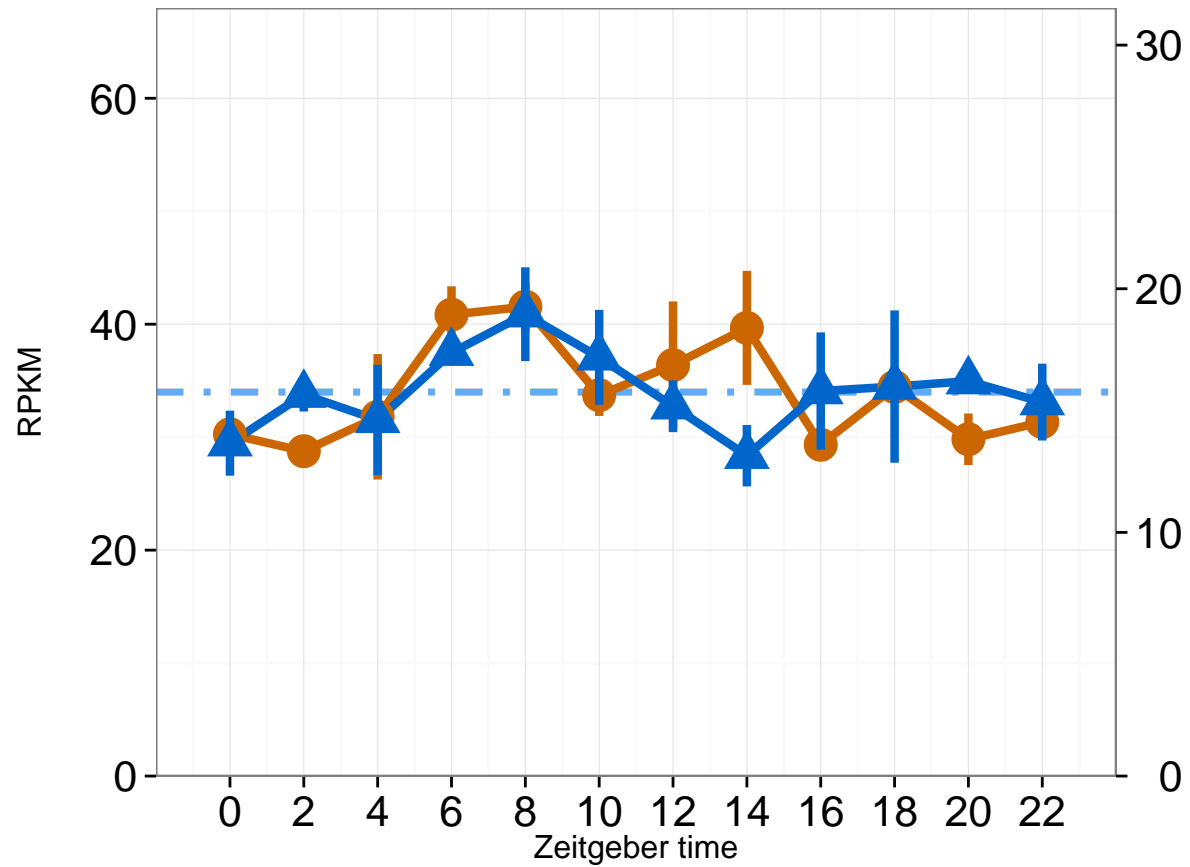

## Dohh

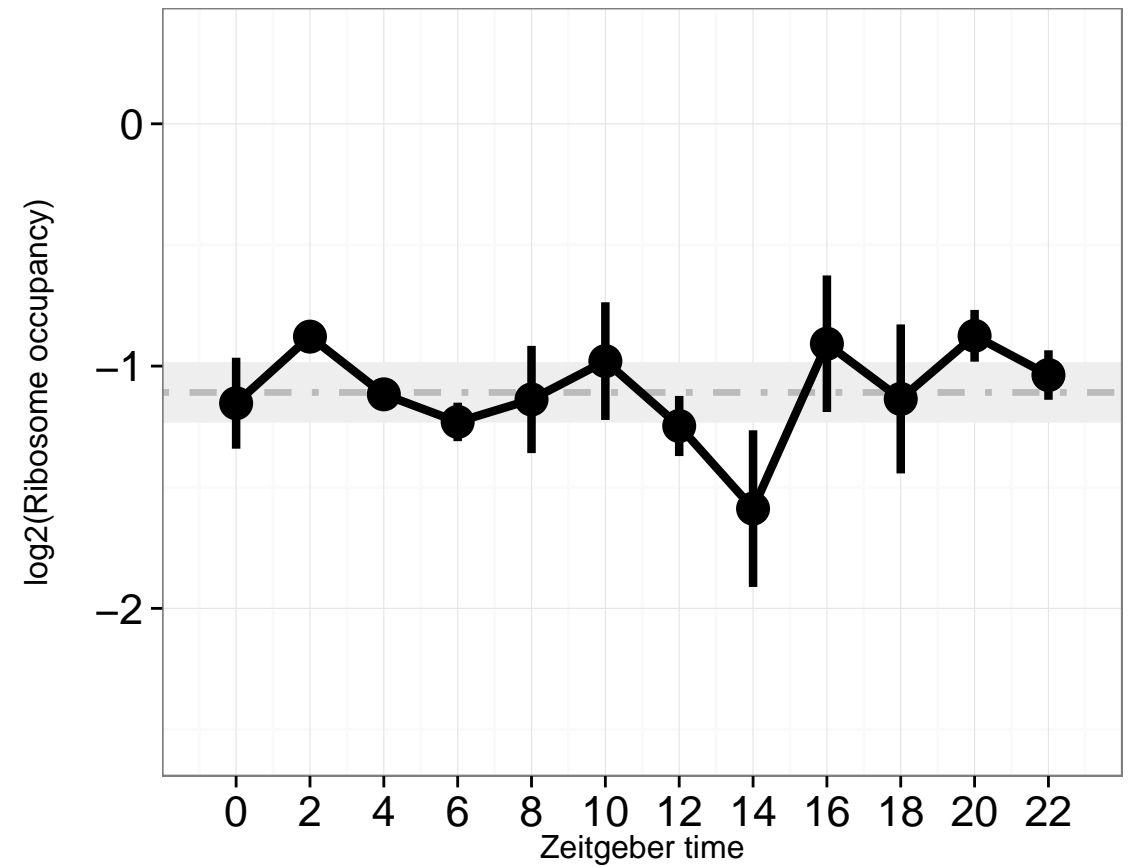

Supplement: Supplementary file 8742 [file 1]

# Cstf2t

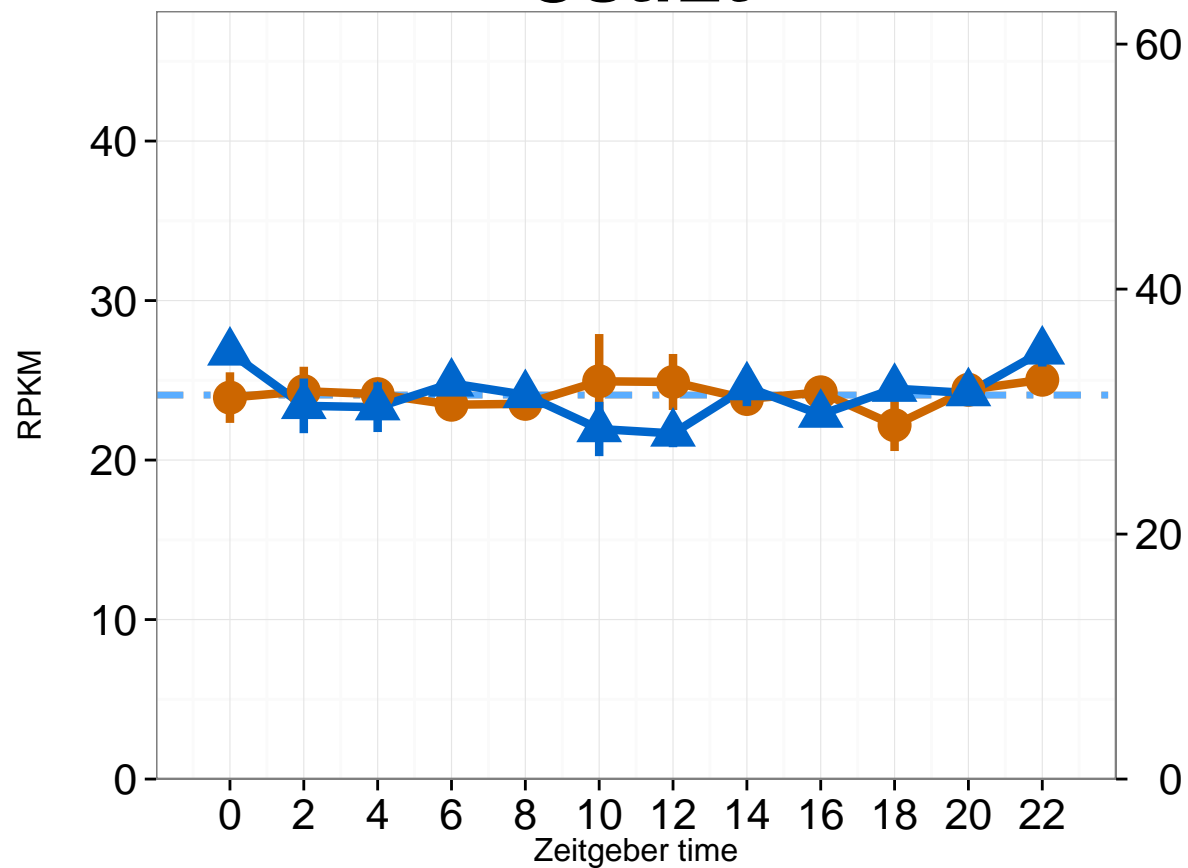

# Cstf2t

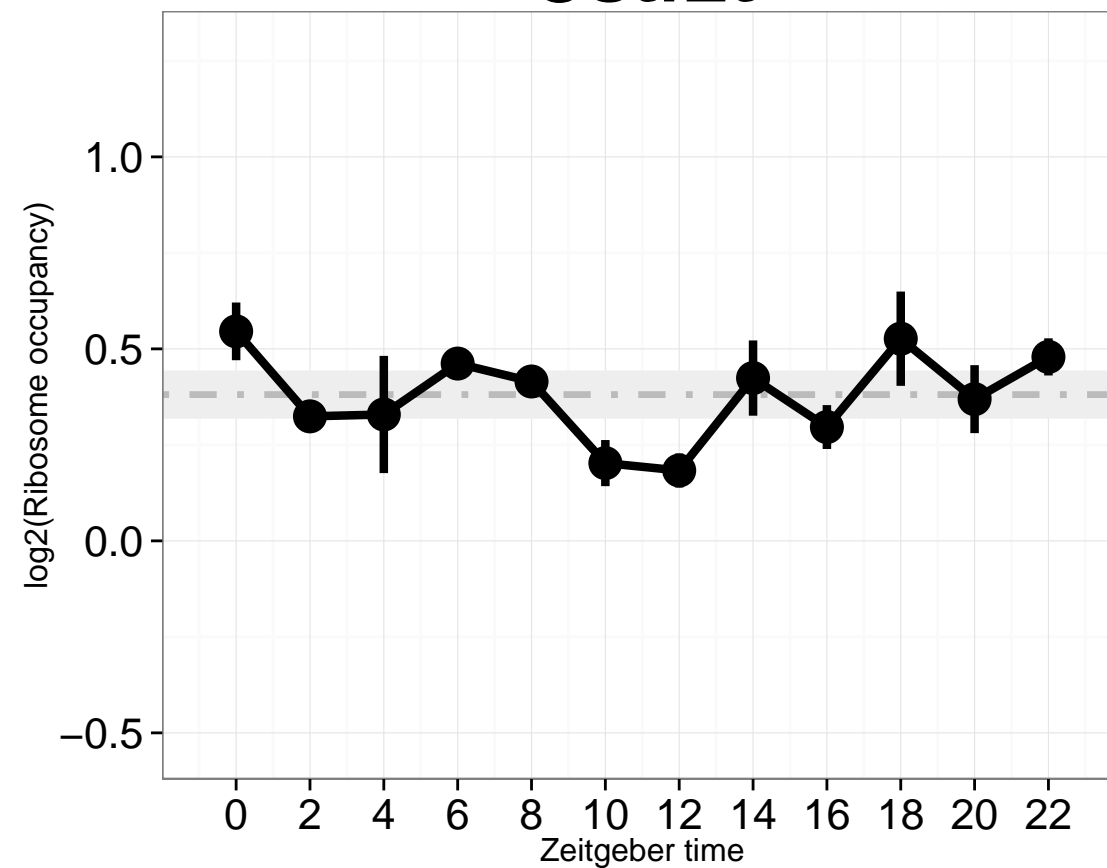

Supplement: Supplementary file 8743 [file 1]

## Slc35d1

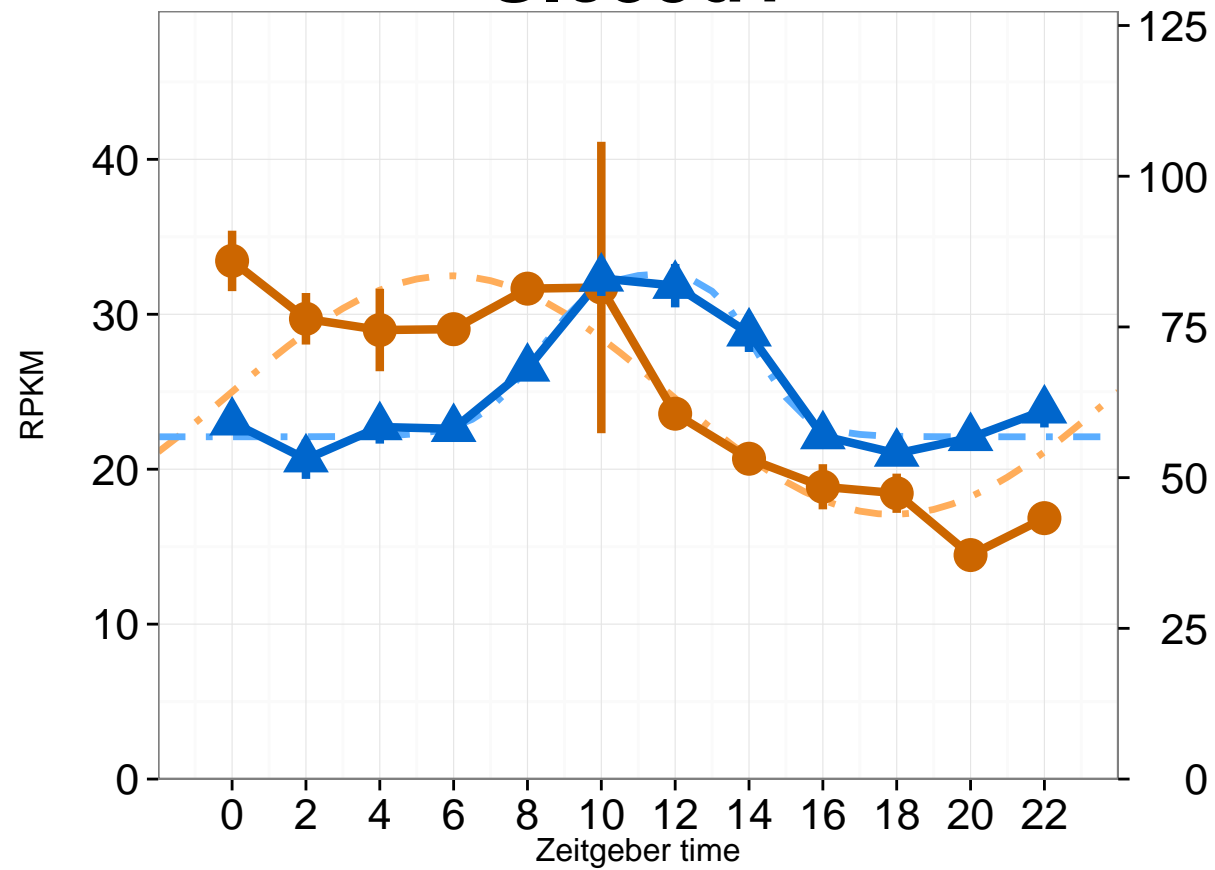

## Slc35d1

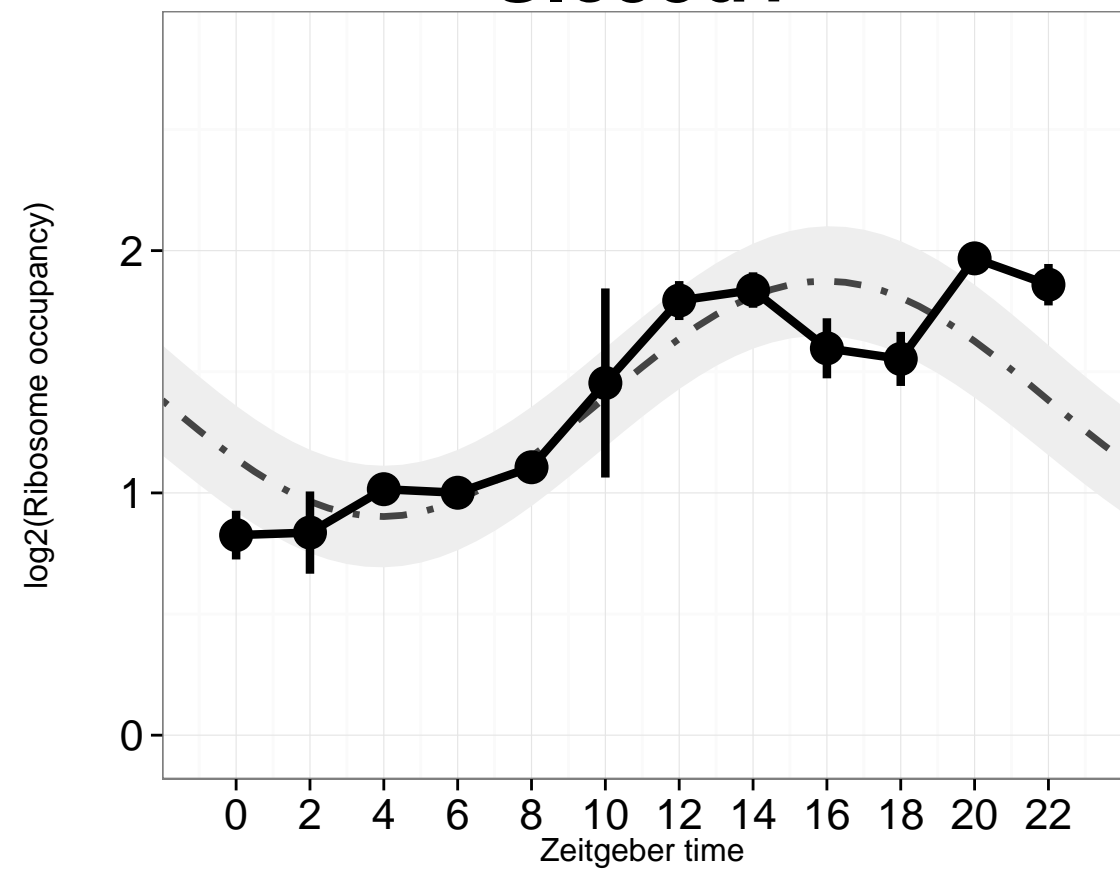

Supplement: Supplementary file 8744 [file 1]

# Slc30a1

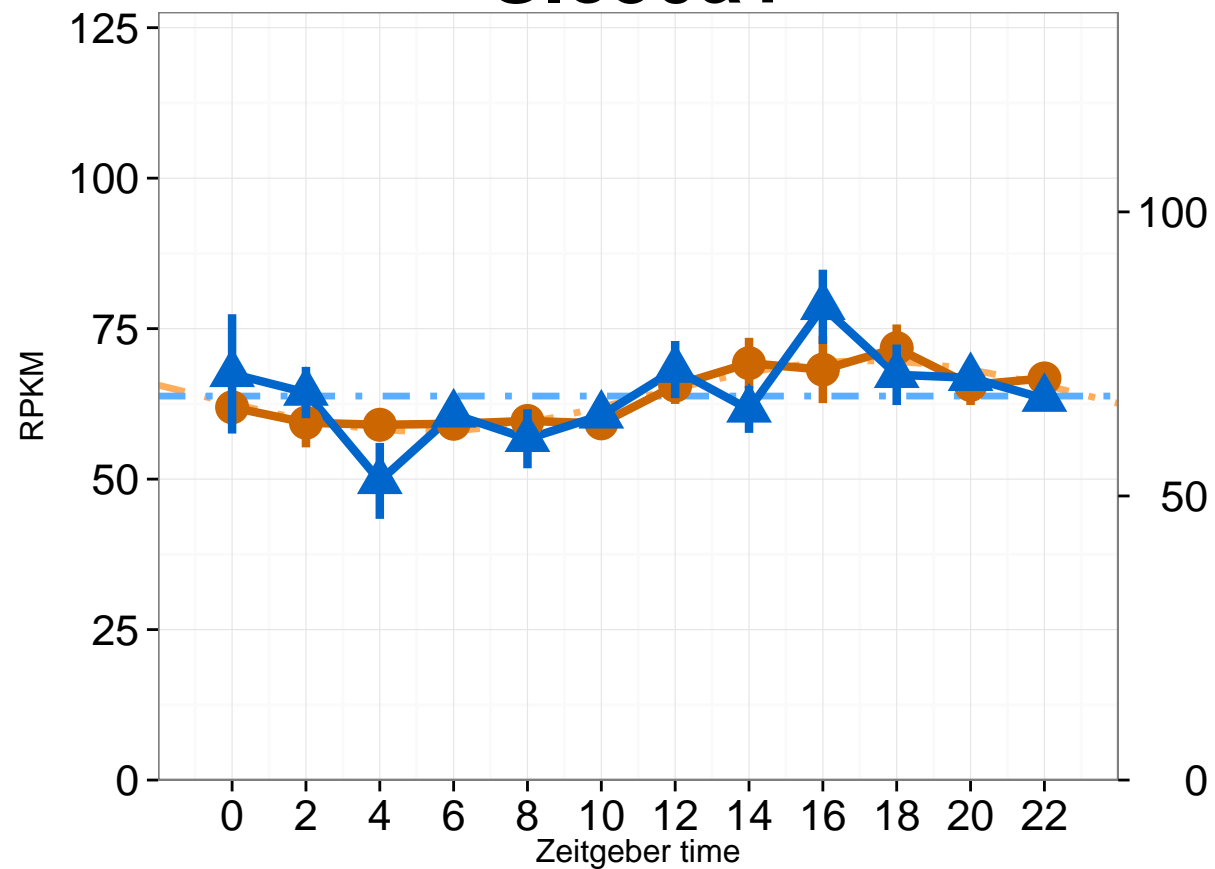

# Slc30a1

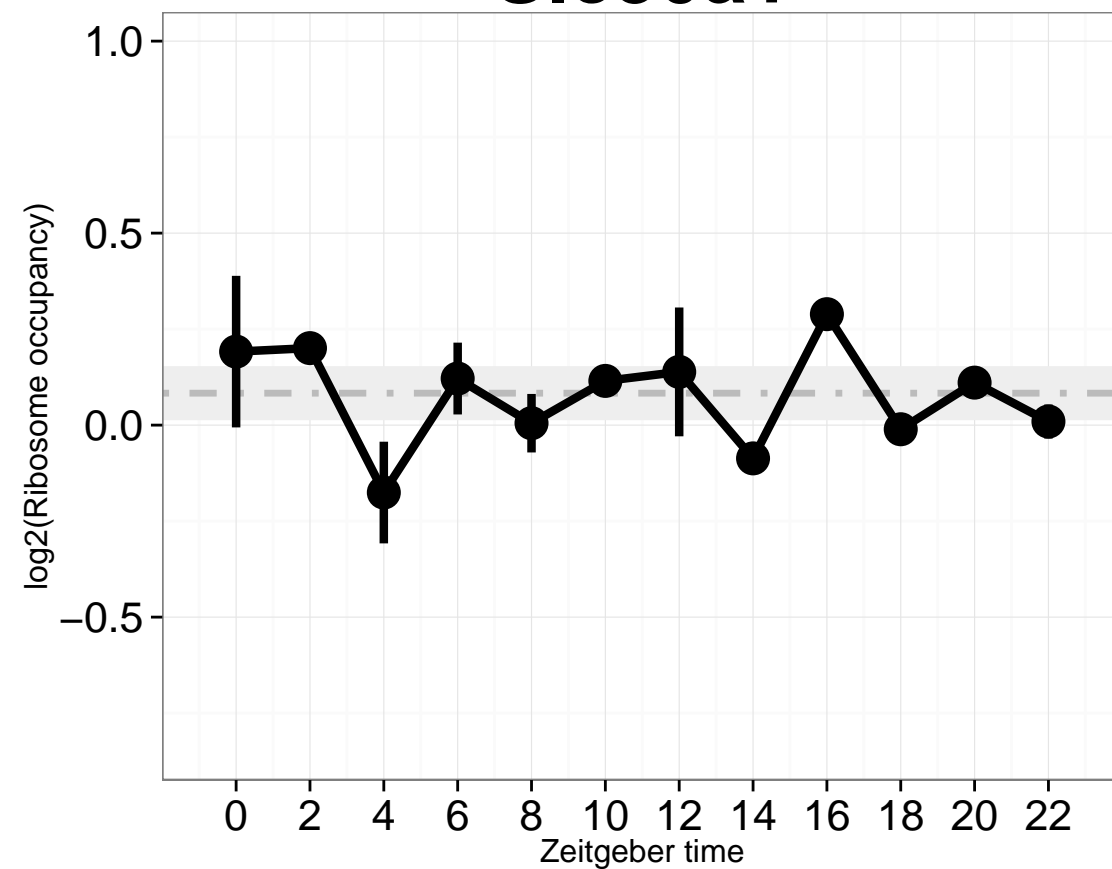

Supplement: Supplementary file 8745 [file 1]

## R3hcc1l

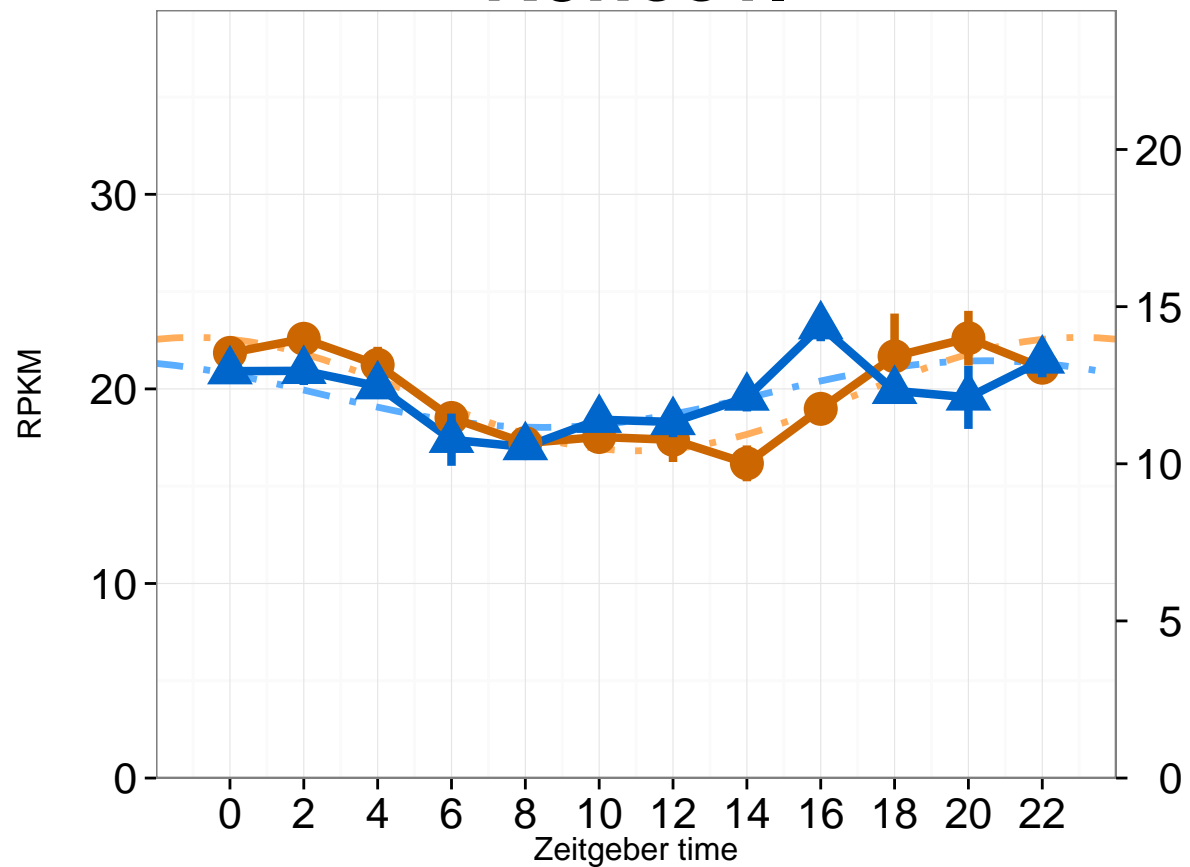

## R3hcc1l

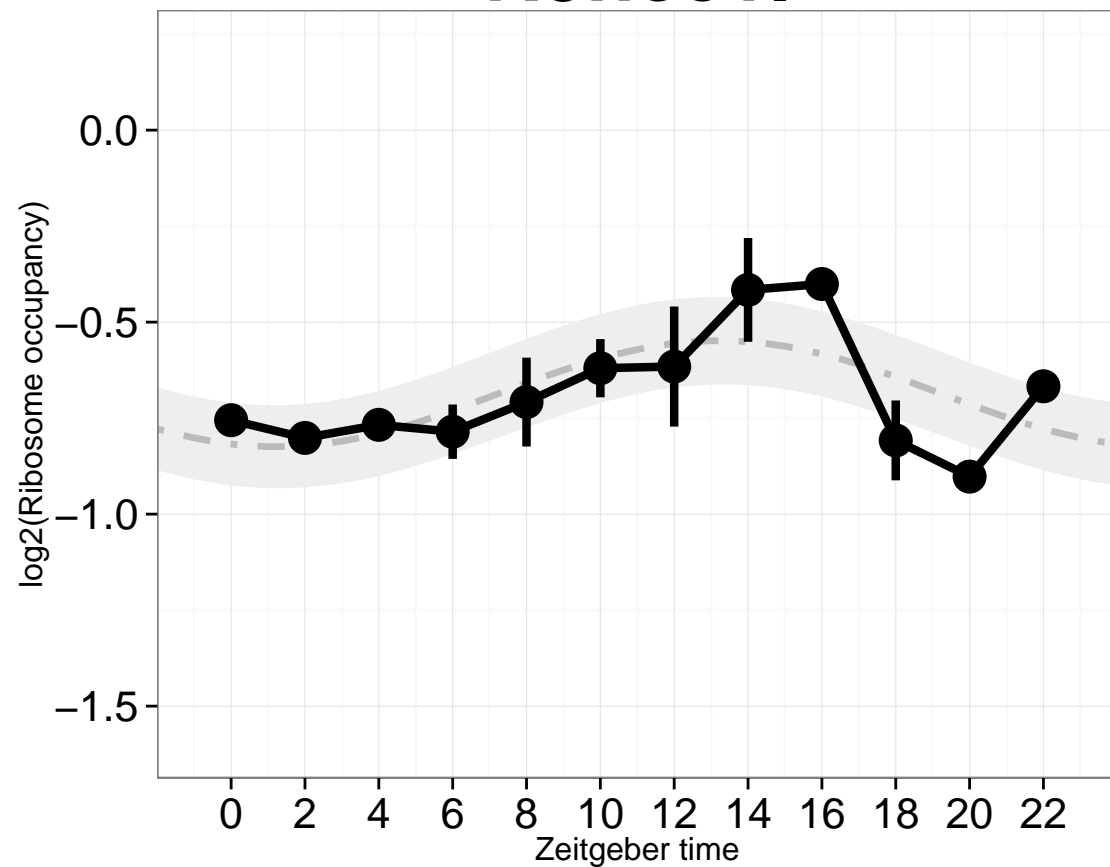

Supplement: Supplementary file 8746 [file 1]

# Gas7

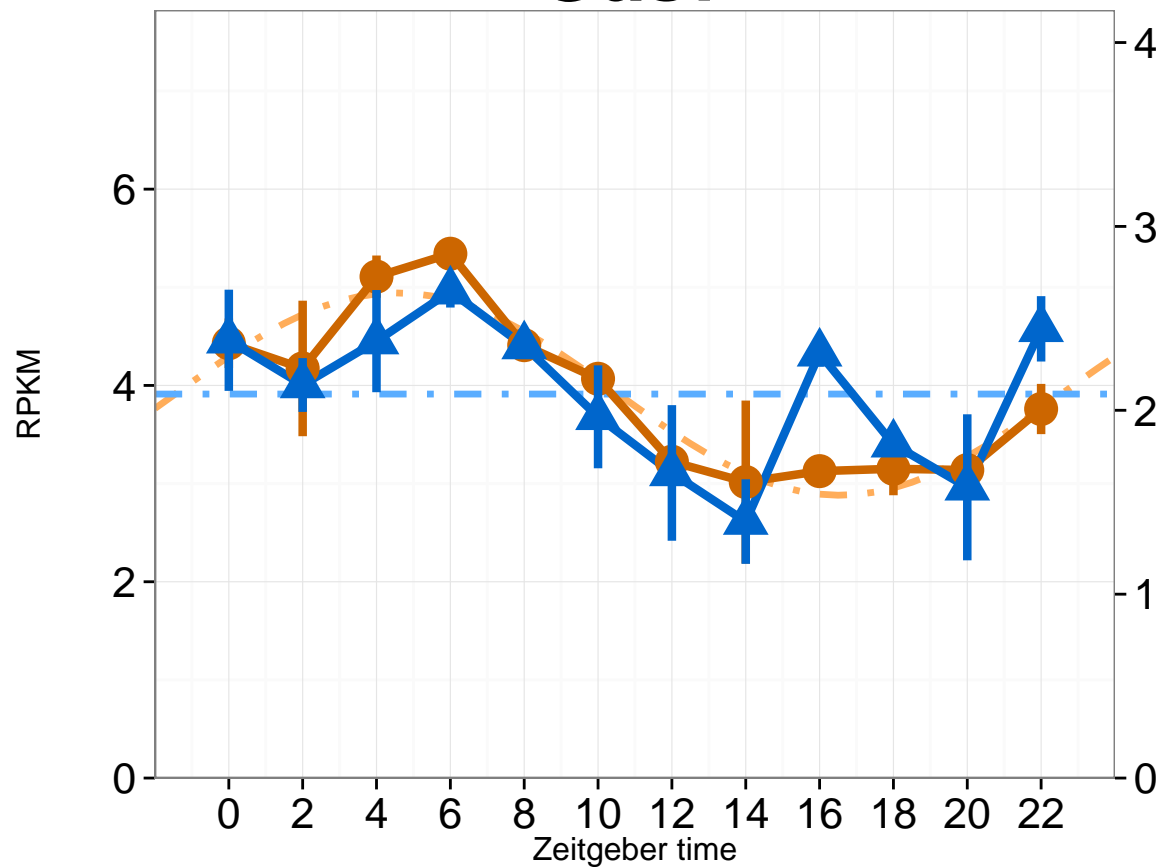

# Gas7

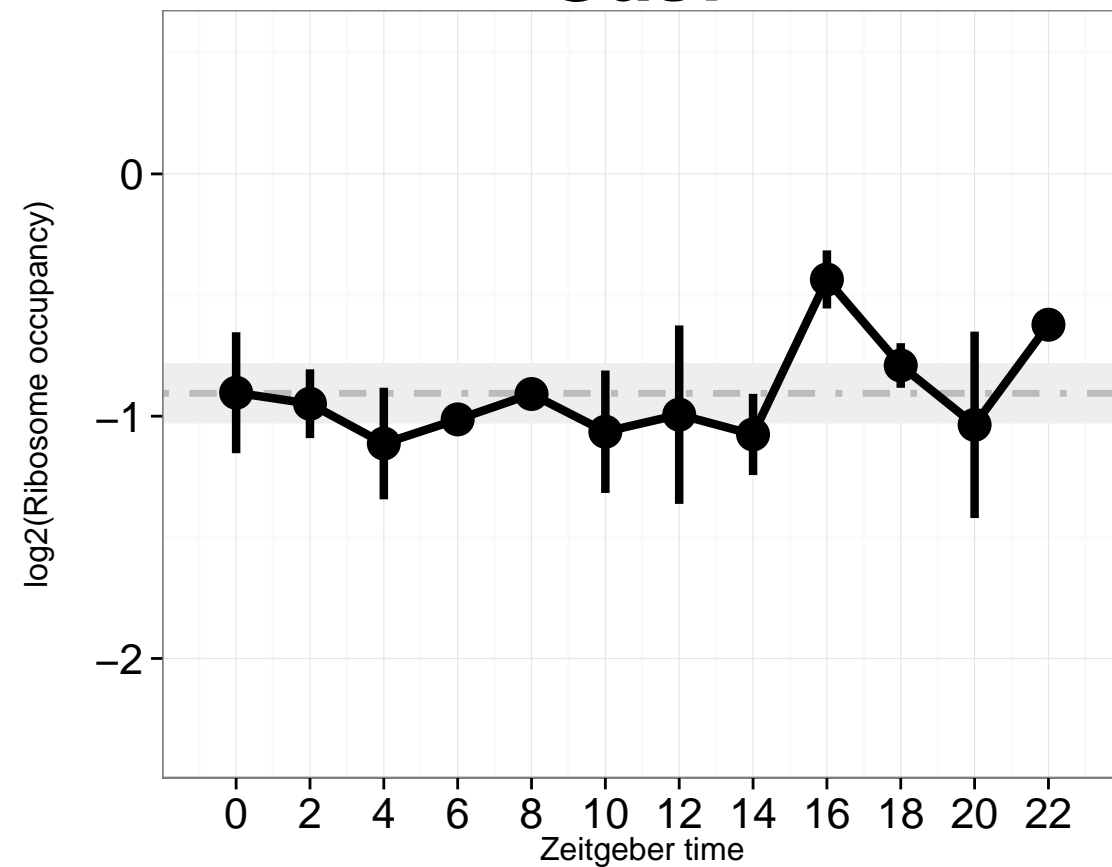

Supplement: Supplementary file 8747 [file 1]

## Cd34

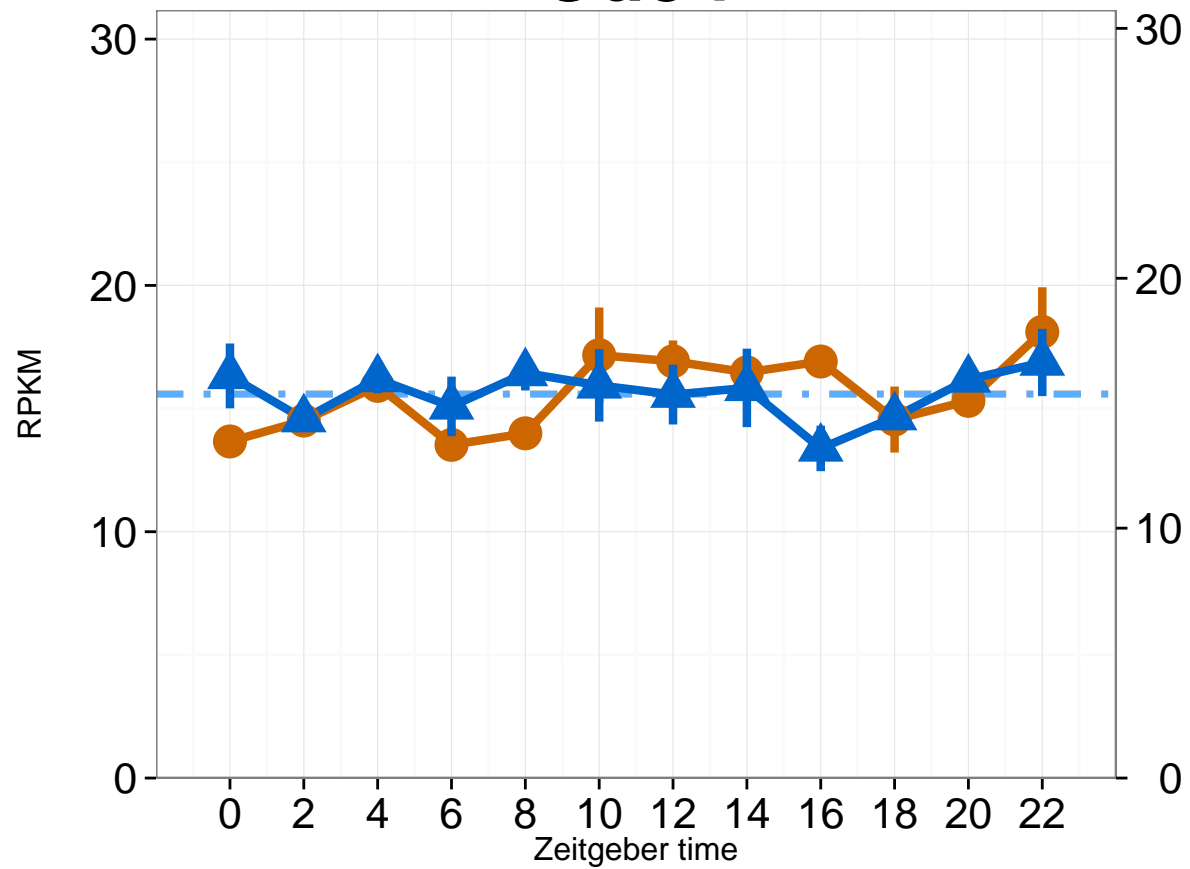

## Cd34

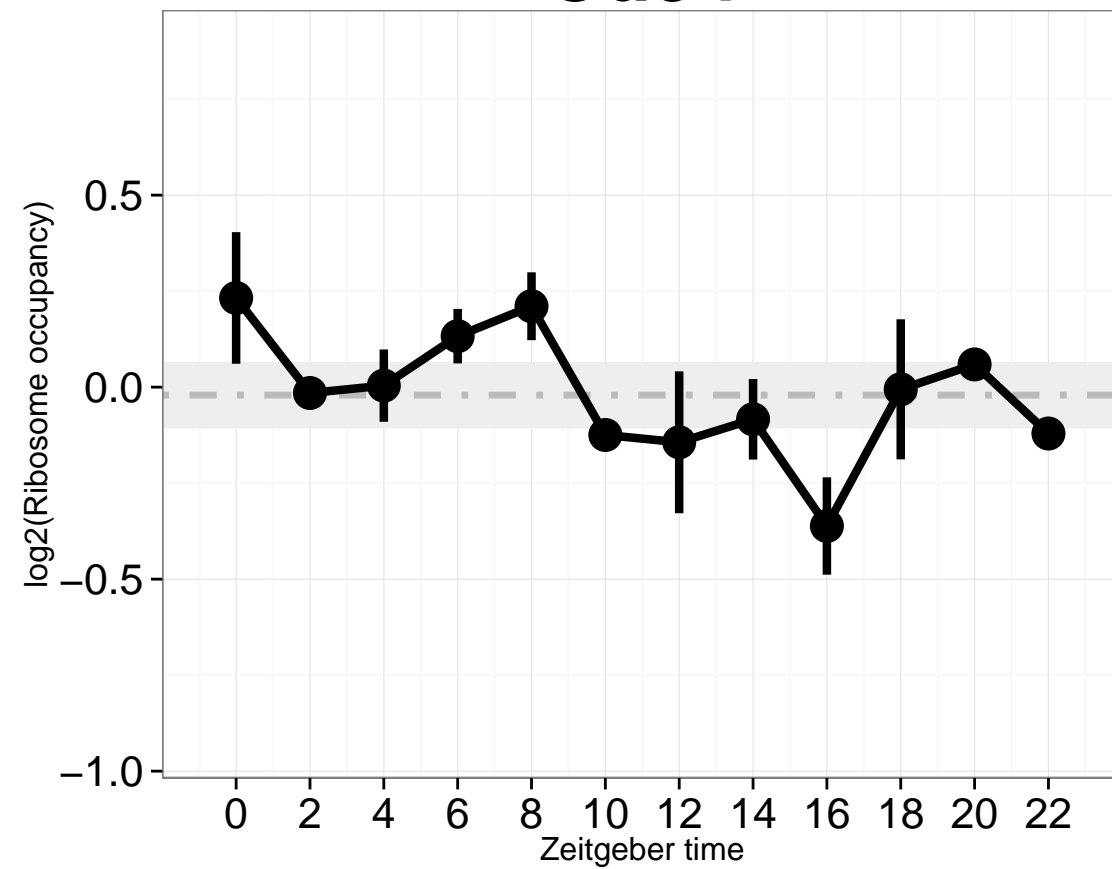

Supplement: Supplementary file 8748 [file 1]

## Atxn2

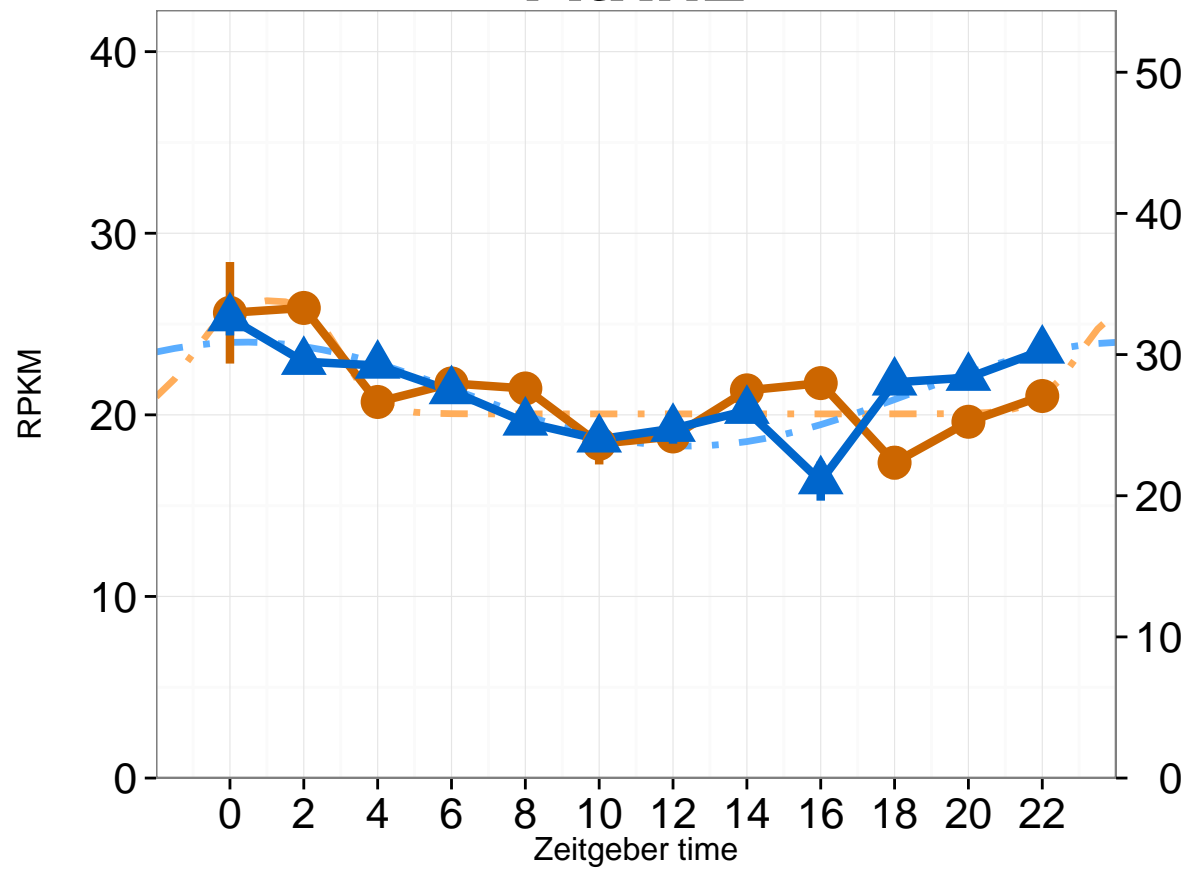

## Atxn2

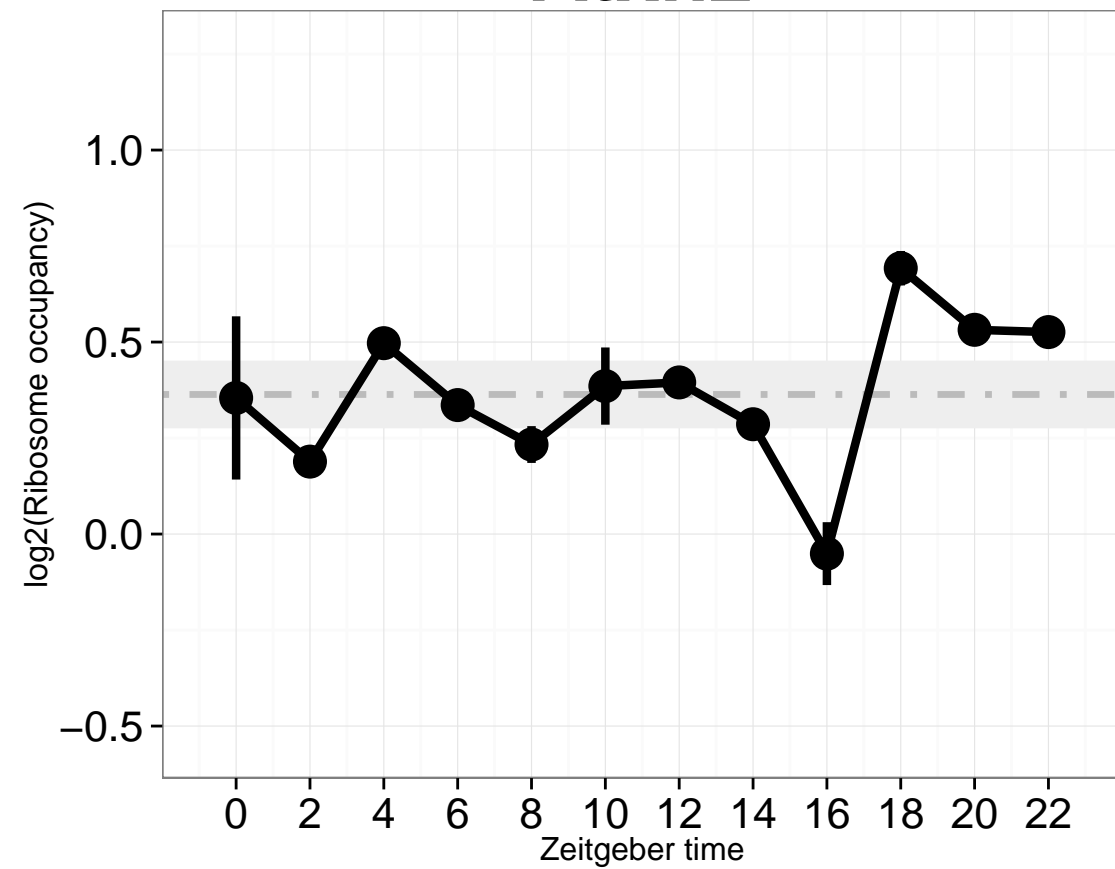

Supplement: Supplementary file 8749 [file 1]

# Etf1

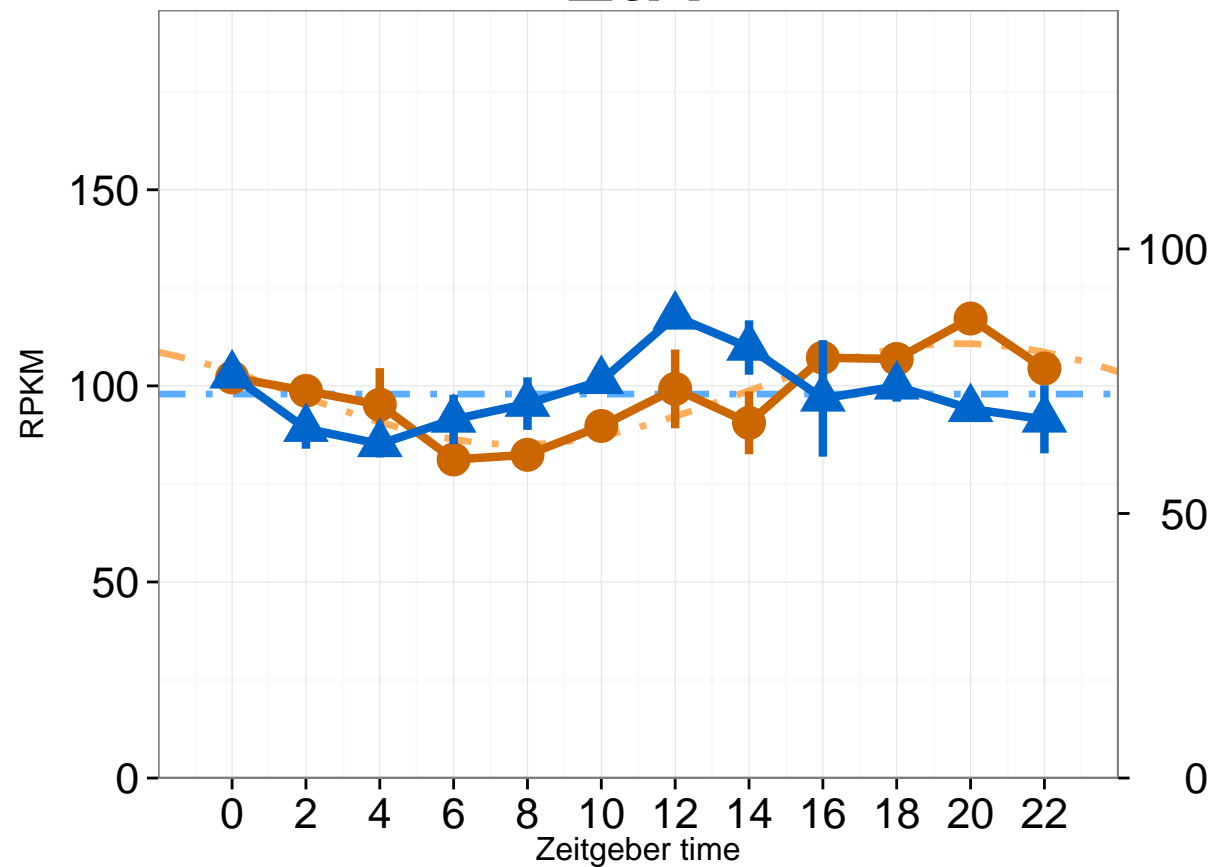

# Etf1

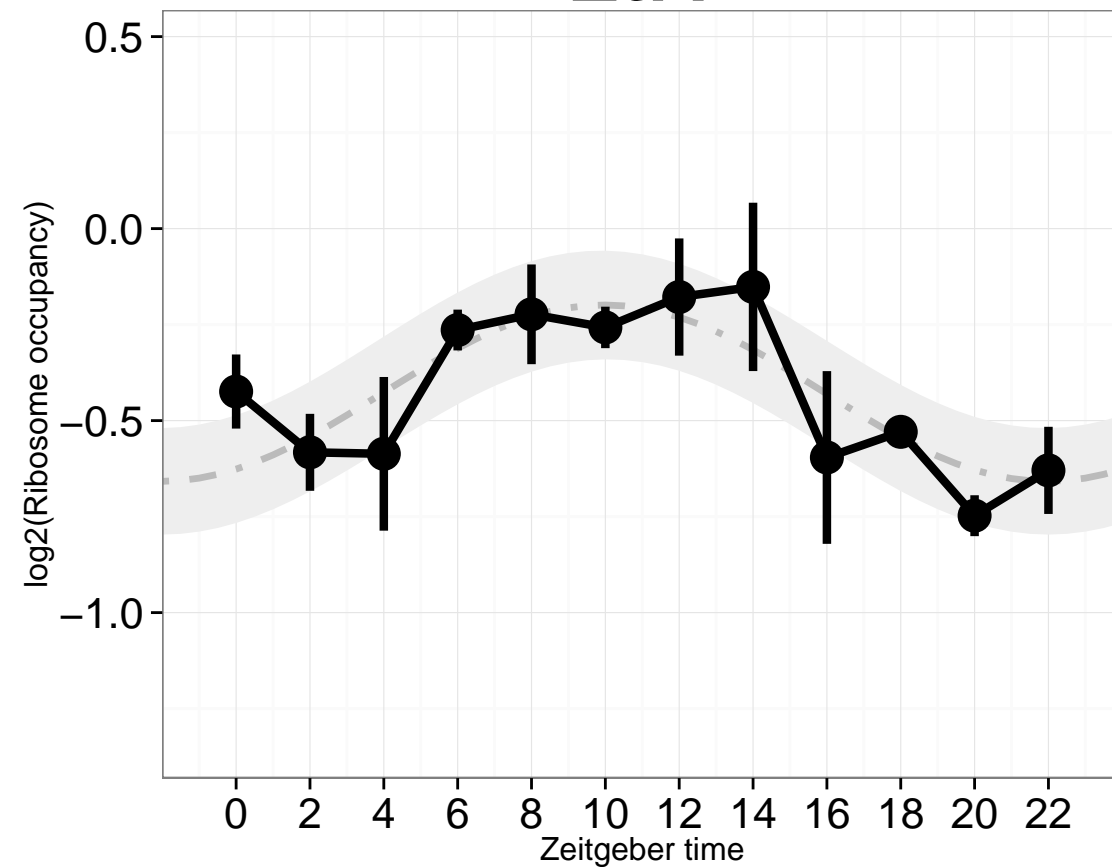

Supplement: Supplementary file 8750 [file 1]

## Hpd

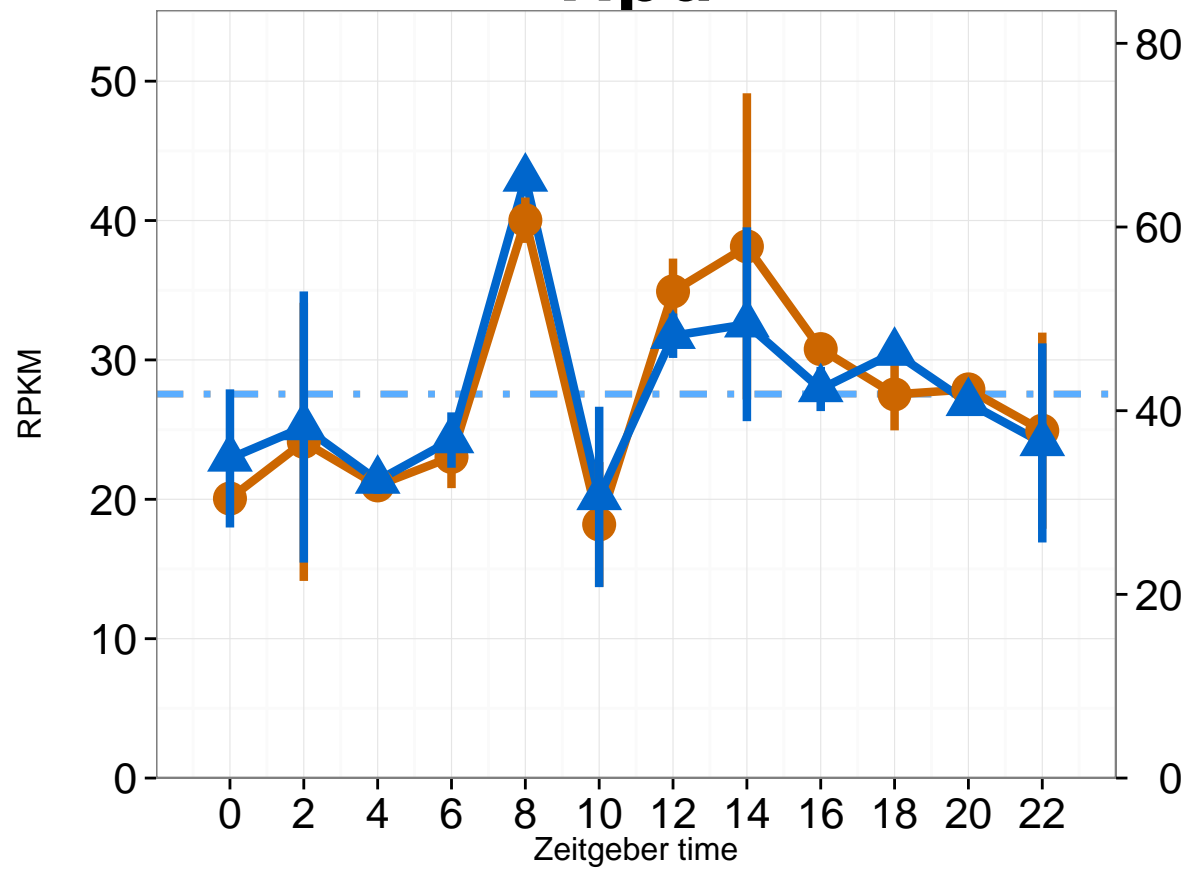

## Hpd

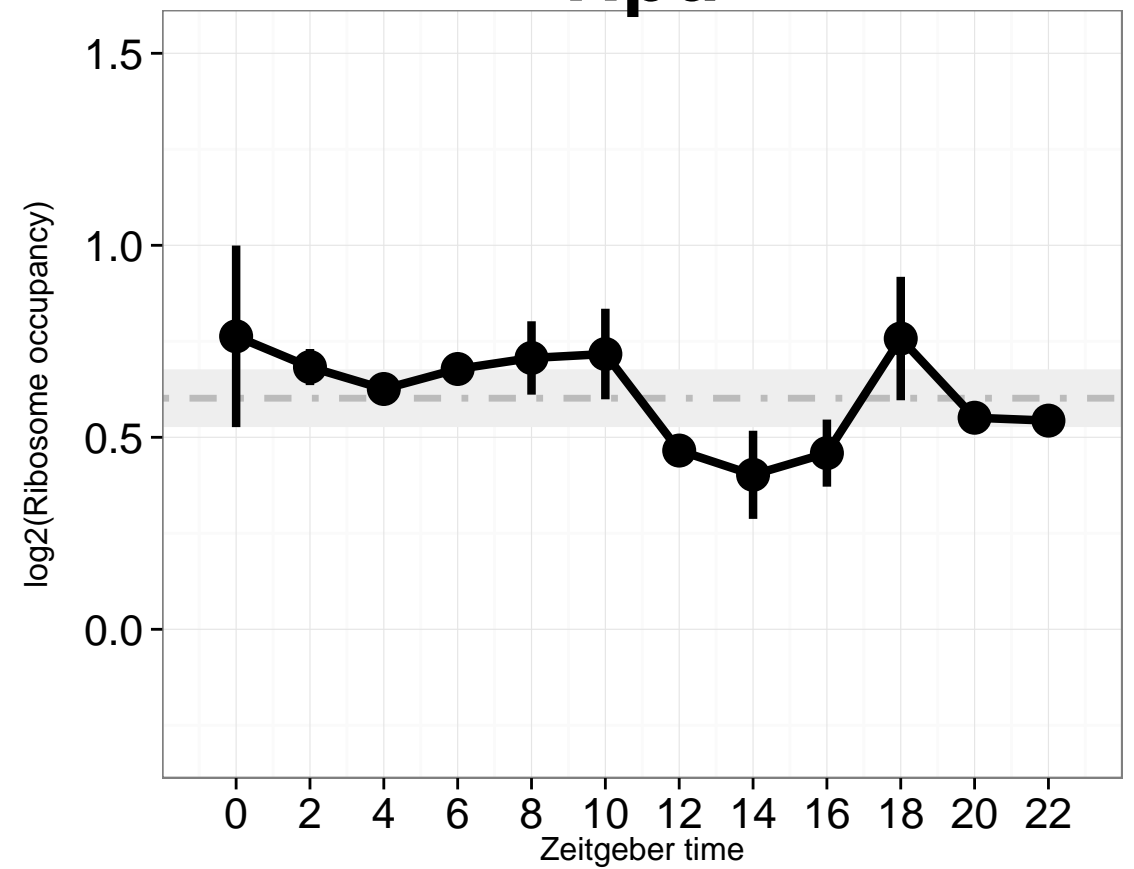

Supplement: Supplementary file 8751 [file 1]

## 2410131K14Rik

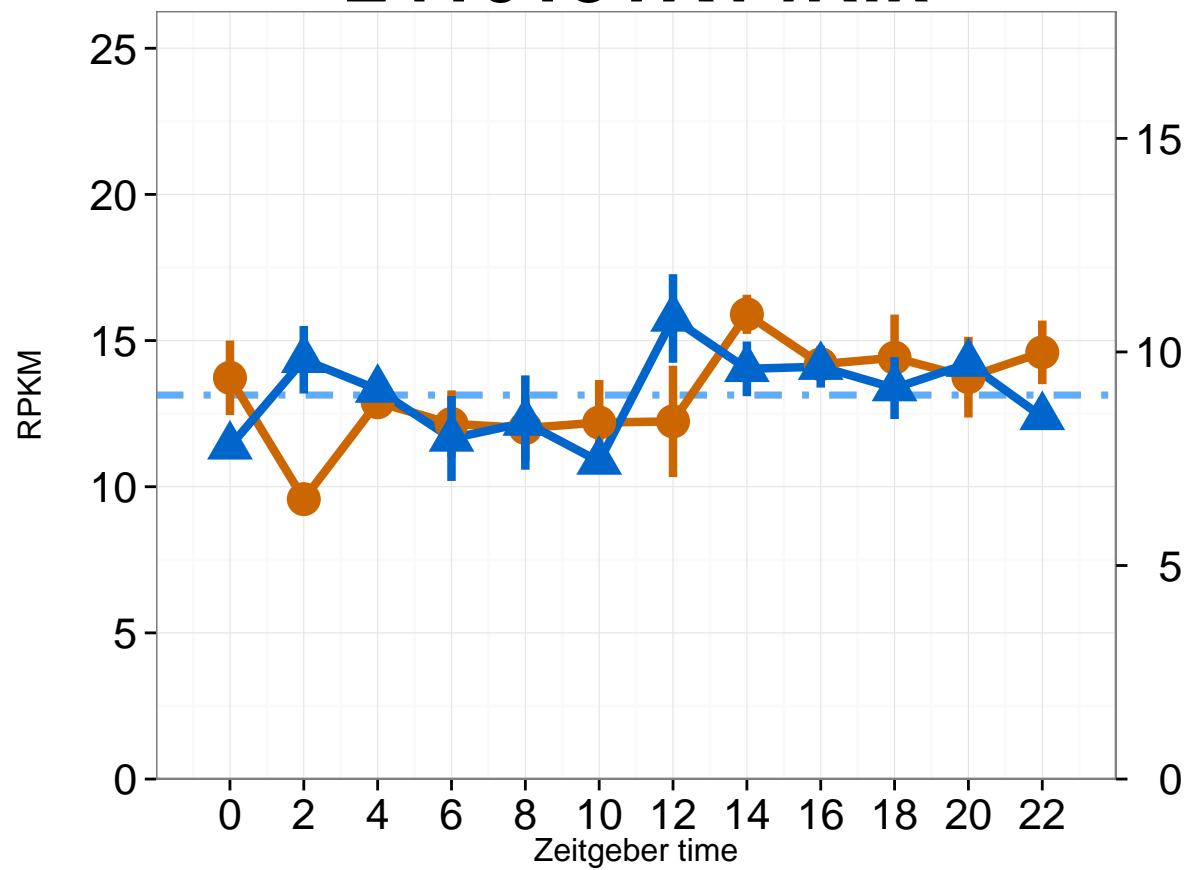

## 2410131K14Rik

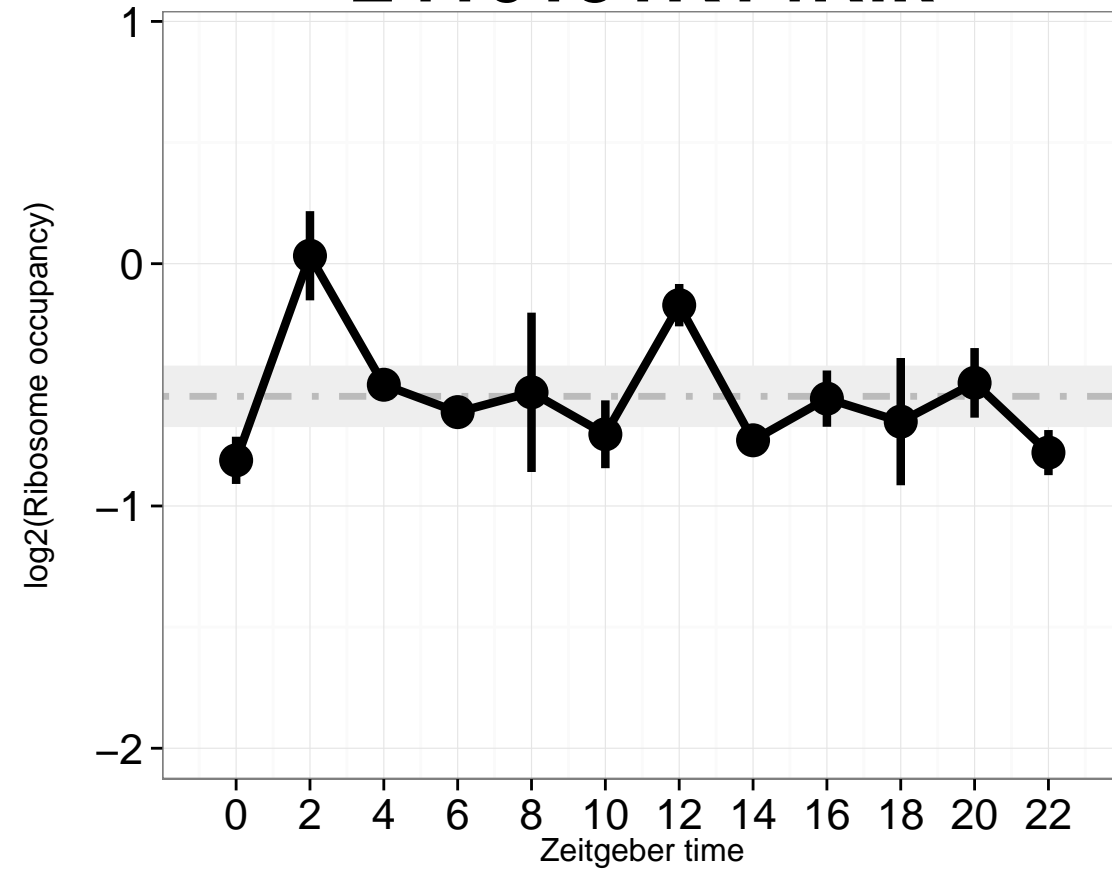

Supplement: Supplementary file 8752 [file 1]

# Cmpk1

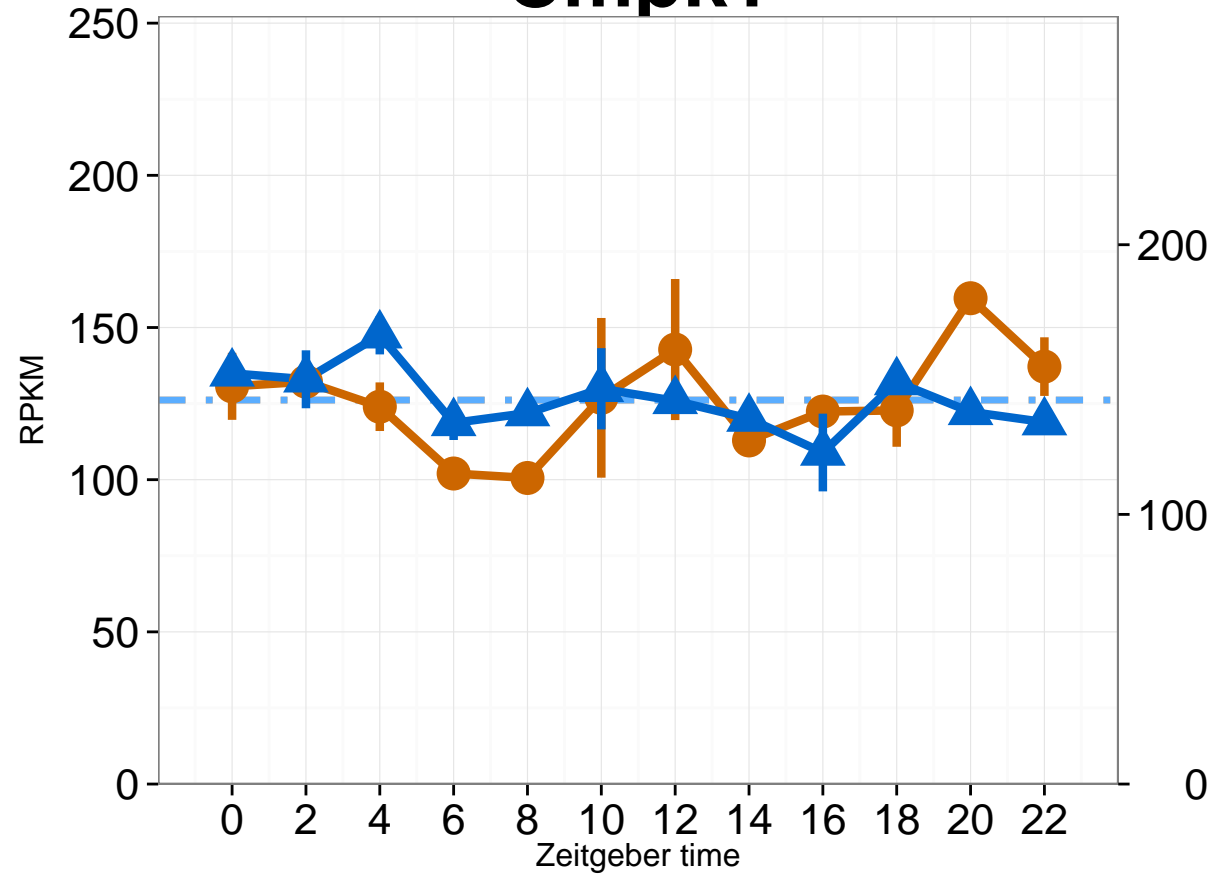

# Cmpk1

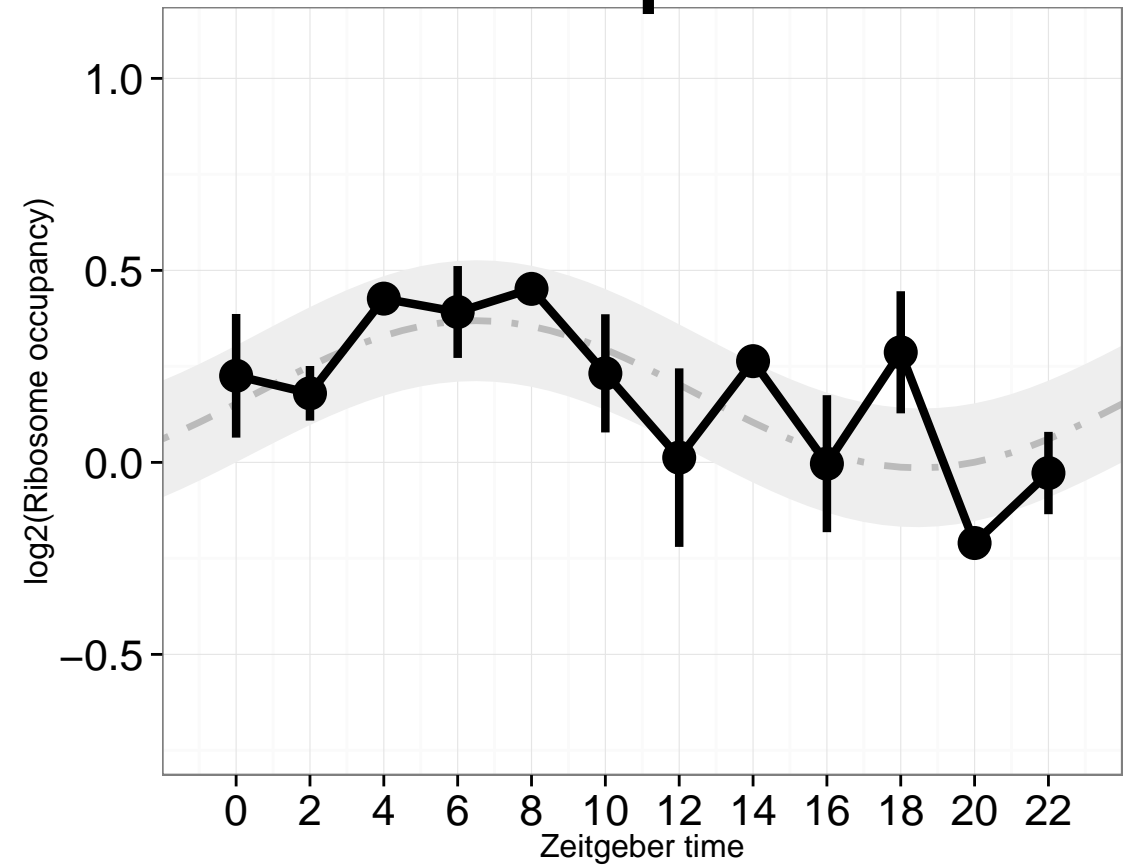

Supplement: Supplementary file 8753 [file 1]

## Irak1

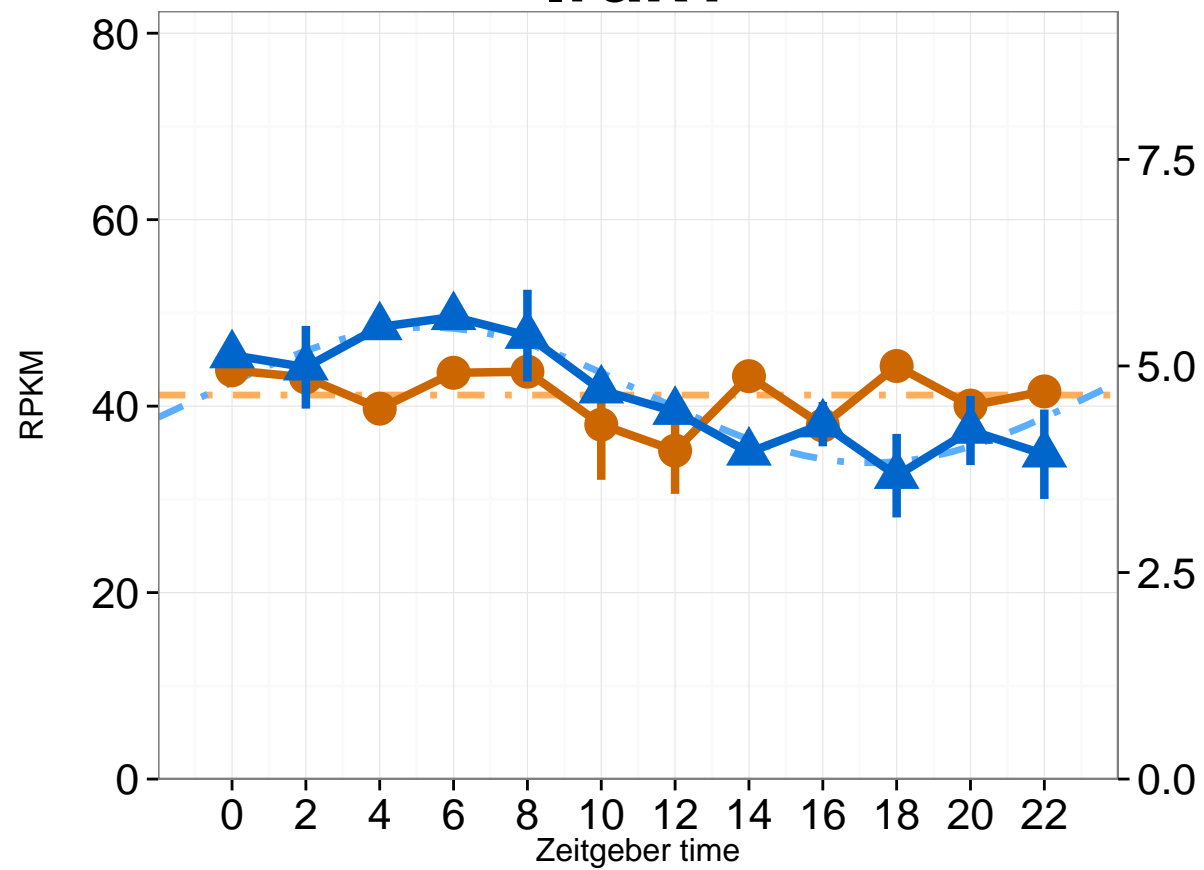

## Irak1

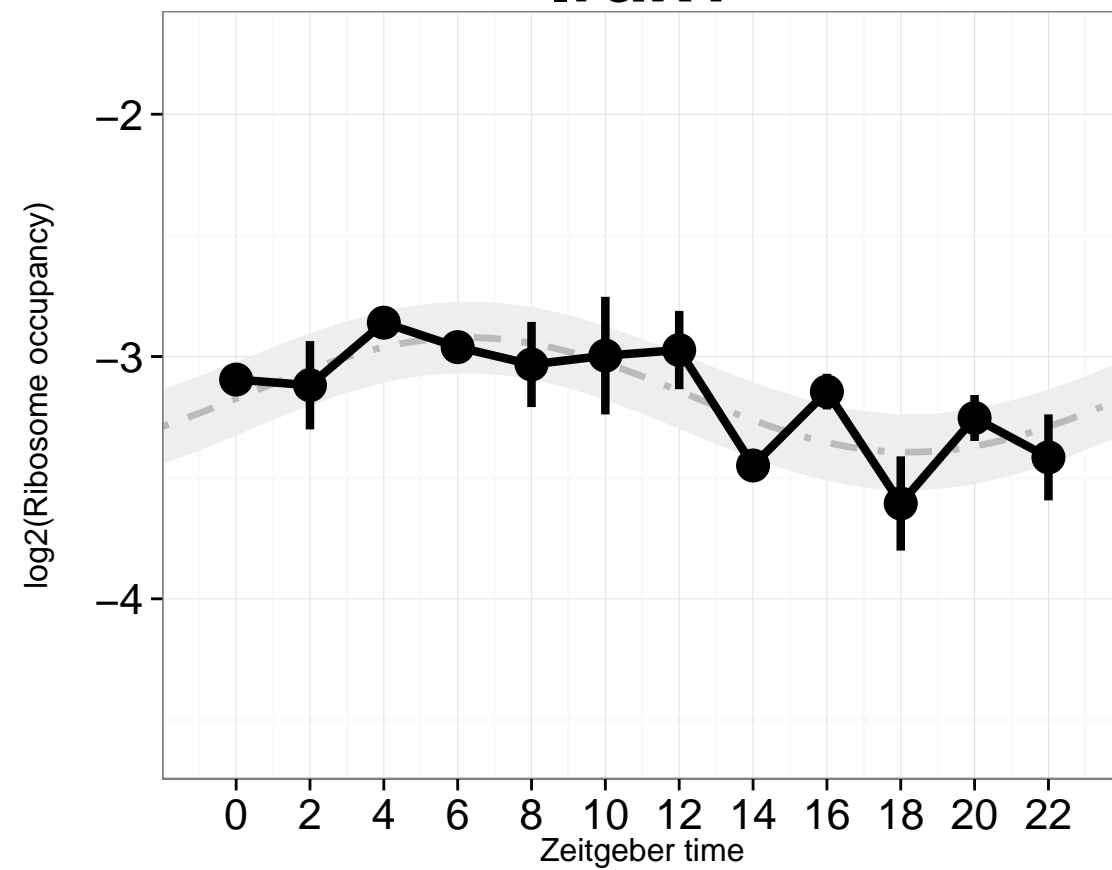

Supplement: Supplementary file 8754 [file 1]

# Sult1a1

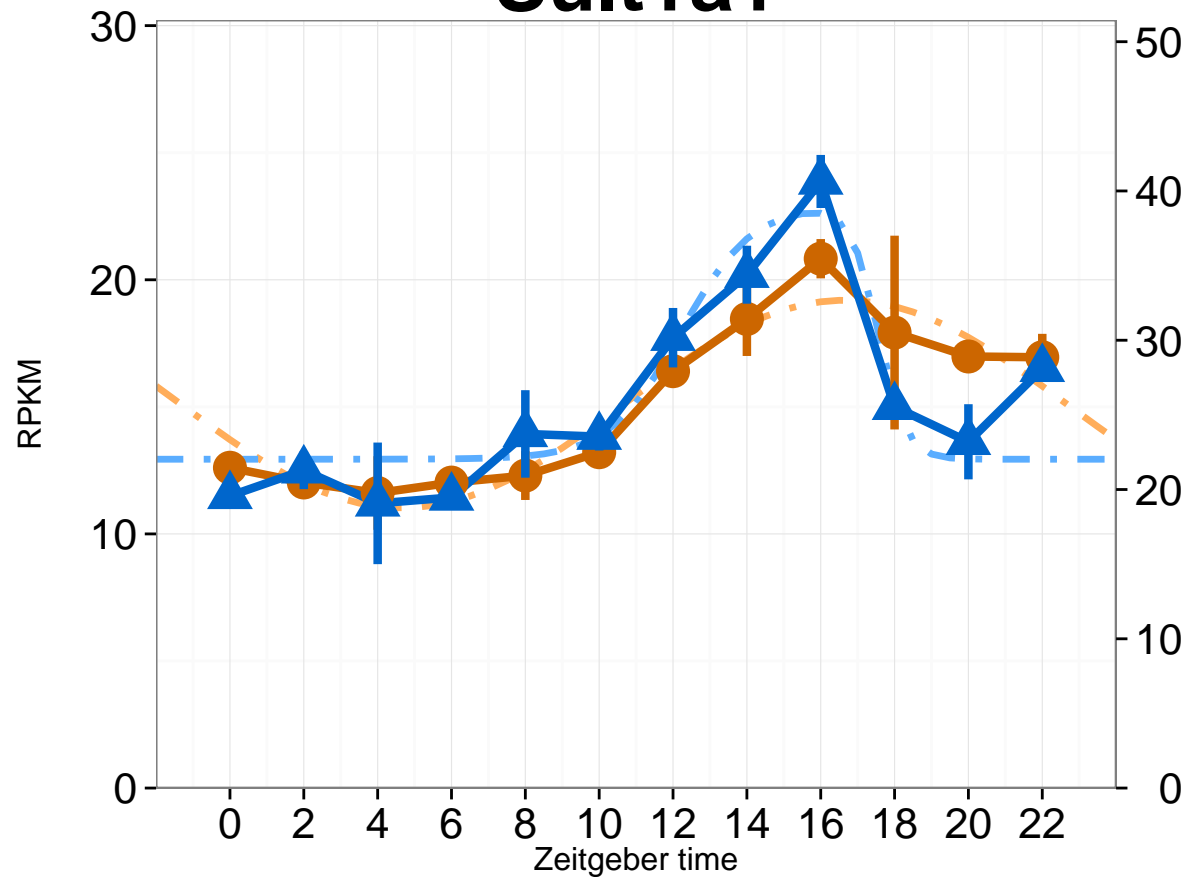

# Sult1a1

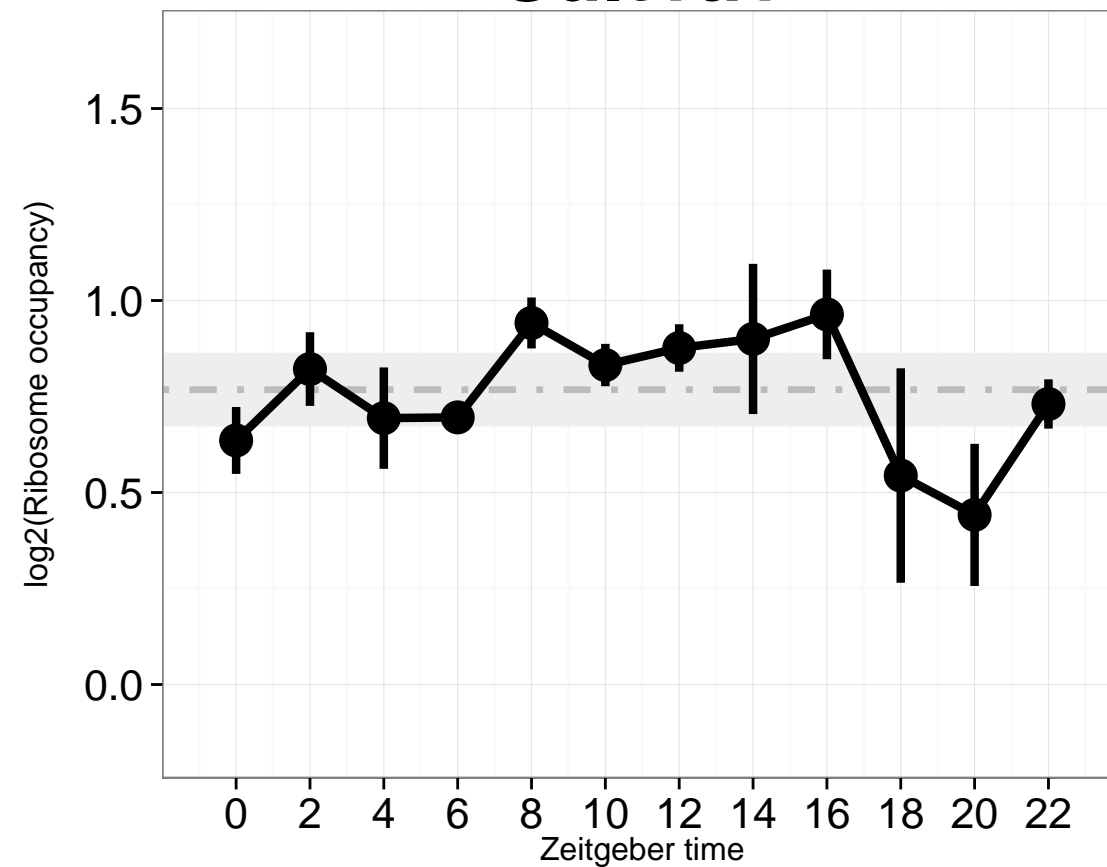

Supplement: Supplementary file 8755 [file 1]

## Pex6

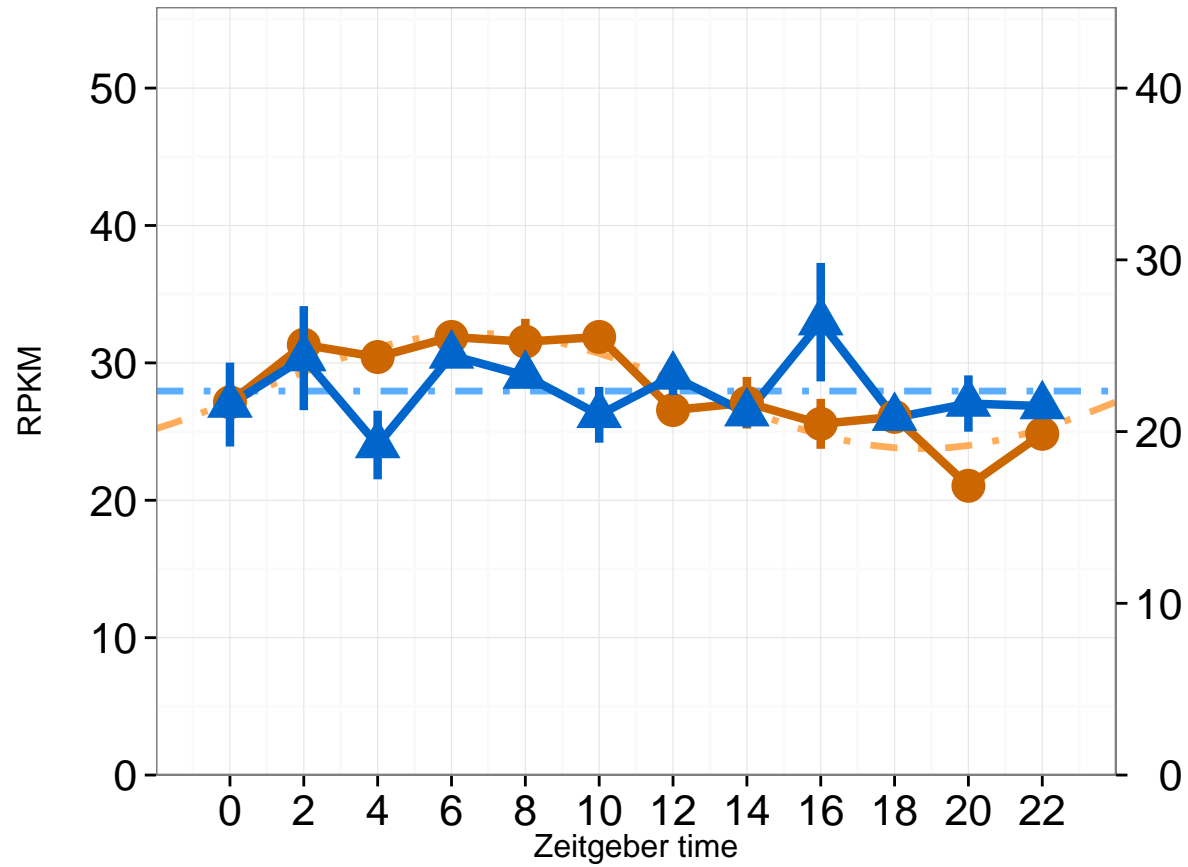

## Pex6

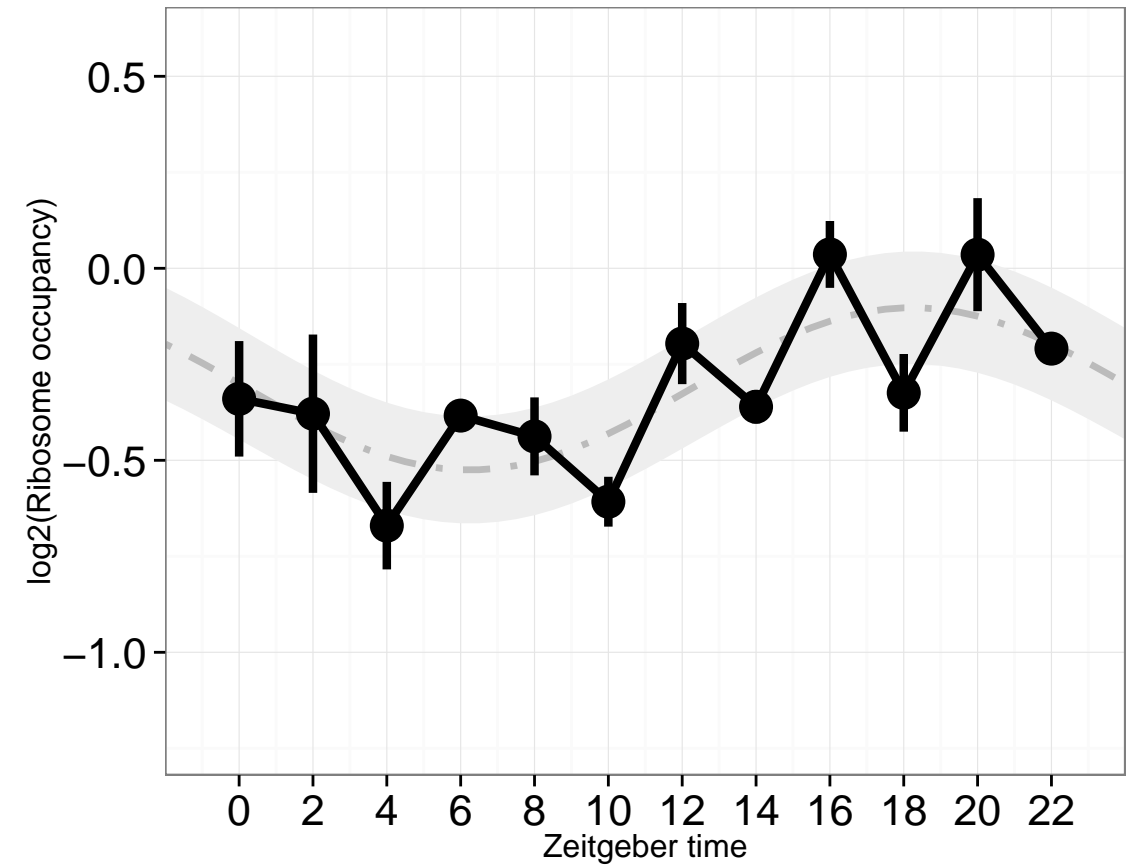

Supplement: Supplementary file 8756 [file 1]

## Pex10

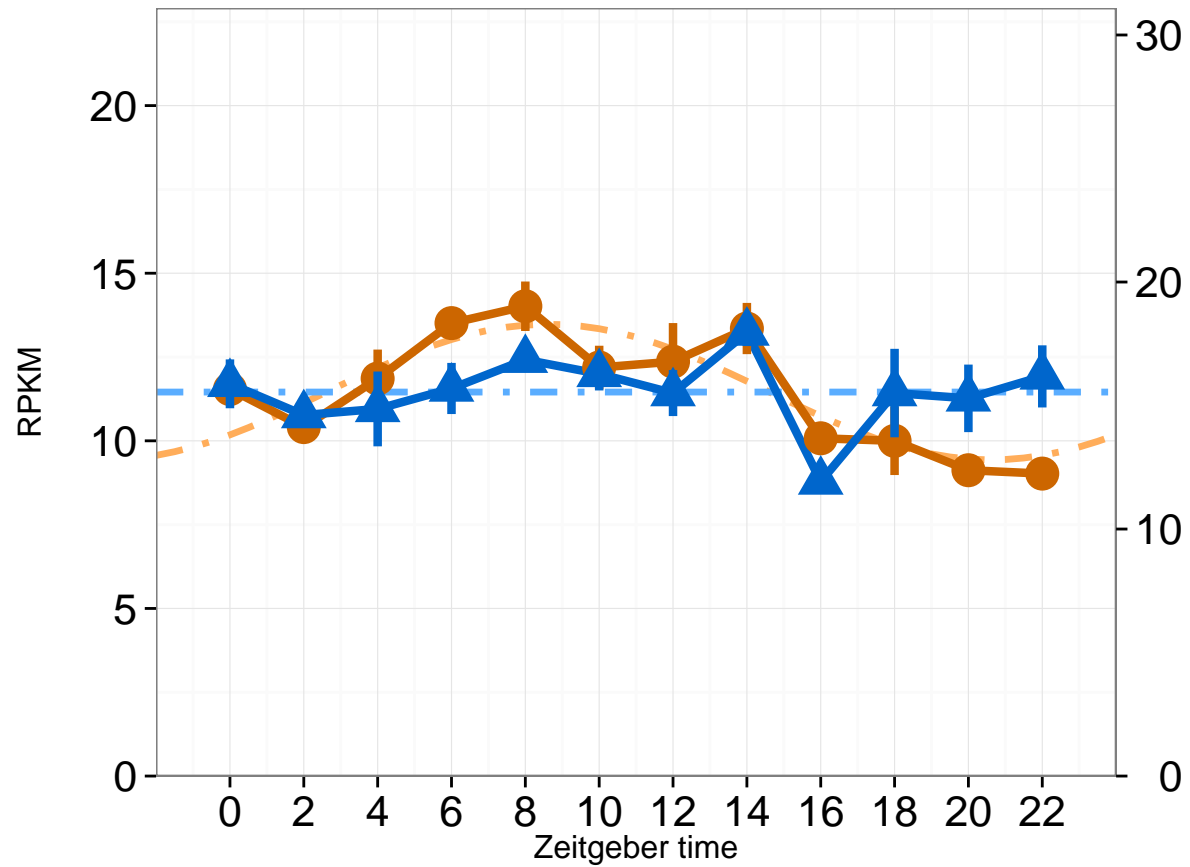

## Pex10

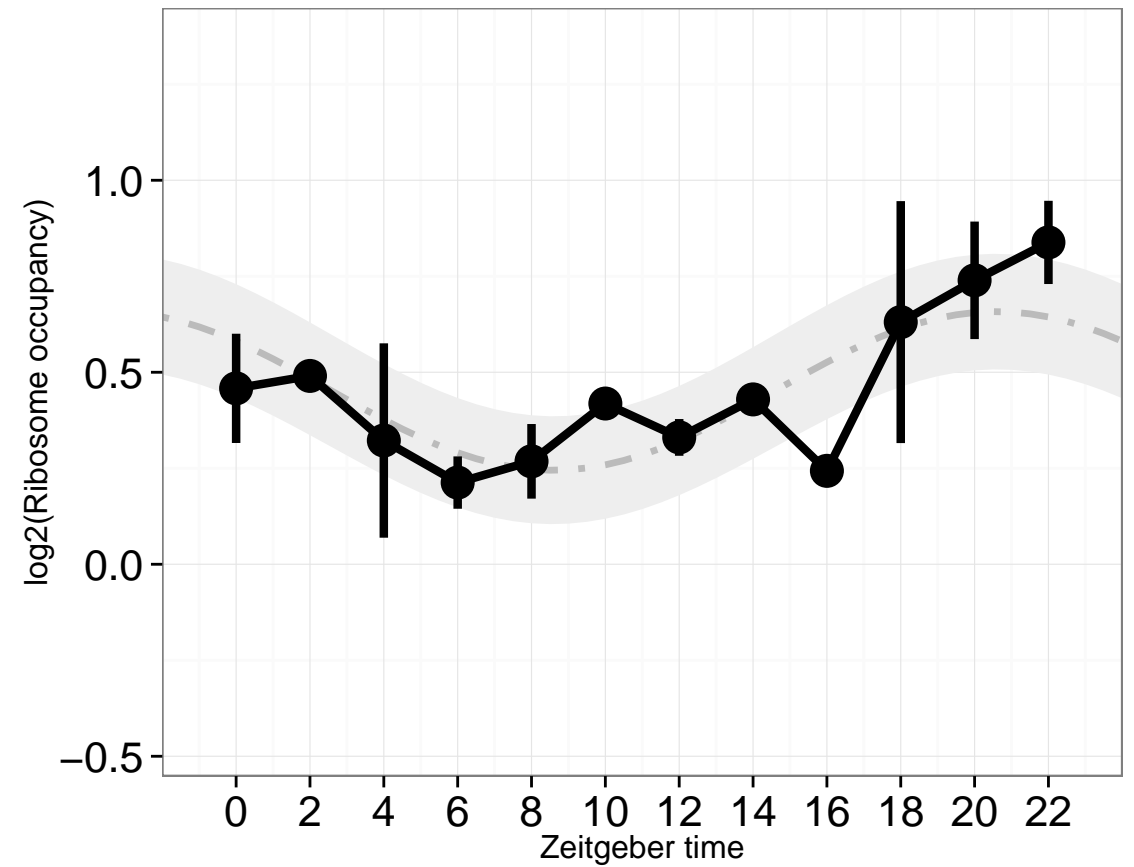

Supplement: Supplementary file 8757 [file 1]

## Brms1l

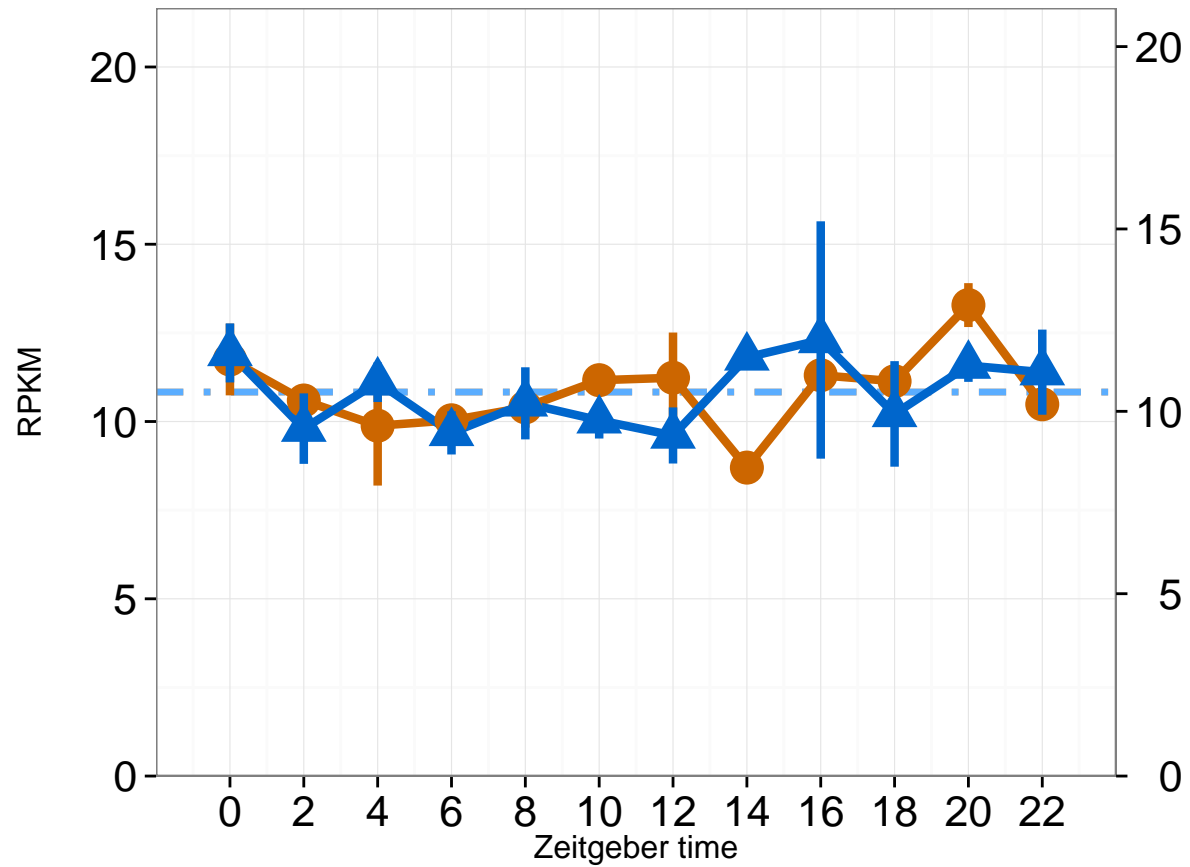

## Brms1l

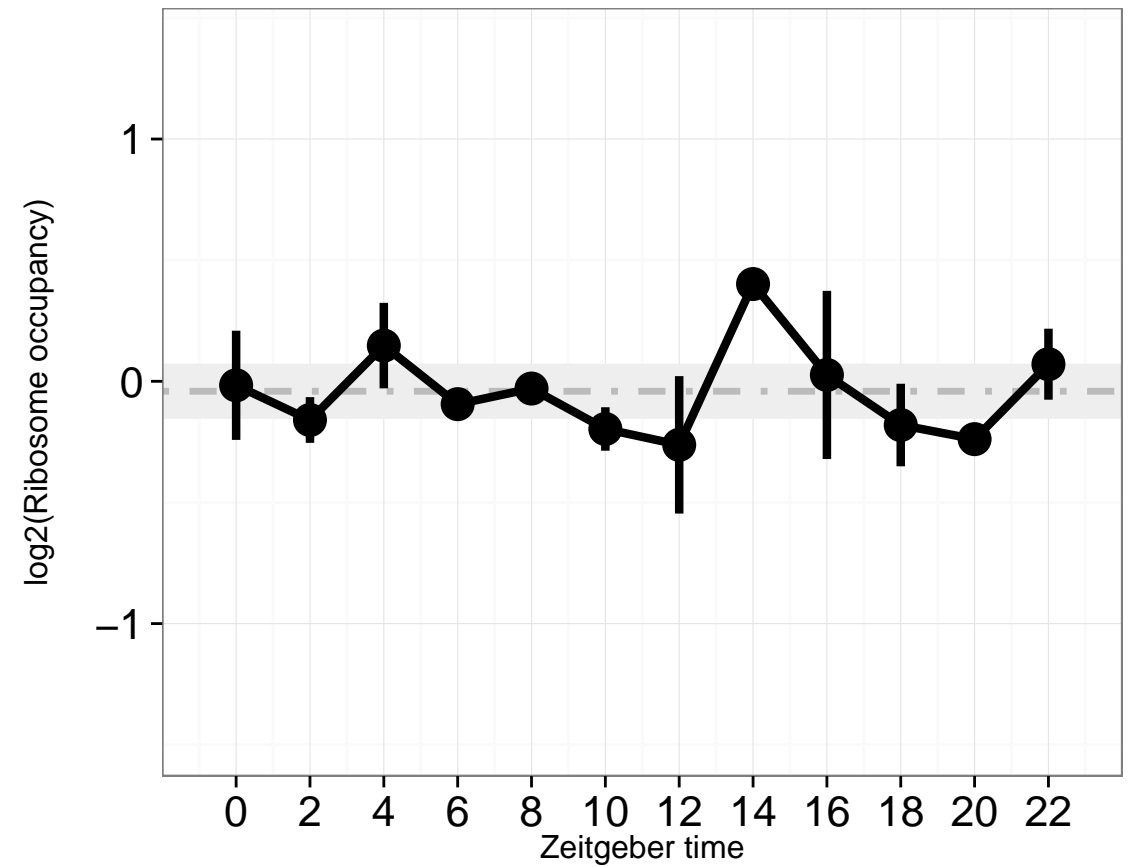

Supplement: Supplementary file 8758 [file 1]

# Fam53a

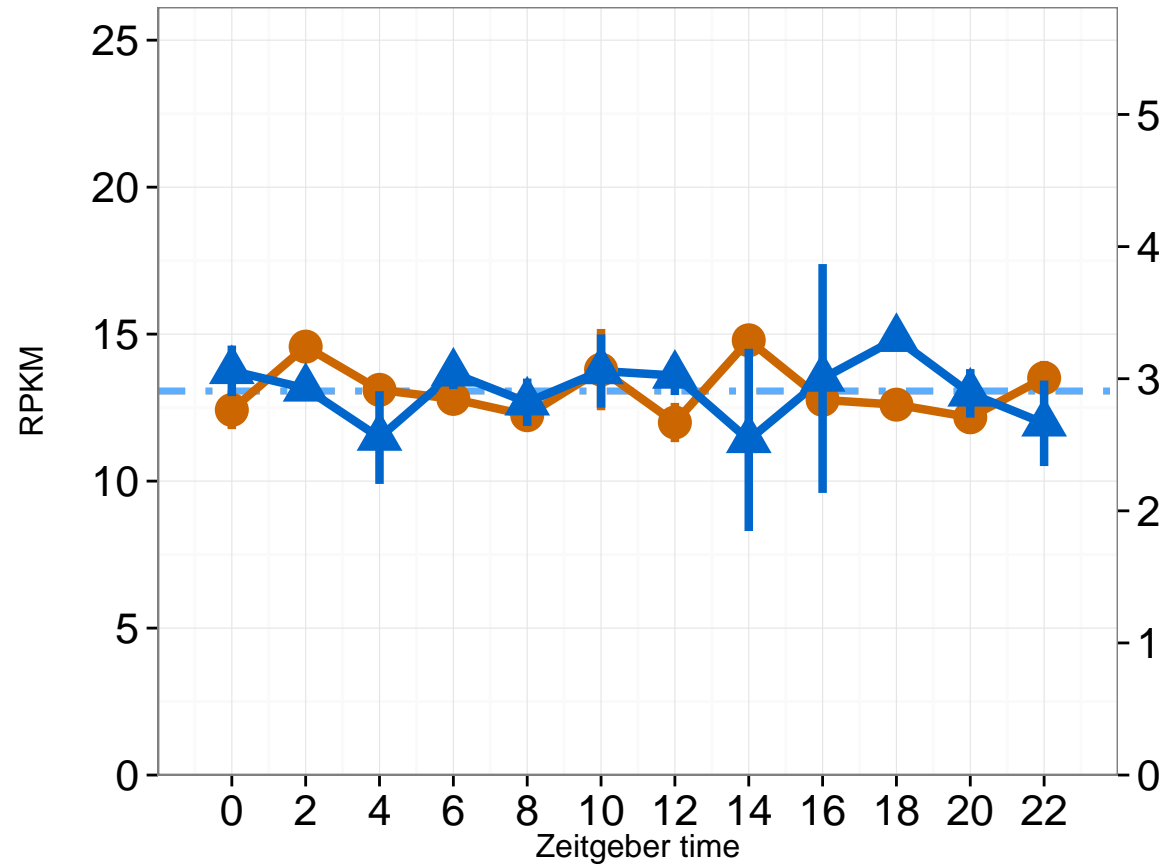

# Fam53a

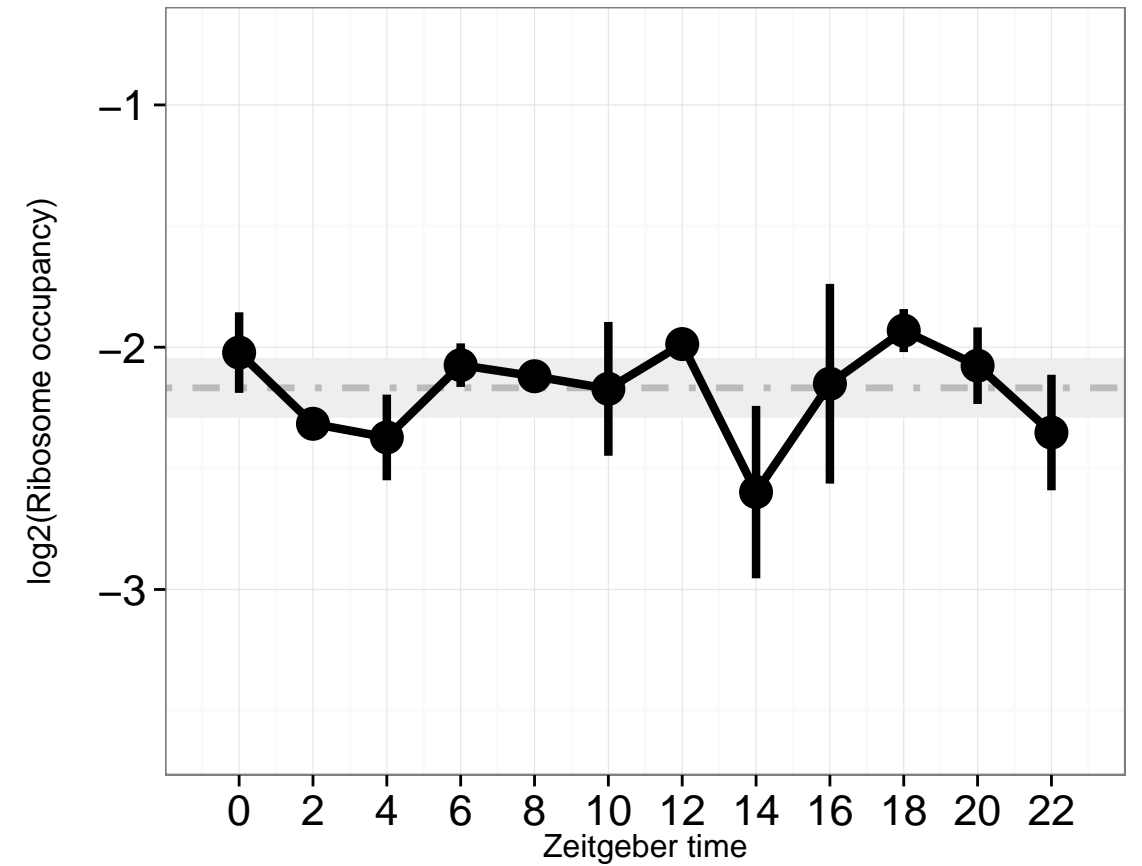

Supplement: Supplementary file 8759 [file 1]

## Stk38l

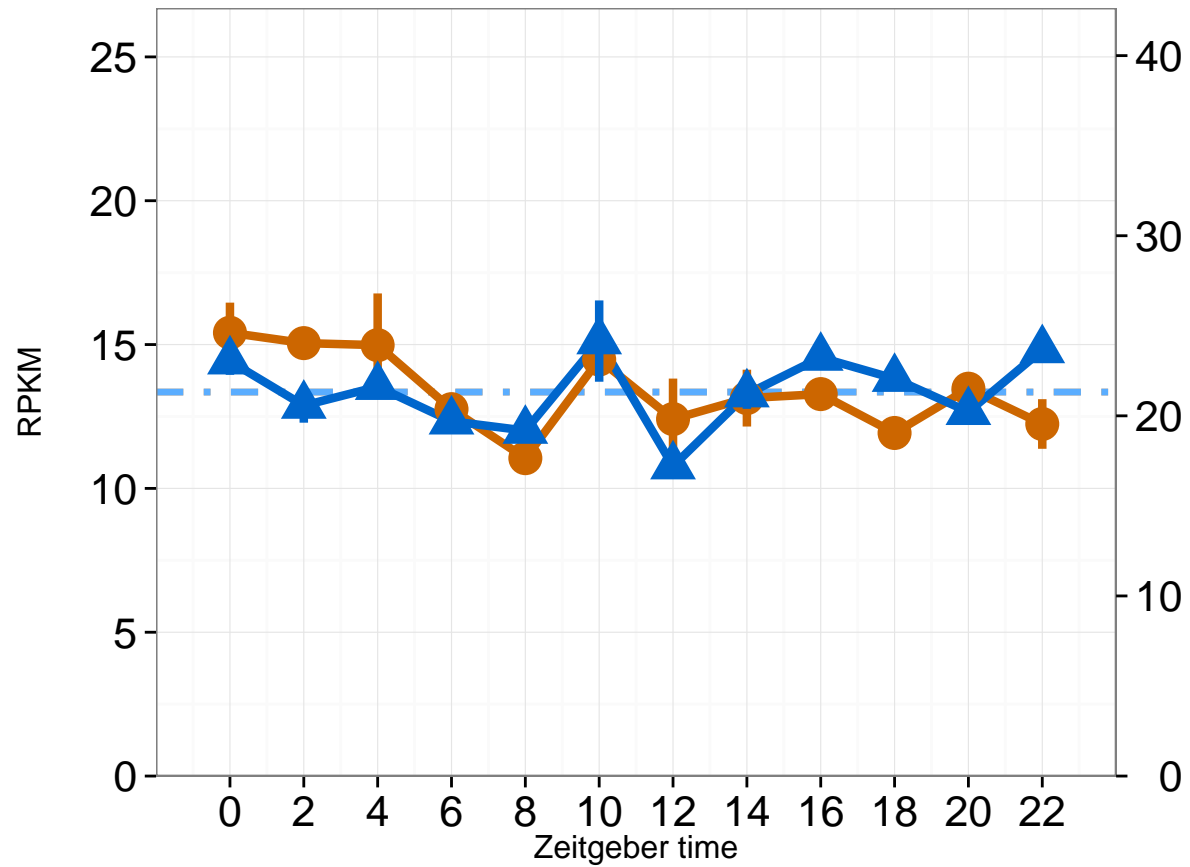

## Stk38l

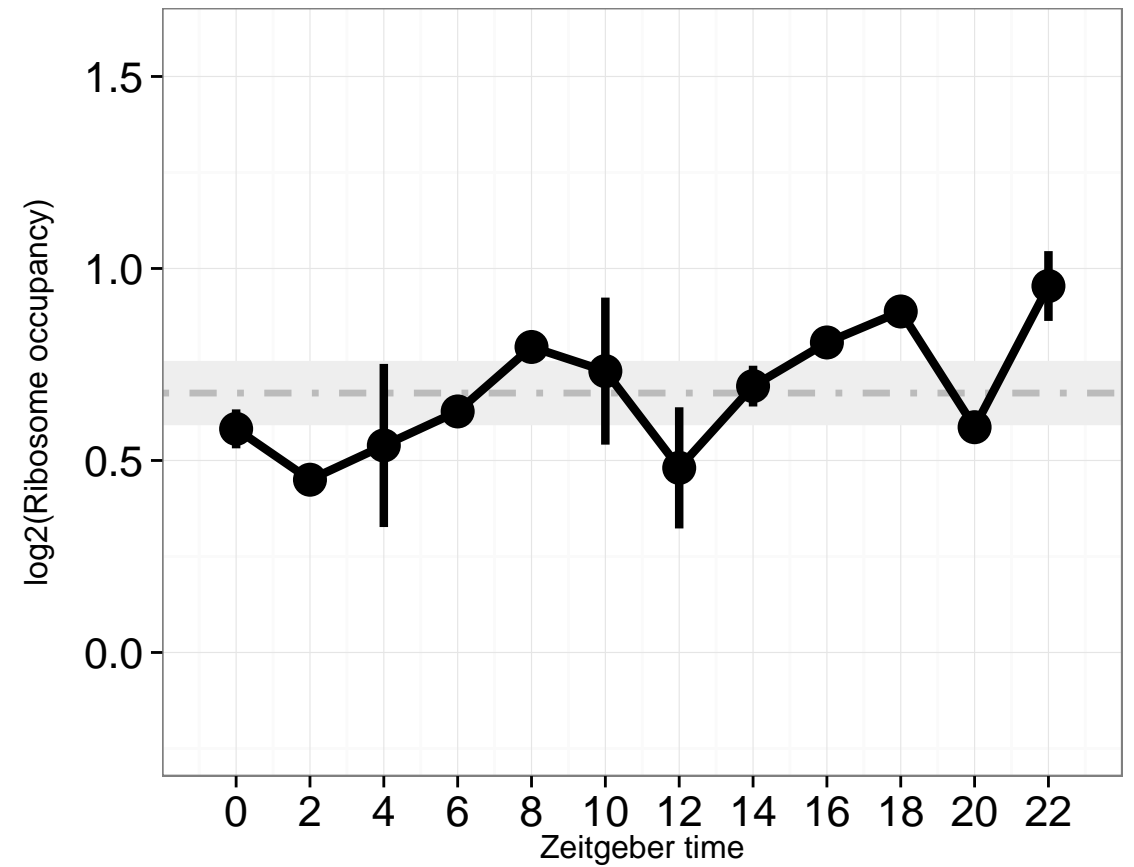

Supplement: Supplementary file 8760 [file 1]

## Btg2

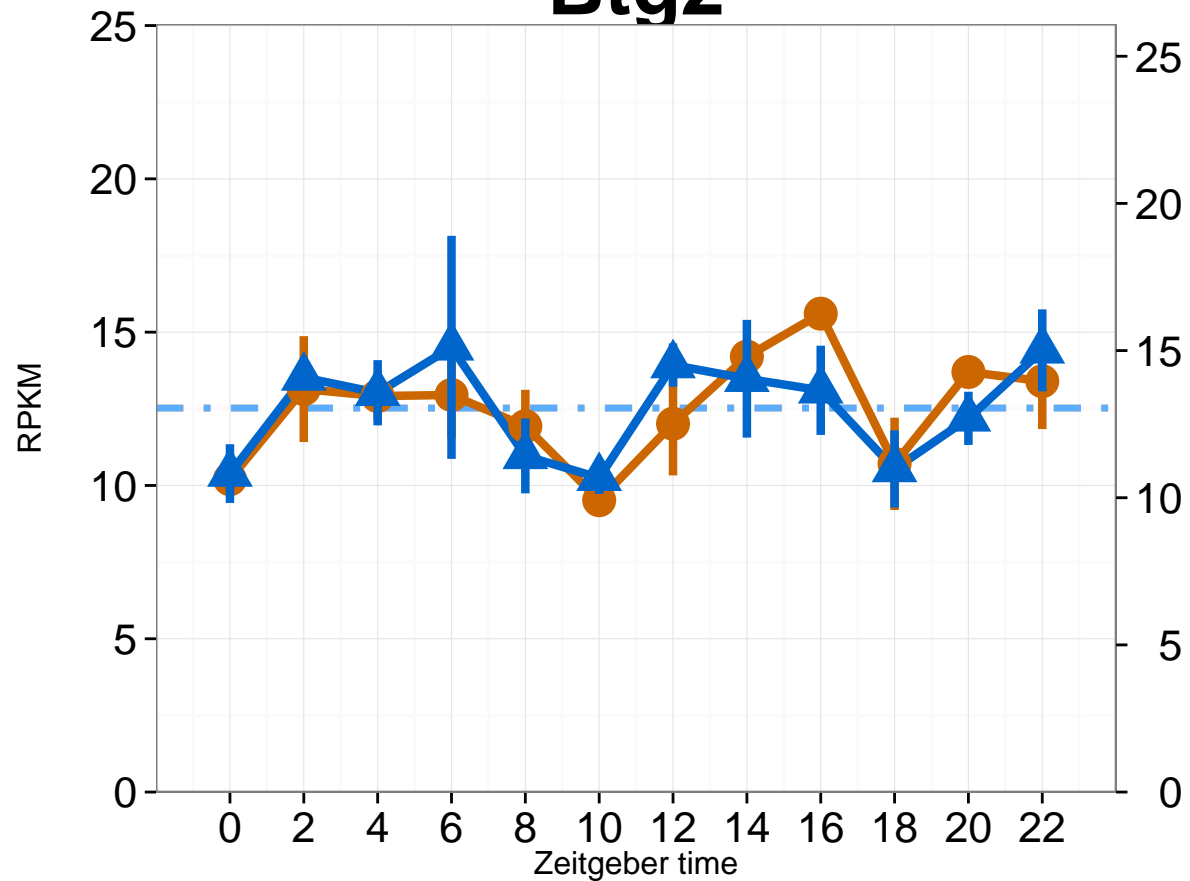

## Btg2

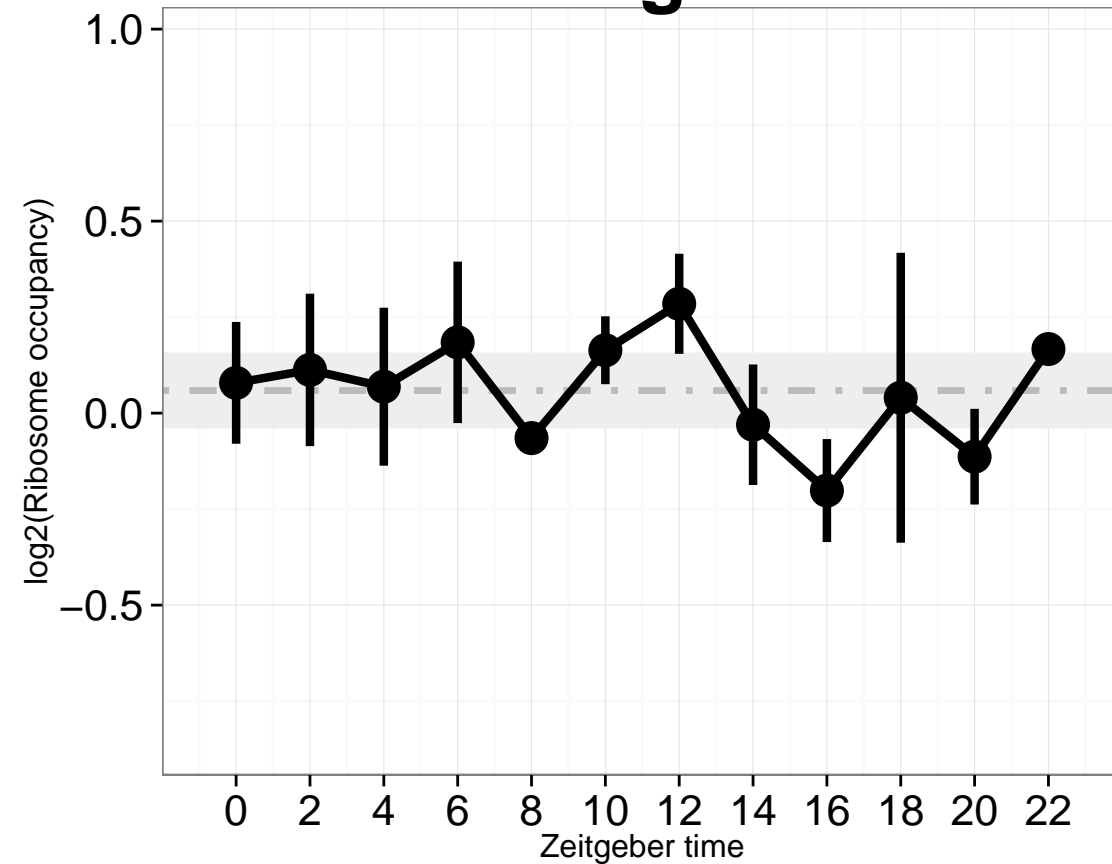

Supplement: Supplementary file 8761 [file 1]

## Tet1

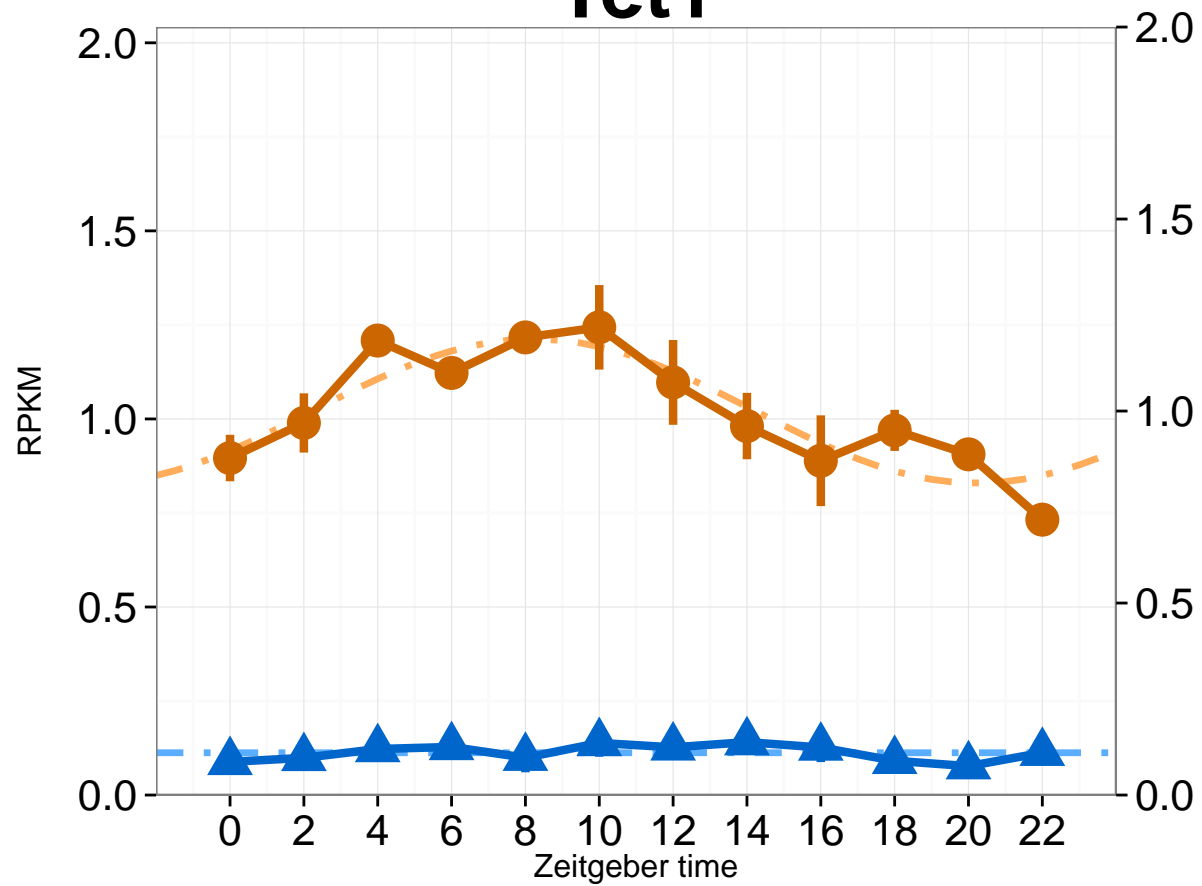

## Tet1

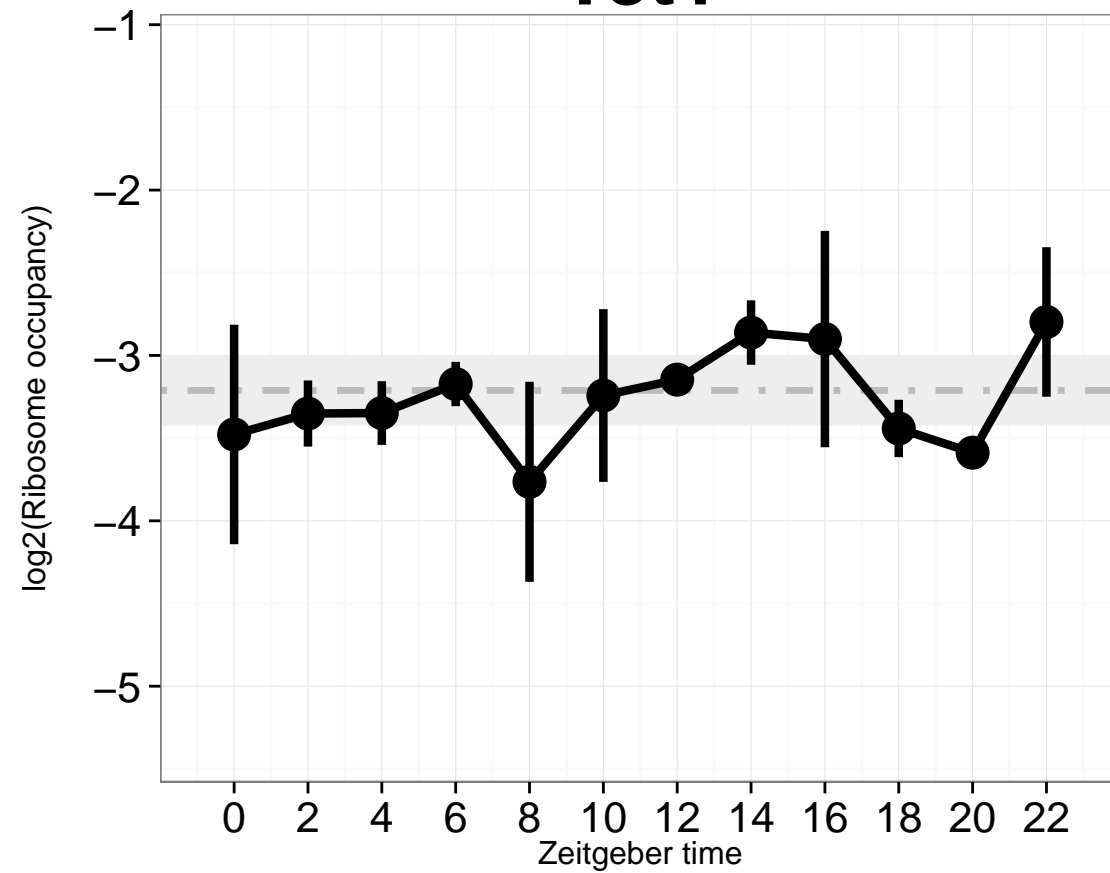

Supplement: Supplementary file 8762 [file 1]

## Kank4

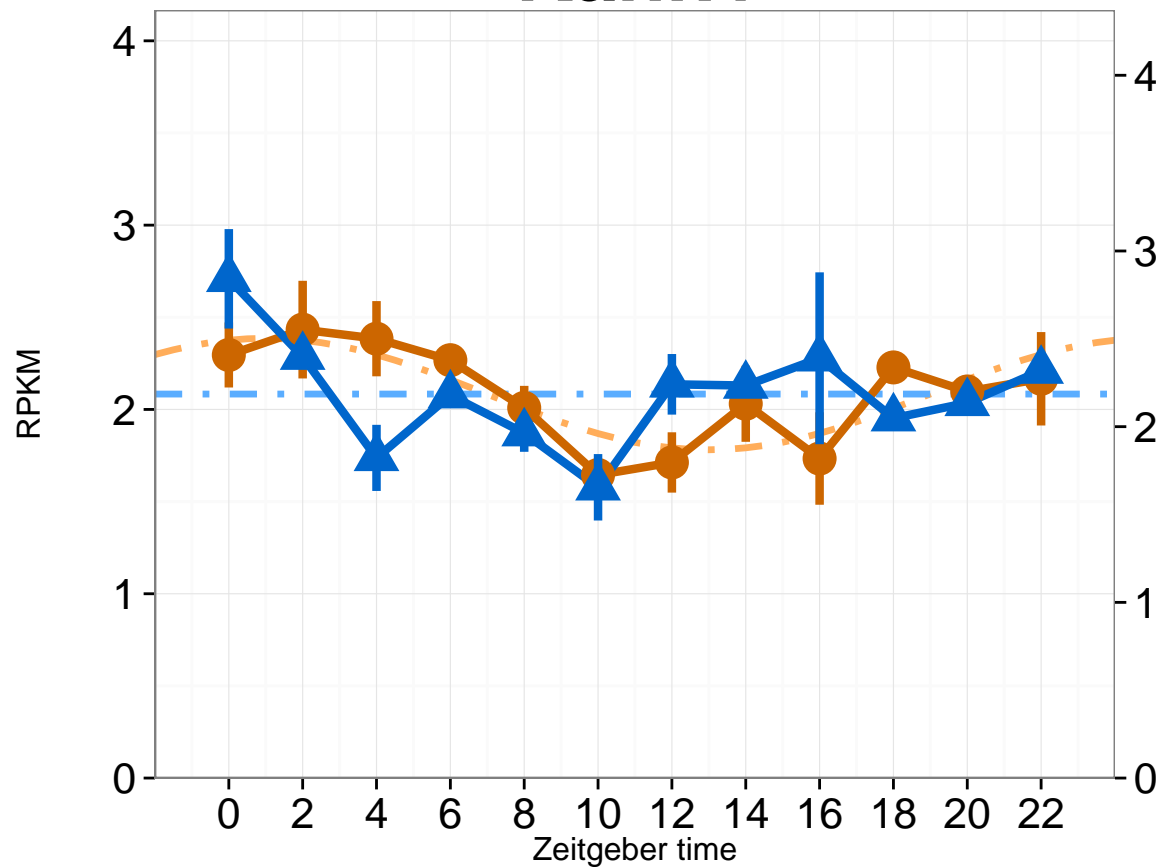

## Kank4

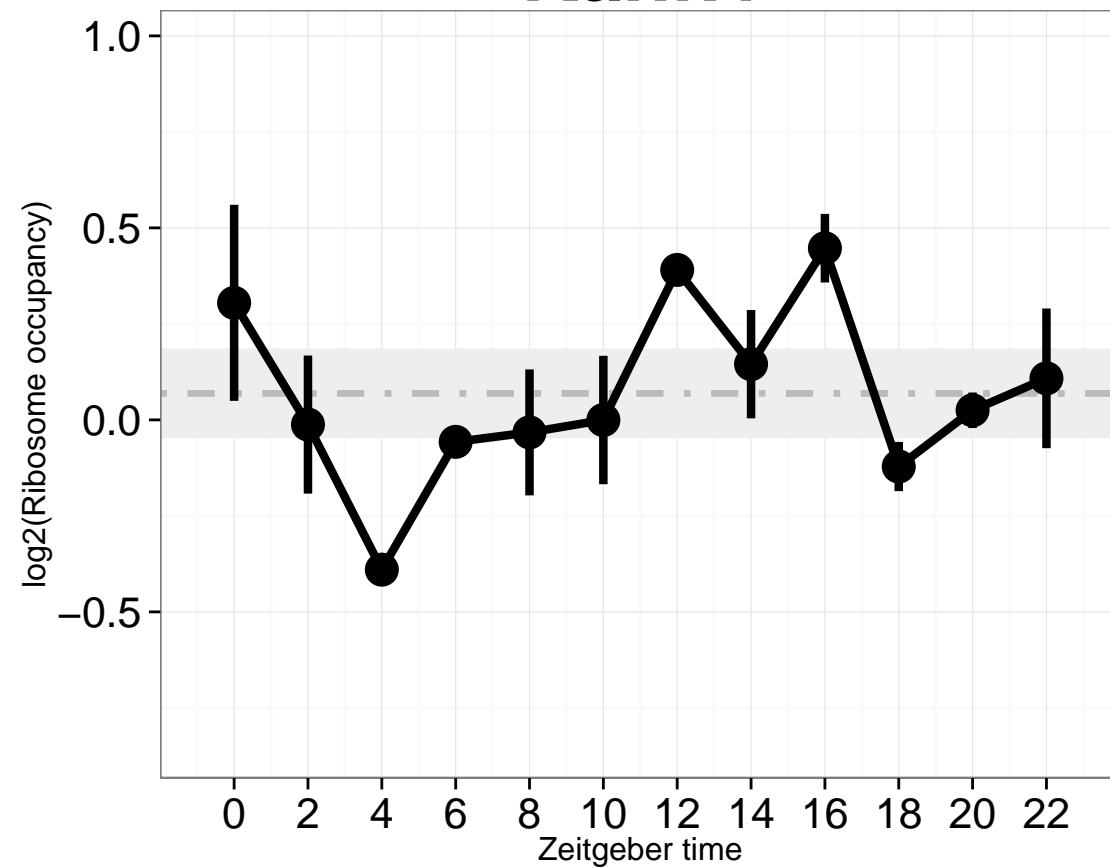

Supplement: Supplementary file 8764 [file 1]

## Tnxb

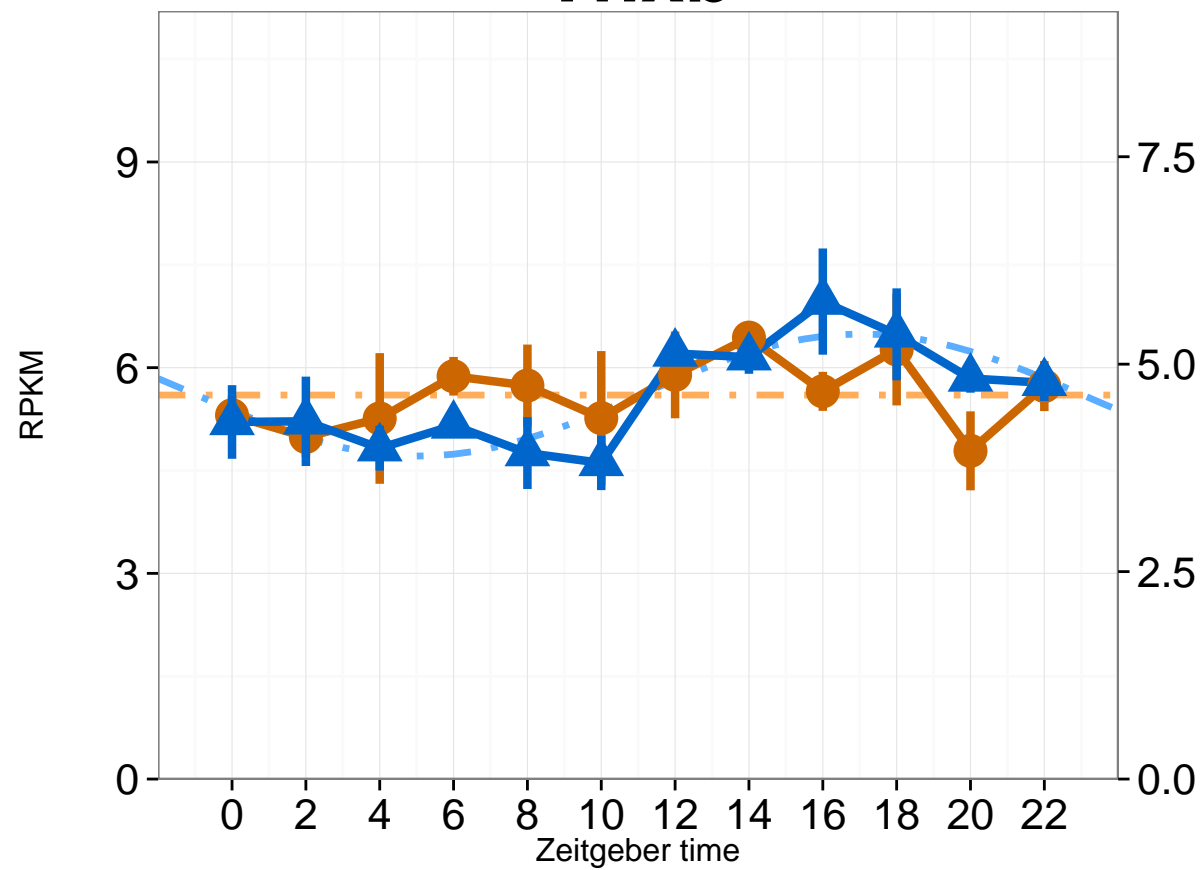

## Tnxb

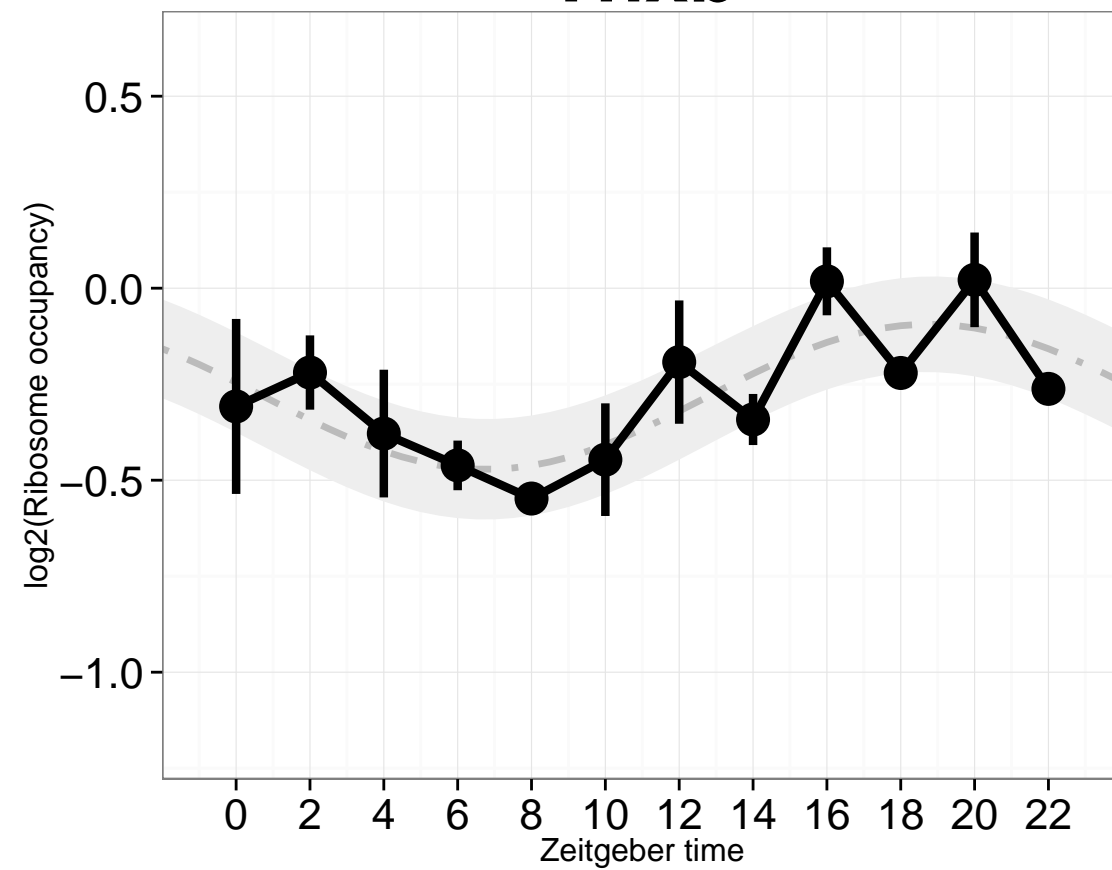

Supplement: Supplementary file 8765 [file 1]

## Gmeb2

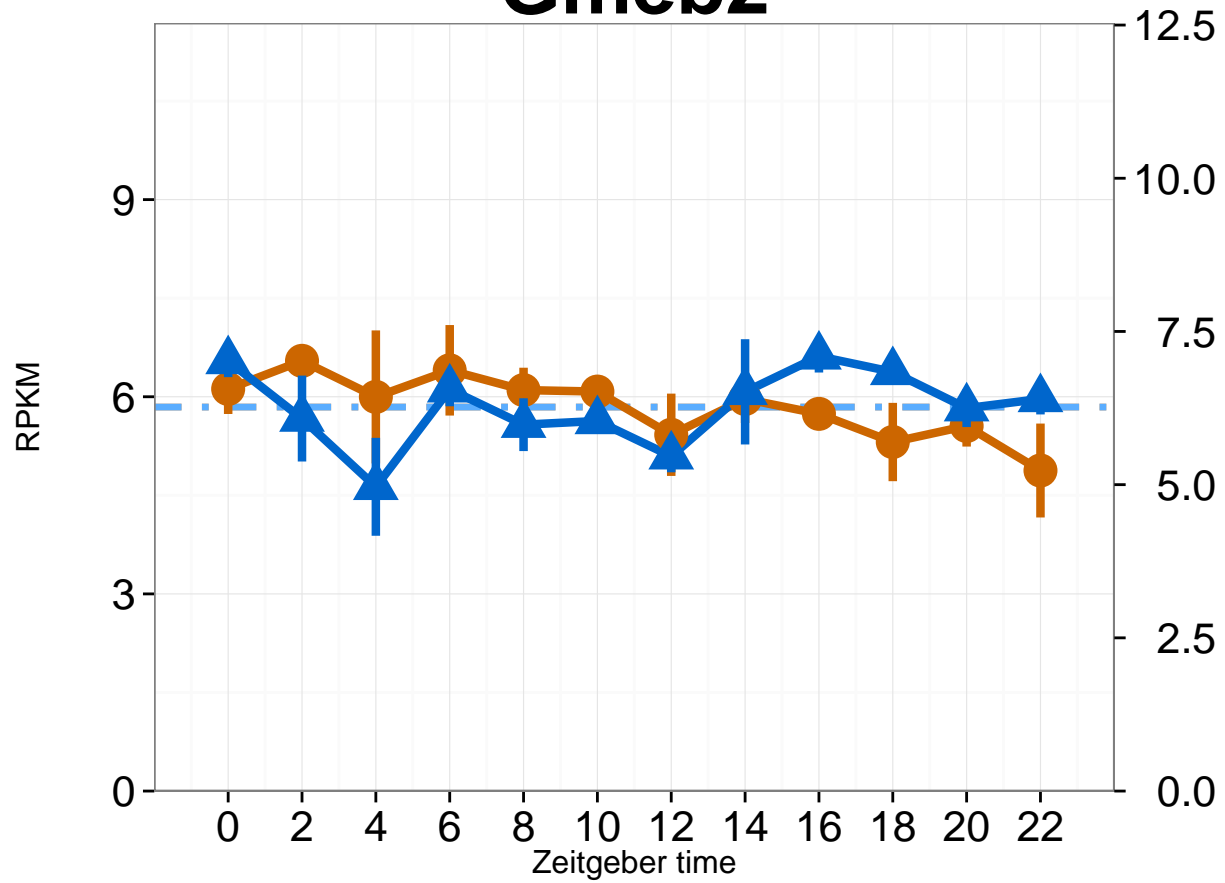

## Gmeb2

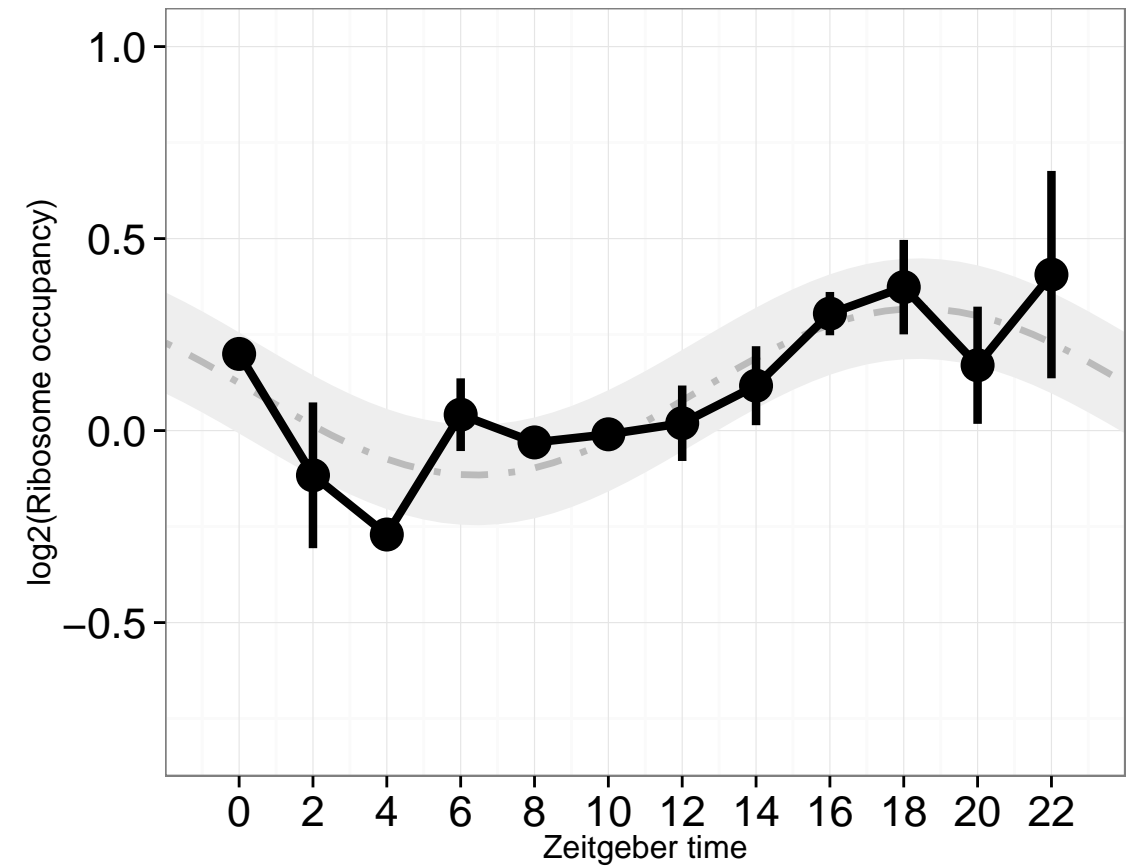

Supplement: Supplementary file 8766 [file 1]

## Tfrc

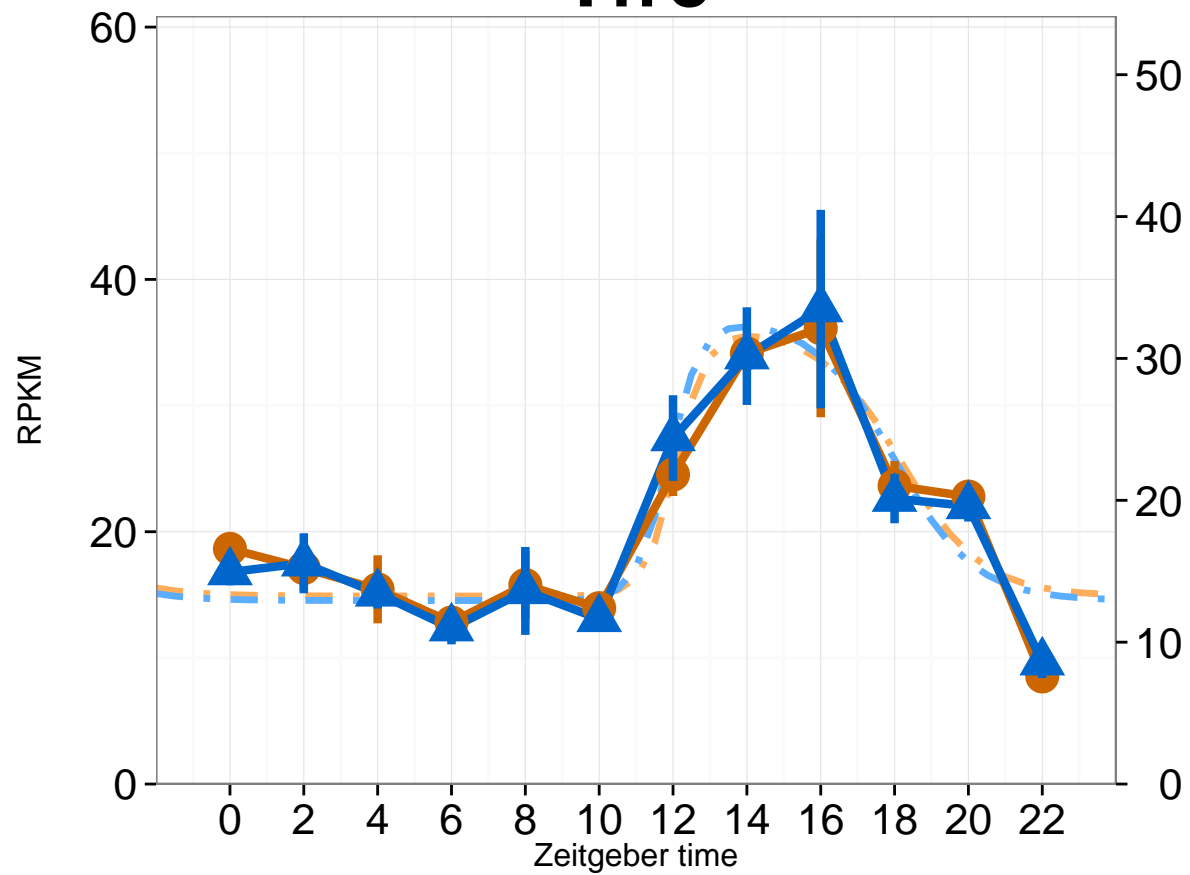

## Tfrc

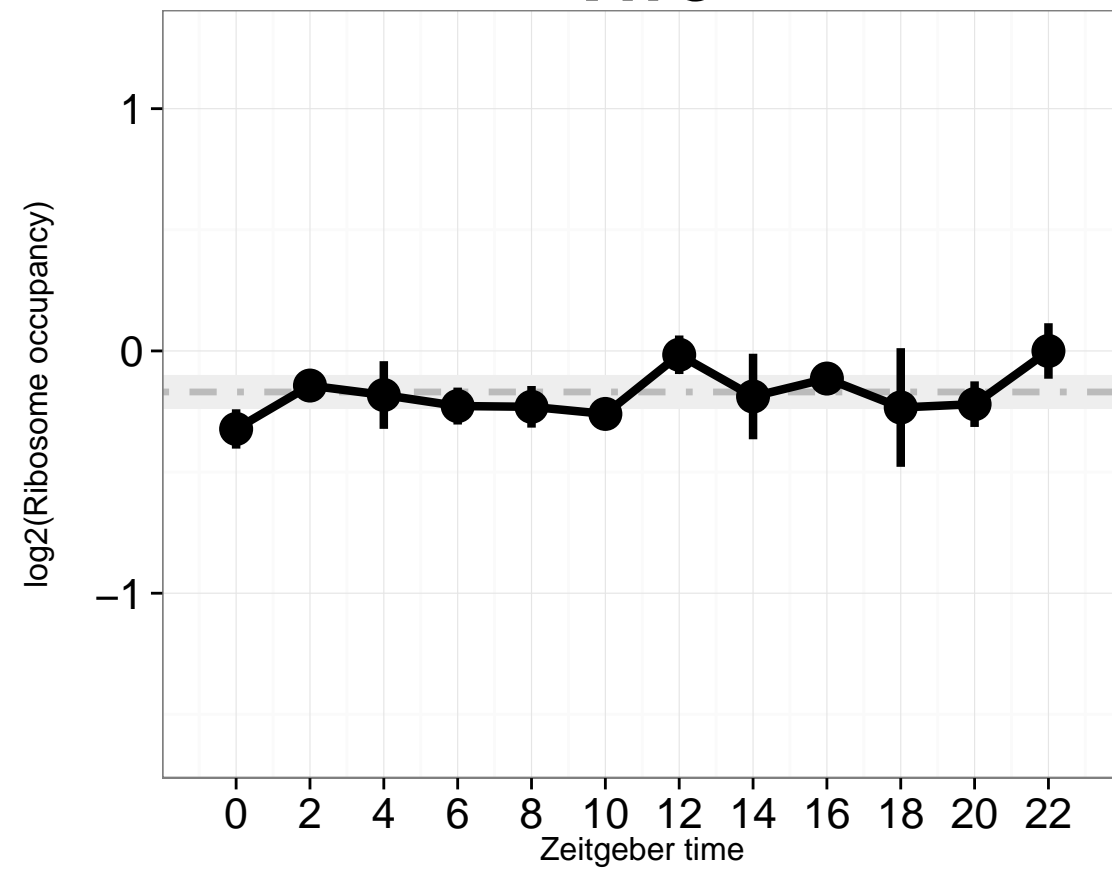

Supplement: Supplementary file 8767 [file 1]

## Cog3

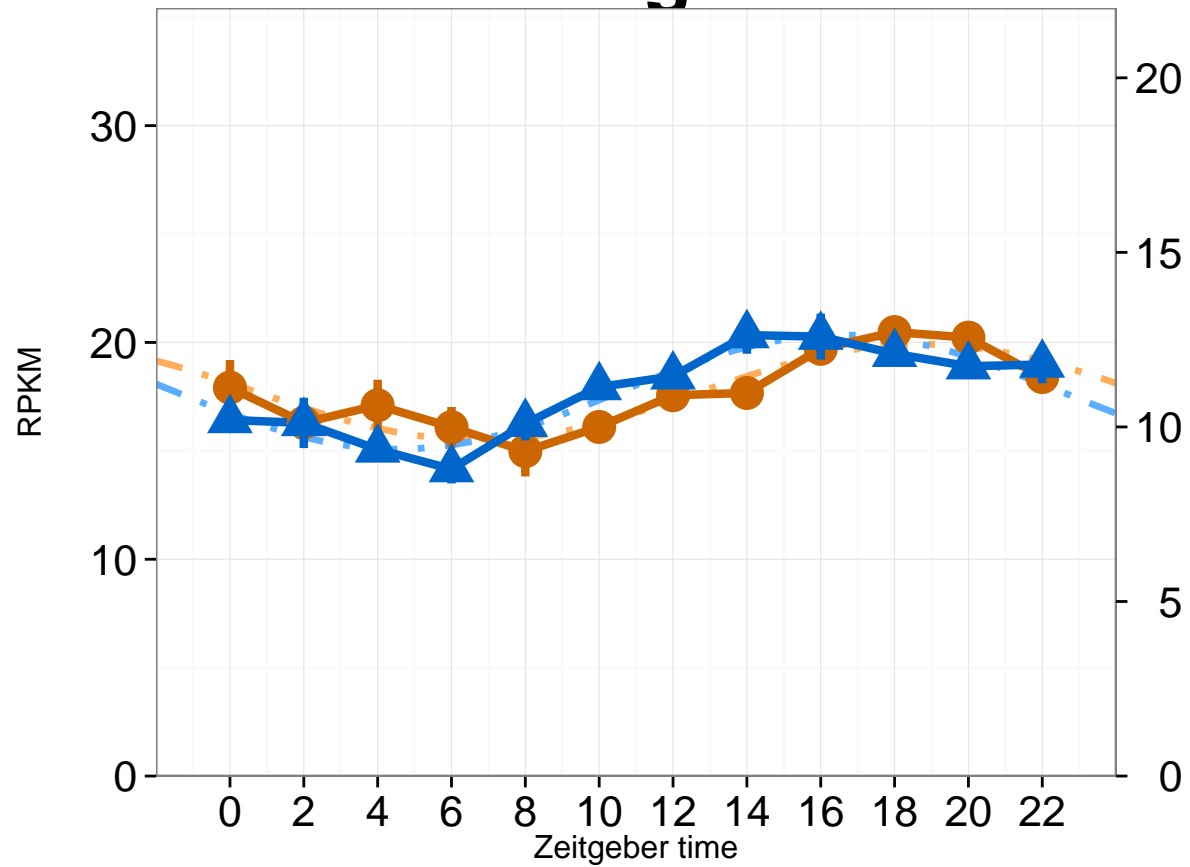

## Cog3

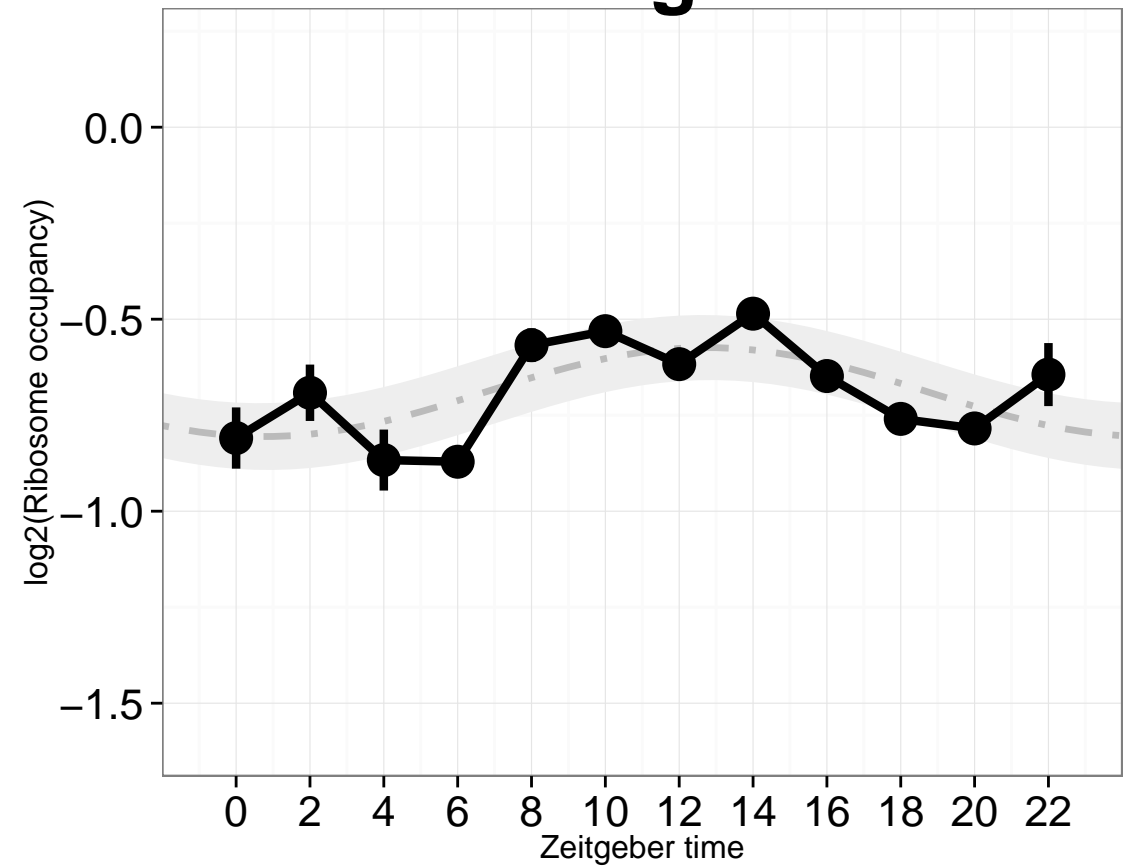

Supplement: Supplementary file 8768 [file 1]

**Tmsb15l TR**

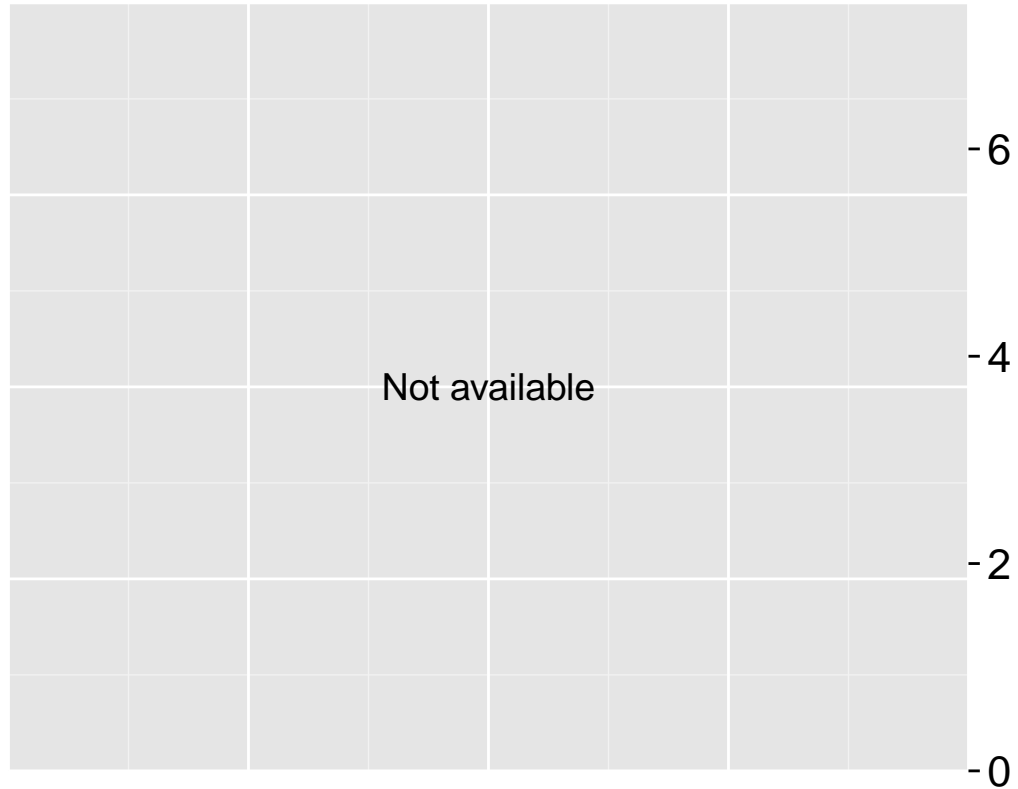

**Tmsb15l log2(Ribosome occupanc**

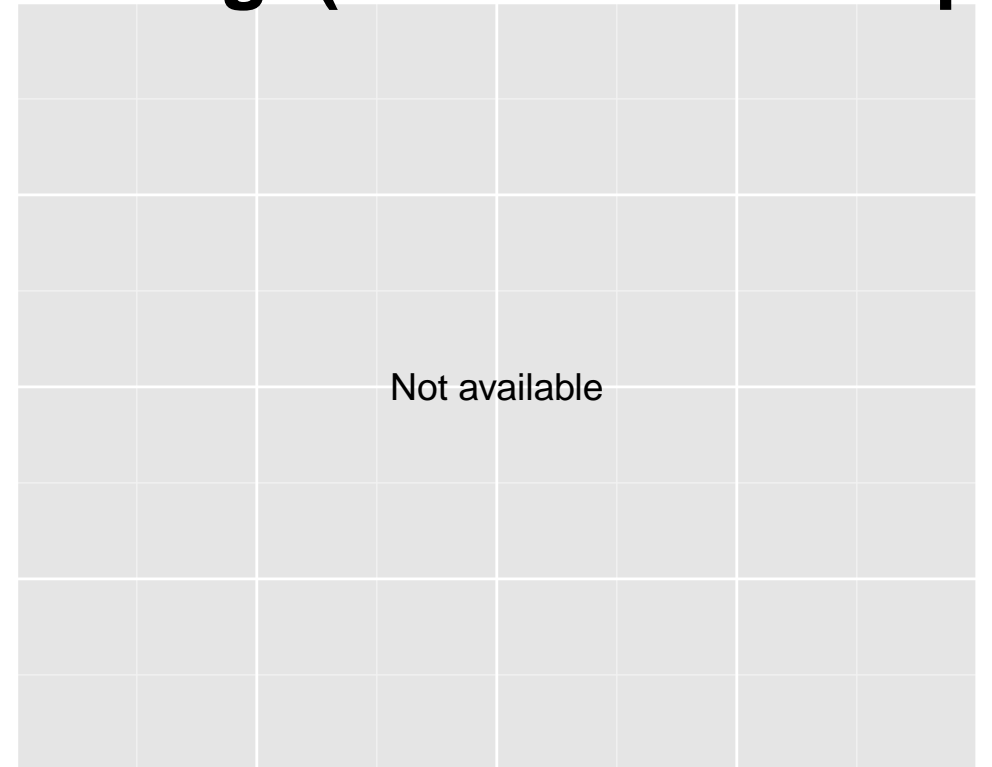

Supplement: Supplementary file 8769 [file 1]

## Tacc2

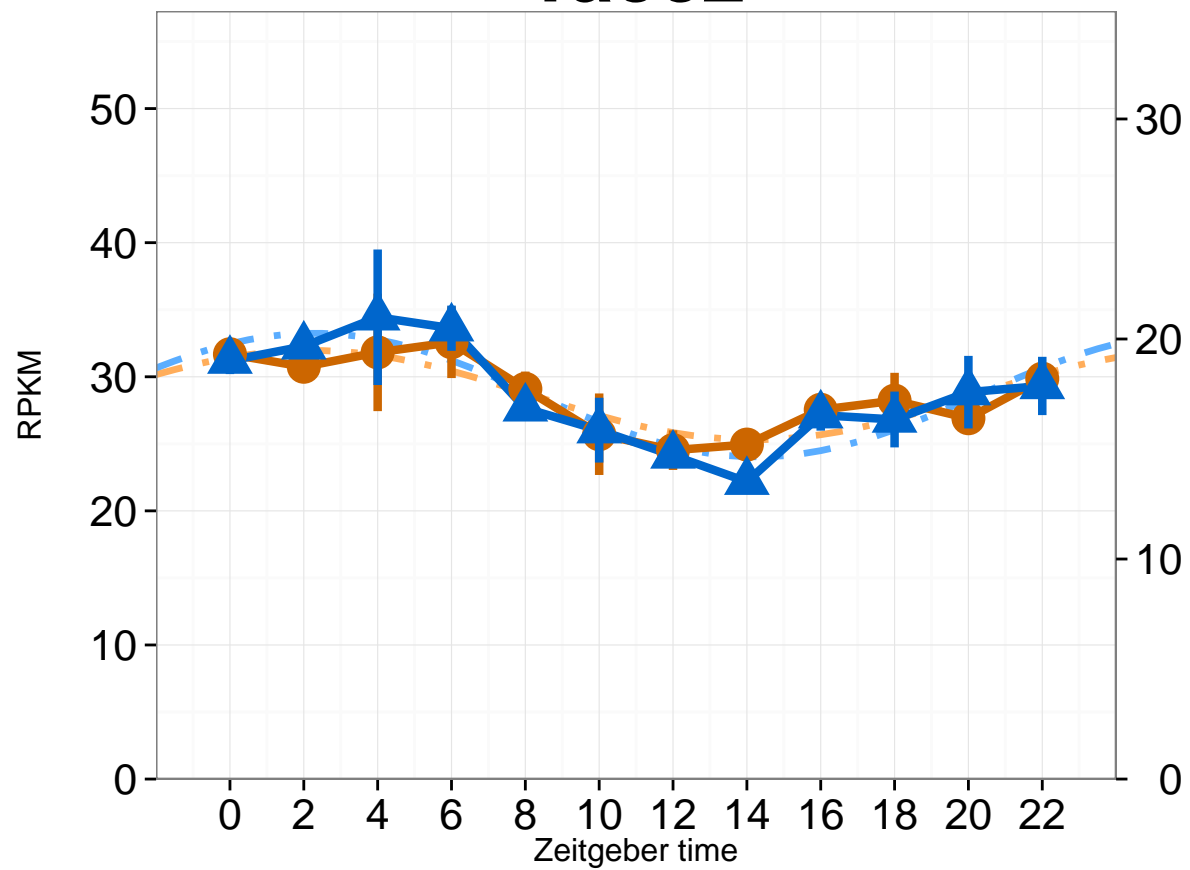

## Tacc2

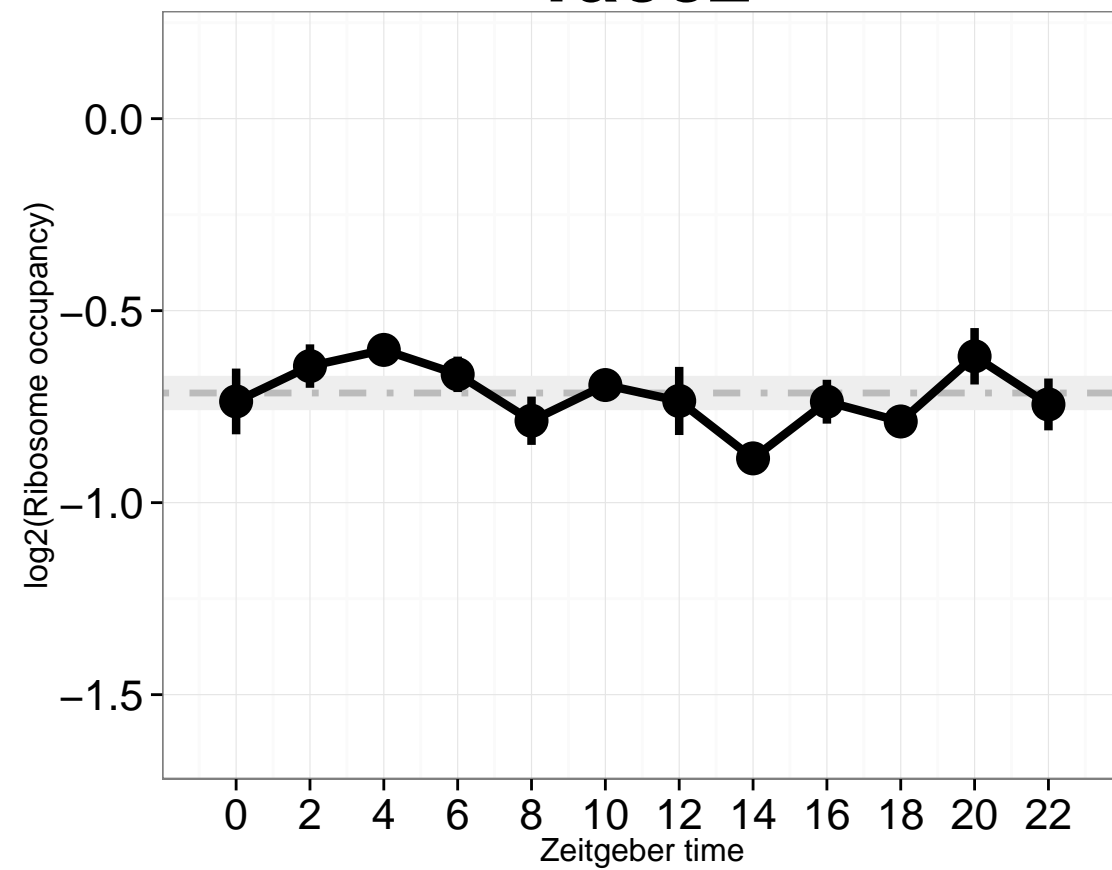

Supplement: Supplementary file 8770 [file 1]

# Rbm12b1

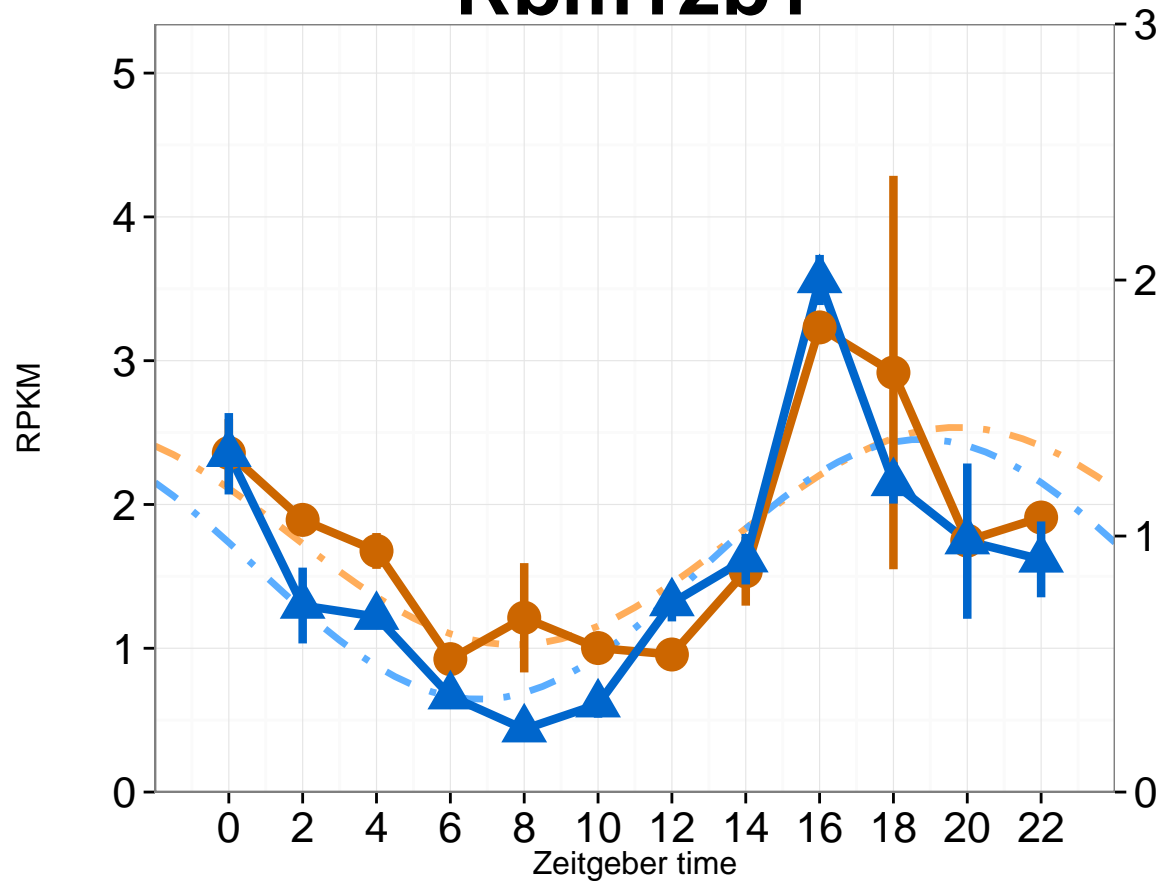

# Rbm12b1

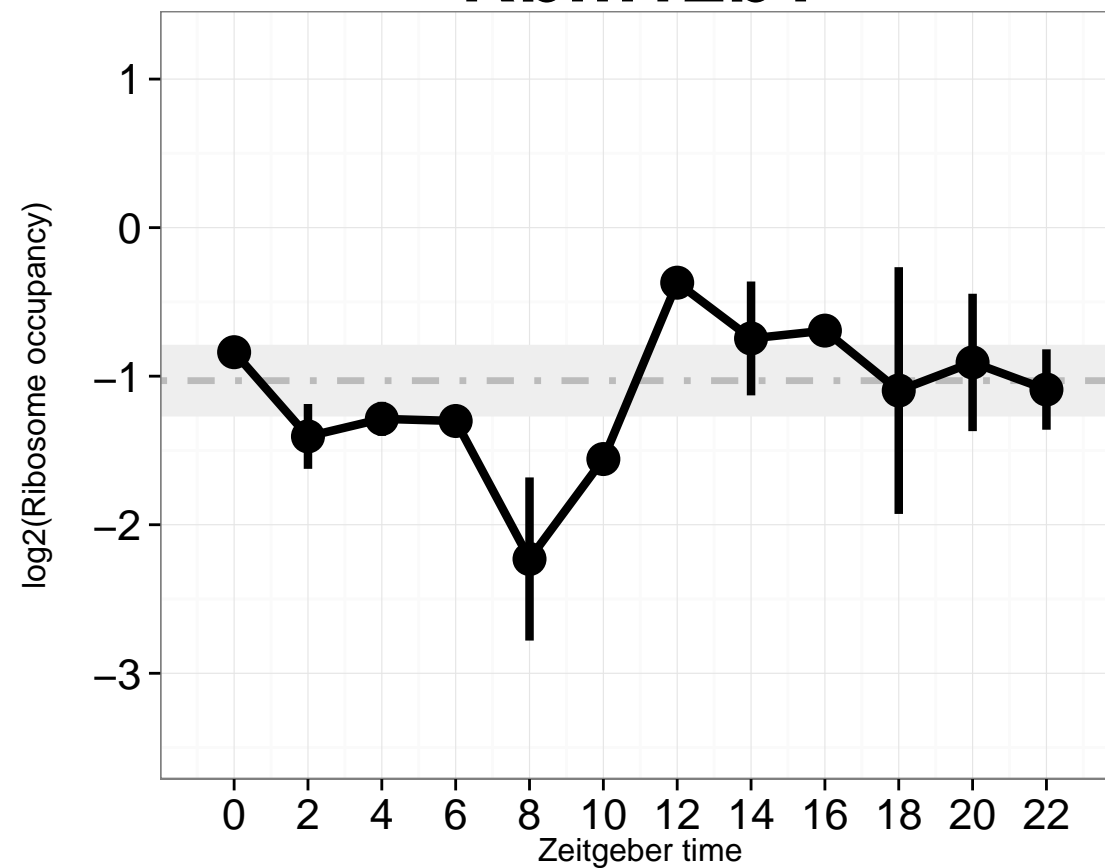

Supplement: Supplementary file 8771 [file 1]

# Trak2

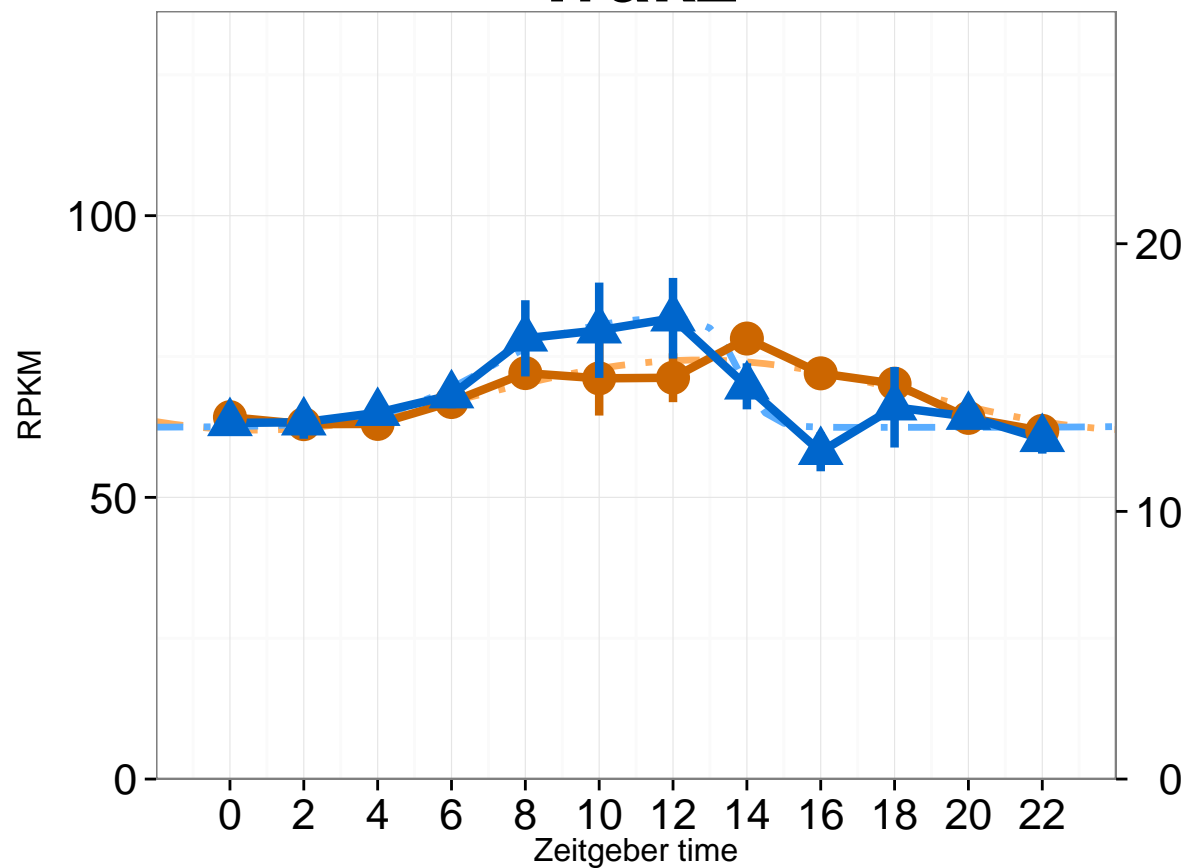

# Trak2

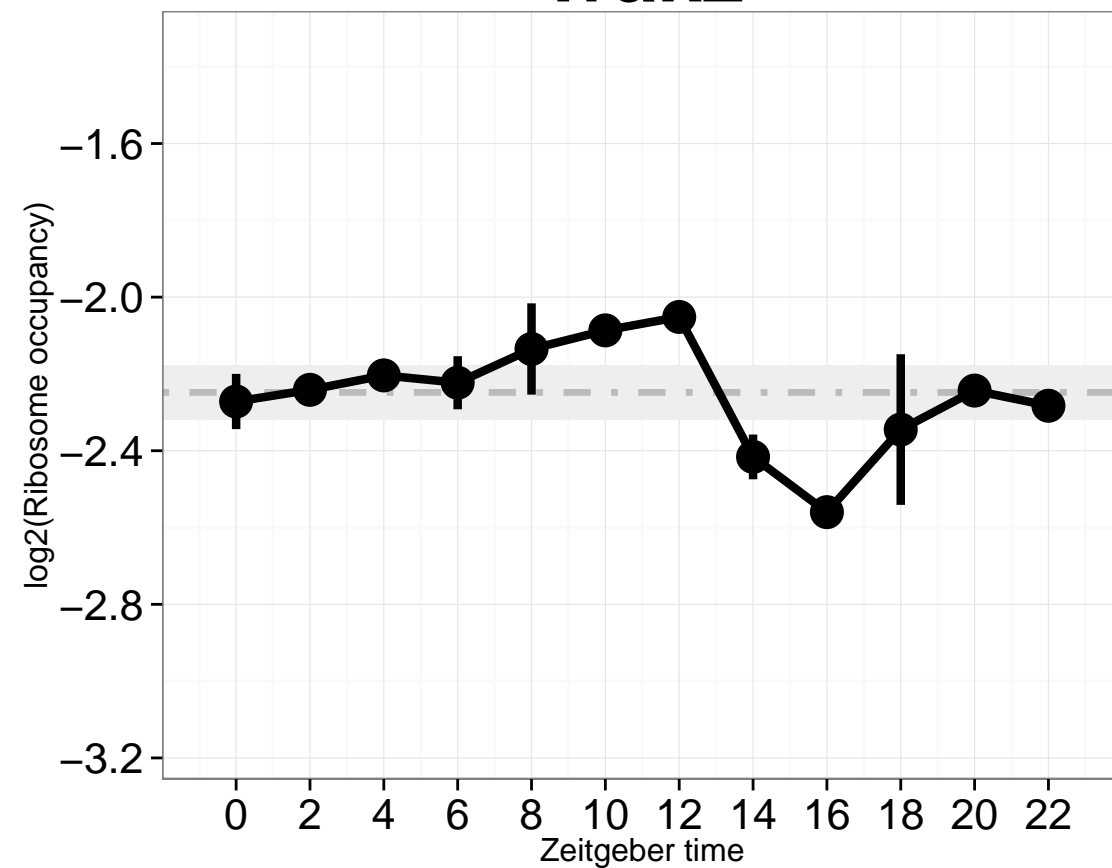

Supplement: Supplementary file 8772 [file 1]

**Lxn**

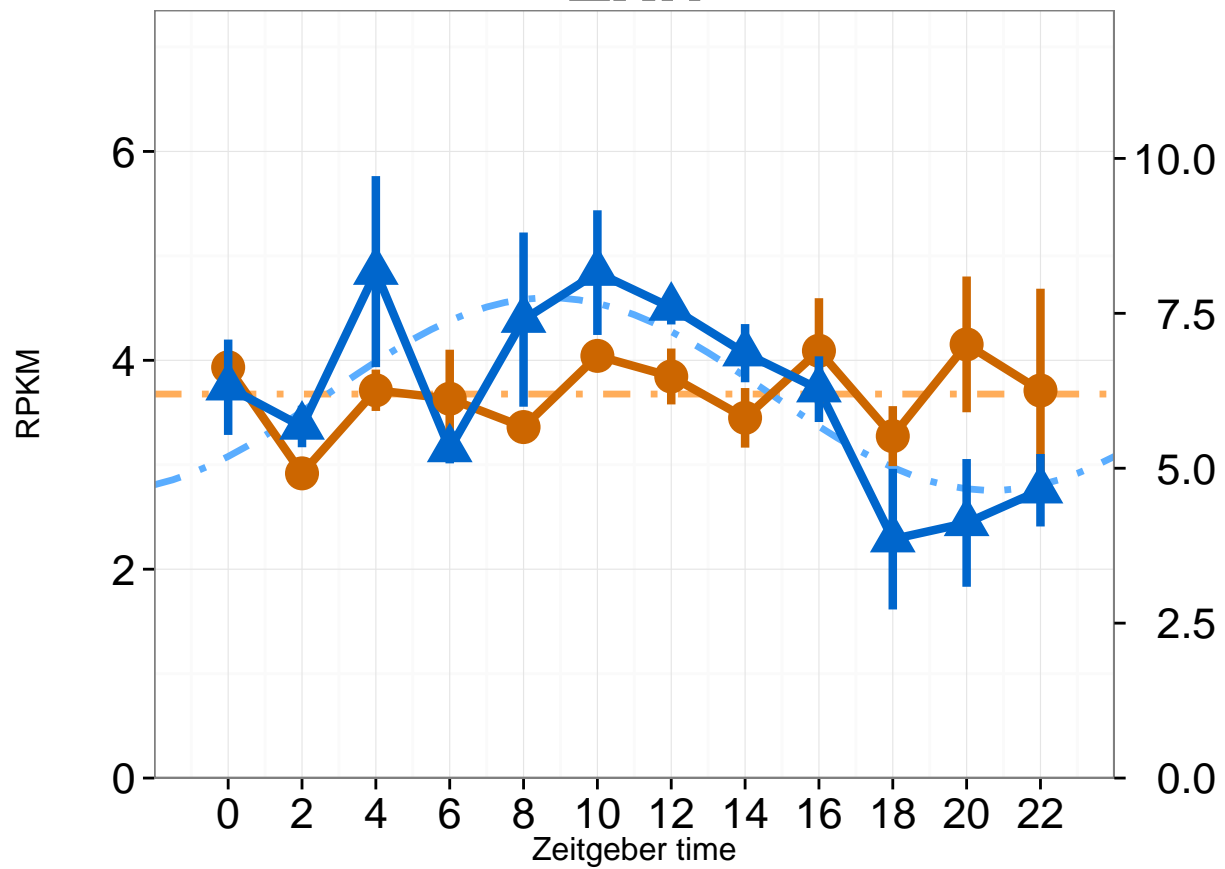

**Lxn**

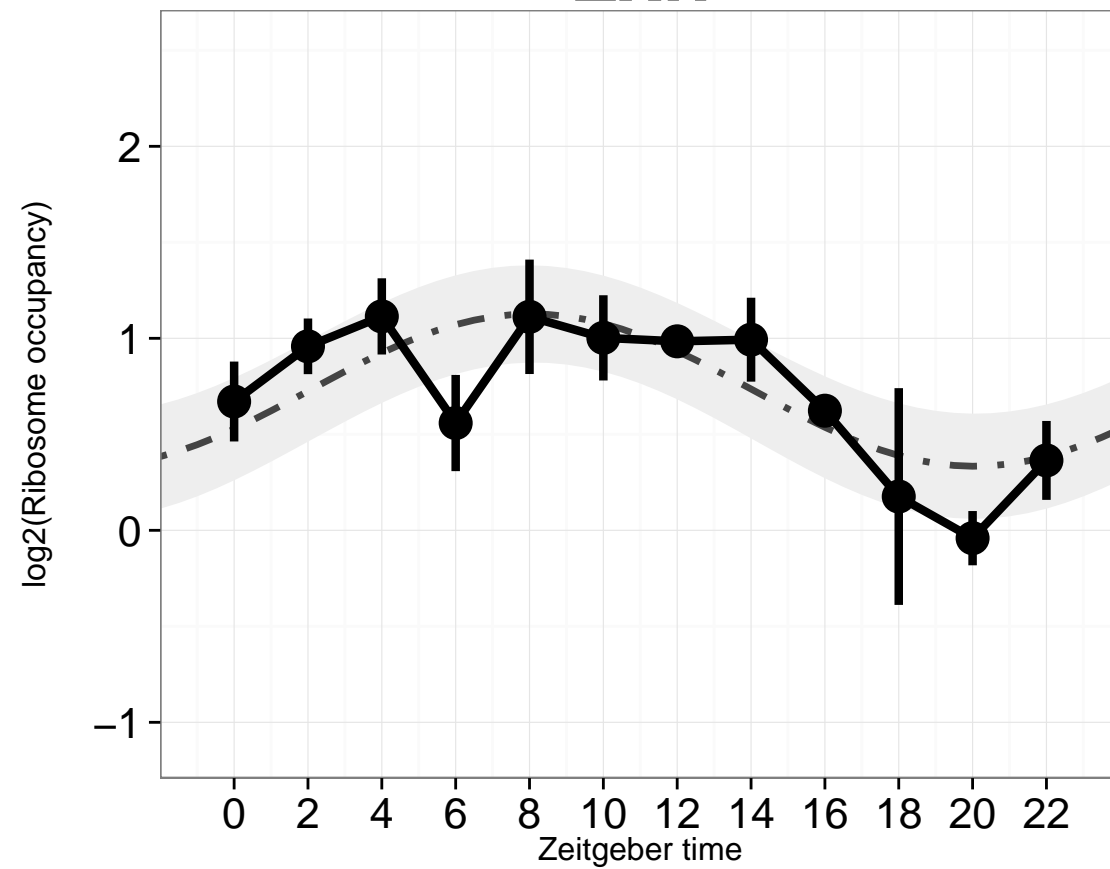

Supplement: Supplementary file 8773 [file 1]

## Gimap3

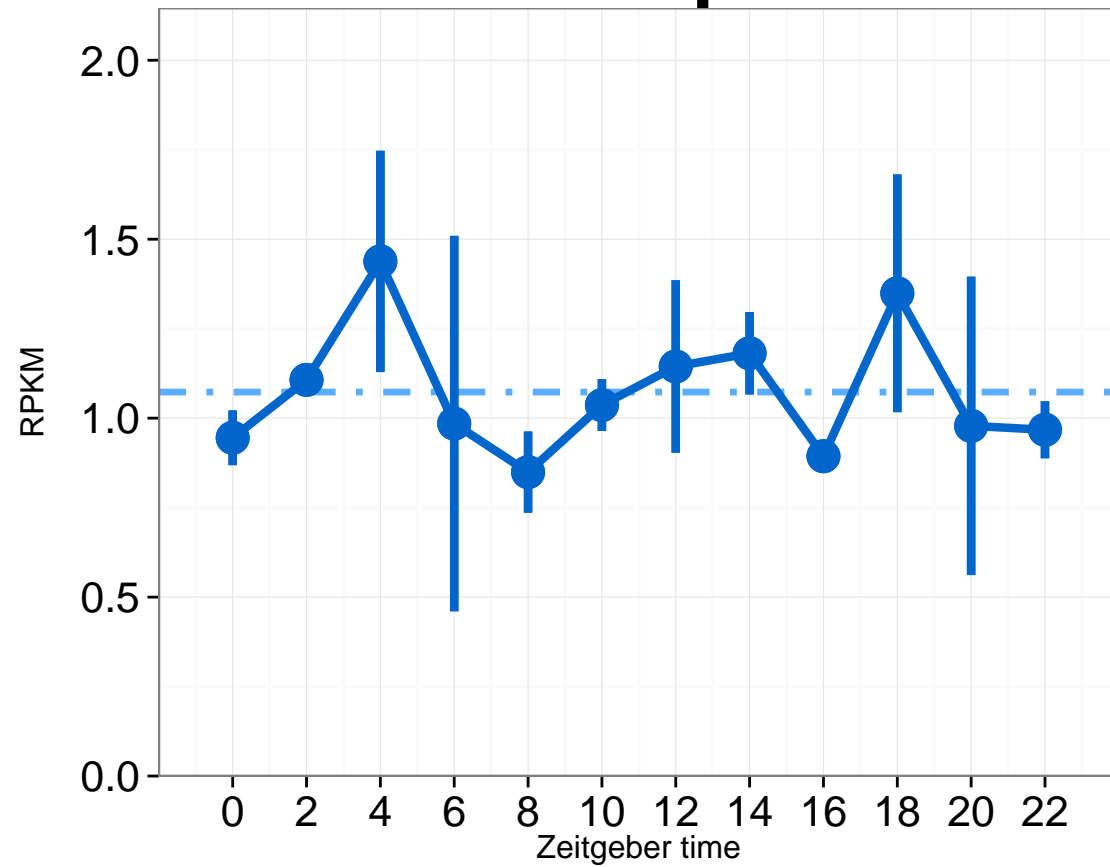

## Gimap3 log2(Ribosome occupancy)

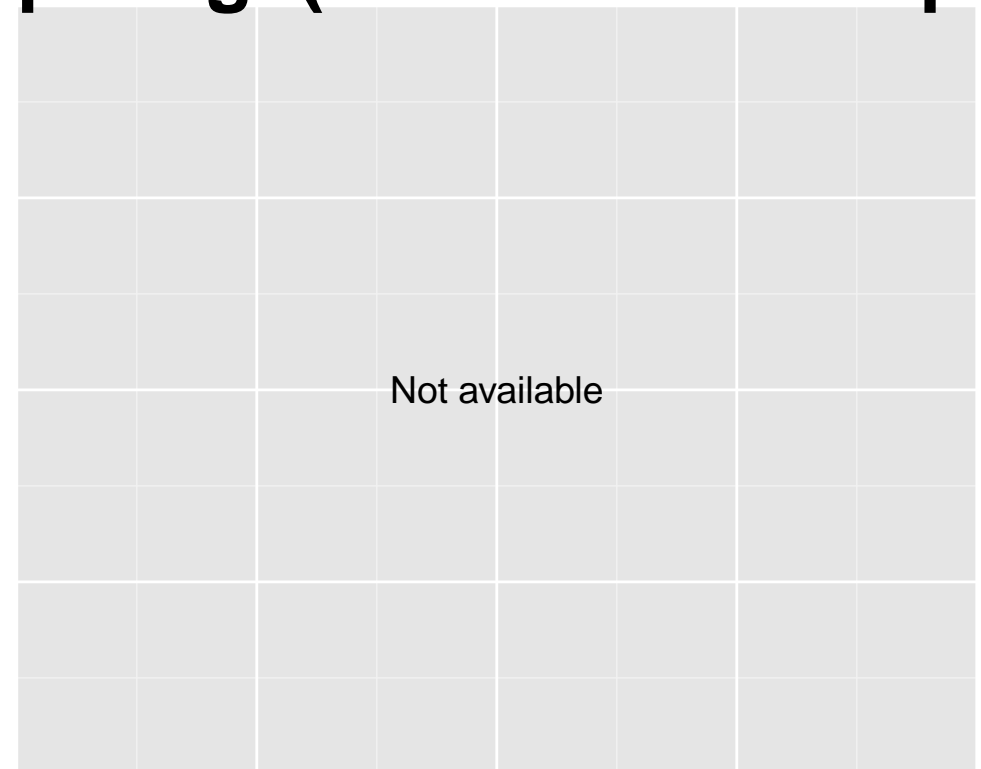

Supplement: Supplementary file 8774 [file 1]

# Tppp3

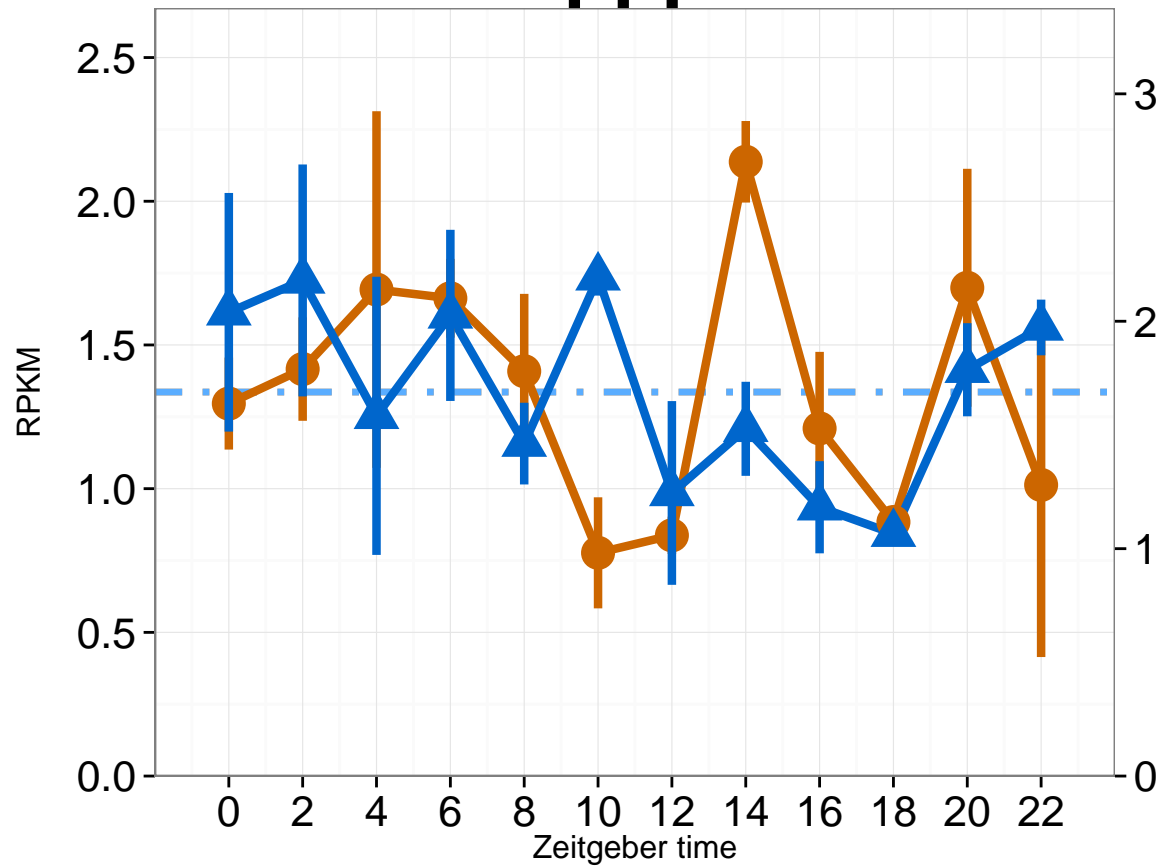

# Tppp3

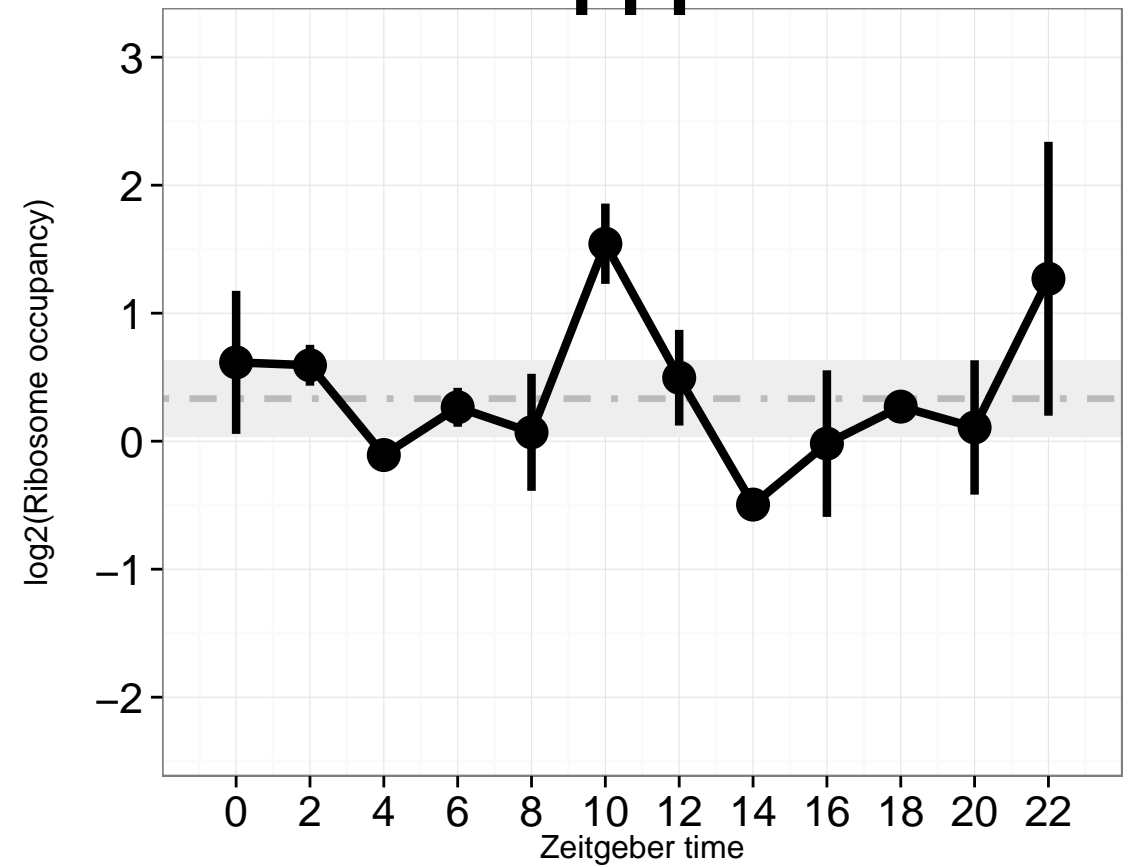

Supplement: Supplementary file 8775 [file 1]

## Nudt2

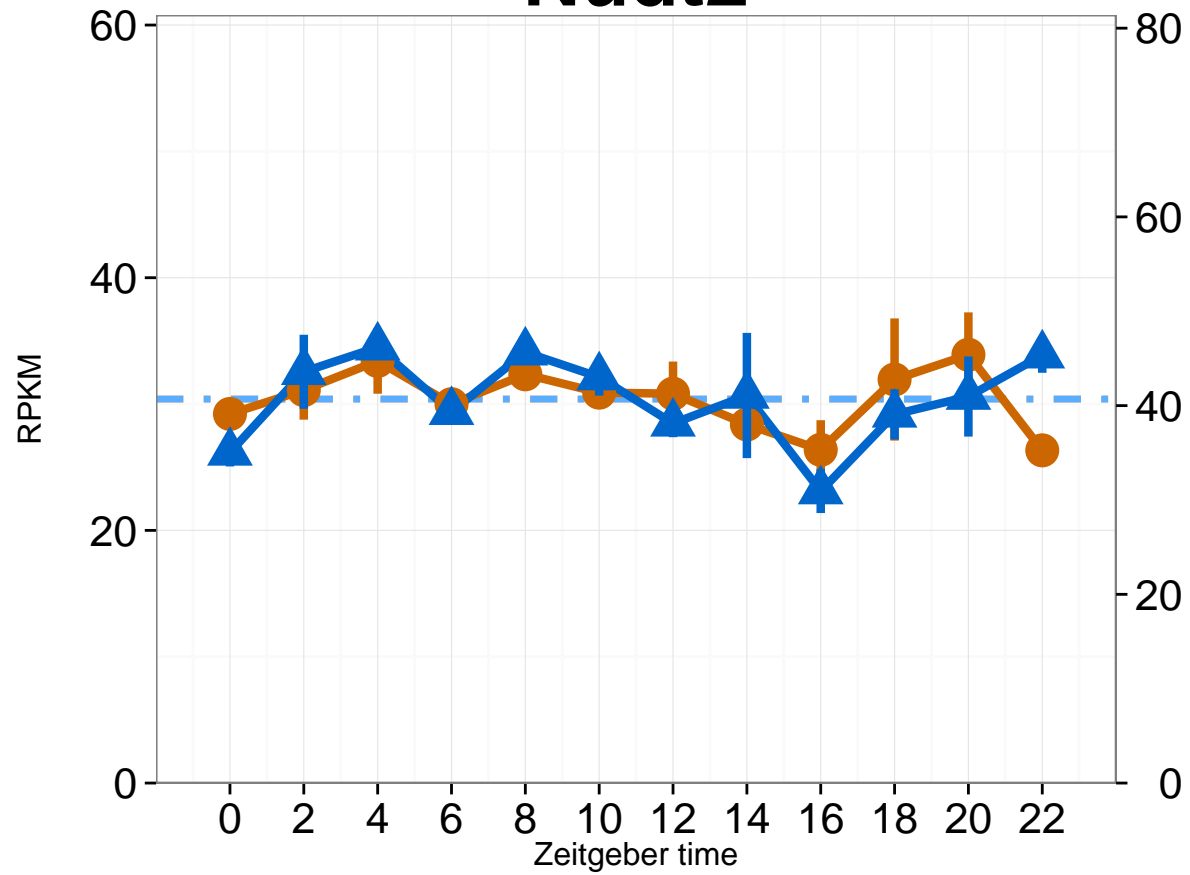

## Nudt2

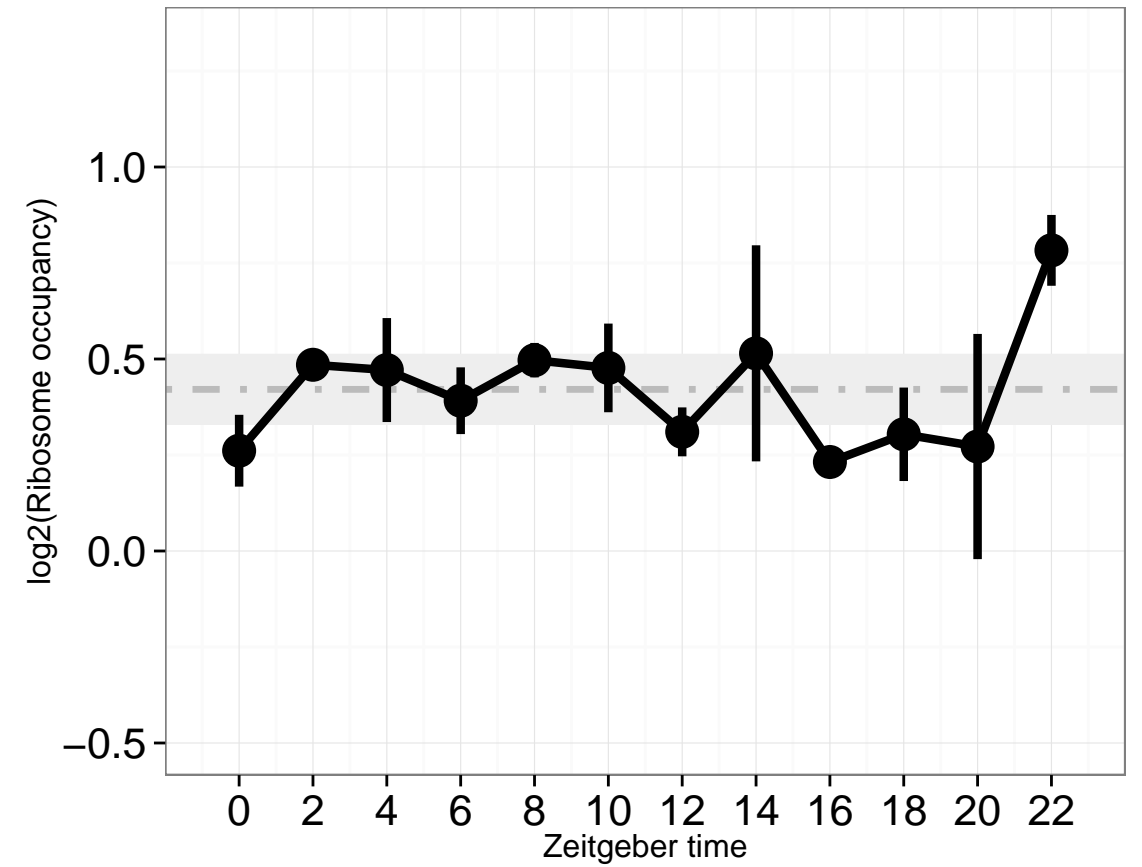

Supplement: Supplementary file 8776 [file 1]

**Traf3ip1**

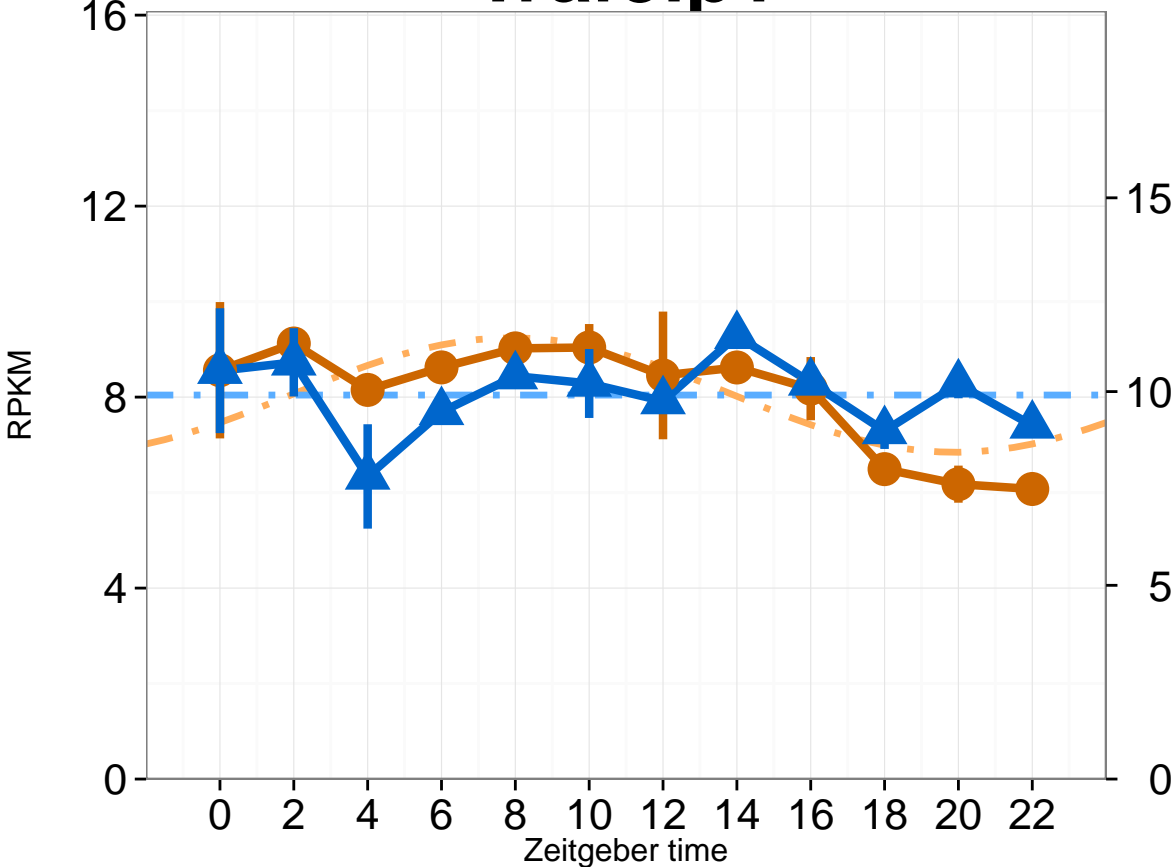

**Traf3ip1**

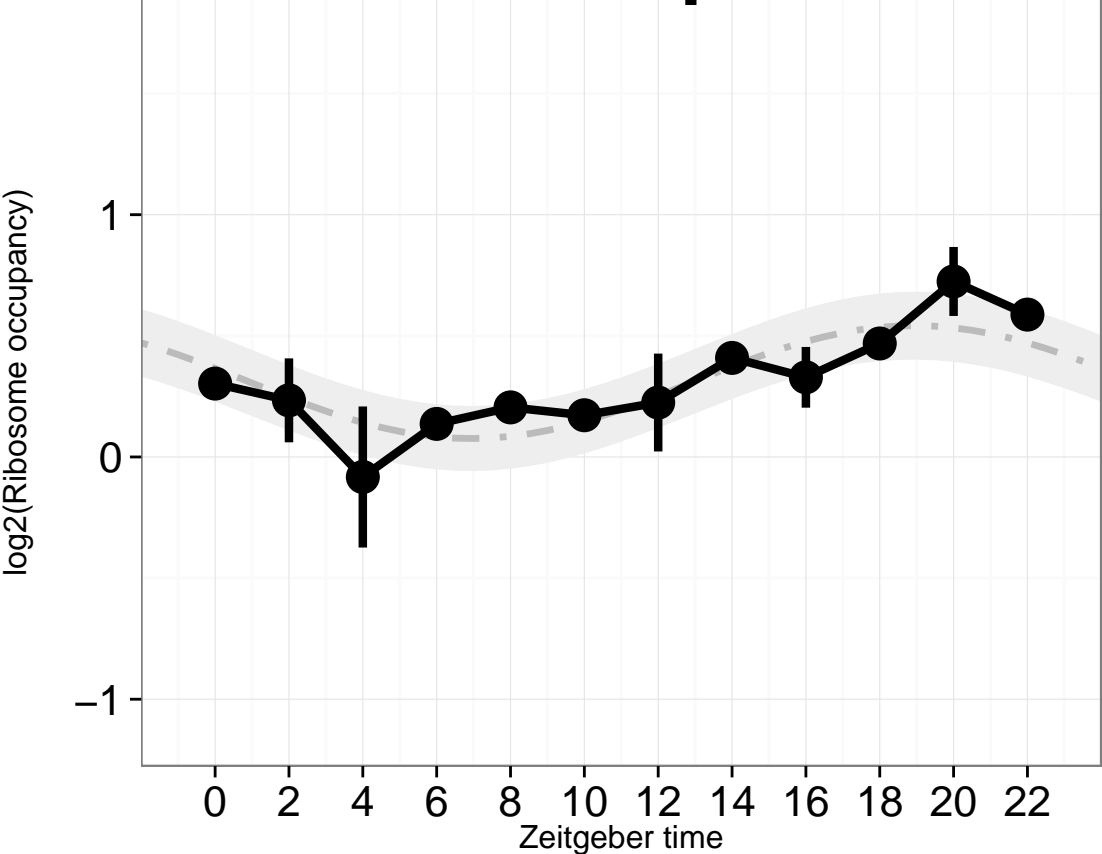

Supplement: Supplementary file 8777 [file 1]

## Uqcrq

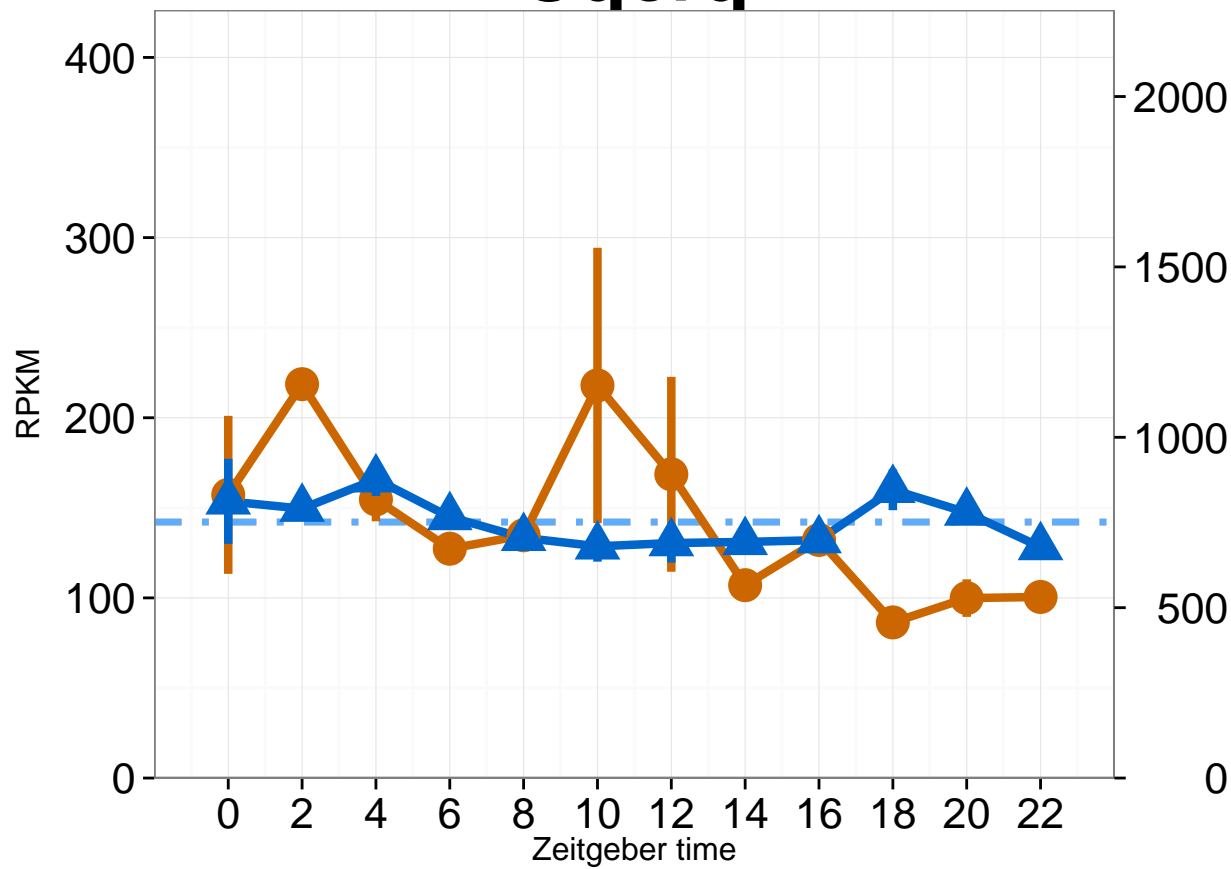

## Uqcrq

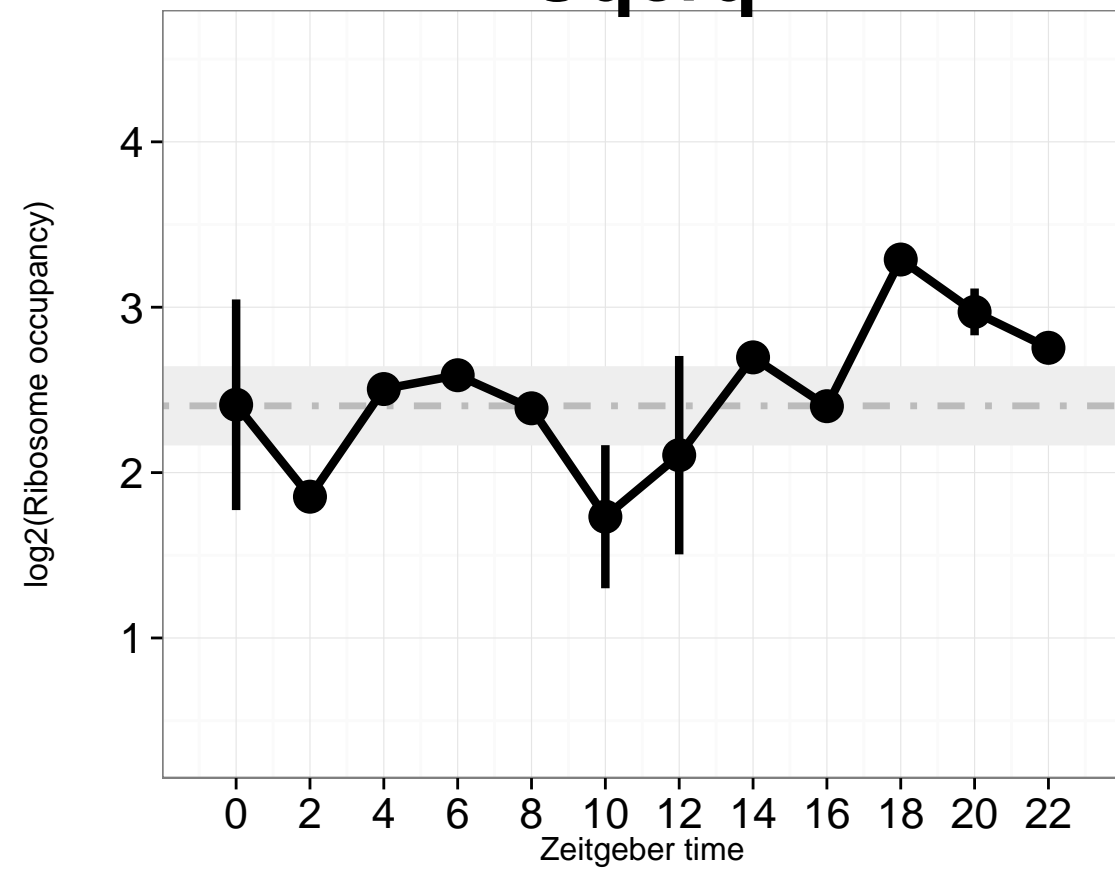

Supplement: Supplementary file 8778 [file 1]

# Zc2hc1a

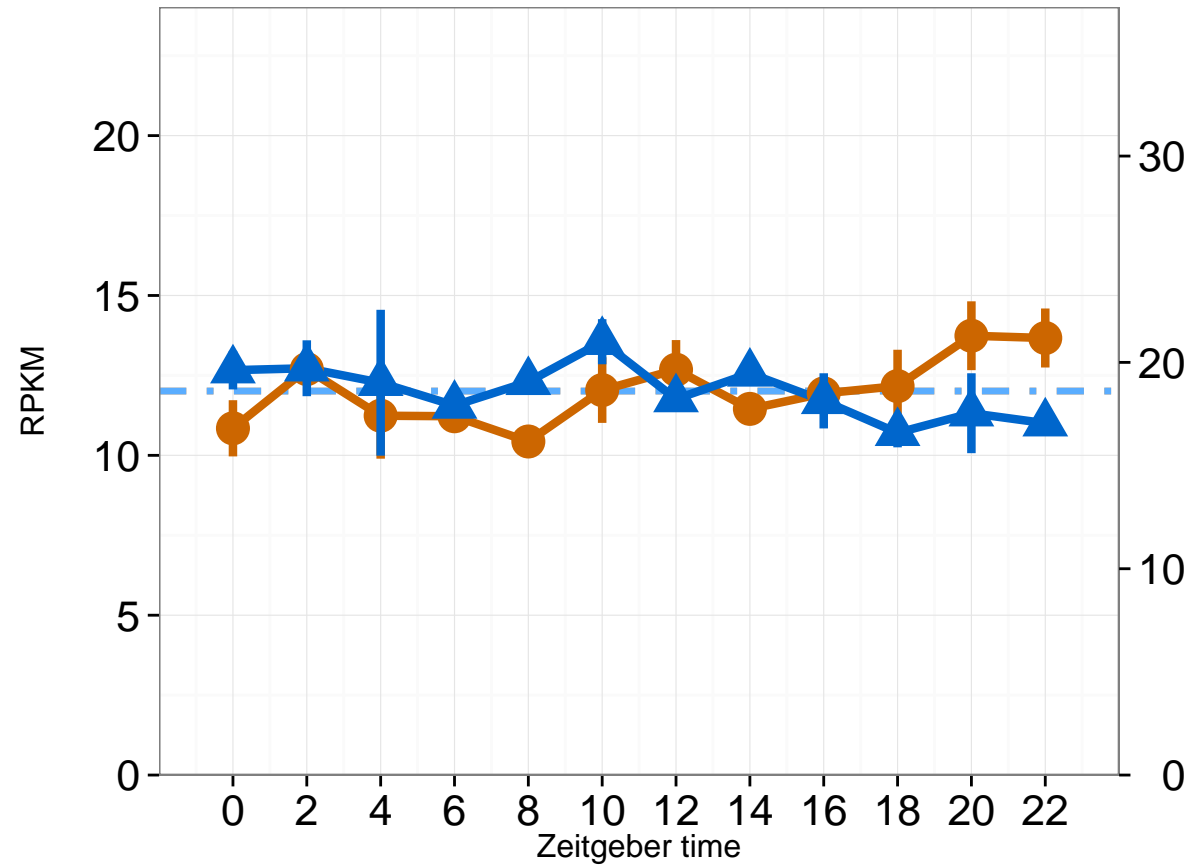

# Zc2hc1a

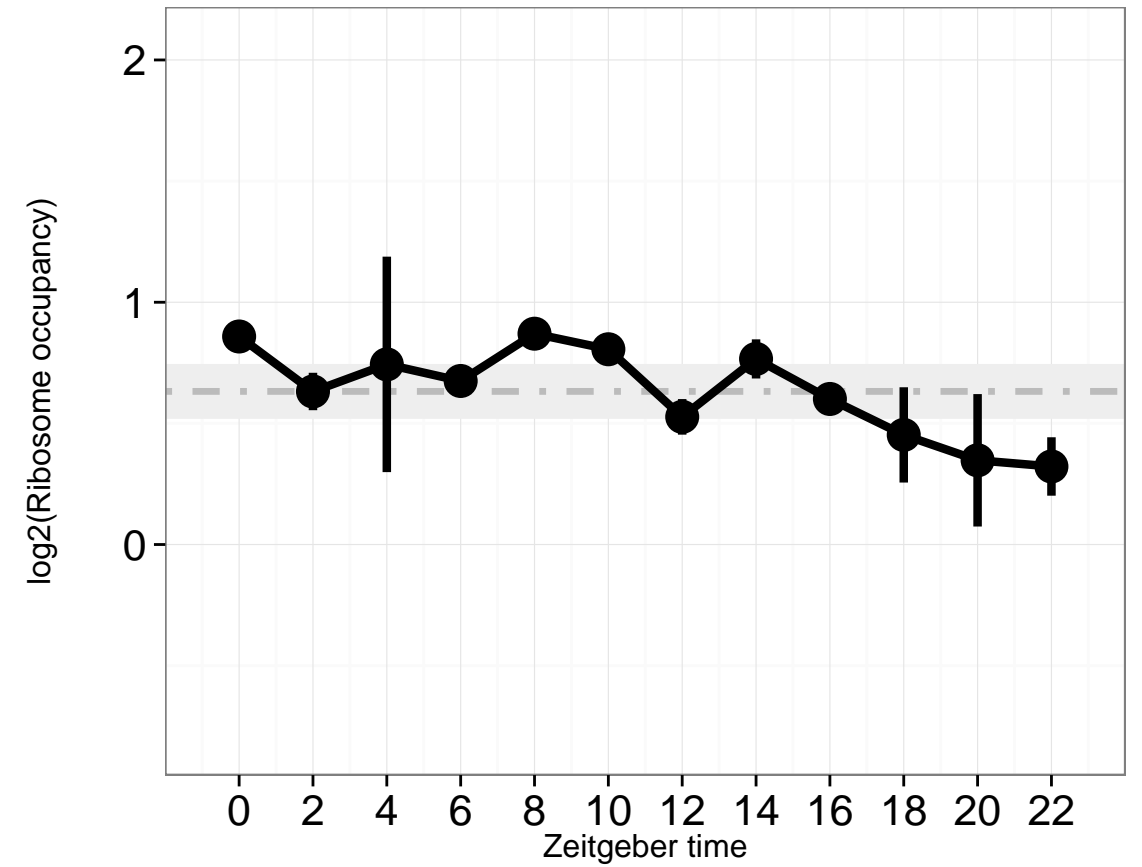

Supplement: Supplementary file 8779 [file 1]

## Tsc1

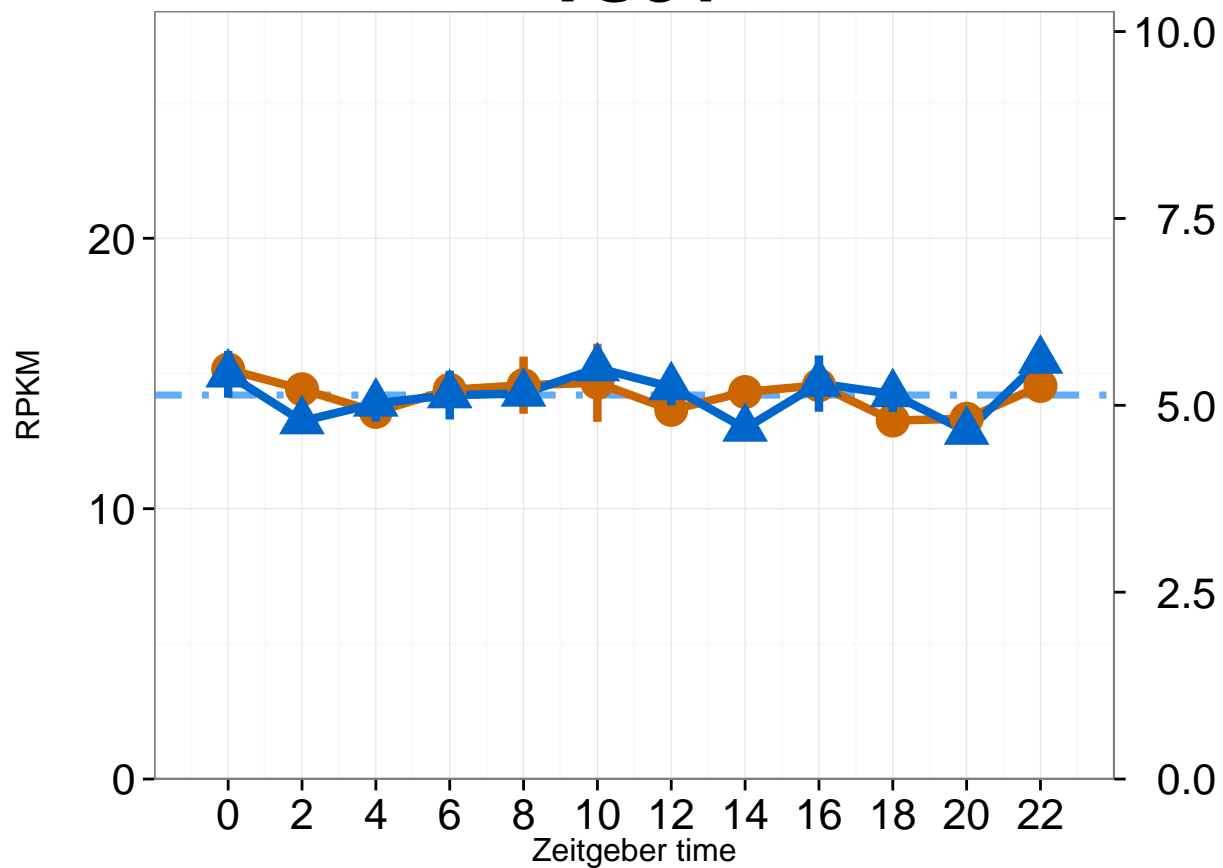

## Tsc1

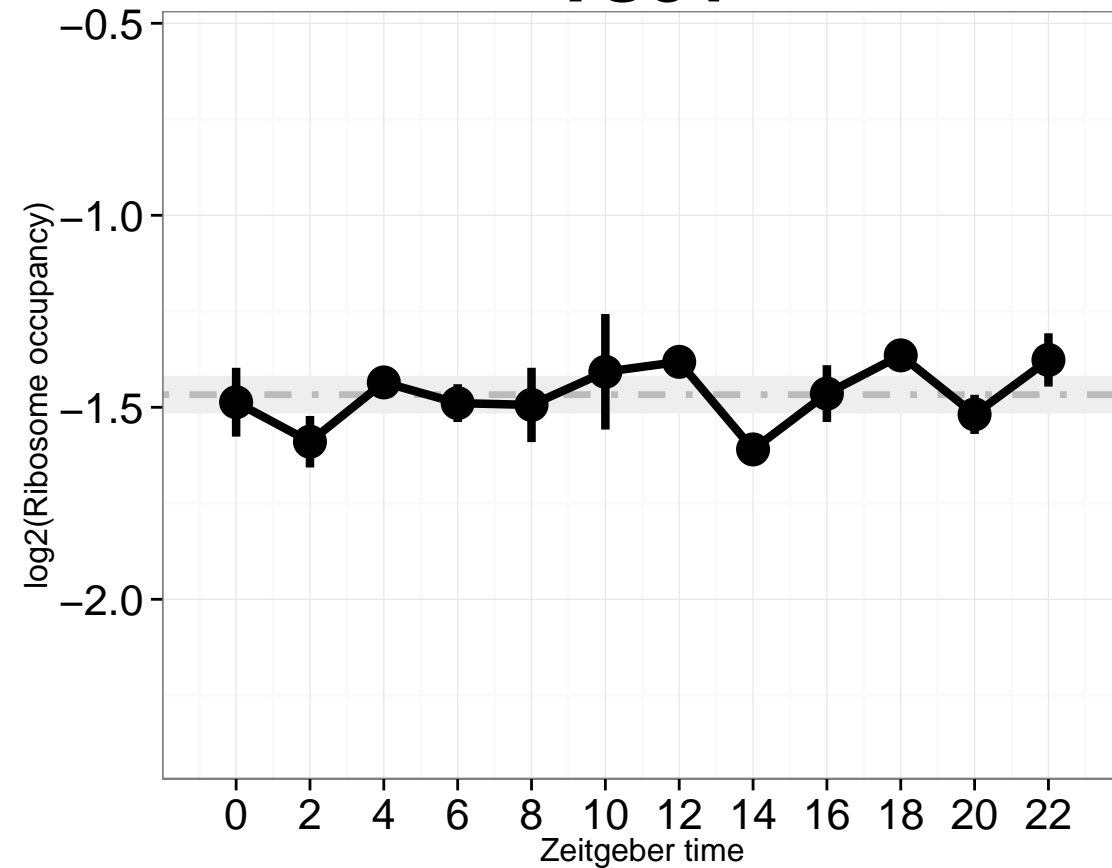

Supplement: Supplementary file 8780 [file 1]

# Cox17

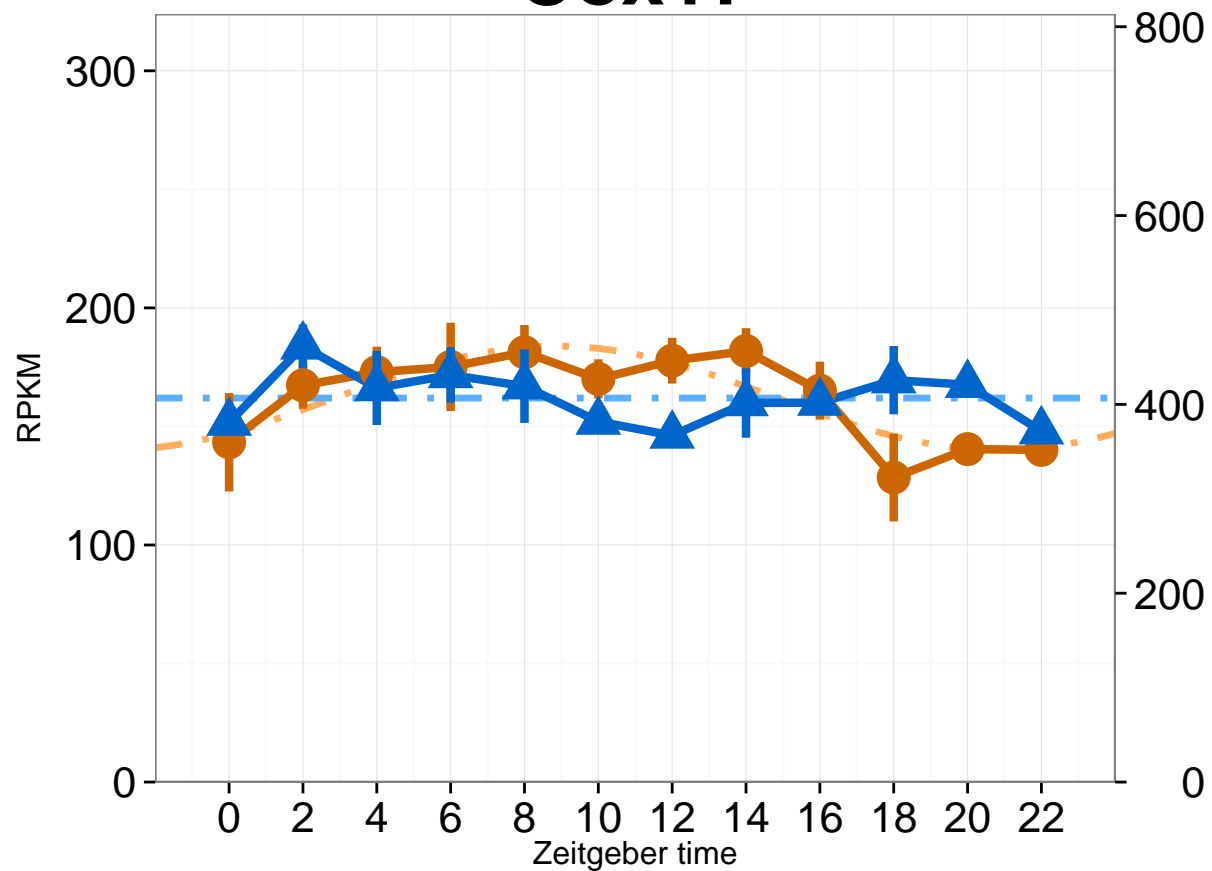

# Cox17

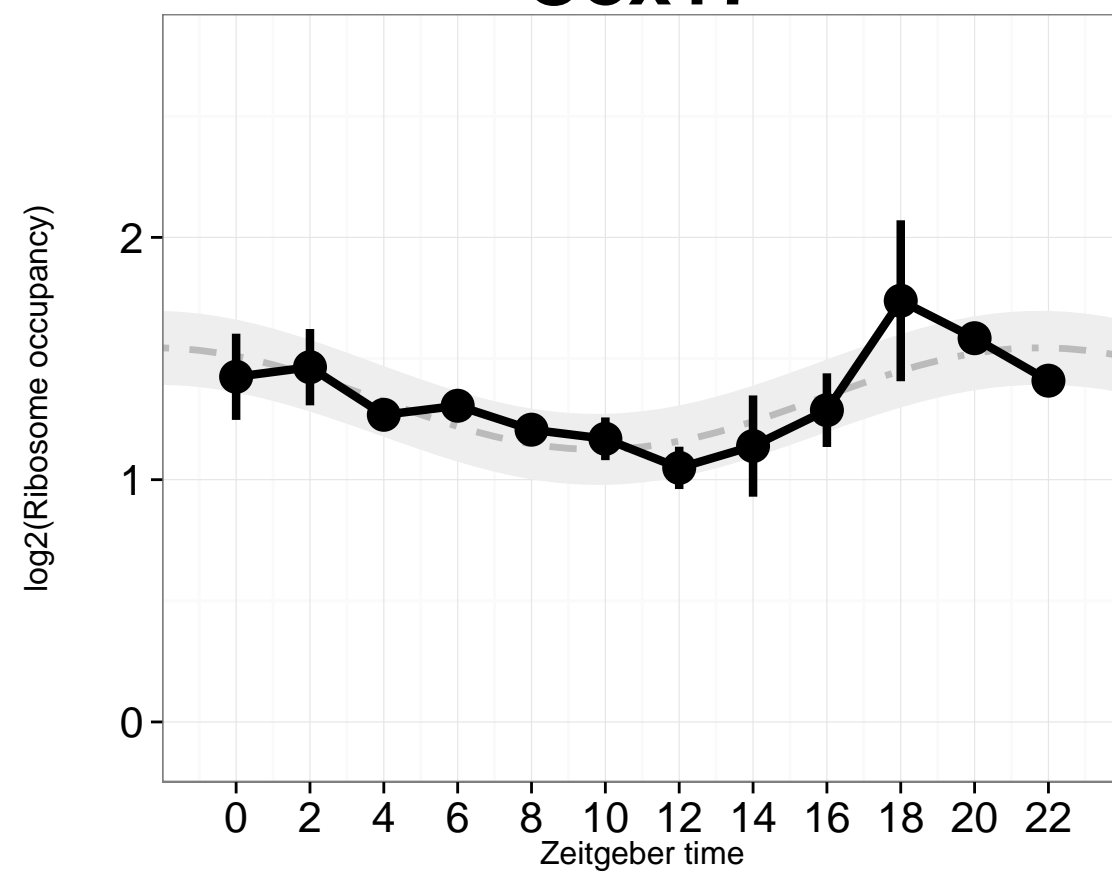

Supplement: Supplementary file 8781 [file 1]

# Eef1g

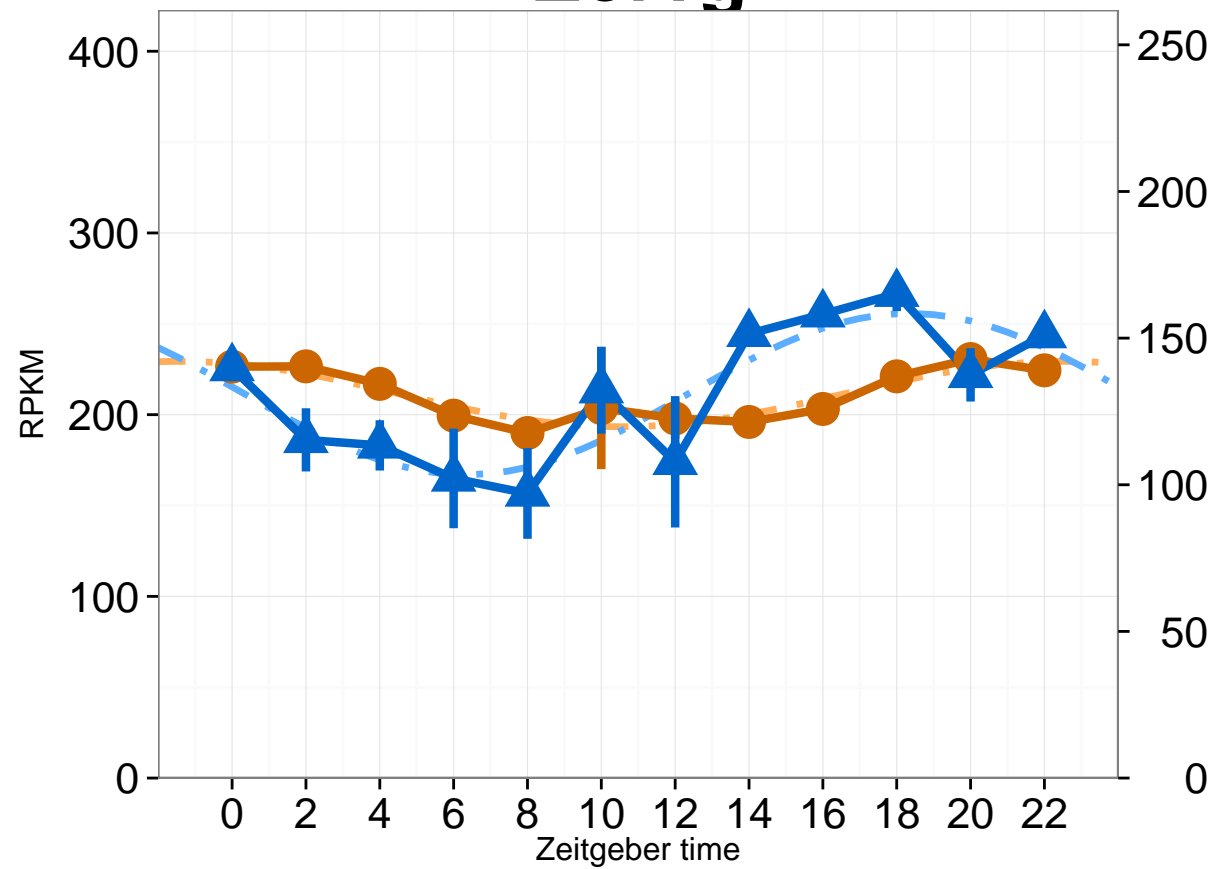

# Eef1g

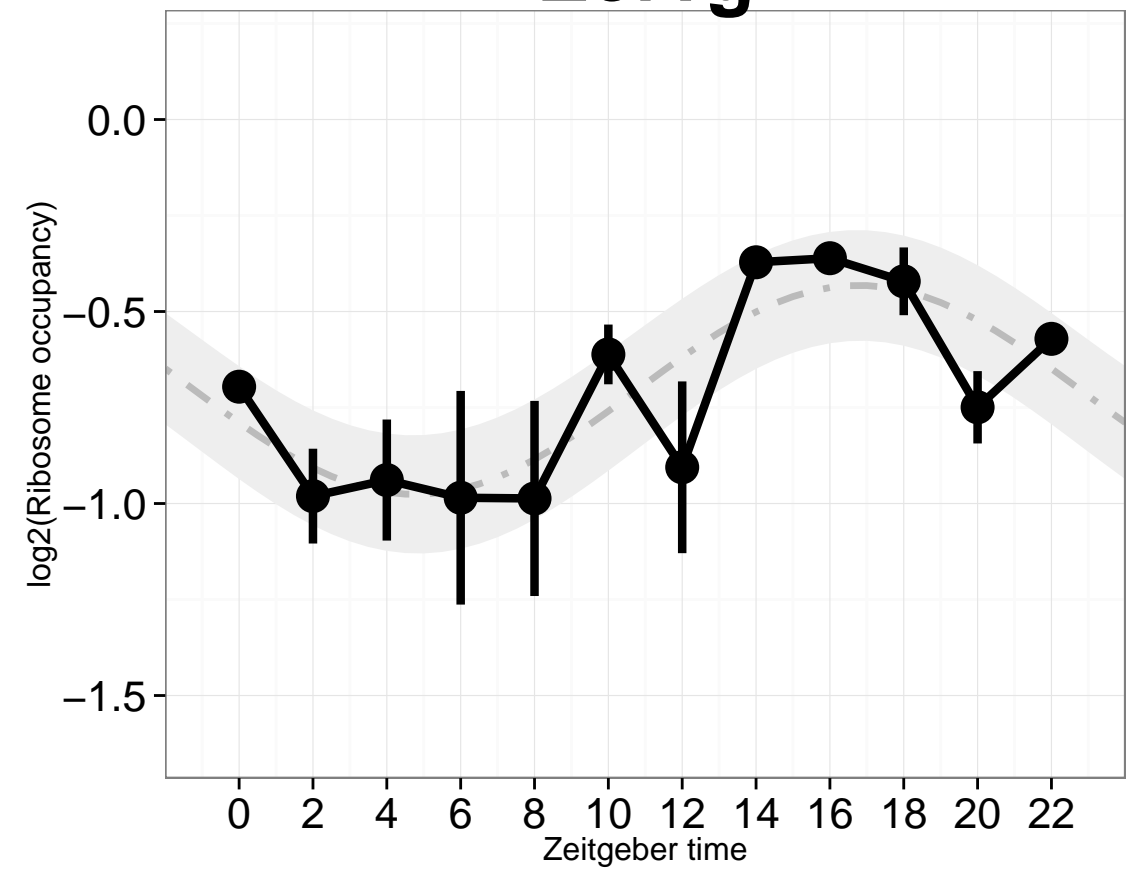

Supplement: Supplementary file 8782 [file 1]

# Vti1a

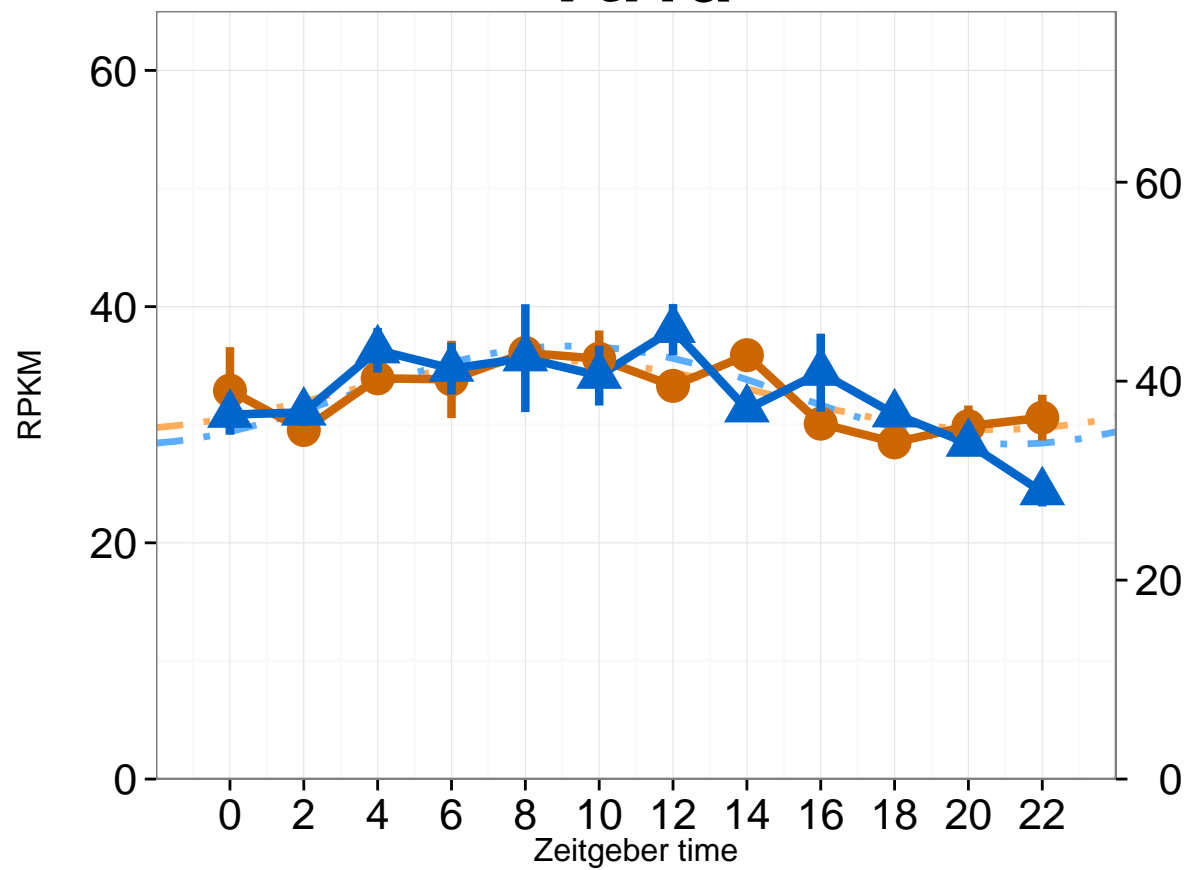

# Vti1a

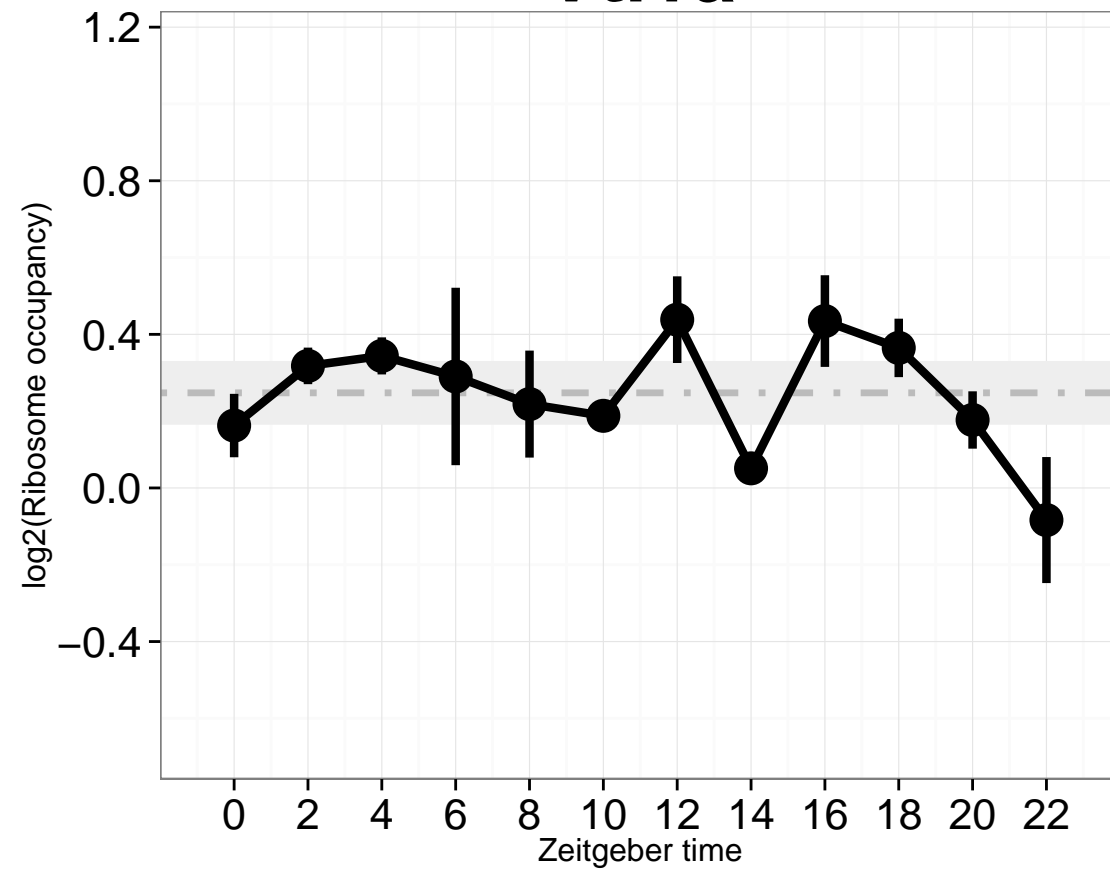

Supplement: Supplementary file 8783 [file 1]

# Cep170b

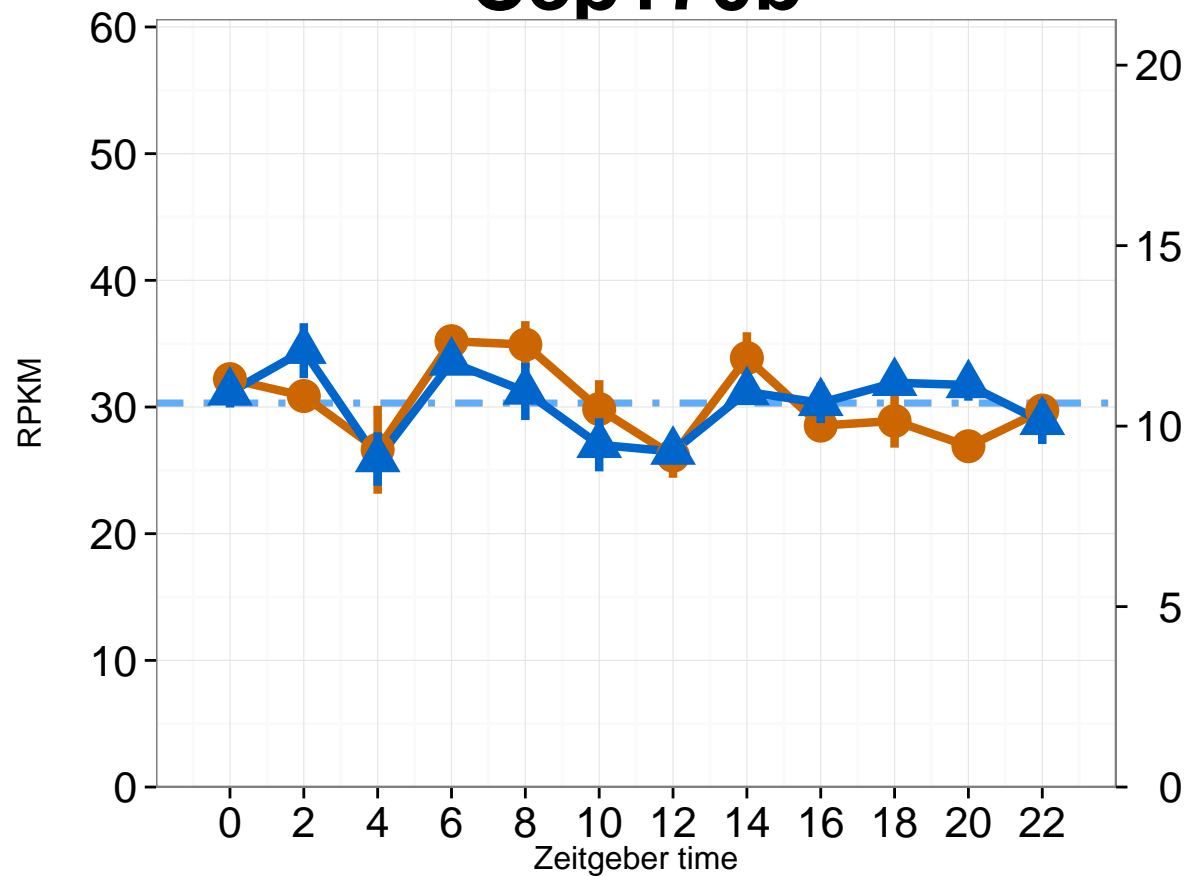

# Cep170b

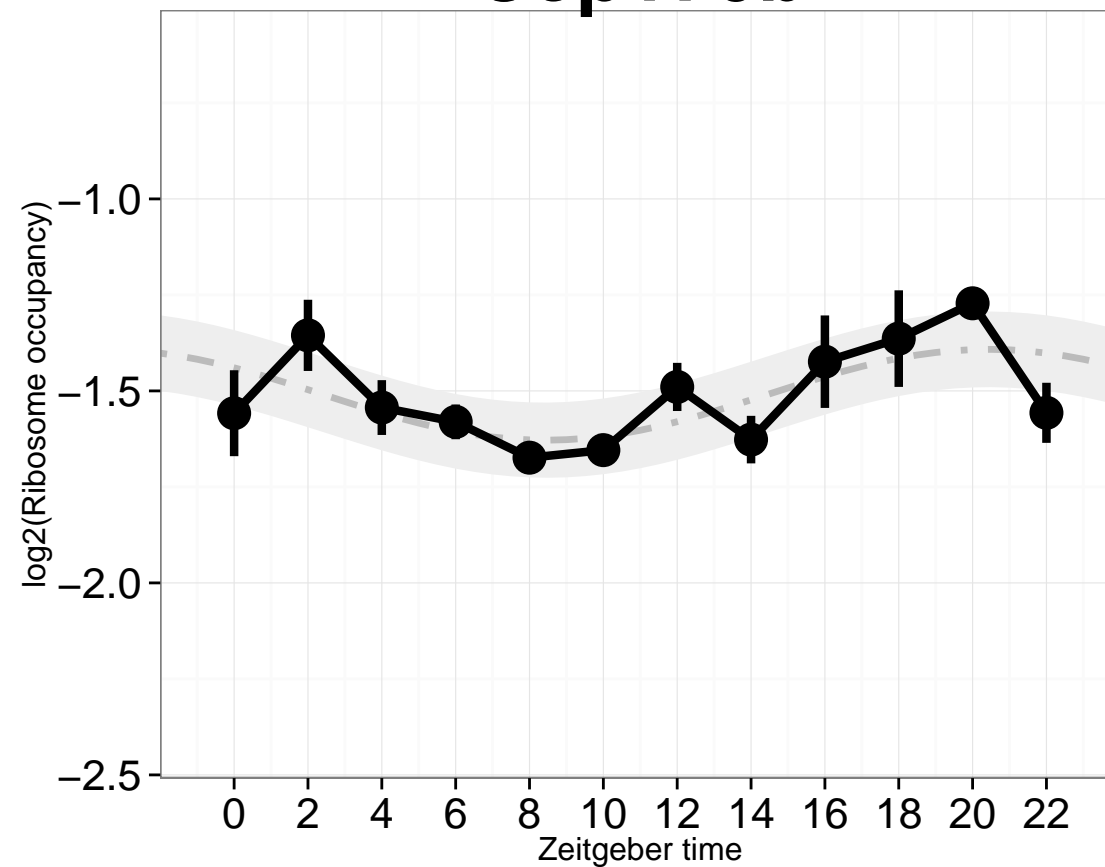

Supplement: Supplementary file 8784 [file 1]

# Pabpn1

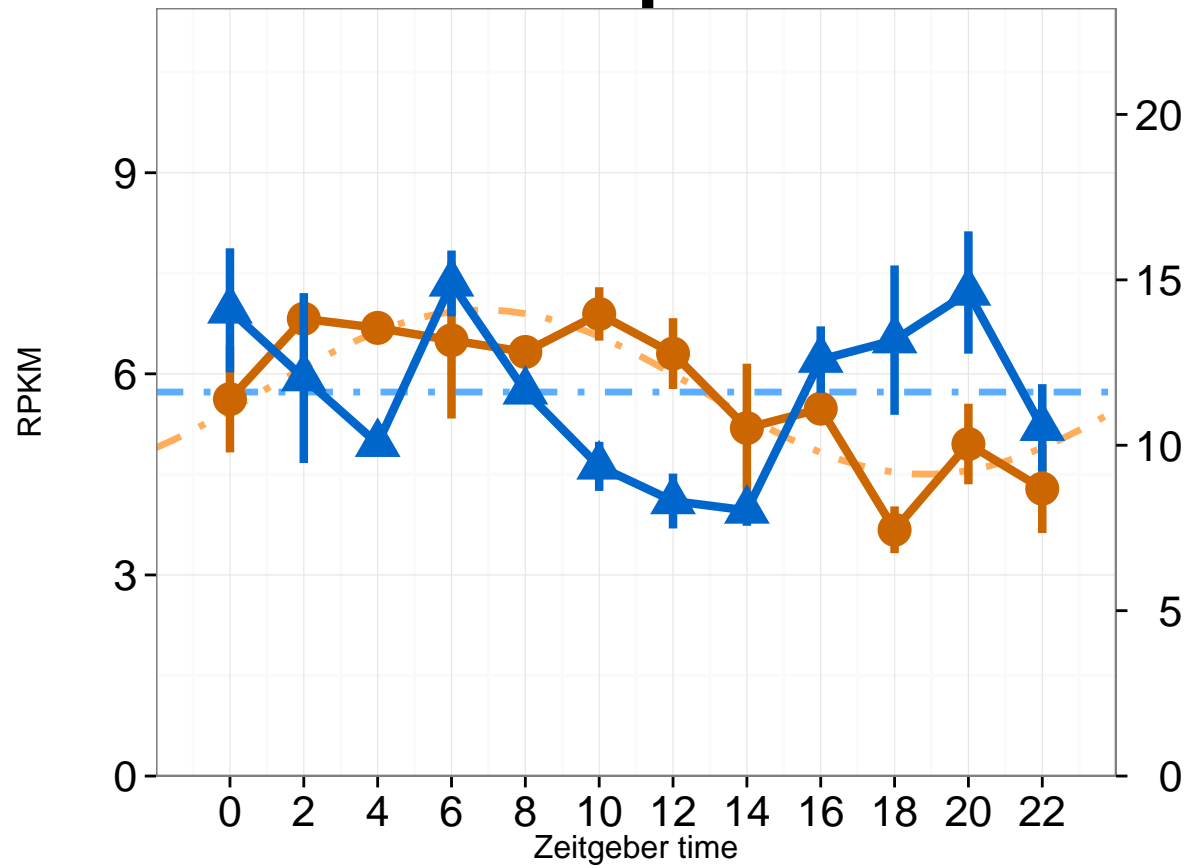

# Pabpn1

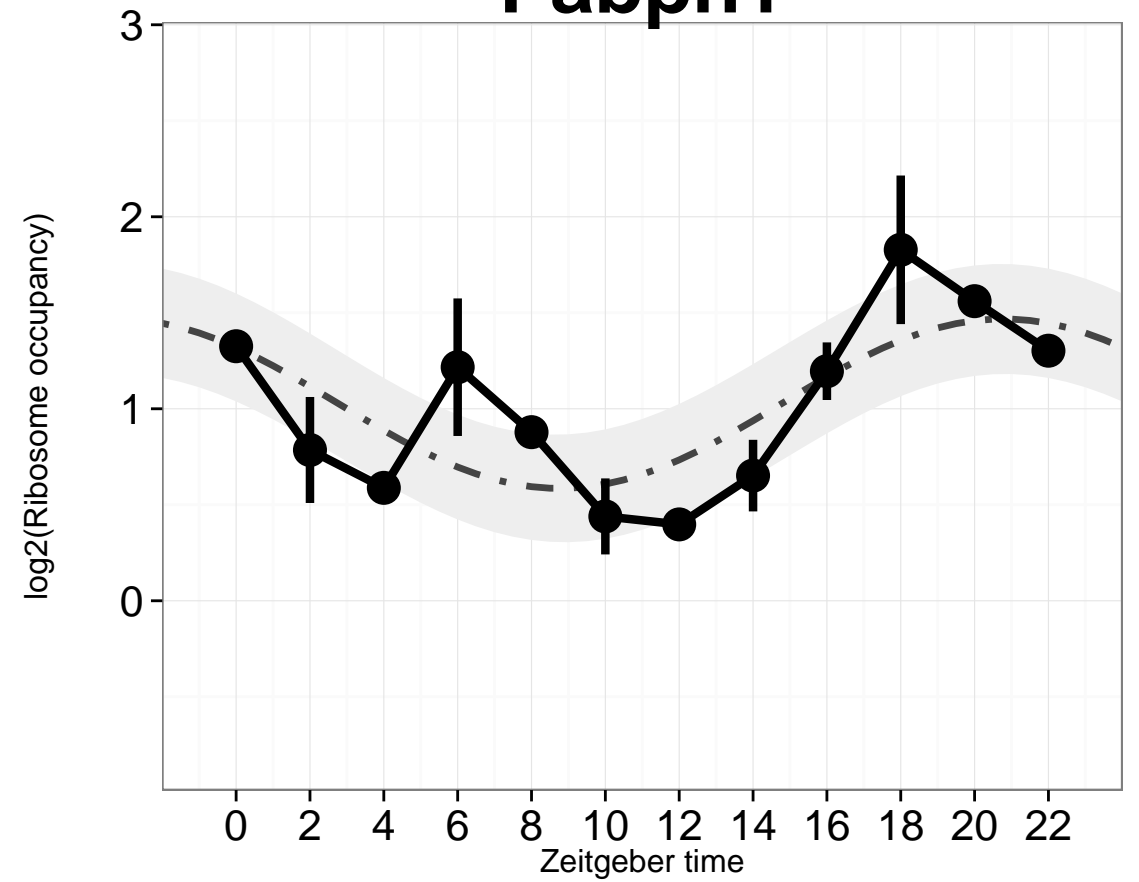

Supplement: Supplementary file 8785 [file 1]

## Cmc2

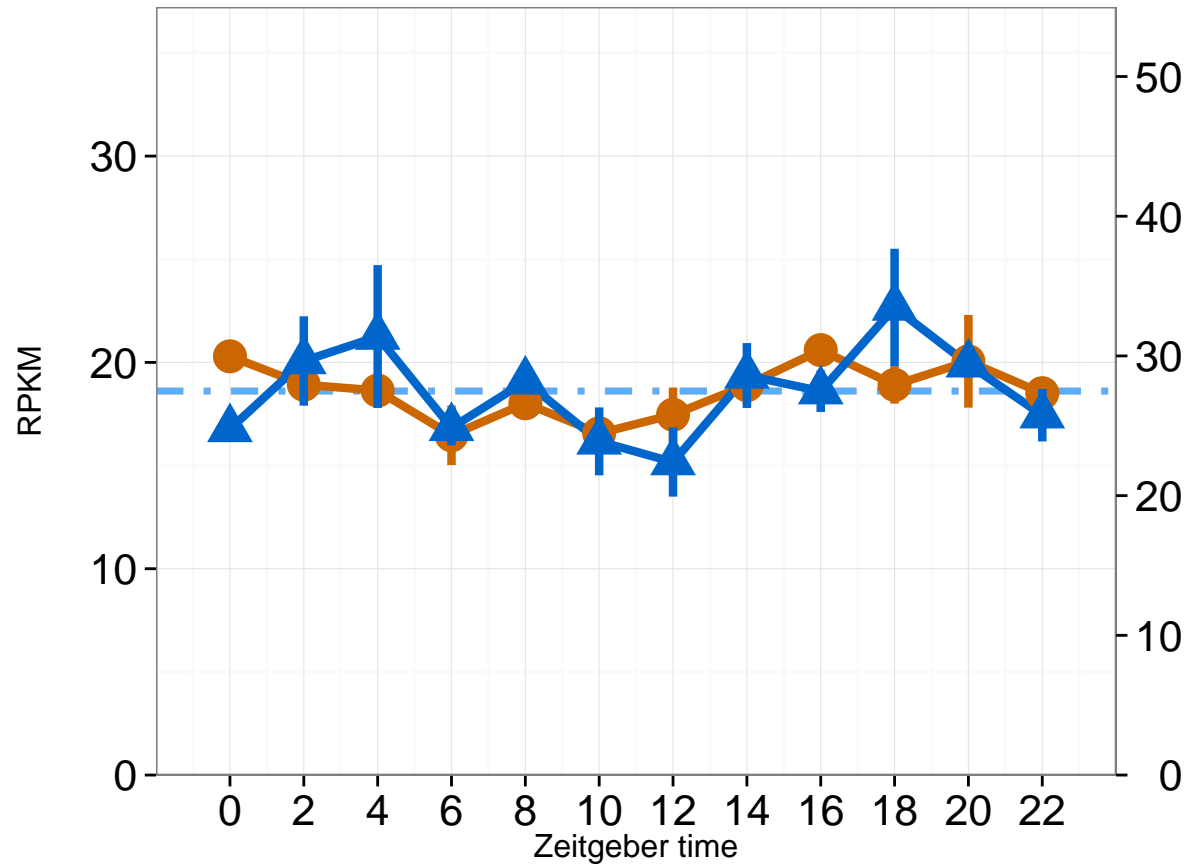

## Cmc2

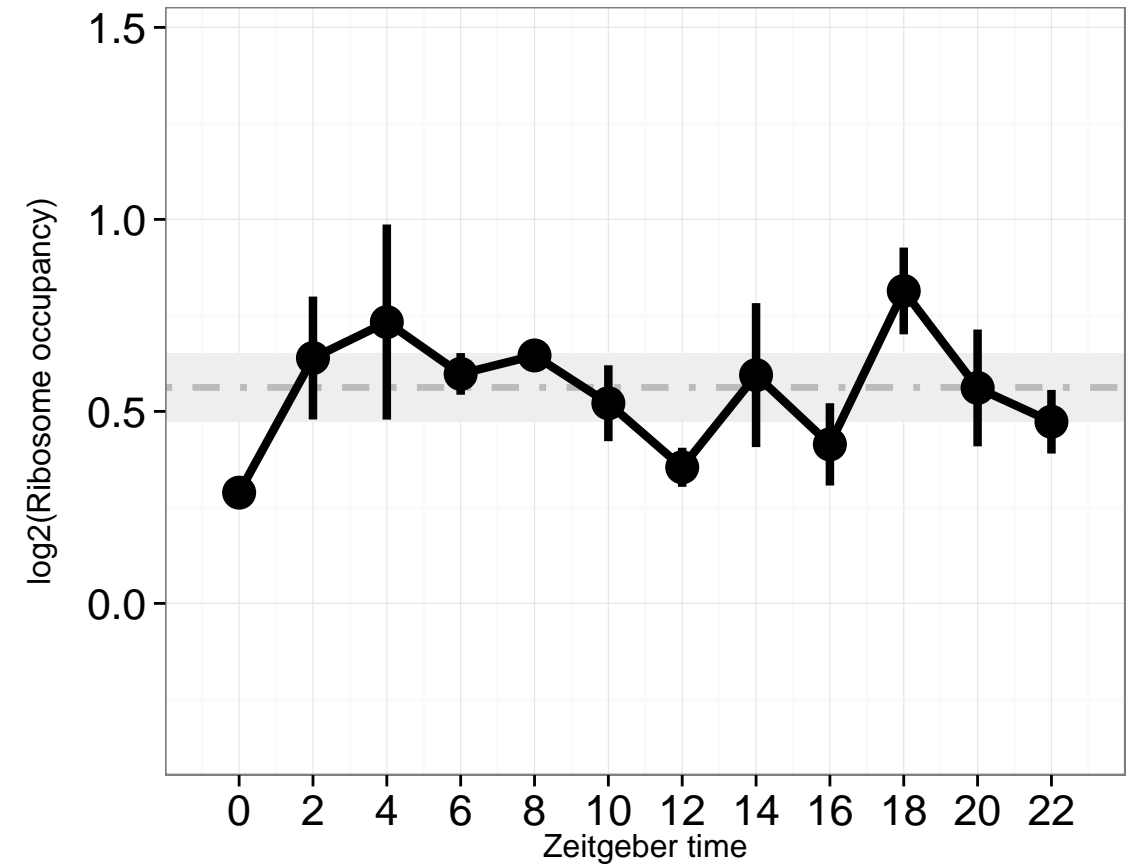

Supplement: Supplementary file 8786 [file 1]

# Atp11c

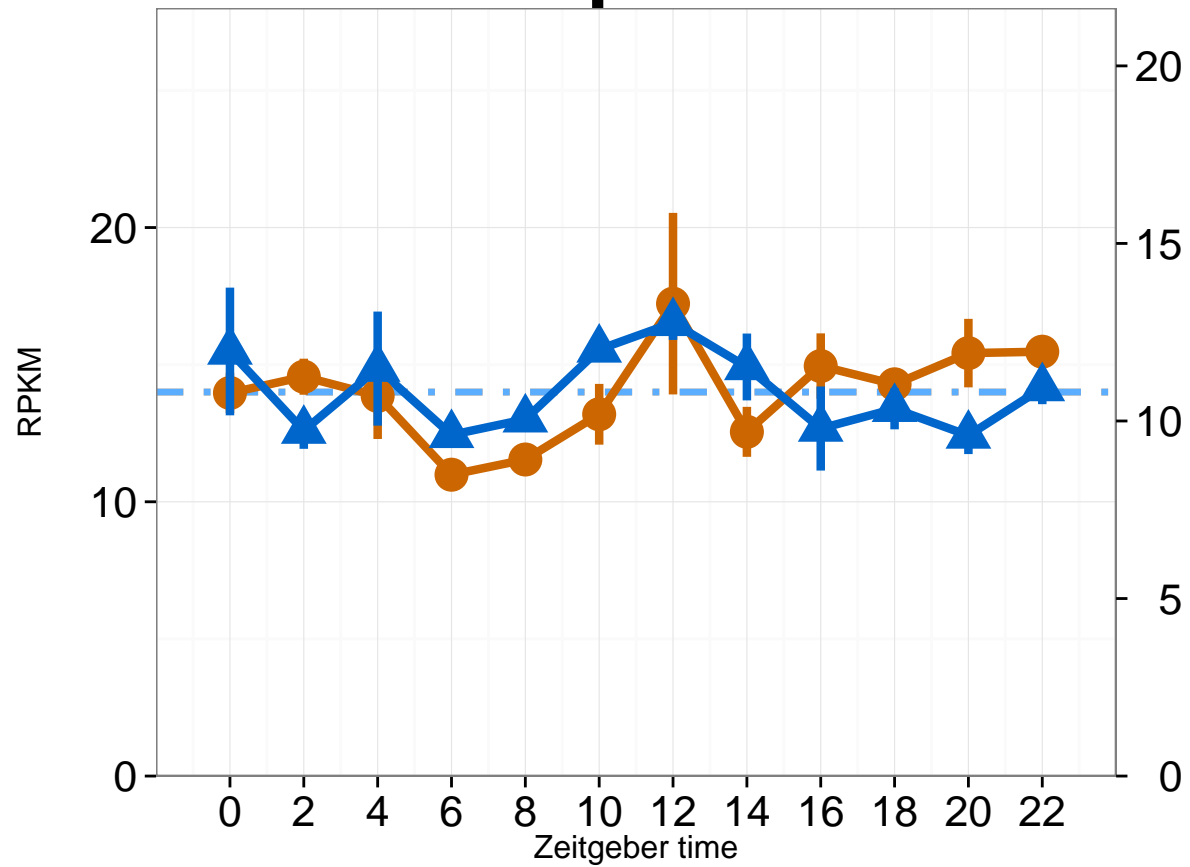

# Atp11c

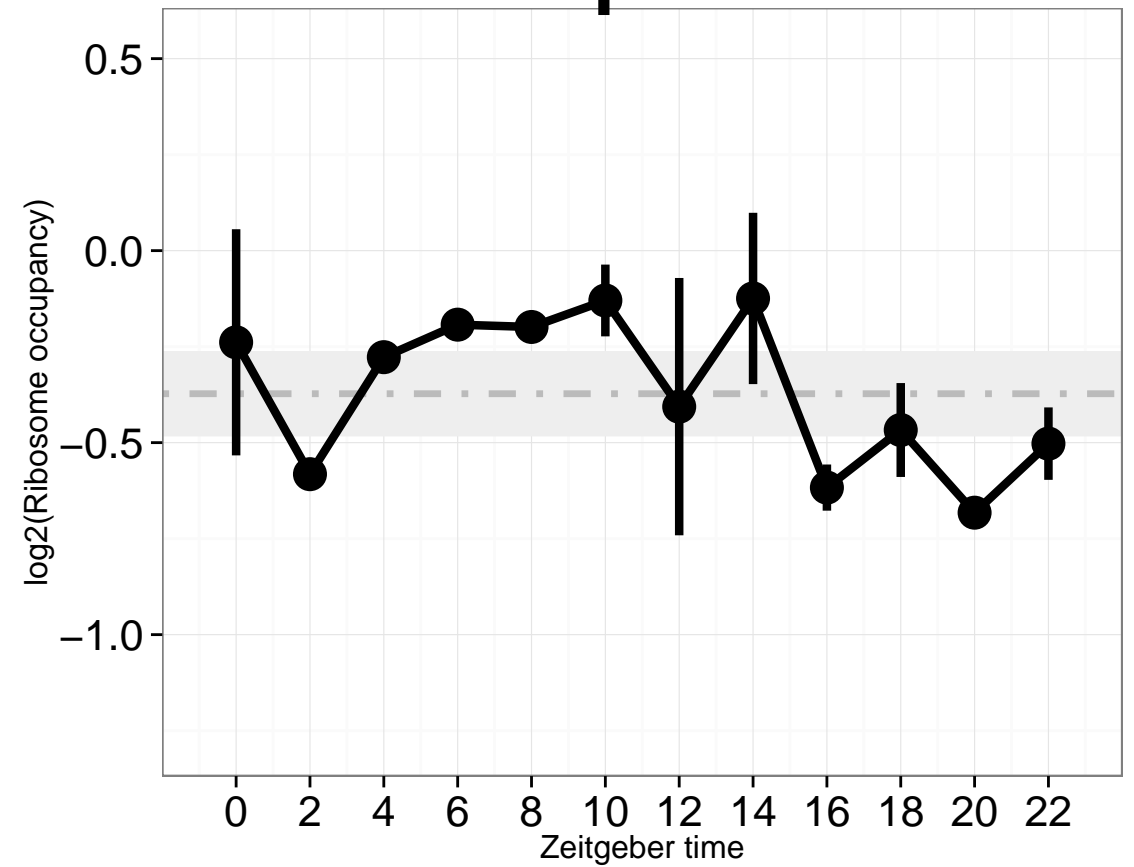

Supplement: Supplementary file 8787 [file 1]

# Cox19

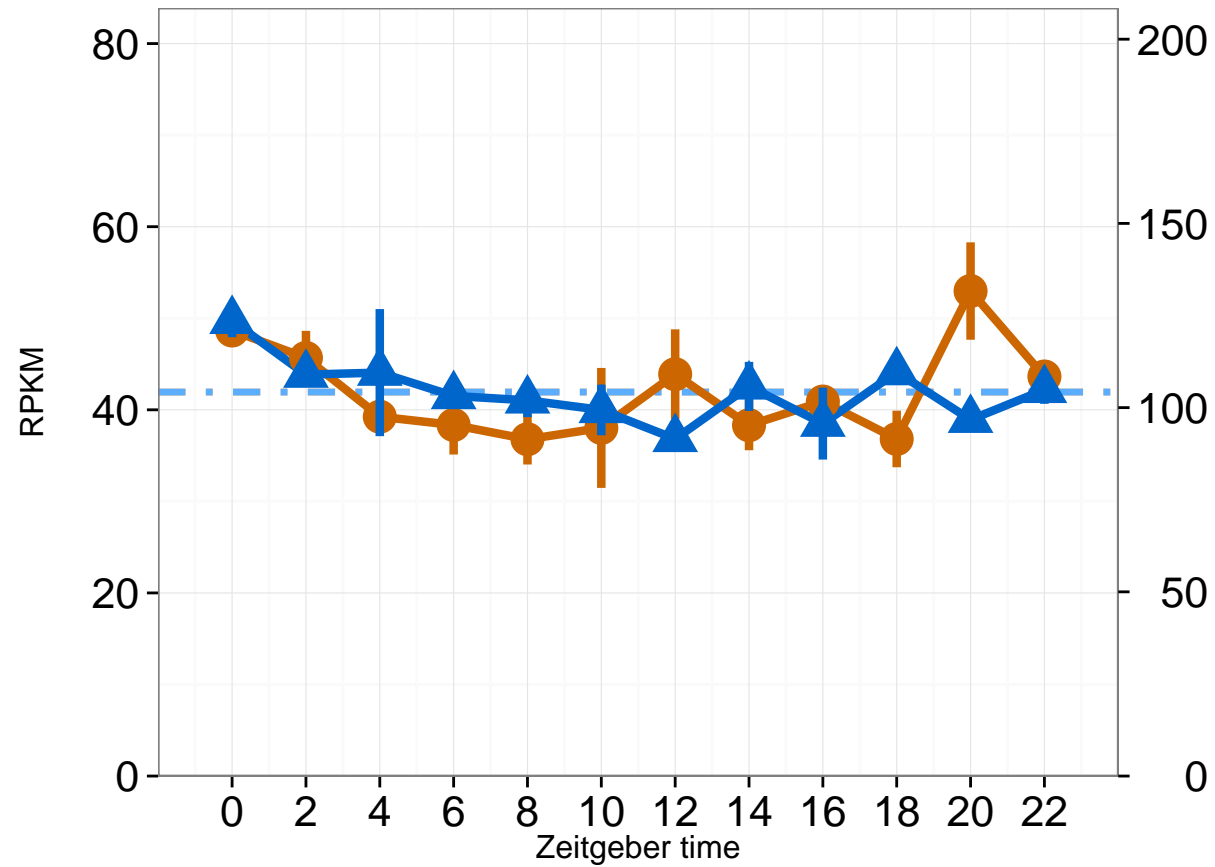

# Cox19

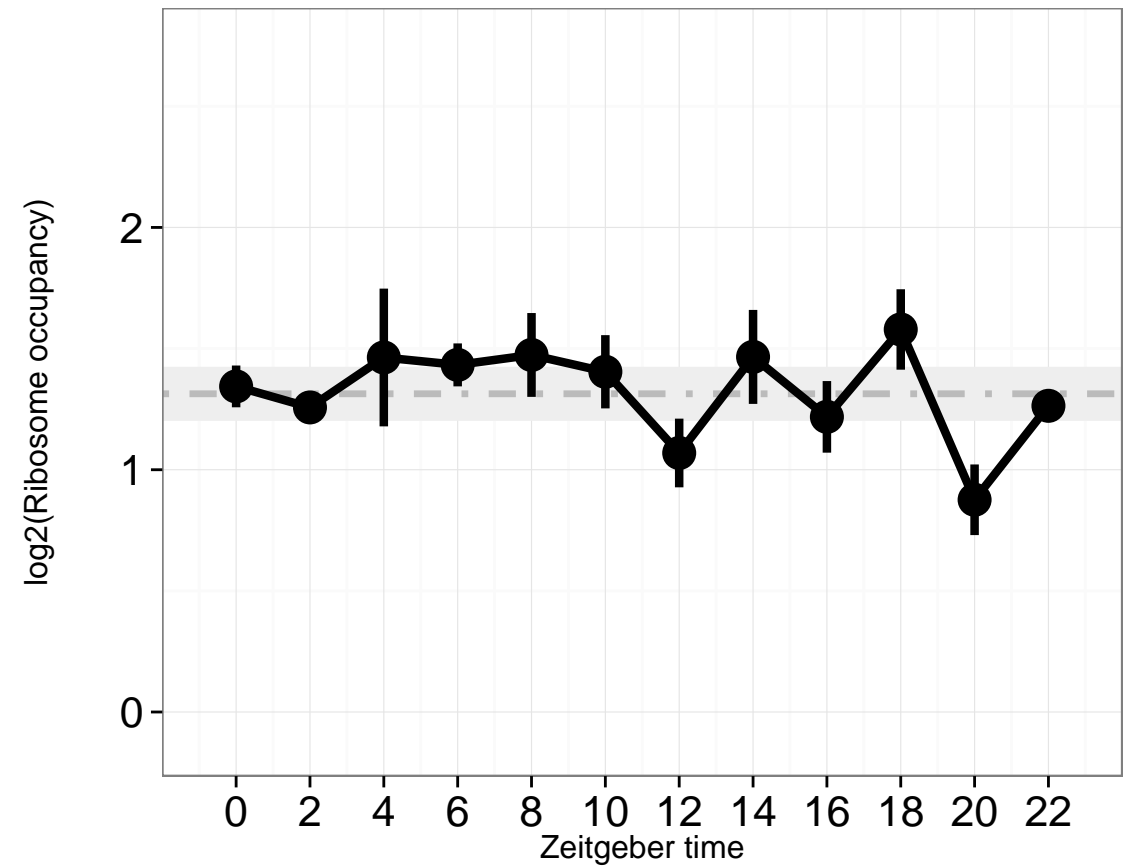

Supplement: Supplementary file 8788 [file 1]

## Nme6

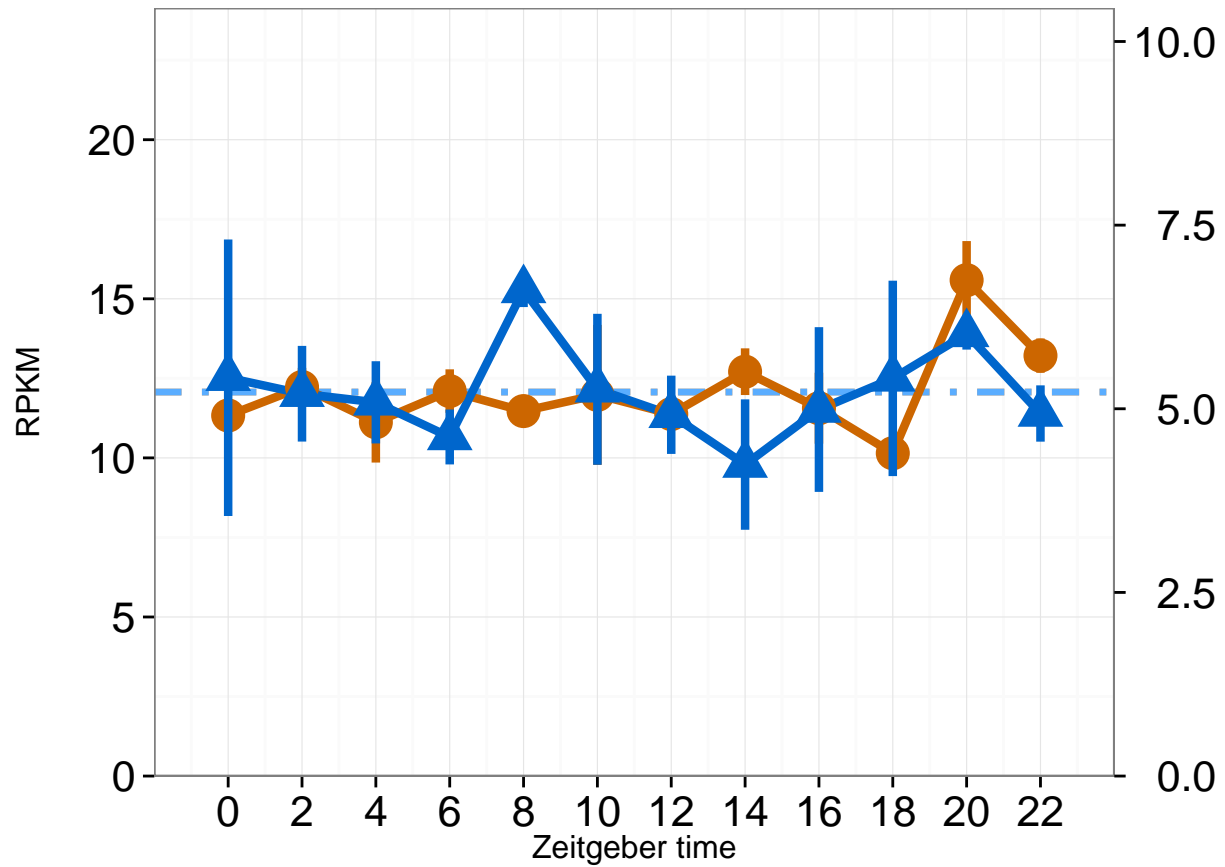

## Nme6

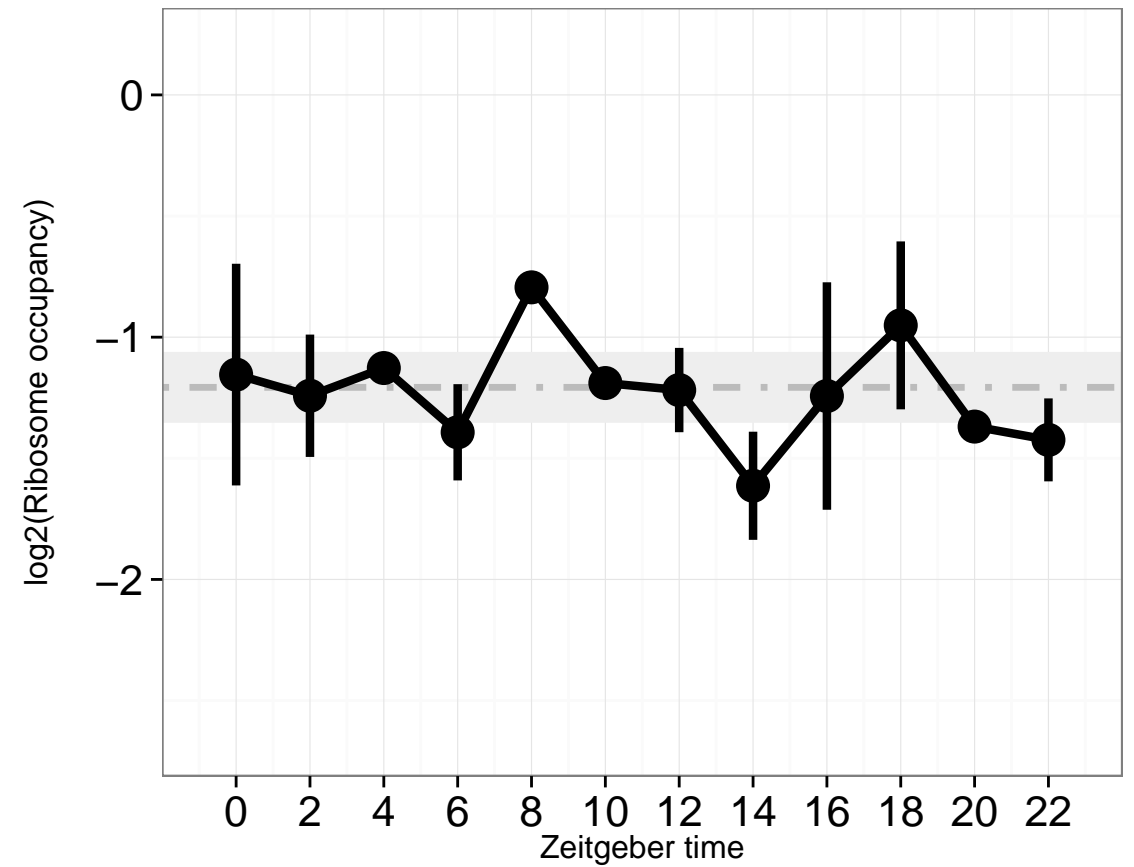

Supplement: Supplementary file 8789 [file 1]

## Pvalb

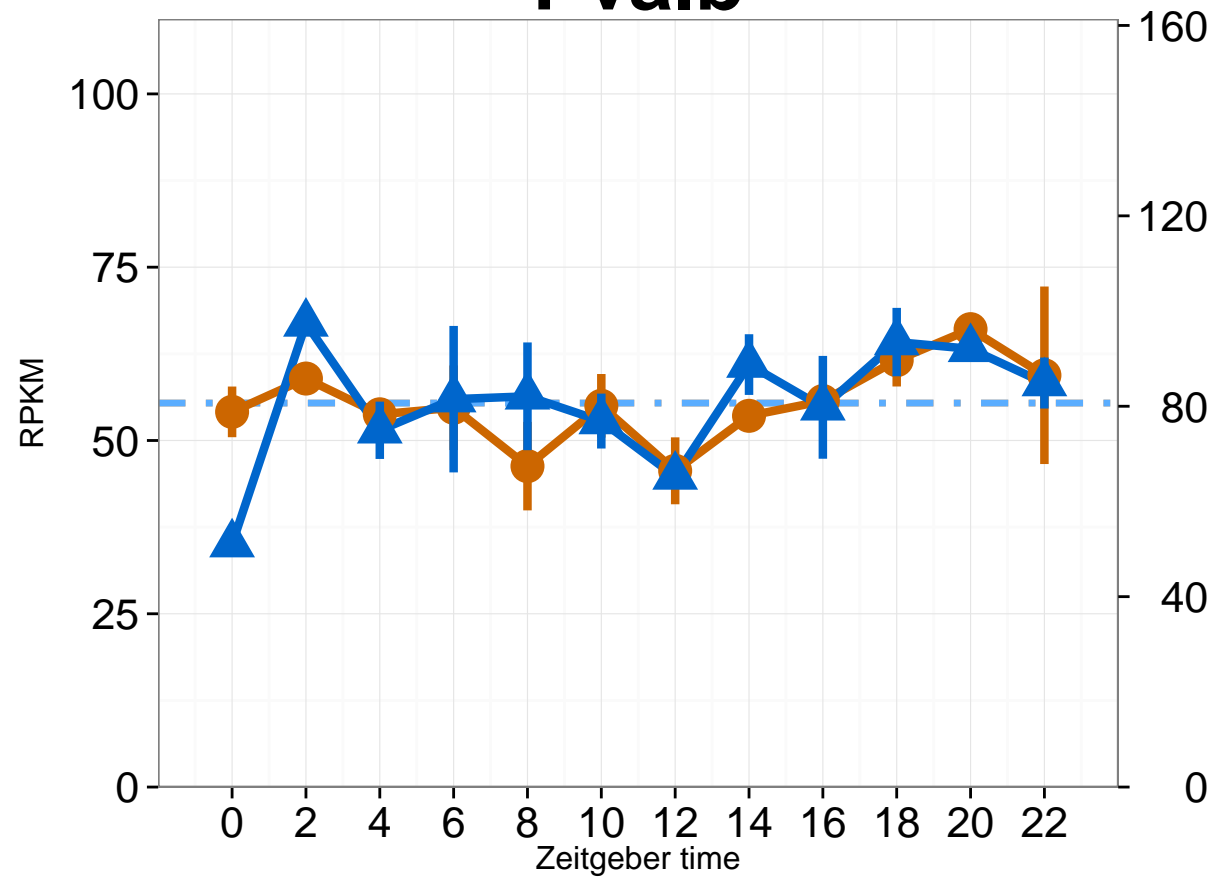

## Pvalb

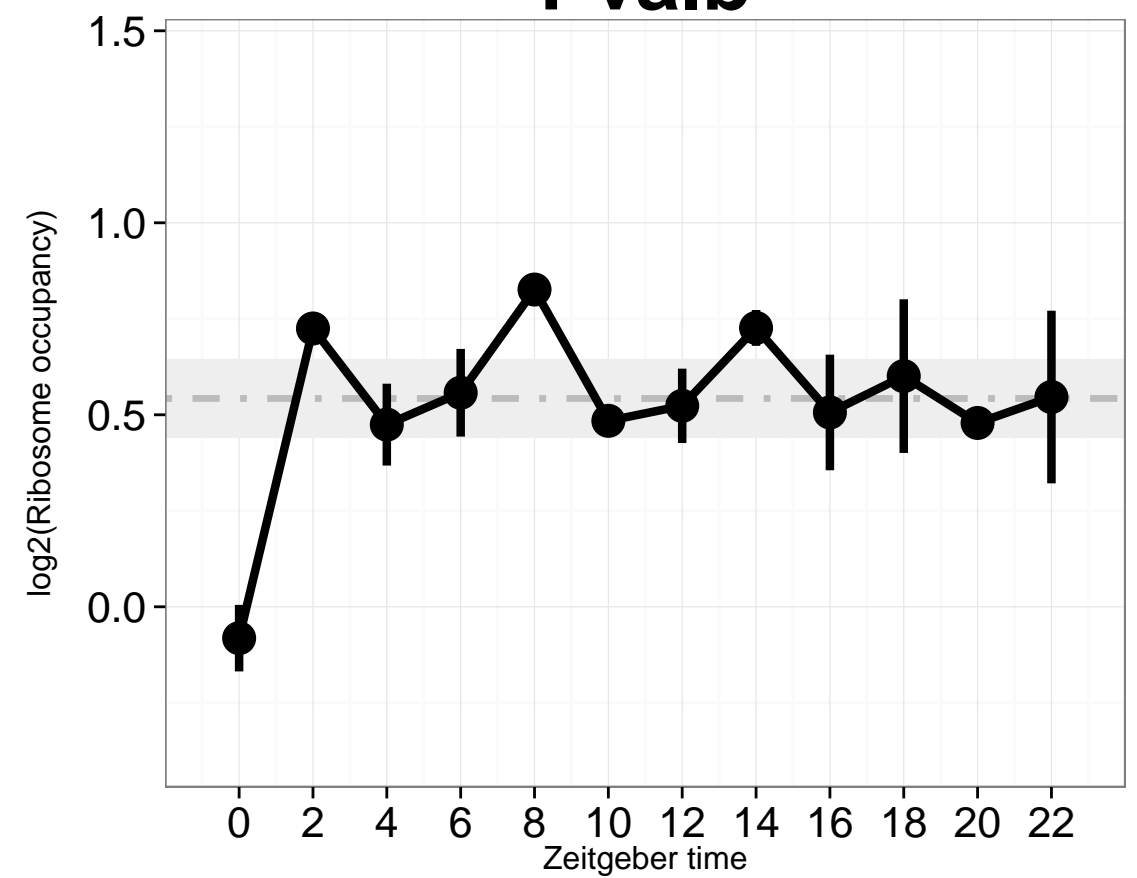

Supplement: Supplementary file 8790 [file 1]

# Baz2b

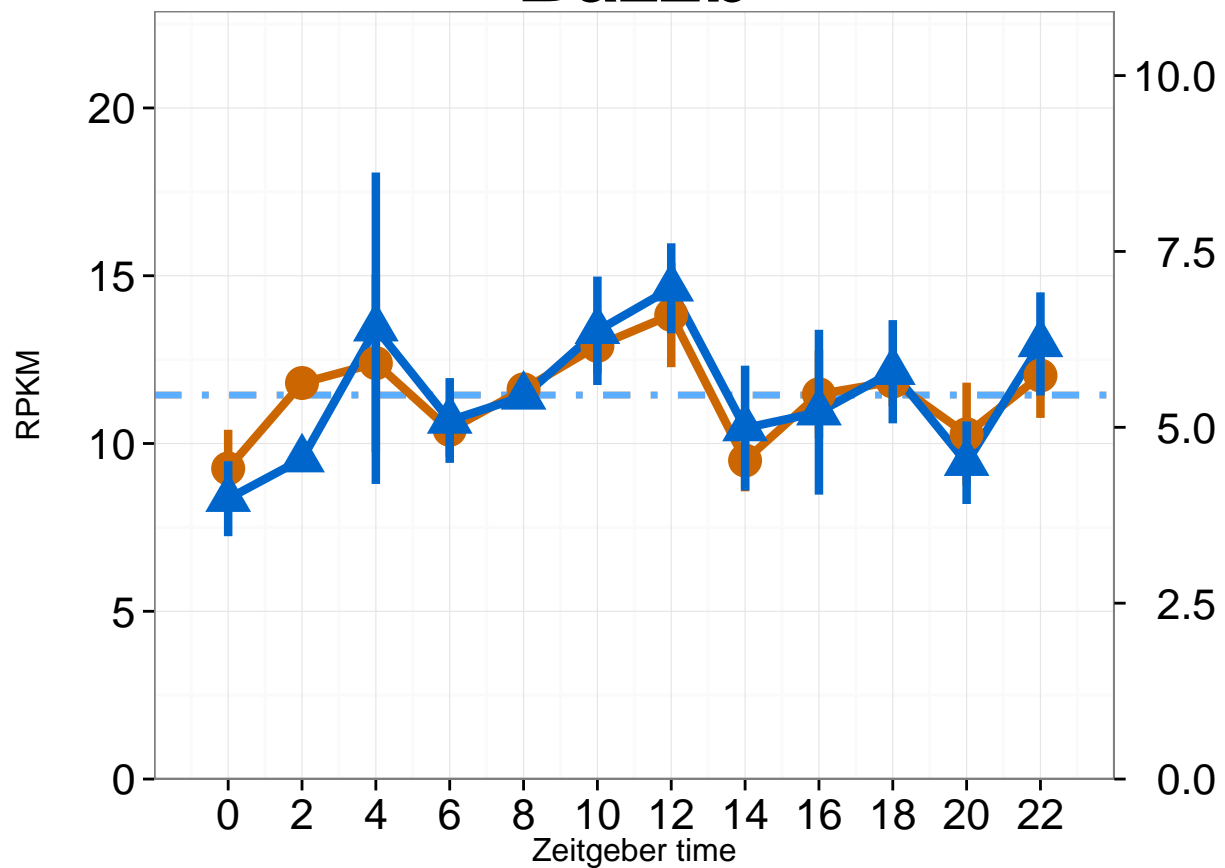

# Baz2b

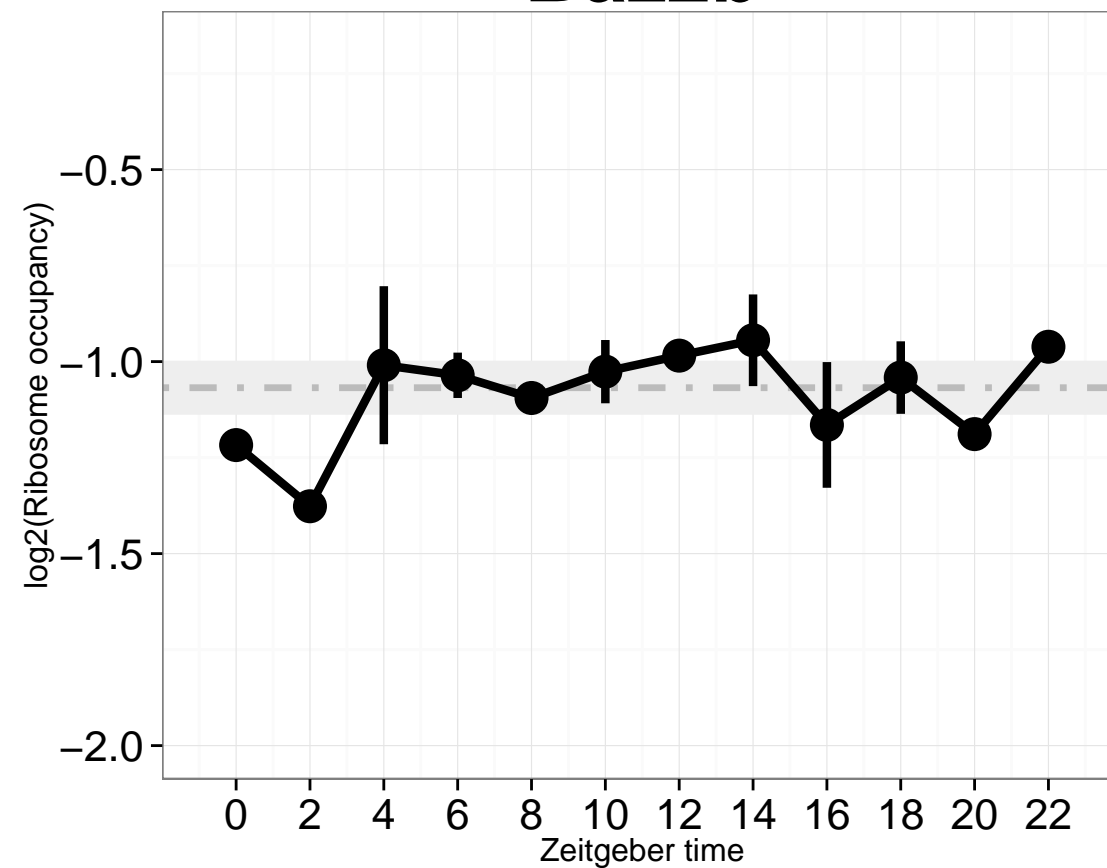

Supplement: Supplementary file 8791 [file 1]

# Map3k7cl

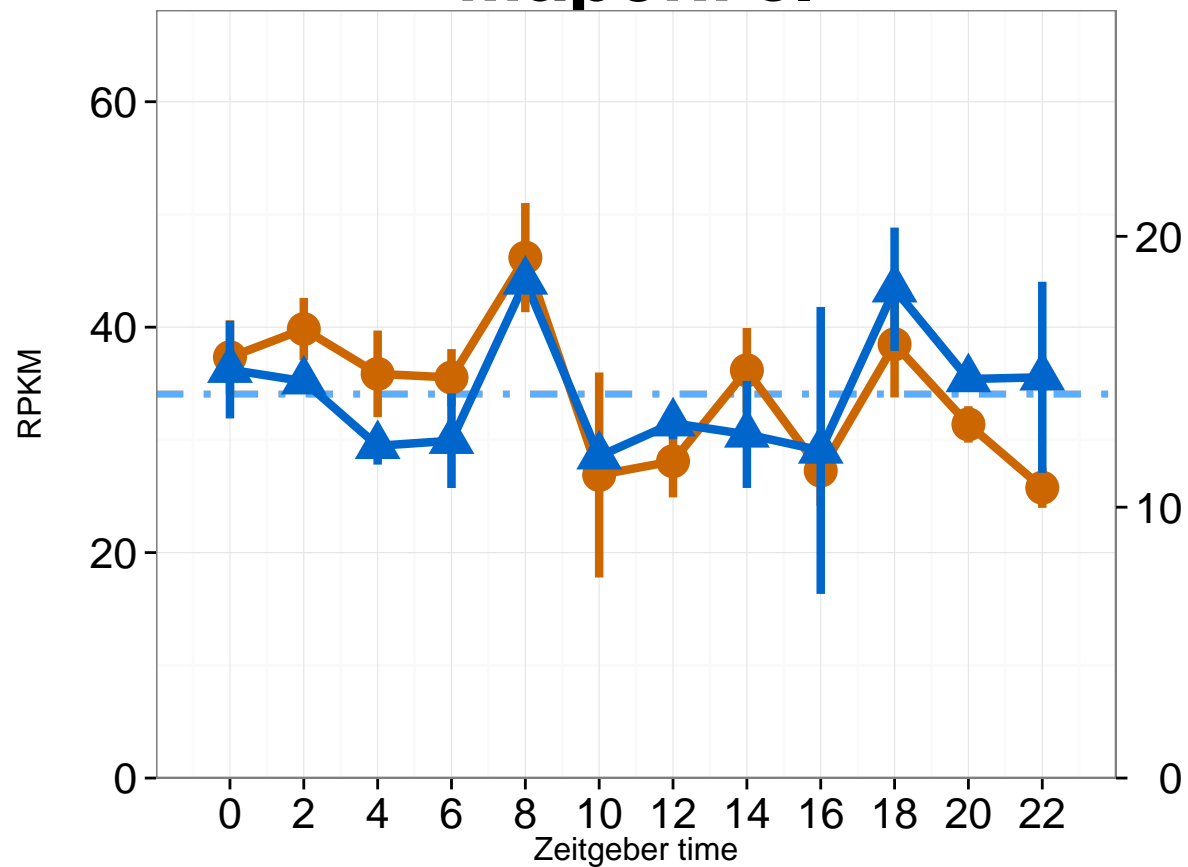

# Map3k7cl

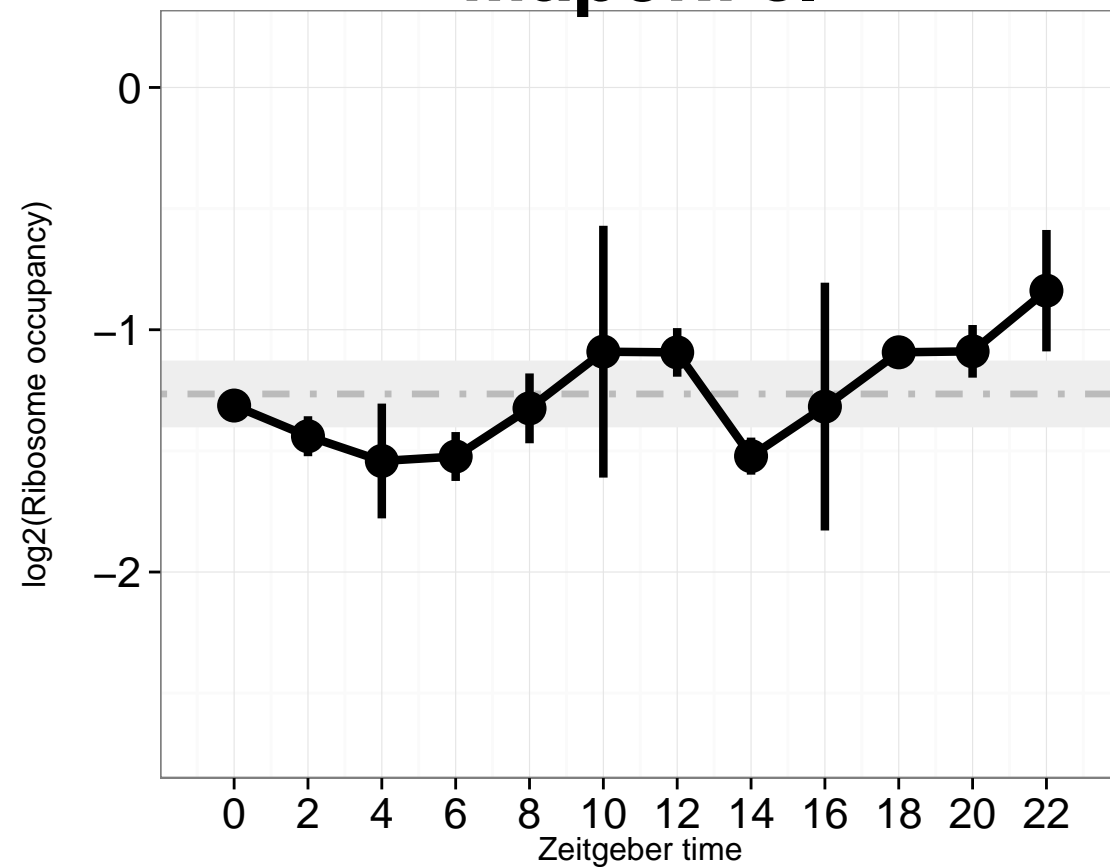

Supplement: Supplementary file 8792 [file 1]

## Aebp2

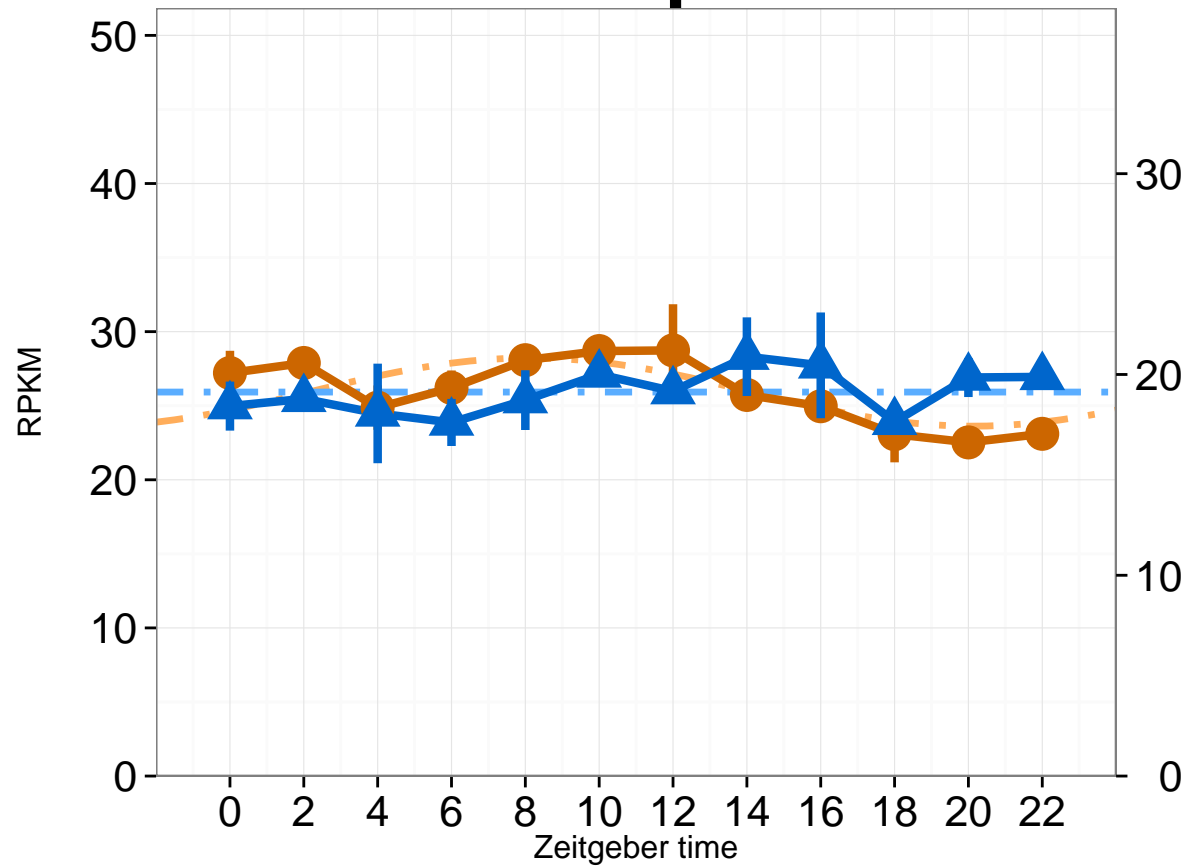

## Aebp2

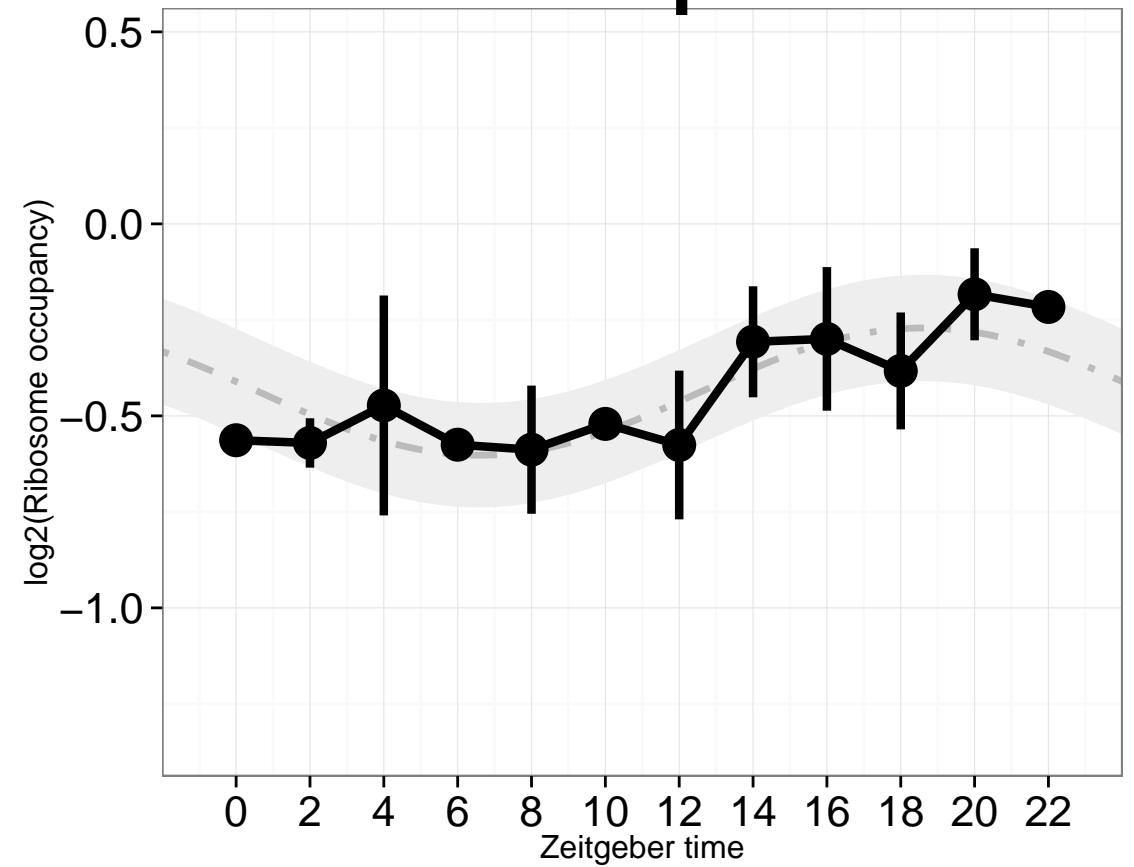

Supplement: Supplementary file 8793 [file 1]

# Dnajb9

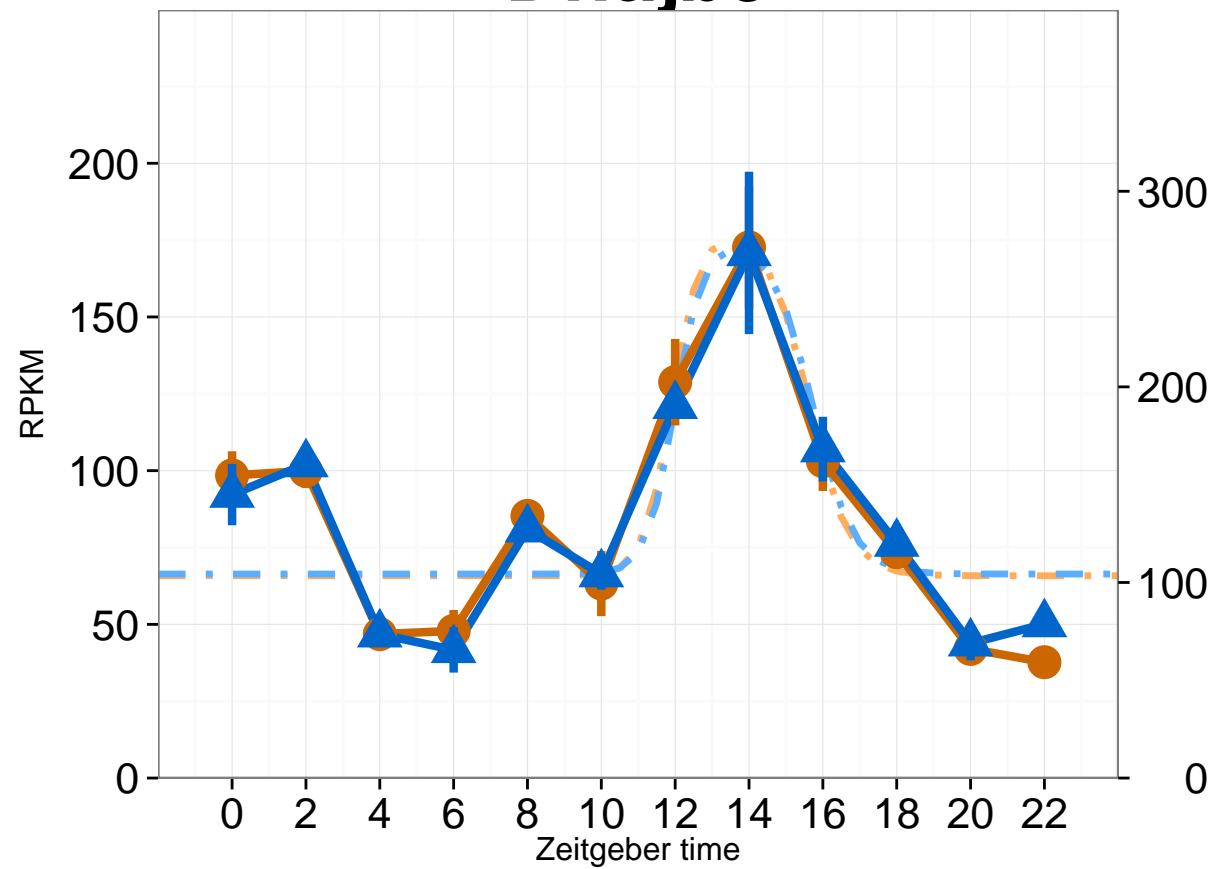

# Dnajb9

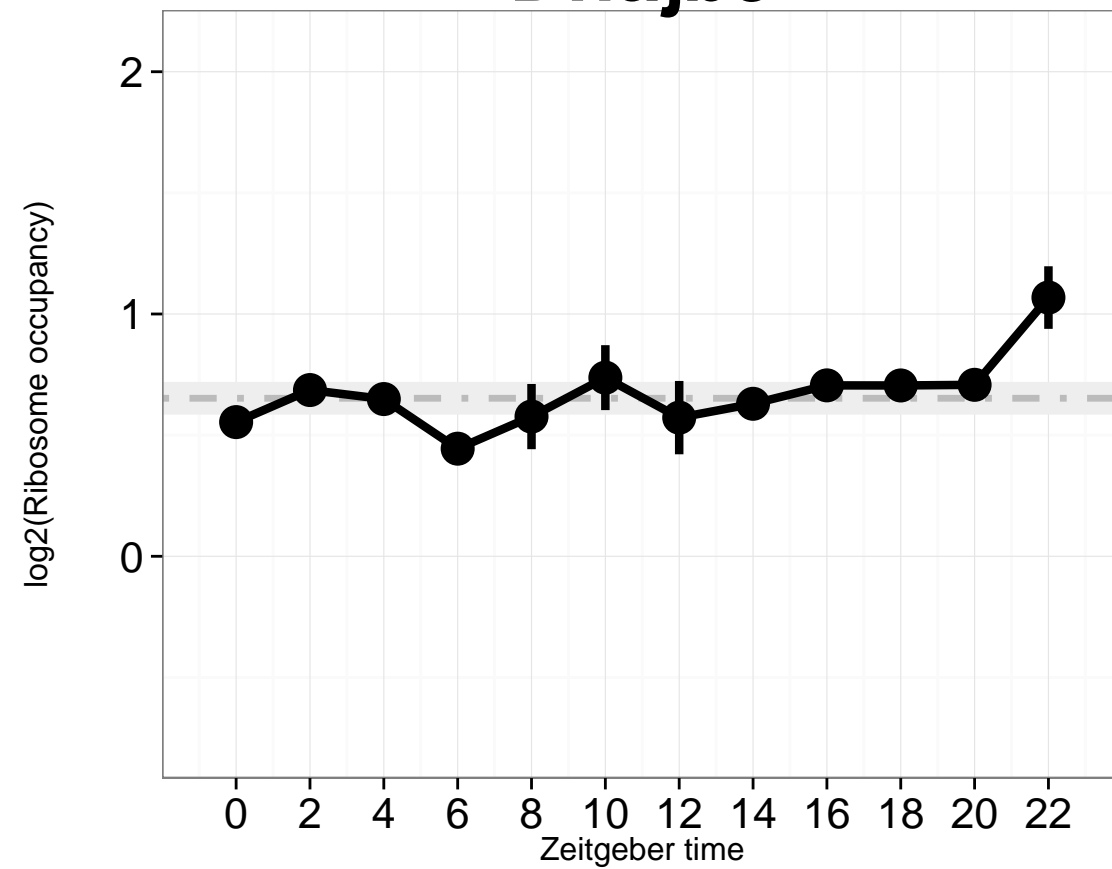

Supplement: Supplementary file 8794 [file 1]

## Tns3

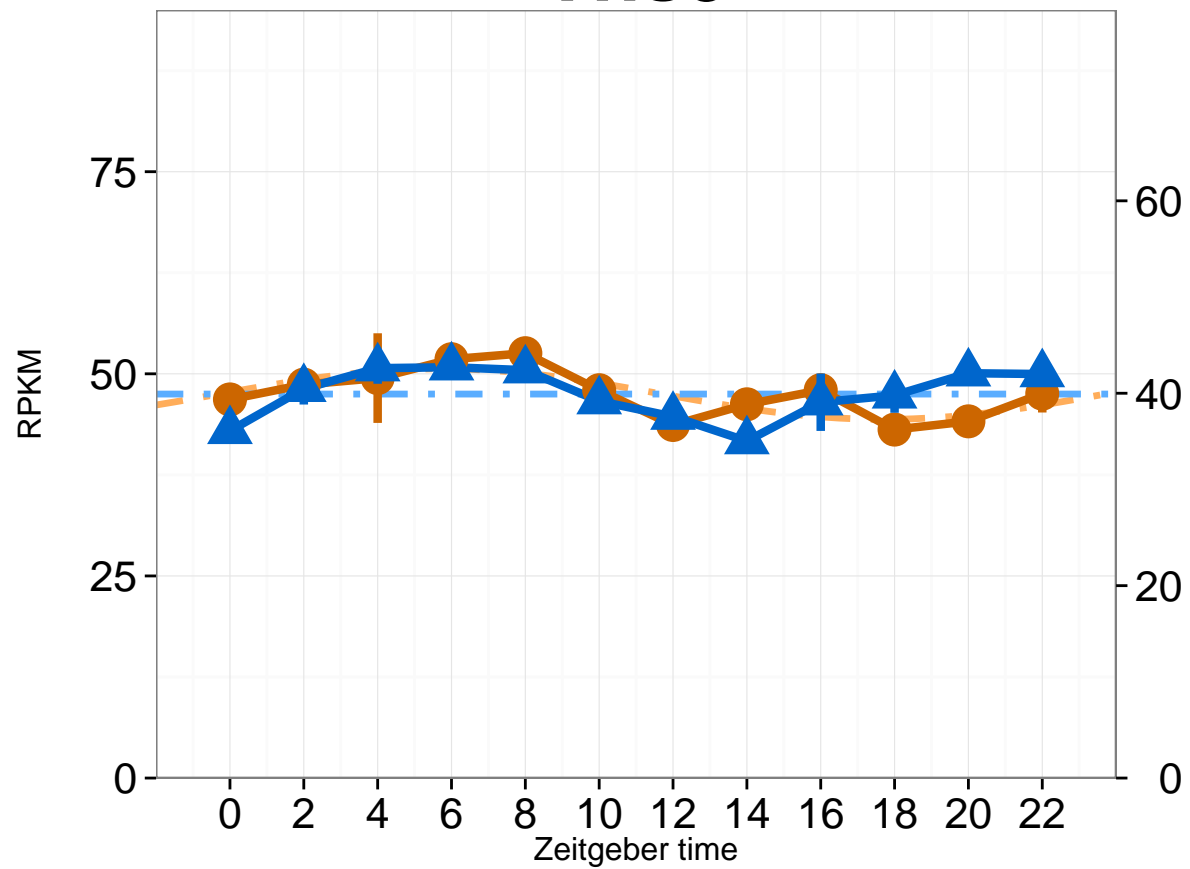

## Tns3

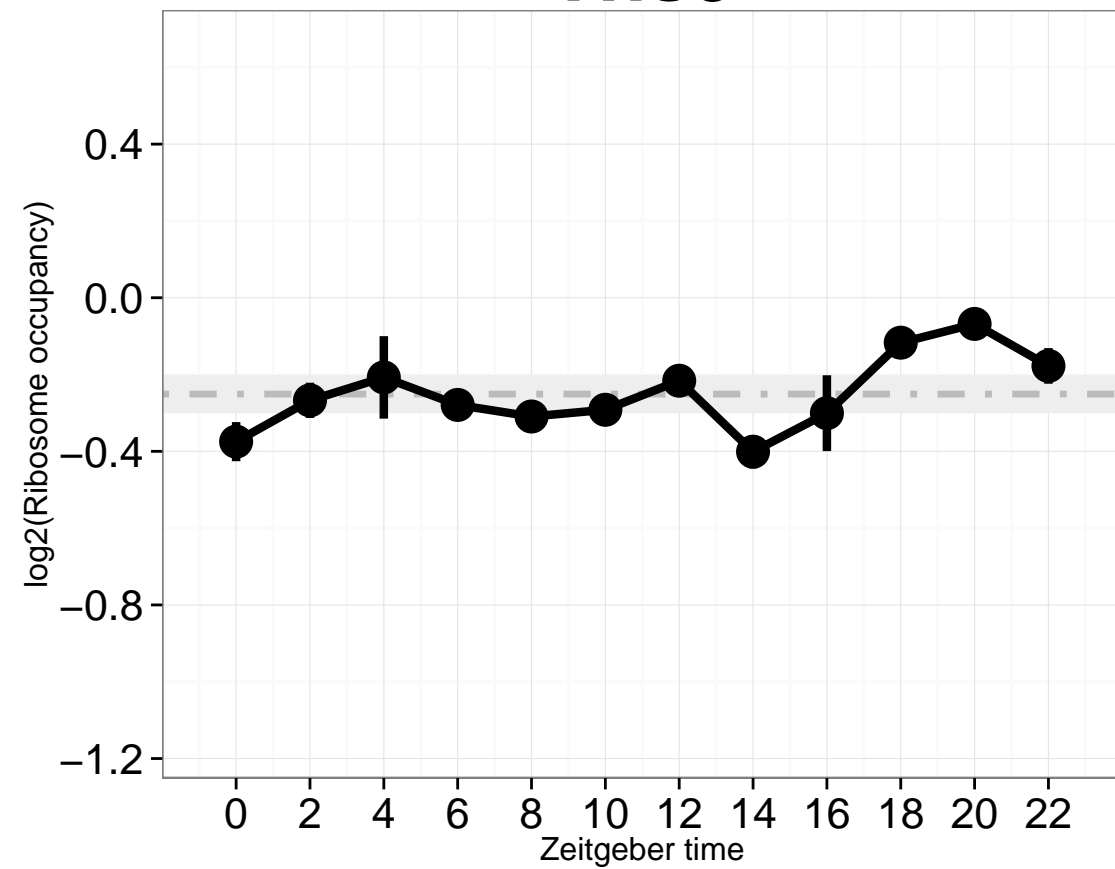

Supplement: Supplementary file 8795 [file 1]

## Zmynd12

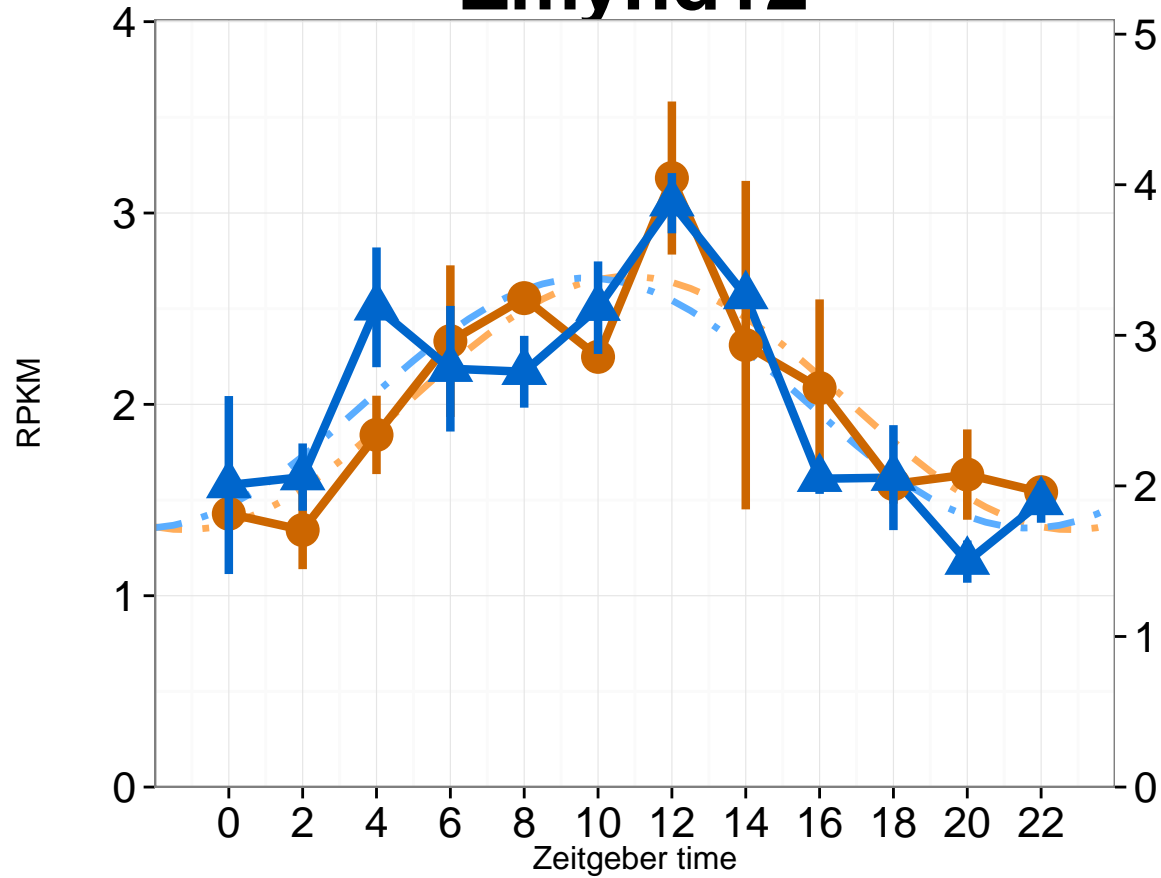

## Zmynd12

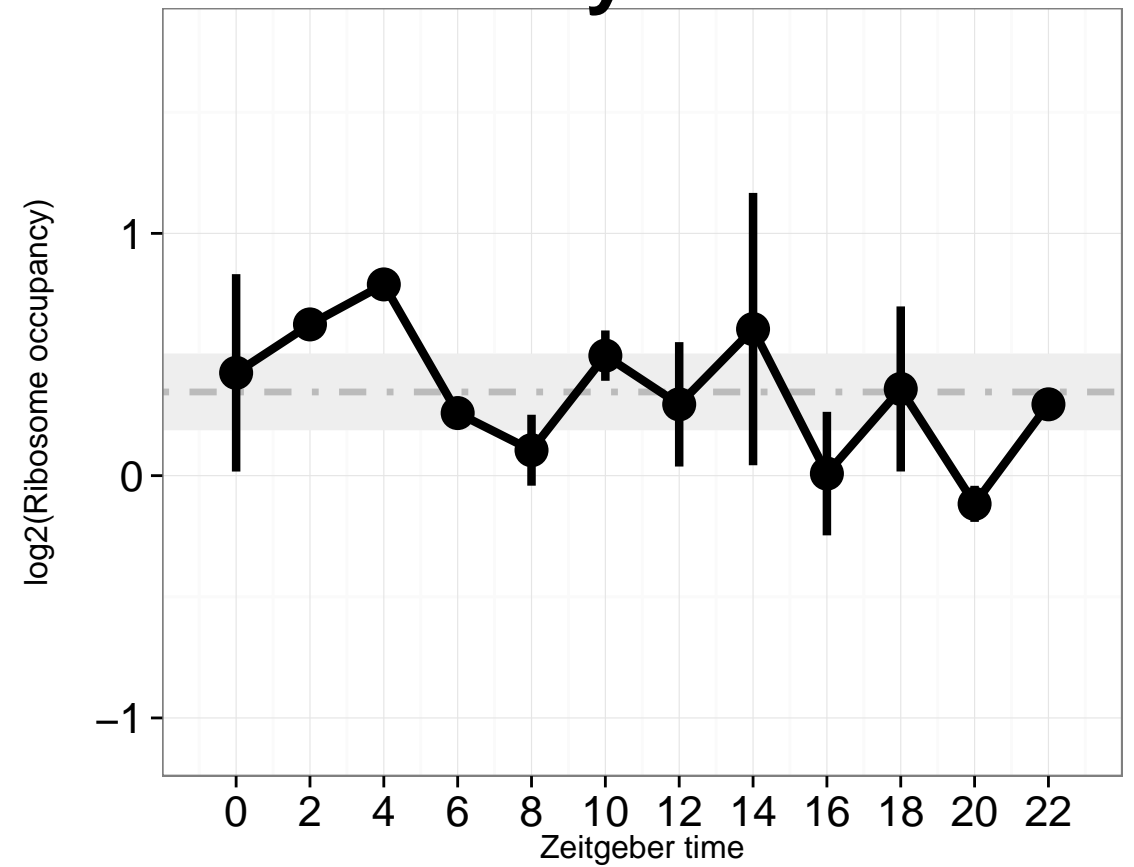

Supplement: Supplementary file 8796 [file 1]

# D3Ertd254e

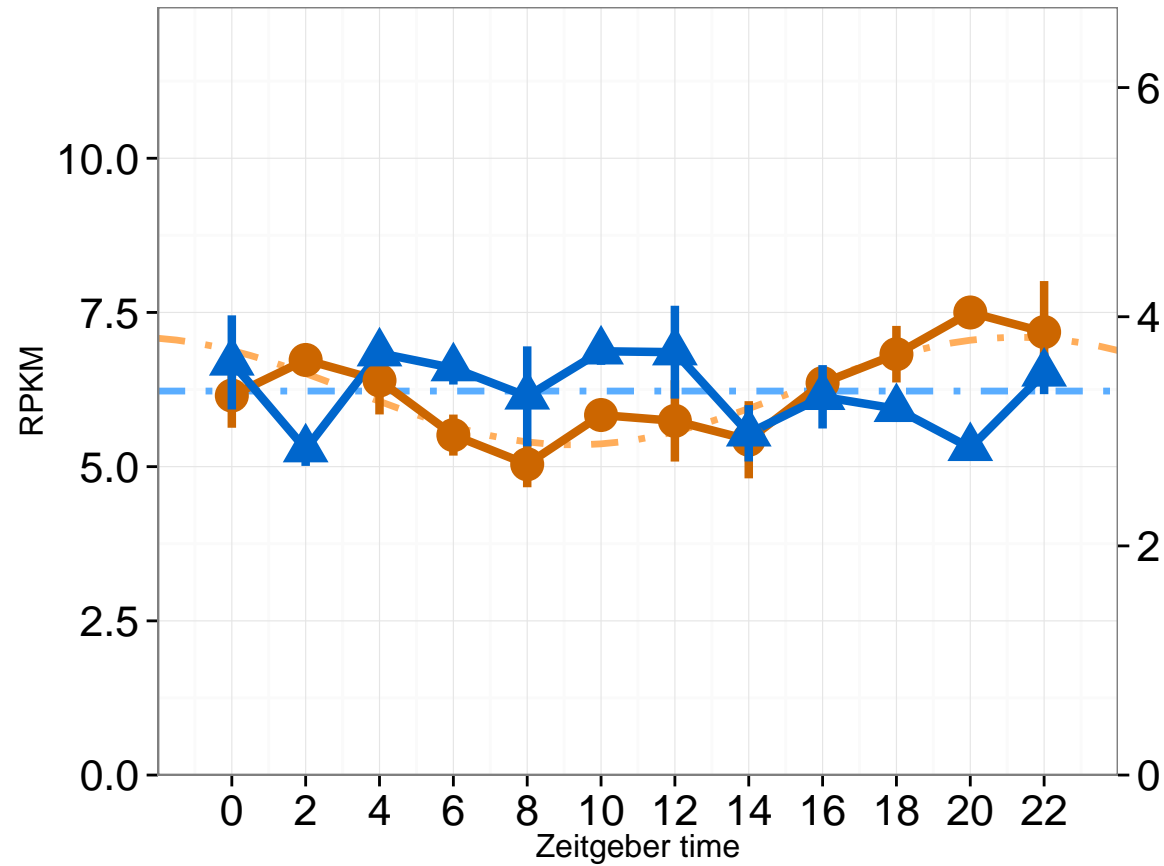

# D3Ertd254e

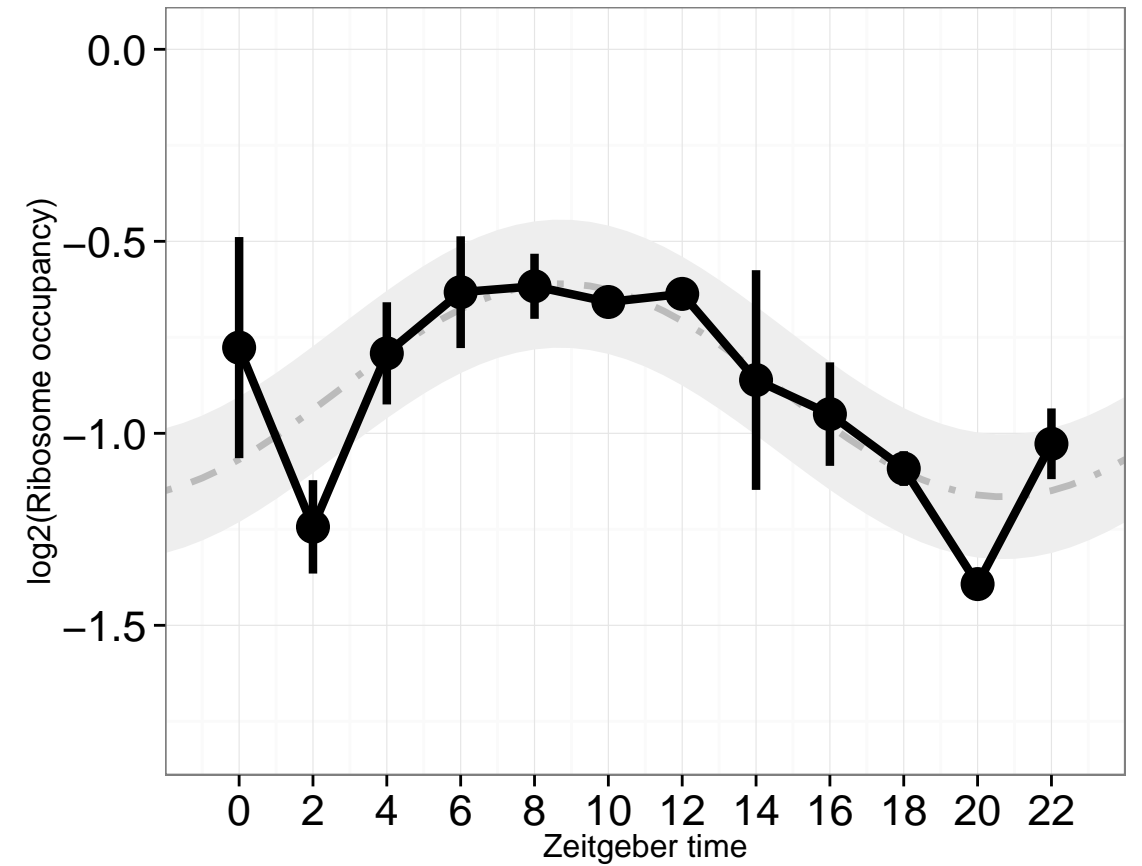

Supplement: Supplementary file 8797 [file 1]

# Dnajc25

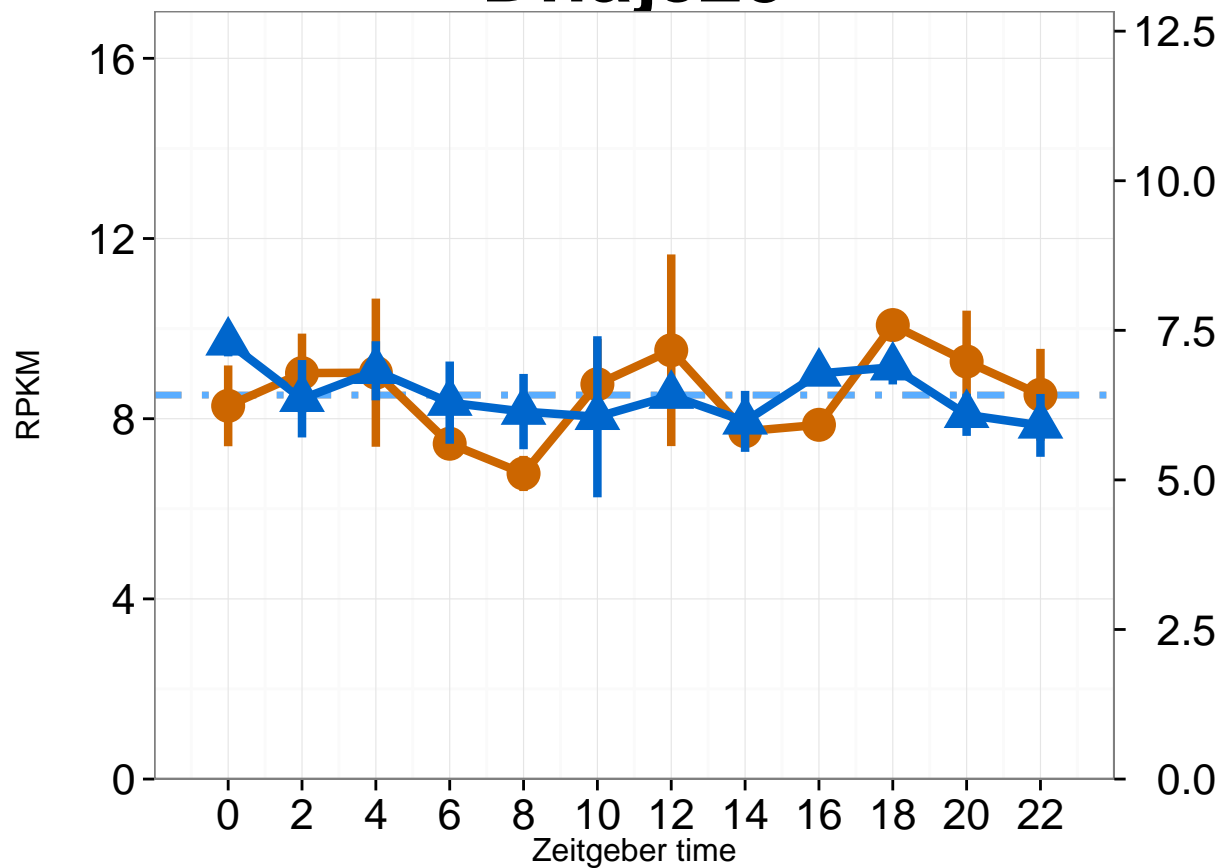

# Dnajc25

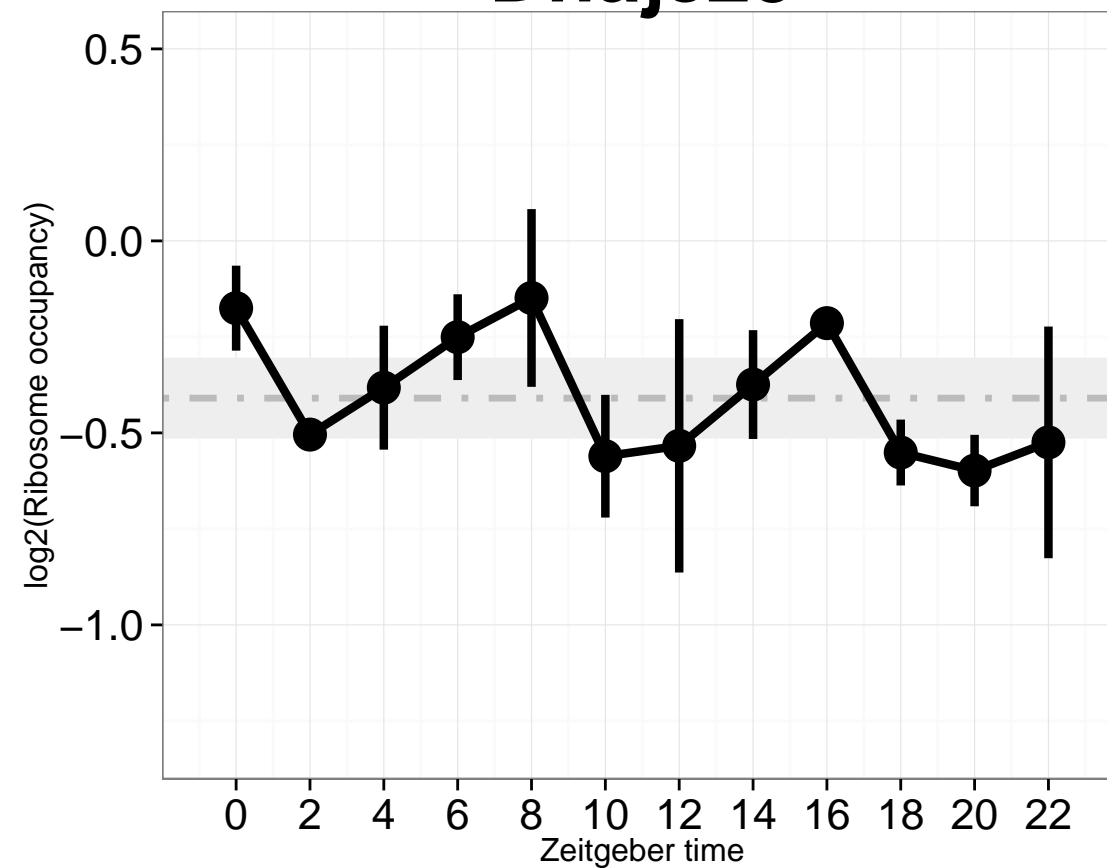

Supplement: Supplementary file 8798 [file 1]

## Slbp

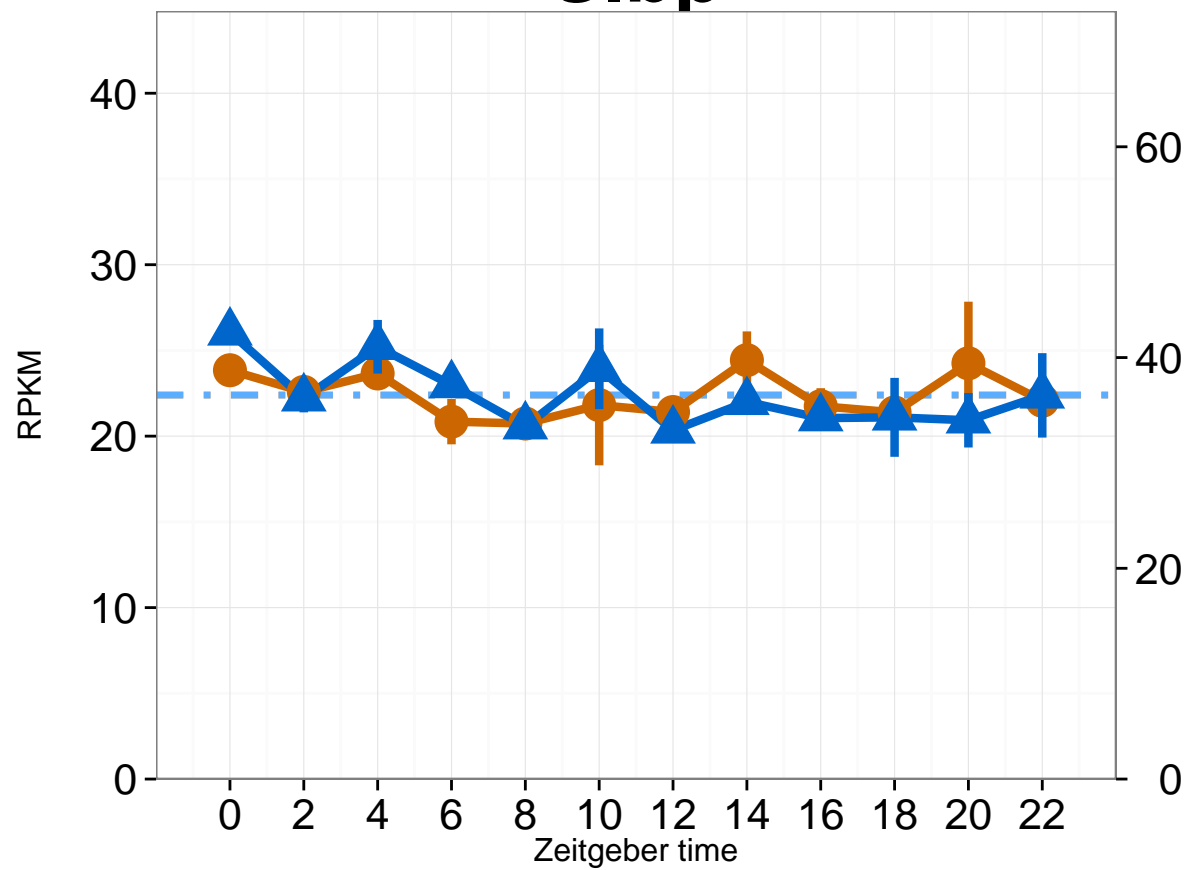

## Slbp

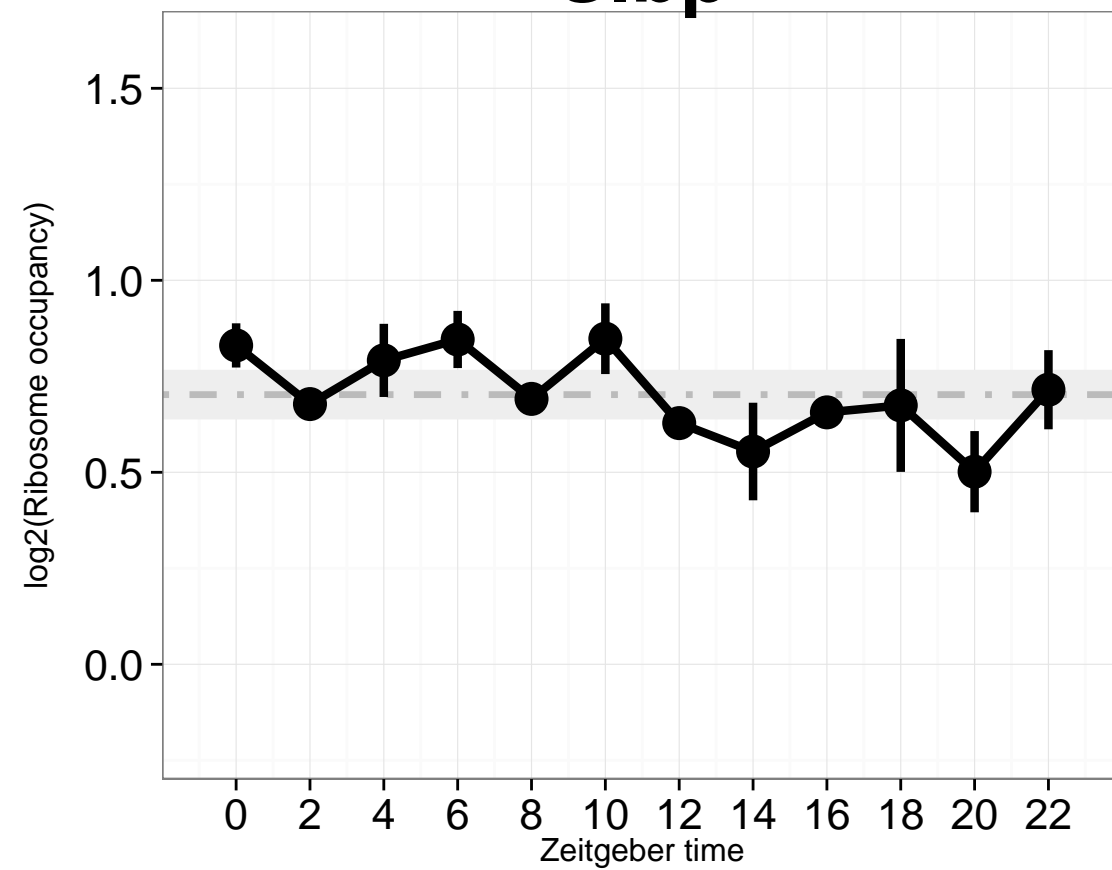

Supplement: Supplementary file 8799 [file 1]

# B9d2

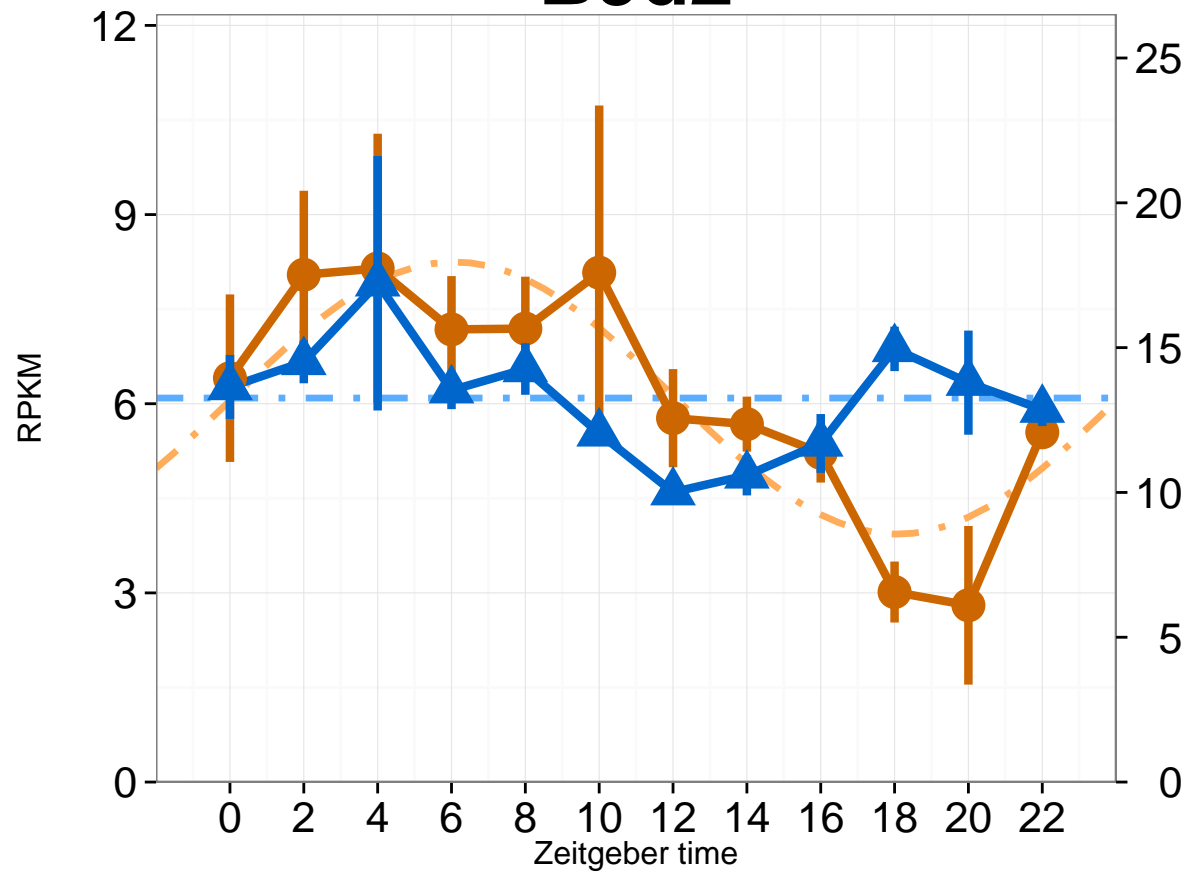

# B9d2

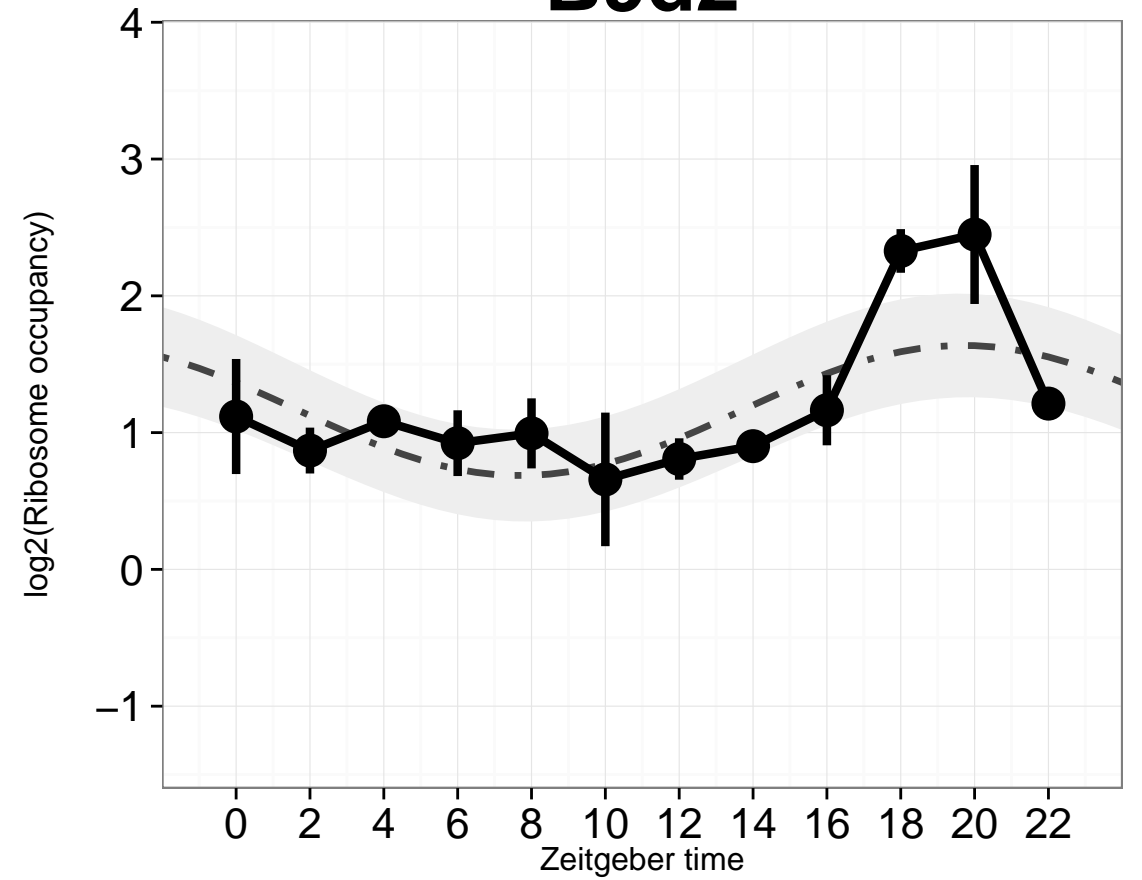

Supplement: Supplementary file 8800 [file 1]

## Eml3

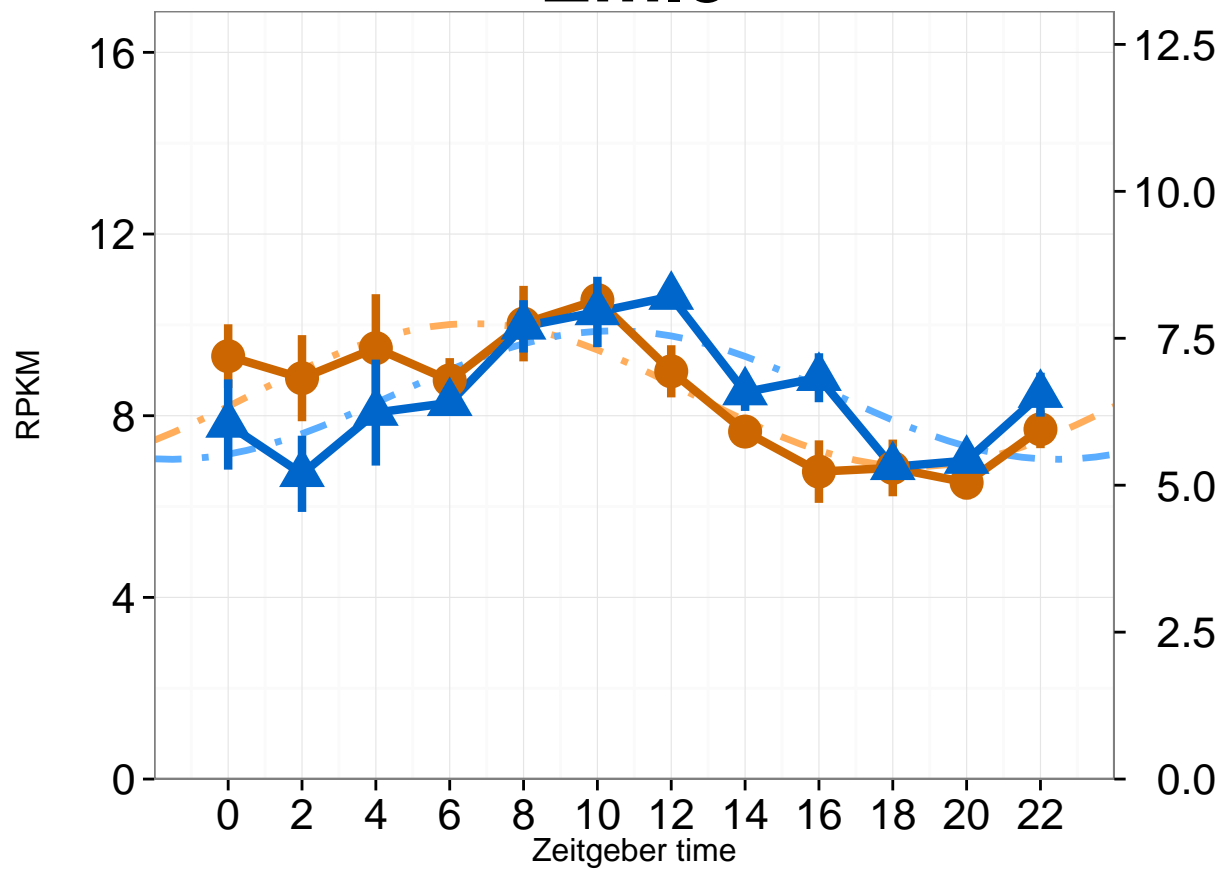

## Eml3

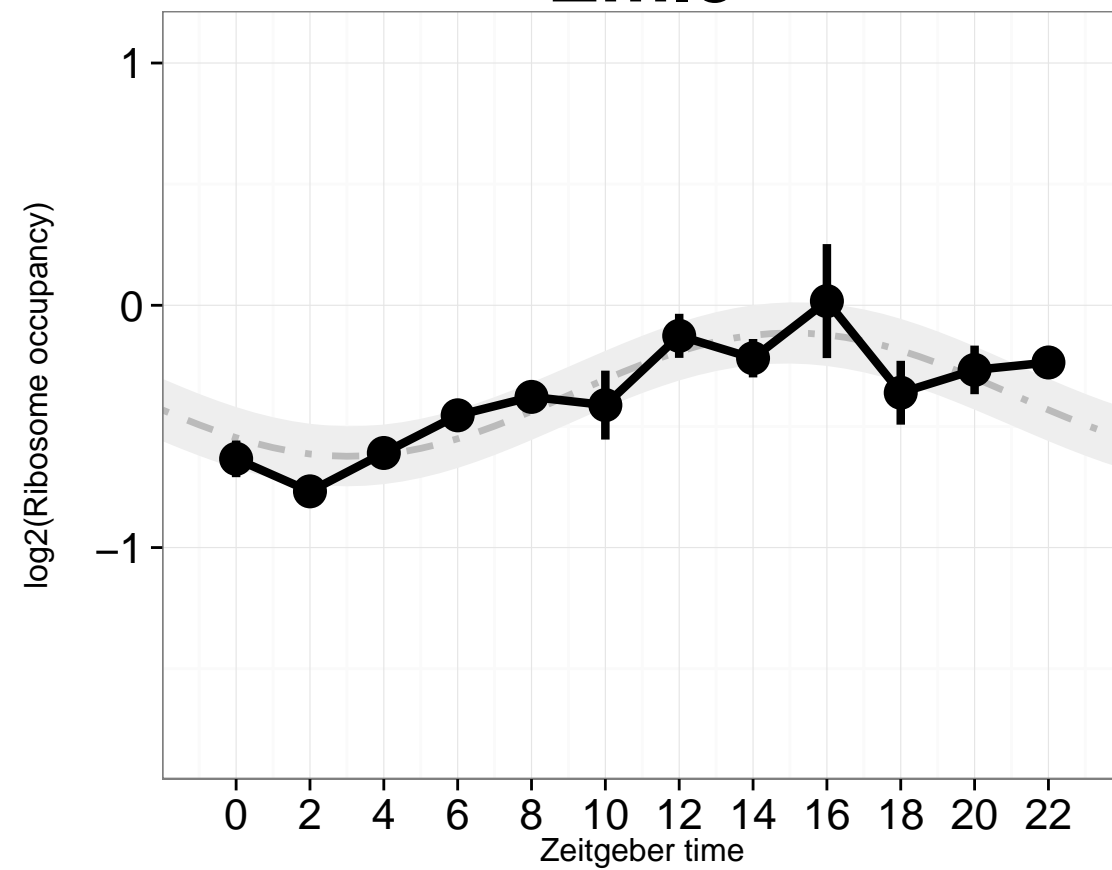

Supplement: Supplementary file 8801 [file 1]

# Ndufb8

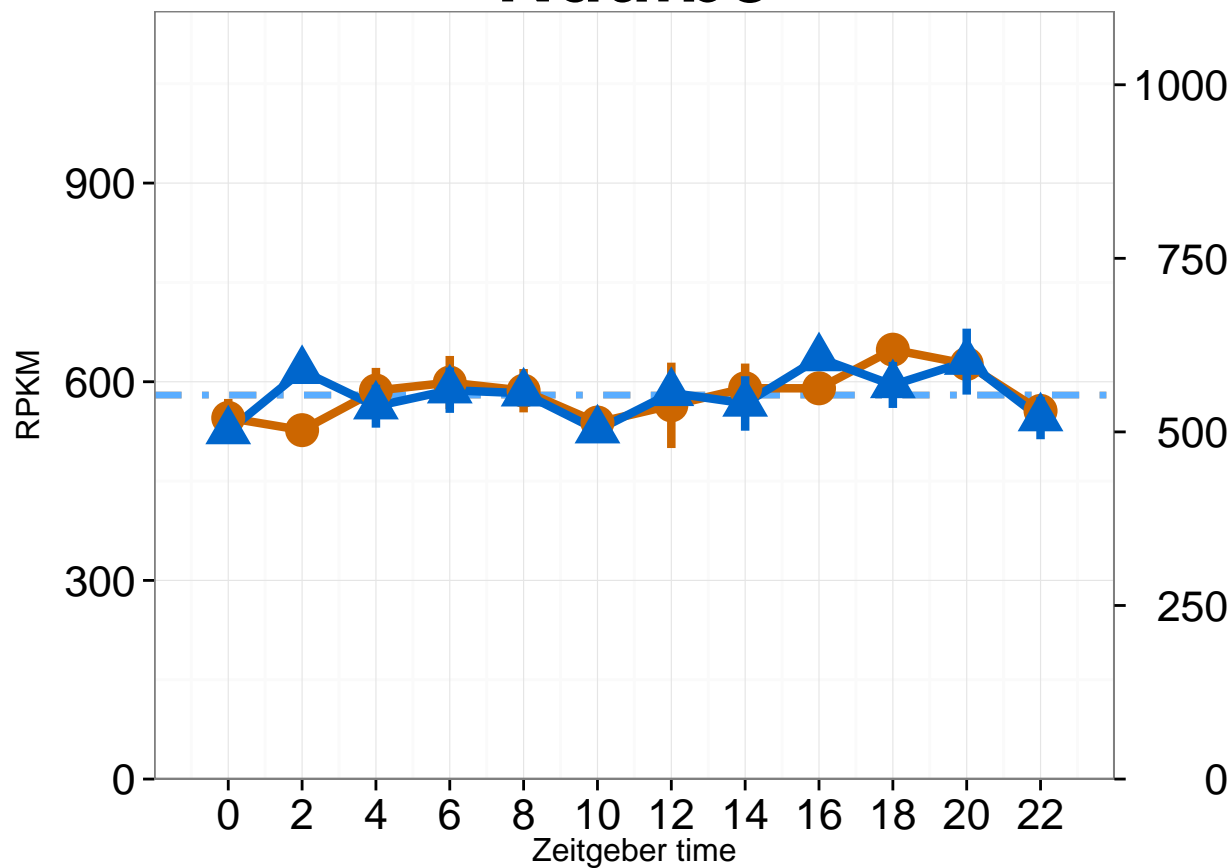

# Ndufb8

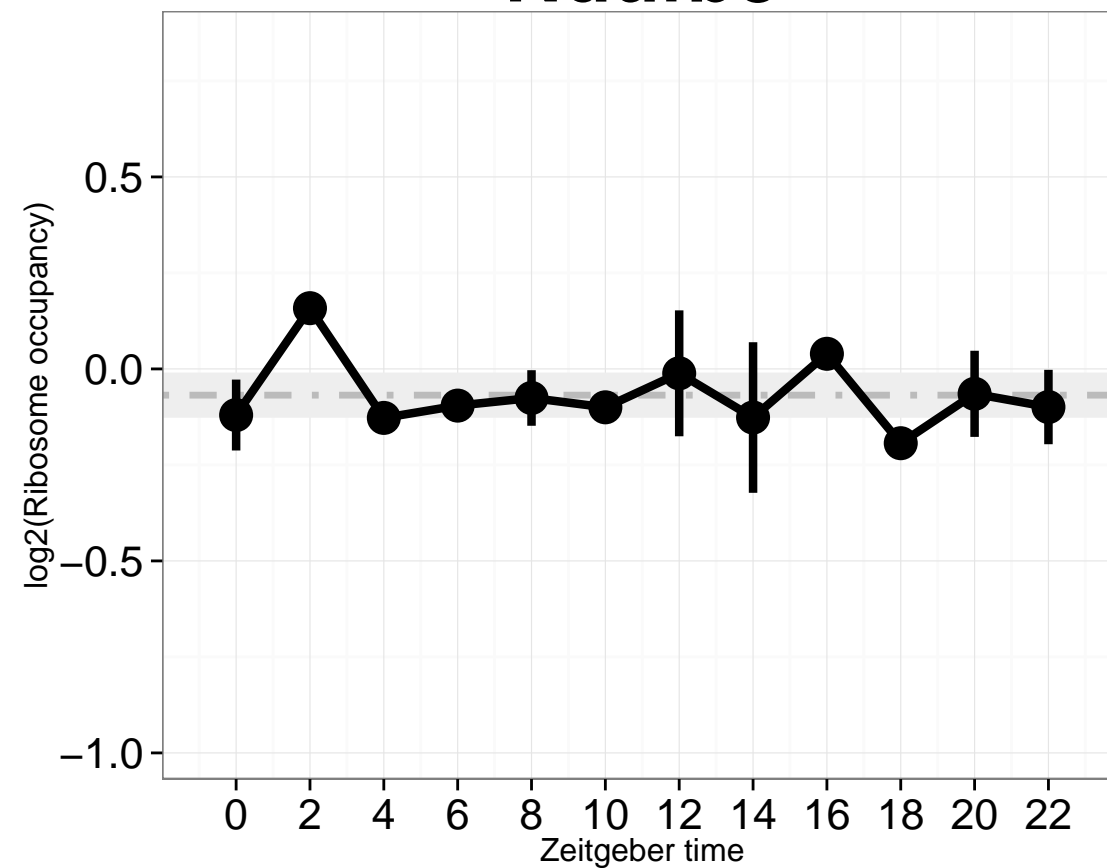

Supplement: Supplementary file 8802 [file 1]

# Mtmr12

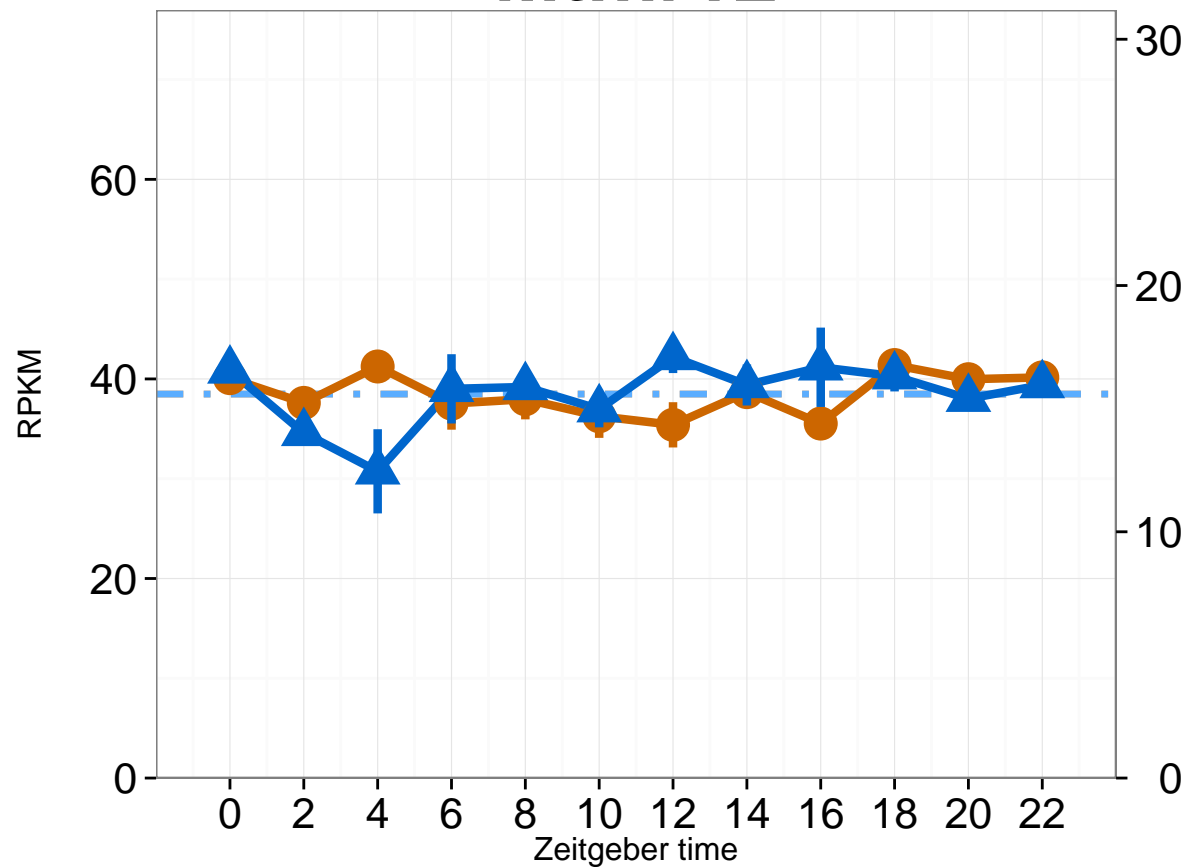

# Mtmr12

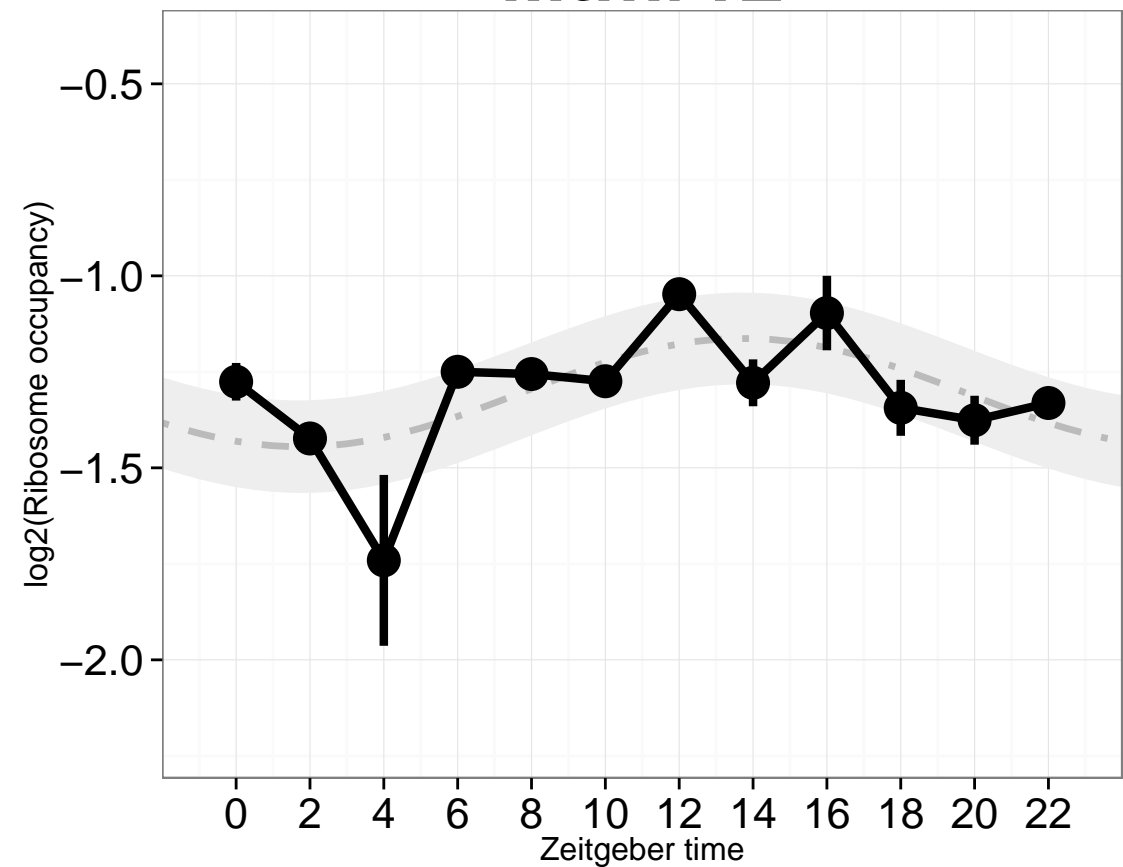

Supplement: Supplementary file 8803 [file 1]

## 6030419C18Rik

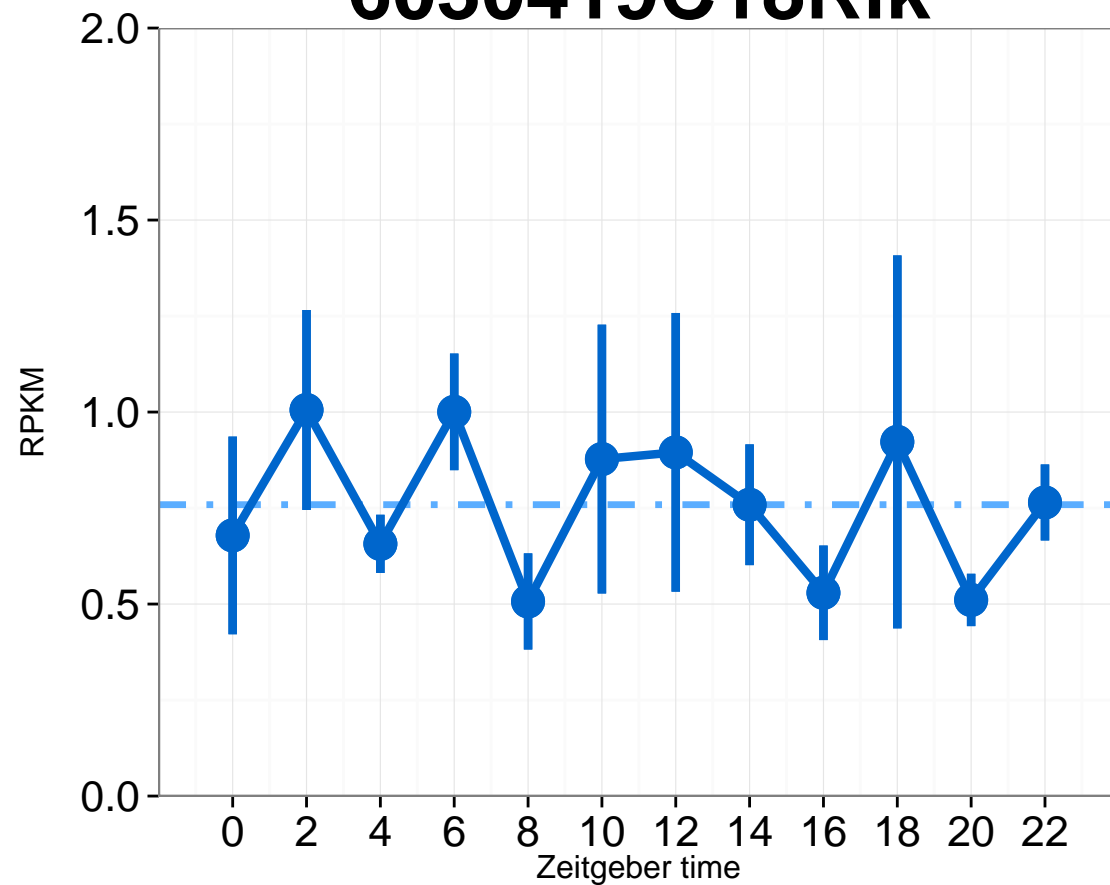

## 6030419C18Rik log2(Ribosome occup

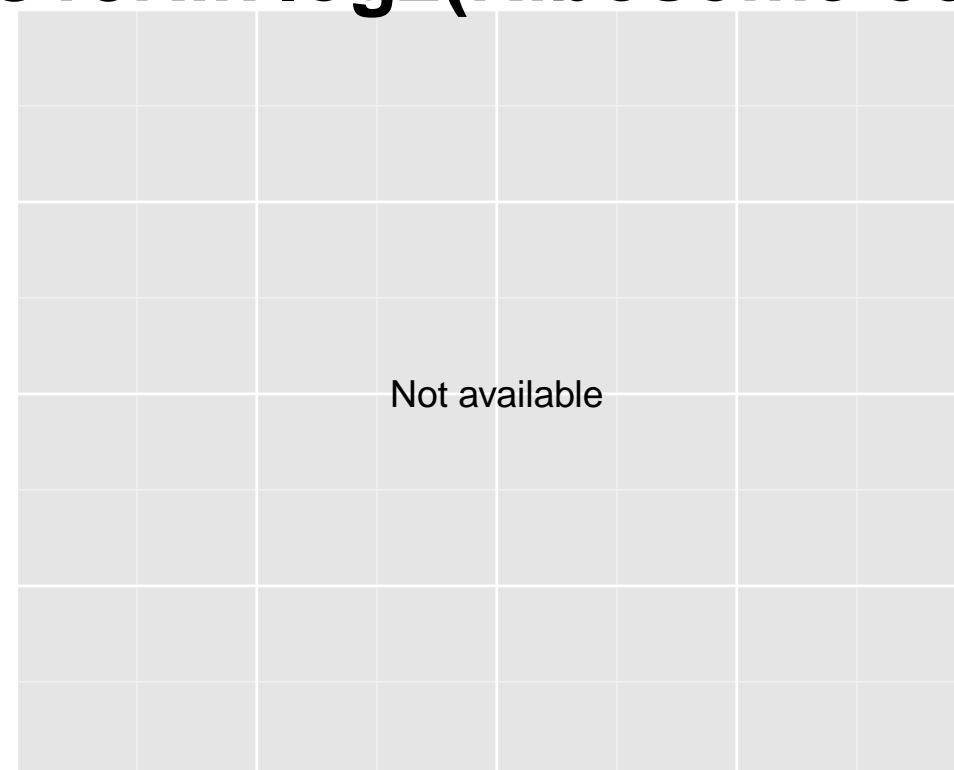

Supplement: Supplementary file 8804 [file 1]

## Adck5

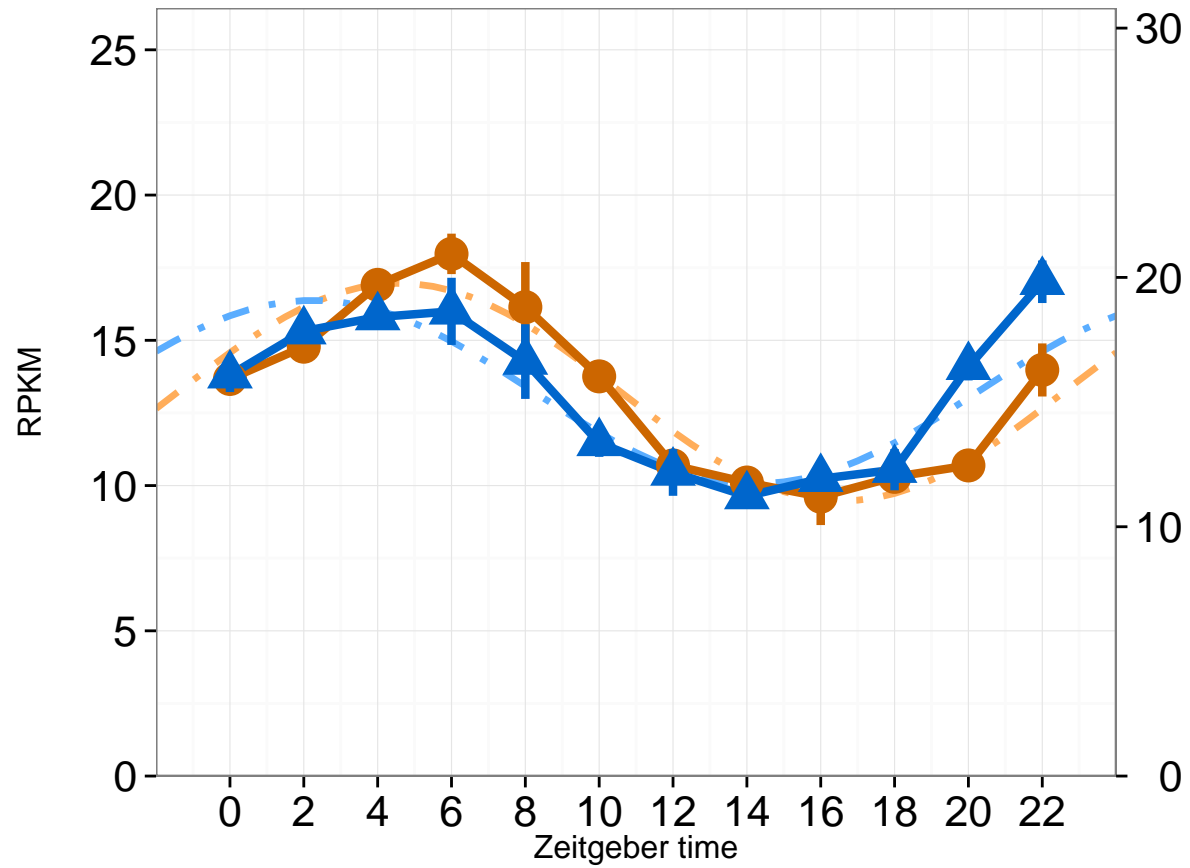

## Adck5

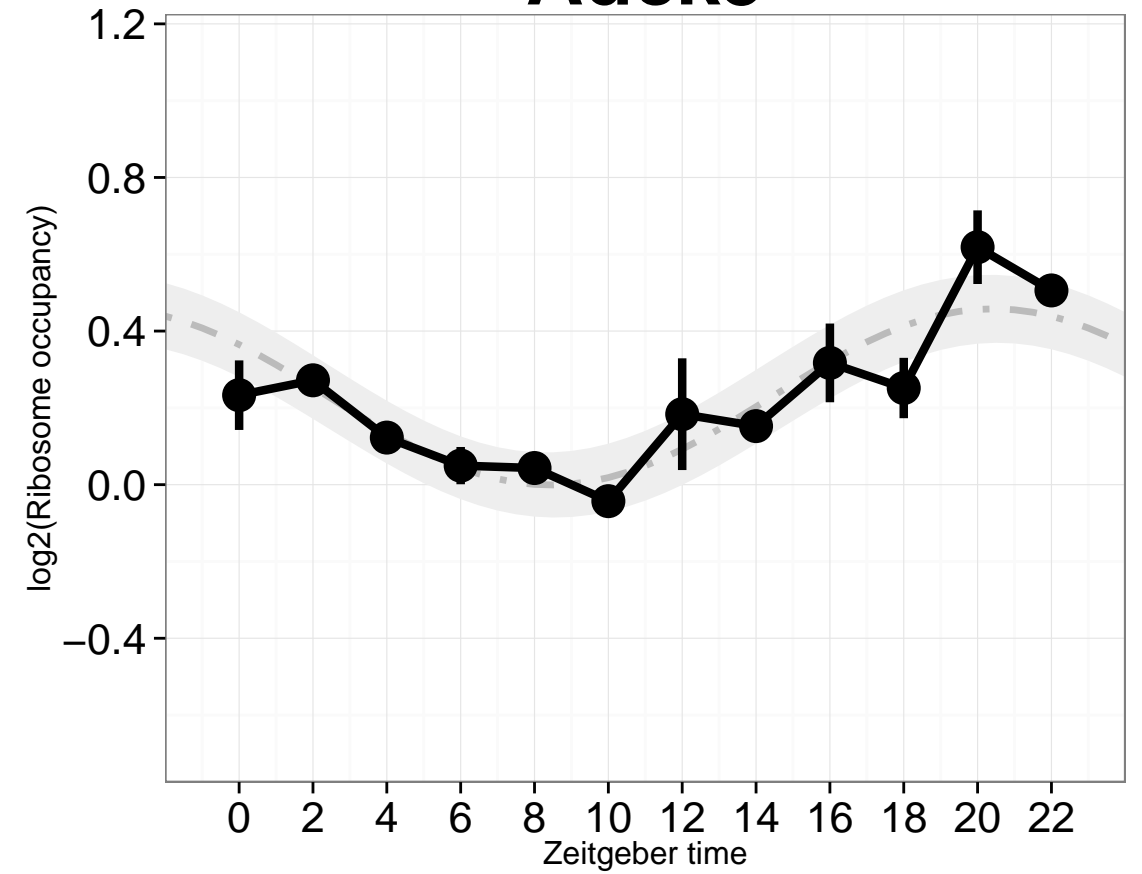

Supplement: Supplementary file 8805 [file 1]

## Hk1

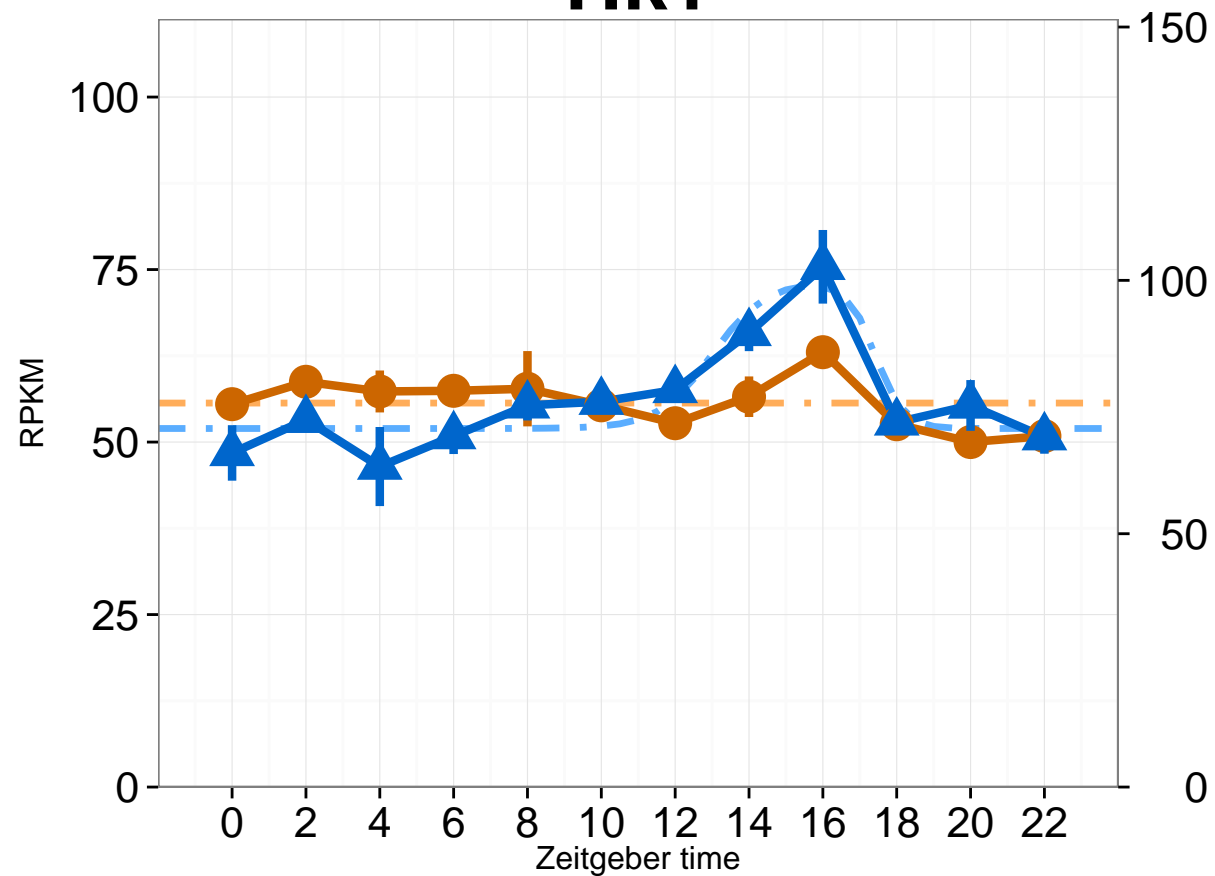

## Hk1

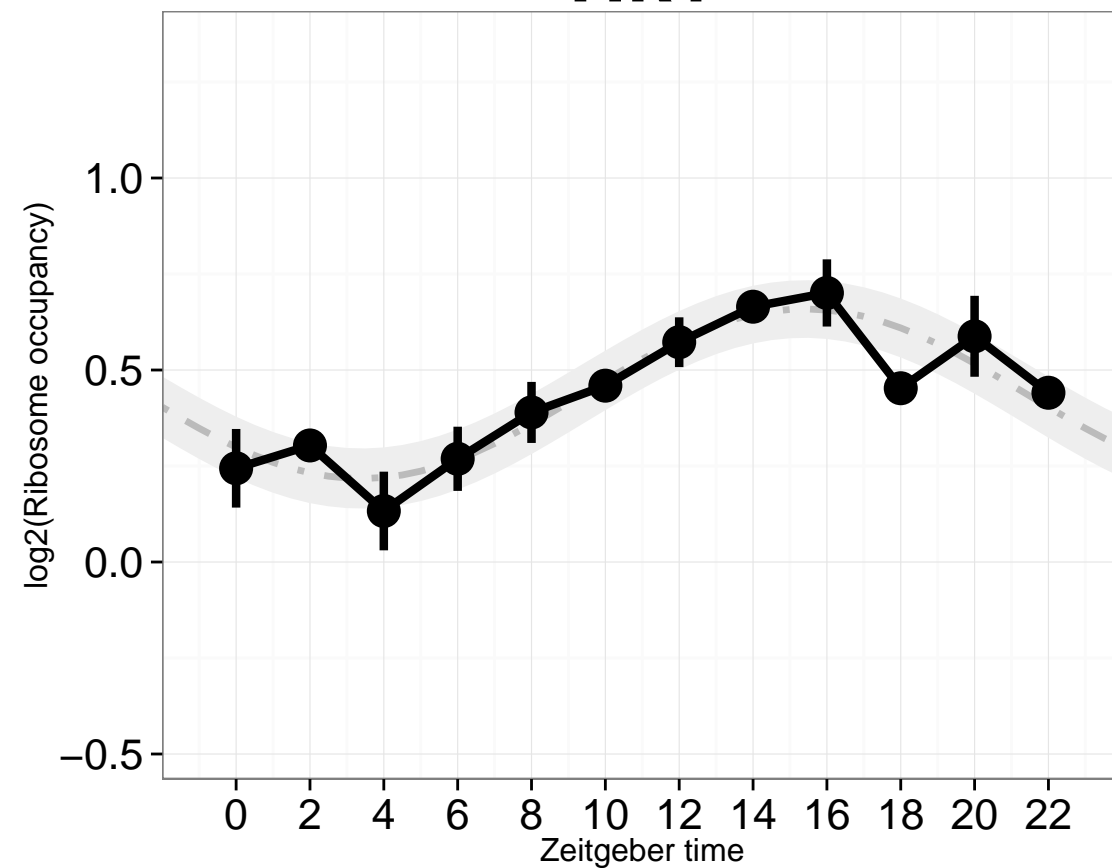

Supplement: Supplementary file 8806 [file 1]

# Arhgap22

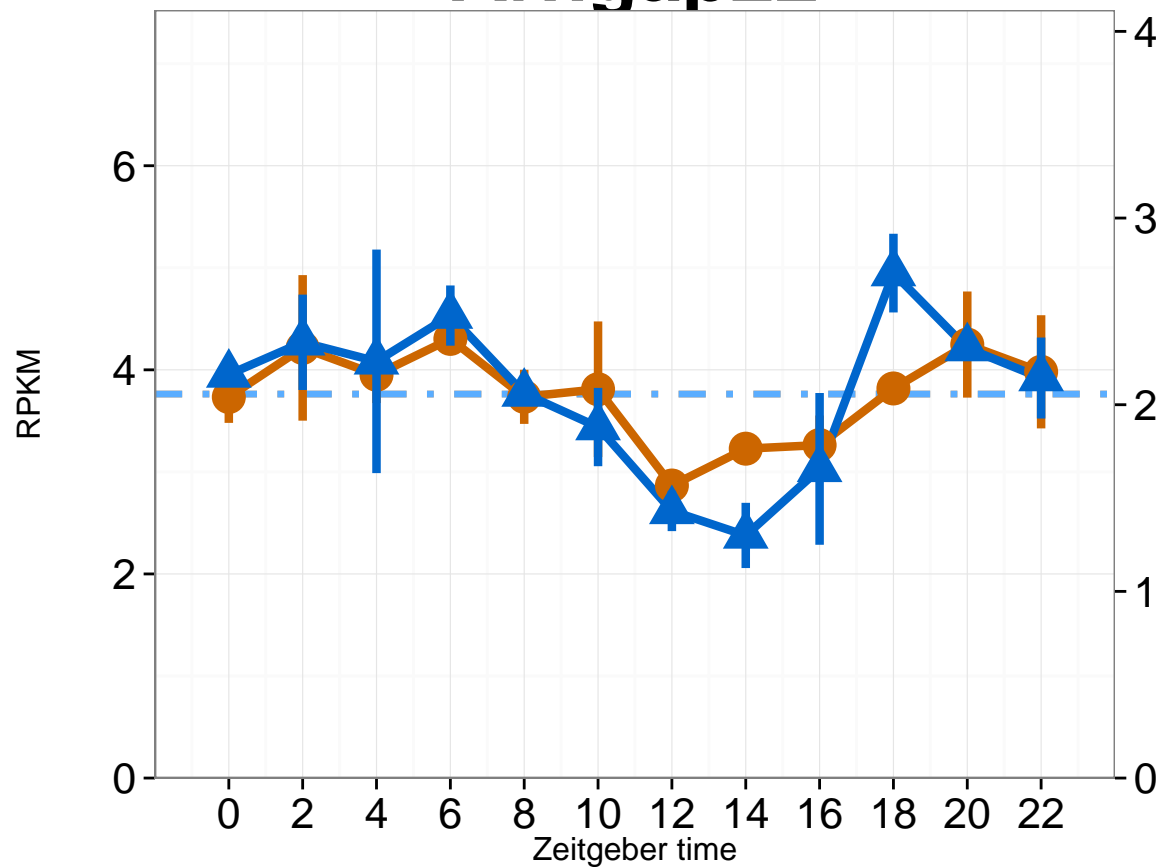

# Arhgap22

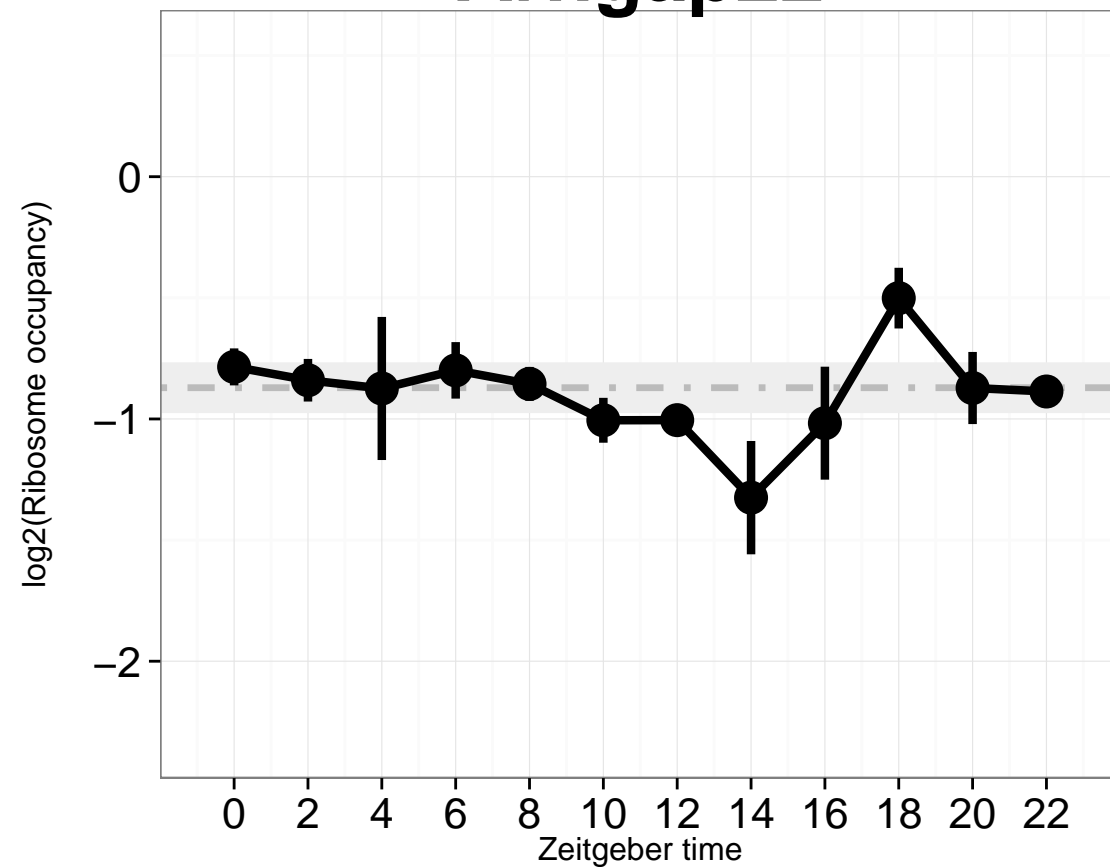

Supplement: Supplementary file 8807 [file 1]

# Mfsd2a

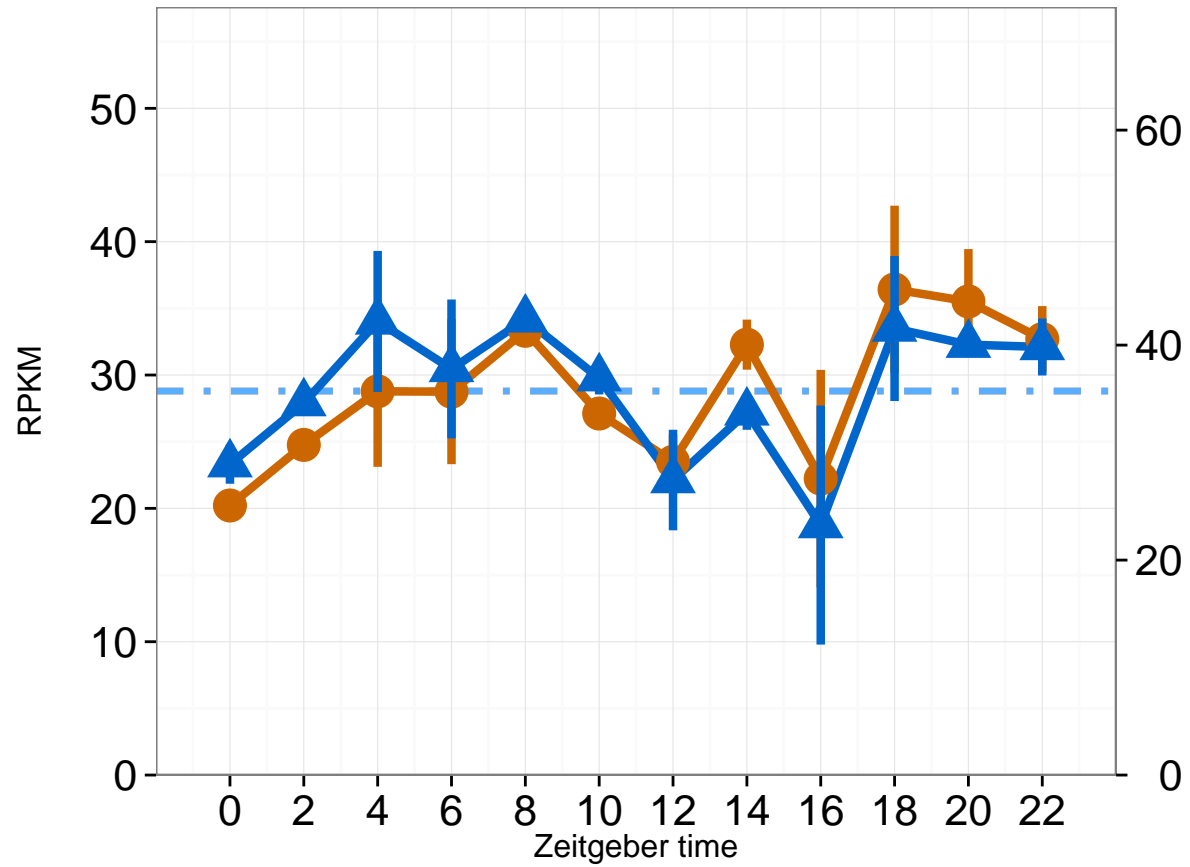

# Mfsd2a

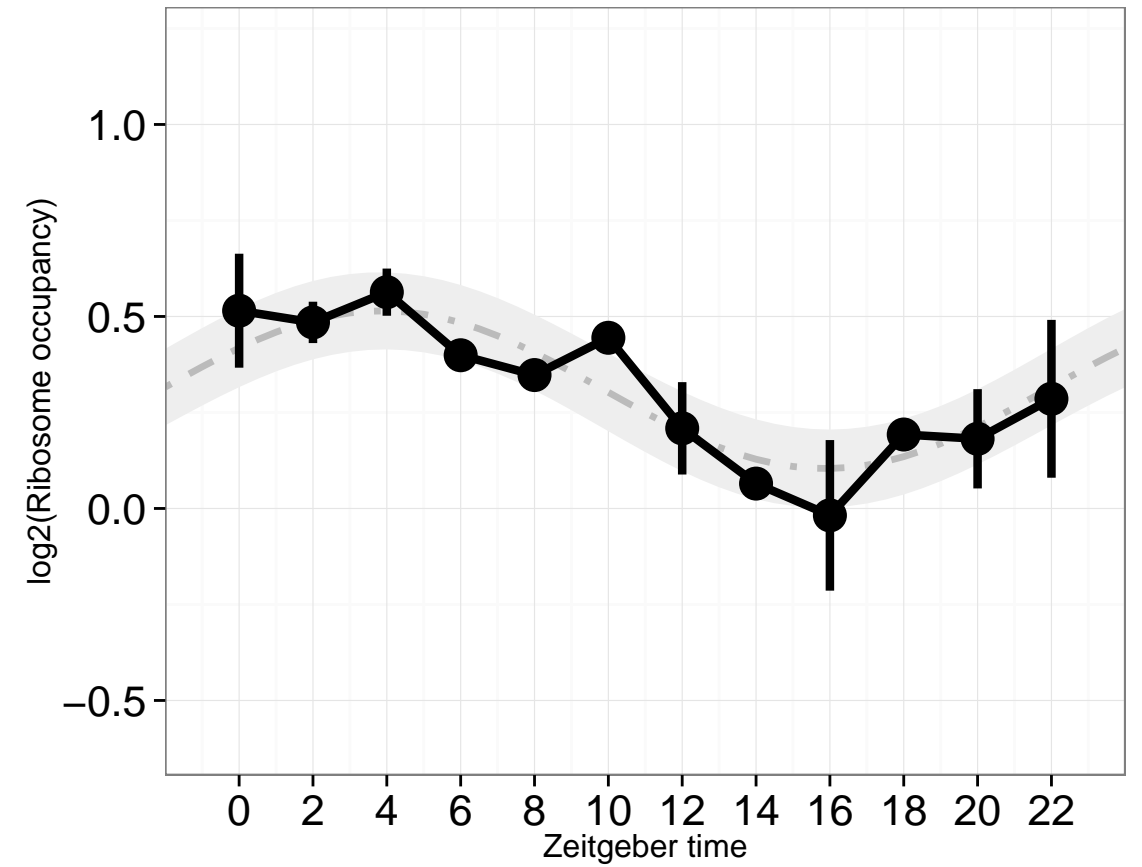

Supplement: Supplementary file 8808 [file 1]

# Matn2

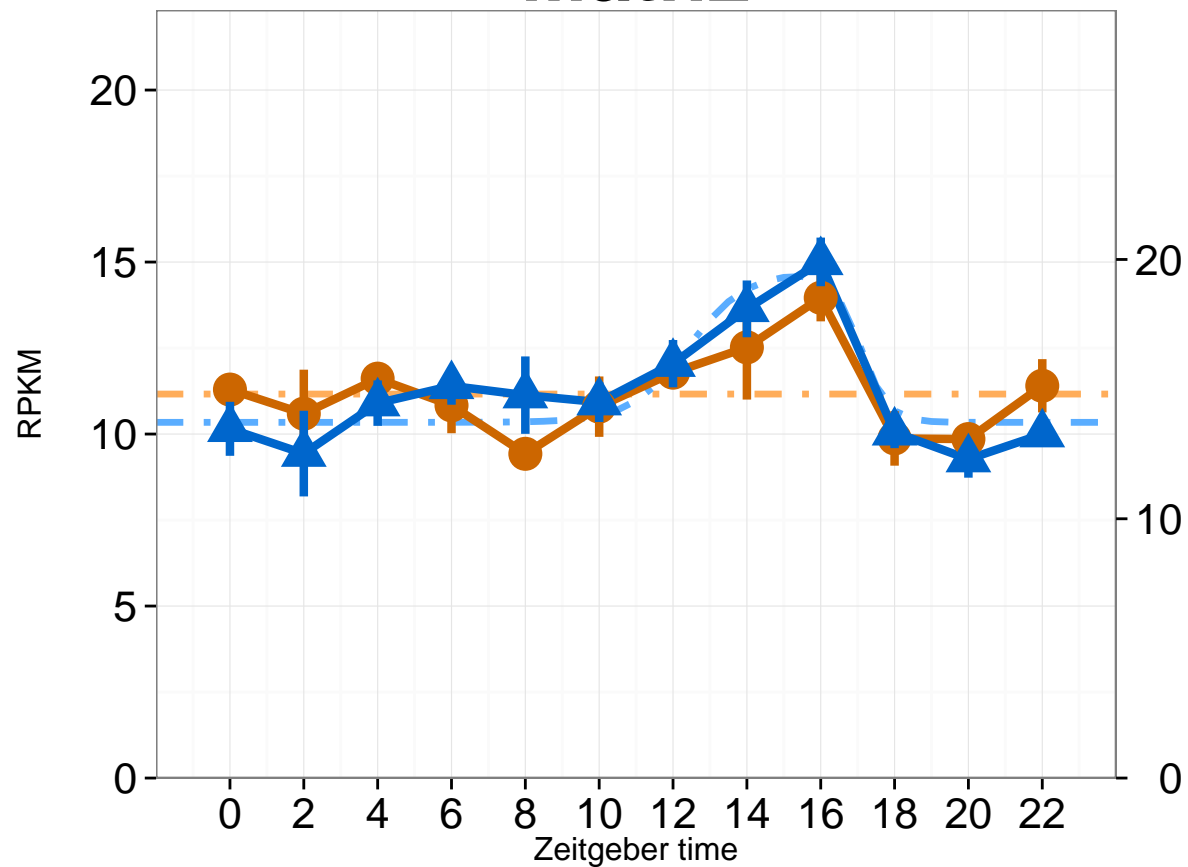

# Matn2

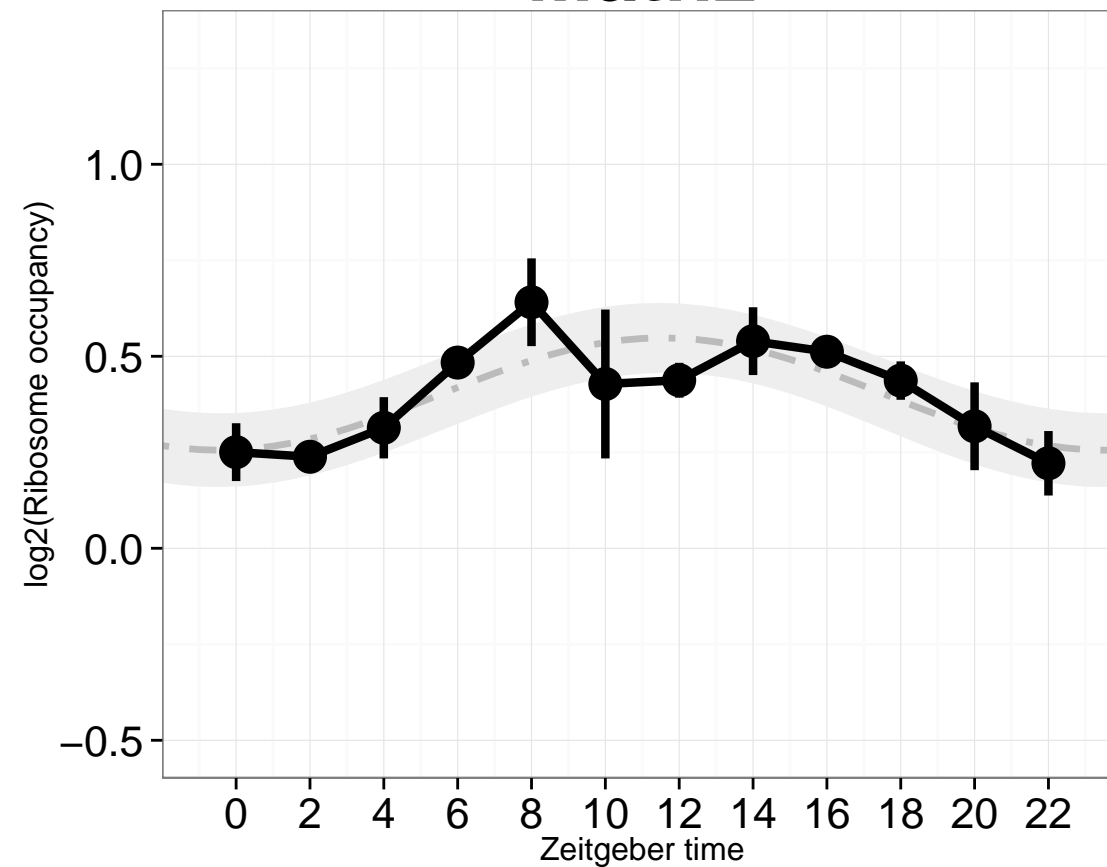

Supplement: Supplementary file 8809 [file 1]

# Top1mt

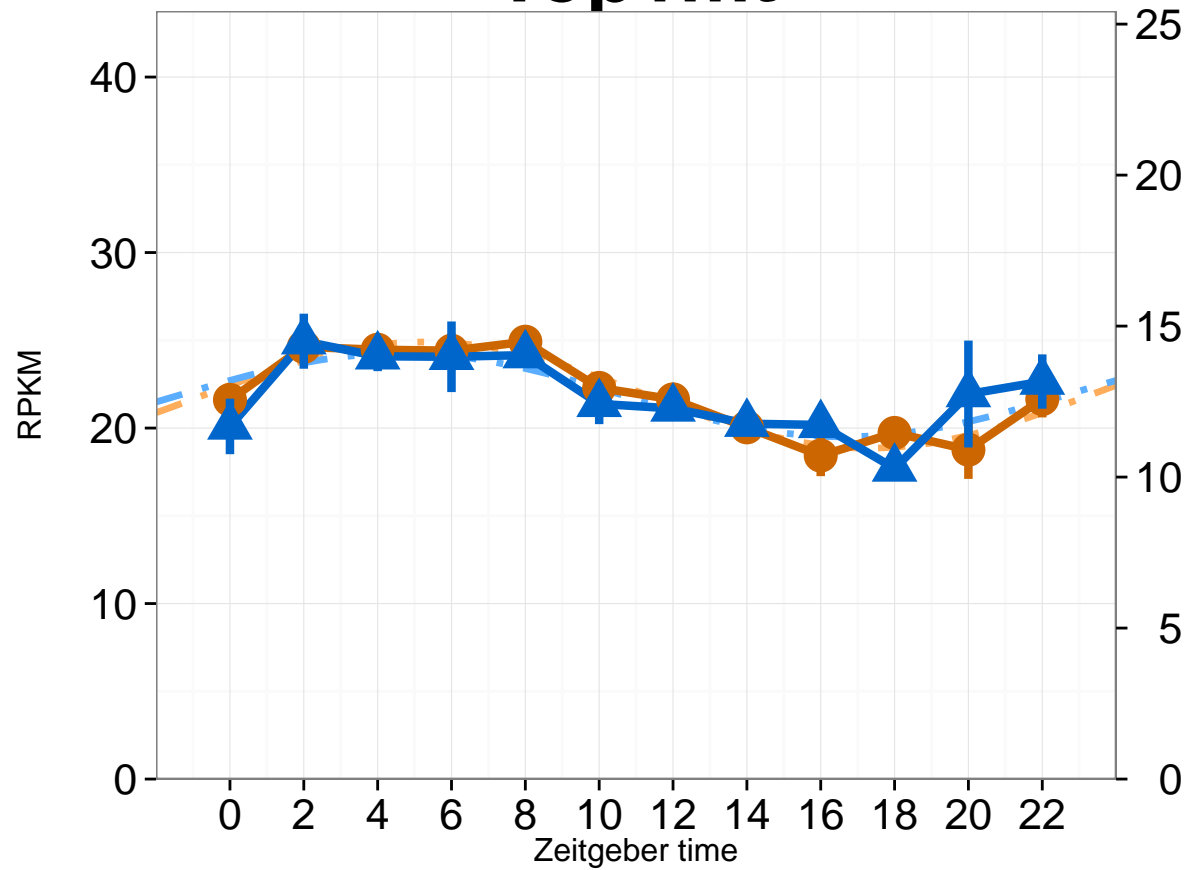

# Top1mt

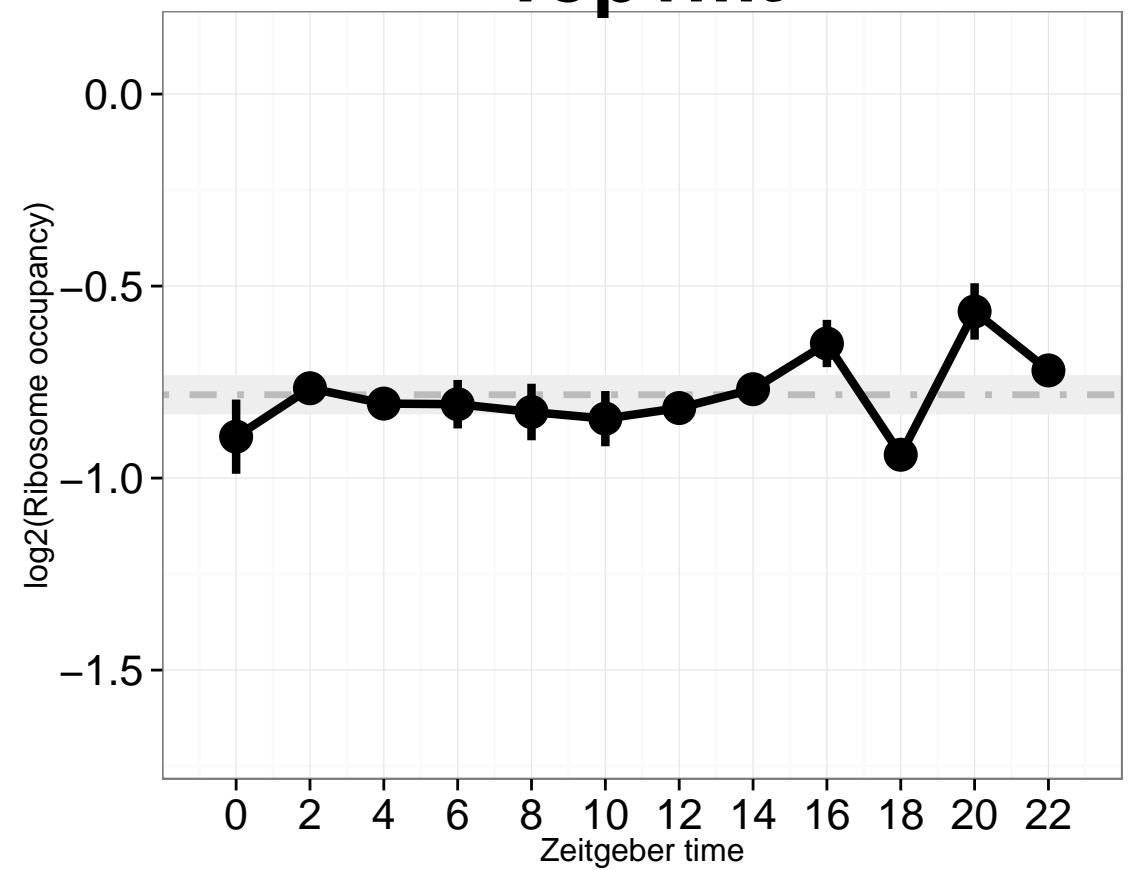

Supplement: Supplementary file 8810 [file 1]

## Impa2

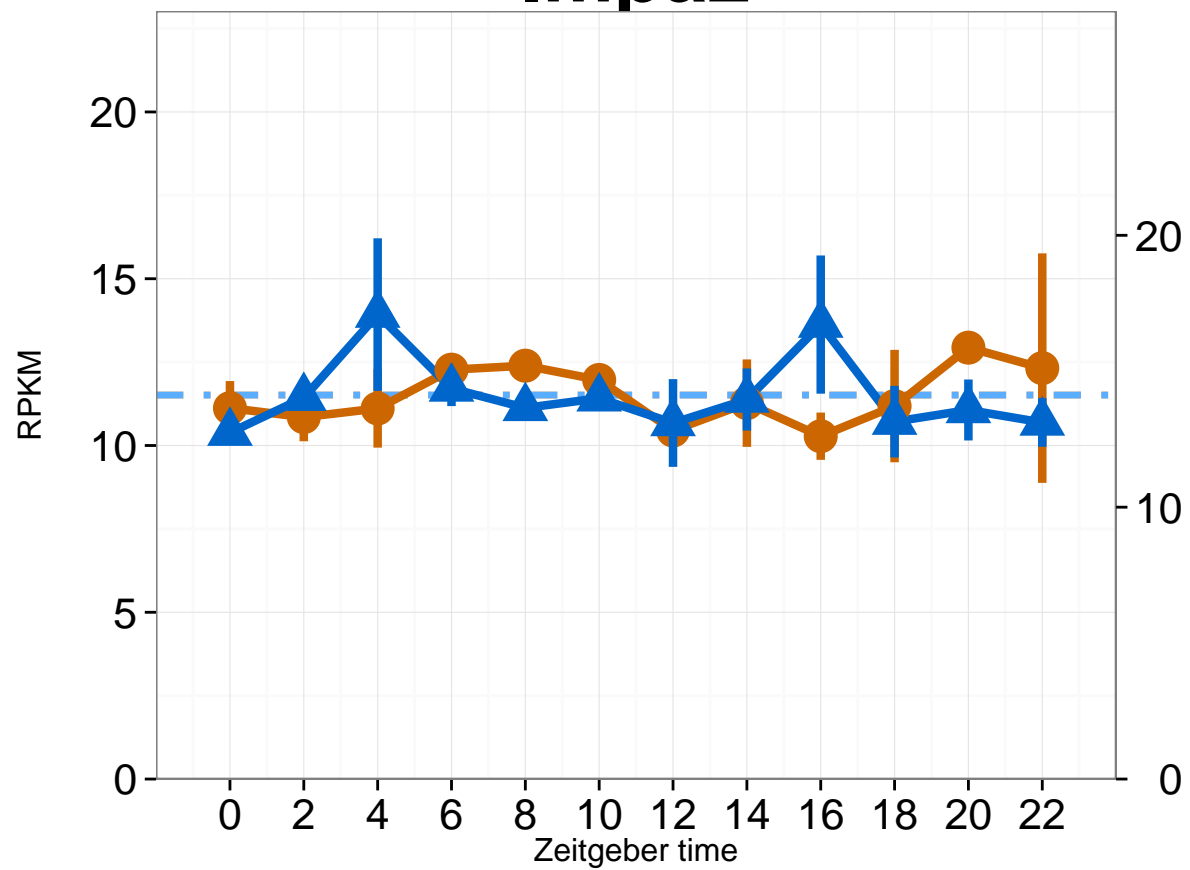

## Impa2

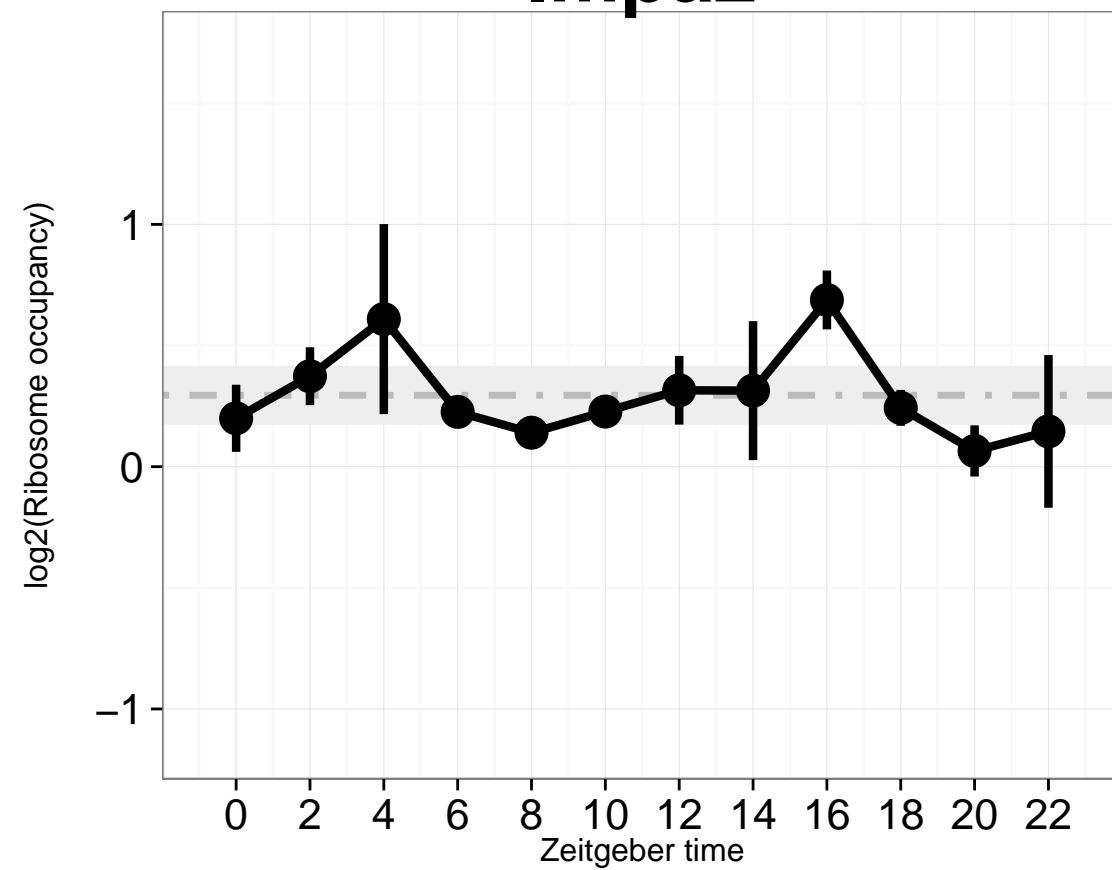

Supplement: Supplementary file 8811 [file 1]

# Fads3

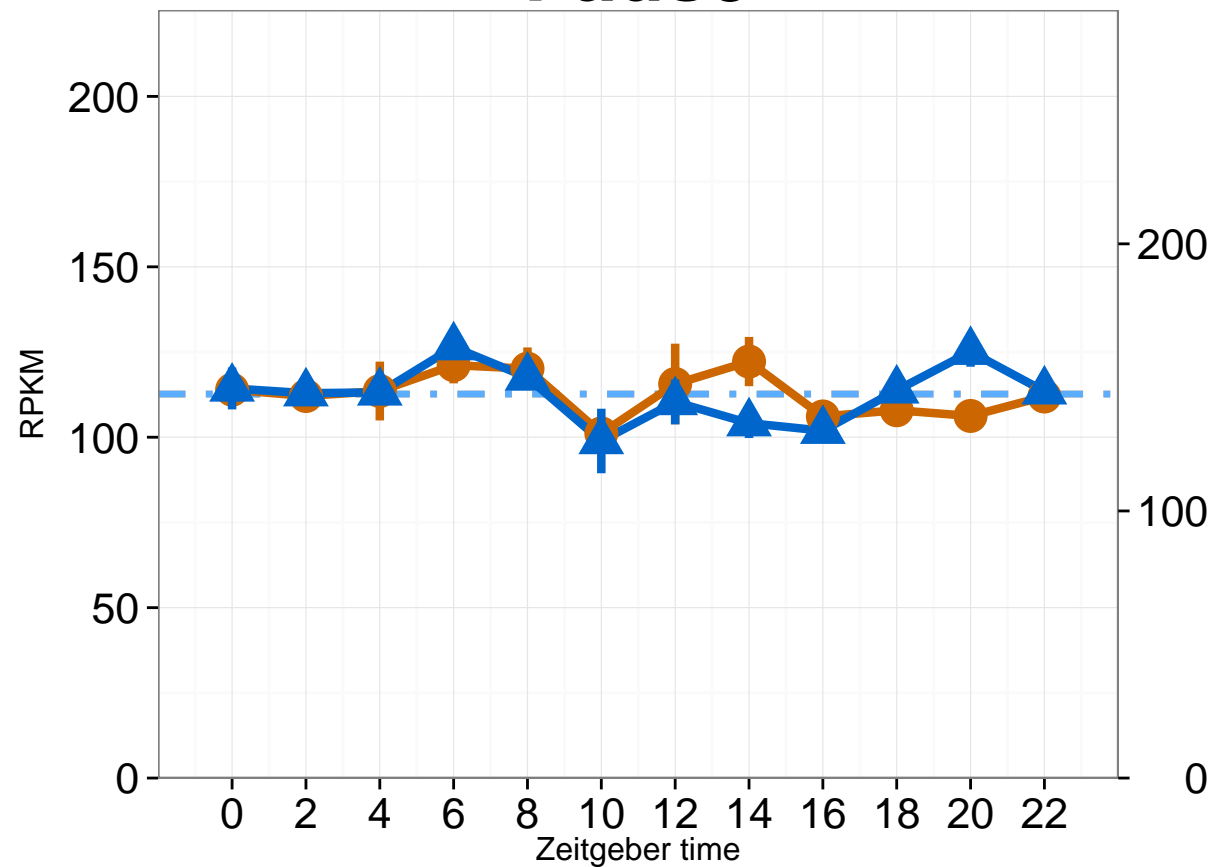

# Fads3

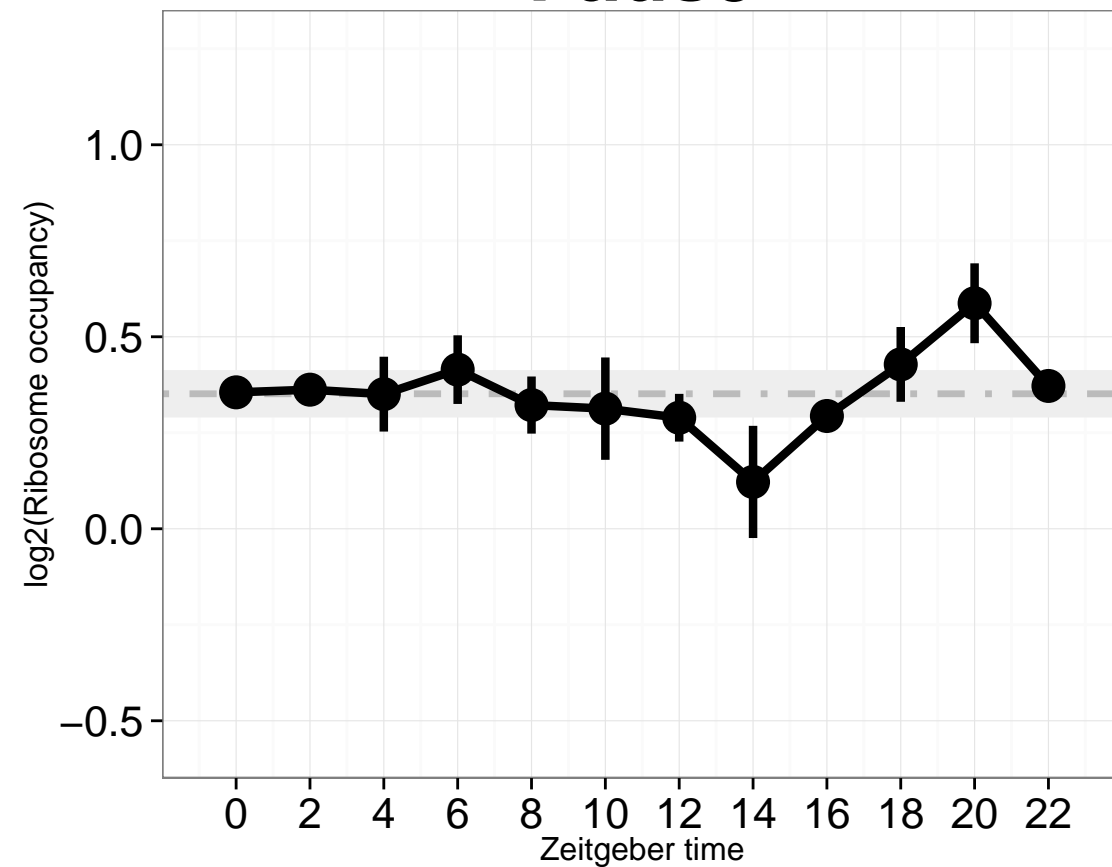

Supplement: Supplementary file 8812 [file 1]

## Imp3

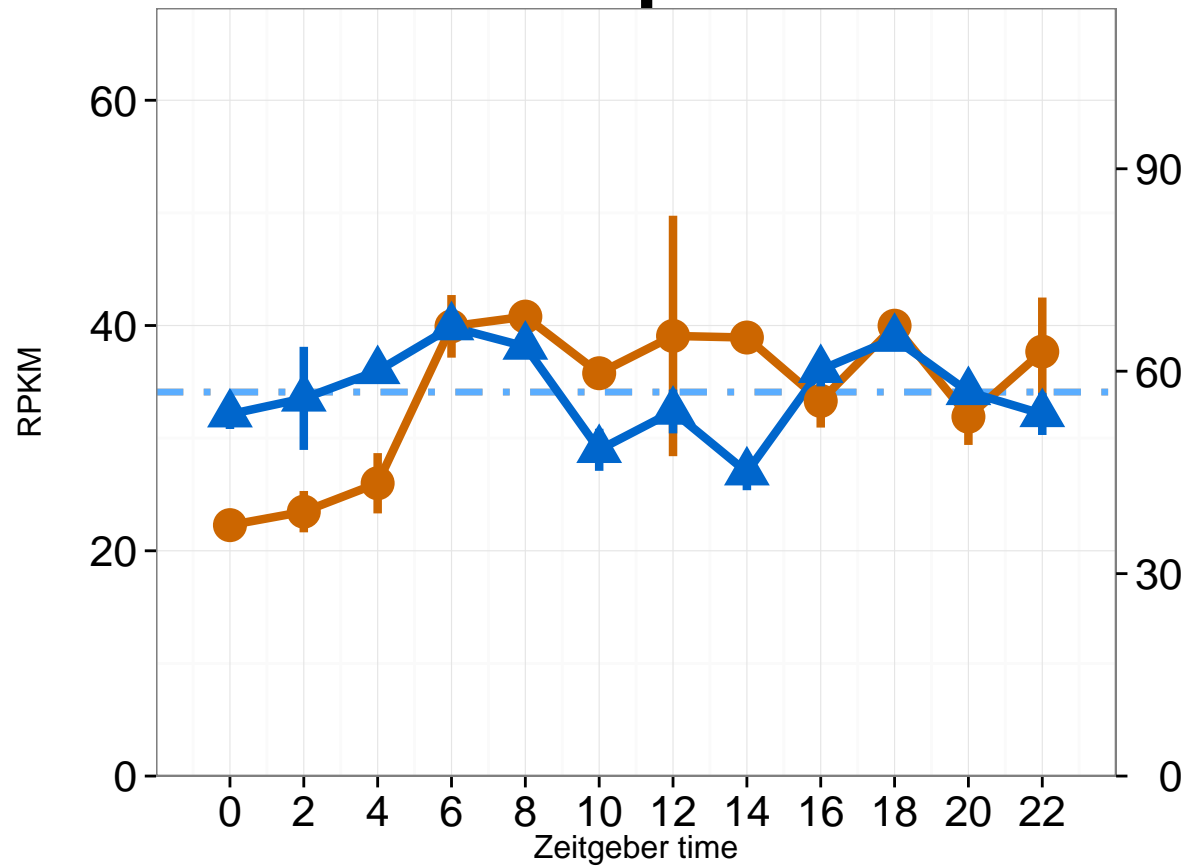

## Imp3

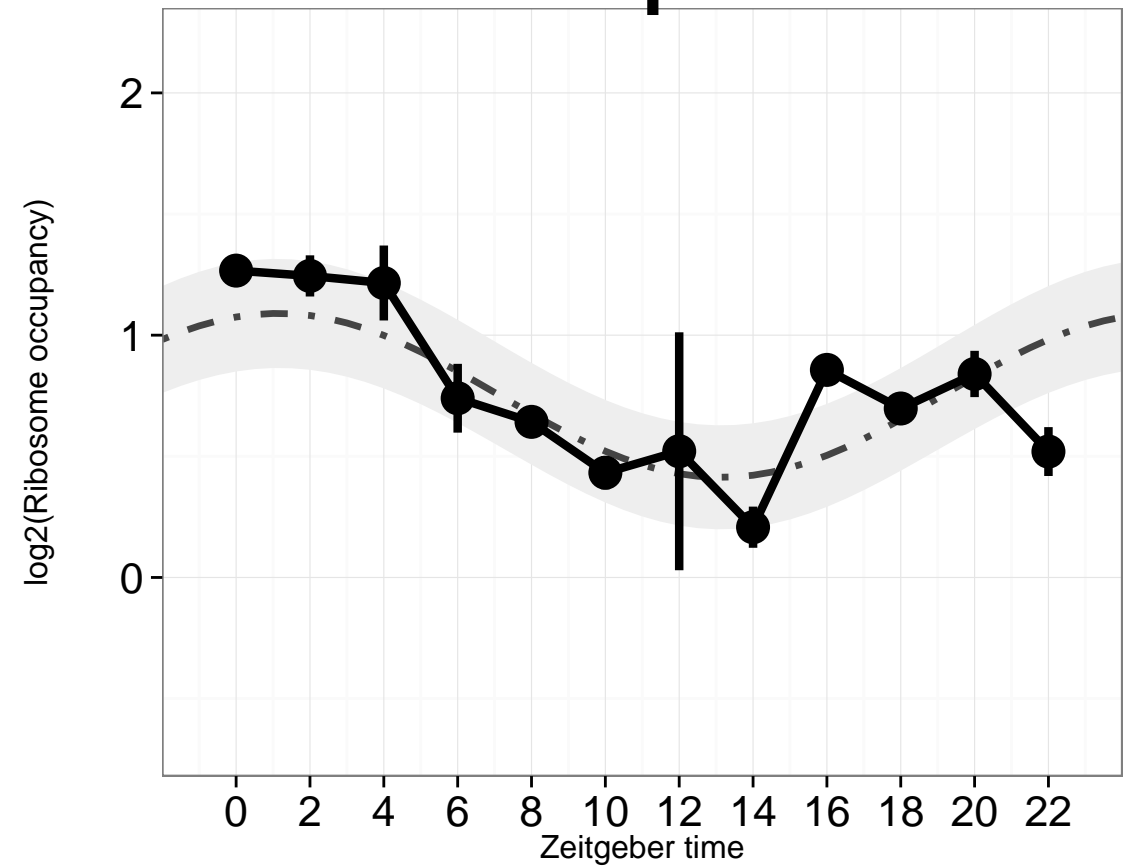

Supplement: Supplementary file 8813 [file 1]

## Exoc3l

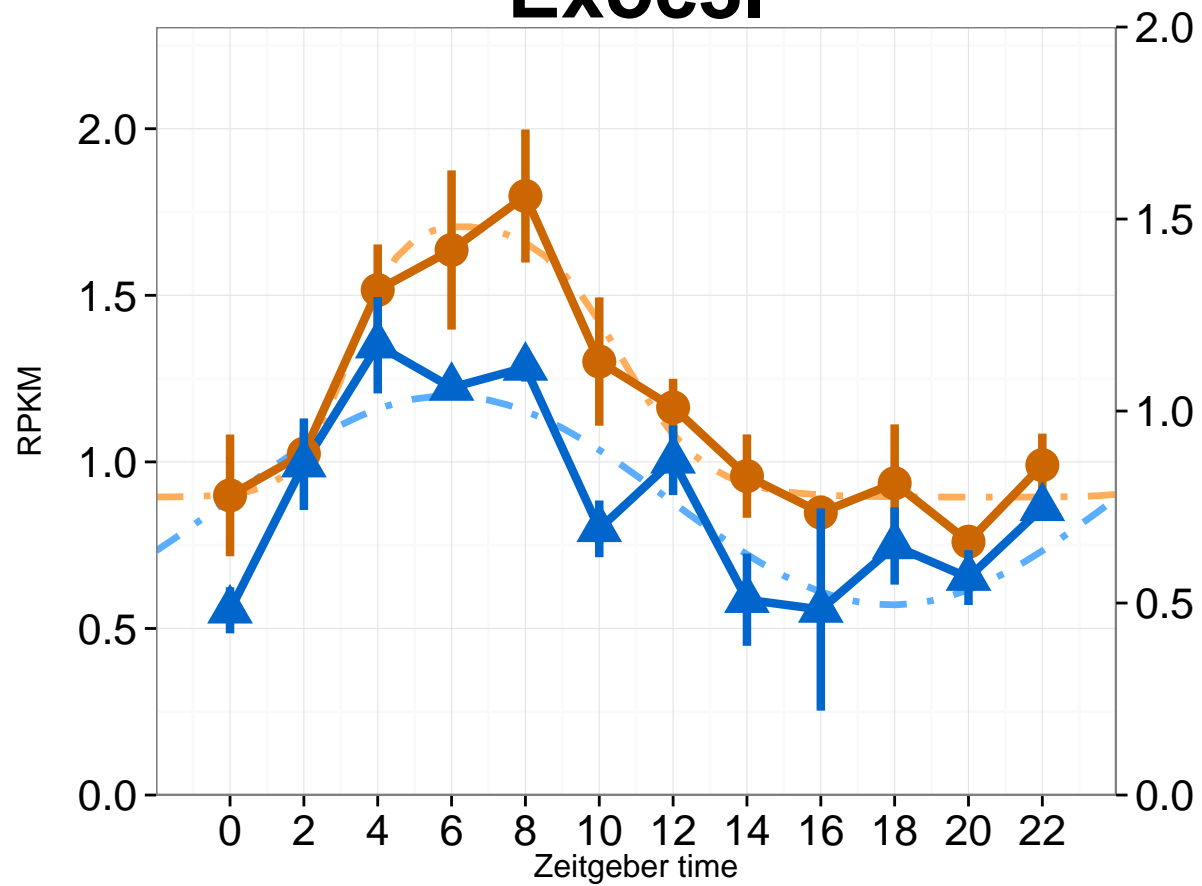

## Exoc3l

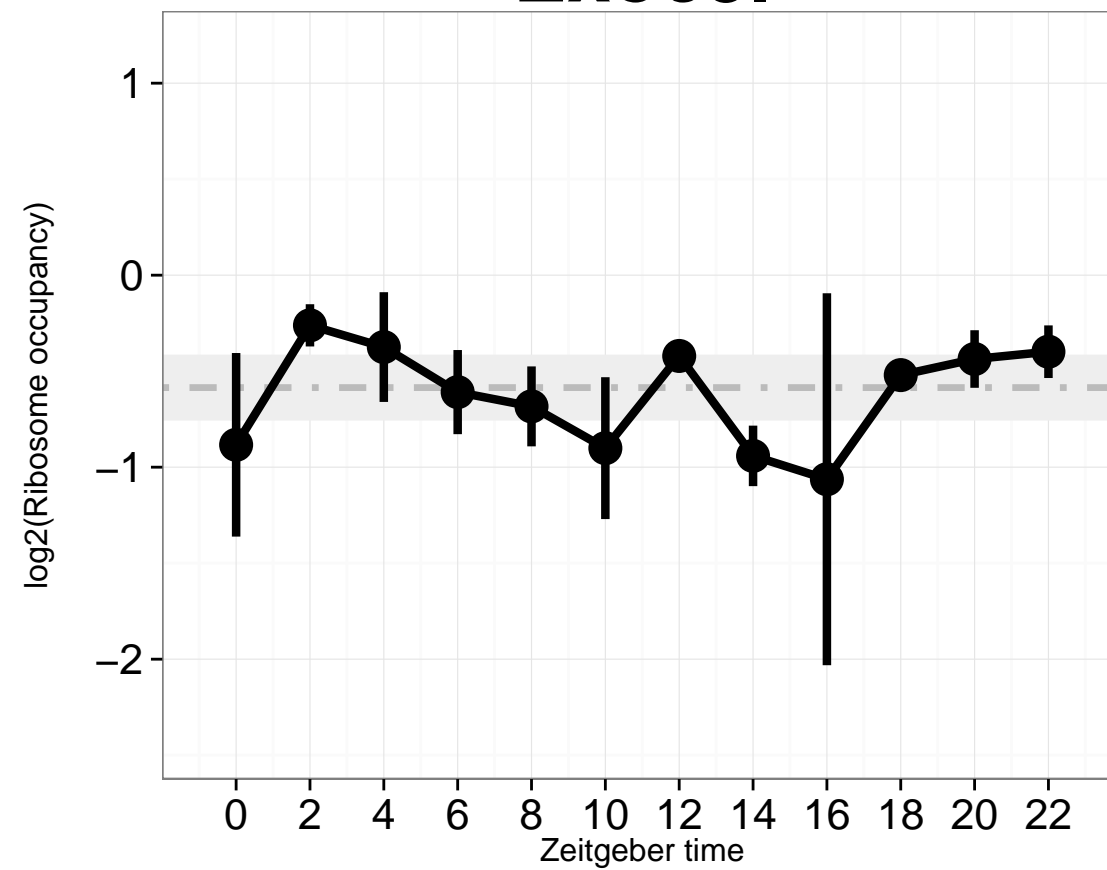

Supplement: Supplementary file 8814 [file 1]

## Synrg

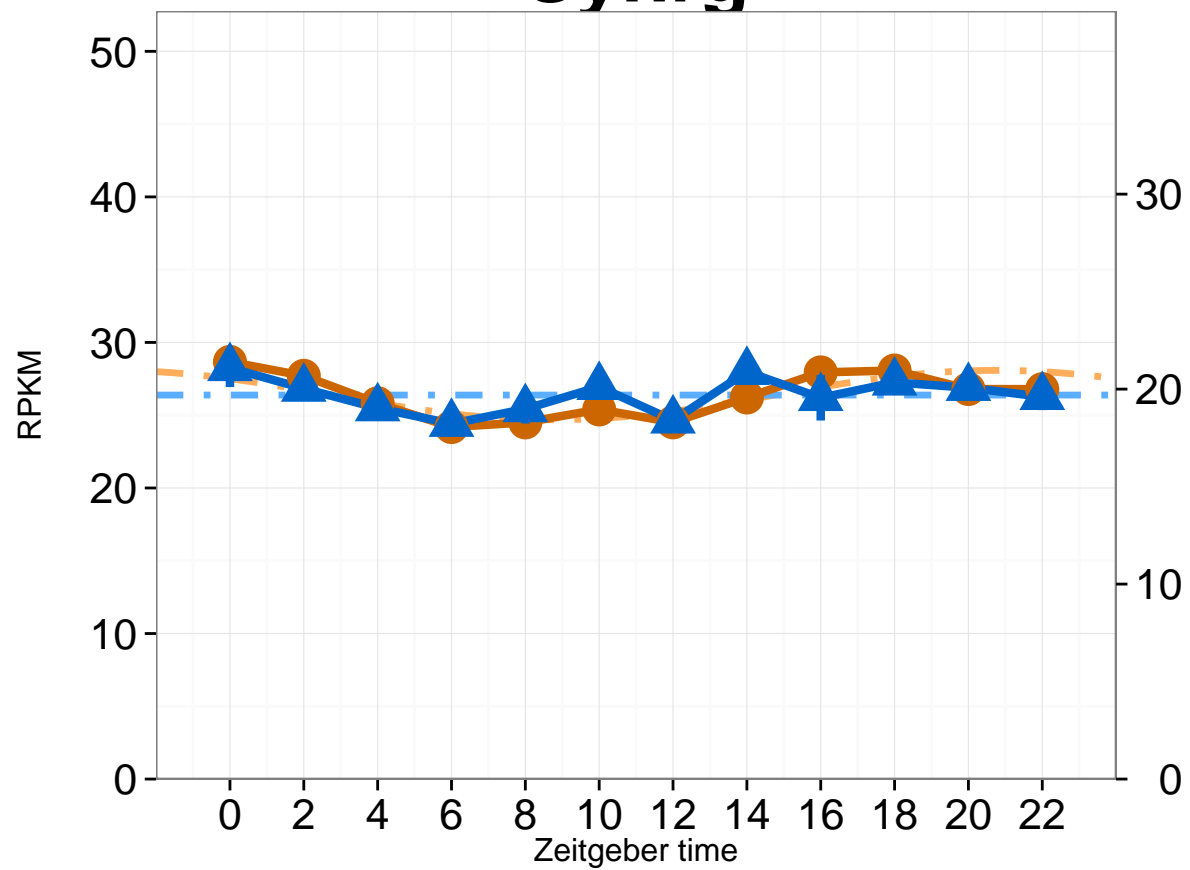

## Synrg

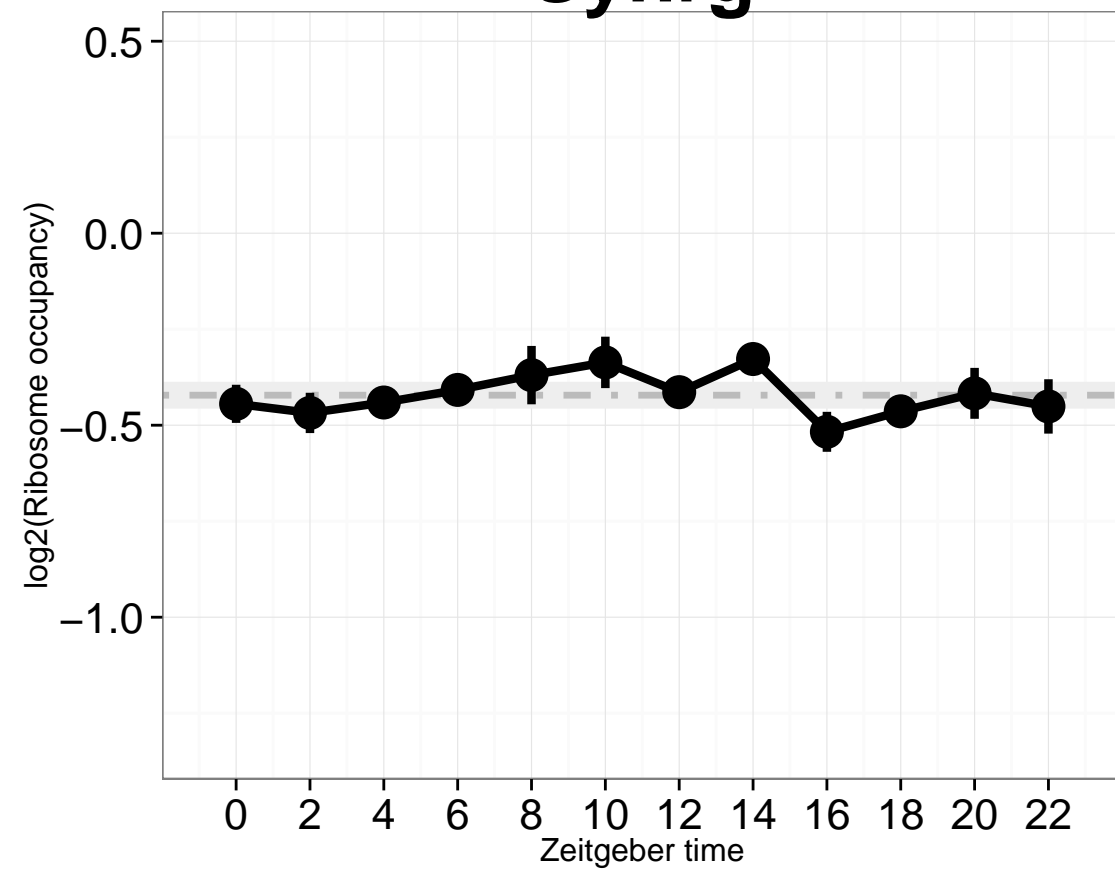

Supplement: Supplementary file 8815 [file 1]

# Cndp2

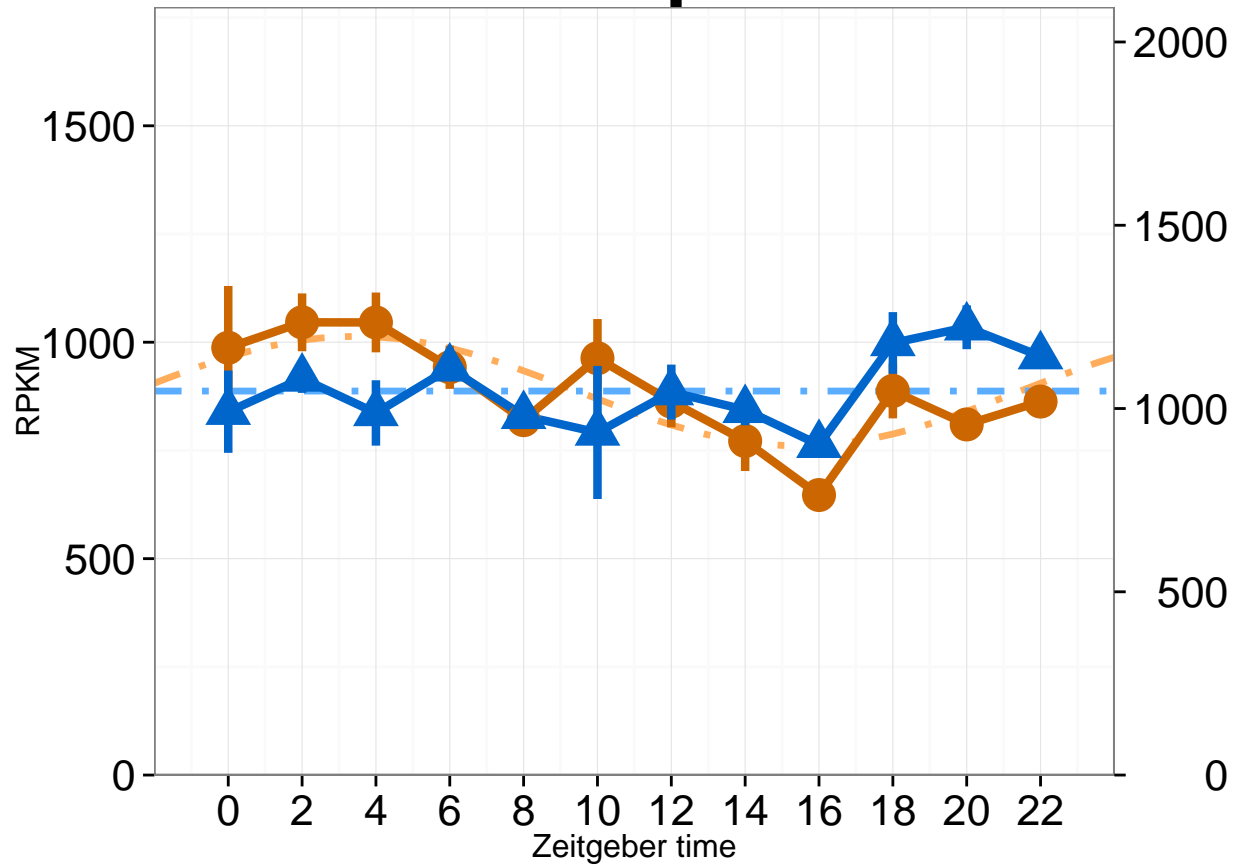

# Cndp2

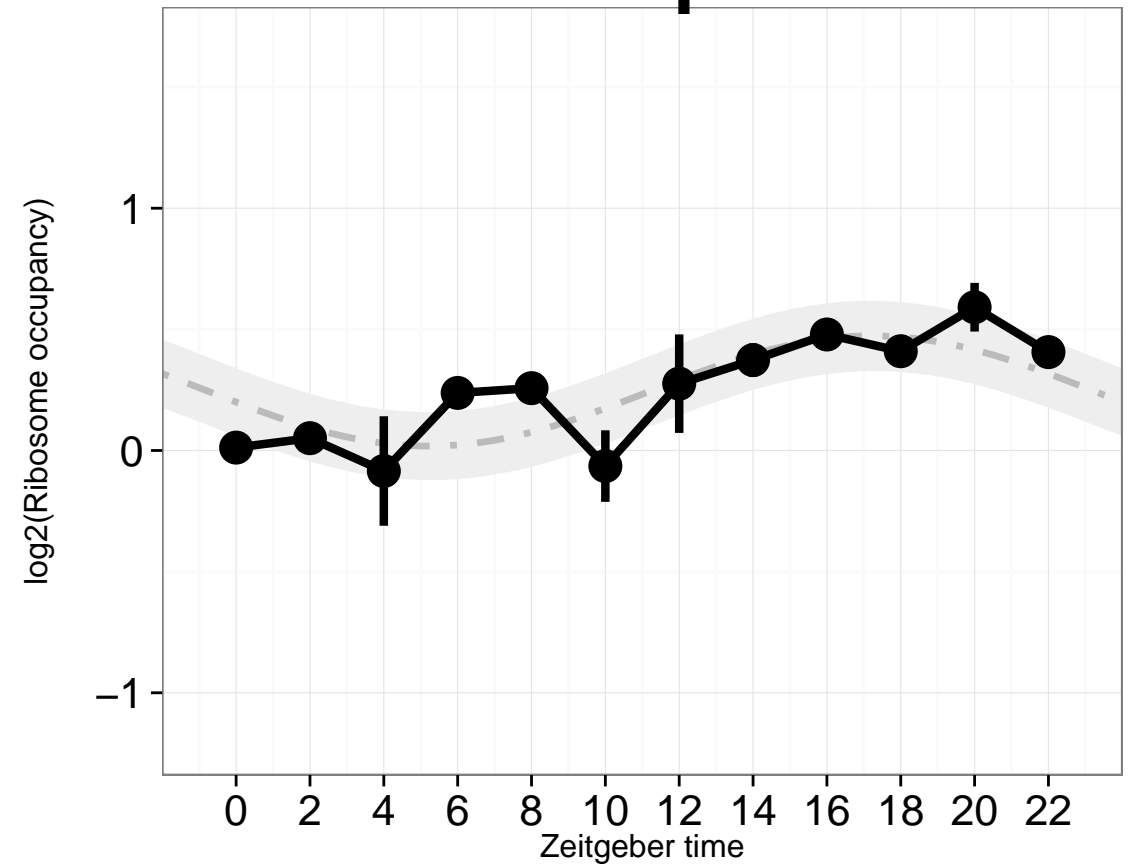

Supplement: Supplementary file 8816 [file 1]

## Cdc42ep4

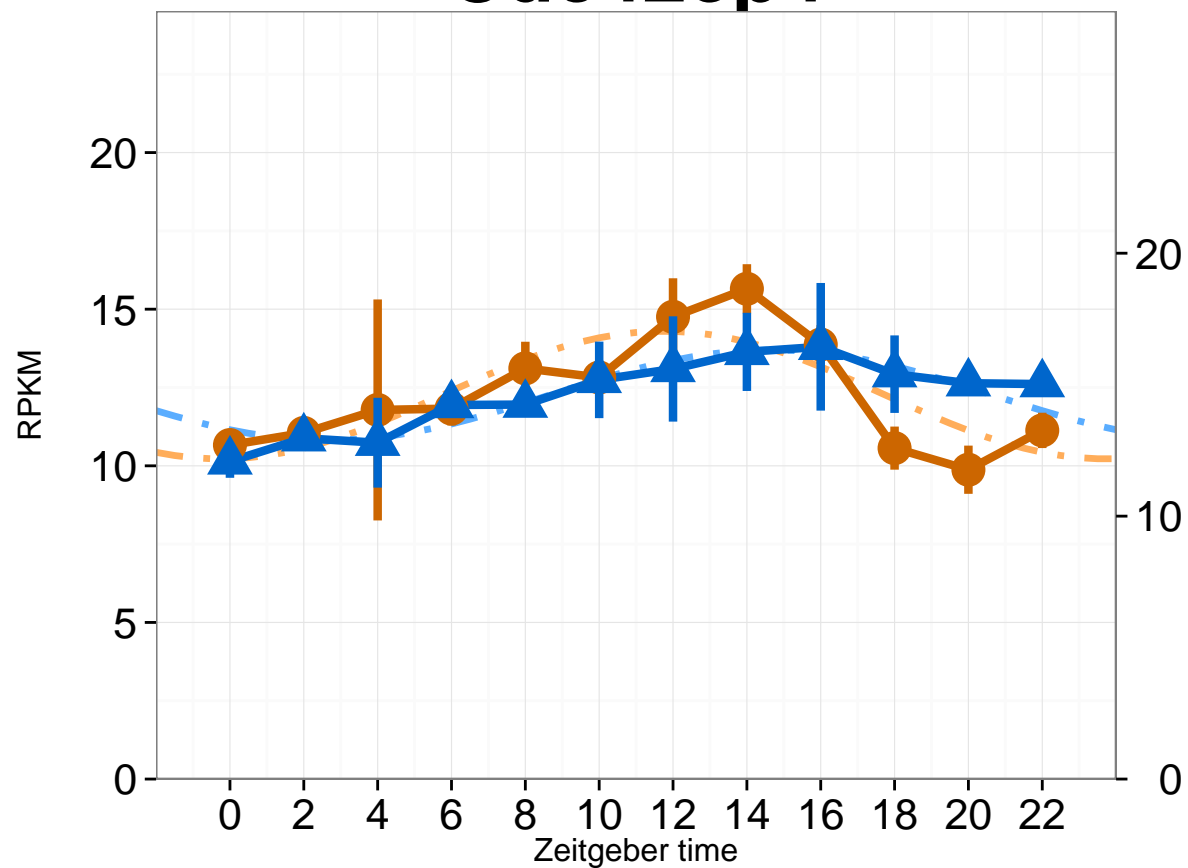

## Cdc42ep4

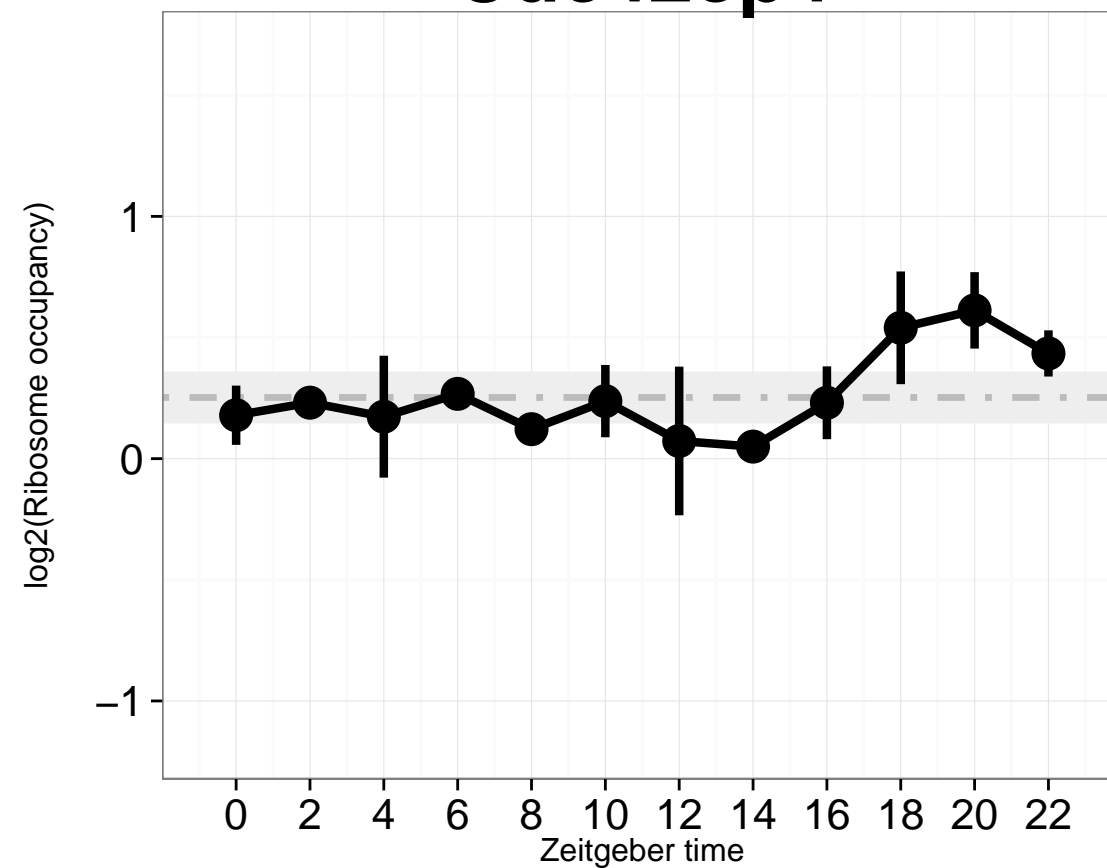

Supplement: Supplementary file 8817 [file 1]

## Mdp1

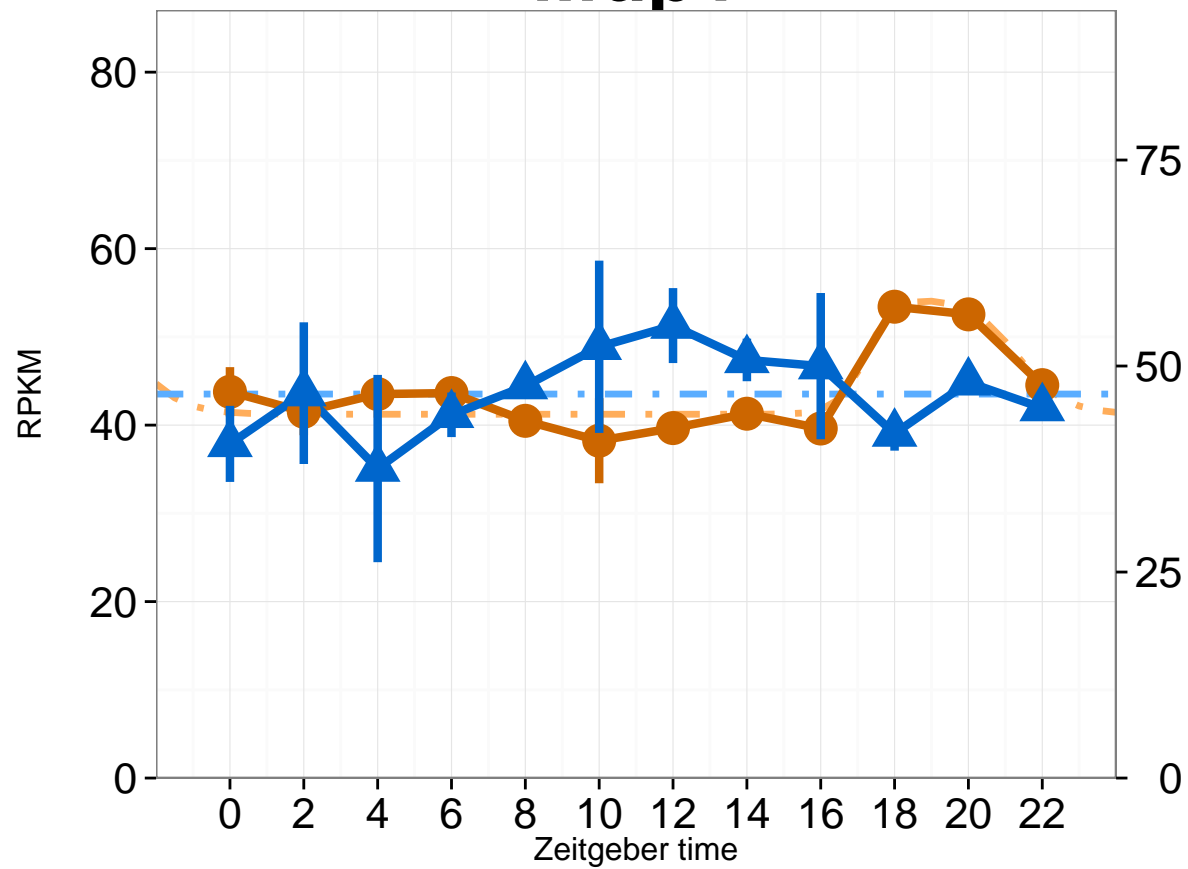

## Mdp1

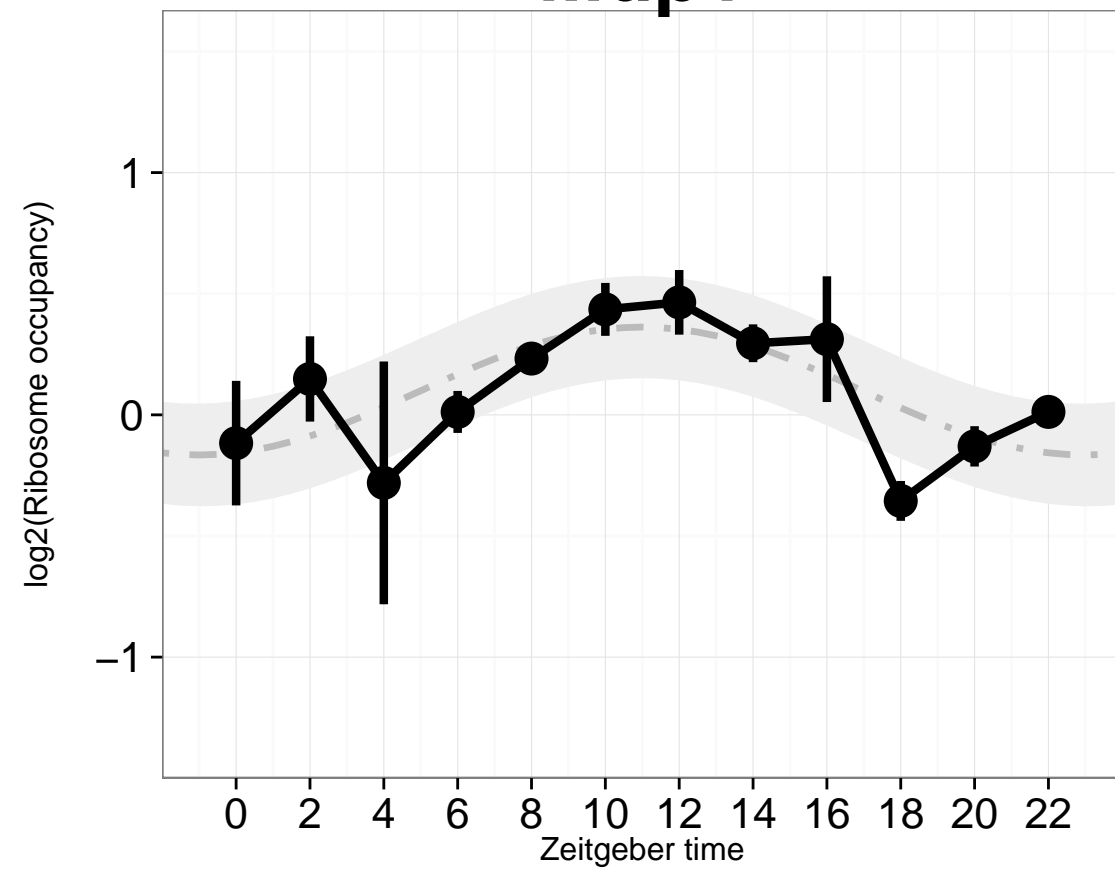

Supplement: Supplementary file 8818 [file 1]

# 5031425E22Rik

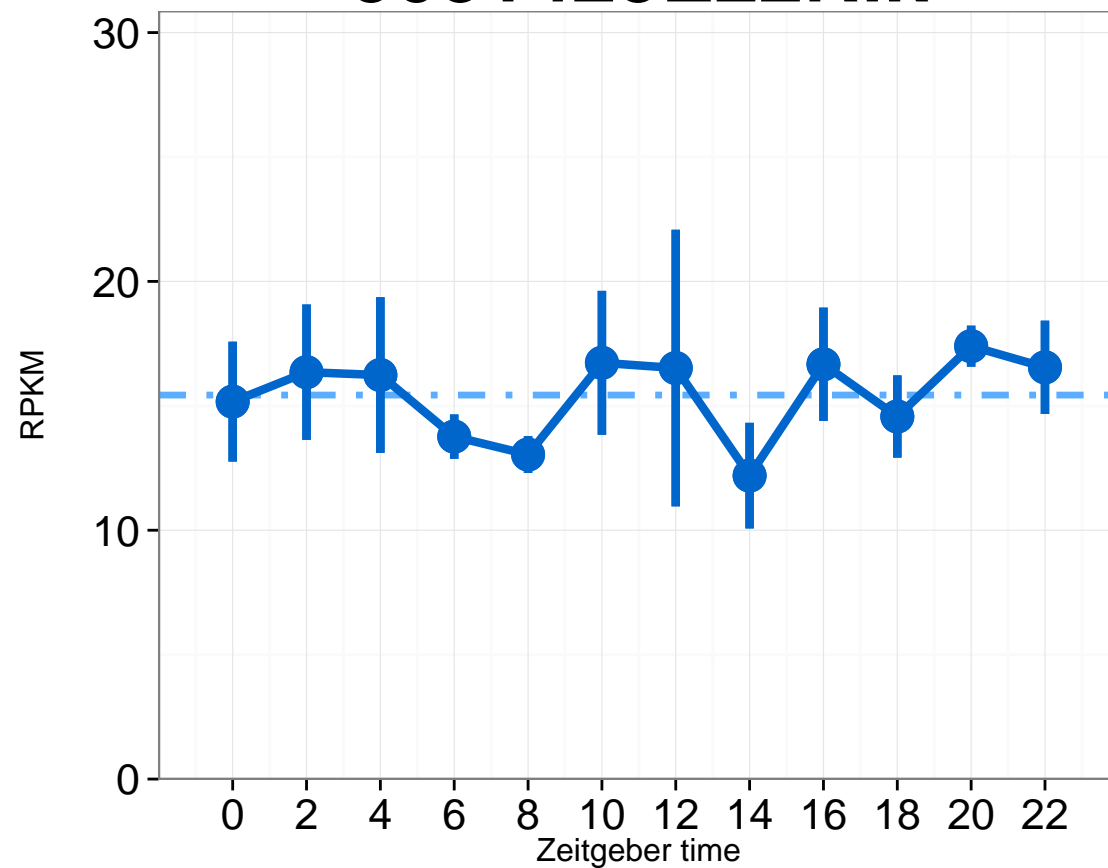

# 5031425E22Rik log2(Ribosome occup

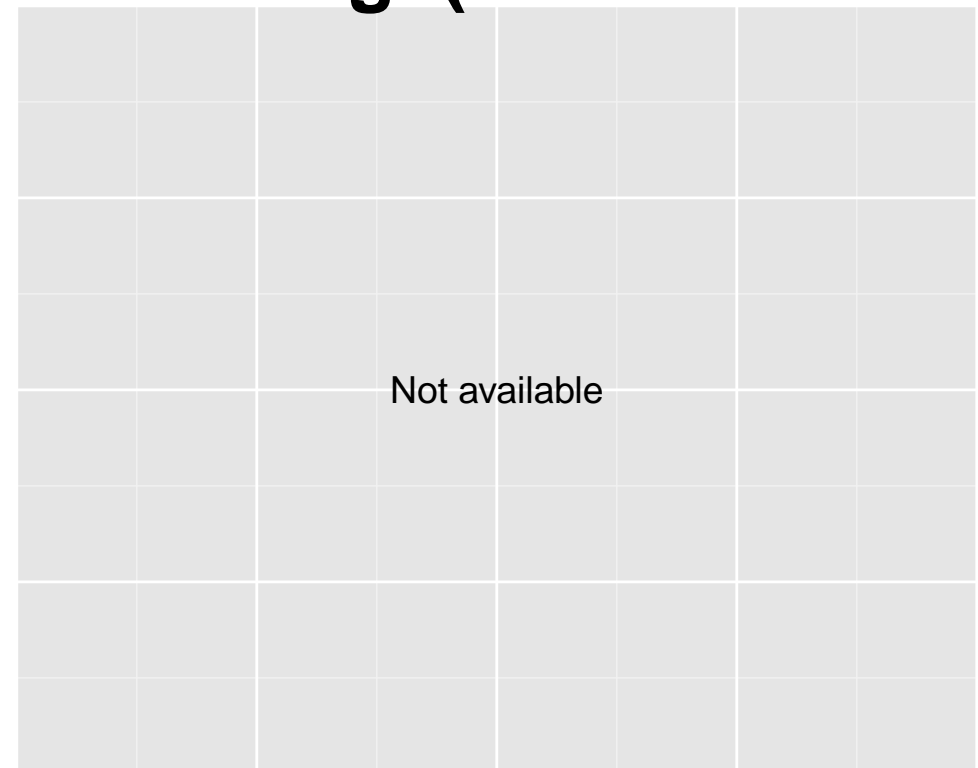

Supplement: Supplementary file 8819 [file 1]

# Snrpb2

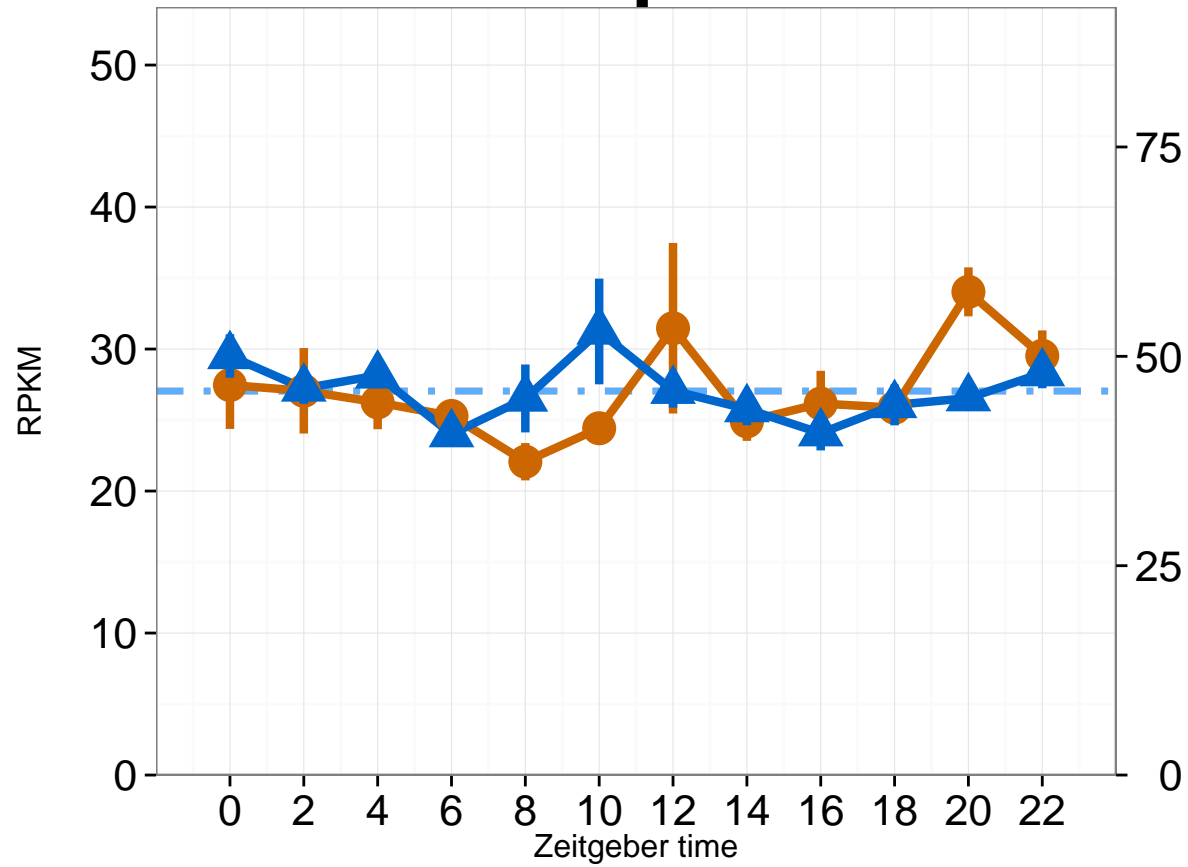

# Snrpb2

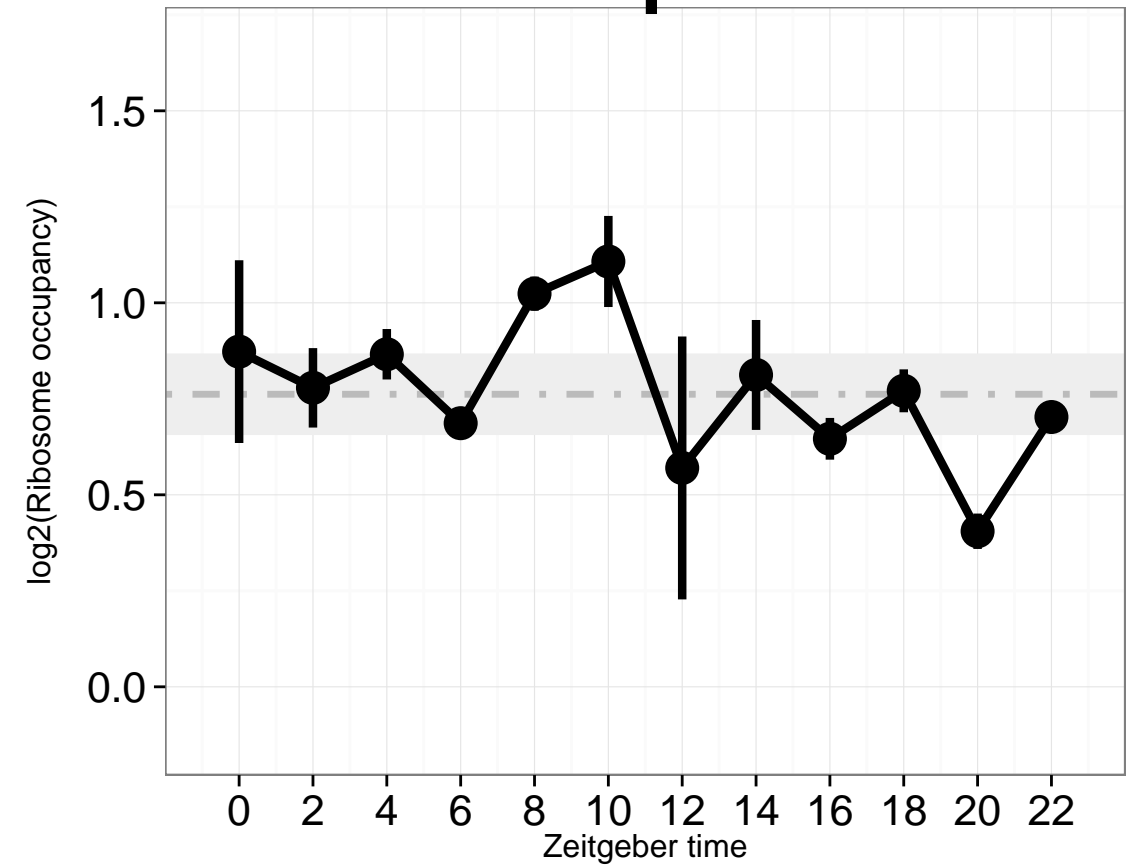

Supplement: Supplementary file 8820 [file 1]

## Ppa1

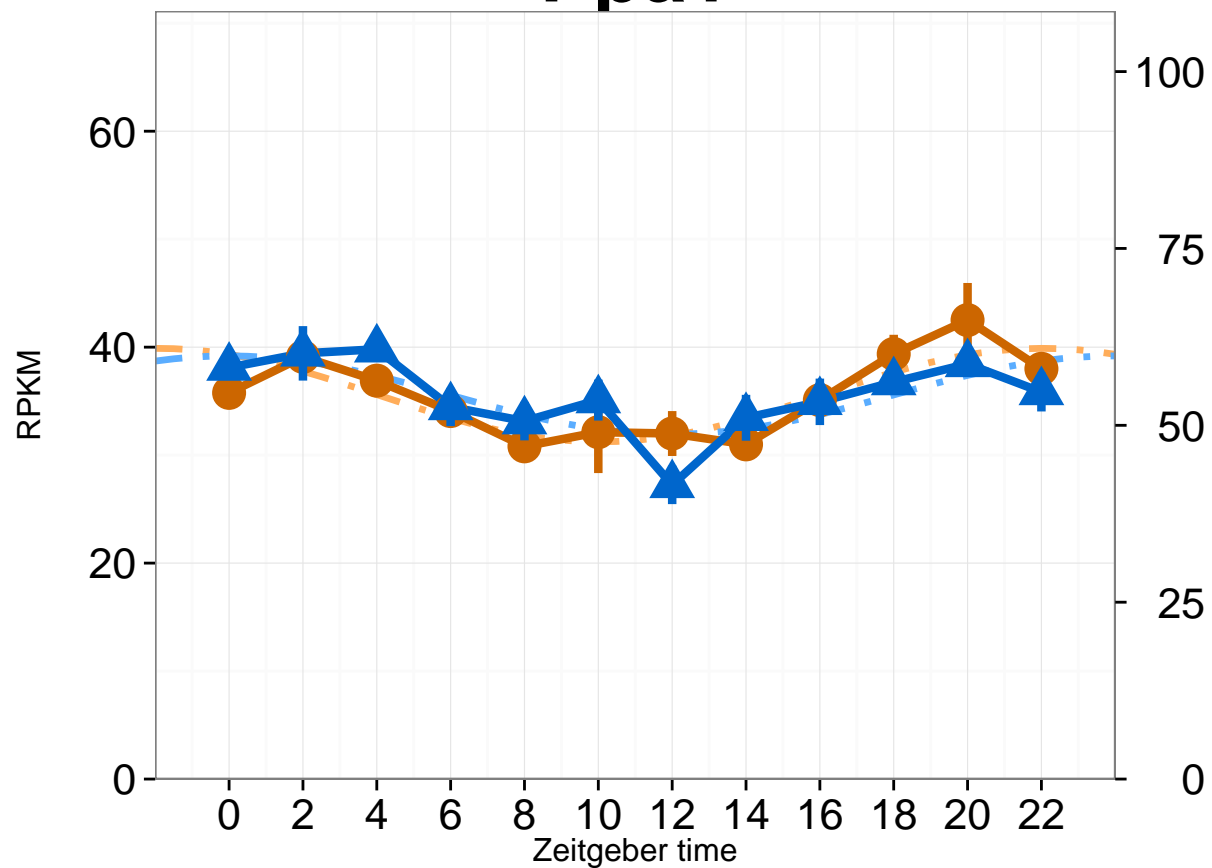

## Ppa1

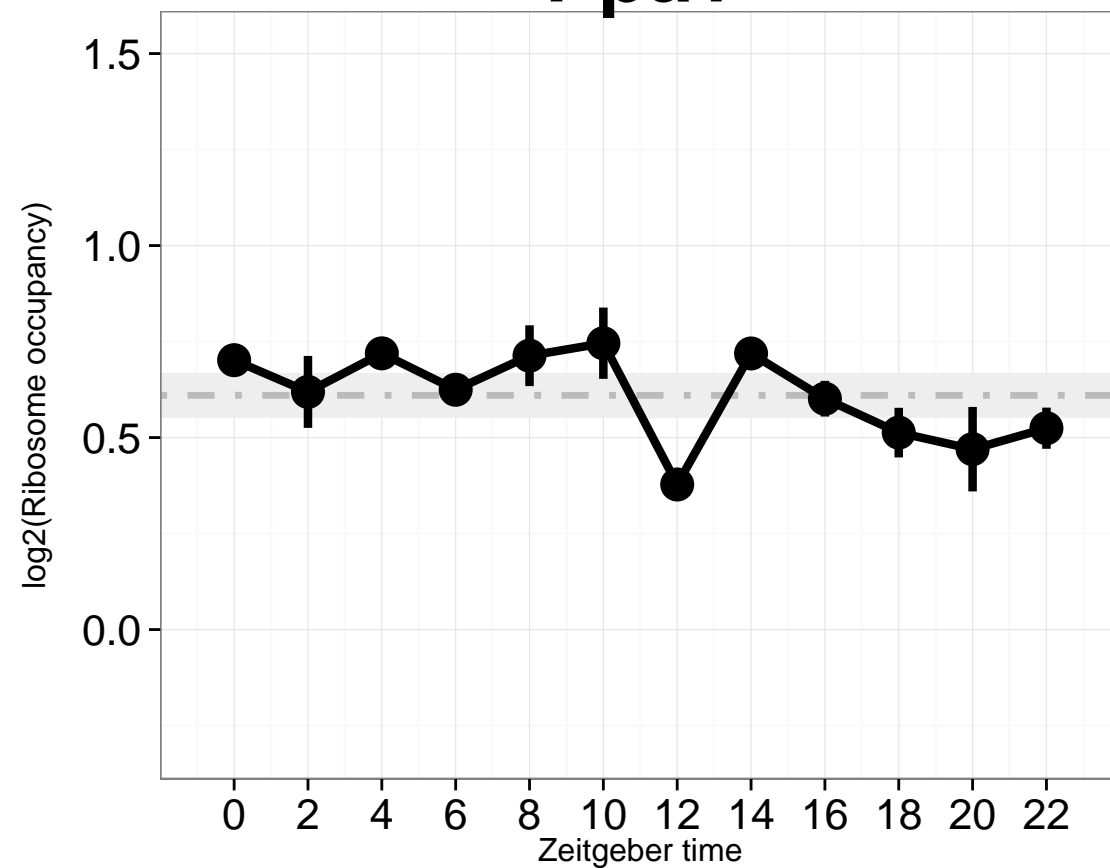

Supplement: Supplementary file 8821 [file 1]

# Caprin1

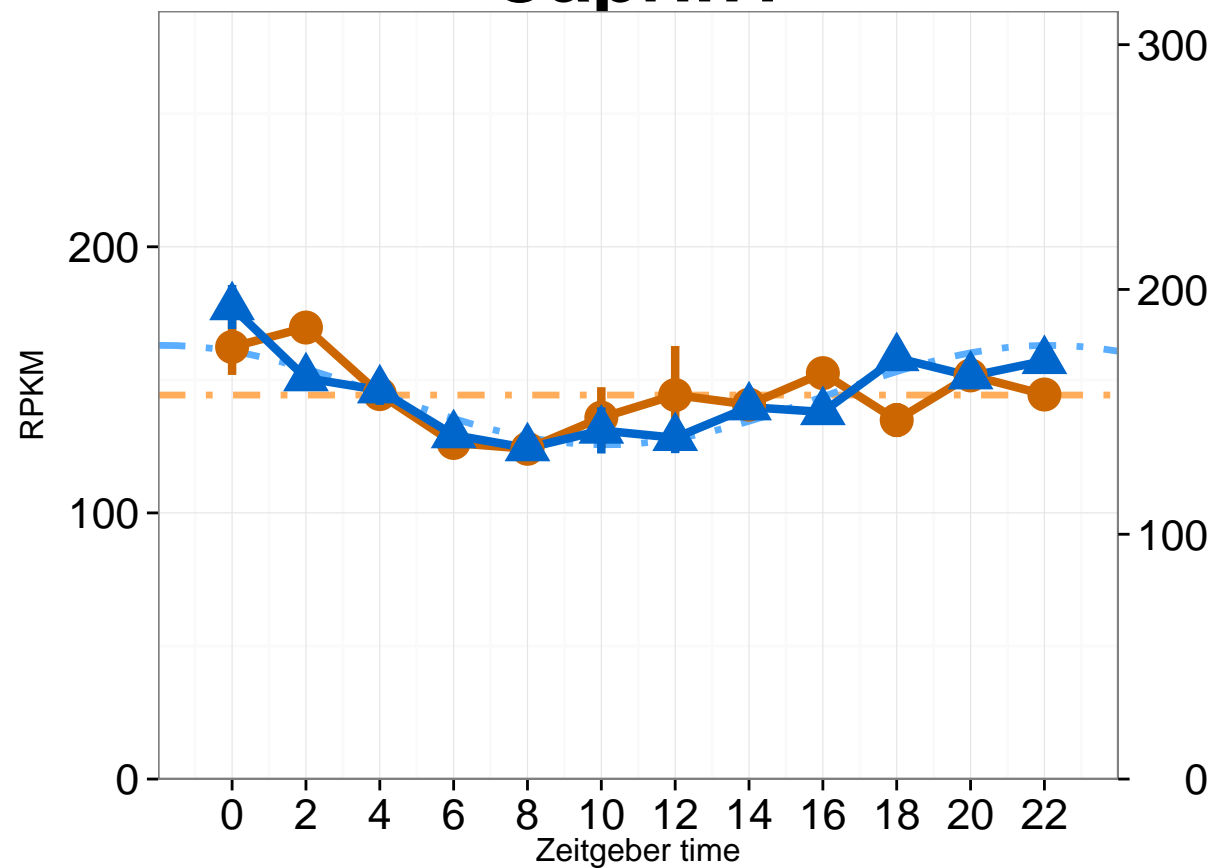

# Caprin1

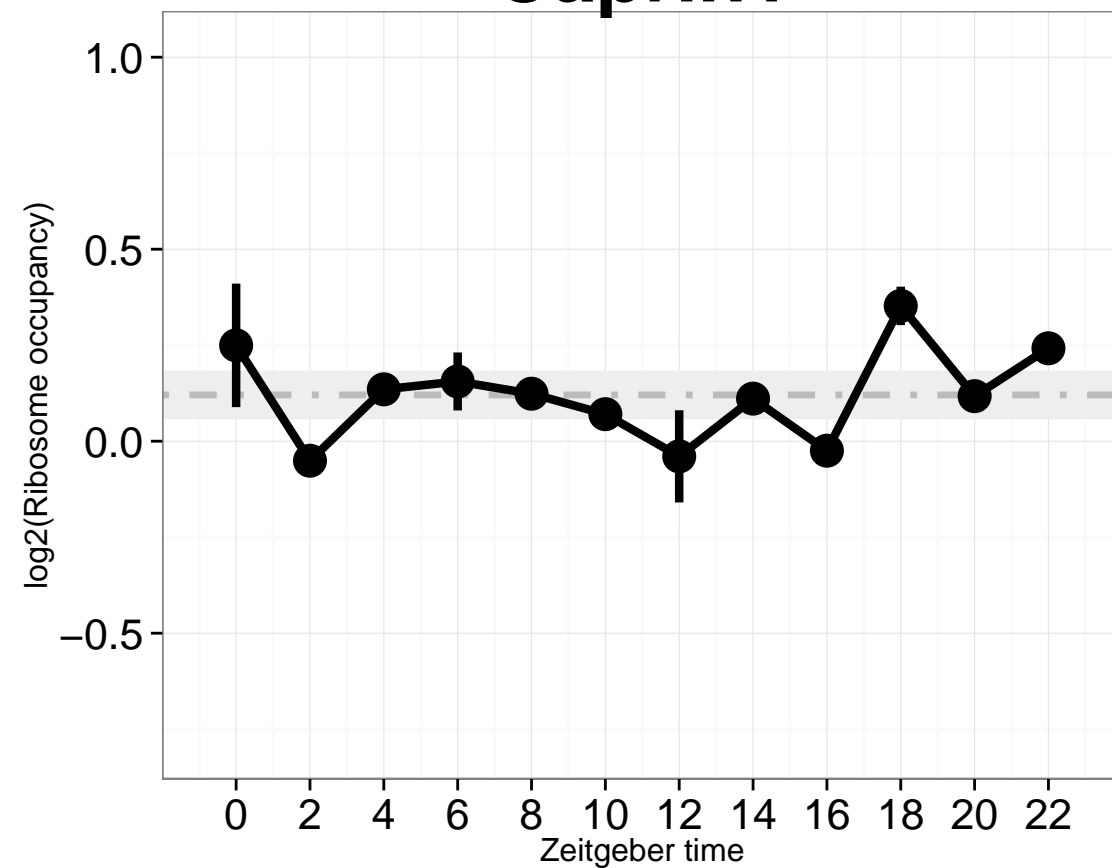

Supplement: Supplementary file 8822 [file 1]

## Azi2

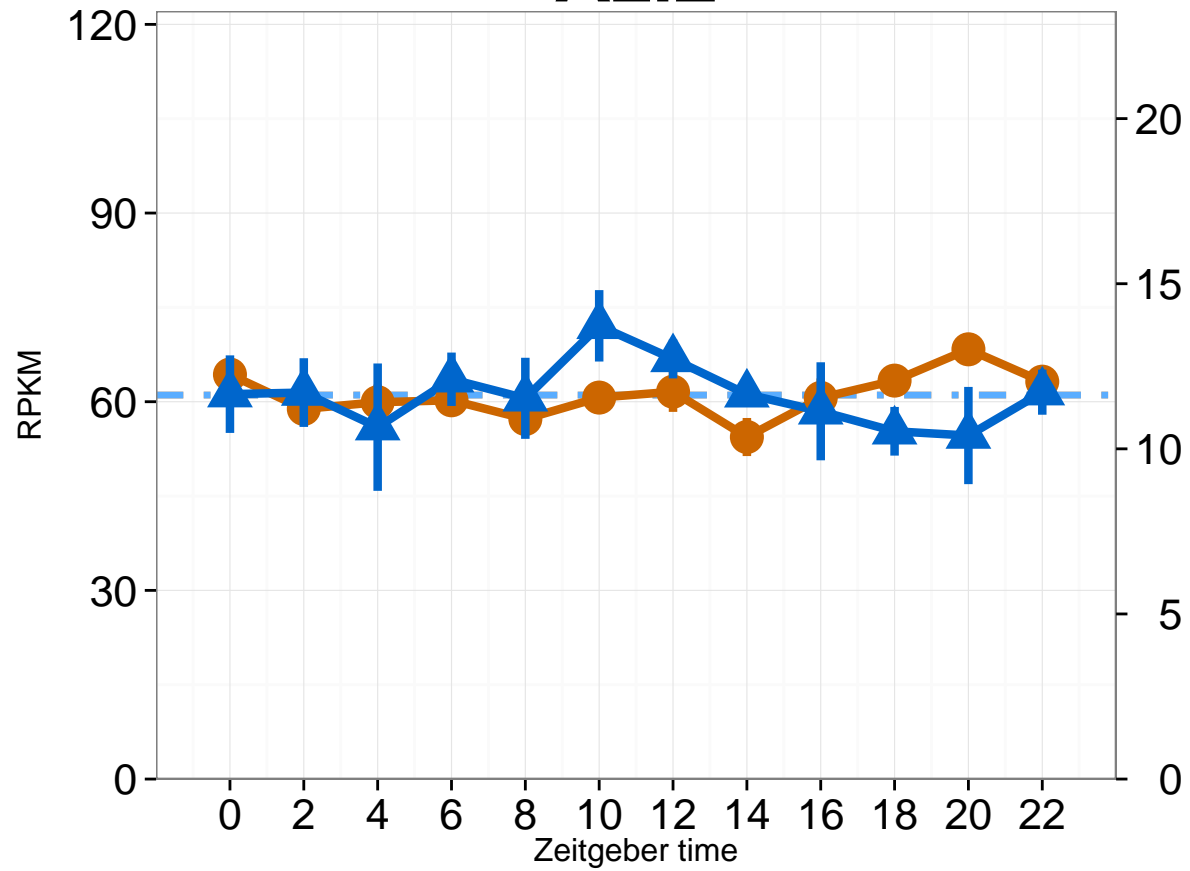

## Azi2

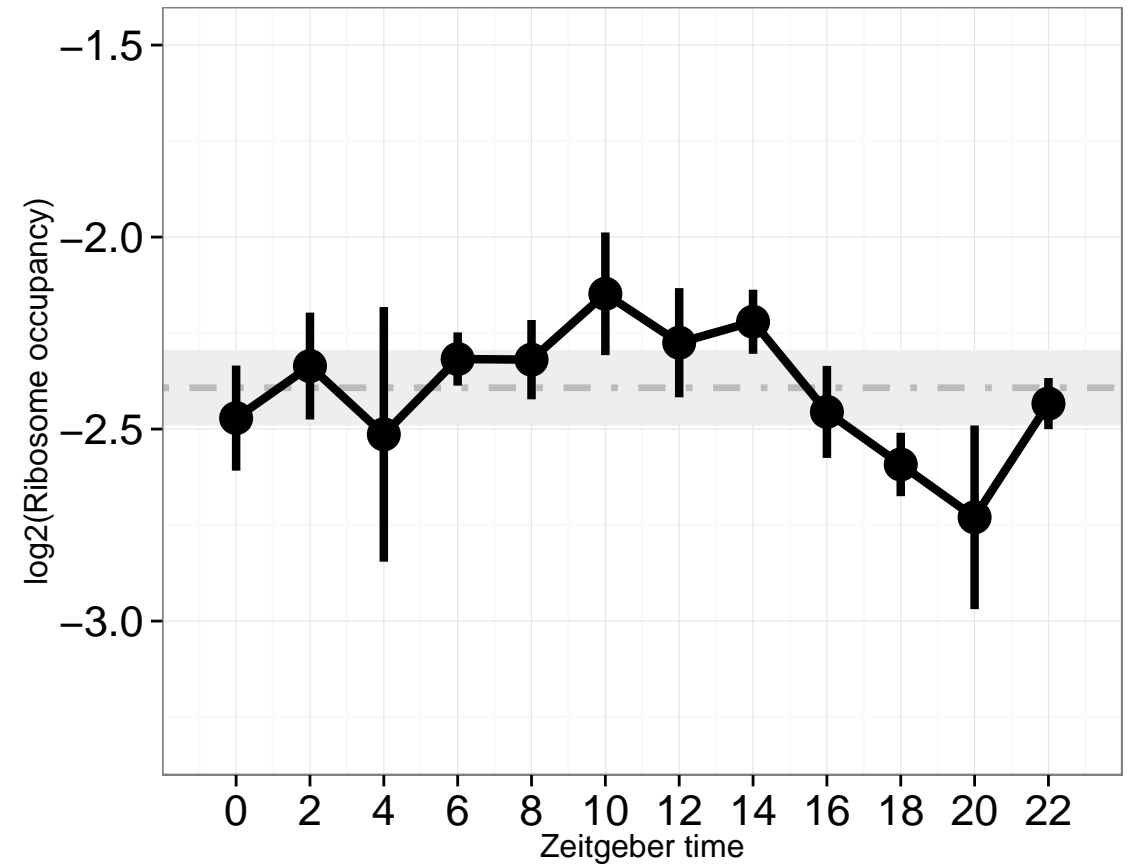

Supplement: Supplementary file 8823 [file 1]

## Ube2d3

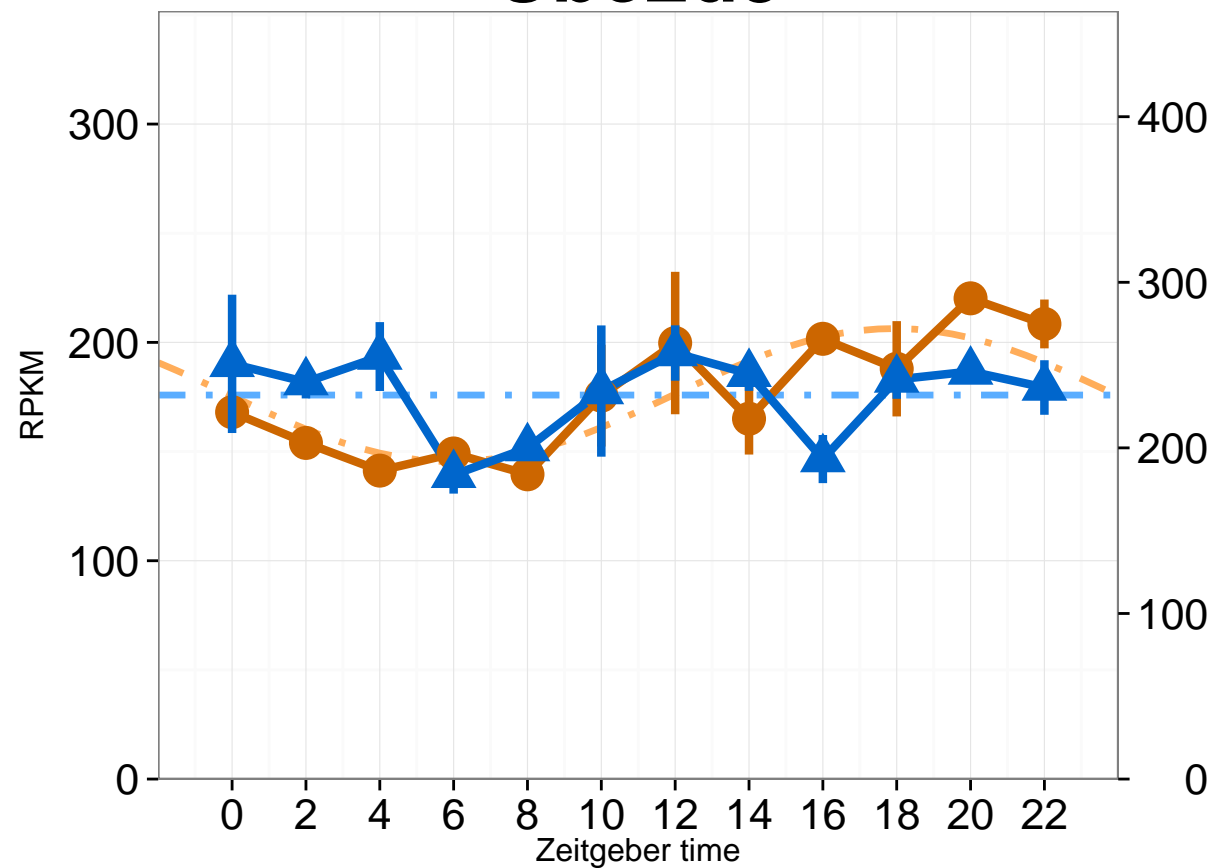

## Ube2d3

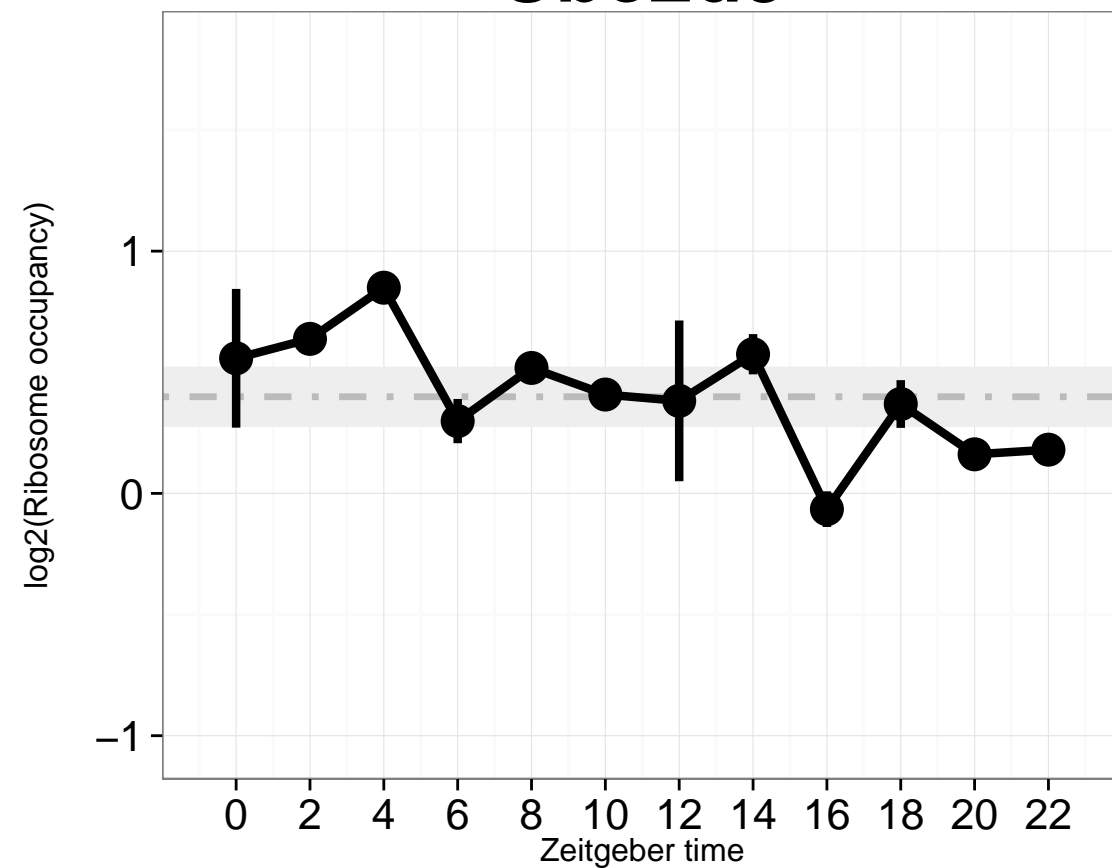

Supplement: Supplementary file 8824 [file 1]

## Wdr34

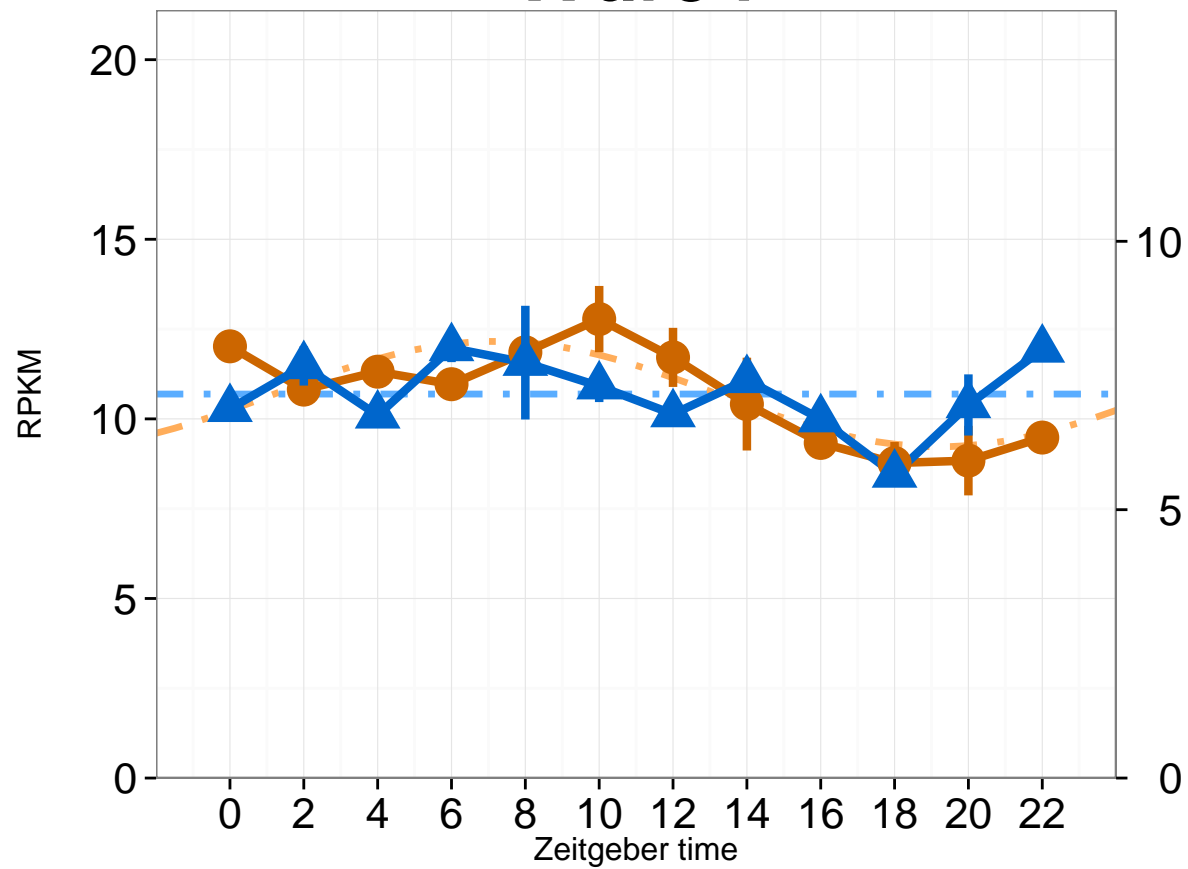

## Wdr34

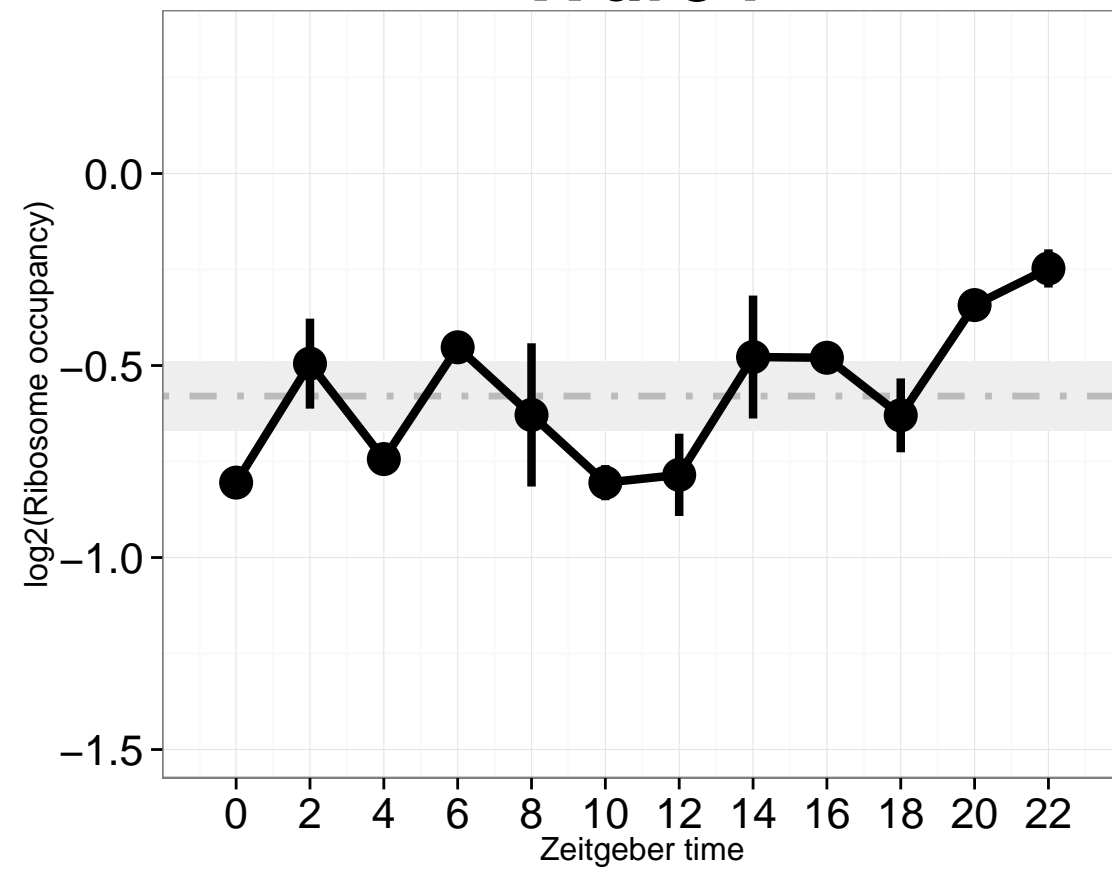

Supplement: Supplementary file 8825 [file 1]

## Atic

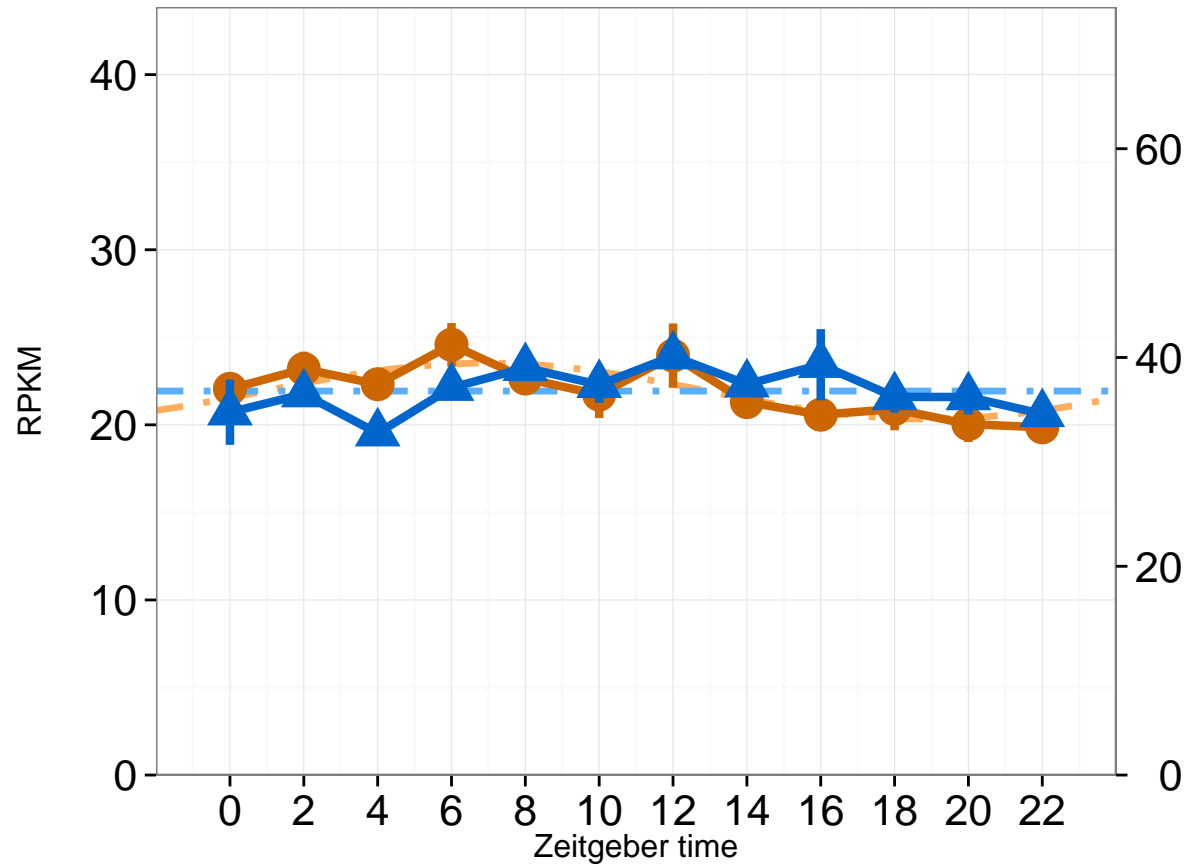

## Atic

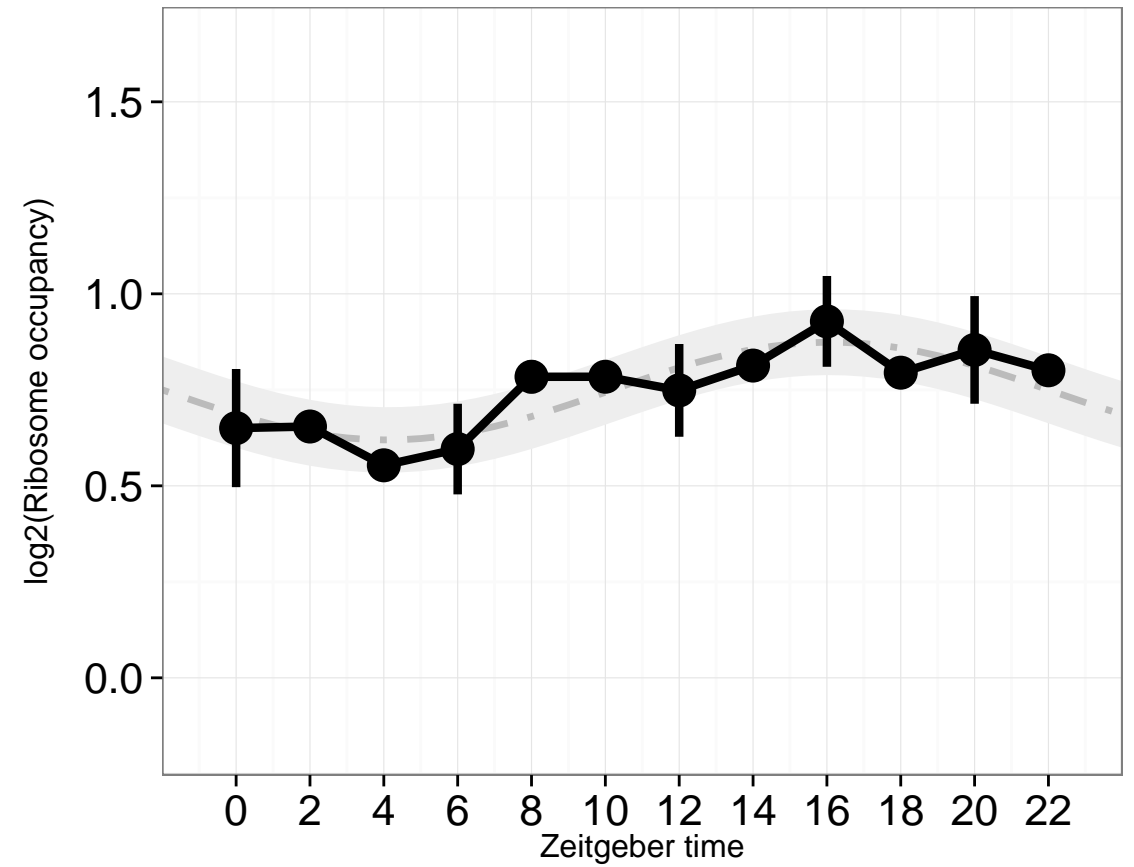

Supplement: Supplementary file 8826 [file 1]

## Oaf

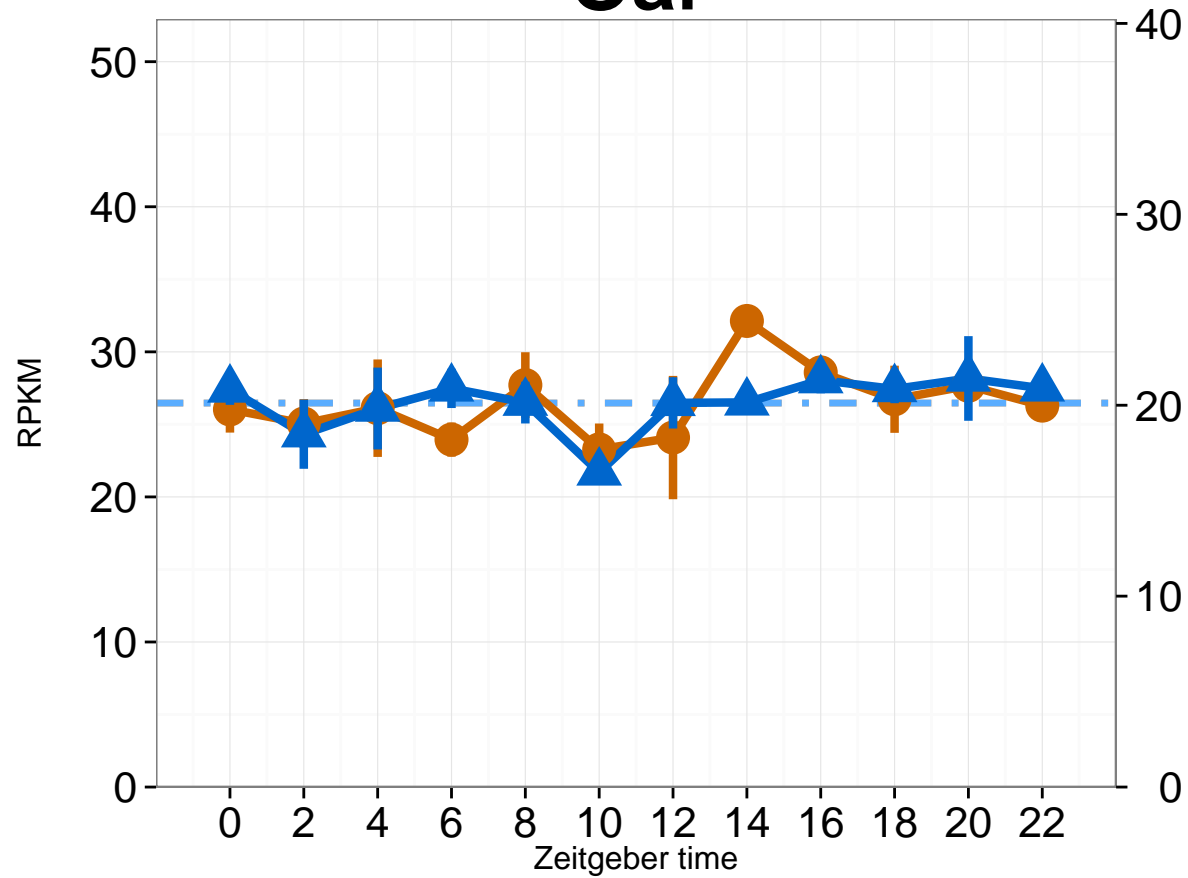

## Oaf

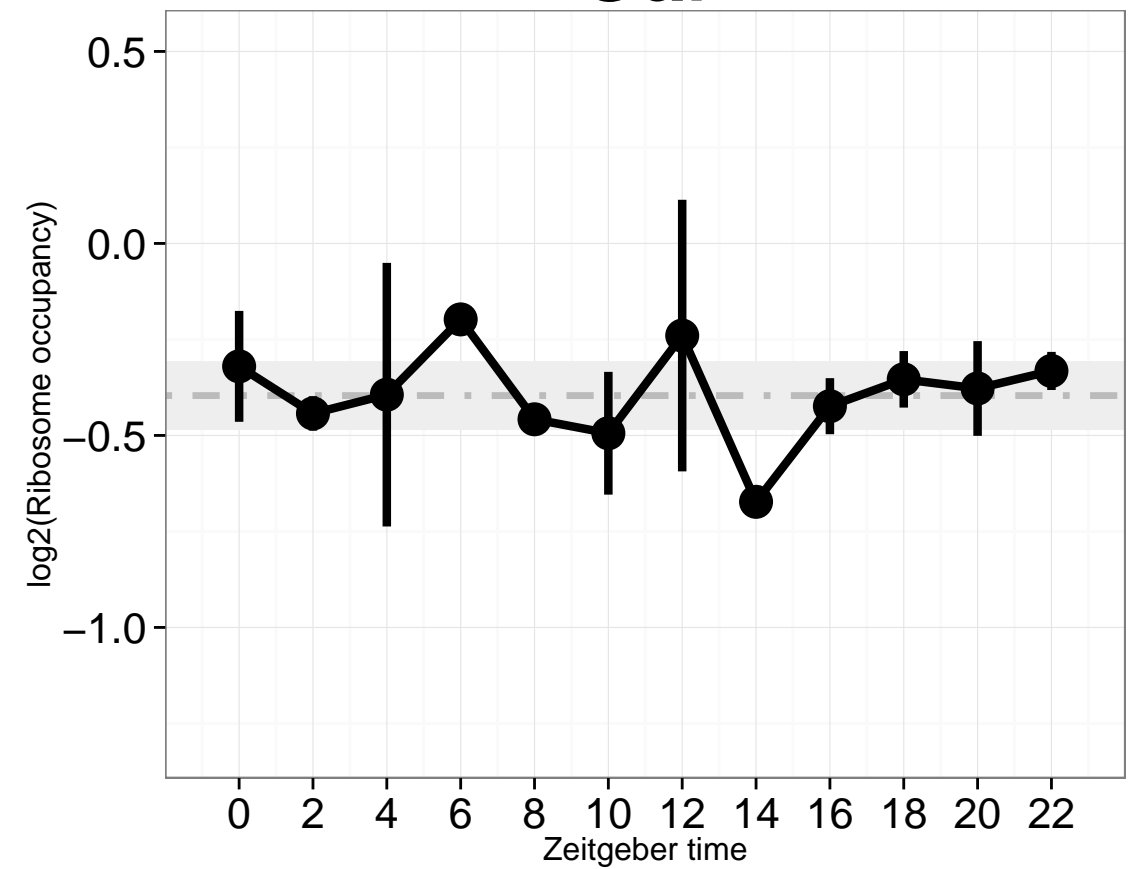

Supplement: Supplementary file 8827 [file 1]

# Ncoa1

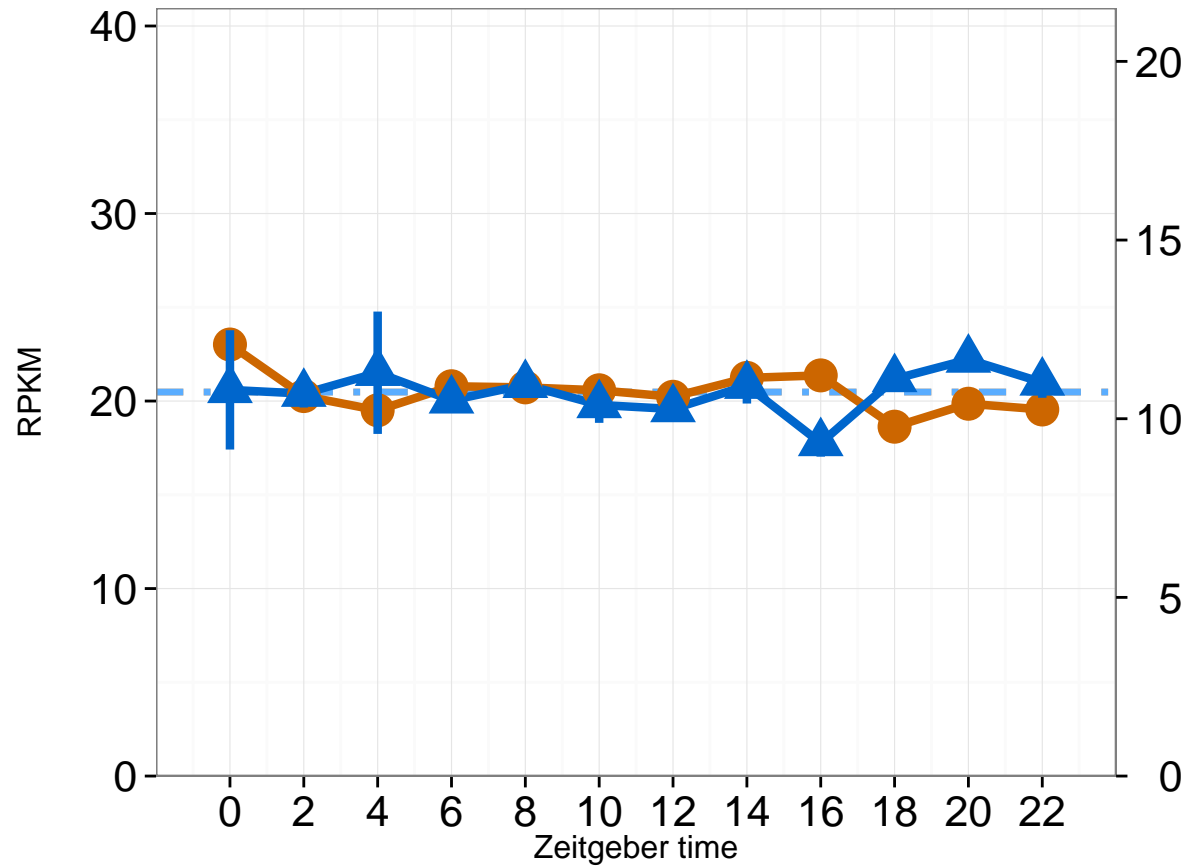

# Ncoa1

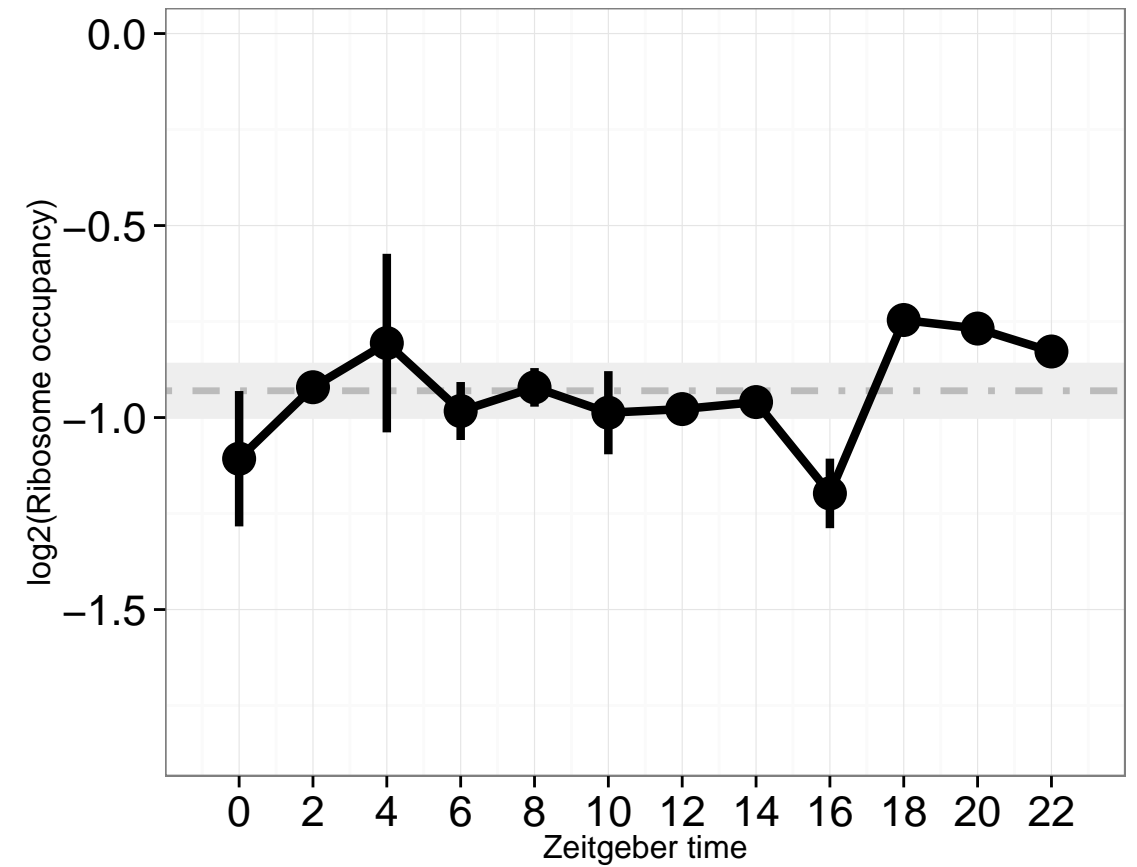

Supplement: Supplementary file 8828 [file 1]

# Tsr1

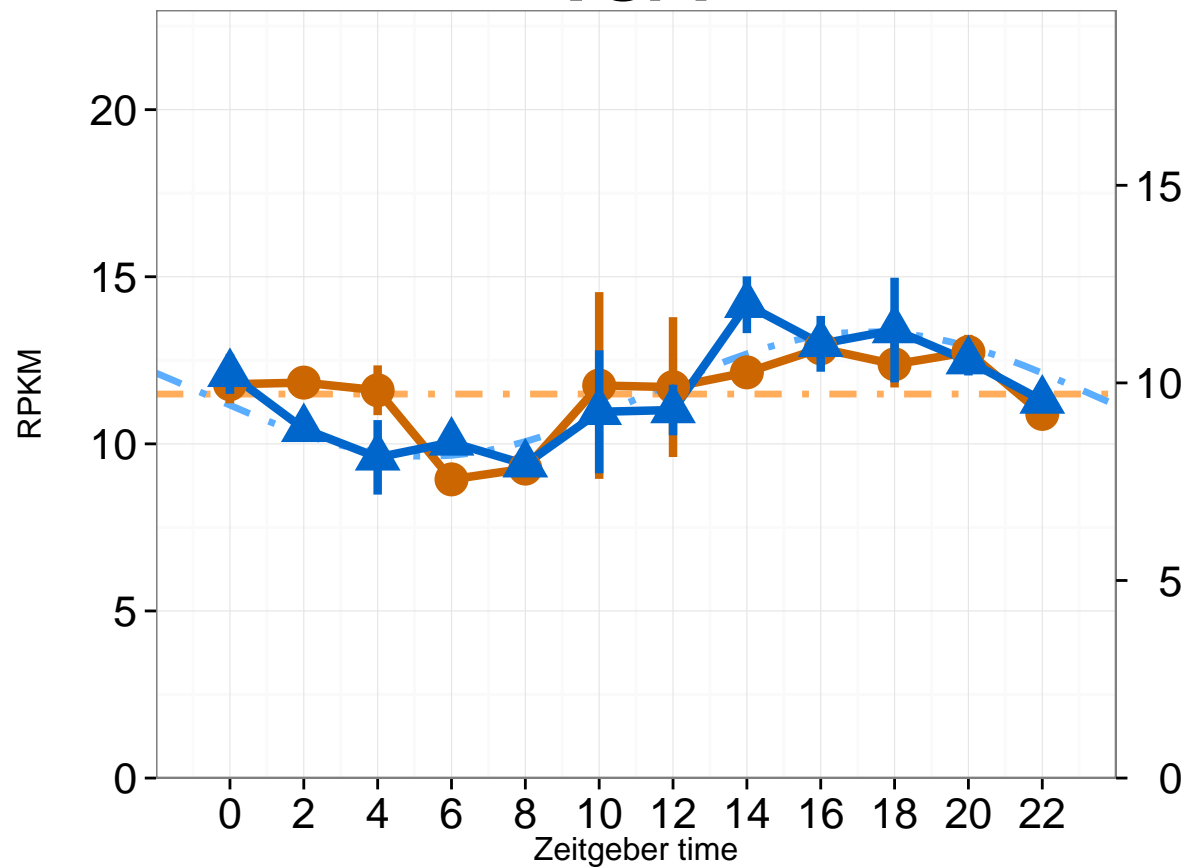

# Tsr1

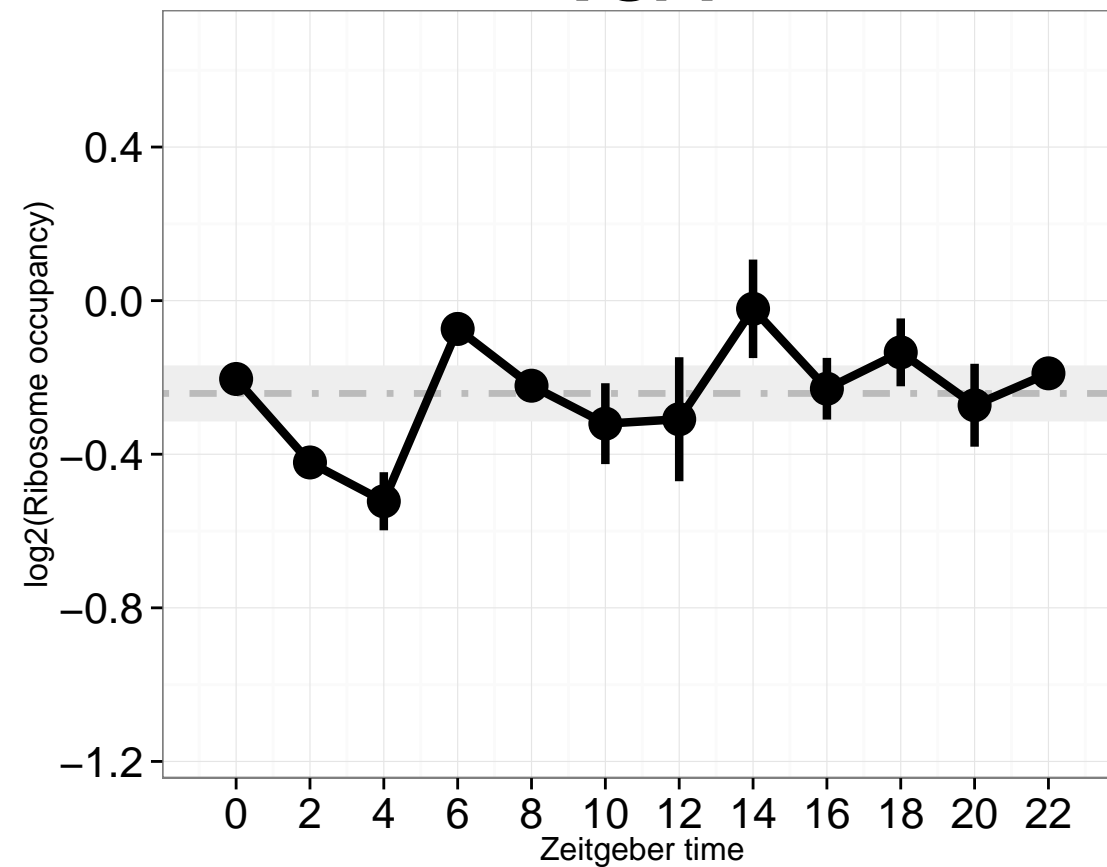

Supplement: Supplementary file 8829 [file 1]

# Rnf139

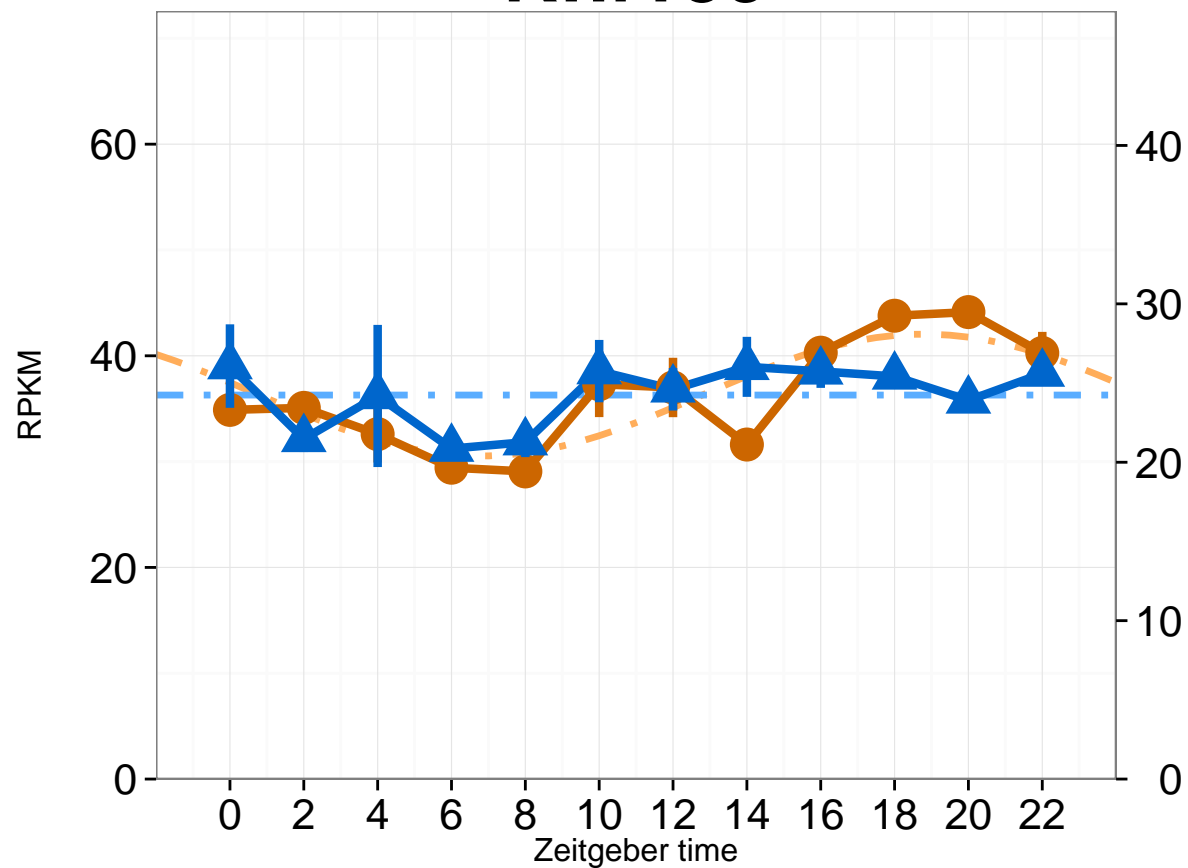

# Rnf139

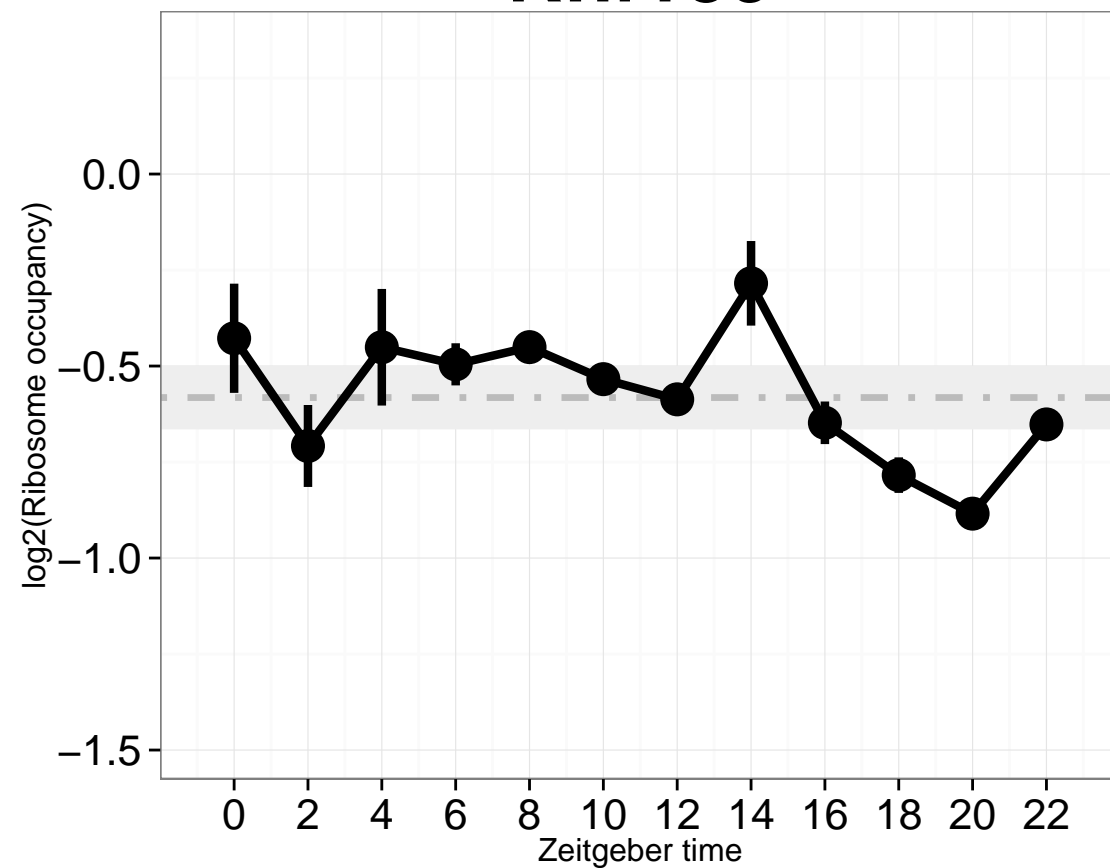

Supplement: Supplementary file 8830 [file 1]
