# Supplementary material (part 89 of 133)
Source: publisher figshare collection journal article supplement (https://springernature.figshare.com/articles/dataset/_/4903193)

# Atp5o

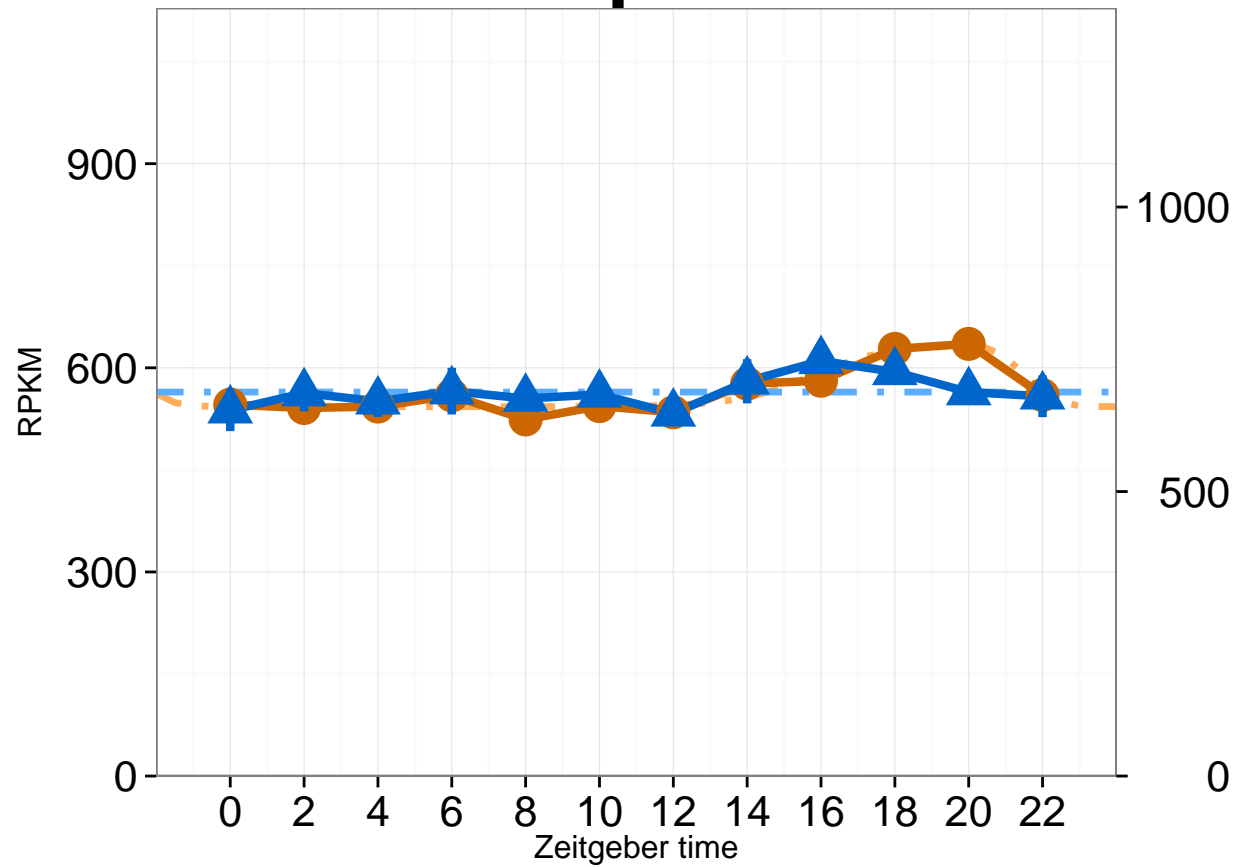

# Atp5o

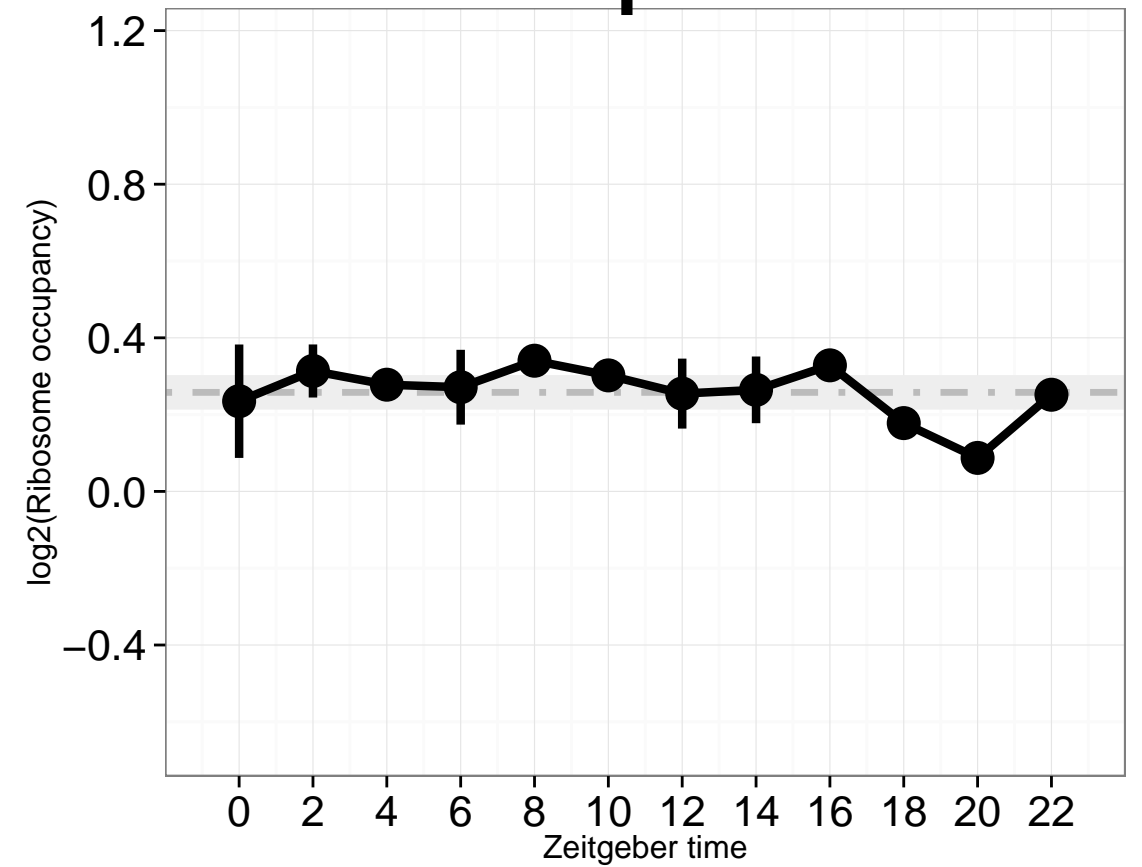

Supplement: Supplementary file 8831 [file 1]

## Fam19a5

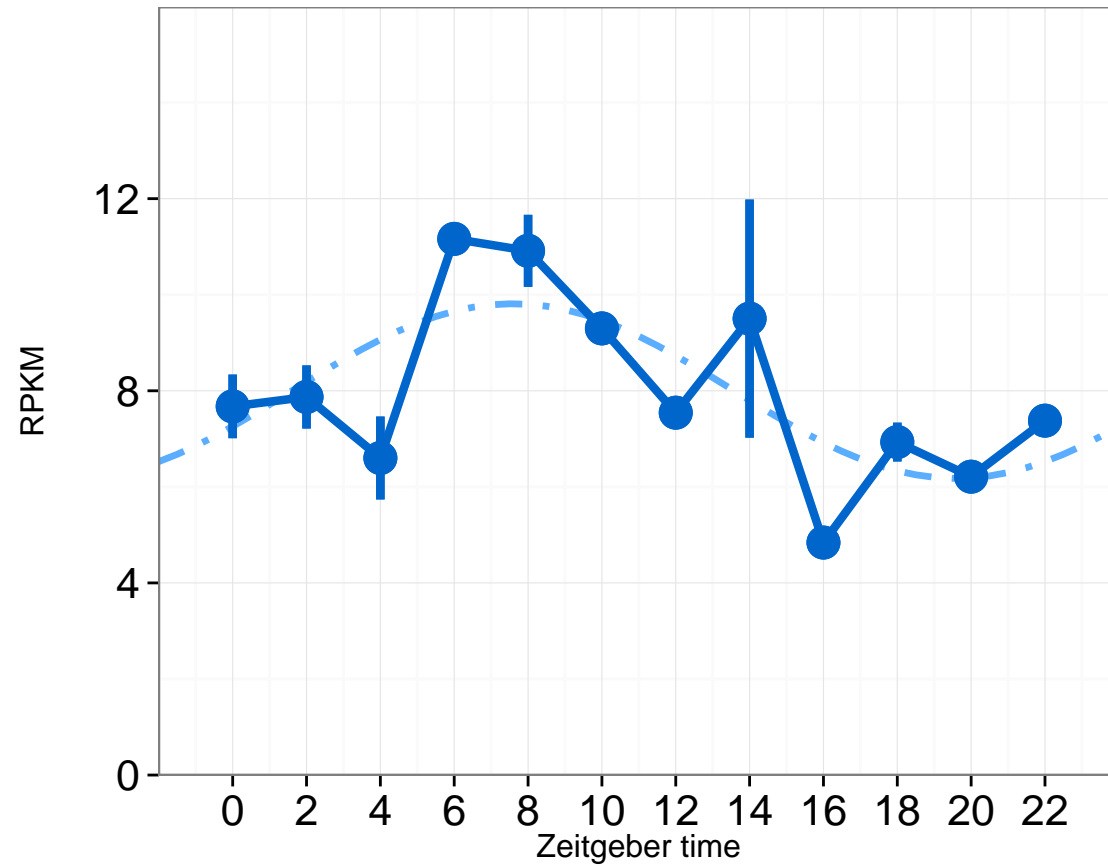

## Fam19a5 log2(Ribosome occupancy)

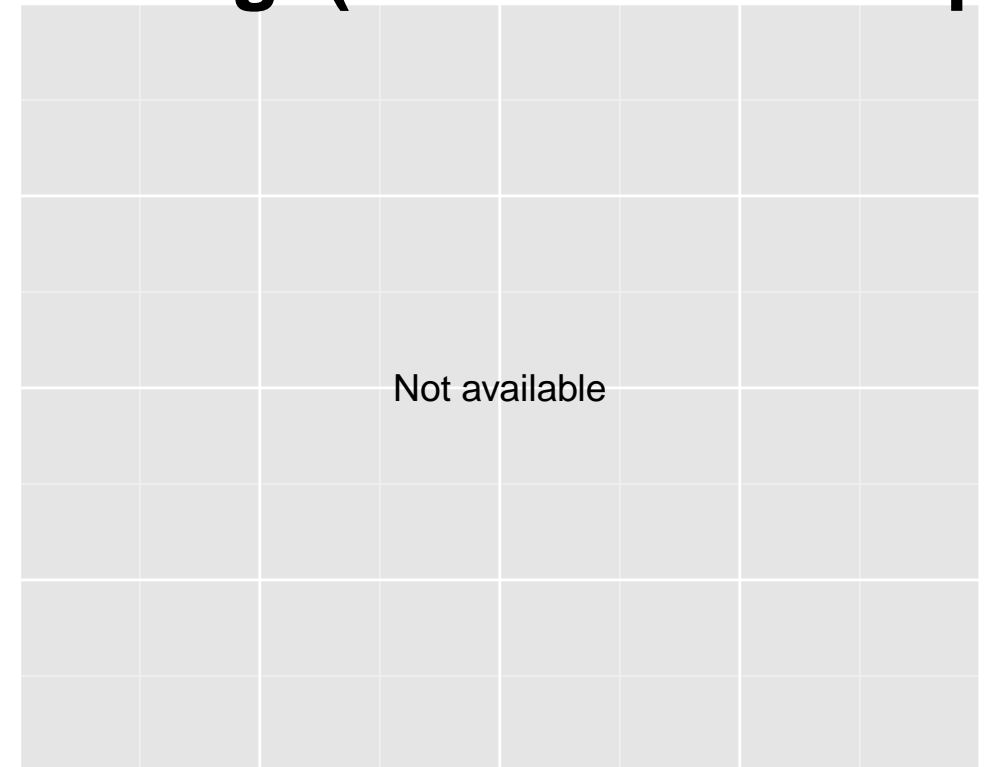

Supplement: Supplementary file 8832 [file 1]

## Wdfy4

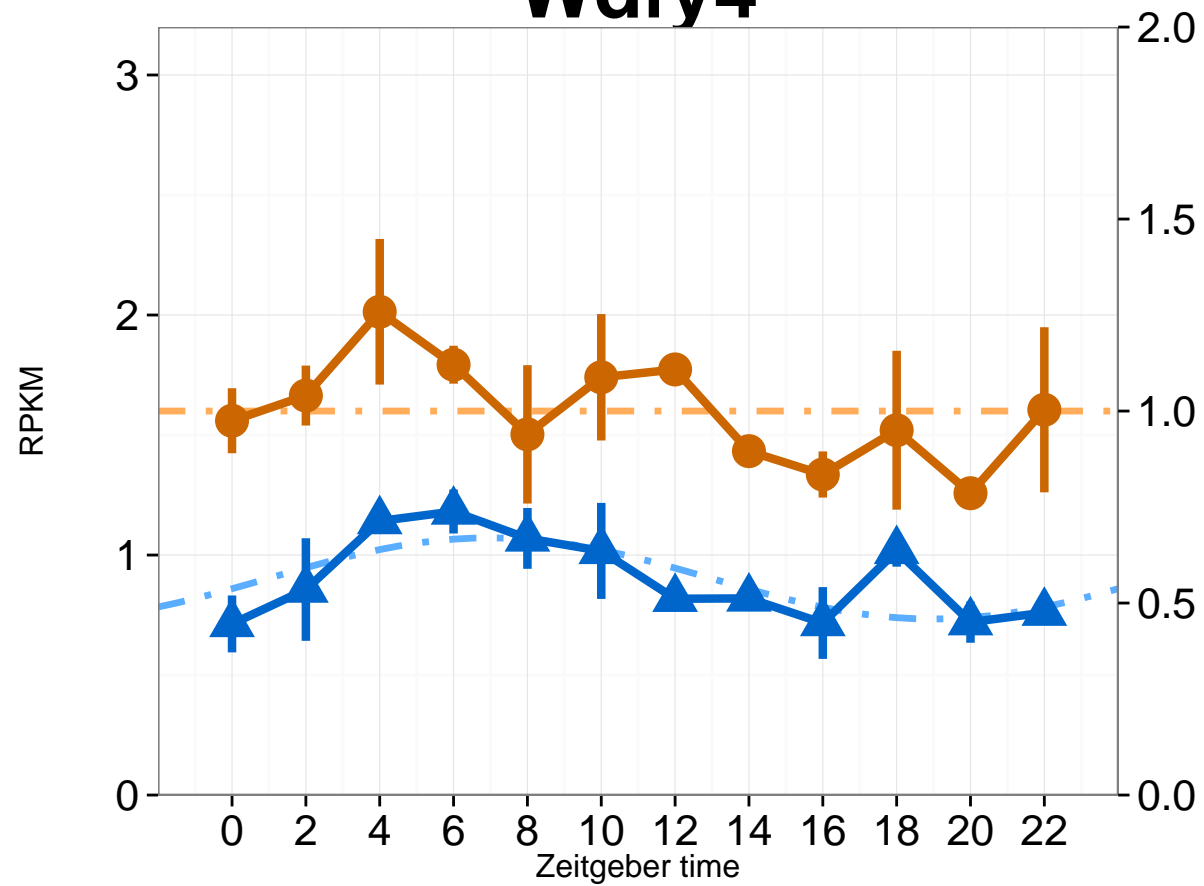

## Wdfy4

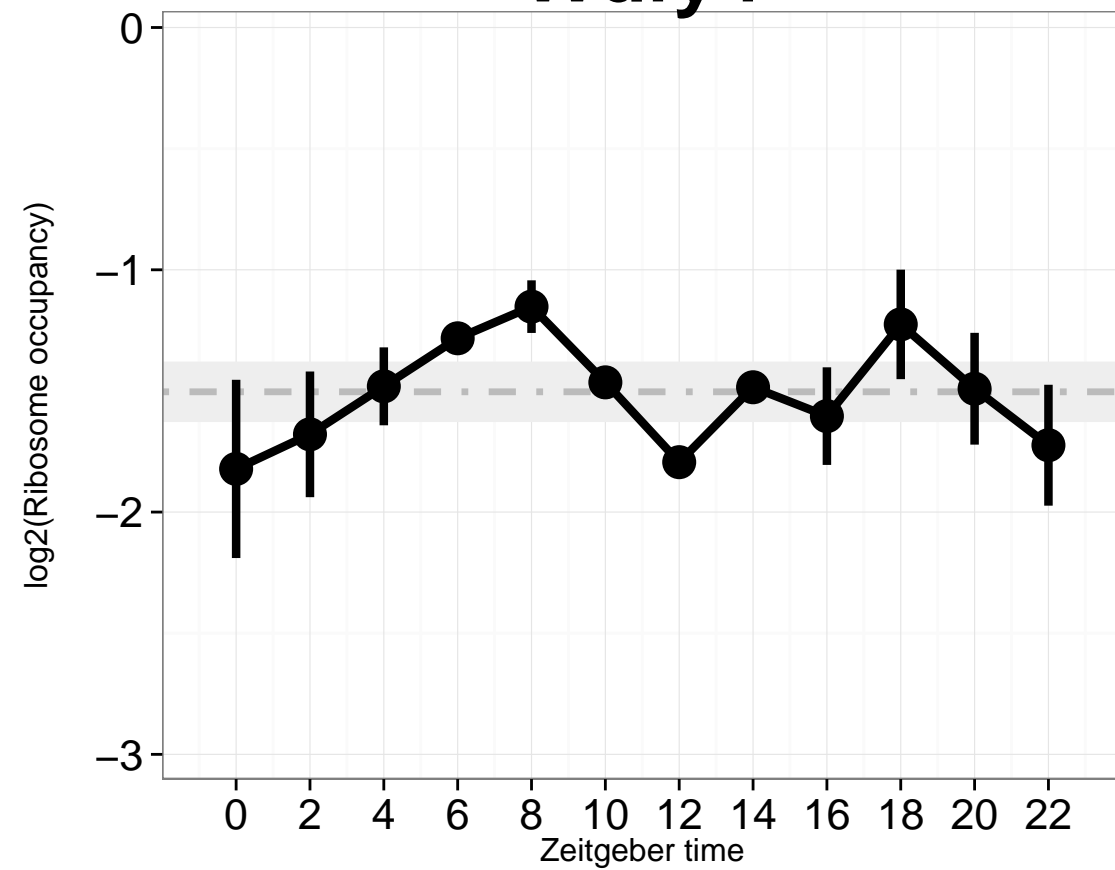

Supplement: Supplementary file 8833 [file 1]

## Brf1

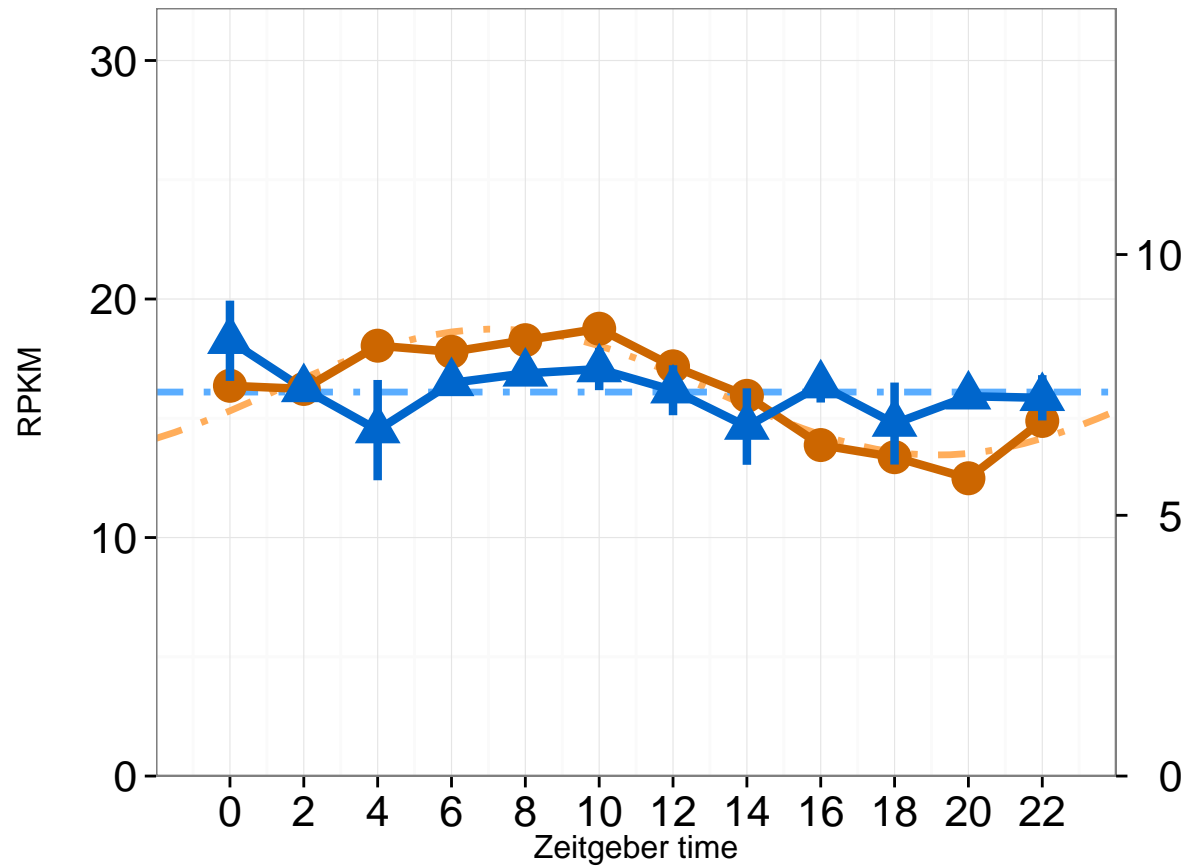

## Brf1

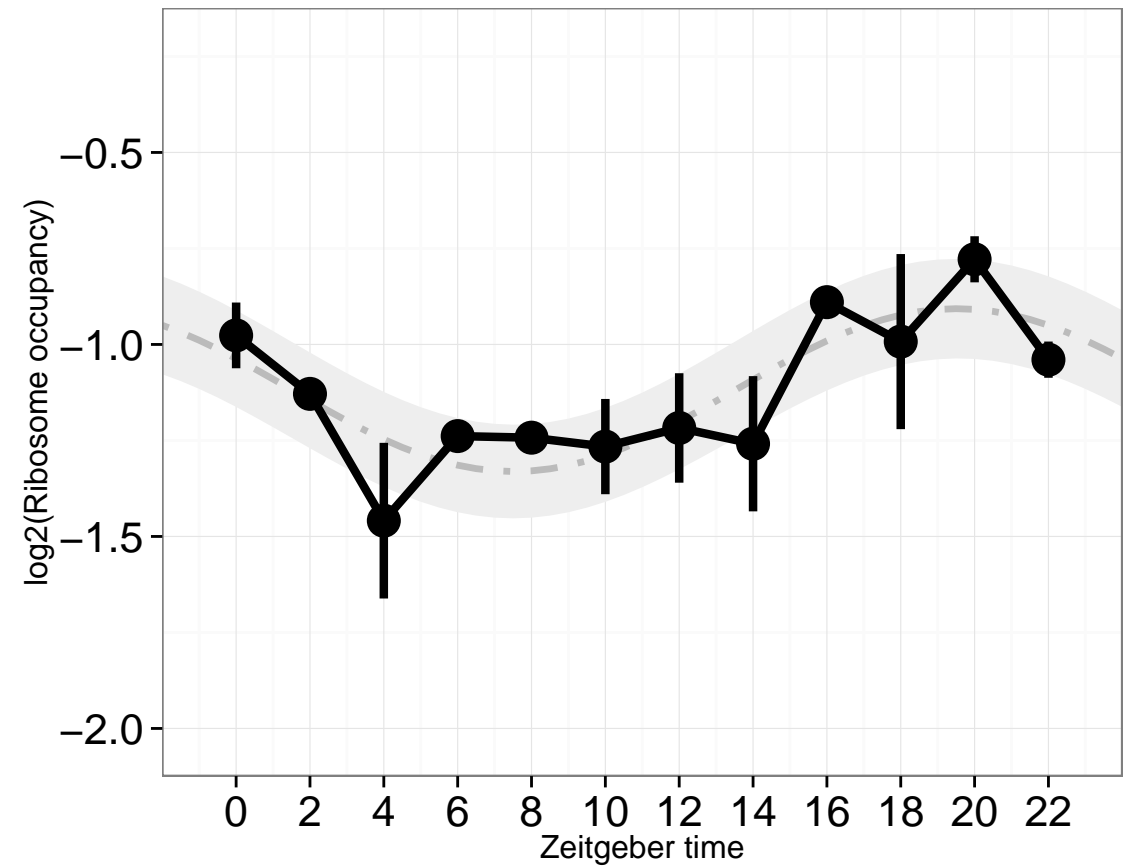

Supplement: Supplementary file 8834 [file 1]

## Plcb1

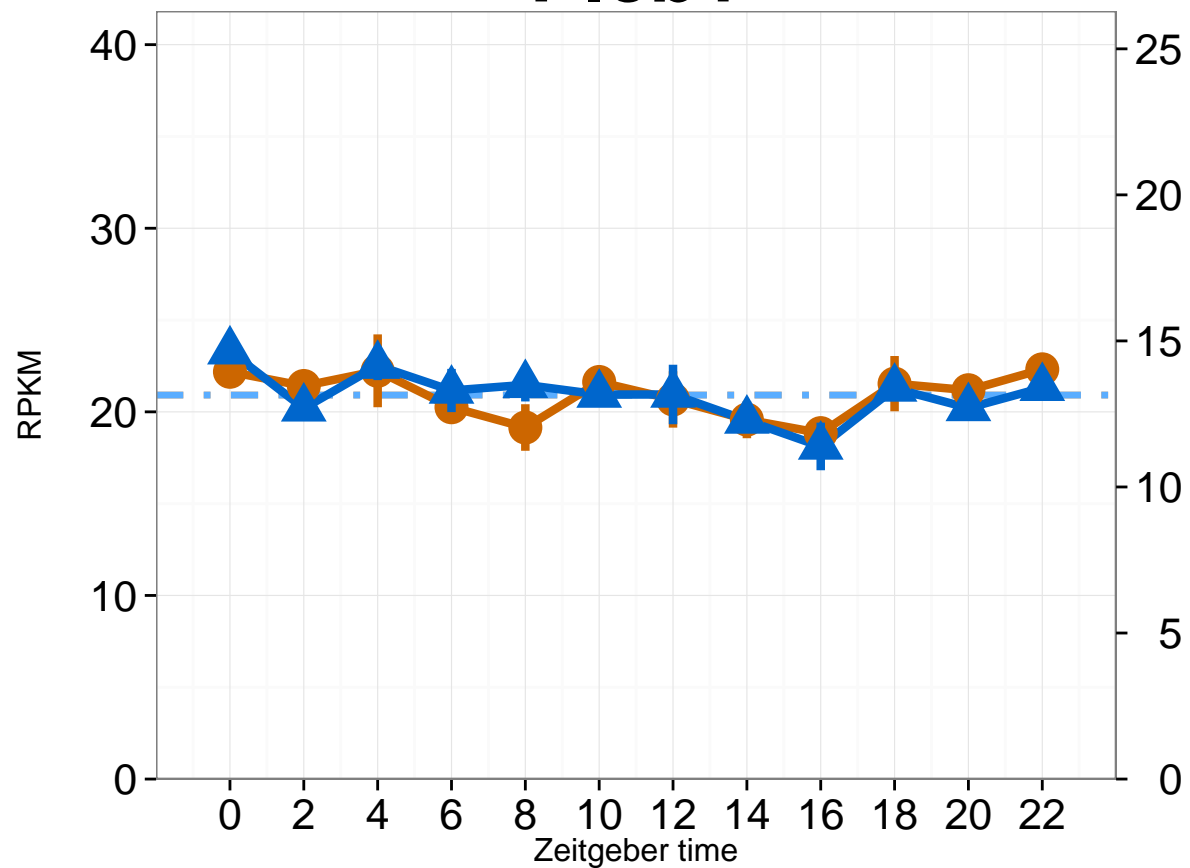

## Plcb1

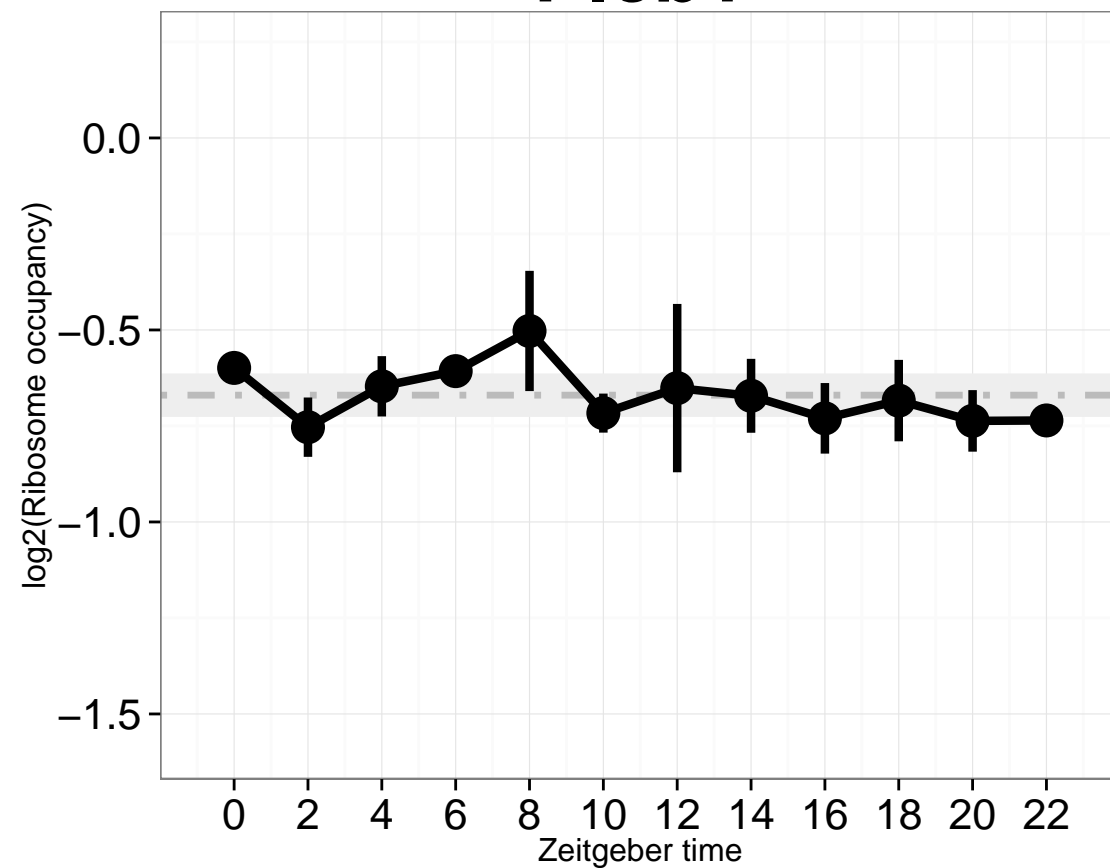

Supplement: Supplementary file 8835 [file 1]

## P4hb

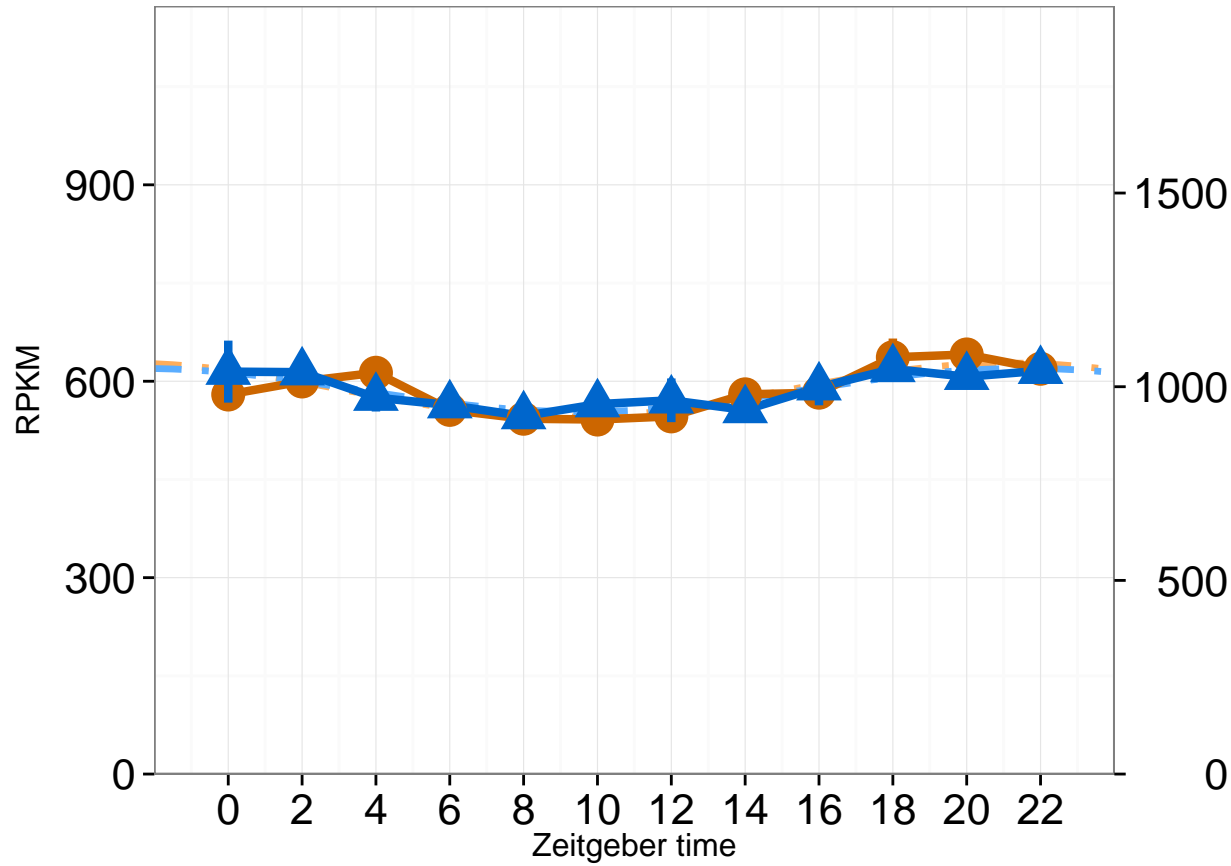

## P4hb

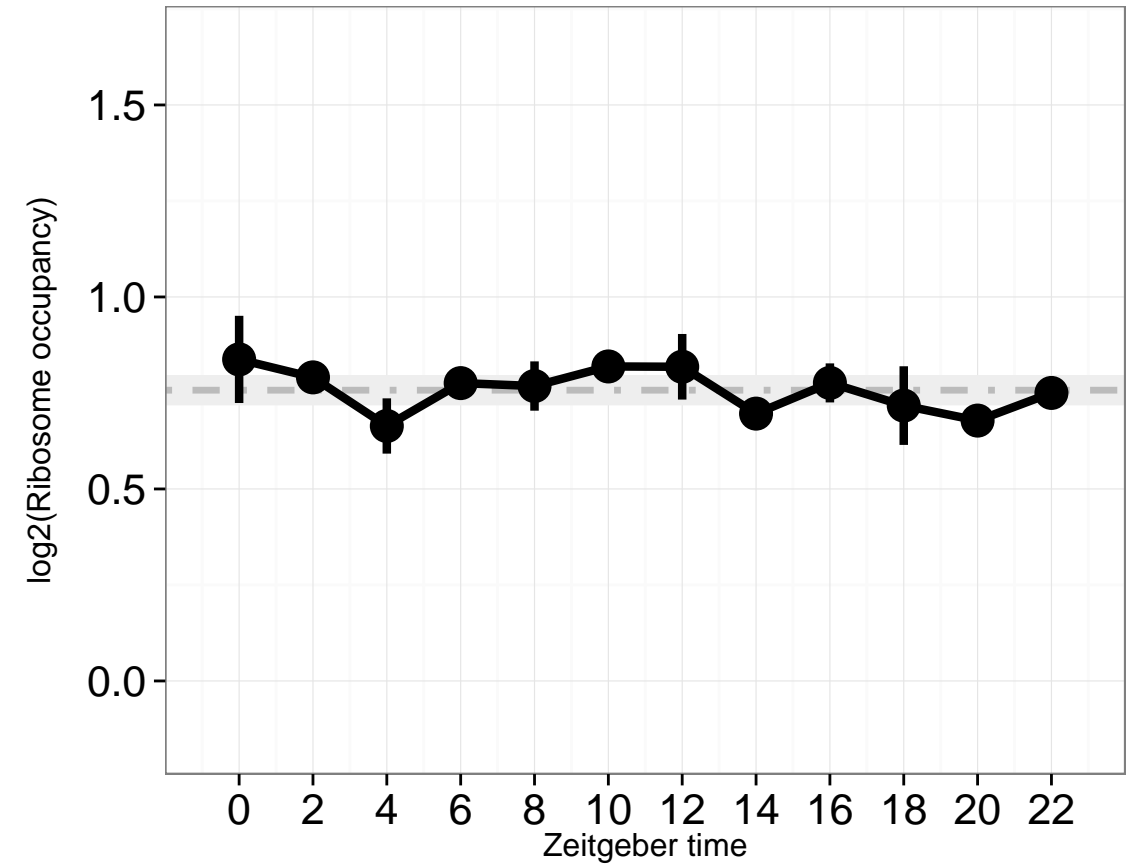

Supplement: Supplementary file 8836 [file 1]

# Cry1

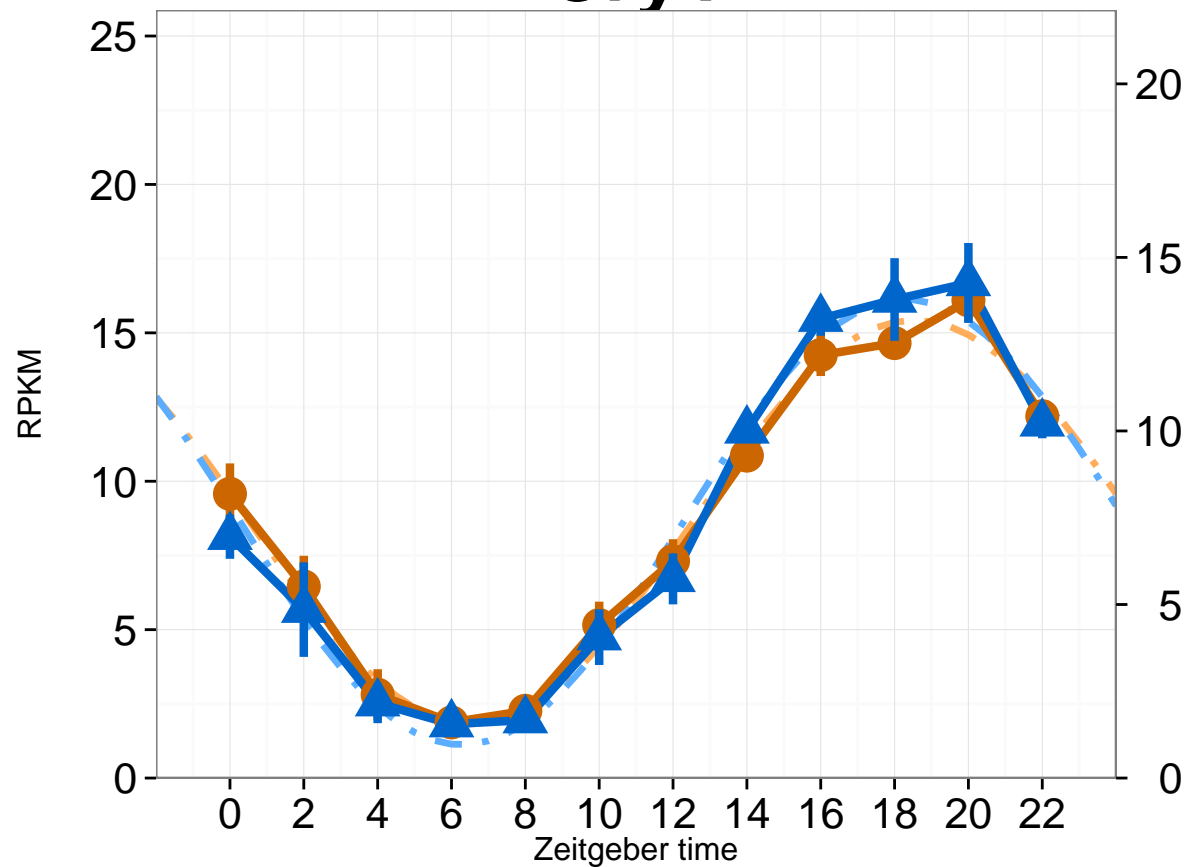

# Cry1

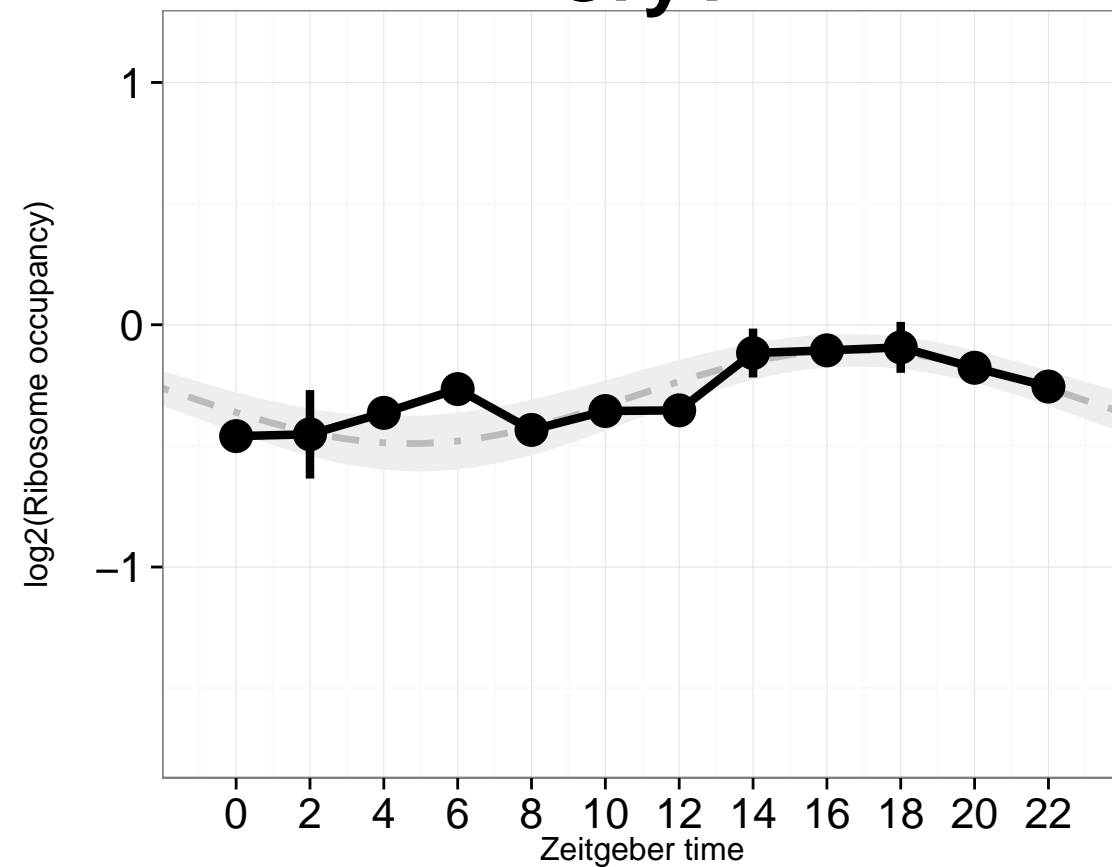

Supplement: Supplementary file 8837 [file 1]

# L3mbtI2

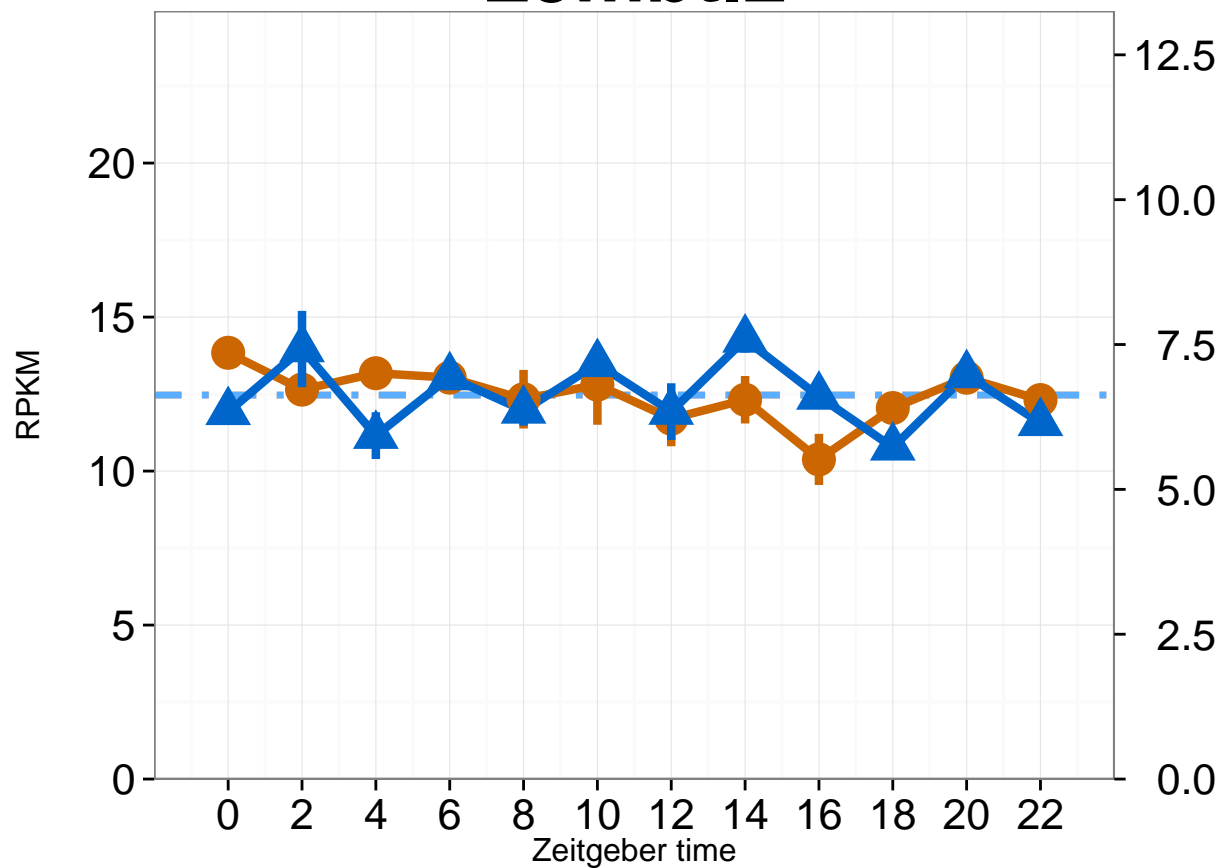

# L3mbtI2

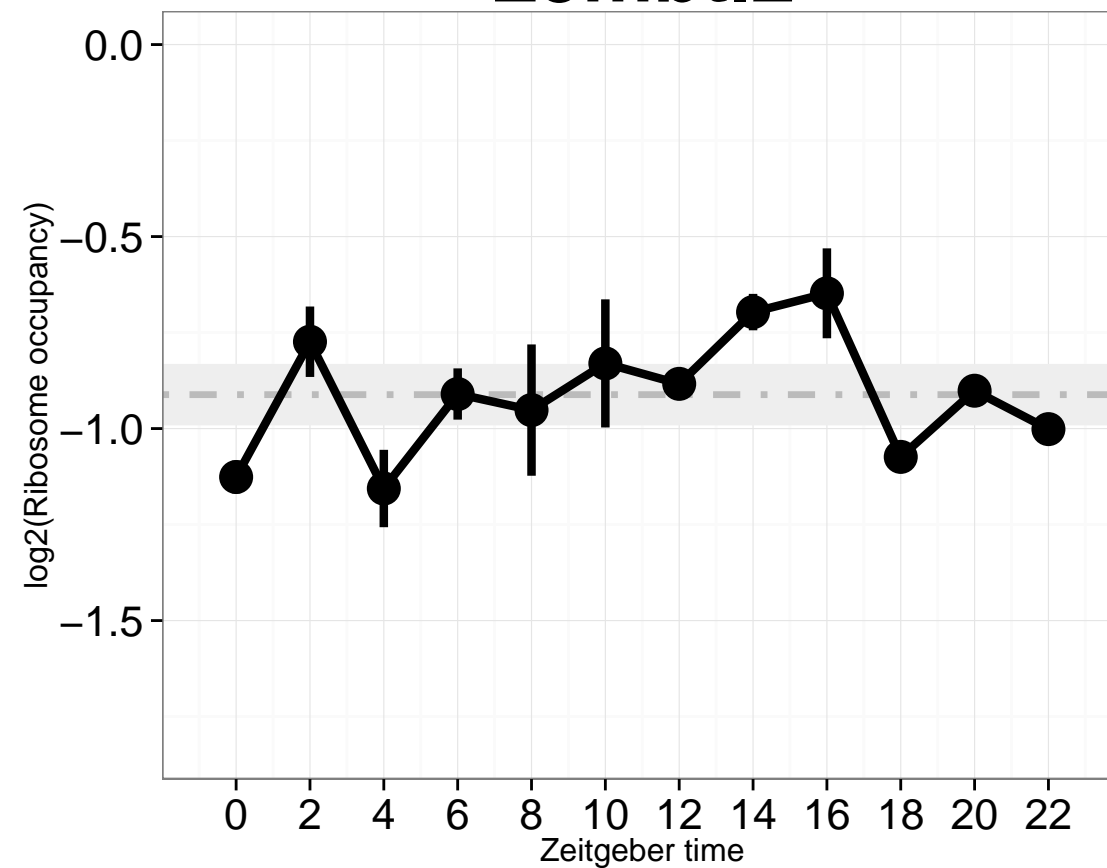

Supplement: Supplementary file 8838 [file 1]

## Scoc

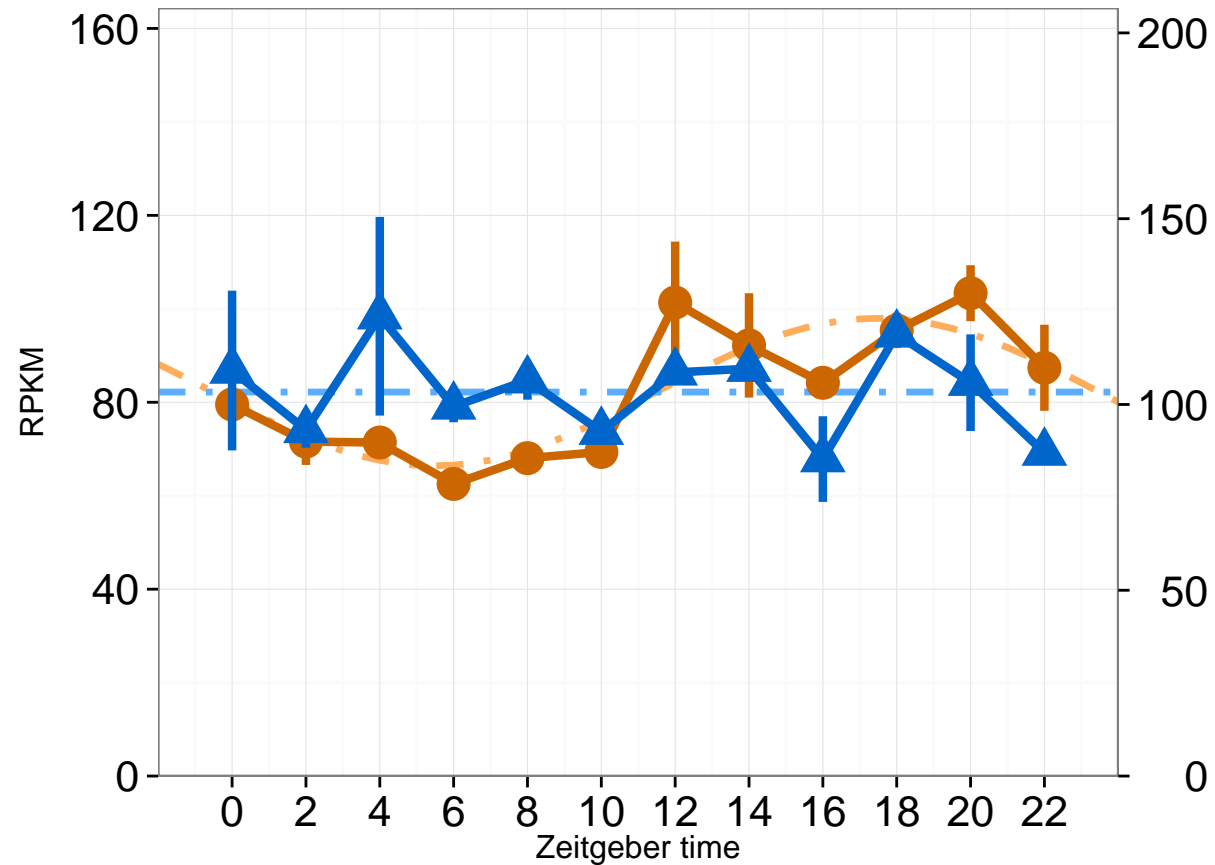

## Scoc

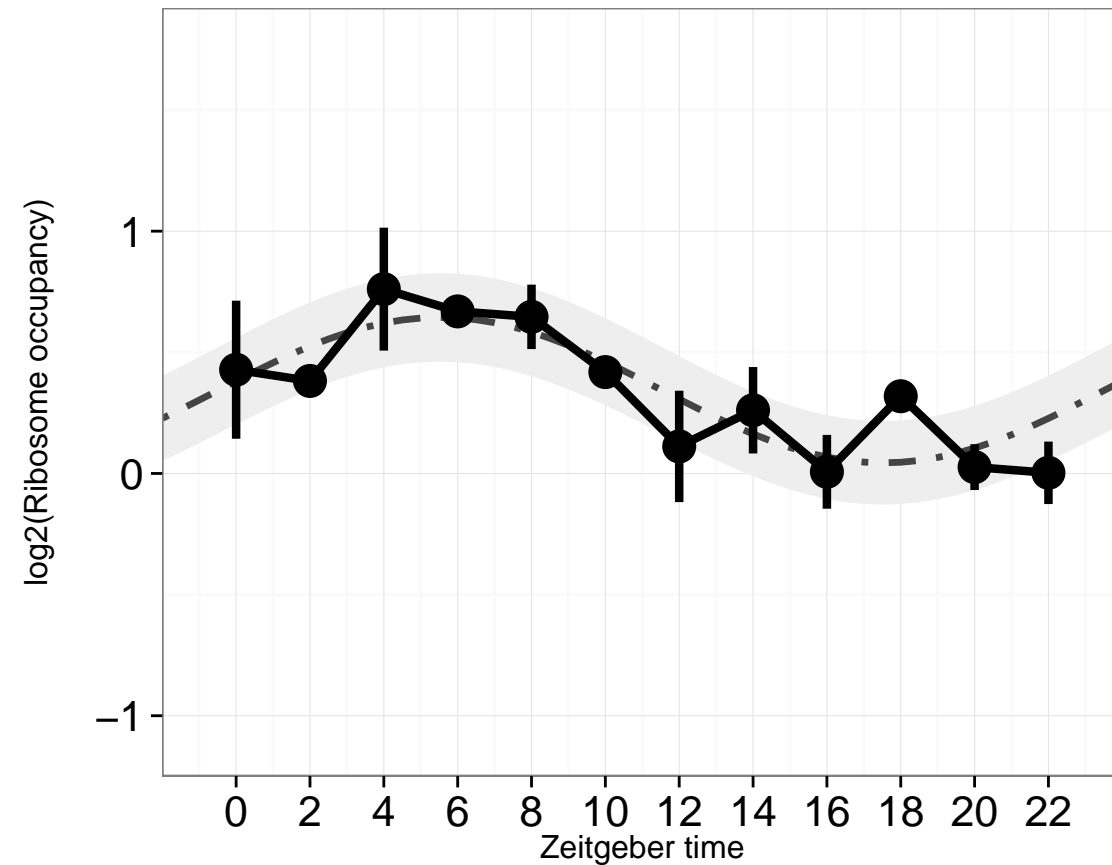

Supplement: Supplementary file 8839 [file 1]

# Dnajc18

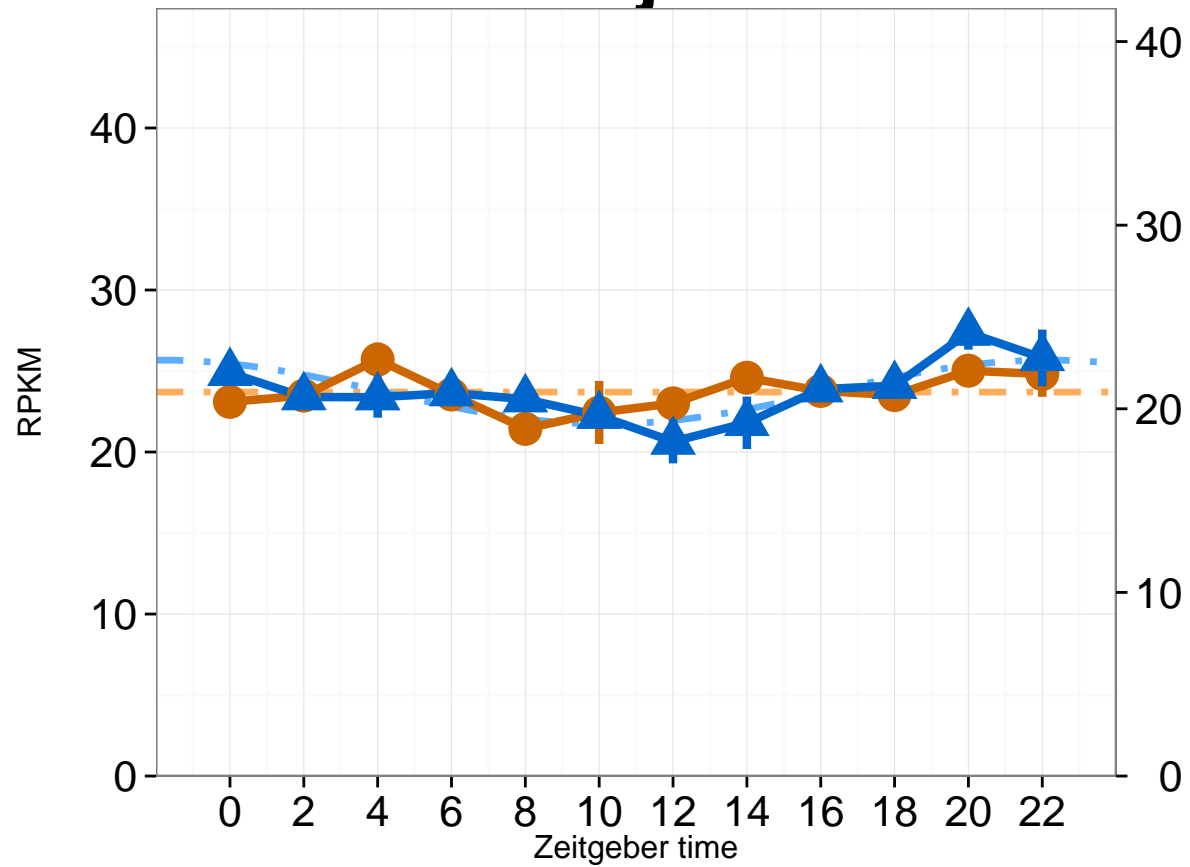

# Dnajc18

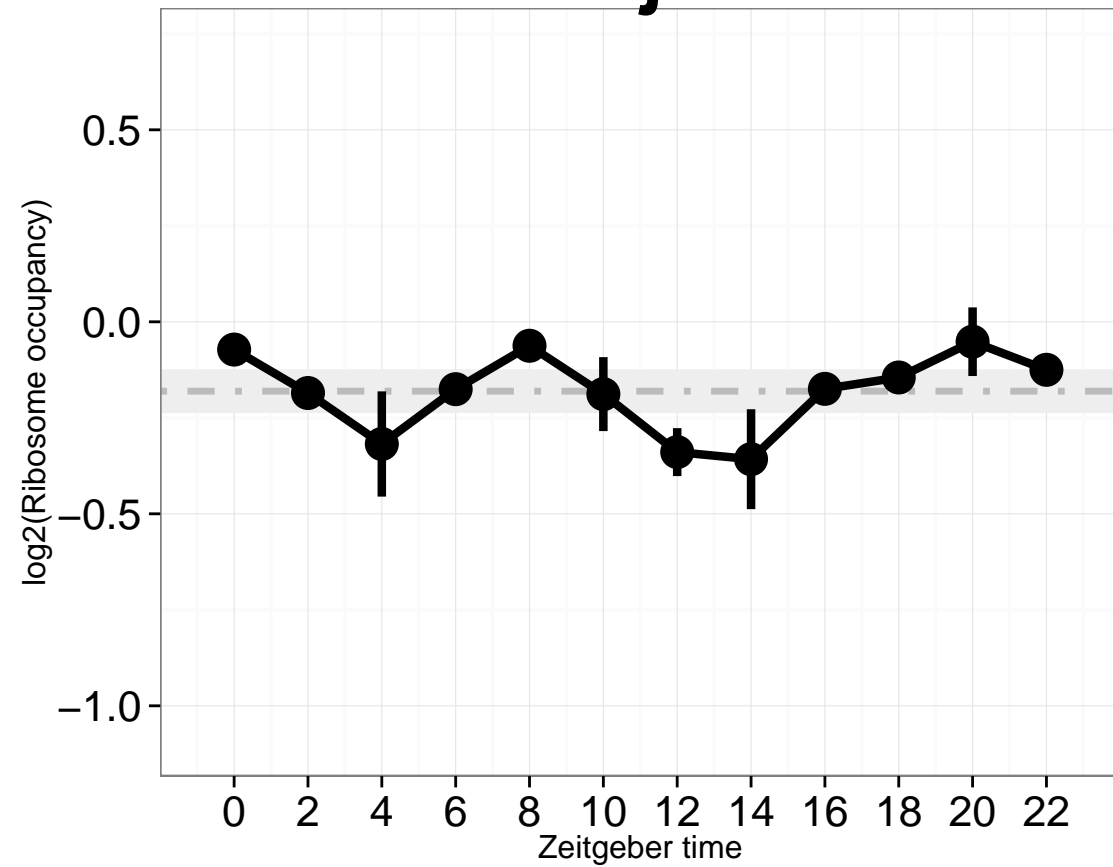

Supplement: Supplementary file 8840 [file 1]

# Slc31a1

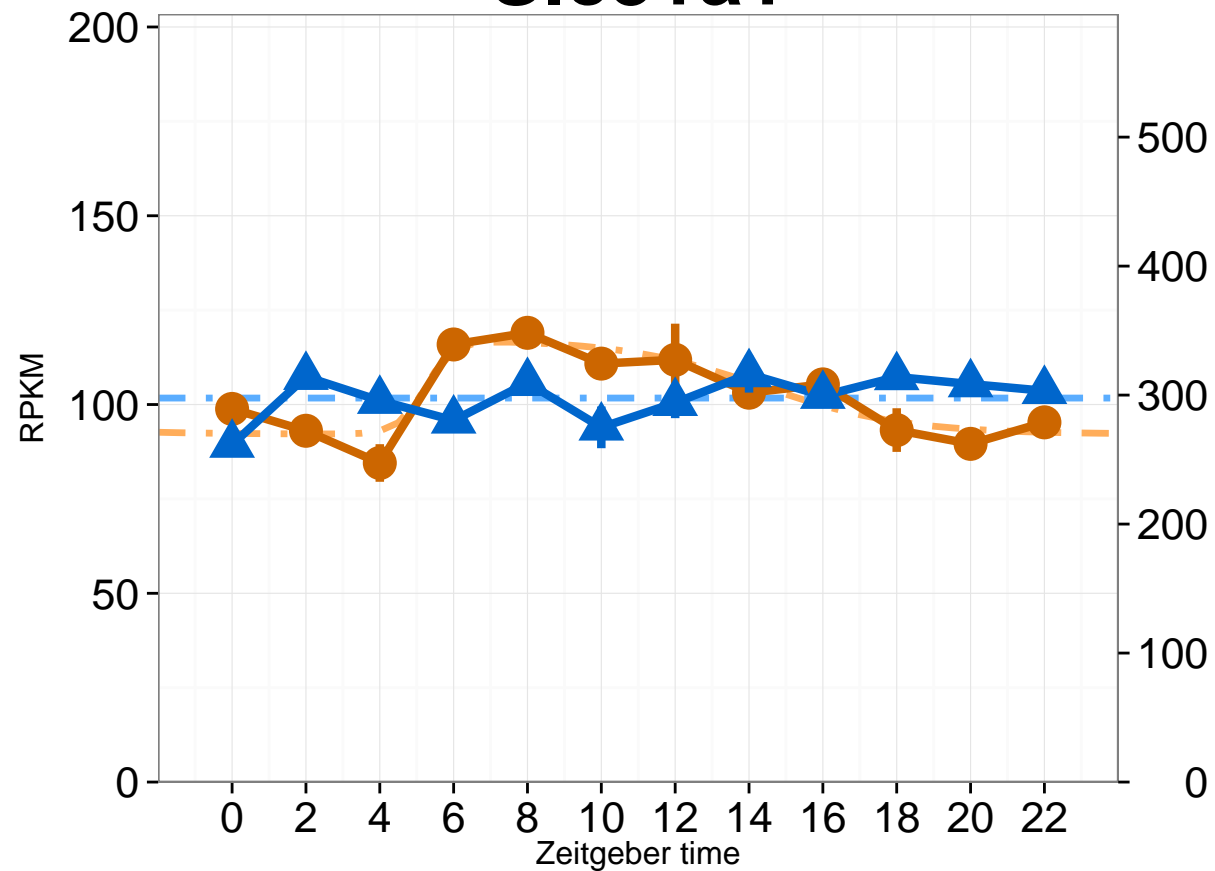

# Slc31a1

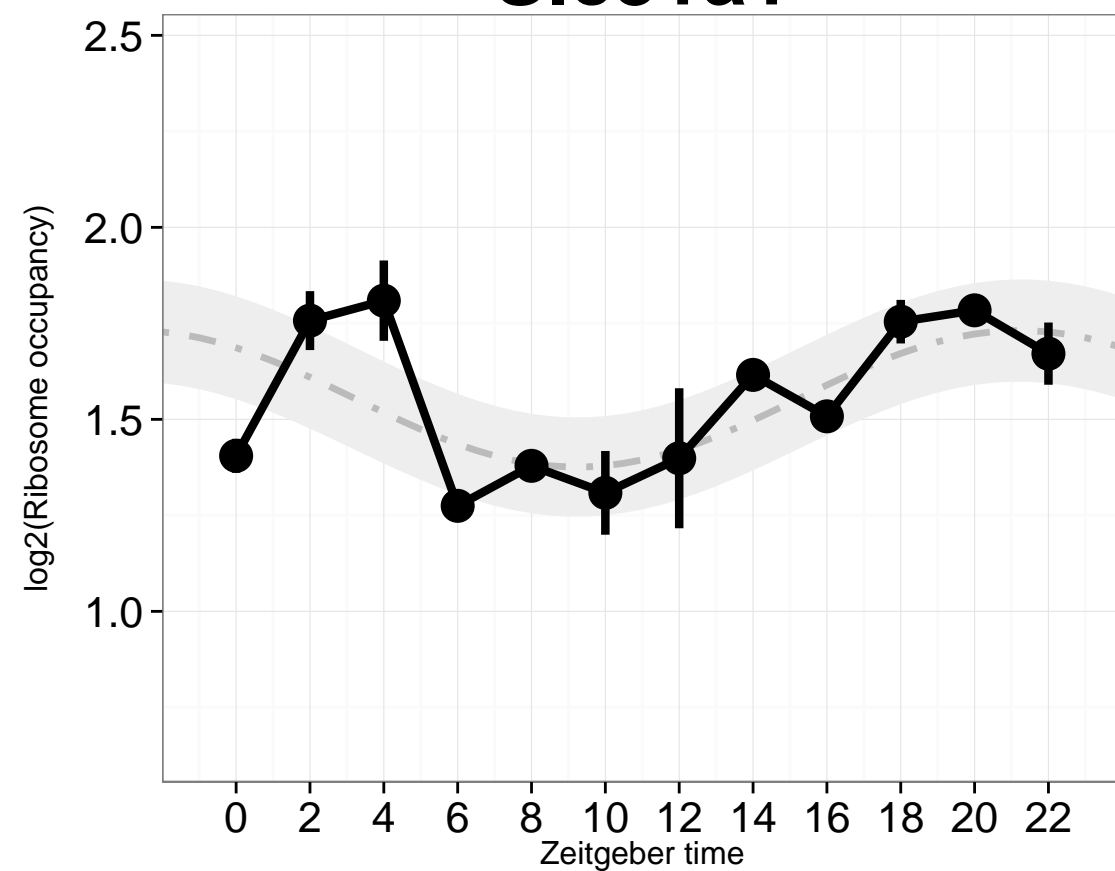

Supplement: Supplementary file 8841 [file 1]

## Arf5

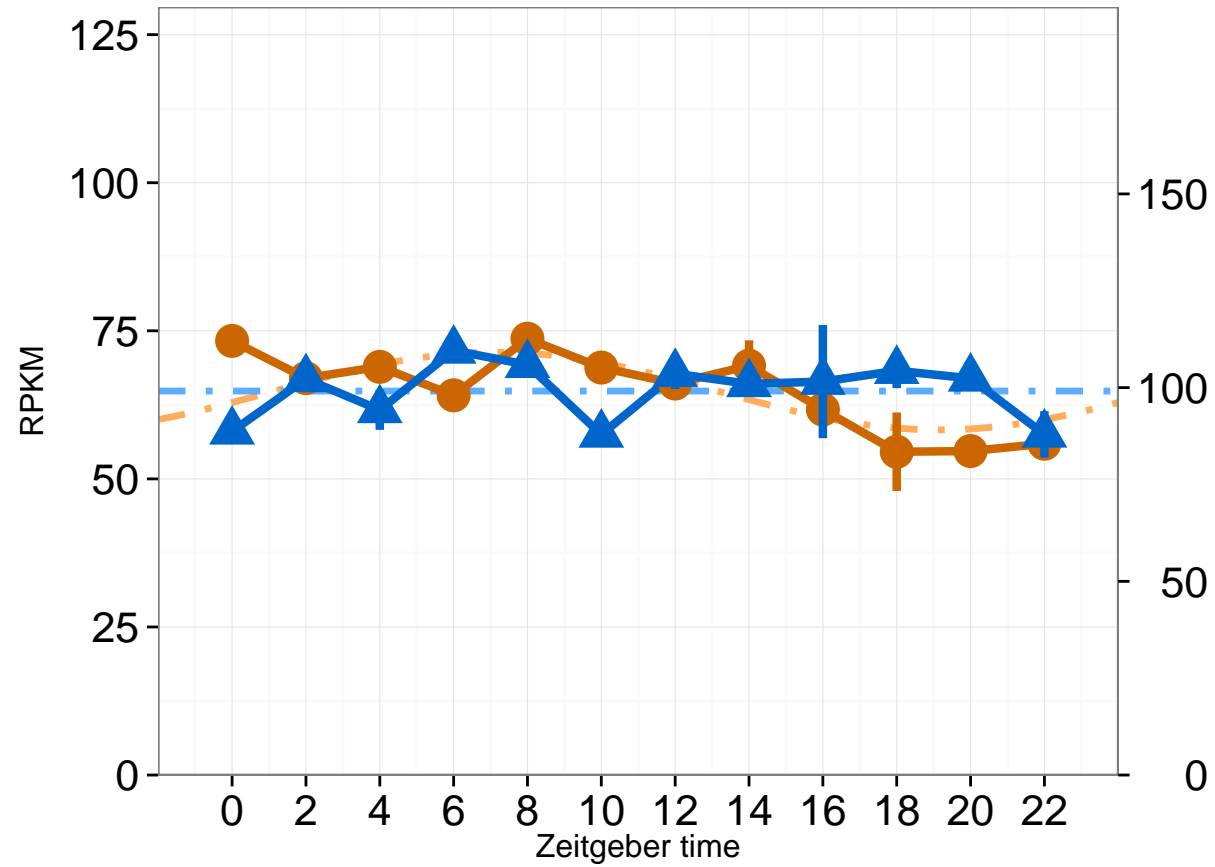

## Arf5

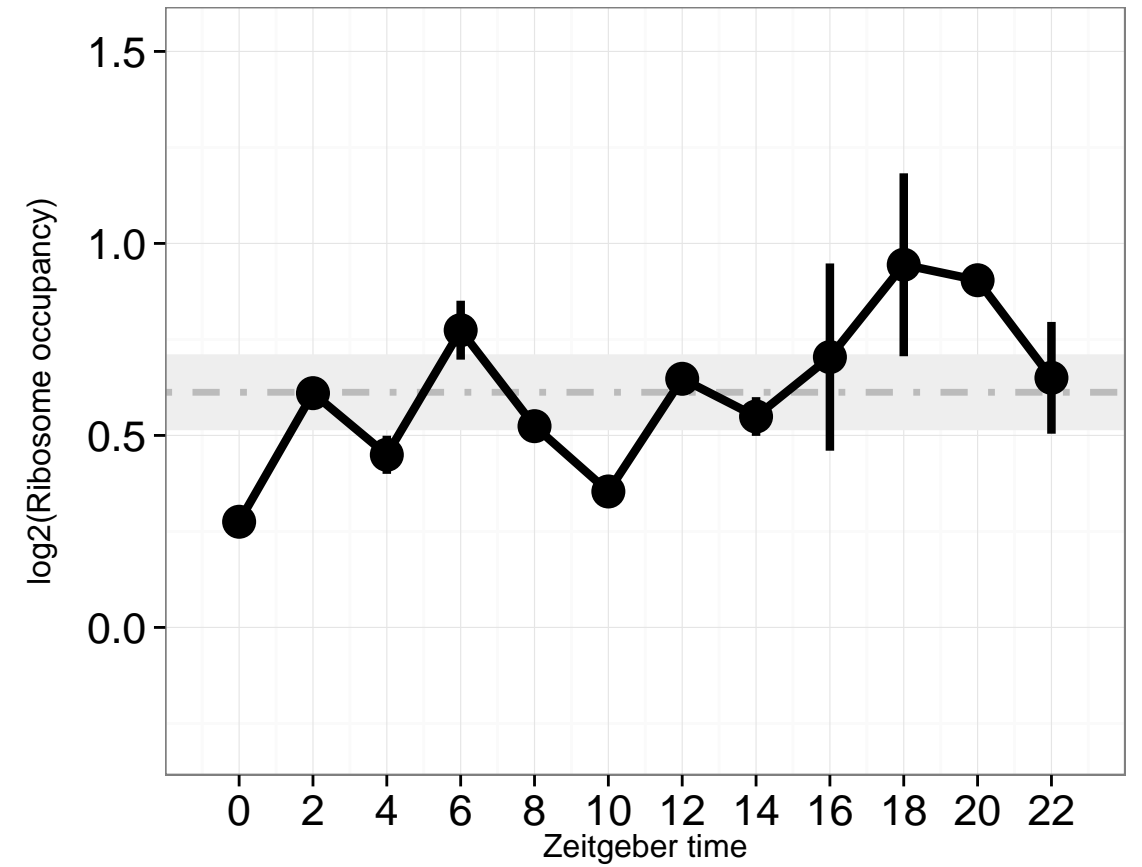

Supplement: Supplementary file 8842 [file 1]

## Hira

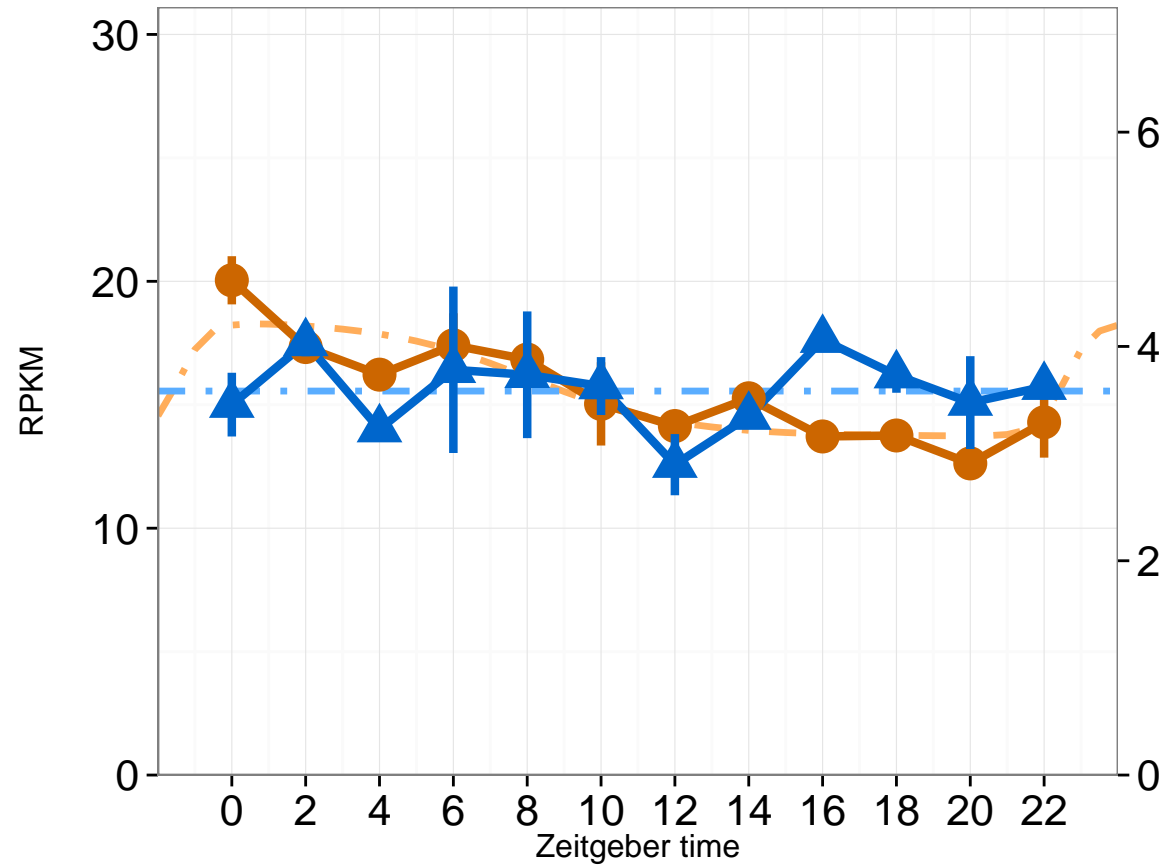

## Hira

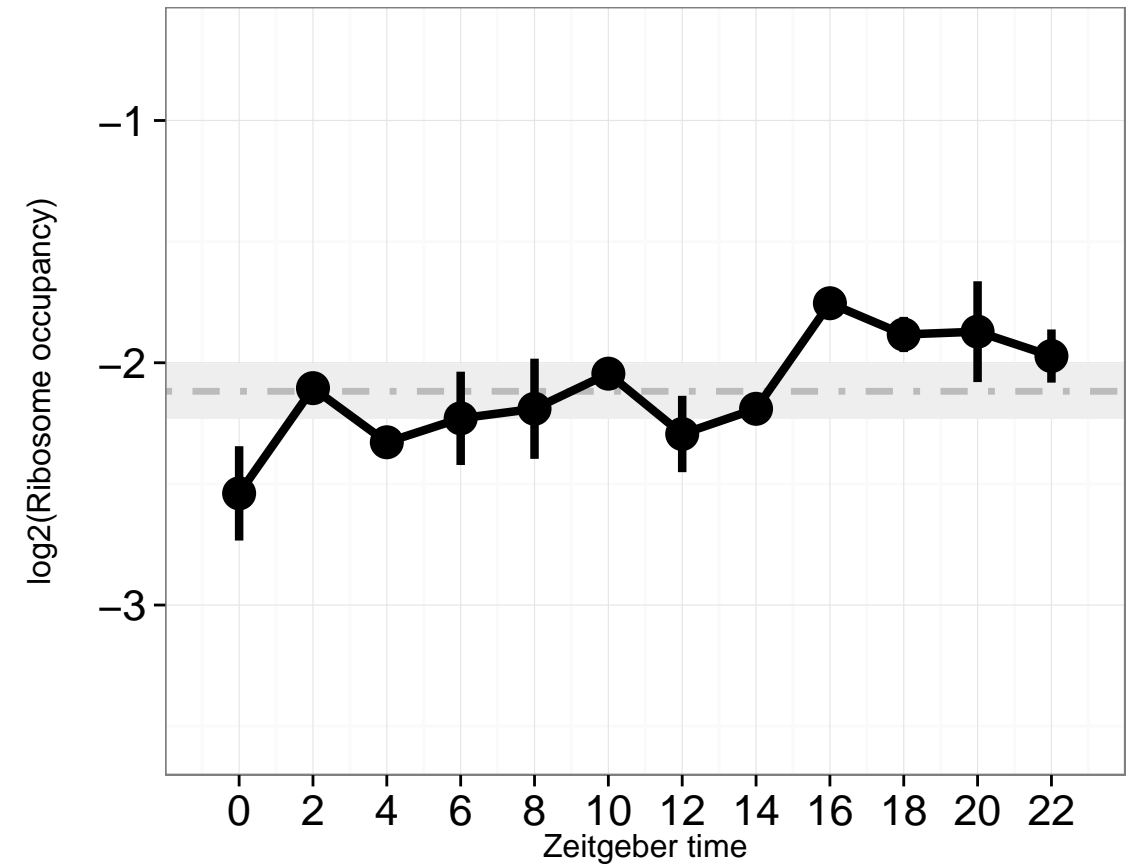

Supplement: Supplementary file 8843 [file 1]

## Soga2

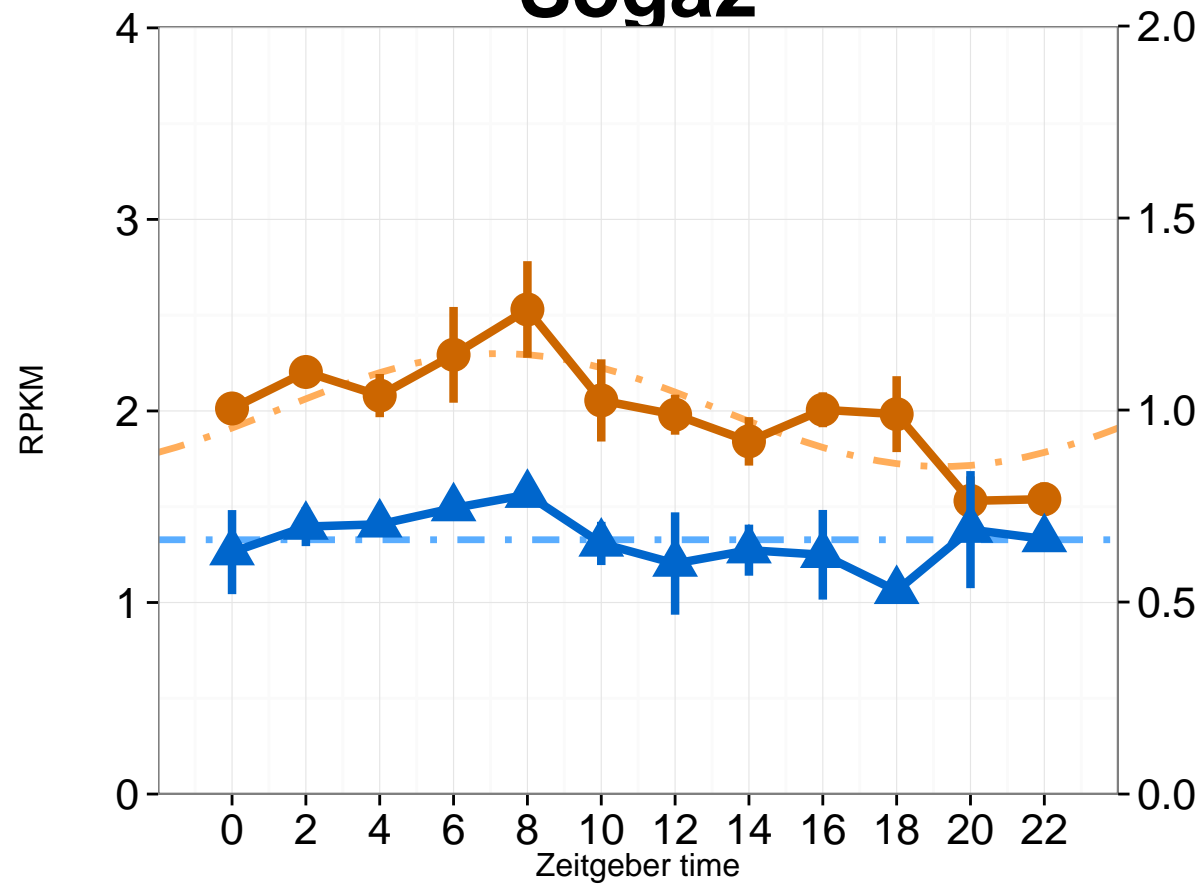

## Soga2

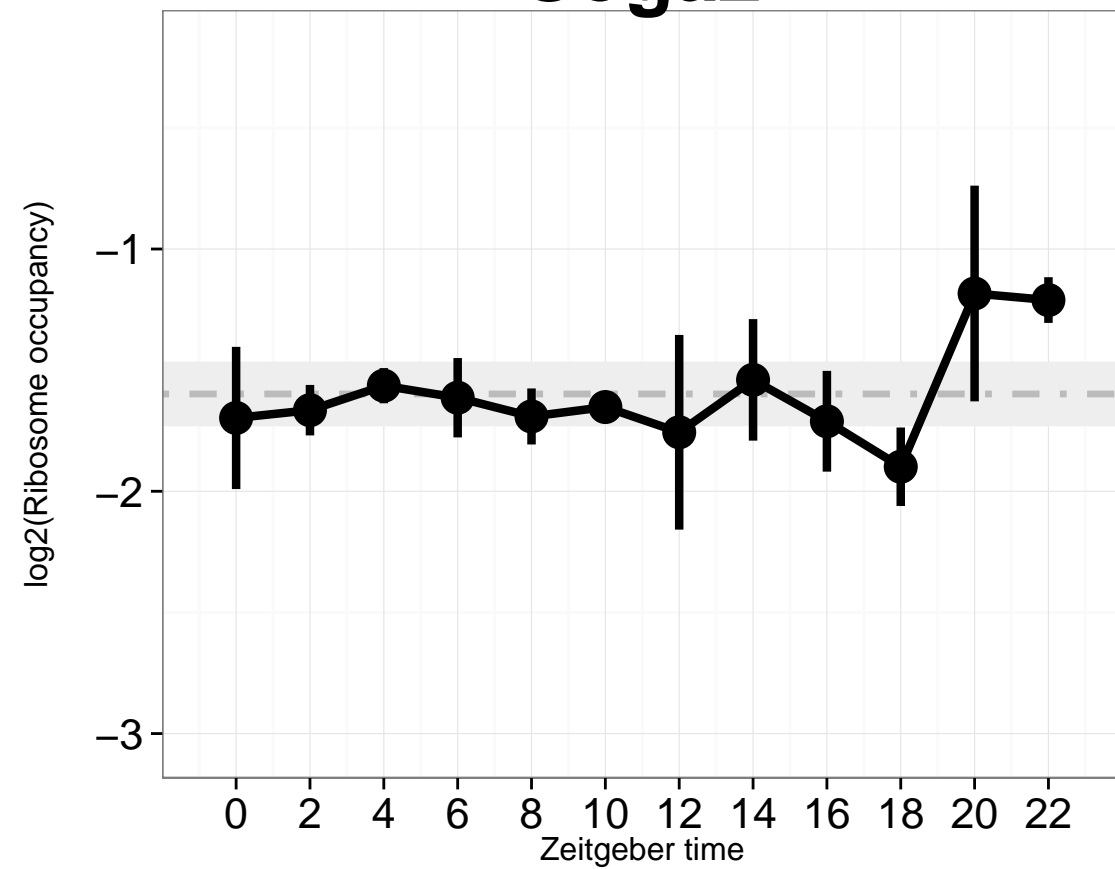

Supplement: Supplementary file 8844 [file 1]

## Ptges2

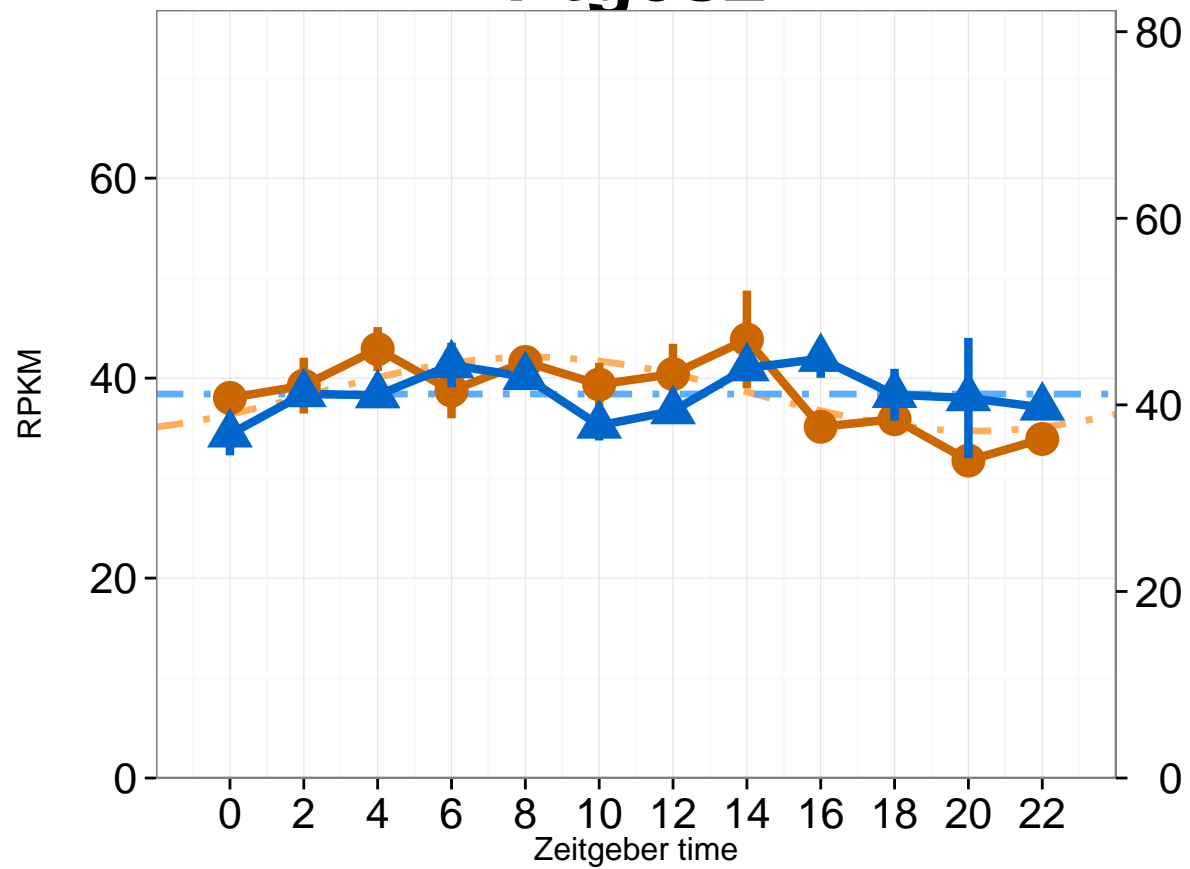

## Ptges2

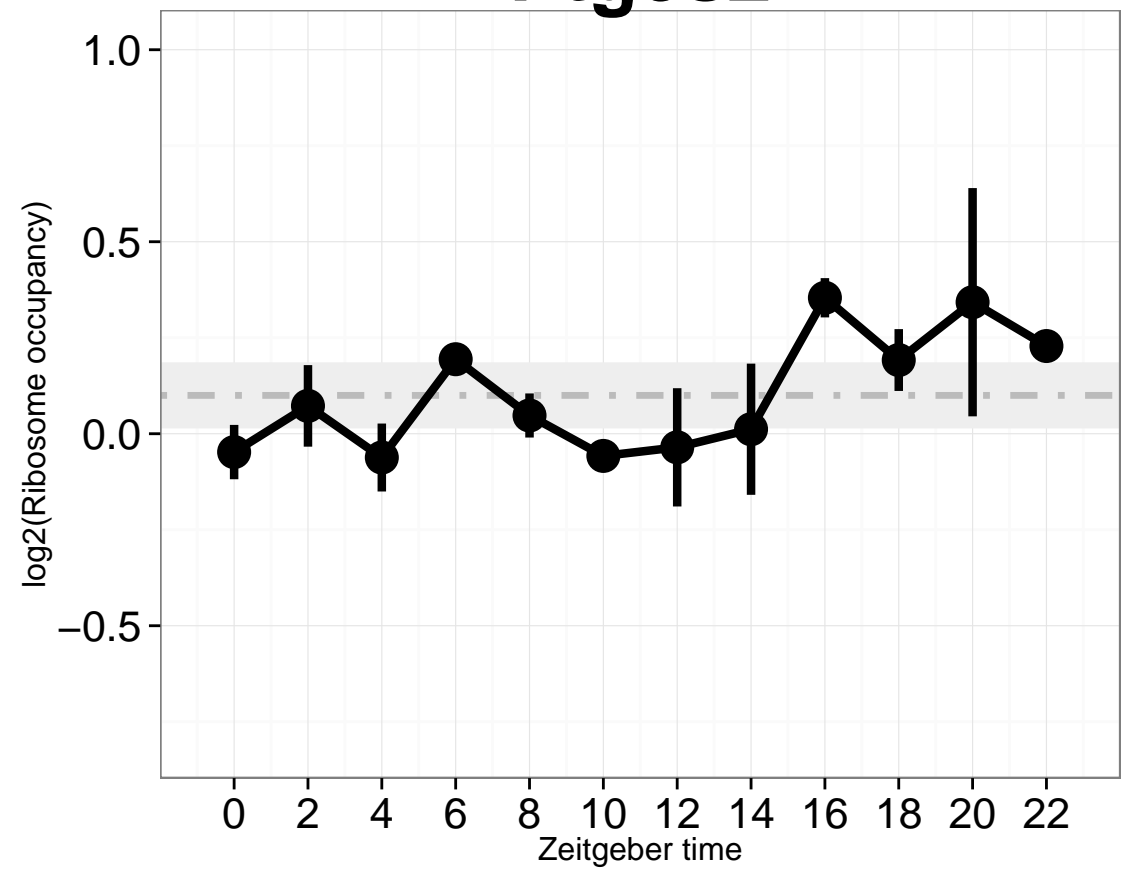

Supplement: Supplementary file 8845 [file 1]

# Lrrc49

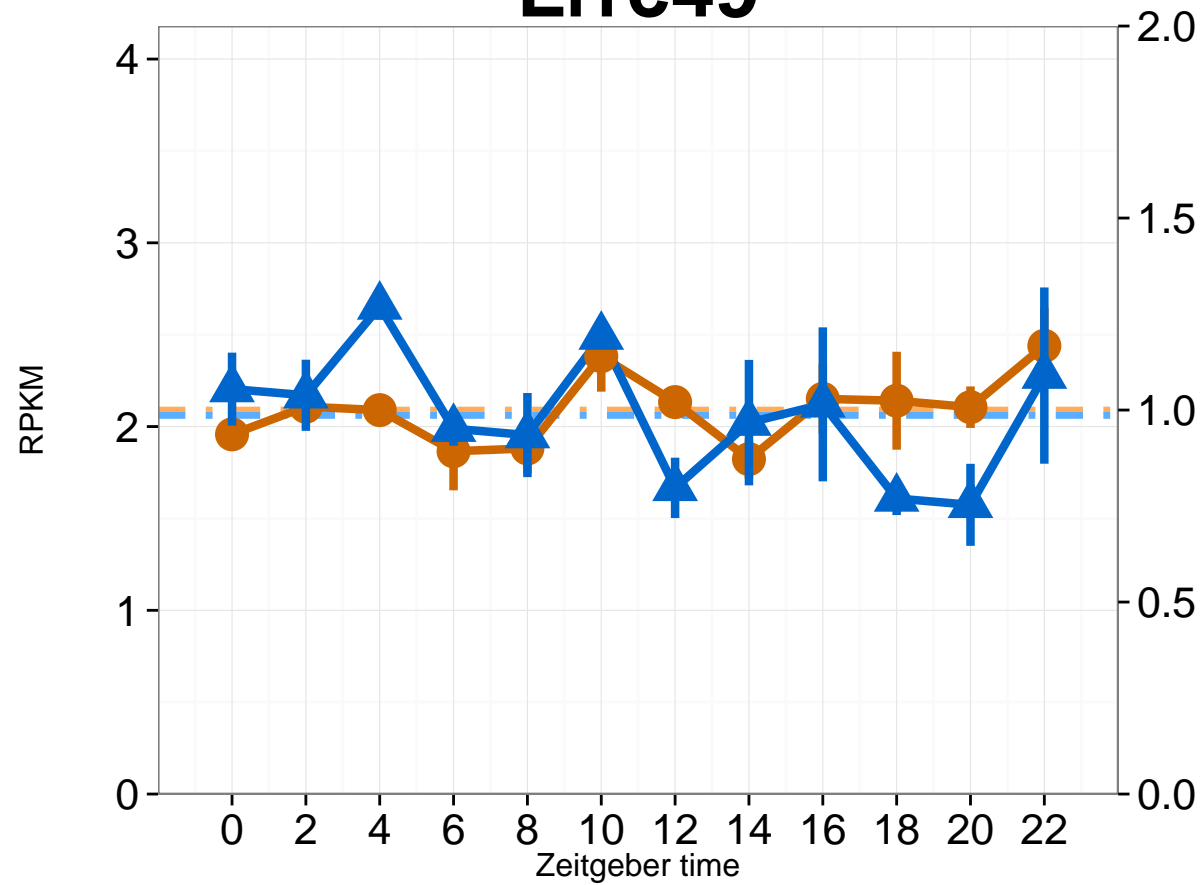

# Lrrc49

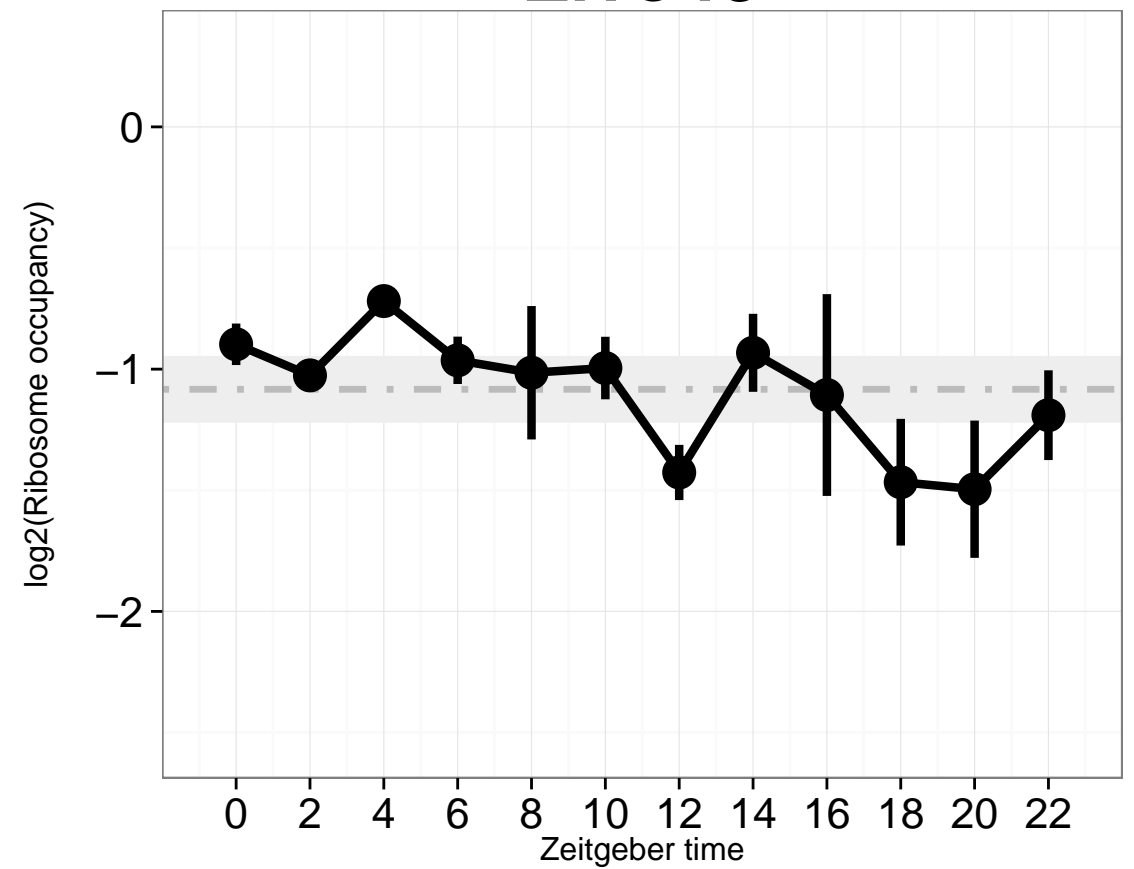

Supplement: Supplementary file 8846 [file 1]

# Rufy3

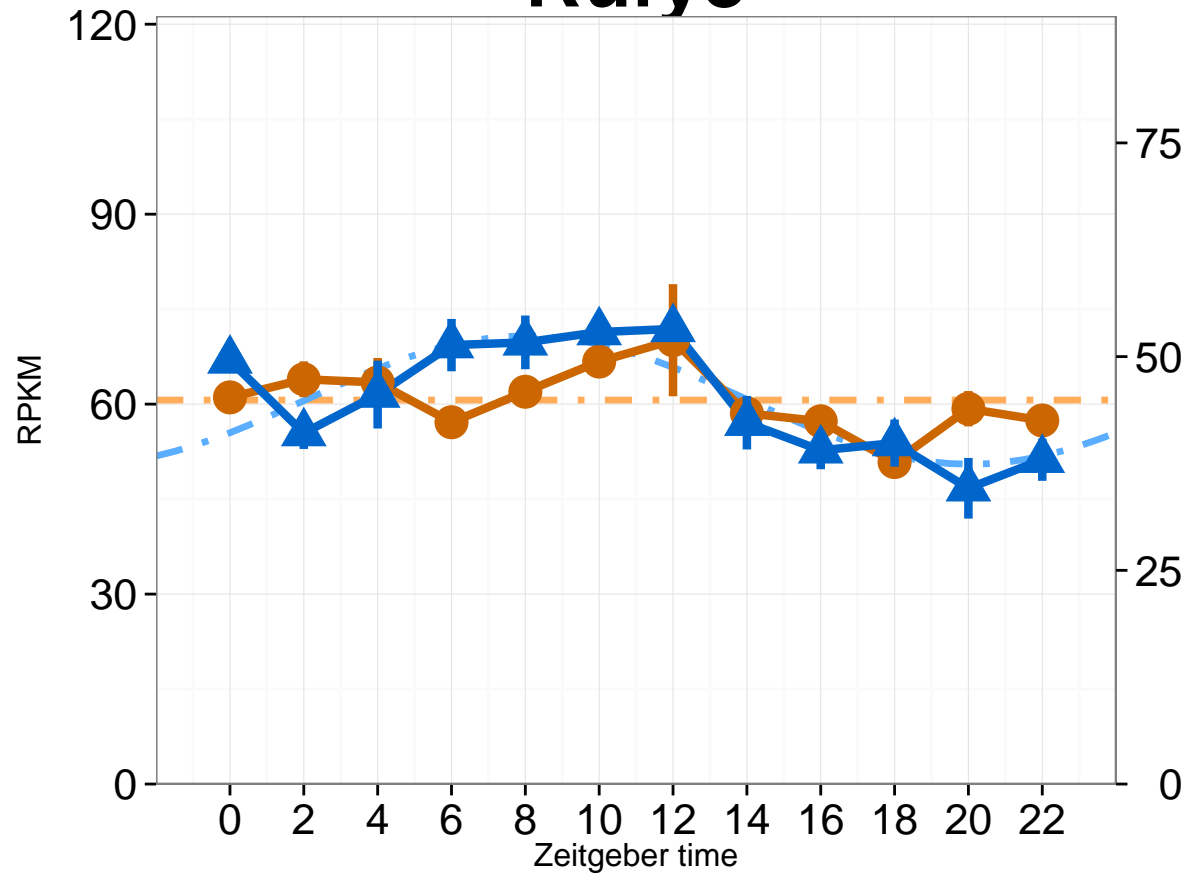

# Rufy3

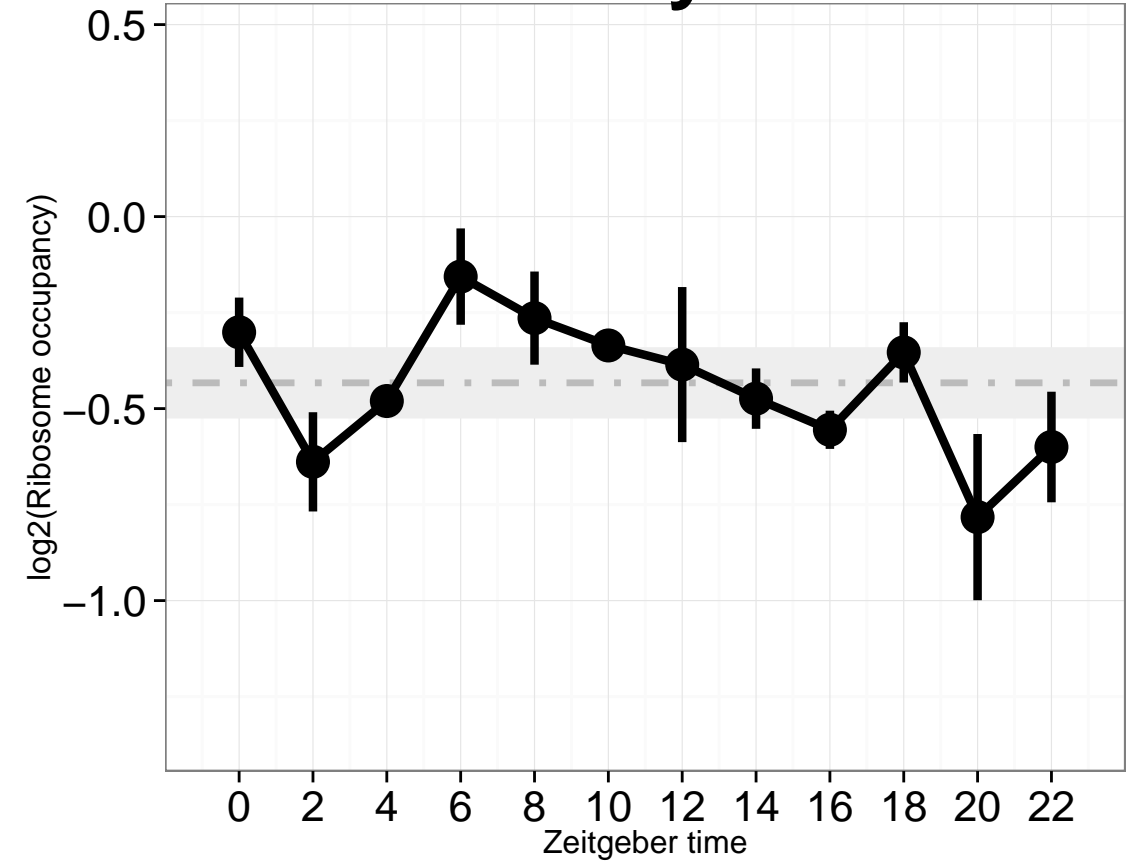

Supplement: Supplementary file 8847 [file 1]

## Syt14

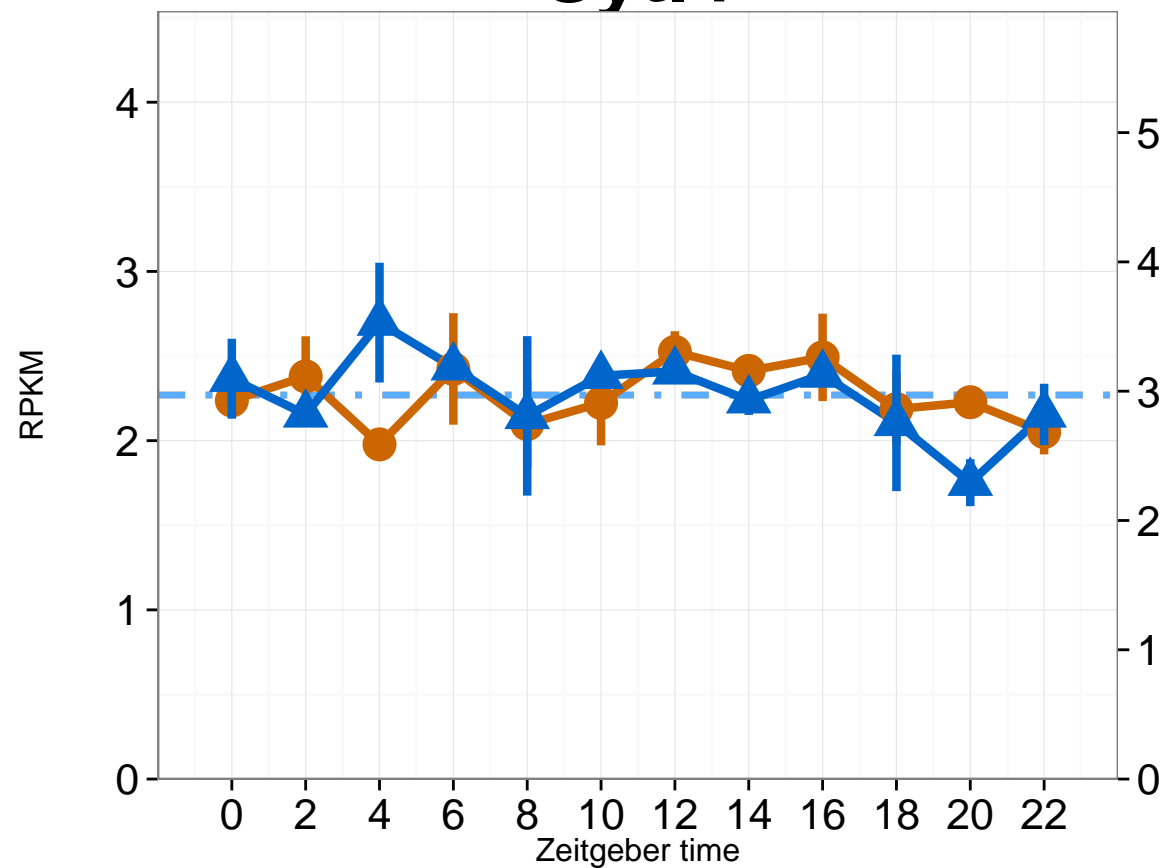

## Syt14

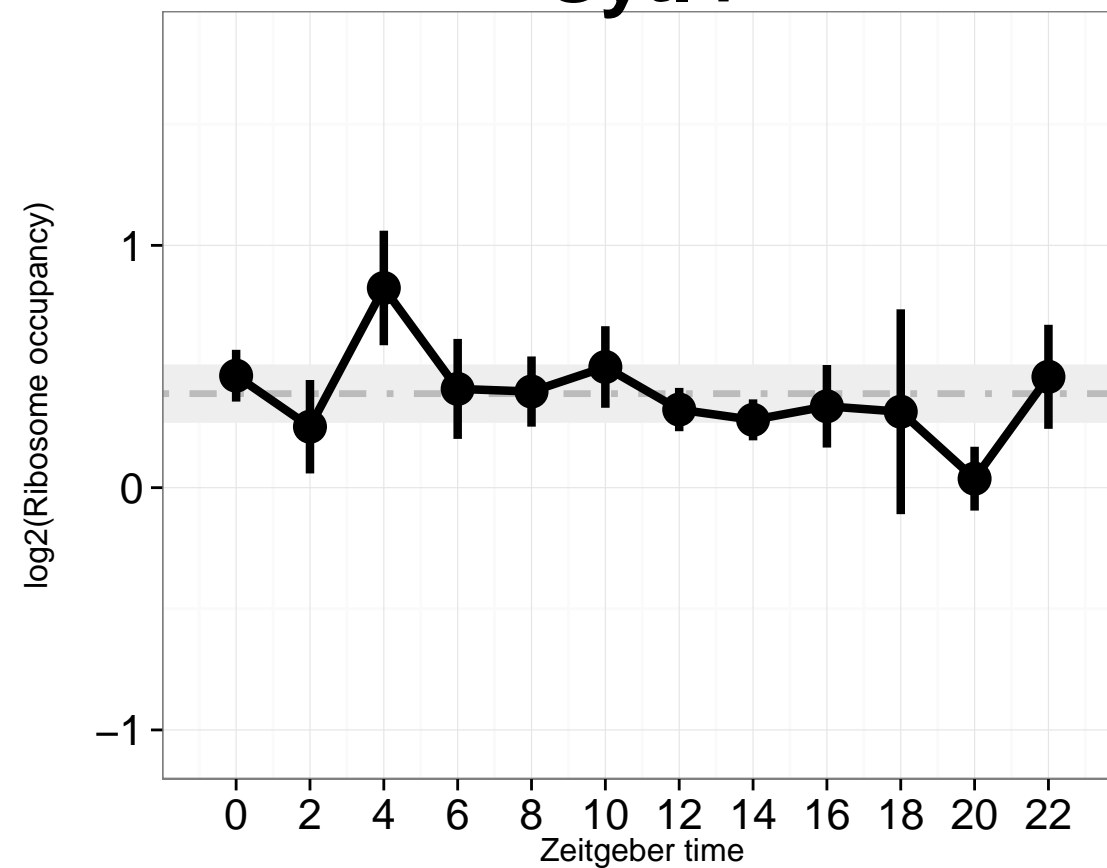

Supplement: Supplementary file 8848 [file 1]

## Rac1

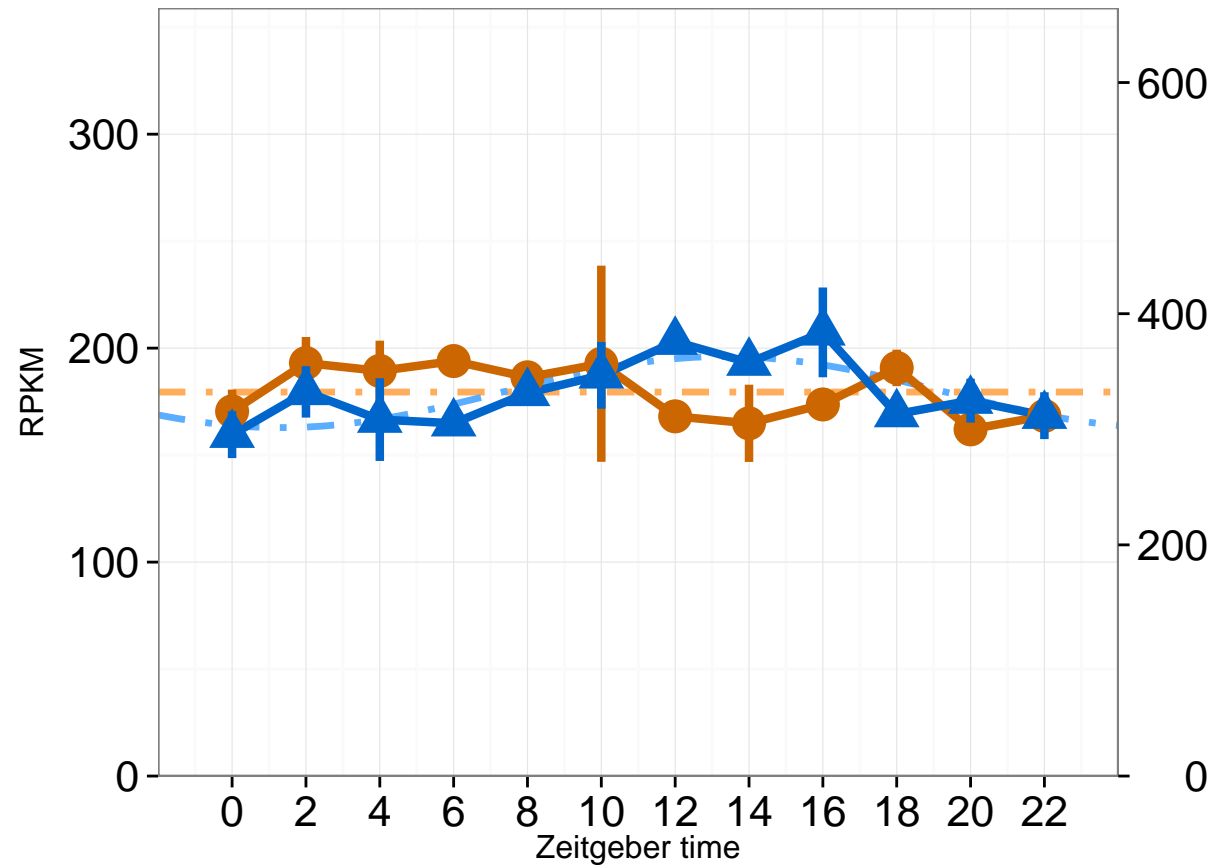

## Rac1

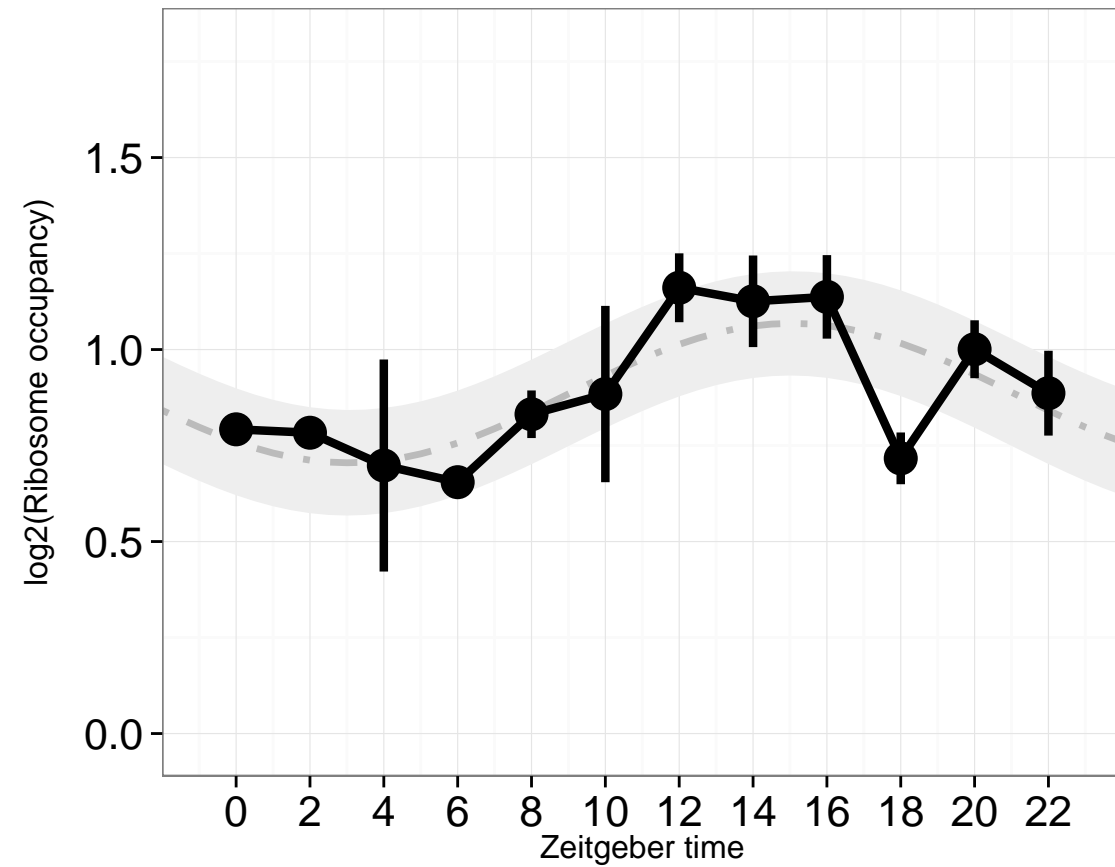

Supplement: Supplementary file 8849 [file 1]

# Atrn

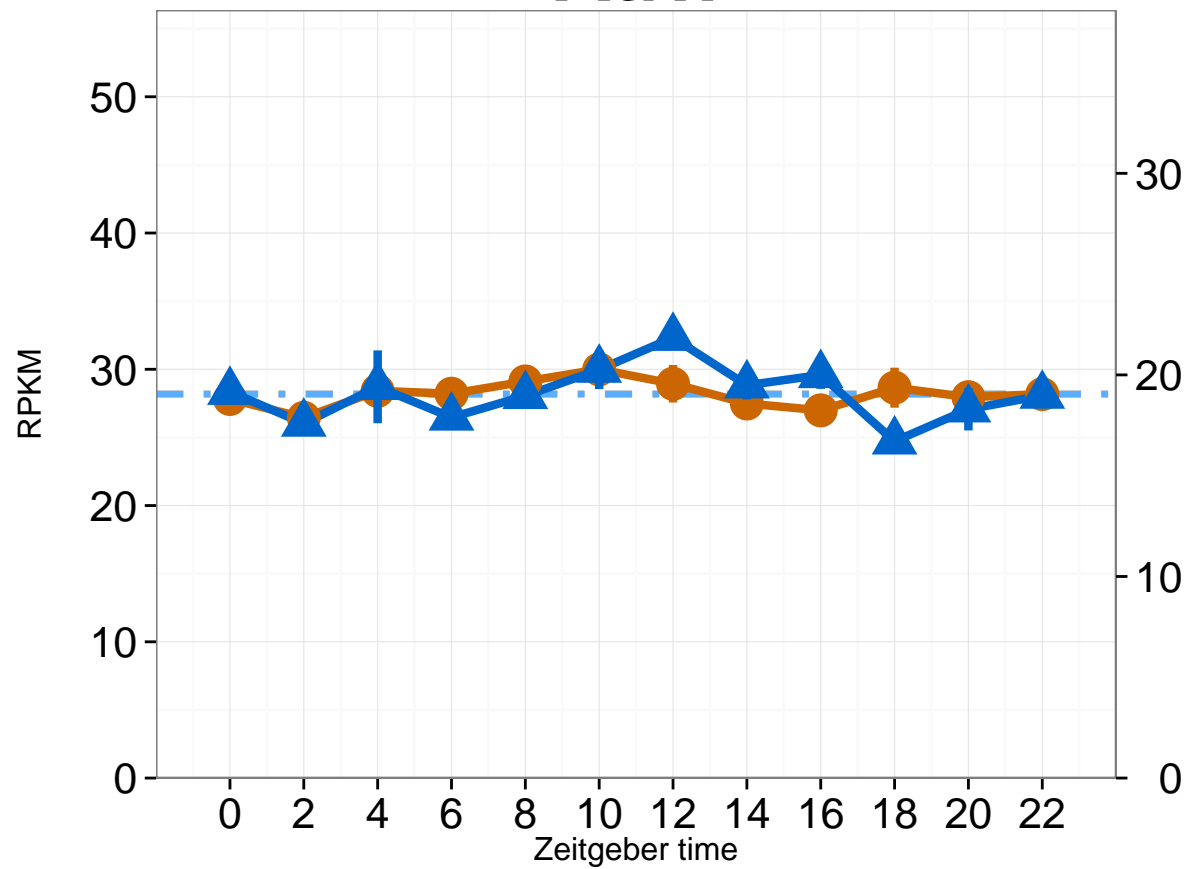

# Atrn

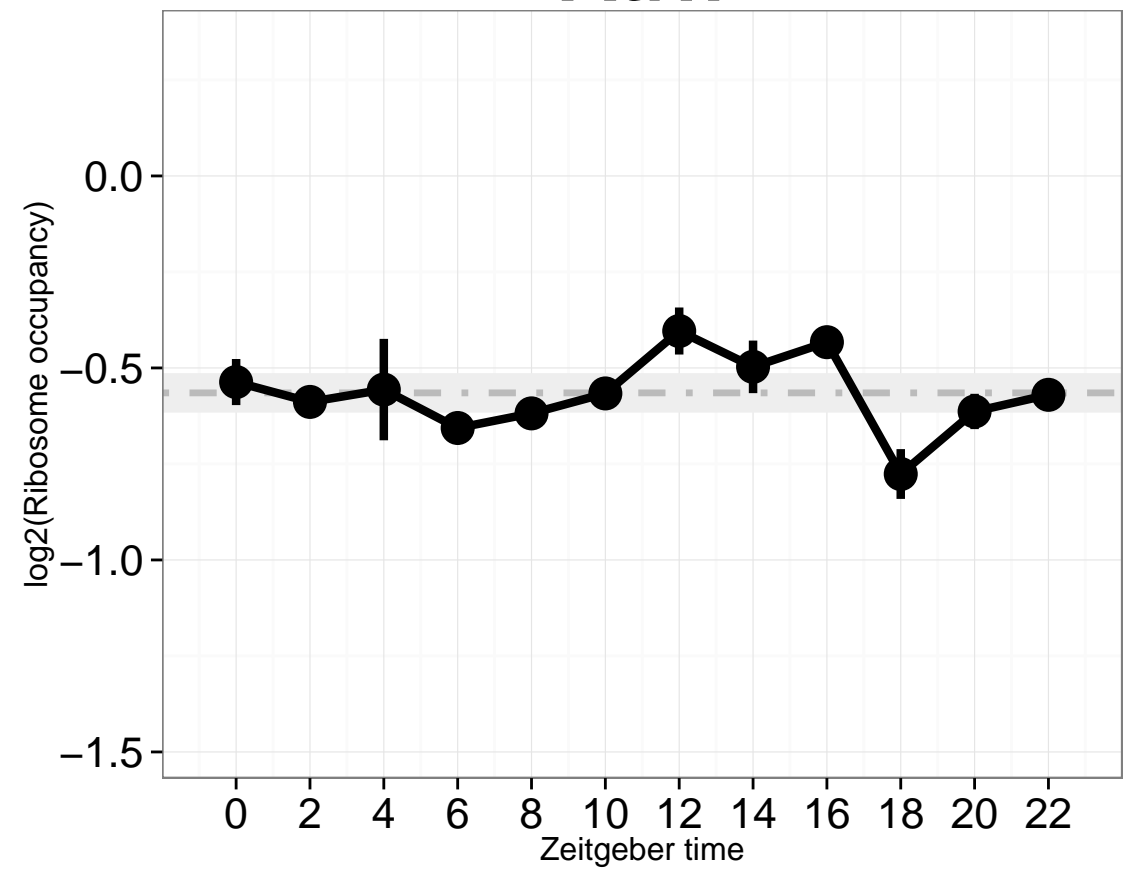

Supplement: Supplementary file 8850 [file 1]

## Cyp27a1

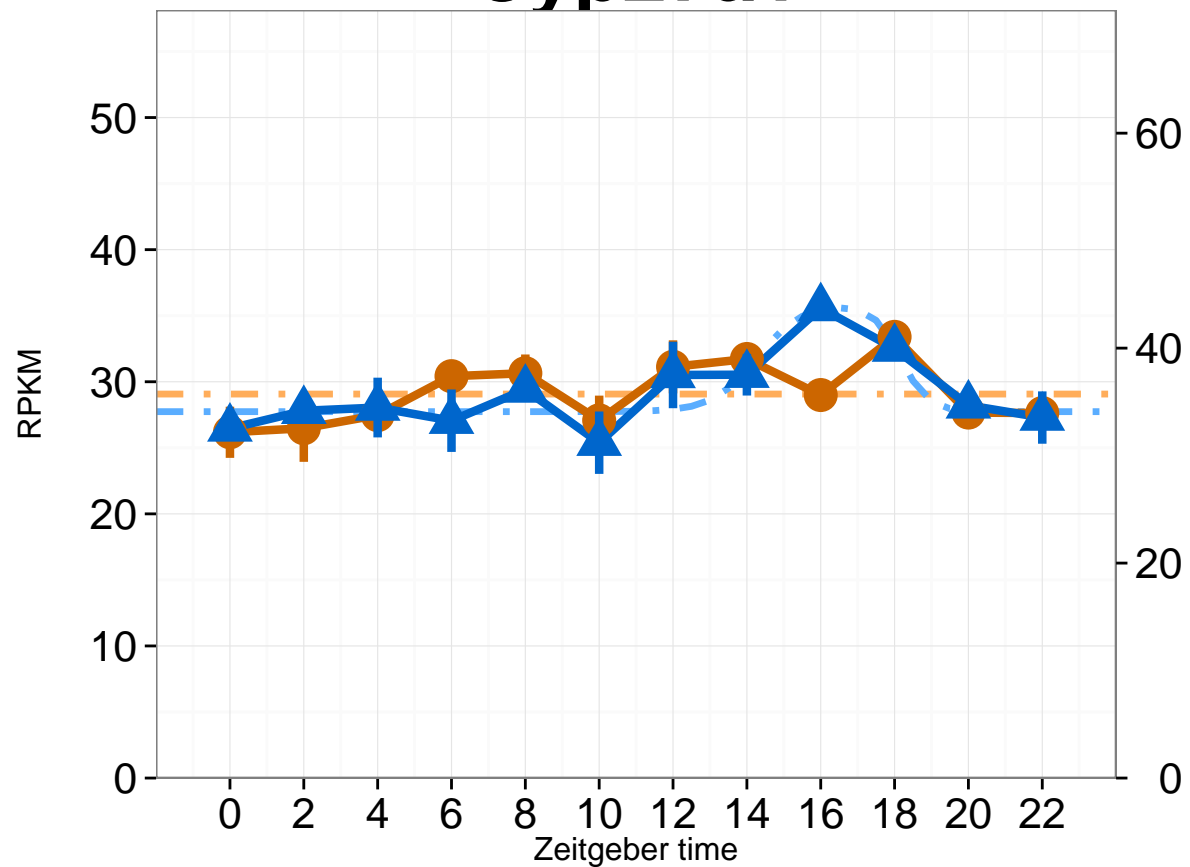

## Cyp27a1

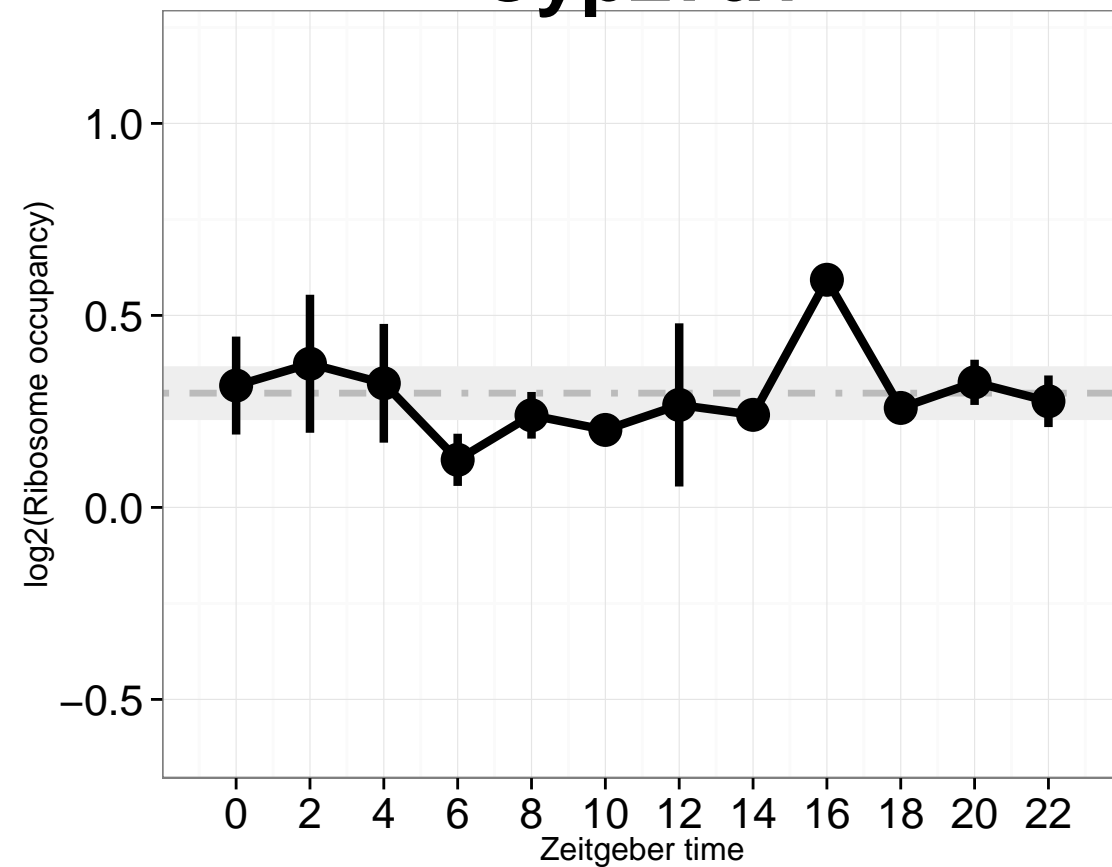

Supplement: Supplementary file 8851 [file 1]

# Chmp2b

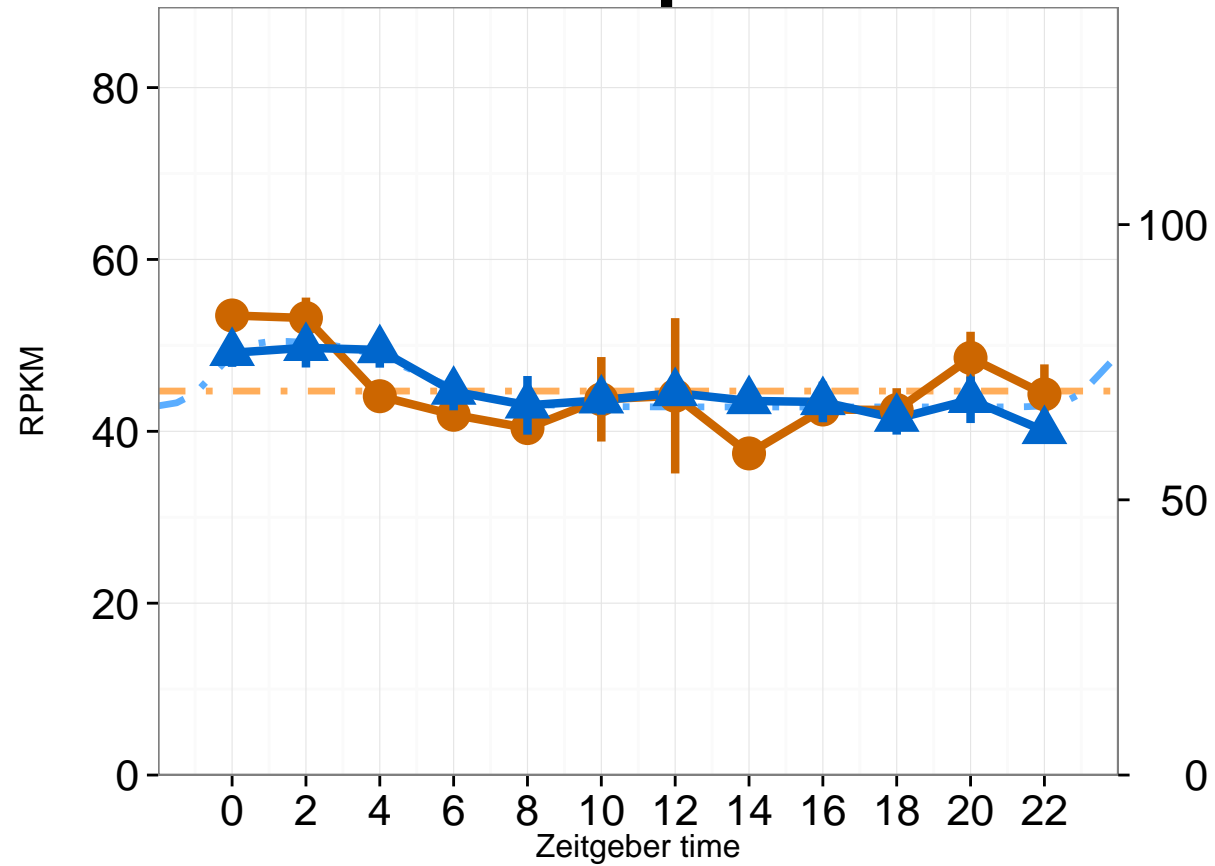

# Chmp2b

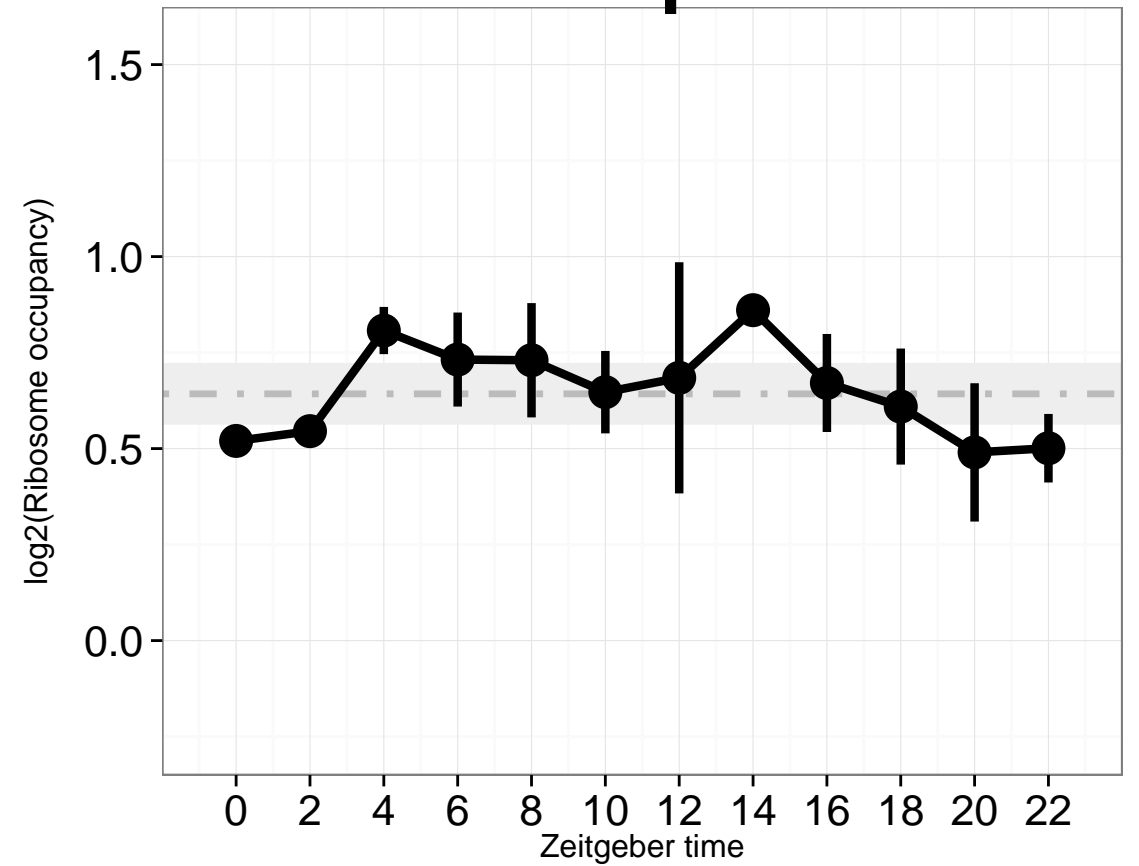

Supplement: Supplementary file 8852 [file 1]

## Exosc5

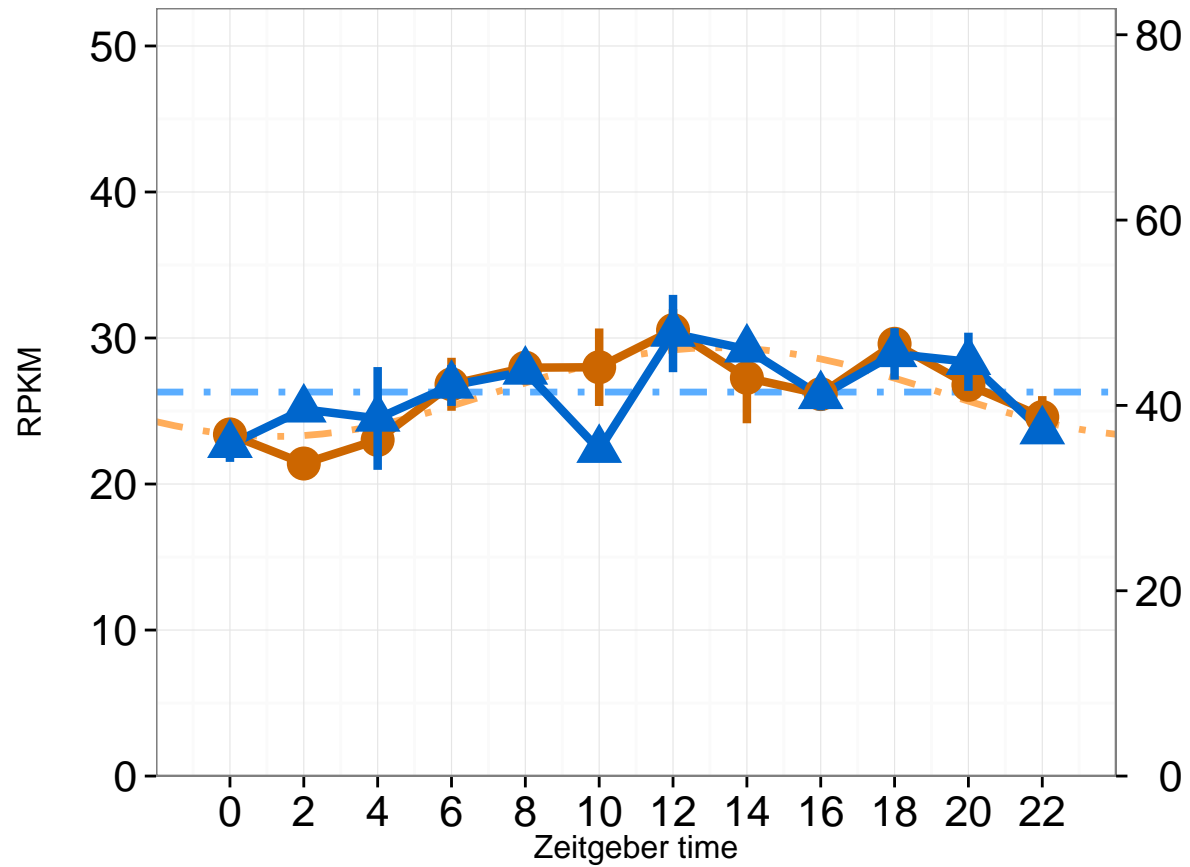

## Exosc5

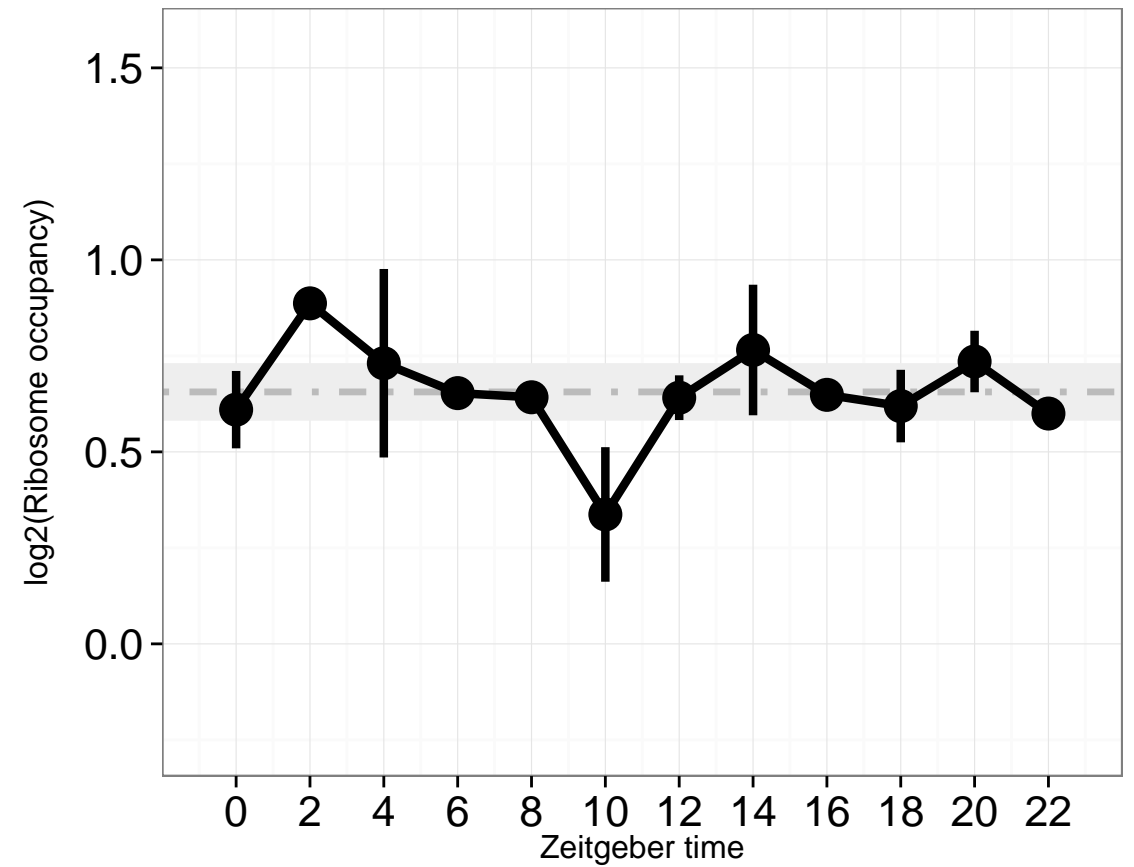

Supplement: Supplementary file 8853 [file 1]

# 1810011O10Rik

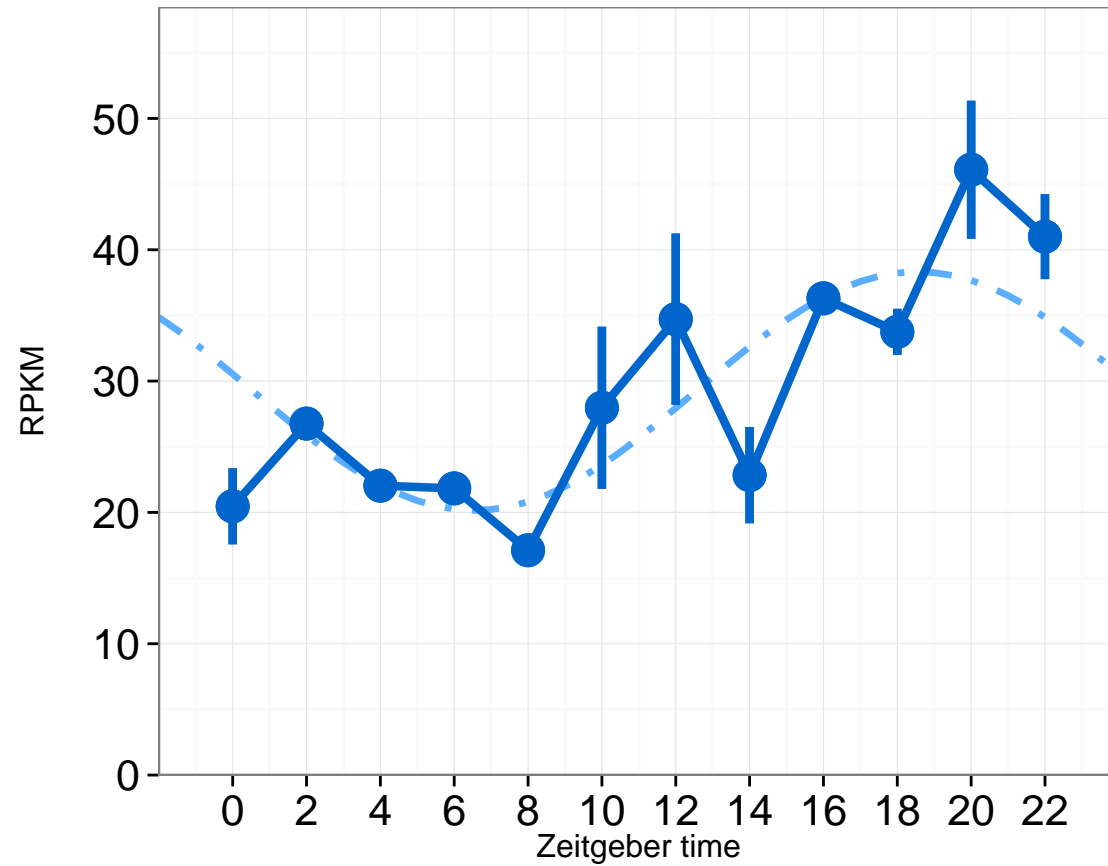

# 1810011O10Rik log2(Ribosome occup

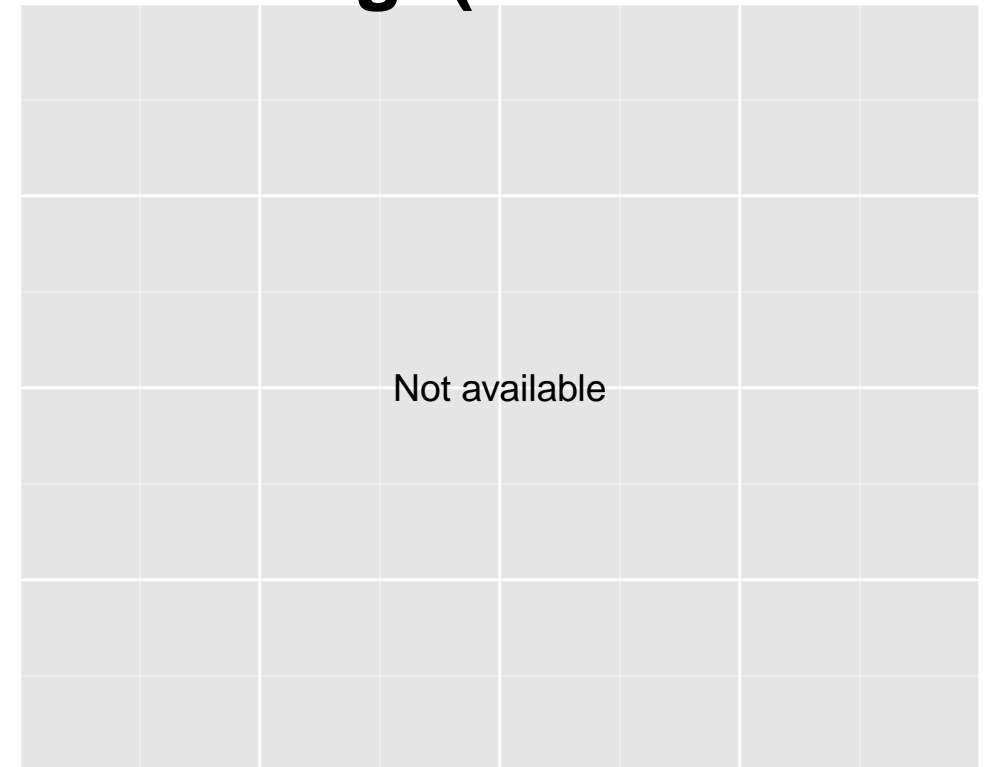

Supplement: Supplementary file 8854 [file 1]

## Smyd2

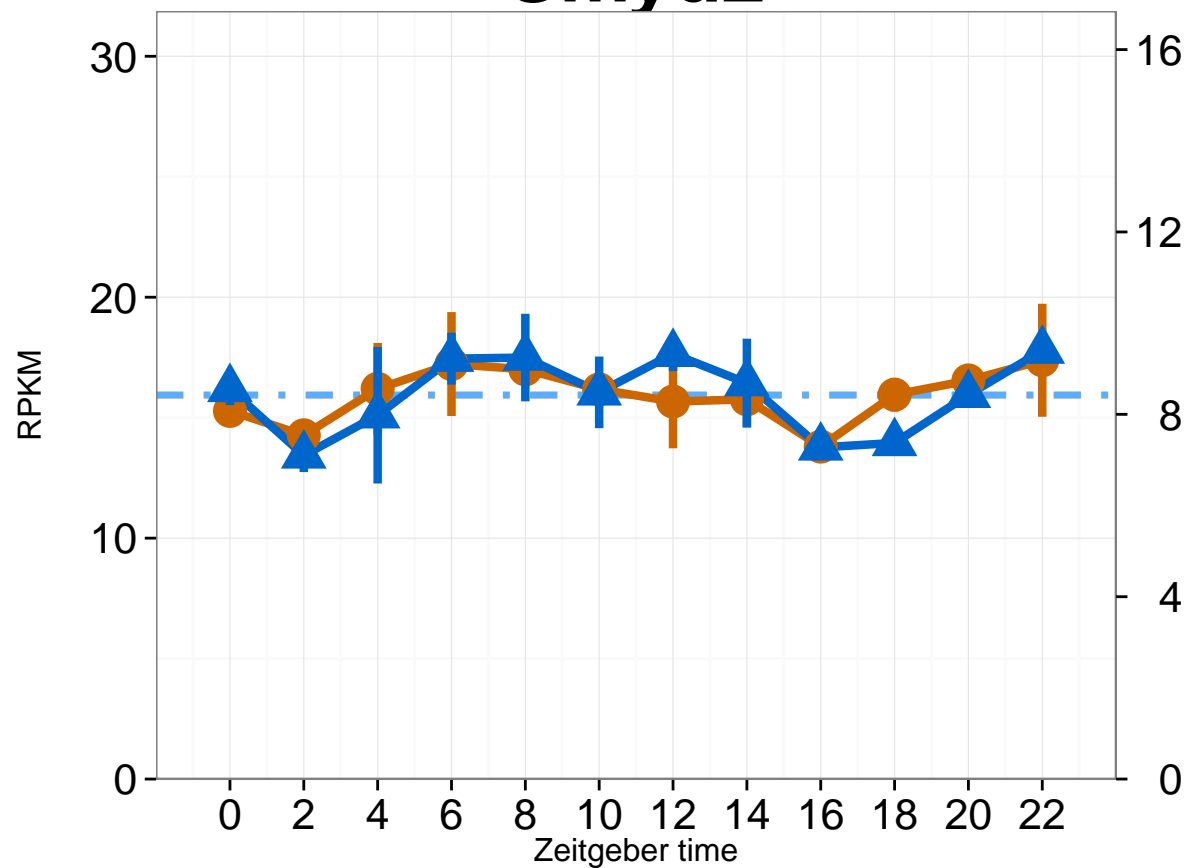

## Smyd2

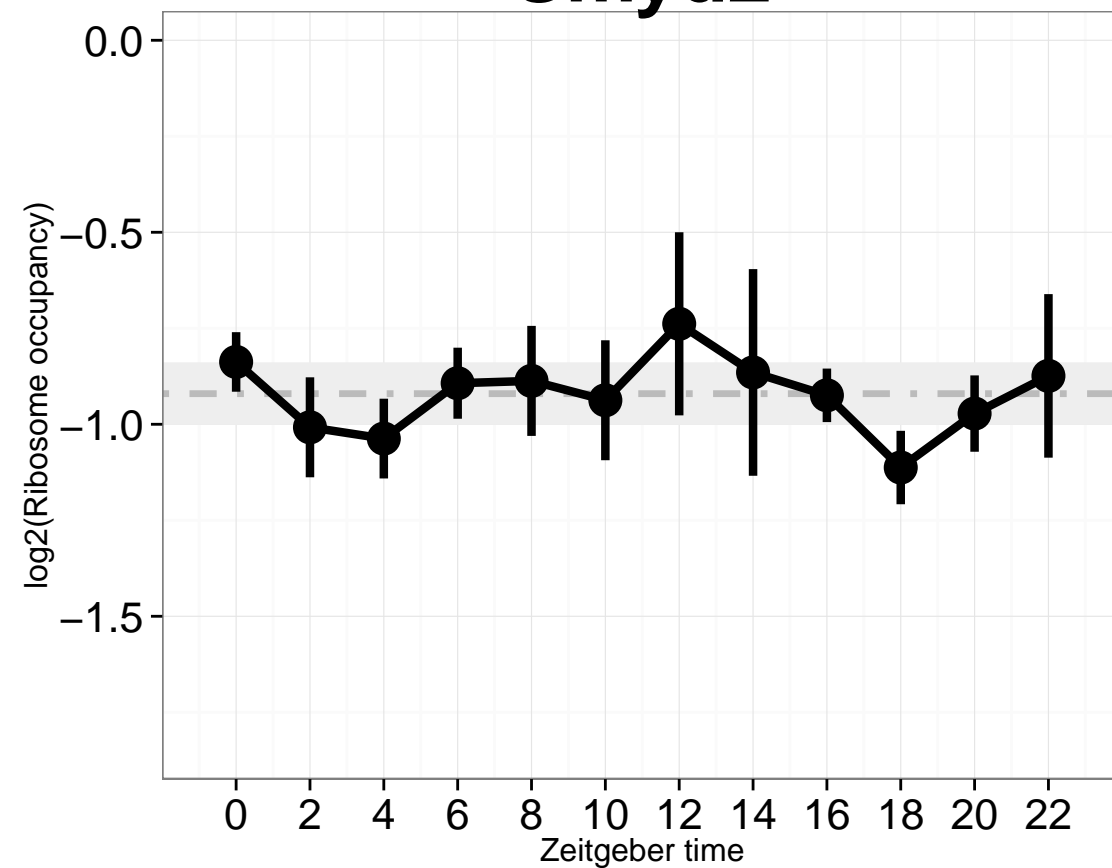

Supplement: Supplementary file 8855 [file 1]

## Uros

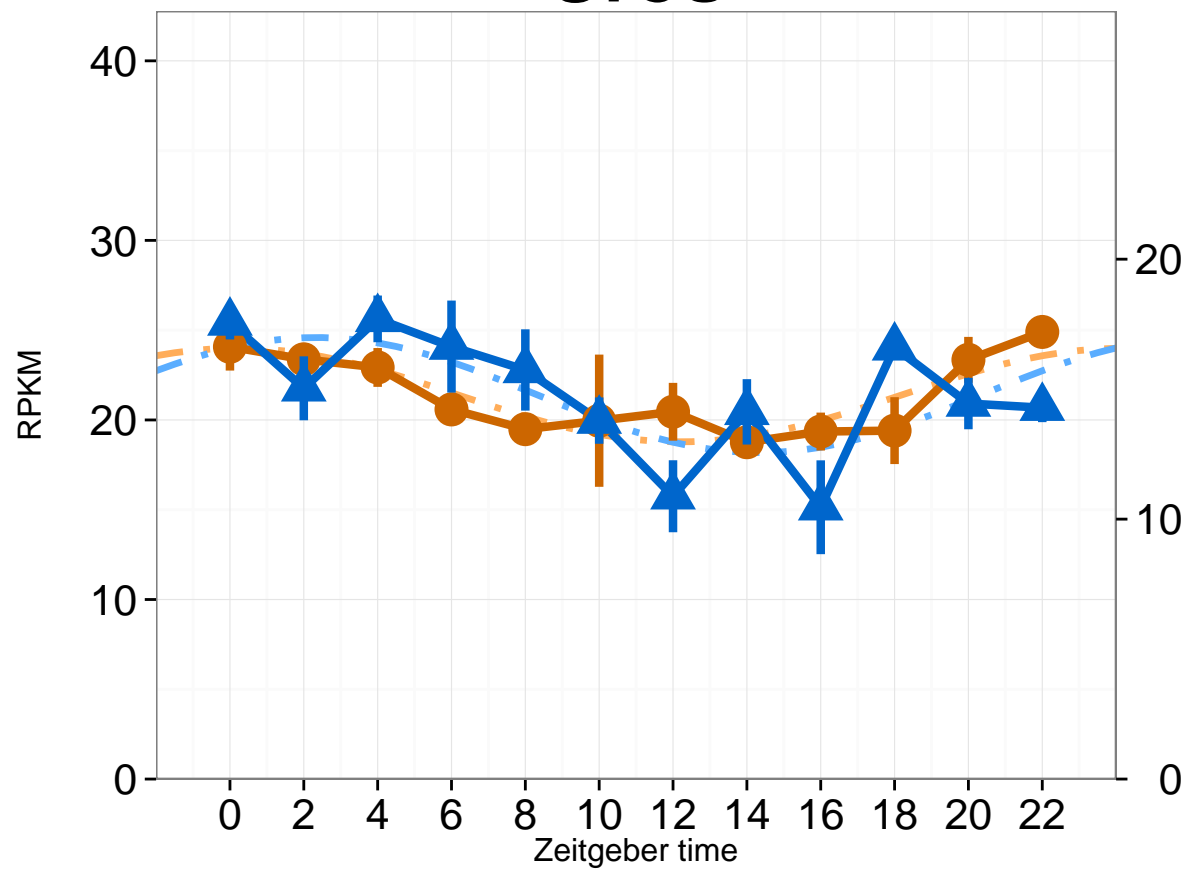

## Uros

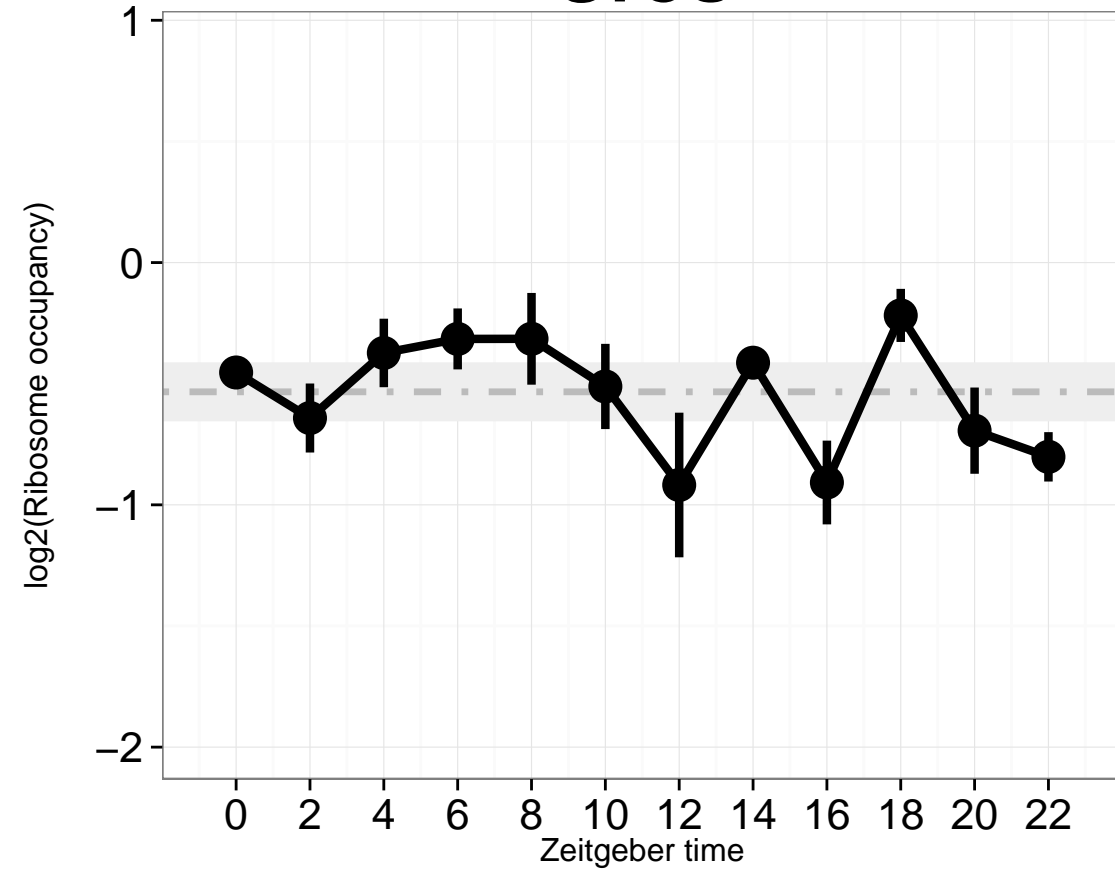

Supplement: Supplementary file 8856 [file 1]

# Lpcat3

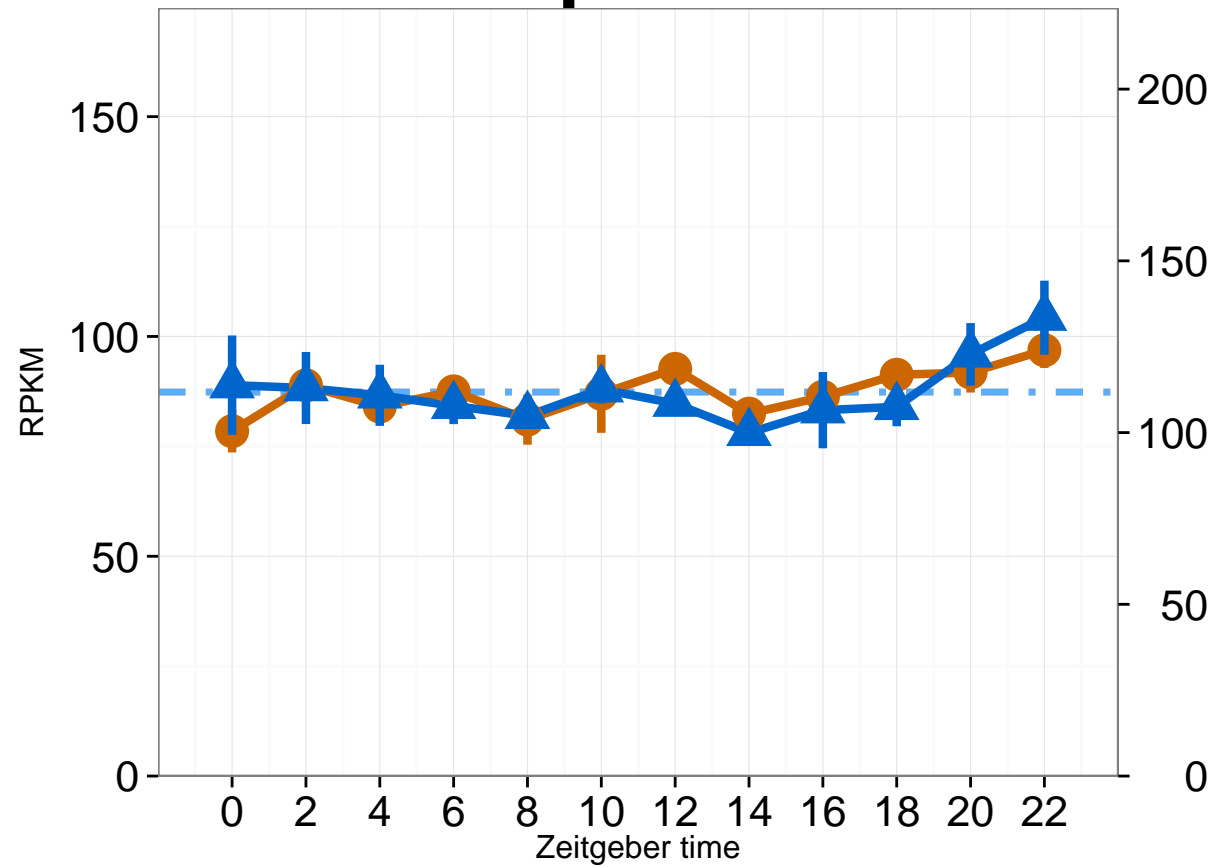

# Lpcat3

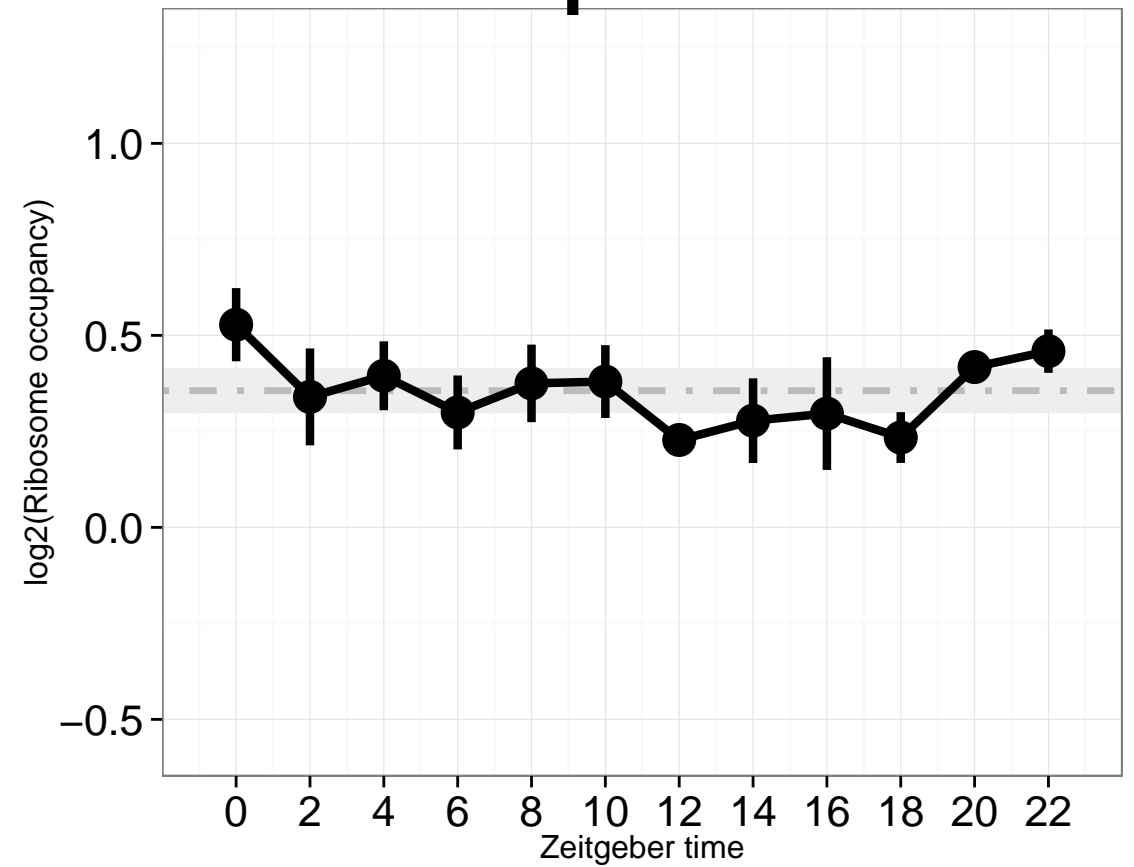

Supplement: Supplementary file 8857 [file 1]

# Sap30

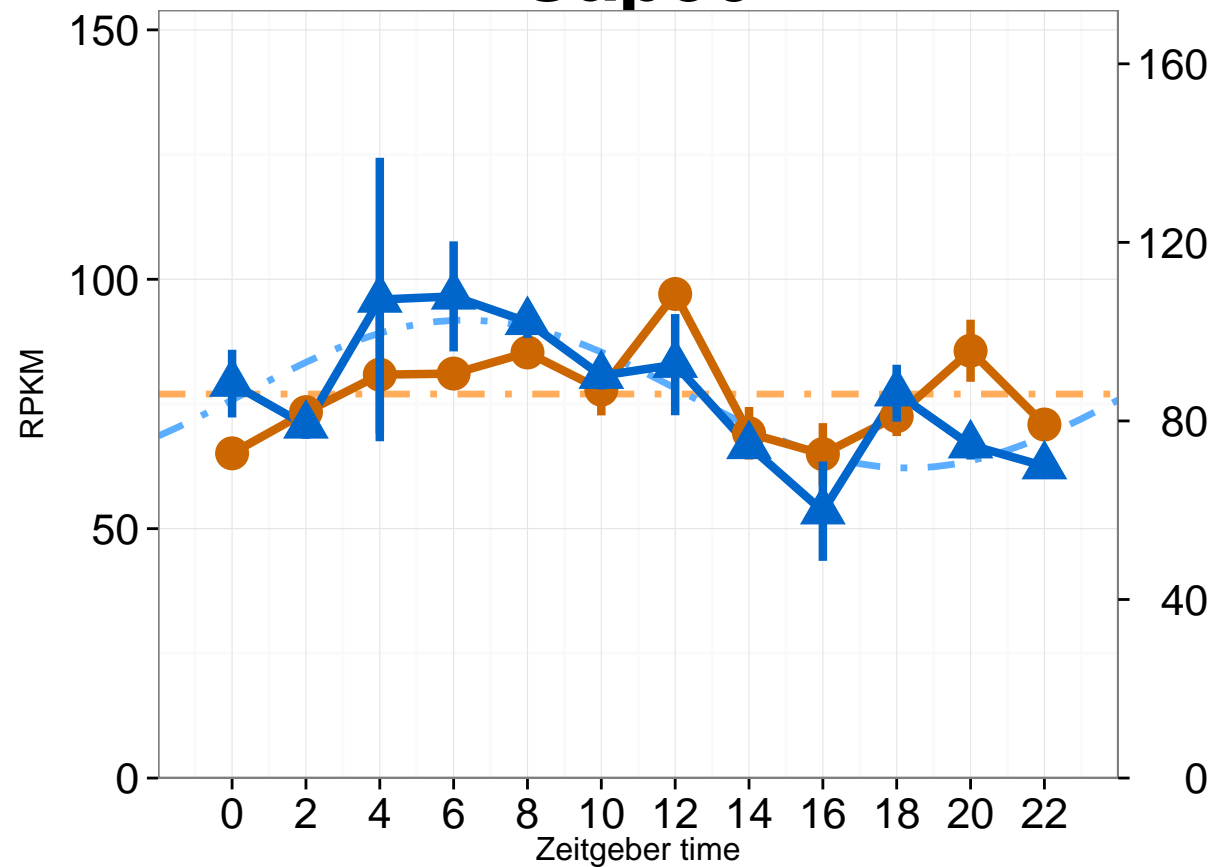

# Sap30

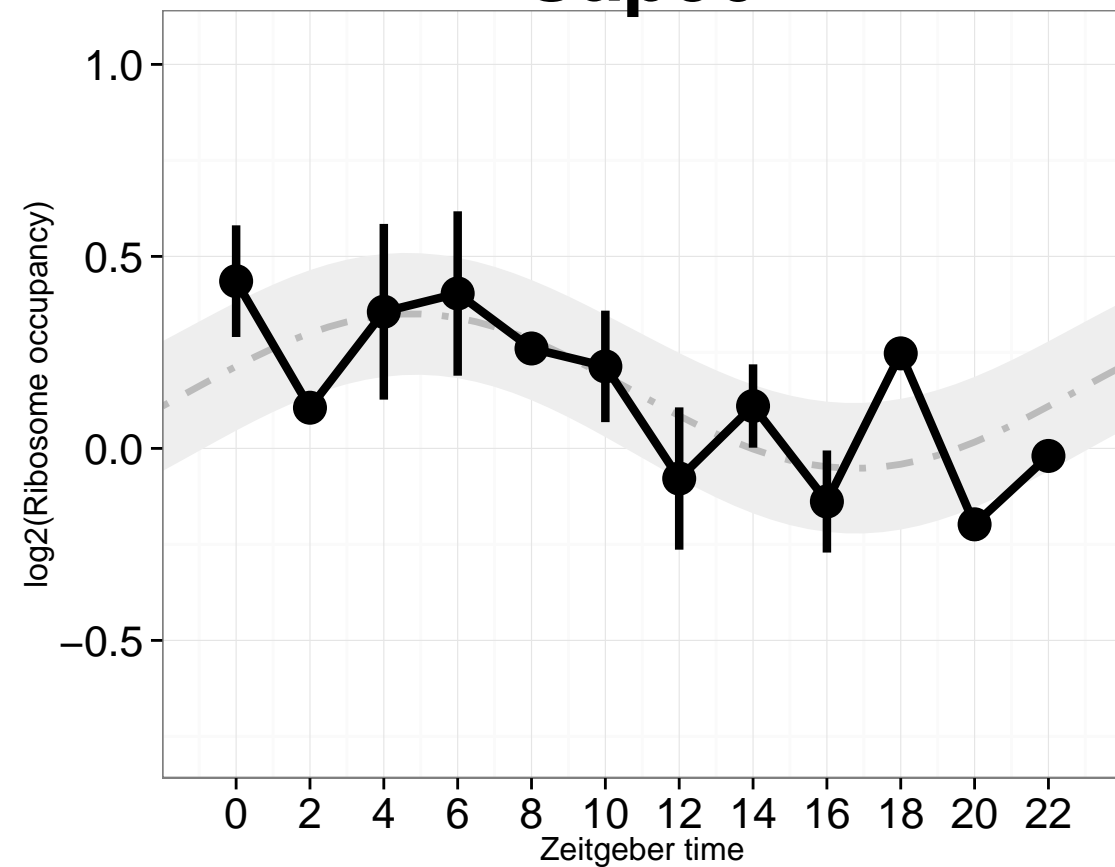

Supplement: Supplementary file 8858 [file 1]

# 1700030K09Rik

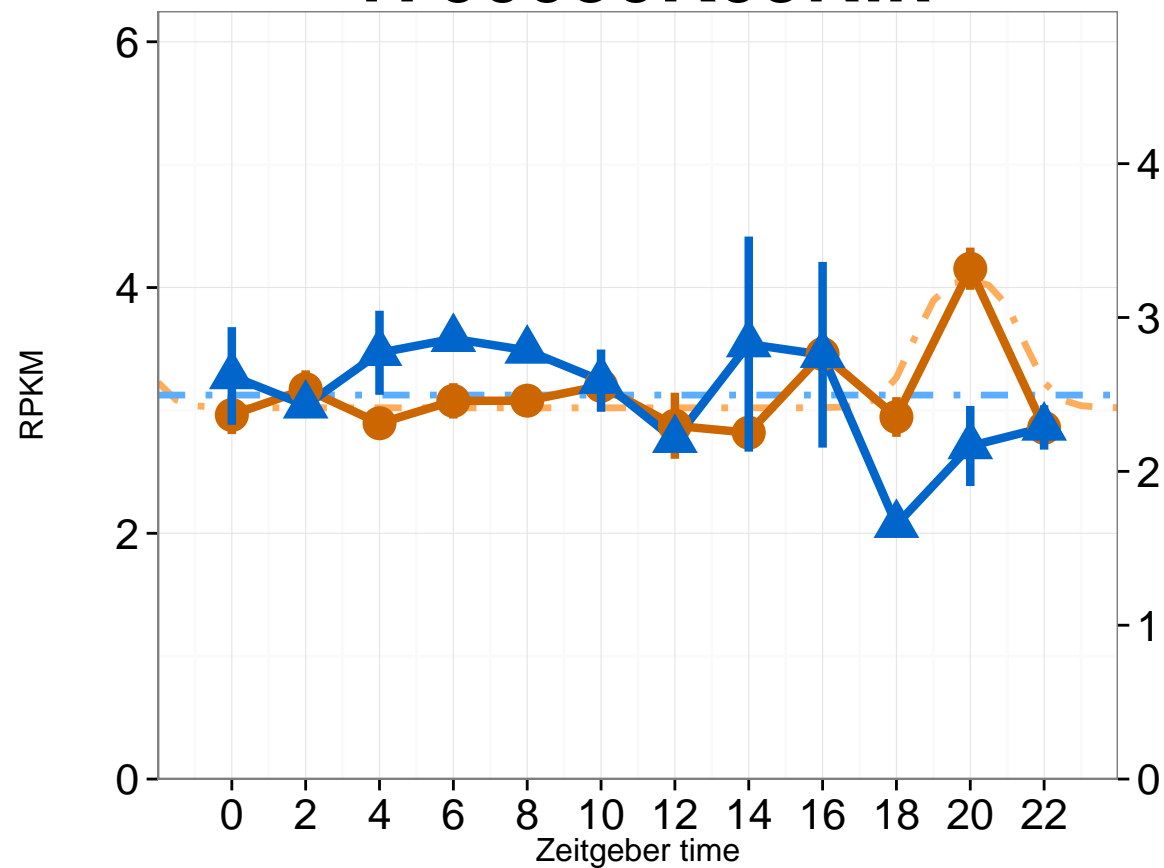

# 1700030K09Rik

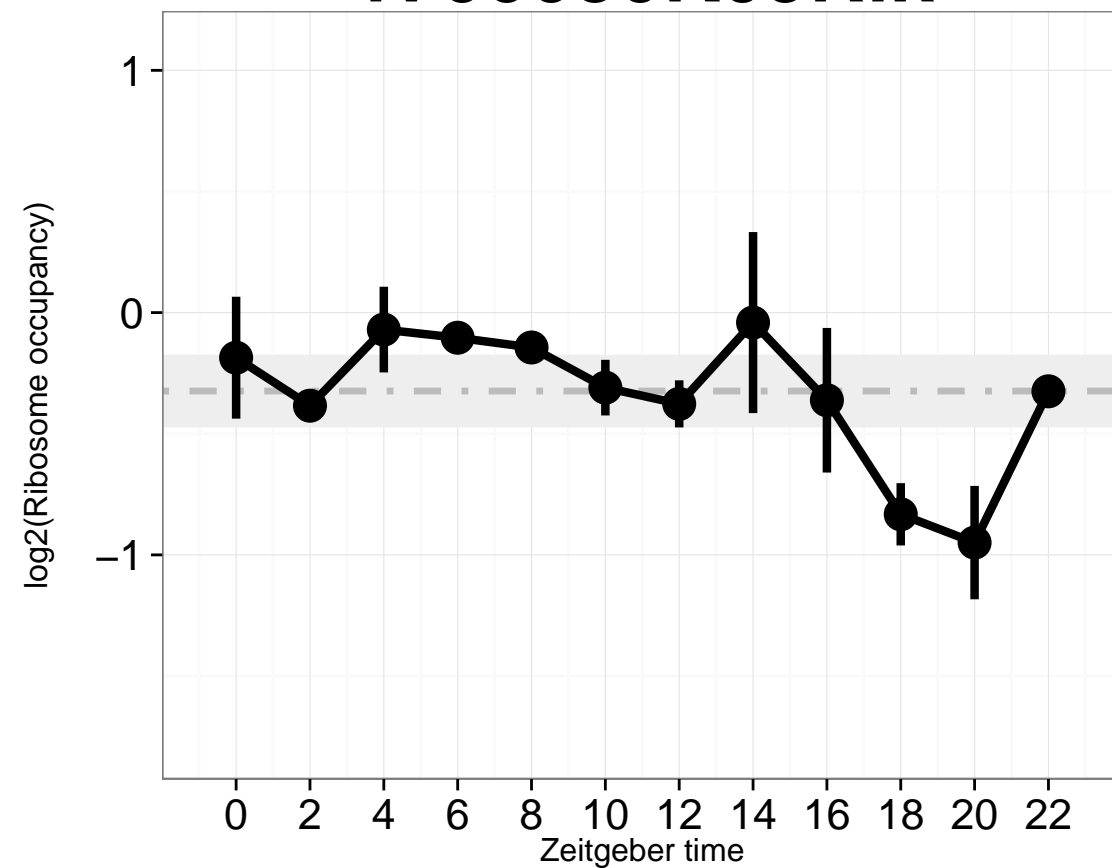

Supplement: Supplementary file 8859 [file 1]

# Atn1

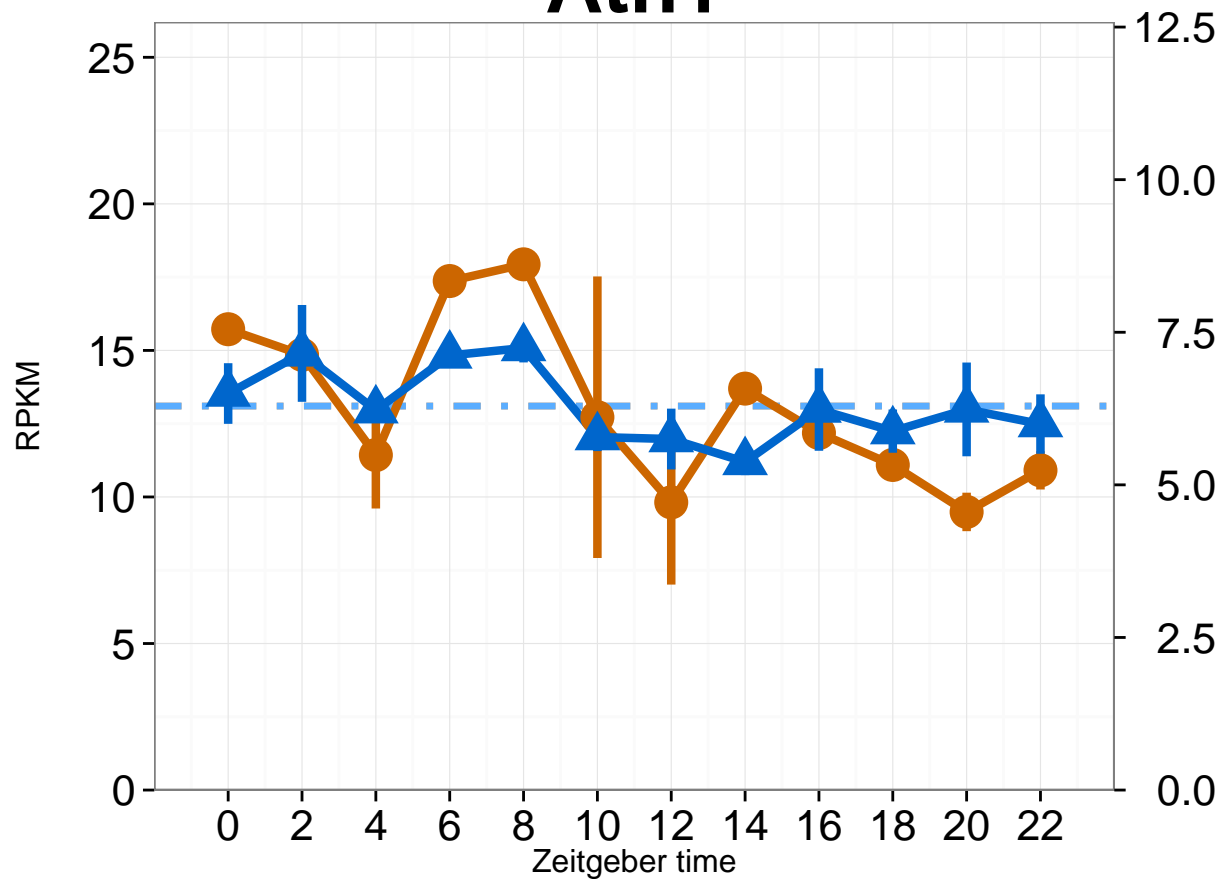

# Atn1

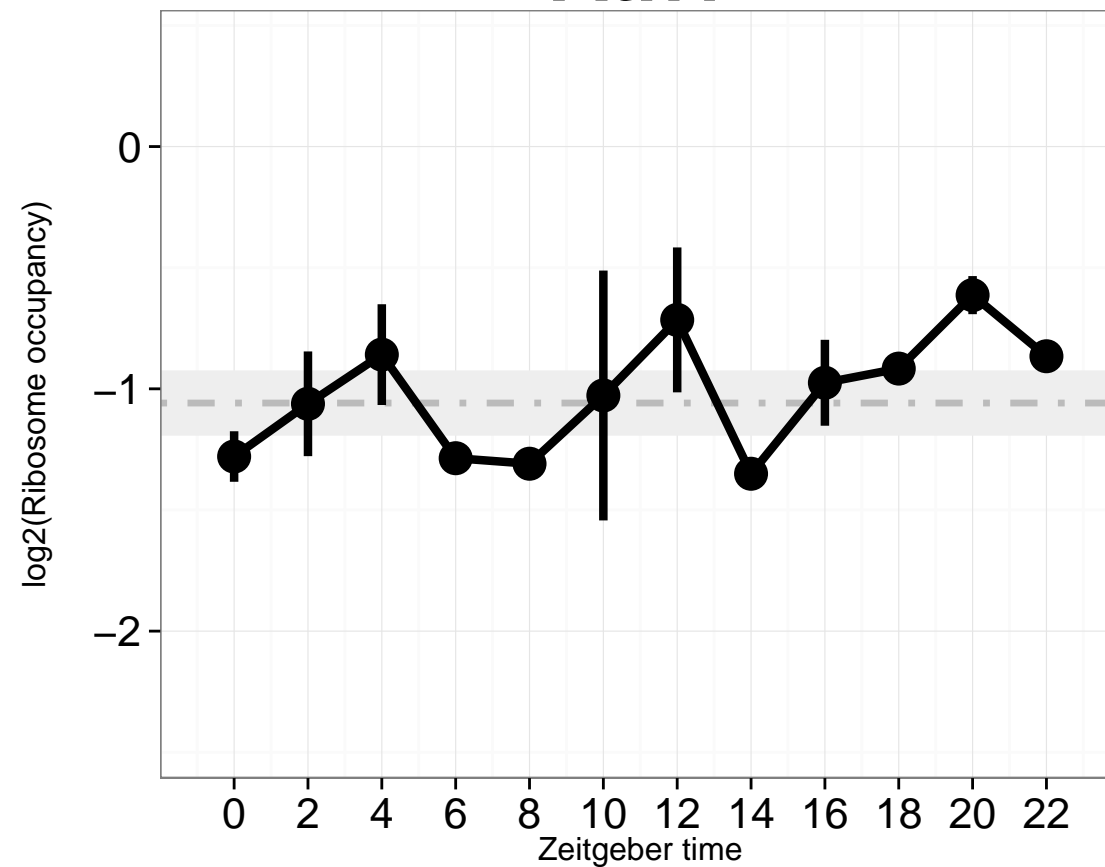

Supplement: Supplementary file 8860 [file 1]

# Akr1b8

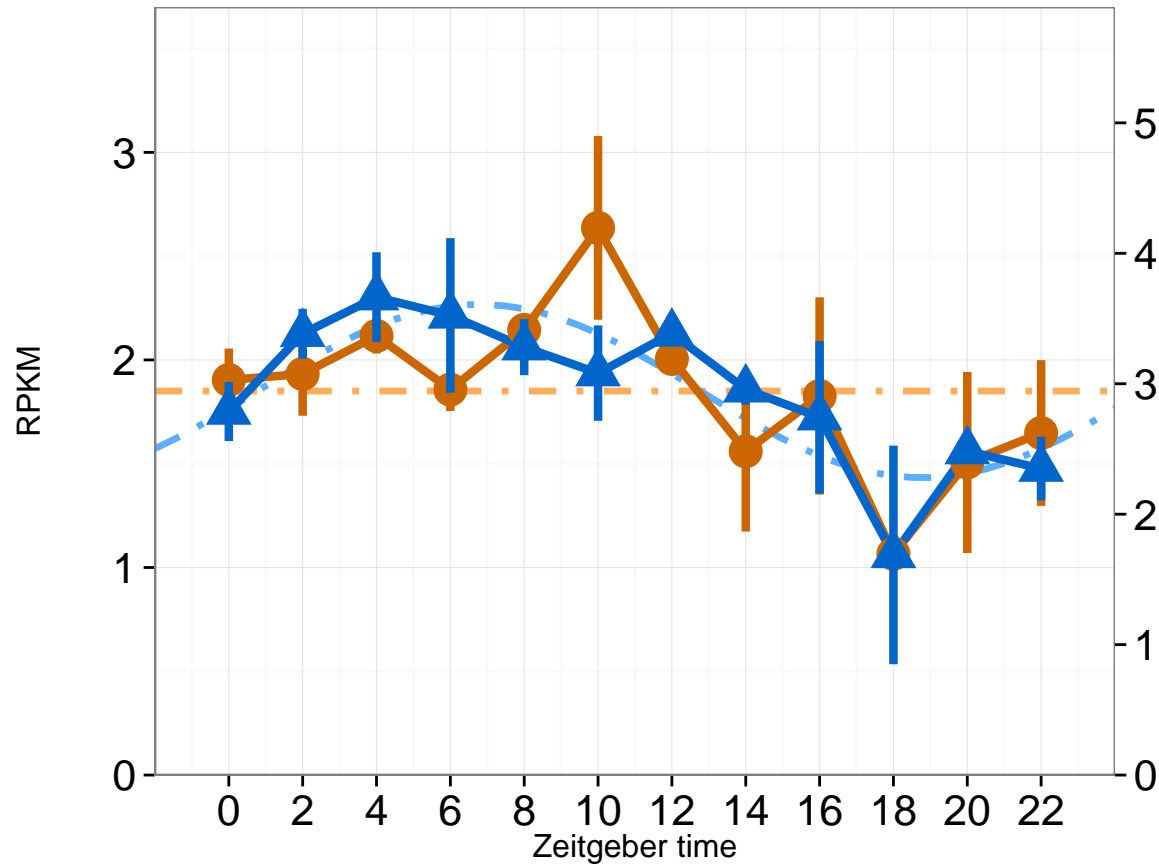

# Akr1b8

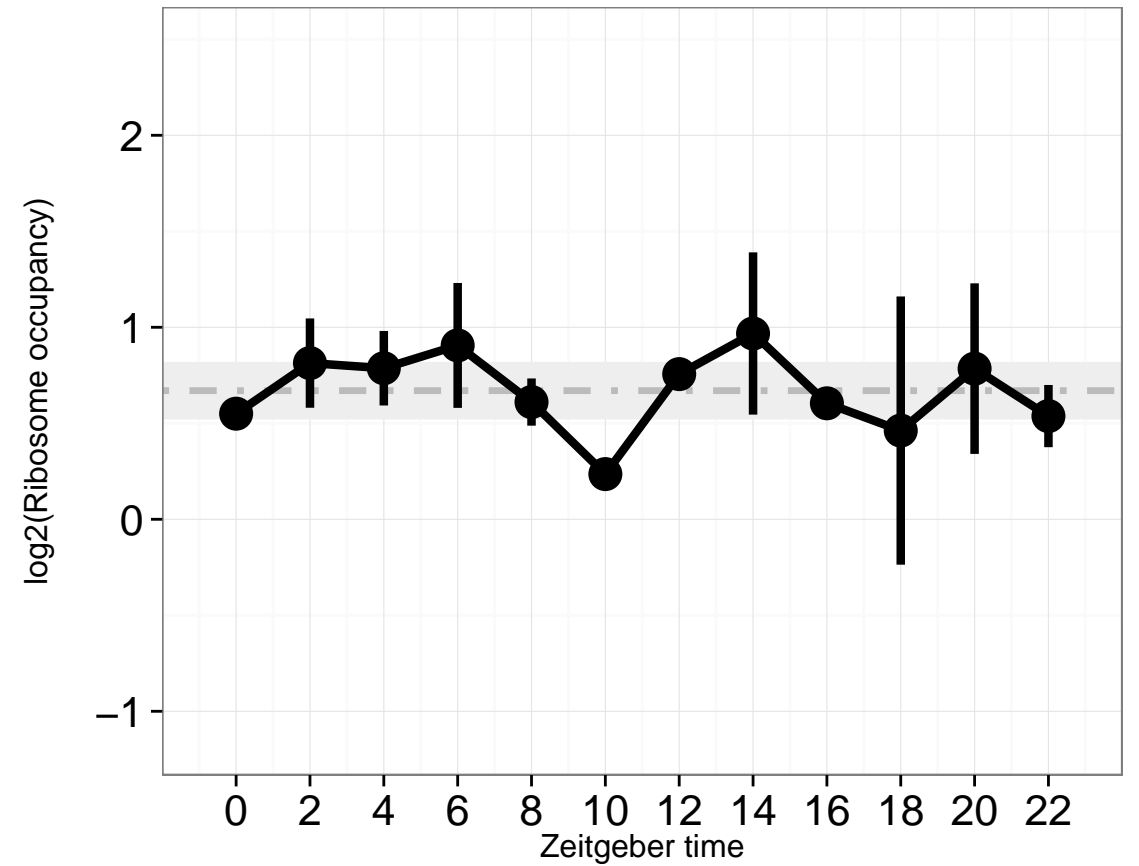

Supplement: Supplementary file 8861 [file 1]

## Rusc2

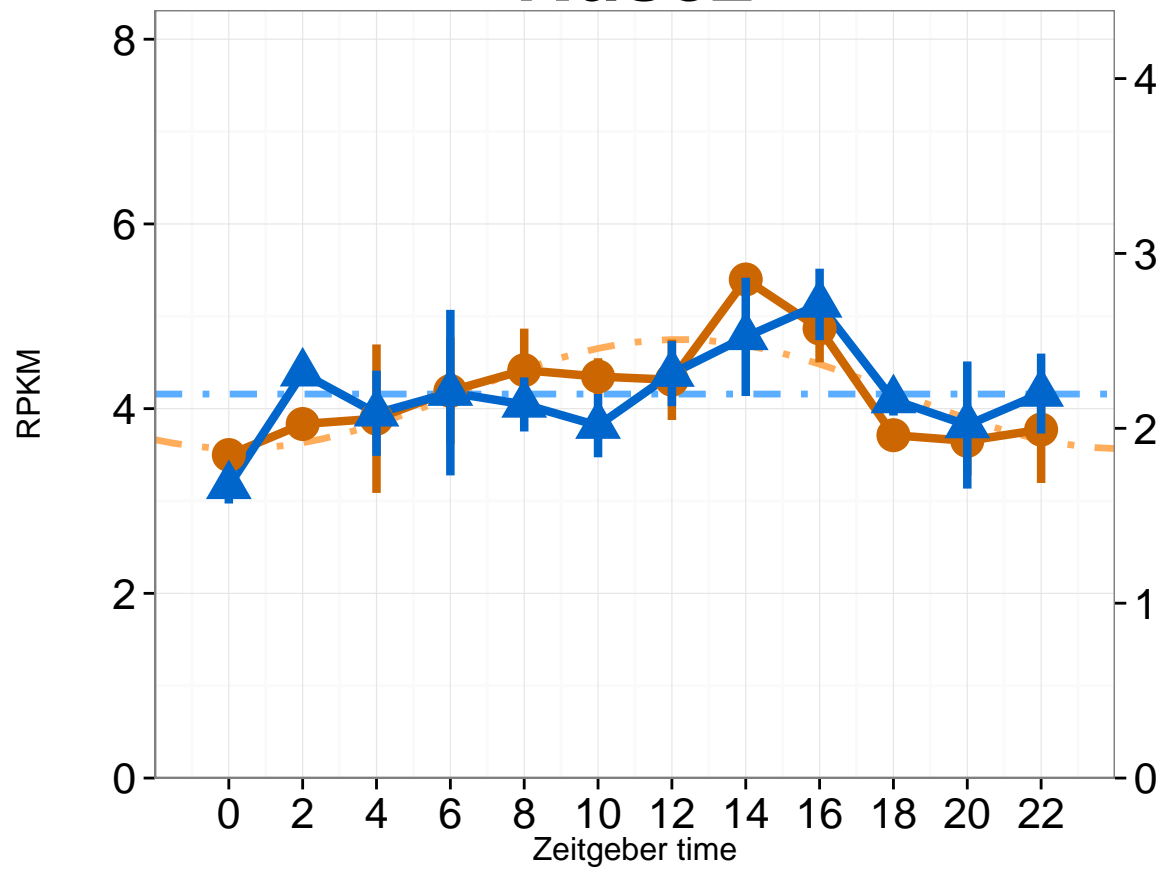

## Rusc2

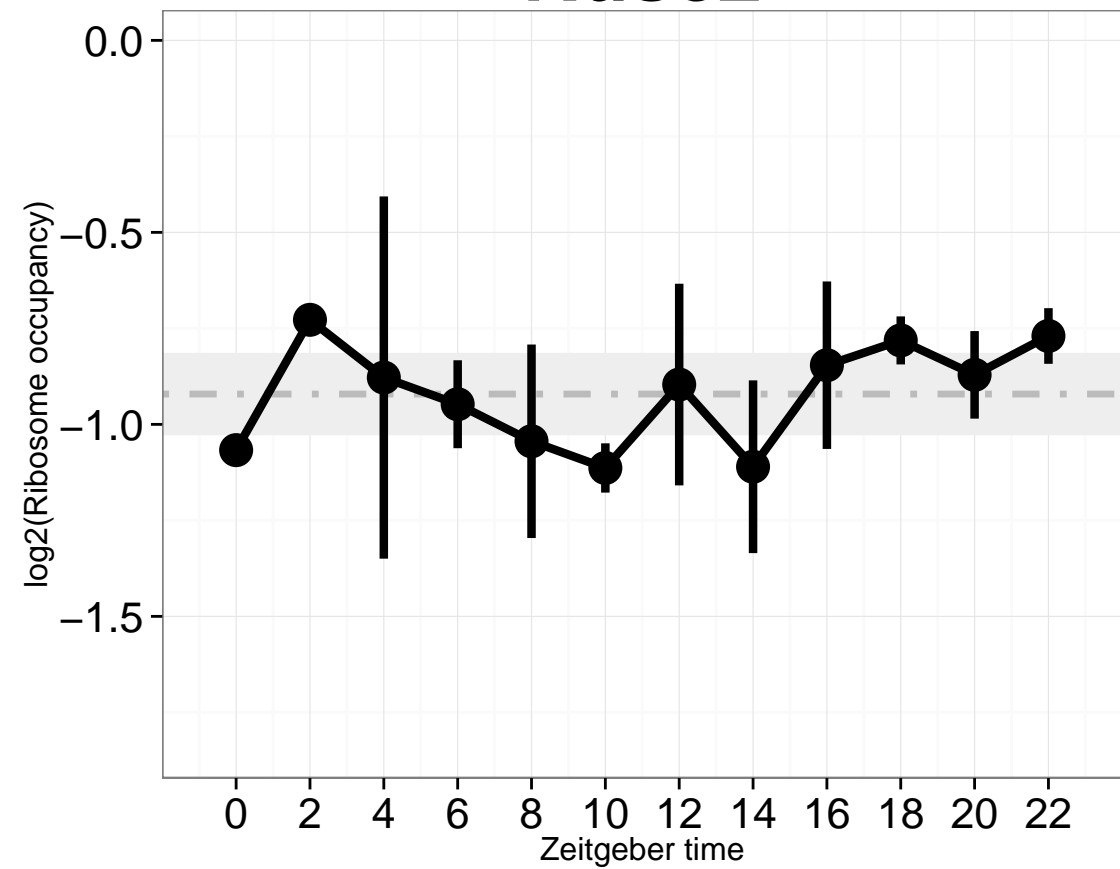

Supplement: Supplementary file 8862 [file 1]

## Mycbp2

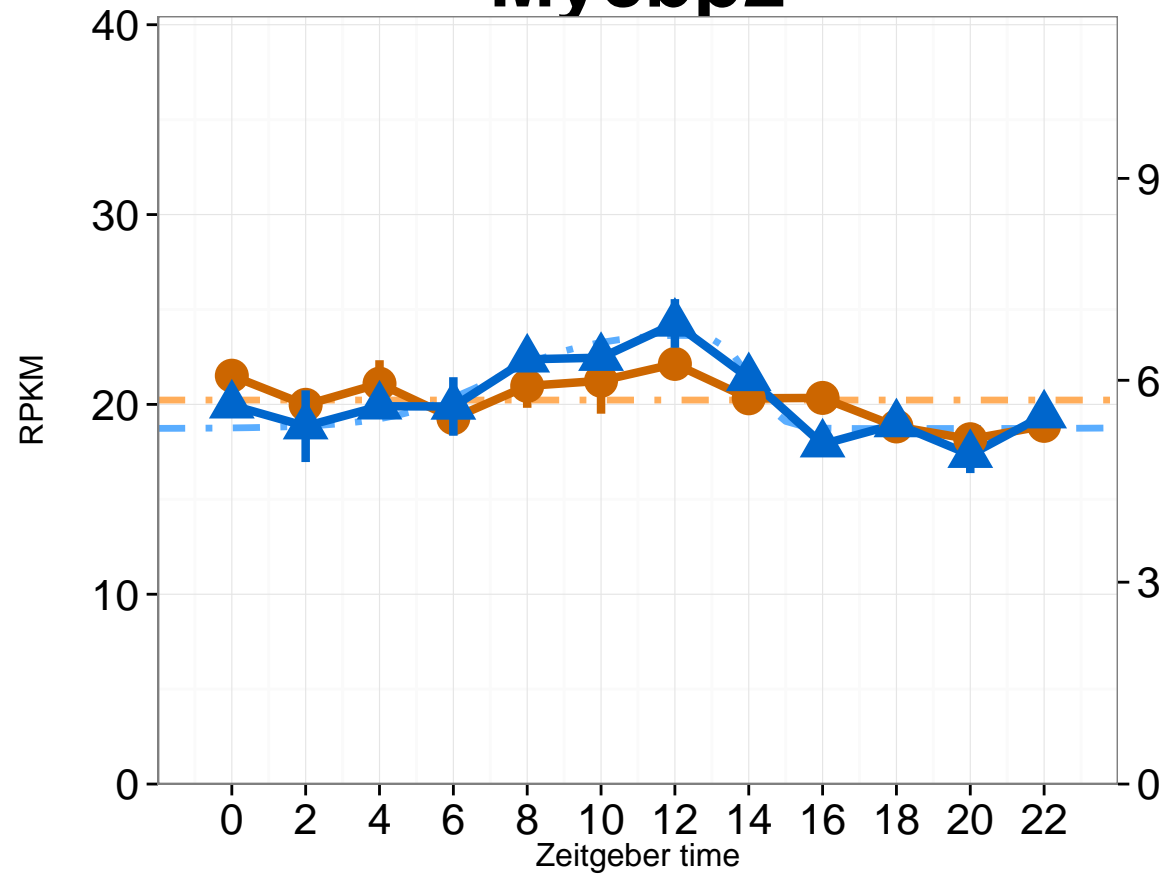

## Mycbp2

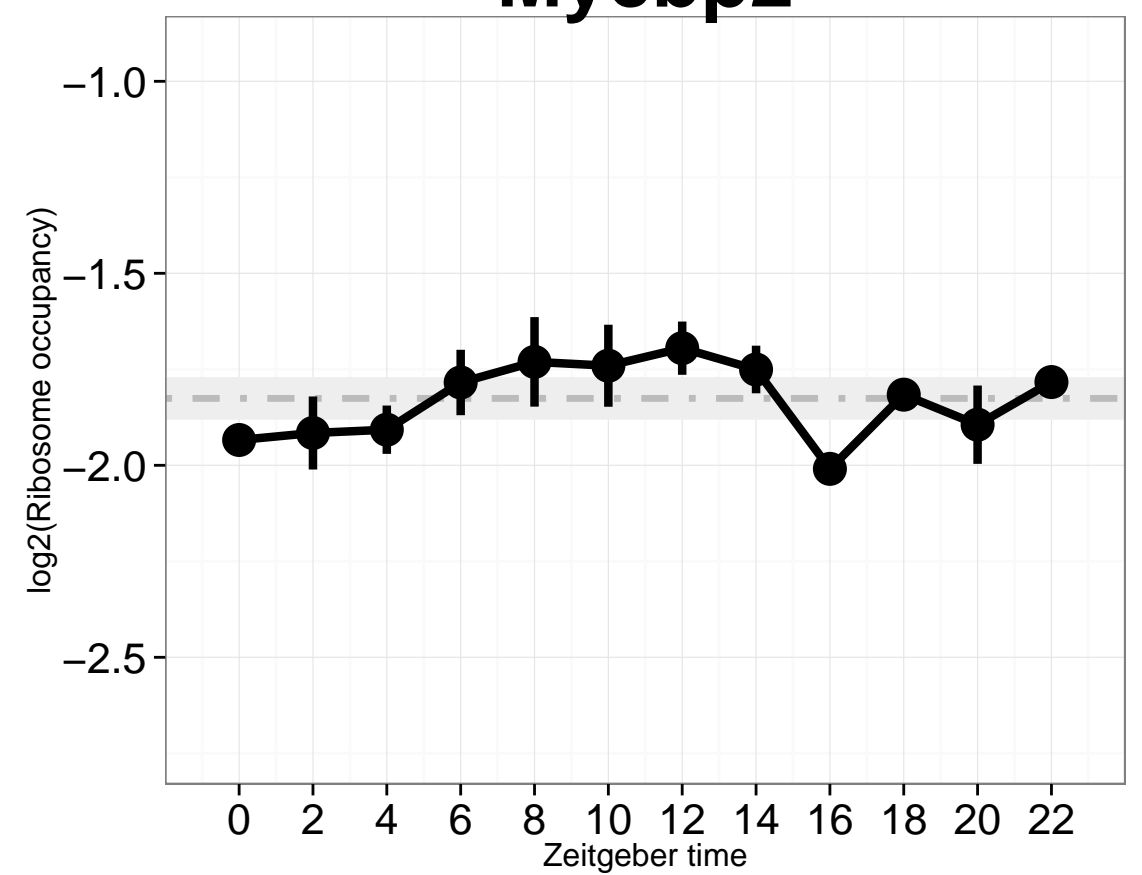

Supplement: Supplementary file 8863 [file 1]

## Plin2

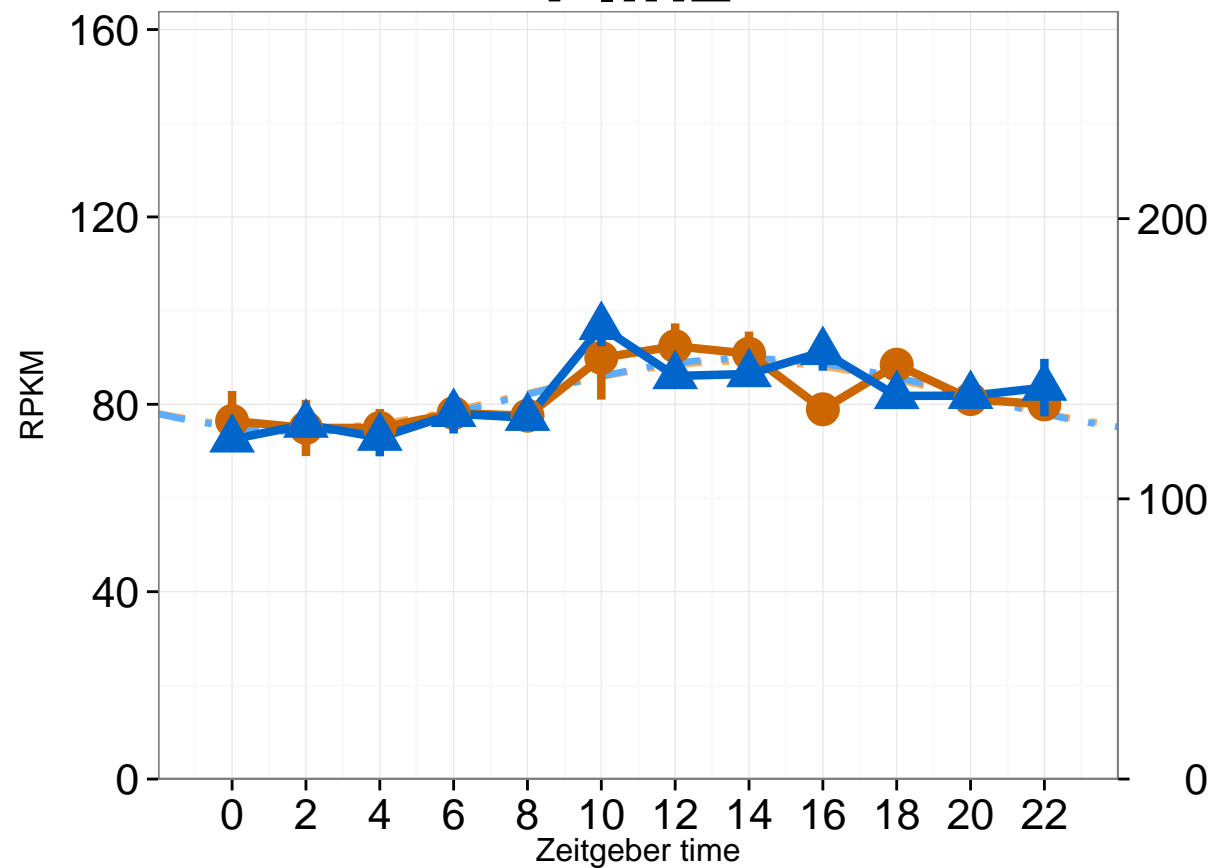

## Plin2

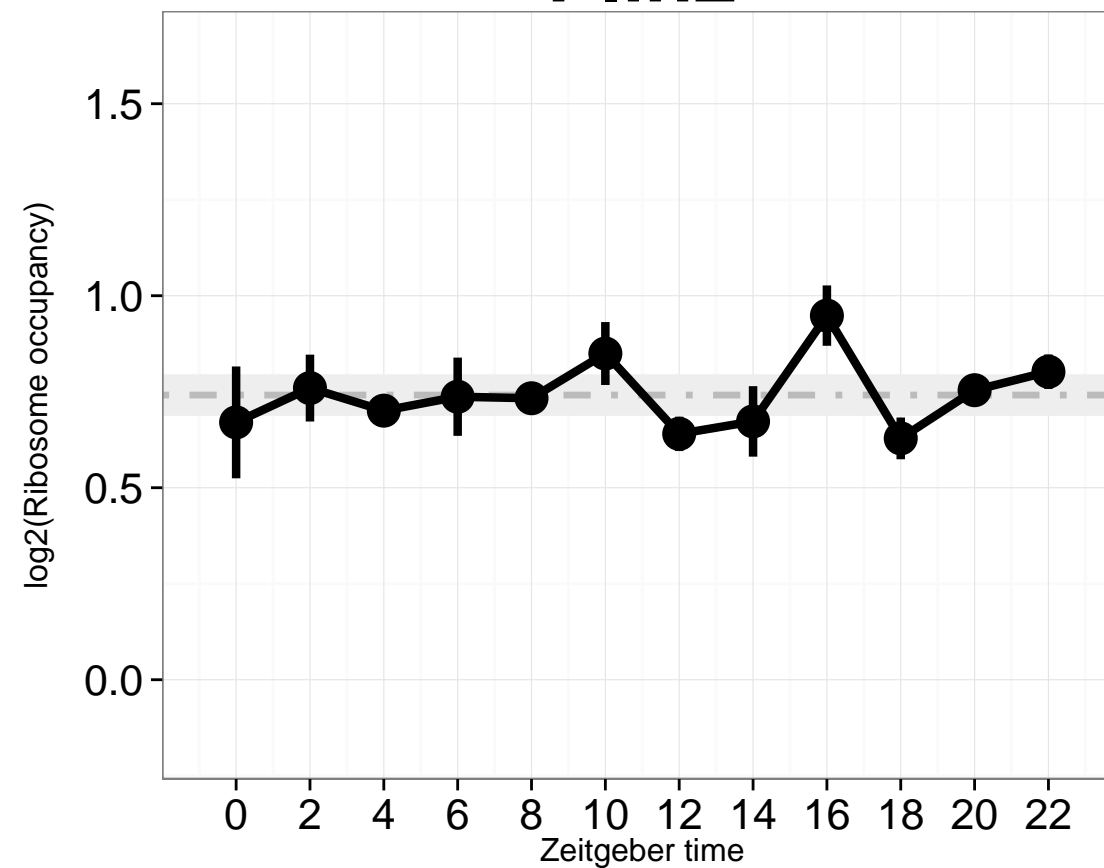

Supplement: Supplementary file 8864 [file 1]

## Kmo

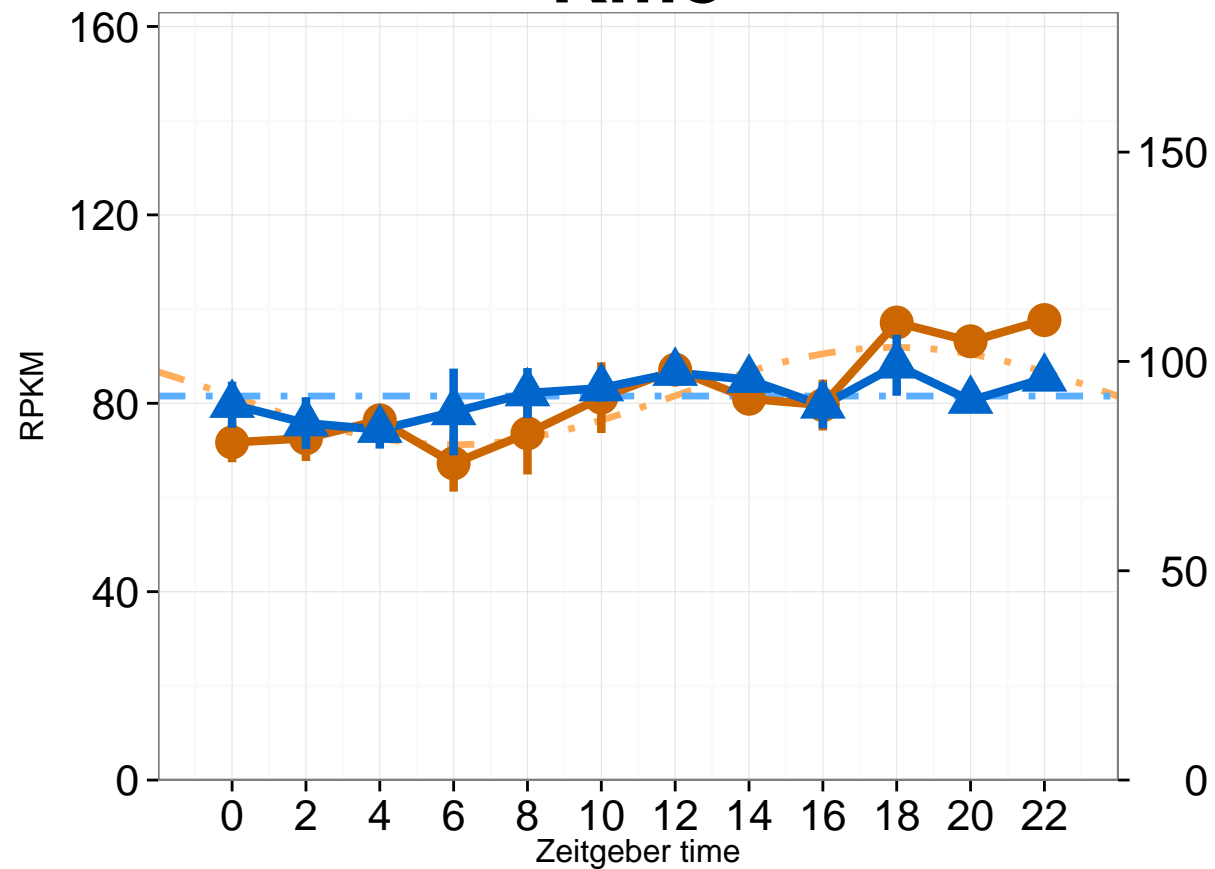

## Kmo

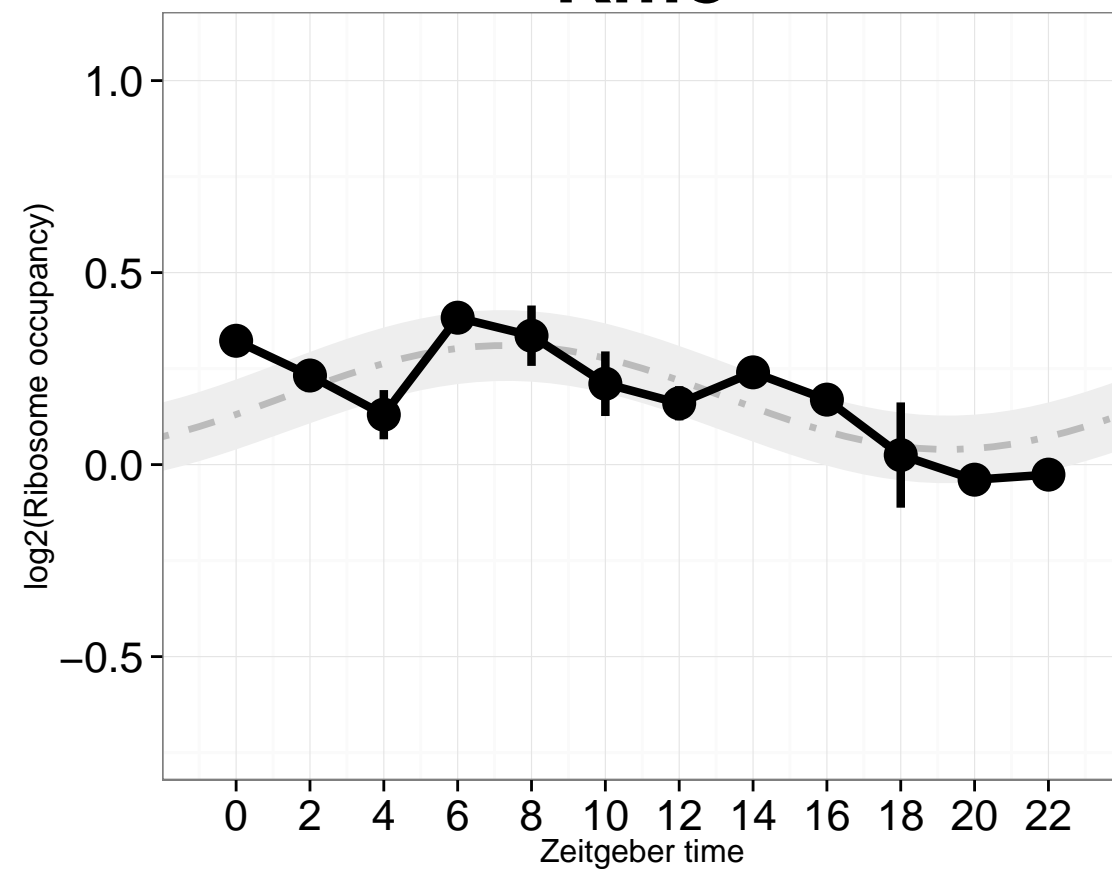

Supplement: Supplementary file 8865 [file 1]

# Cchcr1

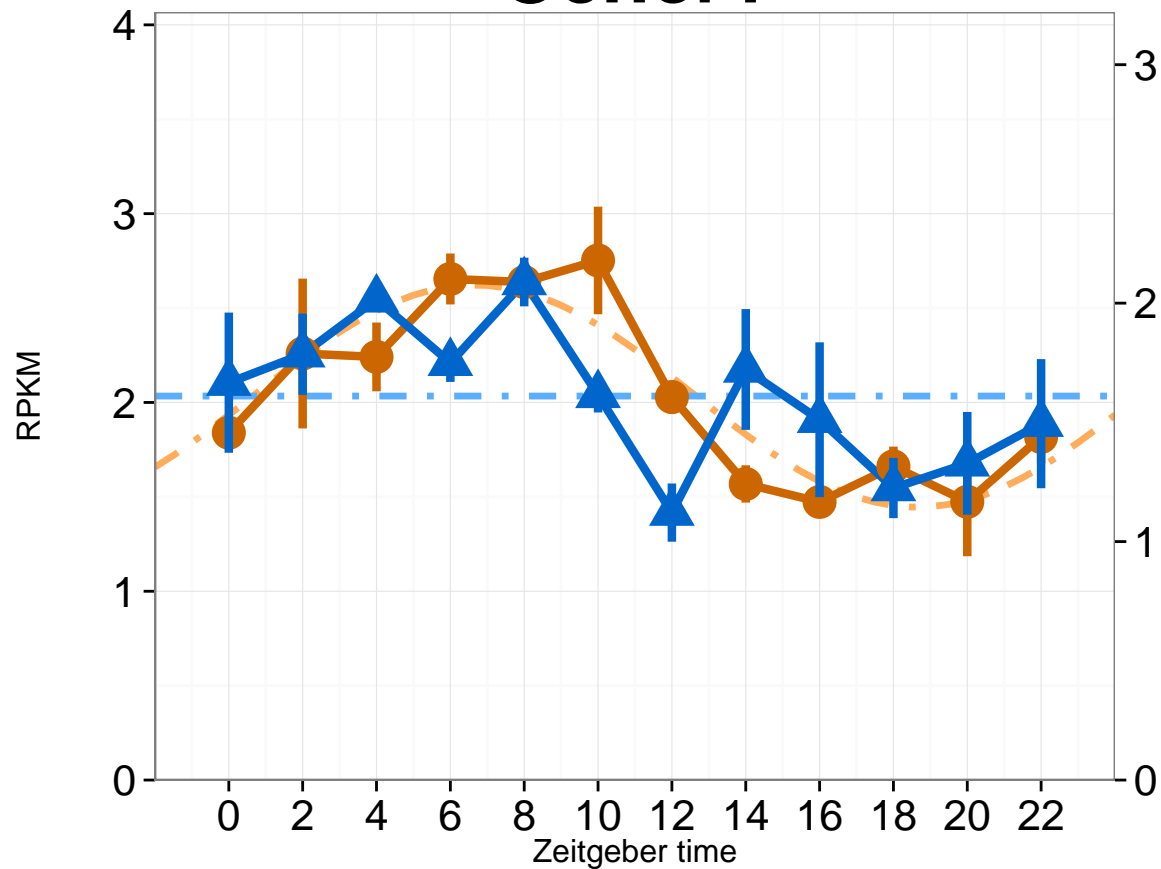

# Cchcr1

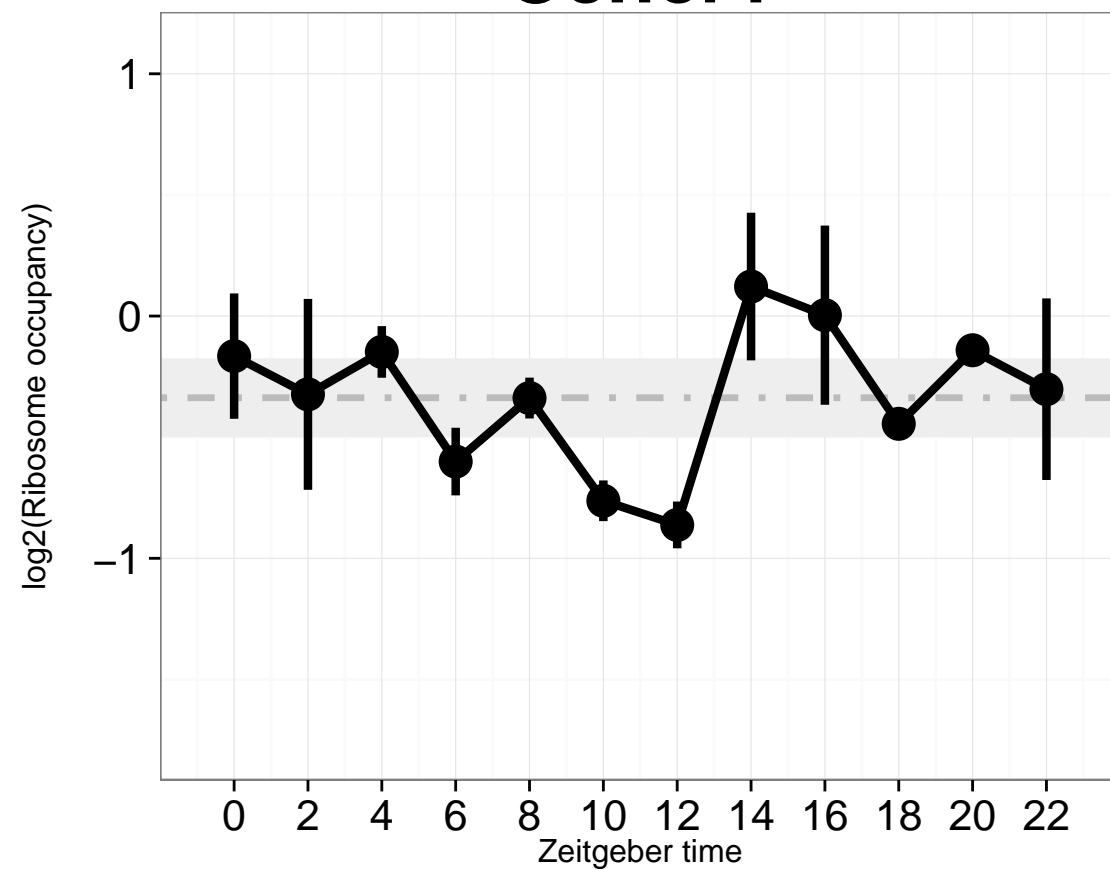

Supplement: Supplementary file 8866 [file 1]

# Lekr1

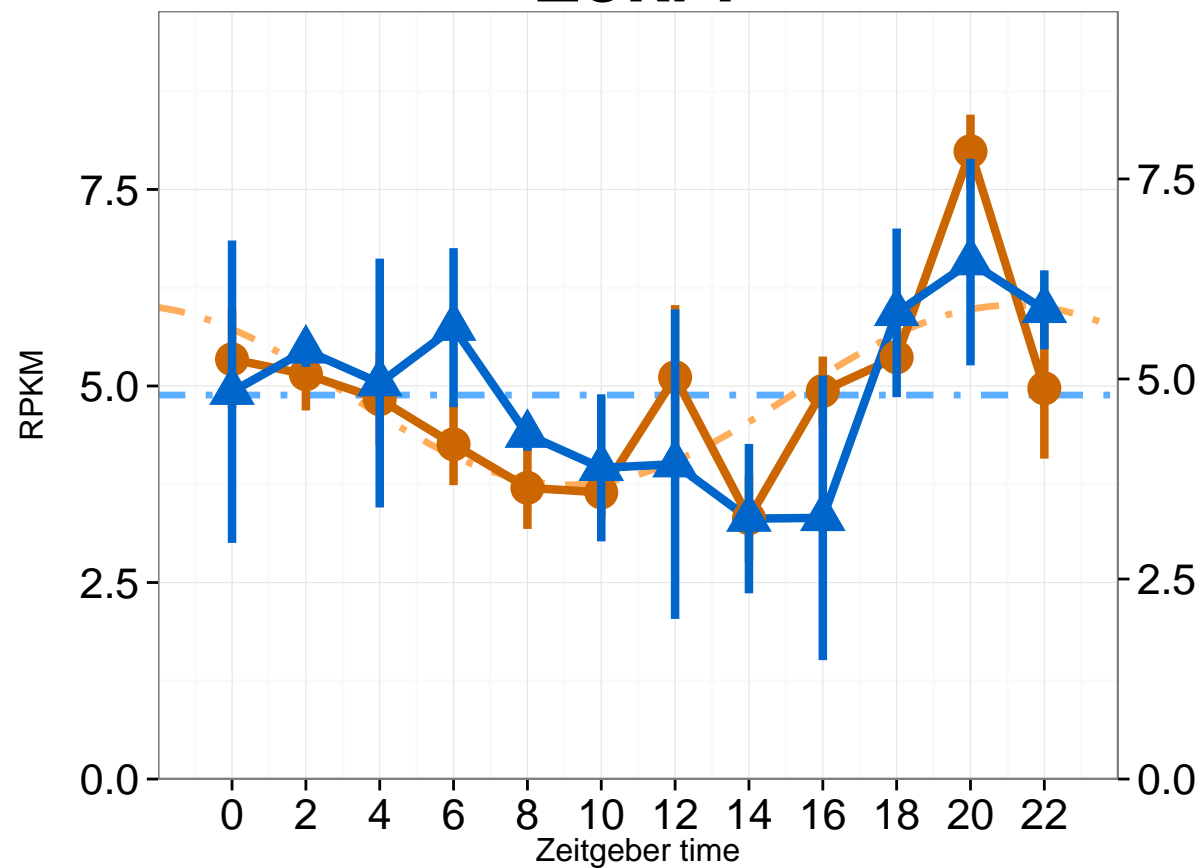

# Lekr1

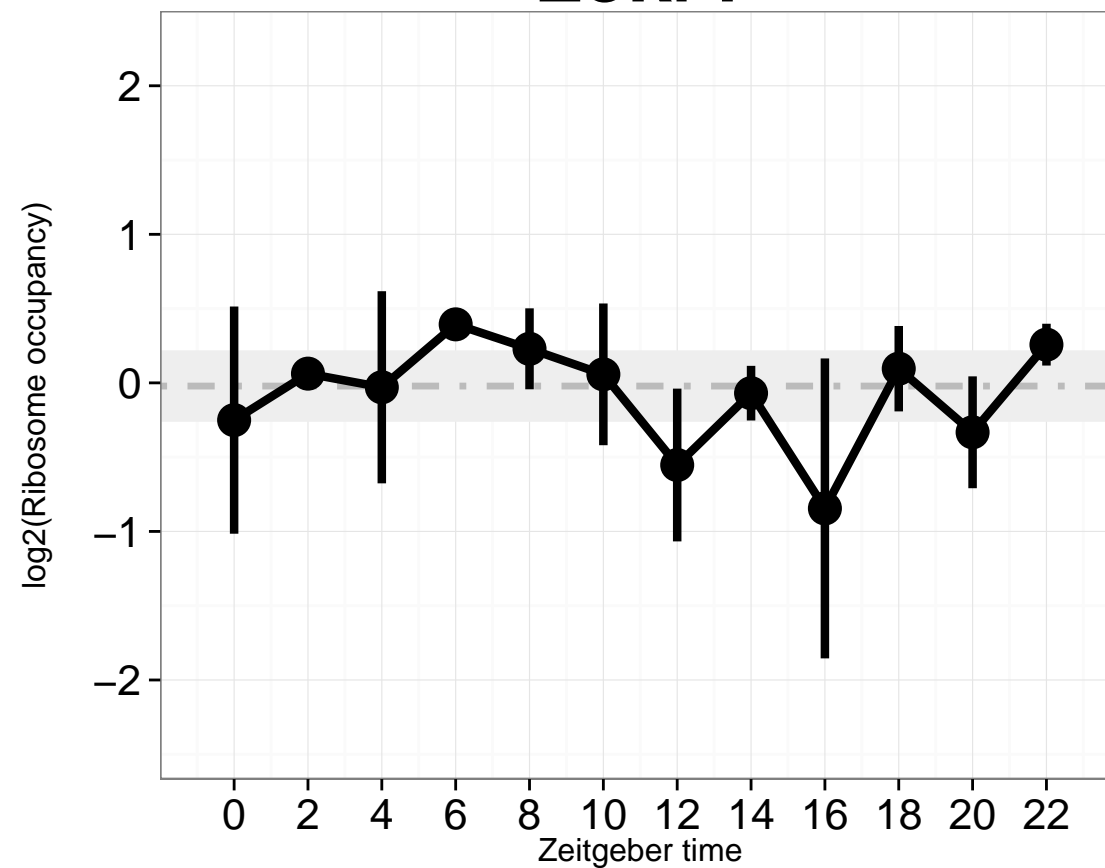

Supplement: Supplementary file 8867 [file 1]

## Abi1

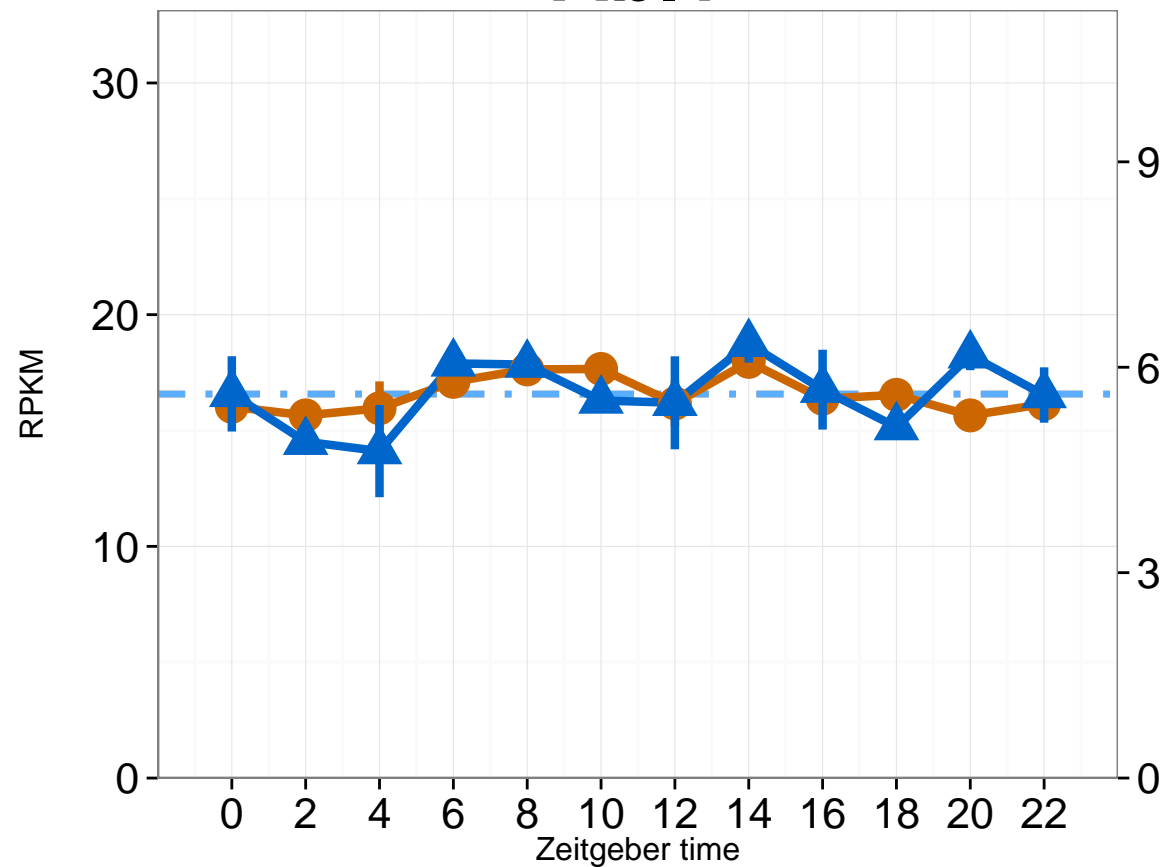

## Abi1

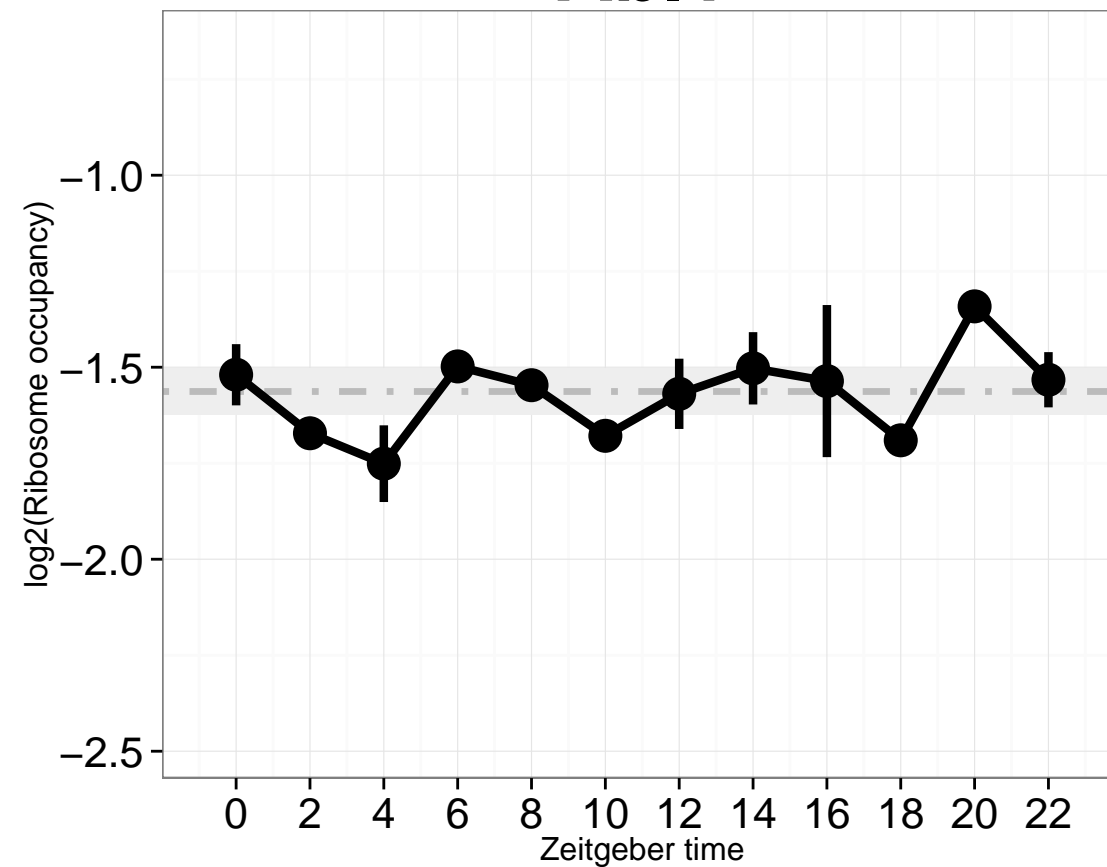

Supplement: Supplementary file 8868 [file 1]

# P4ha1

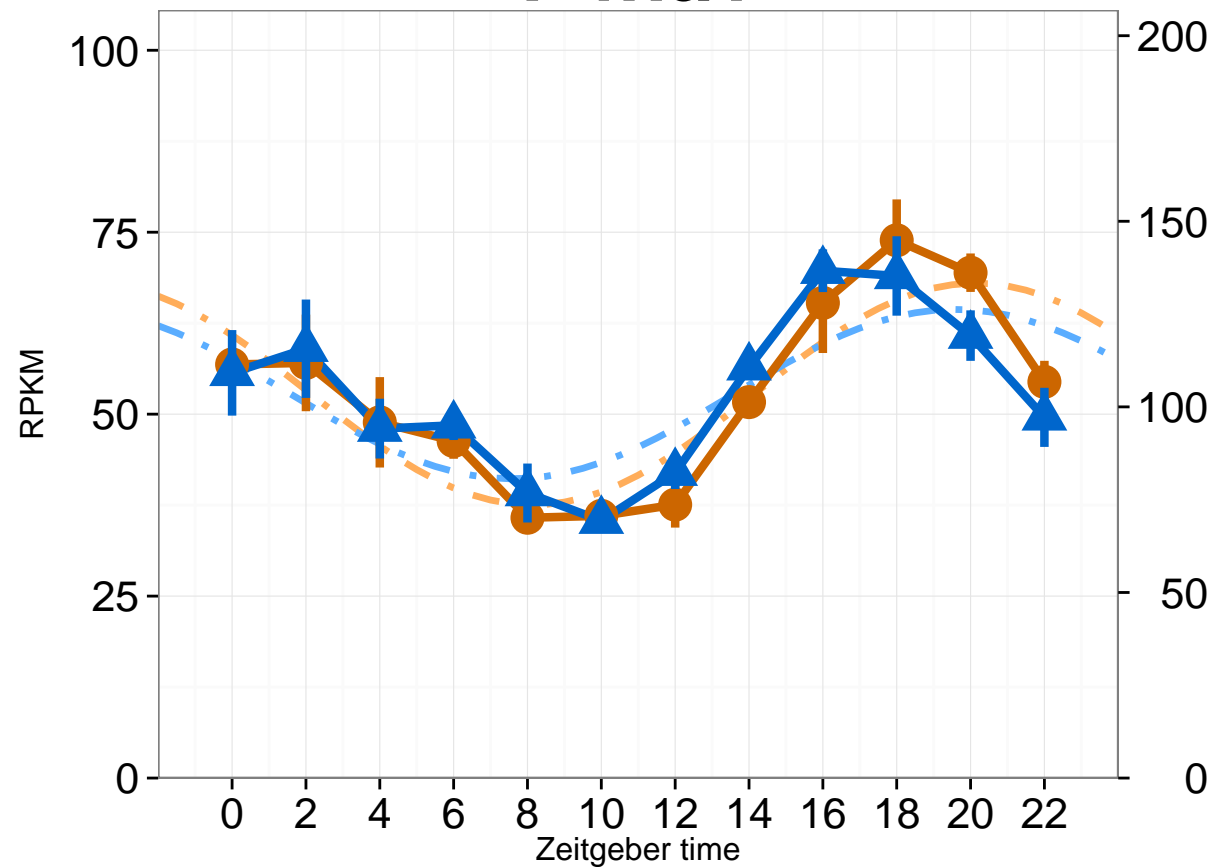

# P4ha1

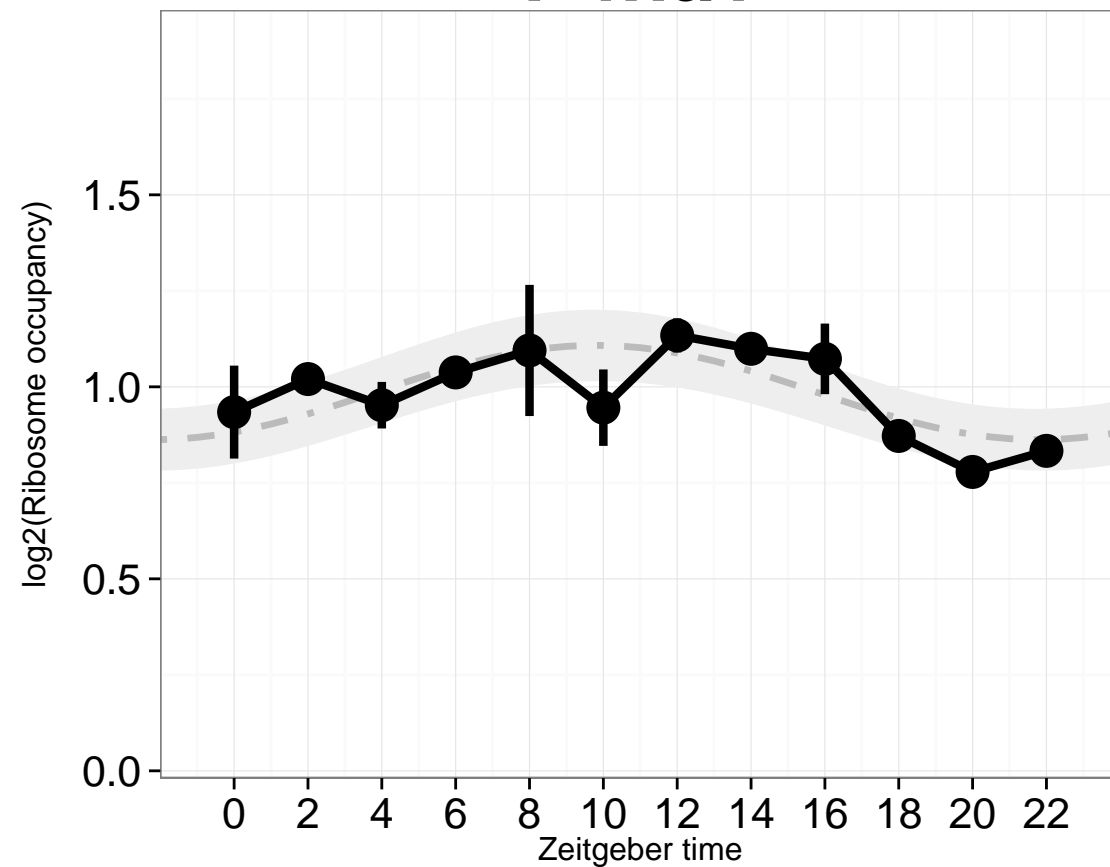

Supplement: Supplementary file 8869 [file 1]

## Mgp

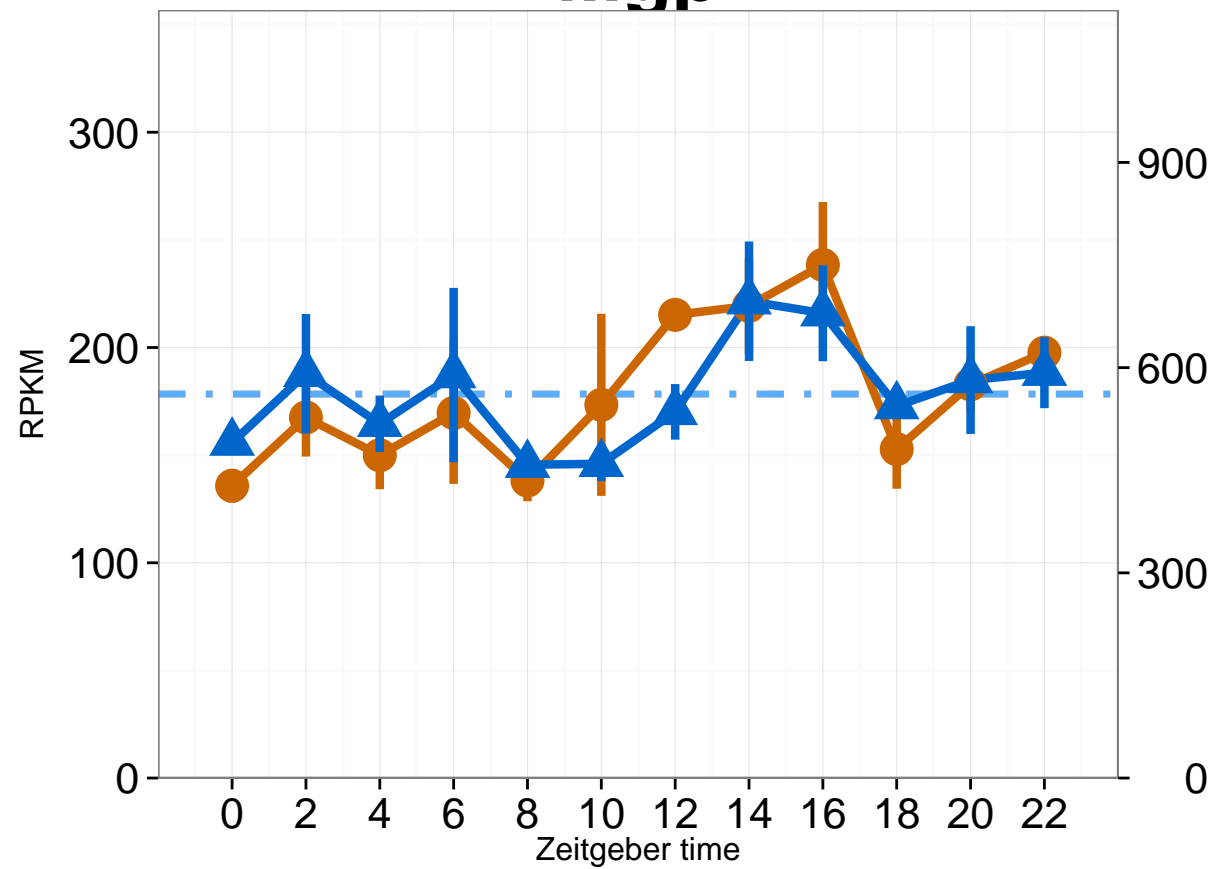

## Mgp

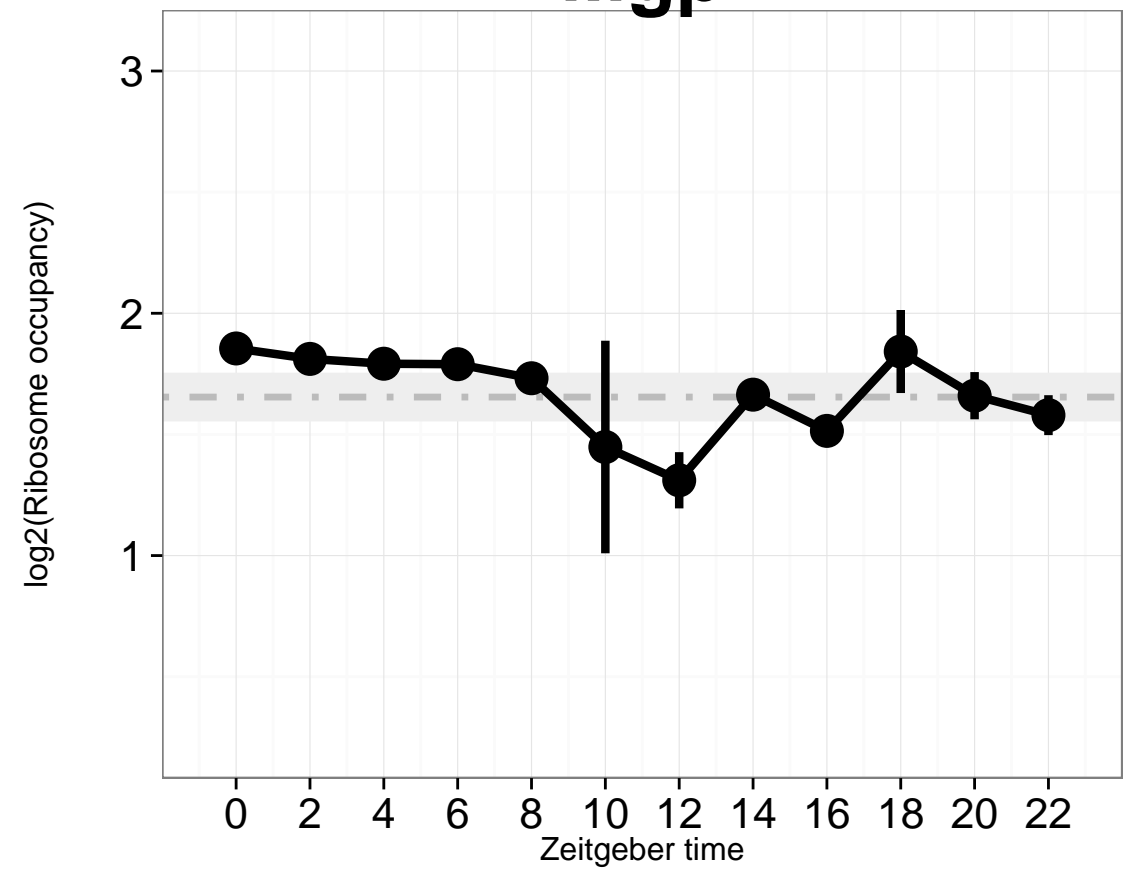

Supplement: Supplementary file 8870 [file 1]

# Mamdc2

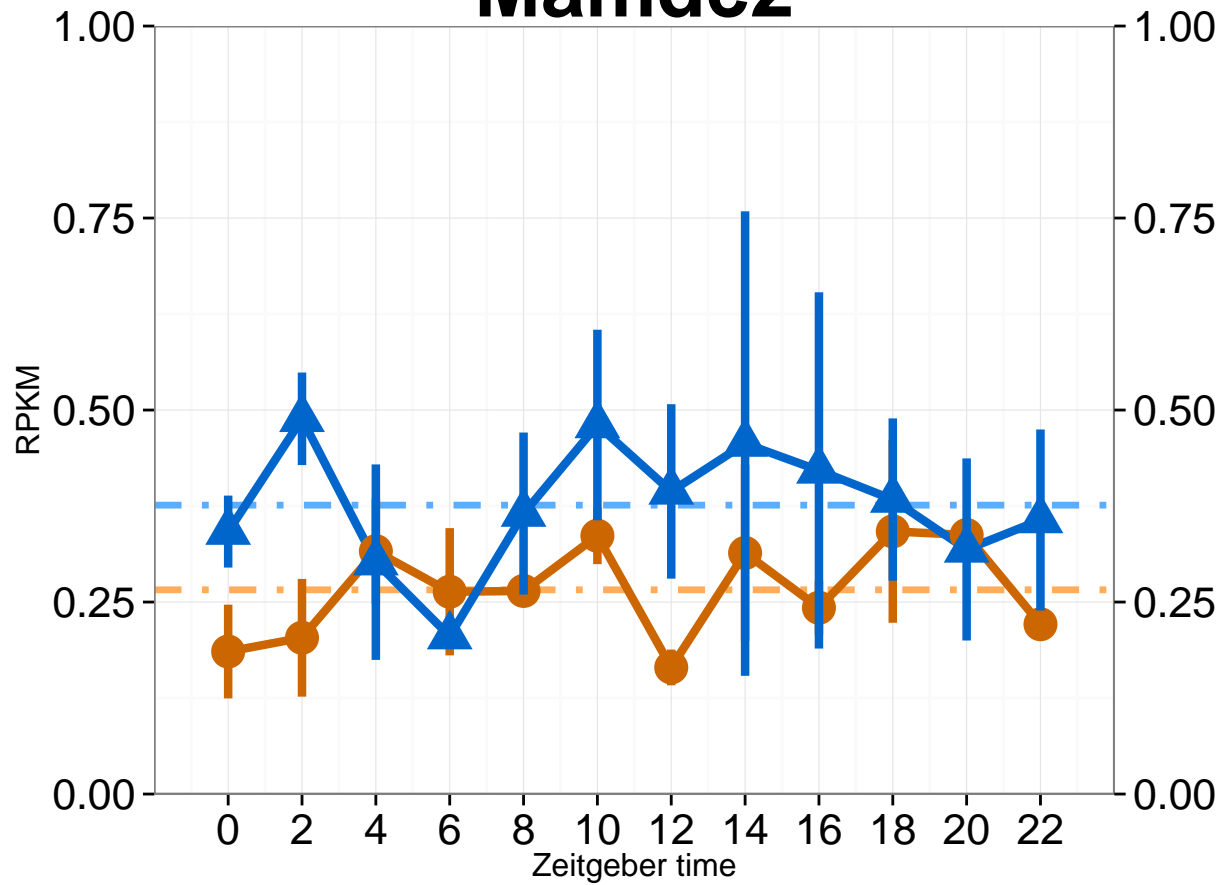

# Mamdc2

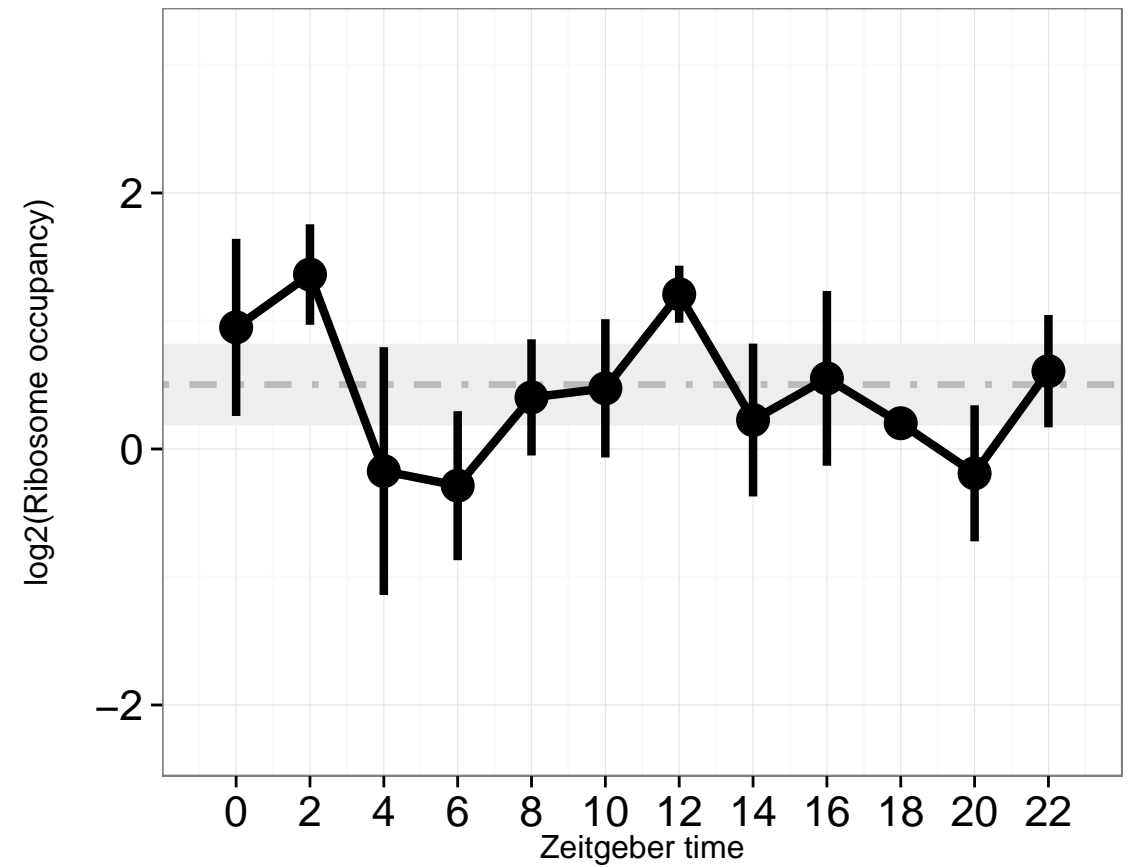

Supplement: Supplementary file 8871 [file 1]

# Ccdc163

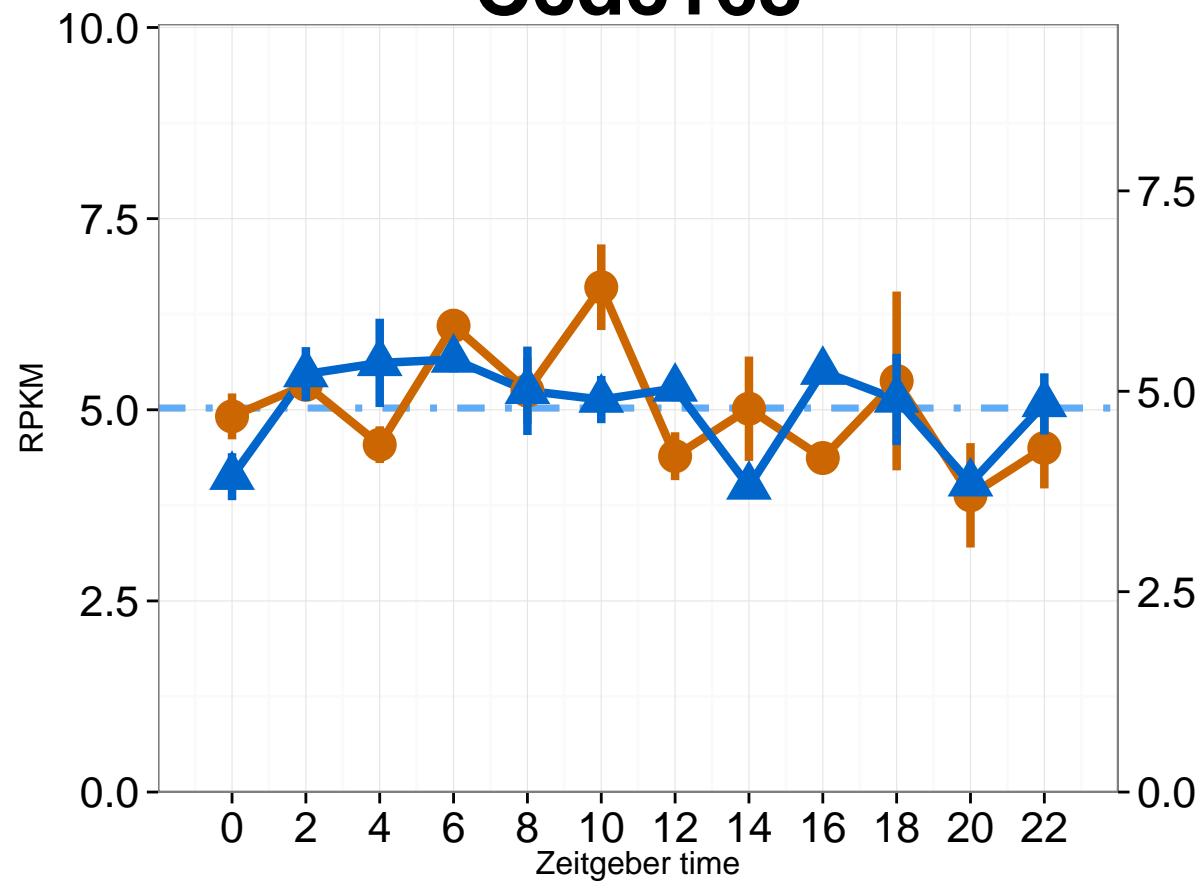

# Ccdc163

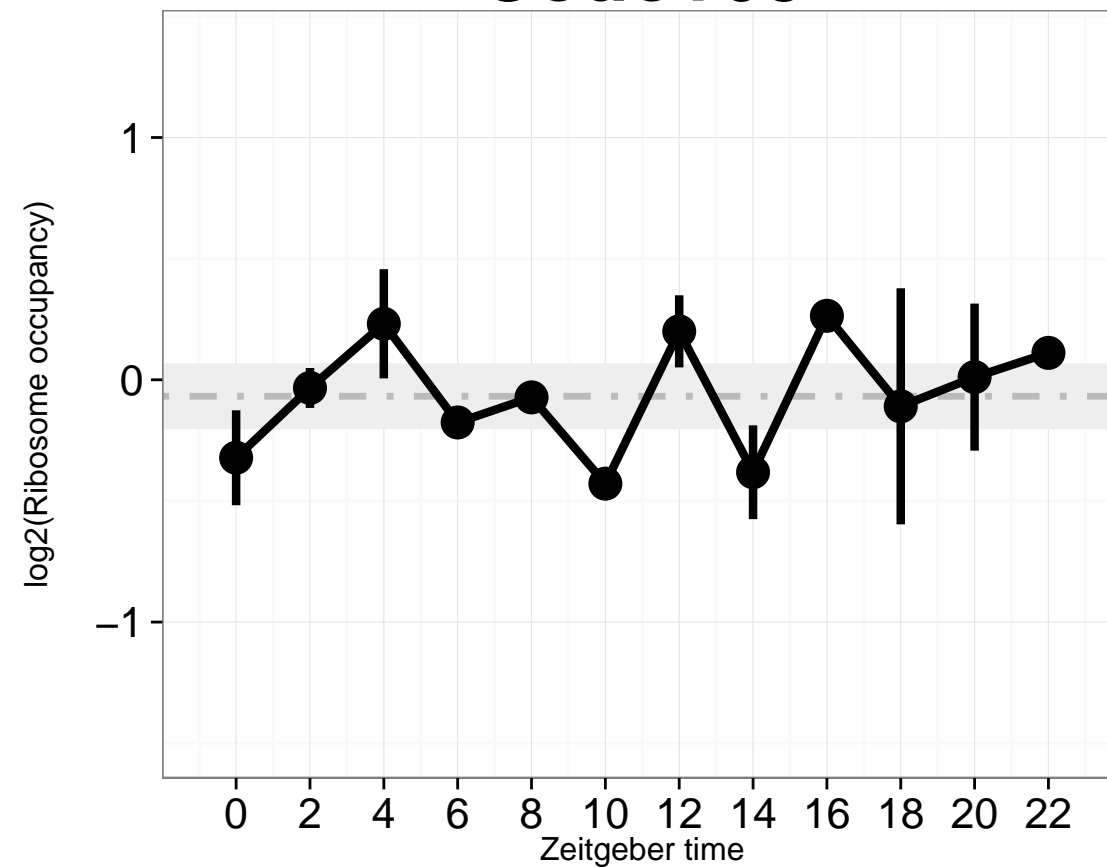

Supplement: Supplementary file 8872 [file 1]

## Sars

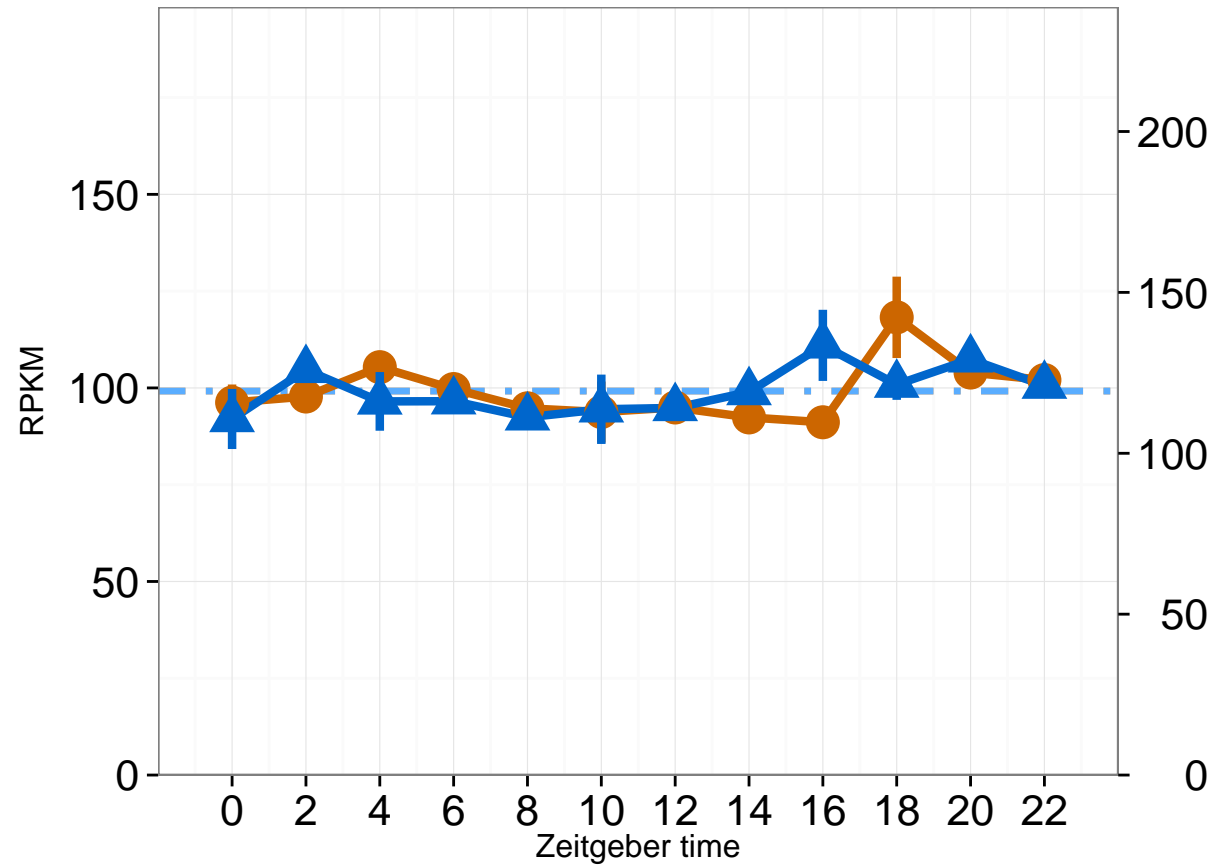

## Sars

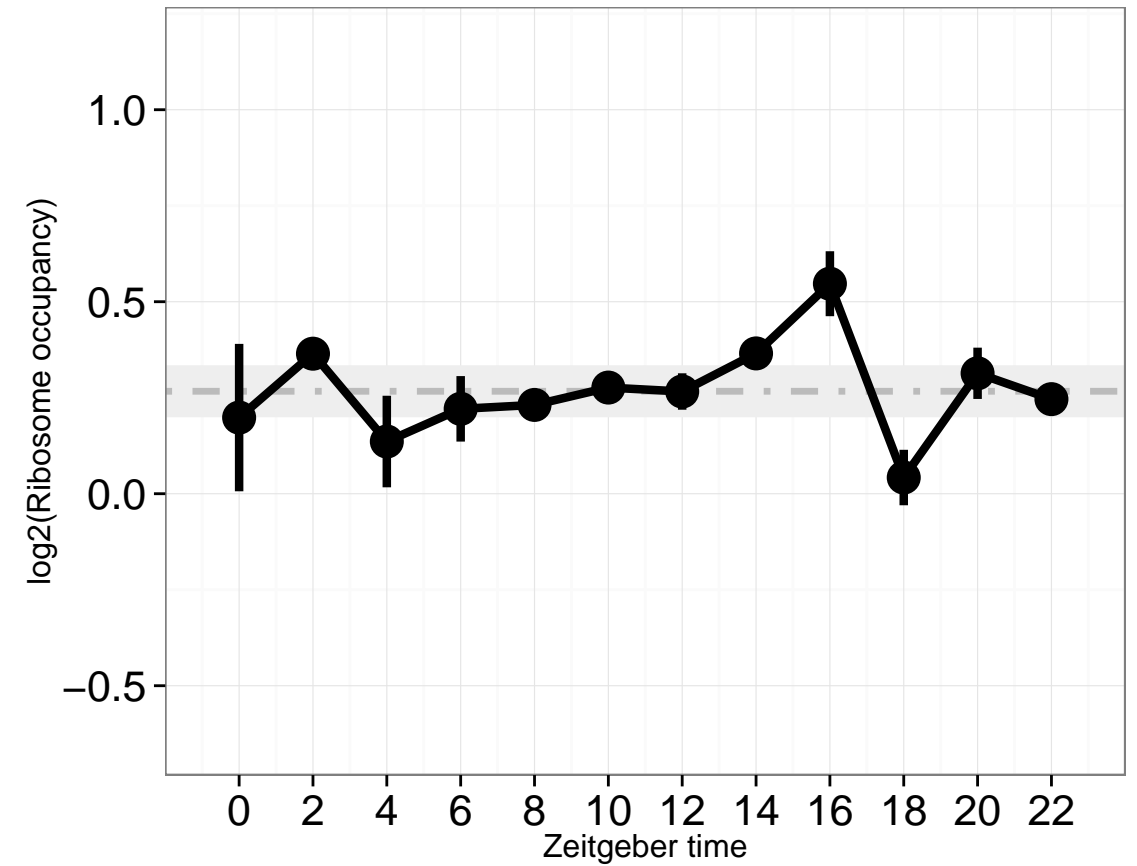

Supplement: Supplementary file 8873 [file 1]

# Tbc1d10b

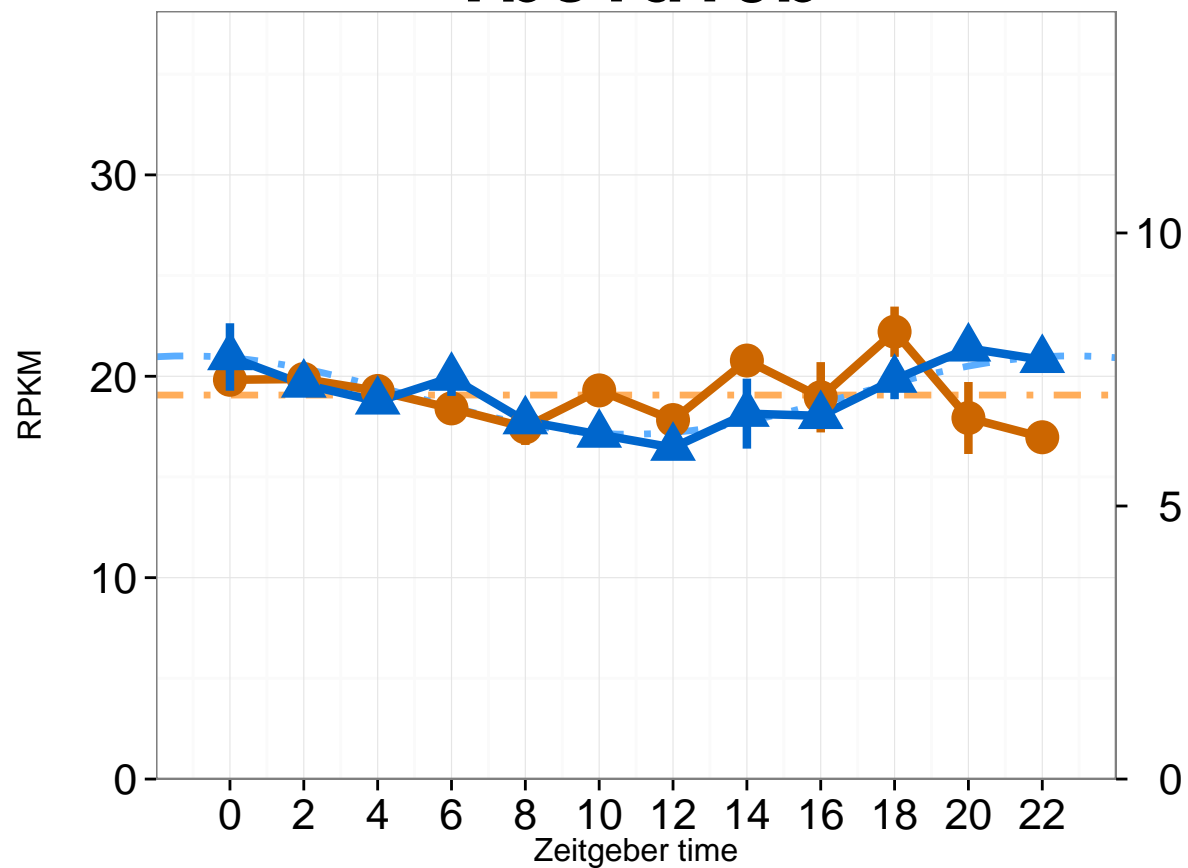

# Tbc1d10b

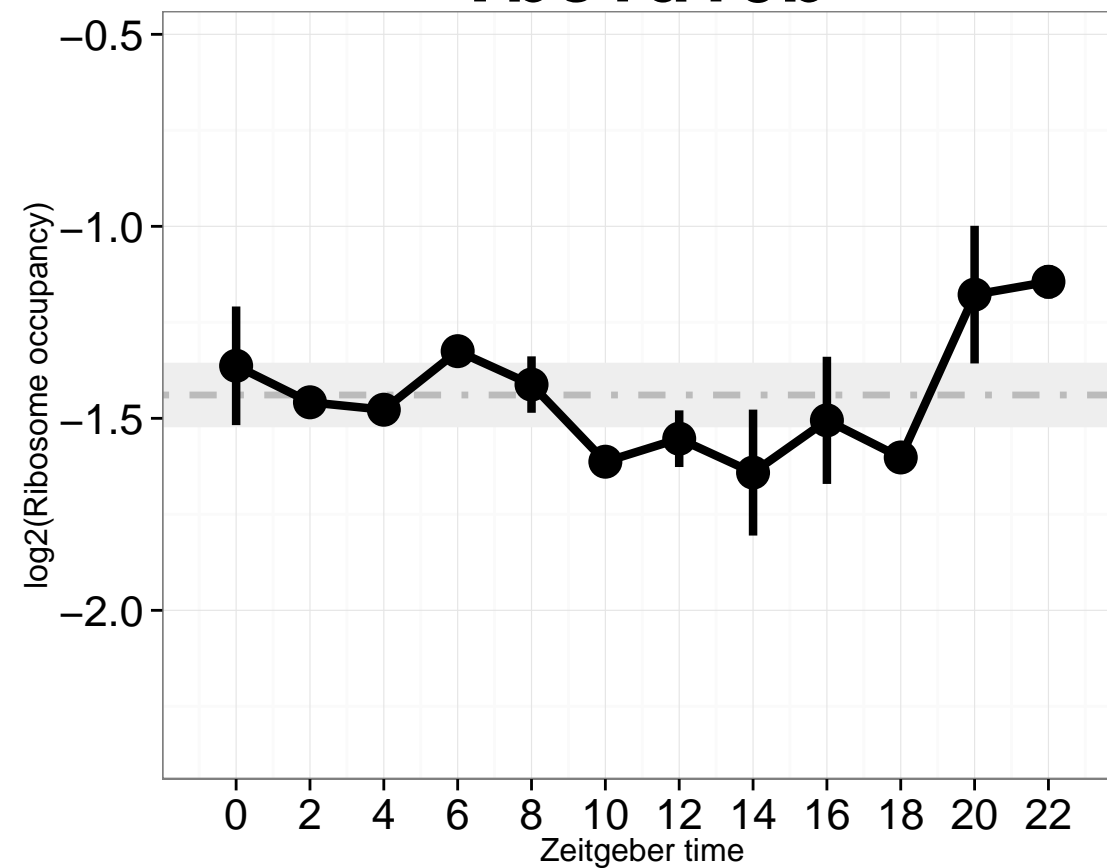

Supplement: Supplementary file 8874 [file 1]

## Ecsit

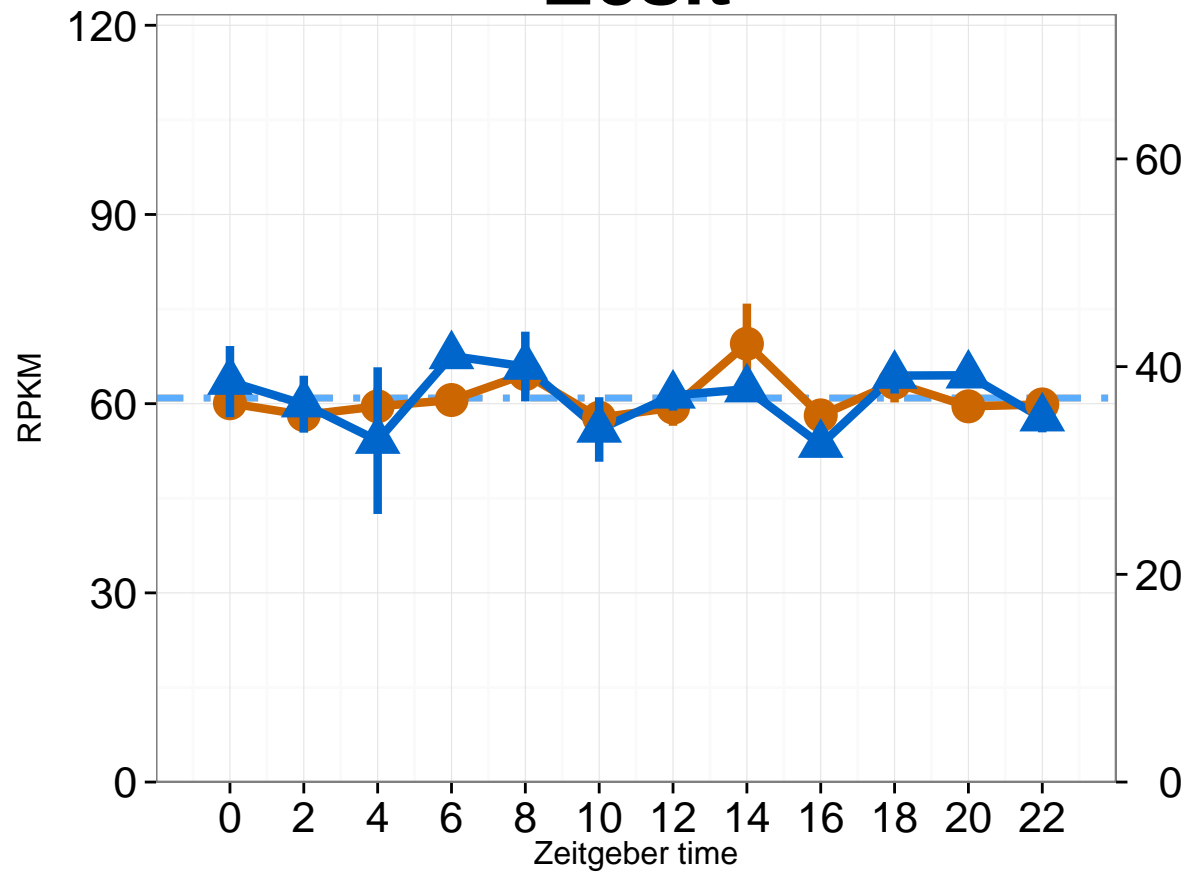

## Ecsit

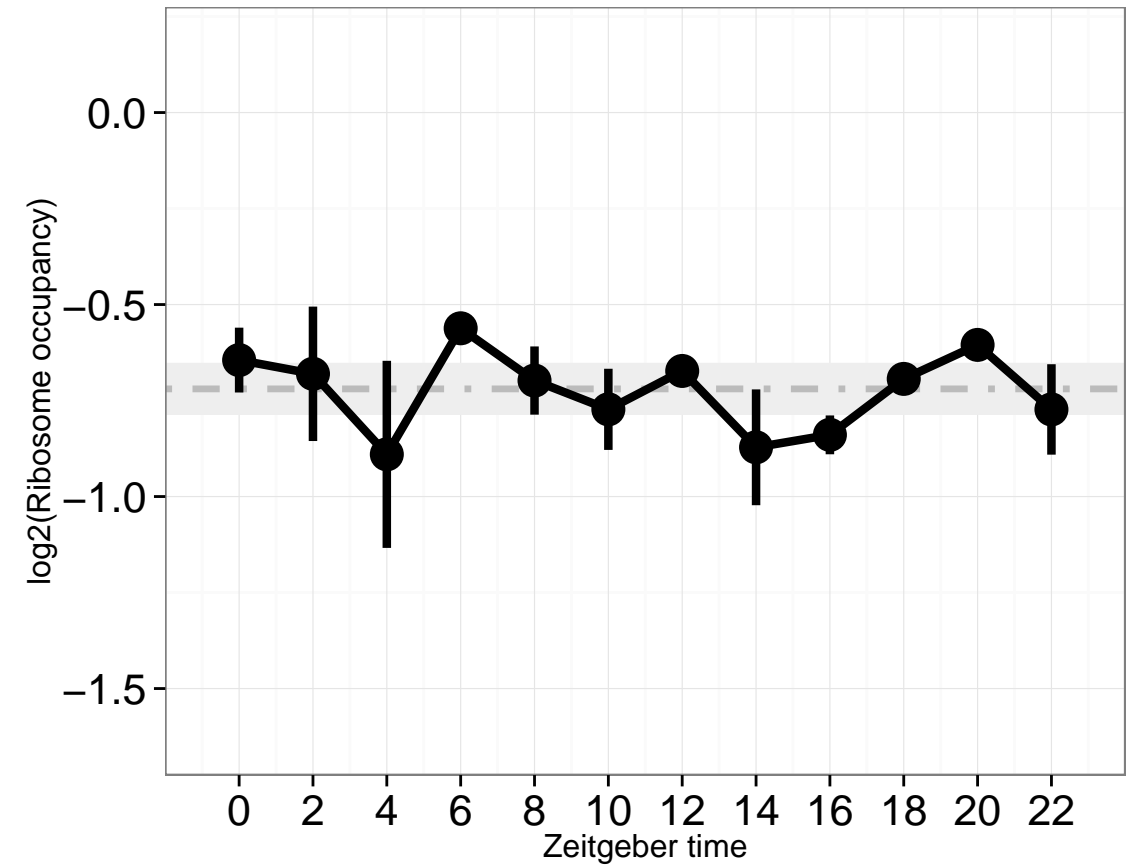

Supplement: Supplementary file 8875 [file 1]

# Cog6

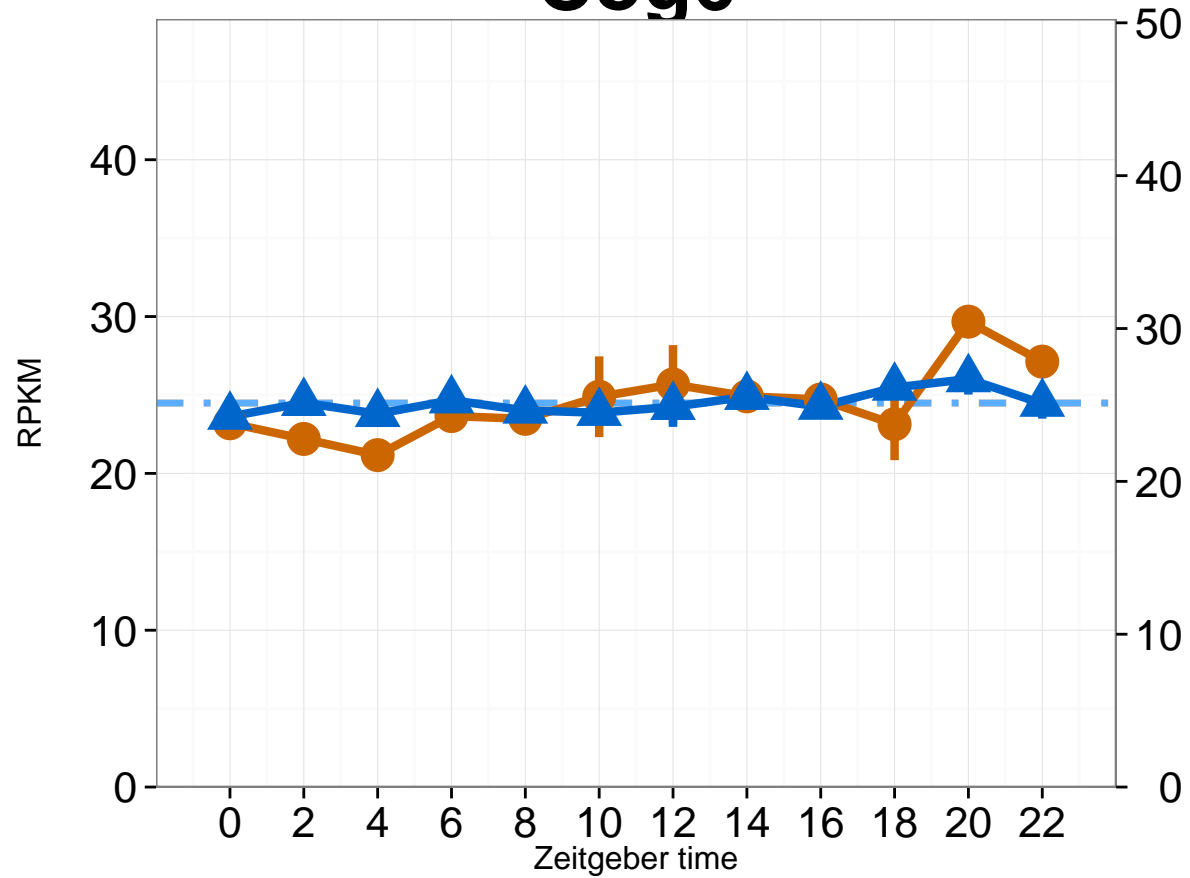

# Cog6

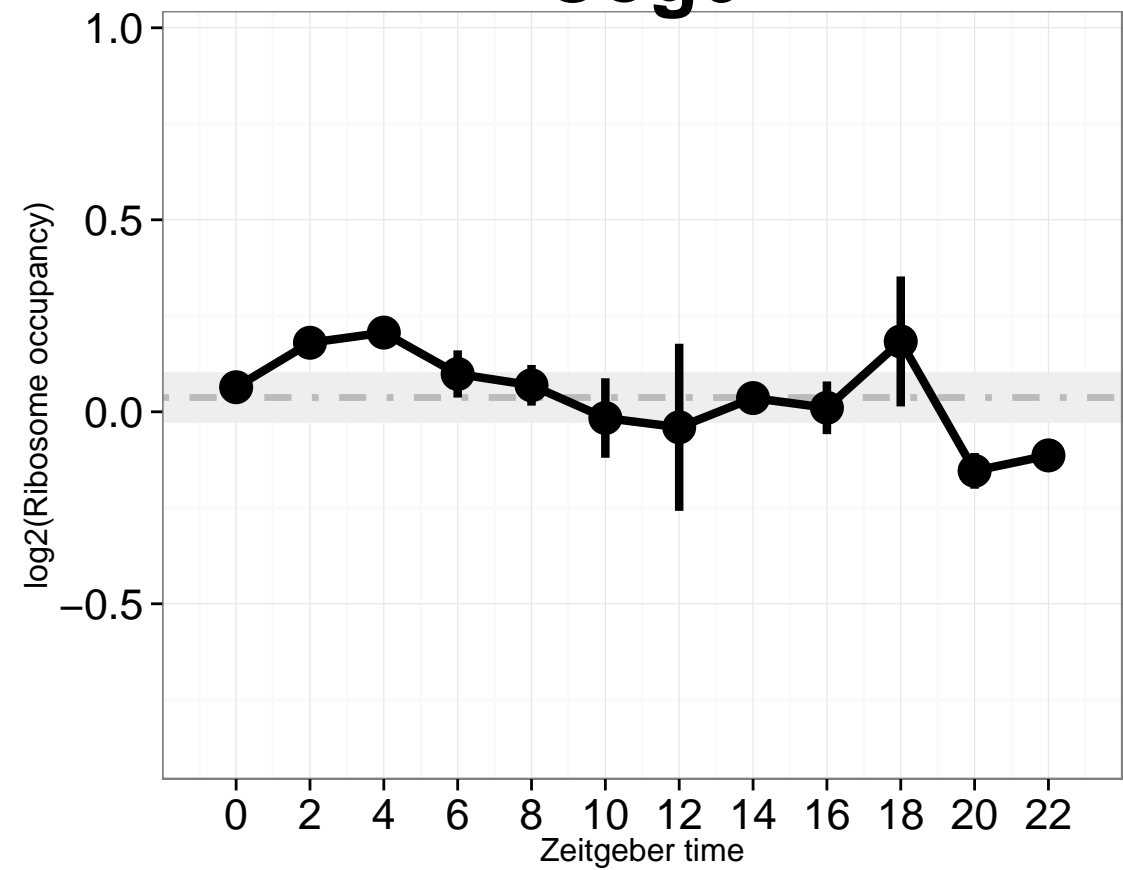

Supplement: Supplementary file 8876 [file 1]

# Slc6a9

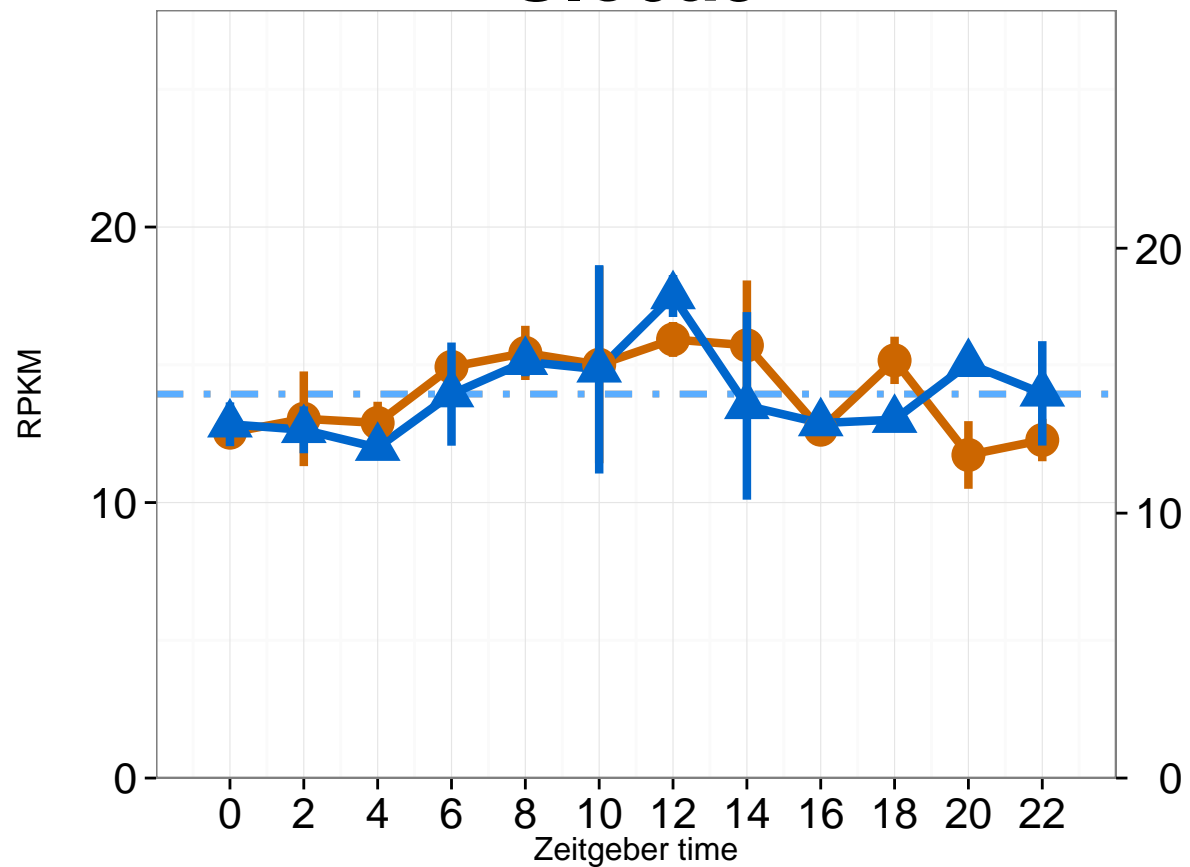

# Slc6a9

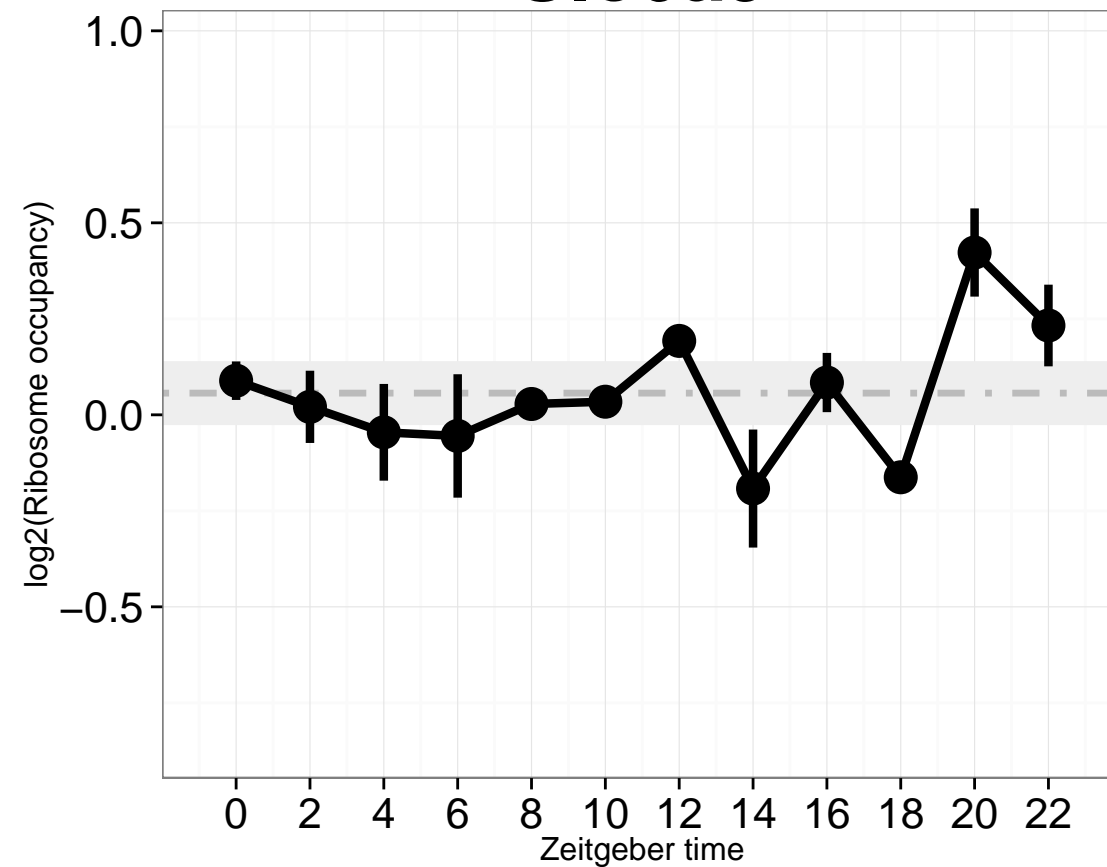

Supplement: Supplementary file 8877 [file 1]

## Alkbh3

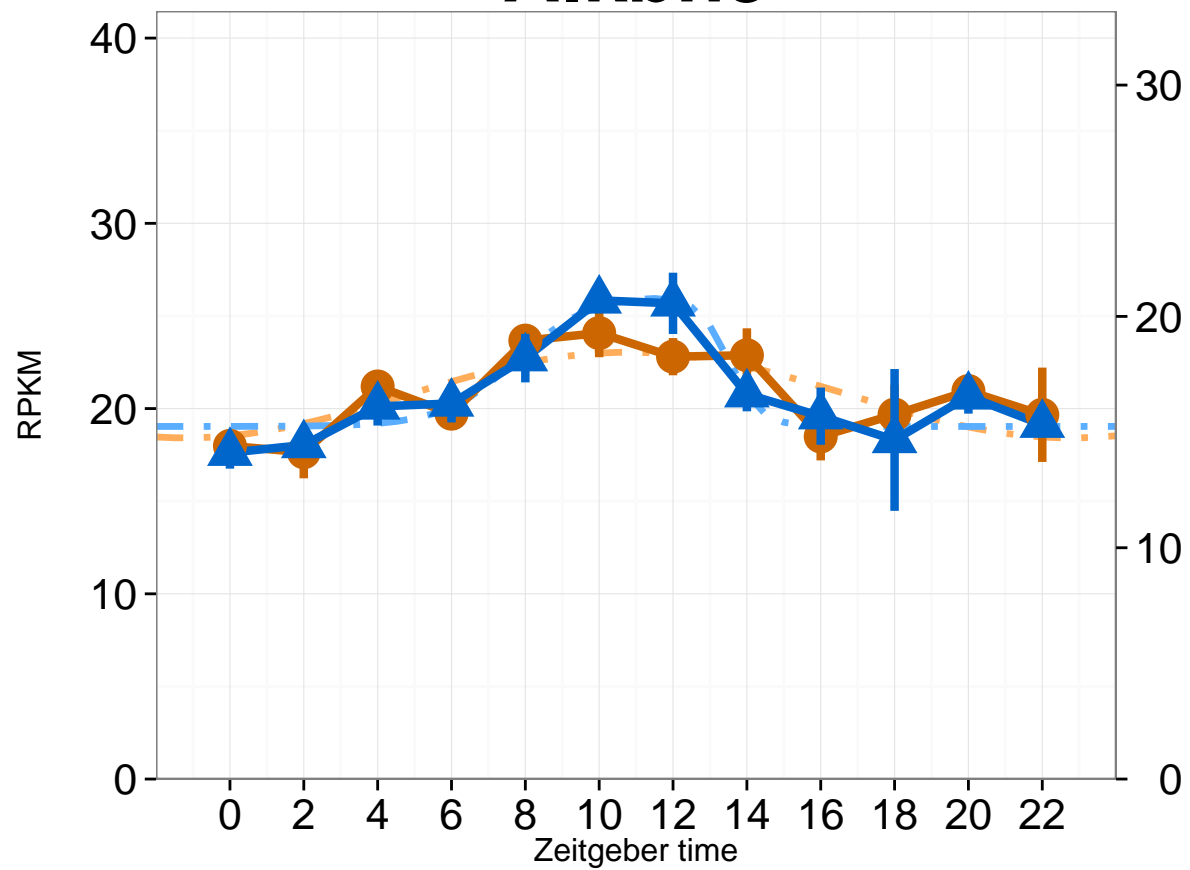

## Alkbh3

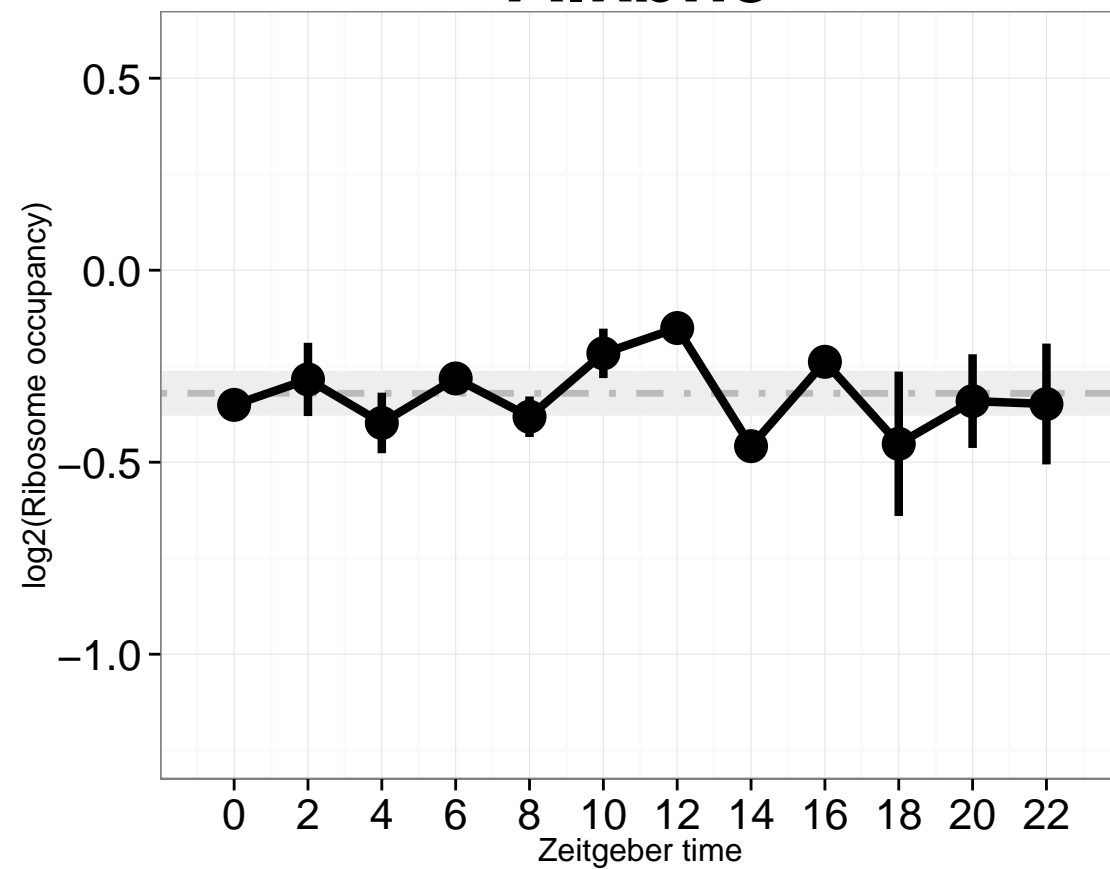

Supplement: Supplementary file 8878 [file 1]

## Lsp1

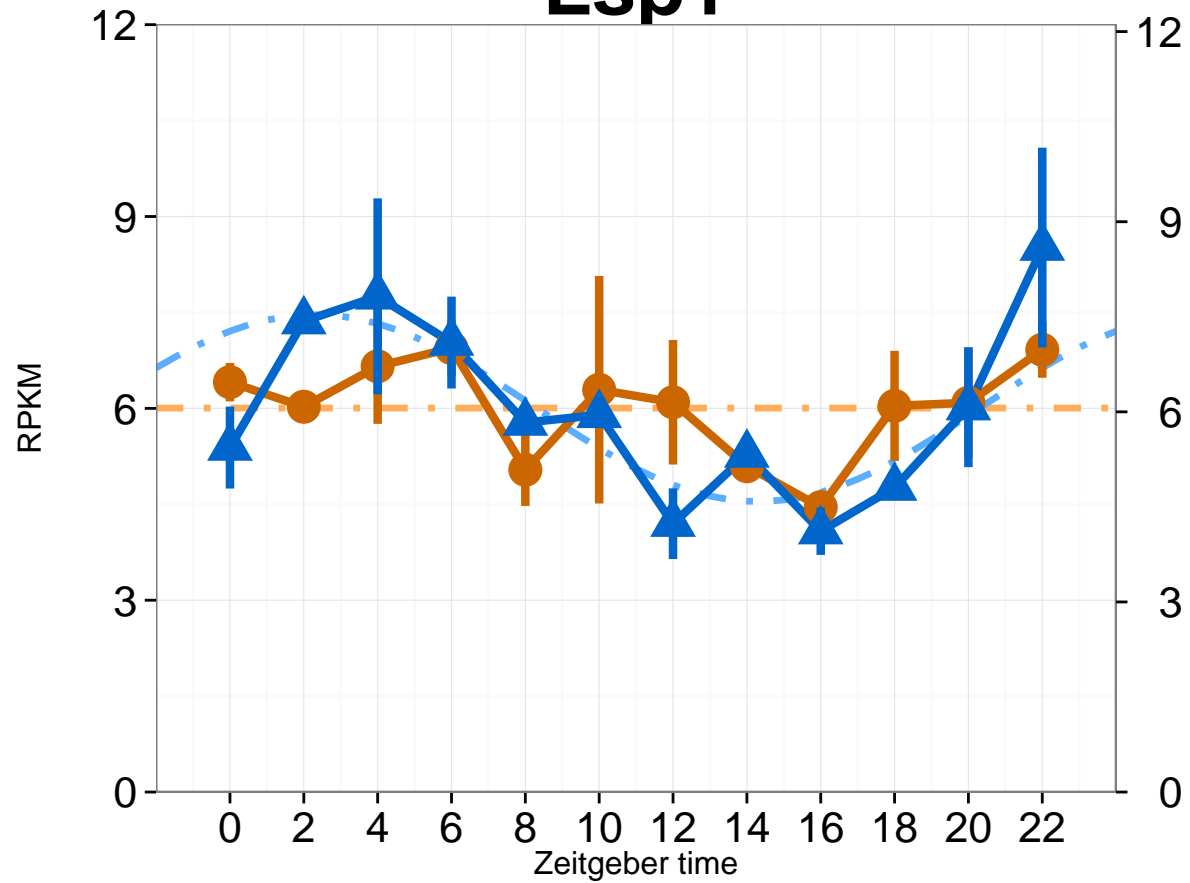

## Lsp1

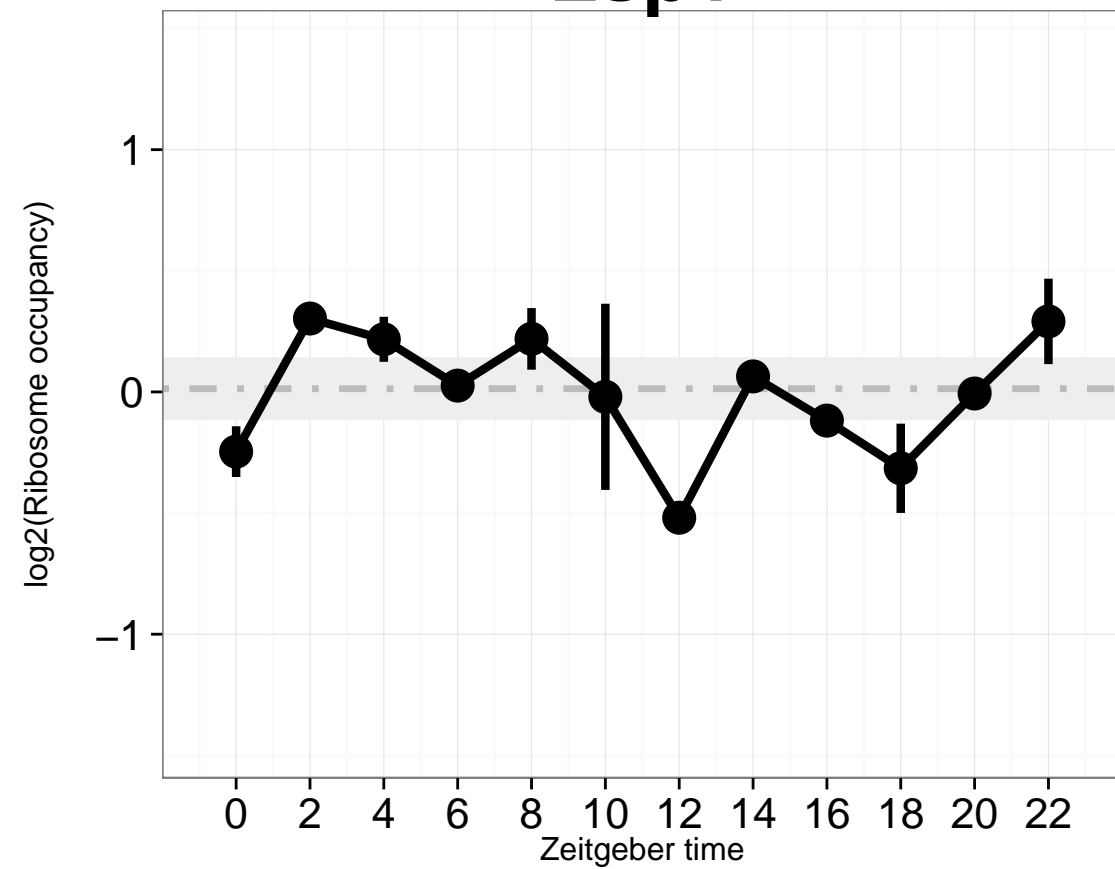

Supplement: Supplementary file 8879 [file 1]

# Cand1

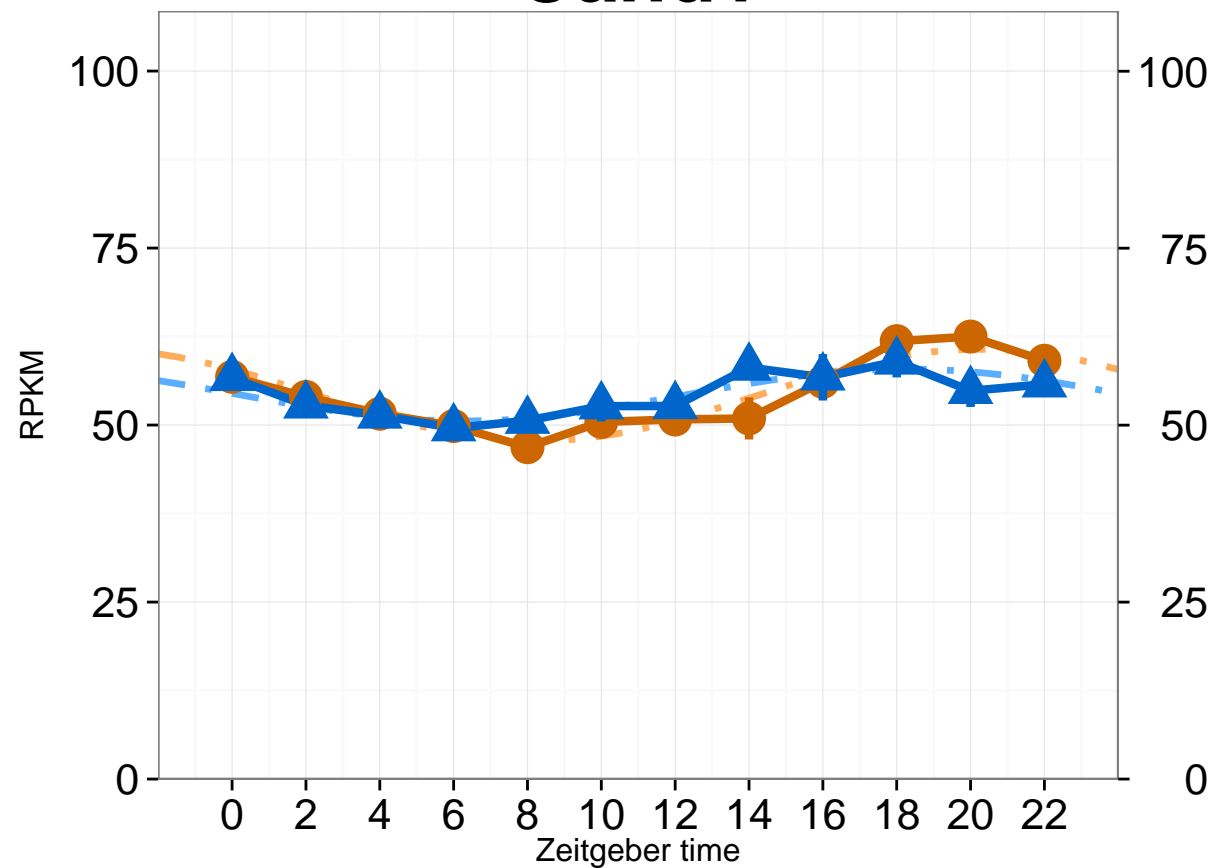

# Cand1

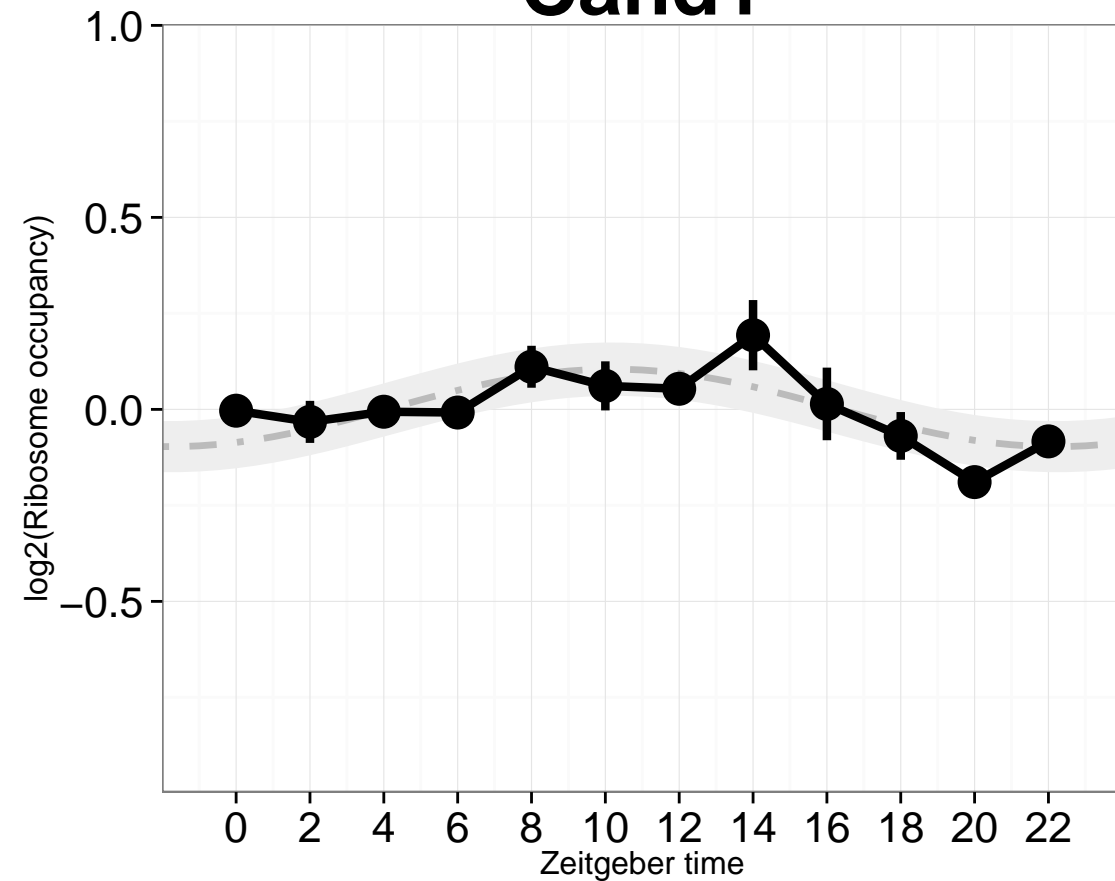

Supplement: Supplementary file 8880 [file 1]

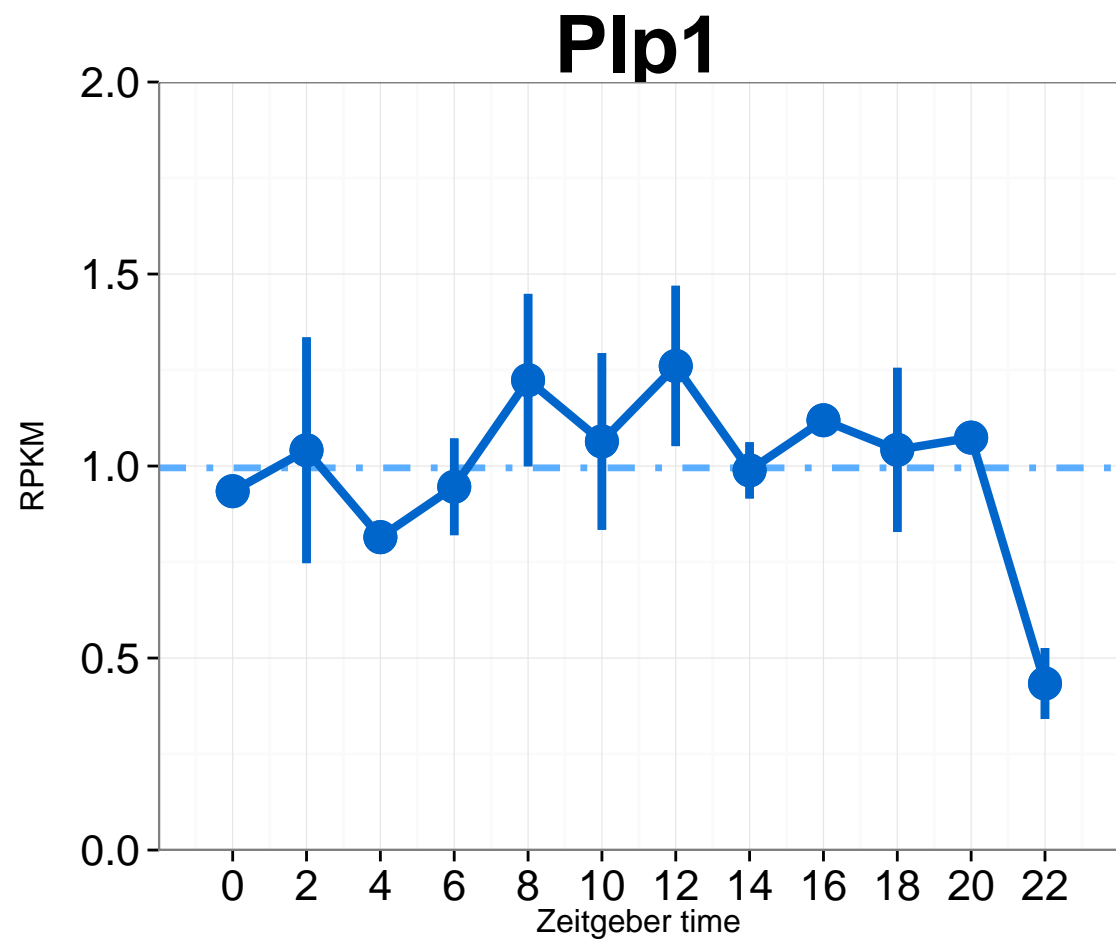

### Plp1 log2(Ribosome occupancy)

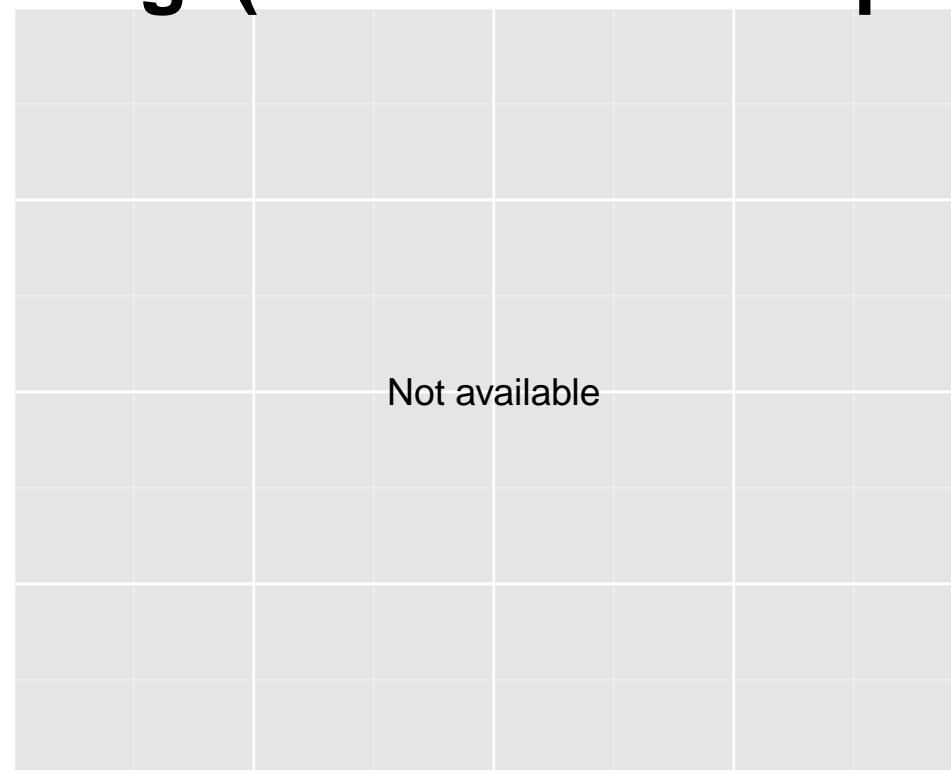

Supplement: Supplementary file 8881 [file 1]

## Adamts2

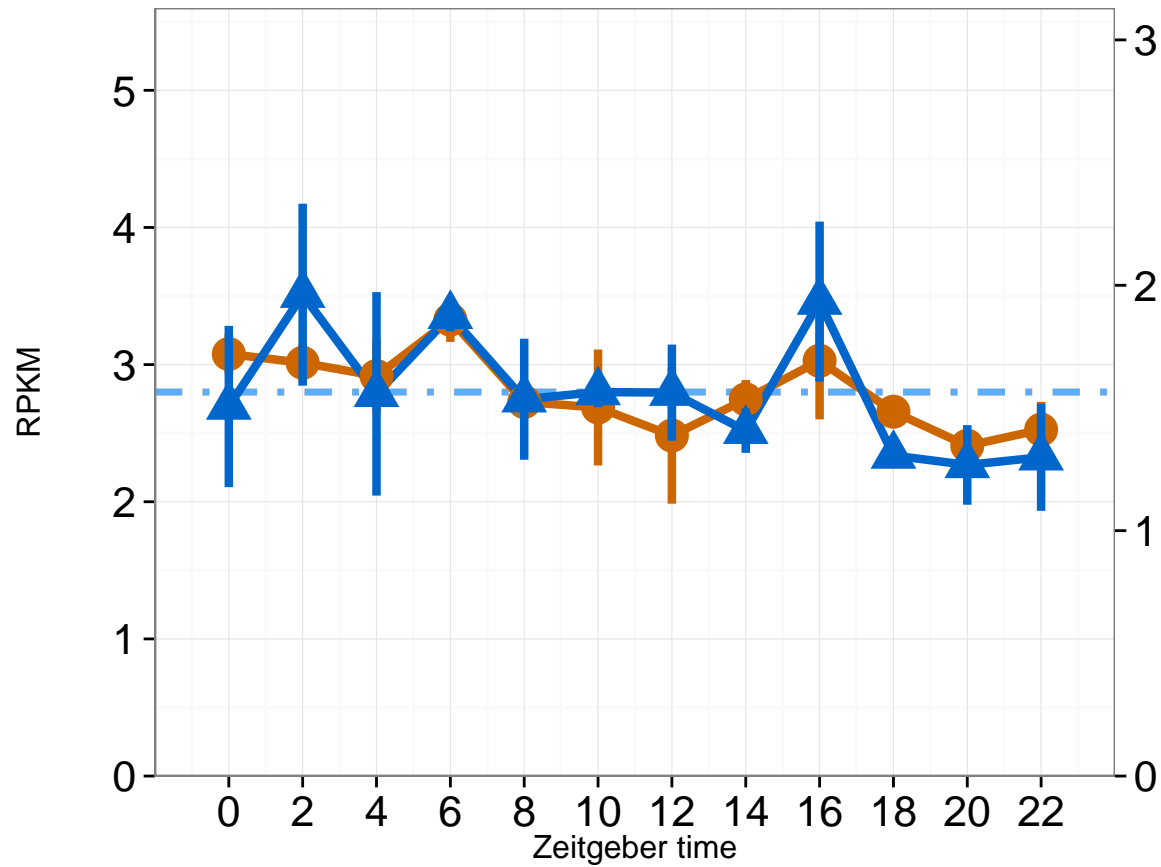

## Adamts2

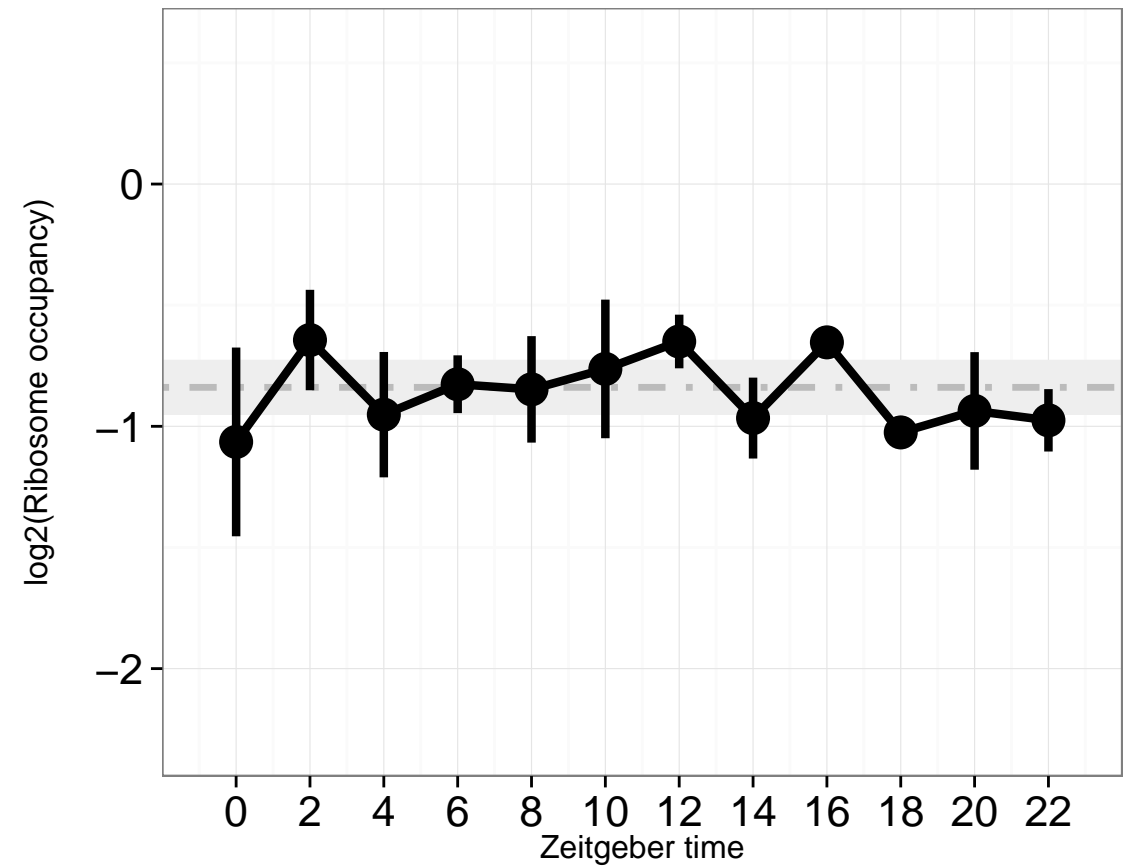

Supplement: Supplementary file 8882 [file 1]

# Cd3eap

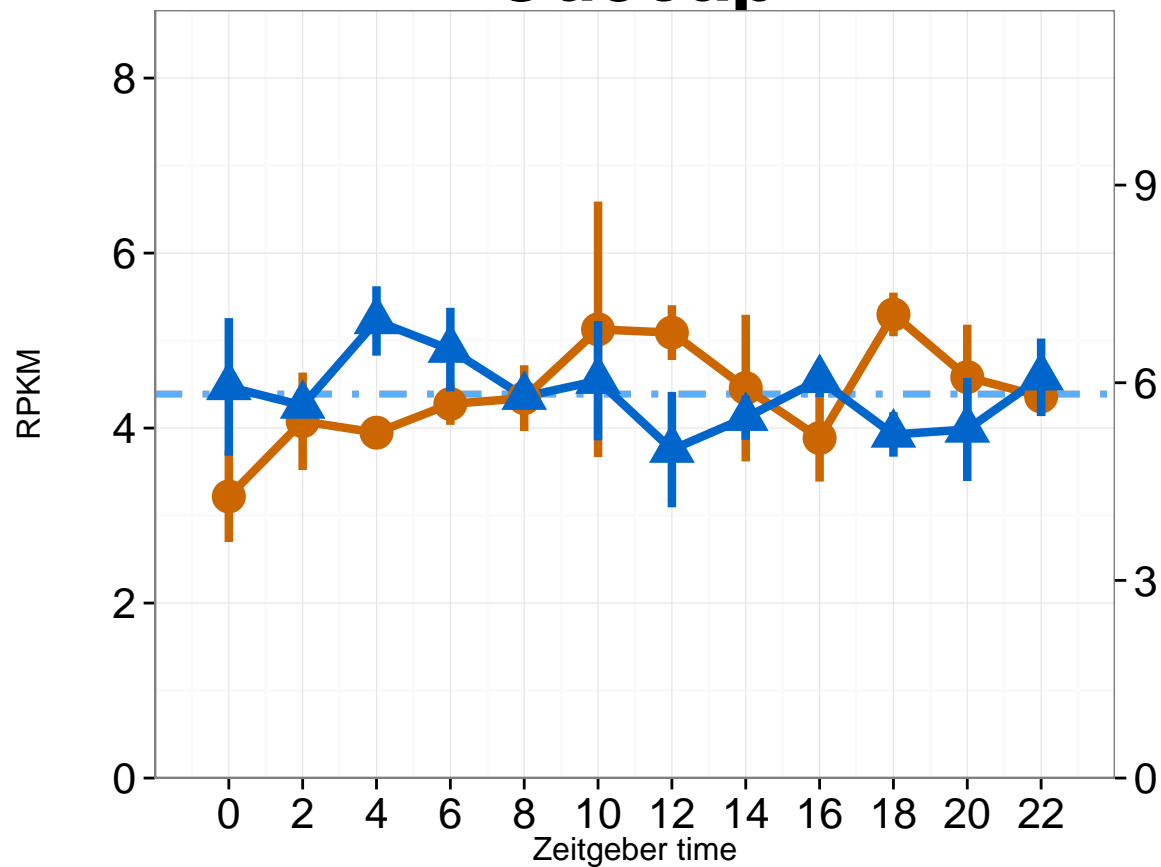

# Cd3eap

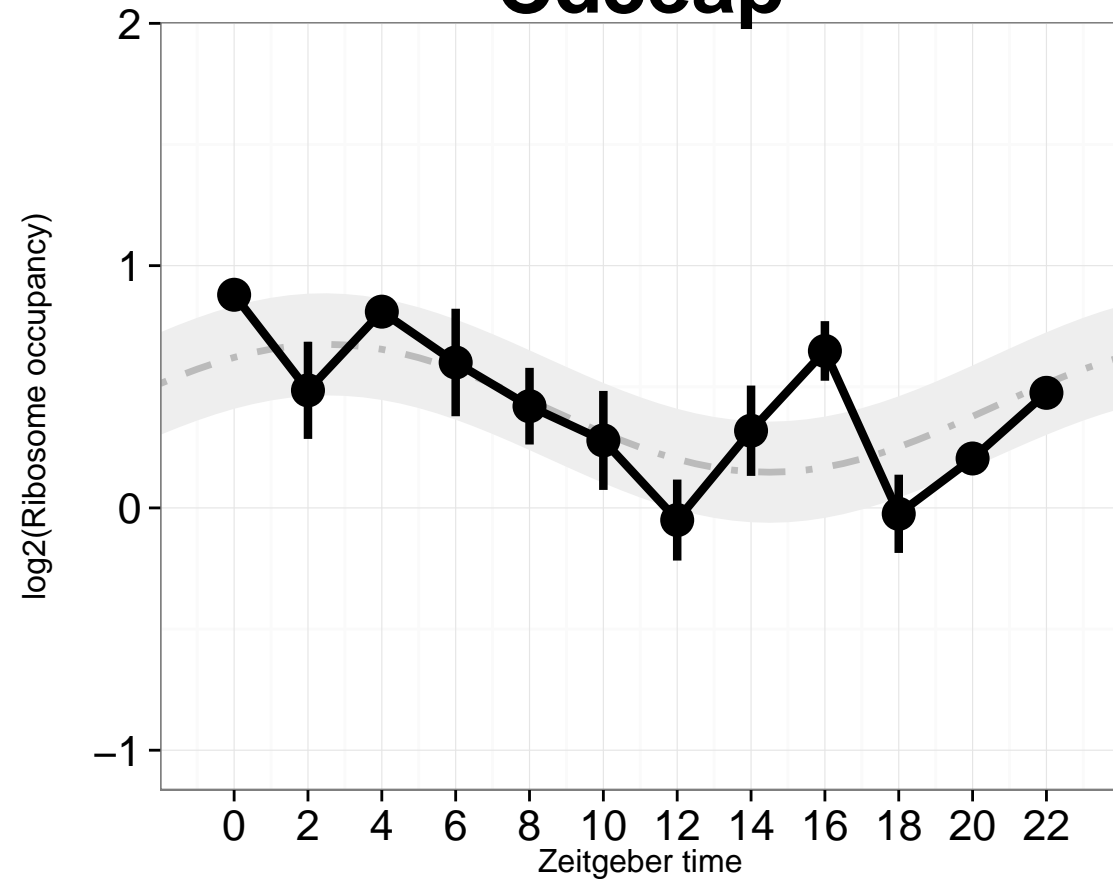

Supplement: Supplementary file 8883 [file 1]

# Tjap1

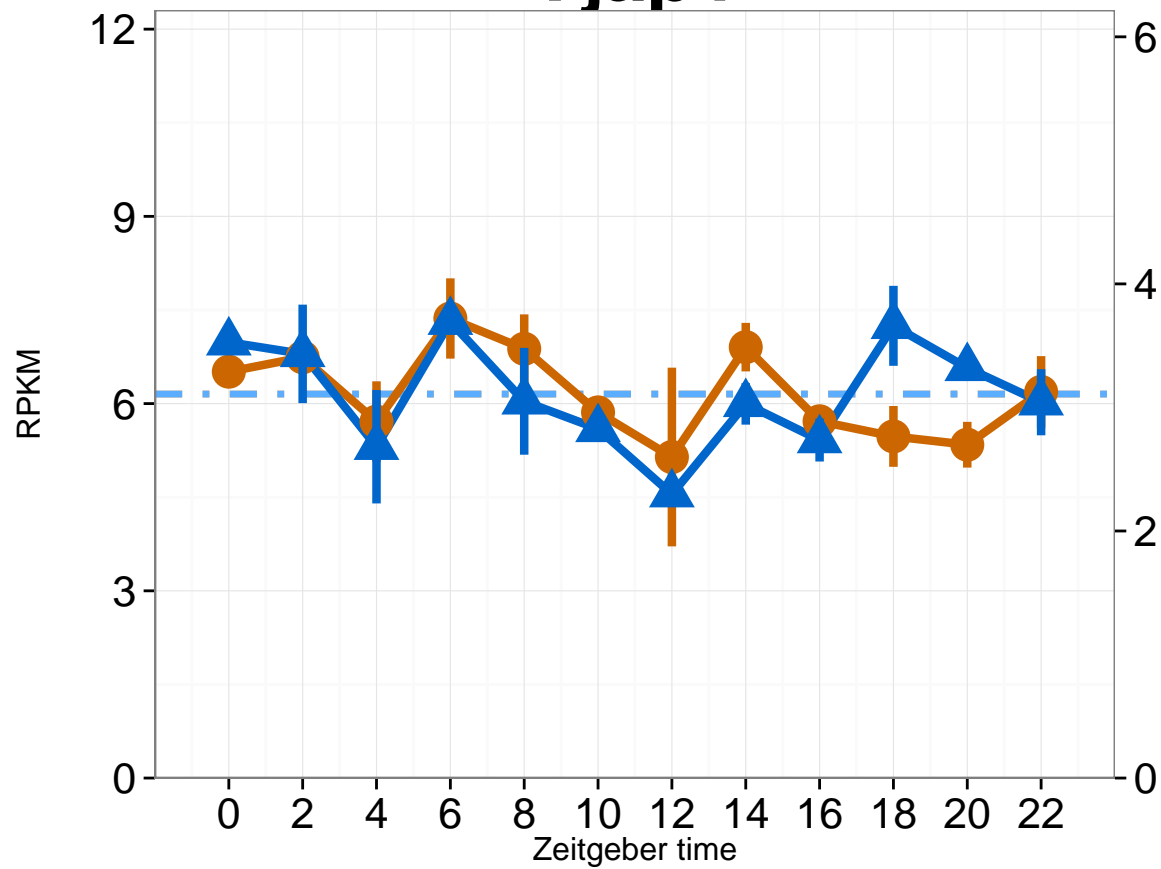

# Tjap1

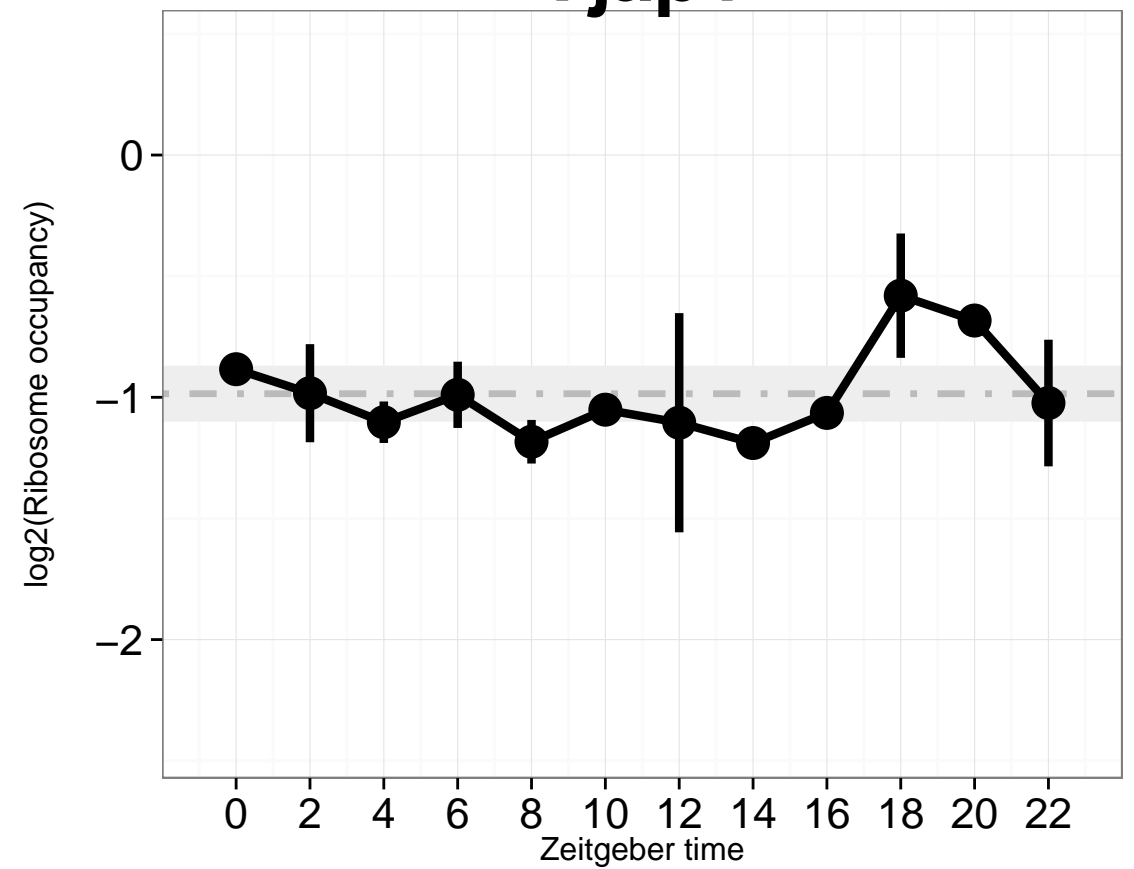

Supplement: Supplementary file 8884 [file 1]

# Mien1

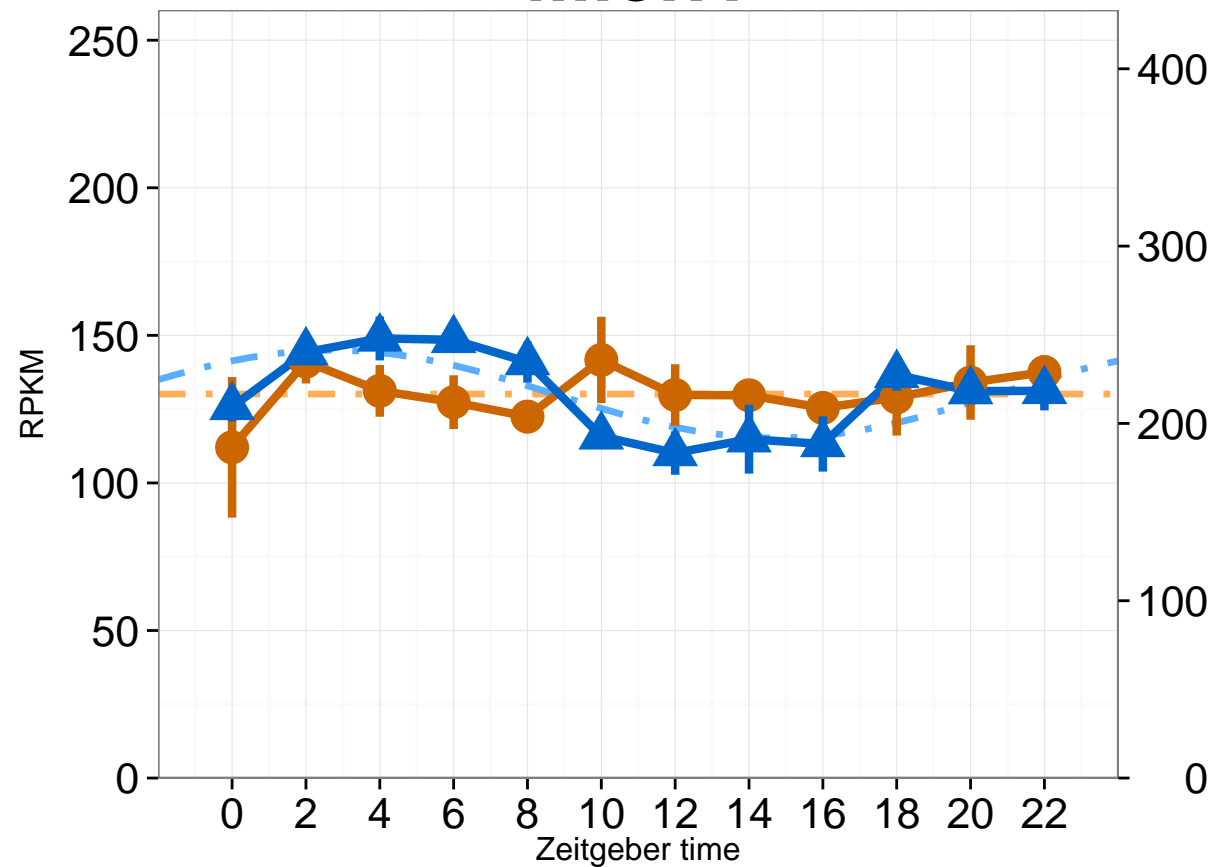

# Mien1

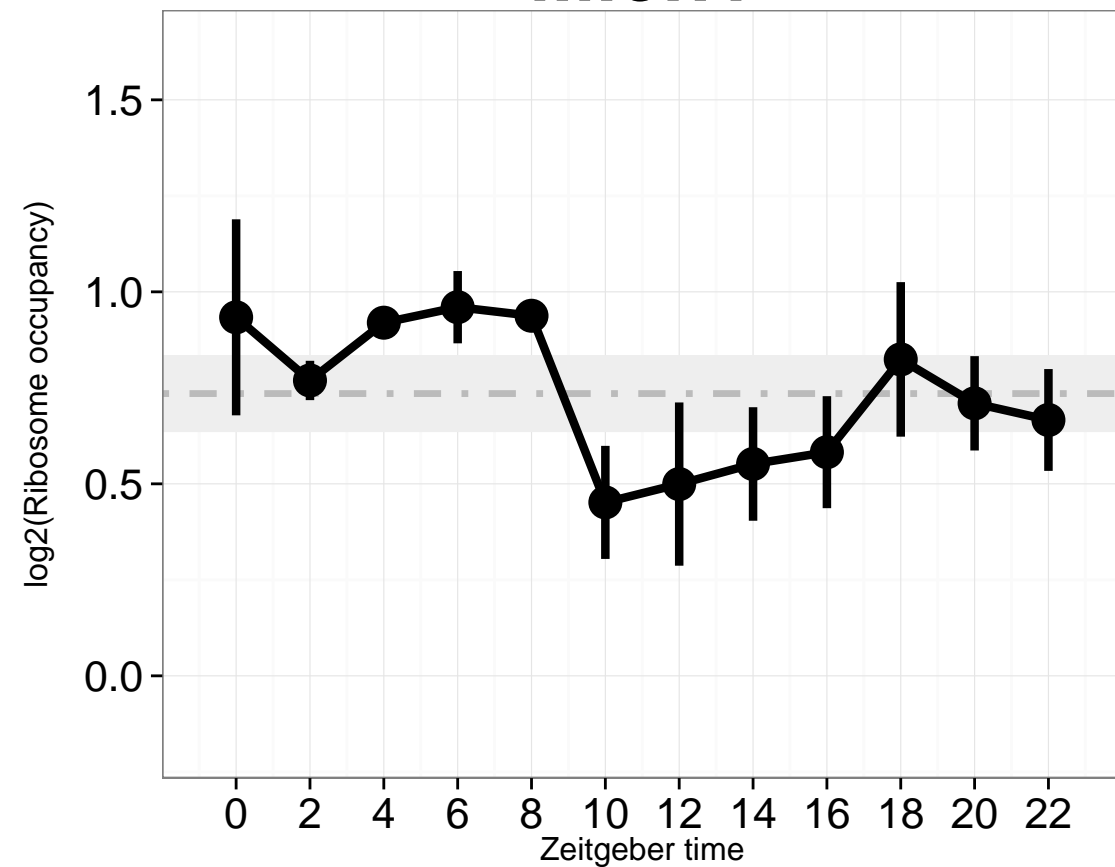

Supplement: Supplementary file 8885 [file 1]

# Ybx2

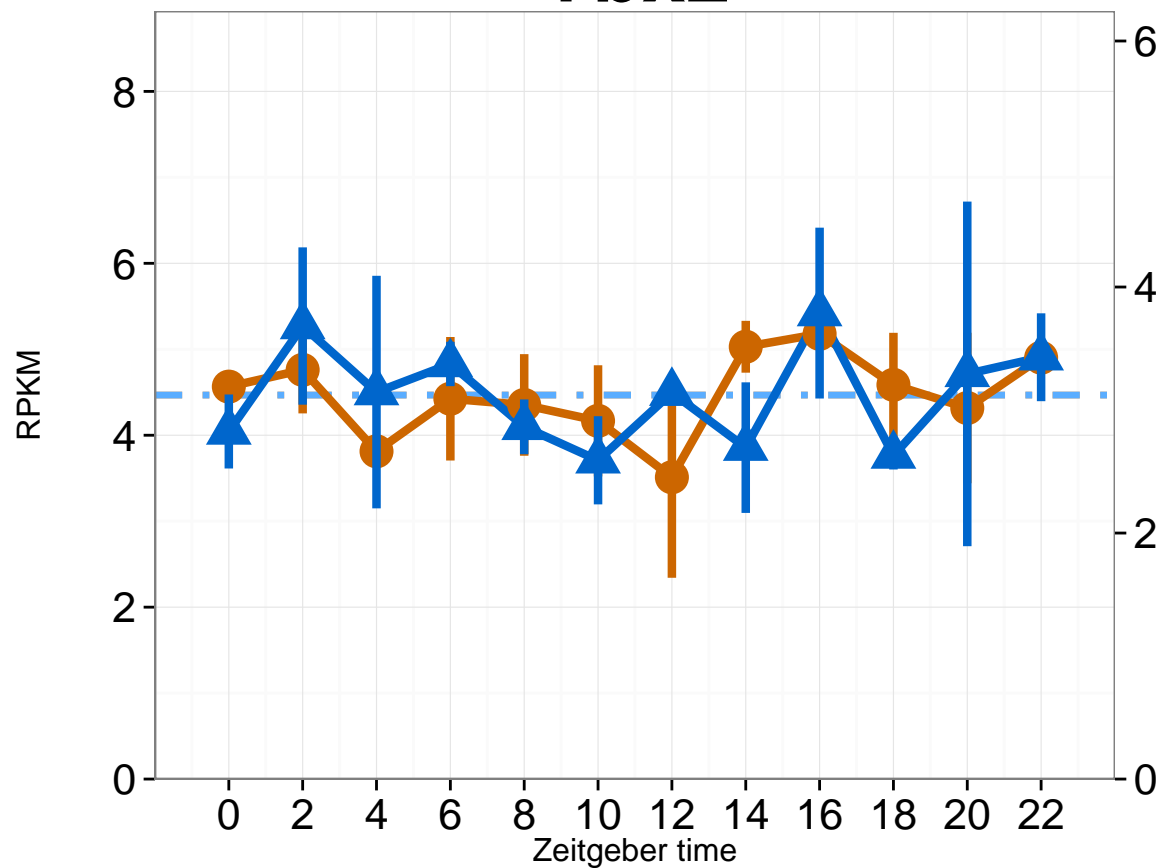

# Ybx2

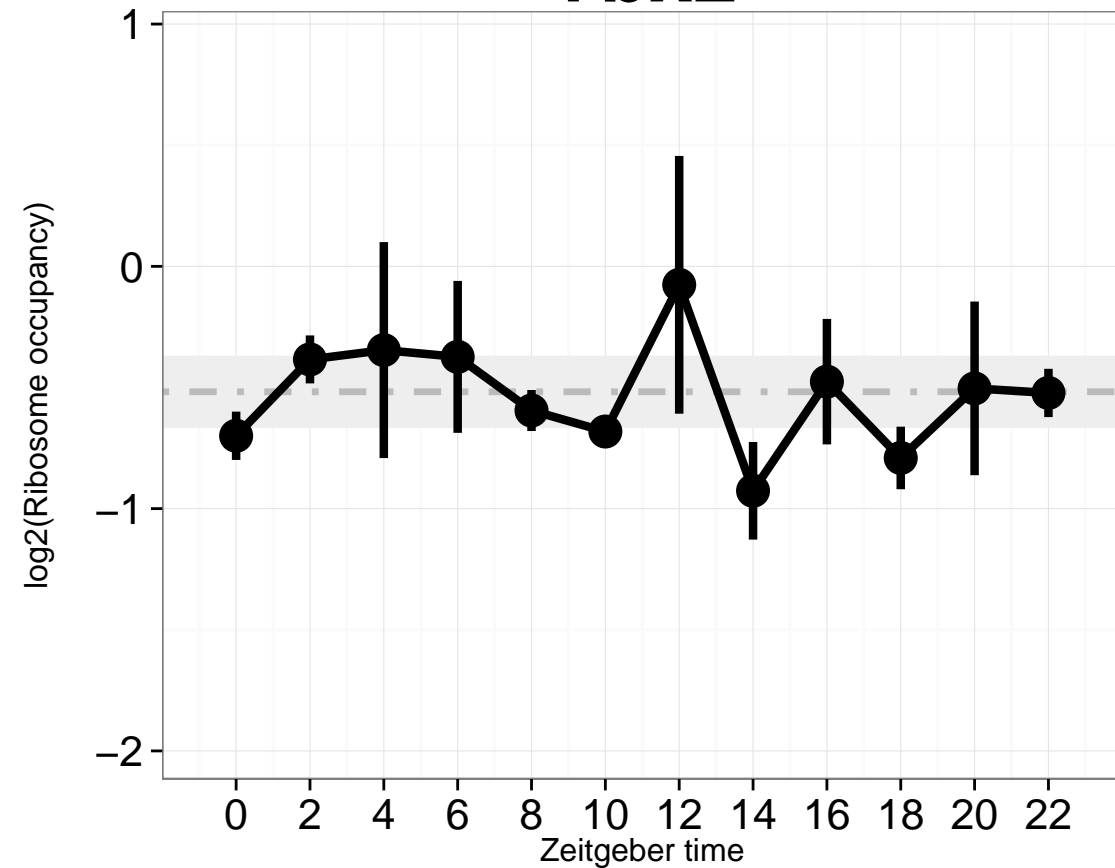

Supplement: Supplementary file 8886 [file 1]

# Lpcat1

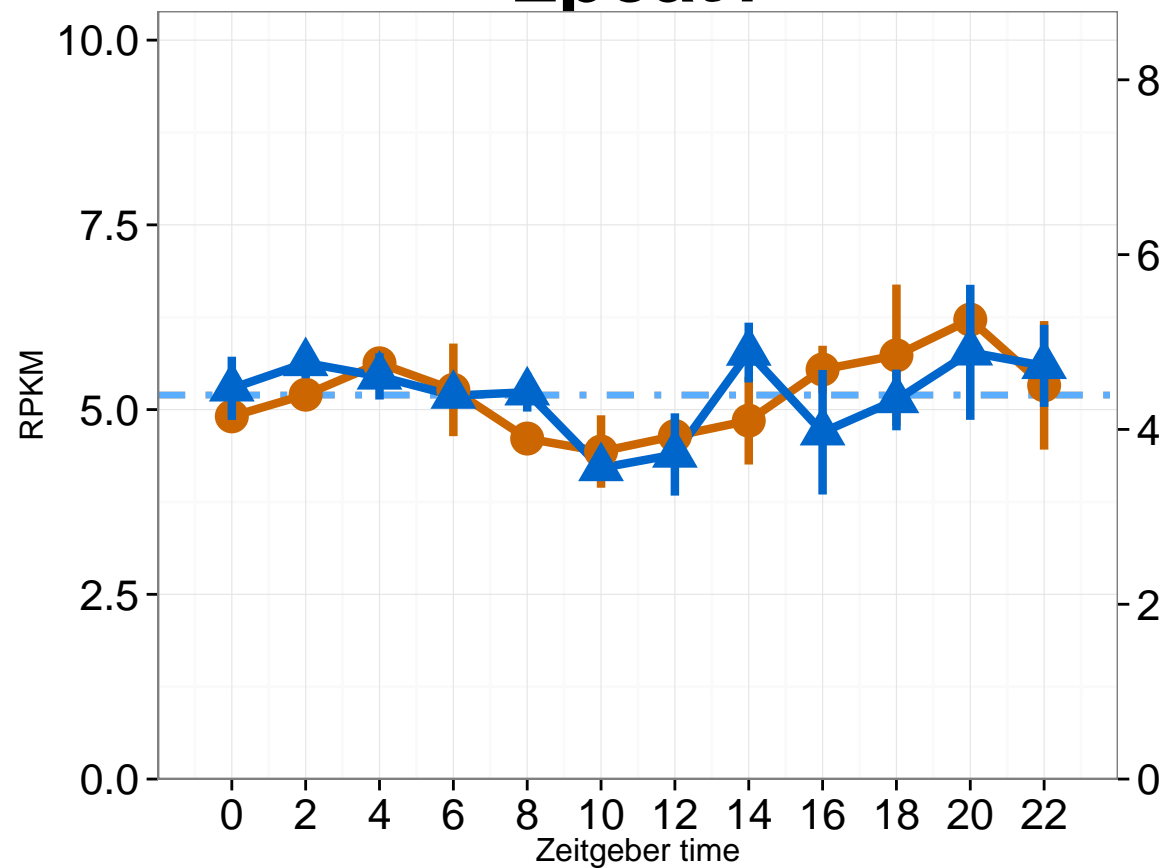

# Lpcat1

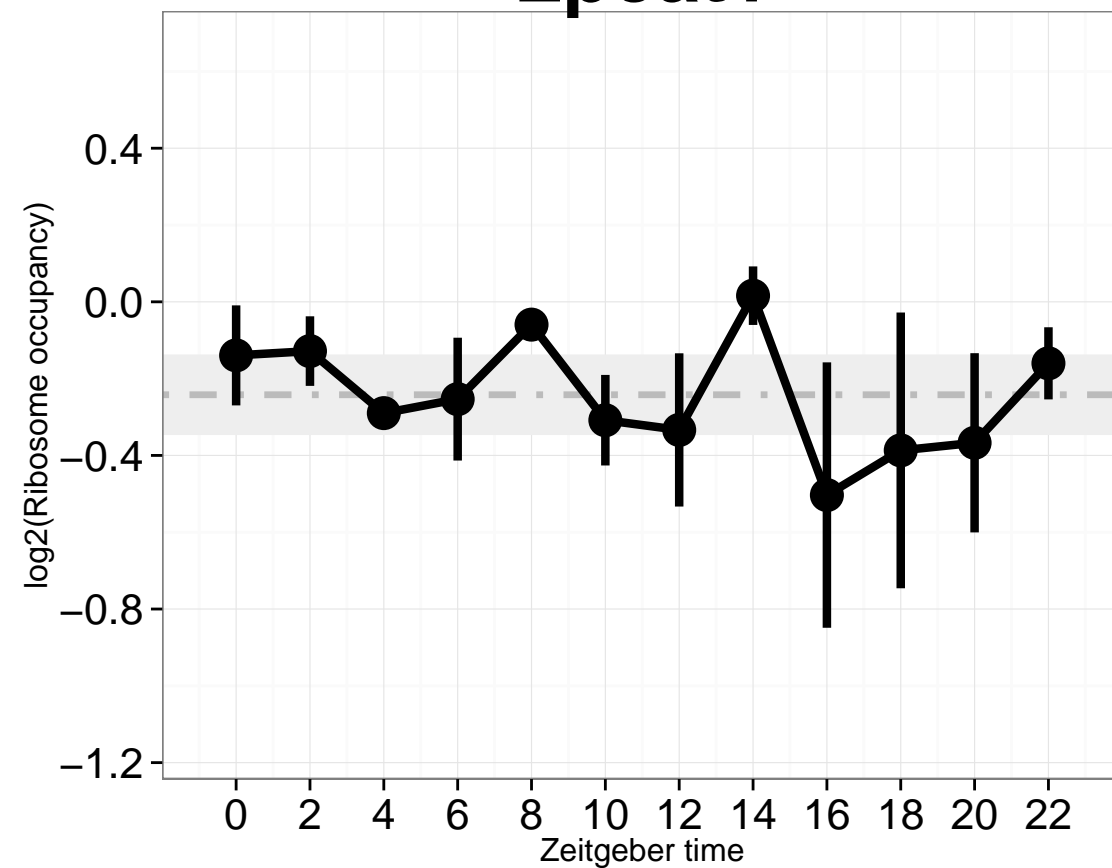

Supplement: Supplementary file 8887 [file 1]

## Fermt2

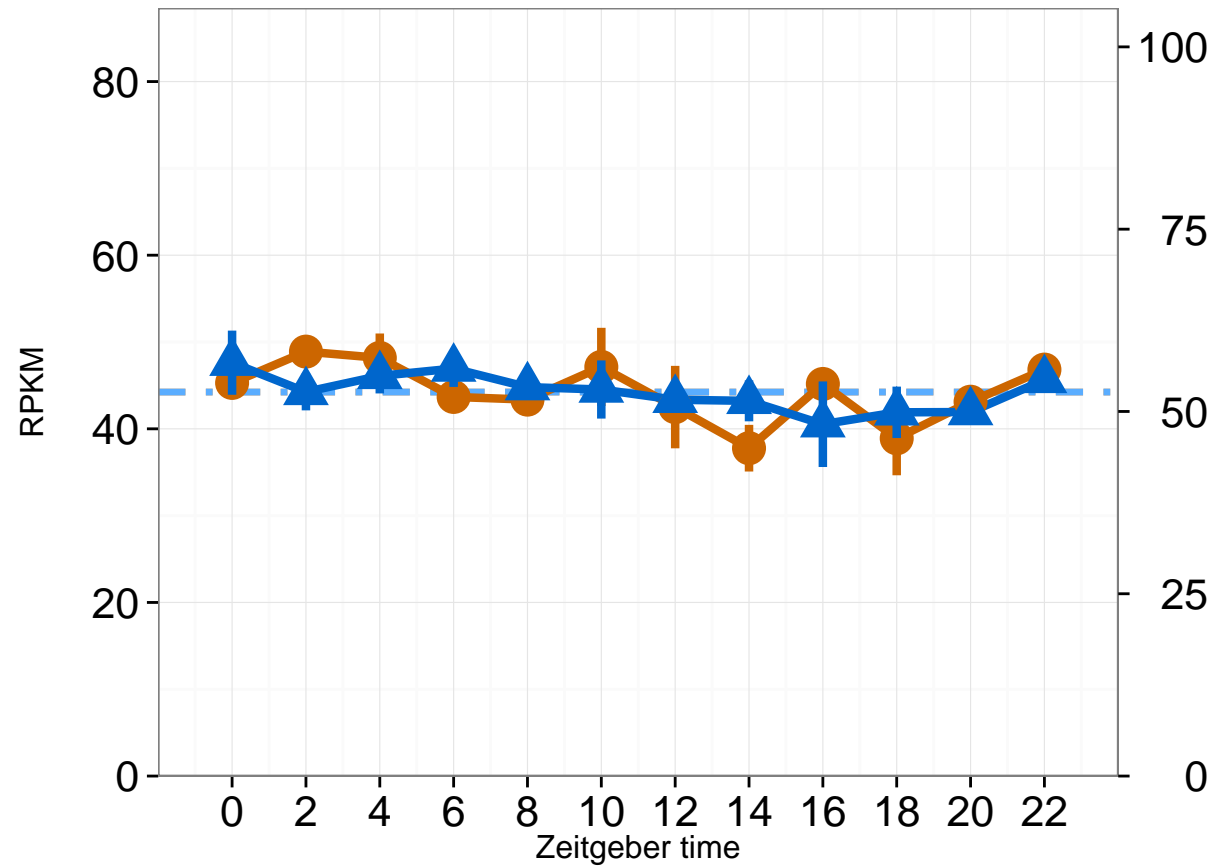

## Fermt2

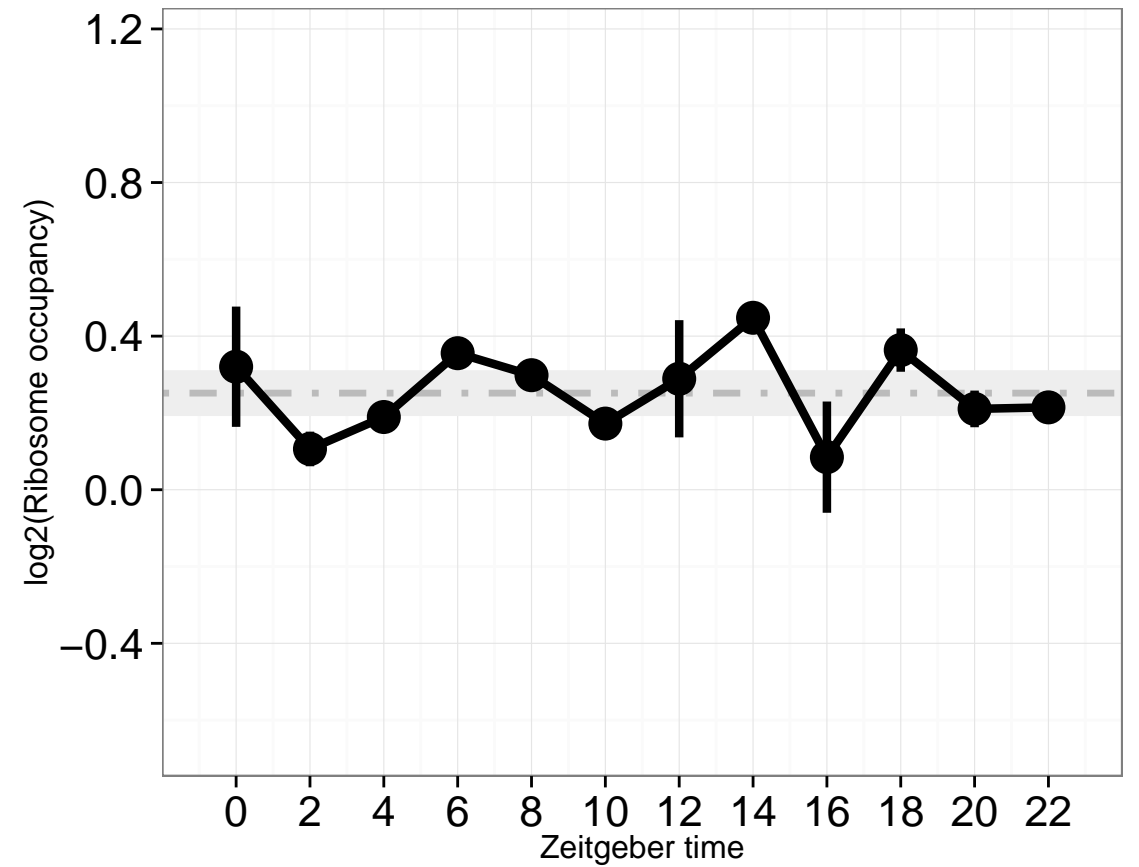

Supplement: Supplementary file 8888 [file 1]

# Slc22a28

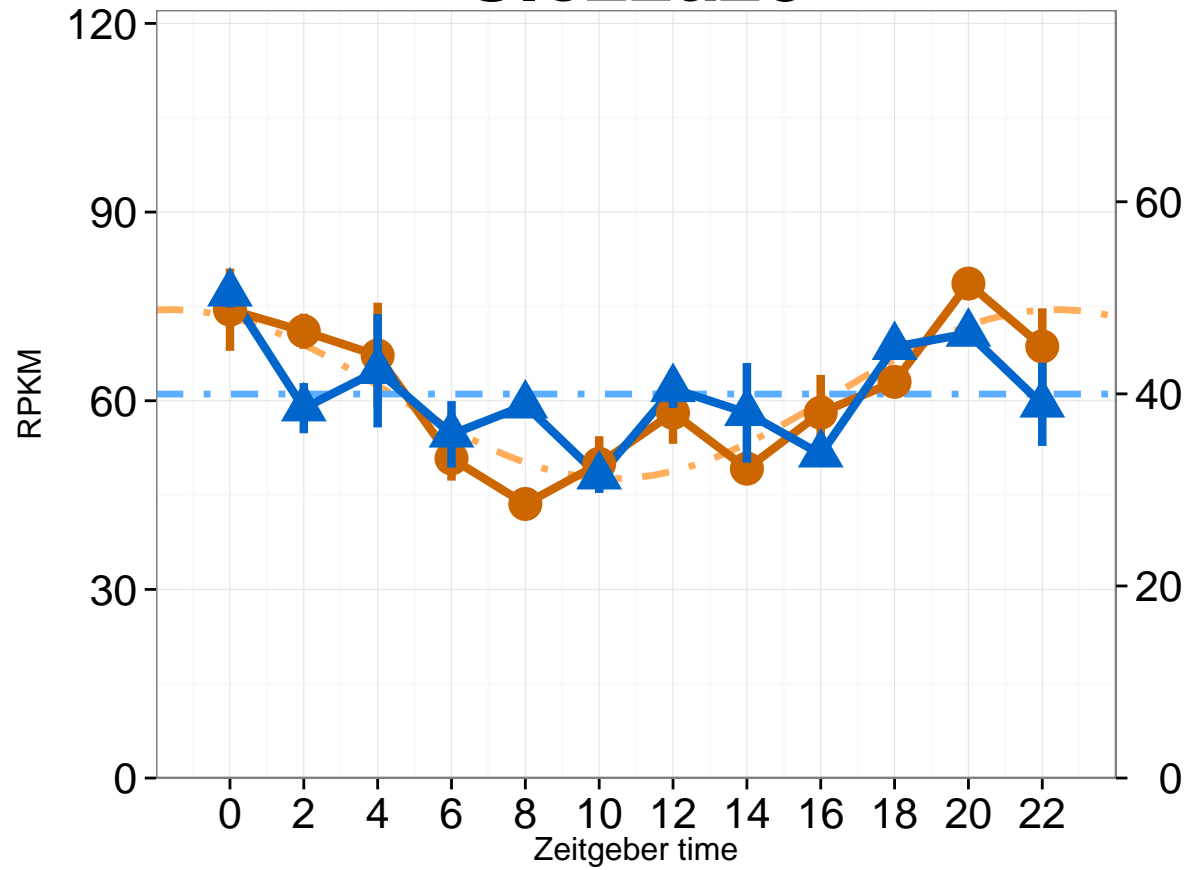

# Slc22a28

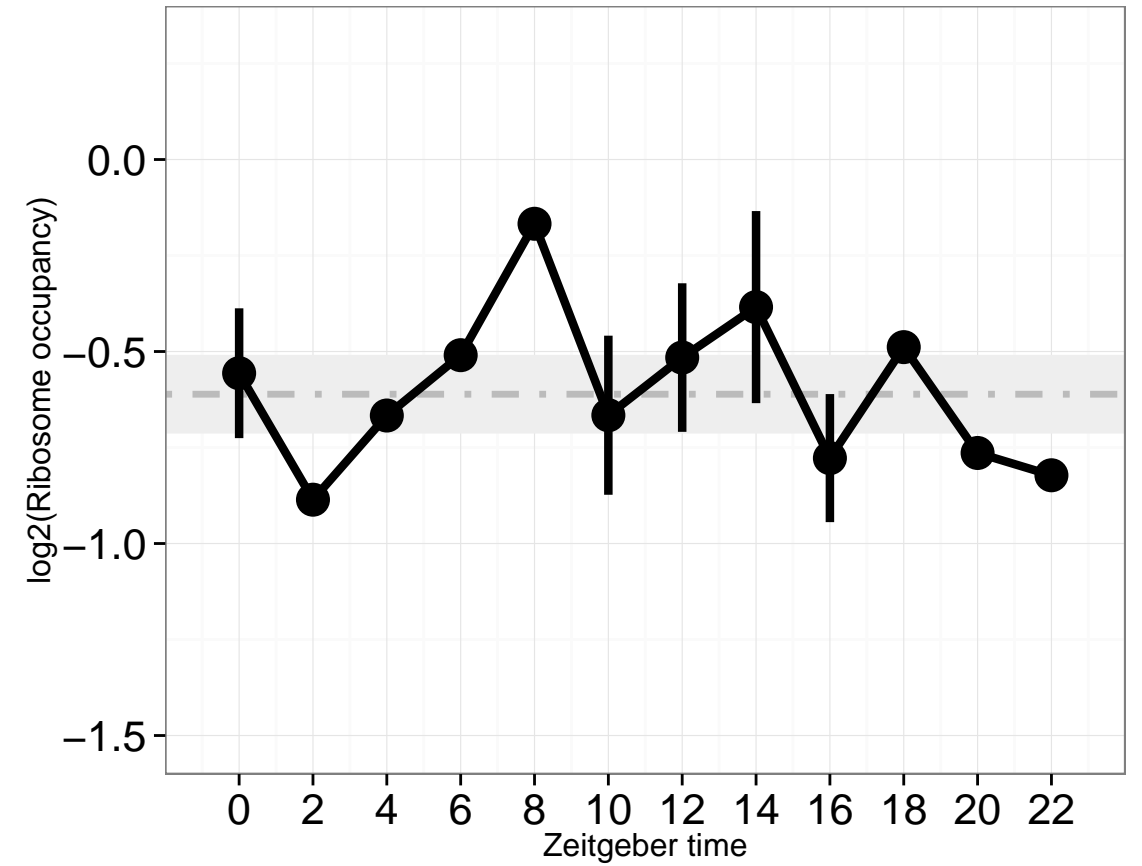

Supplement: Supplementary file 8889 [file 1]

# Capn2

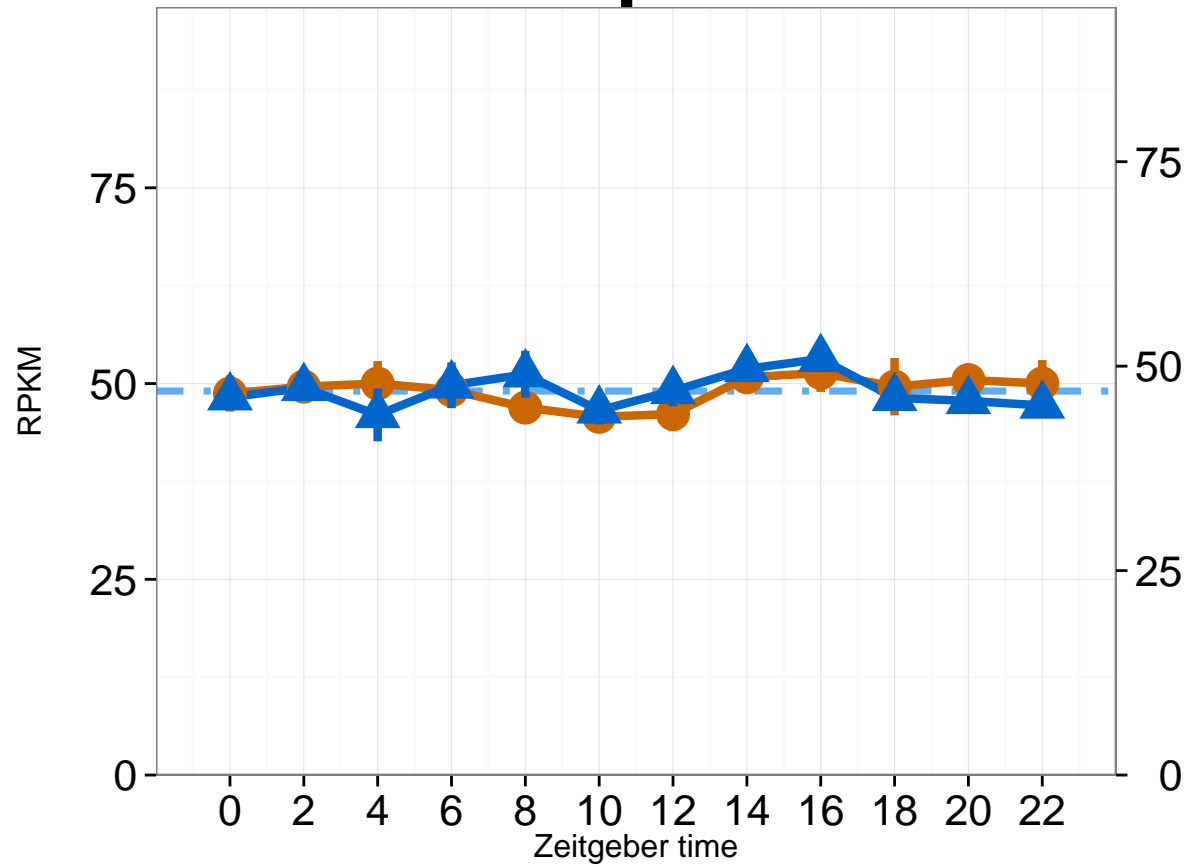

# Capn2

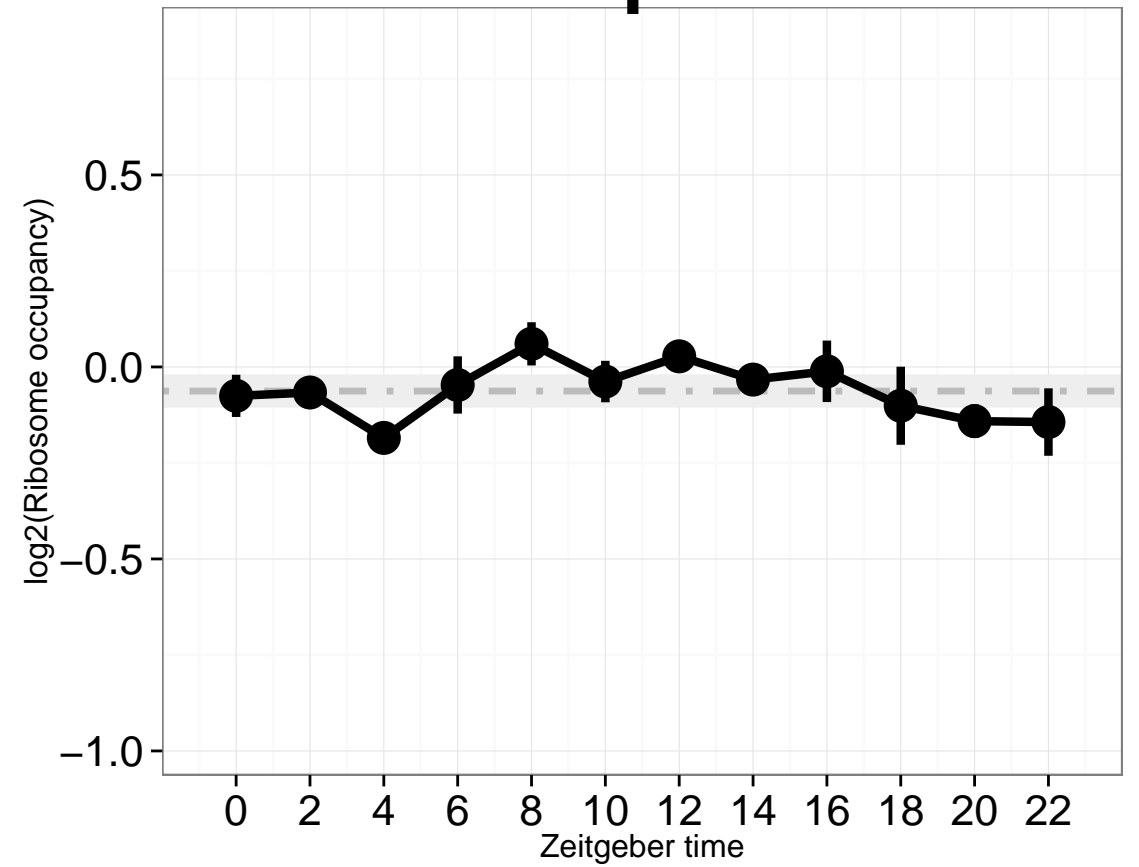

Supplement: Supplementary file 8890 [file 1]

## Klf10

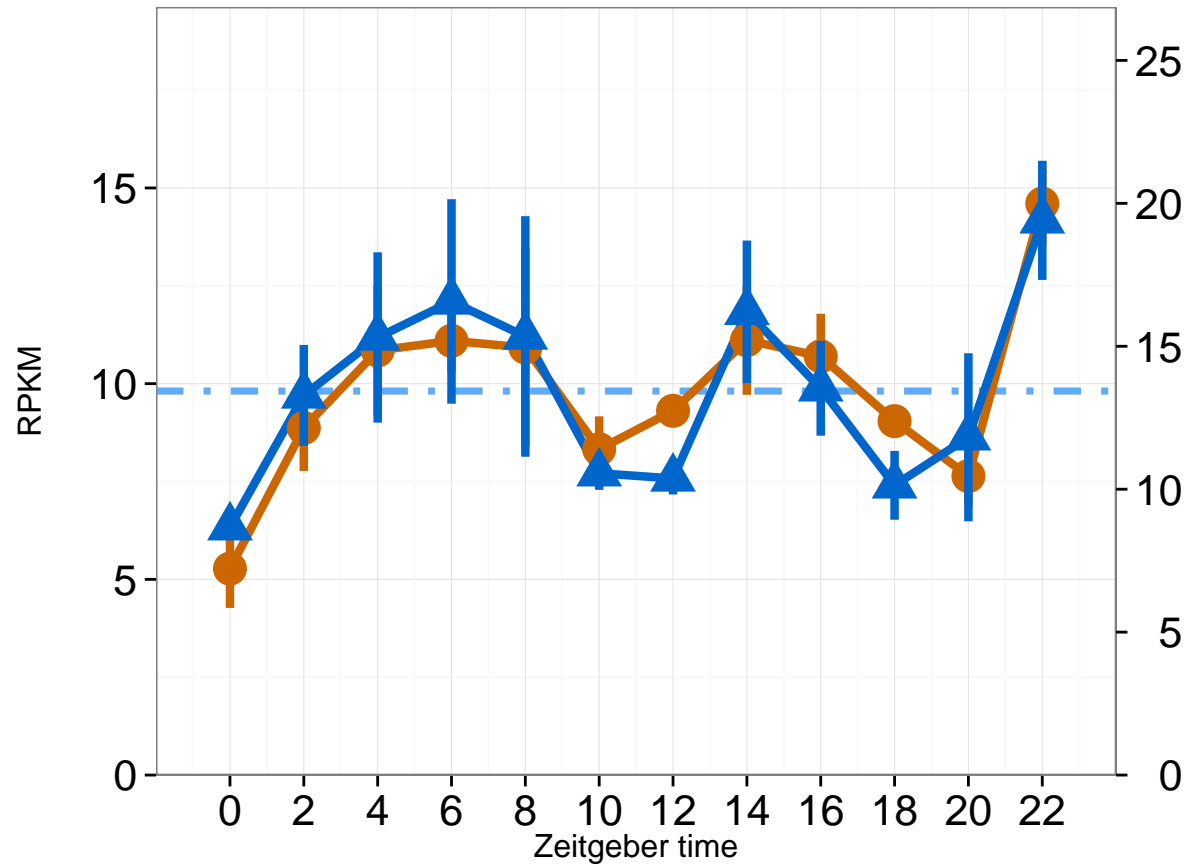

## Klf10

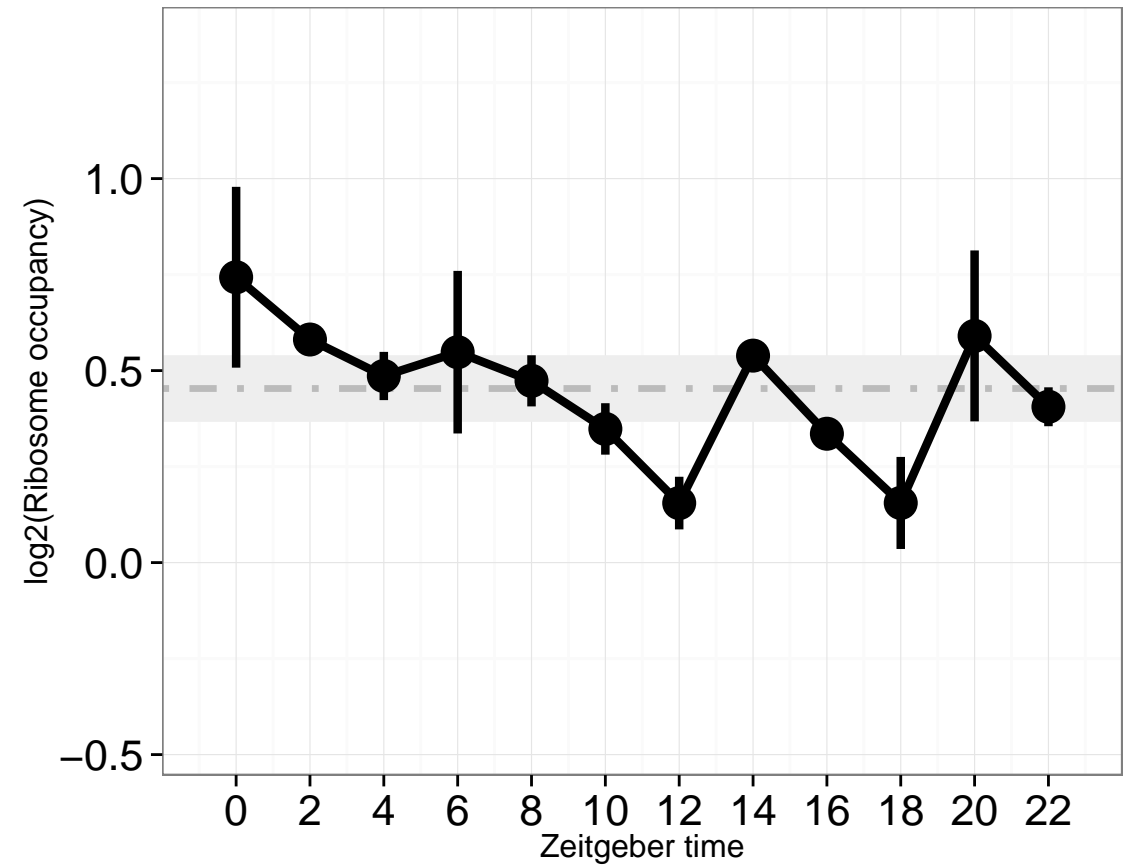

Supplement: Supplementary file 8891 [file 1]

## Orai3

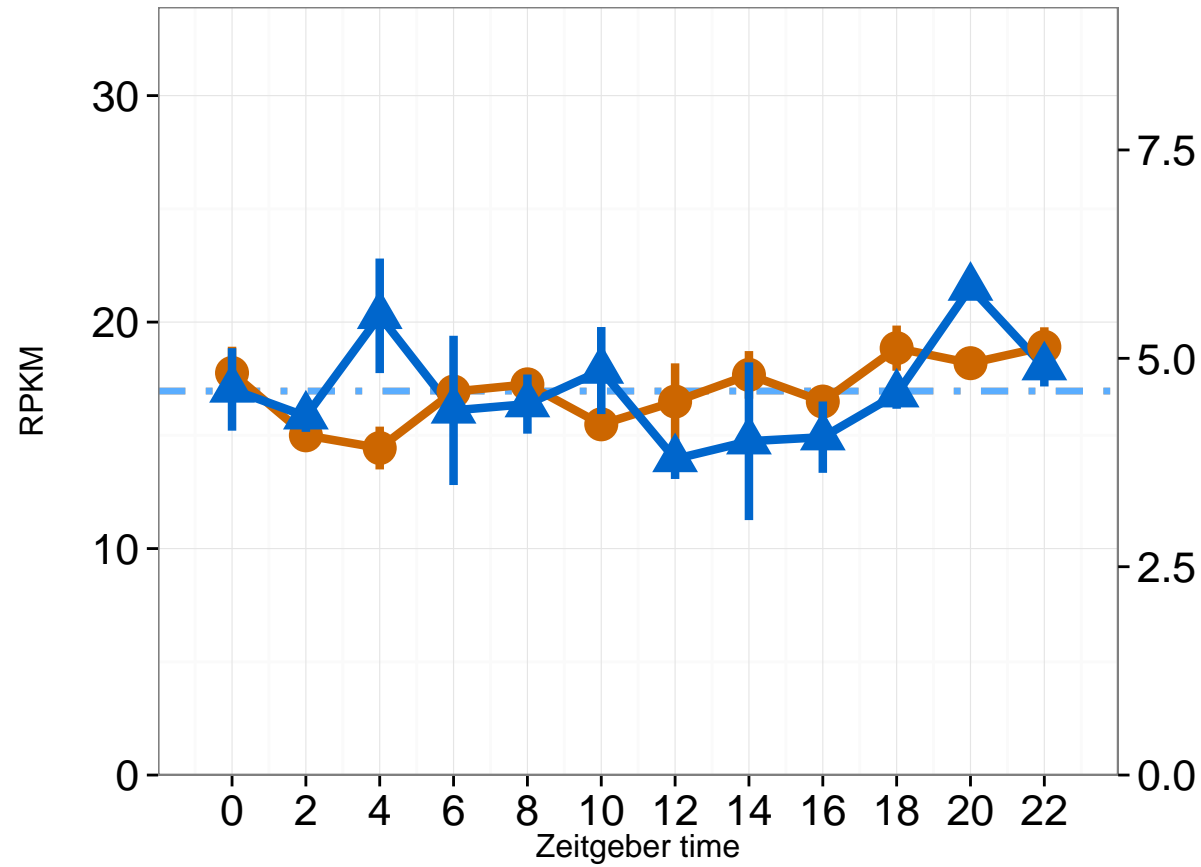

## Orai3

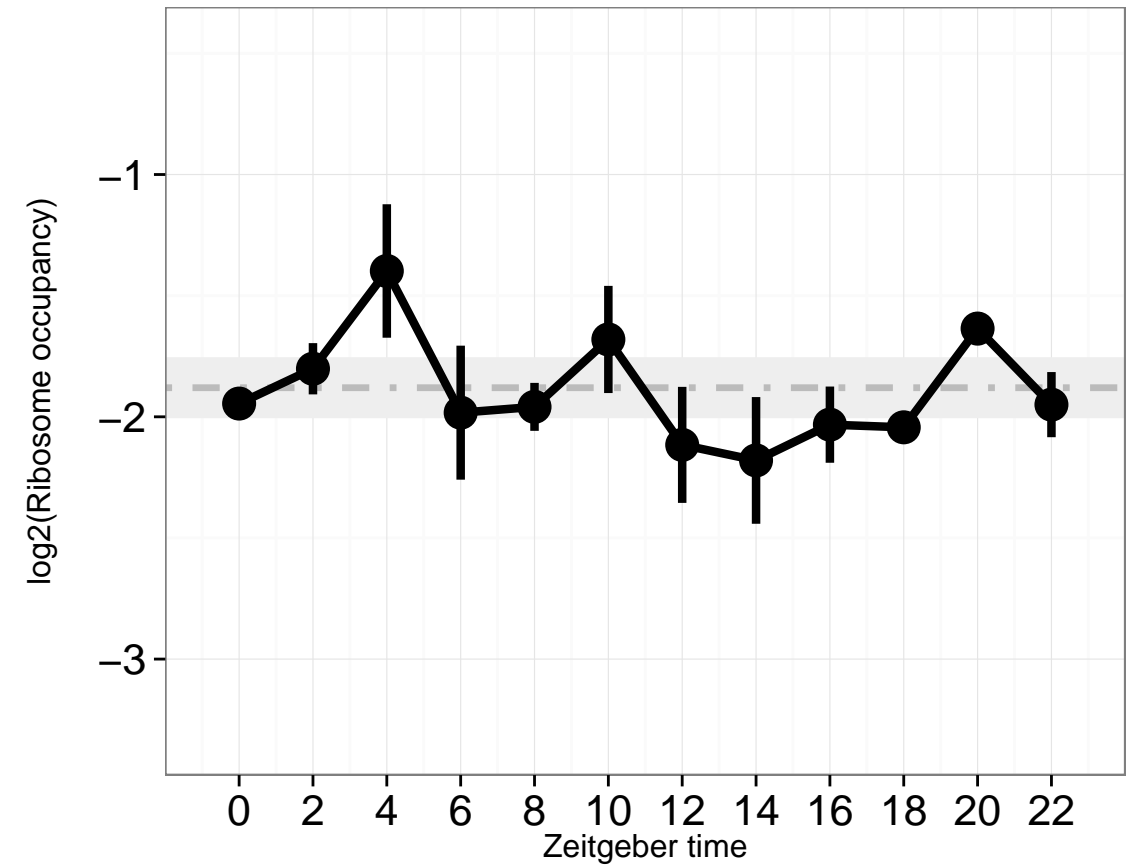

Supplement: Supplementary file 8892 [file 1]

## Cse1l

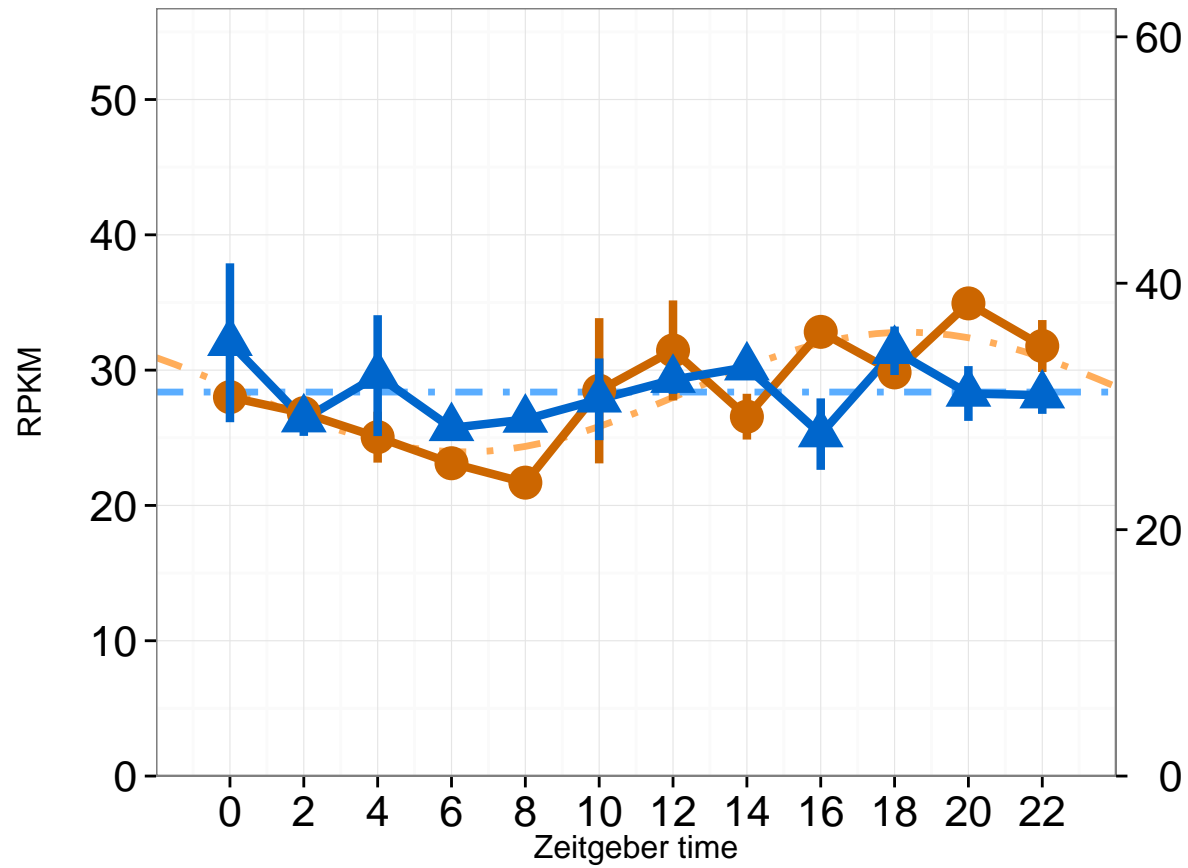

## Cse1l

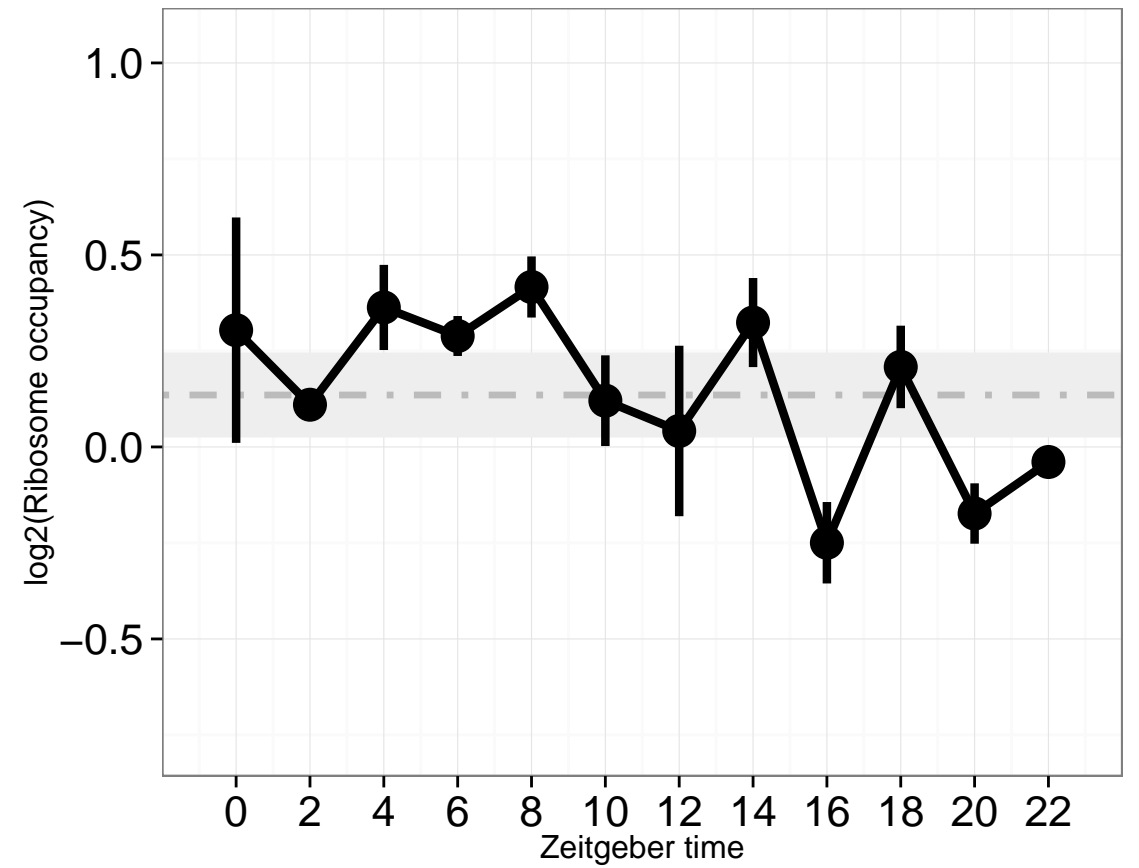

Supplement: Supplementary file 8893 [file 1]

# Aplp1

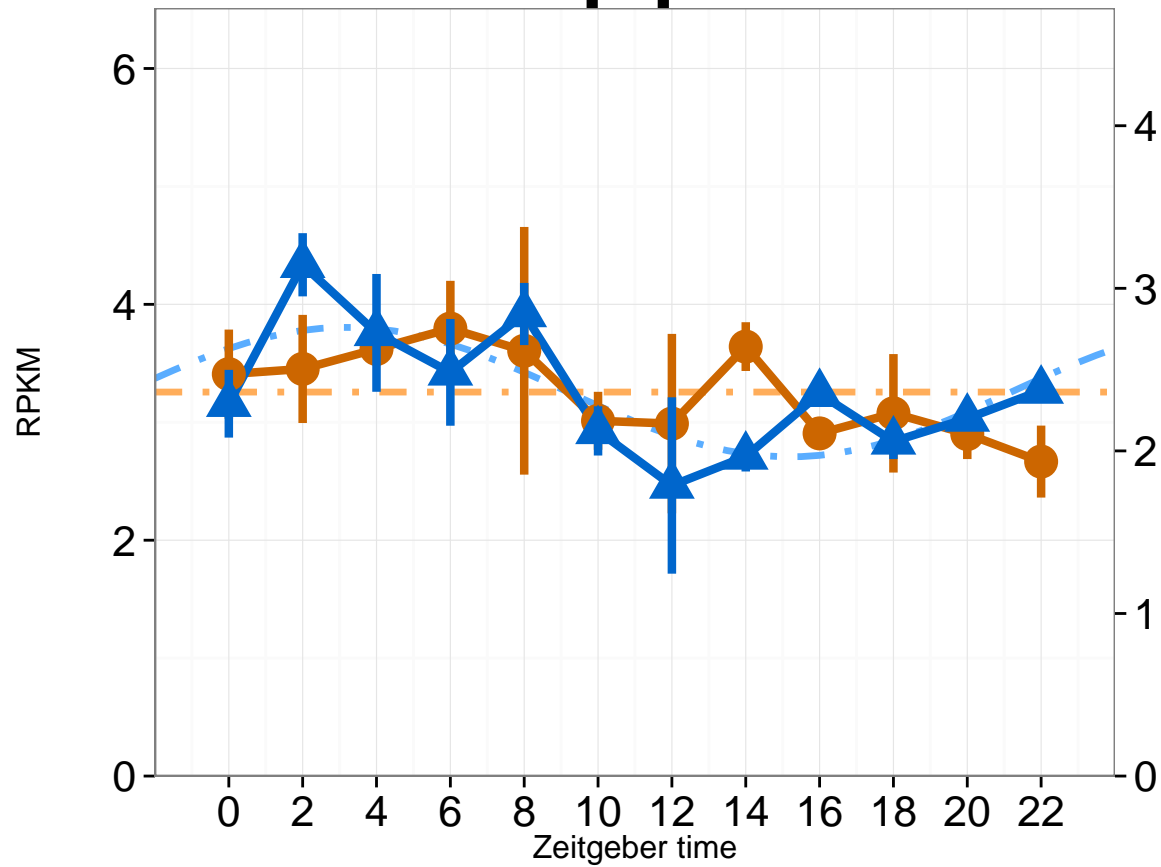

# Aplp1

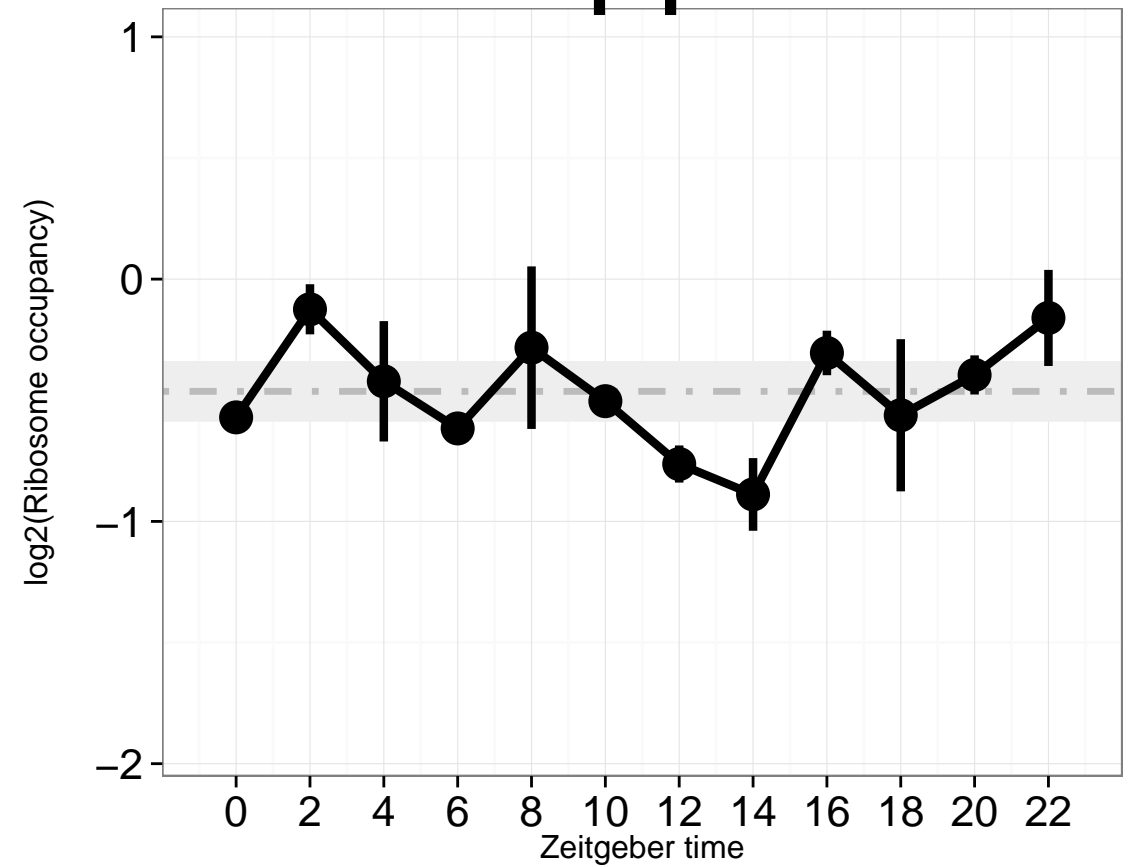

Supplement: Supplementary file 8894 [file 1]

# Pola1

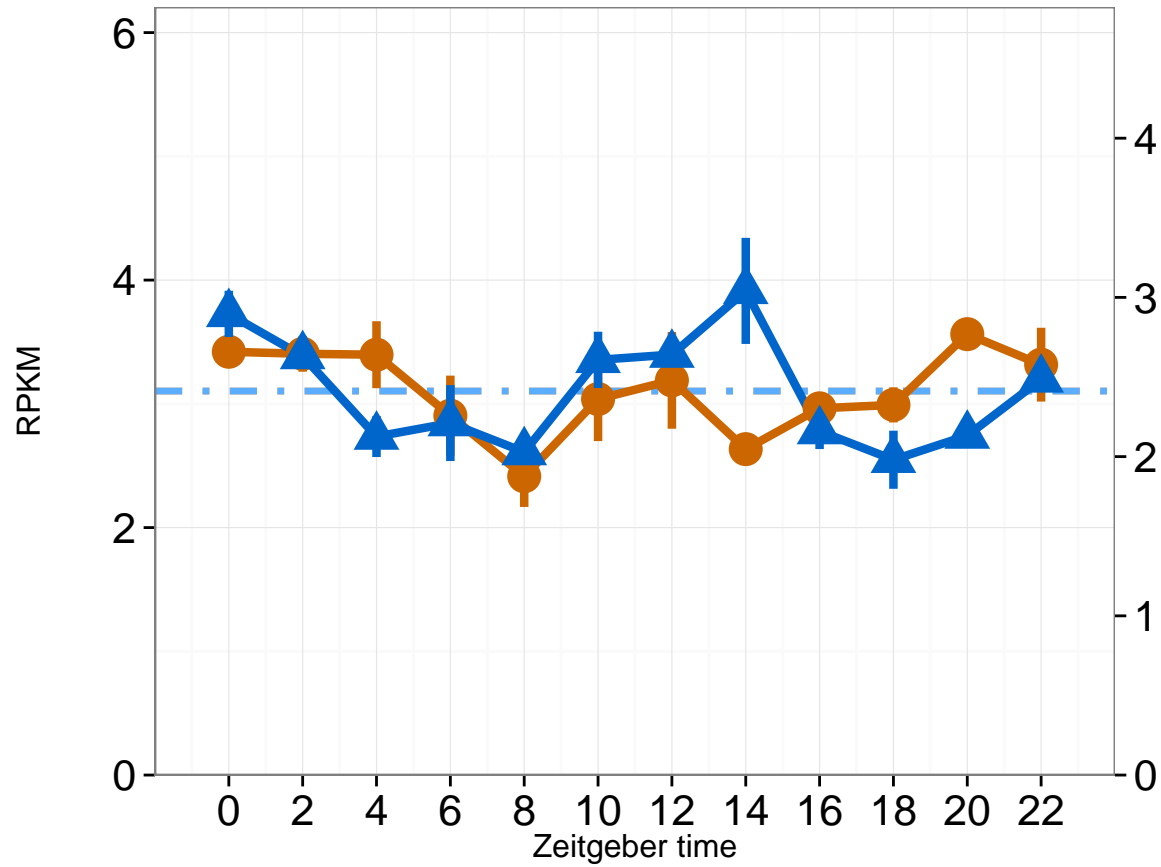

# Pola1

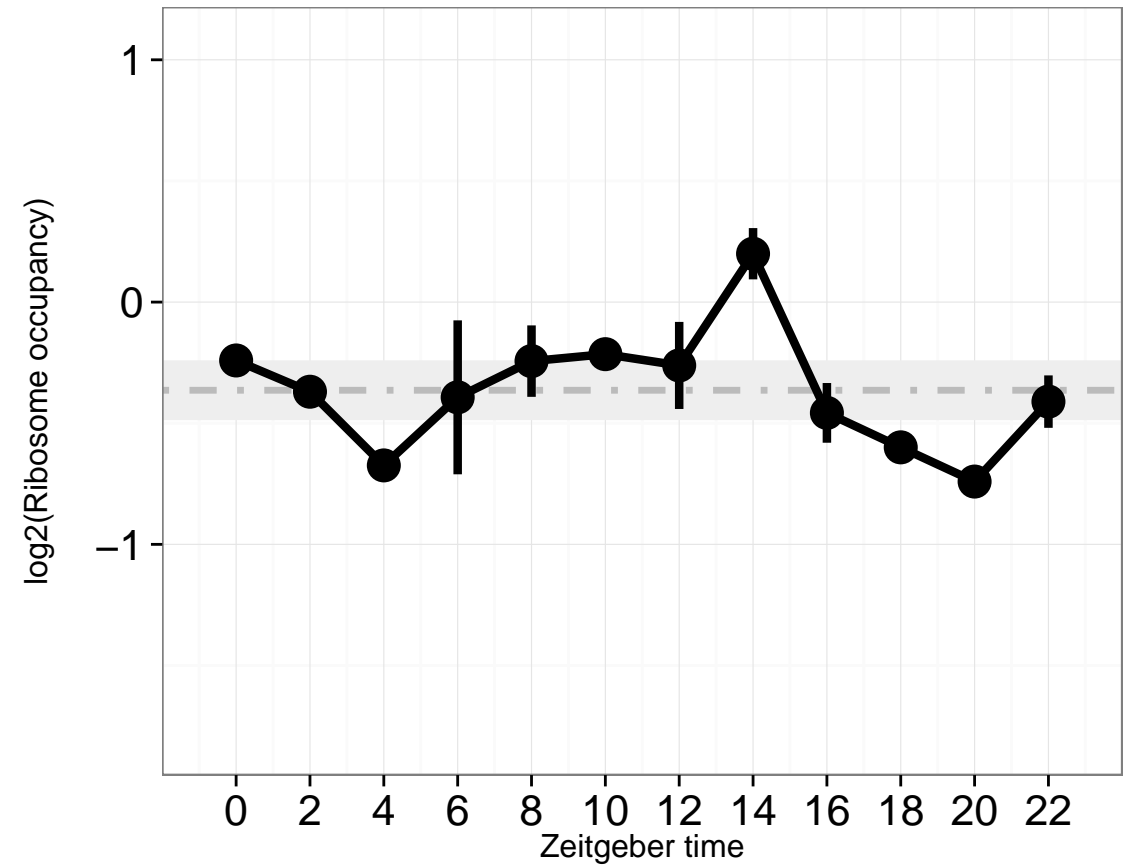

Supplement: Supplementary file 8895 [file 1]

# Arid3a

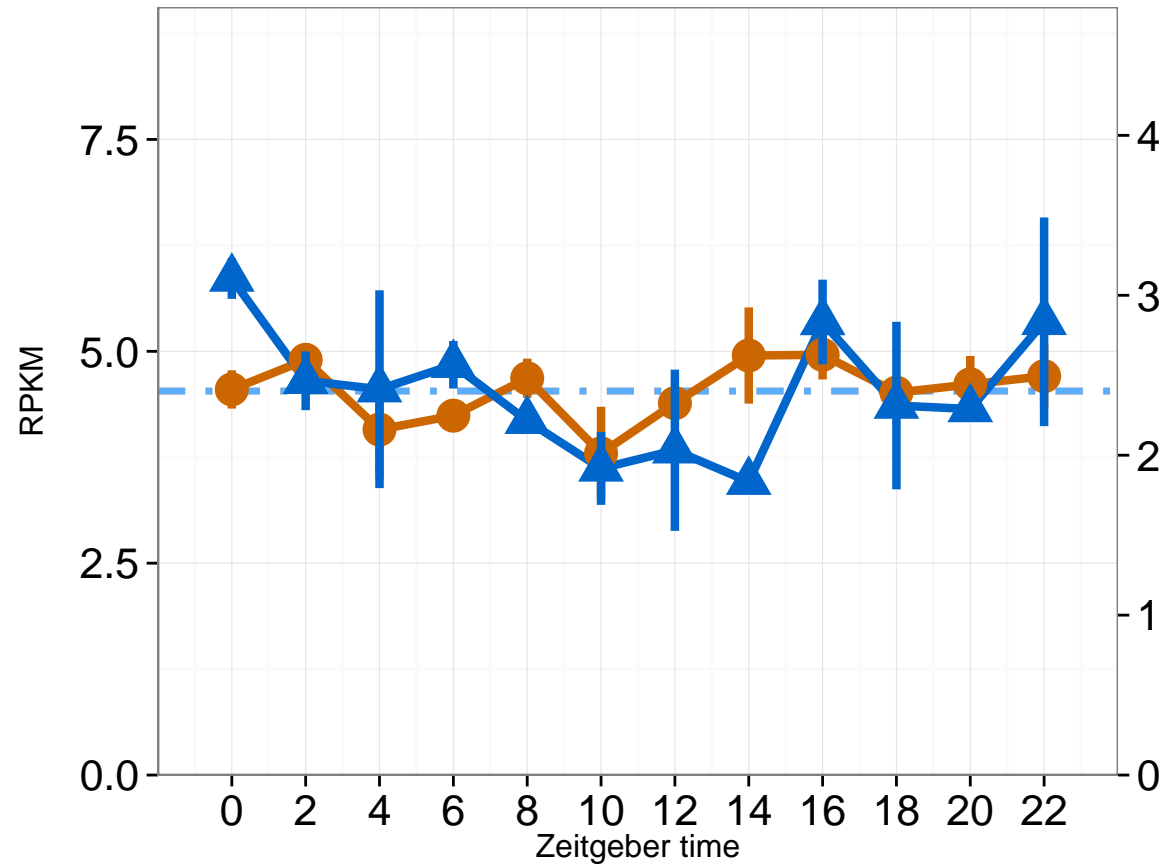

# Arid3a

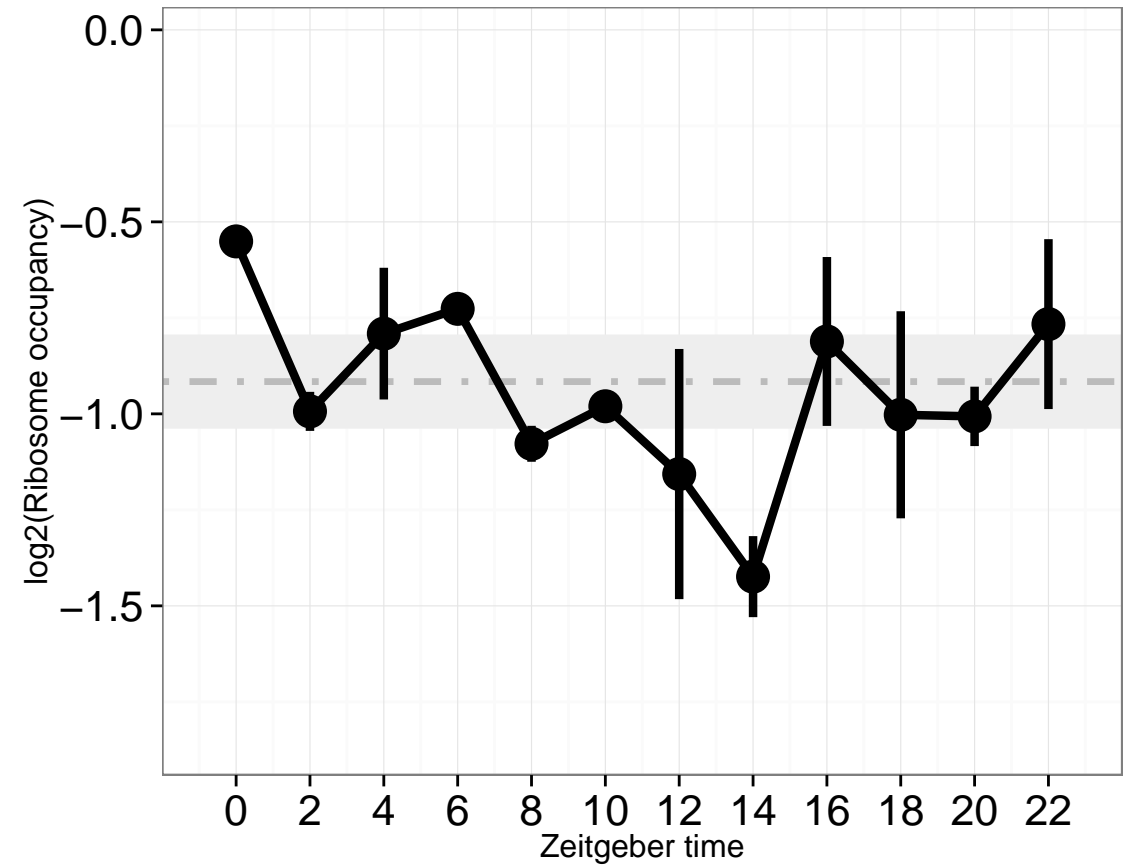

Supplement: Supplementary file 8896 [file 1]

## Arih2

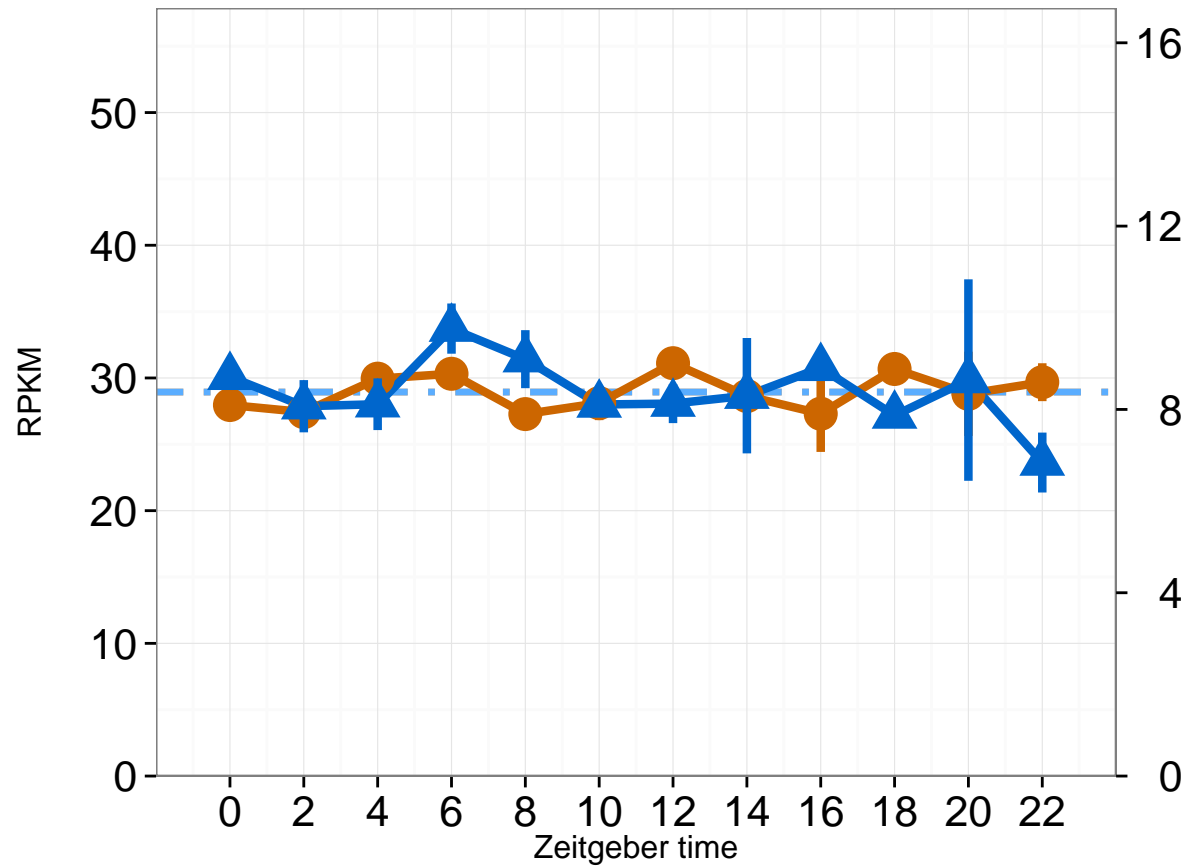

## Arih2

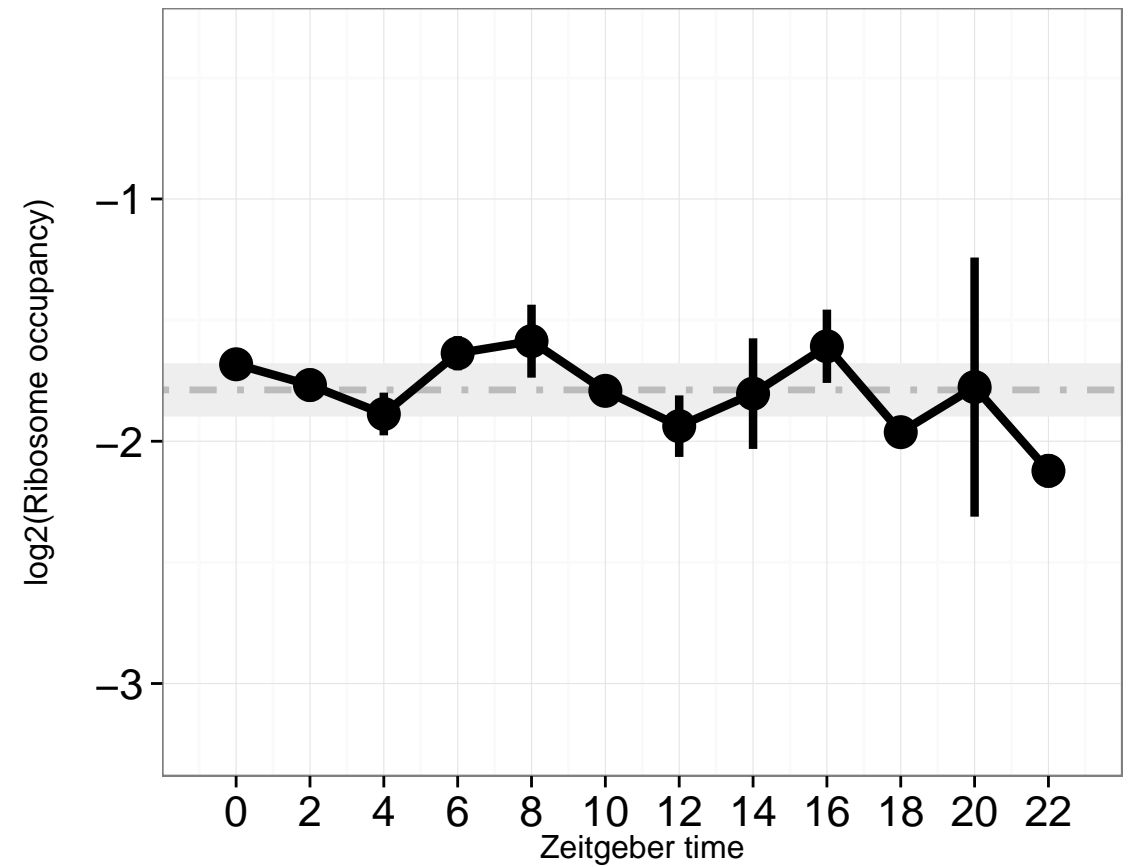

Supplement: Supplementary file 8897 [file 1]

# Col18a1

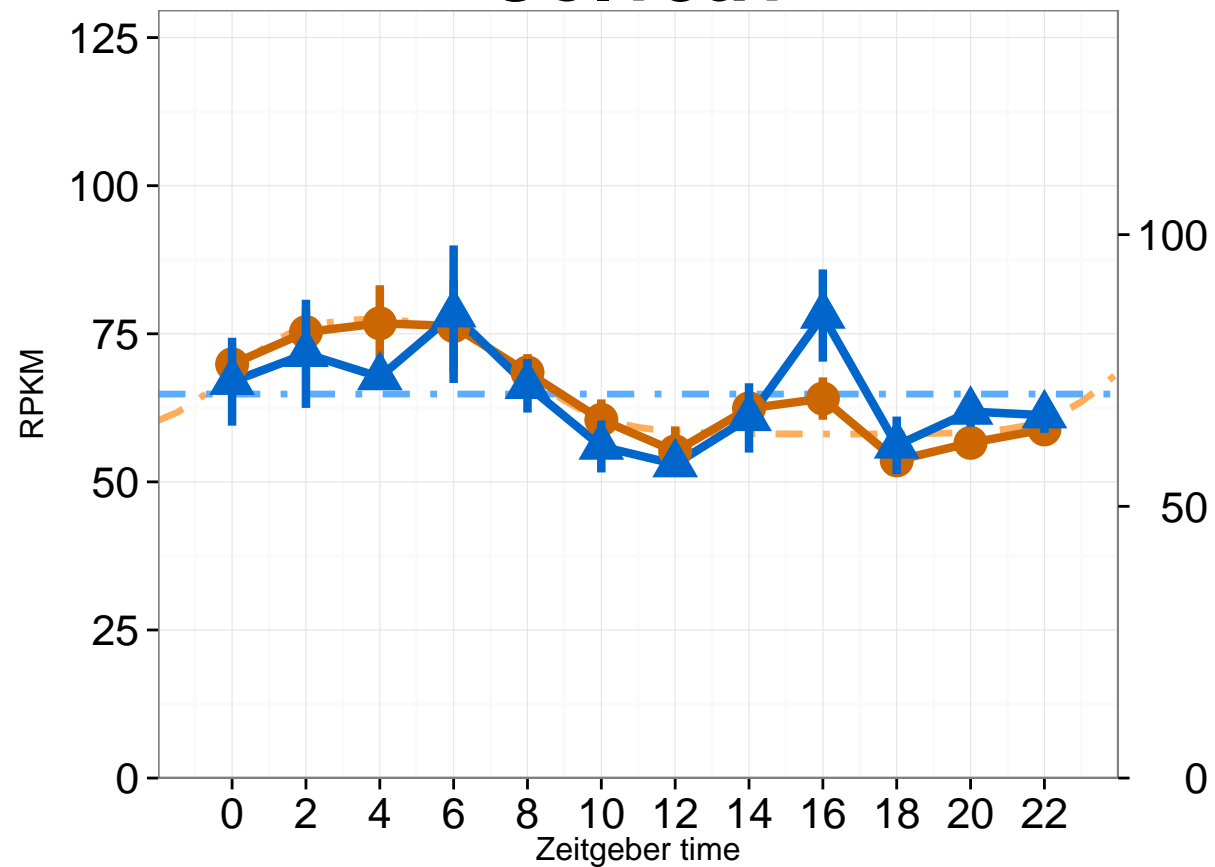

# Col18a1

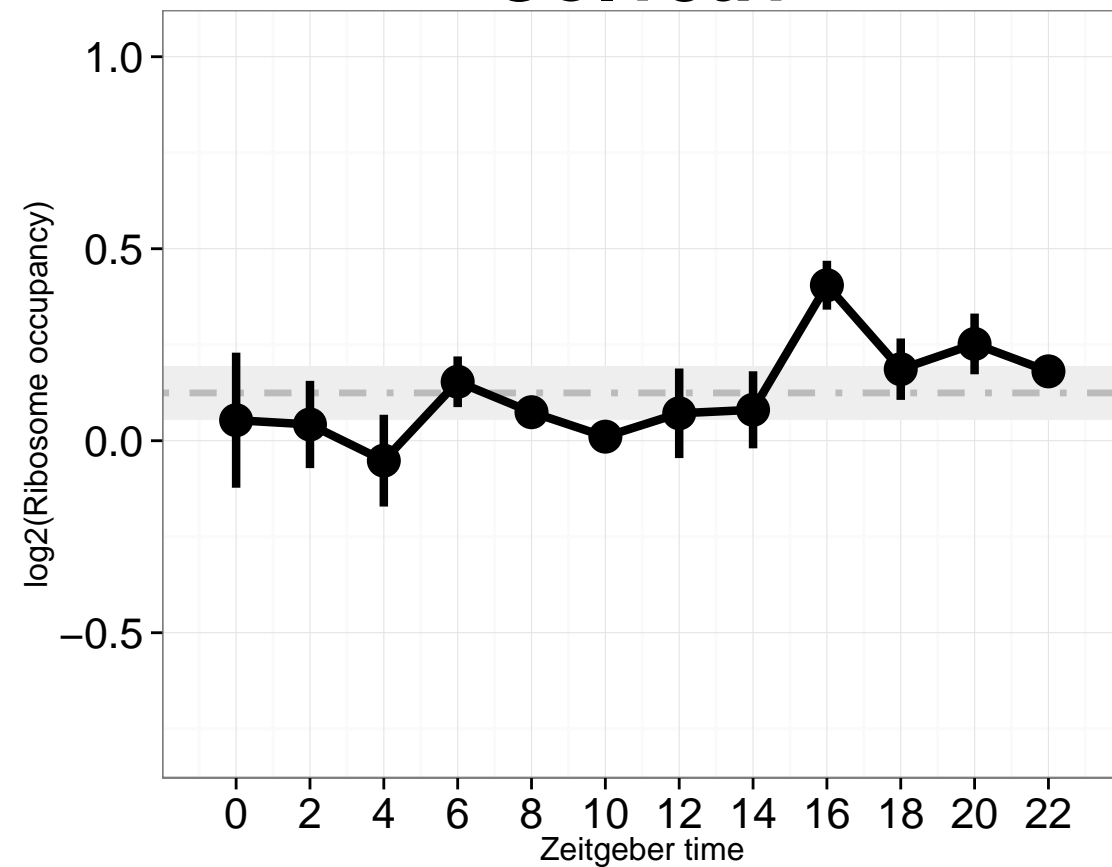

Supplement: Supplementary file 8898 [file 1]

# Cyp1a1

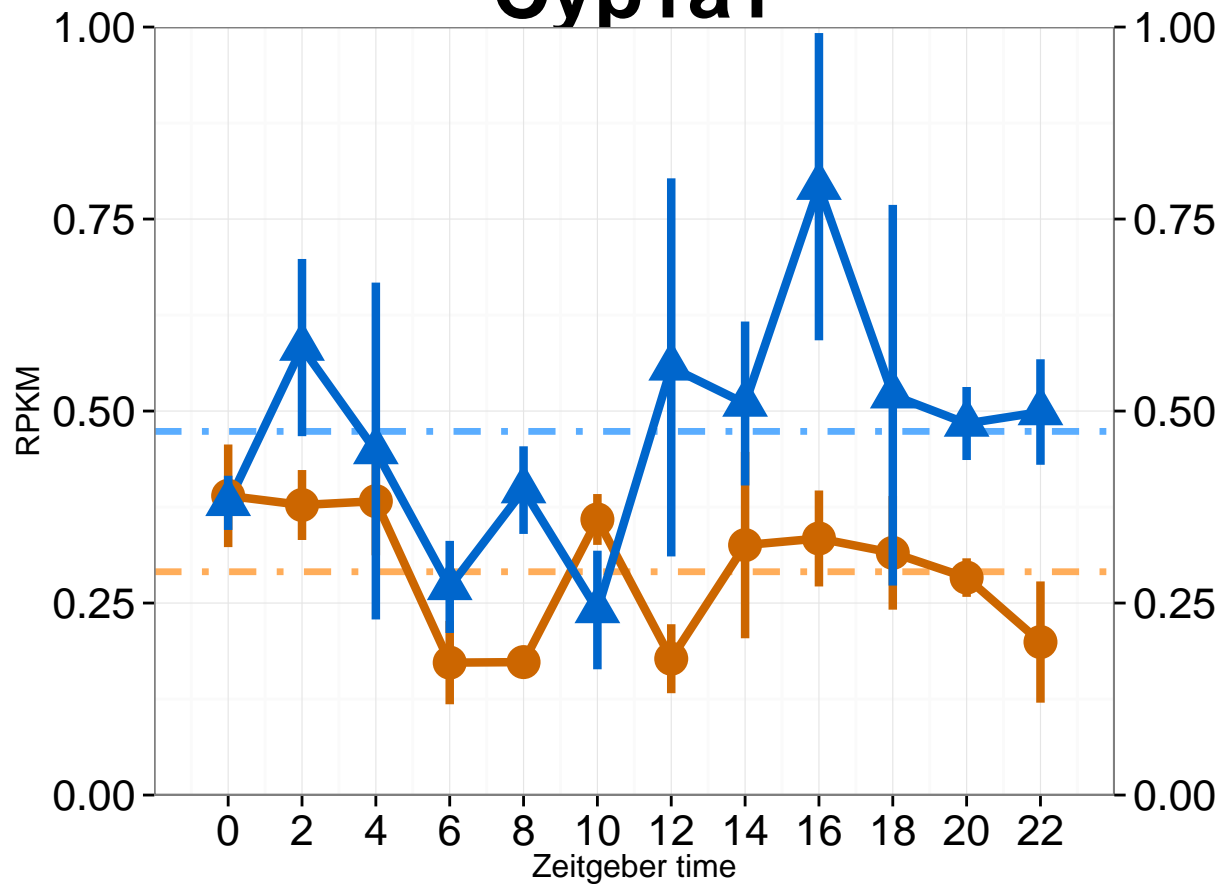

# Cyp1a1

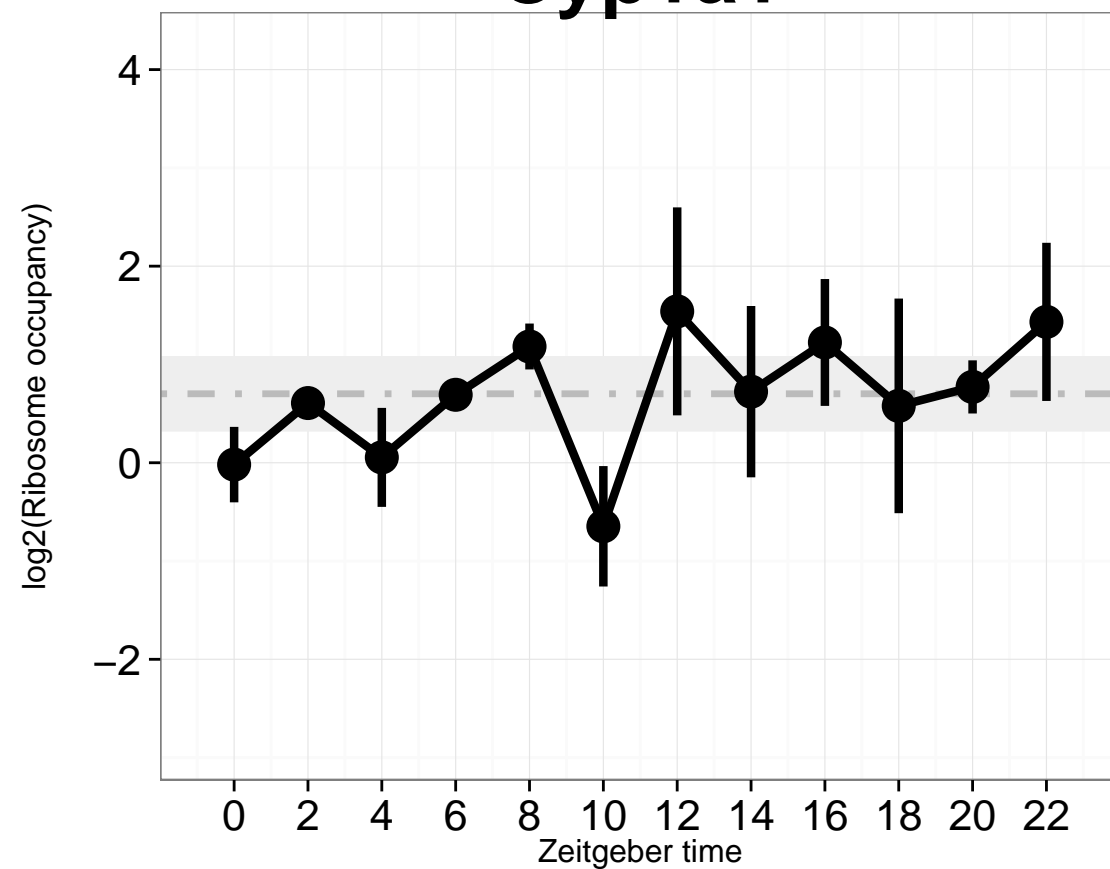

Supplement: Supplementary file 8899 [file 1]

# Hoxb6

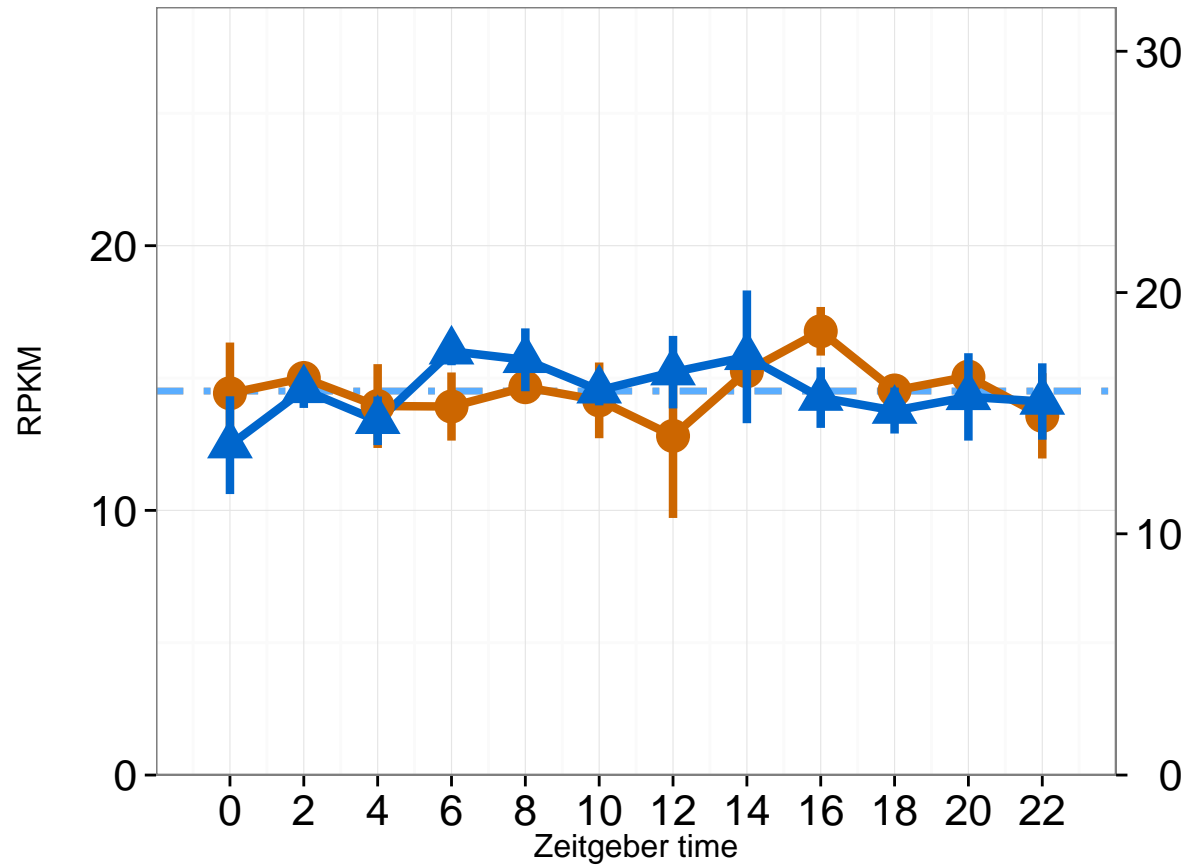

# Hoxb6

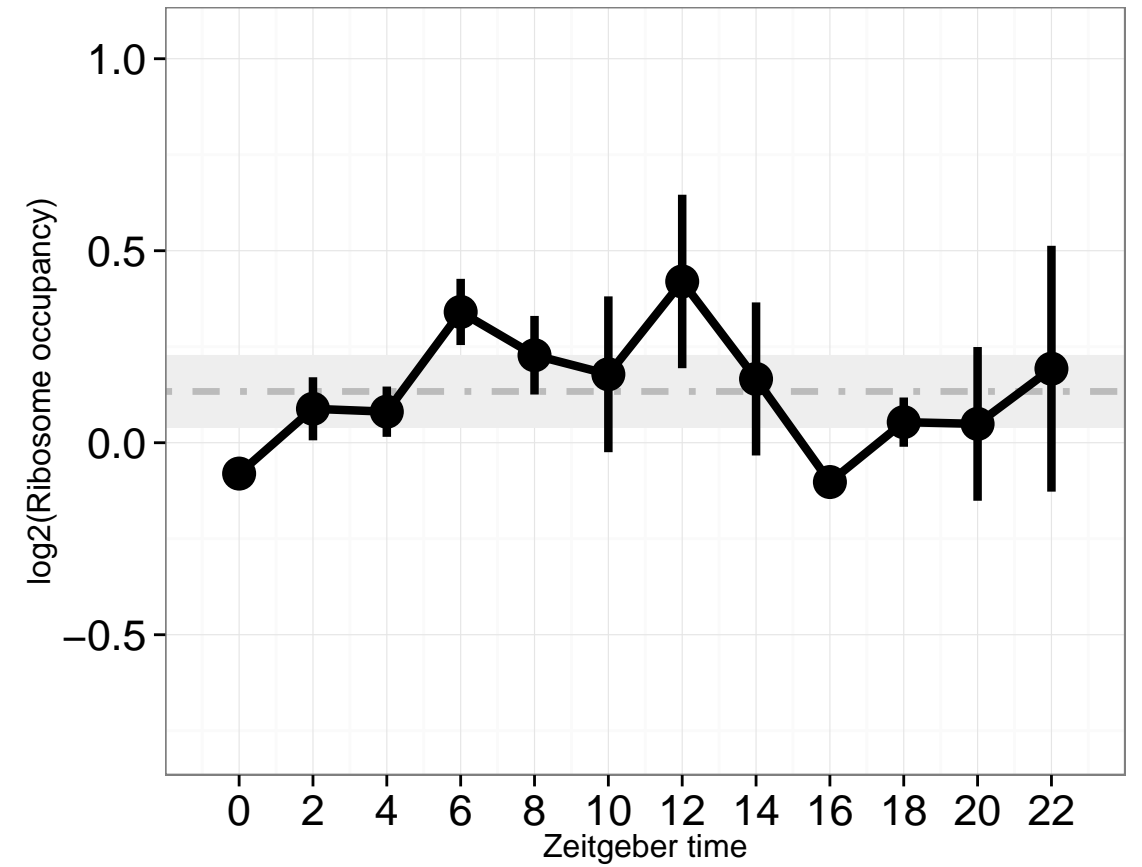

Supplement: Supplementary file 8901 [file 1]

# Saysd1

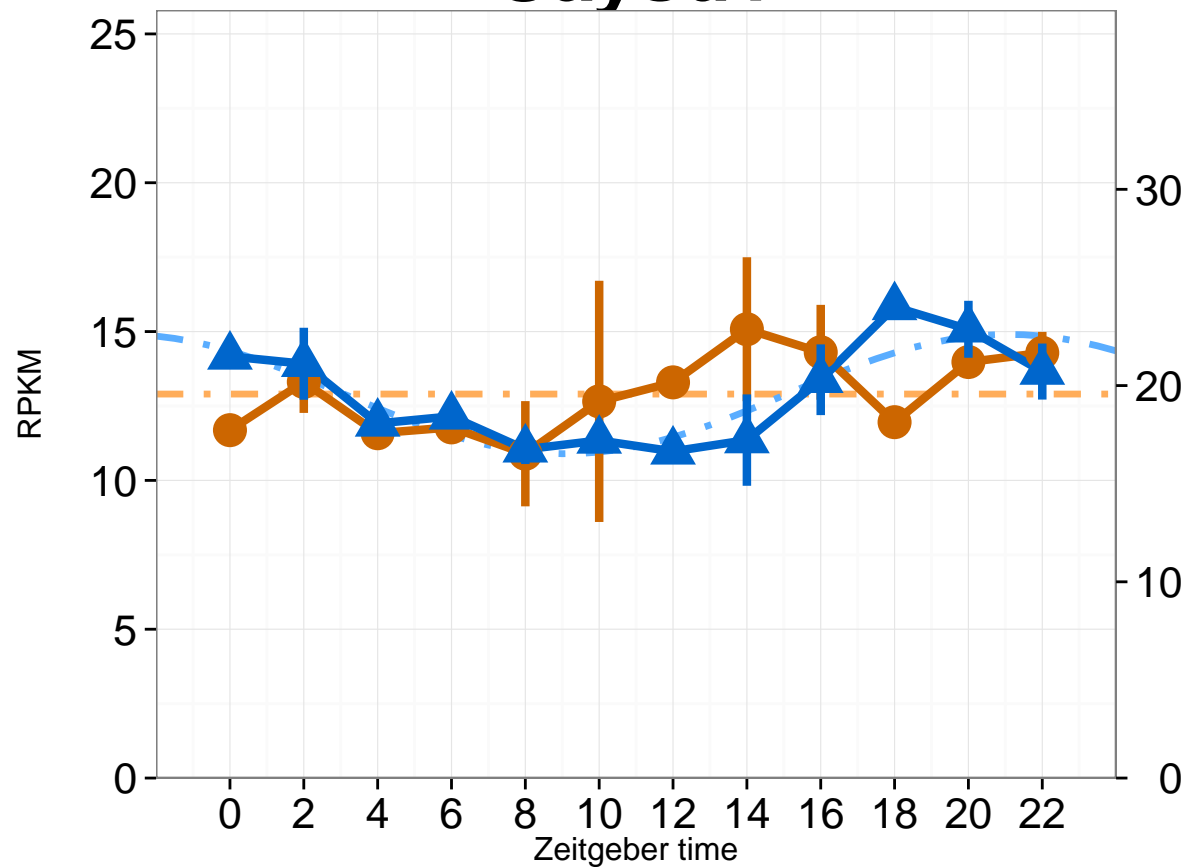

# Saysd1

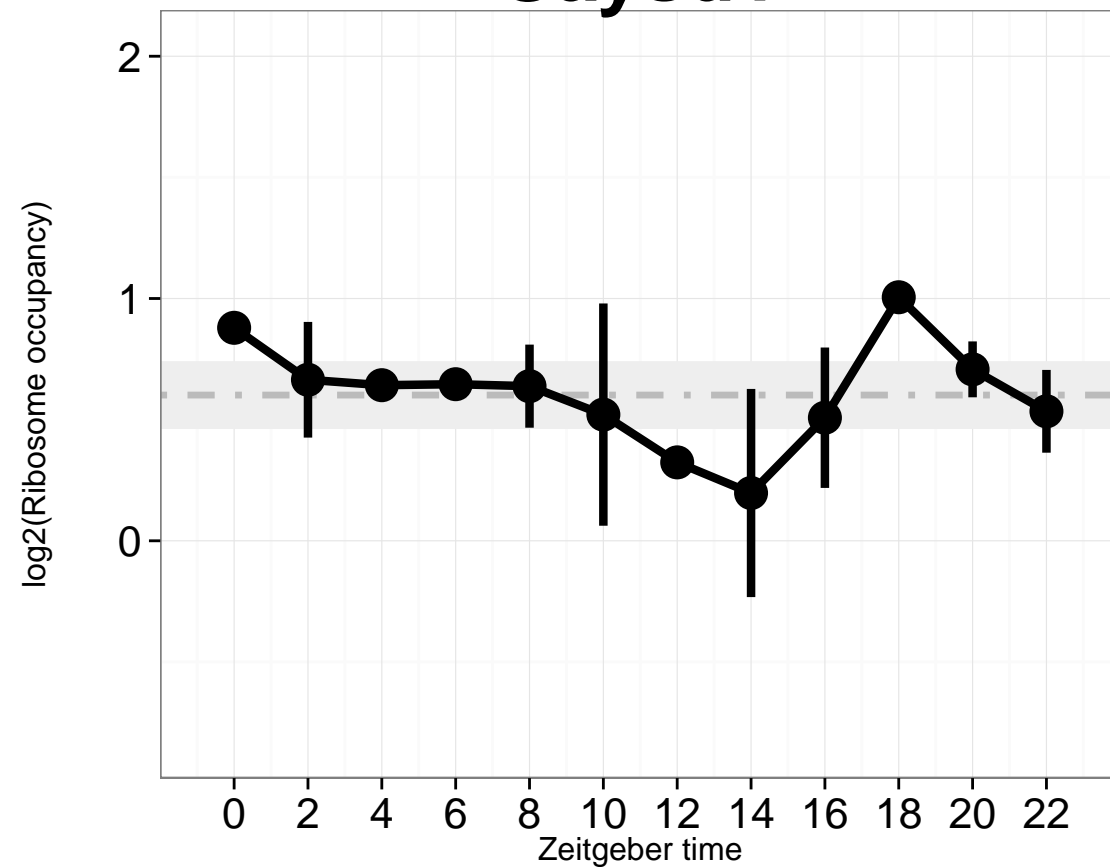

Supplement: Supplementary file 8902 [file 1]

# Tmem159

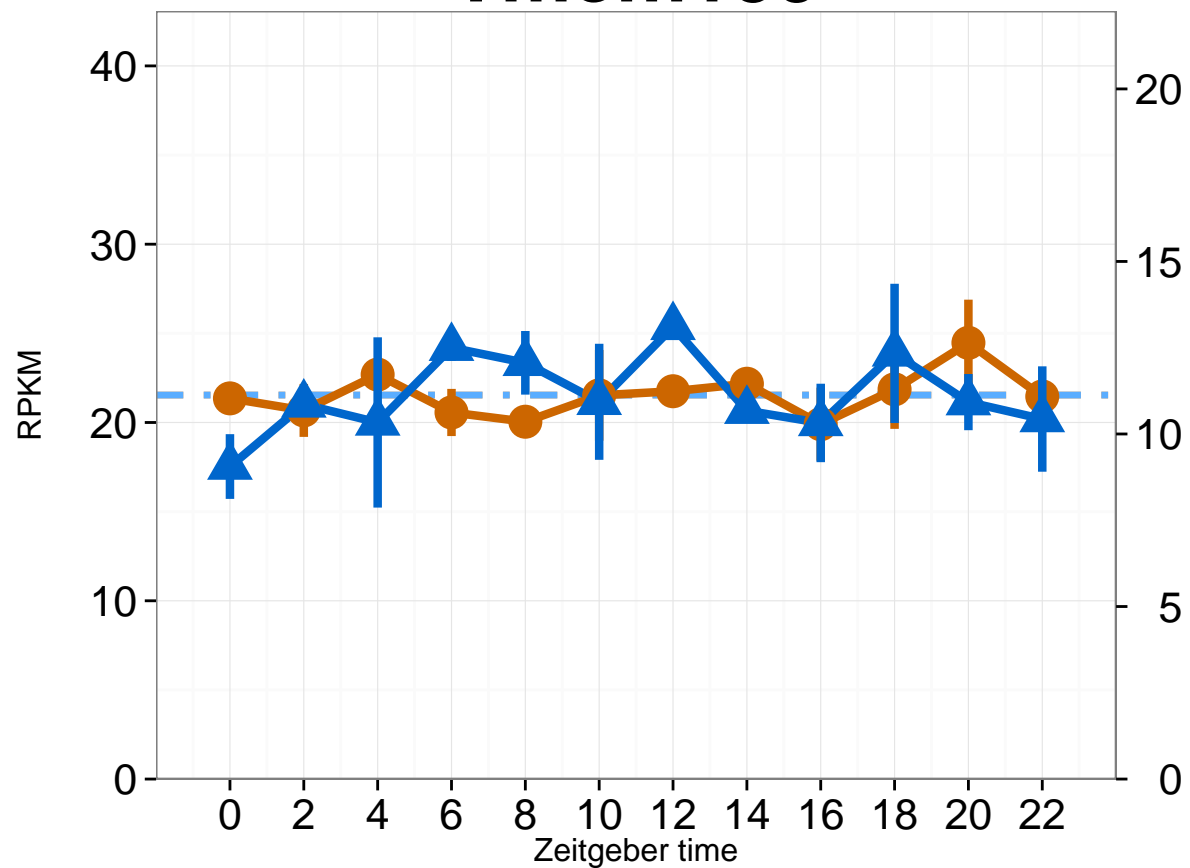

# Tmem159

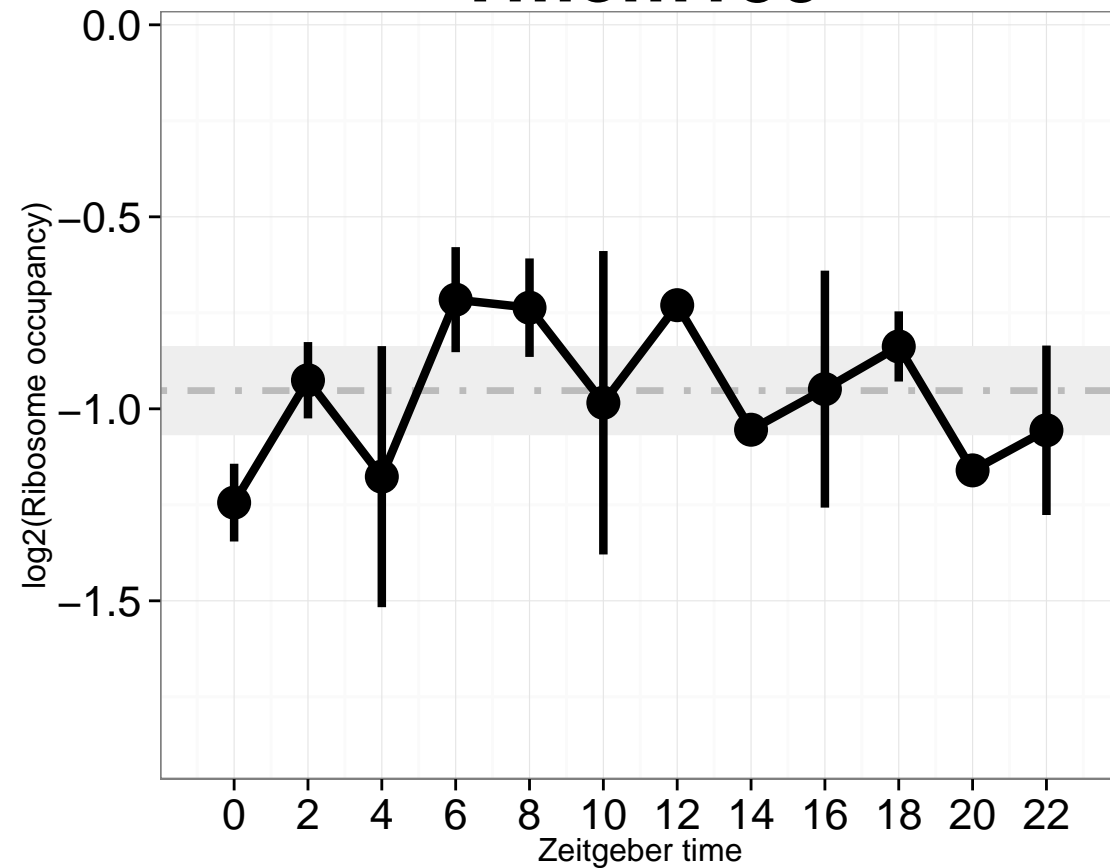

Supplement: Supplementary file 8903 [file 1]

## Aaed1

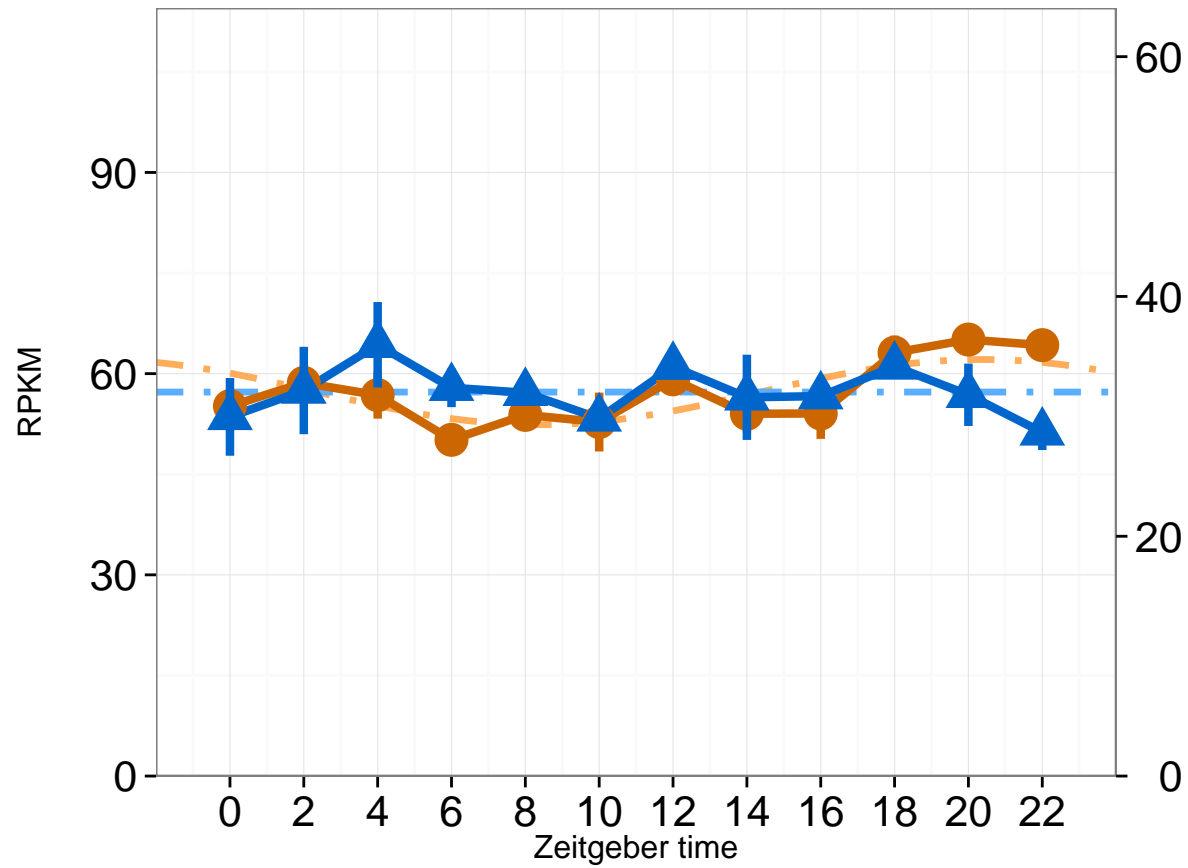

## Aaed1

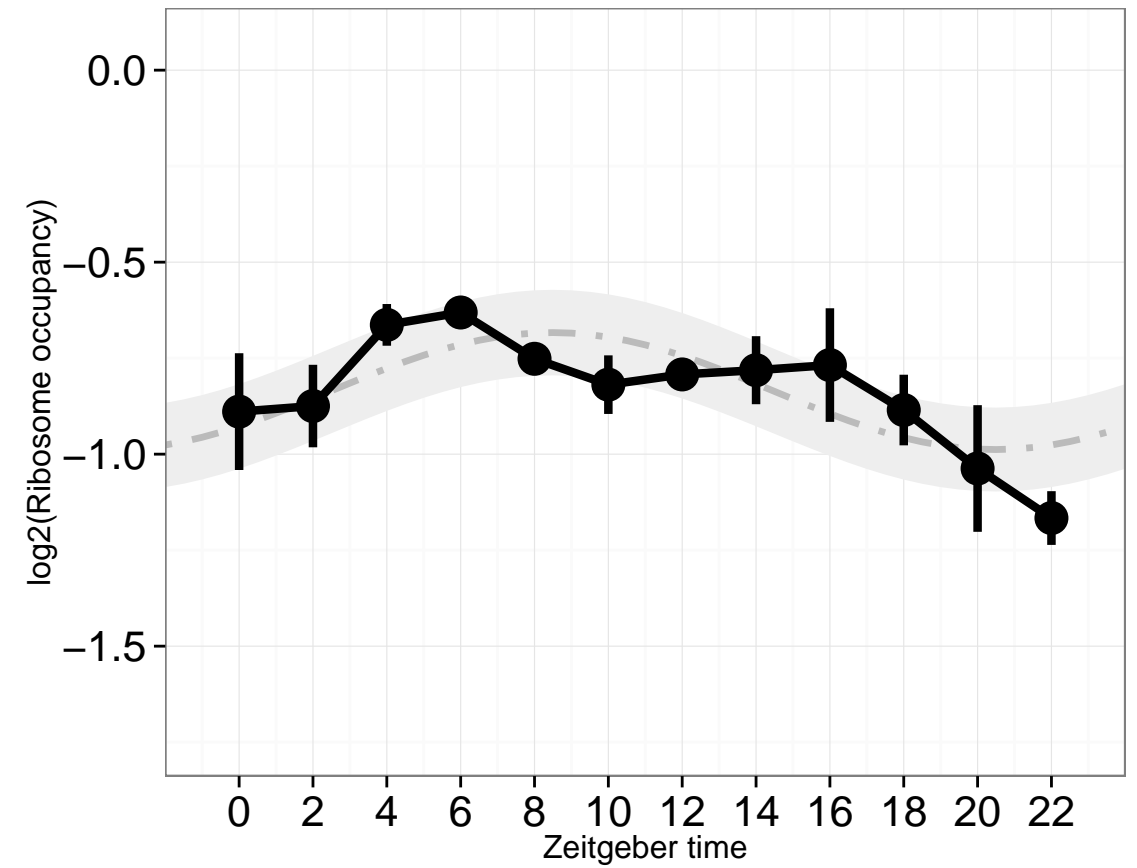

Supplement: Supplementary file 8904 [file 1]

# Top3a

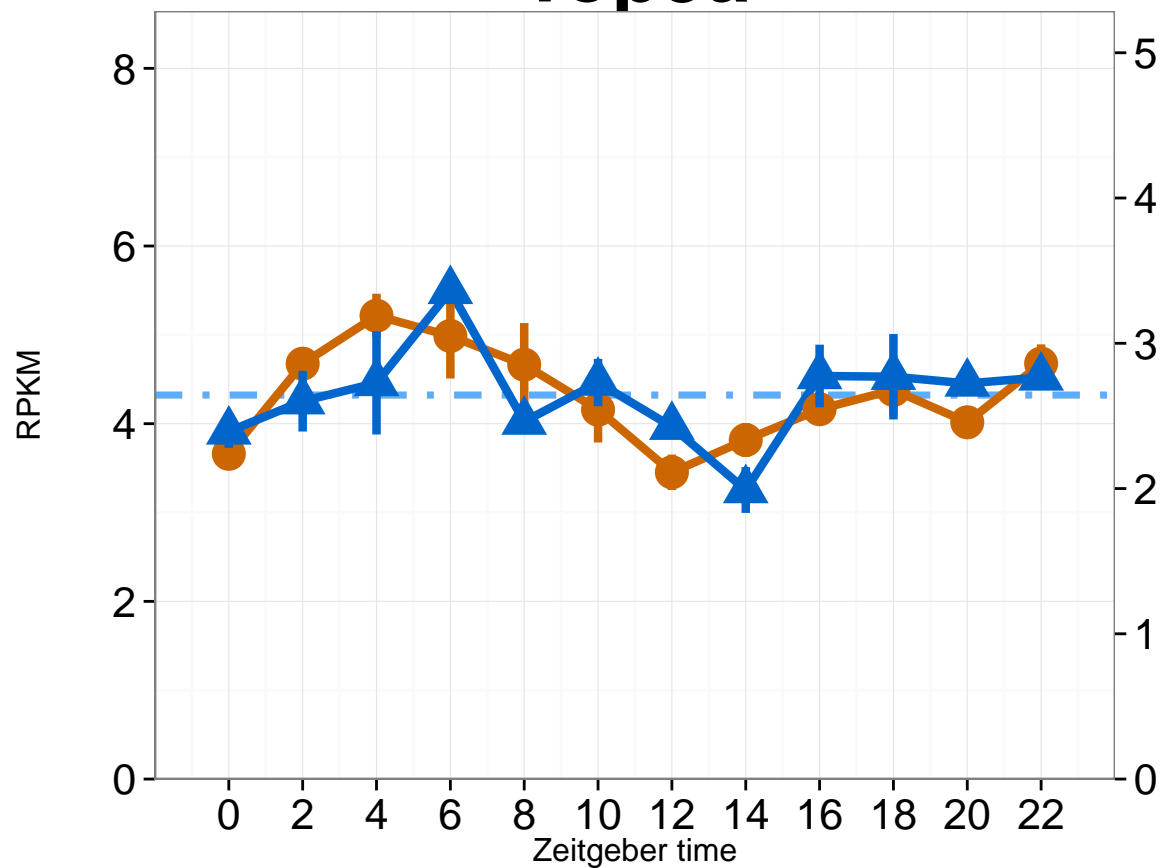

# Top3a

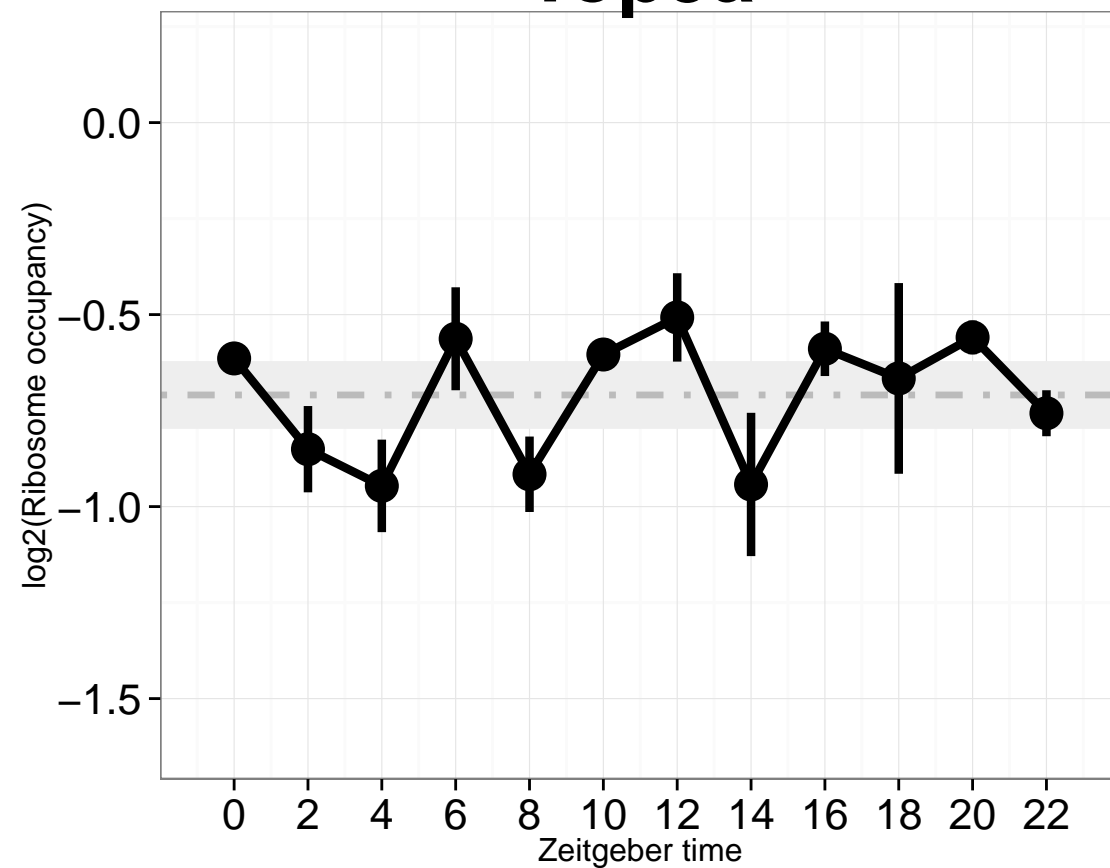

Supplement: Supplementary file 8905 [file 1]

# Nt5dc1

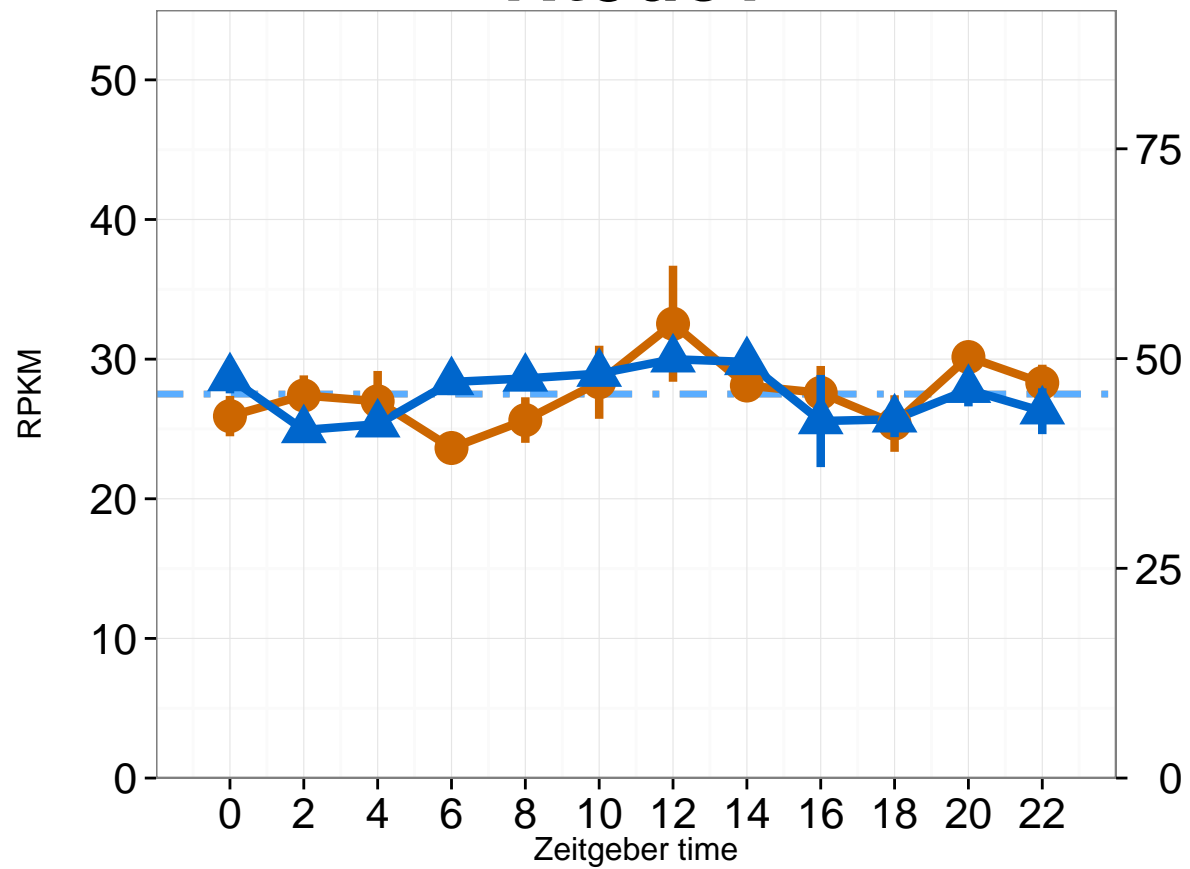

# Nt5dc1

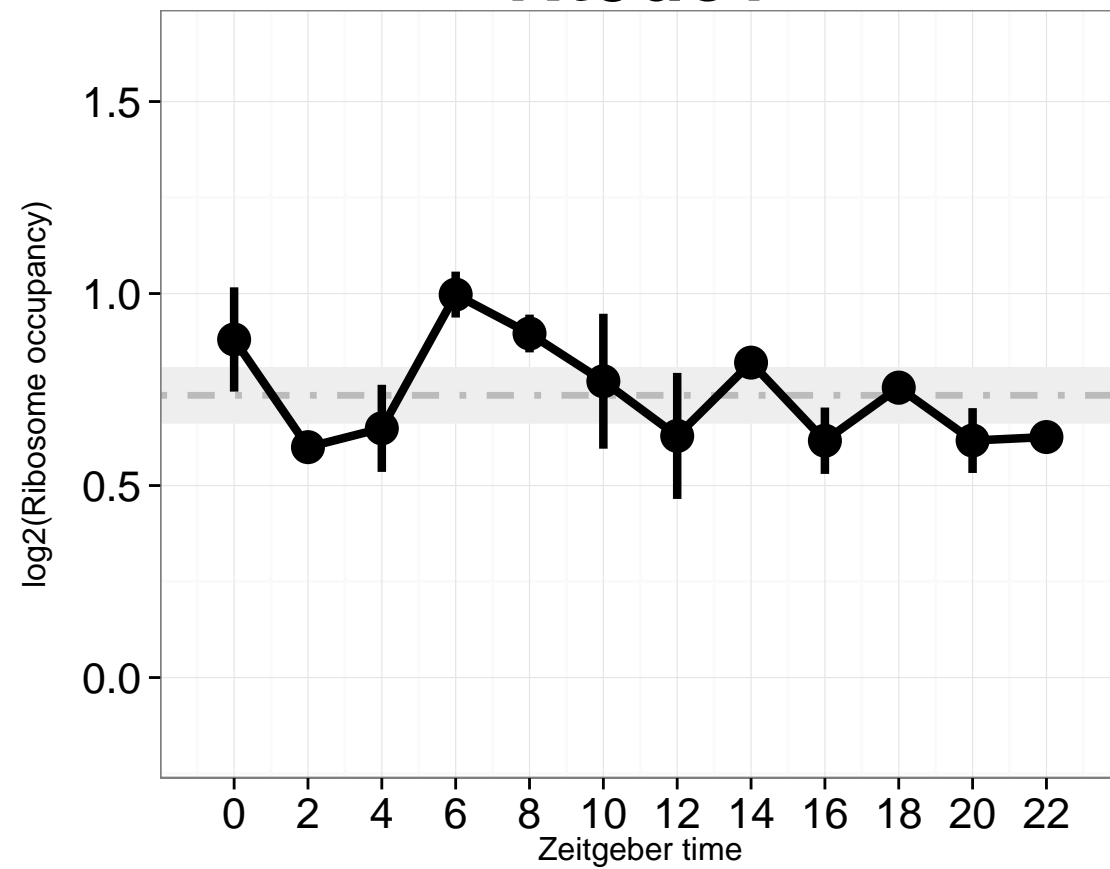

Supplement: Supplementary file 8906 [file 1]

## Cdkal1

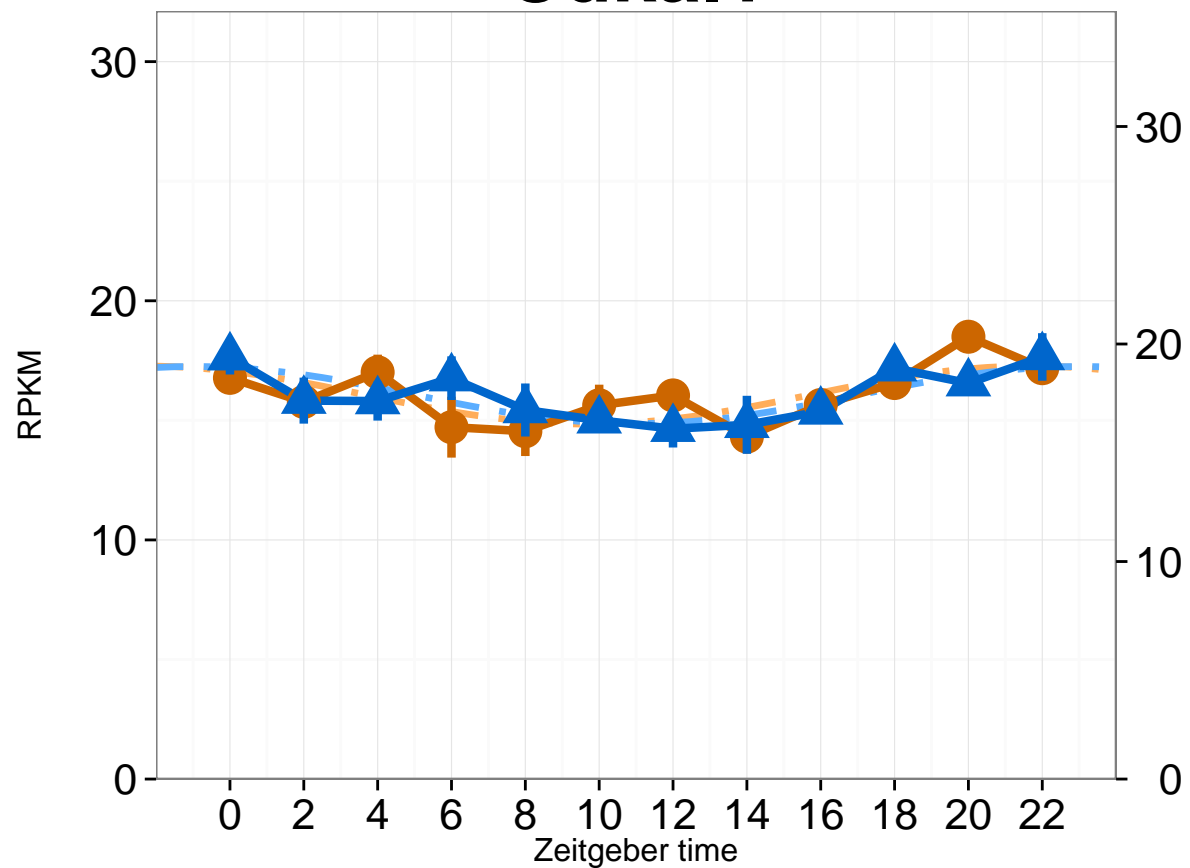

## Cdkal1

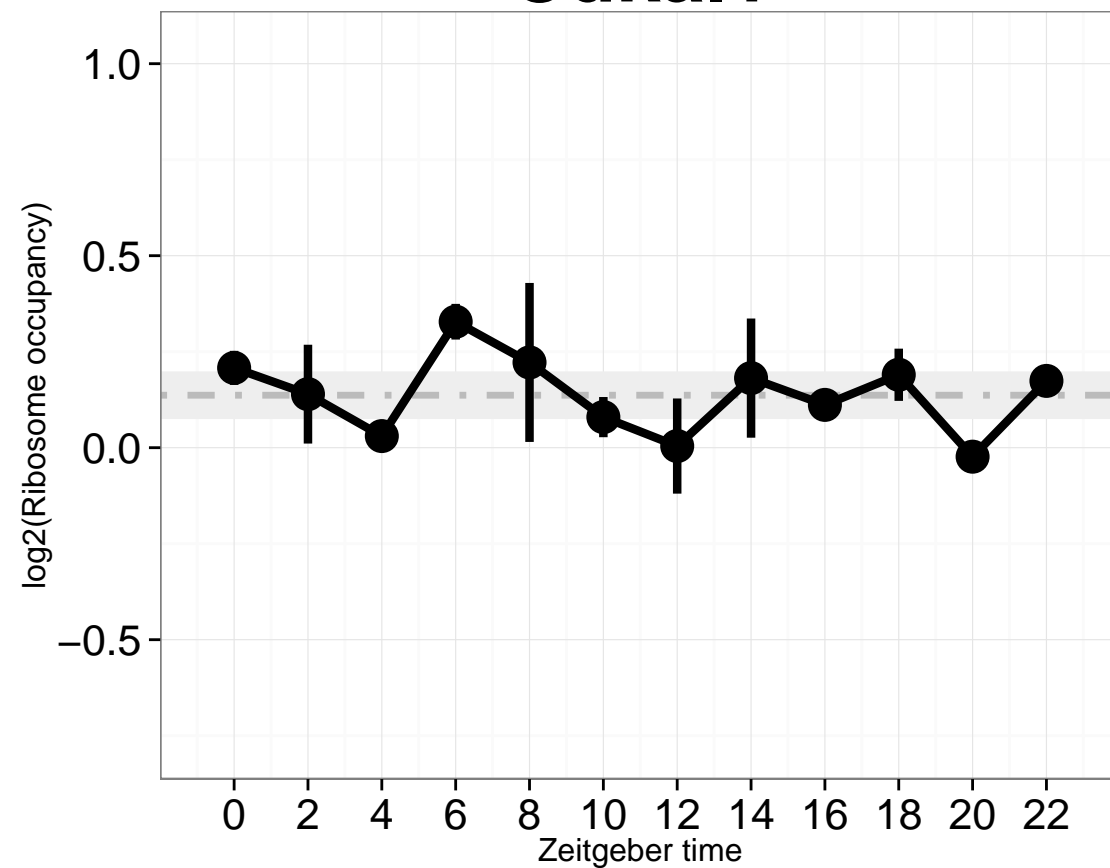

Supplement: Supplementary file 8907 [file 1]

## Lepre1

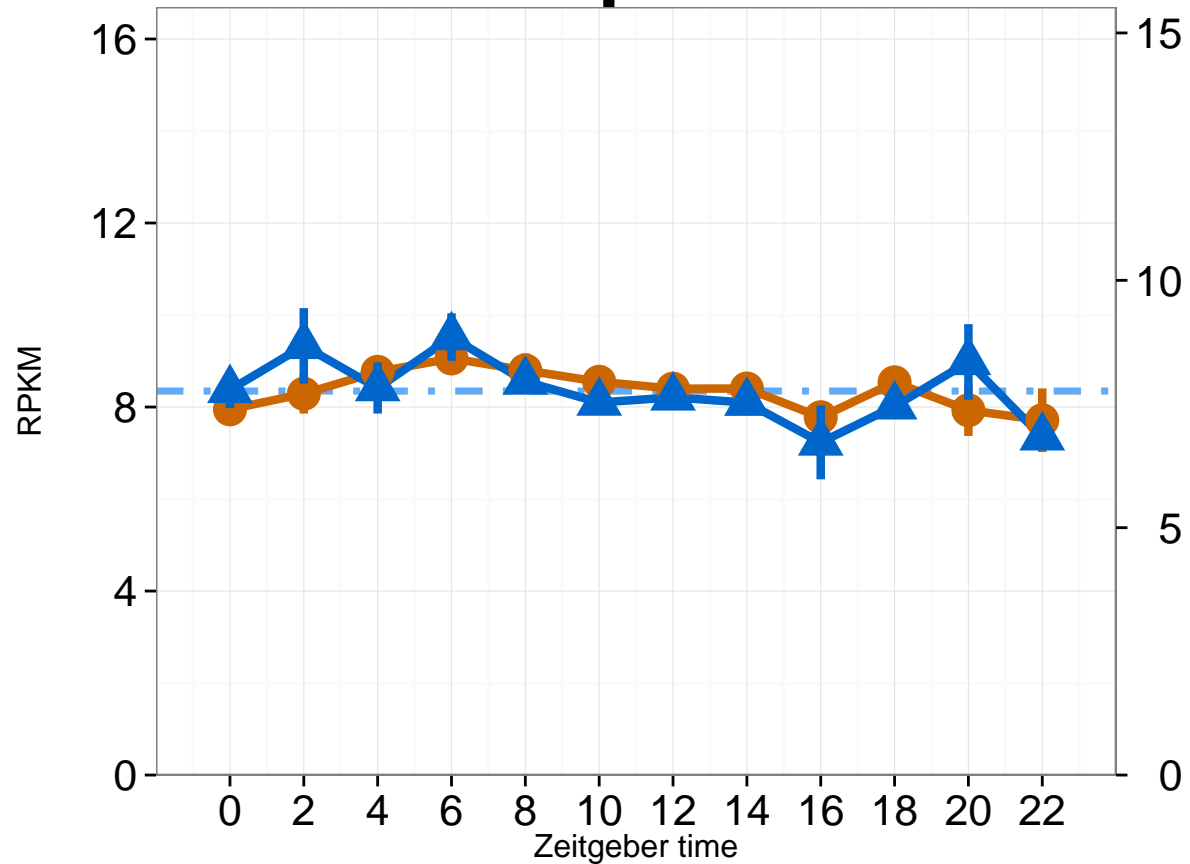

## Lepre1

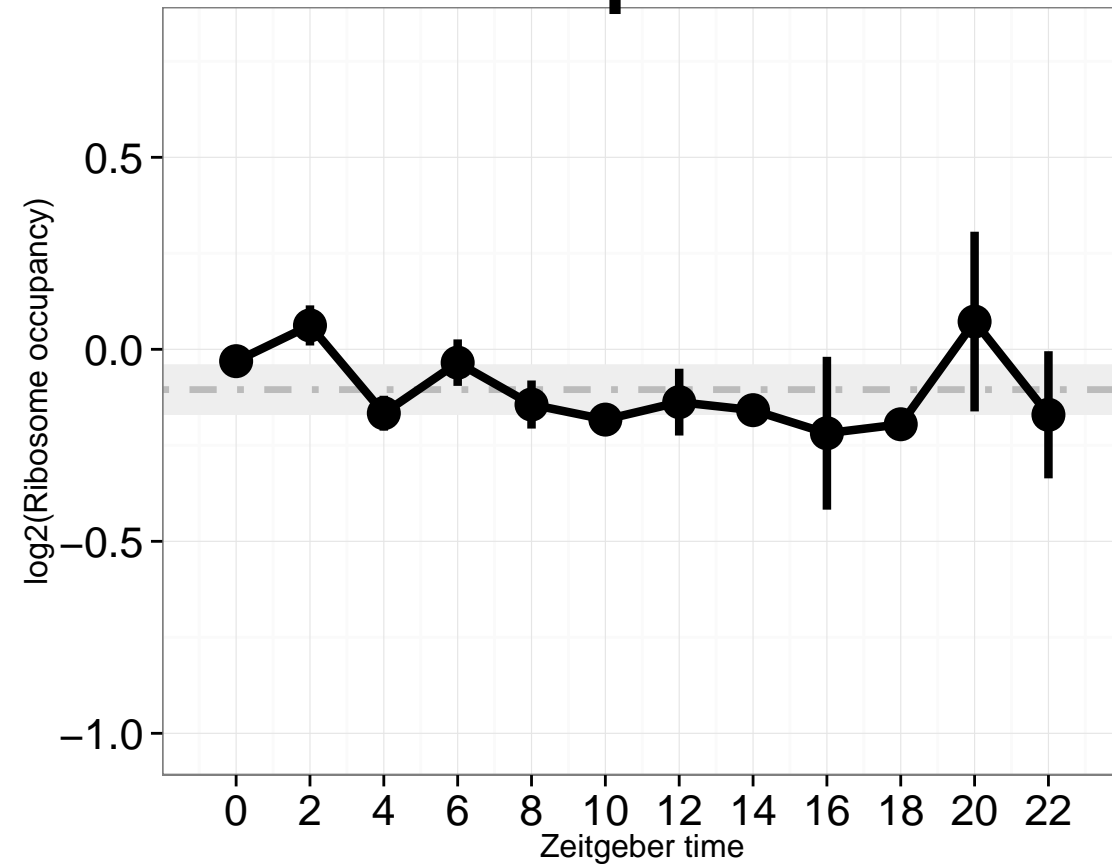

Supplement: Supplementary file 8908 [file 1]

# Larp4b

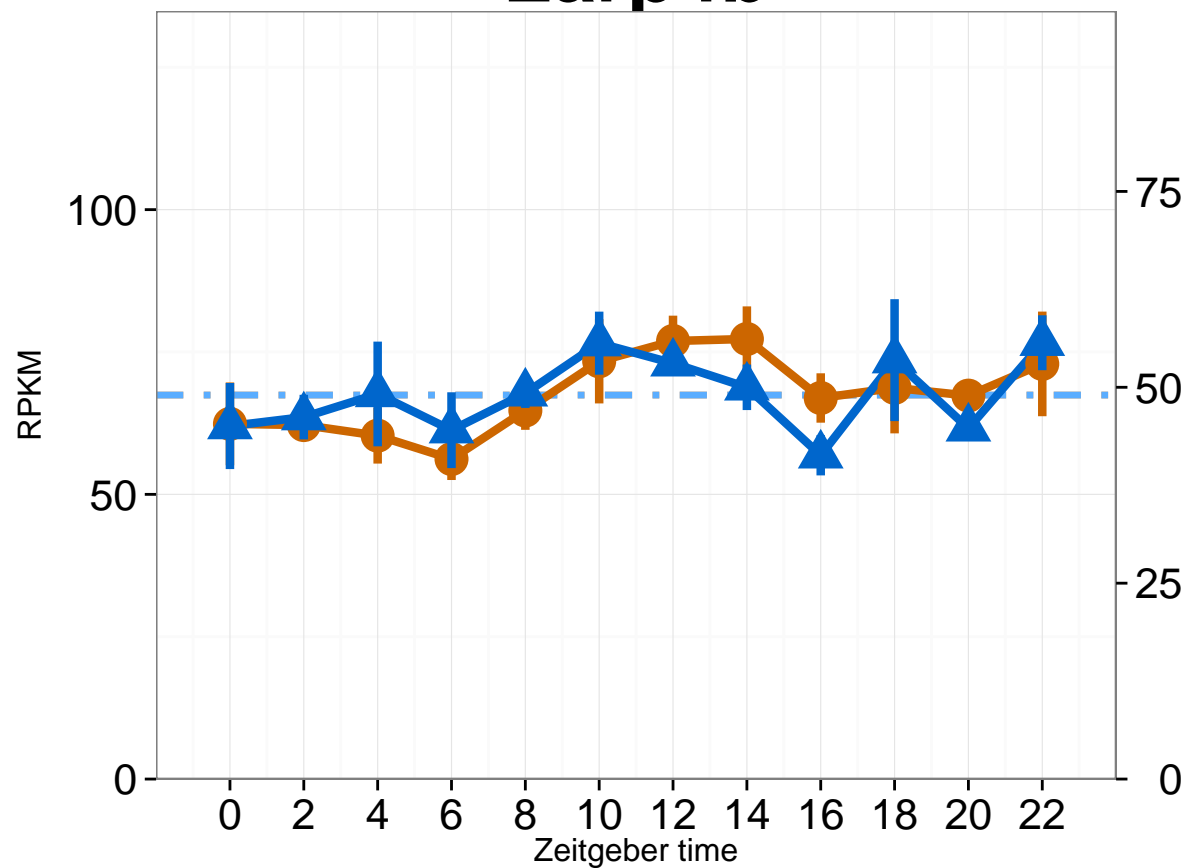

# Larp4b

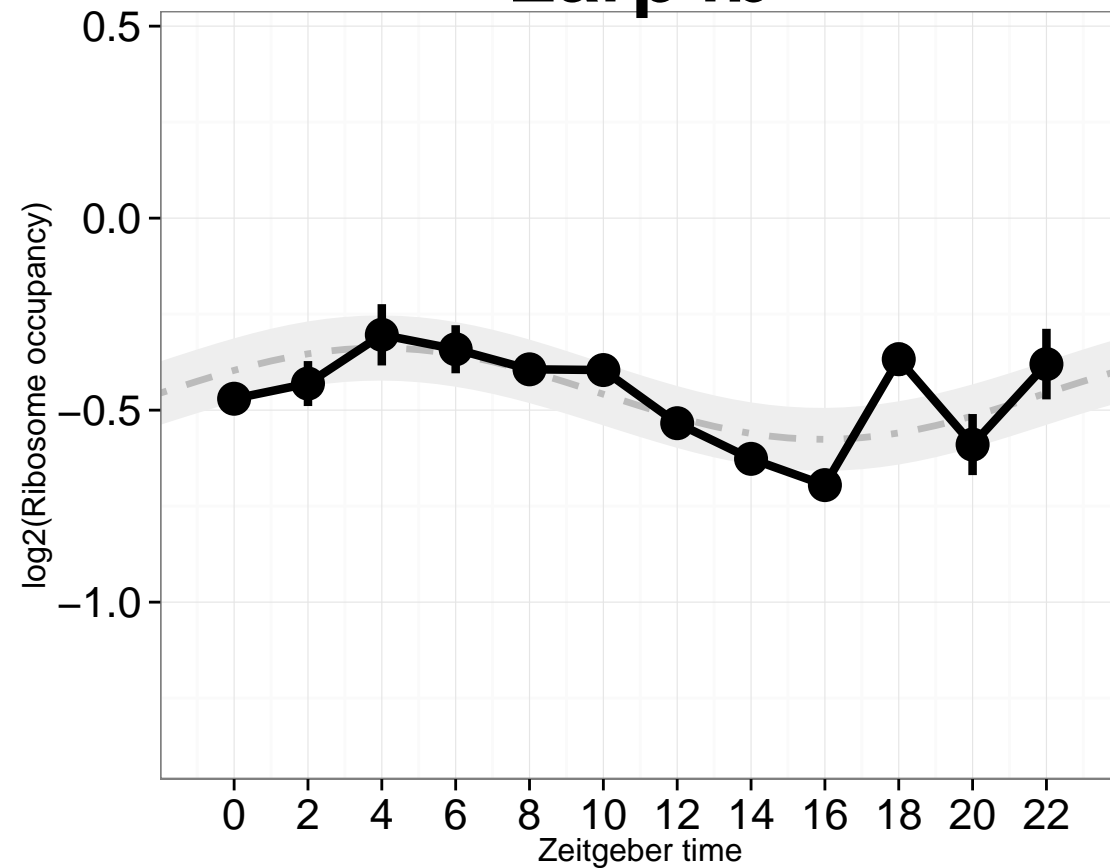

Supplement: Supplementary file 8909 [file 1]

# Nbeal2

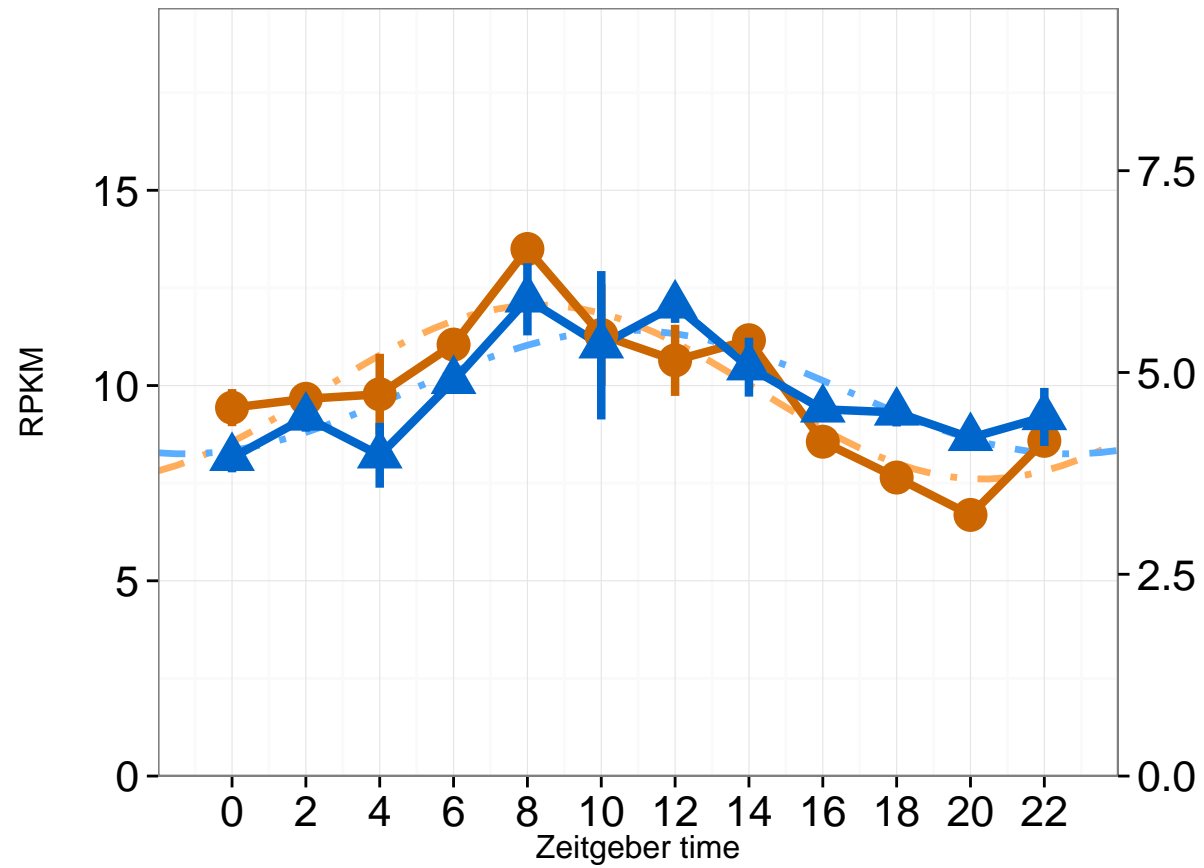

# Nbeal2

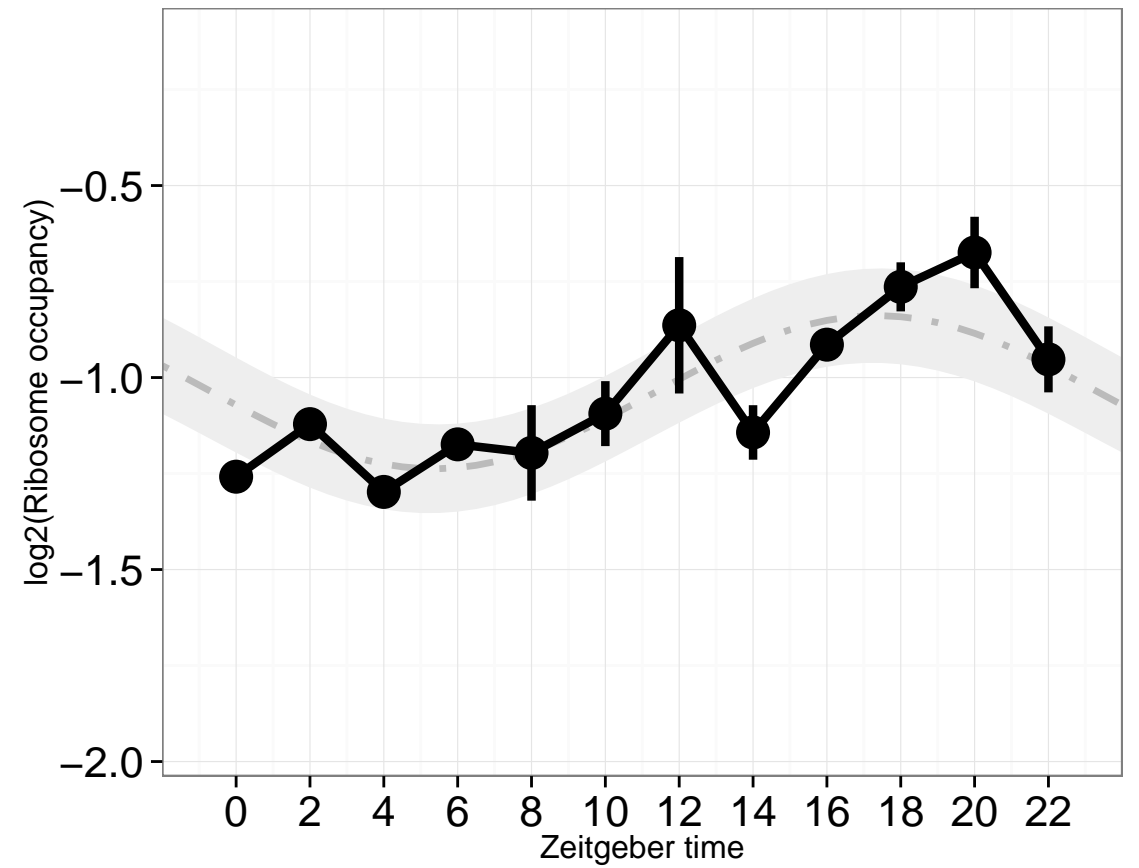

Supplement: Supplementary file 8910 [file 1]

# Trpm4

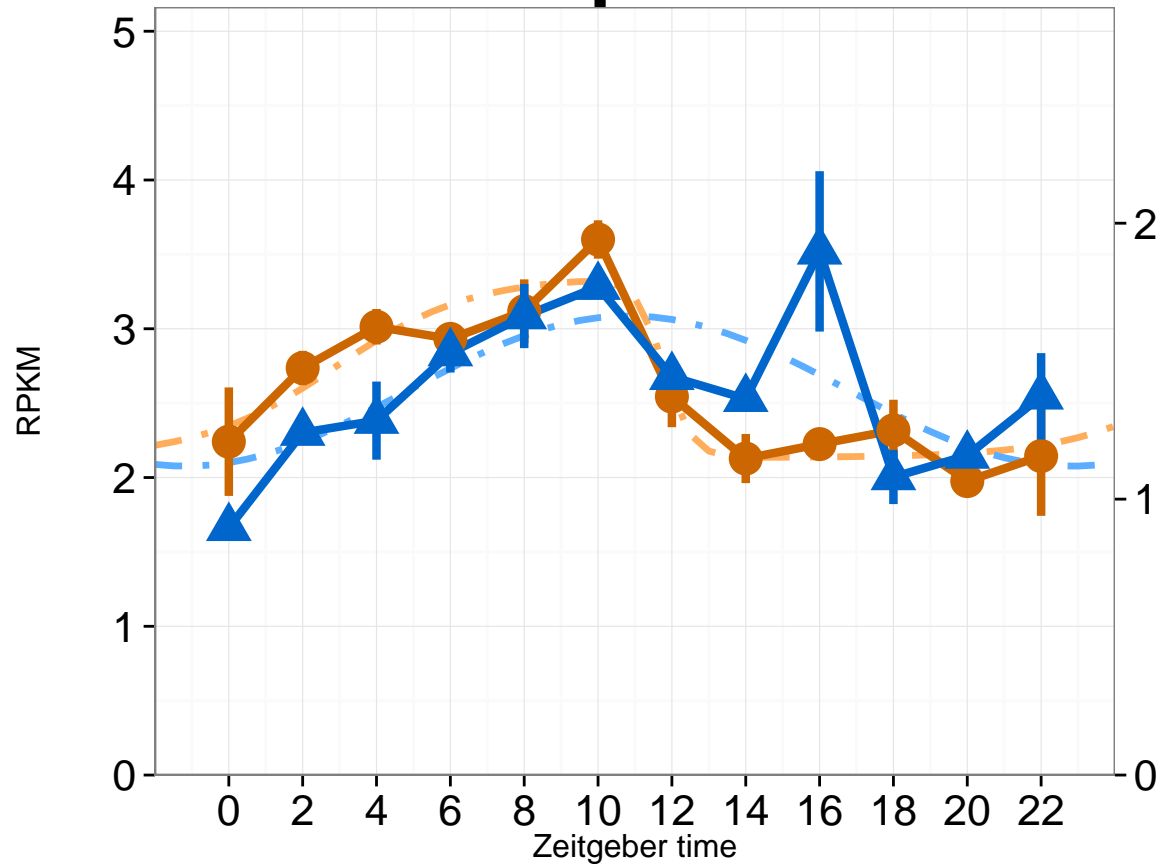

# Trpm4

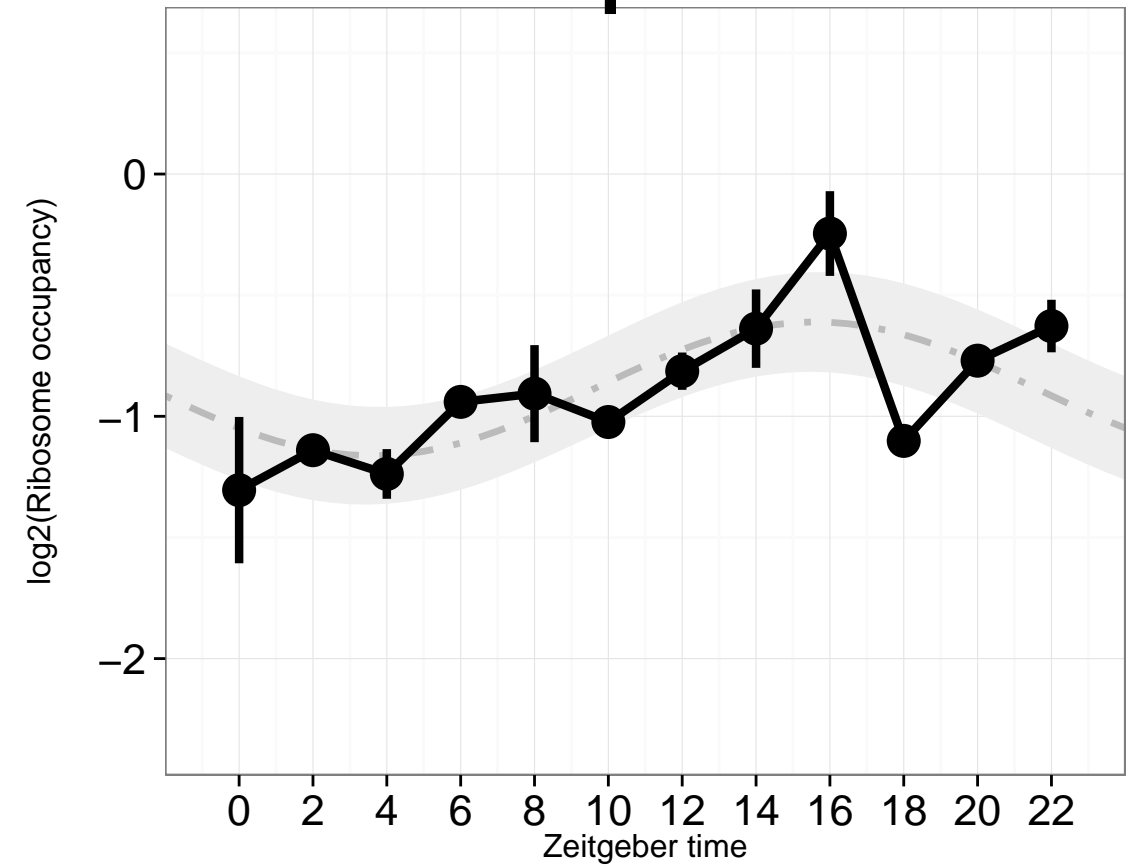

Supplement: Supplementary file 8911 [file 1]

## Pigx

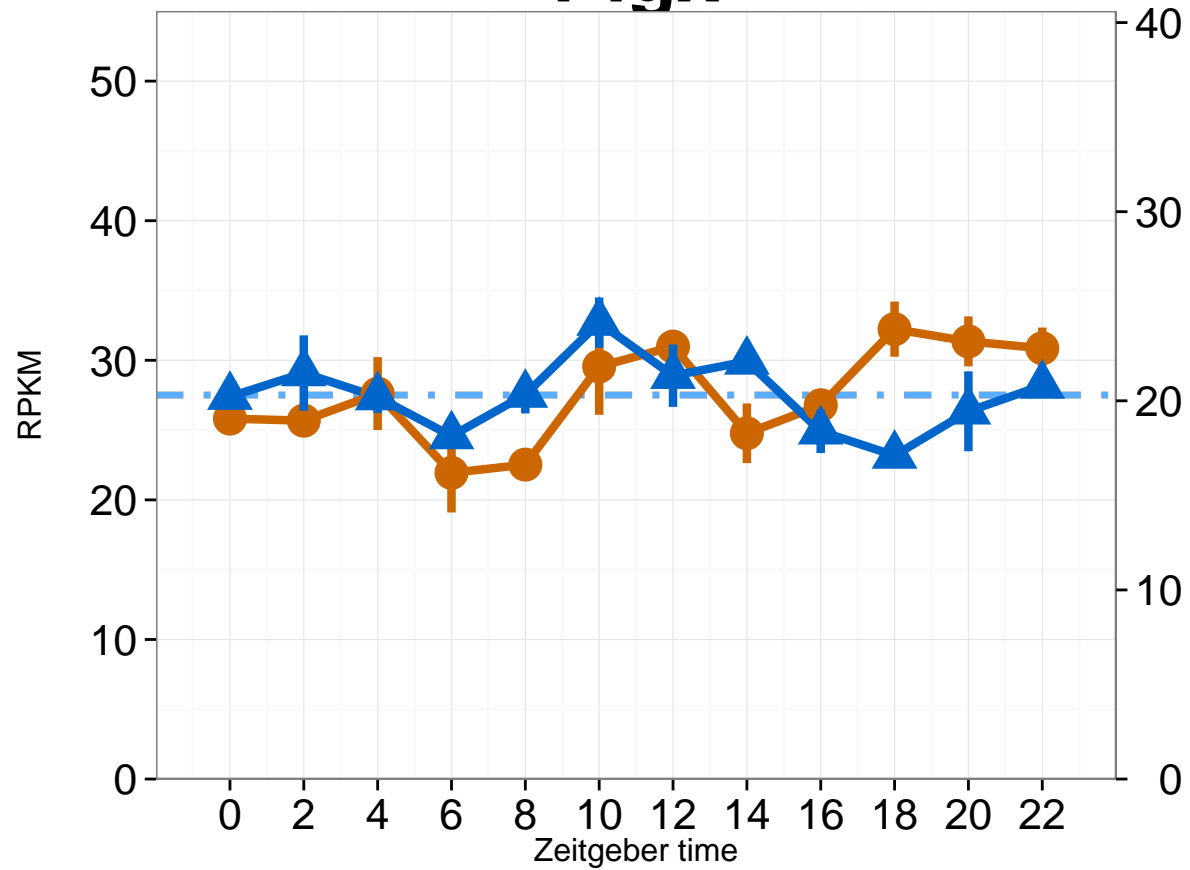

## Pigx

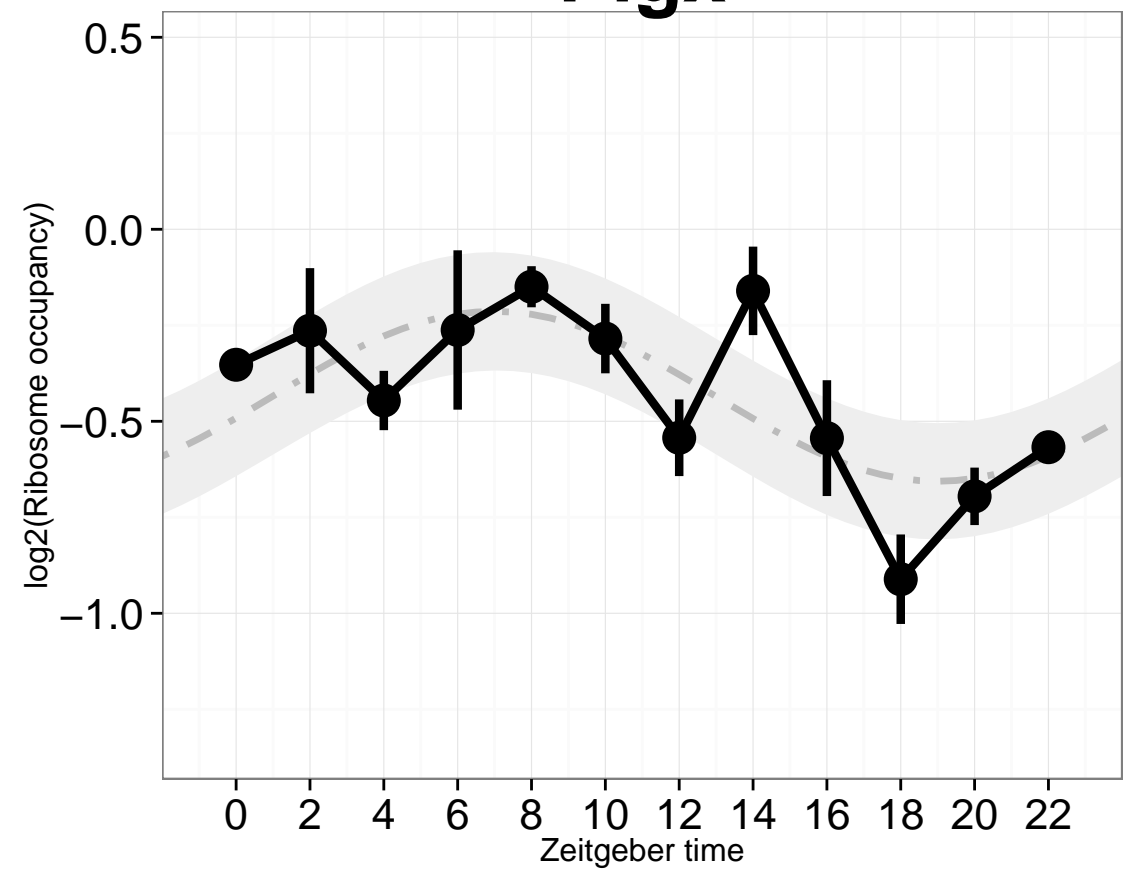

Supplement: Supplementary file 8912 [file 1]

## Sncaip

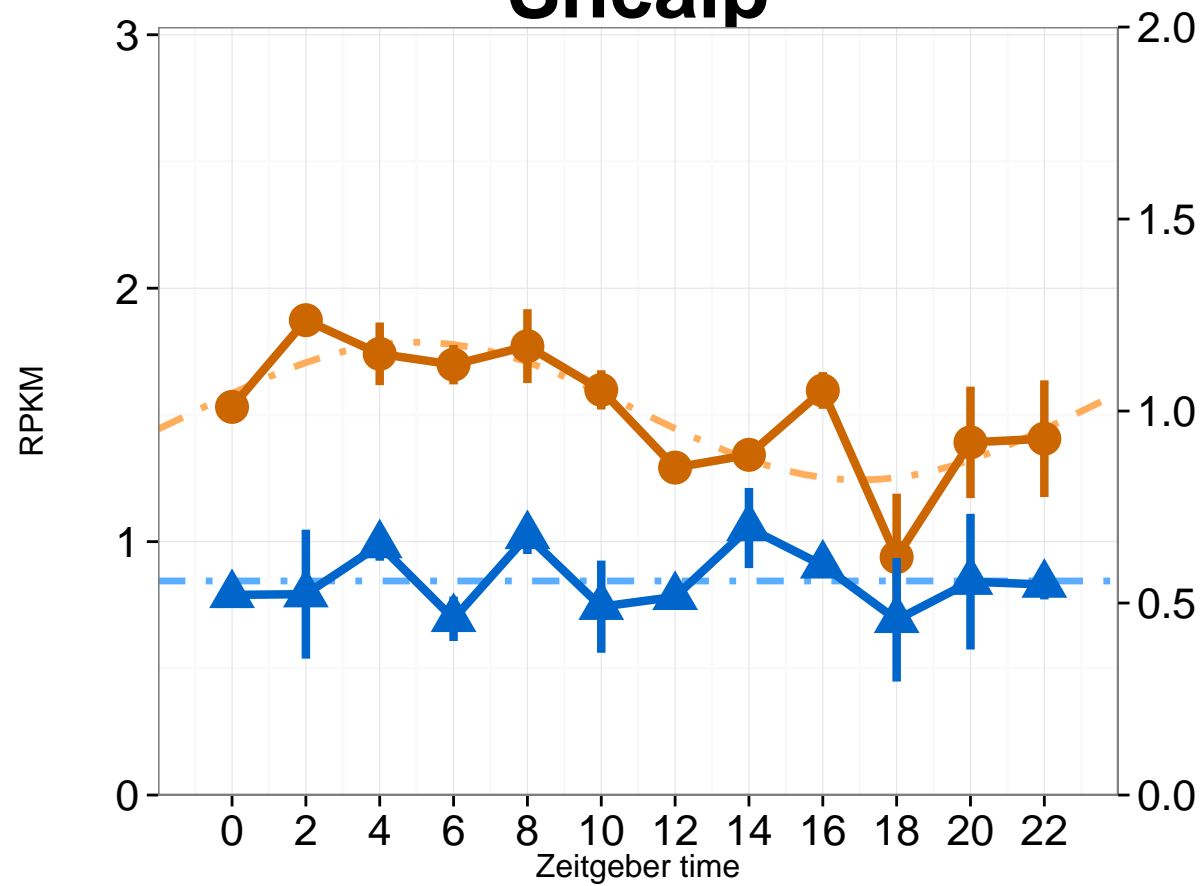

## Sncaip

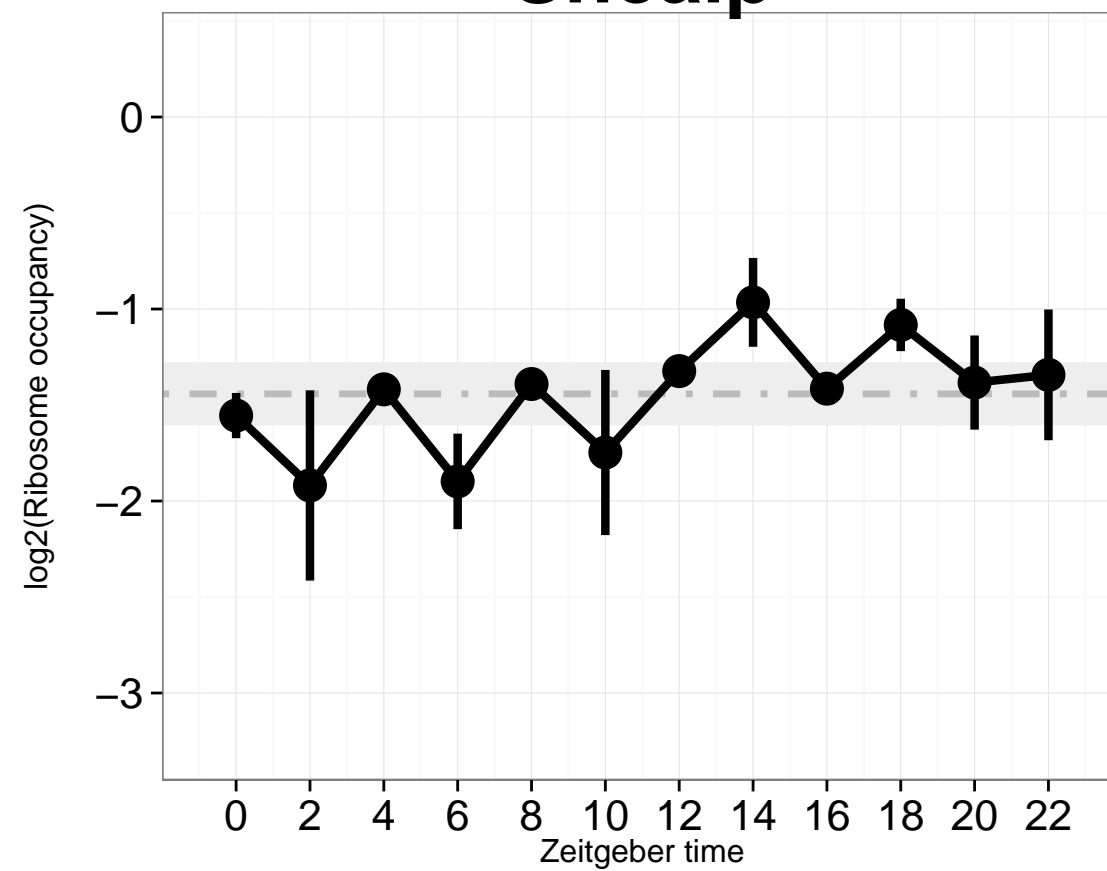

Supplement: Supplementary file 8913 [file 1]

## Dbp

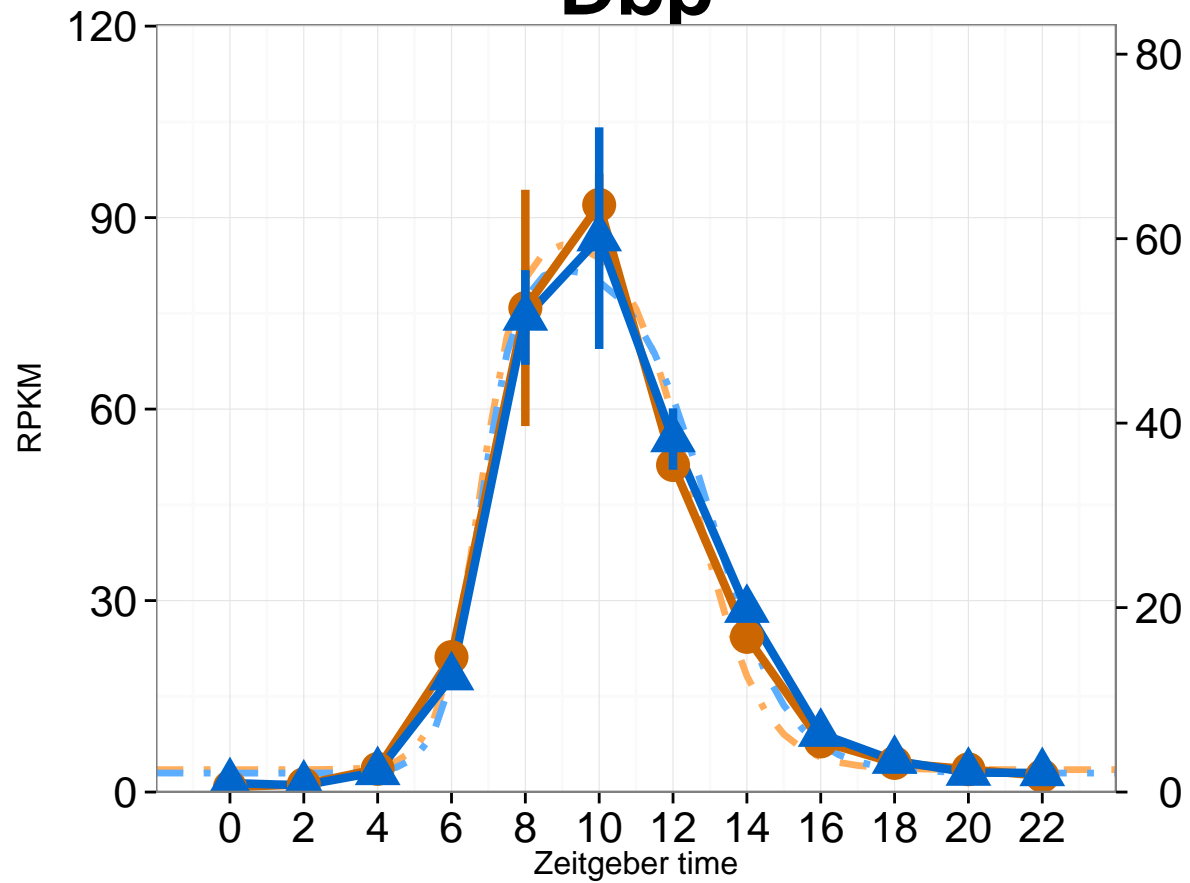

## Dbp

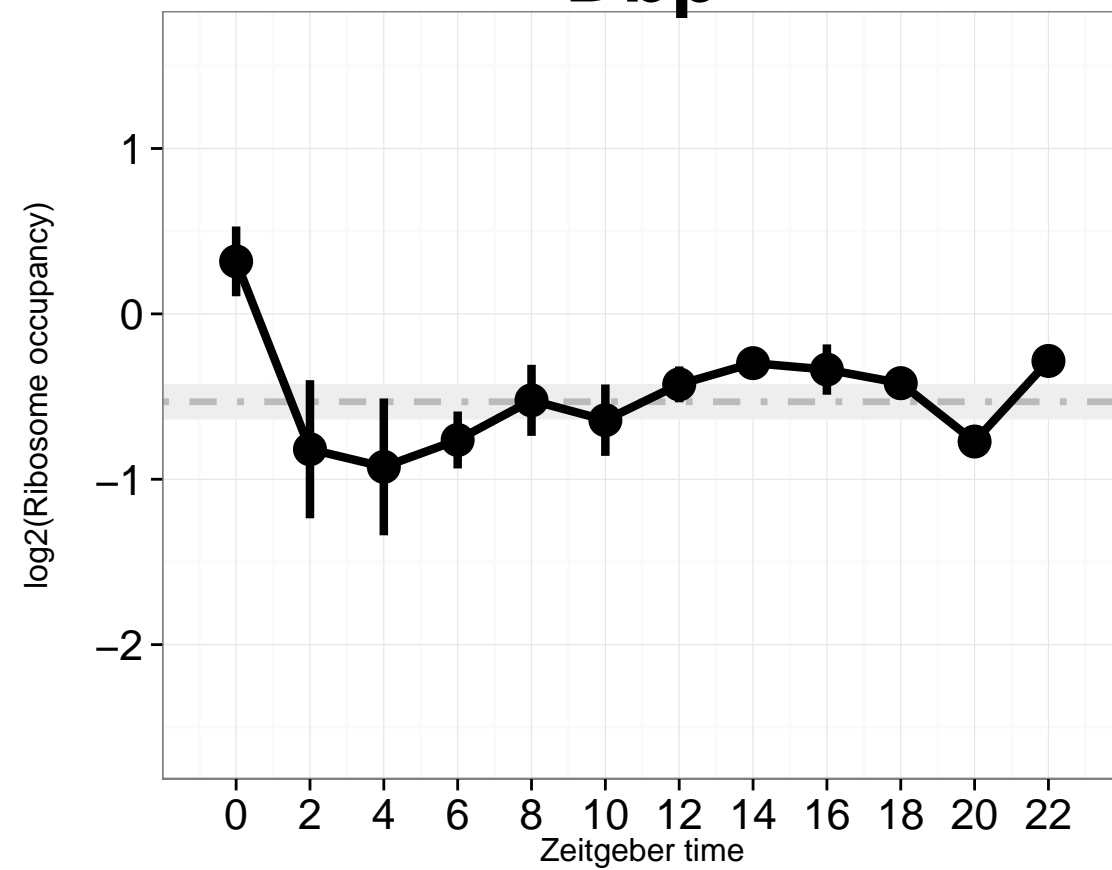

Supplement: Supplementary file 8914 [file 1]

# 1200014J11Rik

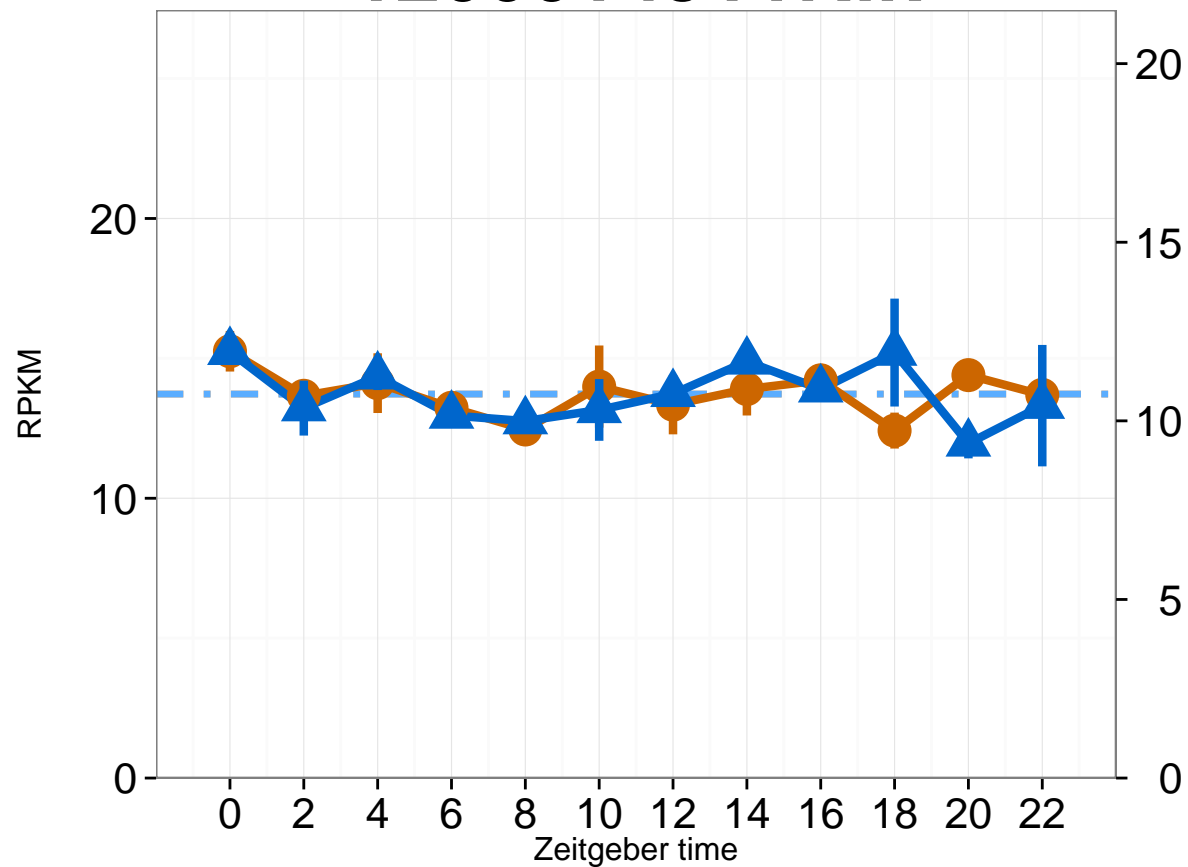

# 1200014J11Rik

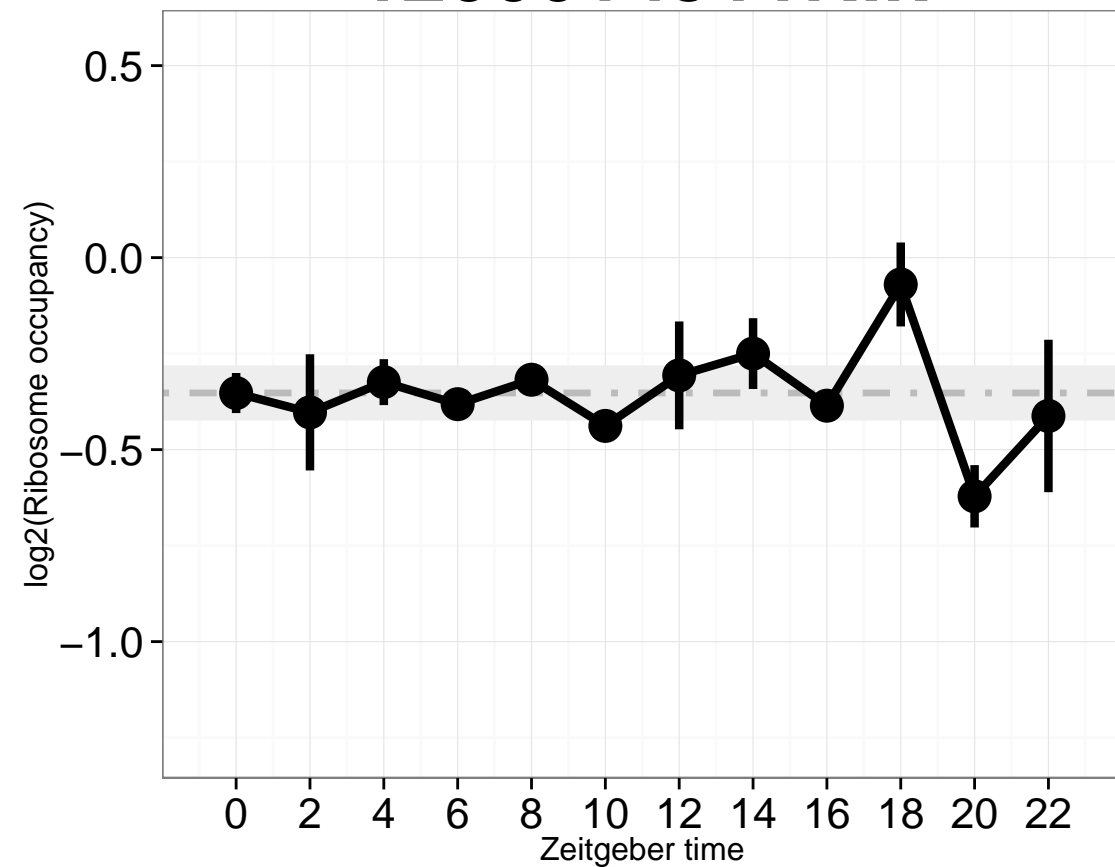

Supplement: Supplementary file 8915 [file 1]

## Eif2ak1

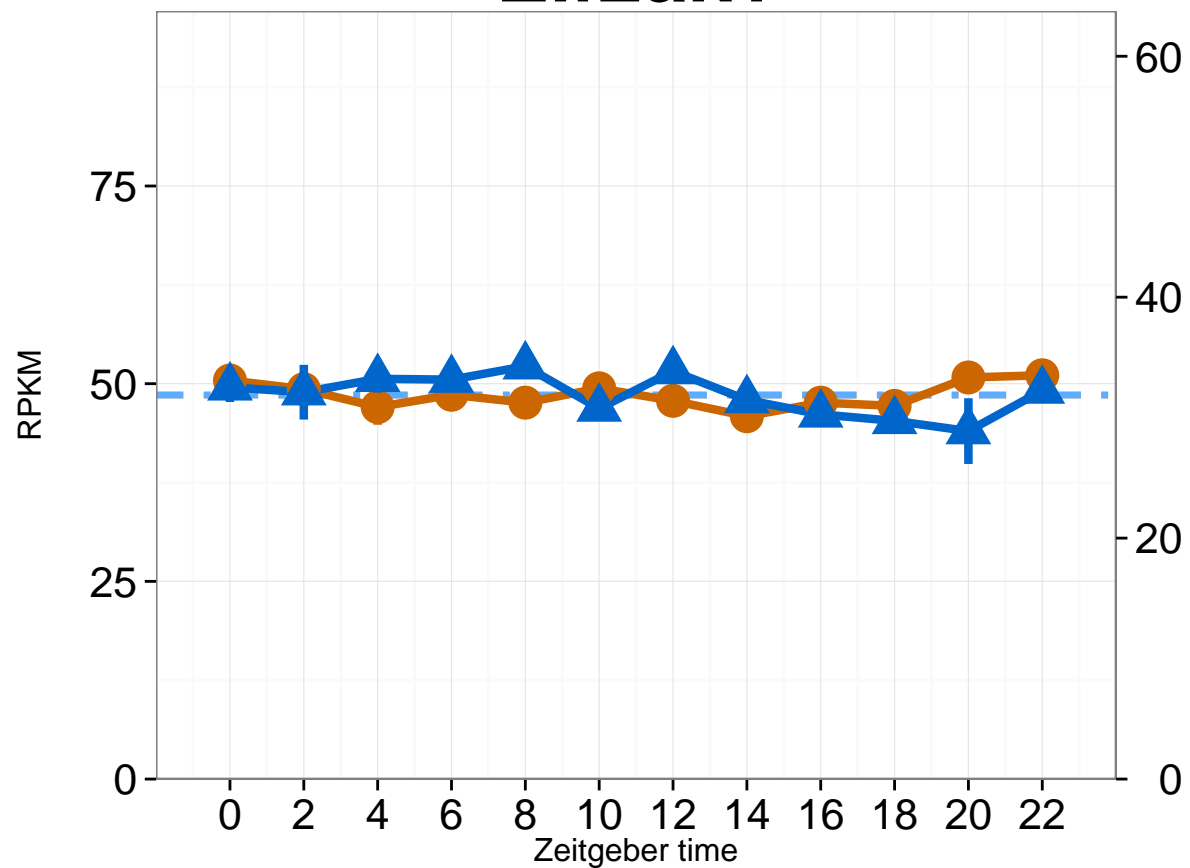

## Eif2ak1

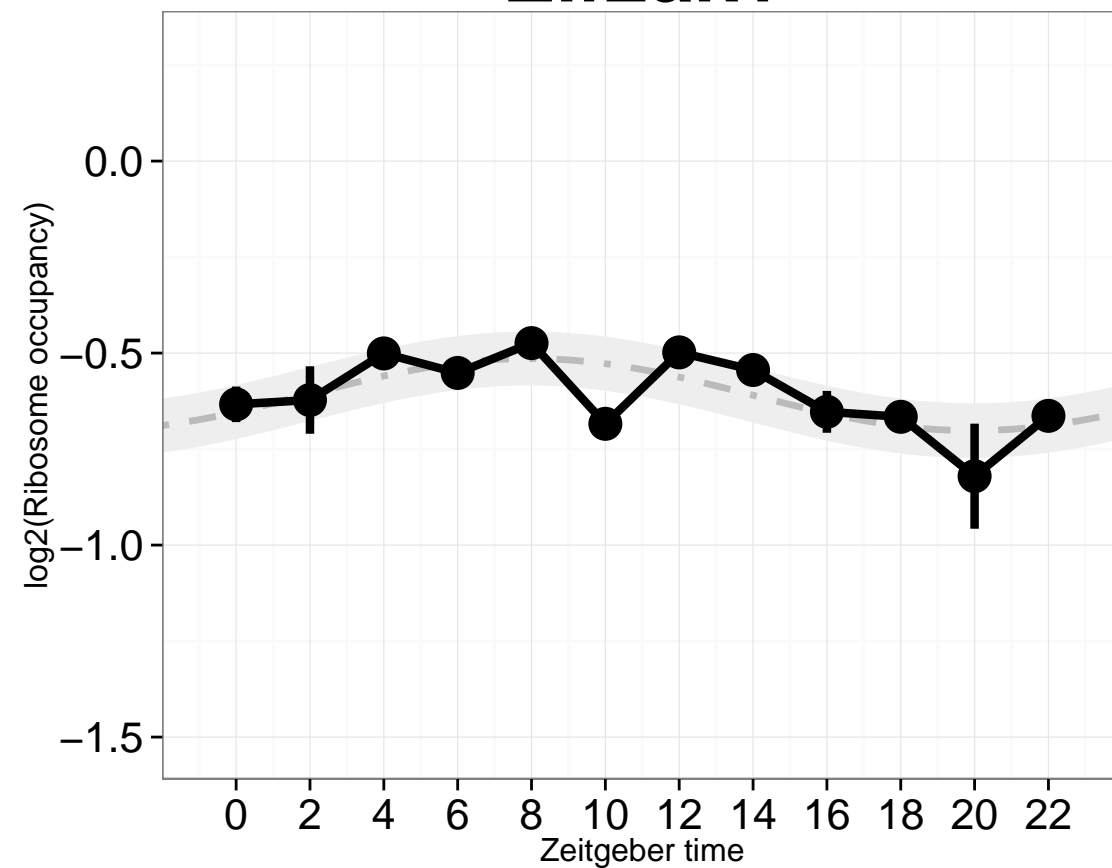

Supplement: Supplementary file 8916 [file 1]

# Skap1

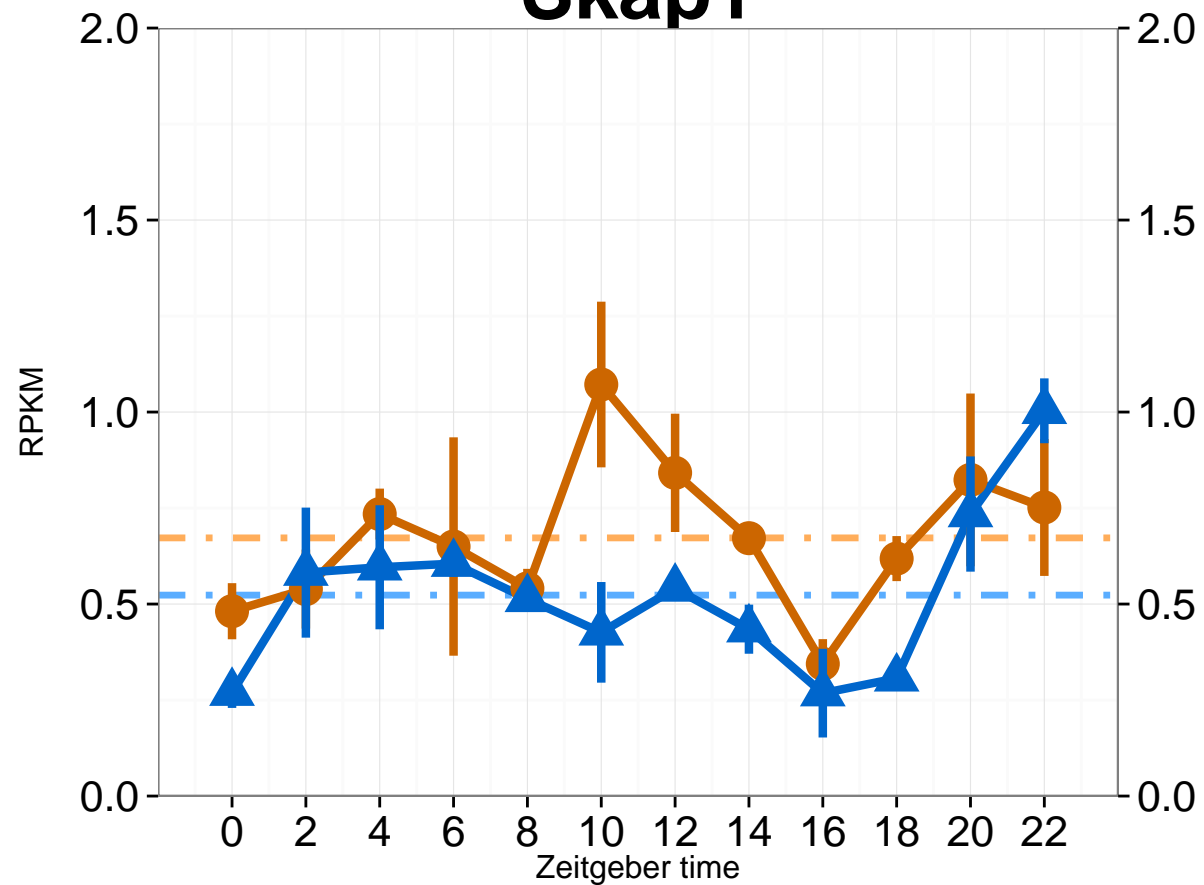

# Skap1

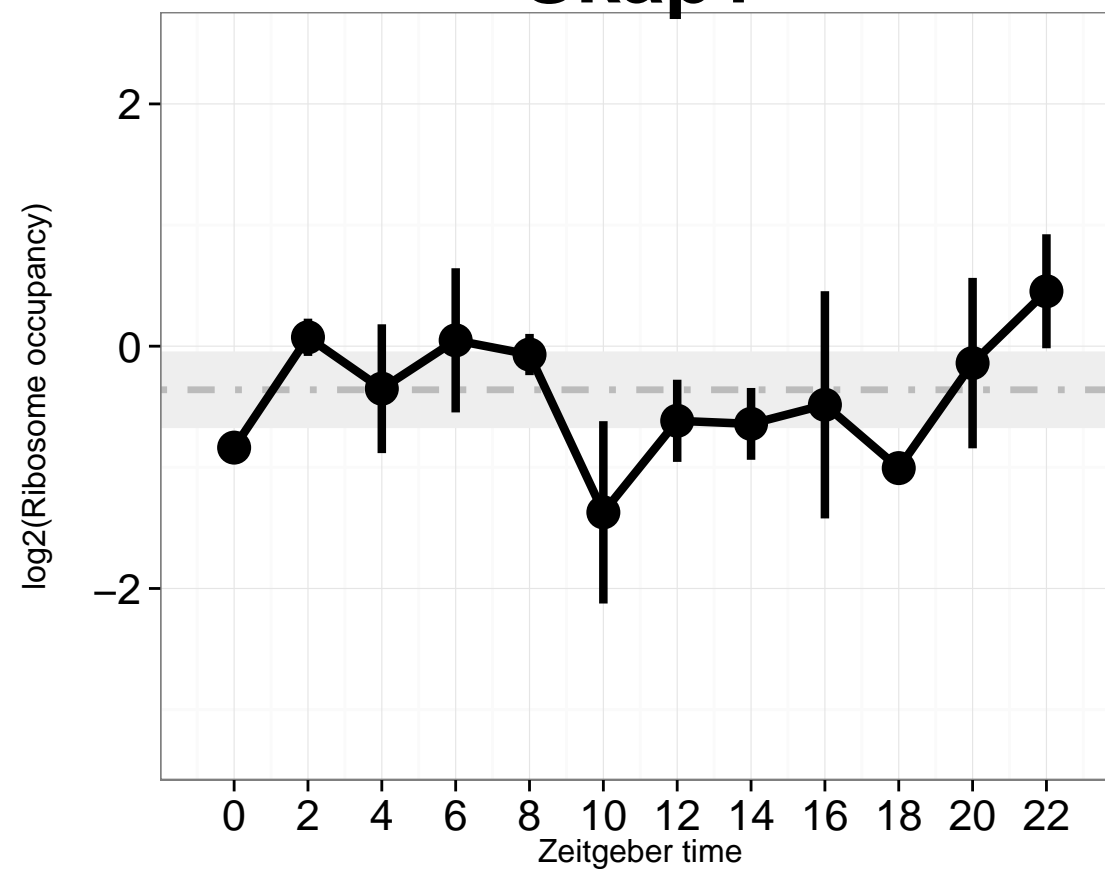

Supplement: Supplementary file 8917 [file 1]

## Snx7

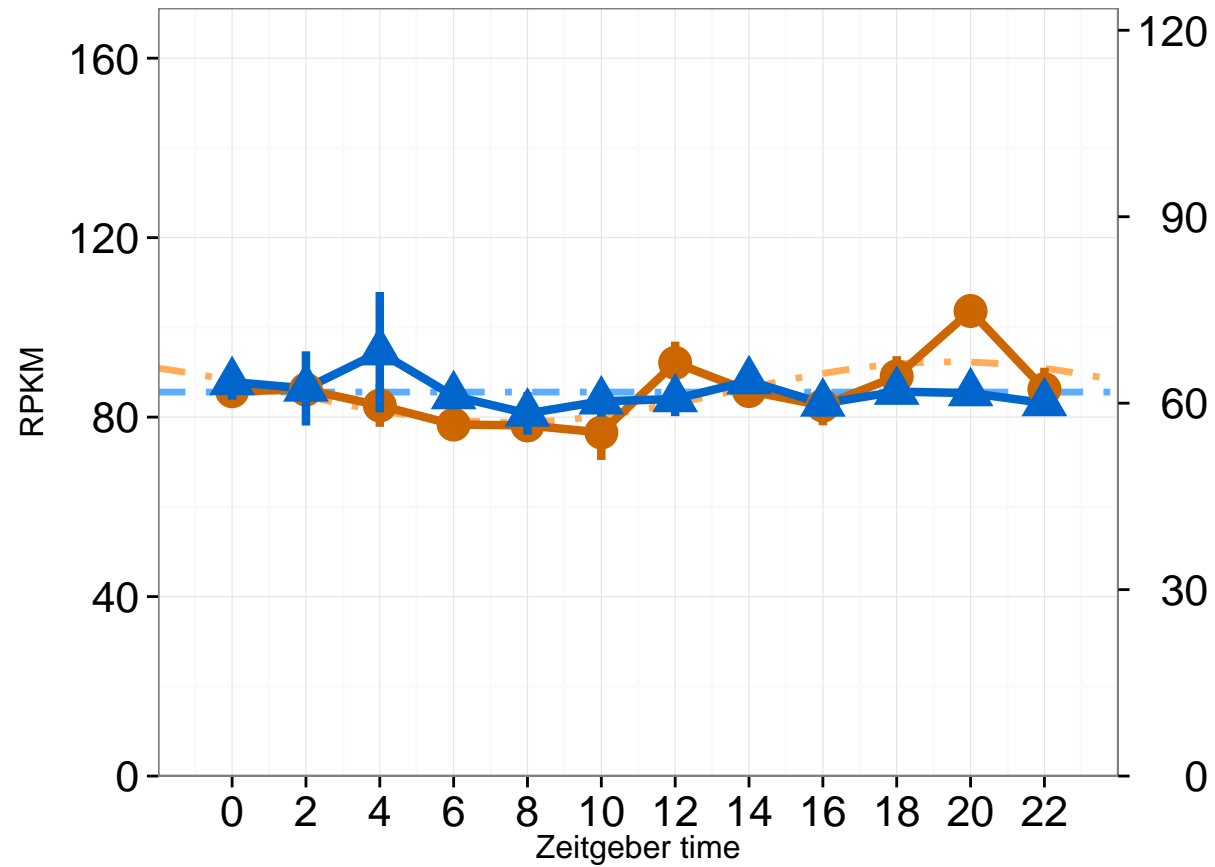

## Snx7

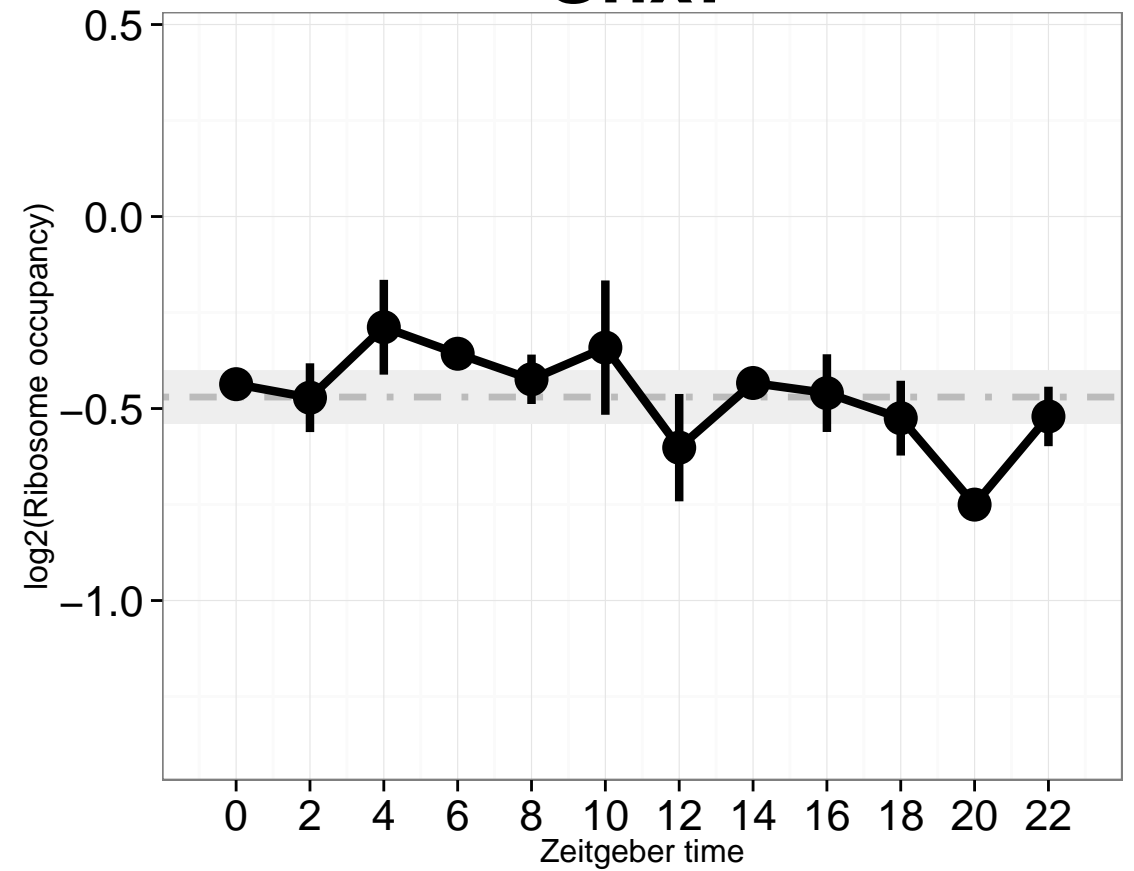

Supplement: Supplementary file 8918 [file 1]

## Tsr3

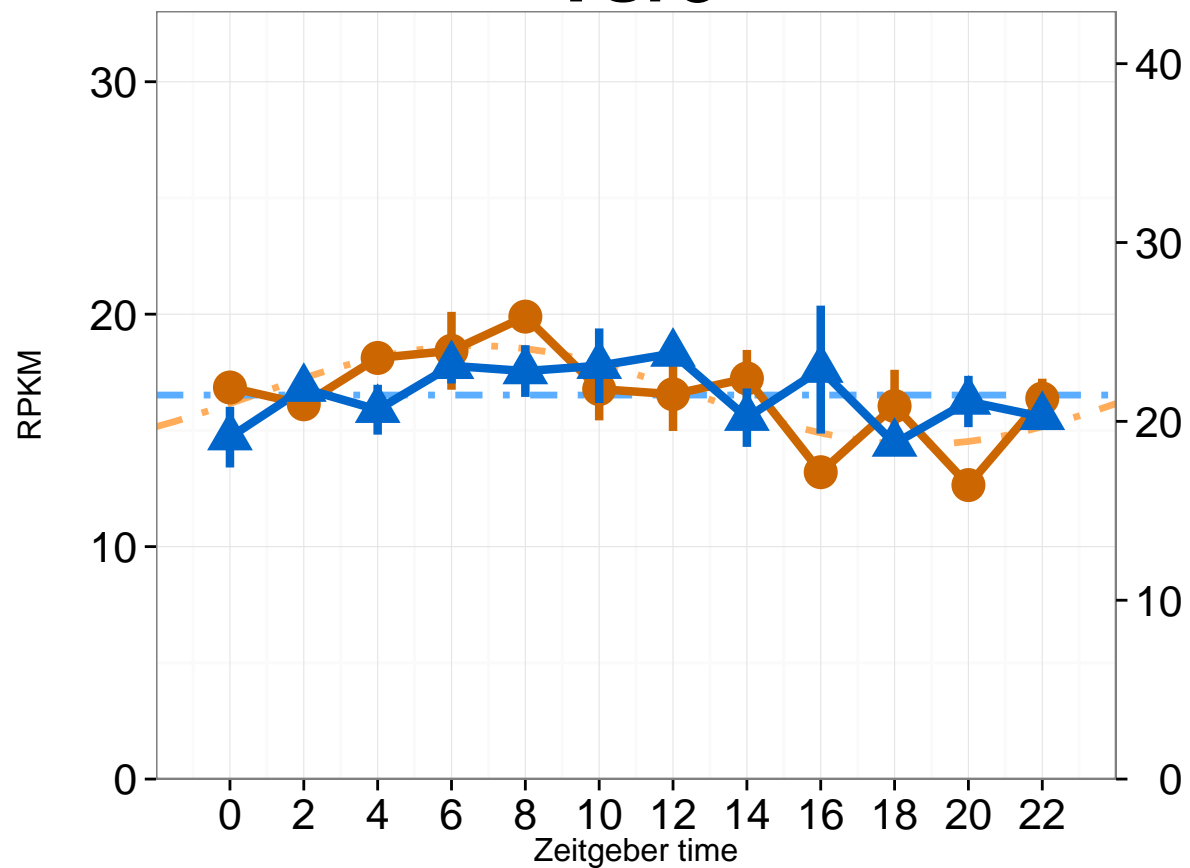

## Tsr3

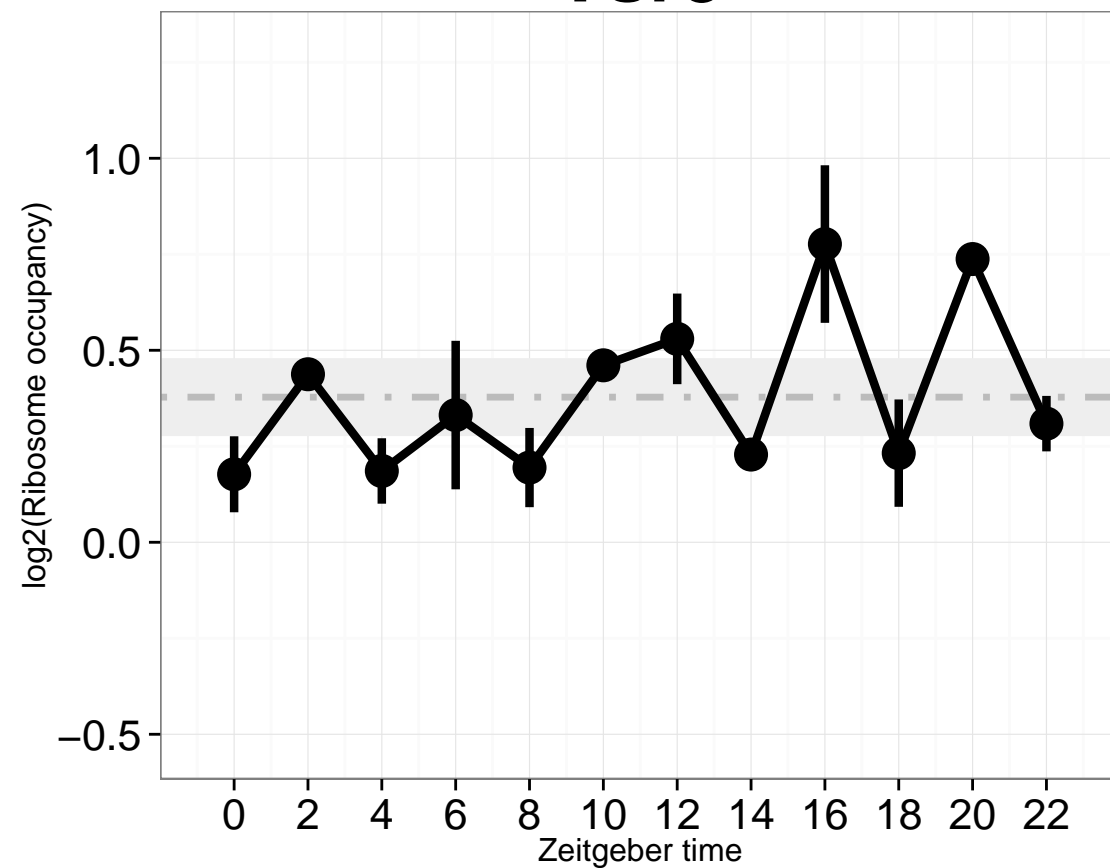

Supplement: Supplementary file 8919 [file 1]

## Lrrc52

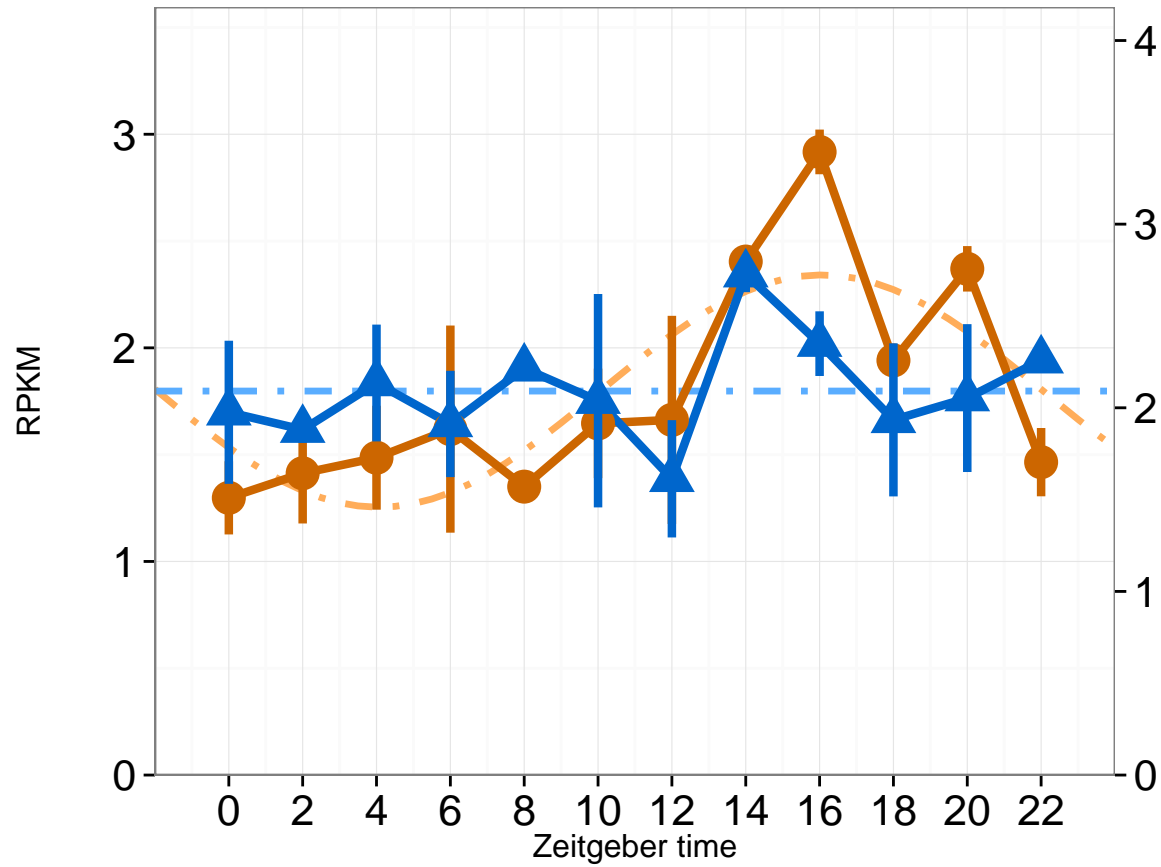

## Lrrc52

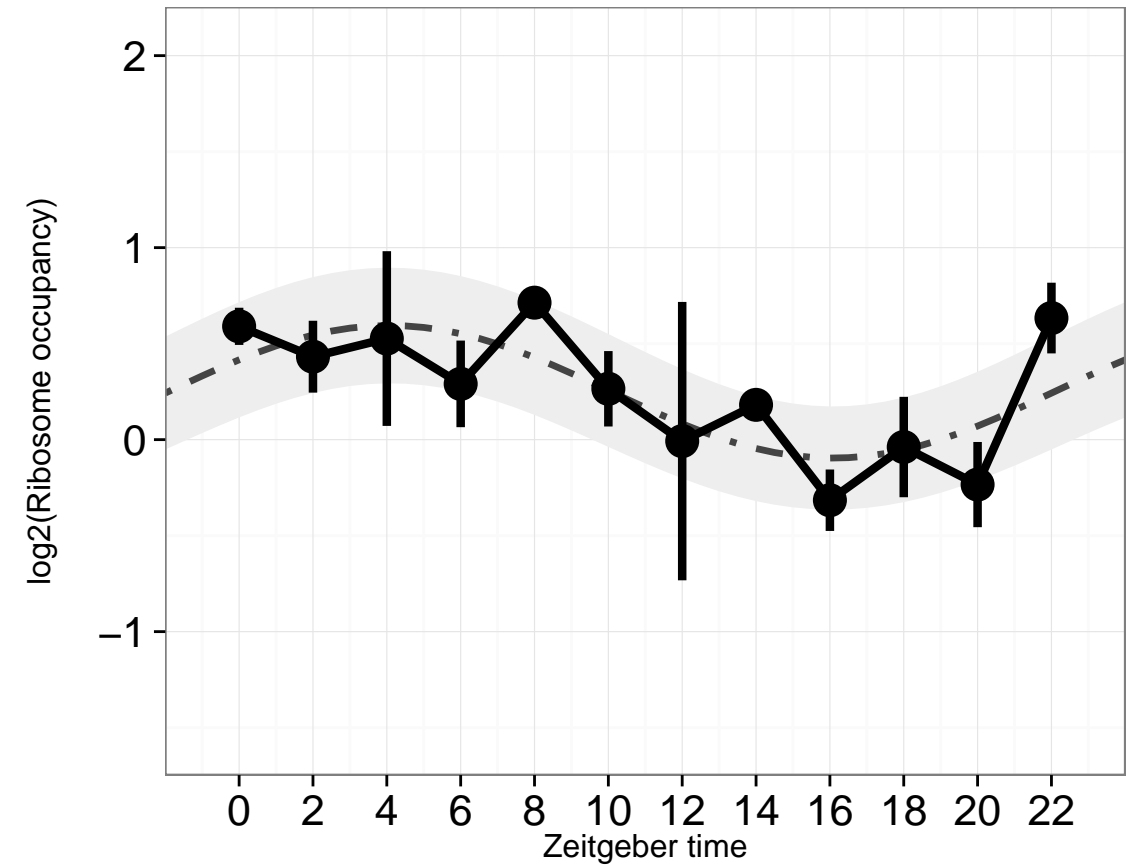

Supplement: Supplementary file 8920 [file 1]

## Wdr24

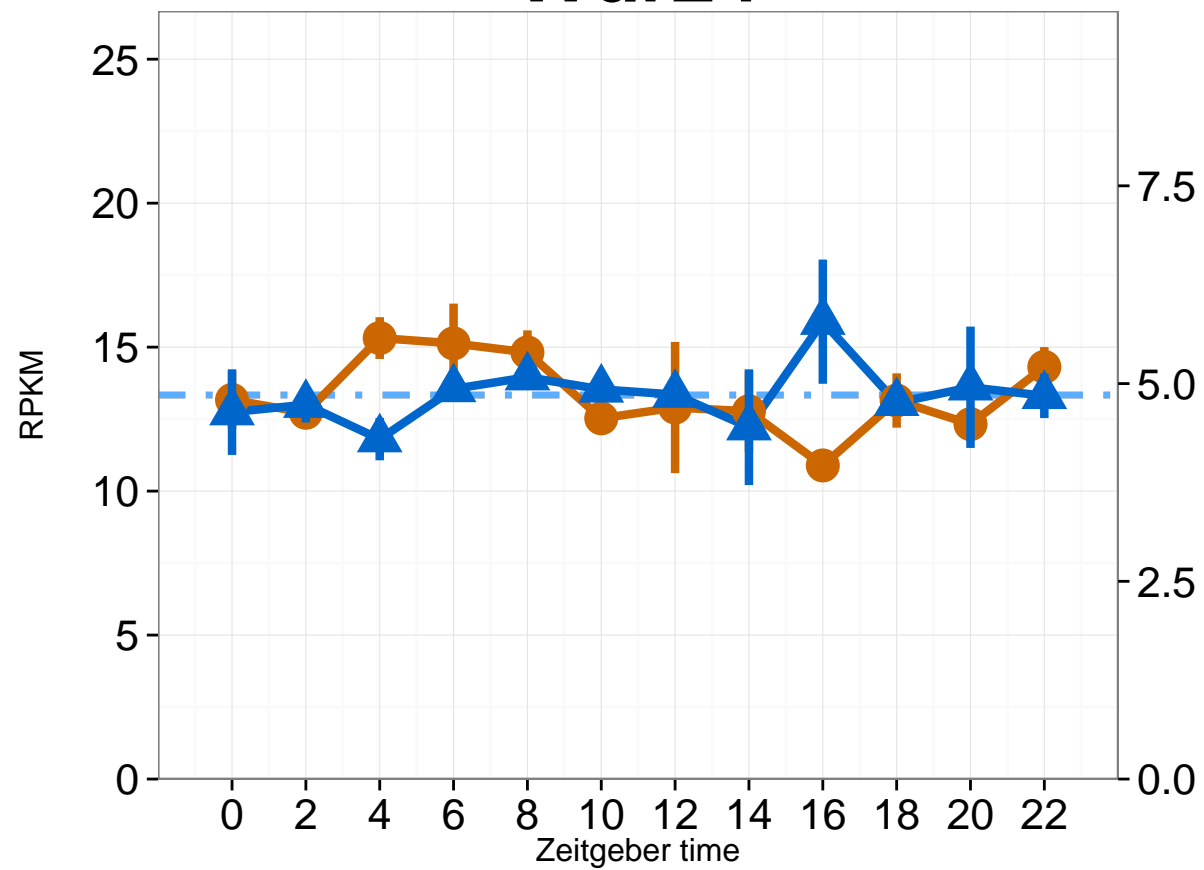

## Wdr24

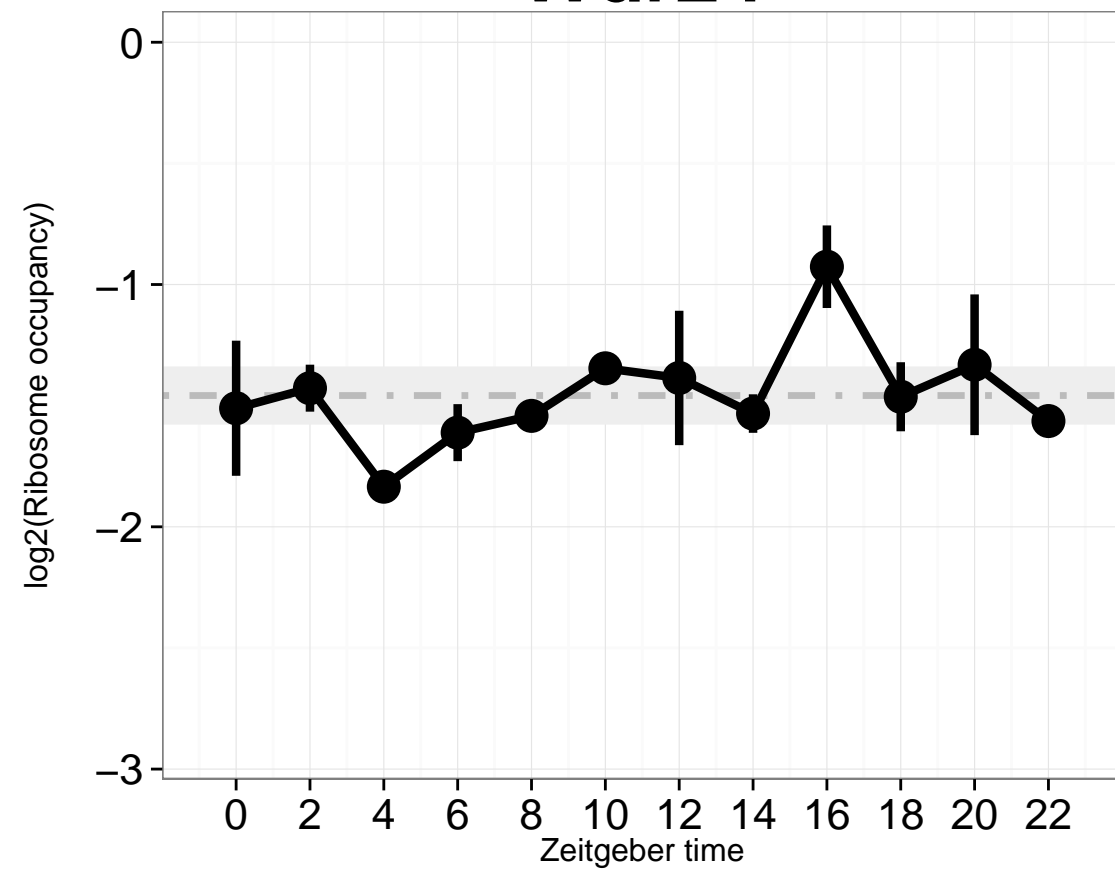

Supplement: Supplementary file 8921 [file 1]

## Sardh

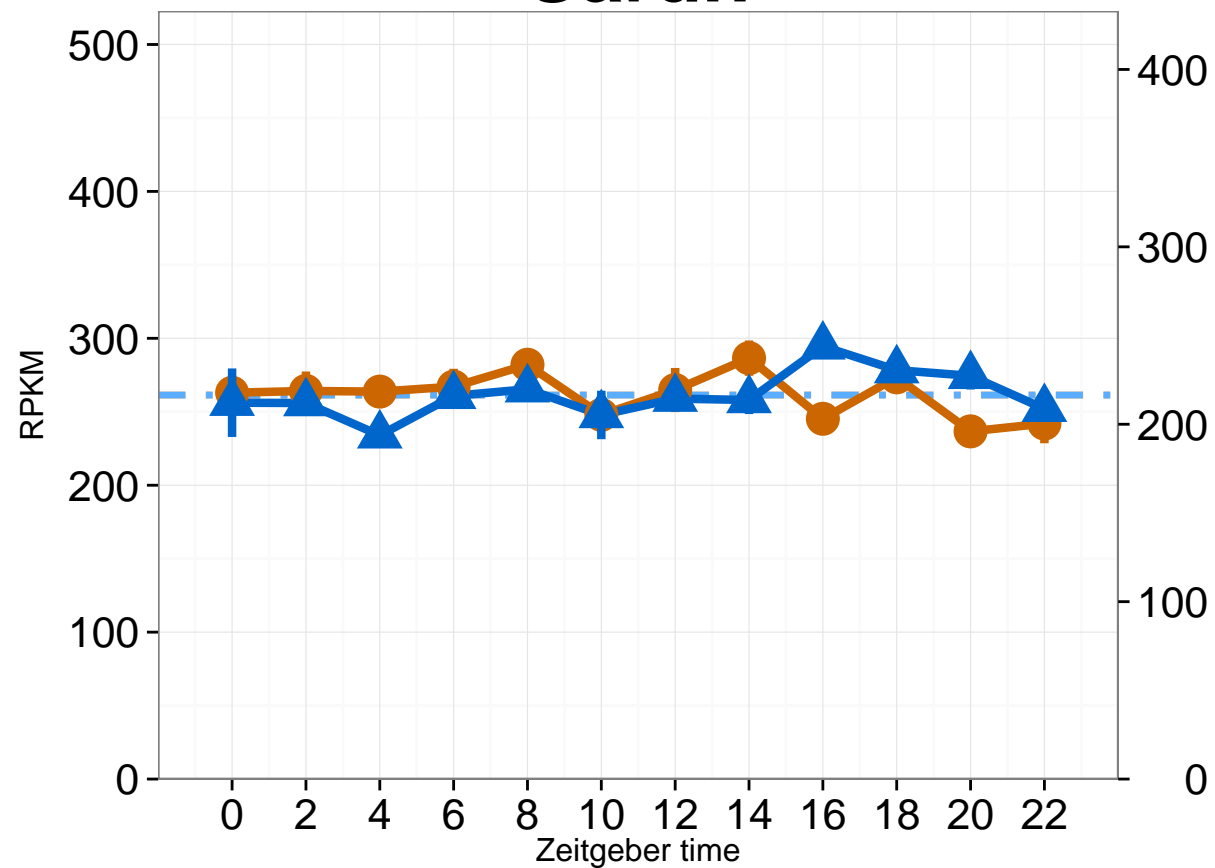

## Sardh

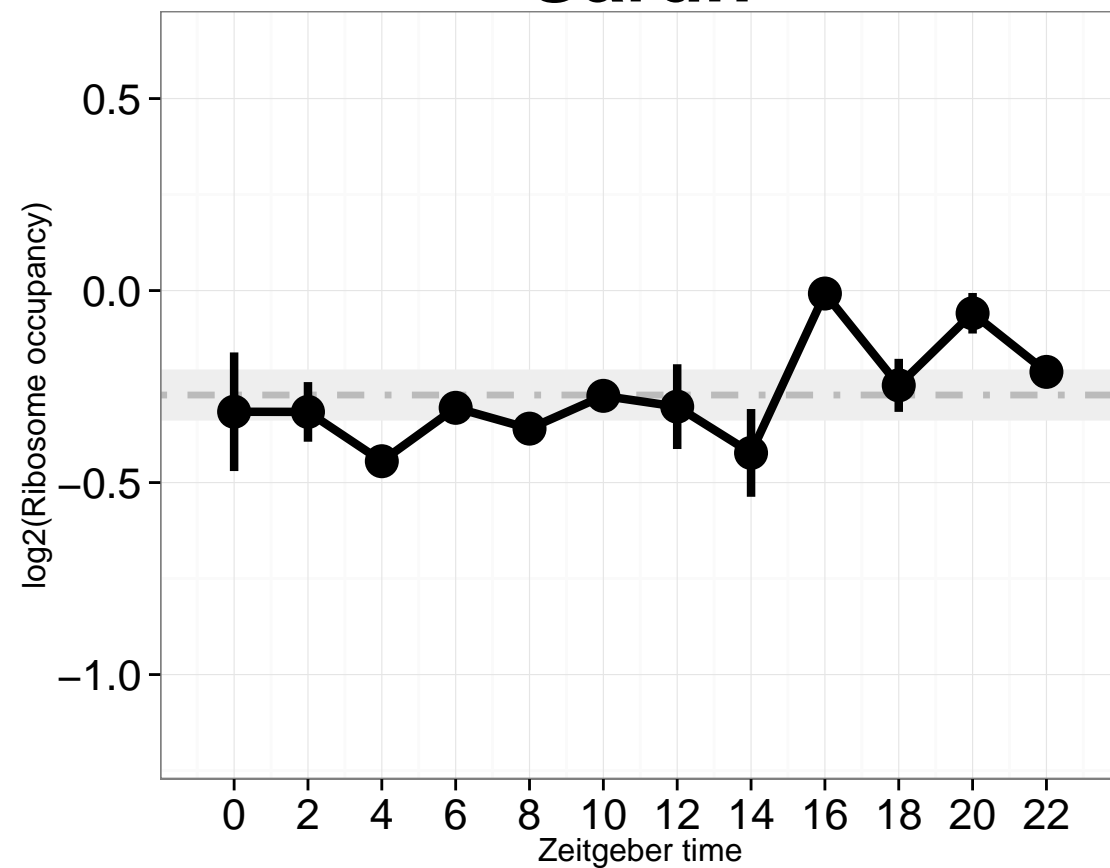

Supplement: Supplementary file 8922 [file 1]

## PIIp

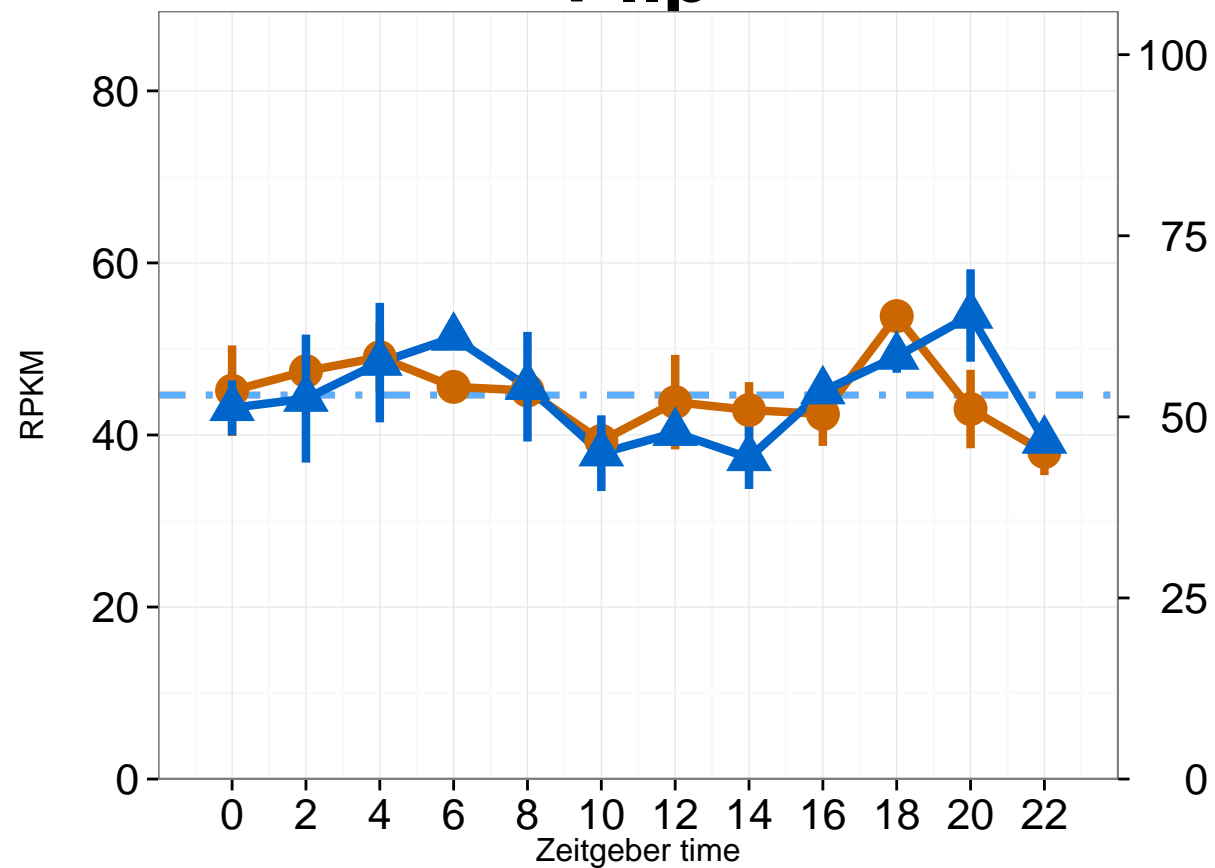

## PIIp

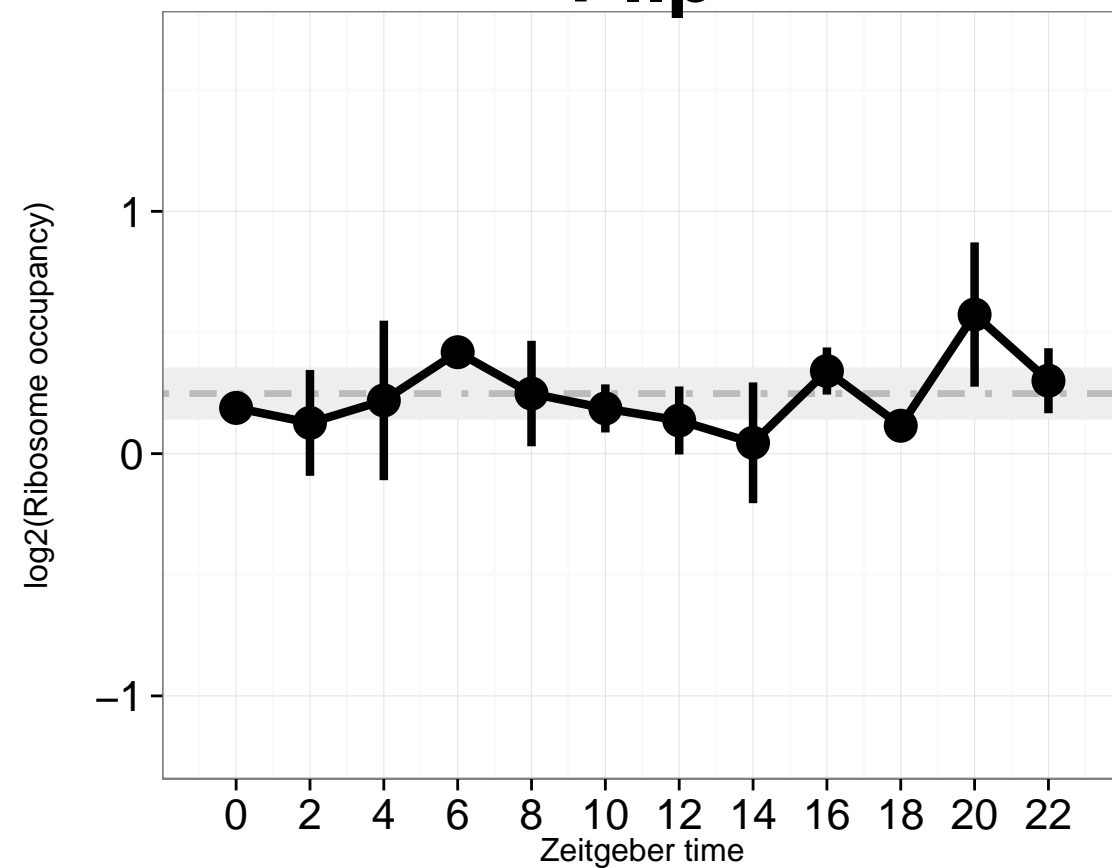

Supplement: Supplementary file 8923 [file 1]

## Gm17545

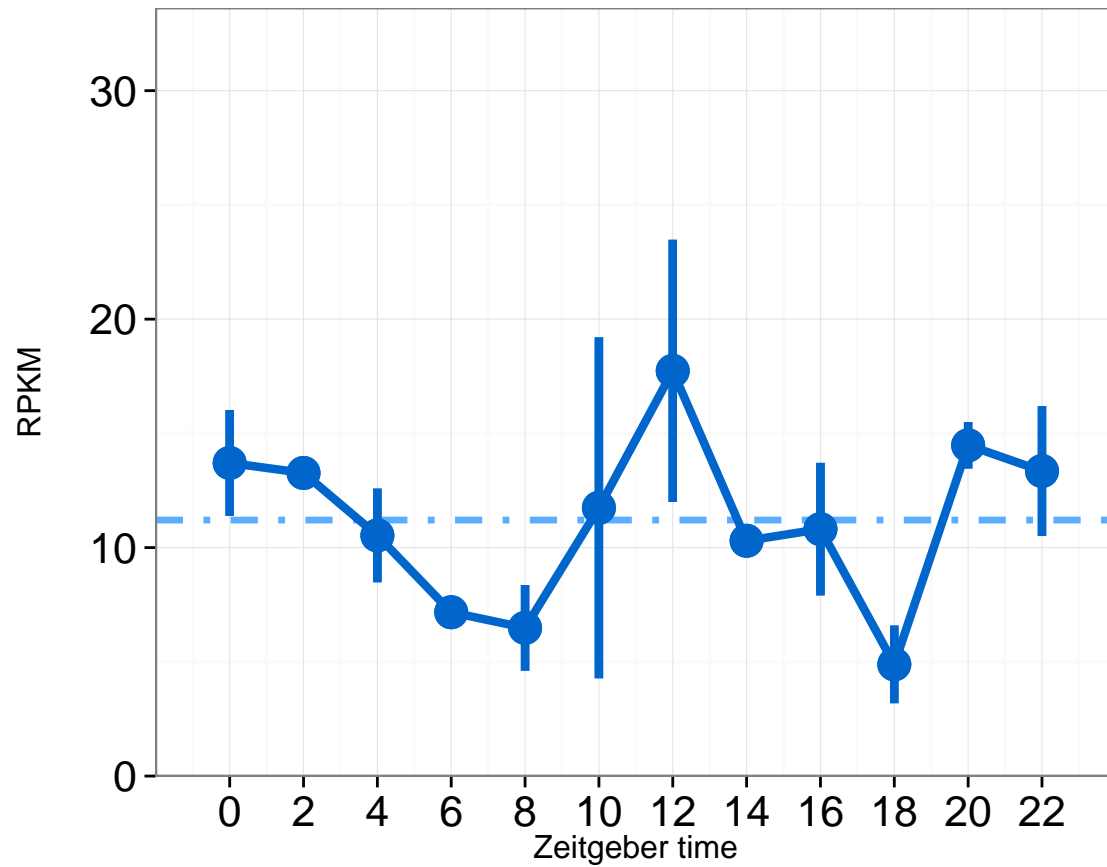

## Gm17545 log2(Ribosome occupancy)

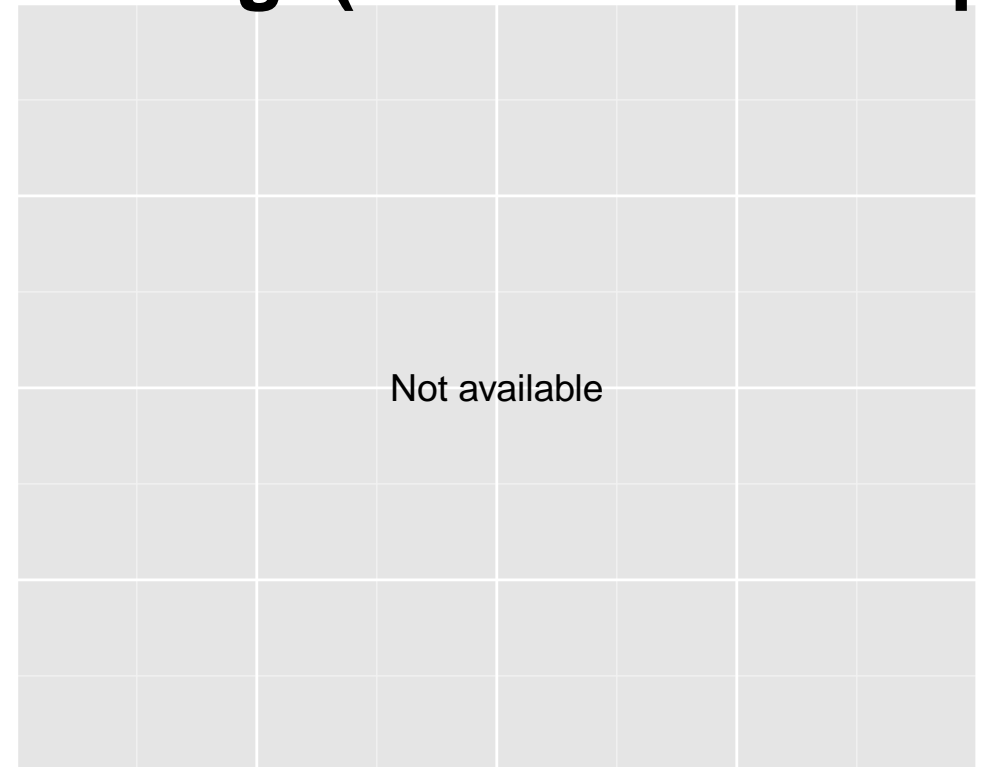

Supplement: Supplementary file 8924 [file 1]

## Gm20594

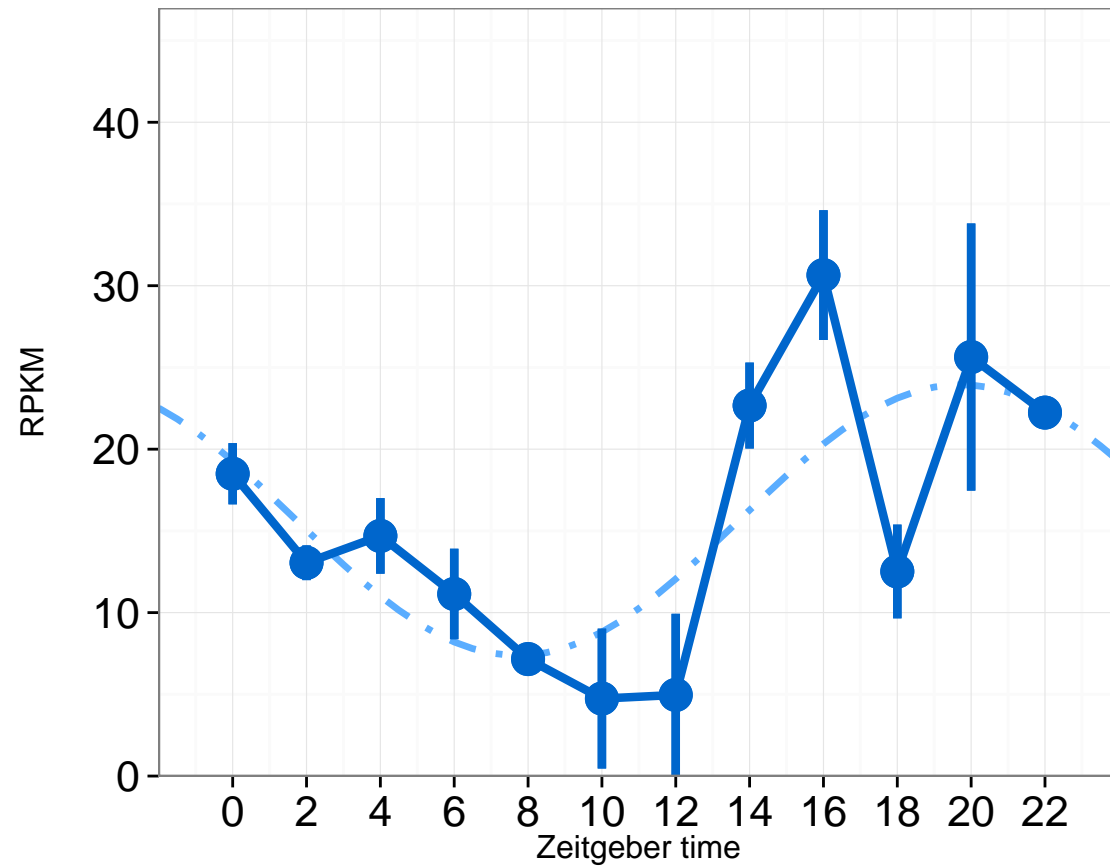

## Gm20594 log2(Ribosome occupancy)

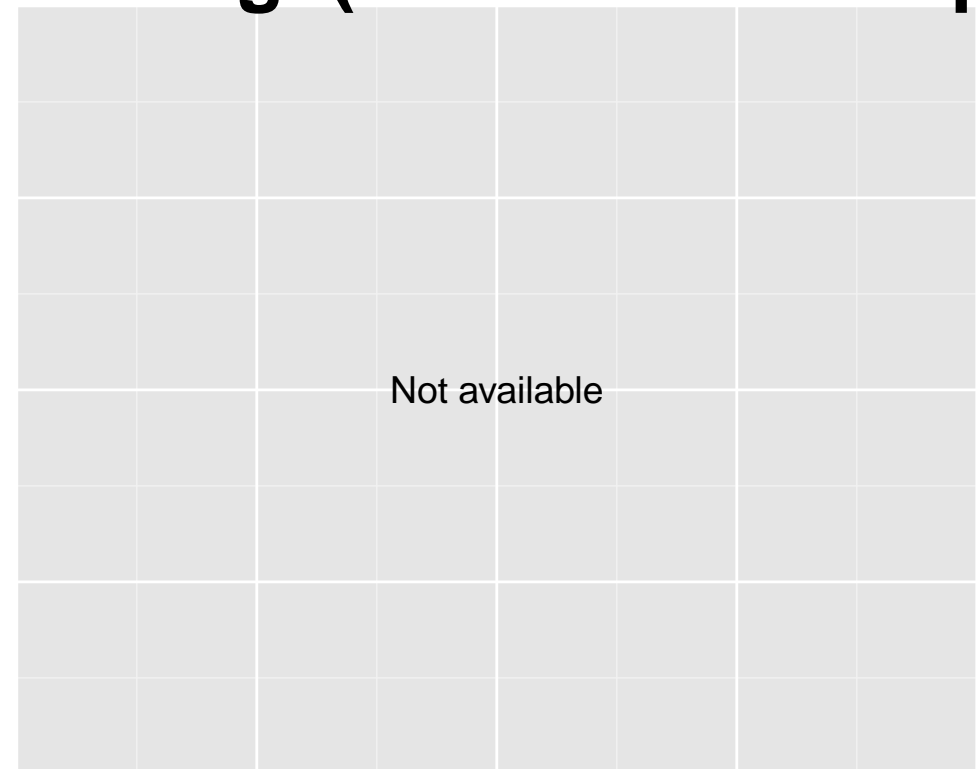

Supplement: Supplementary file 8925 [file 1]

## Ush1c

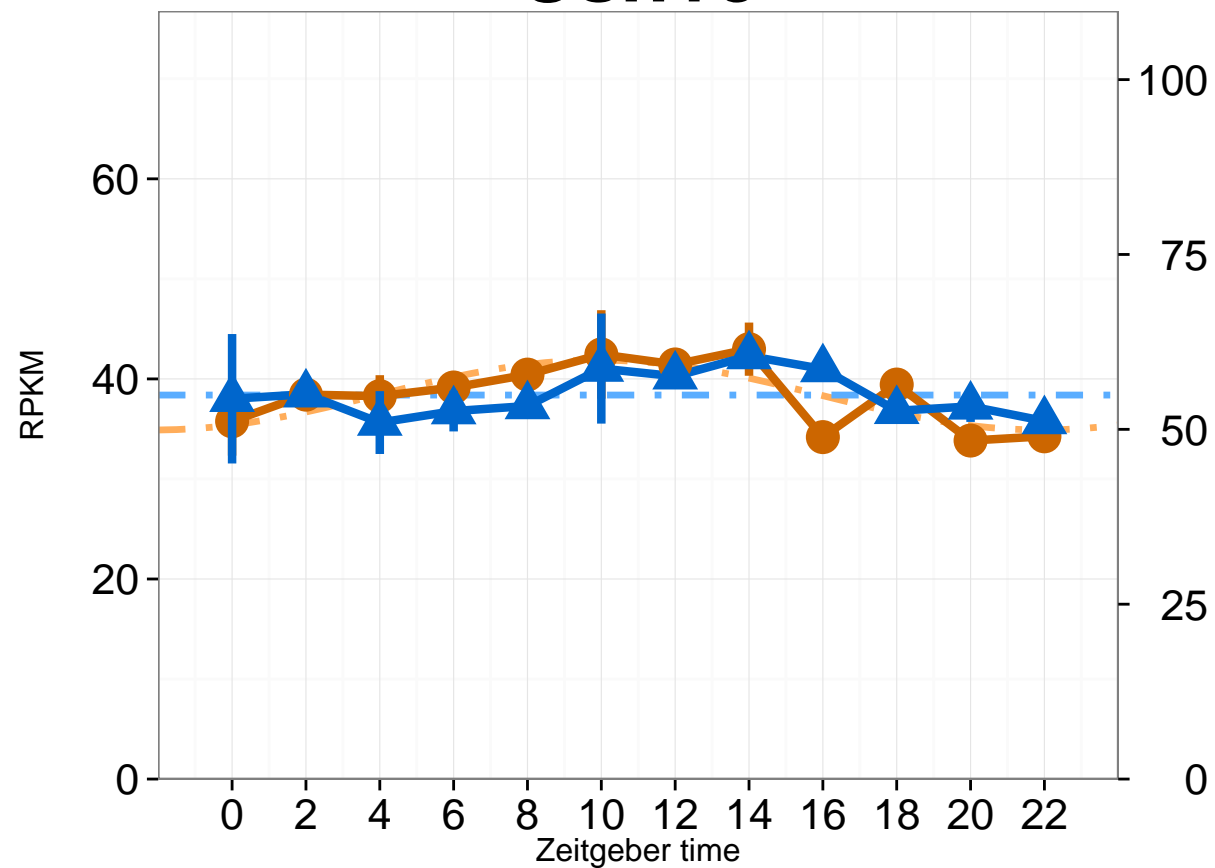

## Ush1c

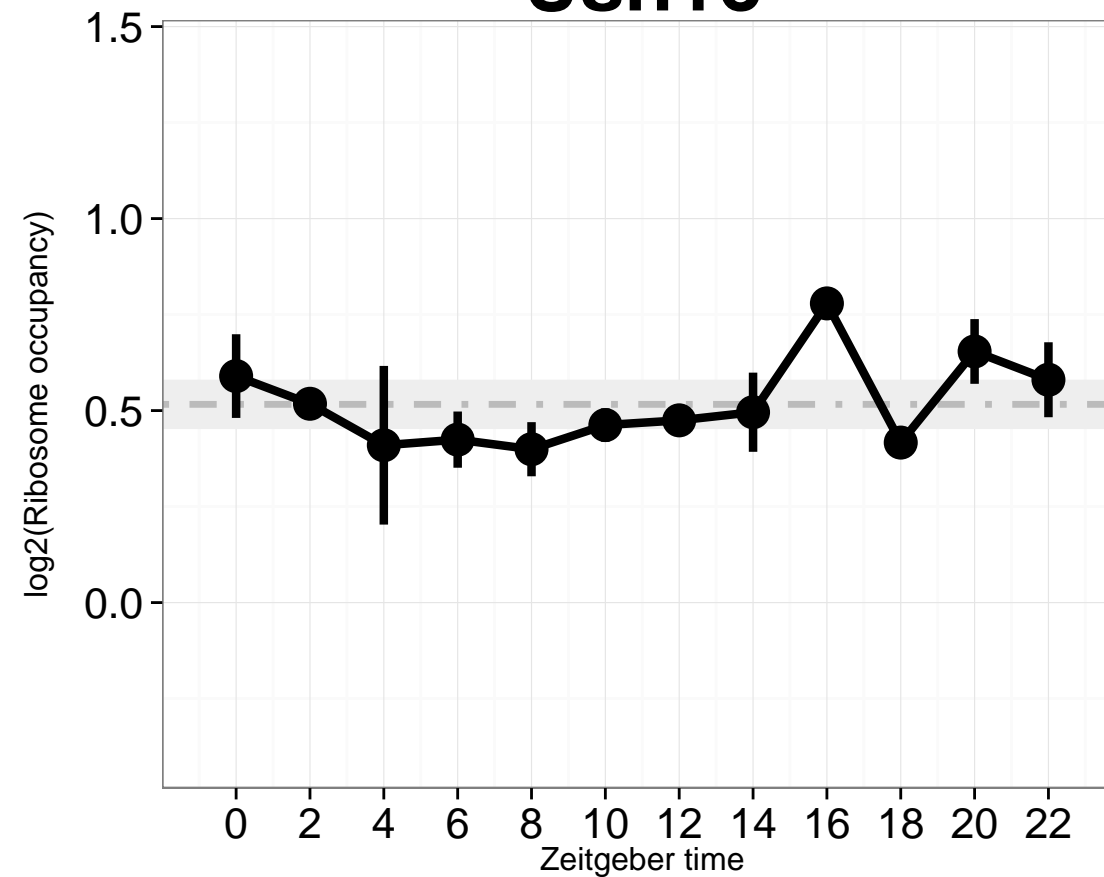

Supplement: Supplementary file 8926 [file 1]

## Kctd7

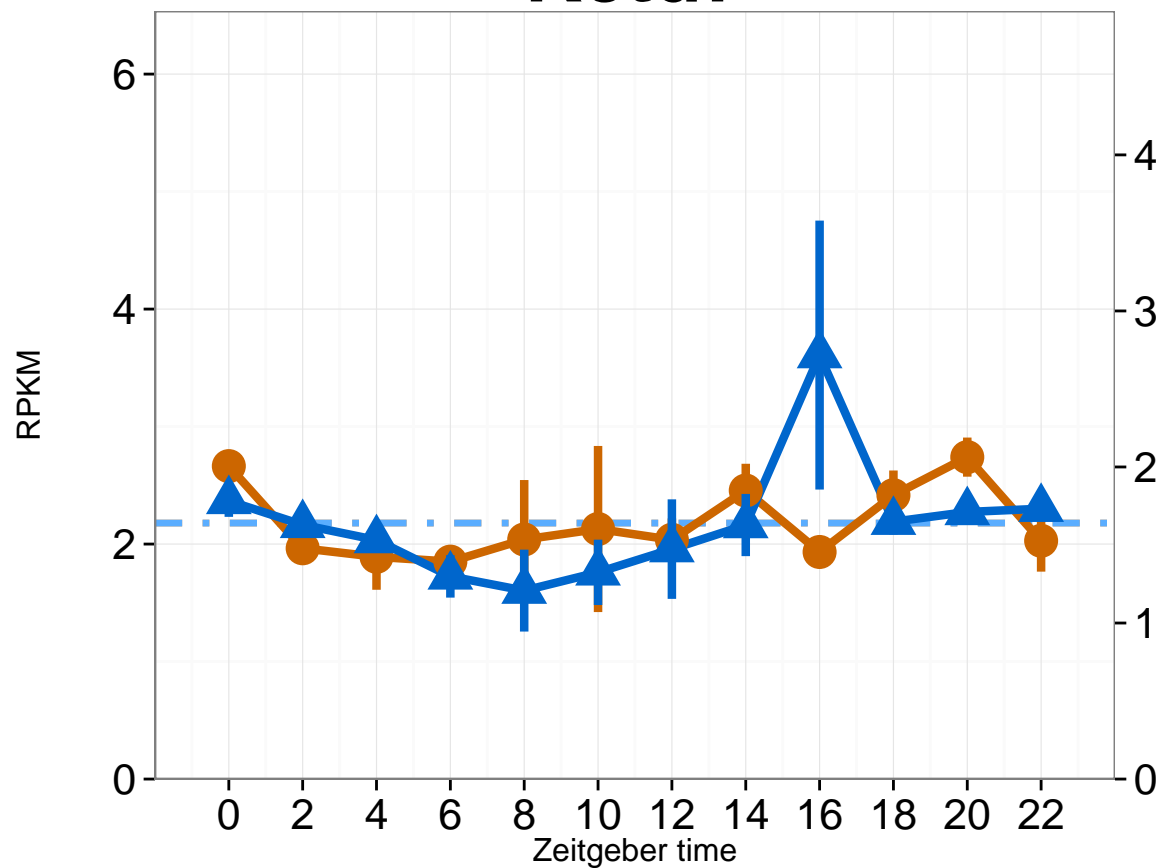

## Kctd7

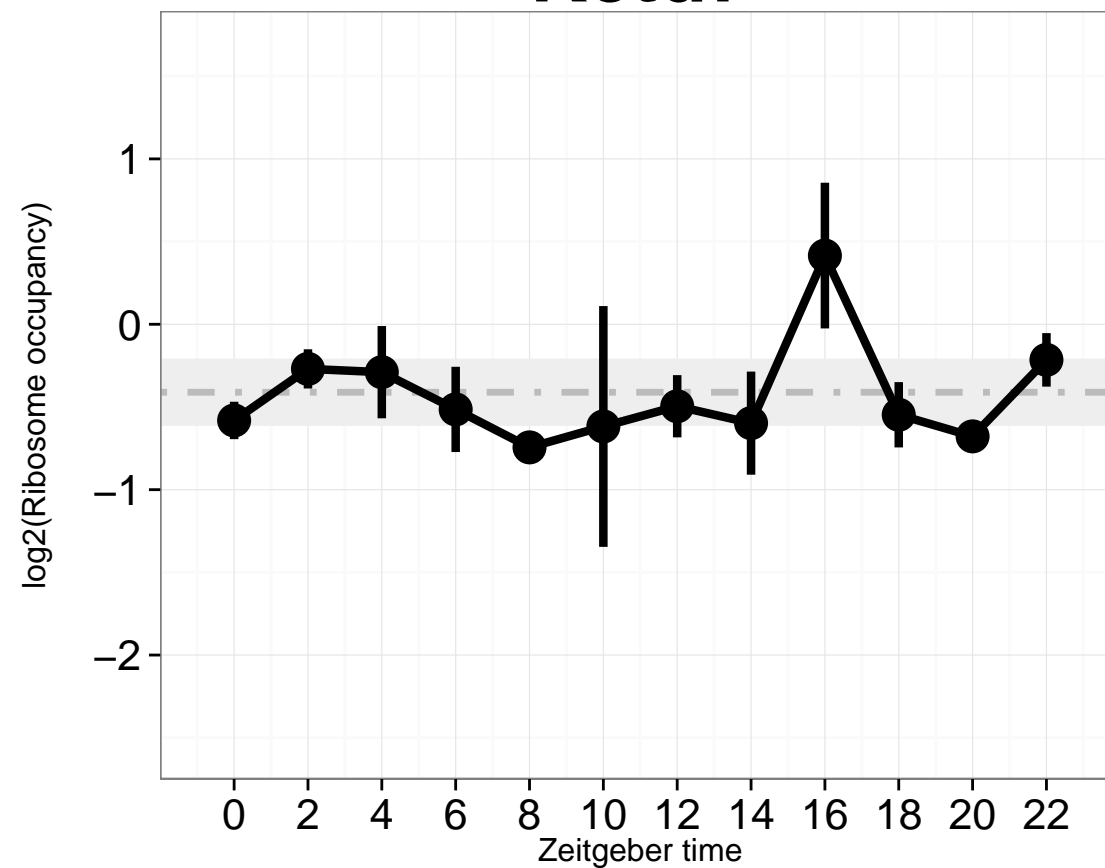

Supplement: Supplementary file 8927 [file 1]

## 4930402H24Rik

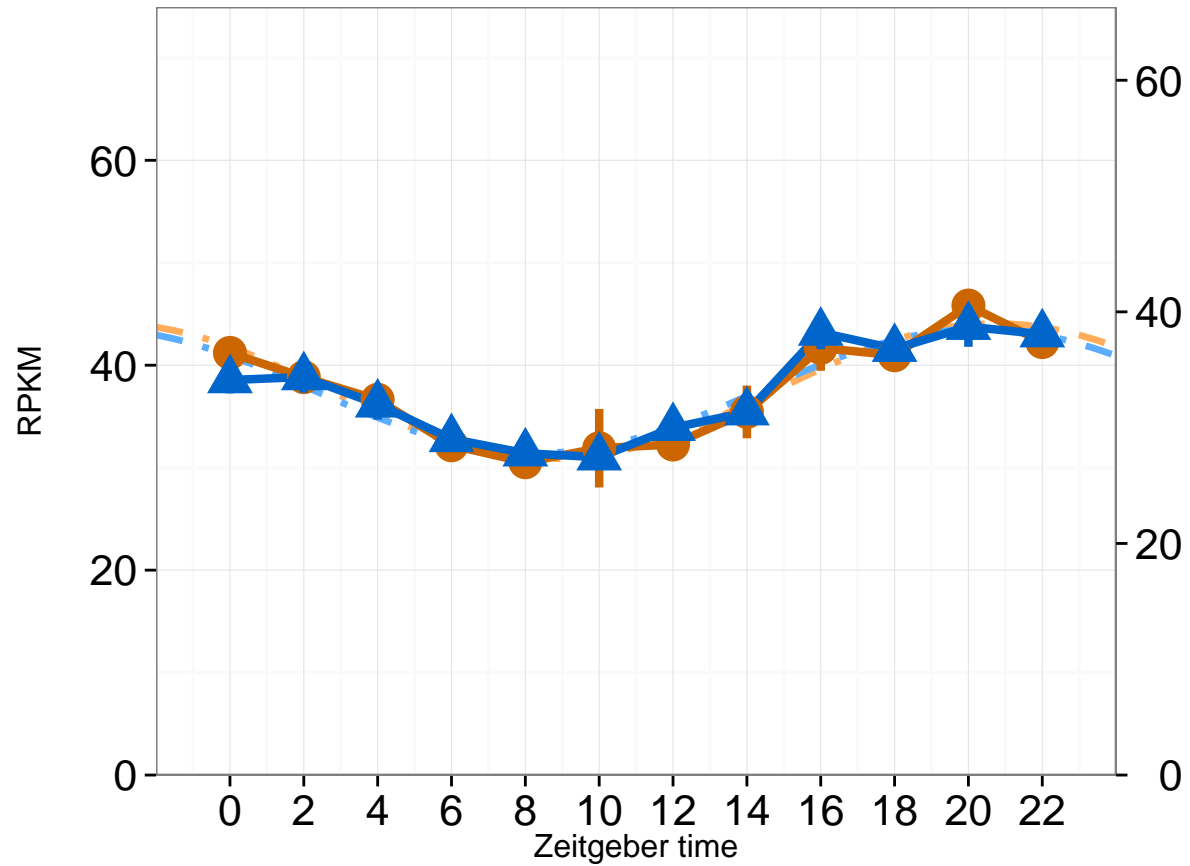

## 4930402H24Rik

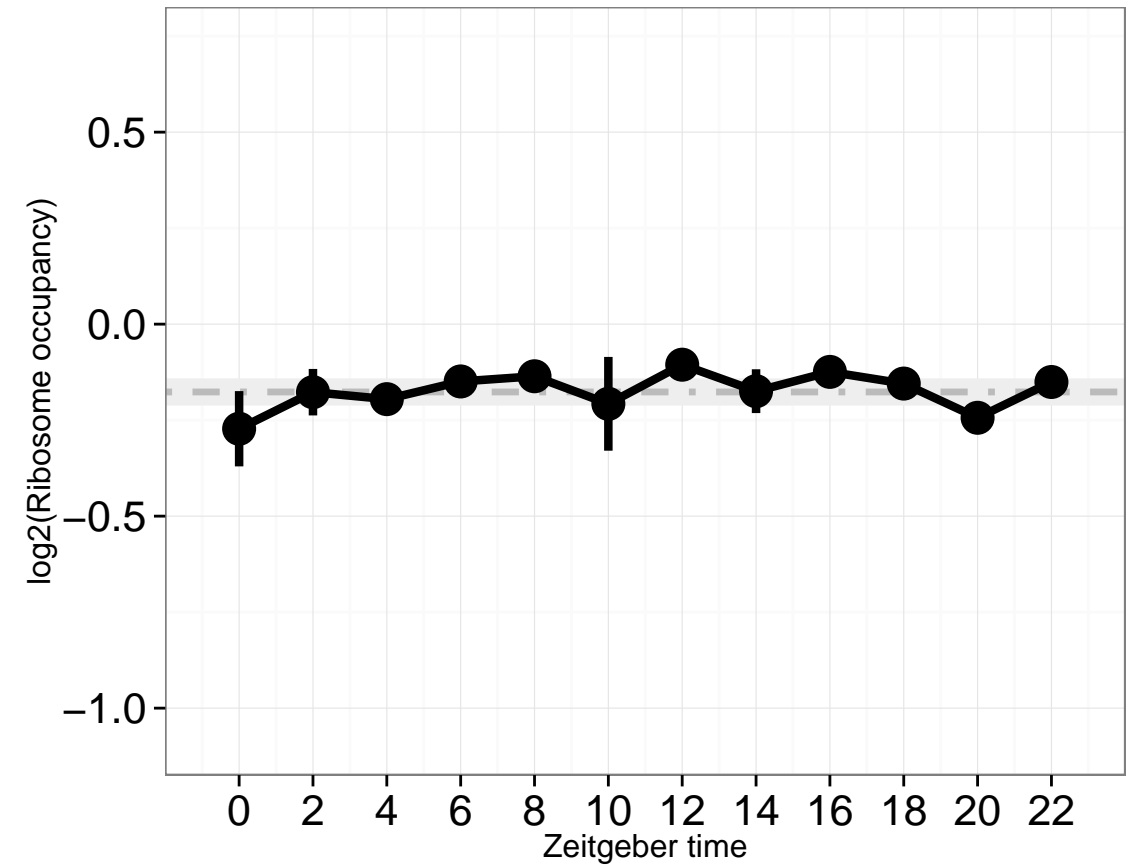

Supplement: Supplementary file 8928 [file 1]

# Mthfd1

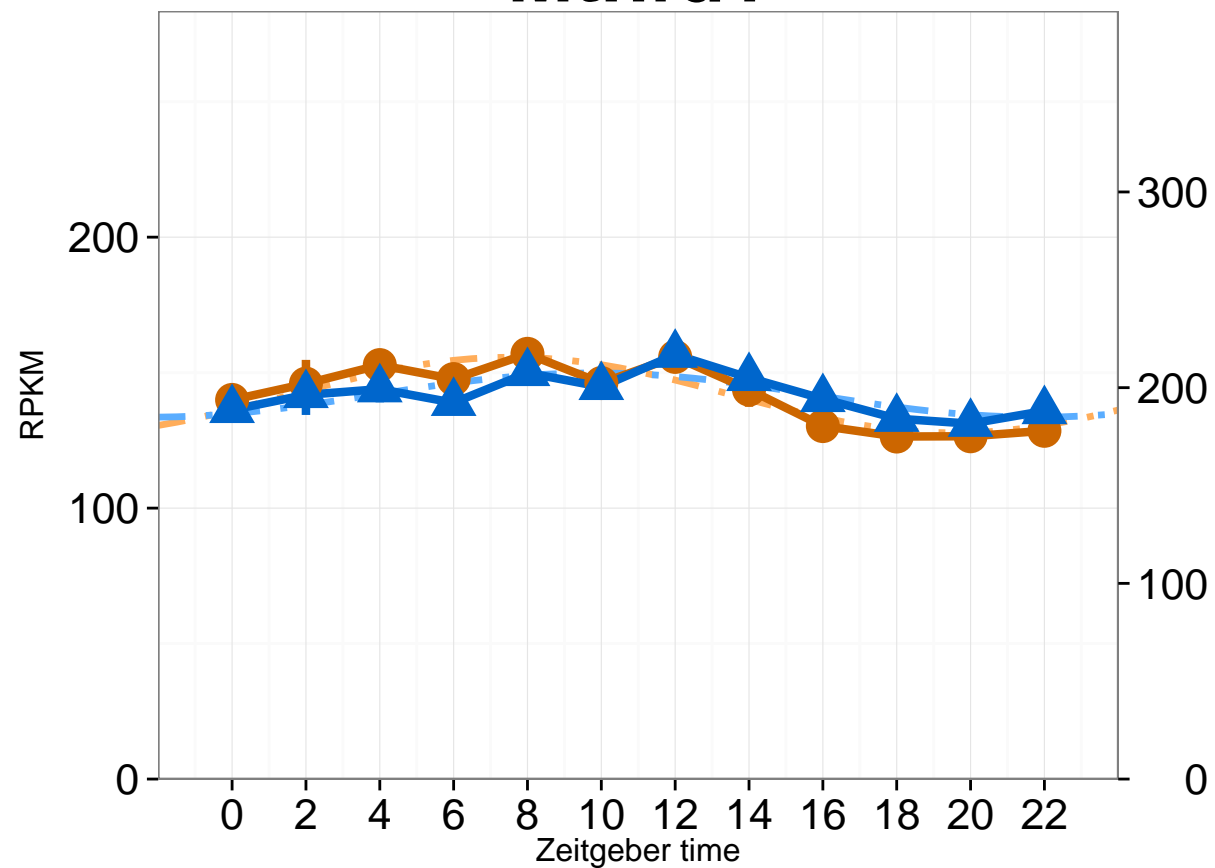

# Mthfd1

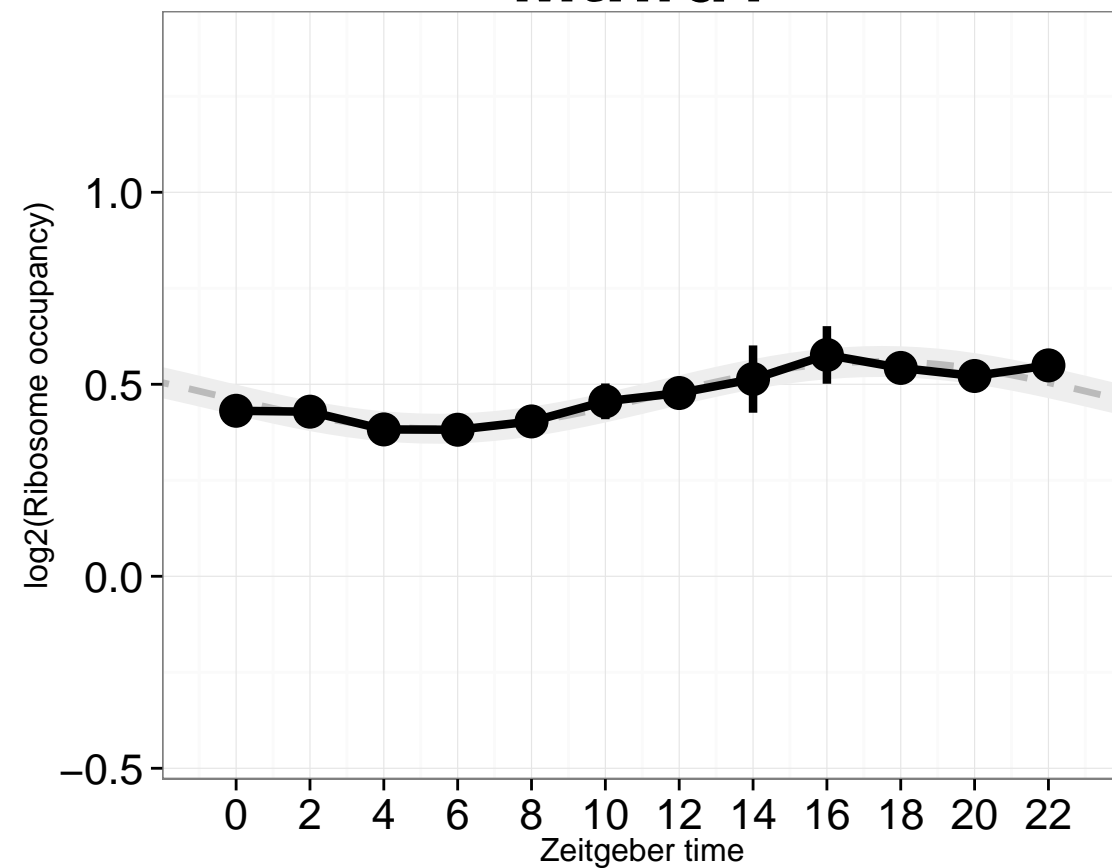

Supplement: Supplementary file 8929 [file 1]

## Ath11

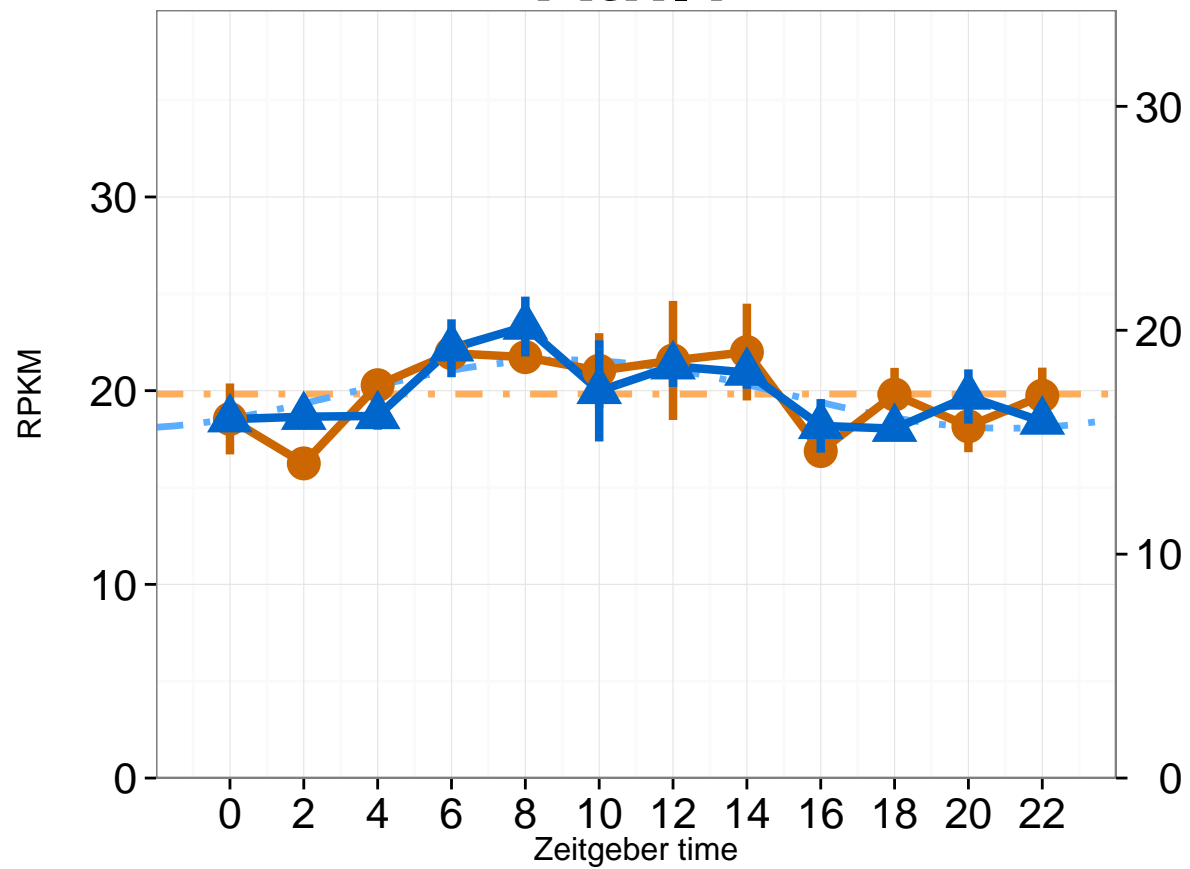

## Ath11

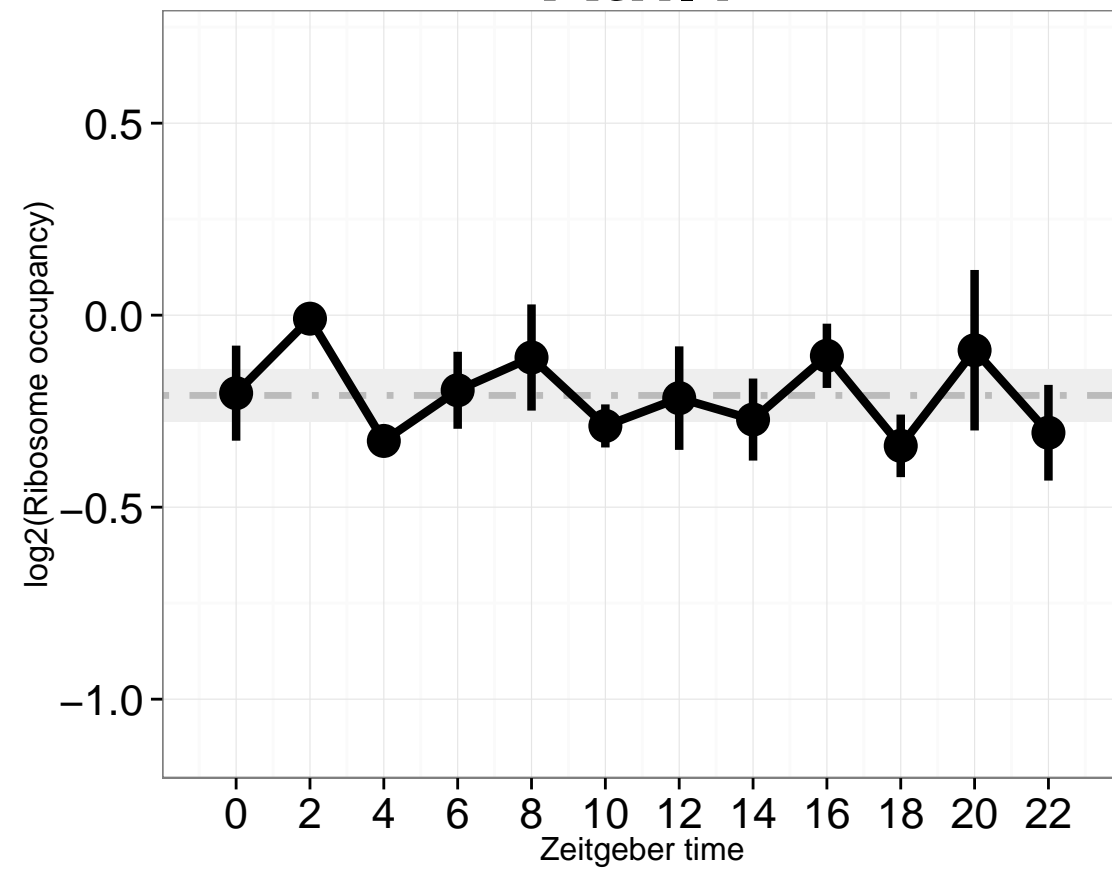

Supplement: Supplementary file 8930 [file 1]

# Tgfb1i1

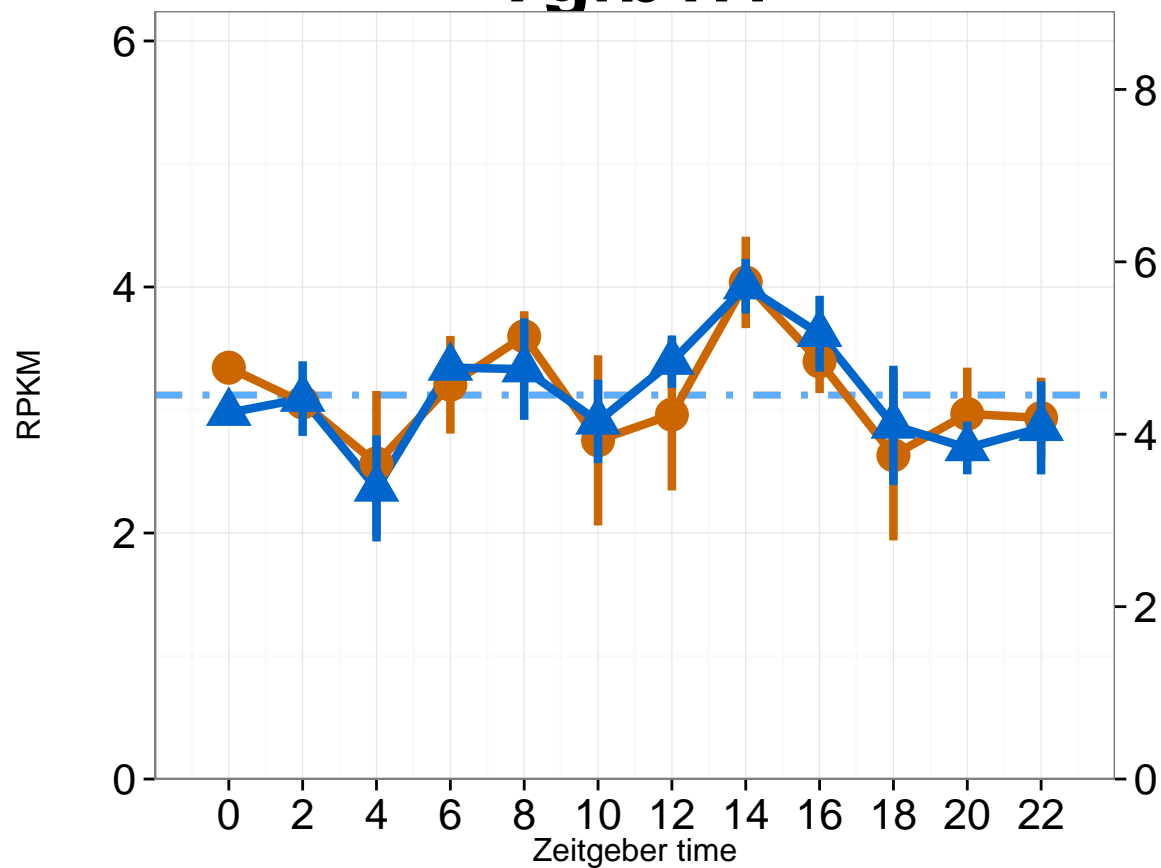

# Tgfb1i1

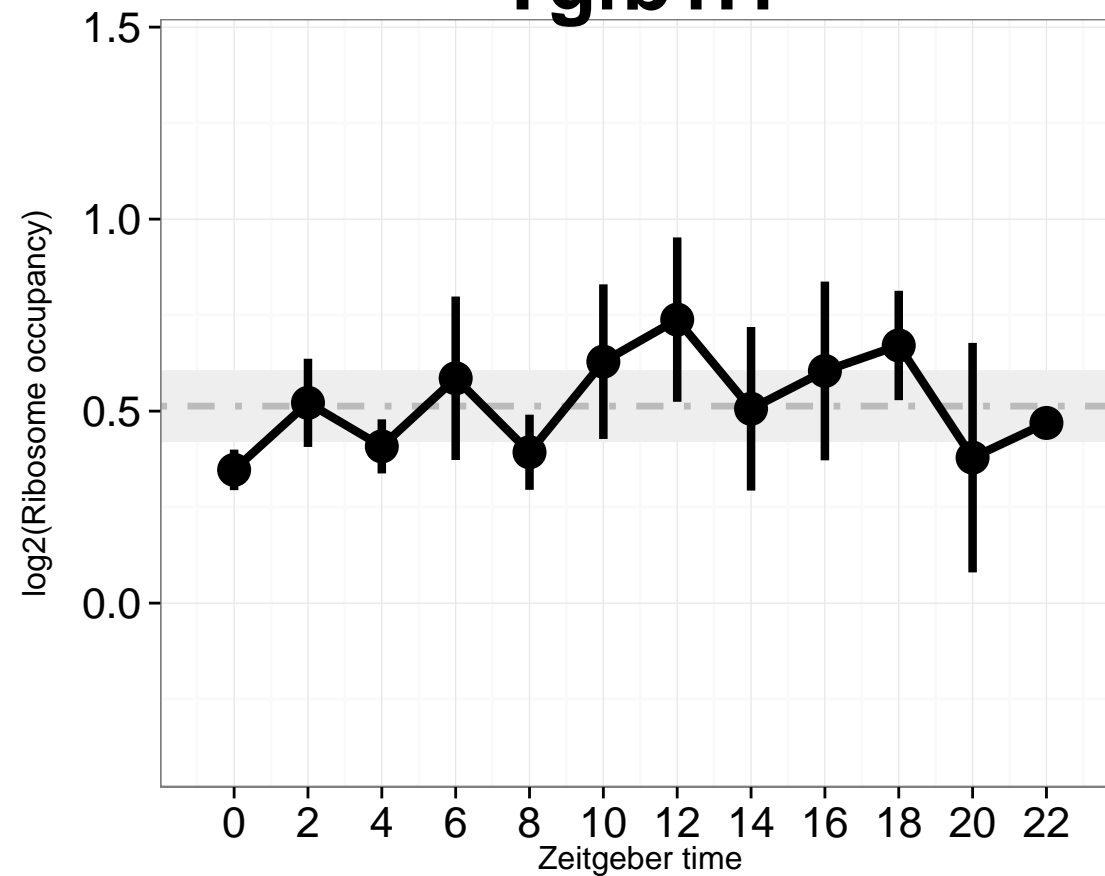

Supplement: Supplementary file 8931 [file 1]
