# Supplementary material (part 90 of 133)
Source: publisher figshare collection journal article supplement (https://springernature.figshare.com/articles/dataset/_/4903193)

## Eno2

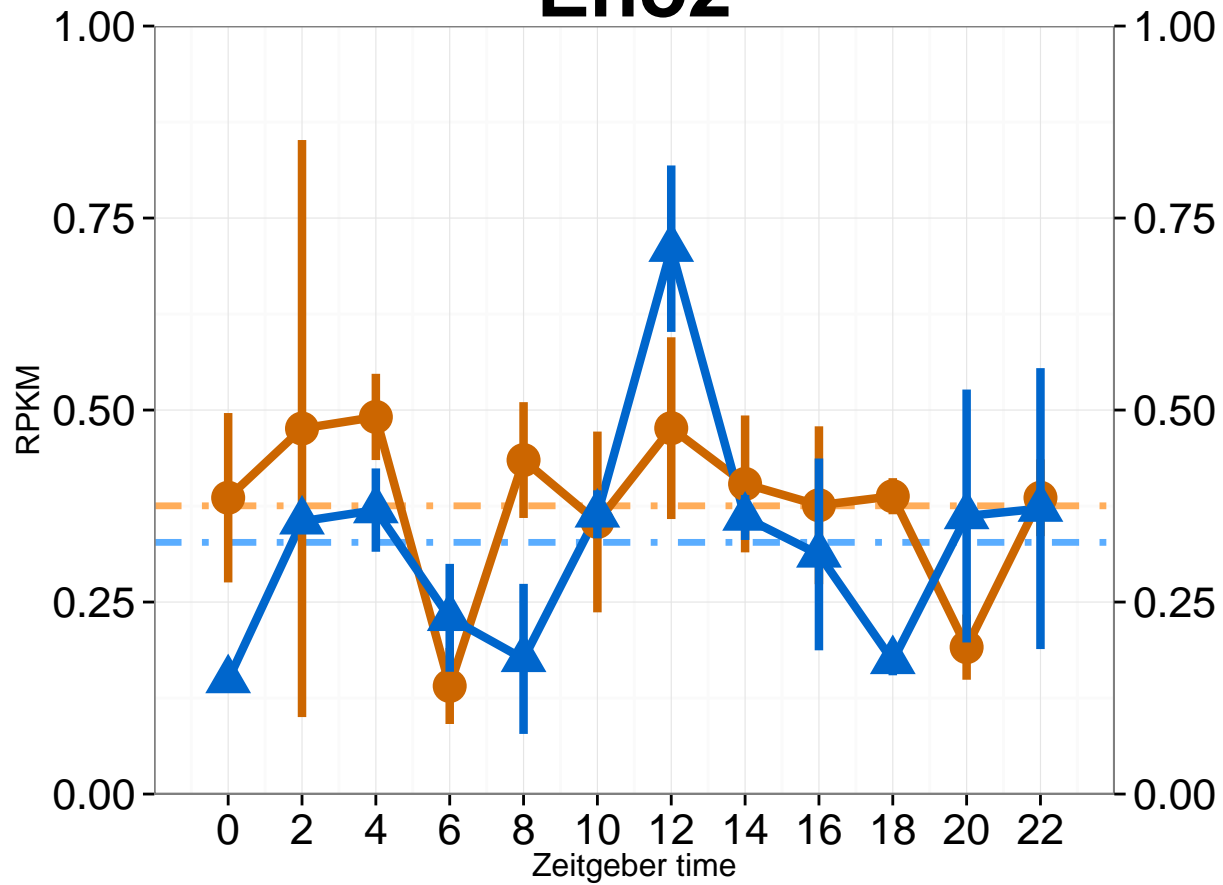

## Eno2

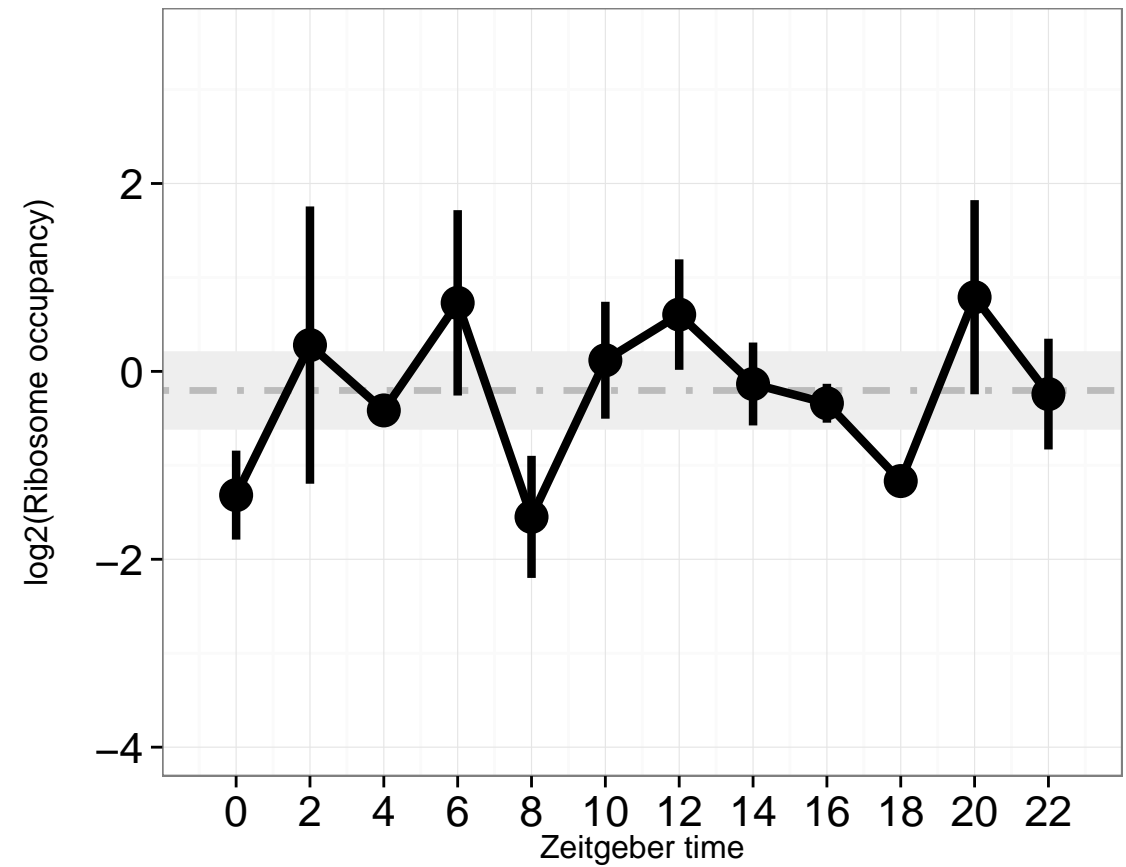

Supplement: Supplementary file 8932 [file 1]

## Braf

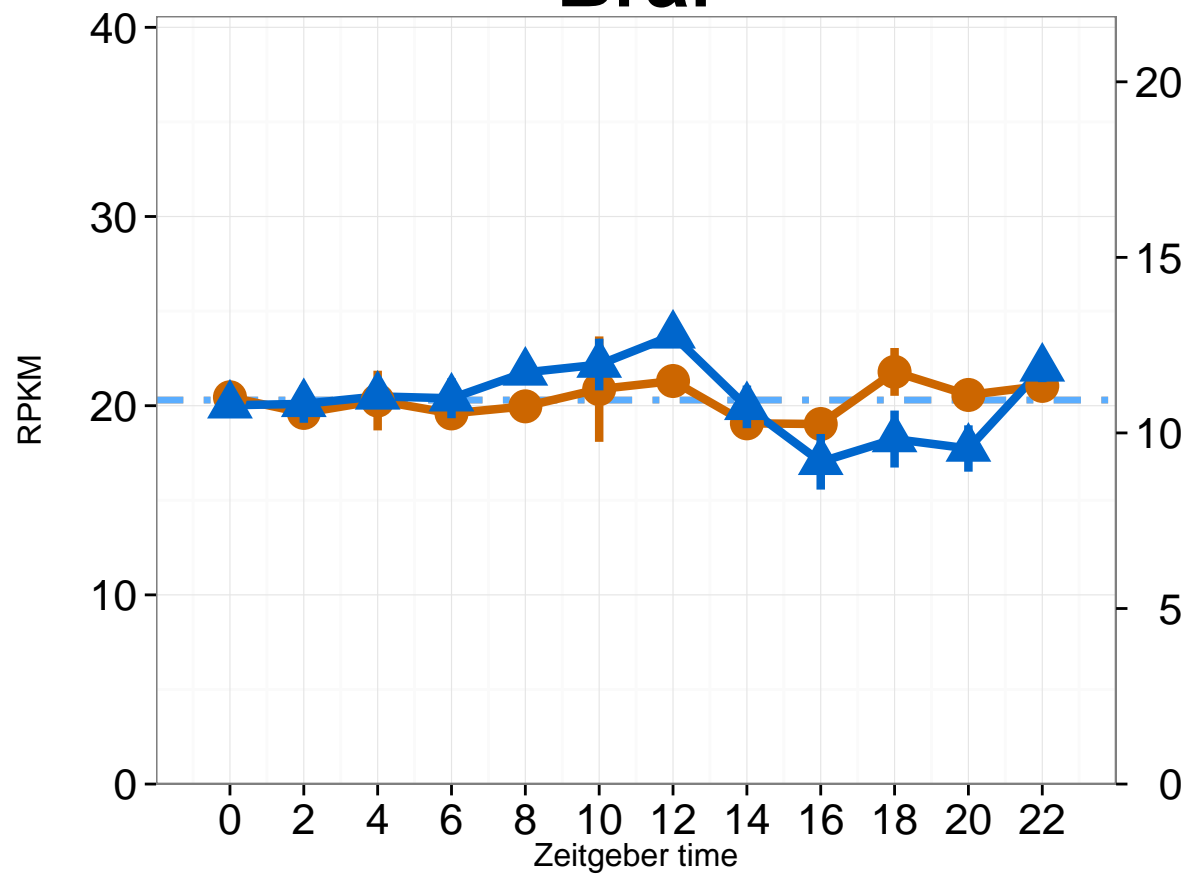

## Braf

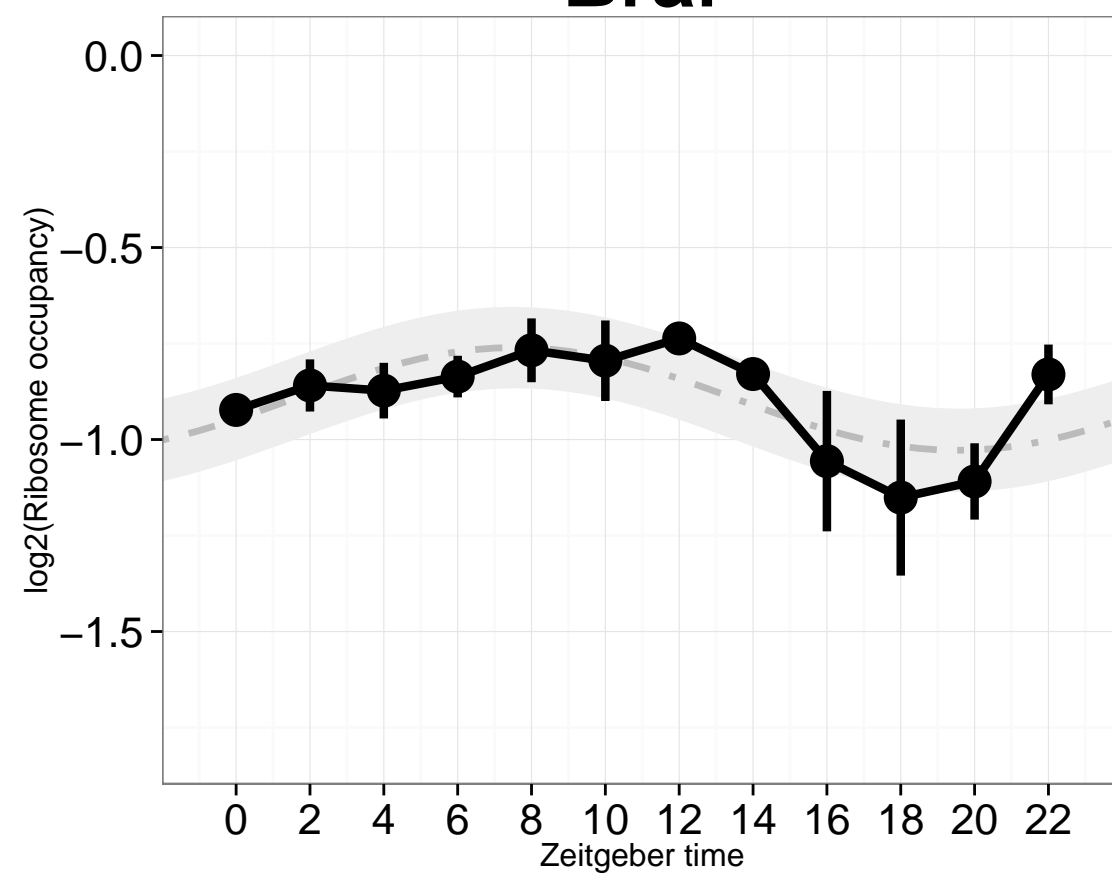

Supplement: Supplementary file 8933 [file 1]

# Tuba4a

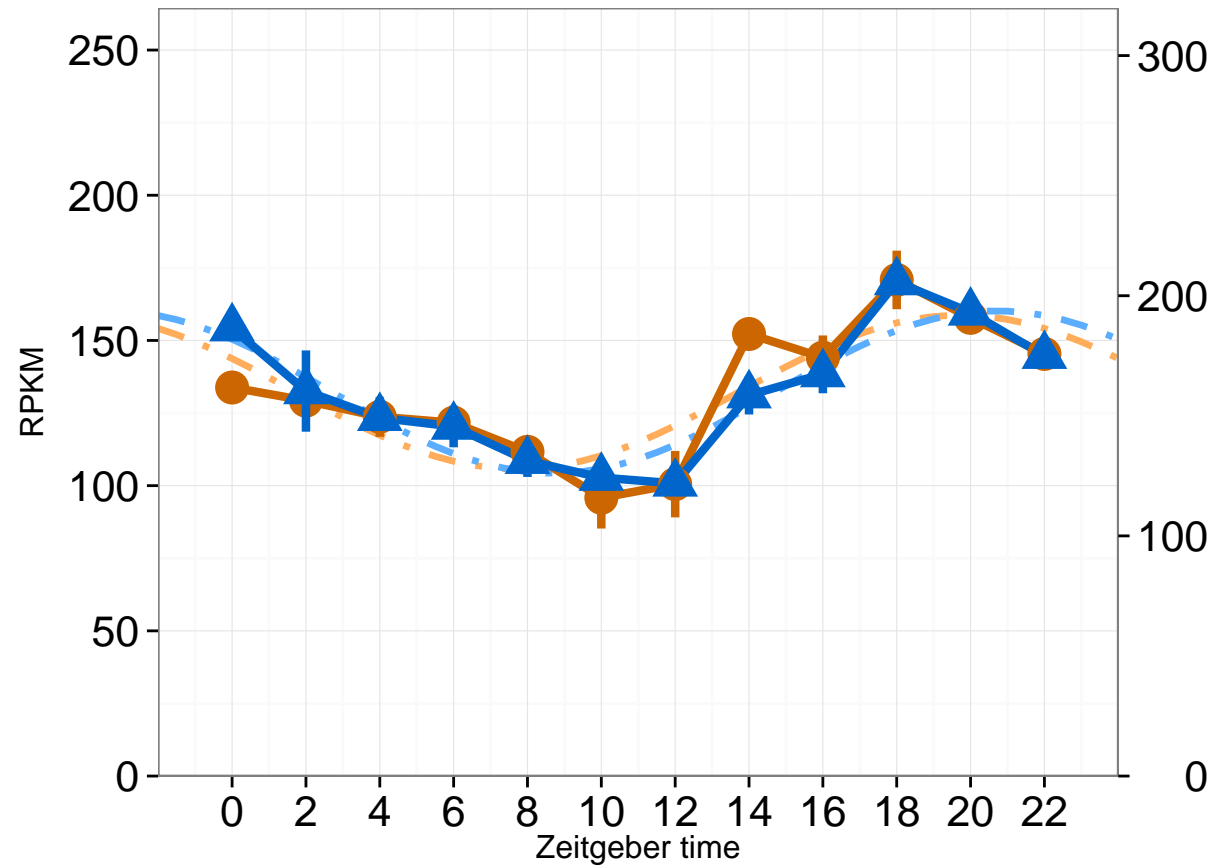

# Tuba4a

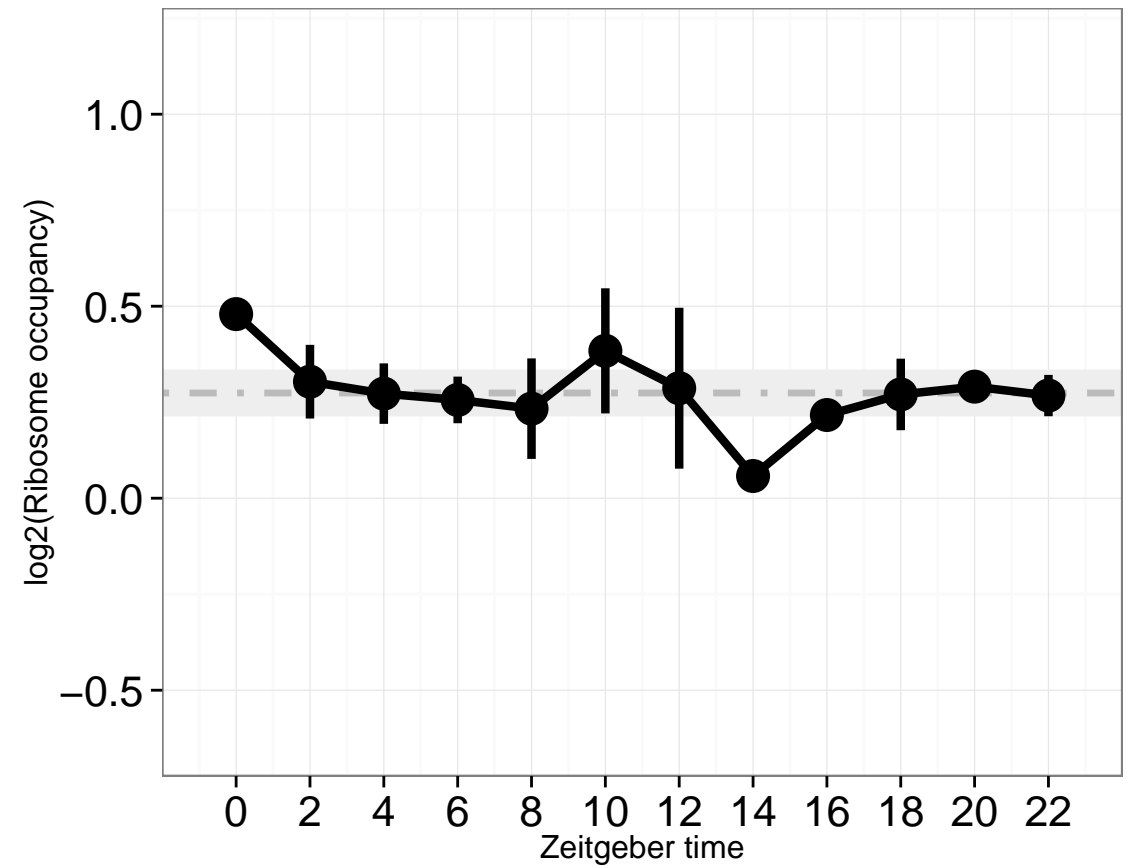

Supplement: Supplementary file 8934 [file 1]

# Ubxn2a

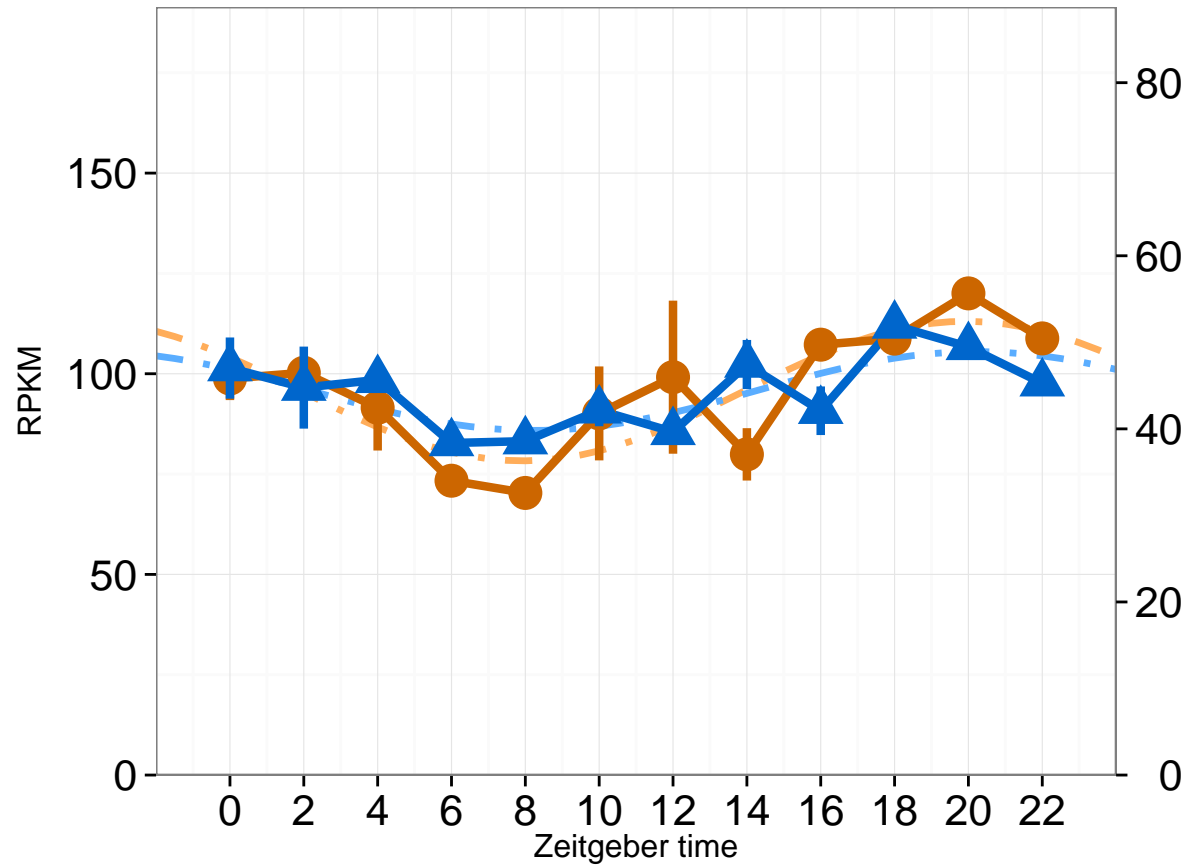

# Ubxn2a

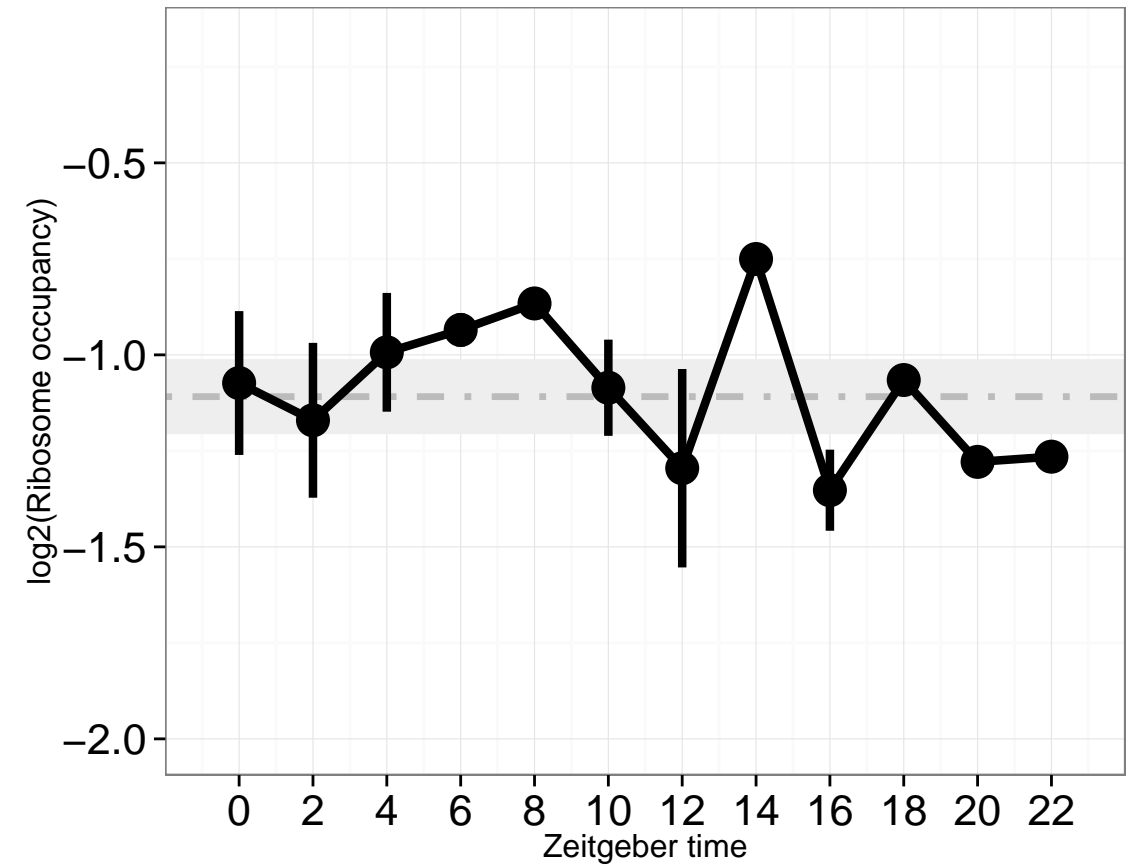

Supplement: Supplementary file 8935 [file 1]

# Ttc18

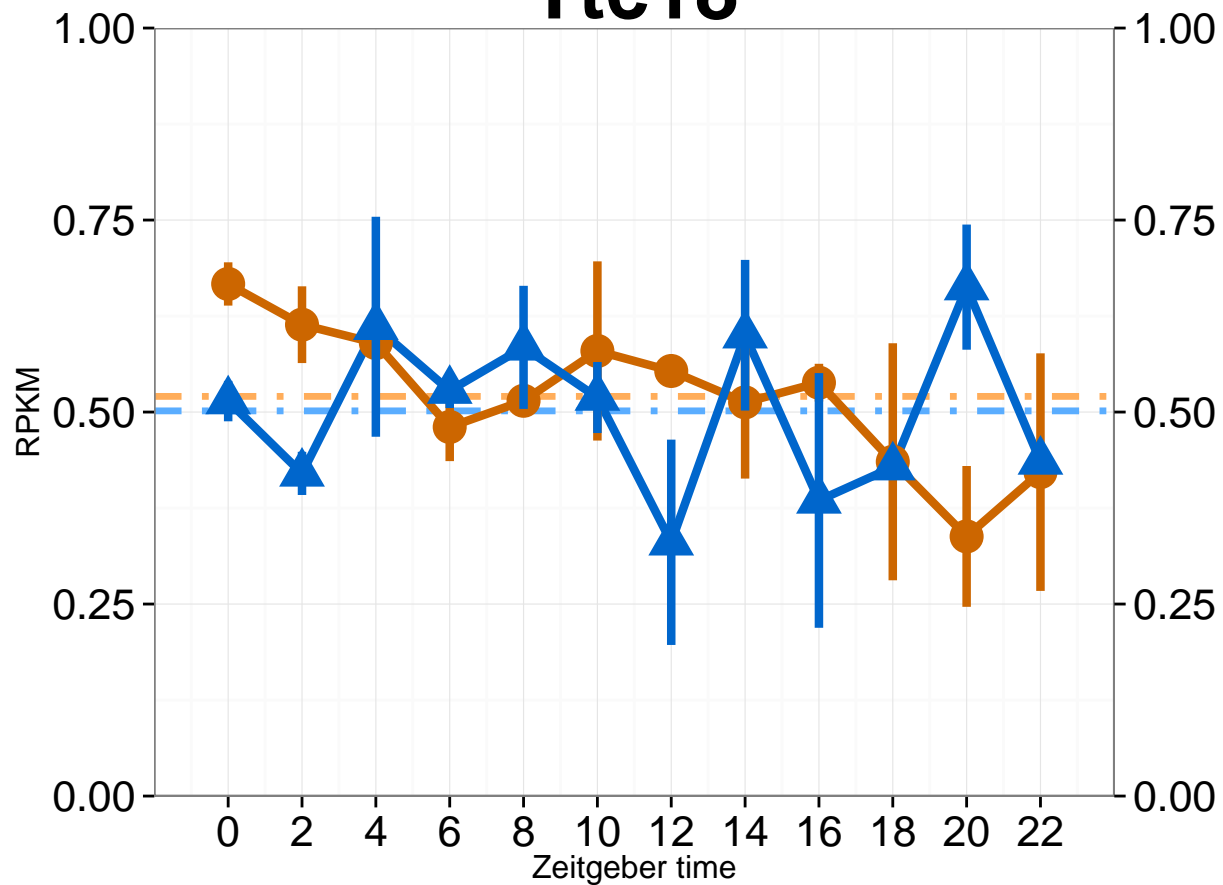

# Ttc18

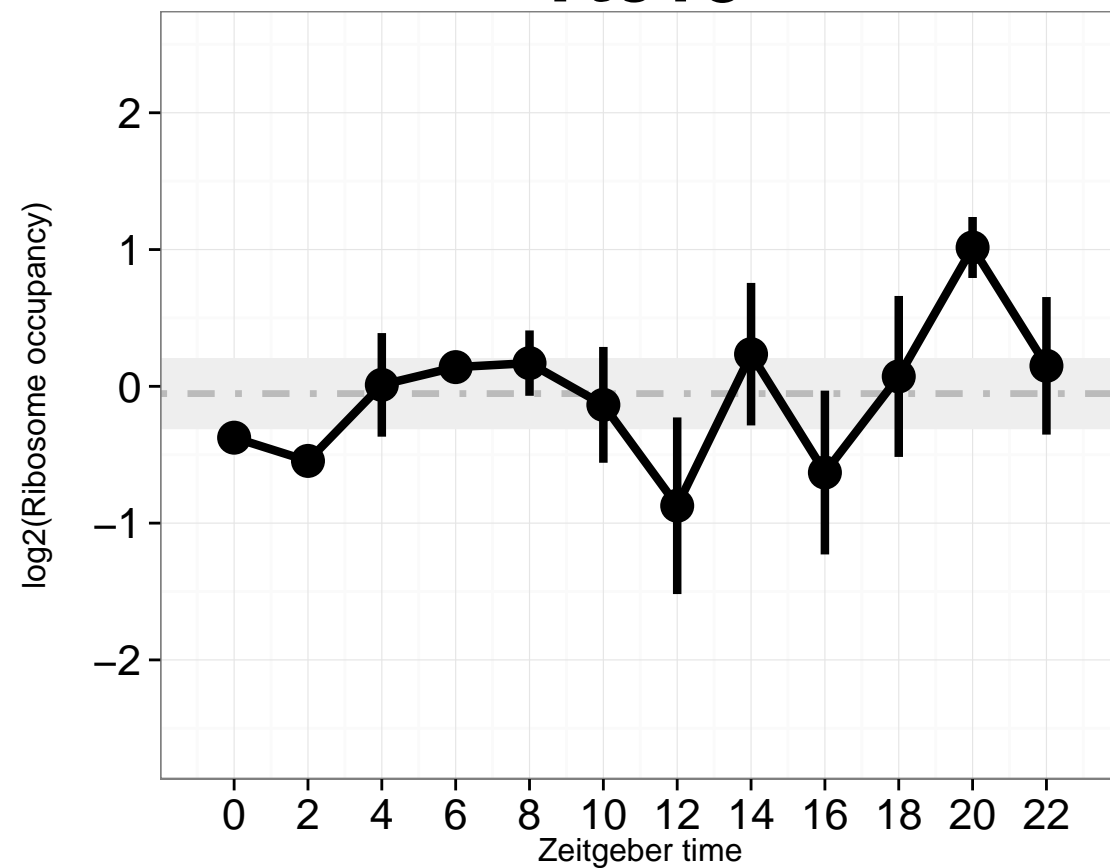

Supplement: Supplementary file 8936 [file 1]

## Slc4a4

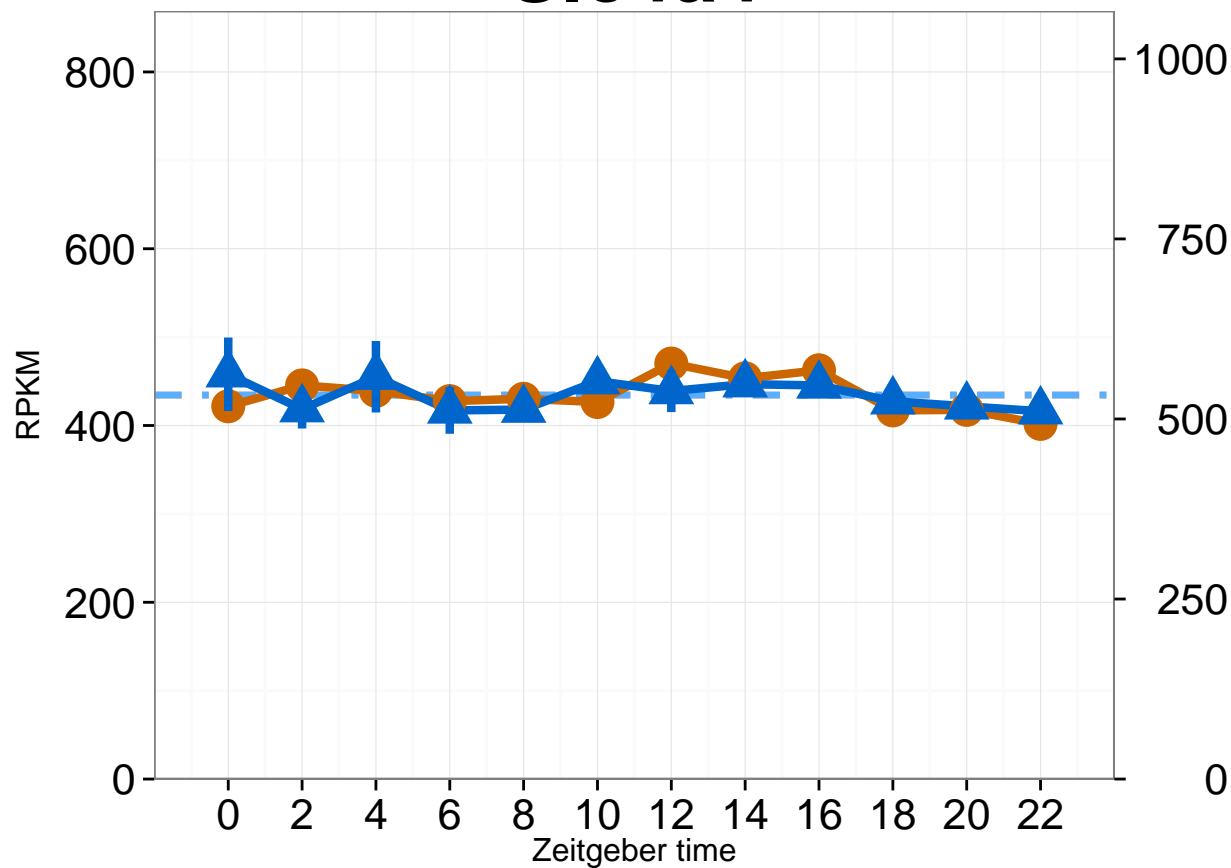

## Slc4a4

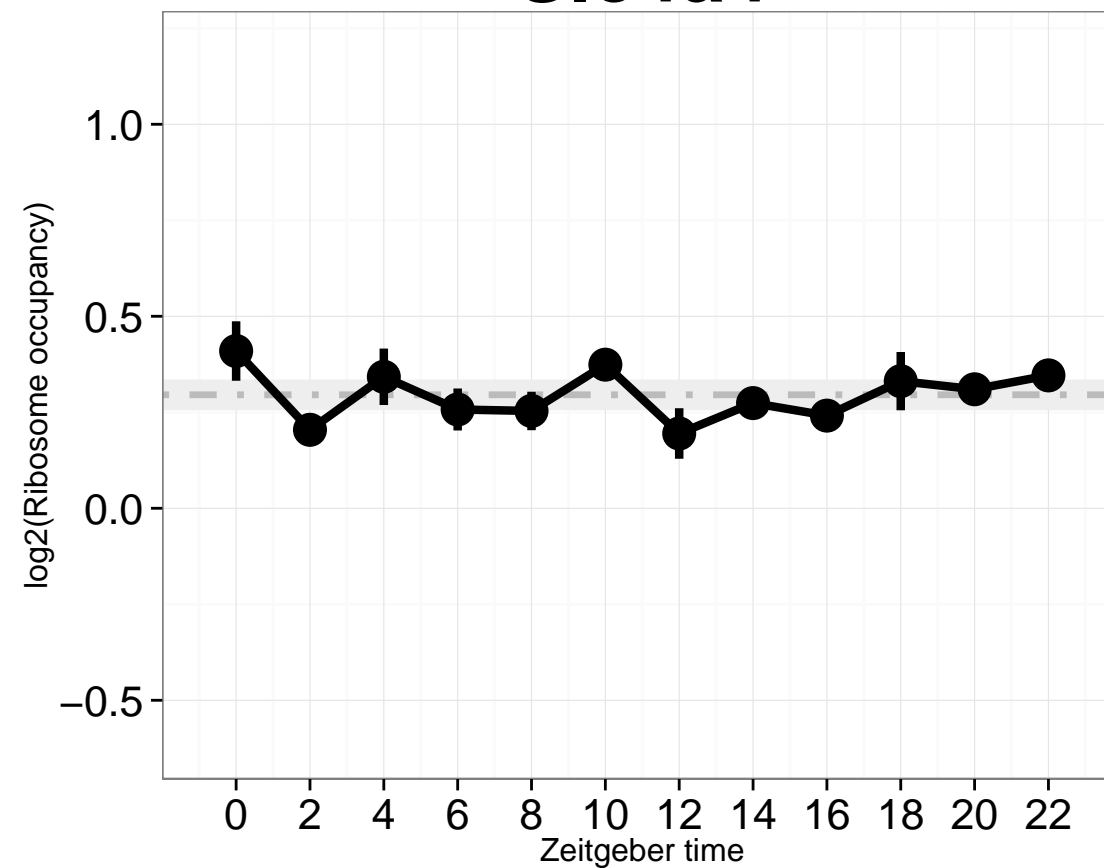

Supplement: Supplementary file 8937 [file 1]

## Pah

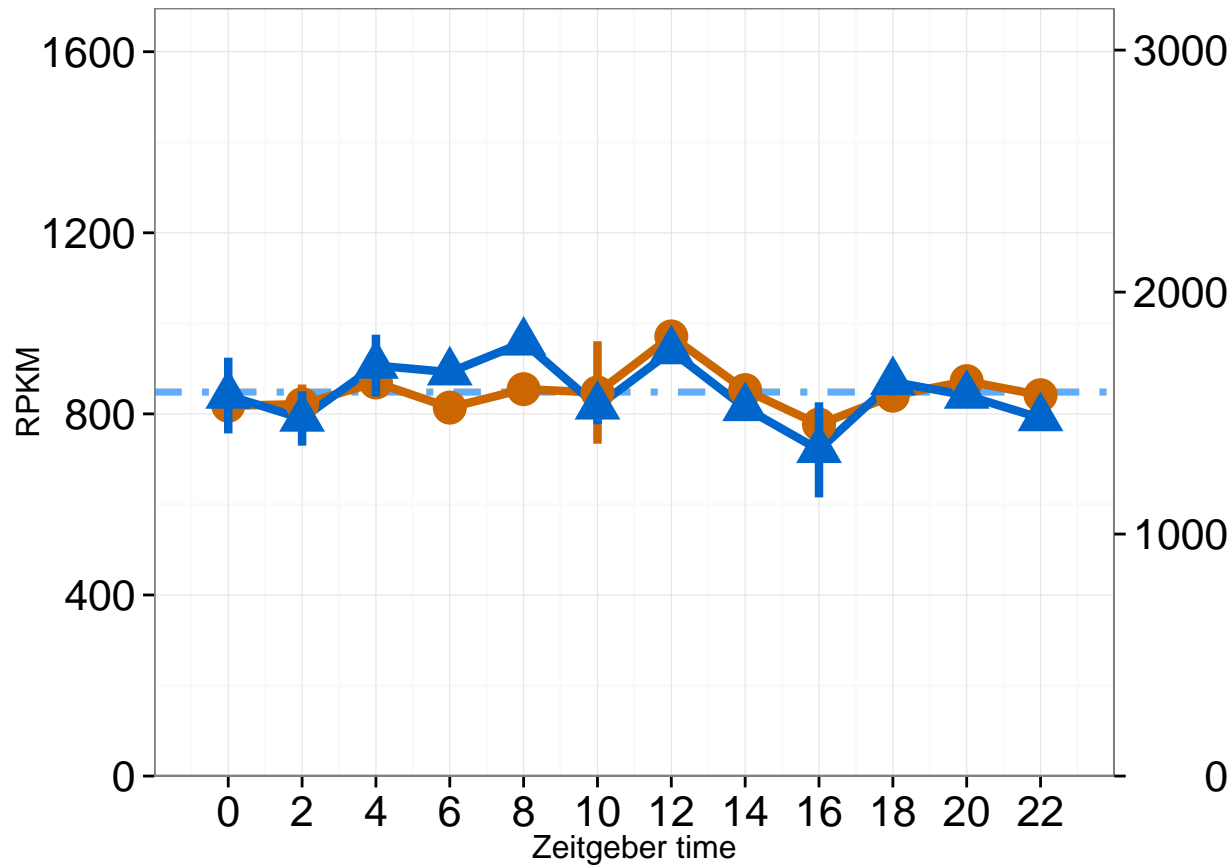

## Pah

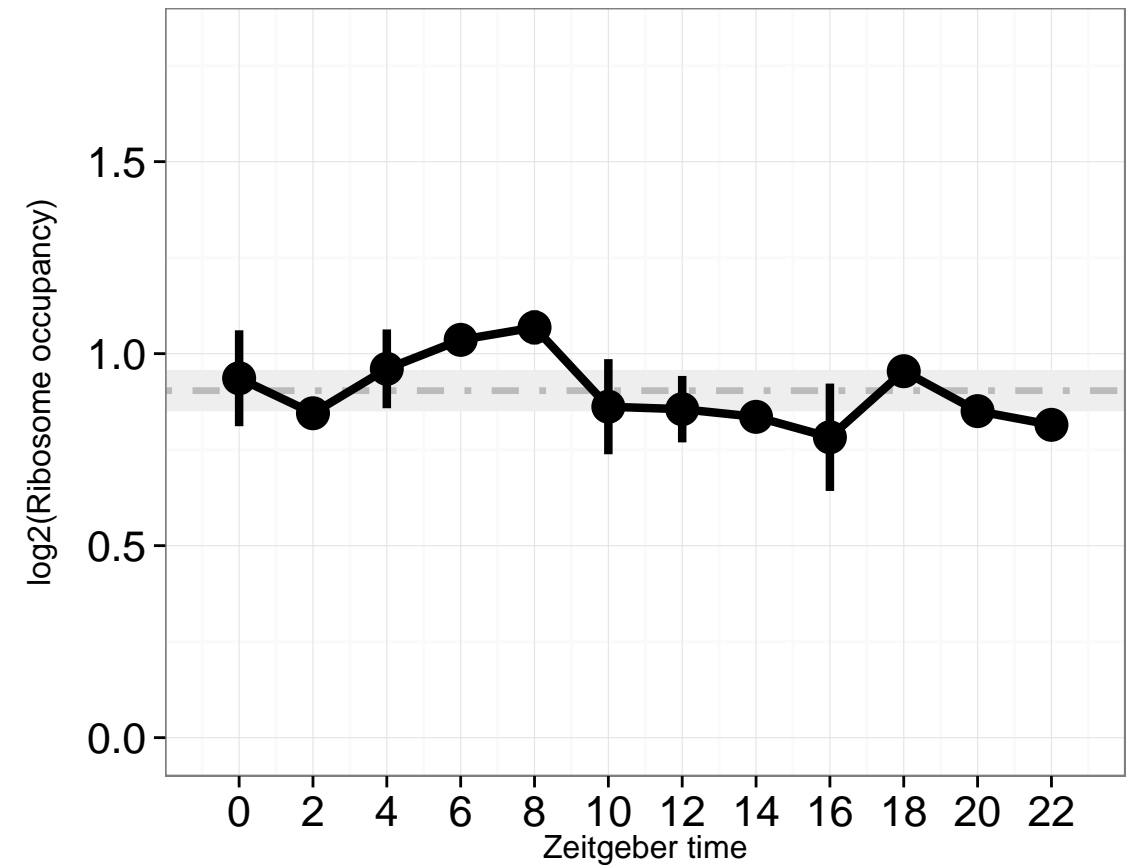

Supplement: Supplementary file 8938 [file 1]

## Rab7l1

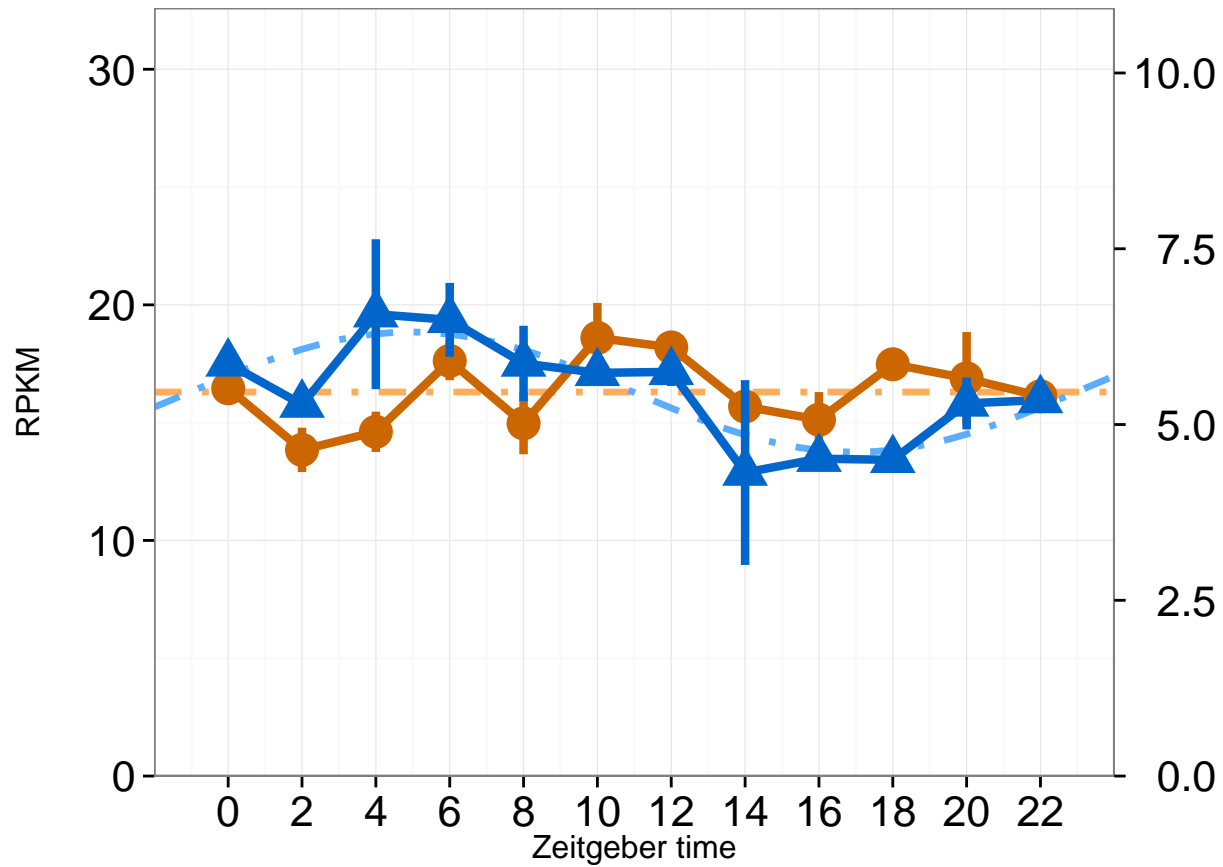

## Rab7l1

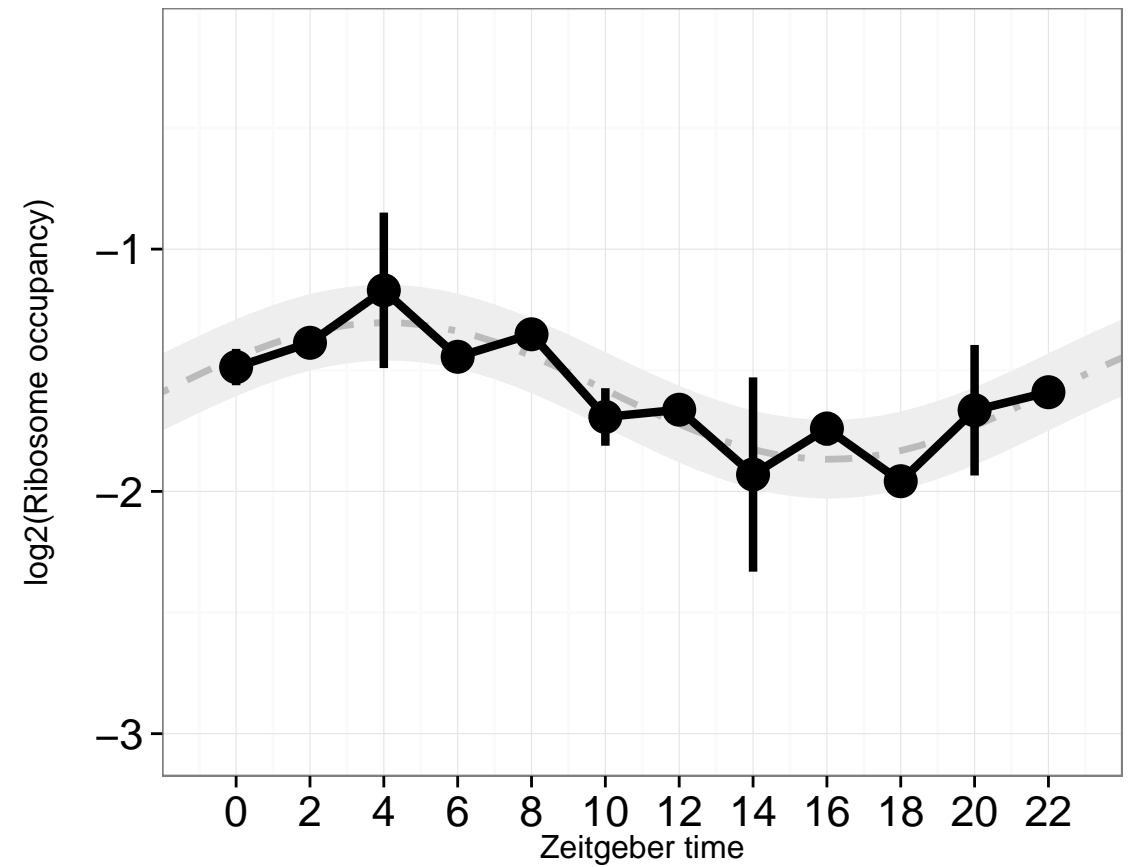

Supplement: Supplementary file 8939 [file 1]

# Mapk4

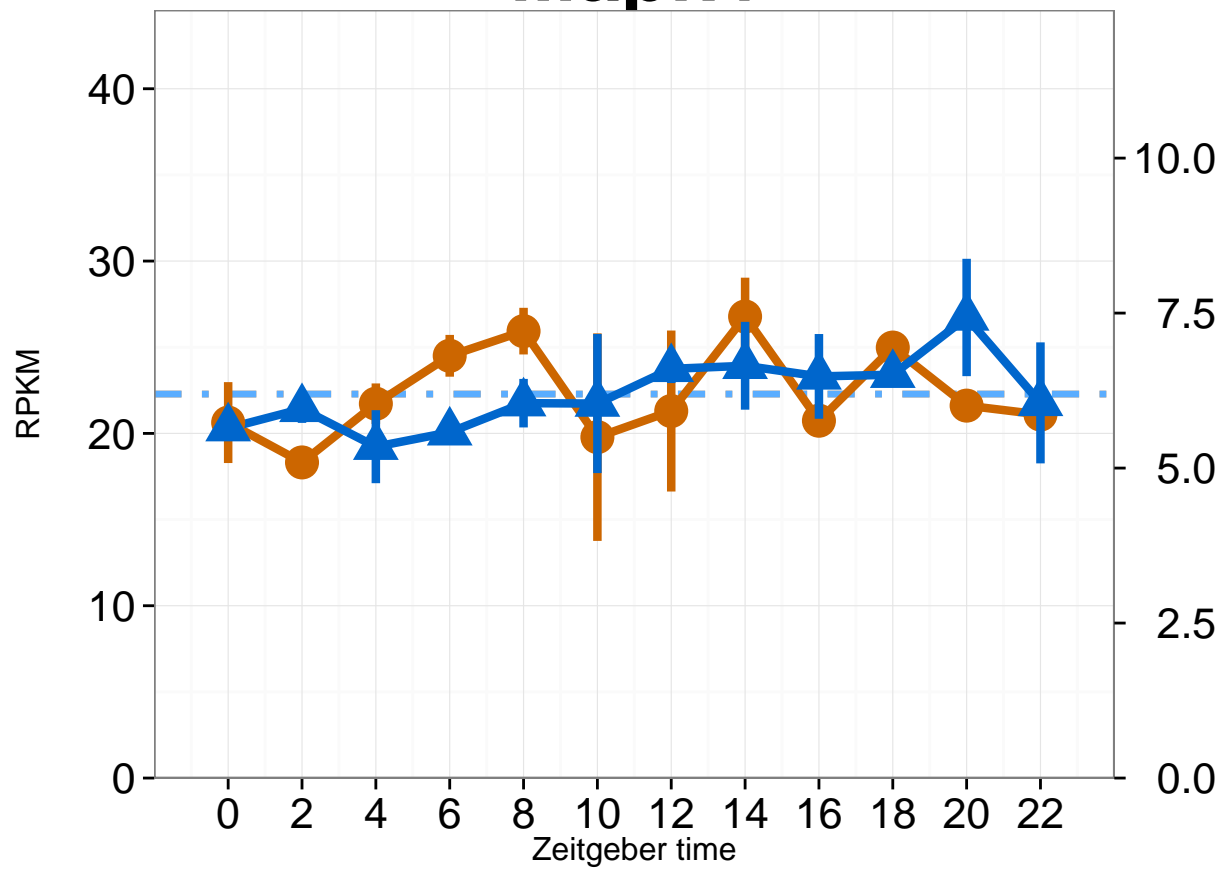

# Mapk4

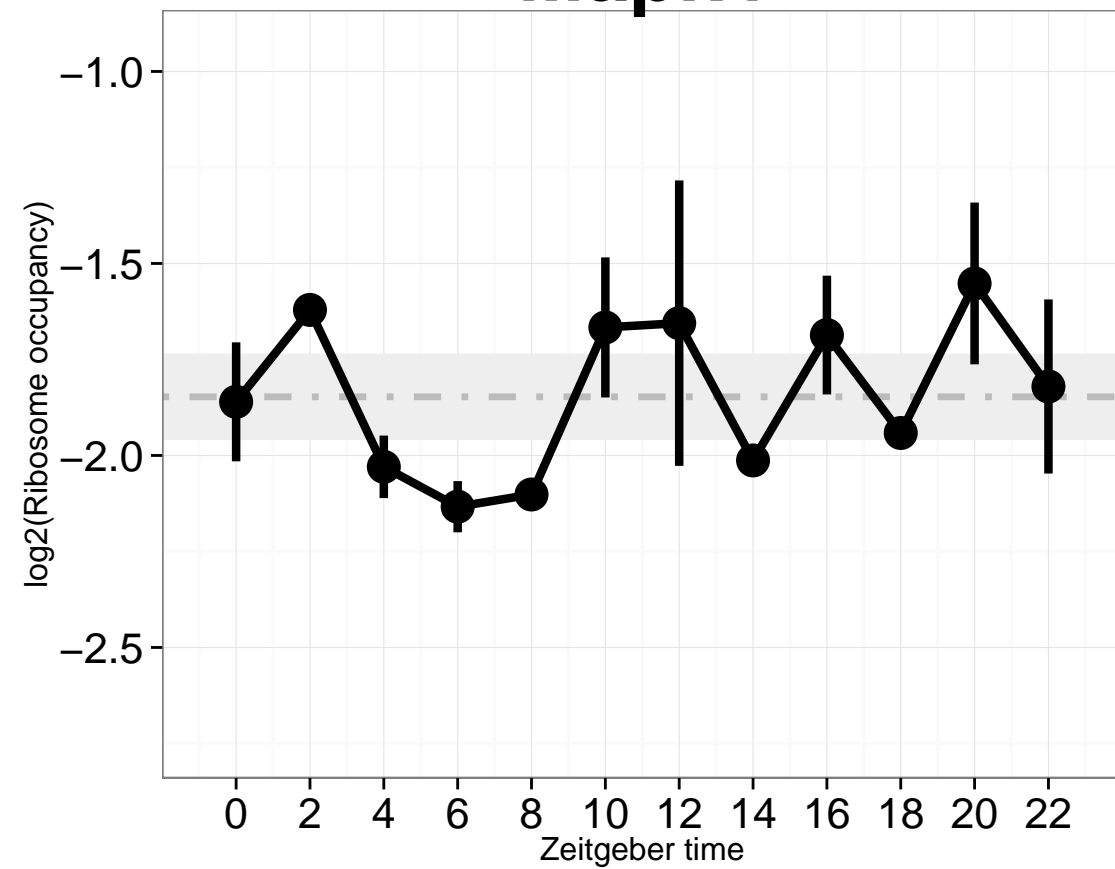

Supplement: Supplementary file 8940 [file 1]

# Sntb2

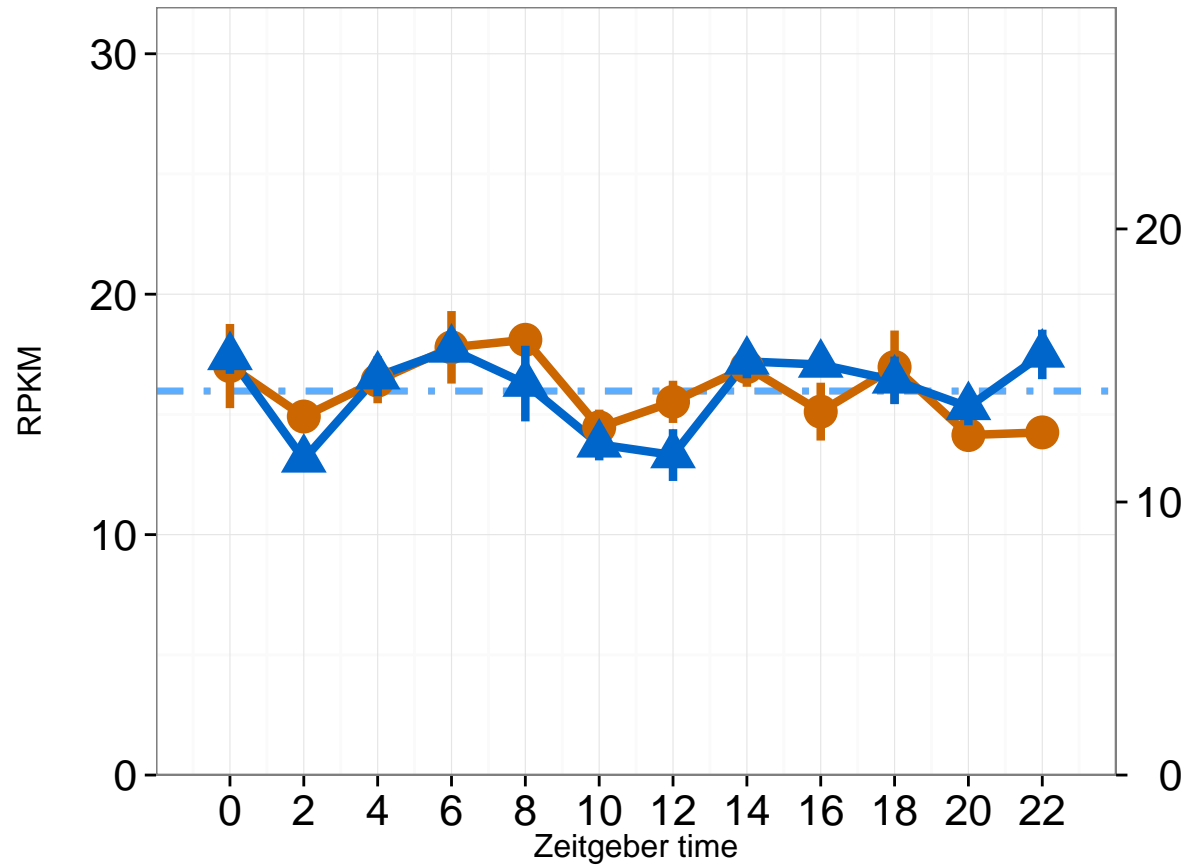

# Sntb2

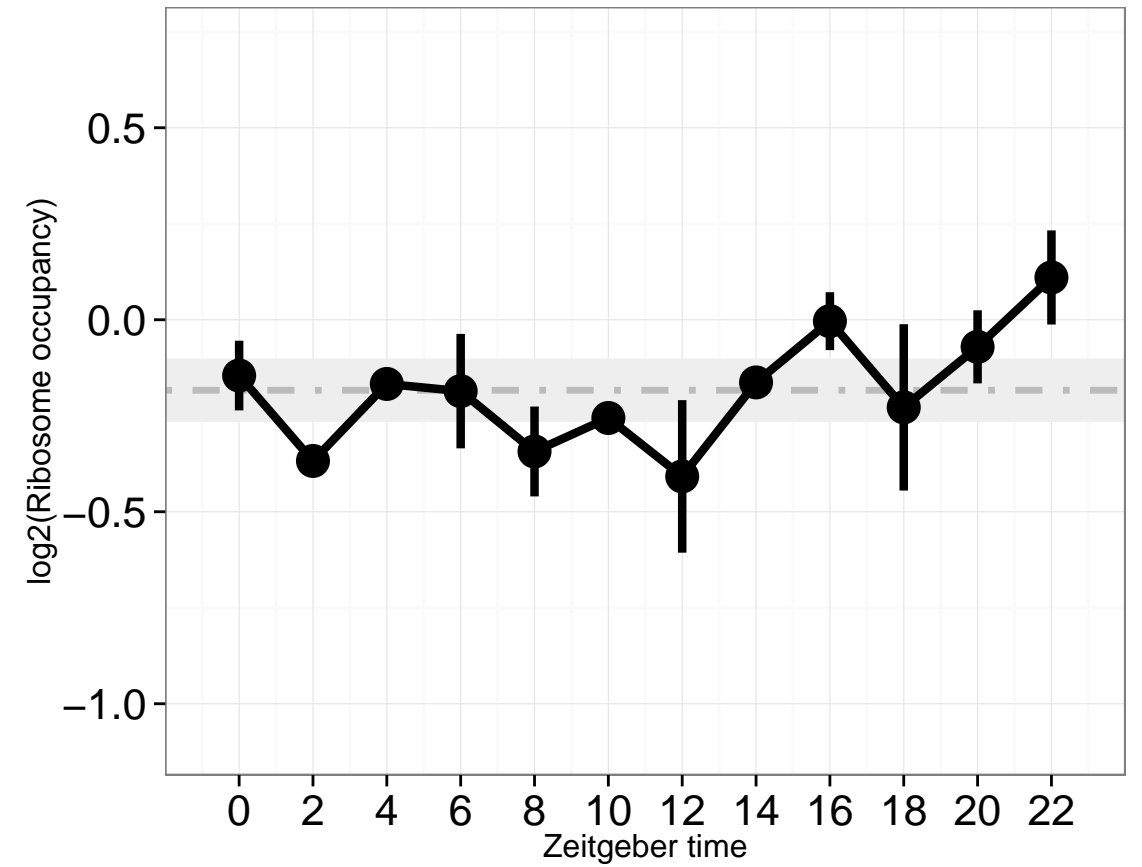

Supplement: Supplementary file 8941 [file 1]

## 4930430F08Rik

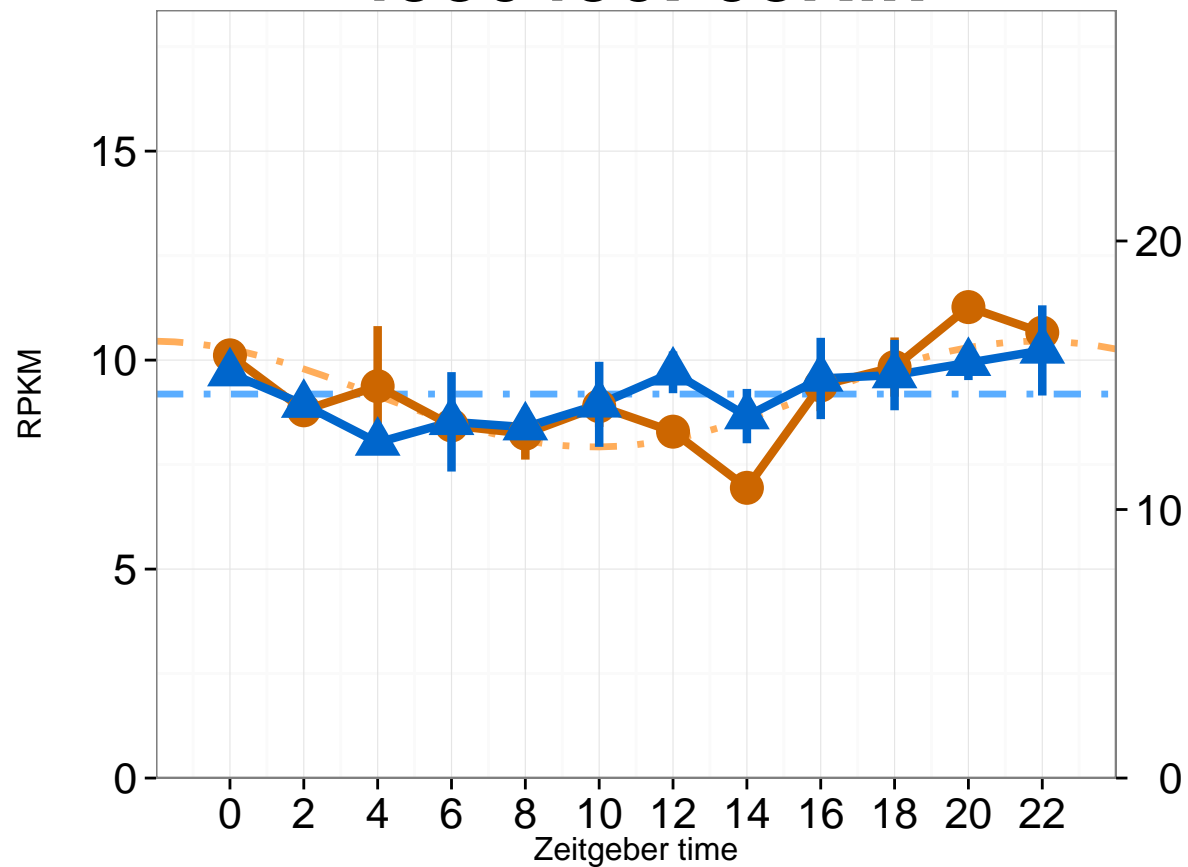

## 4930430F08Rik

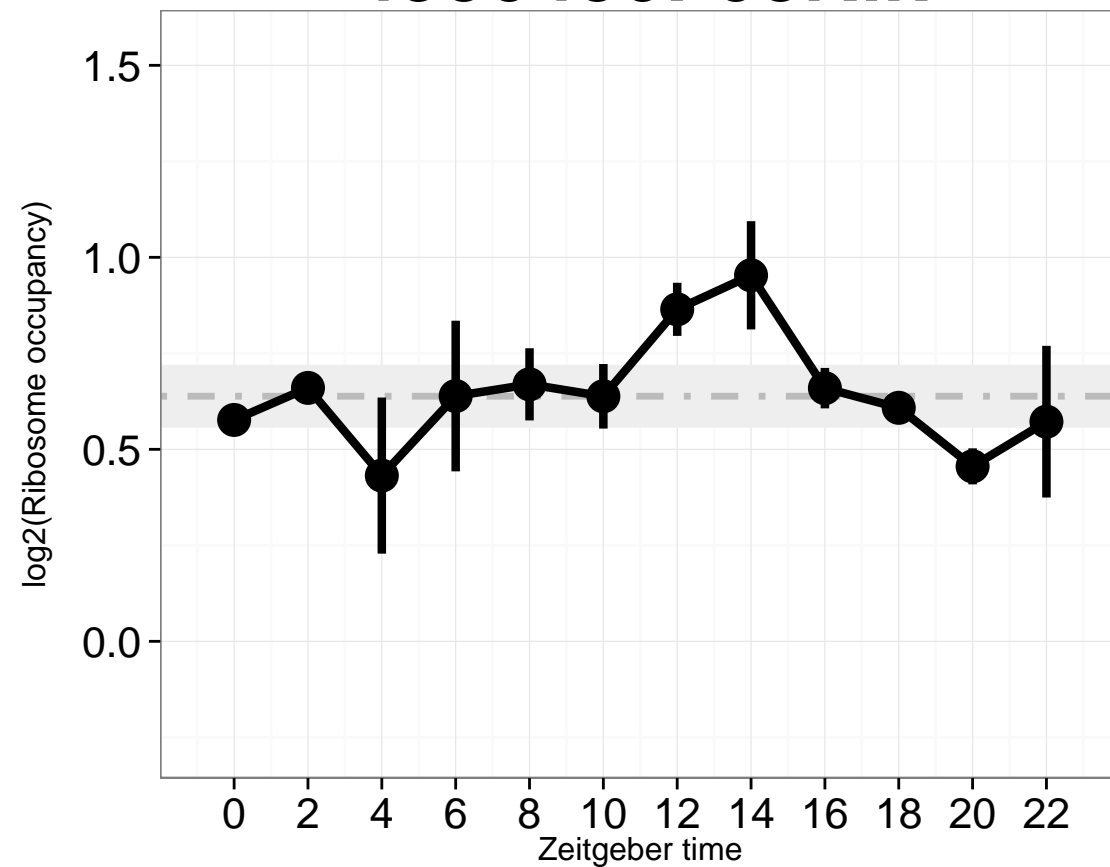

Supplement: Supplementary file 8942 [file 1]

# Tenc1

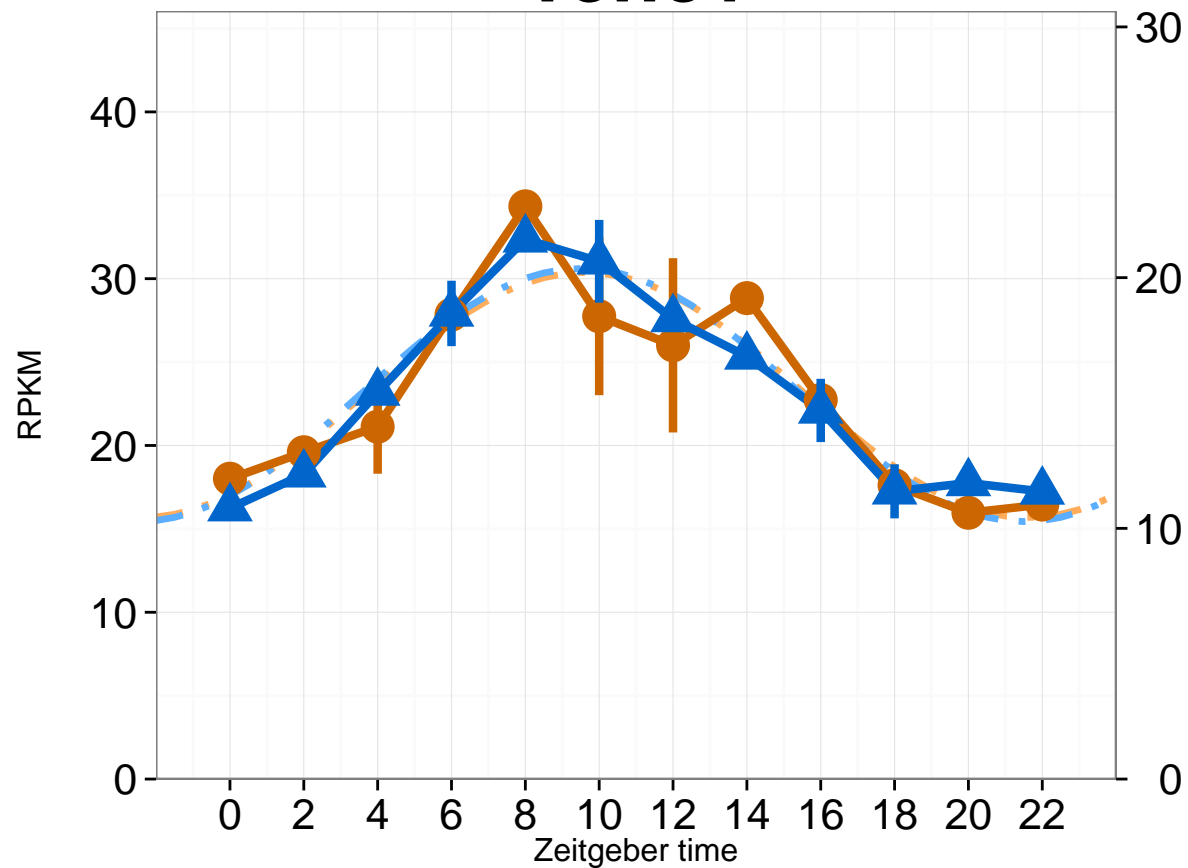

# Tenc1

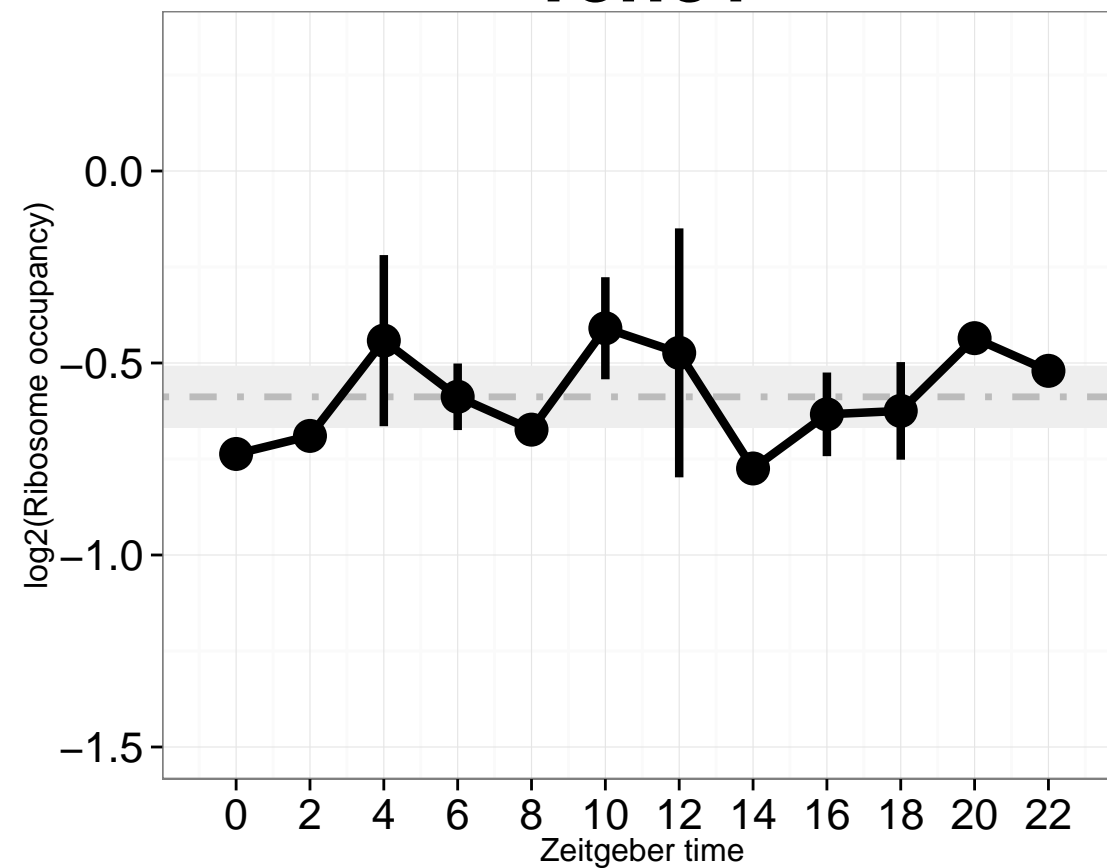

Supplement: Supplementary file 8943 [file 1]

## AtI2

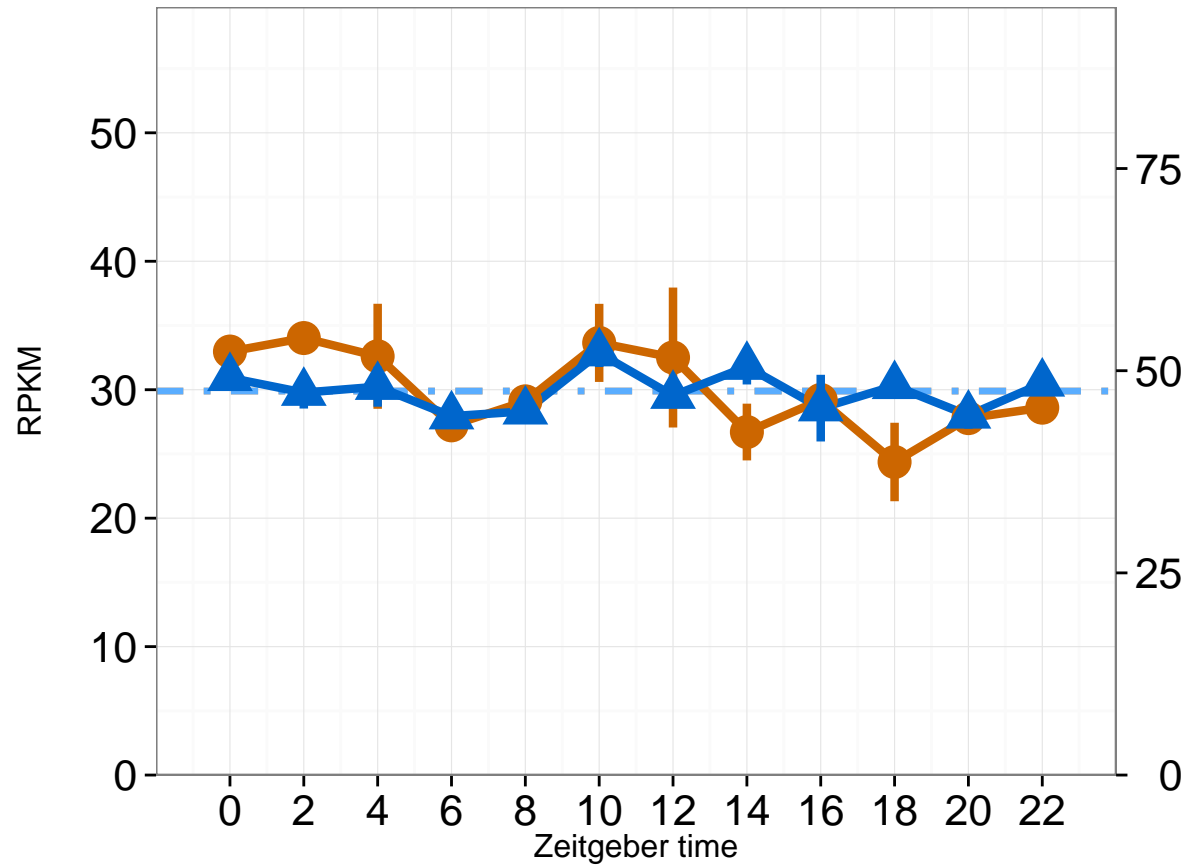

## AtI2

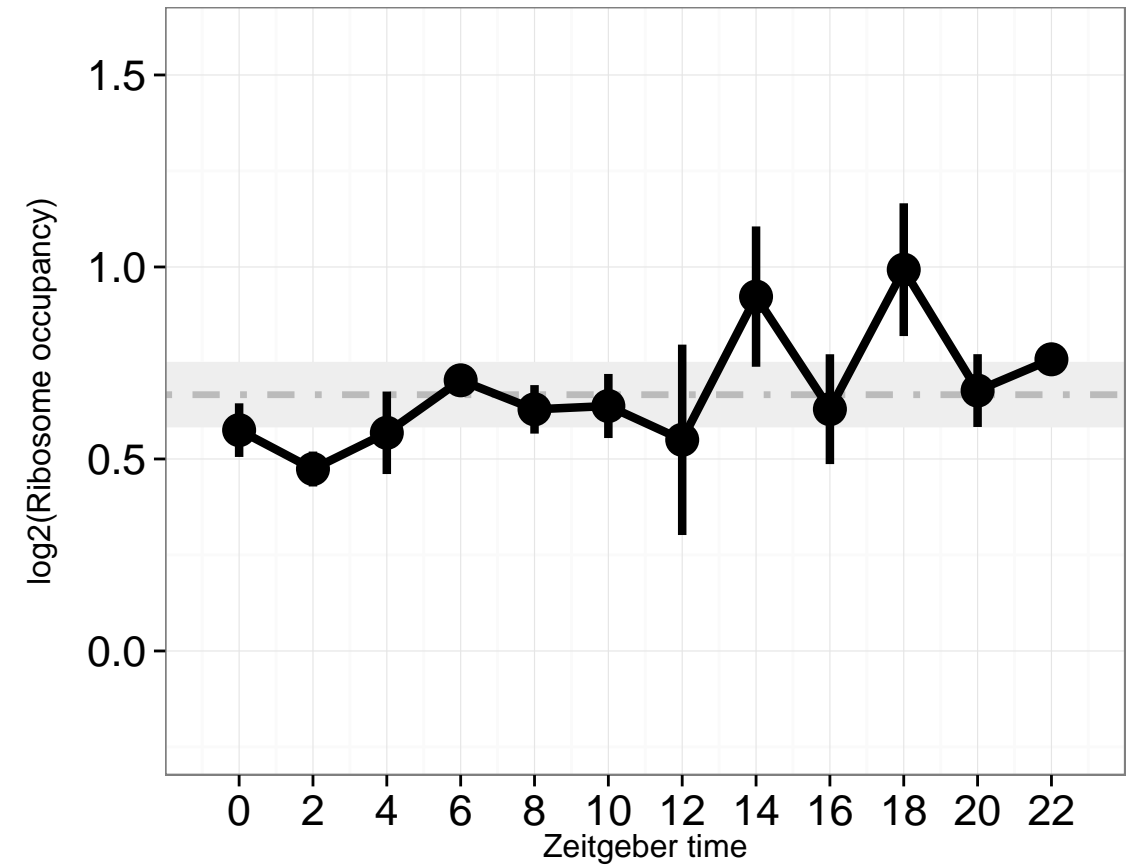

Supplement: Supplementary file 8944 [file 1]

## Gnb2

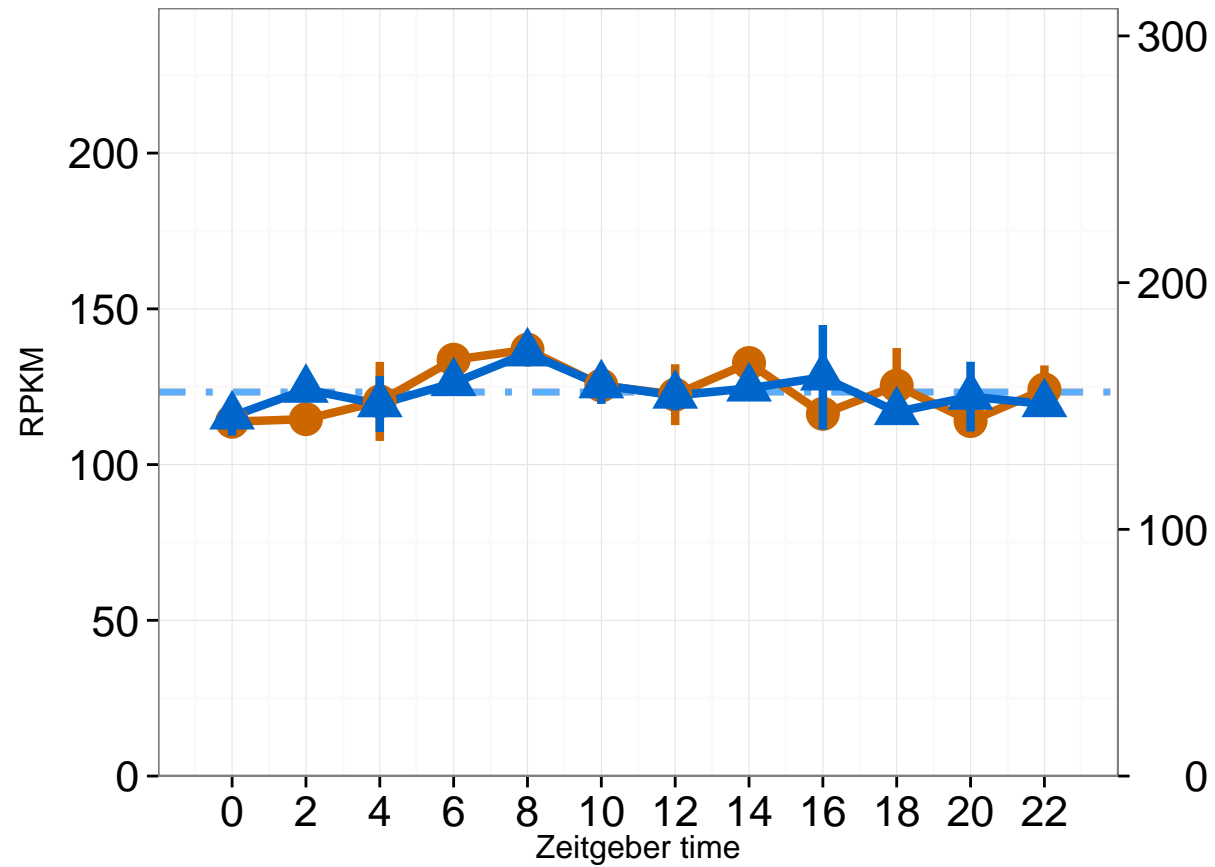

## Gnb2

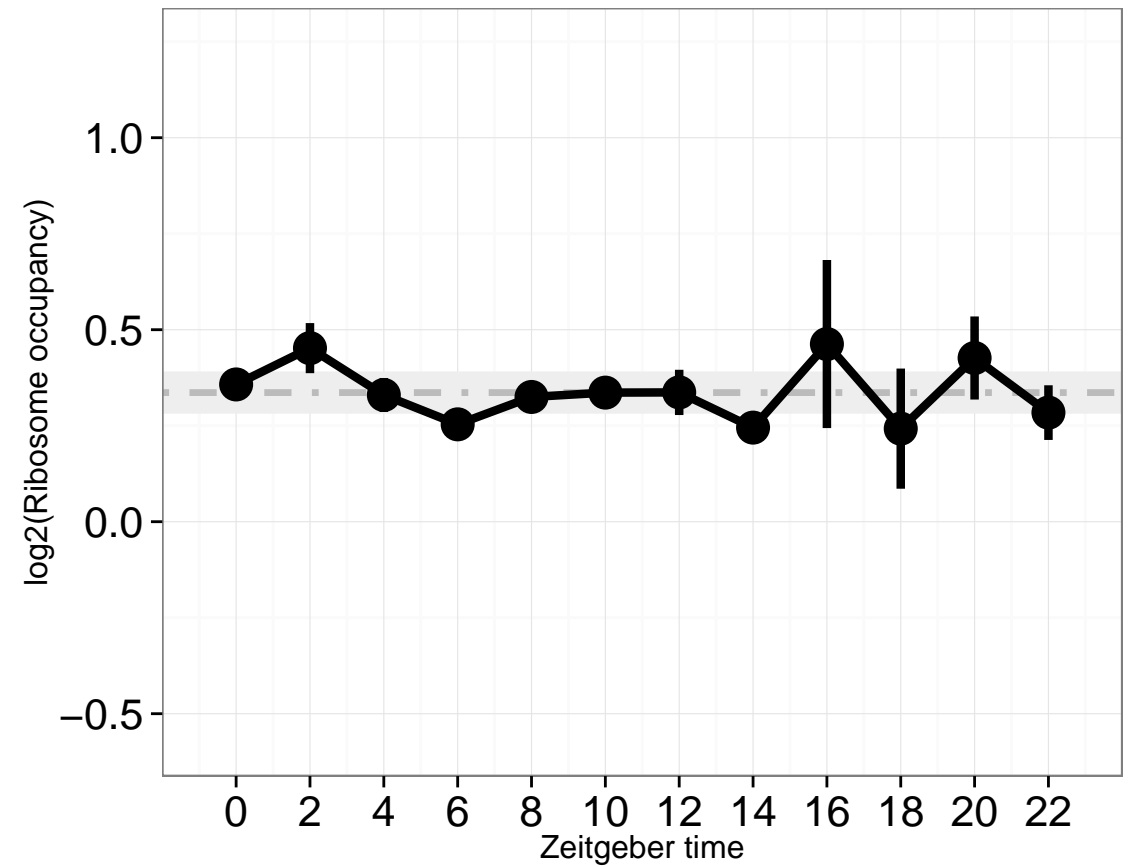

Supplement: Supplementary file 8945 [file 1]

# C3ar1

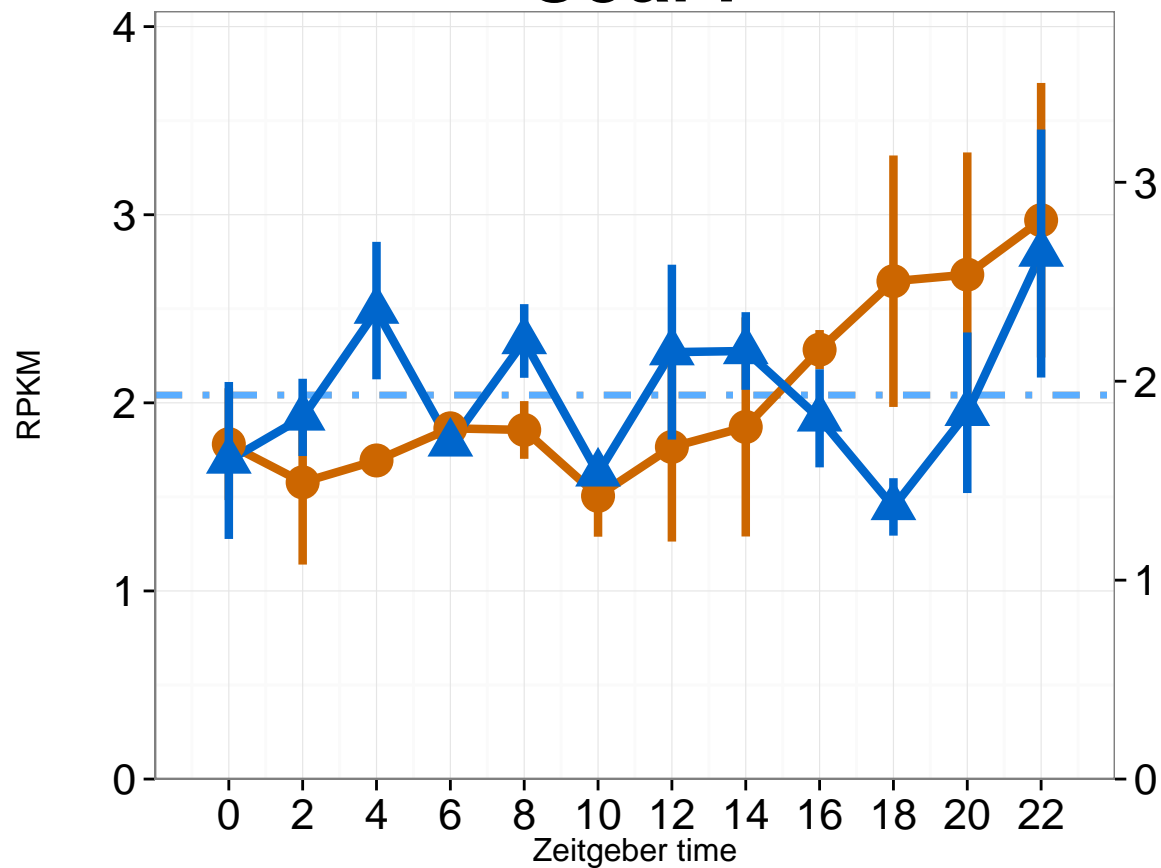

# C3ar1

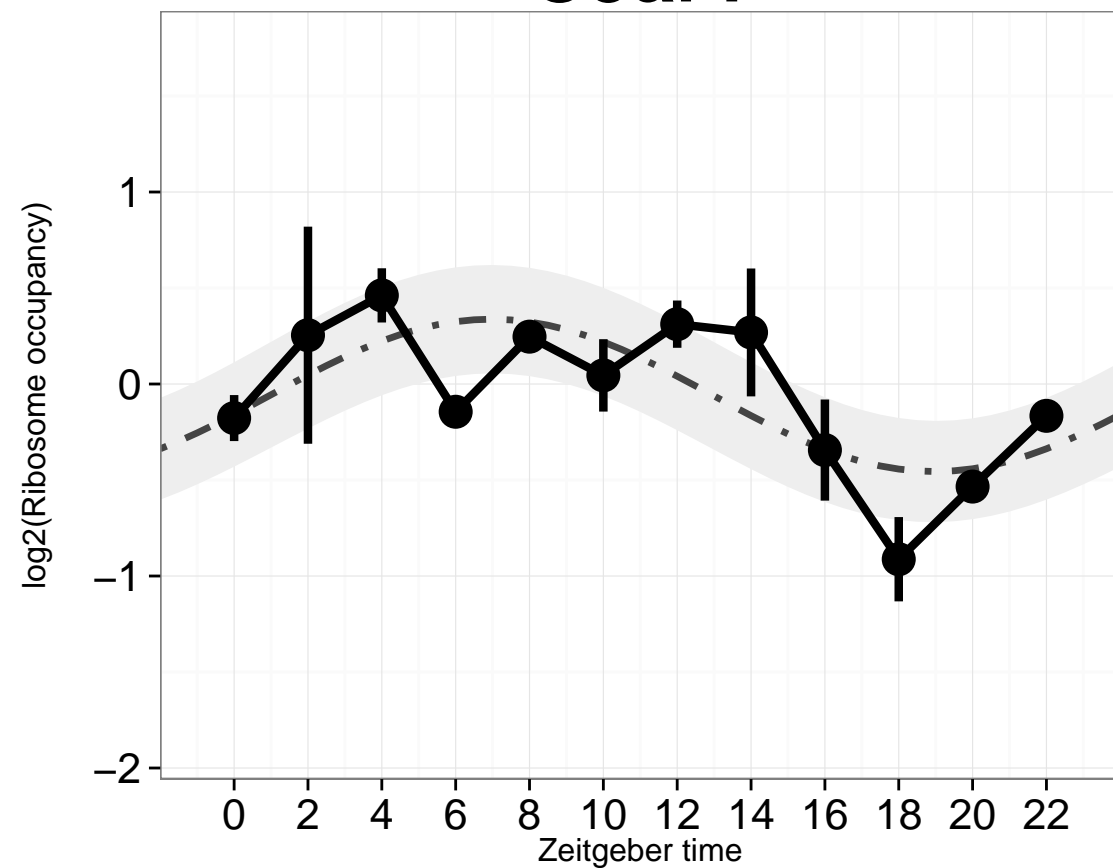

Supplement: Supplementary file 8946 [file 1]

## Nfs1

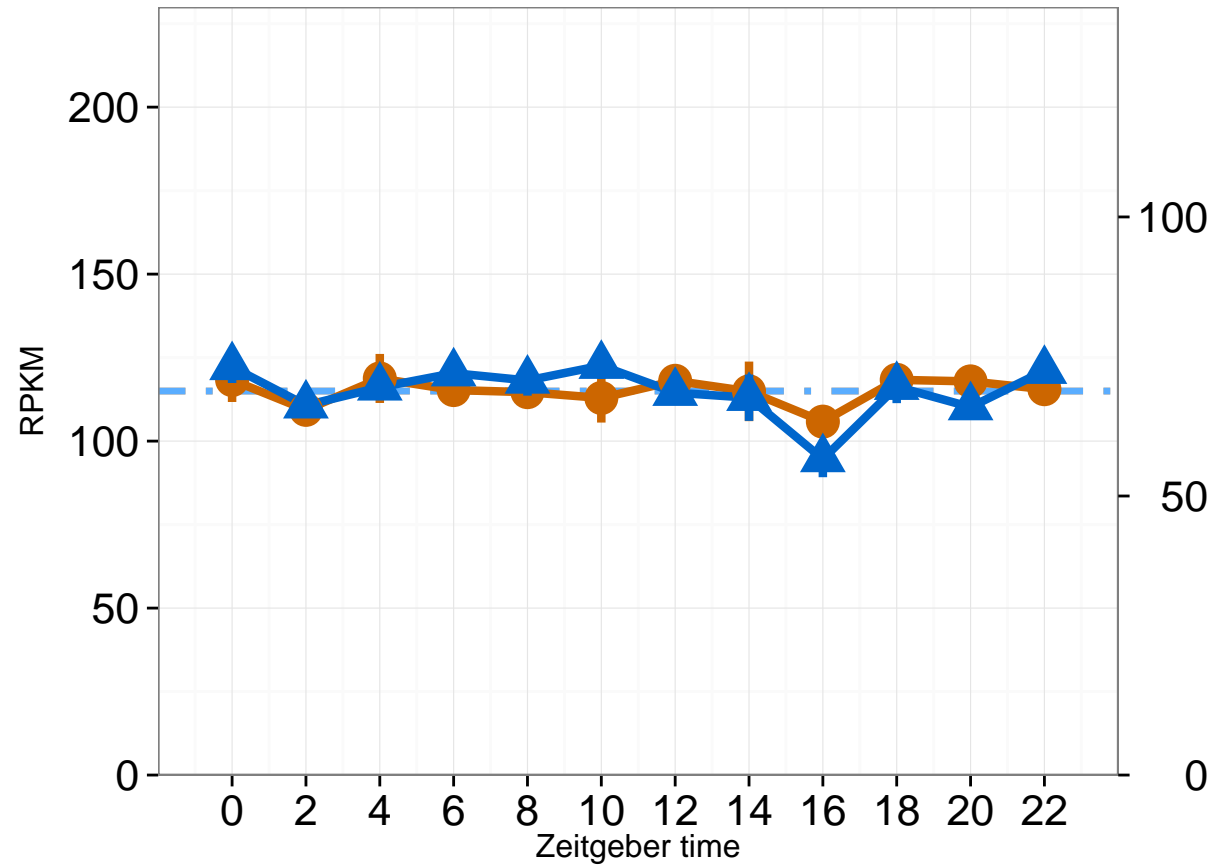

## Nfs1

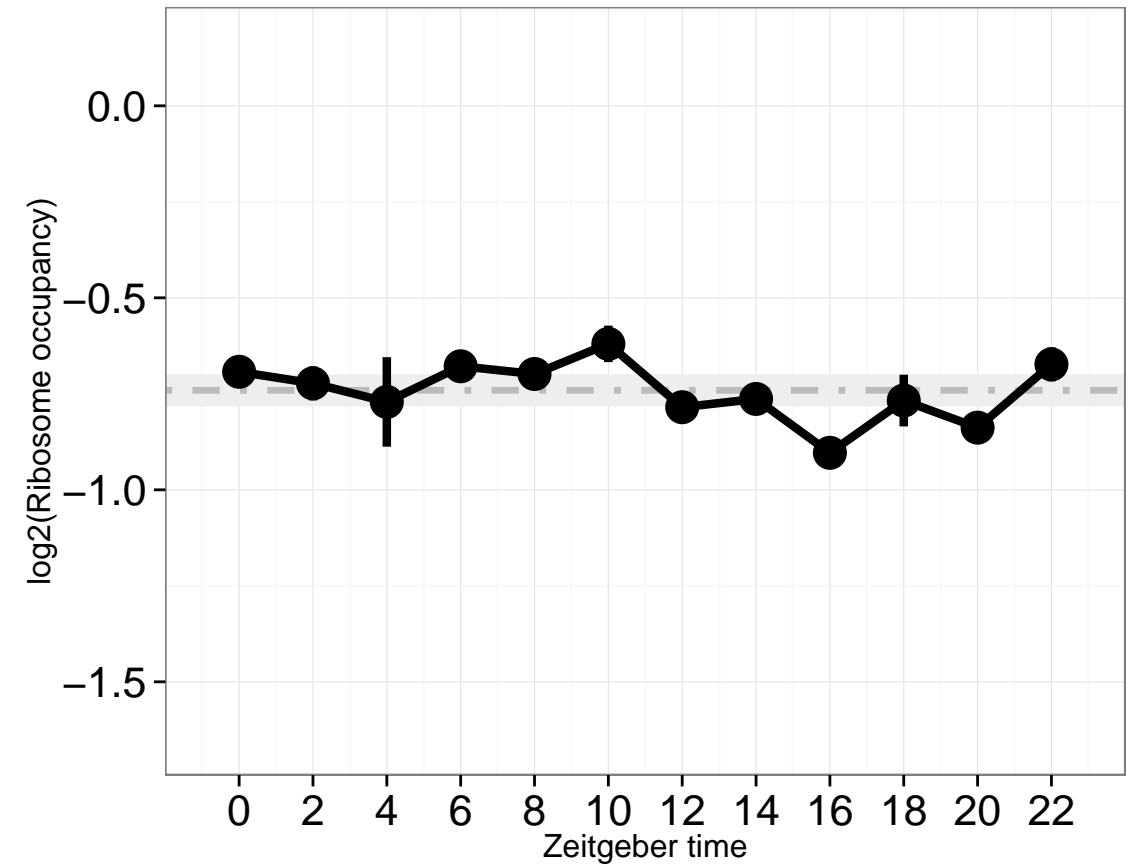

Supplement: Supplementary file 8947 [file 1]

## Socs5

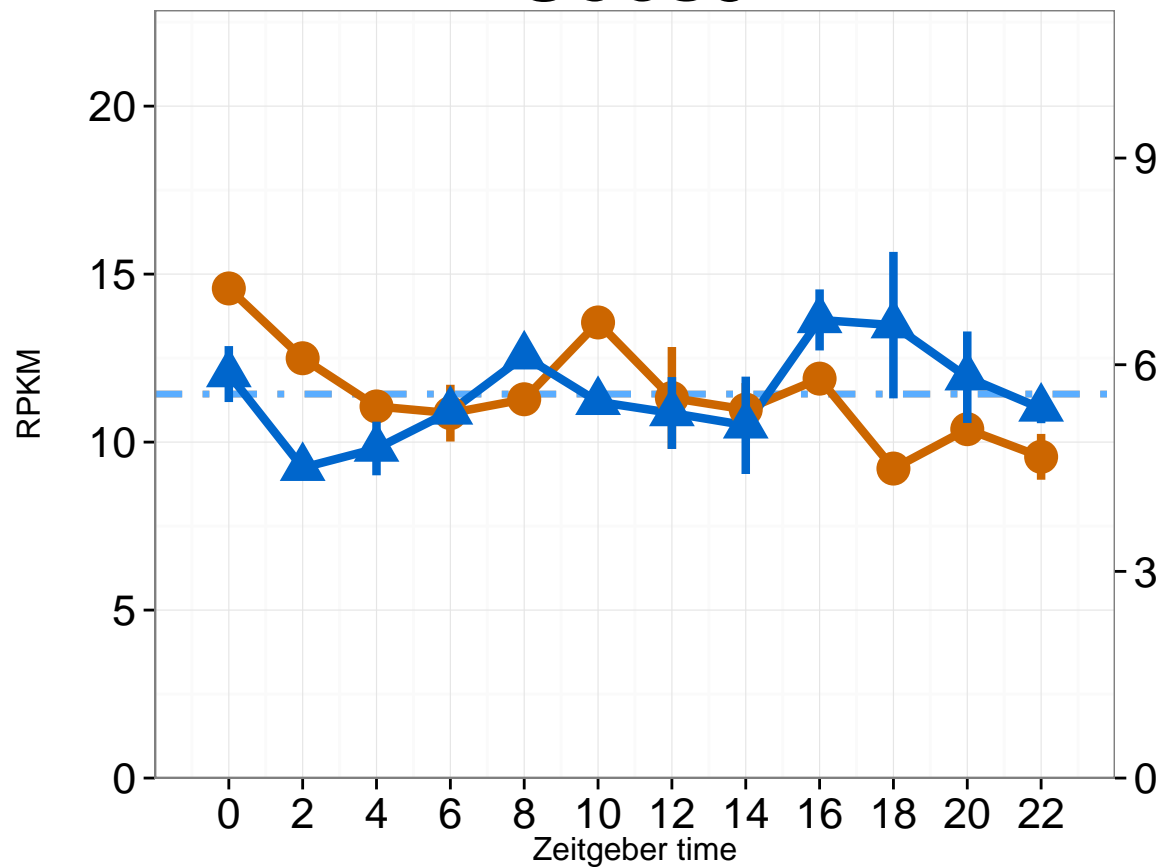

## Socs5

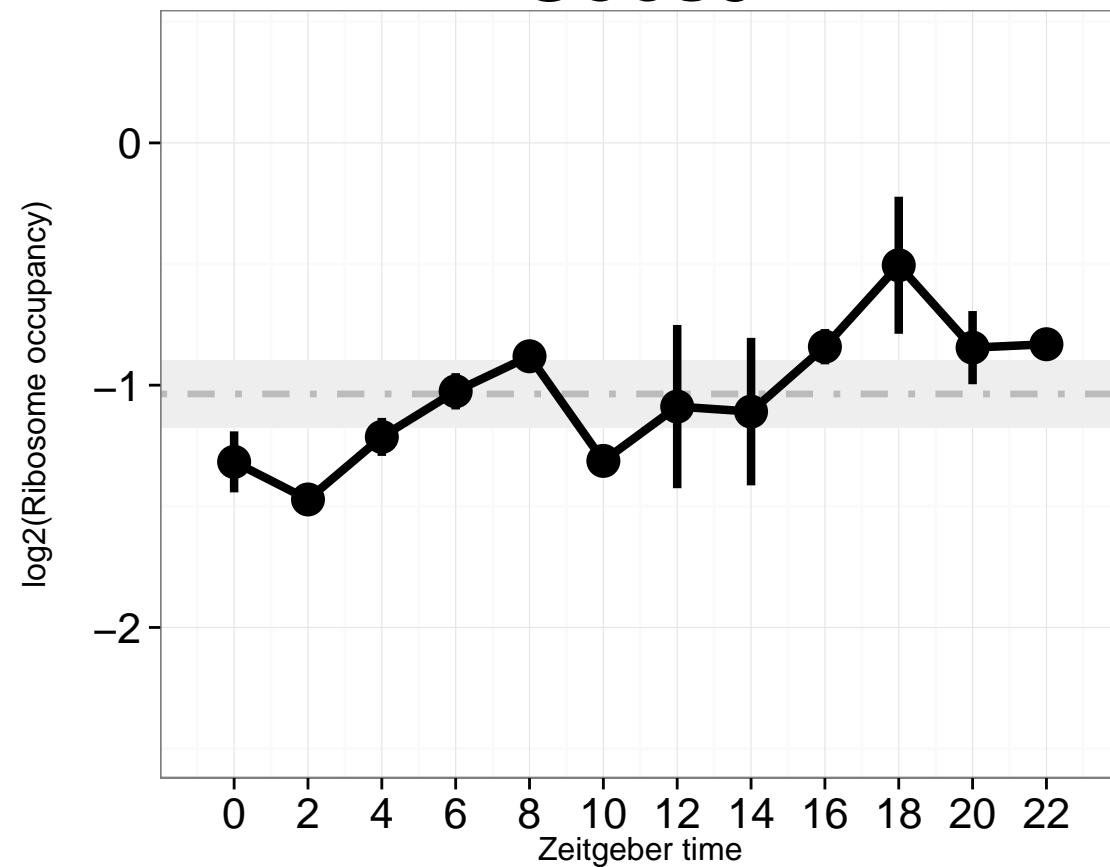

Supplement: Supplementary file 8948 [file 1]

# Smg8

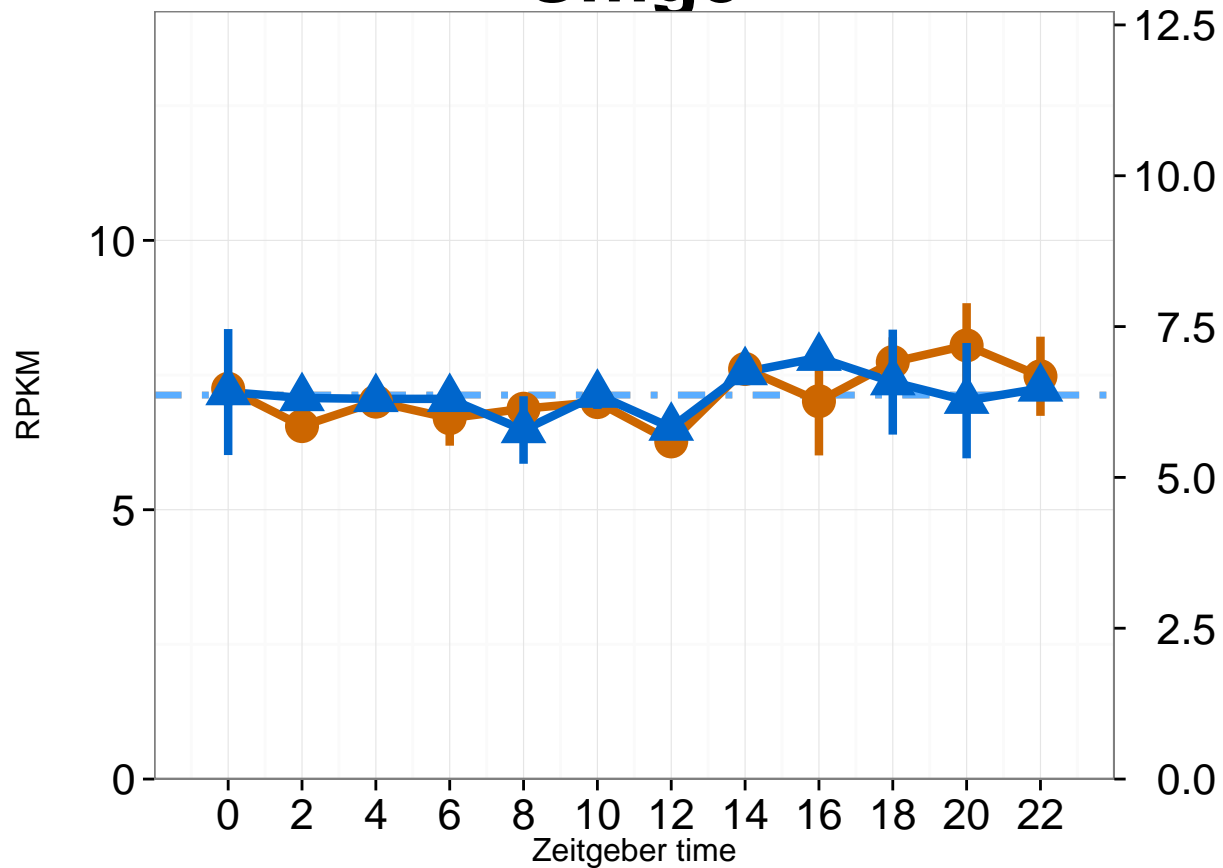

# Smg8

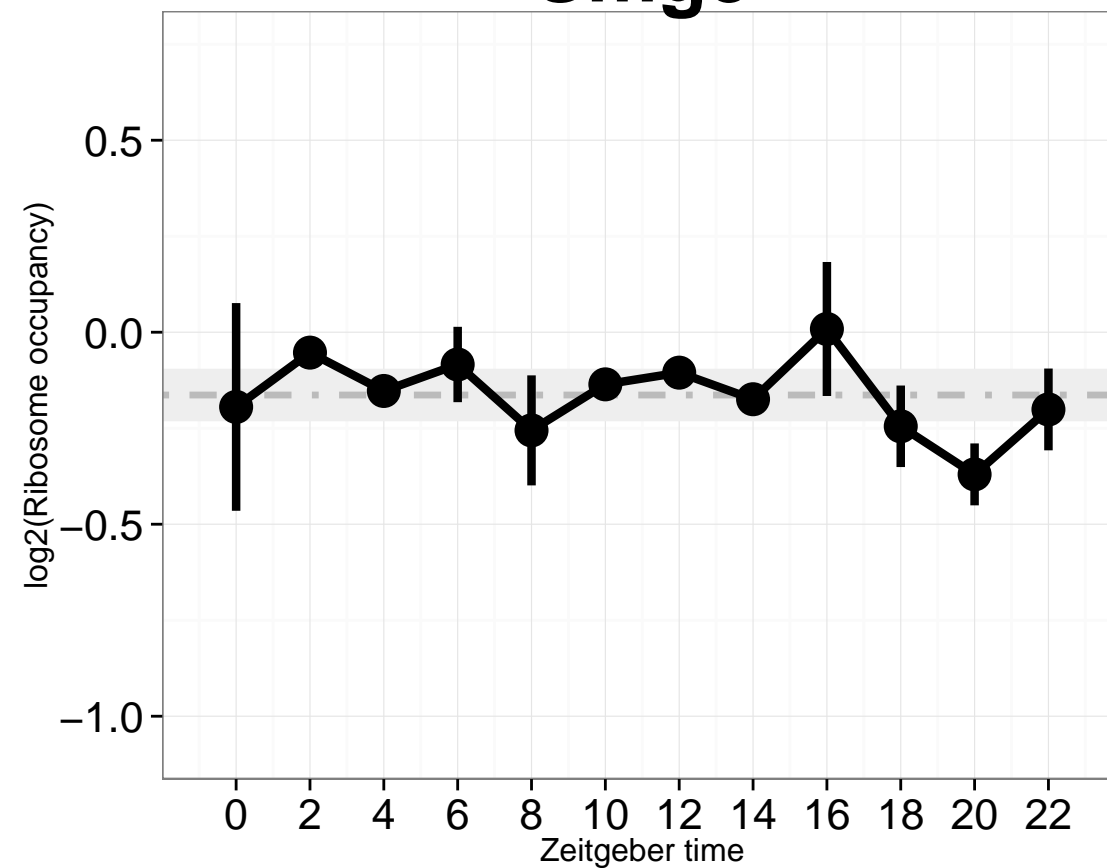

Supplement: Supplementary file 8949 [file 1]

# Slco1a4

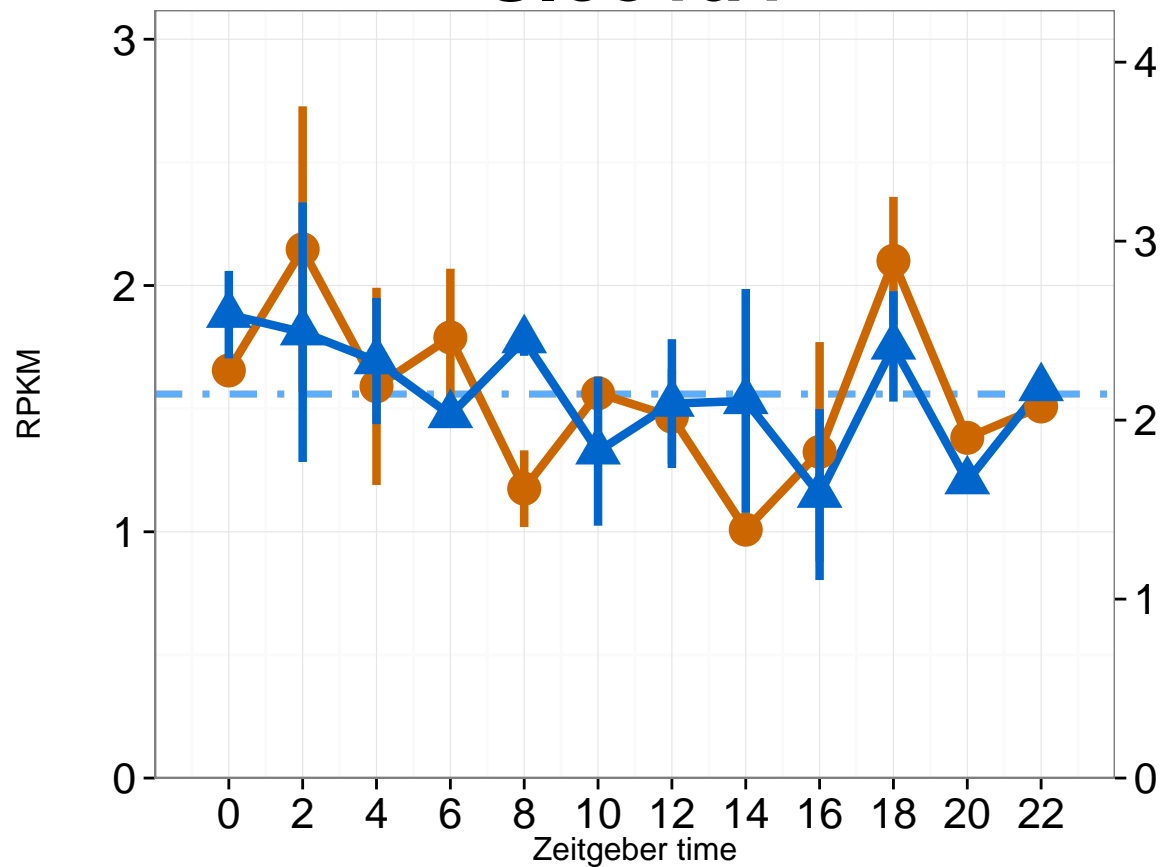

# Slco1a4

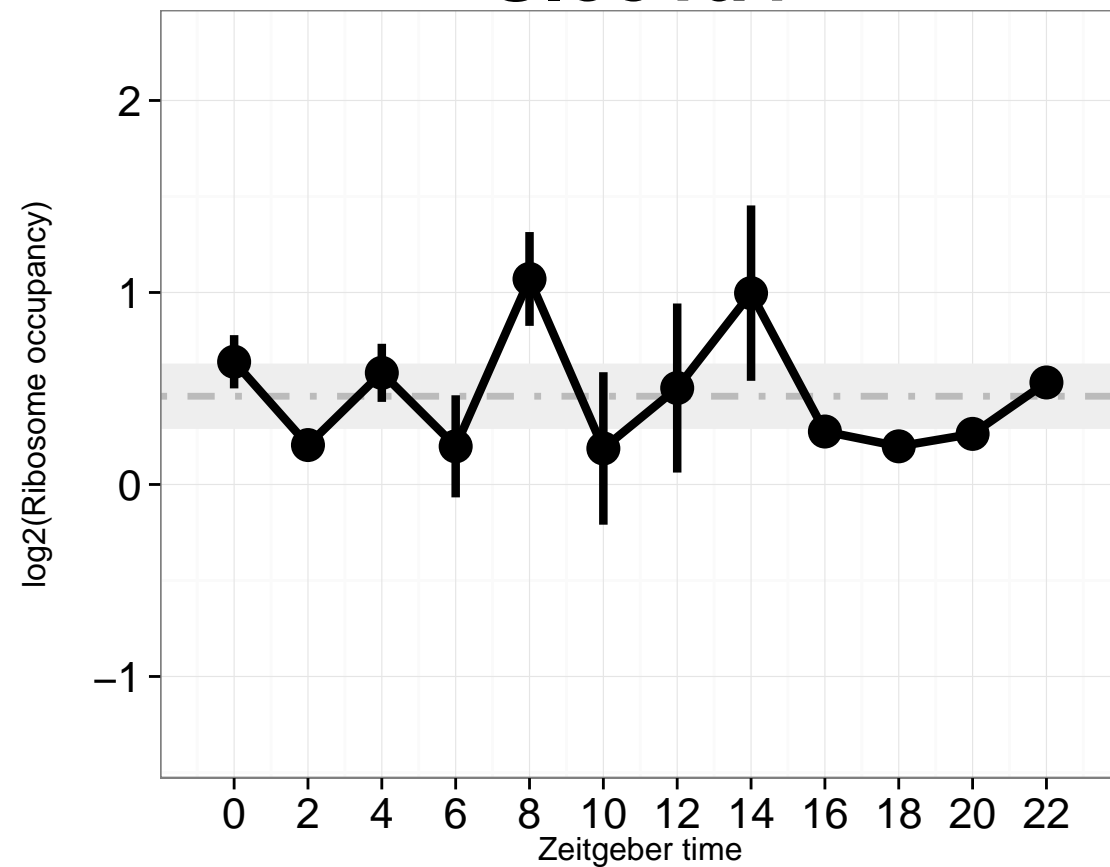

Supplement: Supplementary file 8950 [file 1]

# Cep112

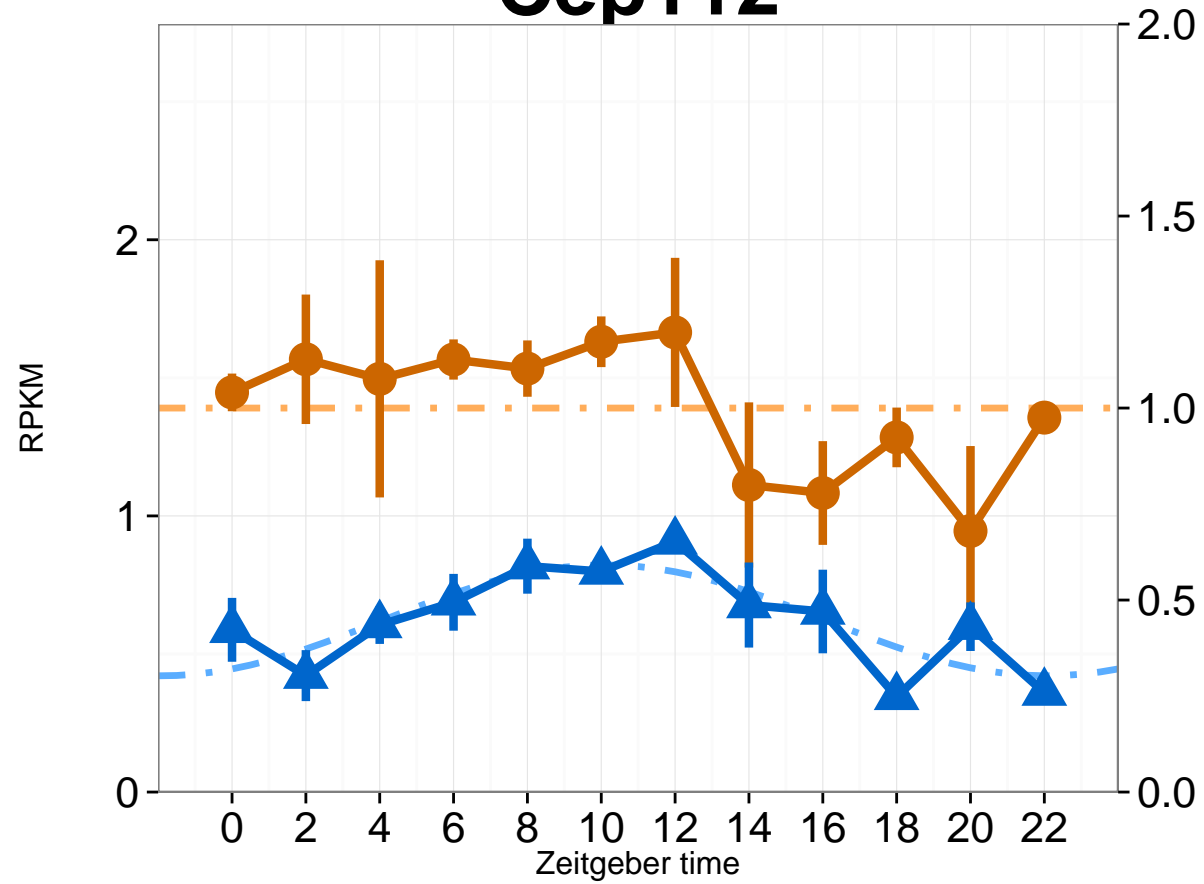

# Cep112

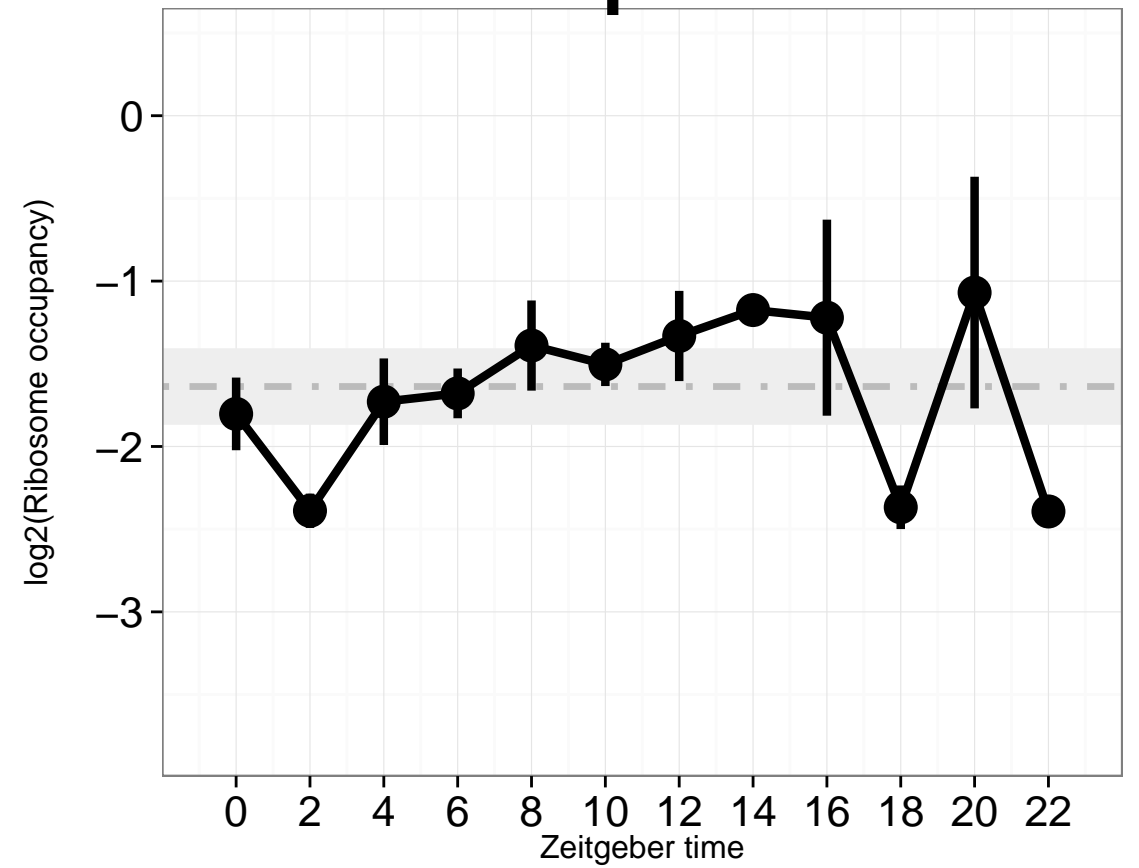

Supplement: Supplementary file 8951 [file 1]

## Ankrd65

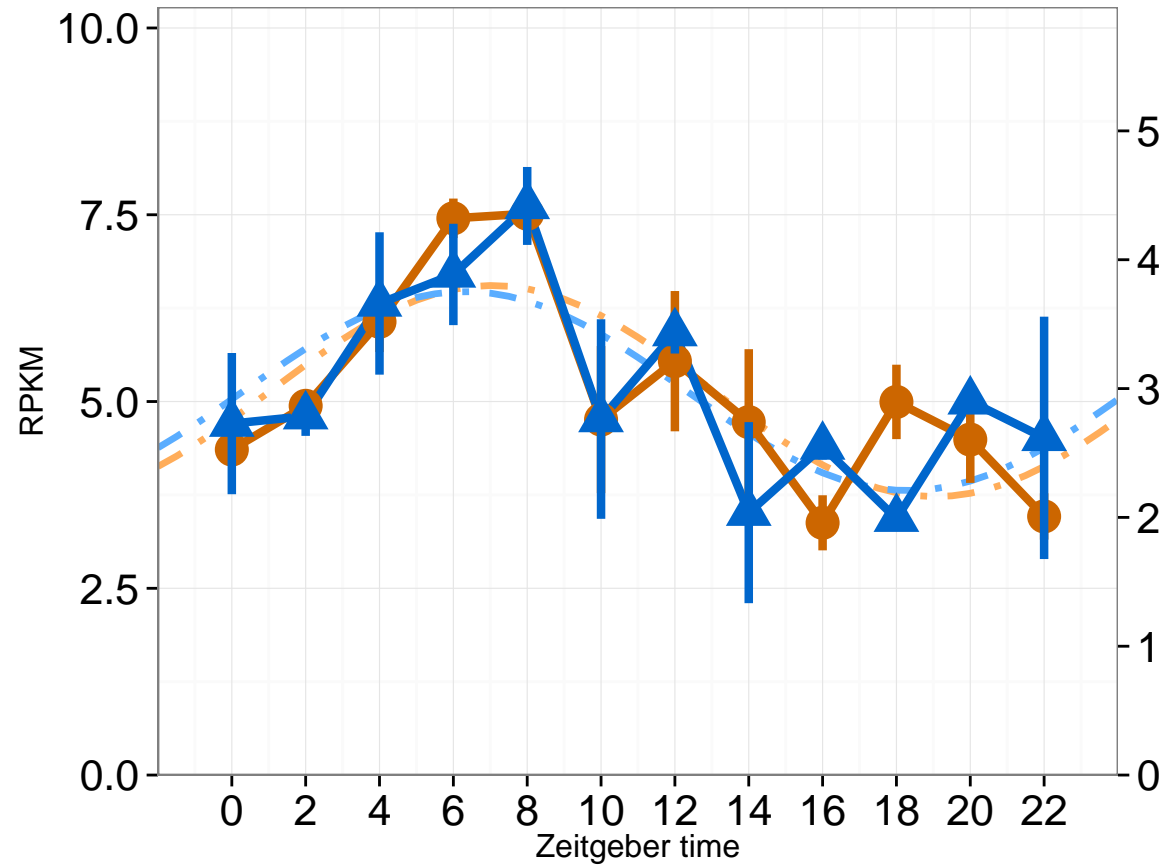

## Ankrd65

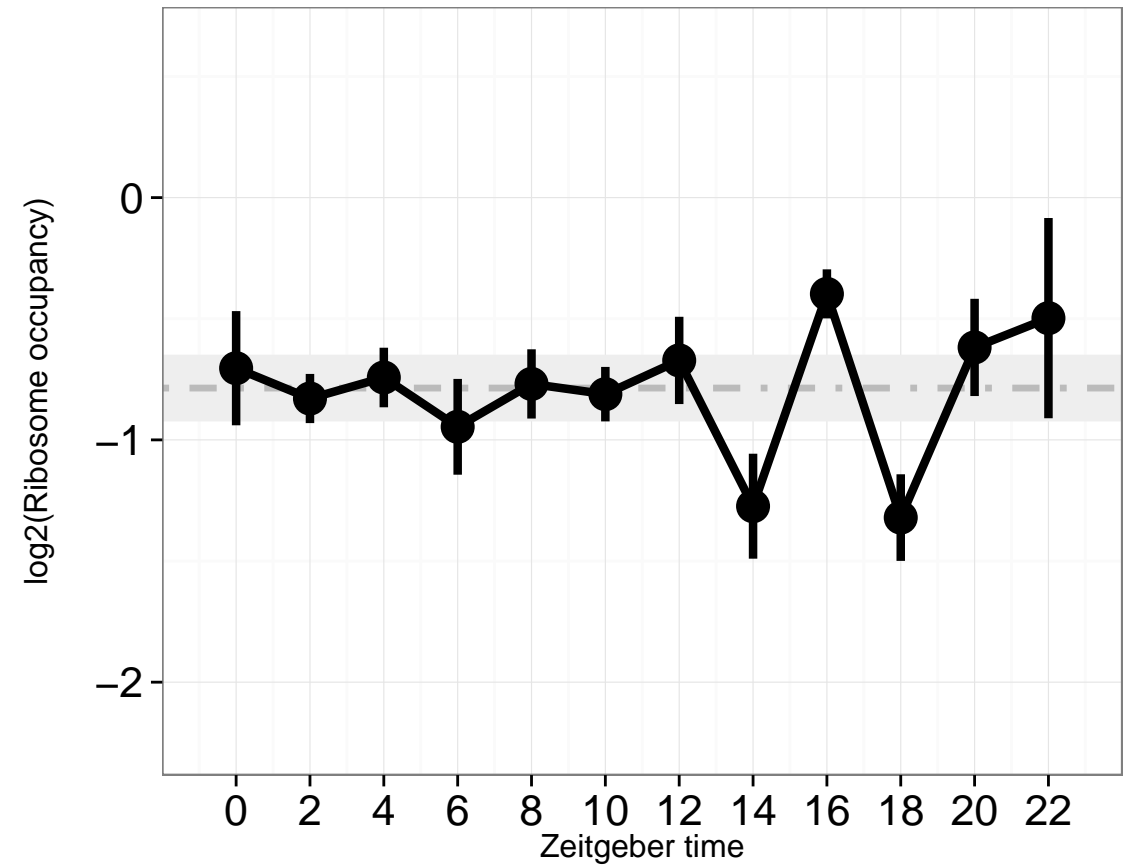

Supplement: Supplementary file 8953 [file 1]

# Myom1

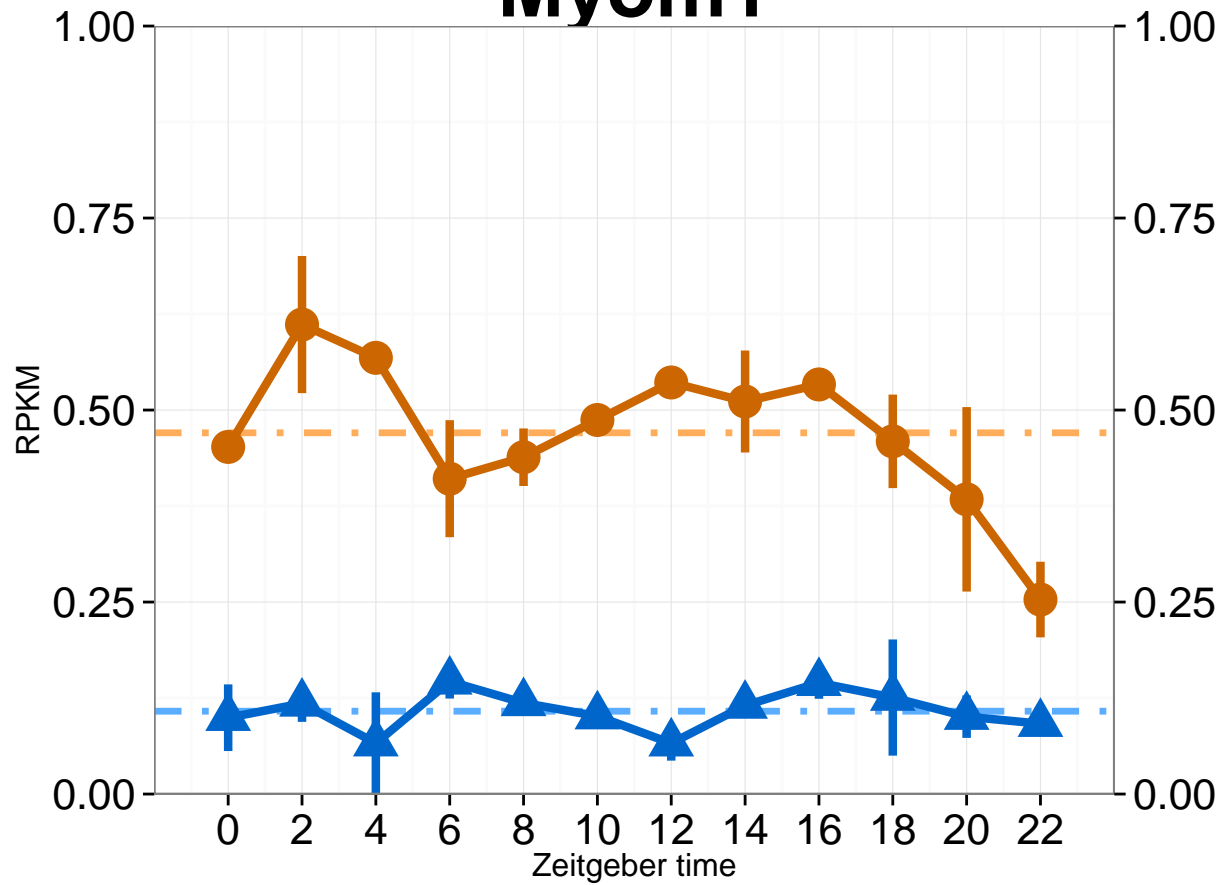

# Myom1

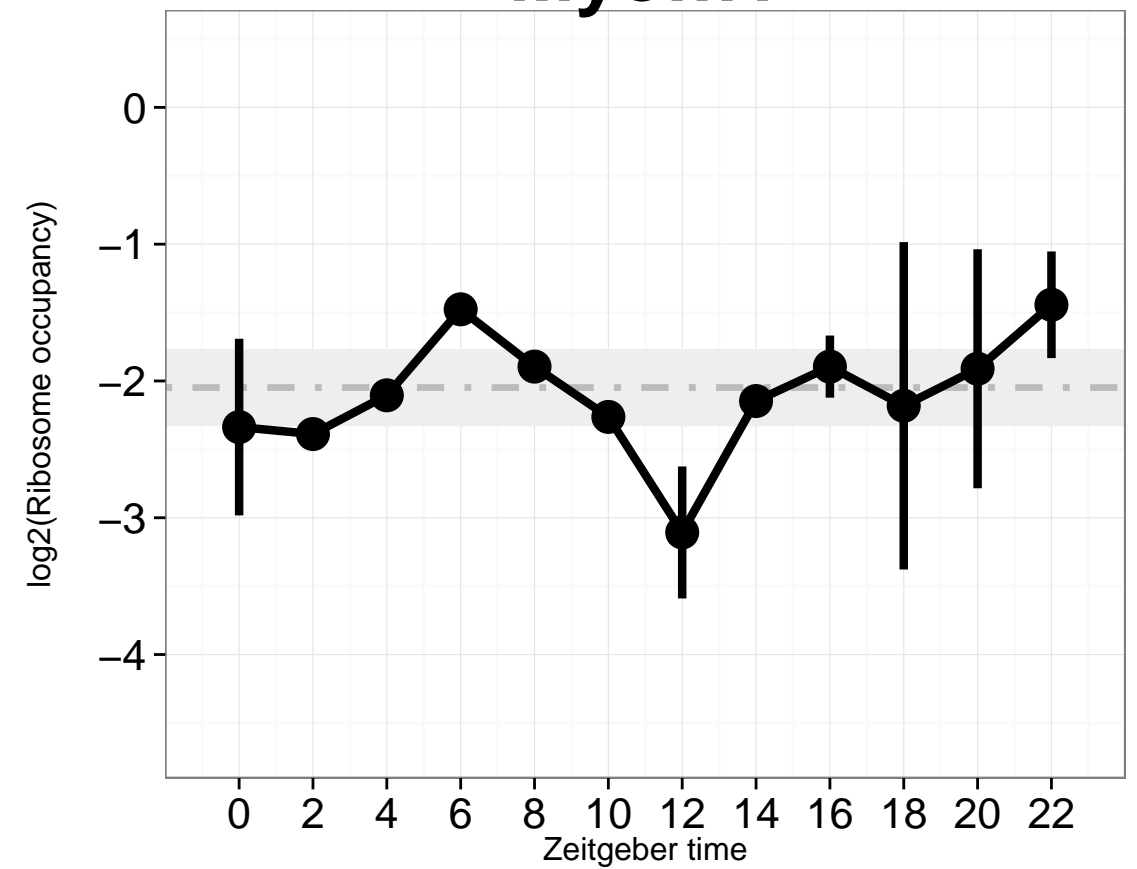

Supplement: Supplementary file 8954 [file 1]

## Ttyh2

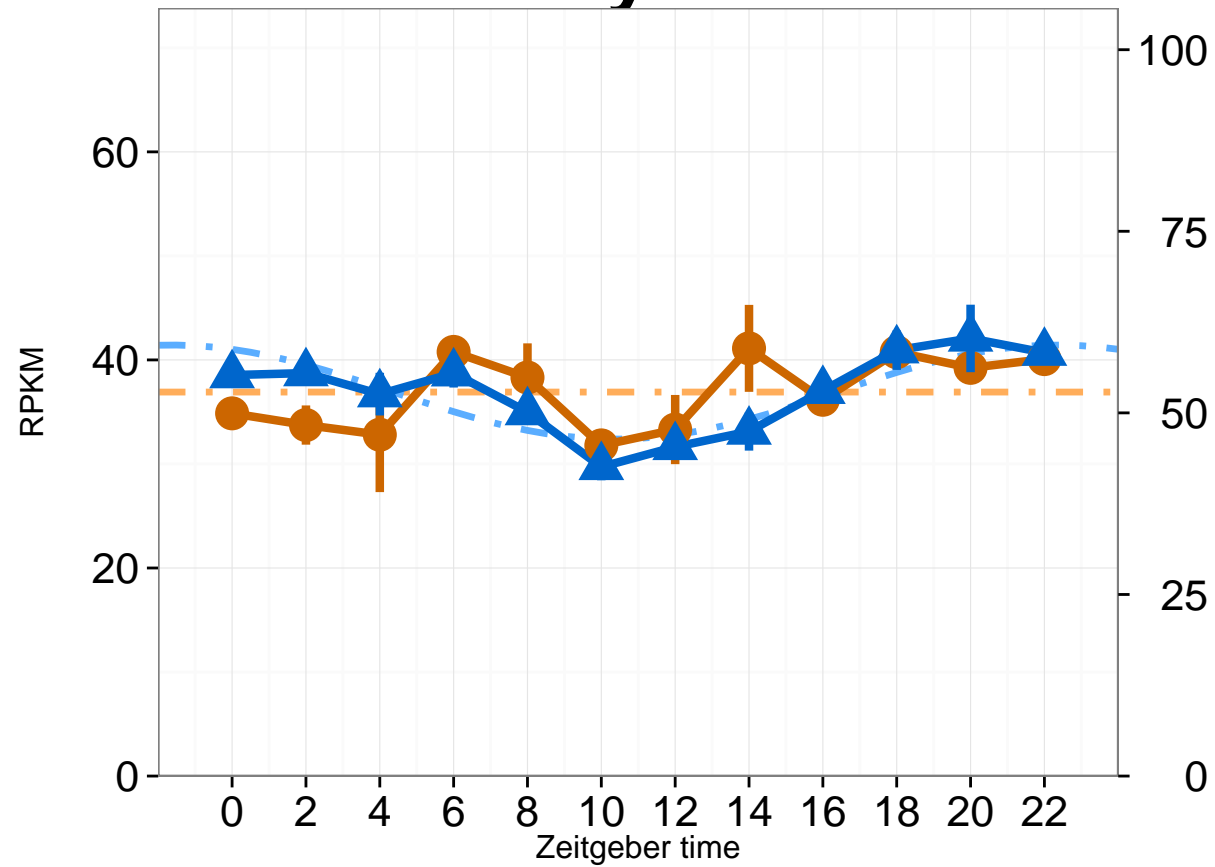

## Ttyh2

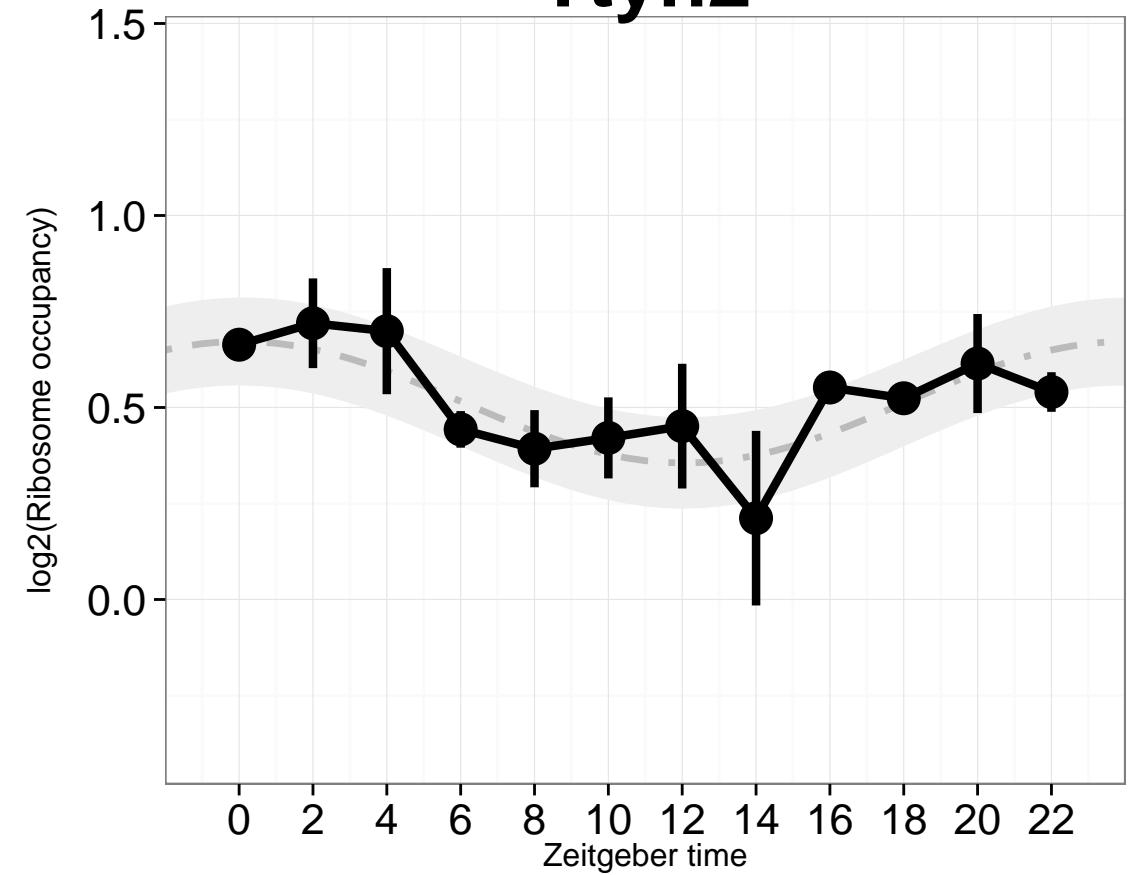

Supplement: Supplementary file 8955 [file 1]

## Miox

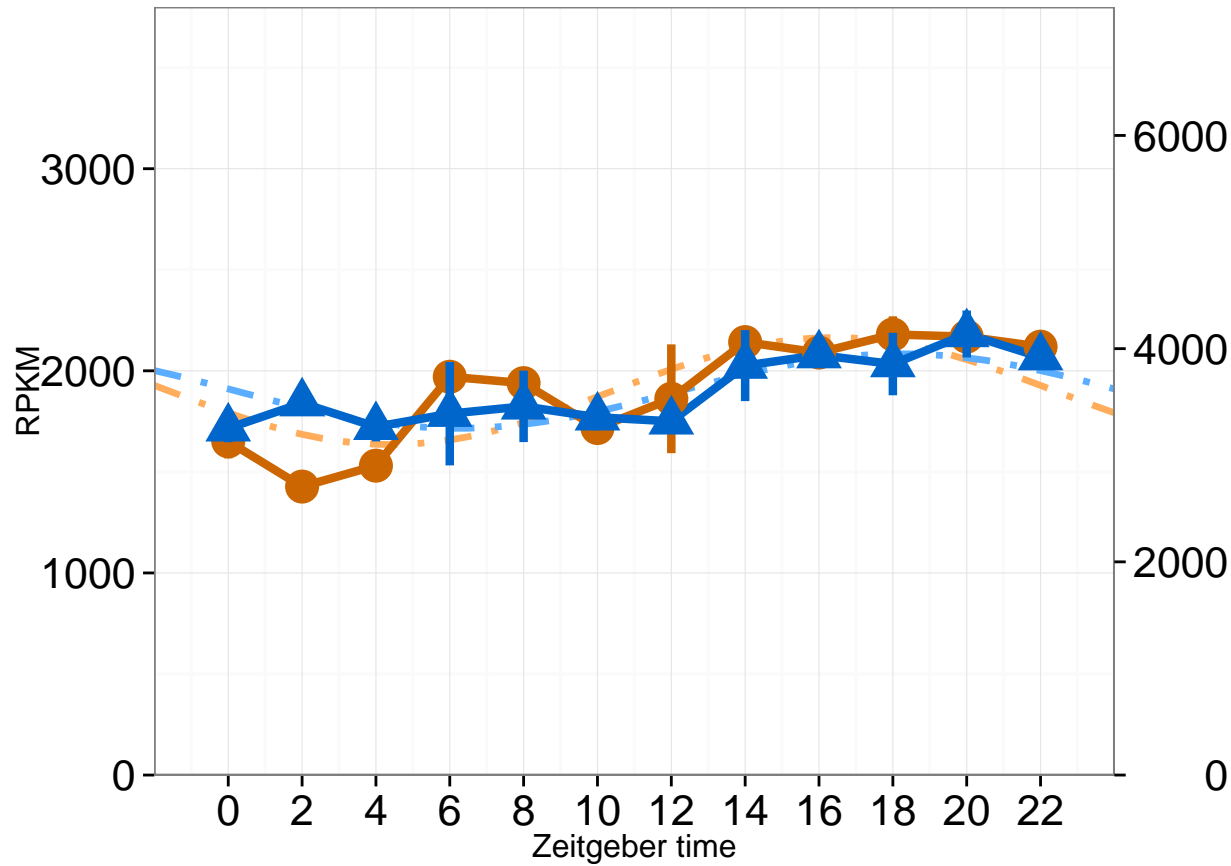

## Miox

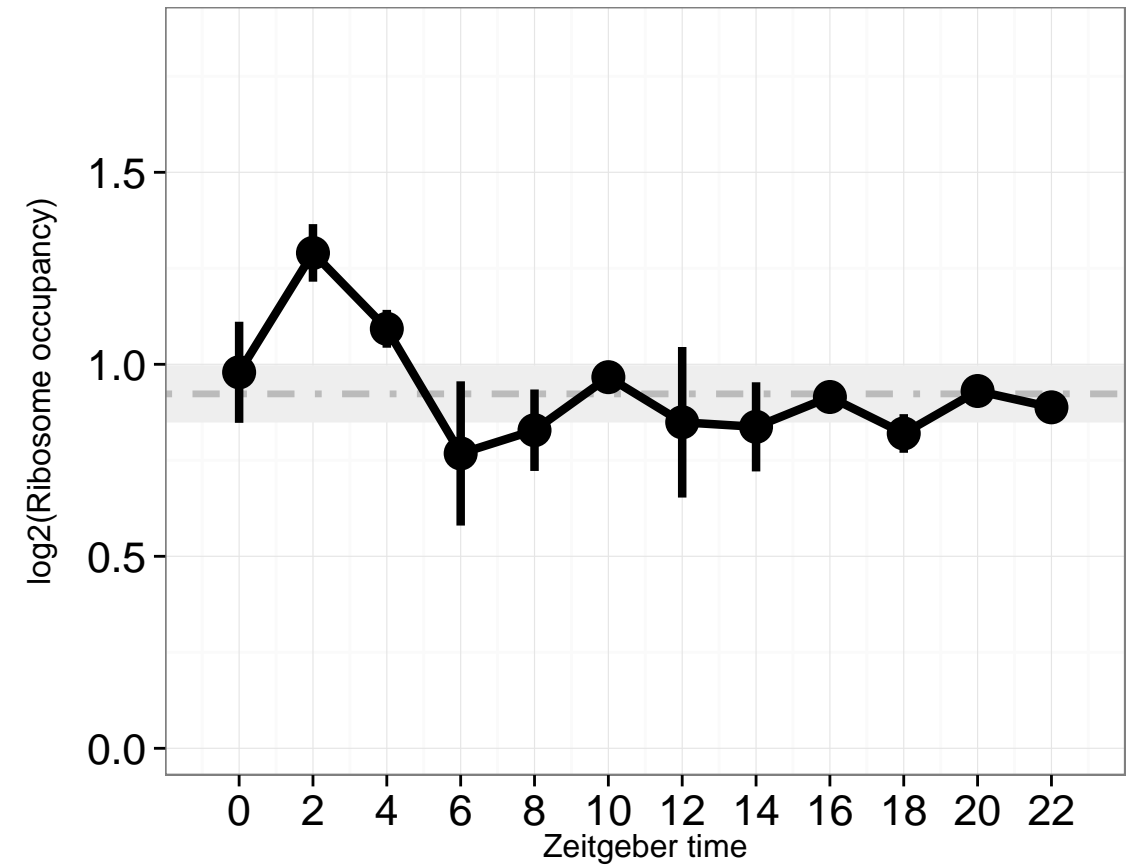

Supplement: Supplementary file 8956 [file 1]

# Mgrn1

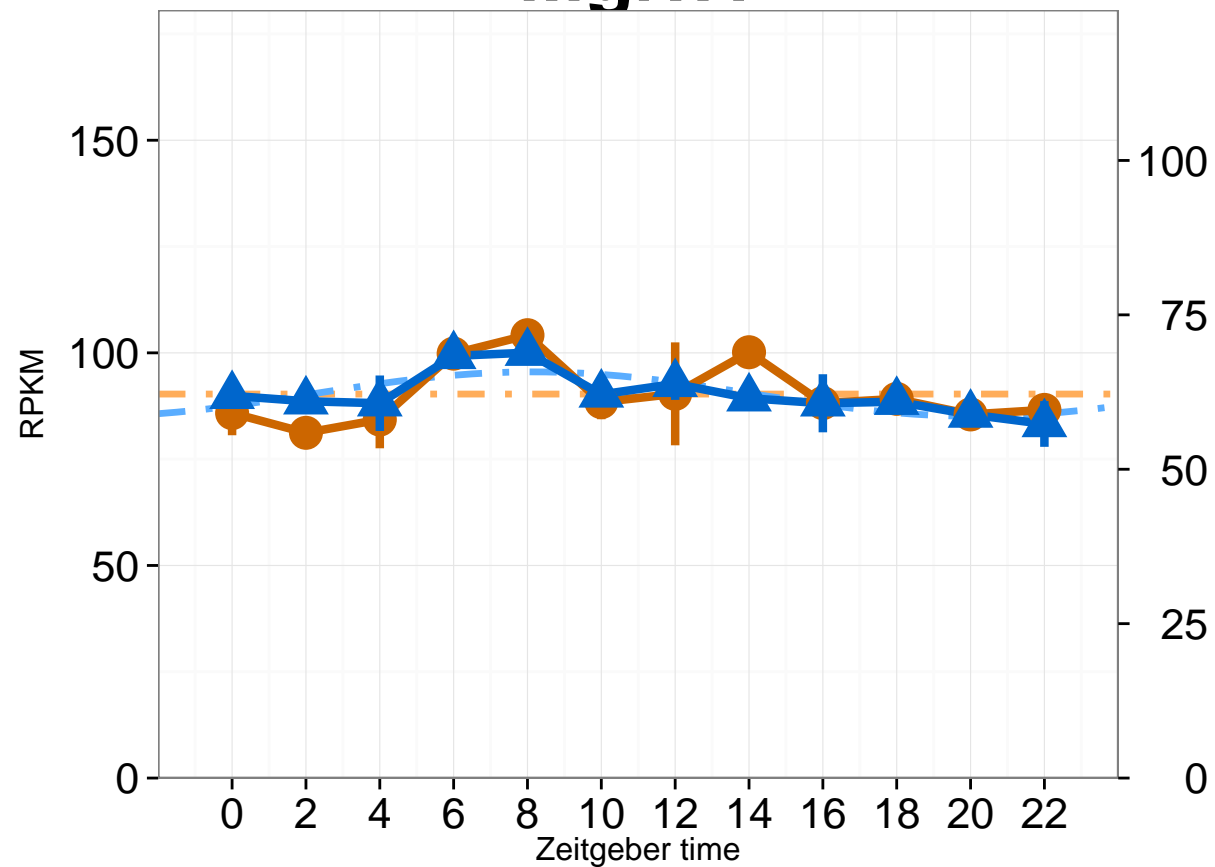

# Mgrn1

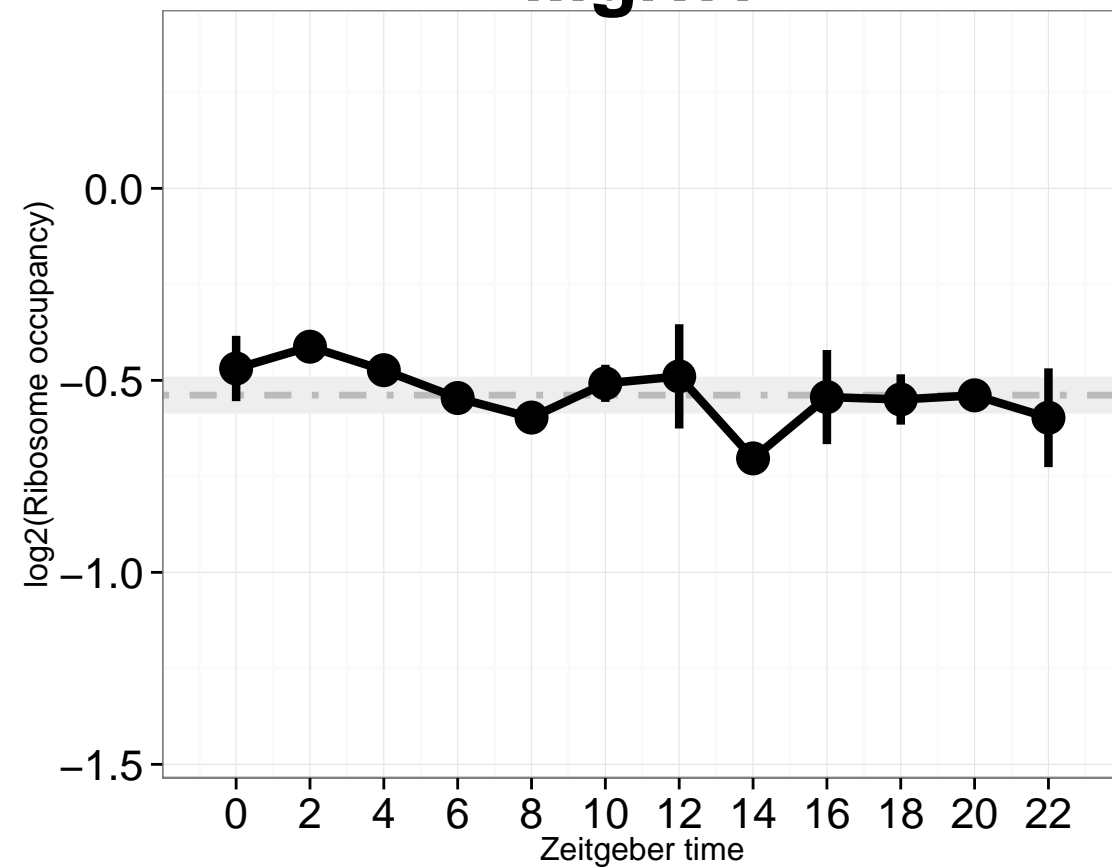

Supplement: Supplementary file 8957 [file 1]

## Arrdc4

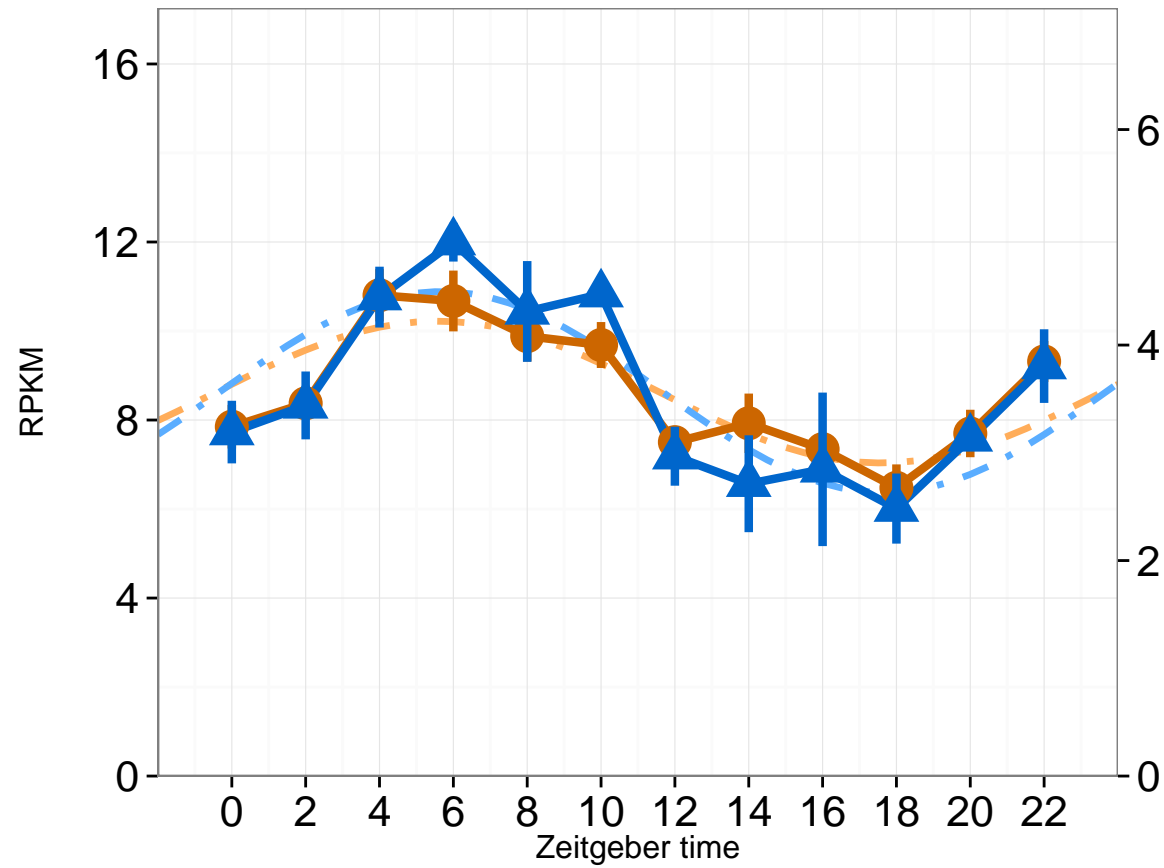

## Arrdc4

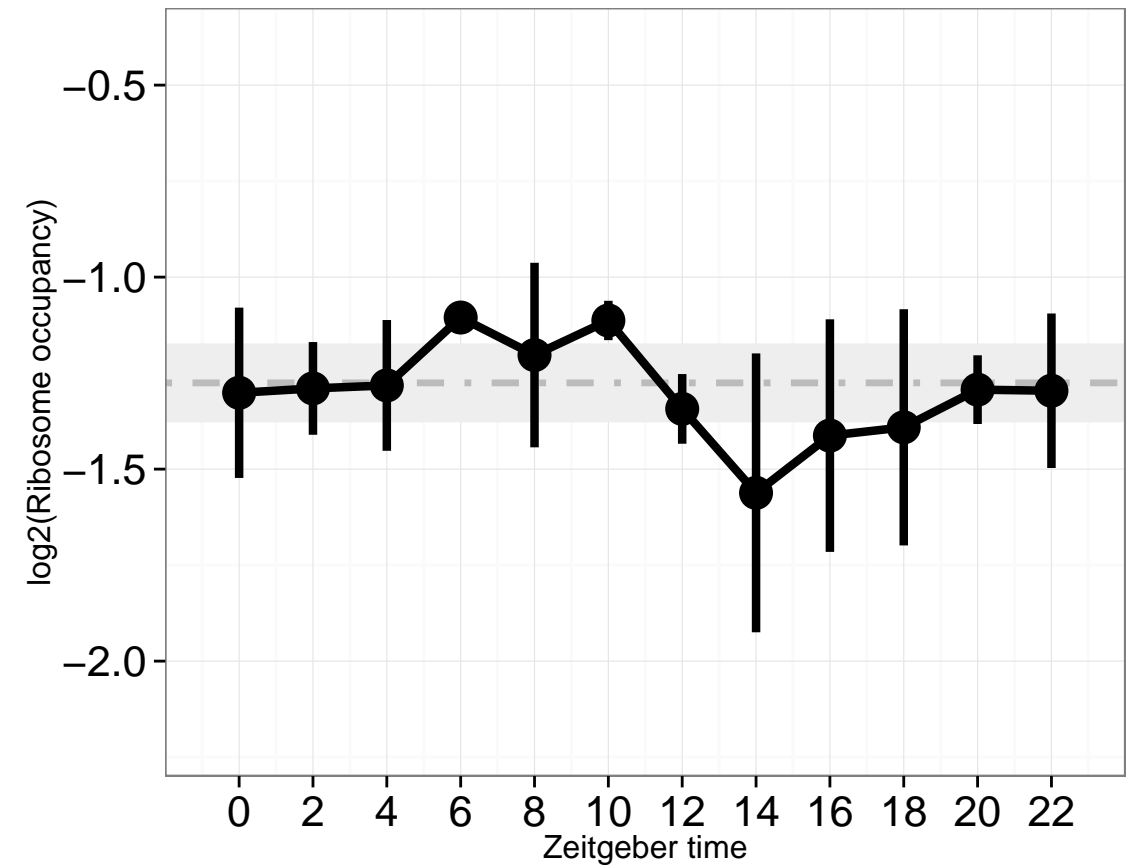

Supplement: Supplementary file 8959 [file 1]

## 9530077C05Rik

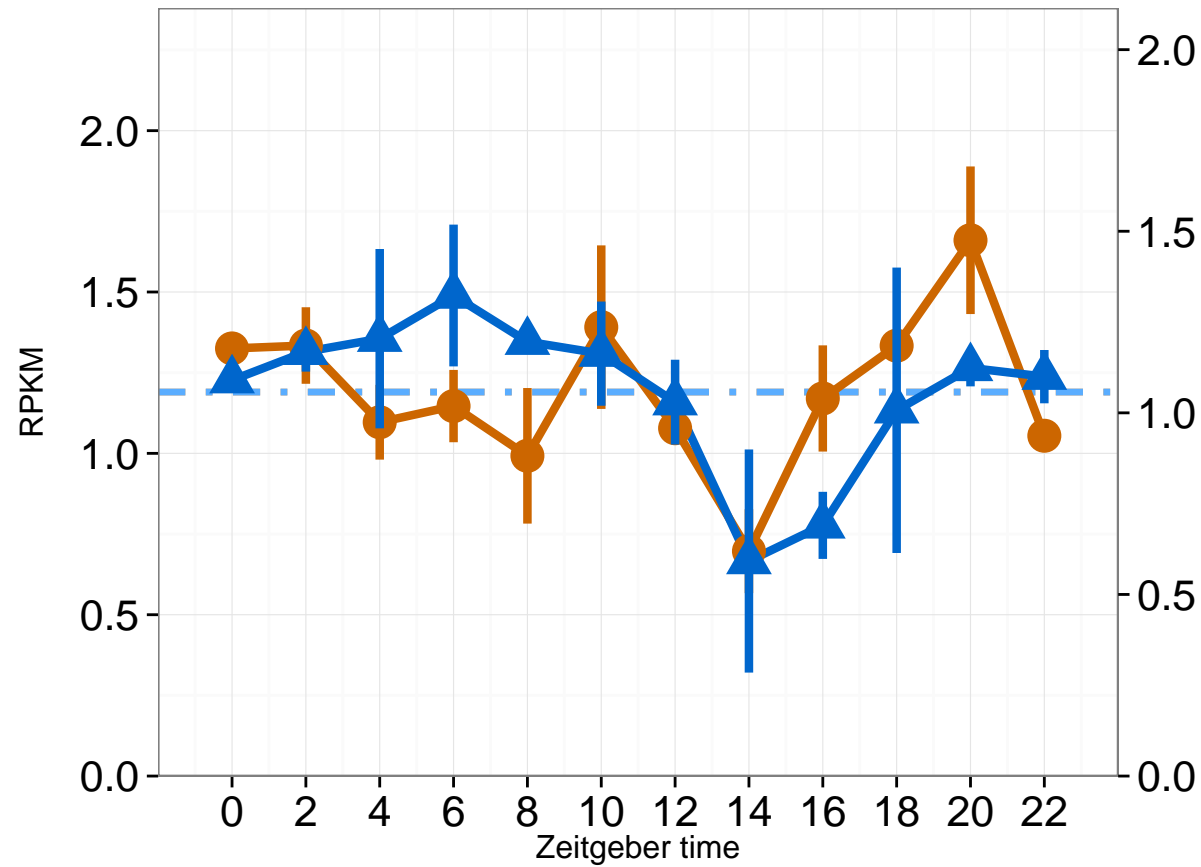

## 9530077C05Rik

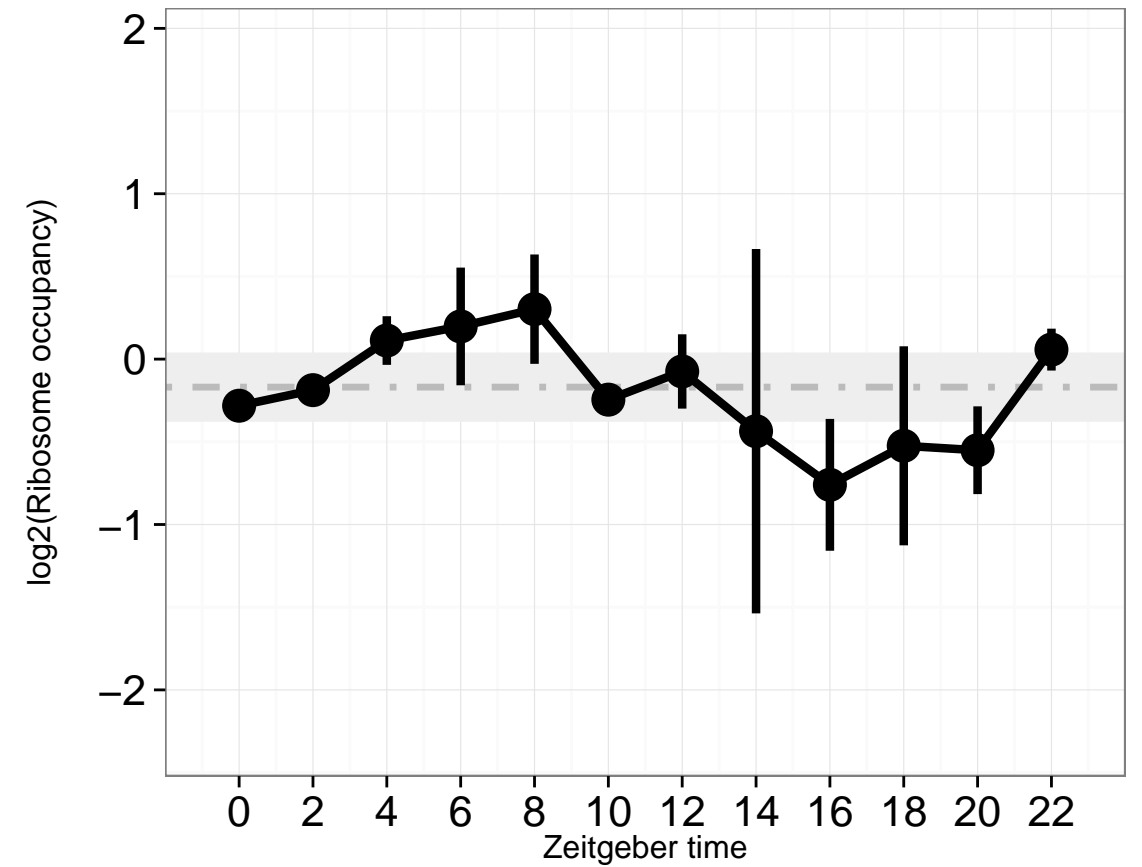

Supplement: Supplementary file 8960 [file 1]

# Pdf

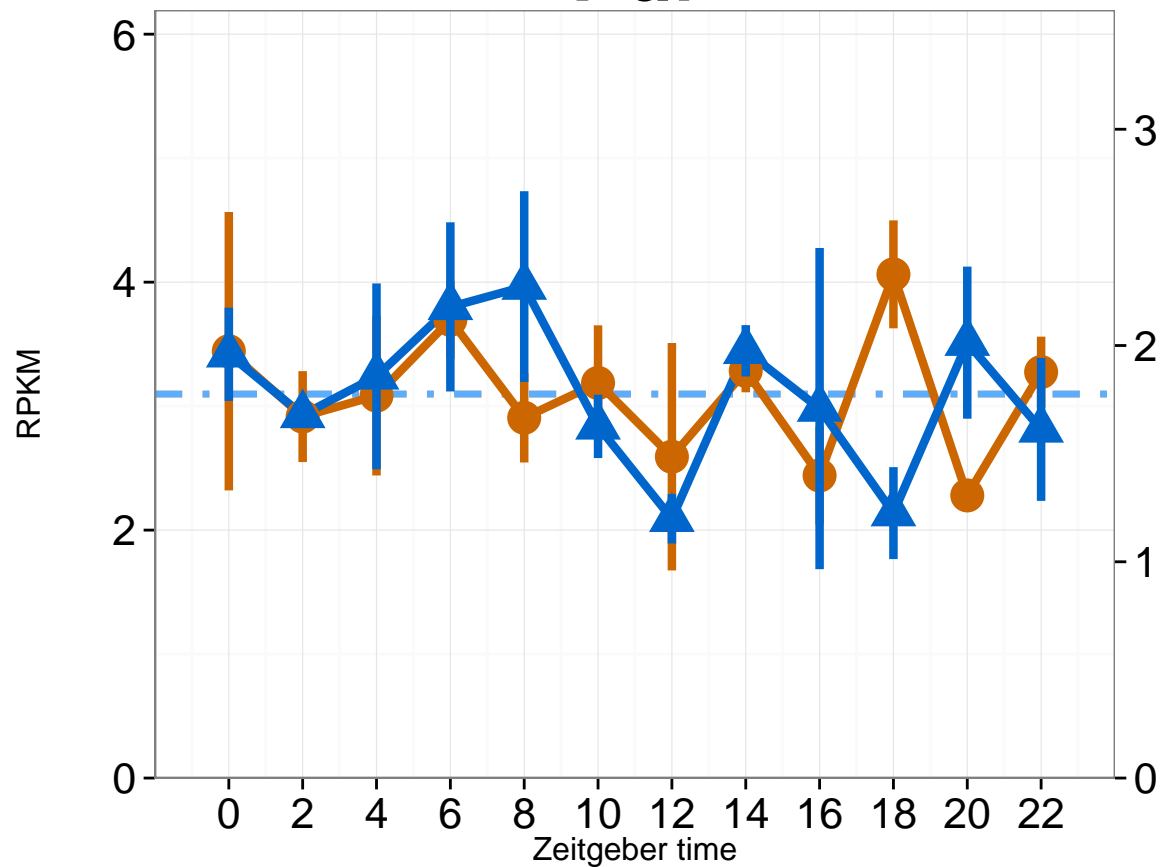

# Pdf

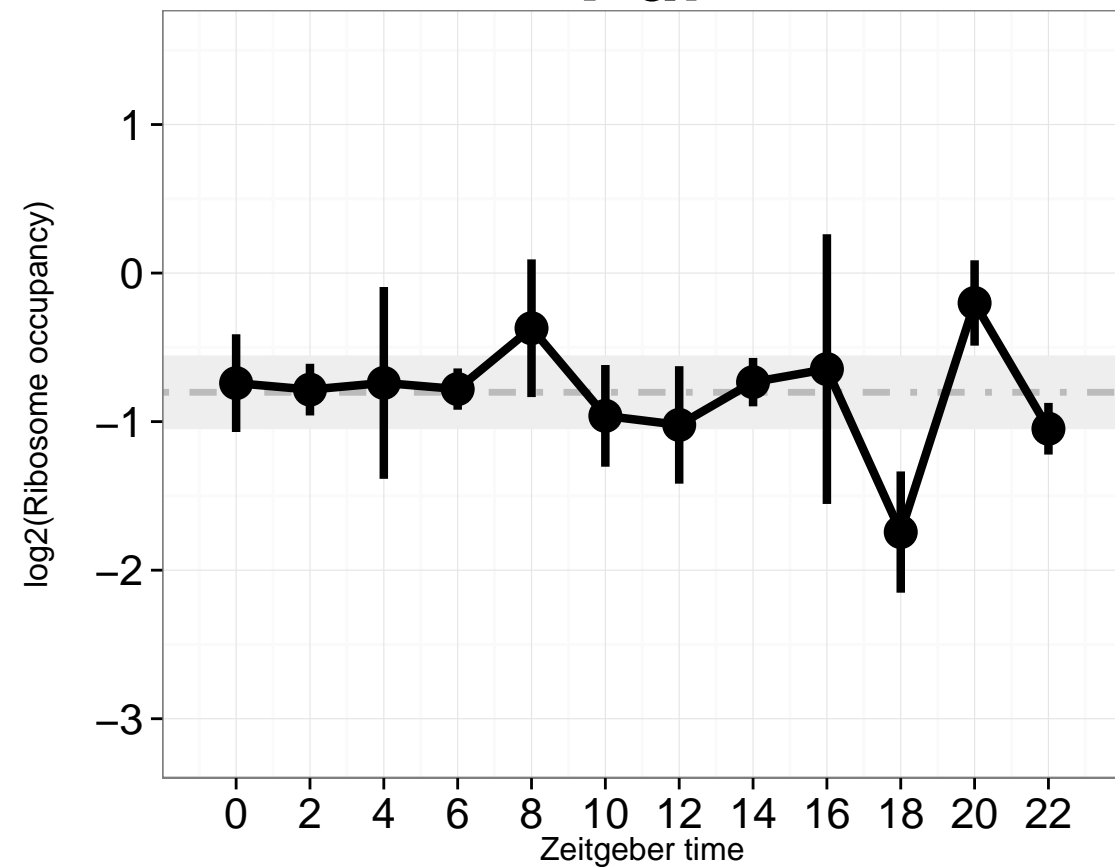

Supplement: Supplementary file 8961 [file 1]

# Tomm40l

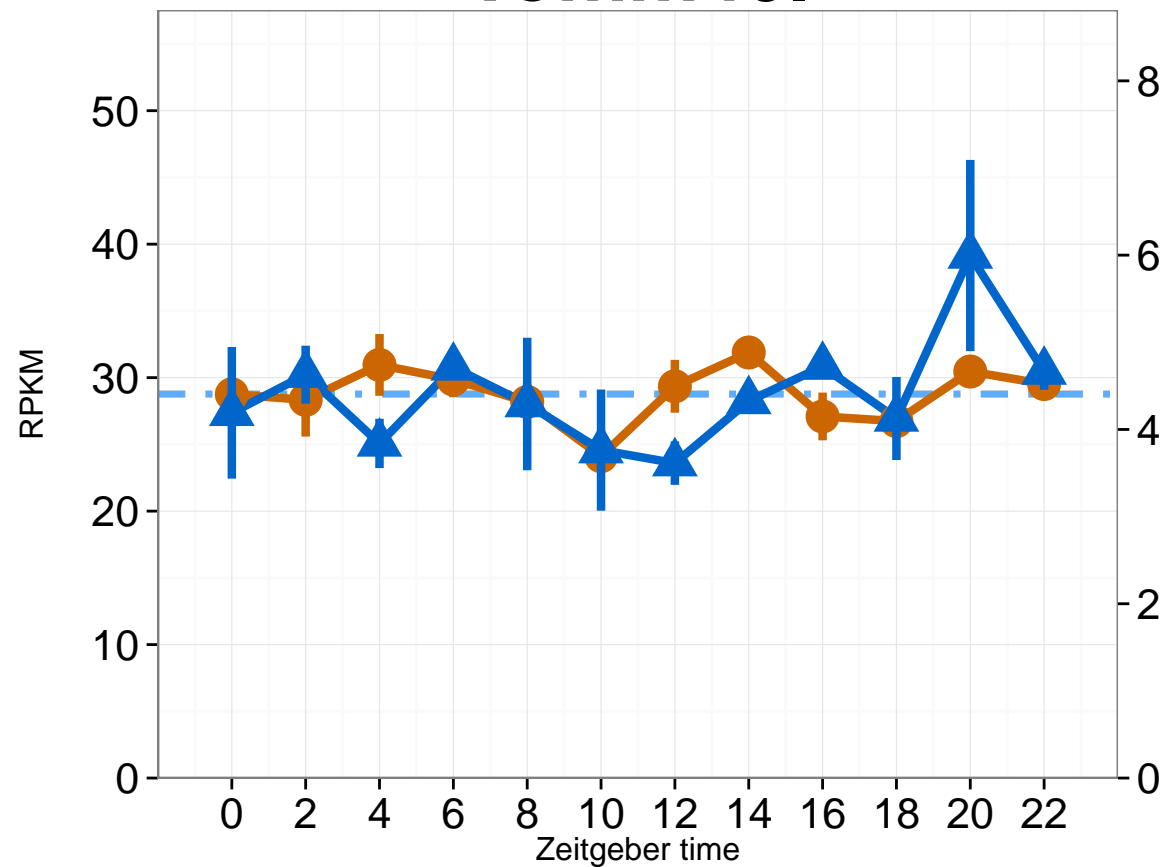

# Tomm40l

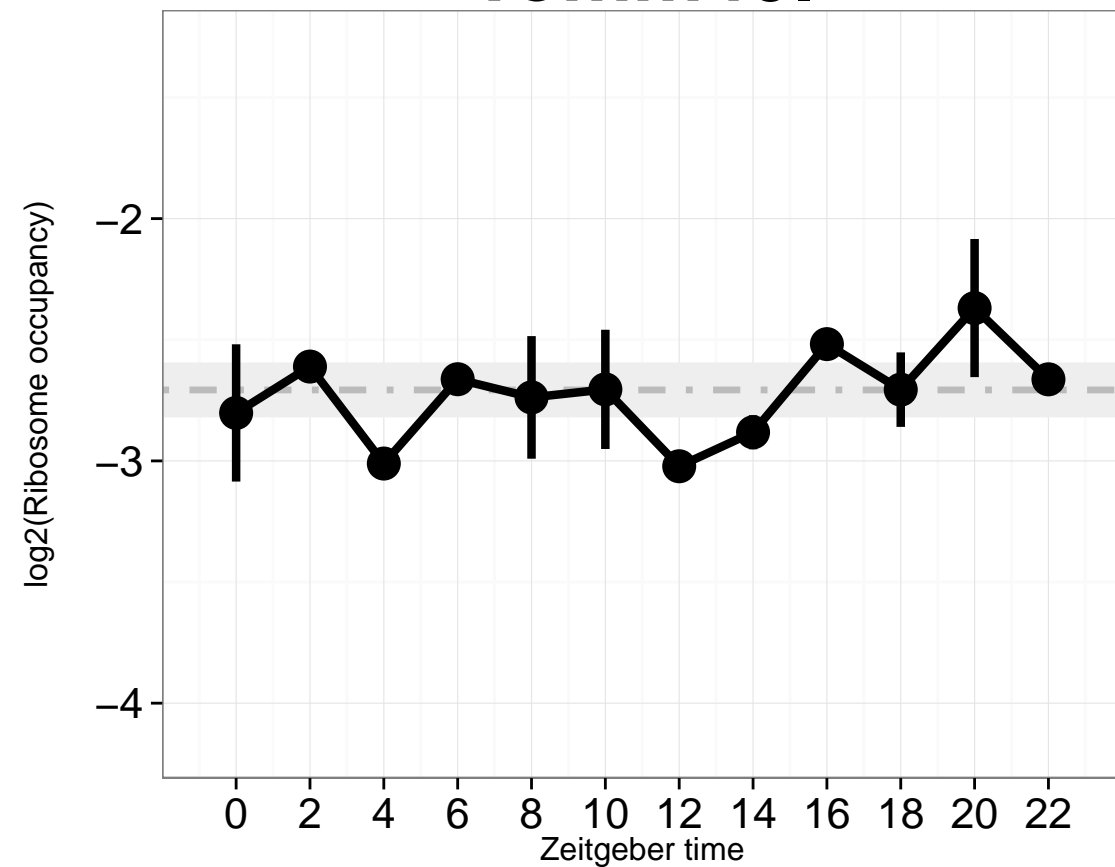

Supplement: Supplementary file 8962 [file 1]

# Higd1a

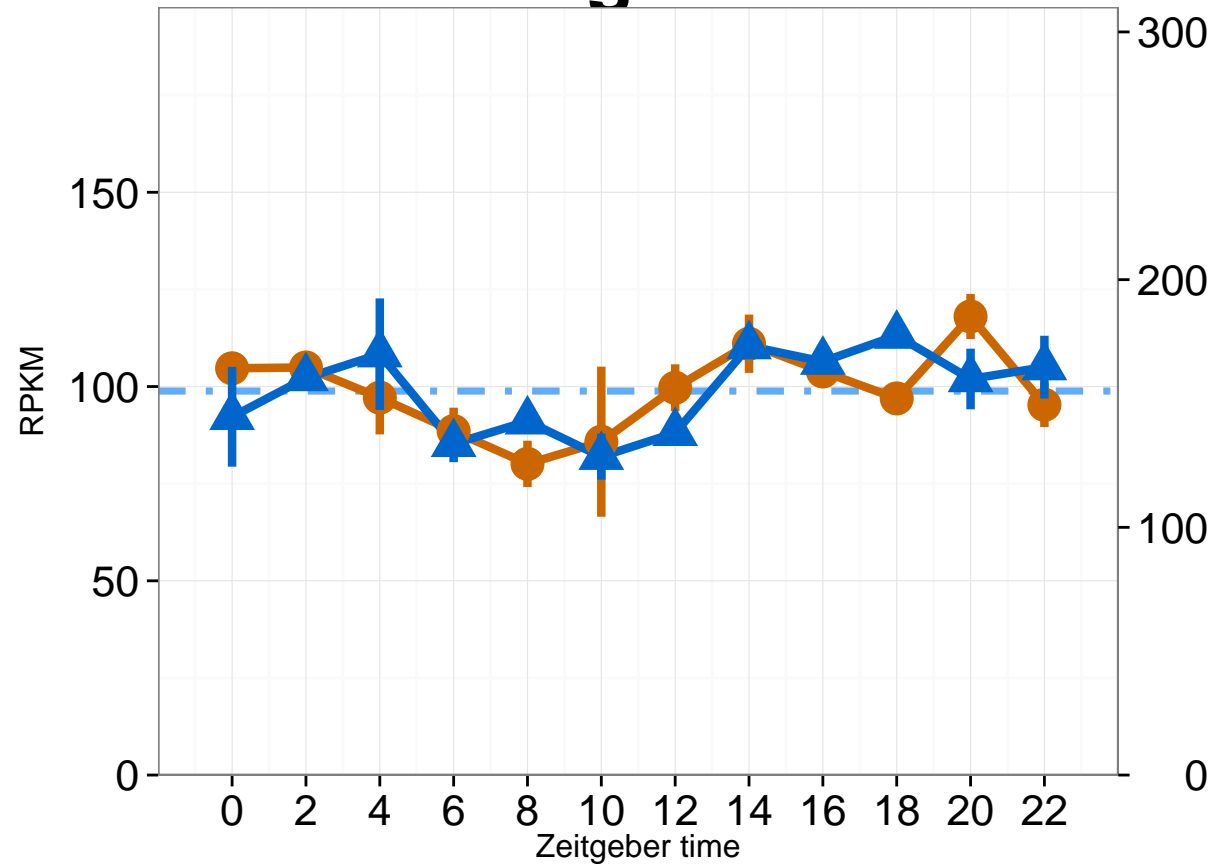

# Higd1a

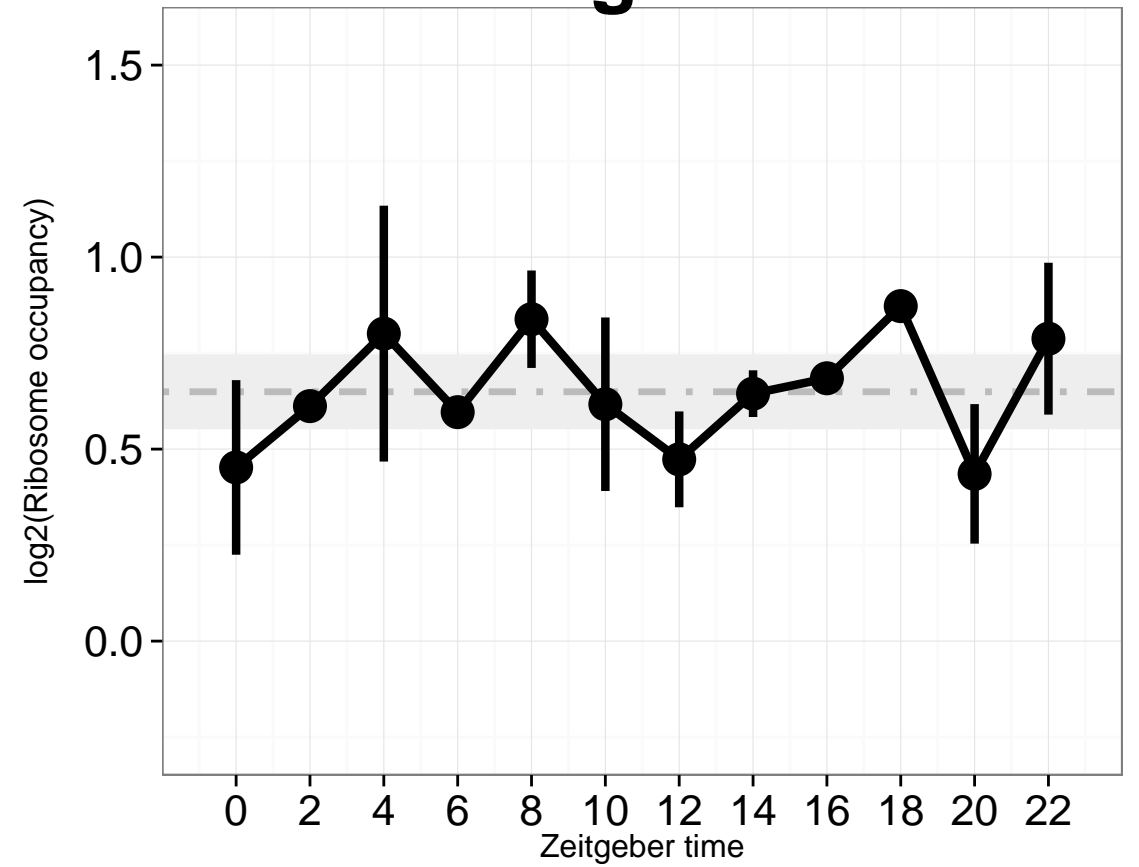

Supplement: Supplementary file 8963 [file 1]

# Map2k3

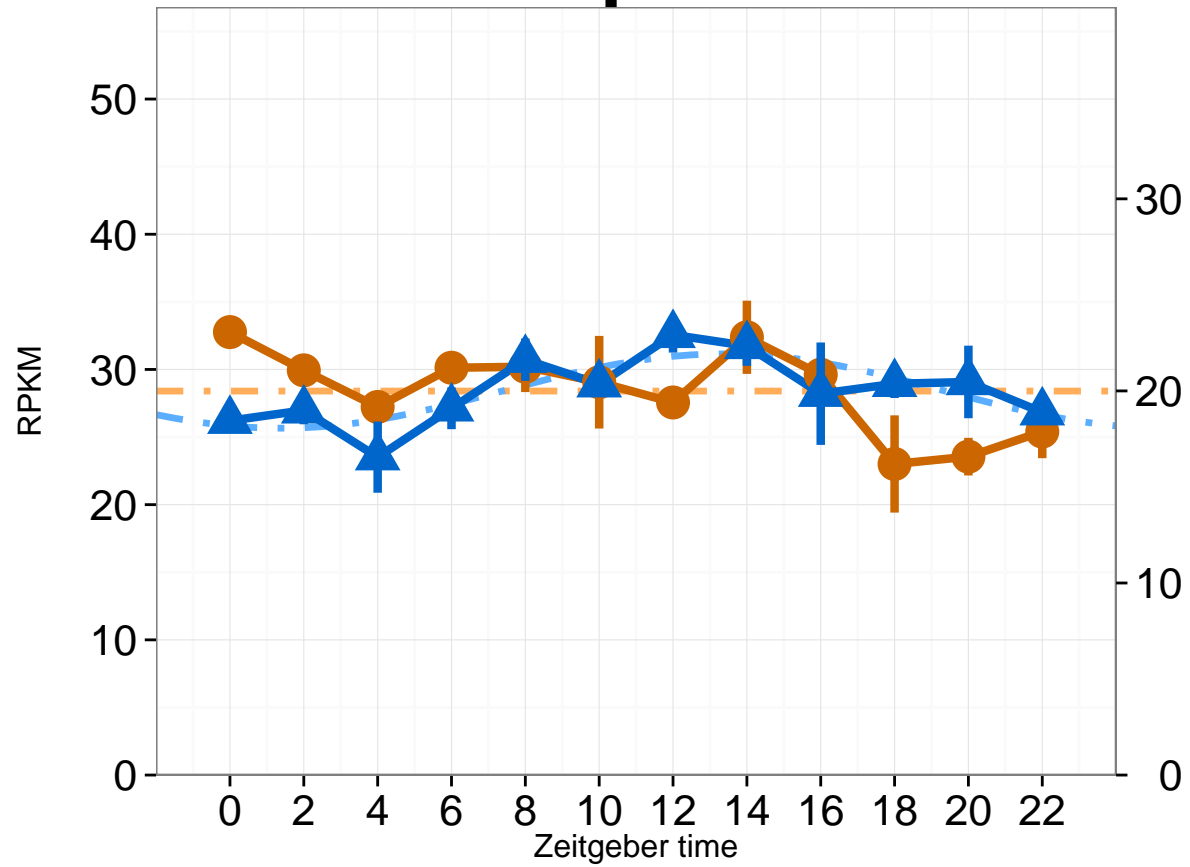

# Map2k3

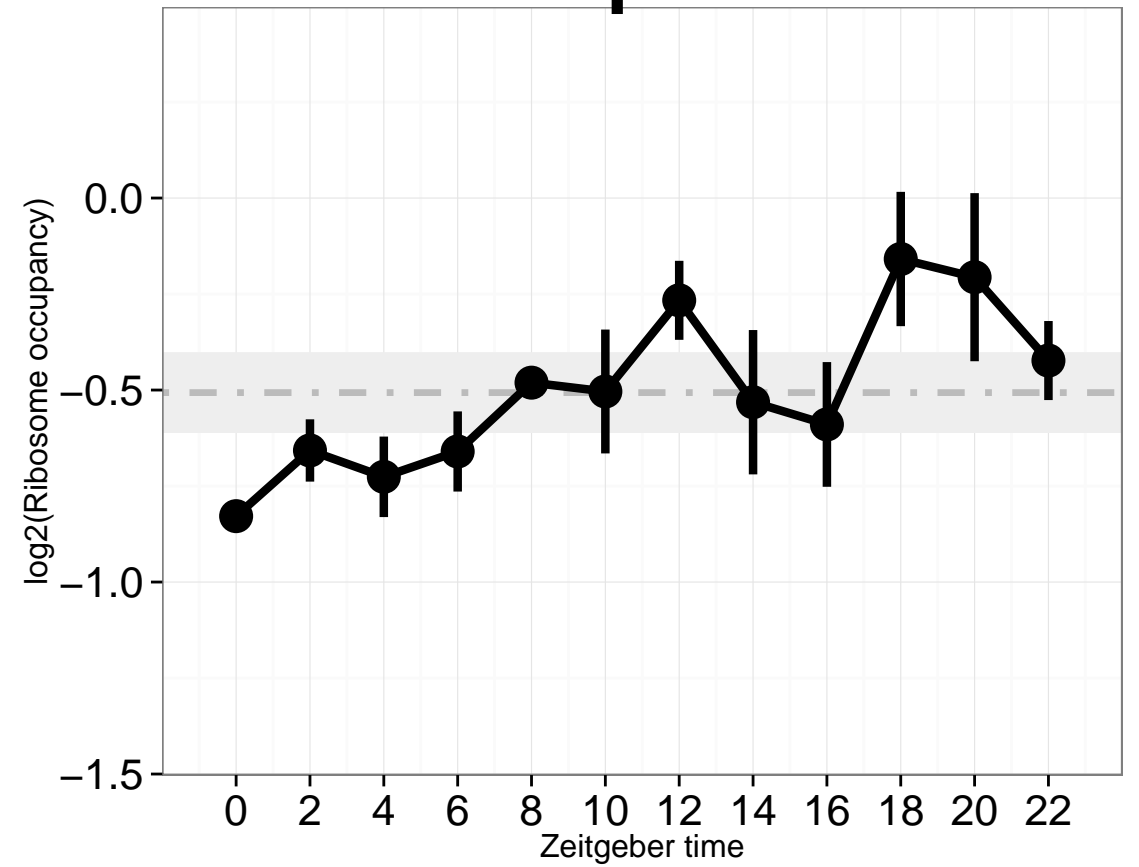

Supplement: Supplementary file 8964 [file 1]

## Adh1

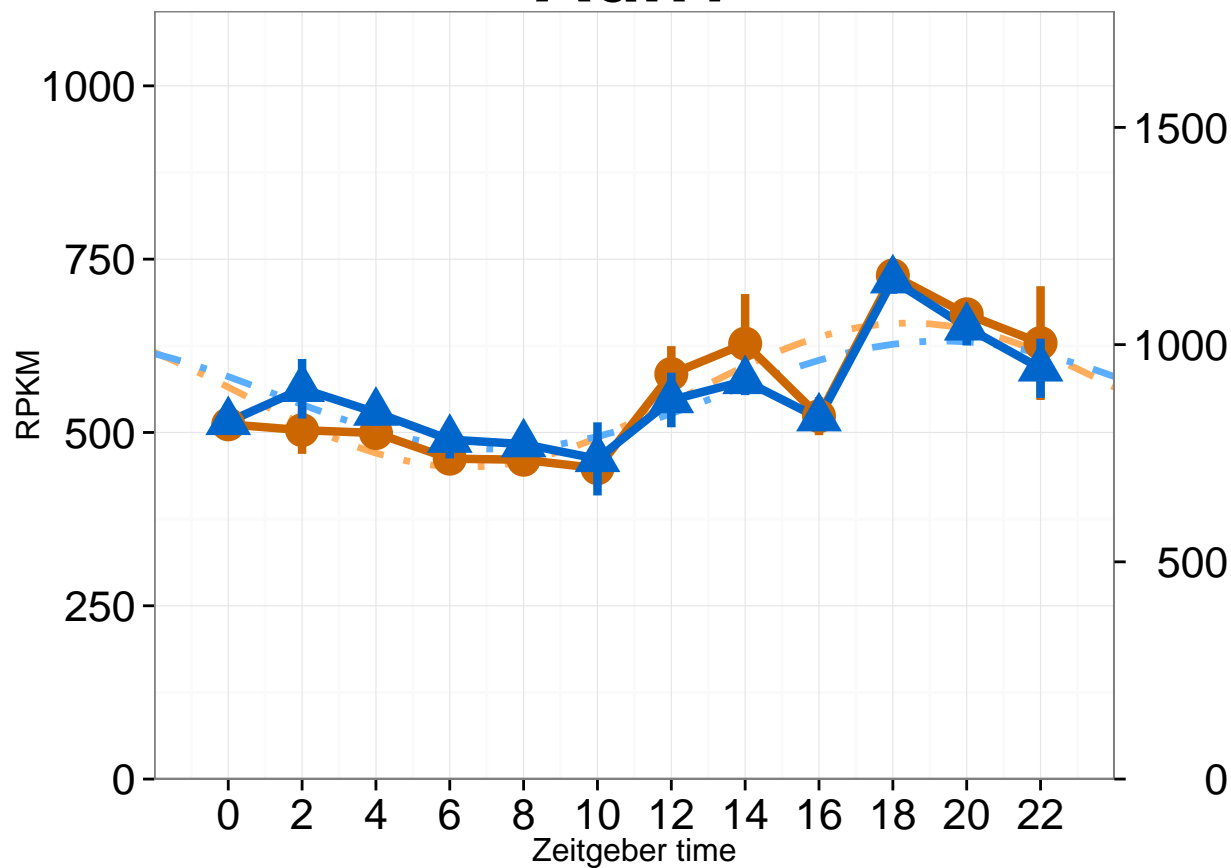

## Adh1

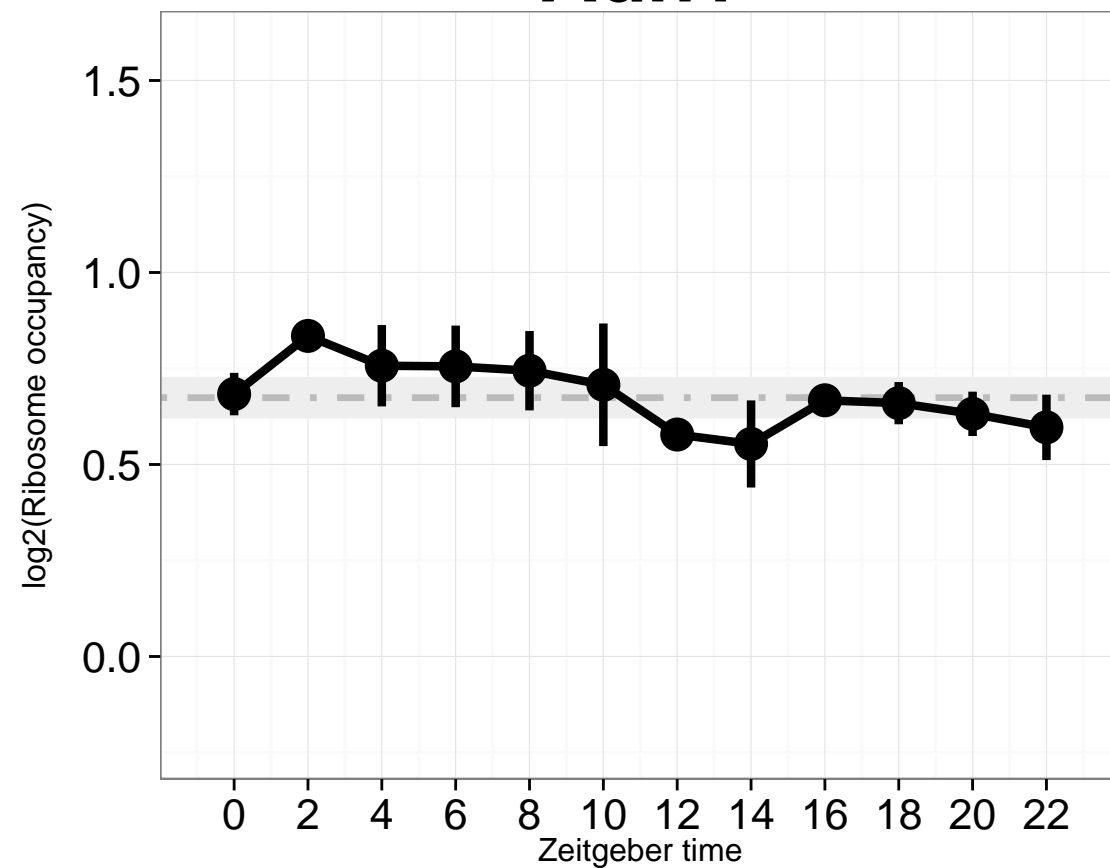

Supplement: Supplementary file 8965 [file 1]

# Rasa1

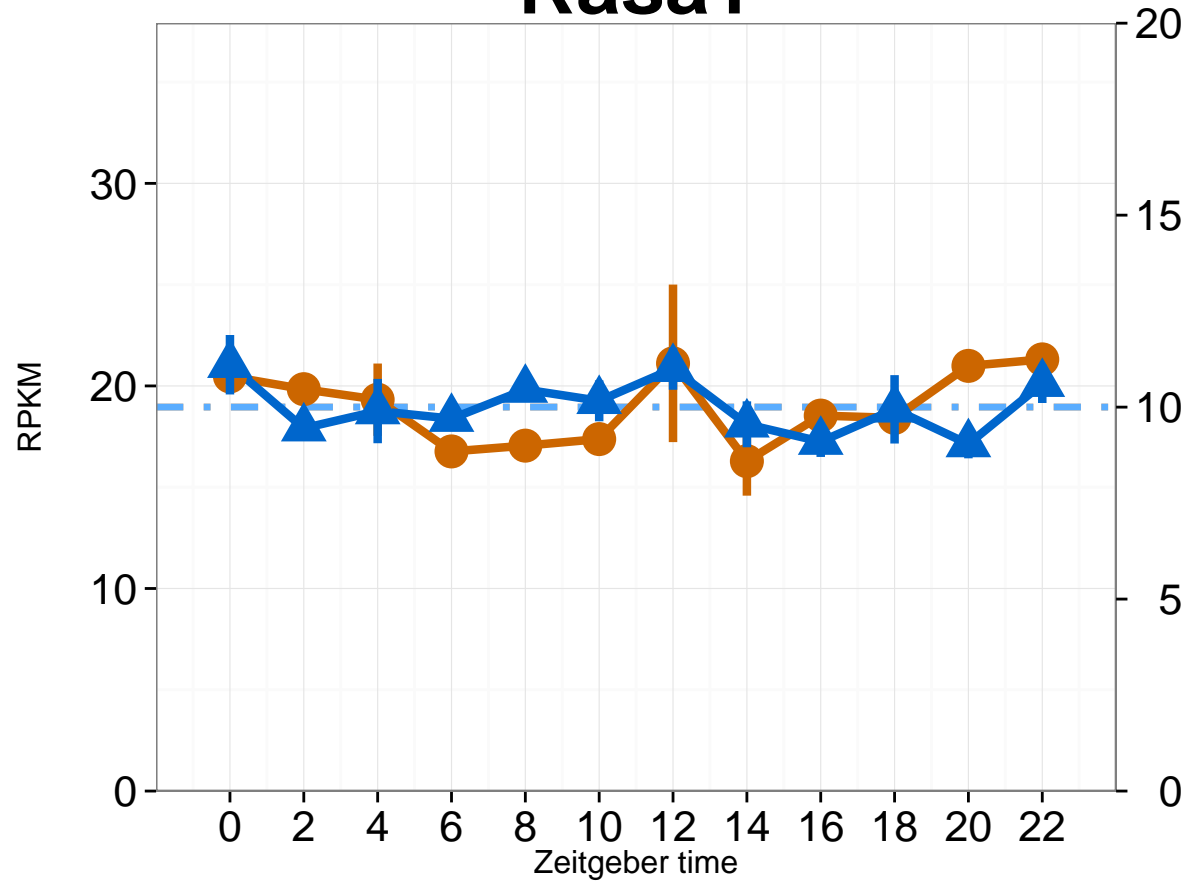

# Rasa1

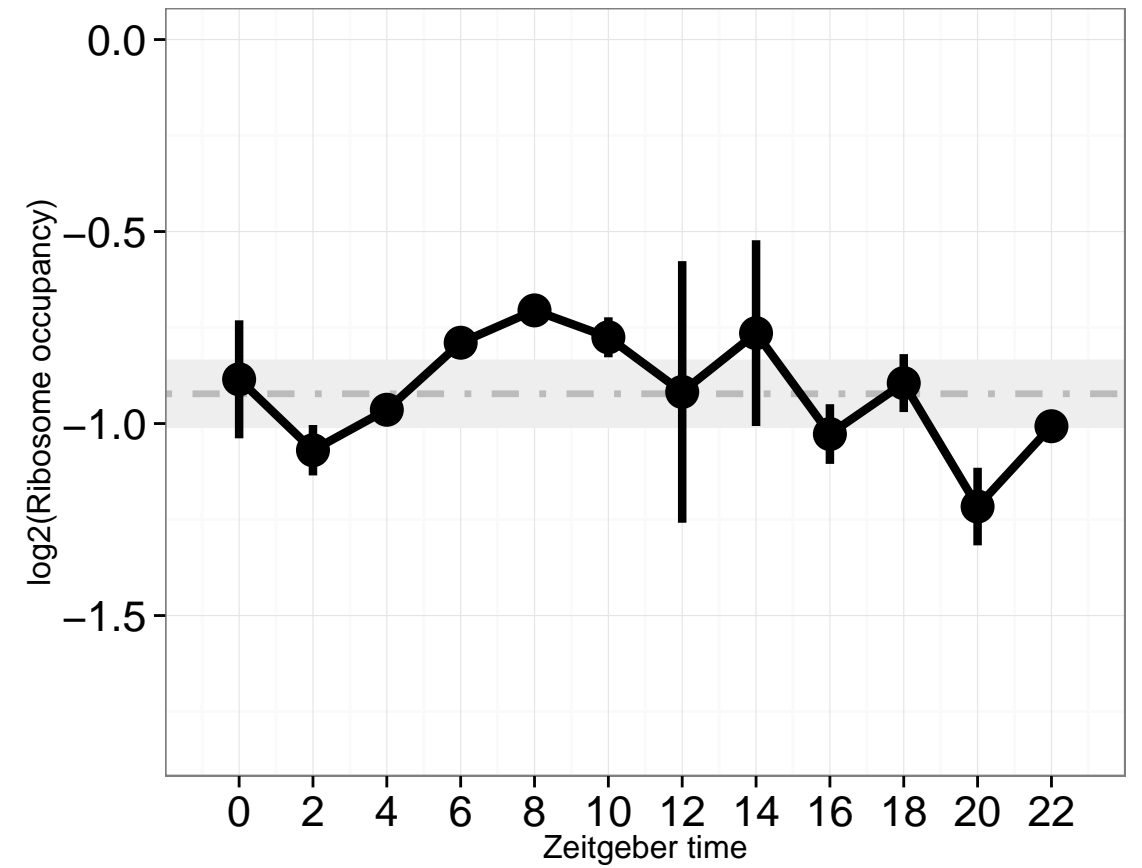

Supplement: Supplementary file 8966 [file 1]

## Sptssa

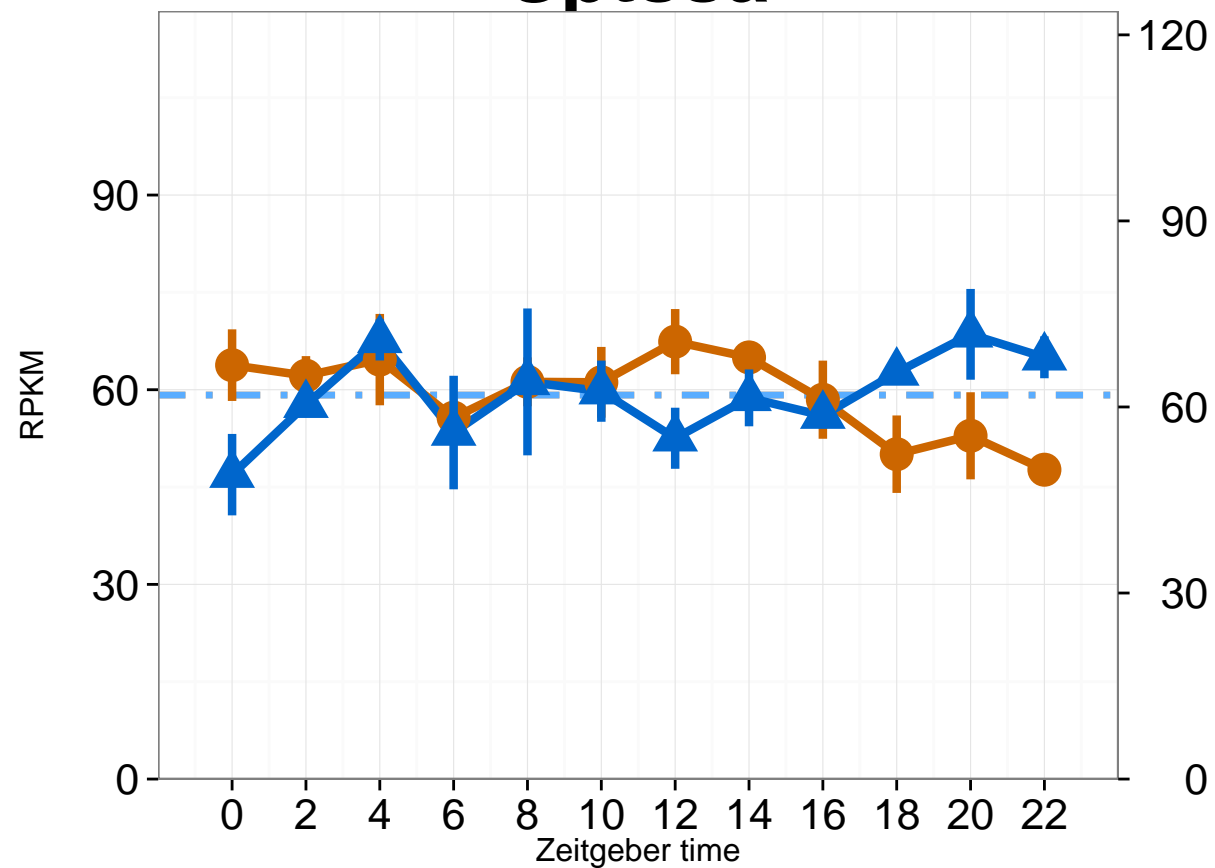

## Sptssa

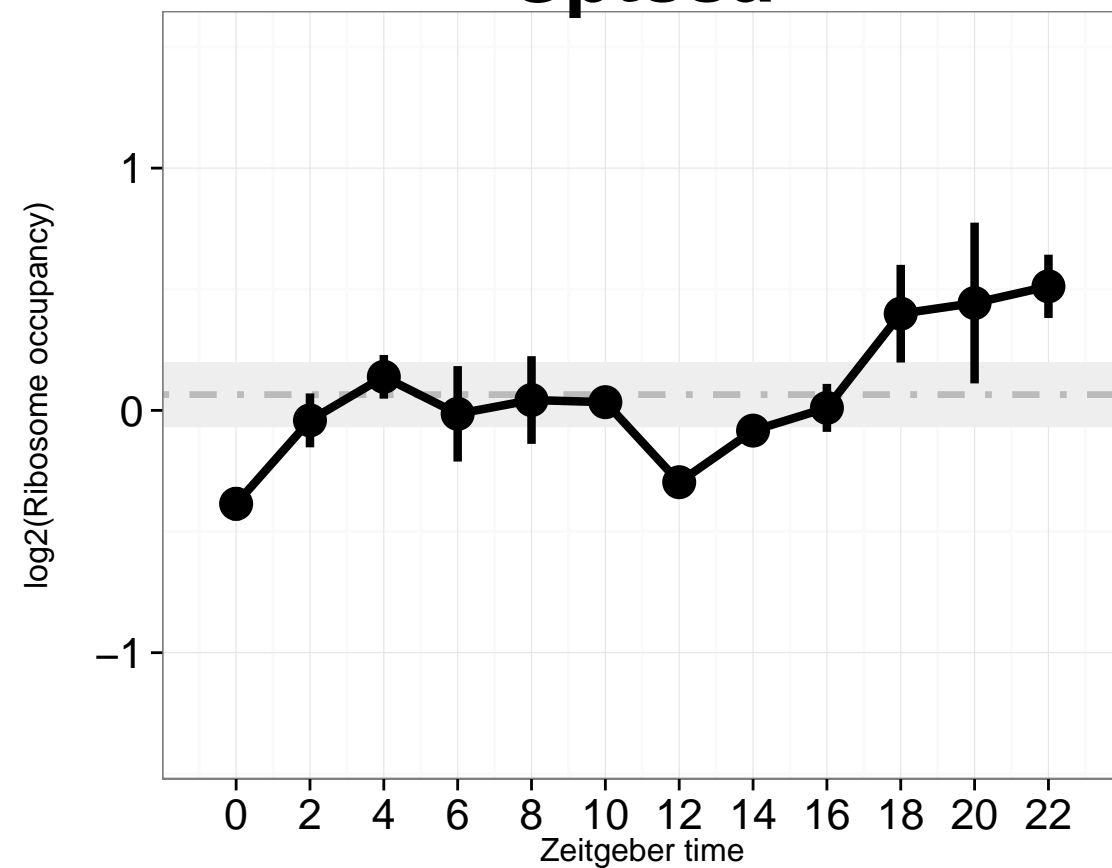

Supplement: Supplementary file 8967 [file 1]

## Shisa4

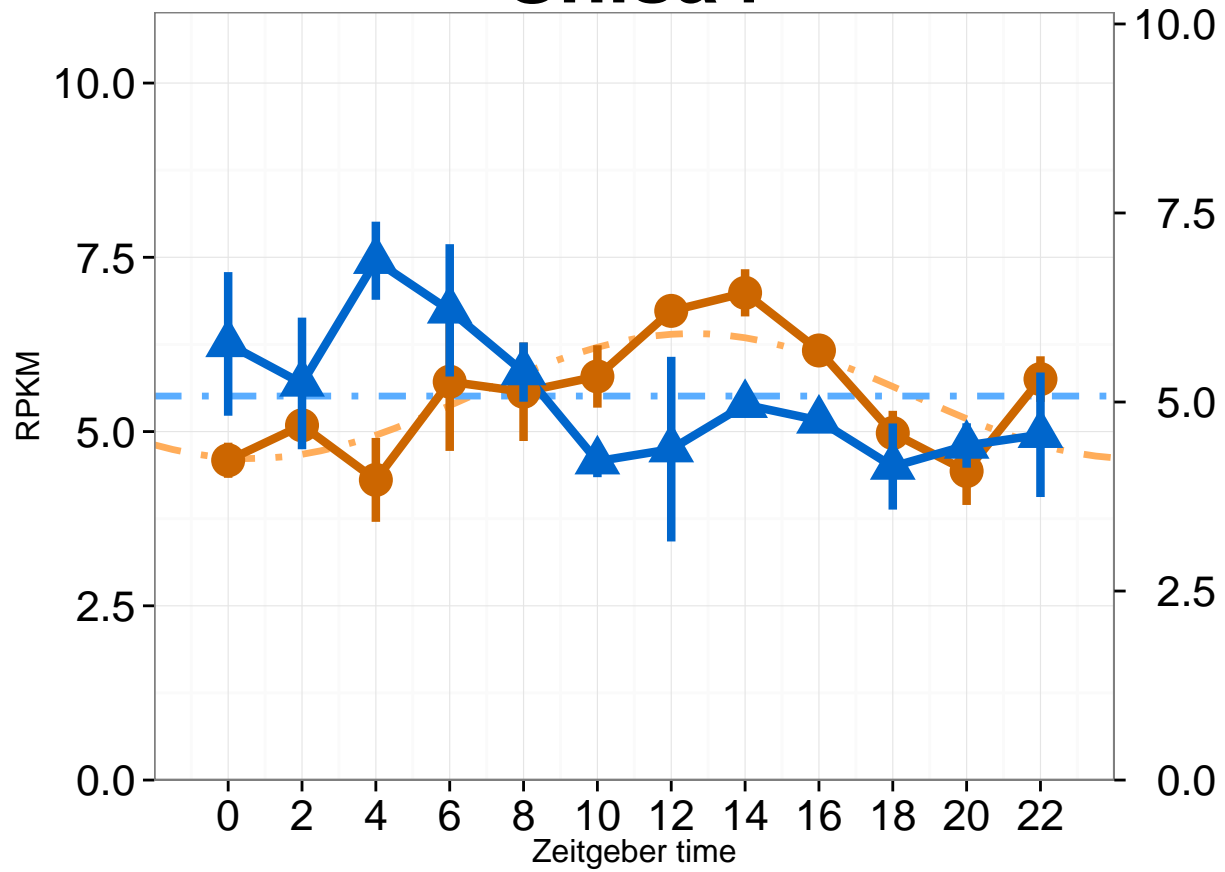

## Shisa4

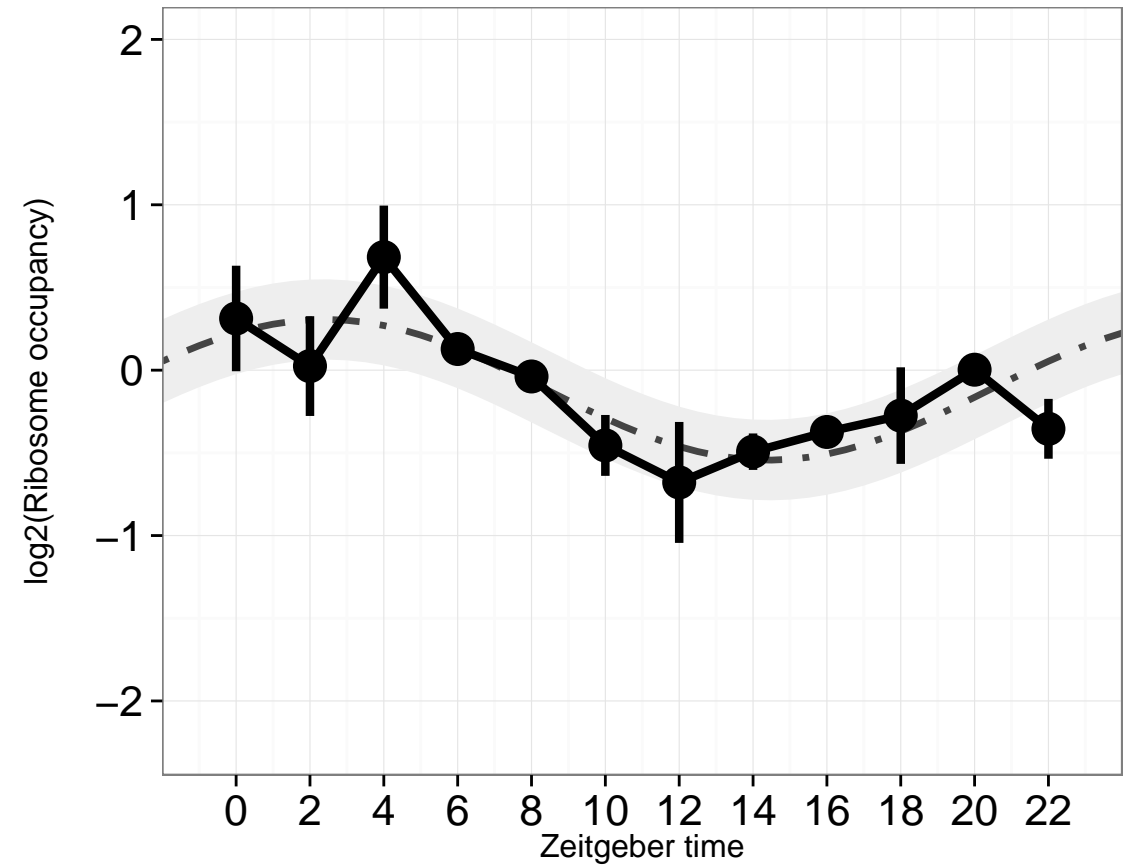

Supplement: Supplementary file 8968 [file 1]

# Ncf1

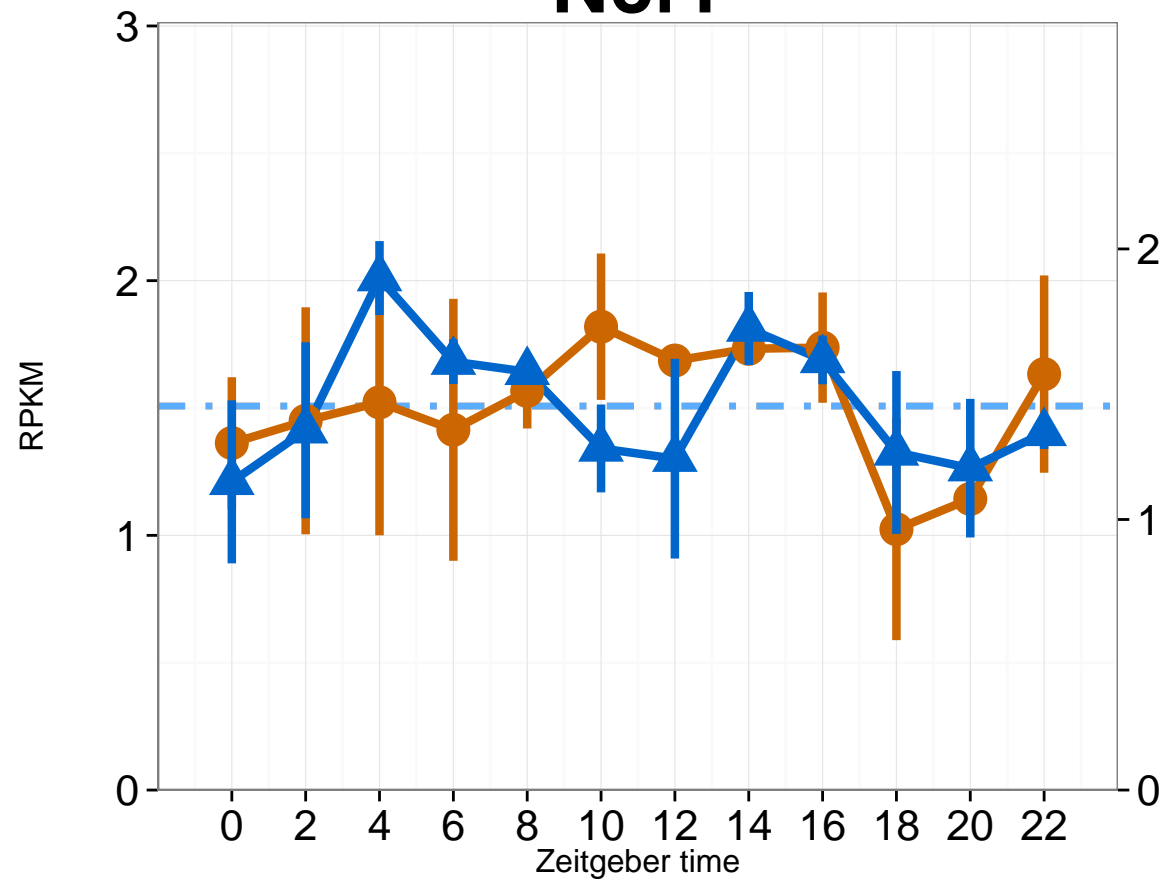

# Ncf1

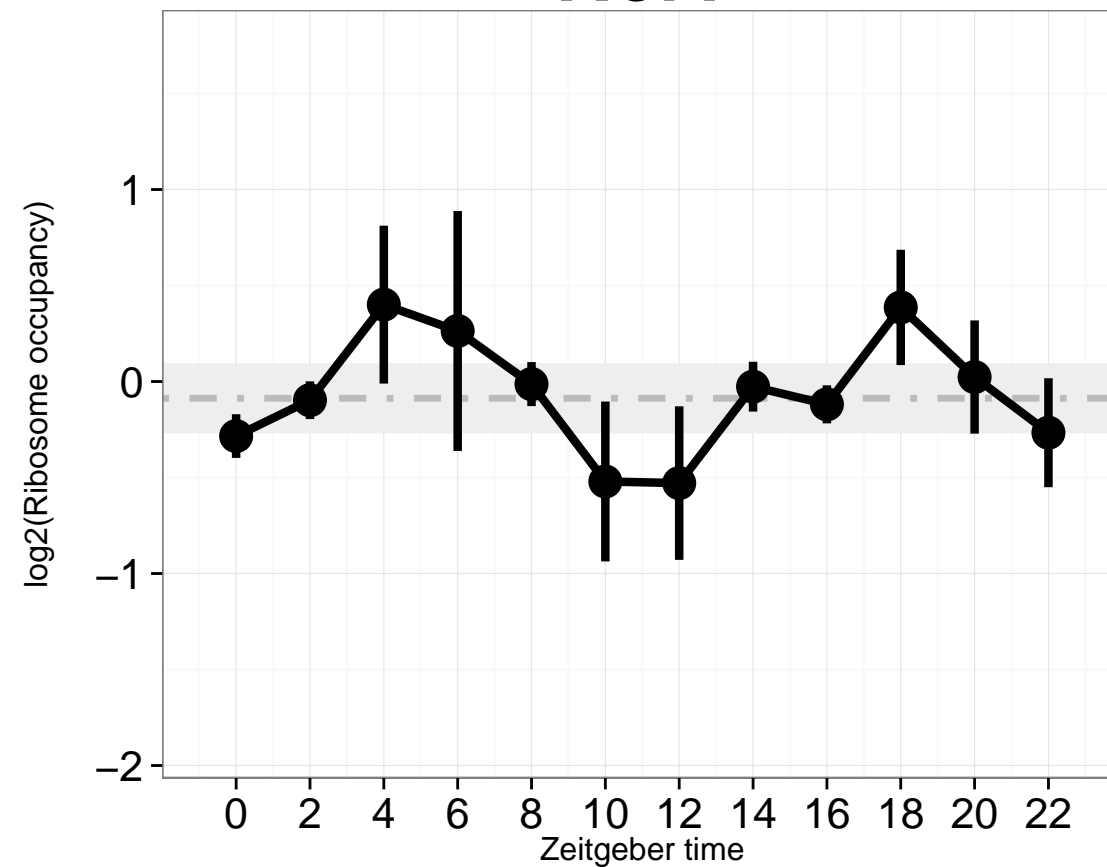

Supplement: Supplementary file 8969 [file 1]

## Gbp7

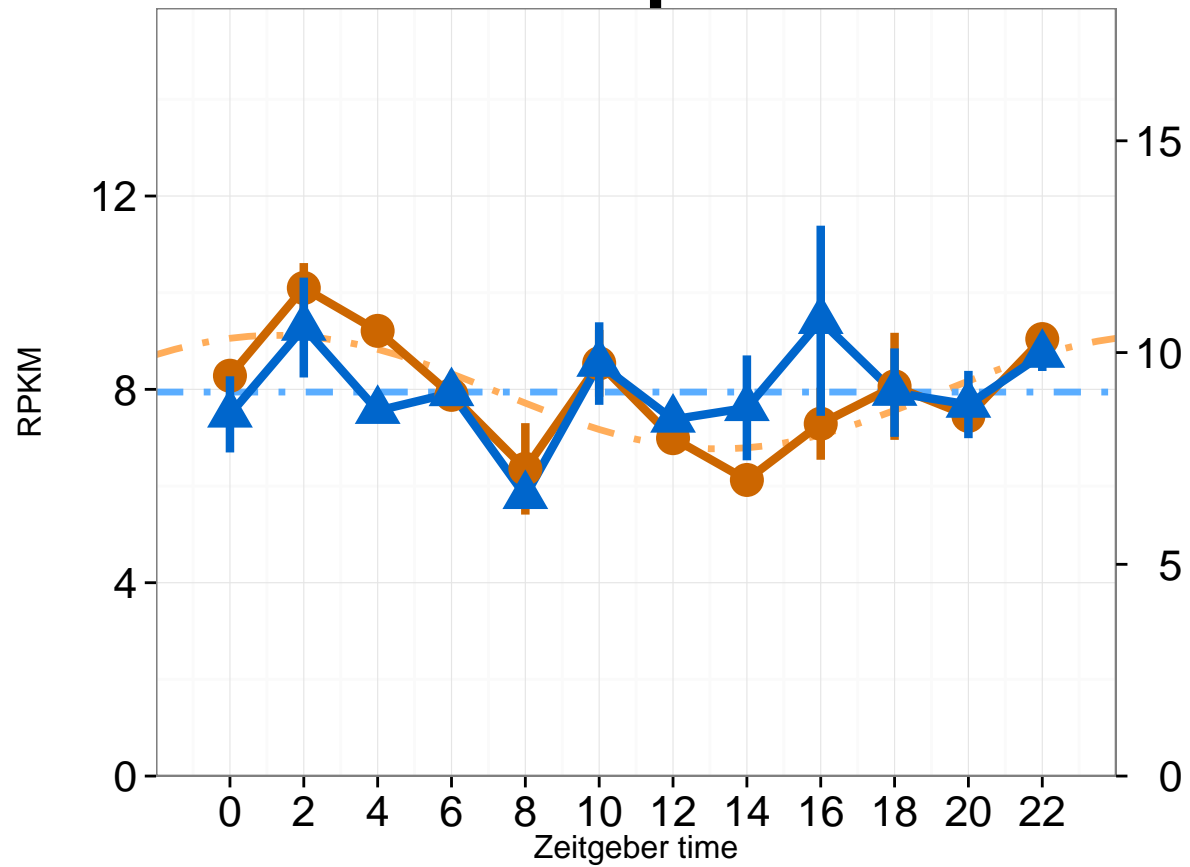

## Gbp7

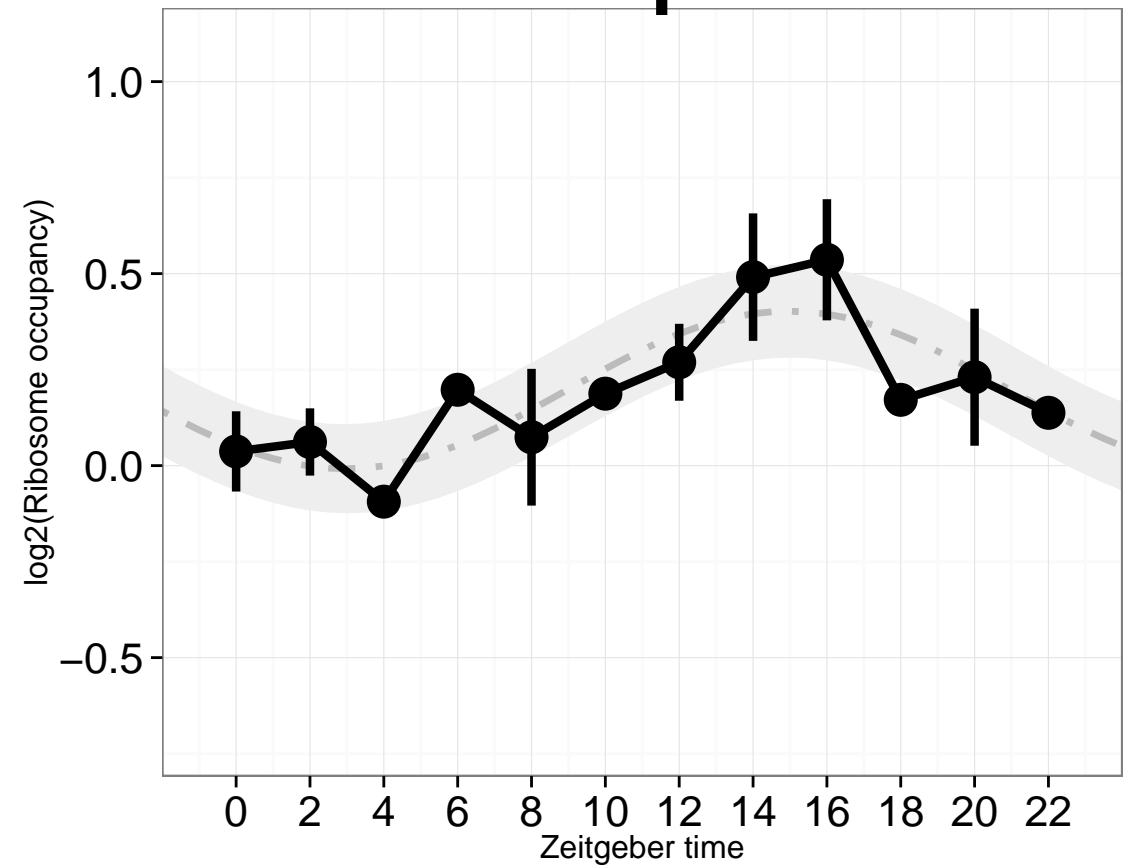

Supplement: Supplementary file 8970 [file 1]

# Lyrm4

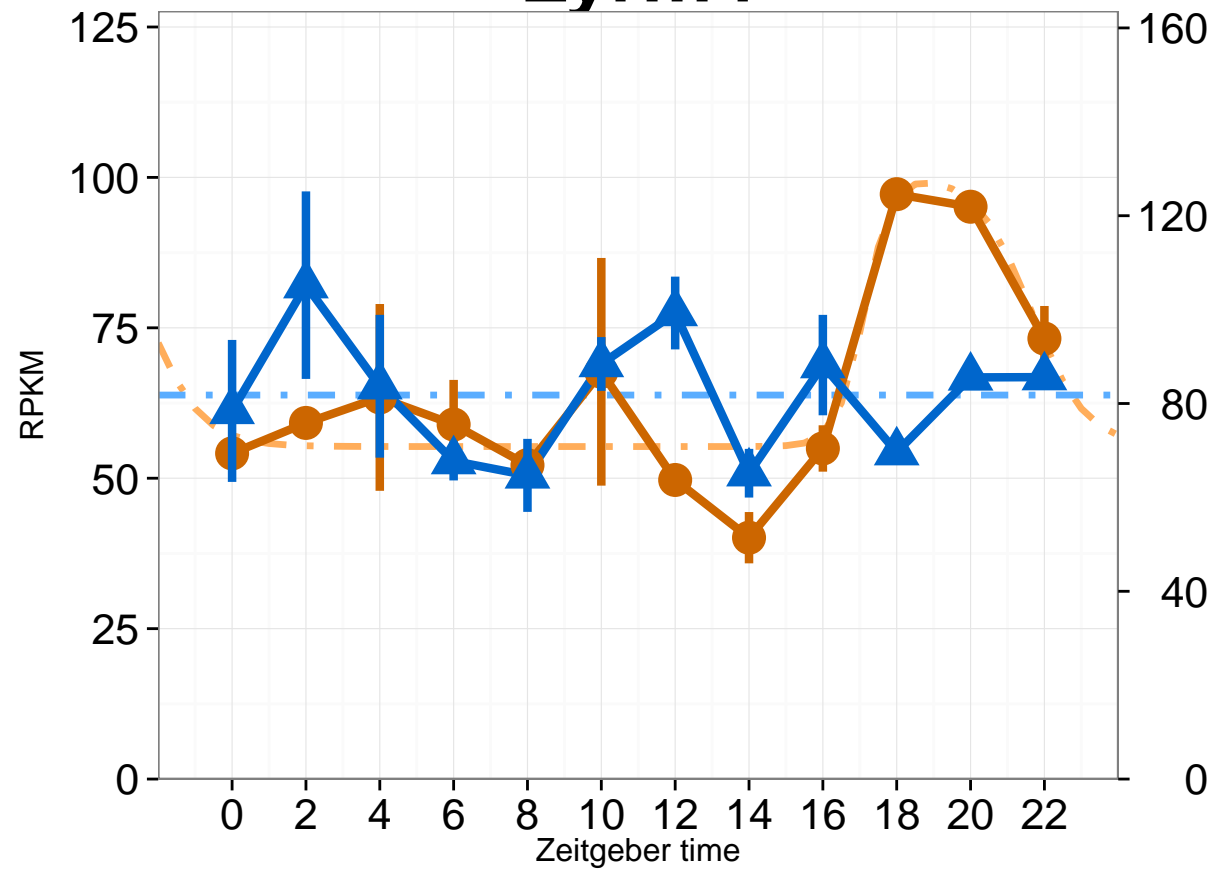

# Lyrm4

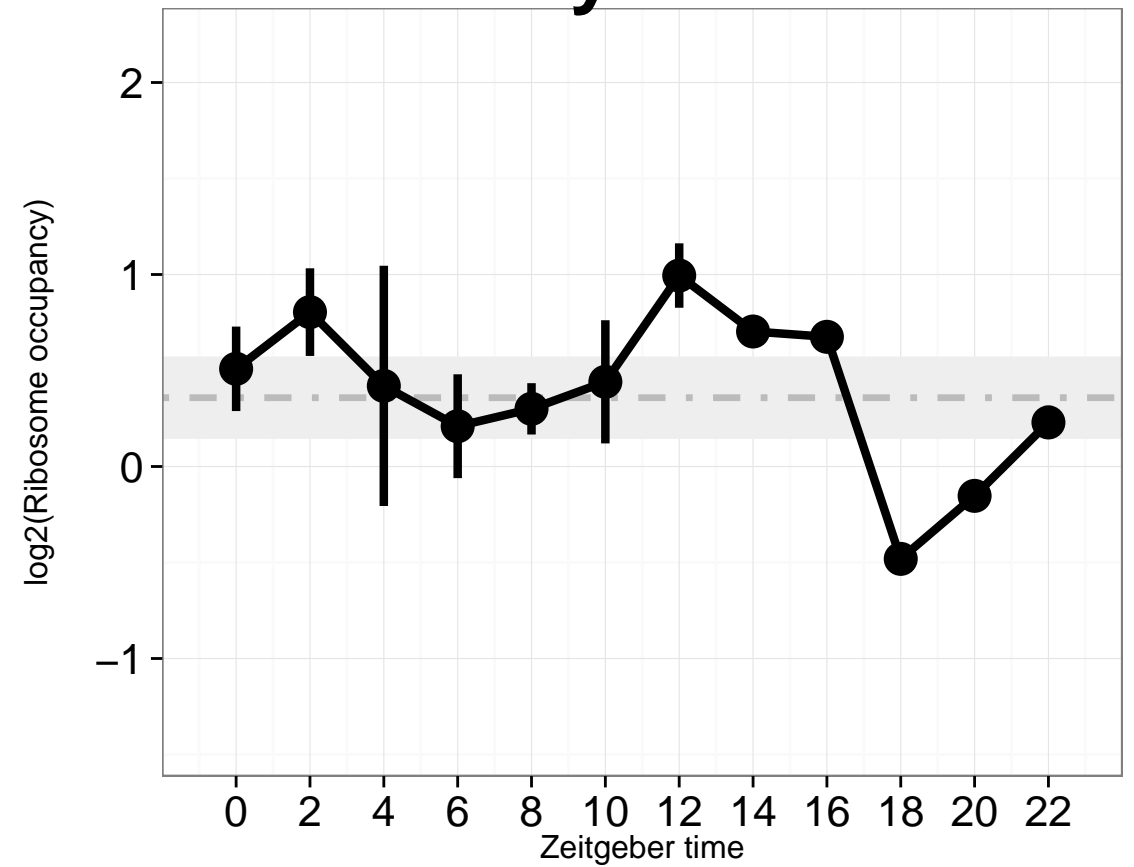

Supplement: Supplementary file 8971 [file 1]

## Traf7

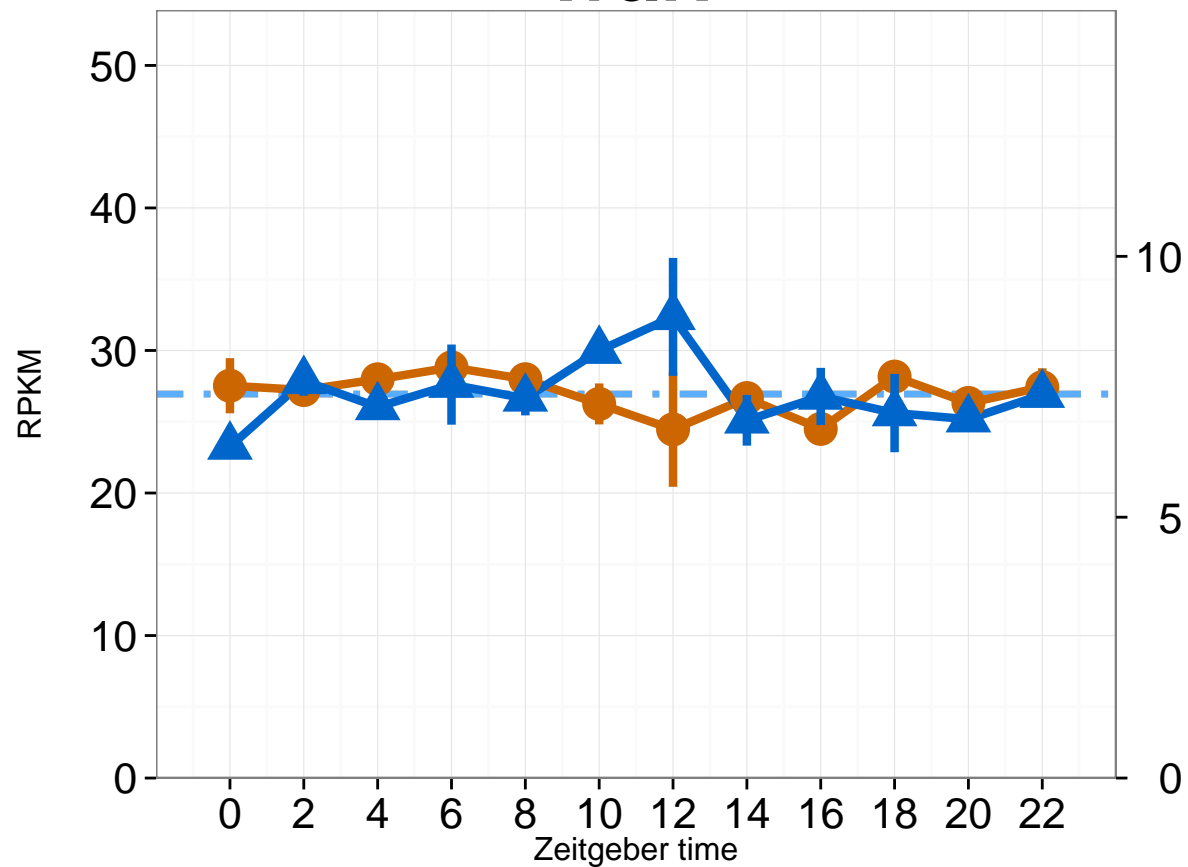

## Traf7

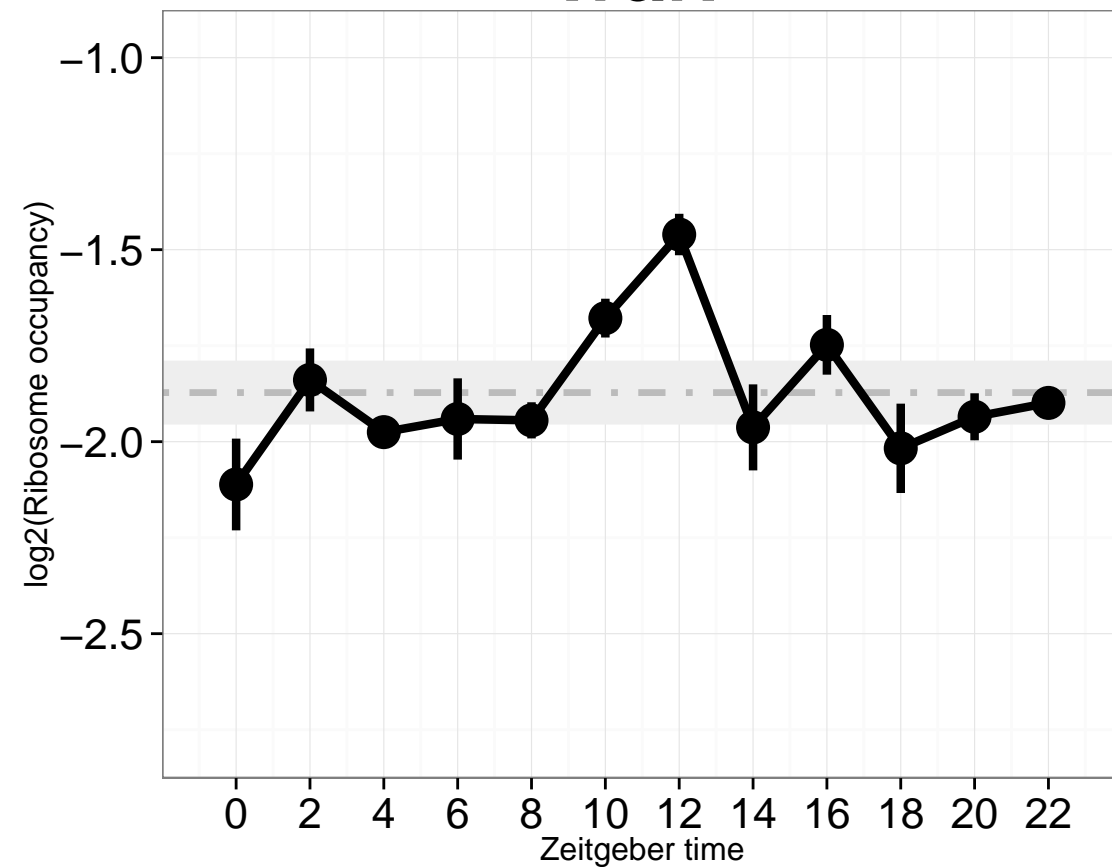

Supplement: Supplementary file 8972 [file 1]

## Il11ra1

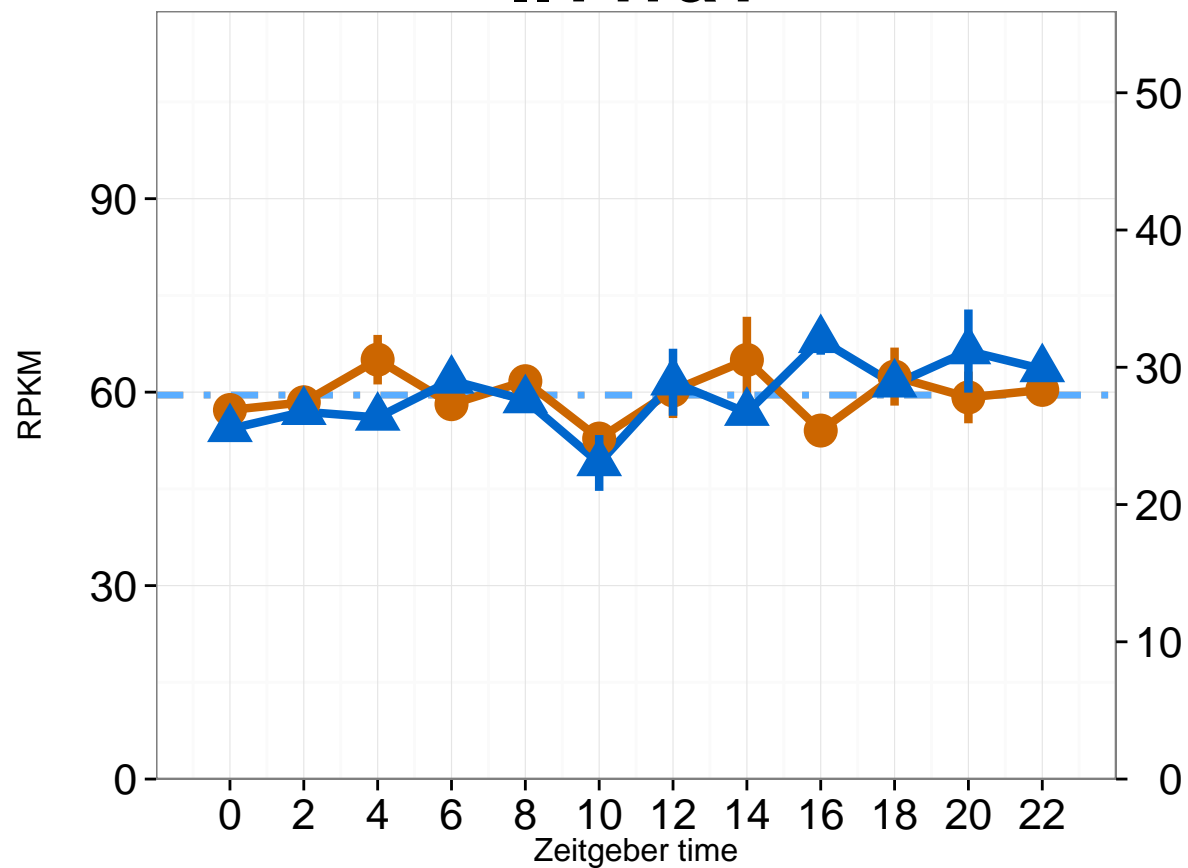

## Il11ra1

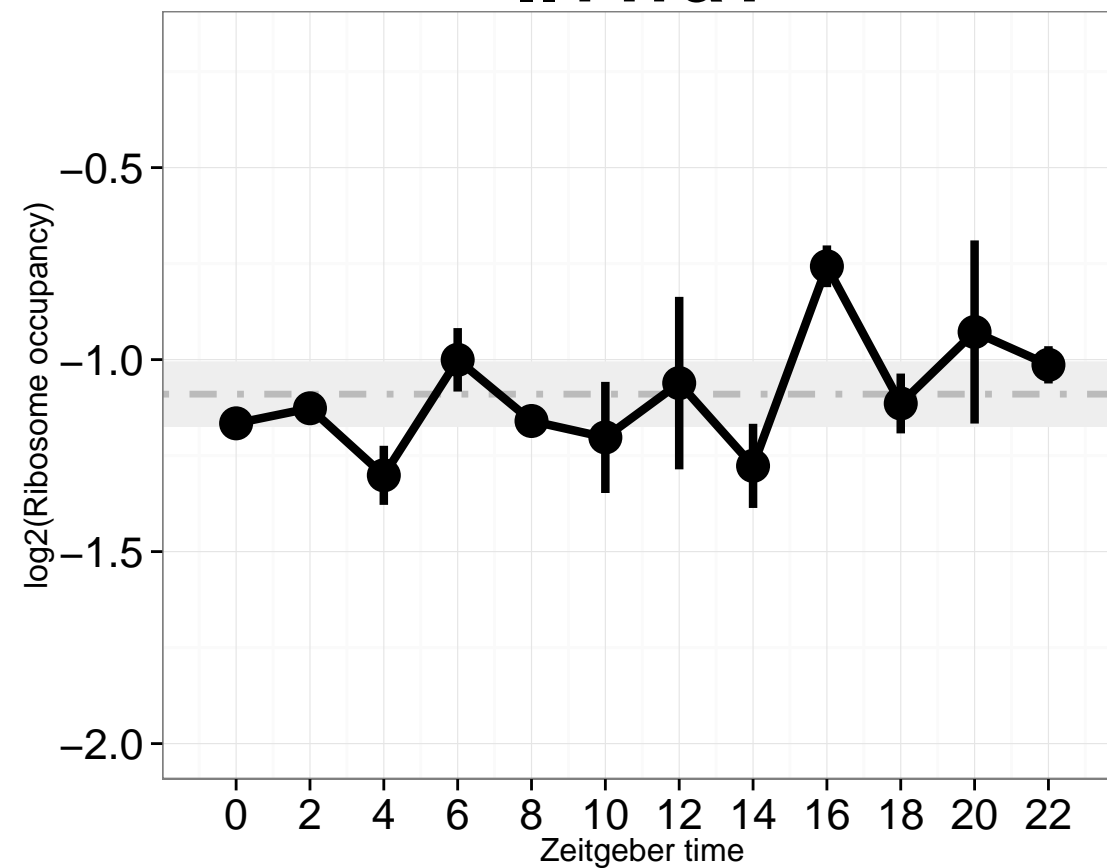

Supplement: Supplementary file 8973 [file 1]

## Srpx

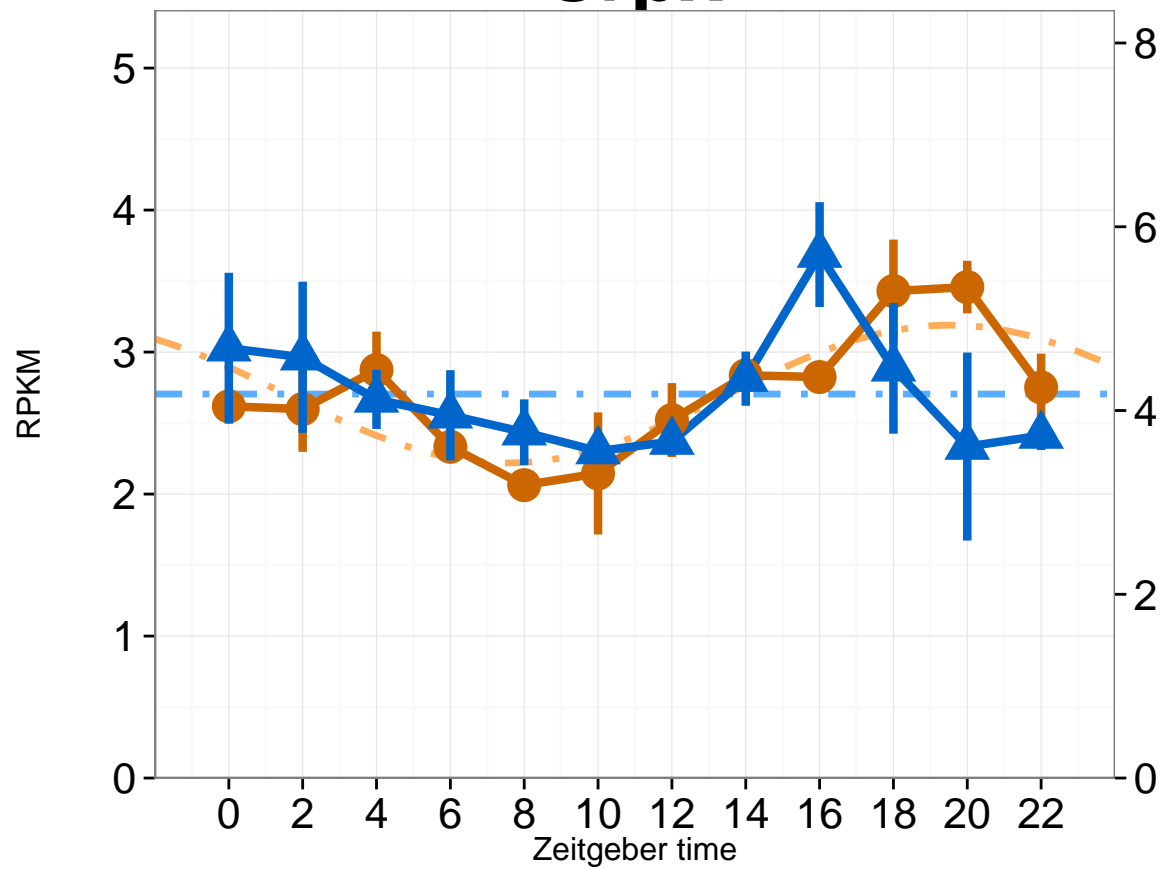

## Srpx

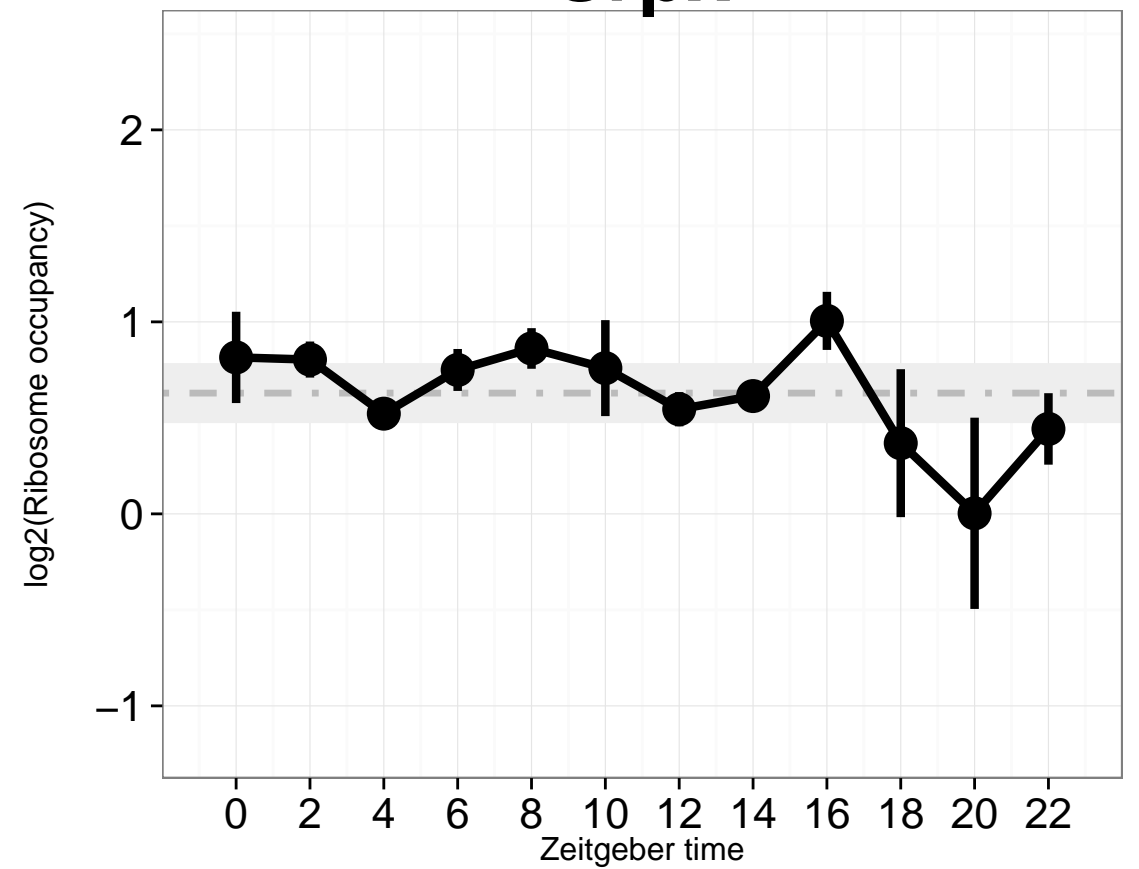

Supplement: Supplementary file 8974 [file 1]

## Eri1

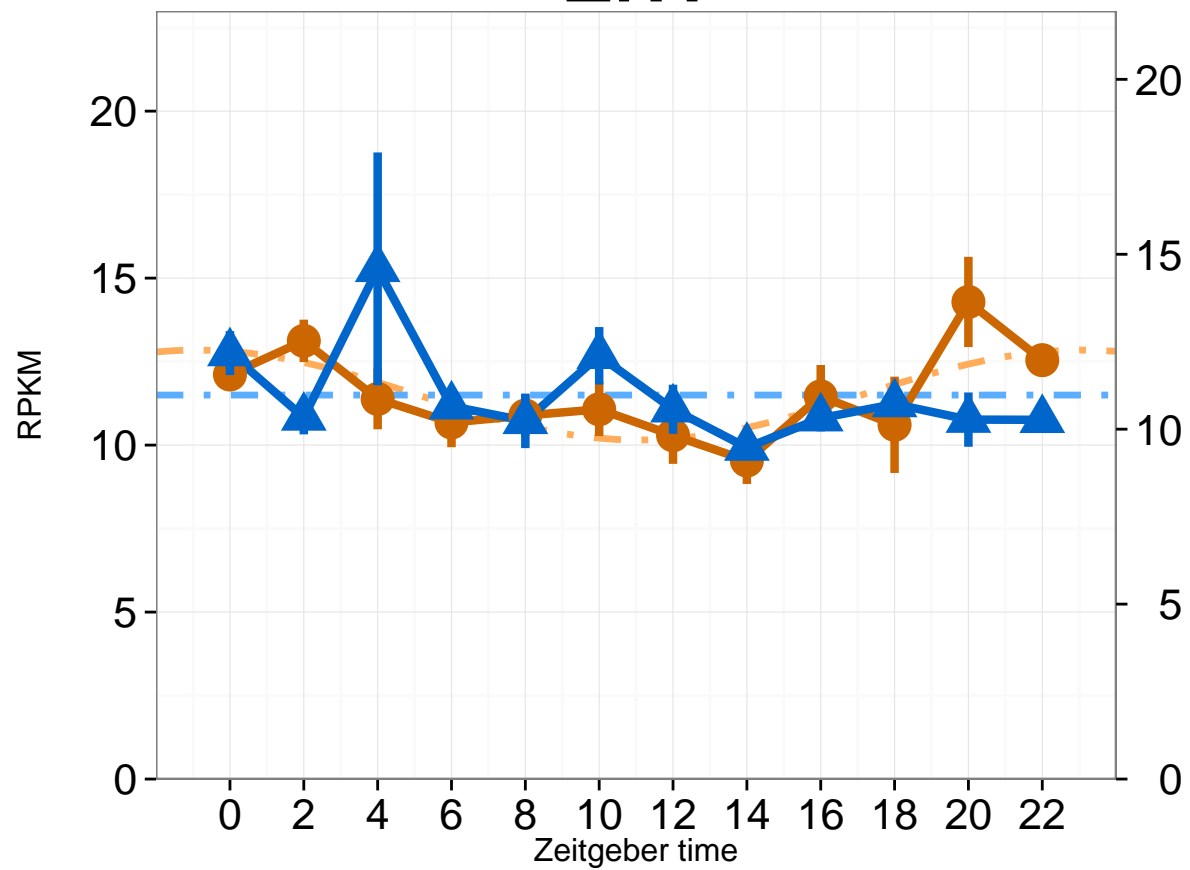

## Eri1

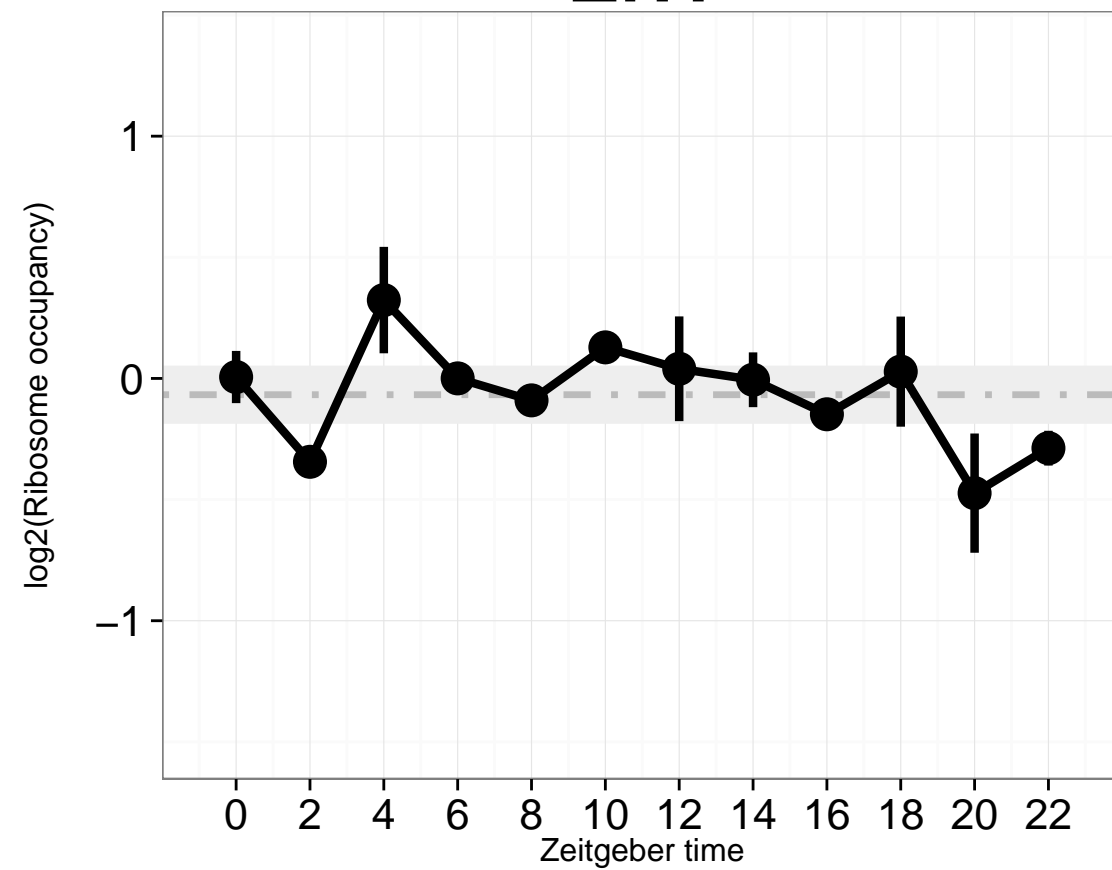

Supplement: Supplementary file 8975 [file 1]

## Tle1

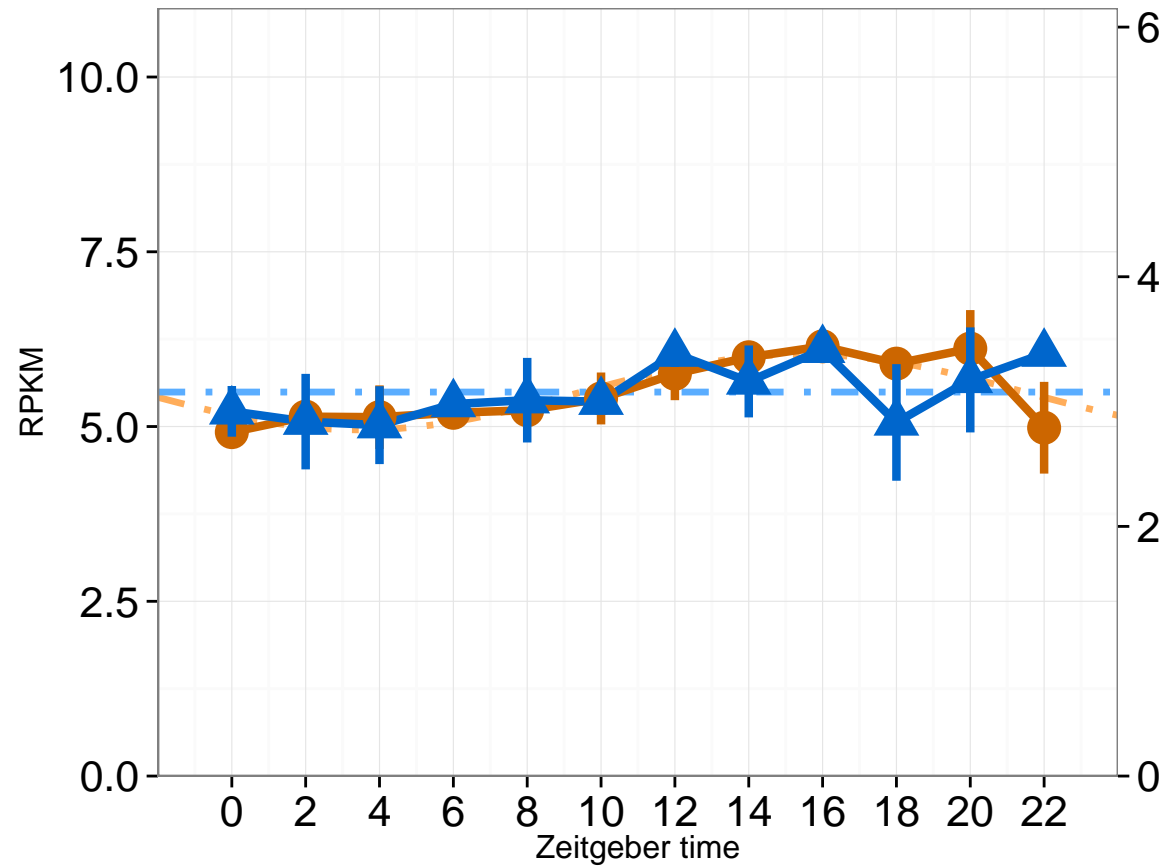

## Tle1

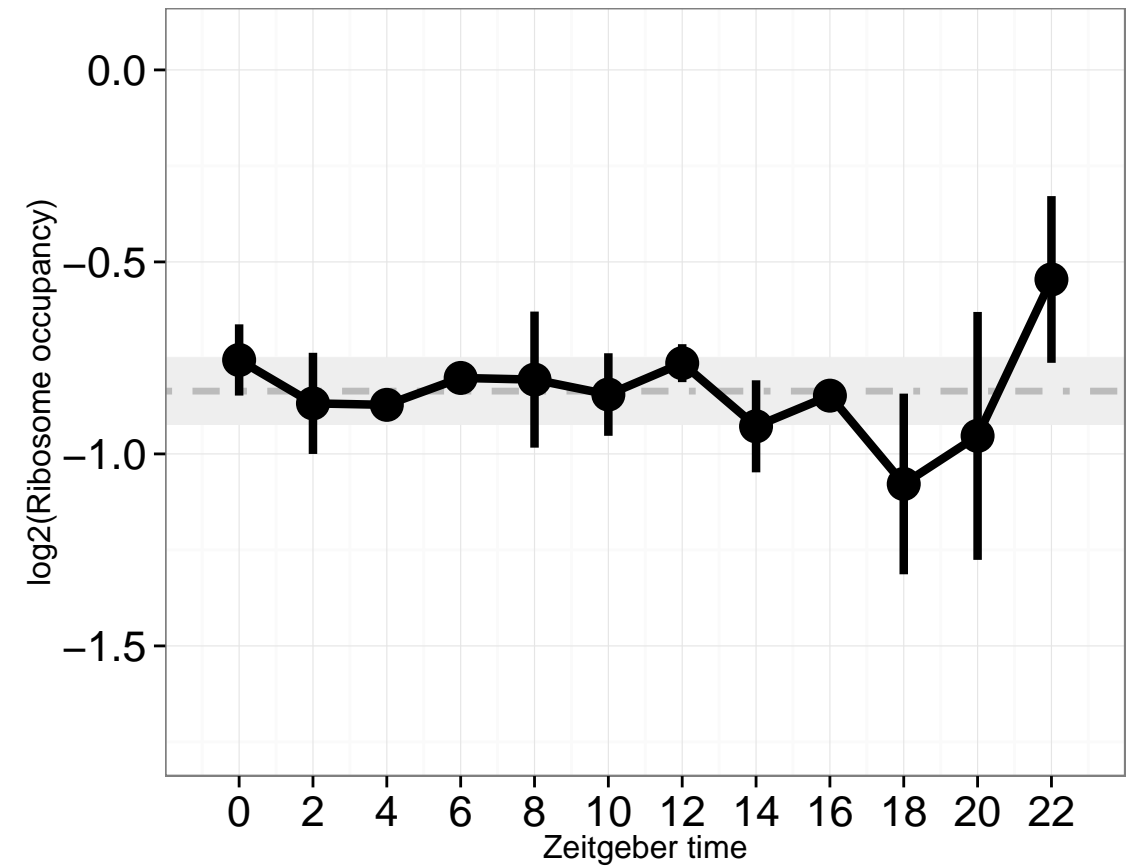

Supplement: Supplementary file 8976 [file 1]

## Ppp2r3a

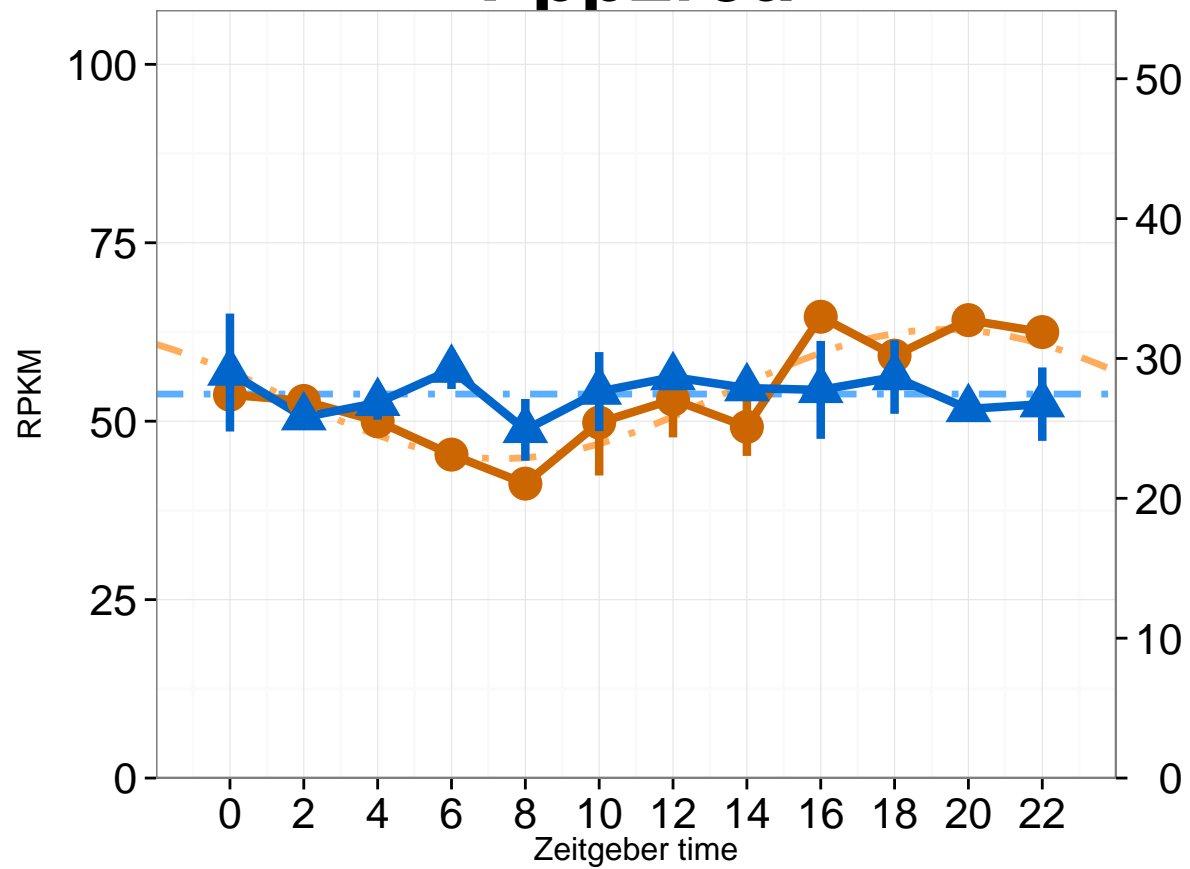

## Ppp2r3a

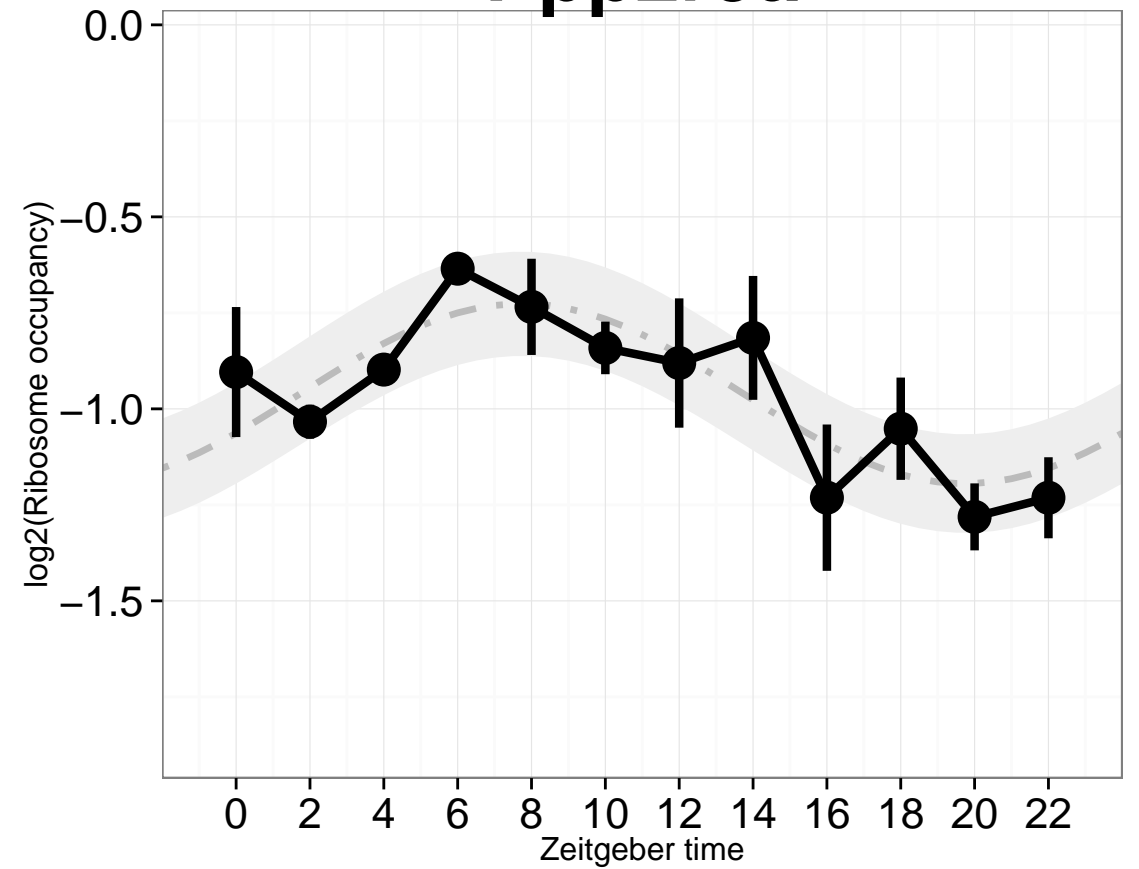

Supplement: Supplementary file 8977 [file 1]

## Acss3

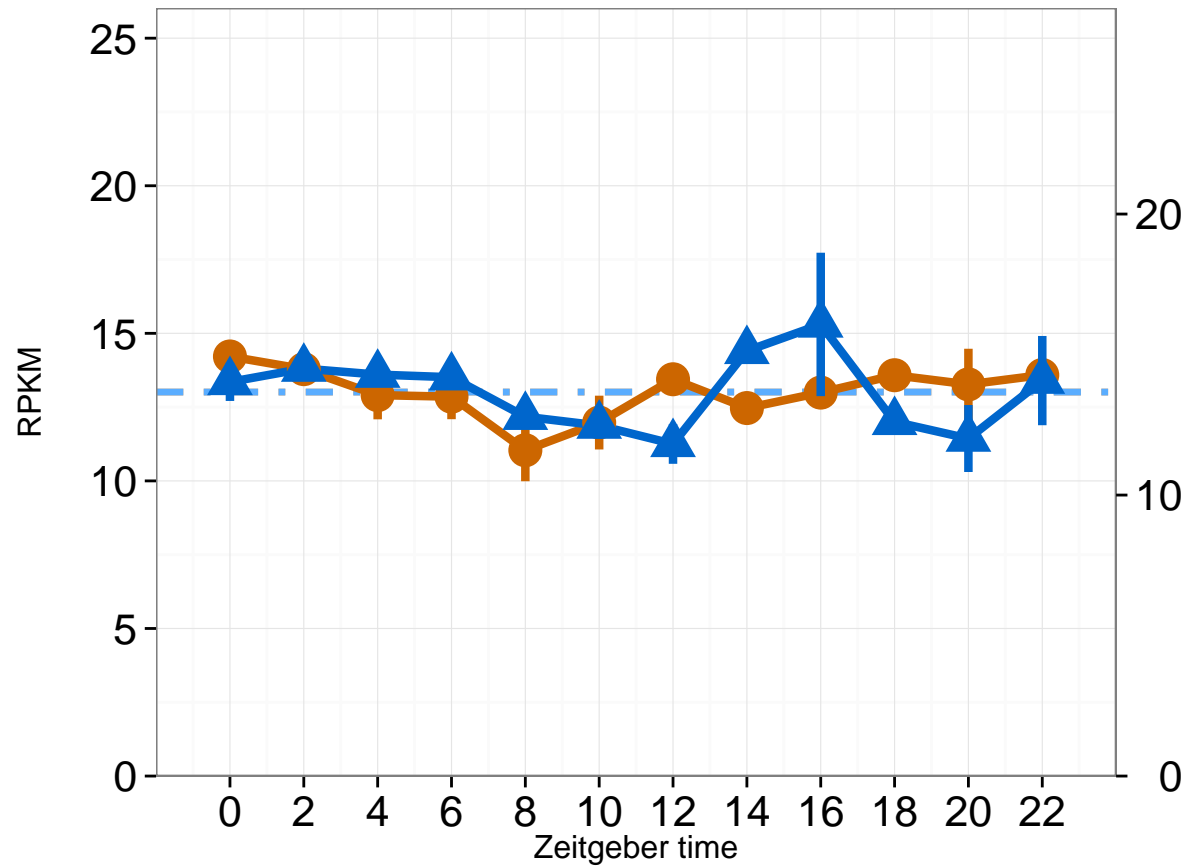

## Acss3

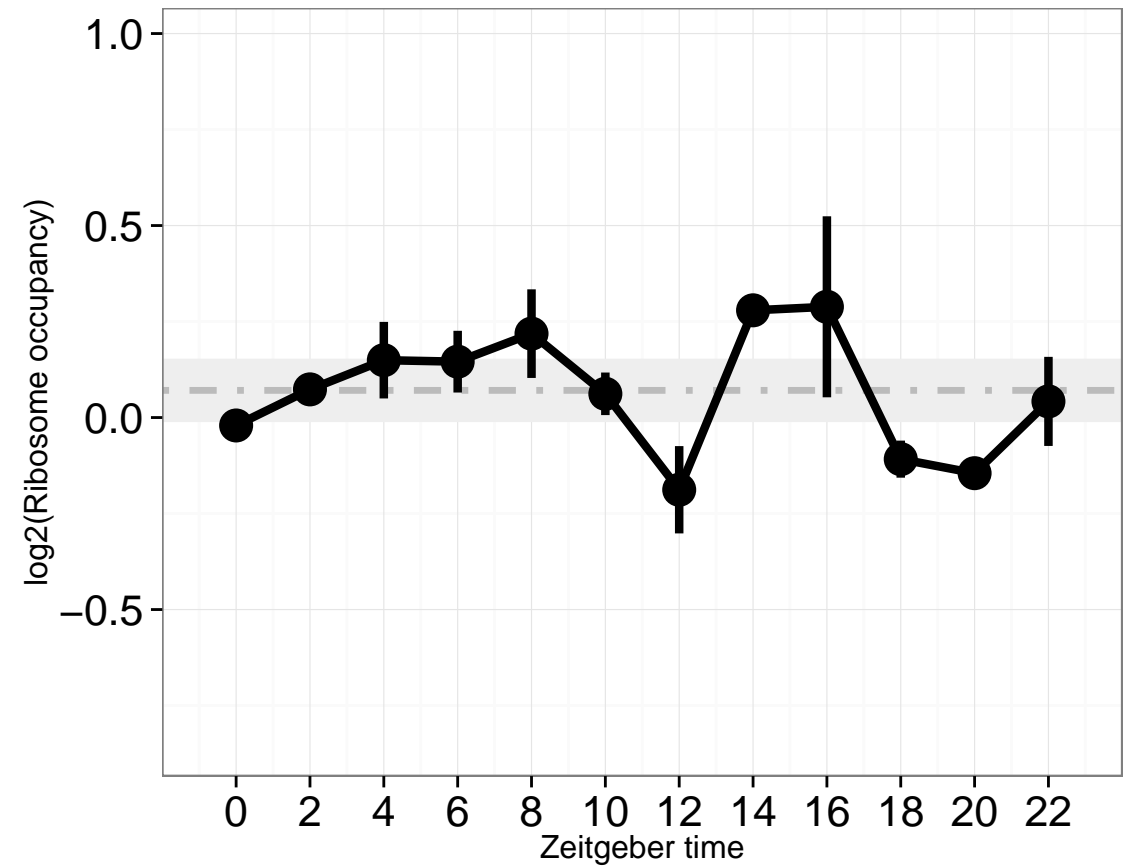

Supplement: Supplementary file 8978 [file 1]

## Ikzf1

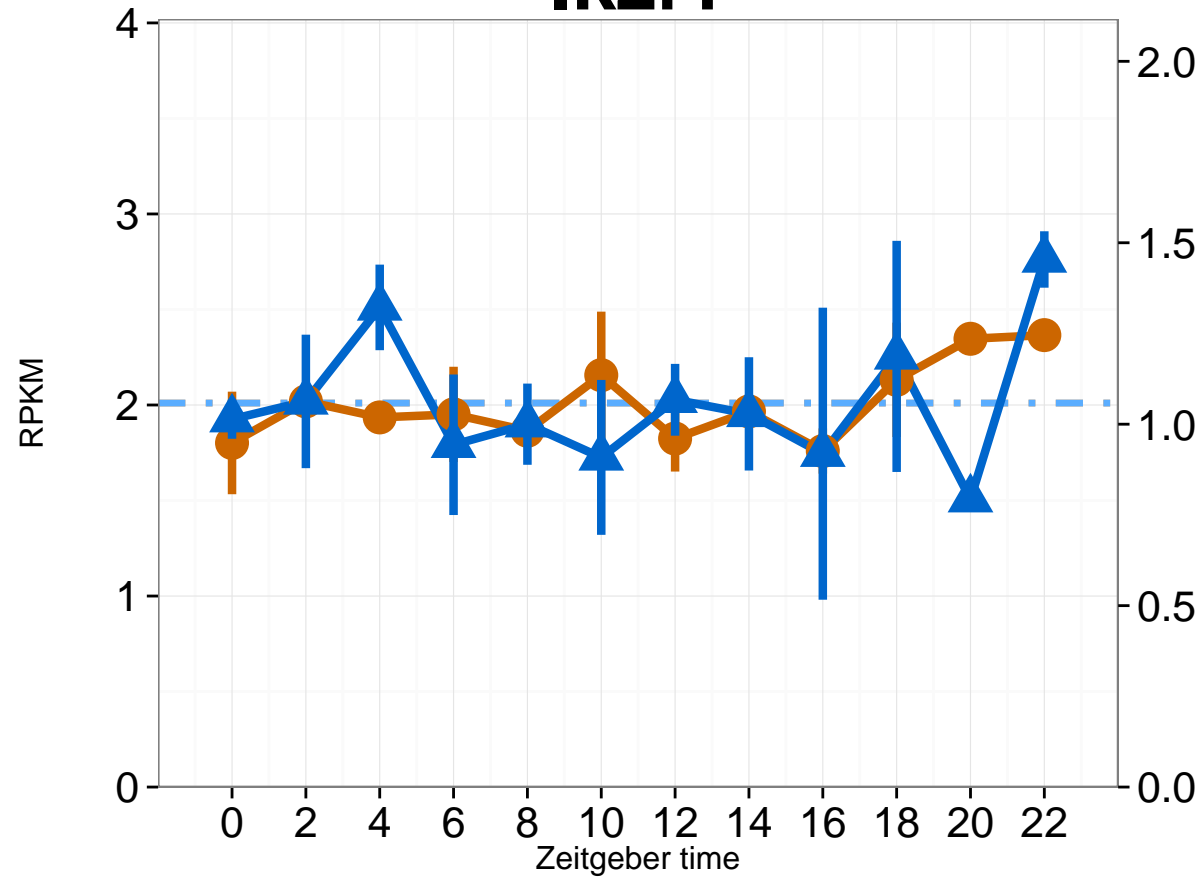

## Ikzf1

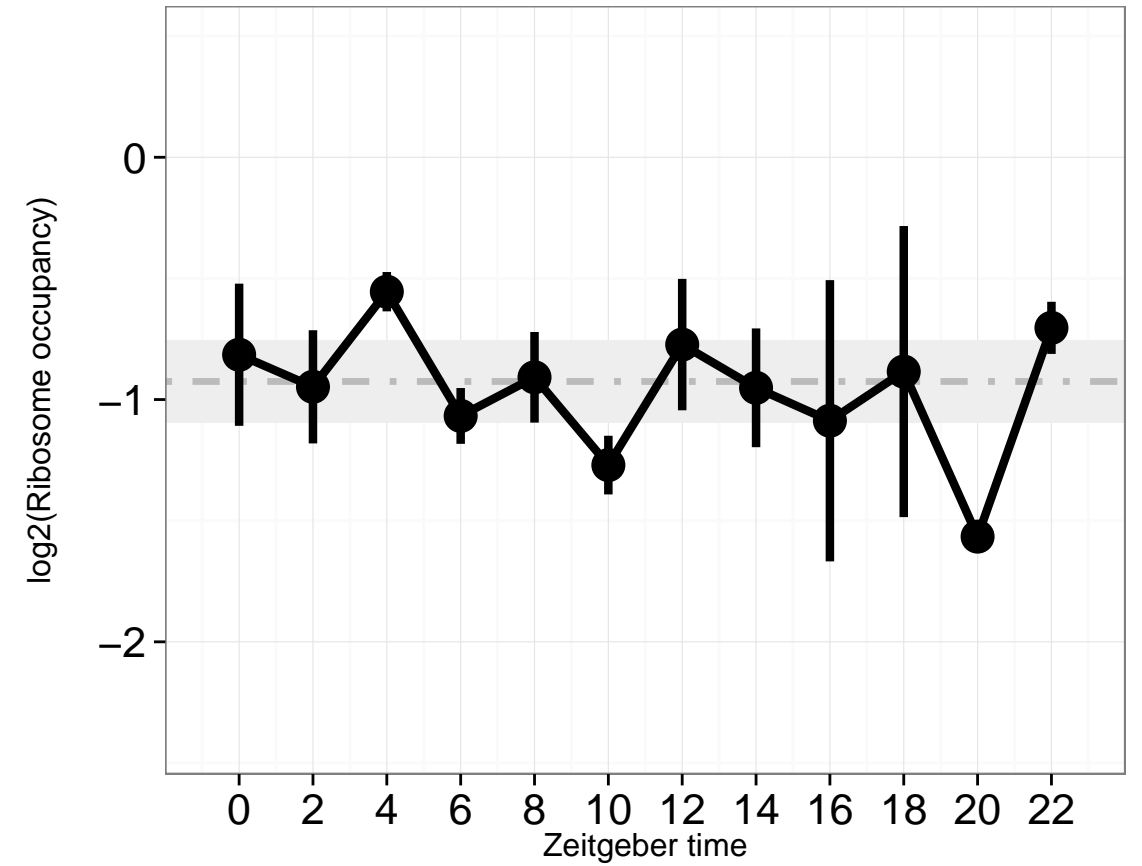

Supplement: Supplementary file 8979 [file 1]

## Mbip

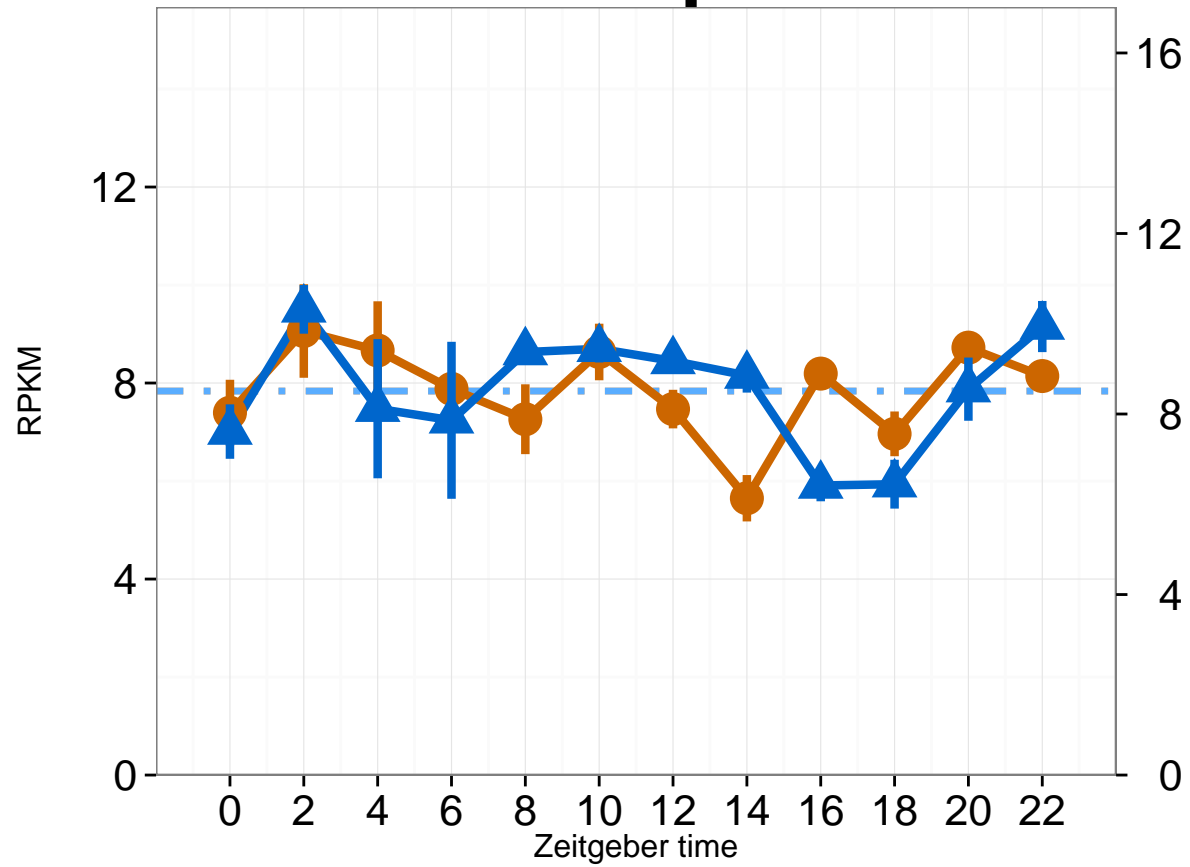

## Mbip

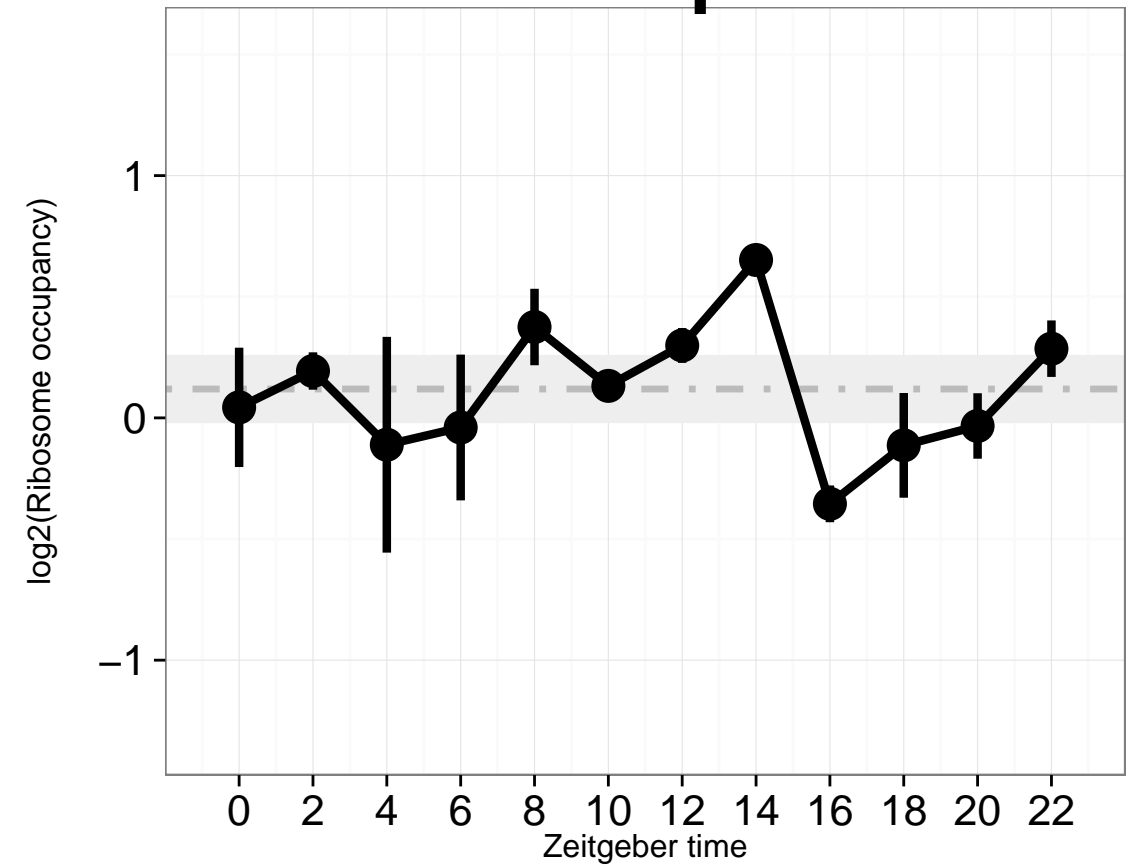

Supplement: Supplementary file 8980 [file 1]

# Zfp948

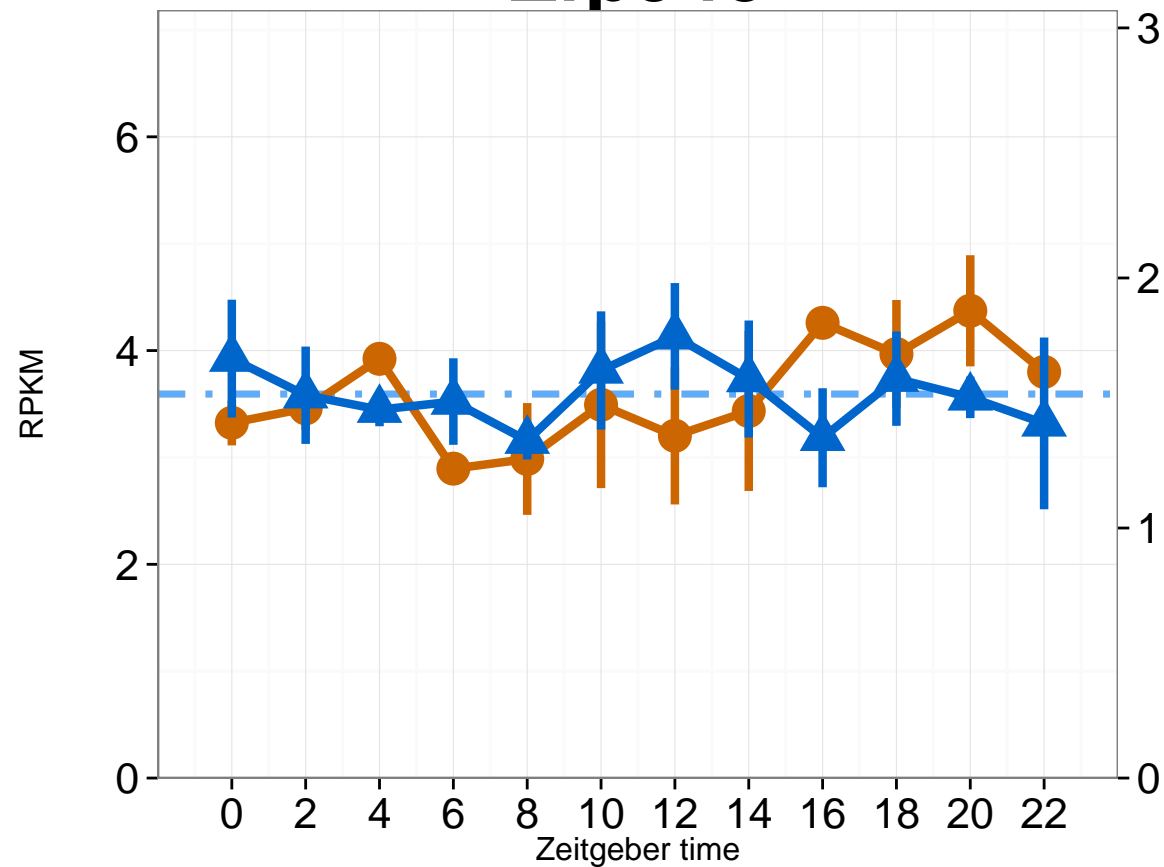

# Zfp948

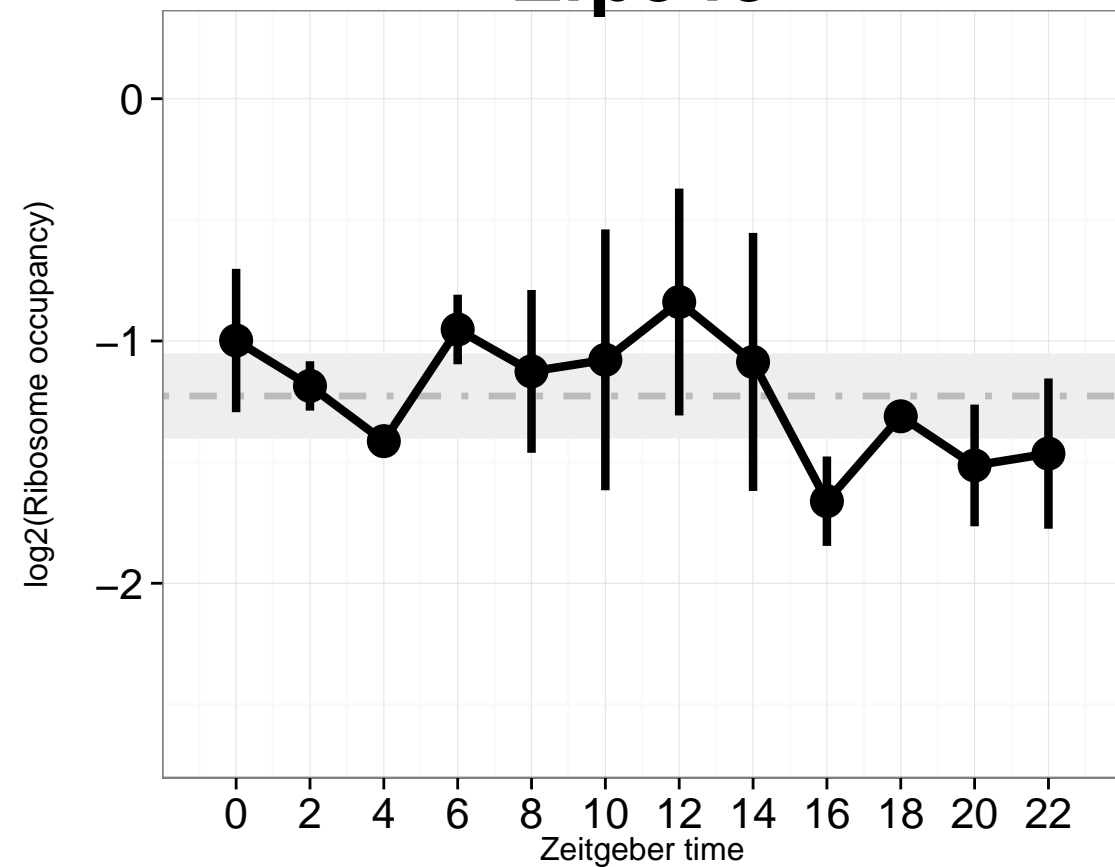

Supplement: Supplementary file 8981 [file 1]

## BC089597

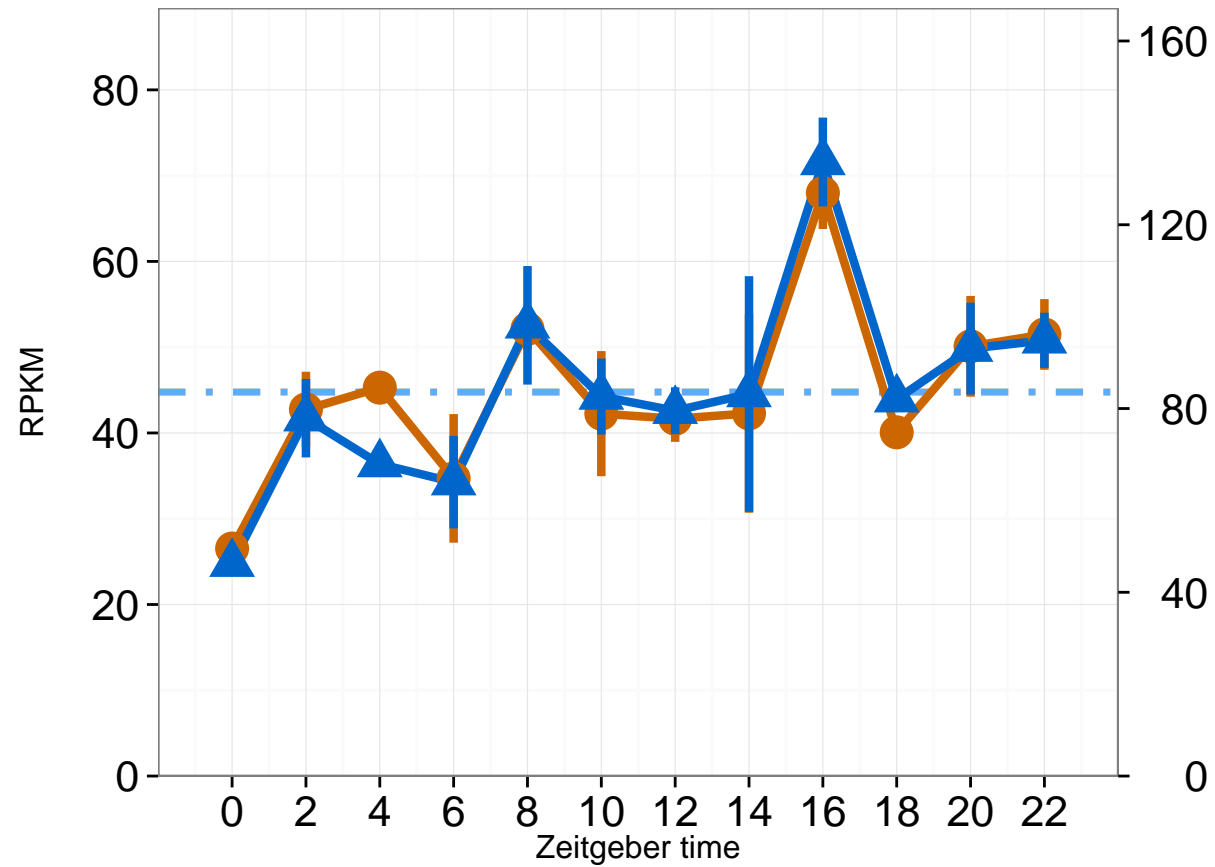

## BC089597

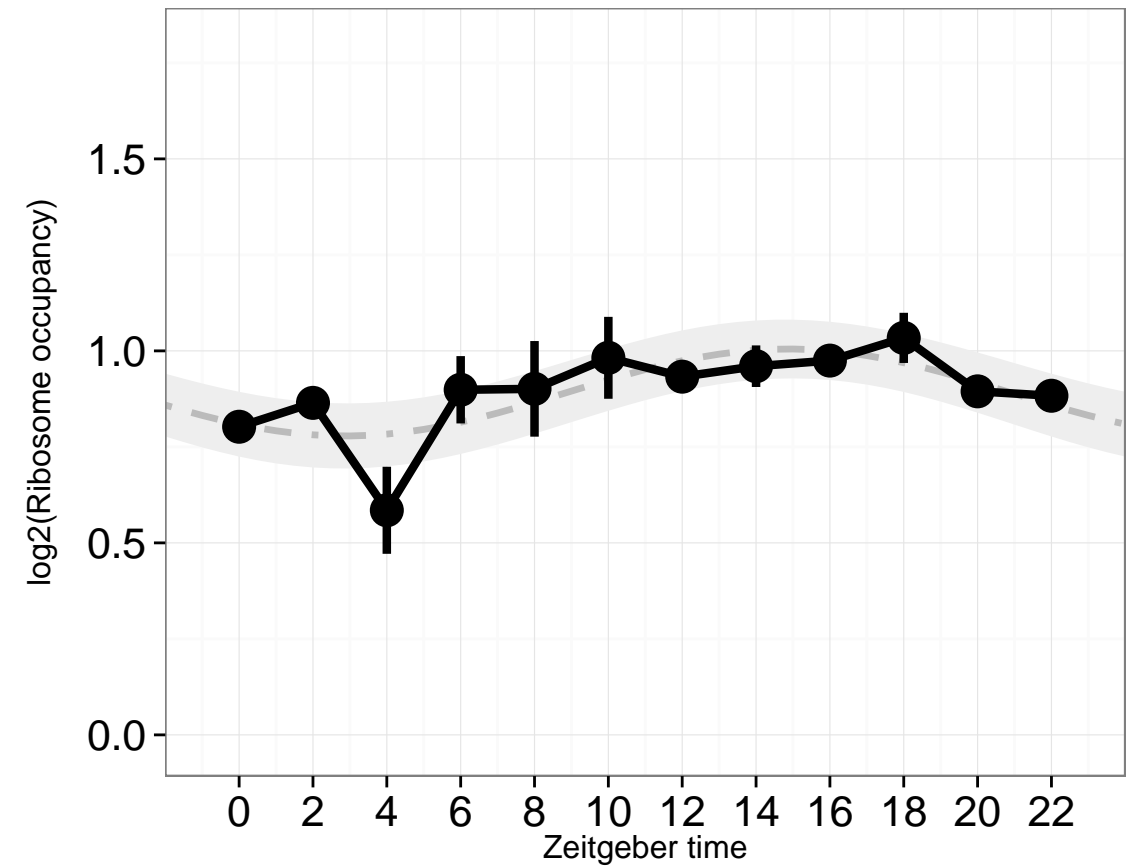

Supplement: Supplementary file 8982 [file 1]

## Negr1

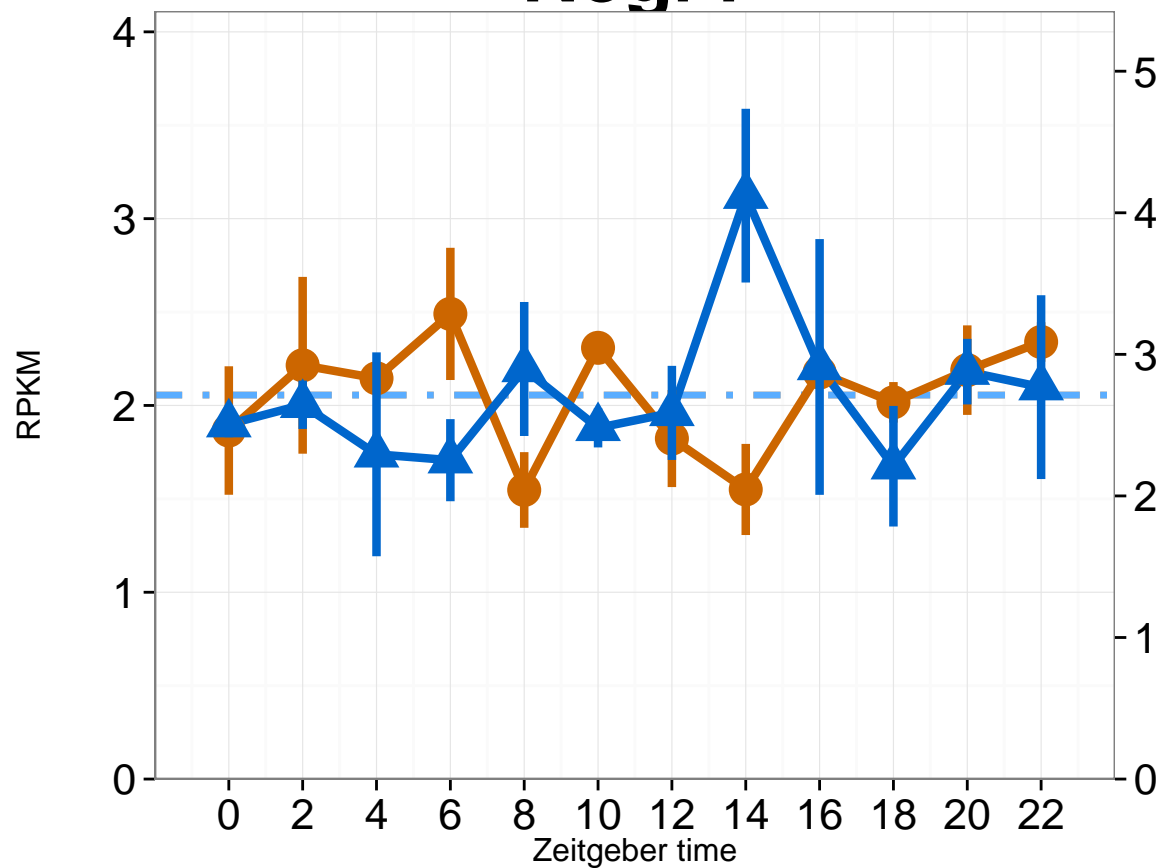

## Negr1

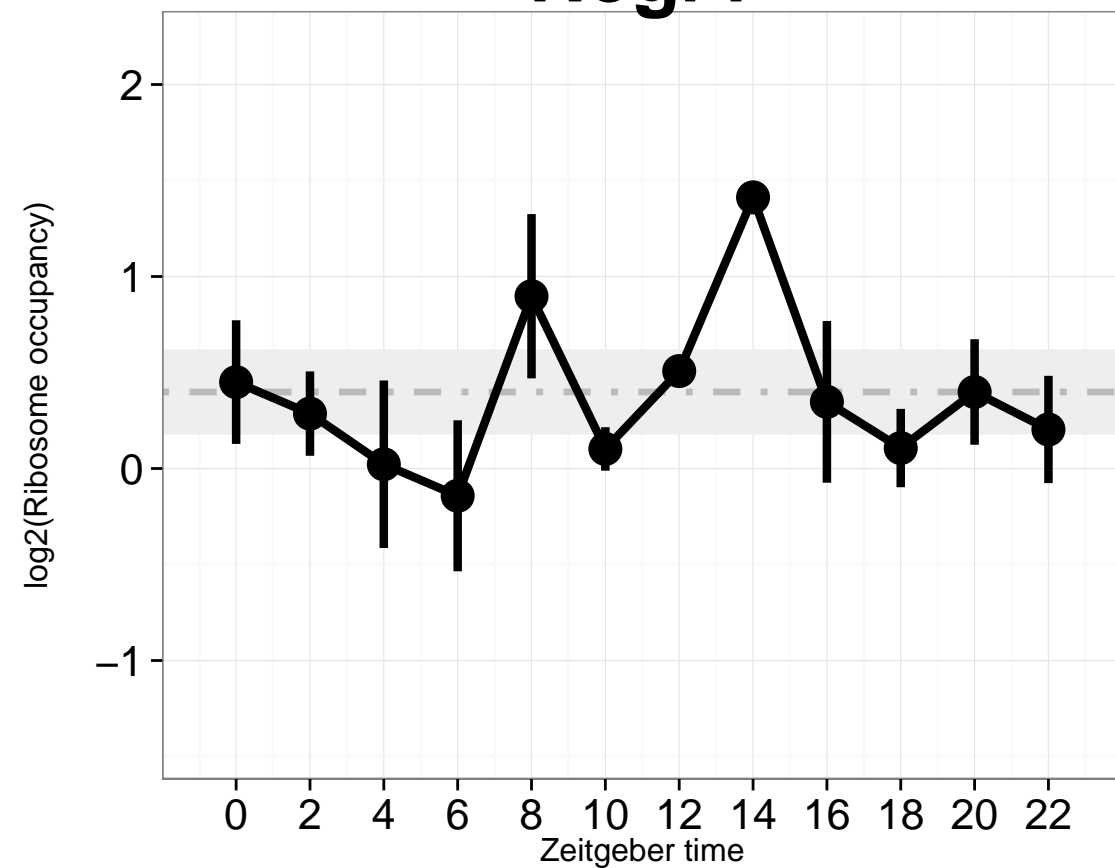

Supplement: Supplementary file 8983 [file 1]

# Rnf141

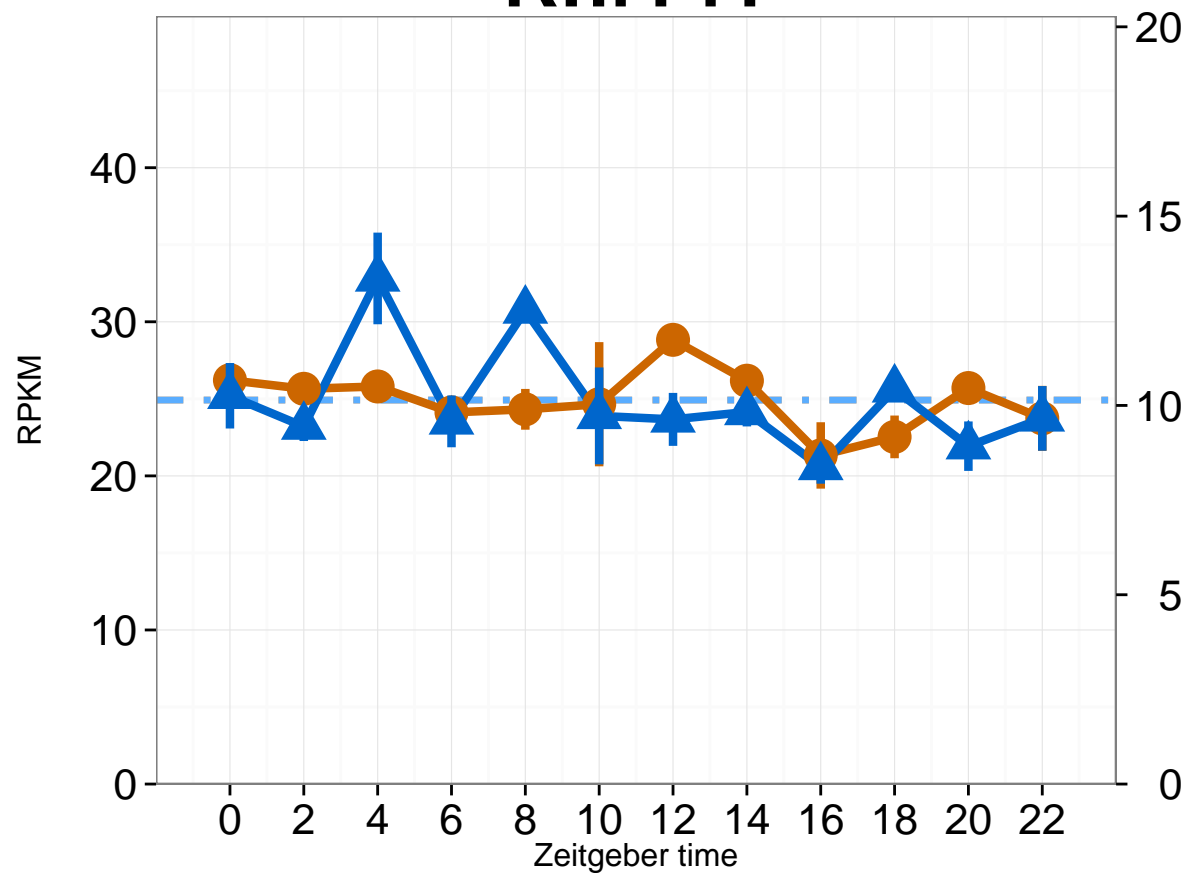

# Rnf141

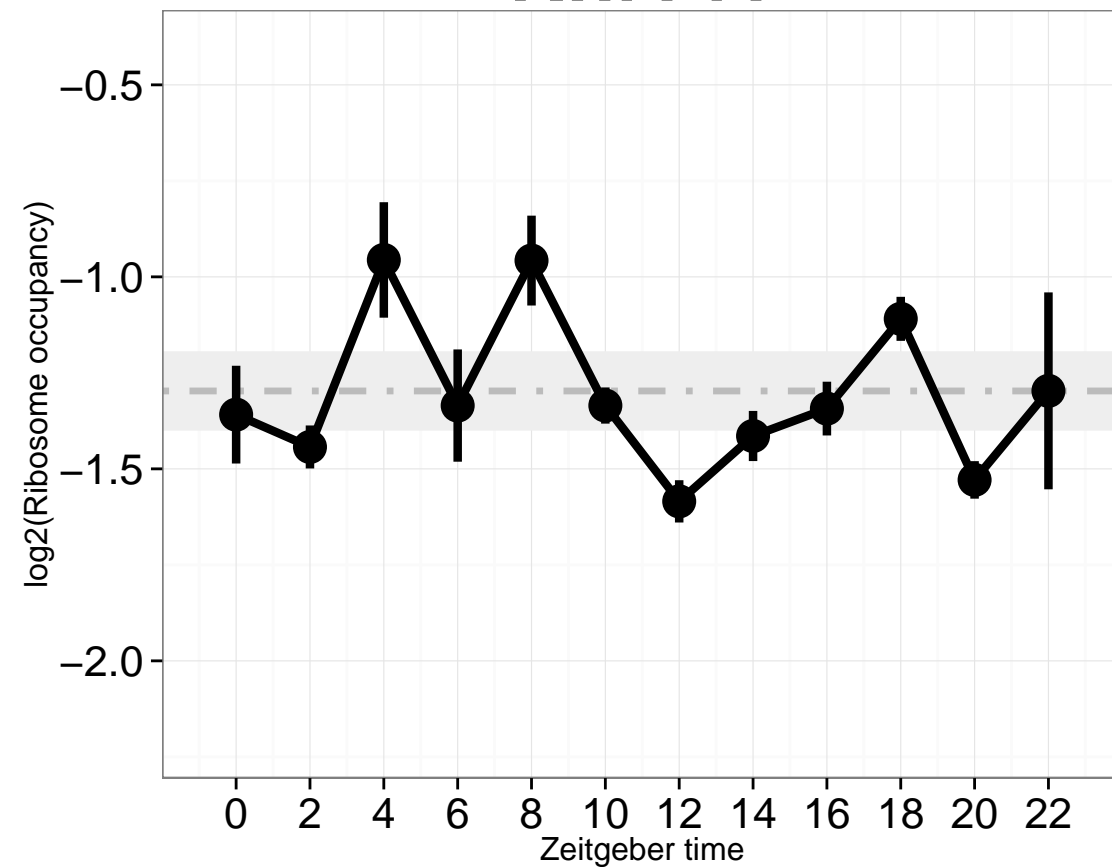

Supplement: Supplementary file 8984 [file 1]

## Lgals3

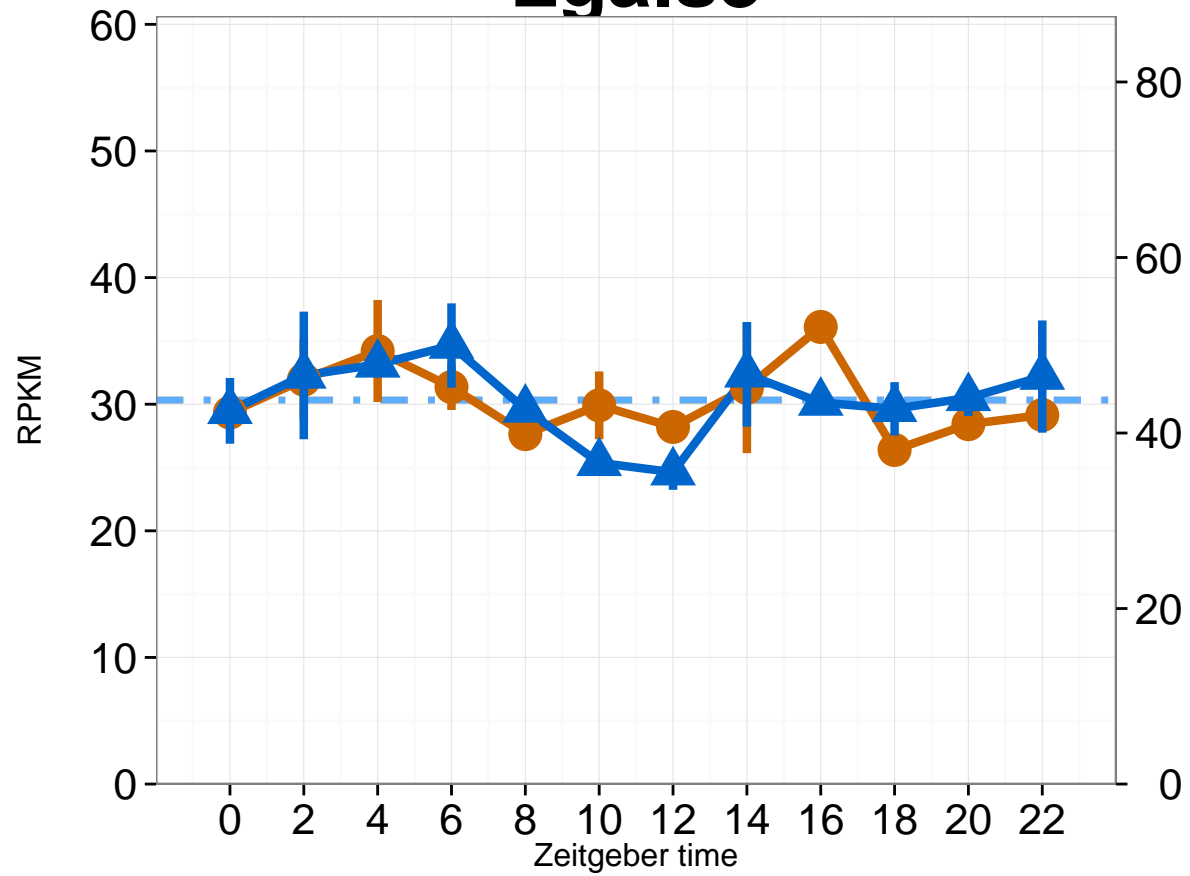

## Lgals3

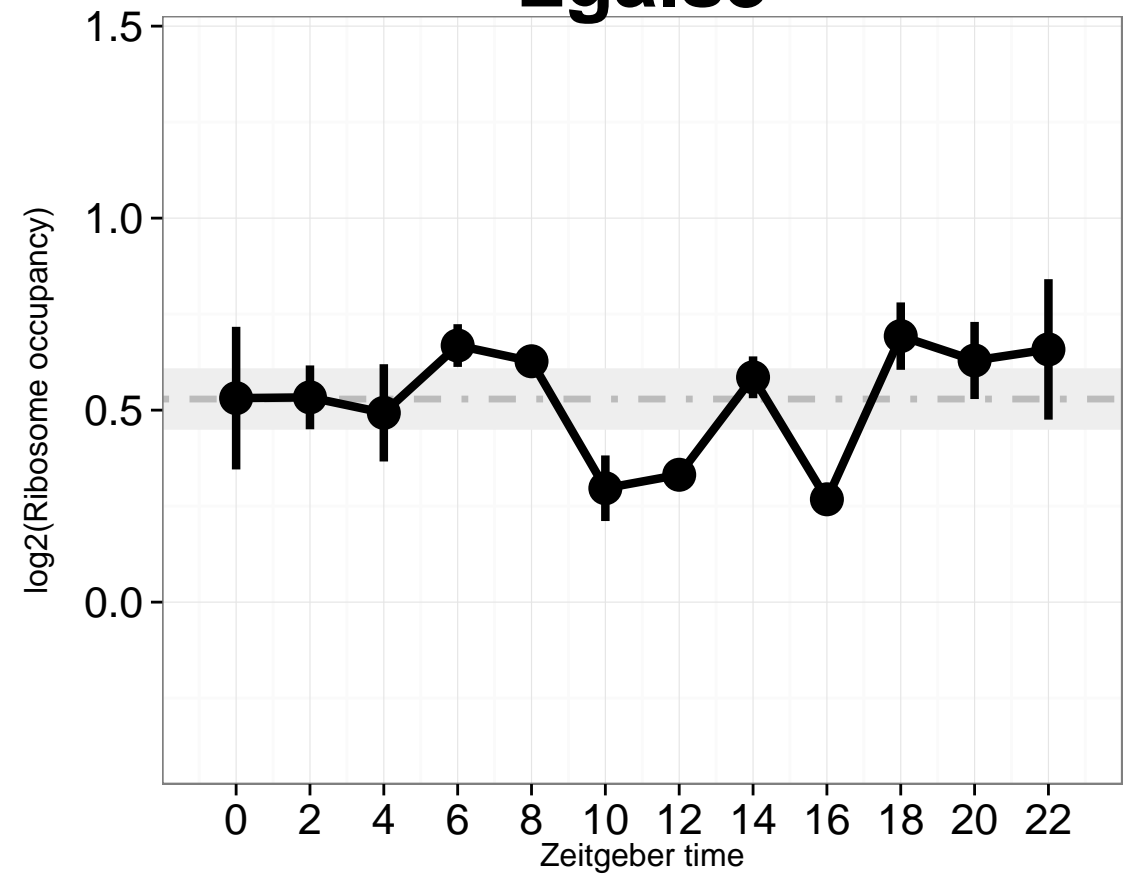

Supplement: Supplementary file 8985 [file 1]

## Gltscr1l

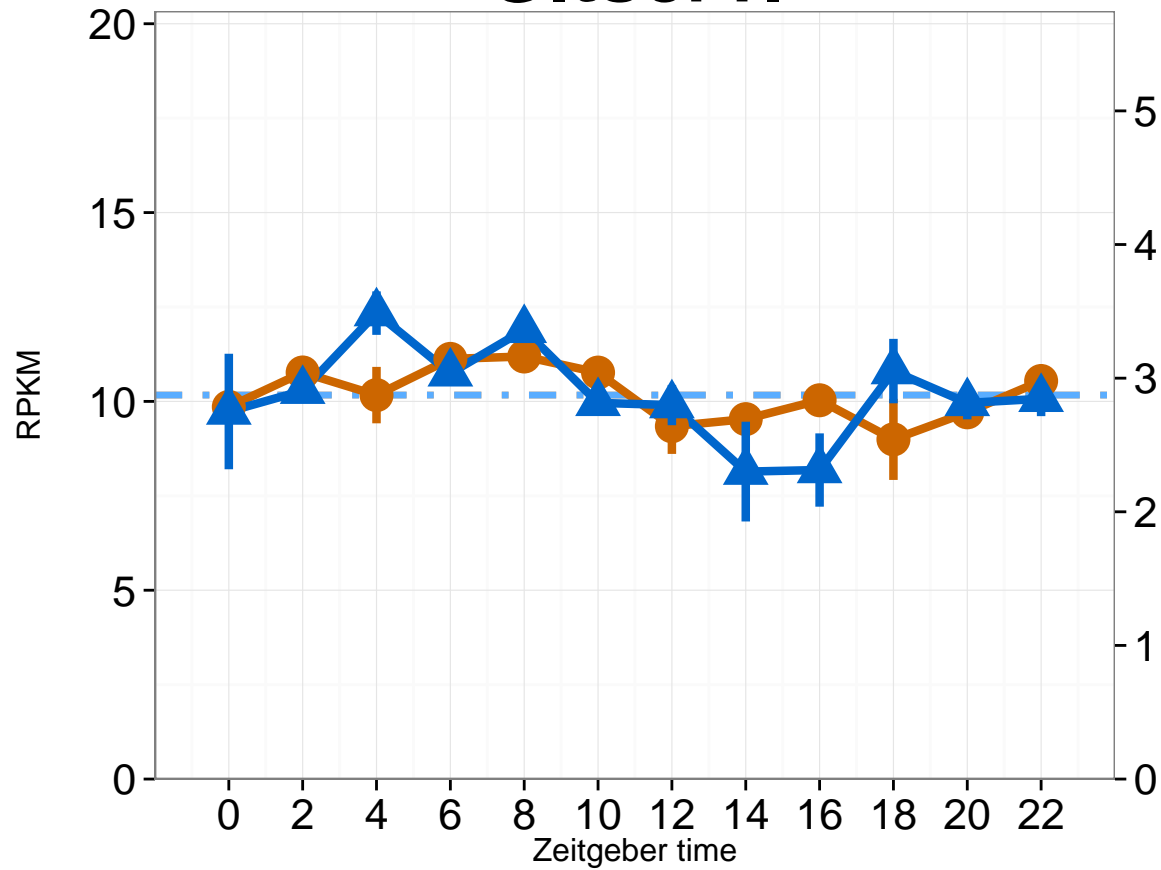

## Gltscr1l

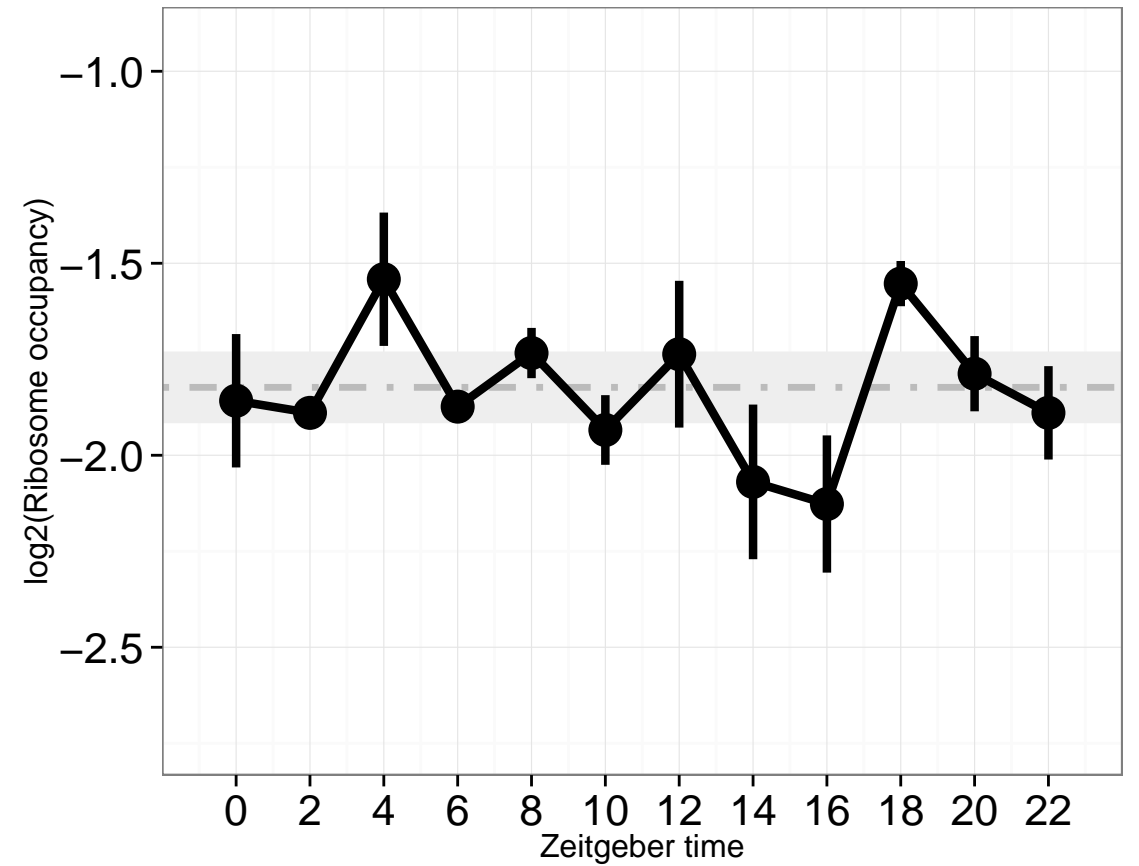

Supplement: Supplementary file 8986 [file 1]

## Erc1

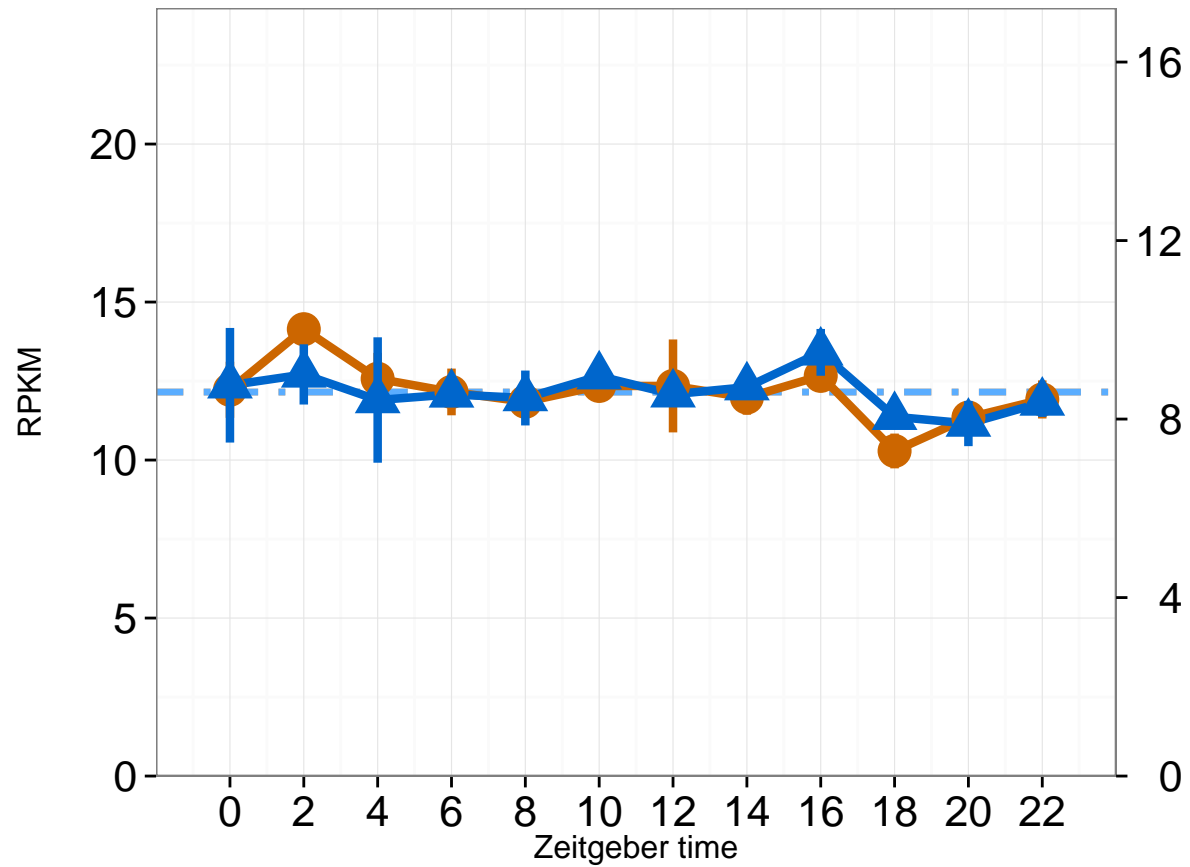

## Erc1

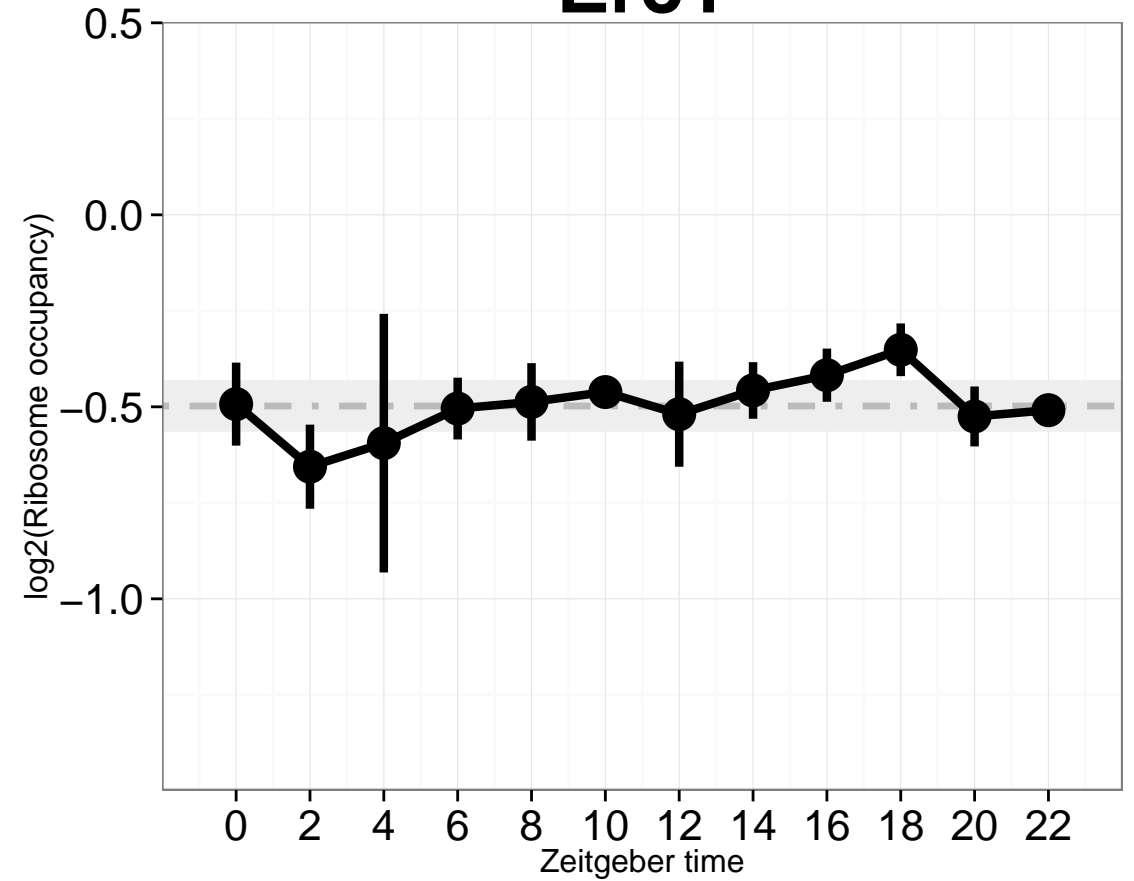

Supplement: Supplementary file 8987 [file 1]

# Fem1c

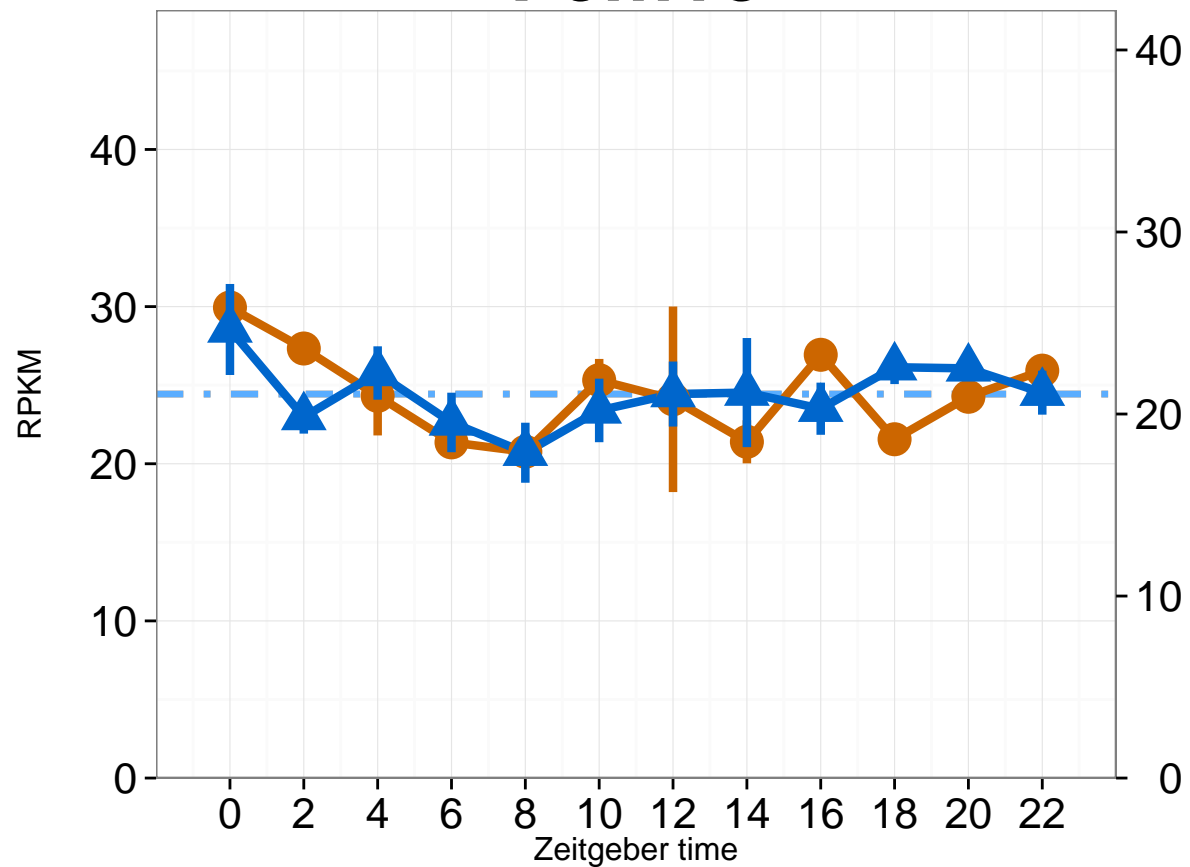

# Fem1c

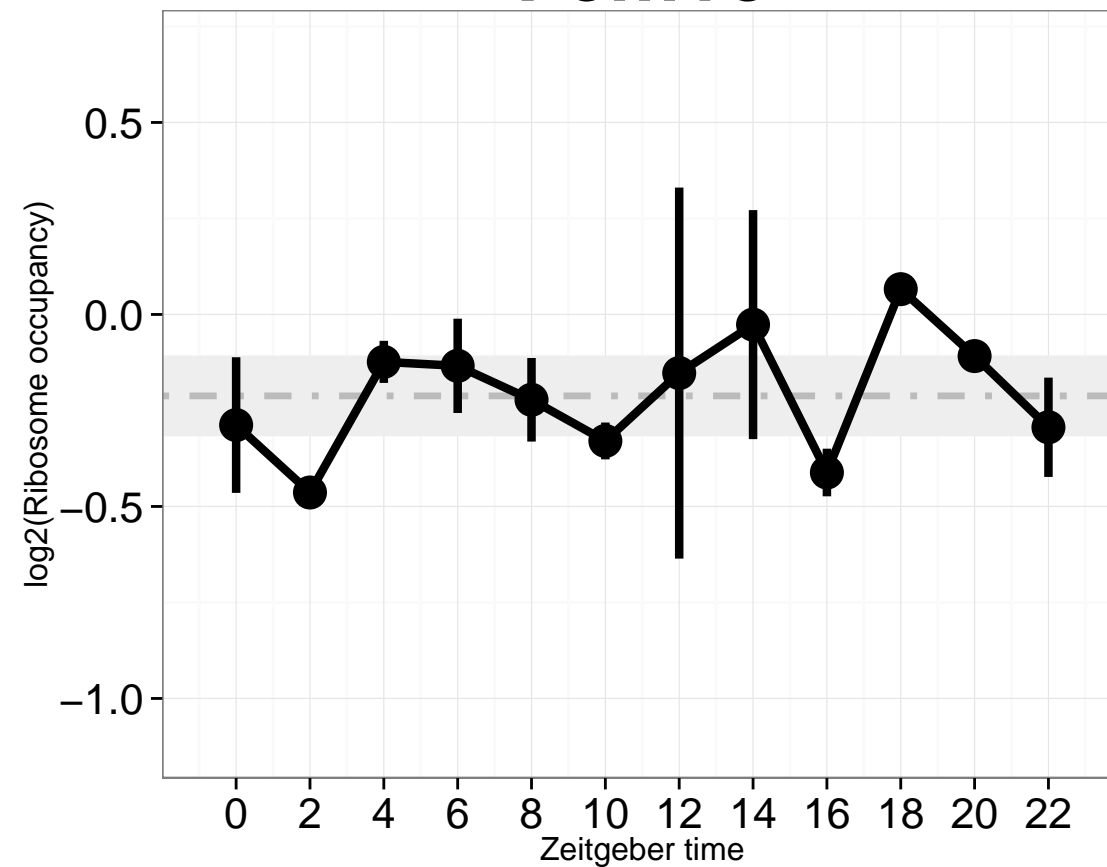

Supplement: Supplementary file 8988 [file 1]

## Trmt6

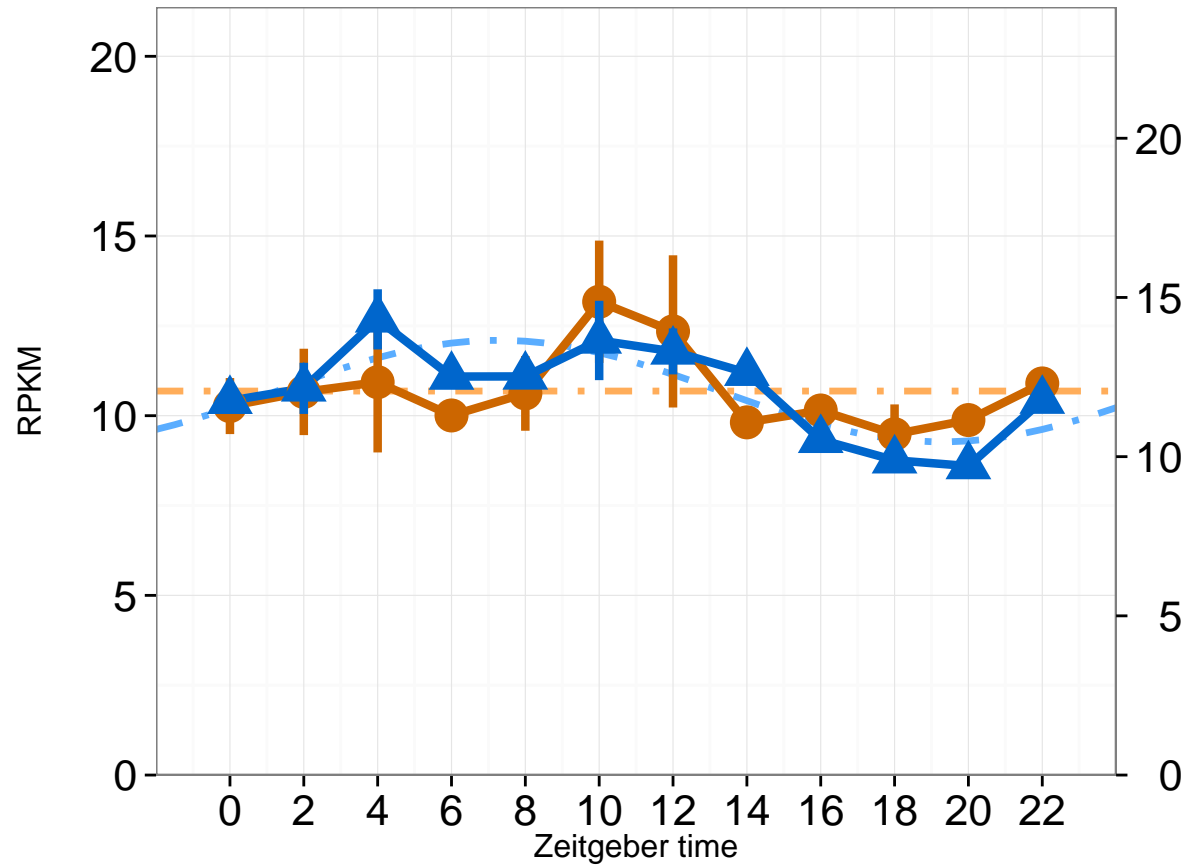

## Trmt6

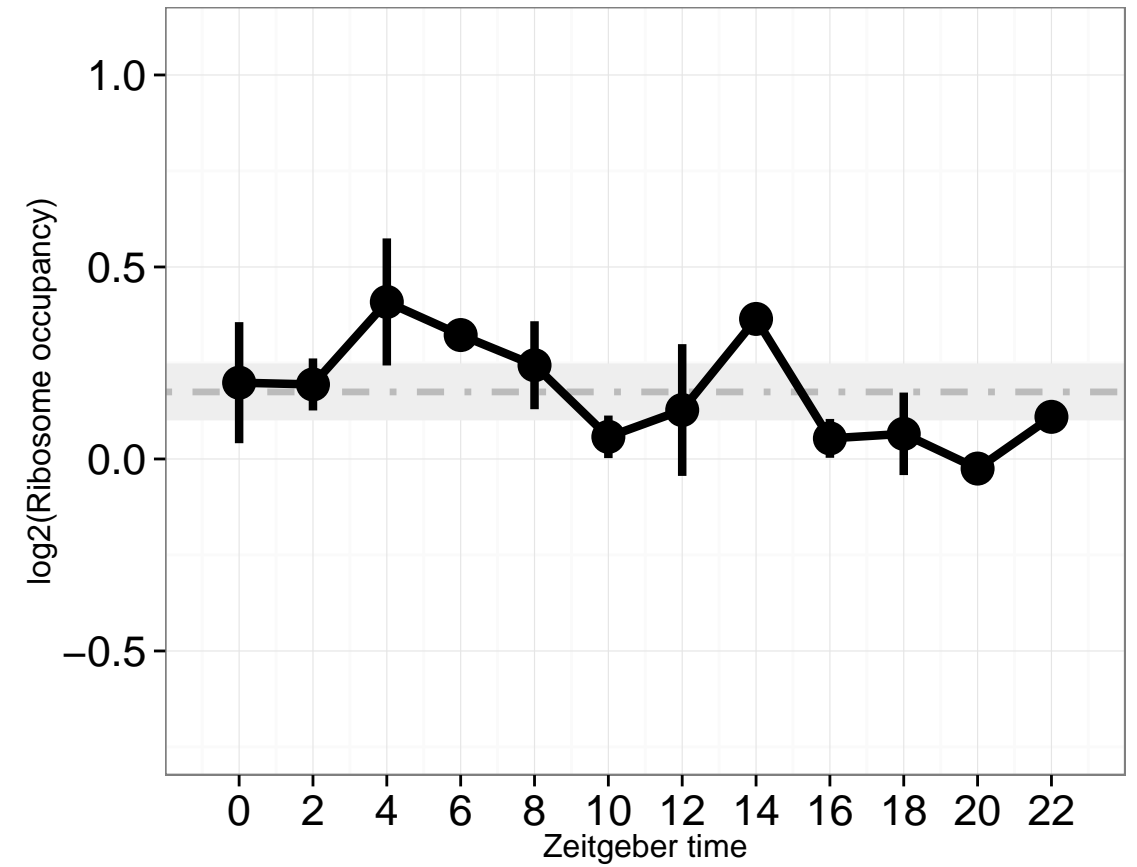

Supplement: Supplementary file 8989 [file 1]

# Loh12cr1

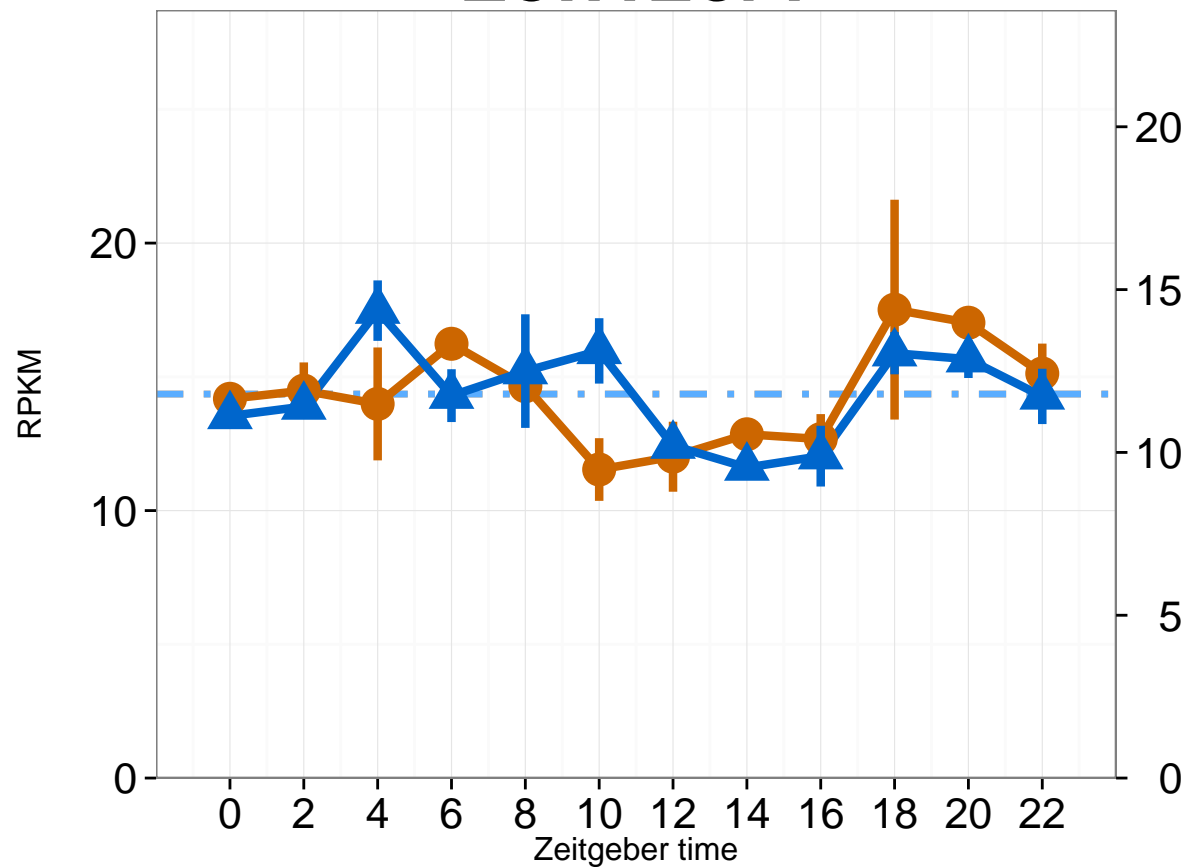

# Loh12cr1

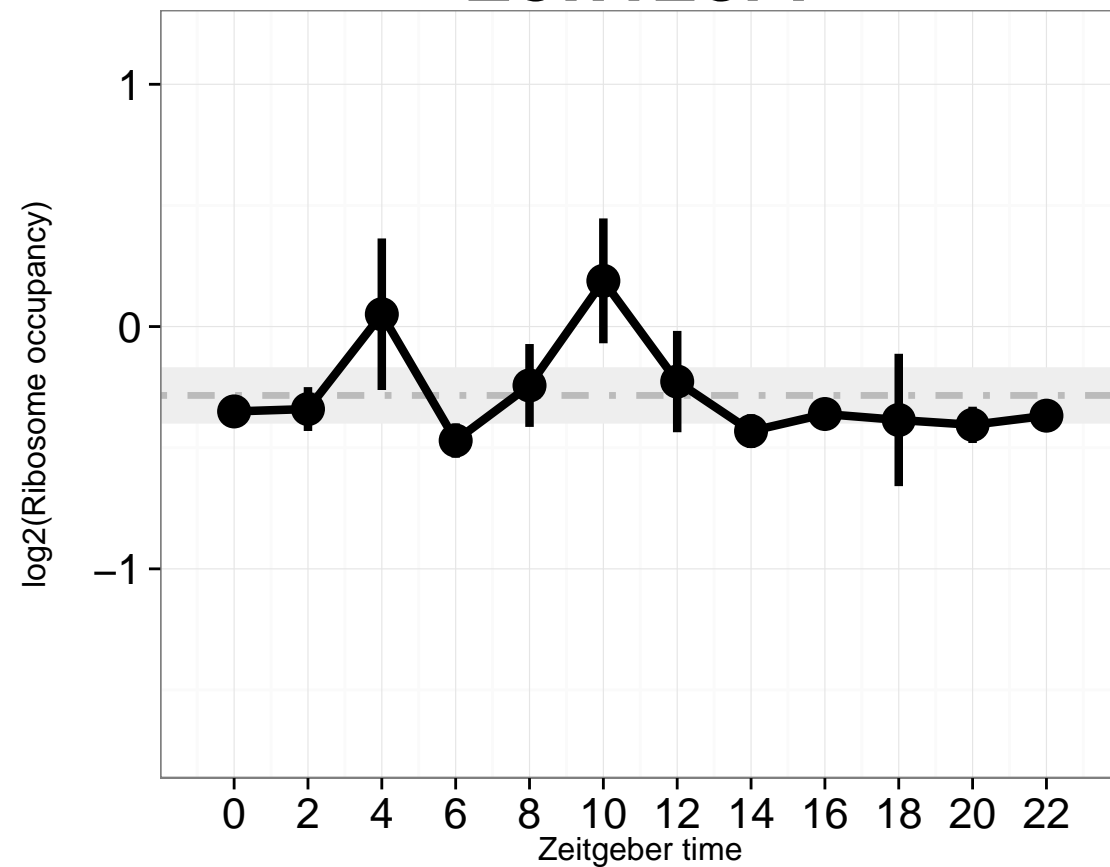

Supplement: Supplementary file 8990 [file 1]

## Arhgef7

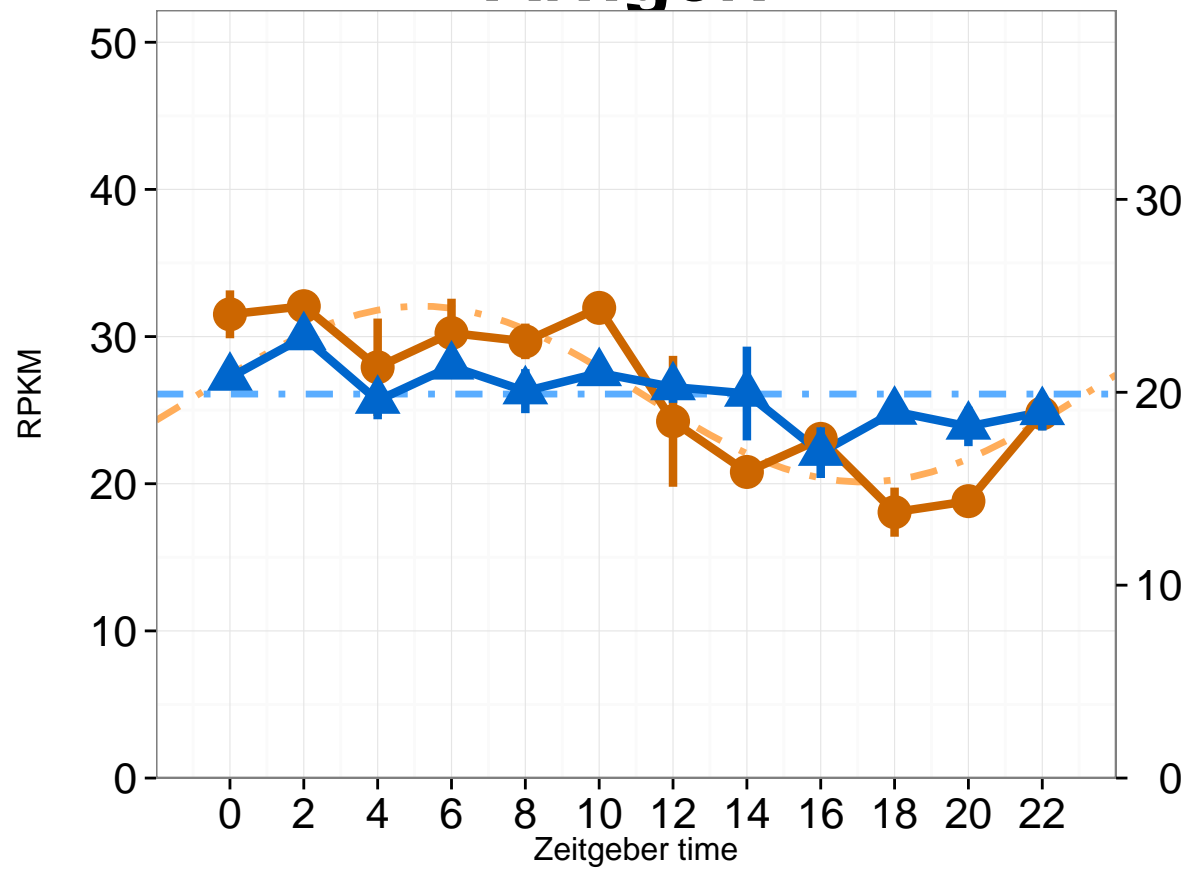

## Arhgef7

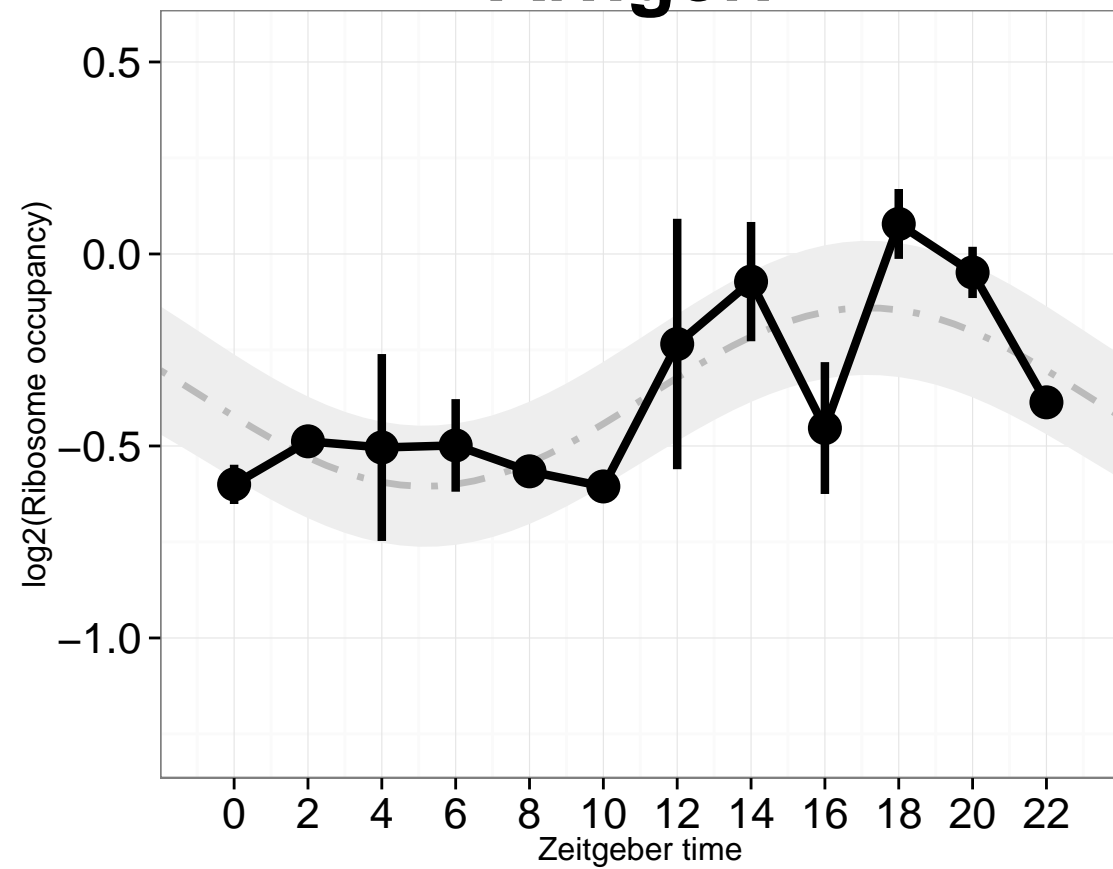

Supplement: Supplementary file 8991 [file 1]

# Tpcn1

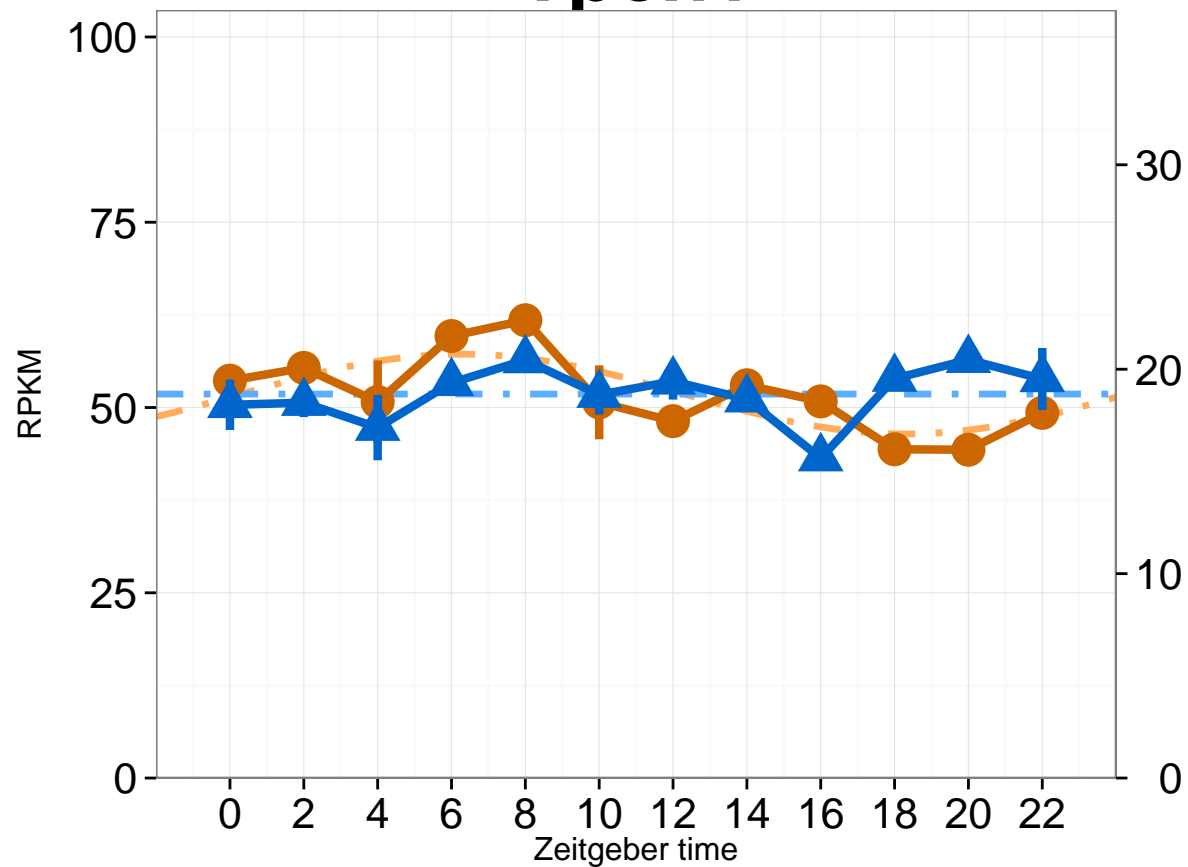

# Tpcn1

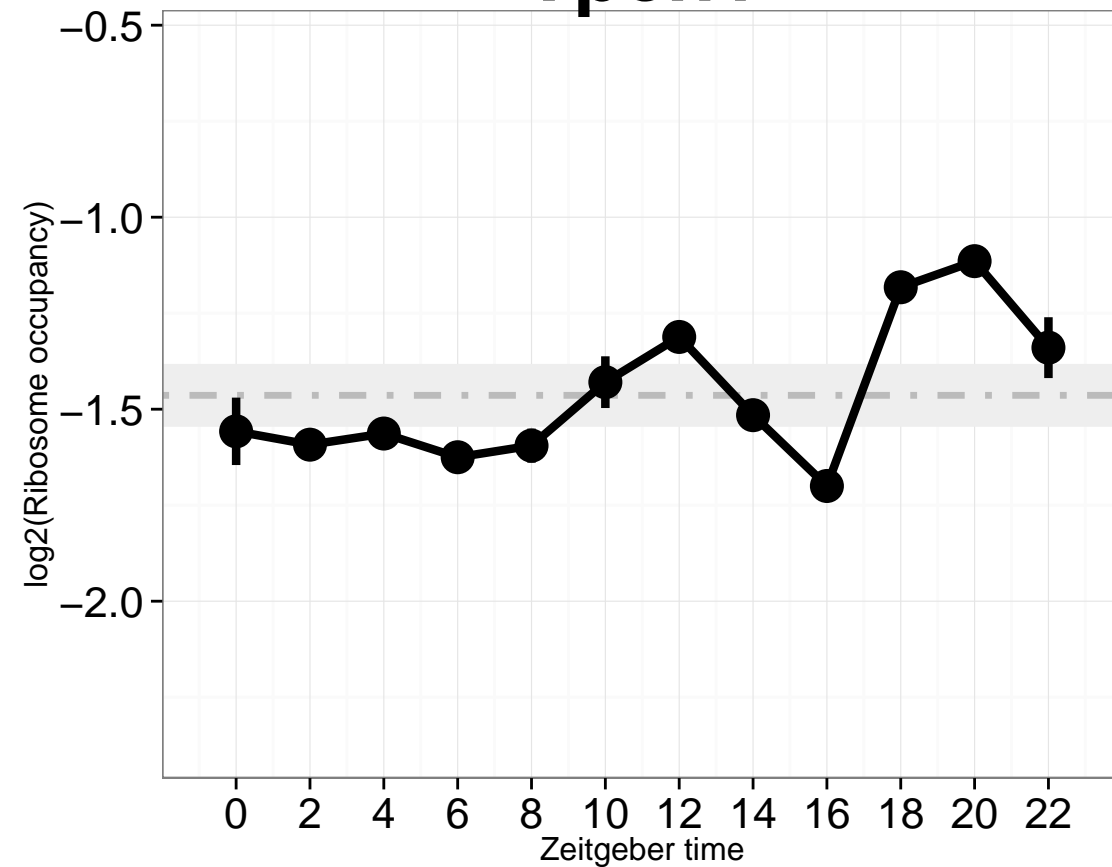

Supplement: Supplementary file 8992 [file 1]

# Igf2bp2

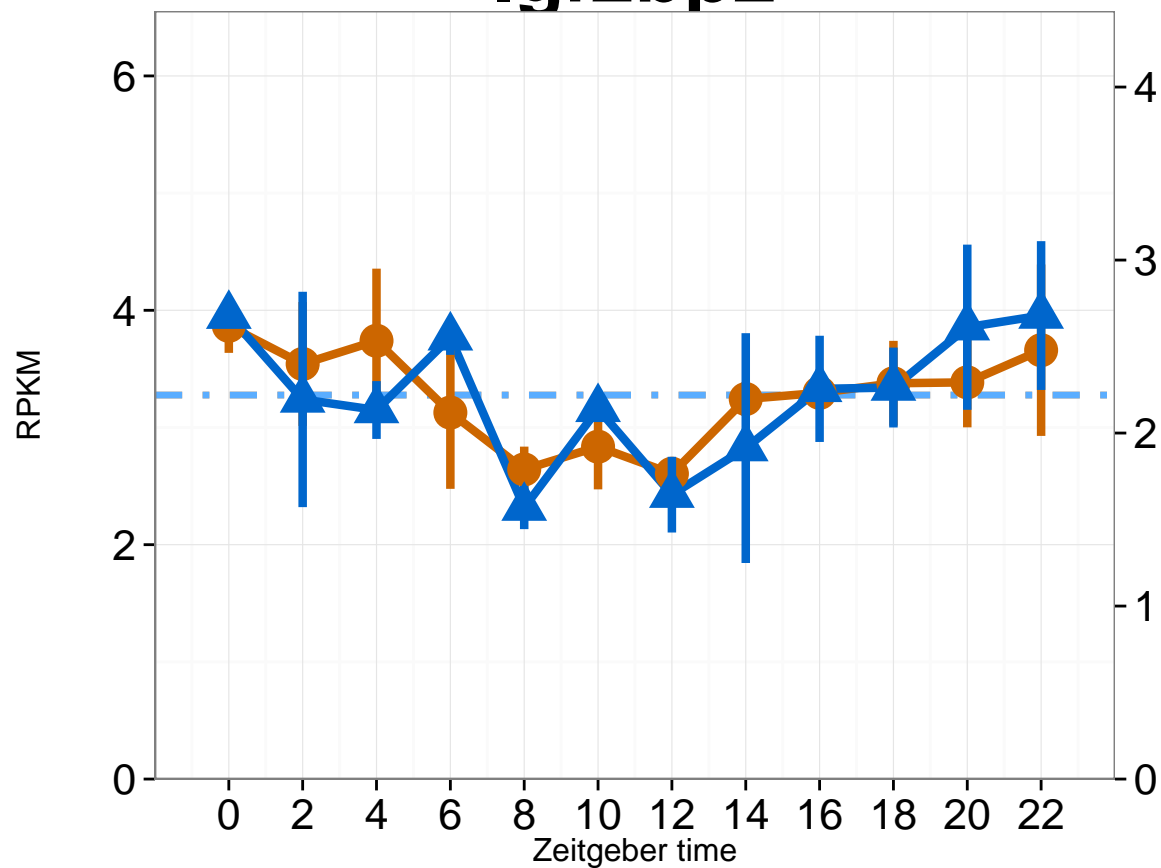

# Igf2bp2

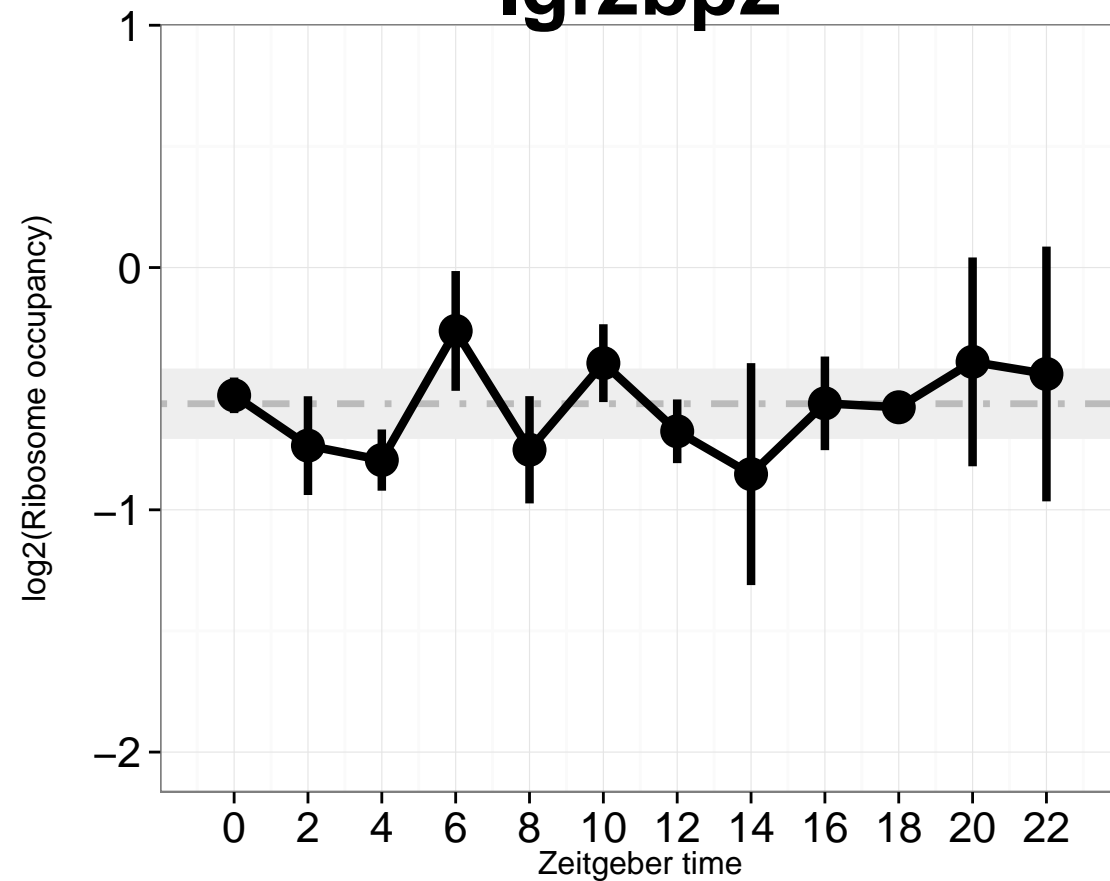

Supplement: Supplementary file 8993 [file 1]

## Tsta3

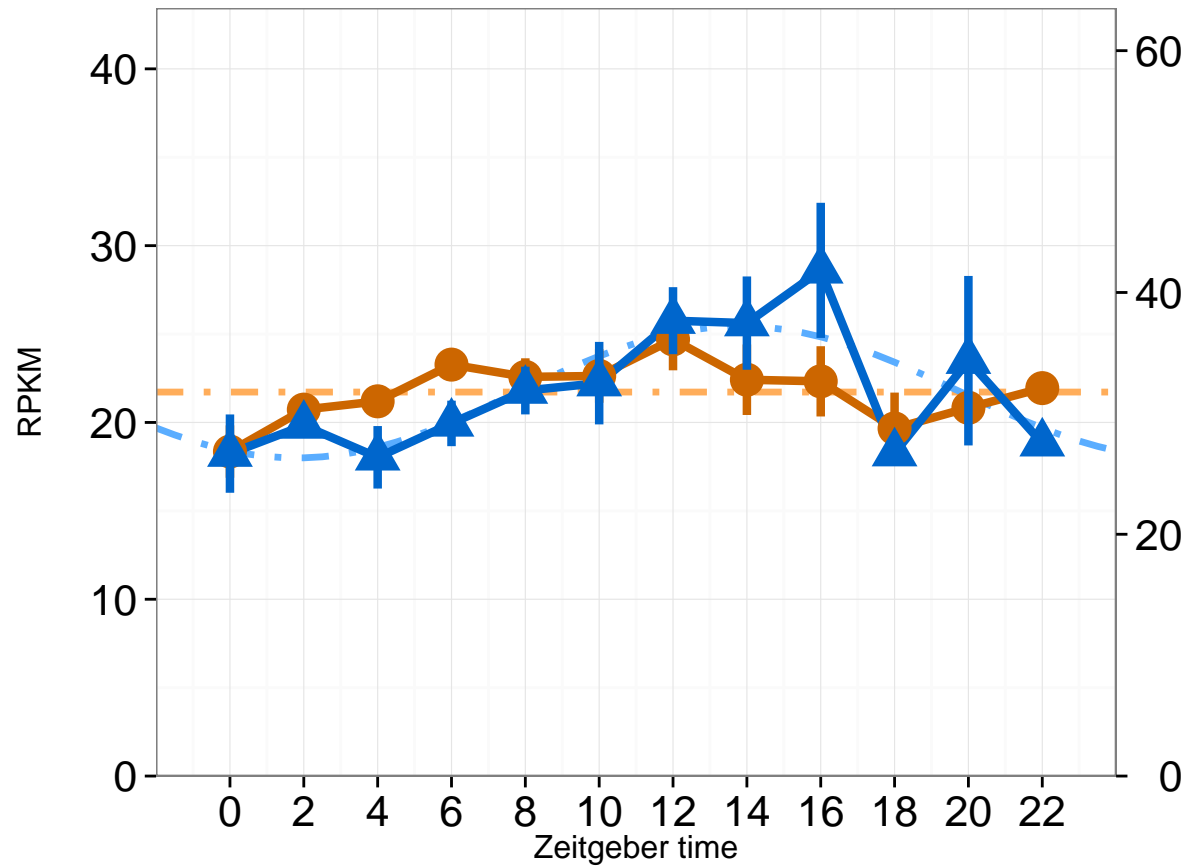

## Tsta3

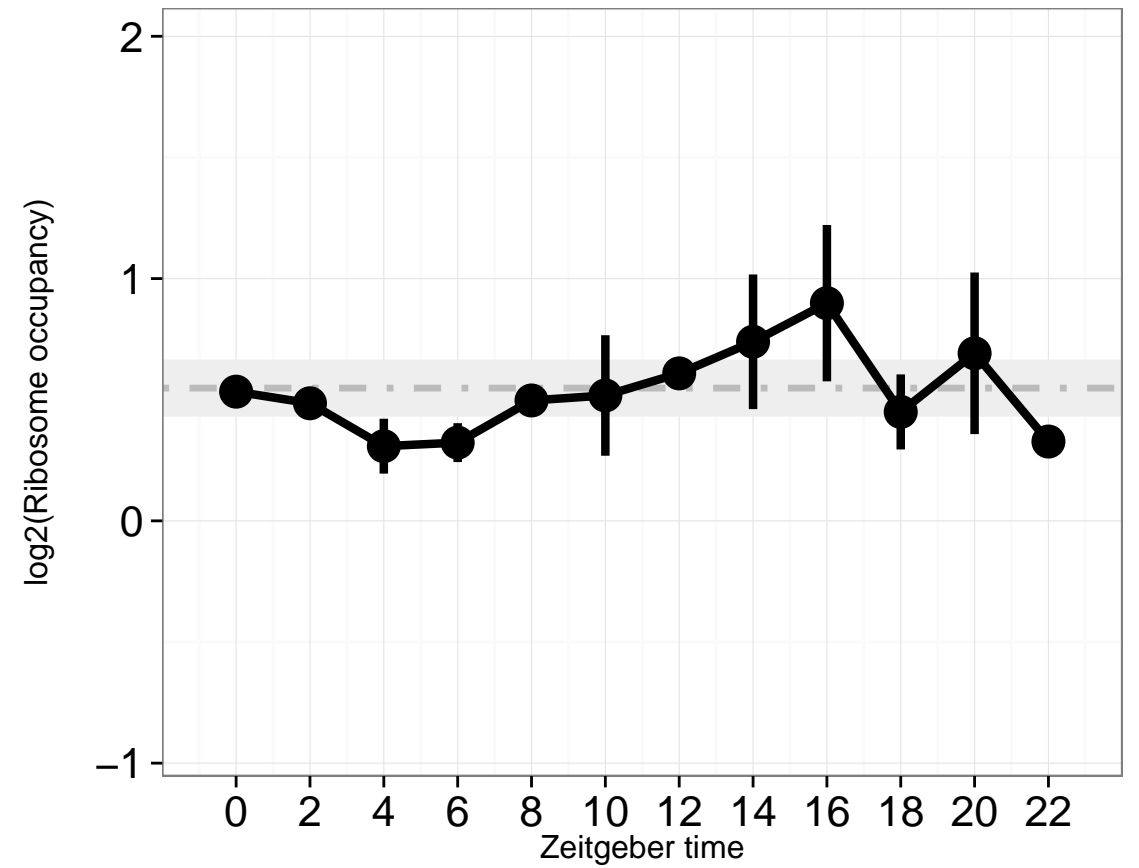

Supplement: Supplementary file 8994 [file 1]

# Pcbd2

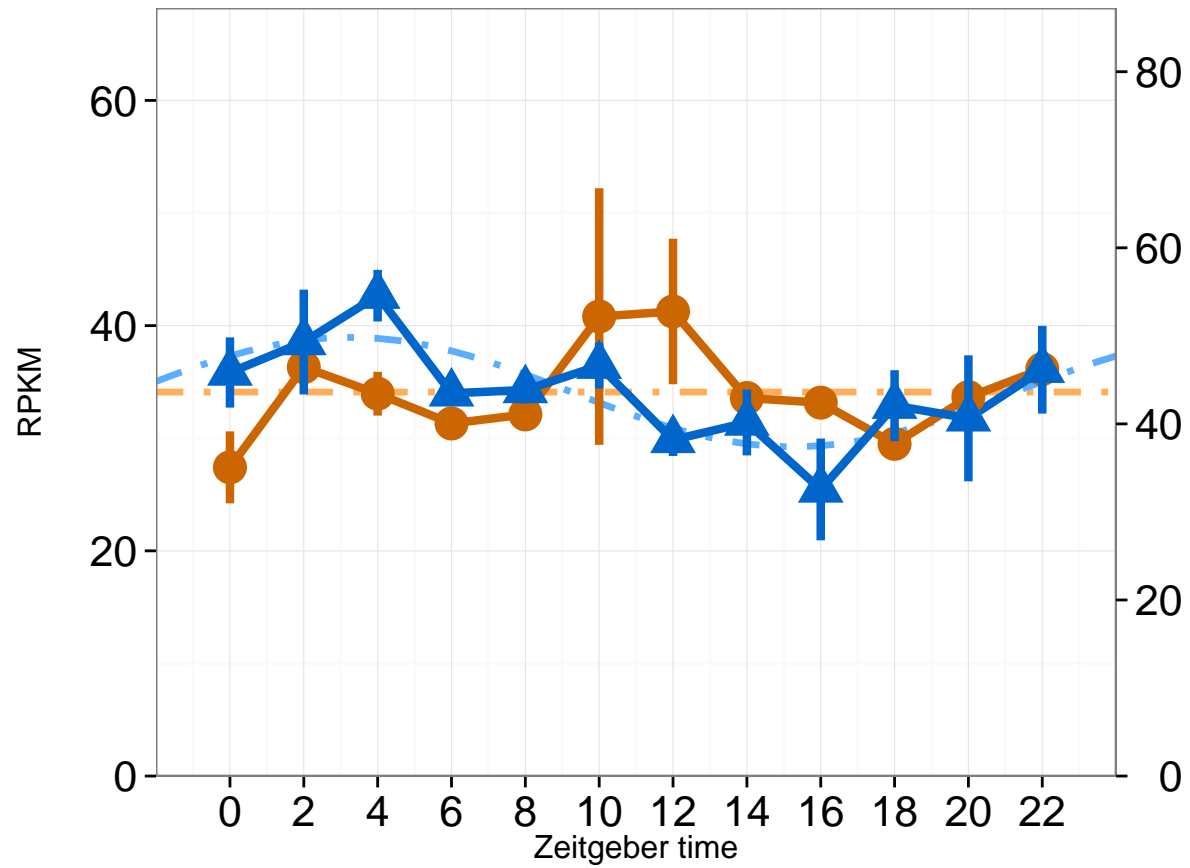

# Pcbd2

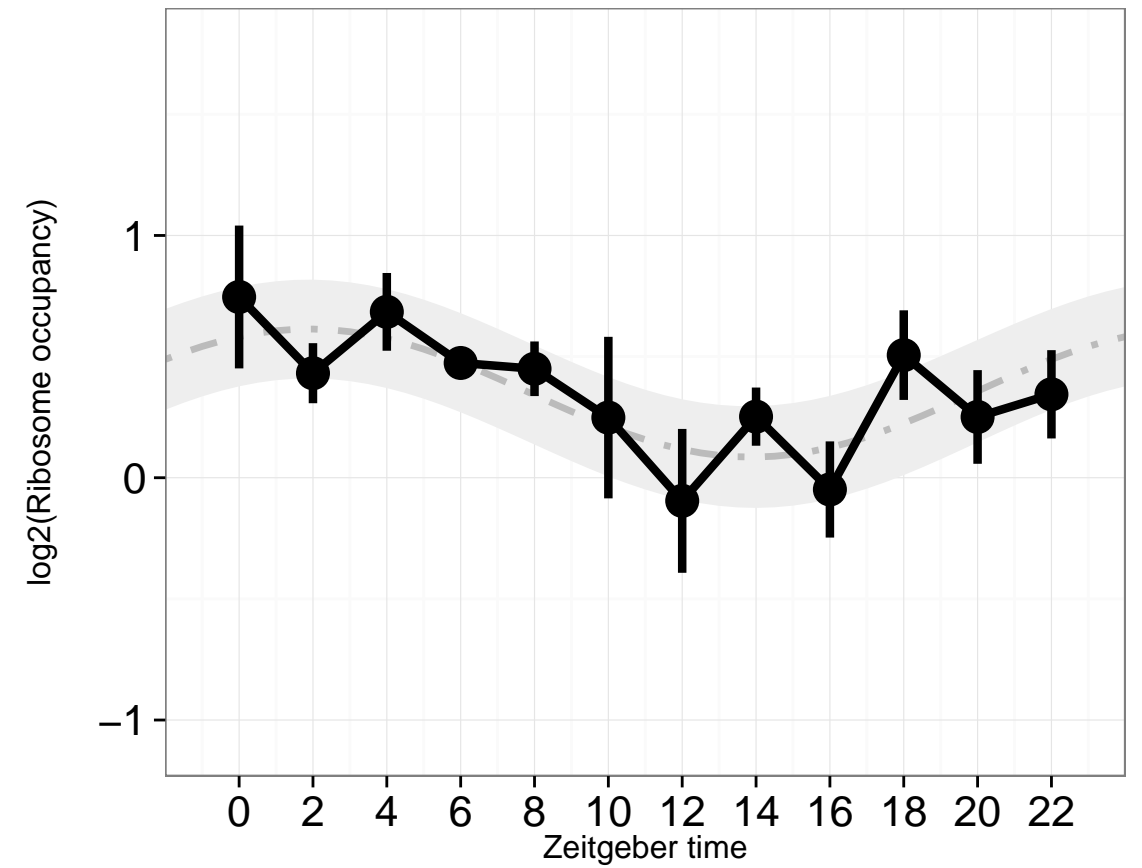

Supplement: Supplementary file 8995 [file 1]

# Timm17b

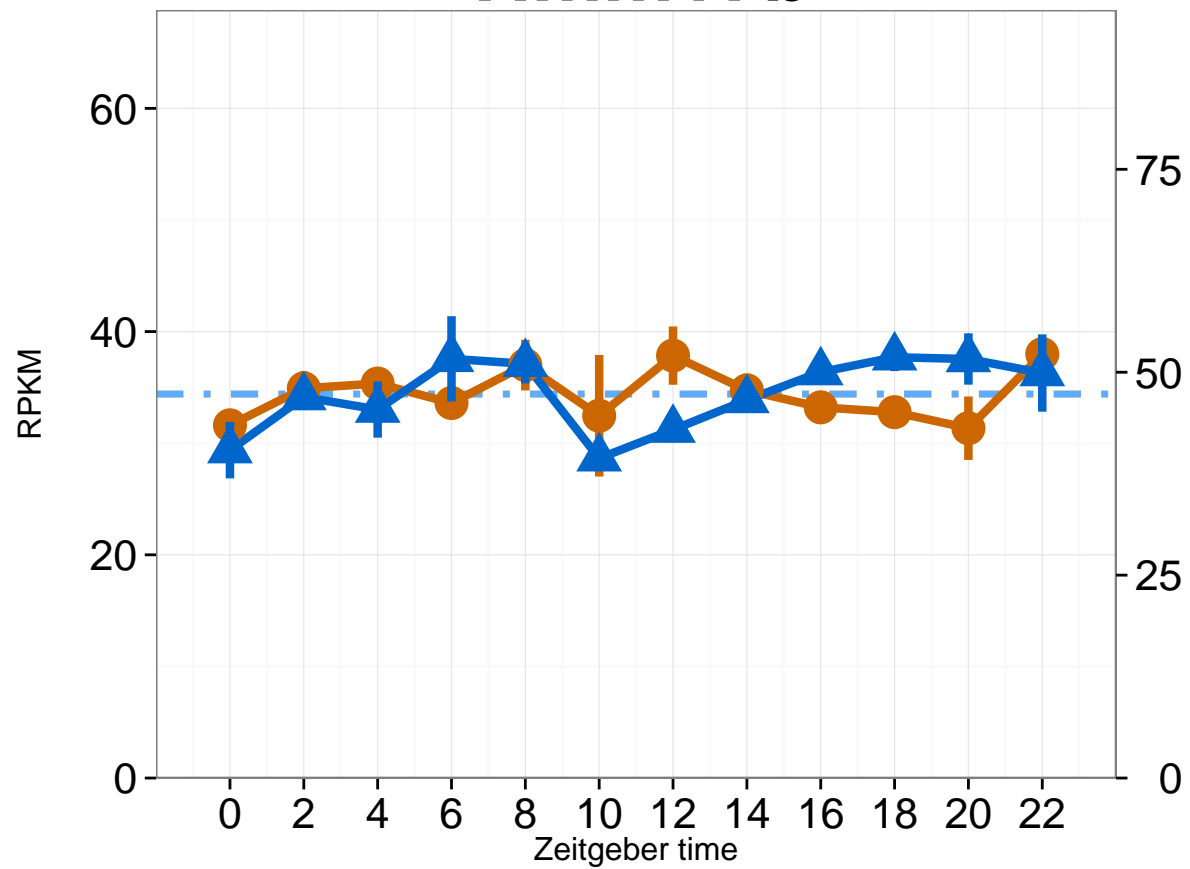

# Timm17b

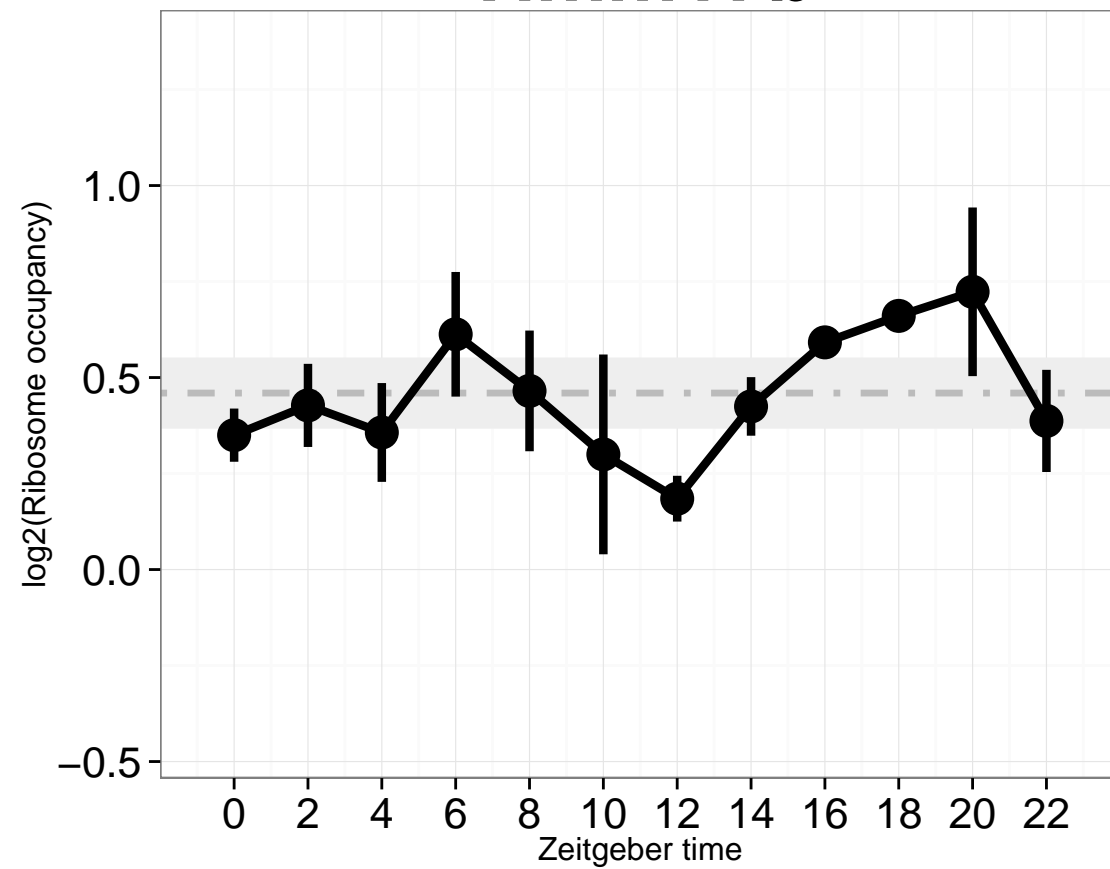

Supplement: Supplementary file 8996 [file 1]

# 4921536K21Rik

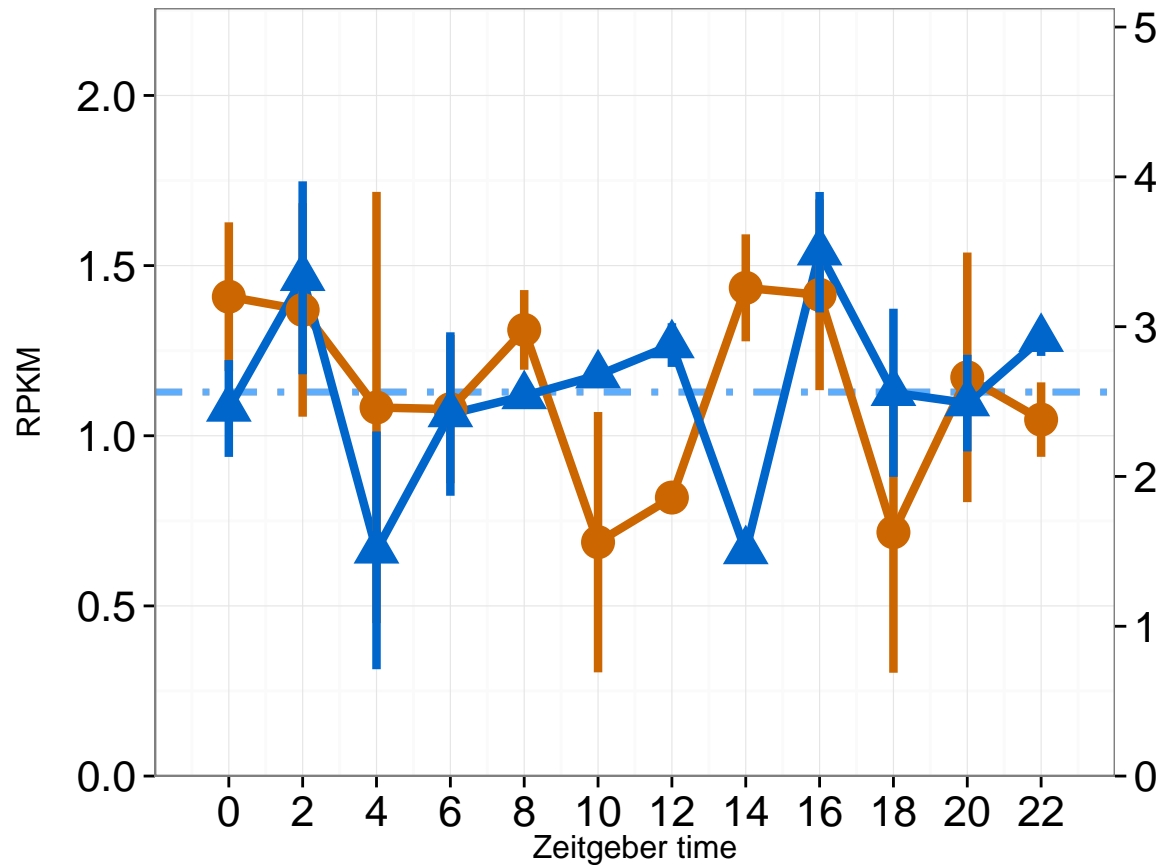

# 4921536K21Rik

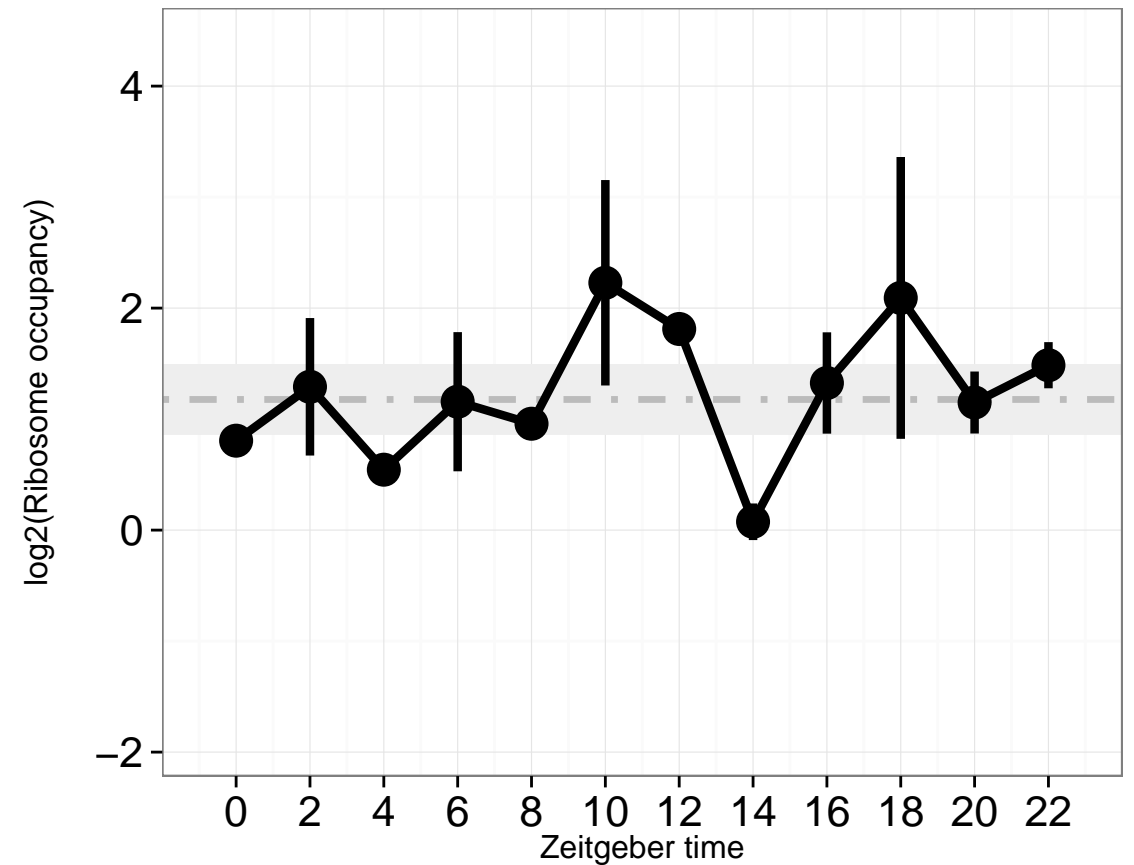

Supplement: Supplementary file 8997 [file 1]

## Dym

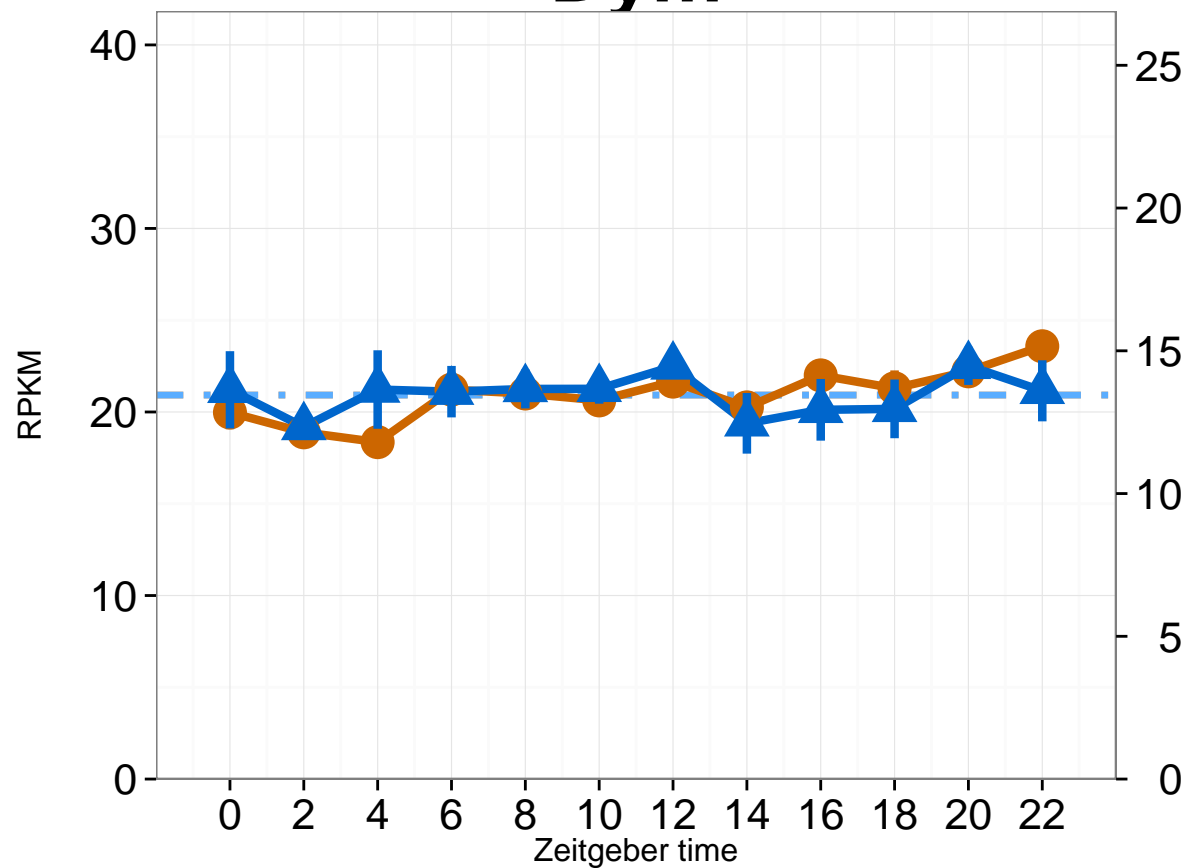

## Dym

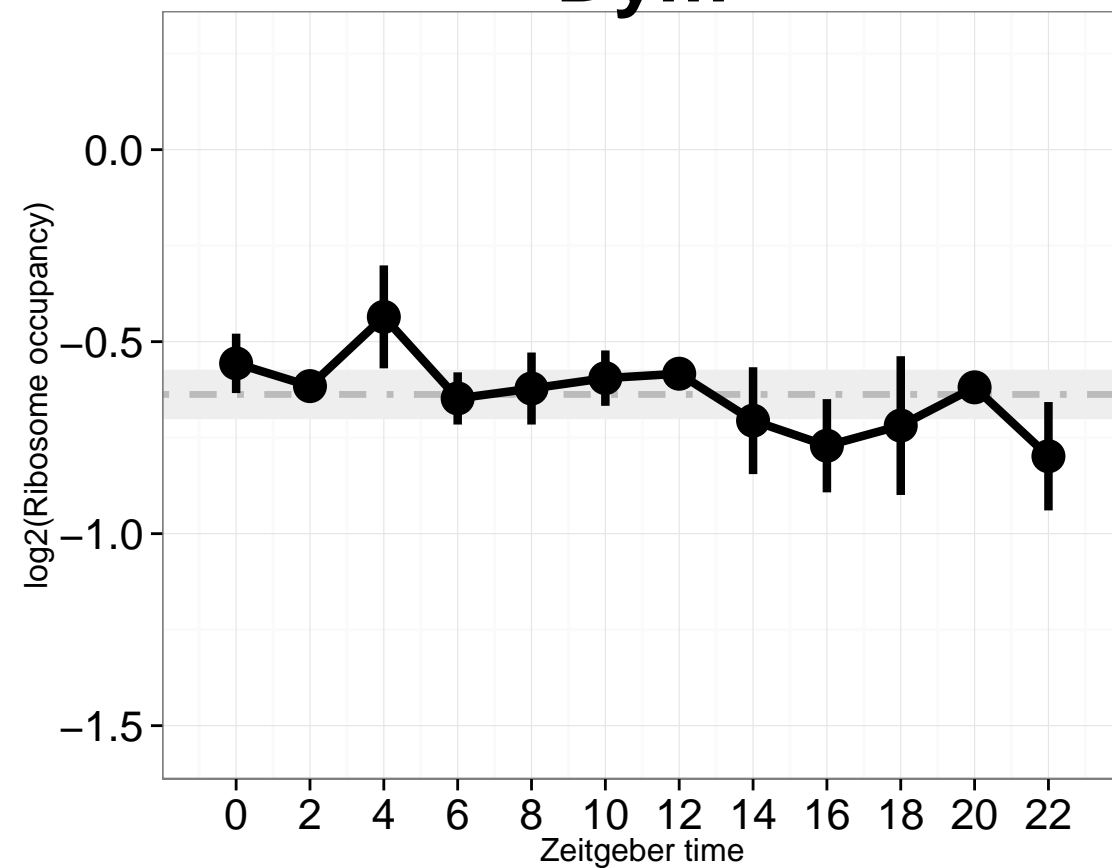

Supplement: Supplementary file 8998 [file 1]

## Enpp1

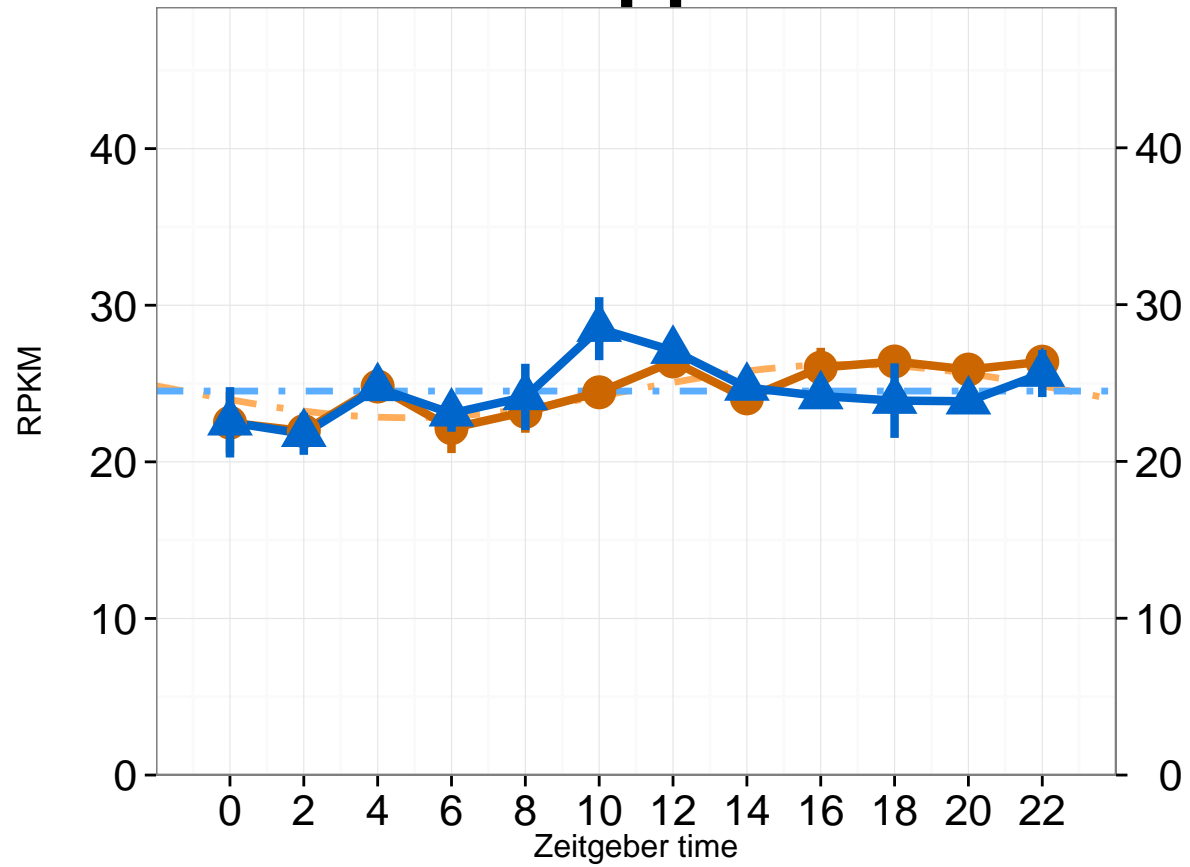

## Enpp1

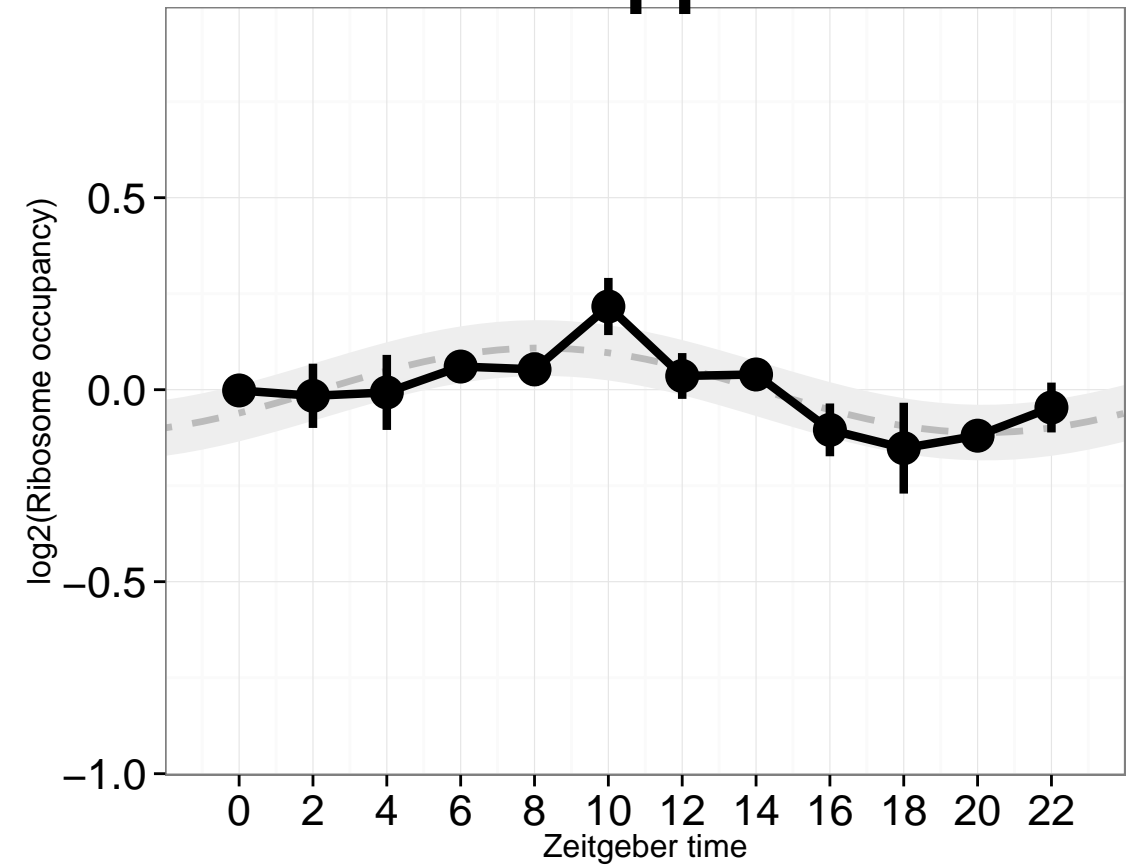

Supplement: Supplementary file 8999 [file 1]

## Lcorl

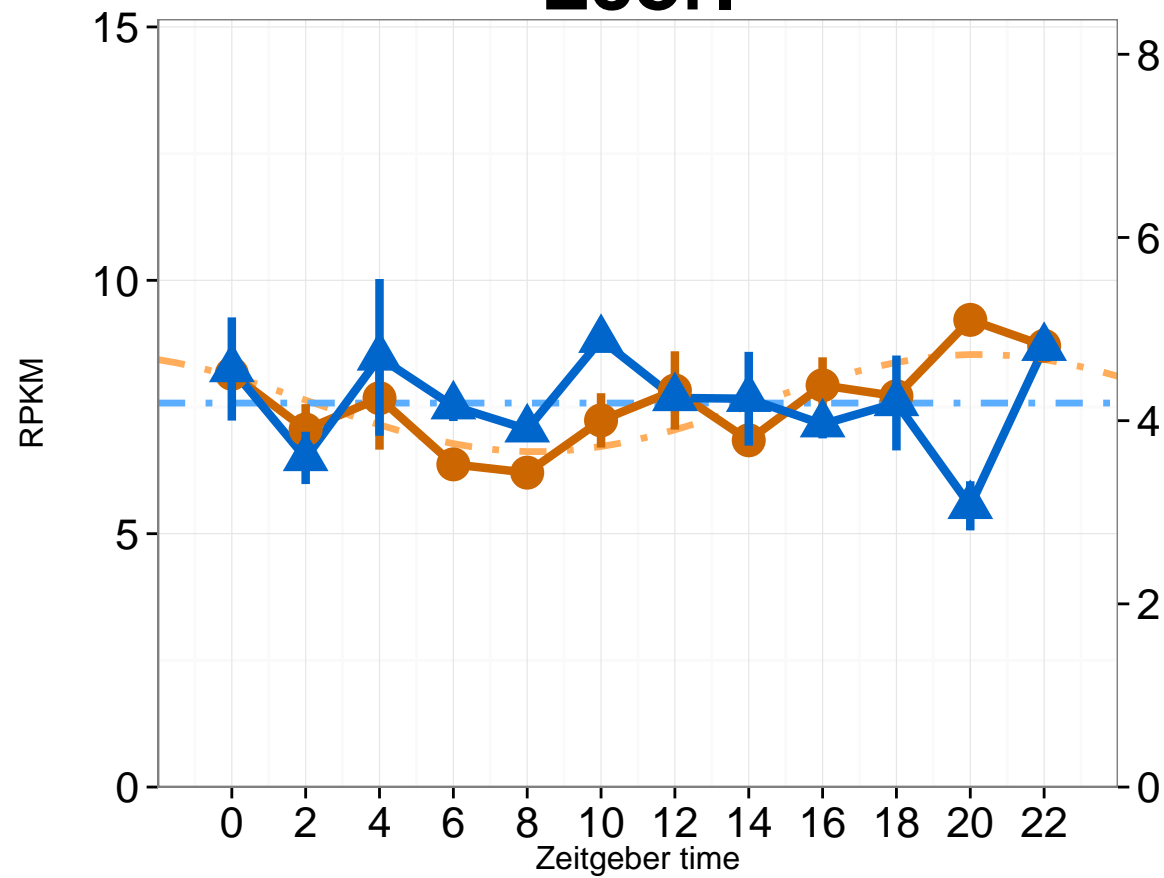

## Lcorl

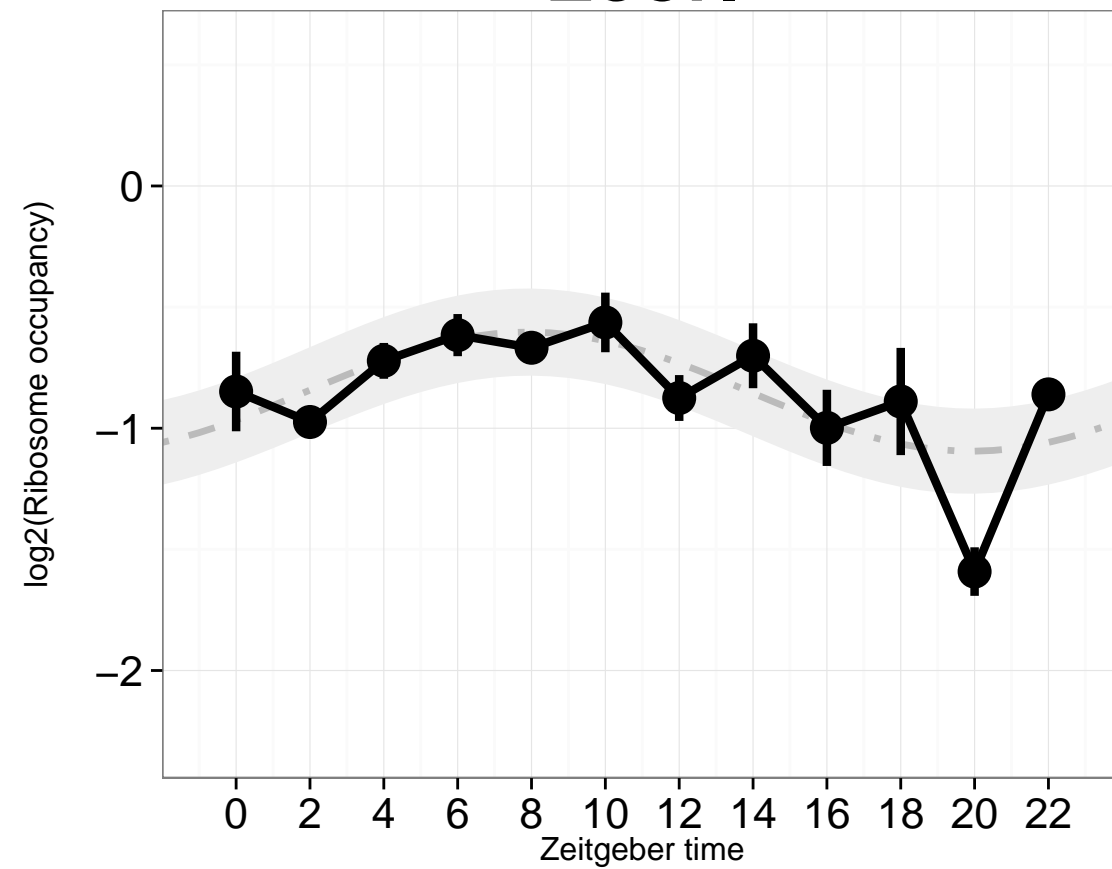

Supplement: Supplementary file 9000 [file 1]

# B3gat3

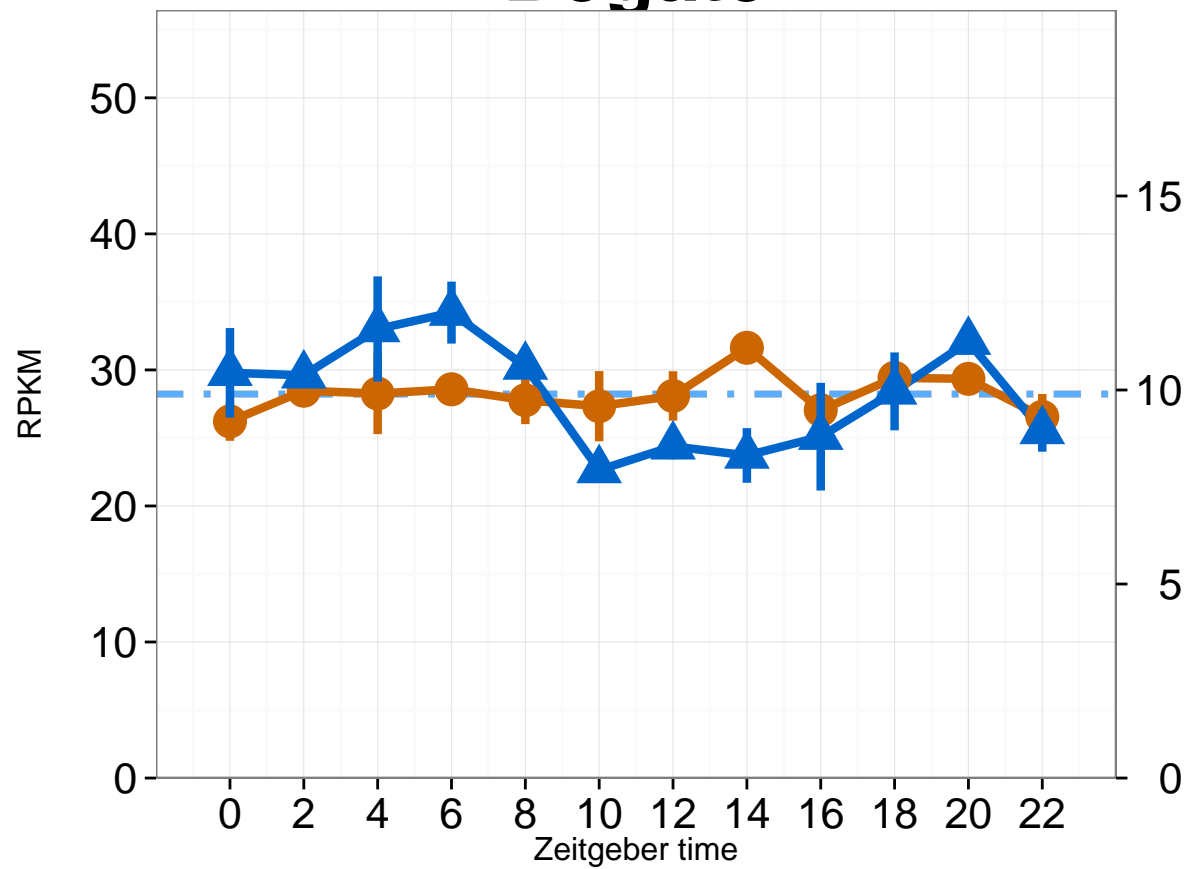

# B3gat3

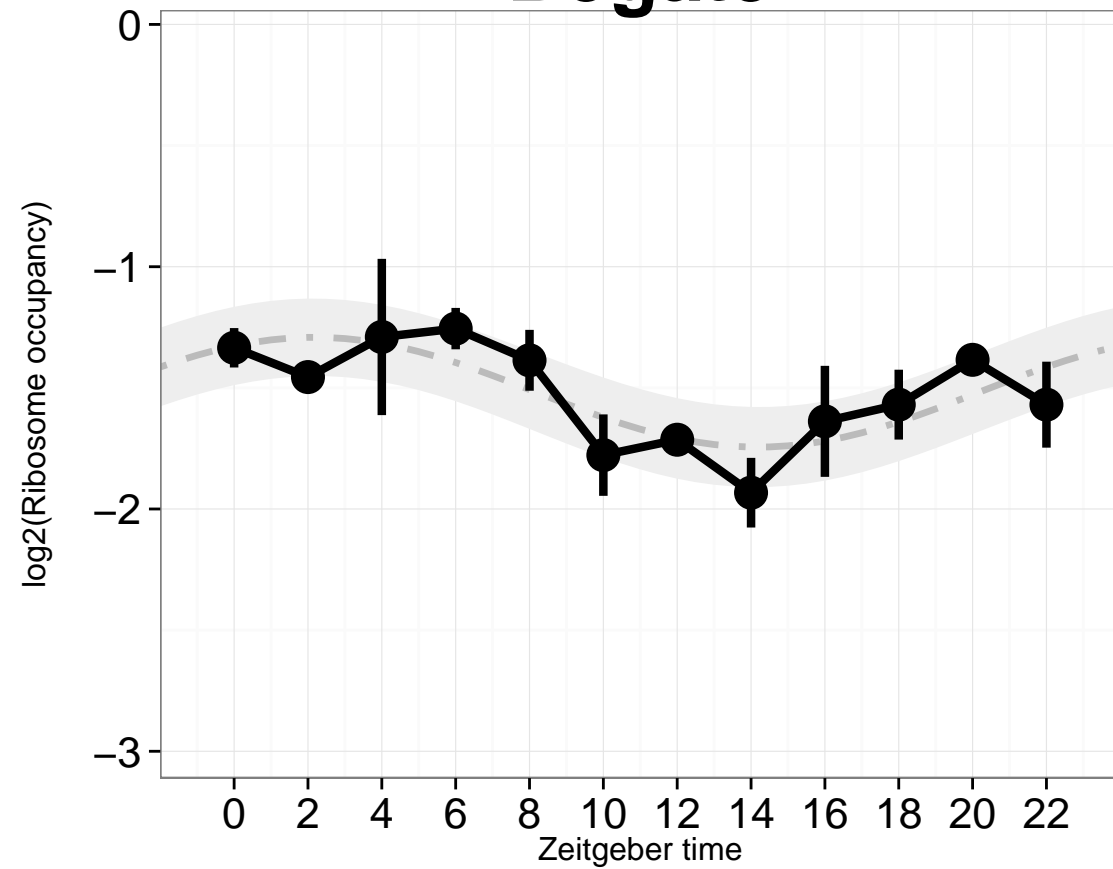

Supplement: Supplementary file 9001 [file 1]

# Cox5a

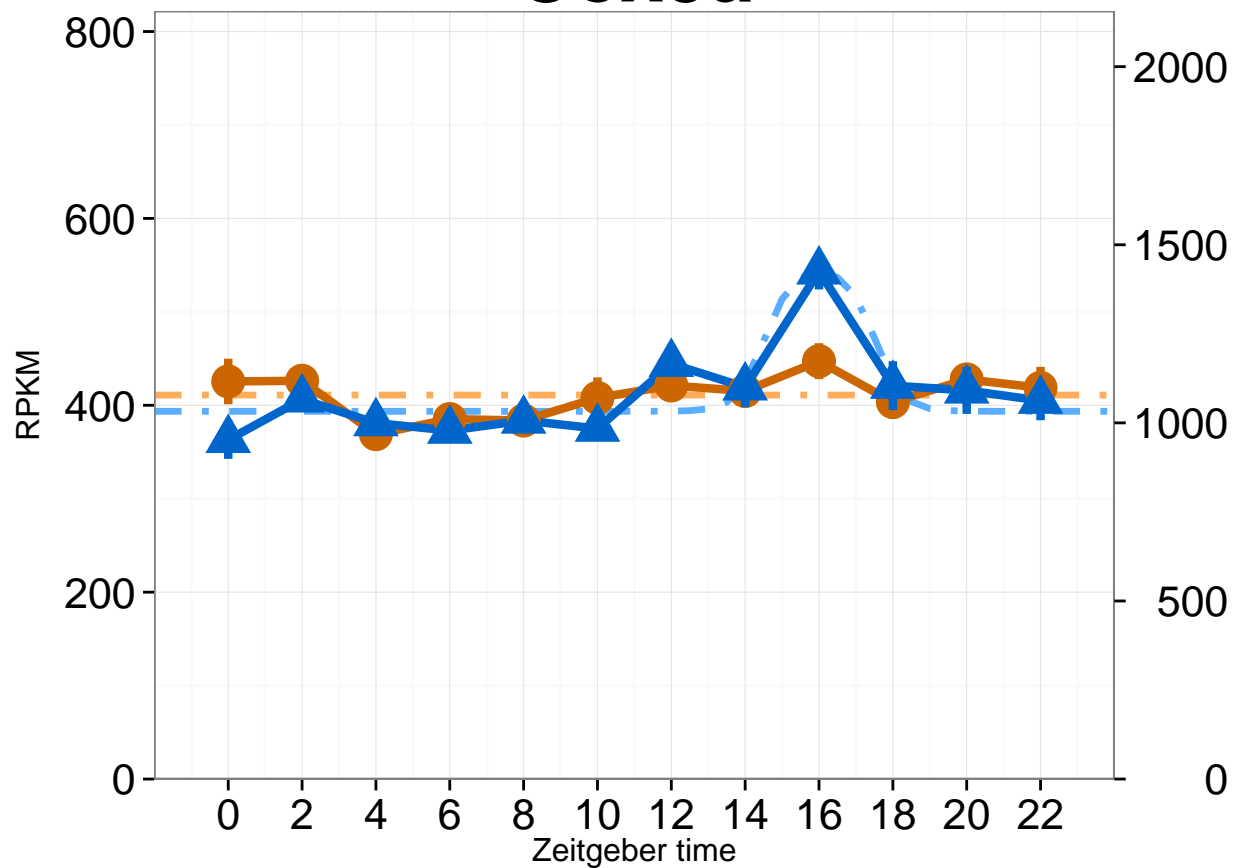

# Cox5a

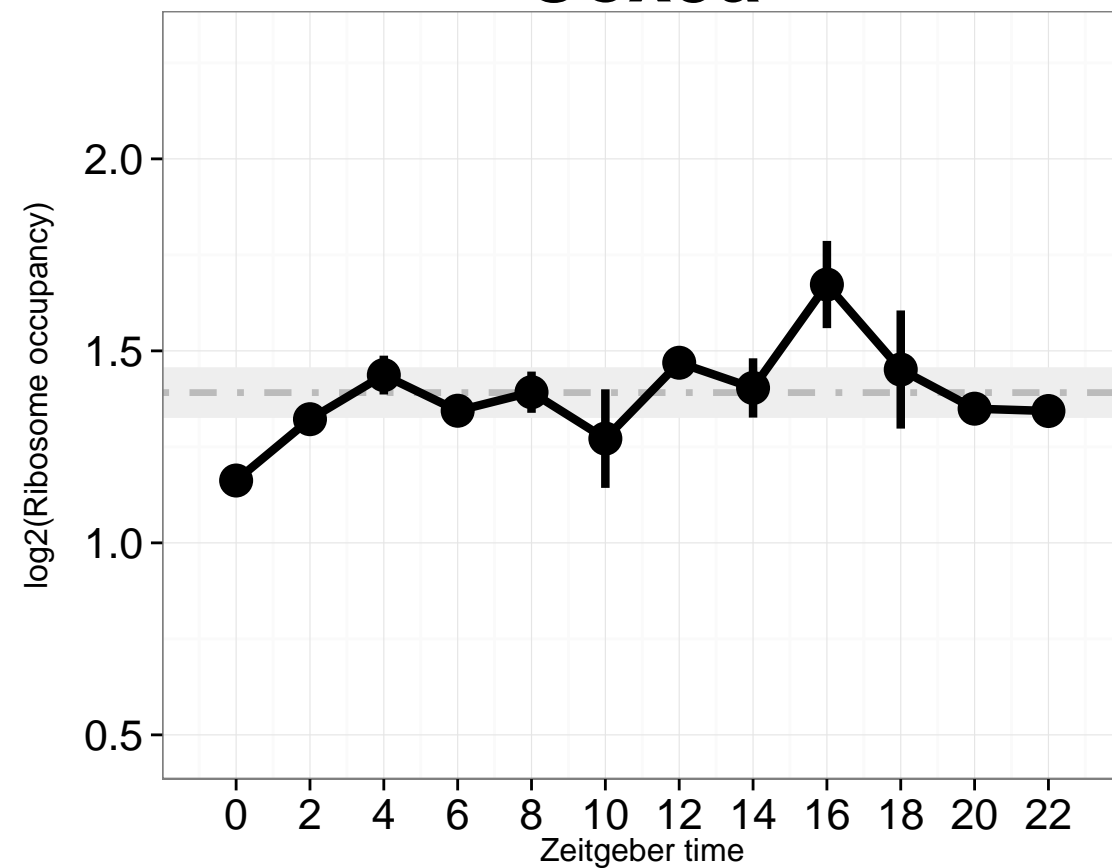

Supplement: Supplementary file 9002 [file 1]

# Chrdl1

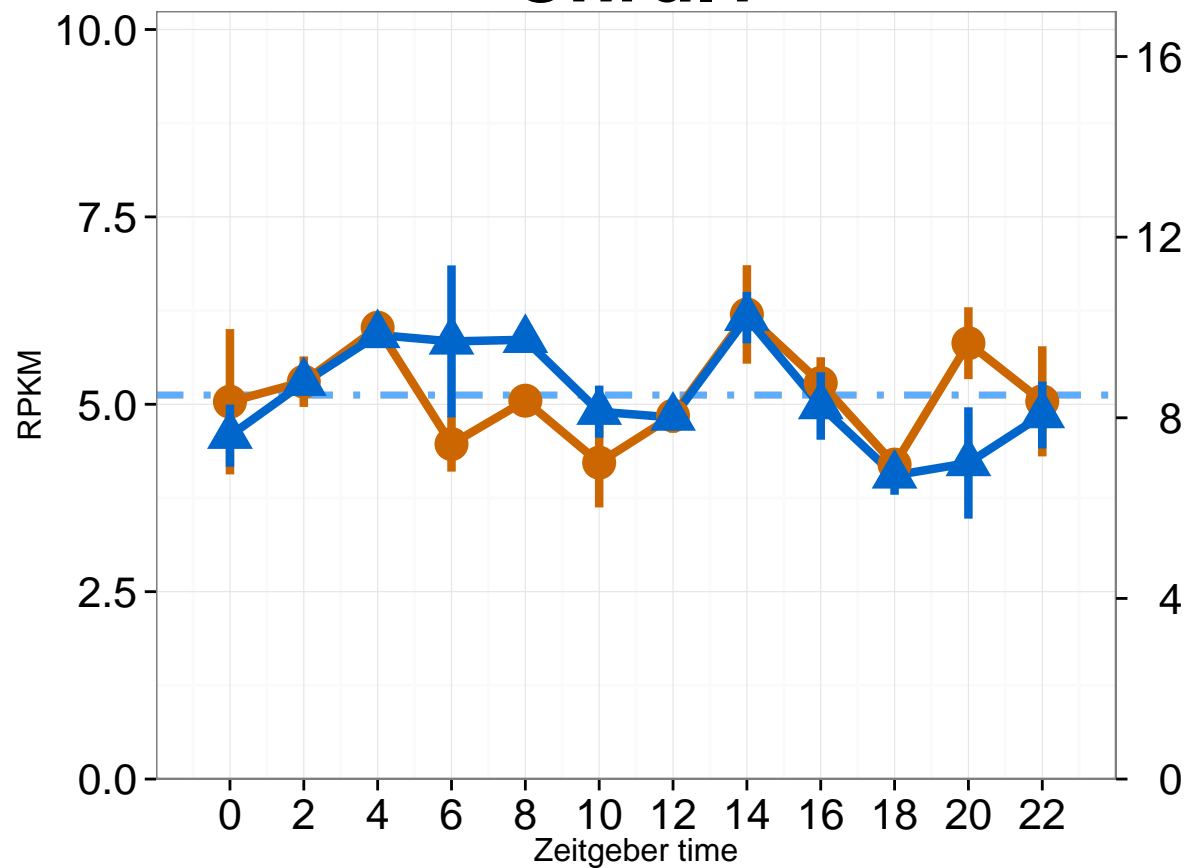

# Chrdl1

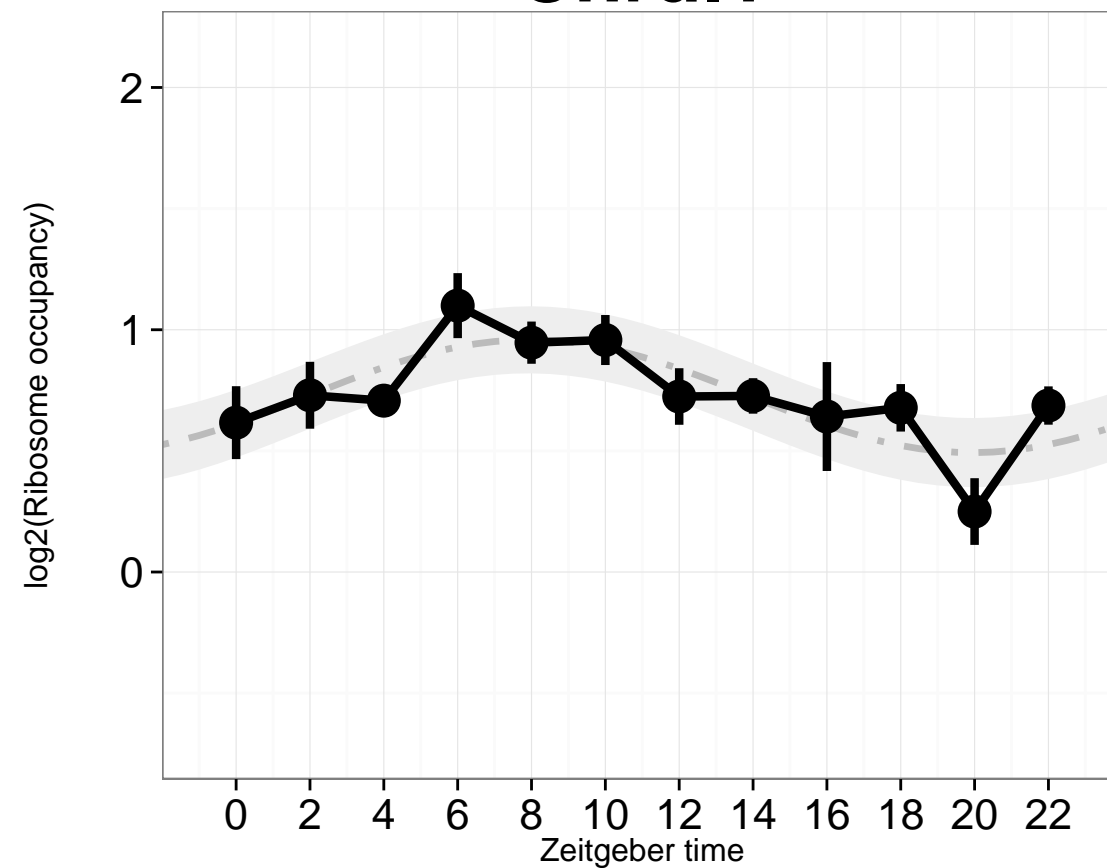

Supplement: Supplementary file 9003 [file 1]

## Hyal1

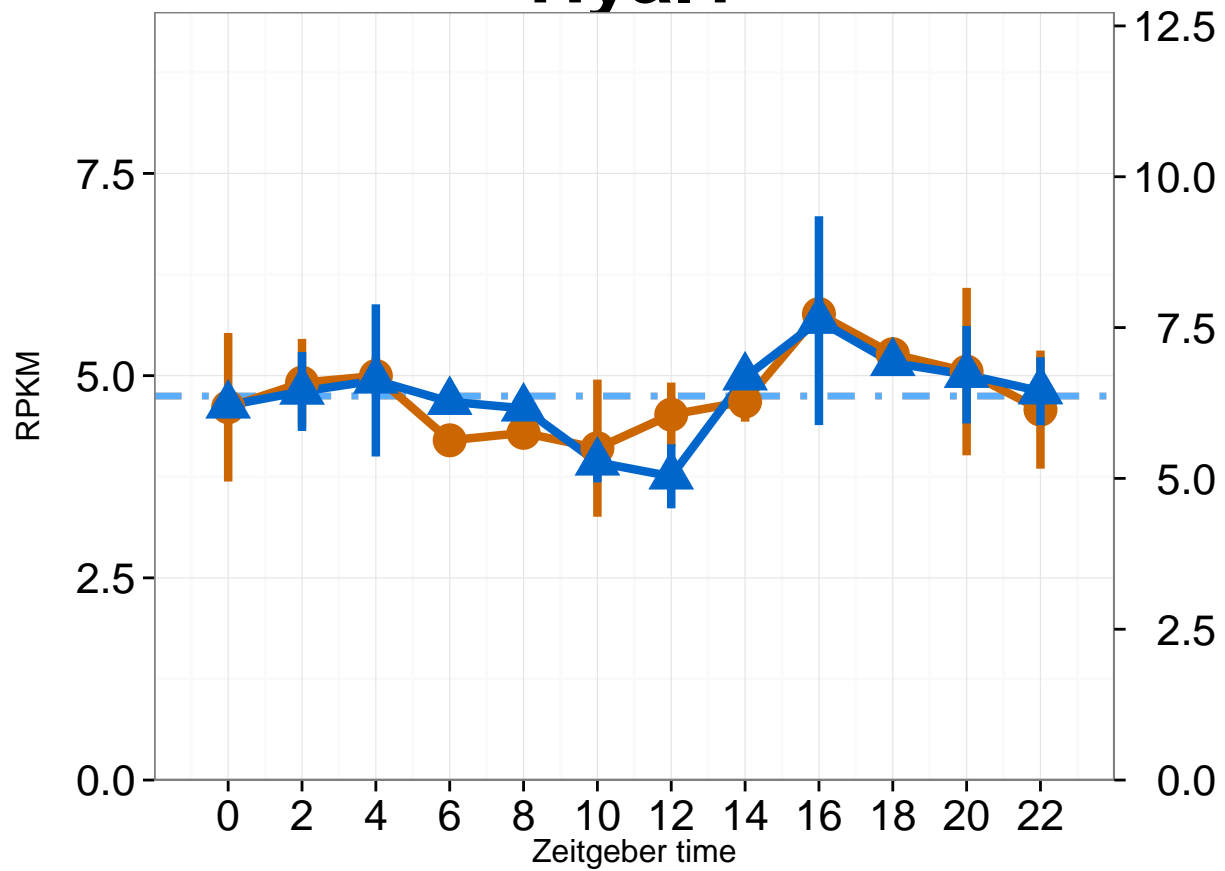

## Hyal1

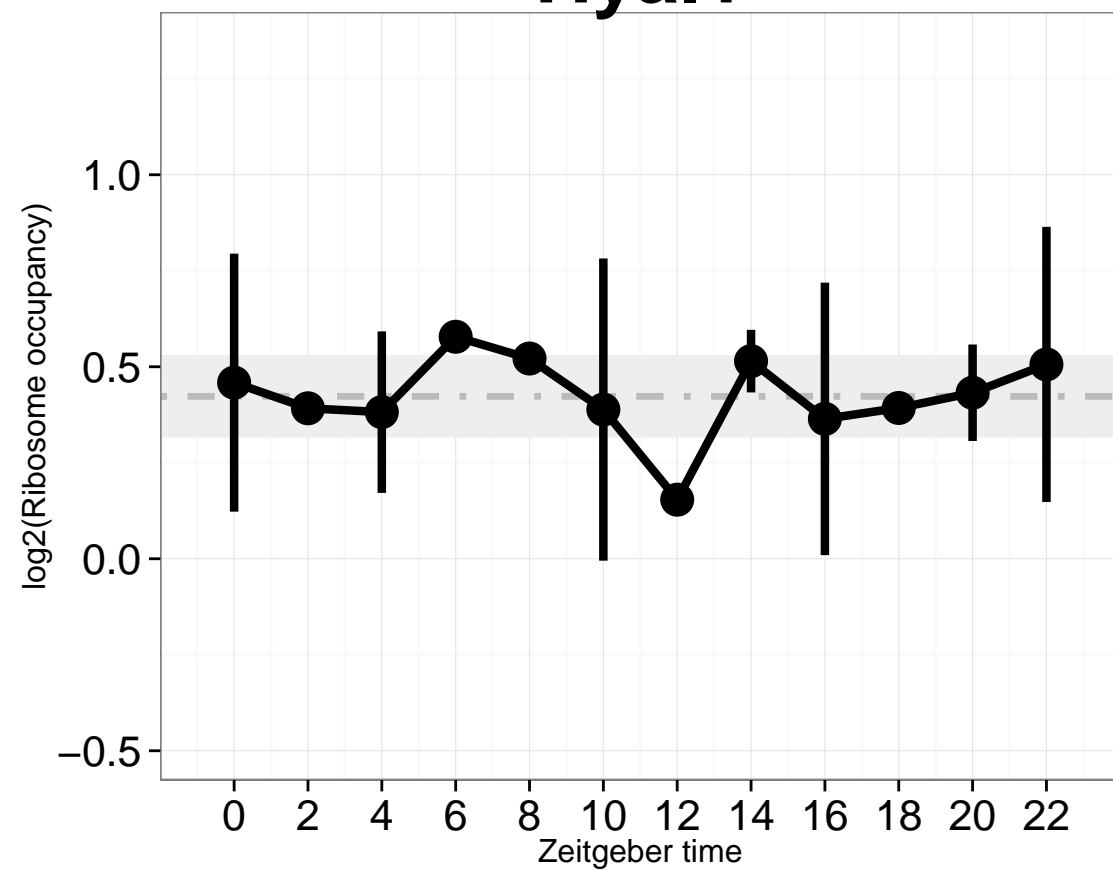

Supplement: Supplementary file 9004 [file 1]

# Unc13a

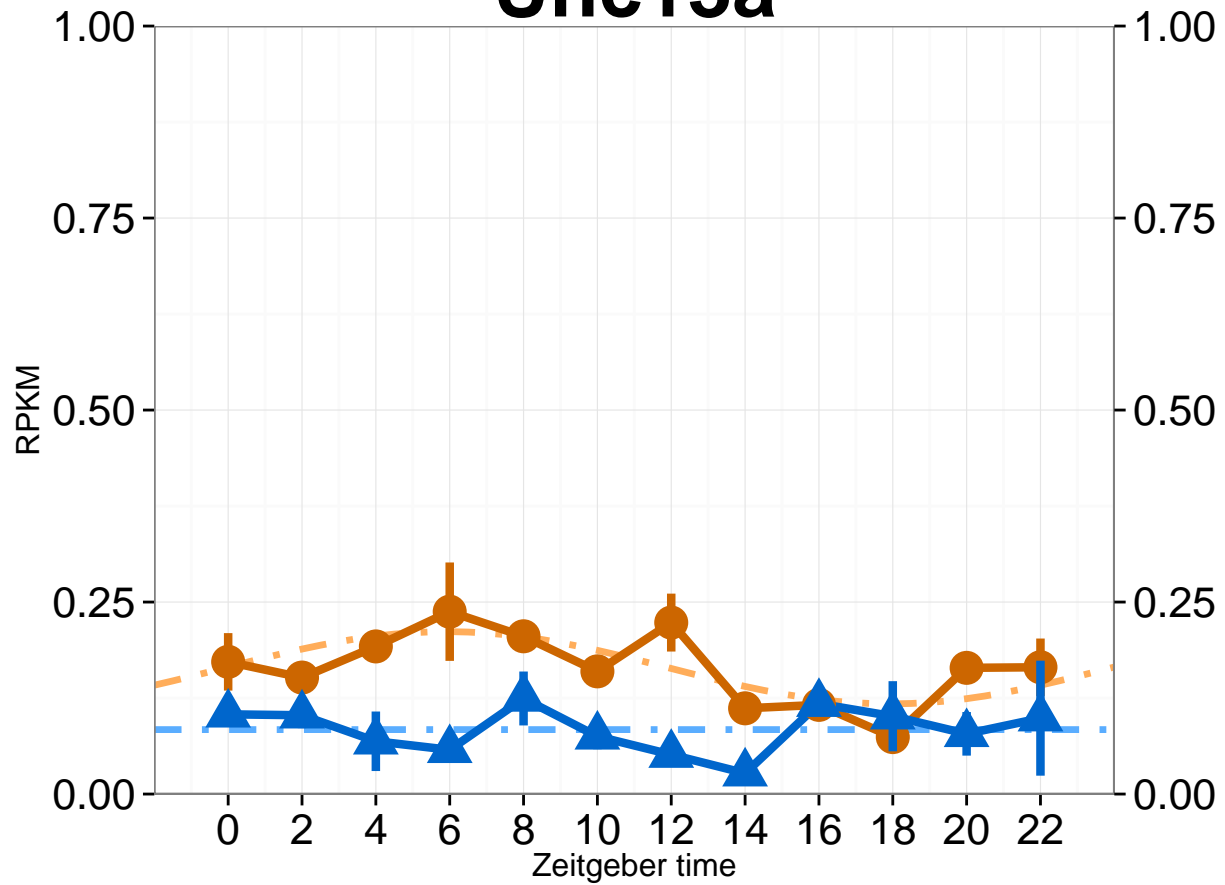

# Unc13a

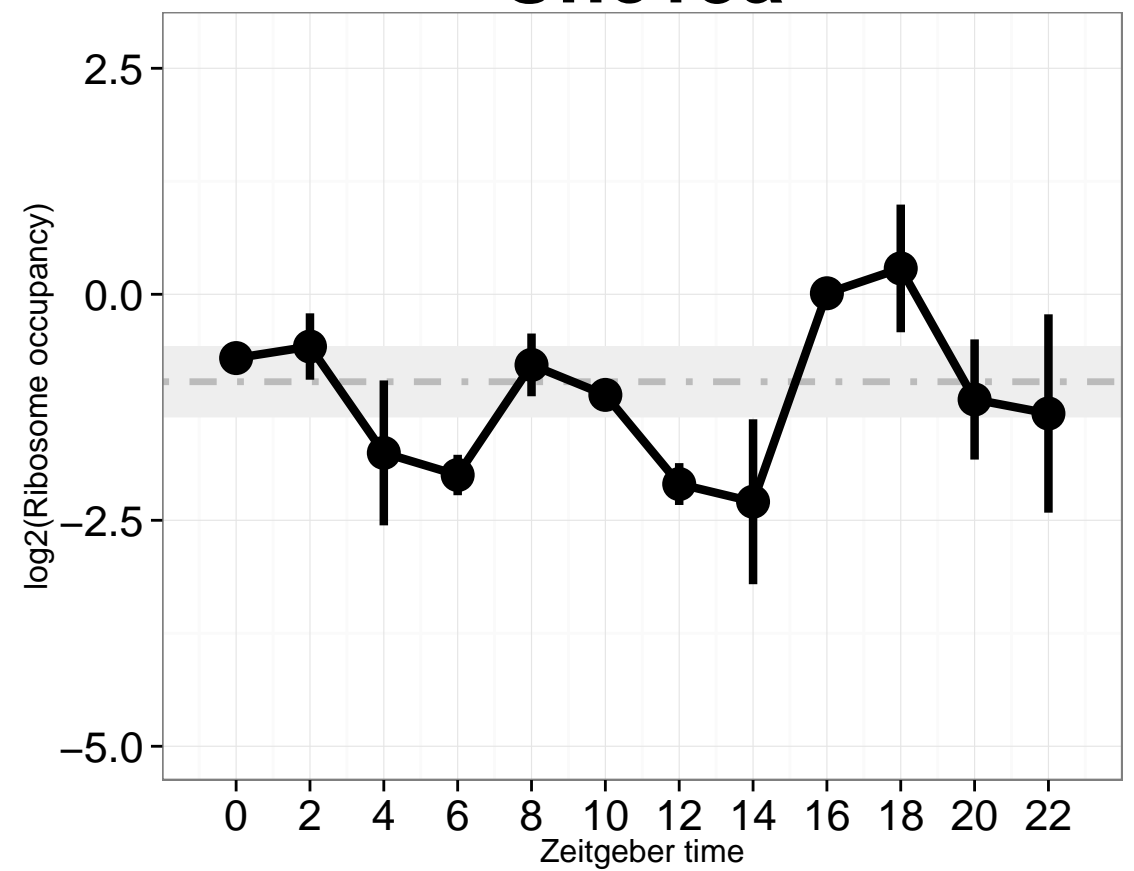

Supplement: Supplementary file 9005 [file 1]

# Zfp82

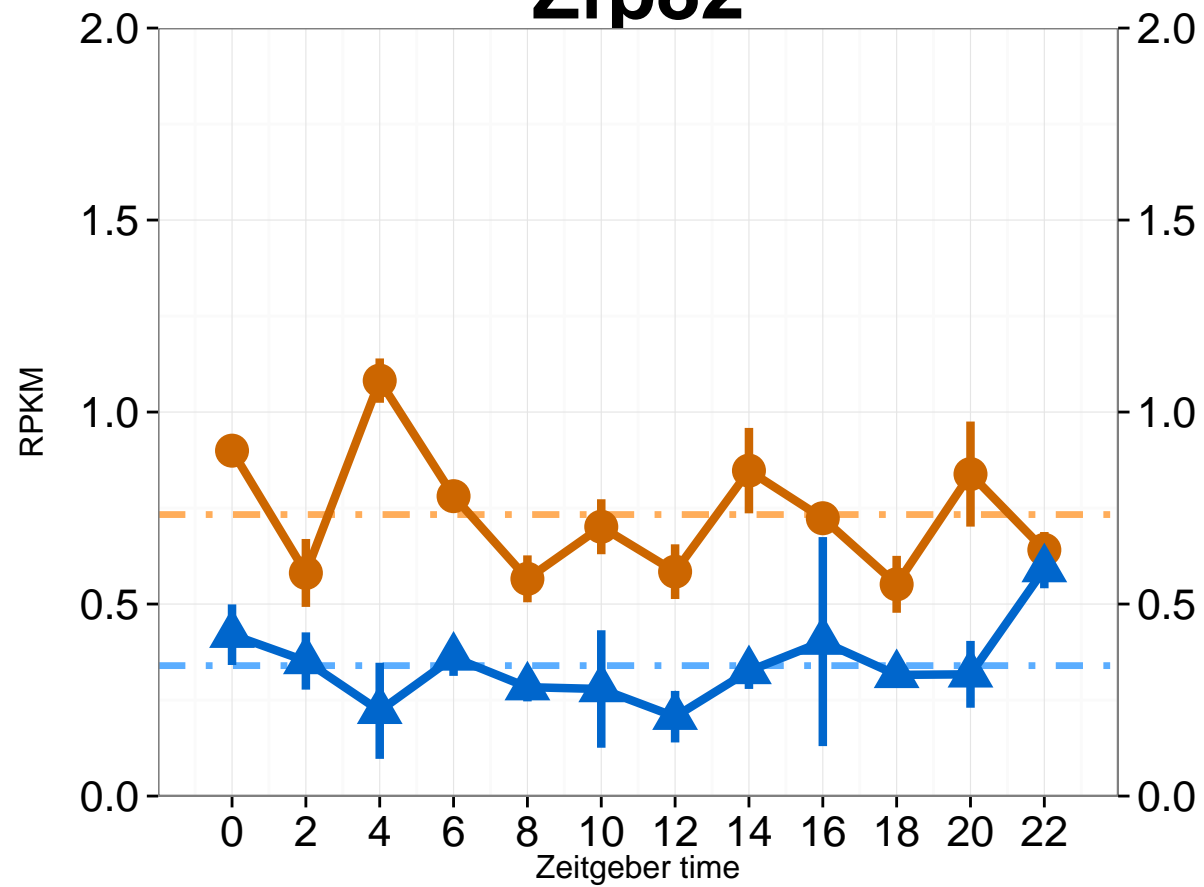

# Zfp82

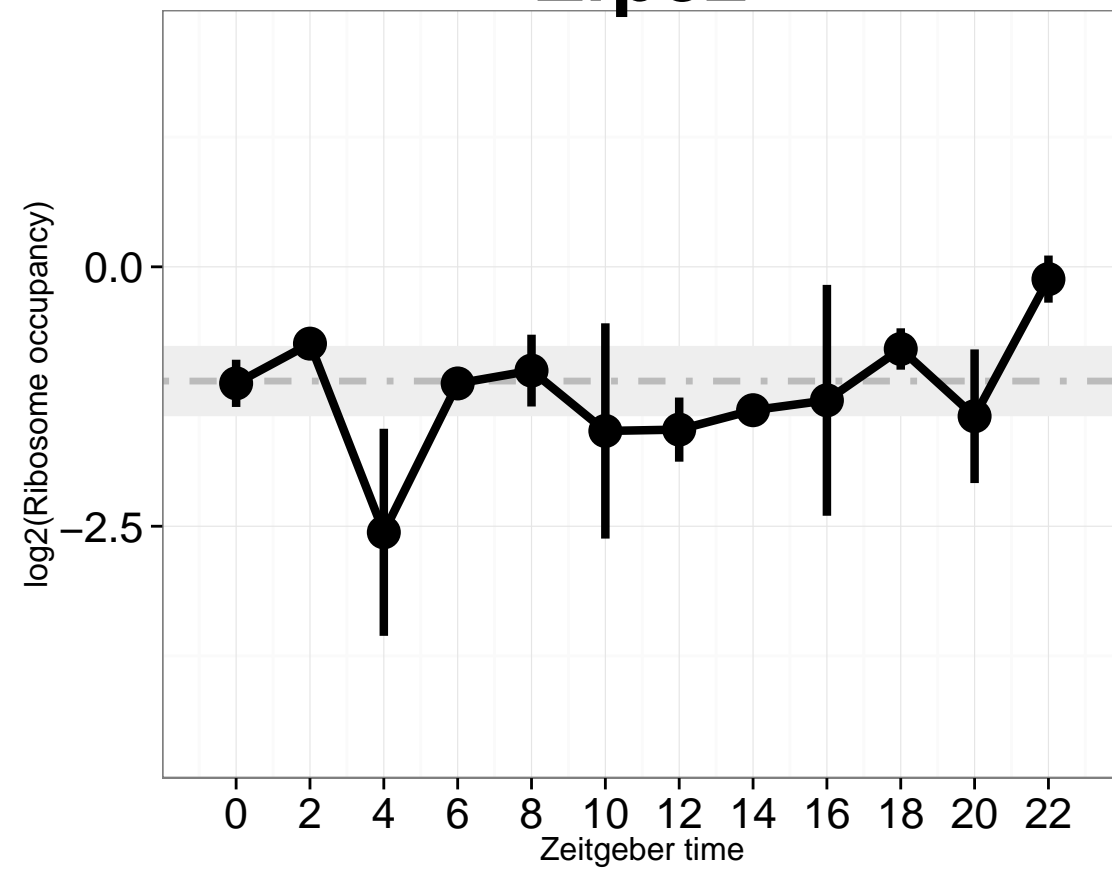

Supplement: Supplementary file 9006 [file 1]

# Lair1

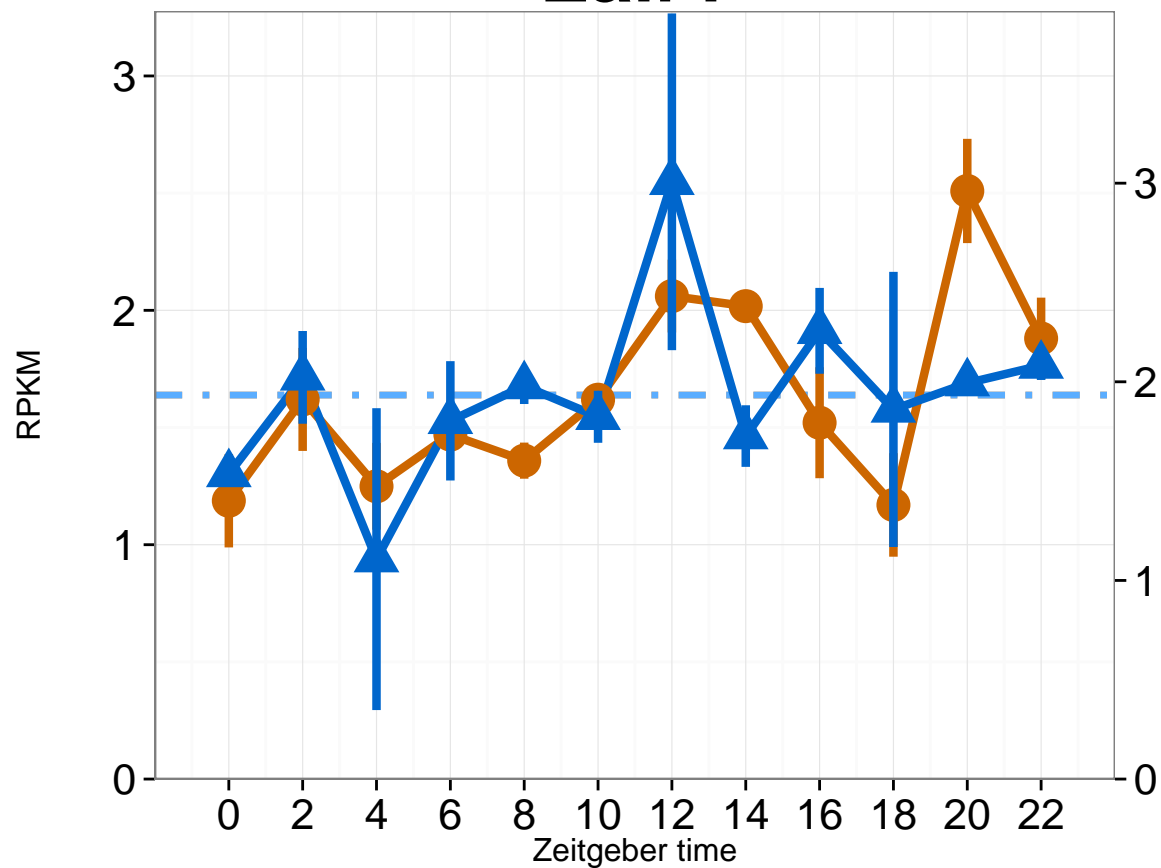

# Lair1

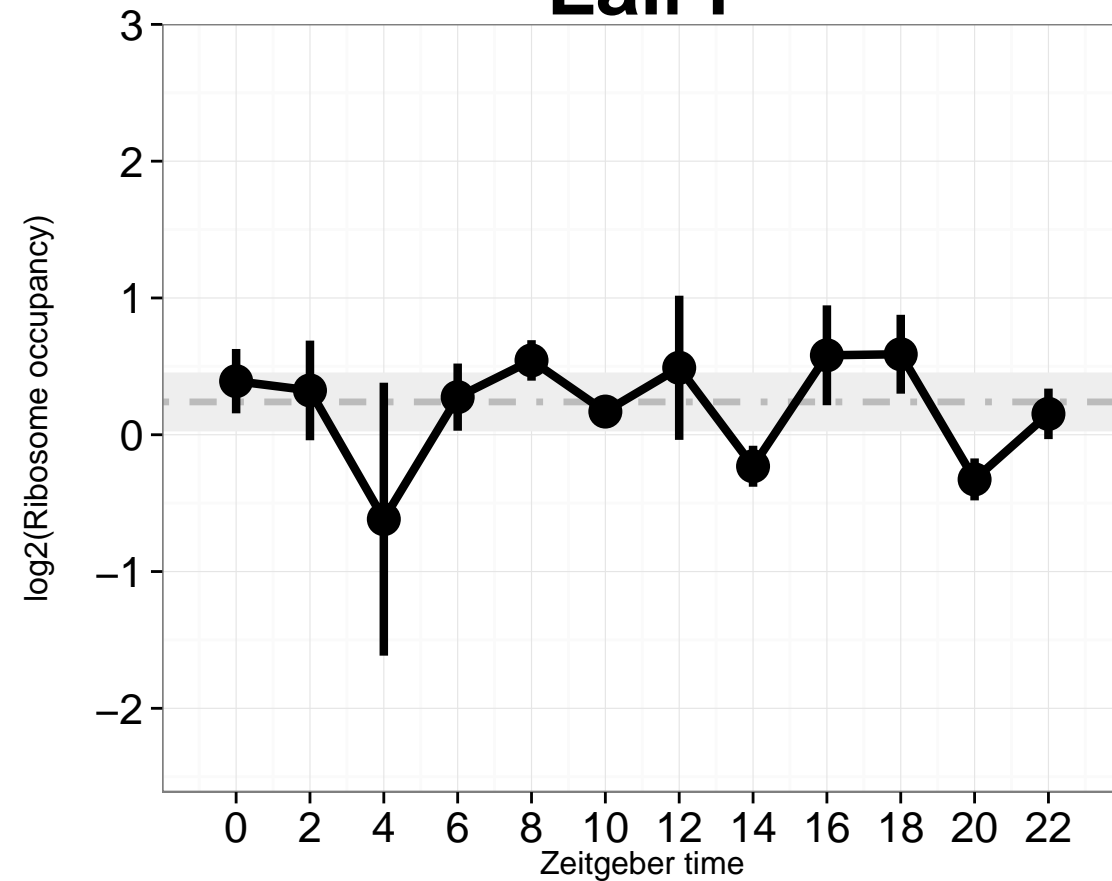

Supplement: Supplementary file 9007 [file 1]

## Suz12

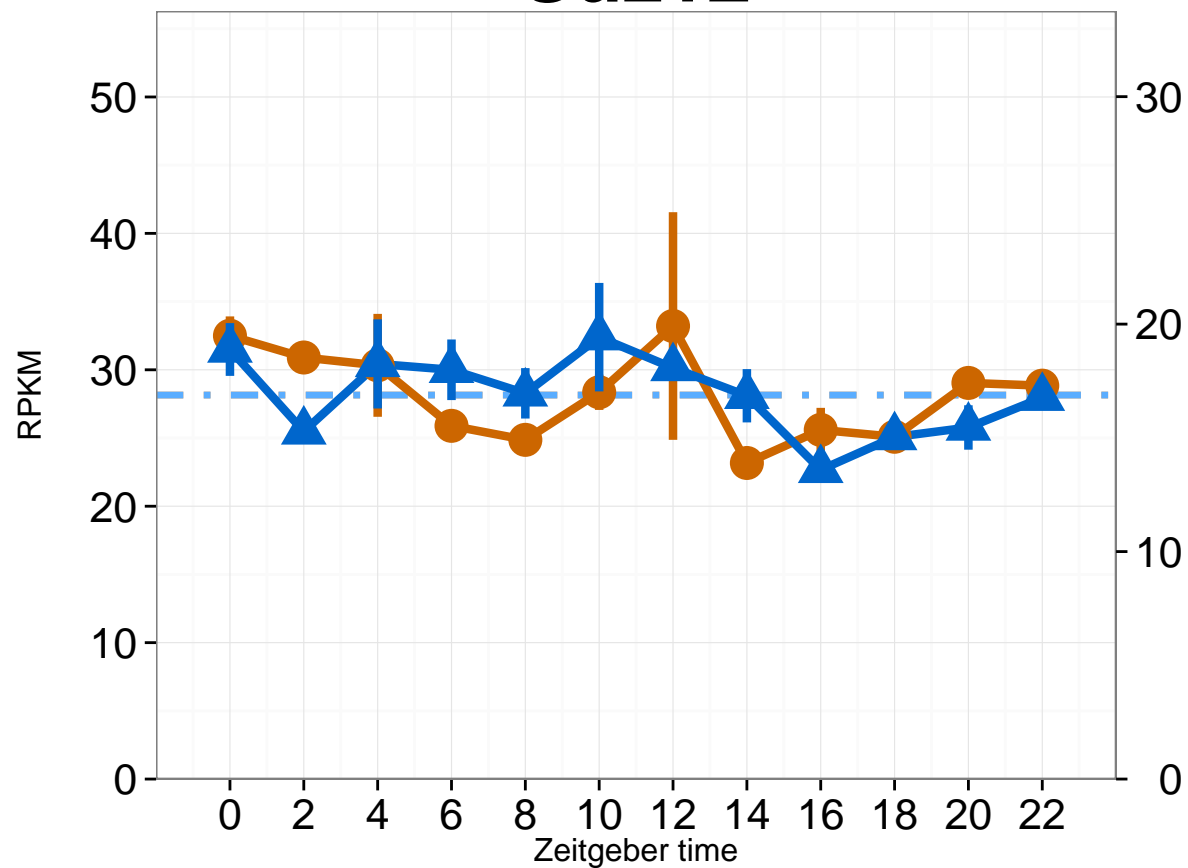

## Suz12

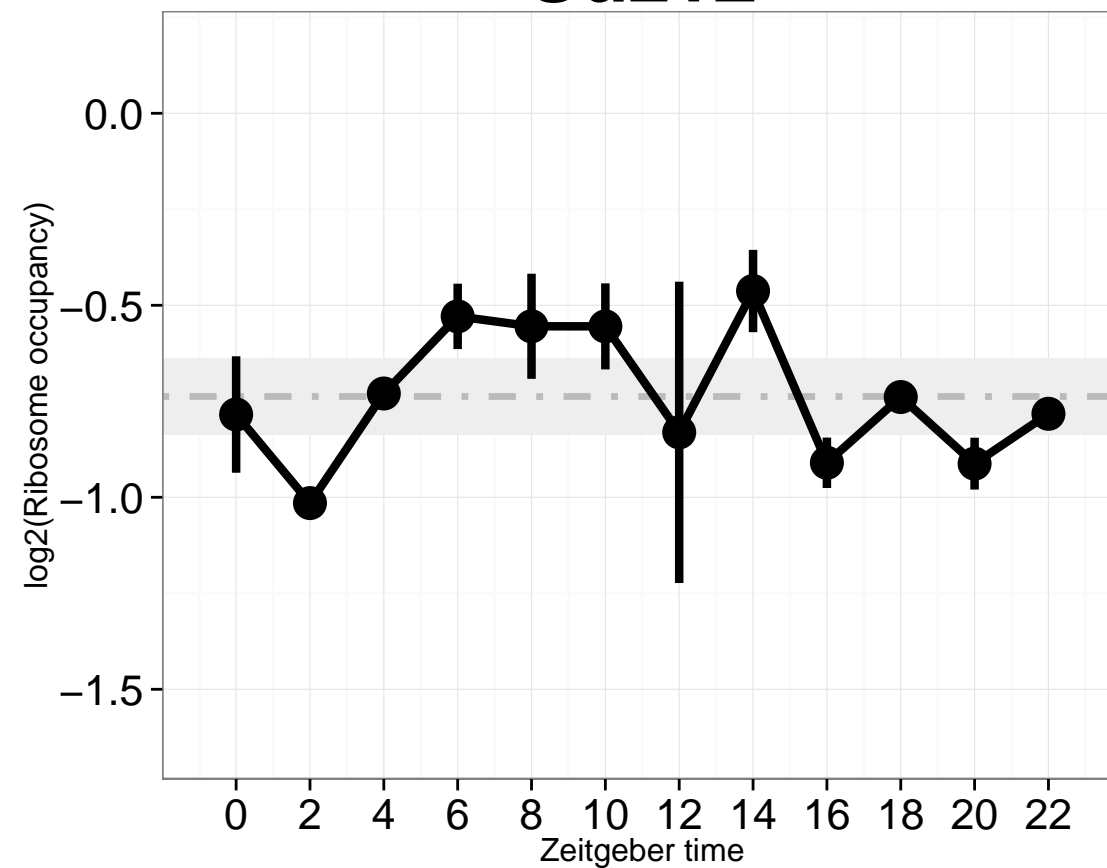

Supplement: Supplementary file 9008 [file 1]

## Ddc

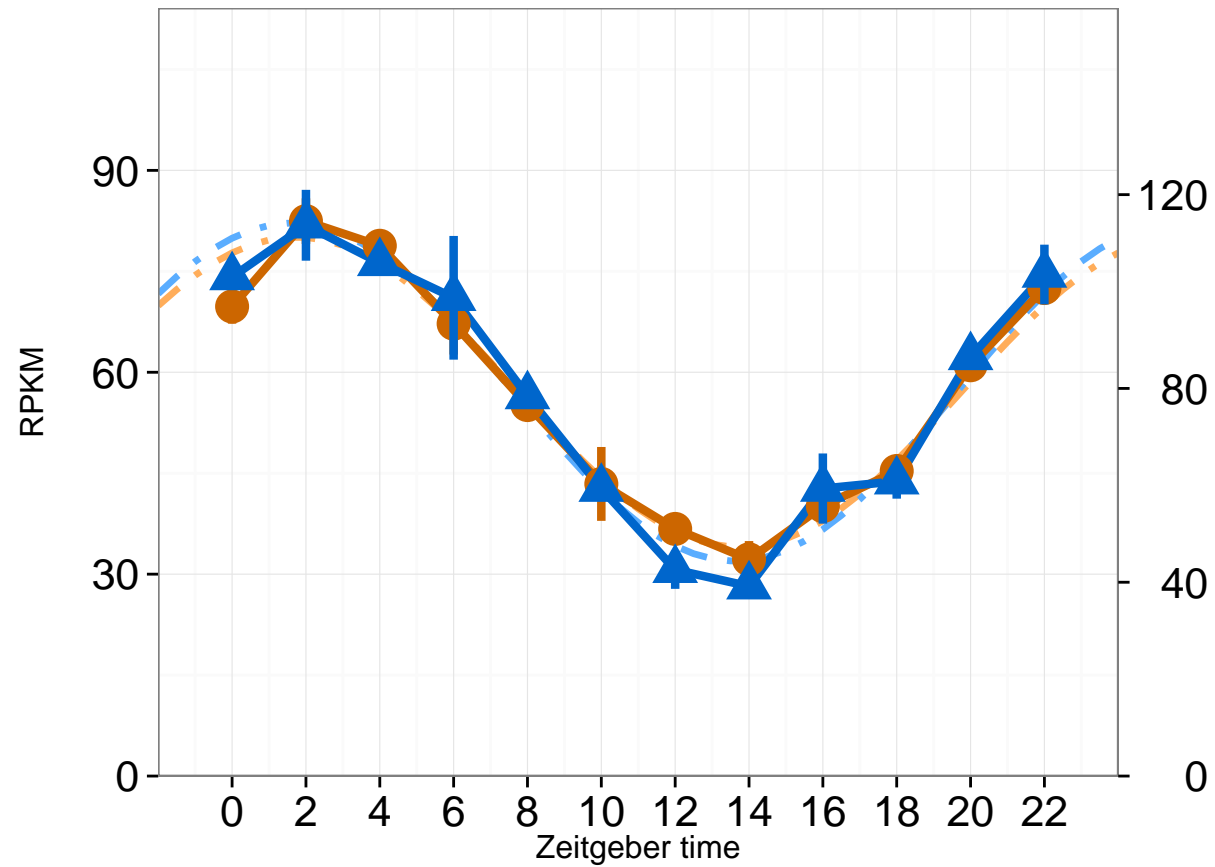

## Ddc

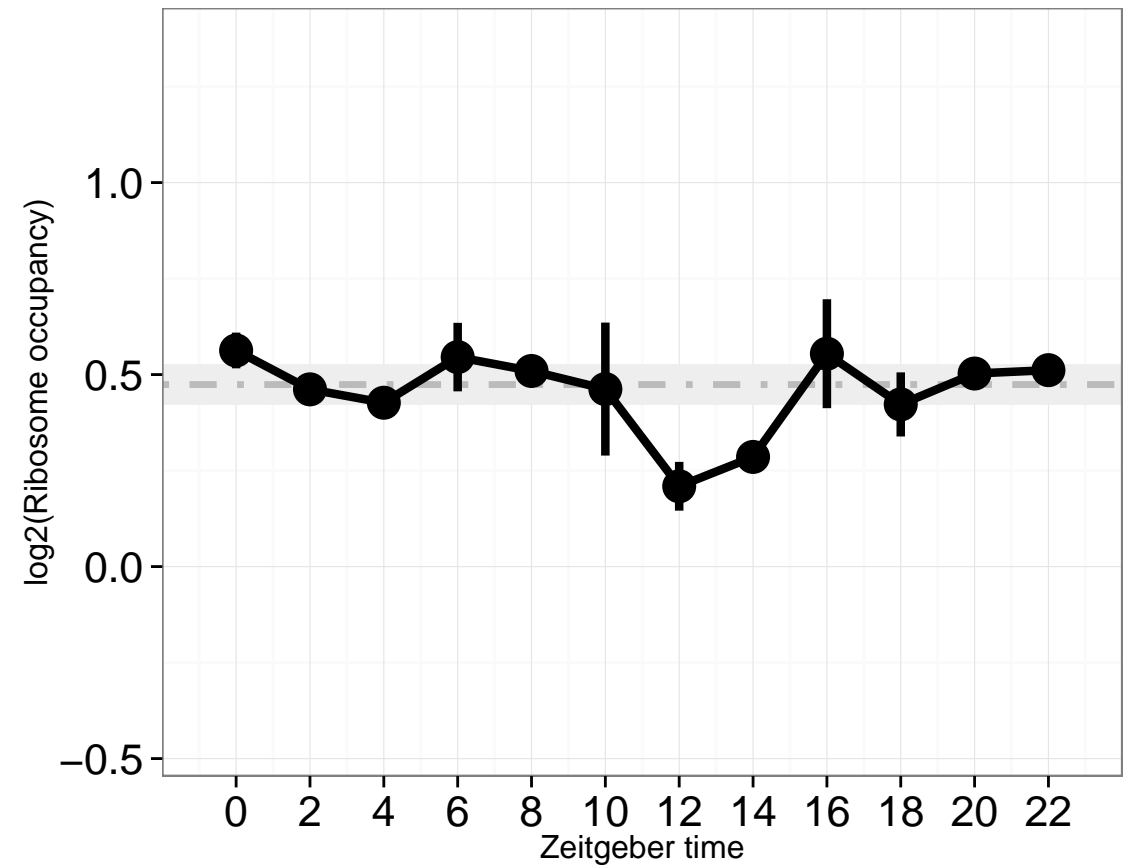

Supplement: Supplementary file 9009 [file 1]

## Txlna

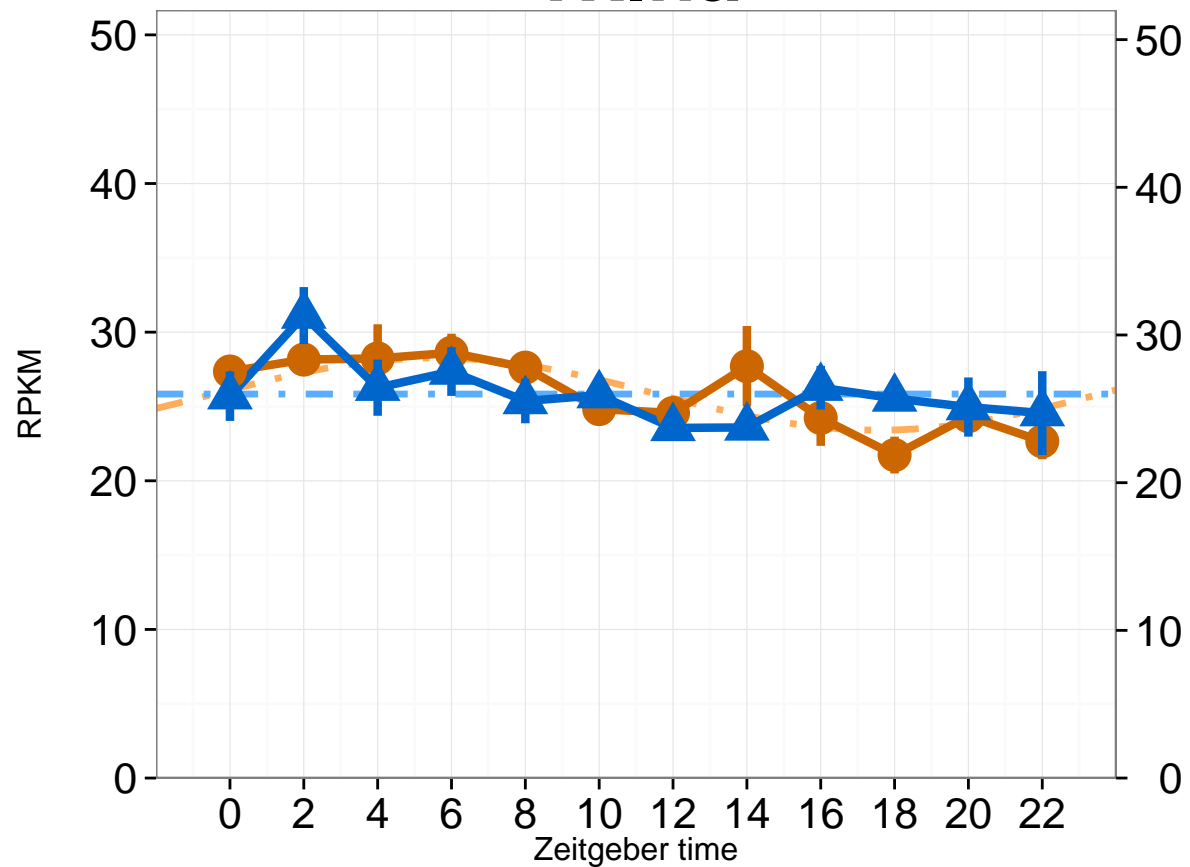

## Txlna

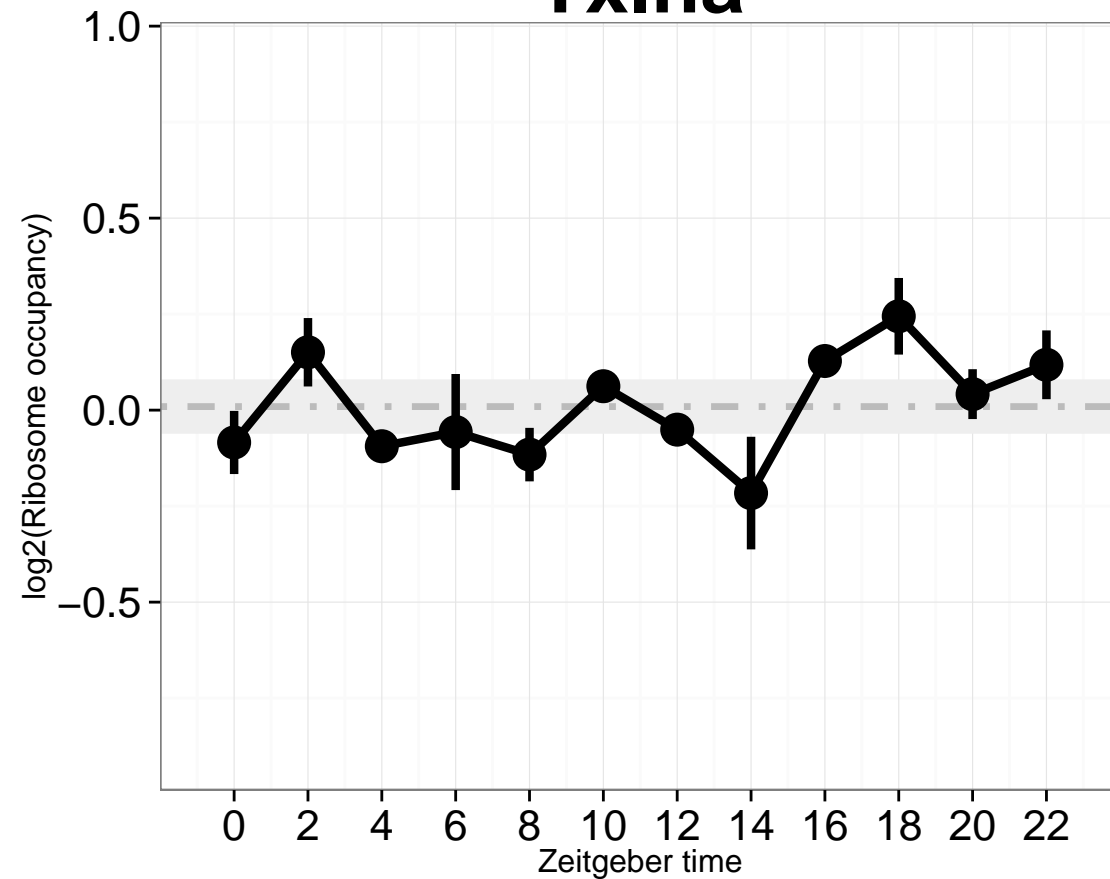

Supplement: Supplementary file 9010 [file 1]

# Mmp9

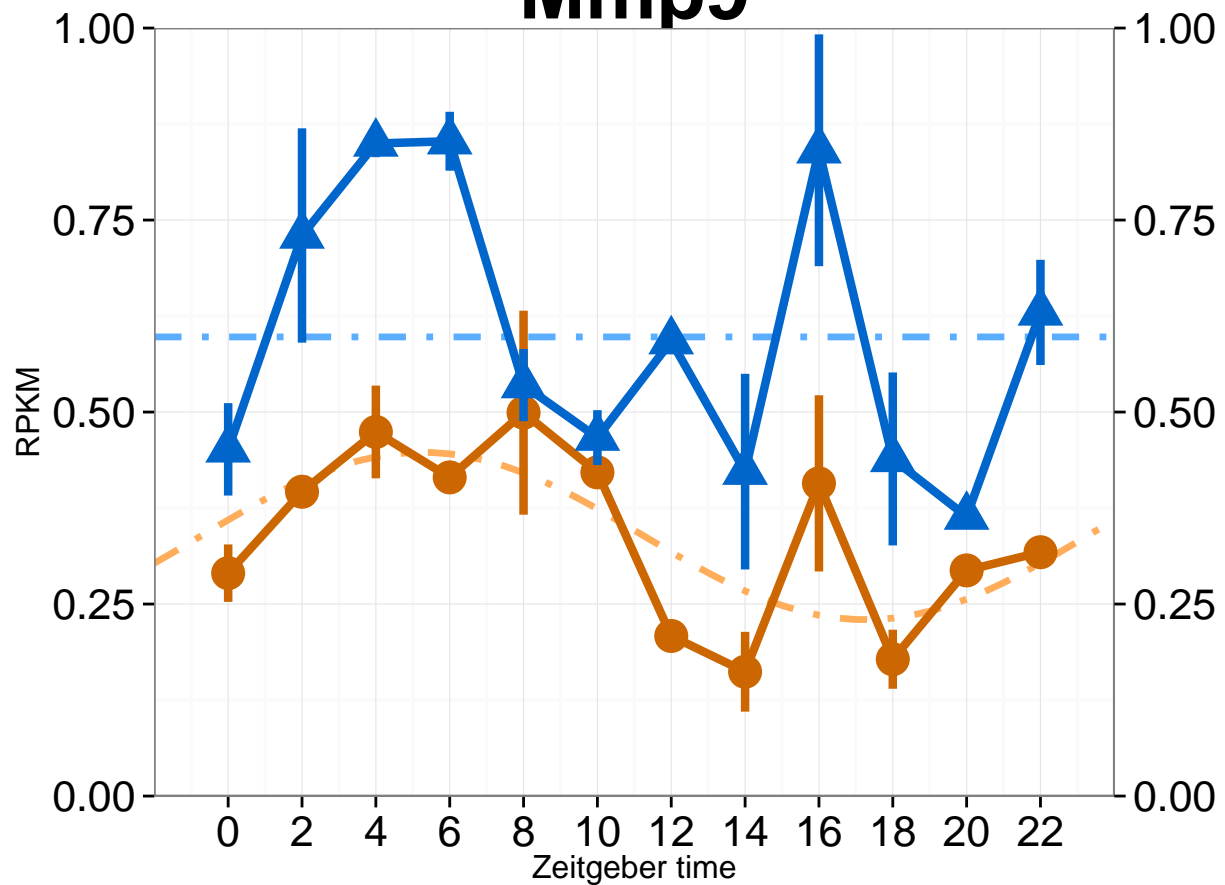

# Mmp9

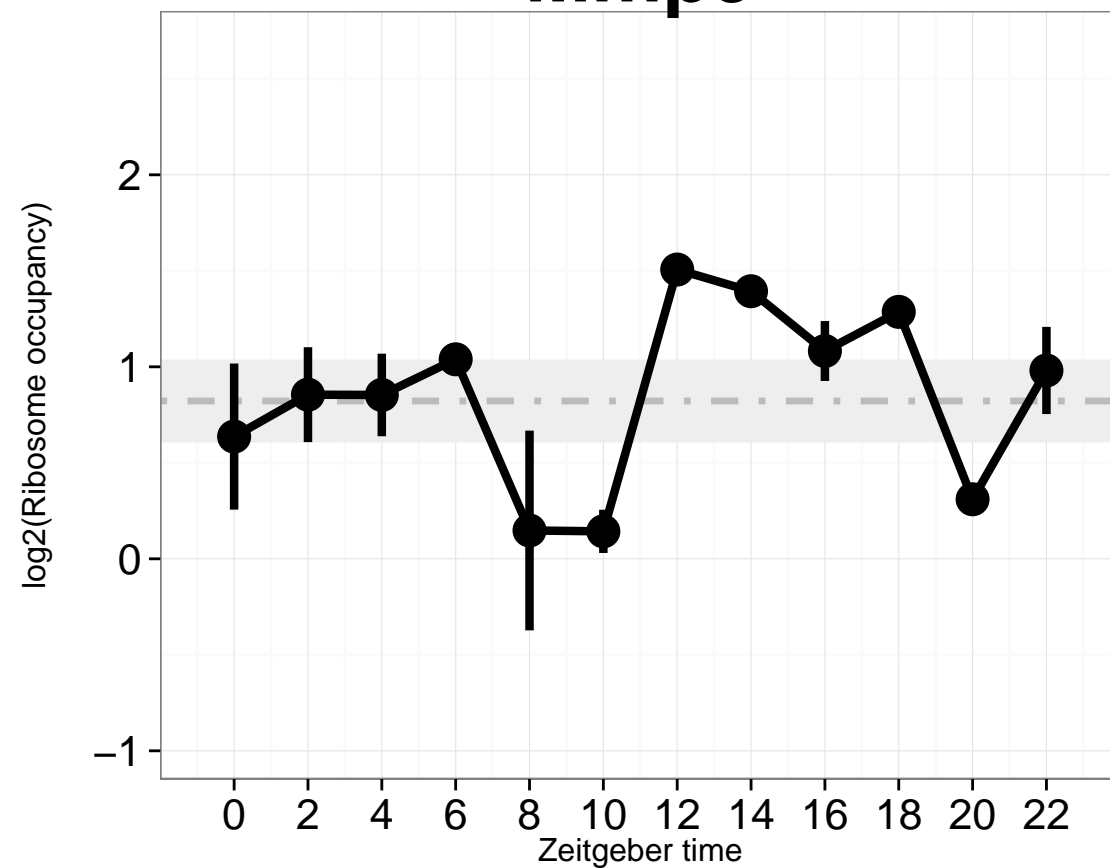

Supplement: Supplementary file 9011 [file 1]

## Akip1

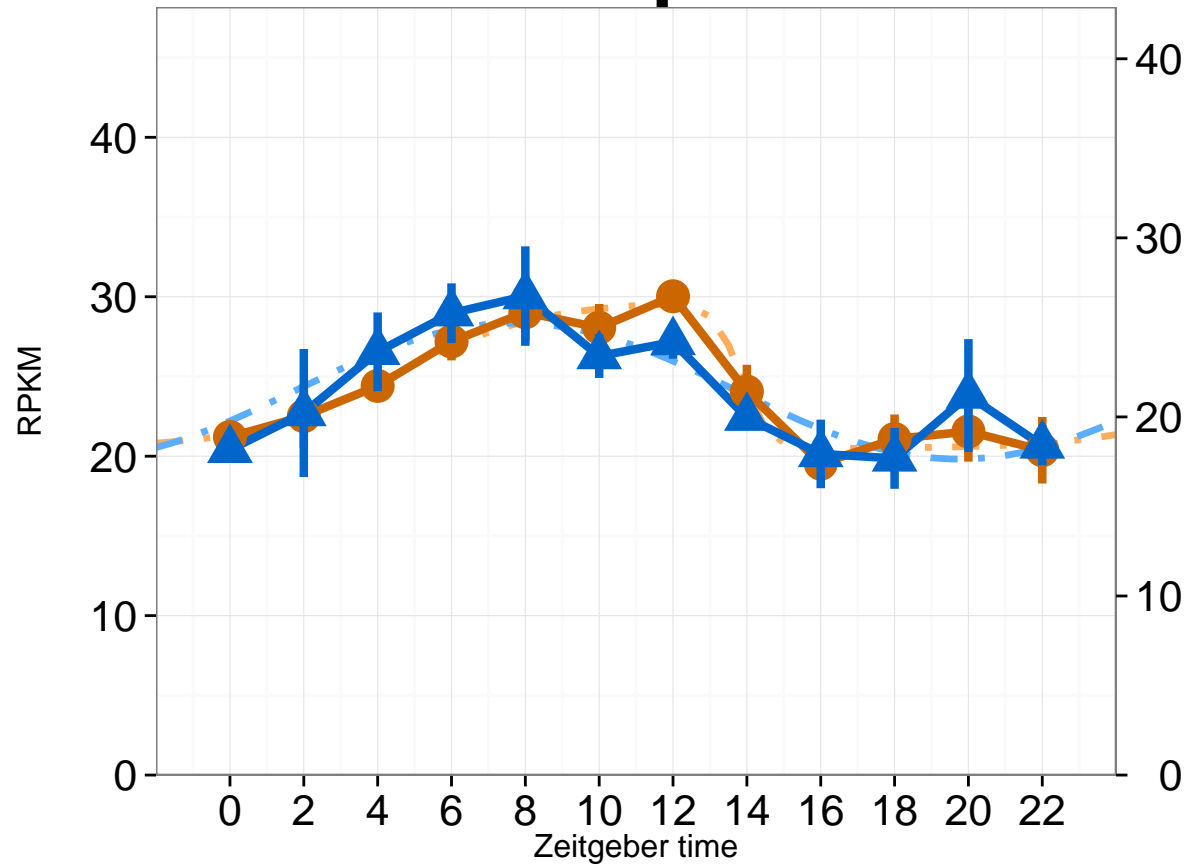

## Akip1

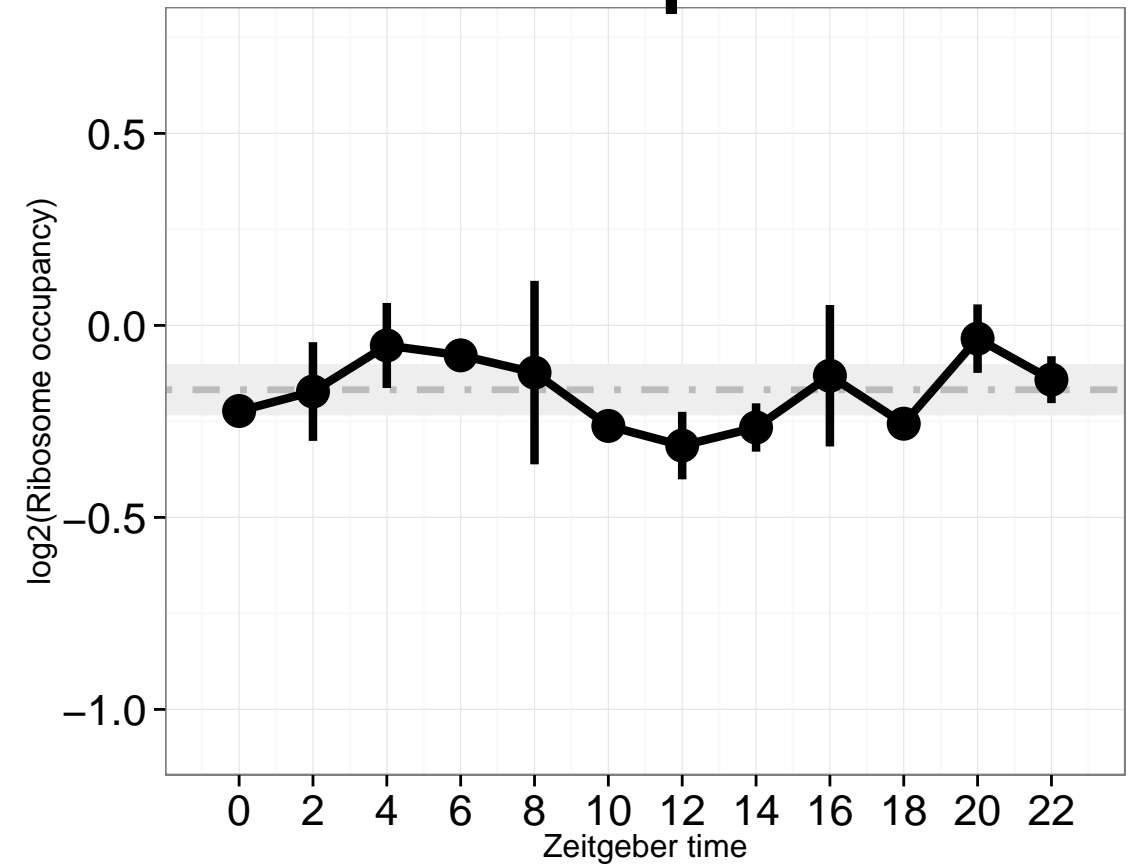

Supplement: Supplementary file 9012 [file 1]

# Slc1a1

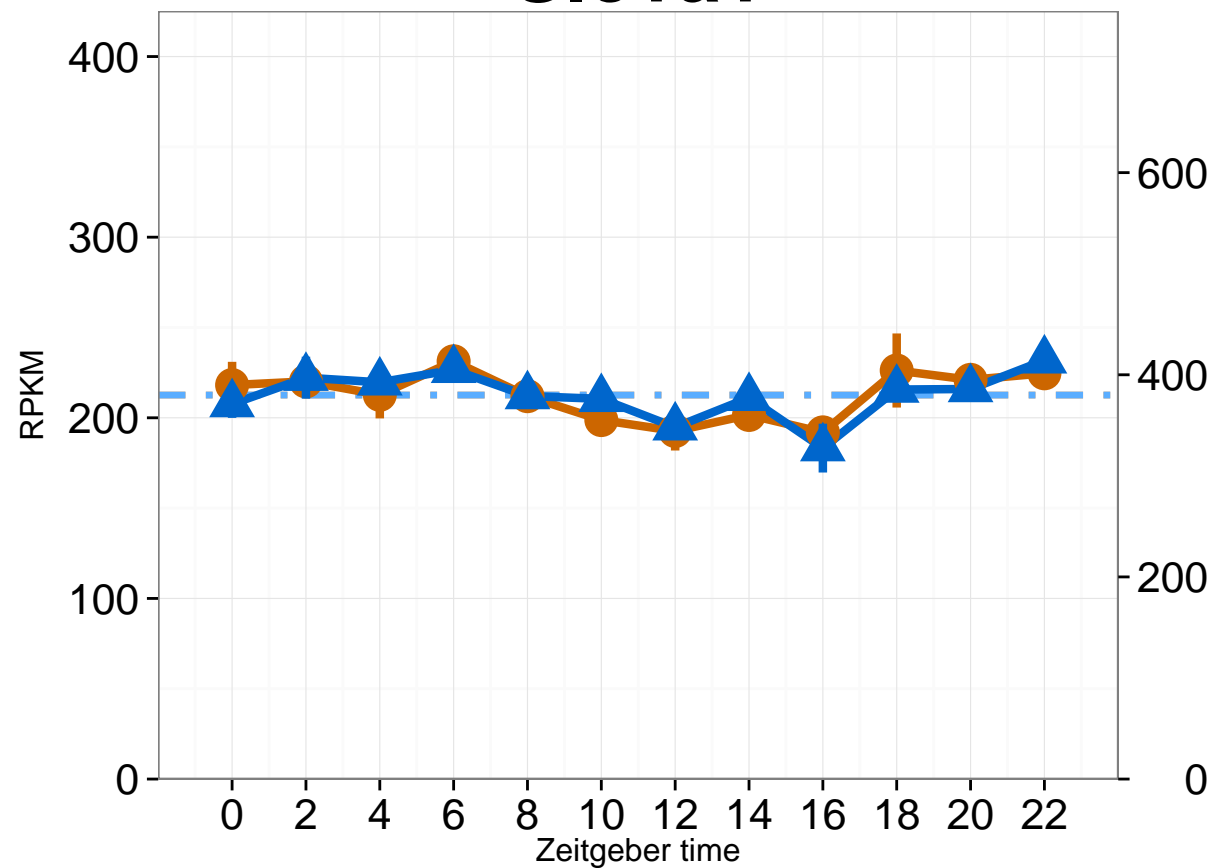

# Slc1a1

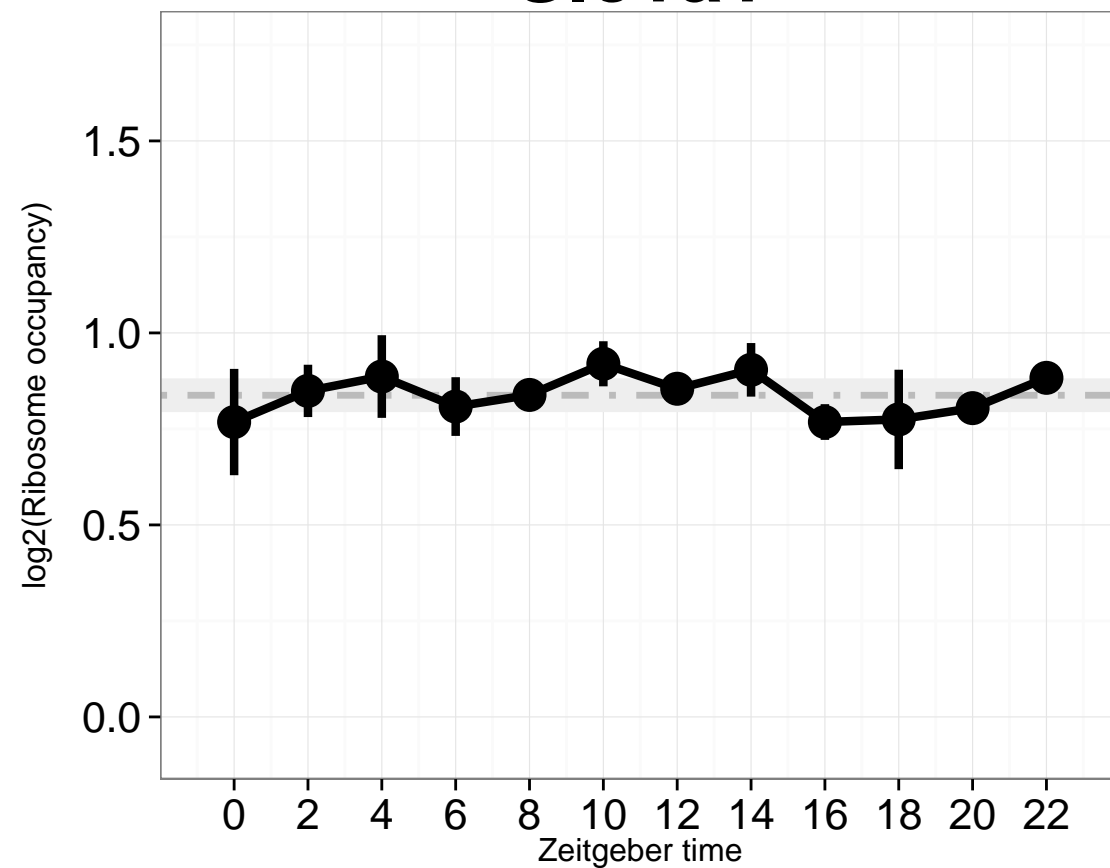

Supplement: Supplementary file 9013 [file 1]

# Afg3l2

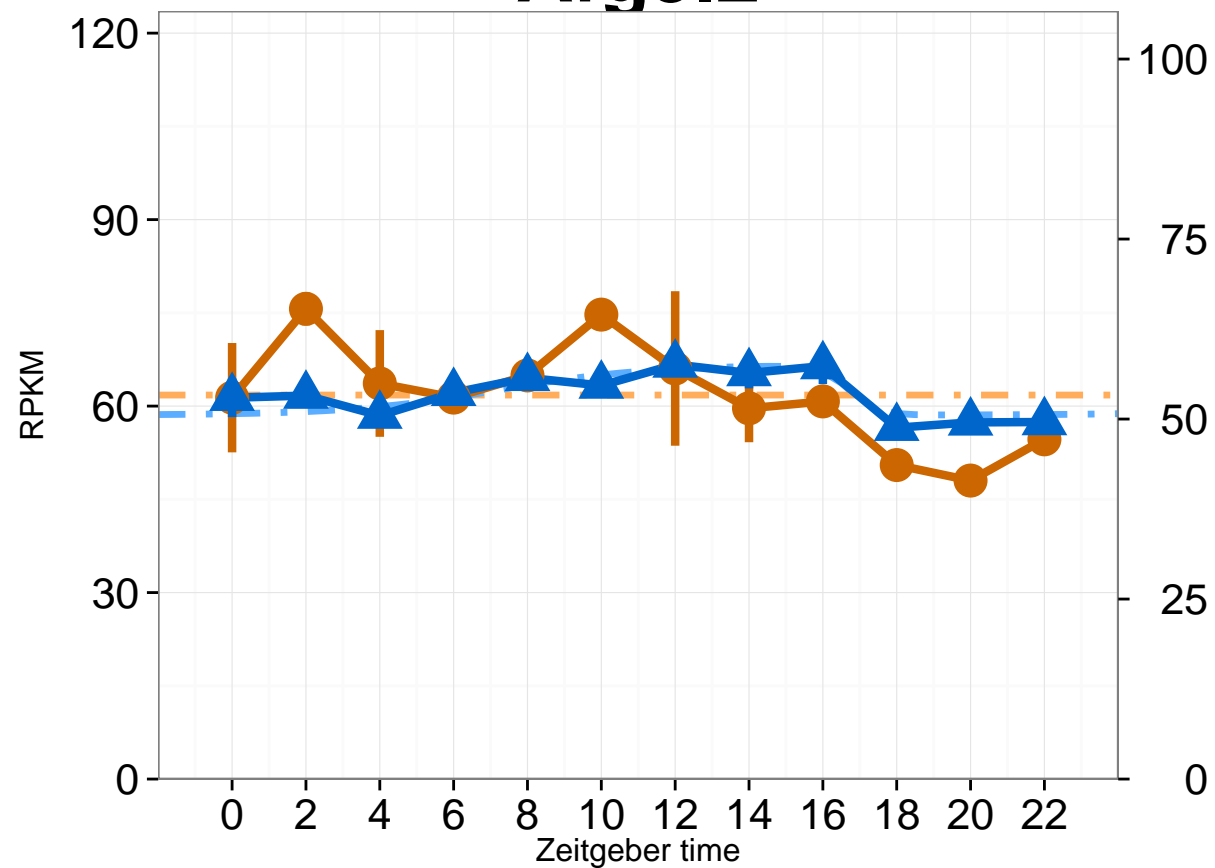

# Afg3l2

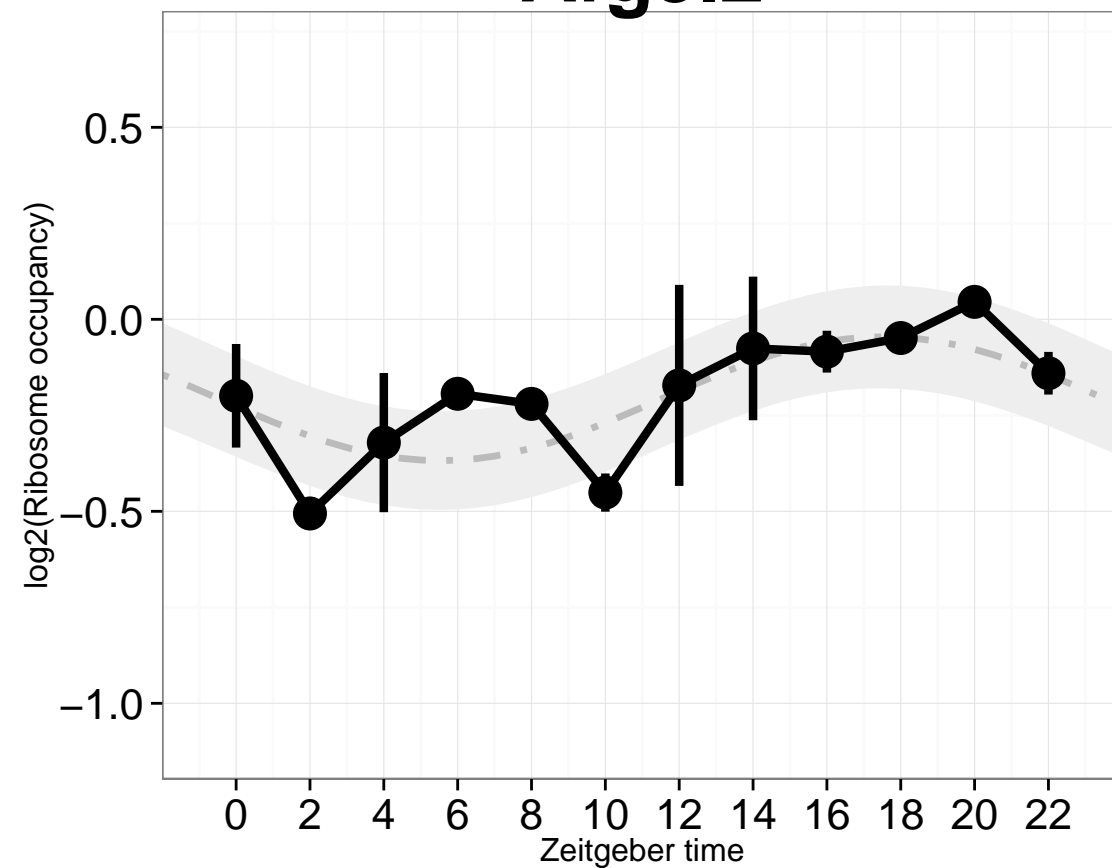

Supplement: Supplementary file 9014 [file 1]

## Rbfox2

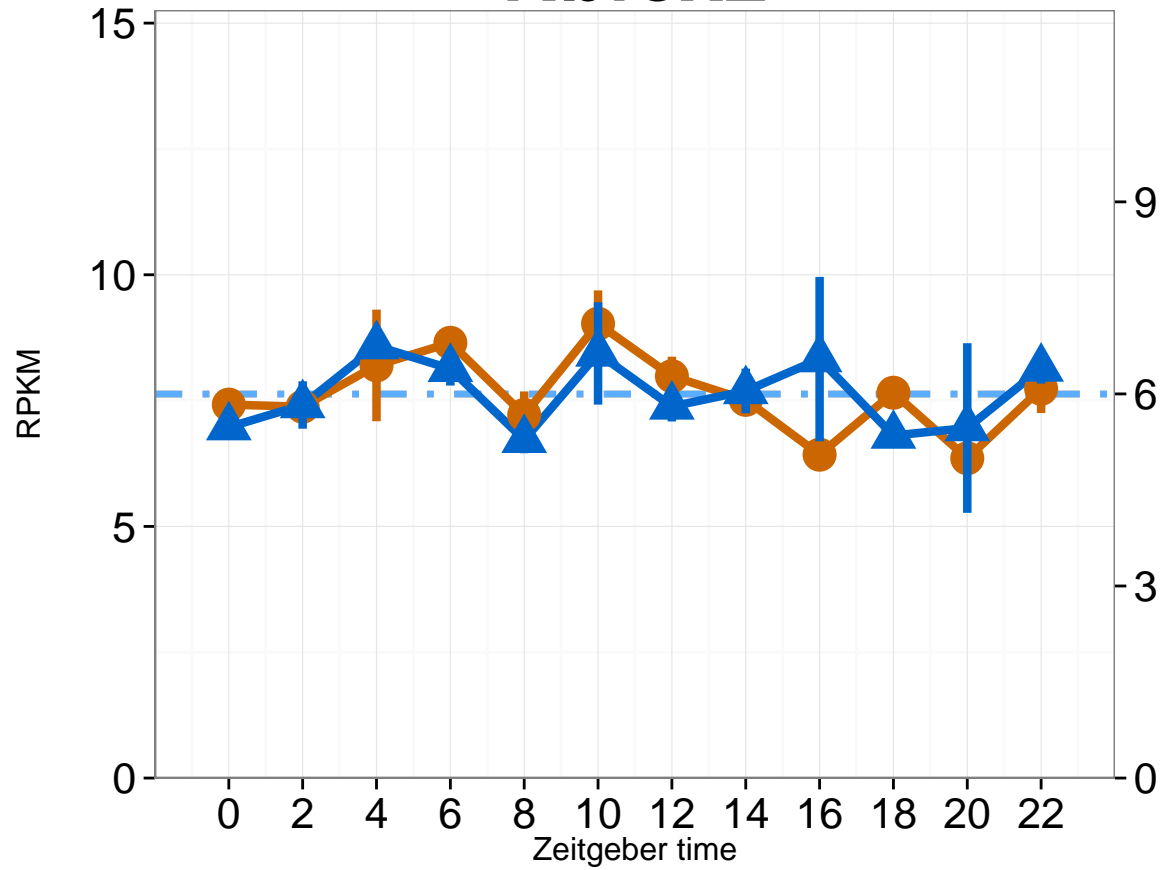

## Rbfox2

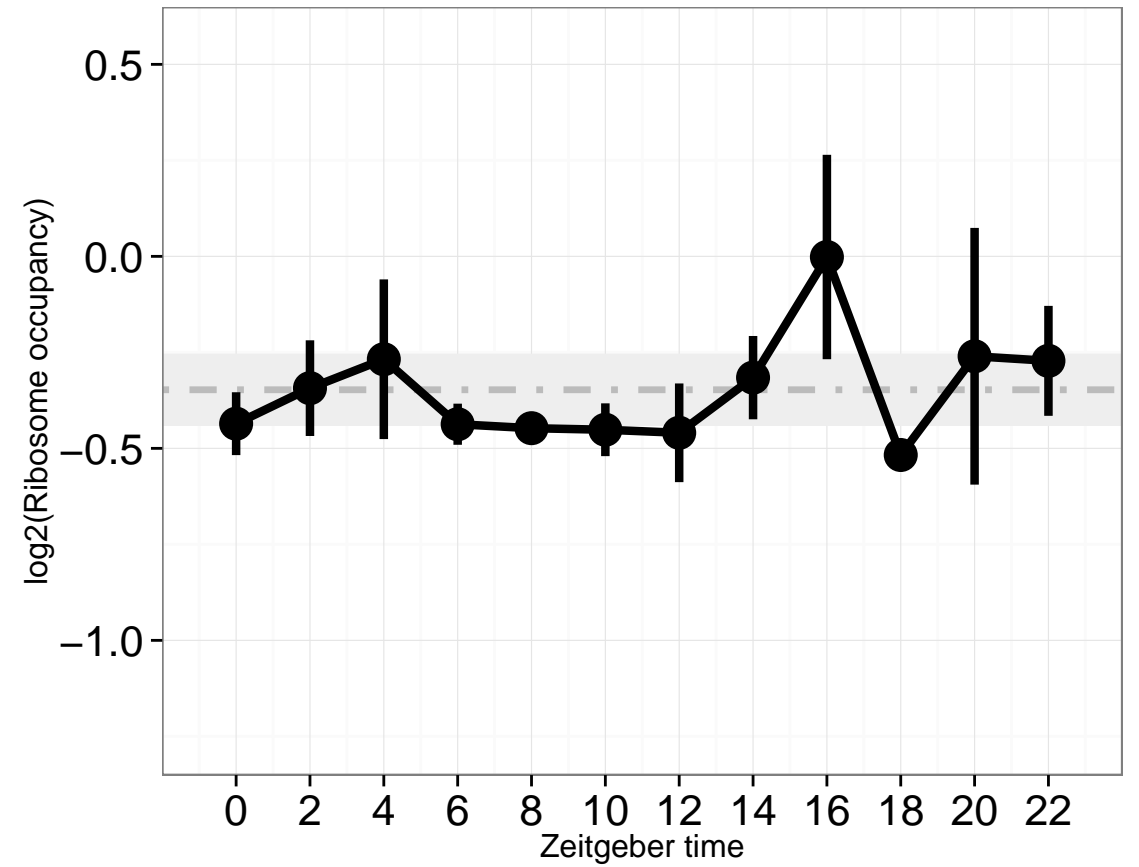

Supplement: Supplementary file 9015 [file 1]

## Ttc17

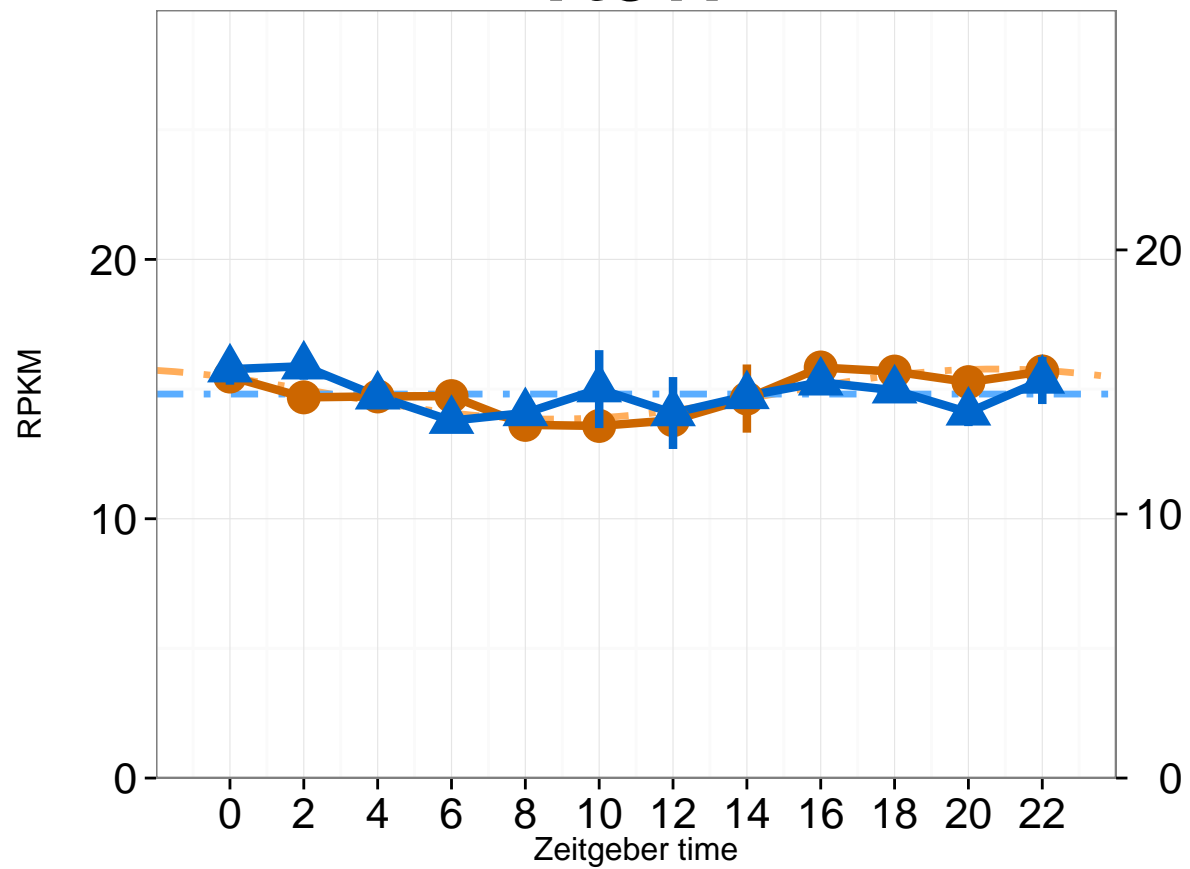

## Ttc17

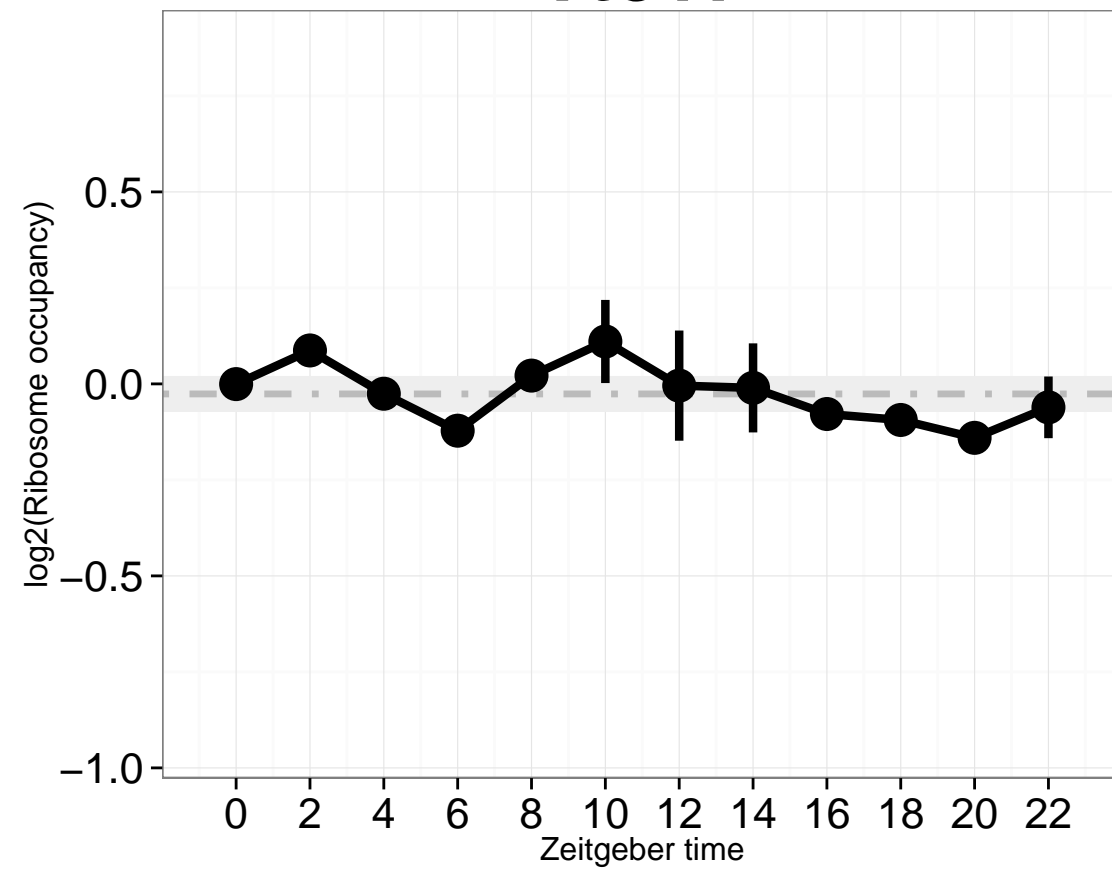

Supplement: Supplementary file 9016 [file 1]

## Sec24c

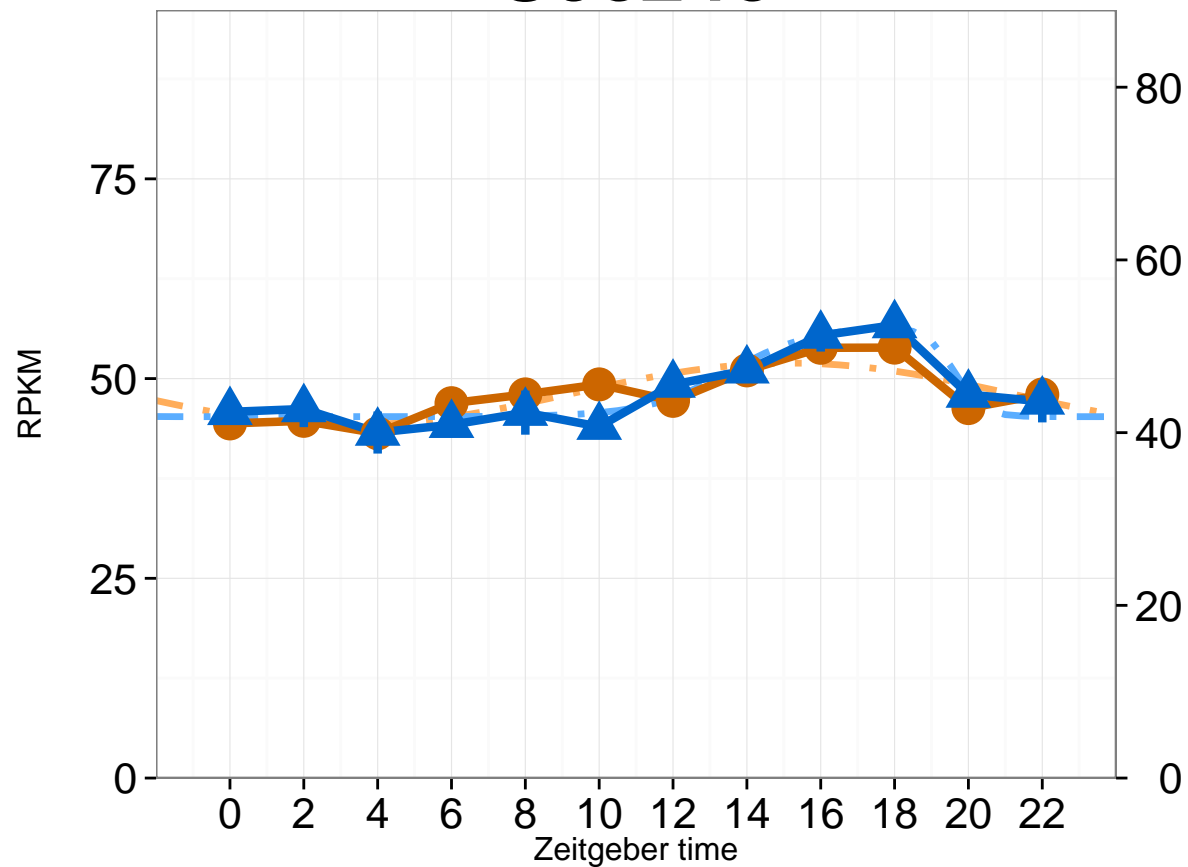

## Sec24c

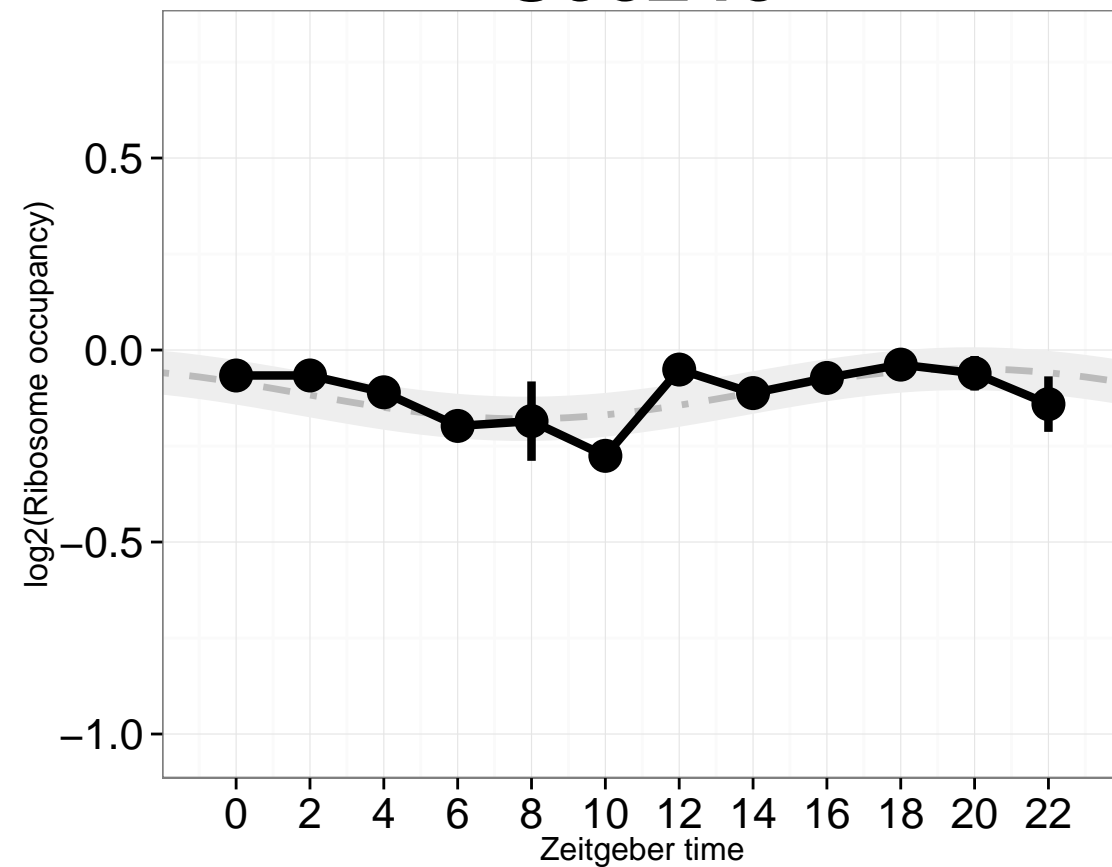

Supplement: Supplementary file 9017 [file 1]

# Slc17a4

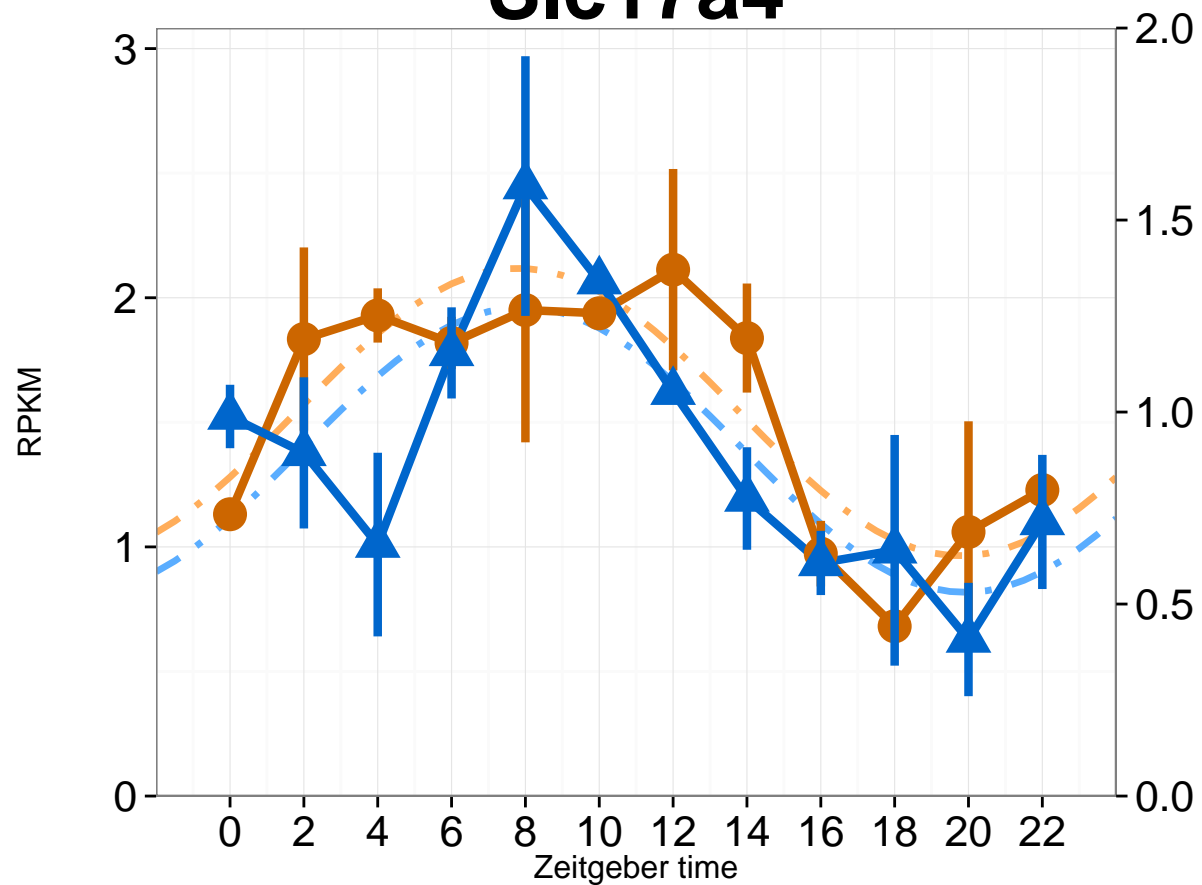

# Slc17a4

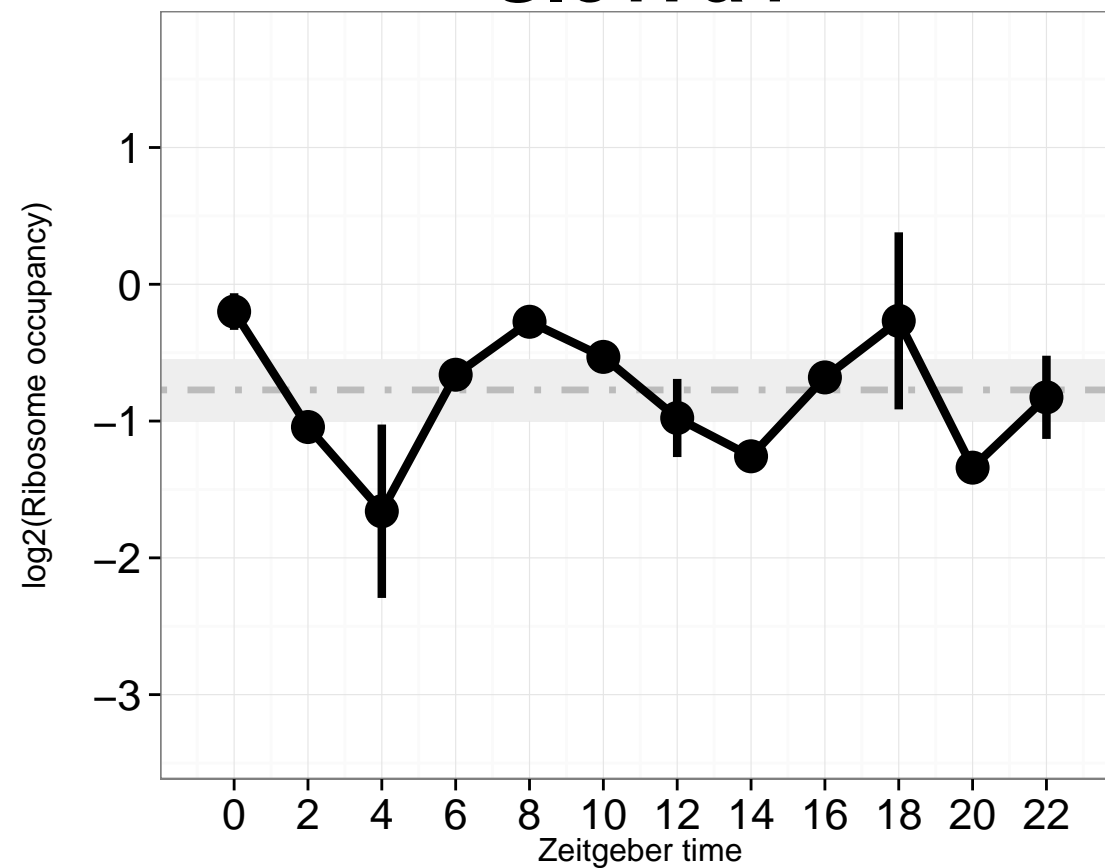

Supplement: Supplementary file 9018 [file 1]

# Rtca

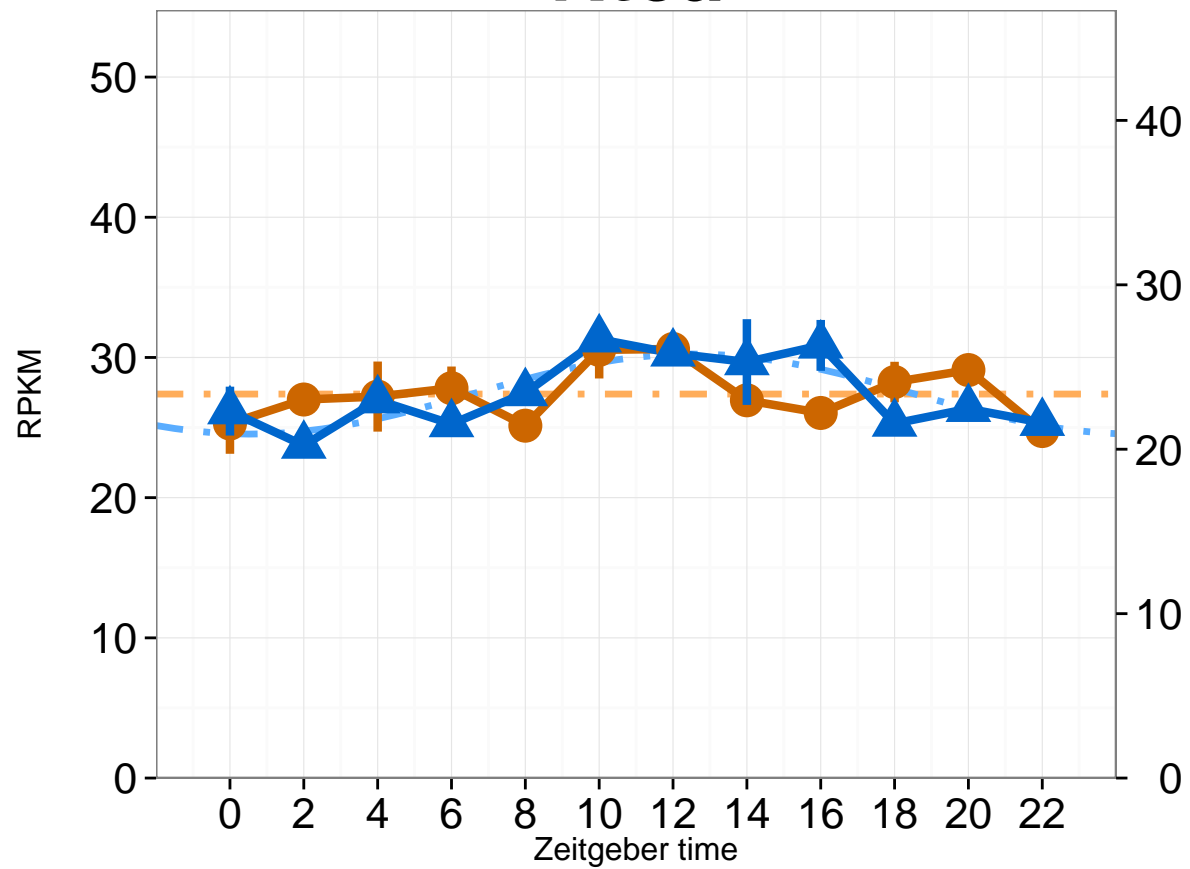

# Rtca

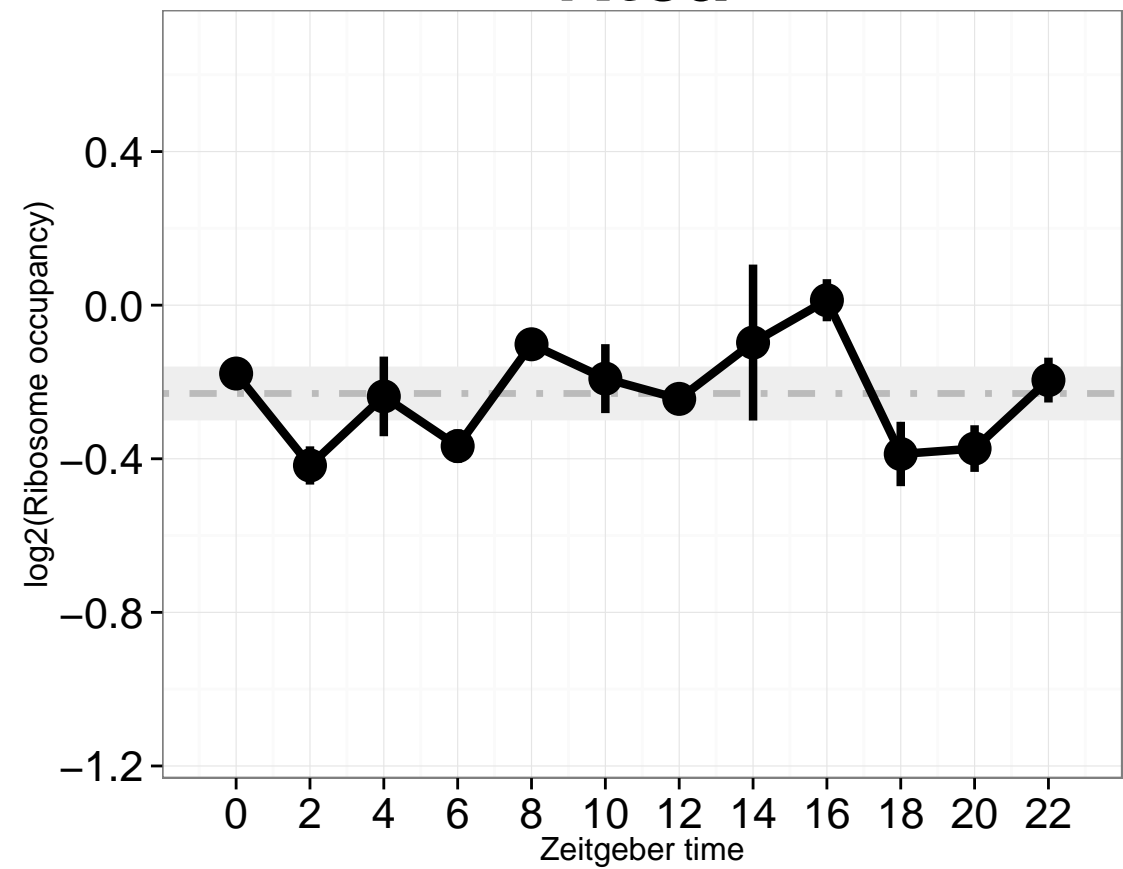

Supplement: Supplementary file 9019 [file 1]

# Deb1

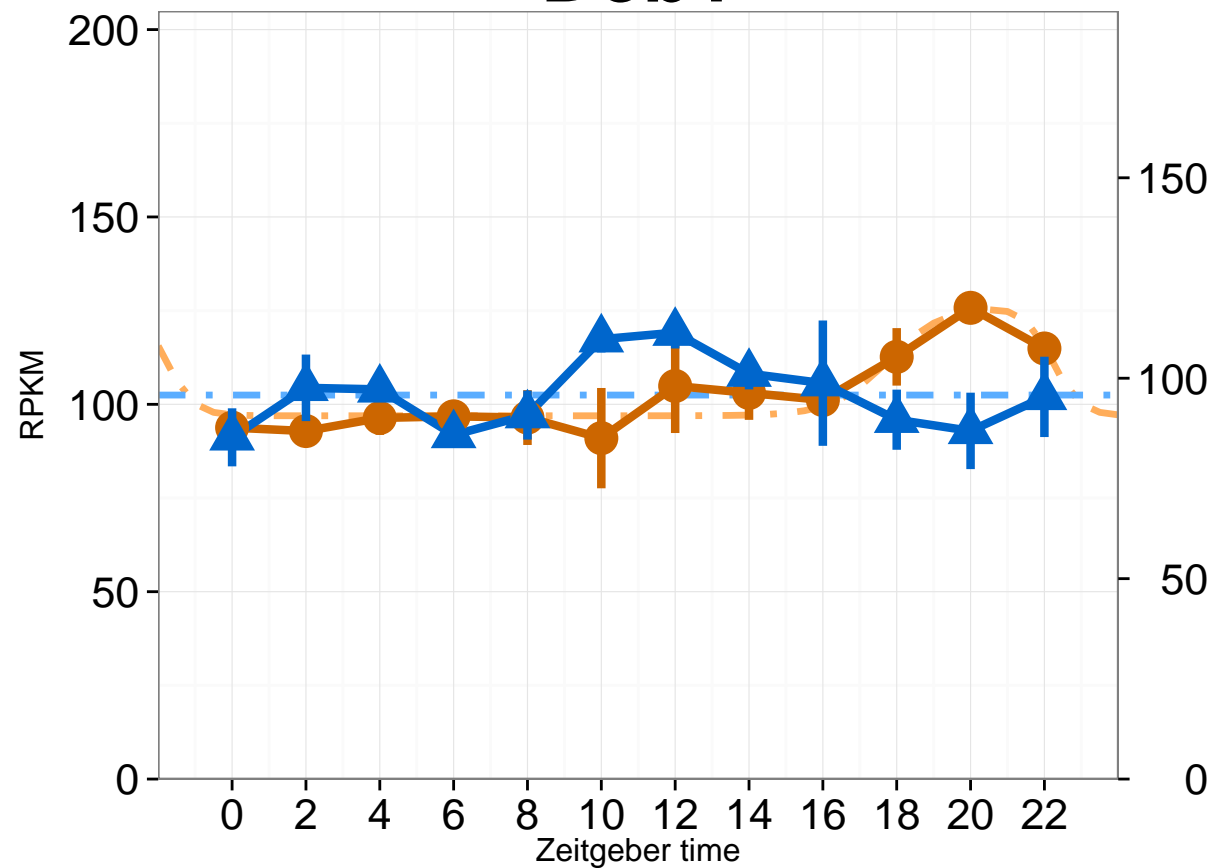

# Deb1

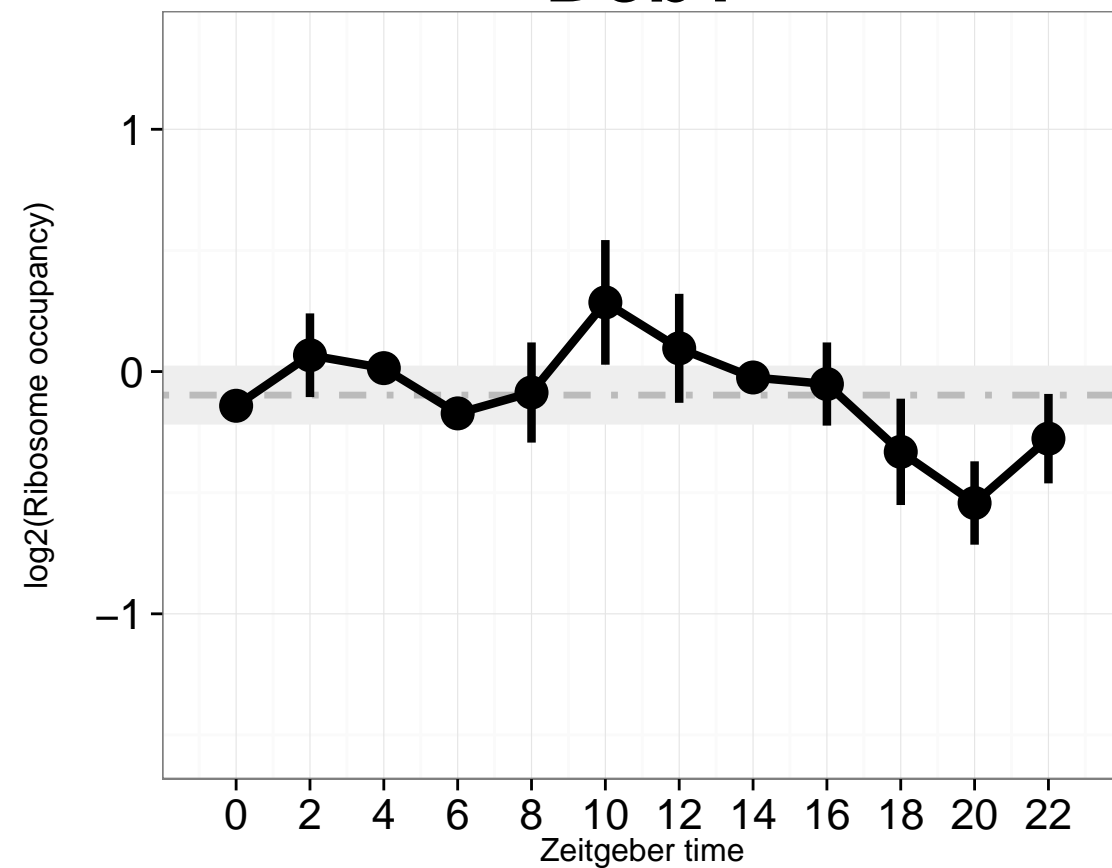

Supplement: Supplementary file 9020 [file 1]

# Map3k8

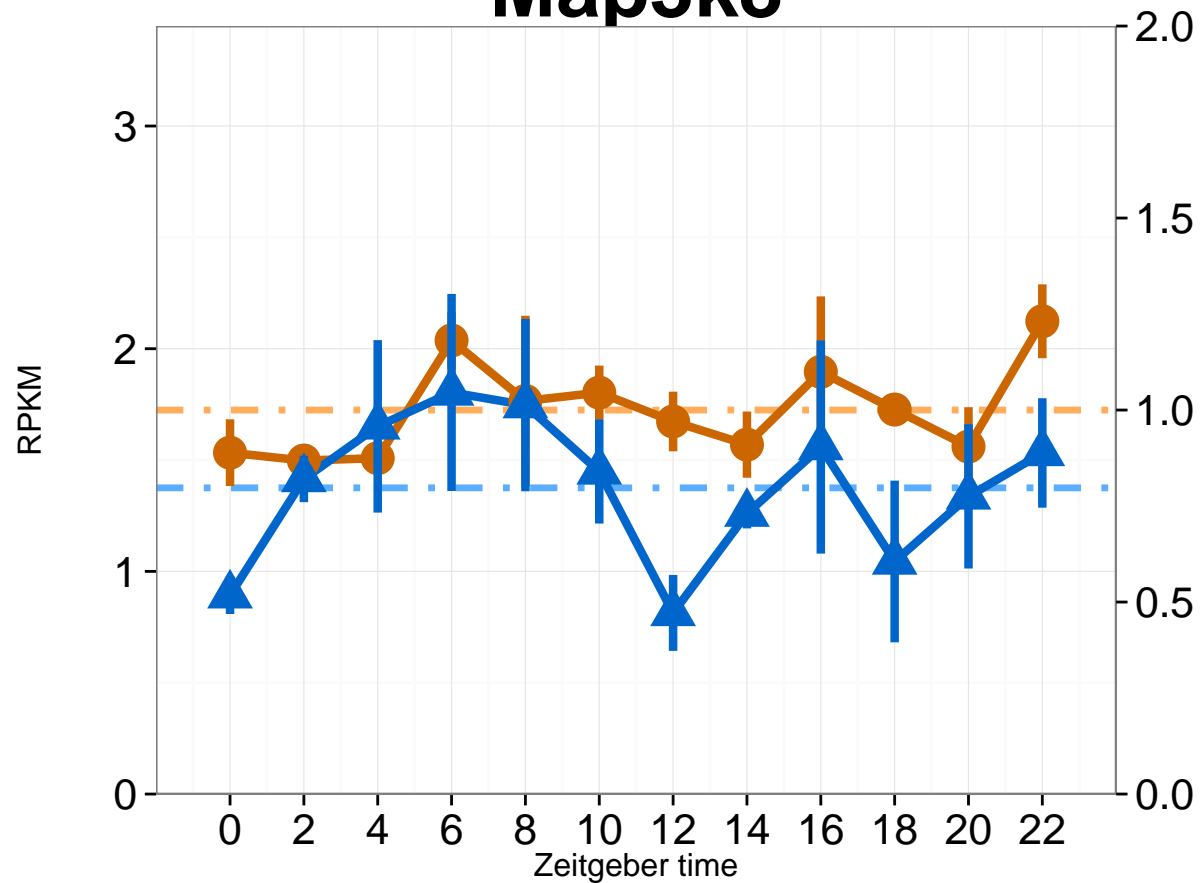

# Map3k8

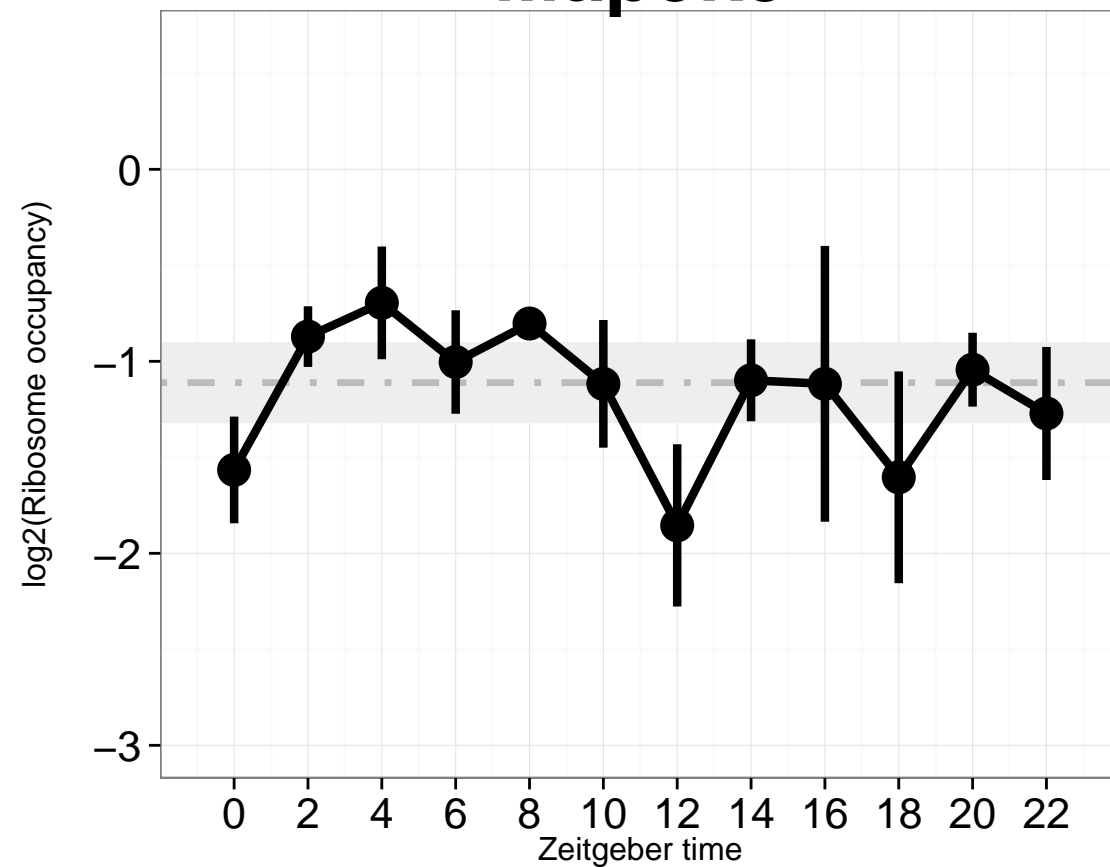

Supplement: Supplementary file 9021 [file 1]

# Rprd1b

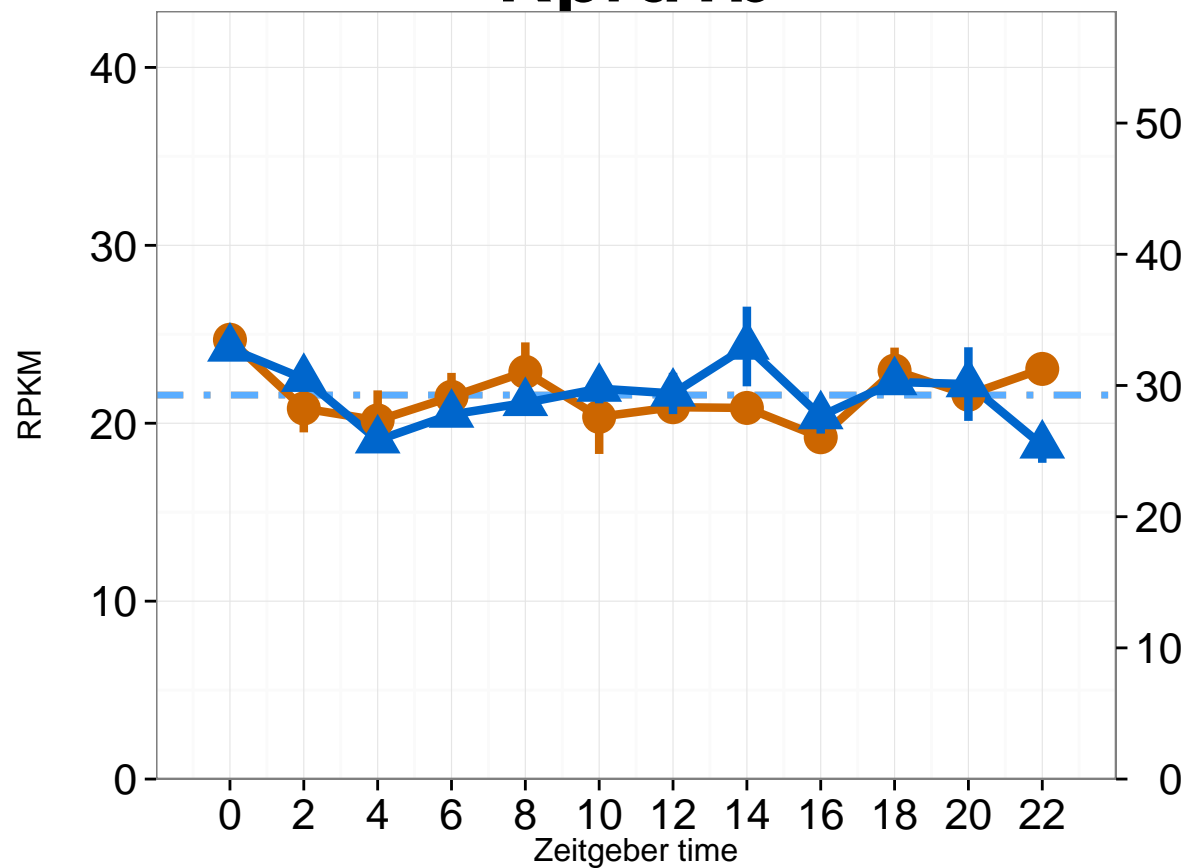

# Rprd1b

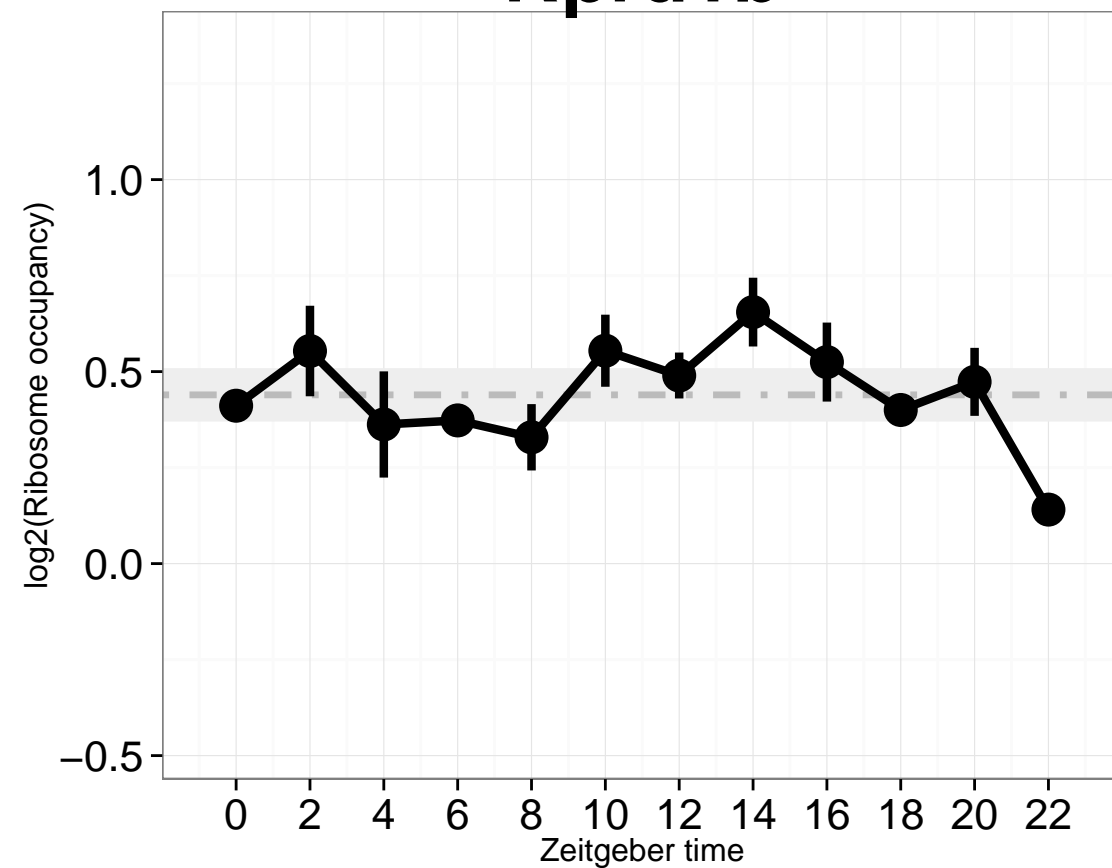

Supplement: Supplementary file 9022 [file 1]

# Pofut1

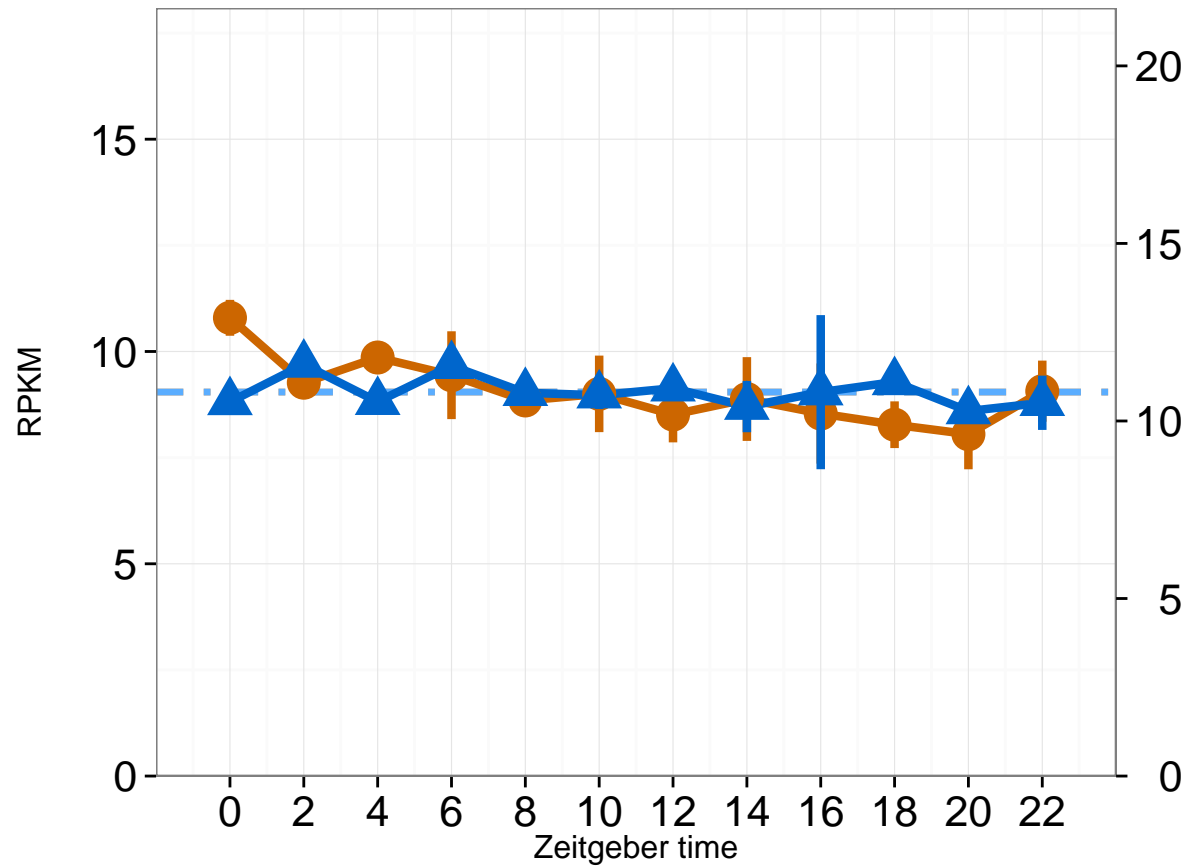

# Pofut1

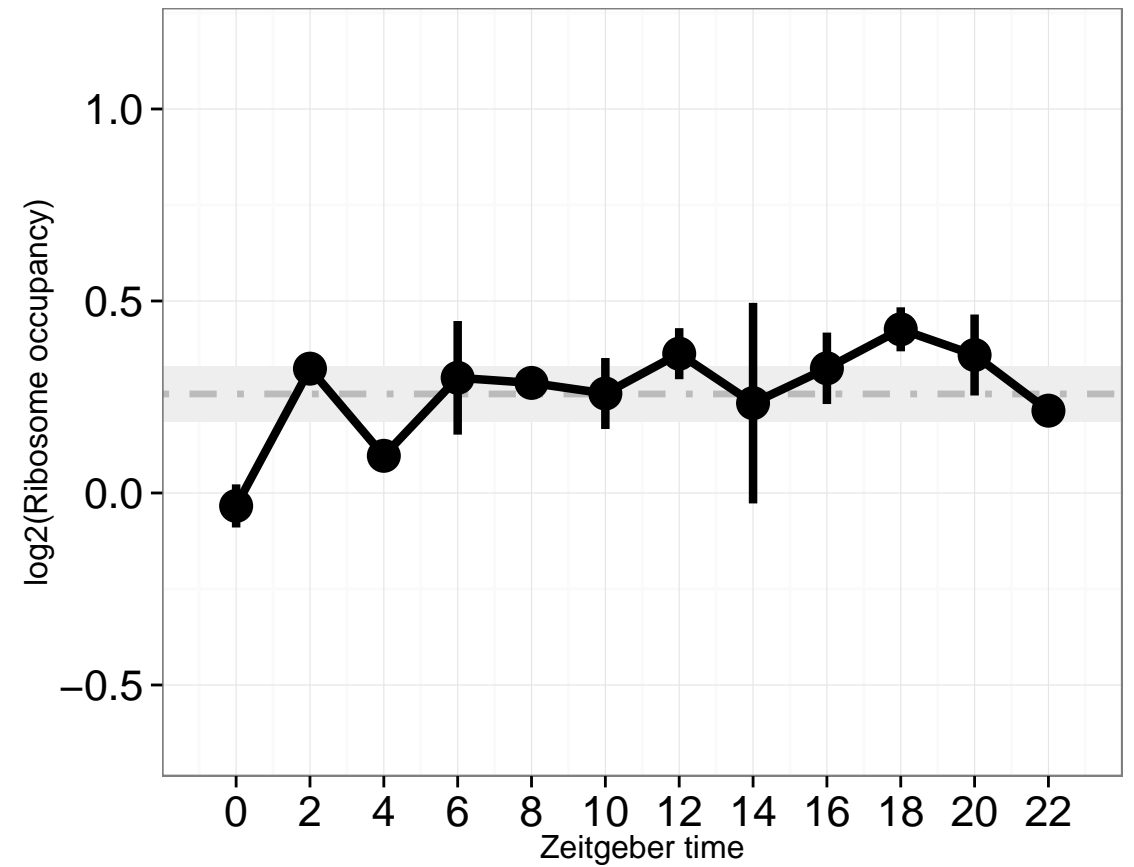

Supplement: Supplementary file 9023 [file 1]

# Hspa1b

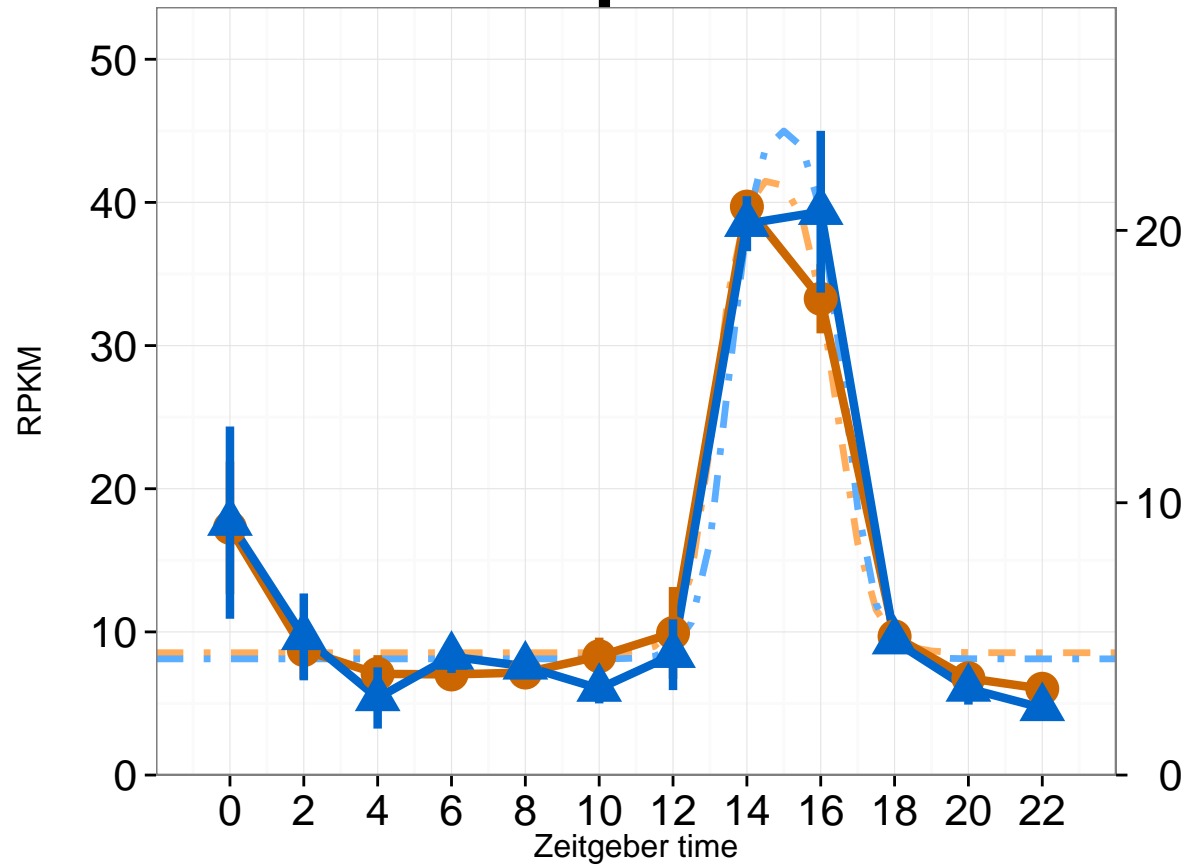

# Hspa1b

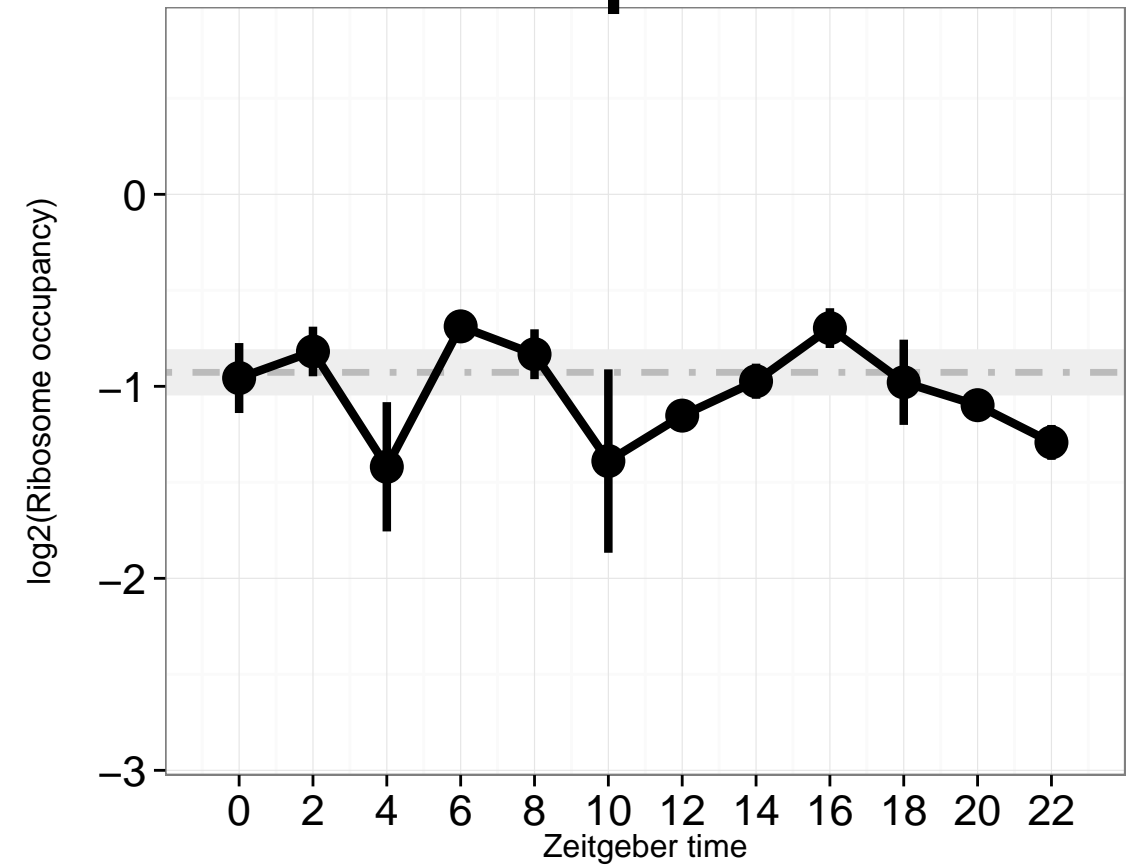

Supplement: Supplementary file 9024 [file 1]

# Ckmt1

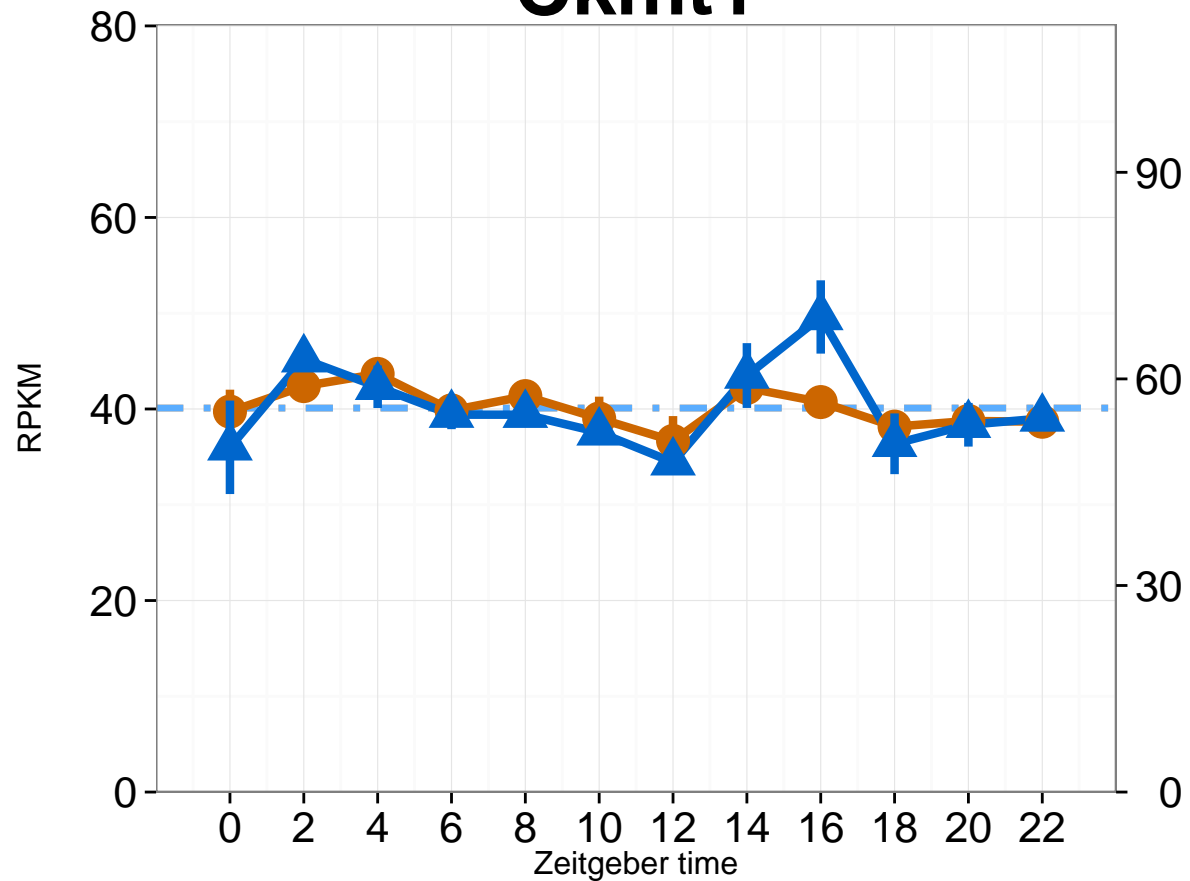

# Ckmt1

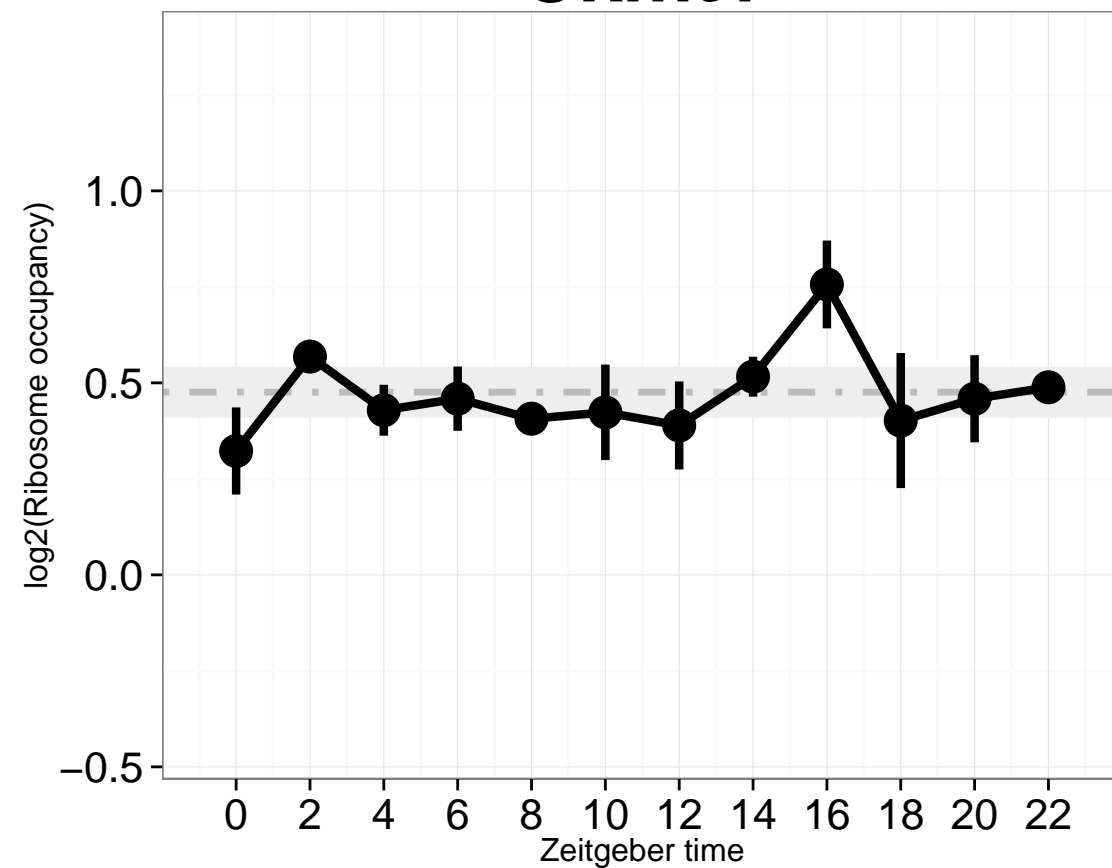

Supplement: Supplementary file 9025 [file 1]

# Clip2

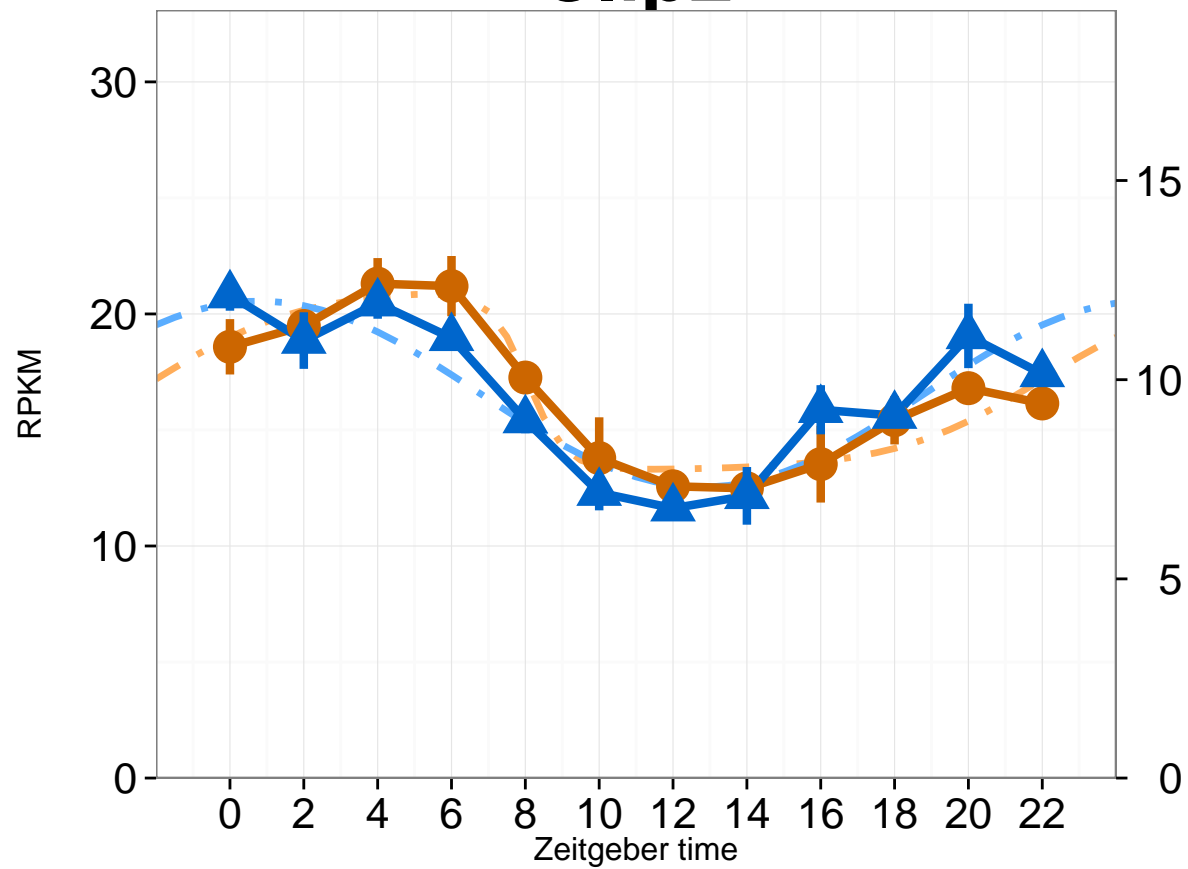

# Clip2

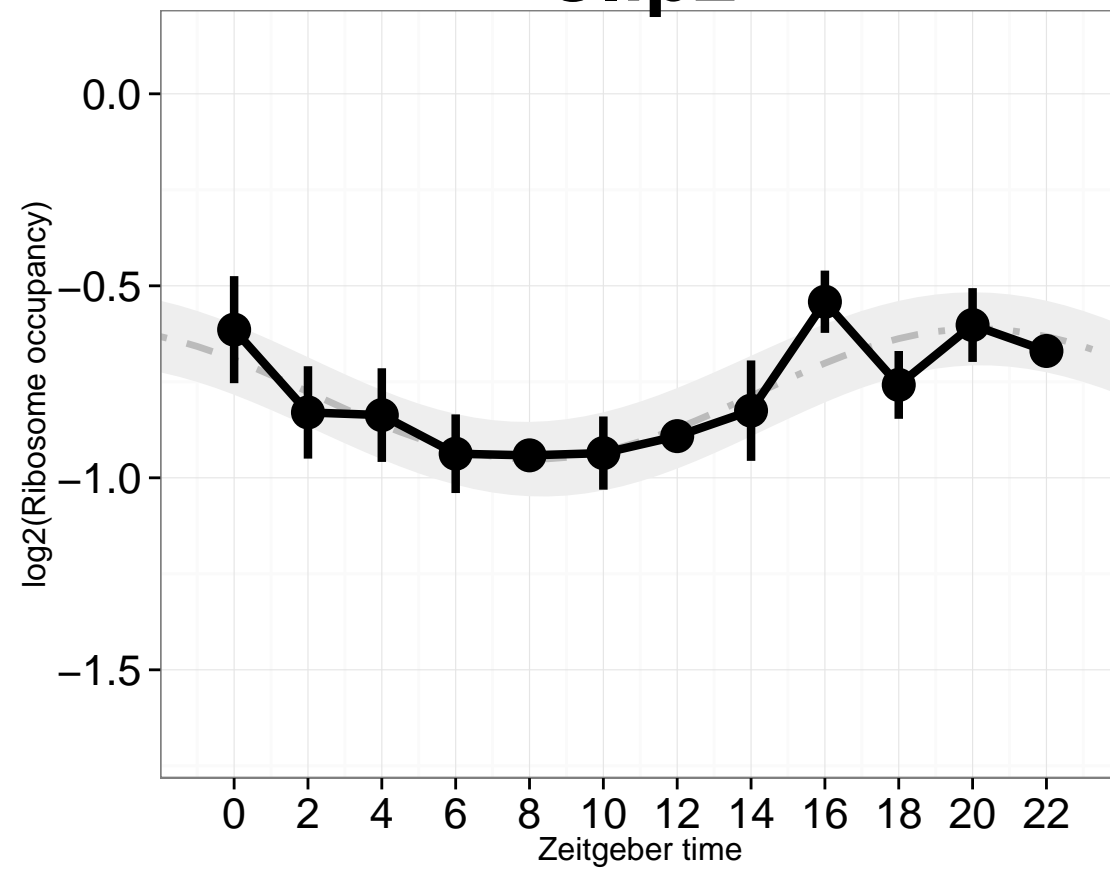

Supplement: Supplementary file 9026 [file 1]

# Gatad2a

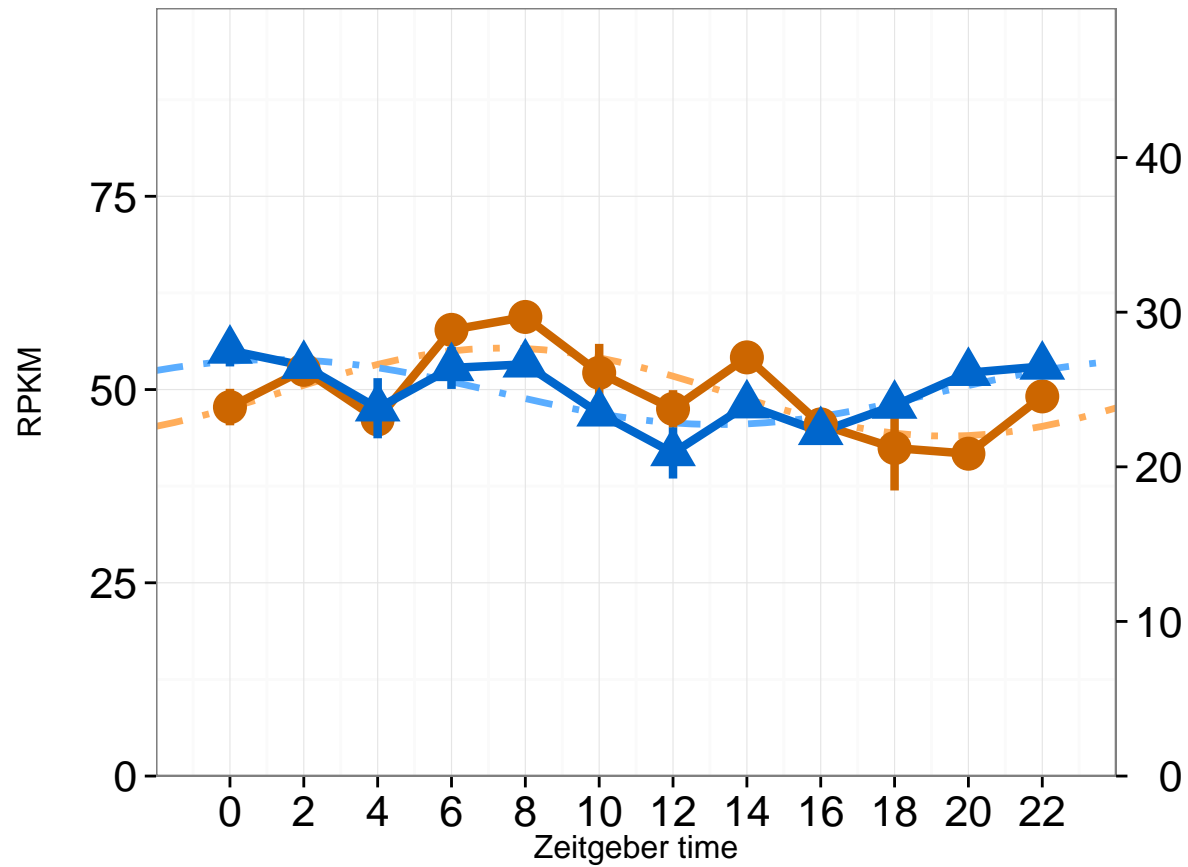

# Gatad2a

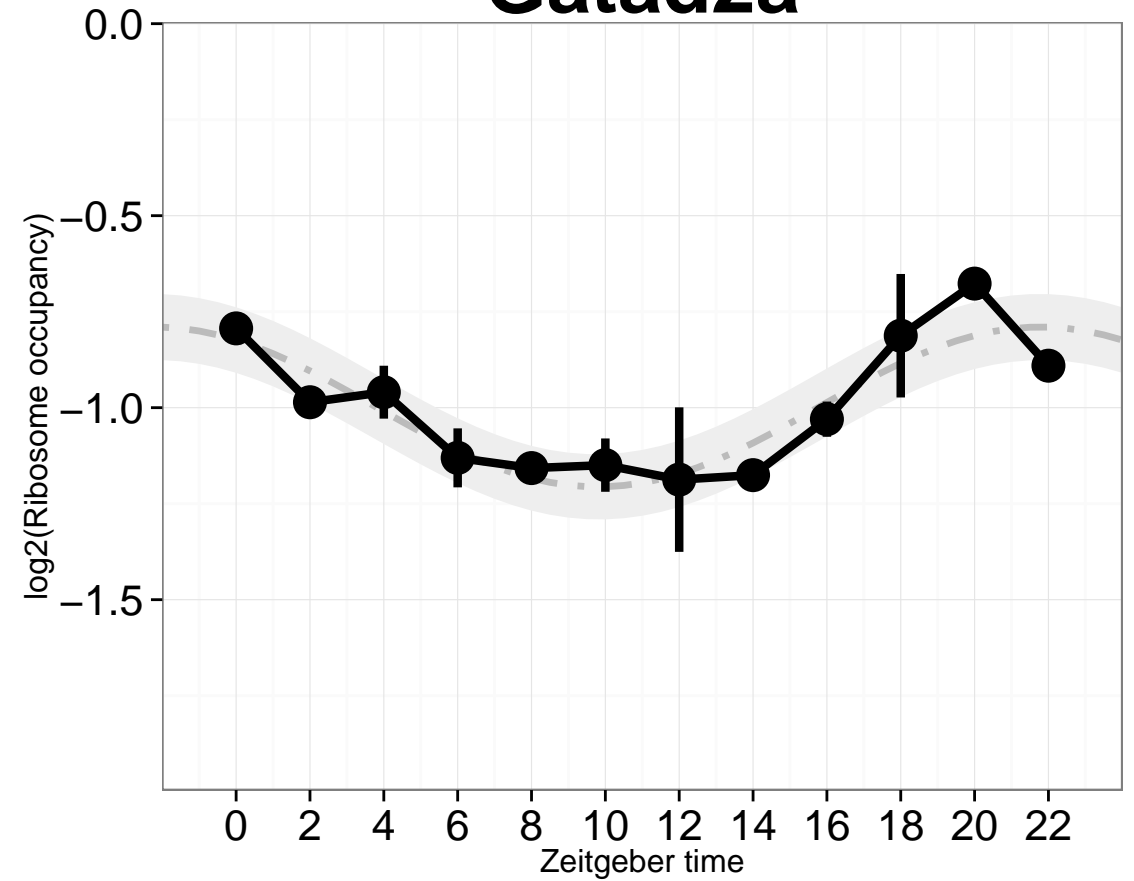

Supplement: Supplementary file 9027 [file 1]

## Rffl

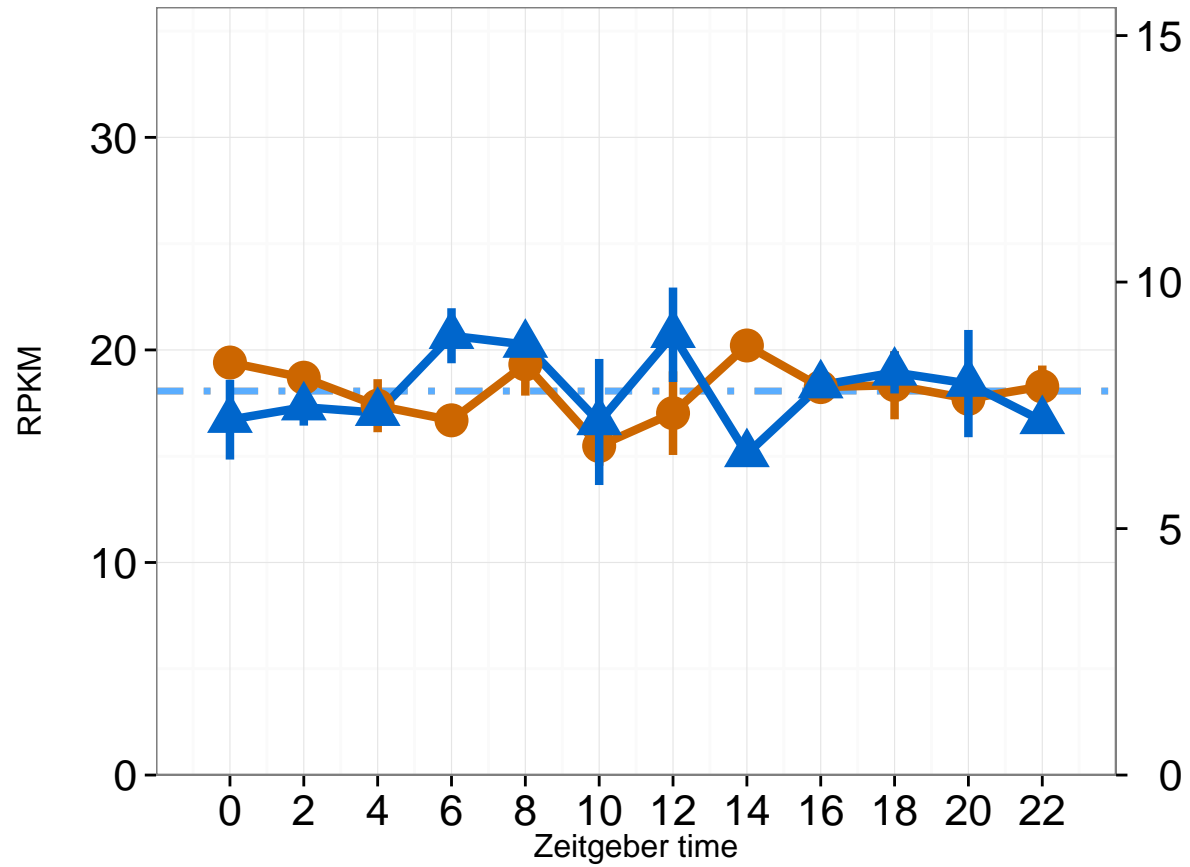

## Rffl

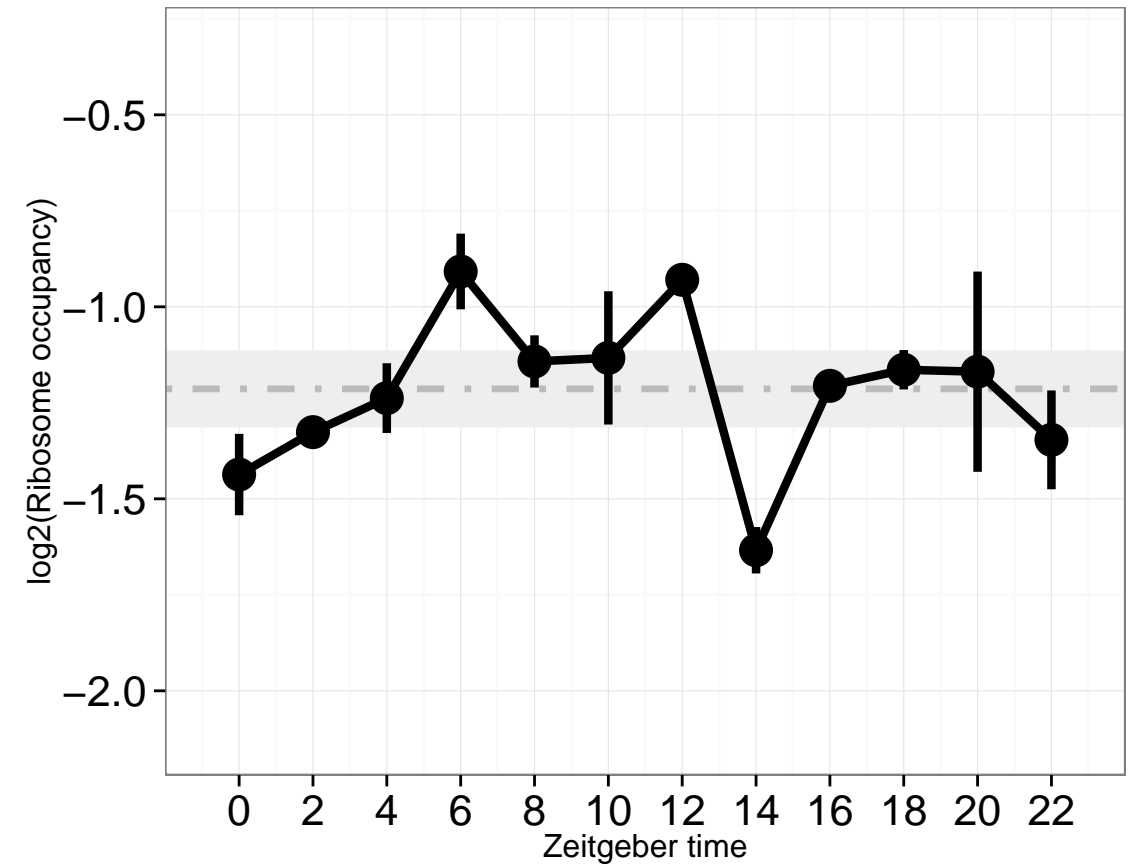

Supplement: Supplementary file 9028 [file 1]

## Ikzf2

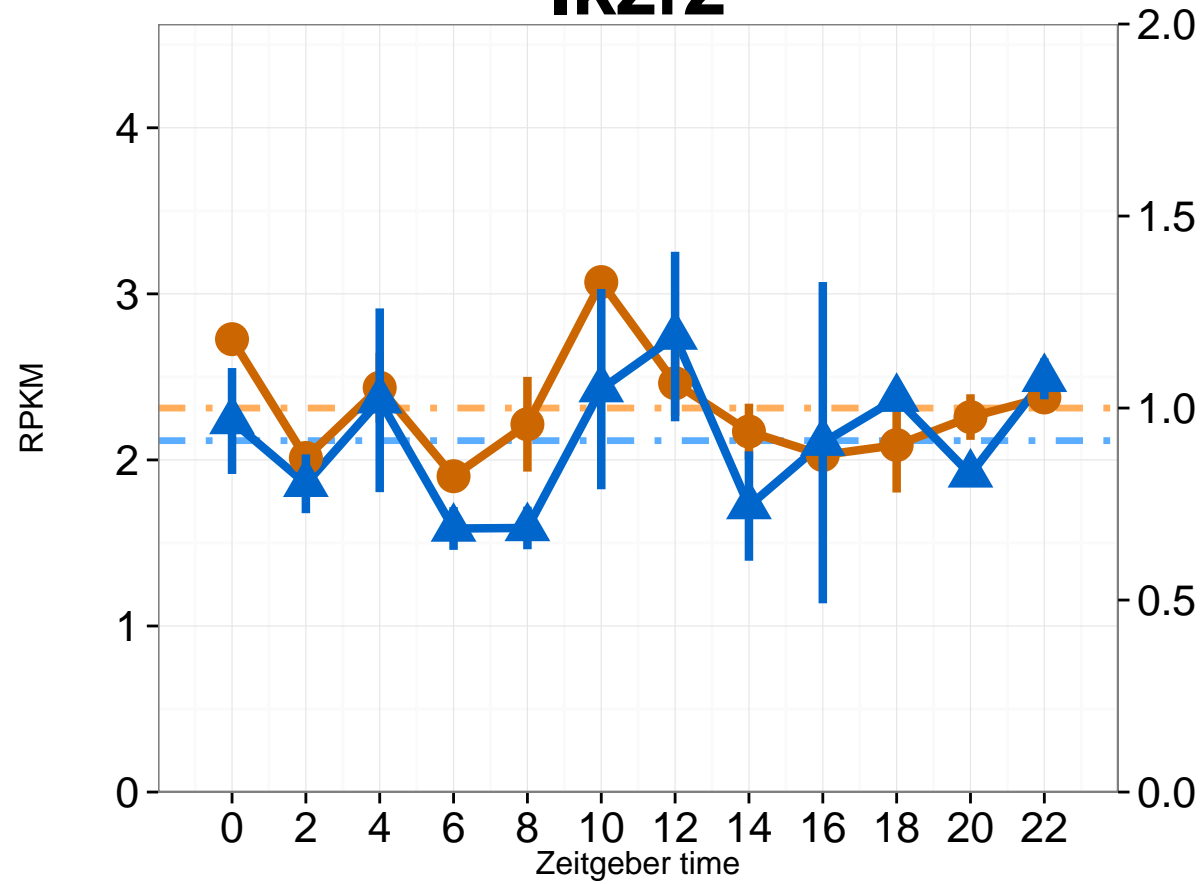

## Ikzf2

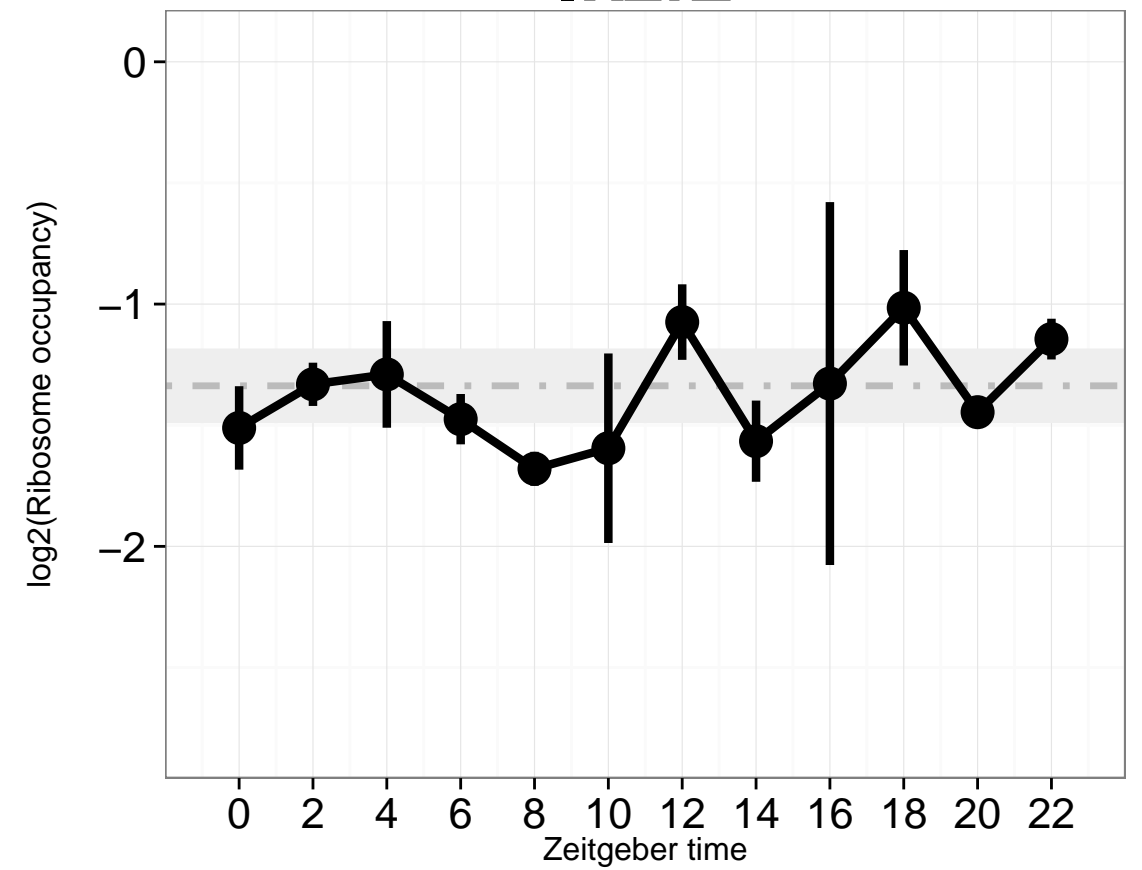

Supplement: Supplementary file 9029 [file 1]

## Litaf

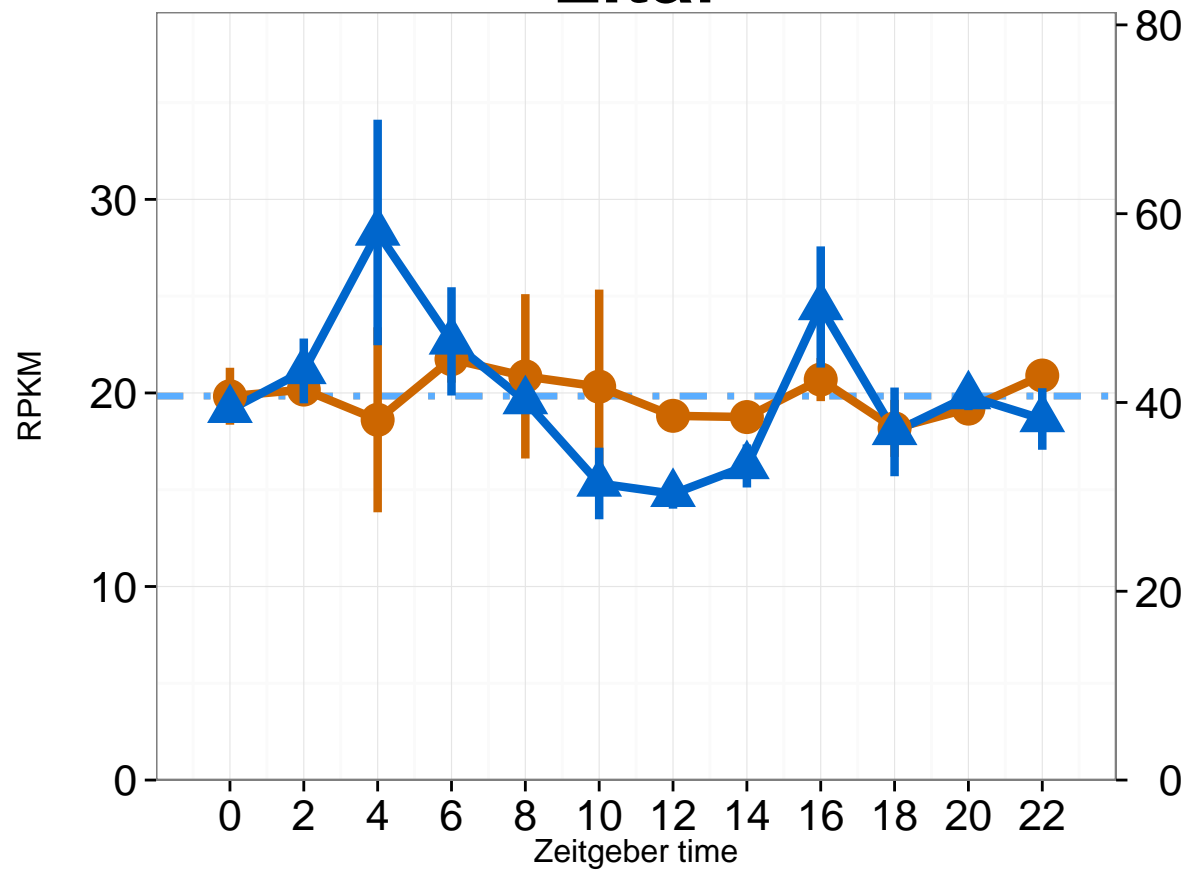

## Litaf

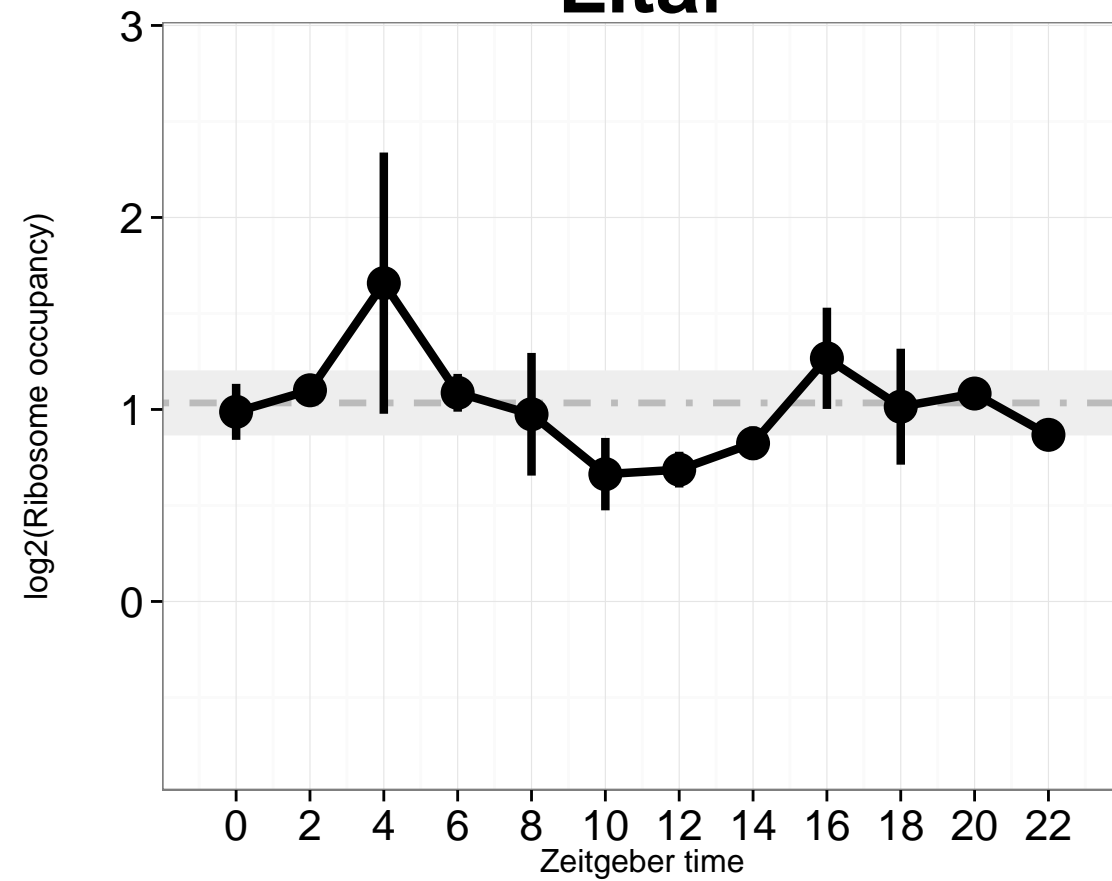

Supplement: Supplementary file 9030 [file 1]

## Ddn

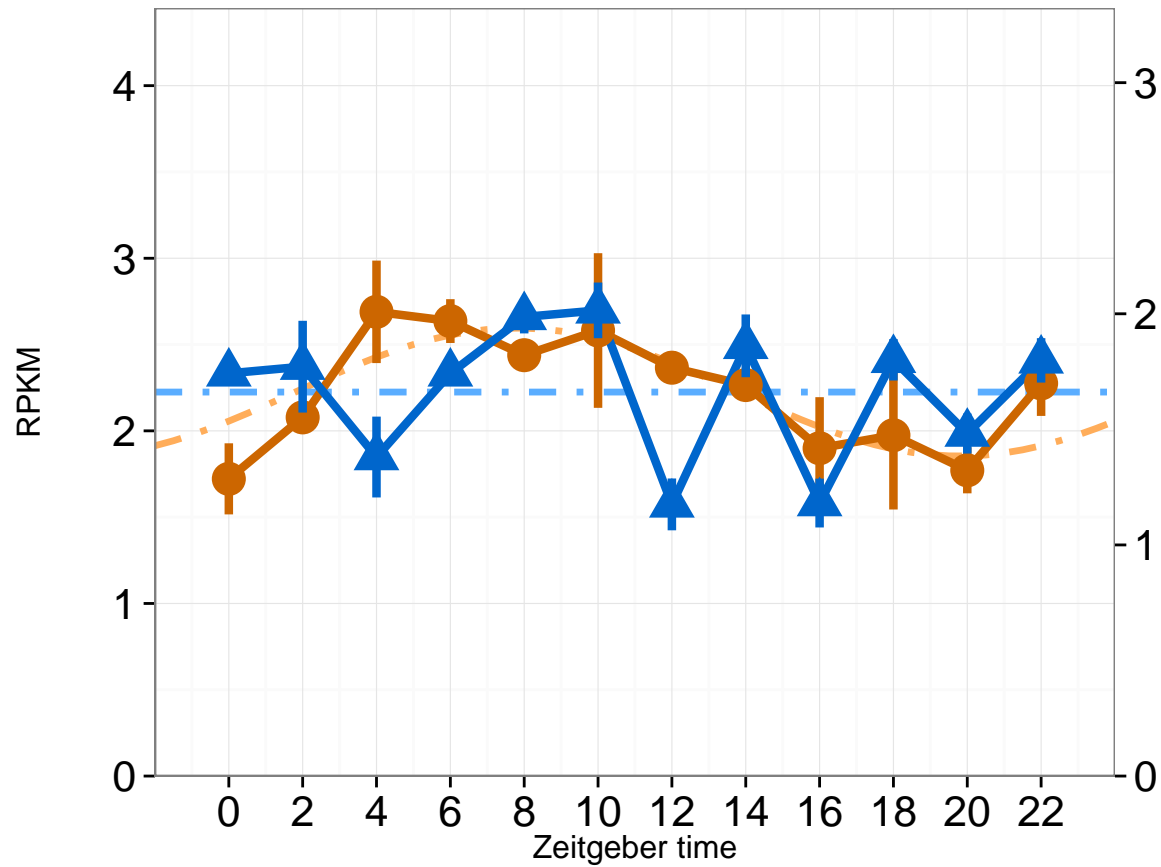

## Ddn

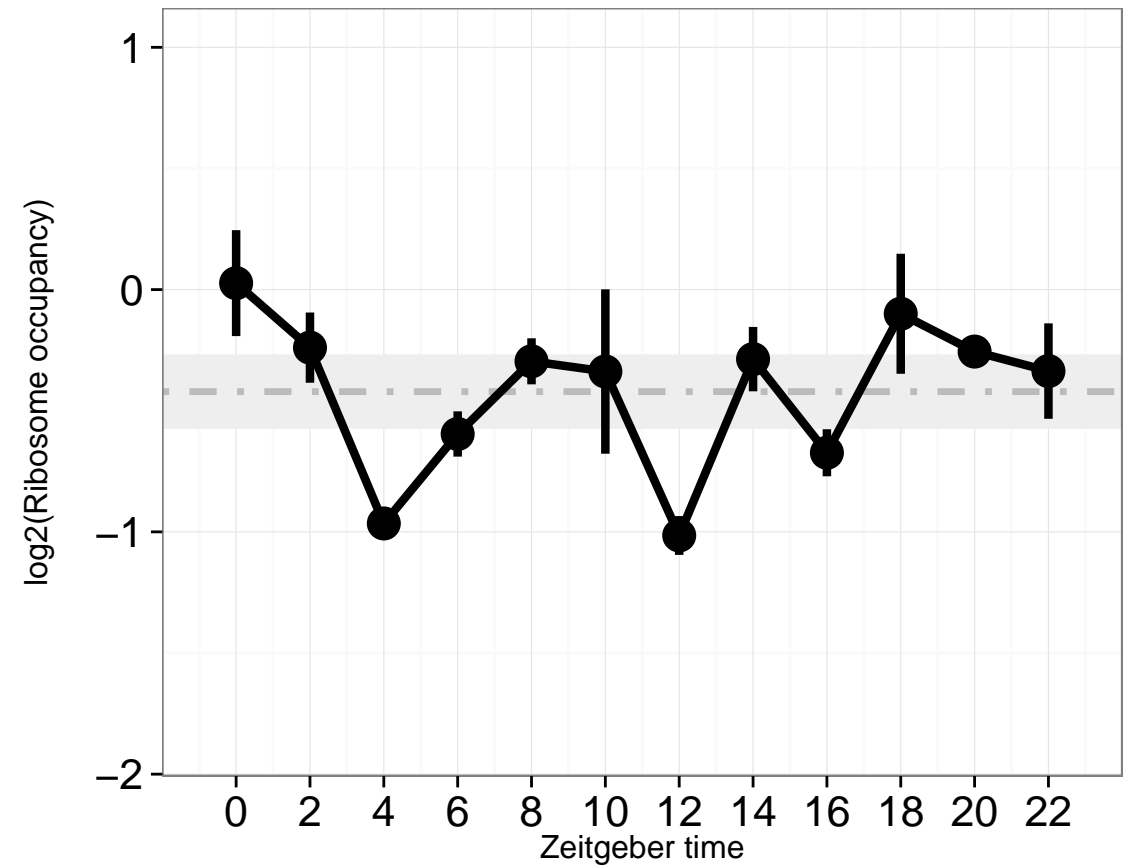

Supplement: Supplementary file 9031 [file 1]

# Zfp316

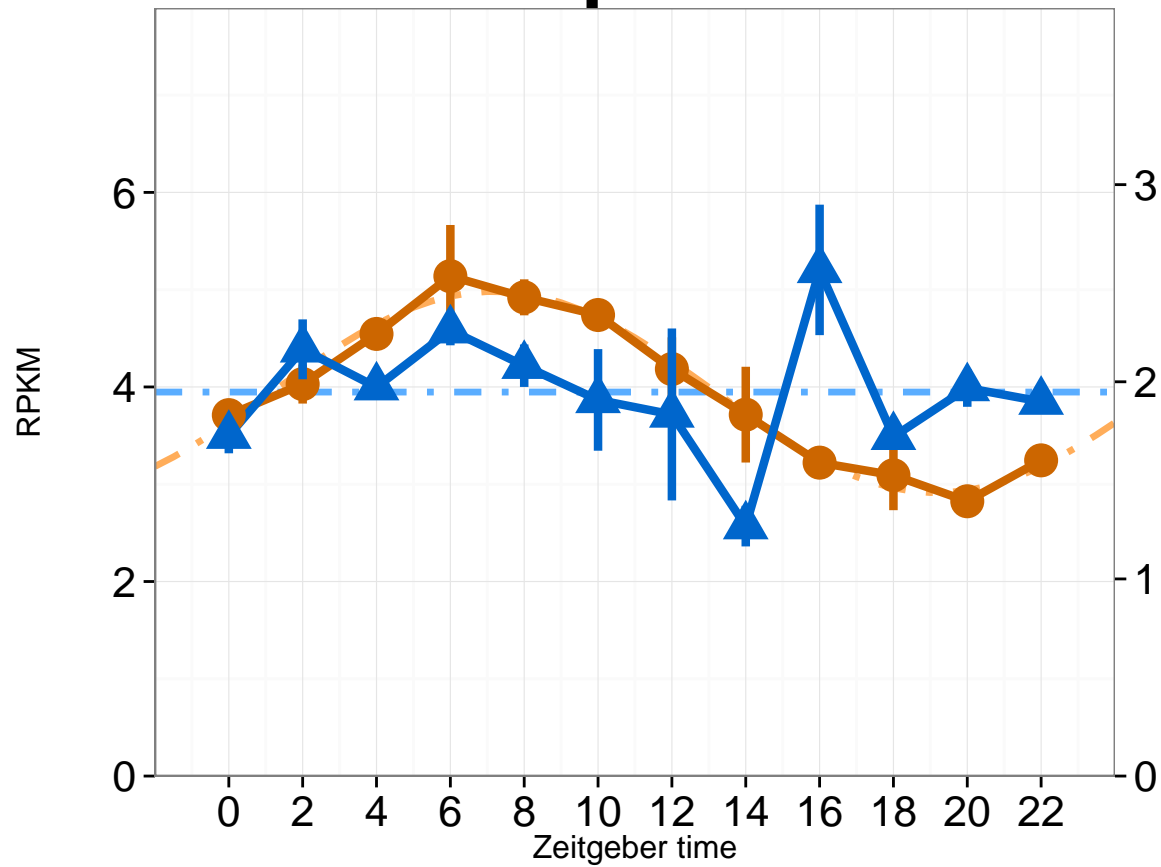

# Zfp316

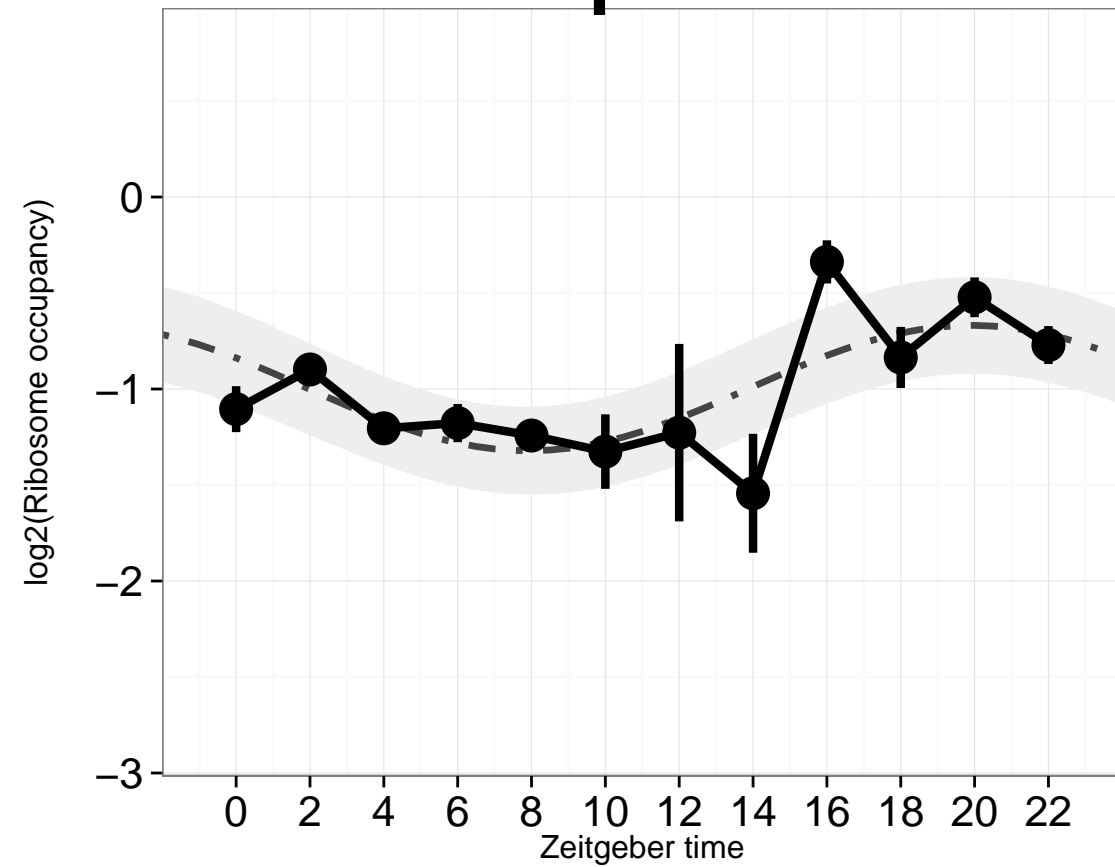

Supplement: Supplementary file 9032 [file 1]

# Kntc1

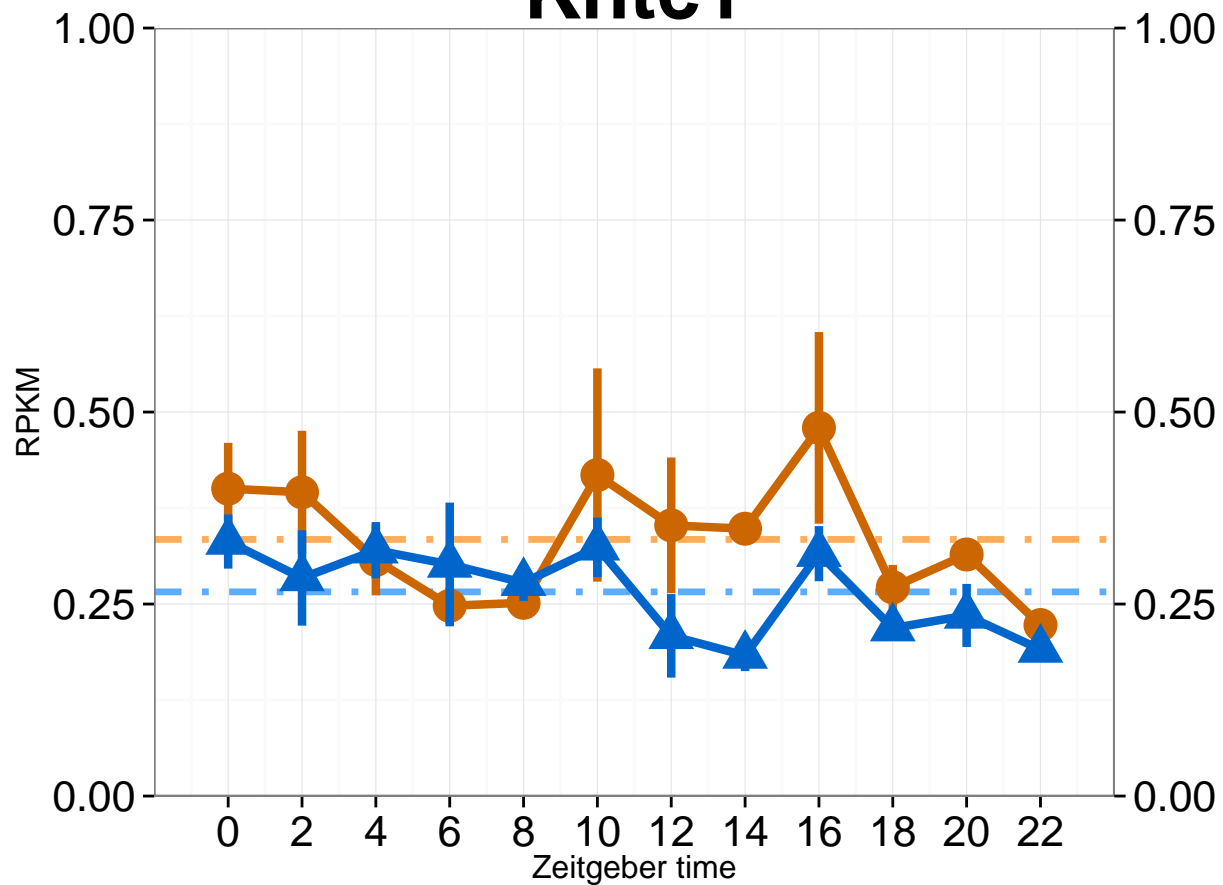

# Kntc1

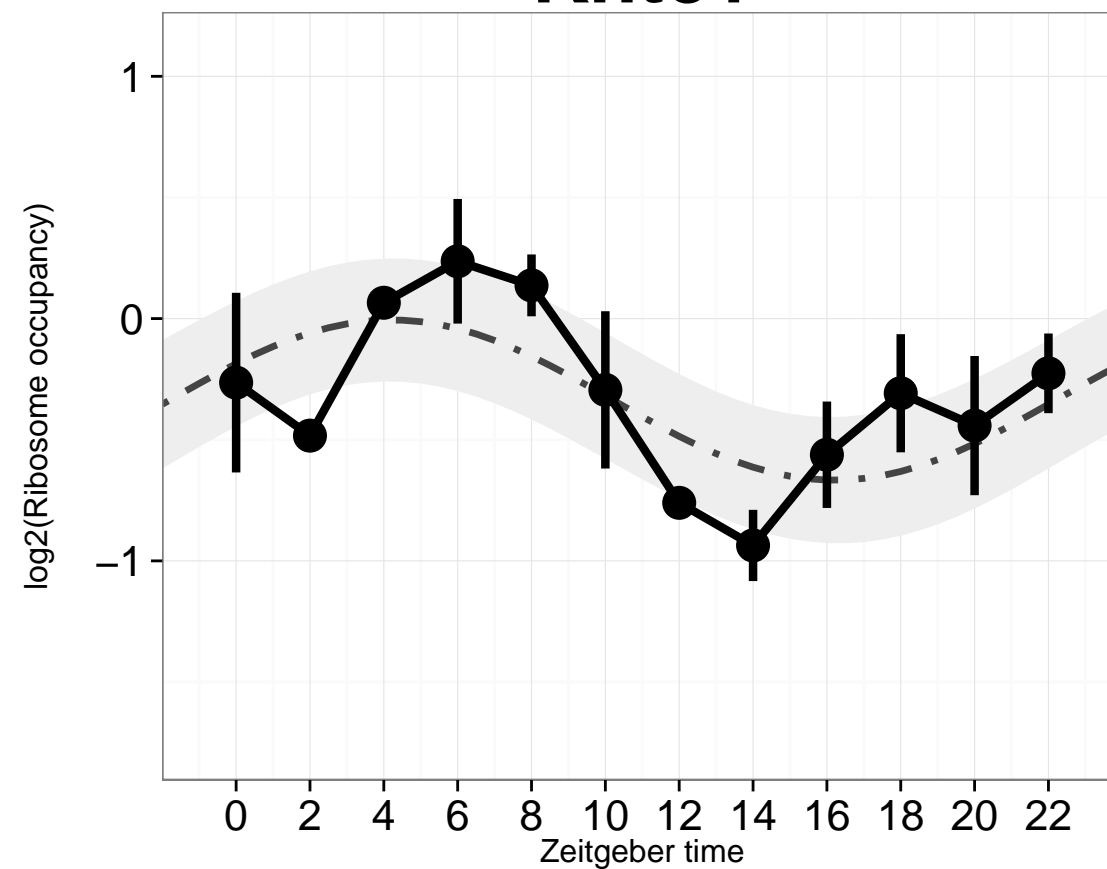

Supplement: Supplementary file 9033 [file 1]
