# Supplementary material (part 91 of 133)
Source: publisher figshare collection journal article supplement (https://springernature.figshare.com/articles/dataset/_/4903193)

# Mrps30

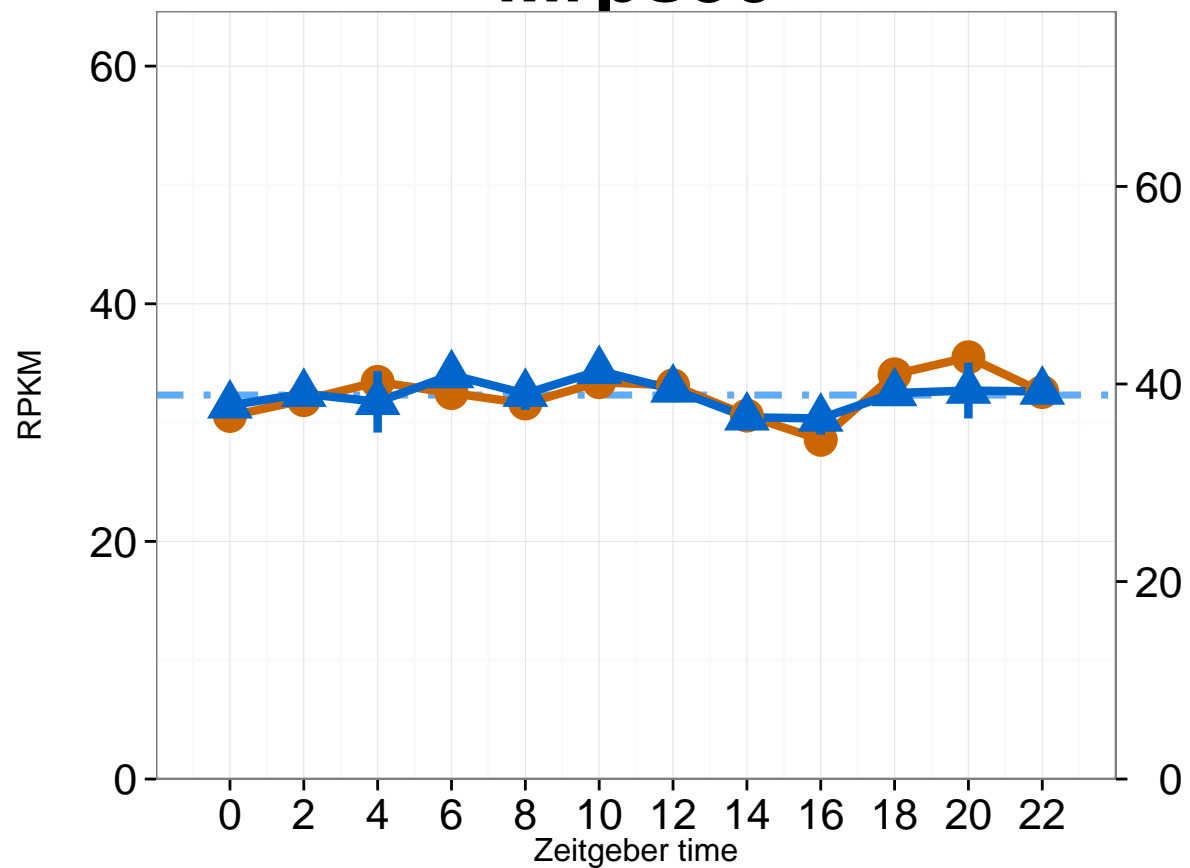

# Mrps30

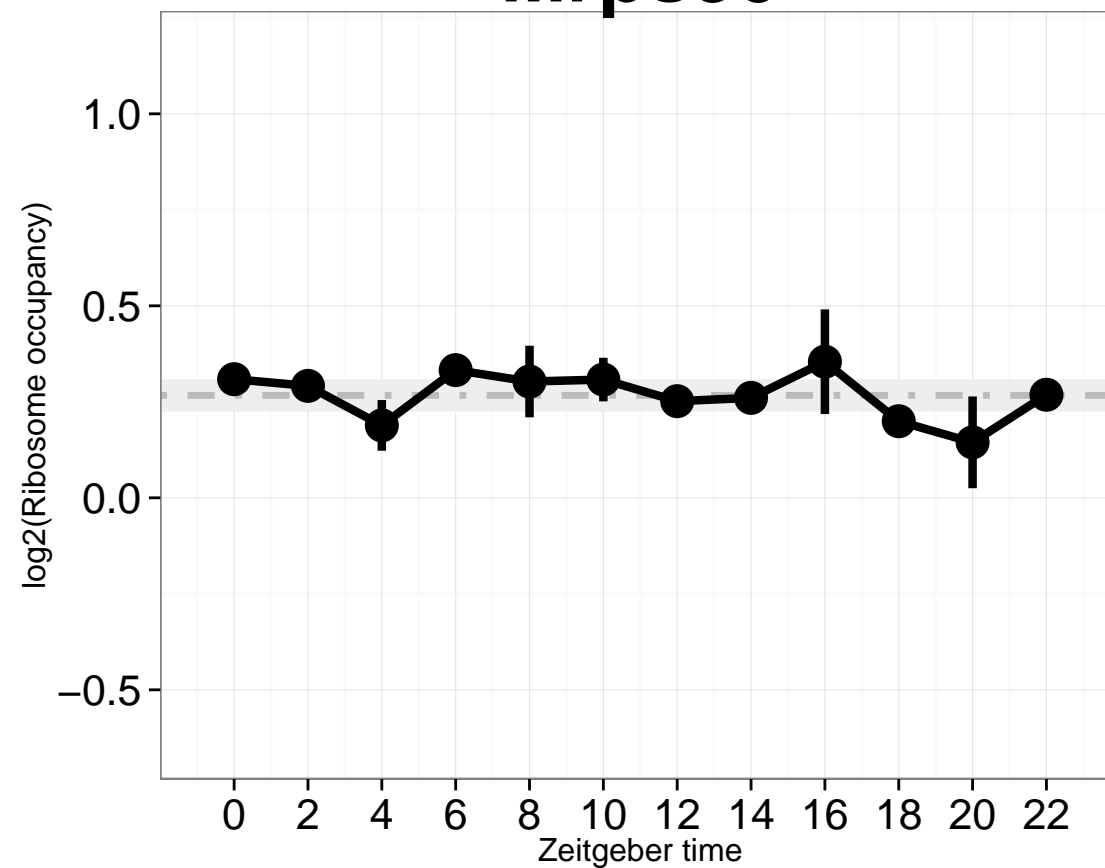

Supplement: Supplementary file 9034 [file 1]

## Tspyl1

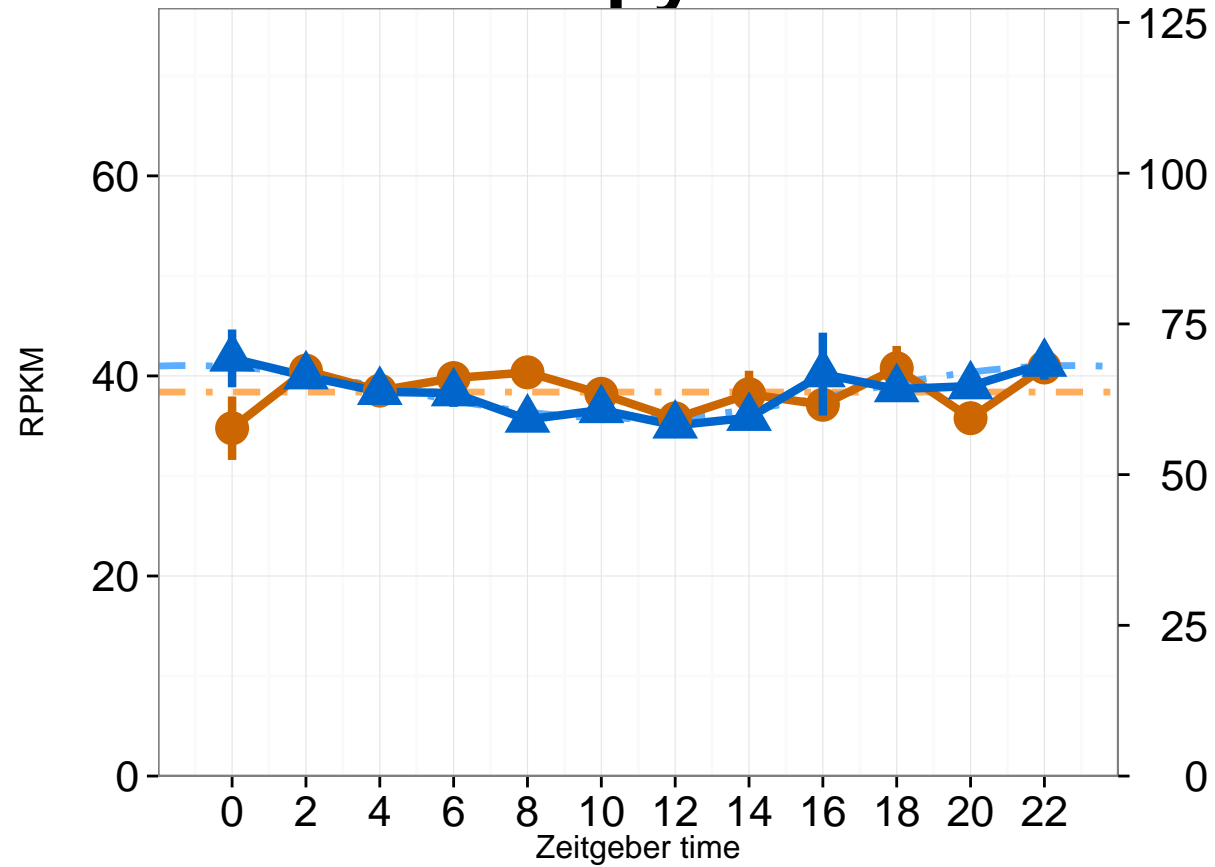

## Tspyl1

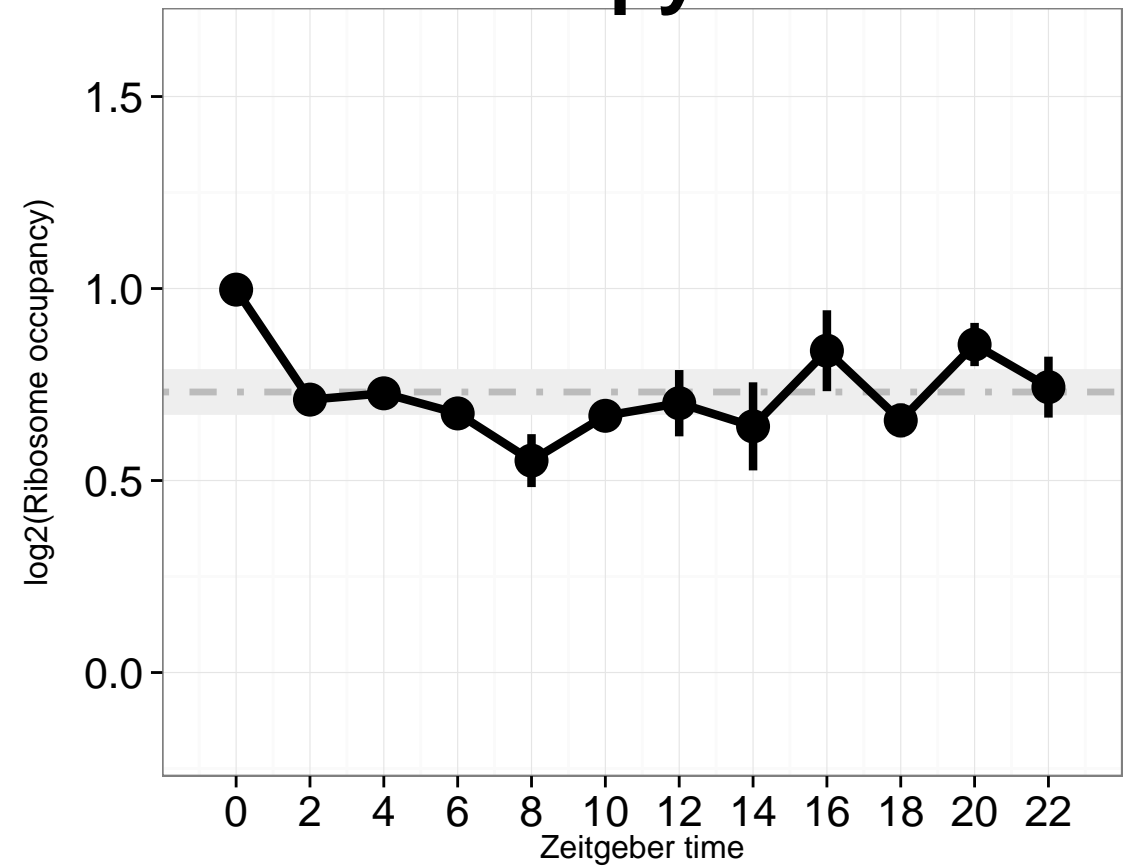

Supplement: Supplementary file 9035 [file 1]

## Scyl2

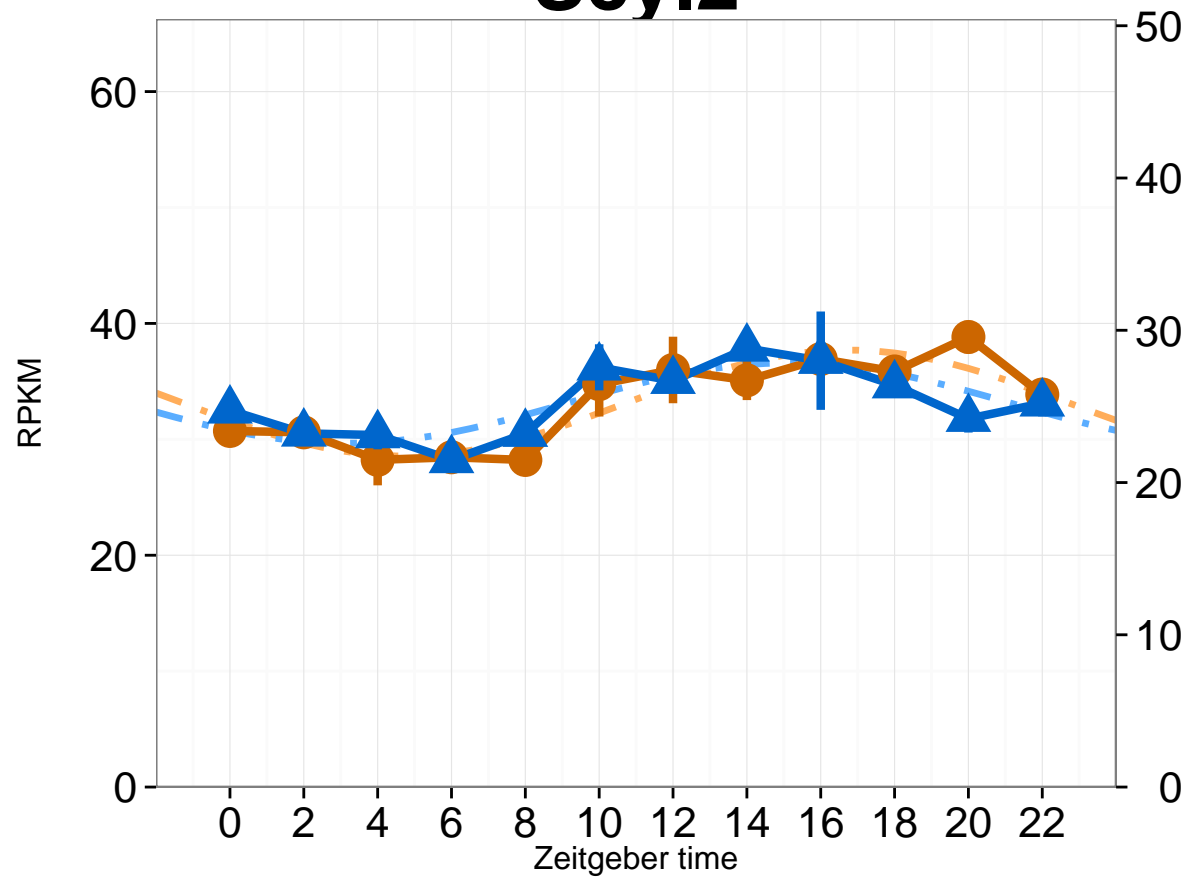

## Scyl2

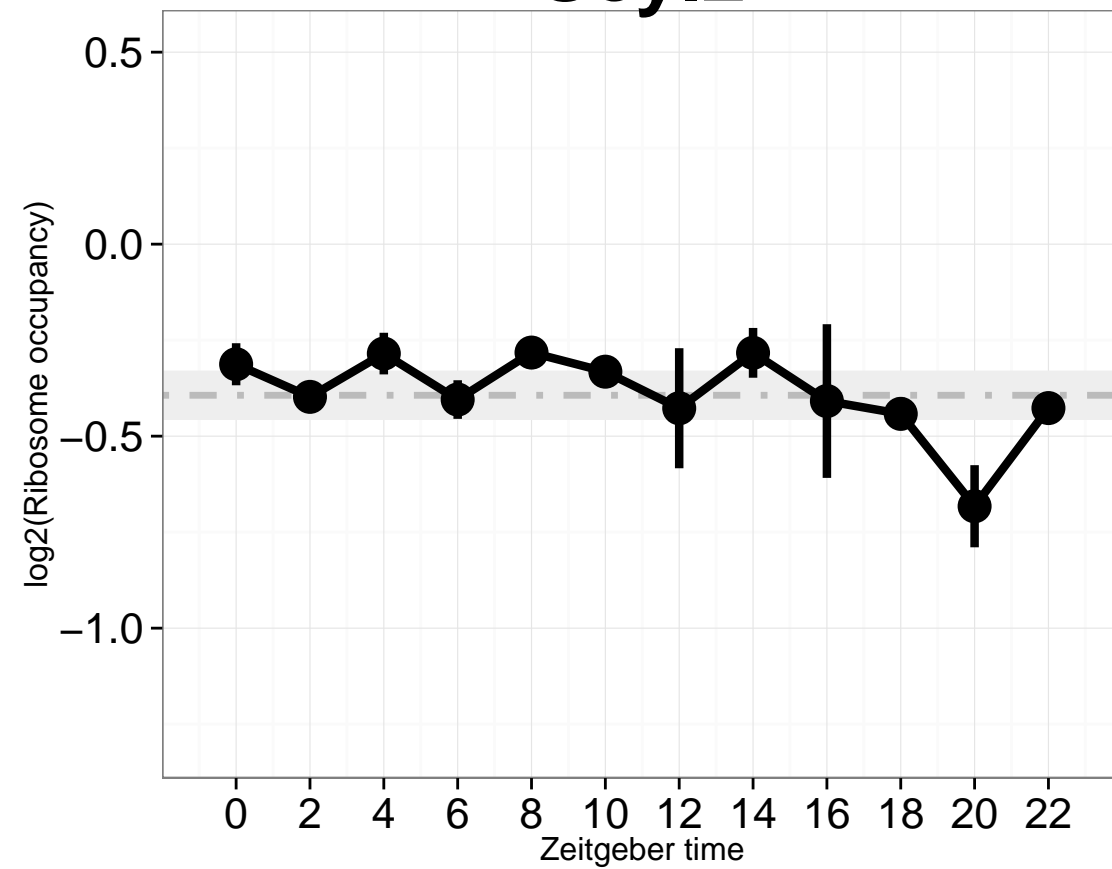

Supplement: Supplementary file 9036 [file 1]

## Kcnj1

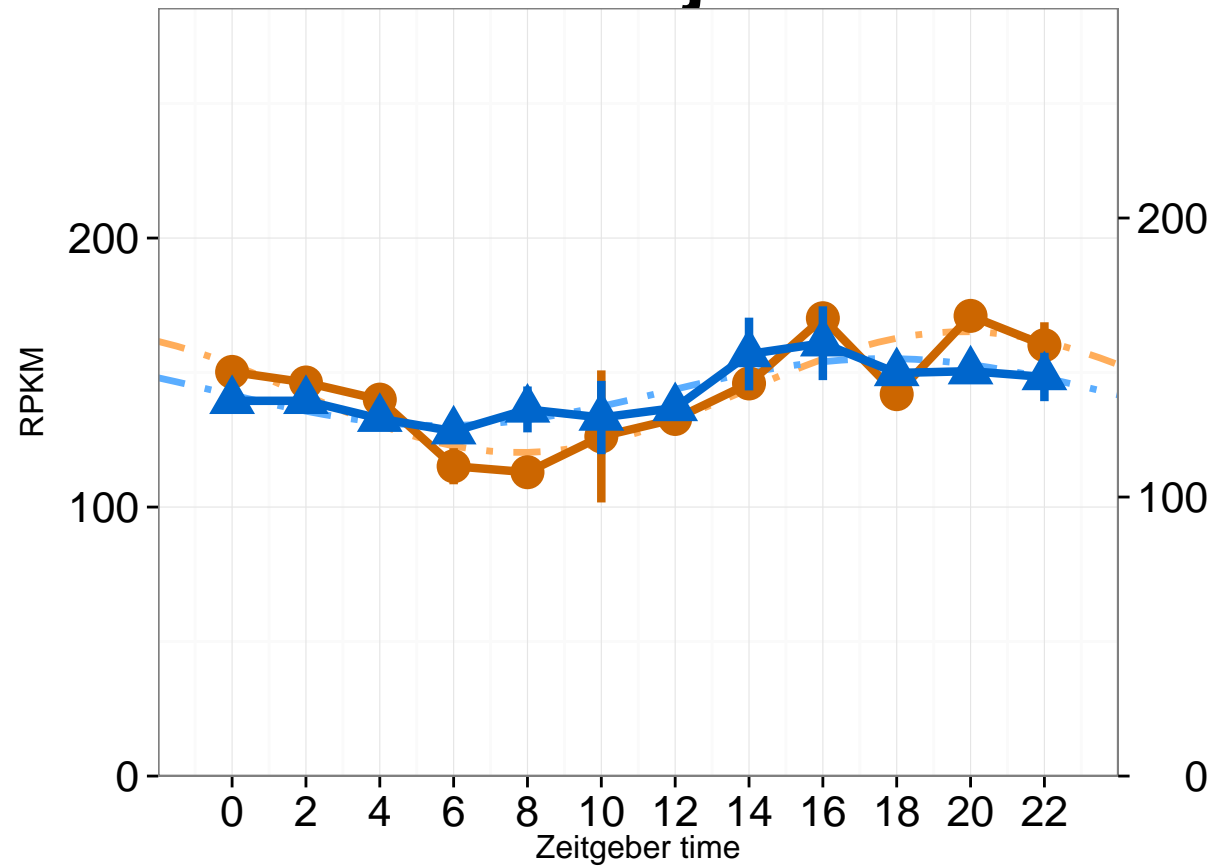

## Kcnj1

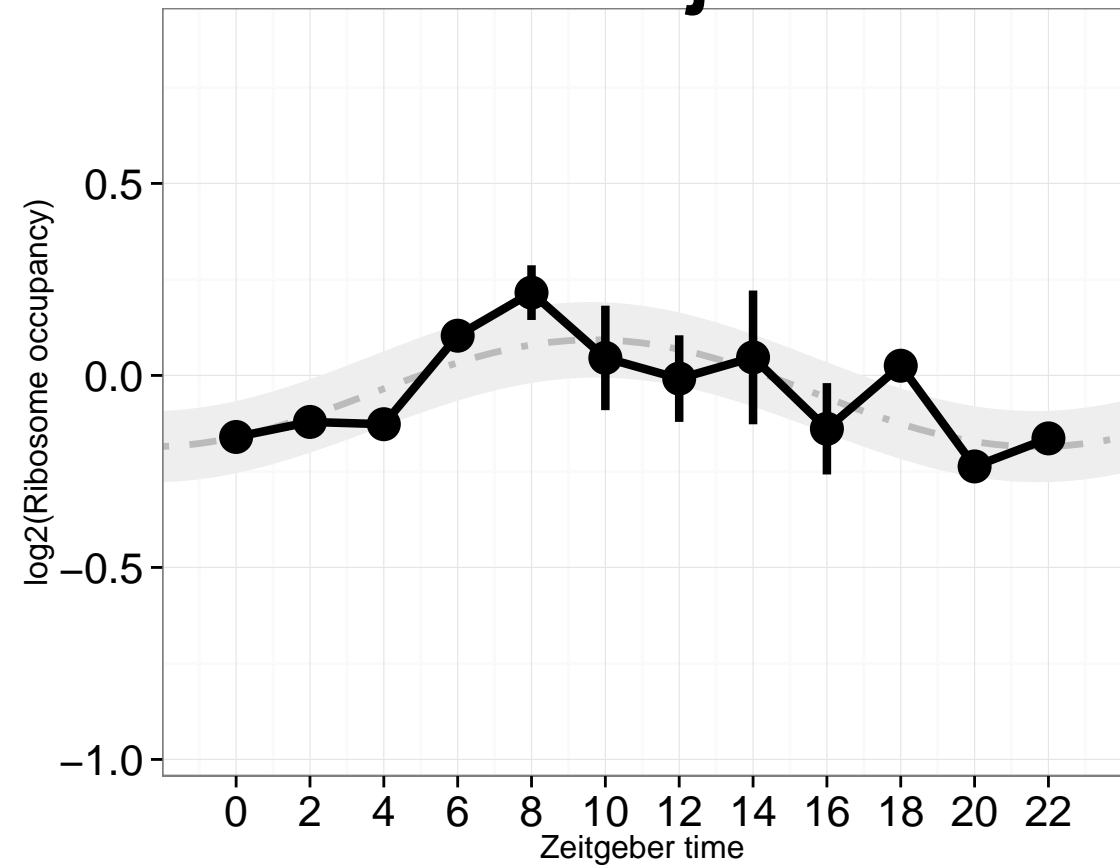

Supplement: Supplementary file 9037 [file 1]

# Arglu1

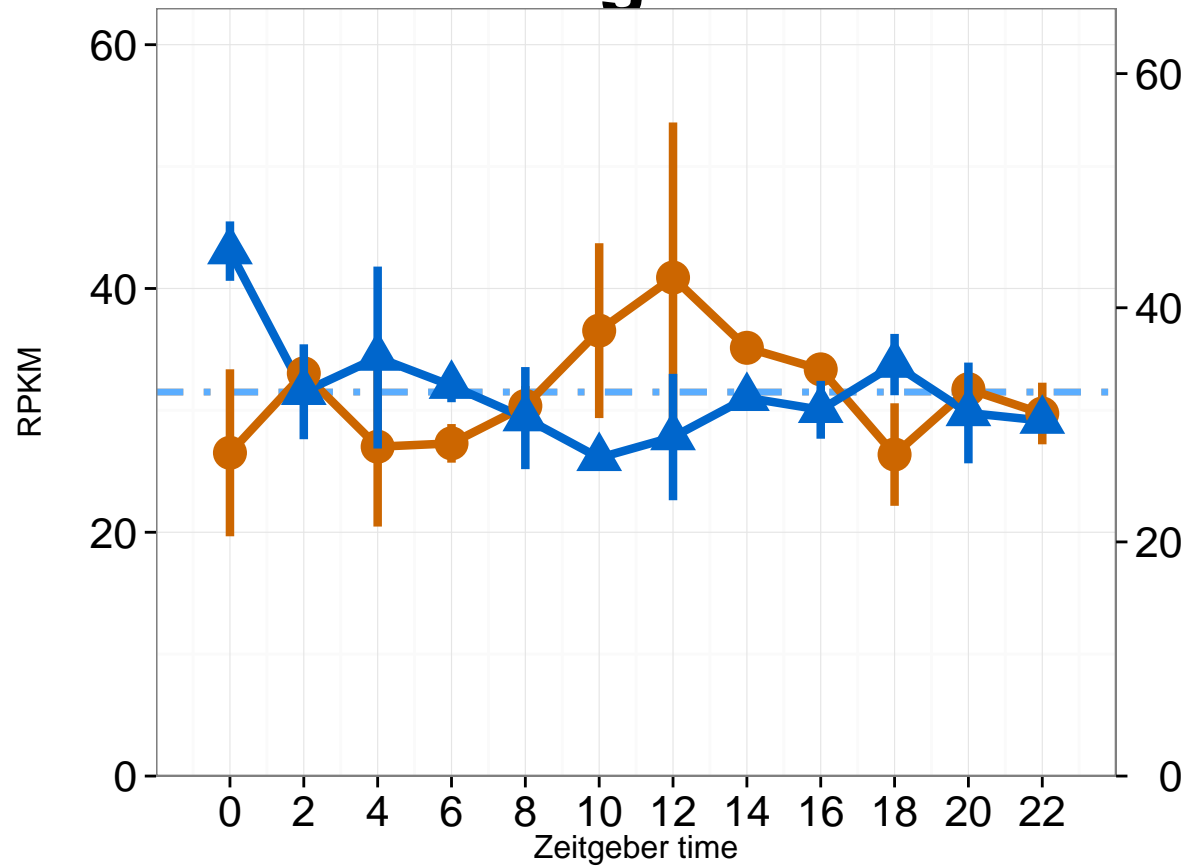

# Arglu1

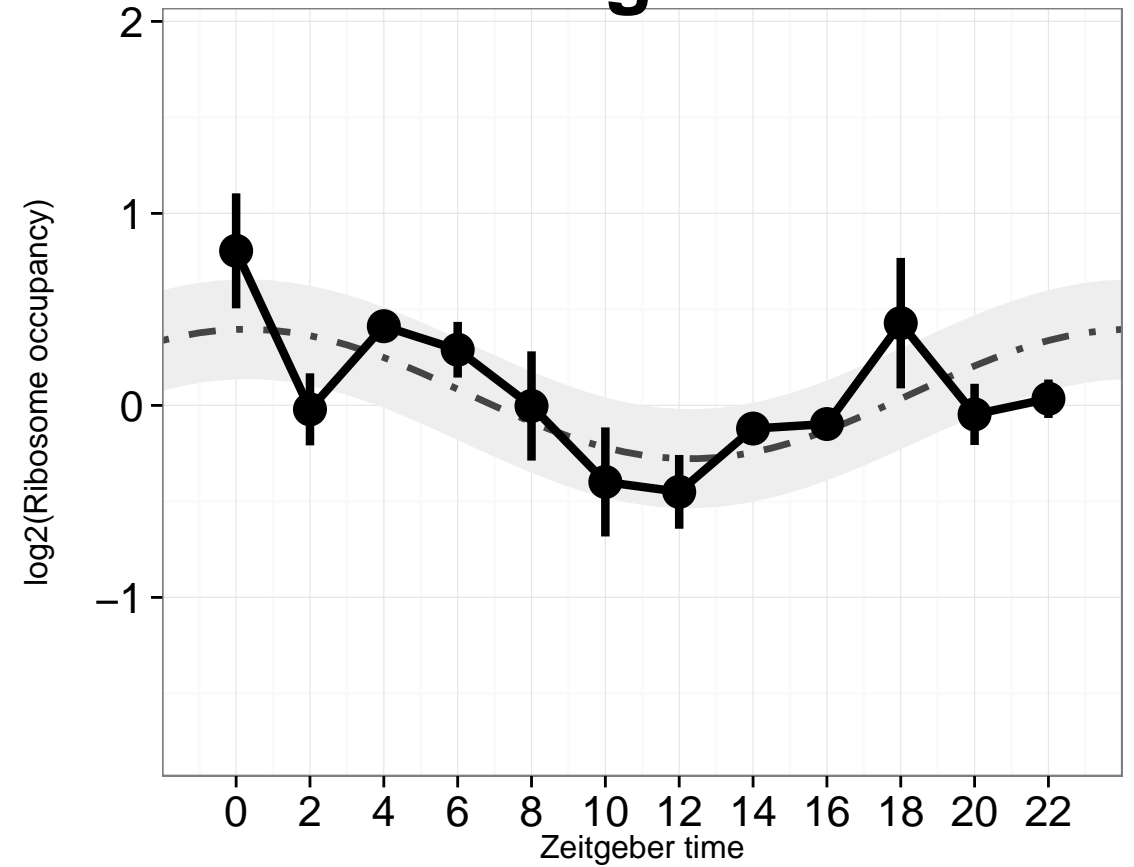

Supplement: Supplementary file 9038 [file 1]

## Ppp1cb

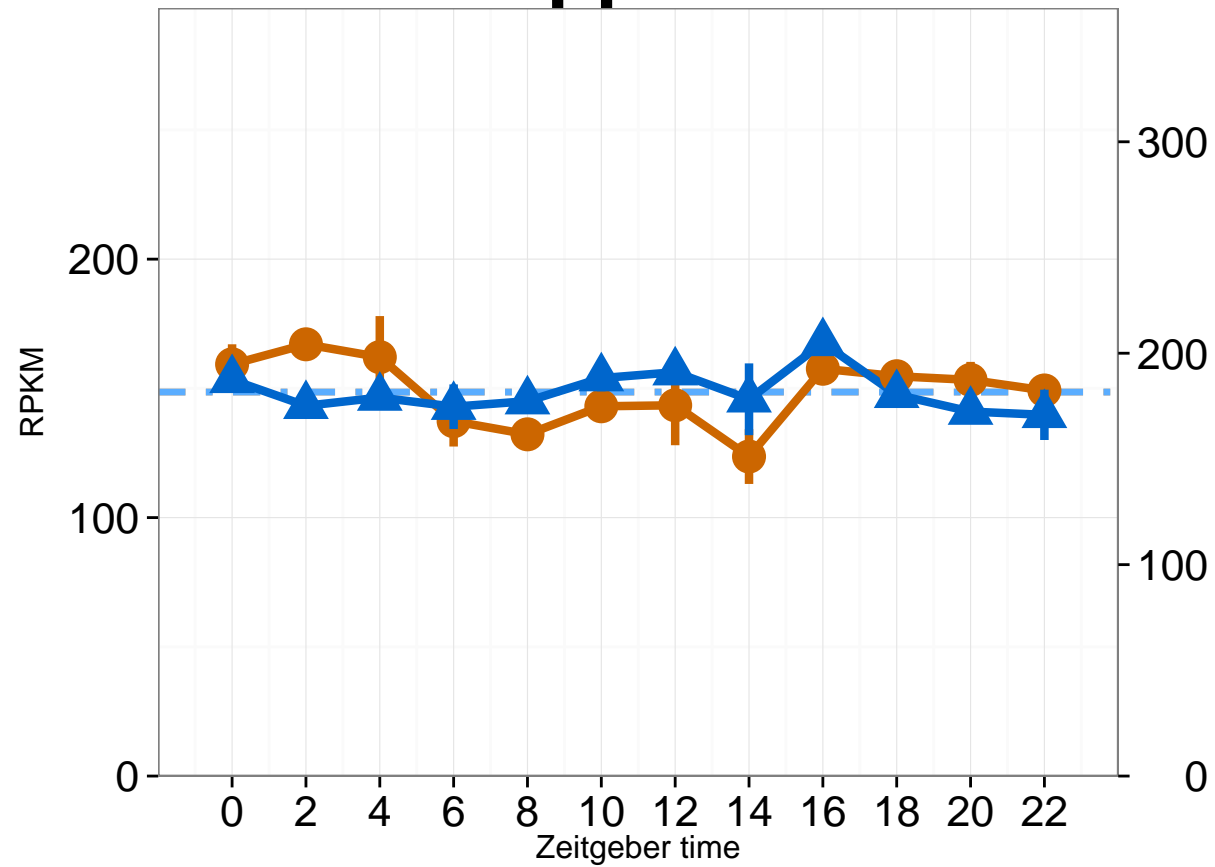

## Ppp1cb

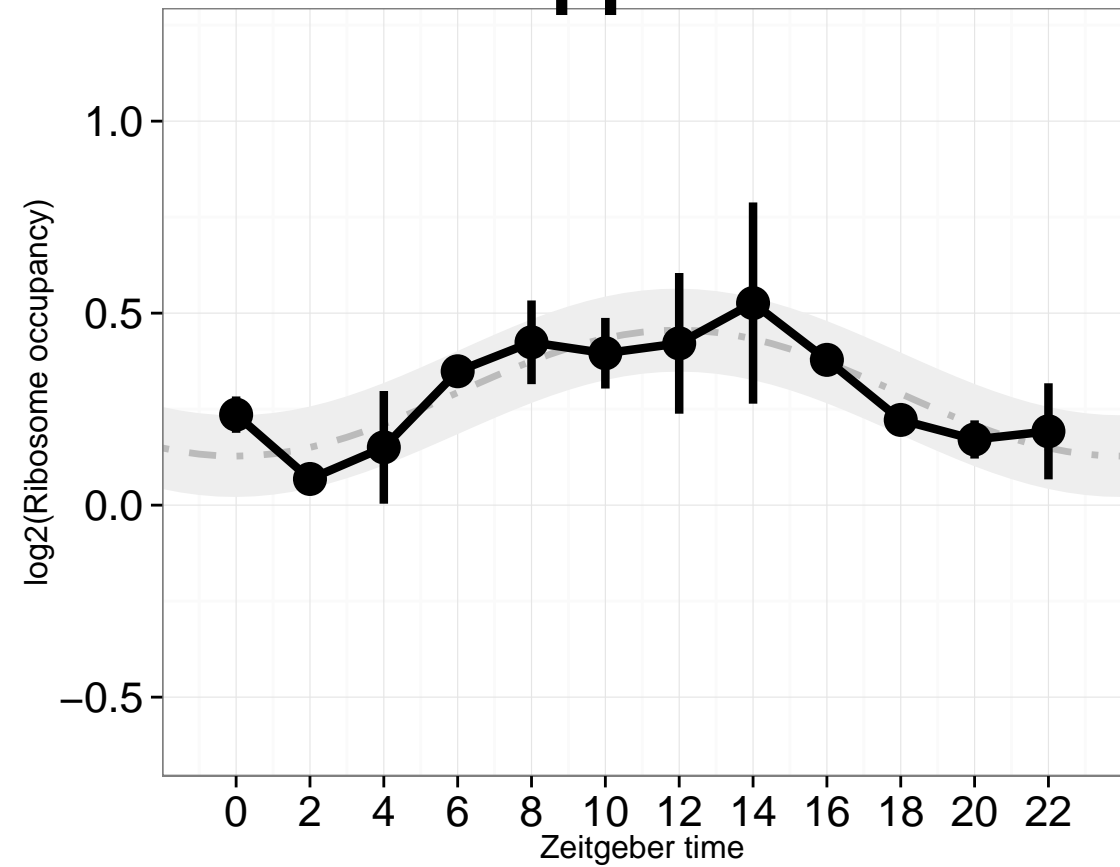

Supplement: Supplementary file 9039 [file 1]

# Slc35f1

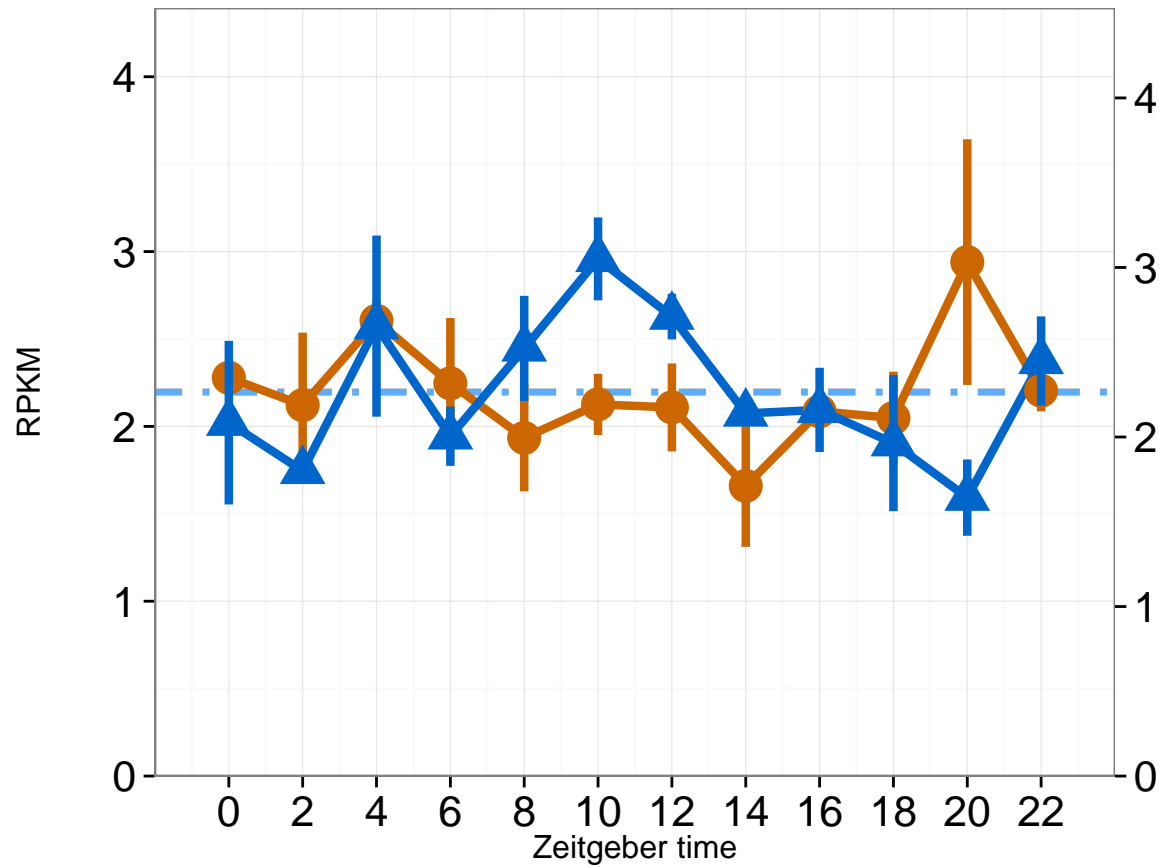

# Slc35f1

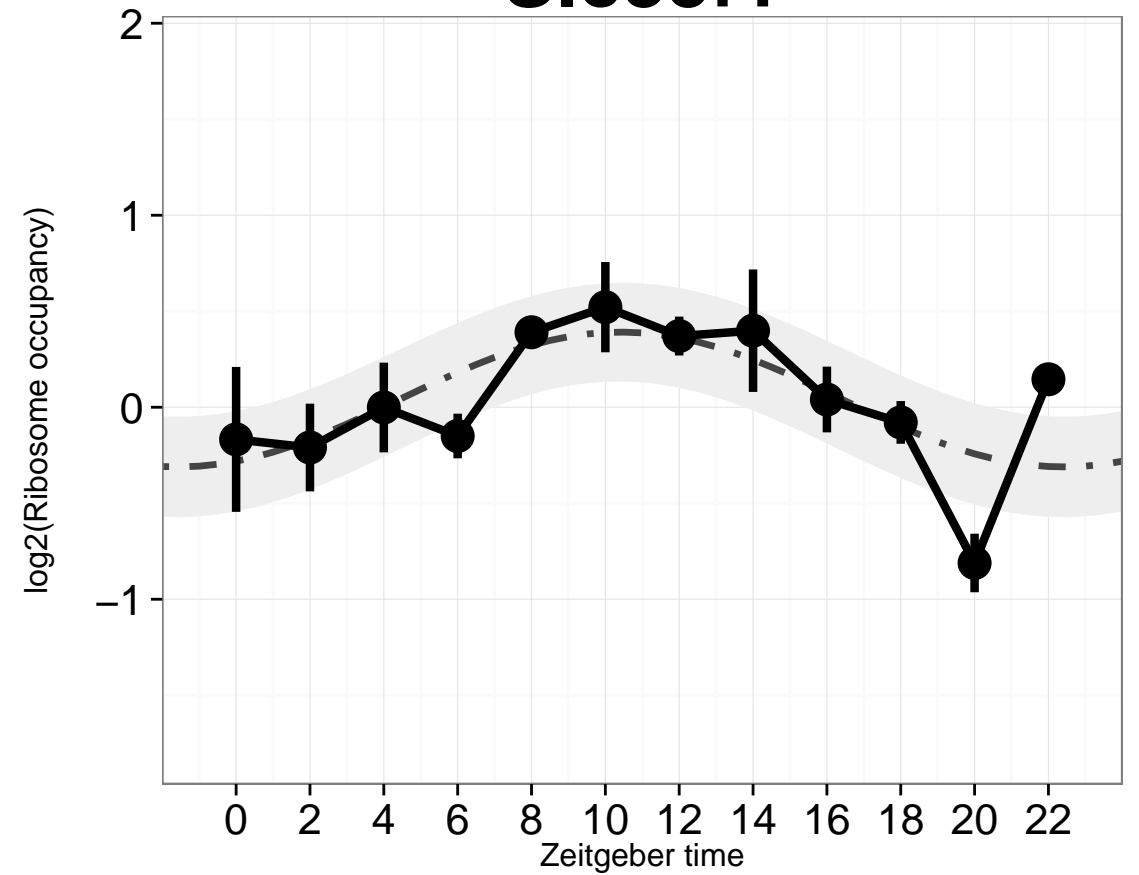

Supplement: Supplementary file 9040 [file 1]

# 4833439L19Rik

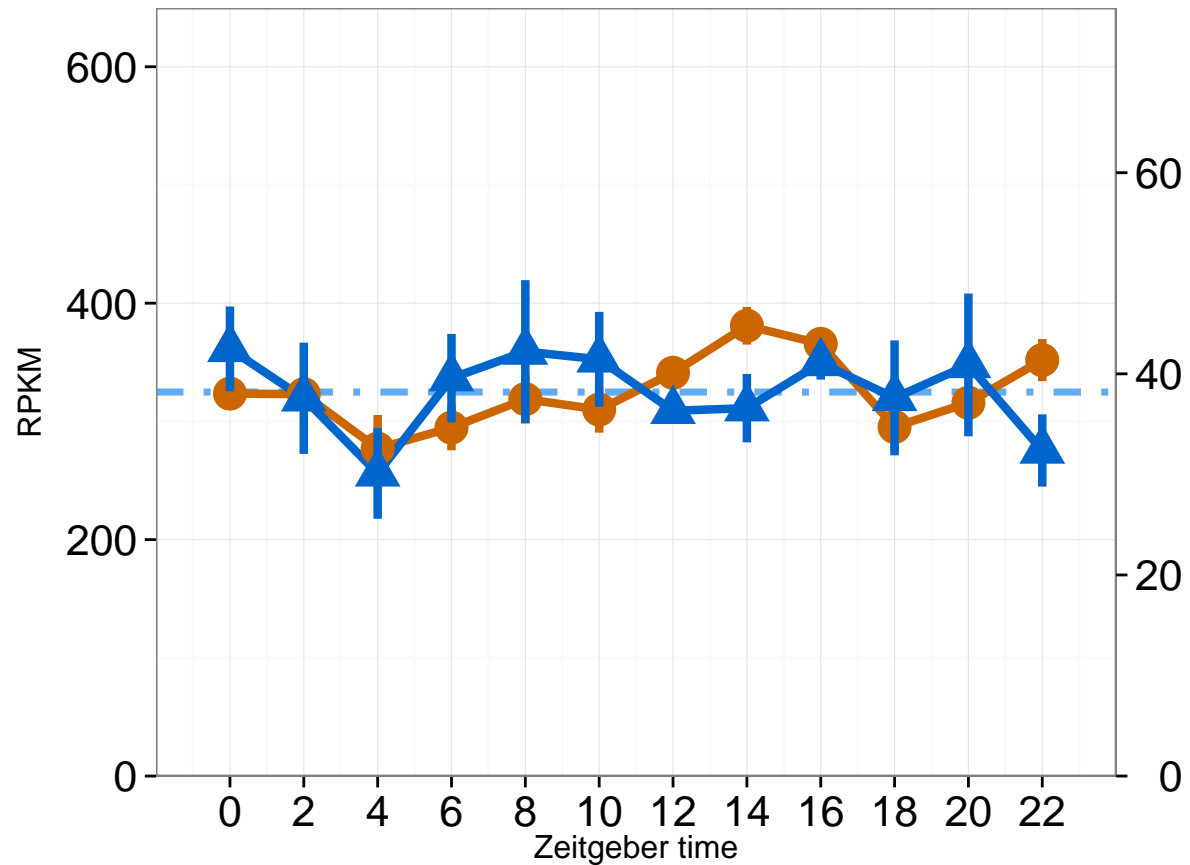

# 4833439L19Rik

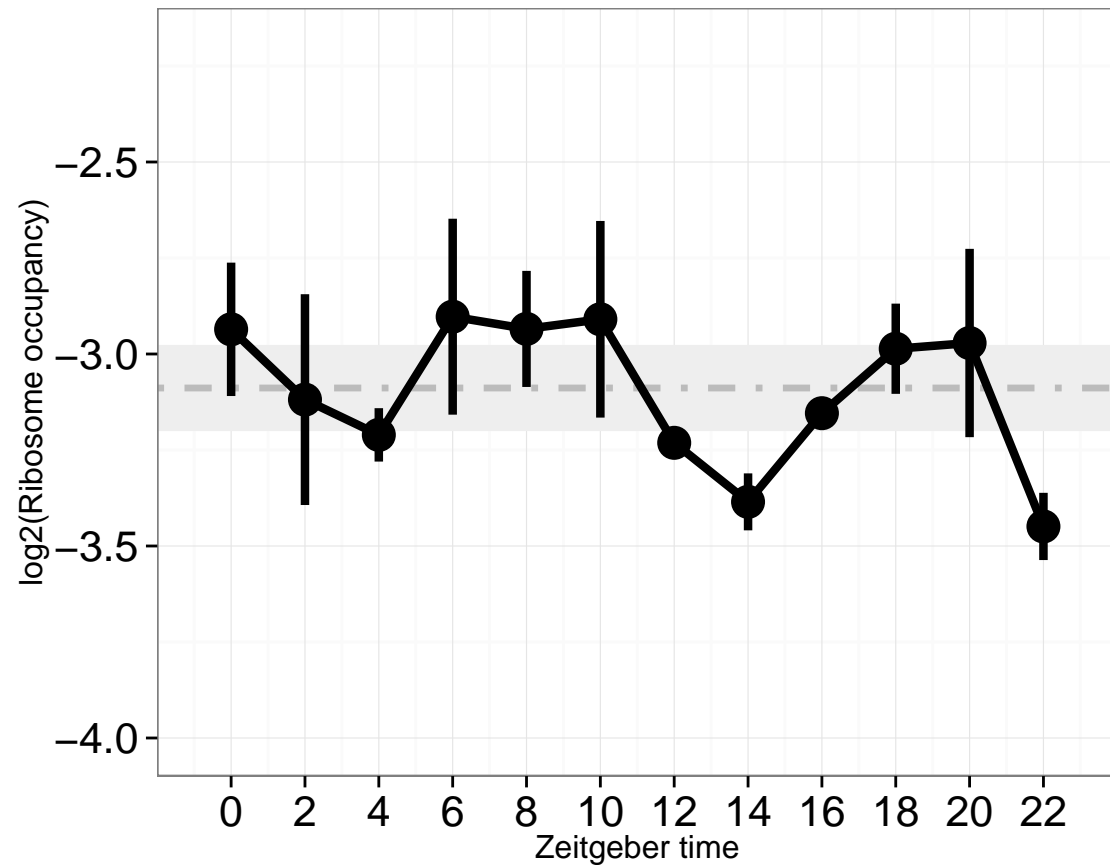

Supplement: Supplementary file 9041 [file 1]

## Plcb3

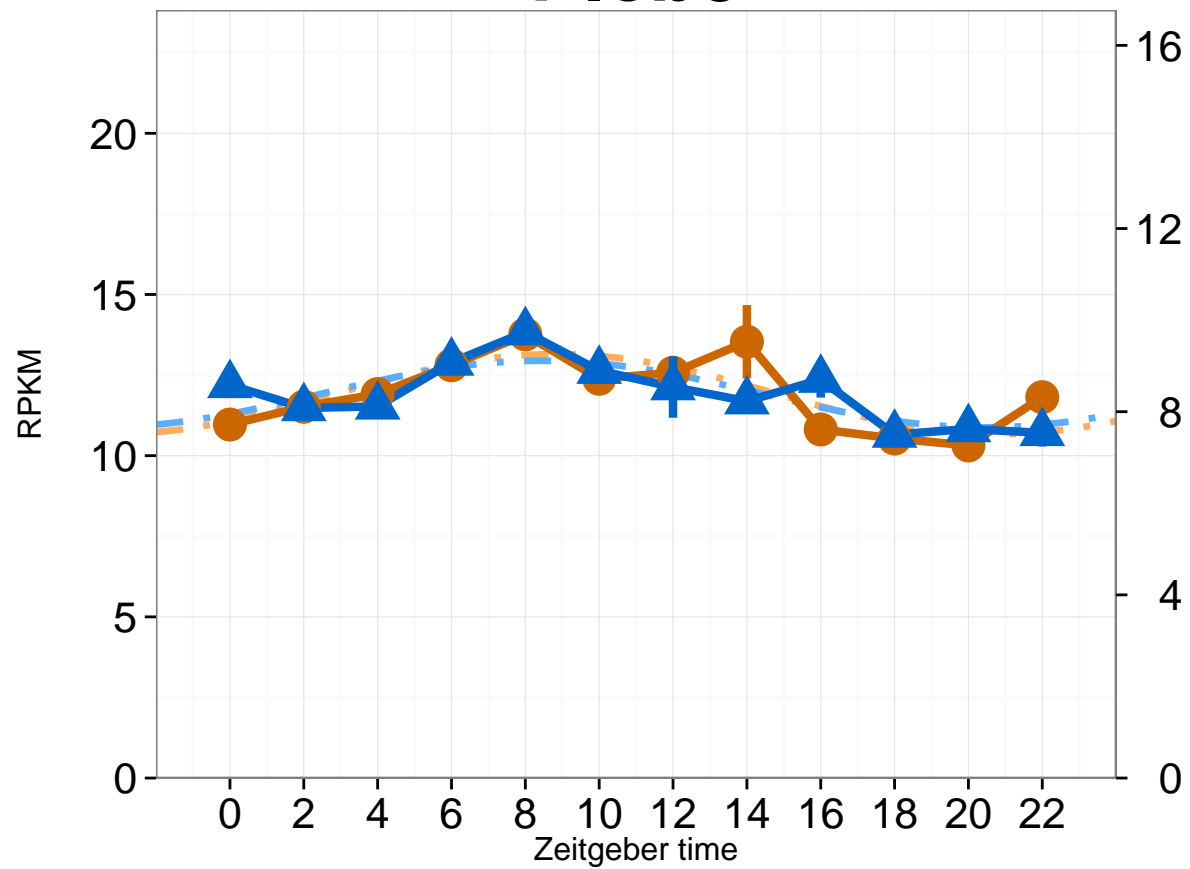

## Plcb3

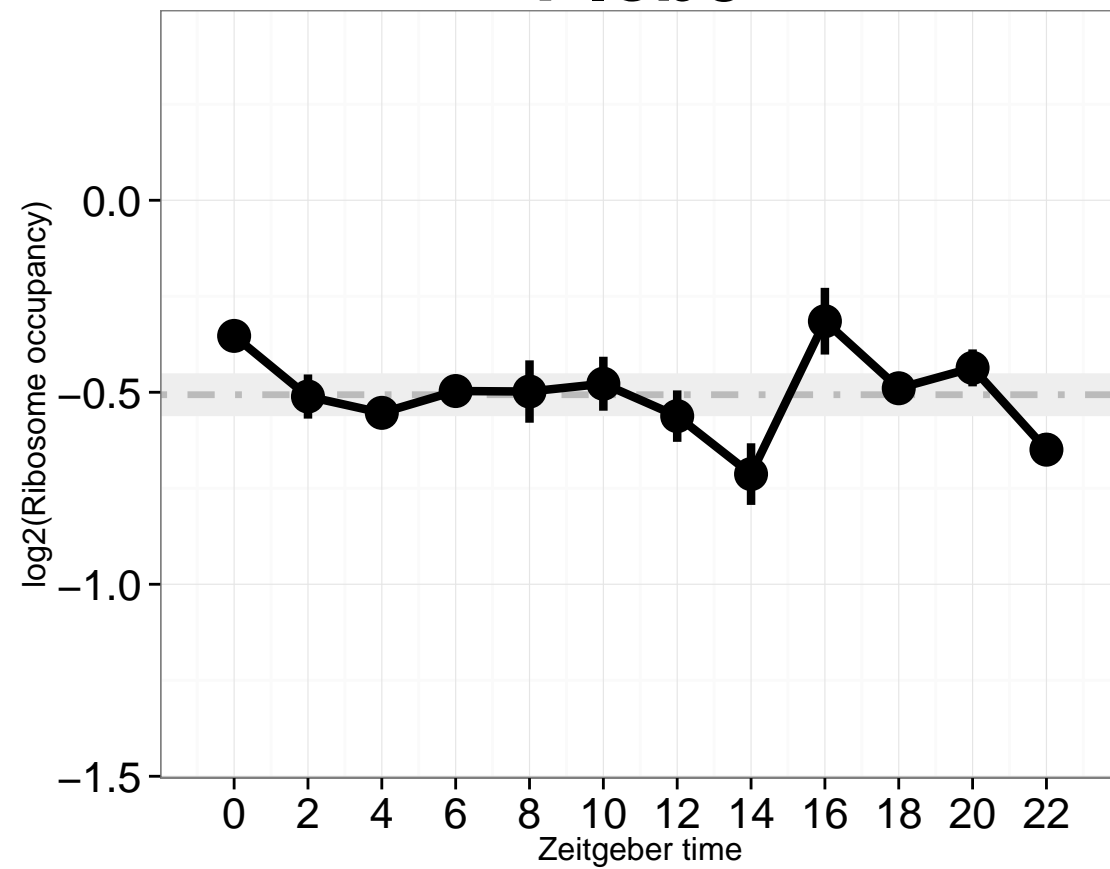

Supplement: Supplementary file 9042 [file 1]

## Parp16

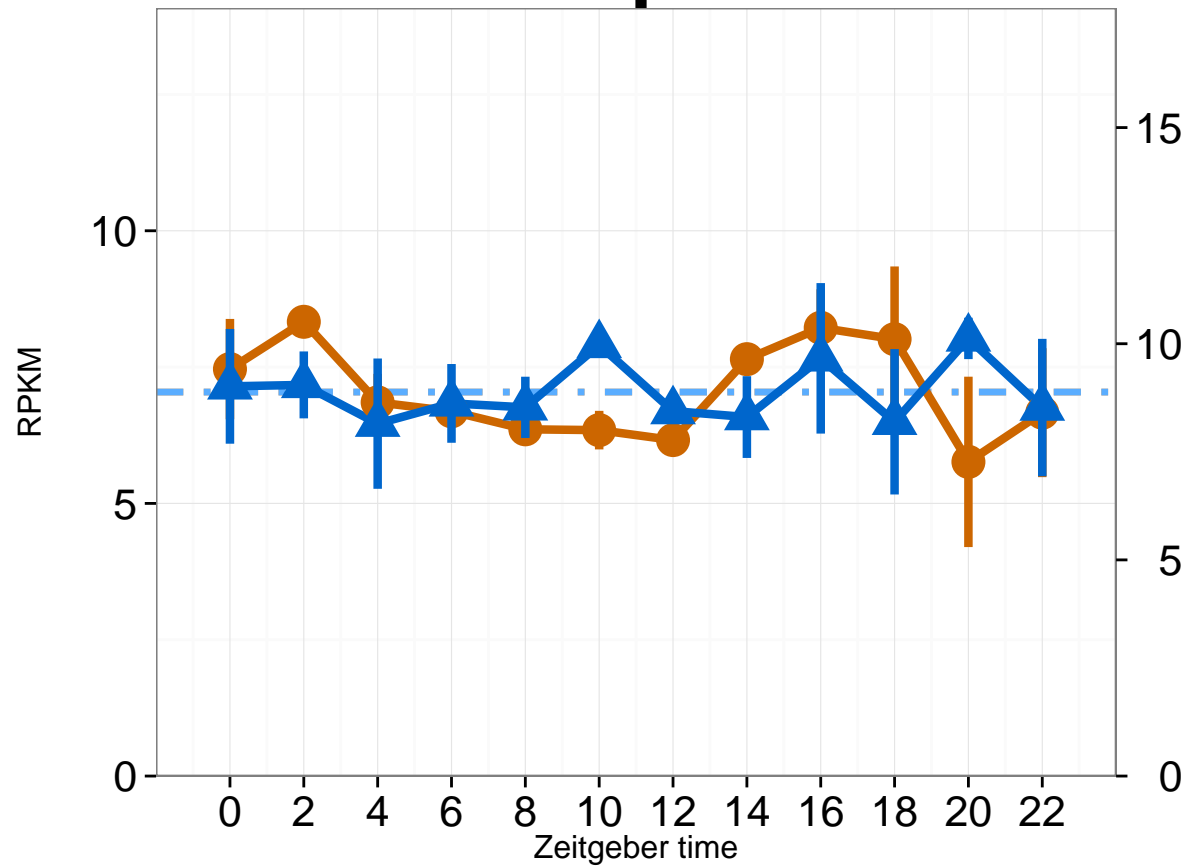

## Parp16

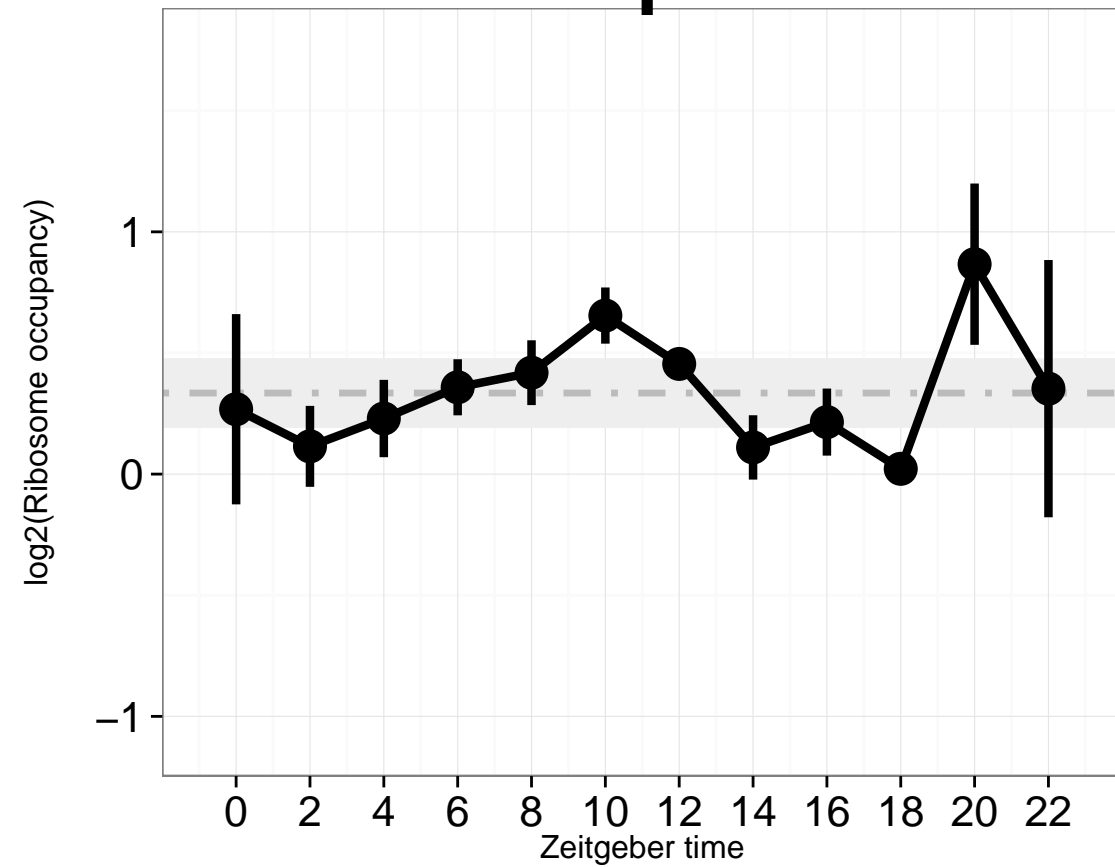

Supplement: Supplementary file 9043 [file 1]

## Sprtn

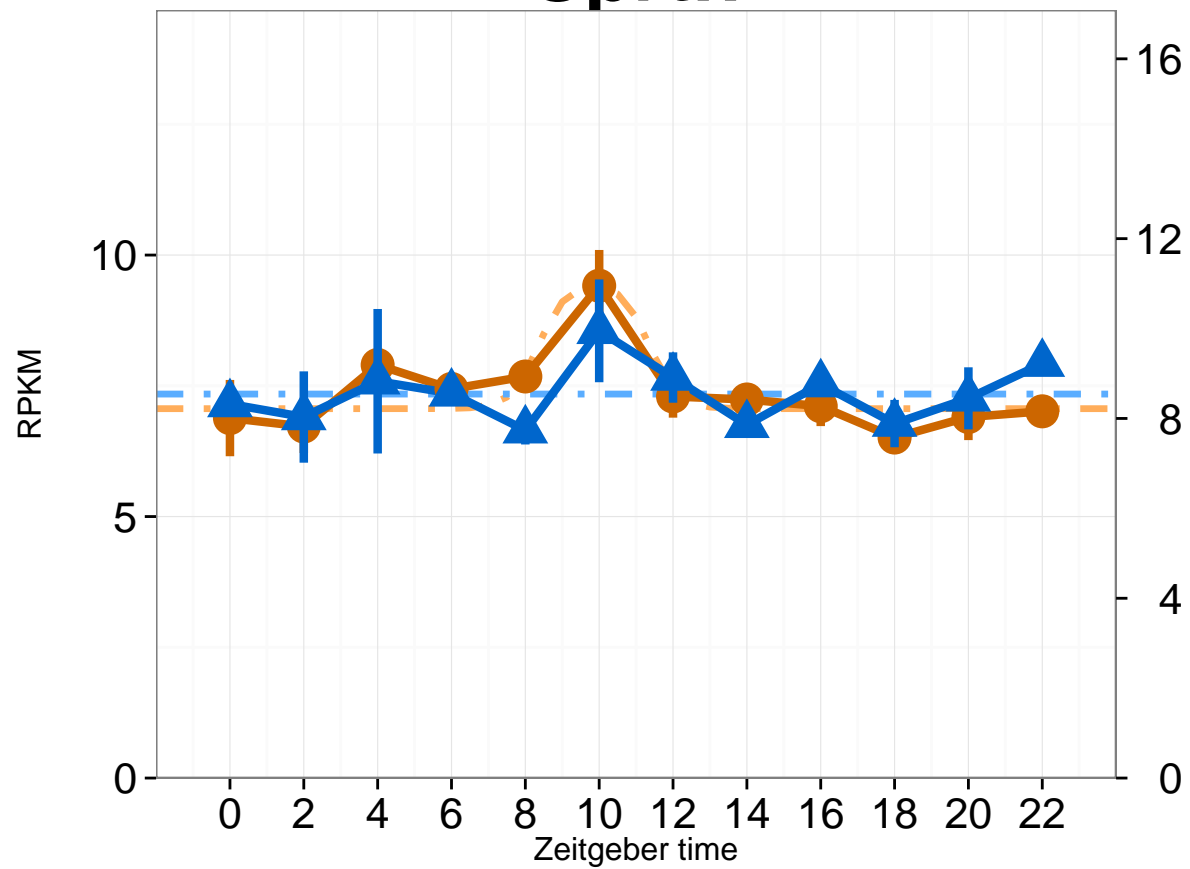

## Sprtn

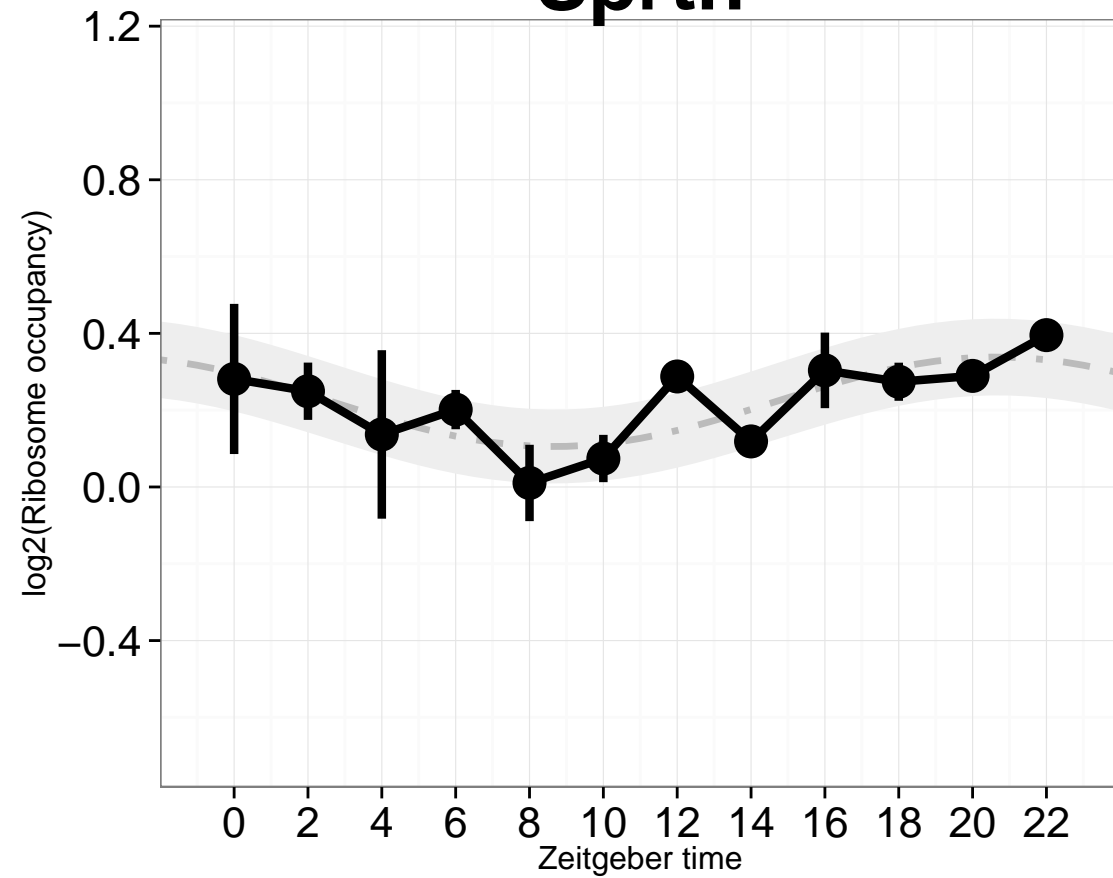

Supplement: Supplementary file 9044 [file 1]

## Gypc TR

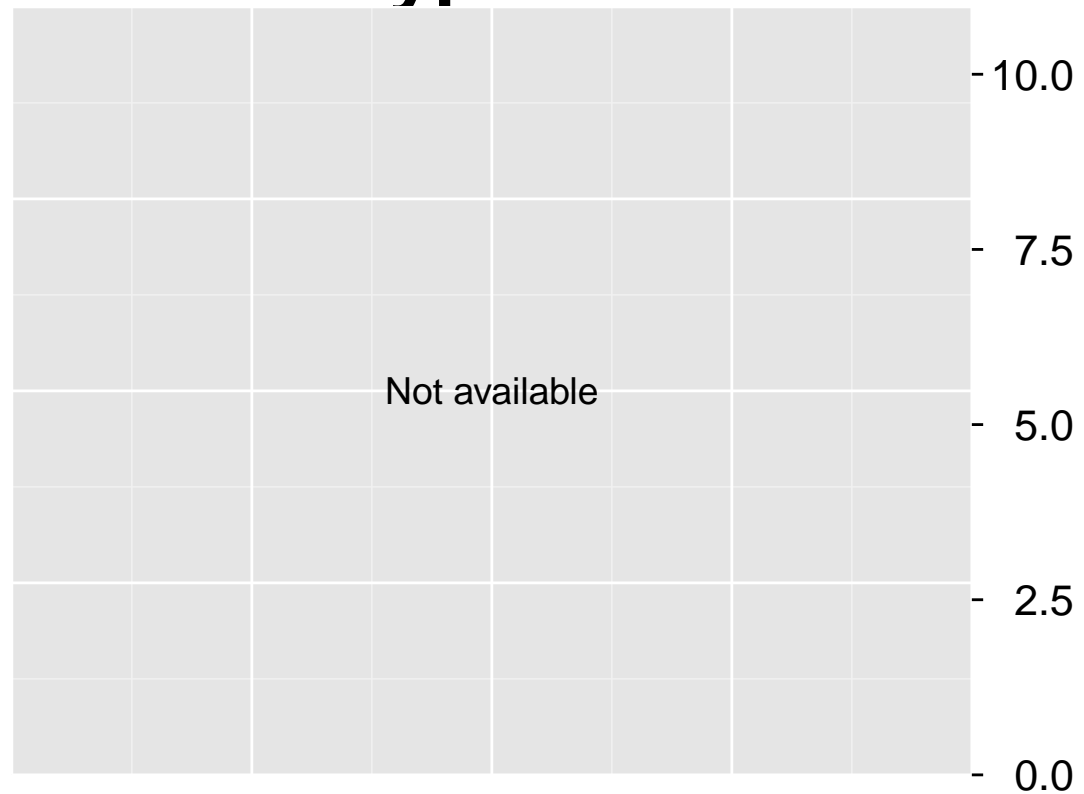

## Gypc log2(Ribosome occupancy)

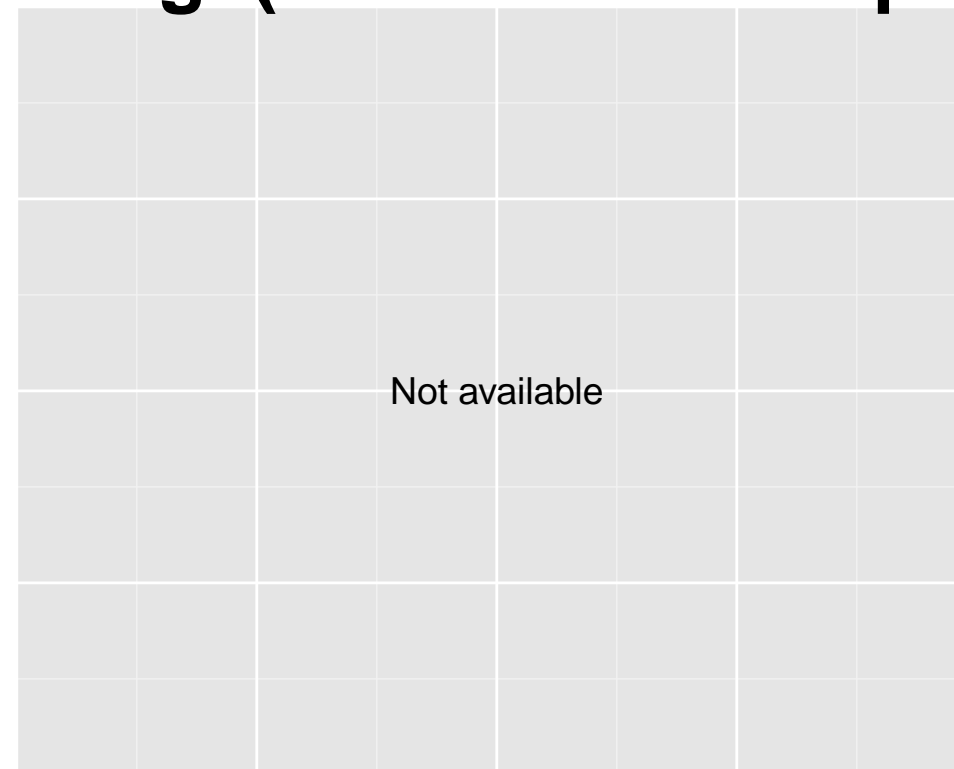

Supplement: Supplementary file 9045 [file 1]

# Pced1b

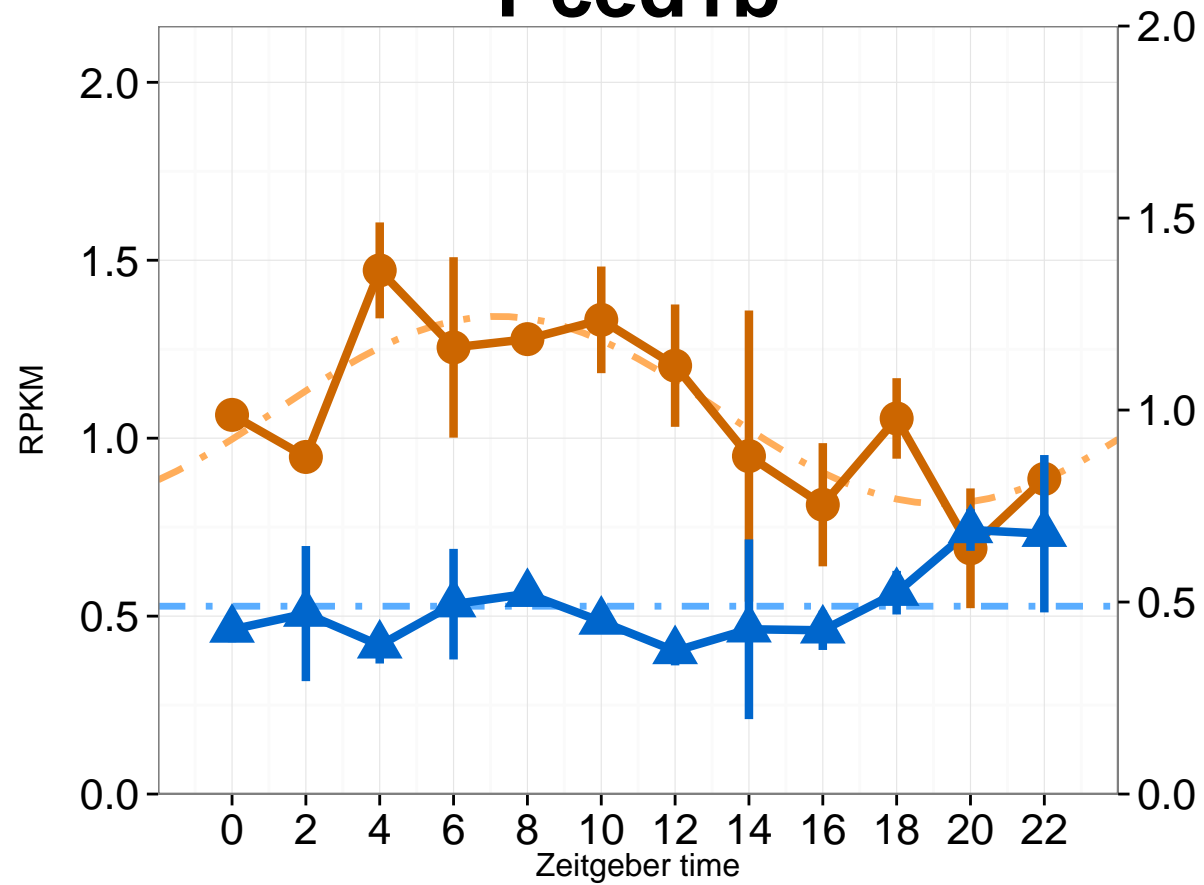

# Pced1b

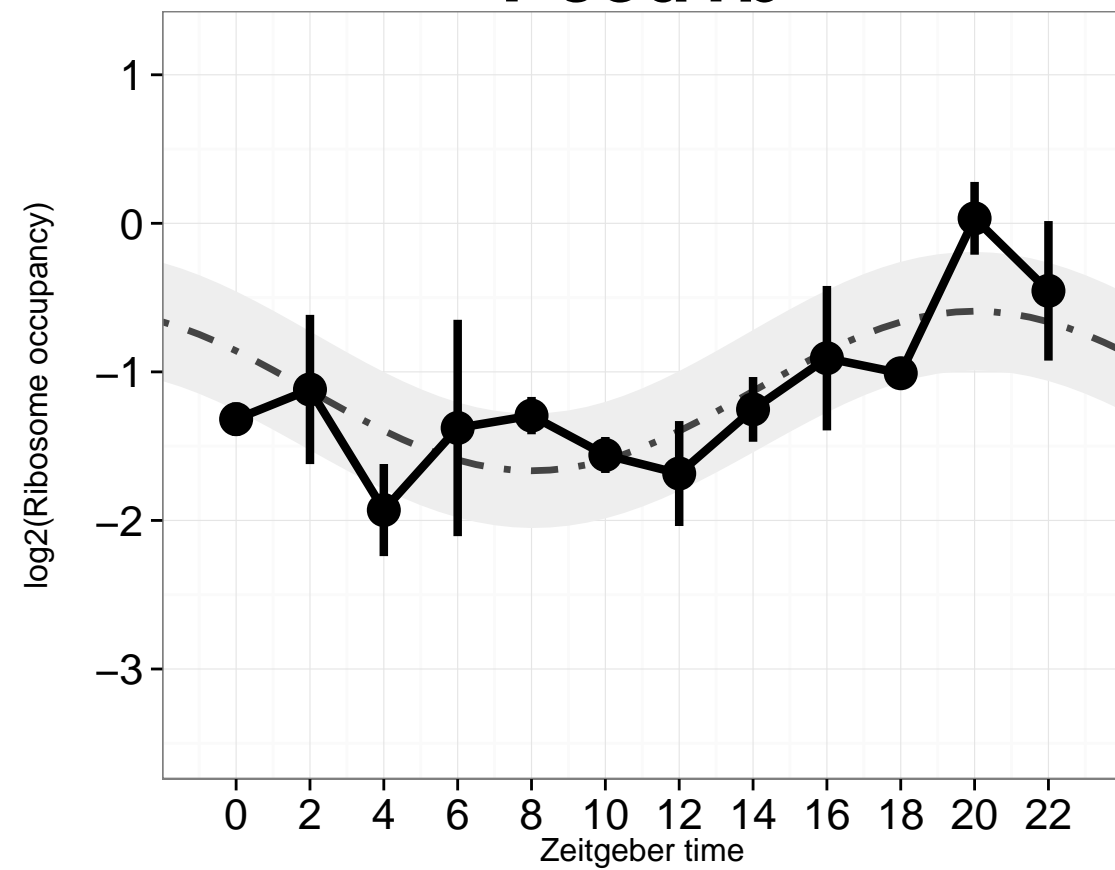

Supplement: Supplementary file 9046 [file 1]

# Setbp1

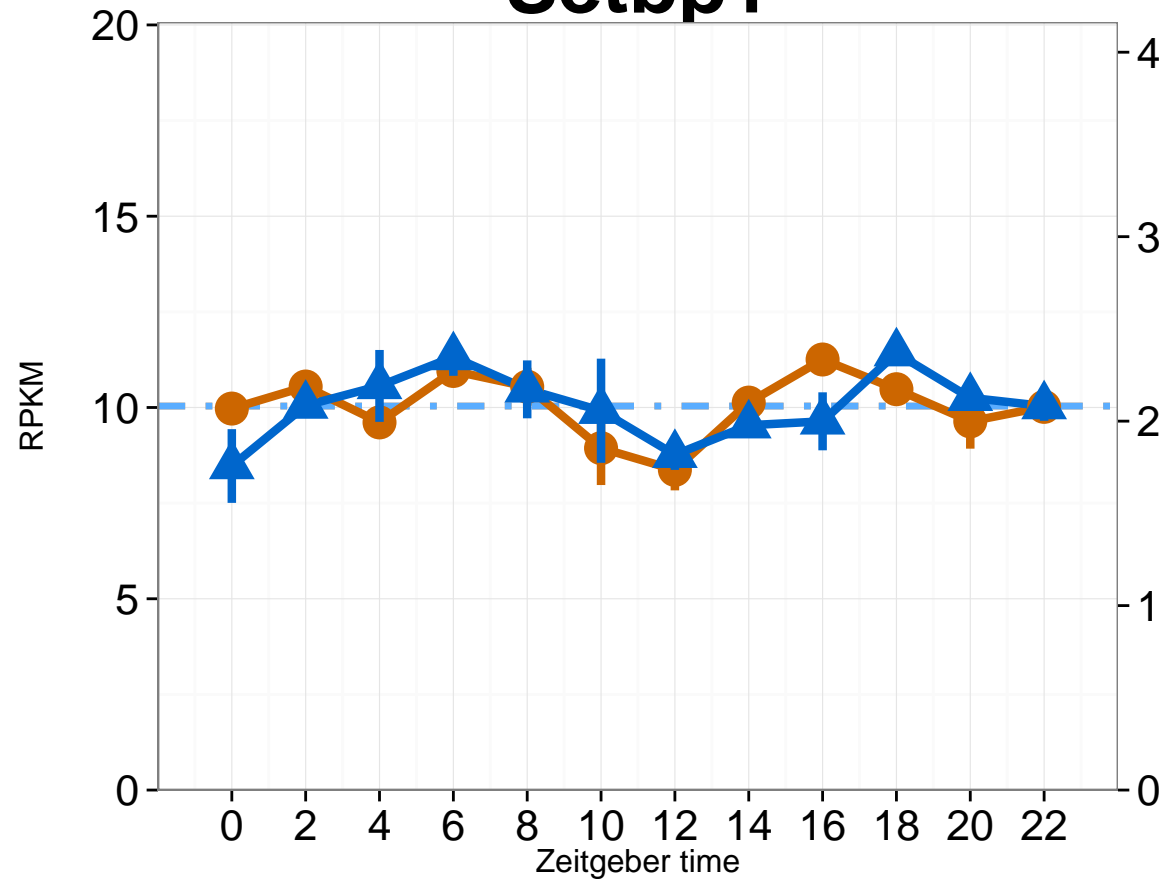

# Setbp1

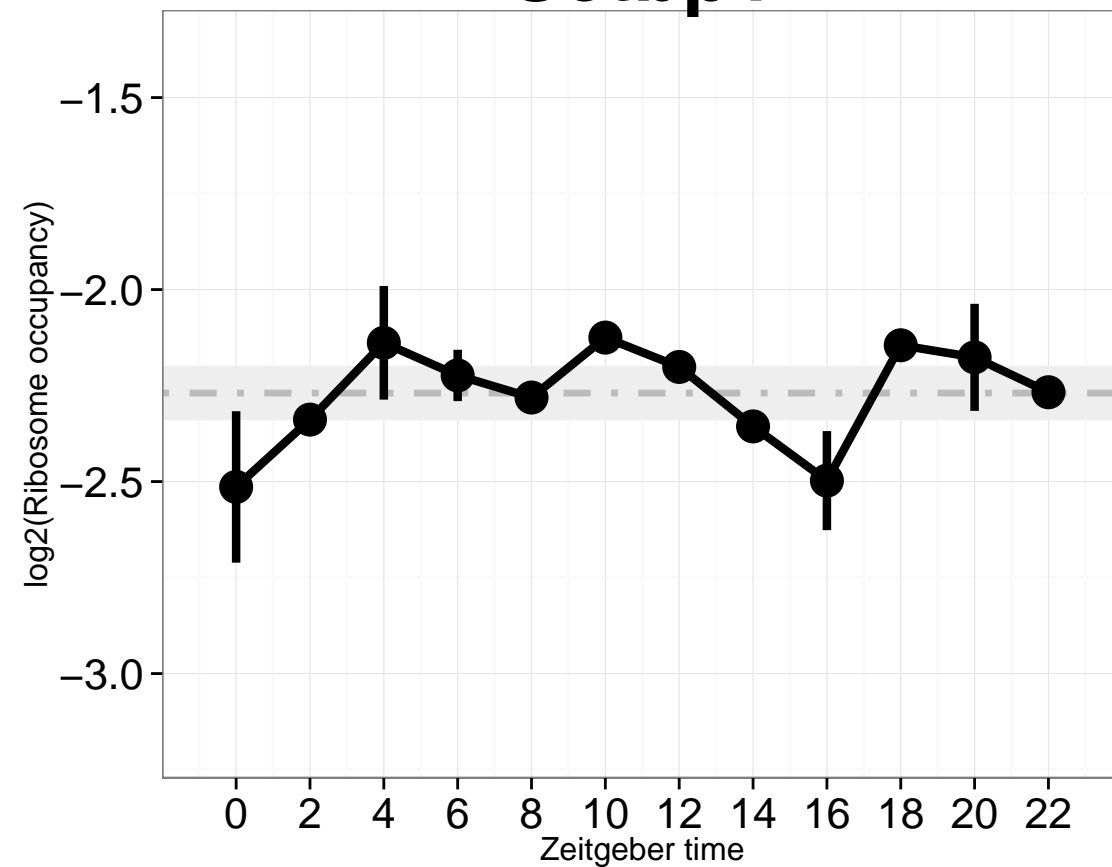

Supplement: Supplementary file 9047 [file 1]

## Gopc

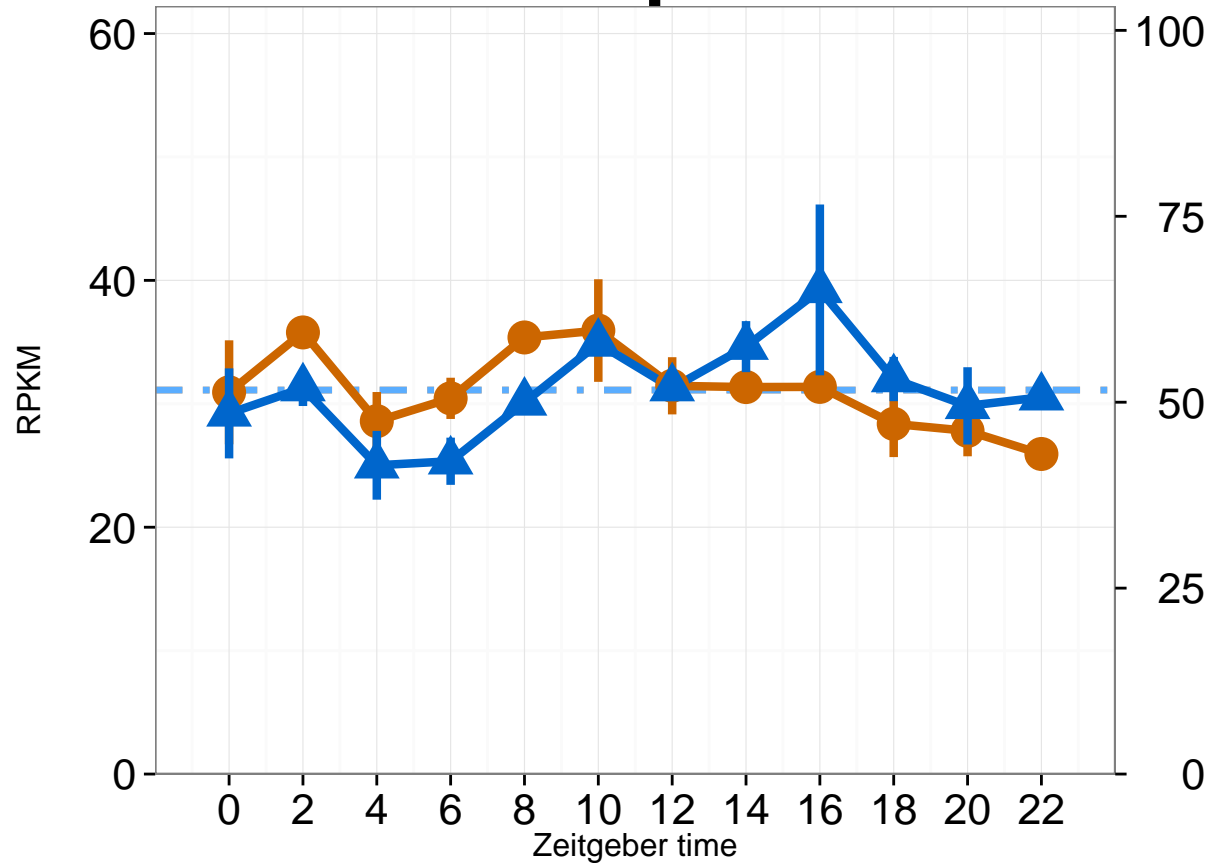

## Gopc

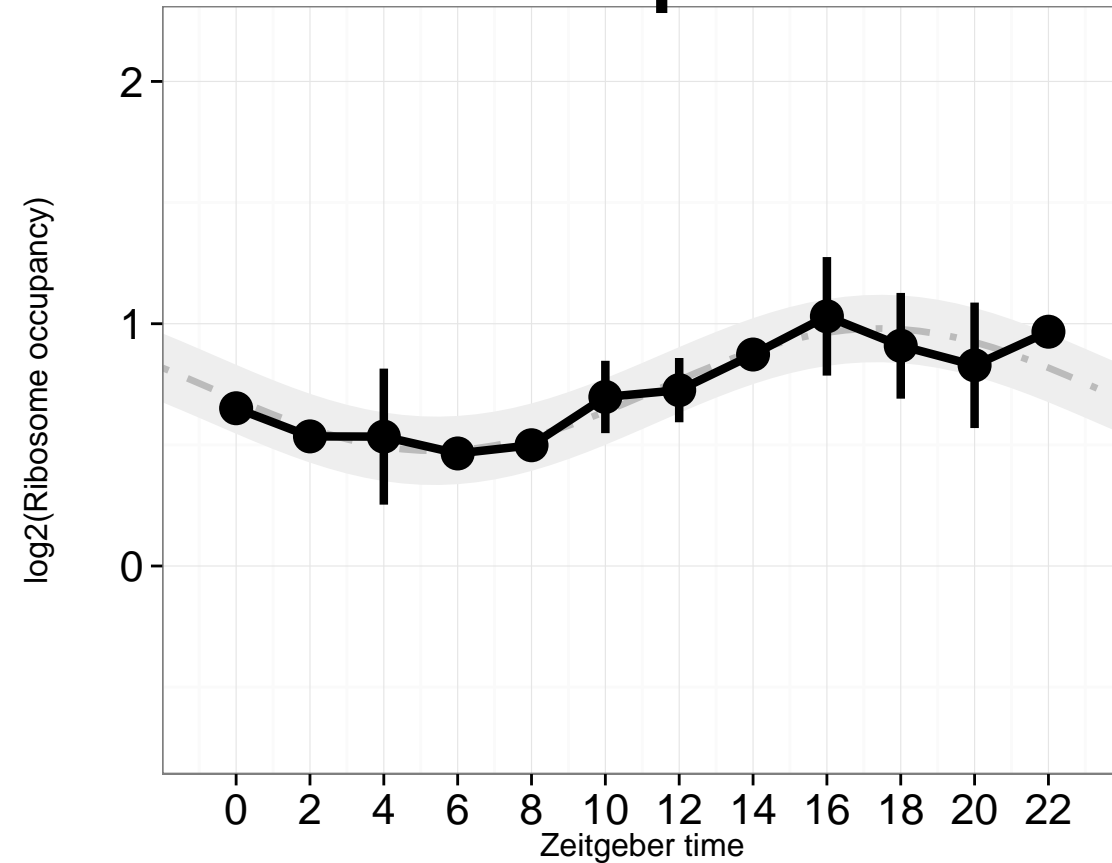

Supplement: Supplementary file 9048 [file 1]

## Atpaf1

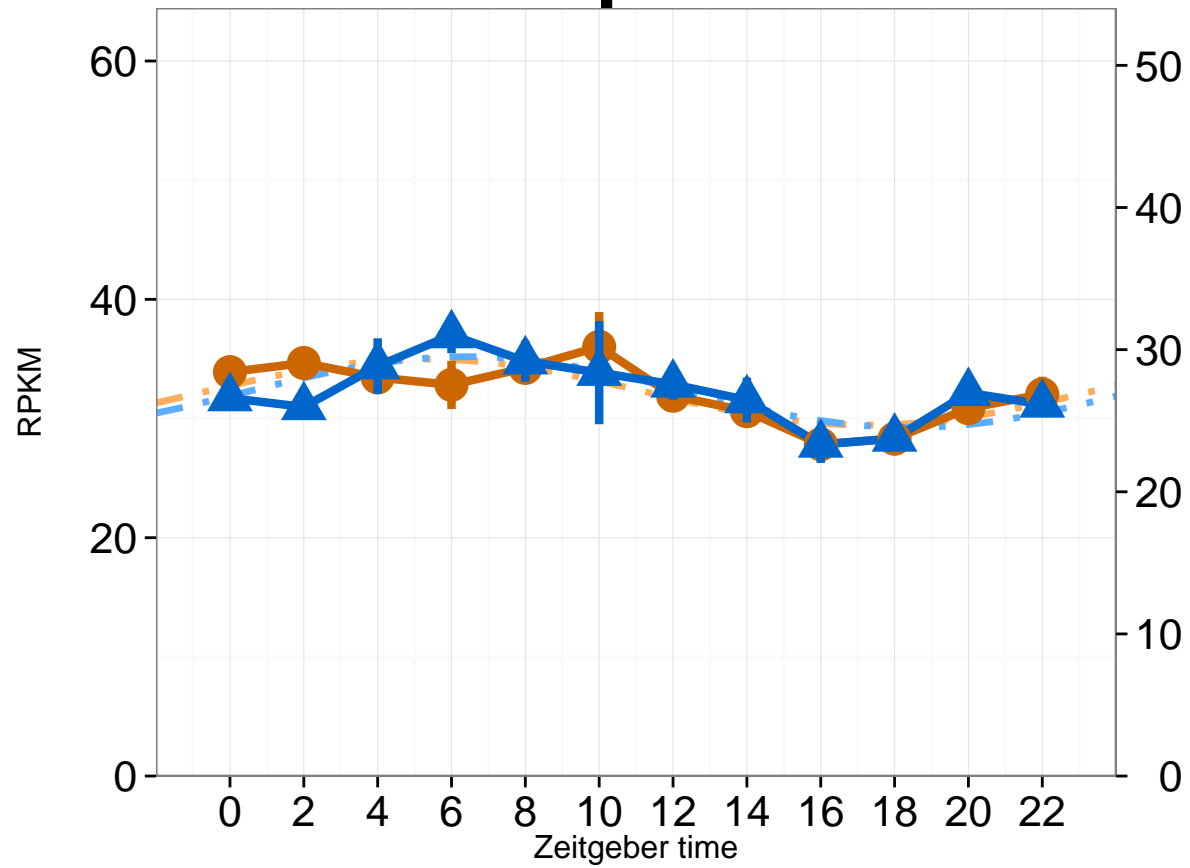

## Atpaf1

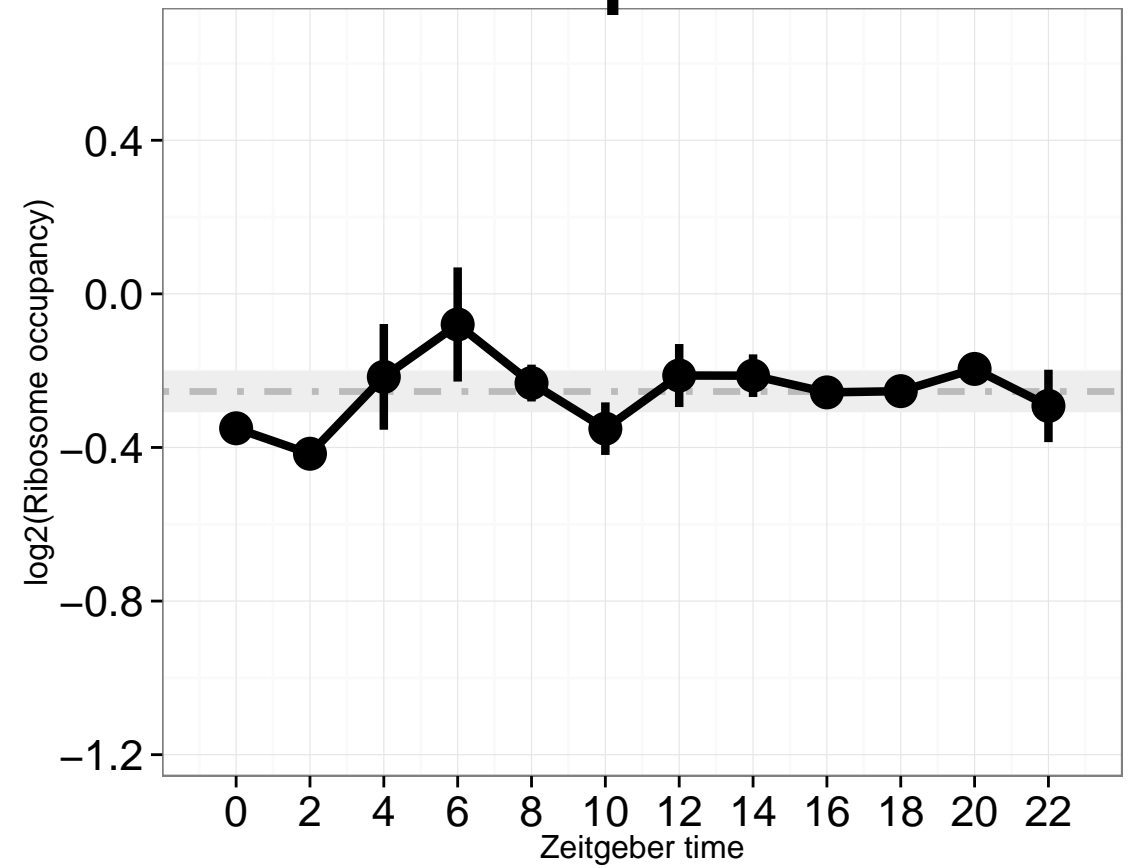

Supplement: Supplementary file 9049 [file 1]

## Nagk

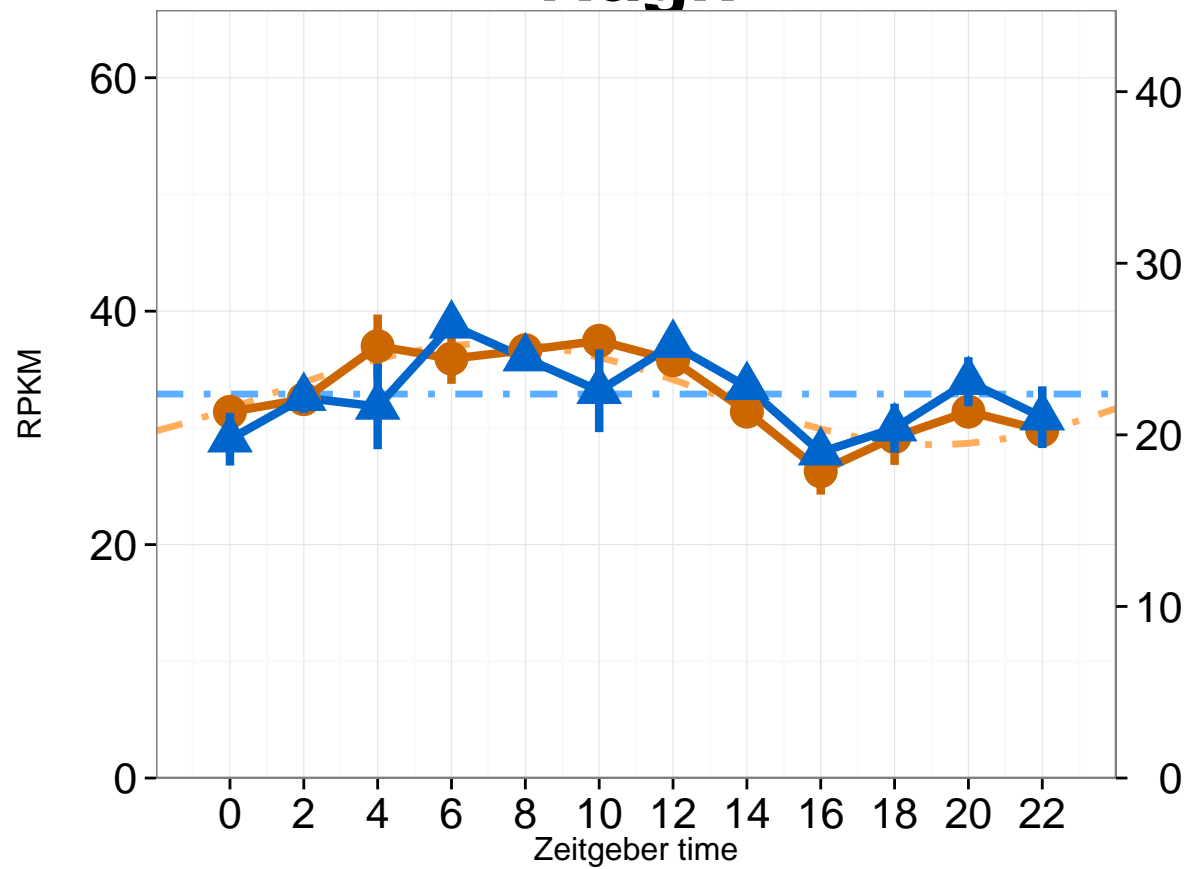

## Nagk

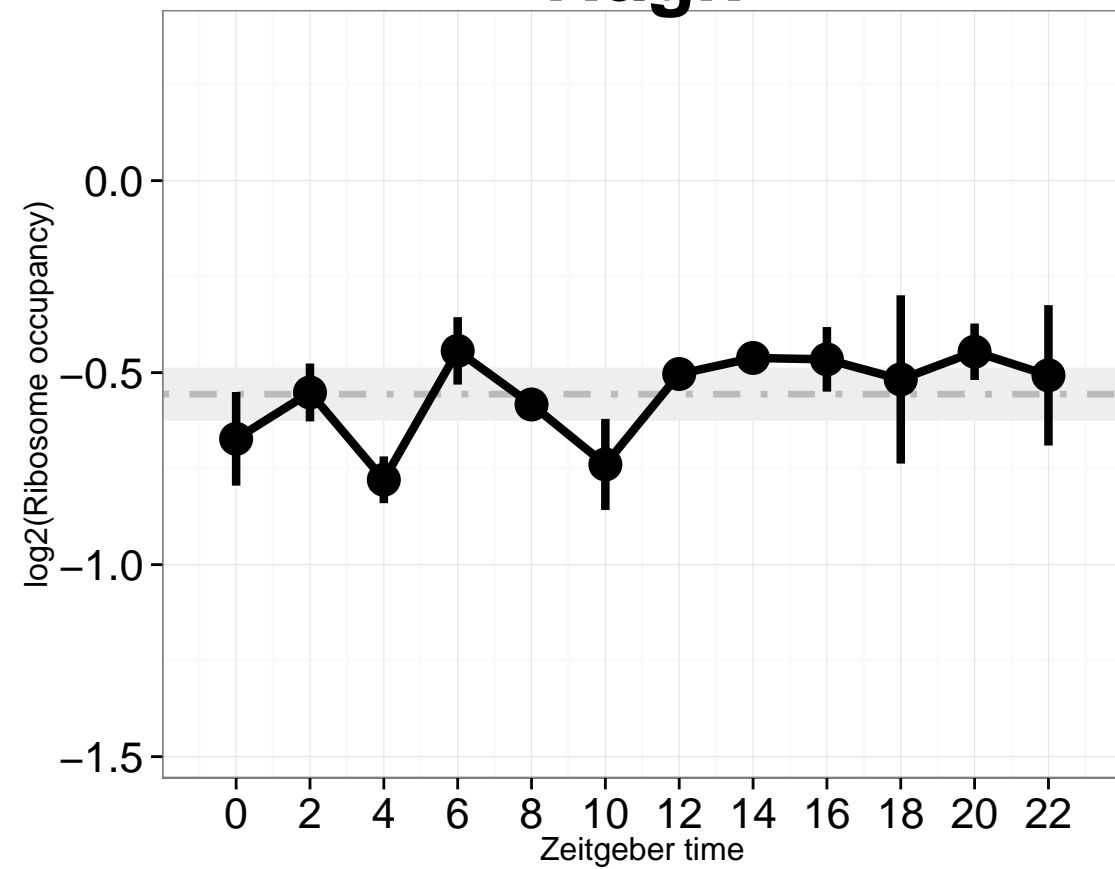

Supplement: Supplementary file 9050 [file 1]

## Serinc5

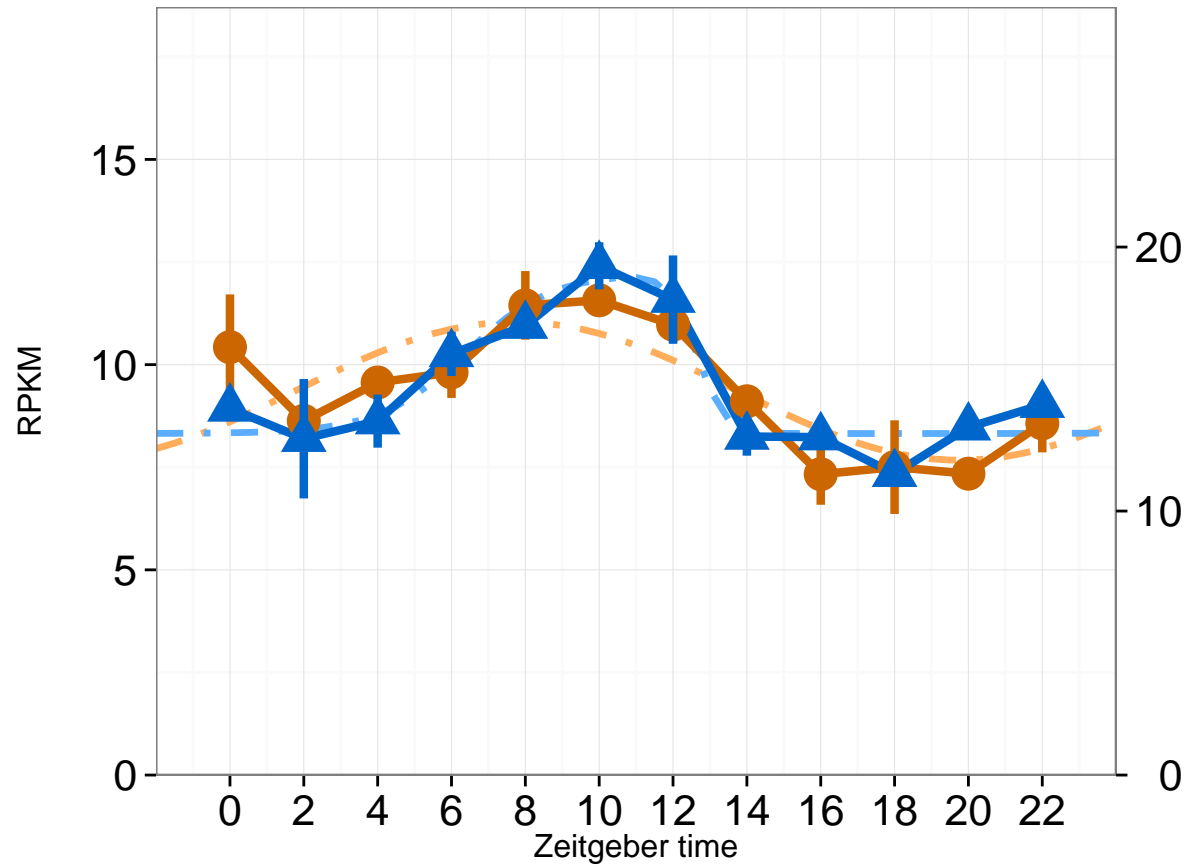

## Serinc5

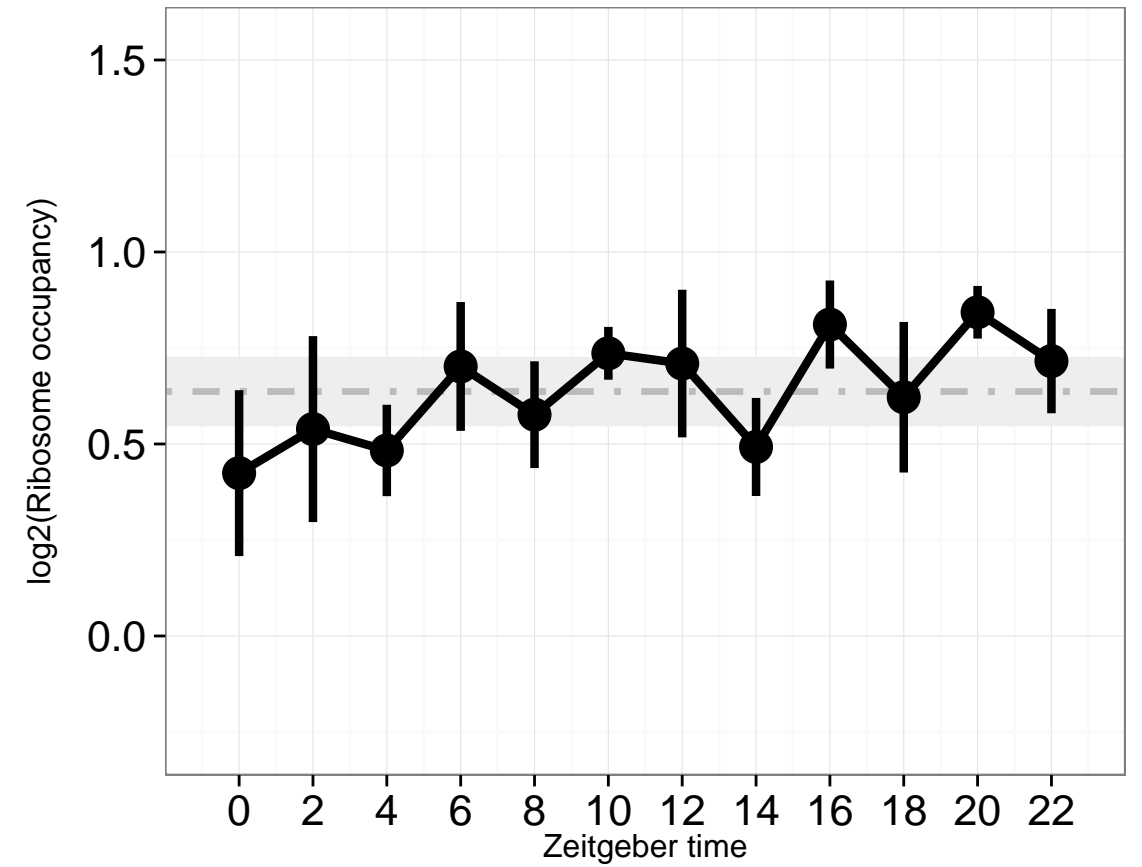

Supplement: Supplementary file 9052 [file 1]

# Ppfibp2

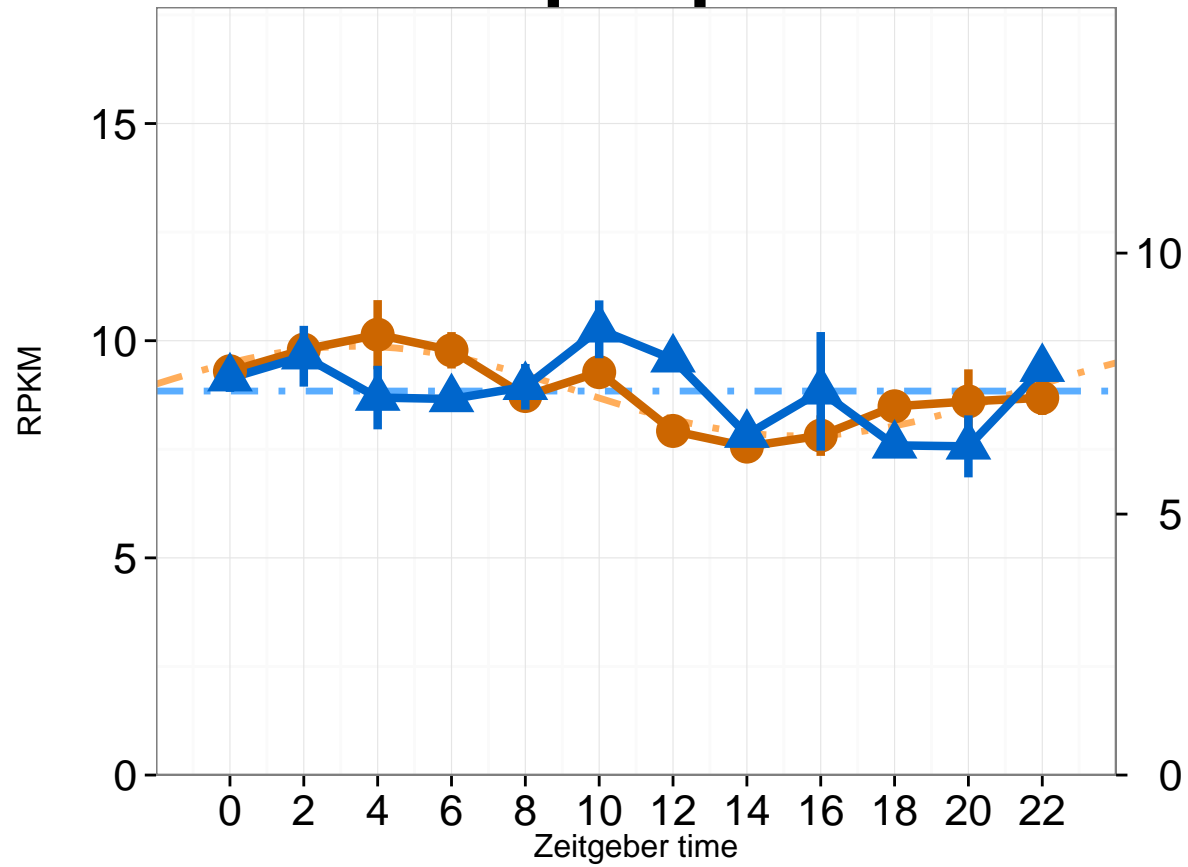

# Ppfibp2

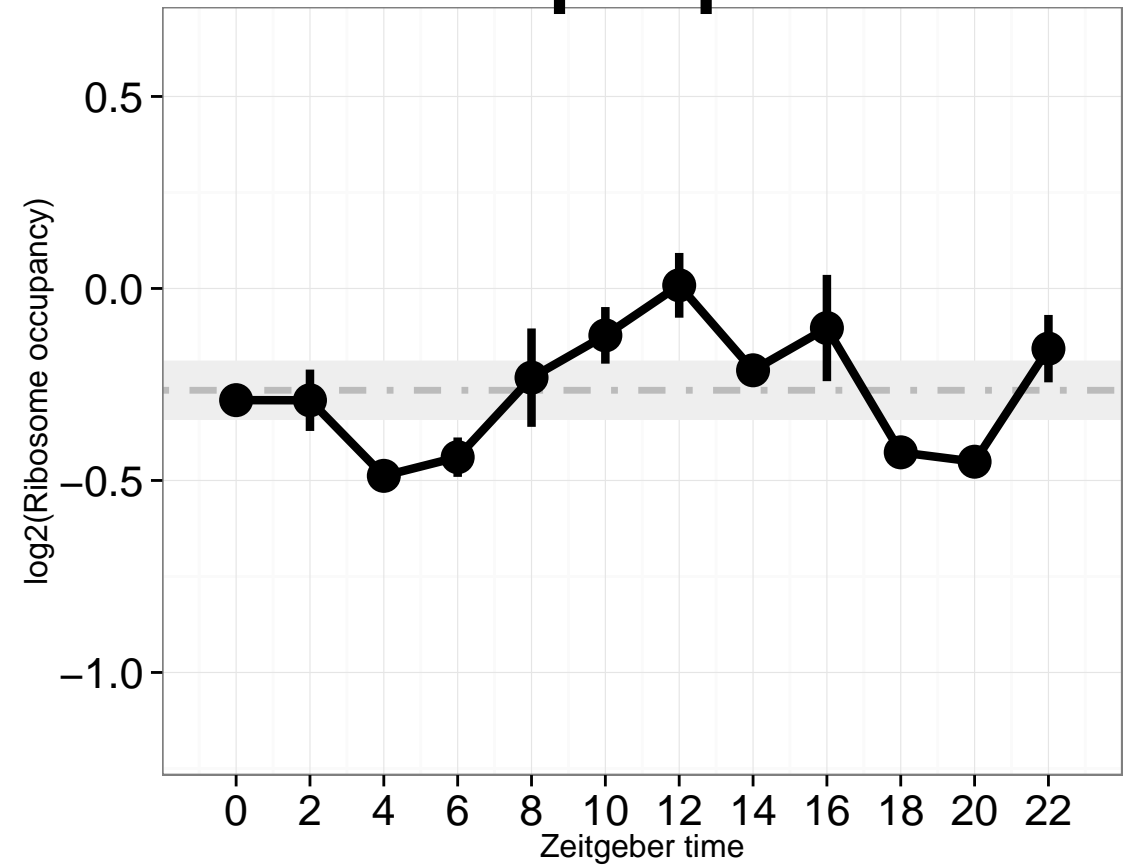

Supplement: Supplementary file 9053 [file 1]

## Orai1

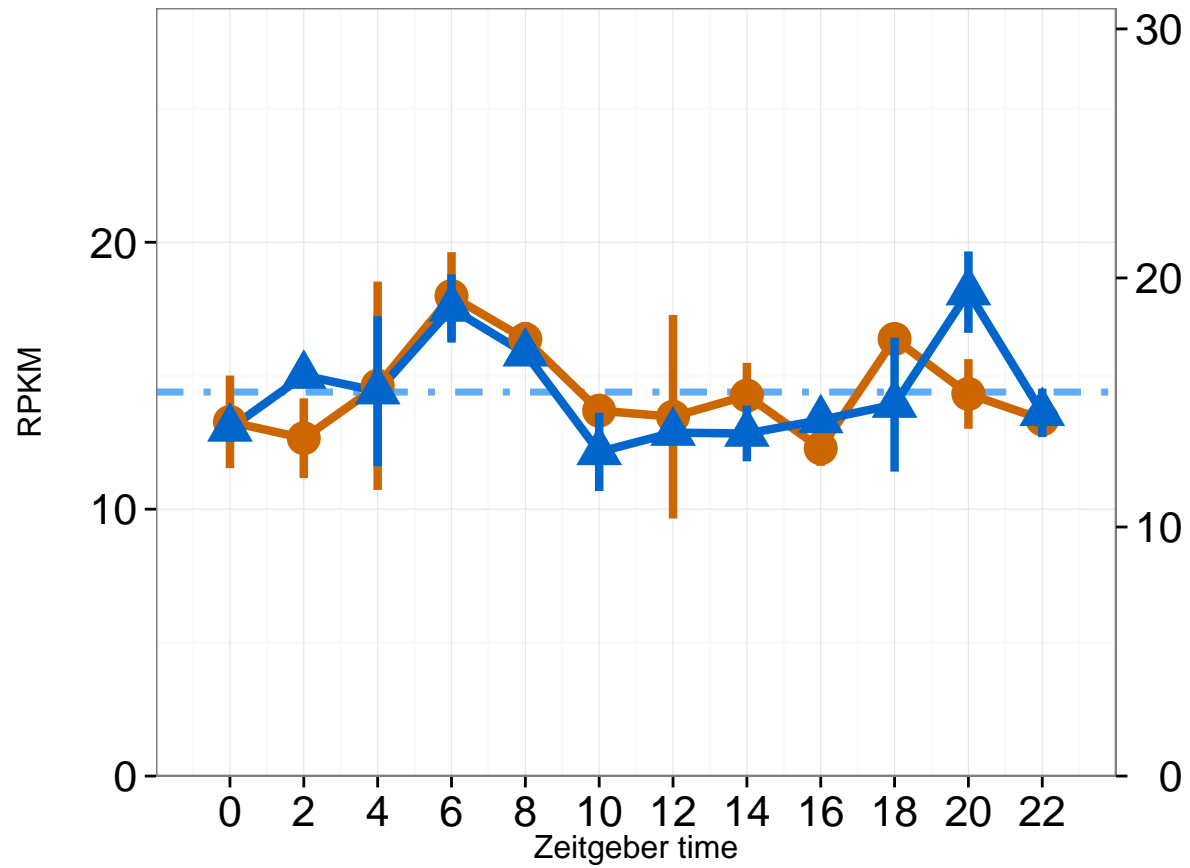

## Orai1

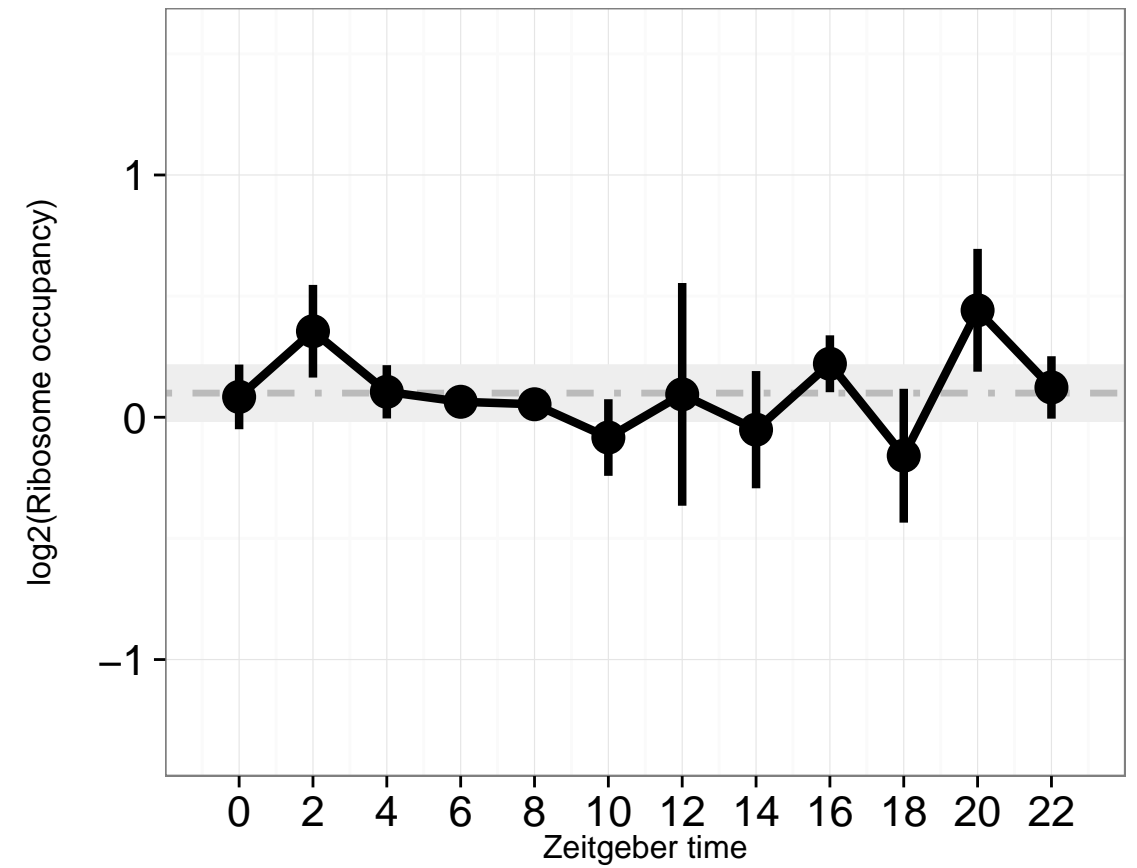

Supplement: Supplementary file 9054 [file 1]

# Zw10

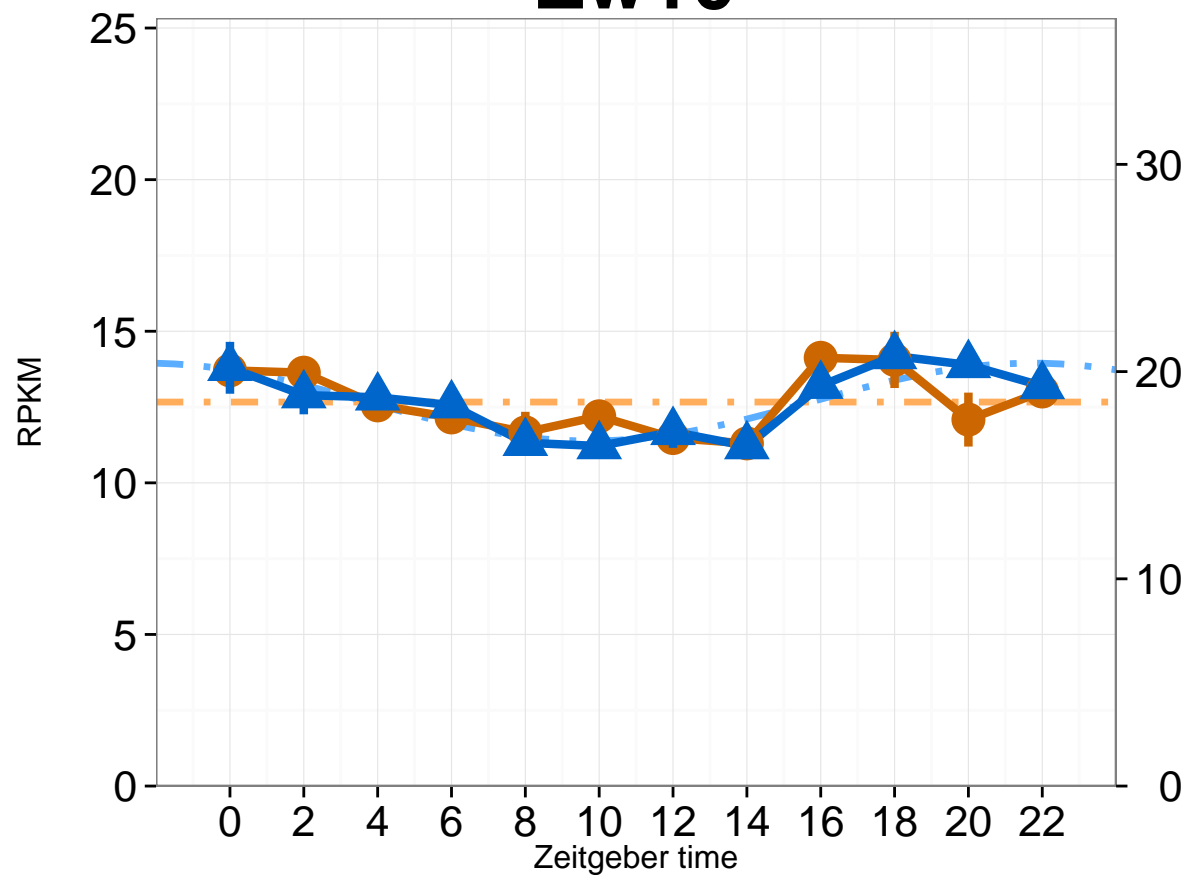

# Zw10

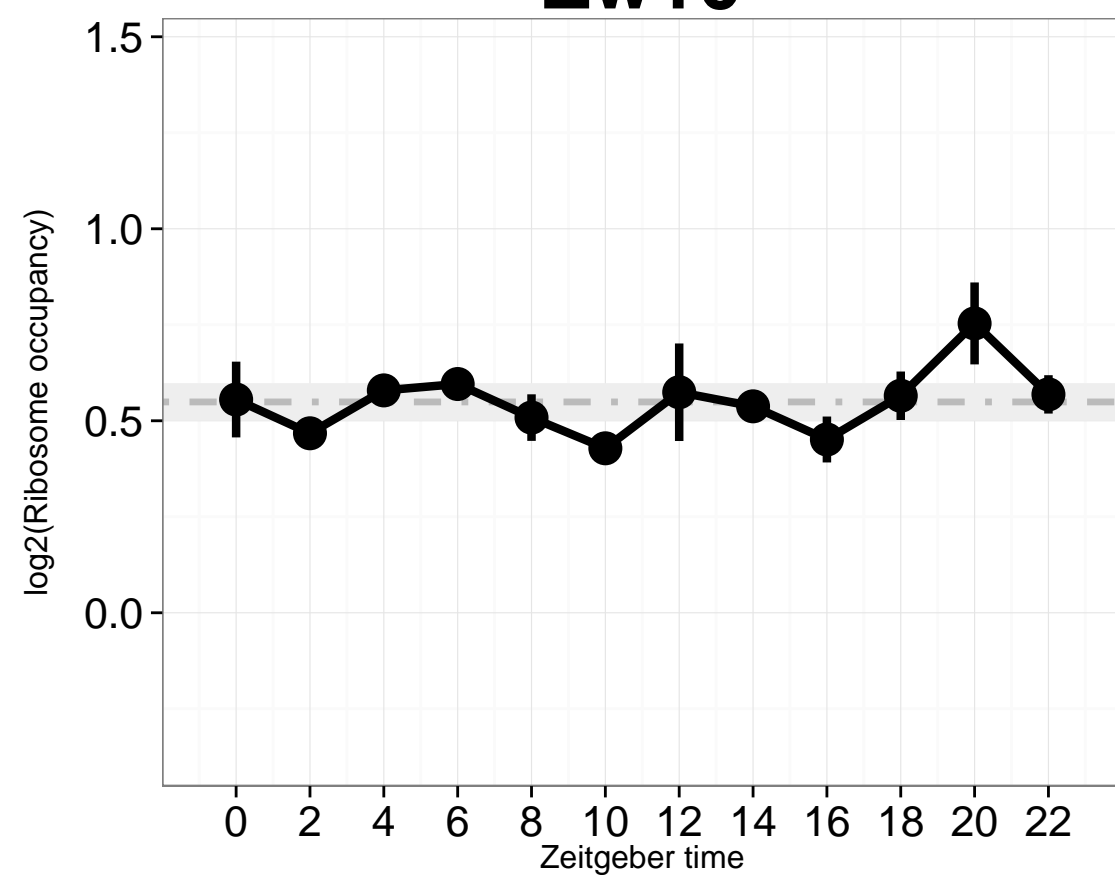

Supplement: Supplementary file 9055 [file 1]

## Cd248

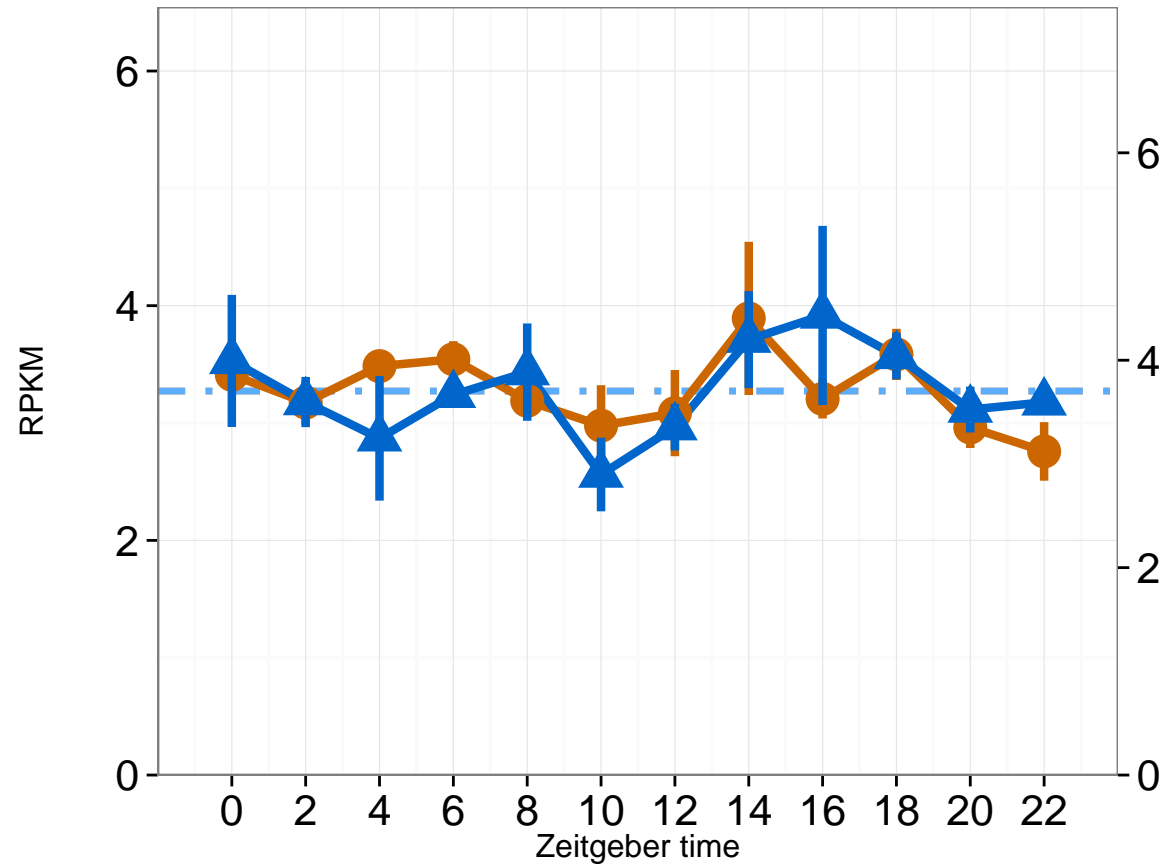

## Cd248

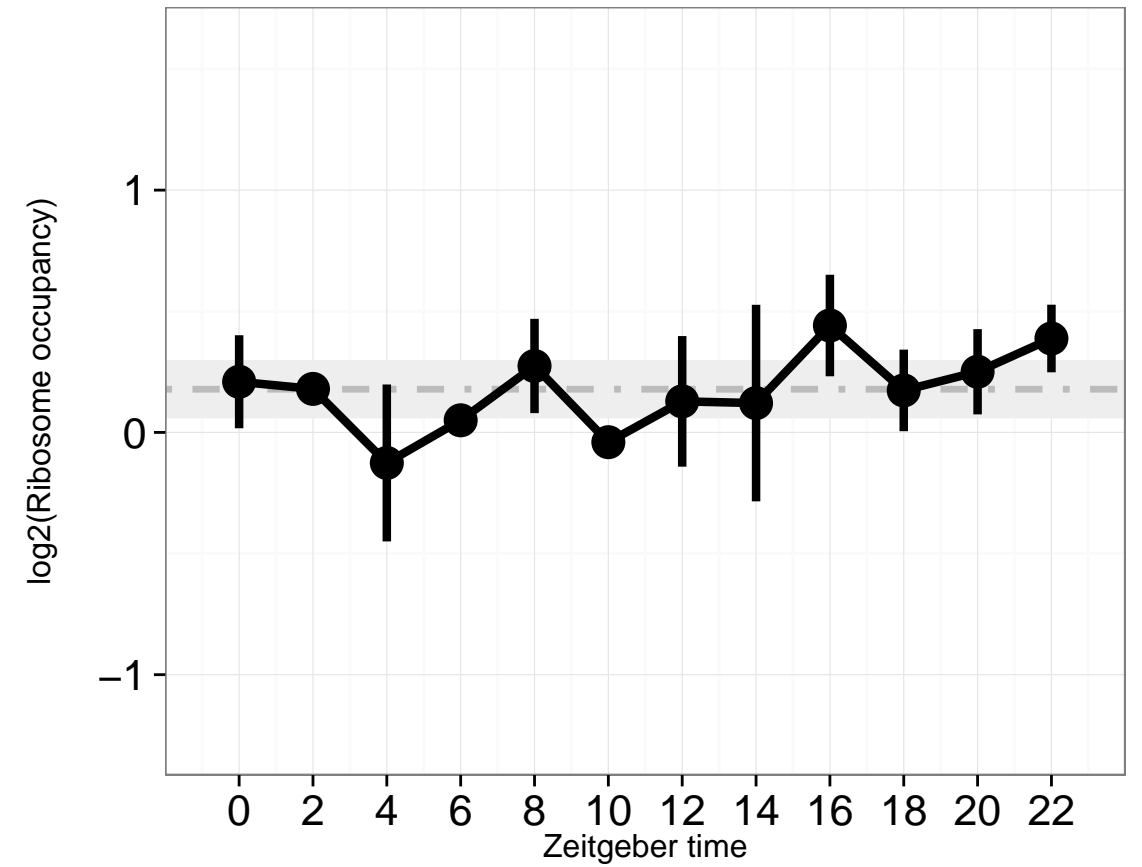

Supplement: Supplementary file 9056 [file 1]

# Mrpl10

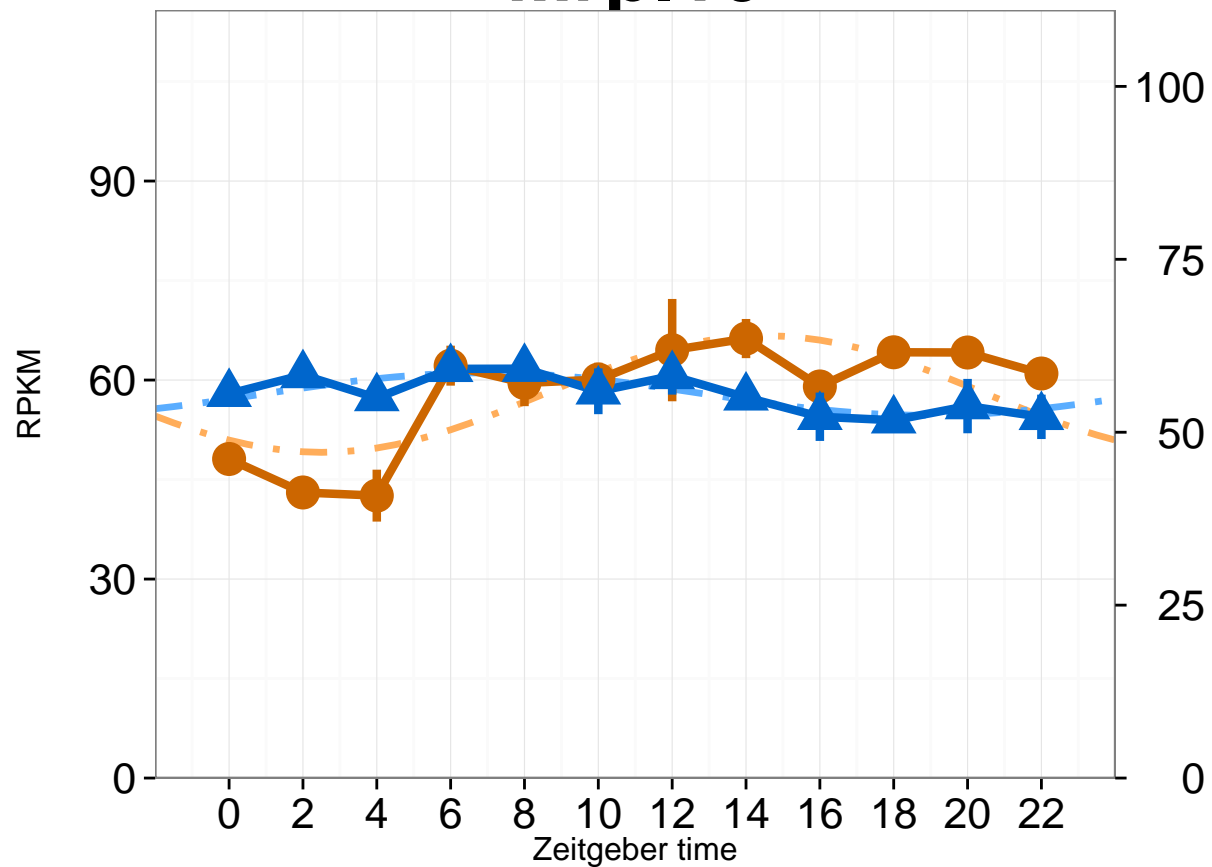

# Mrpl10

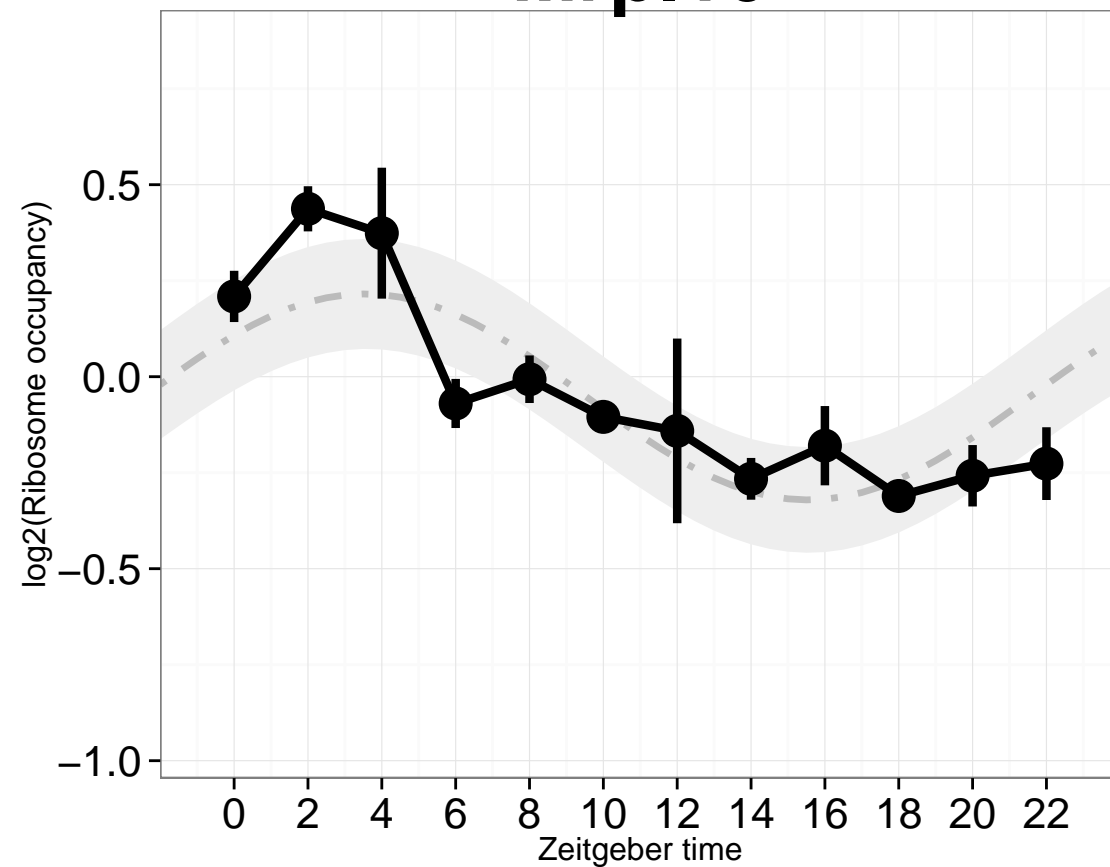

Supplement: Supplementary file 9057 [file 1]

# Gp2

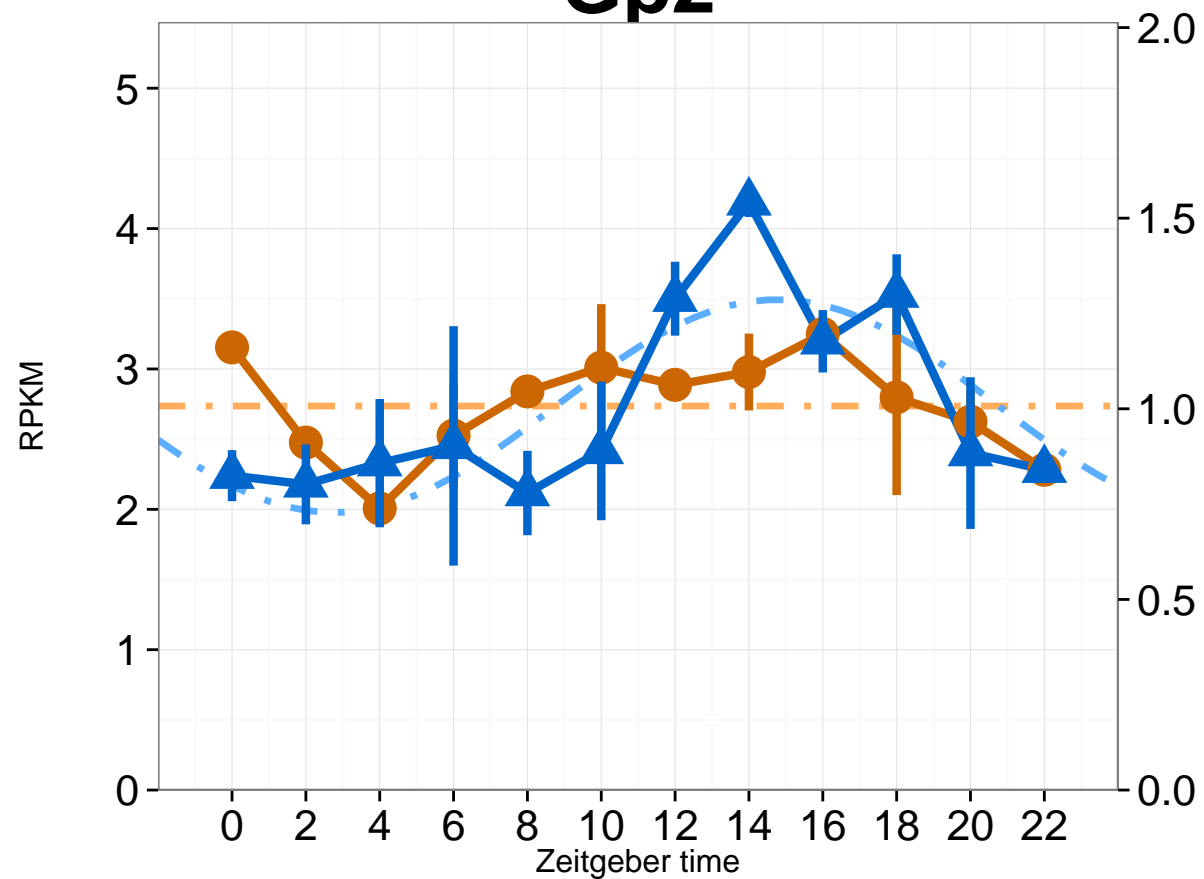

# Gp2

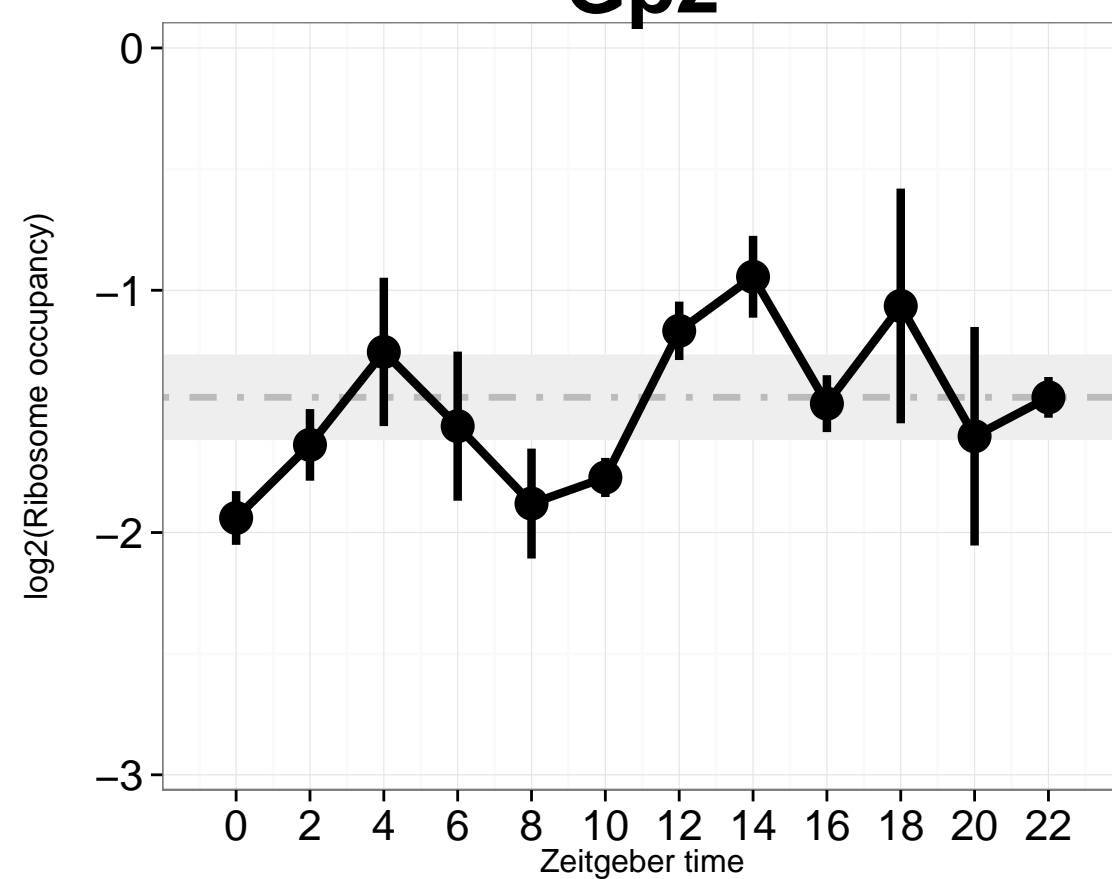

Supplement: Supplementary file 9058 [file 1]

# Trim14

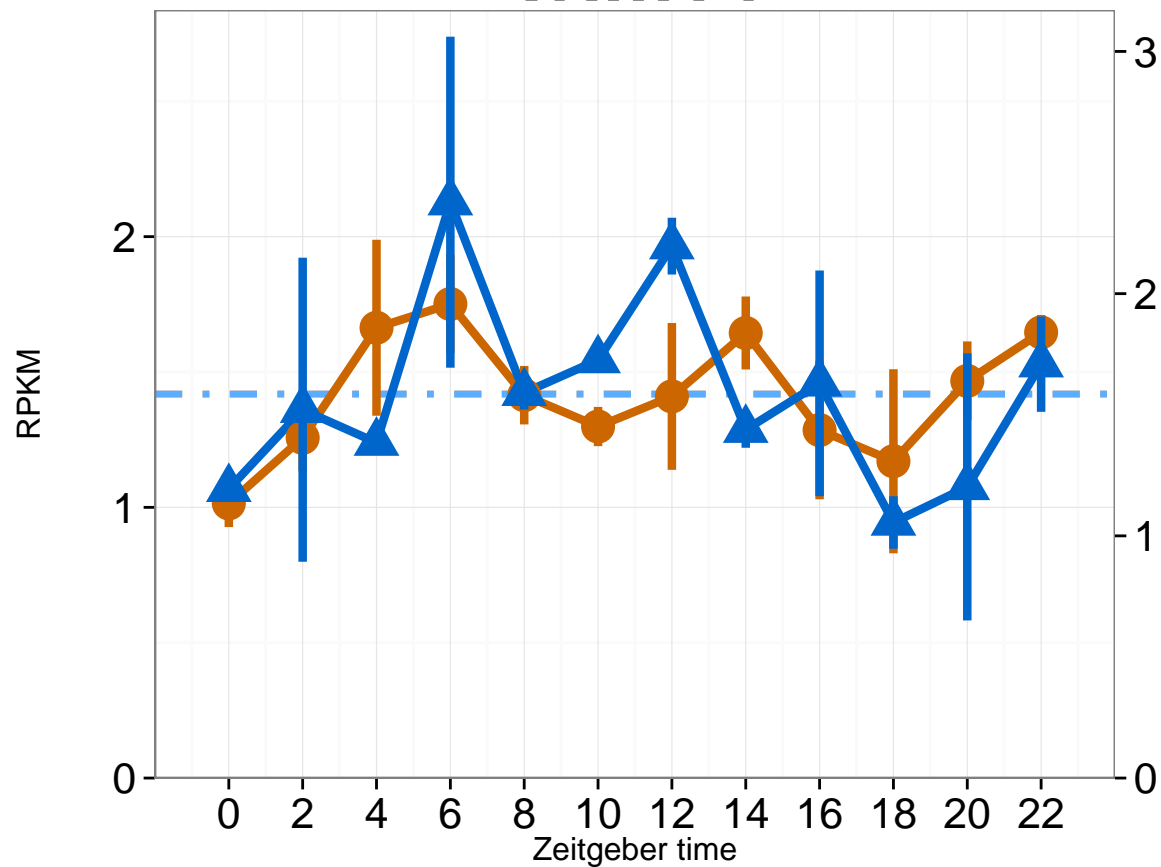

# Trim14

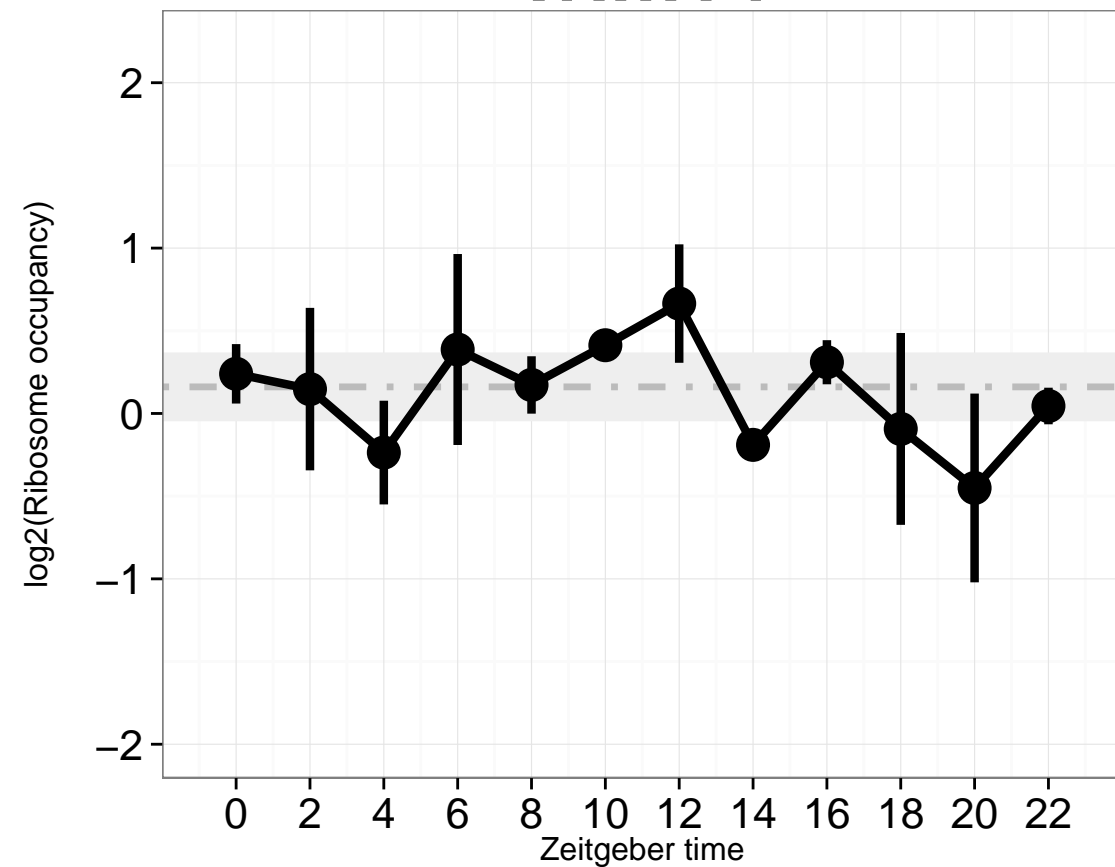

Supplement: Supplementary file 9059 [file 1]

# Kbtbd8

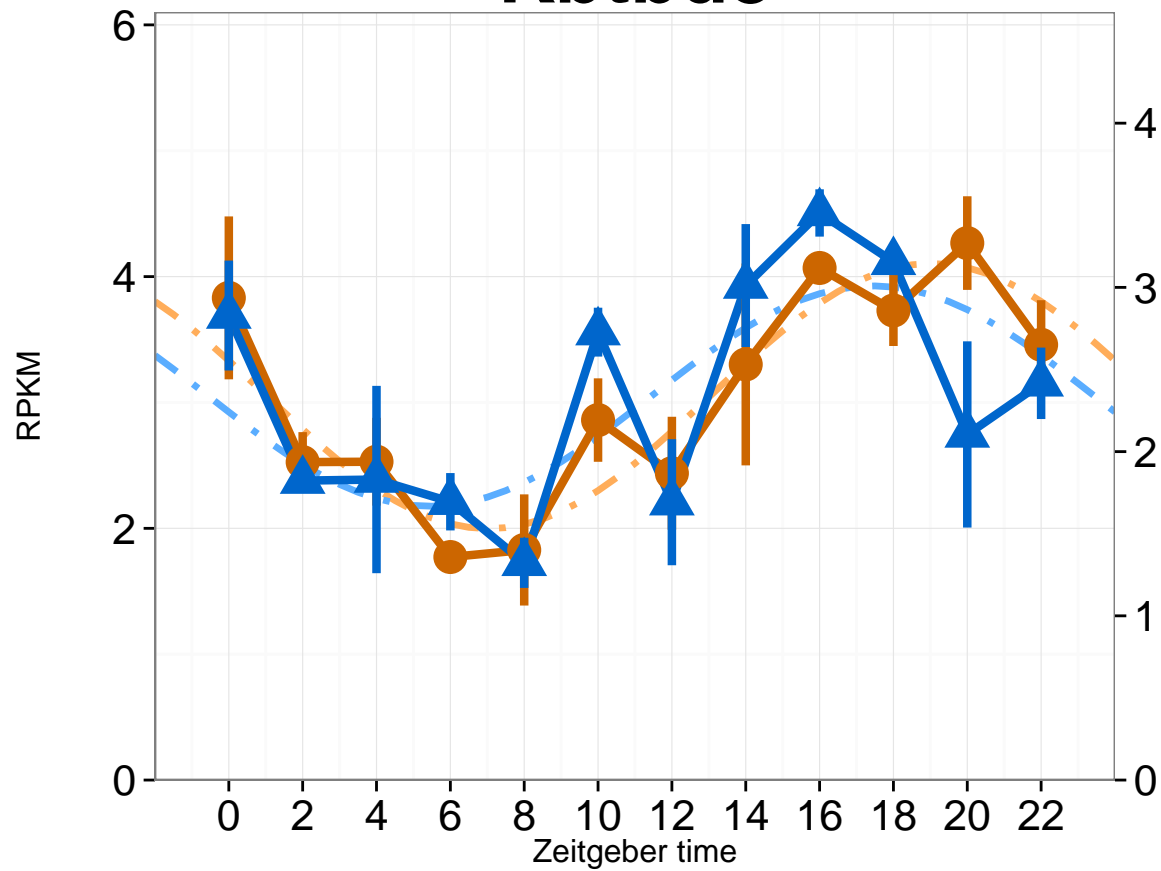

# Kbtbd8

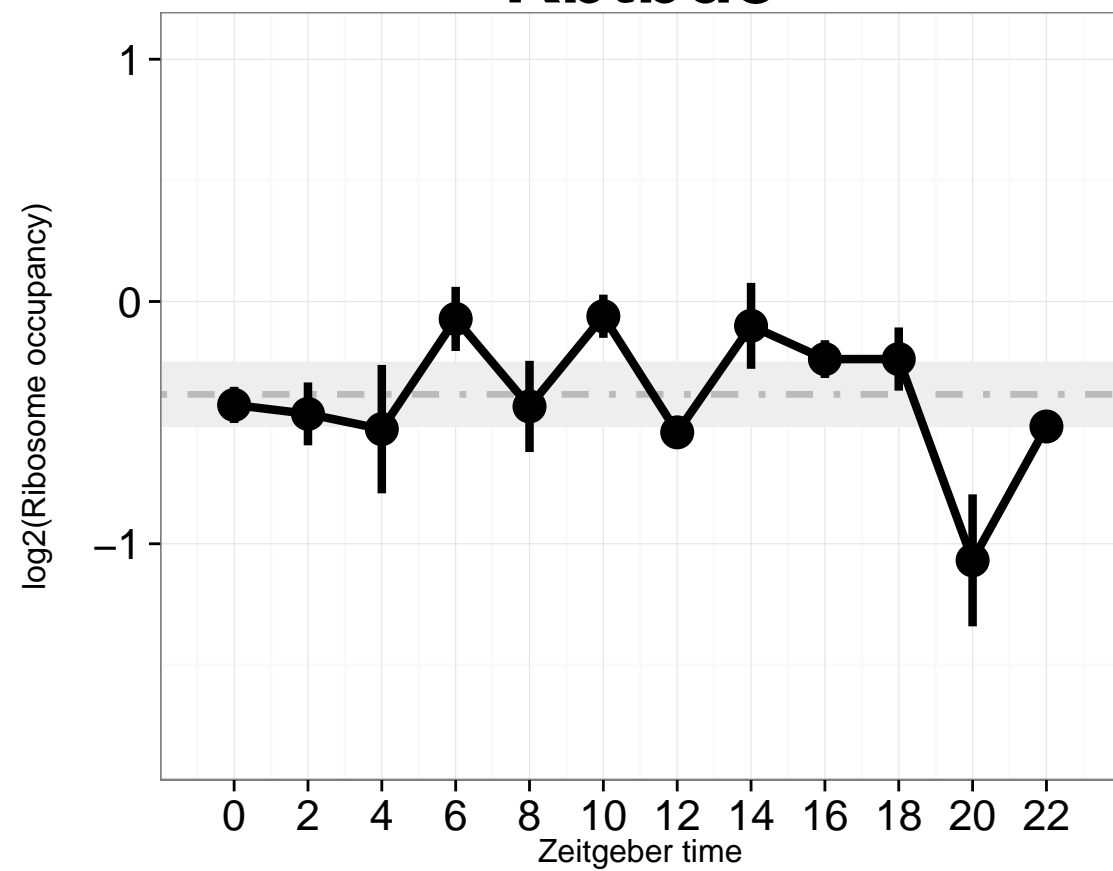

Supplement: Supplementary file 9060 [file 1]

# Map2k6

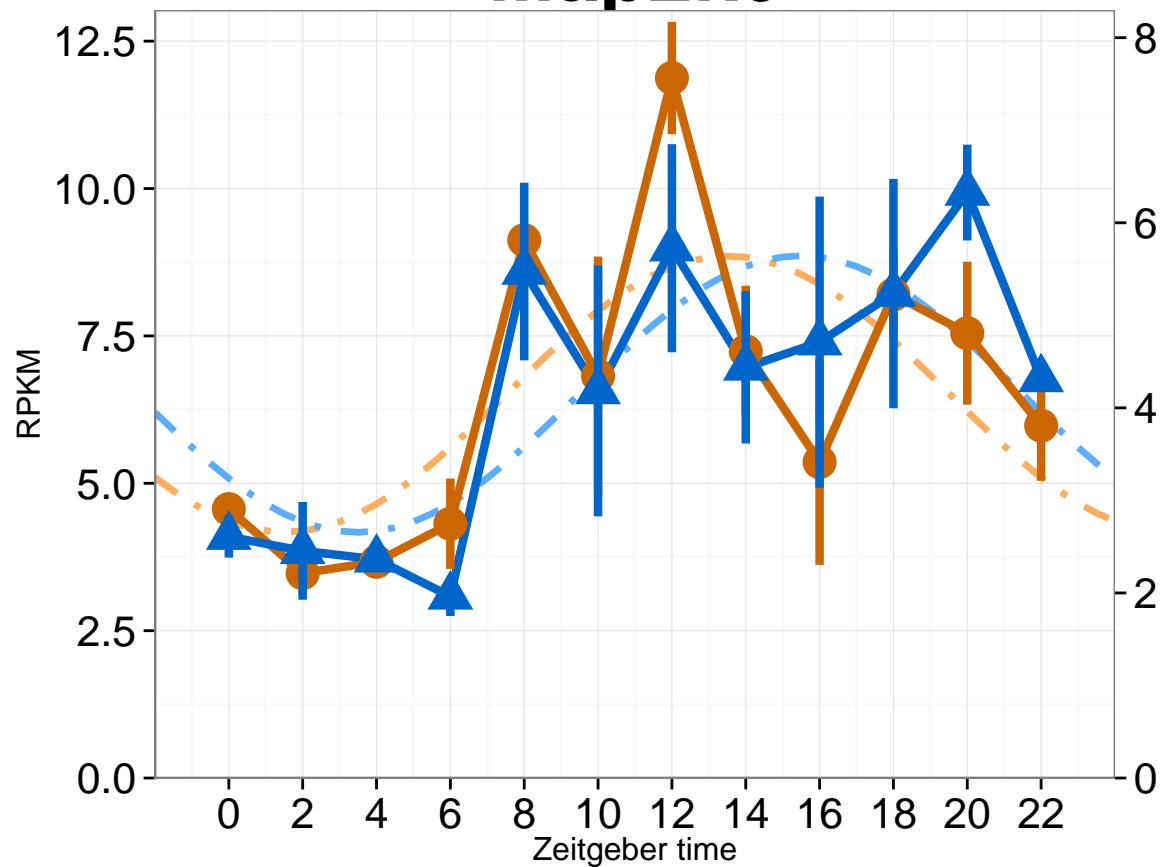

# Map2k6

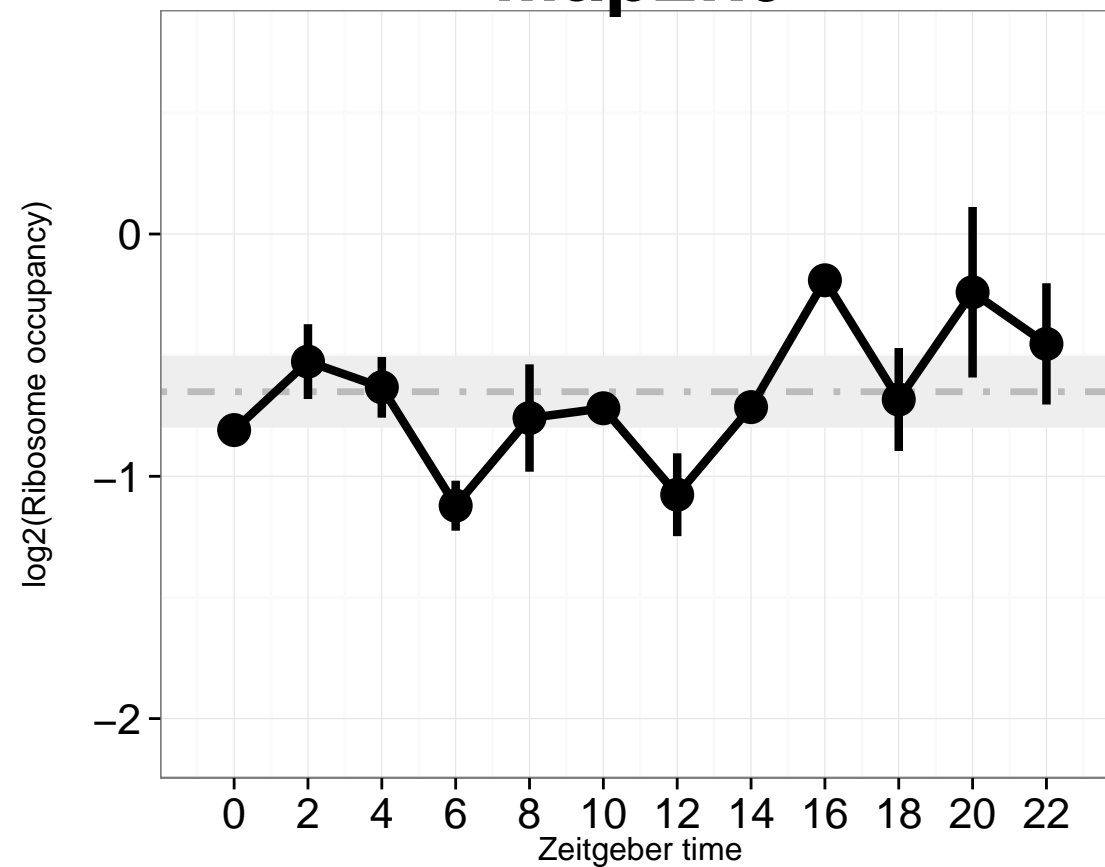

Supplement: Supplementary file 9061 [file 1]

## Abcc1

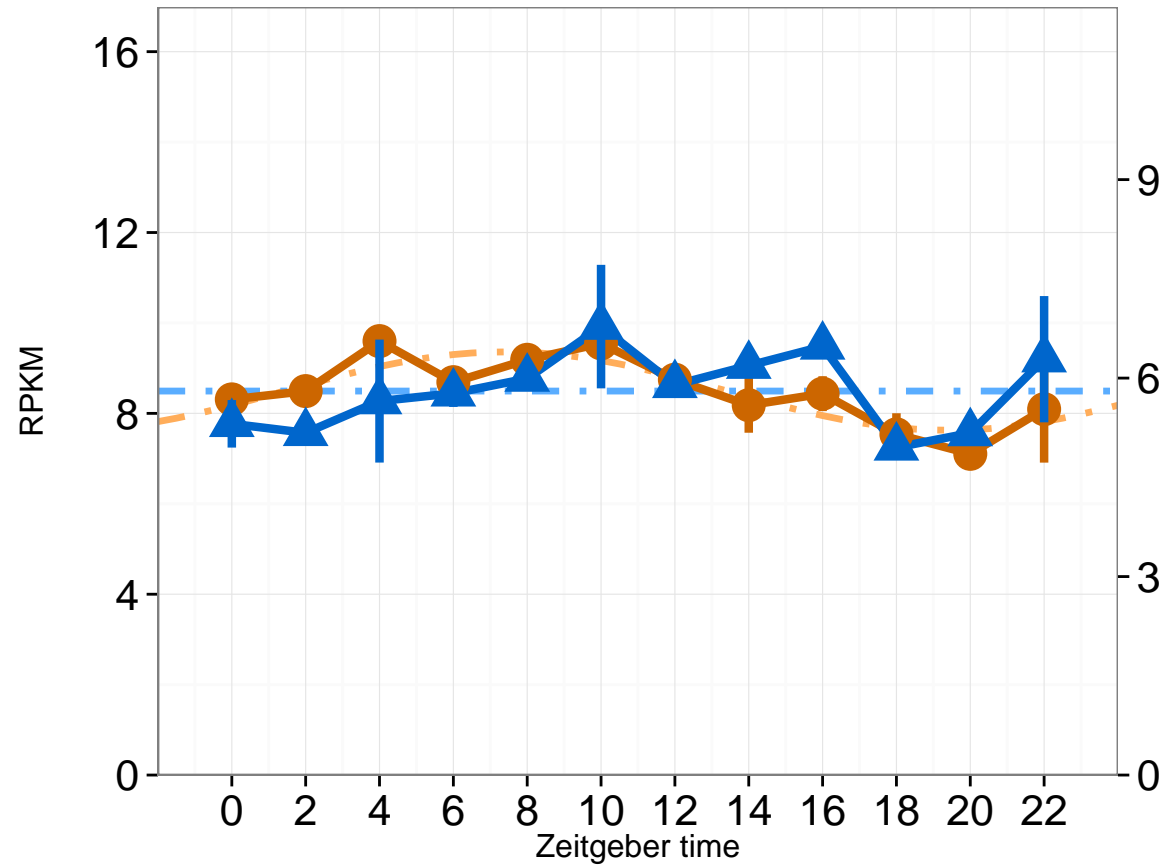

## Abcc1

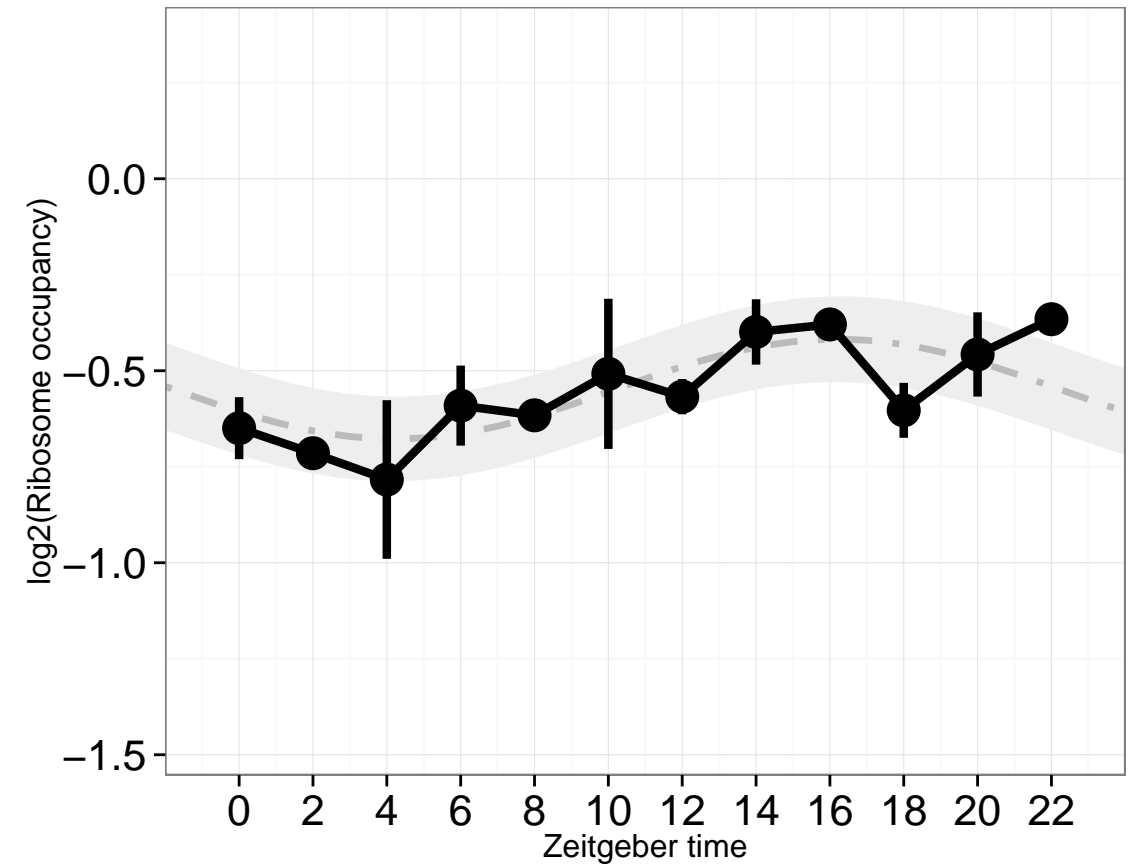

Supplement: Supplementary file 9062 [file 1]

**Ltb4r1 TR**

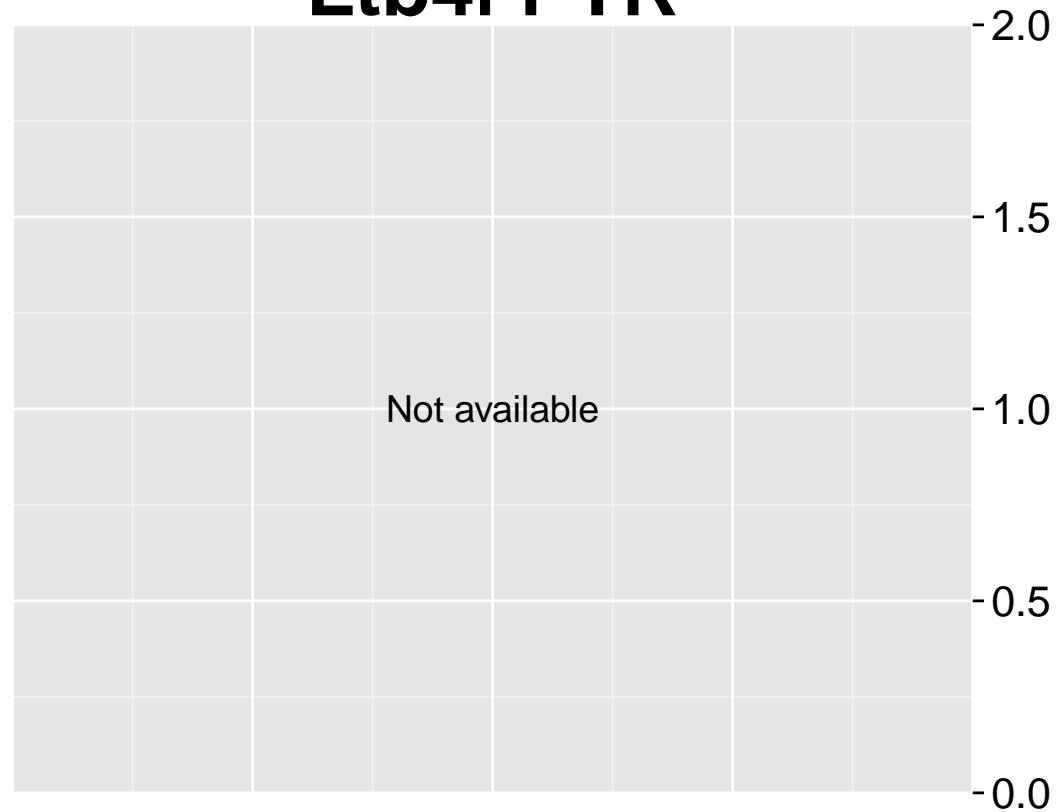

**Ltb4r1 log2(Ribosome occupancy**

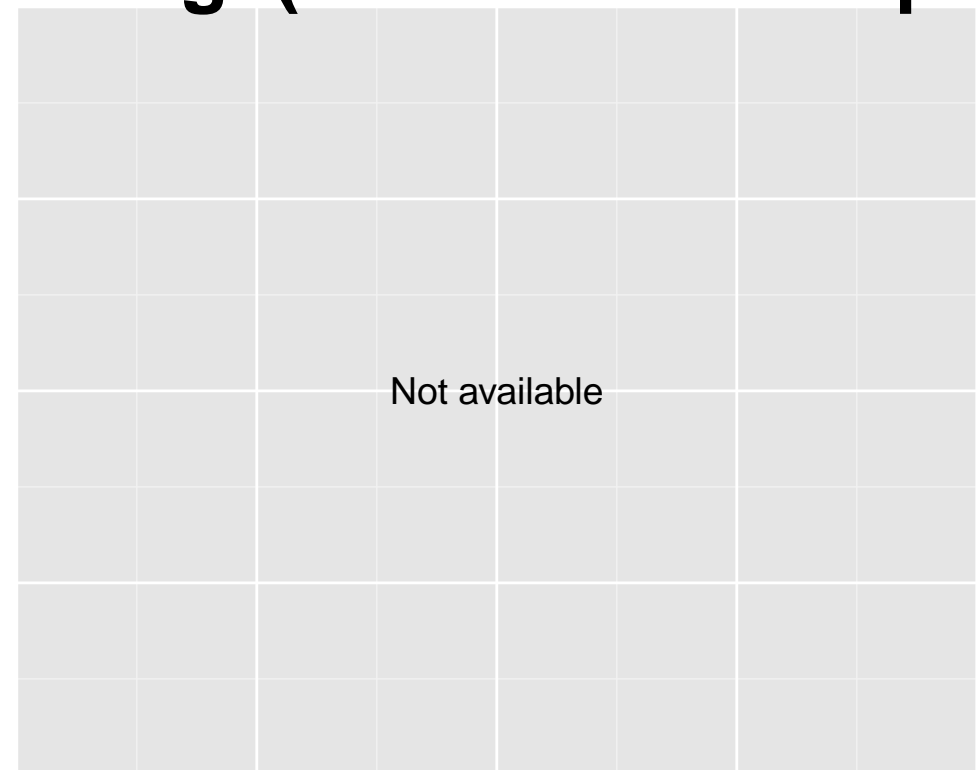

Supplement: Supplementary file 9063 [file 1]

## Tlr12

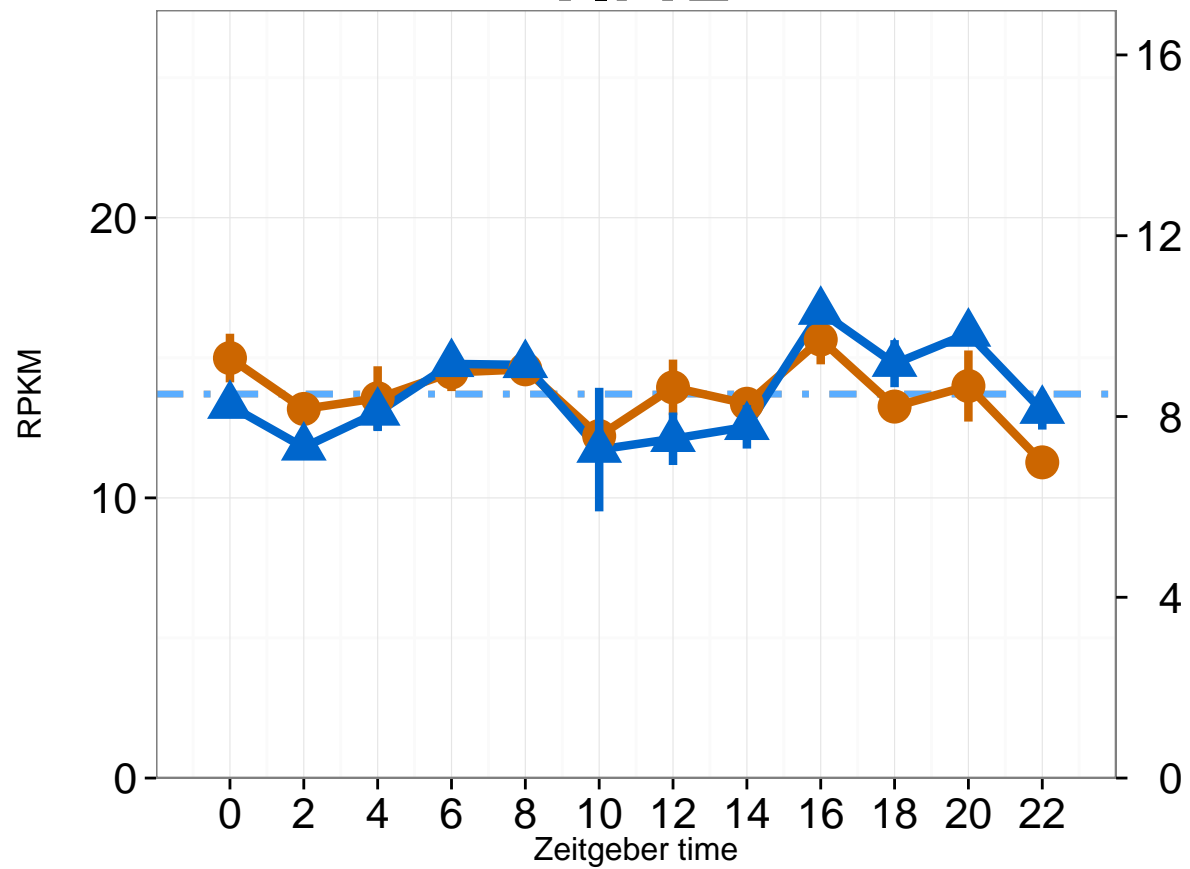

## Tlr12

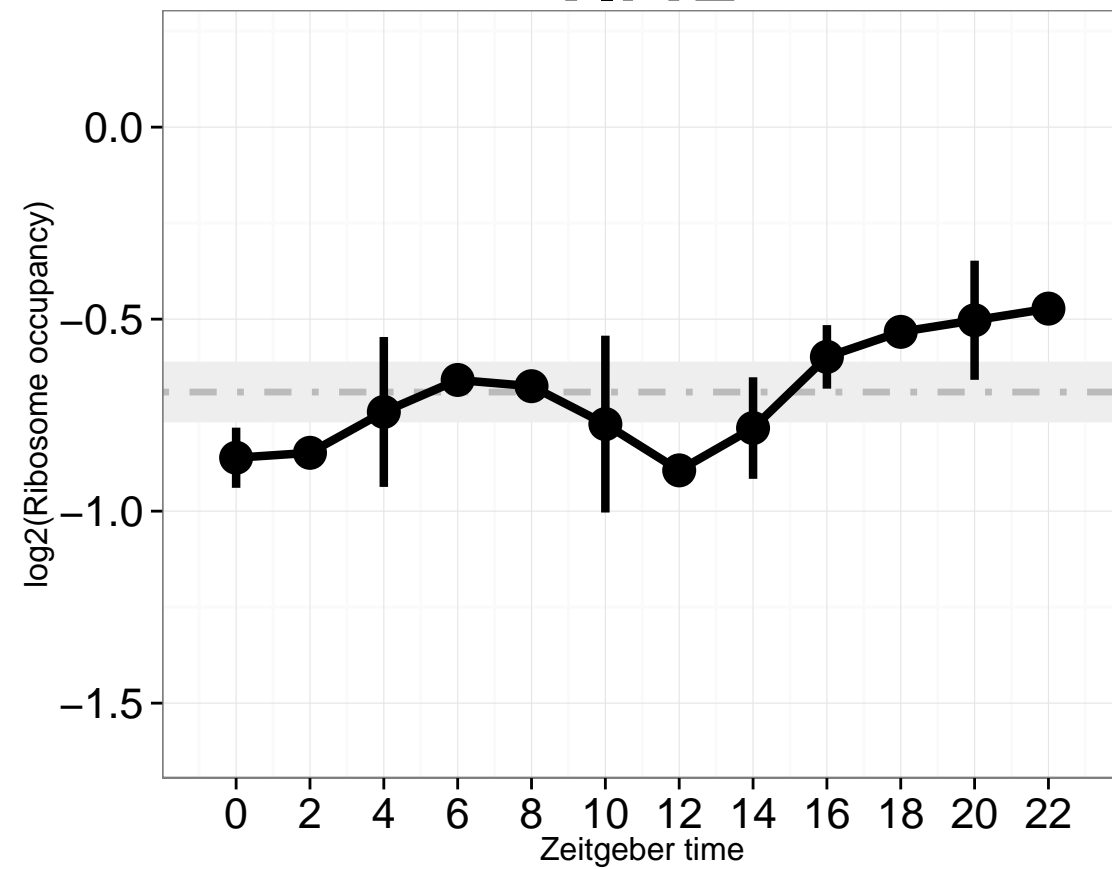

Supplement: Supplementary file 9064 [file 1]

# Rab3il1

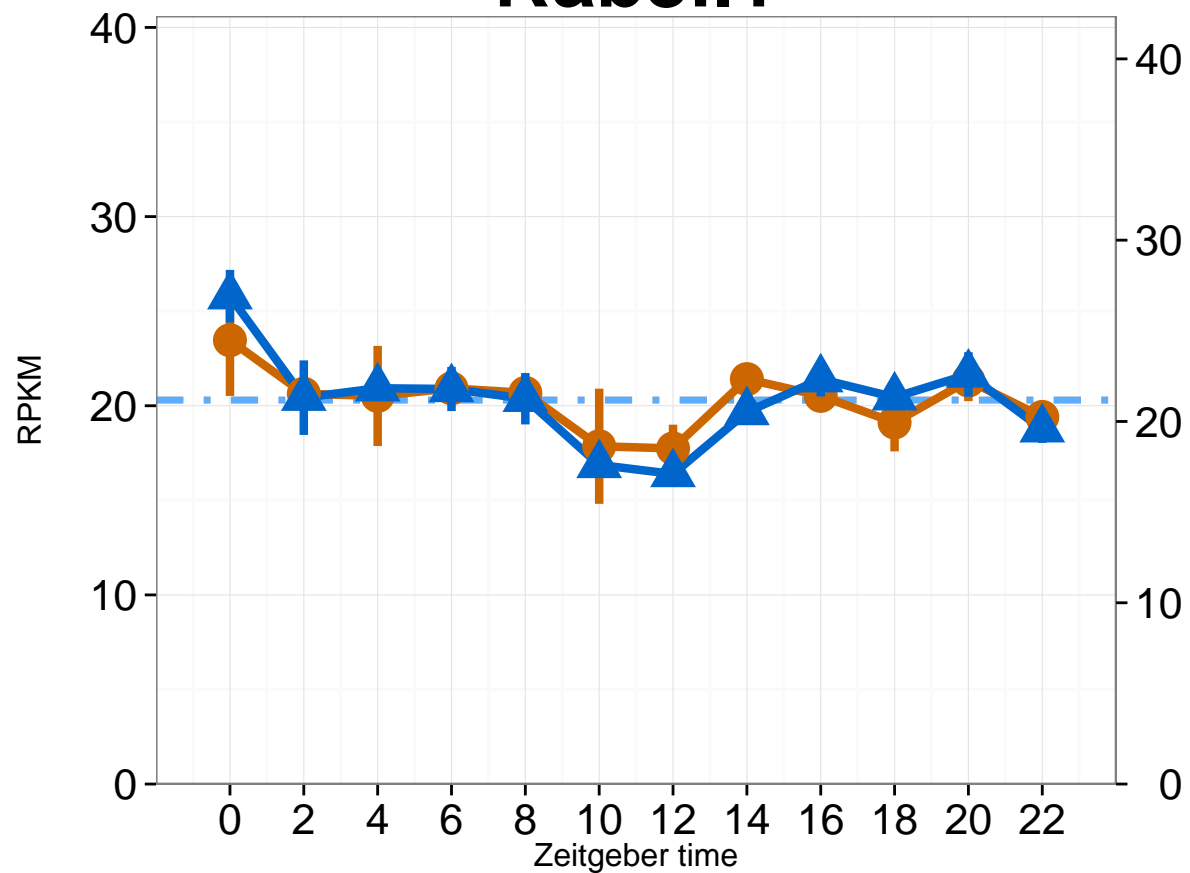

# Rab3il1

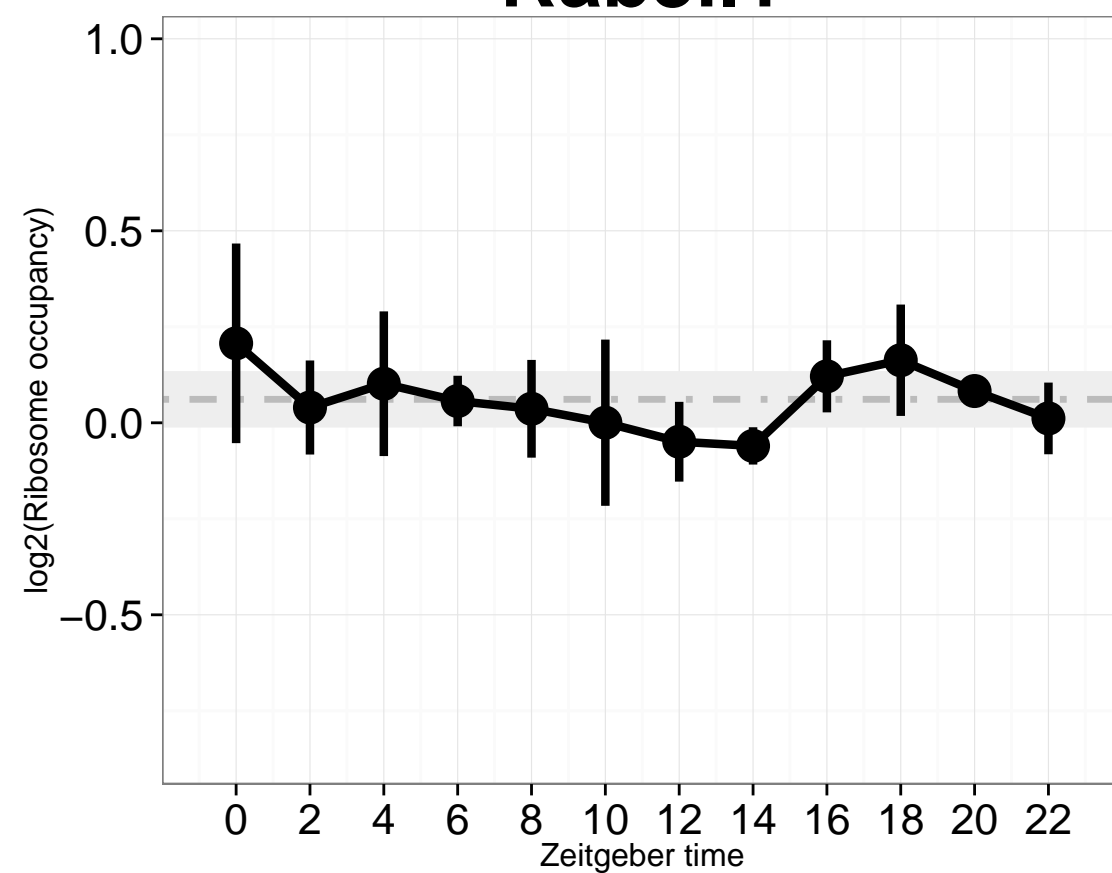

Supplement: Supplementary file 9065 [file 1]

## Ercc5

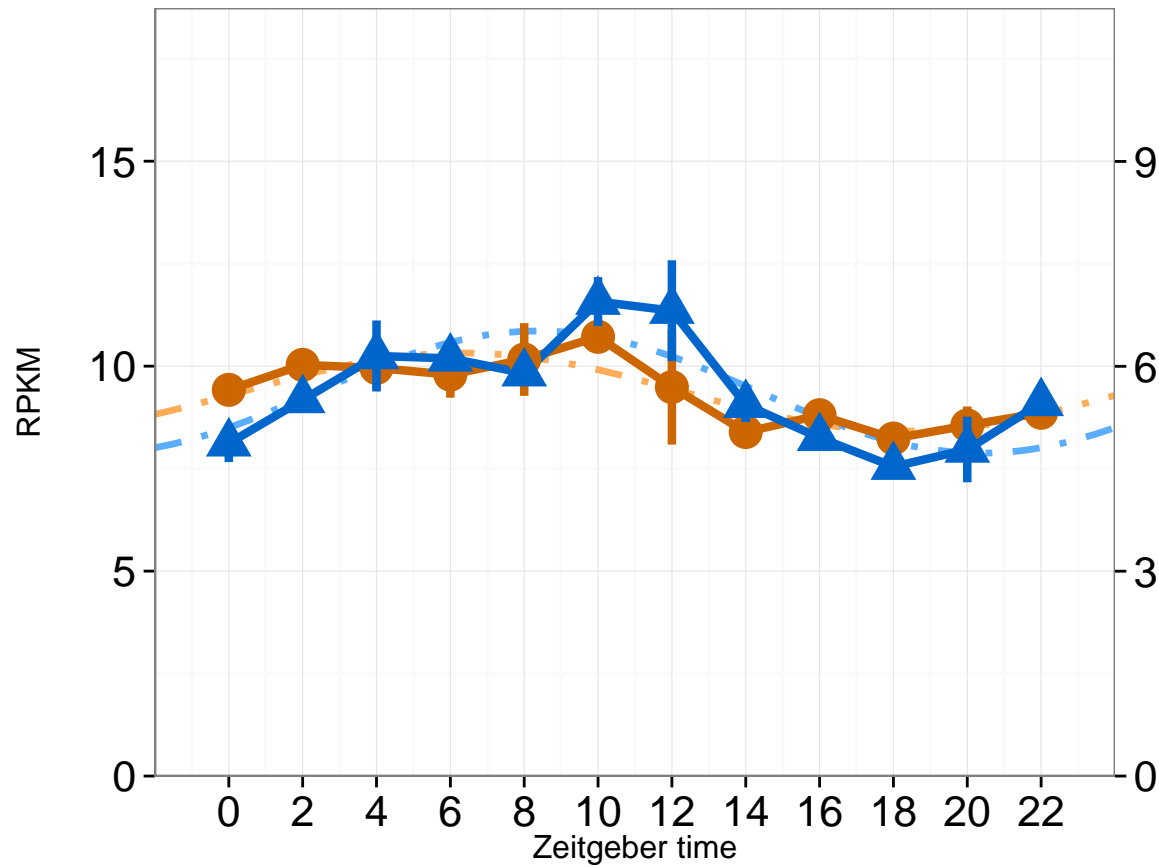

## Ercc5

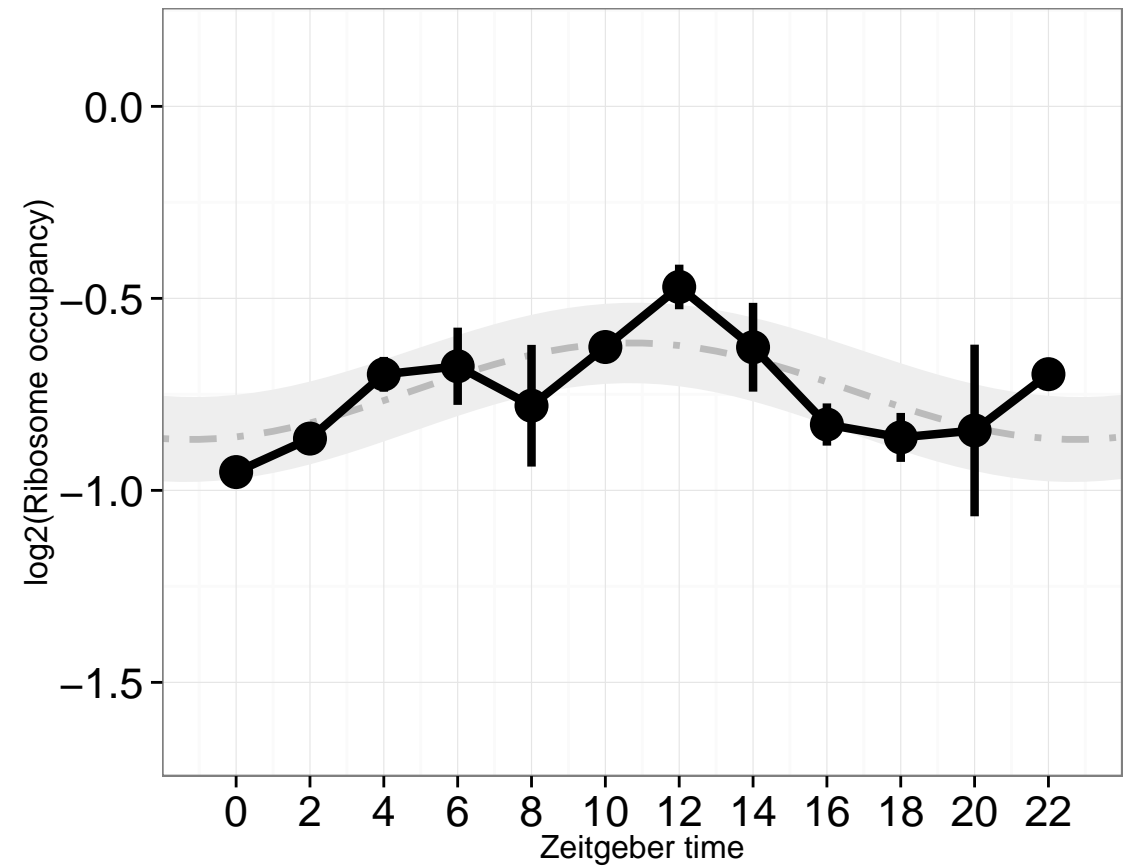

Supplement: Supplementary file 9066 [file 1]

# Tmem64

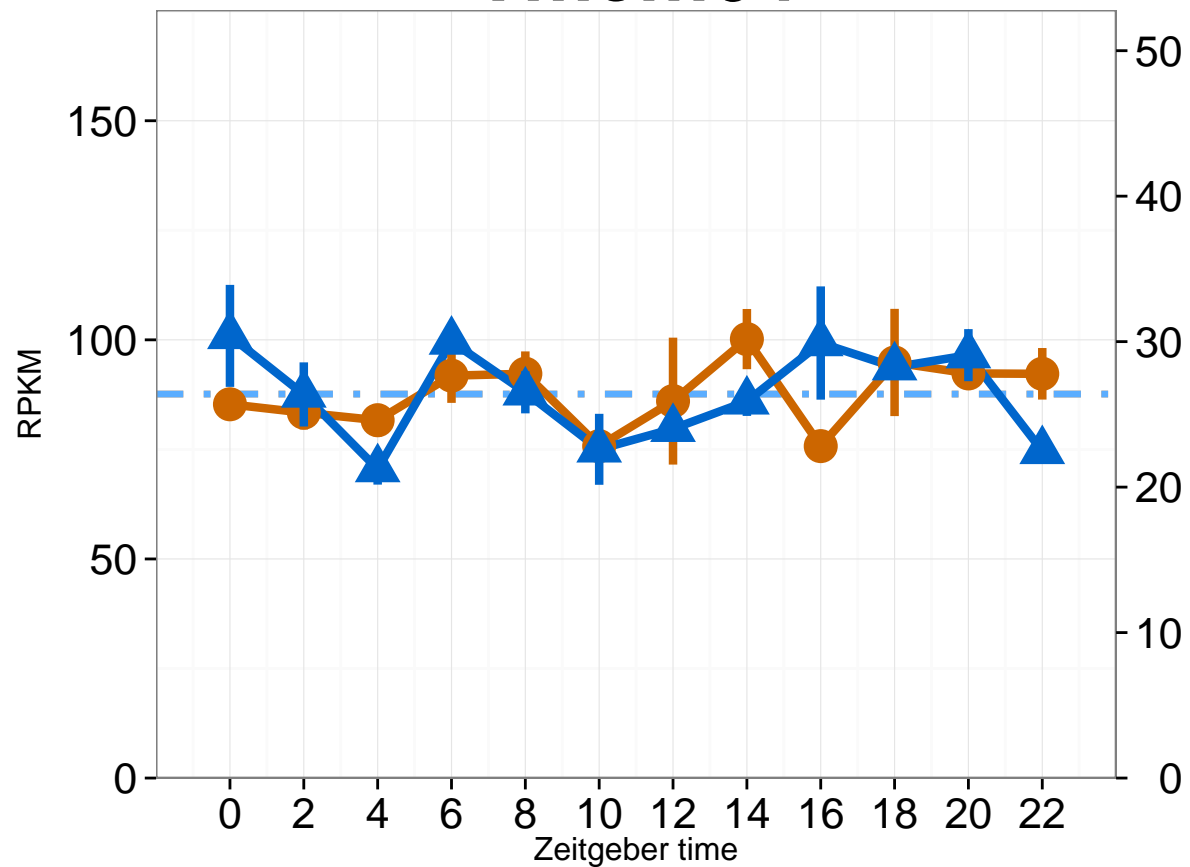

# Tmem64

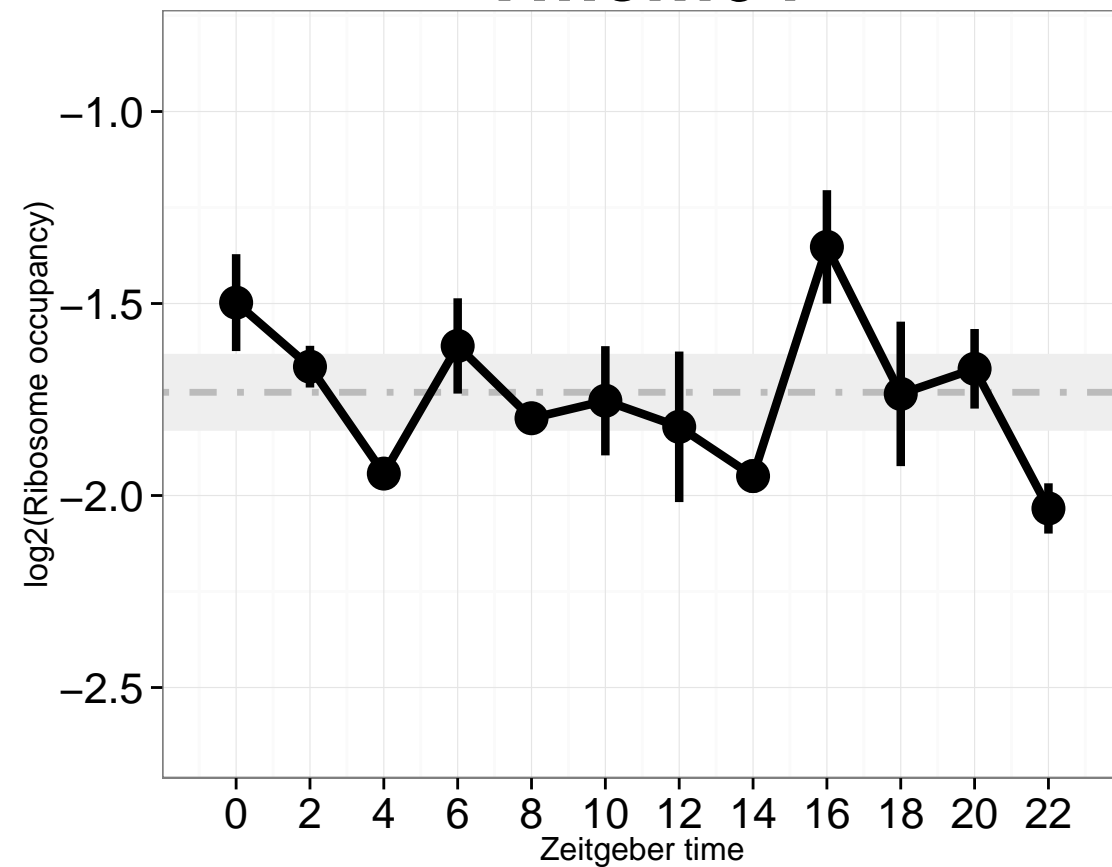

Supplement: Supplementary file 9067 [file 1]

# Mrpl23

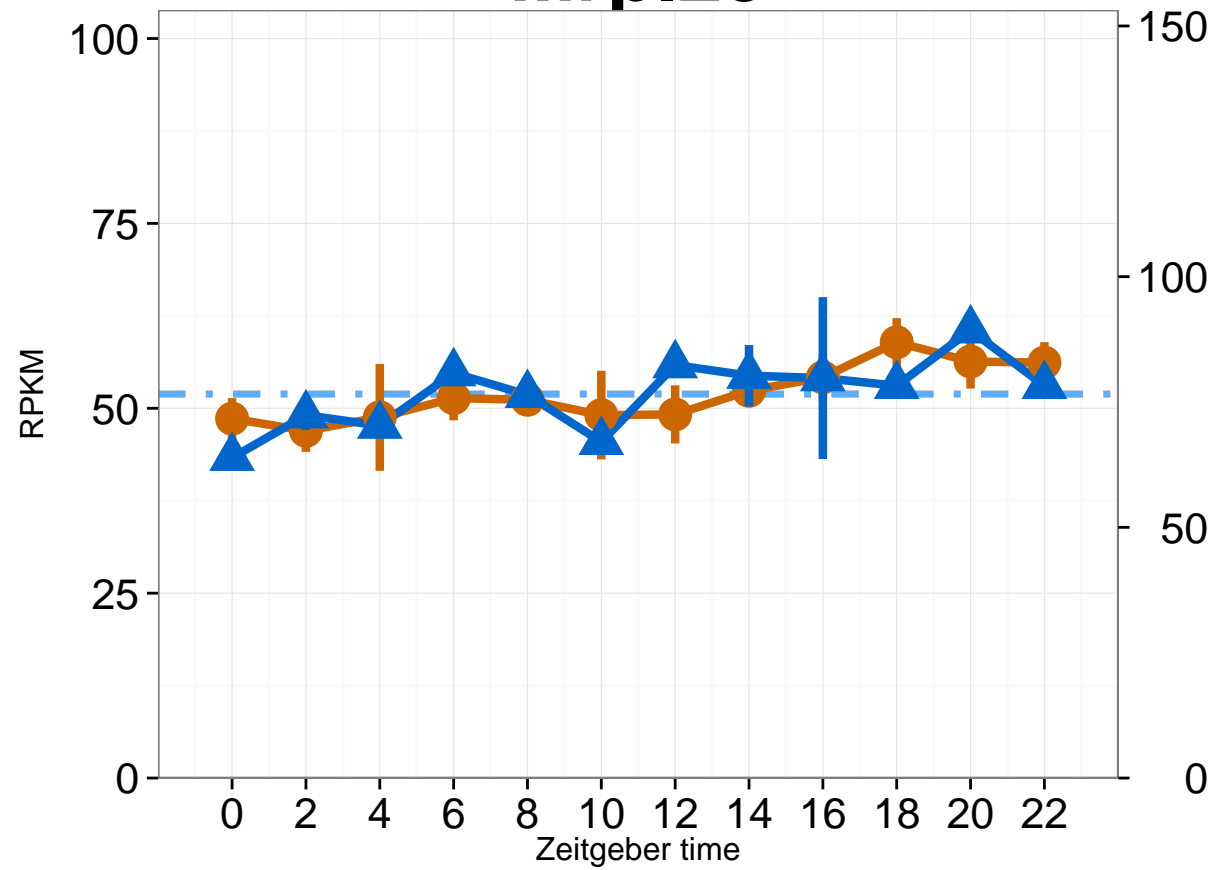

# Mrpl23

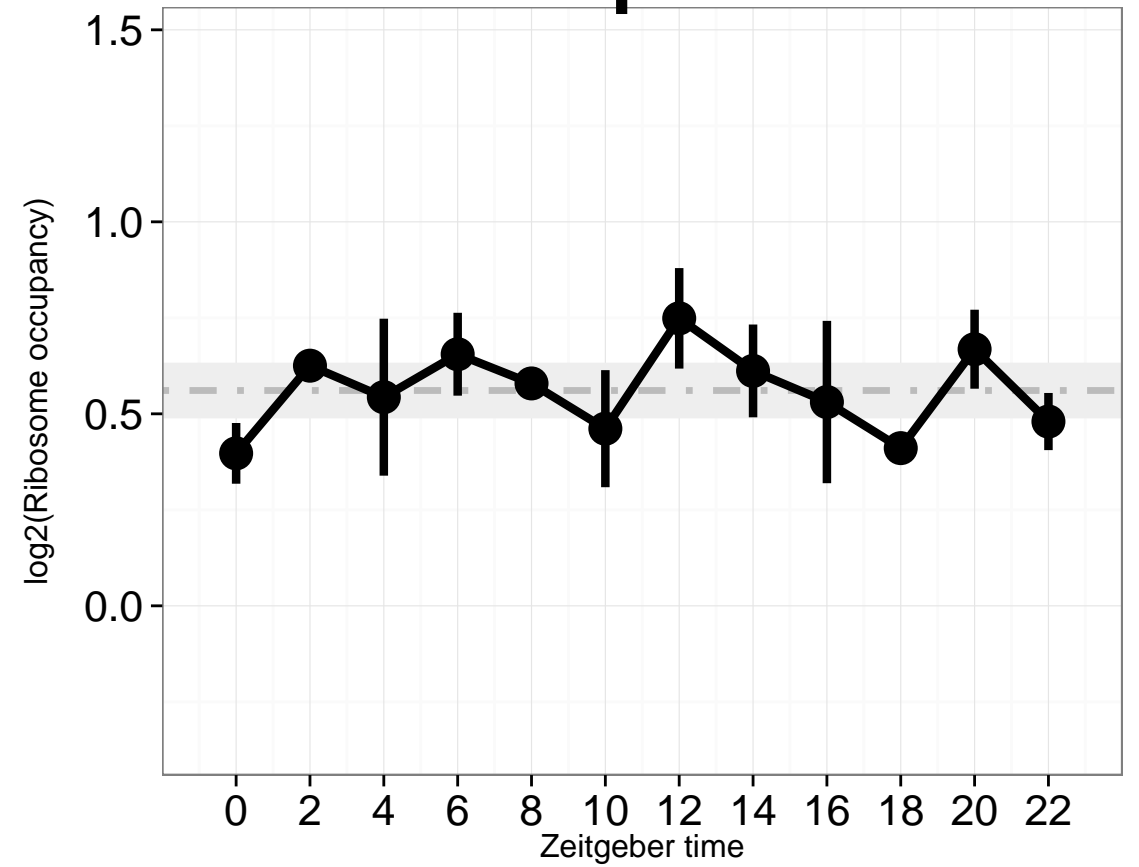

Supplement: Supplementary file 9068 [file 1]

# Decr1

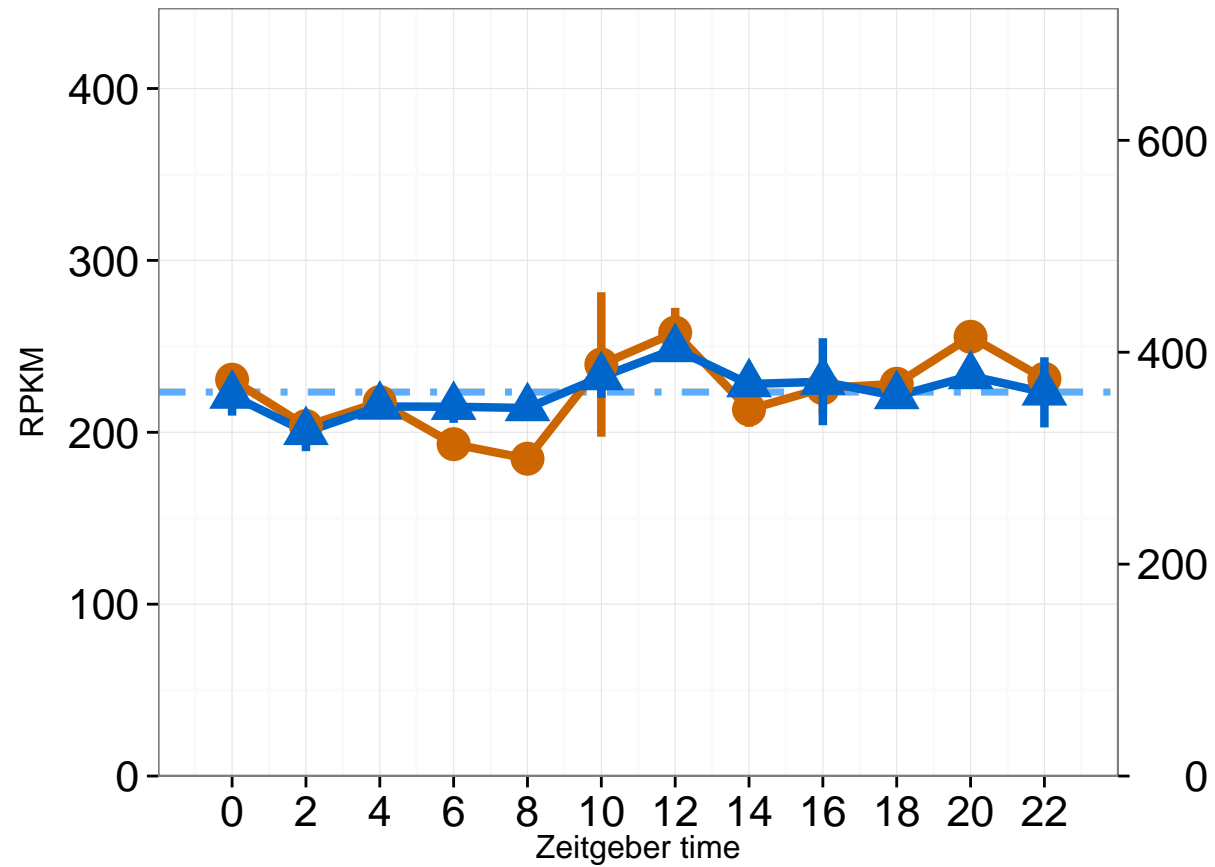

# Decr1

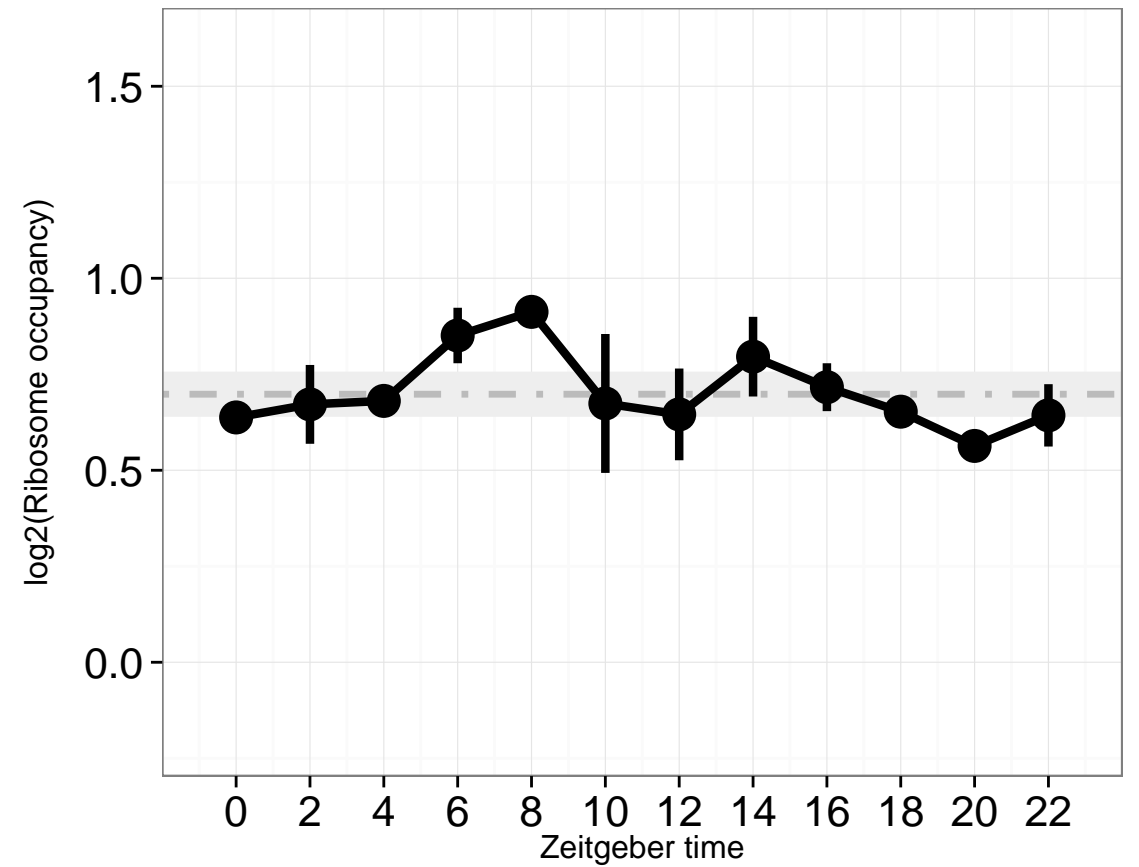

Supplement: Supplementary file 9069 [file 1]

## Ppil2

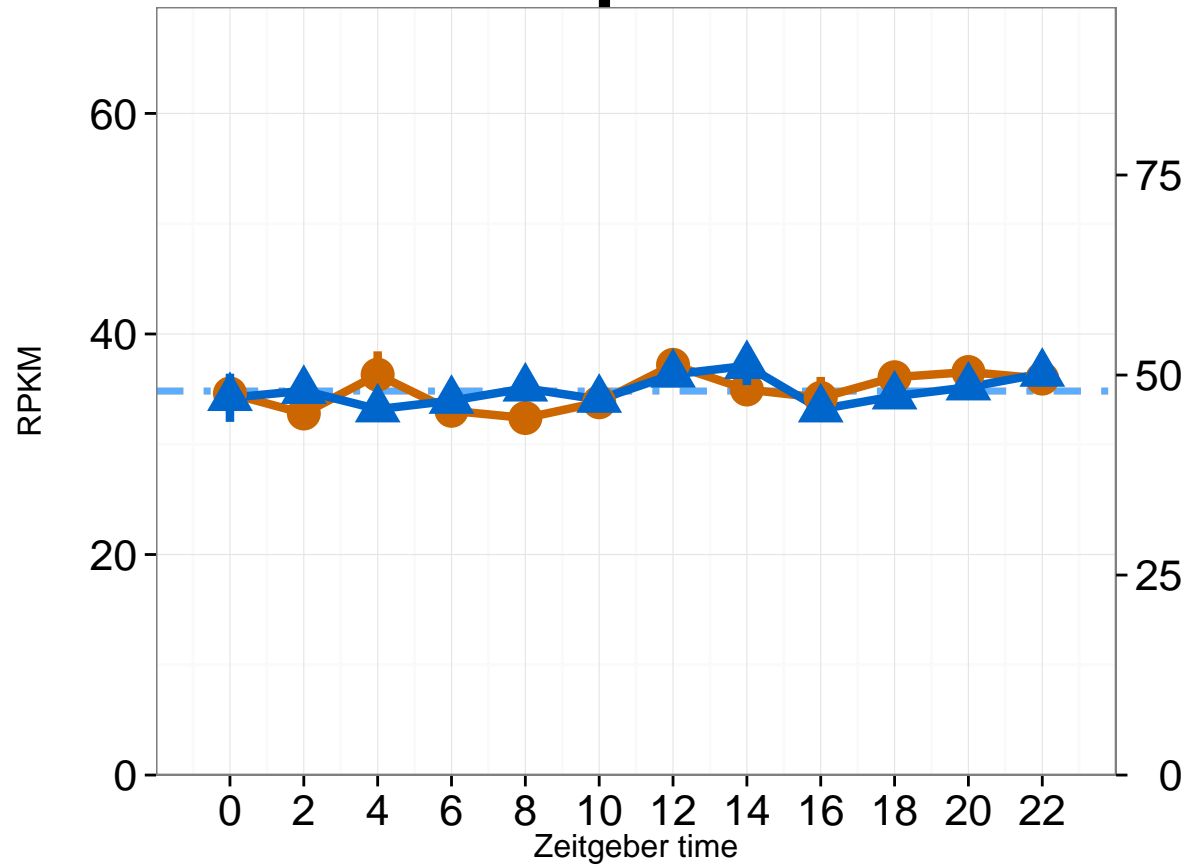

## Ppil2

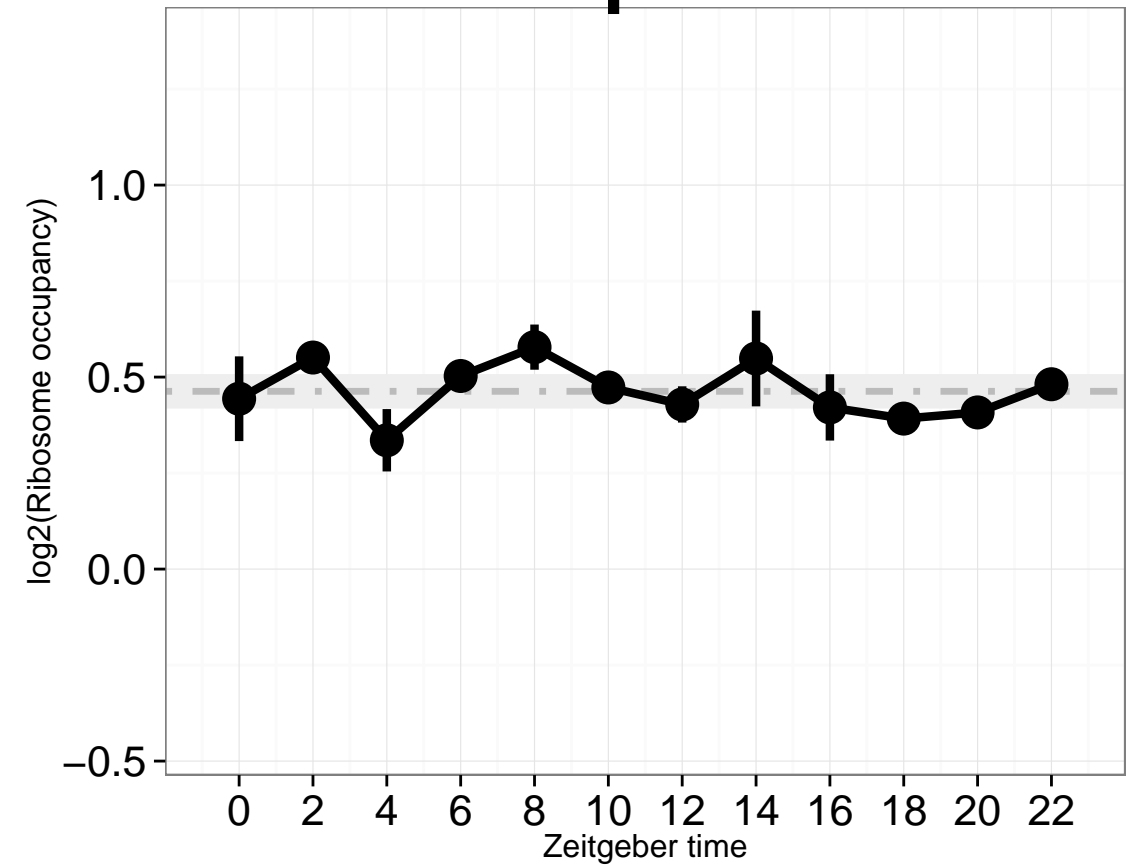

Supplement: Supplementary file 9070 [file 1]

# Traf3

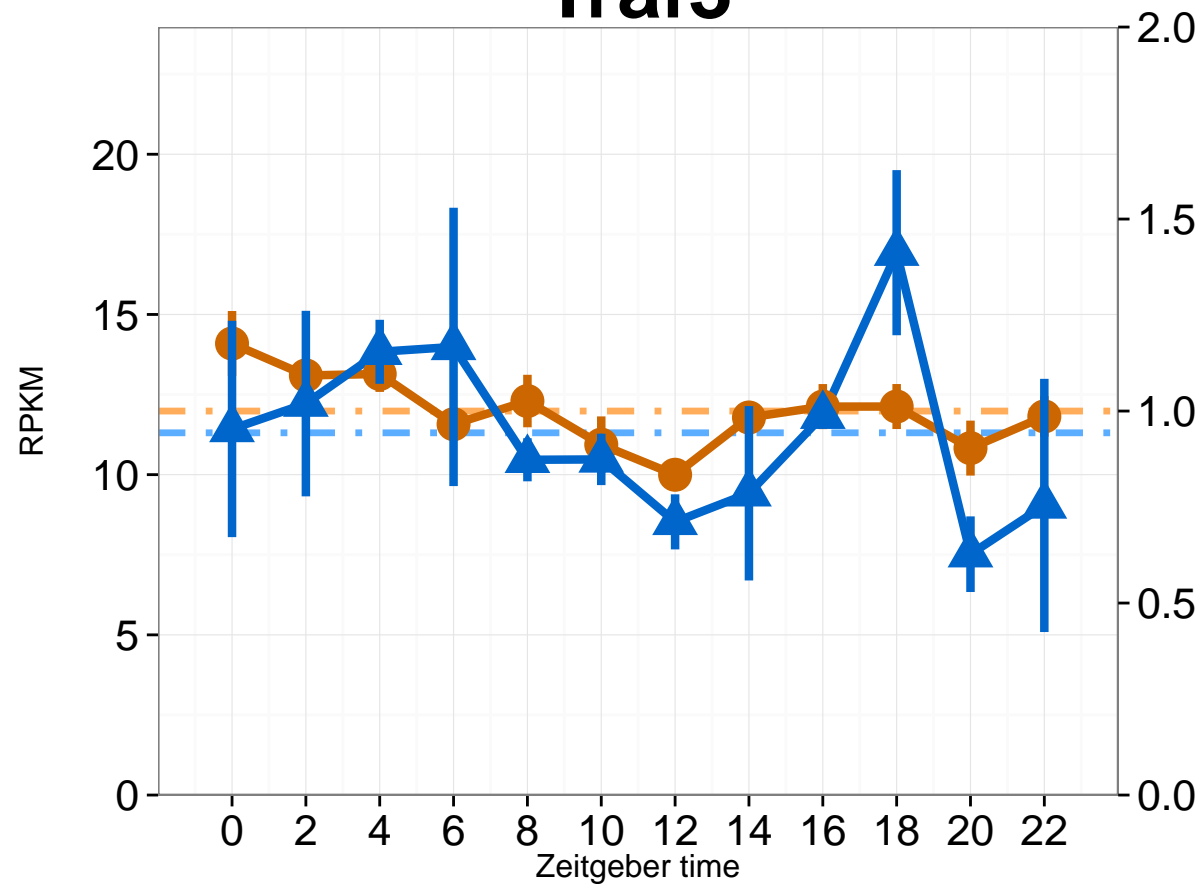

# Traf3

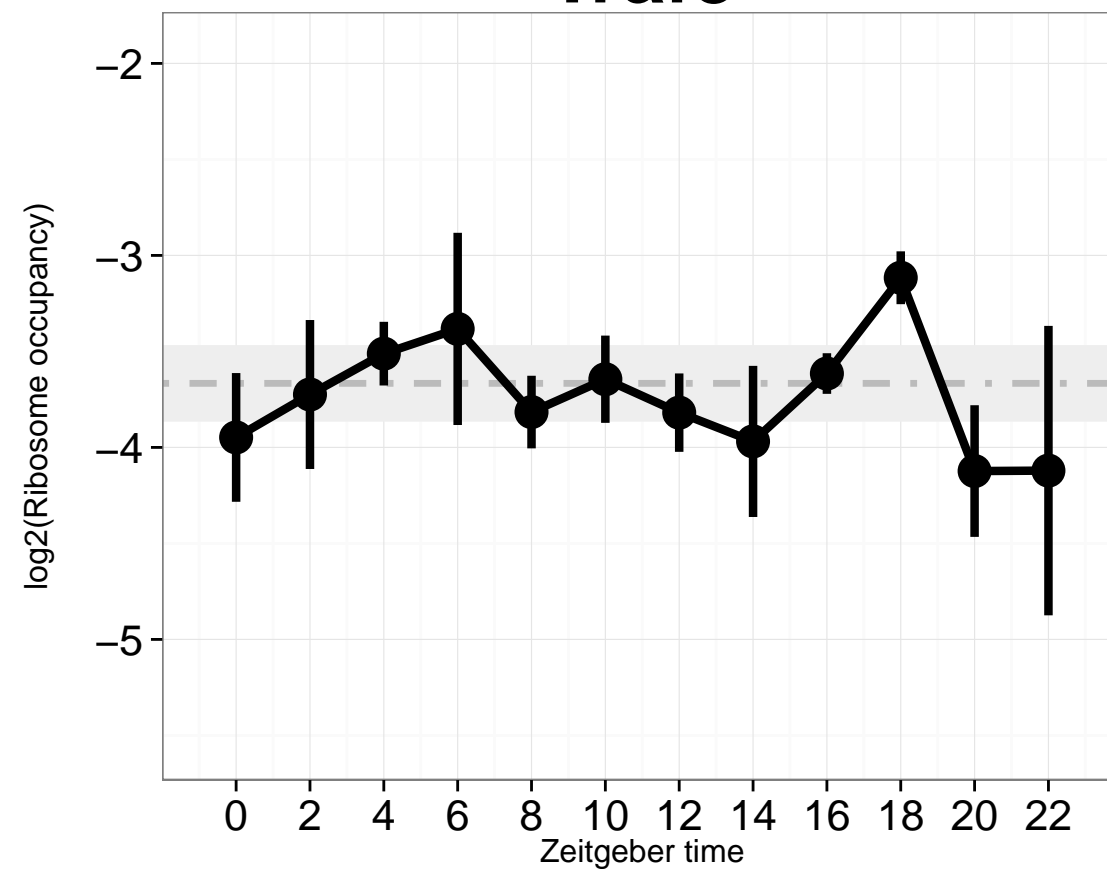

Supplement: Supplementary file 9071 [file 1]

# Fabp7

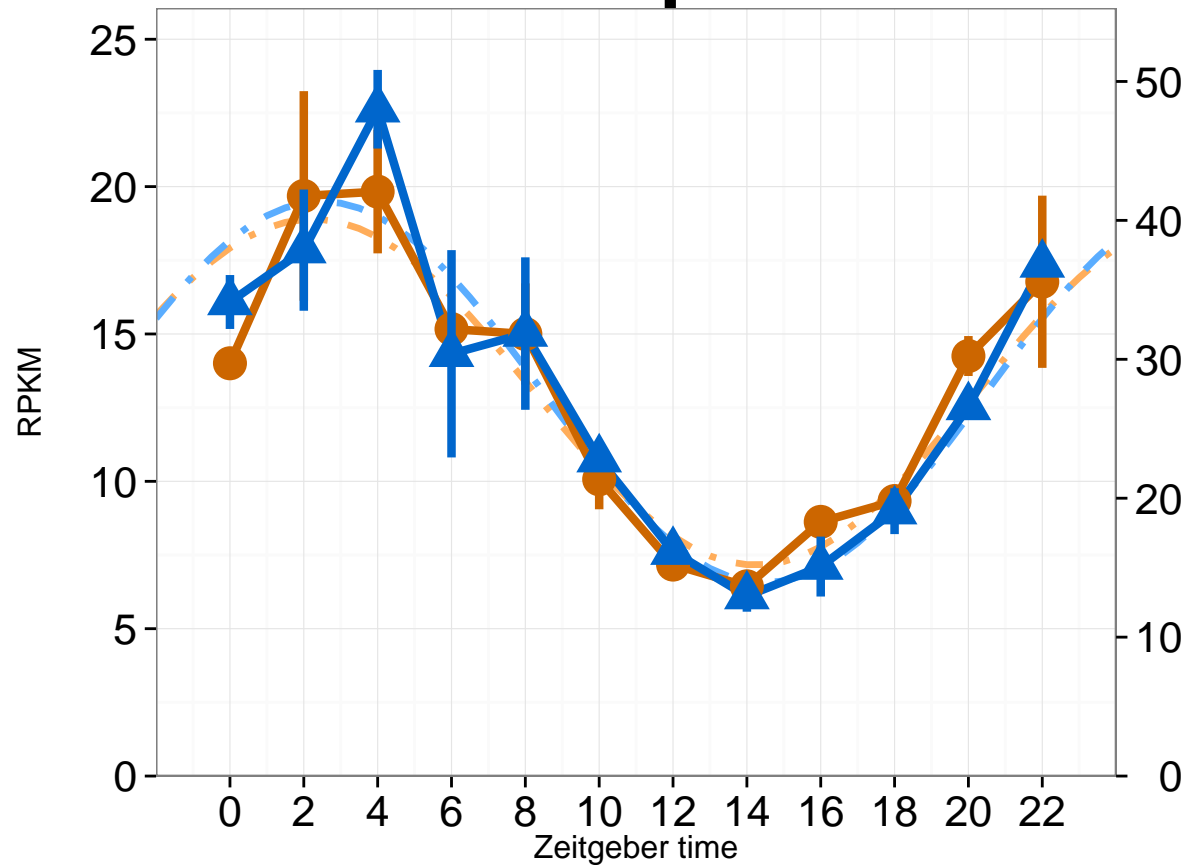

# Fabp7

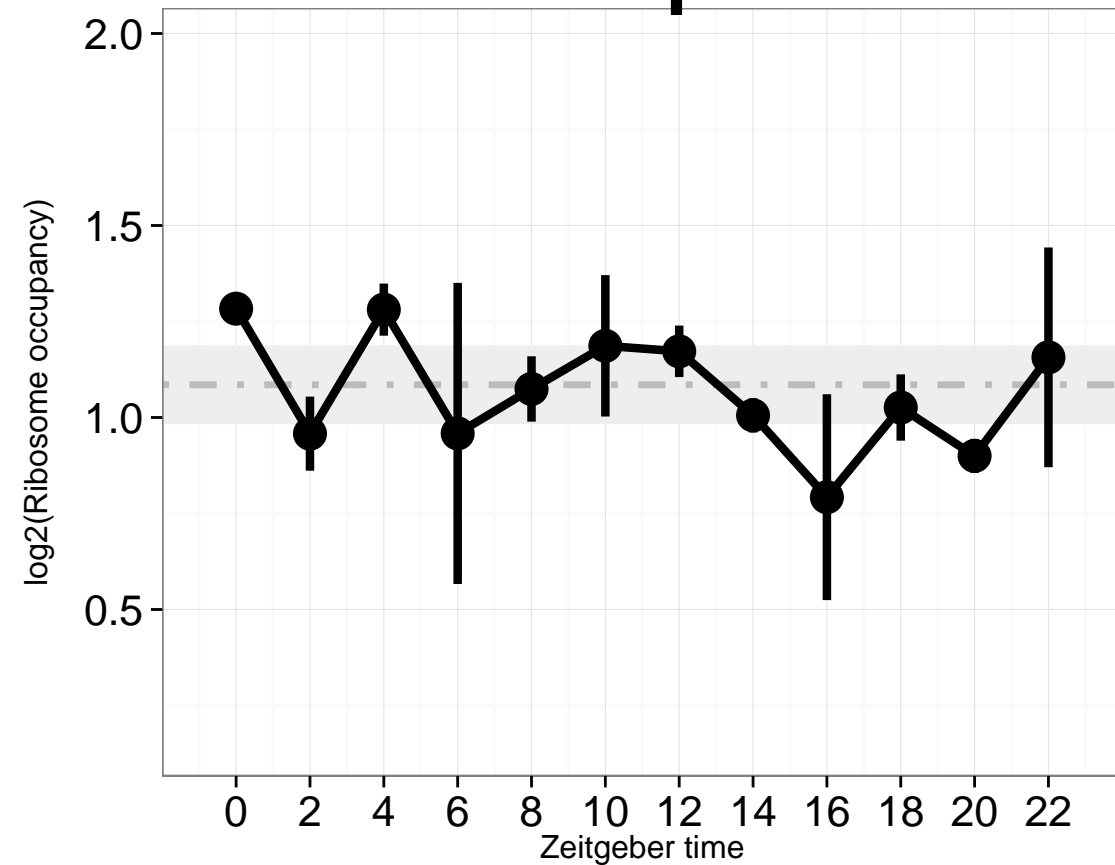

Supplement: Supplementary file 9072 [file 1]

# Hoxa1 TR

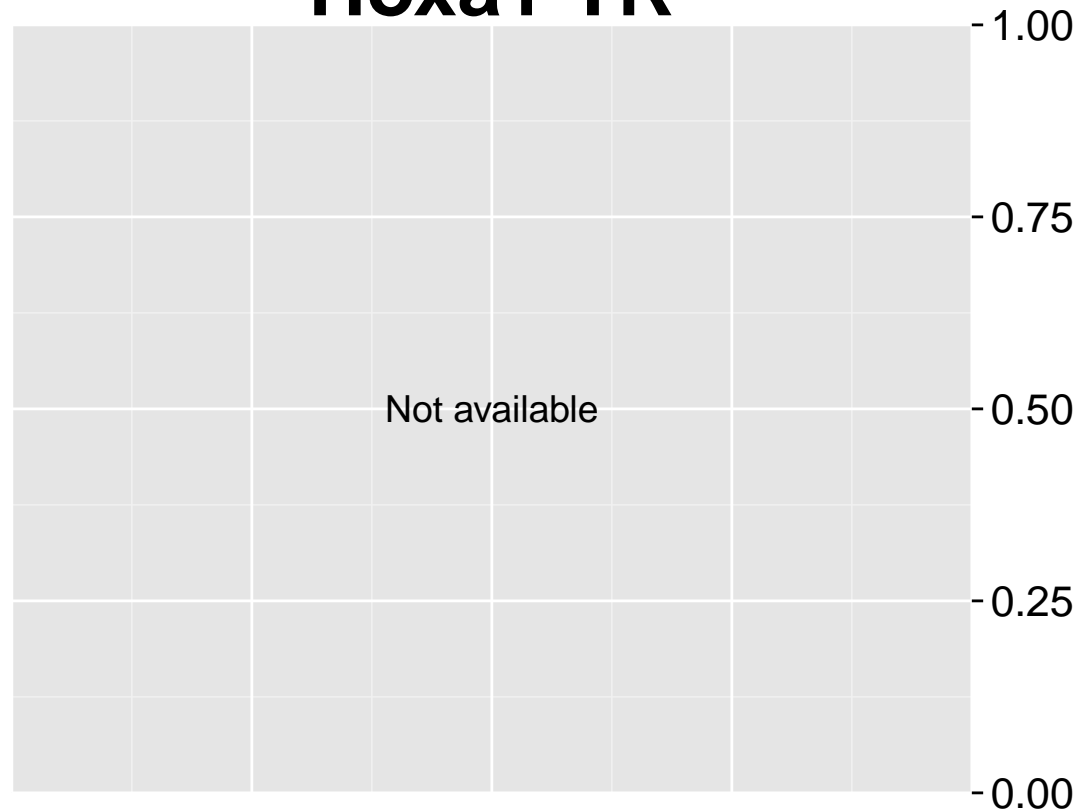

# Hoxa1 log2(Ribosome occupancy

Supplement: Supplementary file 9073 [file 1]

**Ramp1 TR**

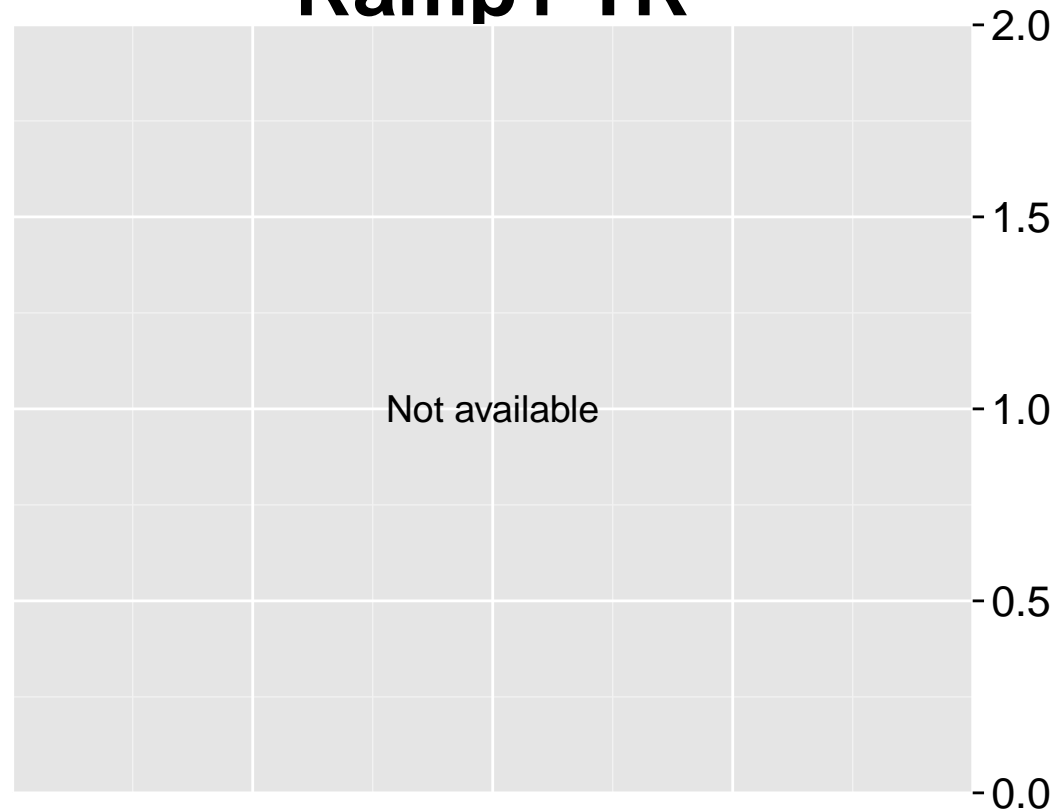

**Ramp1 log2(Ribosome occupancy**

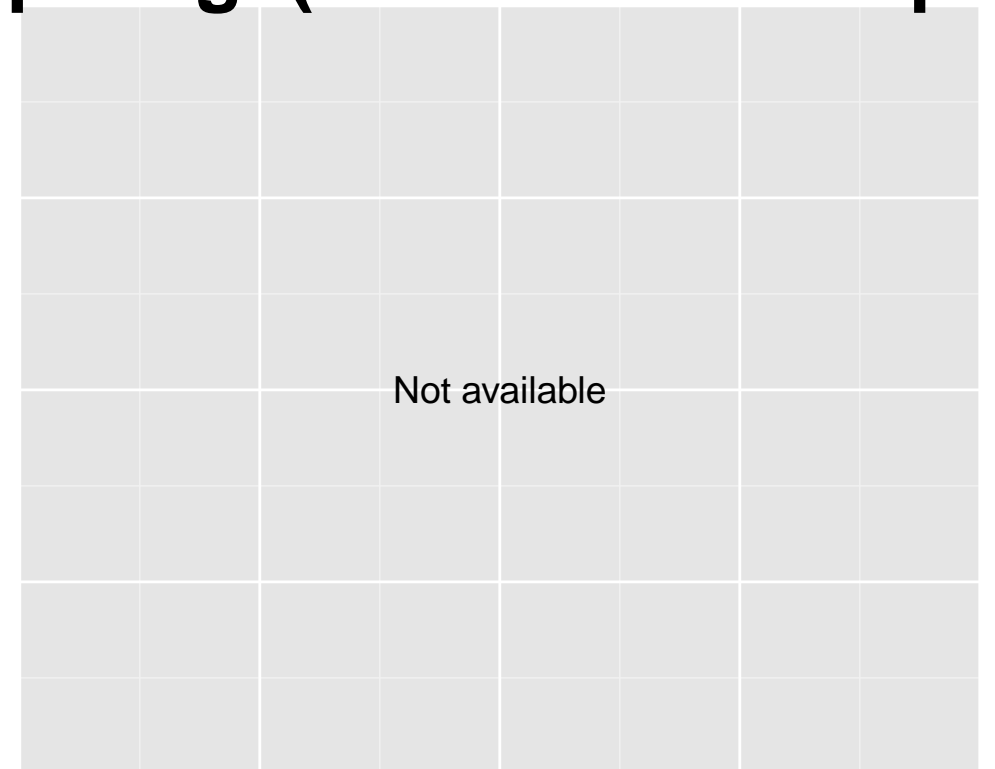

Supplement: Supplementary file 9074 [file 1]

# Mical1

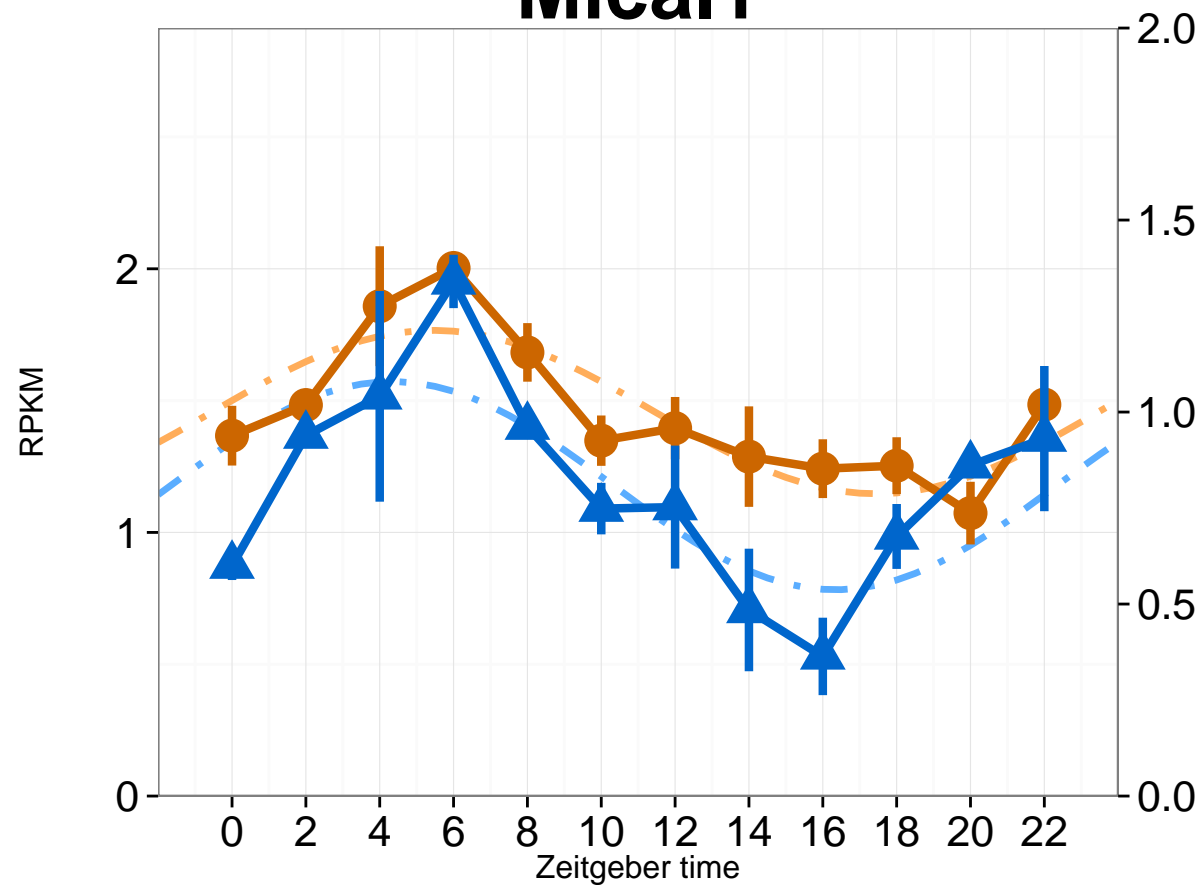

# Mical1

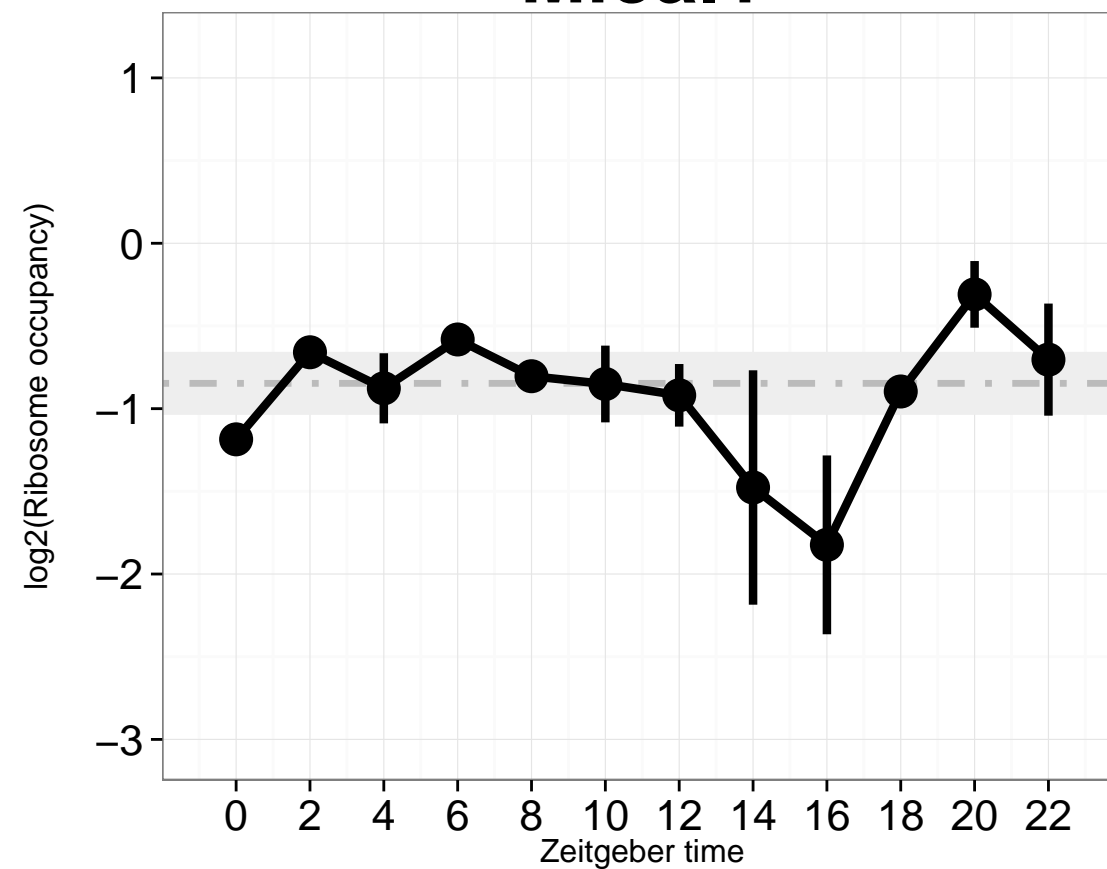

Supplement: Supplementary file 9075 [file 1]

# Dnmt3a

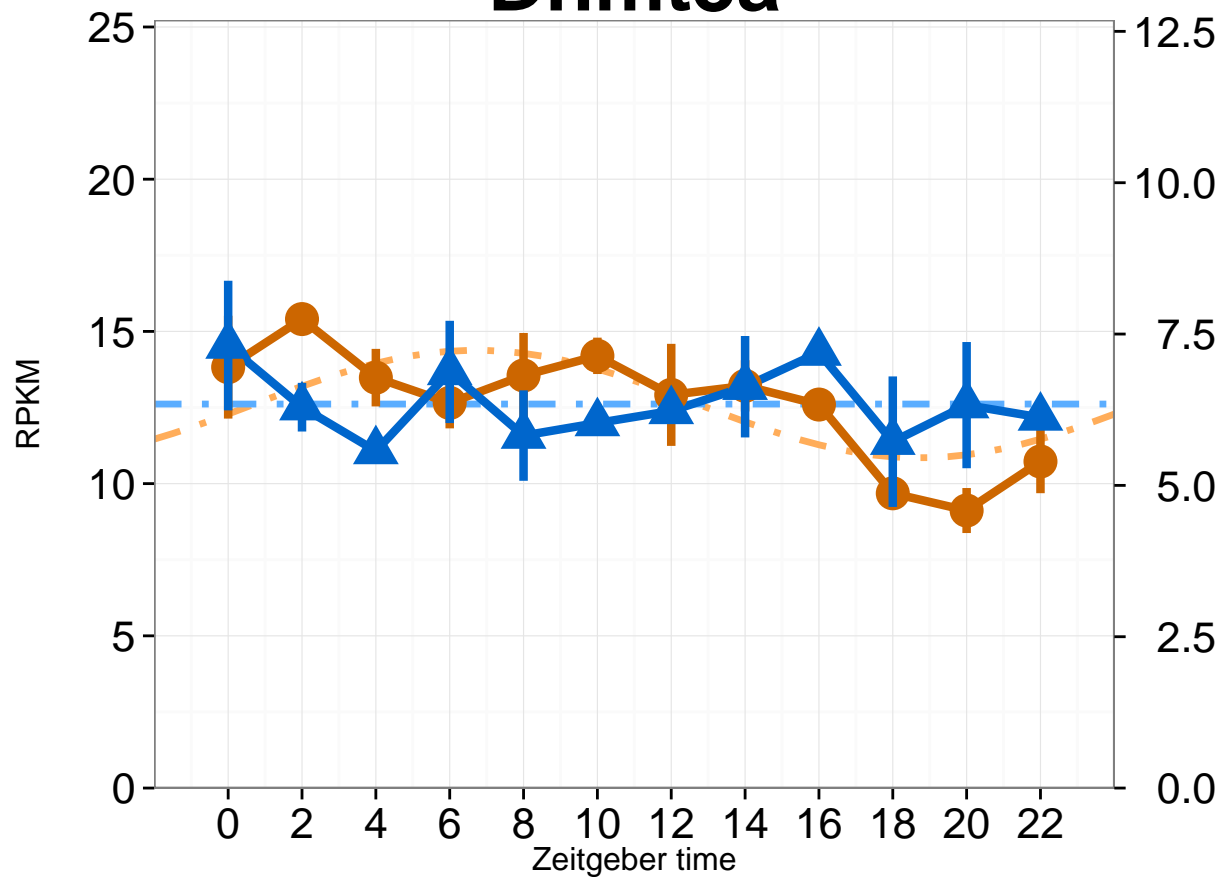

# Dnmt3a

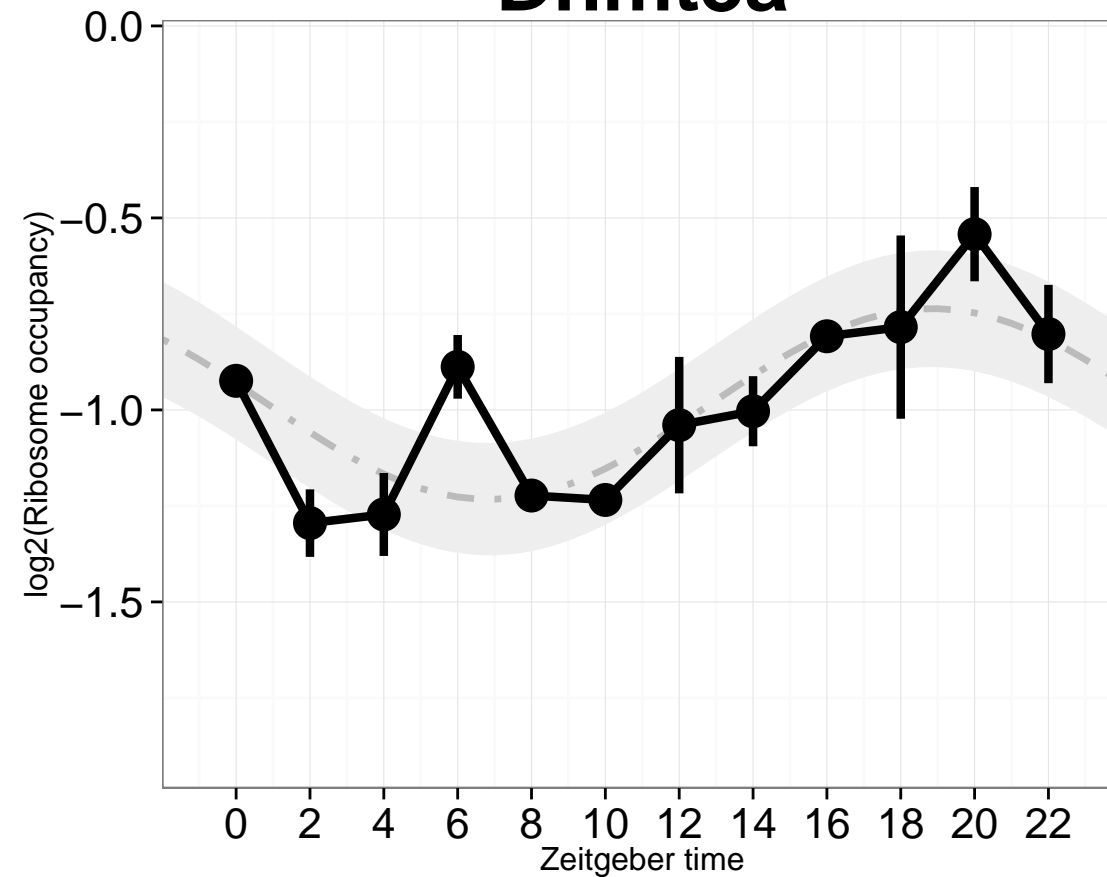

Supplement: Supplementary file 9076 [file 1]

# Pdcd11

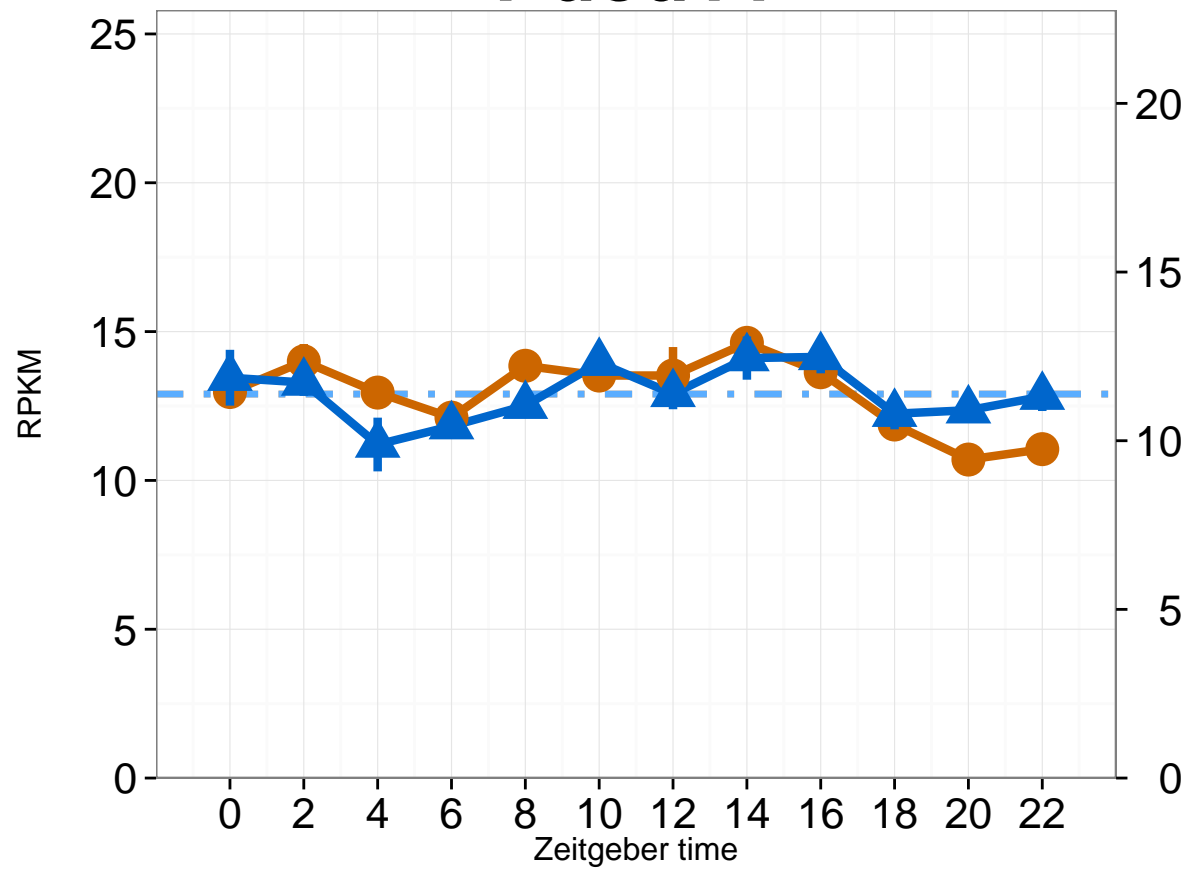

# Pdcd11

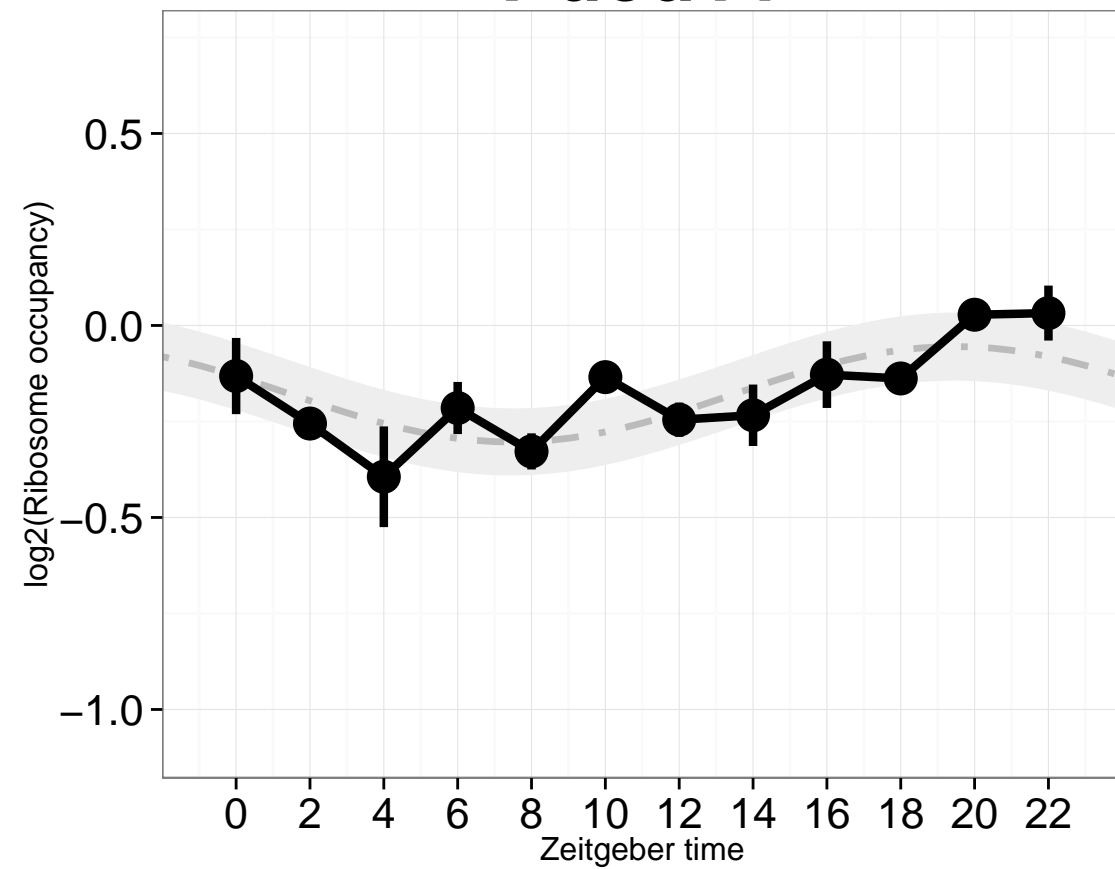

Supplement: Supplementary file 9077 [file 1]

# Ablim2

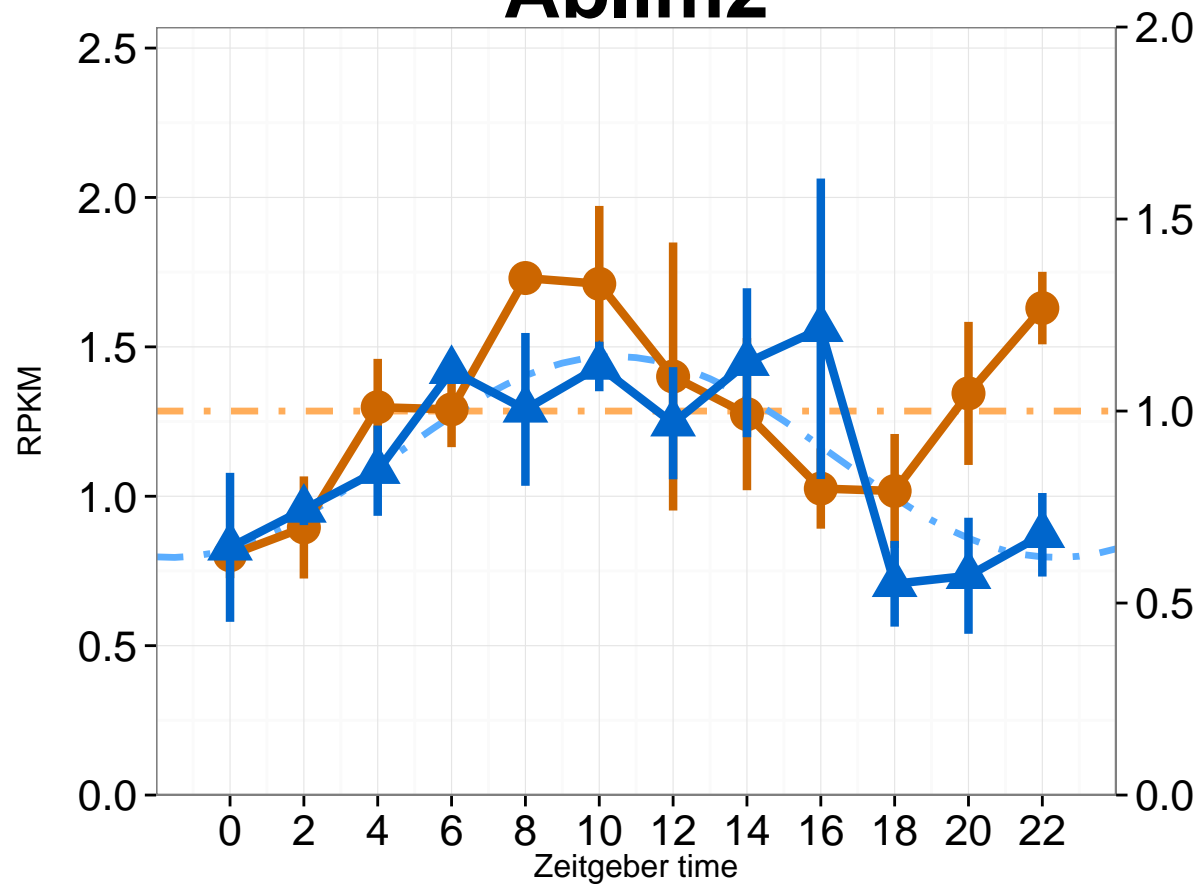

# Ablim2

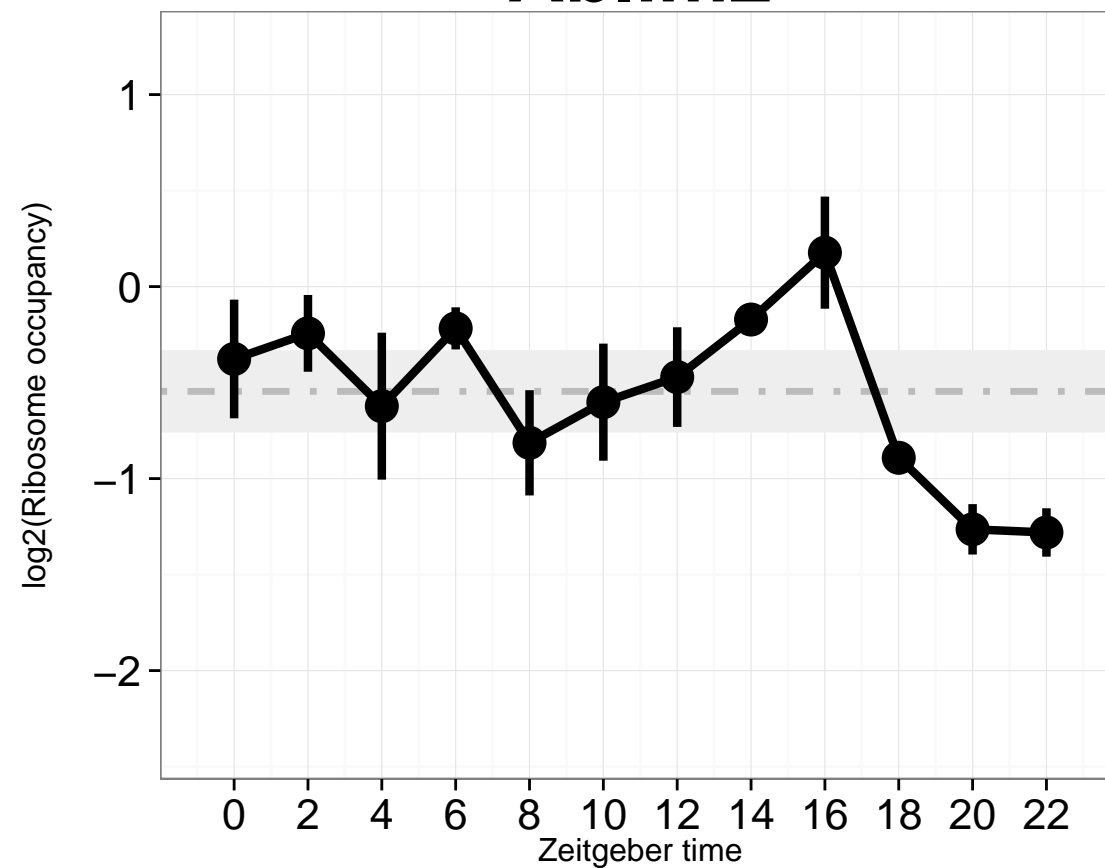

Supplement: Supplementary file 9078 [file 1]

# Dusp16

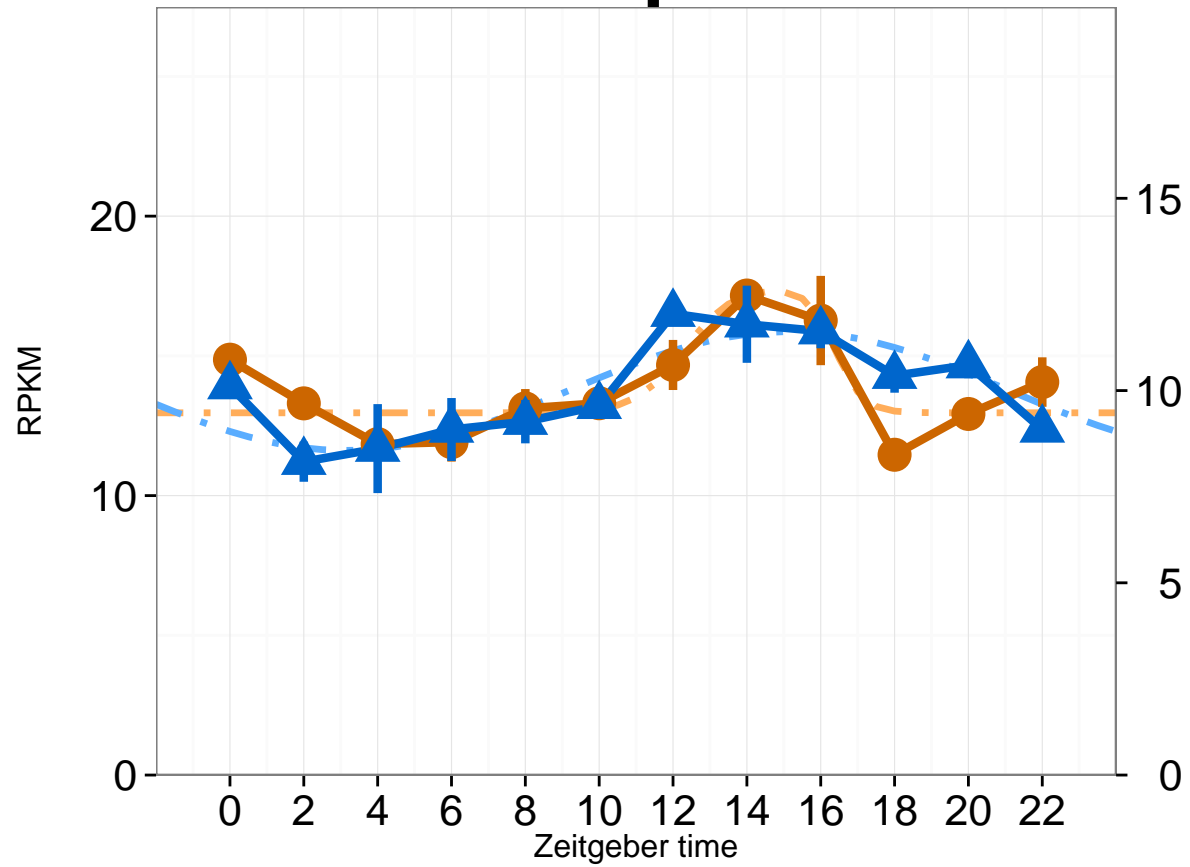

# Dusp16

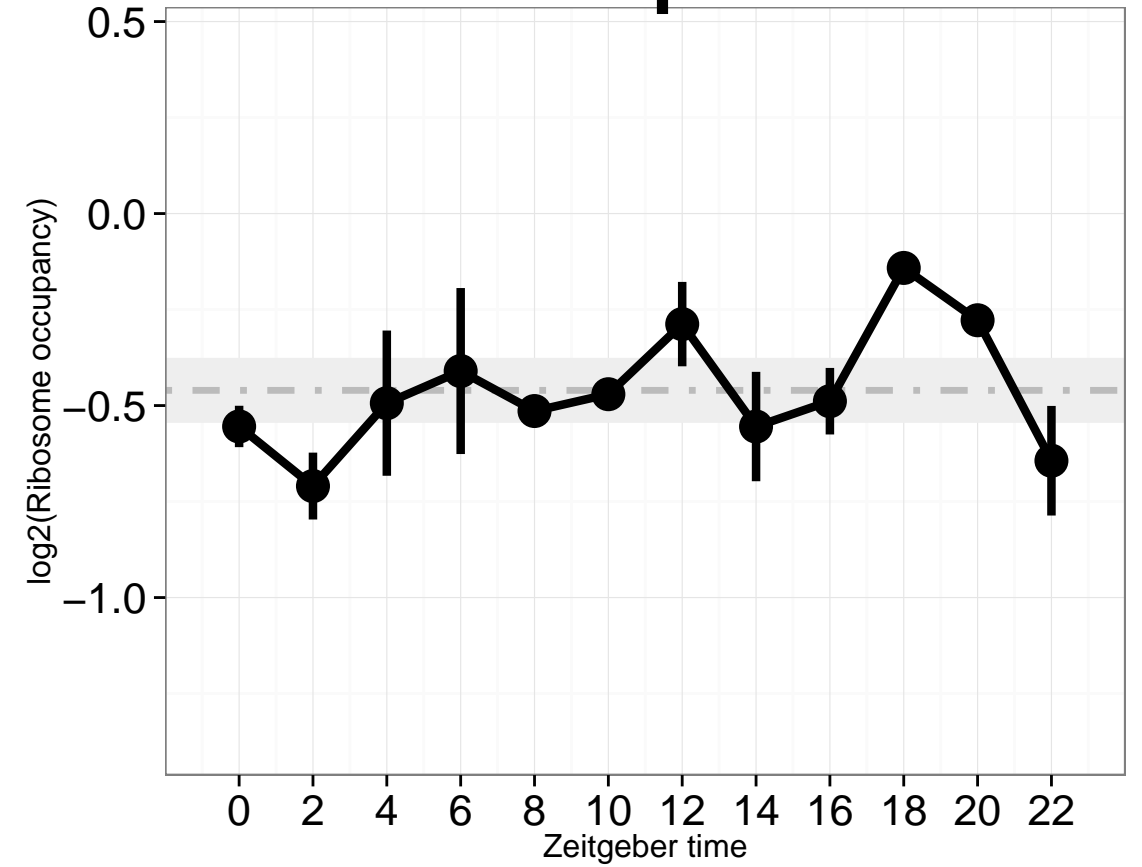

Supplement: Supplementary file 9079 [file 1]

## Tbp

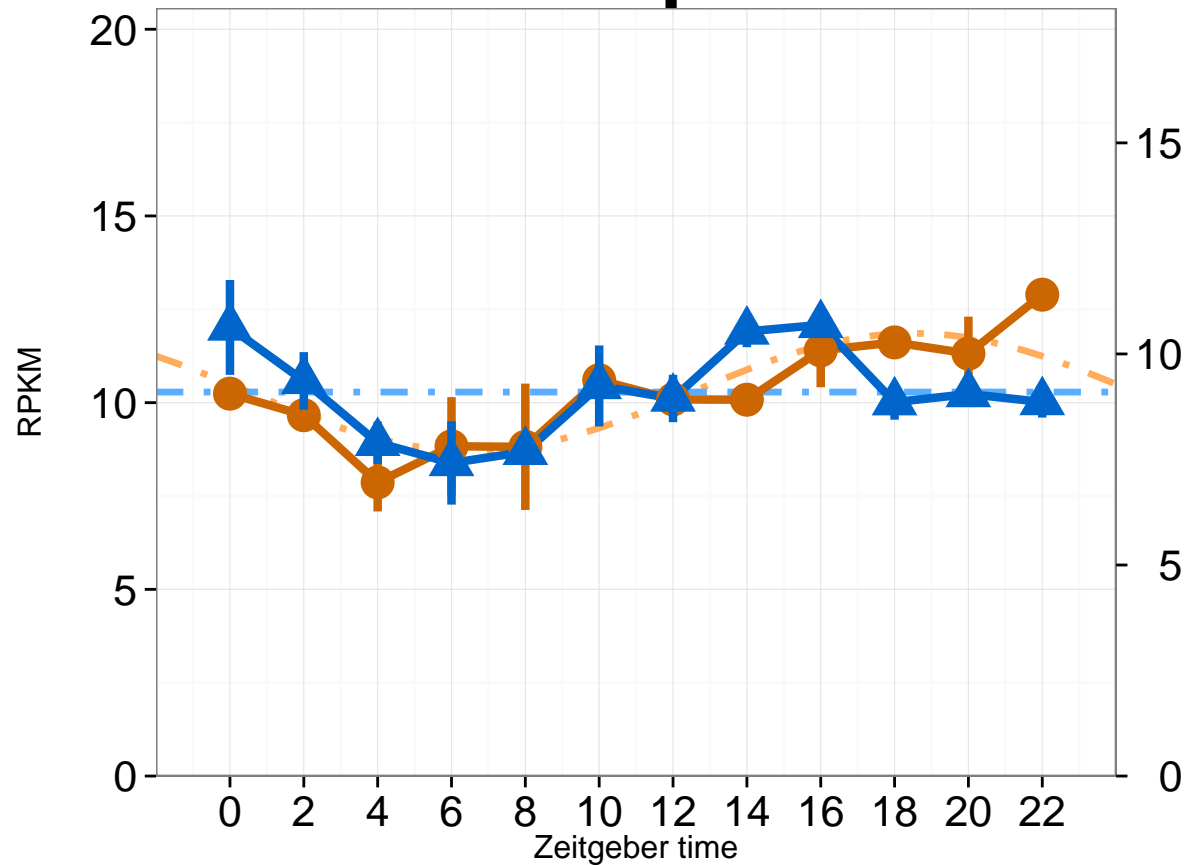

## Tbp

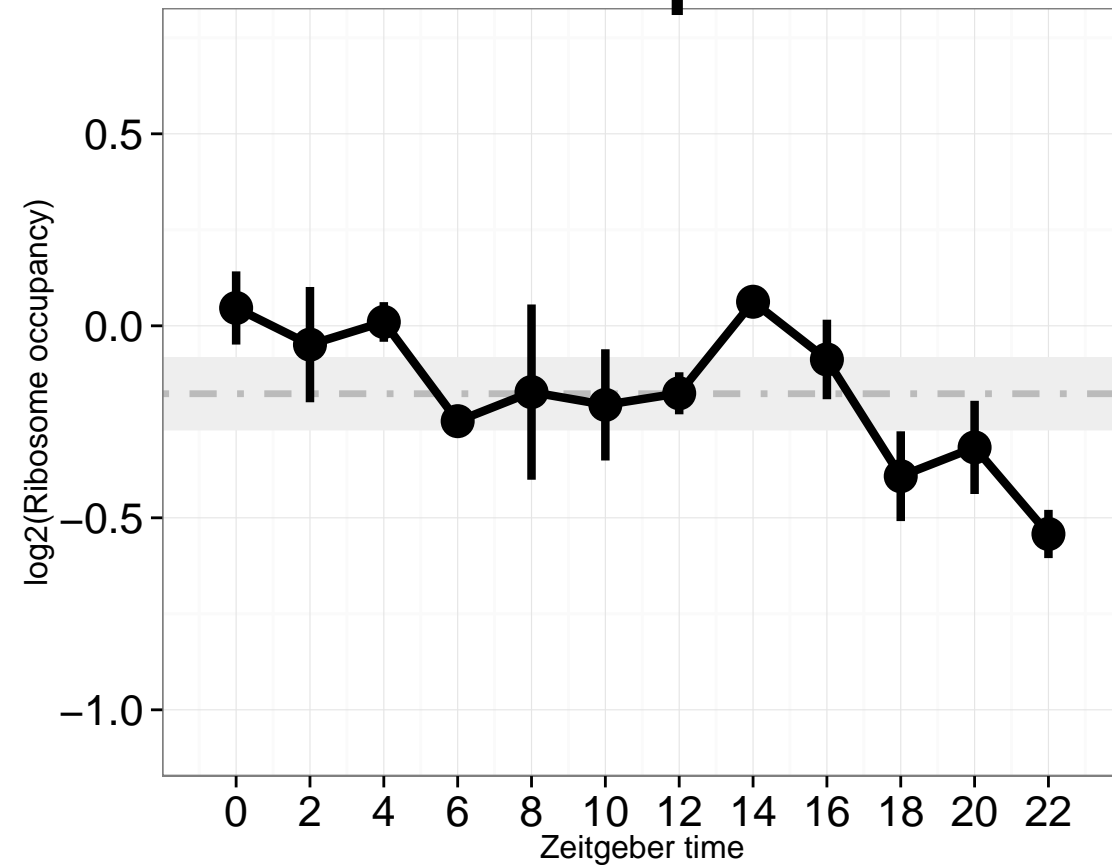

Supplement: Supplementary file 9080 [file 1]

## Tsc22d4

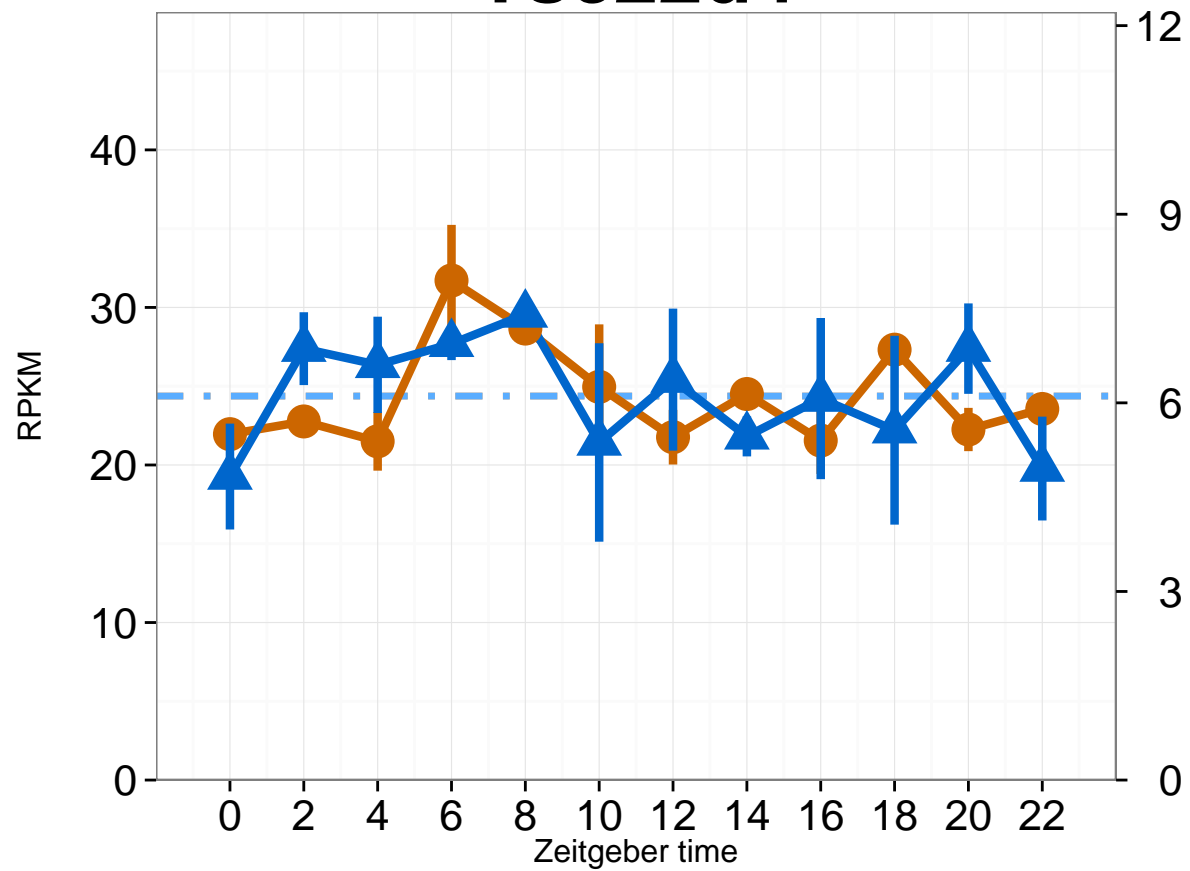

## Tsc22d4

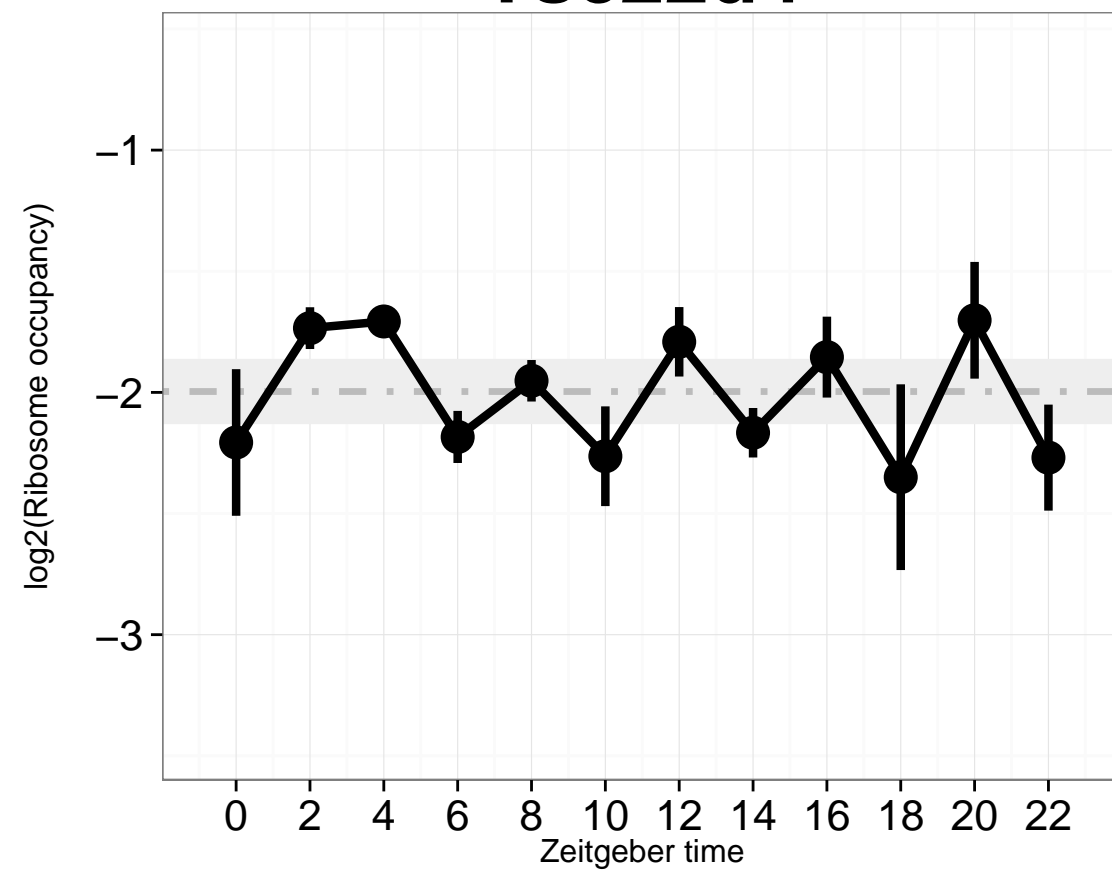

Supplement: Supplementary file 9081 [file 1]

## Esrp2

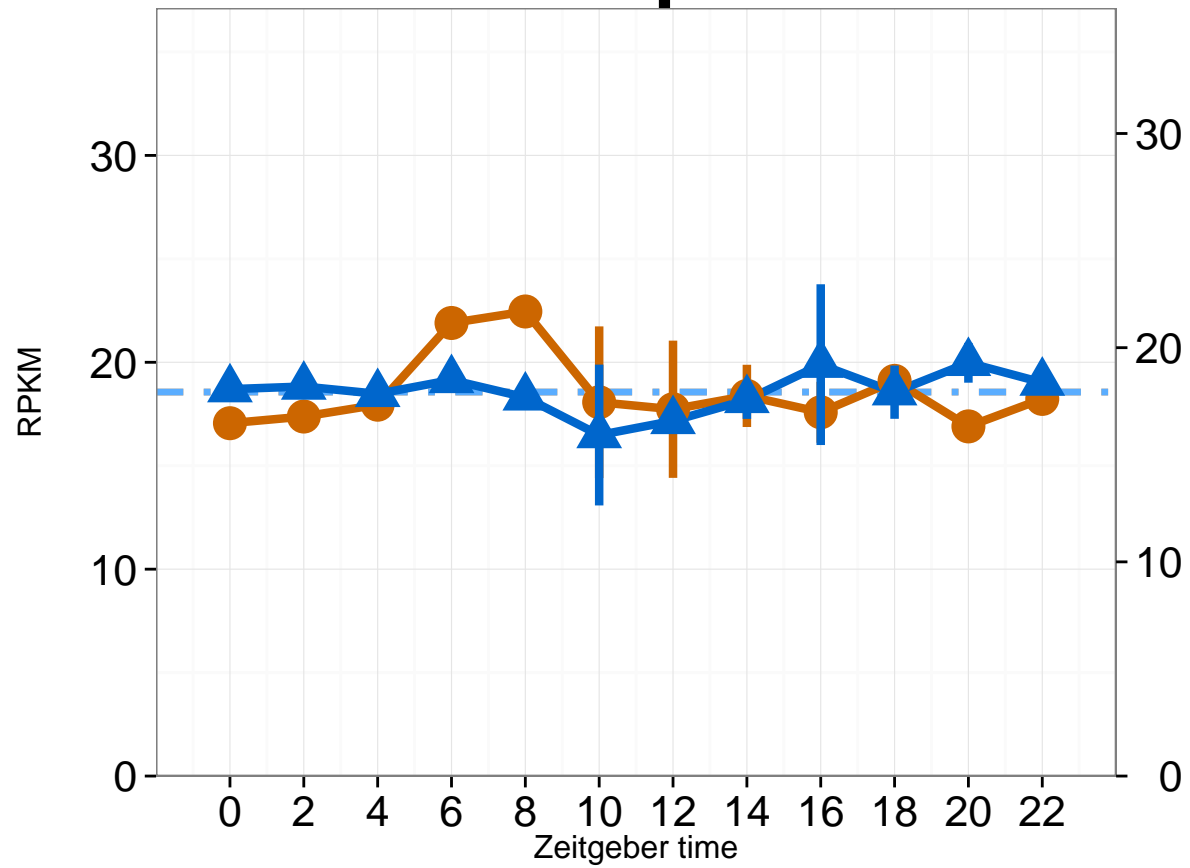

## Esrp2

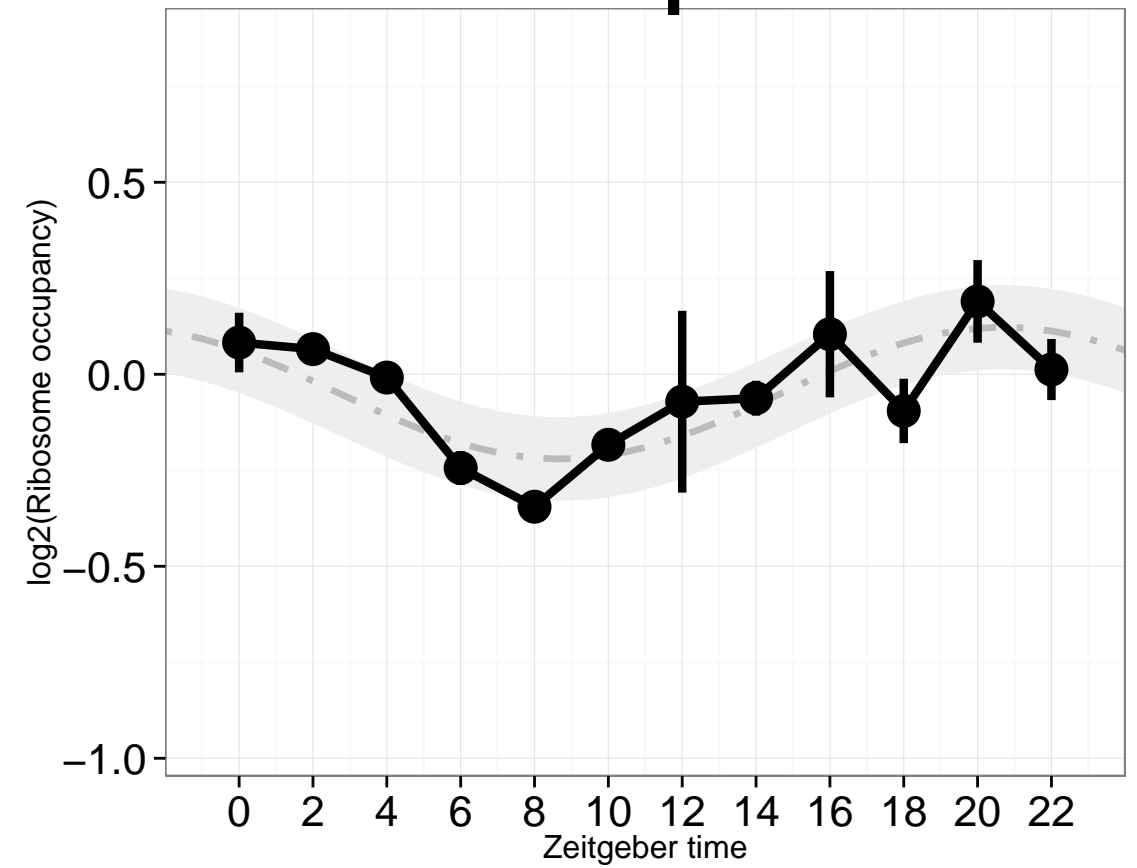

Supplement: Supplementary file 9082 [file 1]

# AU019823

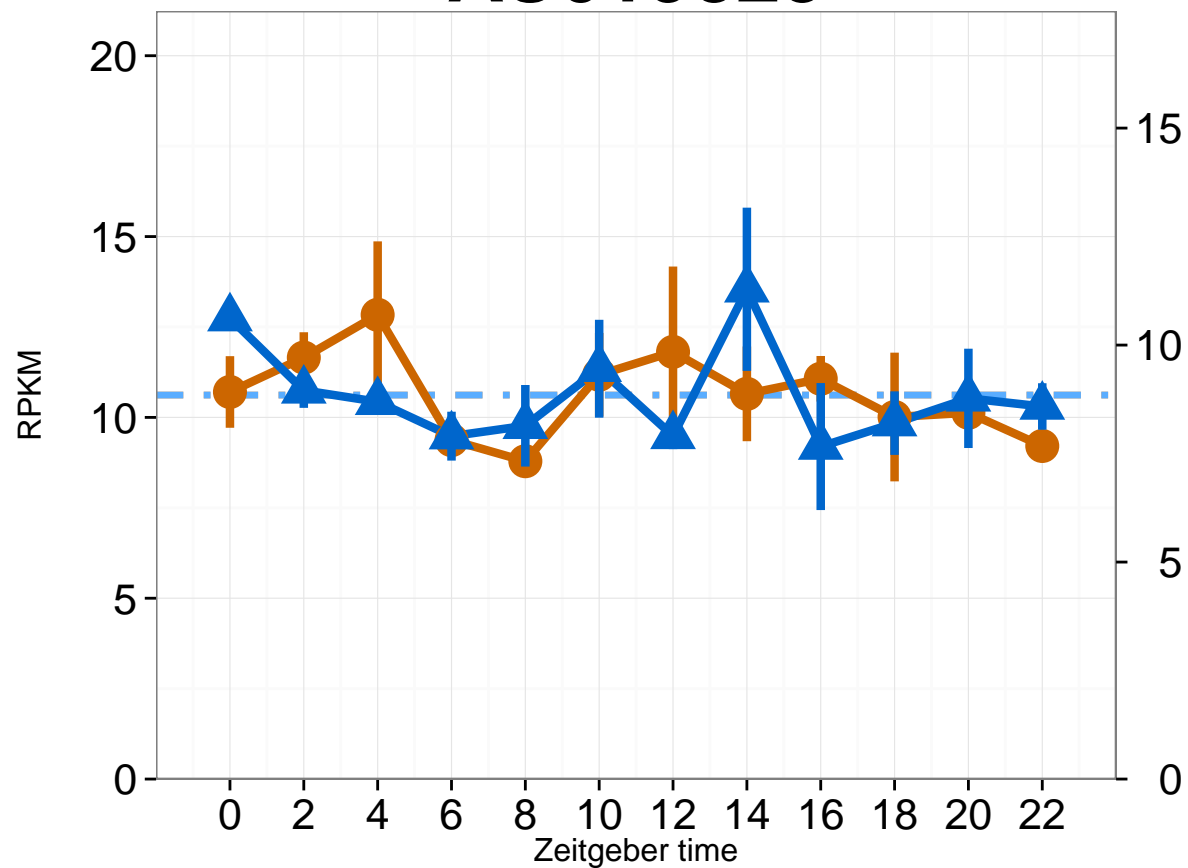

# AU019823

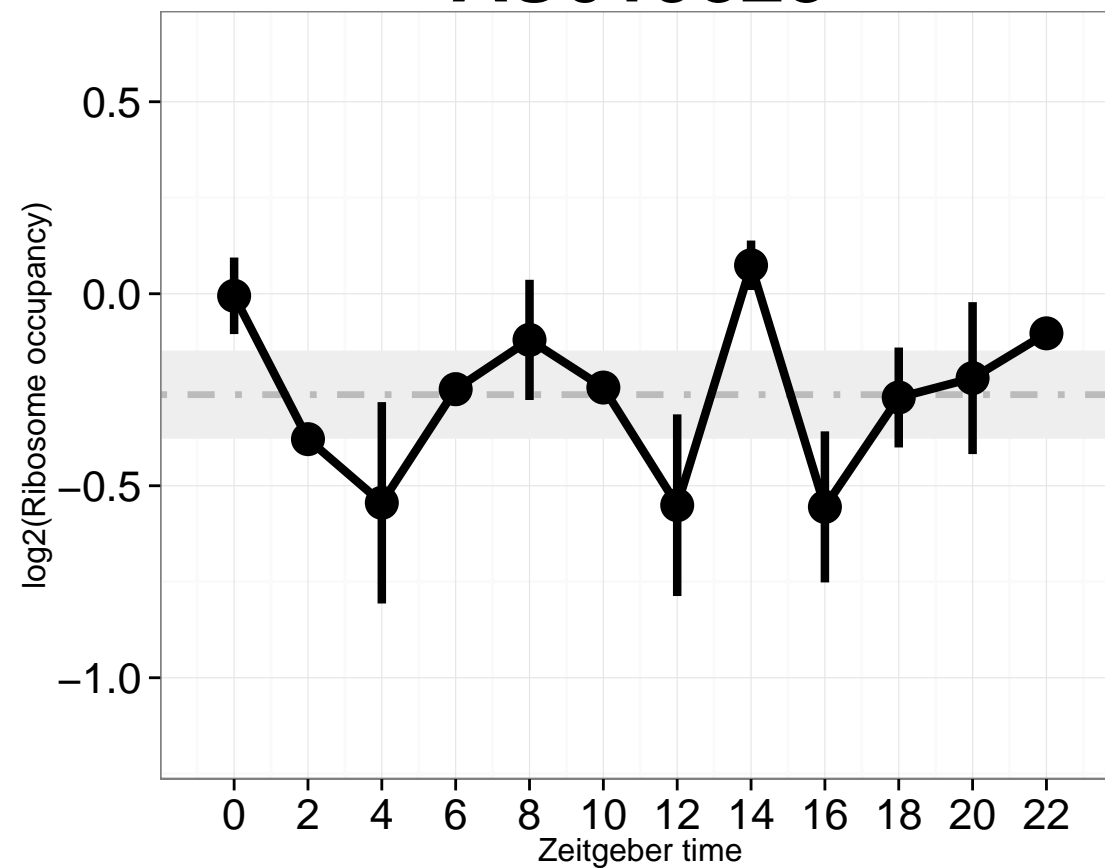

Supplement: Supplementary file 9083 [file 1]

## AI429214

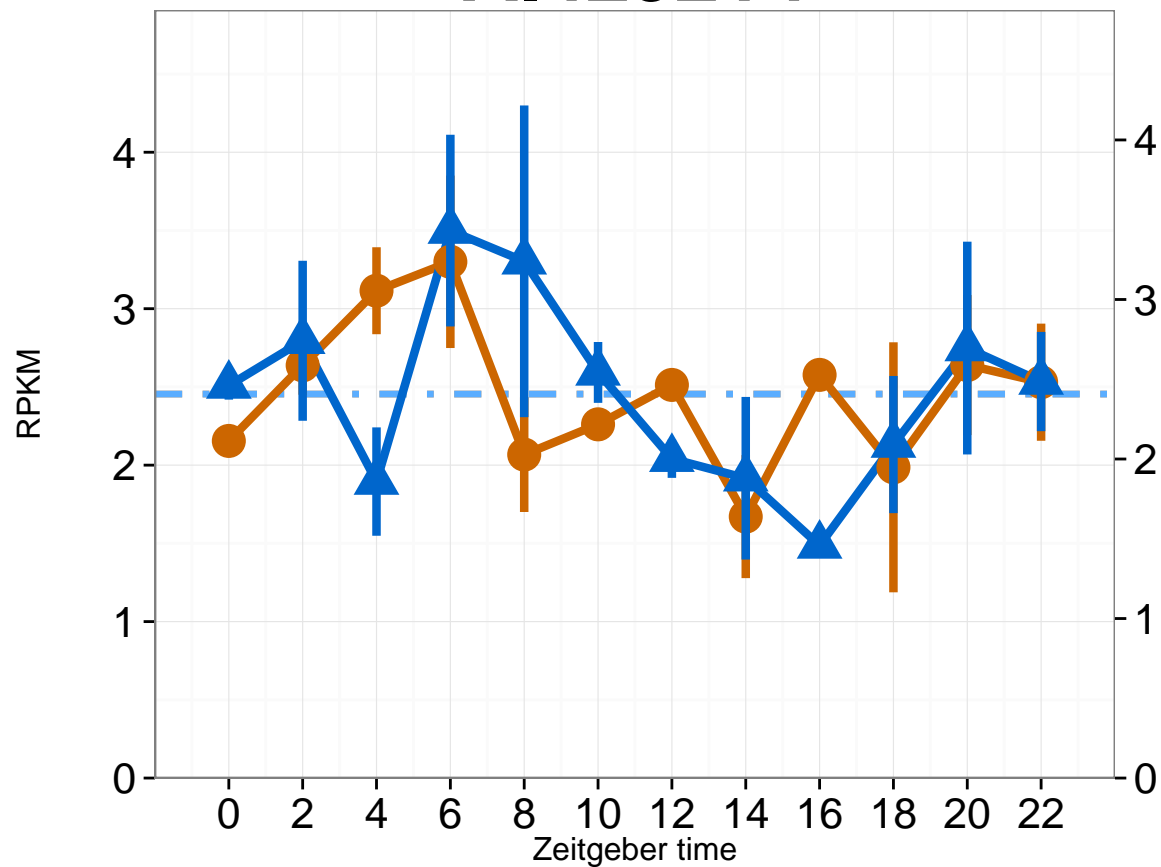

## AI429214

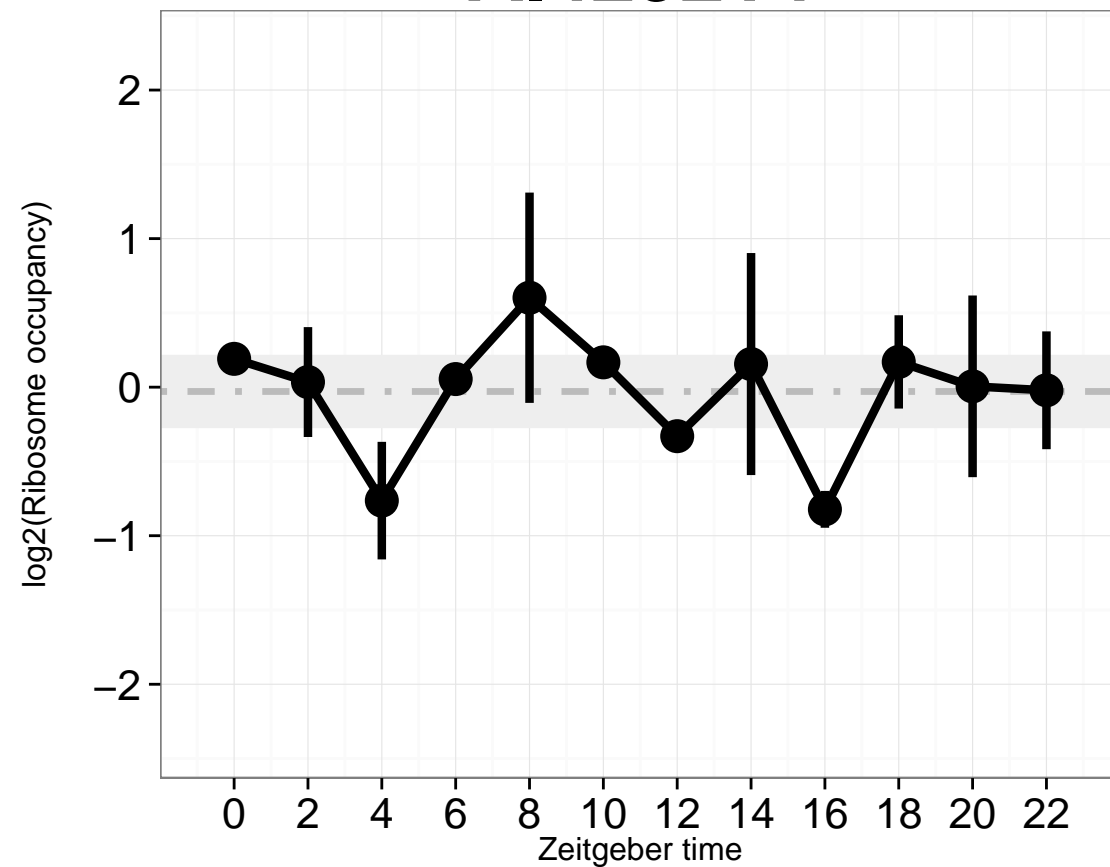

Supplement: Supplementary file 9084 [file 1]

## Agmat

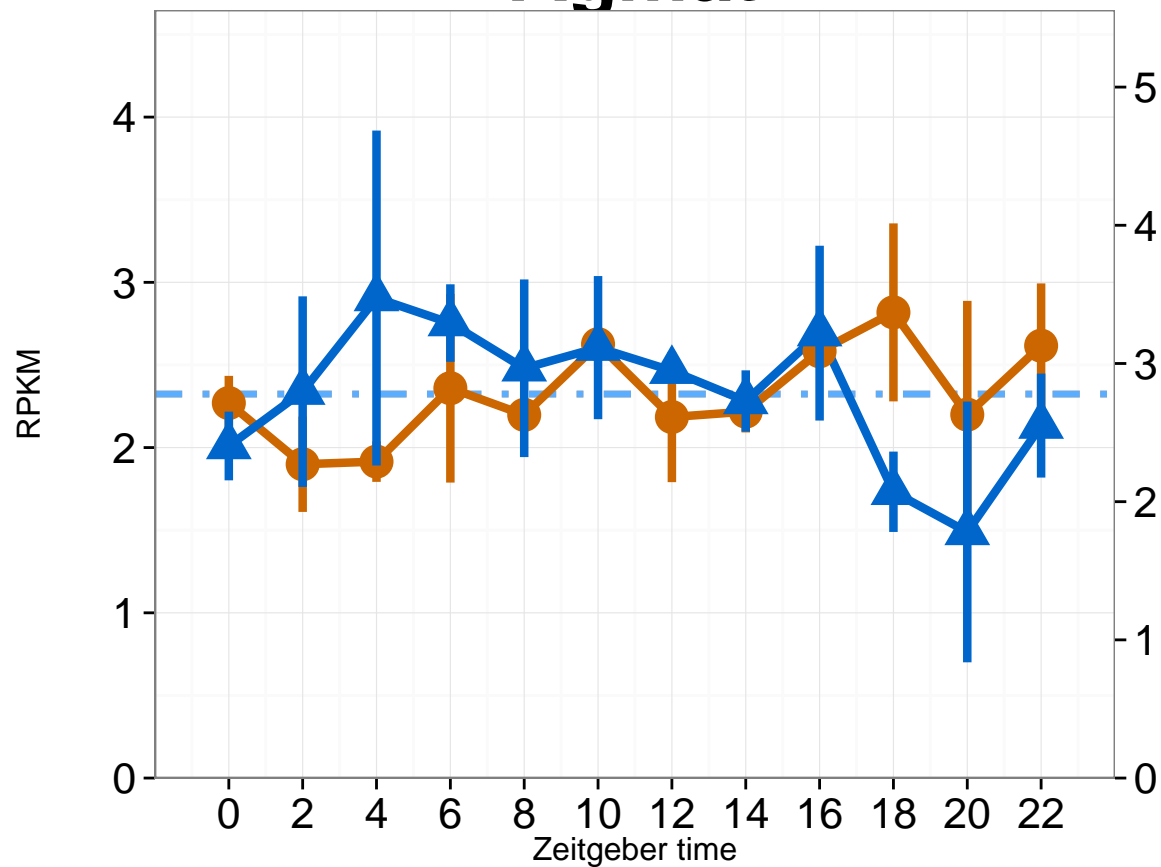

## Agmat

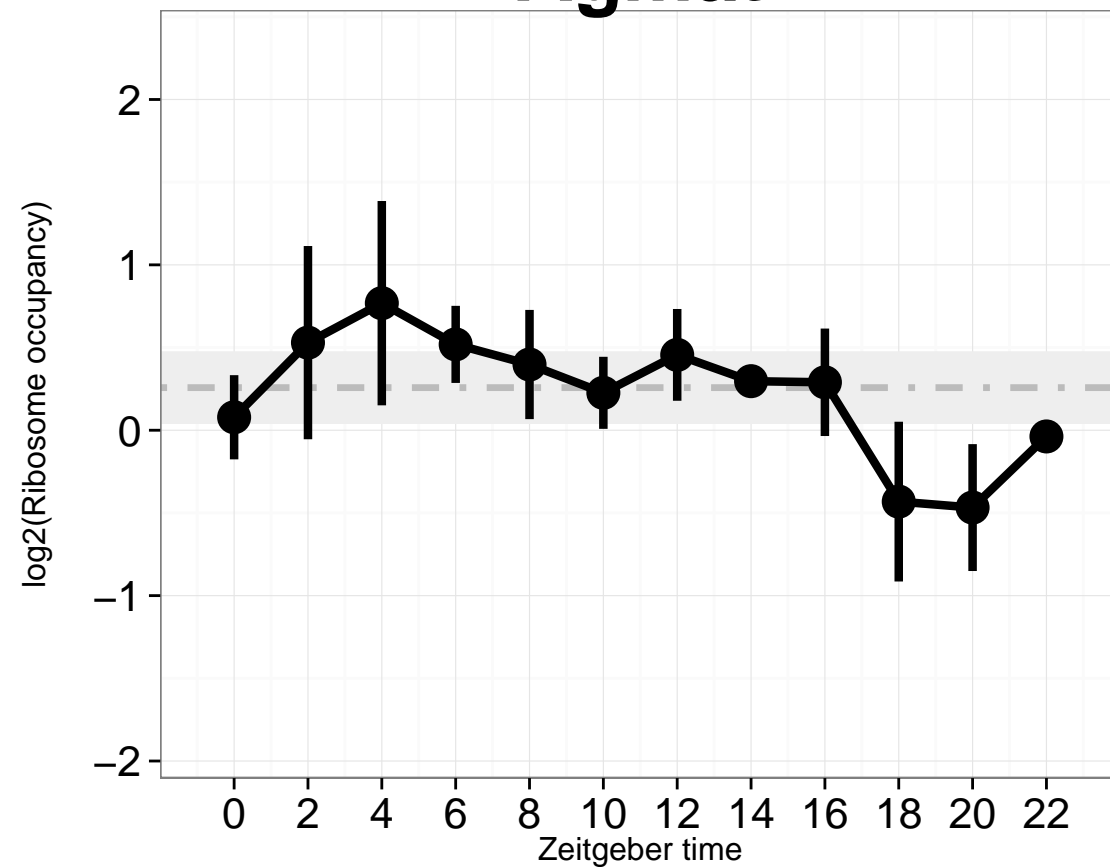

Supplement: Supplementary file 9085 [file 1]

# Fgd6

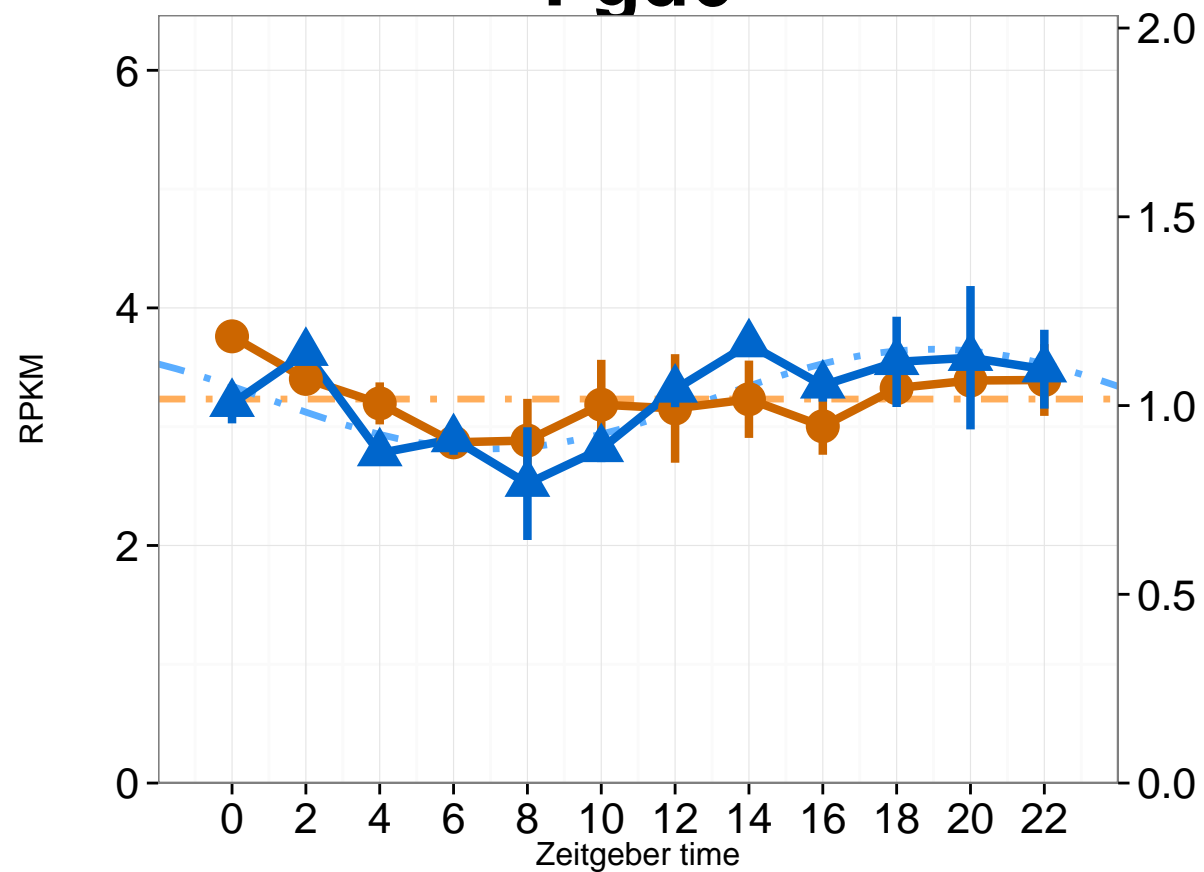

# Fgd6

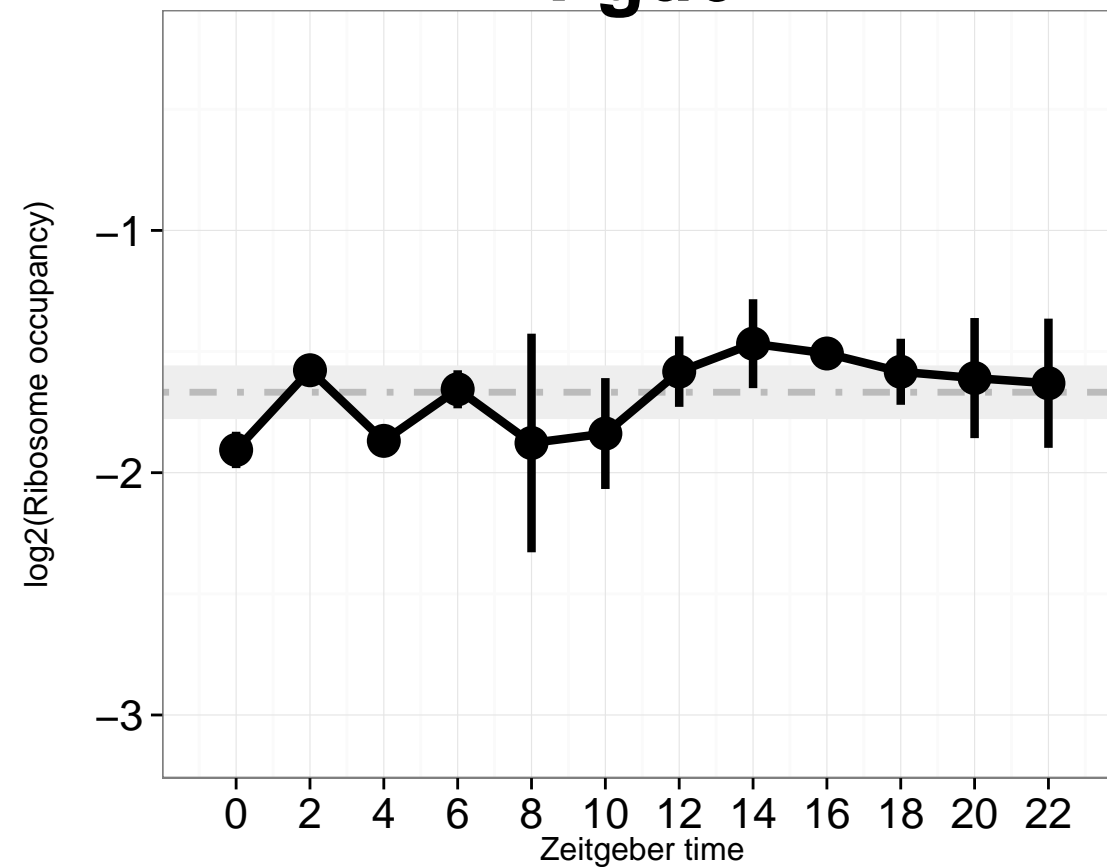

Supplement: Supplementary file 9086 [file 1]

## Unkl

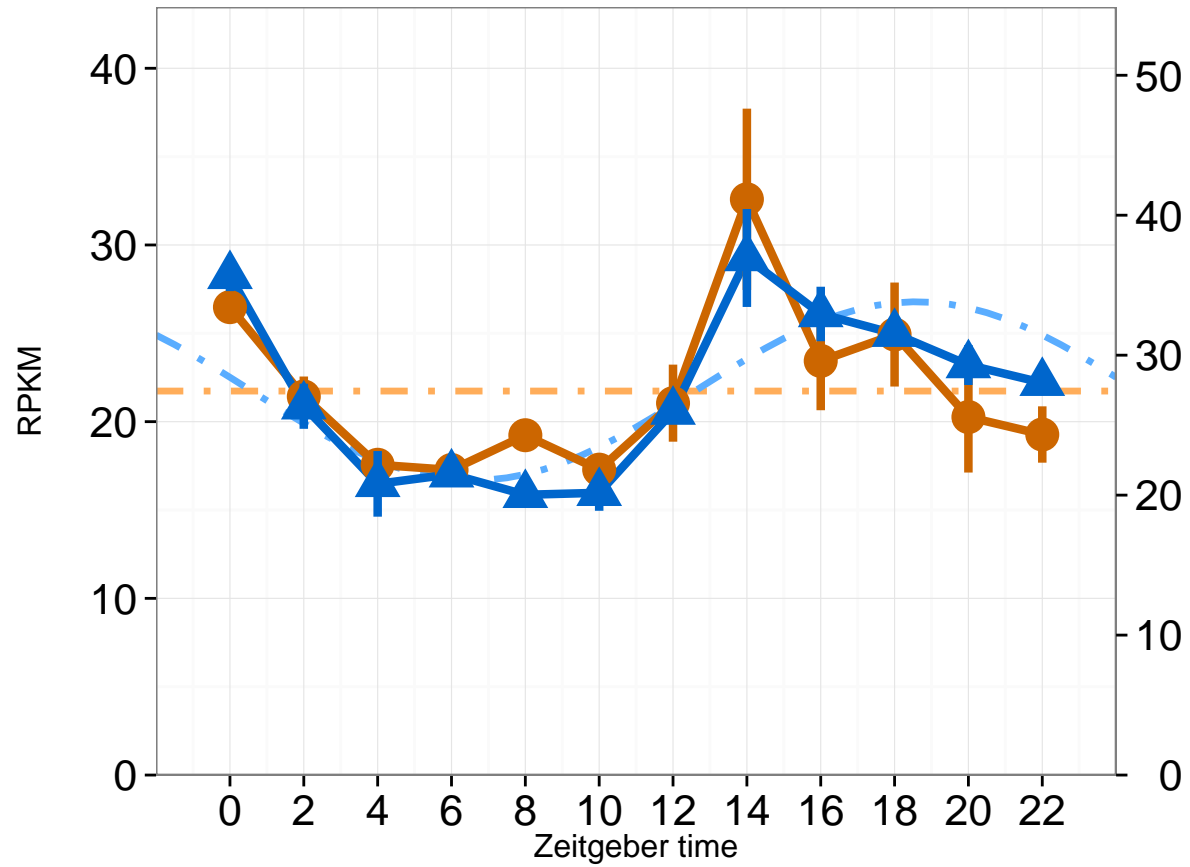

## Unkl

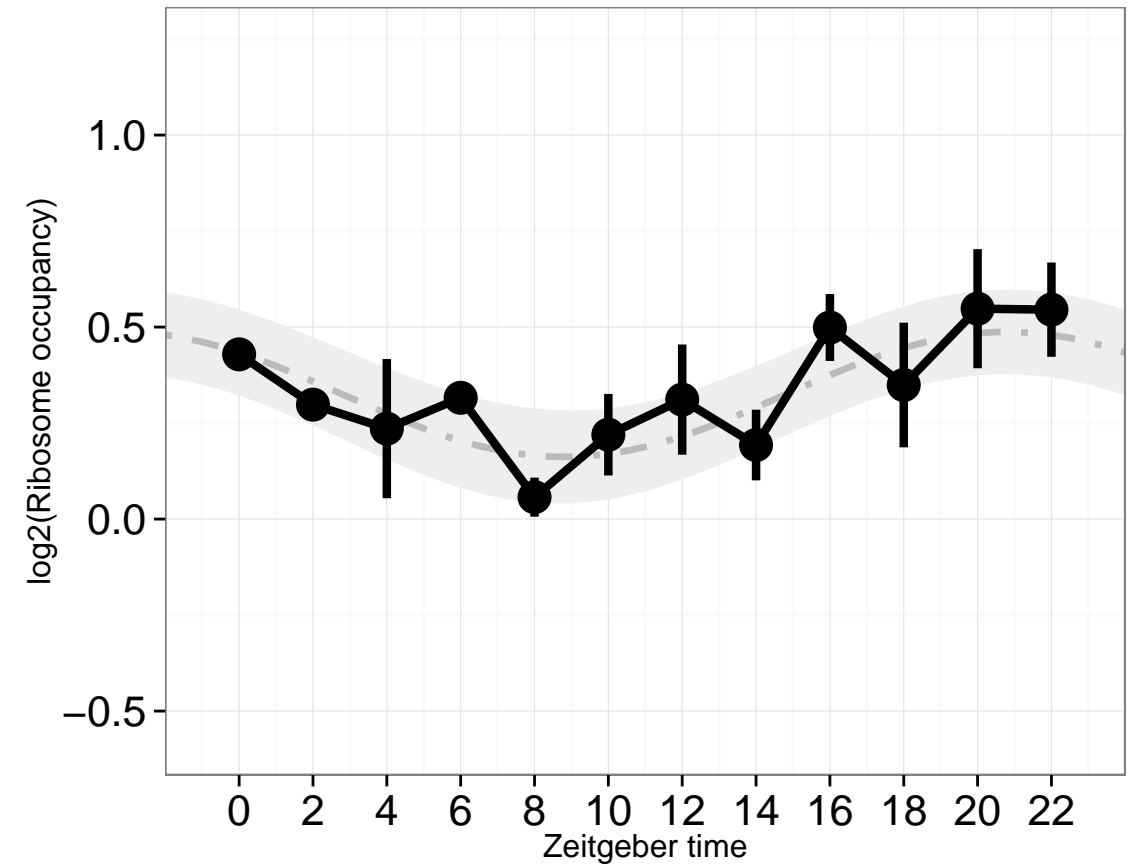

Supplement: Supplementary file 9087 [file 1]

## Oaz2

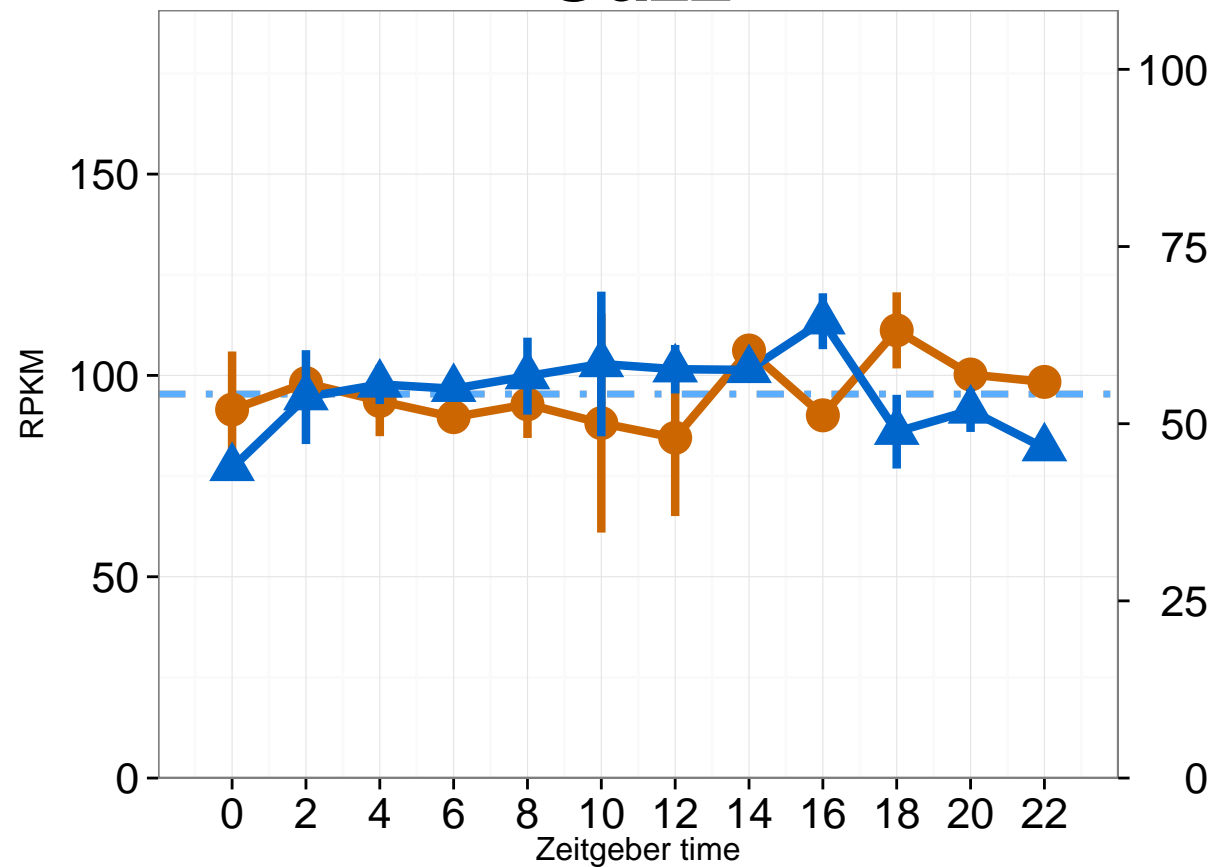

## Oaz2

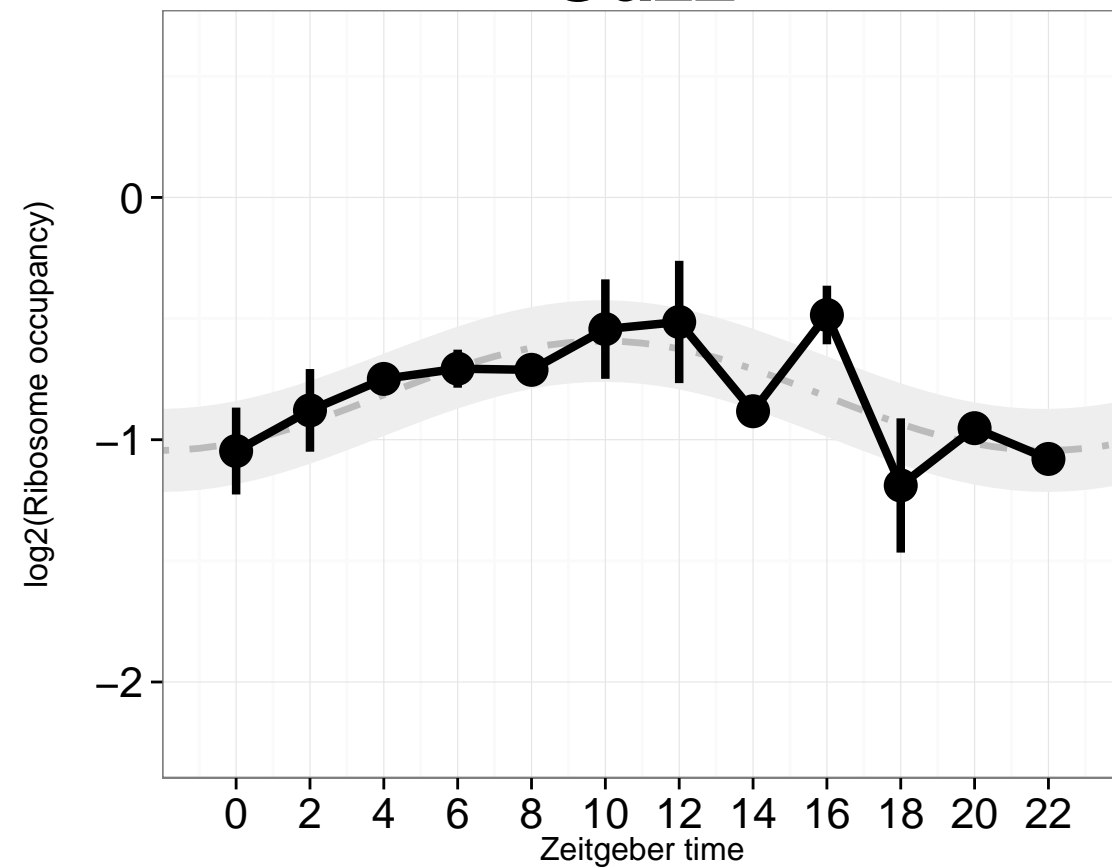

Supplement: Supplementary file 9088 [file 1]

## Inmt

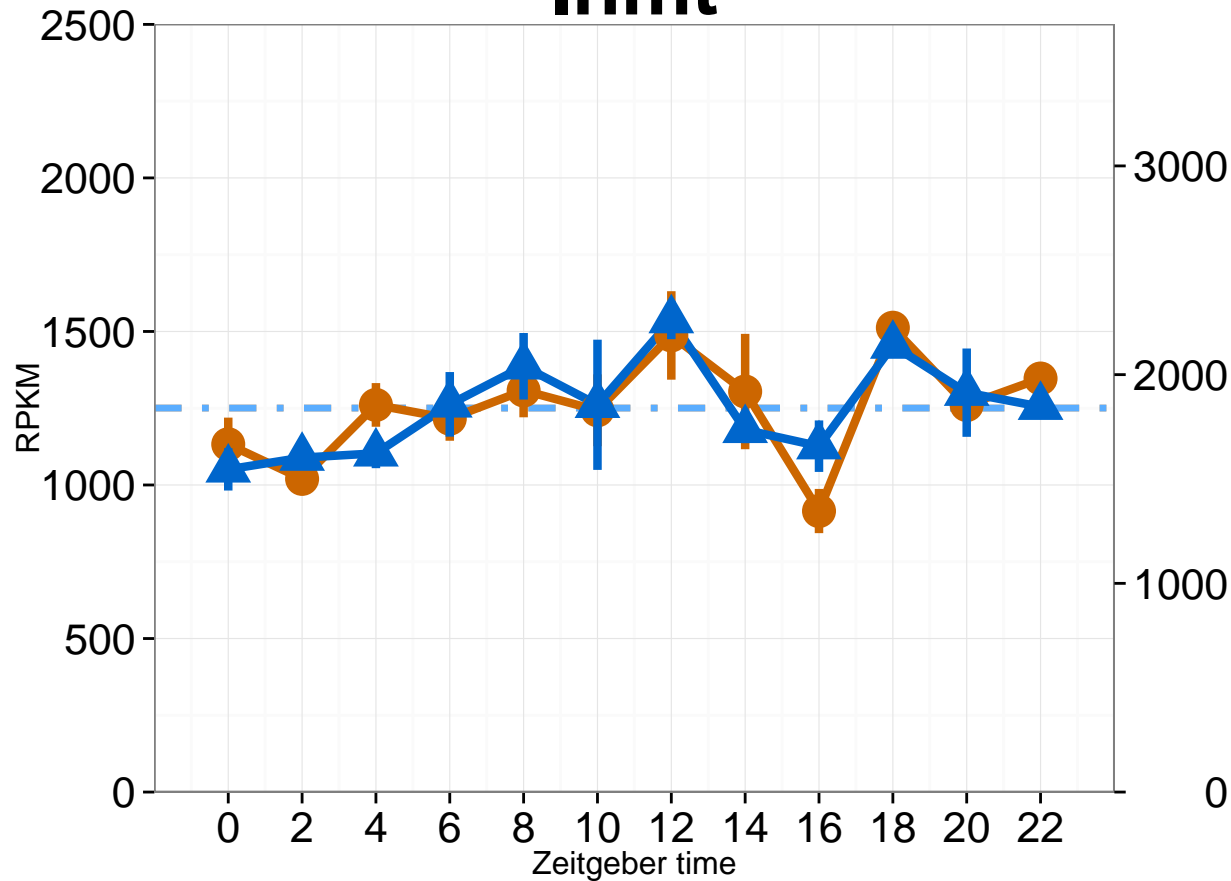

## Inmt

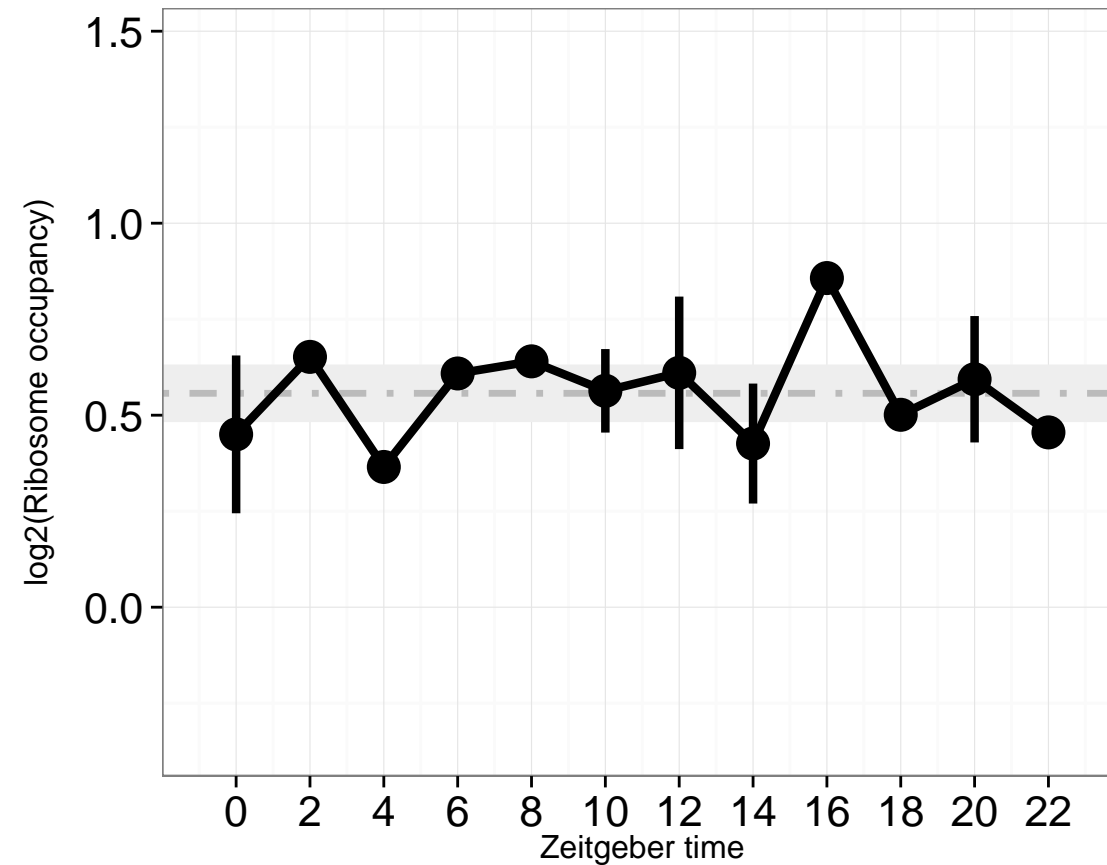

Supplement: Supplementary file 9089 [file 1]

## Slc25a32

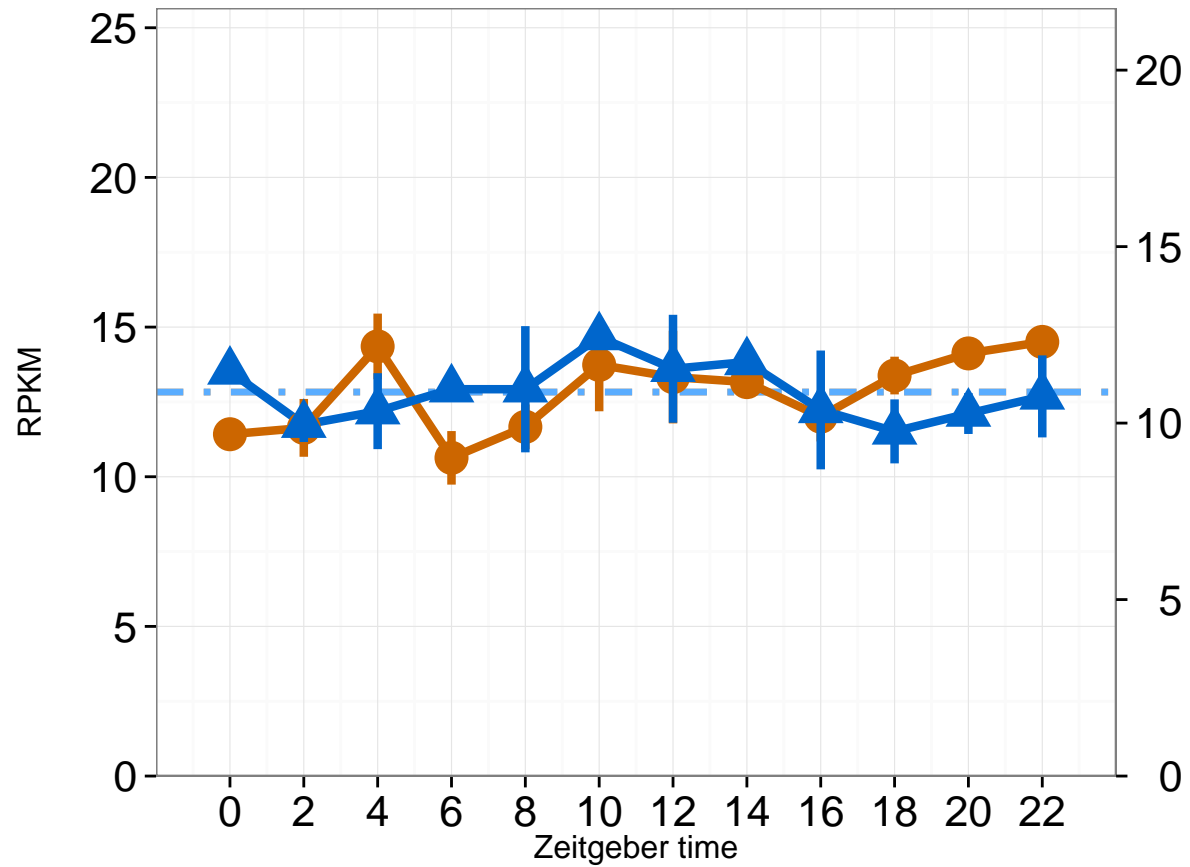

## Slc25a32

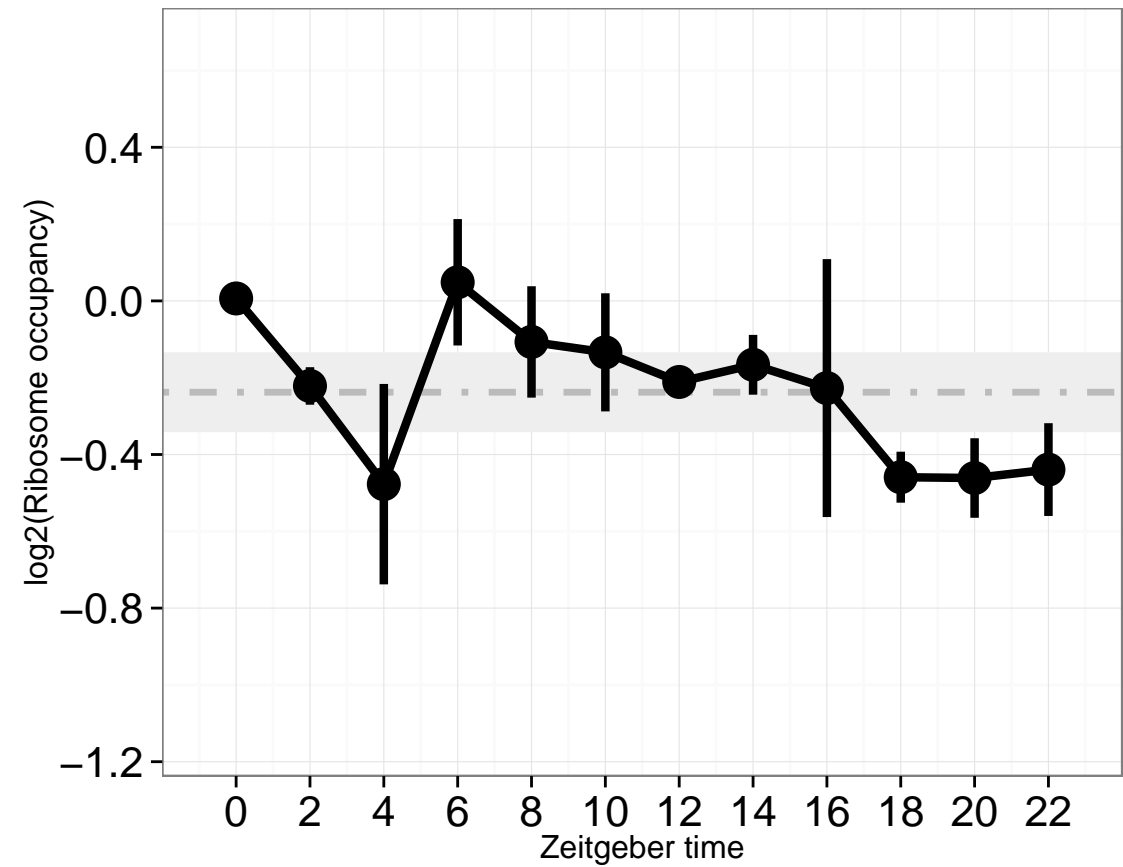

Supplement: Supplementary file 9090 [file 1]

## Ly75

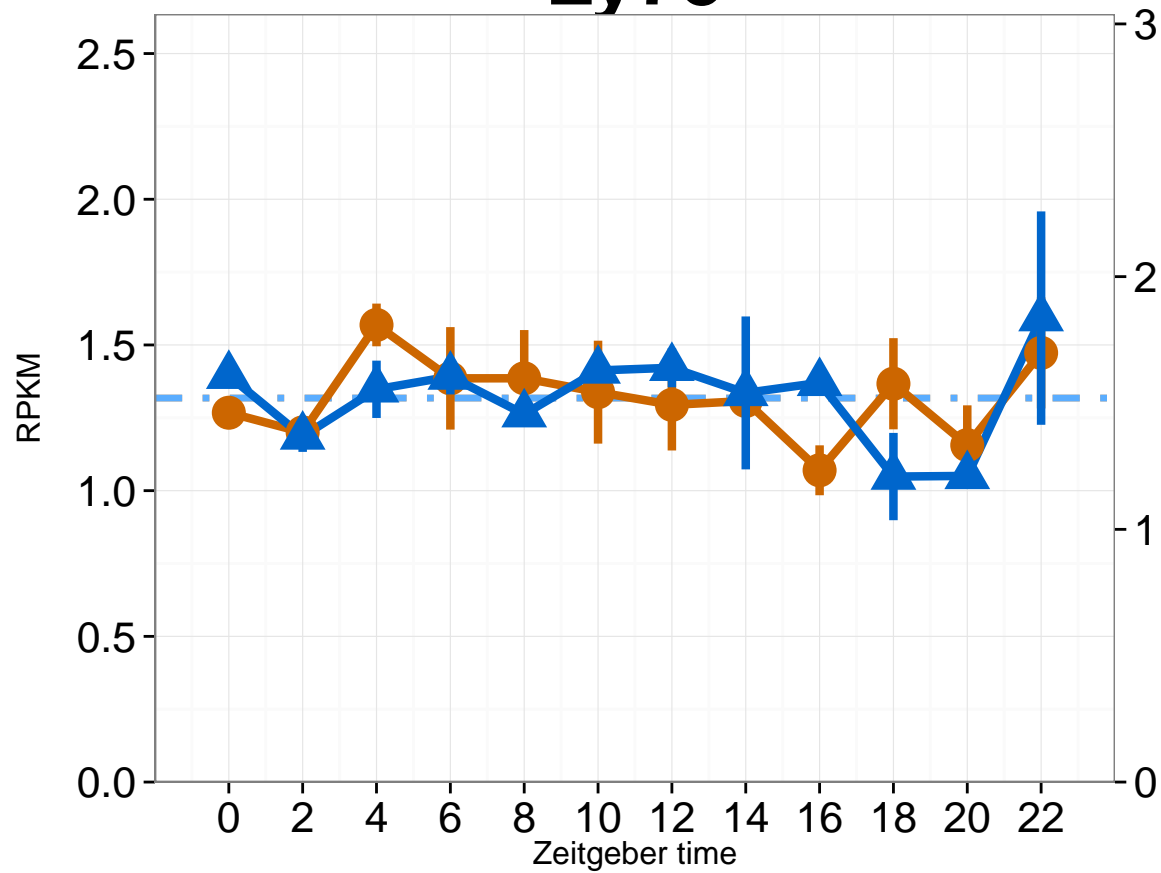

## Ly75

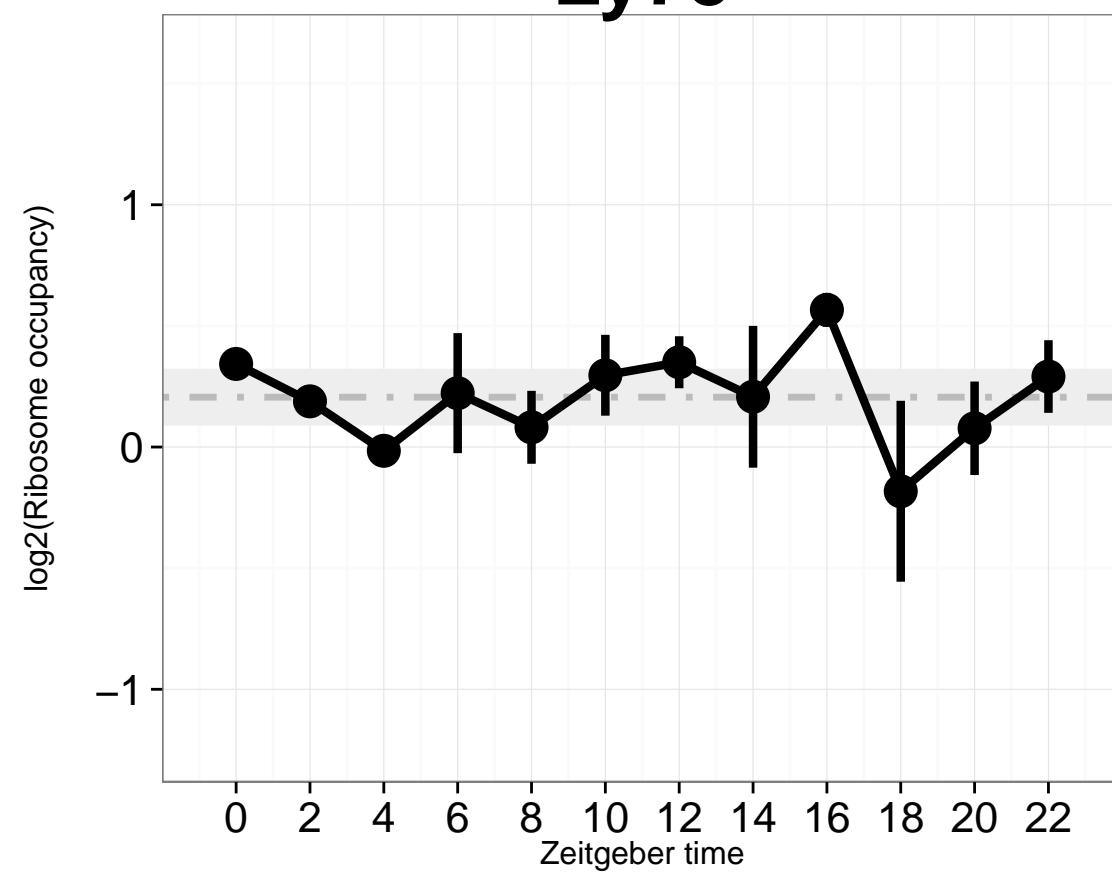

Supplement: Supplementary file 9091 [file 1]

## Rps6ka3

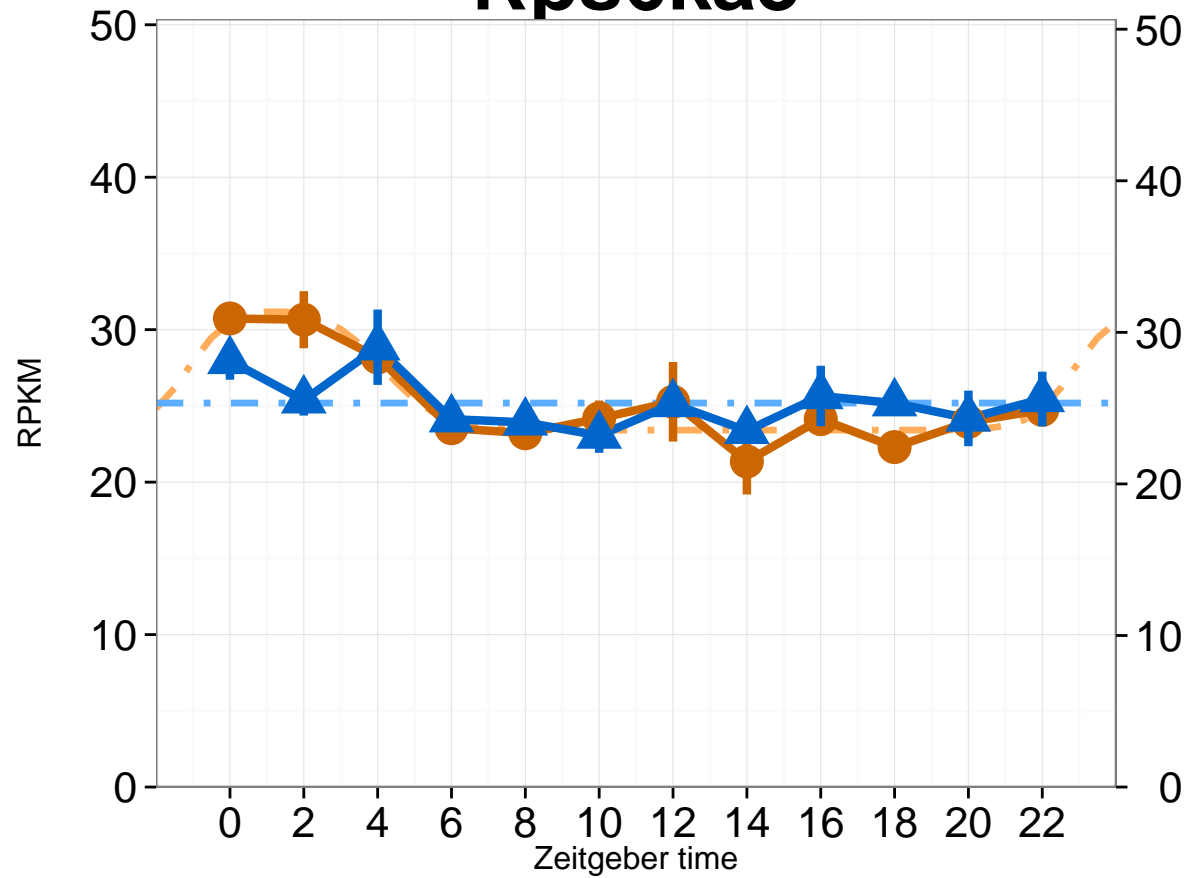

## Rps6ka3

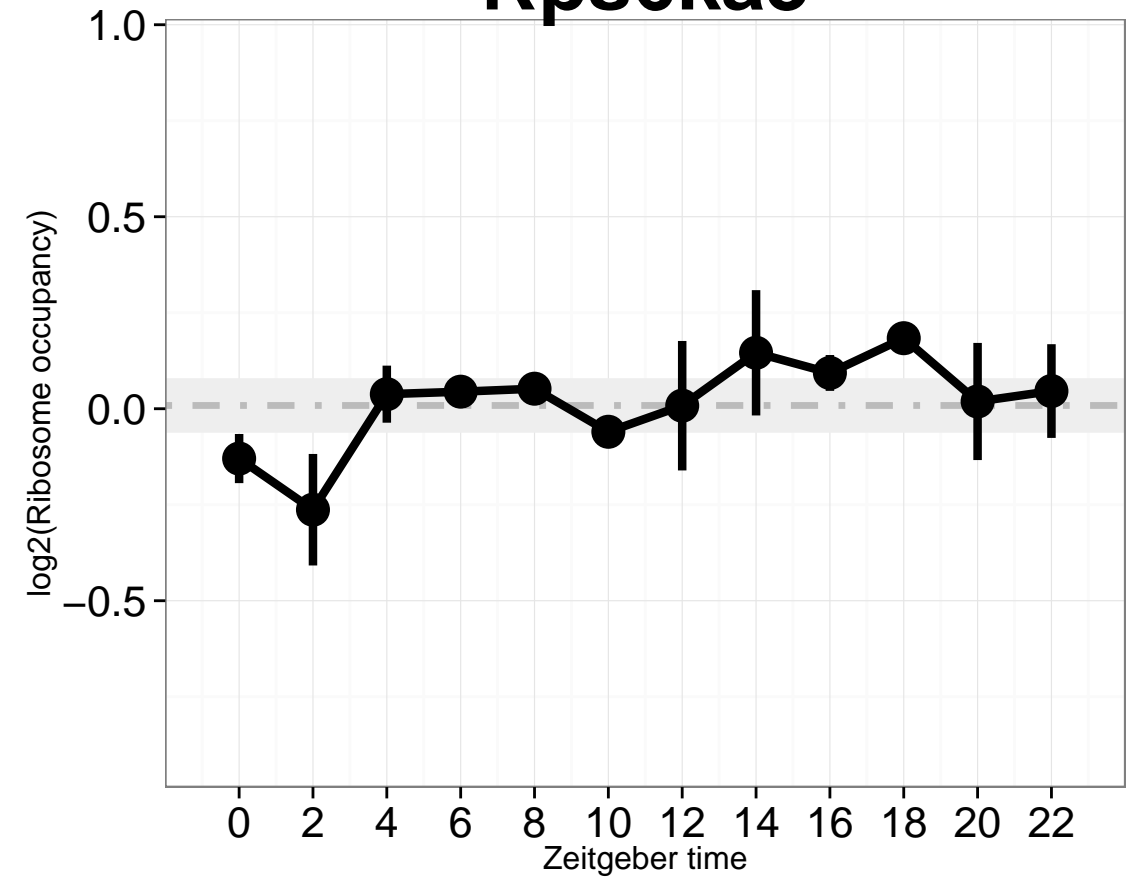

Supplement: Supplementary file 9092 [file 1]

# Ces2g

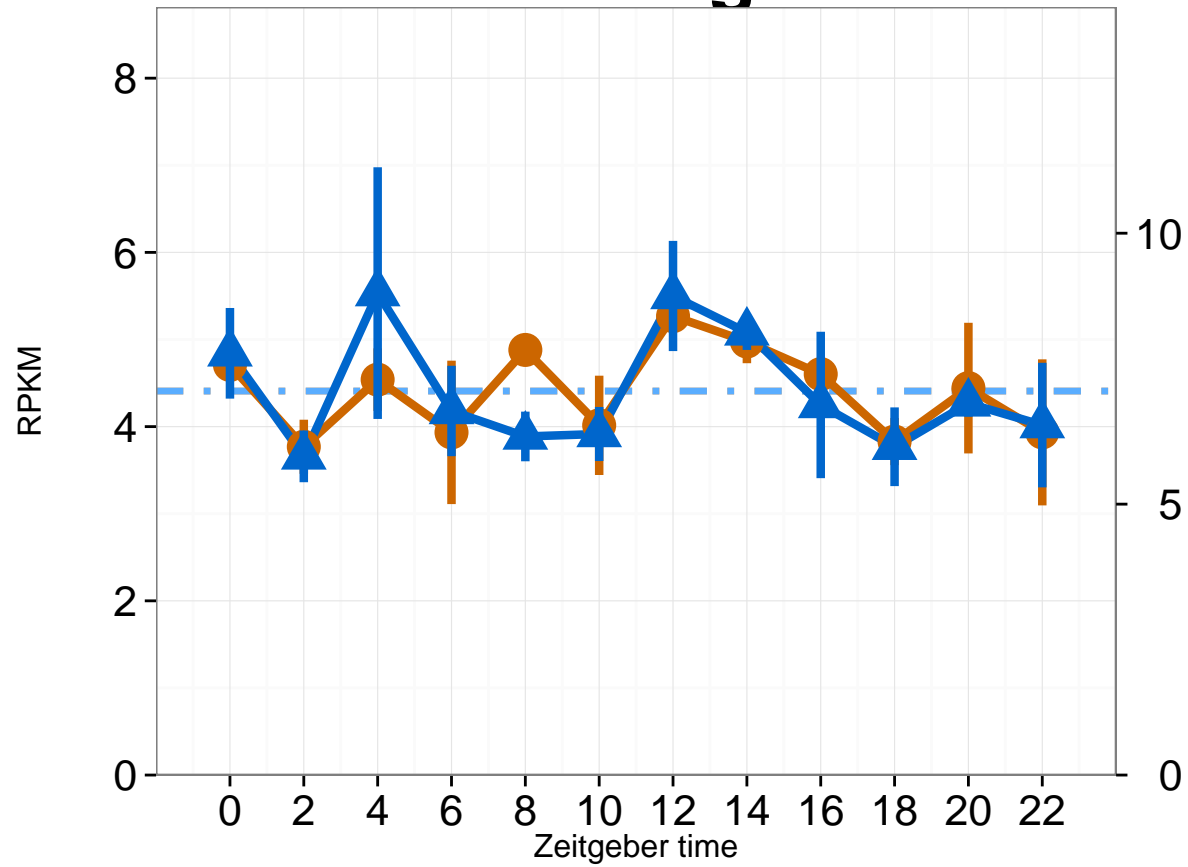

# Ces2g

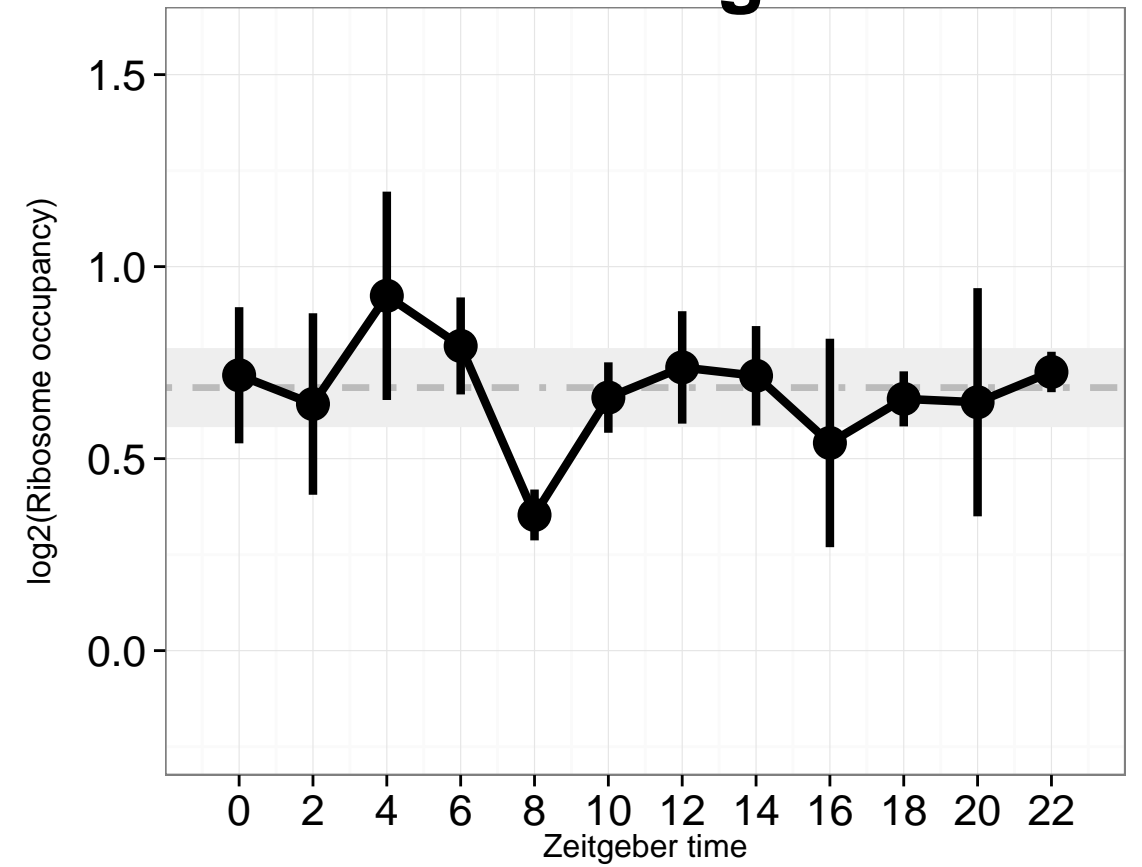

Supplement: Supplementary file 9093 [file 1]

# Gstm6

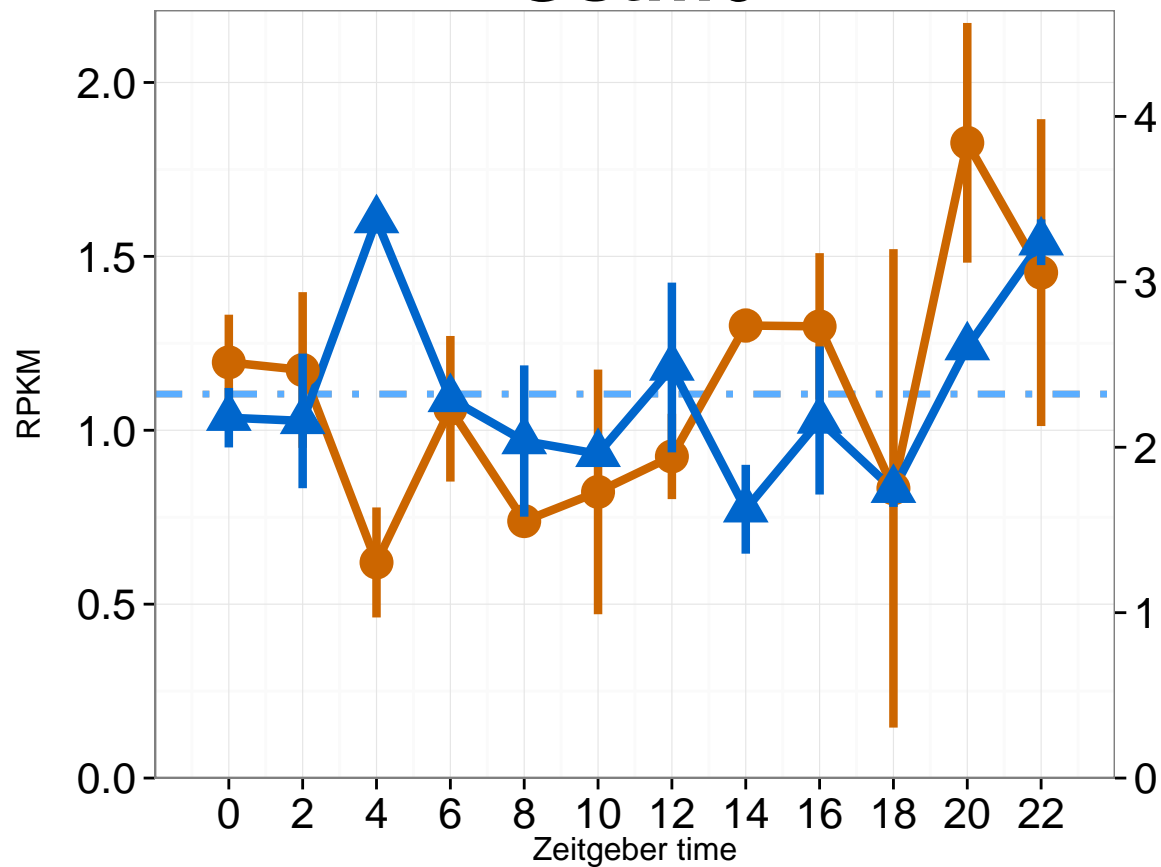

# Gstm6

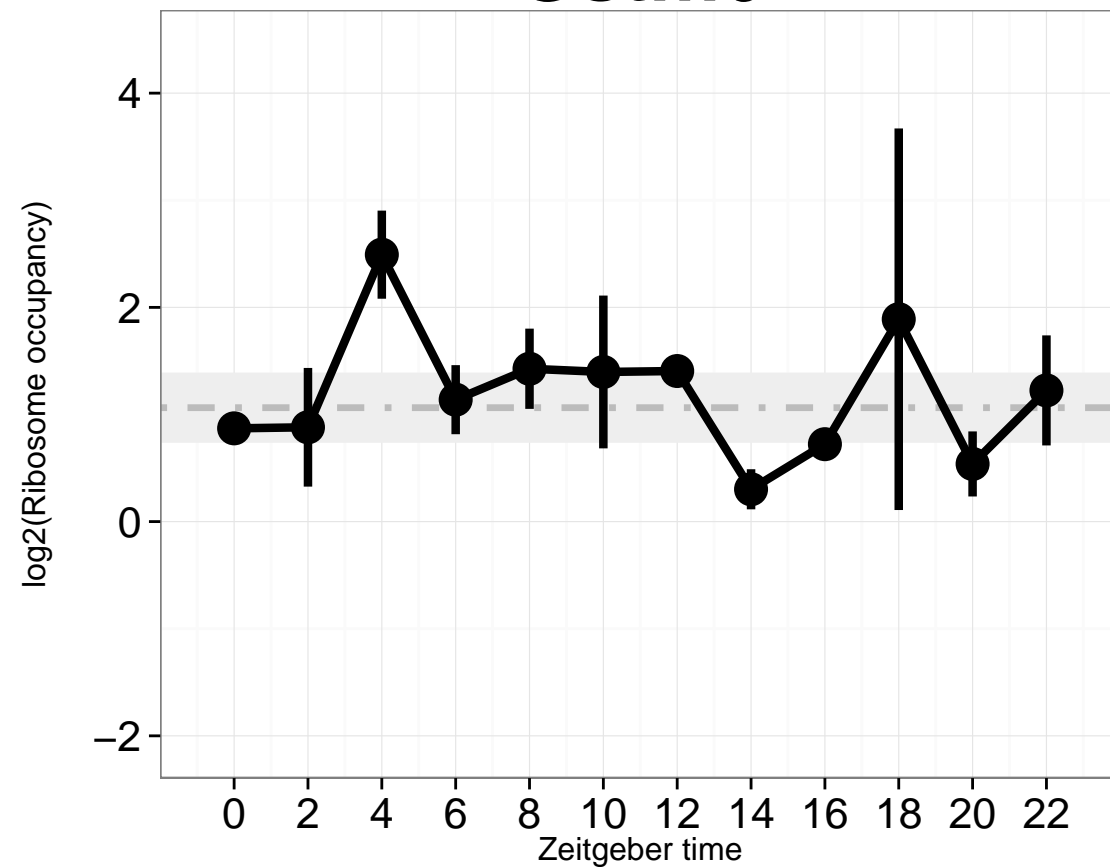

Supplement: Supplementary file 9094 [file 1]

## Fah

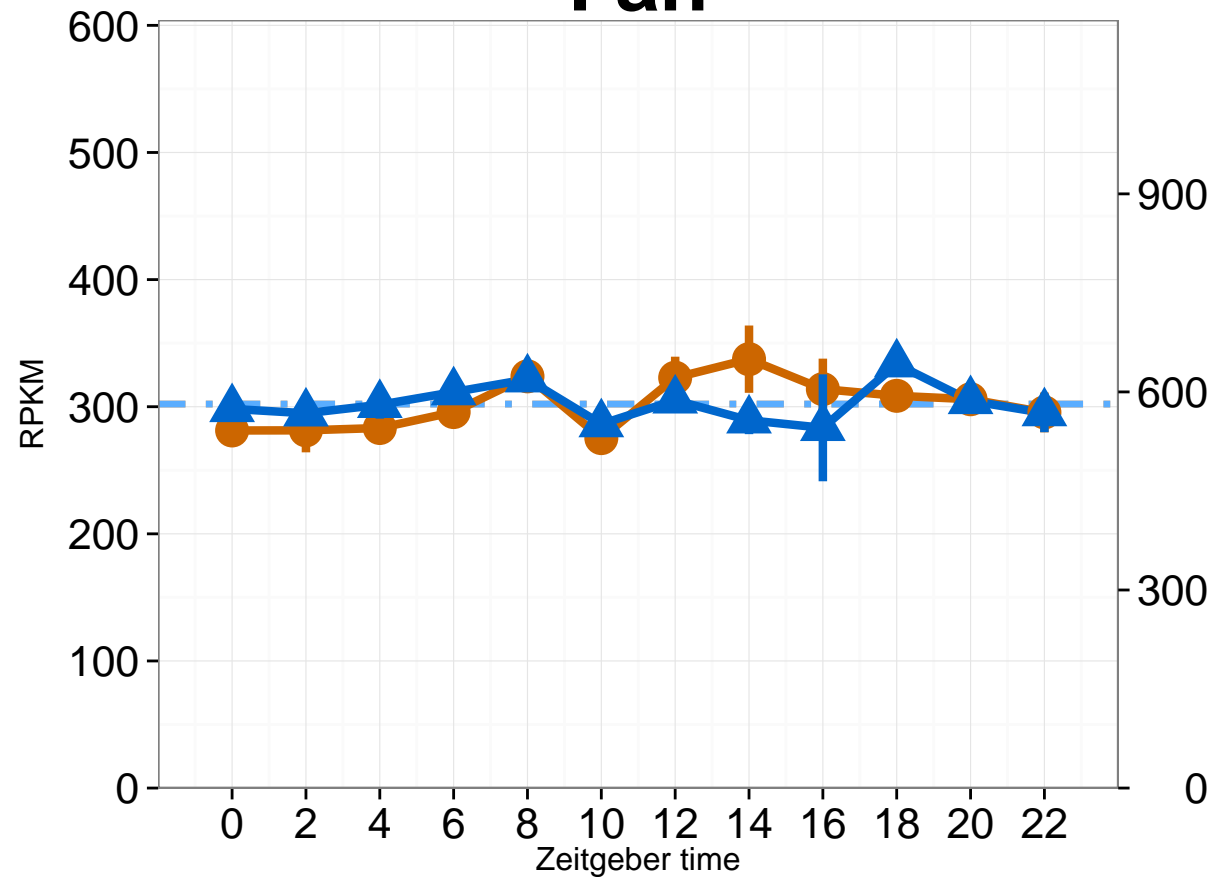

## Fah

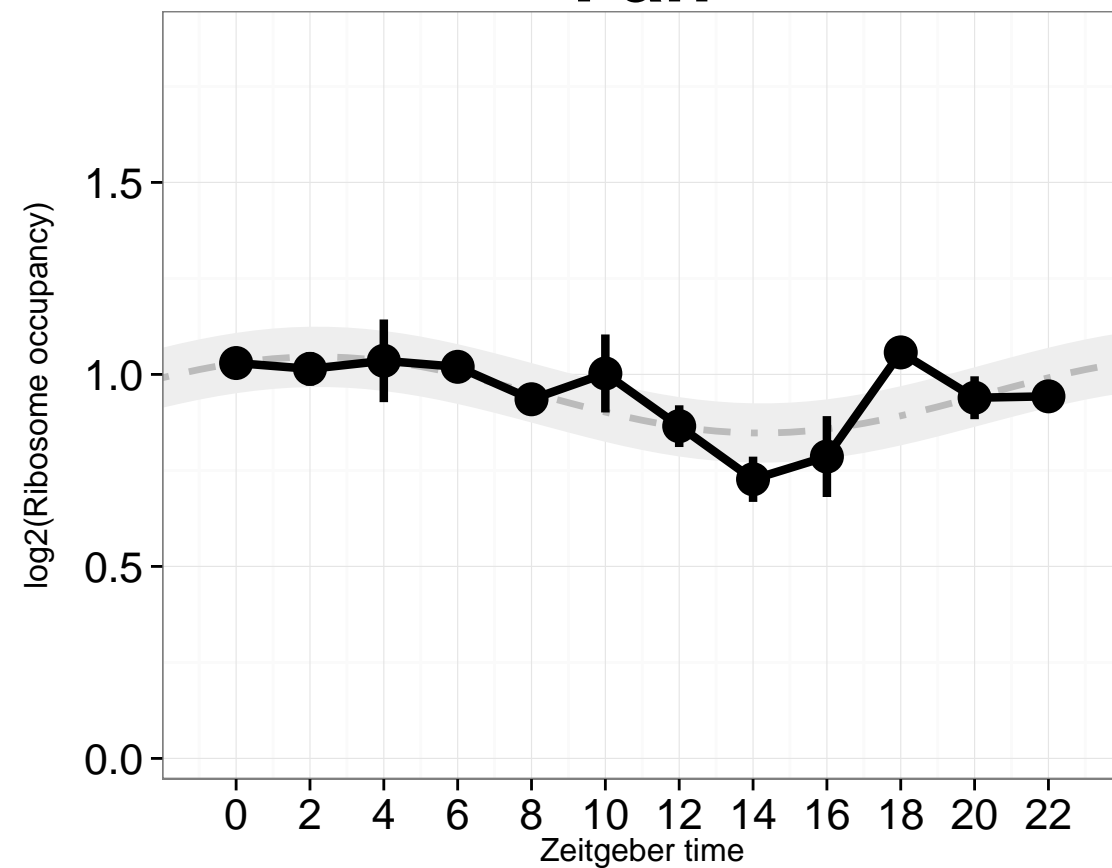

Supplement: Supplementary file 9095 [file 1]

# Kremen1

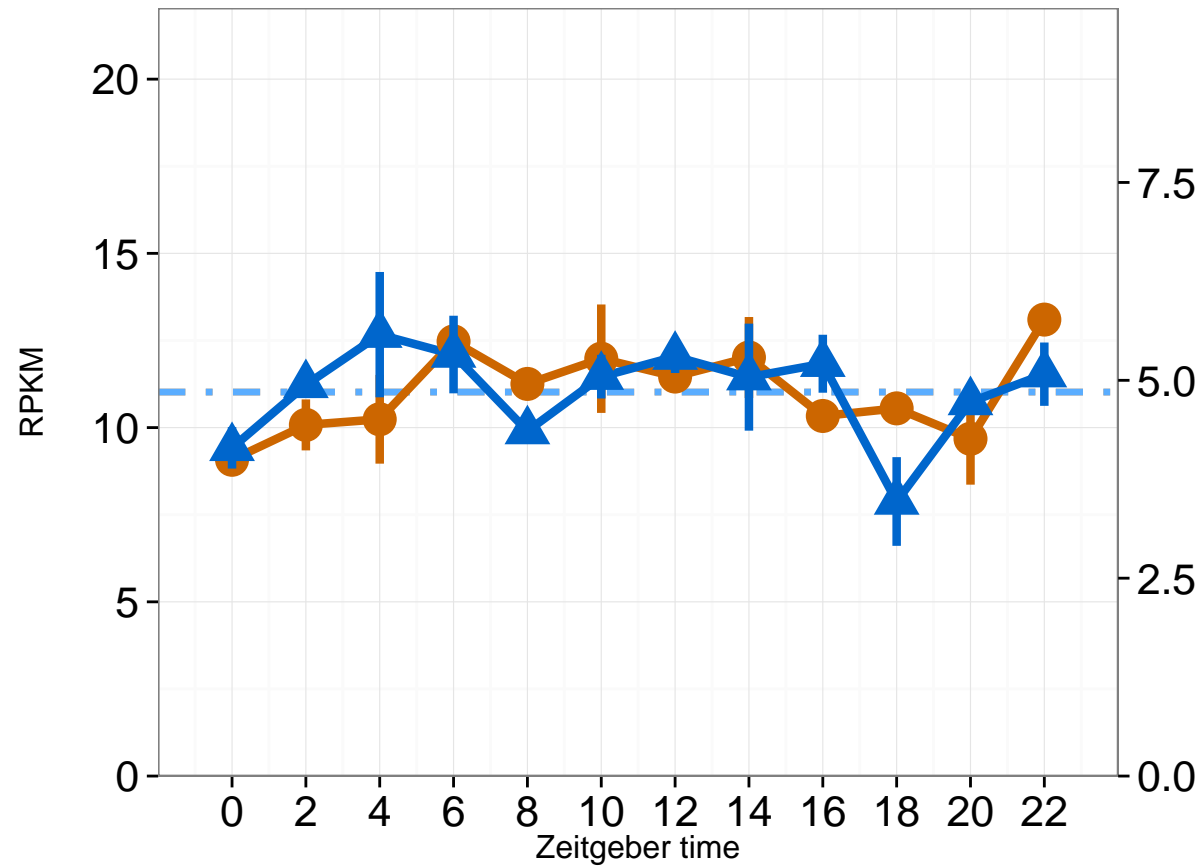

# Kremen1

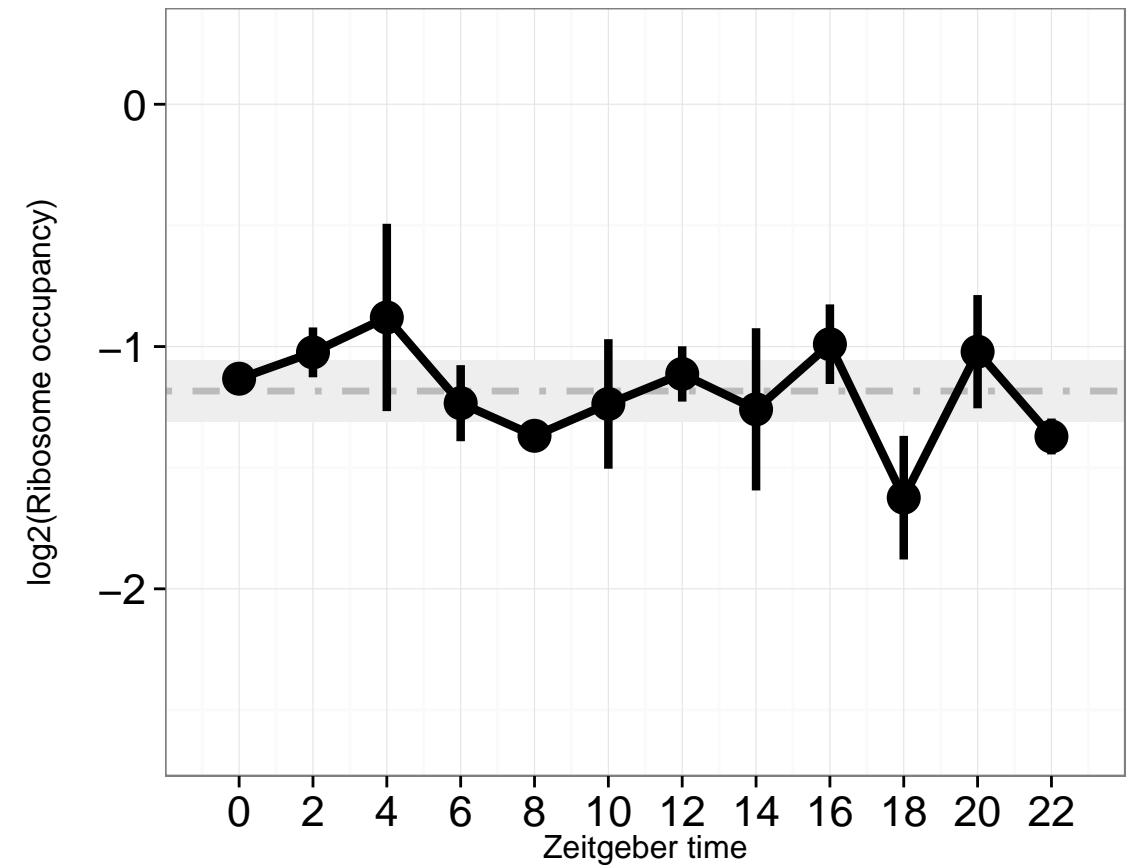

Supplement: Supplementary file 9096 [file 1]

# Rbm15

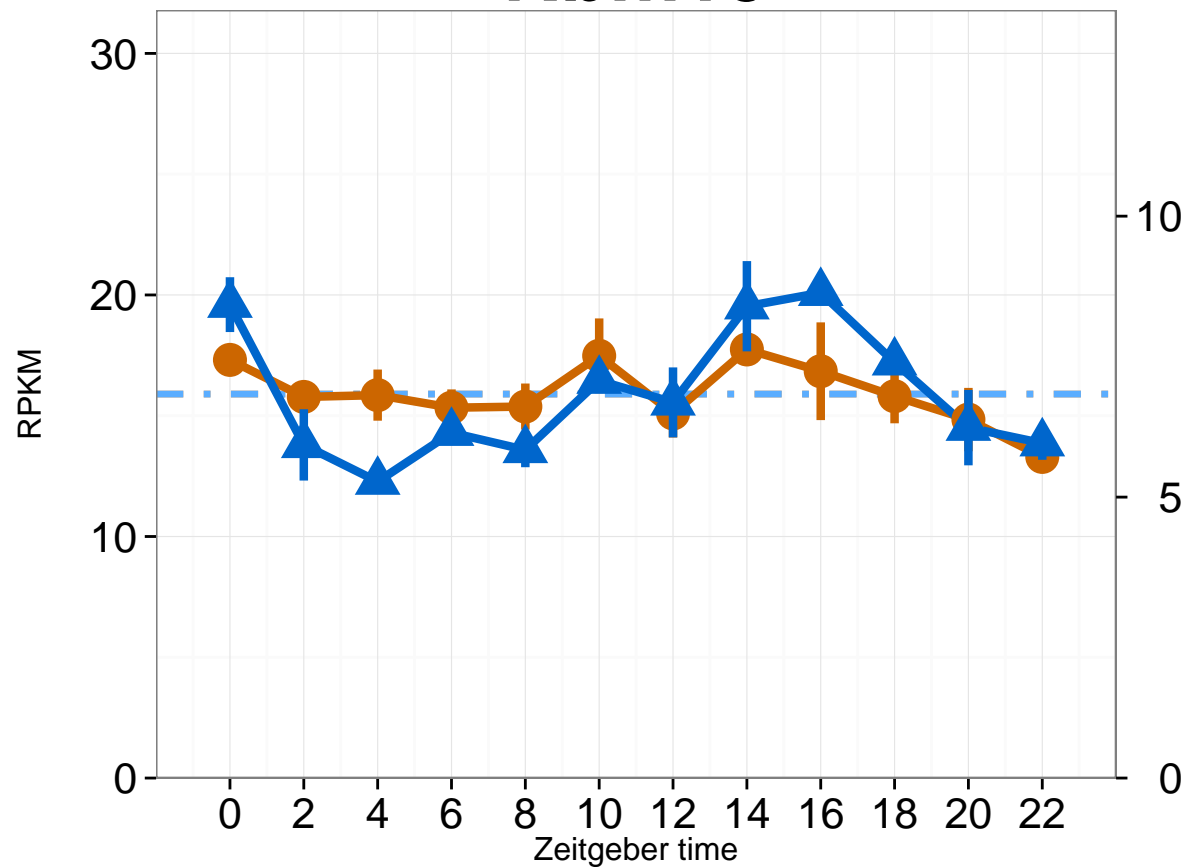

# Rbm15

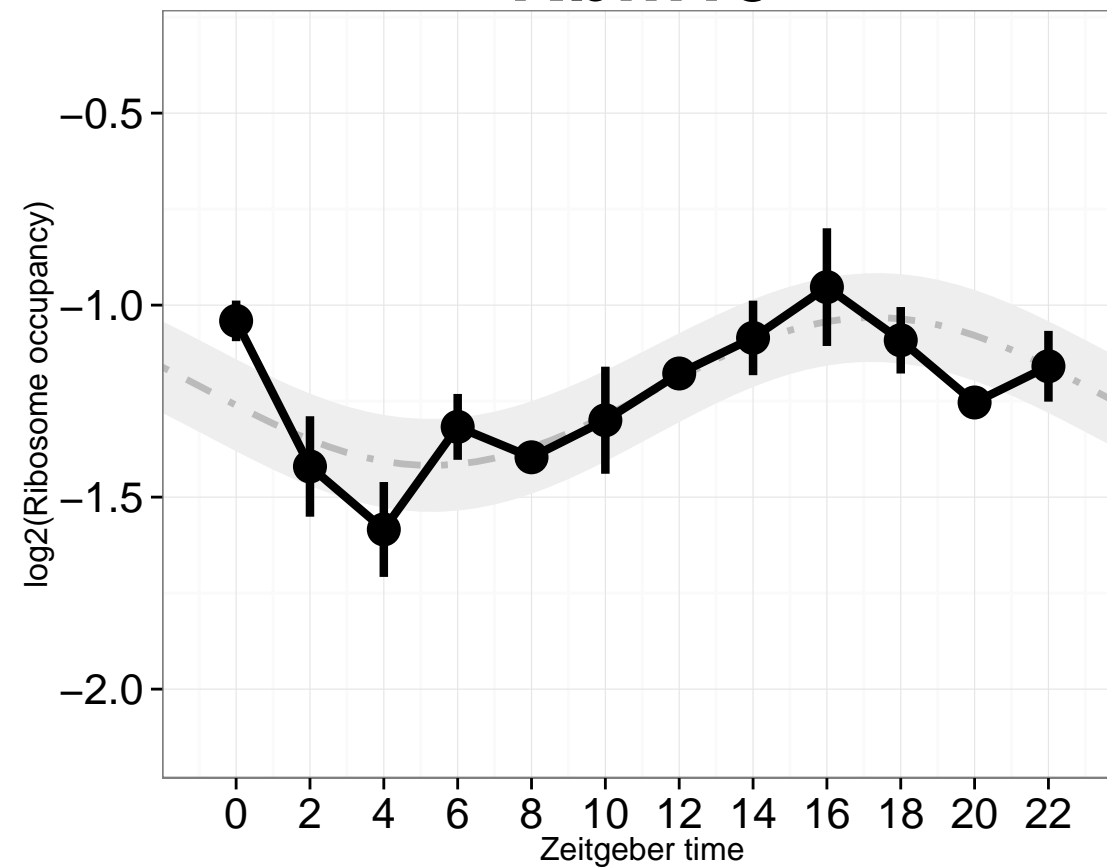

Supplement: Supplementary file 9097 [file 1]

## Tlr1

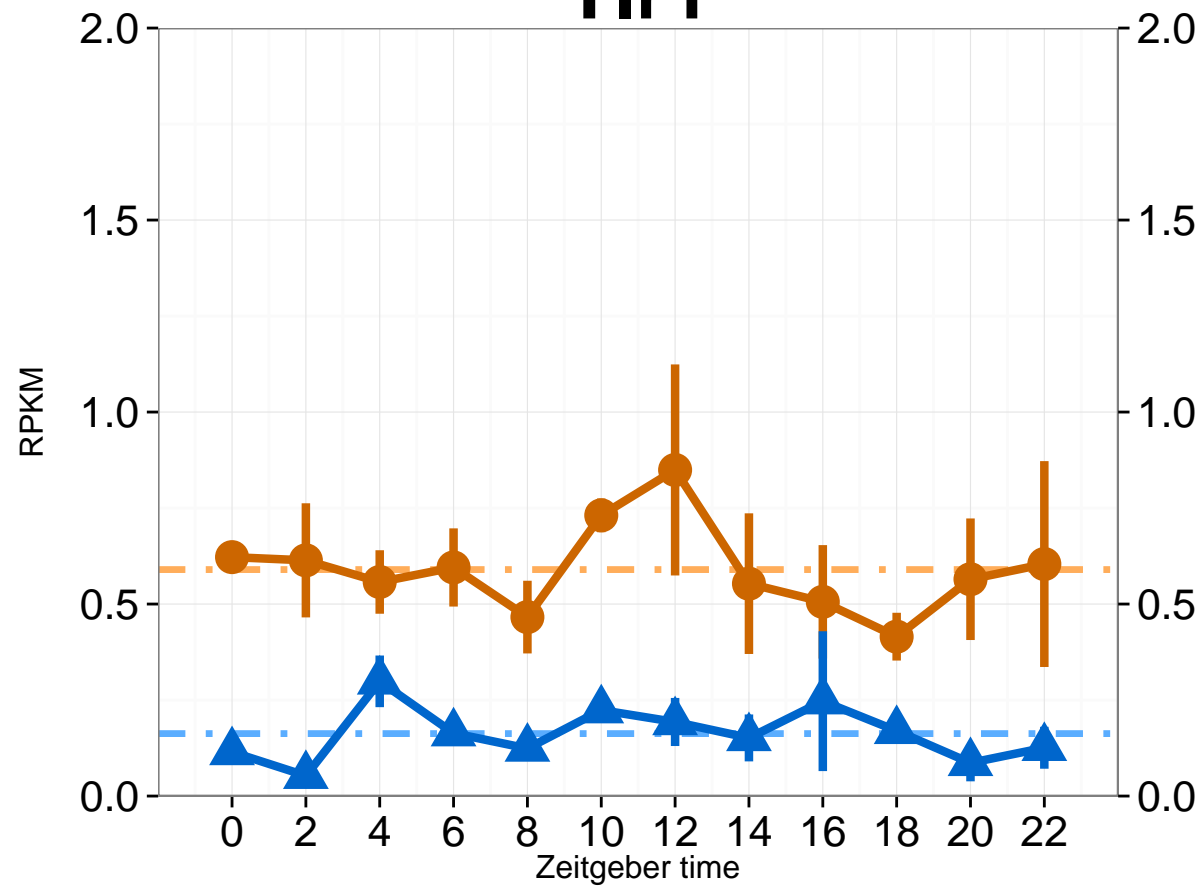

## Tlr1

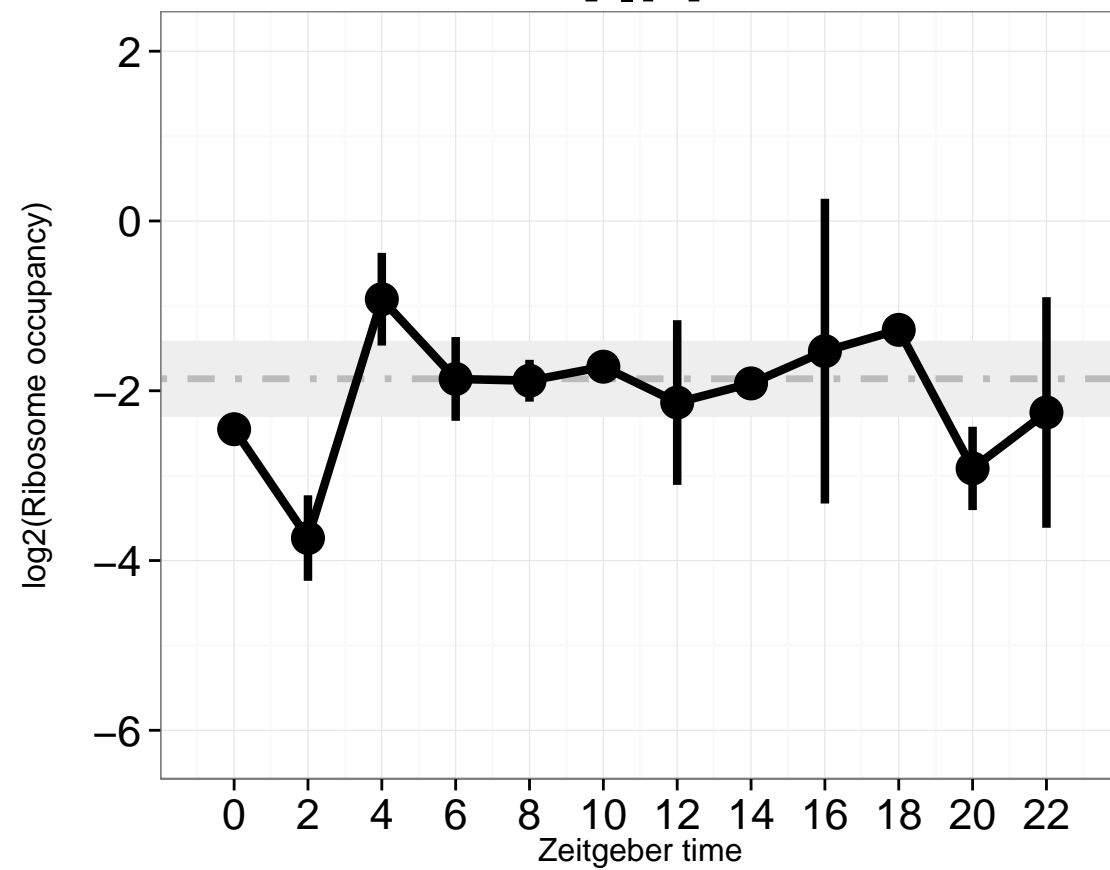

Supplement: Supplementary file 9098 [file 1]

## Atf2

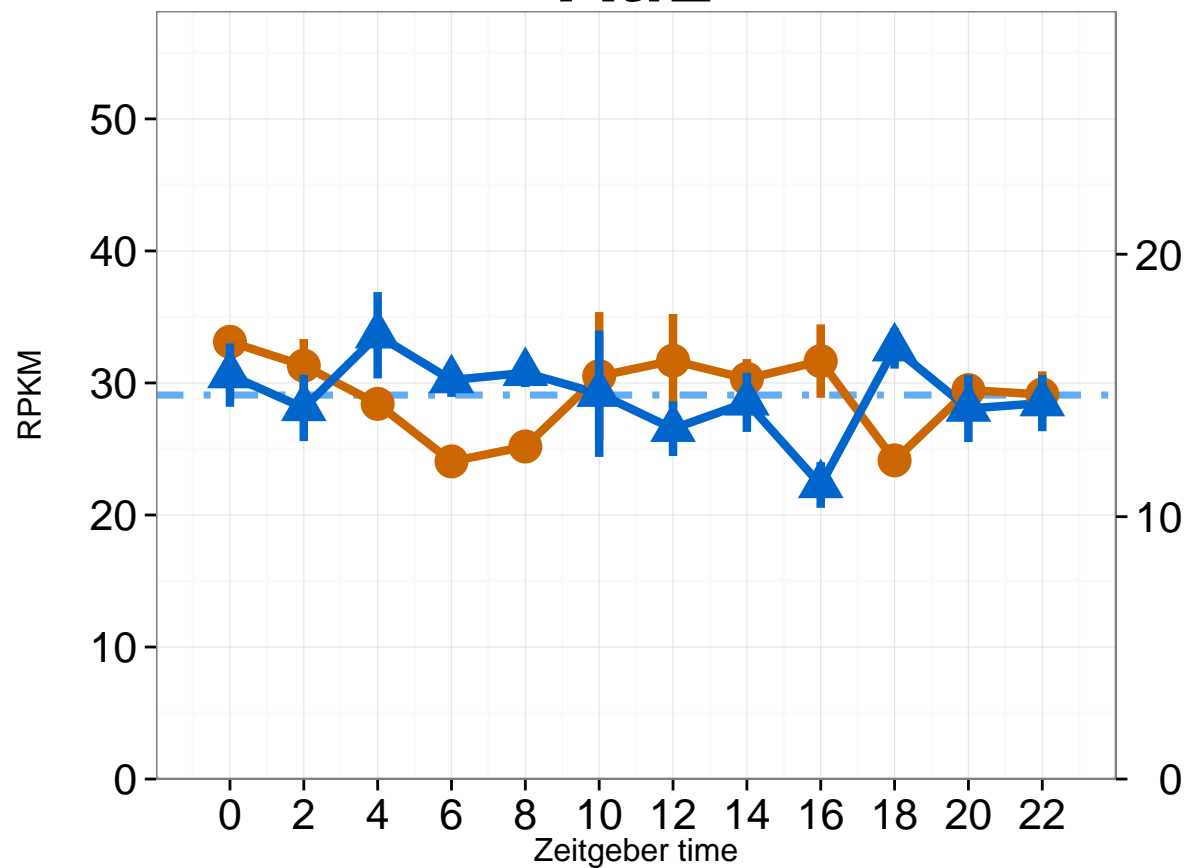

## Atf2

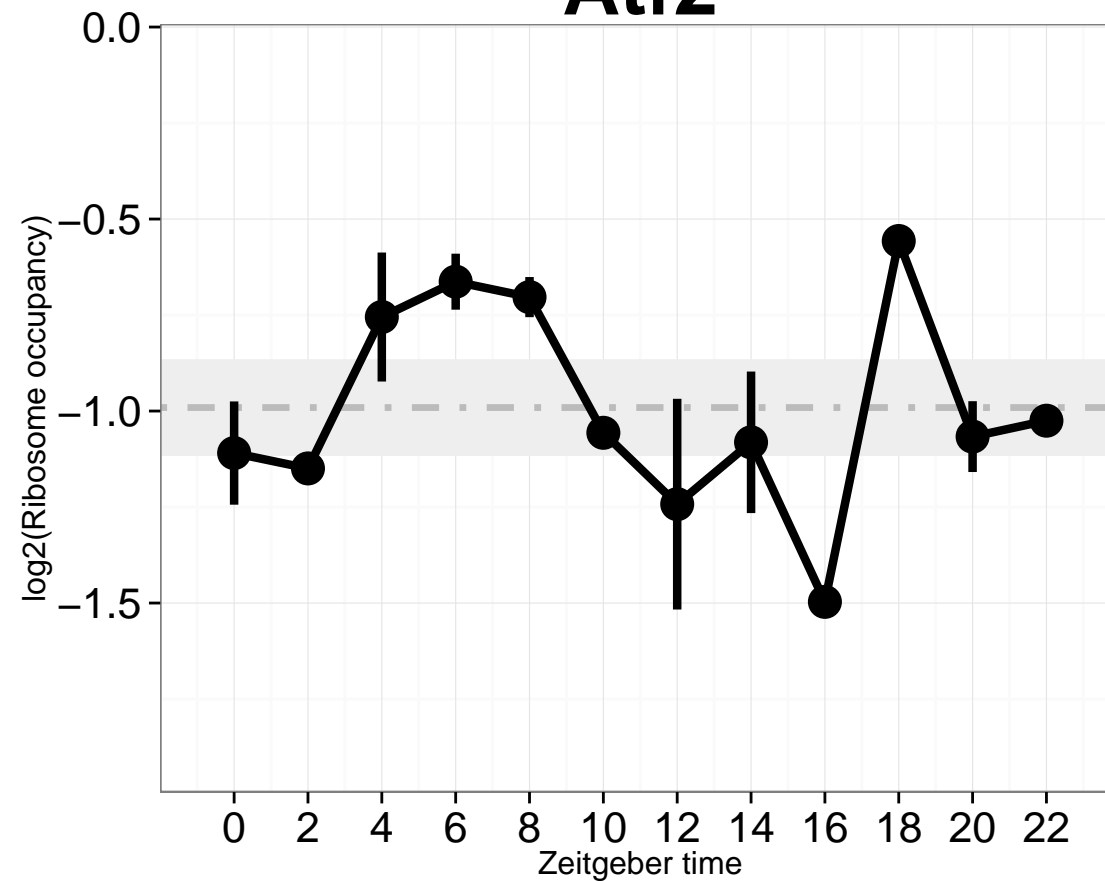

Supplement: Supplementary file 9099 [file 1]

## Mpzi1

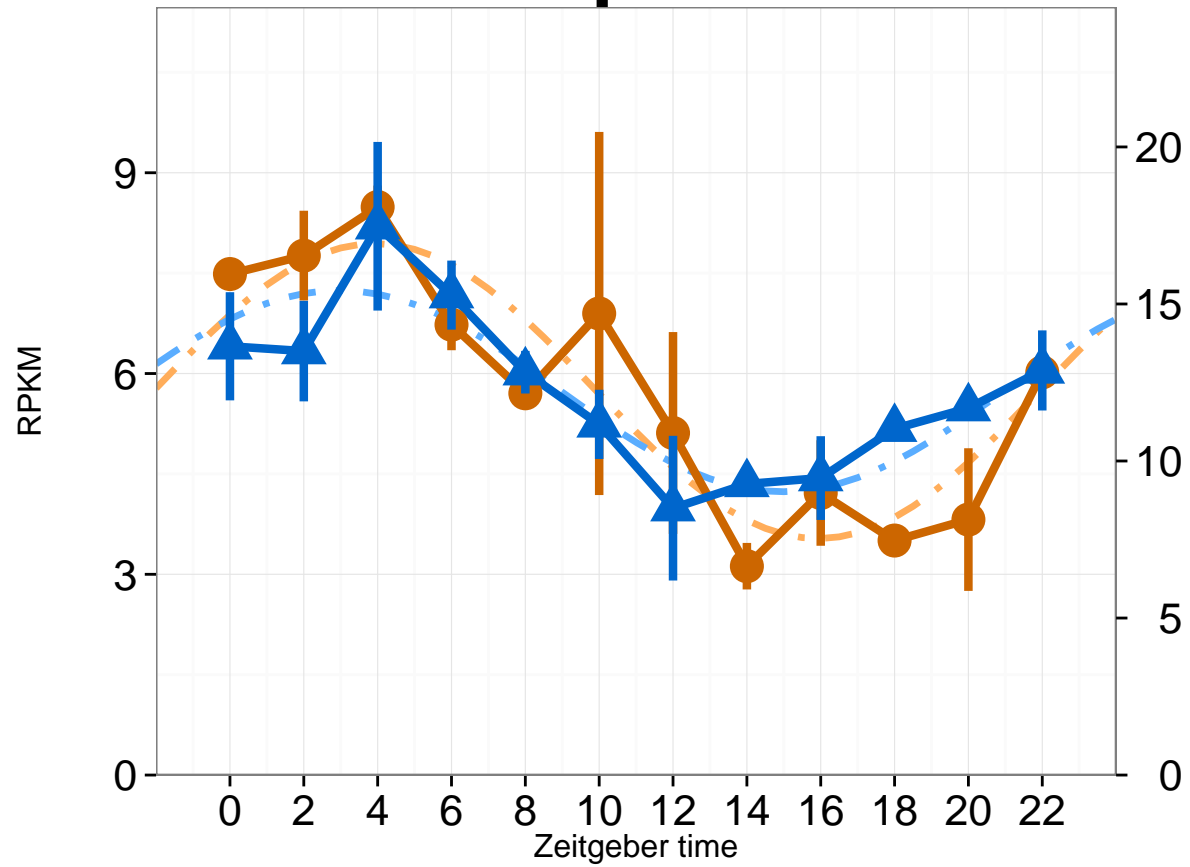

## Mpzi1

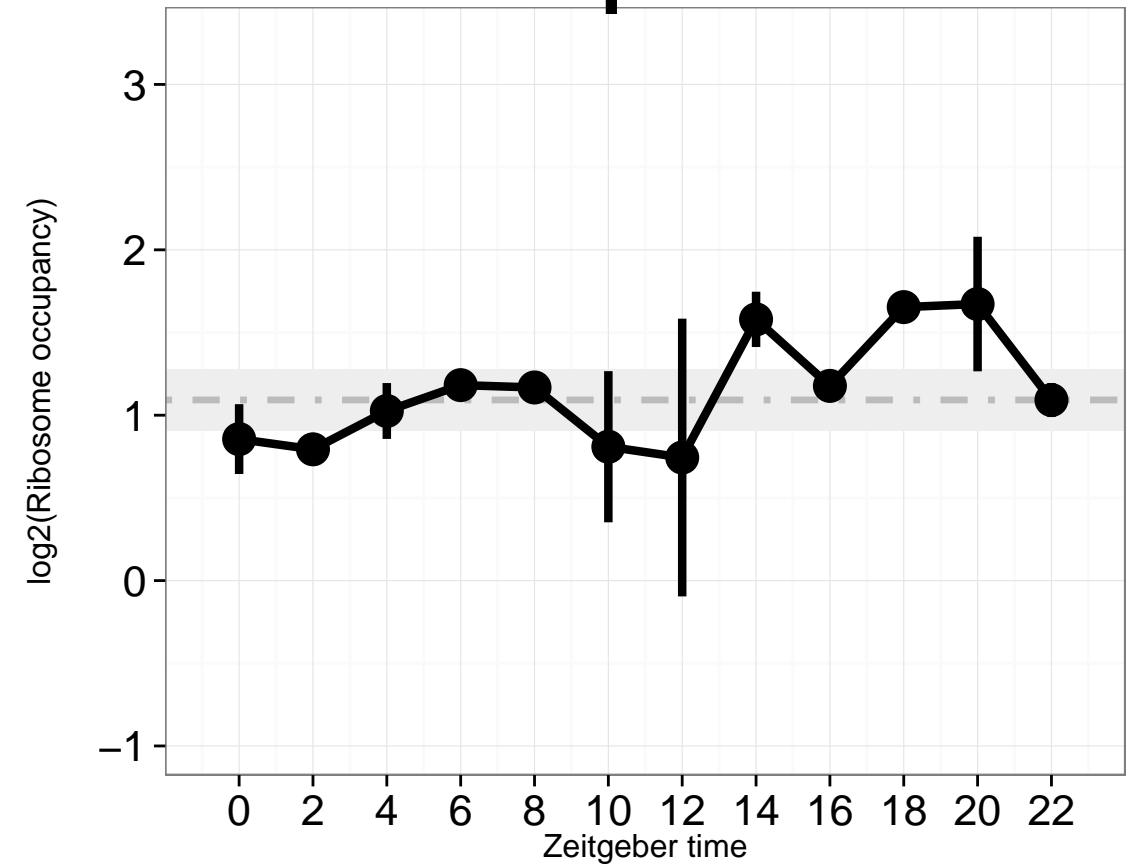

Supplement: Supplementary file 9100 [file 1]

# Vasp

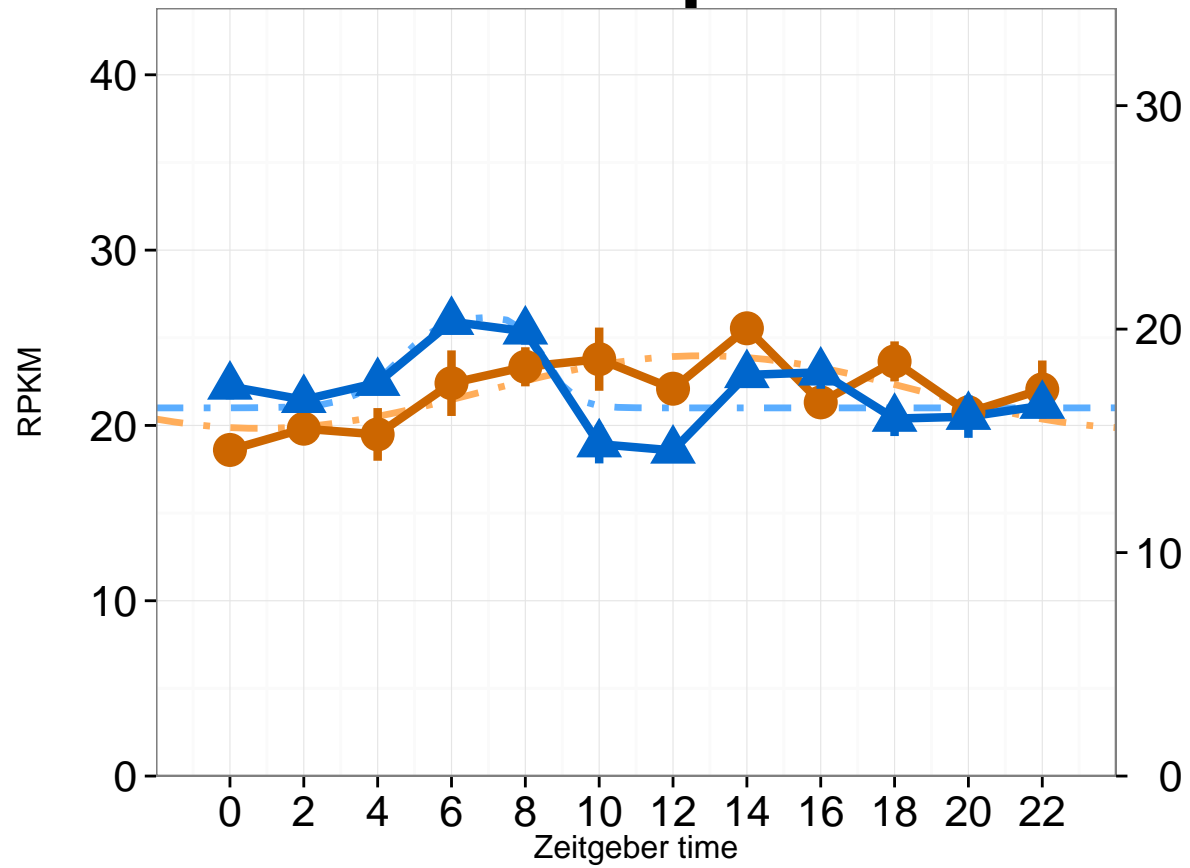

# Vasp

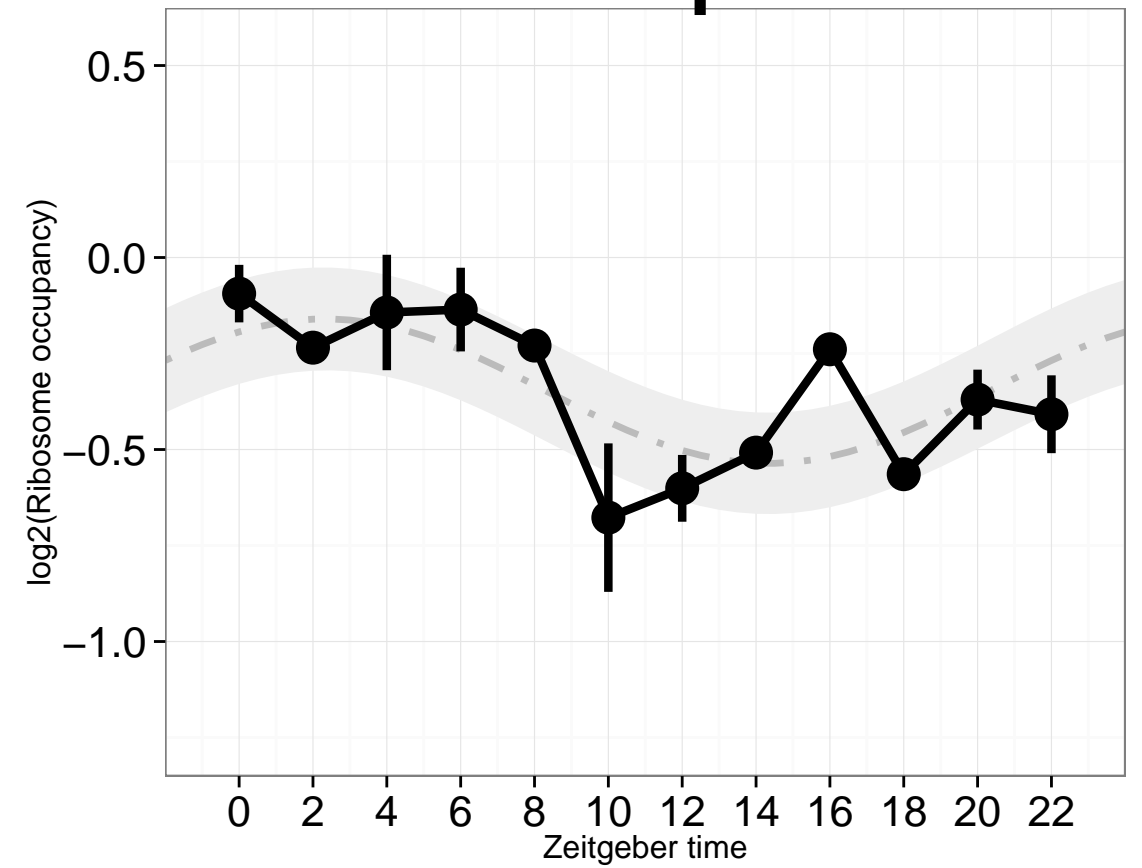

Supplement: Supplementary file 9101 [file 1]

# Kif26a

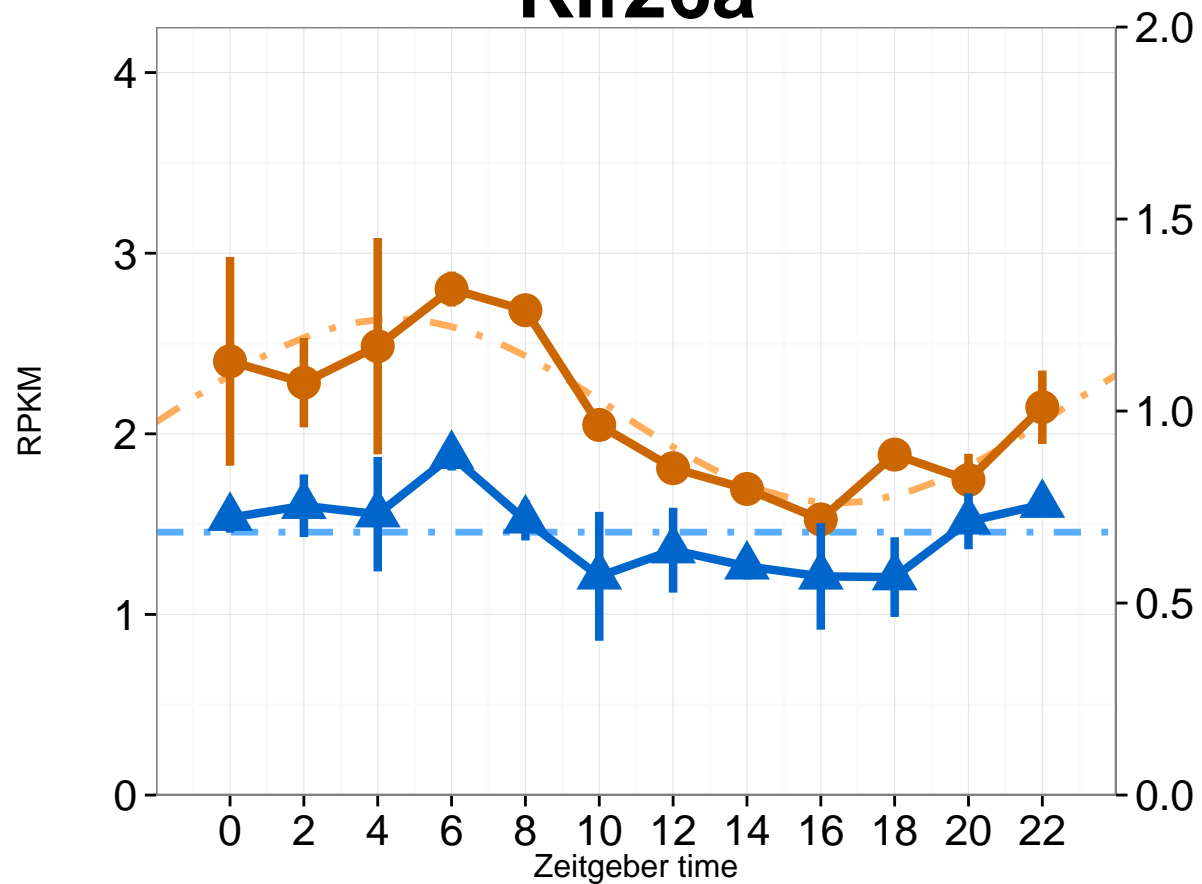

# Kif26a

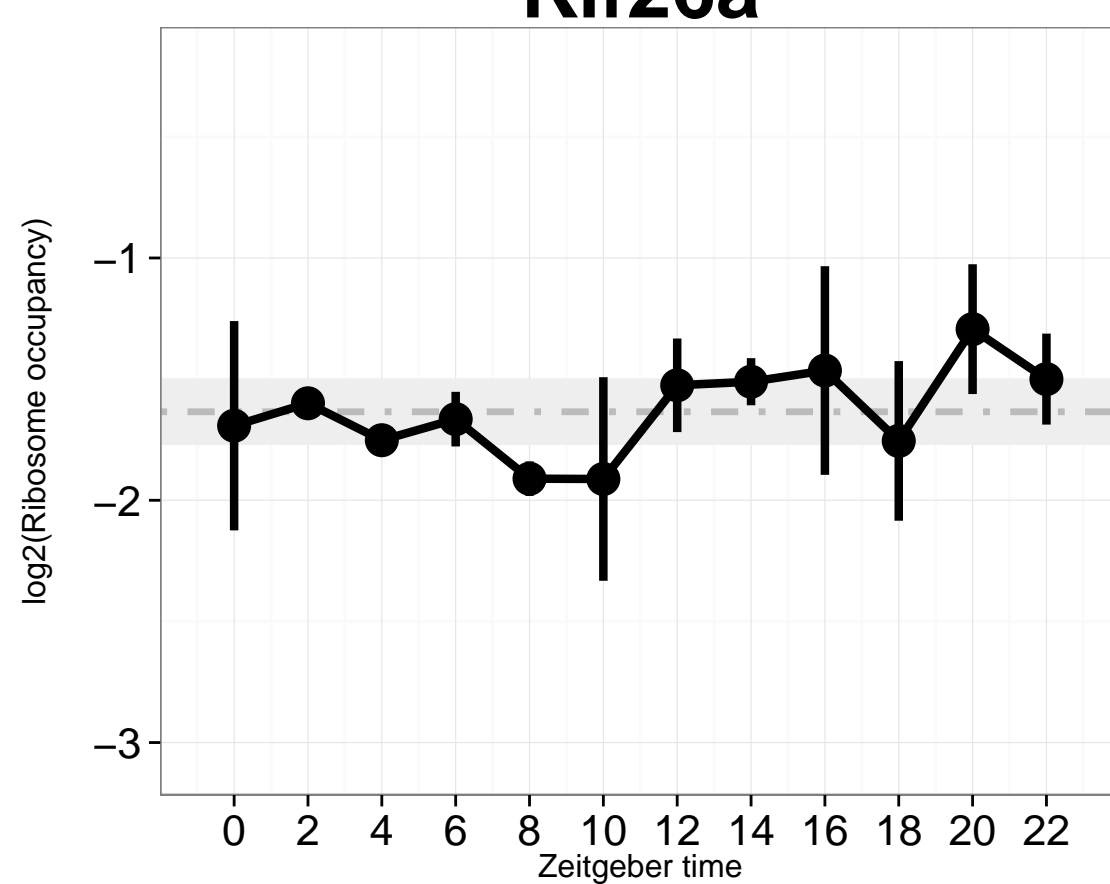

Supplement: Supplementary file 9102 [file 1]

## Calhm2

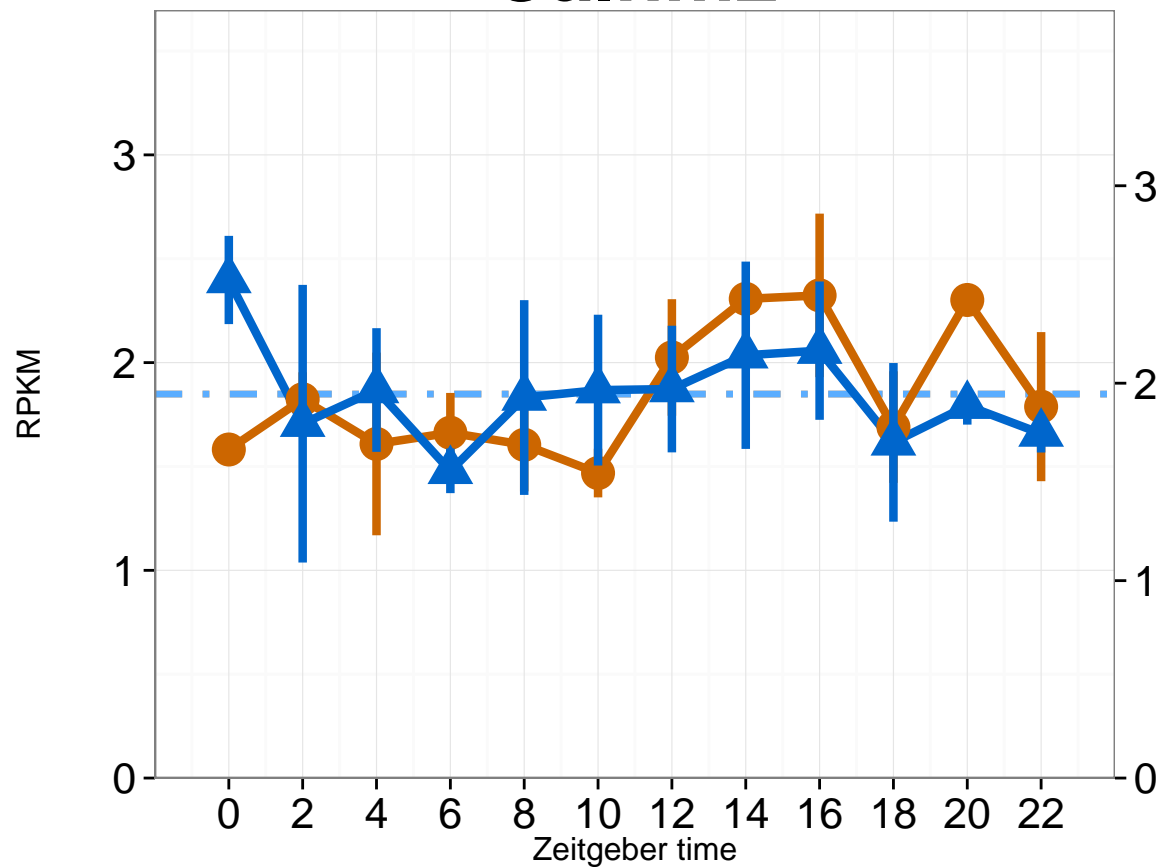

## Calhm2

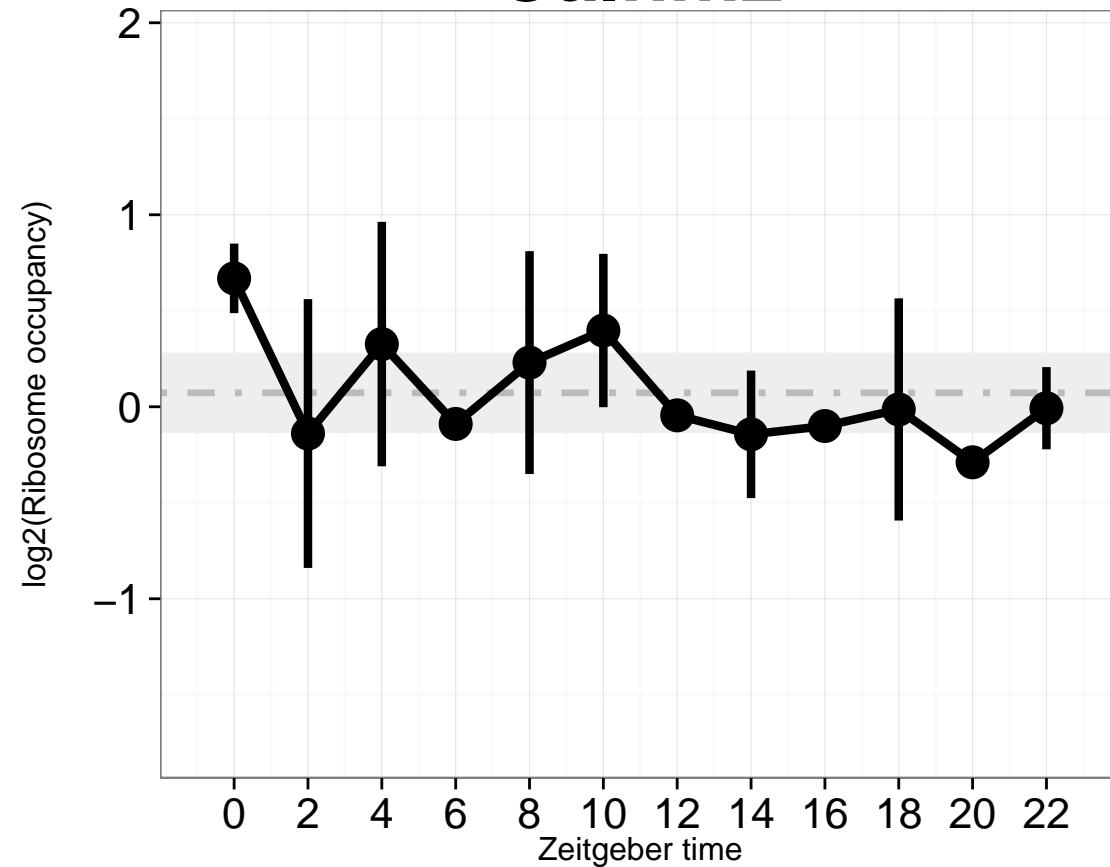

Supplement: Supplementary file 9103 [file 1]

## Dph1

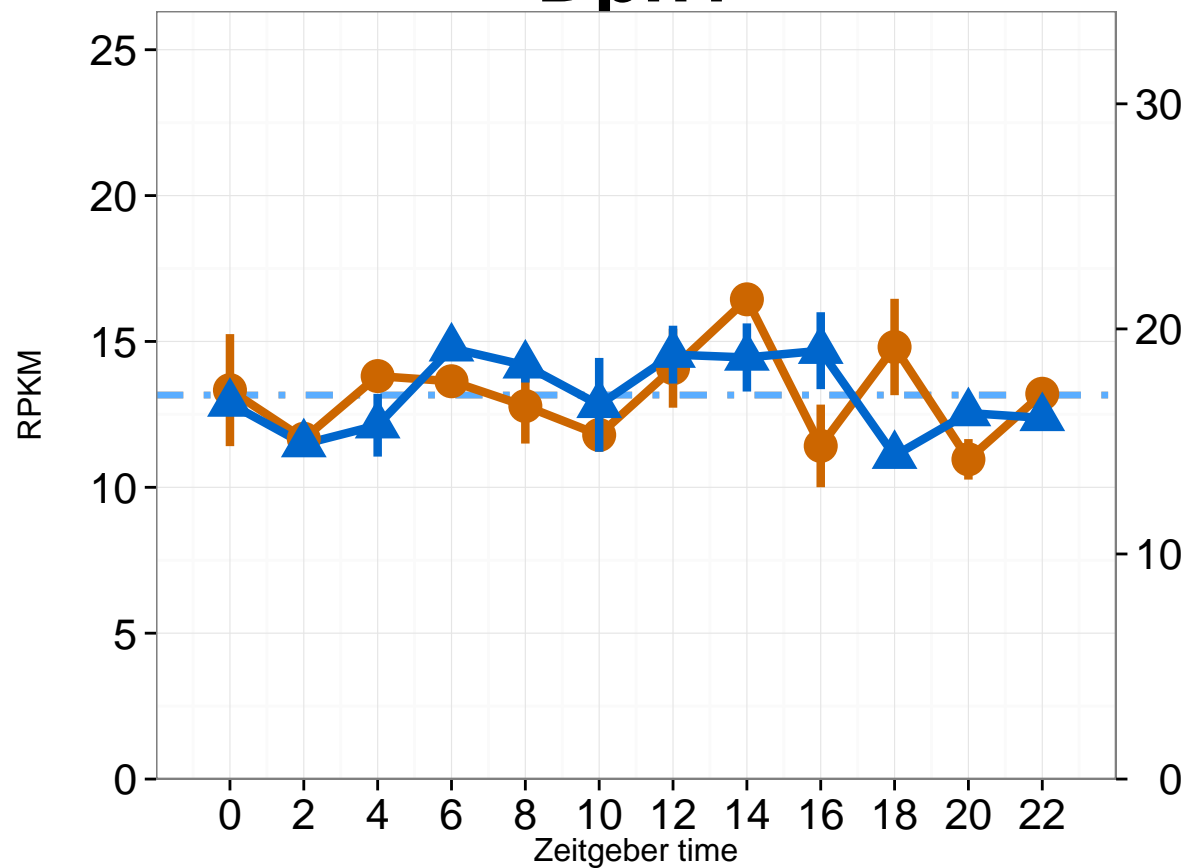

## Dph1

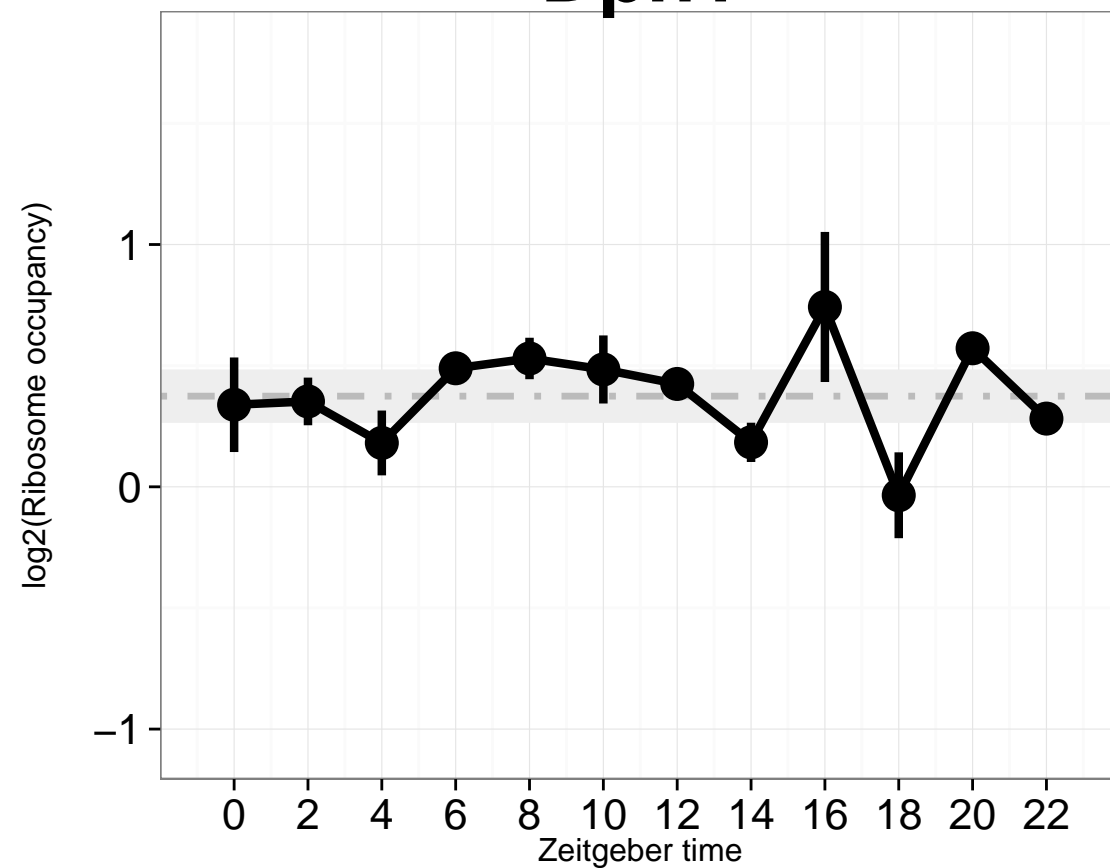

Supplement: Supplementary file 9104 [file 1]

# Plek2

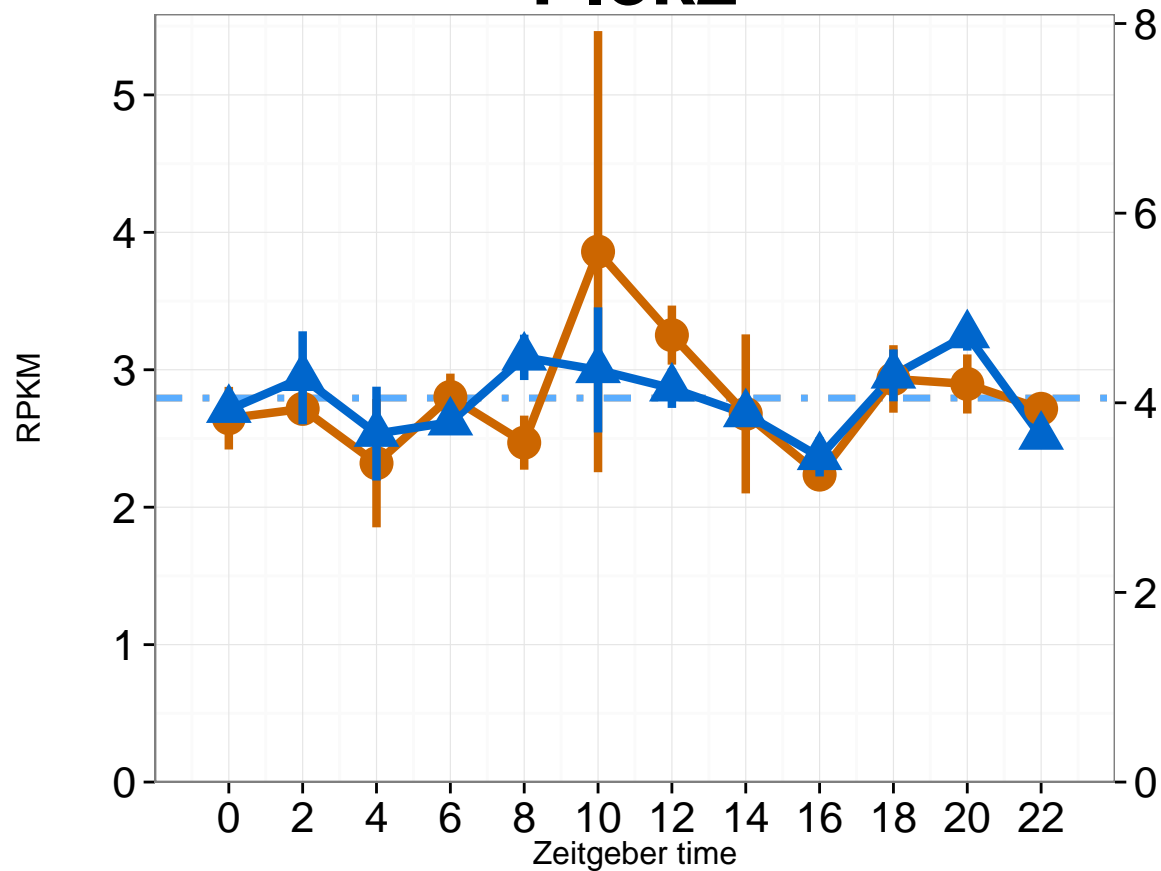

# Plek2

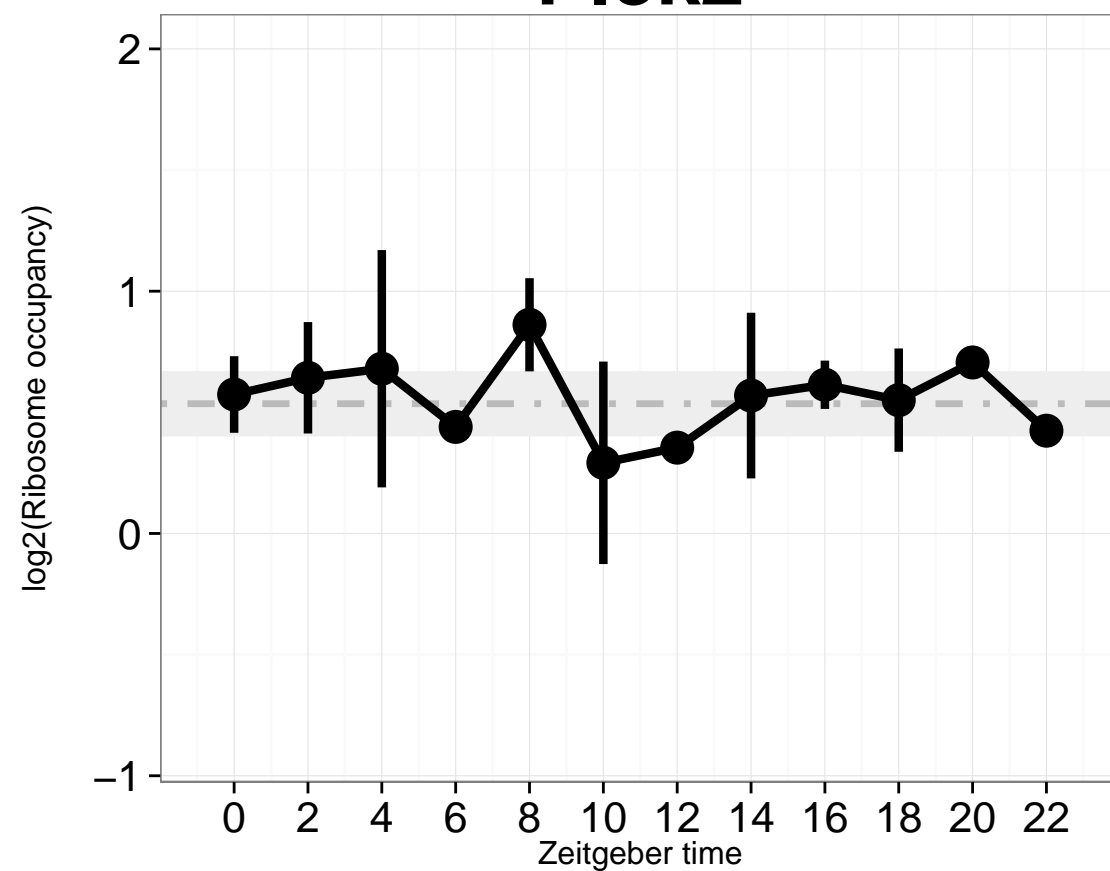

Supplement: Supplementary file 9105 [file 1]

**lft74**

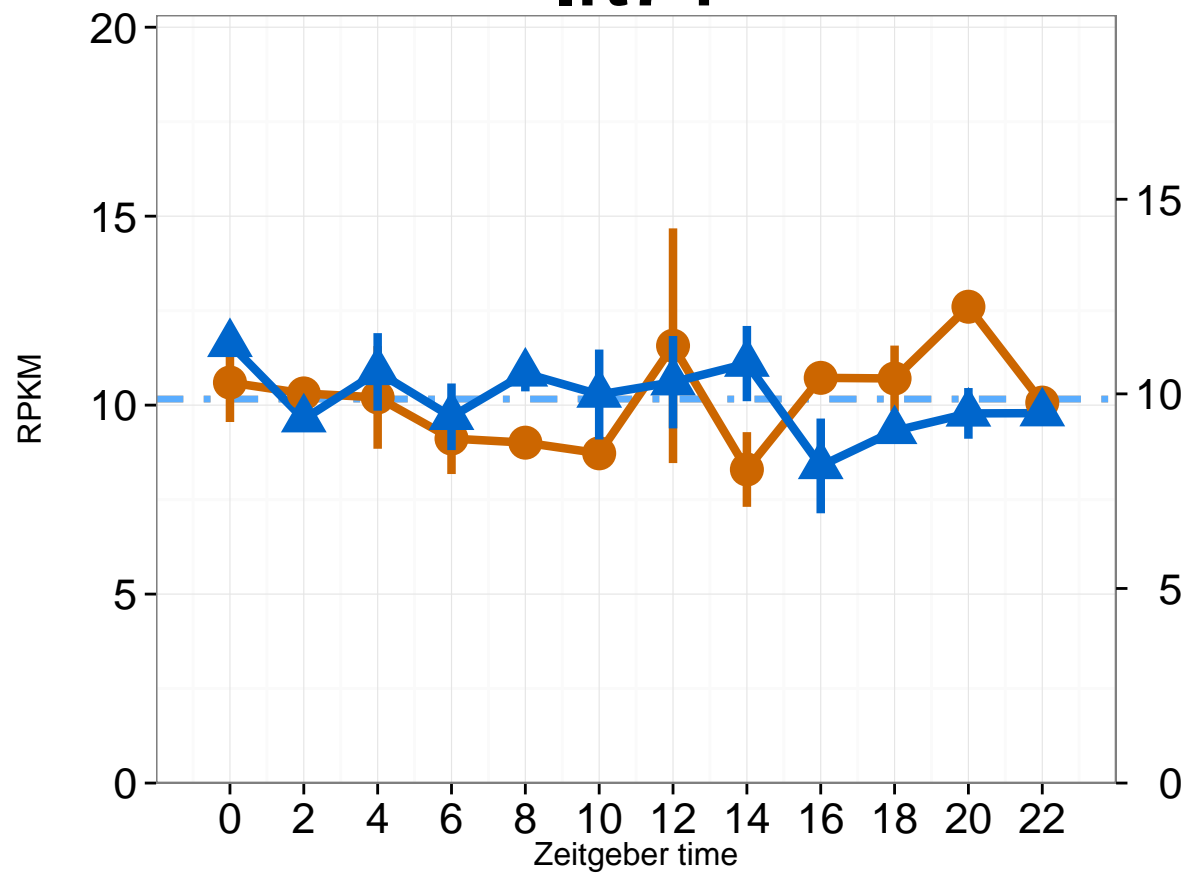

**lft74**

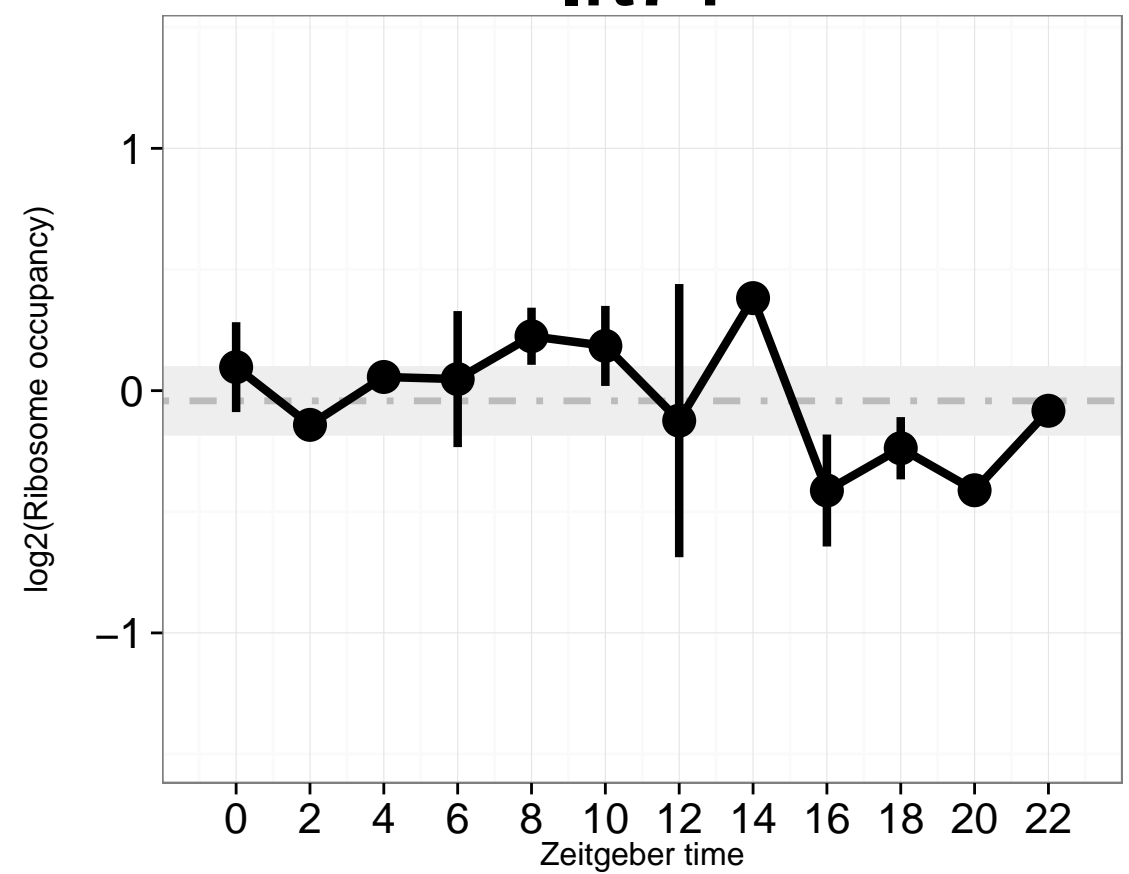

Supplement: Supplementary file 9106 [file 1]

## Nicn1

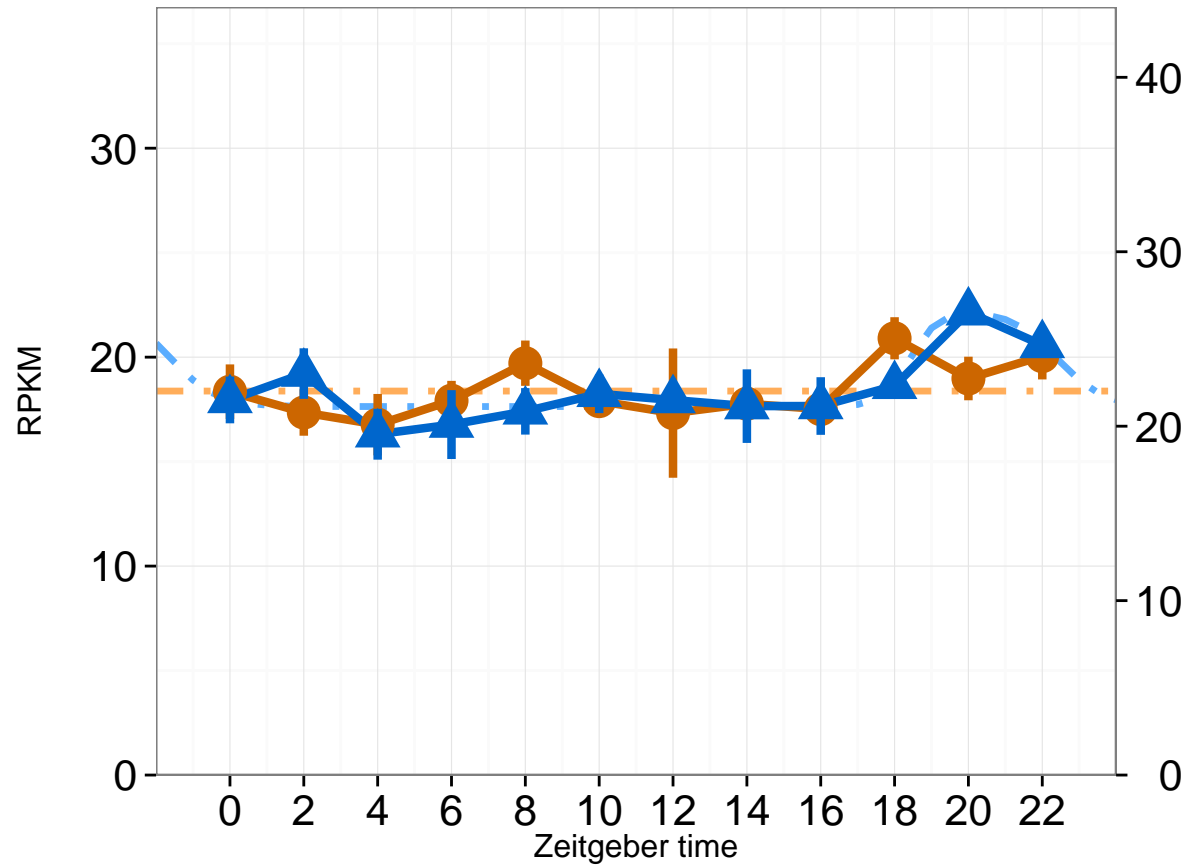

## Nicn1

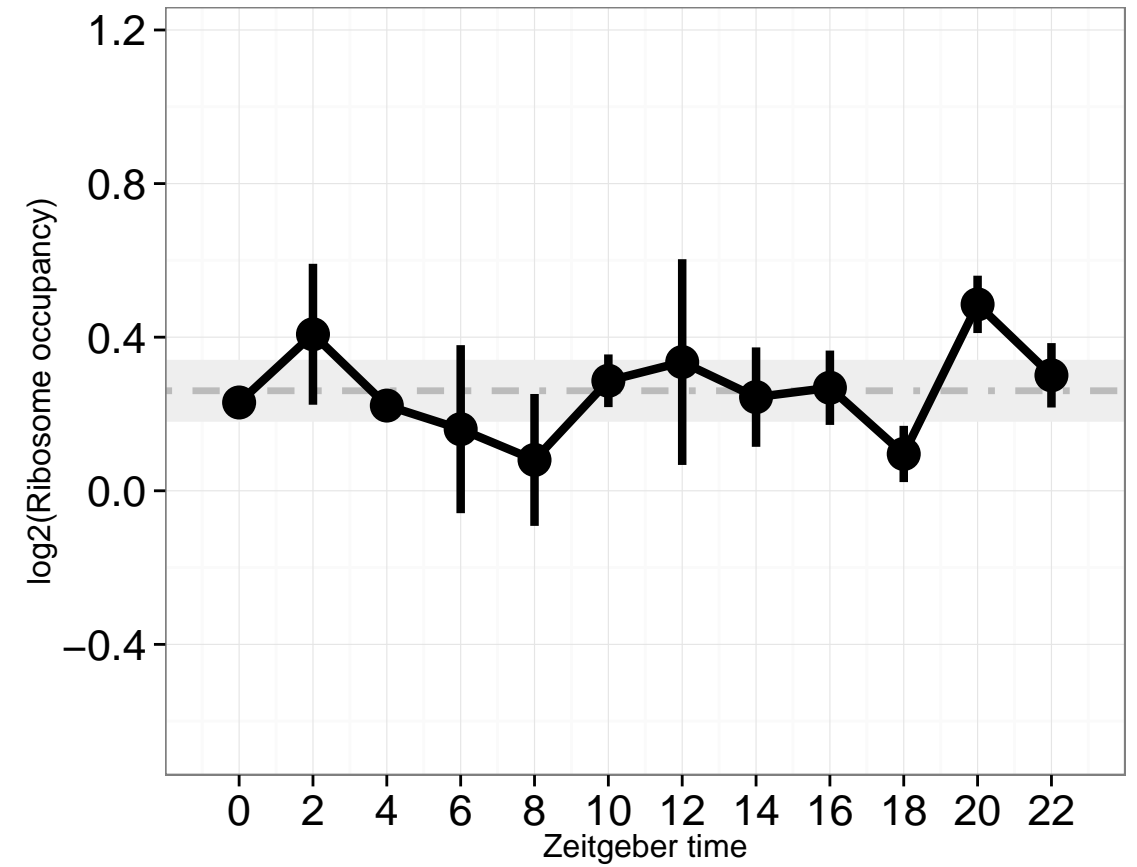

Supplement: Supplementary file 9107 [file 1]

## Rhbdd1

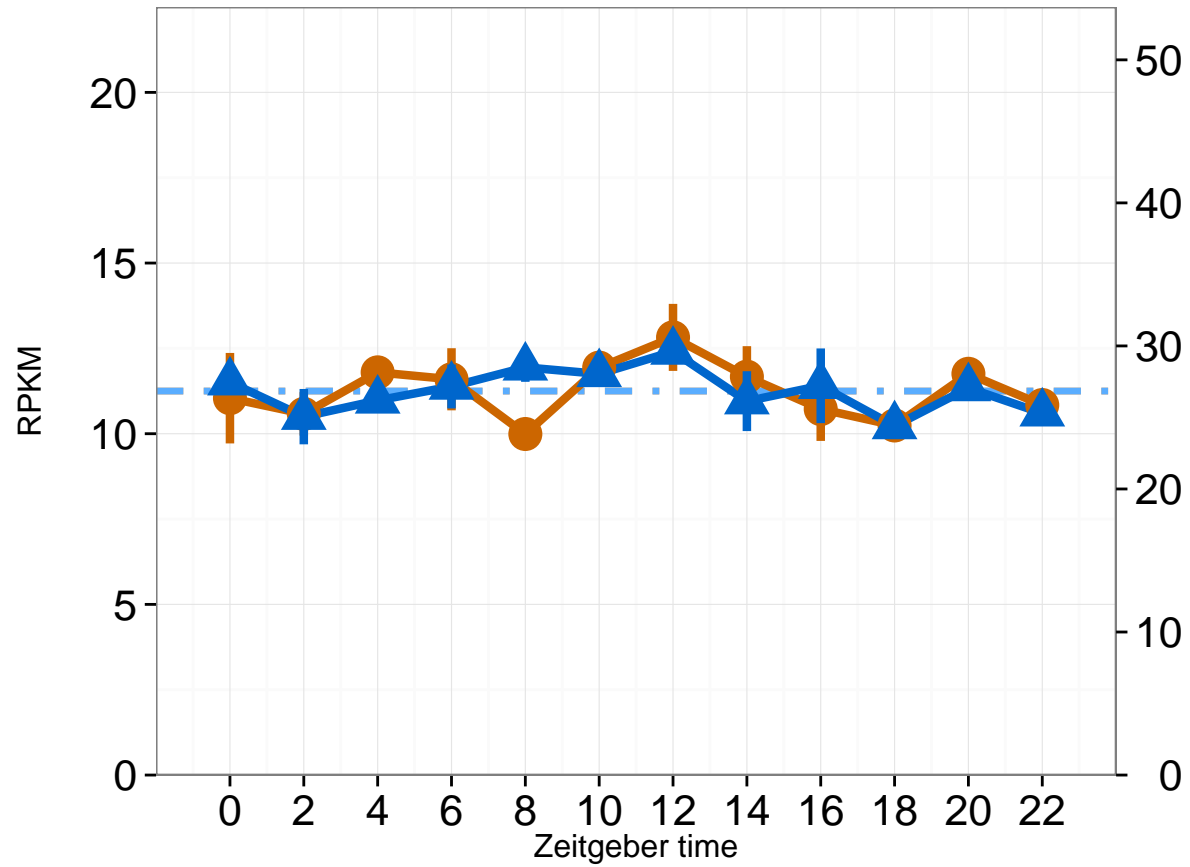

## Rhbdd1

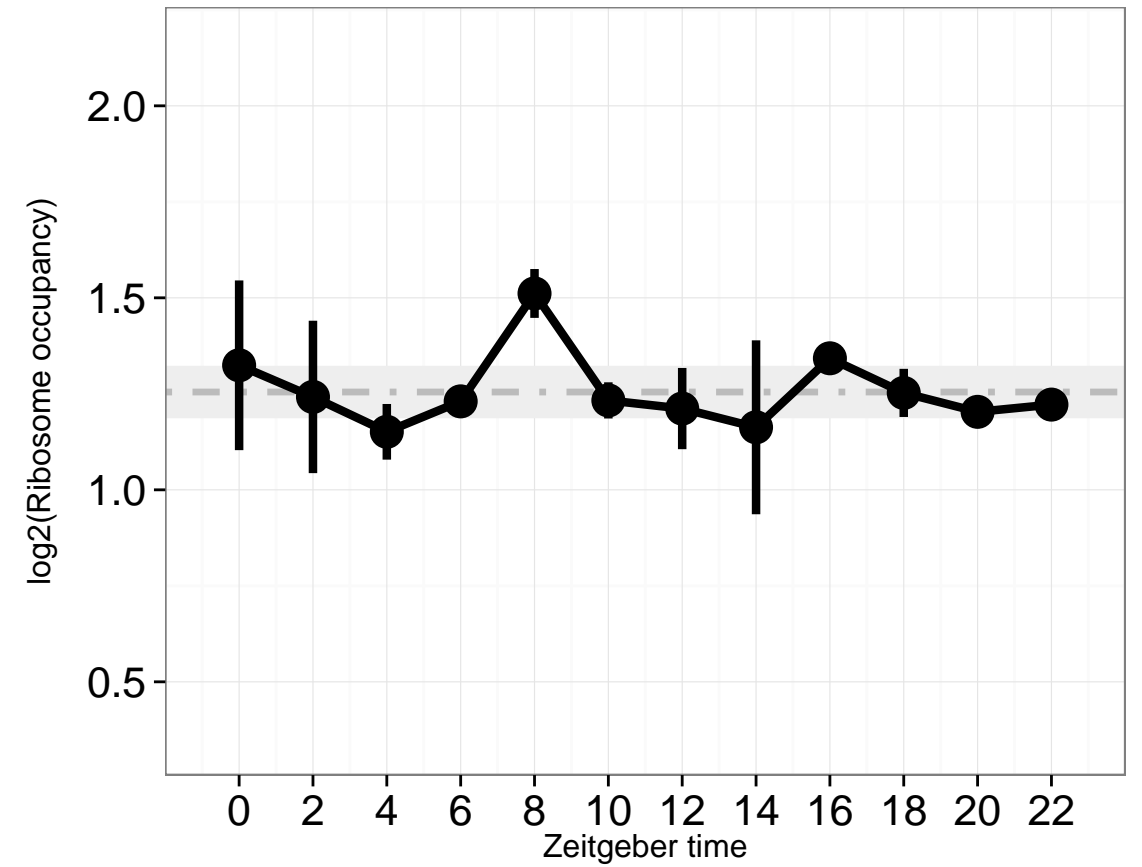

Supplement: Supplementary file 9108 [file 1]

## Fmo1

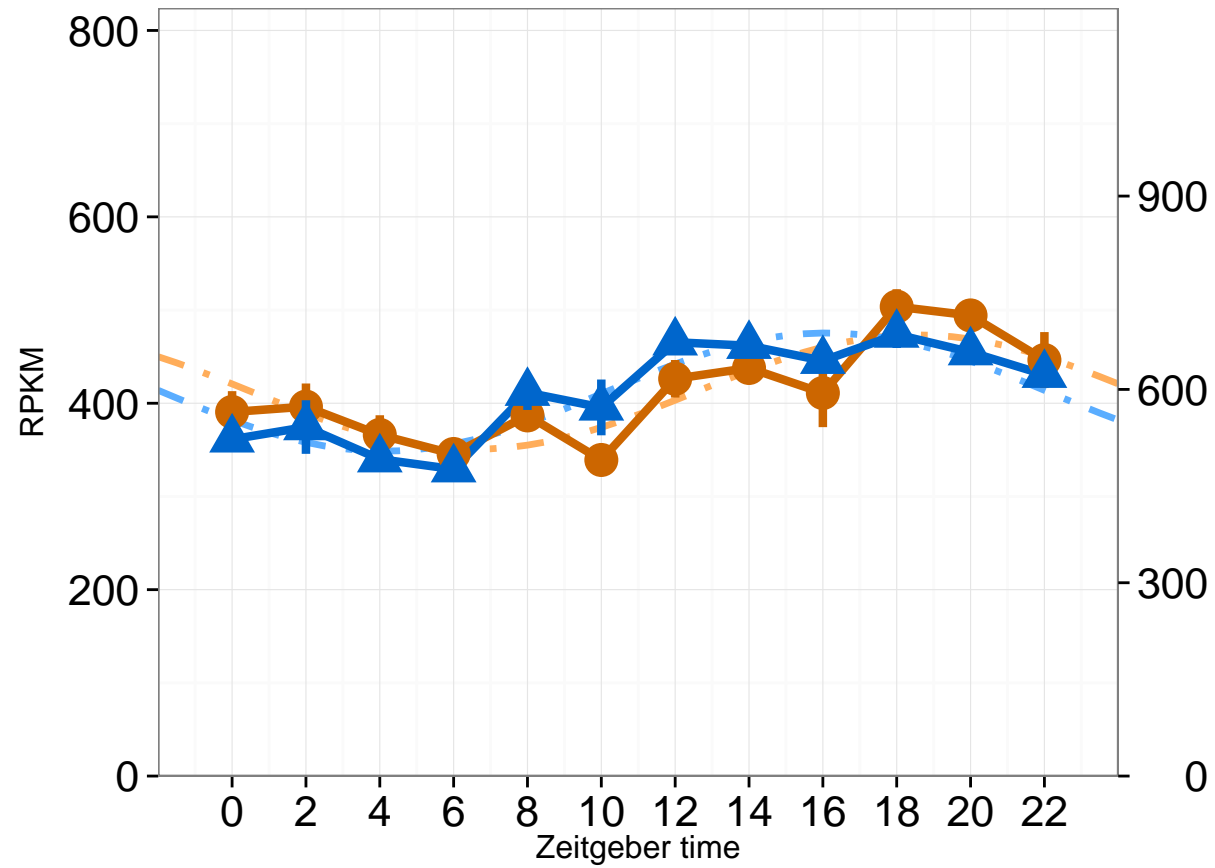

## Fmo1

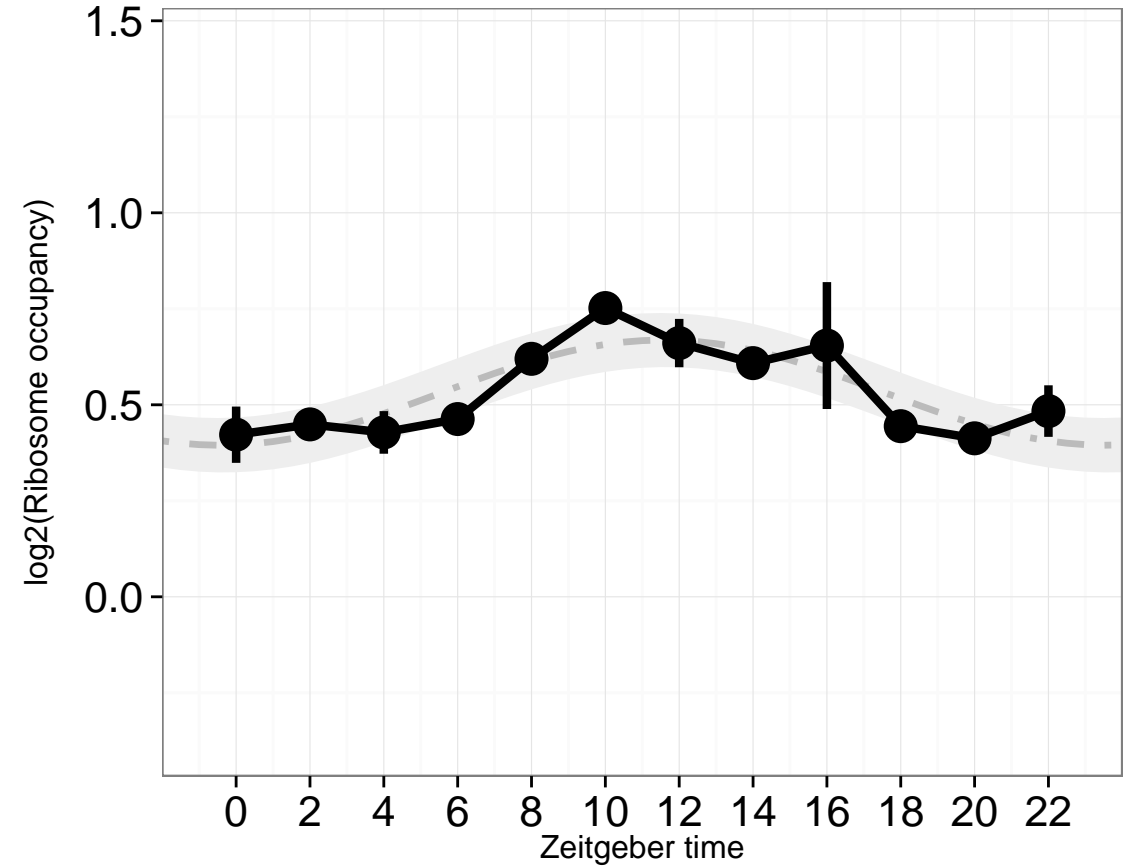

Supplement: Supplementary file 9109 [file 1]

## Pstpip2

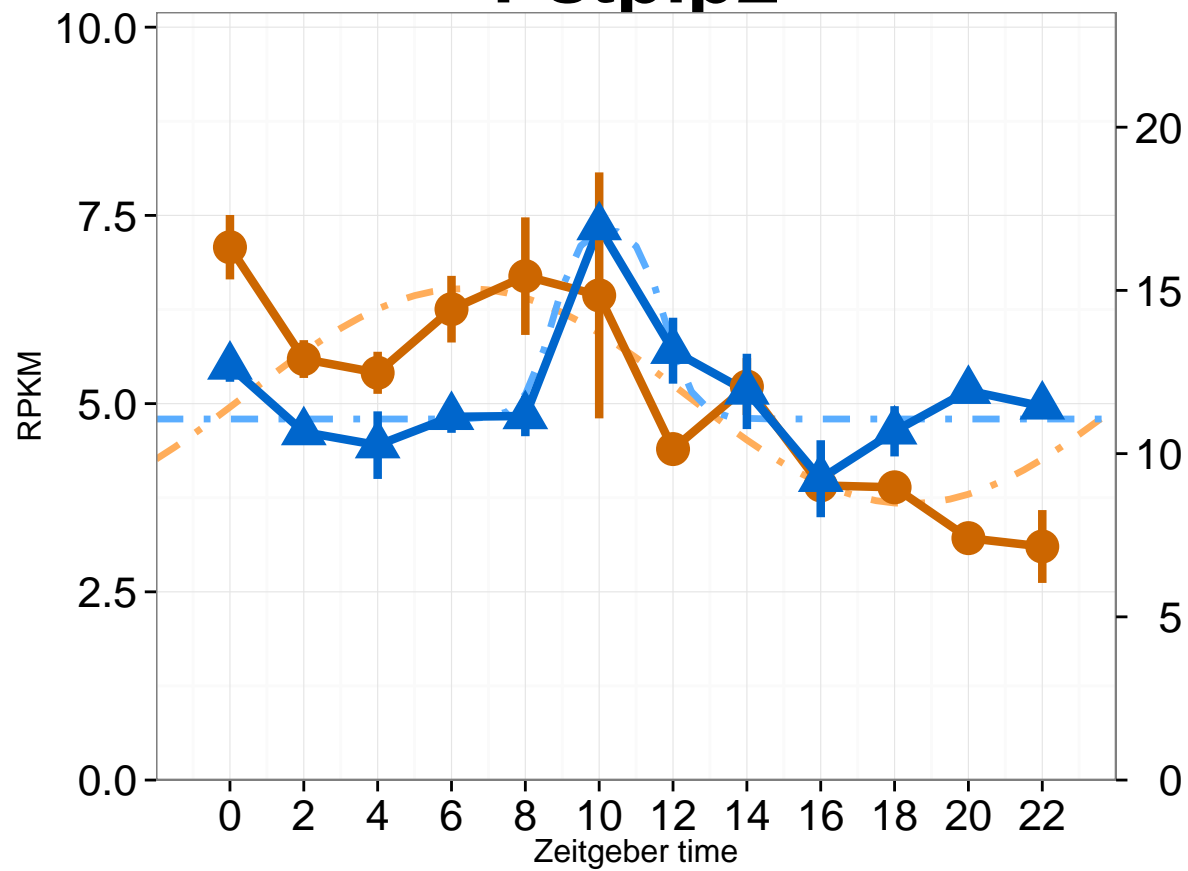

## Pstpip2

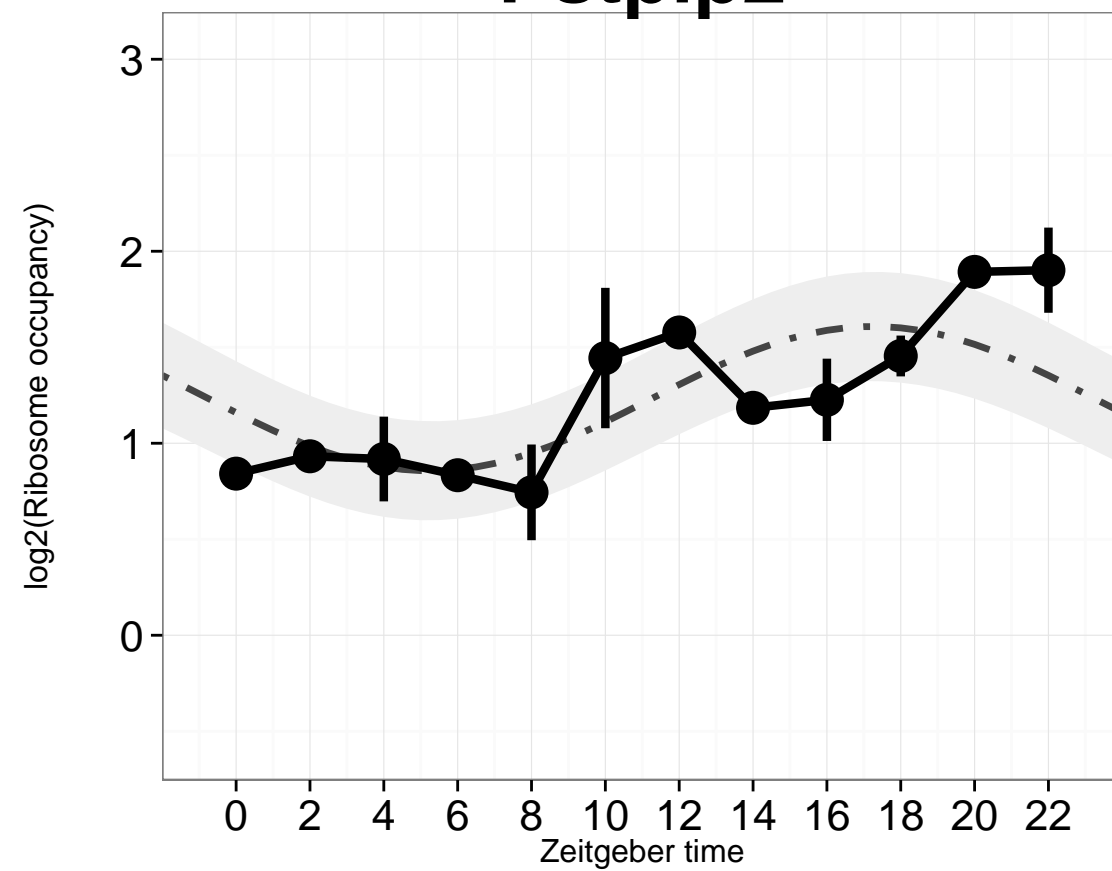

Supplement: Supplementary file 9110 [file 1]

# Srpx2

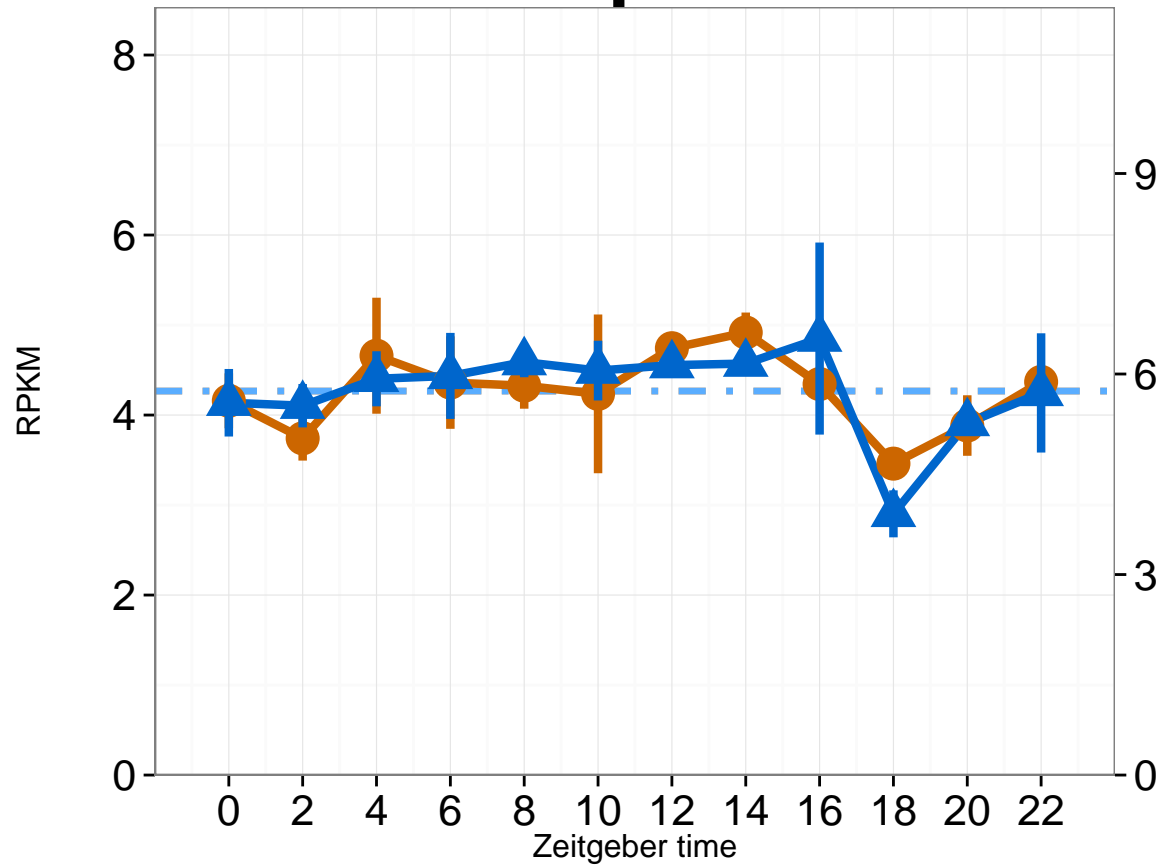

# Srpx2

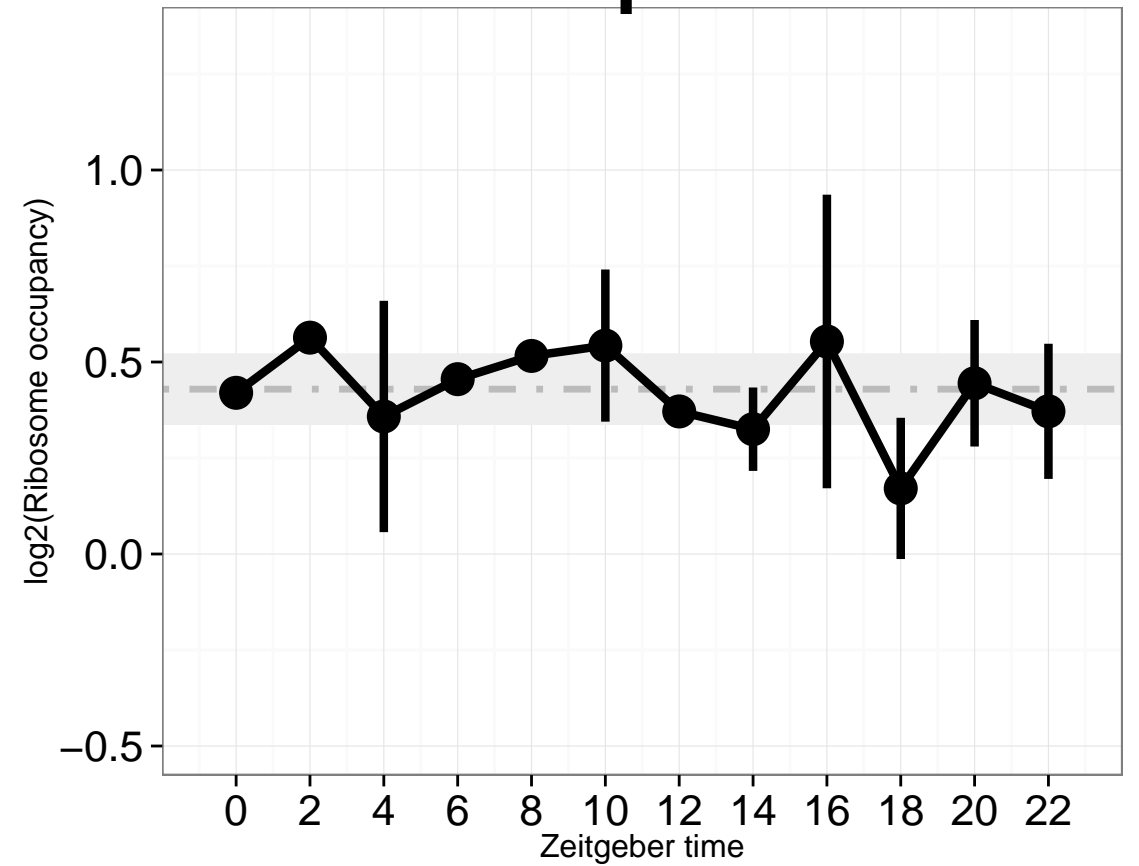

Supplement: Supplementary file 9111 [file 1]

# Timmdc1

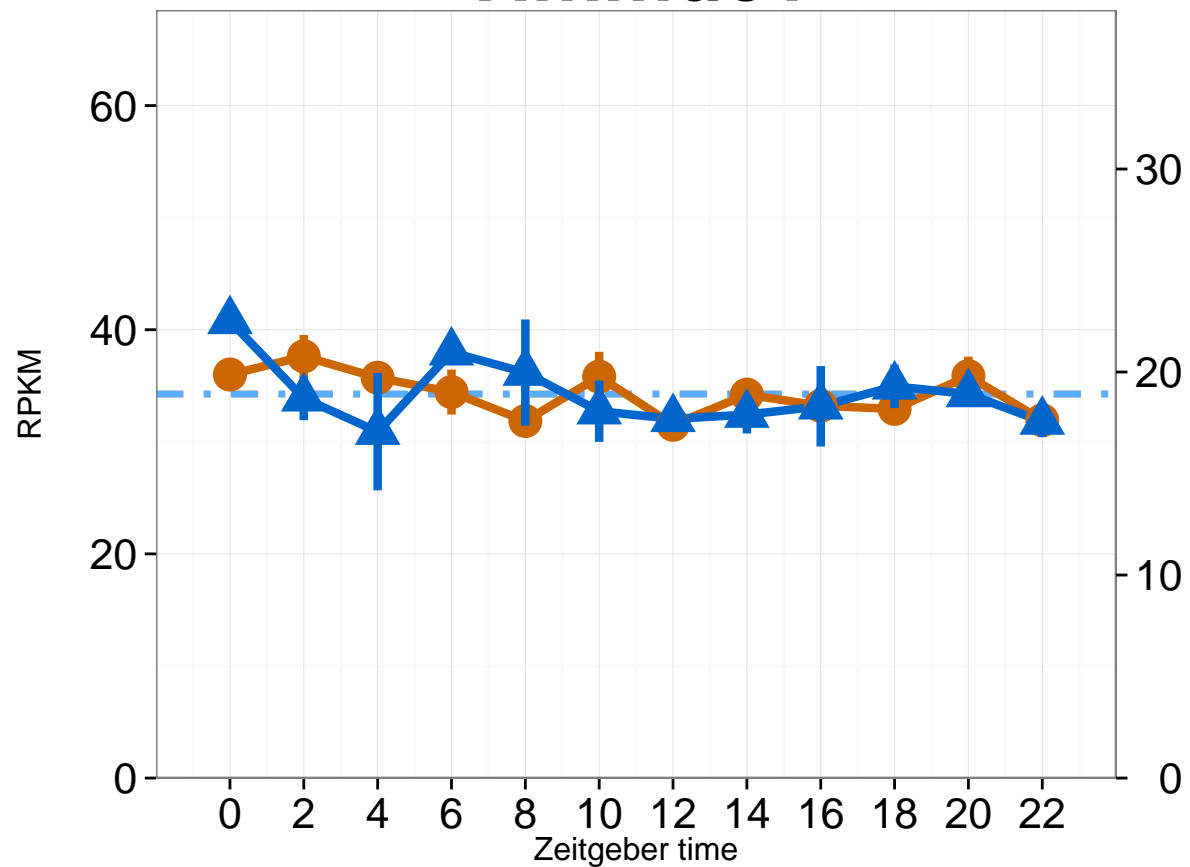

# Timmdc1

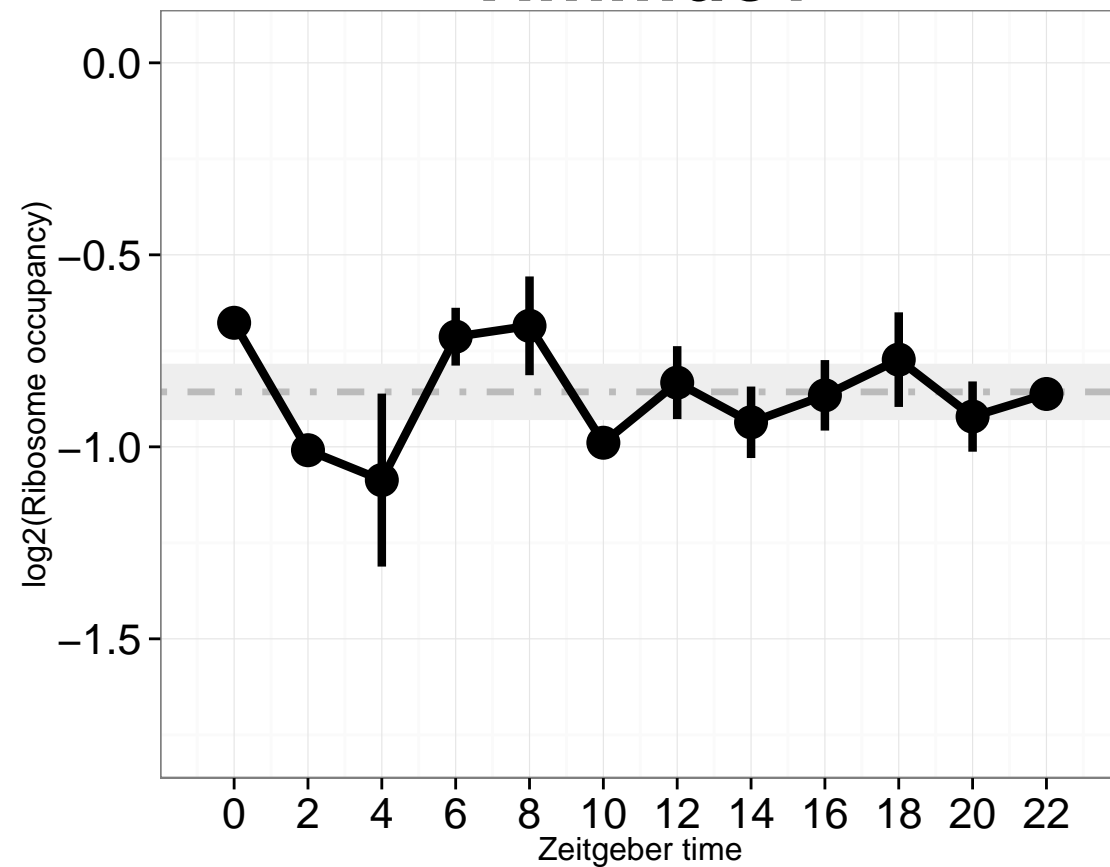

Supplement: Supplementary file 9112 [file 1]

## Adtrp

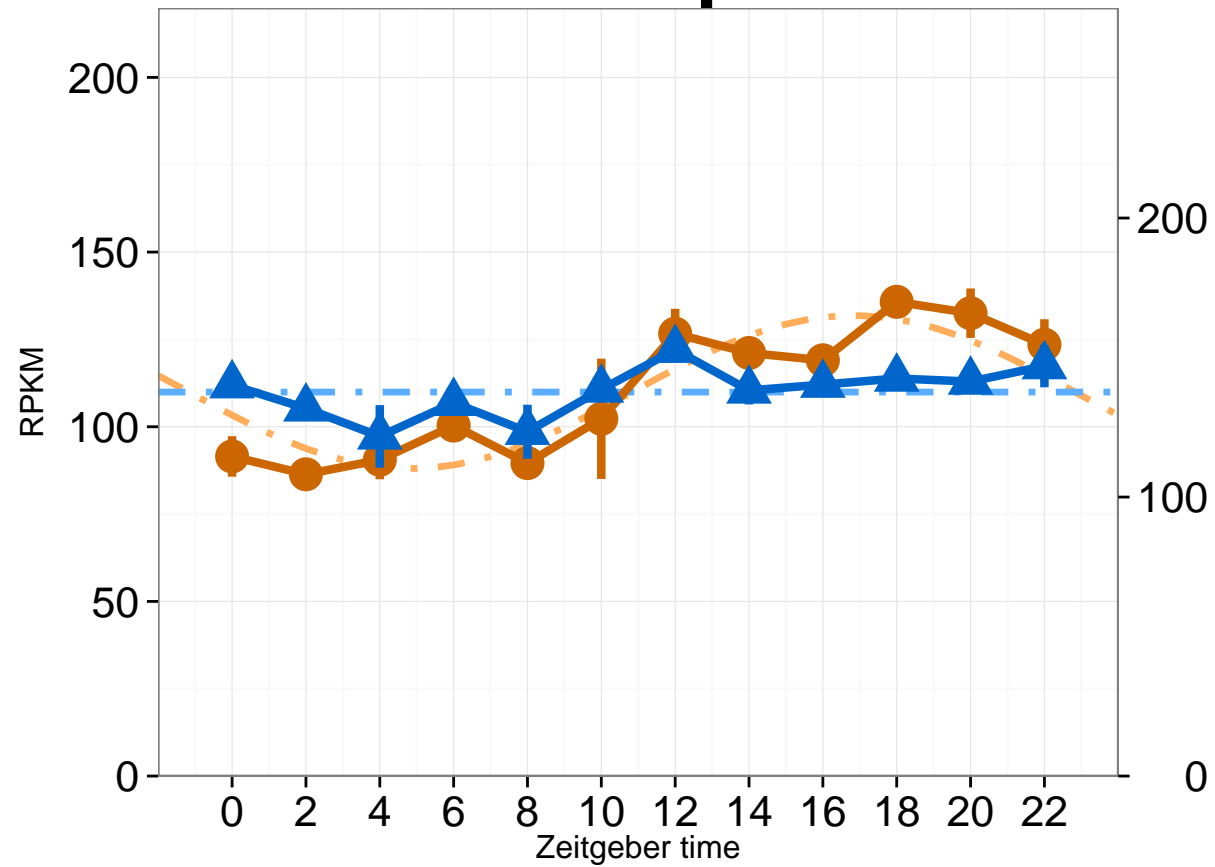

## Adtrp

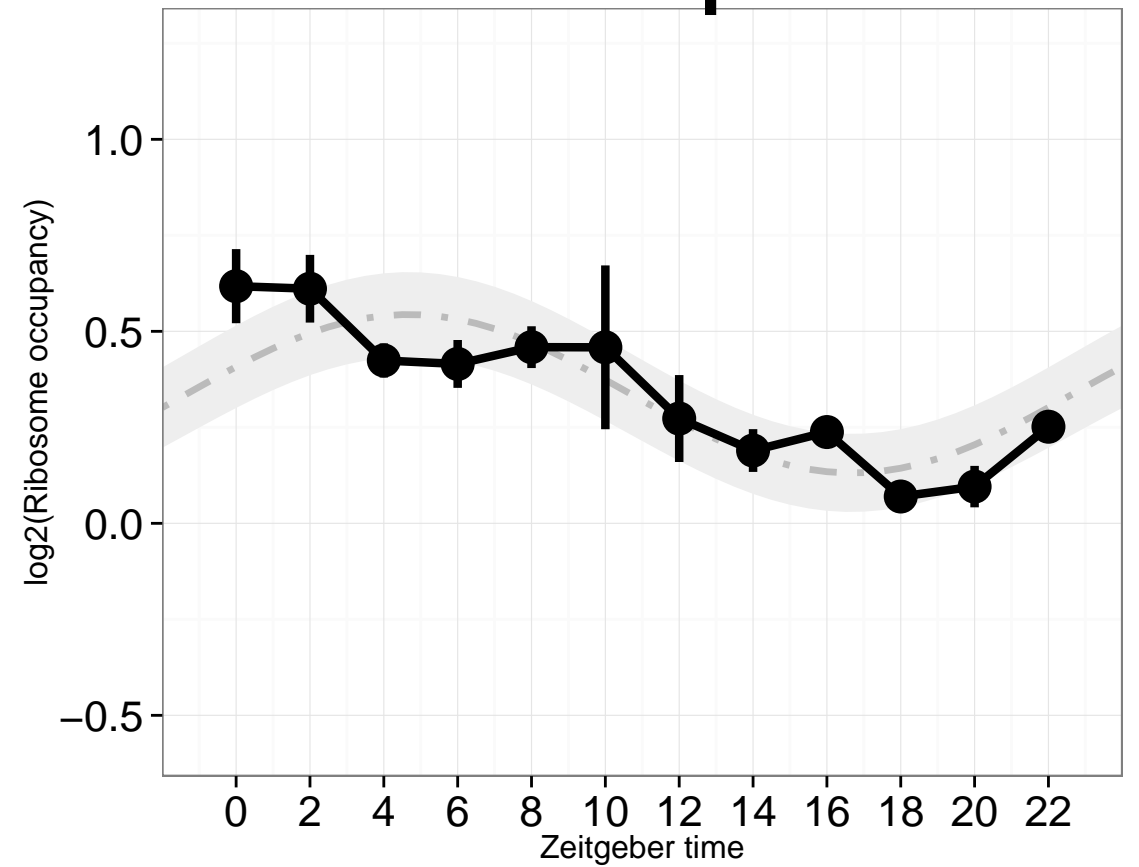

Supplement: Supplementary file 9113 [file 1]

# AI846148

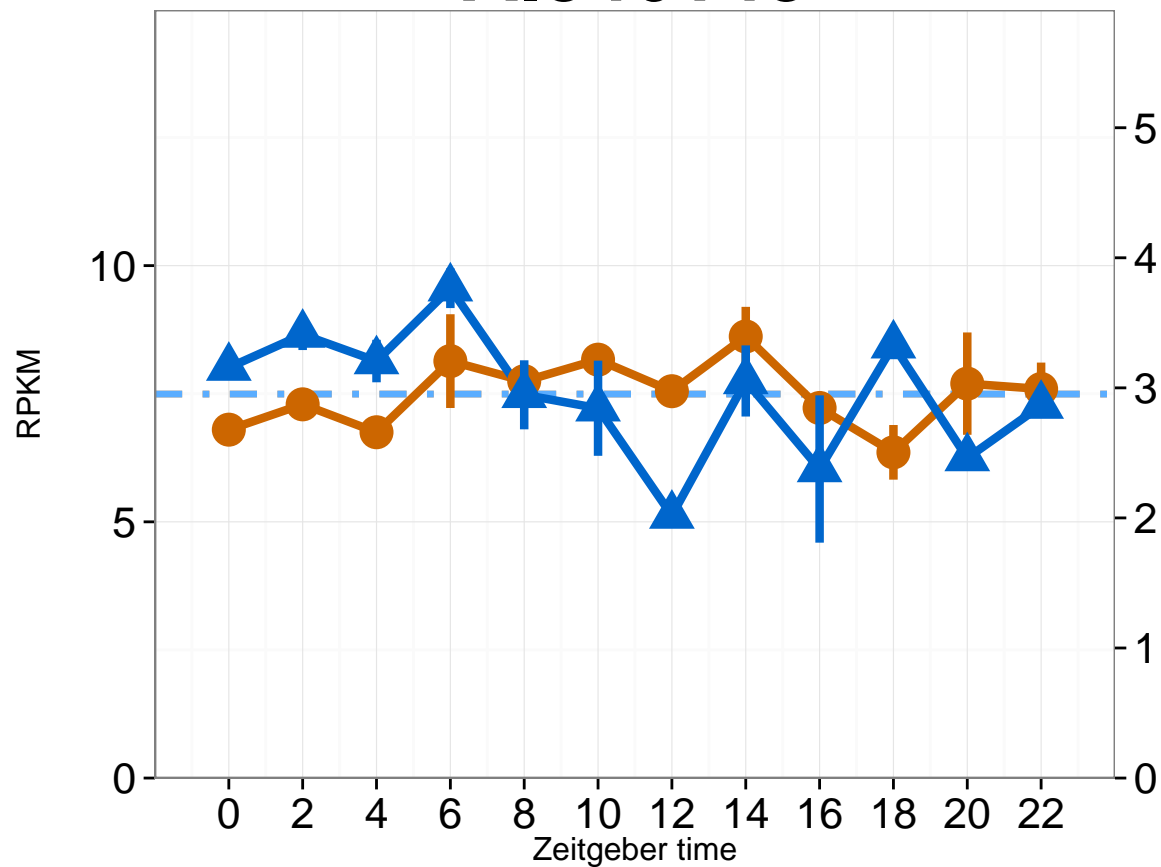

# AI846148

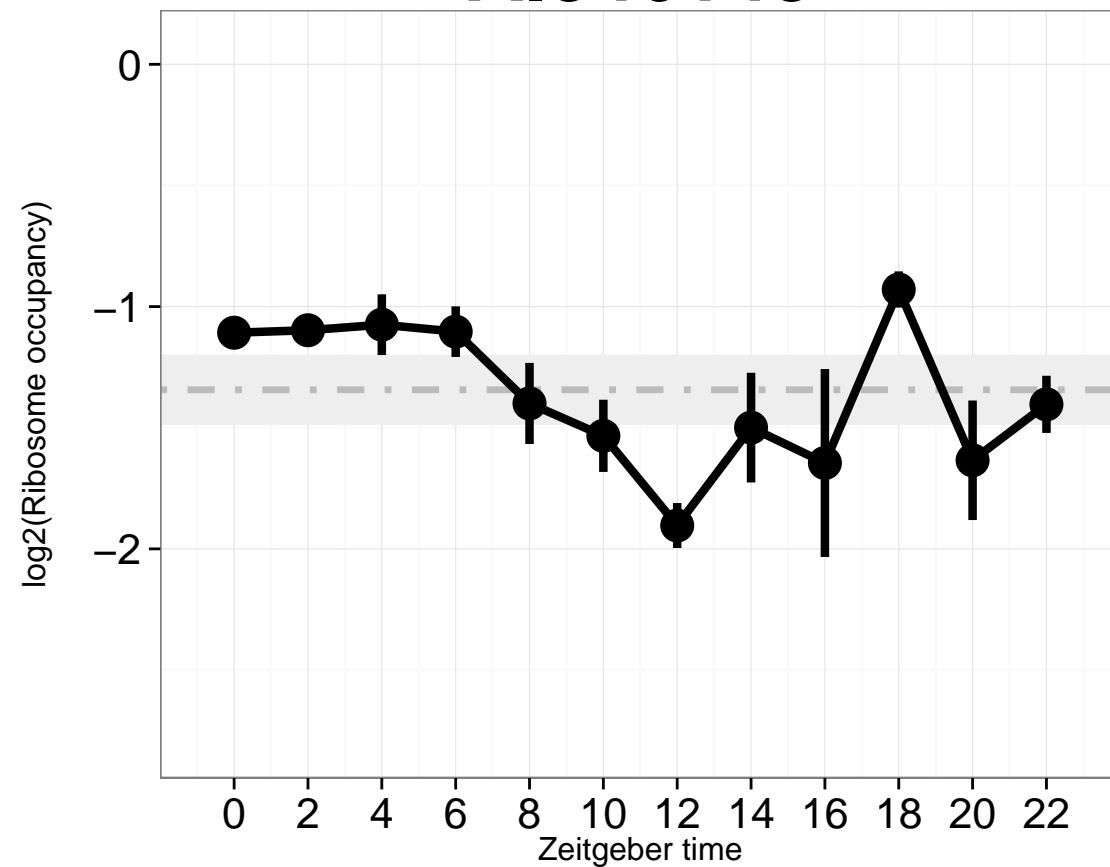

Supplement: Supplementary file 9114 [file 1]

# Hrsp12

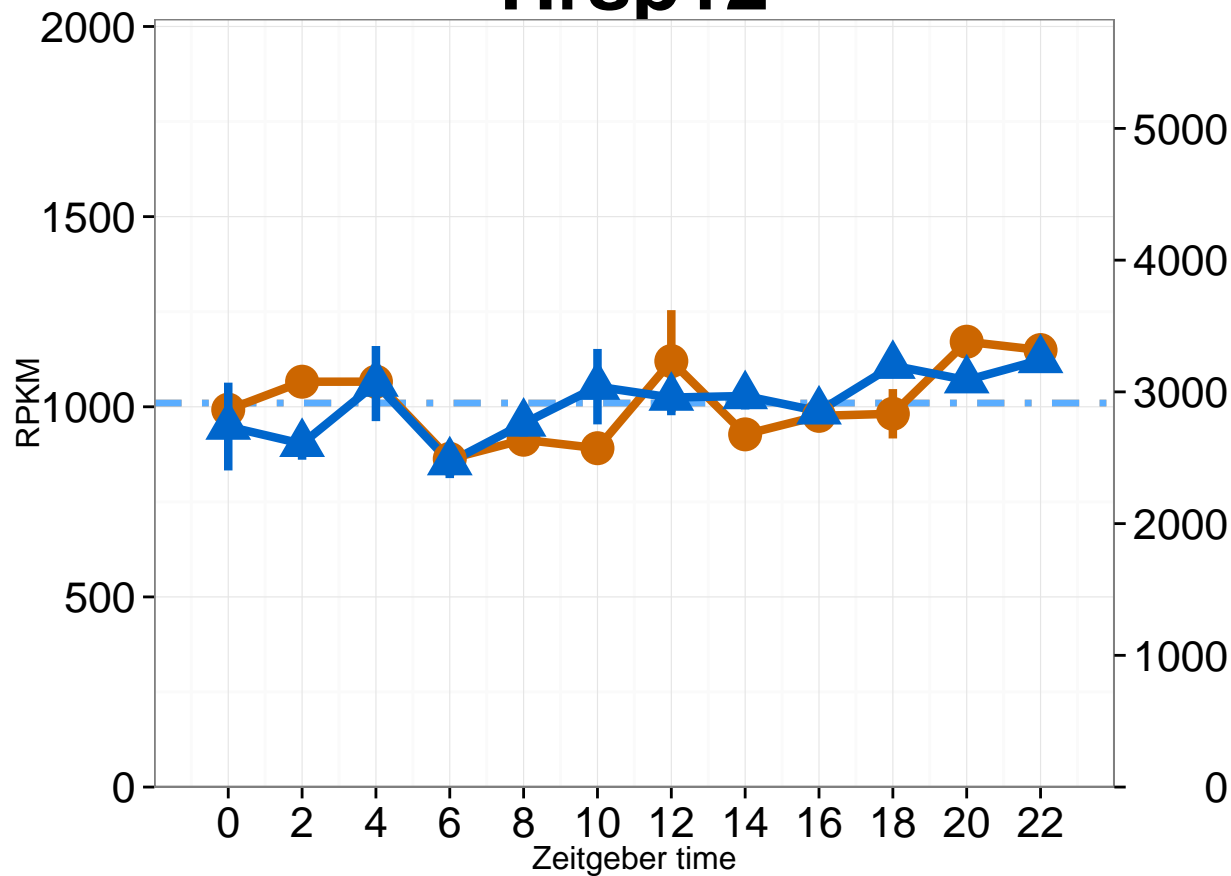

# Hrsp12

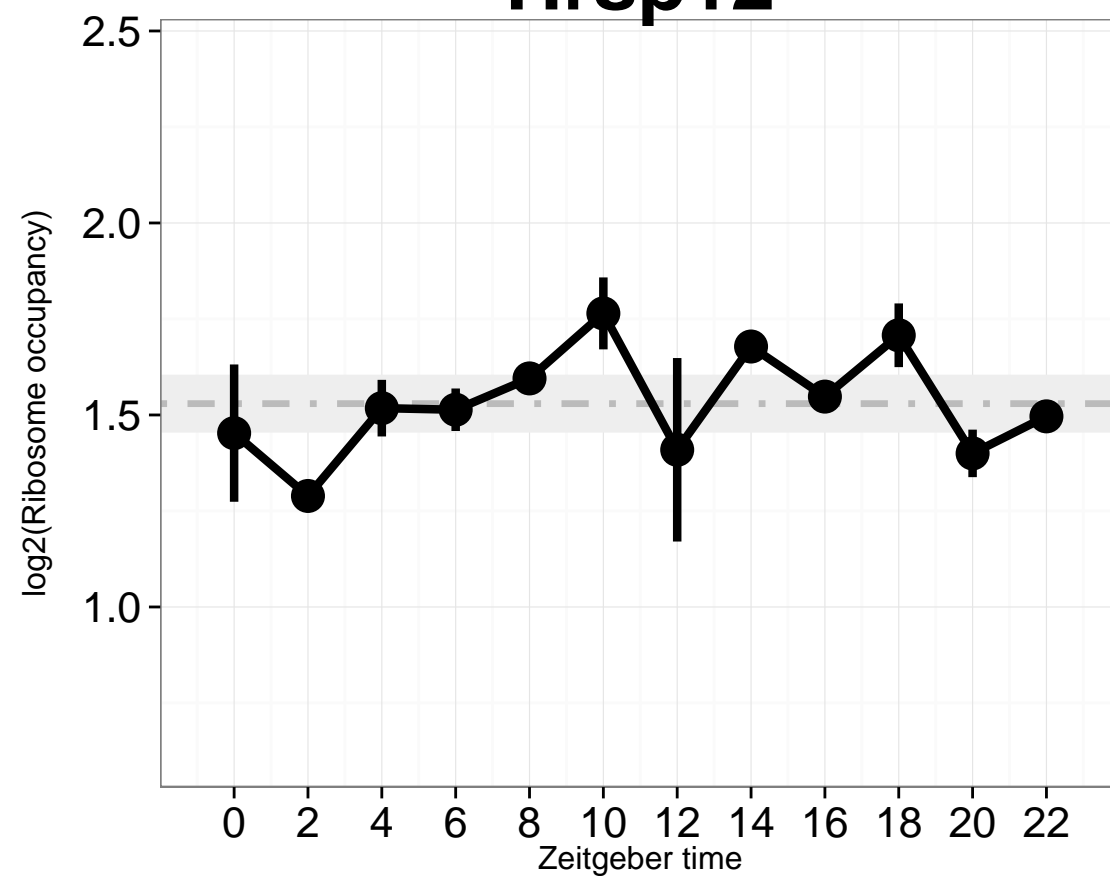

Supplement: Supplementary file 9115 [file 1]

# Zfp874a

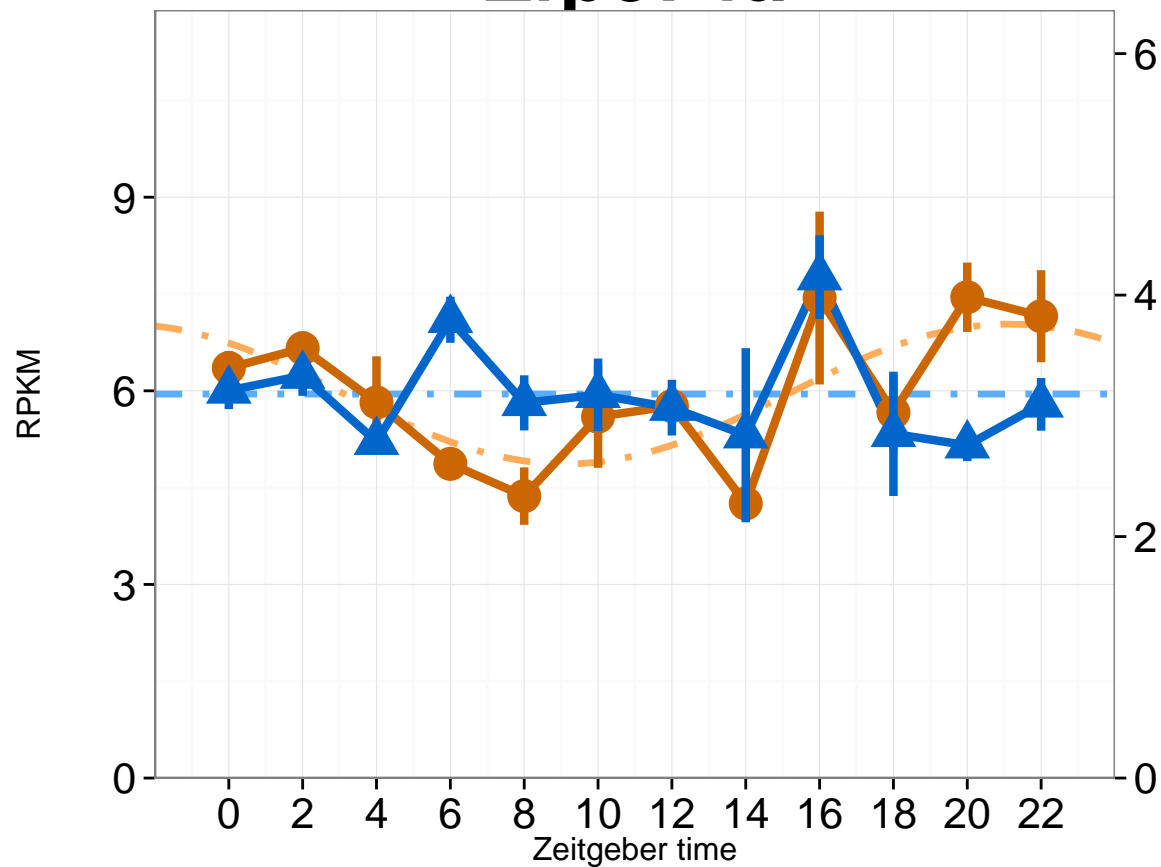

# Zfp874a

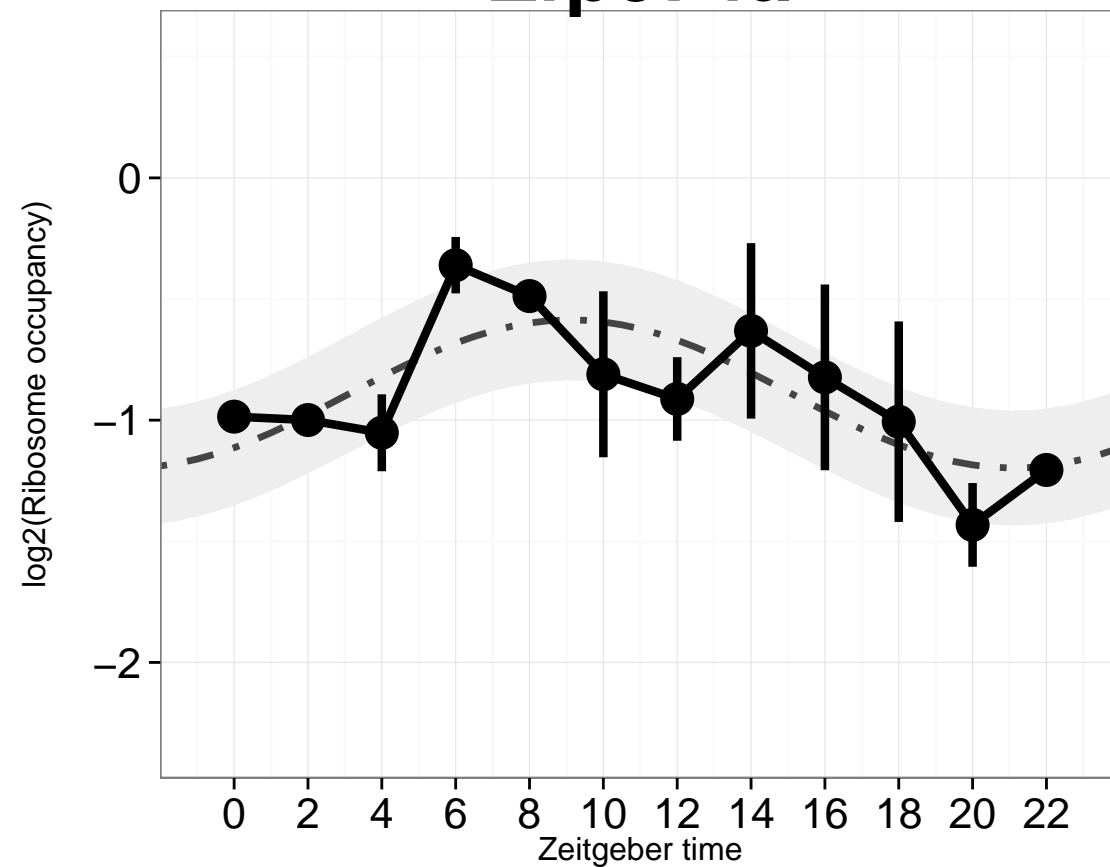

Supplement: Supplementary file 9116 [file 1]

## Kdelr3

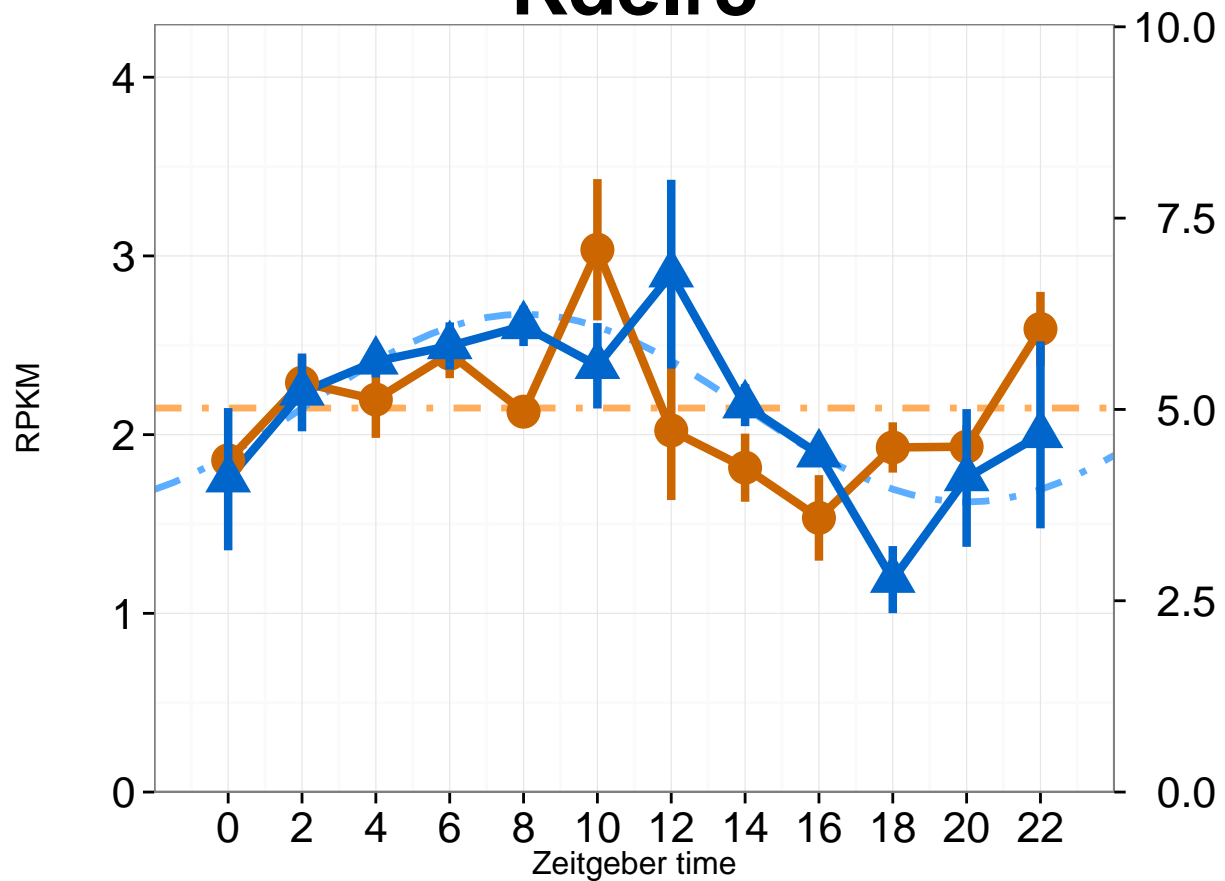

## Kdelr3

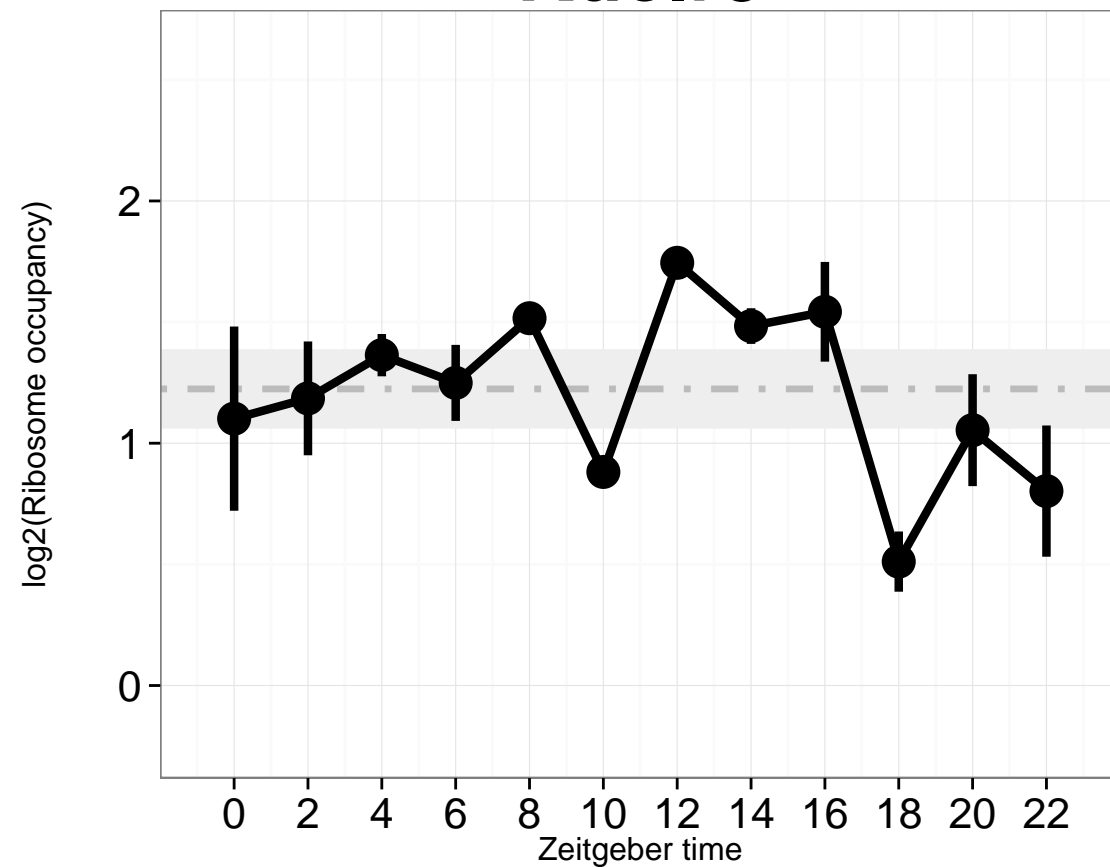

Supplement: Supplementary file 9117 [file 1]

## Htatsf1

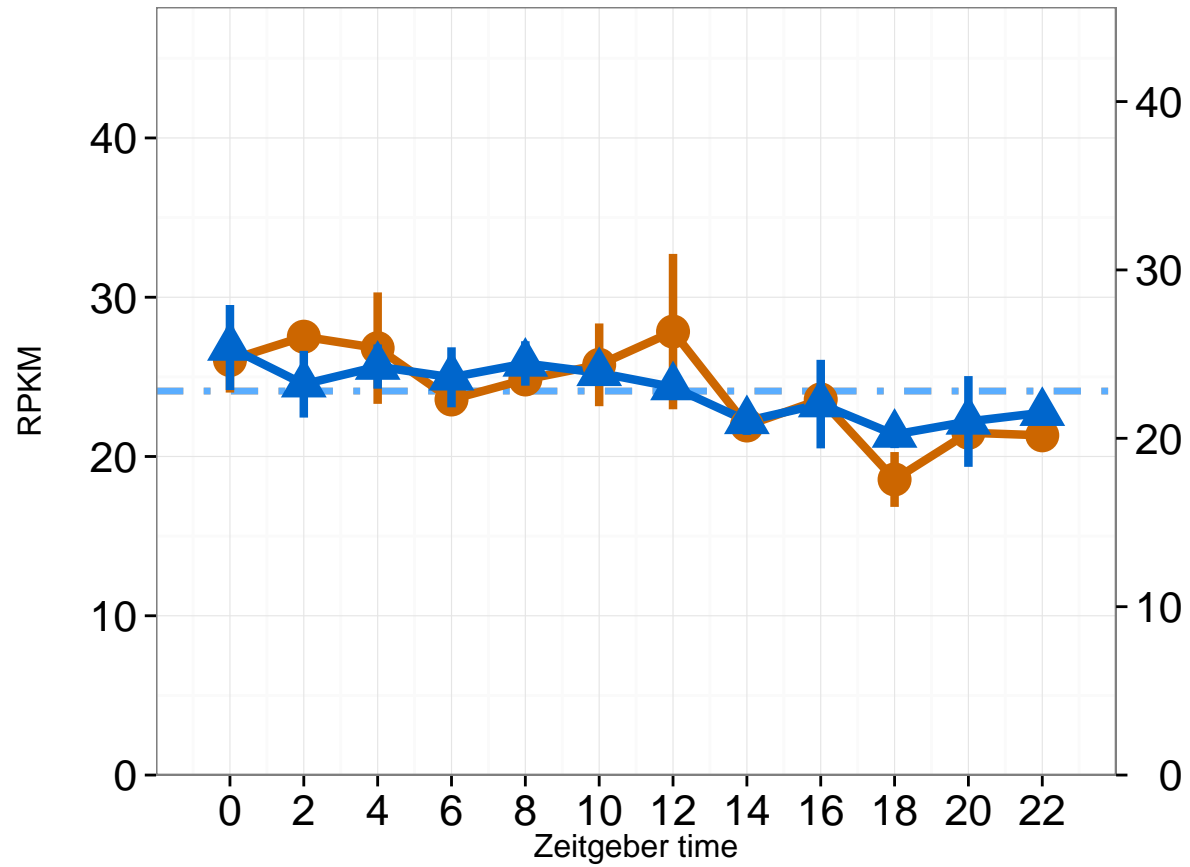

## Htatsf1

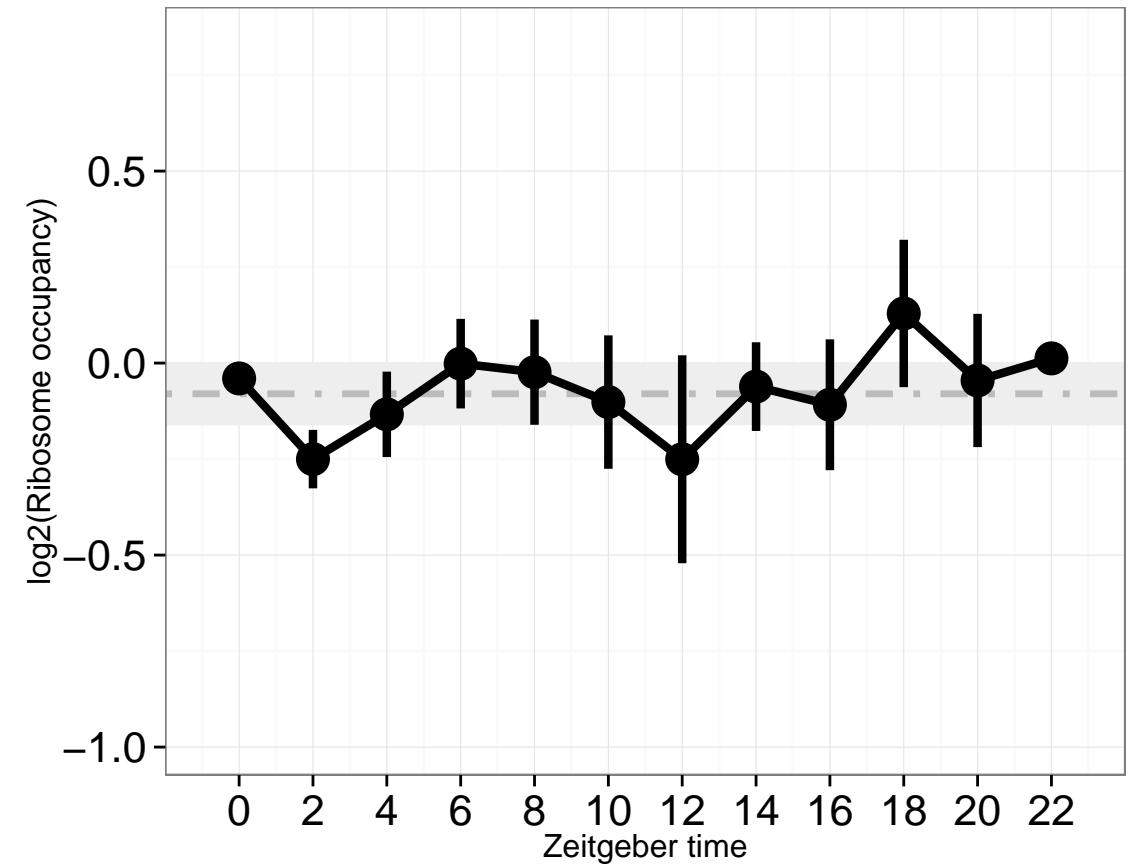

Supplement: Supplementary file 9118 [file 1]

# Rsl1d1

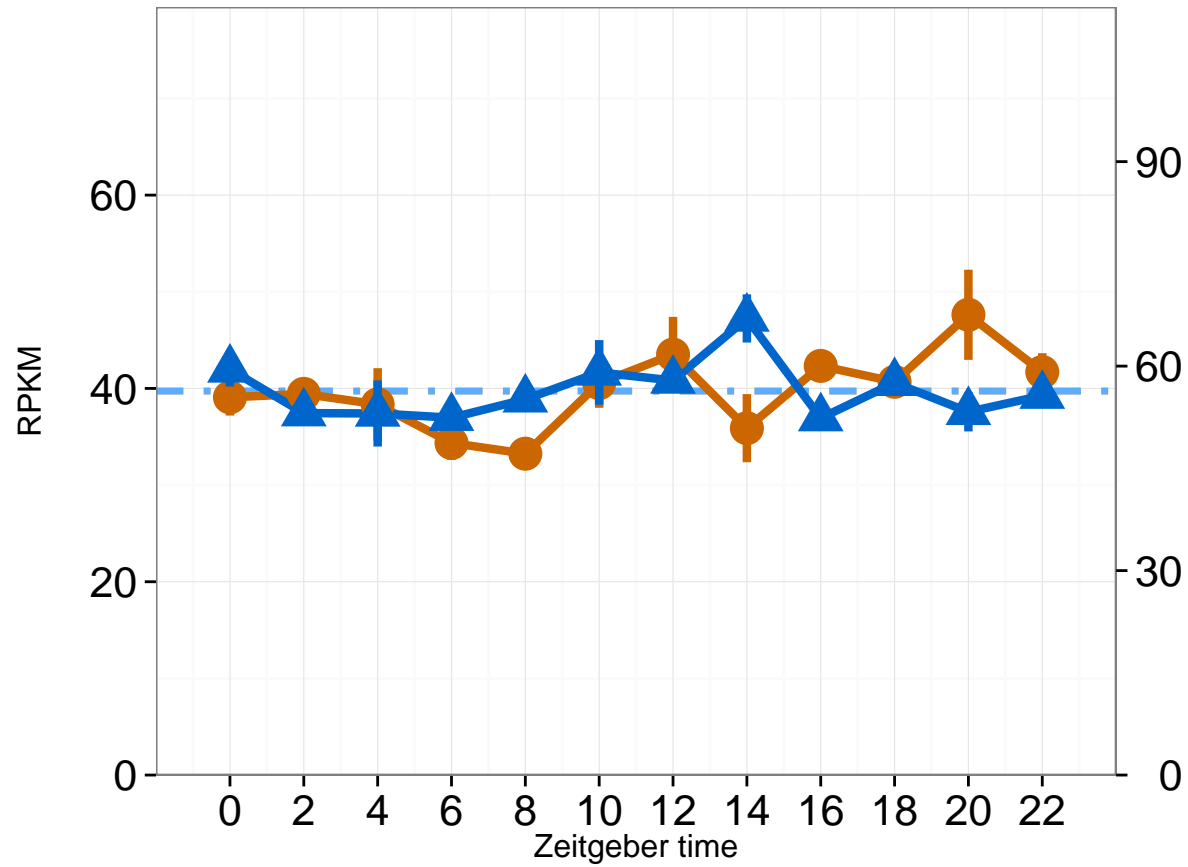

# Rsl1d1

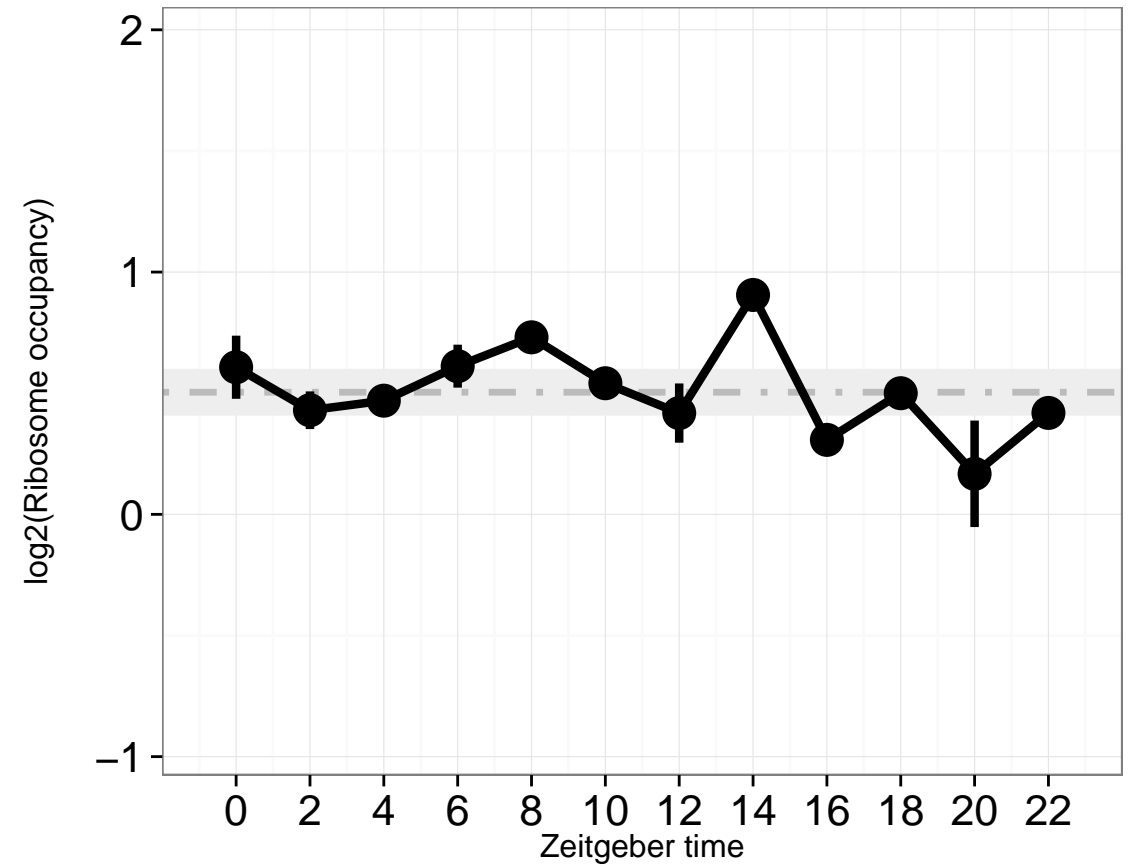

Supplement: Supplementary file 9119 [file 1]

# Atp13a1

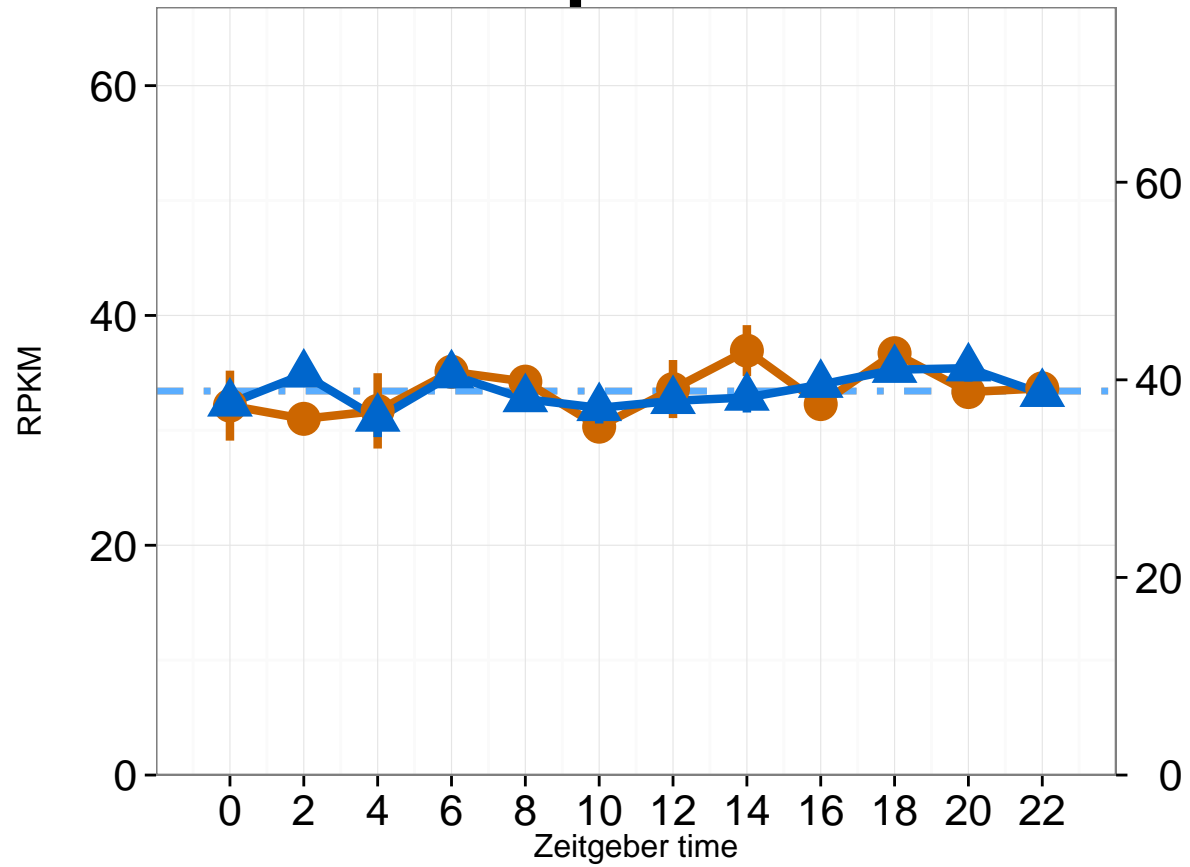

# Atp13a1

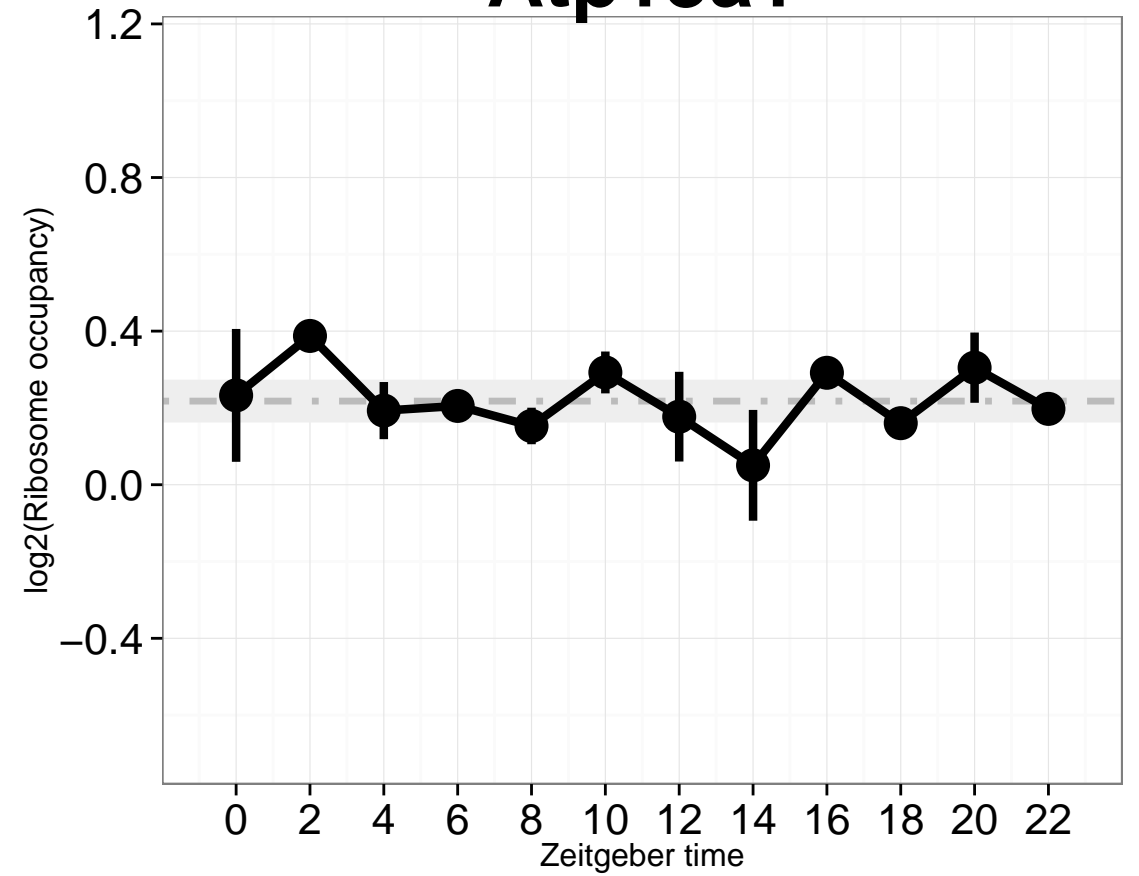

Supplement: Supplementary file 9120 [file 1]

## Ppat

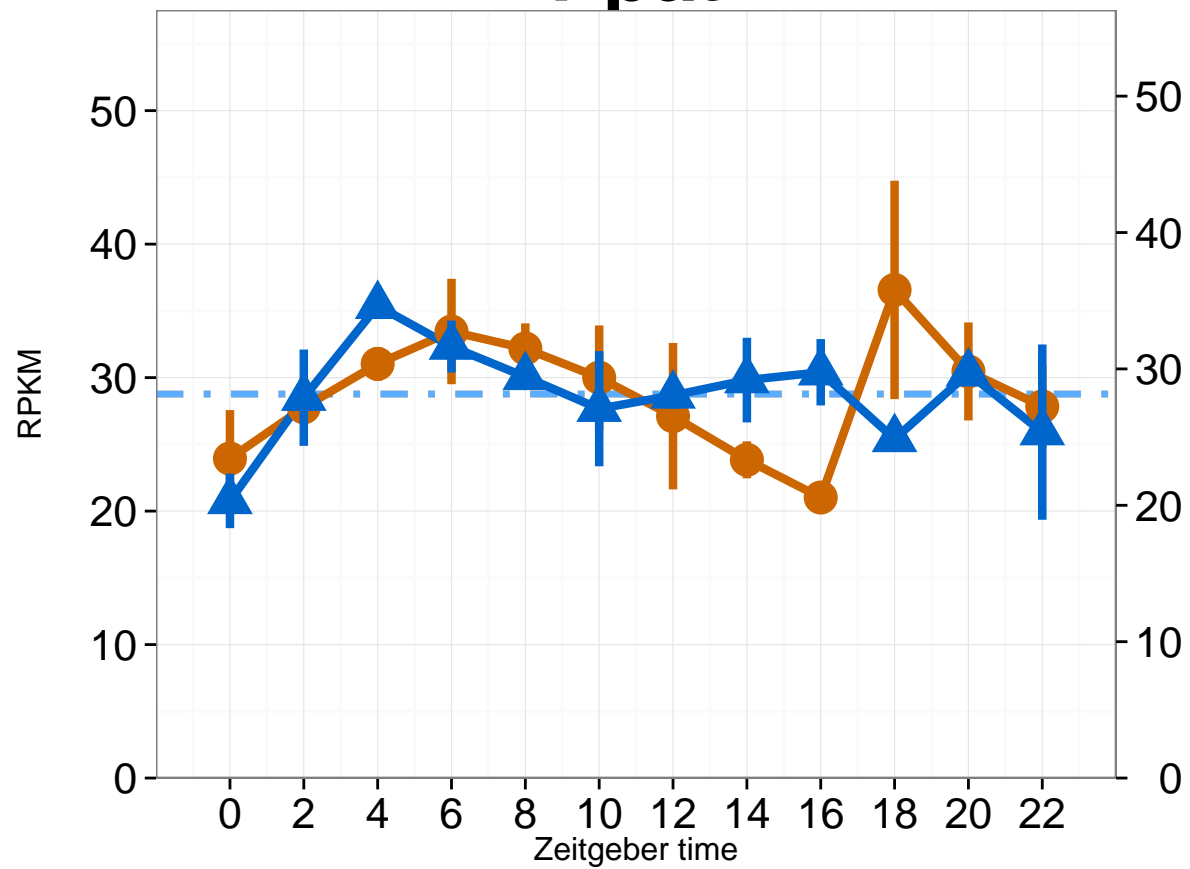

## Ppat

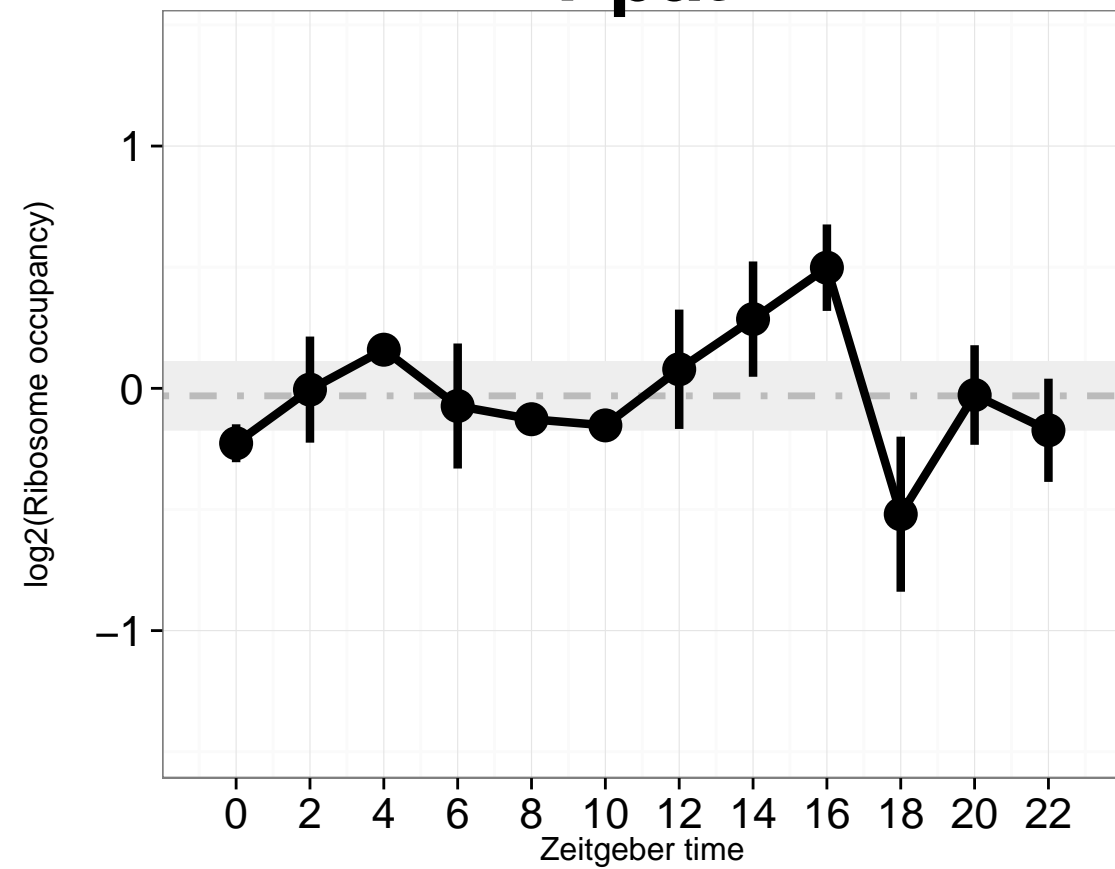

Supplement: Supplementary file 9121 [file 1]

# Pfkfb3

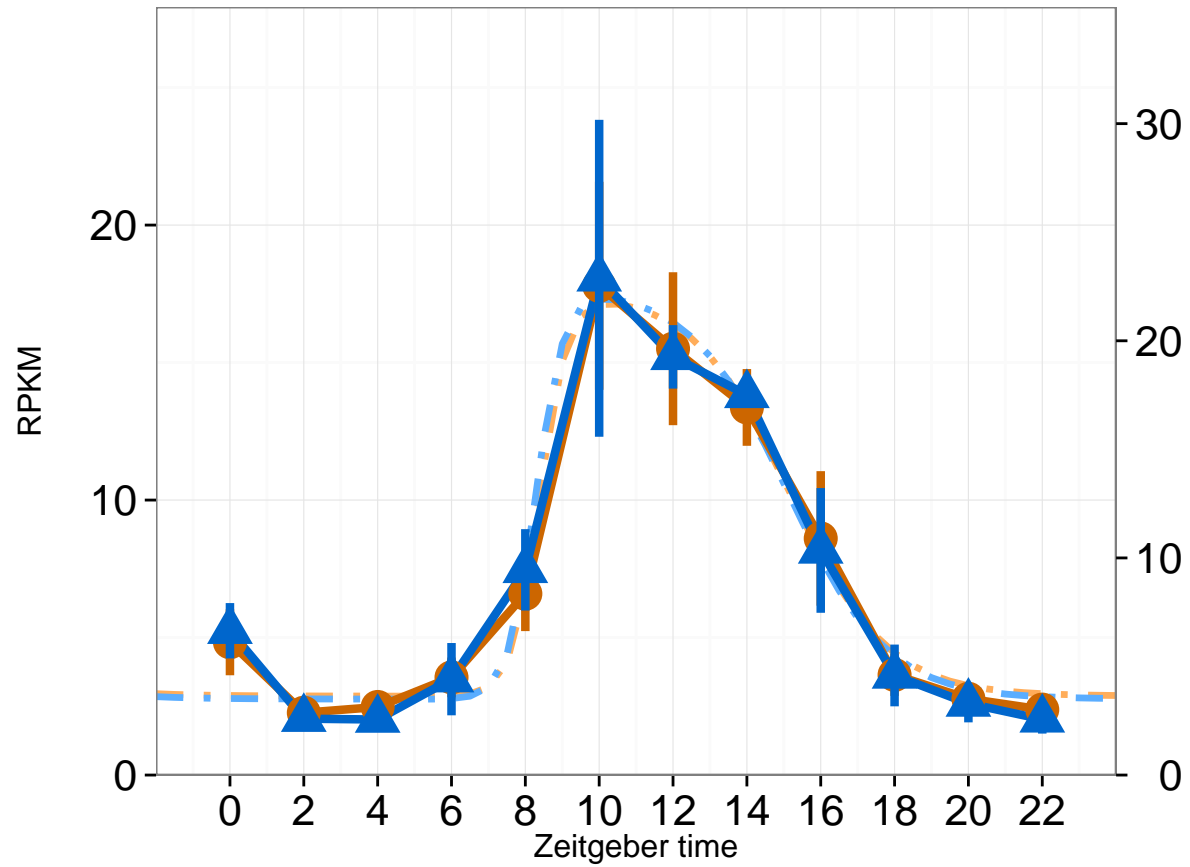

# Pfkfb3

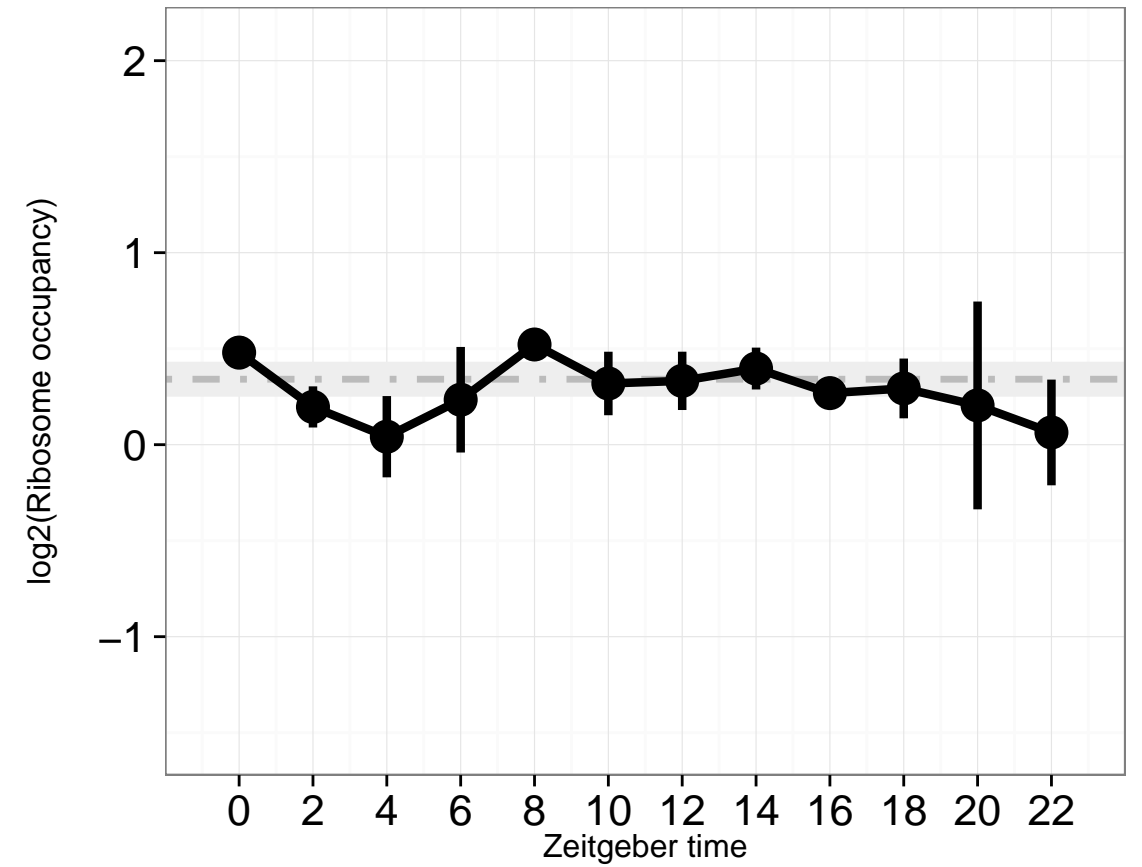

Supplement: Supplementary file 9122 [file 1]

# Ranbp10

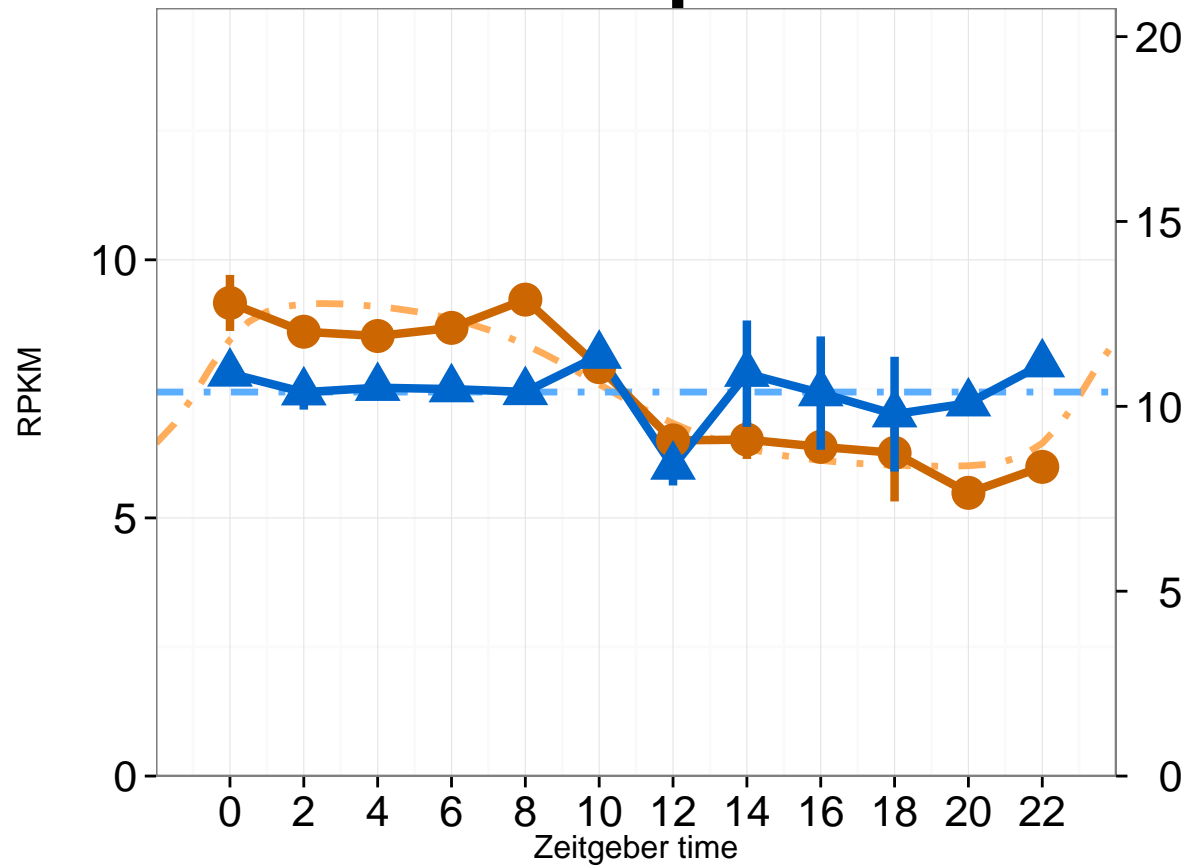

# Ranbp10

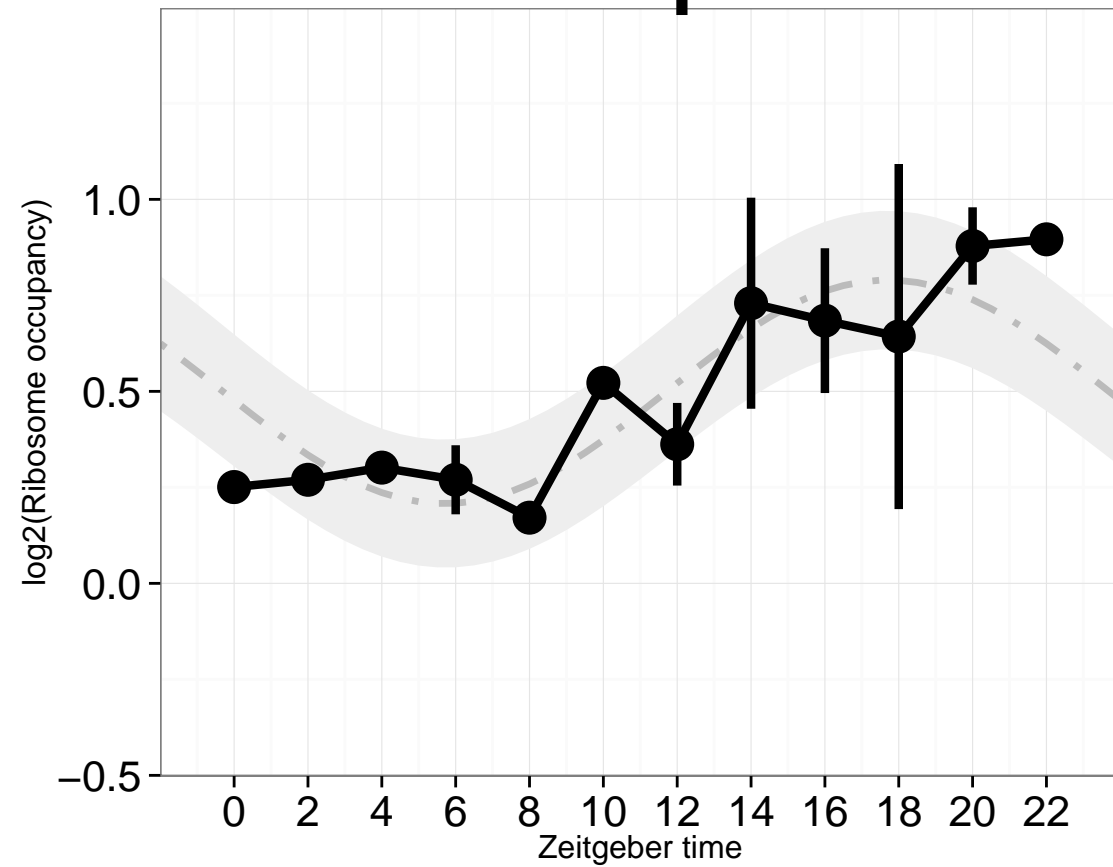

Supplement: Supplementary file 9123 [file 1]

## Sdf2l1

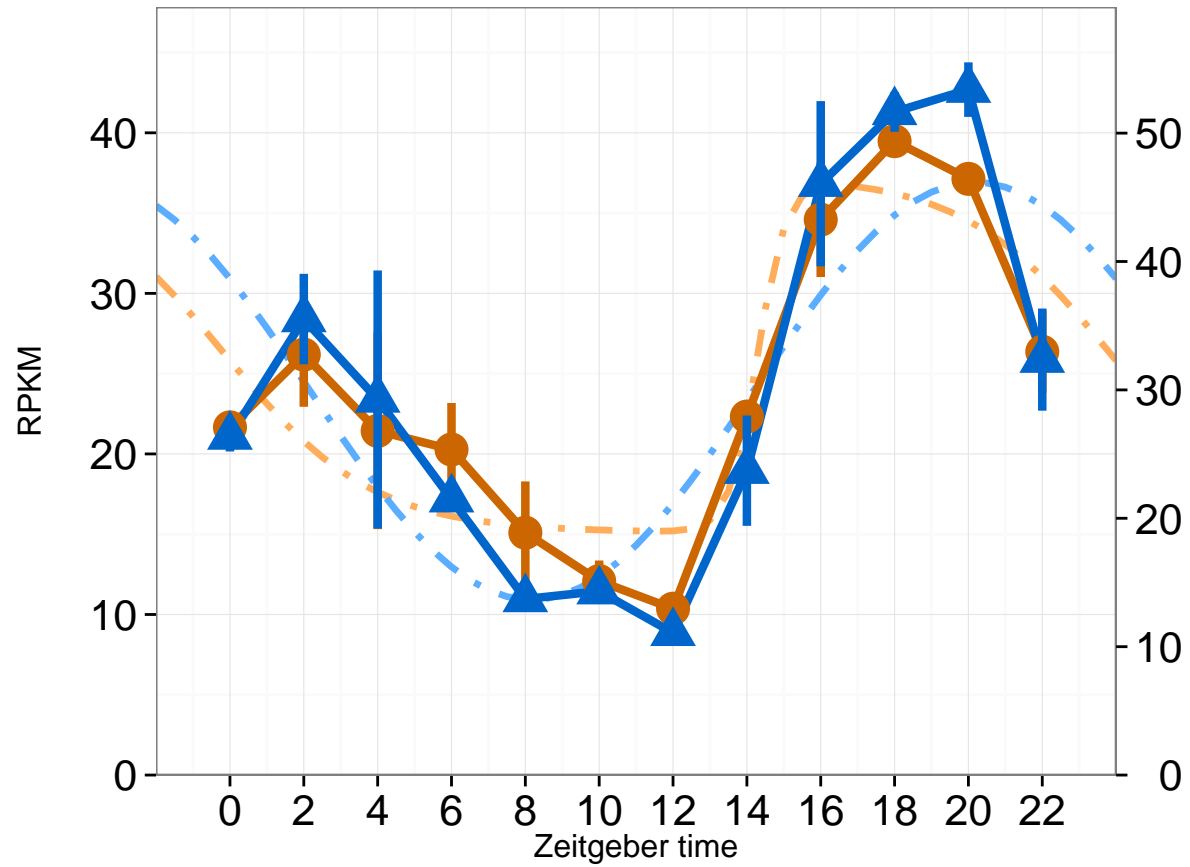

## Sdf2l1

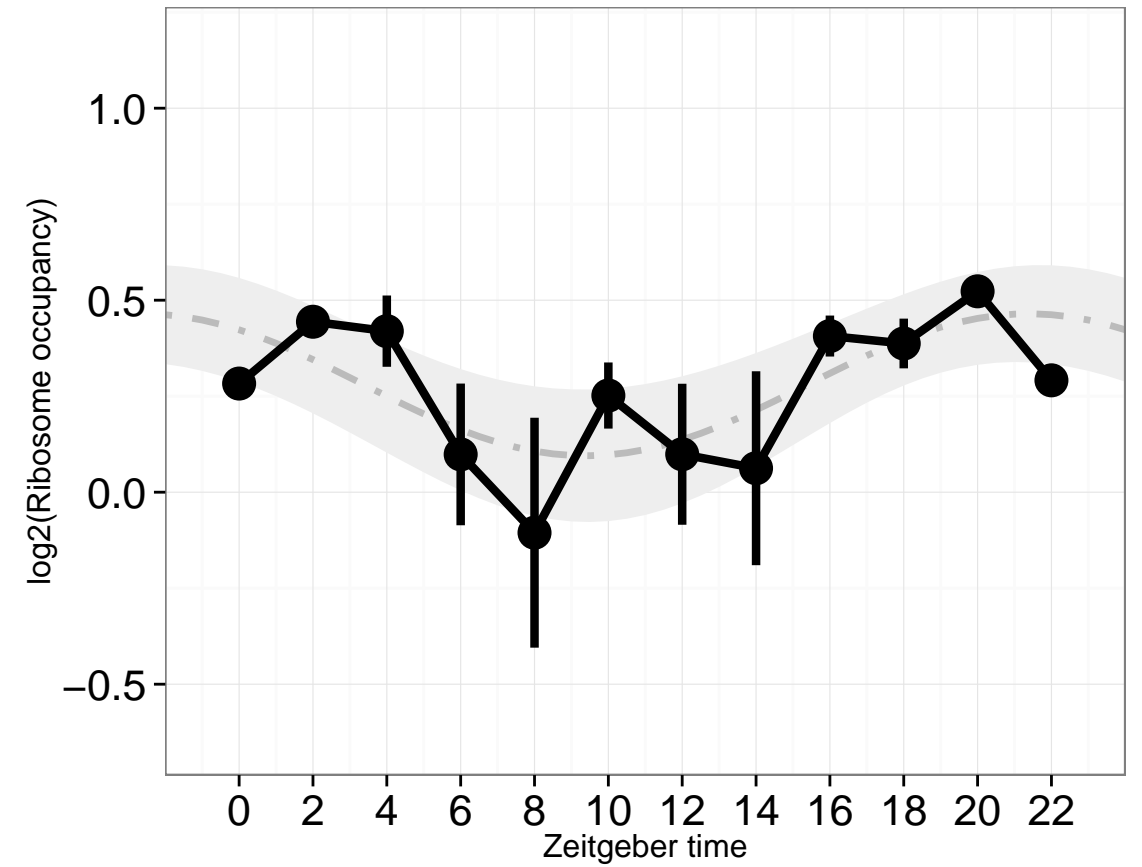

Supplement: Supplementary file 9124 [file 1]

# Dcaf5

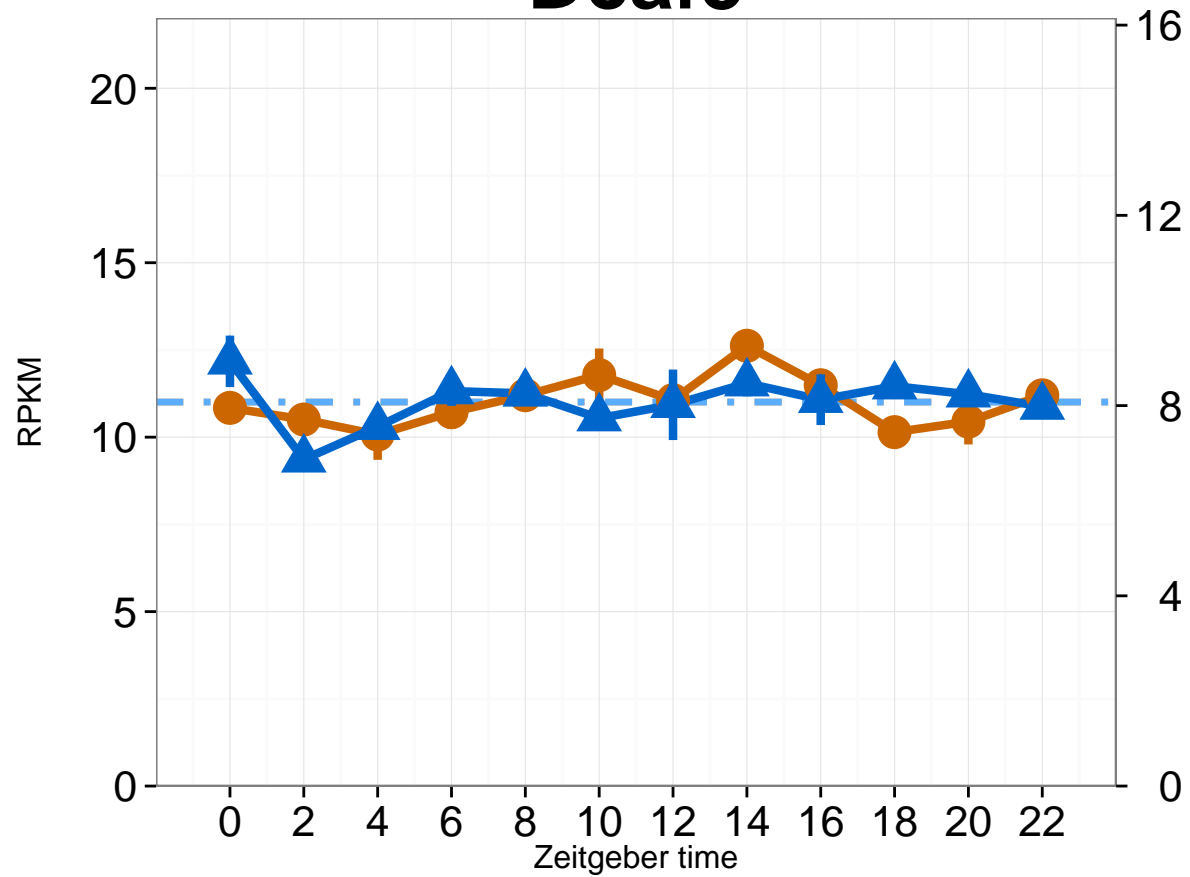

# Dcaf5

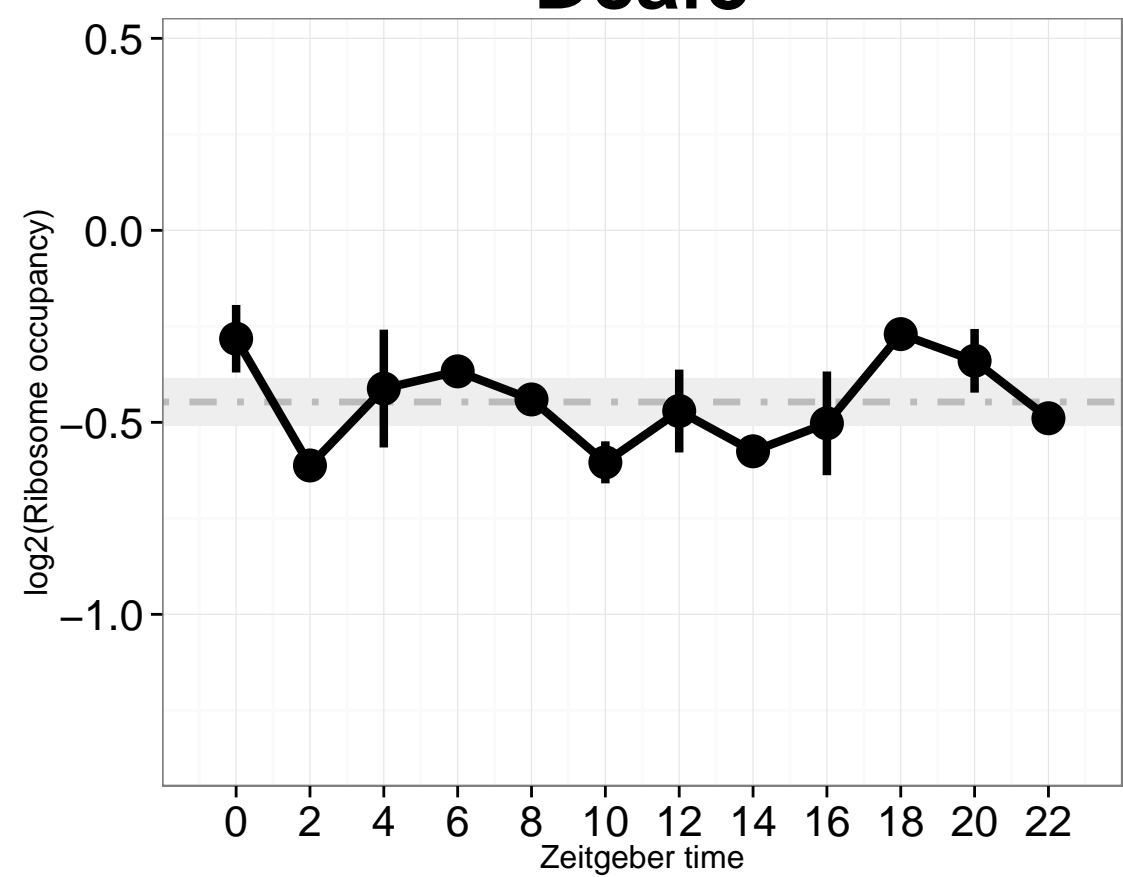

Supplement: Supplementary file 9125 [file 1]

# Znrd1as

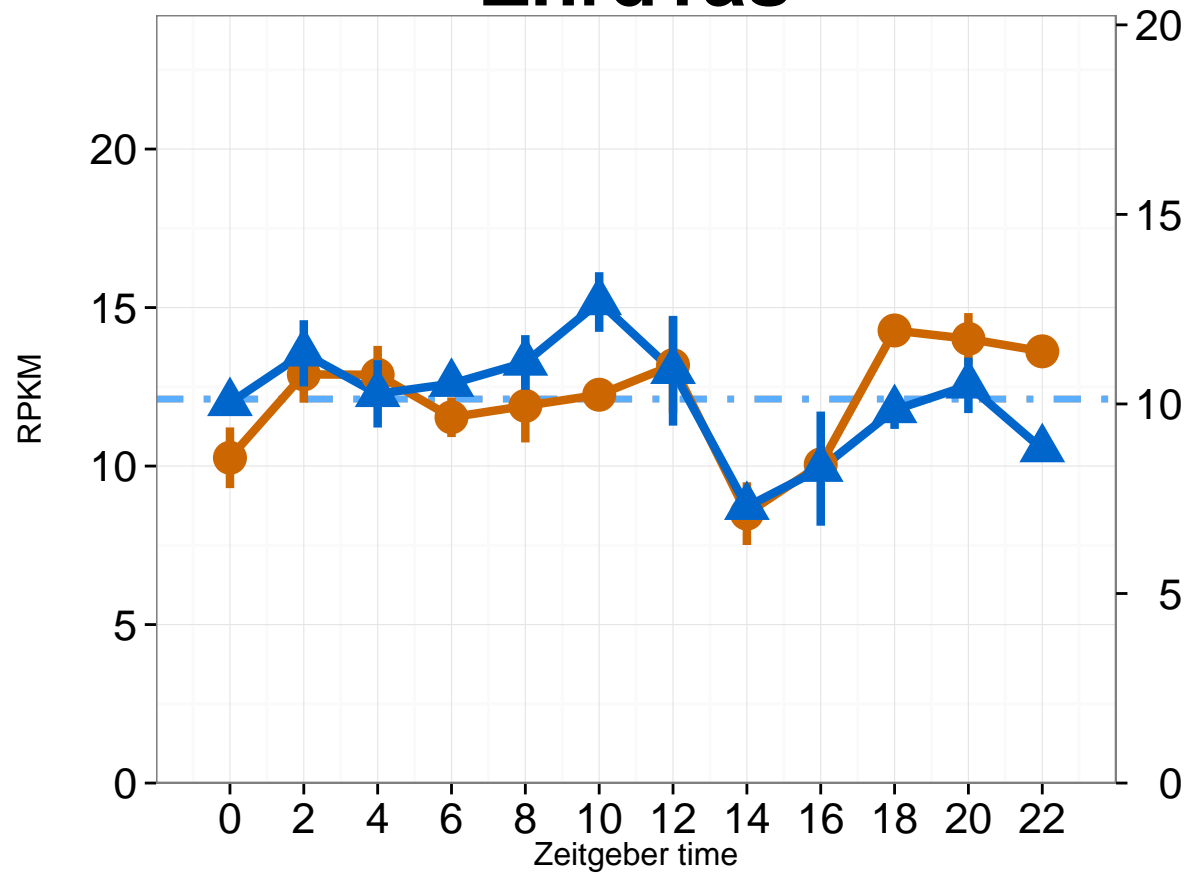

# Znrd1as

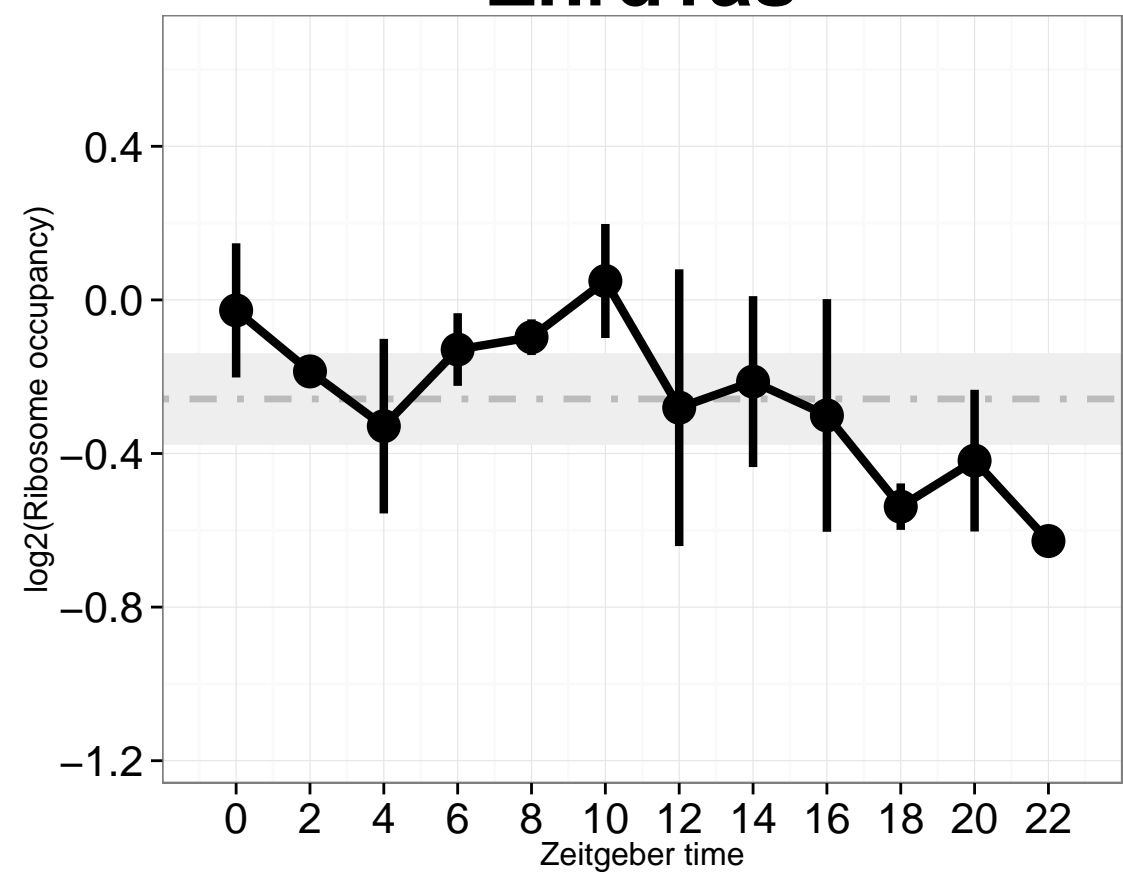

Supplement: Supplementary file 9127 [file 1]

# lvns1abp

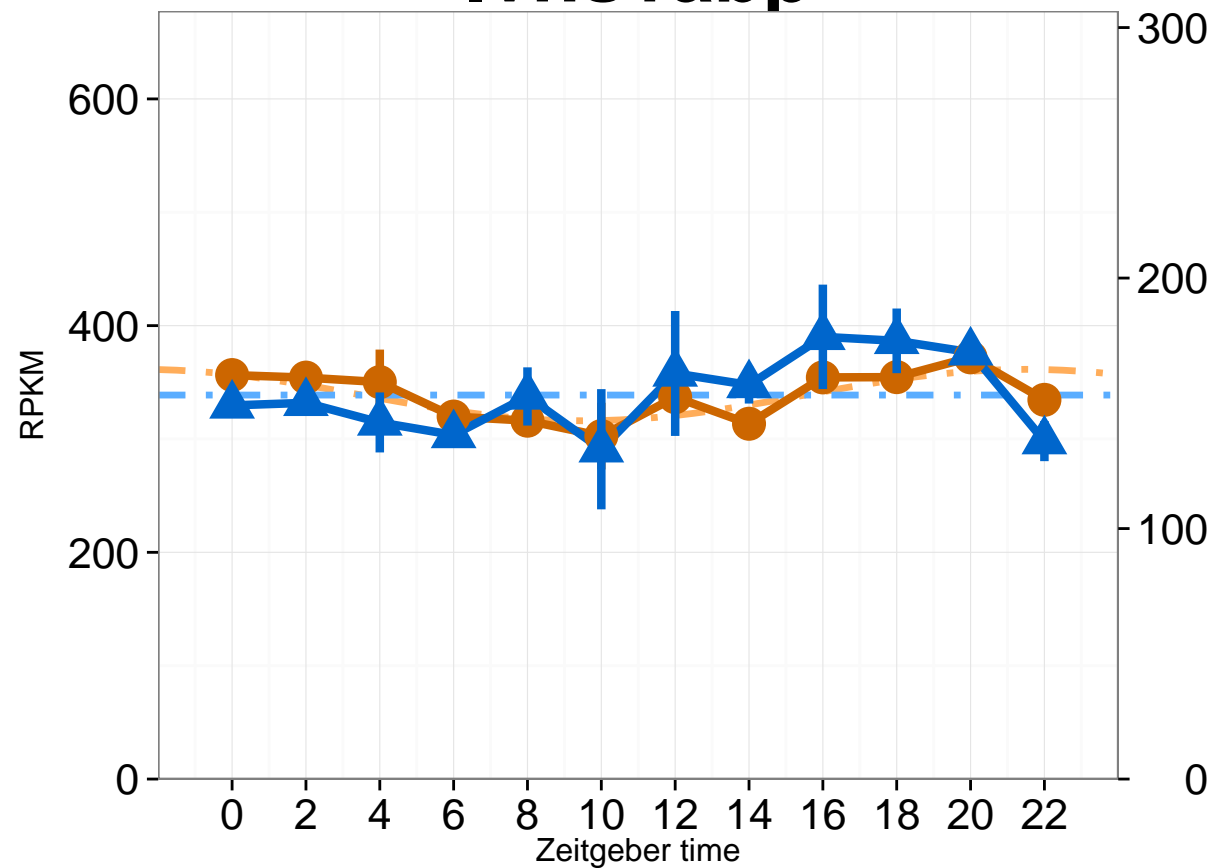

# lvns1abp

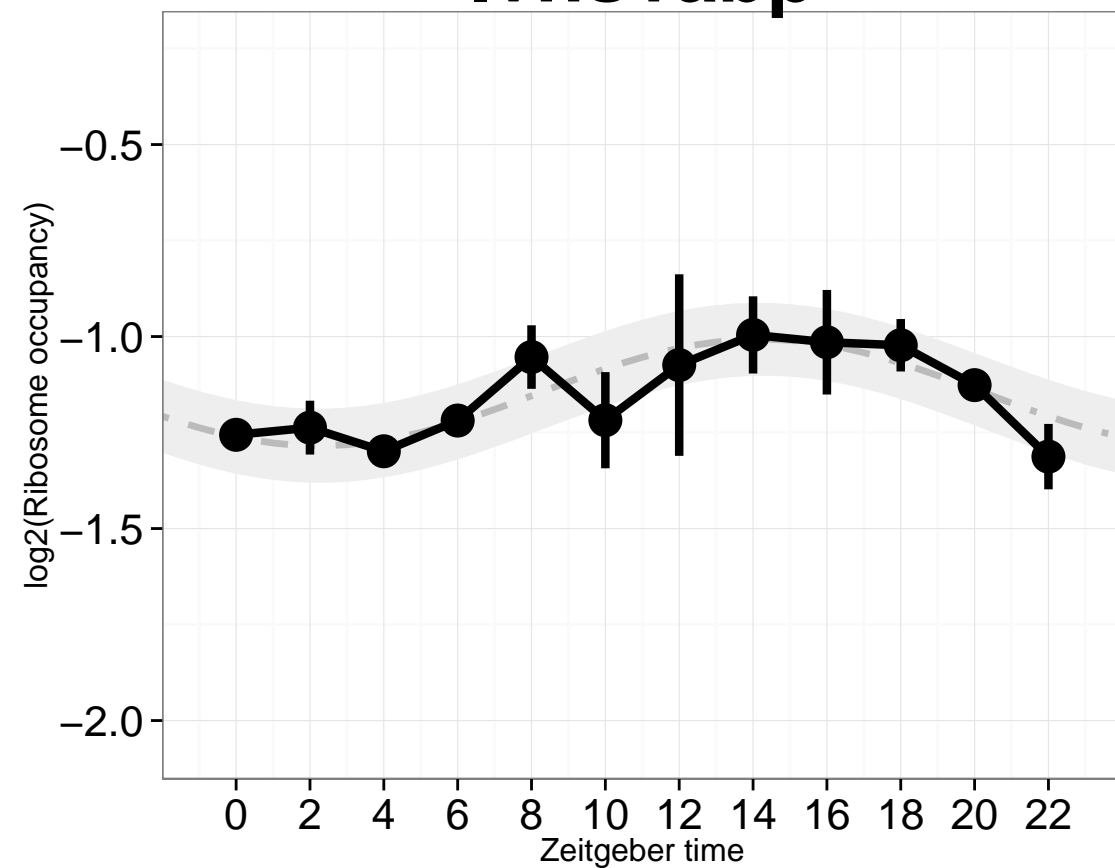

Supplement: Supplementary file 9128 [file 1]

## Rassf2

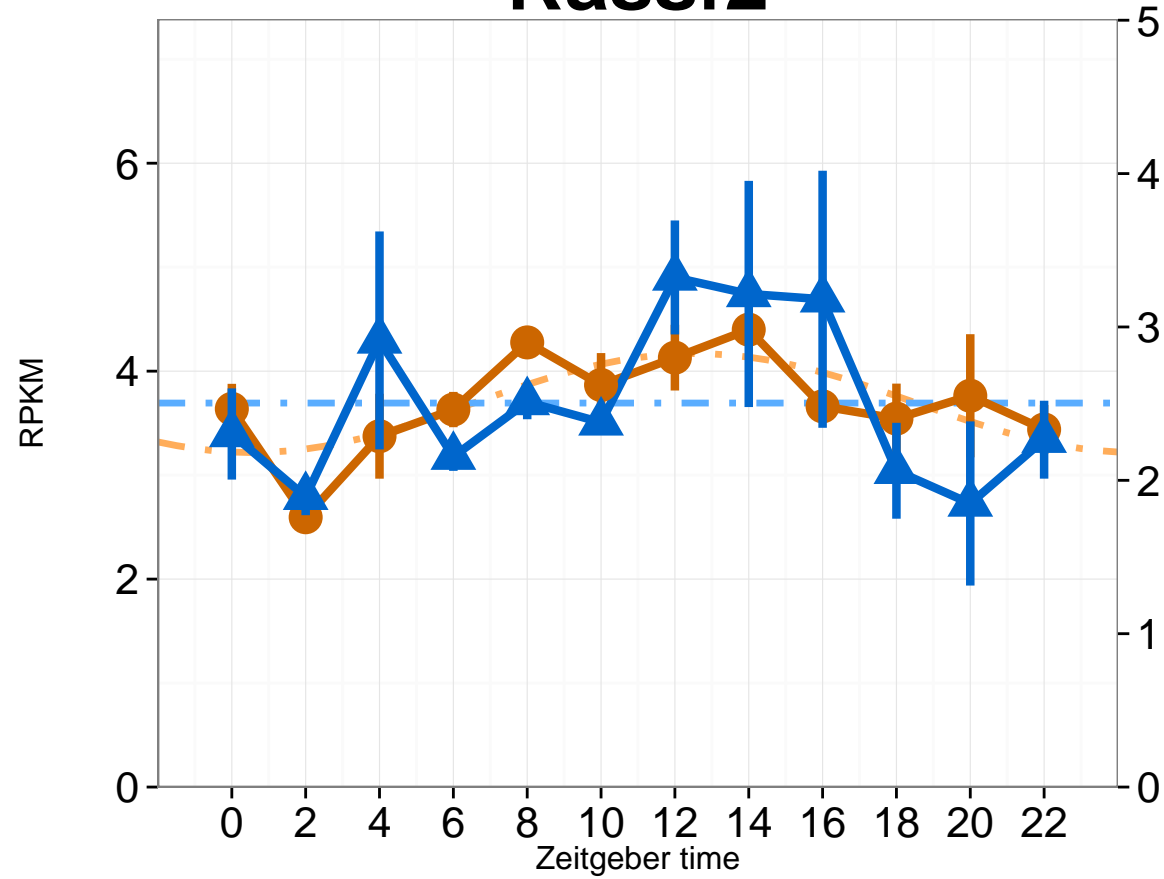

## Rassf2

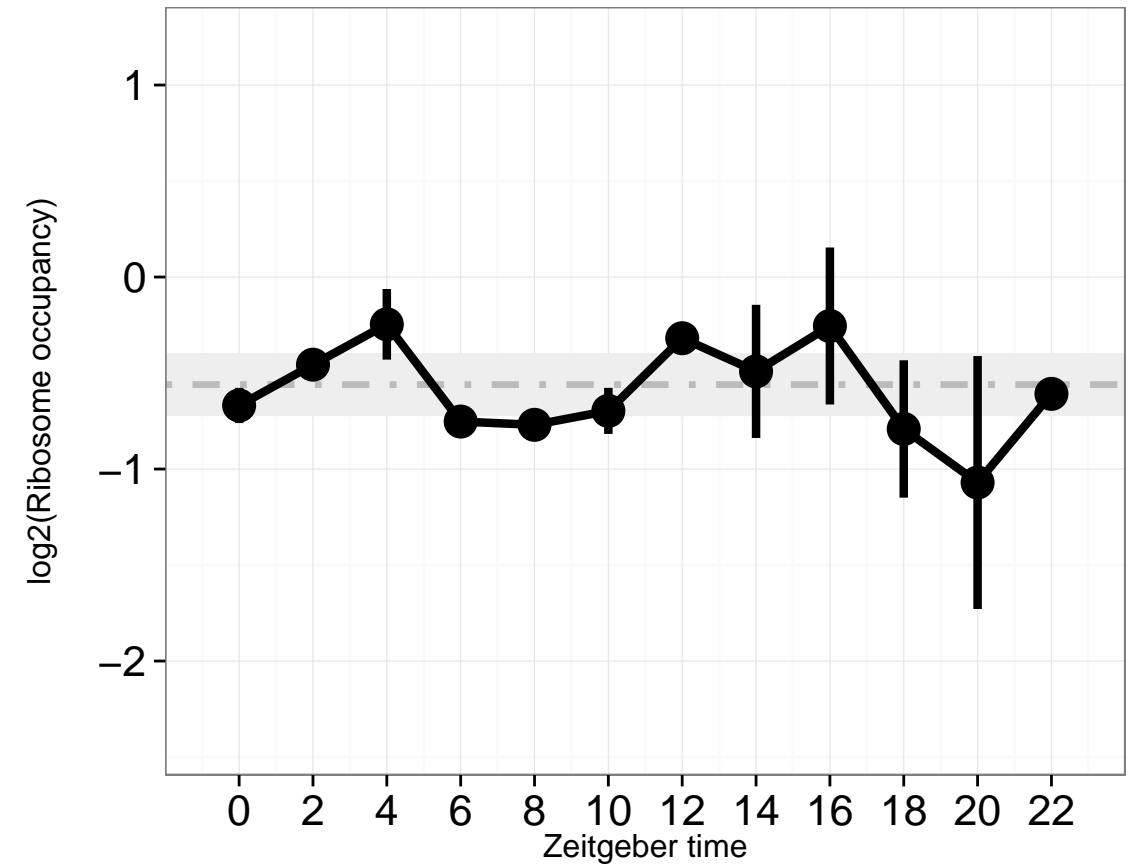

Supplement: Supplementary file 9129 [file 1]

## Eps15I1

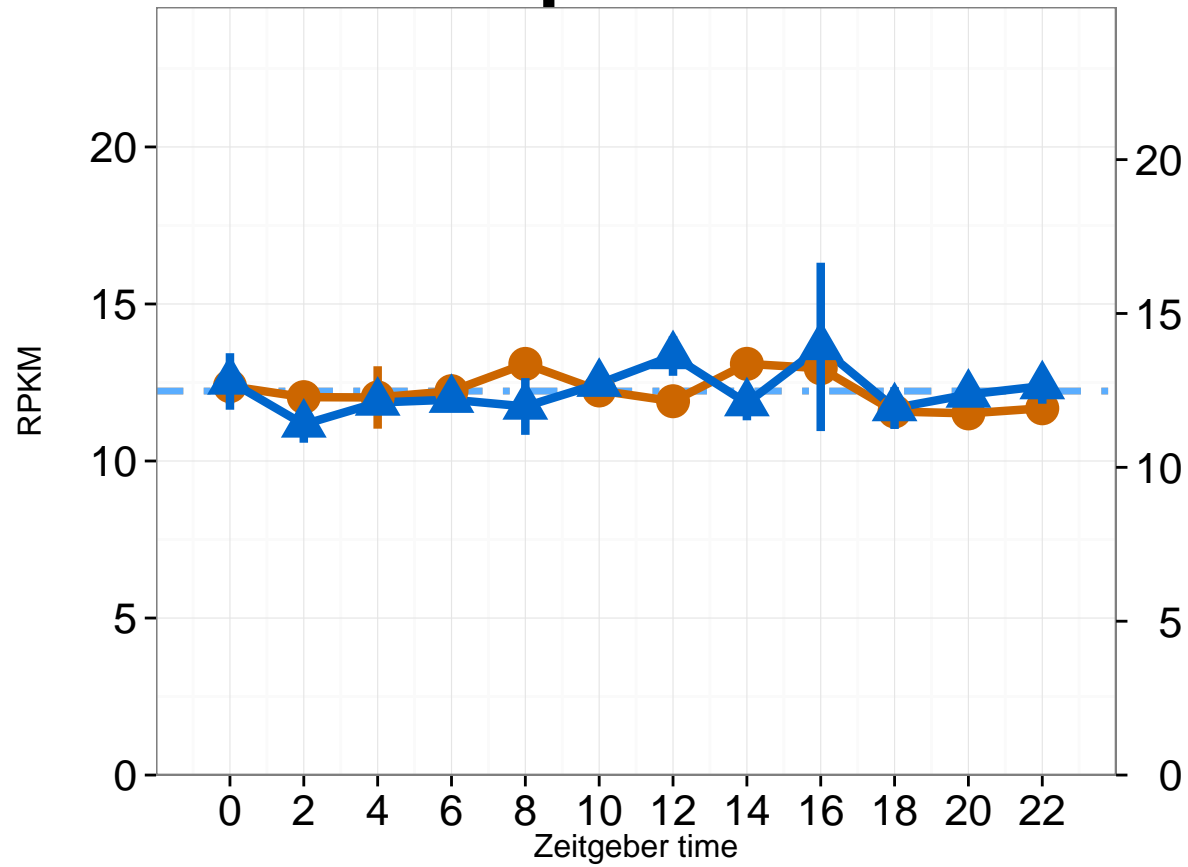

## Eps15I1

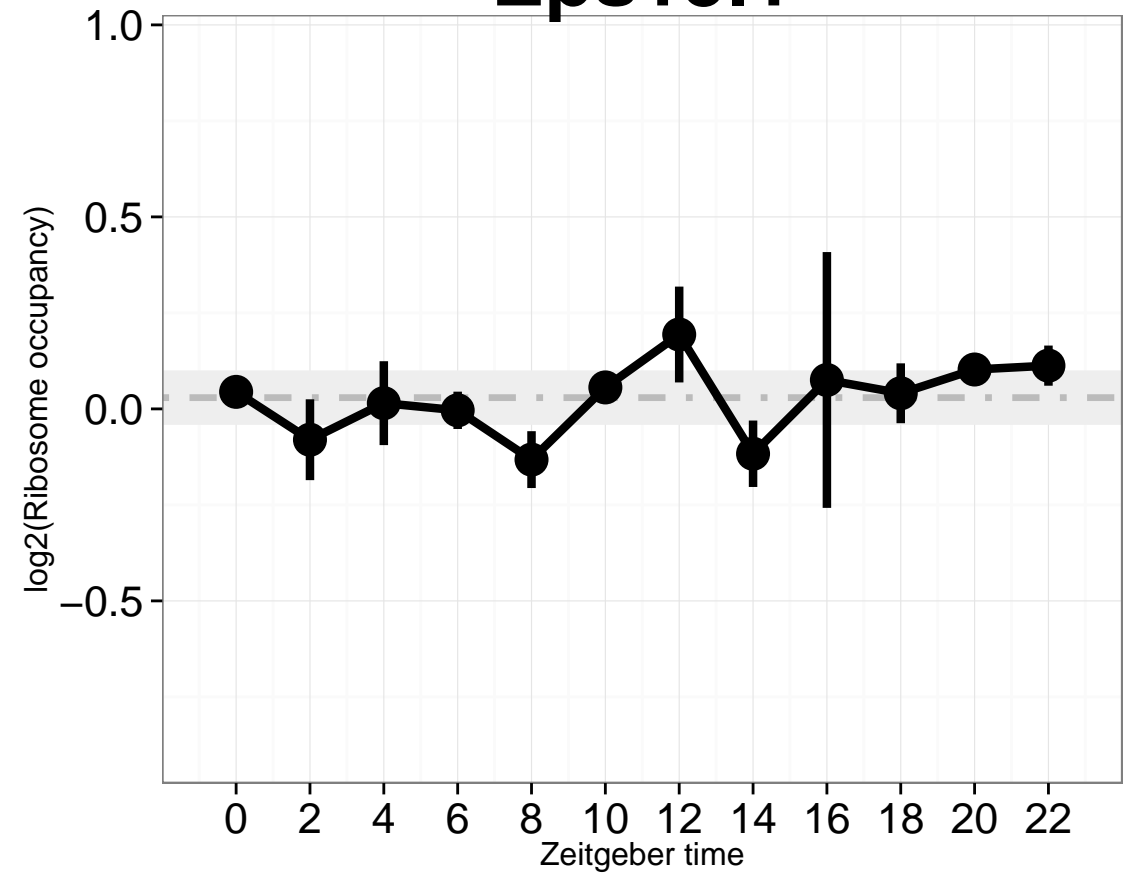

Supplement: Supplementary file 9130 [file 1]

# Abhd8

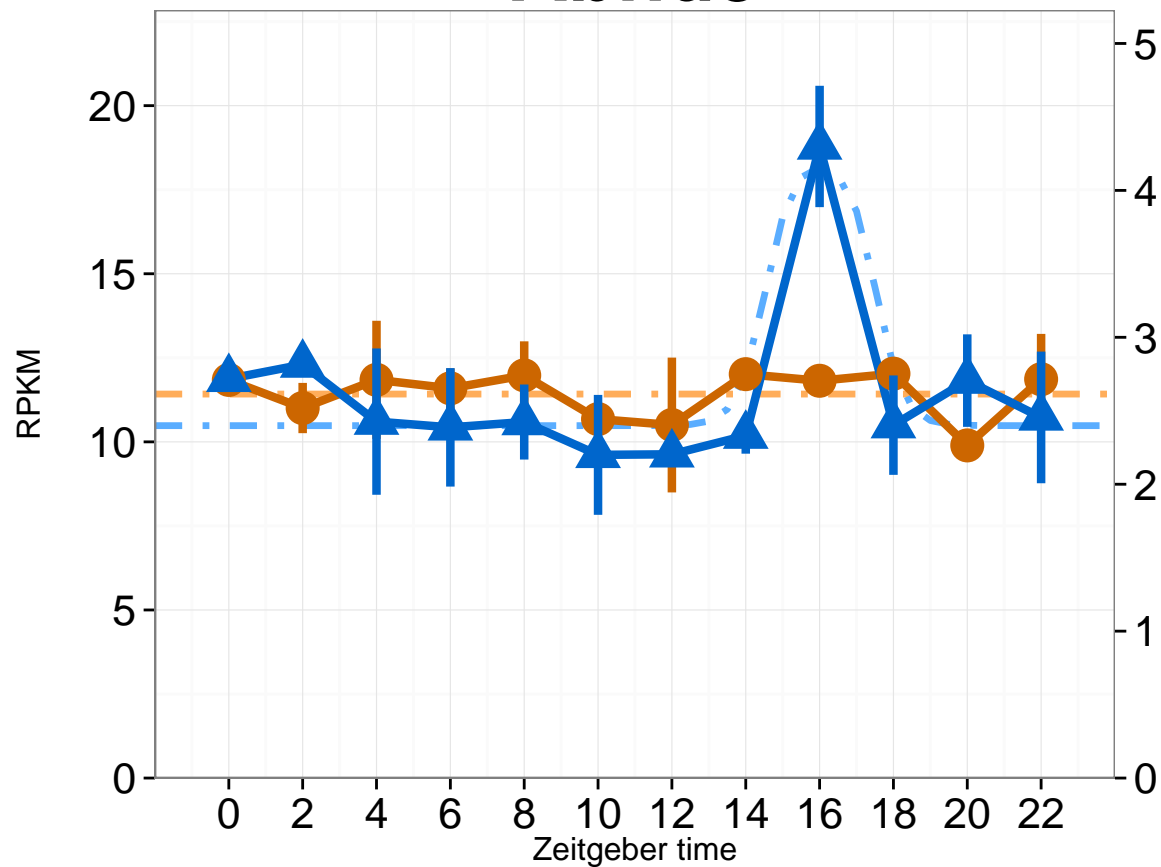

# Abhd8

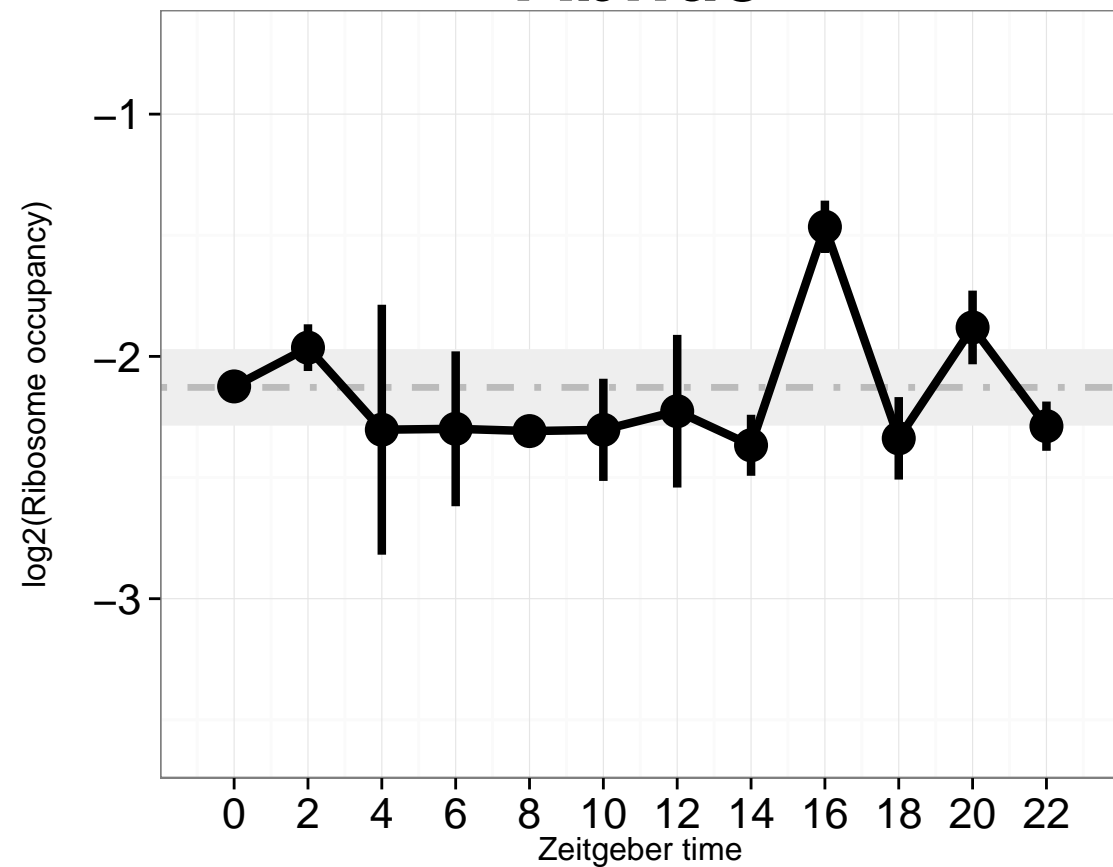

Supplement: Supplementary file 9131 [file 1]

## Rnf13

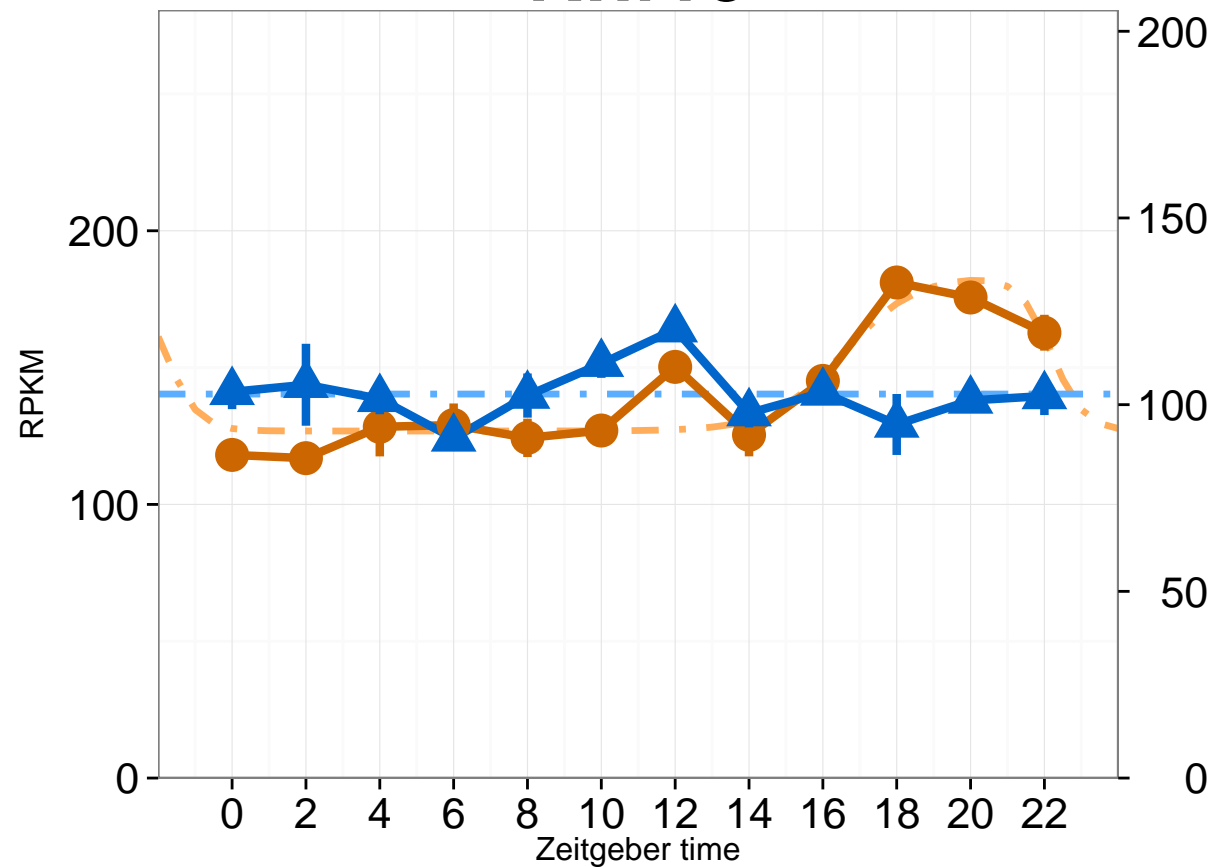

## Rnf13

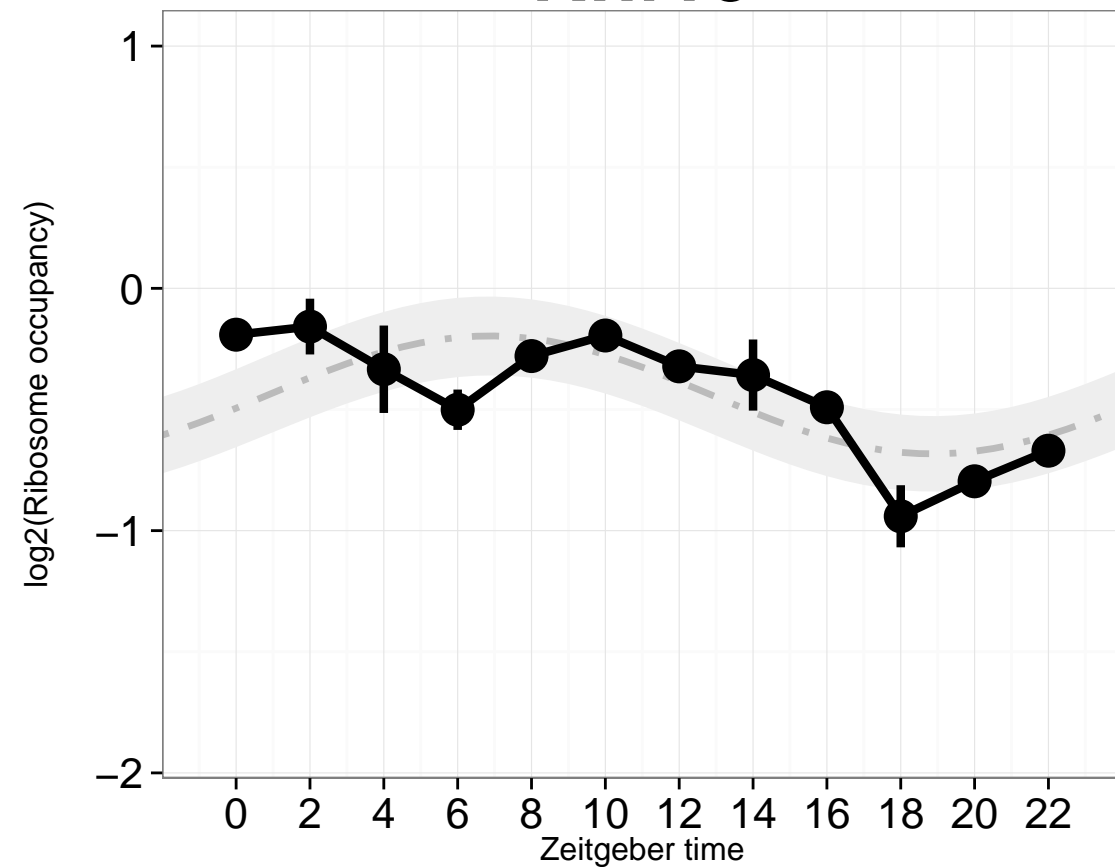

Supplement: Supplementary file 9132 [file 1]

## 0610009D07Rik

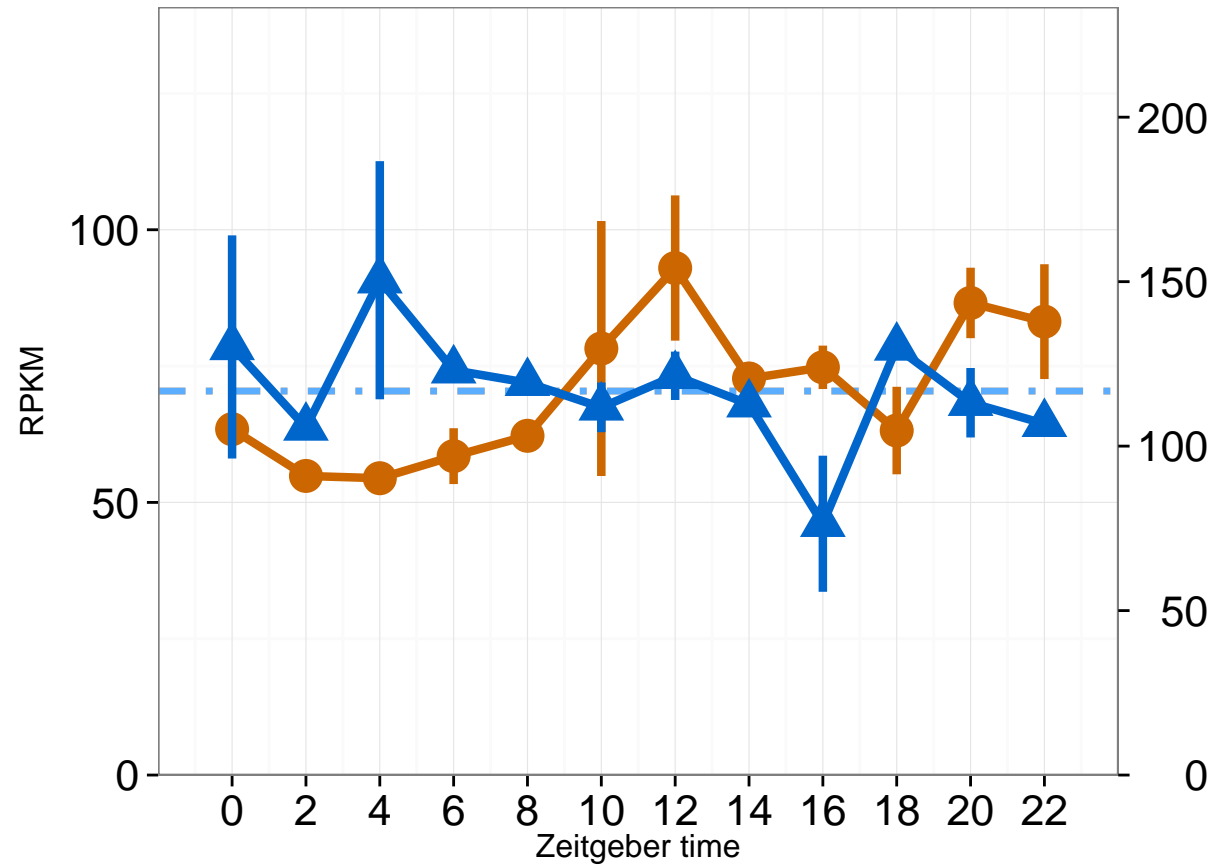

## 0610009D07Rik

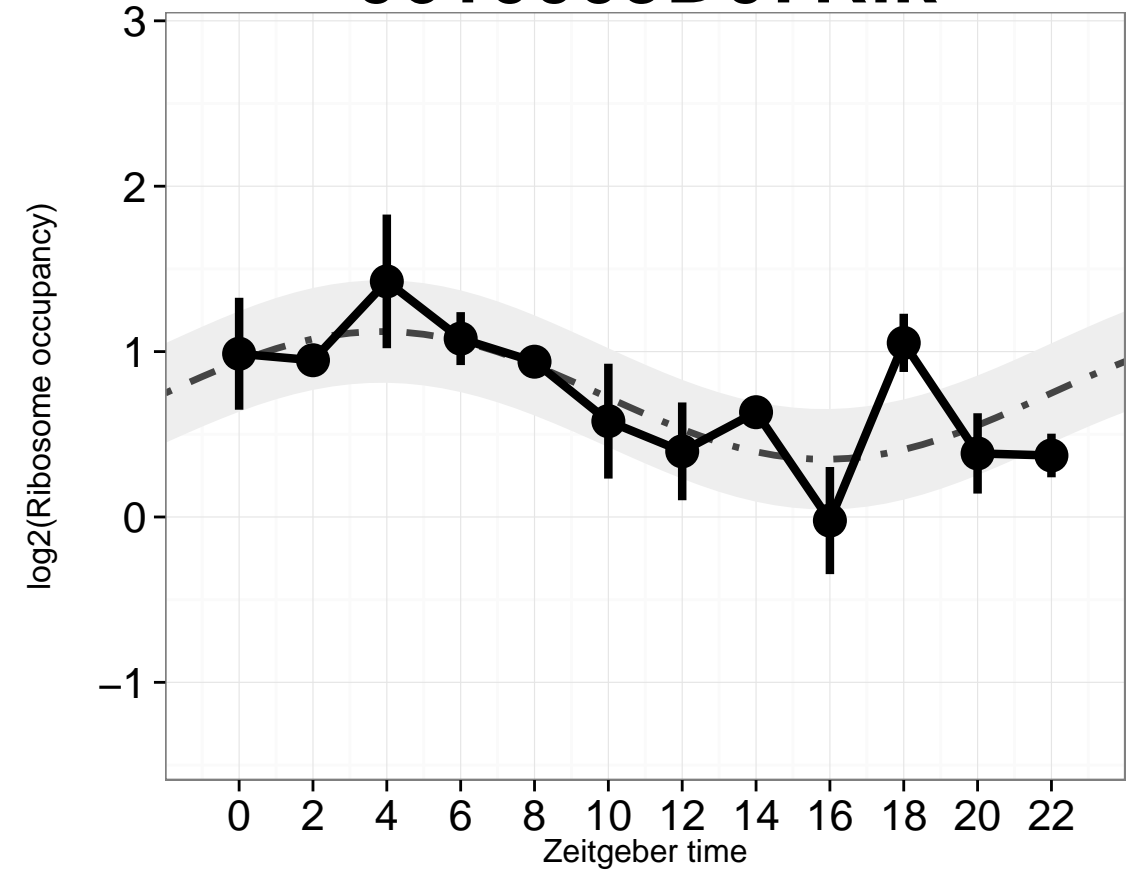

Supplement: Supplementary file 9133 [file 1]

## Klhl3

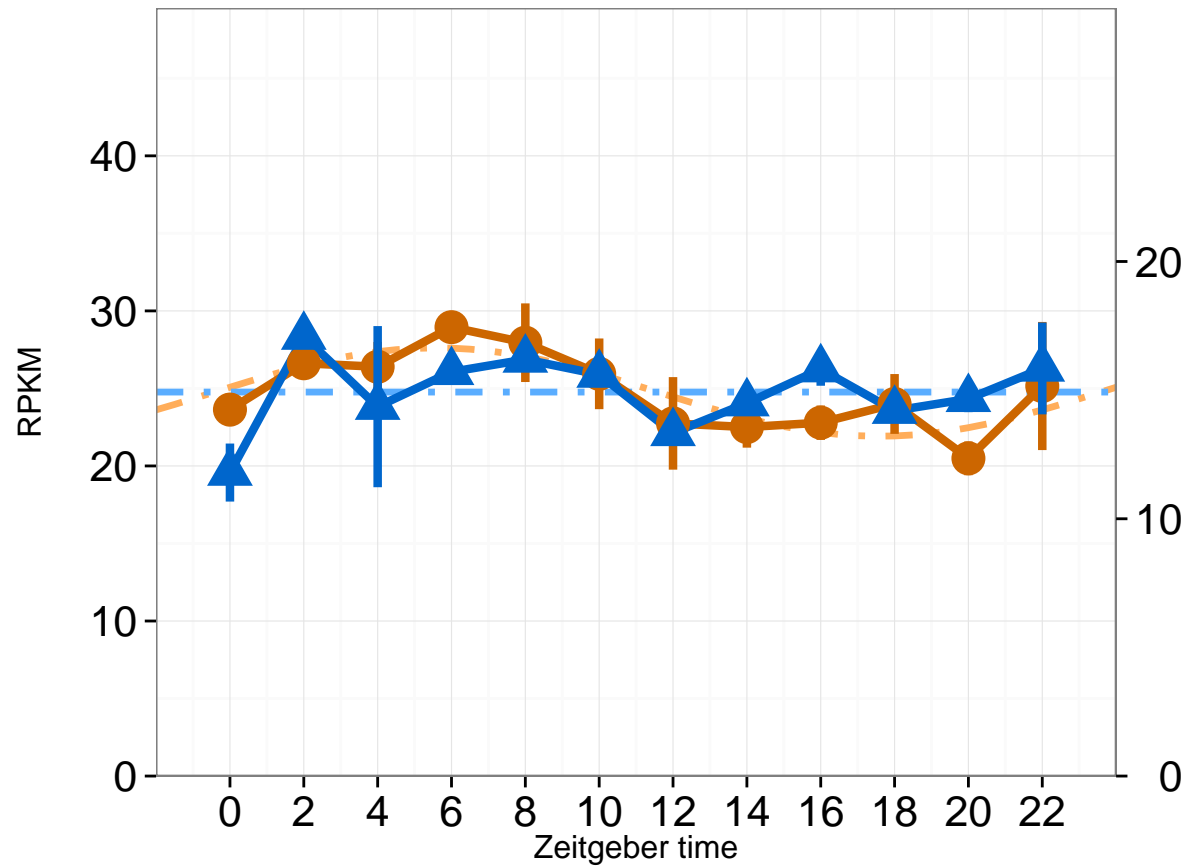

## Klhl3

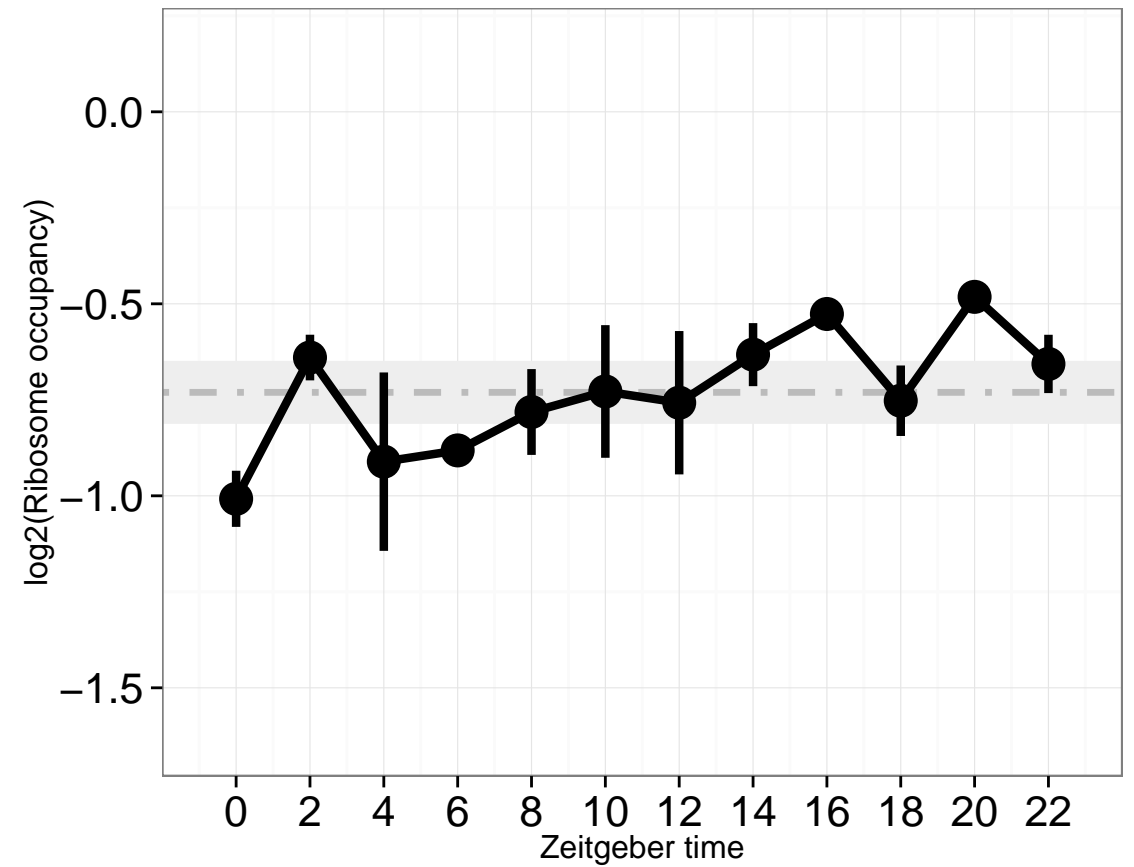

Supplement: Supplementary file 9134 [file 1]

# Clnn

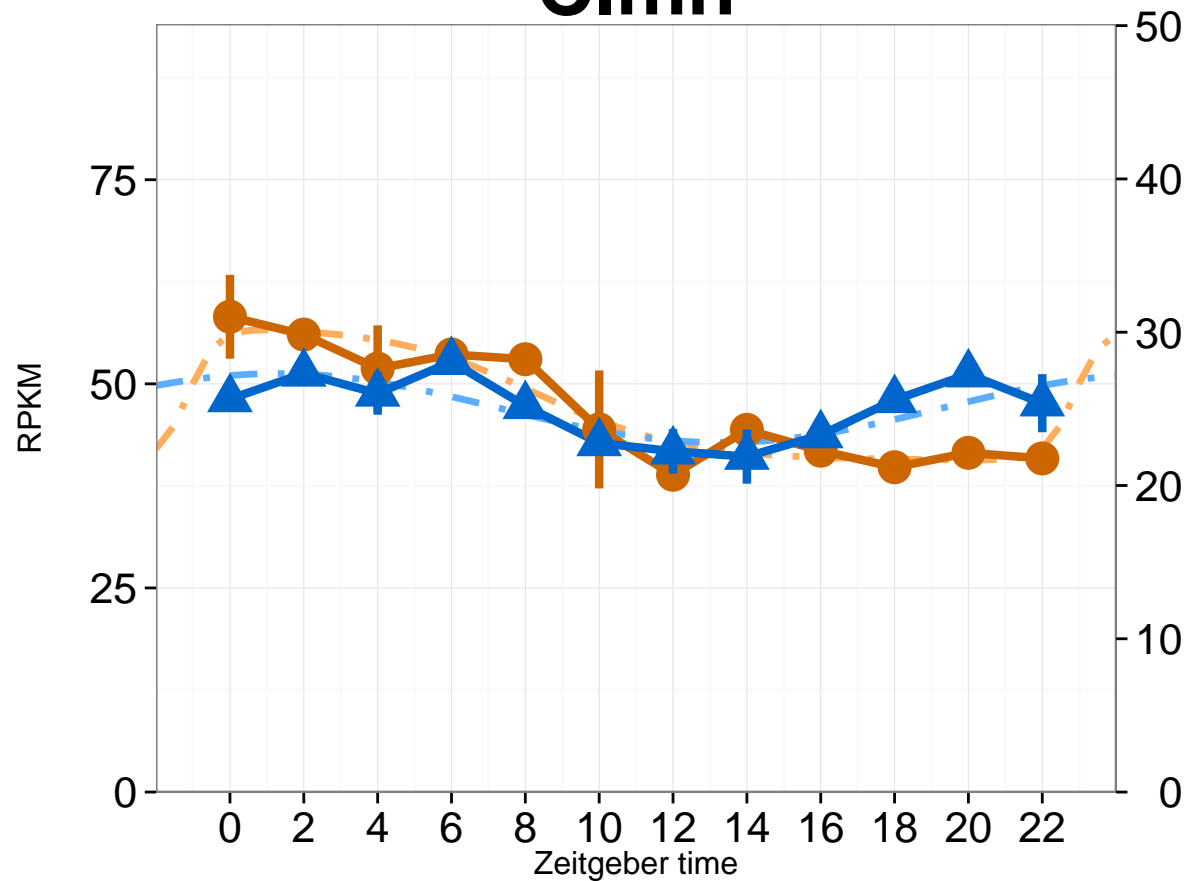

# Clnn

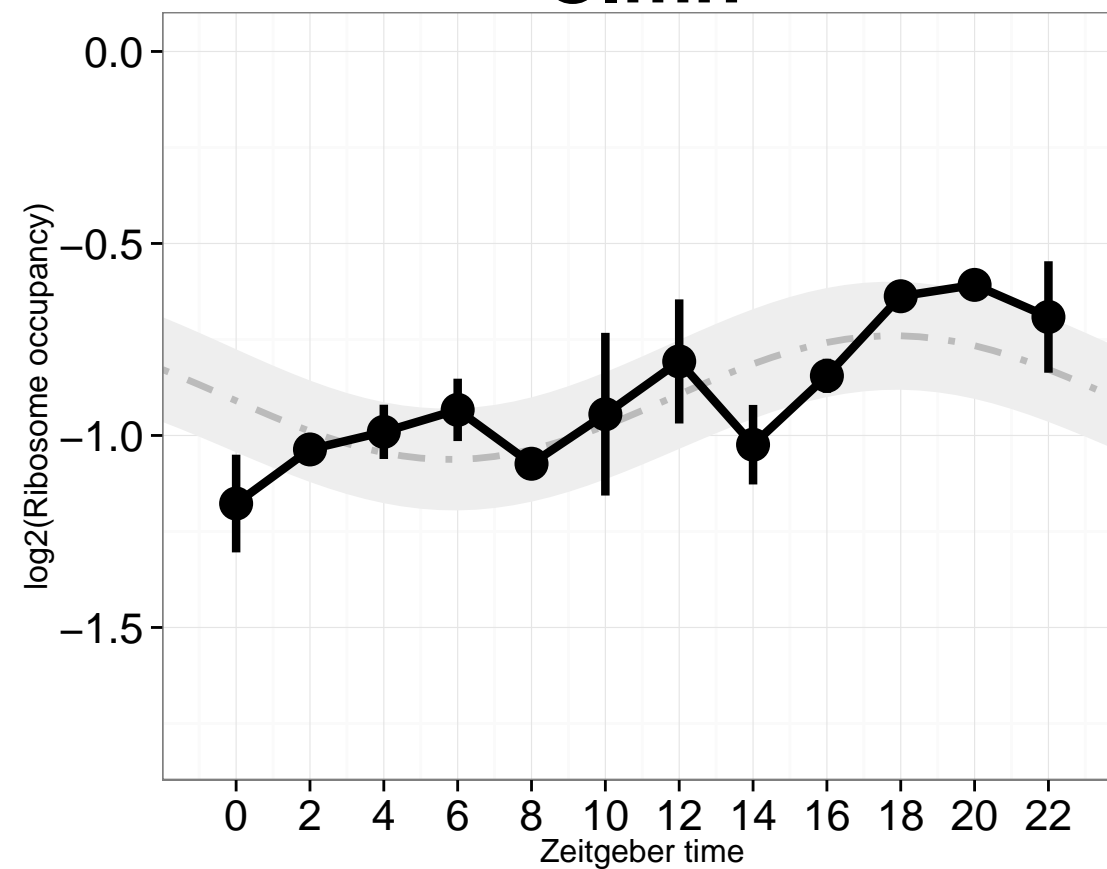

Supplement: Supplementary file 9135 [file 1]
