# Supplementary material (part 92 of 133)
Source: publisher figshare collection journal article supplement (https://springernature.figshare.com/articles/dataset/_/4903193)

## Cstf3

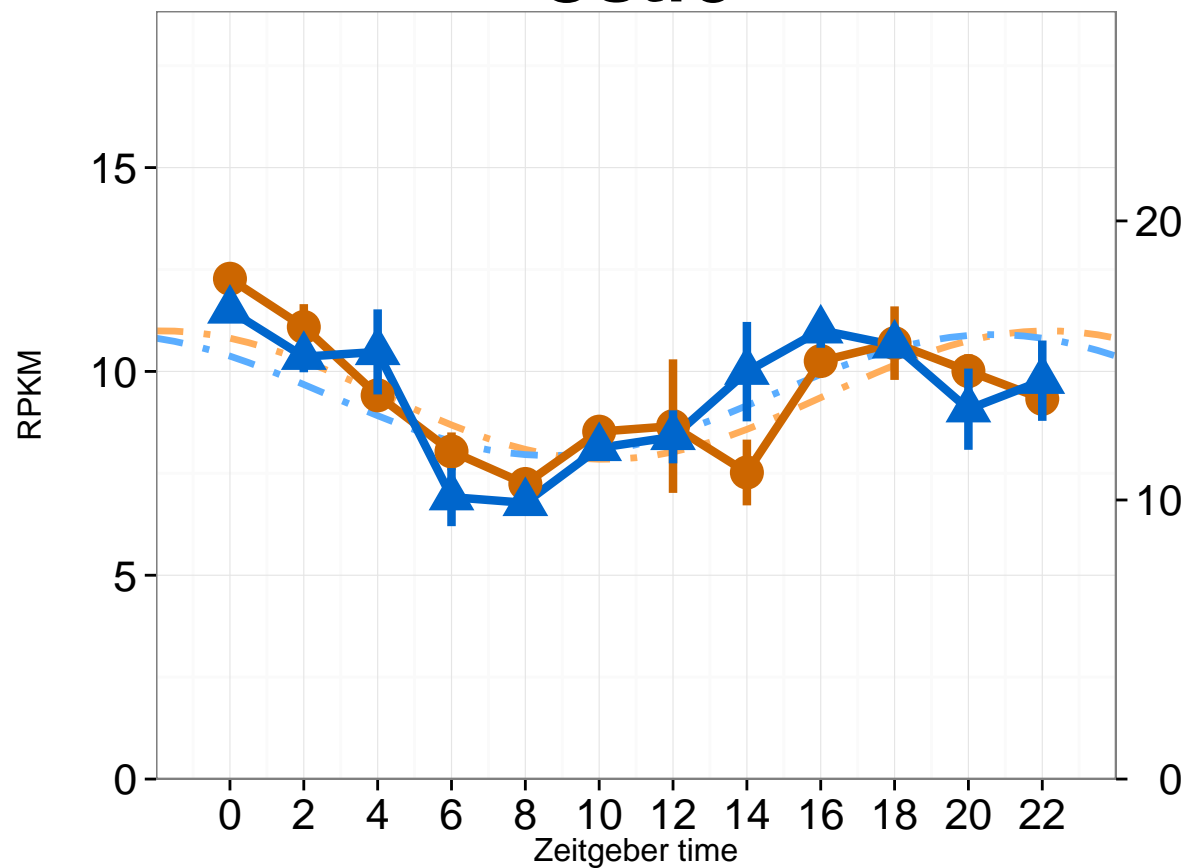

## Cstf3

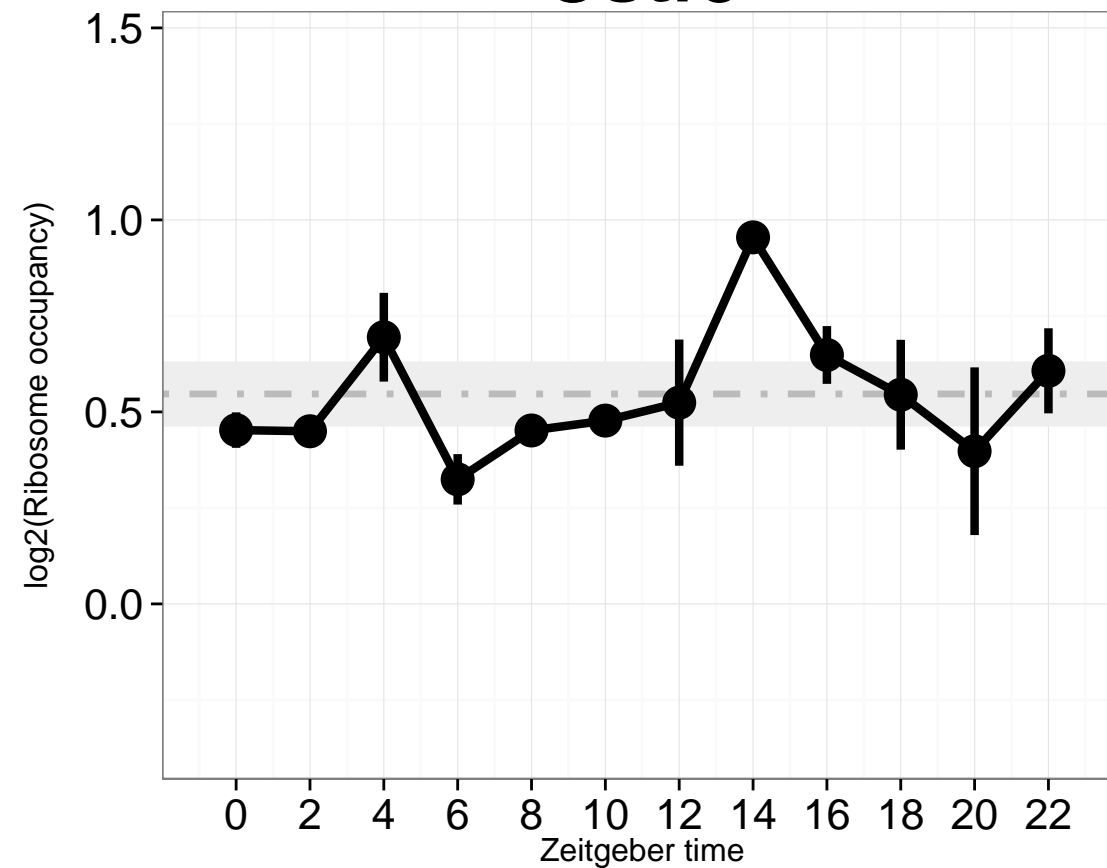

Supplement: Supplementary file 9136 [file 1]

# Zfand1

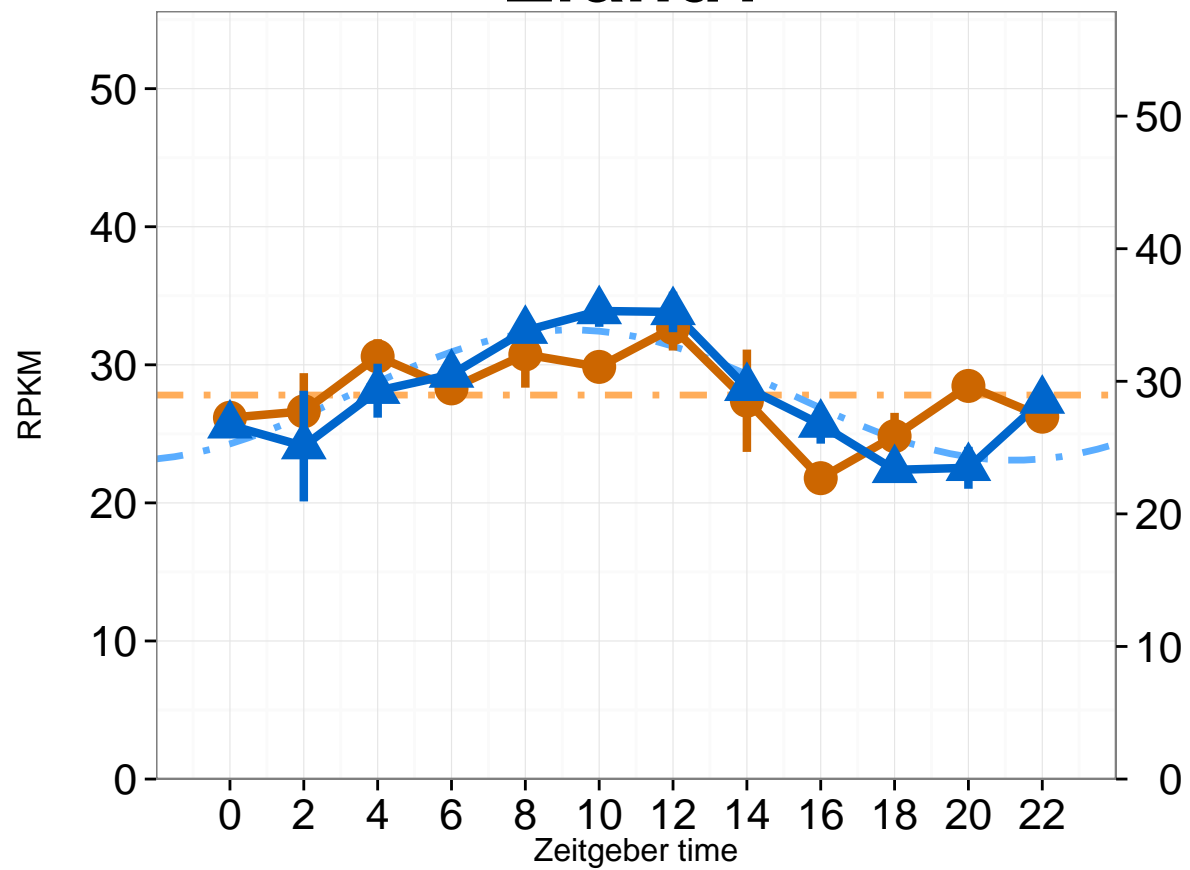

# Zfand1

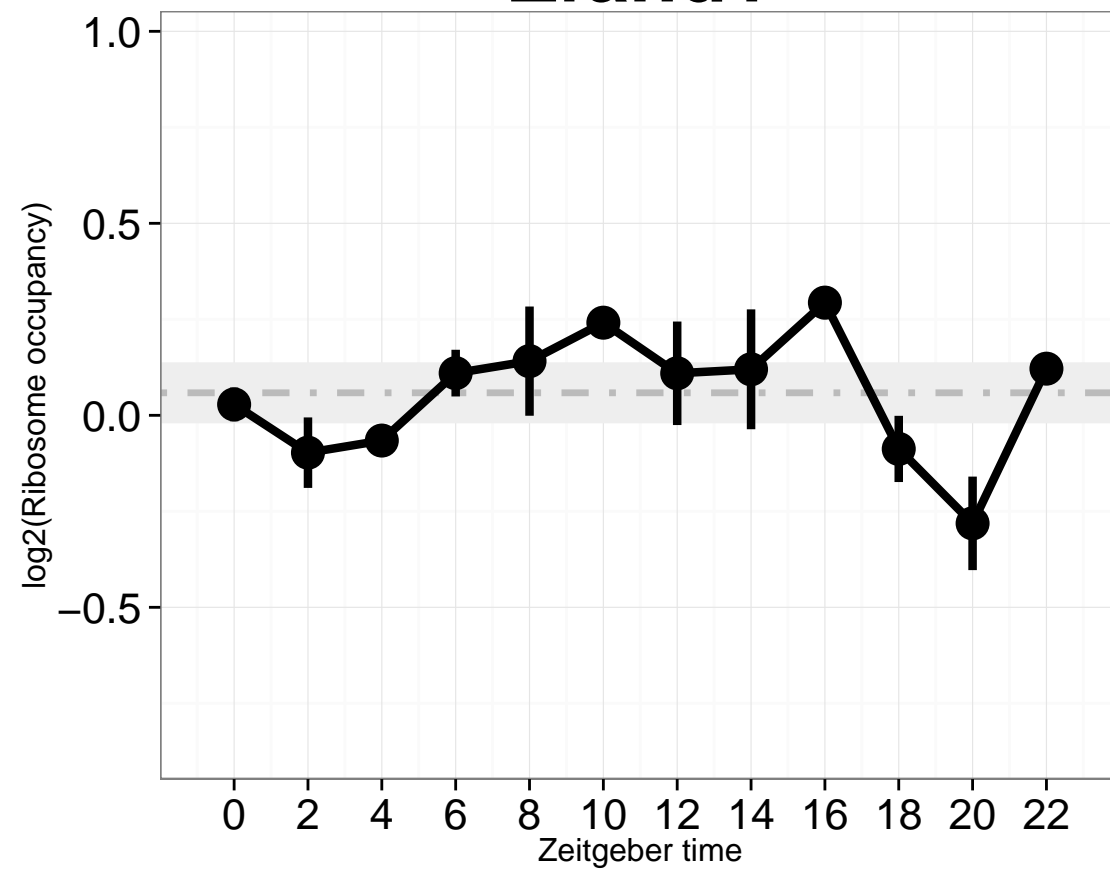

Supplement: Supplementary file 9137 [file 1]

## Adra2c

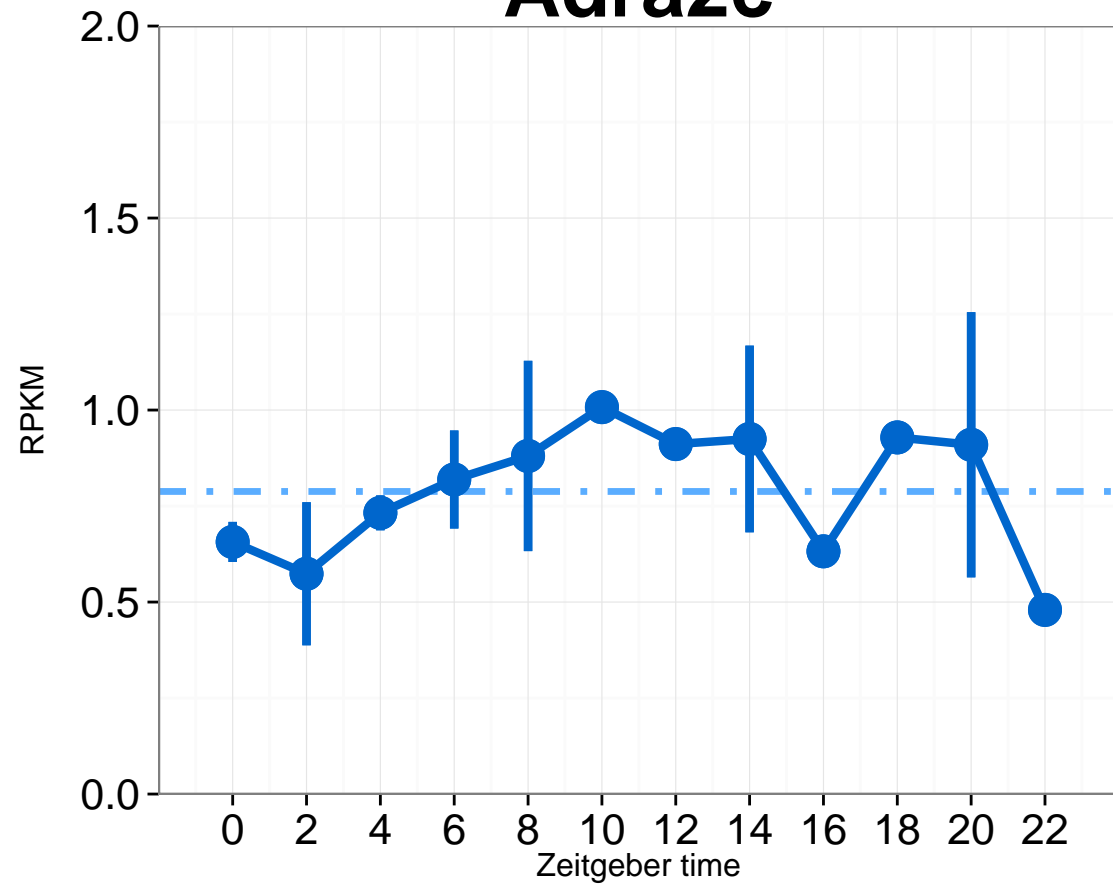

## Adra2c log2(Ribosome occupancy

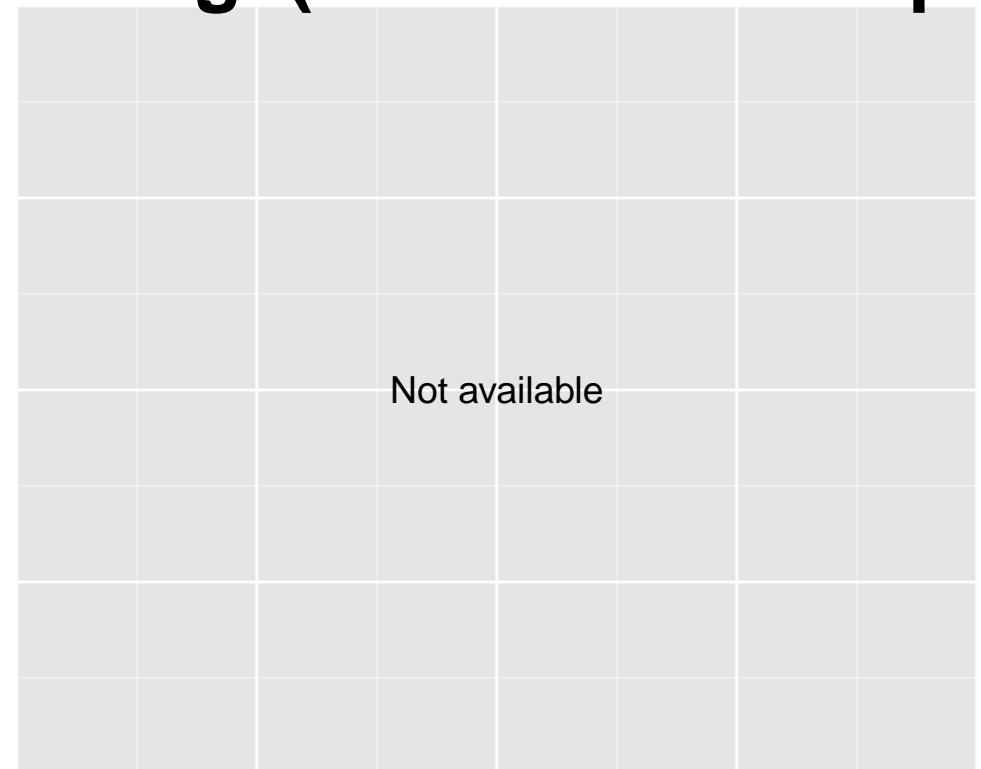

Supplement: Supplementary file 9138 [file 1]

## Lin52

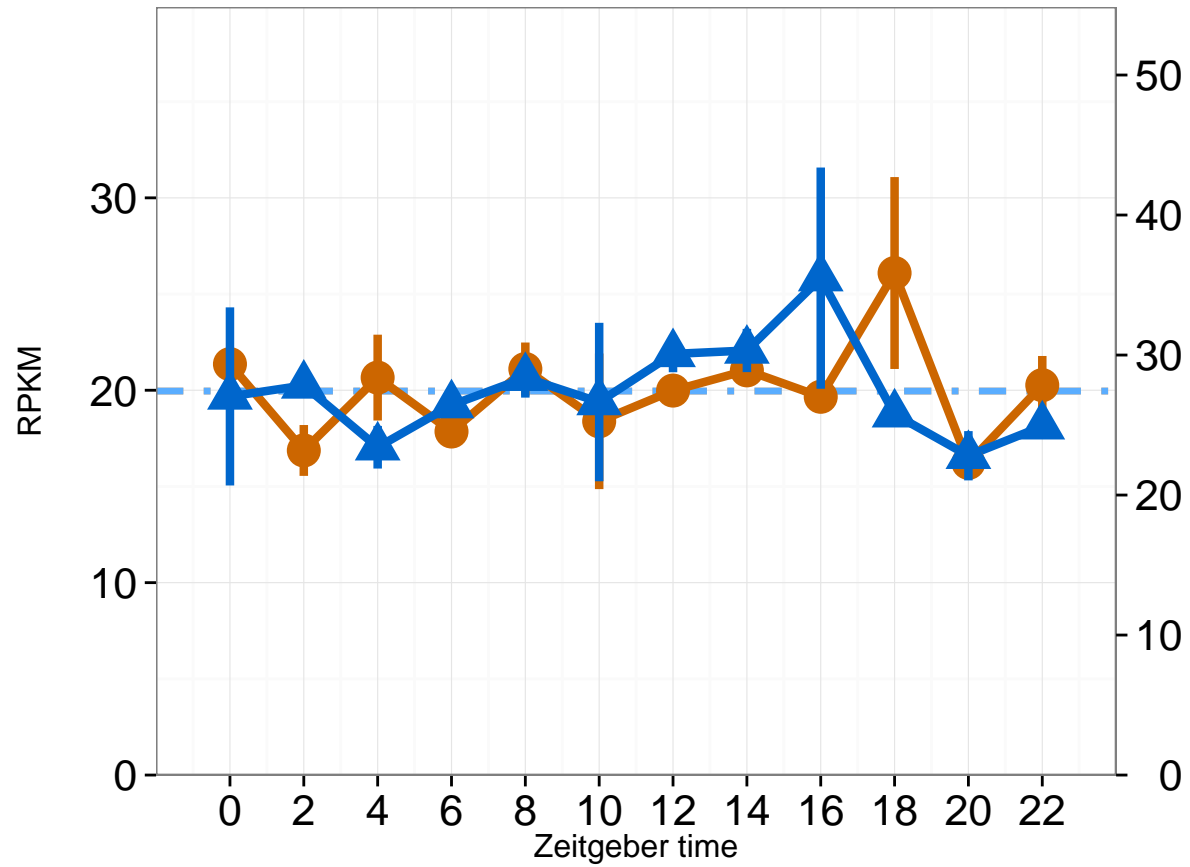

## Lin52

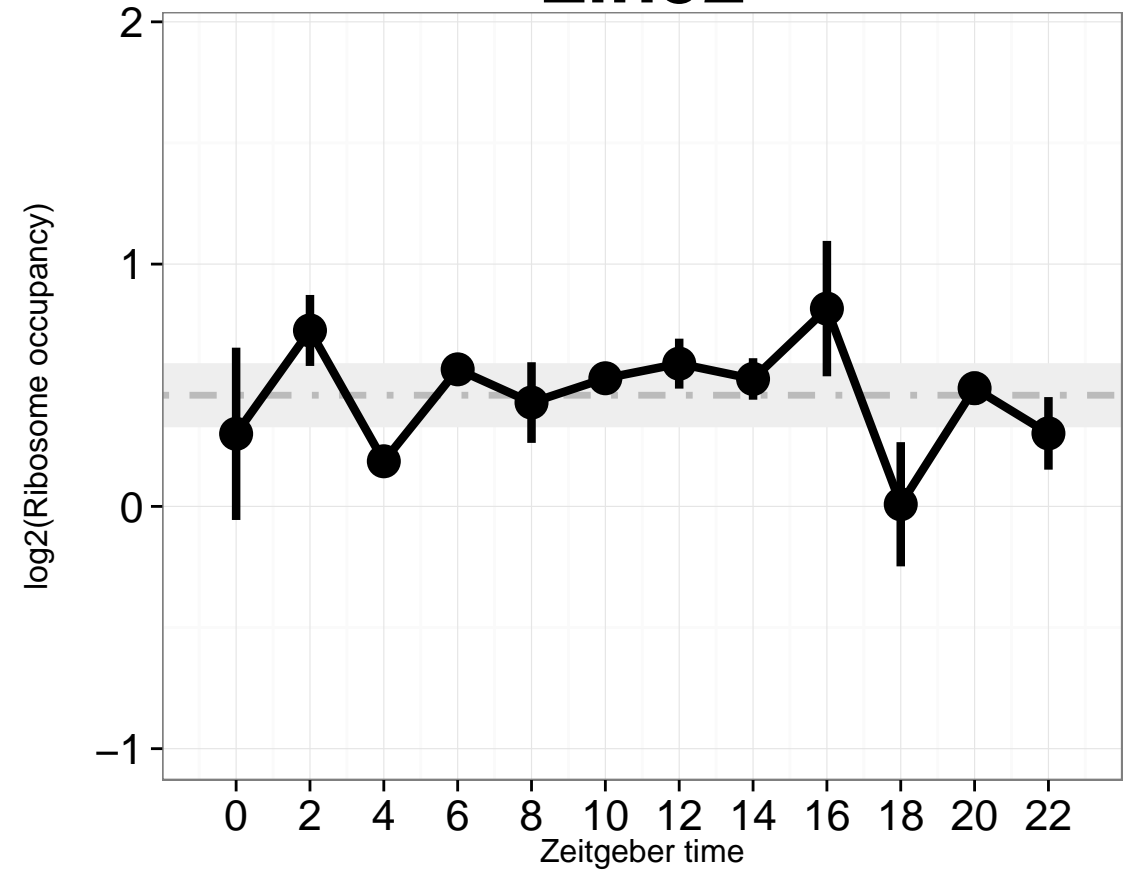

Supplement: Supplementary file 9139 [file 1]

# Etaa1

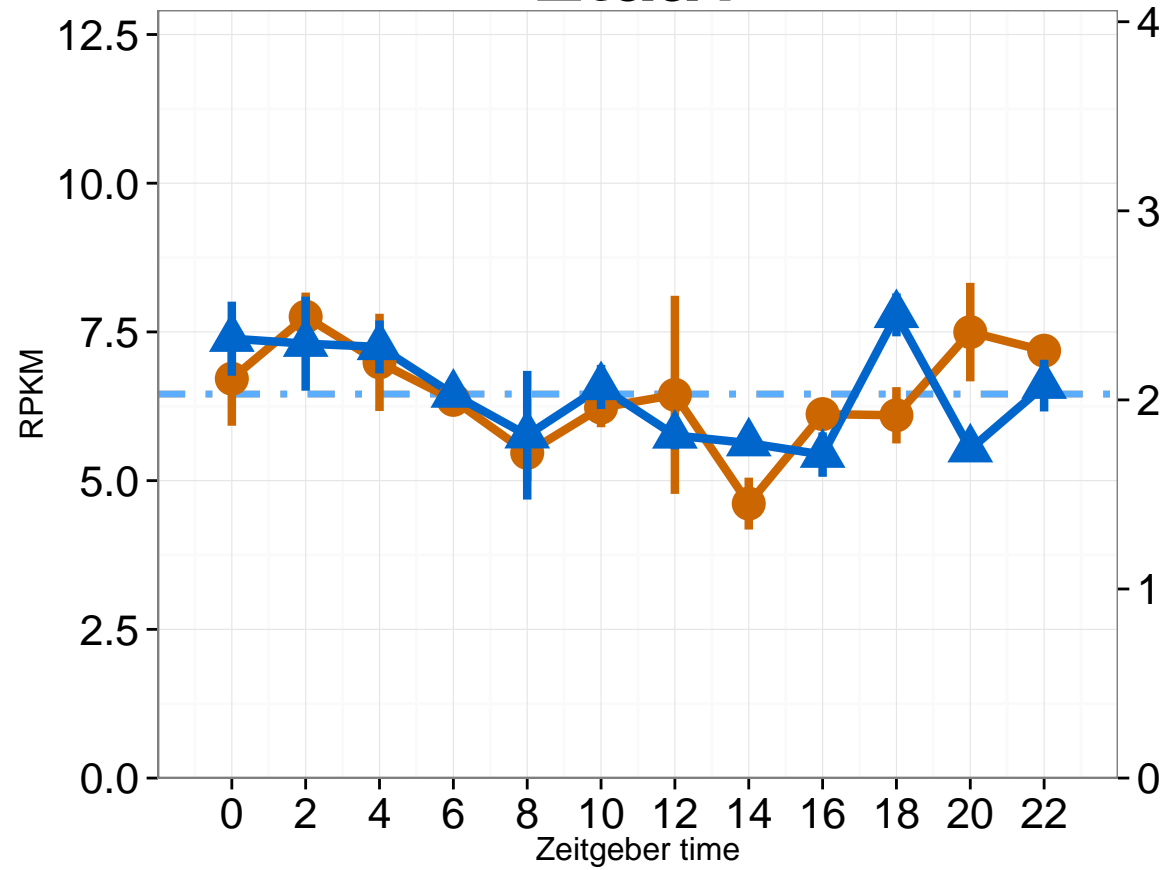

# Etaa1

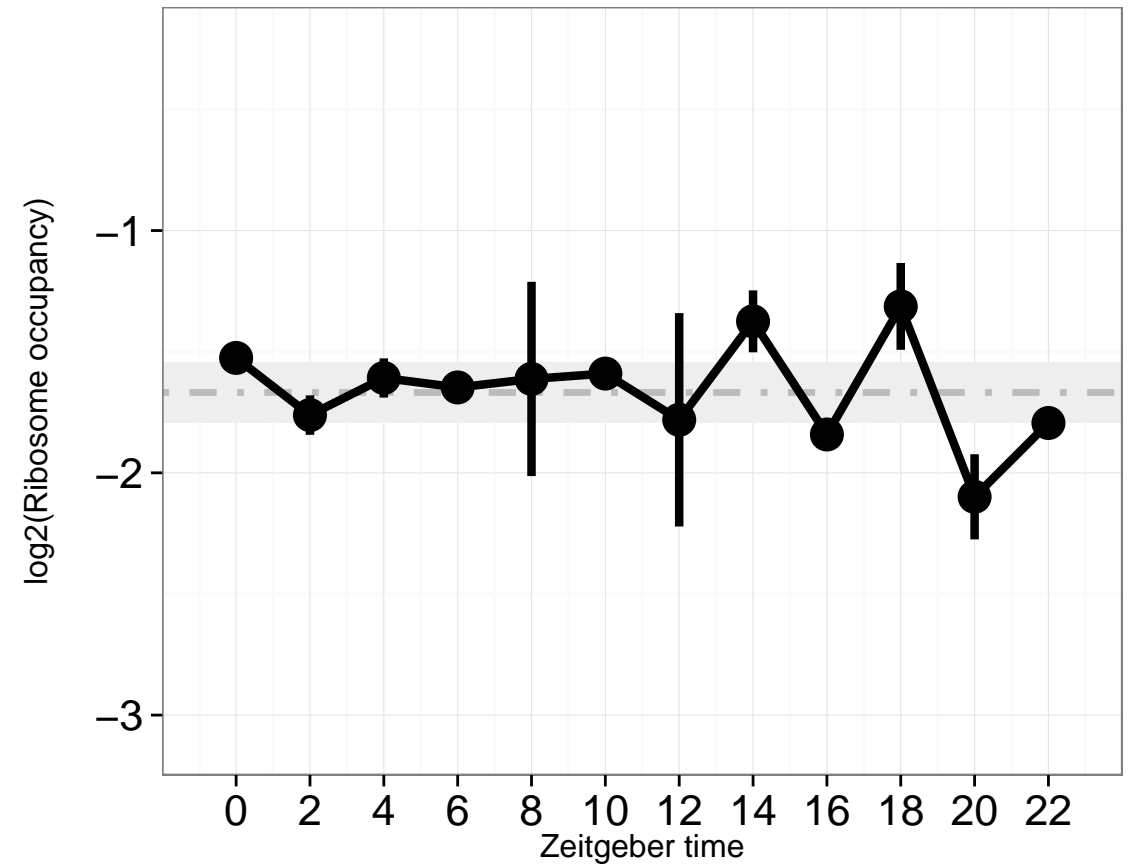

Supplement: Supplementary file 9140 [file 1]

# Sart3

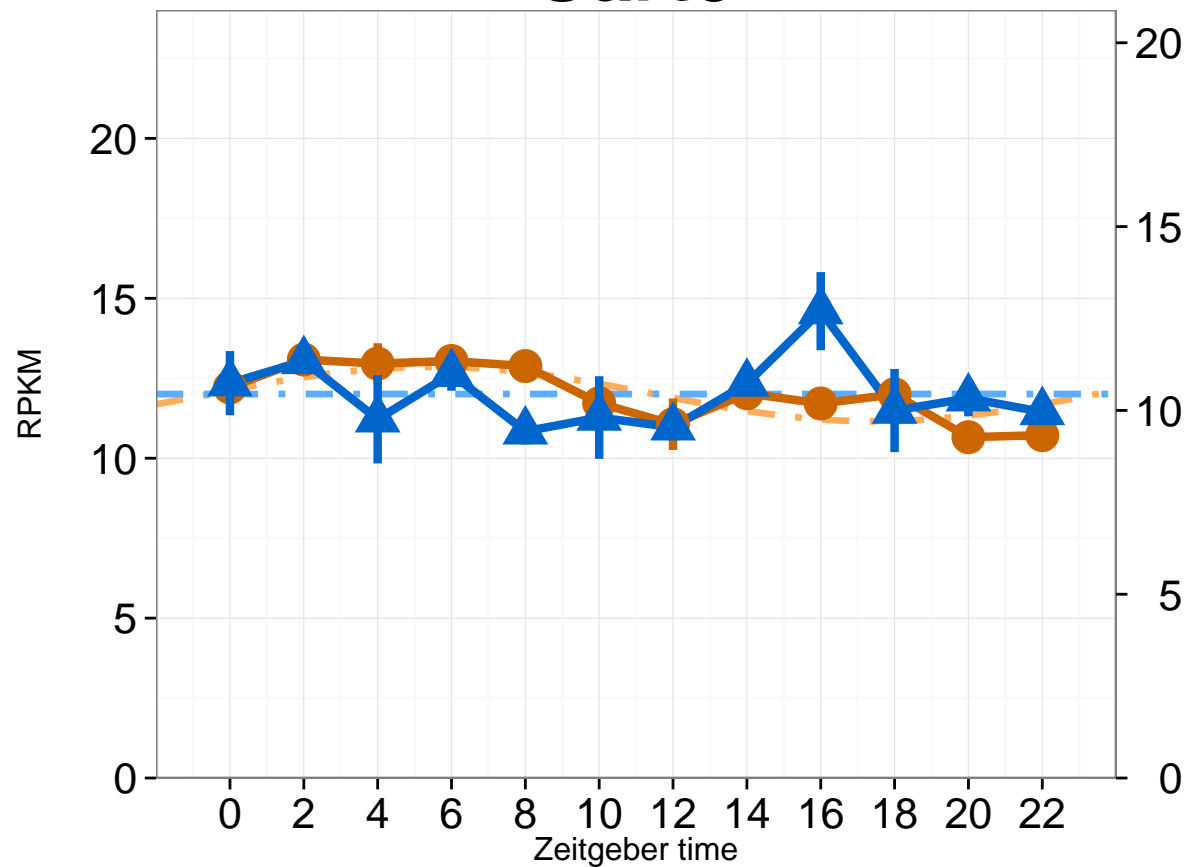

# Sart3

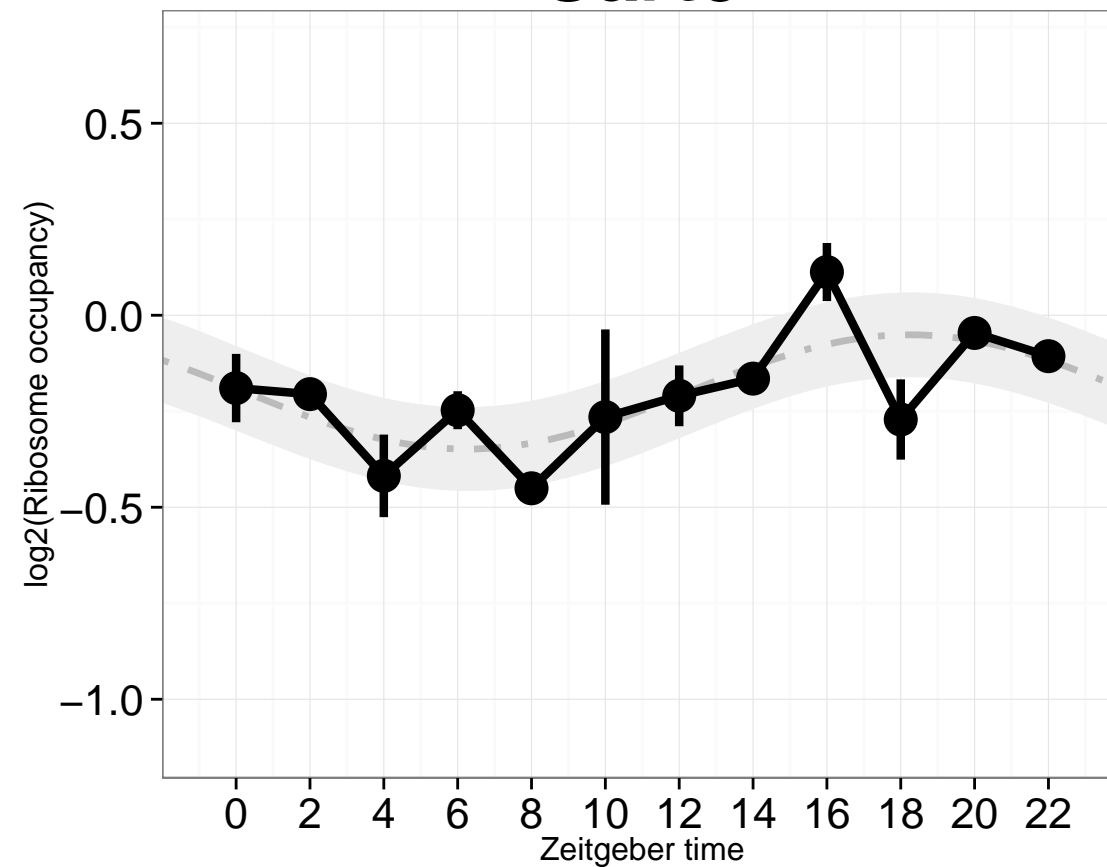

Supplement: Supplementary file 9141 [file 1]

# Tra2b

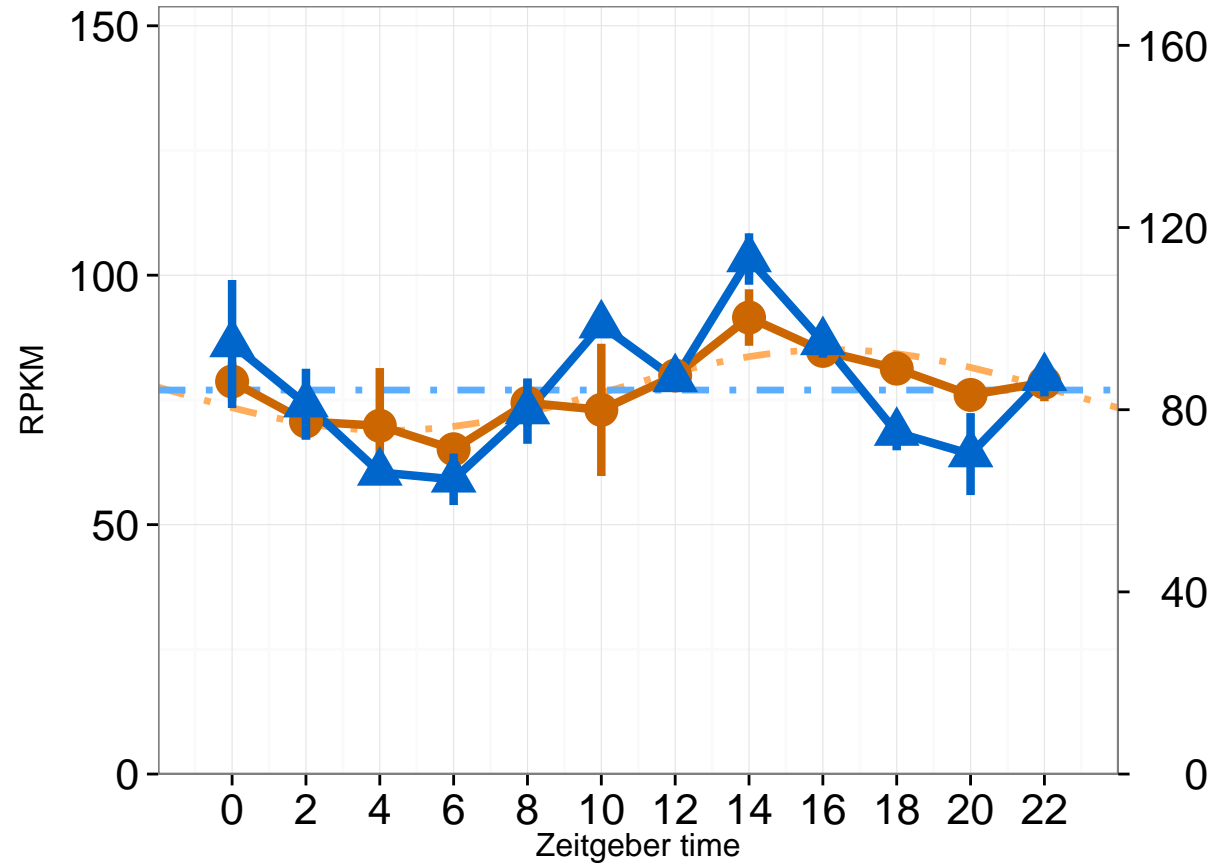

# Tra2b

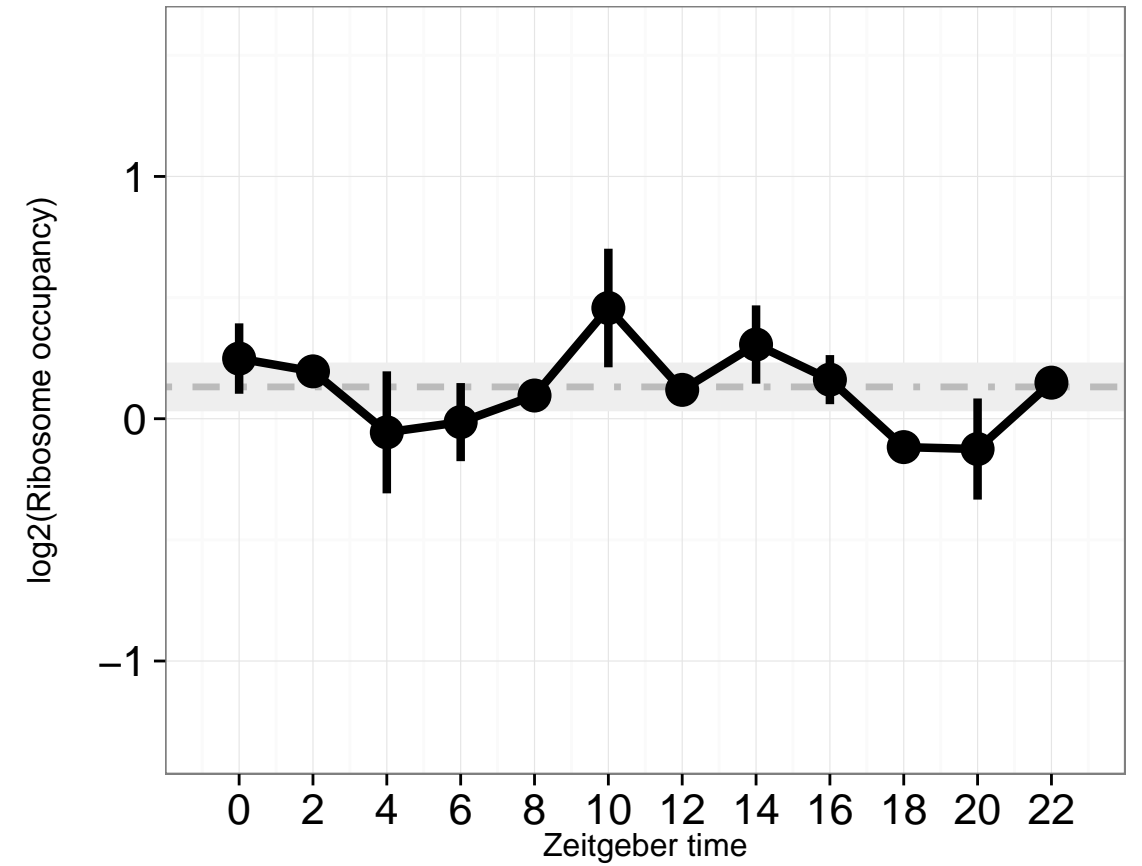

Supplement: Supplementary file 9142 [file 1]

## Ei24

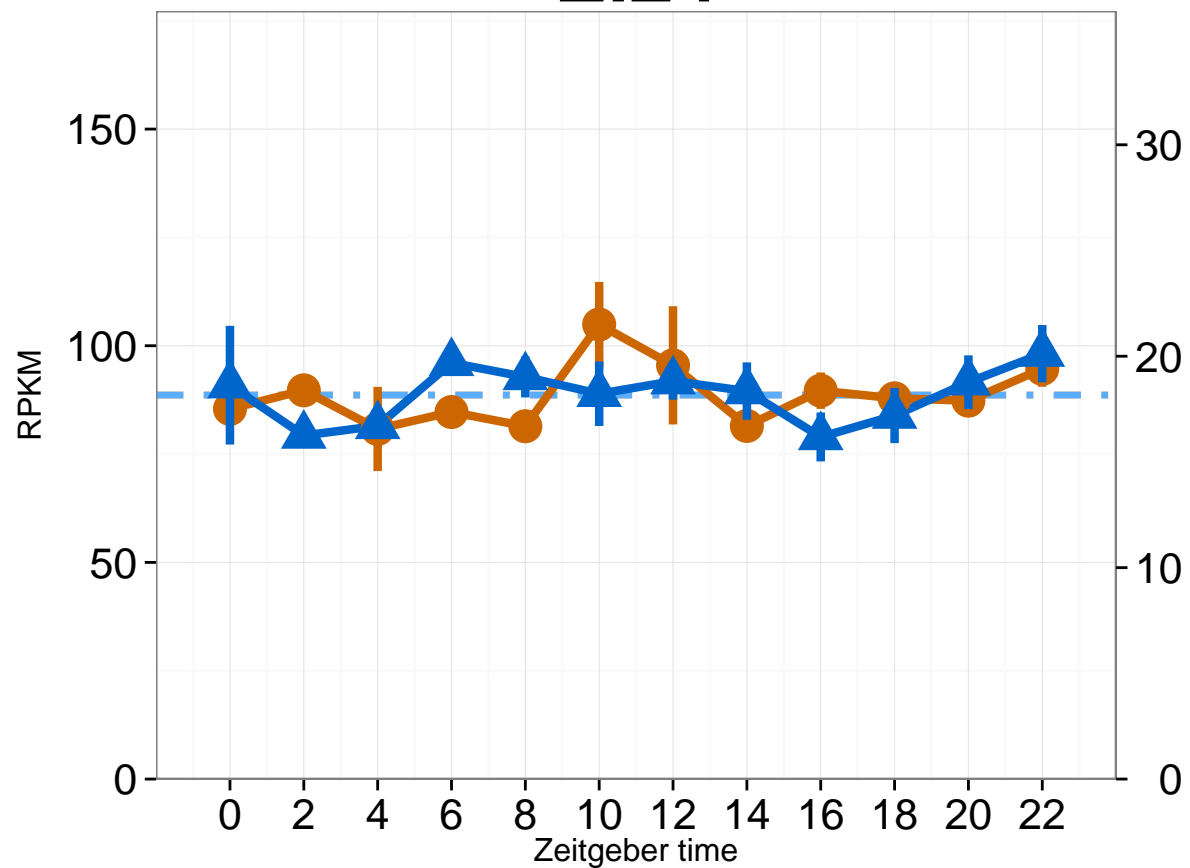

## Ei24

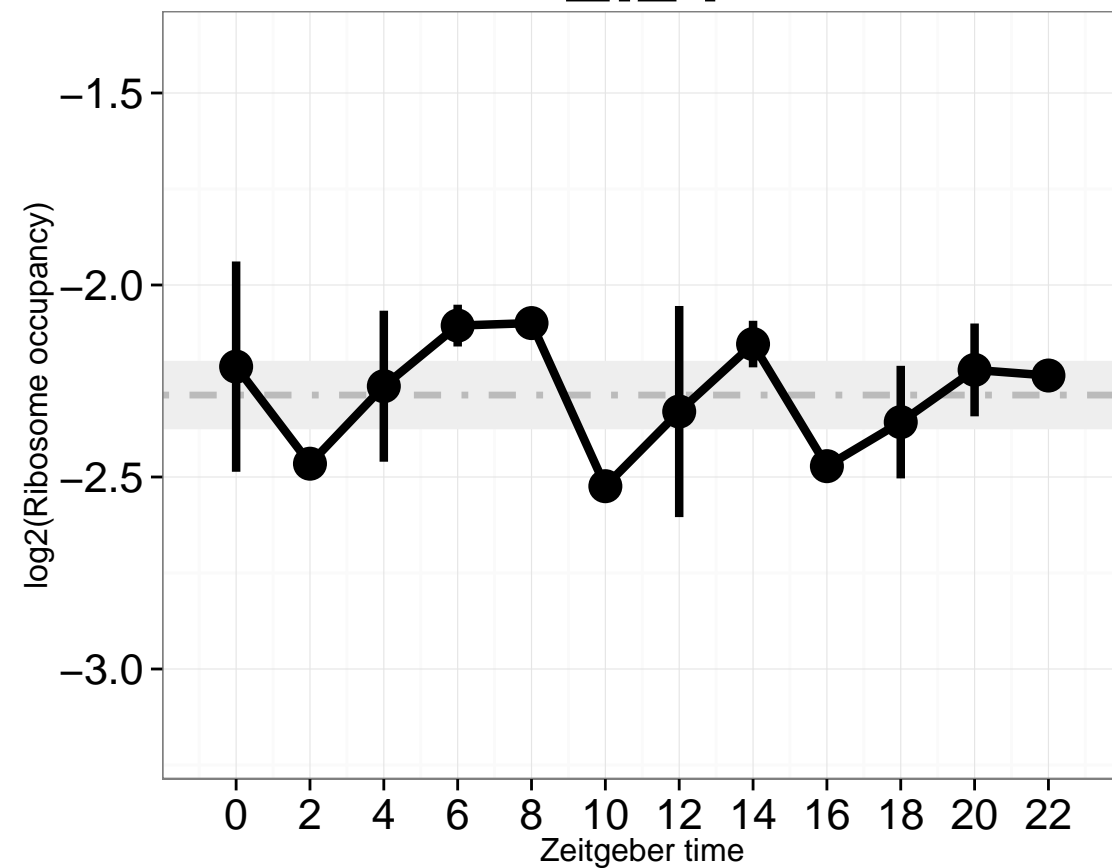

Supplement: Supplementary file 9143 [file 1]

# Rfc3

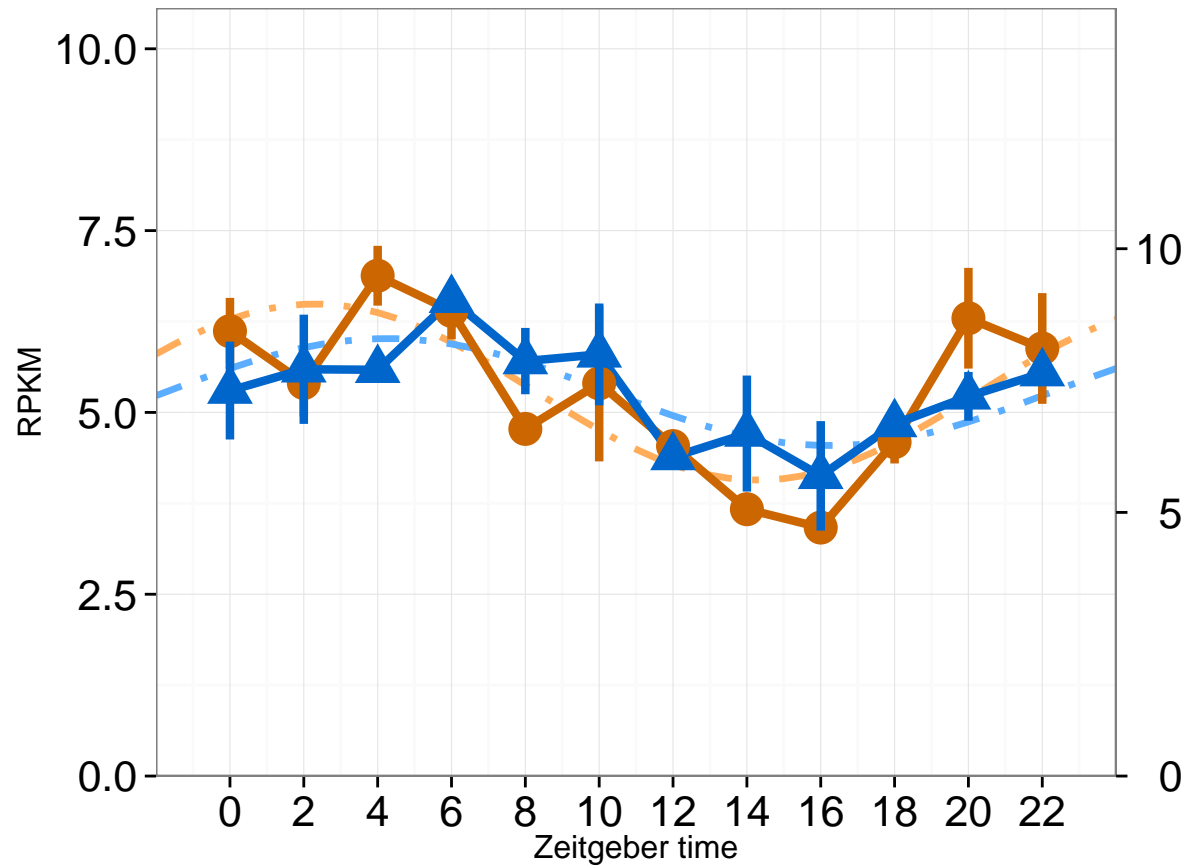

# Rfc3

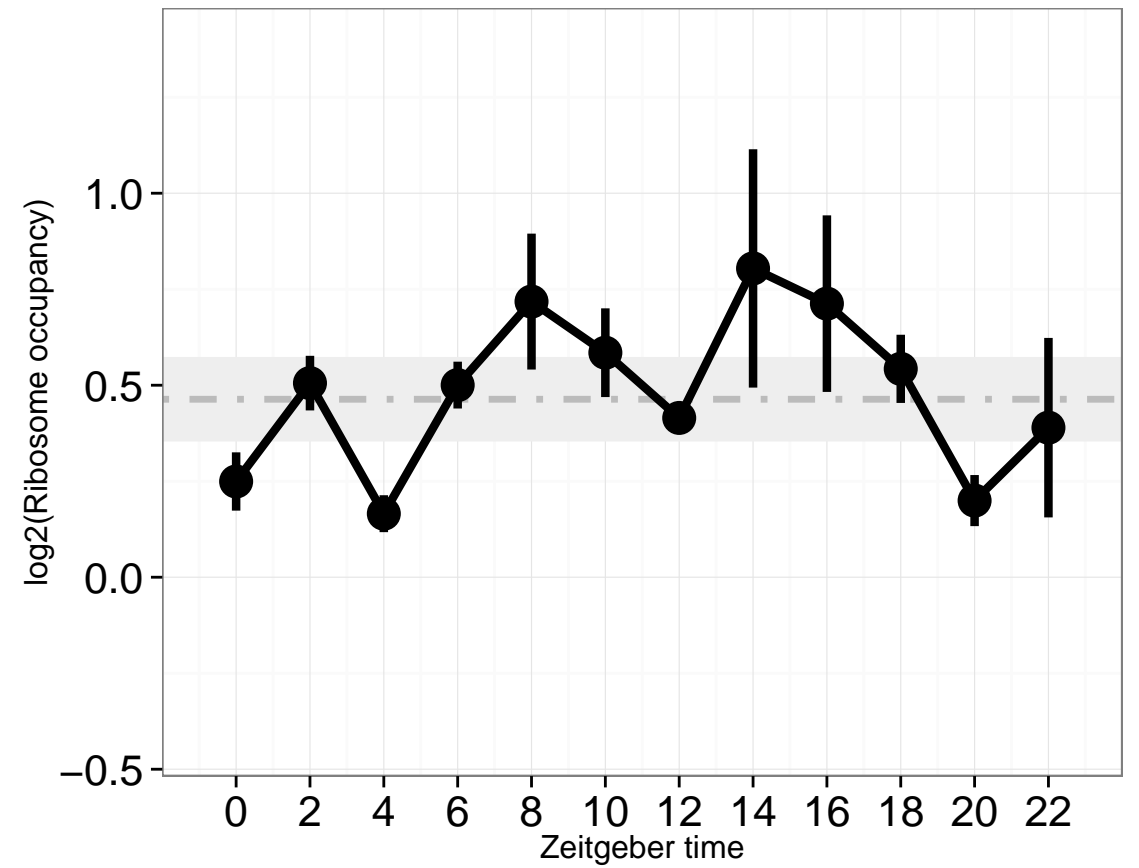

Supplement: Supplementary file 9144 [file 1]

# Tcirg1

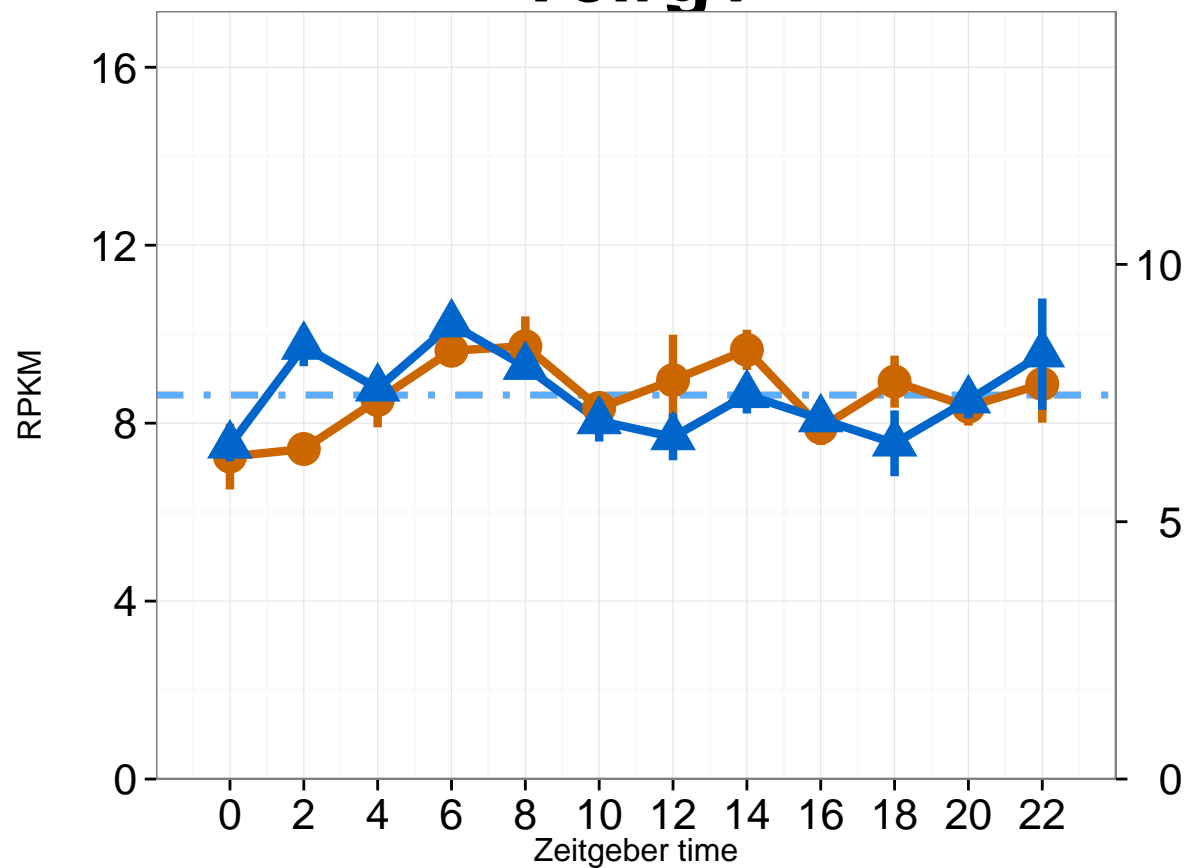

# Tcirg1

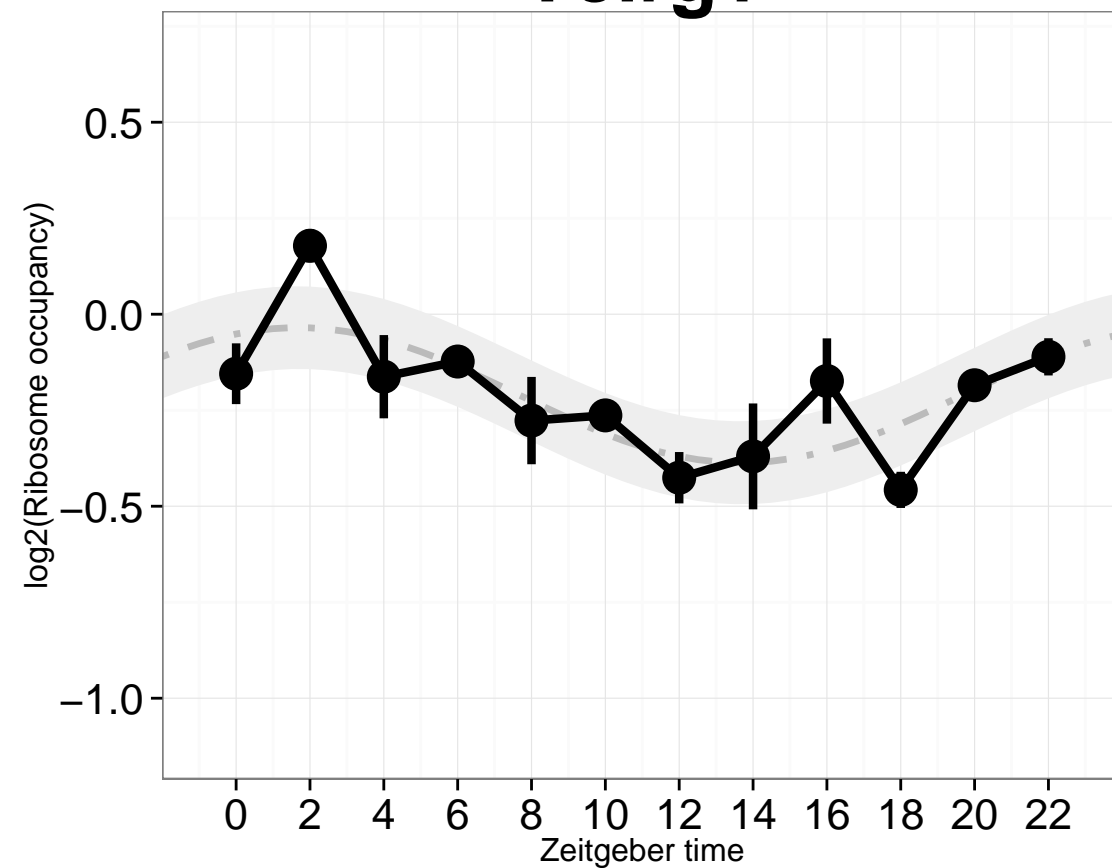

Supplement: Supplementary file 9145 [file 1]

## Micu2

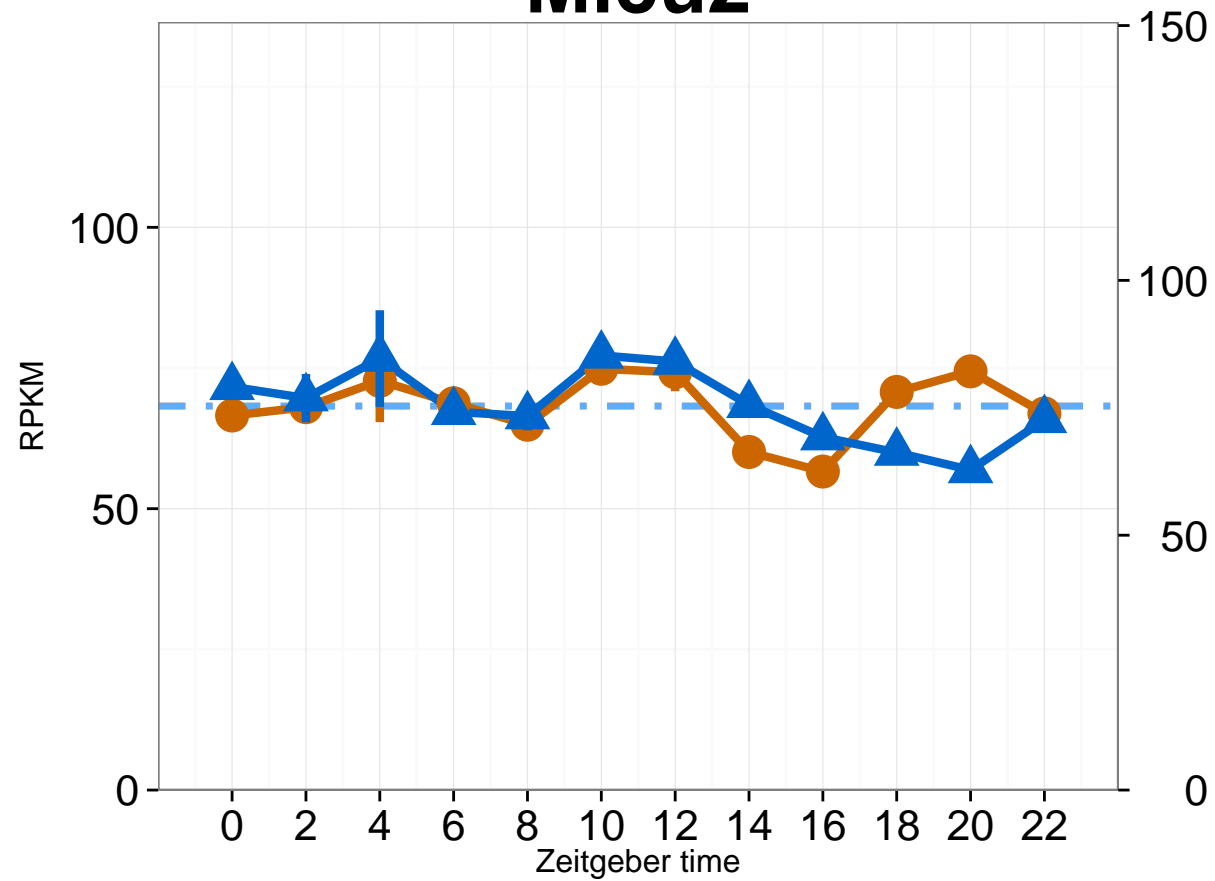

## Micu2

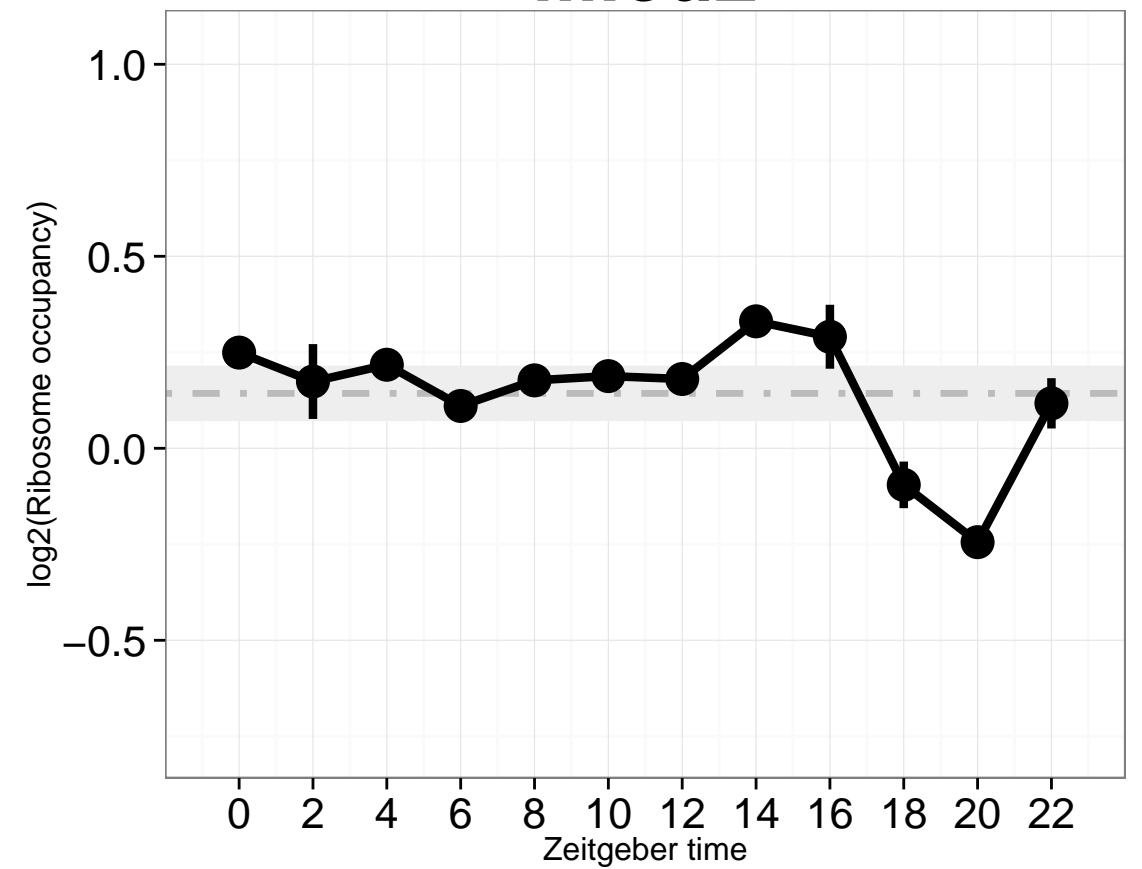

Supplement: Supplementary file 9146 [file 1]

# Tctex1d2

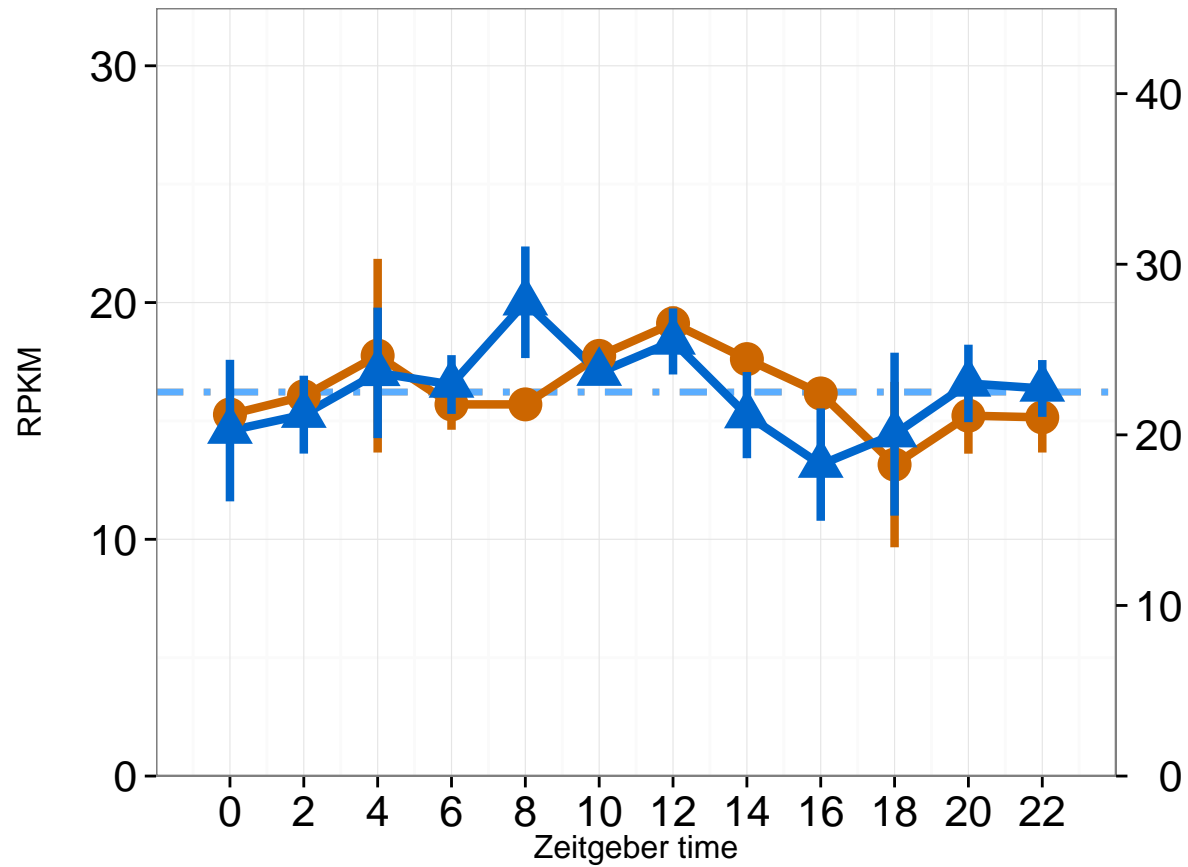

# Tctex1d2

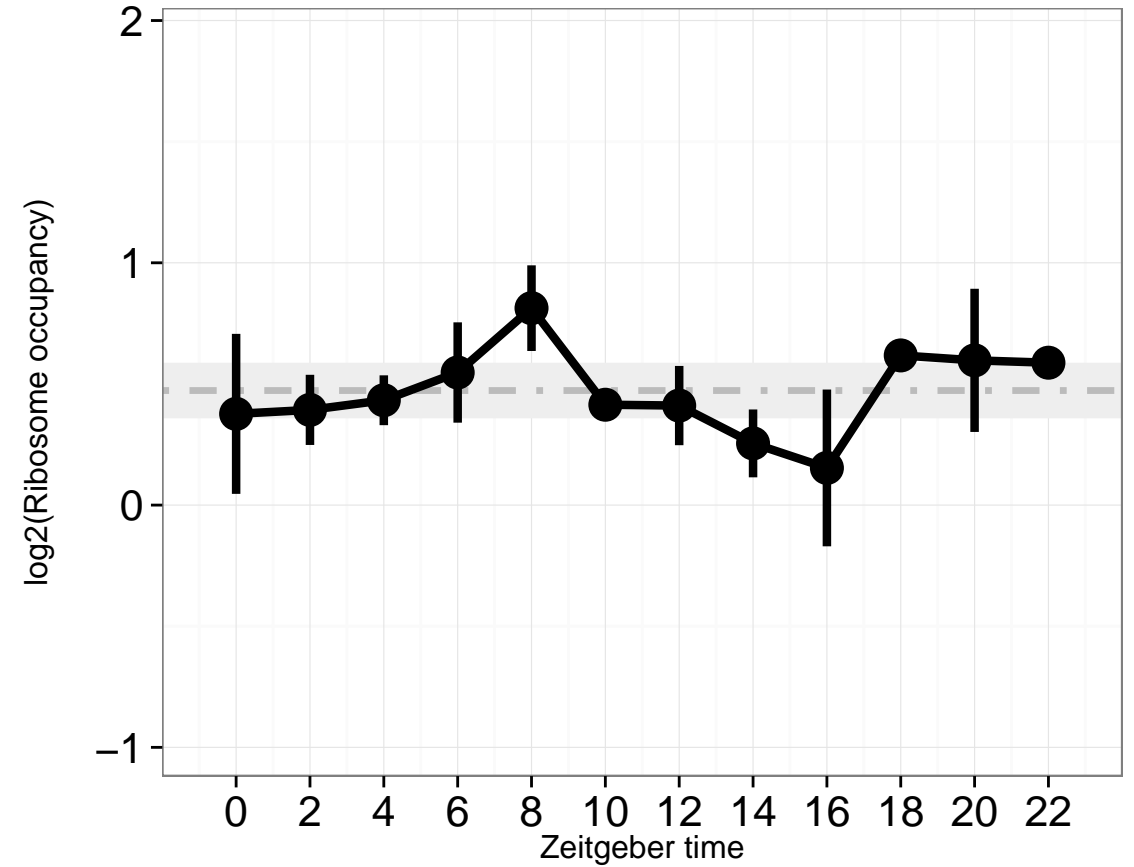

Supplement: Supplementary file 9147 [file 1]

# D130043K22Rik

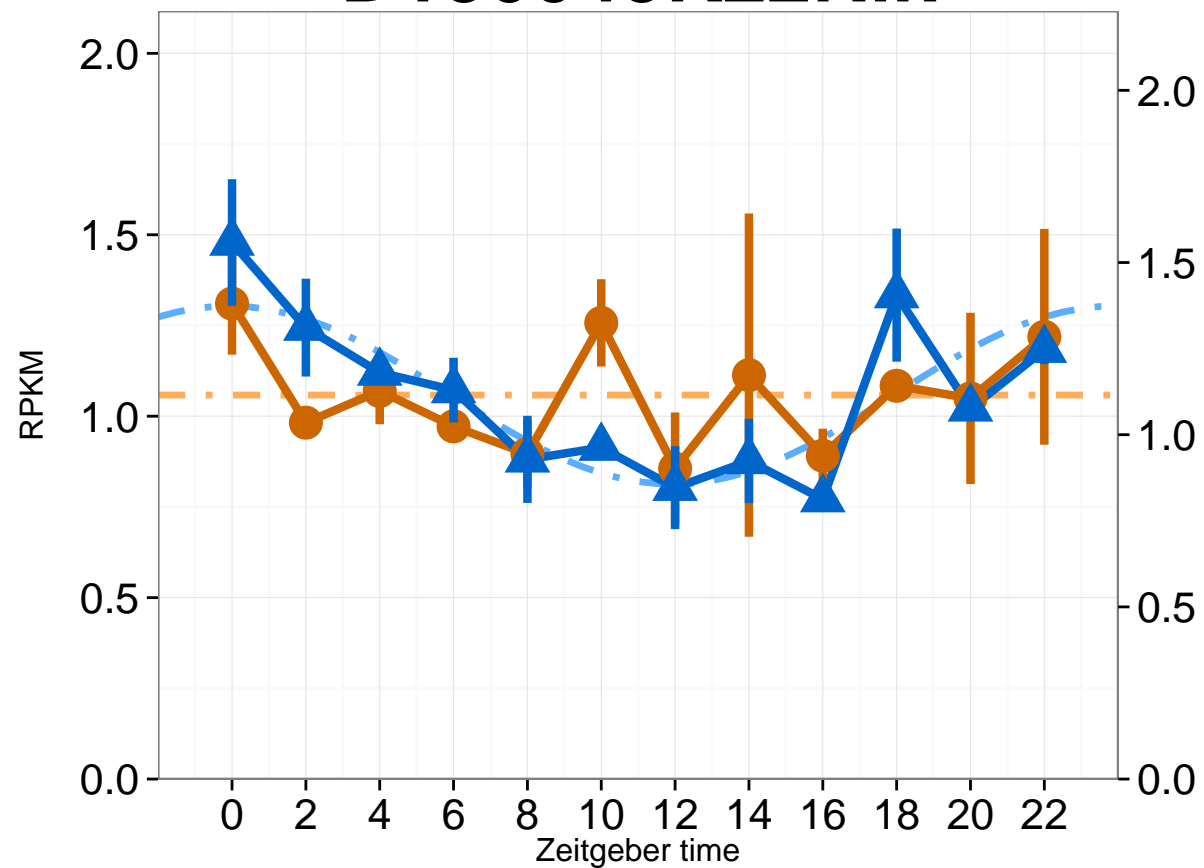

# D130043K22Rik

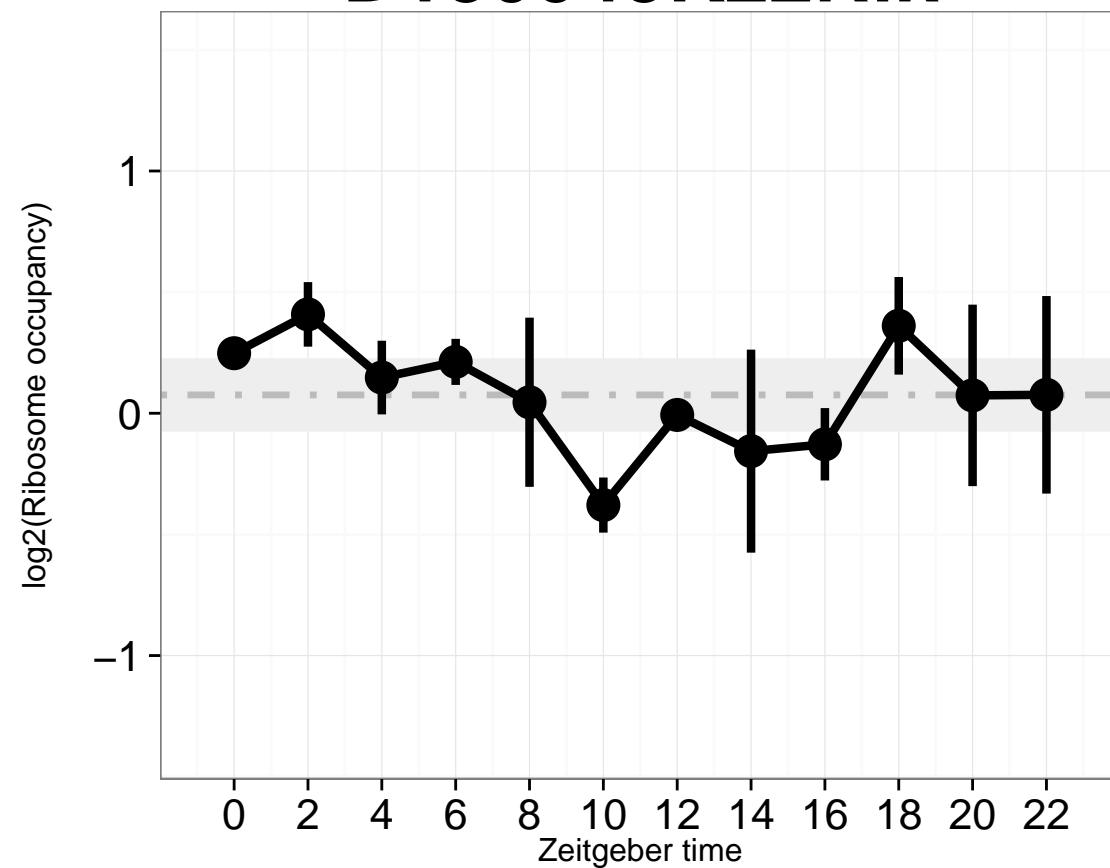

Supplement: Supplementary file 9148 [file 1]

**mt-Atp6**

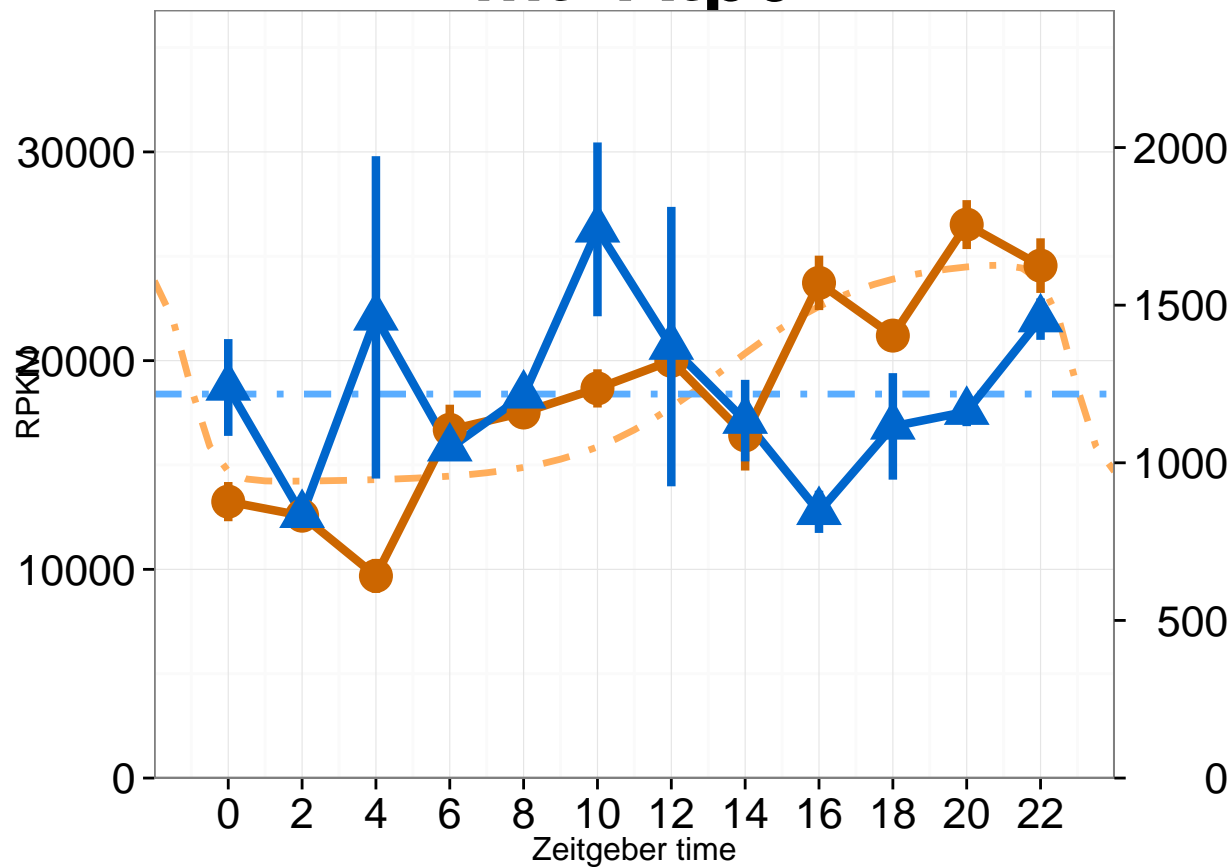

**mt-Atp6**

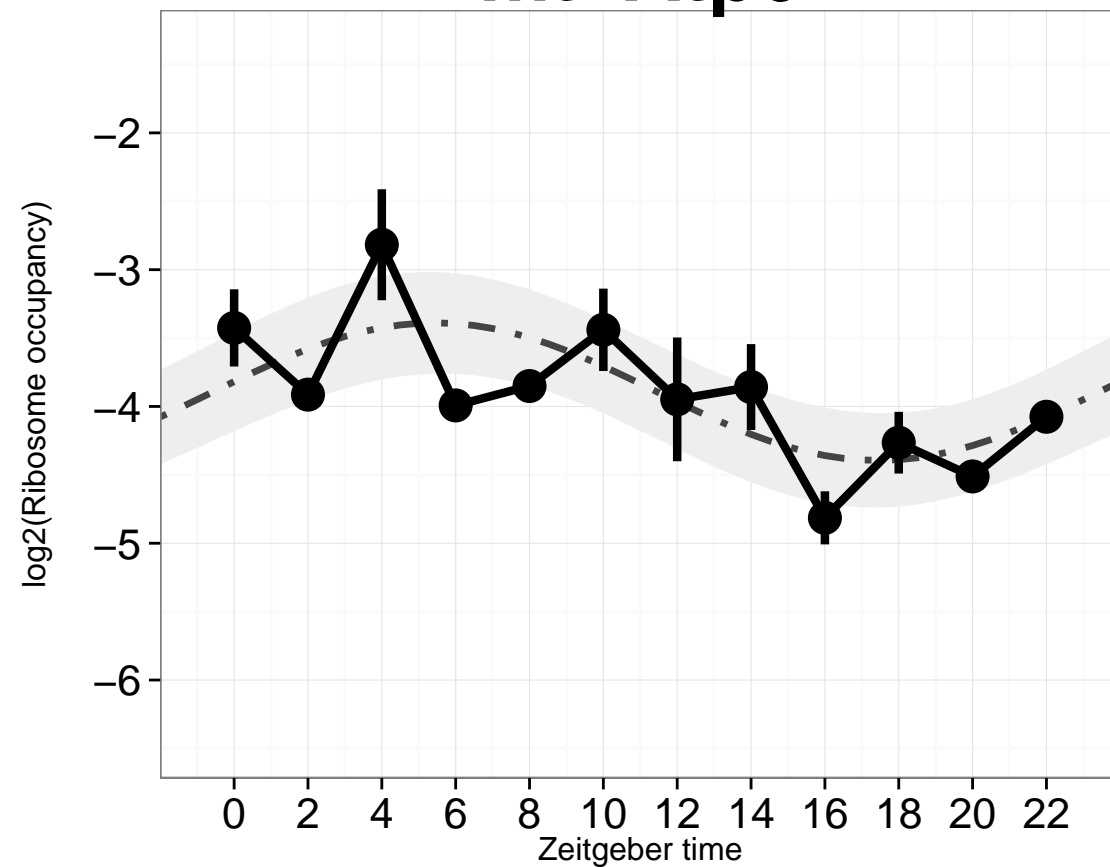

Supplement: Supplementary file 9149 [file 1]

# Mrpl37

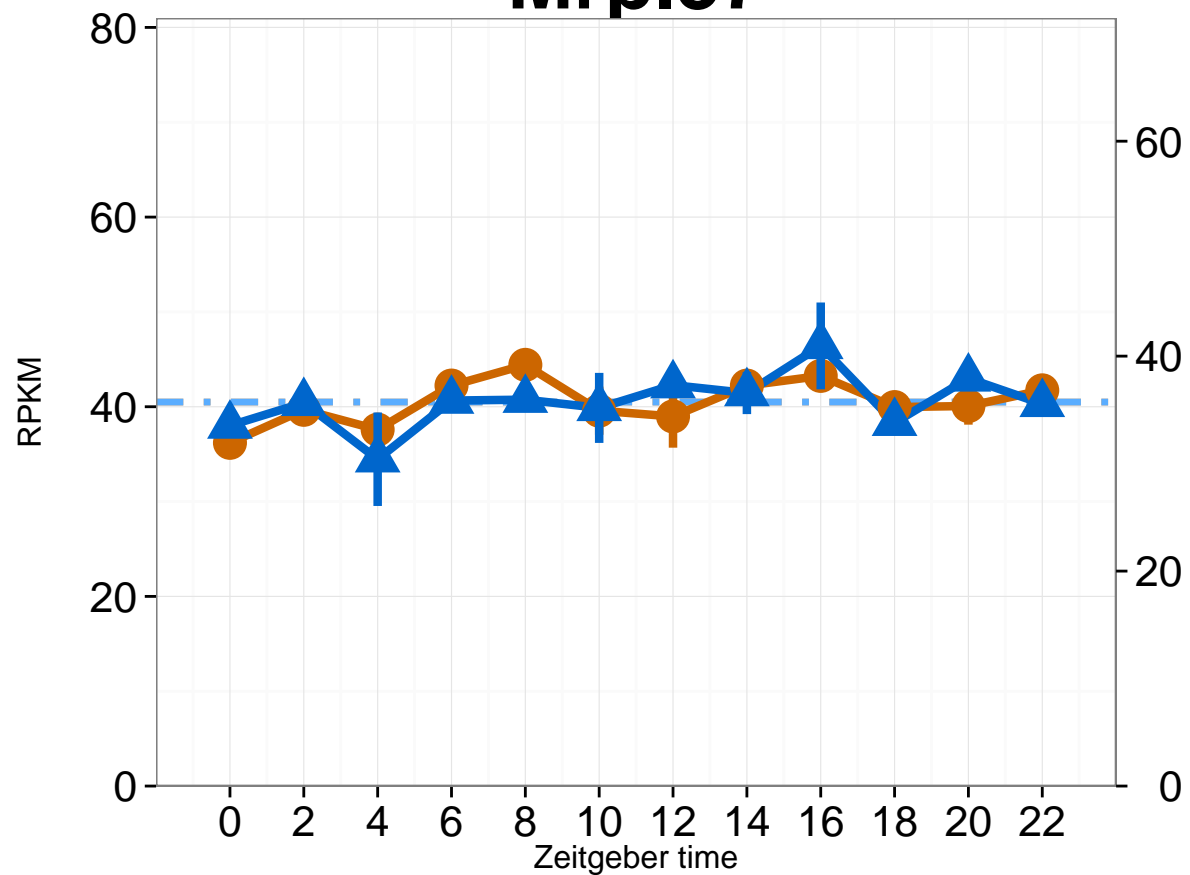

# Mrpl37

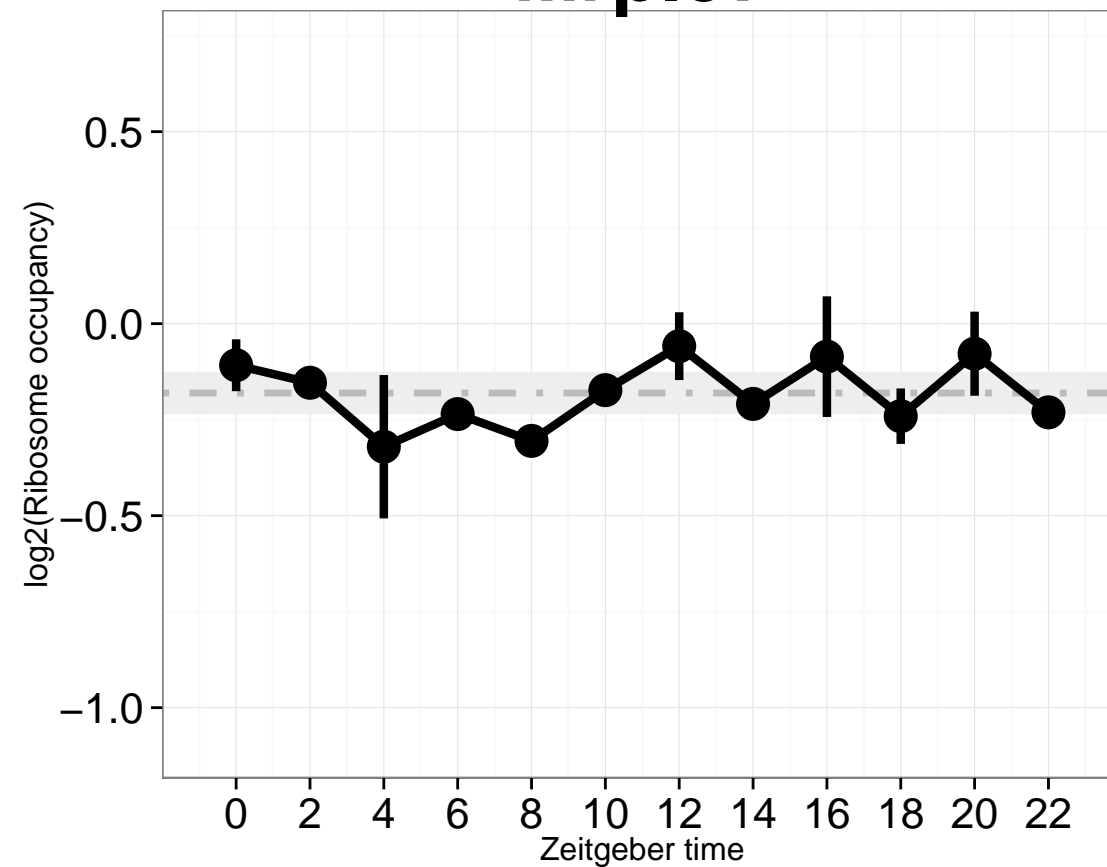

Supplement: Supplementary file 9150 [file 1]

## Asap3

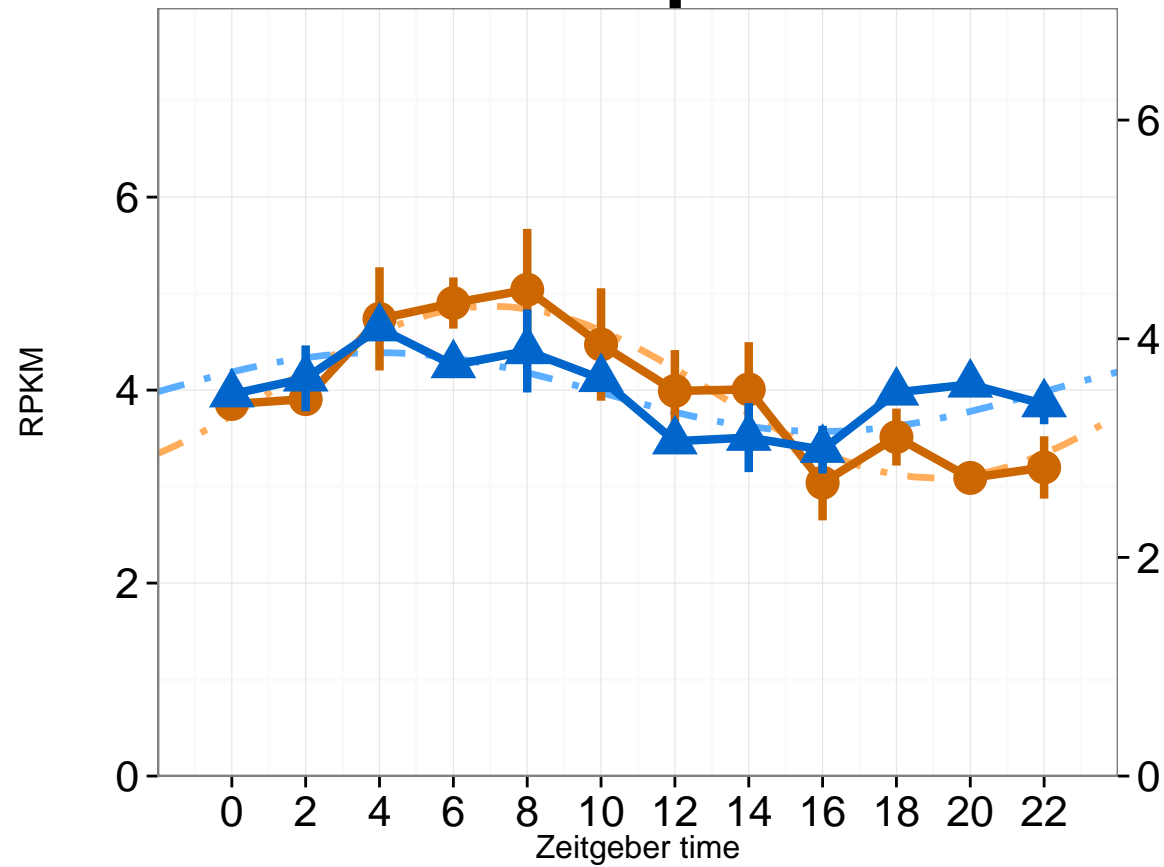

## Asap3

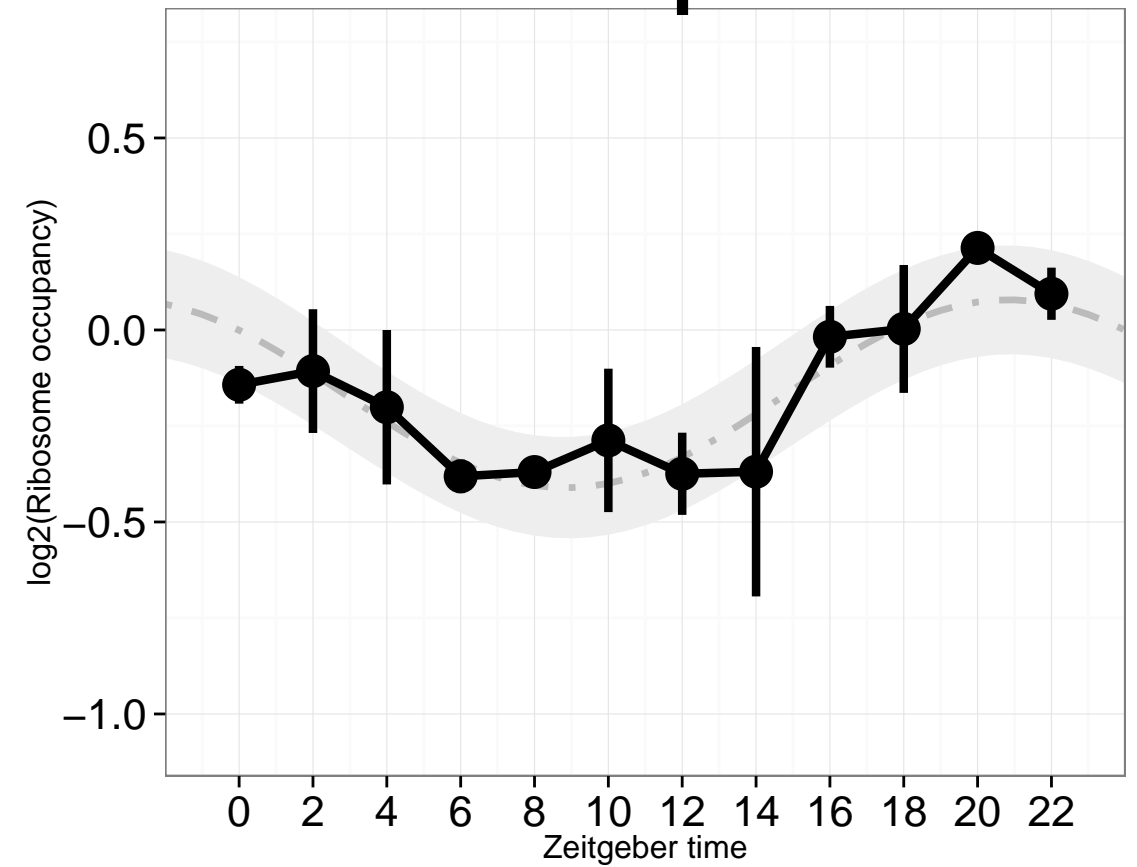

Supplement: Supplementary file 9151 [file 1]

# Ints1

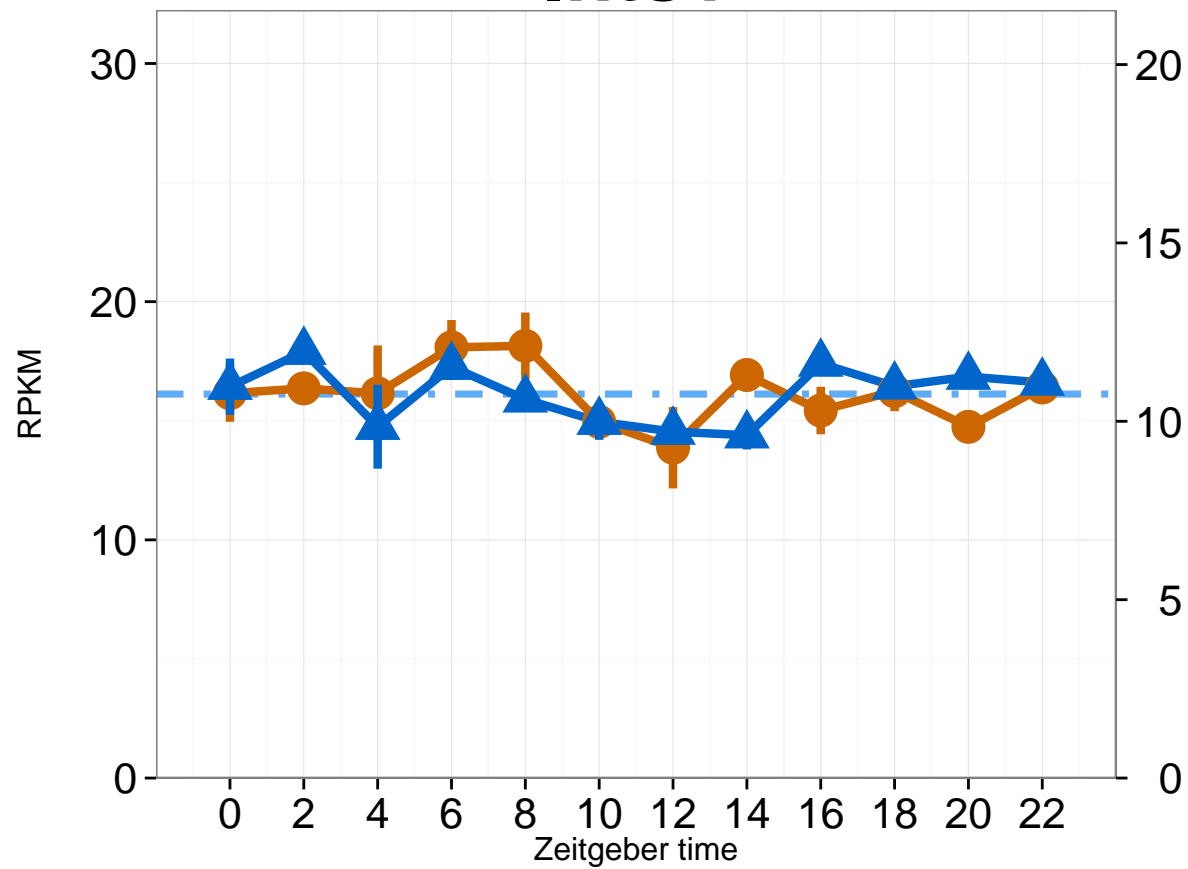

# Ints1

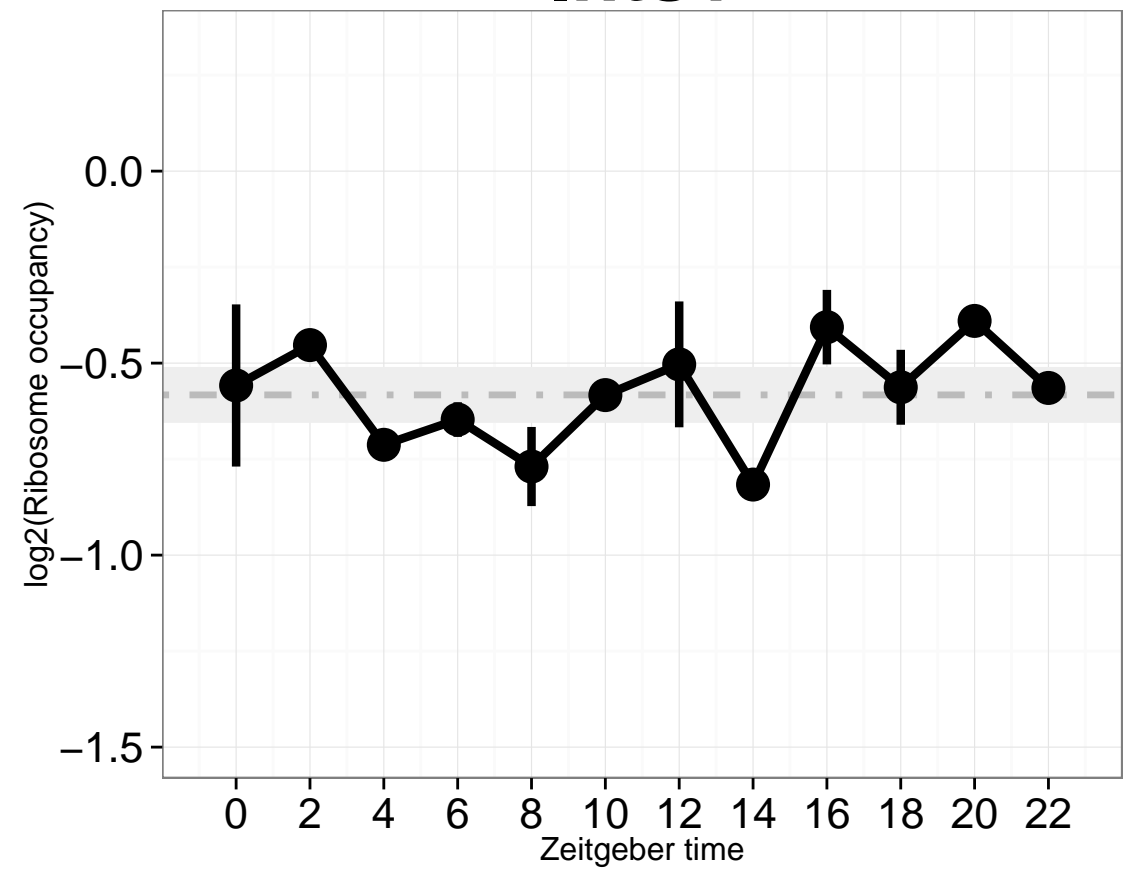

Supplement: Supplementary file 9152 [file 1]

# Srd5a3

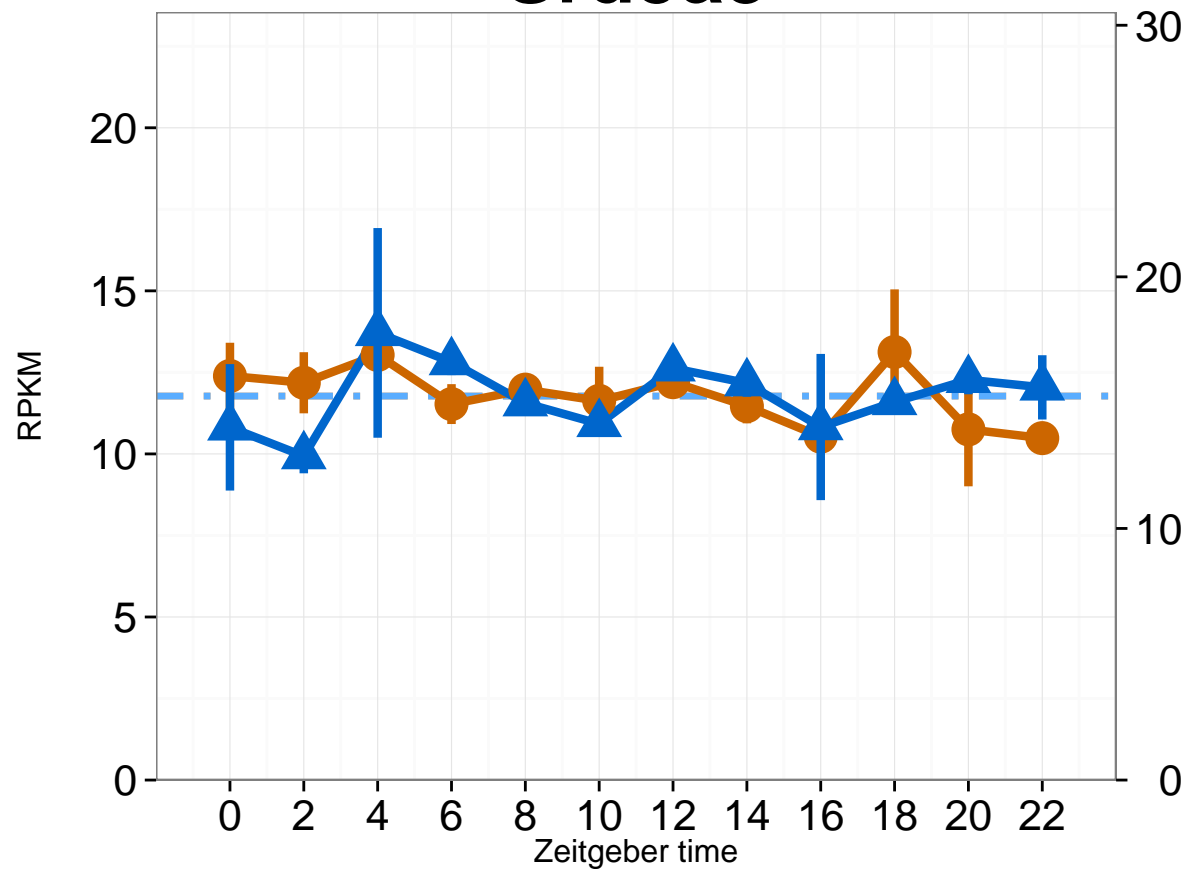

# Srd5a3

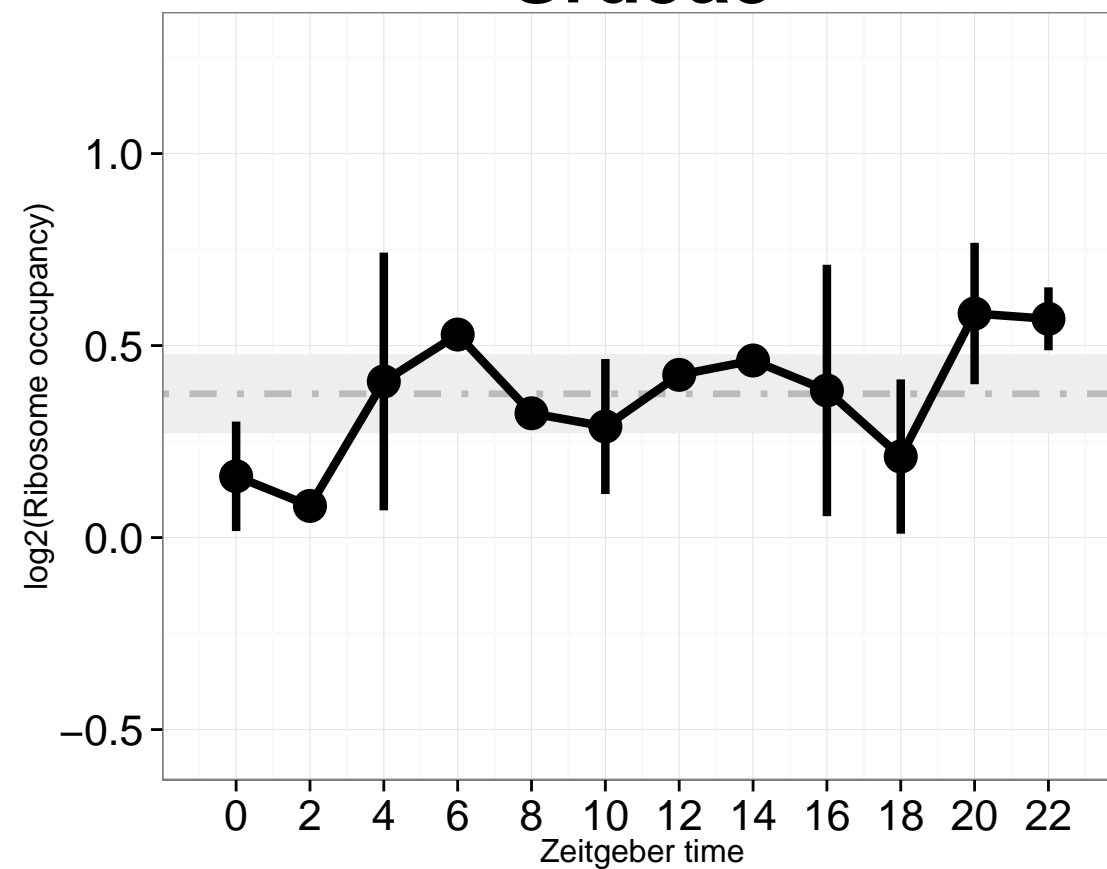

Supplement: Supplementary file 9153 [file 1]

# Pagr1a

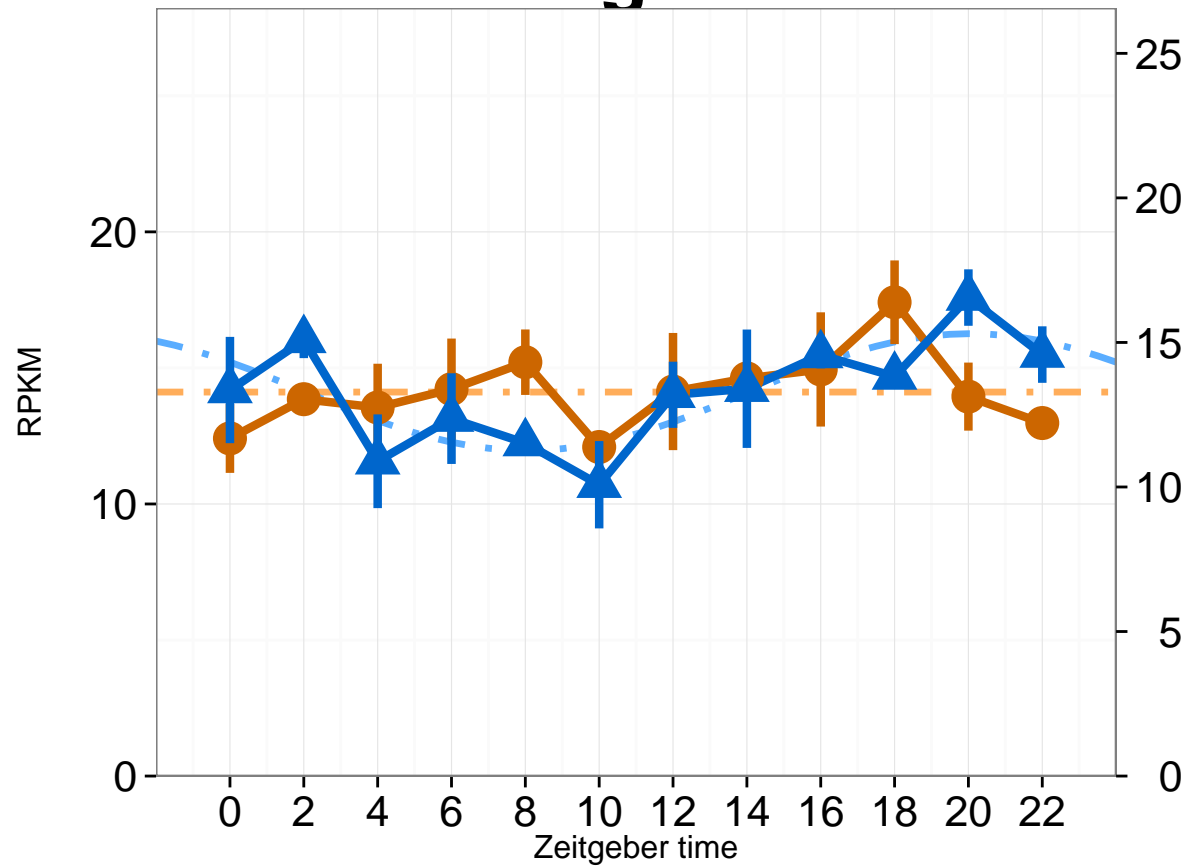

# Pagr1a

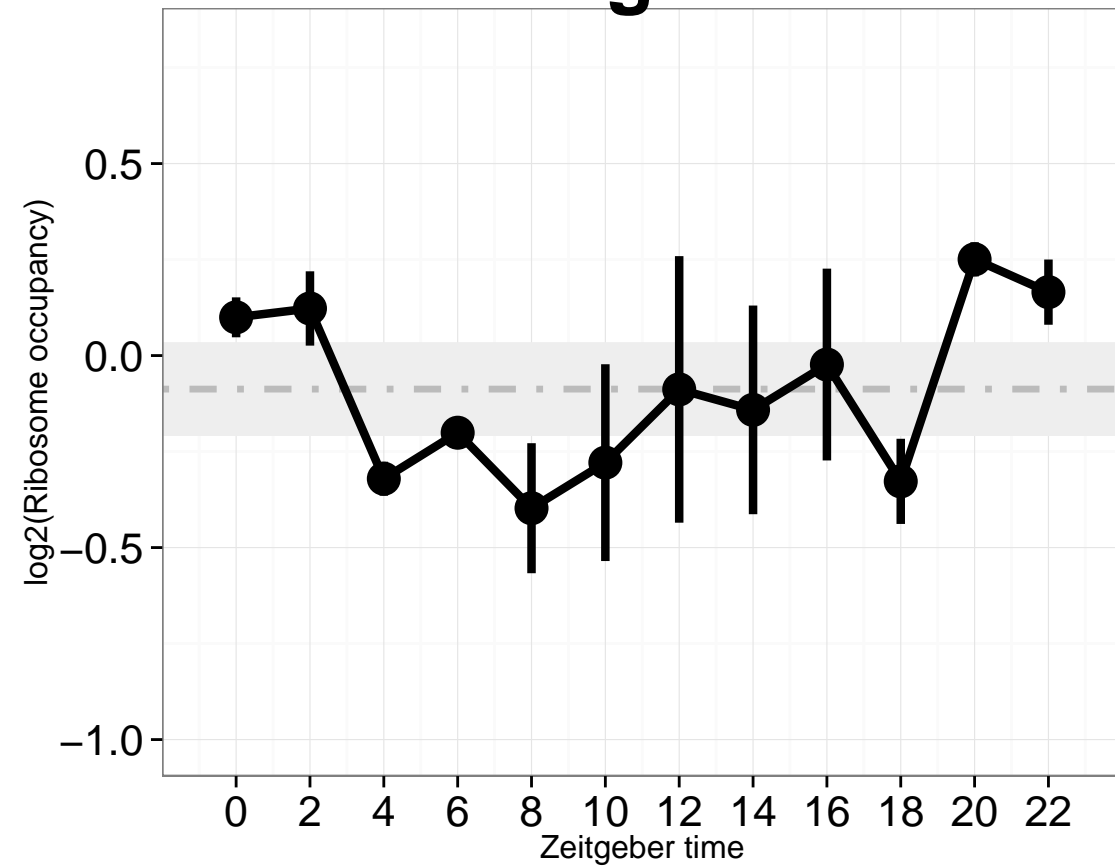

Supplement: Supplementary file 9154 [file 1]

## Iscu

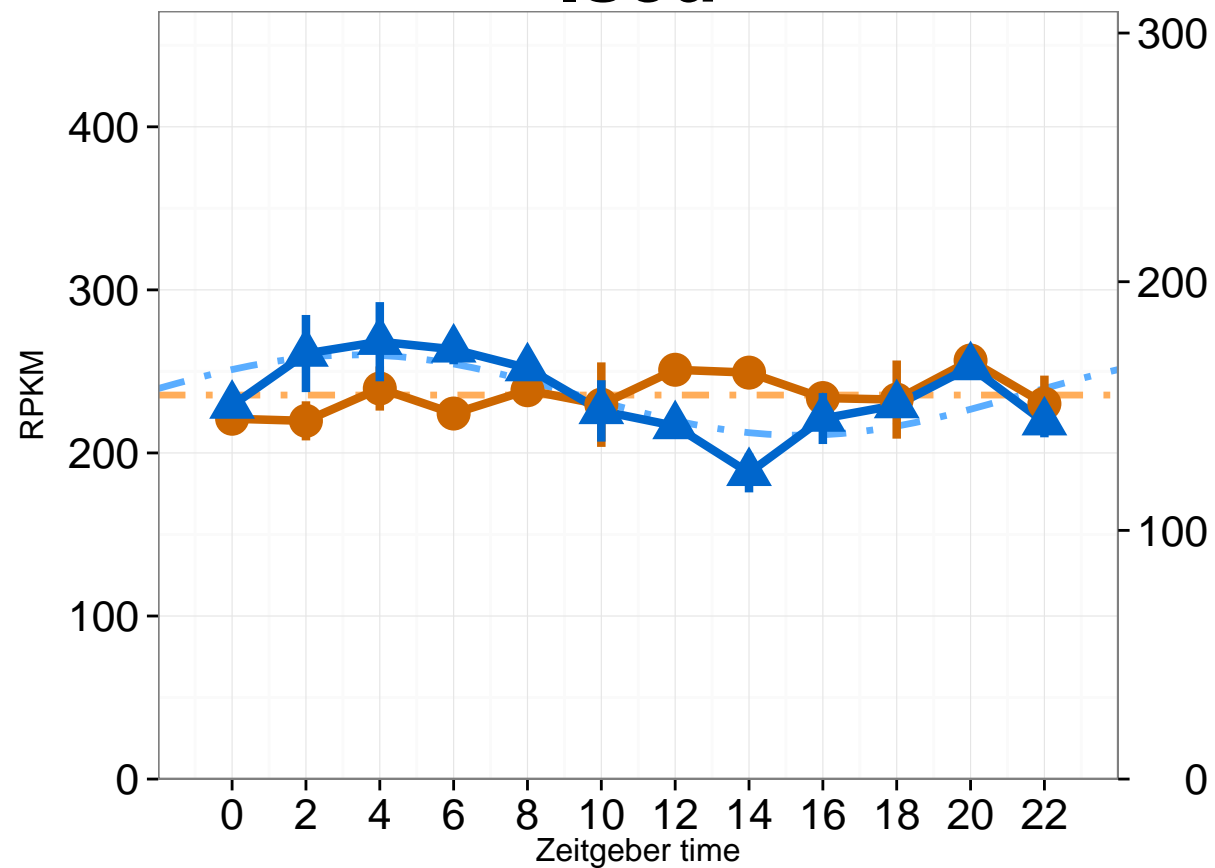

## Iscu

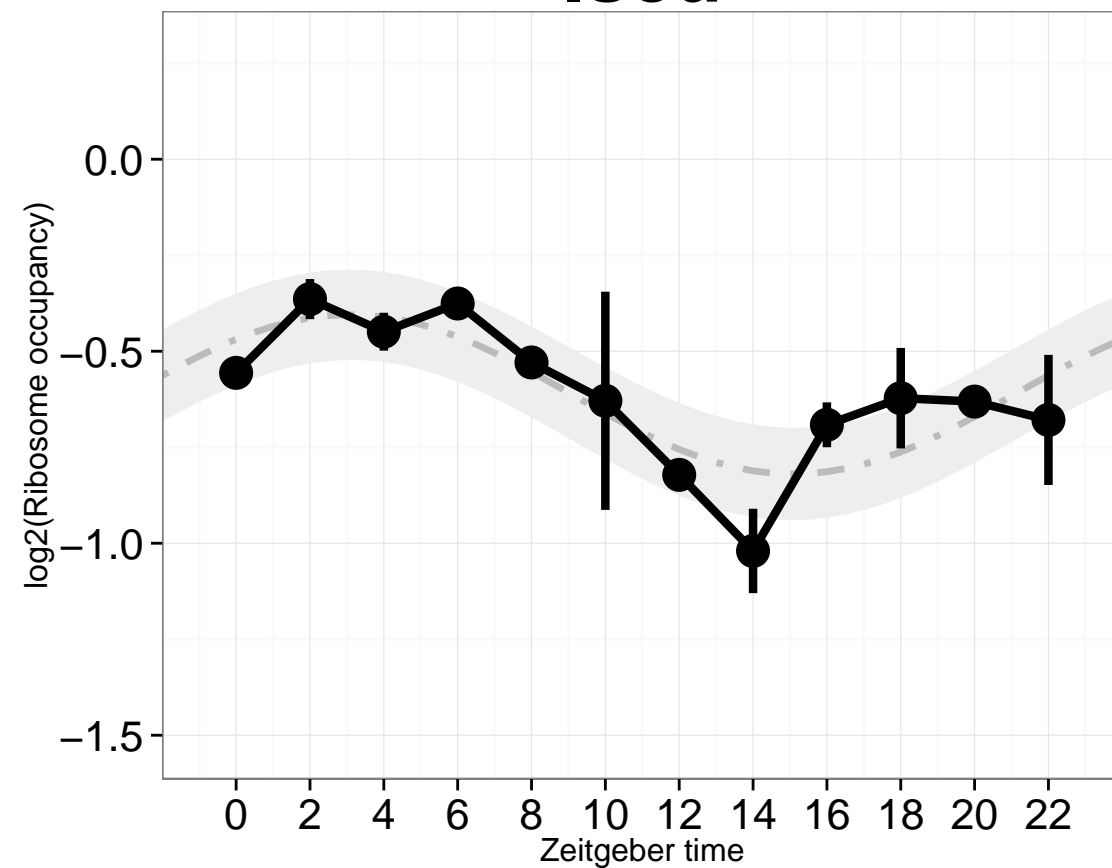

Supplement: Supplementary file 9155 [file 1]

# Rtn4r

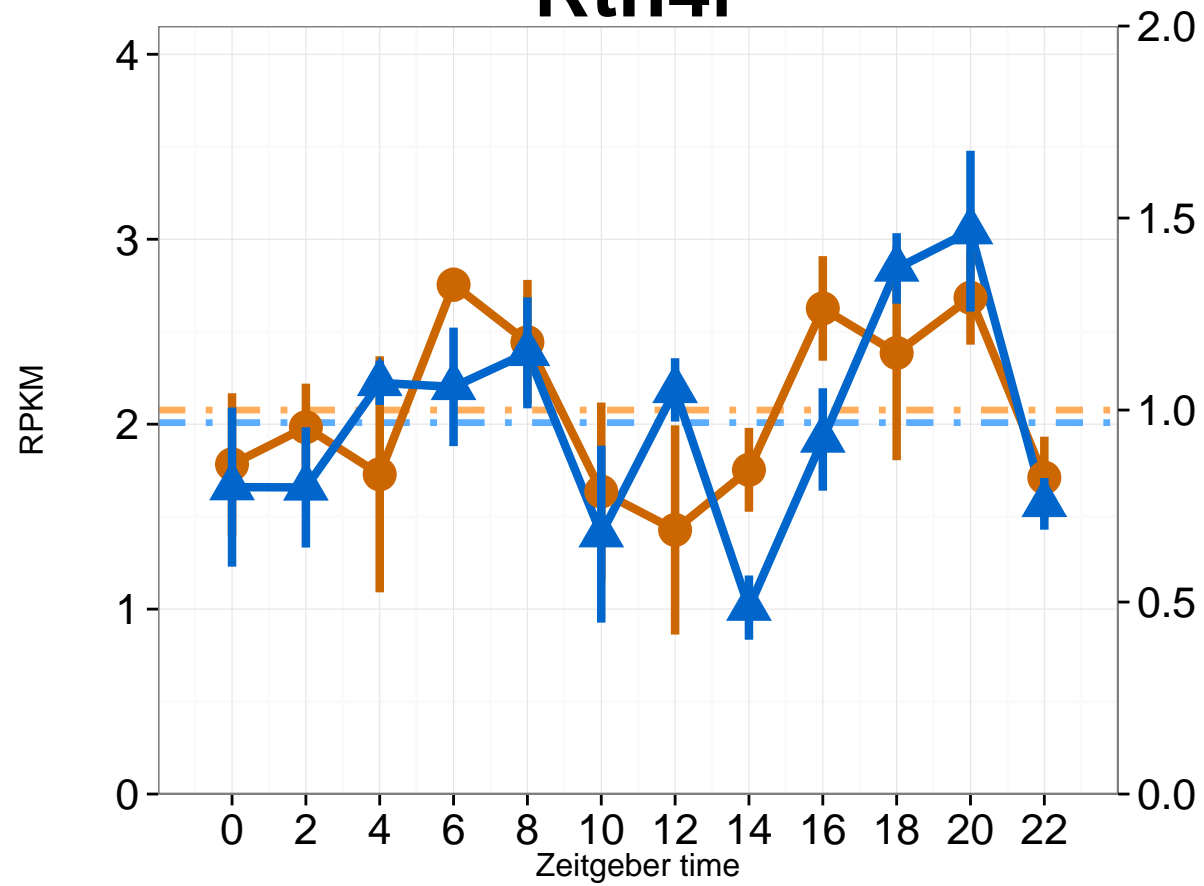

# Rtn4r

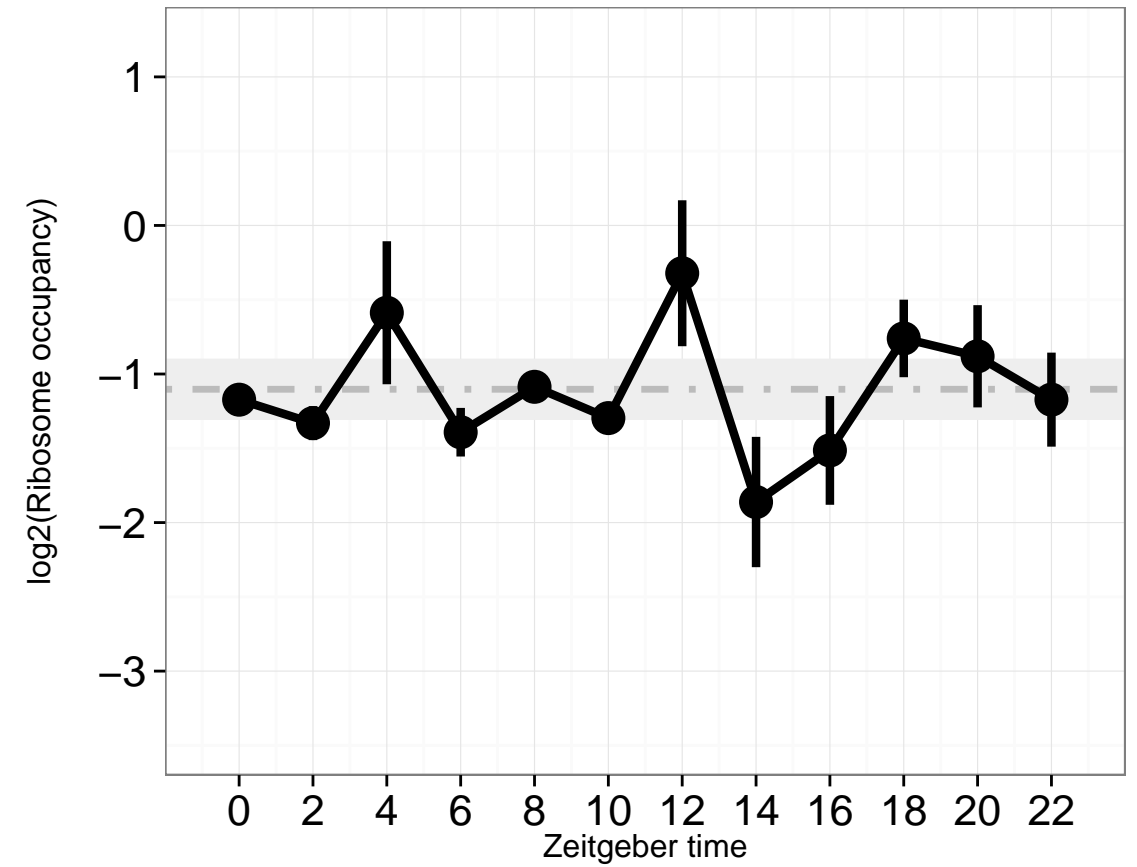

Supplement: Supplementary file 9156 [file 1]

# Tgds

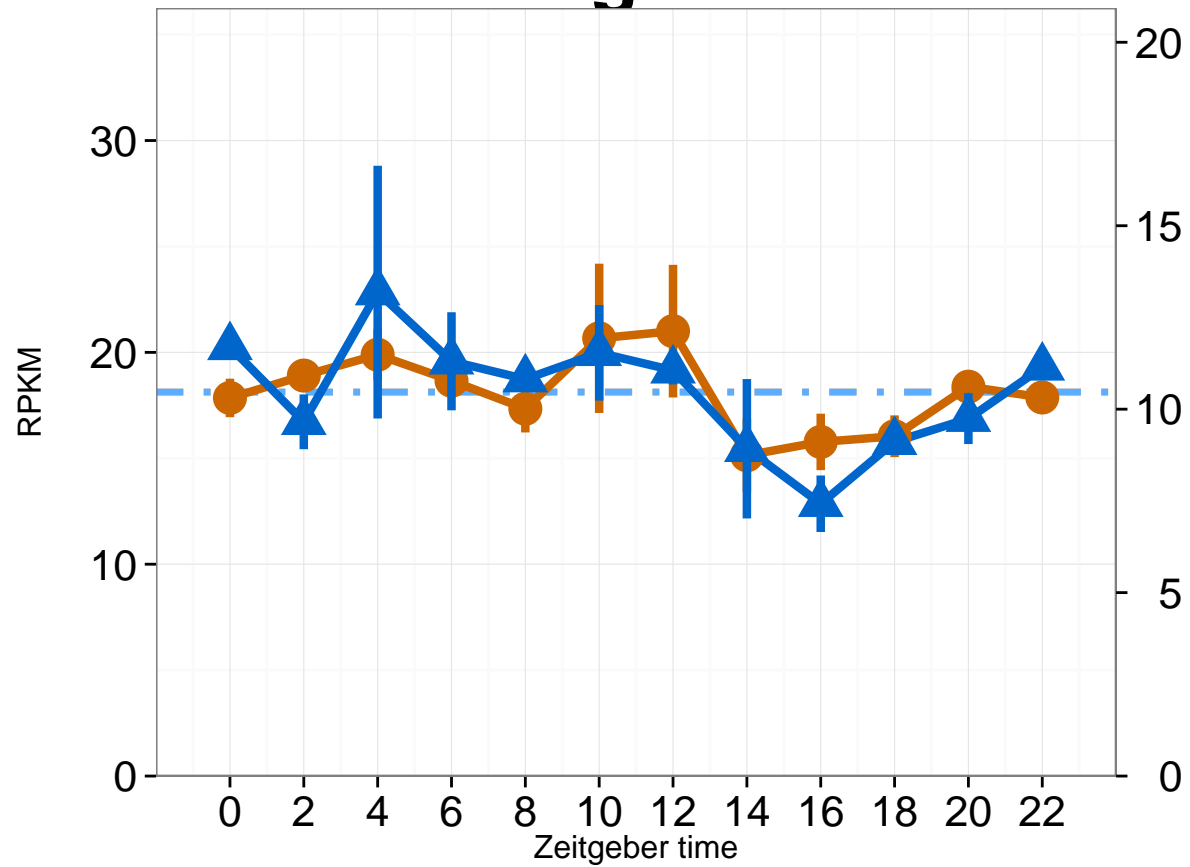

# Tgds

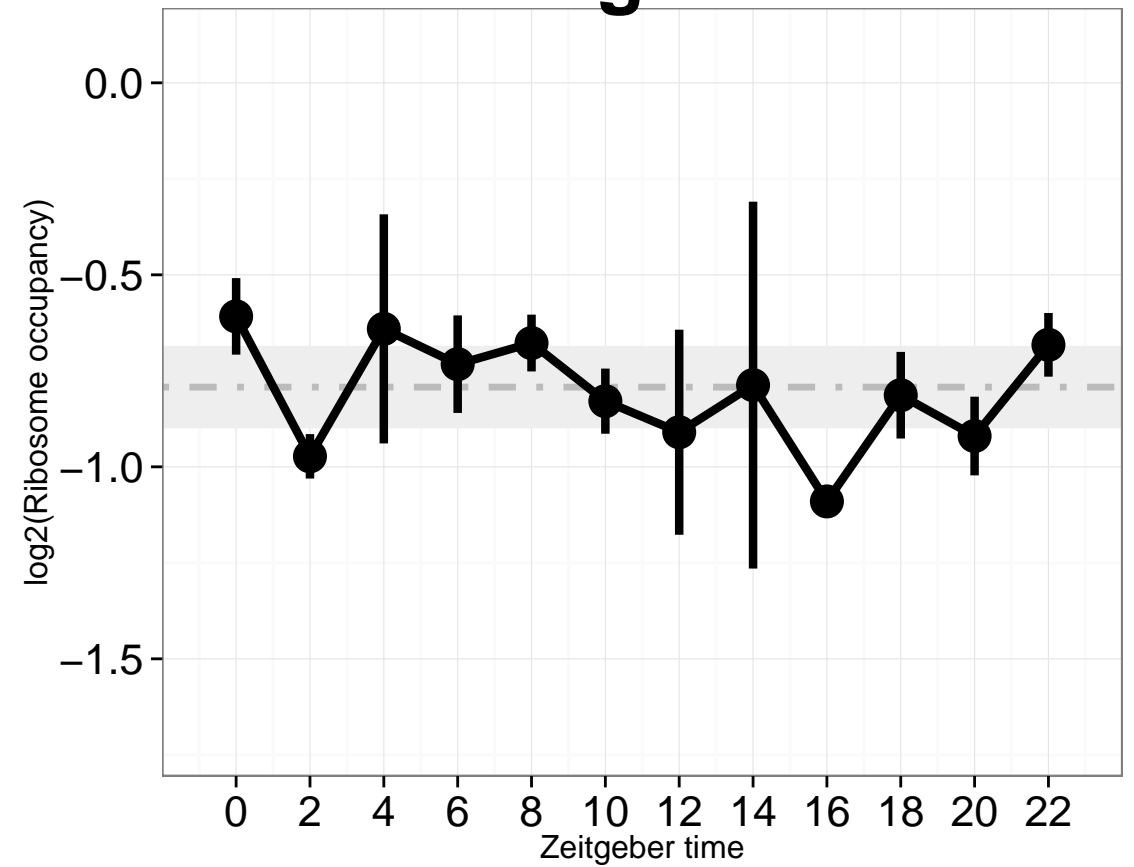

Supplement: Supplementary file 9157 [file 1]

# Adrb2

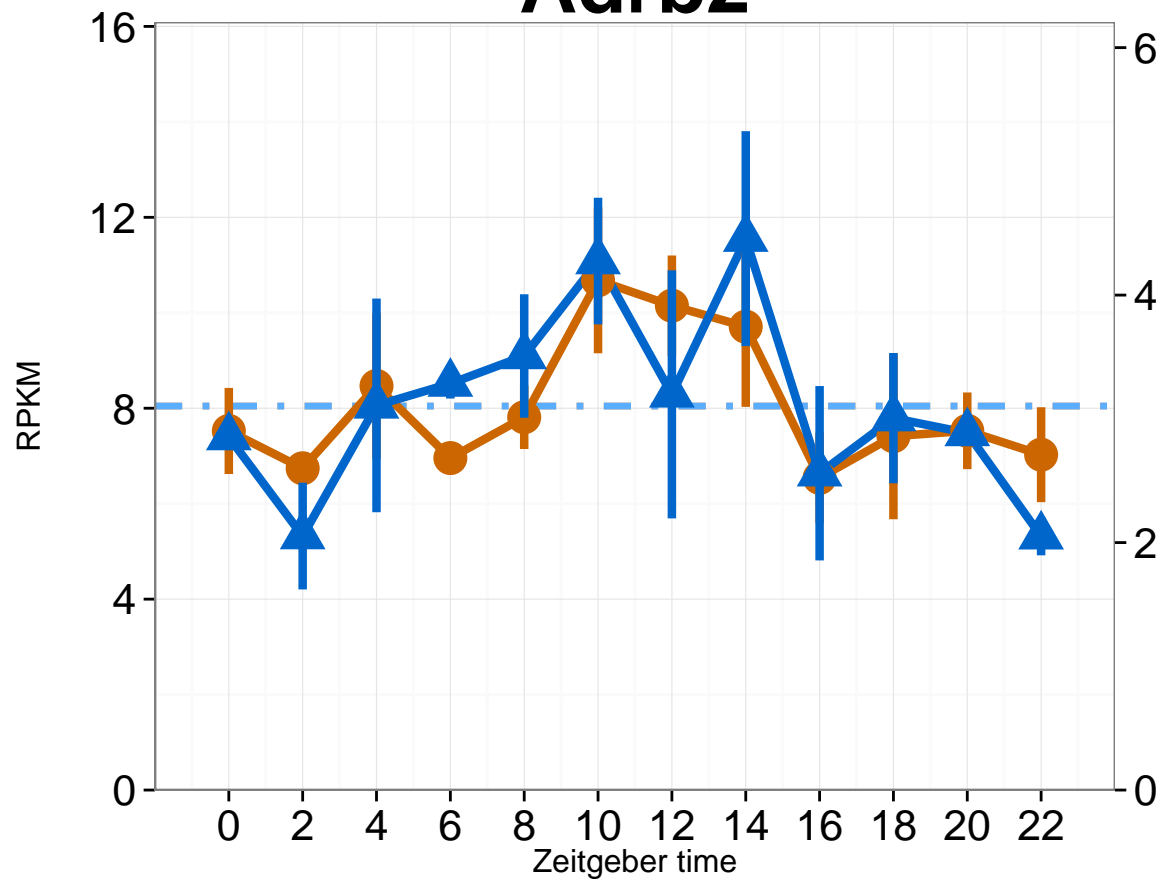

# Adrb2

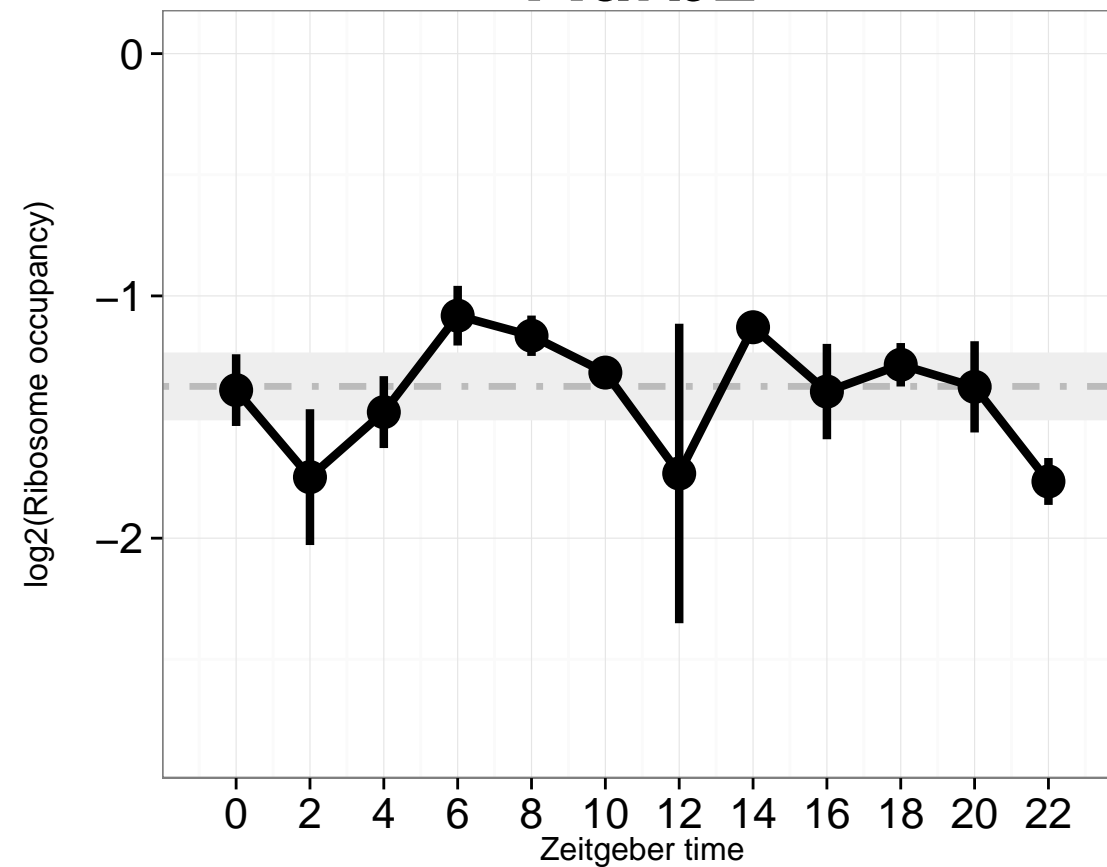

Supplement: Supplementary file 9158 [file 1]

## Myzap TR

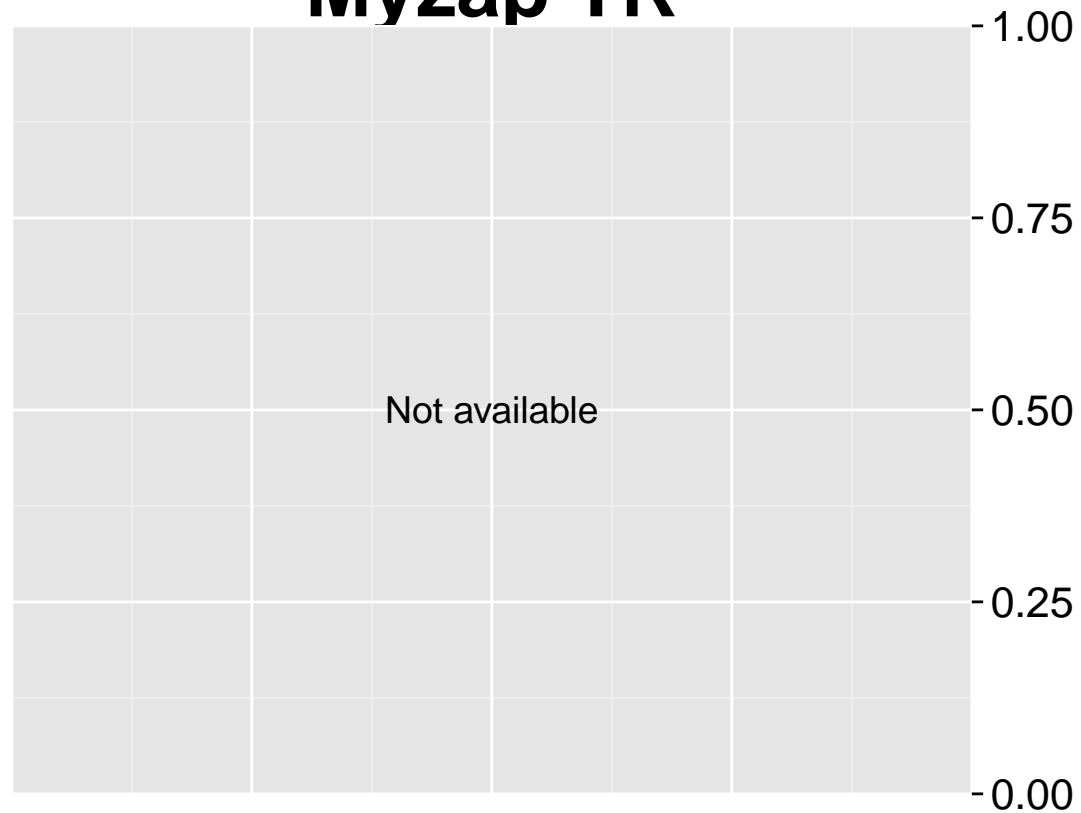

## Myzap log2(Ribosome occupancy

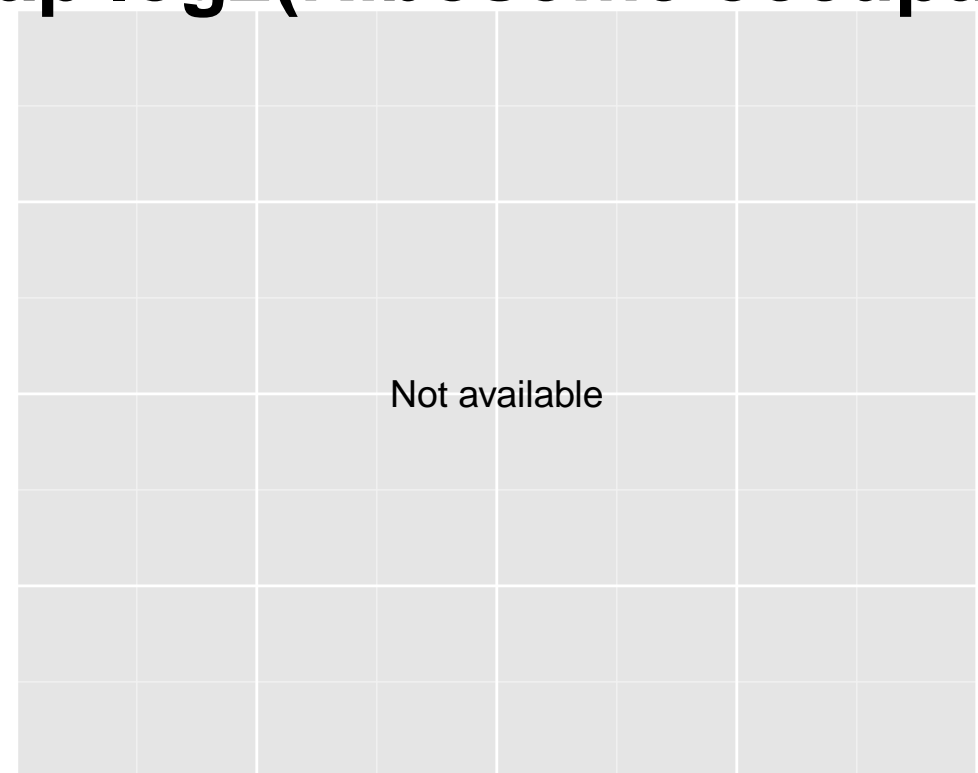

Supplement: Supplementary file 9159 [file 1]

## AnIn

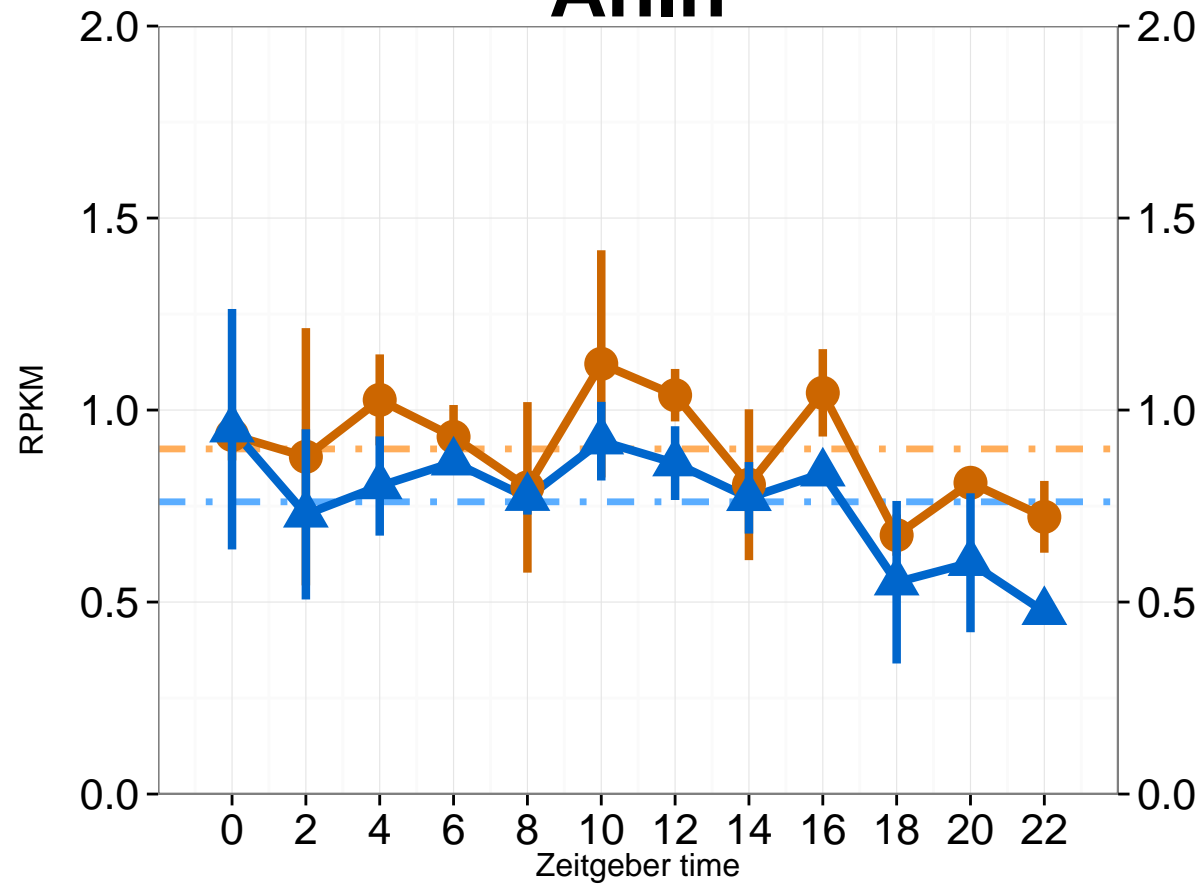

## AnIn

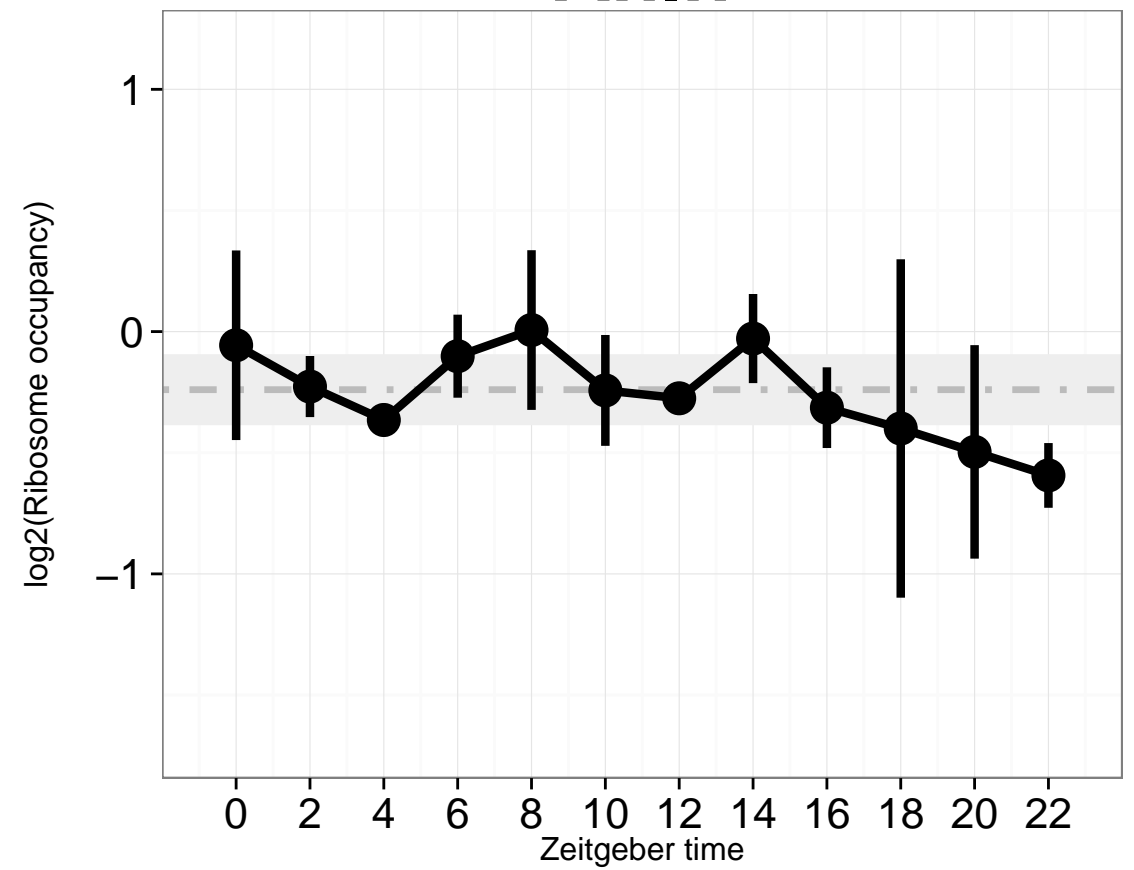

Supplement: Supplementary file 9160 [file 1]

# Traf3ip3

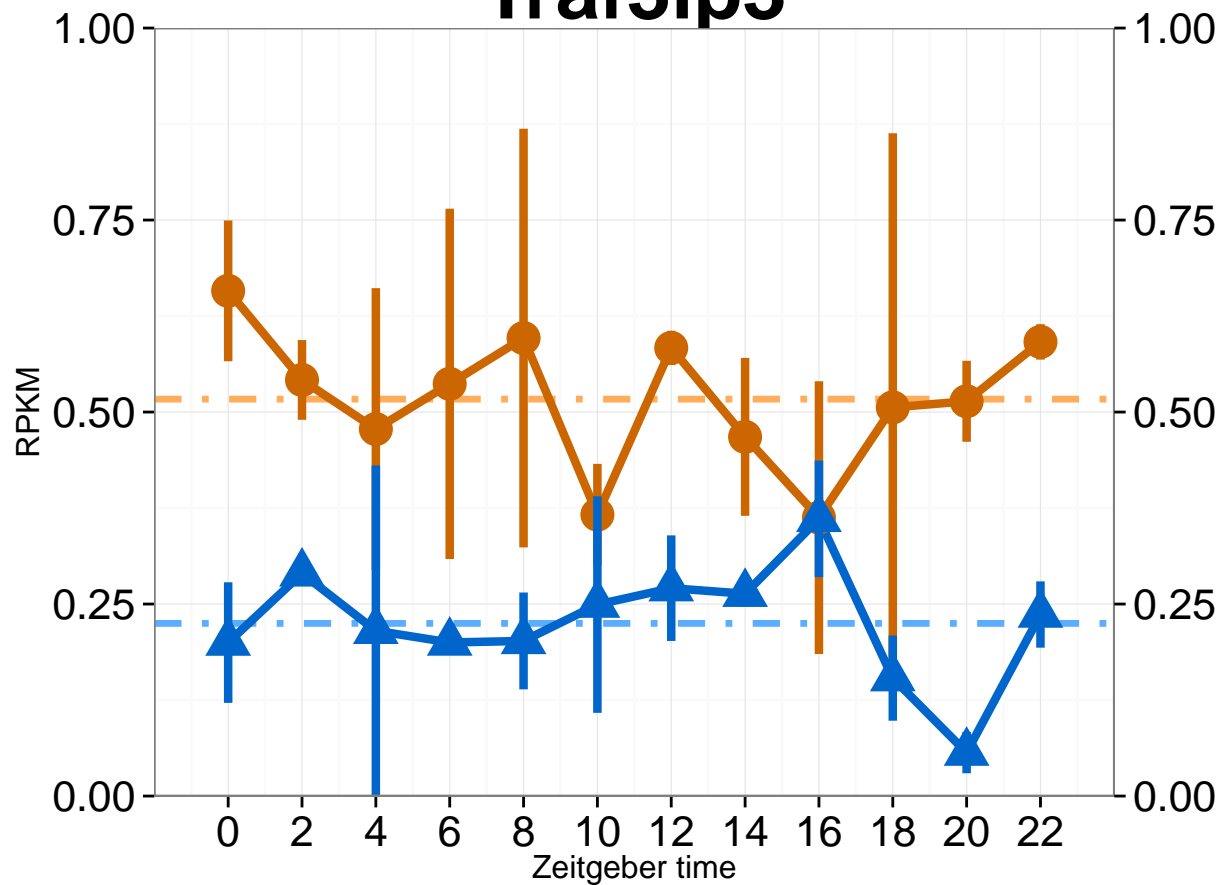

# Traf3ip3

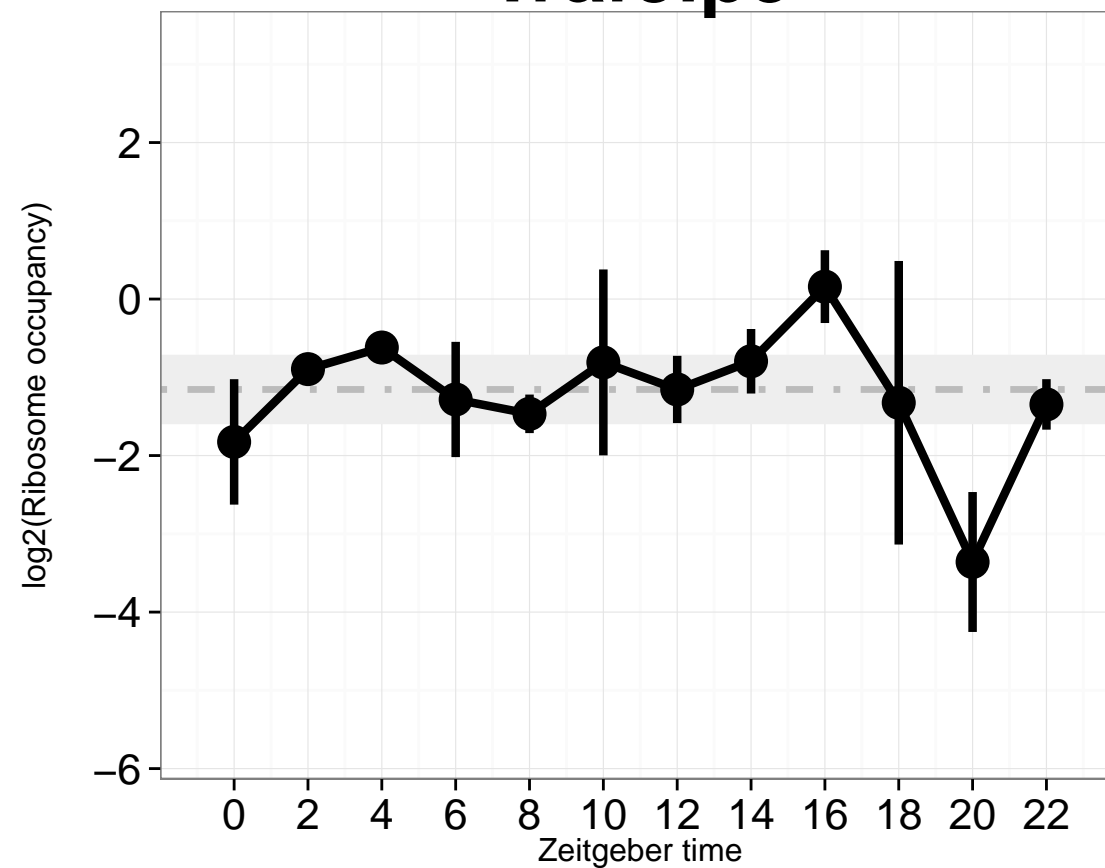

Supplement: Supplementary file 9161 [file 1]

# Pmpcb

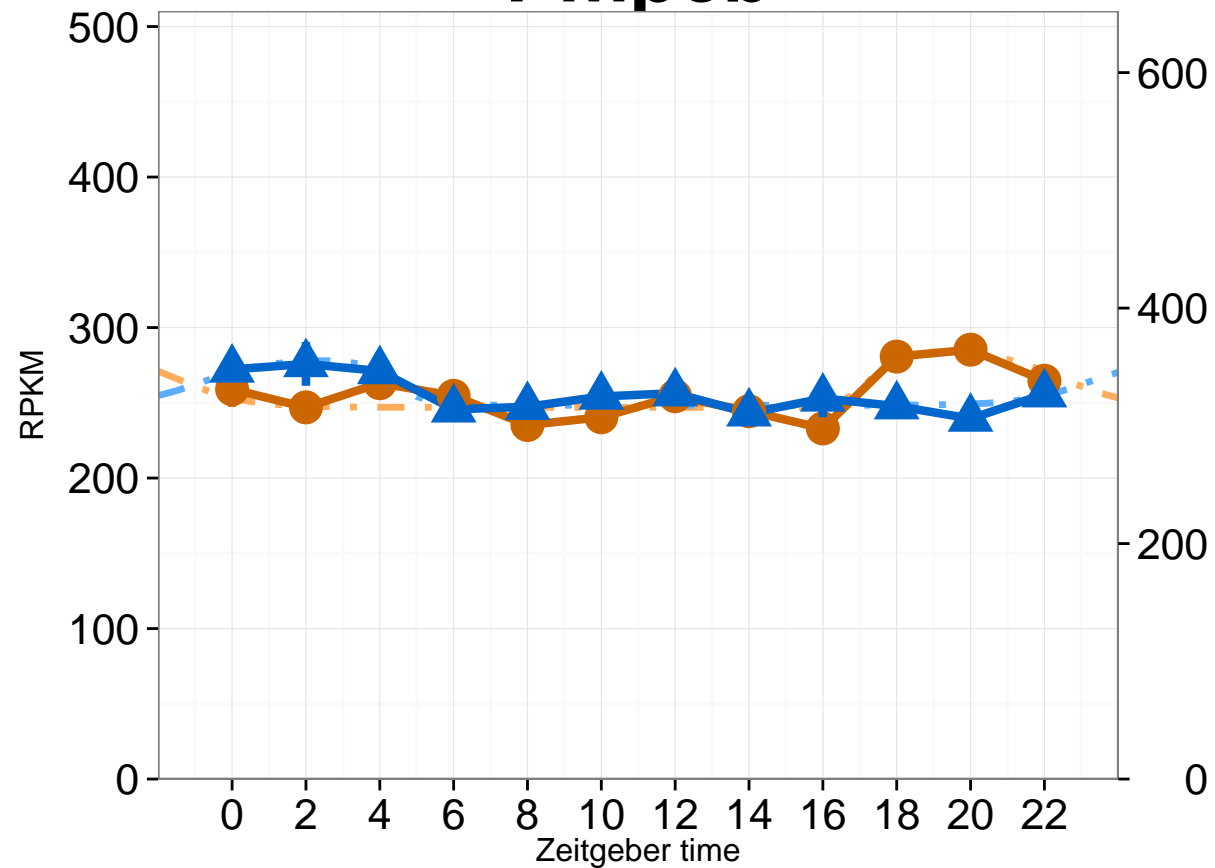

# Pmpcb

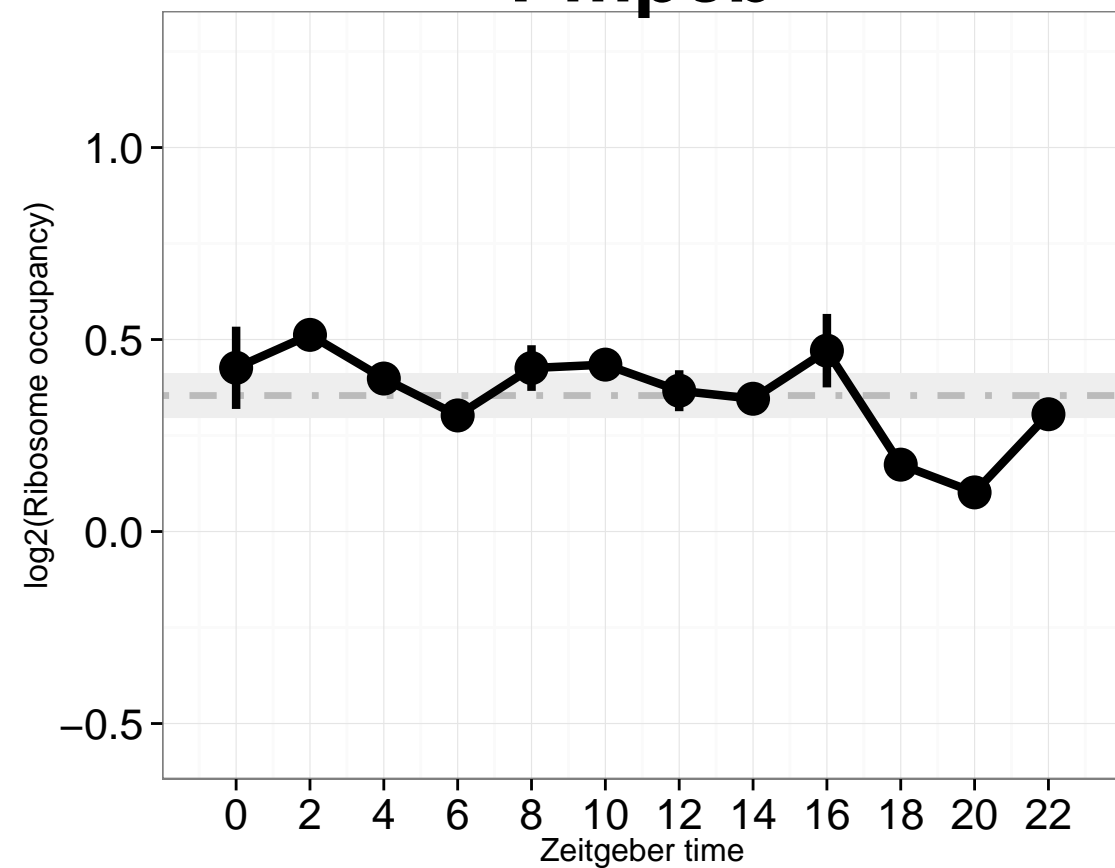

Supplement: Supplementary file 9162 [file 1]

# Stx11

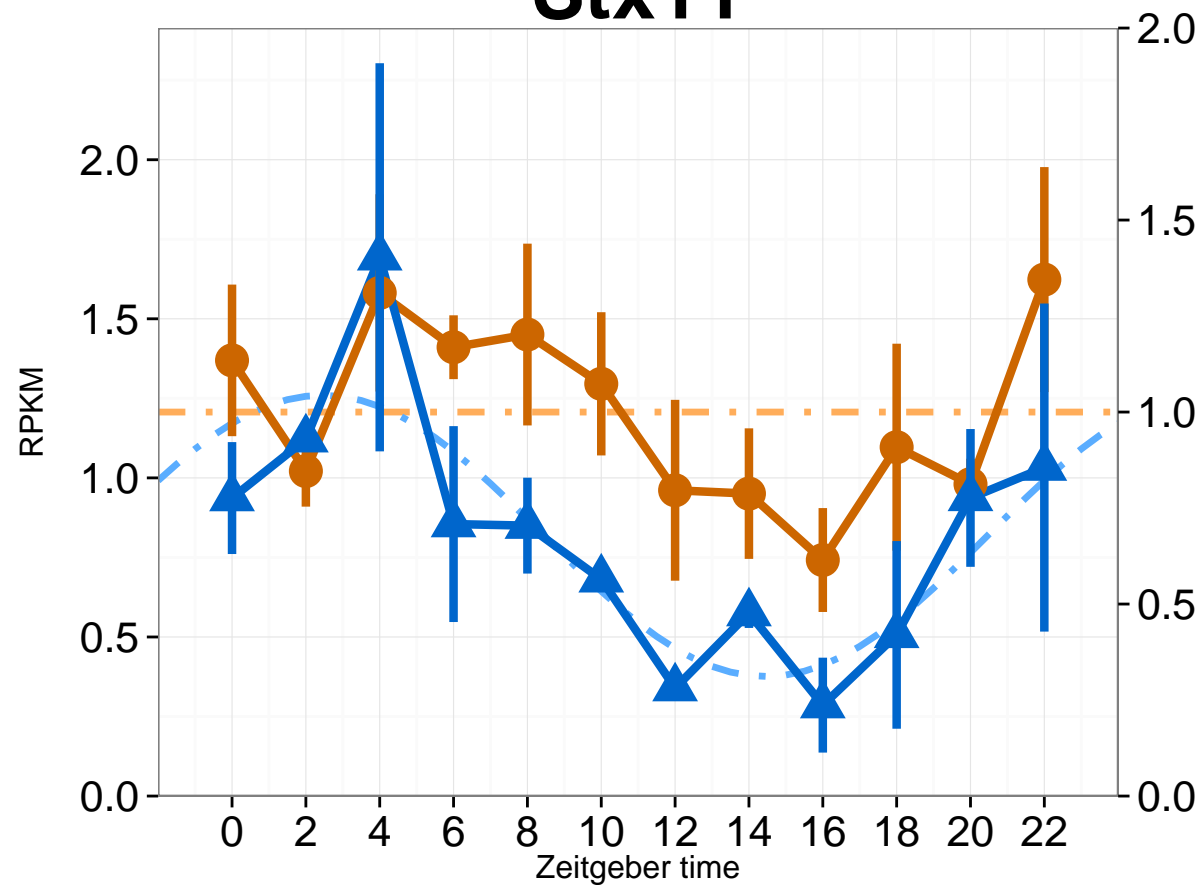

# Stx11

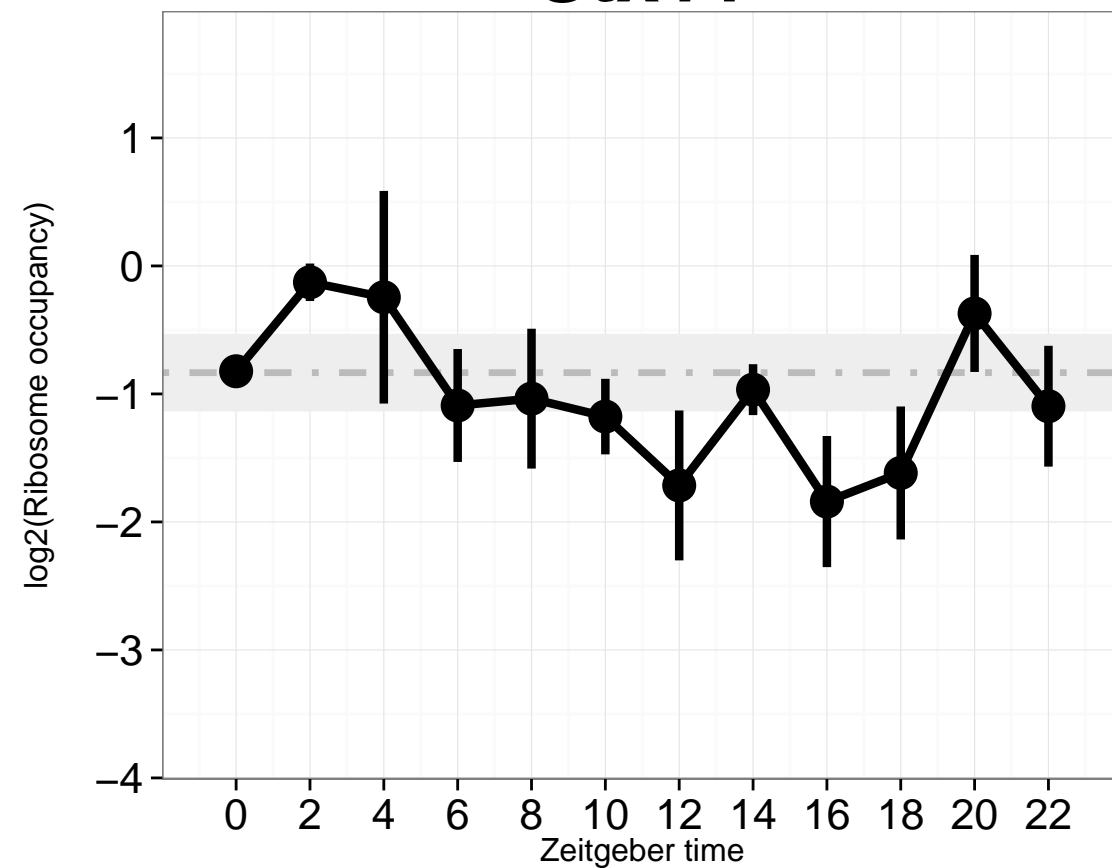

Supplement: Supplementary file 9163 [file 1]

# Rftn2

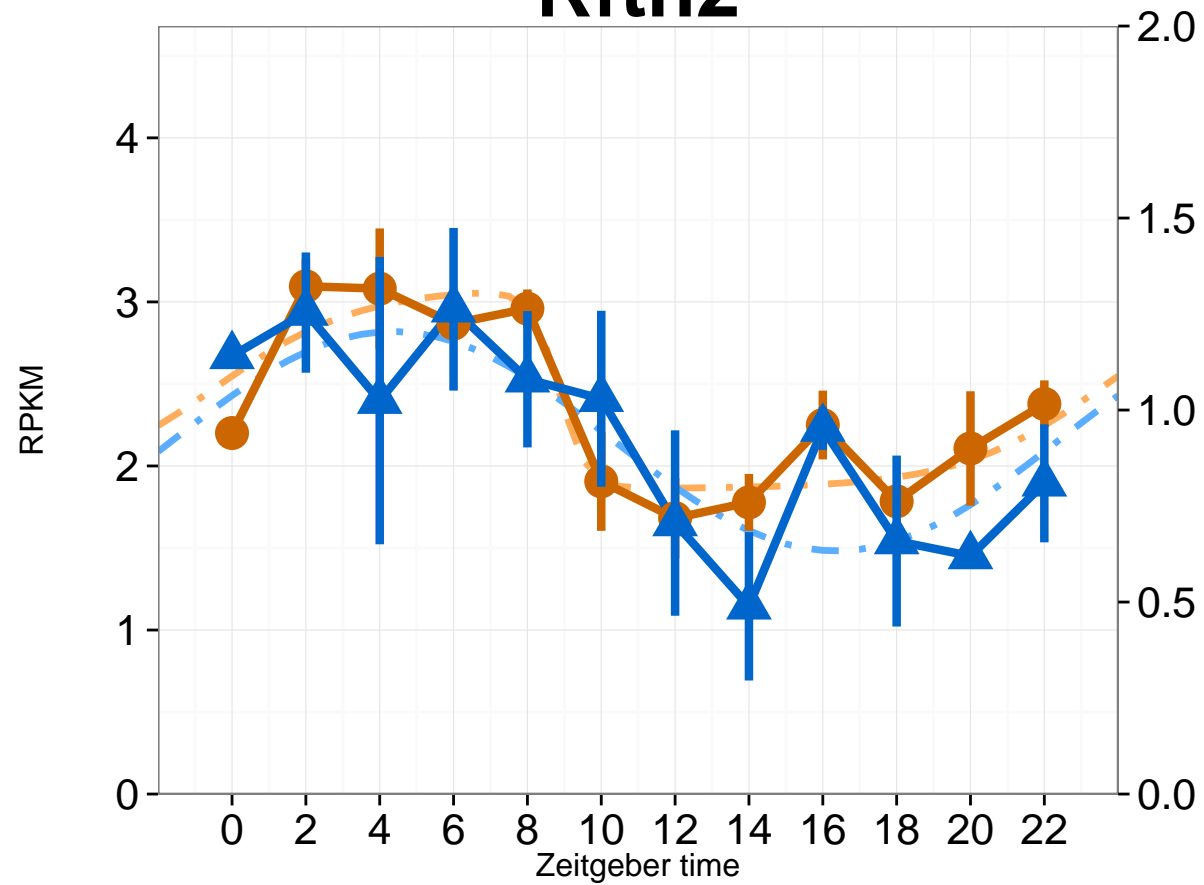

# Rftn2

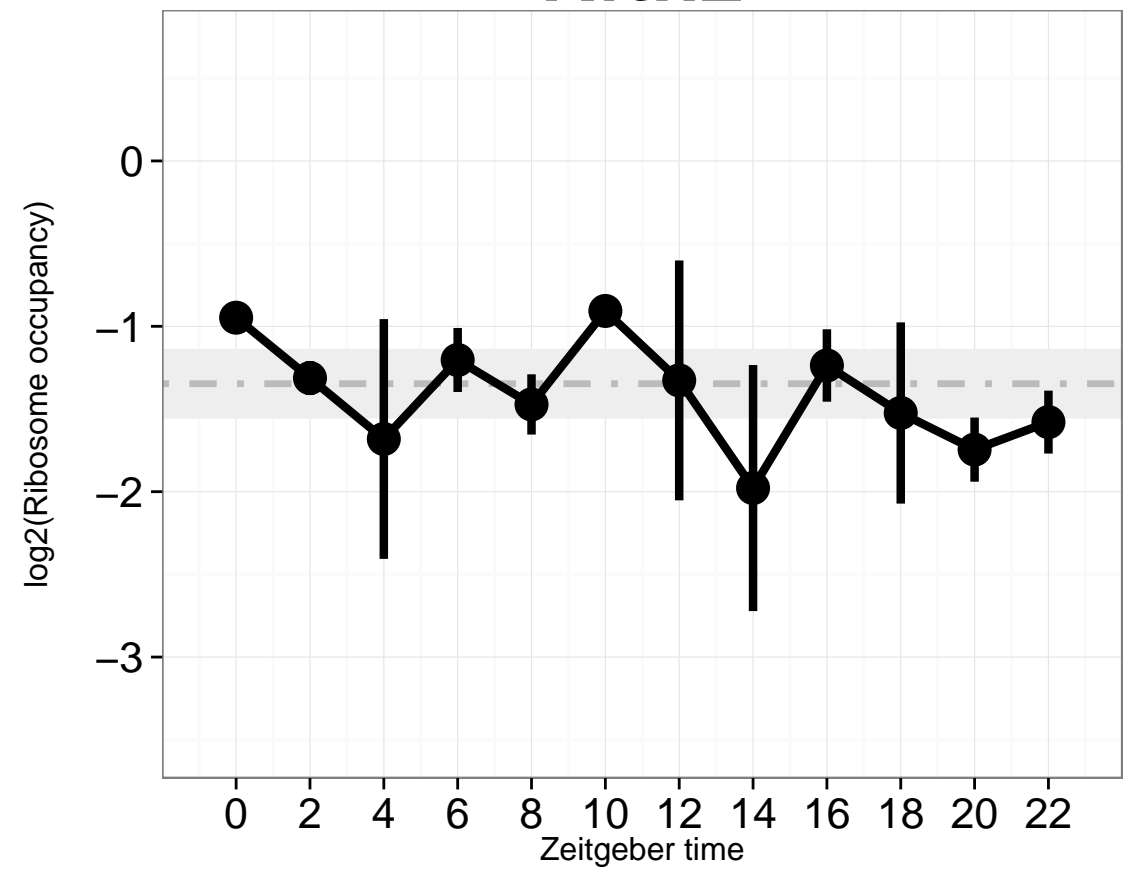

Supplement: Supplementary file 9164 [file 1]

# A130010J15Rik

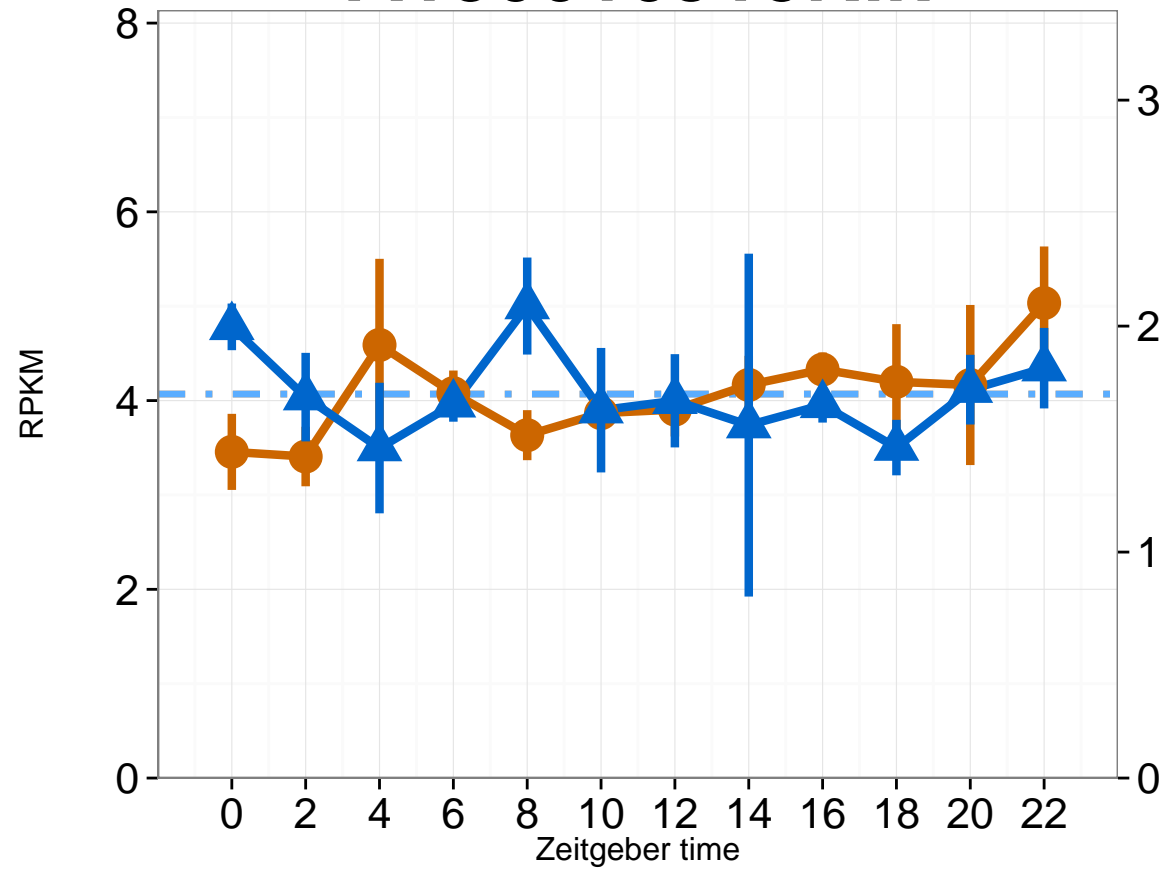

# A130010J15Rik

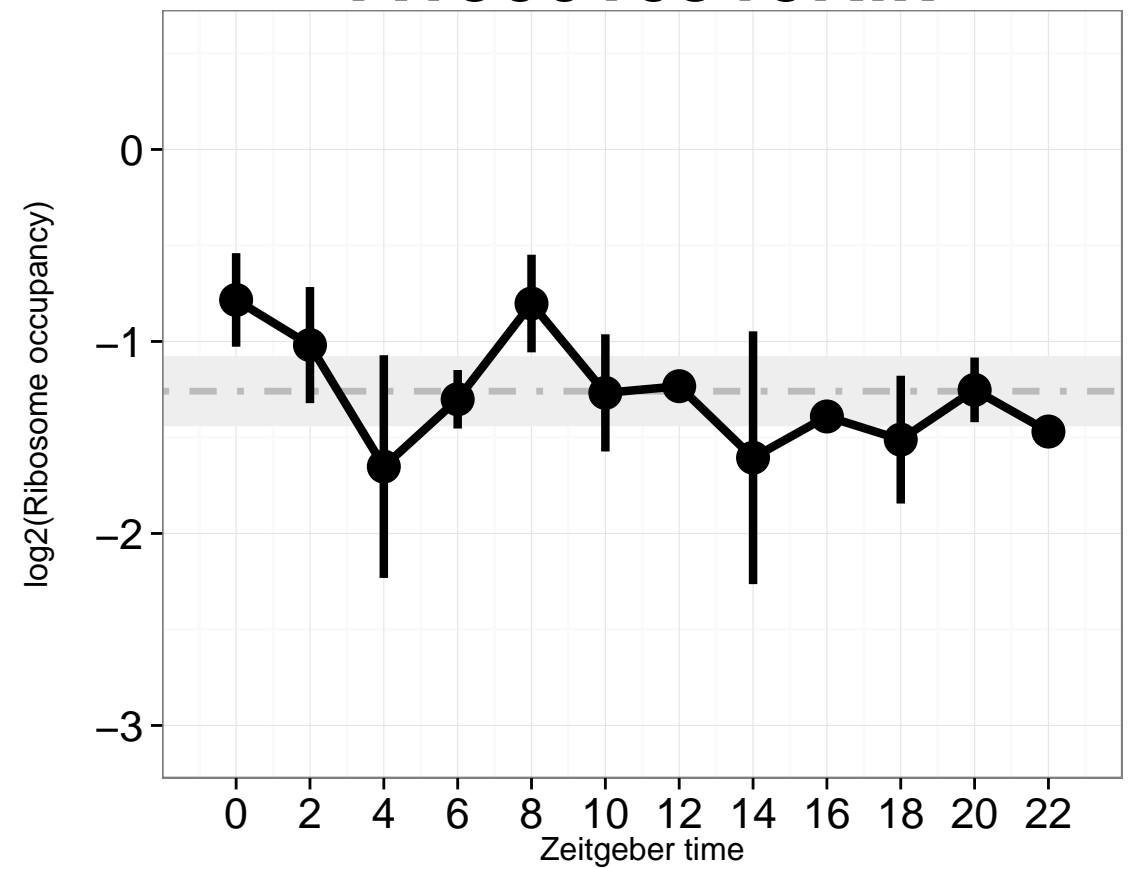

Supplement: Supplementary file 9165 [file 1]

## Osbp

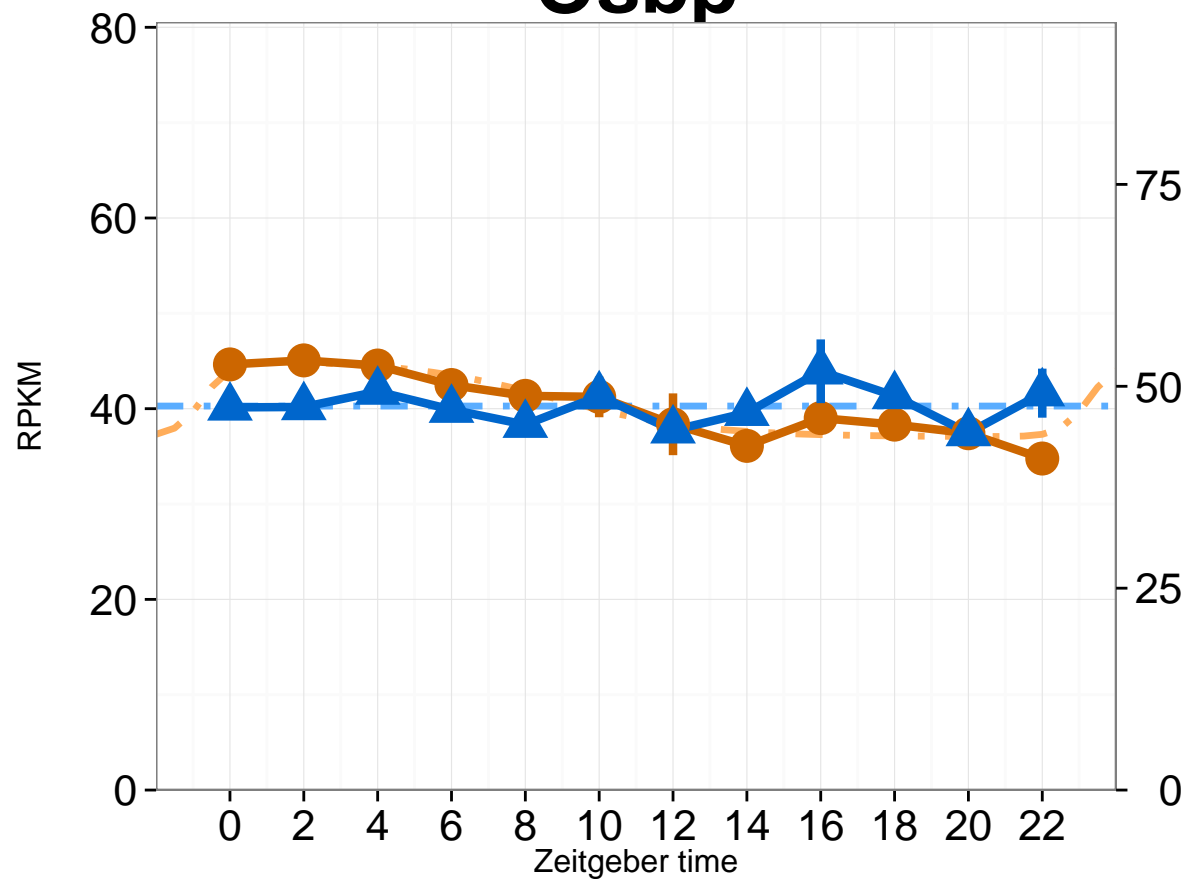

## Osbp

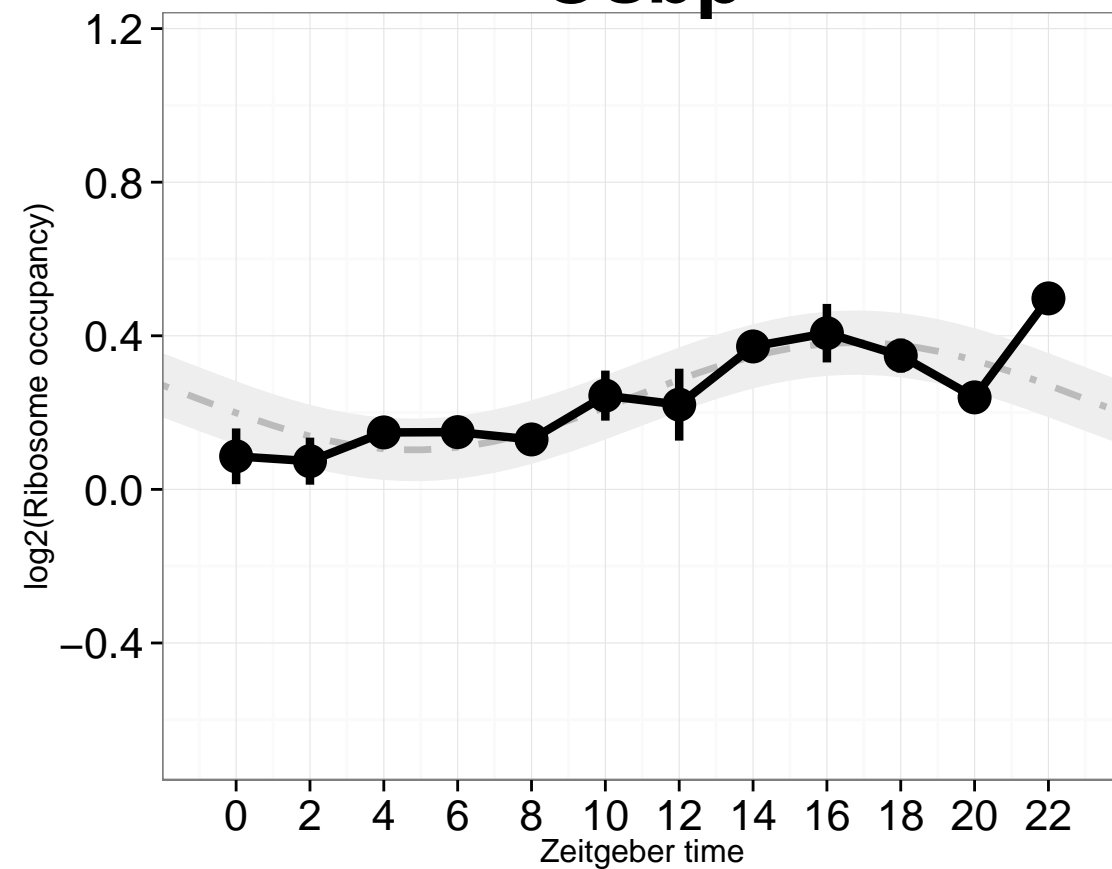

Supplement: Supplementary file 9166 [file 1]

# 4632428N05Rik

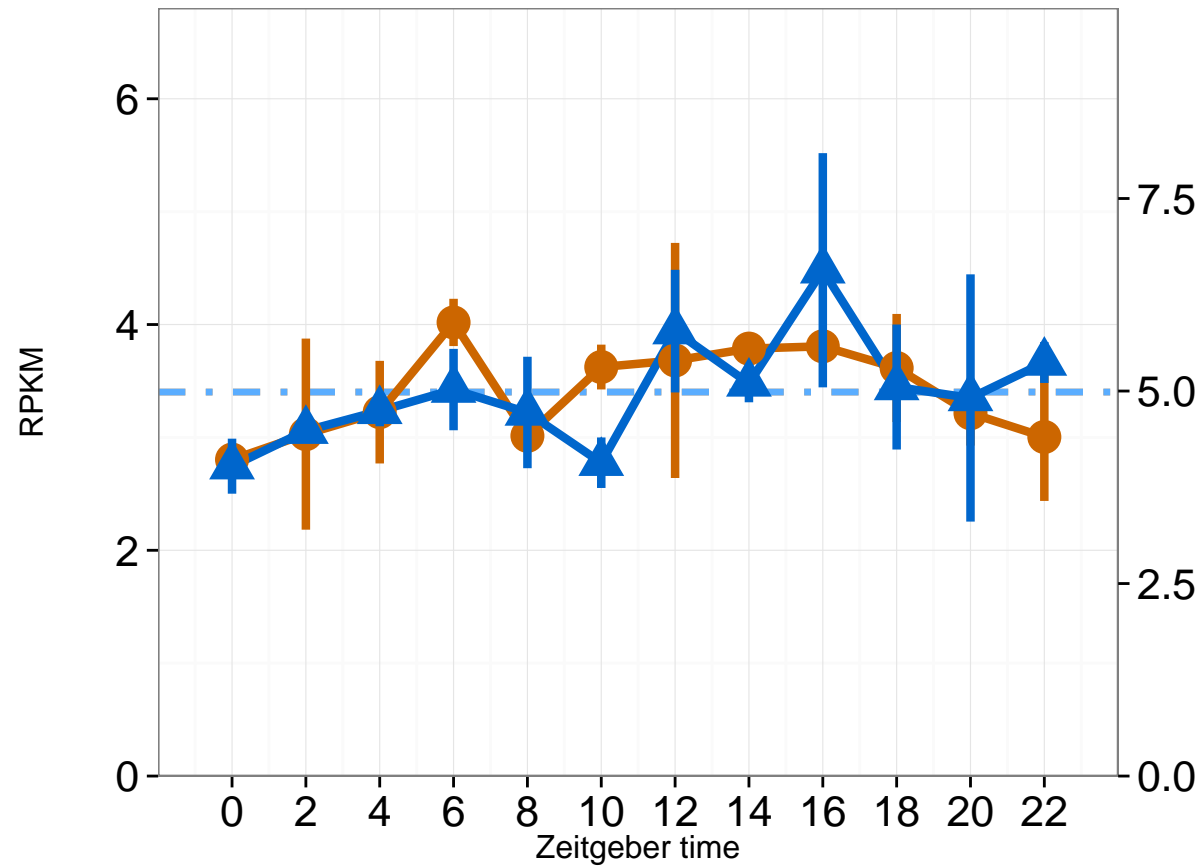

# 4632428N05Rik

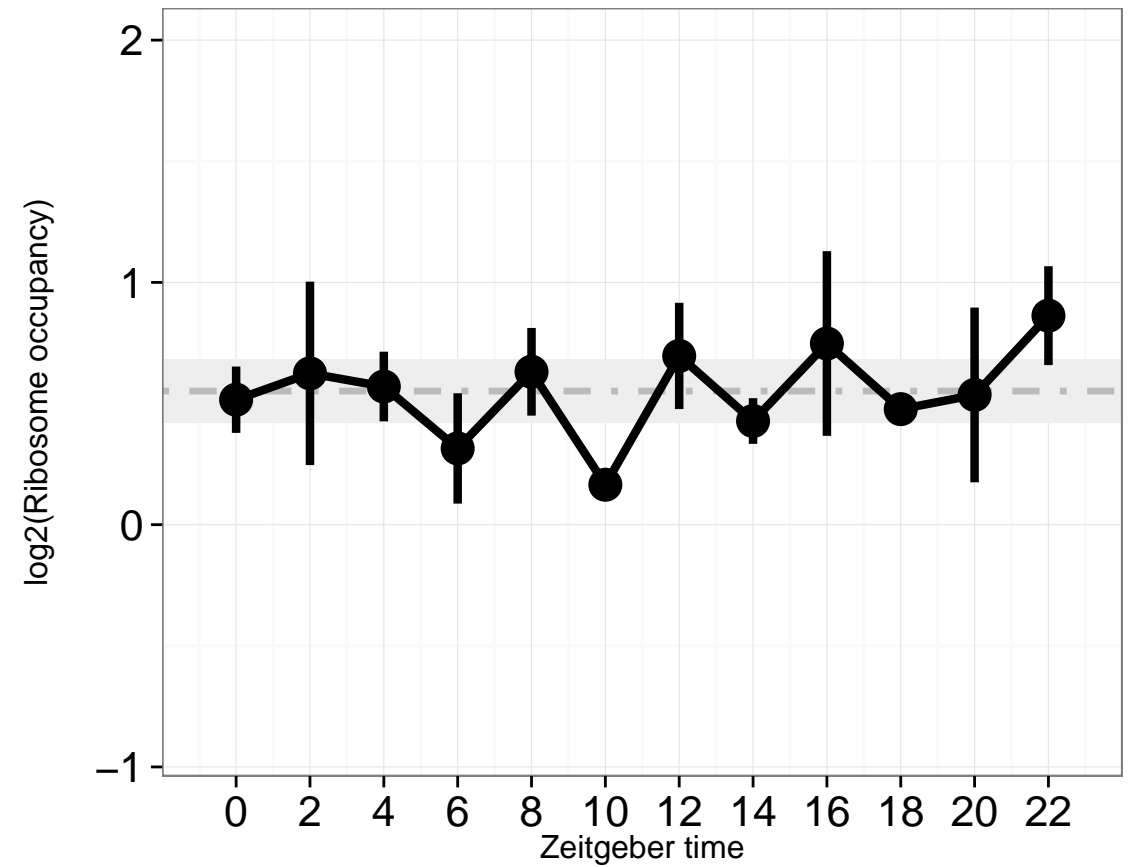

Supplement: Supplementary file 9167 [file 1]

## Rwdd3

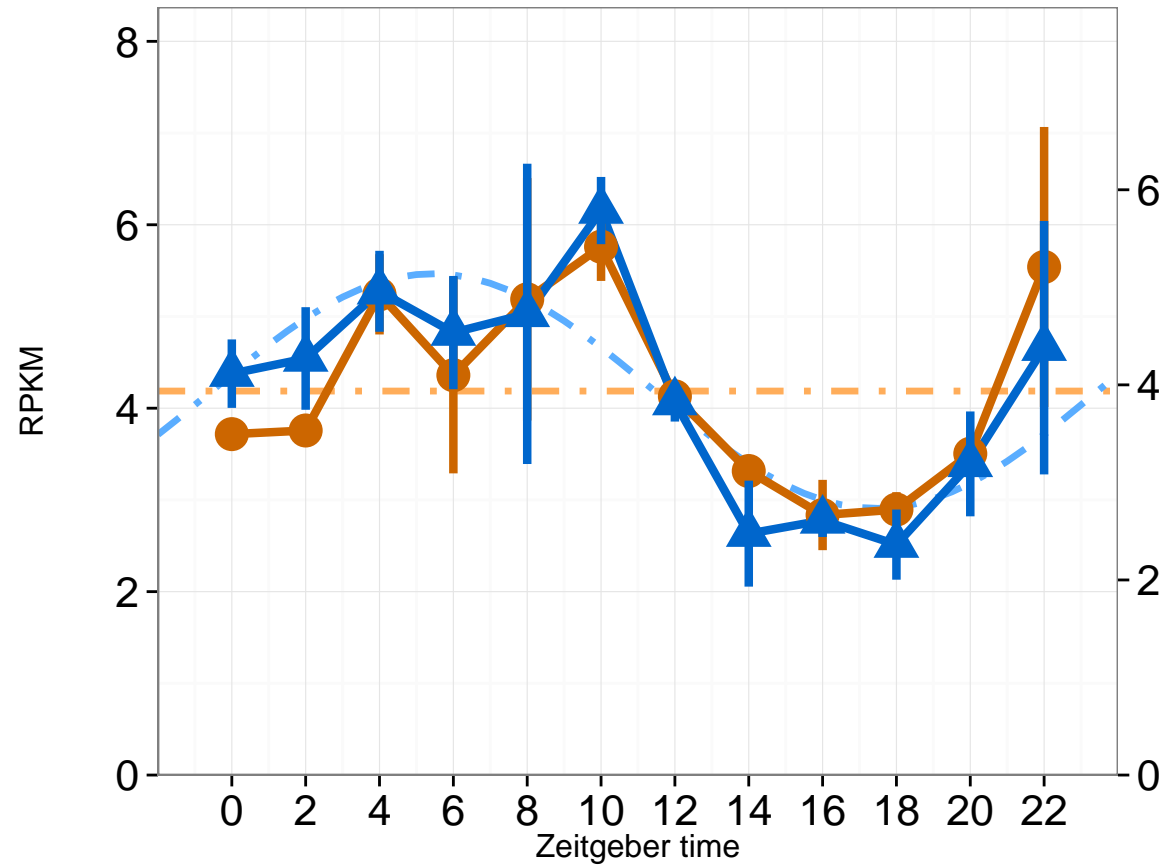

## Rwdd3

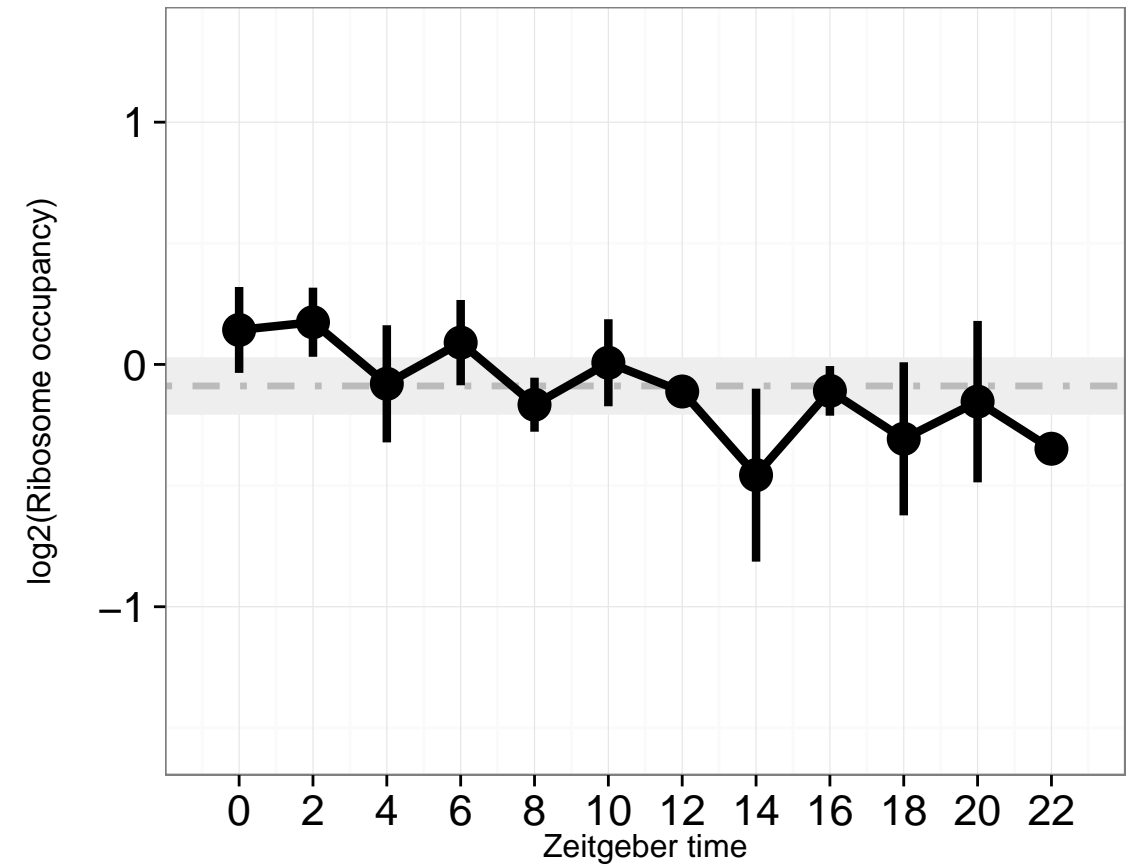

Supplement: Supplementary file 9168 [file 1]

## Galk1

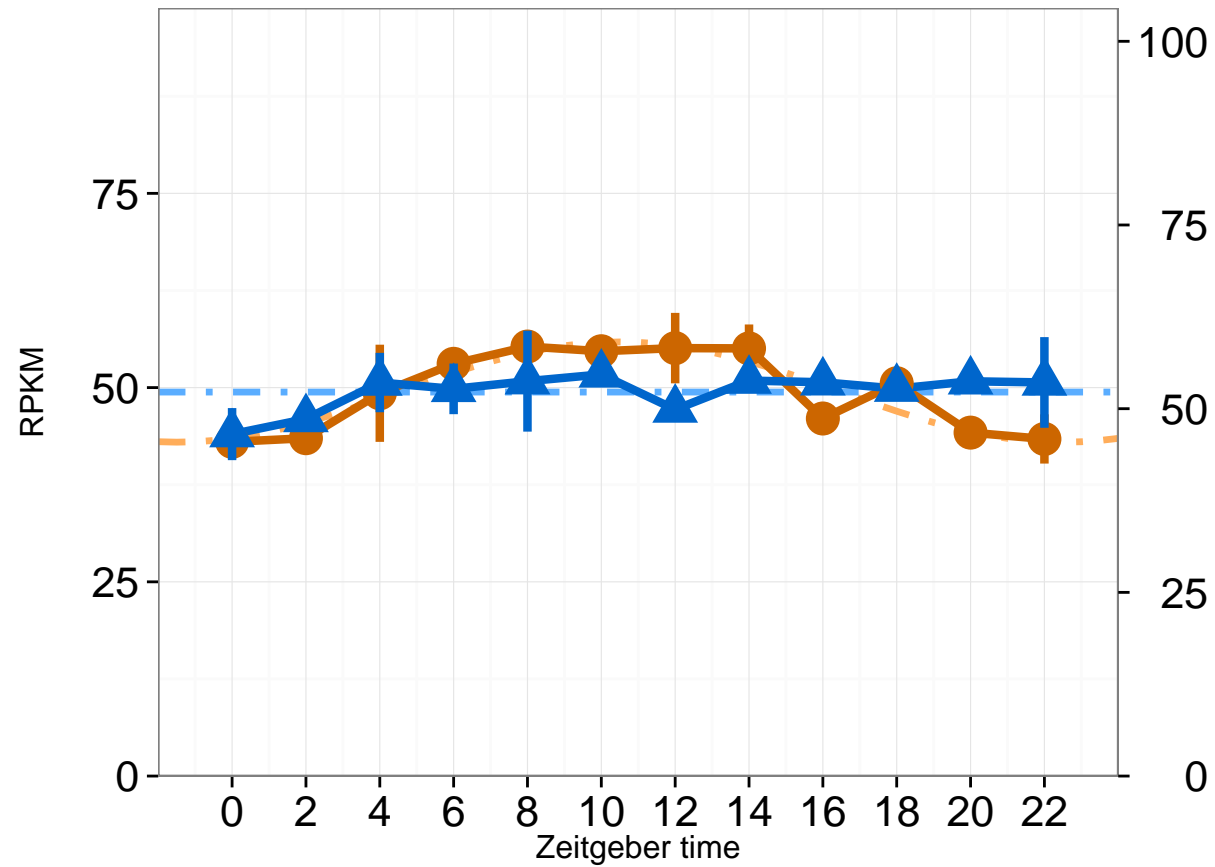

## Galk1

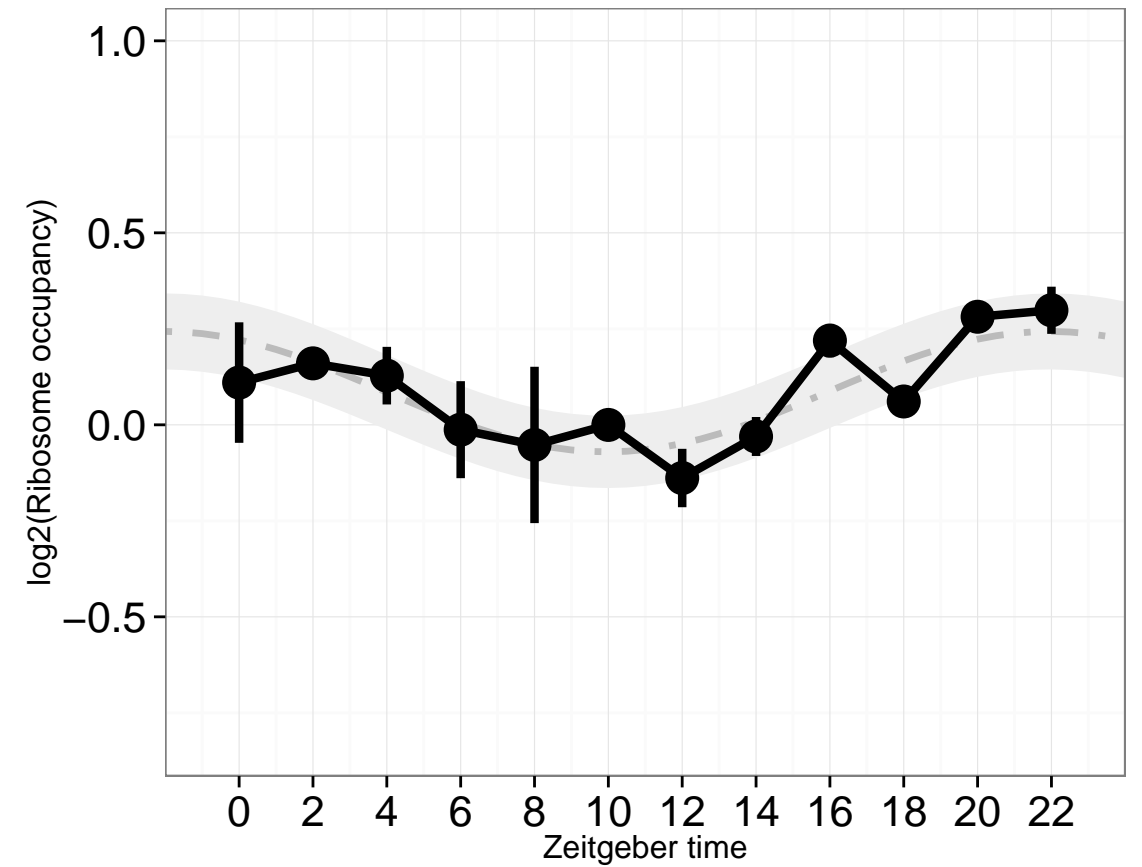

Supplement: Supplementary file 9169 [file 1]

## Nedd1

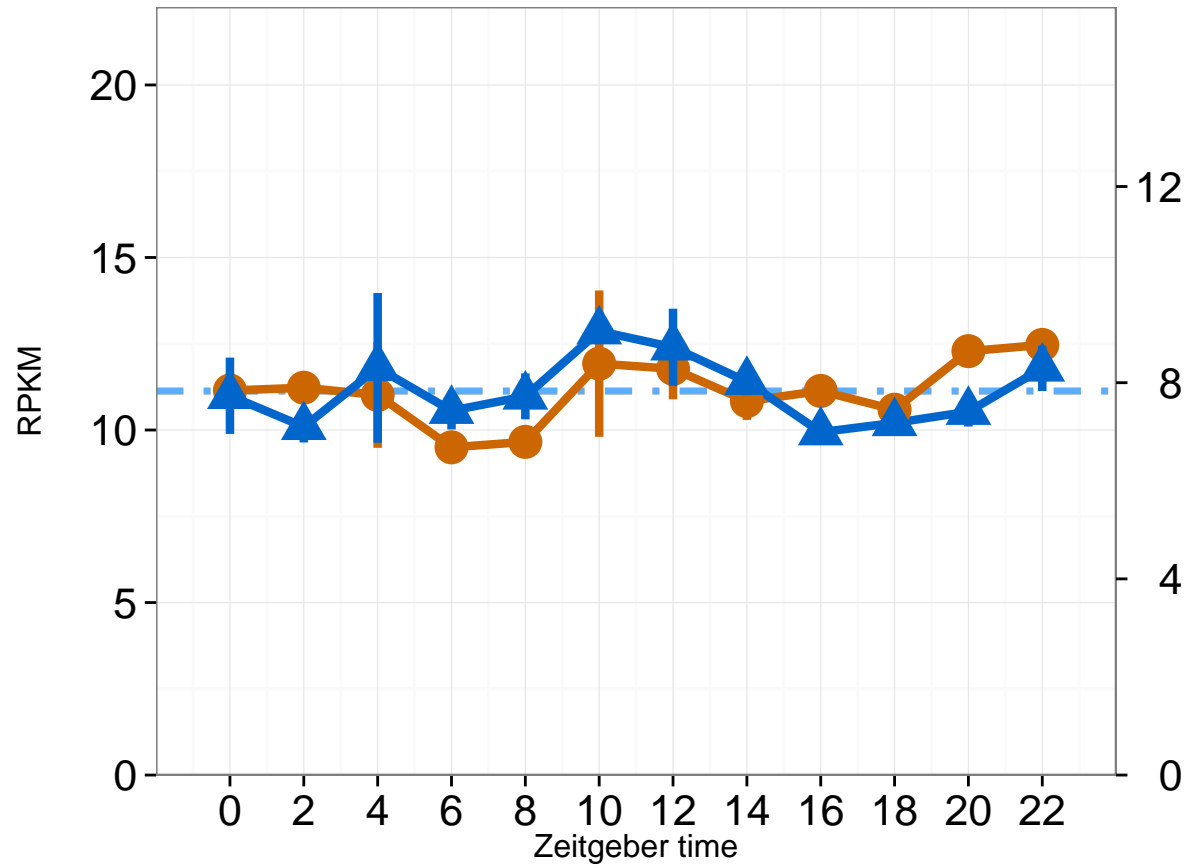

## Nedd1

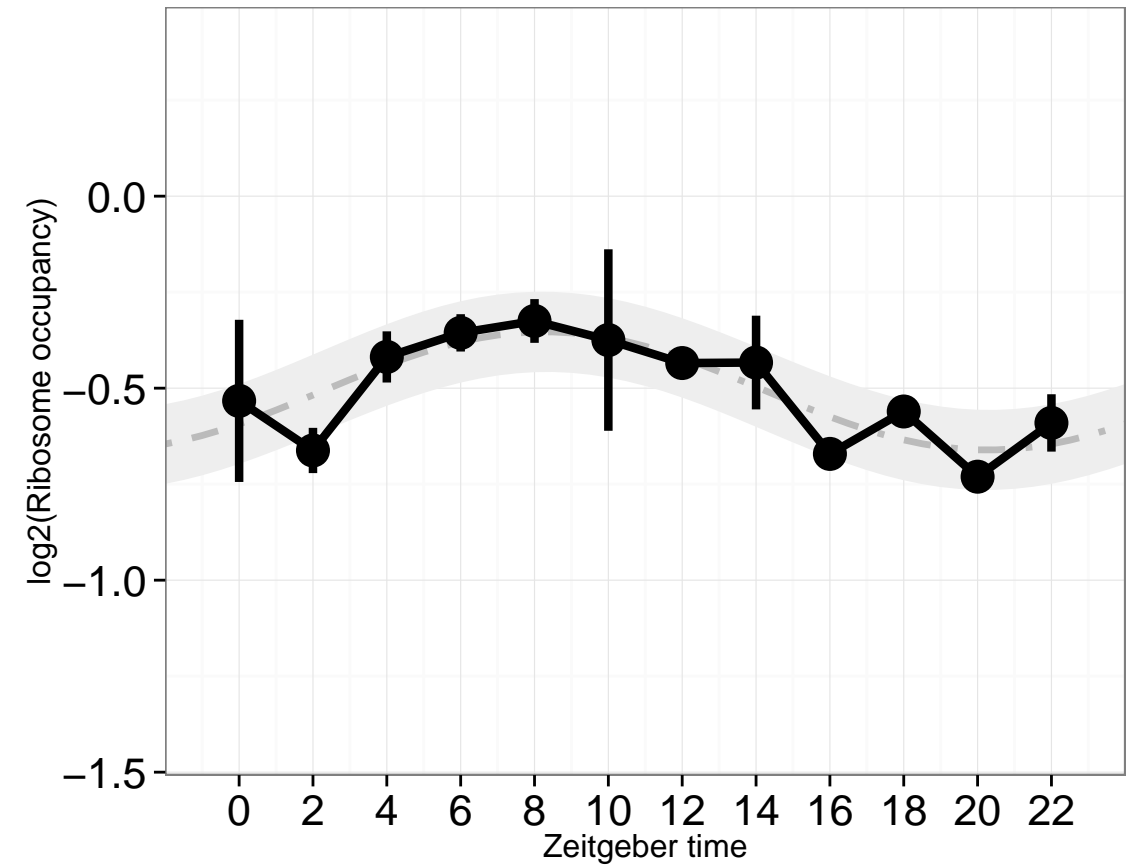

Supplement: Supplementary file 9170 [file 1]

## Klk1

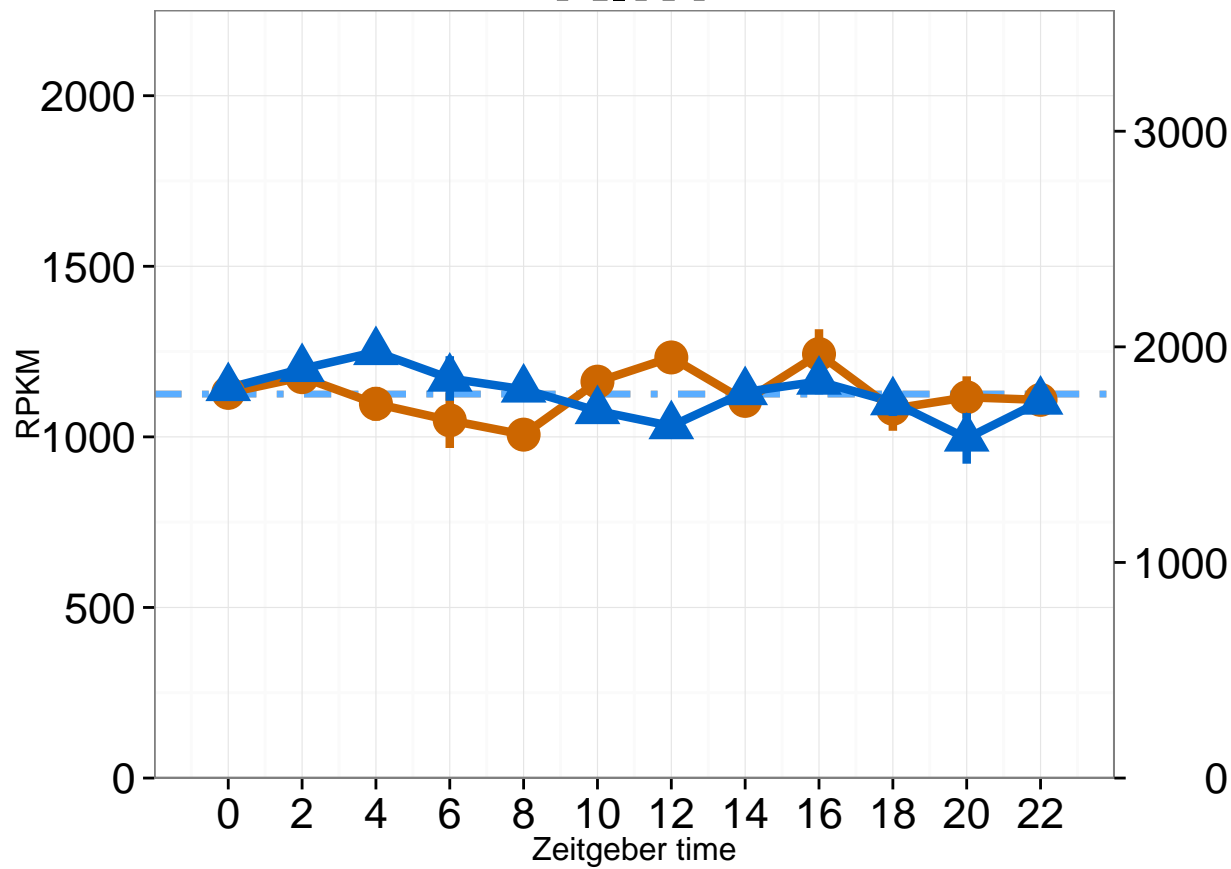

## Klk1

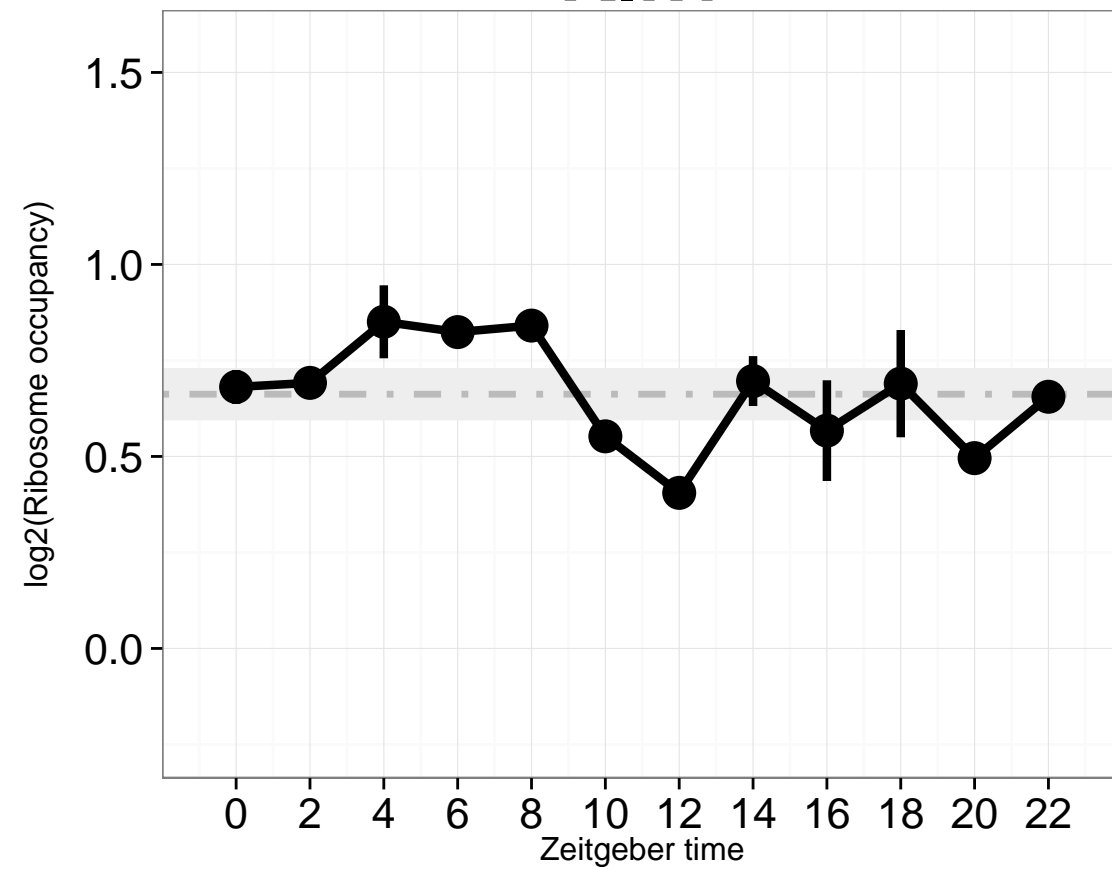

Supplement: Supplementary file 9171 [file 1]

# Zfp579

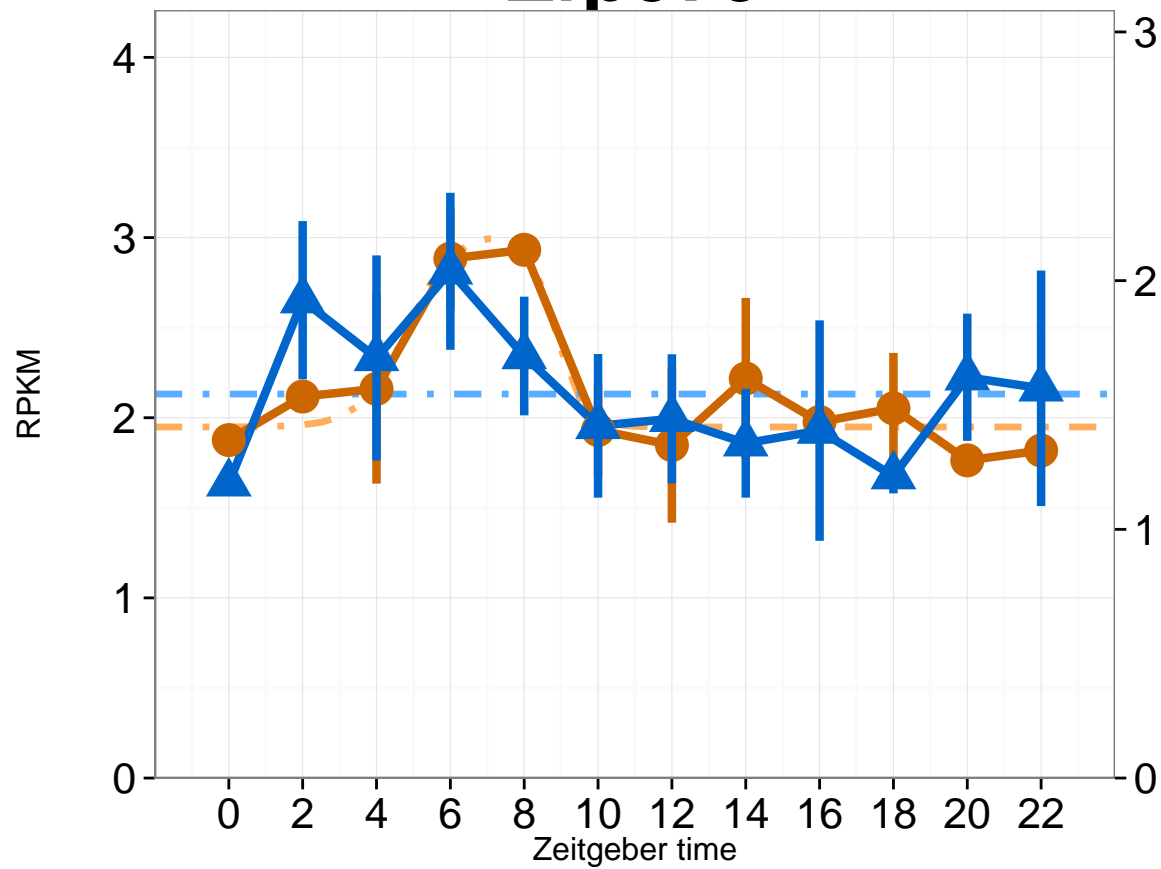

# Zfp579

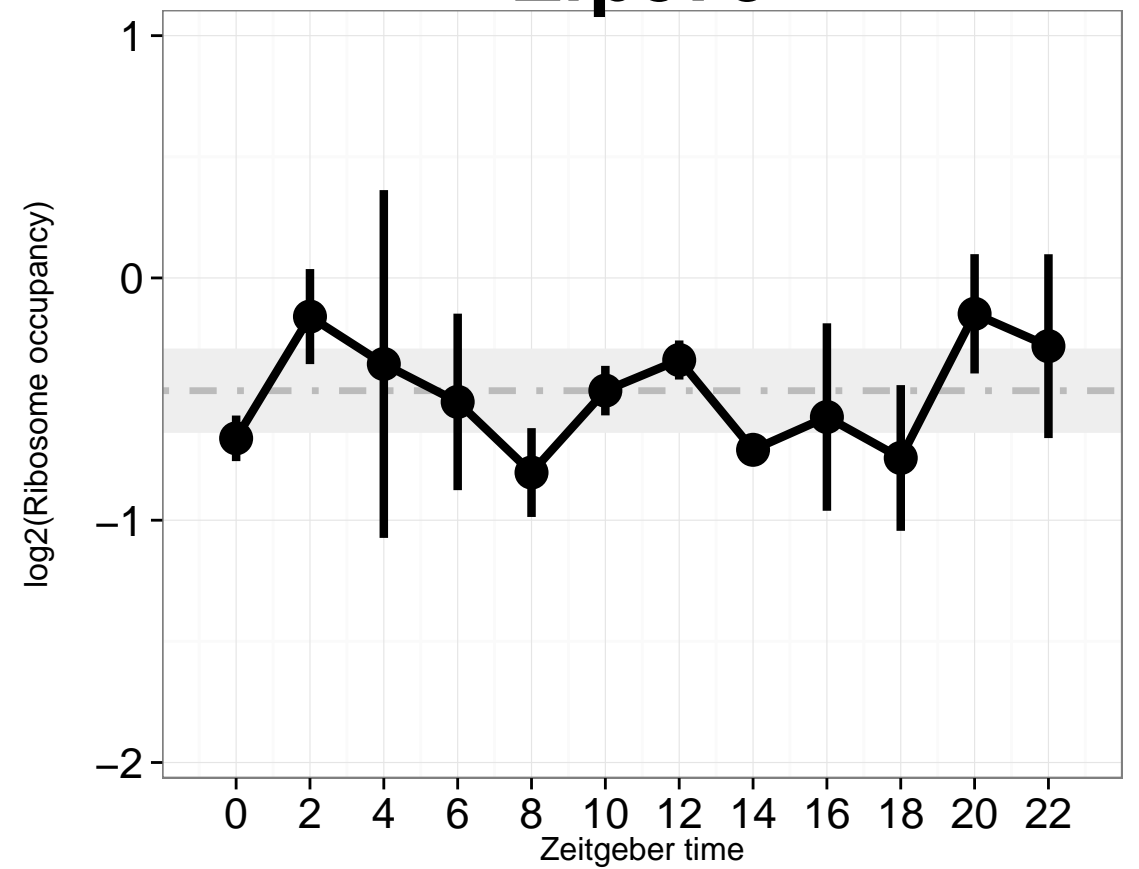

Supplement: Supplementary file 9172 [file 1]

## Dck

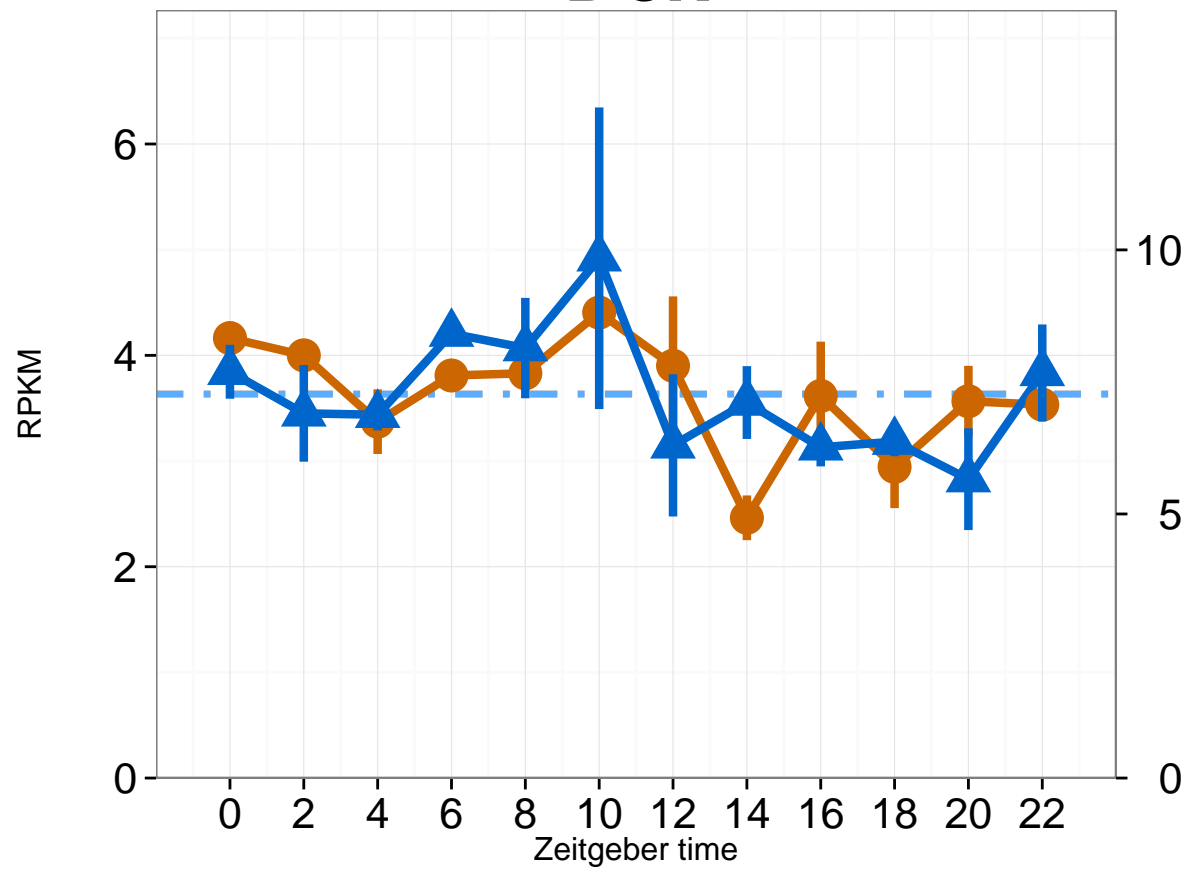

## Dck

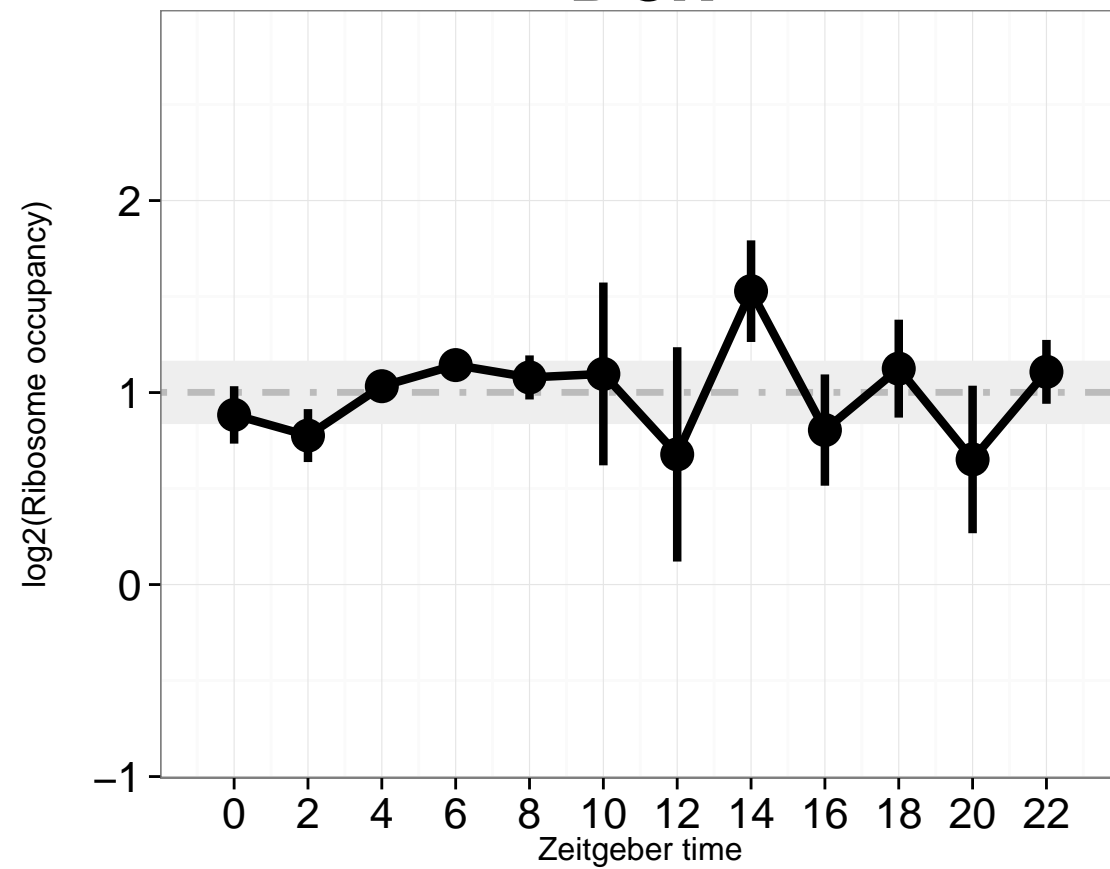

Supplement: Supplementary file 9173 [file 1]

# Man1a2

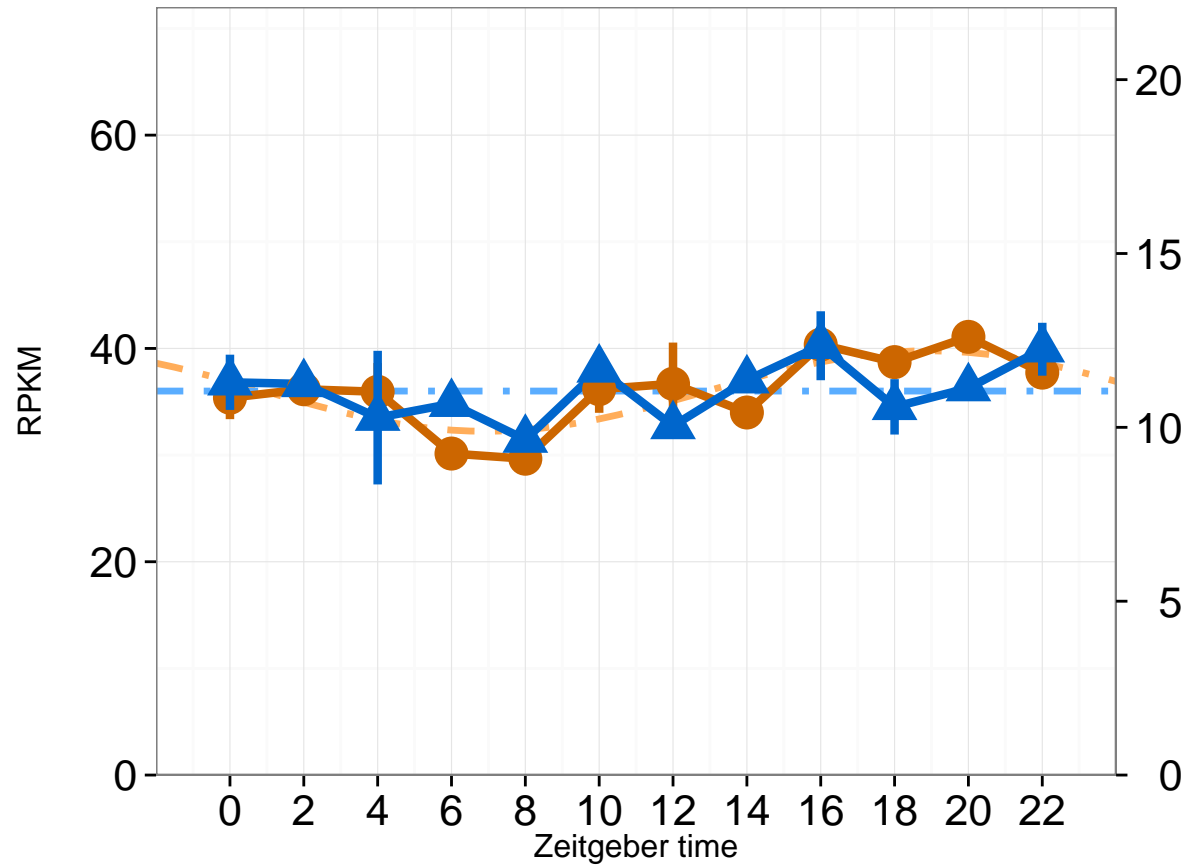

# Man1a2

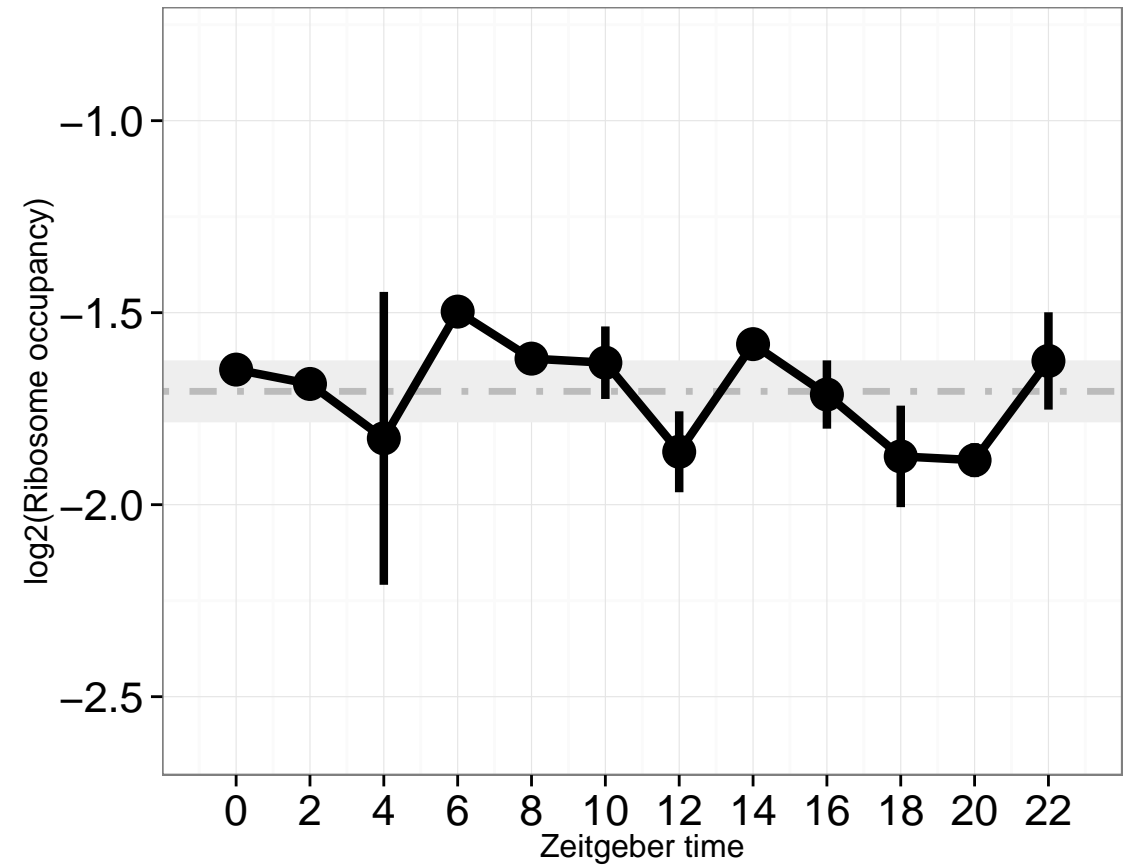

Supplement: Supplementary file 9174 [file 1]

## Mut

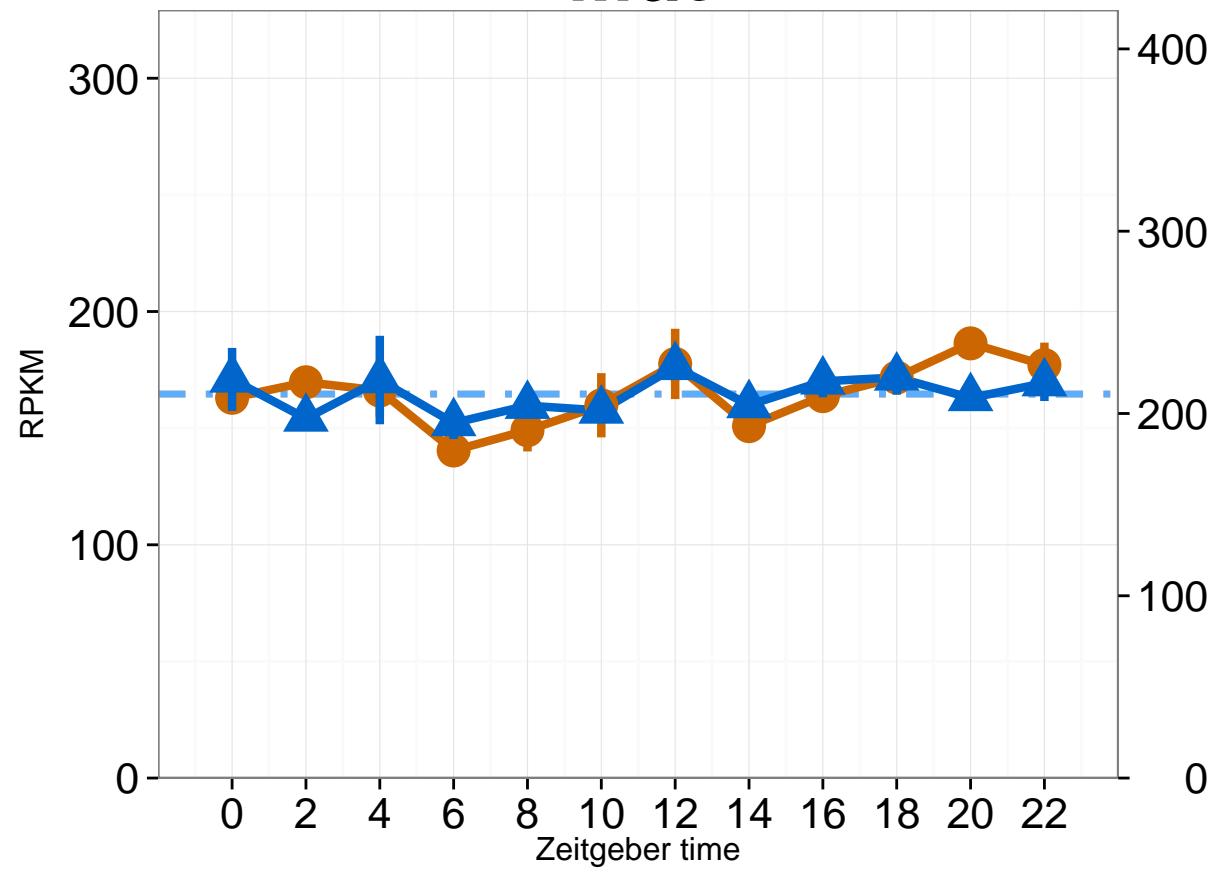

## Mut

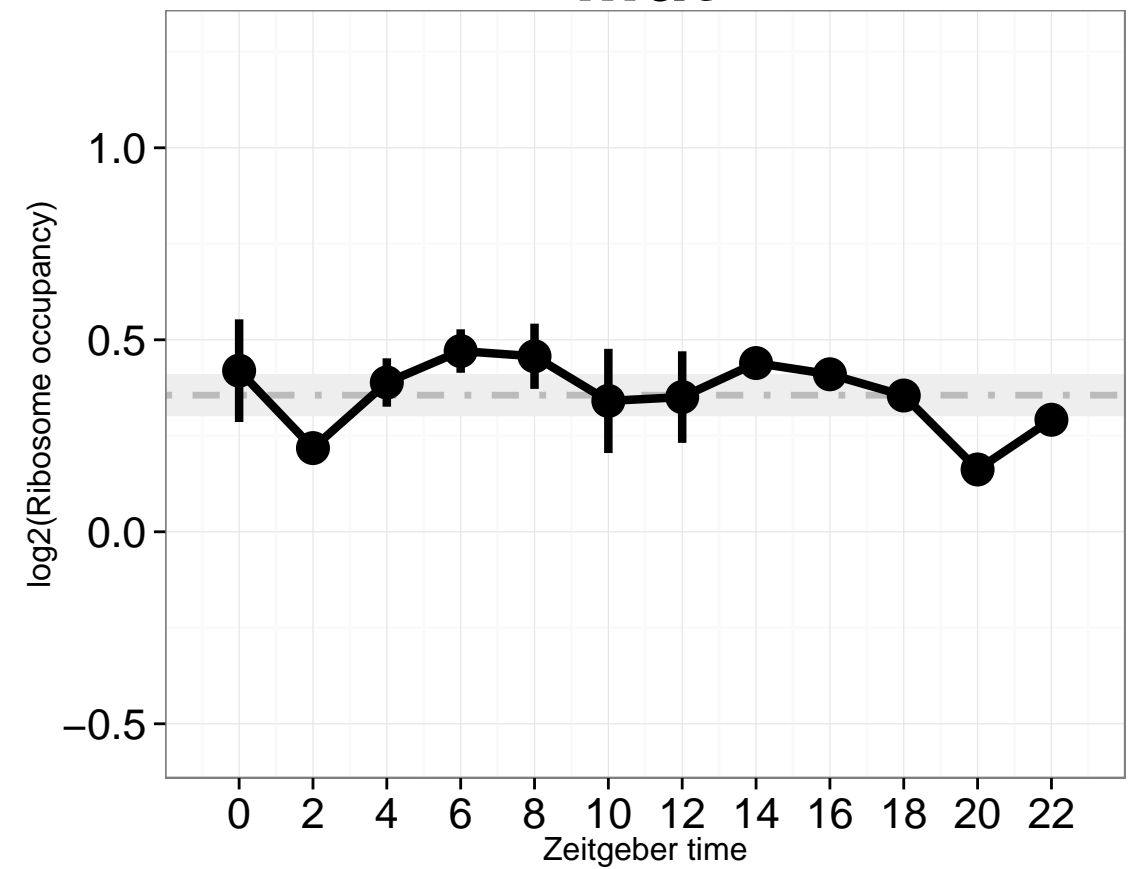

Supplement: Supplementary file 9175 [file 1]

# Zfp41

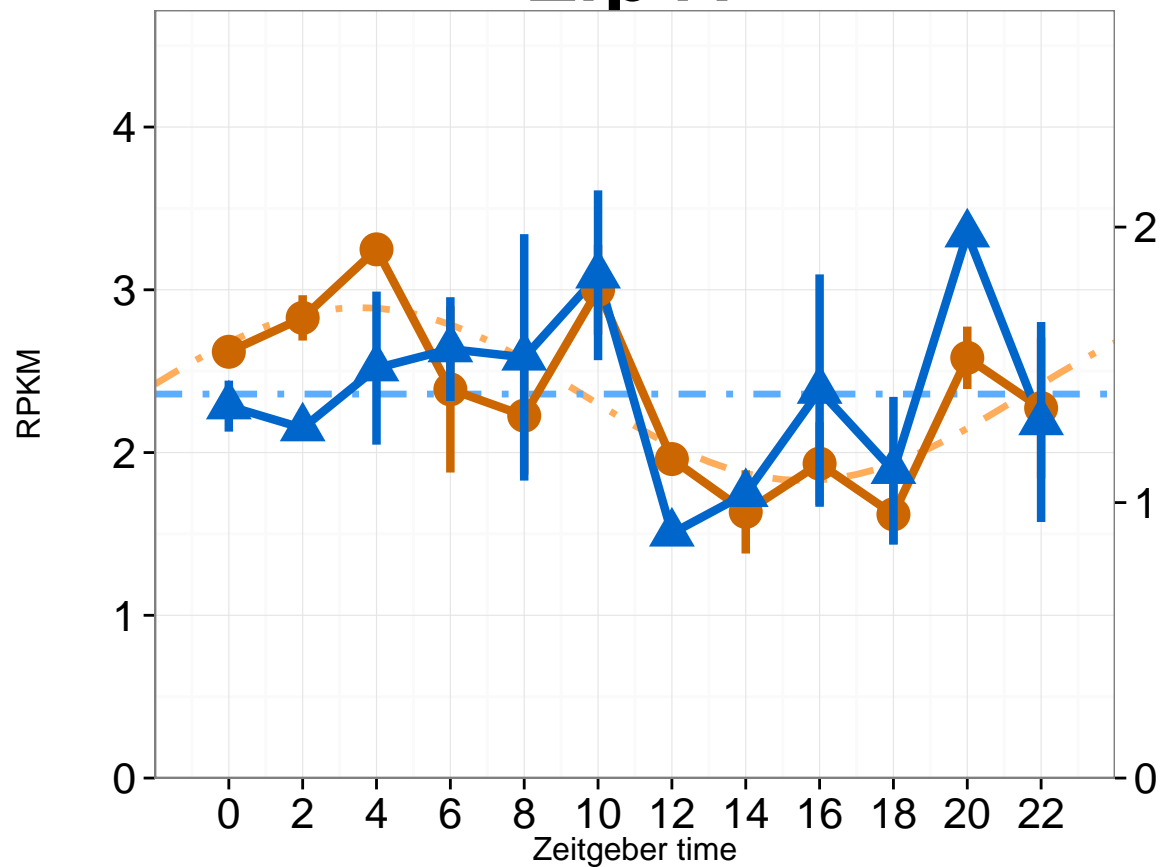

# Zfp41

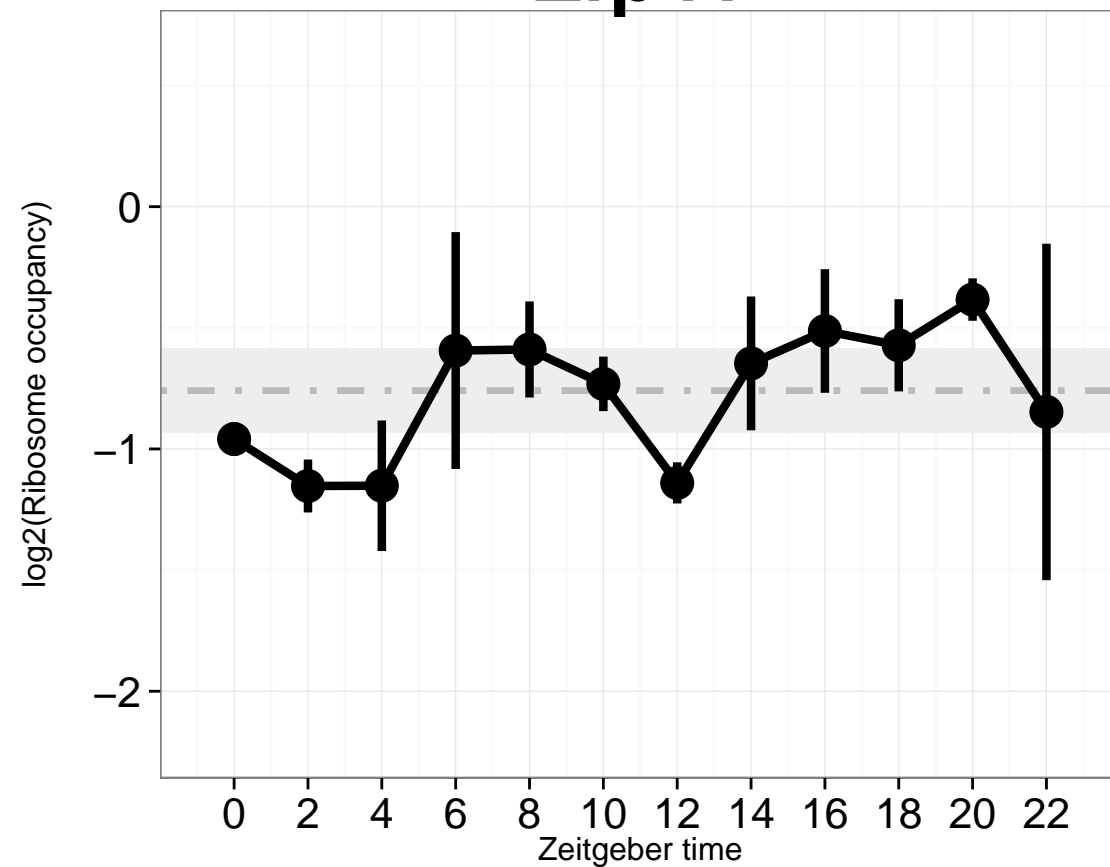

Supplement: Supplementary file 9176 [file 1]

## Chac2

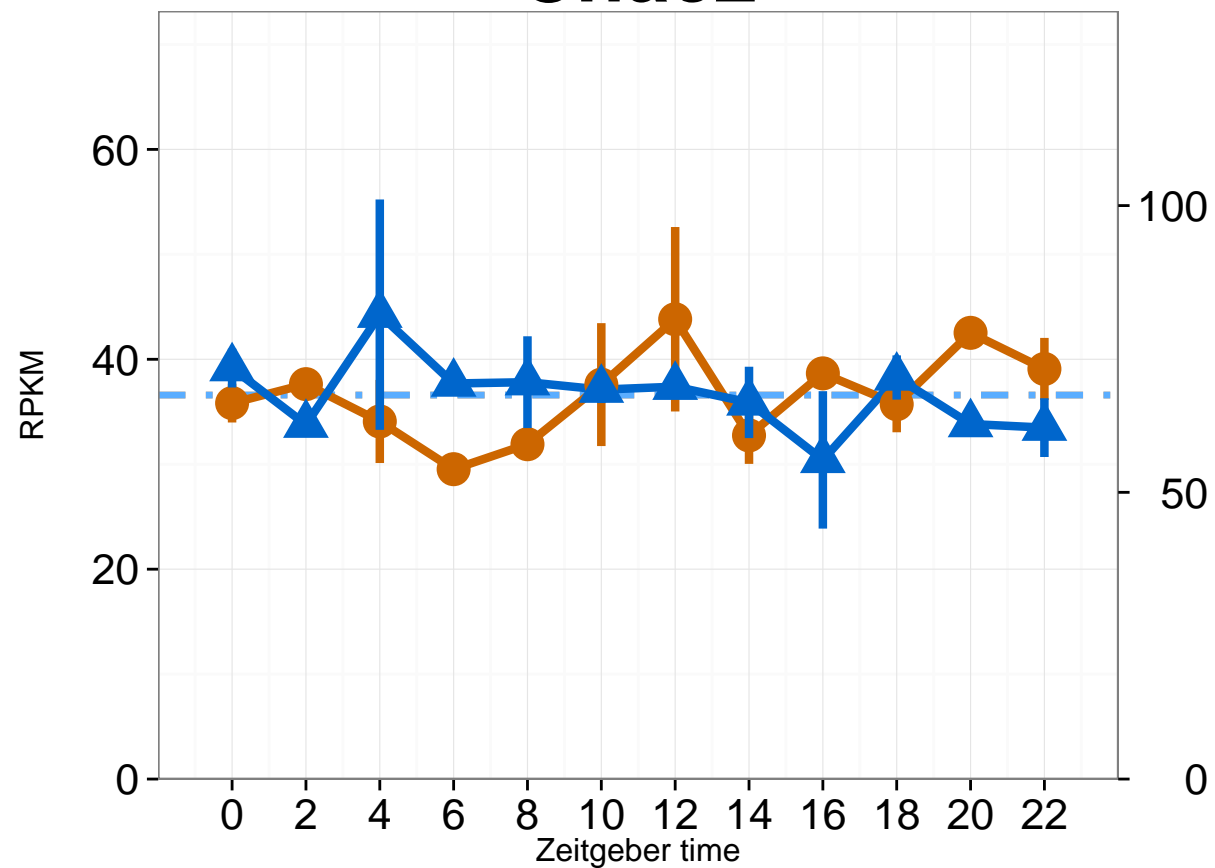

## Chac2

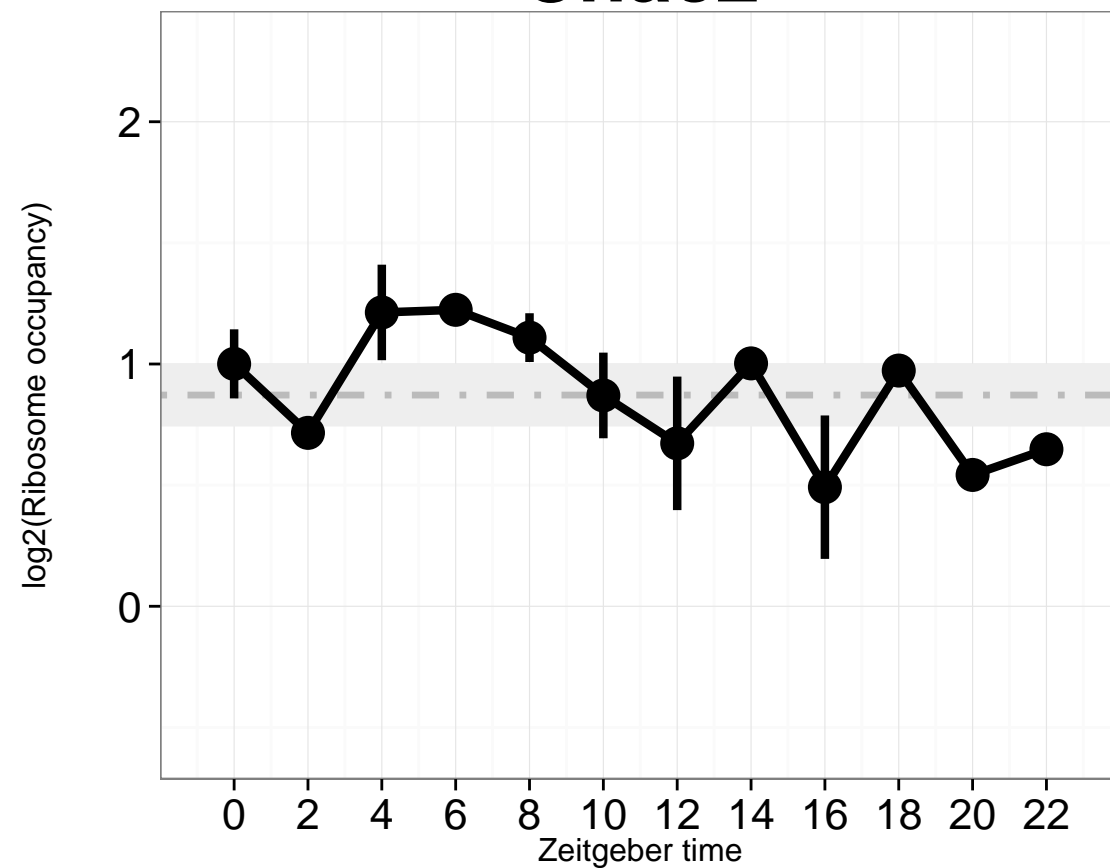

Supplement: Supplementary file 9177 [file 1]

## Aagab

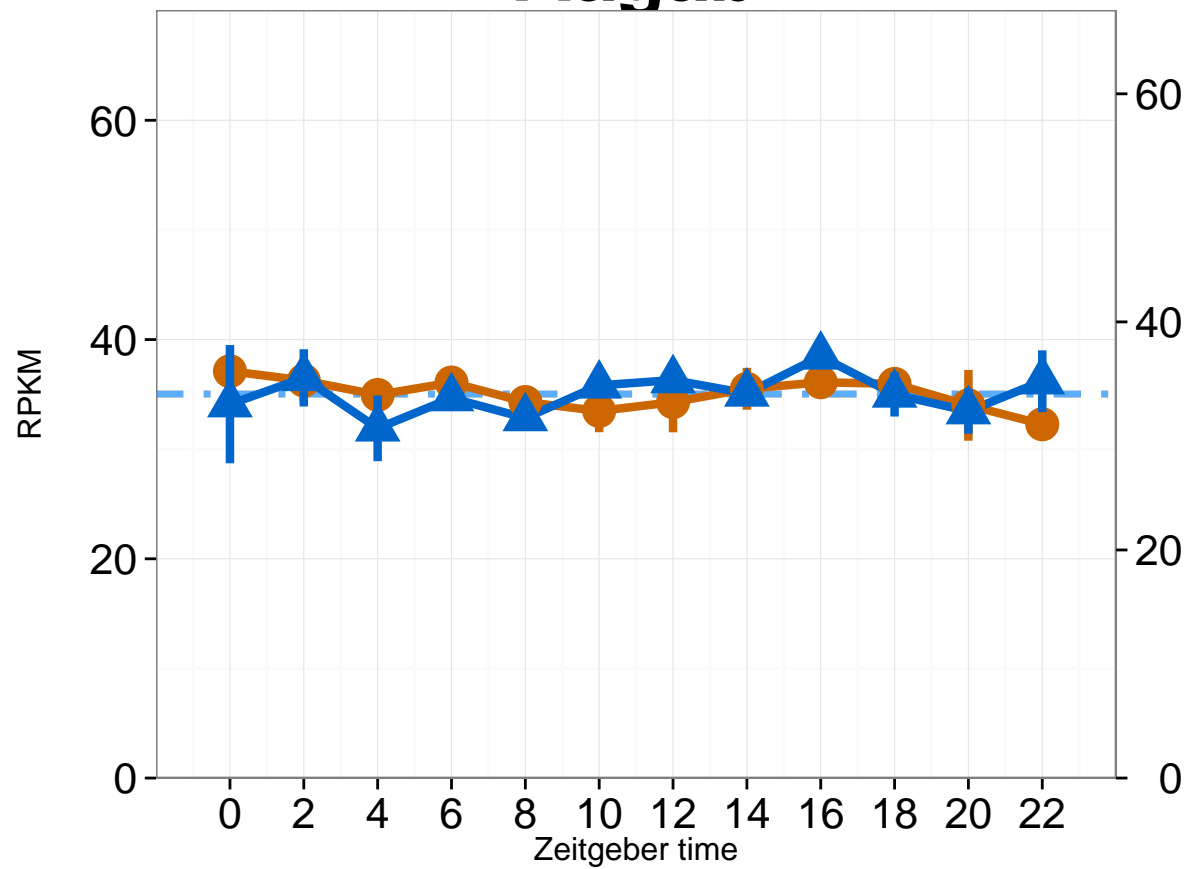

## Aagab

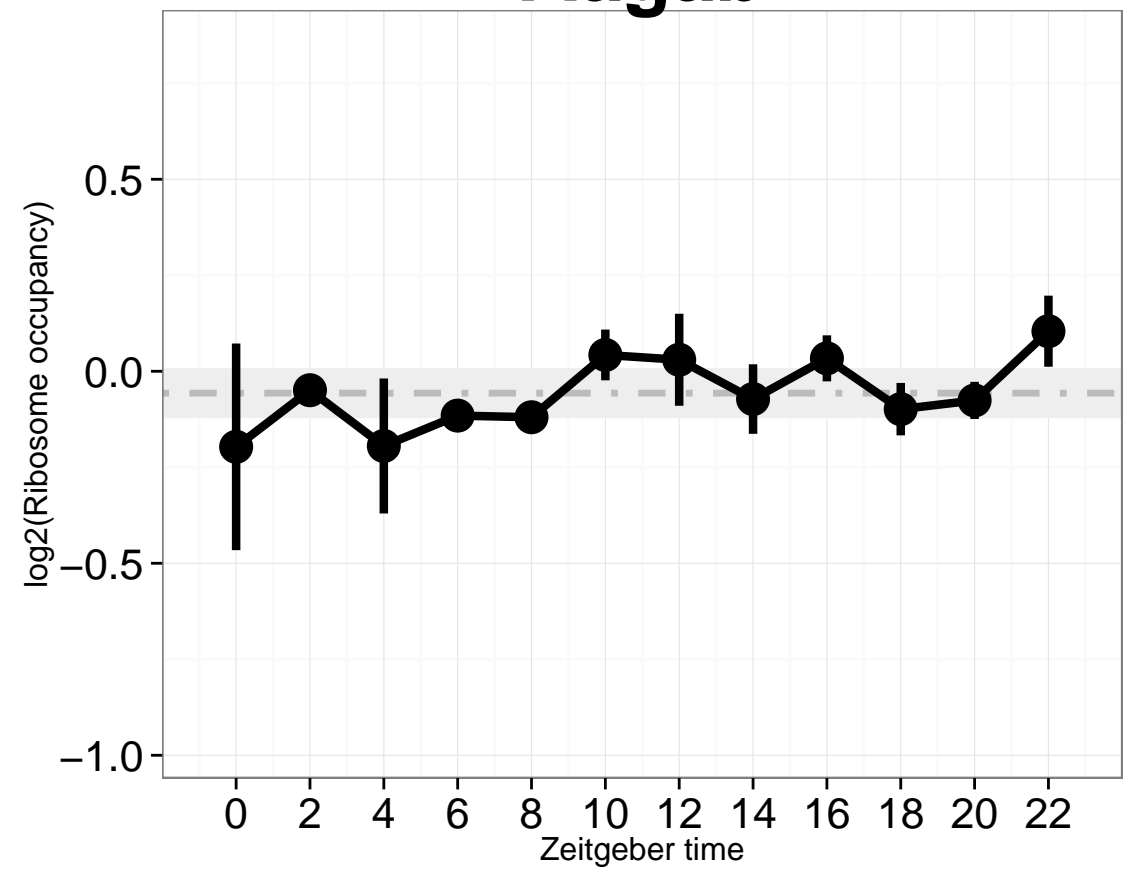

Supplement: Supplementary file 9178 [file 1]

## Tpd52

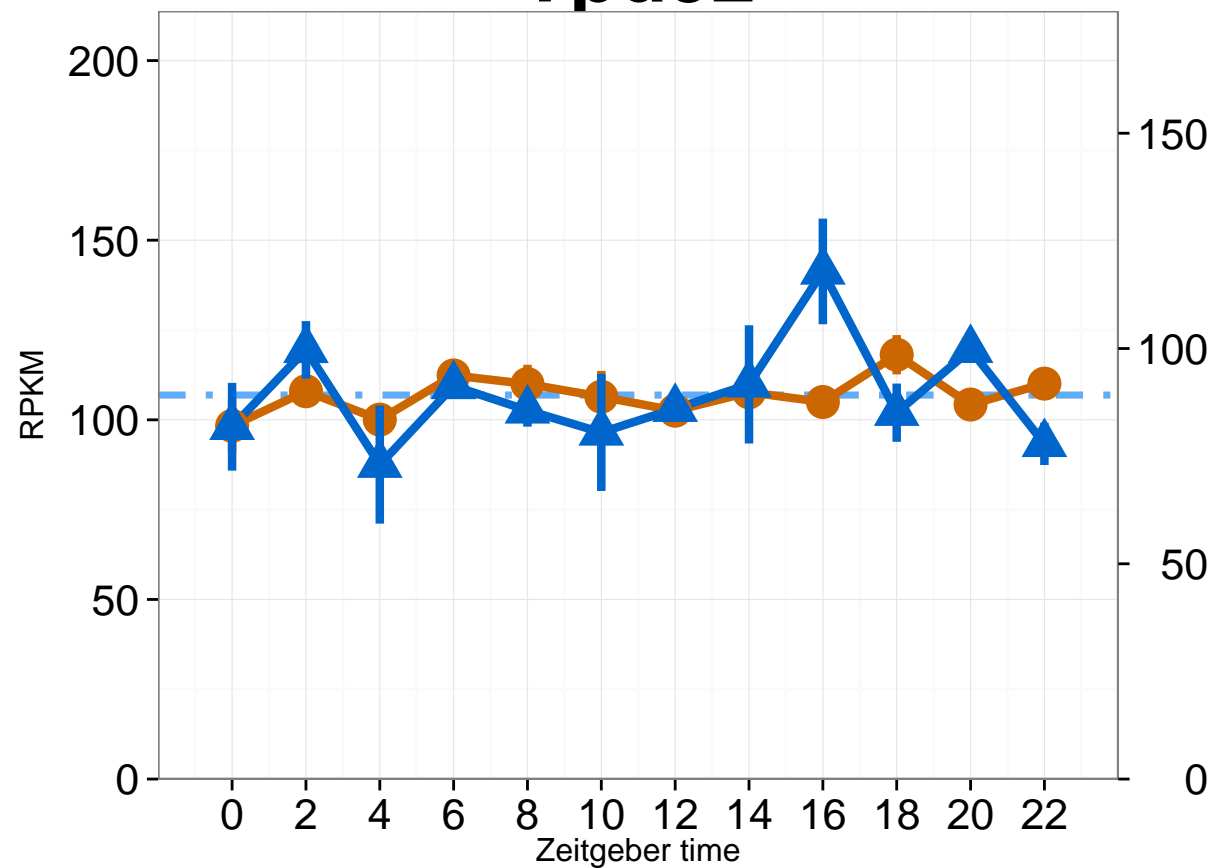

## Tpd52

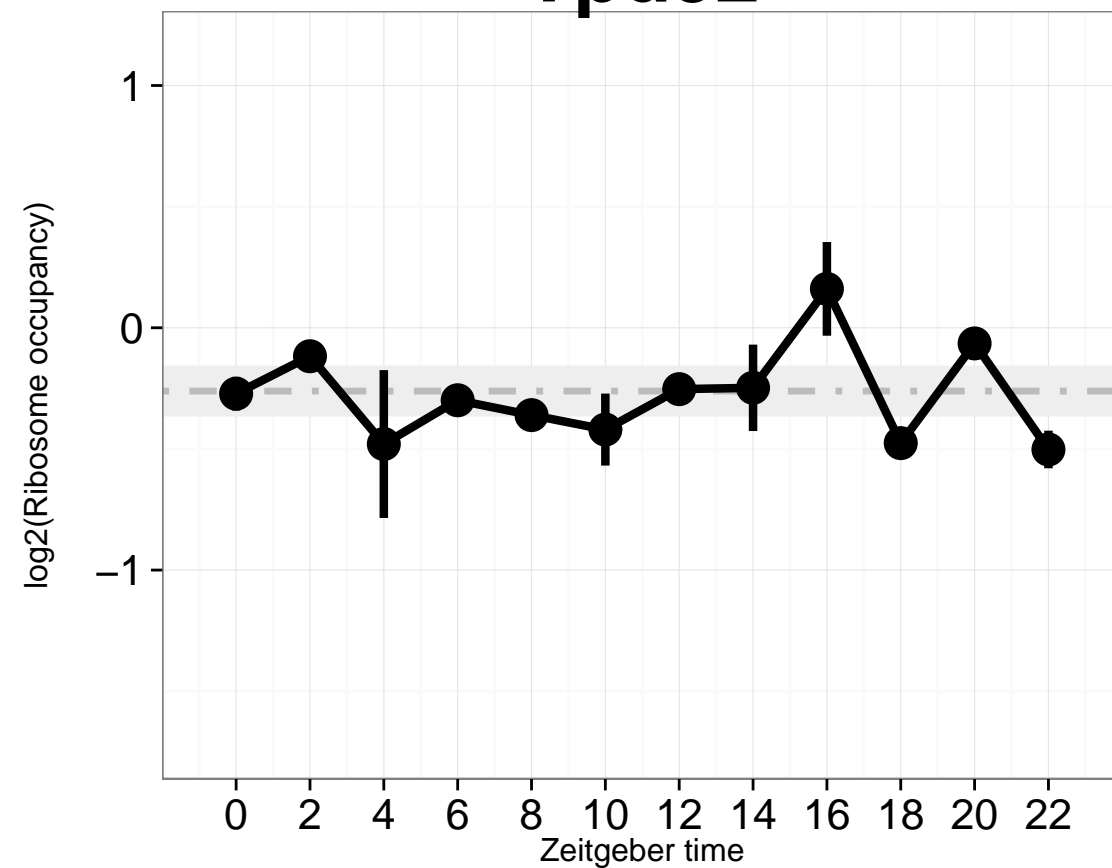

Supplement: Supplementary file 9179 [file 1]

## Olfml2b

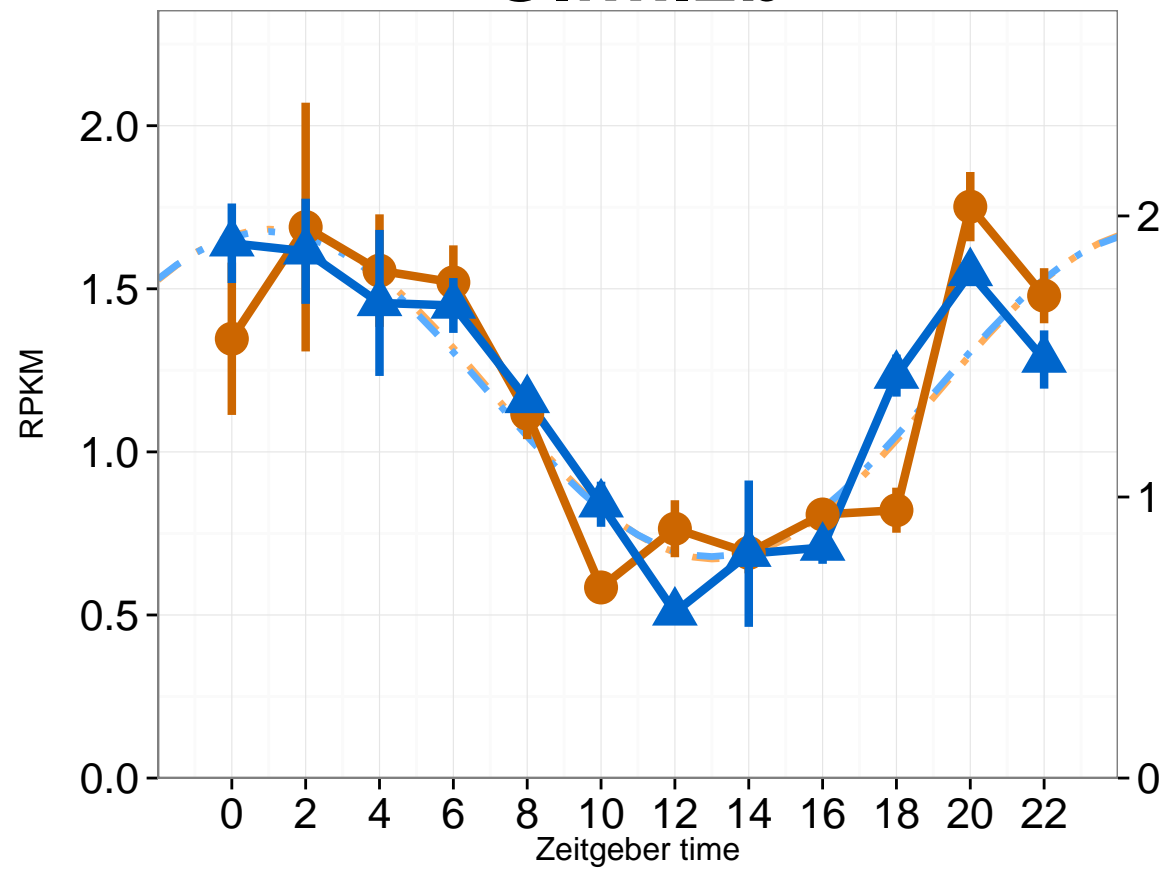

## Olfml2b

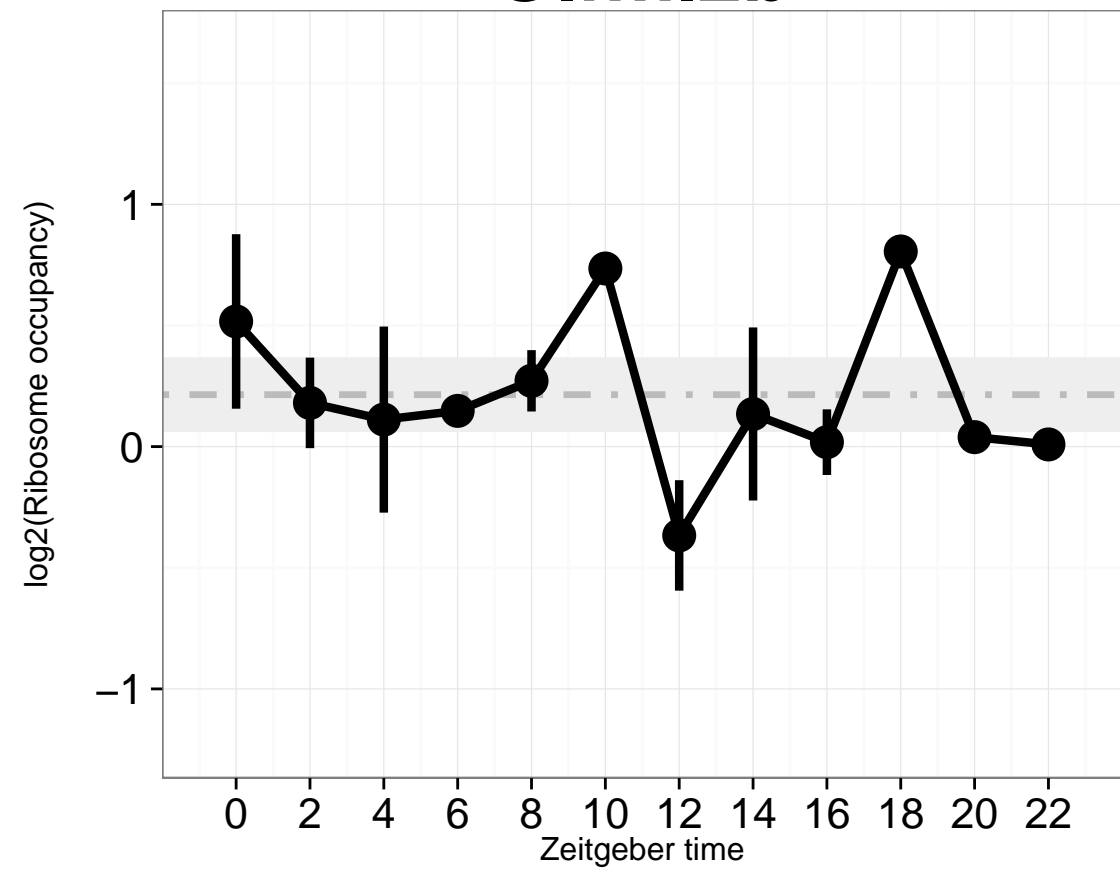

Supplement: Supplementary file 9180 [file 1]

## Flt1

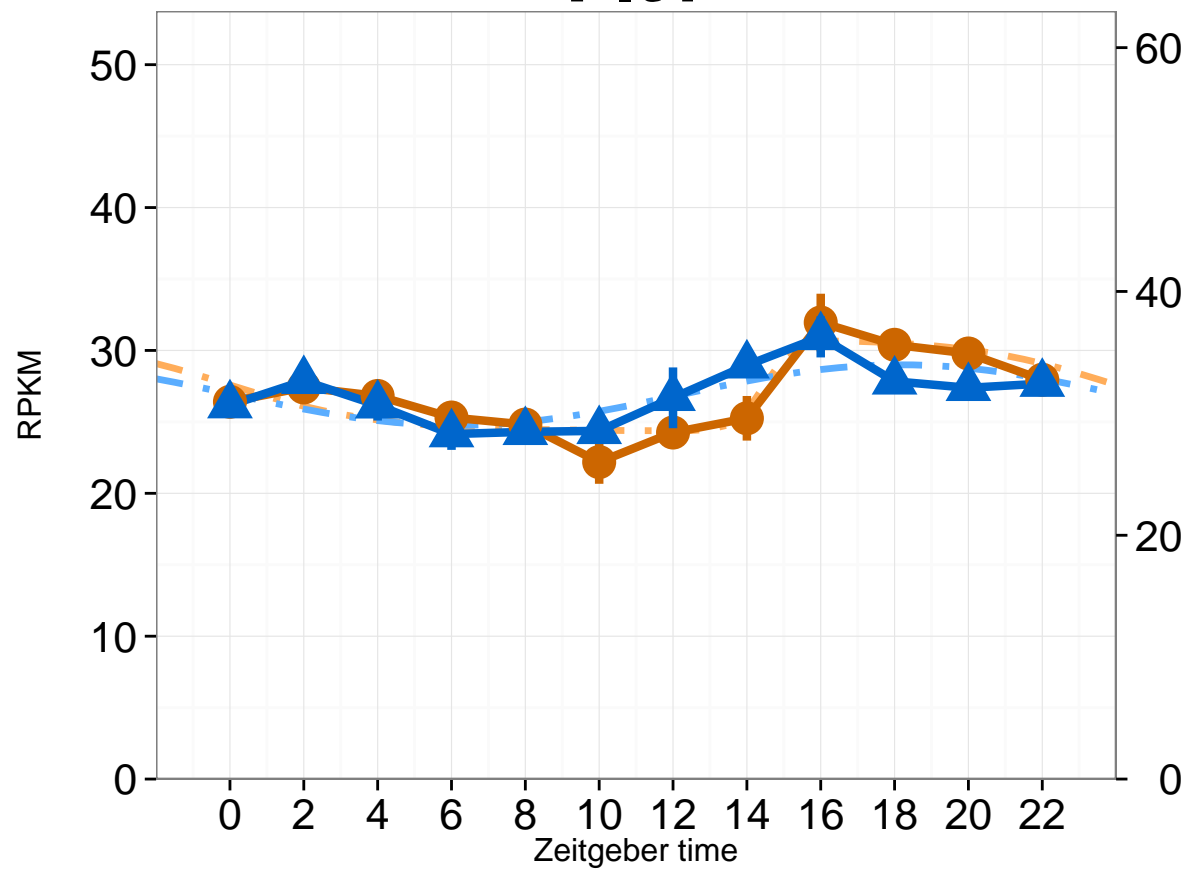

## Flt1

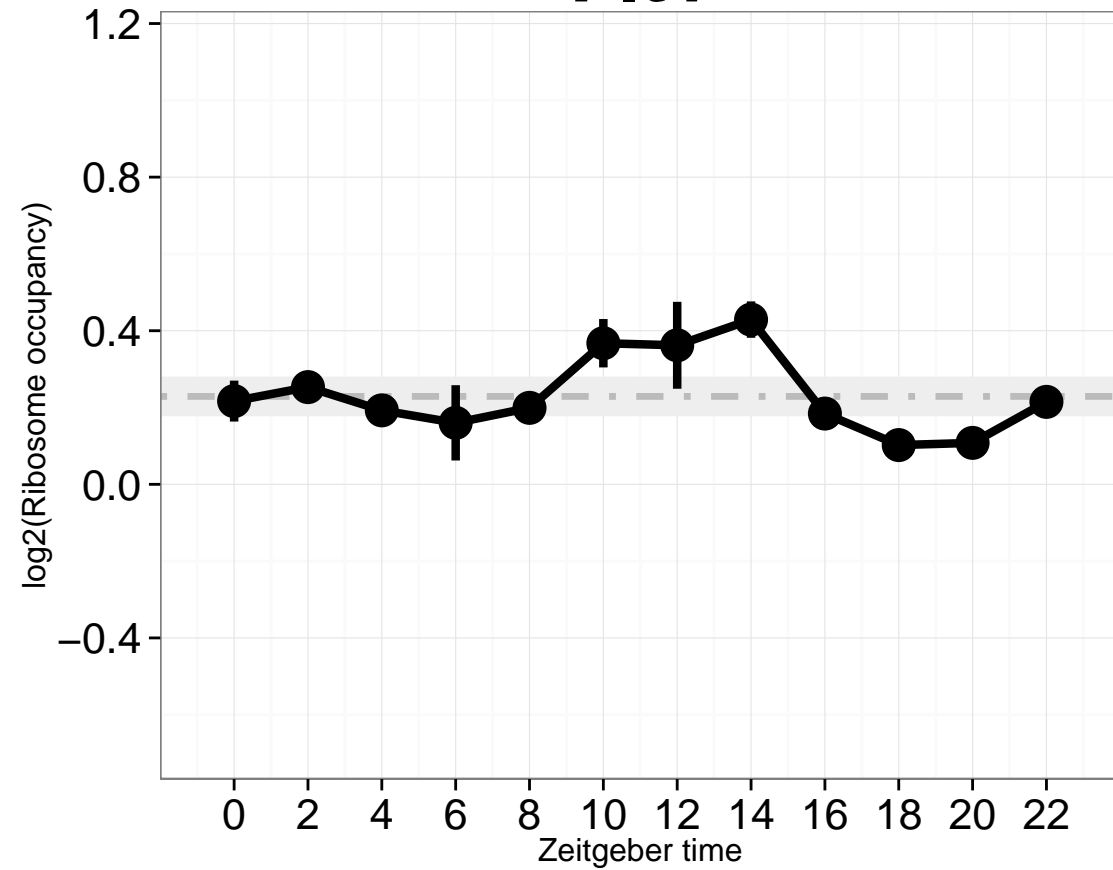

Supplement: Supplementary file 9181 [file 1]

# Rnf208

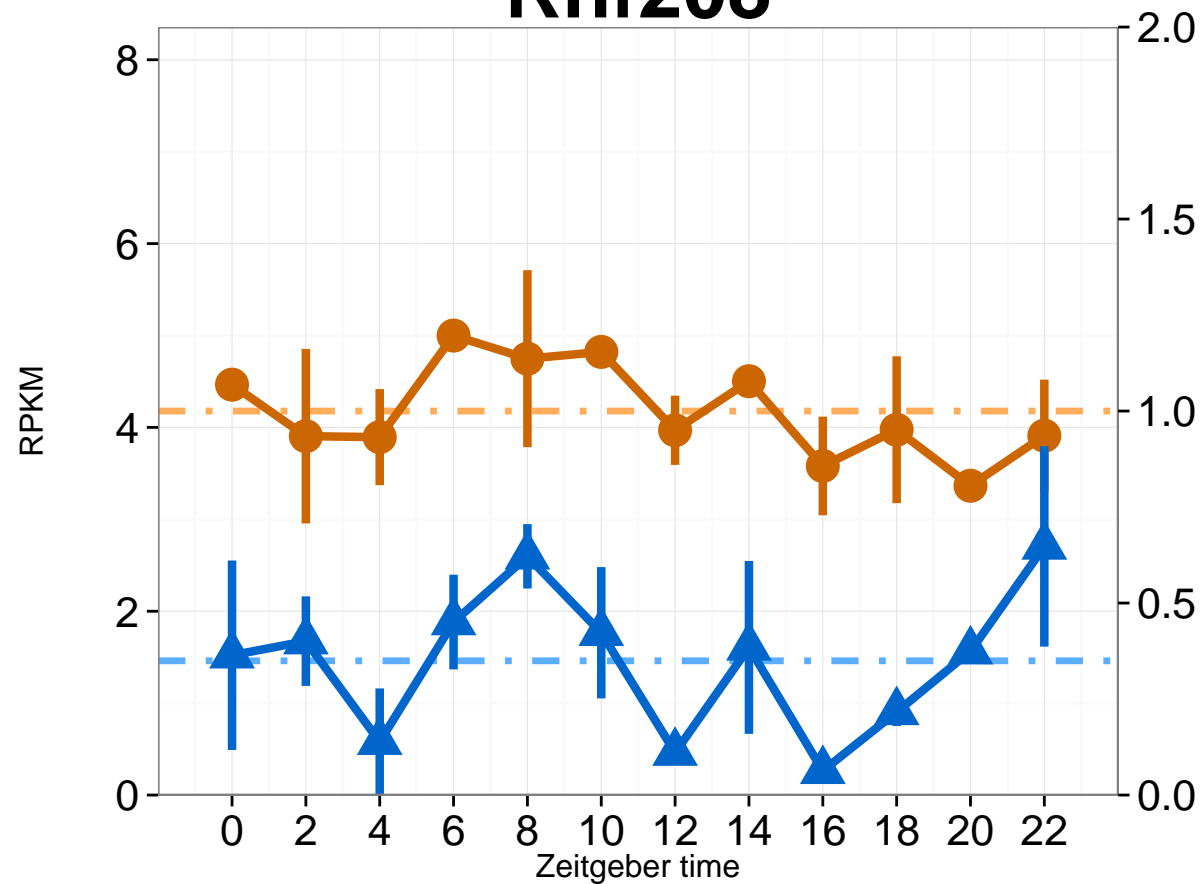

# Rnf208

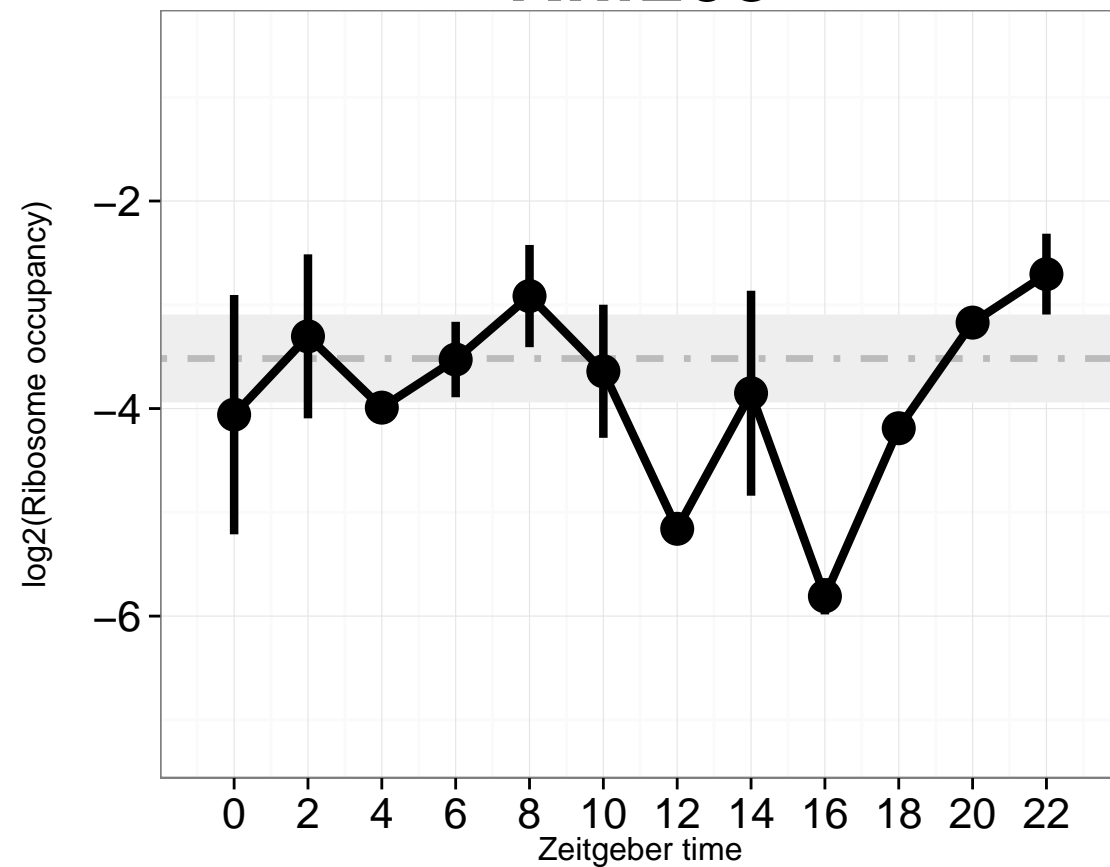

Supplement: Supplementary file 9182 [file 1]

# Slc39a3

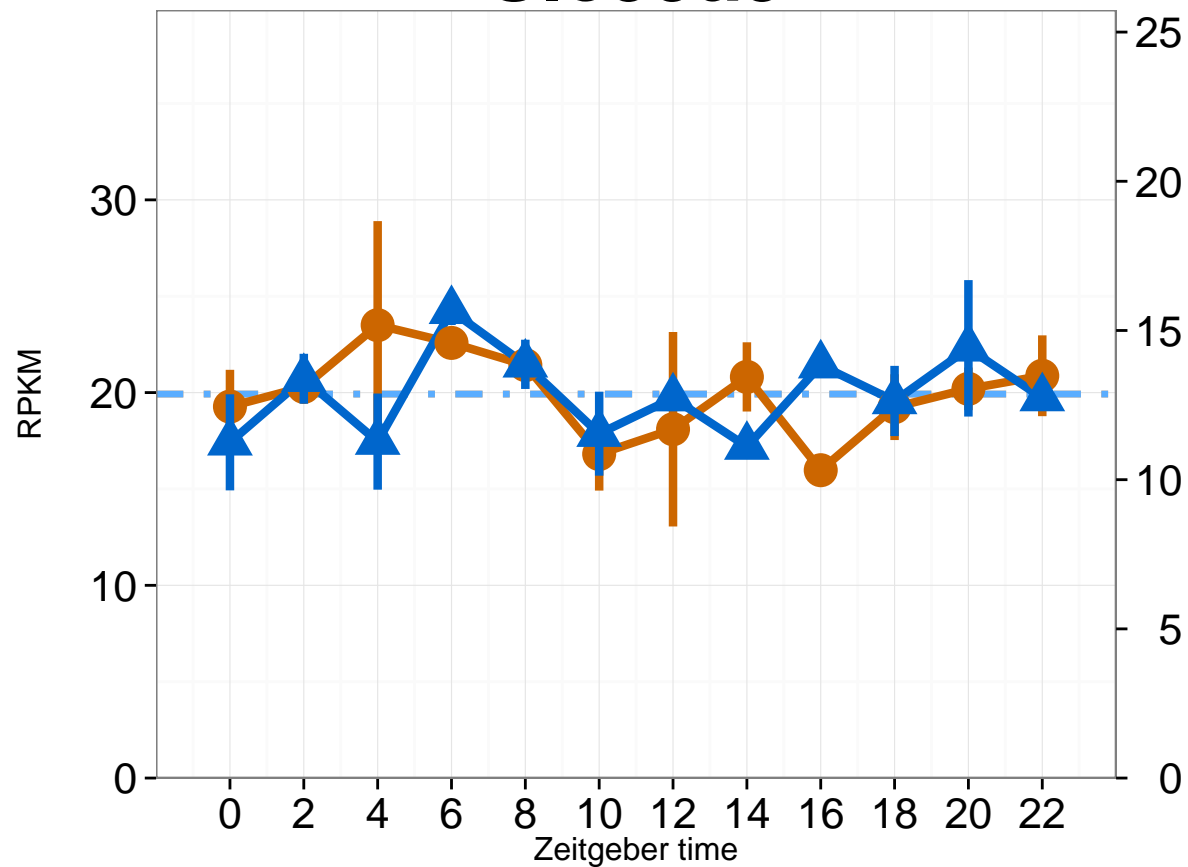

# Slc39a3

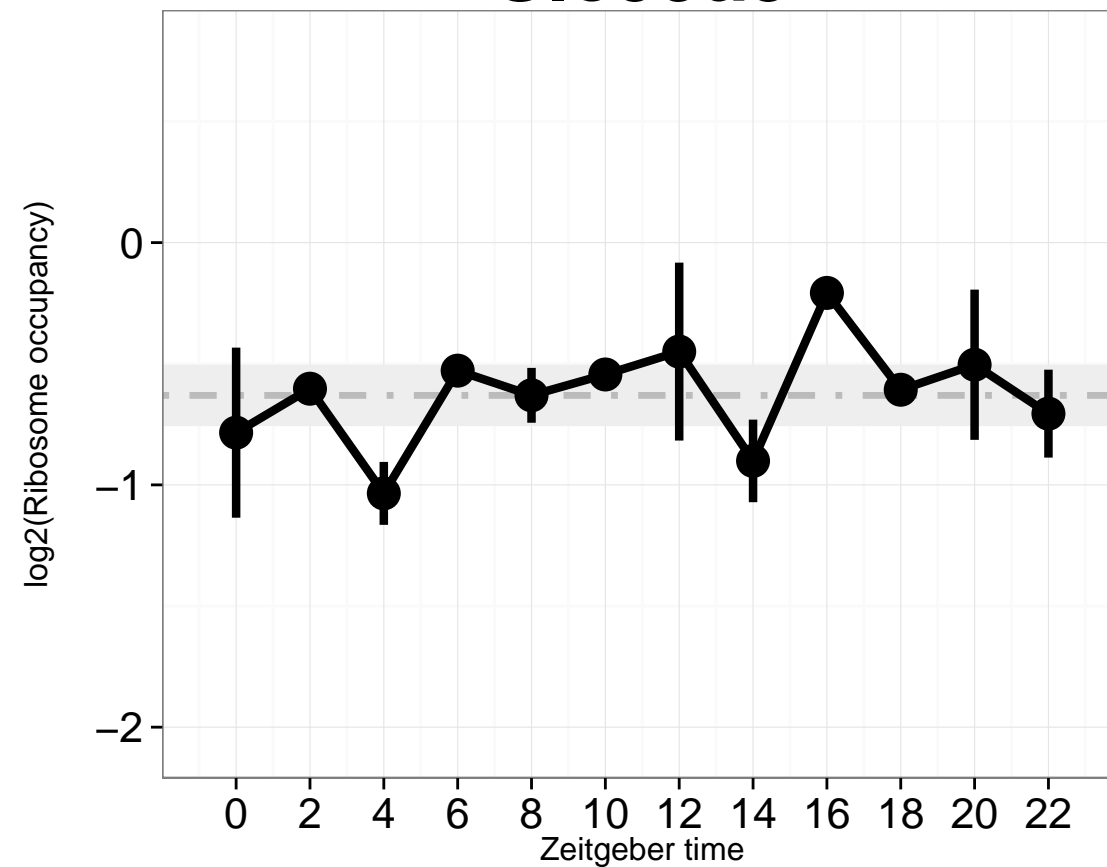

Supplement: Supplementary file 9183 [file 1]

# Atg4b

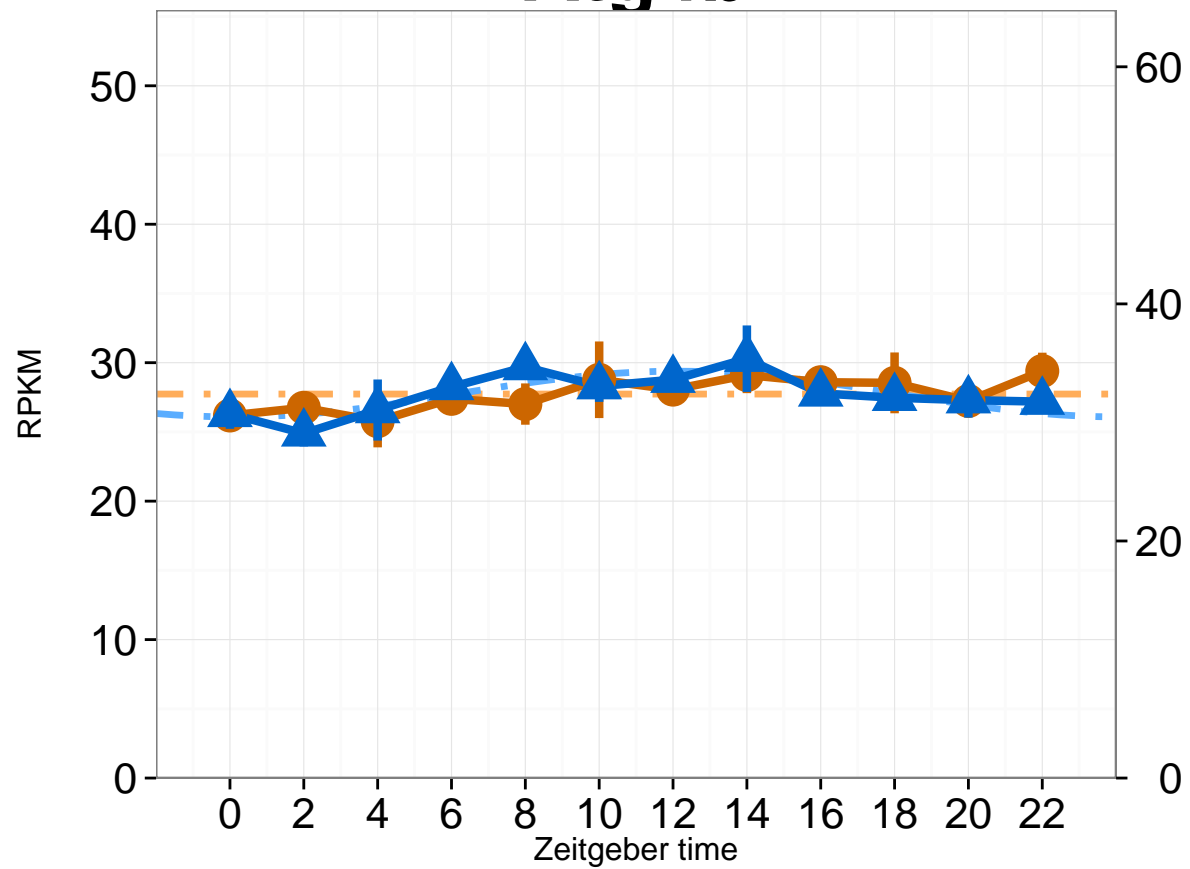

# Atg4b

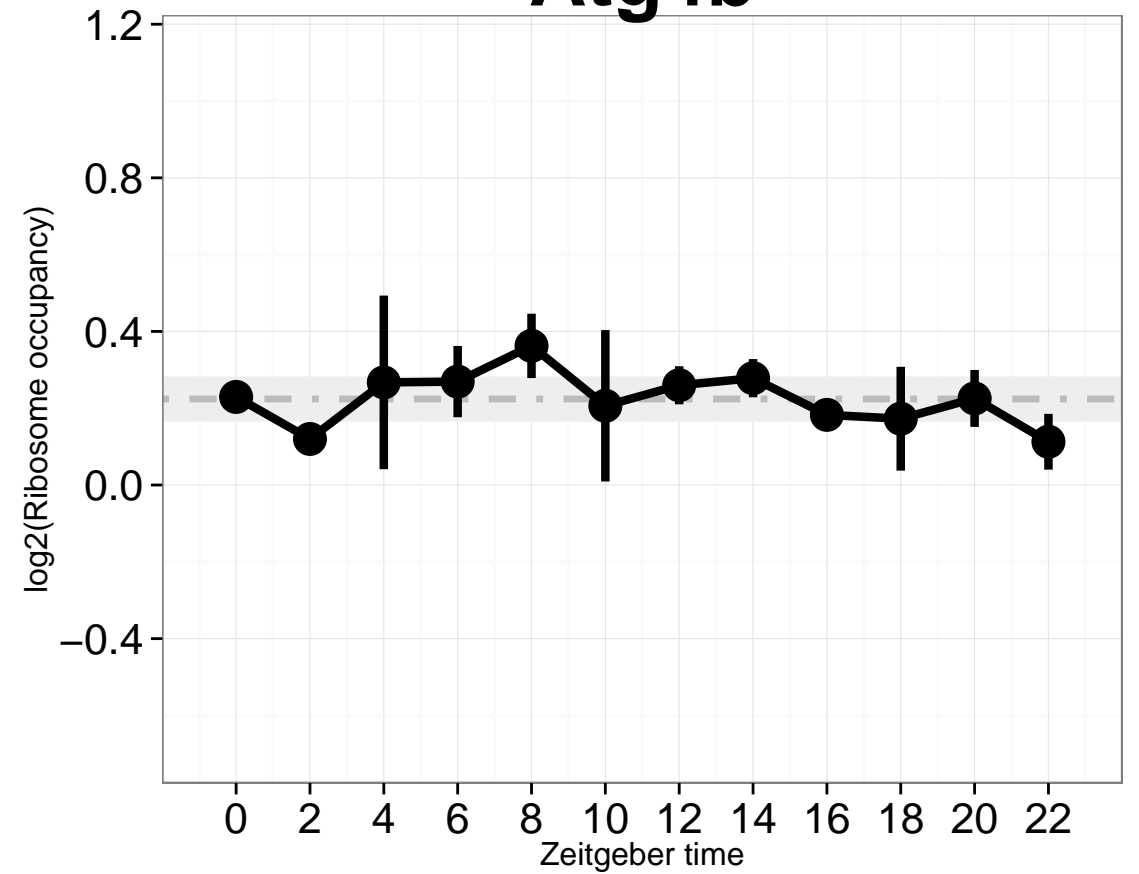

Supplement: Supplementary file 9184 [file 1]

## Cdc42se2

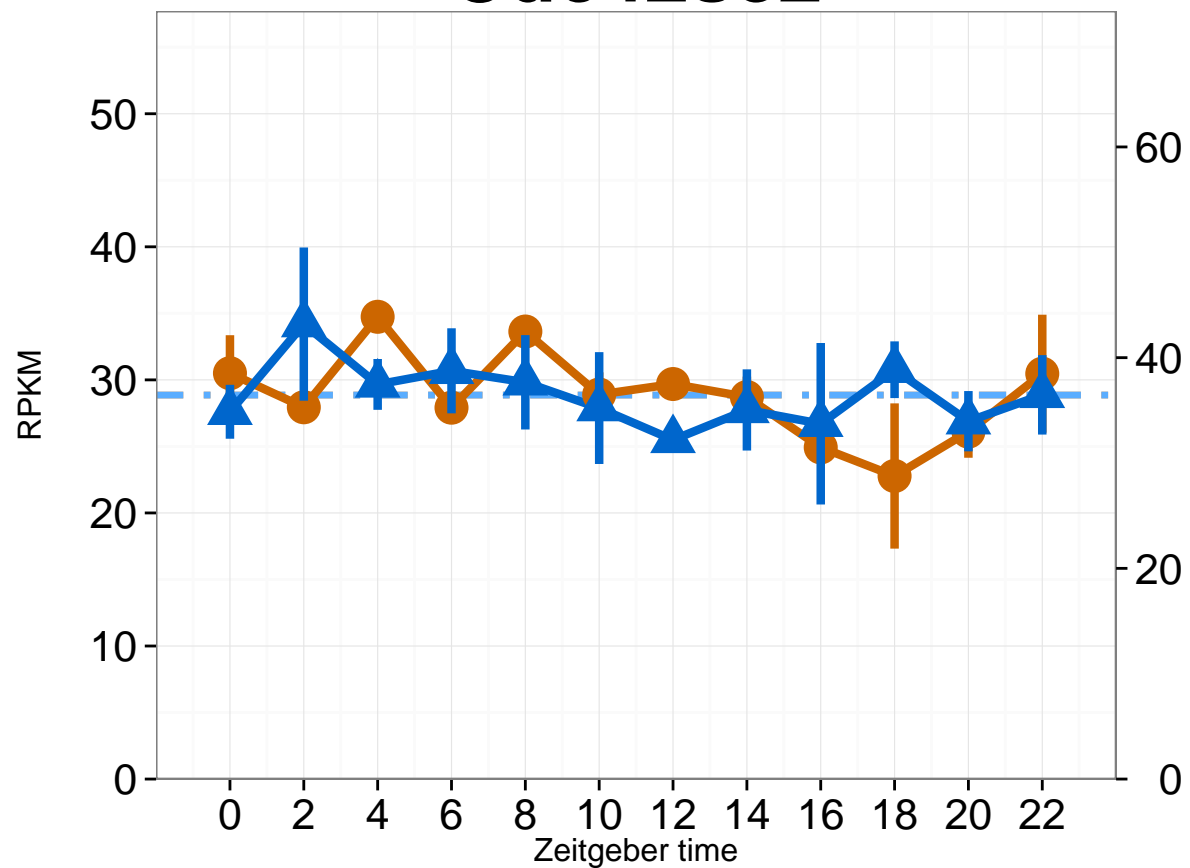

## Cdc42se2

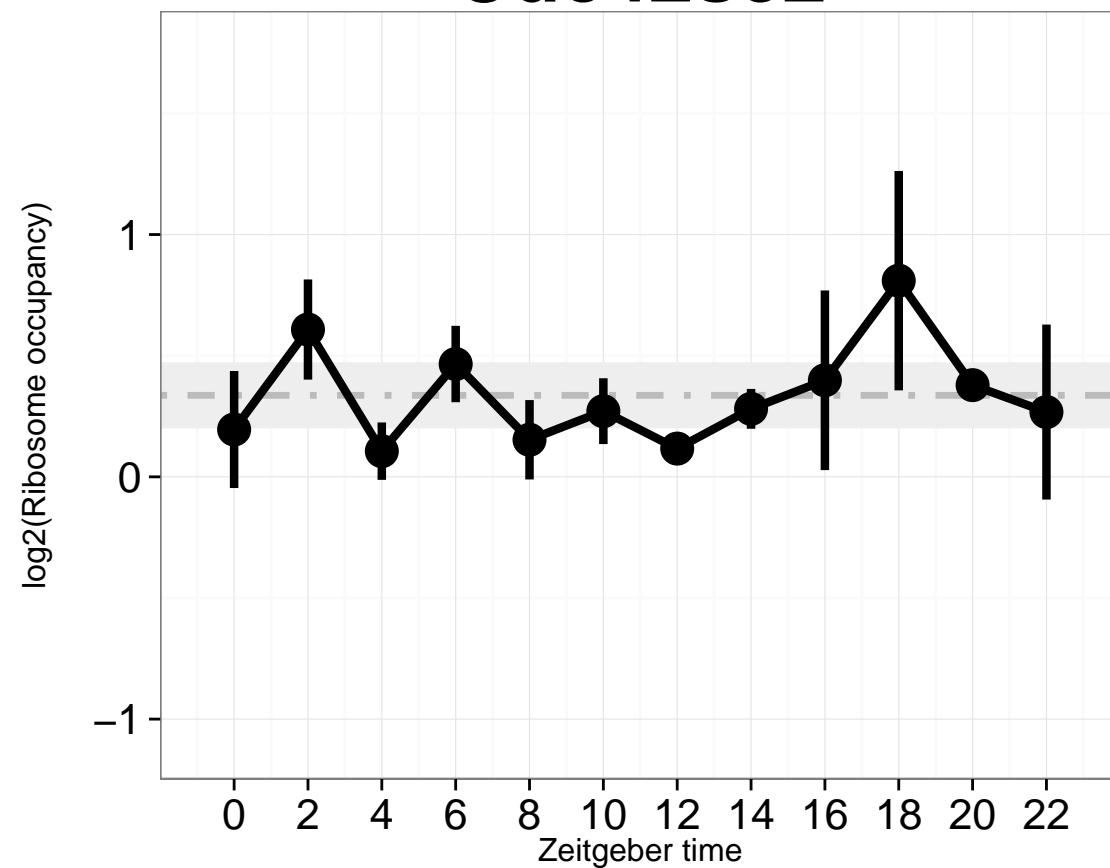

Supplement: Supplementary file 9185 [file 1]

# Wasl

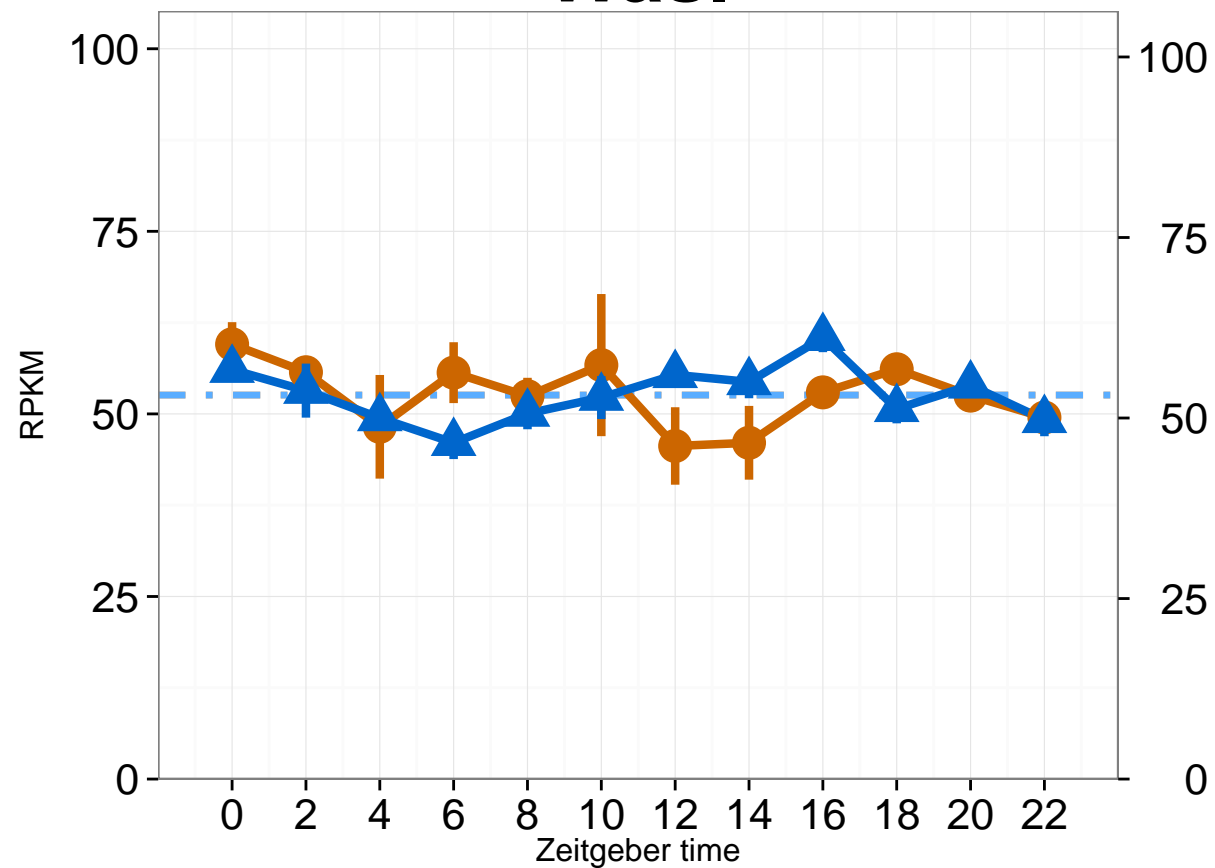

# Wasl

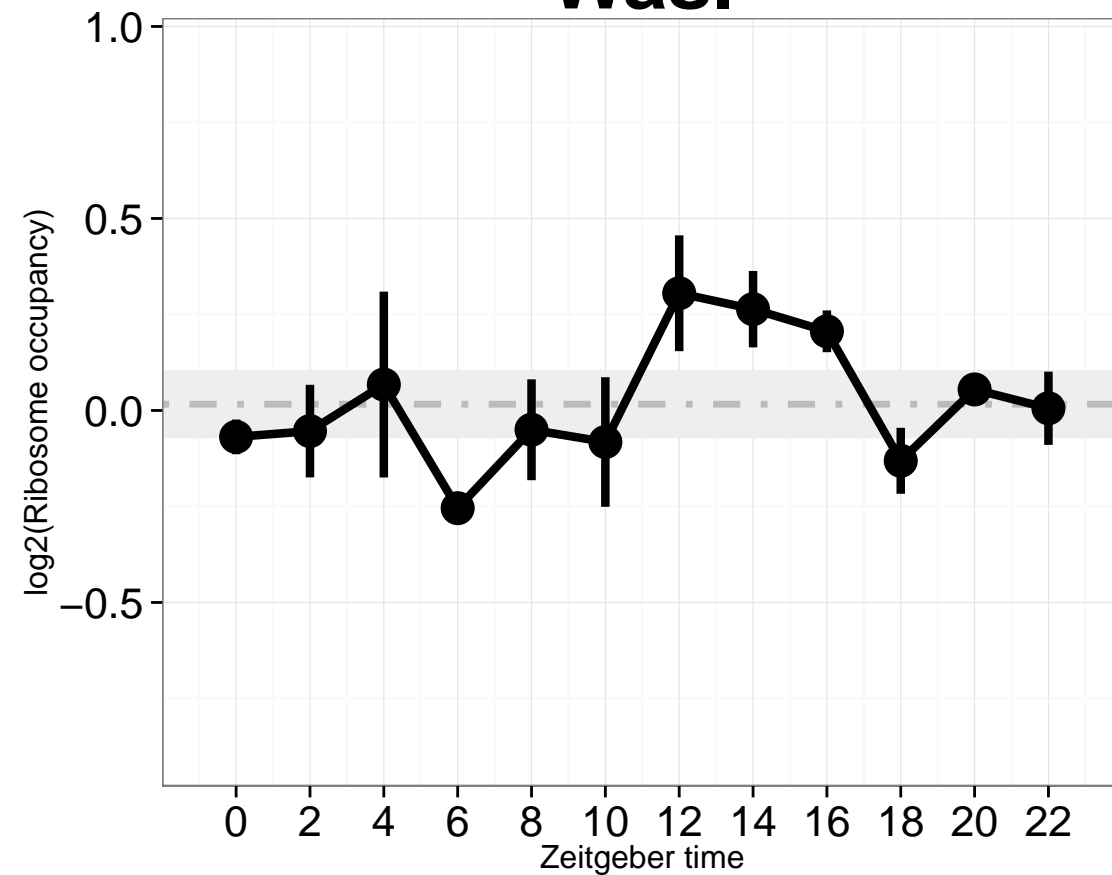

Supplement: Supplementary file 9186 [file 1]

# Mettl13

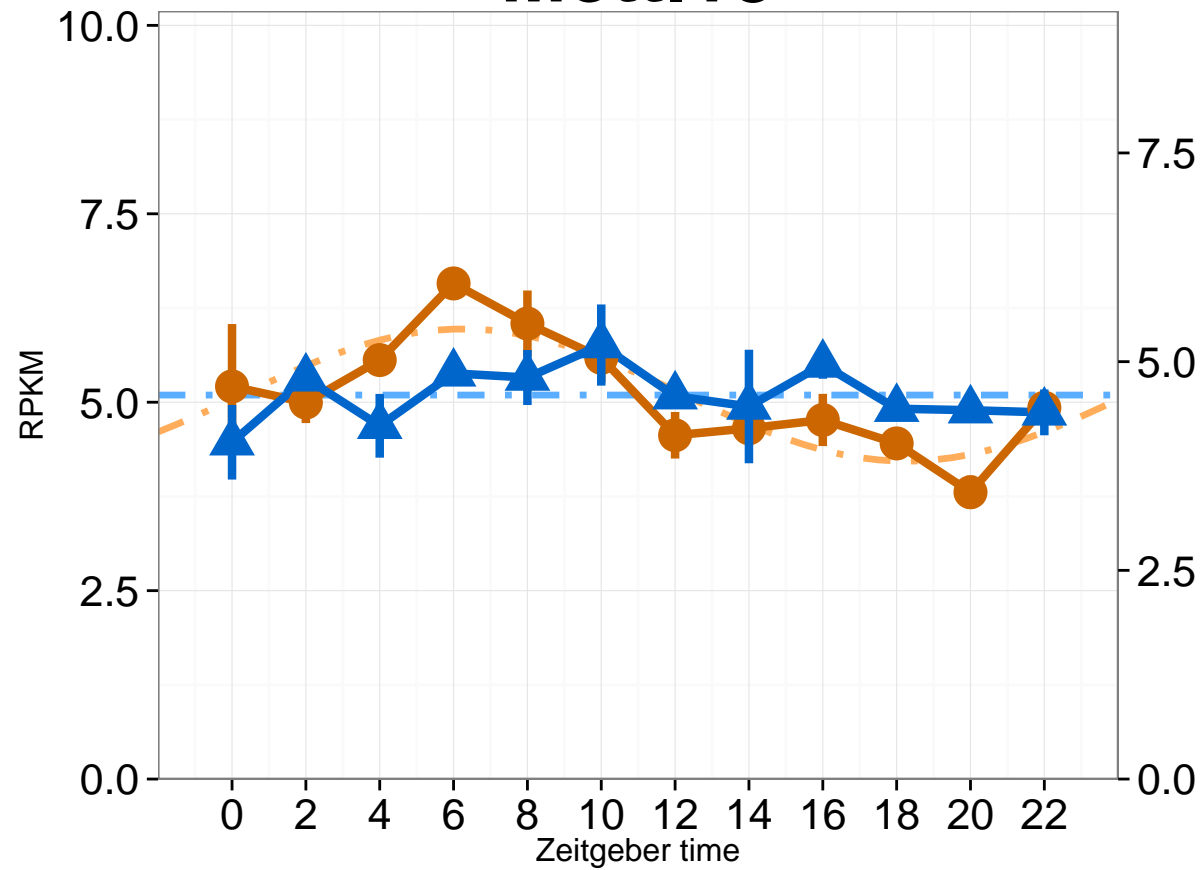

# Mettl13

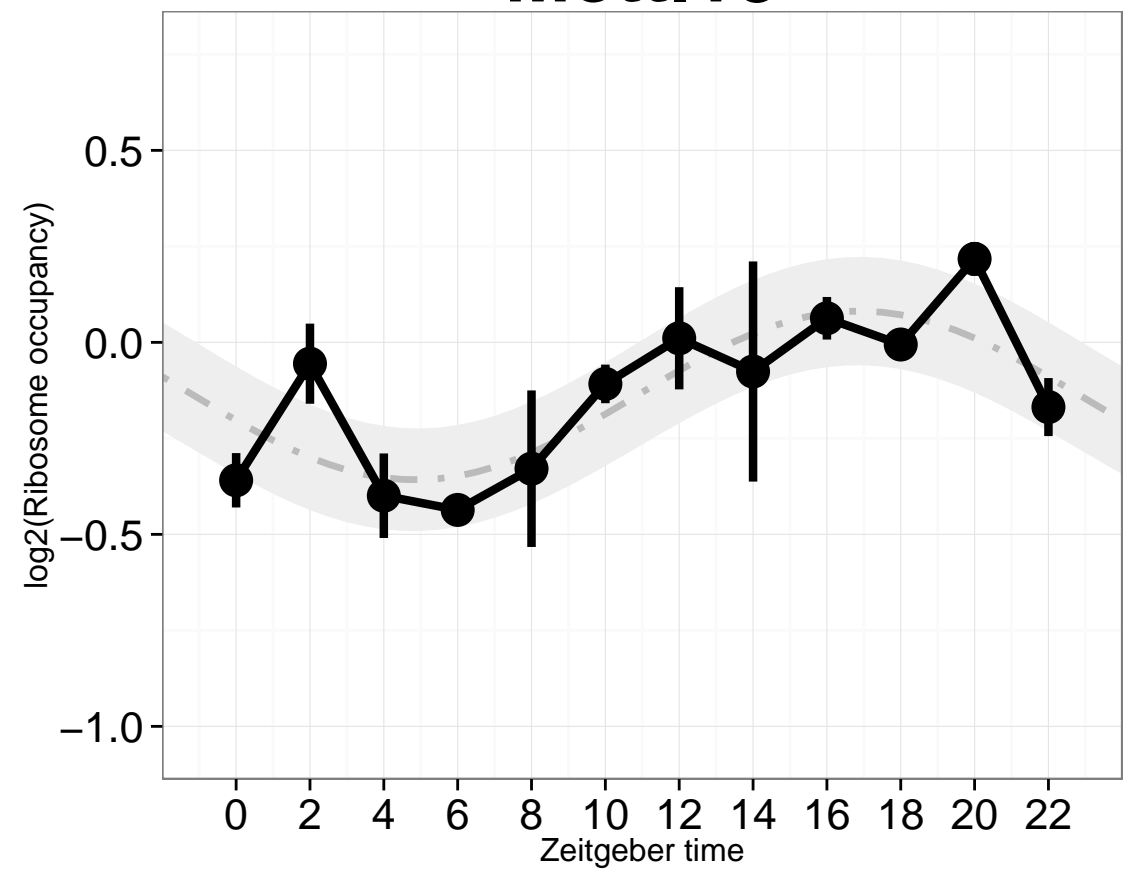

Supplement: Supplementary file 9187 [file 1]

## Mfsd3

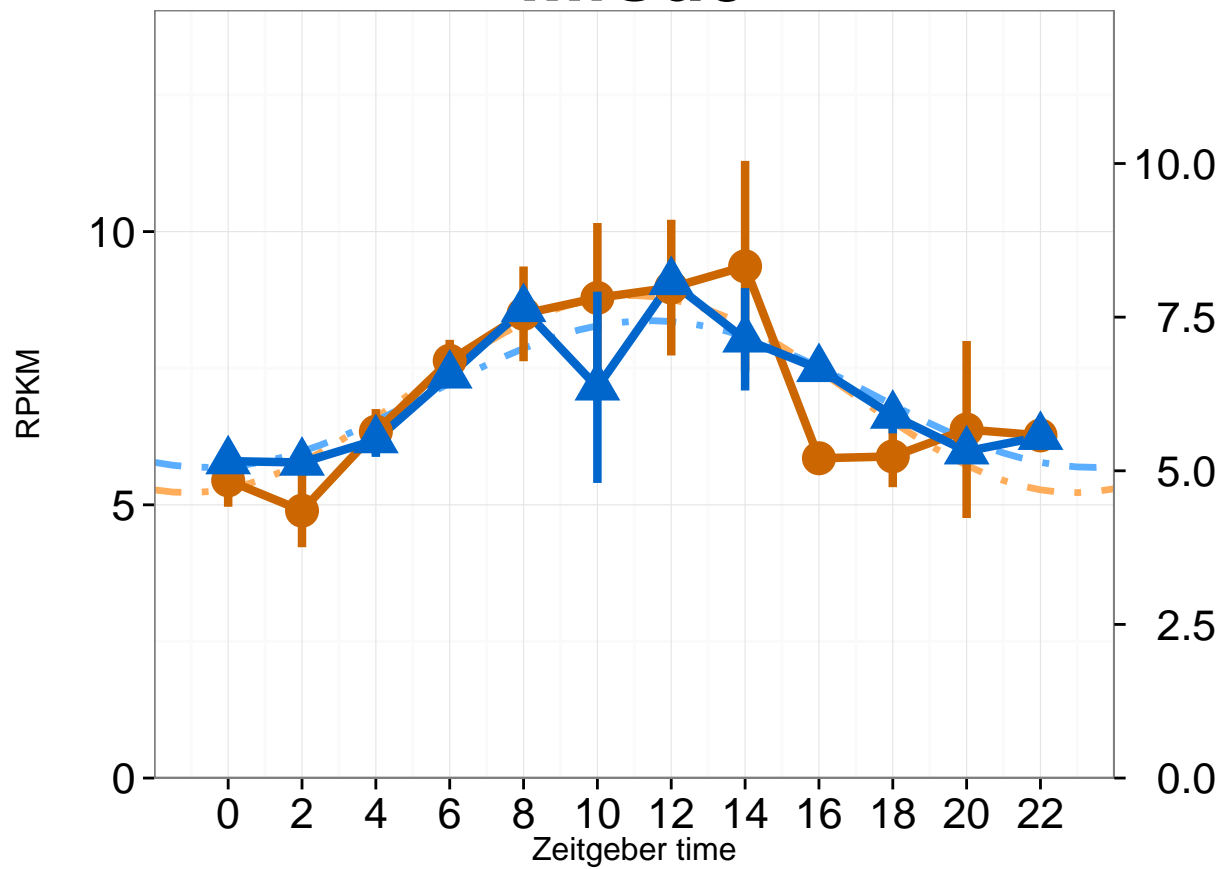

## Mfsd3

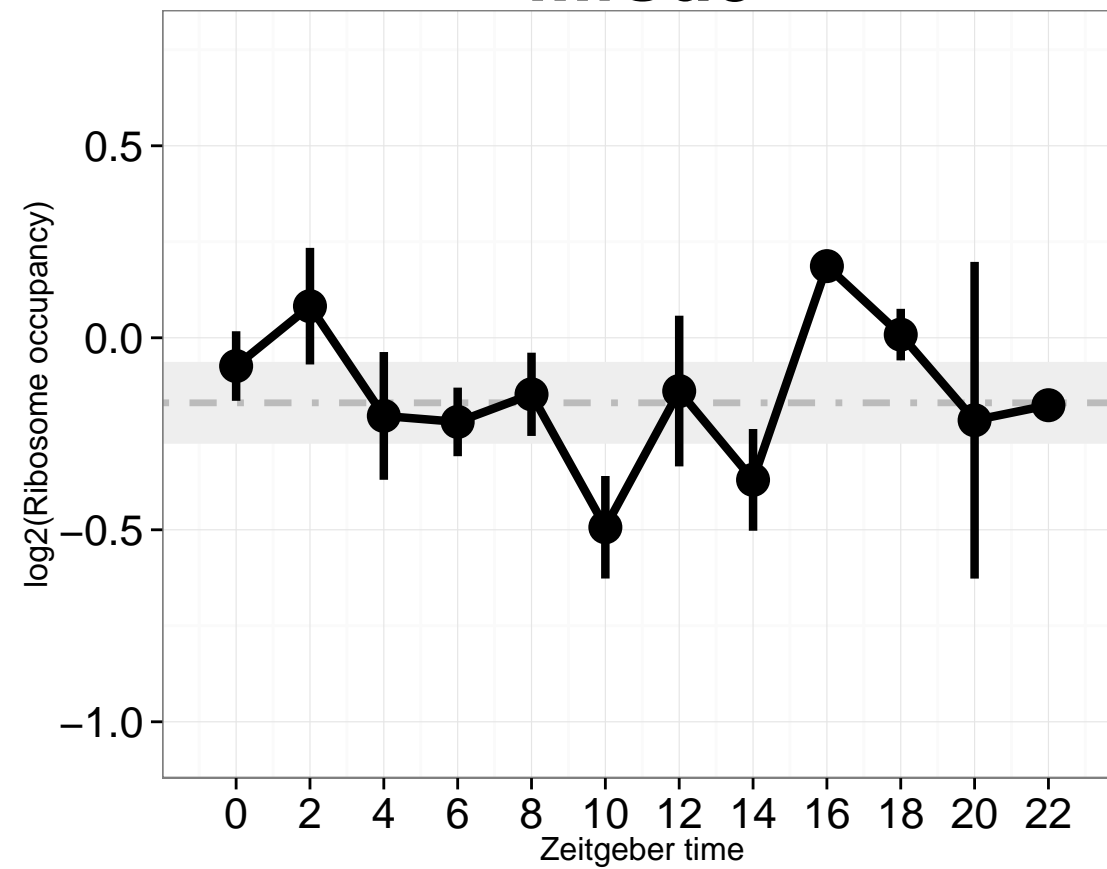

Supplement: Supplementary file 9188 [file 1]

## Kbtbd3

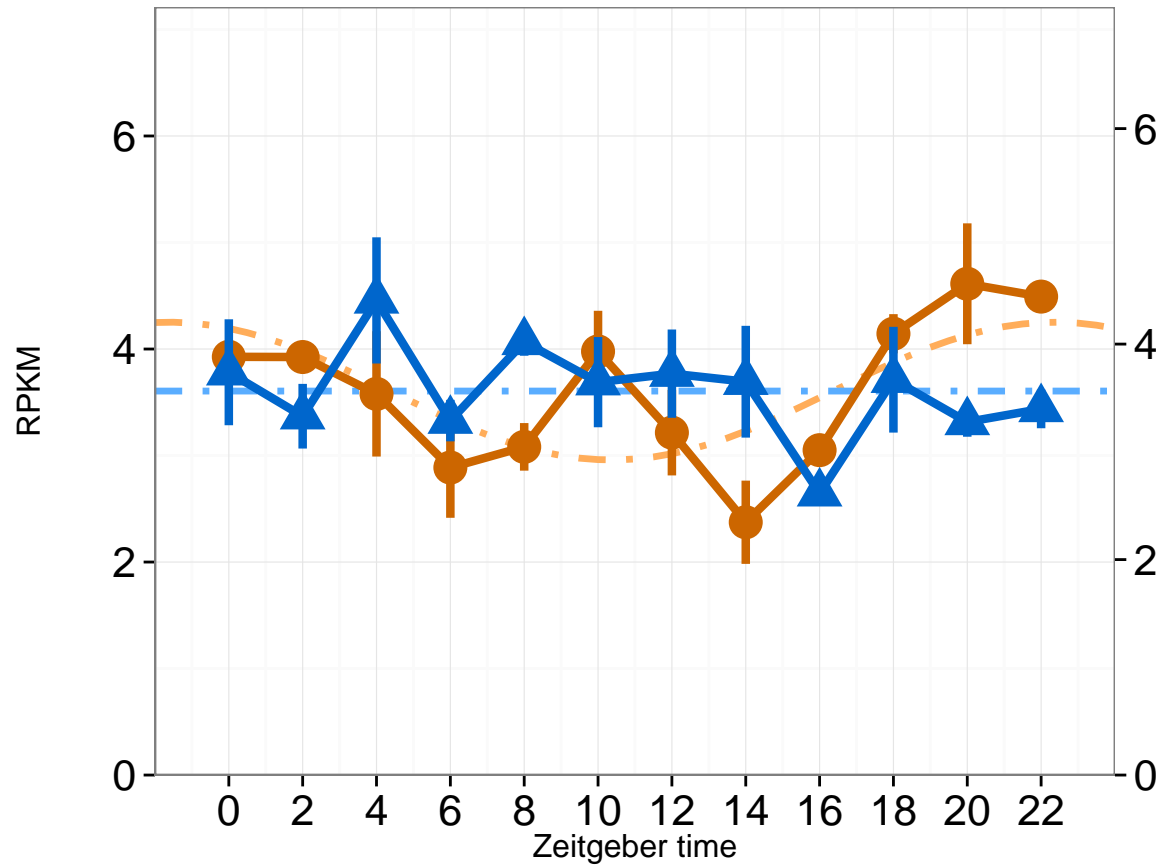

## Kbtbd3

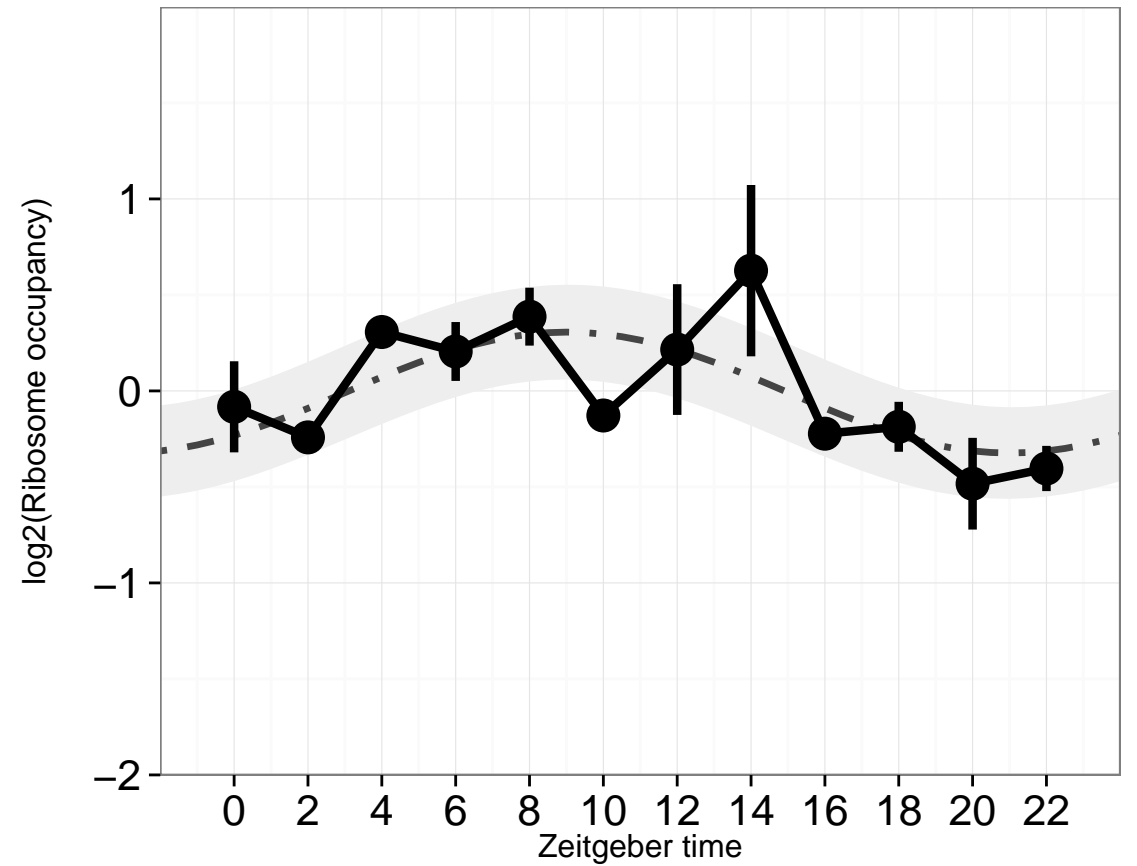

Supplement: Supplementary file 9189 [file 1]

## Smg1

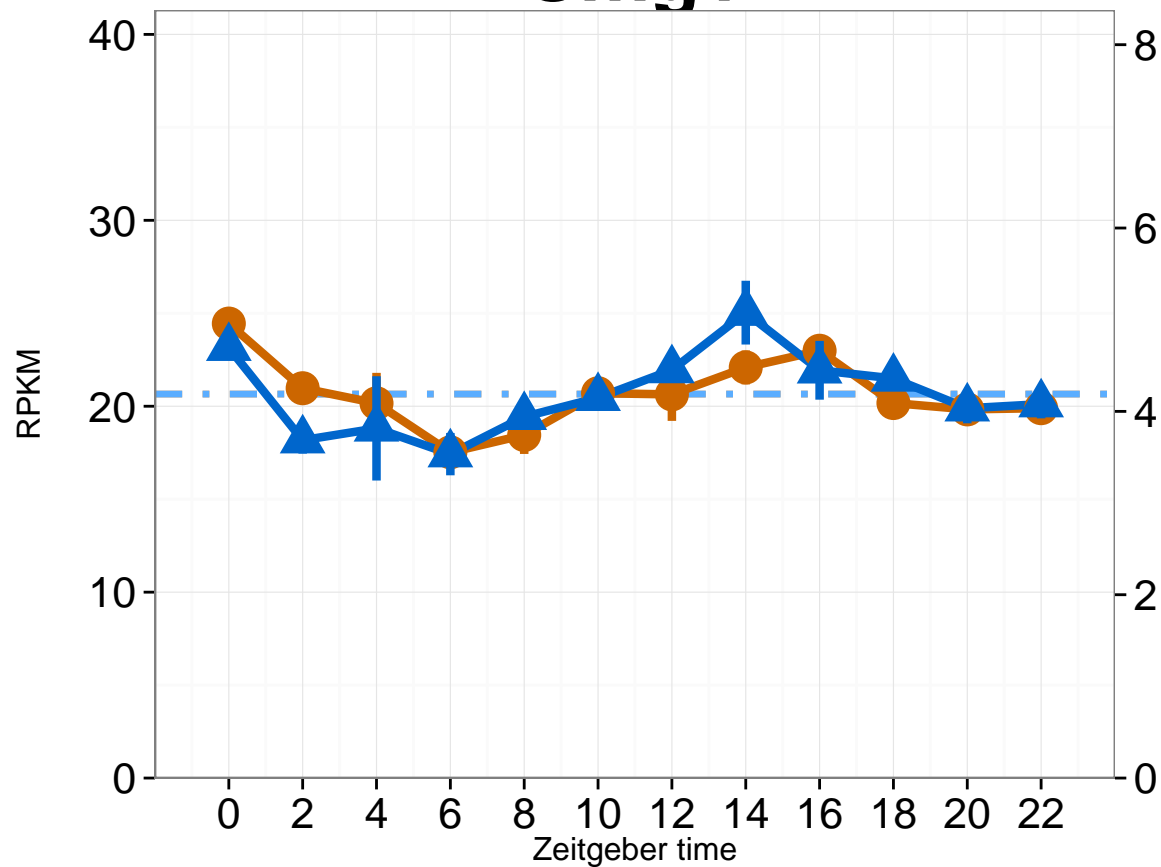

## Smg1

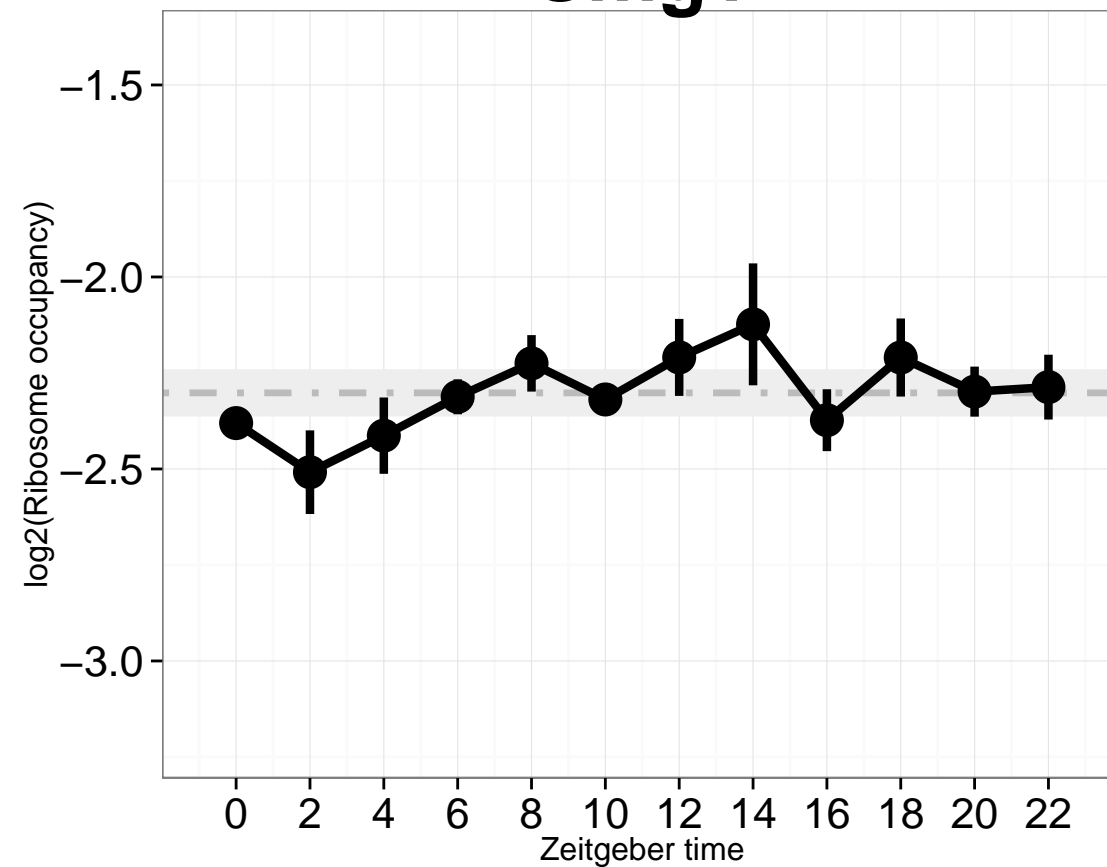

Supplement: Supplementary file 9190 [file 1]

## Elac2

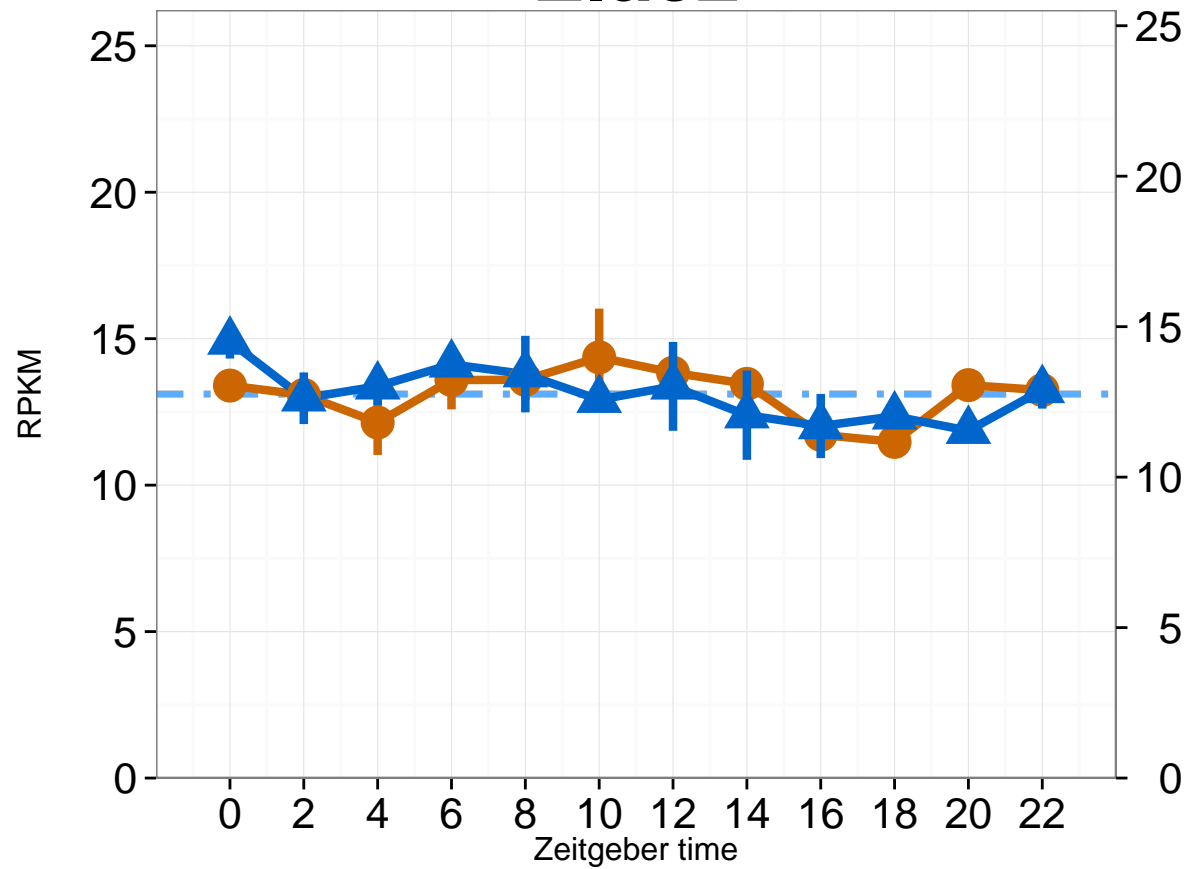

## Elac2

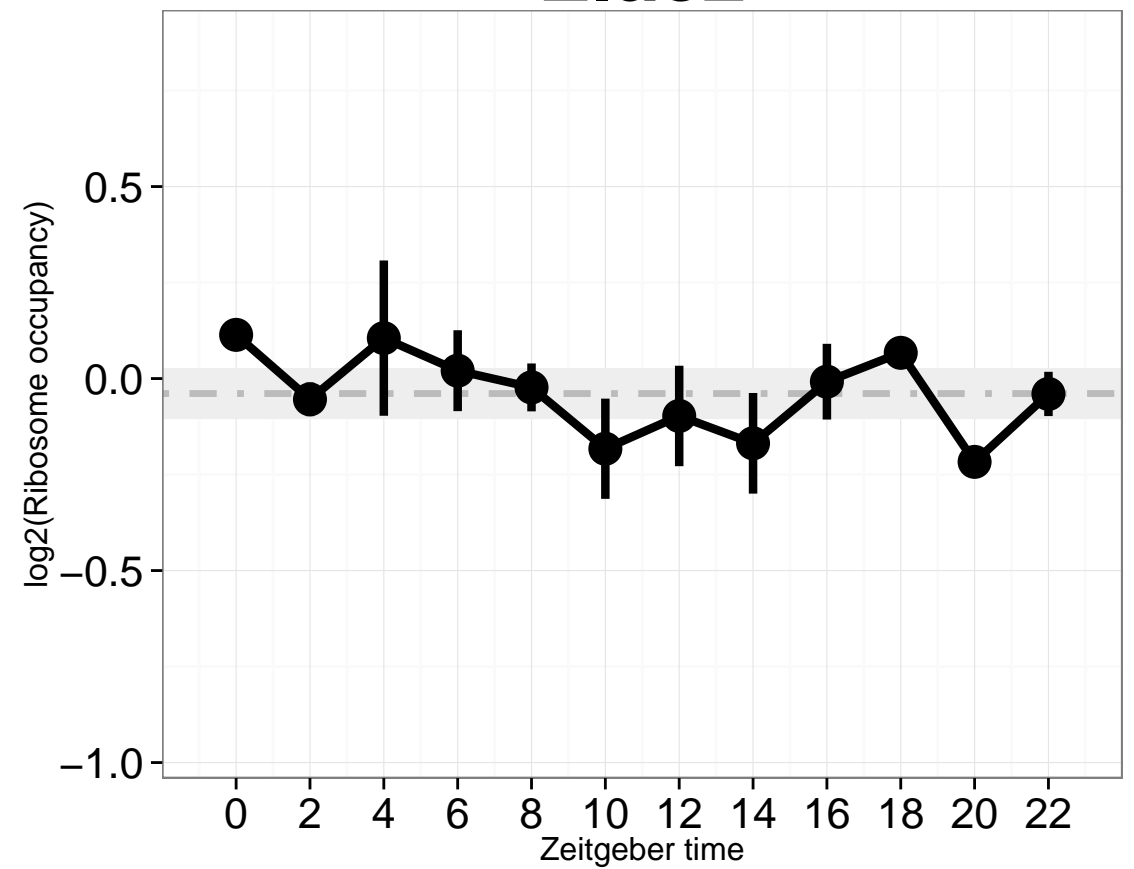

Supplement: Supplementary file 9191 [file 1]

# Slc2a3

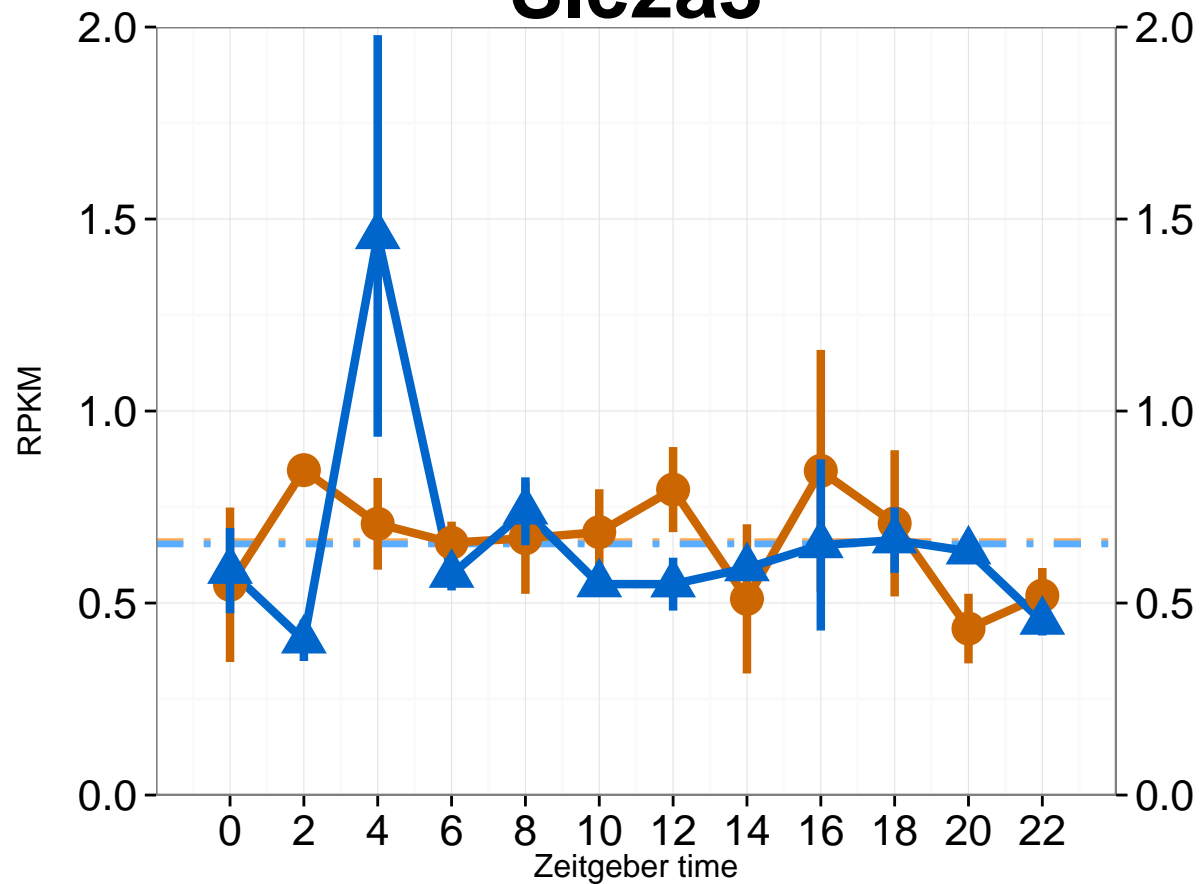

# Slc2a3

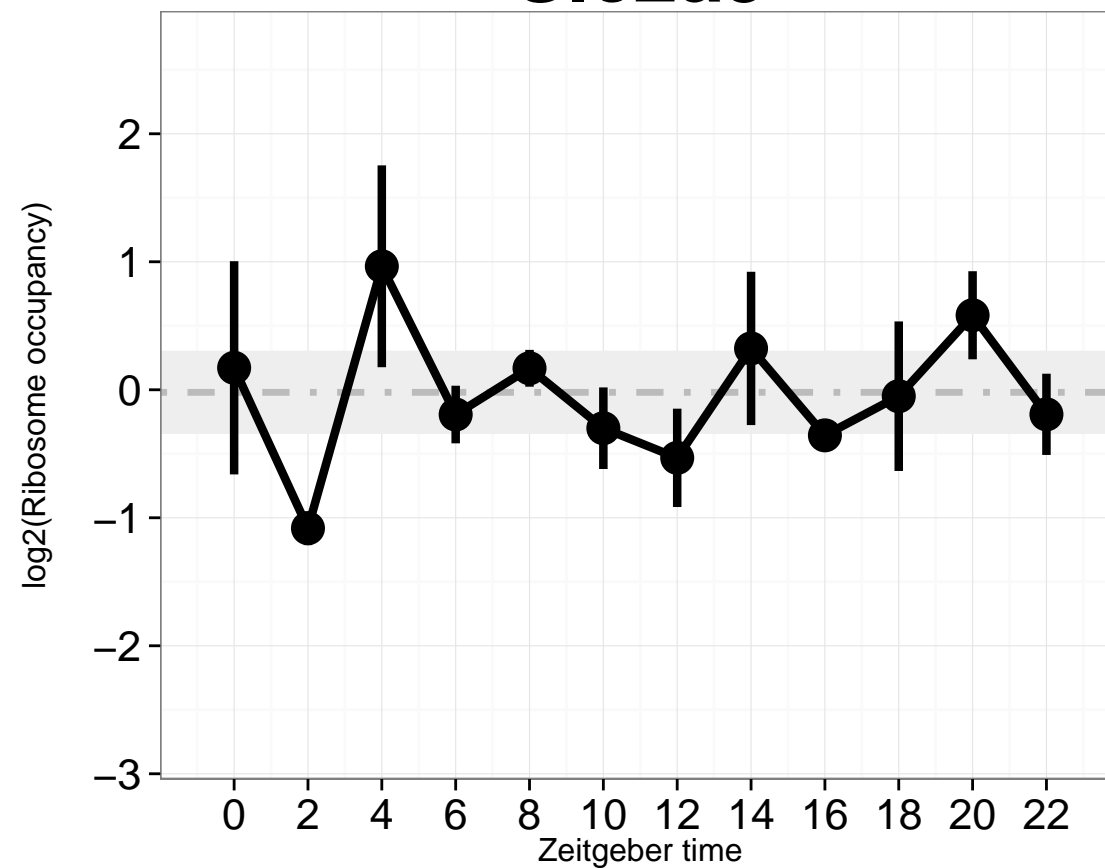

Supplement: Supplementary file 9192 [file 1]

## Stau2

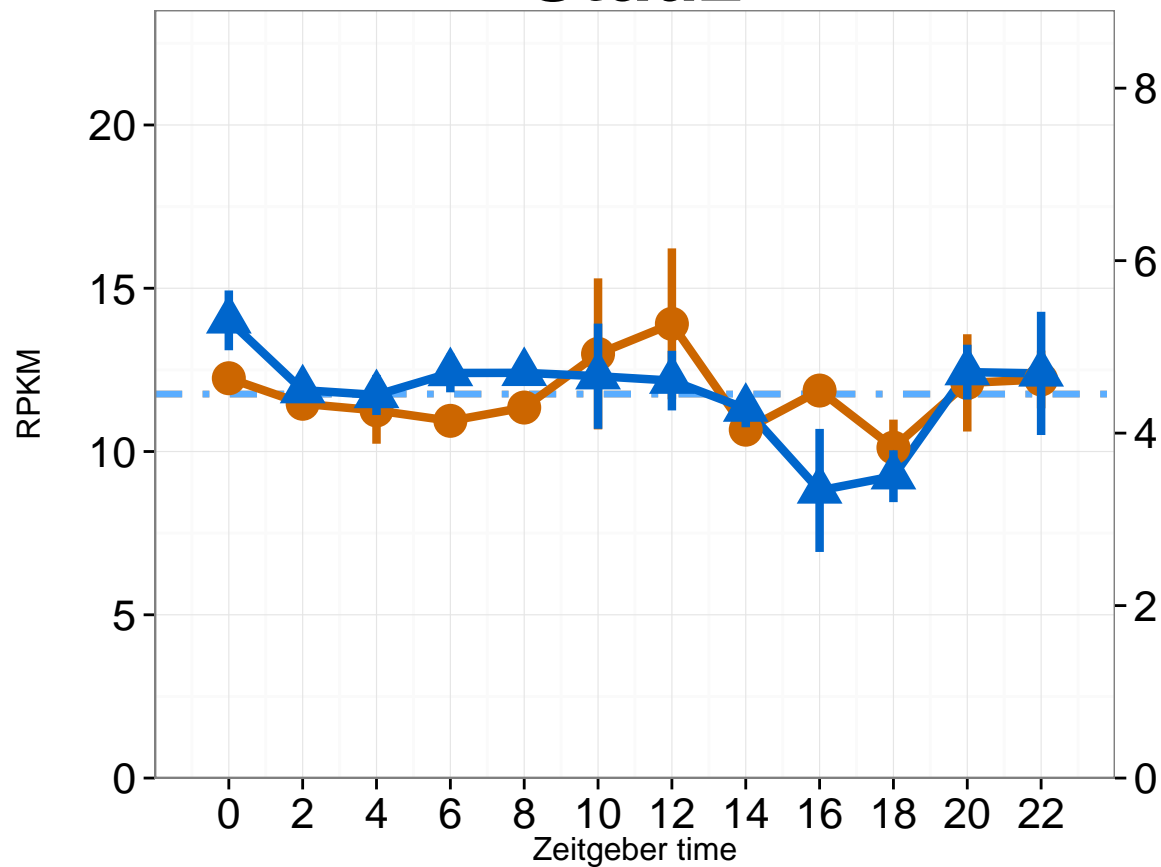

## Stau2

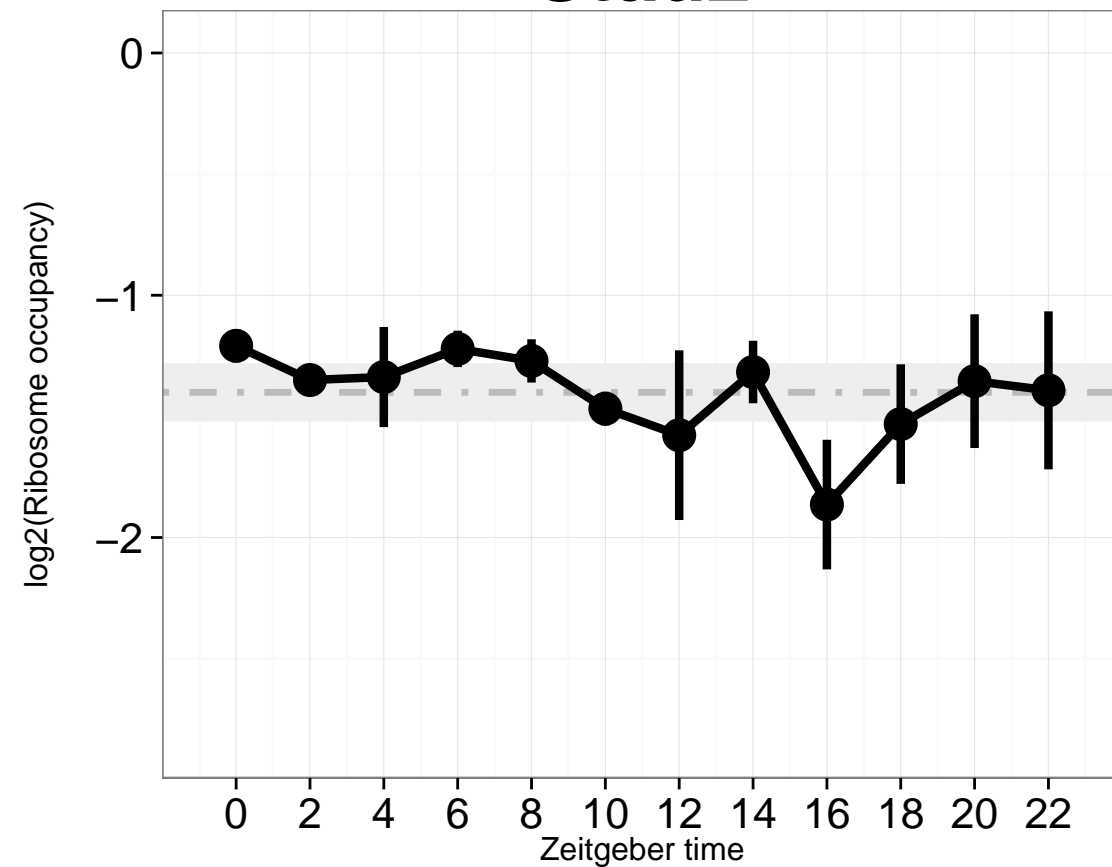

Supplement: Supplementary file 9193 [file 1]

## Ndfip2

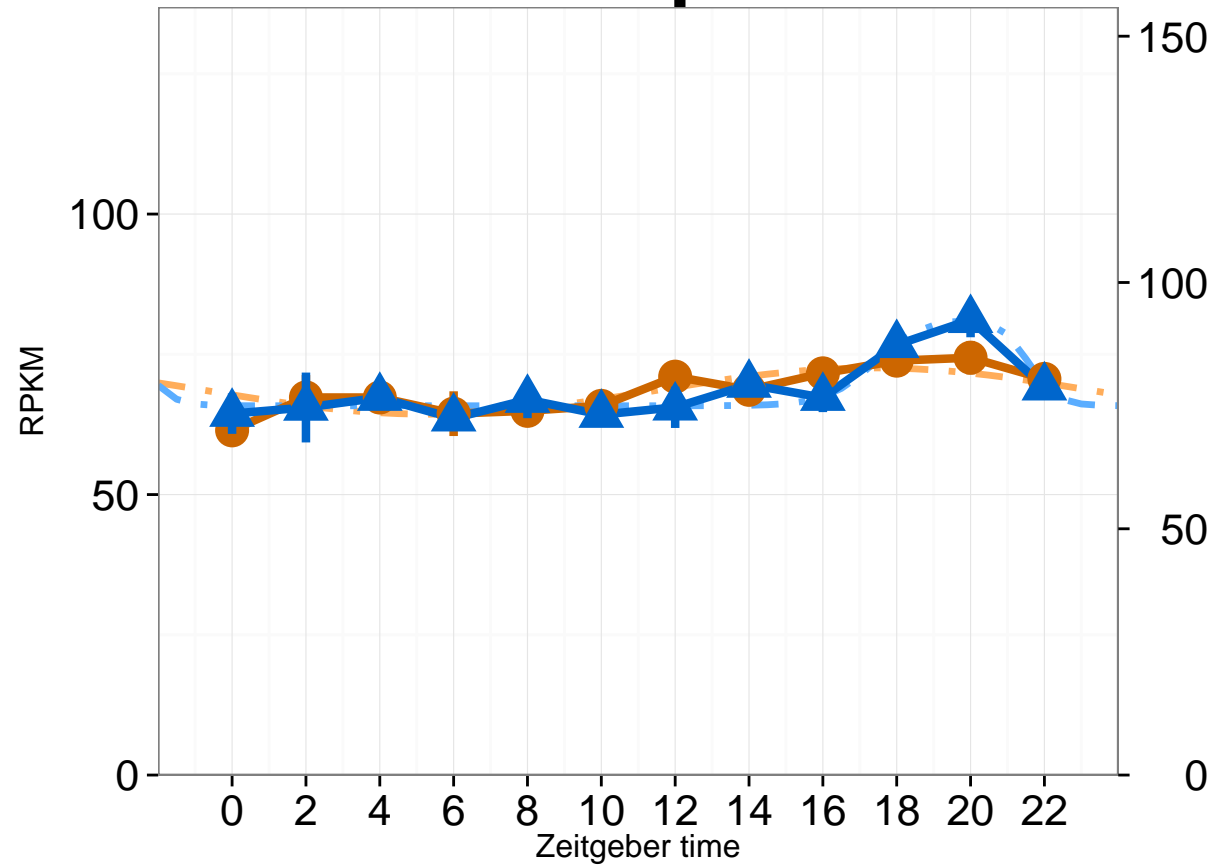

## Ndfip2

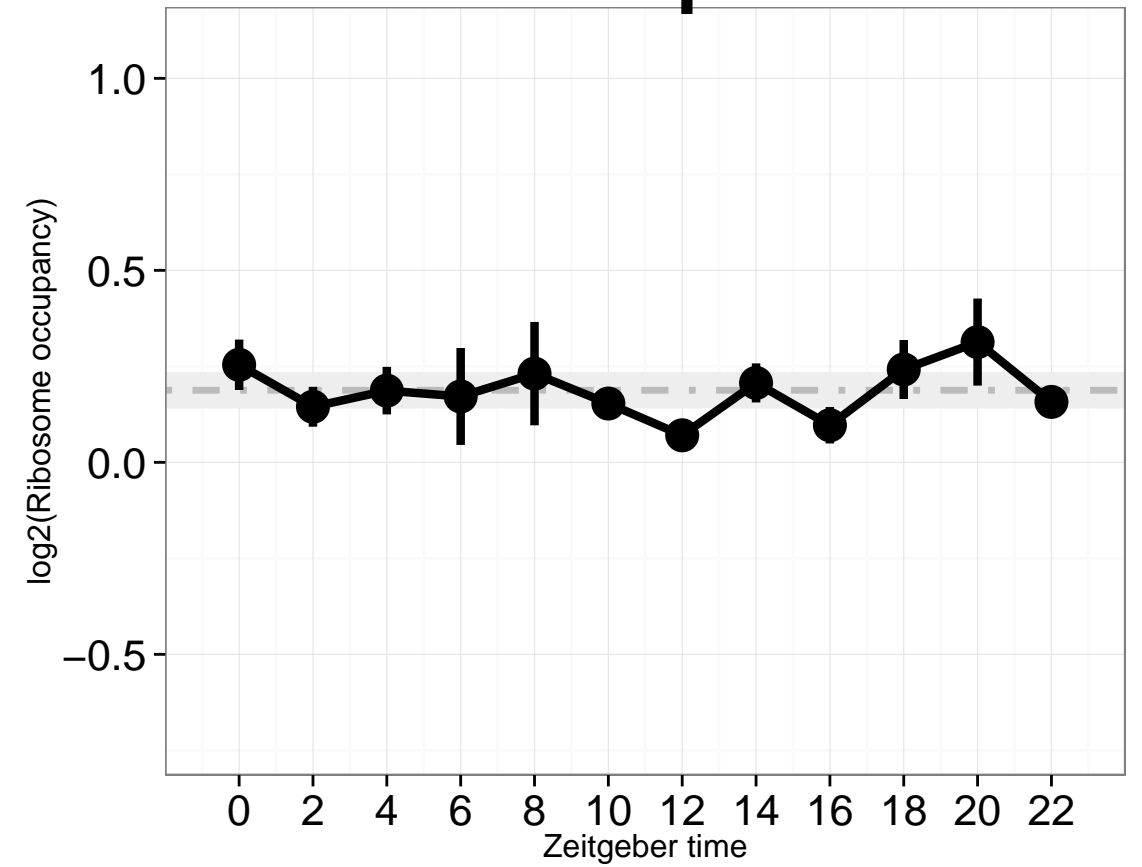

Supplement: Supplementary file 9194 [file 1]

# Pde1a

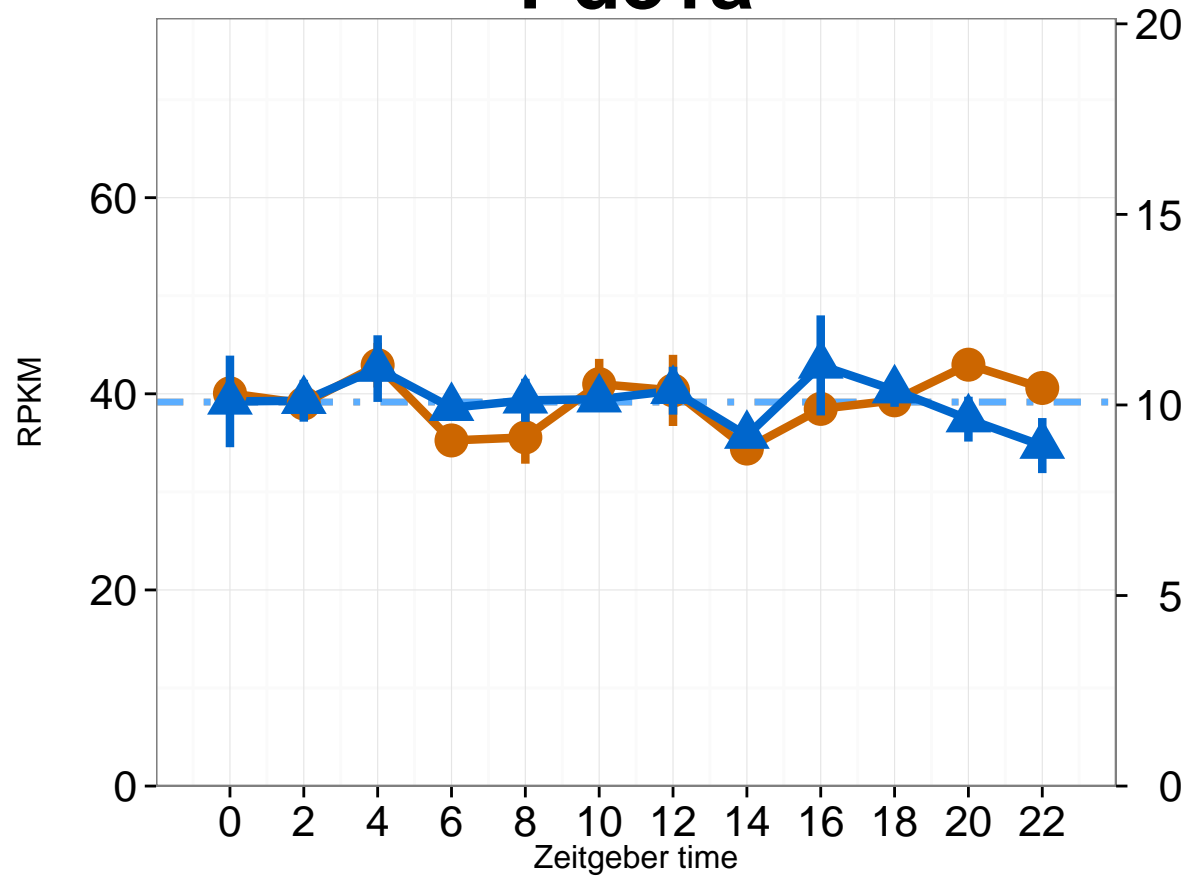

# Pde1a

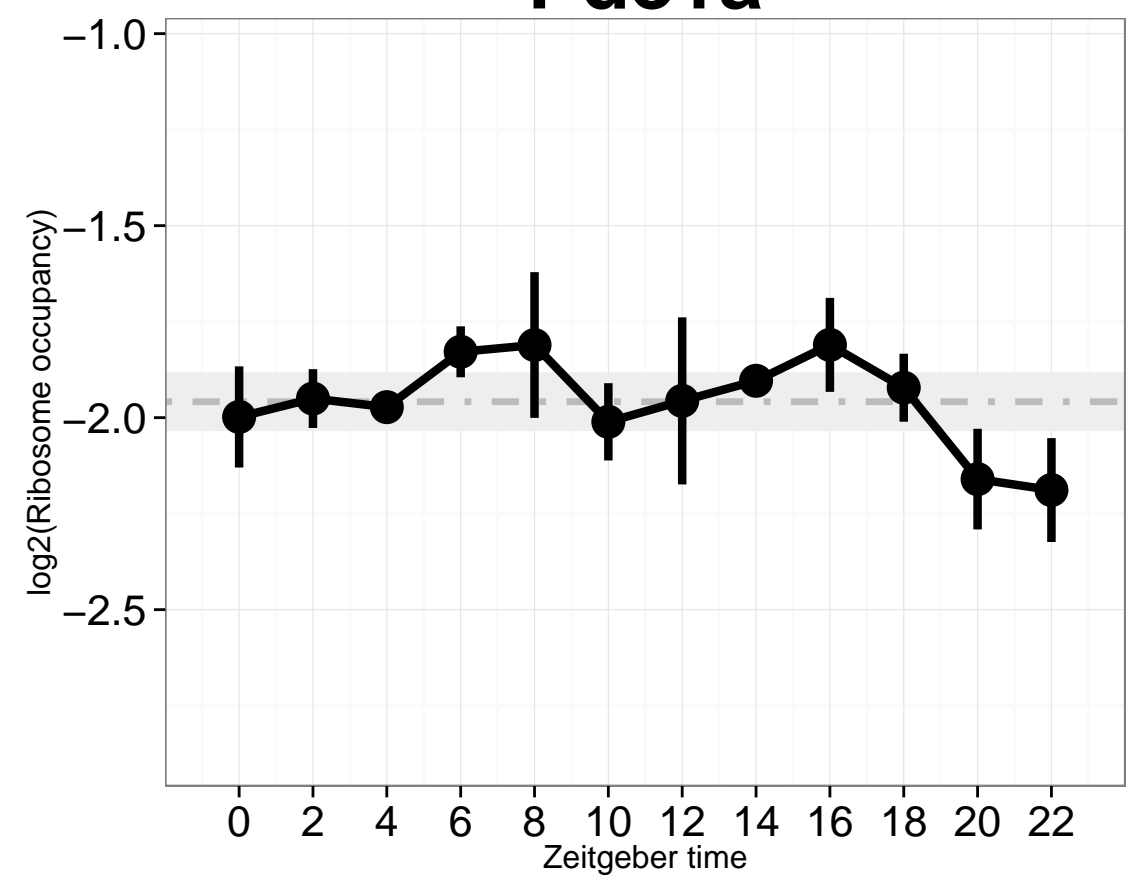

Supplement: Supplementary file 9195 [file 1]

## Wdr59

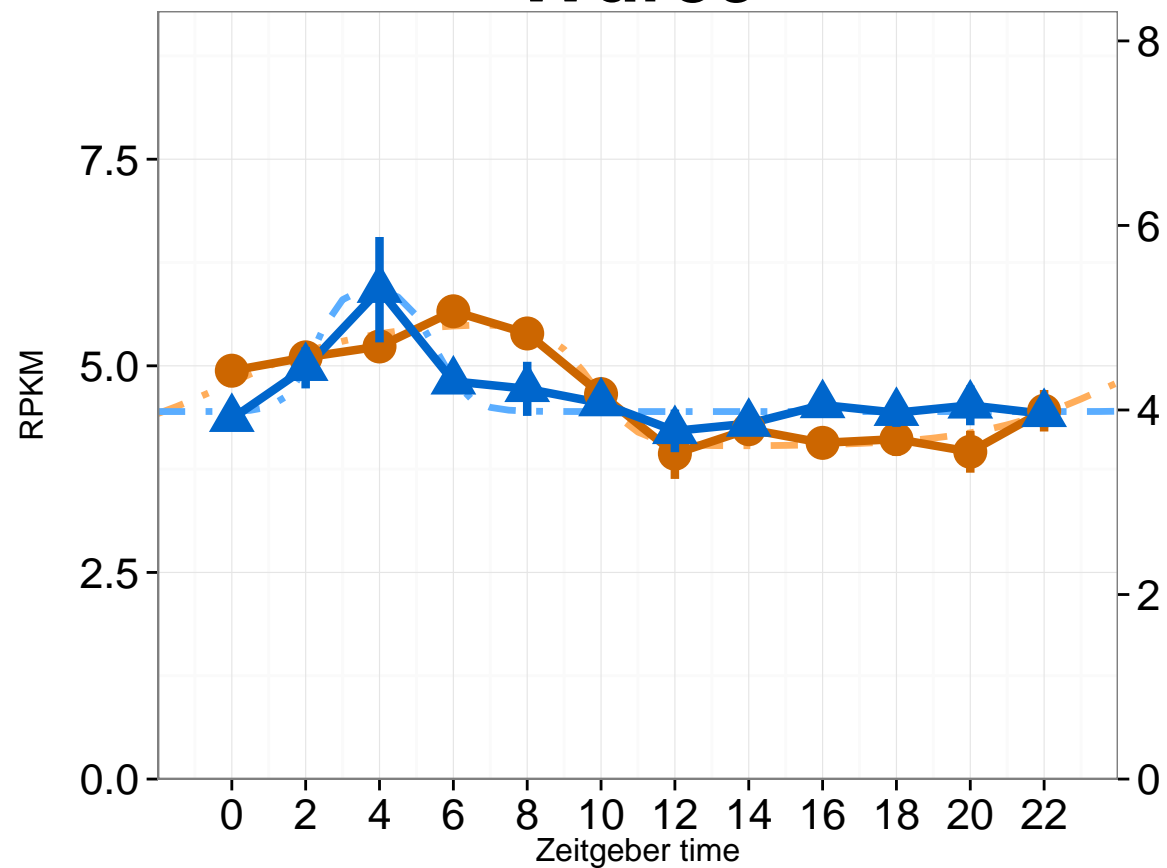

## Wdr59

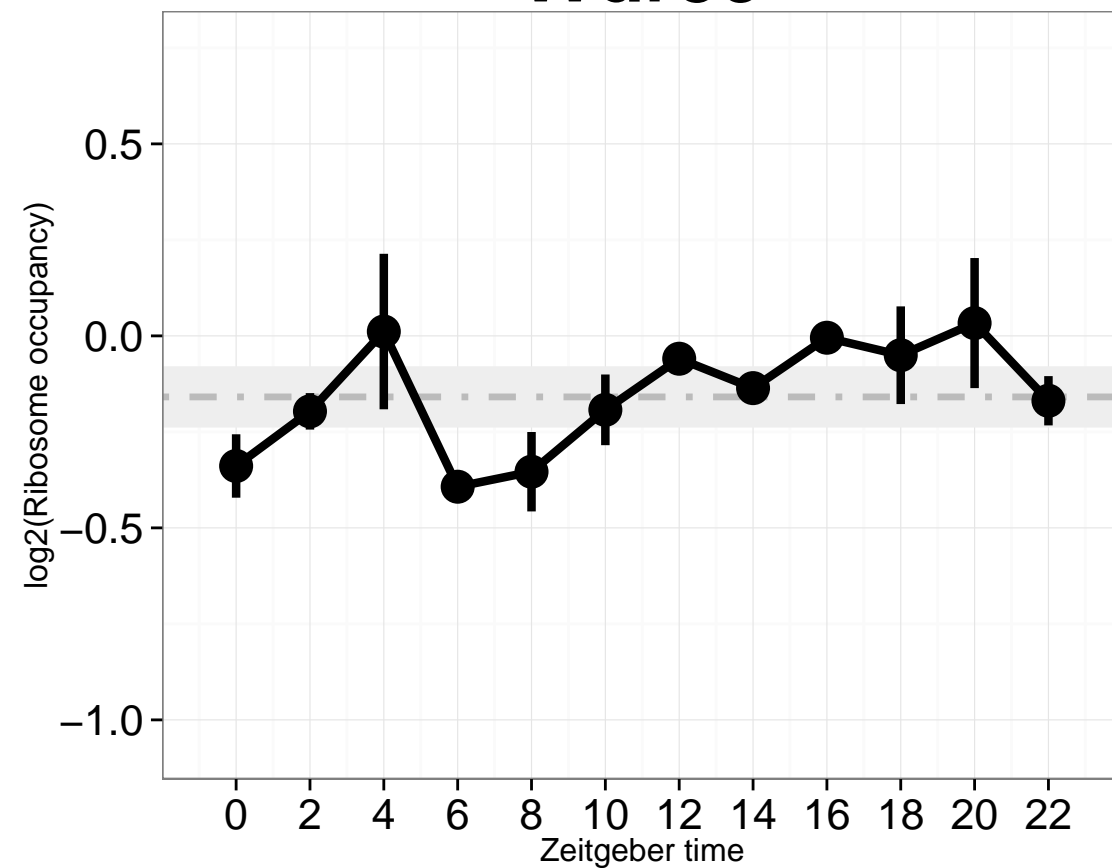

Supplement: Supplementary file 9196 [file 1]

## Plekha2

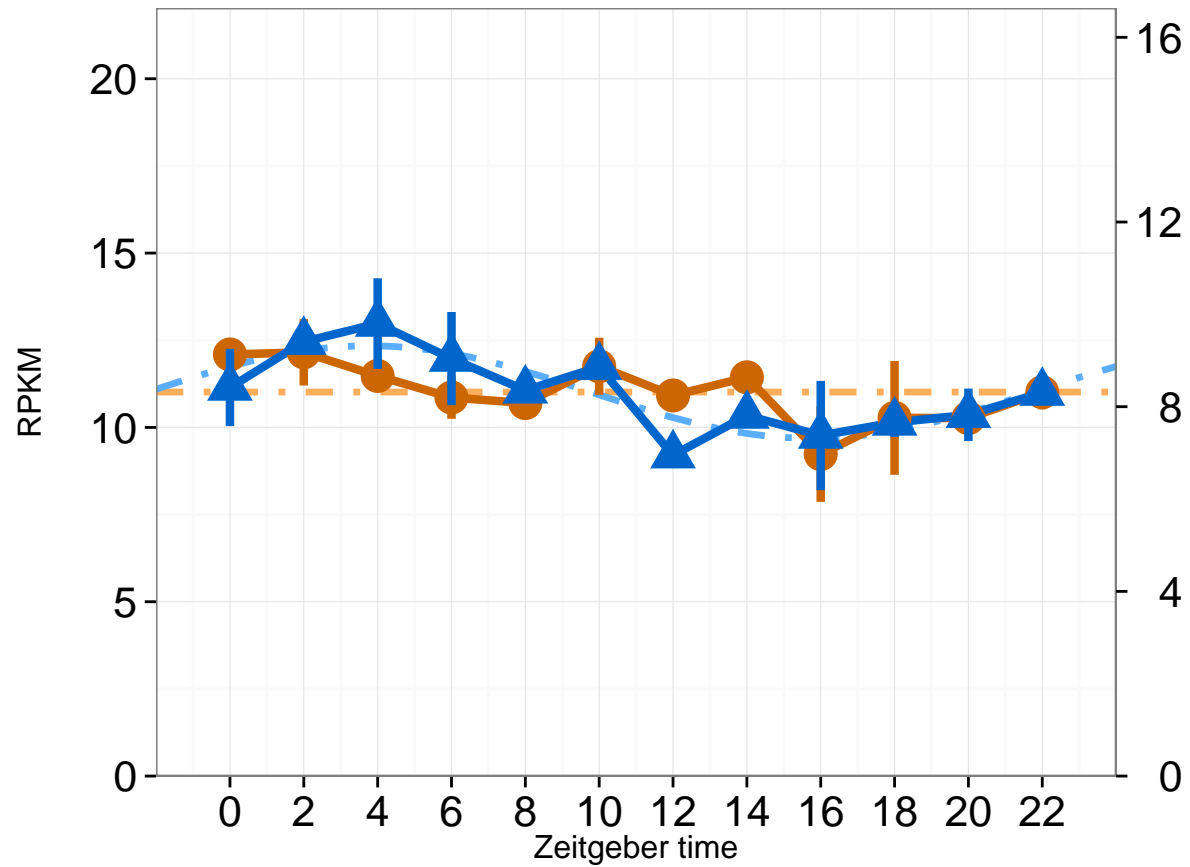

## Plekha2

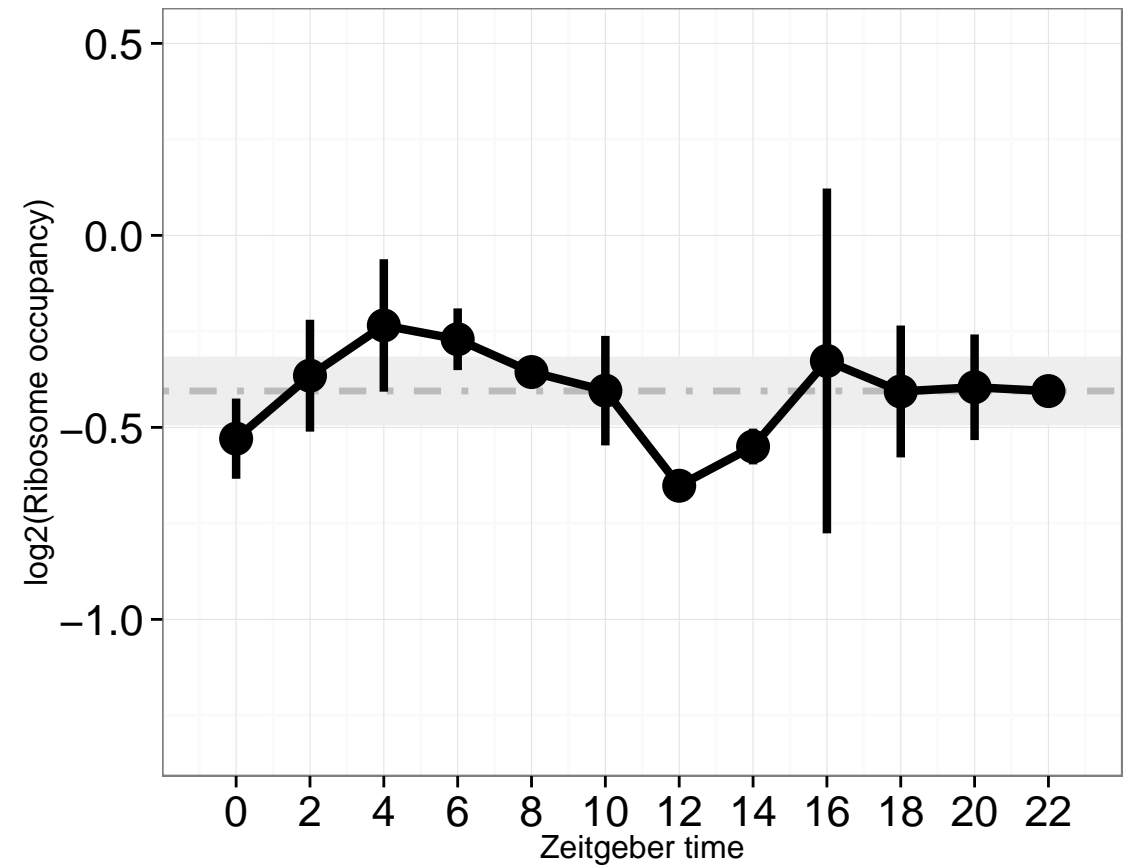

Supplement: Supplementary file 9197 [file 1]

## Acta2

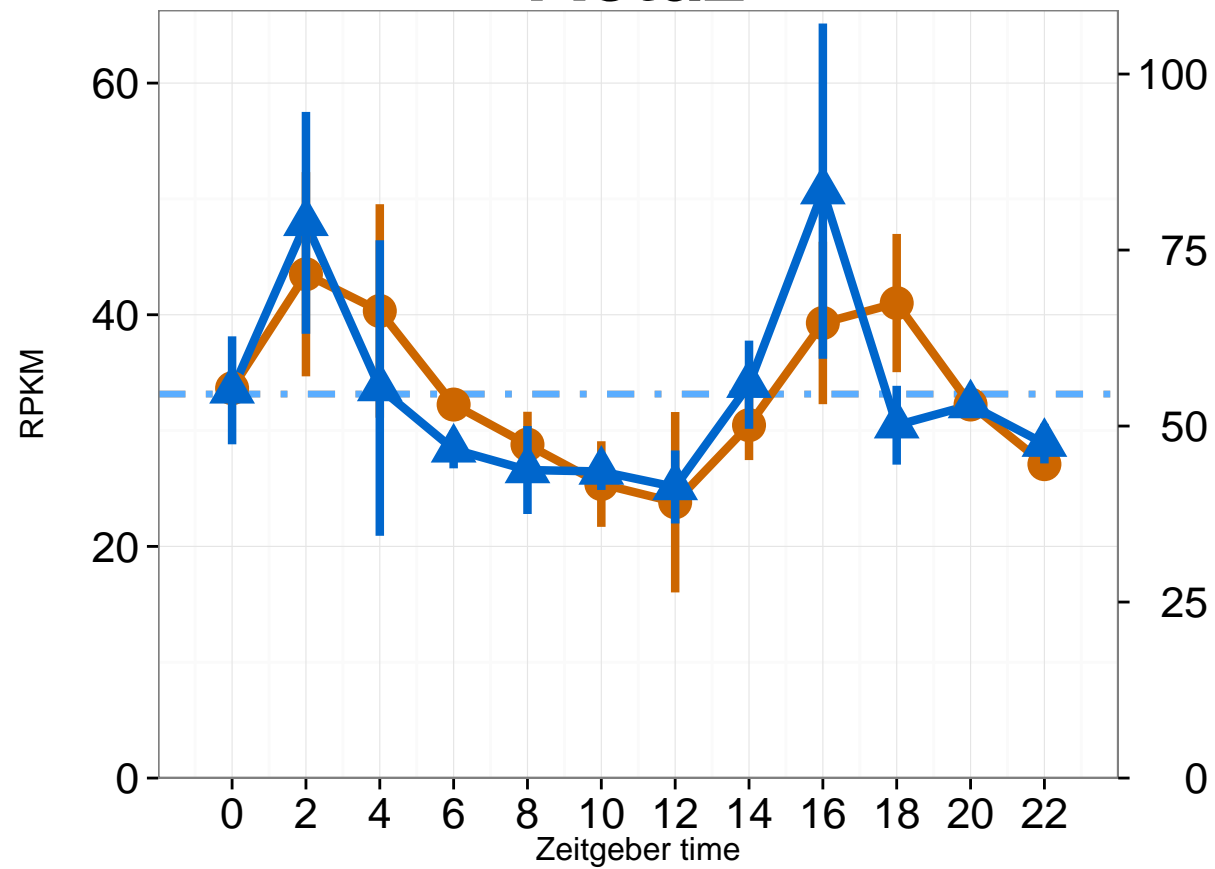

## Acta2

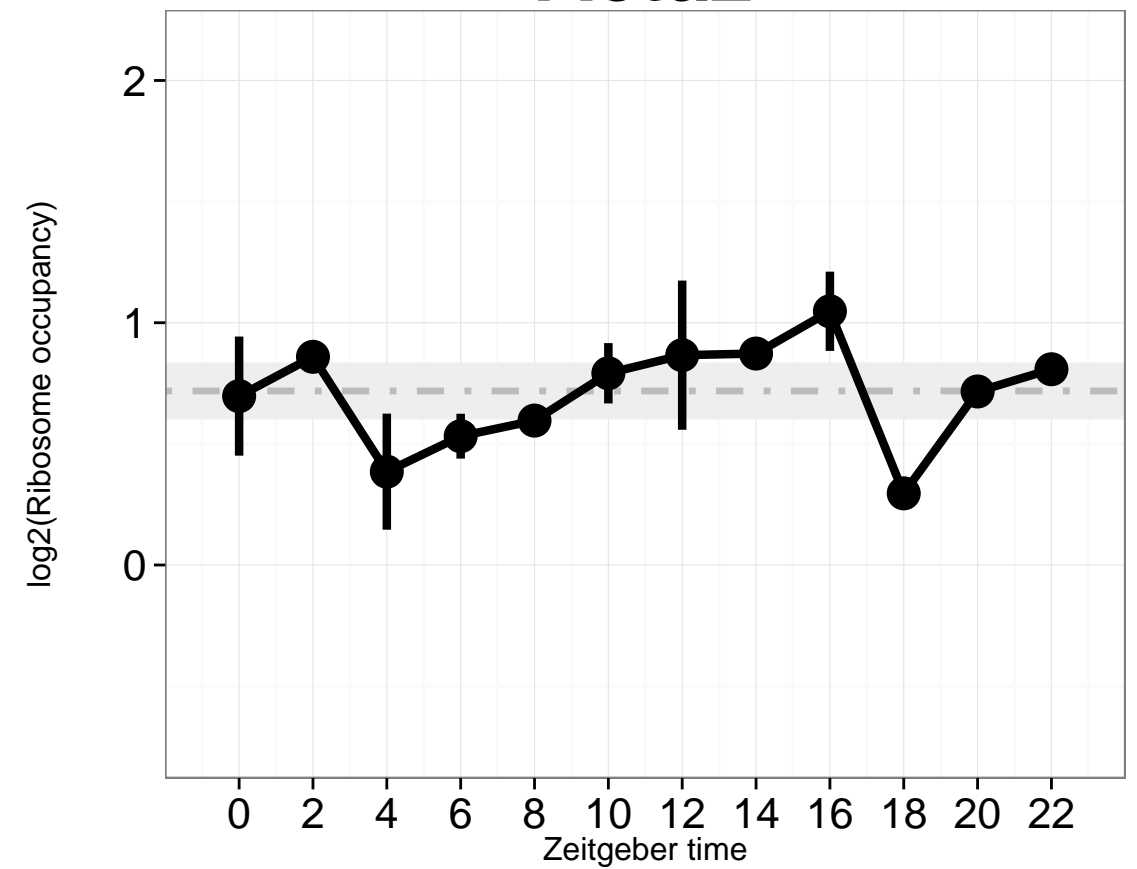

Supplement: Supplementary file 9198 [file 1]

# Zfp53

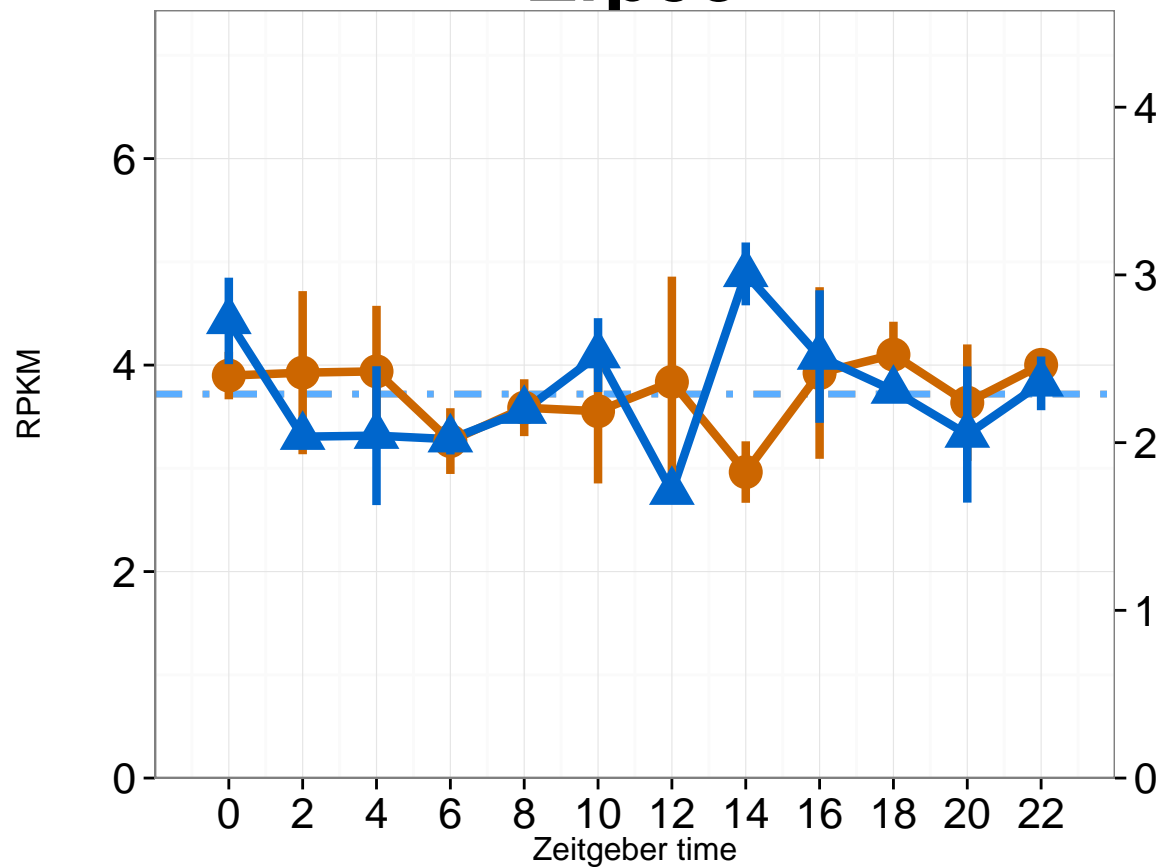

# Zfp53

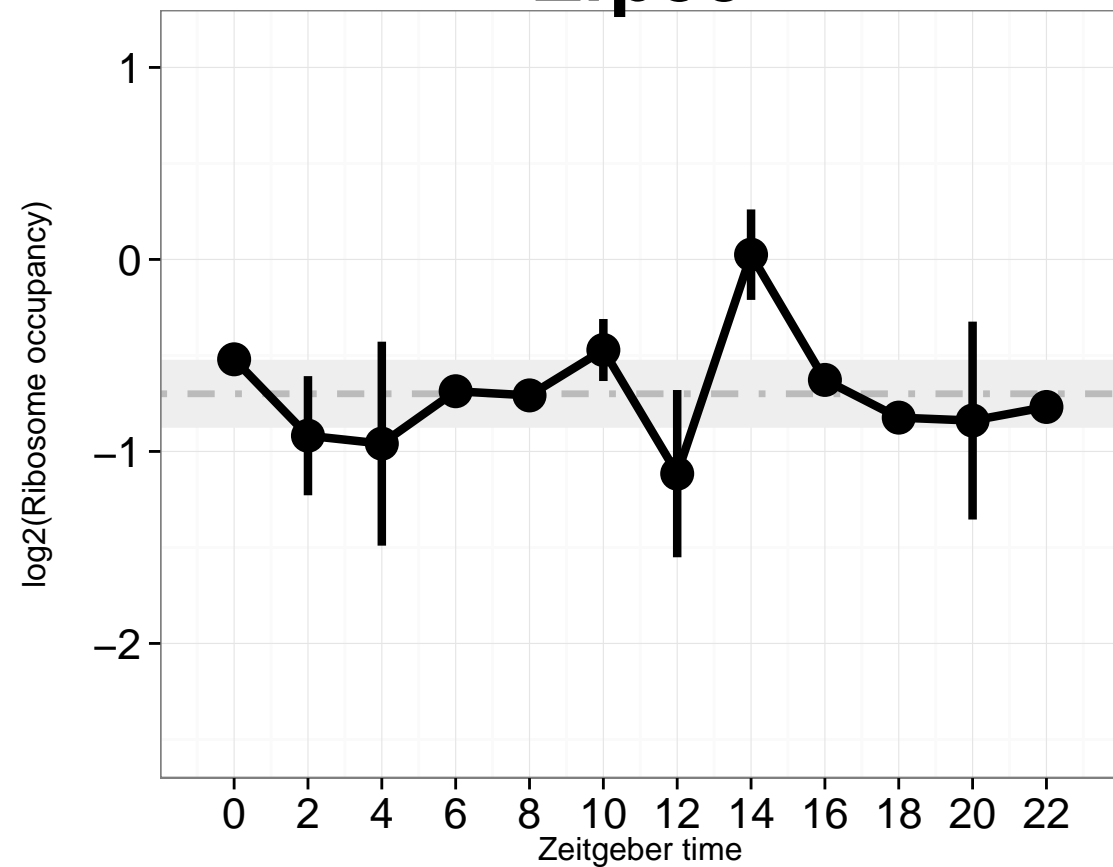

Supplement: Supplementary file 9199 [file 1]

## Pdk1

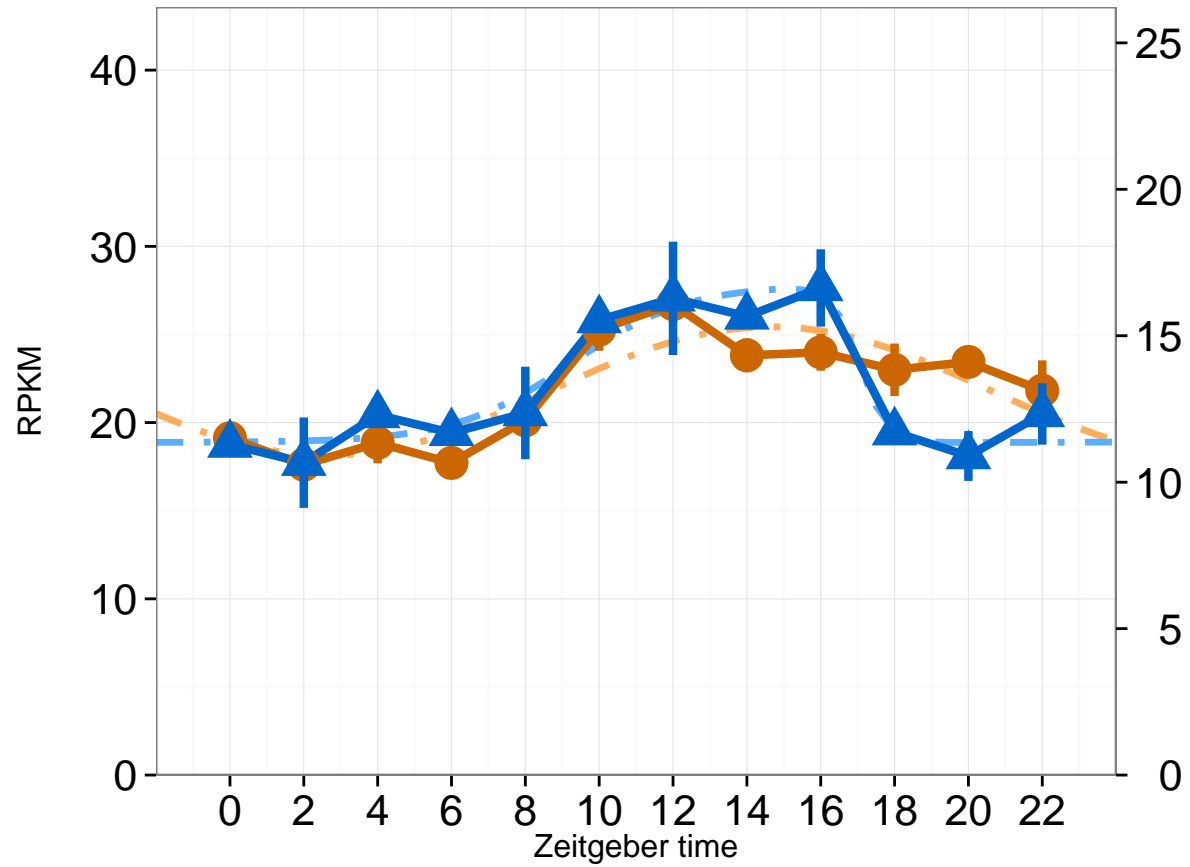

## Pdk1

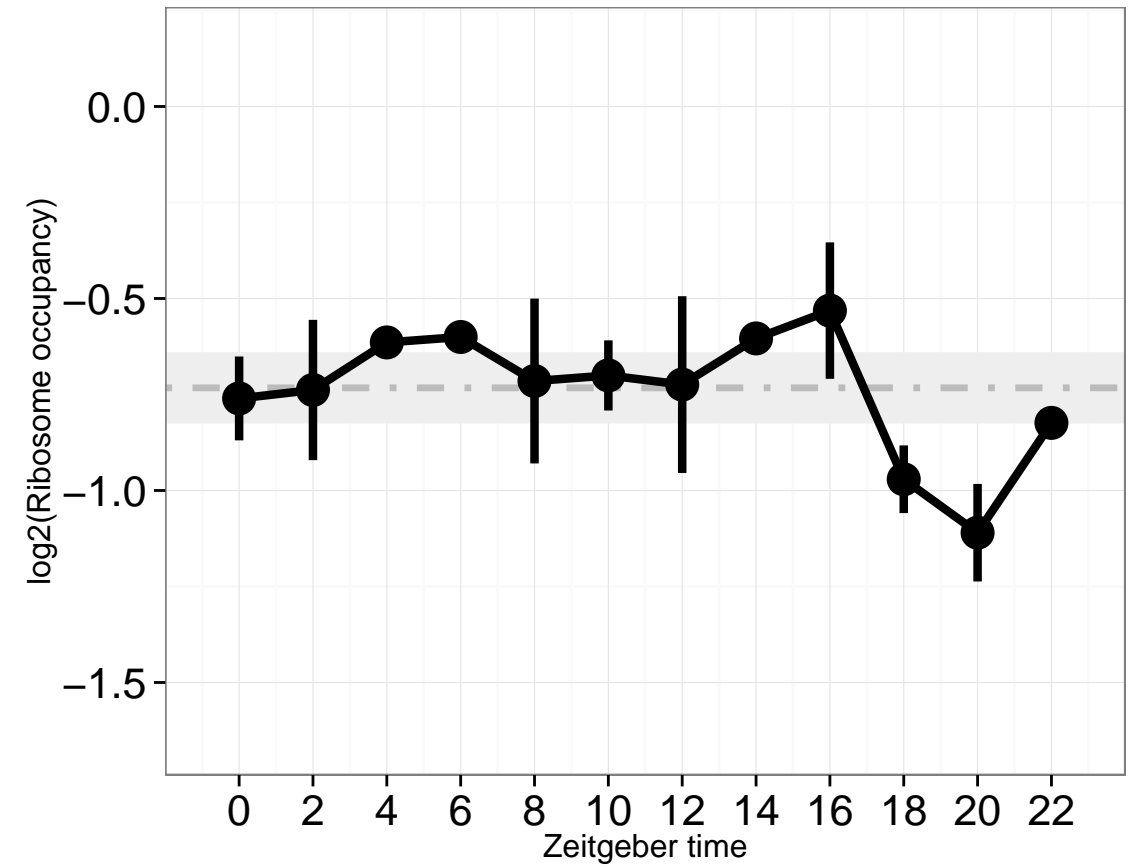

Supplement: Supplementary file 9200 [file 1]

# Inpp5a

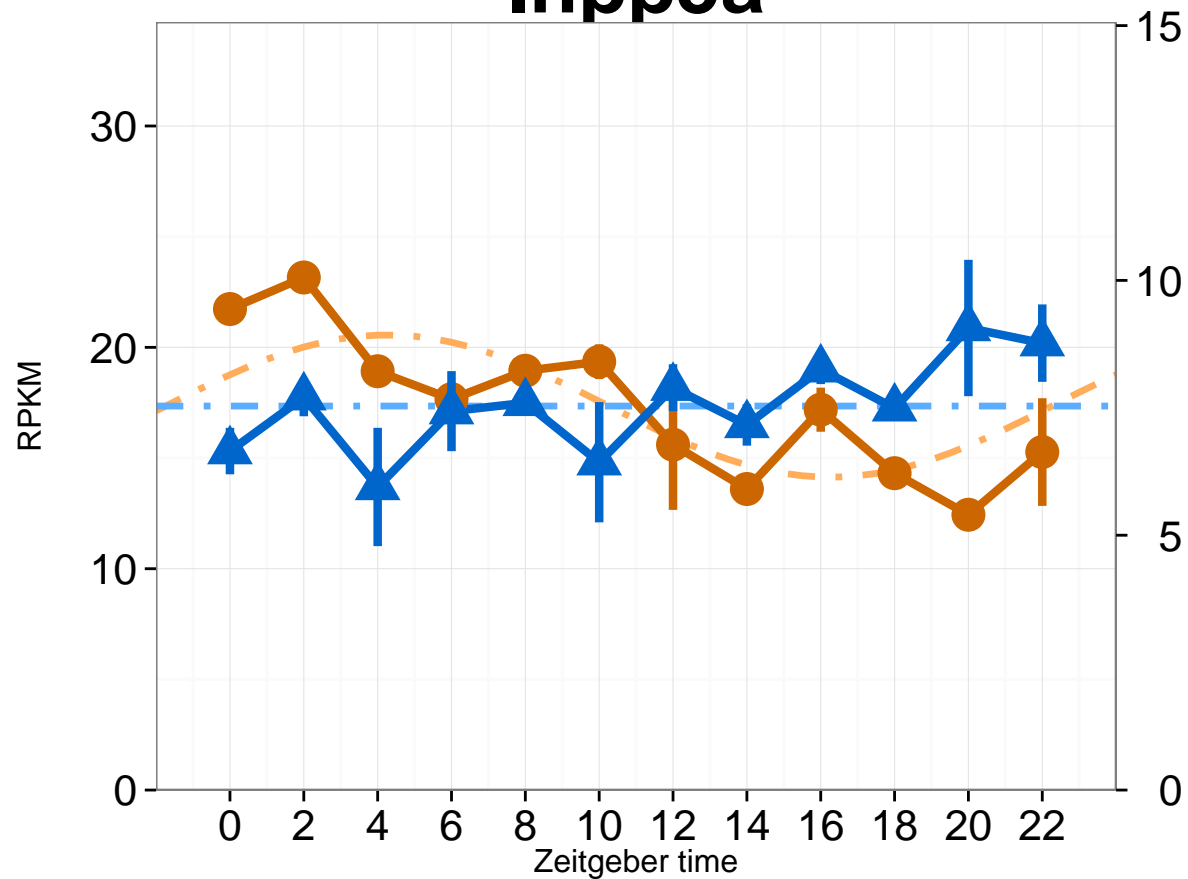

# Inpp5a

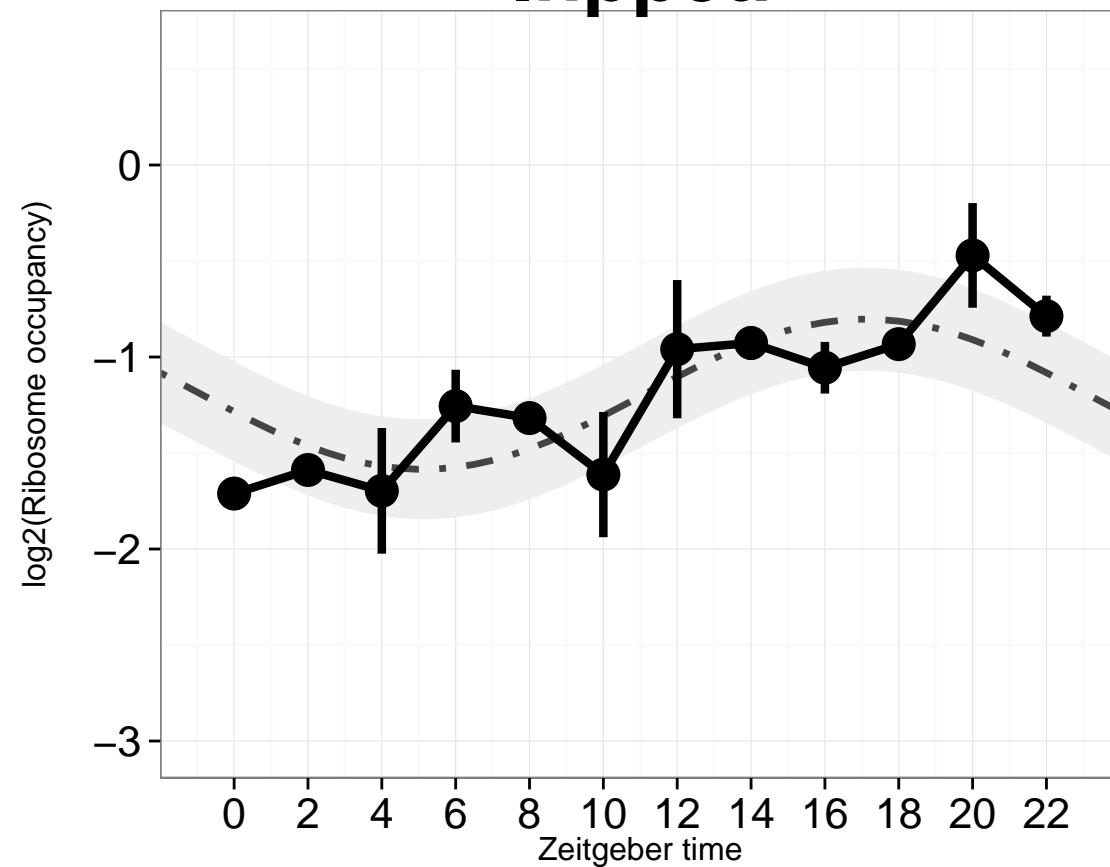

Supplement: Supplementary file 9201 [file 1]

# Cep170

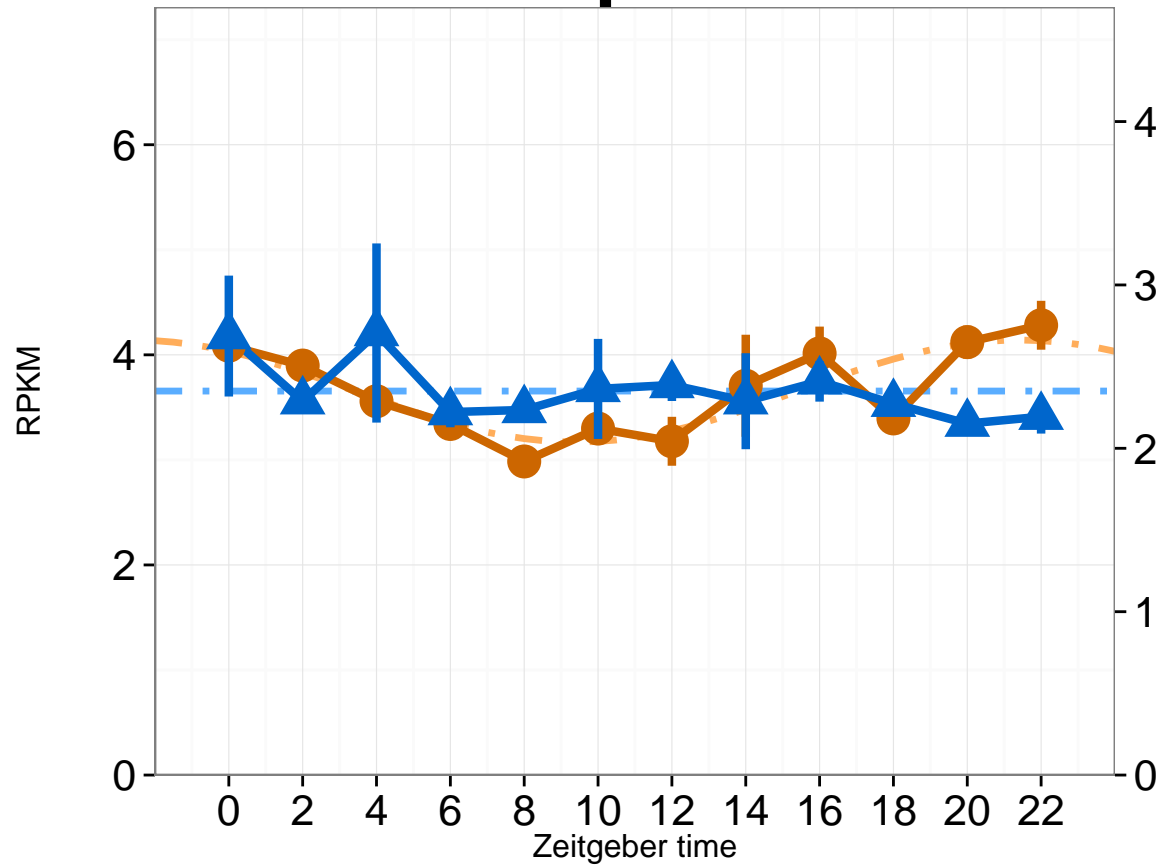

# Cep170

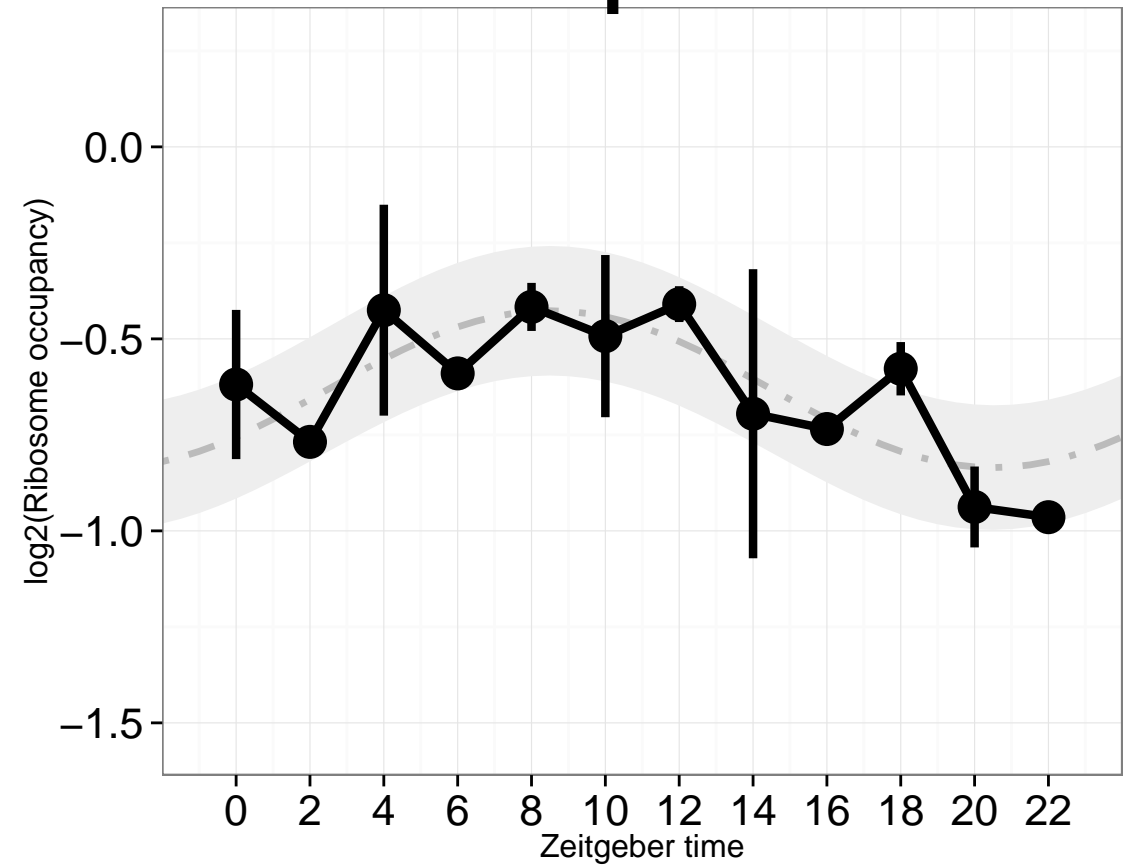

Supplement: Supplementary file 9202 [file 1]

# Col5a3

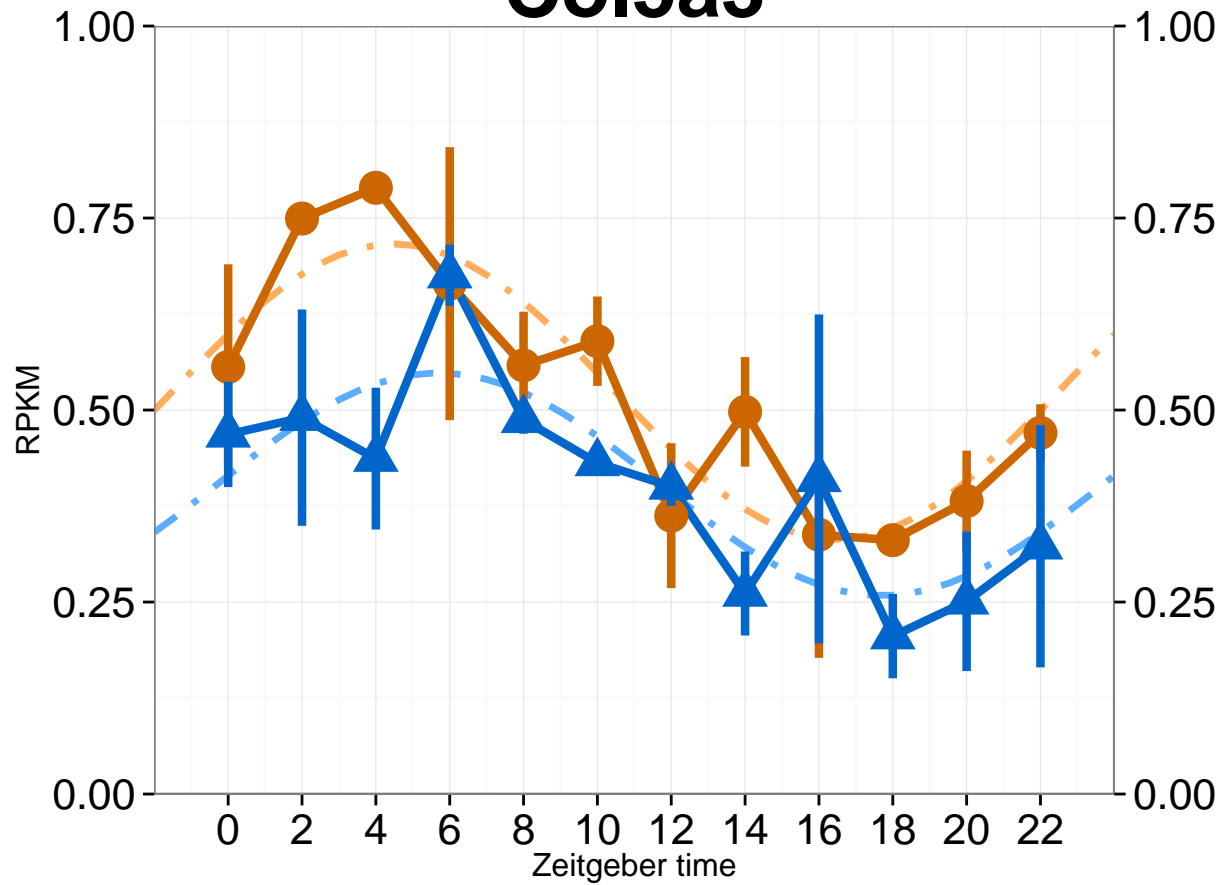

# Col5a3

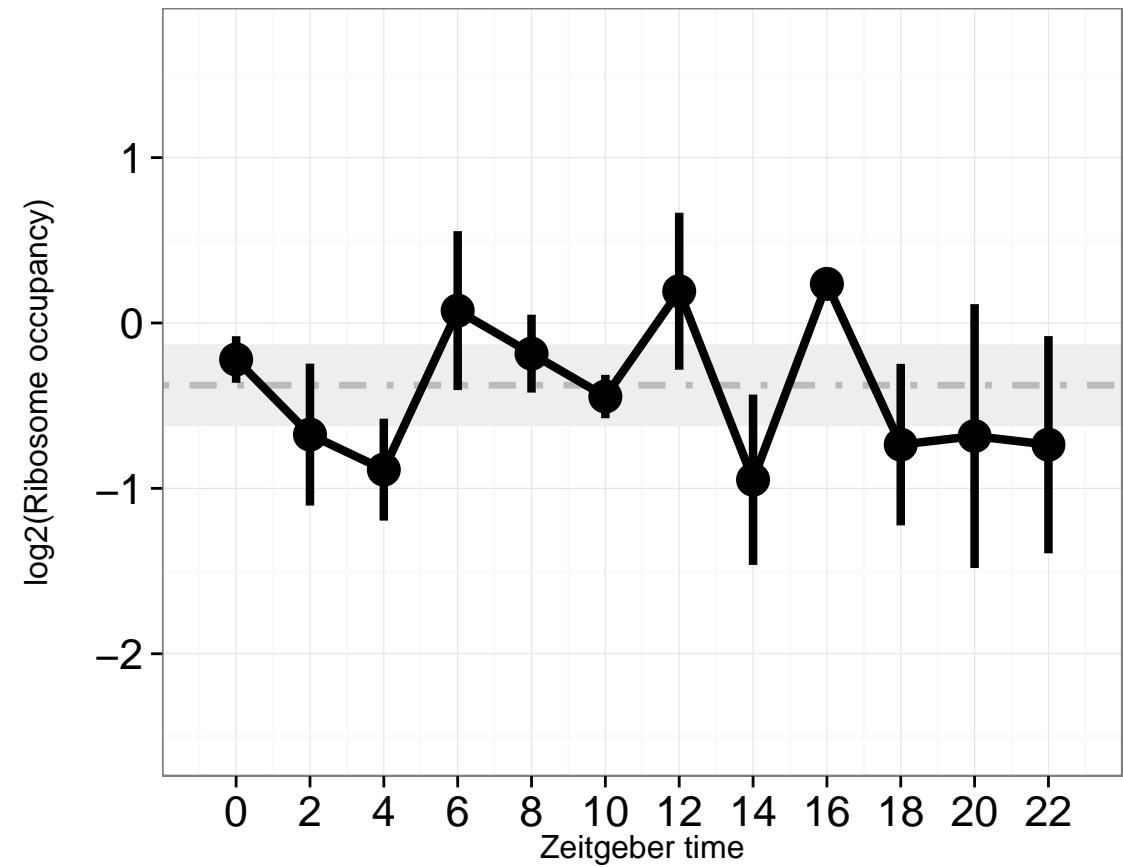

Supplement: Supplementary file 9203 [file 1]

## Cpsf2

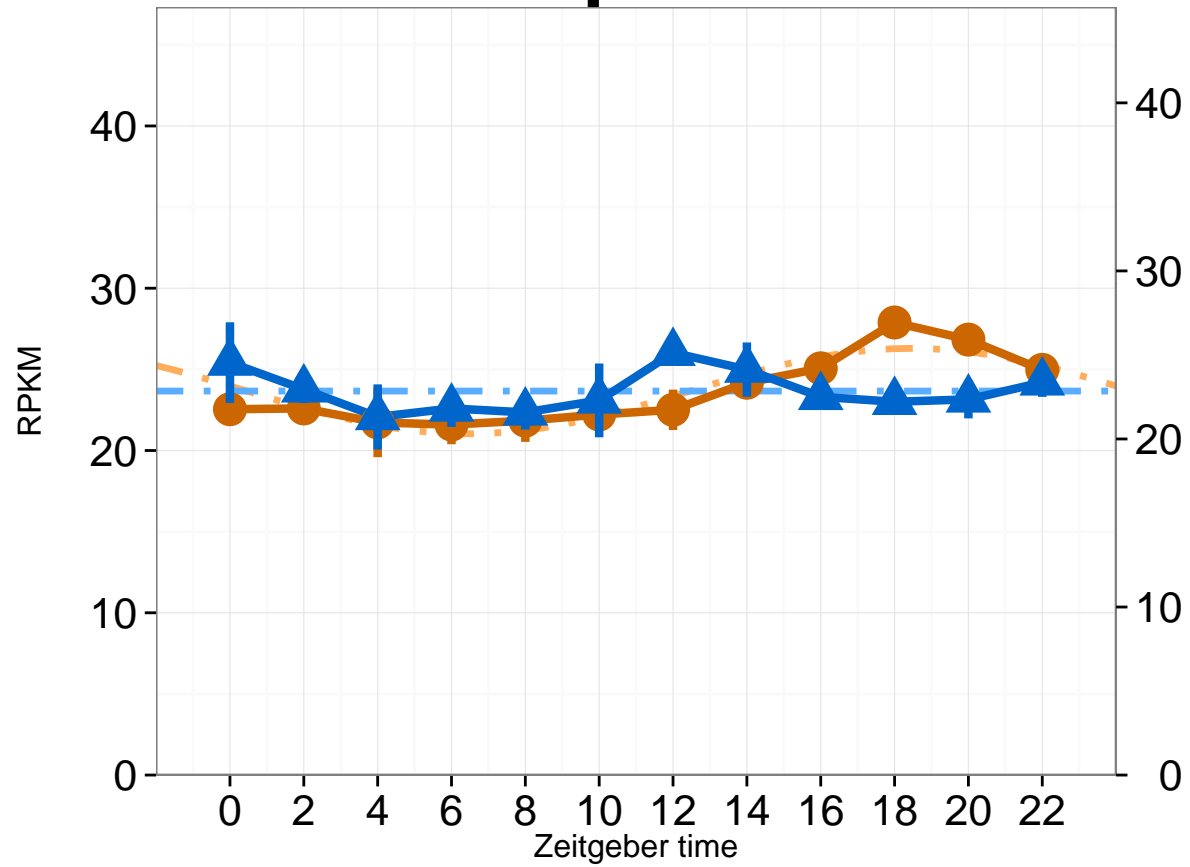

## Cpsf2

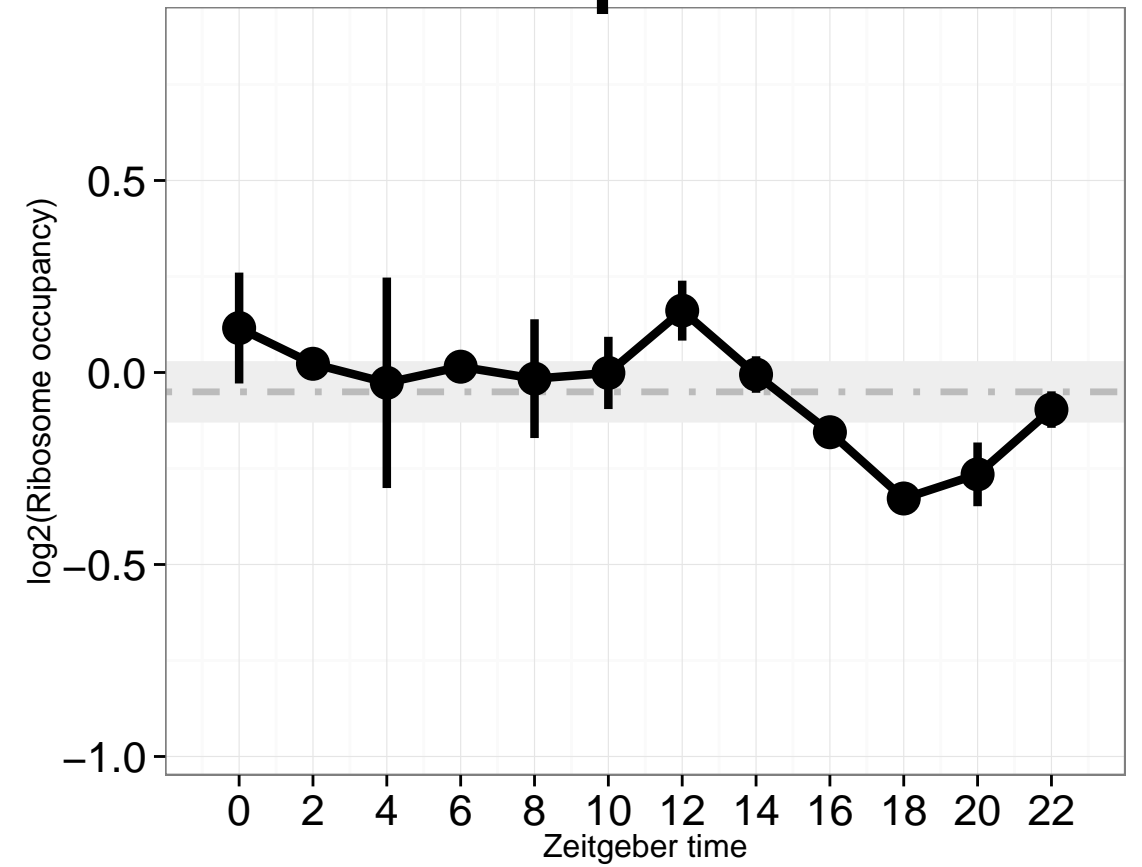

Supplement: Supplementary file 9204 [file 1]

**lgj**

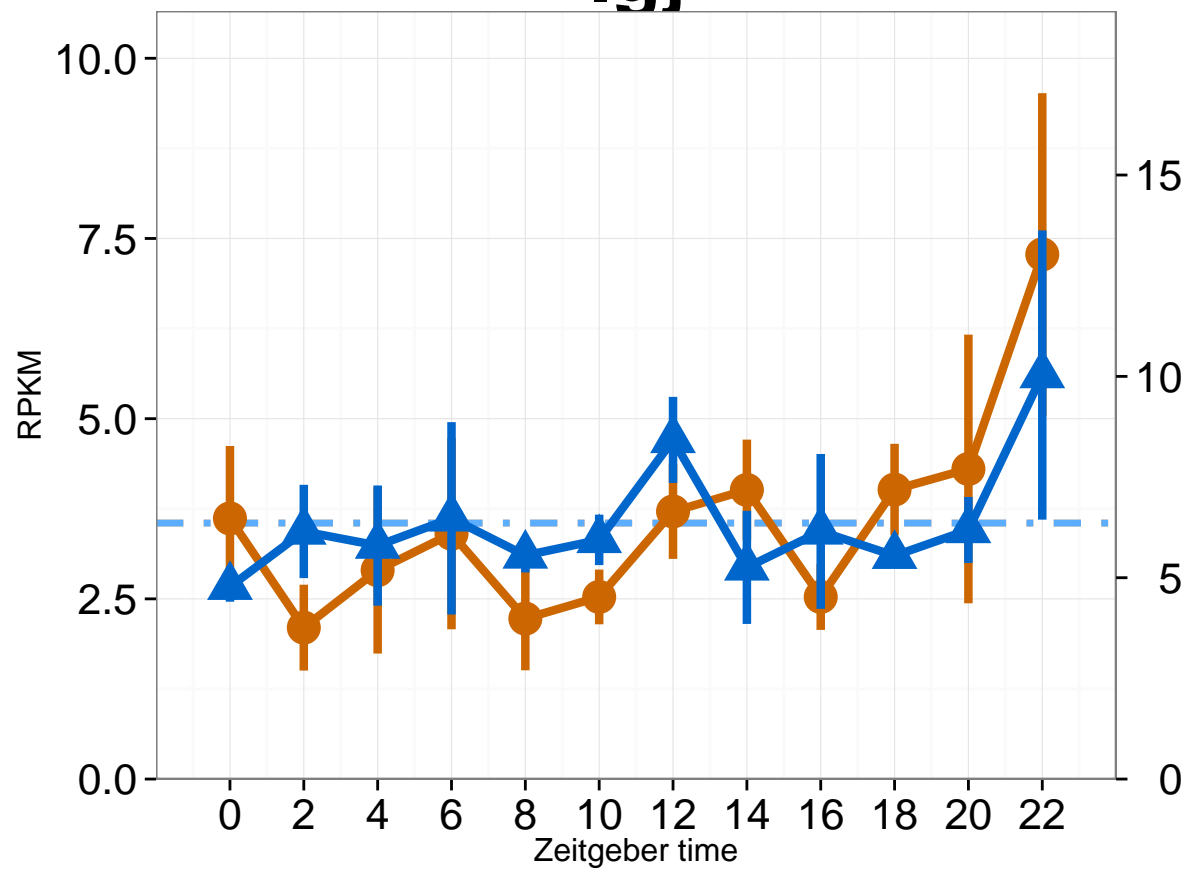

**lgj**

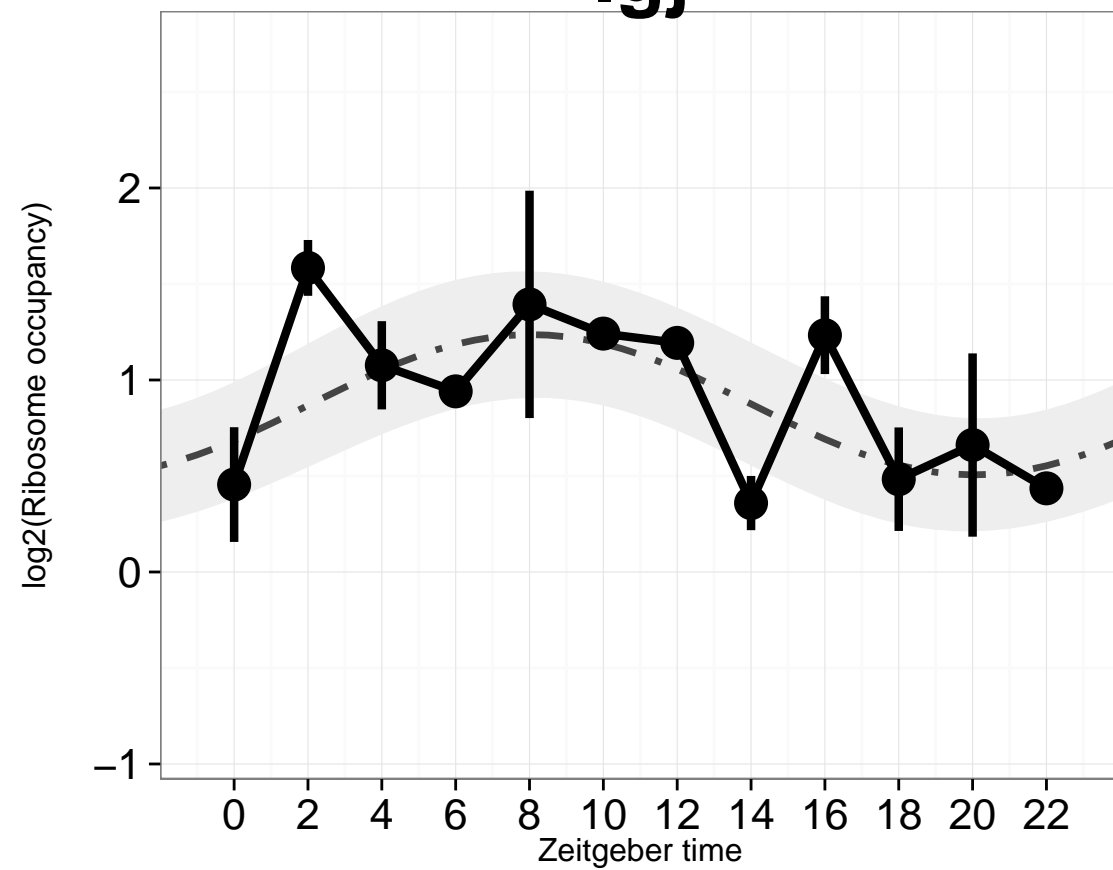

Supplement: Supplementary file 9205 [file 1]

# Sorbs2

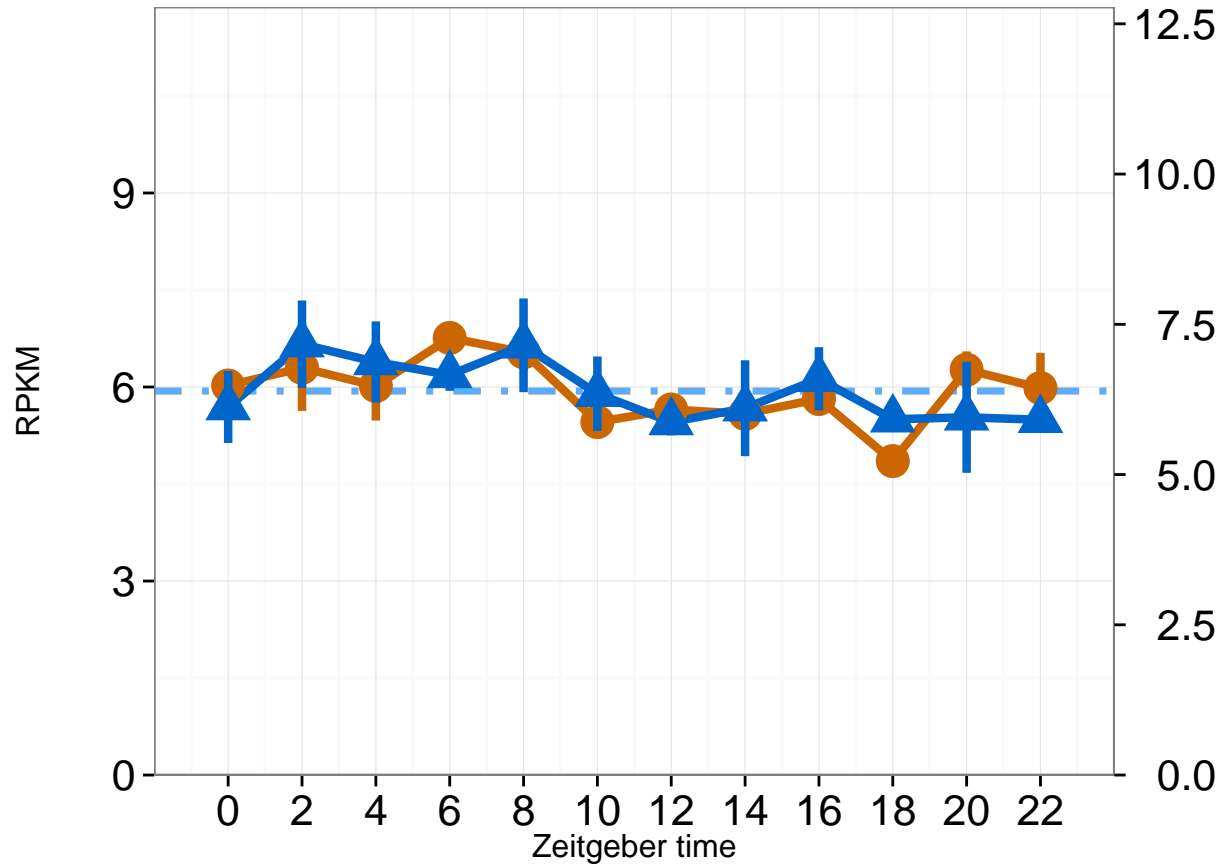

# Sorbs2

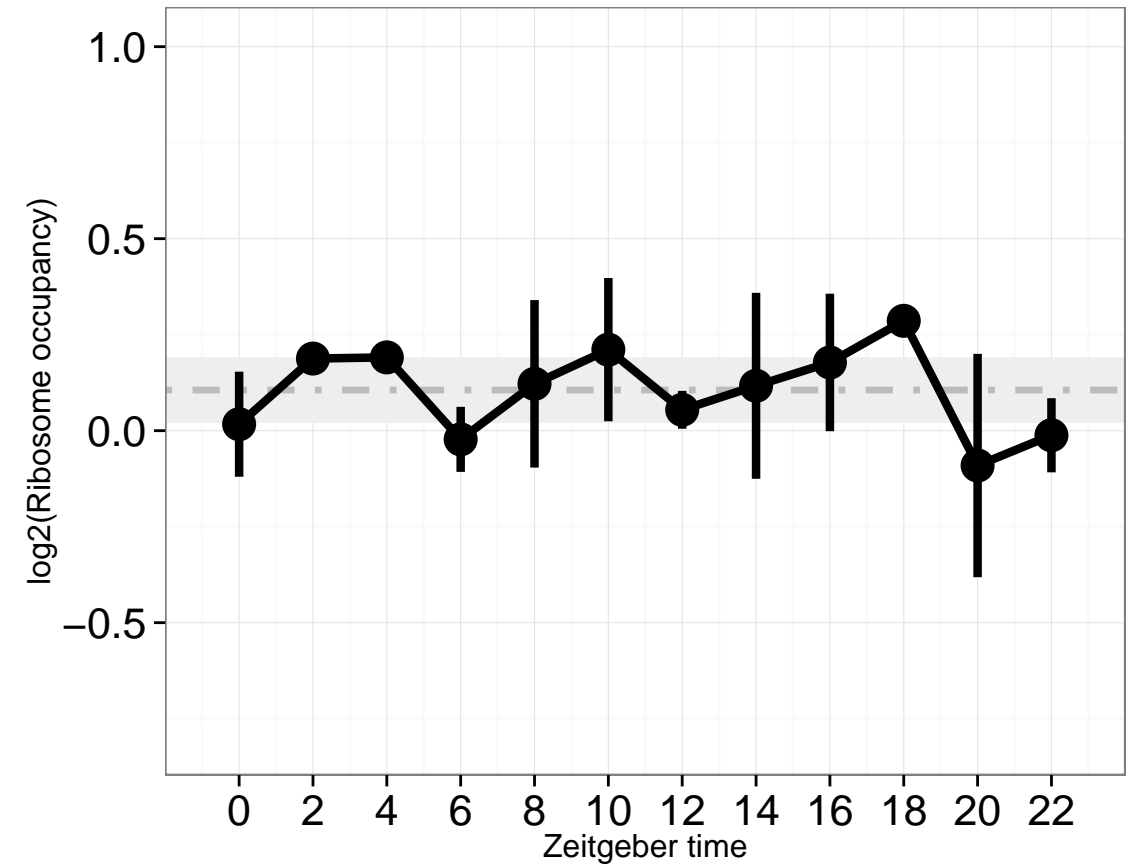

Supplement: Supplementary file 9206 [file 1]

## Naa38

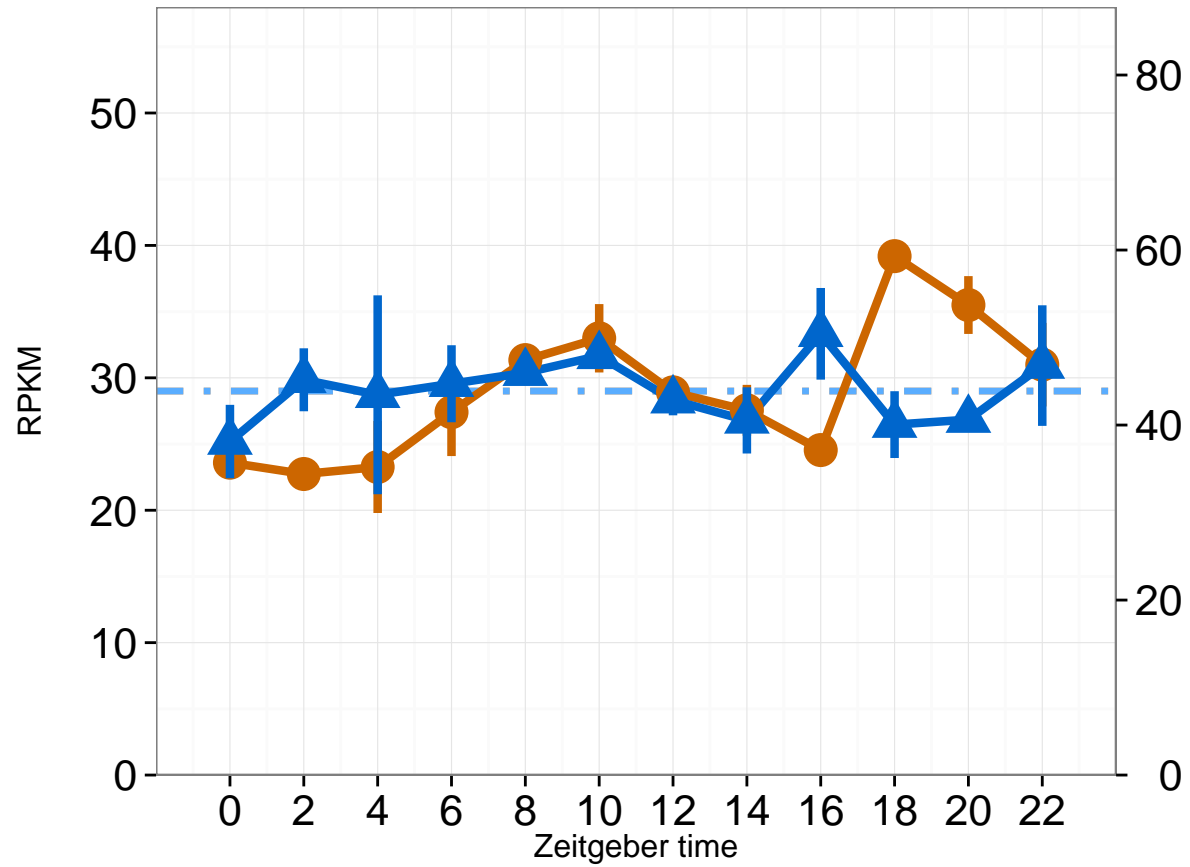

## Naa38

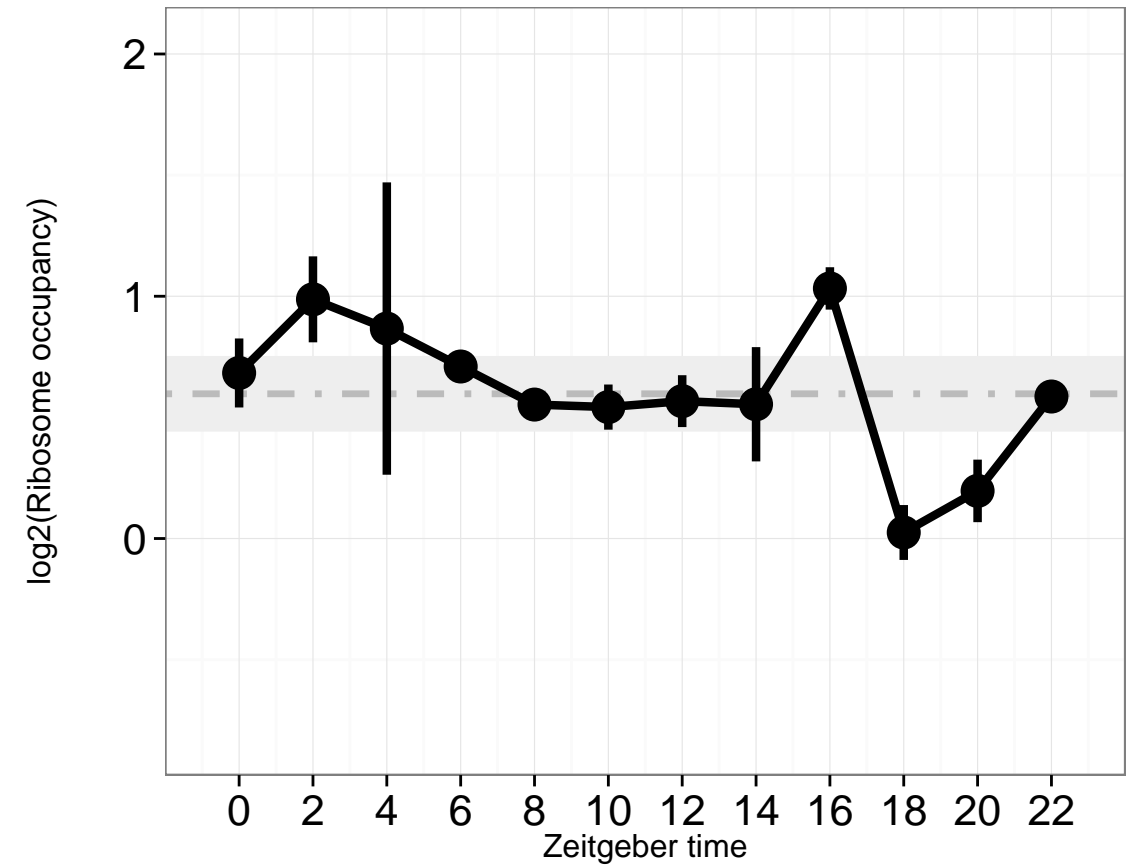

Supplement: Supplementary file 9207 [file 1]

# Zfp750

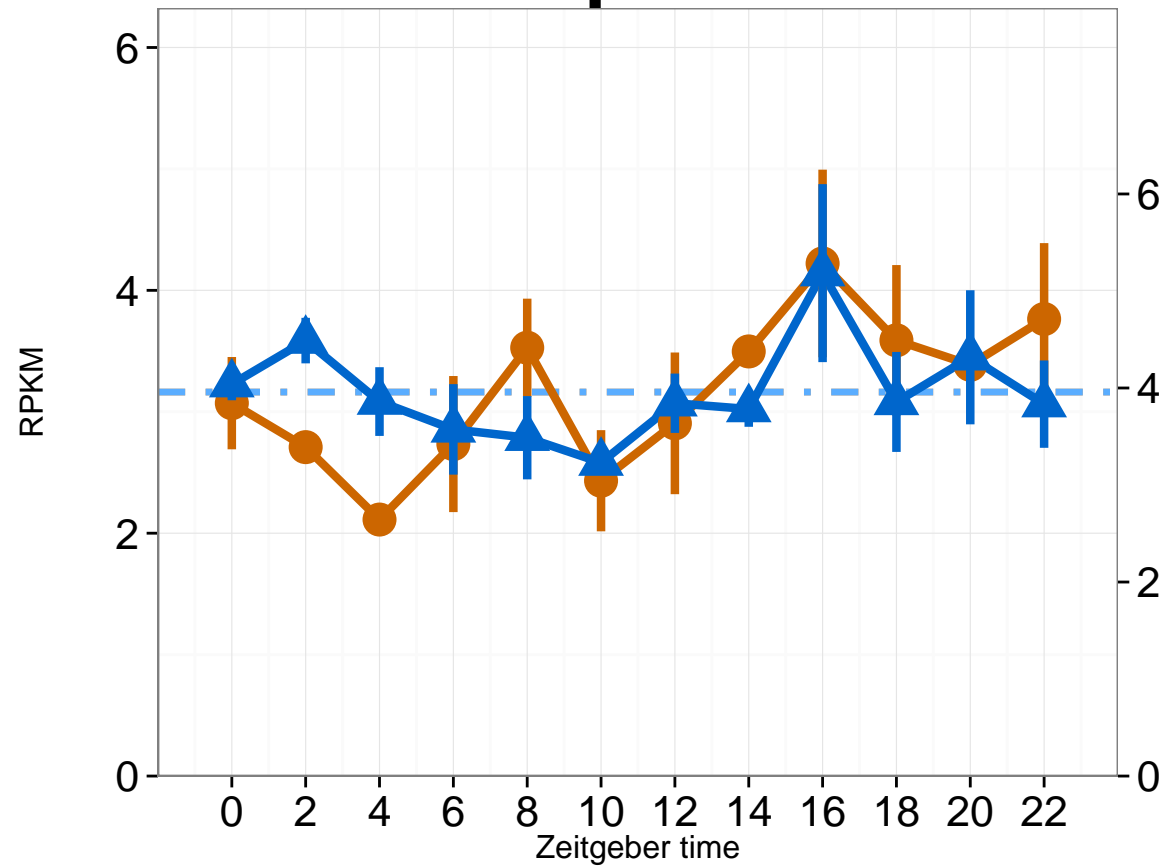

# Zfp750

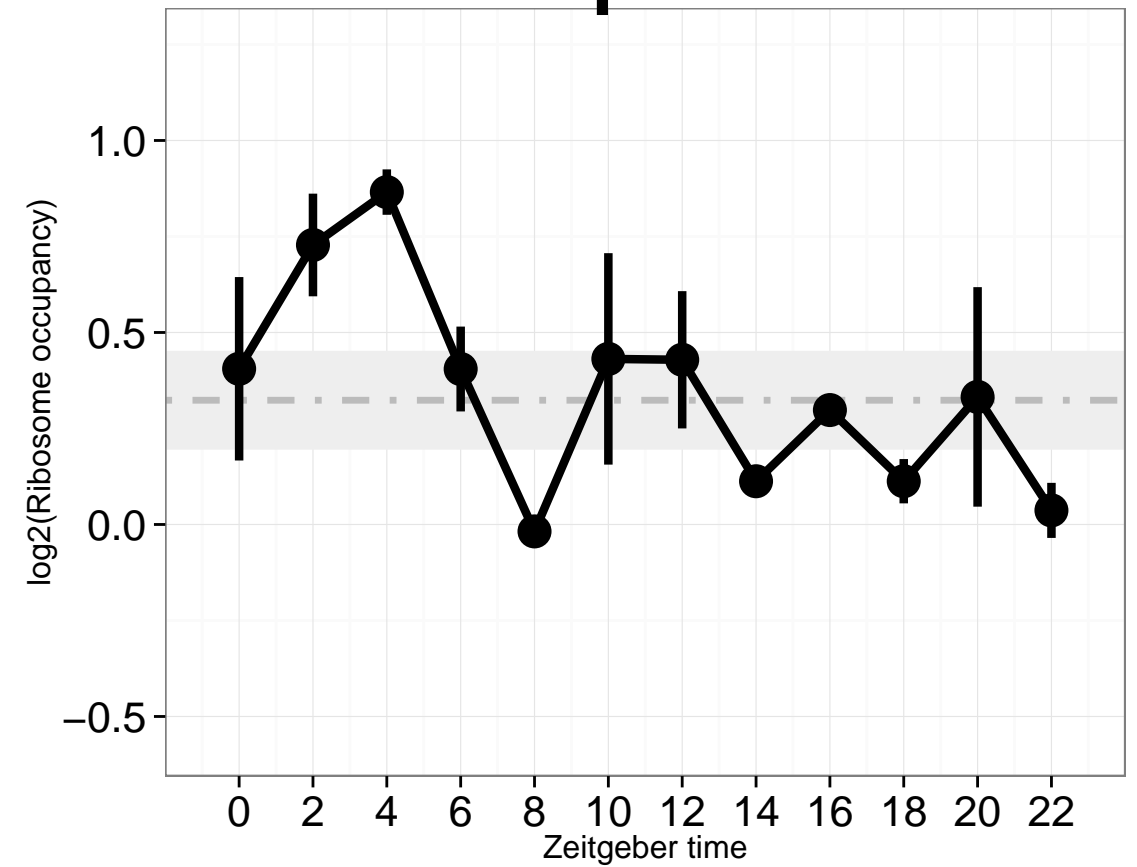

Supplement: Supplementary file 9208 [file 1]

# Mtmr9

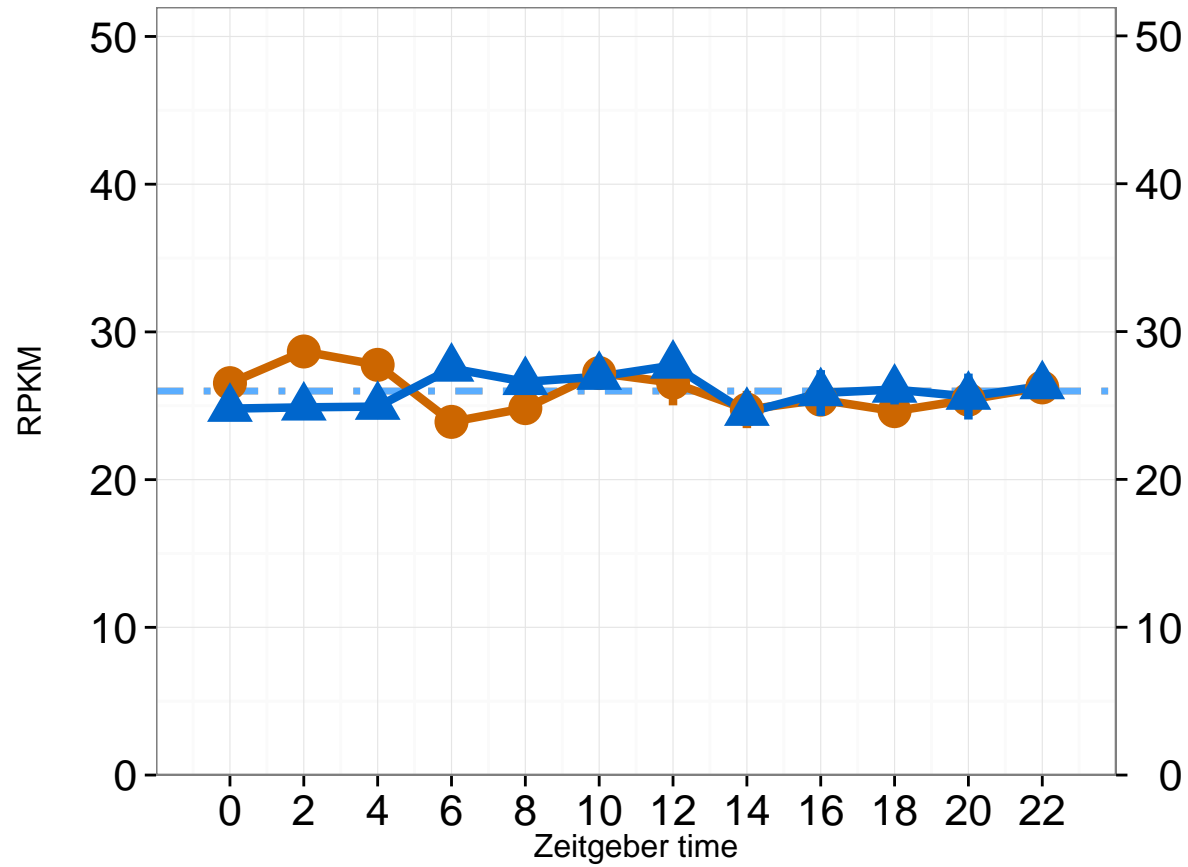

# Mtmr9

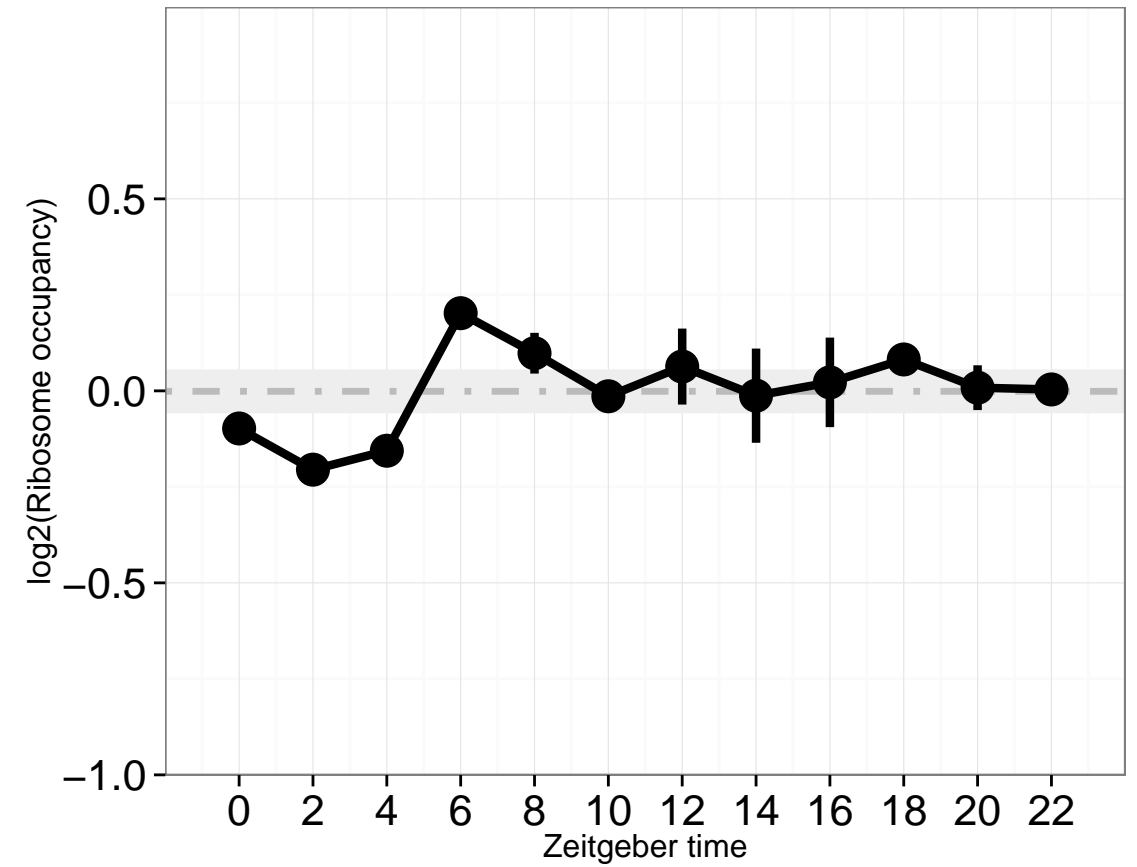

Supplement: Supplementary file 9209 [file 1]

# Ccdc151

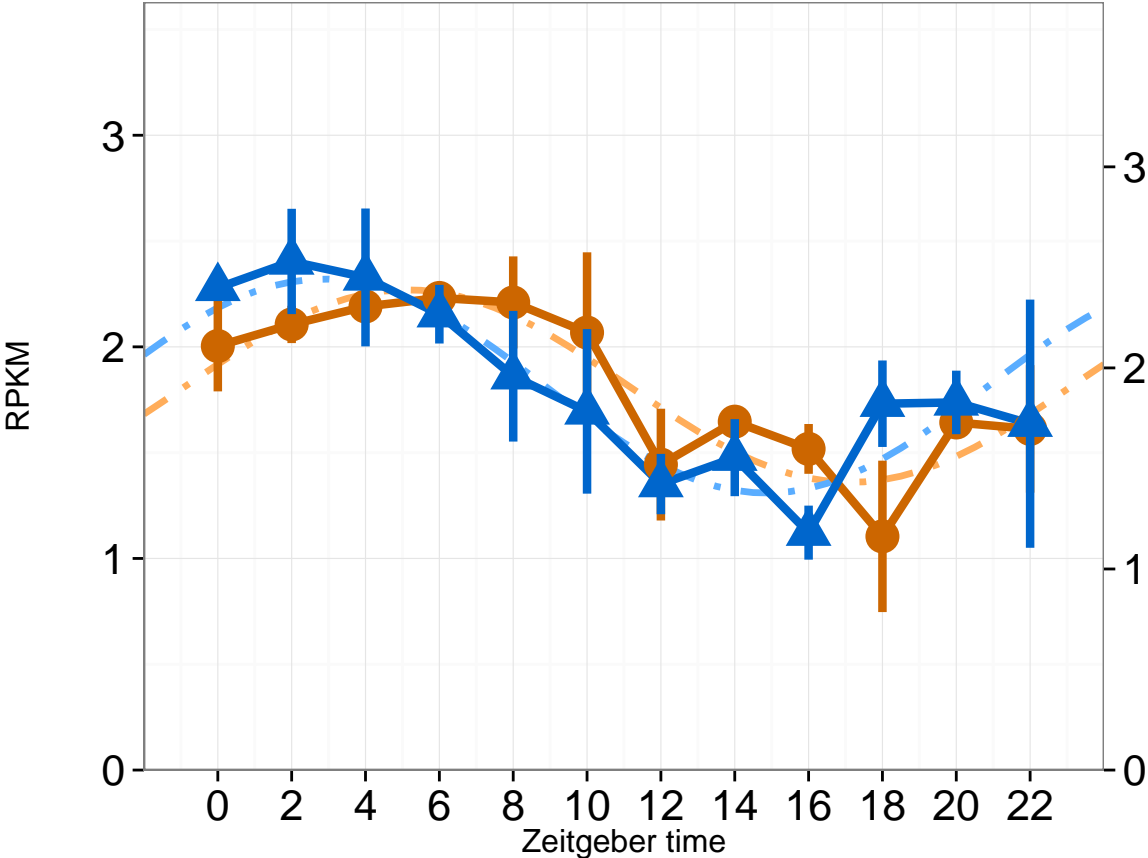

# Ccdc151

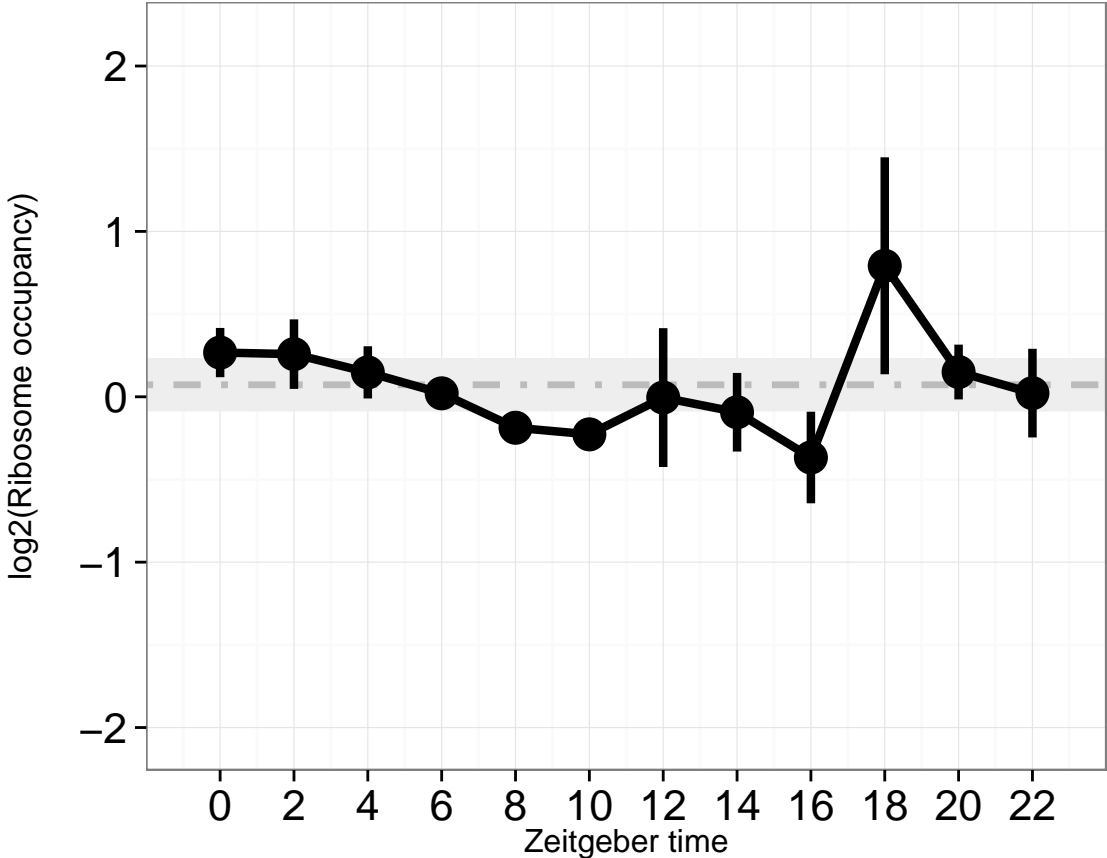

Supplement: Supplementary file 9210 [file 1]

# Ribc1

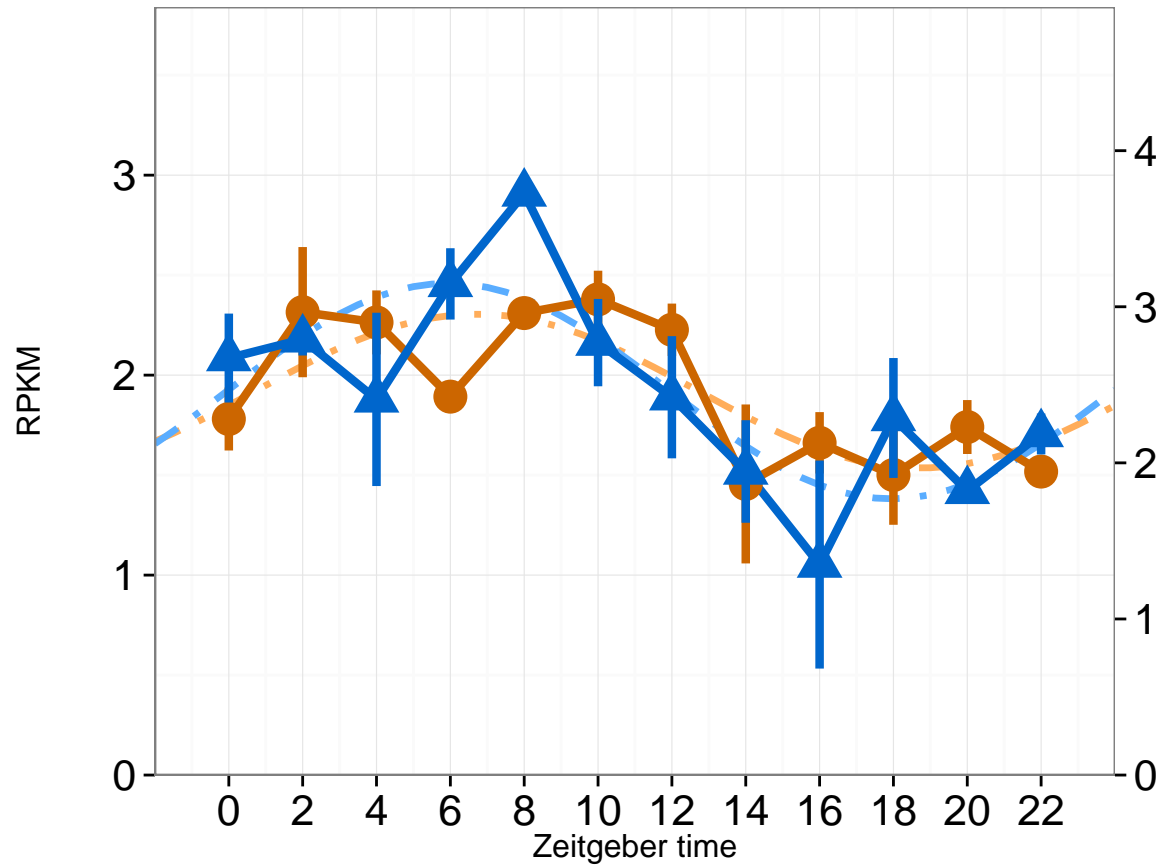

# Ribc1

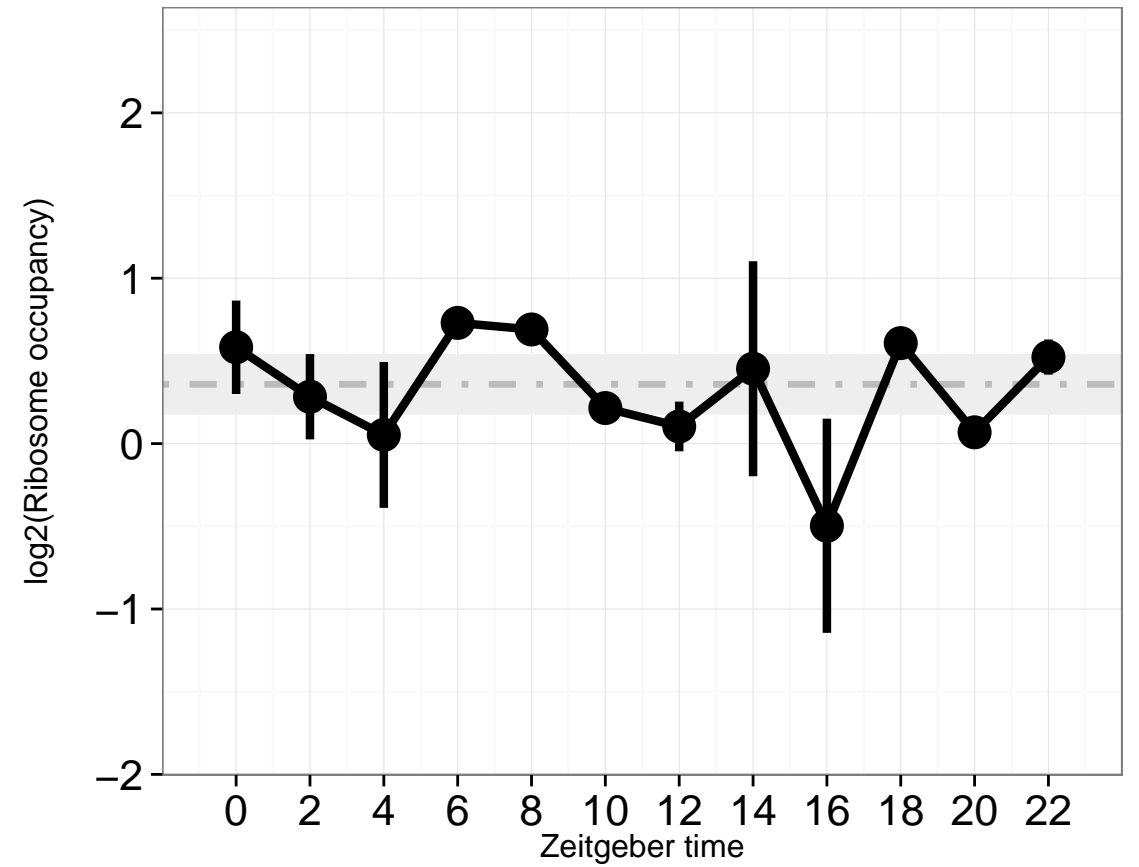

Supplement: Supplementary file 9211 [file 1]

# Gpc6

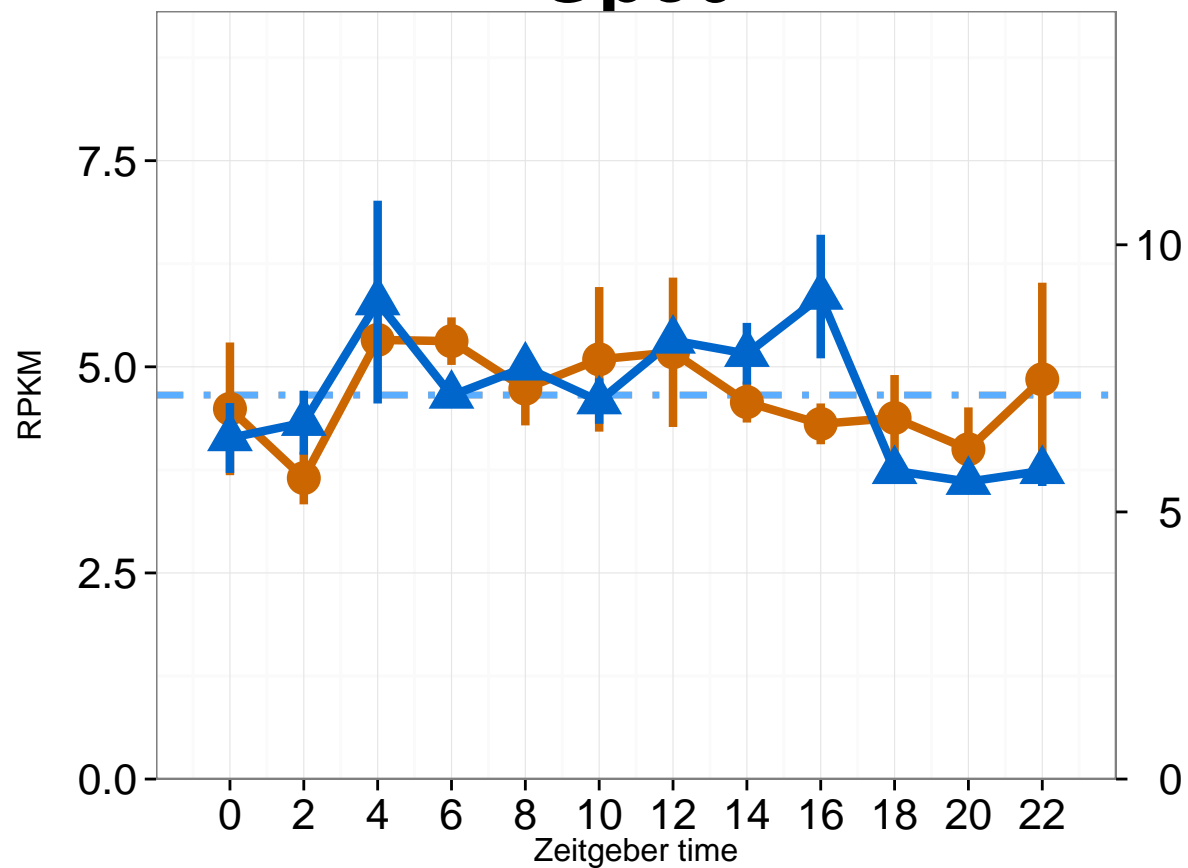

# Gpc6

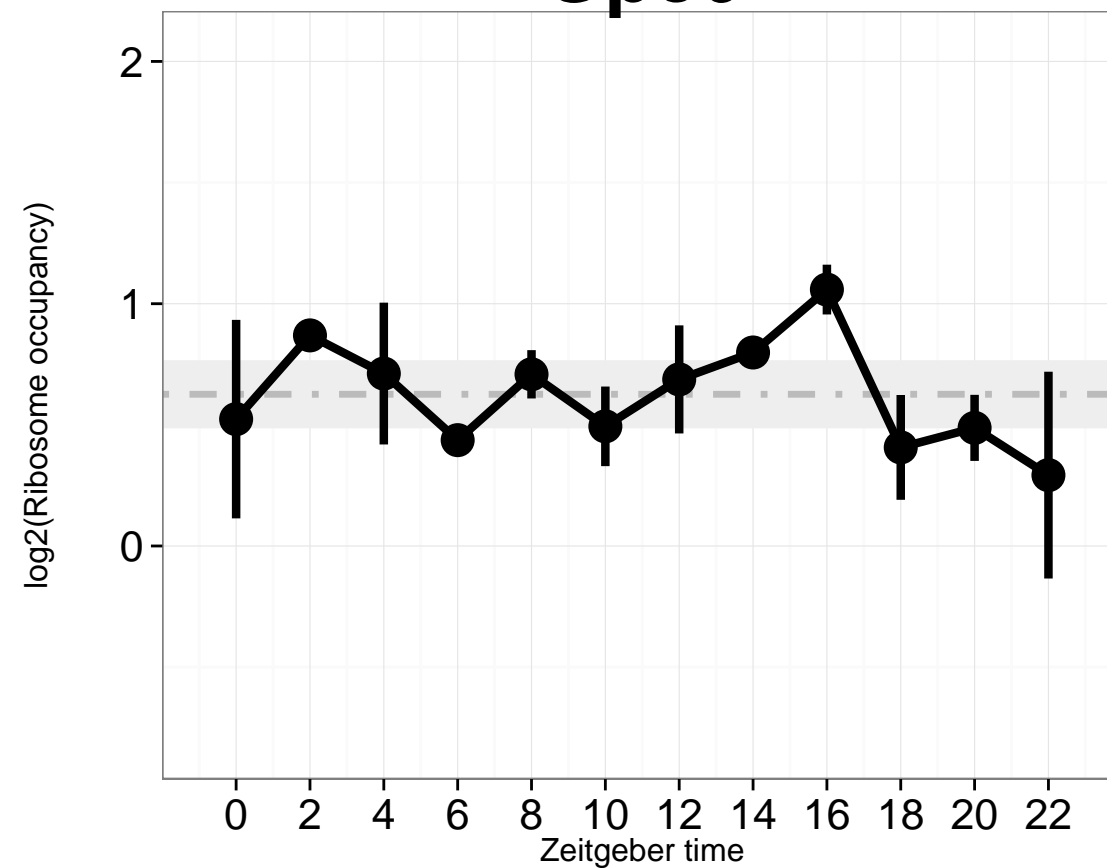

Supplement: Supplementary file 9212 [file 1]

# Dnajc5

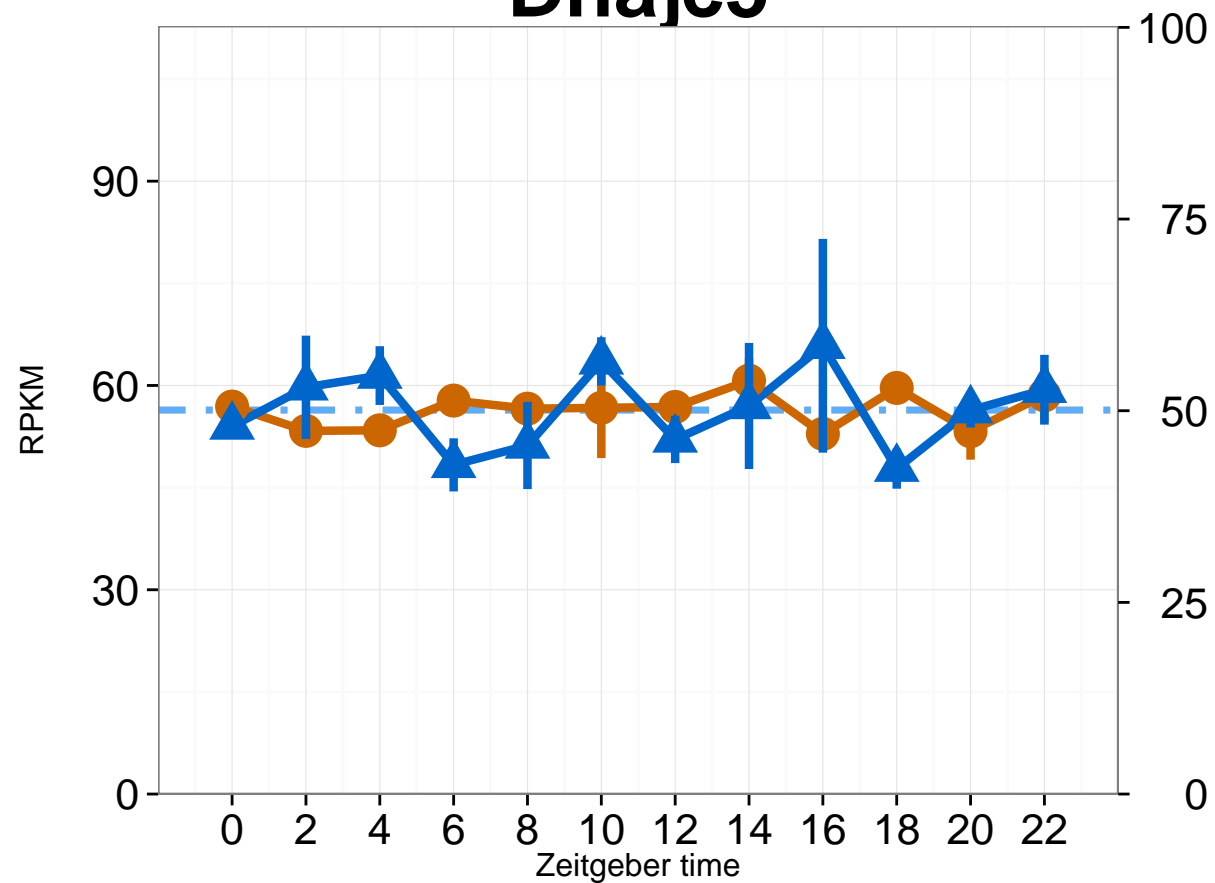

# Dnajc5

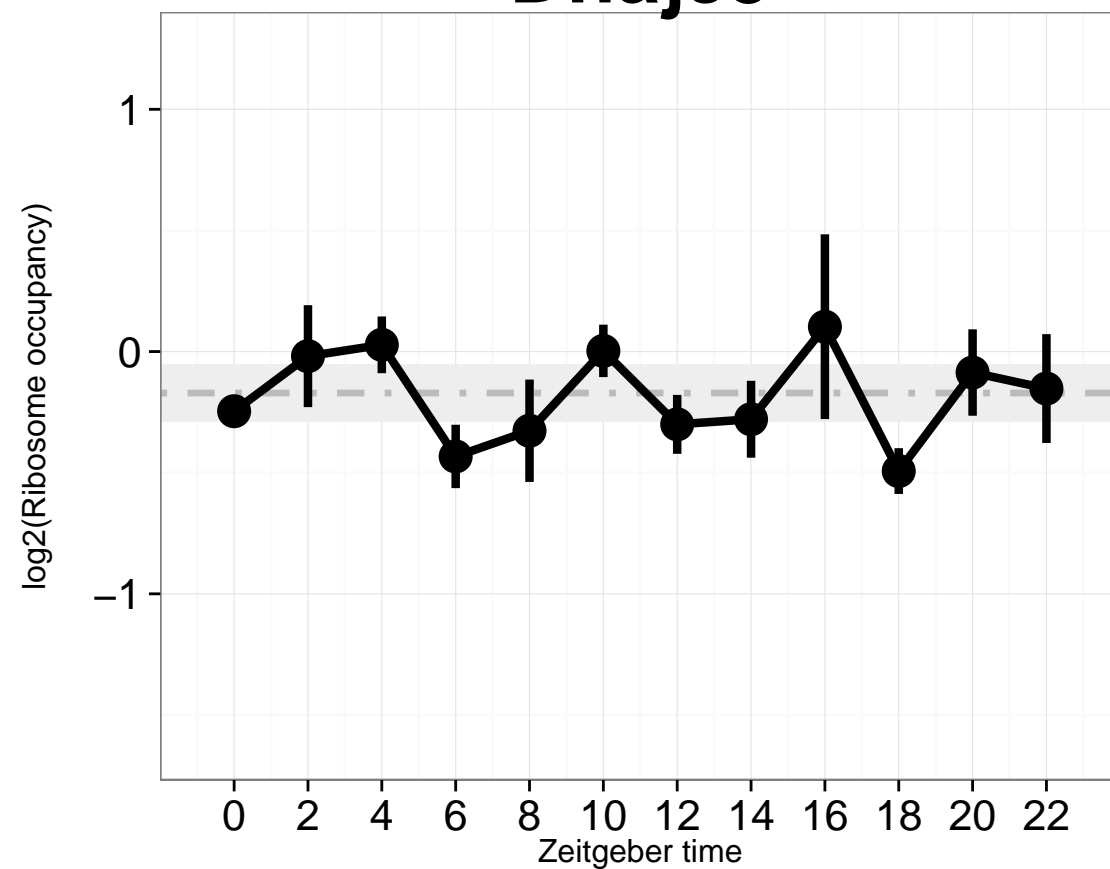

Supplement: Supplementary file 9213 [file 1]

## LgalsI

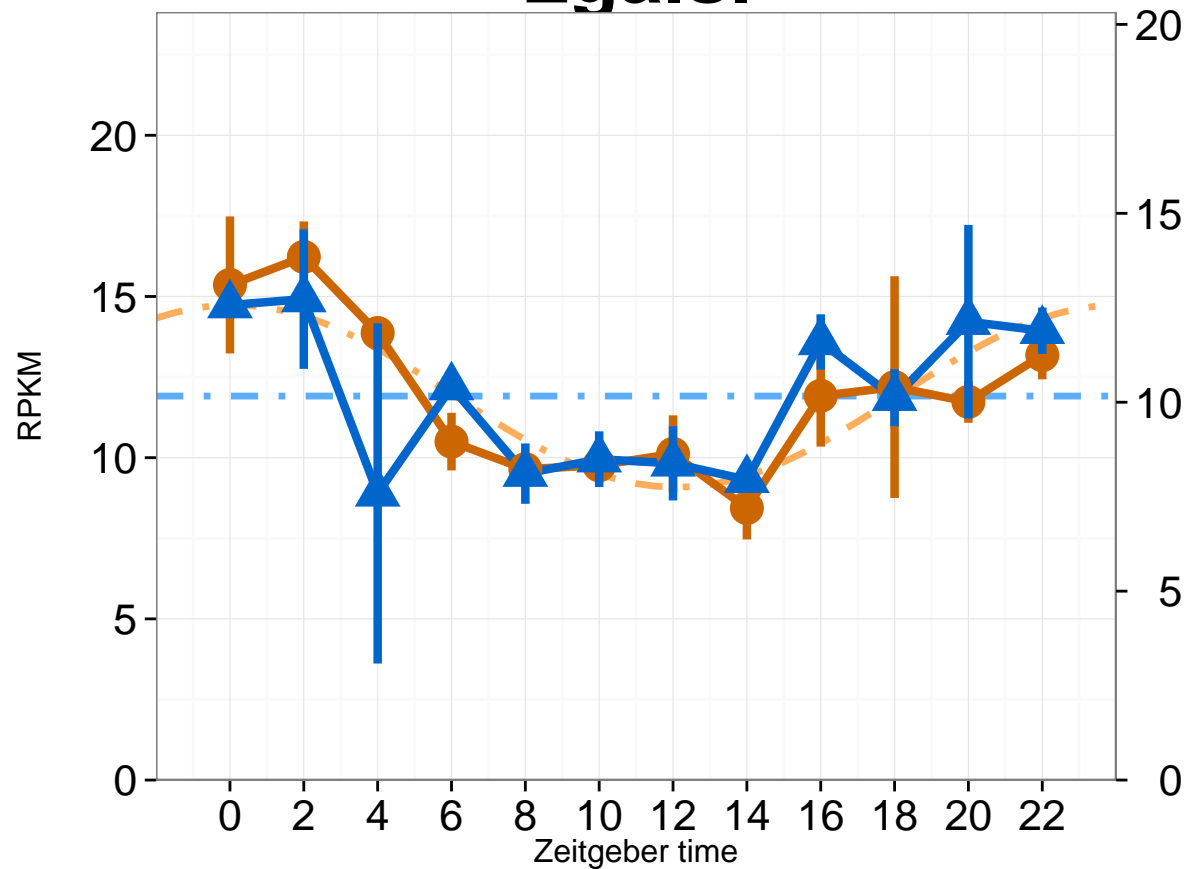

## LgalsI

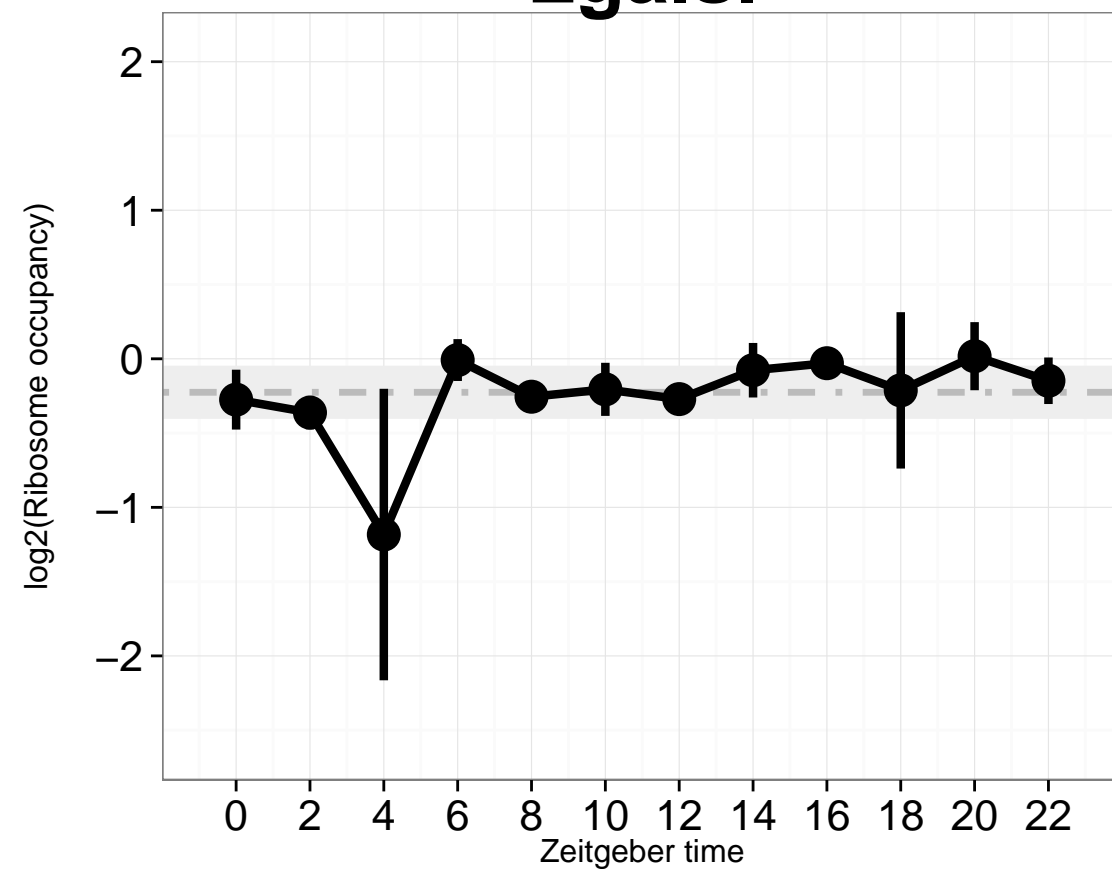

Supplement: Supplementary file 9214 [file 1]

## Echs1

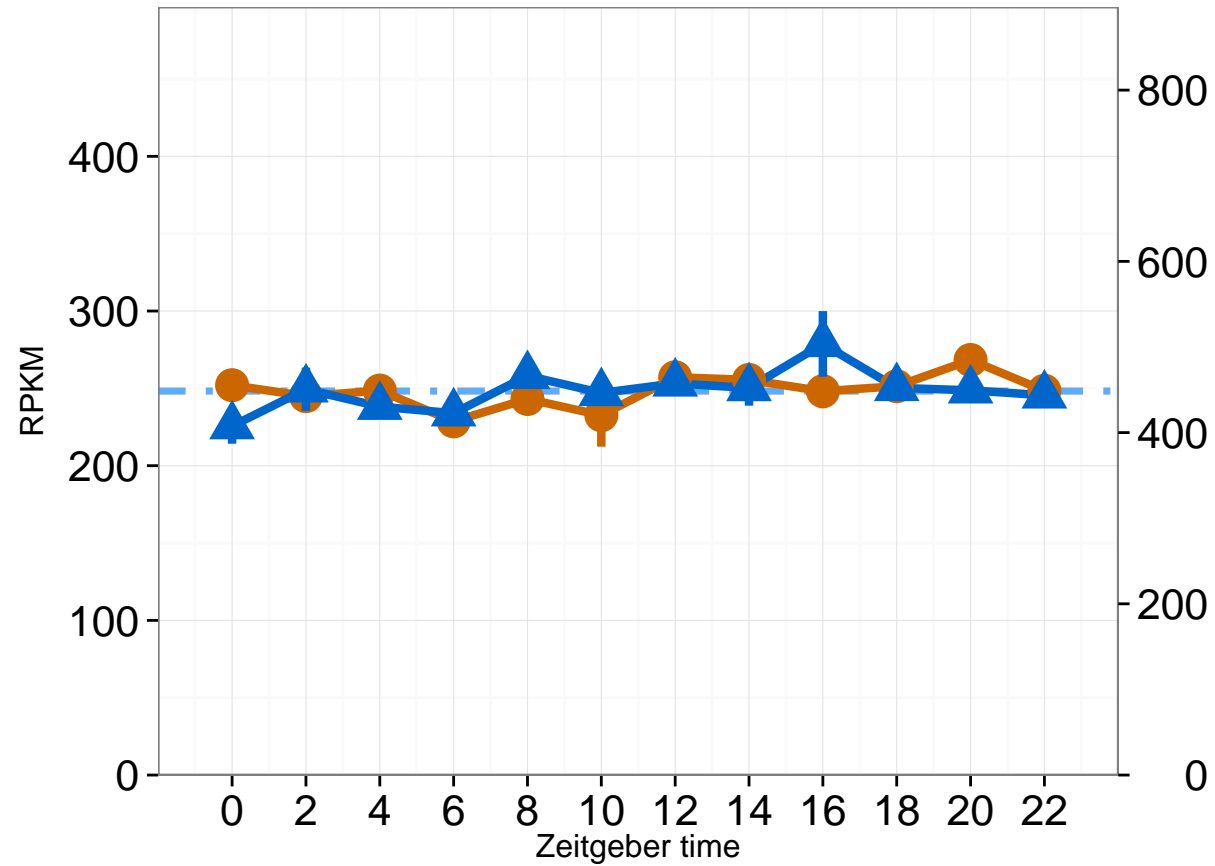

## Echs1

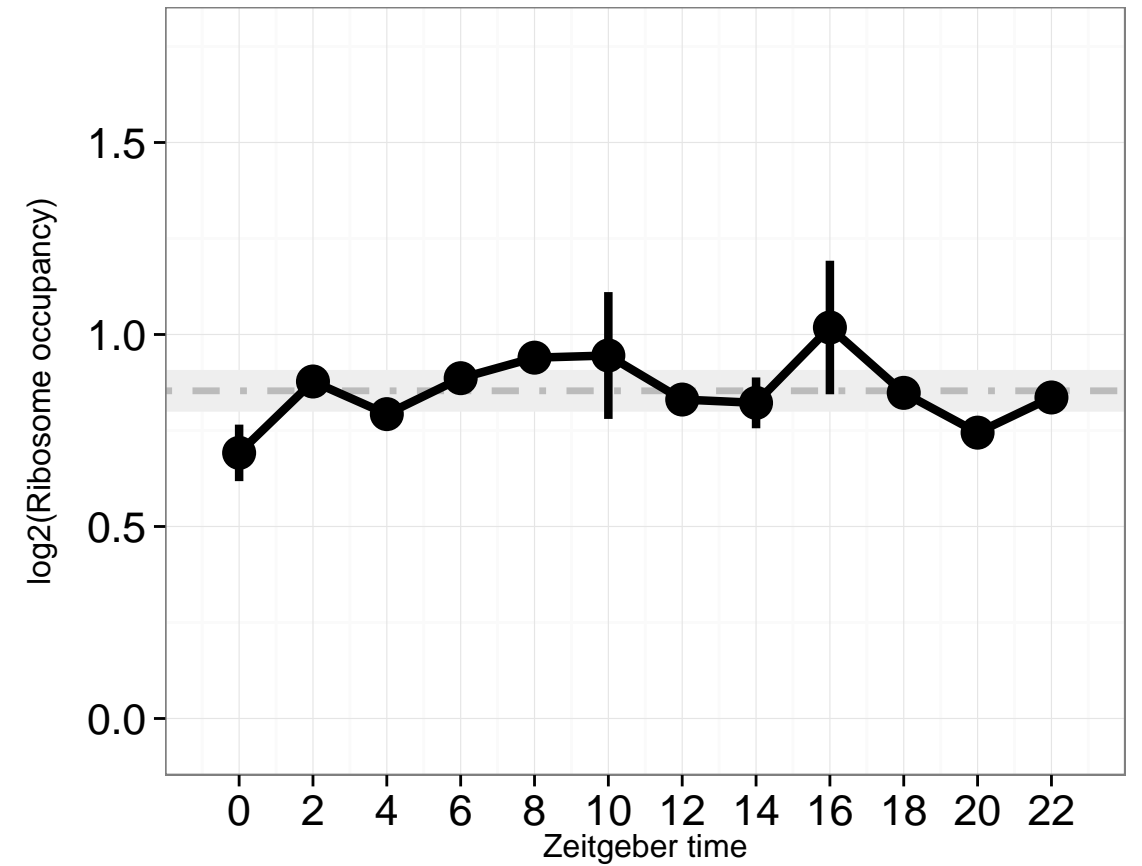

Supplement: Supplementary file 9215 [file 1]

## Kctd9

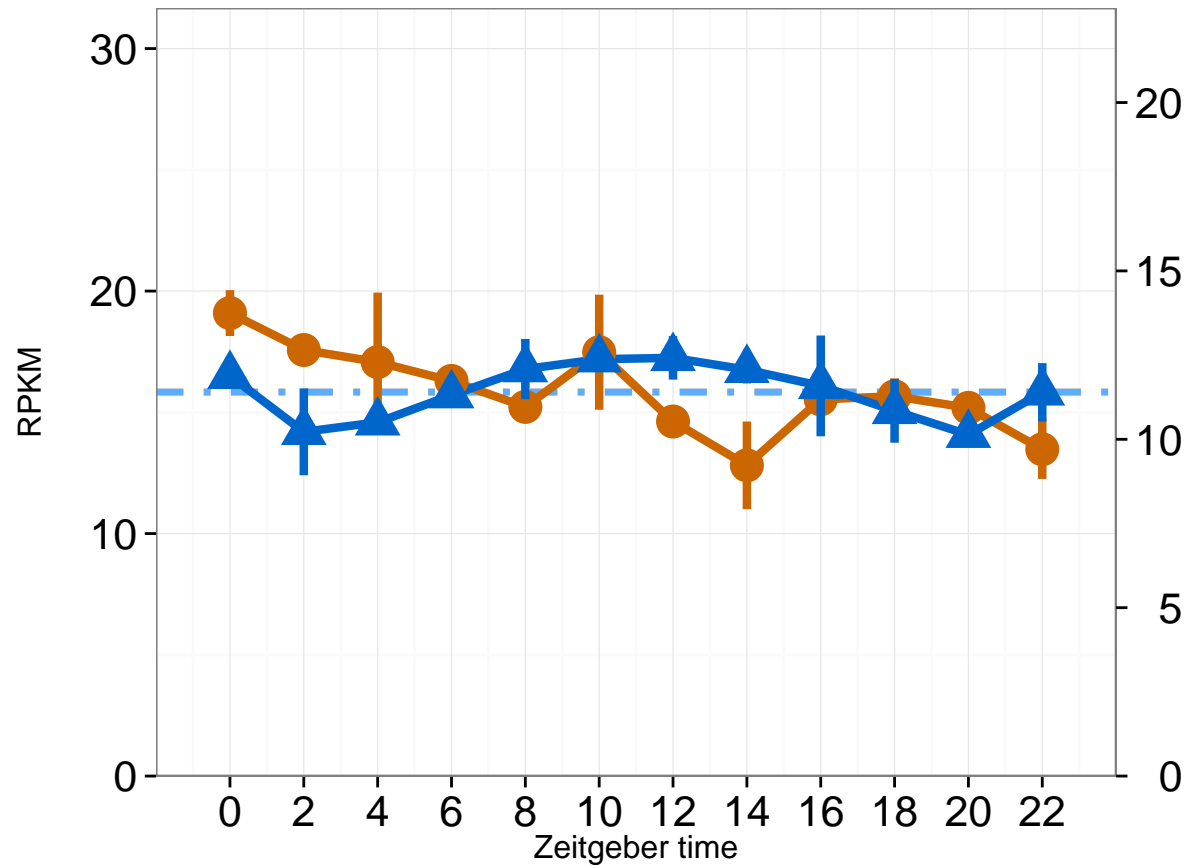

## Kctd9

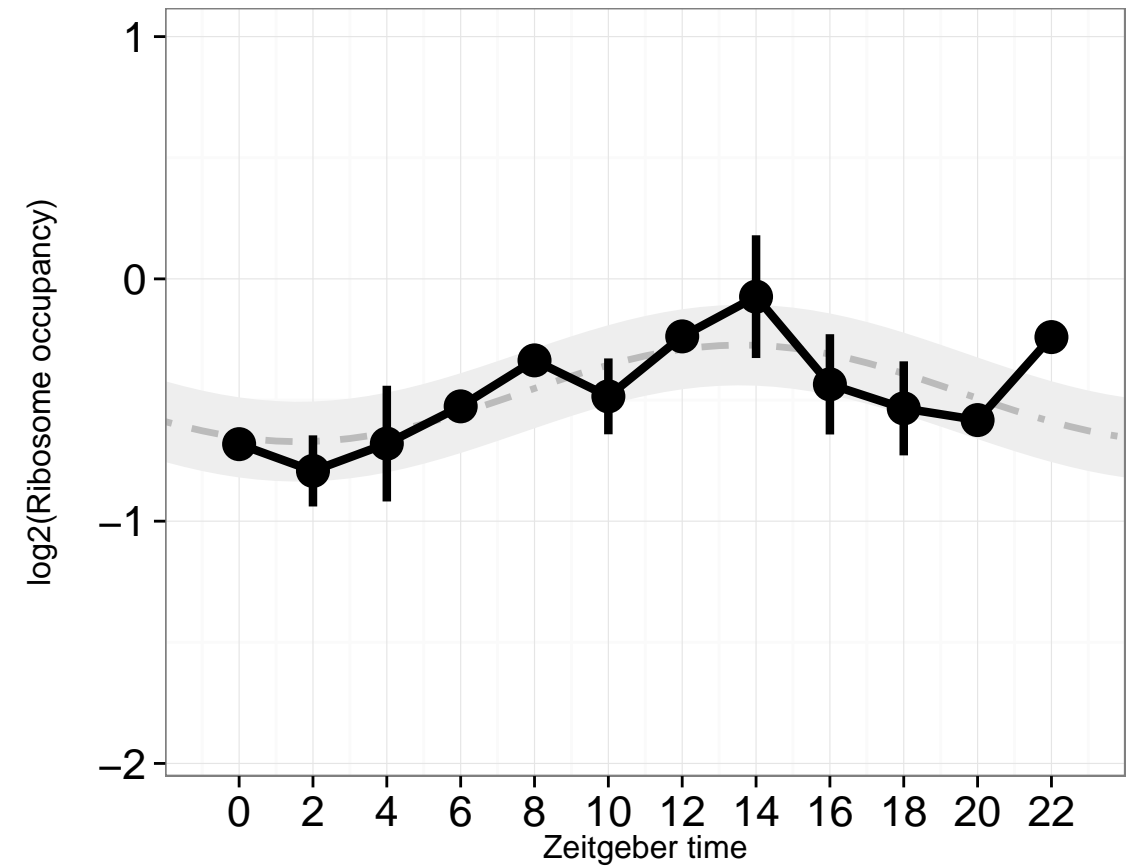

Supplement: Supplementary file 9216 [file 1]

# Mep1a

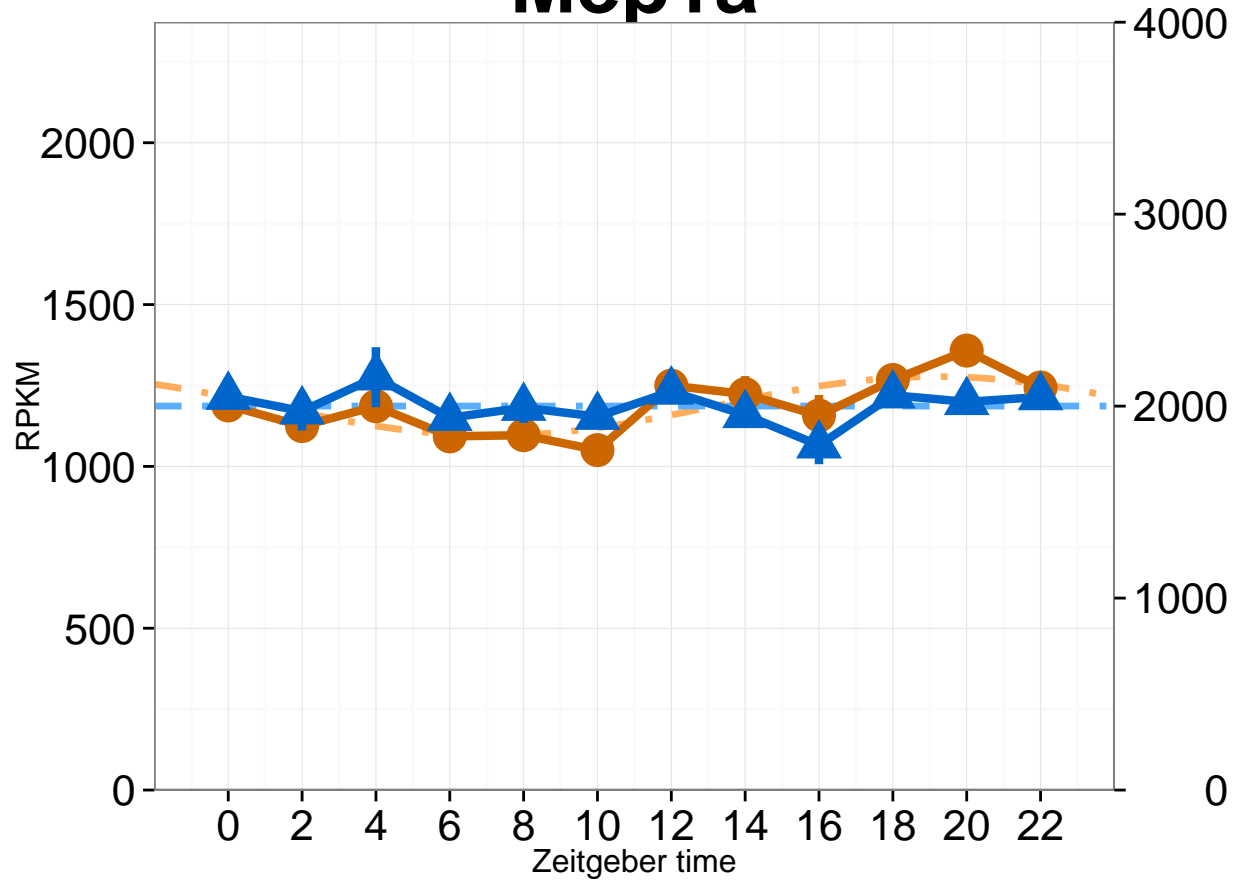

# Mep1a

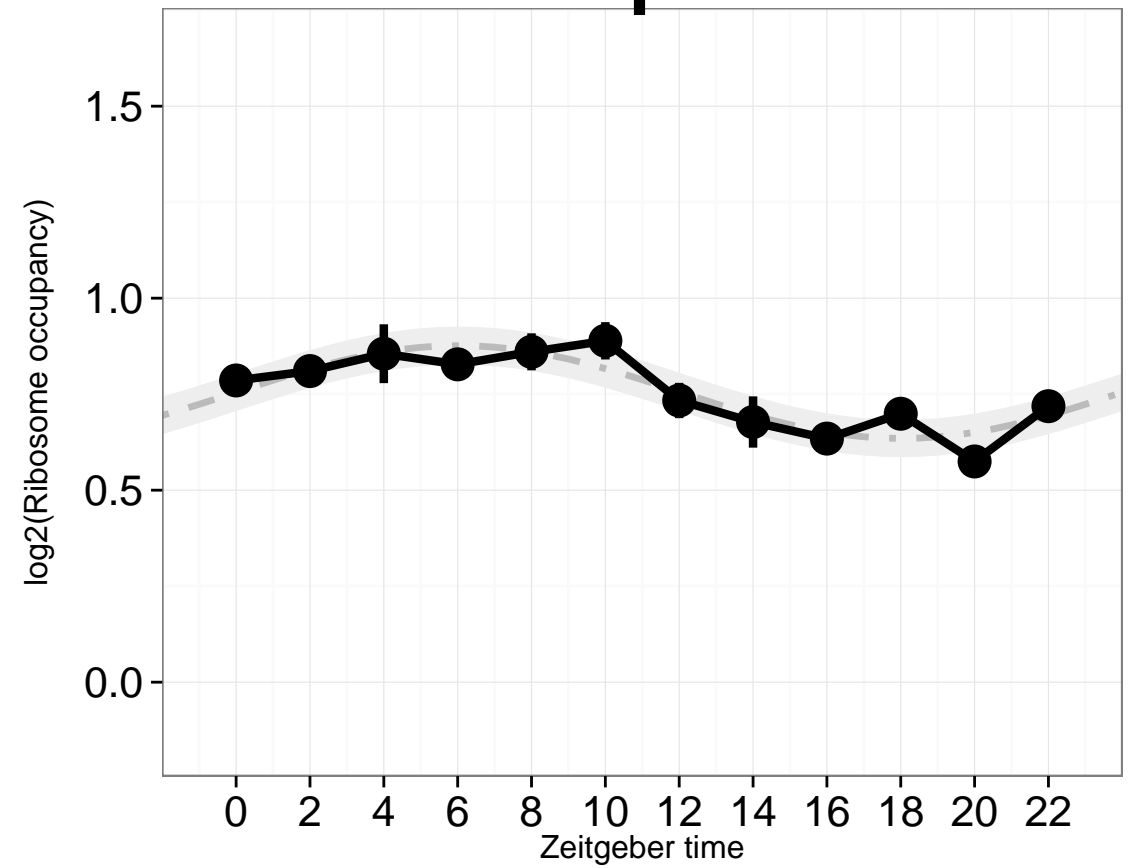

Supplement: Supplementary file 9217 [file 1]

# Mrpl18

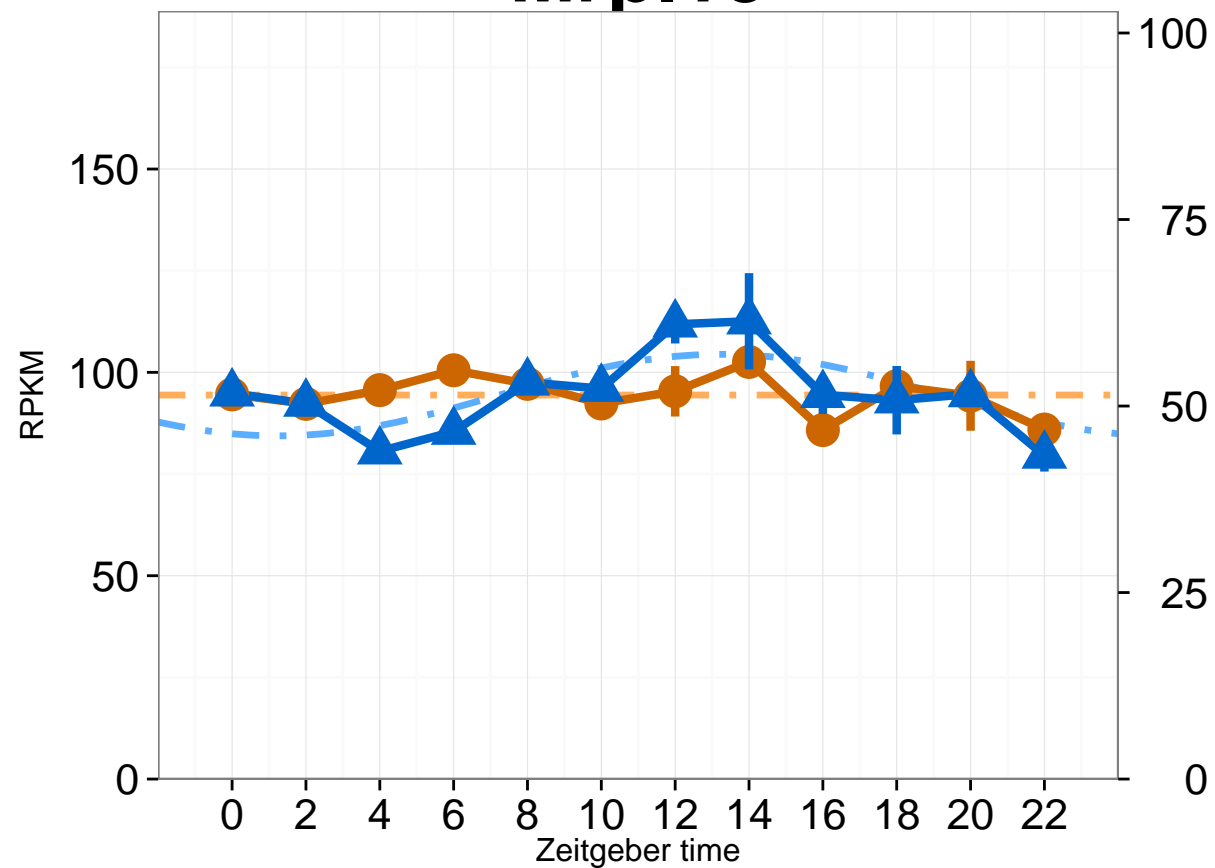

# Mrpl18

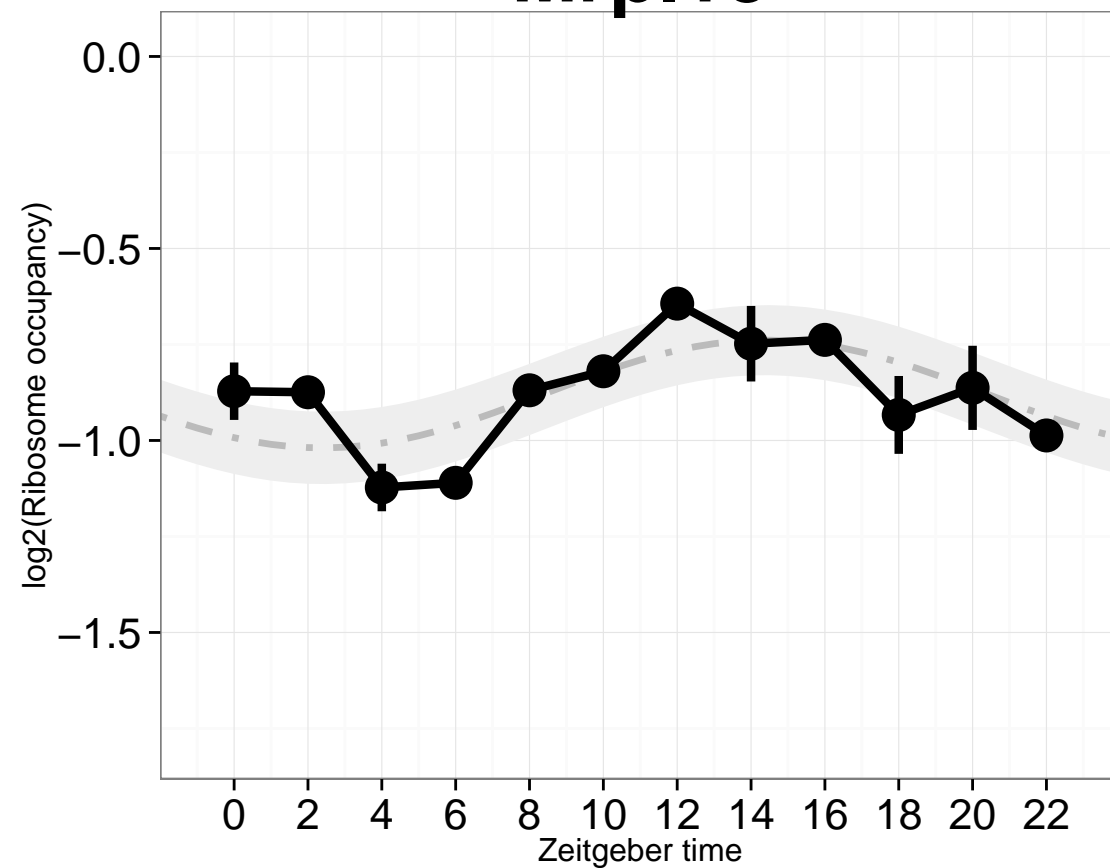

Supplement: Supplementary file 9218 [file 1]

## Abcg2

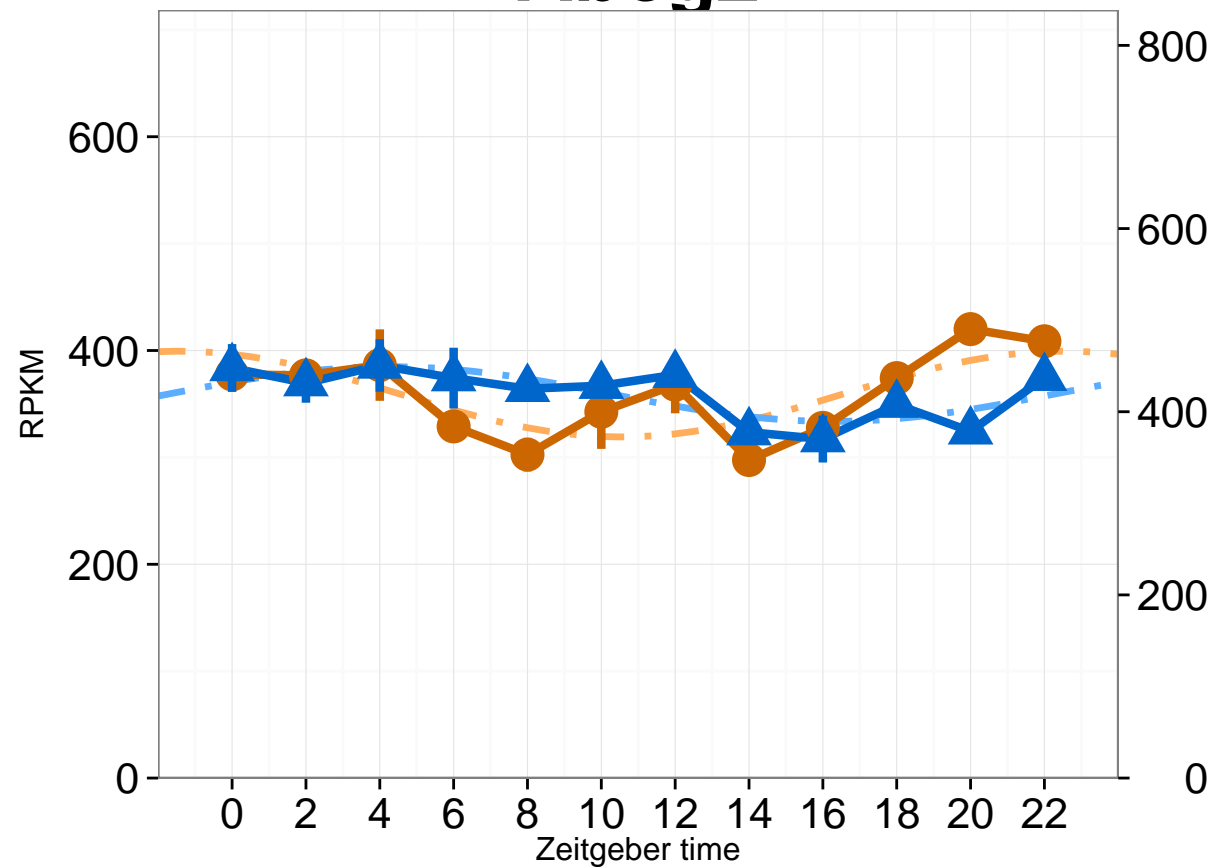

## Abcg2

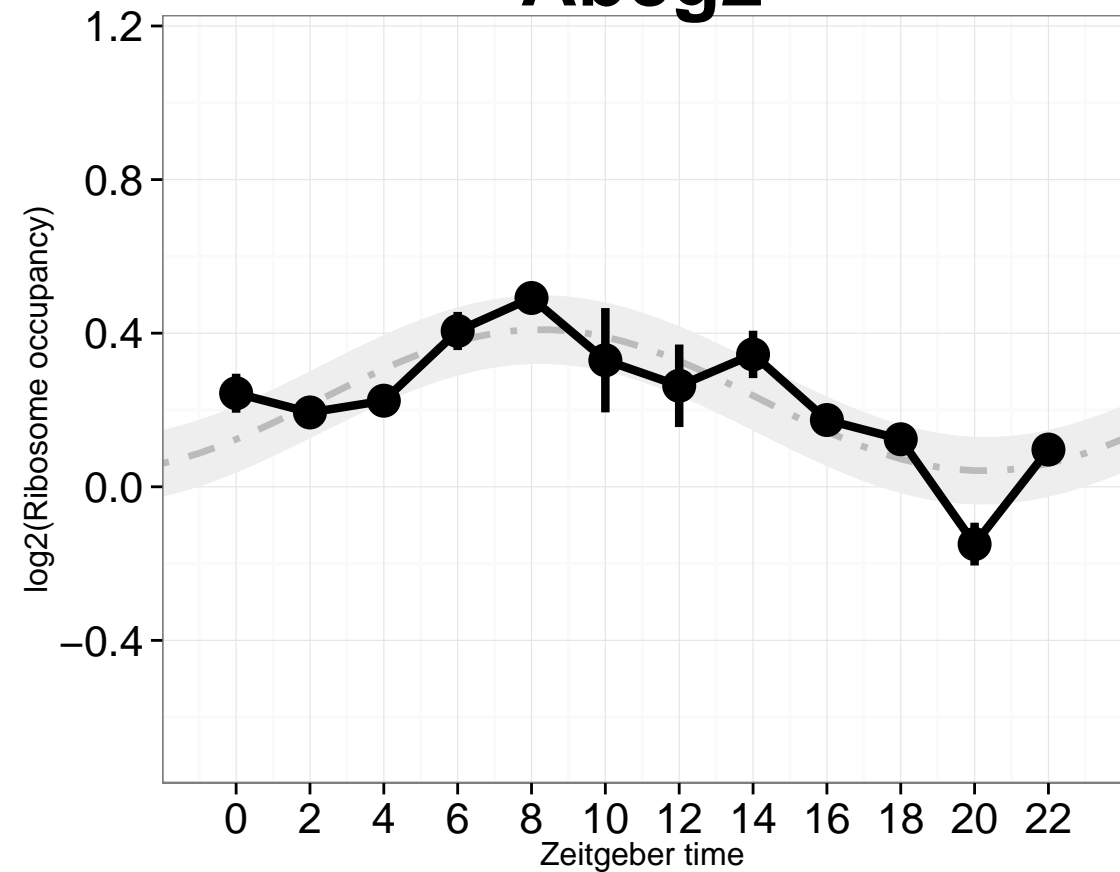

Supplement: Supplementary file 9219 [file 1]

# Tmem176a

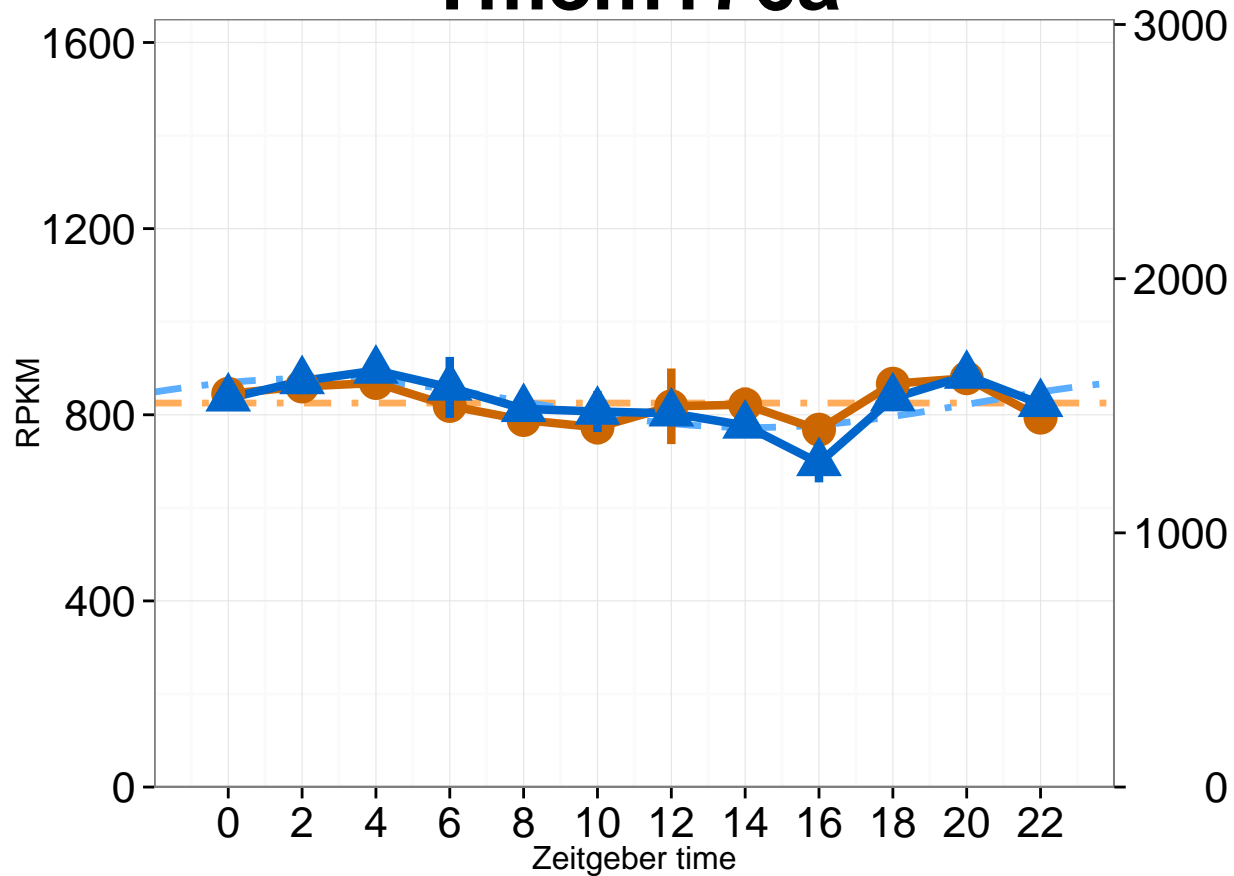

# Tmem176a

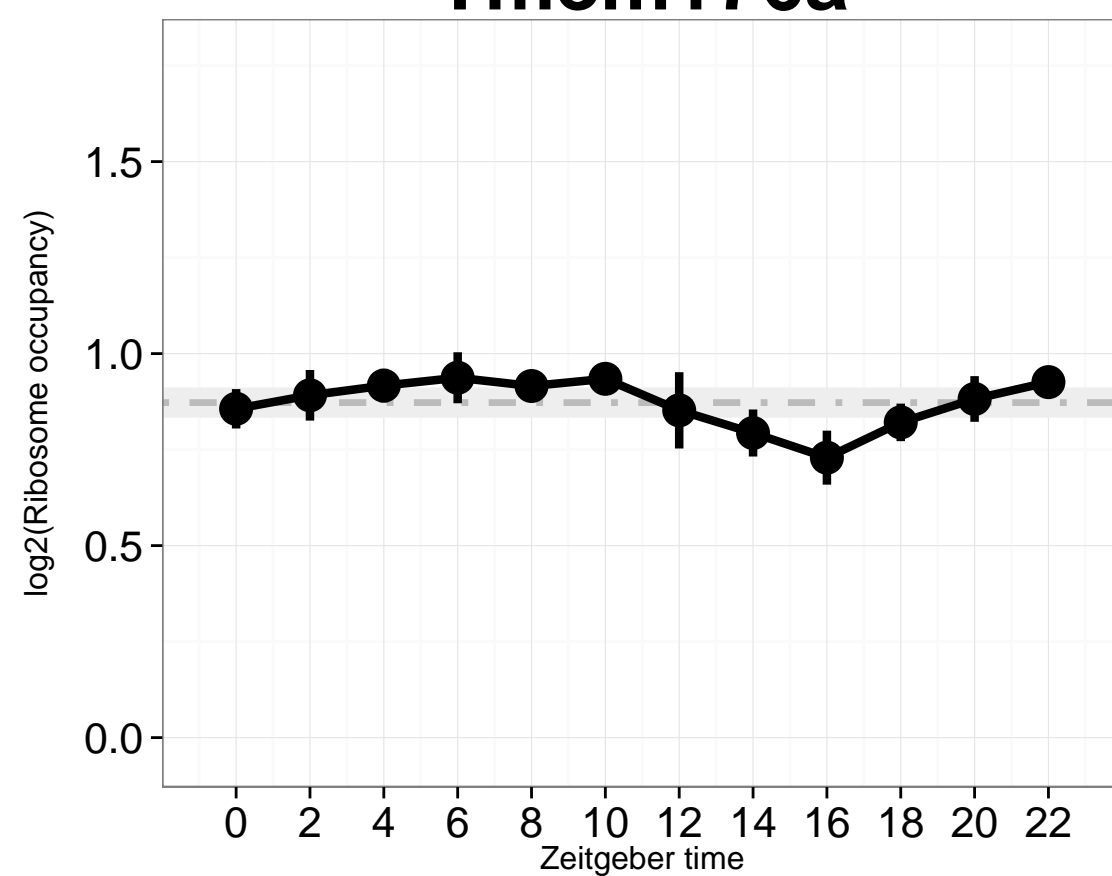

Supplement: Supplementary file 9220 [file 1]

## Sf3b1

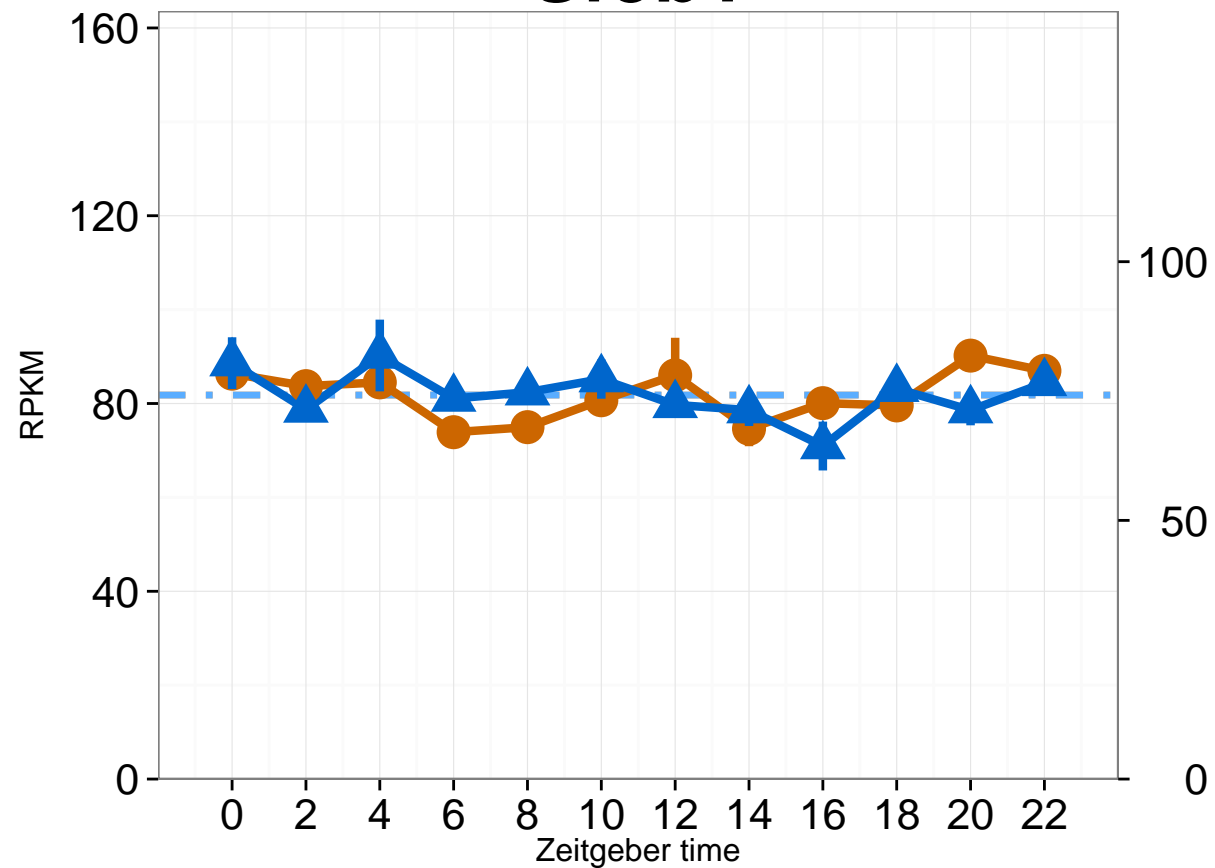

## Sf3b1

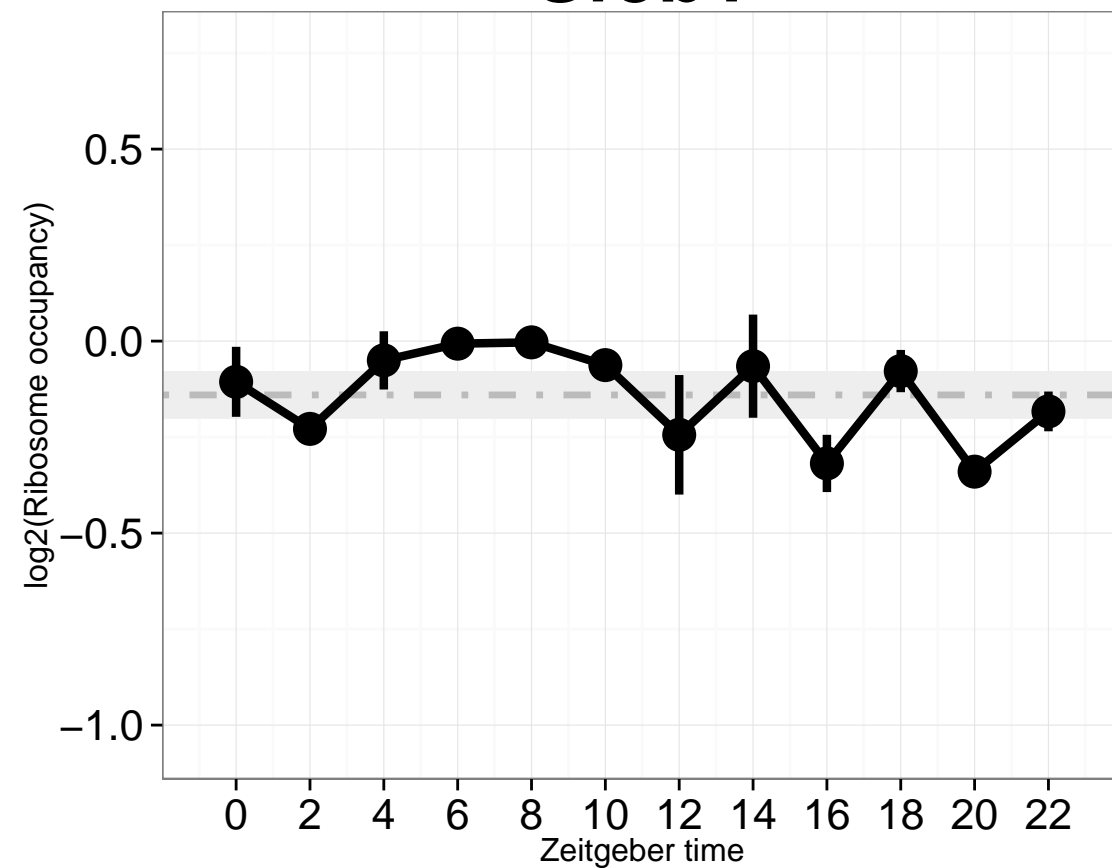

Supplement: Supplementary file 9221 [file 1]

# Lrrc40

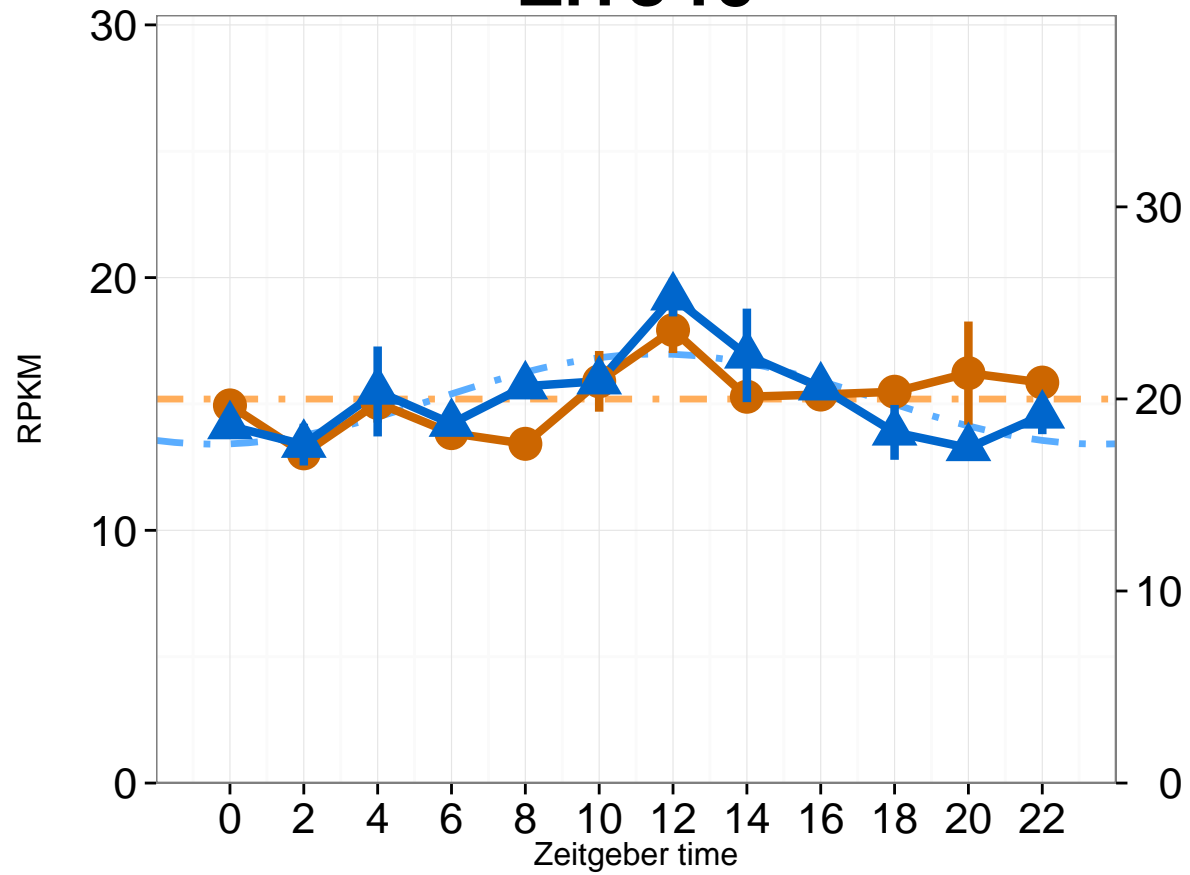

# Lrrc40

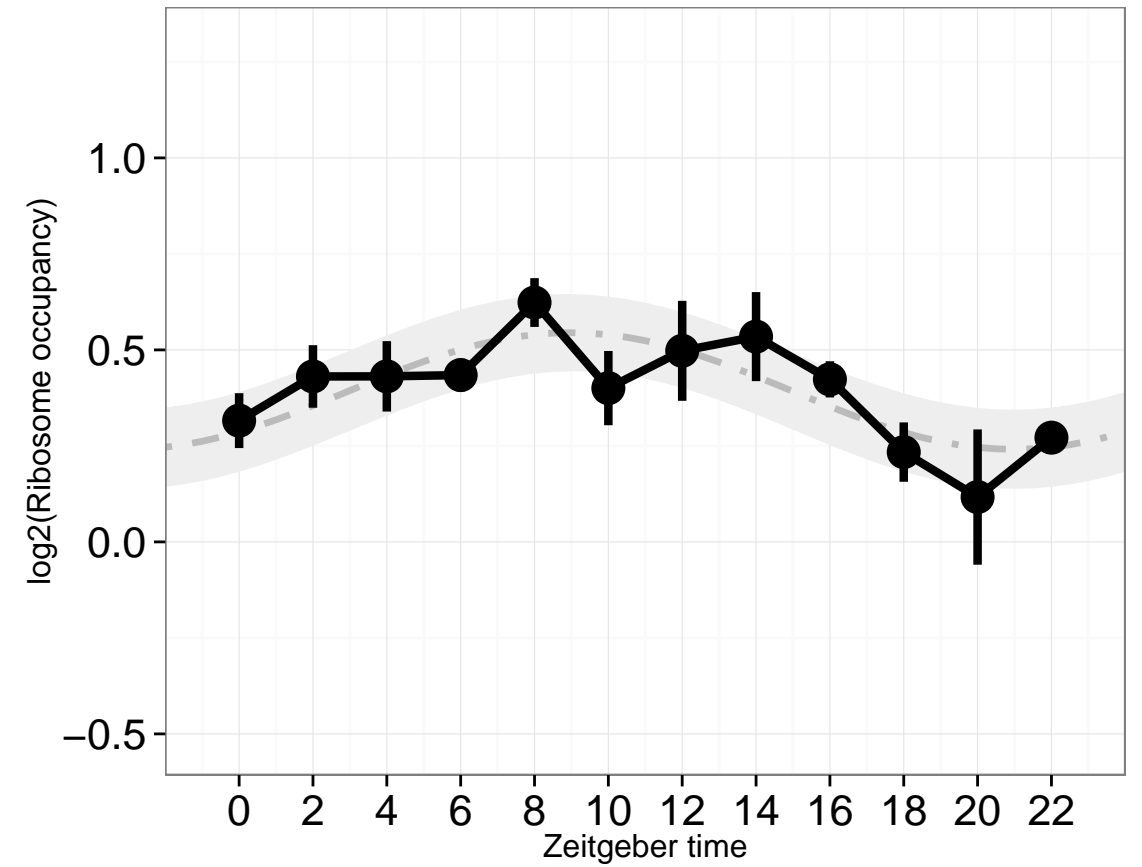

Supplement: Supplementary file 9222 [file 1]

## Sesn3

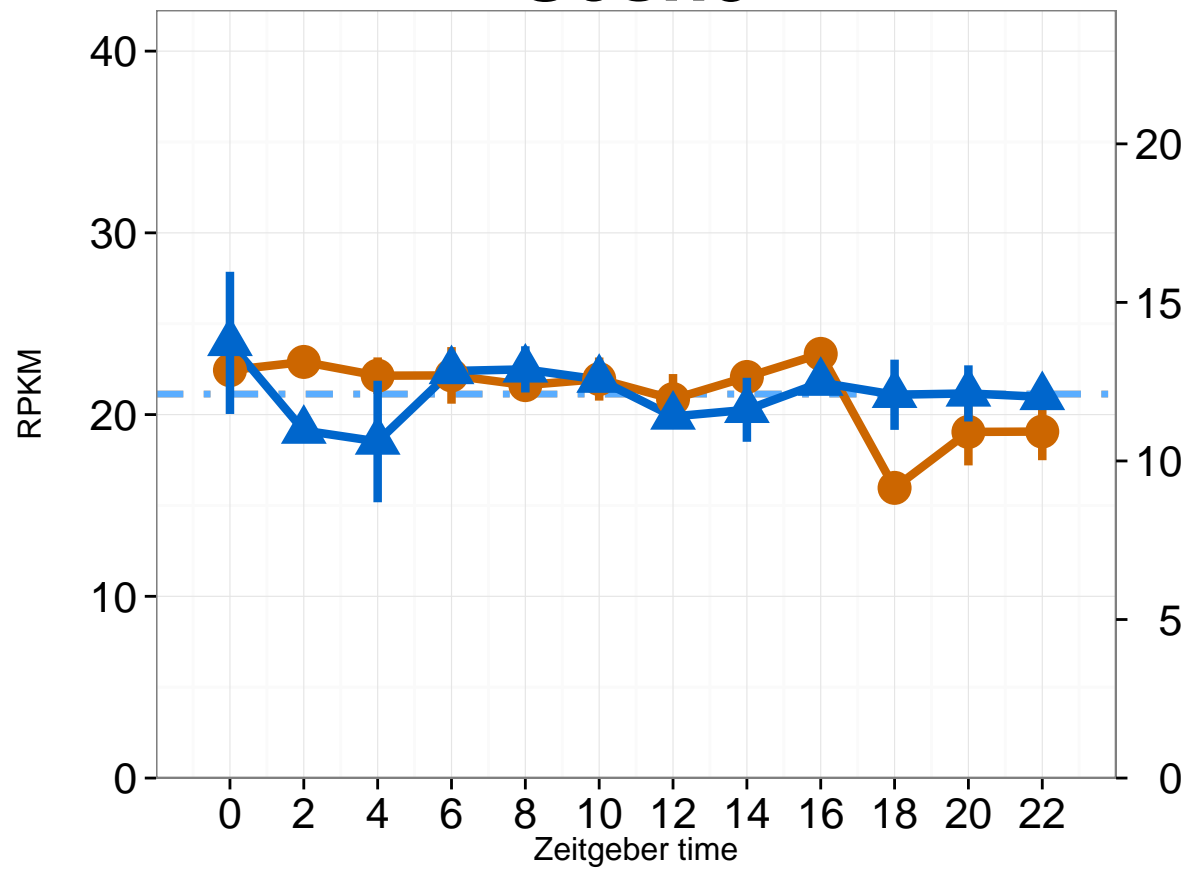

## Sesn3

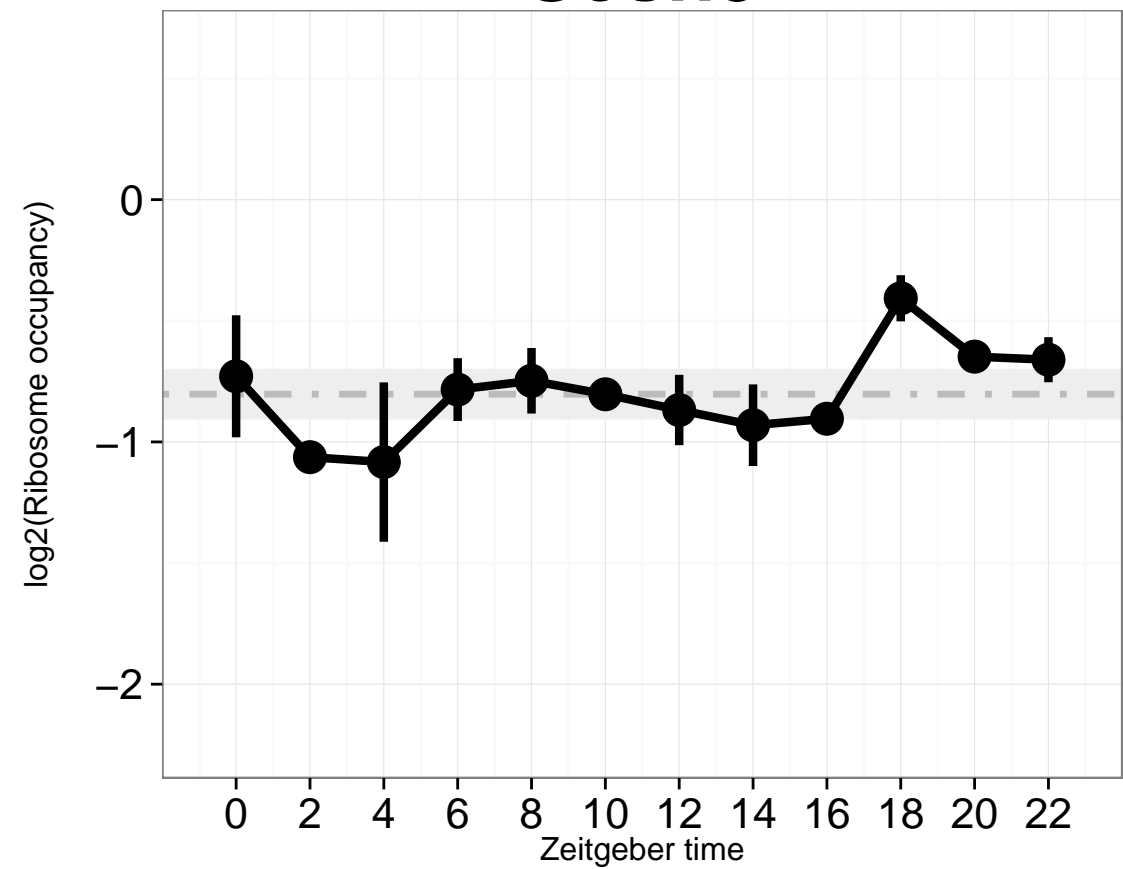

Supplement: Supplementary file 9223 [file 1]

# St14

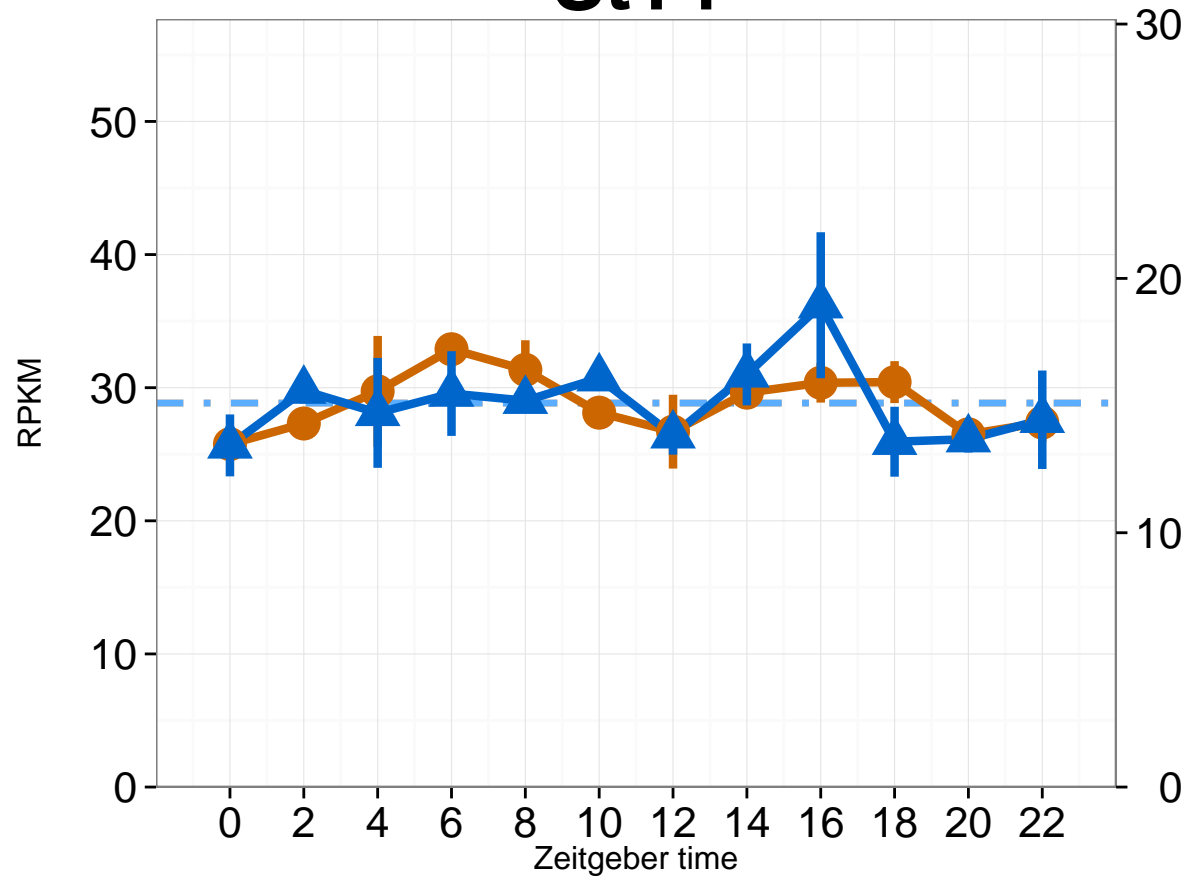

# St14

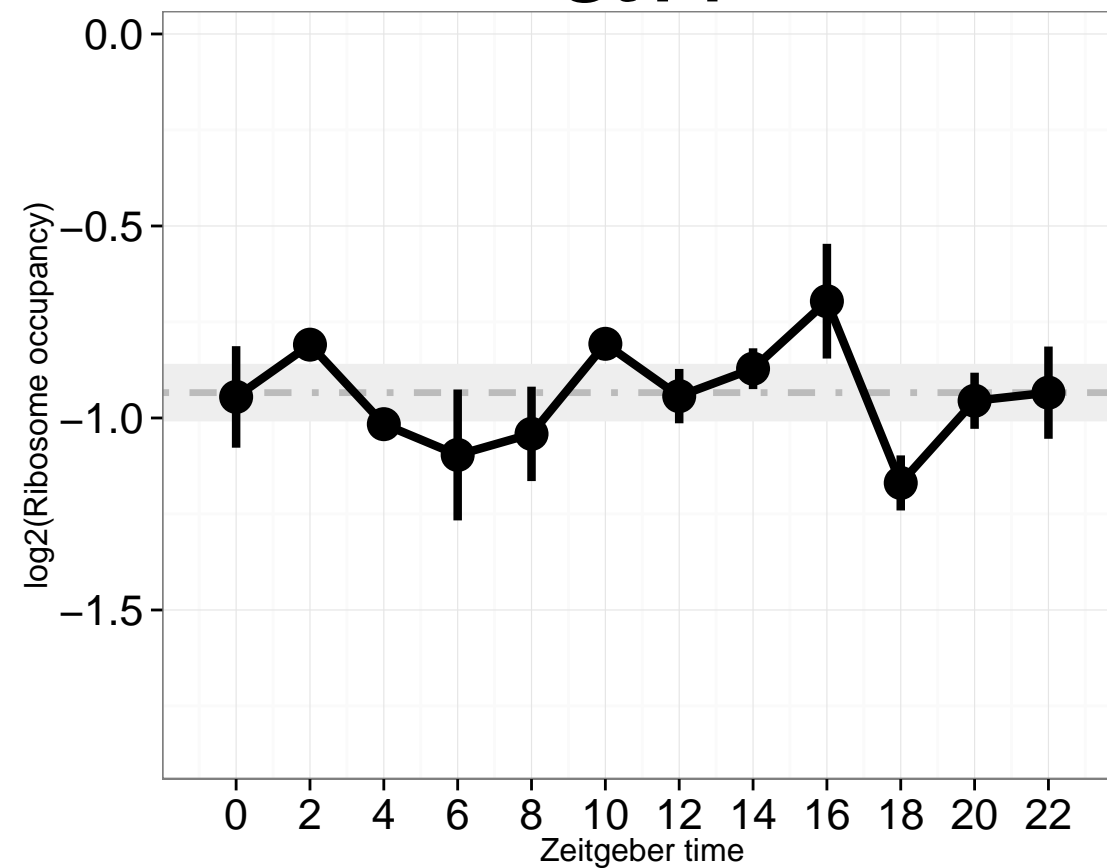

Supplement: Supplementary file 9224 [file 1]

# Tpk1

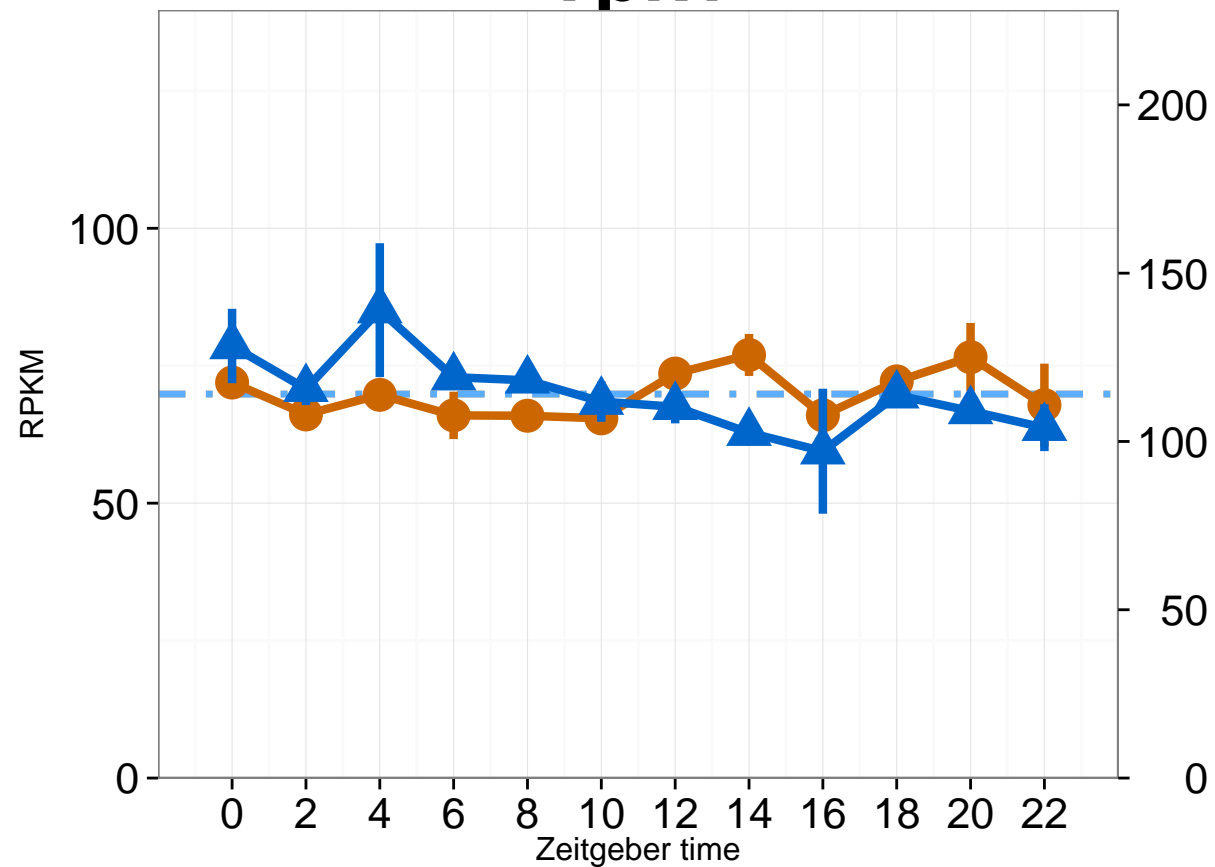

# Tpk1

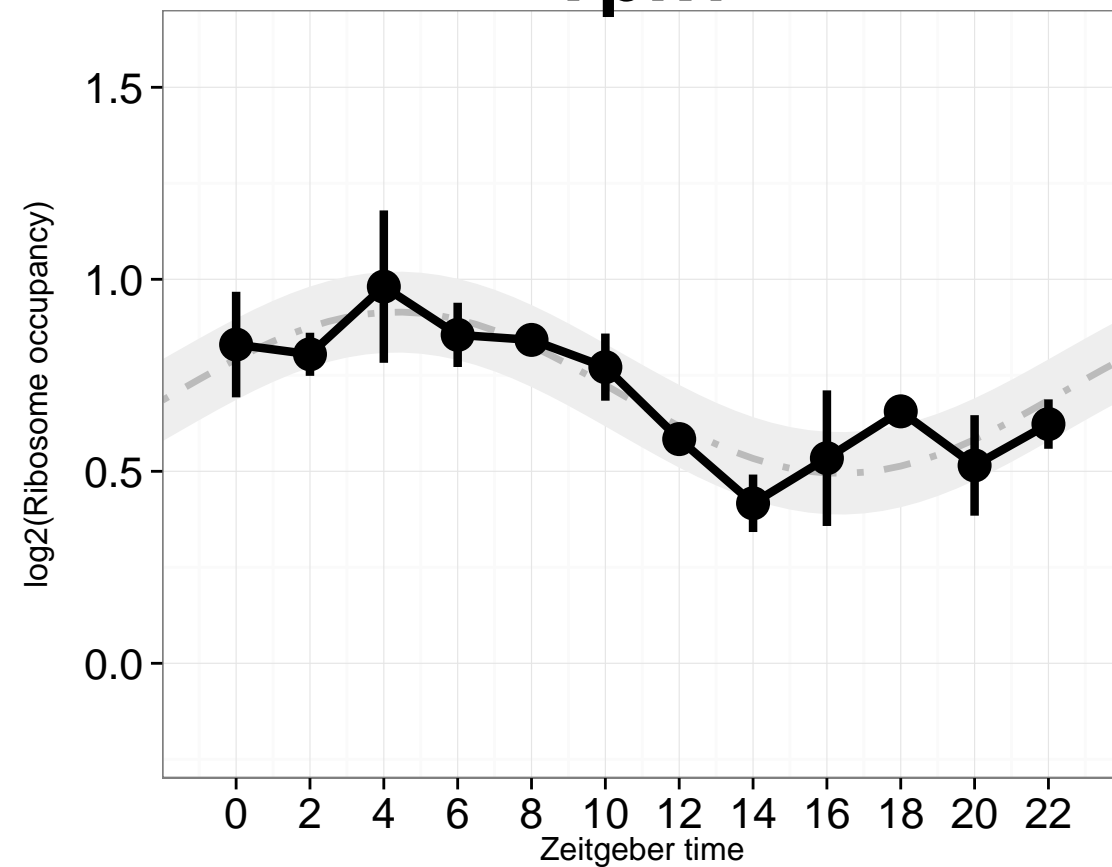

Supplement: Supplementary file 9225 [file 1]

# Vasn

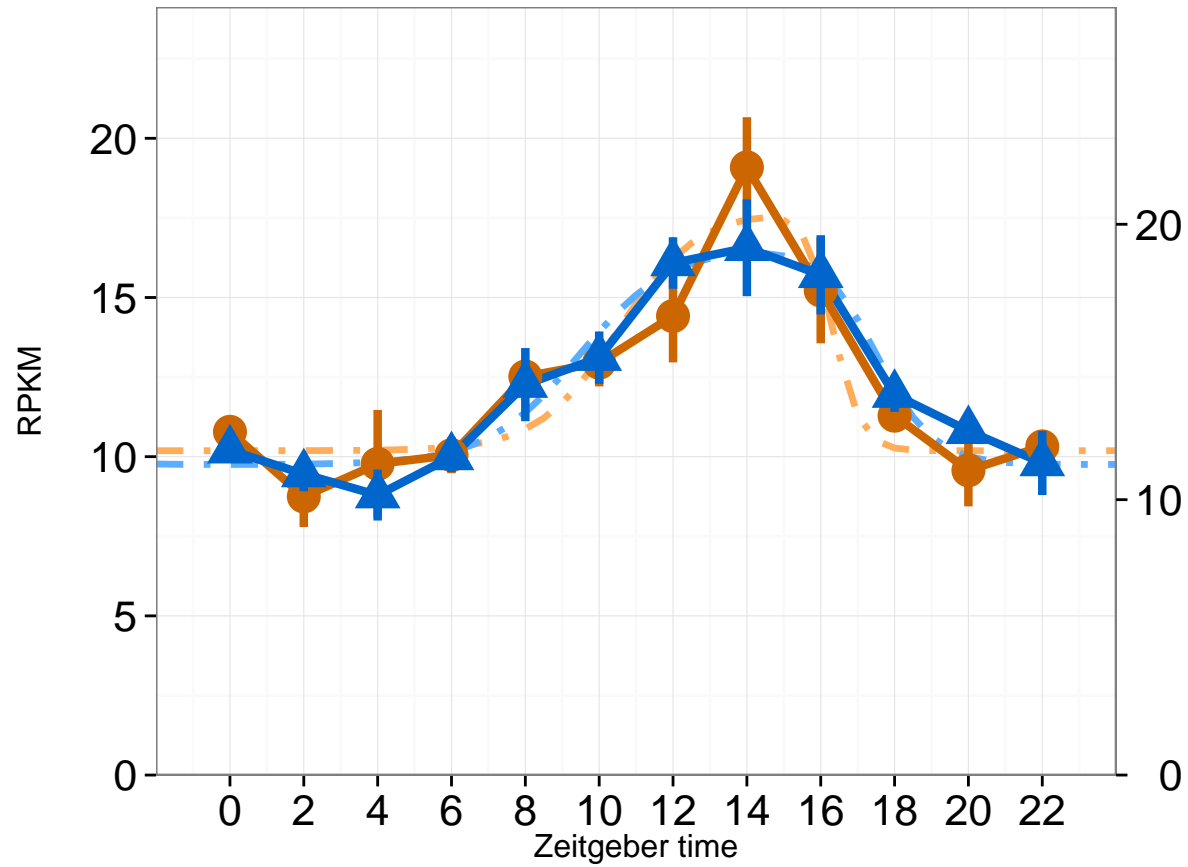

# Vasn

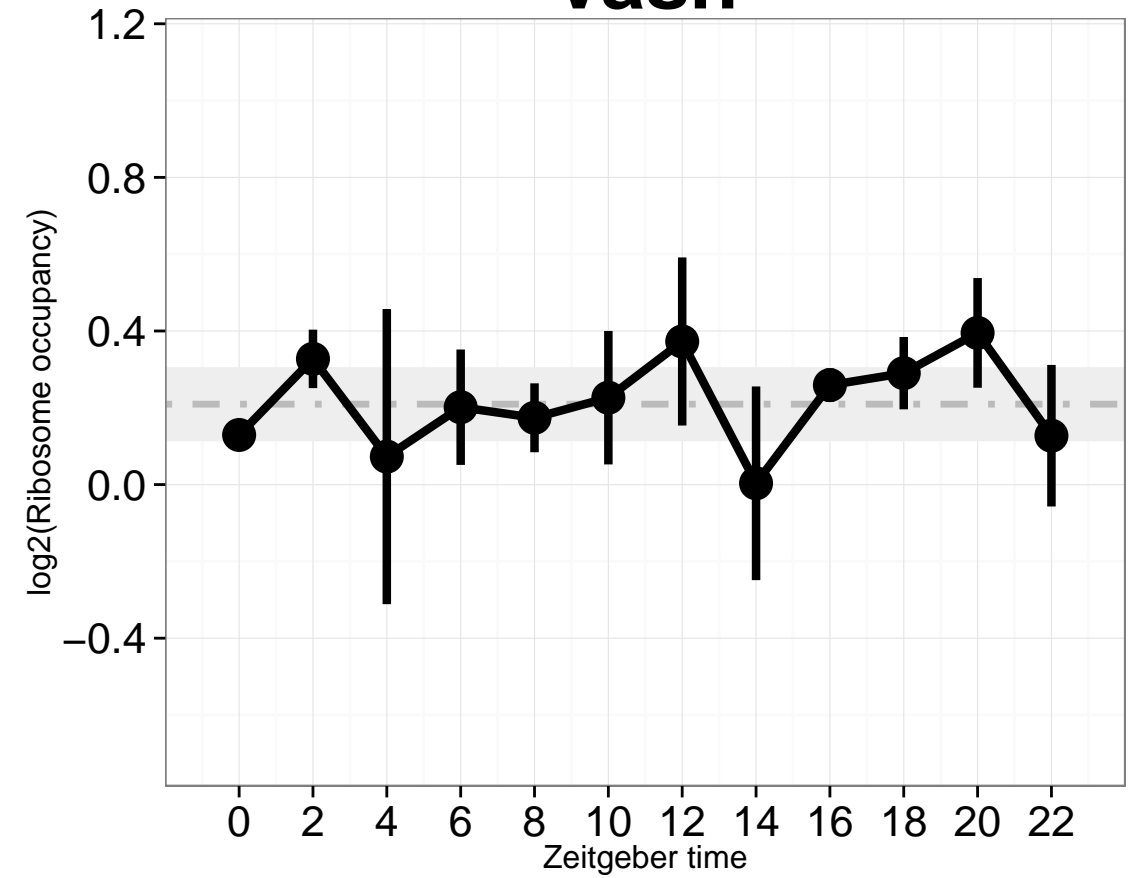

Supplement: Supplementary file 9226 [file 1]

# Arid4a

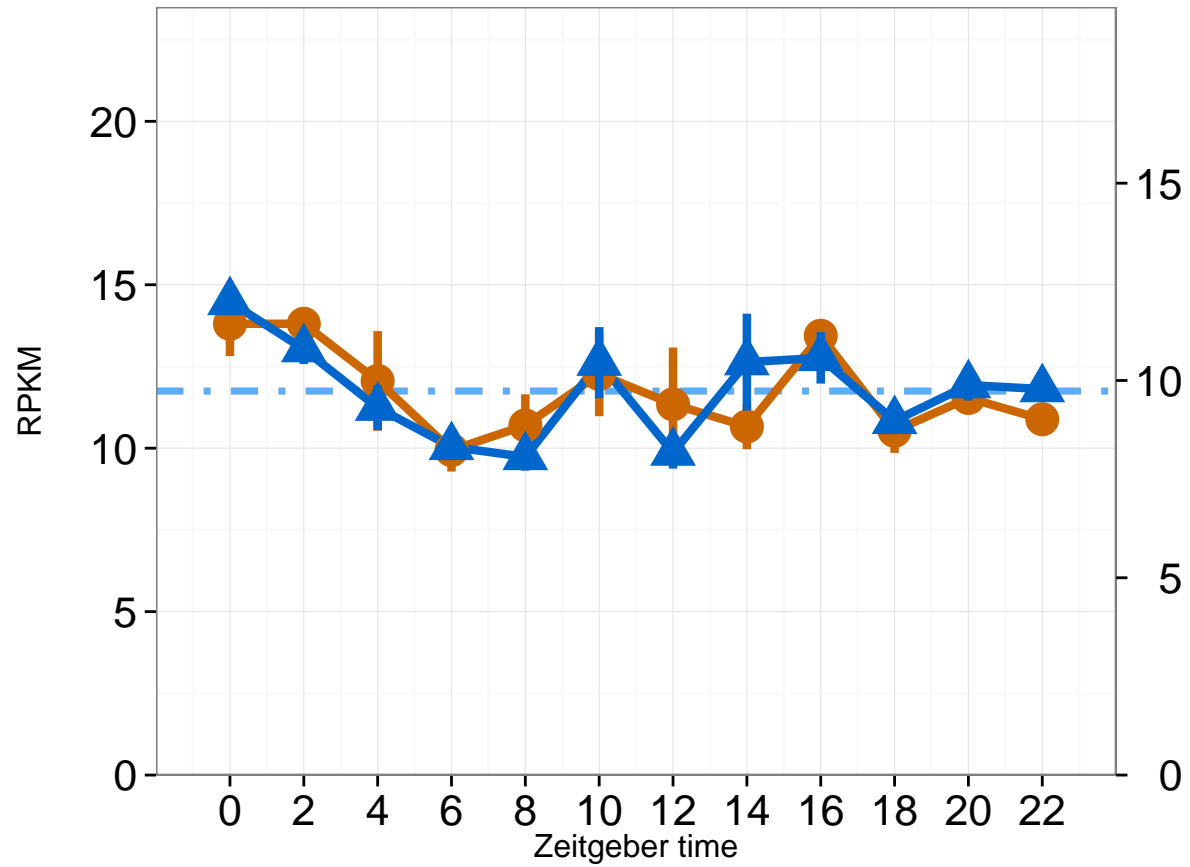

# Arid4a

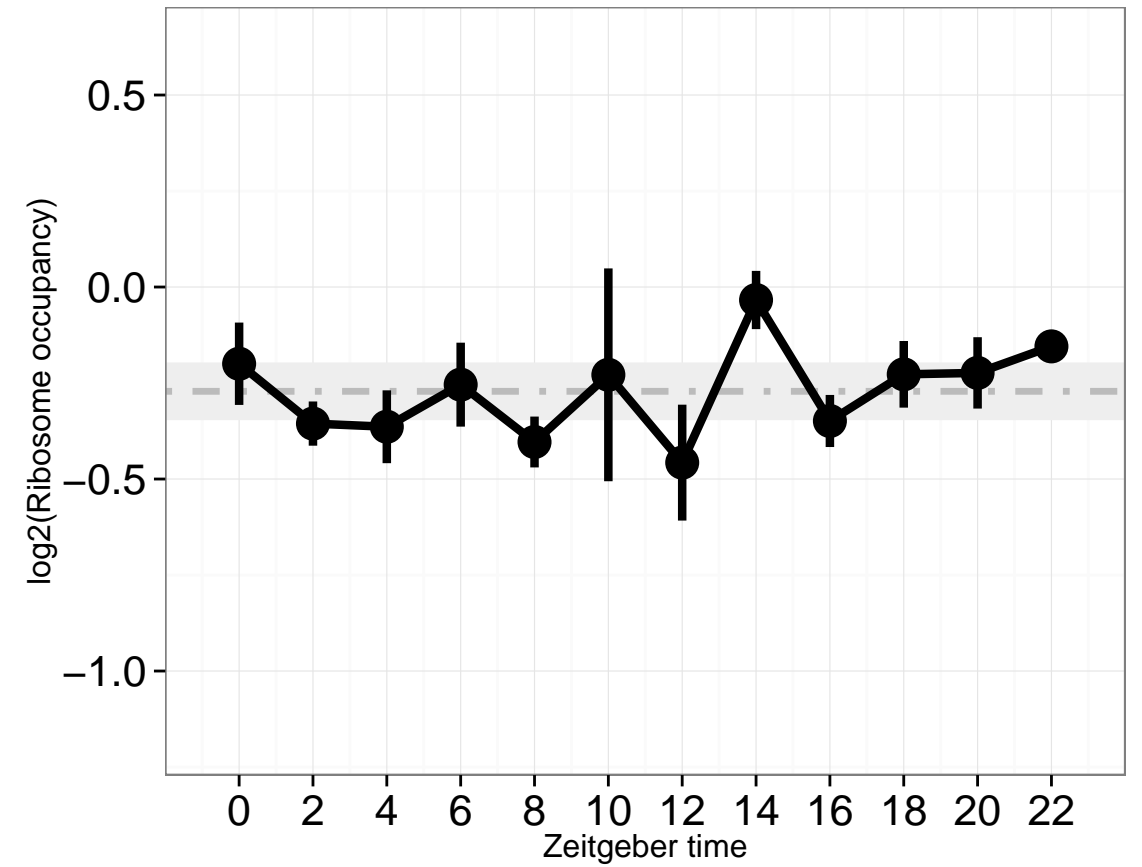

Supplement: Supplementary file 9227 [file 1]

## Acbd5

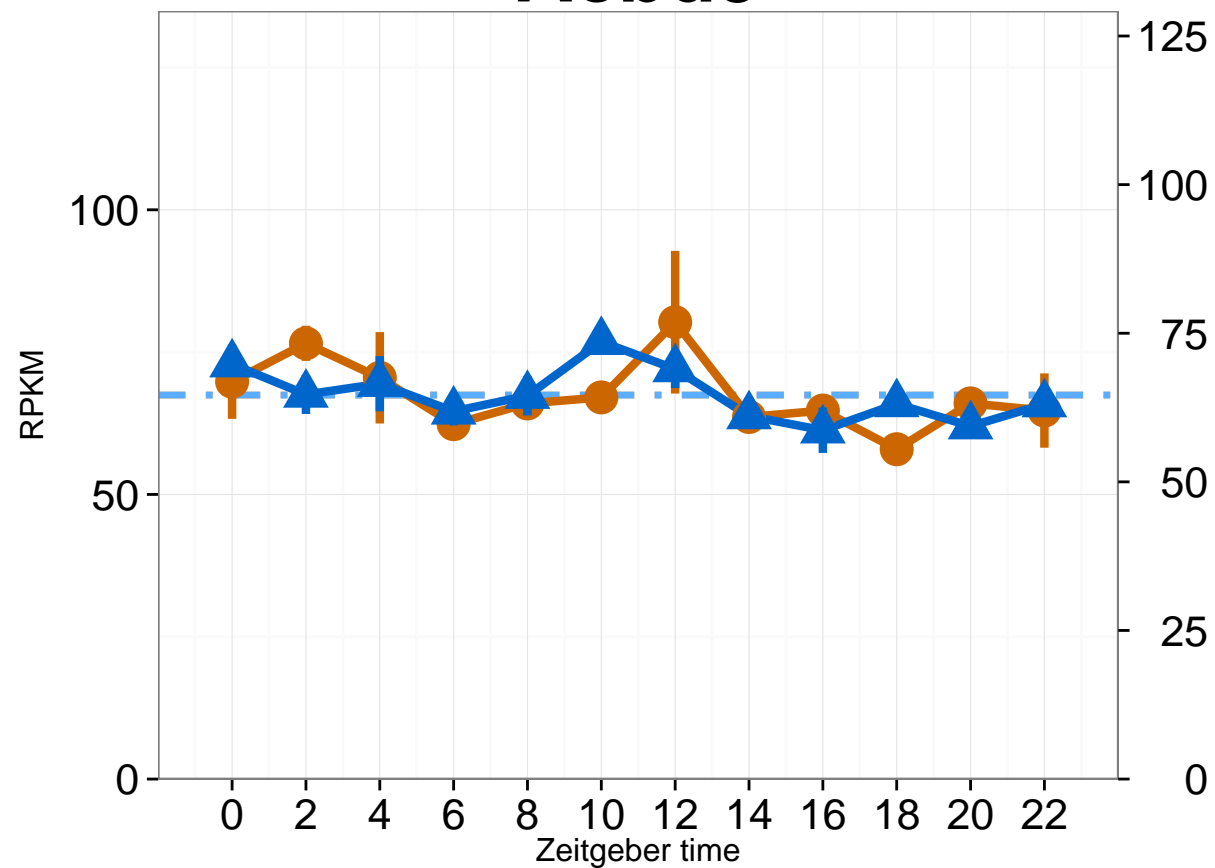

## Acbd5

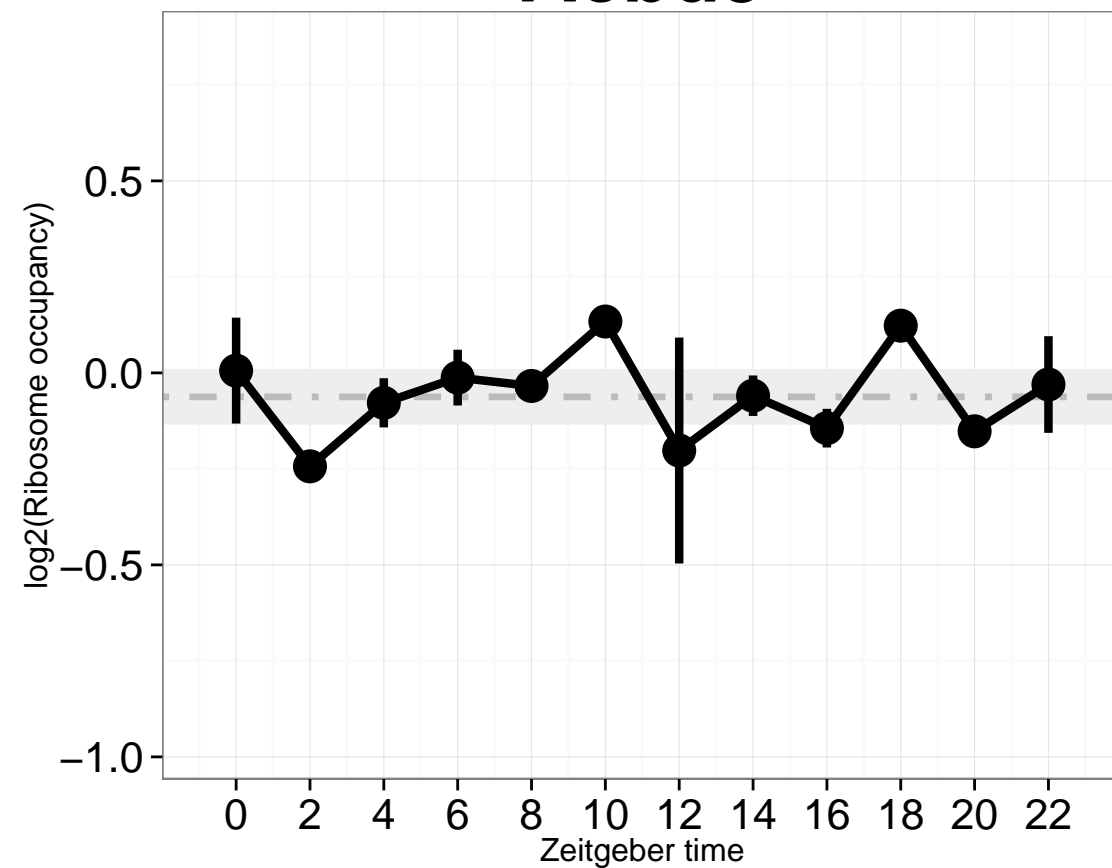

Supplement: Supplementary file 9228 [file 1]

## Pxmp2

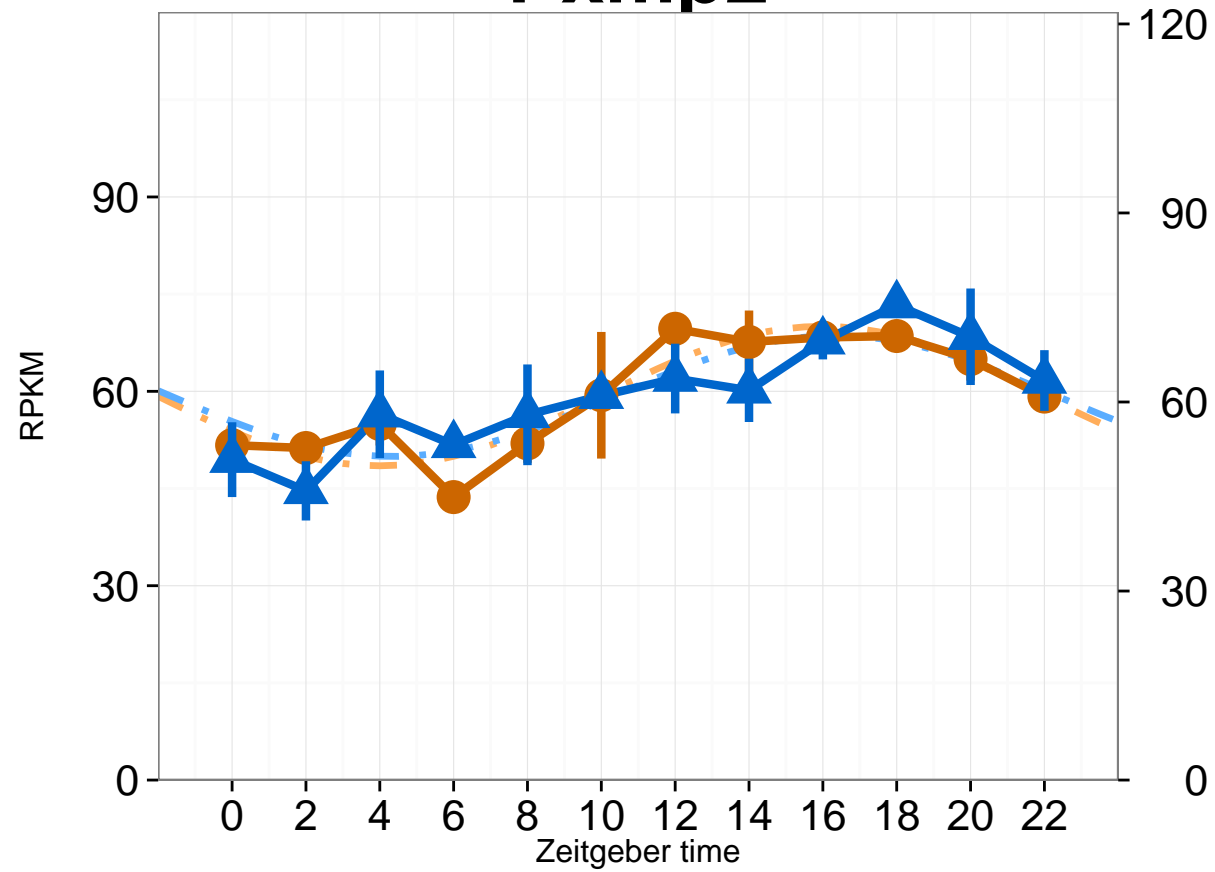

## Pxmp2

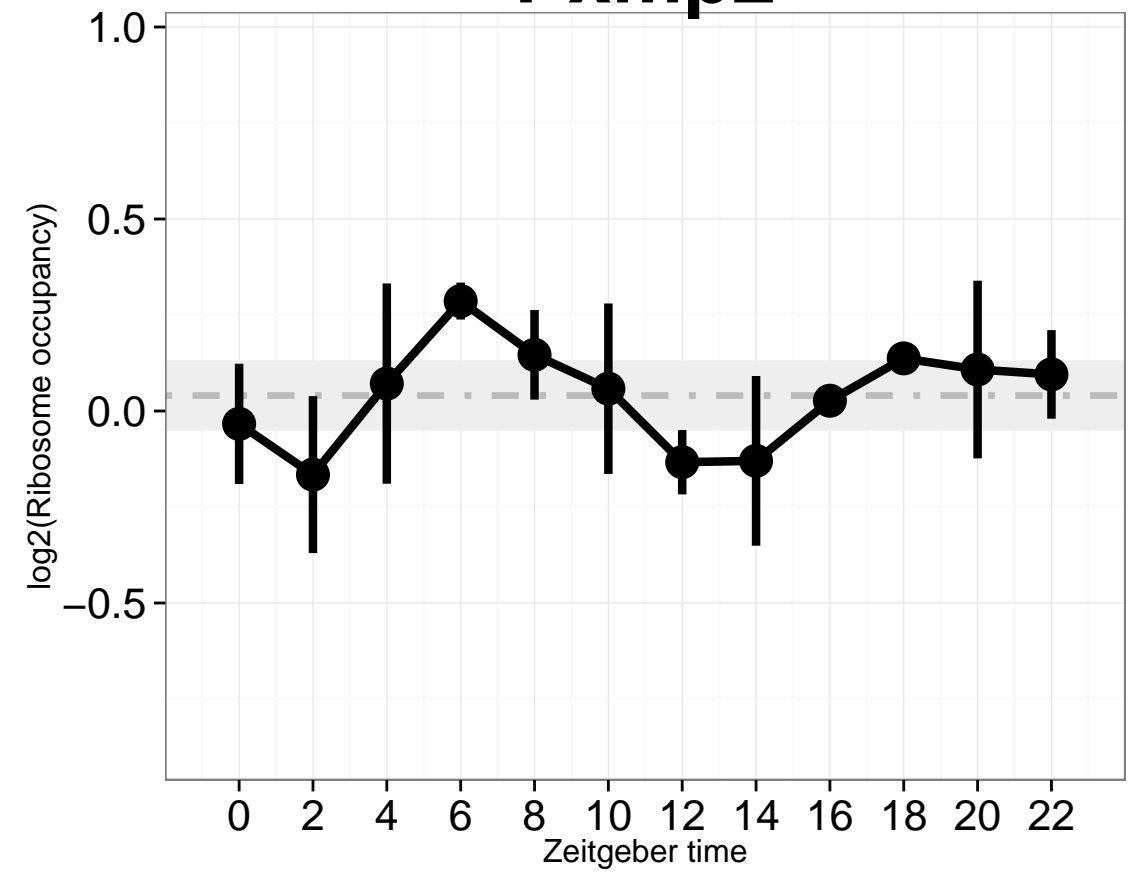

Supplement: Supplementary file 9229 [file 1]

# Atad5

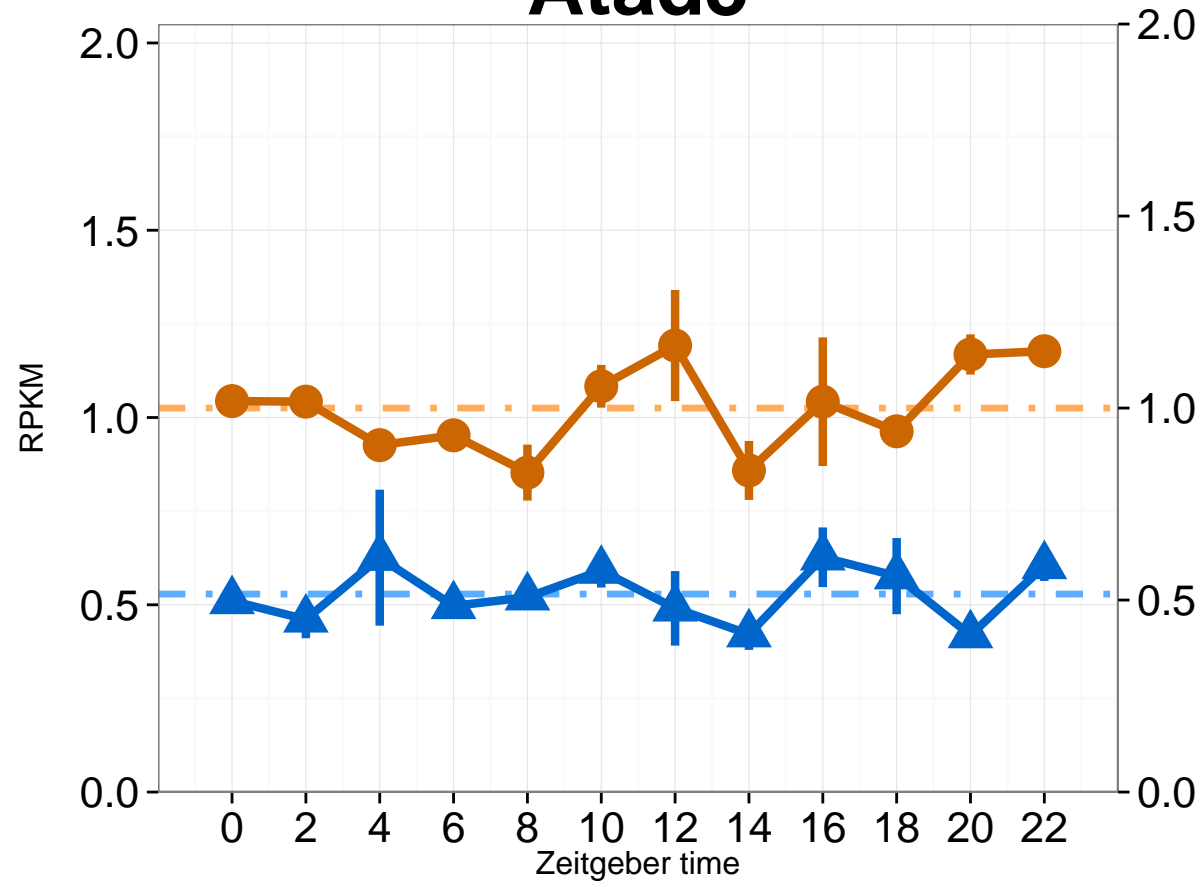

# Atad5

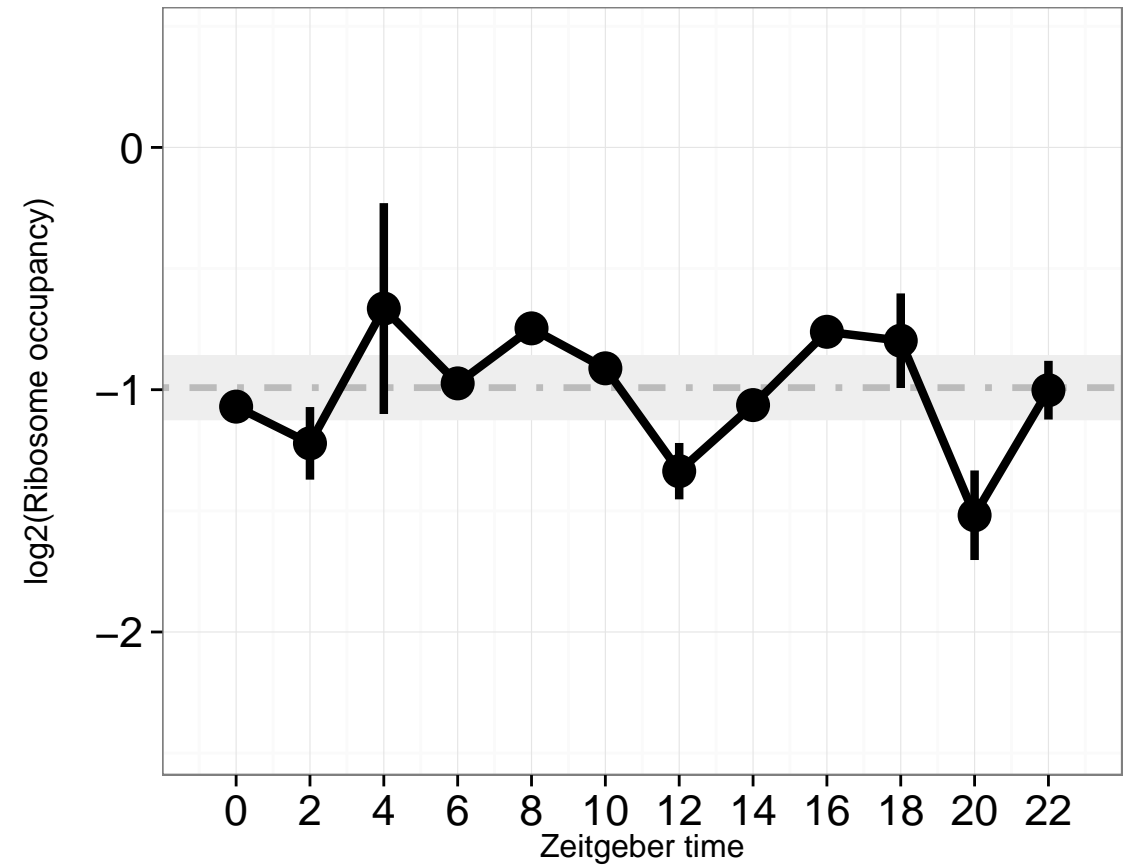

Supplement: Supplementary file 9230 [file 1]

## Cep164

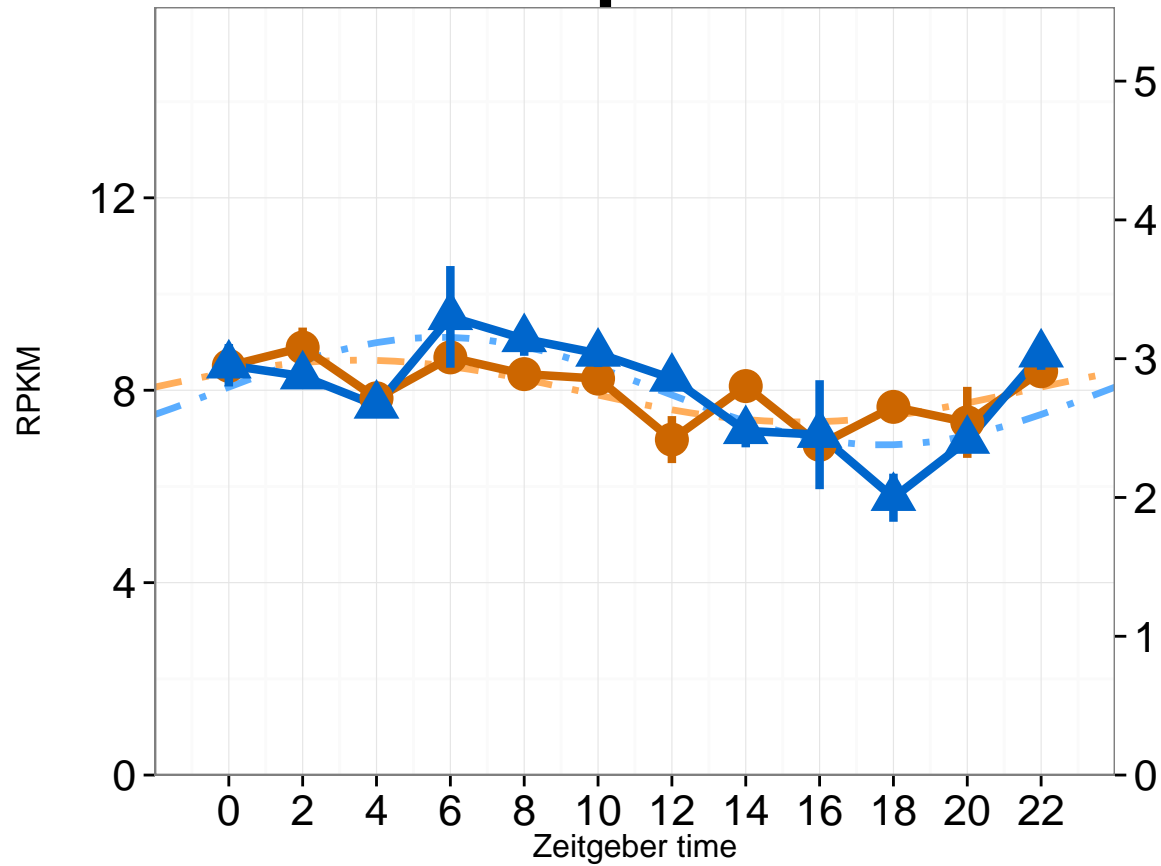

## Cep164

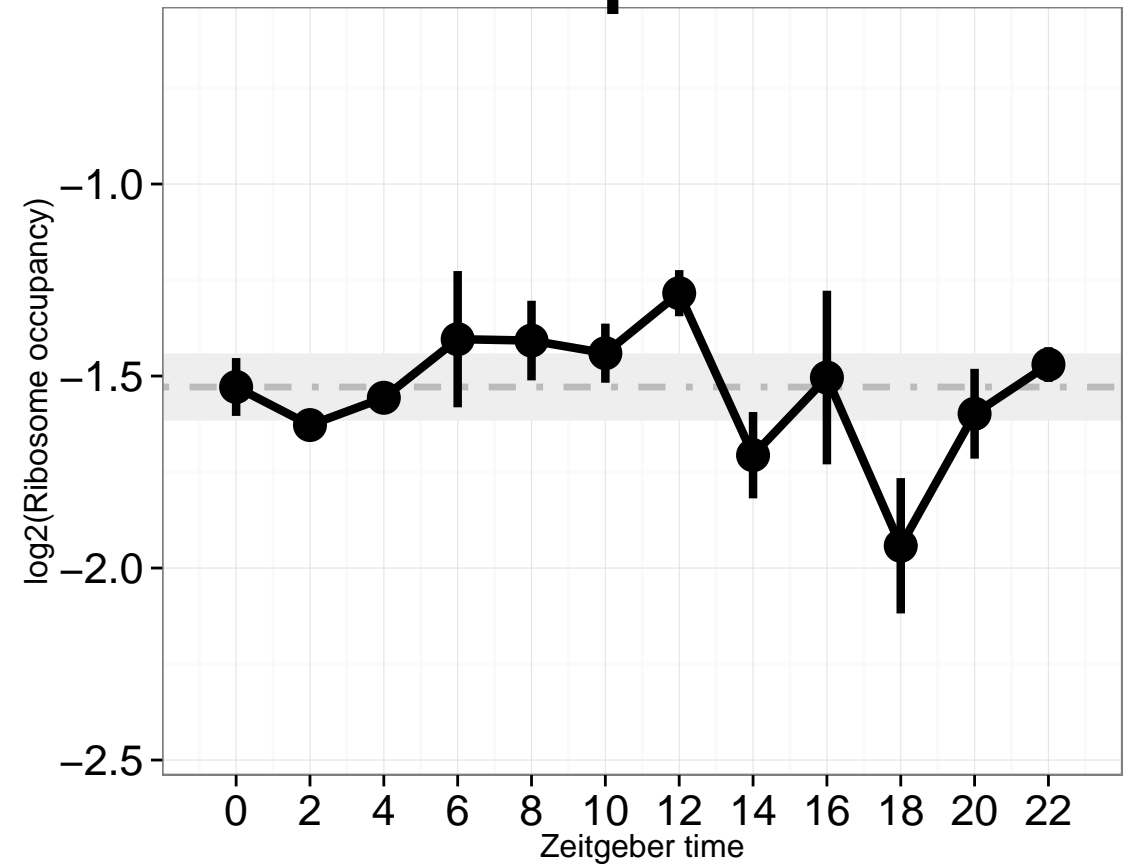

Supplement: Supplementary file 9231 [file 1]

# Rrnad1

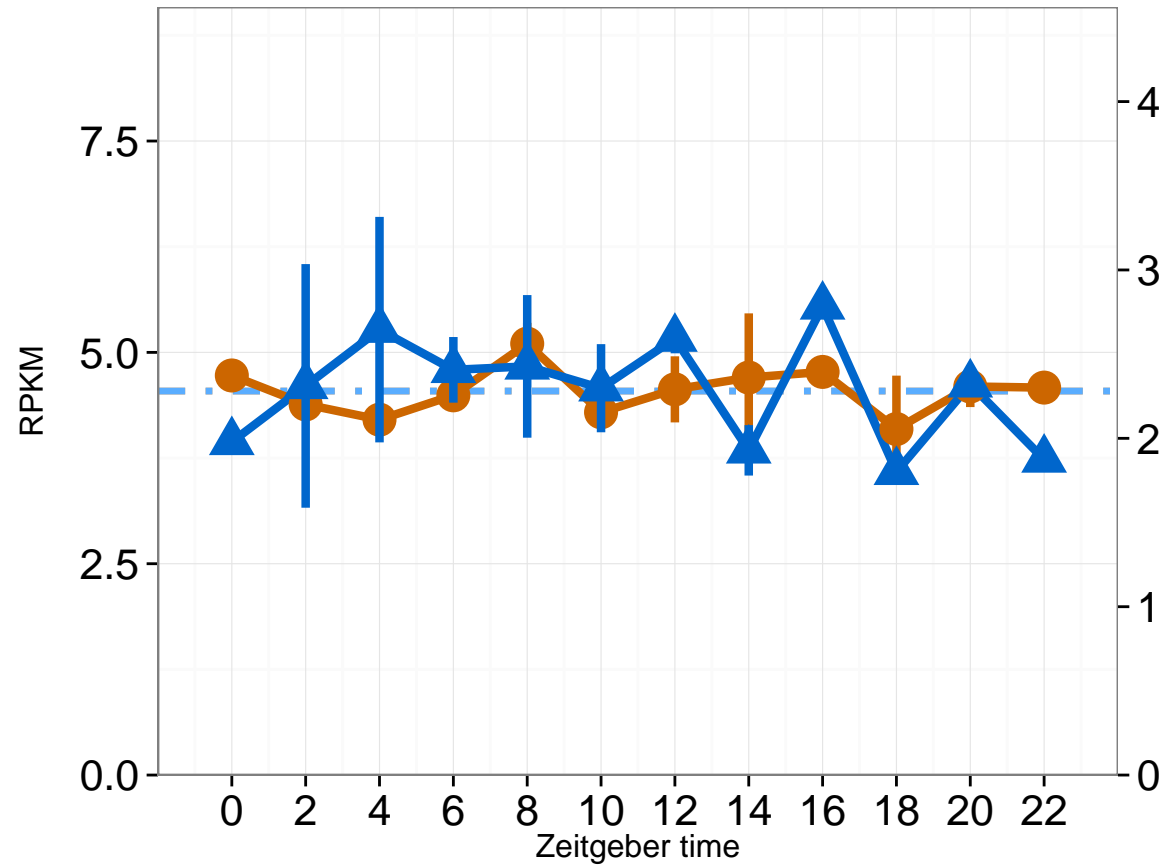

# Rrnad1

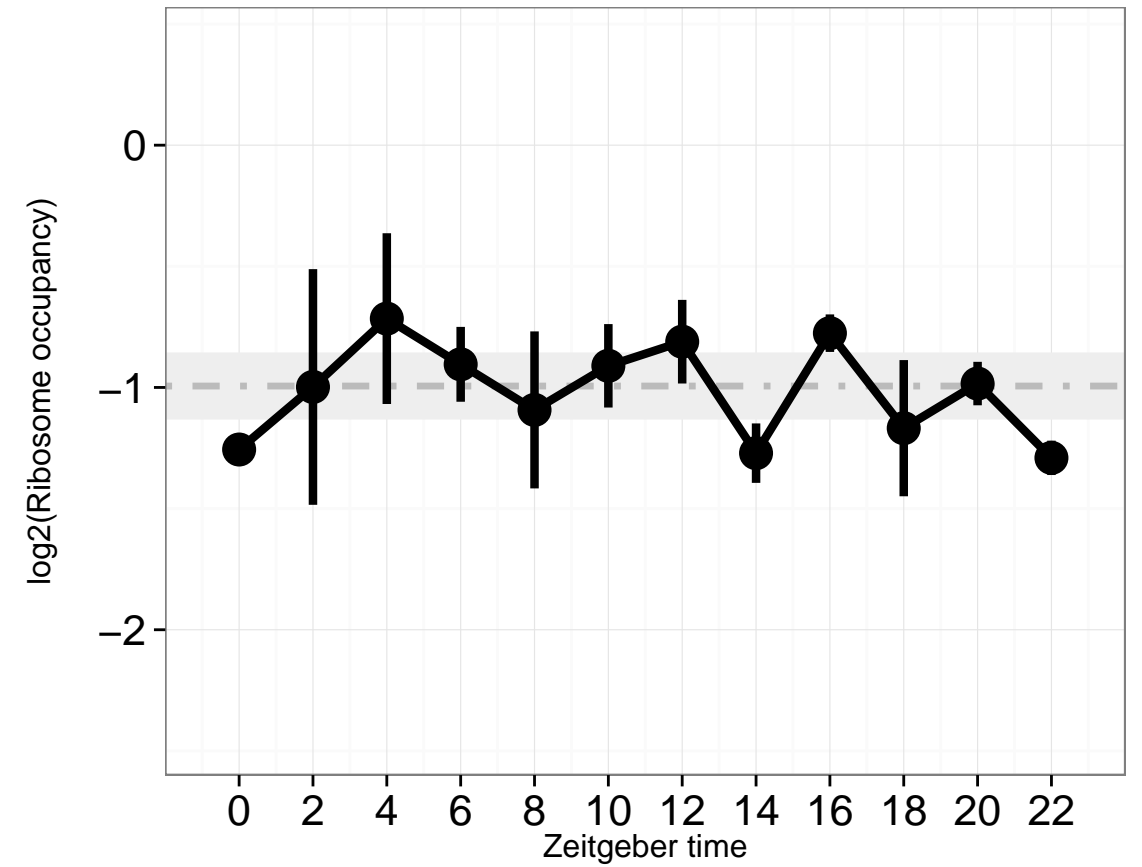

Supplement: Supplementary file 9232 [file 1]

Nans

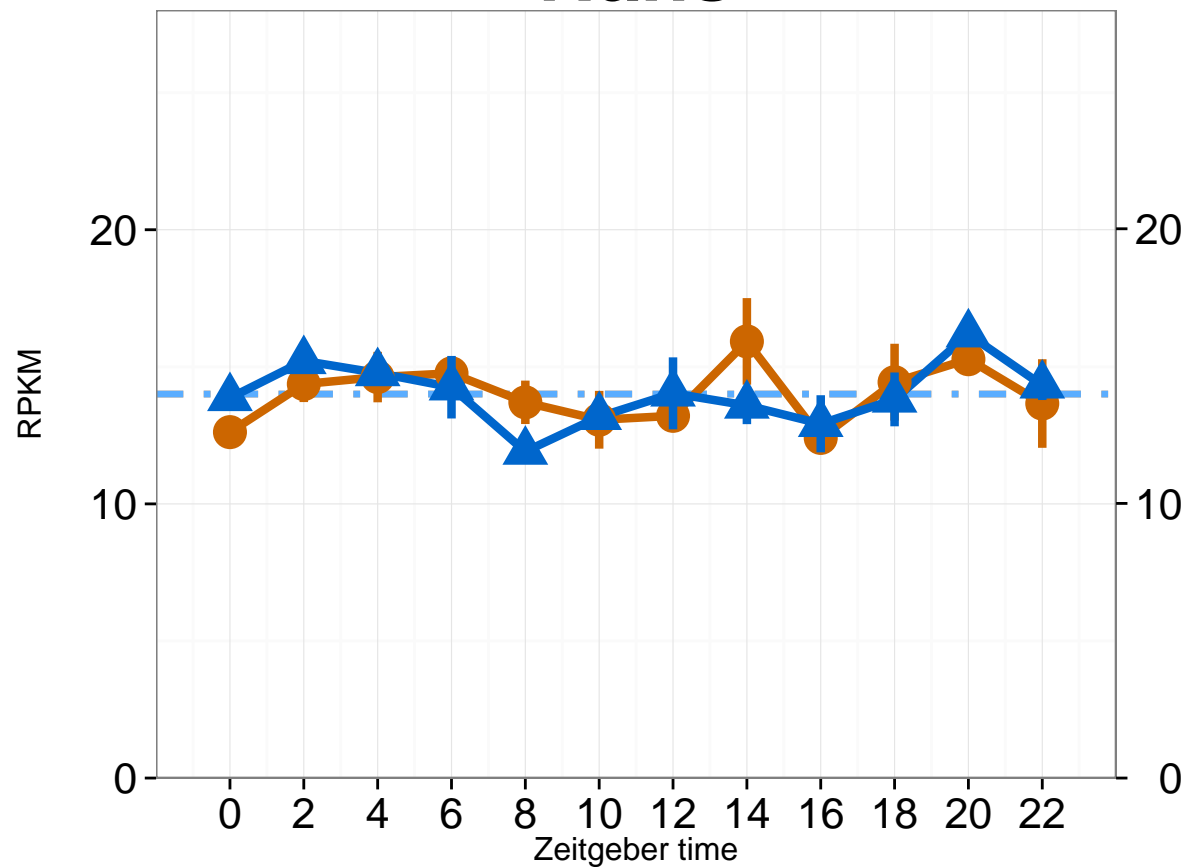

Nans

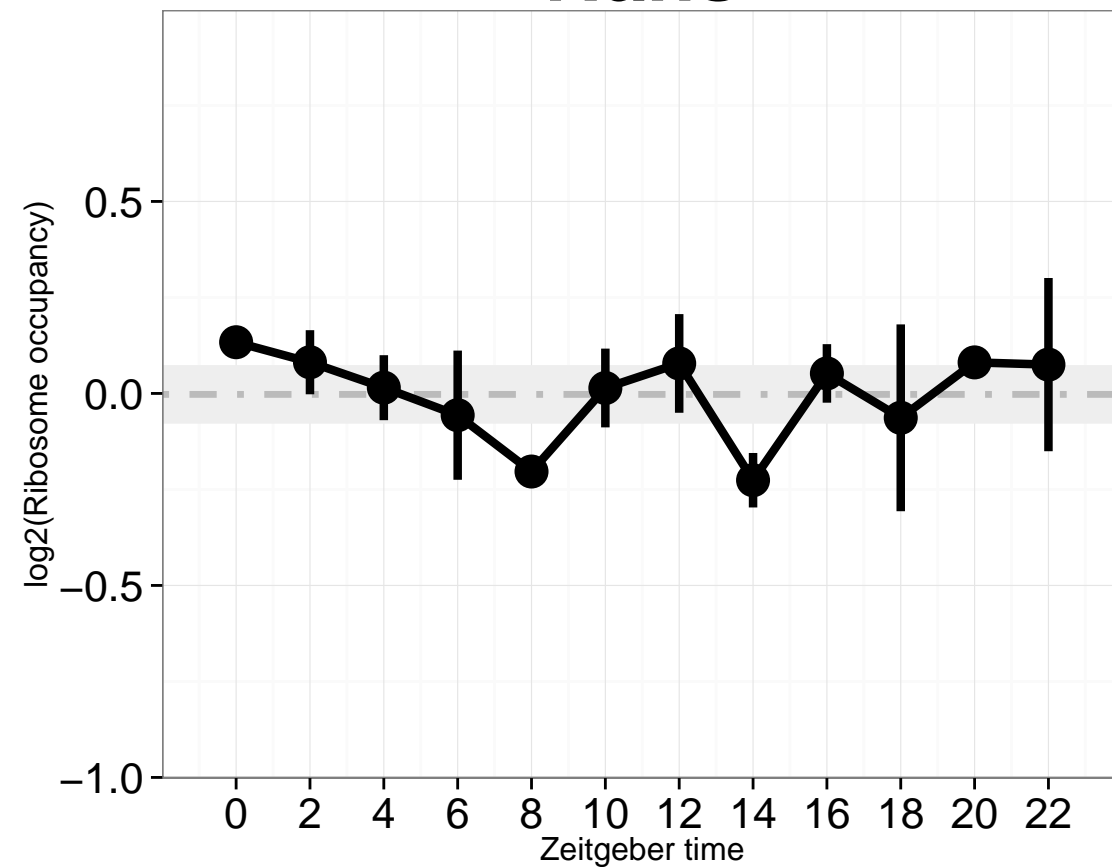

Supplement: Supplementary file 9233 [file 1]

## Nudt4

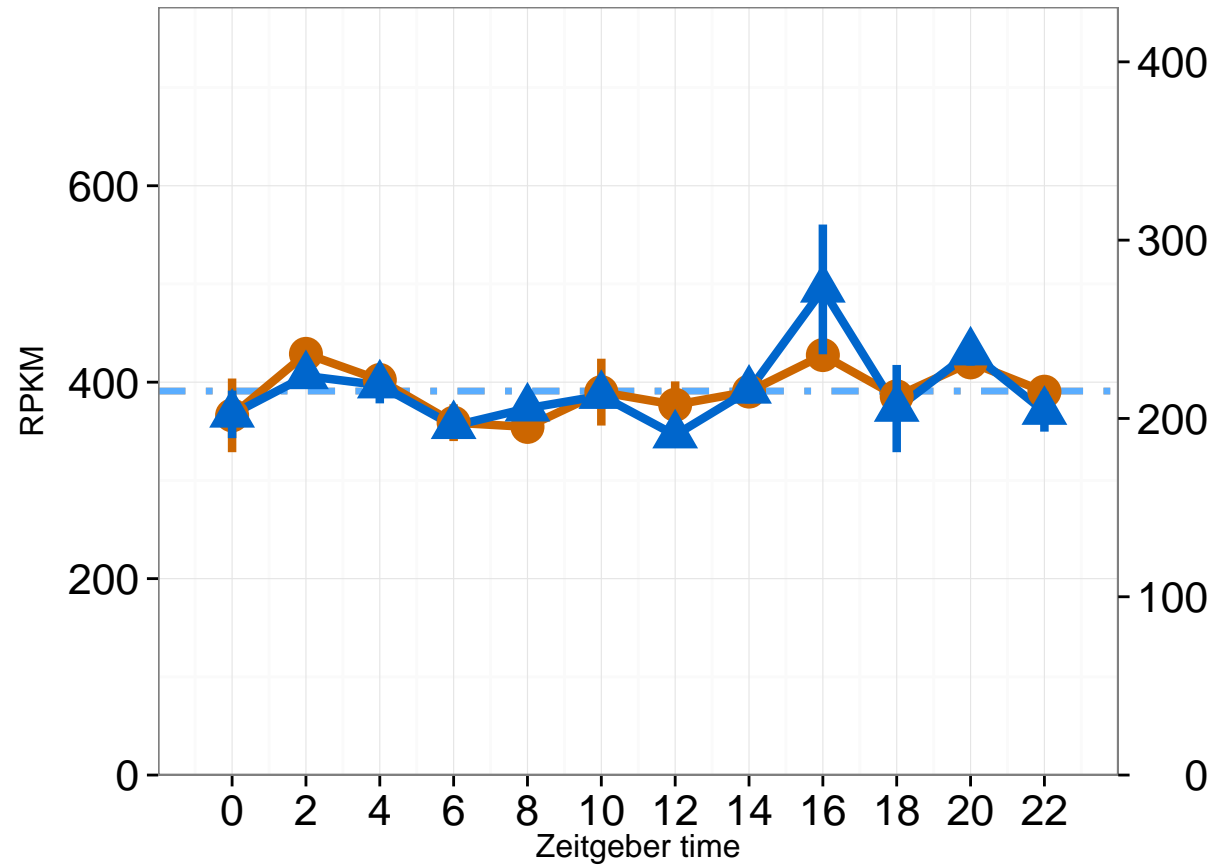

## Nudt4

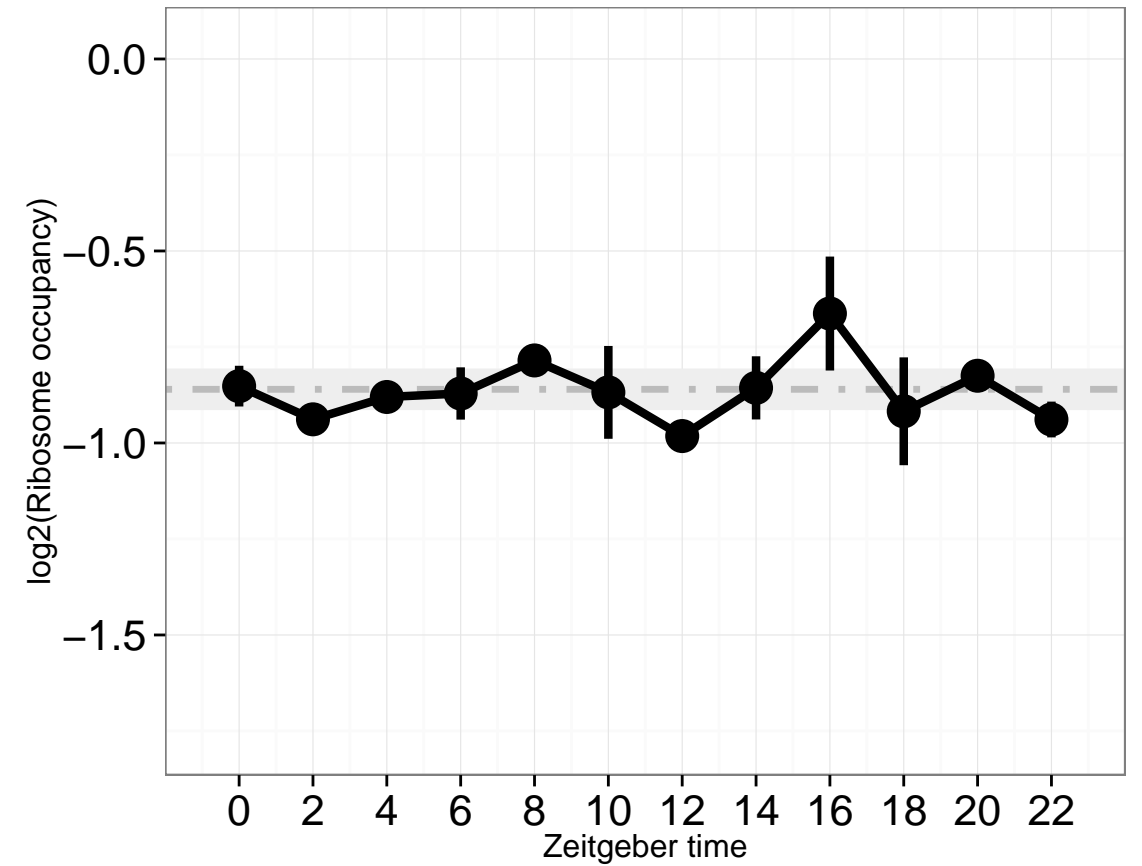

Supplement: Supplementary file 9234 [file 1]

## Has3

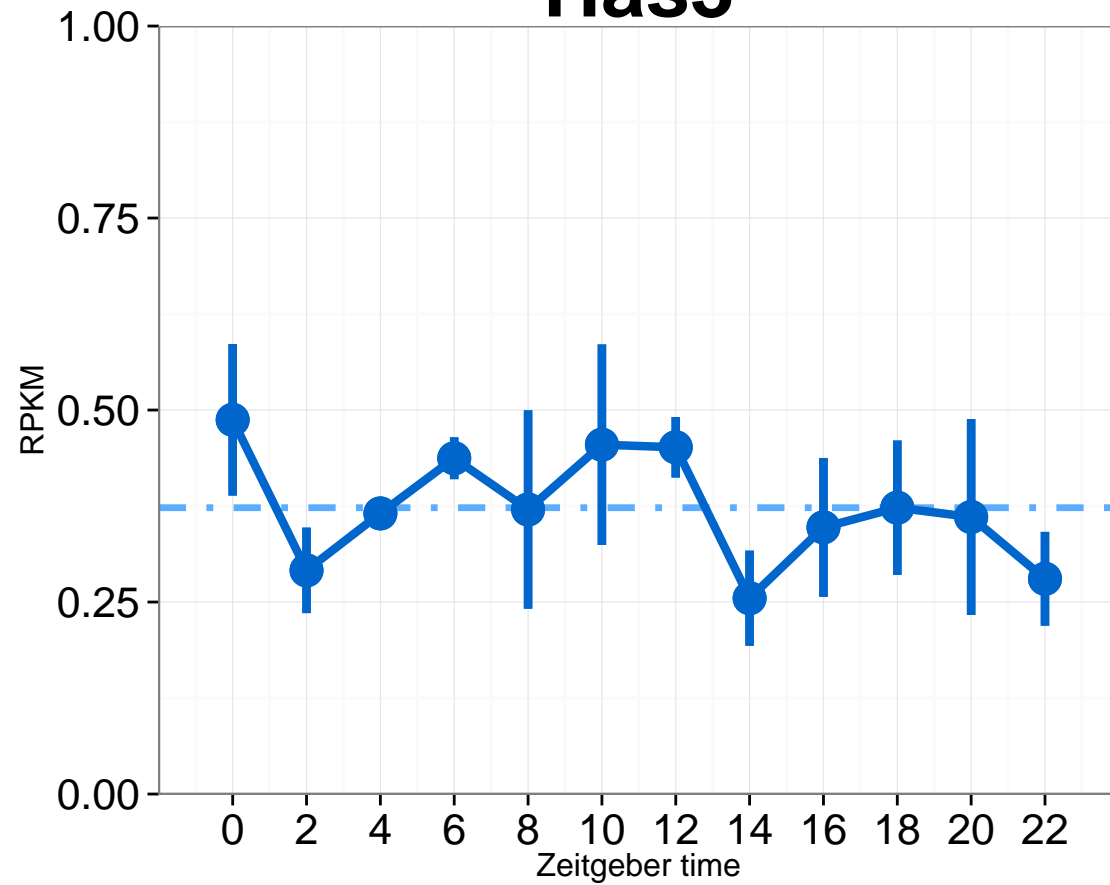

## Has3 log2(Ribosome occupancy)

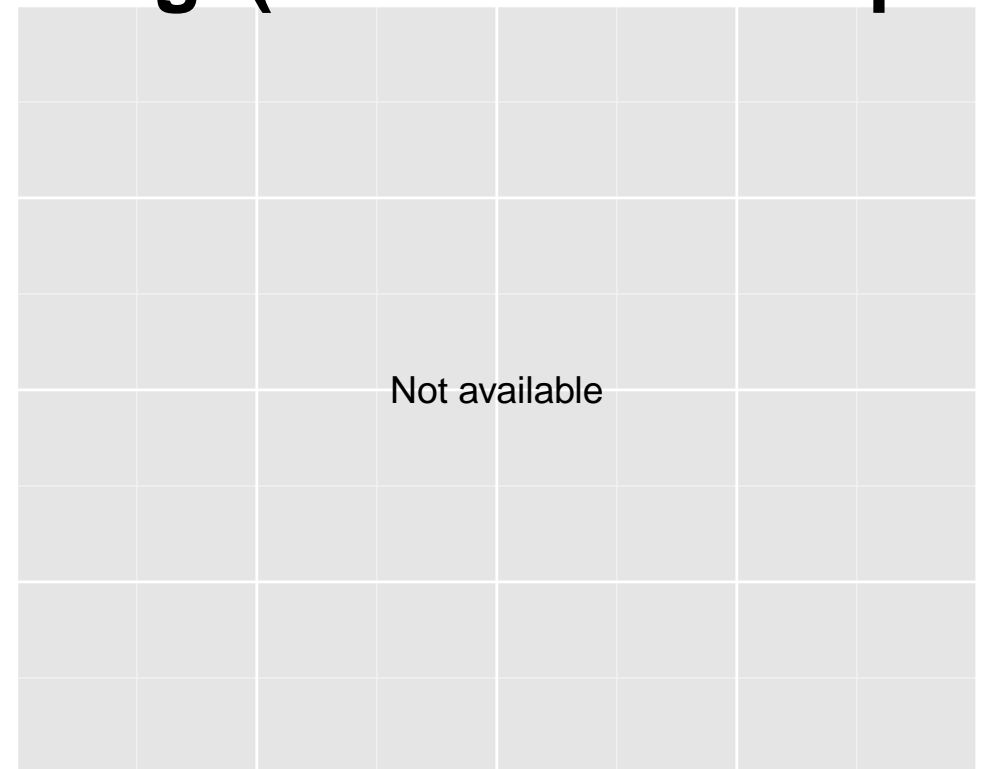

Supplement: Supplementary file 9235 [file 1]
