# Supplementary material (part 93 of 133)
Source: publisher figshare collection journal article supplement (https://springernature.figshare.com/articles/dataset/_/4903193)

# Sema4g

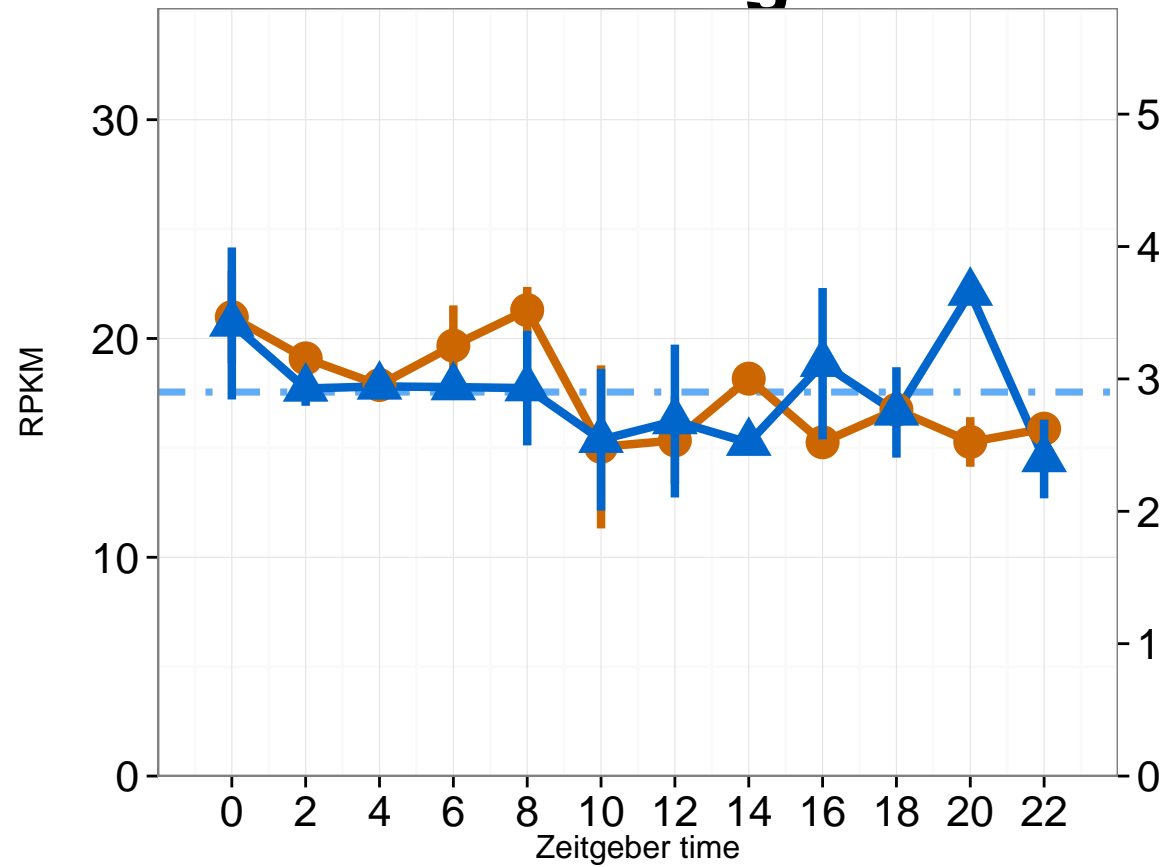

# Sema4g

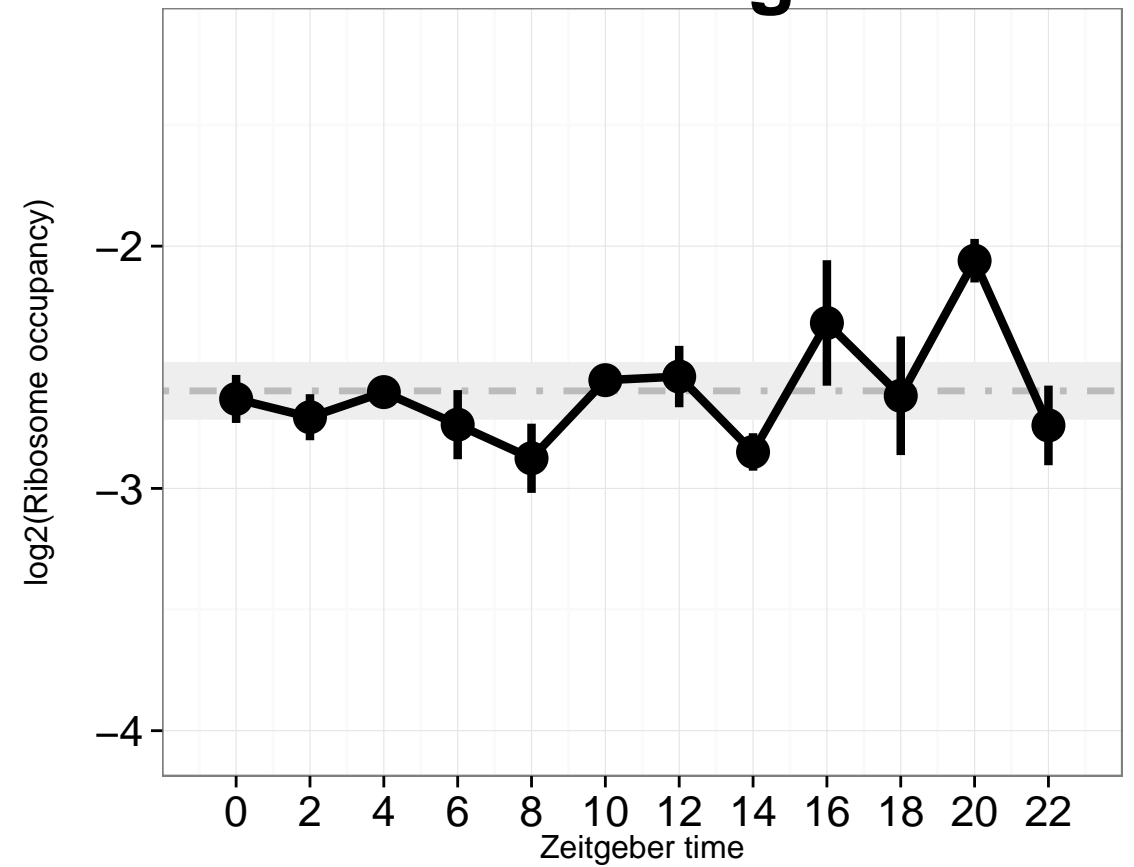

Supplement: Supplementary file 9236 [file 1]

# Fam107b

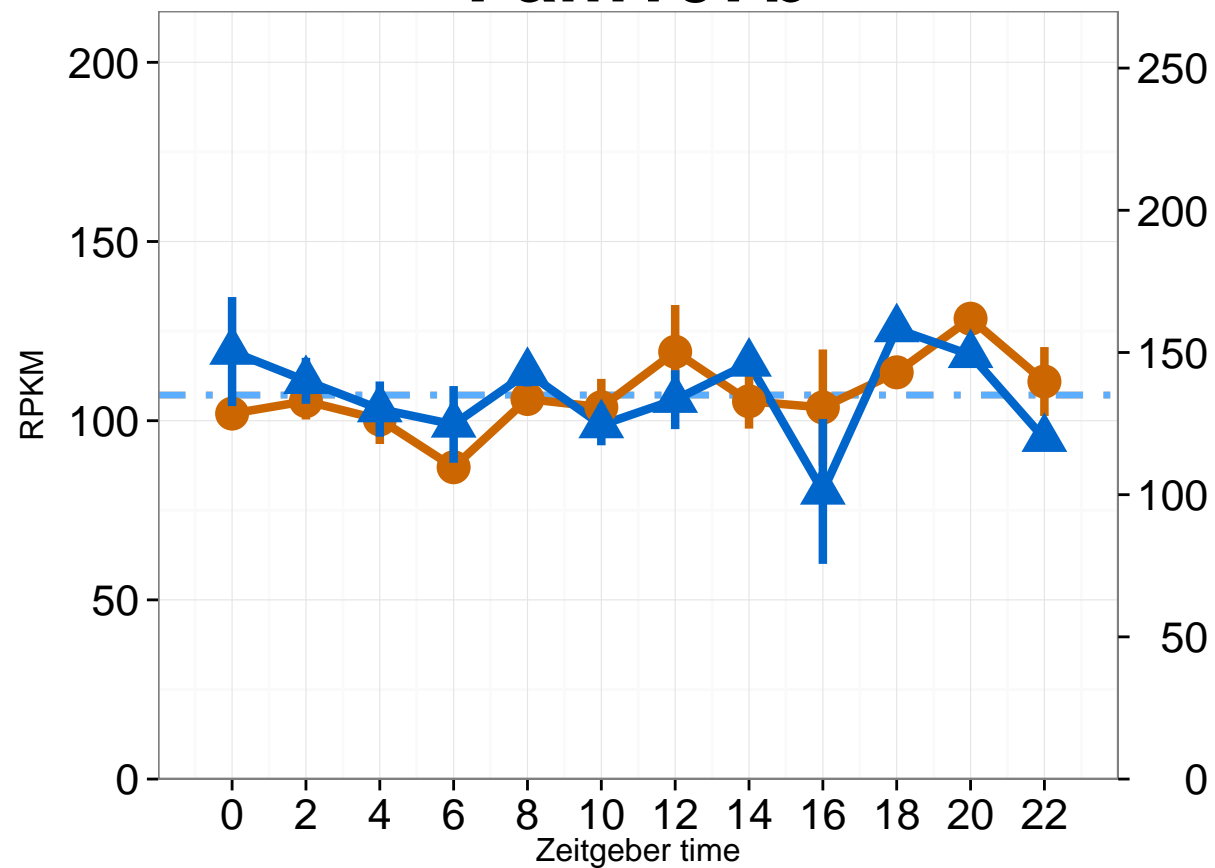

# Fam107b

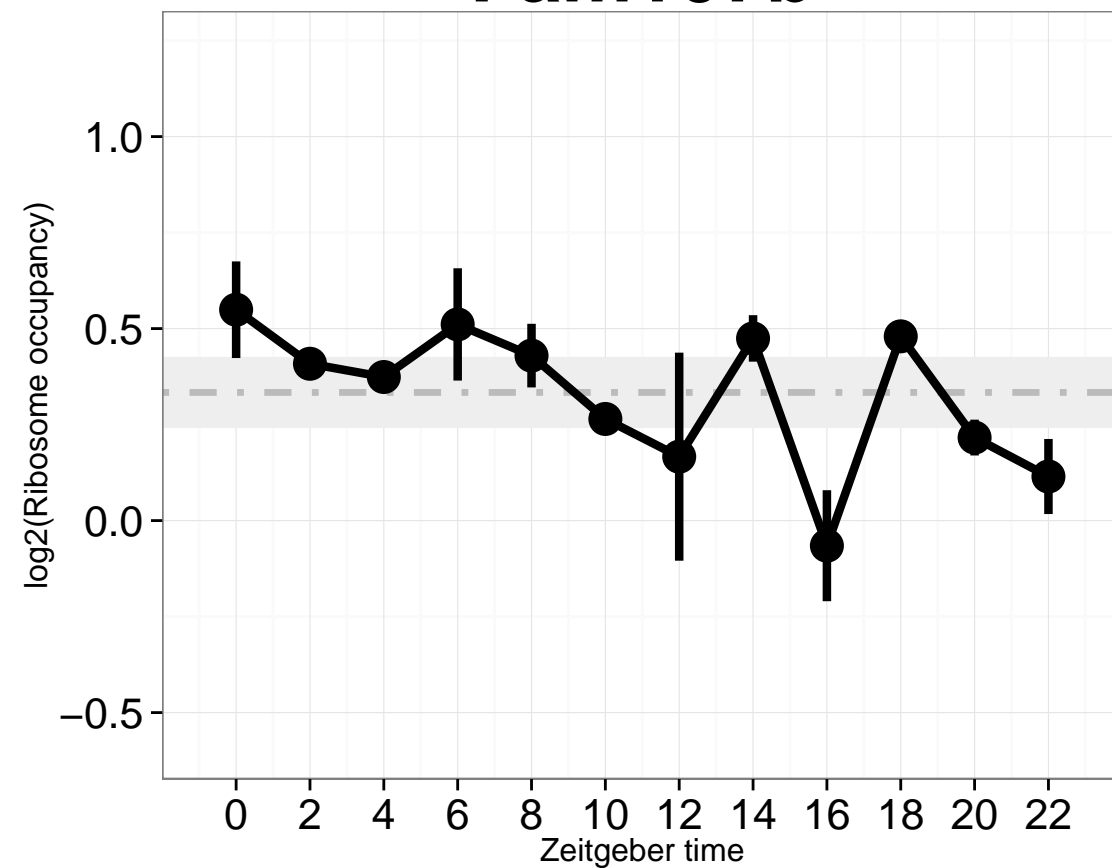

Supplement: Supplementary file 9237 [file 1]

# Ppp1r35

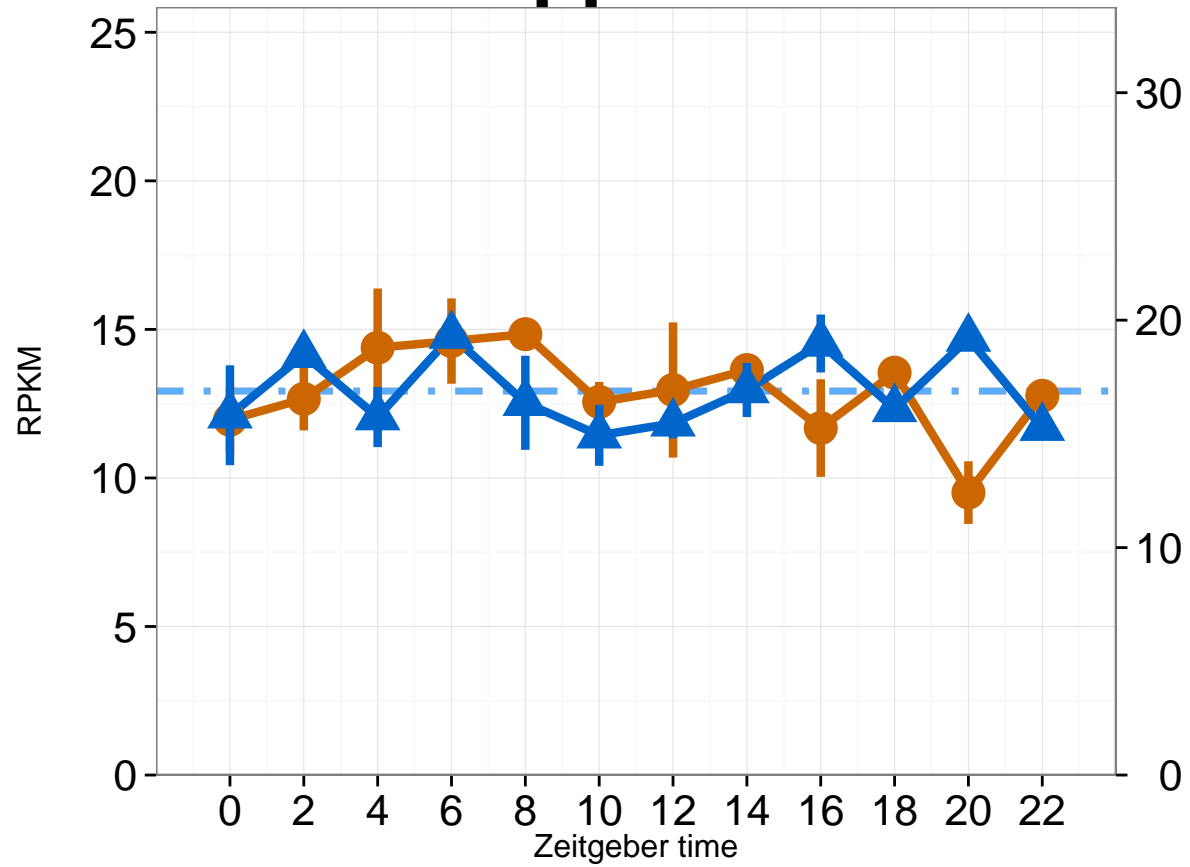

# Ppp1r35

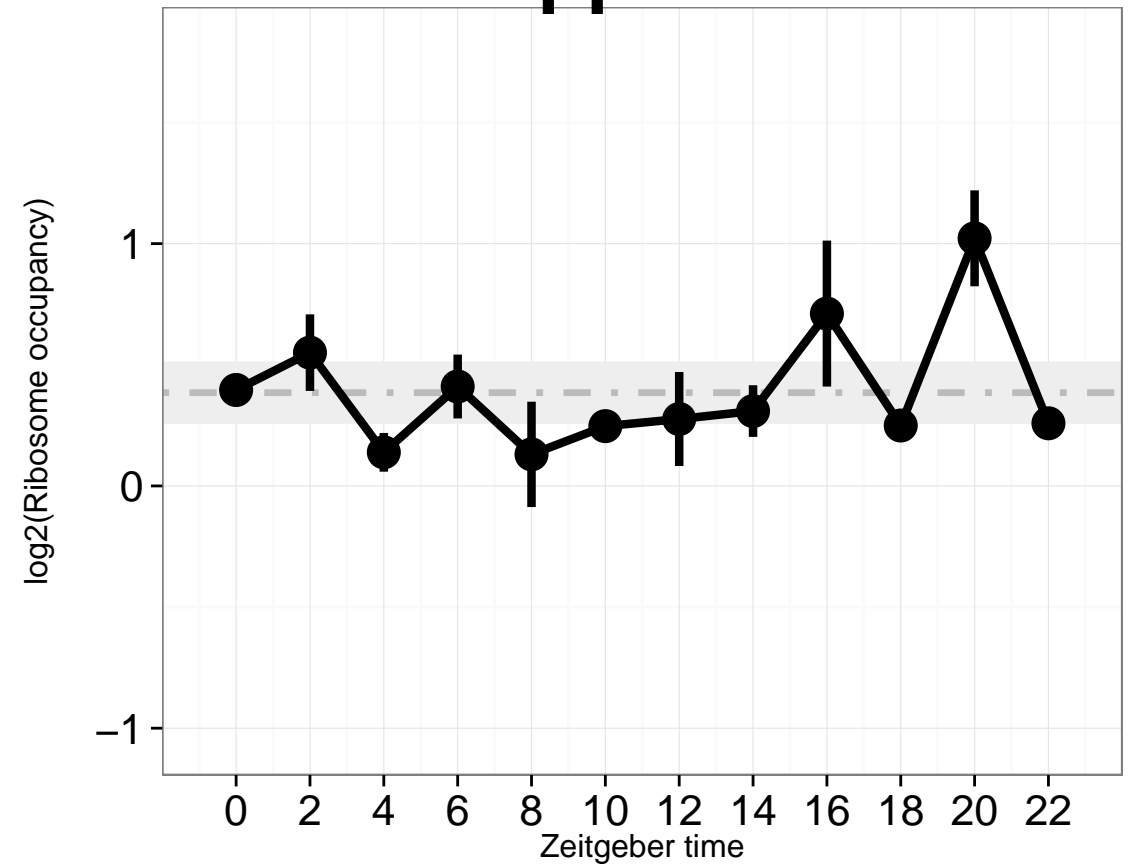

Supplement: Supplementary file 9238 [file 1]

## Dyrk3

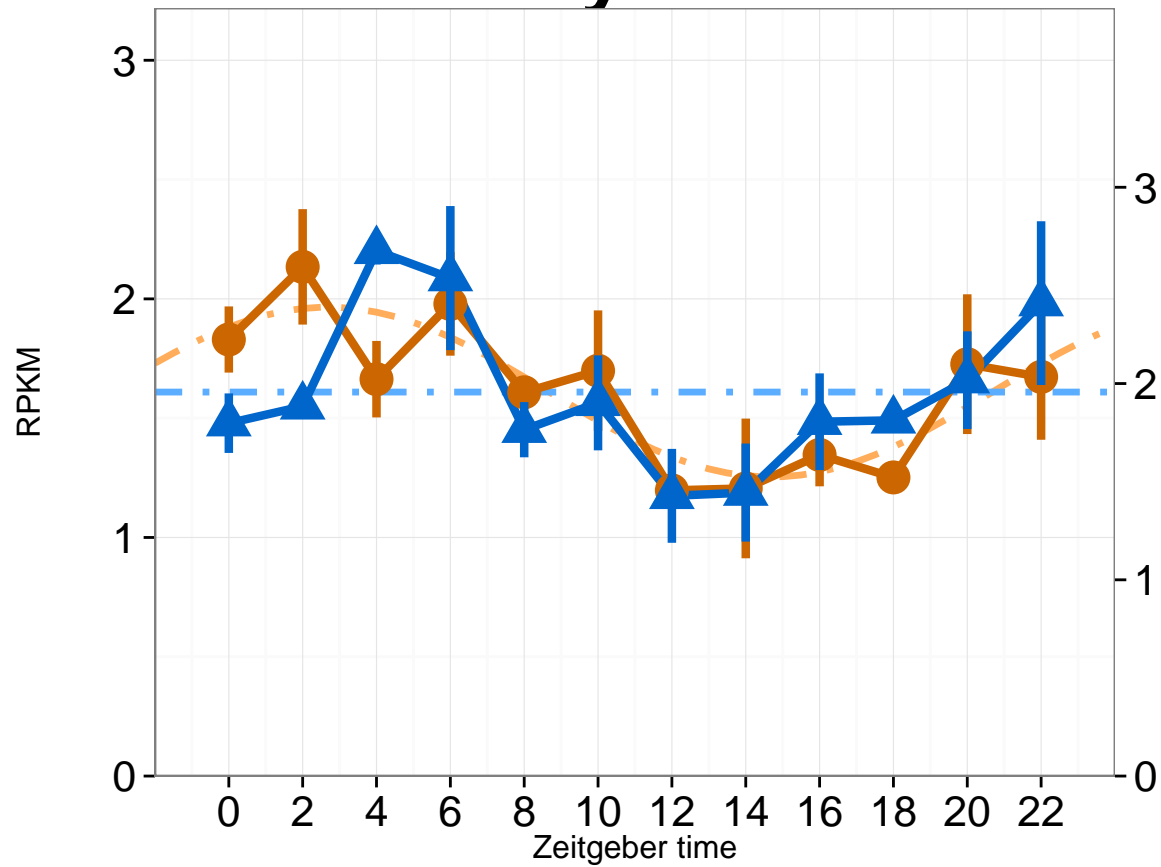

## Dyrk3

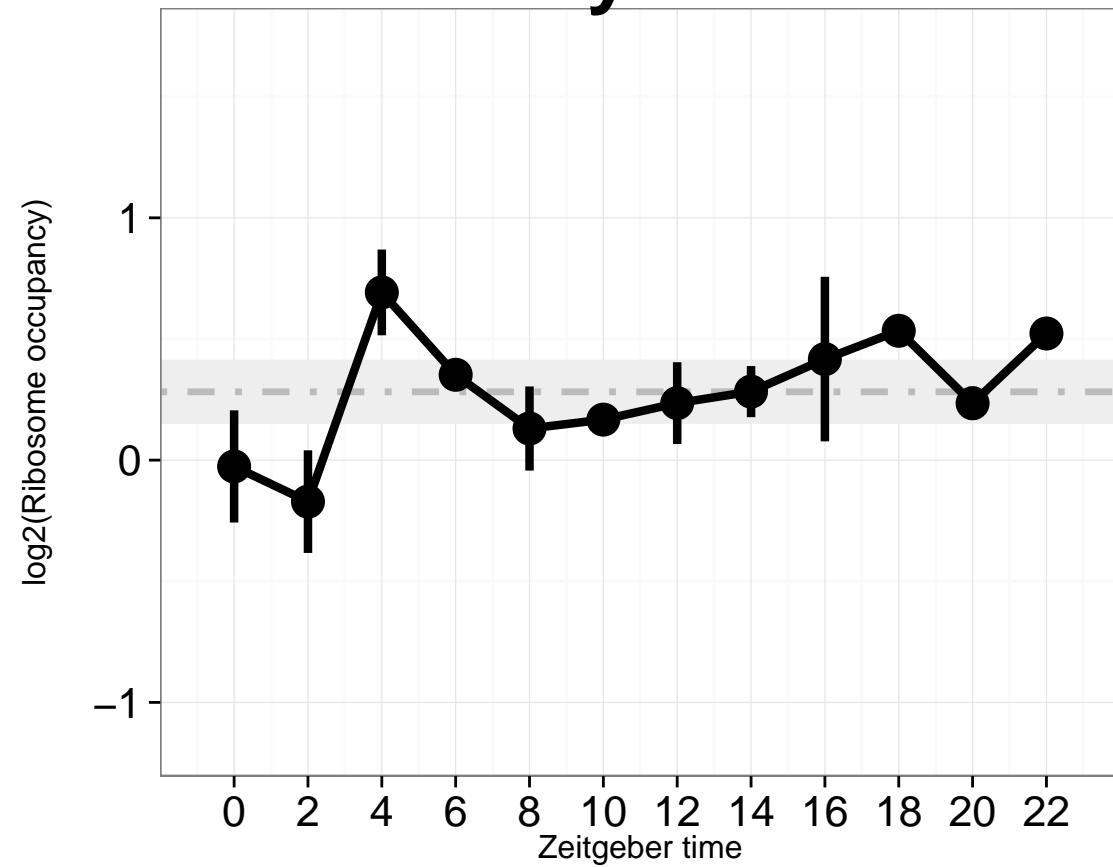

Supplement: Supplementary file 9239 [file 1]

## RPL24

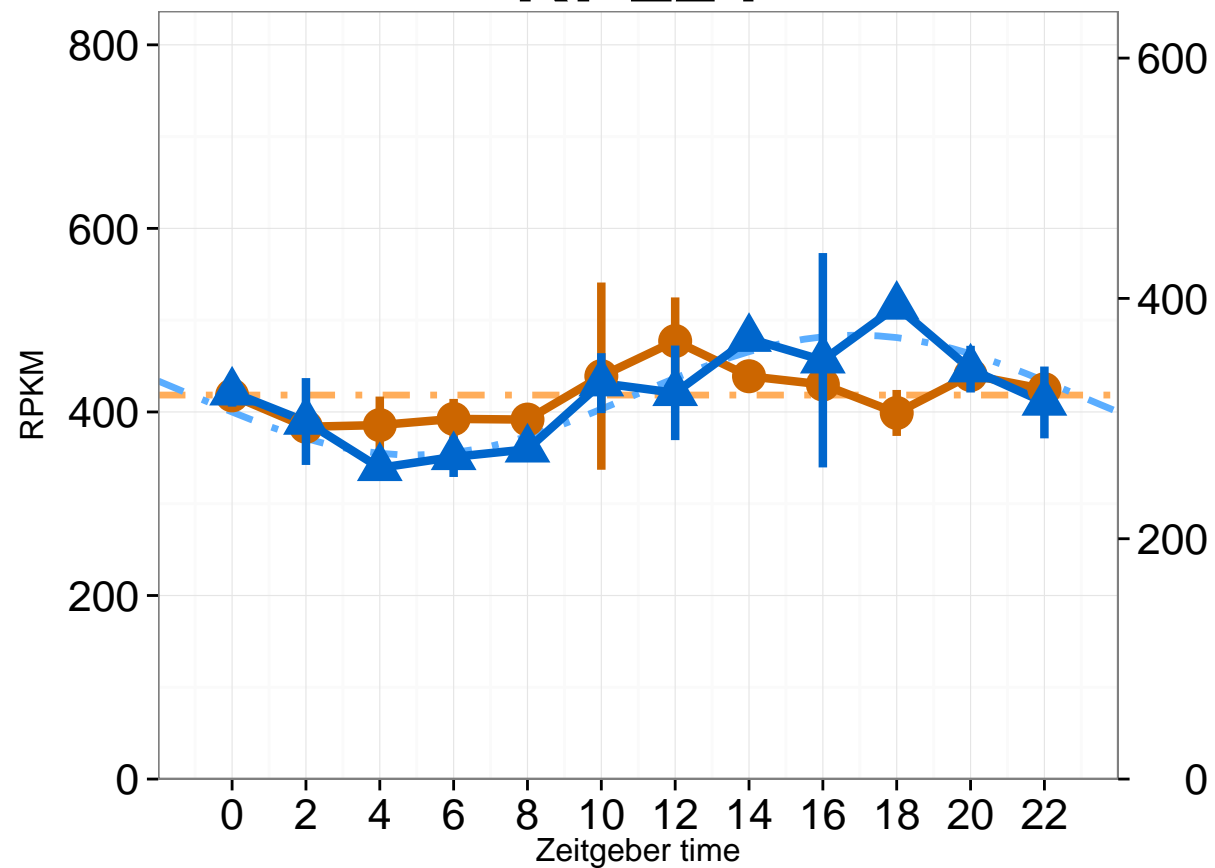

## RPL24

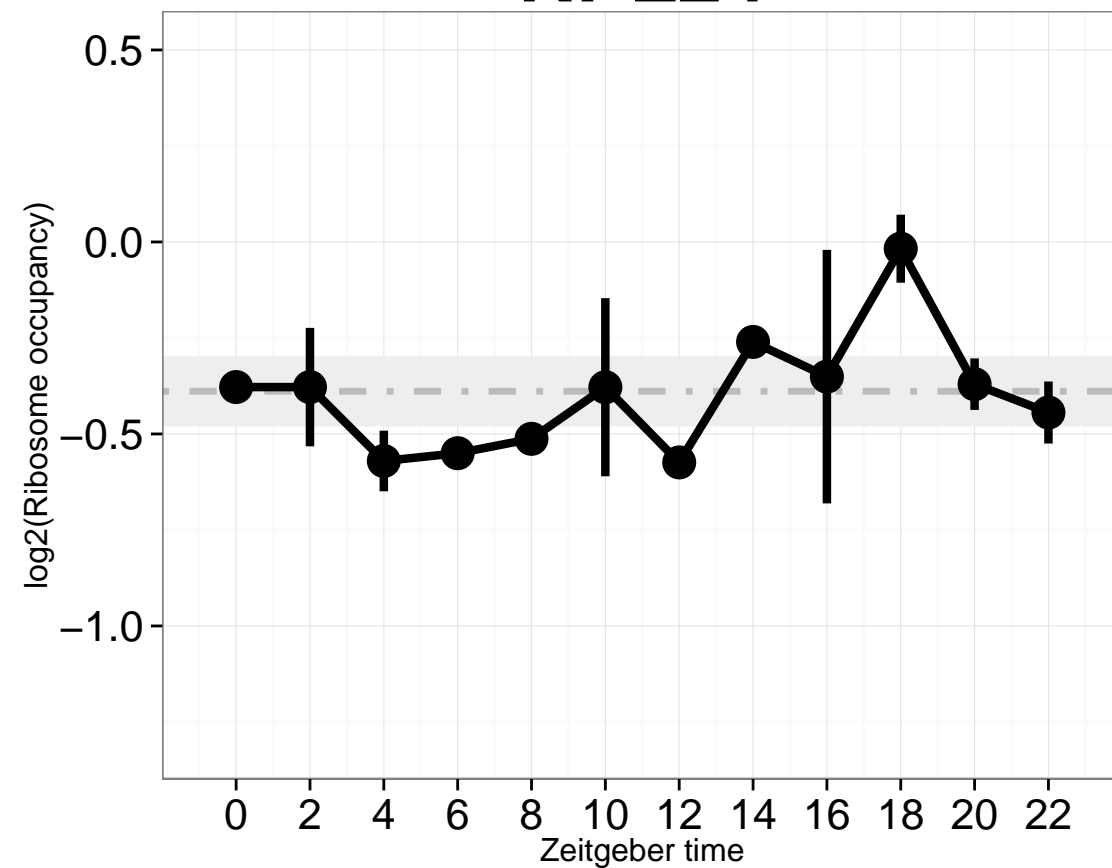

Supplement: Supplementary file 9240 [file 1]

## Aass

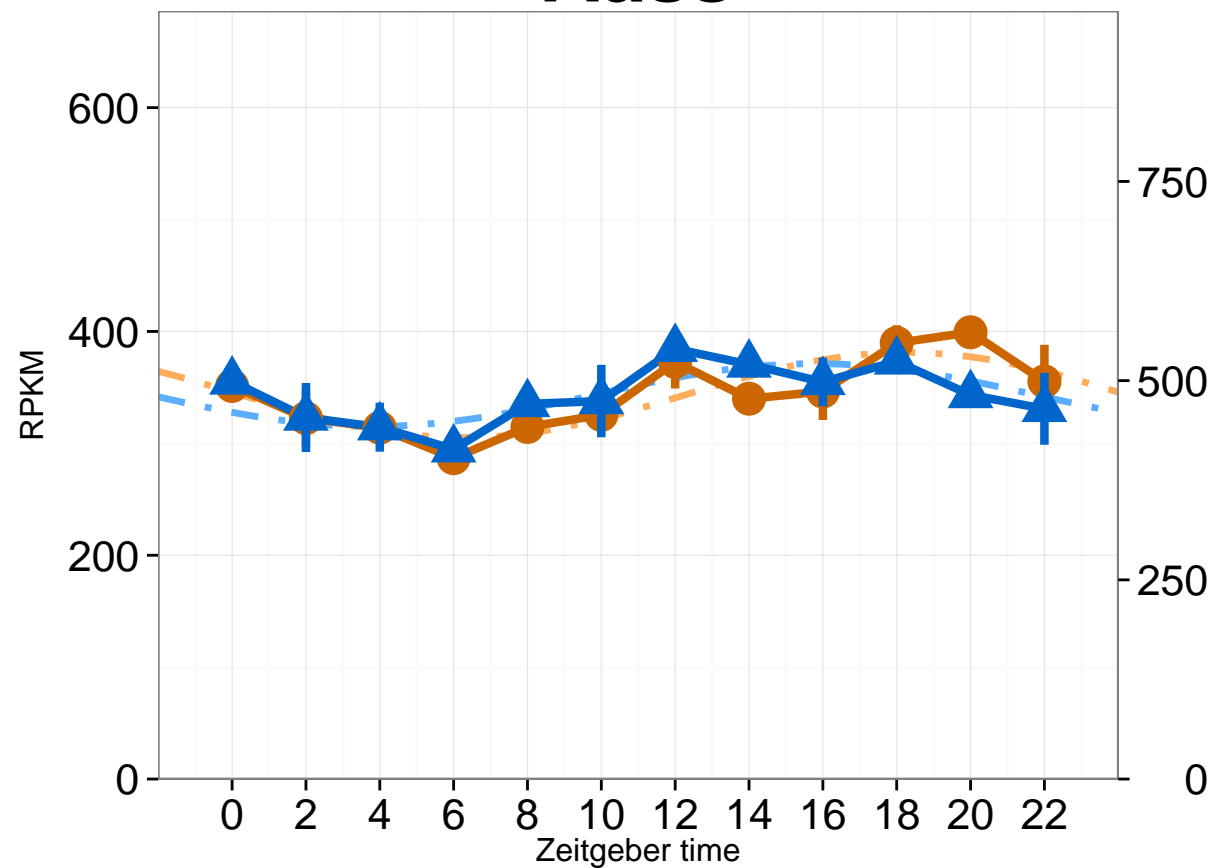

## Aass

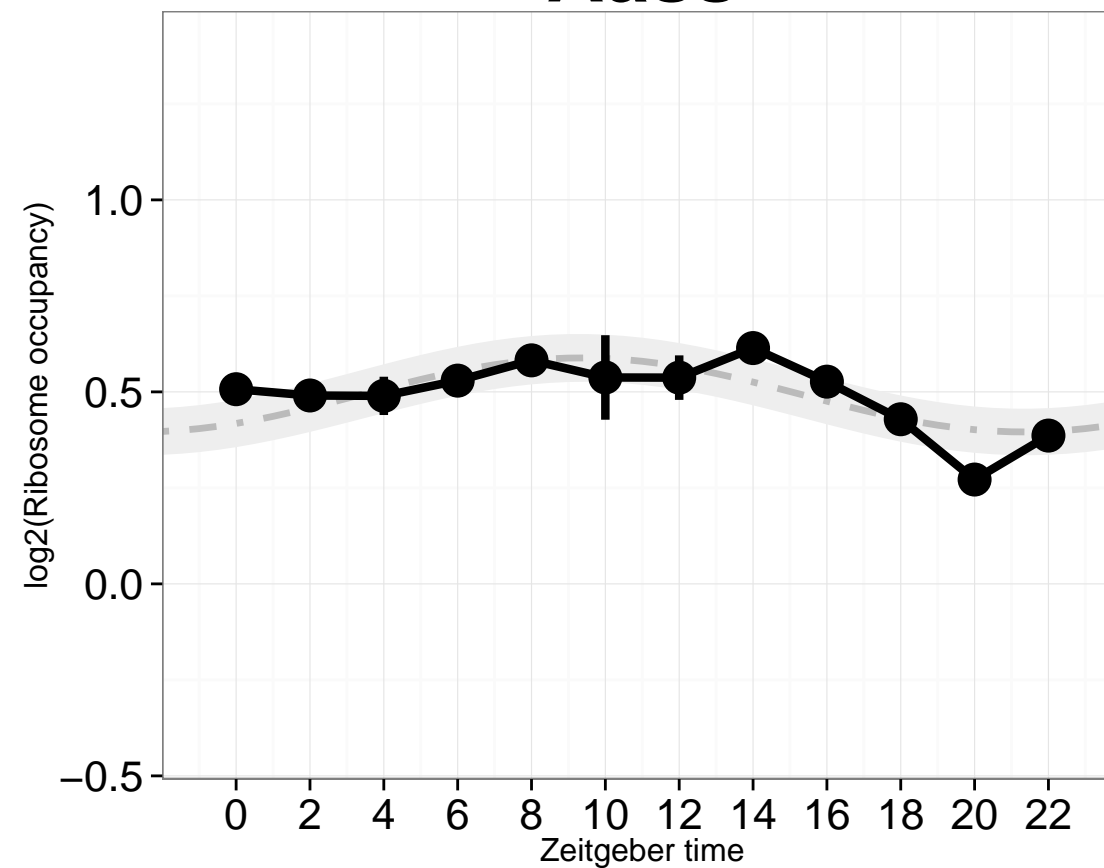

Supplement: Supplementary file 9241 [file 1]

# Mtfp1

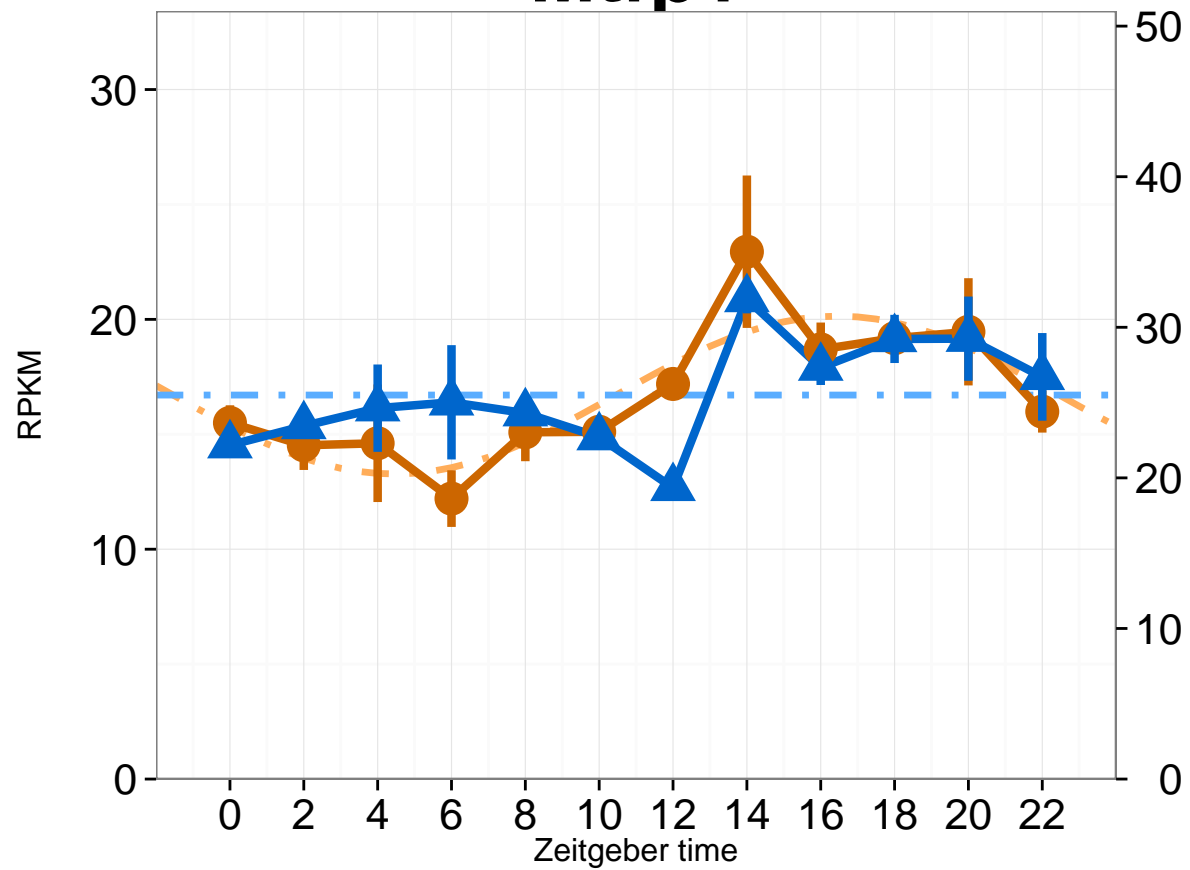

# Mtfp1

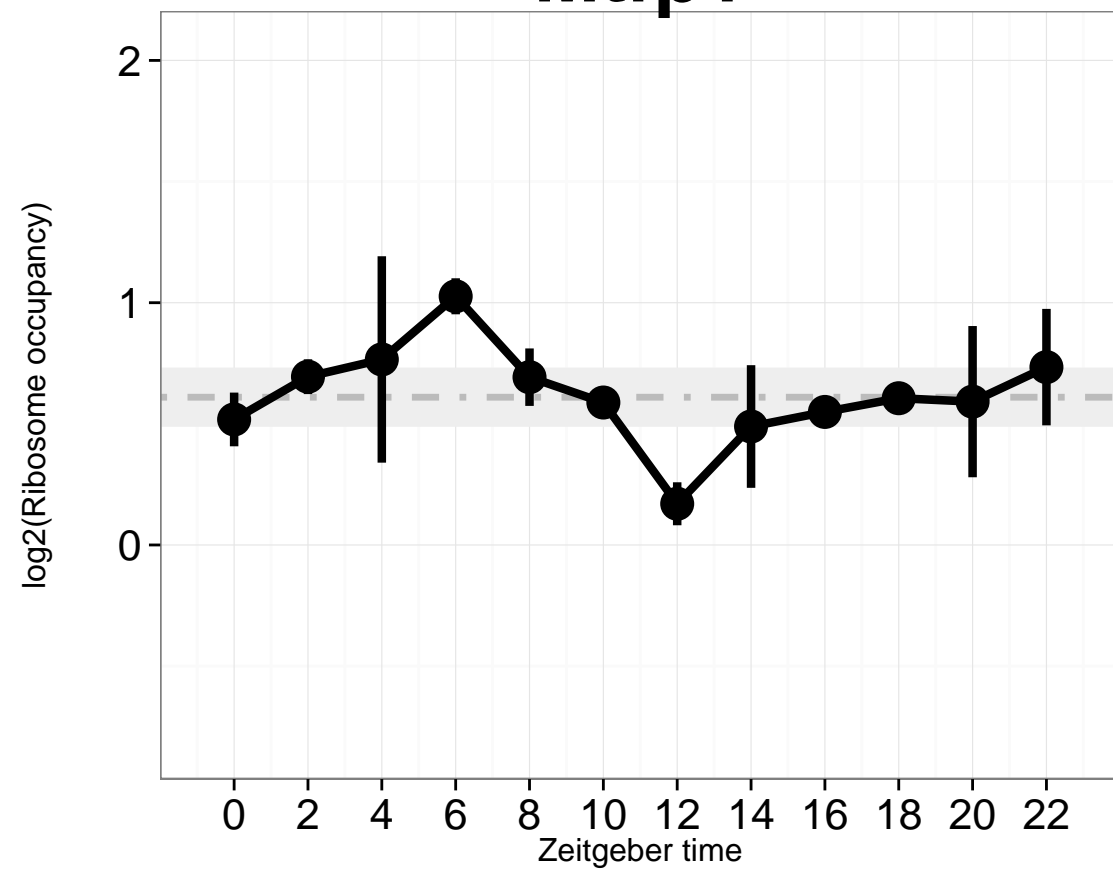

Supplement: Supplementary file 9242 [file 1]

# Trappc3

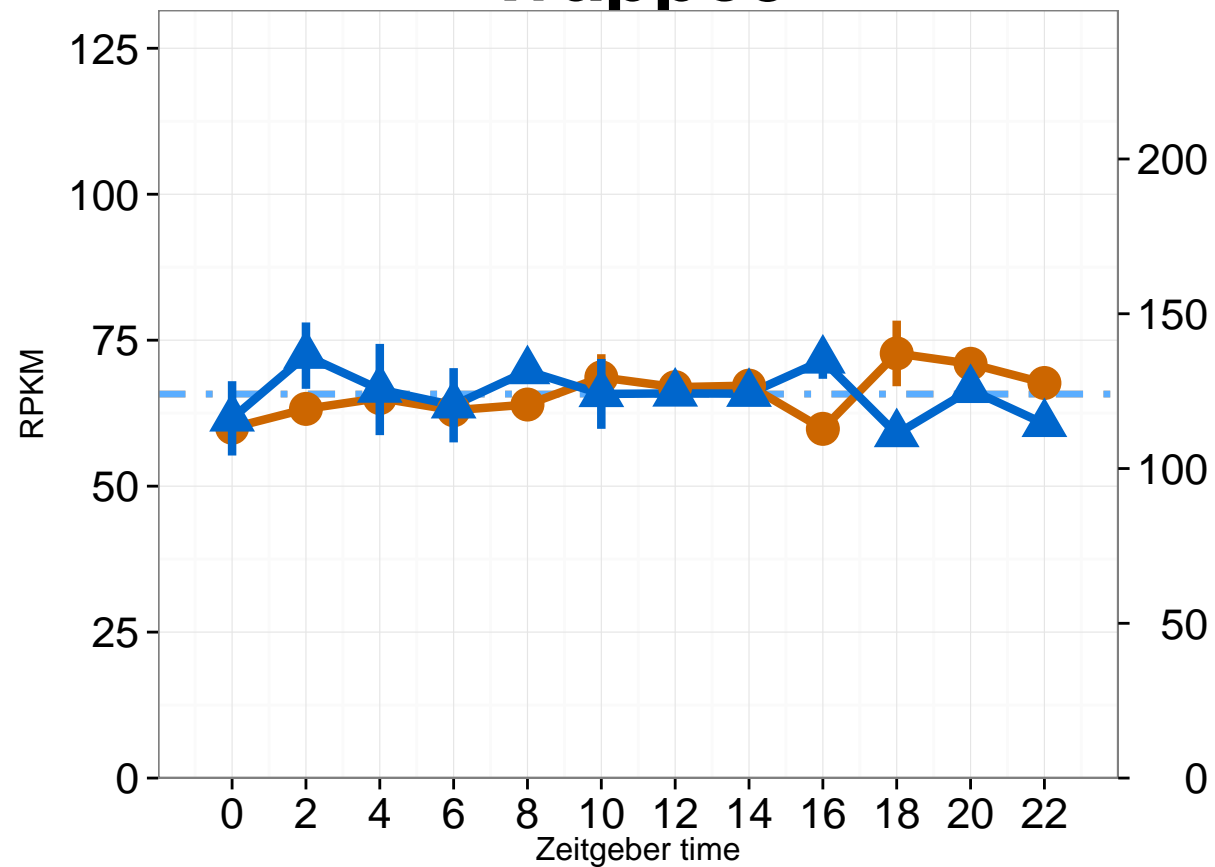

# Trappc3

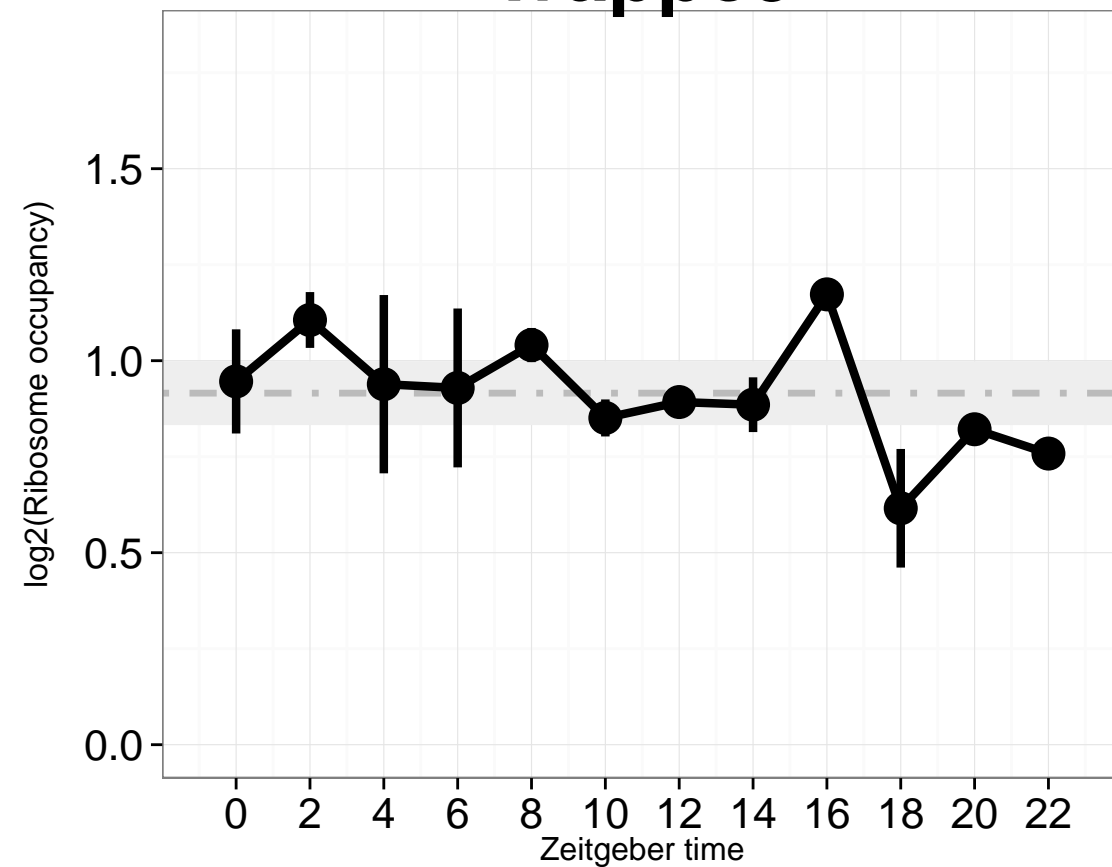

Supplement: Supplementary file 9243 [file 1]

## Prkacb

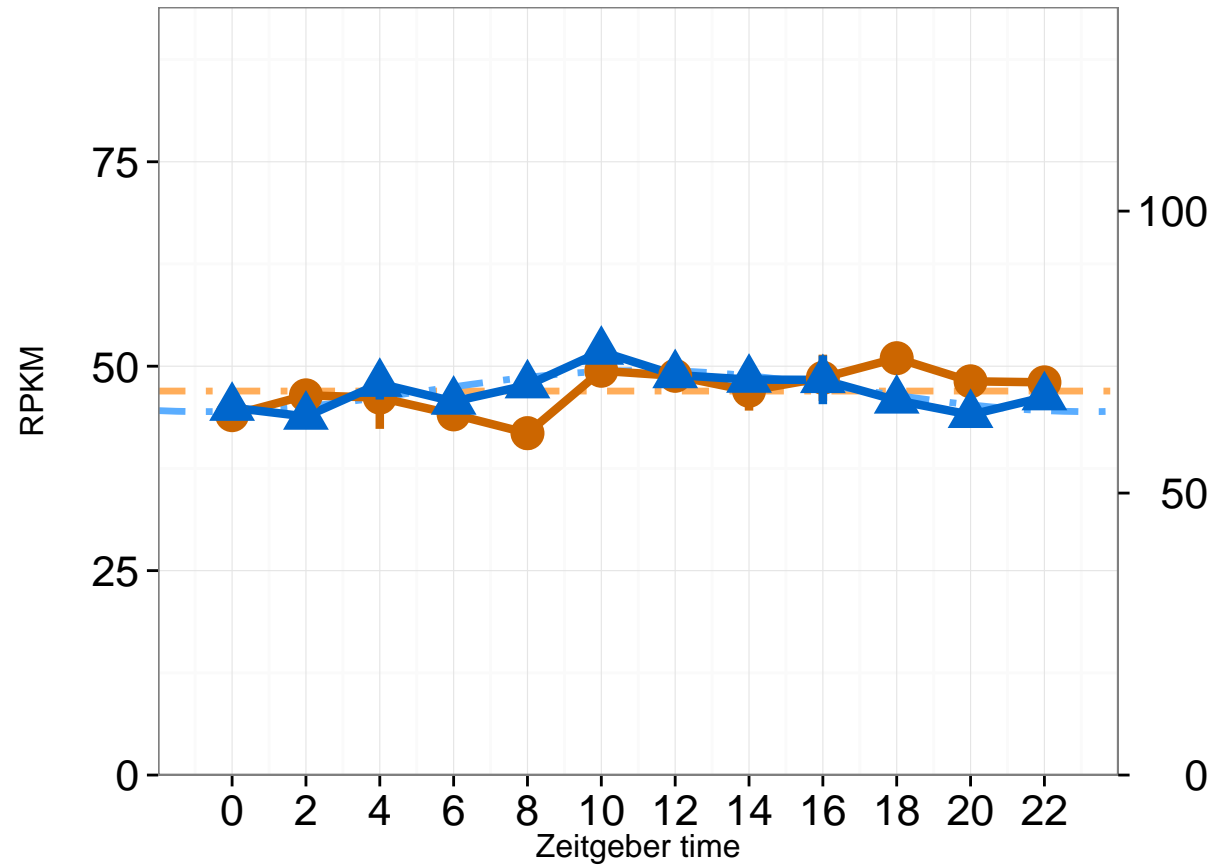

## Prkacb

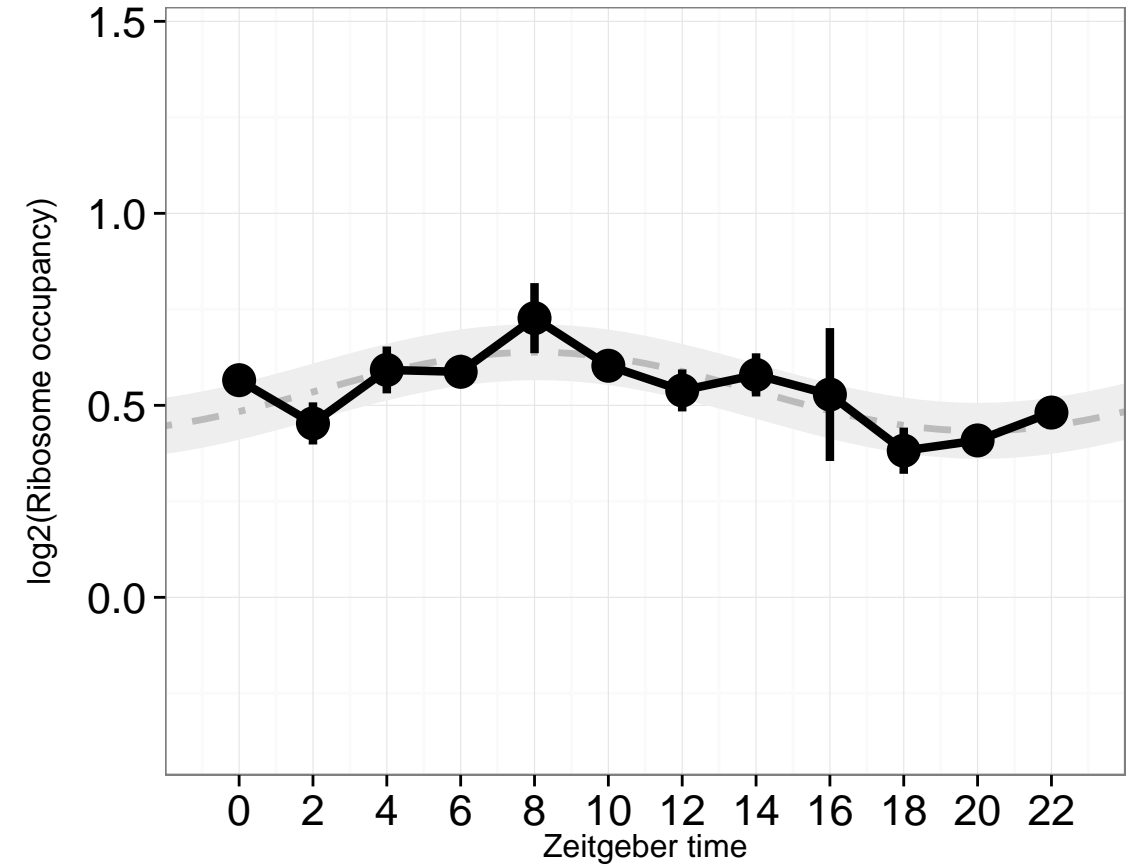

Supplement: Supplementary file 9244 [file 1]

## Psma2

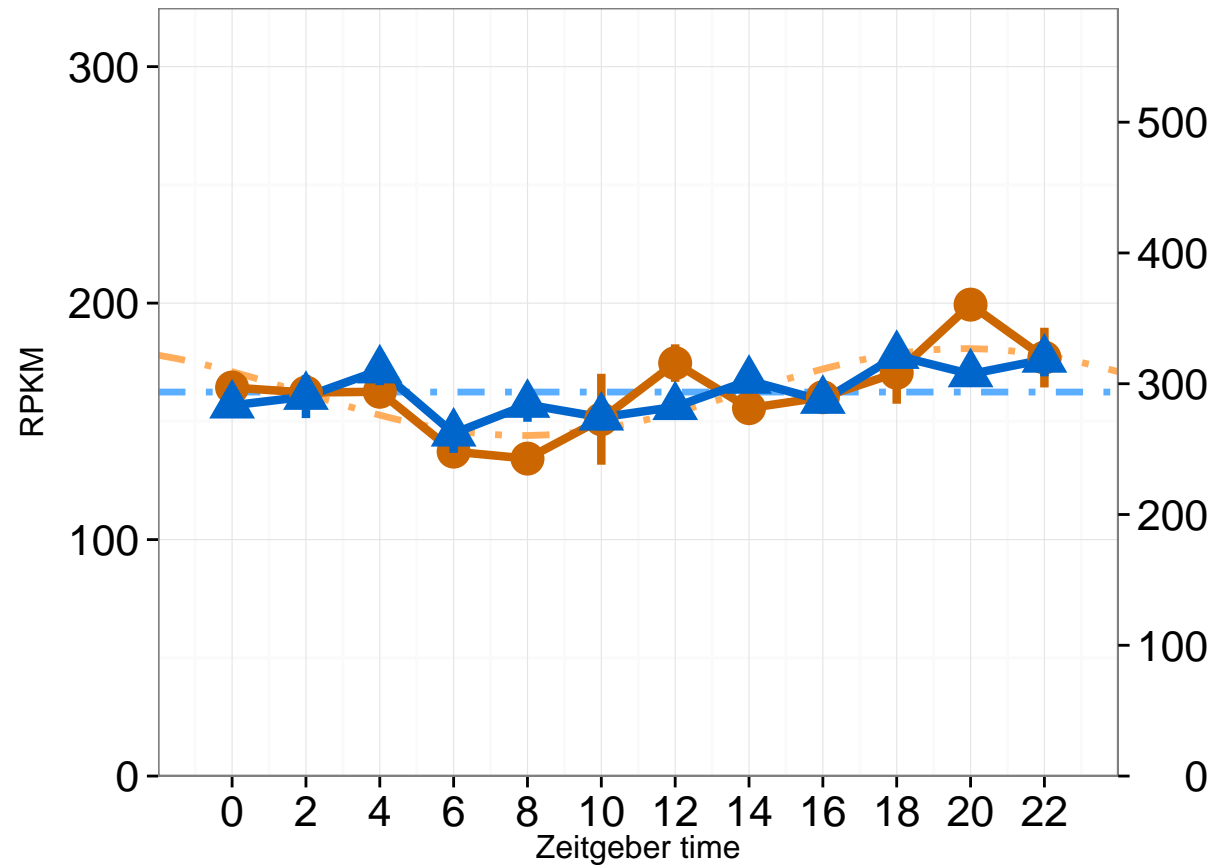

## Psma2

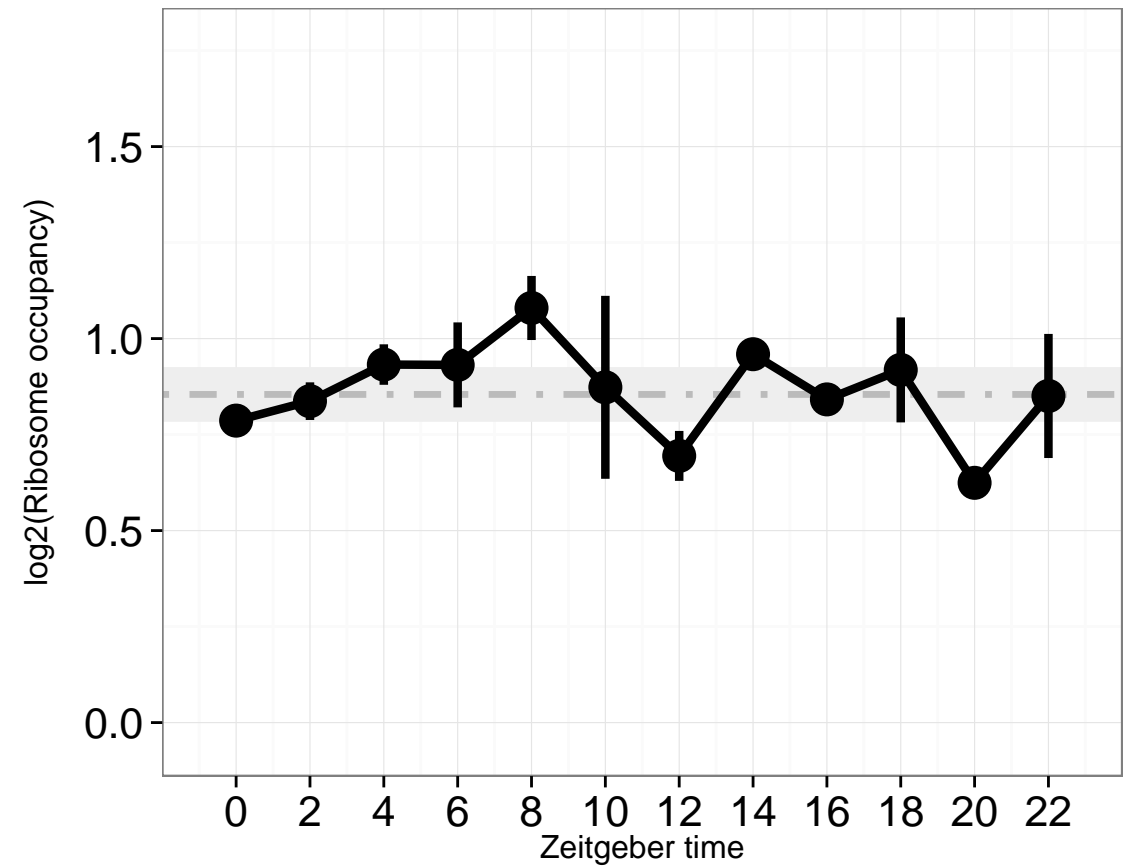

Supplement: Supplementary file 9245 [file 1]

## Heph

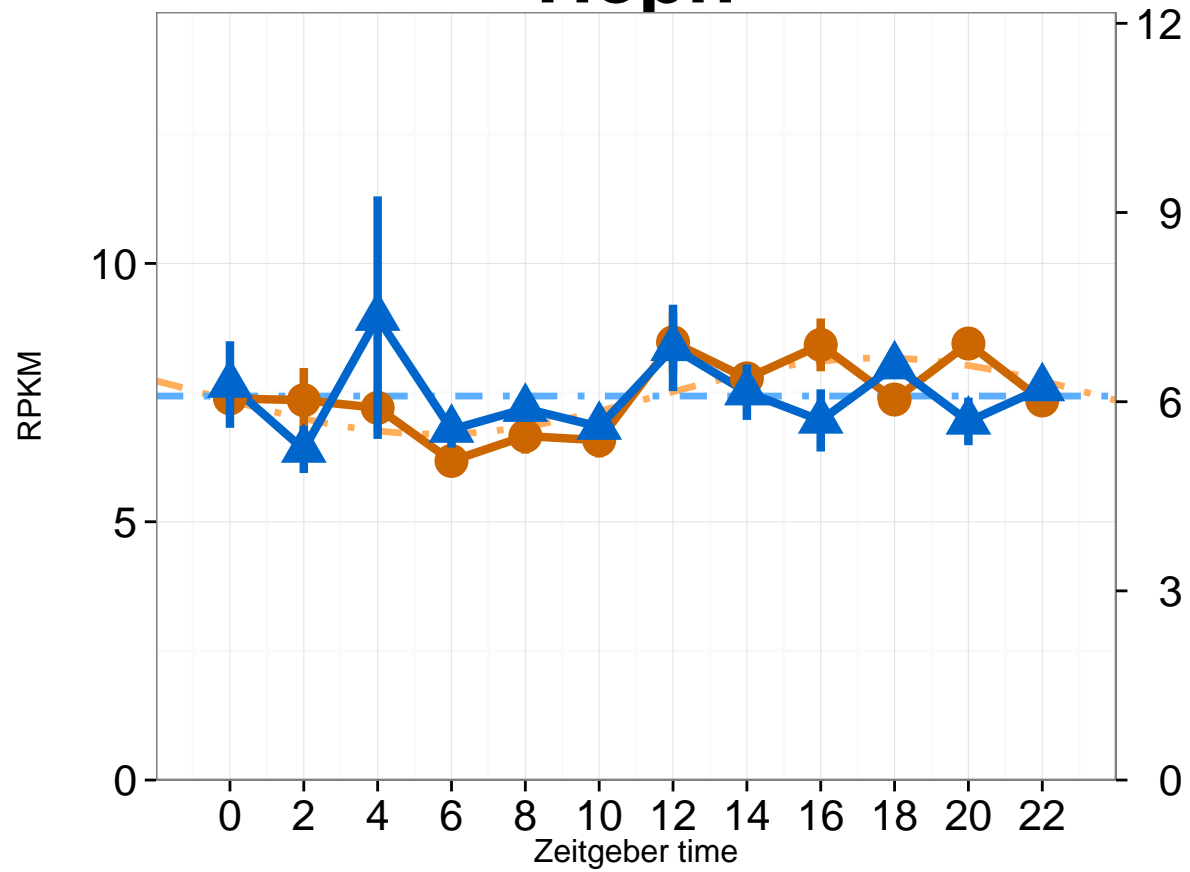

## Heph

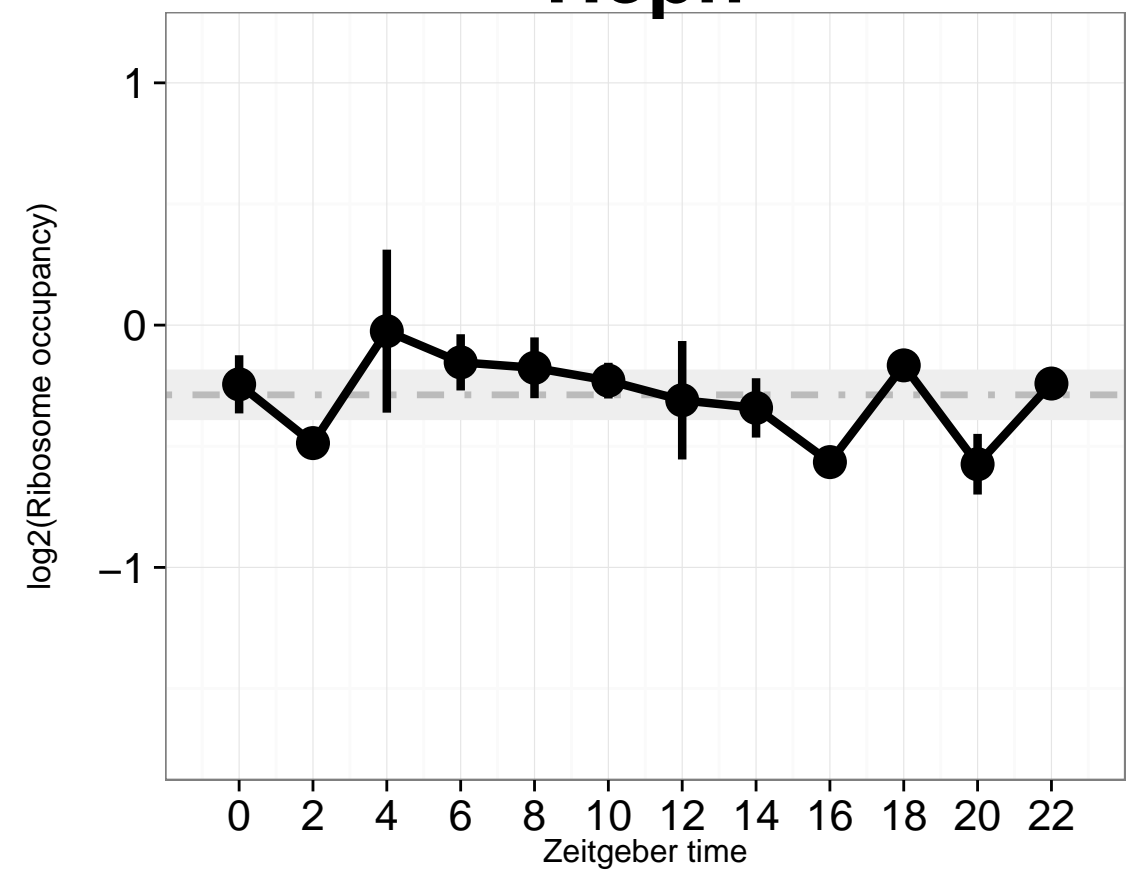

Supplement: Supplementary file 9246 [file 1]

## Capzb

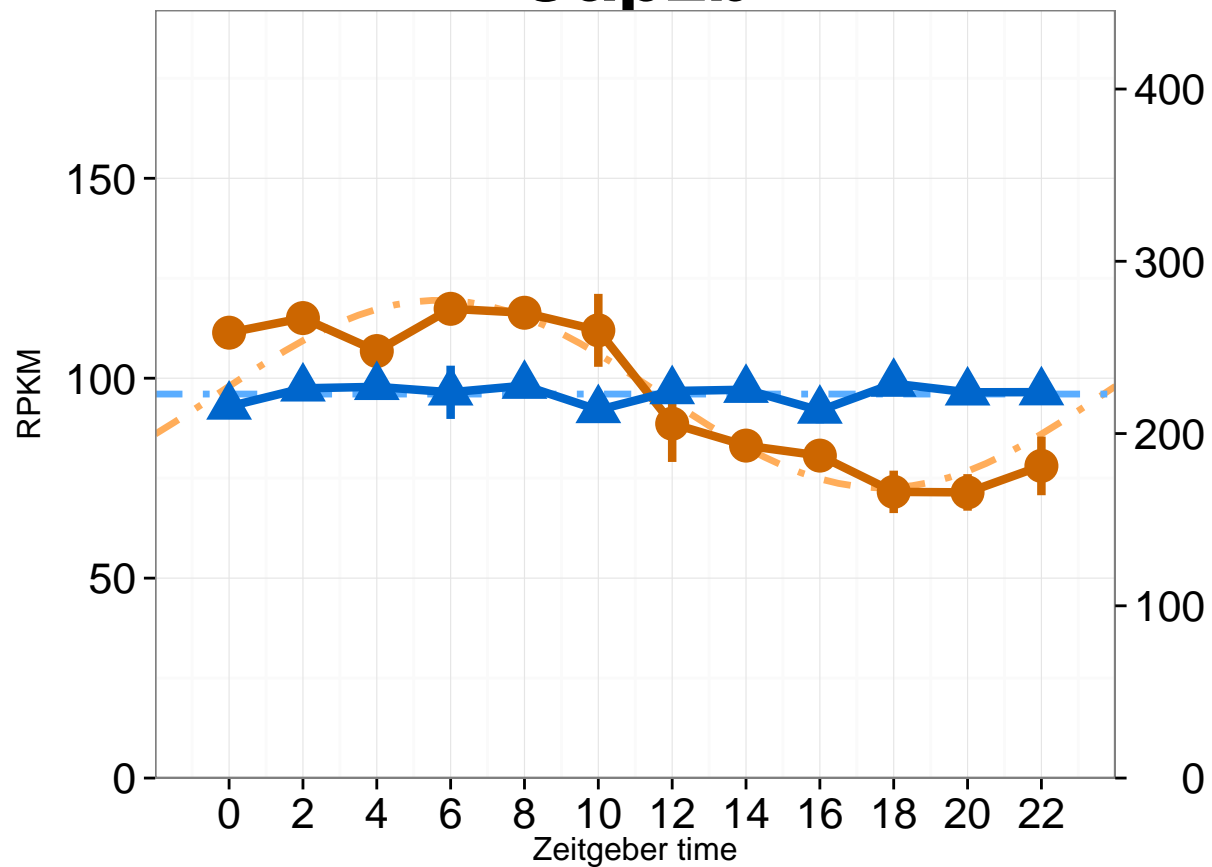

## Capzb

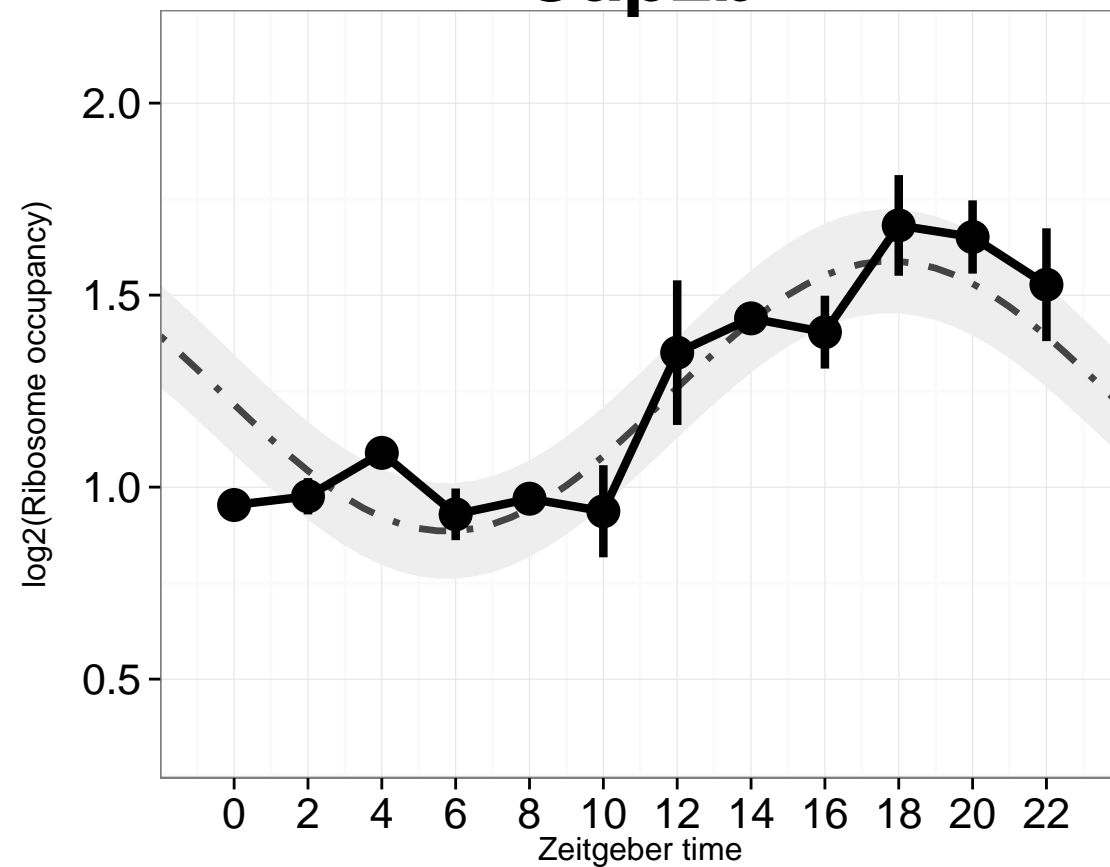

Supplement: Supplementary file 9247 [file 1]

## Nod1

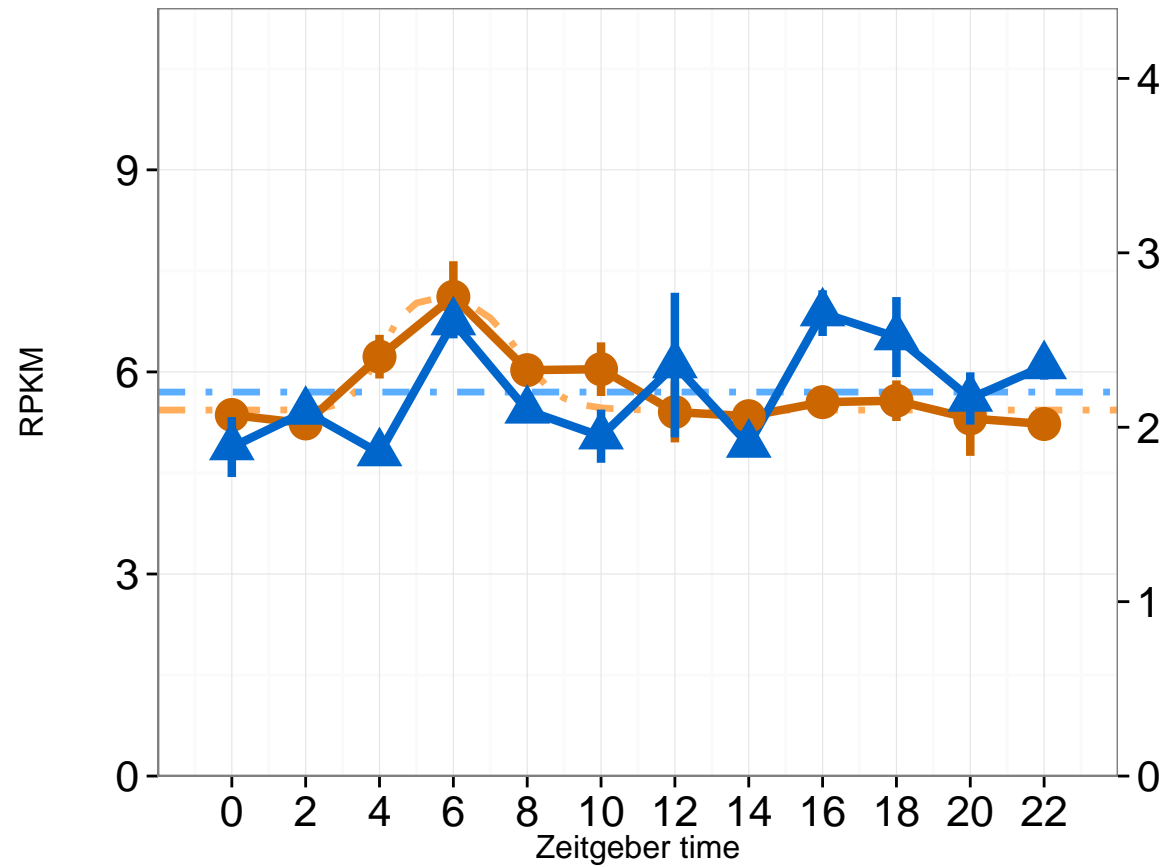

## Nod1

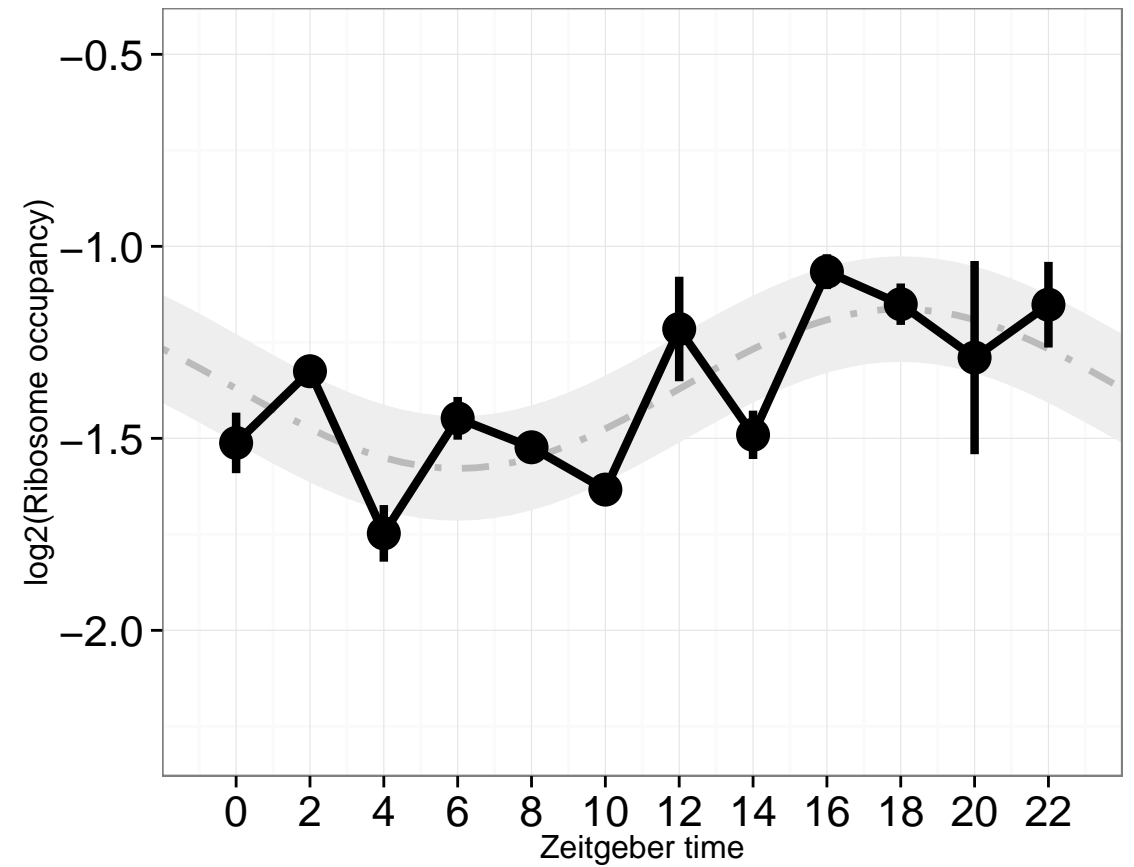

Supplement: Supplementary file 9248 [file 1]

# Timm23

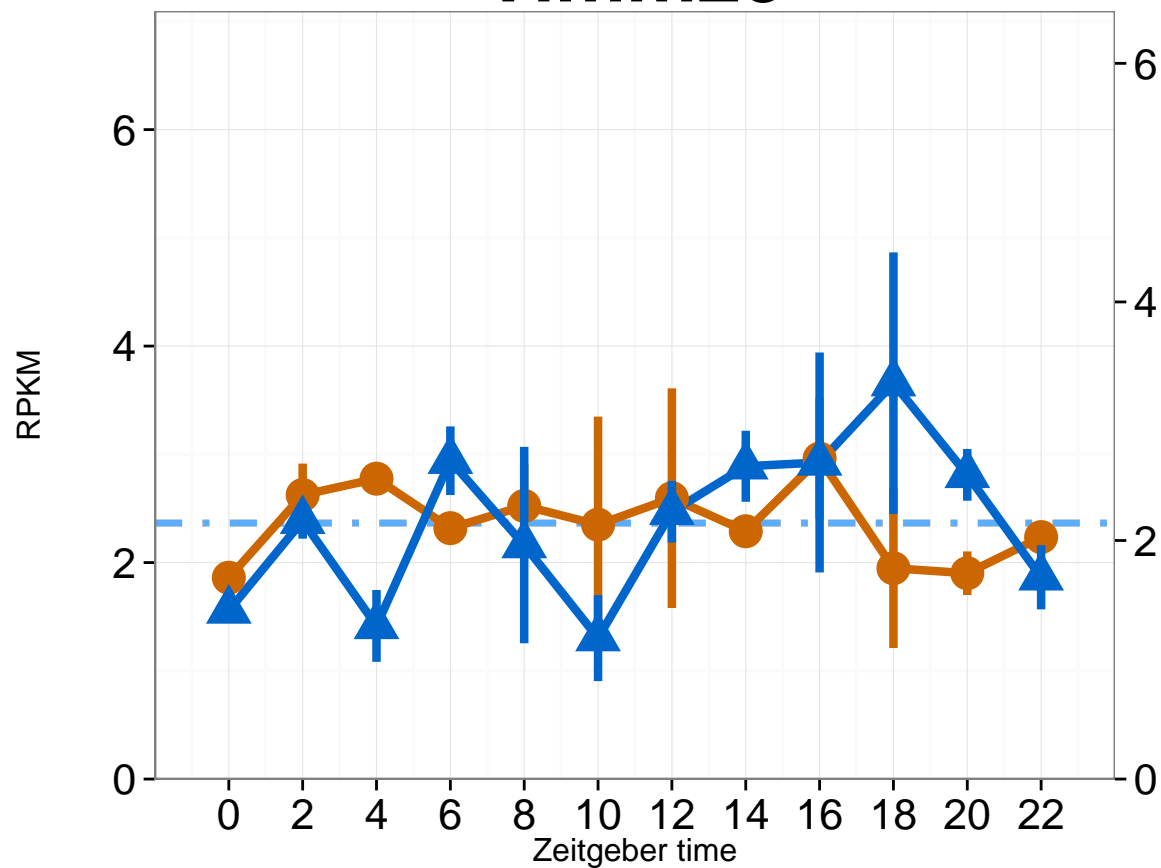

# Timm23

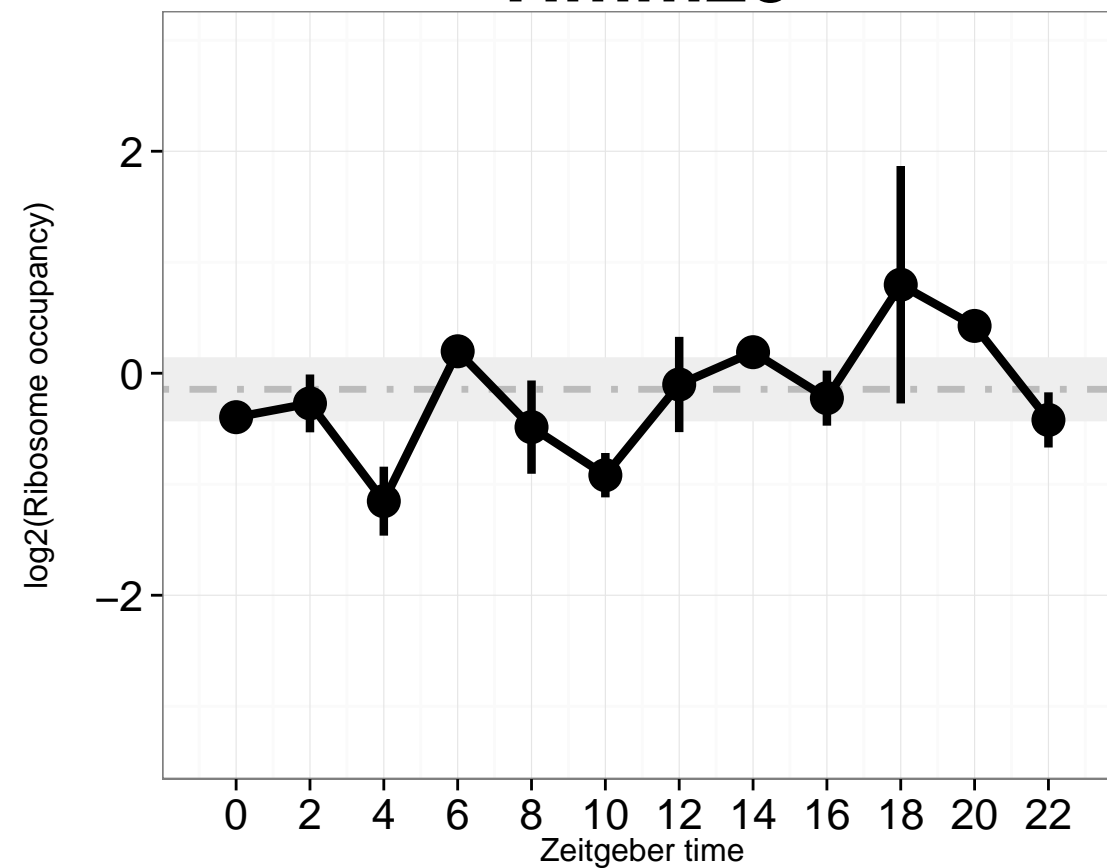

Supplement: Supplementary file 9249 [file 1]

## Znrf1

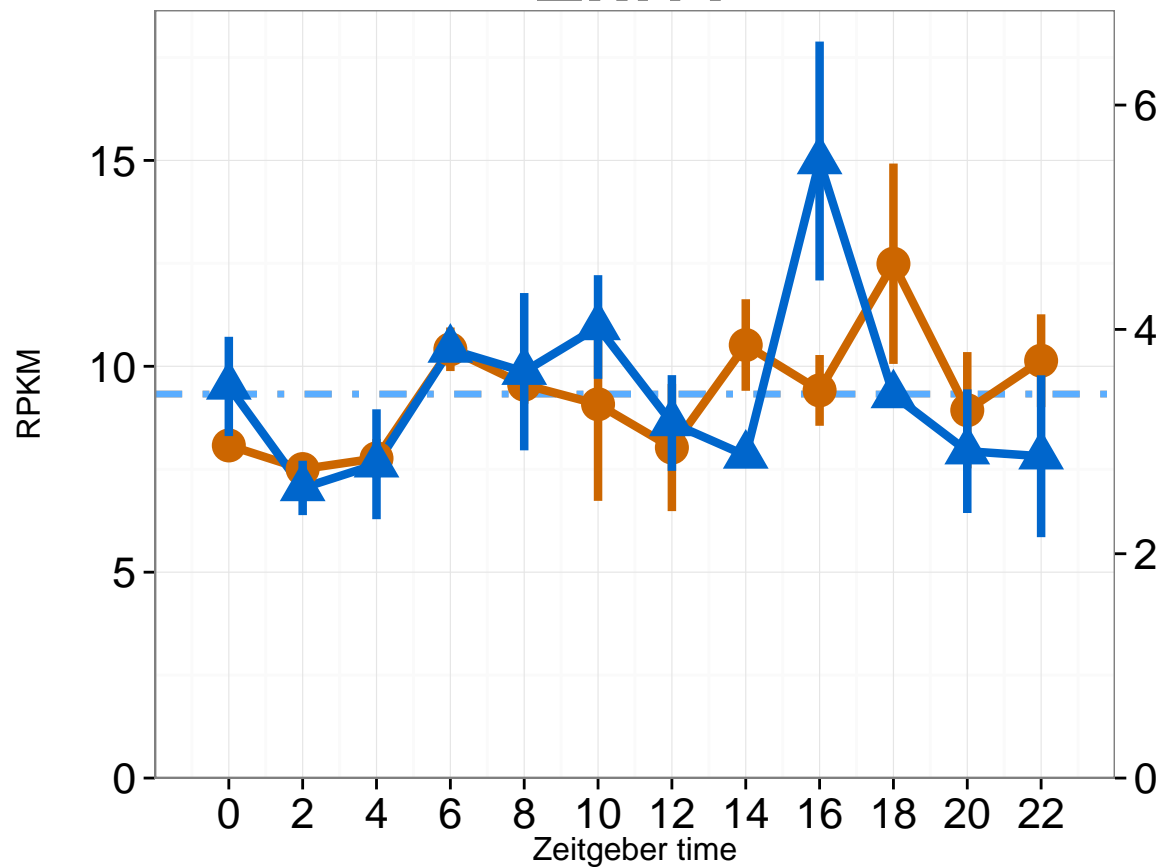

## Znrf1

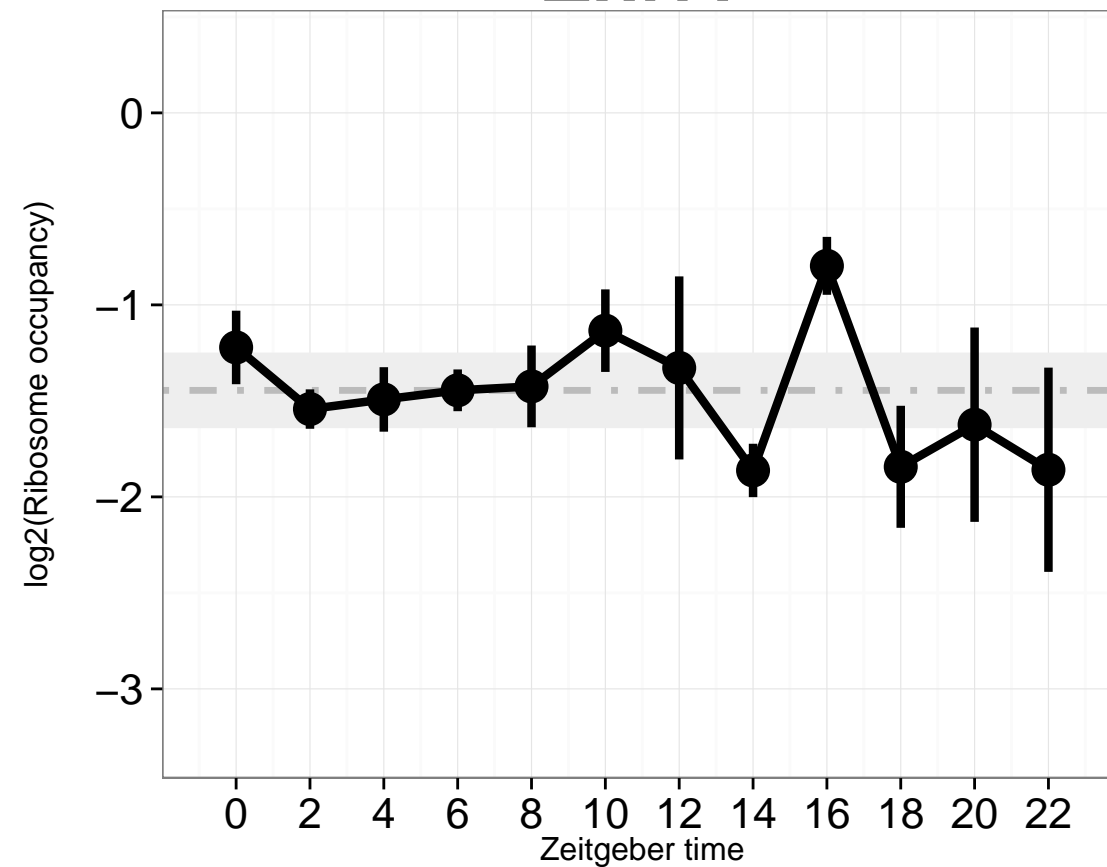

Supplement: Supplementary file 9250 [file 1]

# Kcnma1

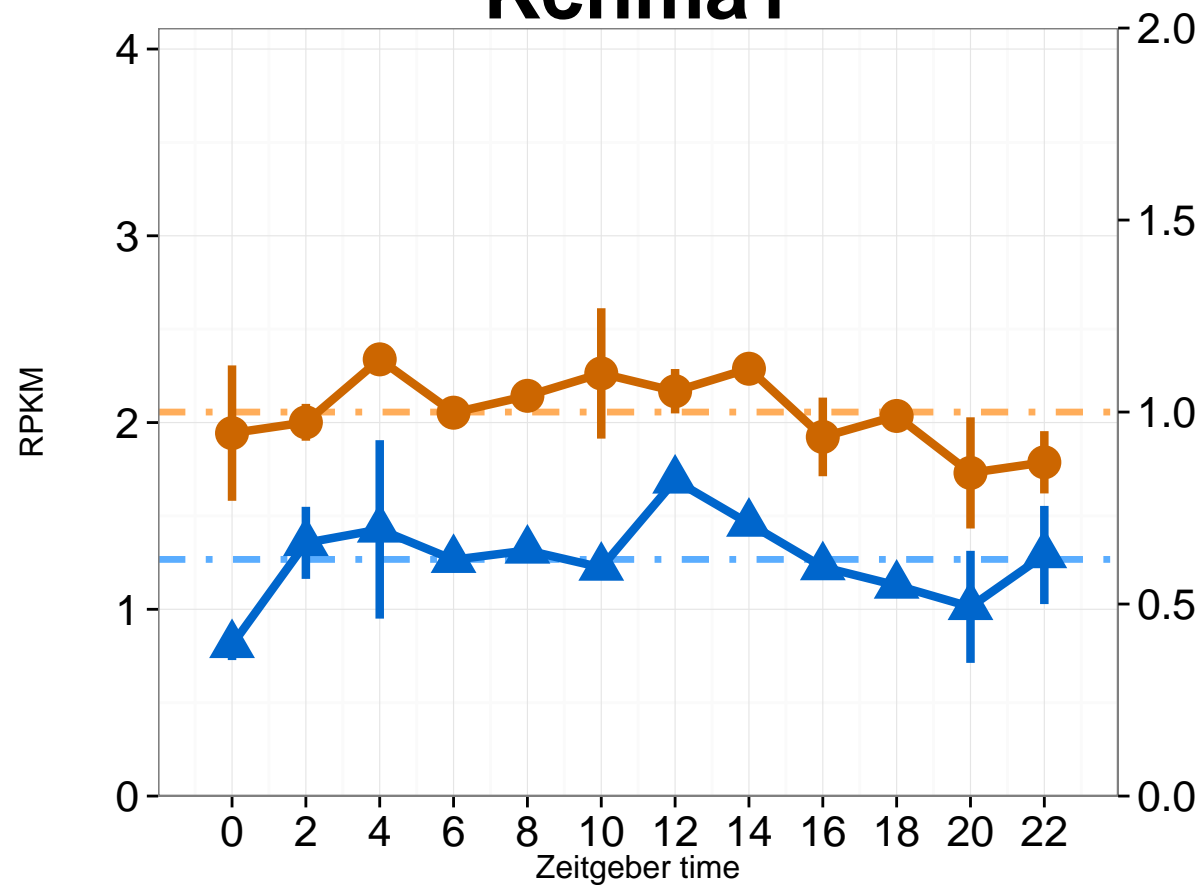

# Kcnma1

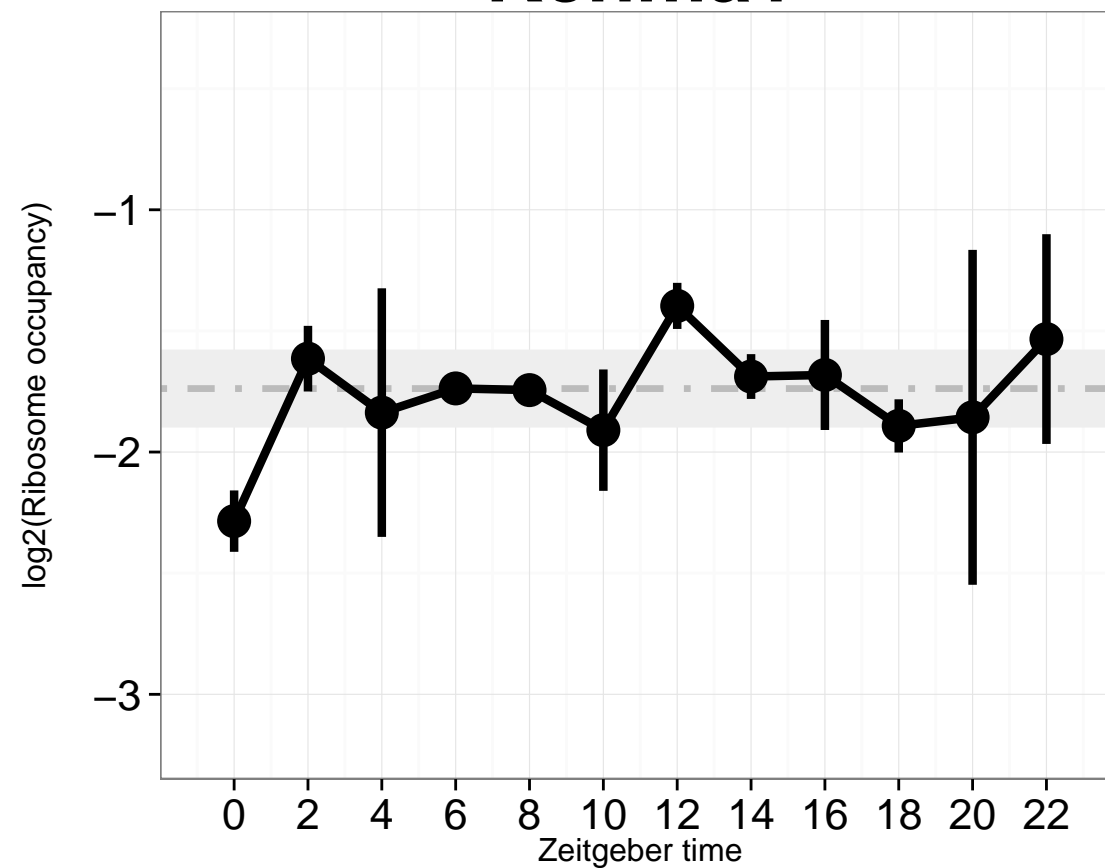

Supplement: Supplementary file 9251 [file 1]

**Gm11696 TR**

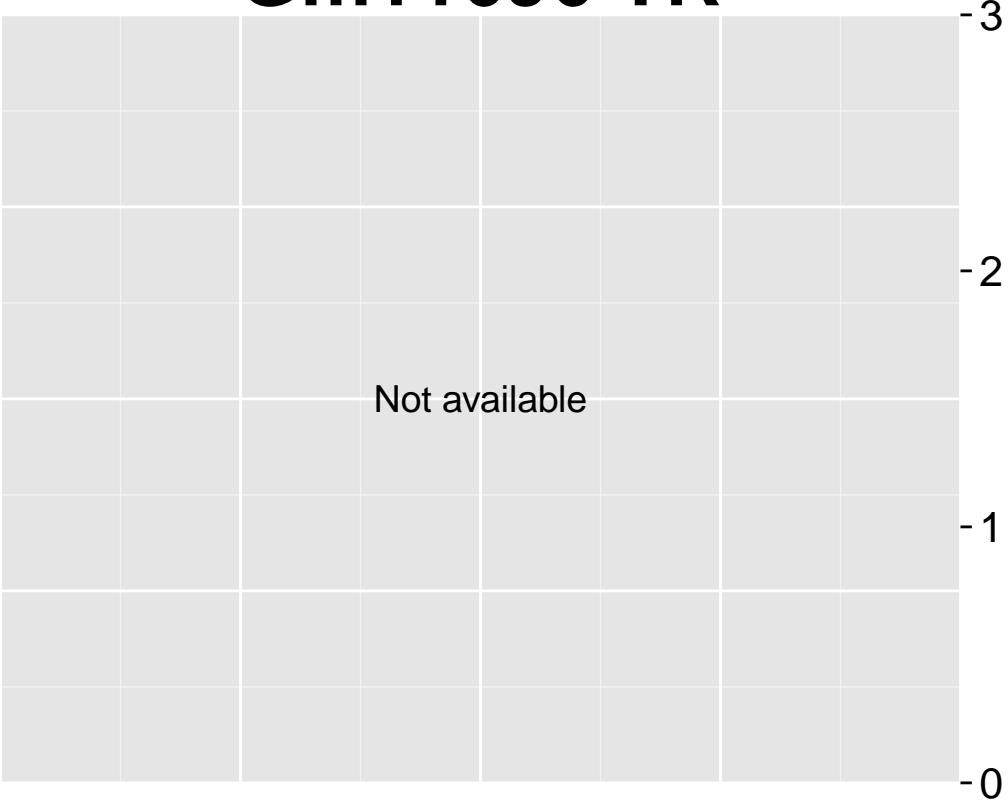

**Gm11696 log2(Ribosome occupanc**

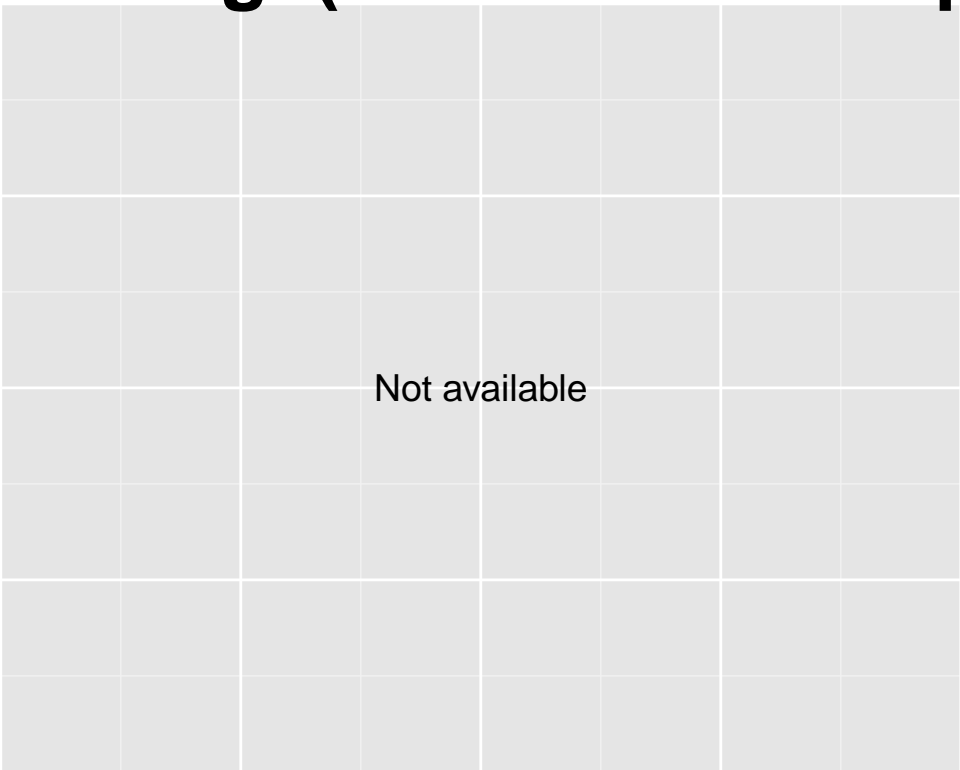

Supplement: Supplementary file 9252 [file 1]

## Aen

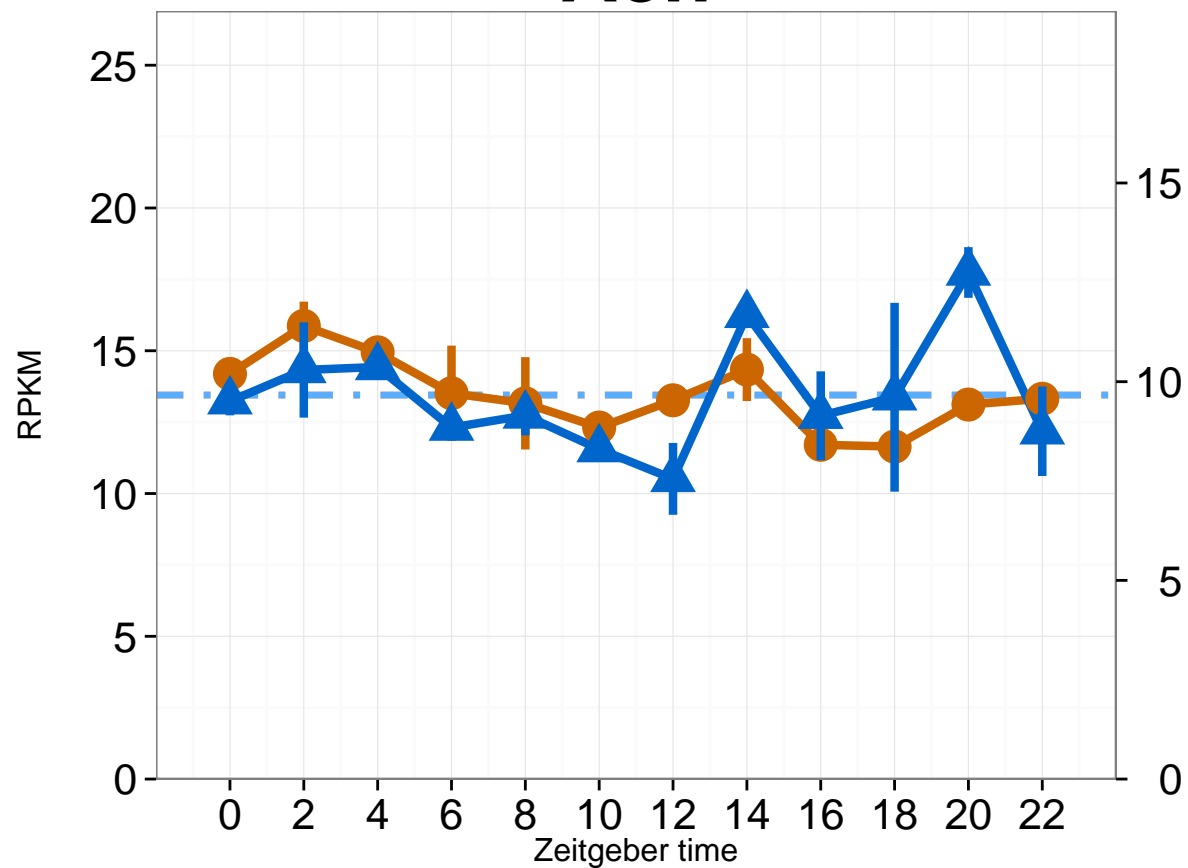

## Aen

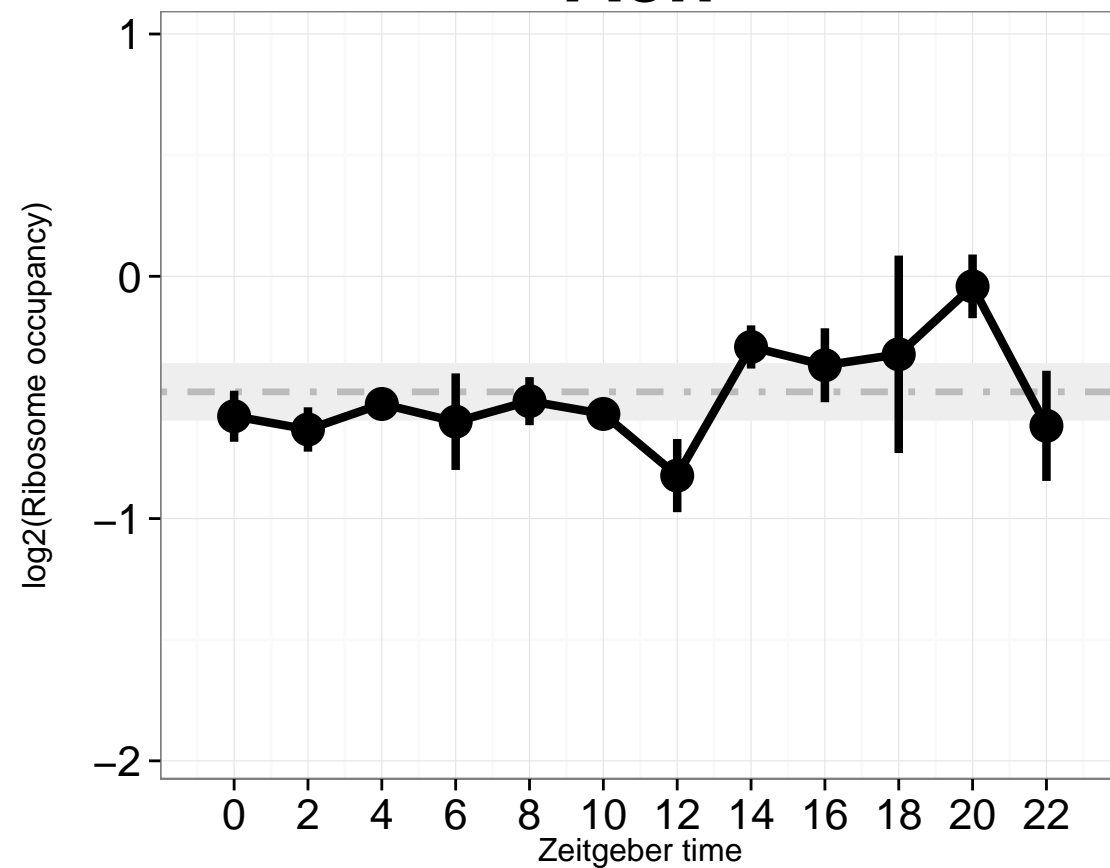

Supplement: Supplementary file 9253 [file 1]

# Tob2

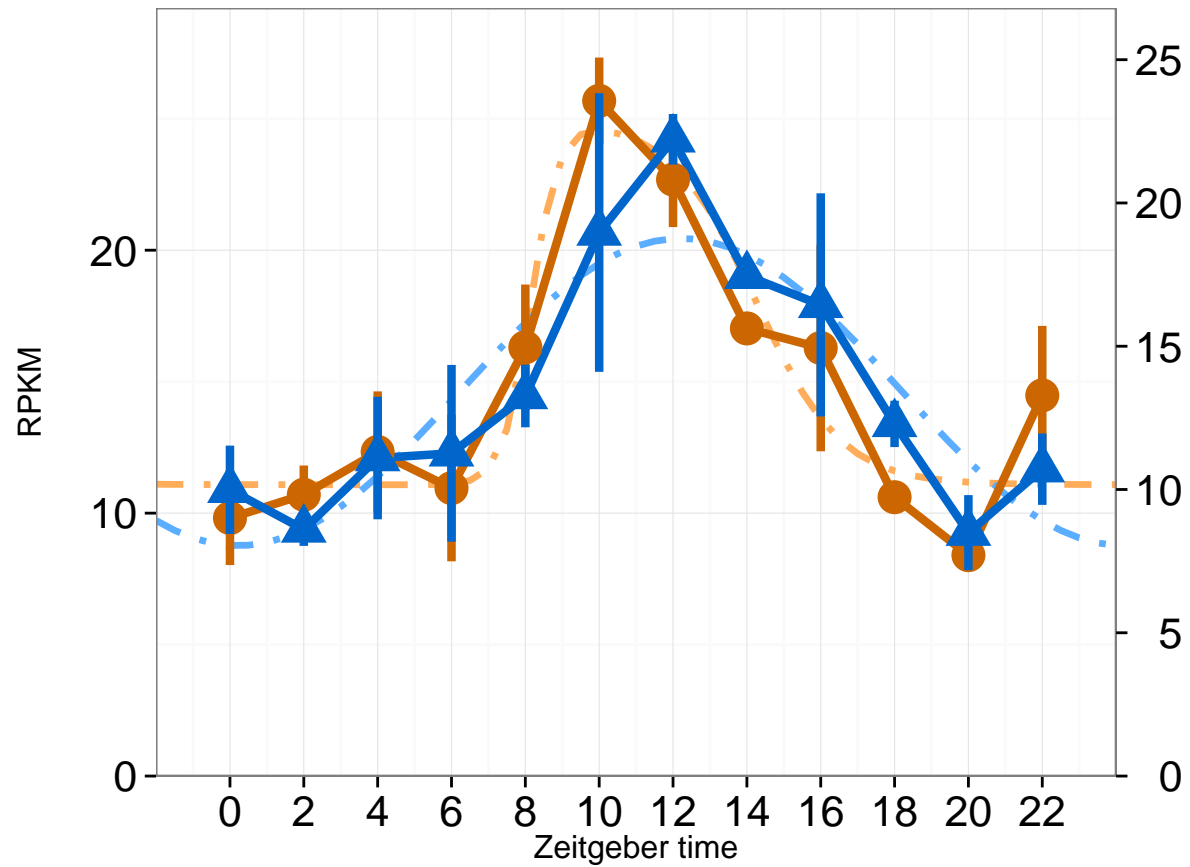

# Tob2

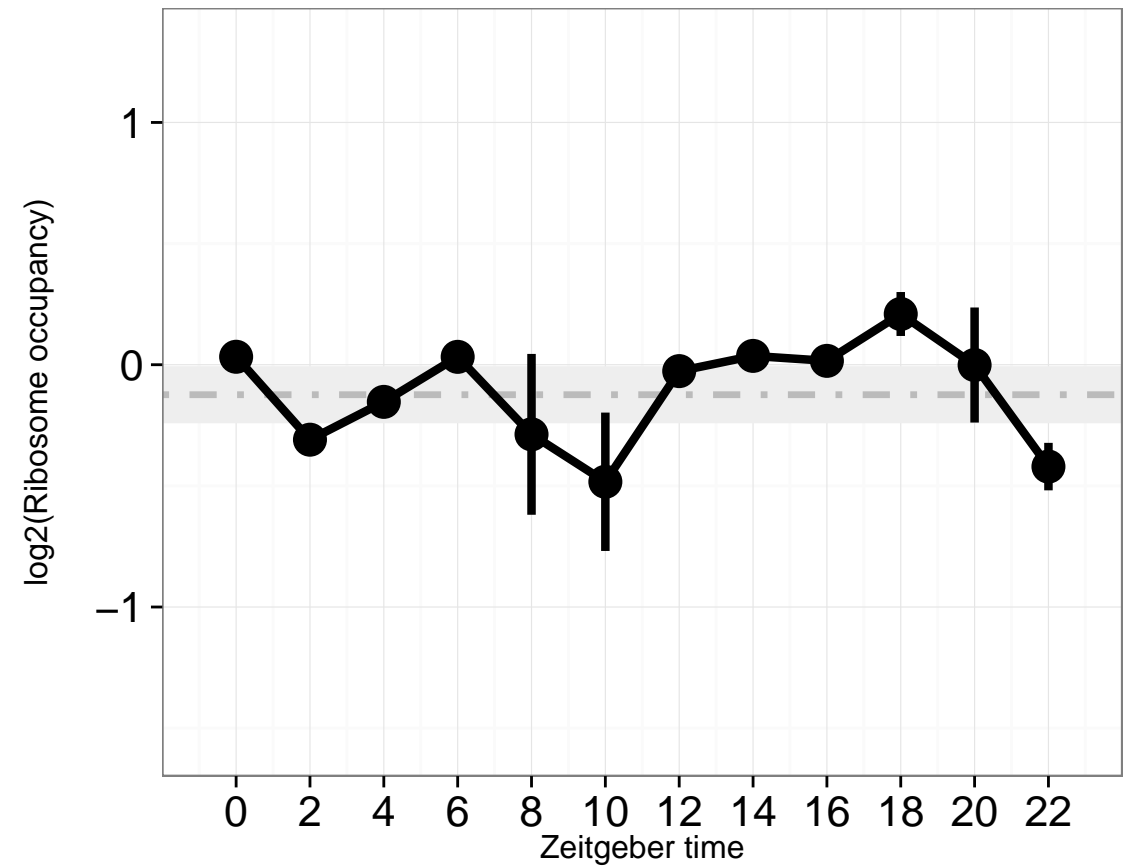

Supplement: Supplementary file 9254 [file 1]

## Slc31a2

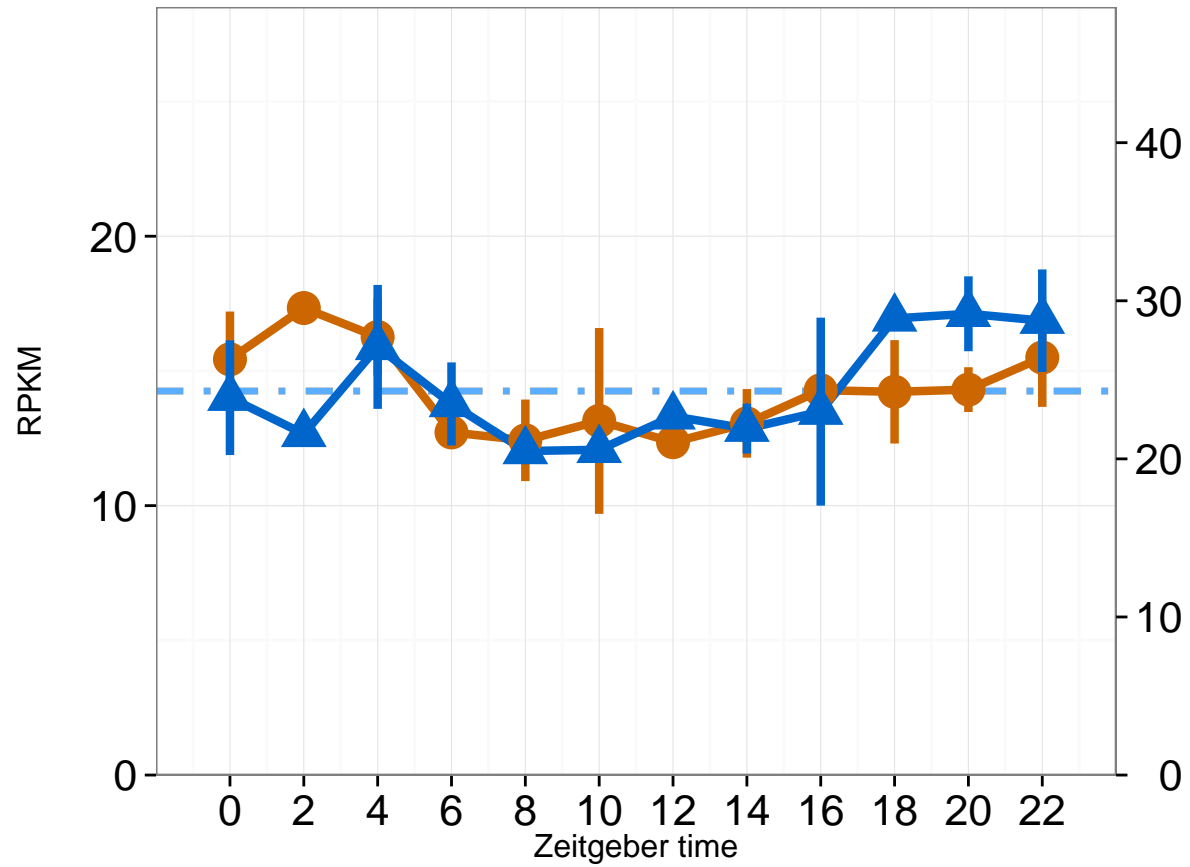

## Slc31a2

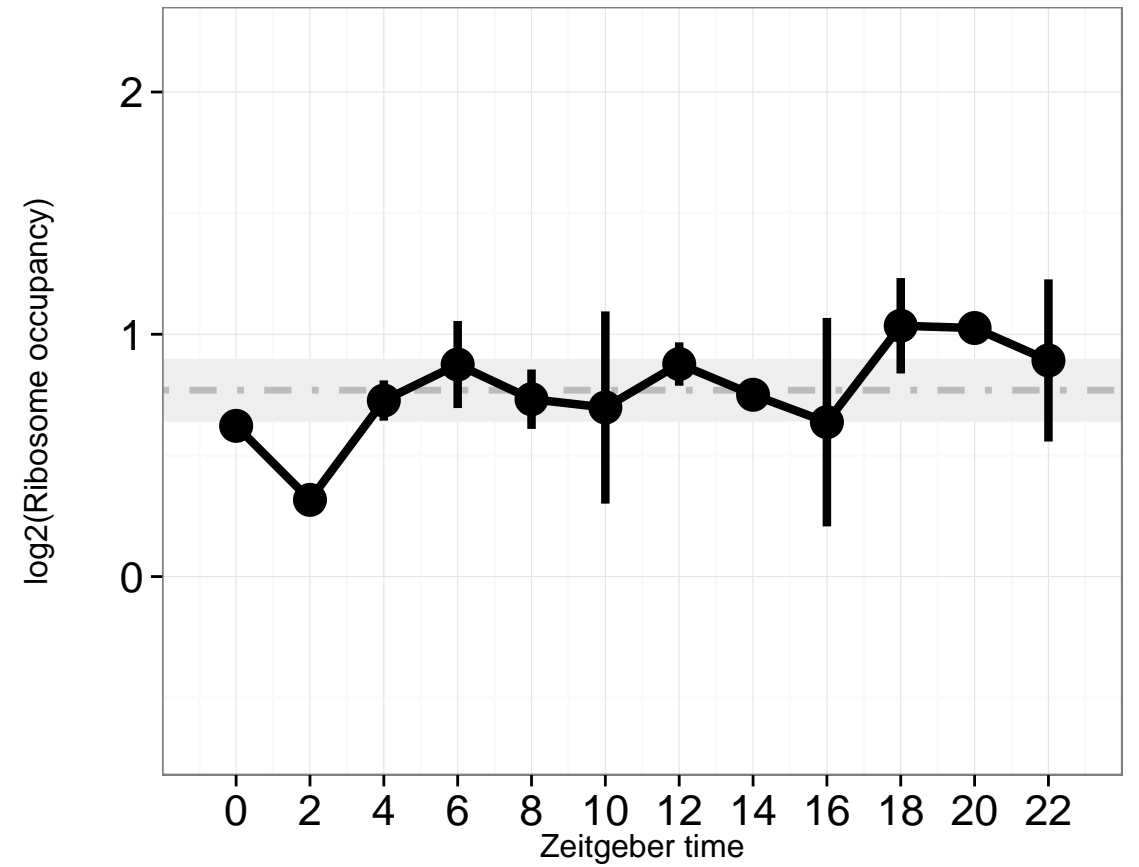

Supplement: Supplementary file 9255 [file 1]

## Plcd4

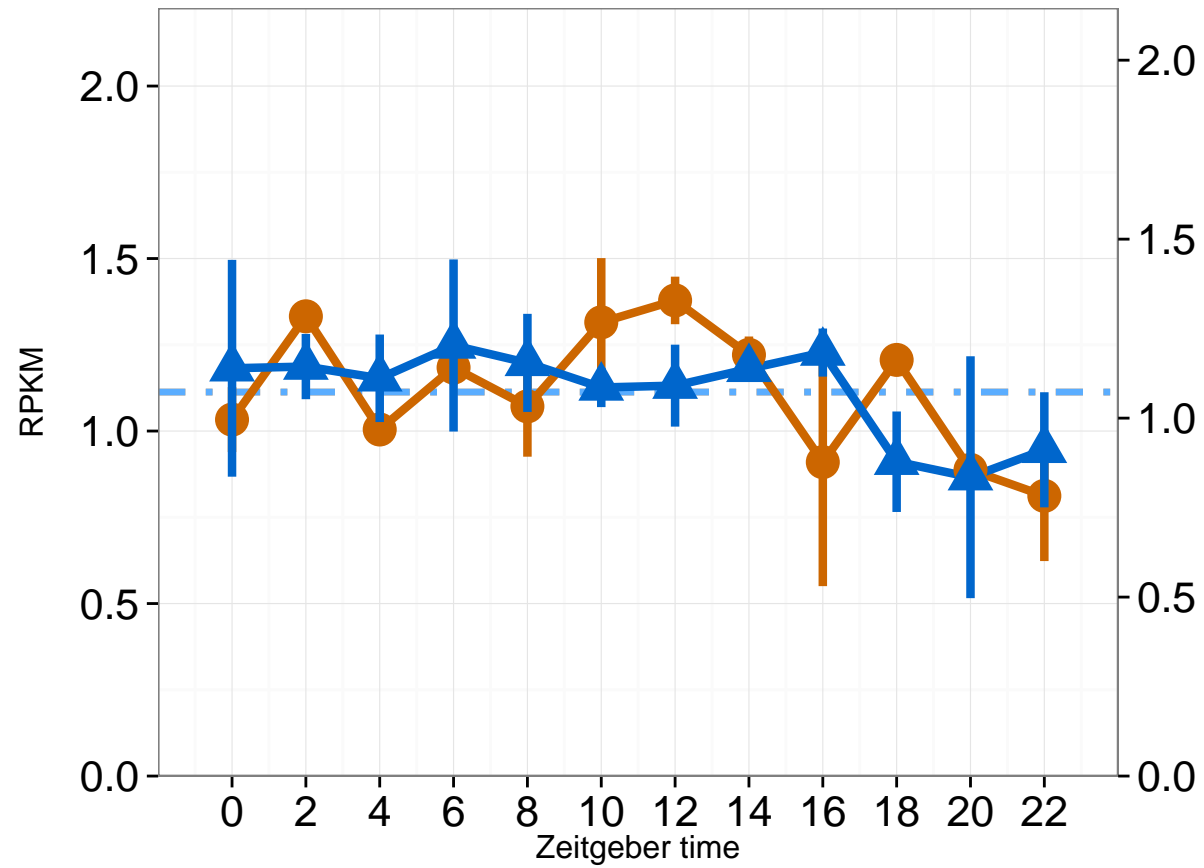

## Plcd4

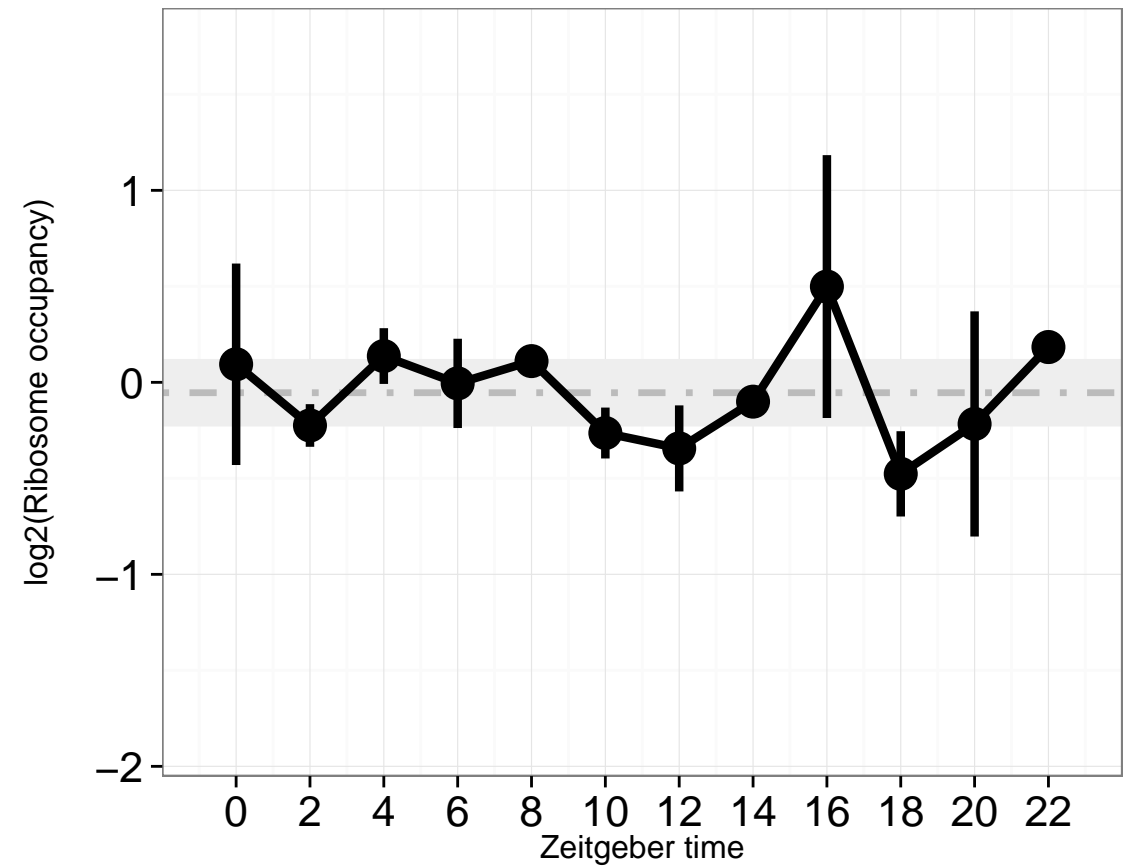

Supplement: Supplementary file 9256 [file 1]

## Cdv3

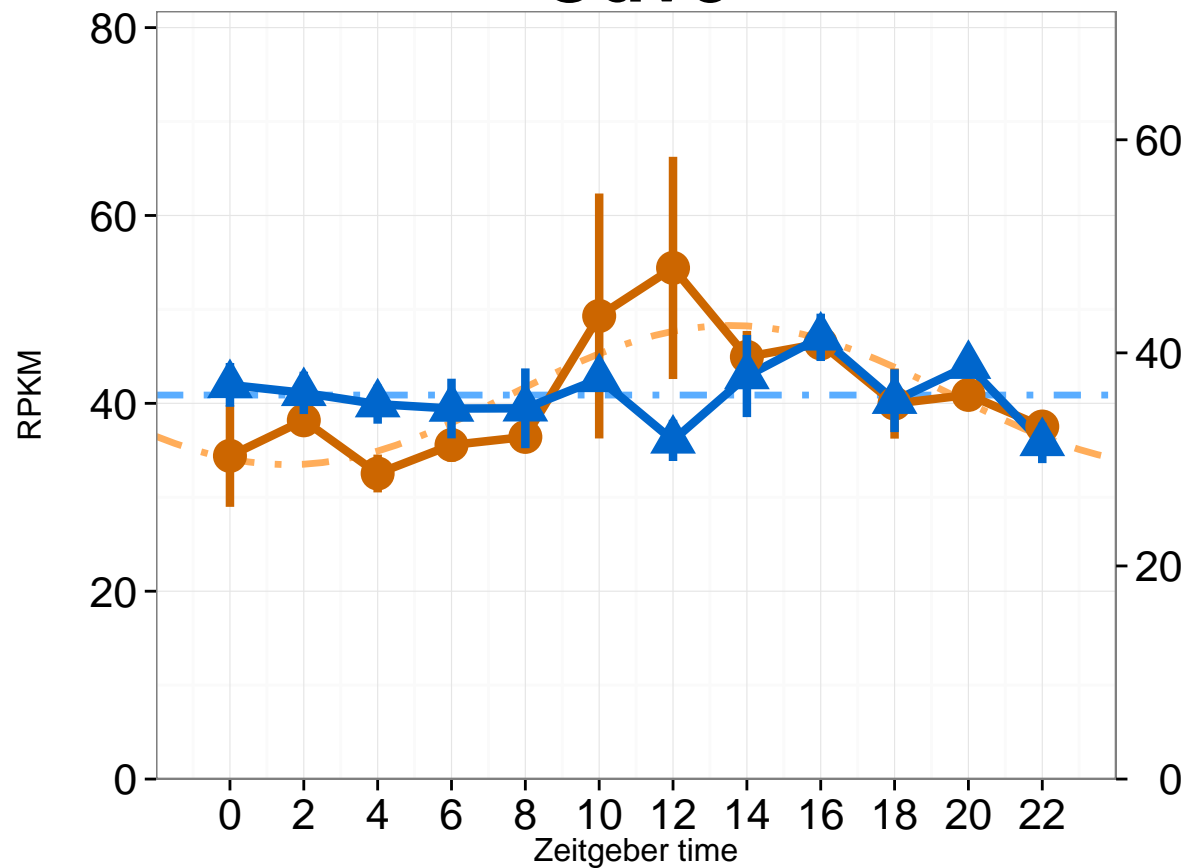

## Cdv3

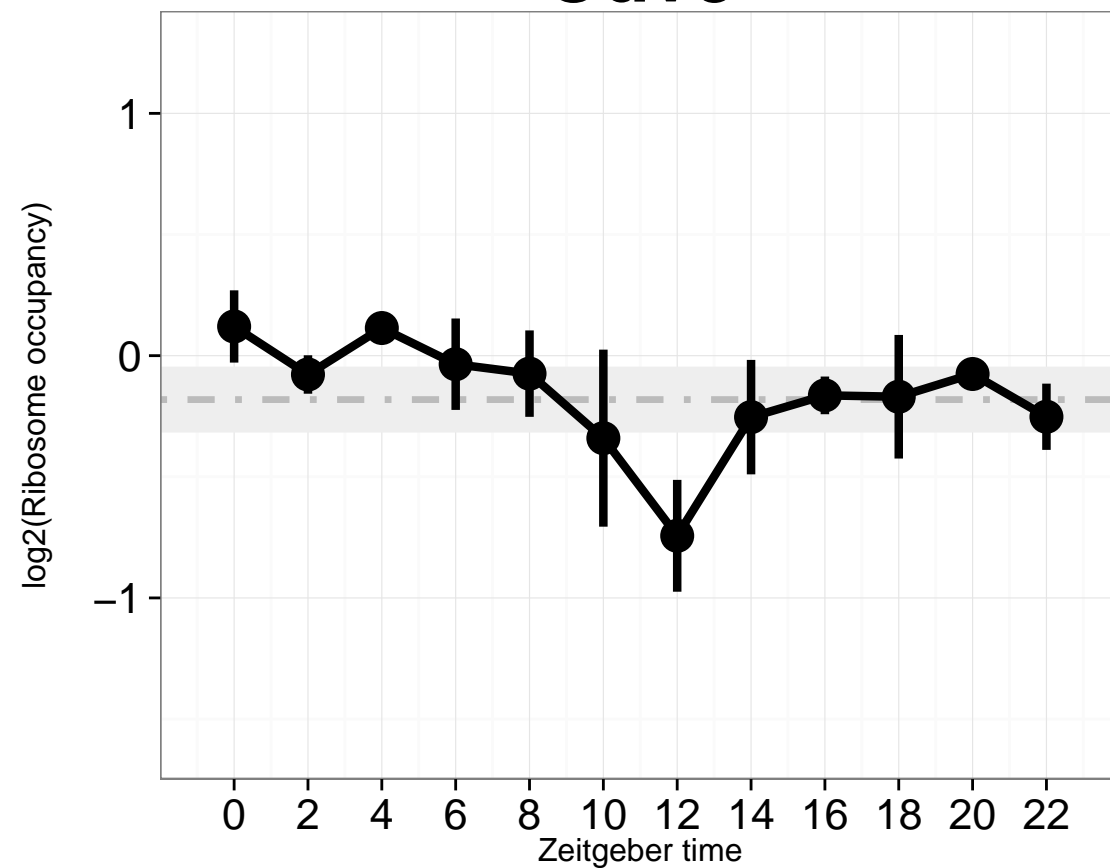

Supplement: Supplementary file 9257 [file 1]

# Cfl1

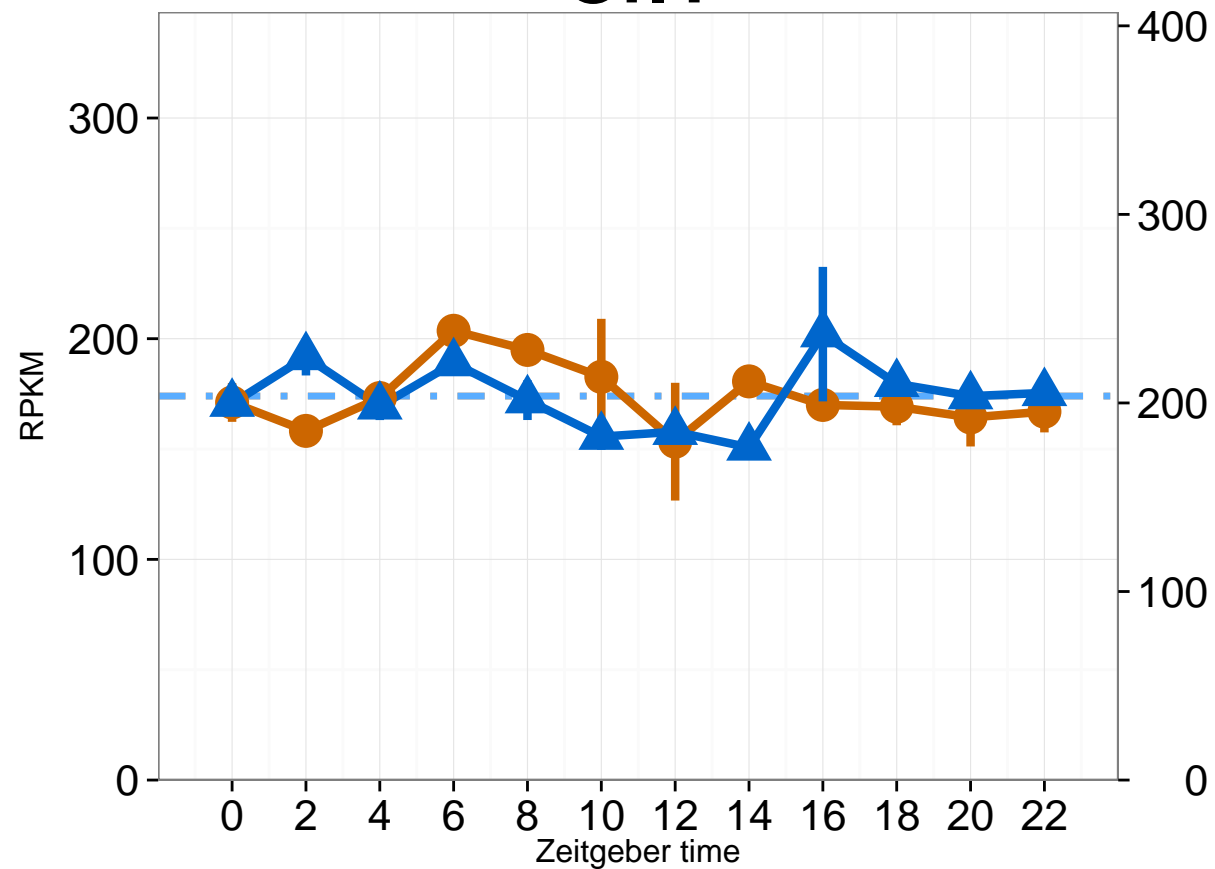

# Cfl1

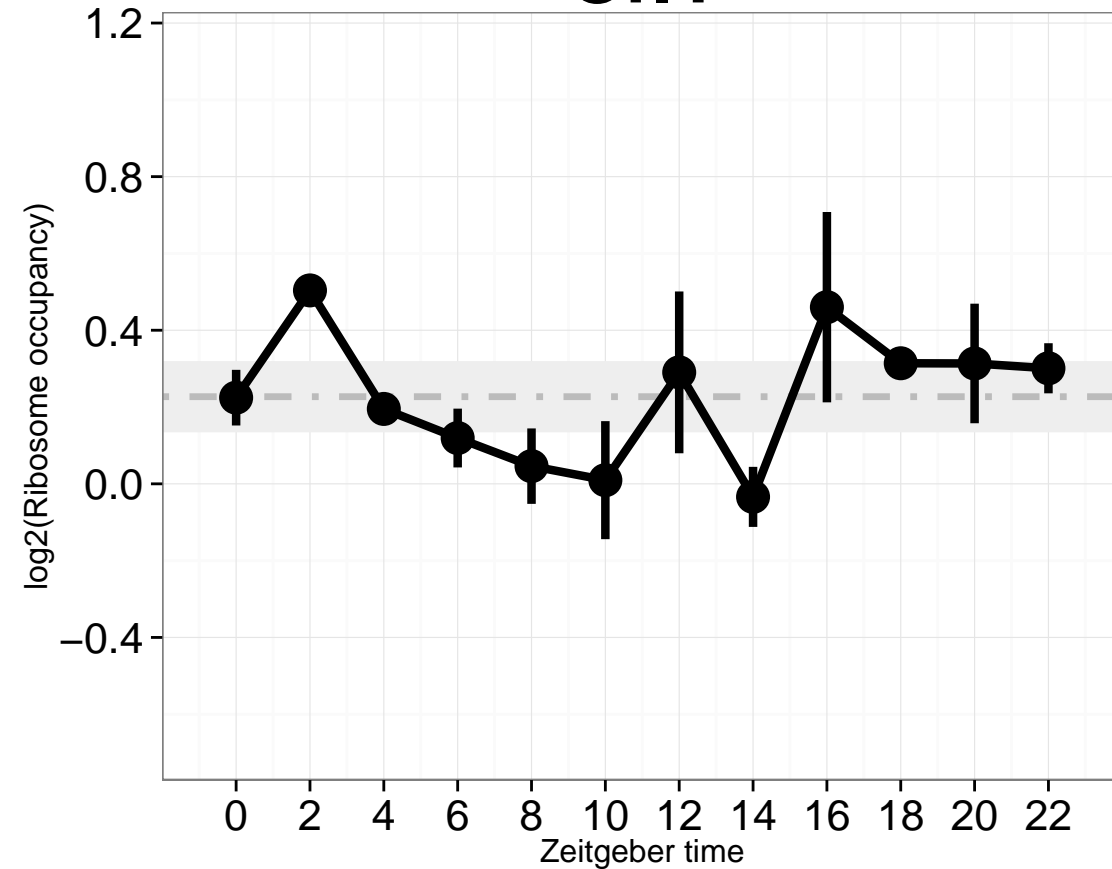

Supplement: Supplementary file 9258 [file 1]

9230102O04Rik TR

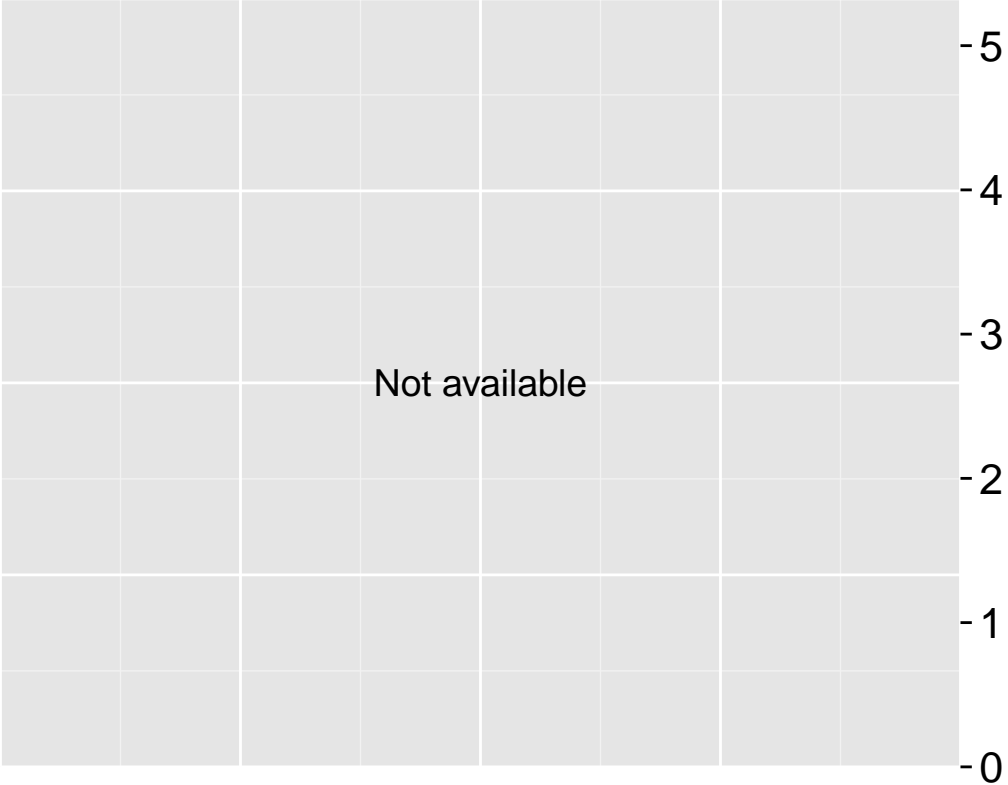

9230102O04Rik log2(Ribosome occup

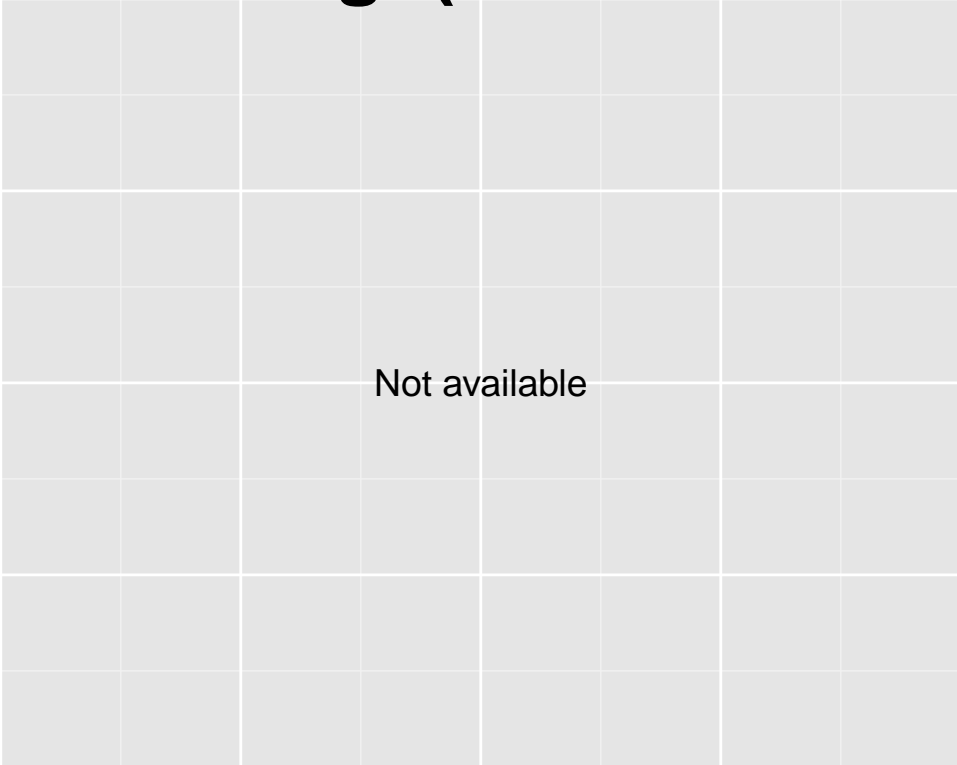

Supplement: Supplementary file 9259 [file 1]

## Gid4

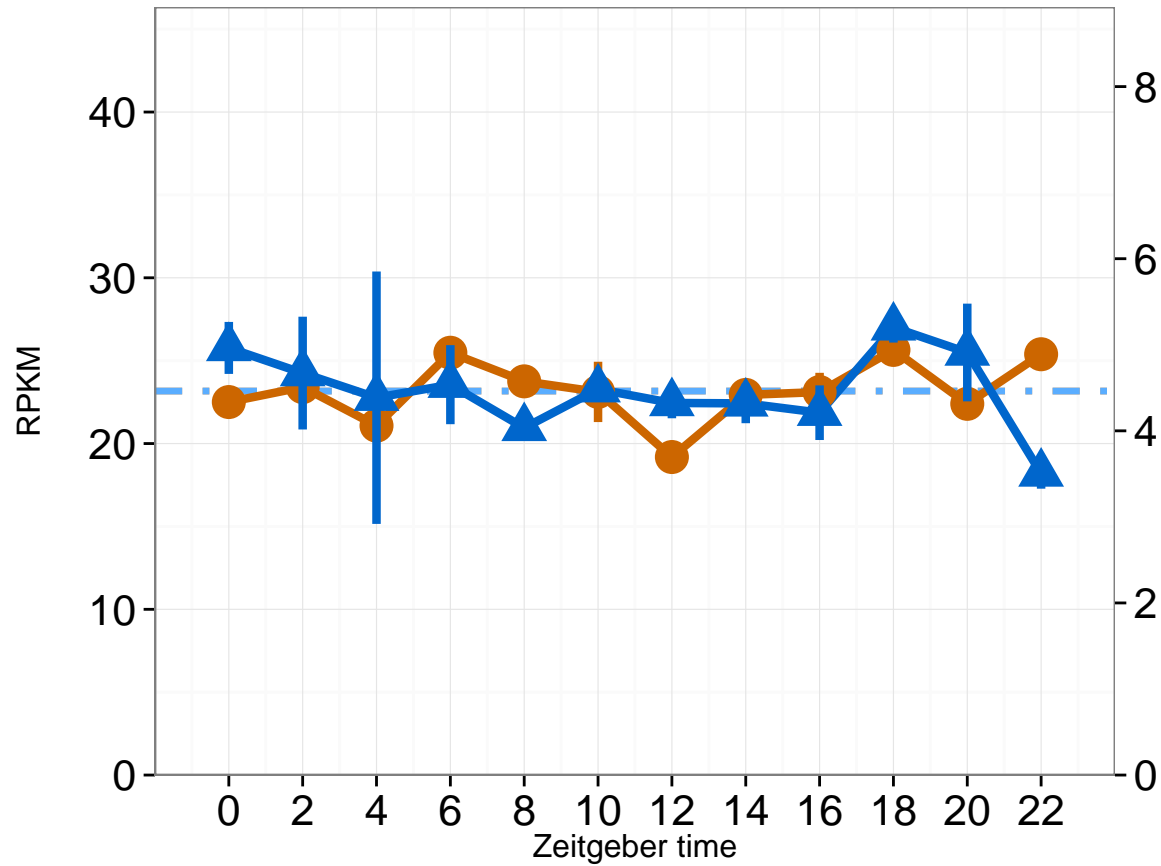

## Gid4

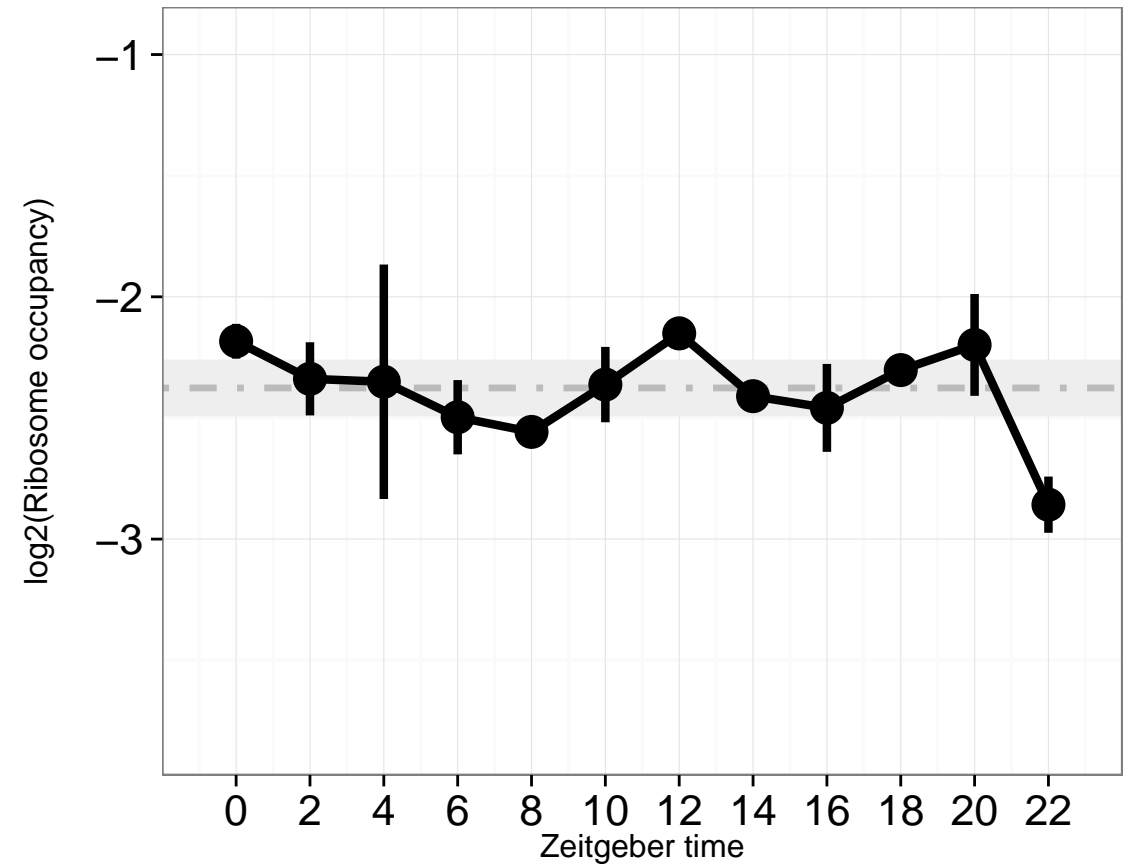

Supplement: Supplementary file 9260 [file 1]

## Cdca3

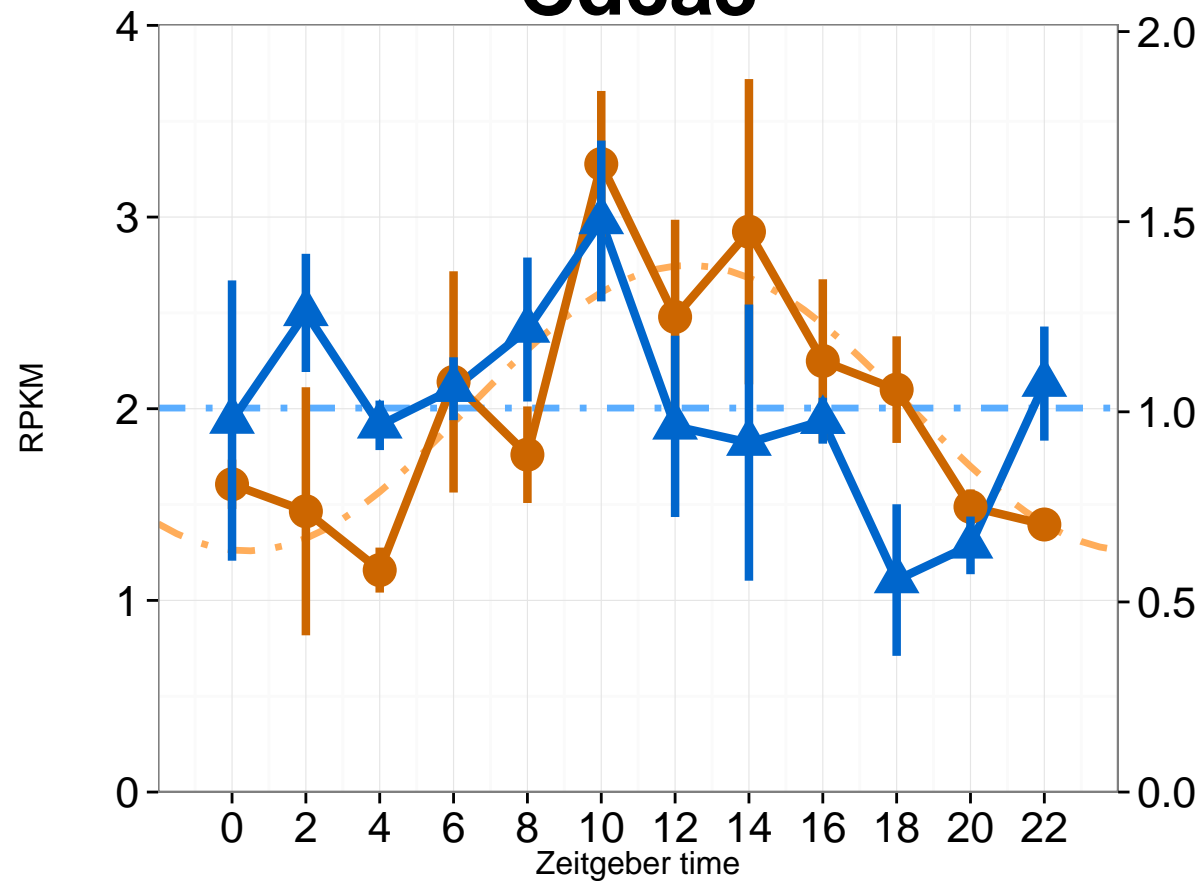

## Cdca3

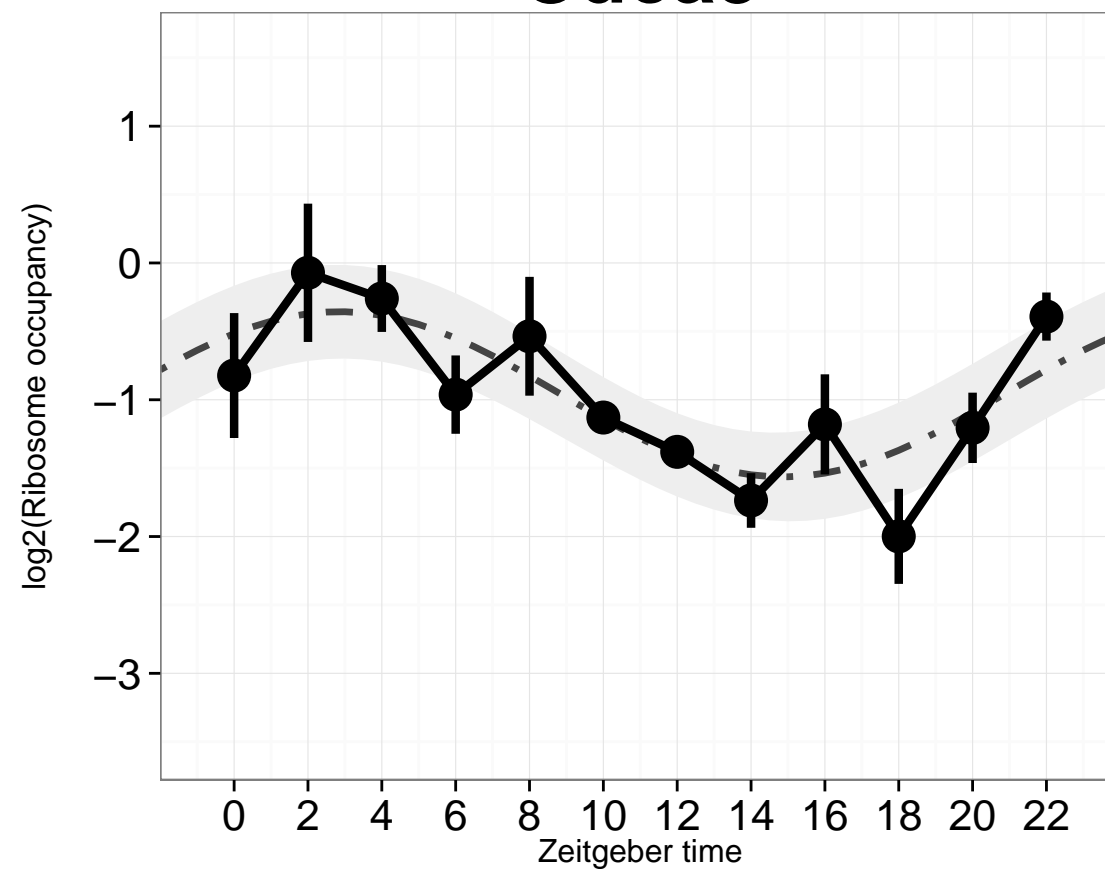

Supplement: Supplementary file 9261 [file 1]

## Nip7

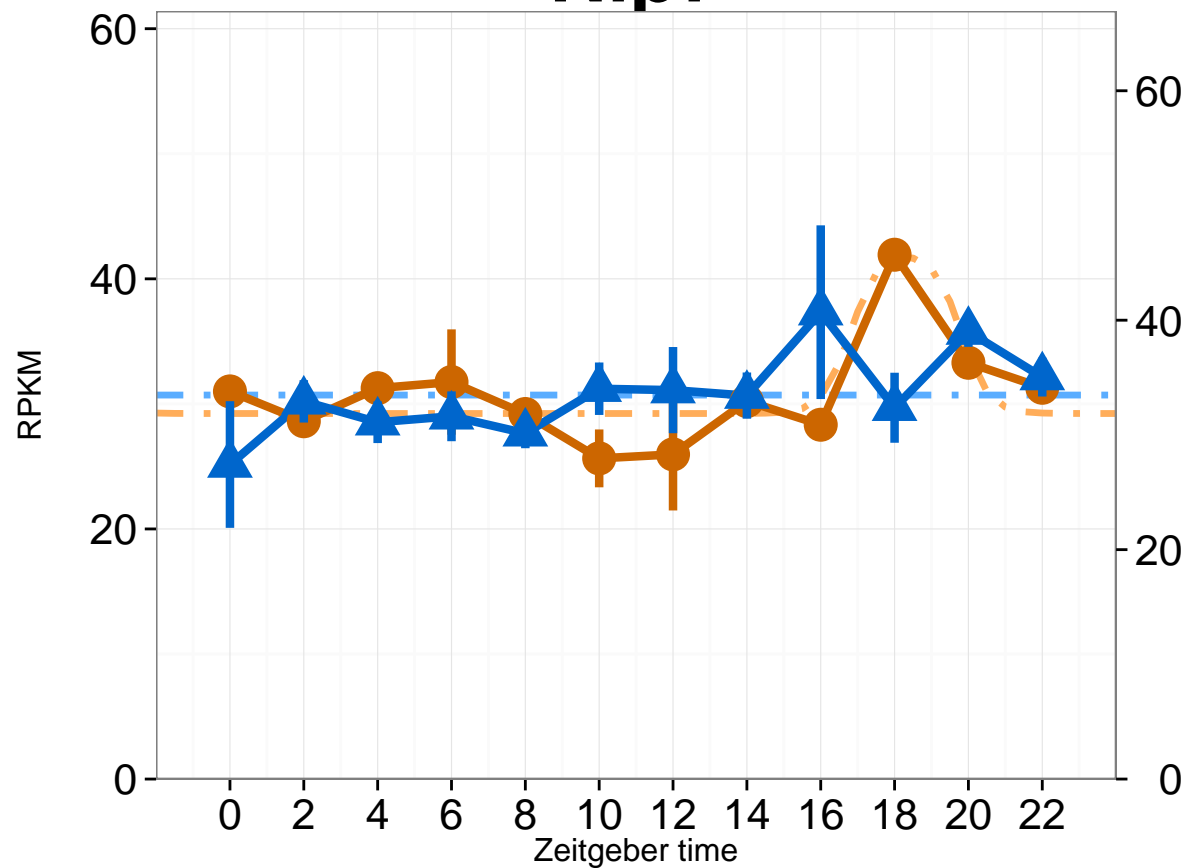

## Nip7

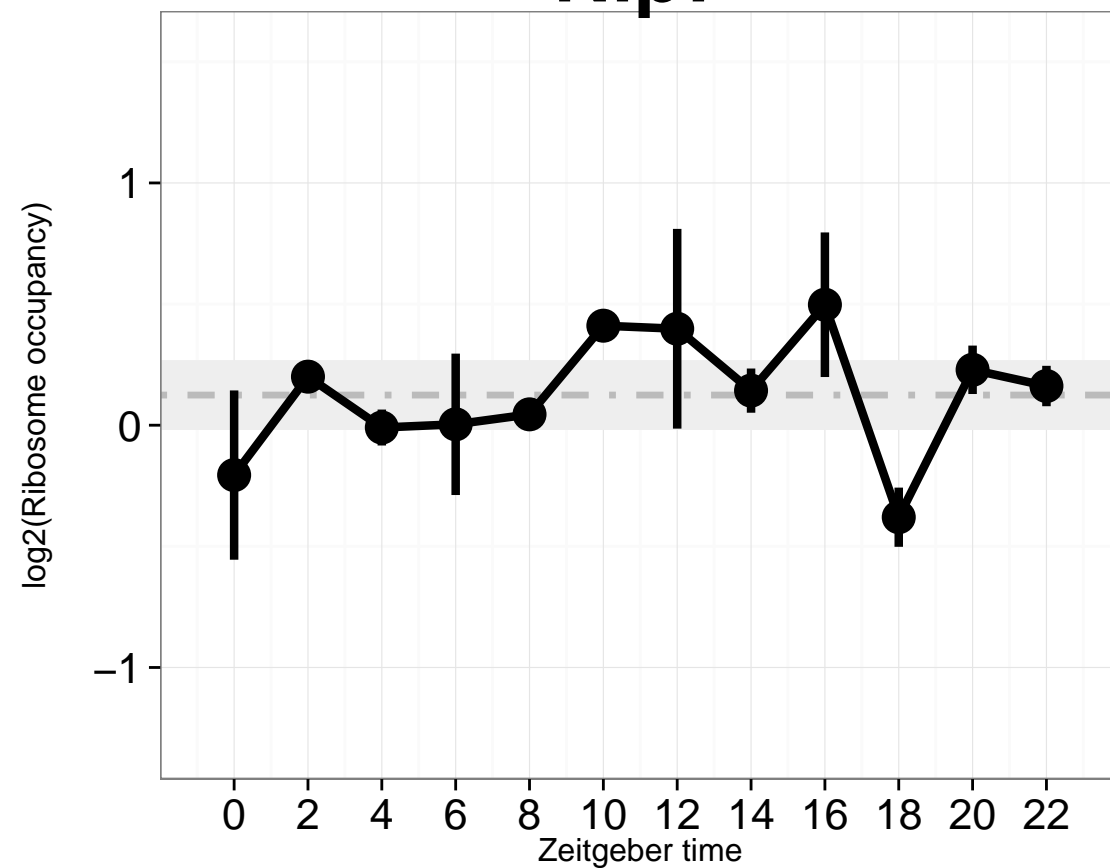

Supplement: Supplementary file 9262 [file 1]

## Arnt2

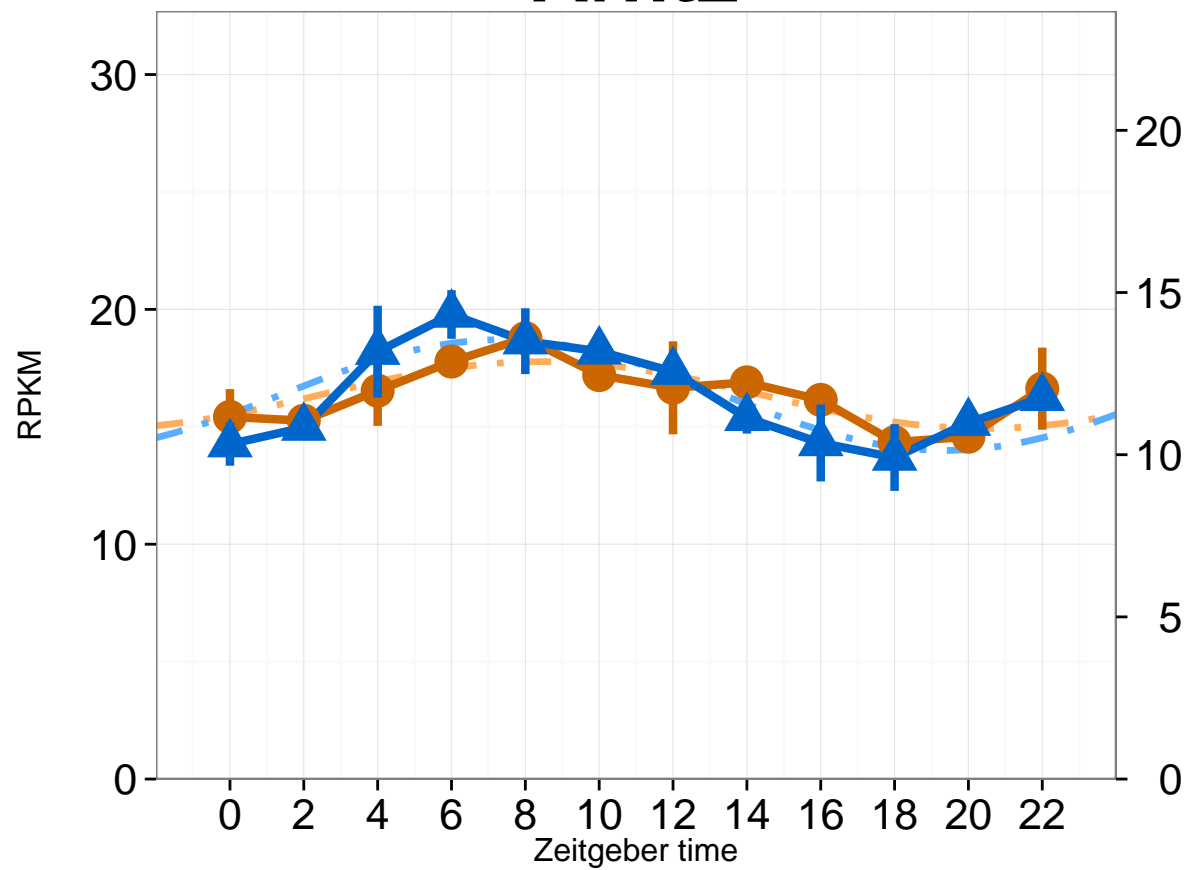

## Arnt2

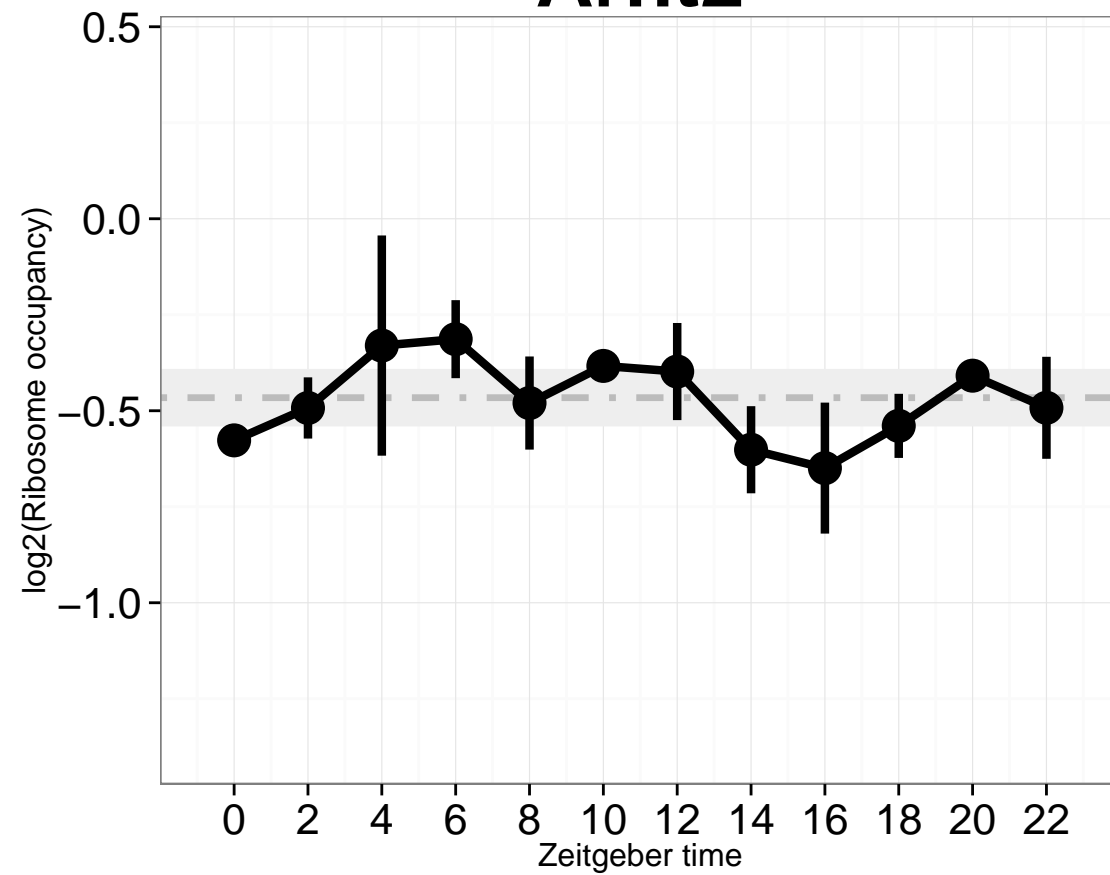

Supplement: Supplementary file 9263 [file 1]

# Depdc7

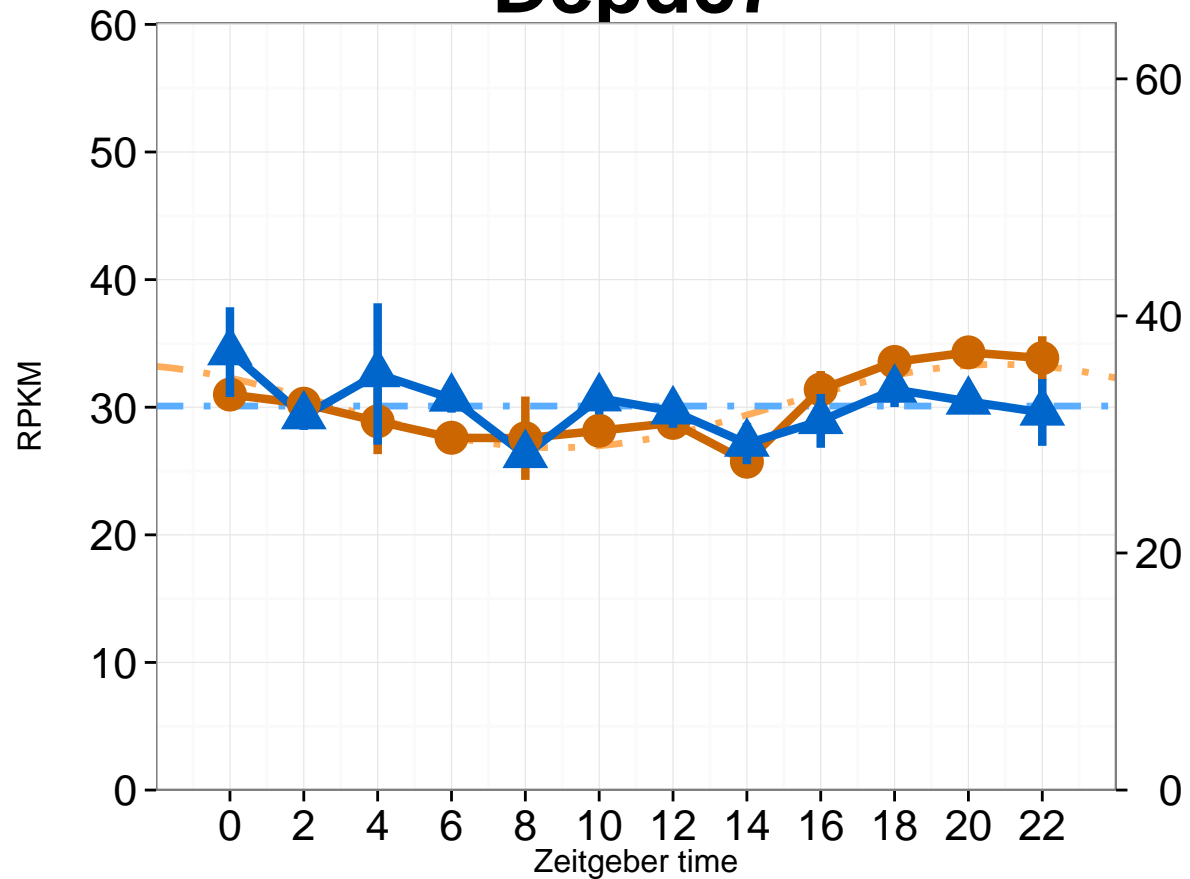

# Depdc7

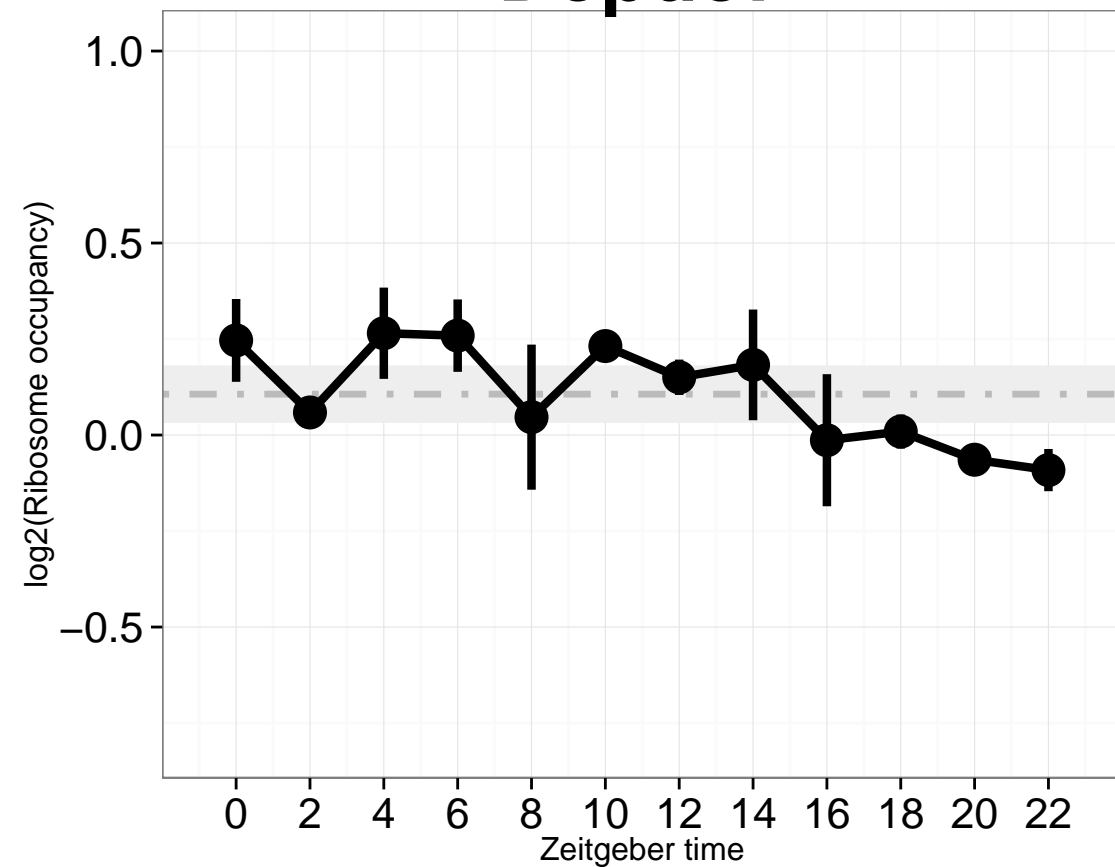

Supplement: Supplementary file 9264 [file 1]

## Rgs3

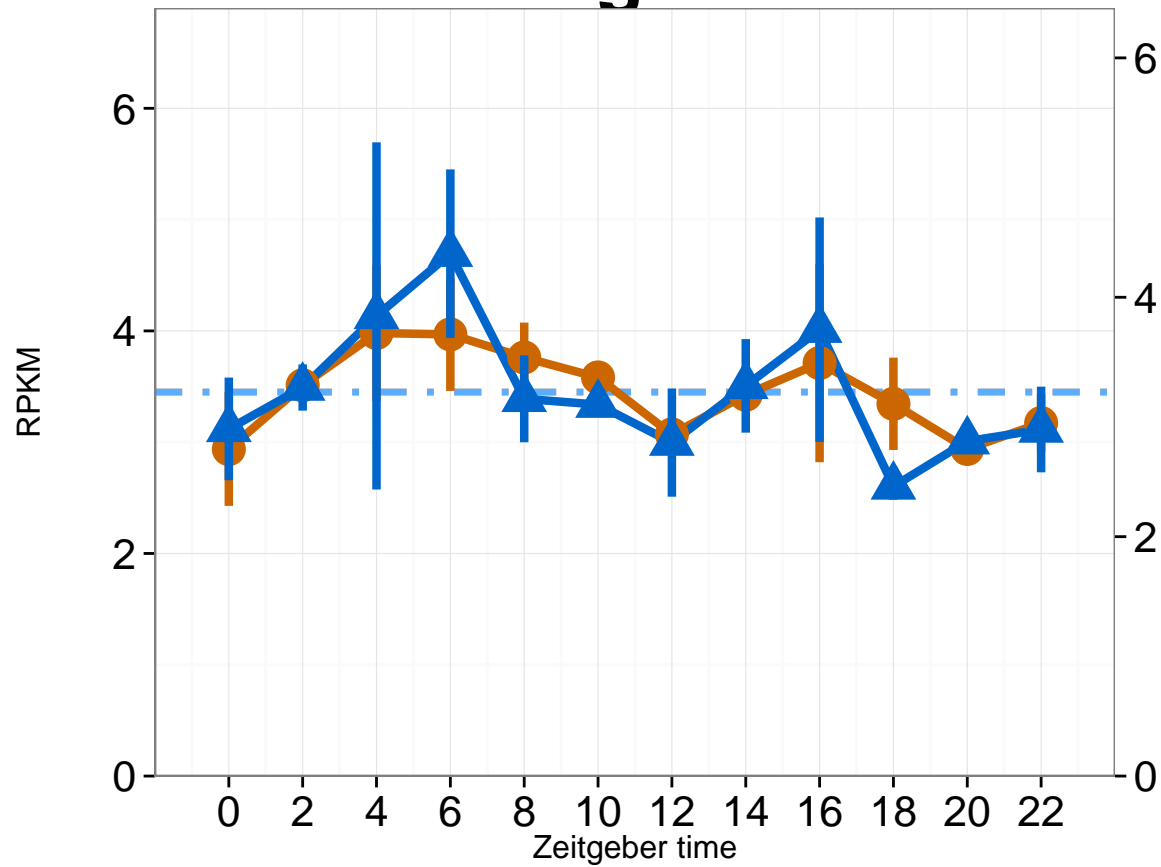

## Rgs3

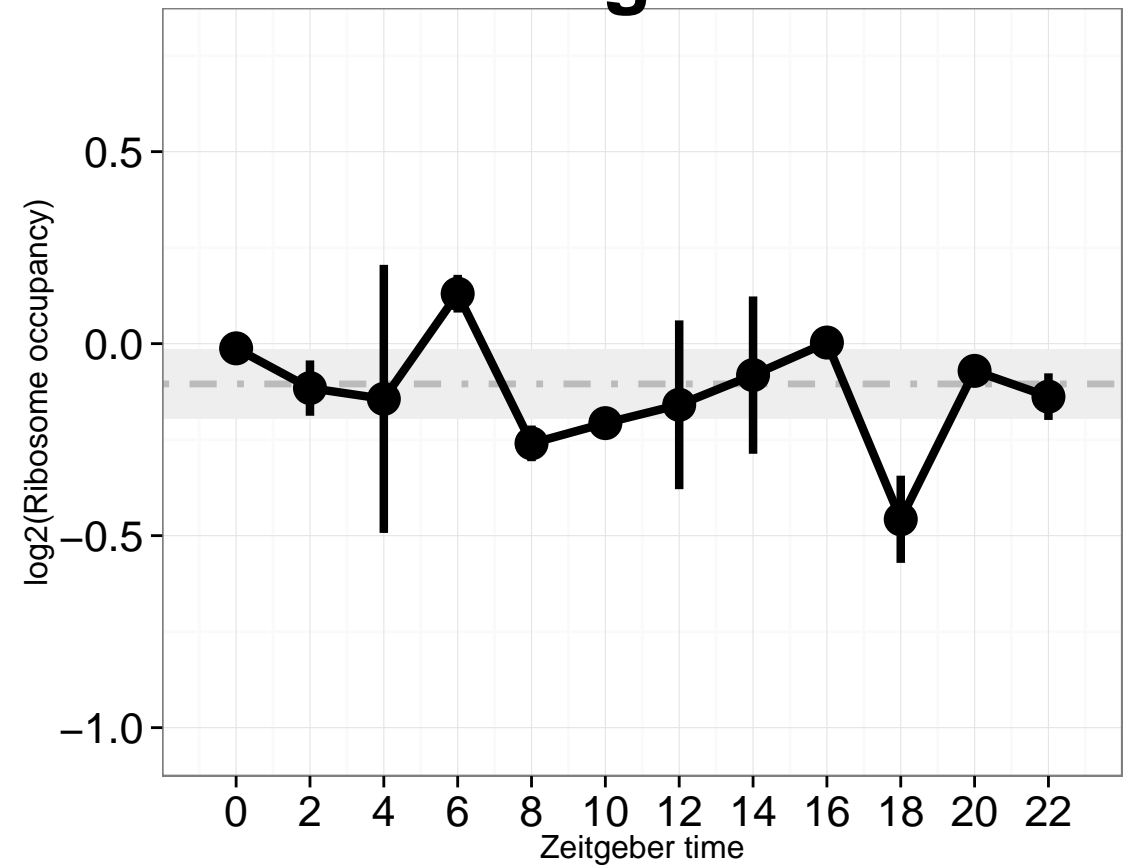

Supplement: Supplementary file 9265 [file 1]

# Tmco1

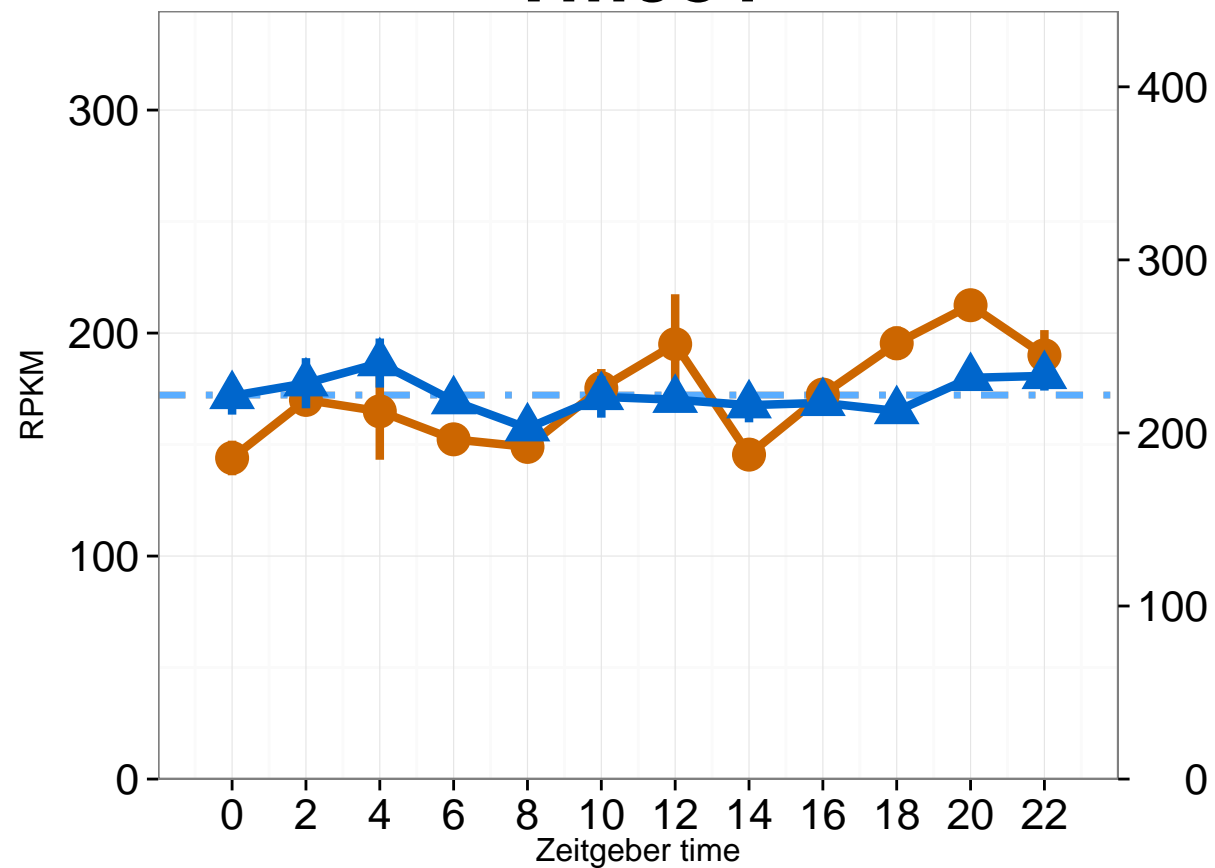

# Tmco1

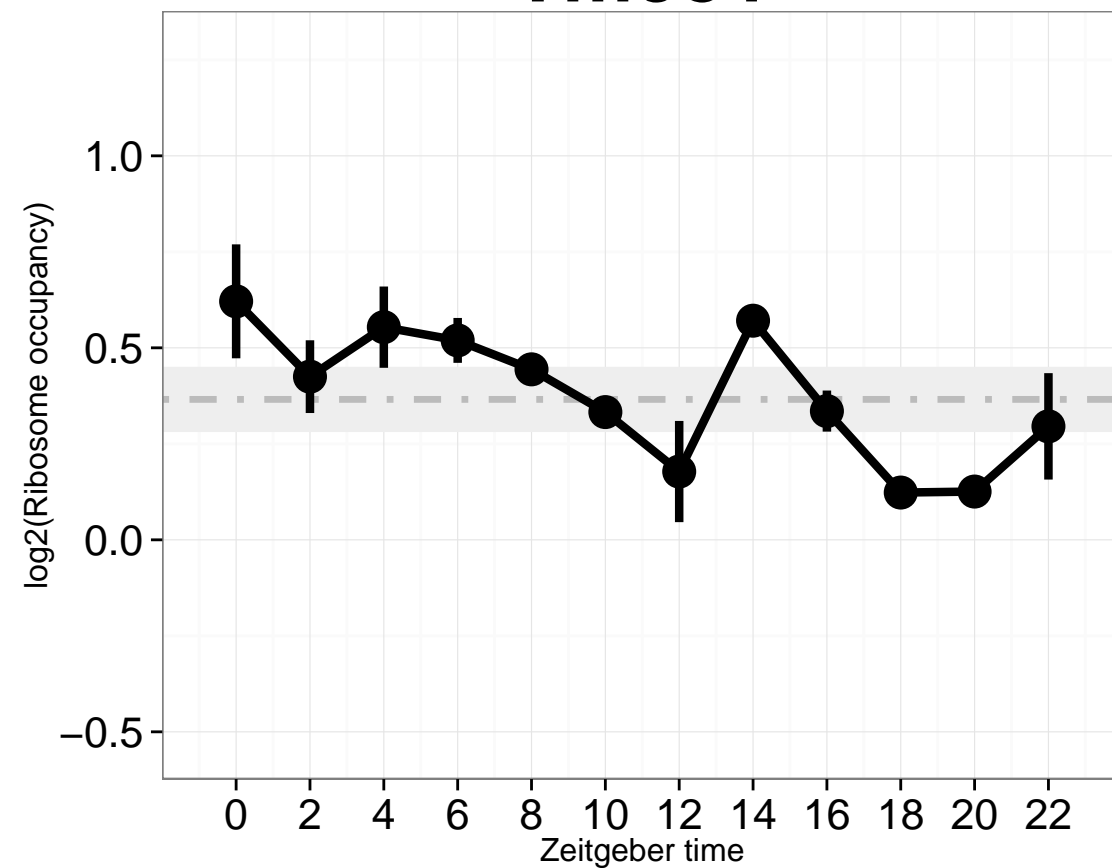

Supplement: Supplementary file 9266 [file 1]

## Fgg

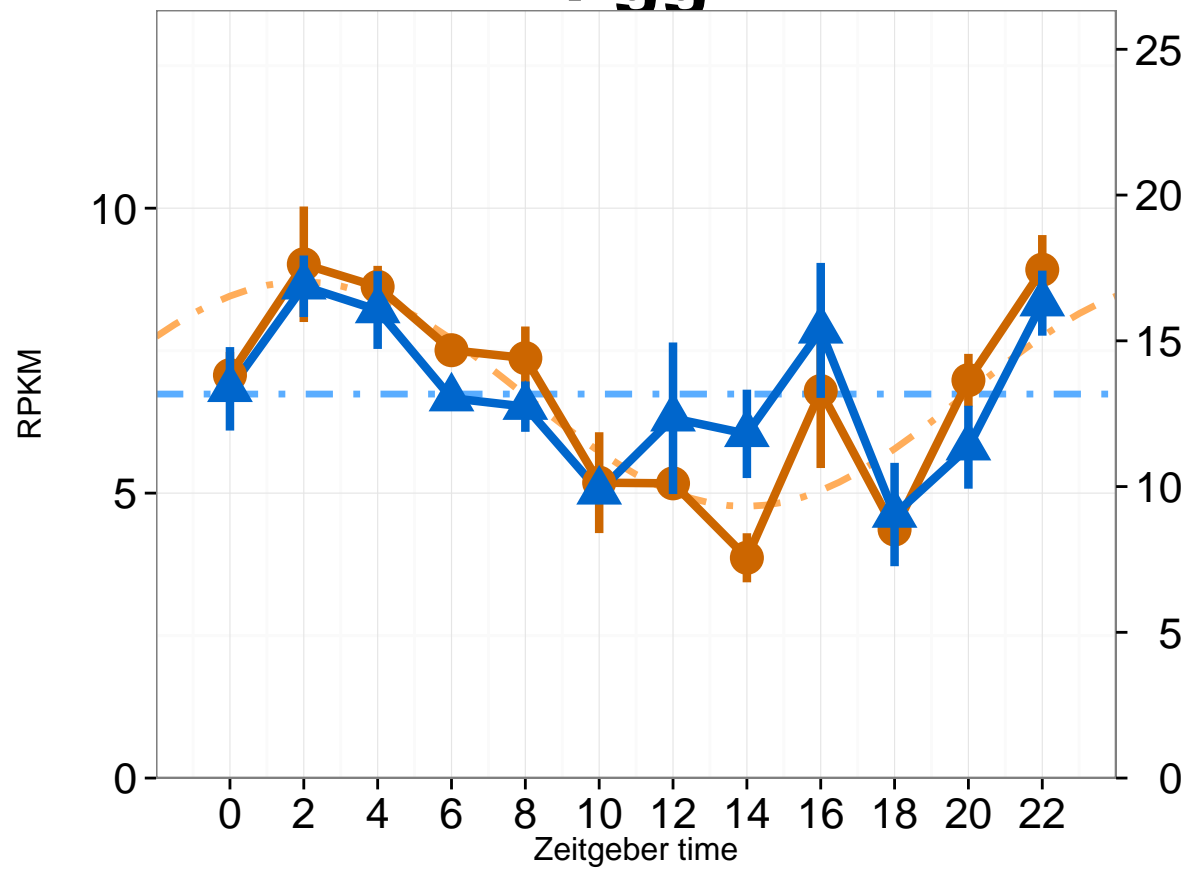

## Fgg

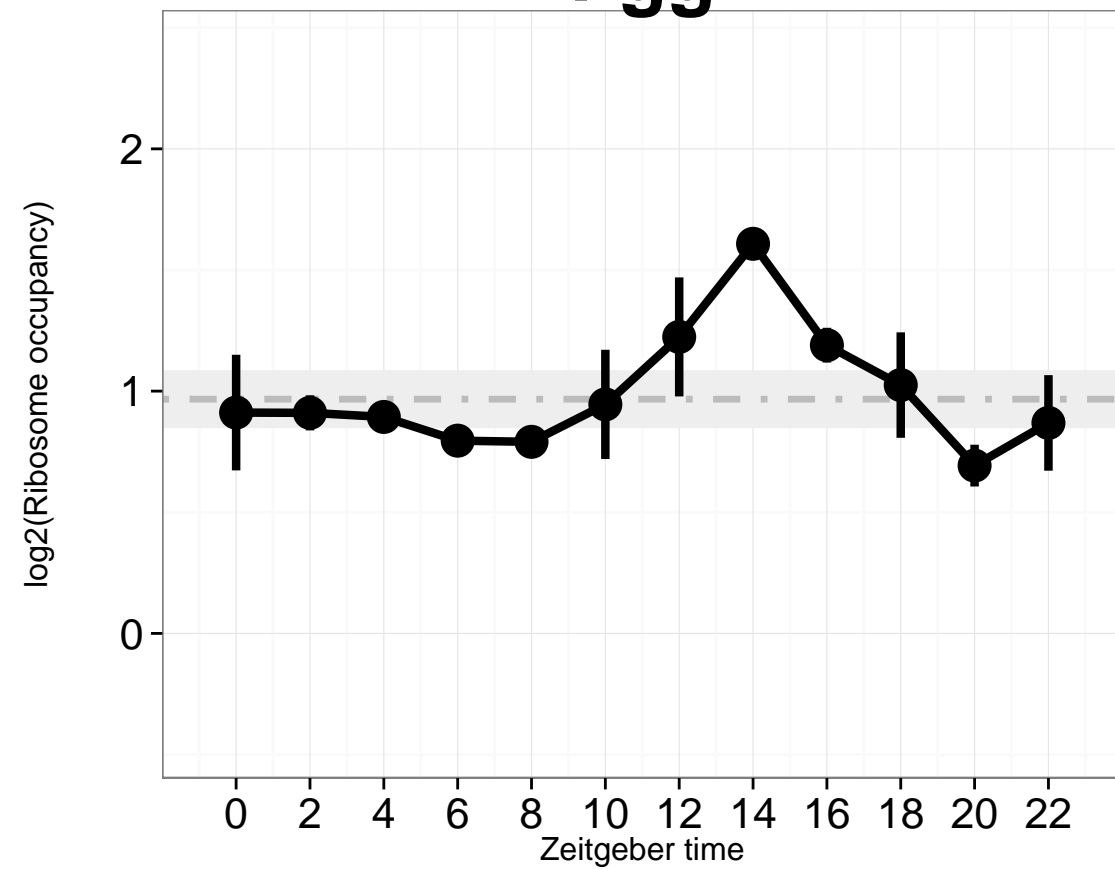

Supplement: Supplementary file 9267 [file 1]

# Selrc1

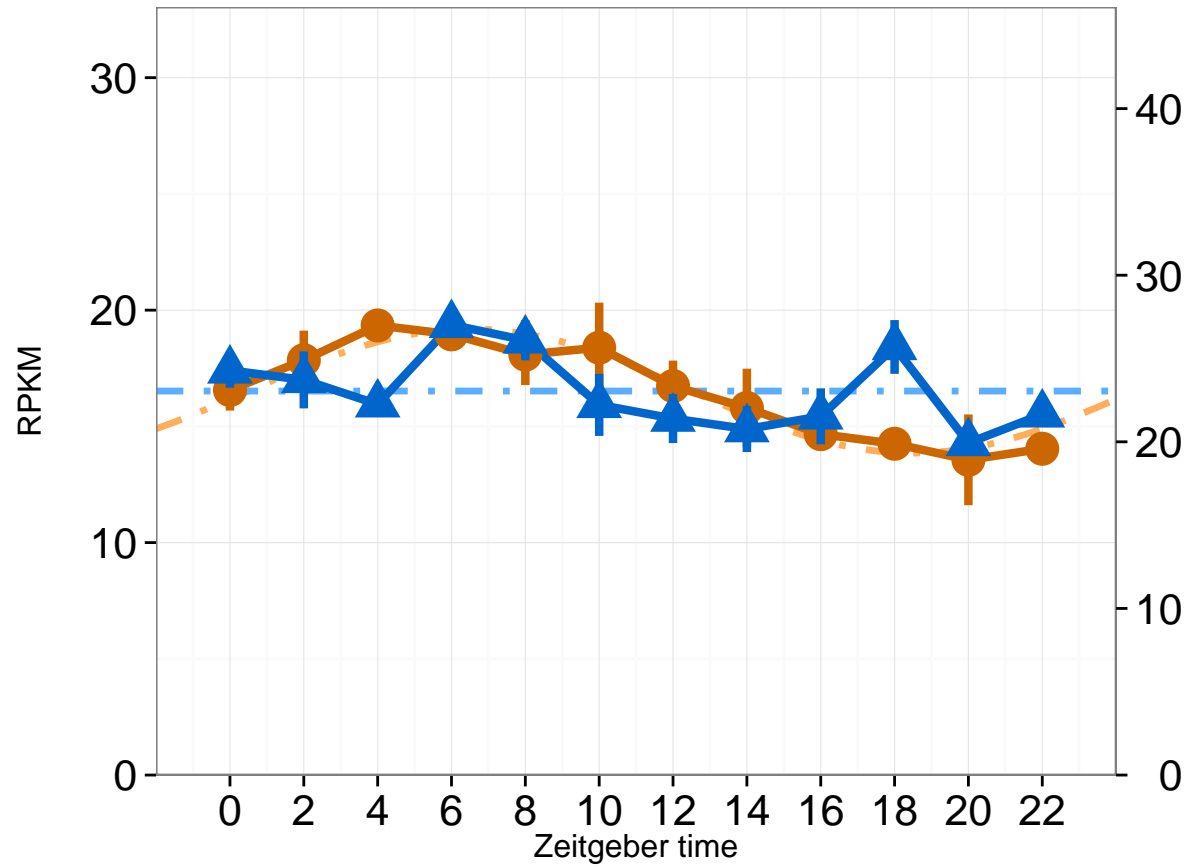

# Selrc1

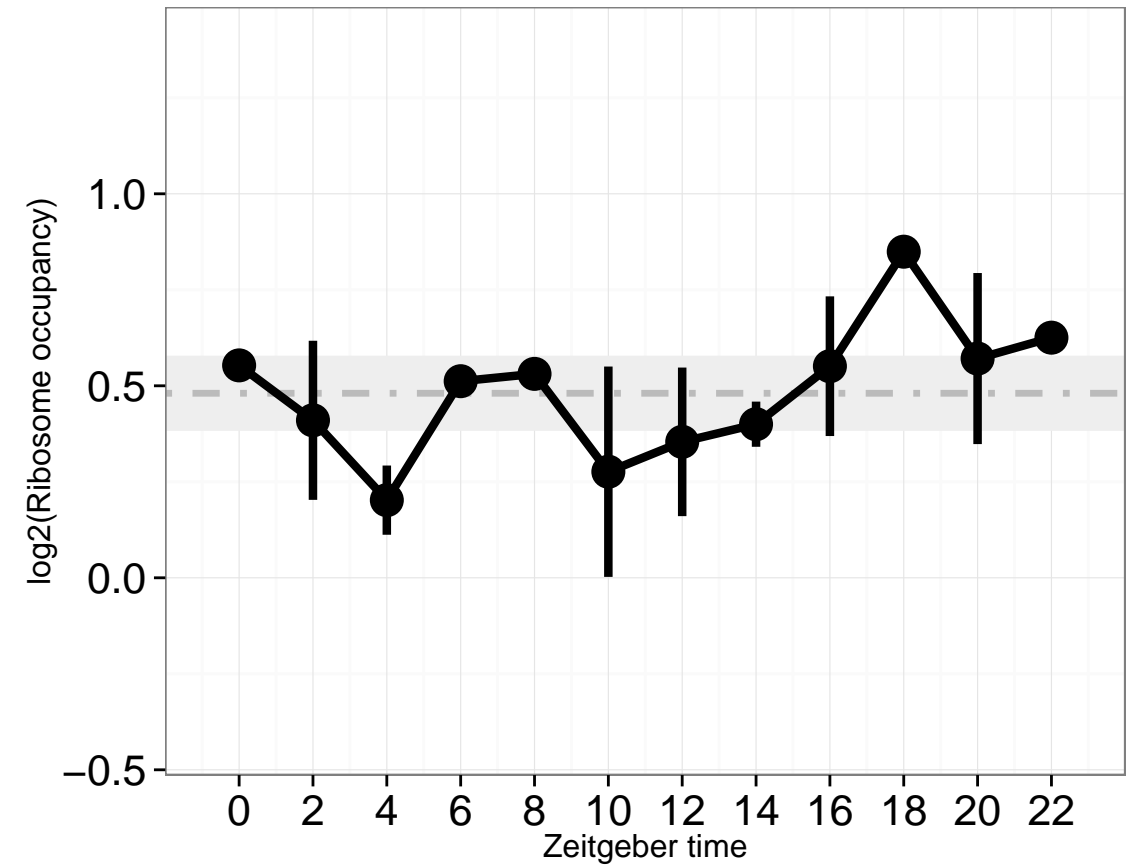

Supplement: Supplementary file 9268 [file 1]

## Ubtf

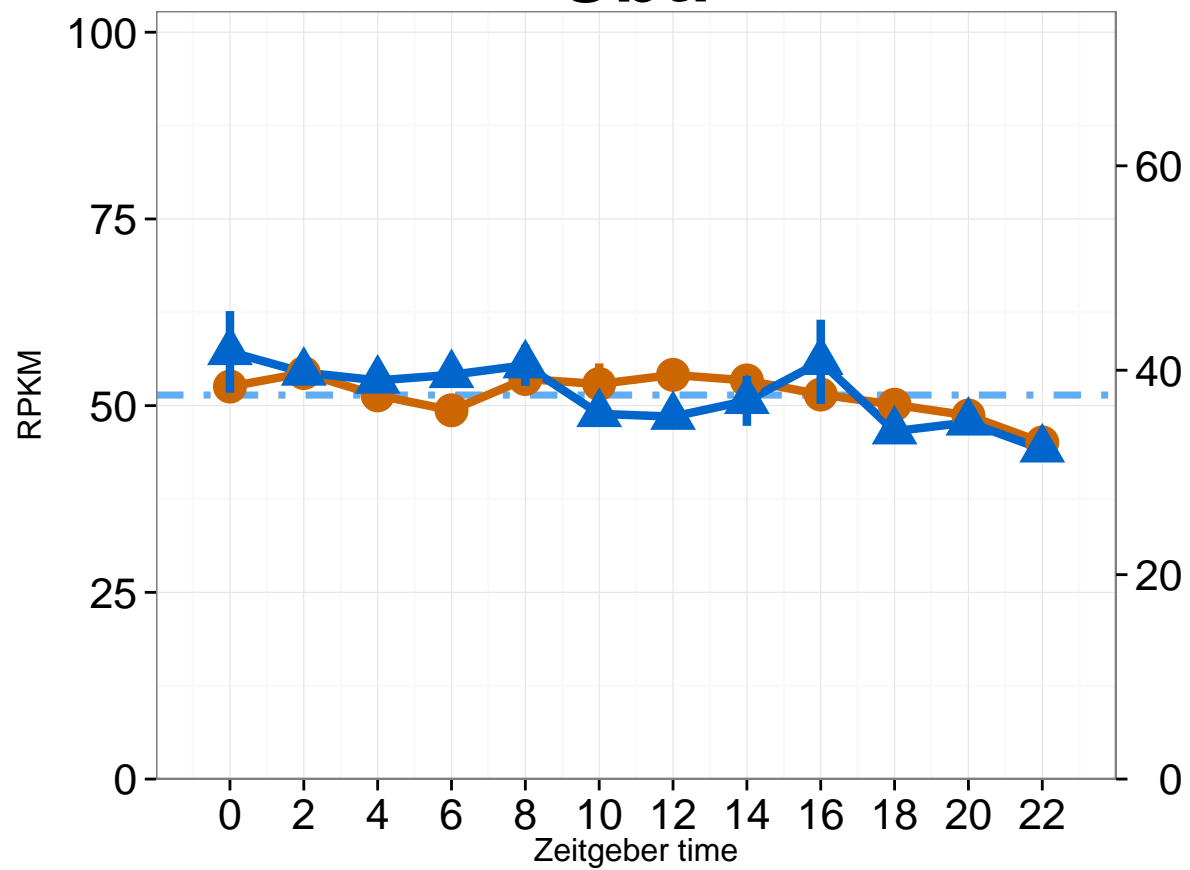

## Ubtf

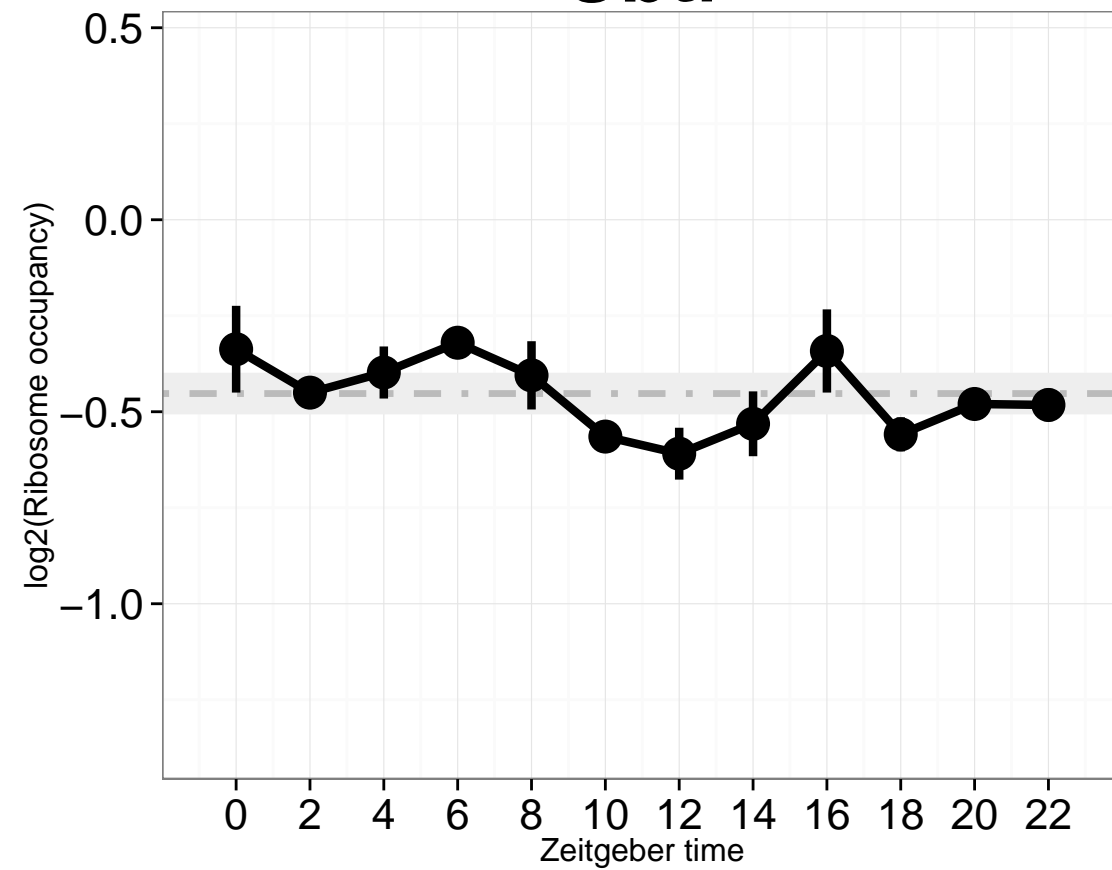

Supplement: Supplementary file 9269 [file 1]

## Ikzf3

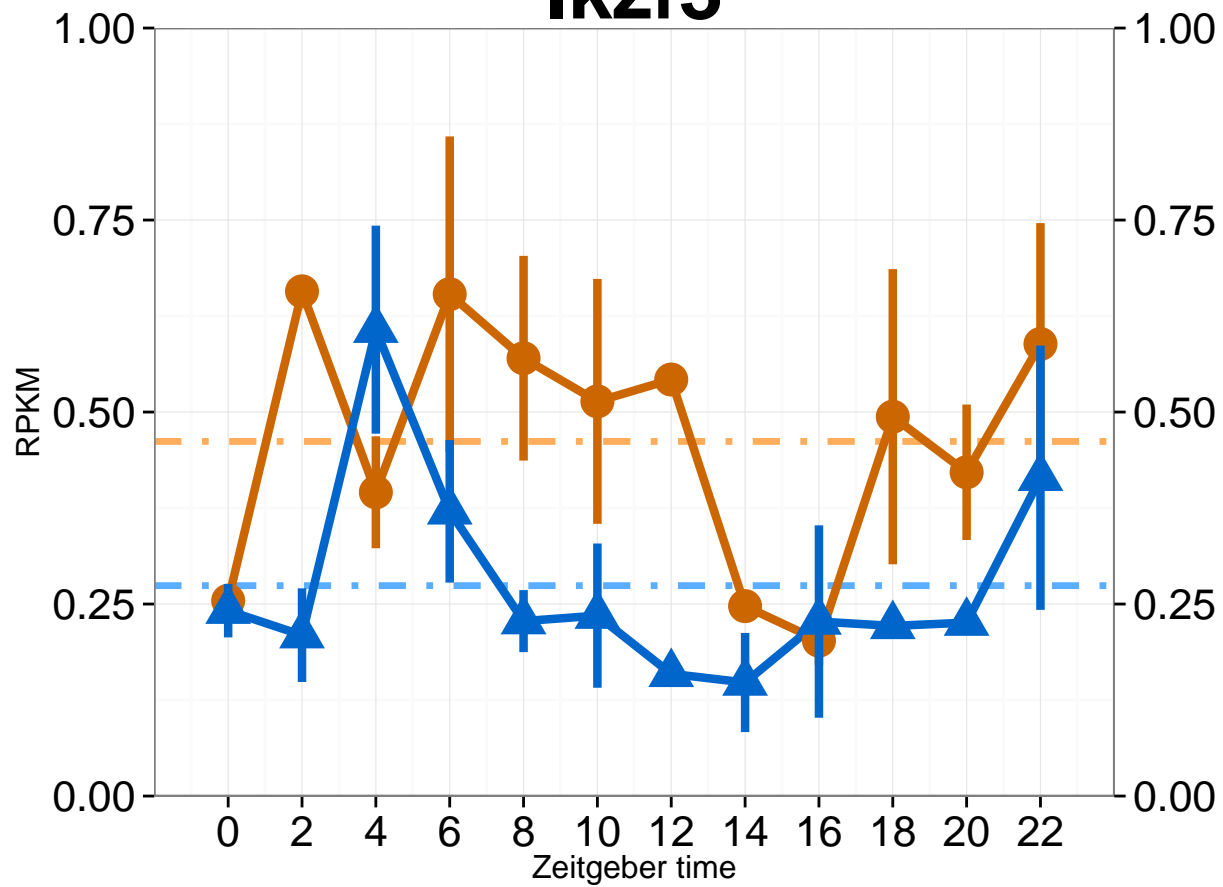

## Ikzf3

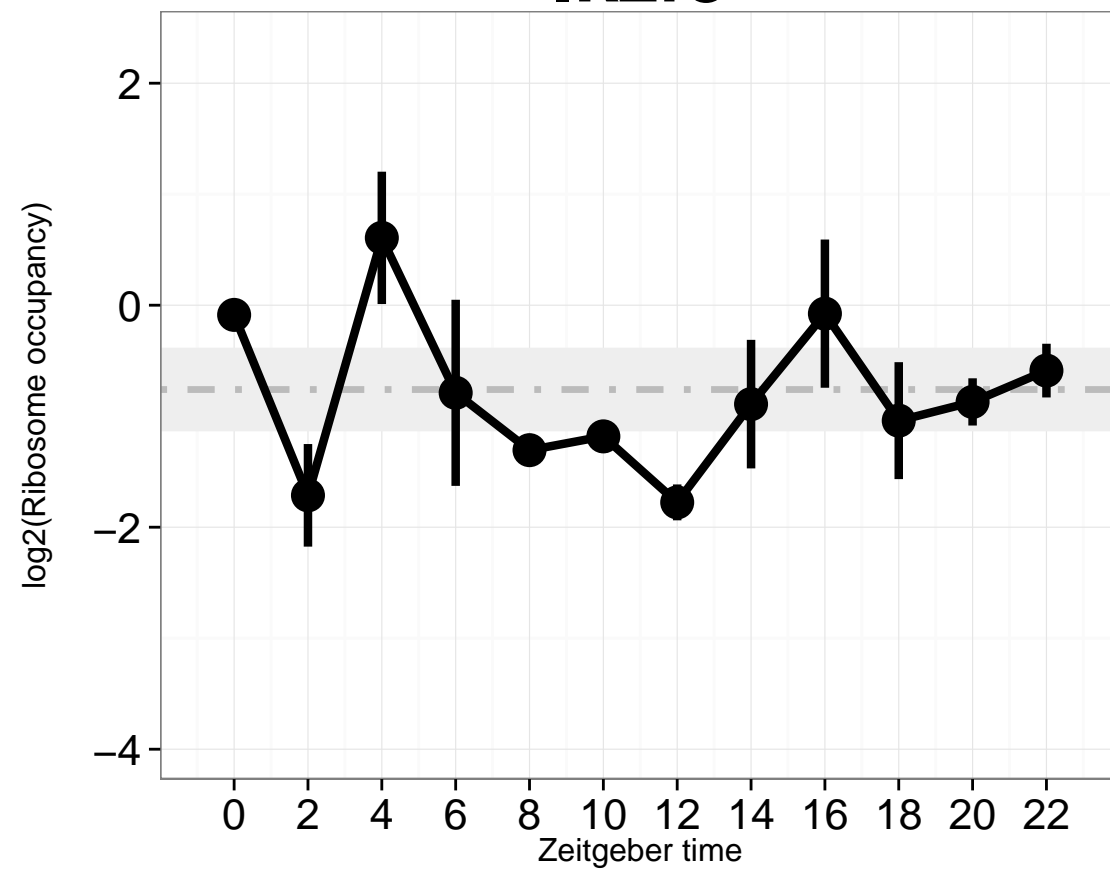

Supplement: Supplementary file 9270 [file 1]

# Gtpbp8

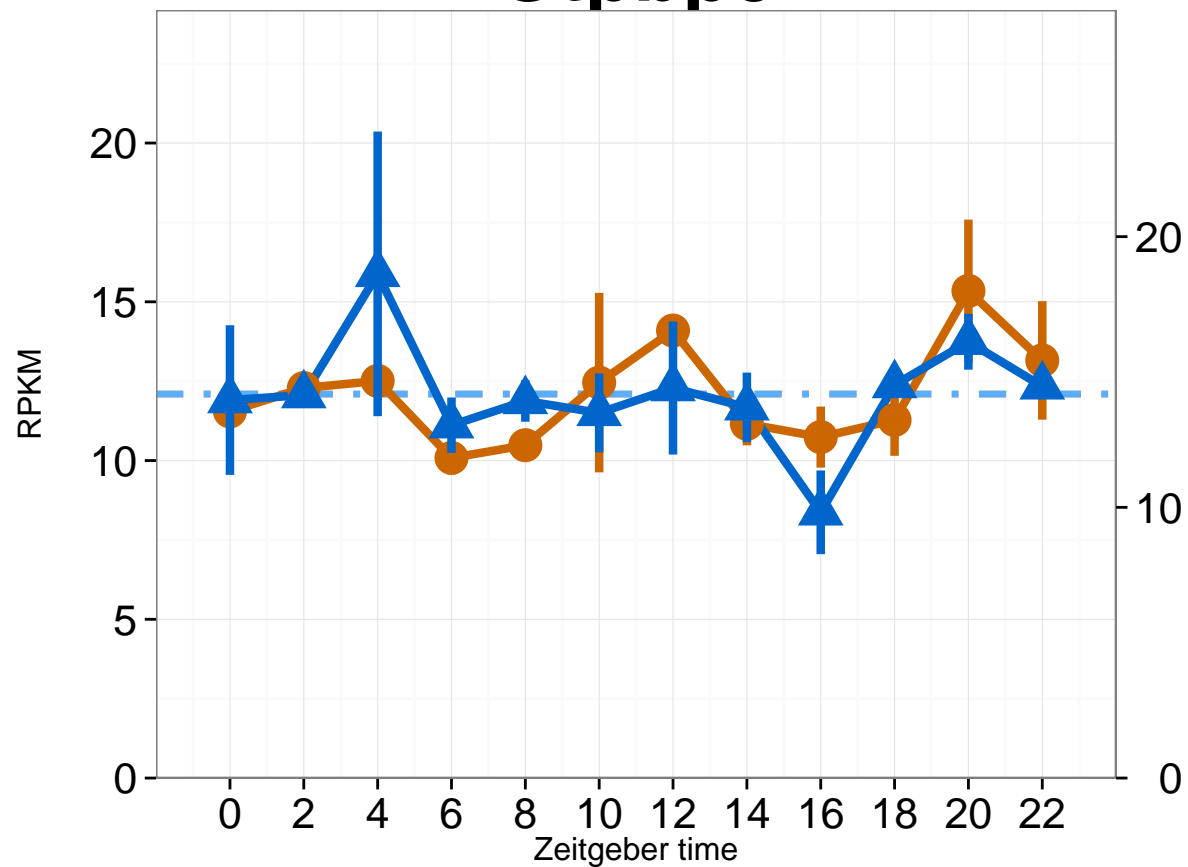

# Gtpbp8

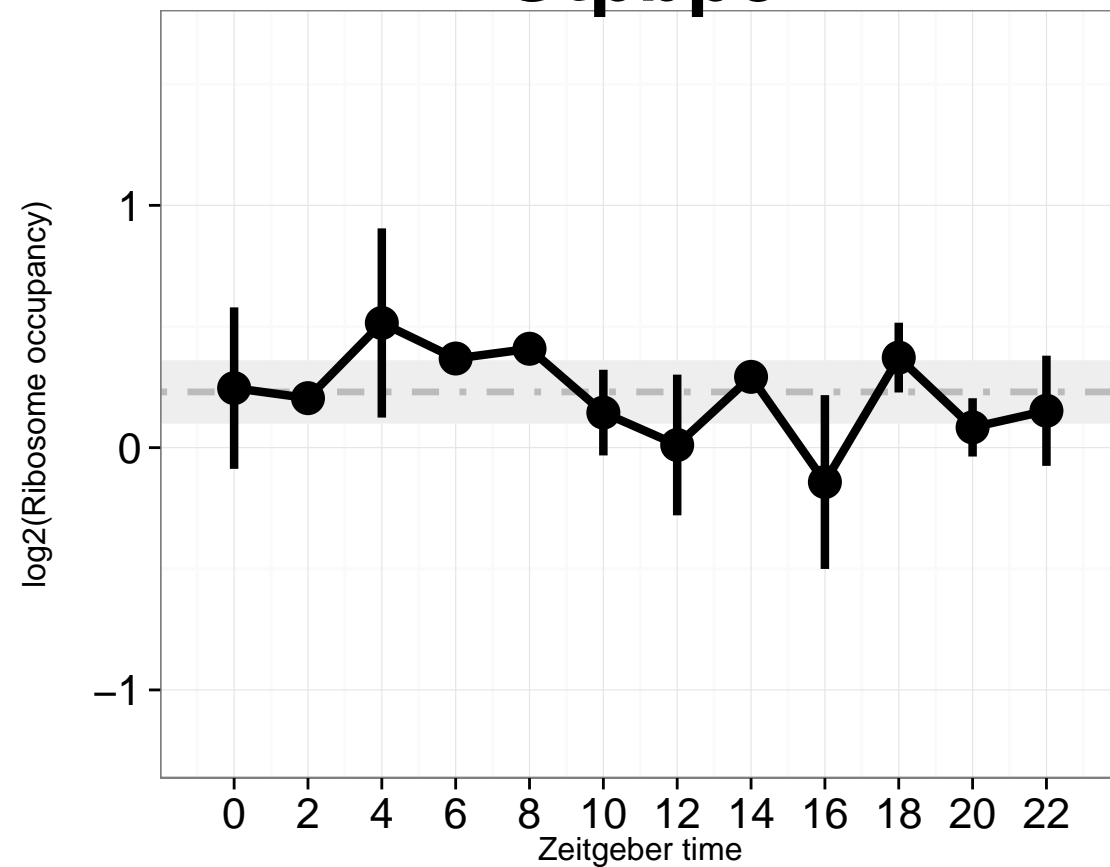

Supplement: Supplementary file 9271 [file 1]

## Rassf9

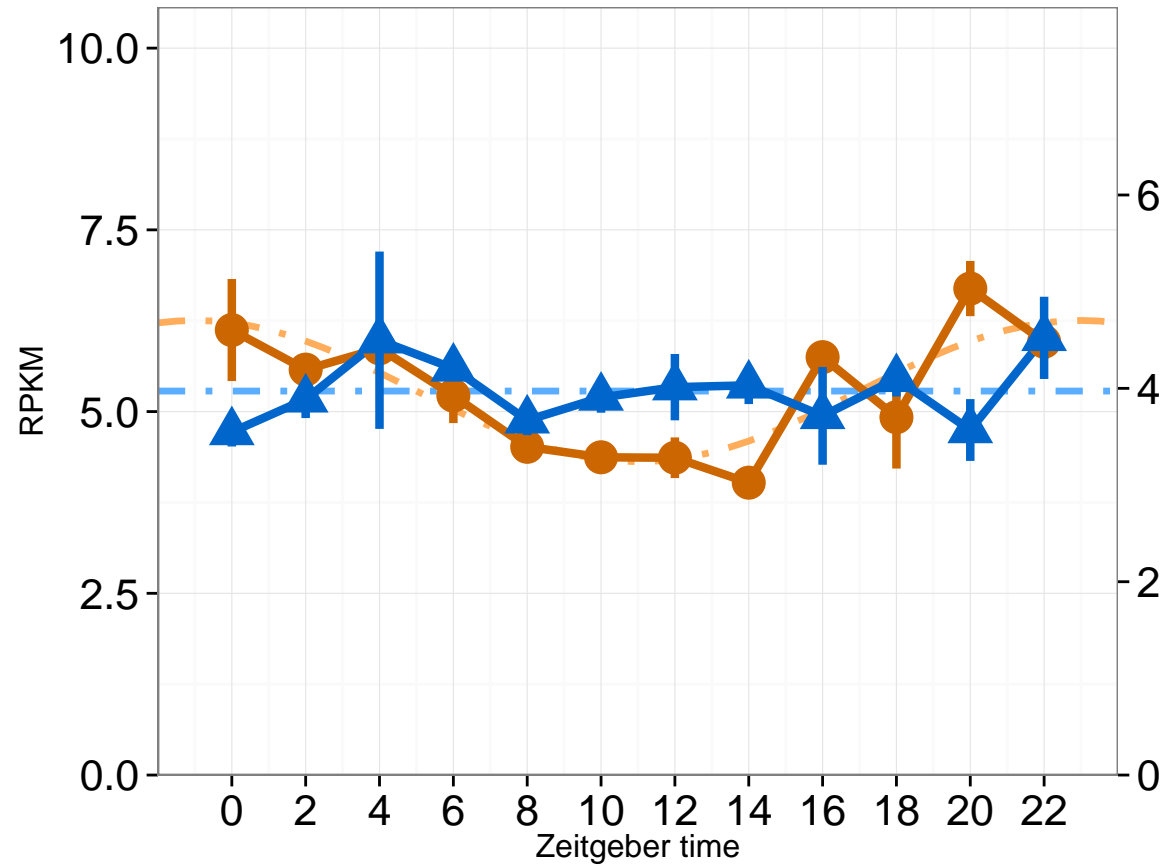

## Rassf9

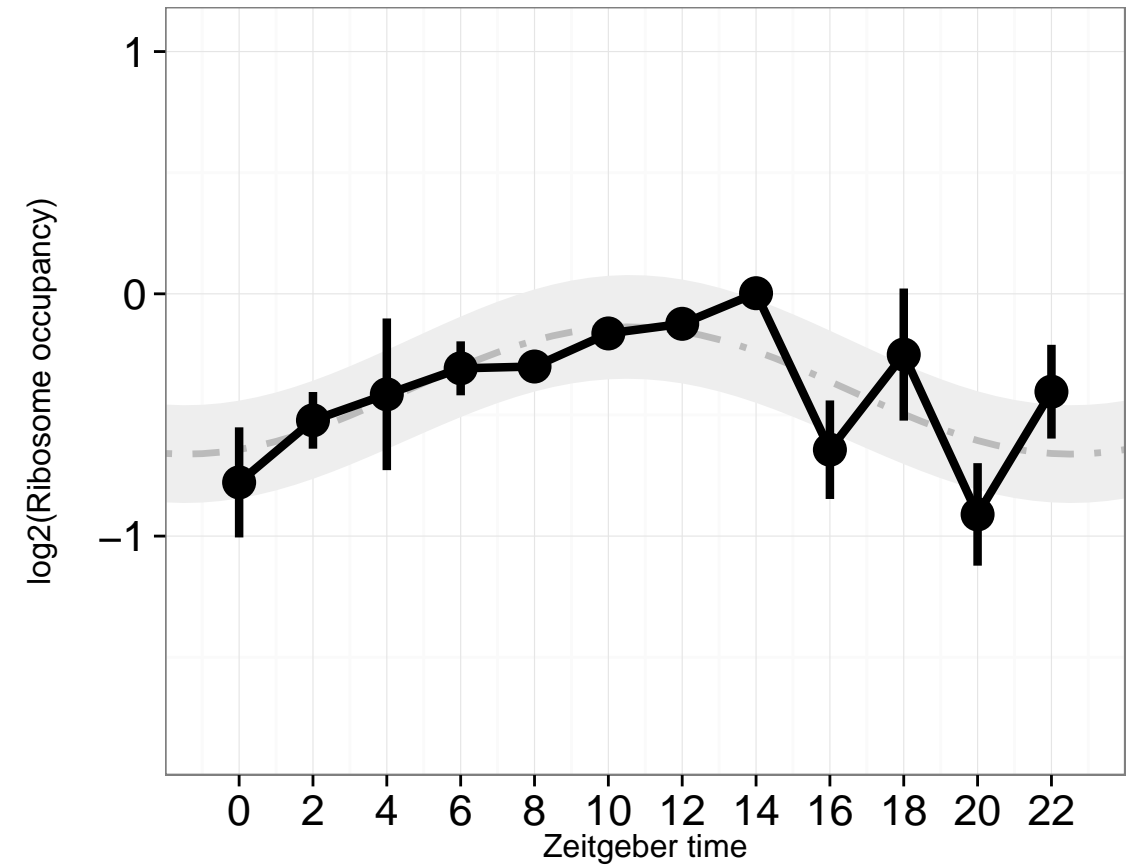

Supplement: Supplementary file 9272 [file 1]

## Spin1

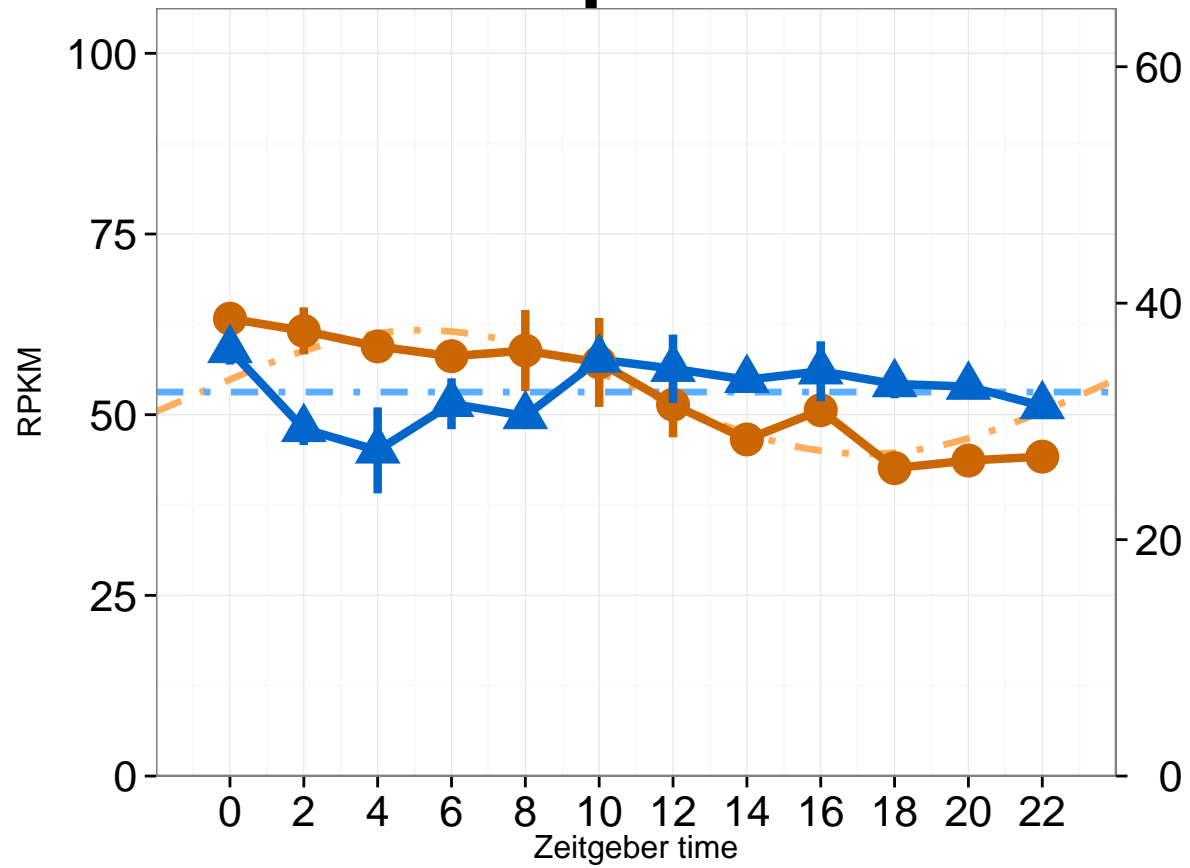

## Spin1

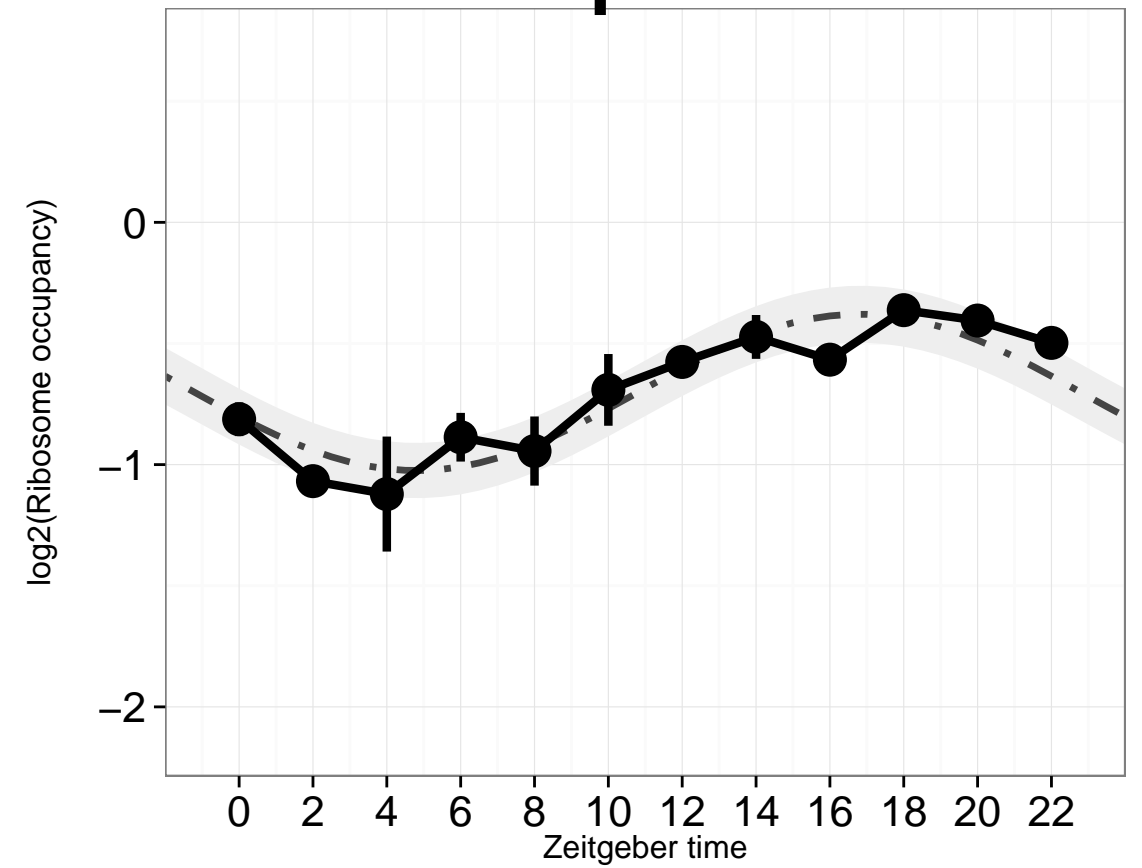

Supplement: Supplementary file 9273 [file 1]

## Gm4076

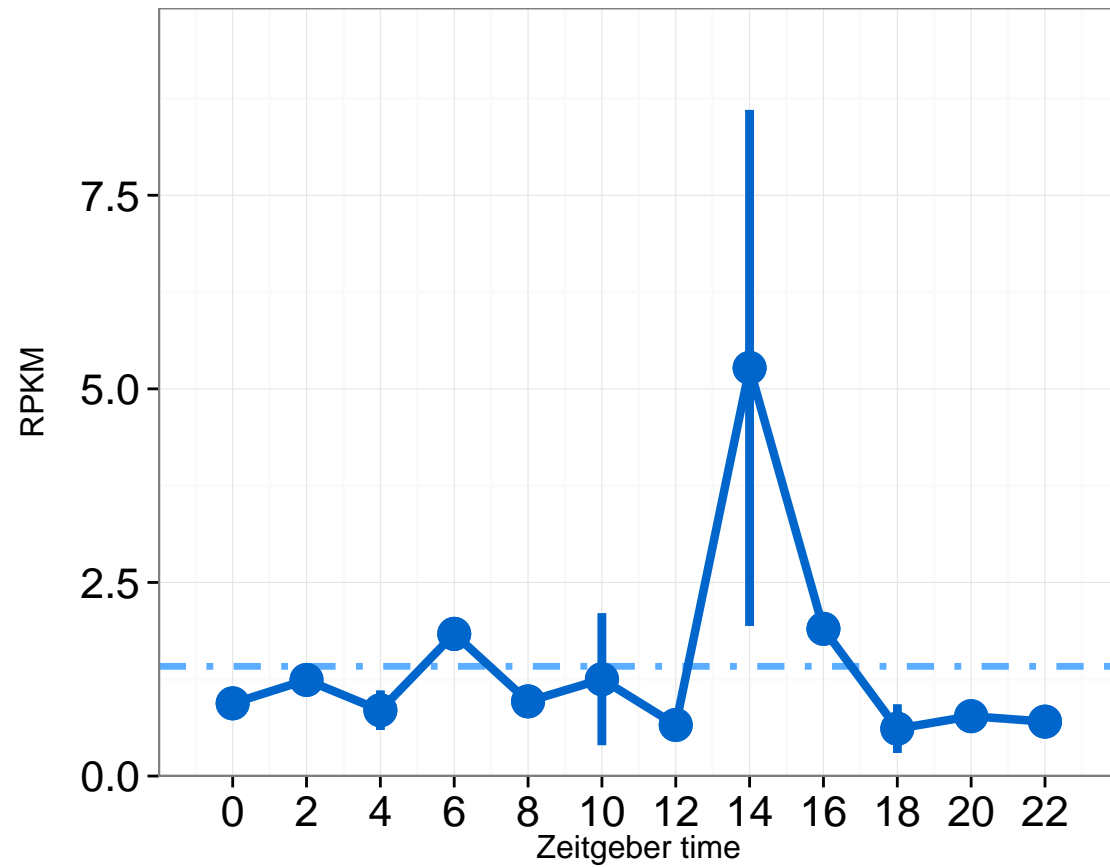

## Gm4076 log2(Ribosome occupanc

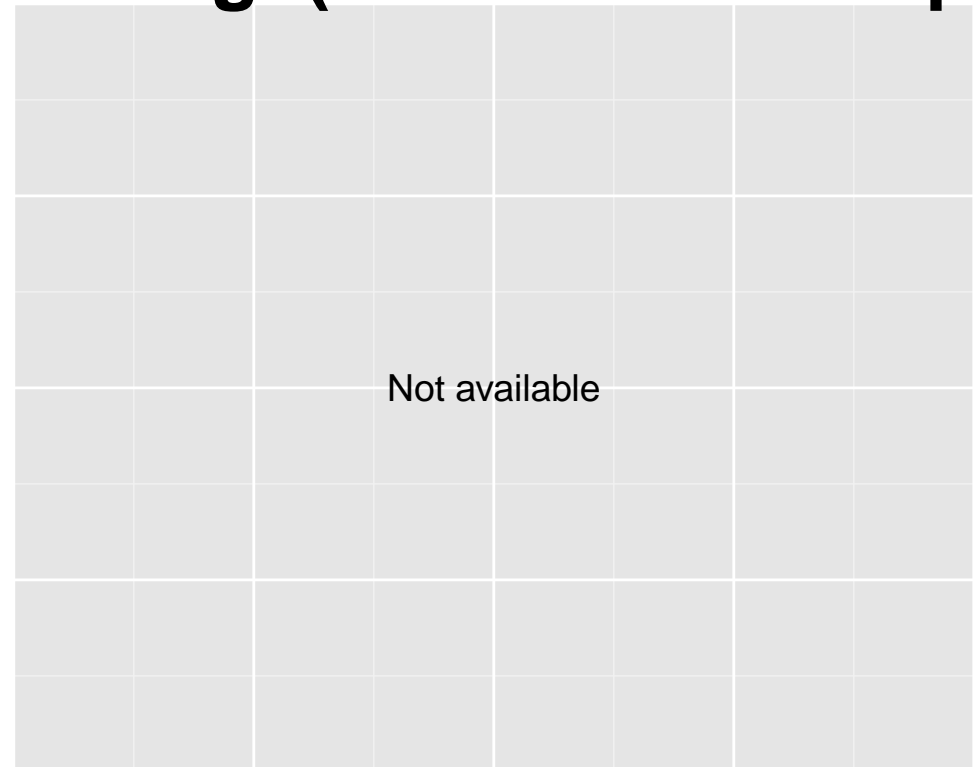

Supplement: Supplementary file 9274 [file 1]

## Fbxl22

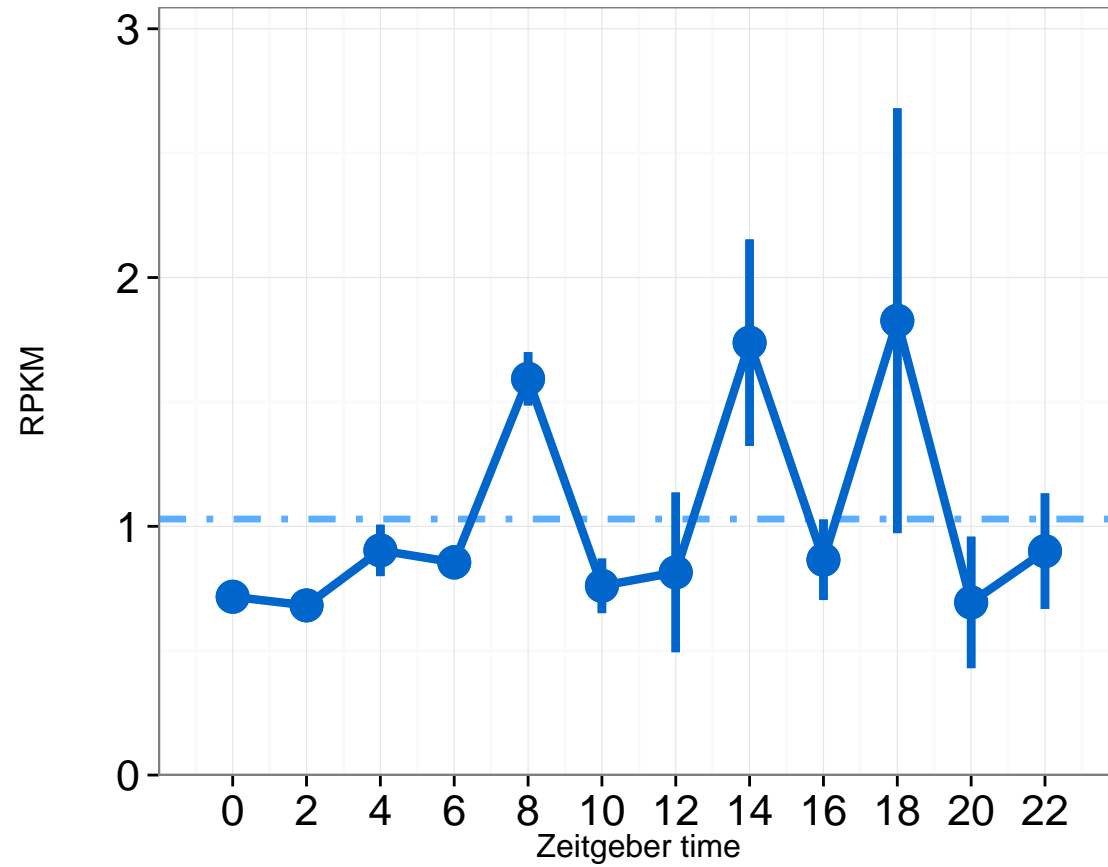

## Fbxl22 log2(Ribosome occupancy

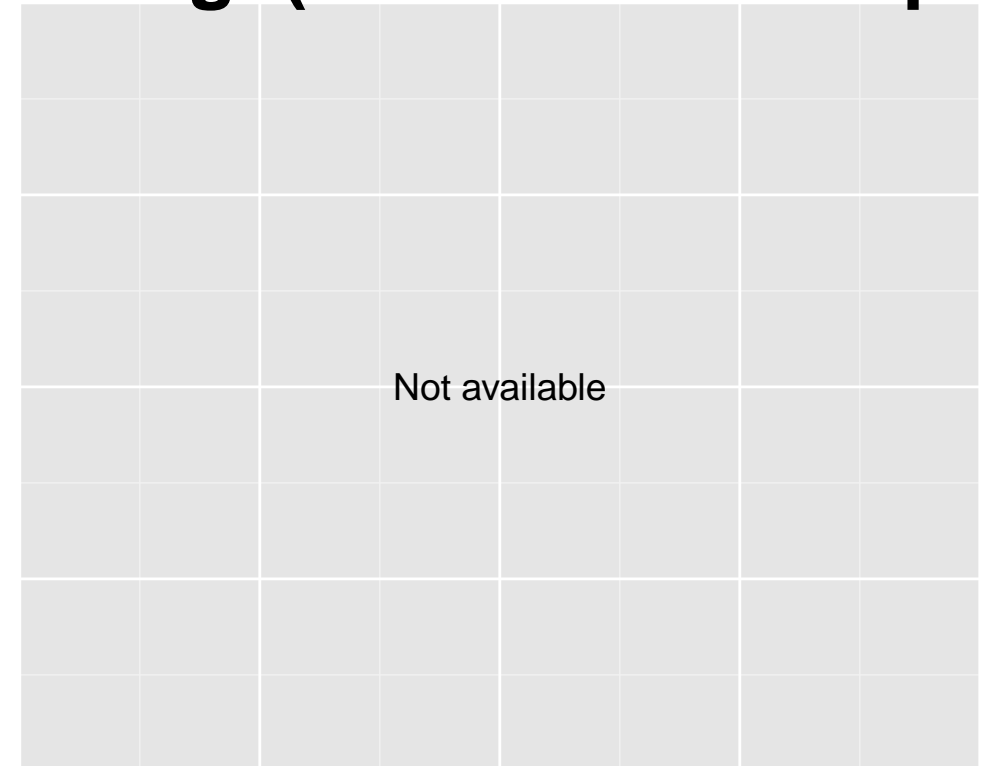

Supplement: Supplementary file 9275 [file 1]

## Dnajb1

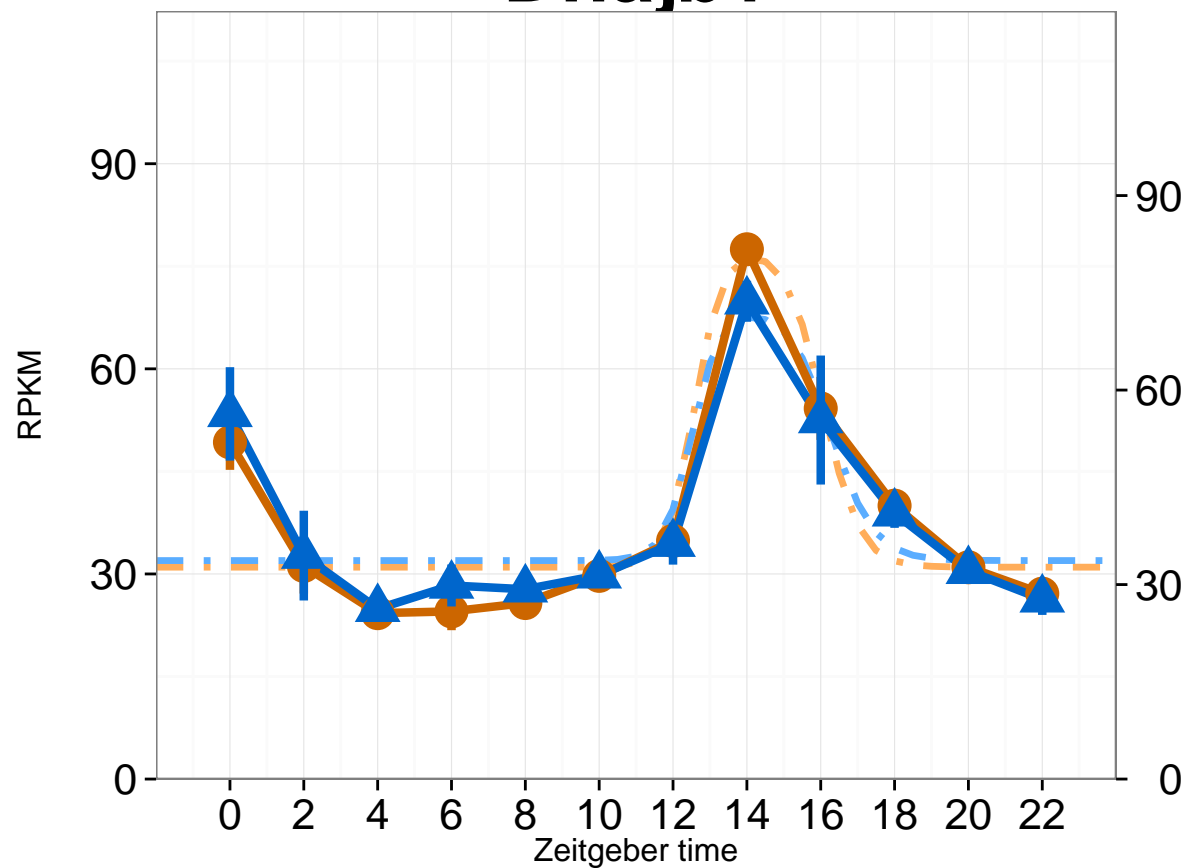

## Dnajb1

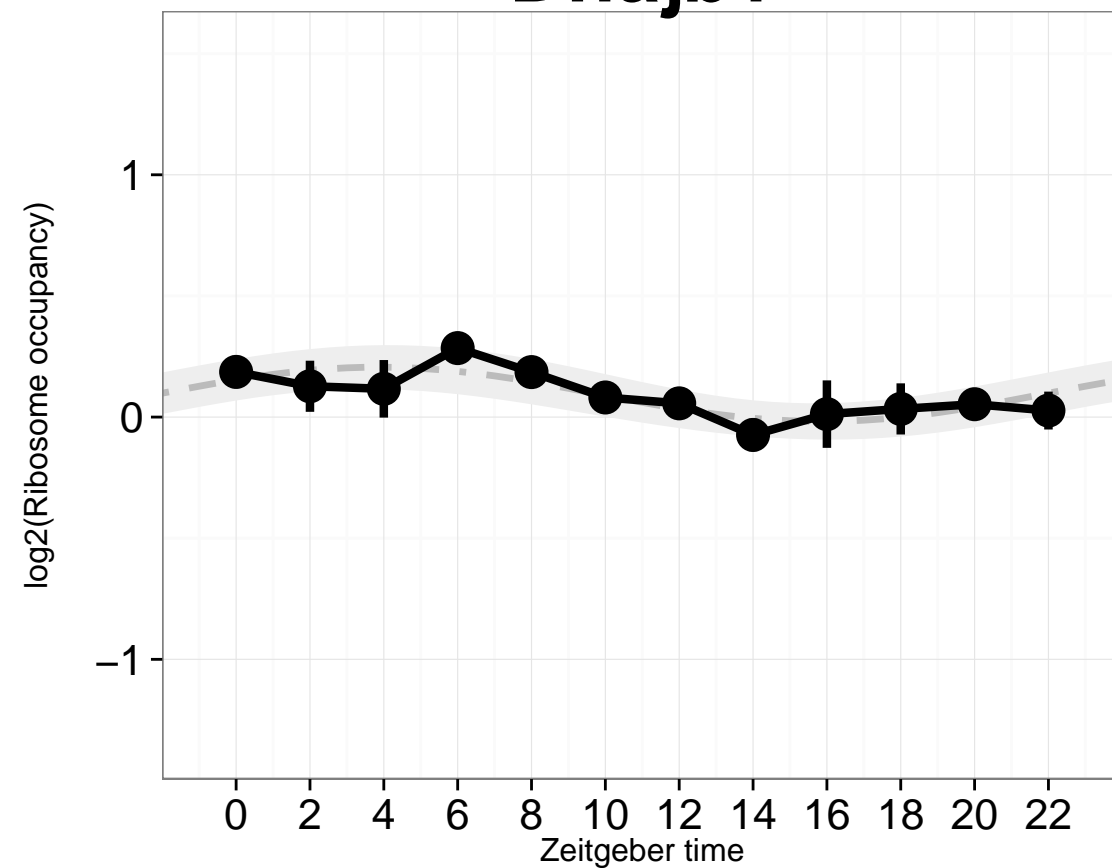

Supplement: Supplementary file 9276 [file 1]

## Nup153

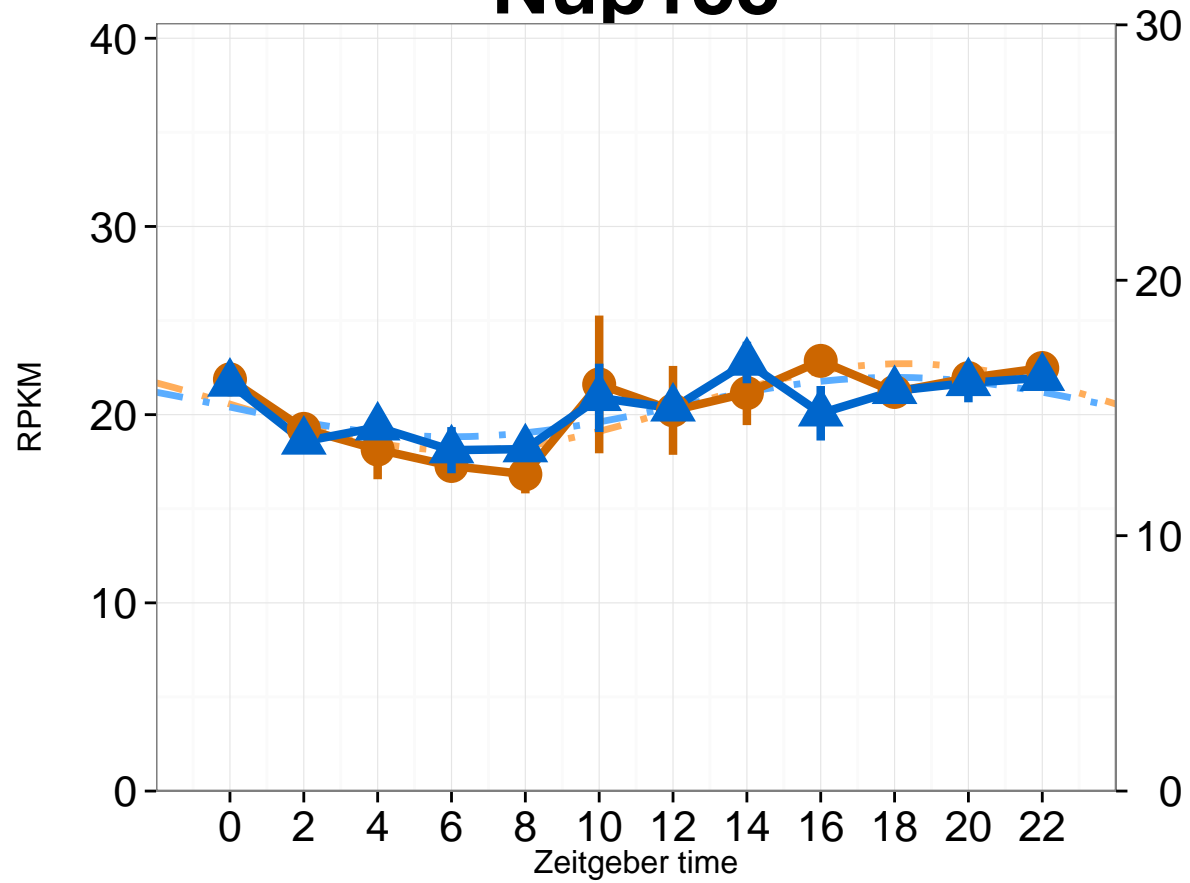

## Nup153

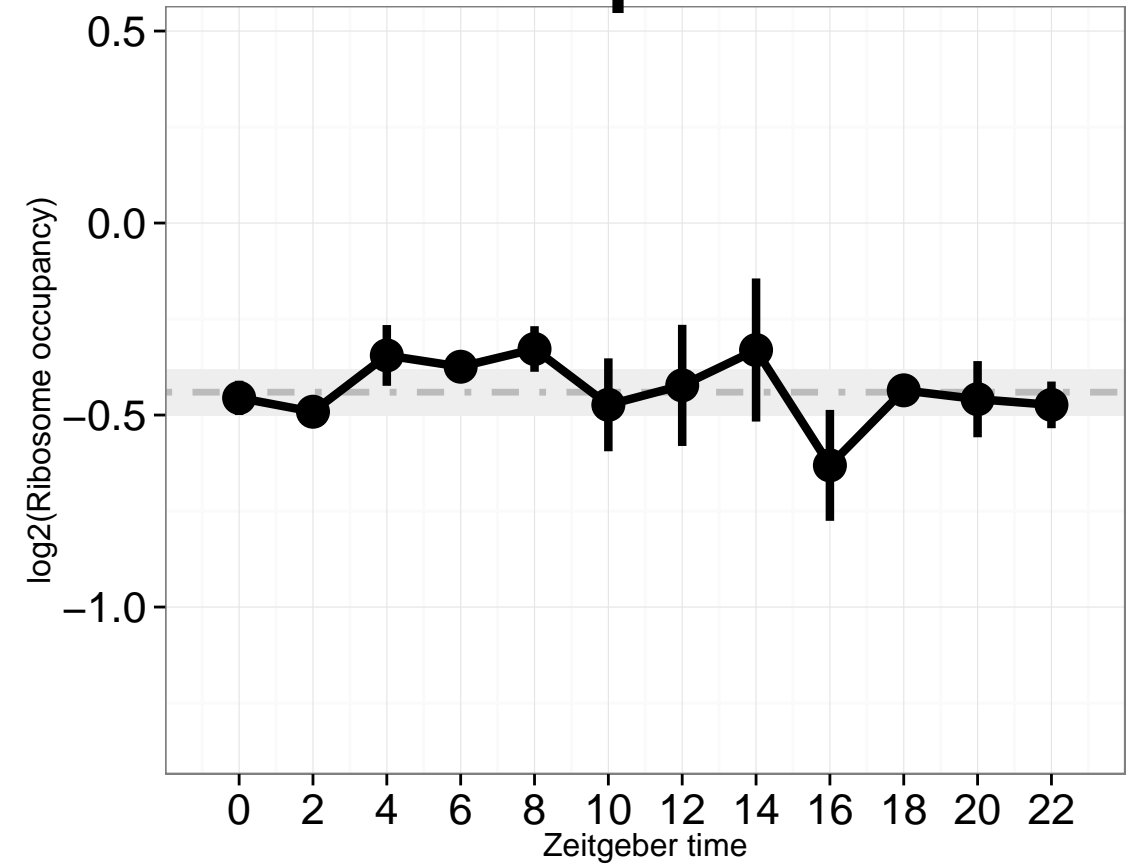

Supplement: Supplementary file 9277 [file 1]

## Slc6a18

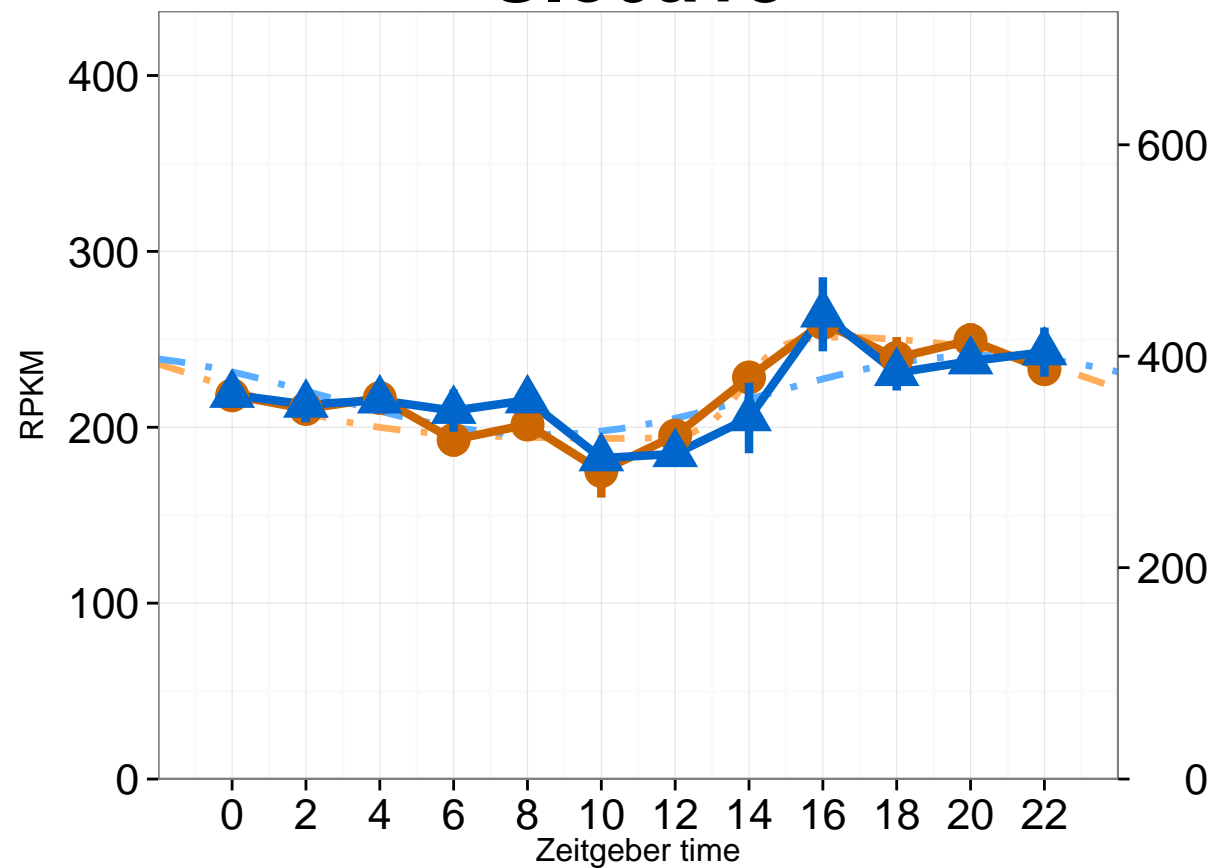

## Slc6a18

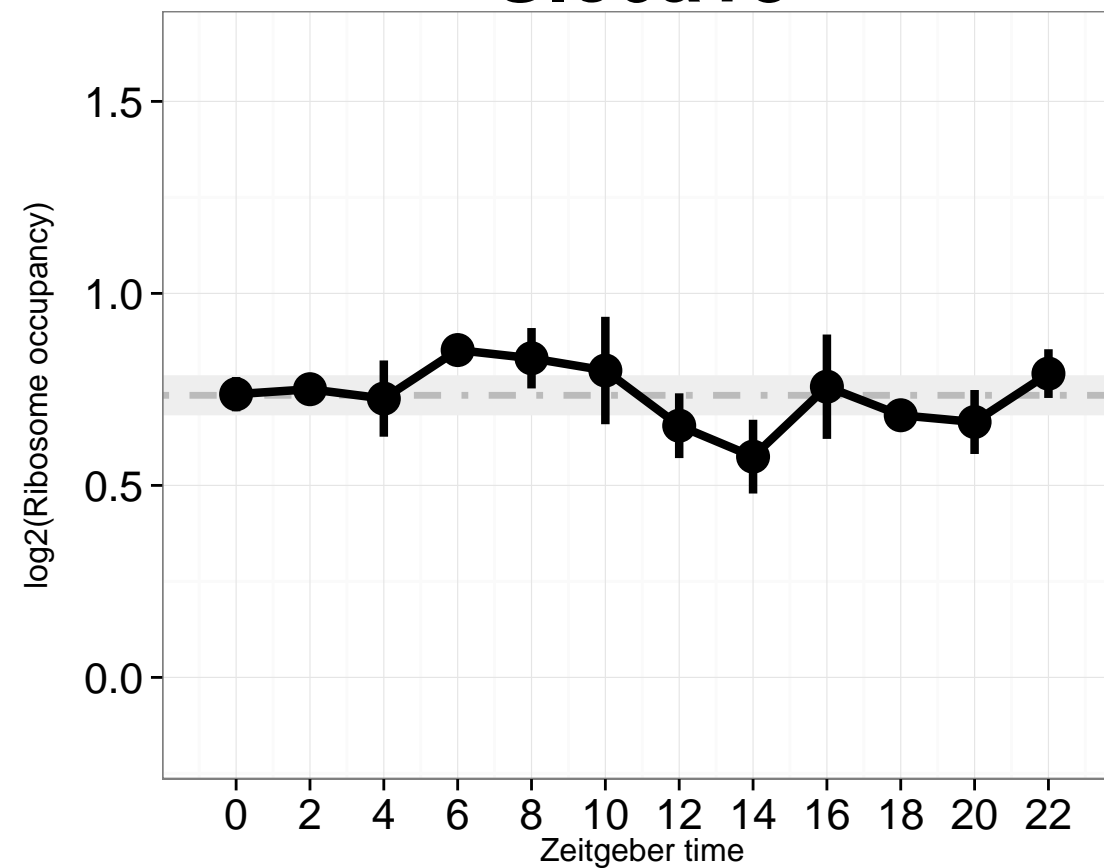

Supplement: Supplementary file 9278 [file 1]

## Sfr1

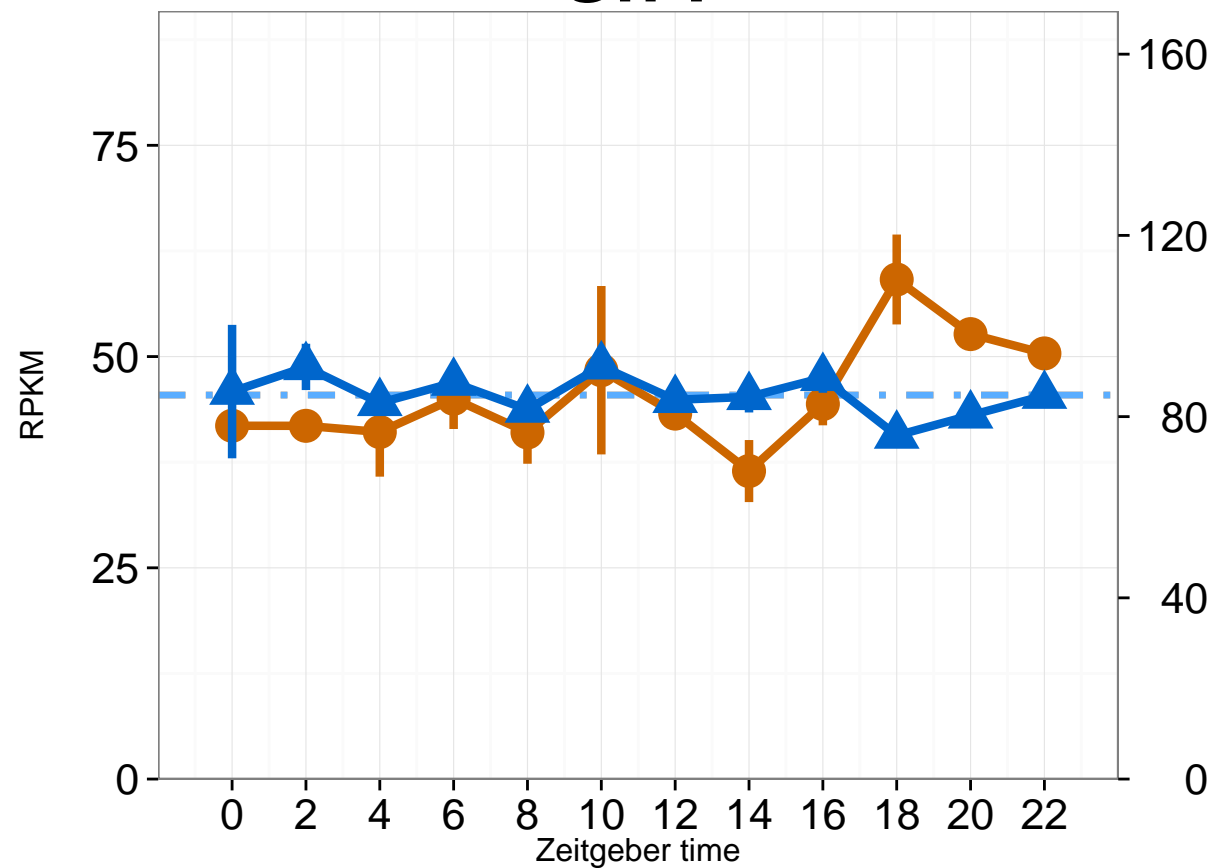

## Sfr1

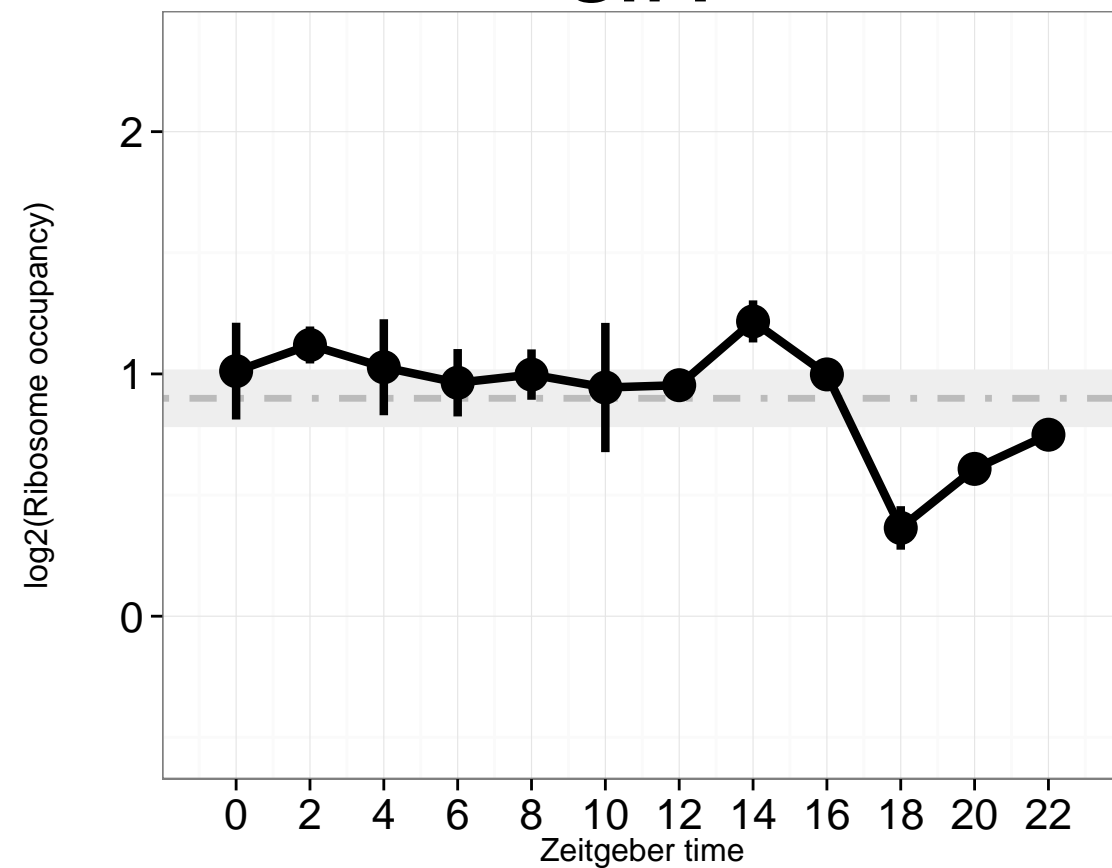

Supplement: Supplementary file 9279 [file 1]

# Scand1

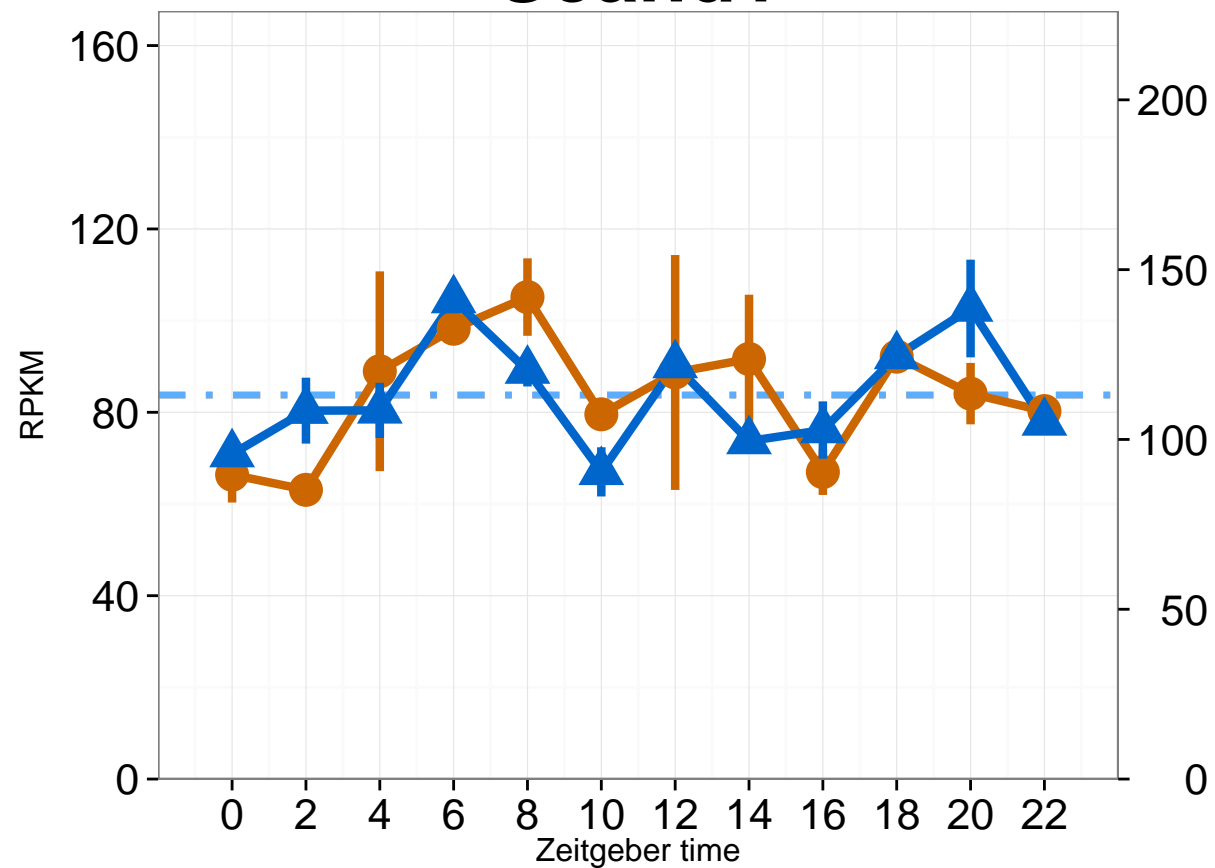

# Scand1

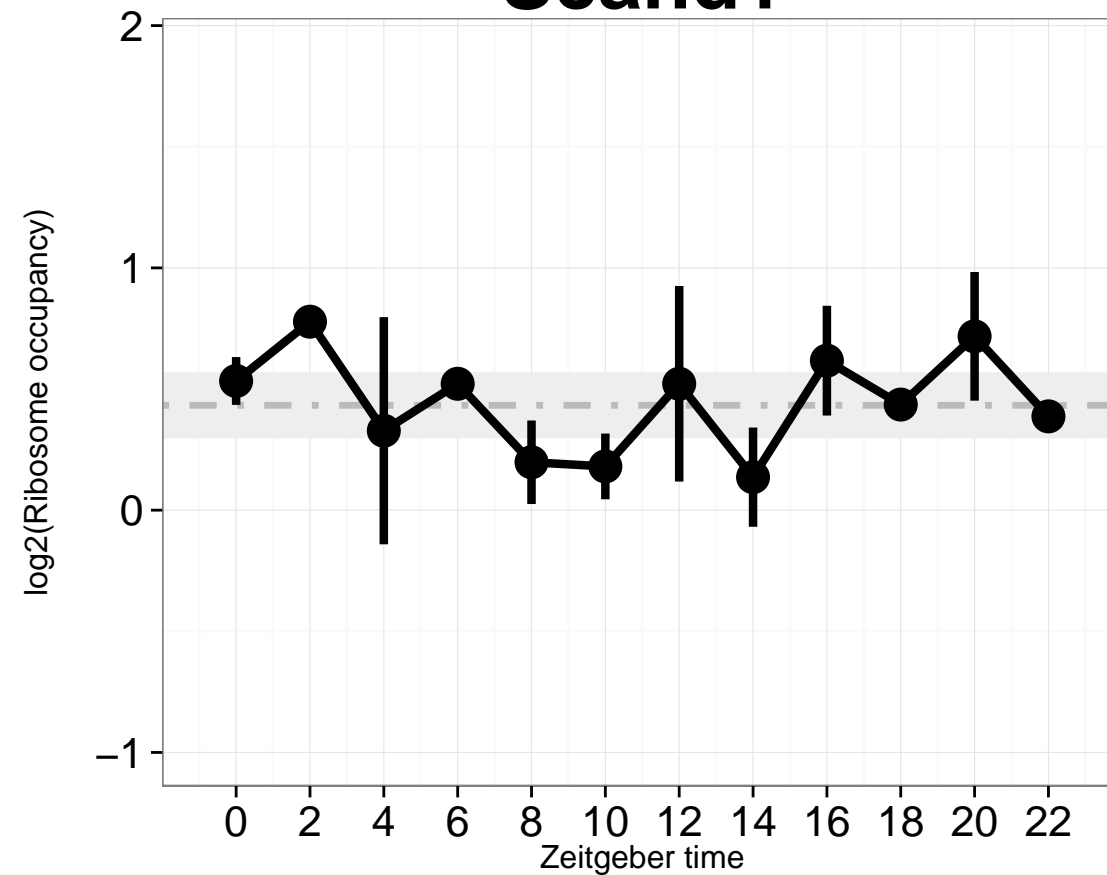

Supplement: Supplementary file 9280 [file 1]

# Gm4952

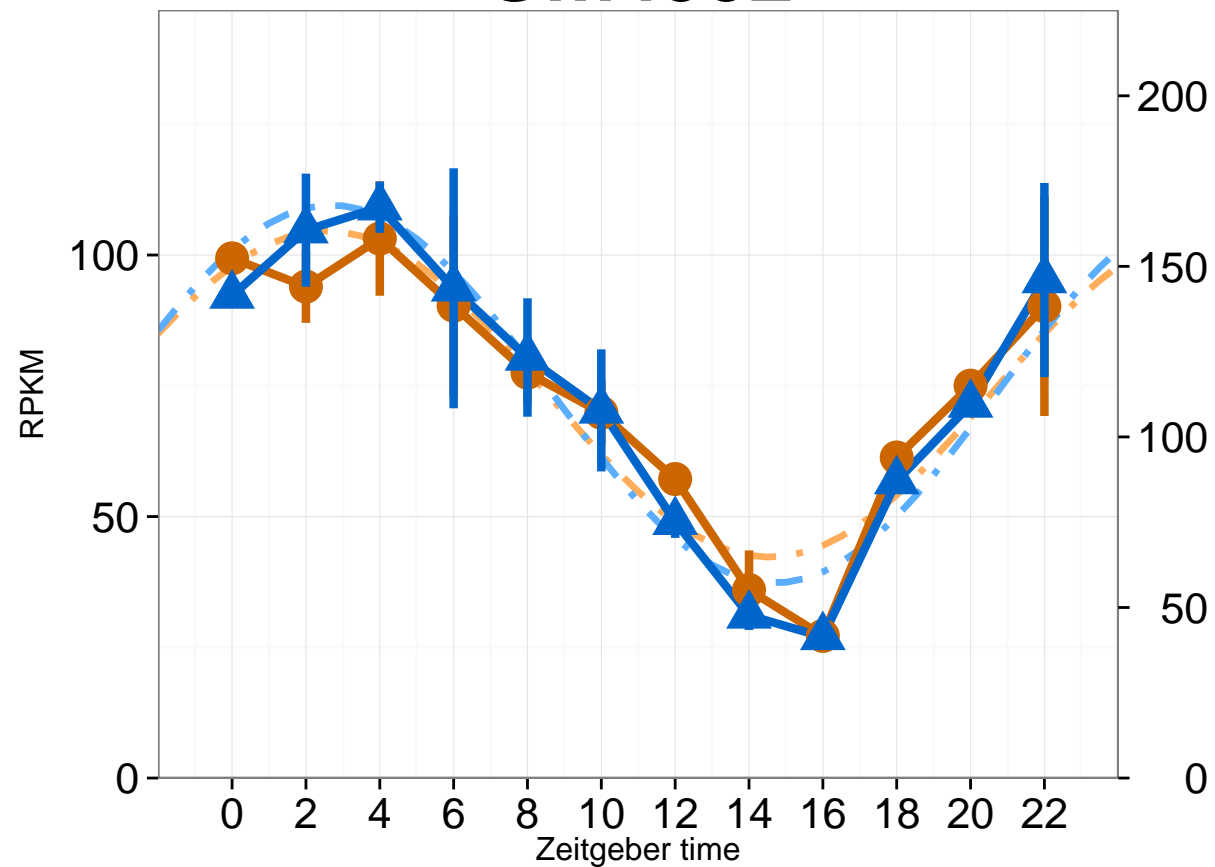

# Gm4952

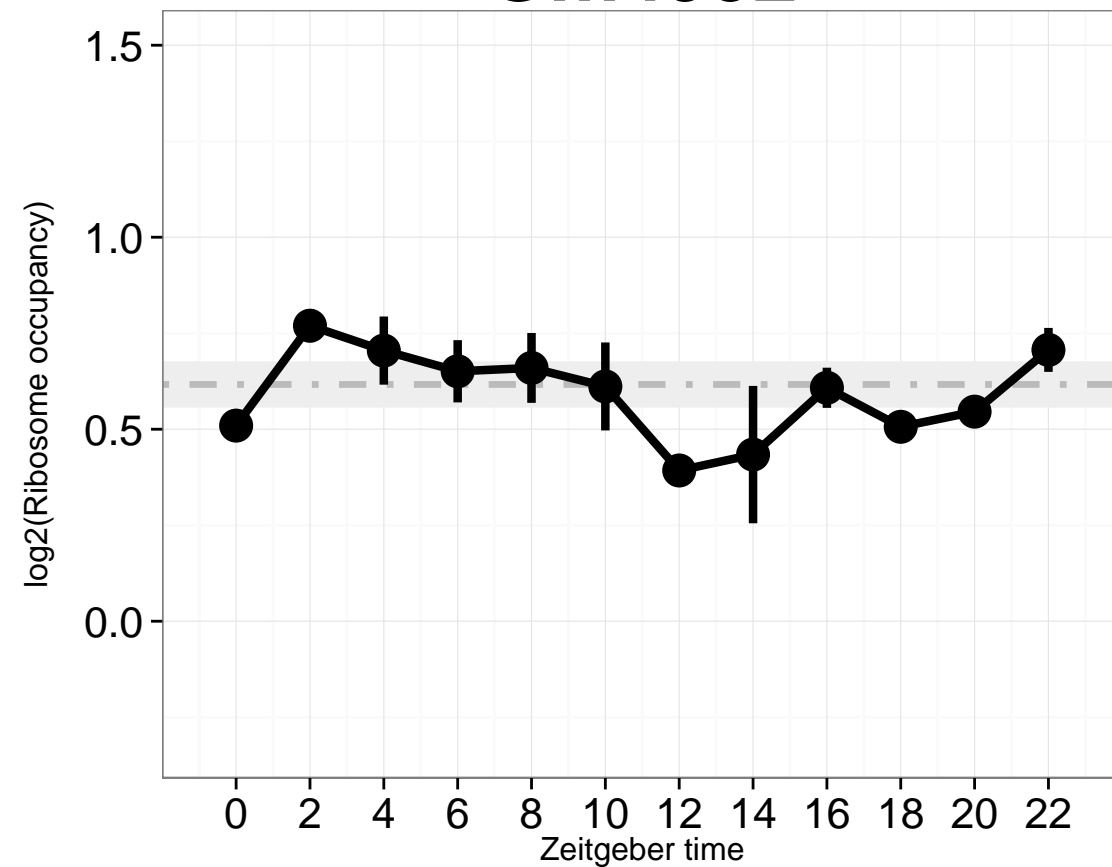

Supplement: Supplementary file 9281 [file 1]

**Wt1**

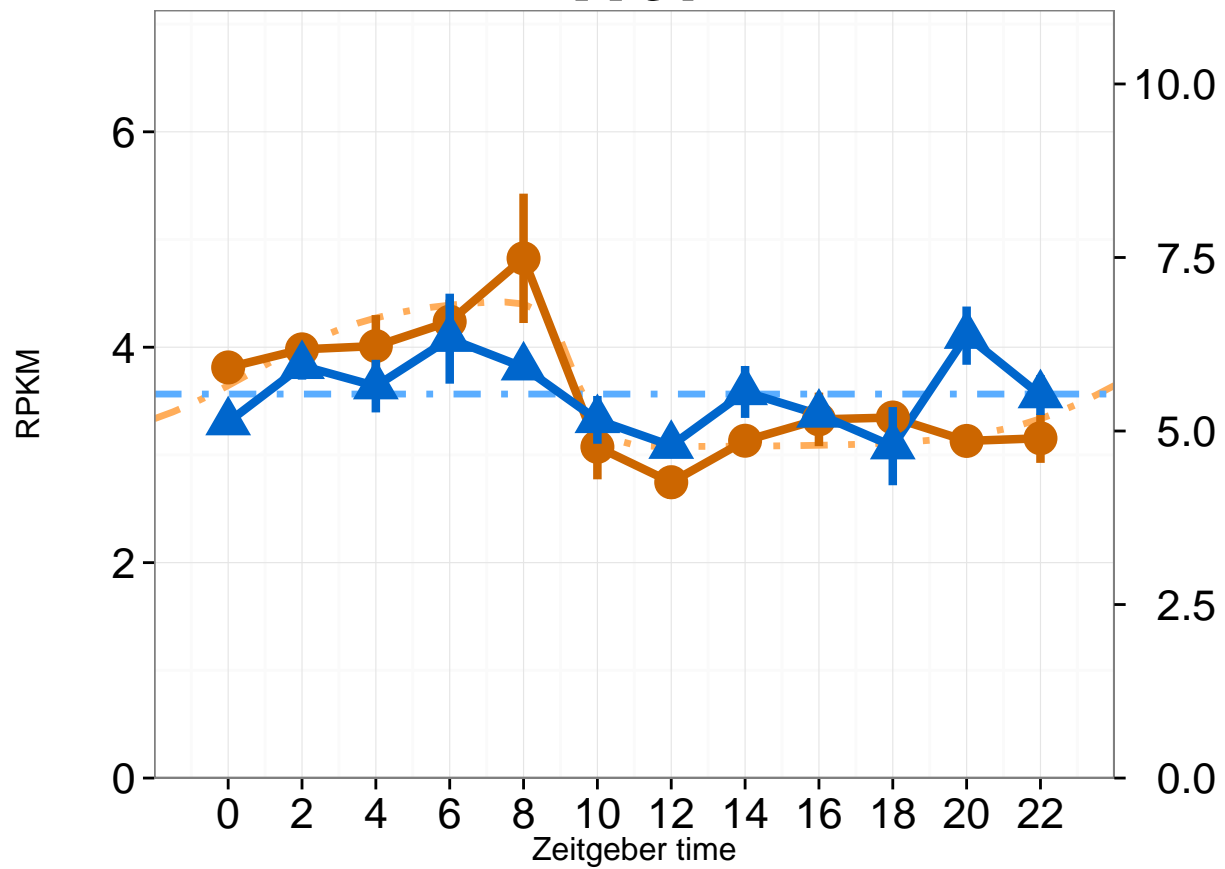

**Wt1**

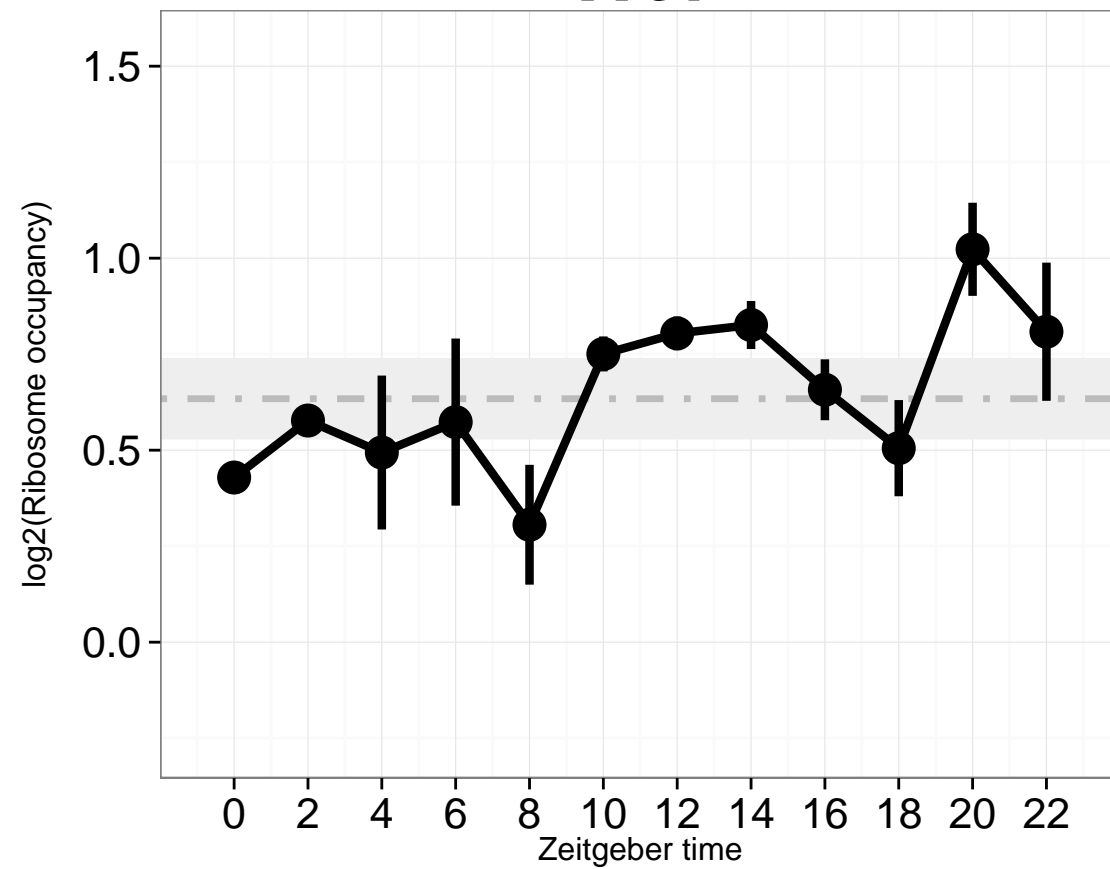

Supplement: Supplementary file 9282 [file 1]

## Mpp6

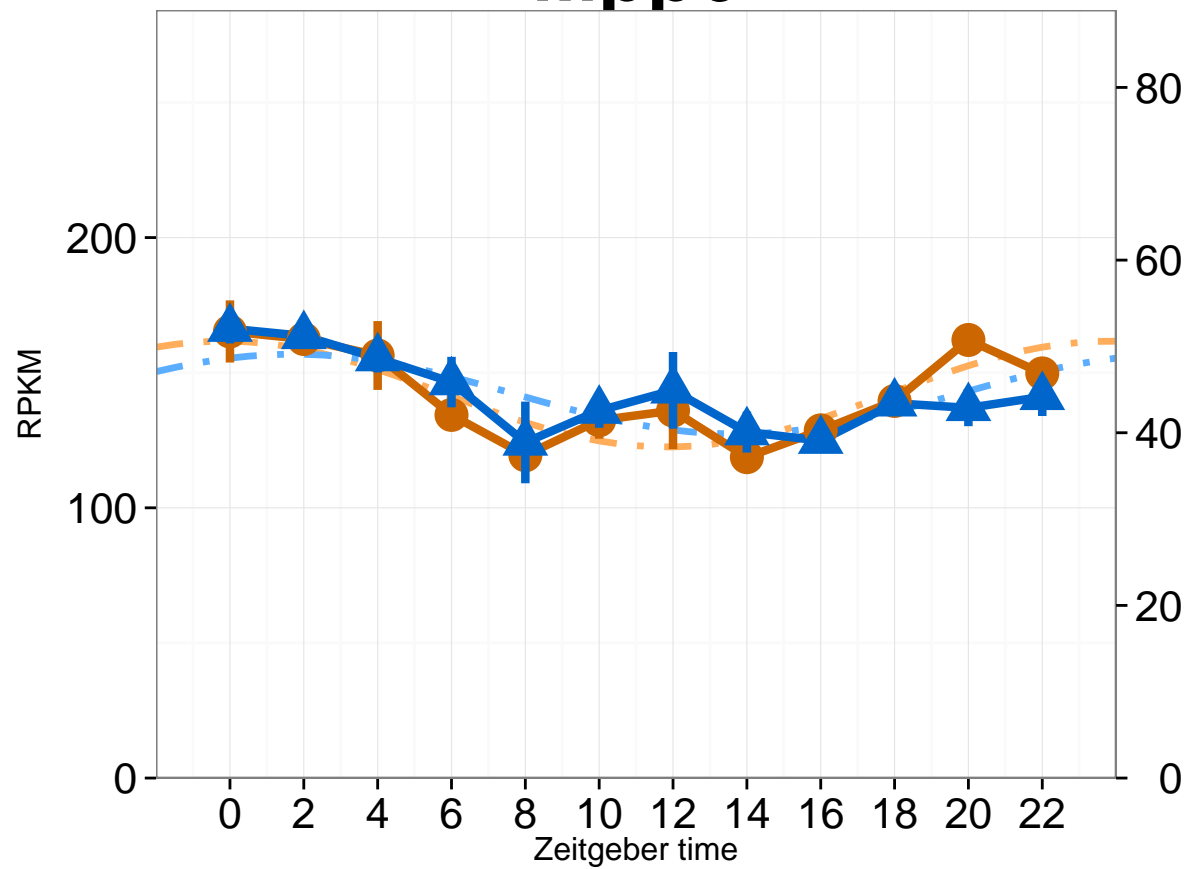

## Mpp6

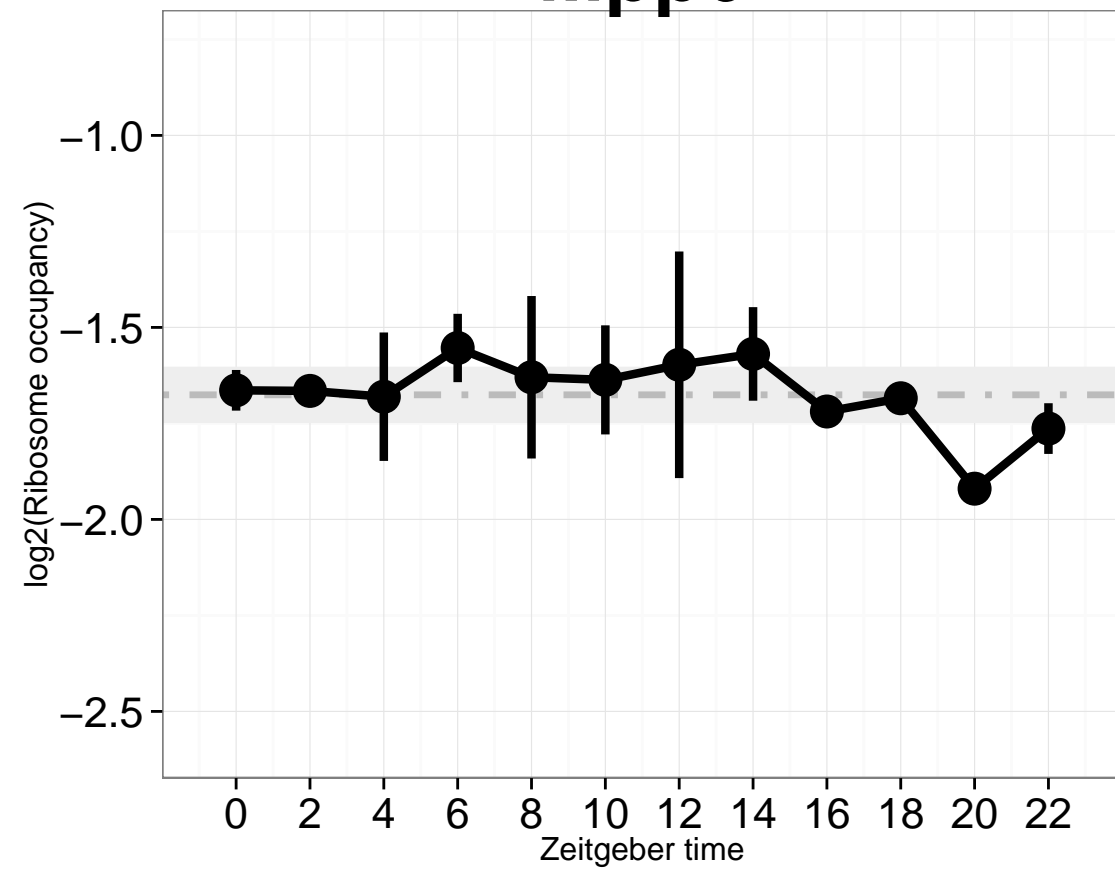

Supplement: Supplementary file 9283 [file 1]

## Add1

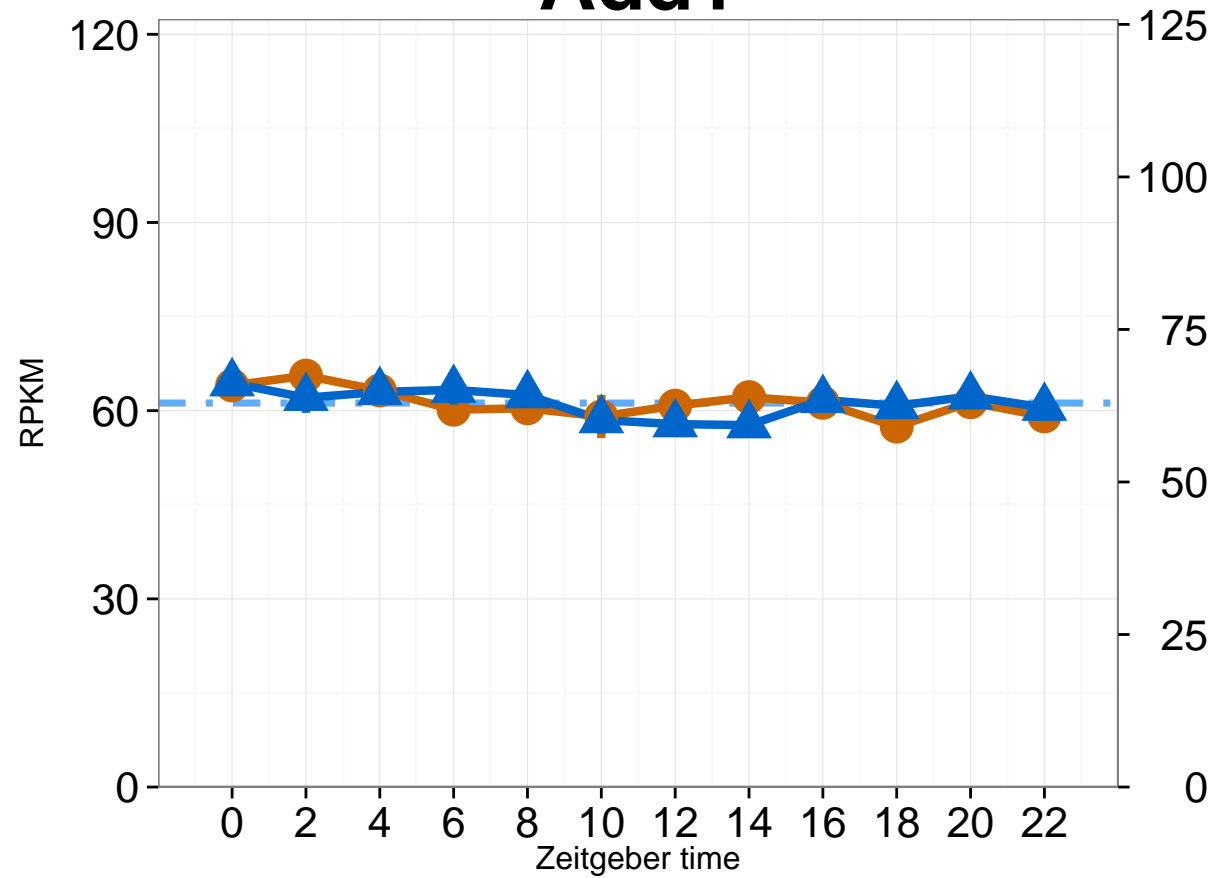

## Add1

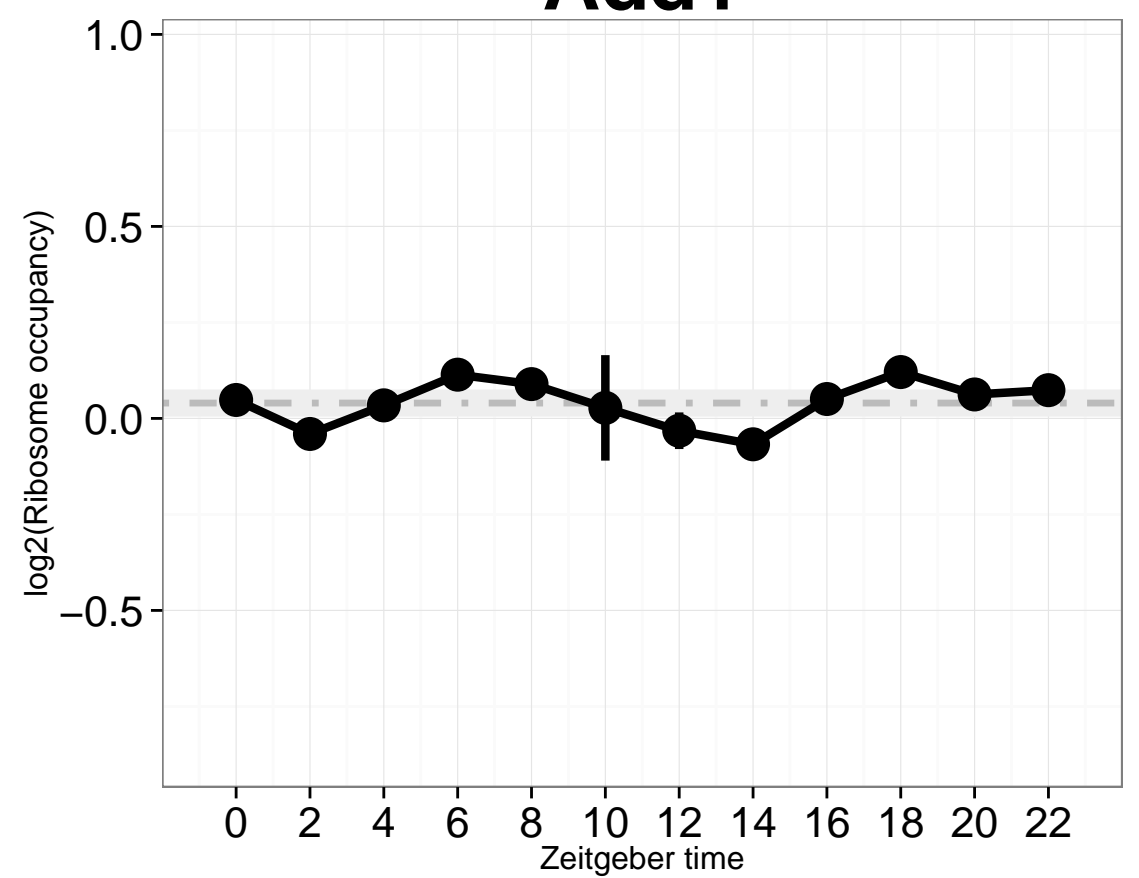

Supplement: Supplementary file 9284 [file 1]

## Rab18

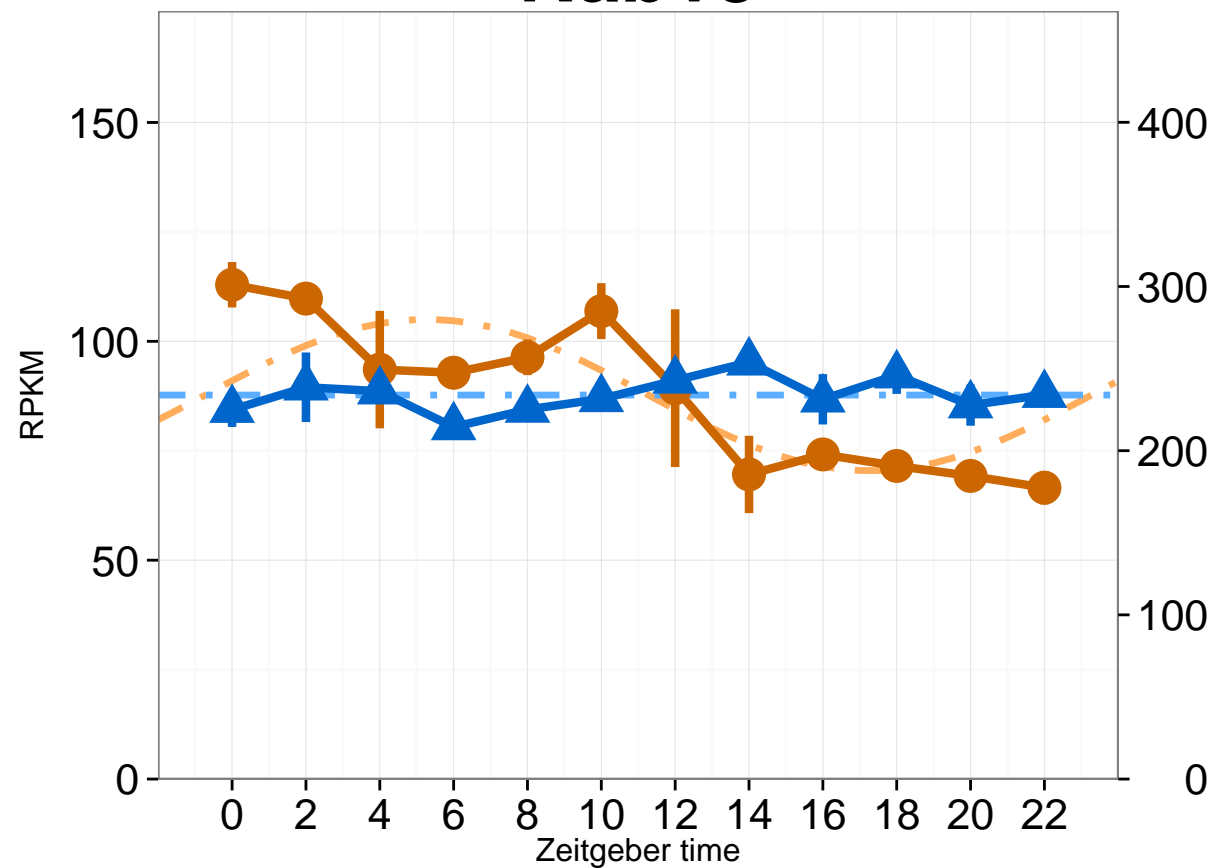

## Rab18

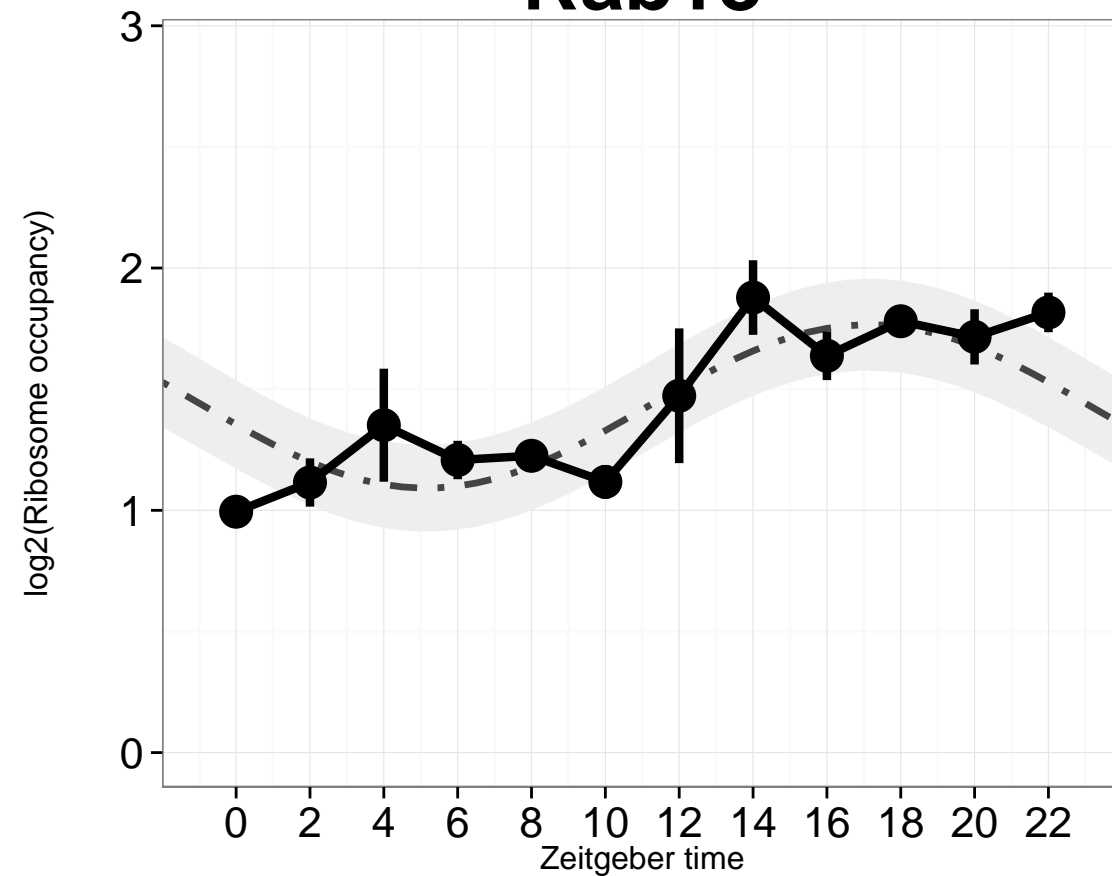

Supplement: Supplementary file 9285 [file 1]

# Cenpf

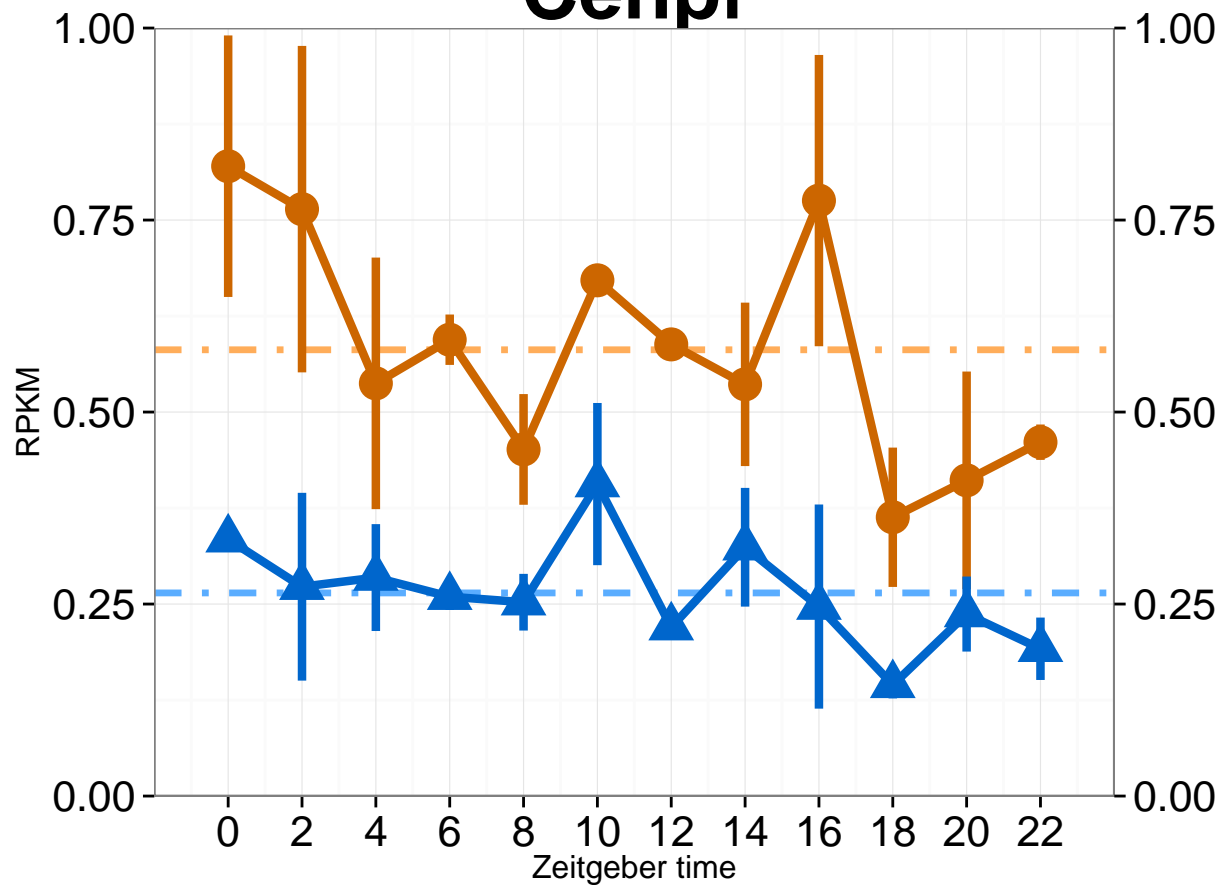

# Cenpf

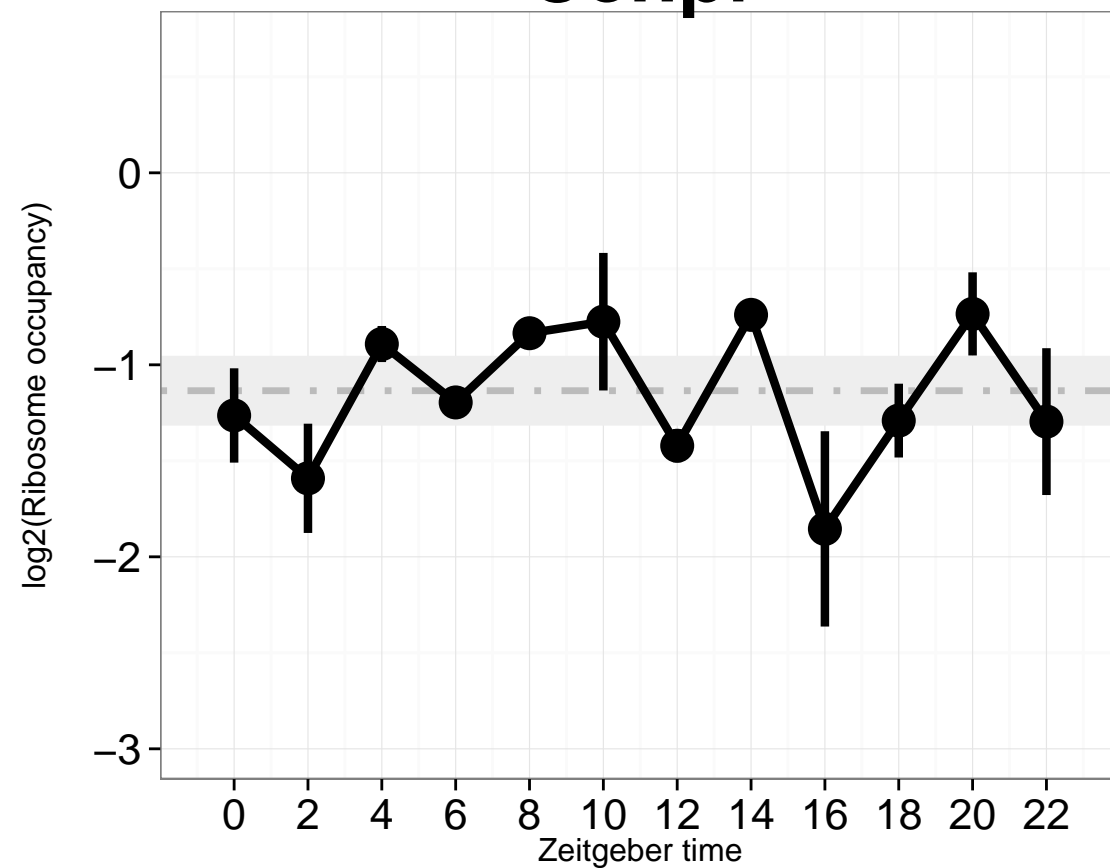

Supplement: Supplementary file 9286 [file 1]

## Jmjd4

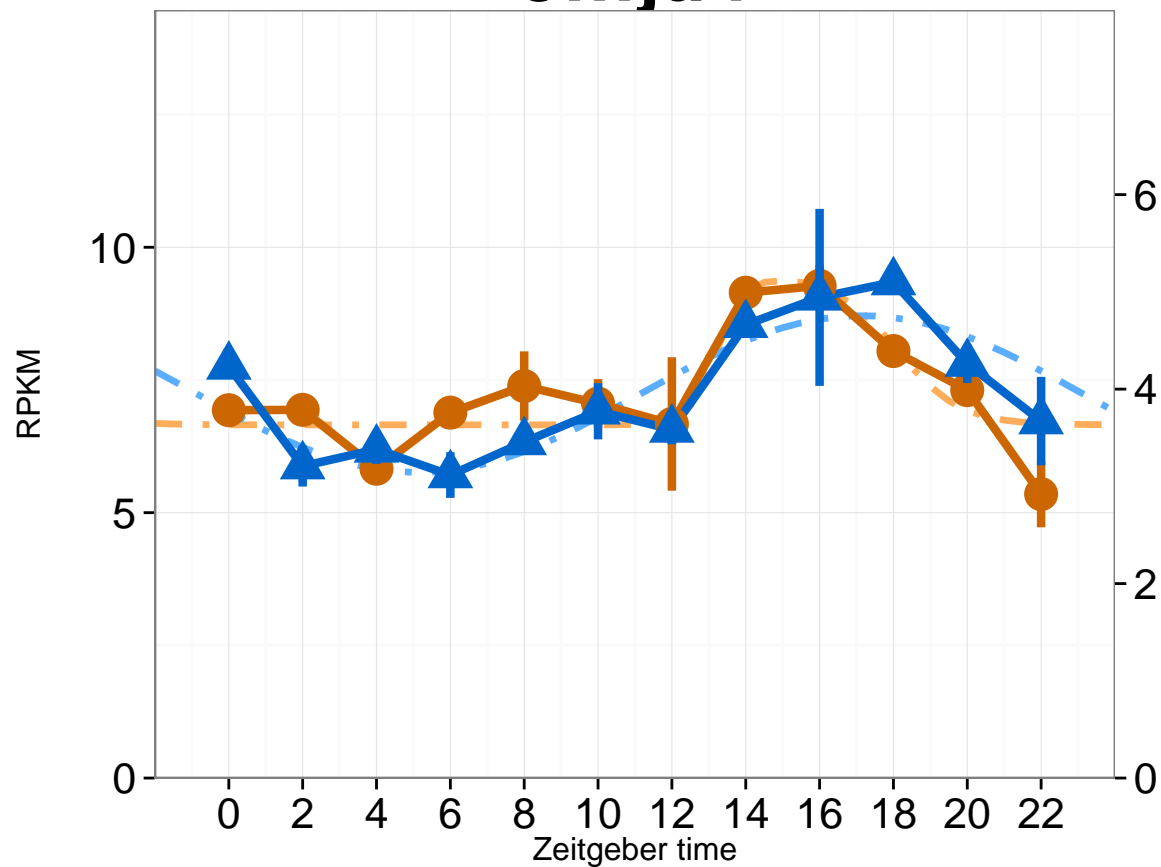

## Jmjd4

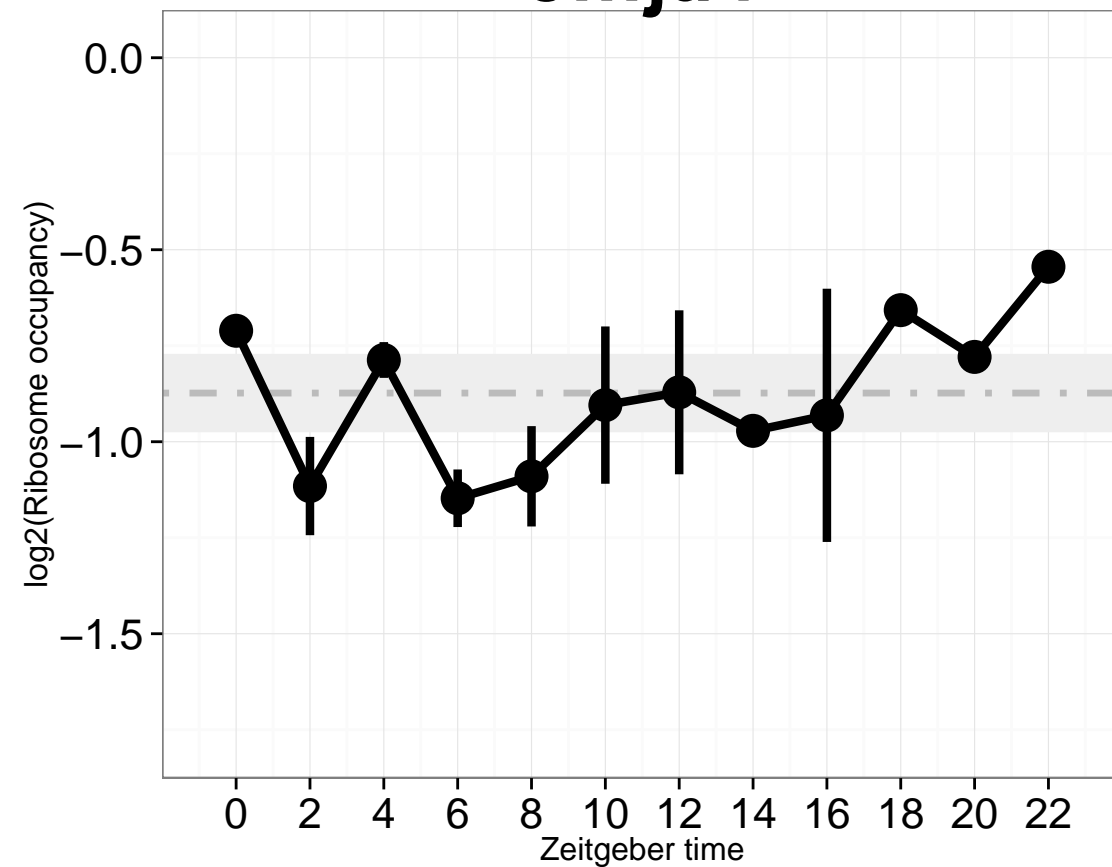

Supplement: Supplementary file 9287 [file 1]

# Zfp36

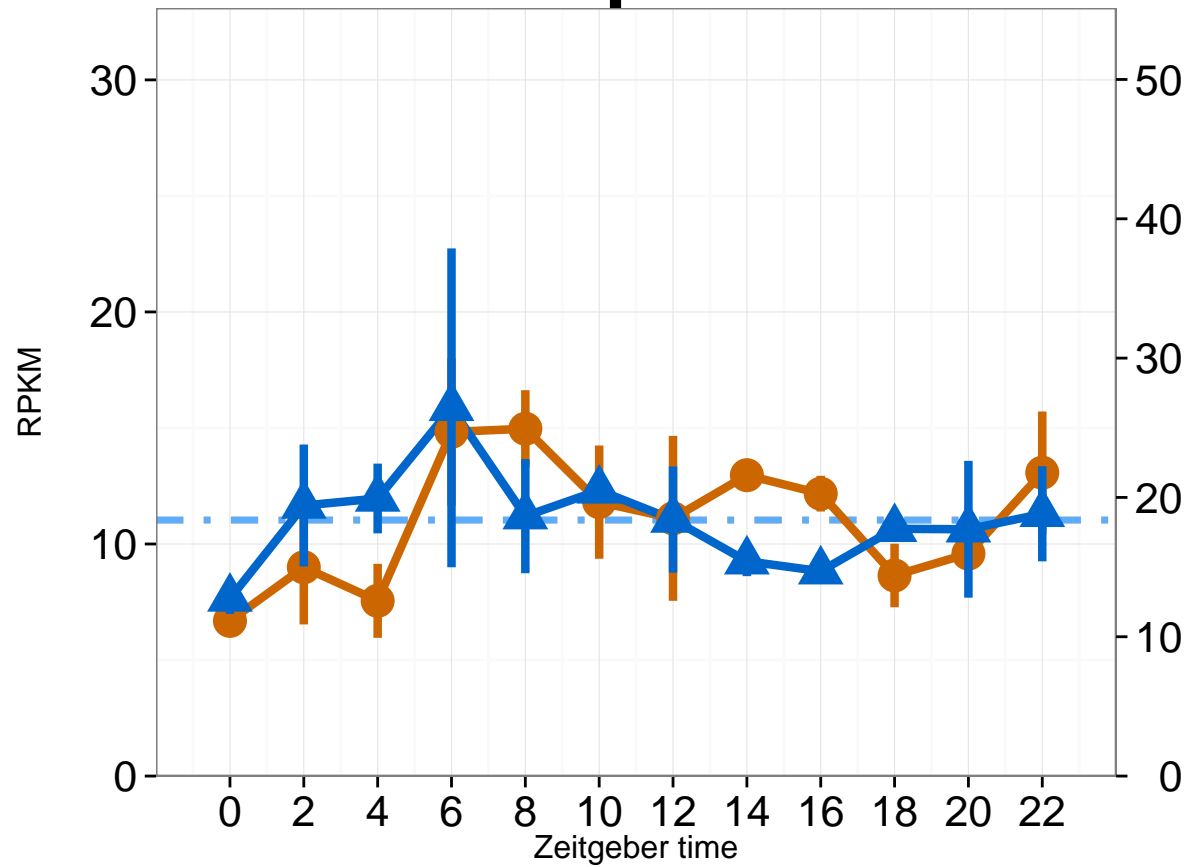

# Zfp36

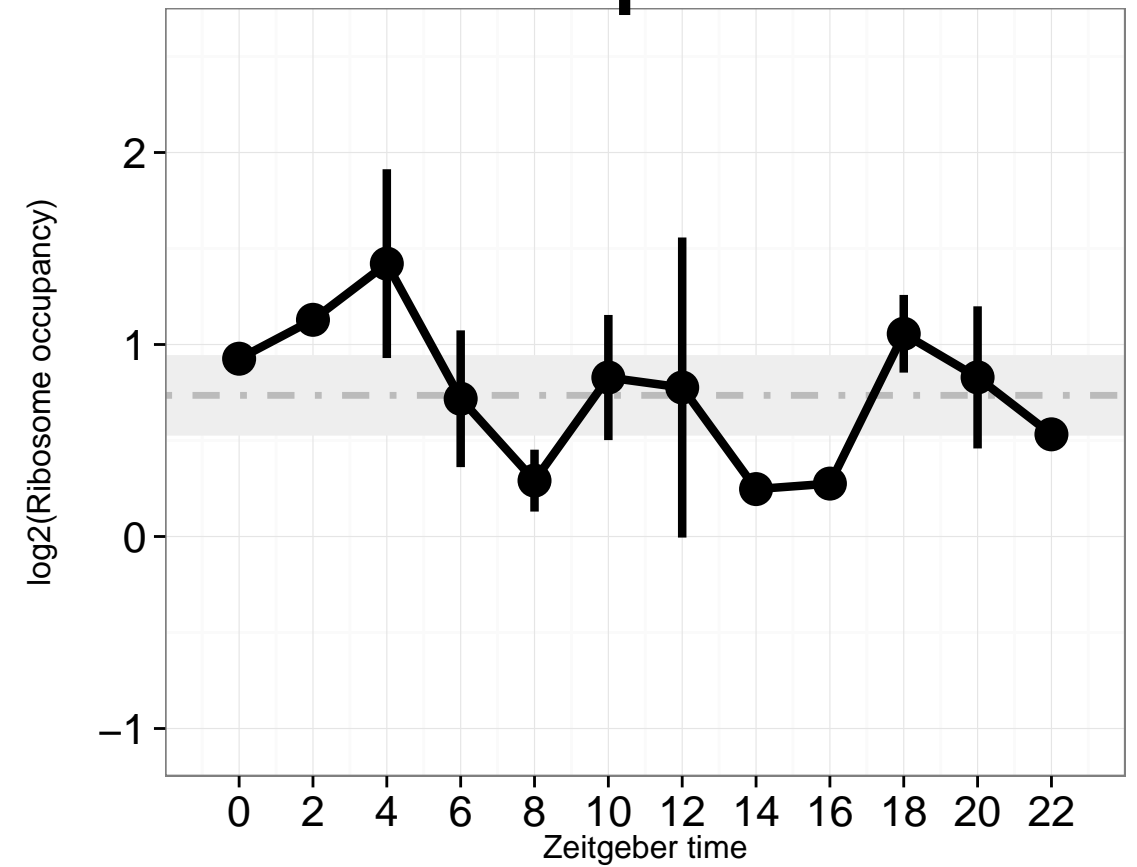

Supplement: Supplementary file 9288 [file 1]

## Prdx2

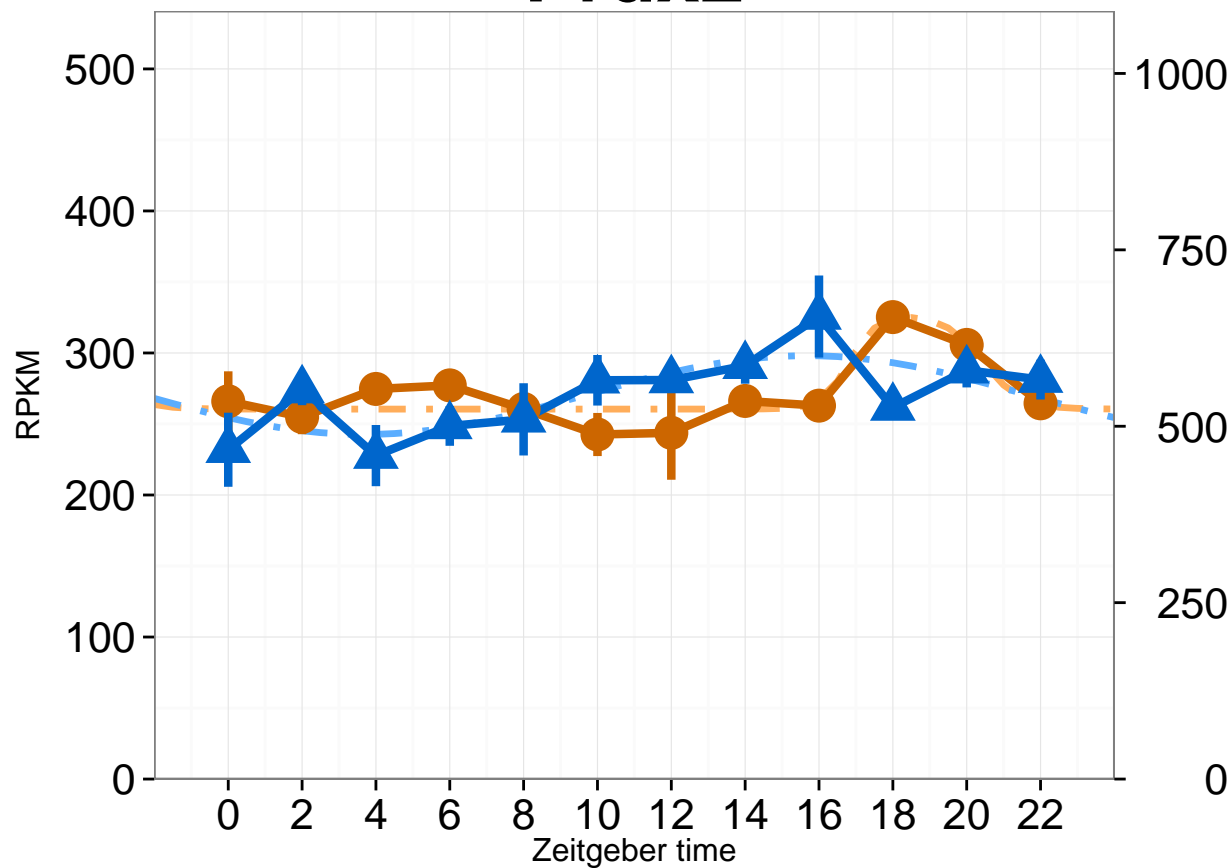

## Prdx2

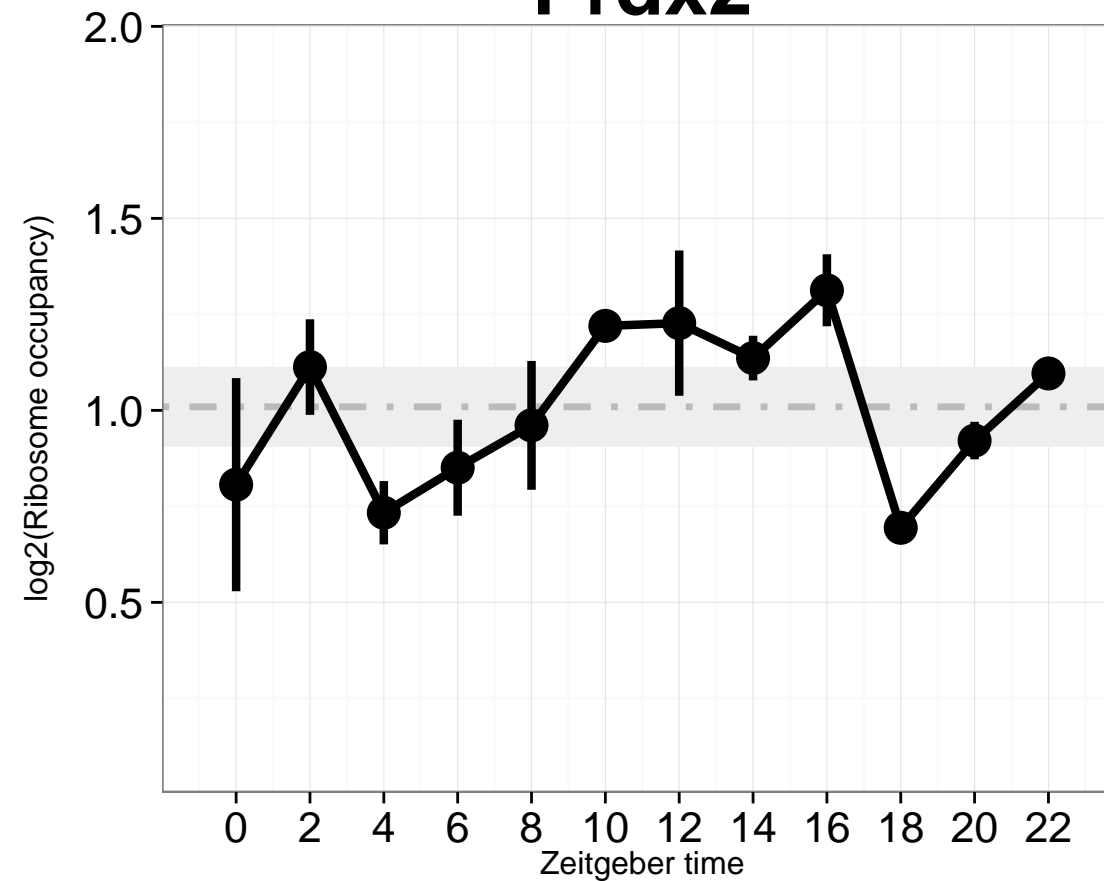

Supplement: Supplementary file 9289 [file 1]

# 2610034B18Rik

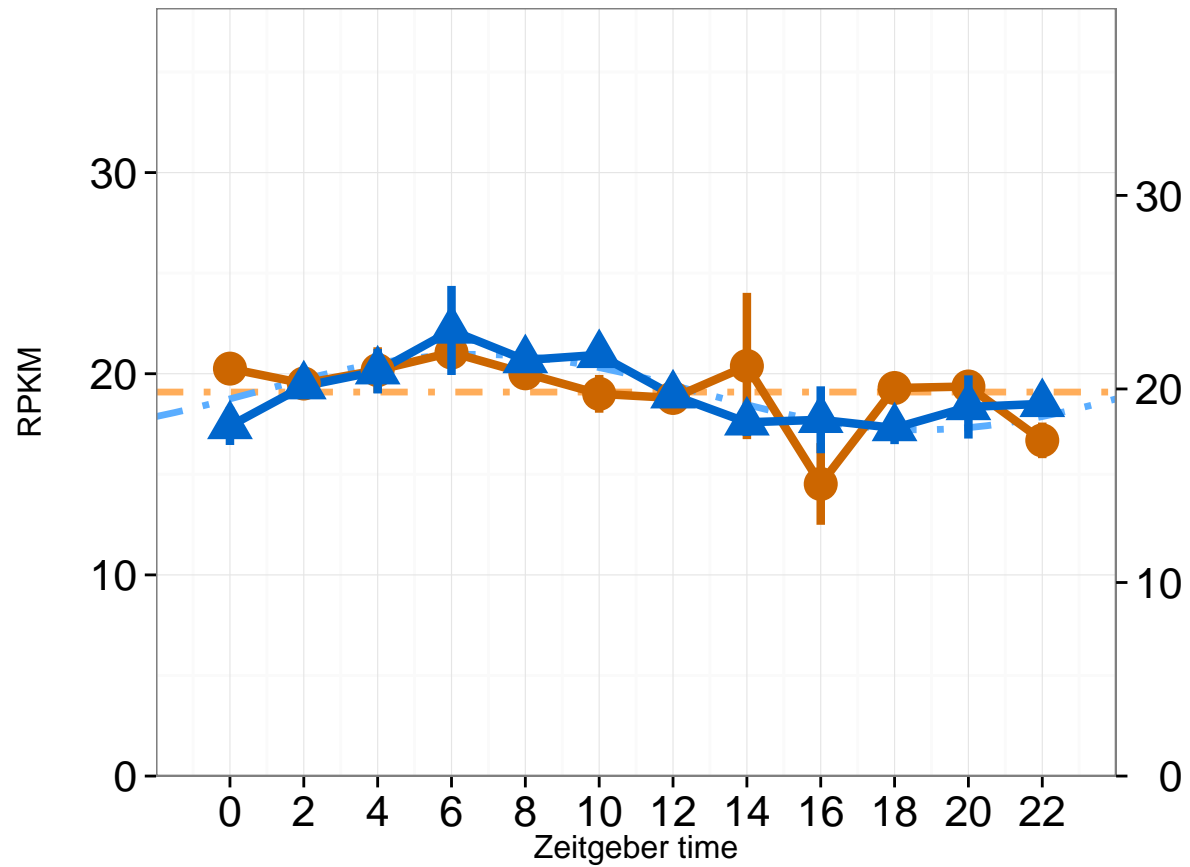

# 2610034B18Rik

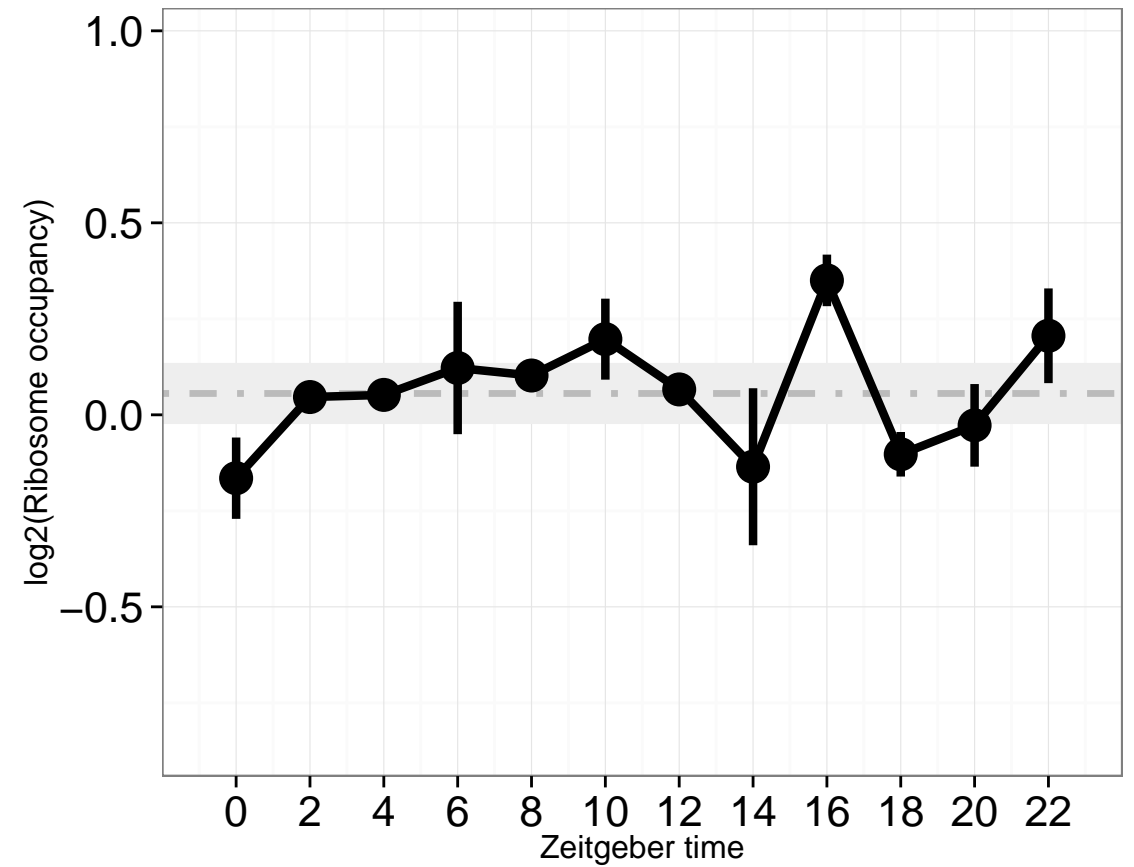

Supplement: Supplementary file 9290 [file 1]

# Slc25a26

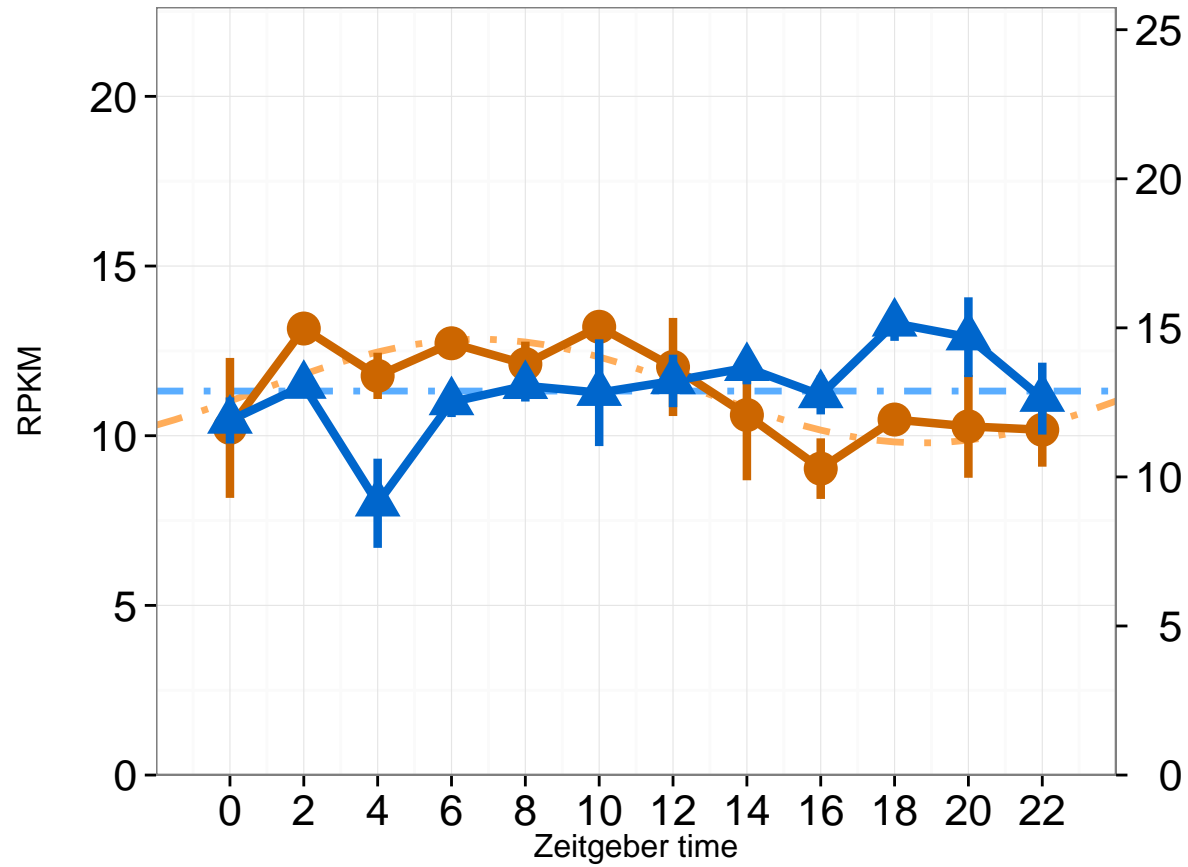

# Slc25a26

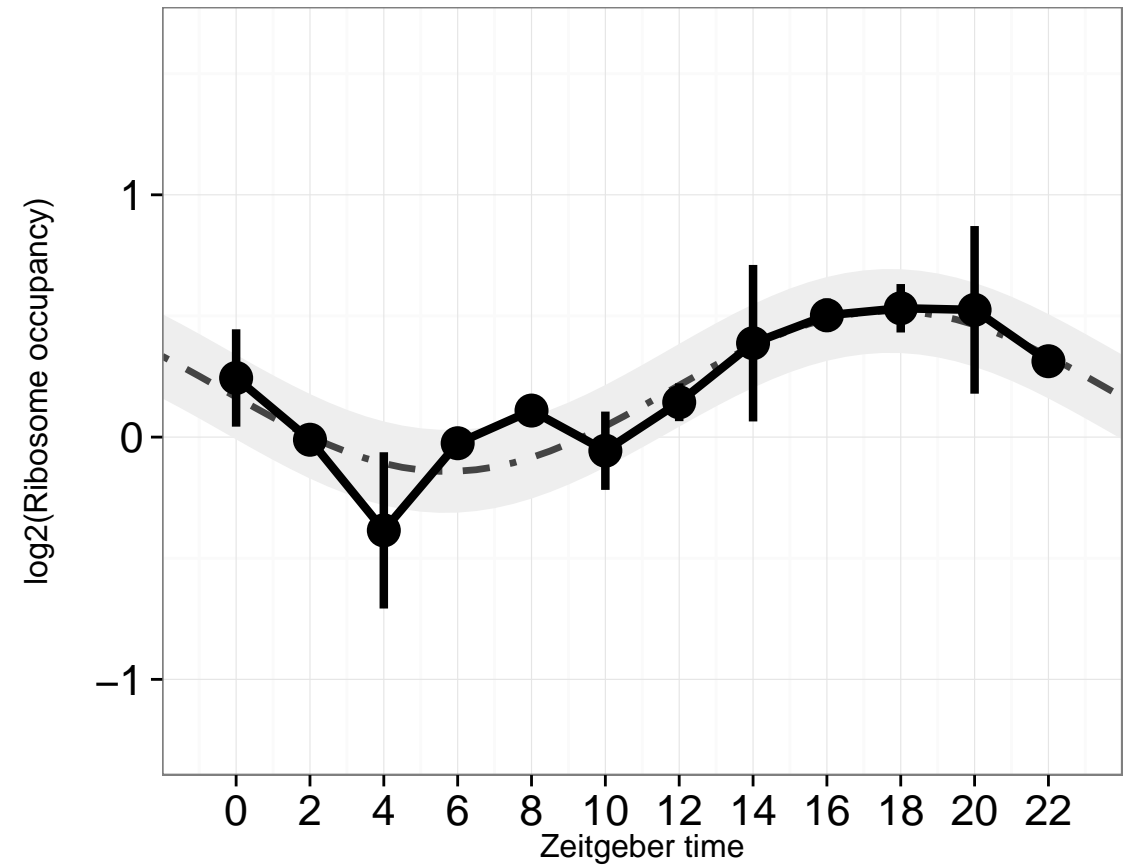

Supplement: Supplementary file 9291 [file 1]

## Ngfrap1

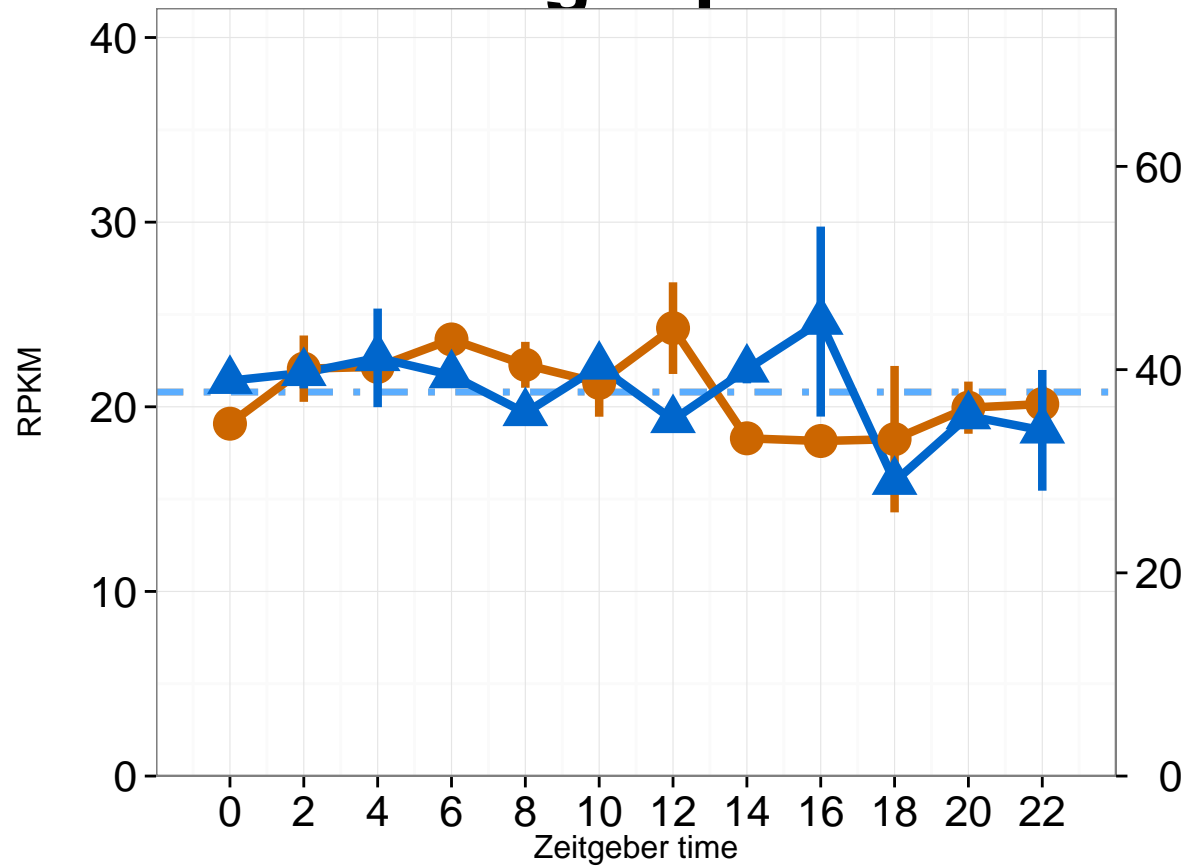

## Ngfrap1

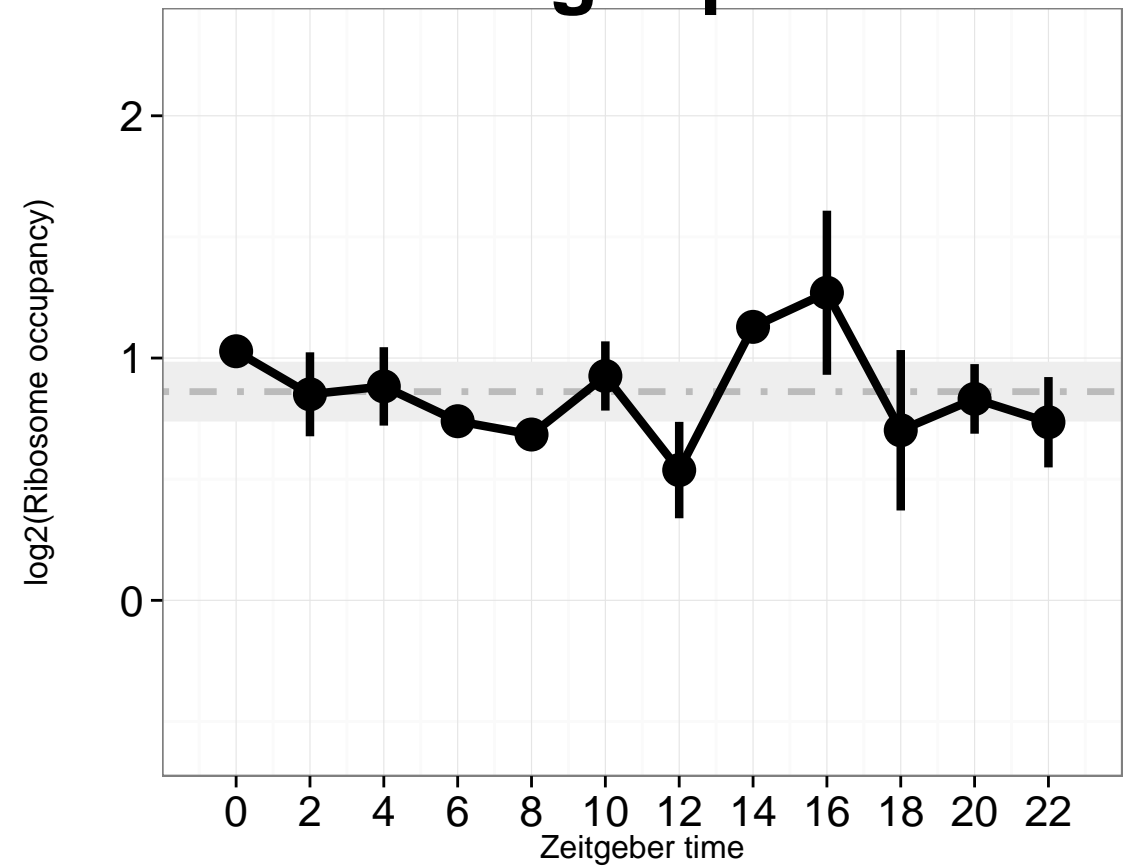

Supplement: Supplementary file 9292 [file 1]

## Cr1l

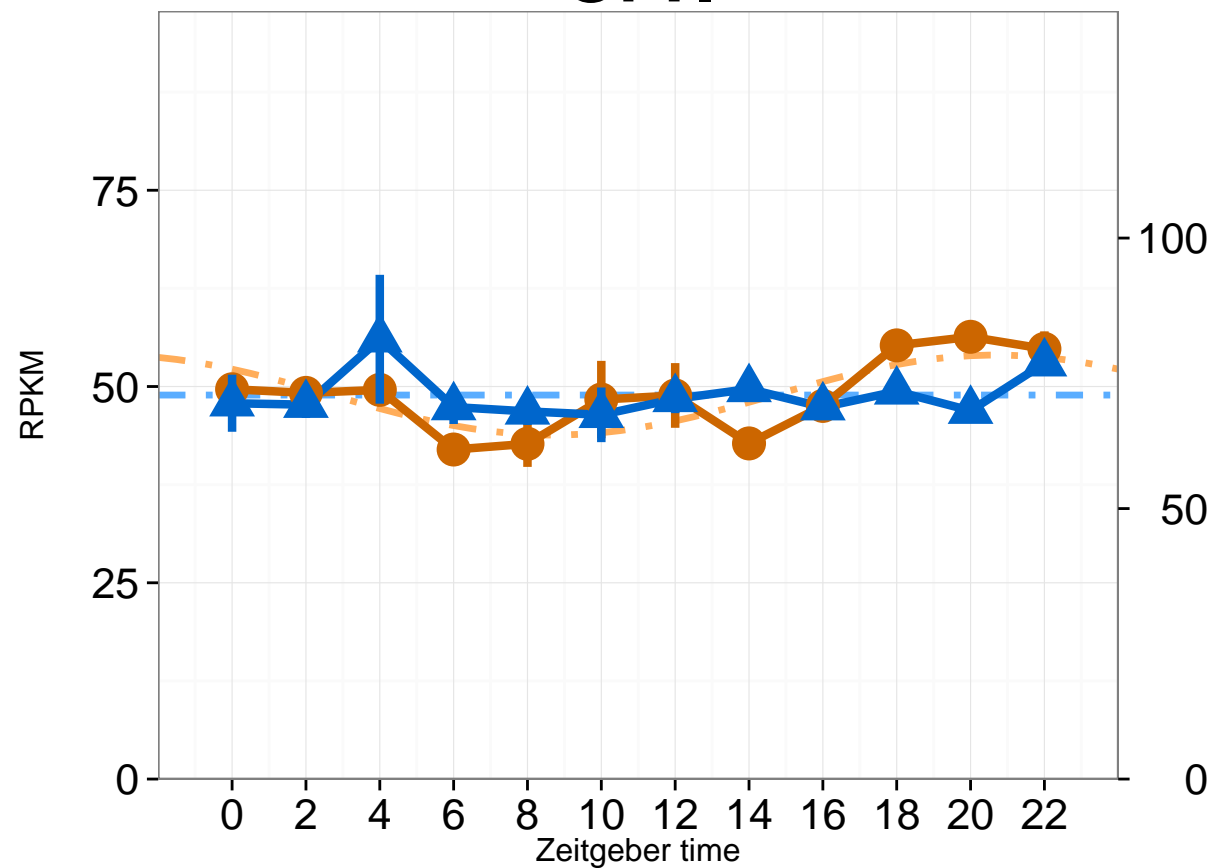

## Cr1l

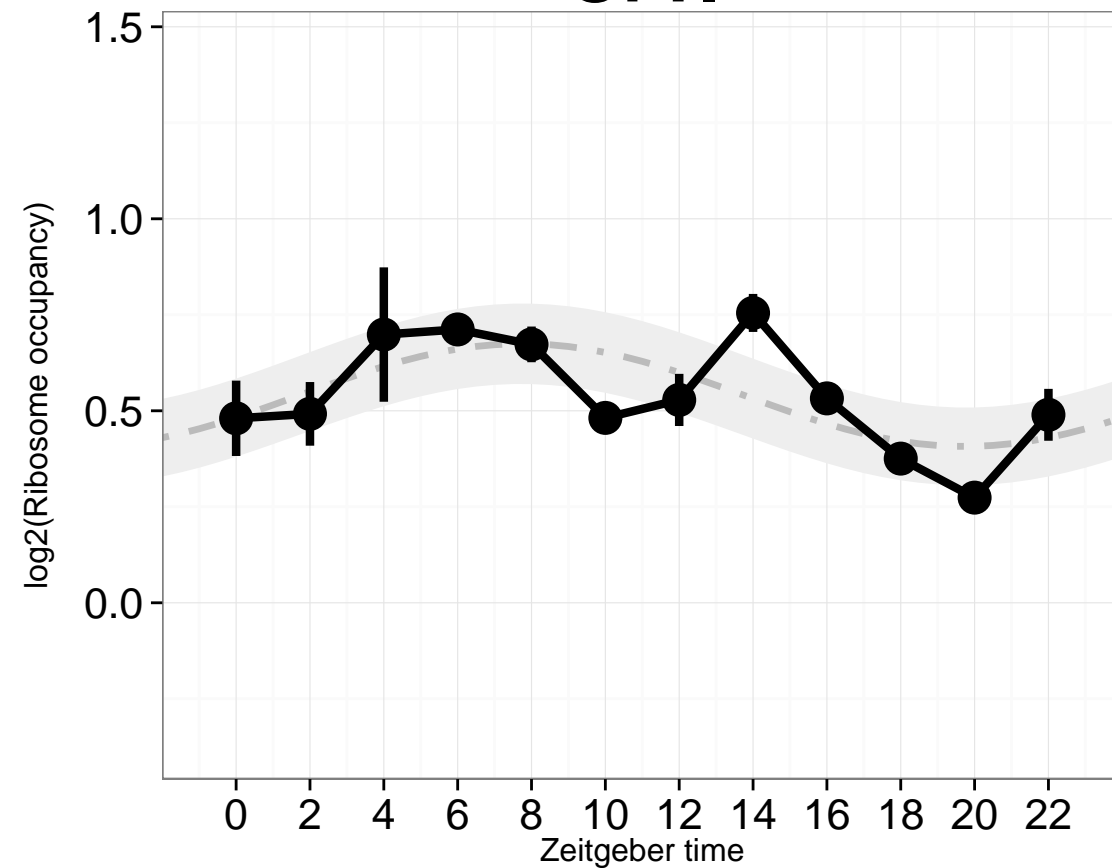

Supplement: Supplementary file 9293 [file 1]

# Tmem160

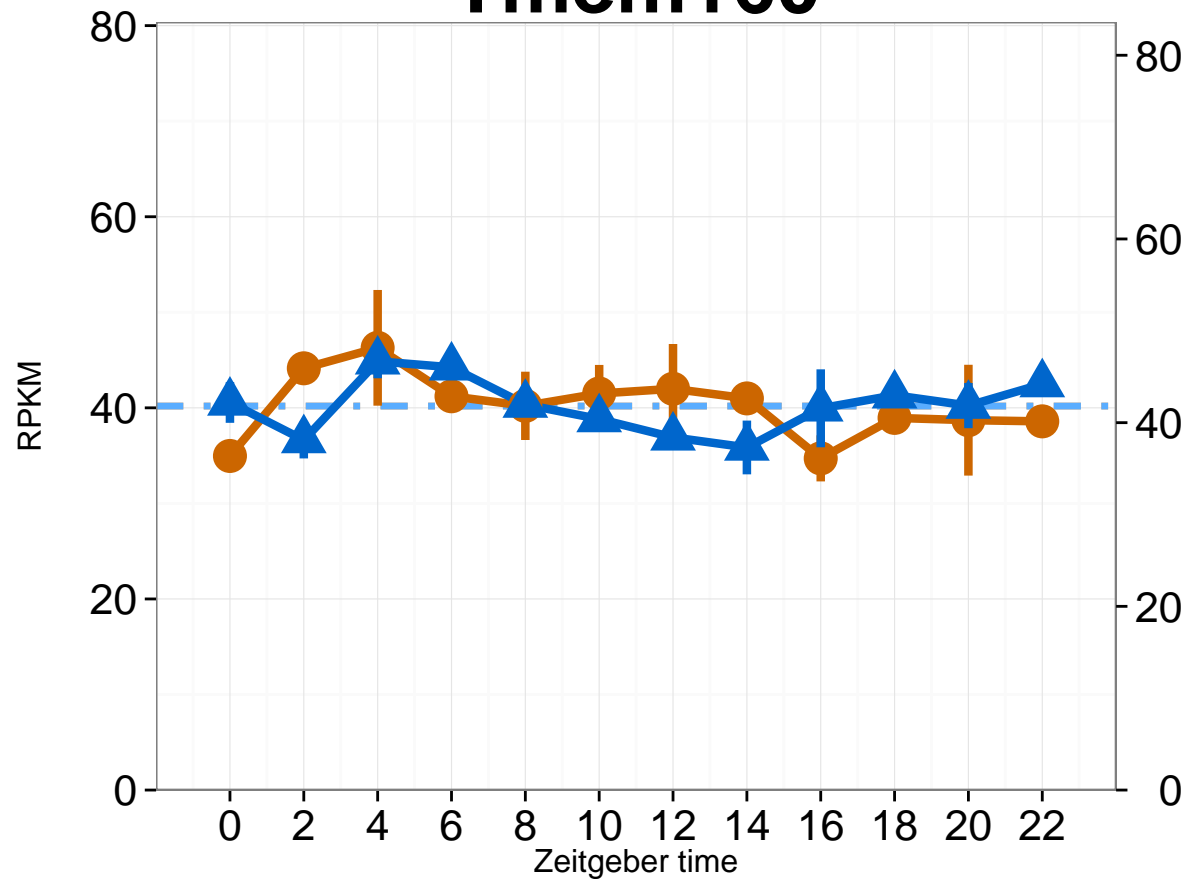

# Tmem160

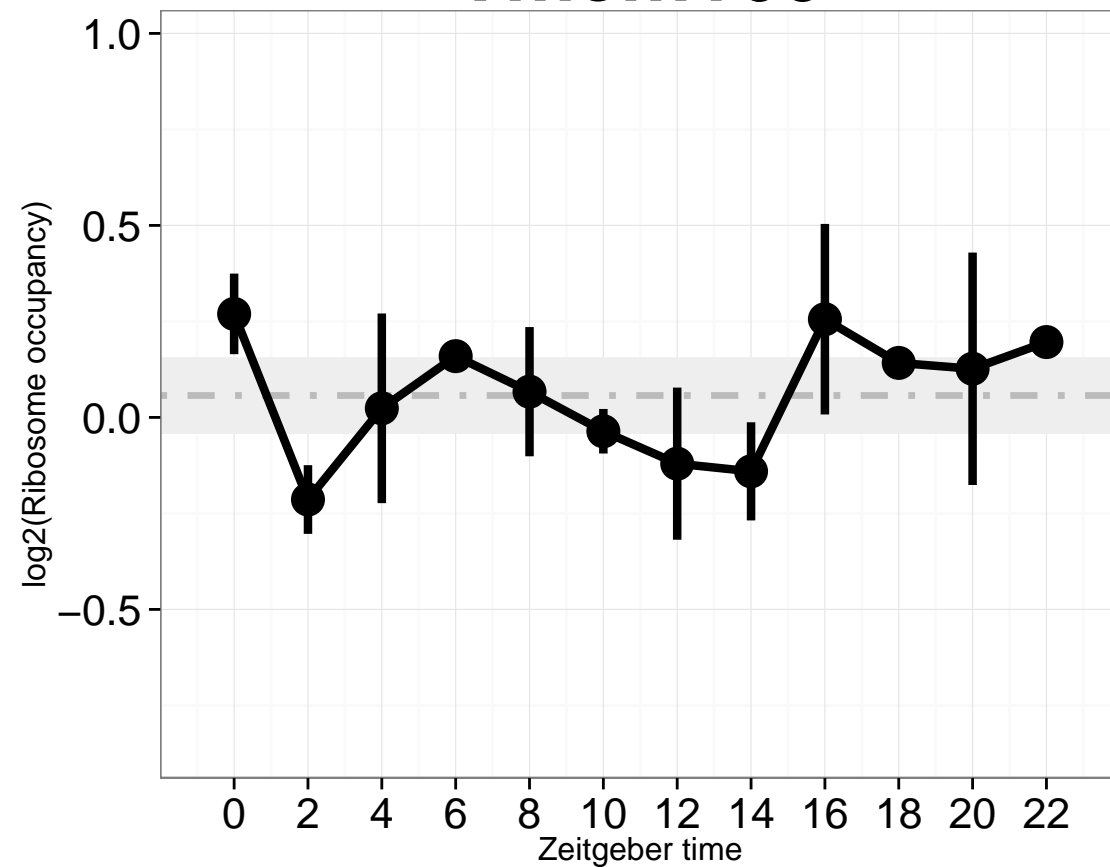

Supplement: Supplementary file 9294 [file 1]

# Gpr160

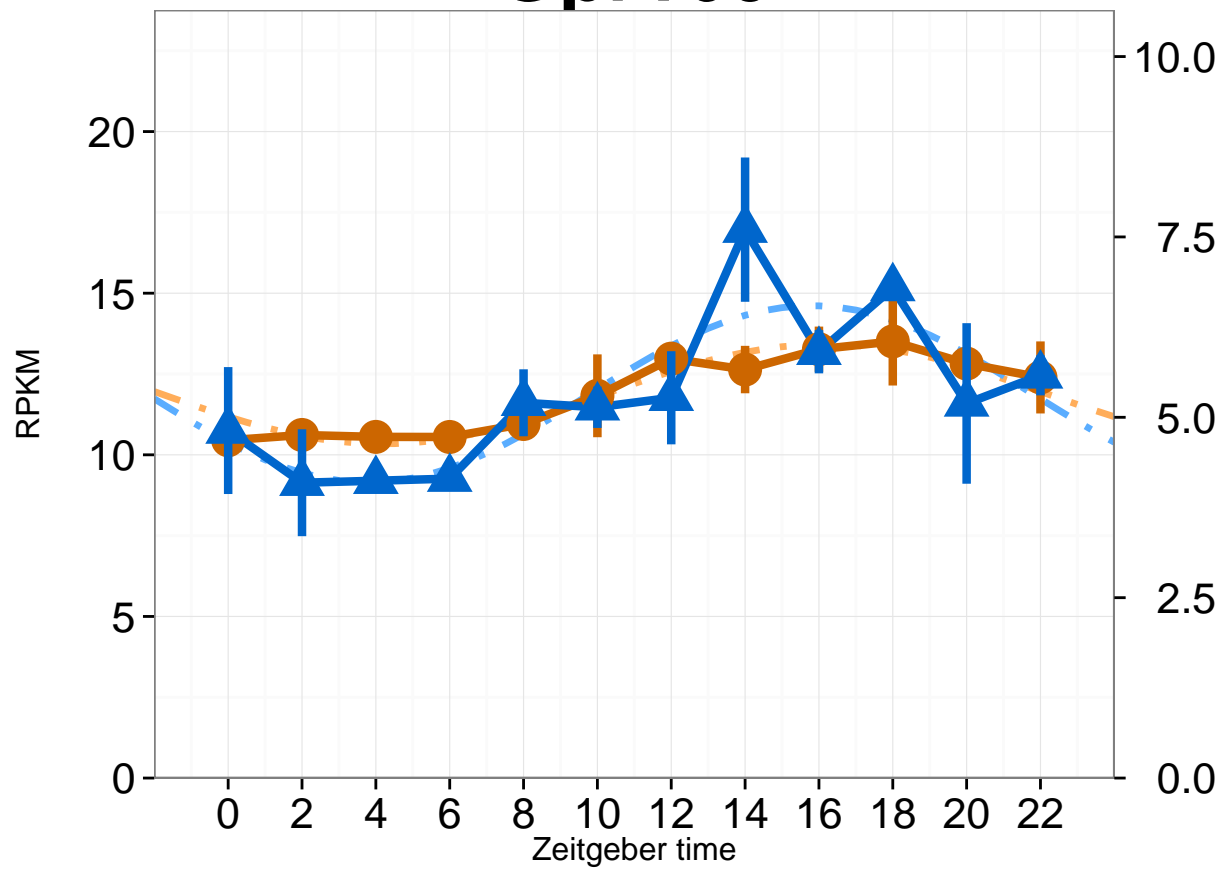

# Gpr160

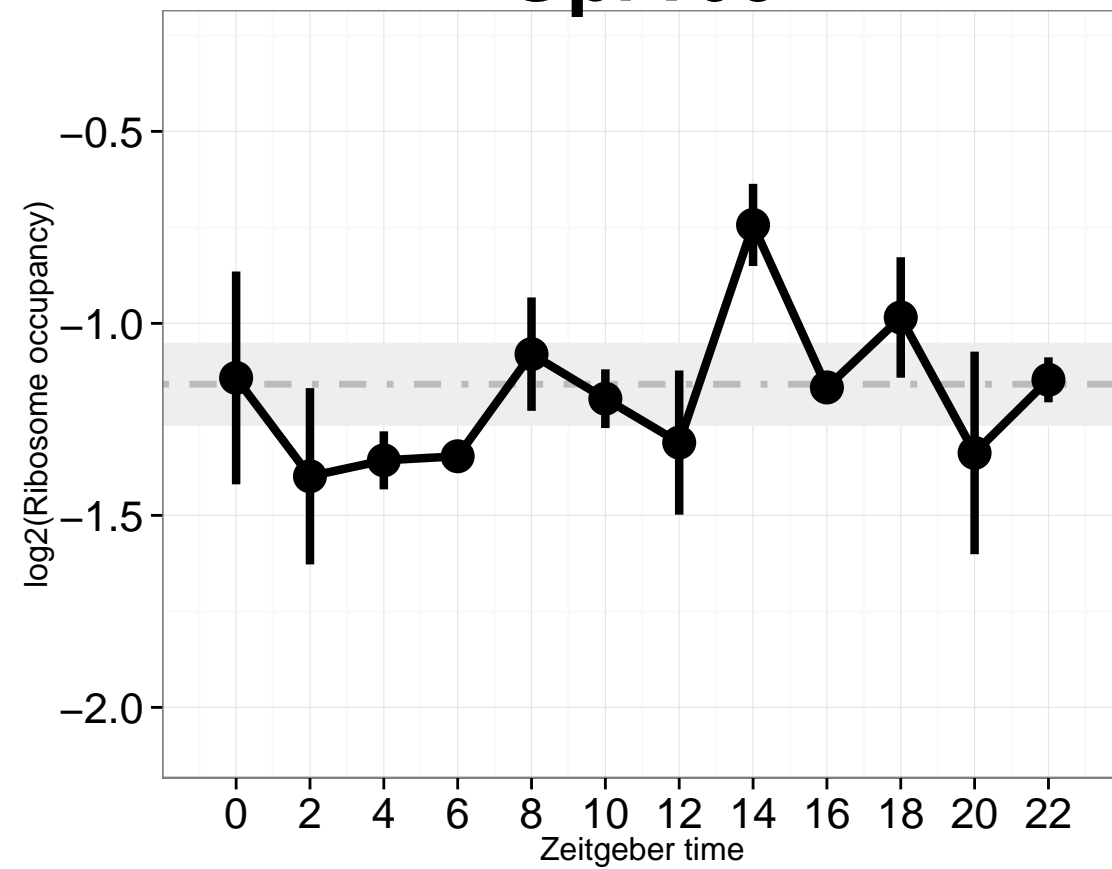

Supplement: Supplementary file 9295 [file 1]

mt-Nd2

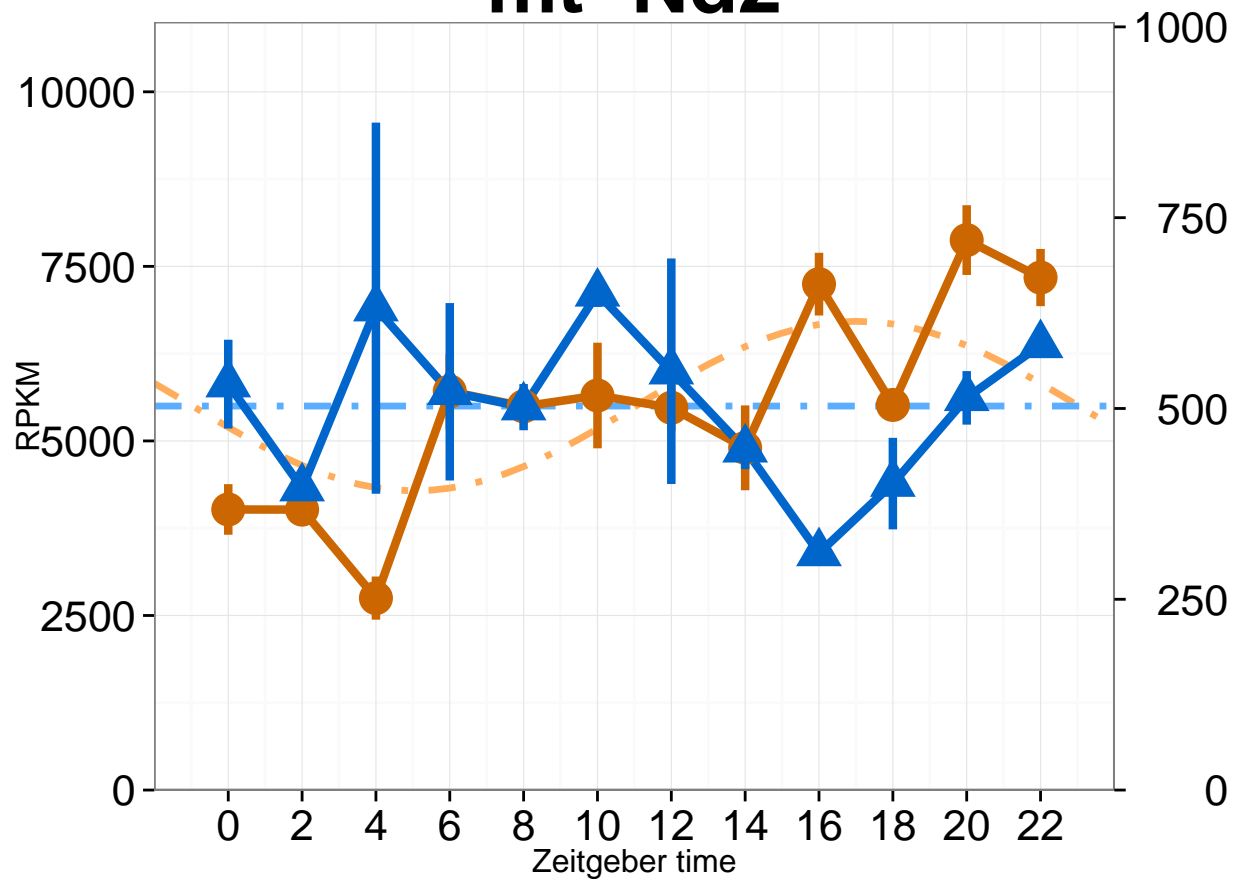

mt-Nd2

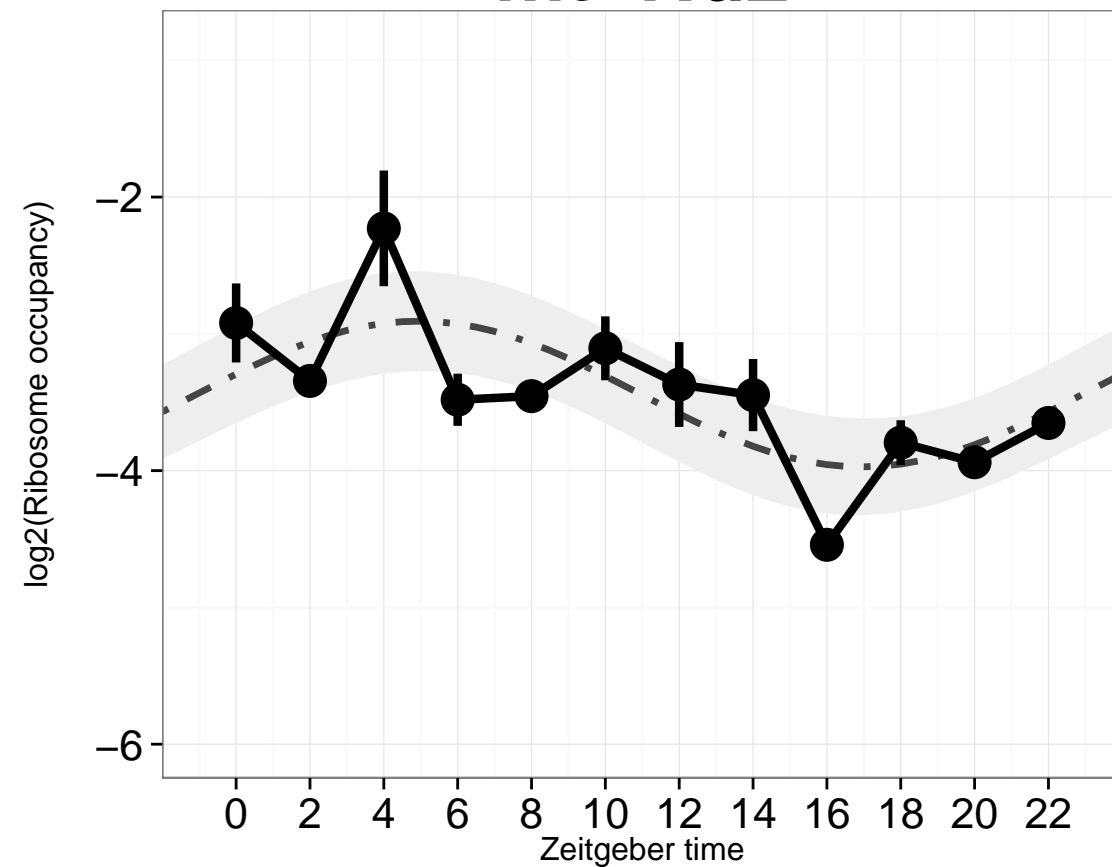

Supplement: Supplementary file 9296 [file 1]

# Rnd3

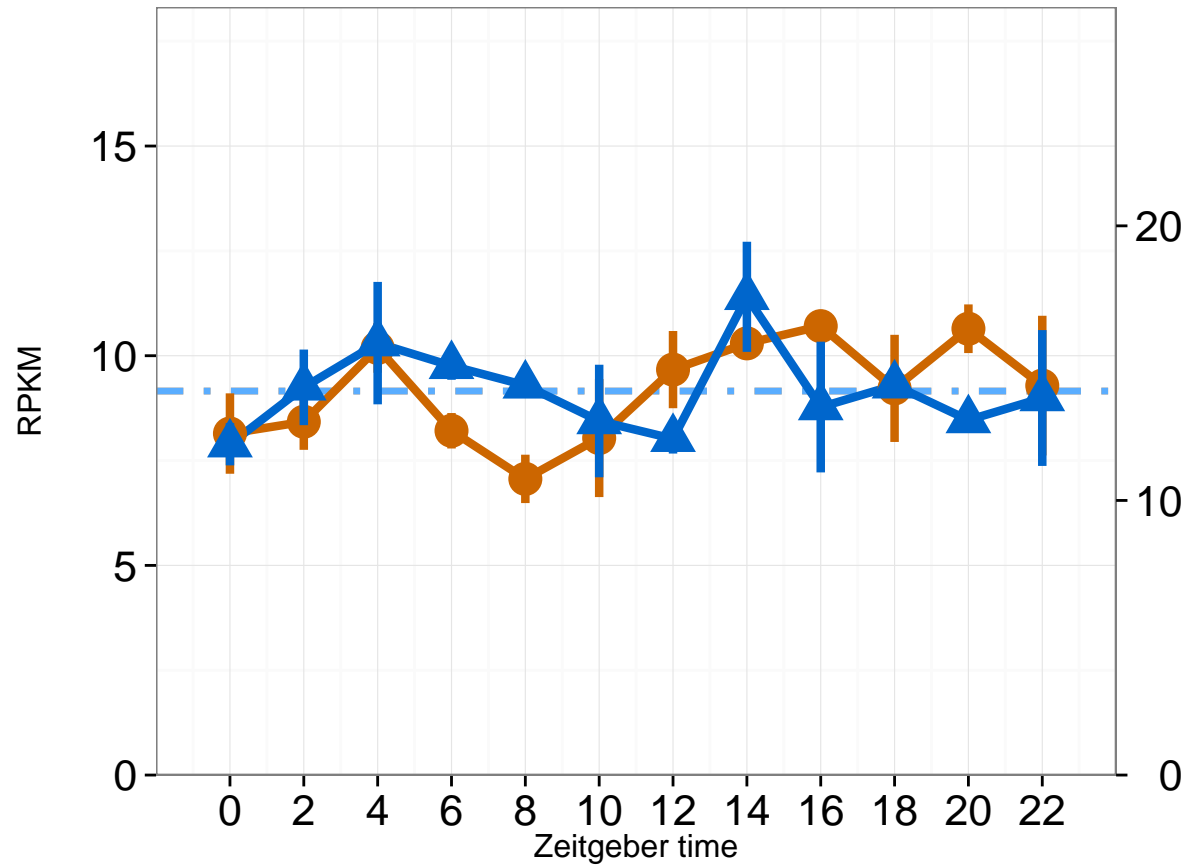

# Rnd3

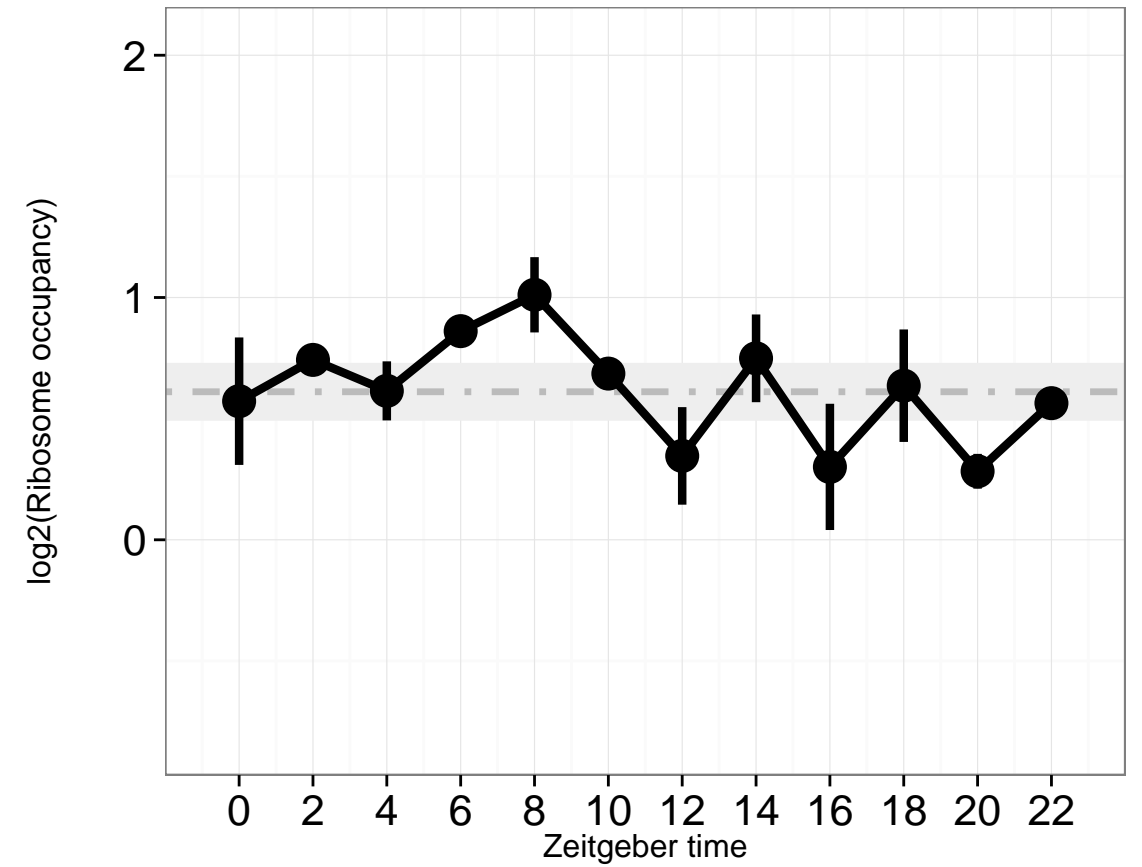

Supplement: Supplementary file 9297 [file 1]

## Ddah2

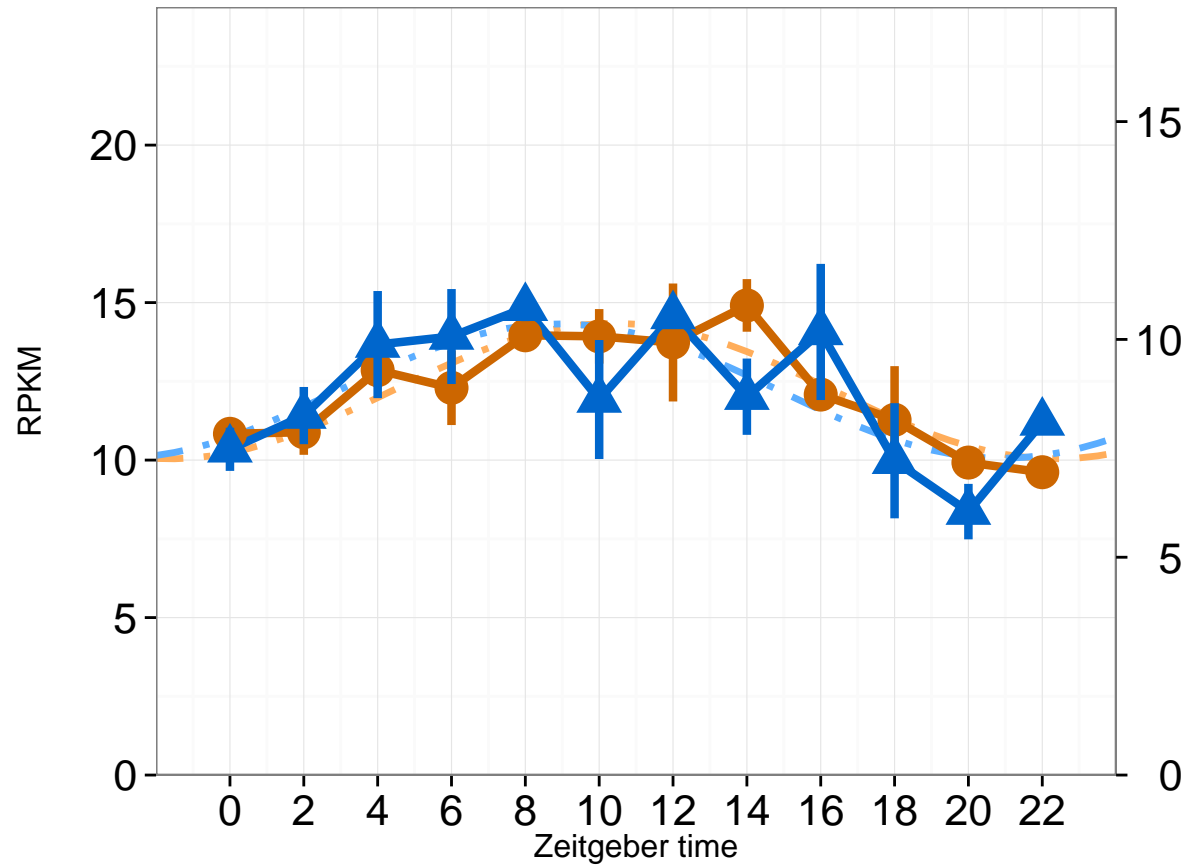

## Ddah2

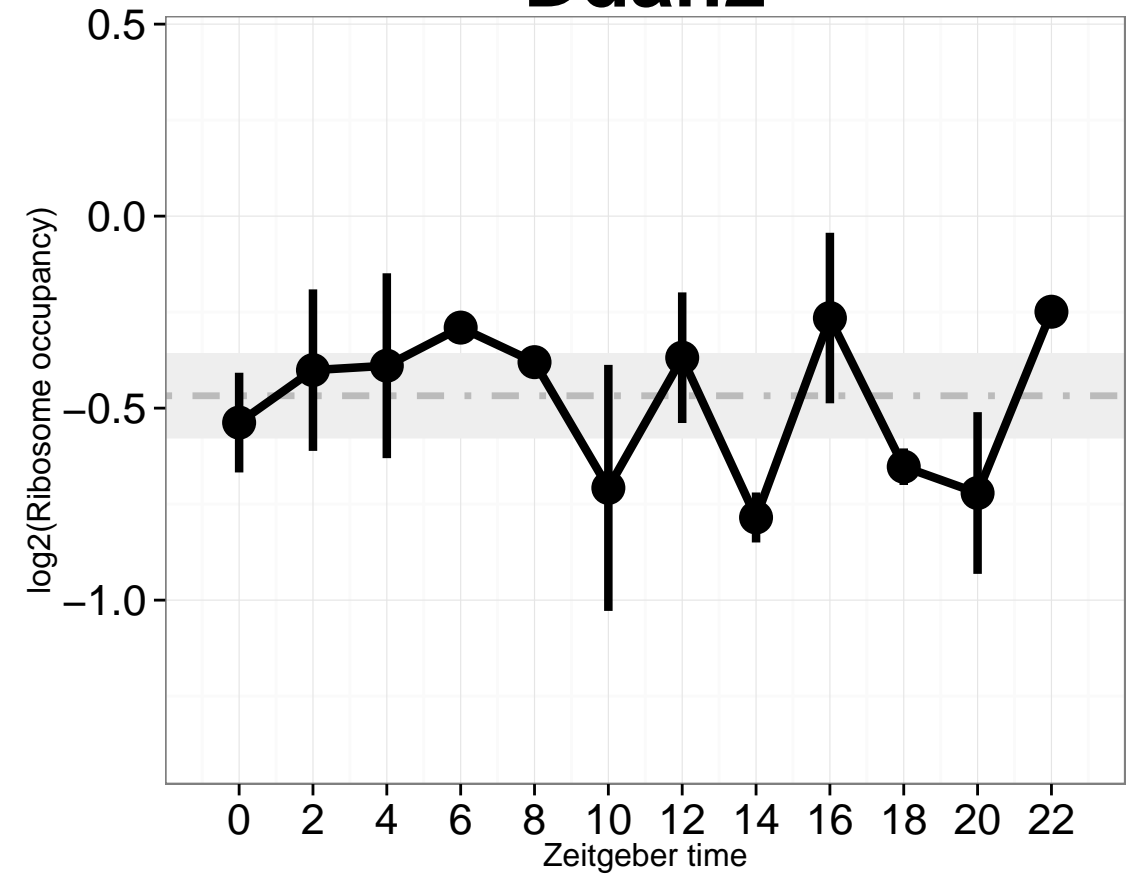

Supplement: Supplementary file 9298 [file 1]

# Pithd1

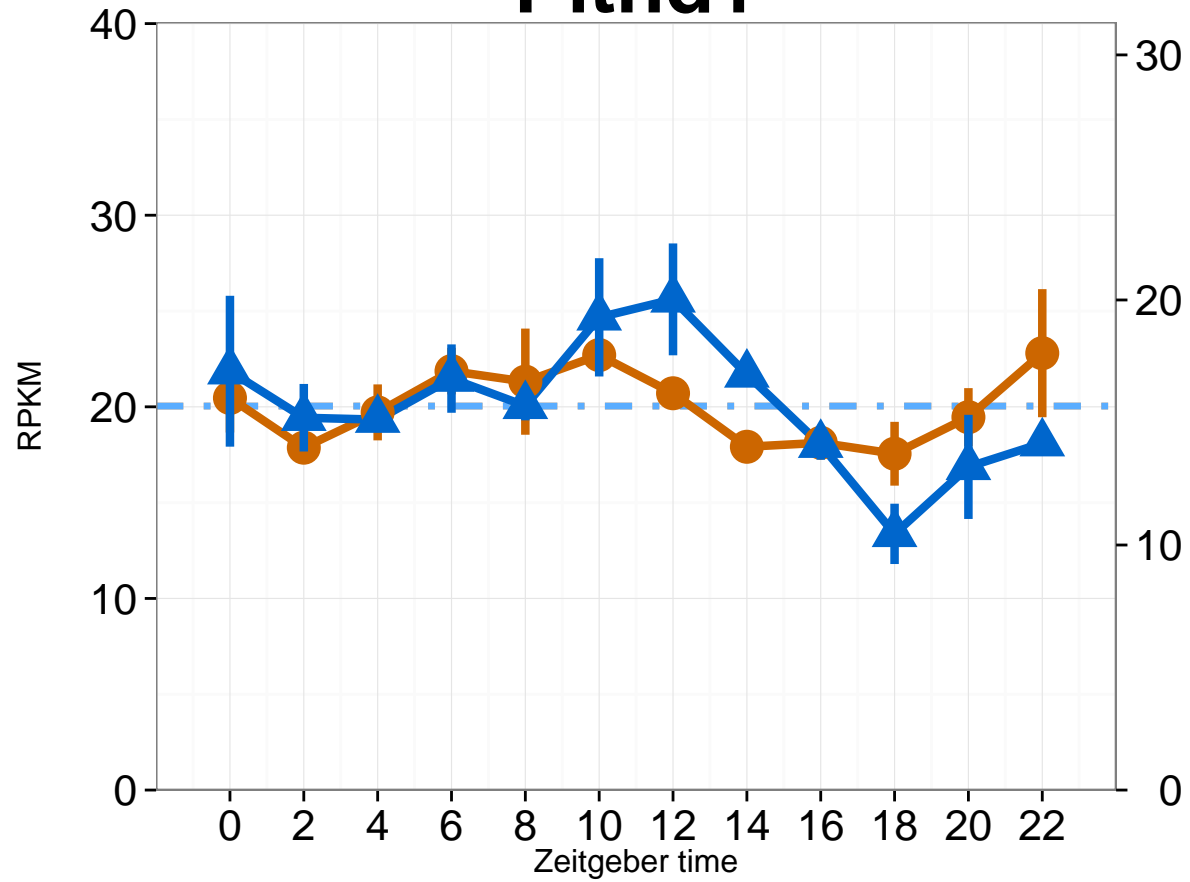

# Pithd1

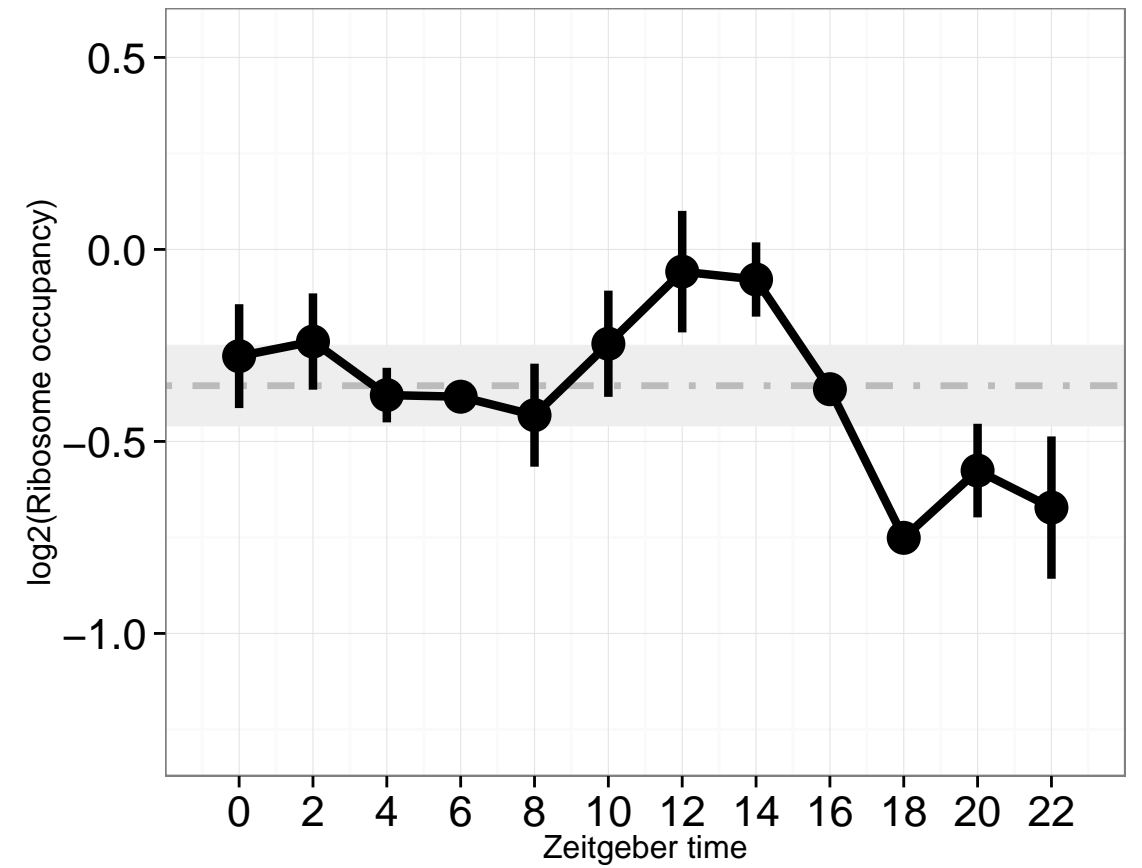

Supplement: Supplementary file 9299 [file 1]

## Hpx

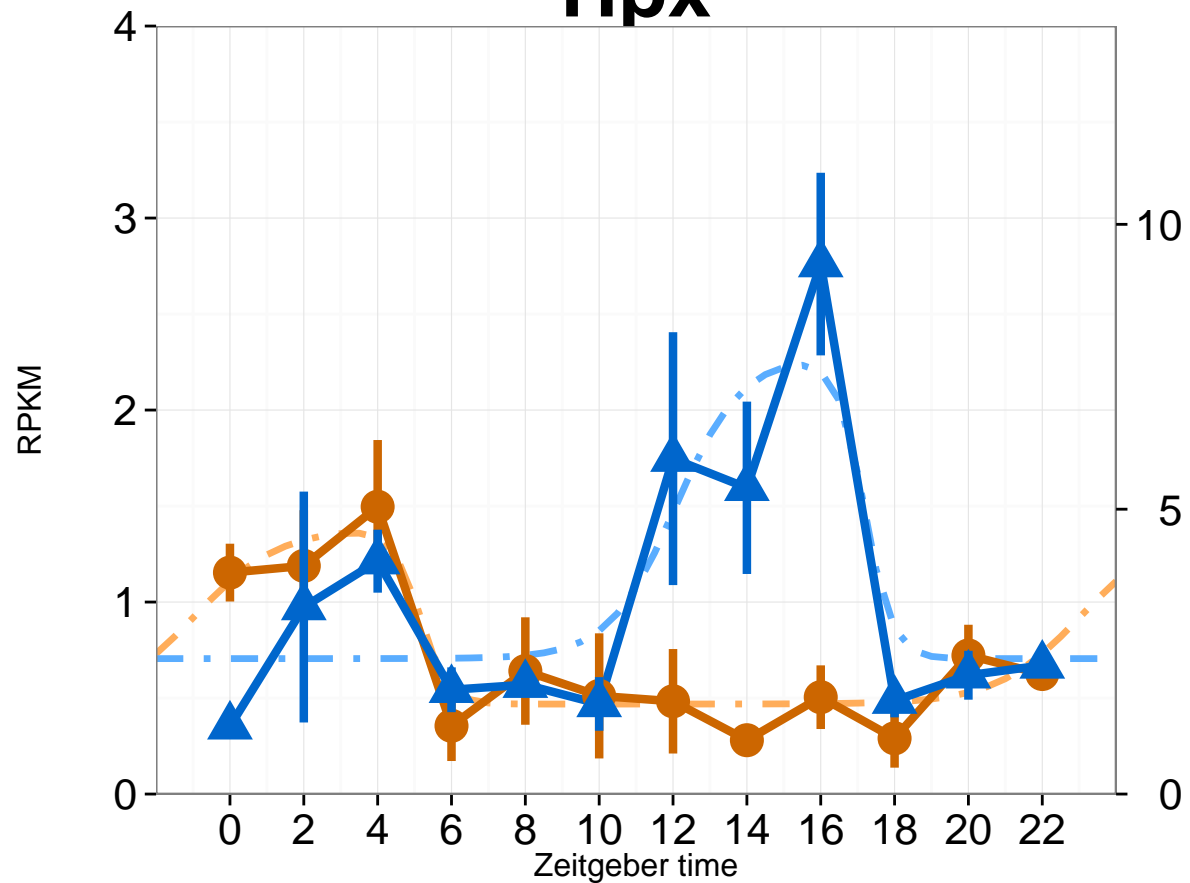

## Hpx

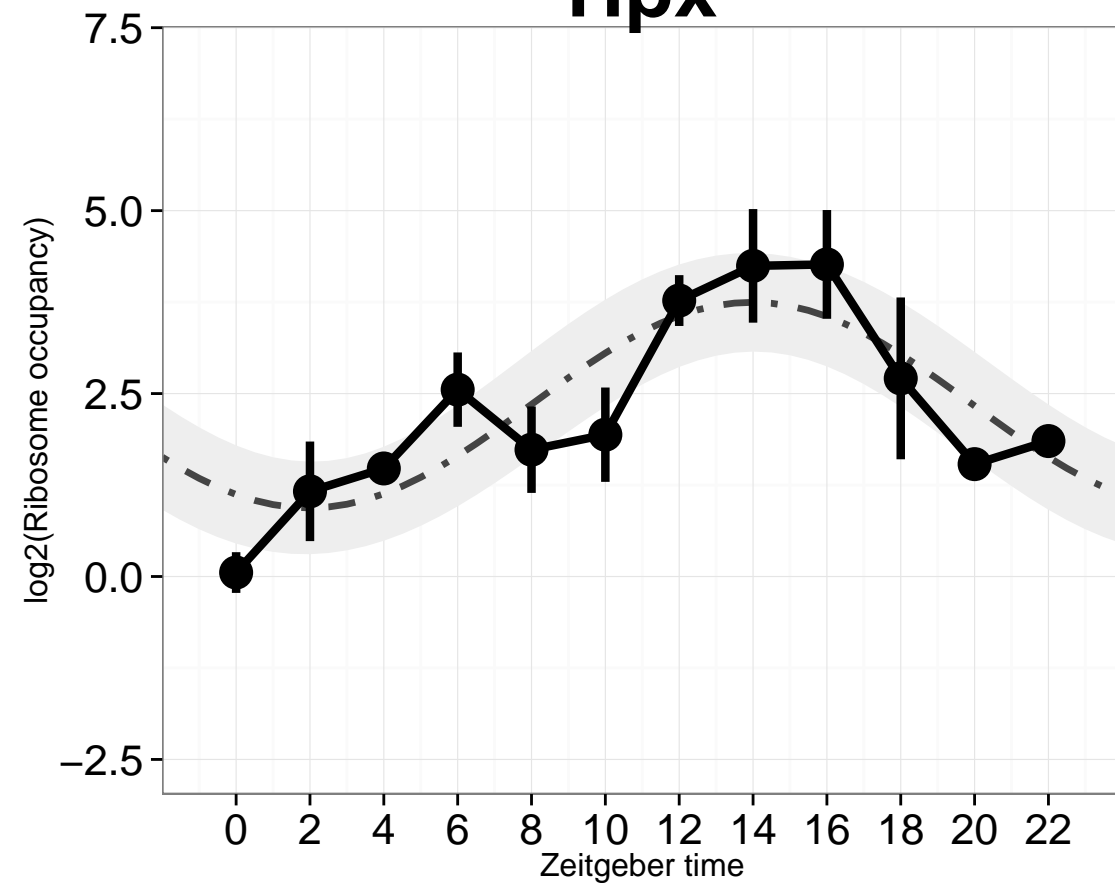

Supplement: Supplementary file 9300 [file 1]

## Evc

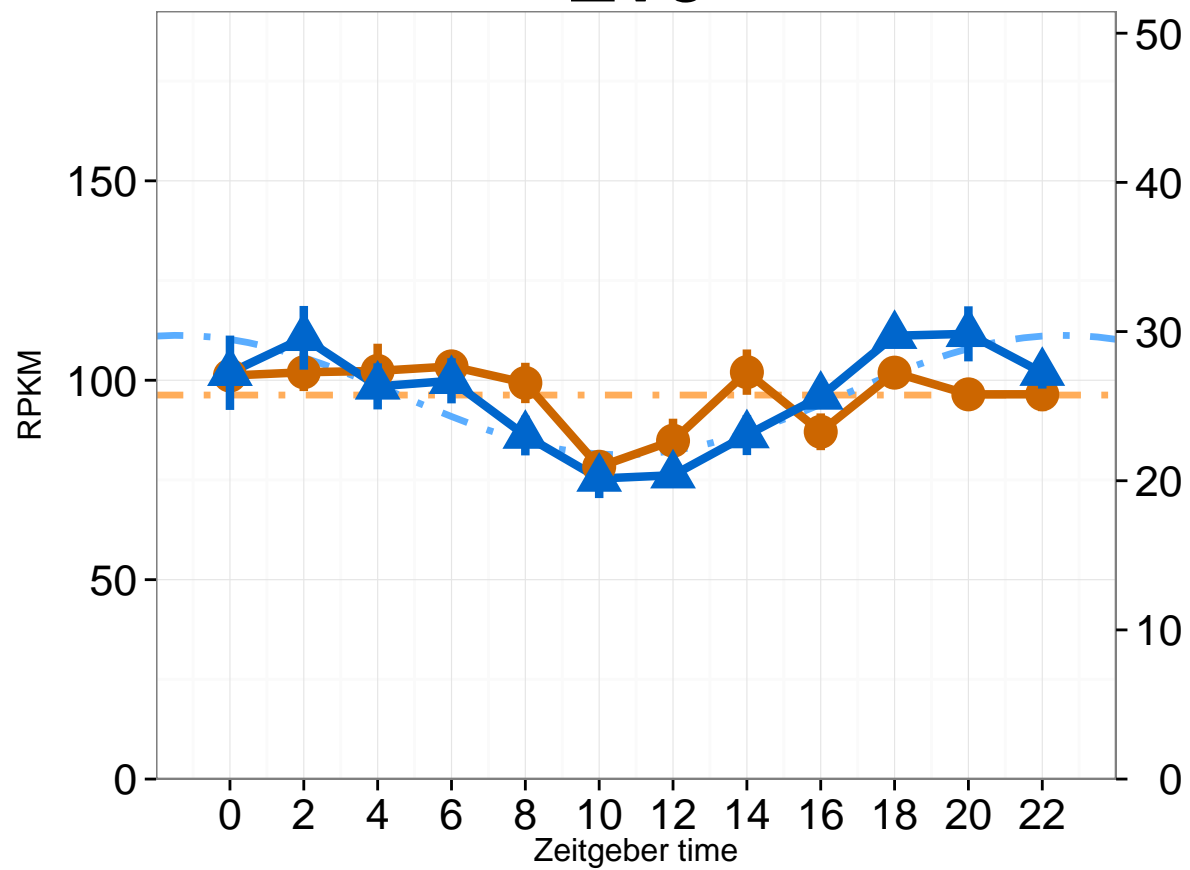

## Evc

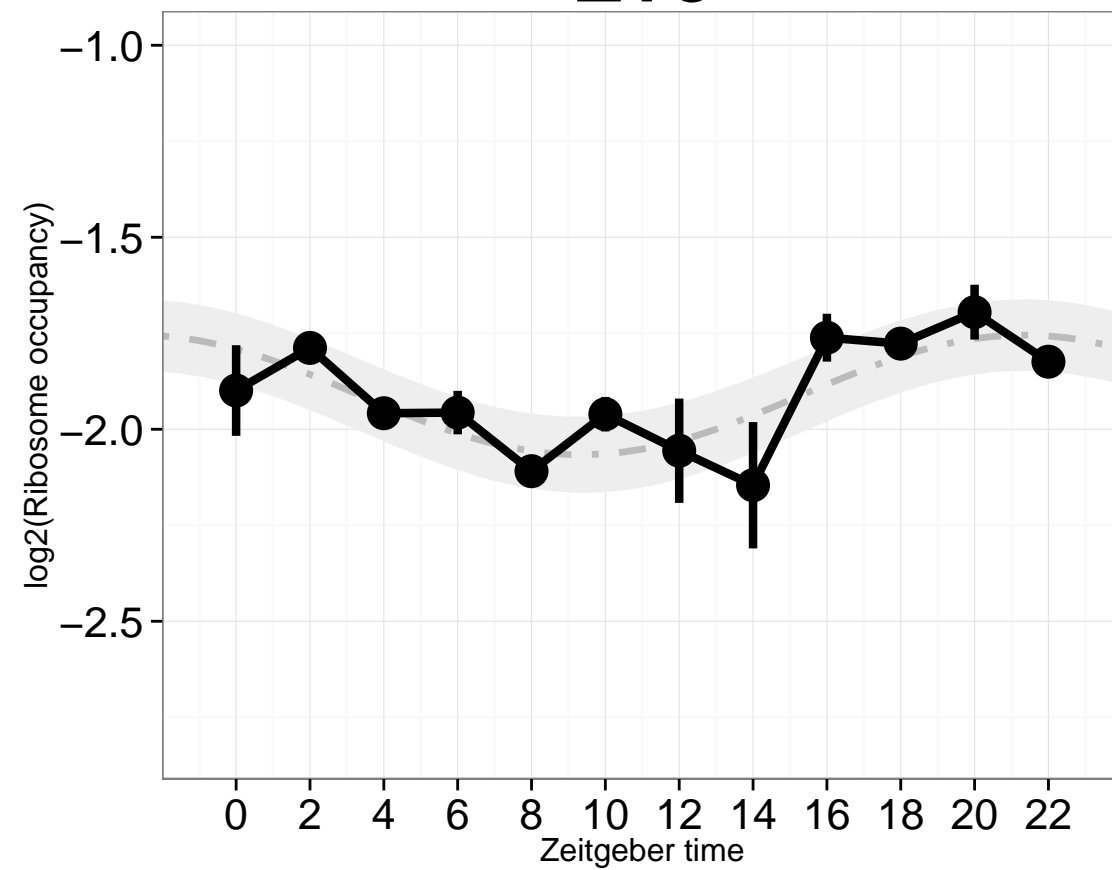

Supplement: Supplementary file 9301 [file 1]

## Egfl8

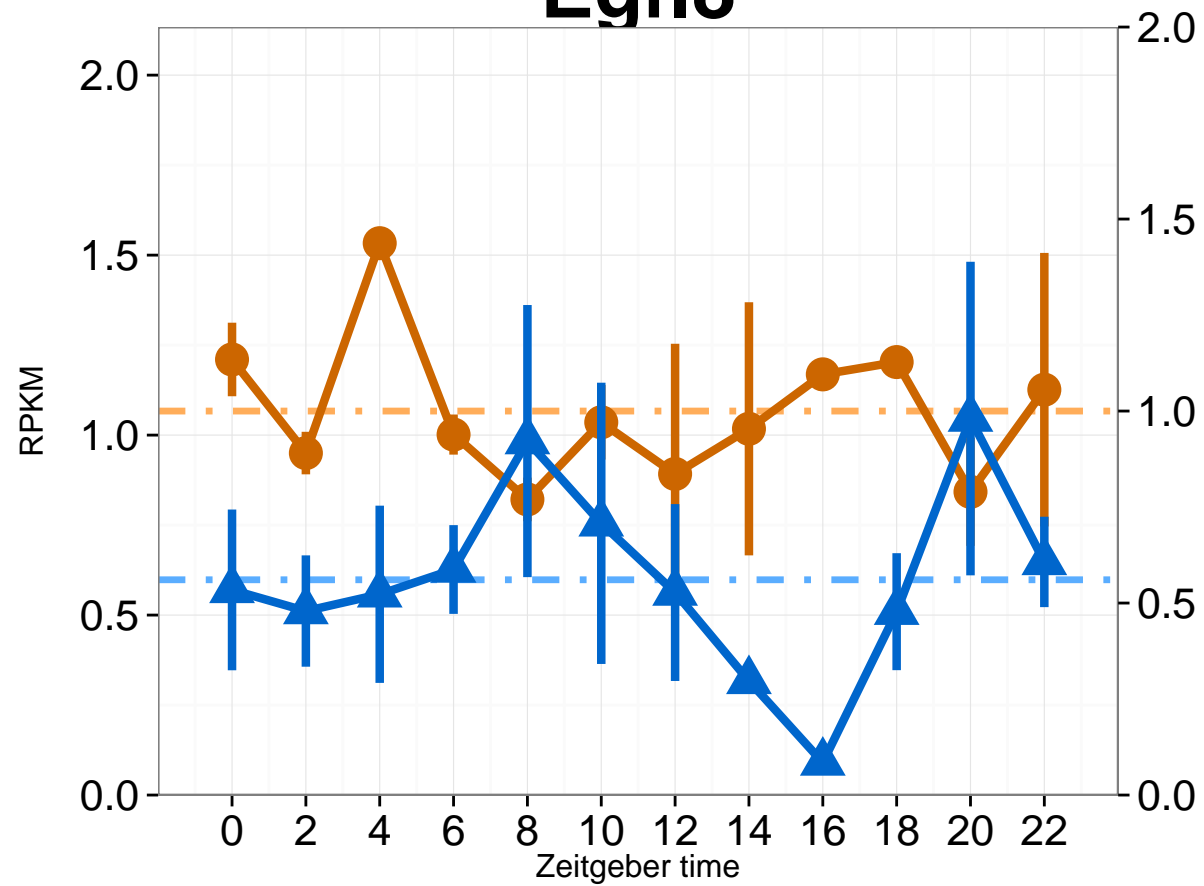

## Egfl8

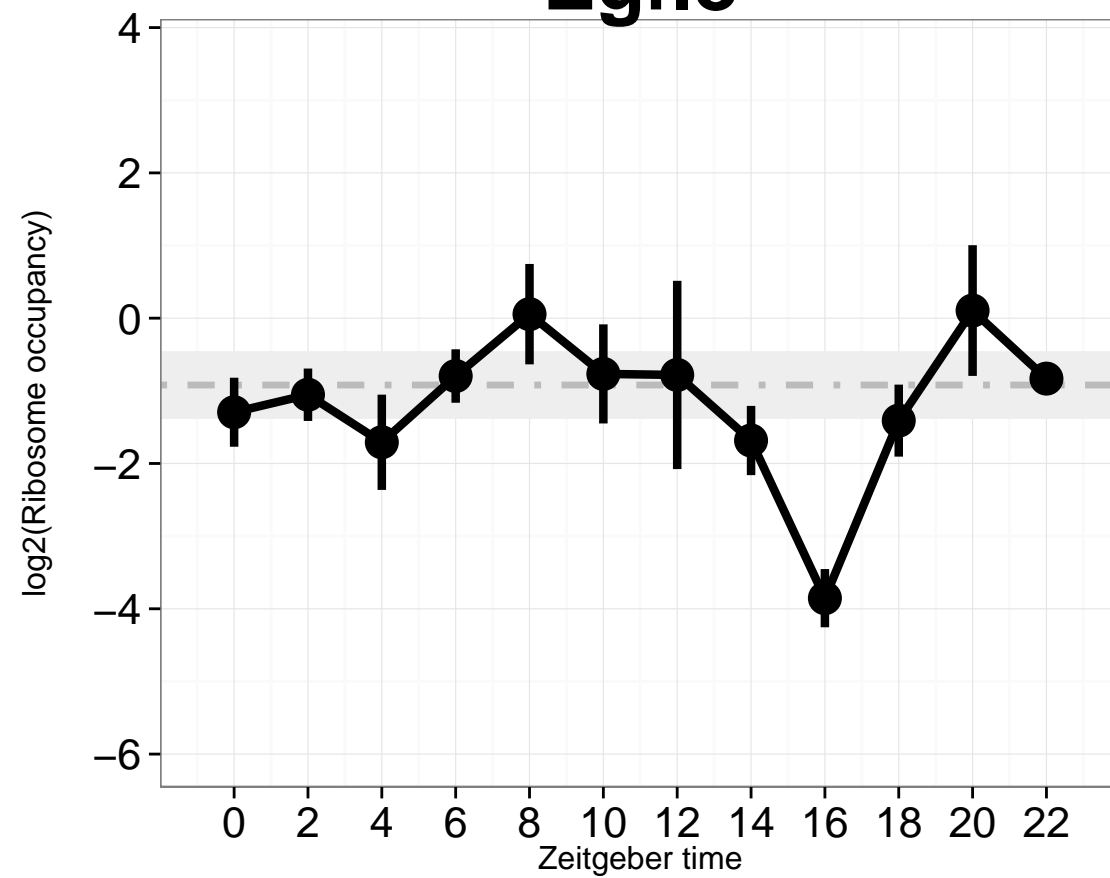

Supplement: Supplementary file 9302 [file 1]

# Anapc16

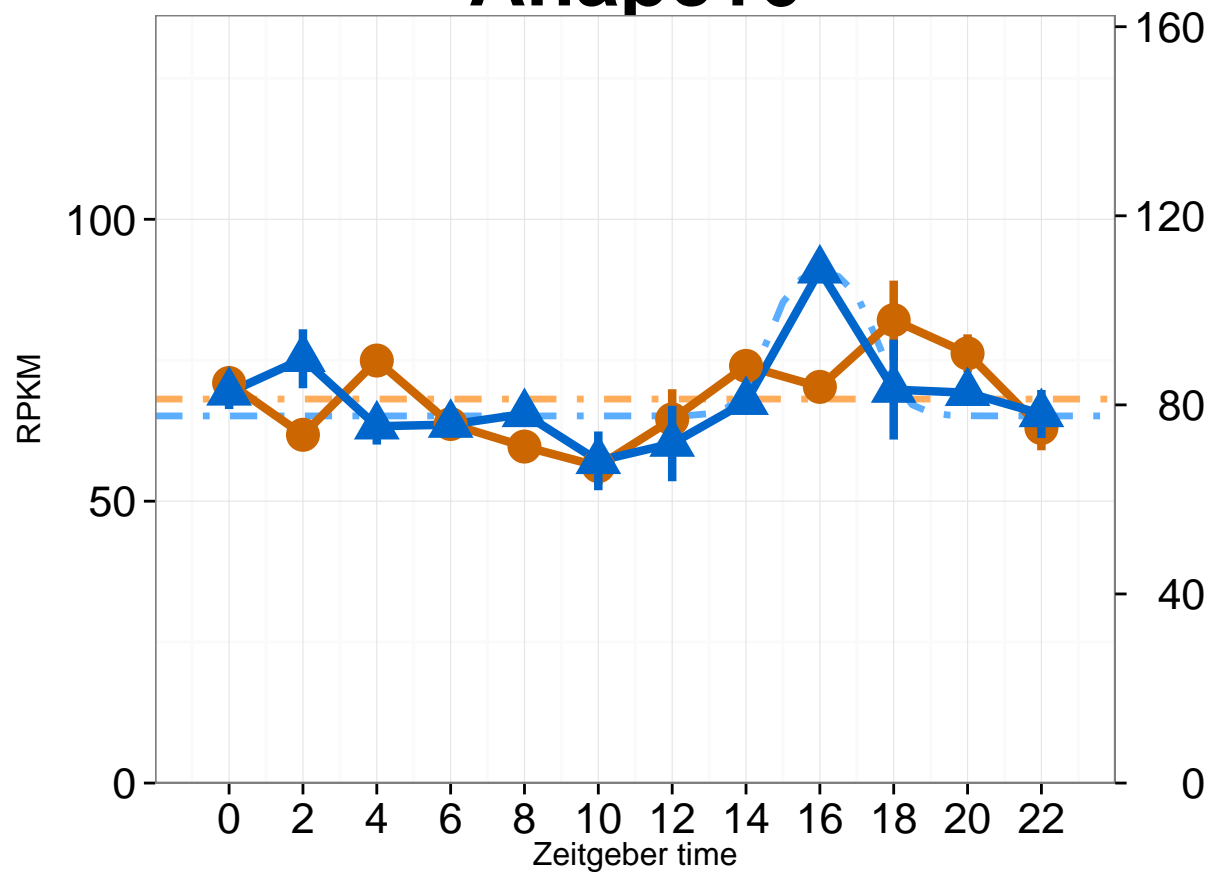

# Anapc16

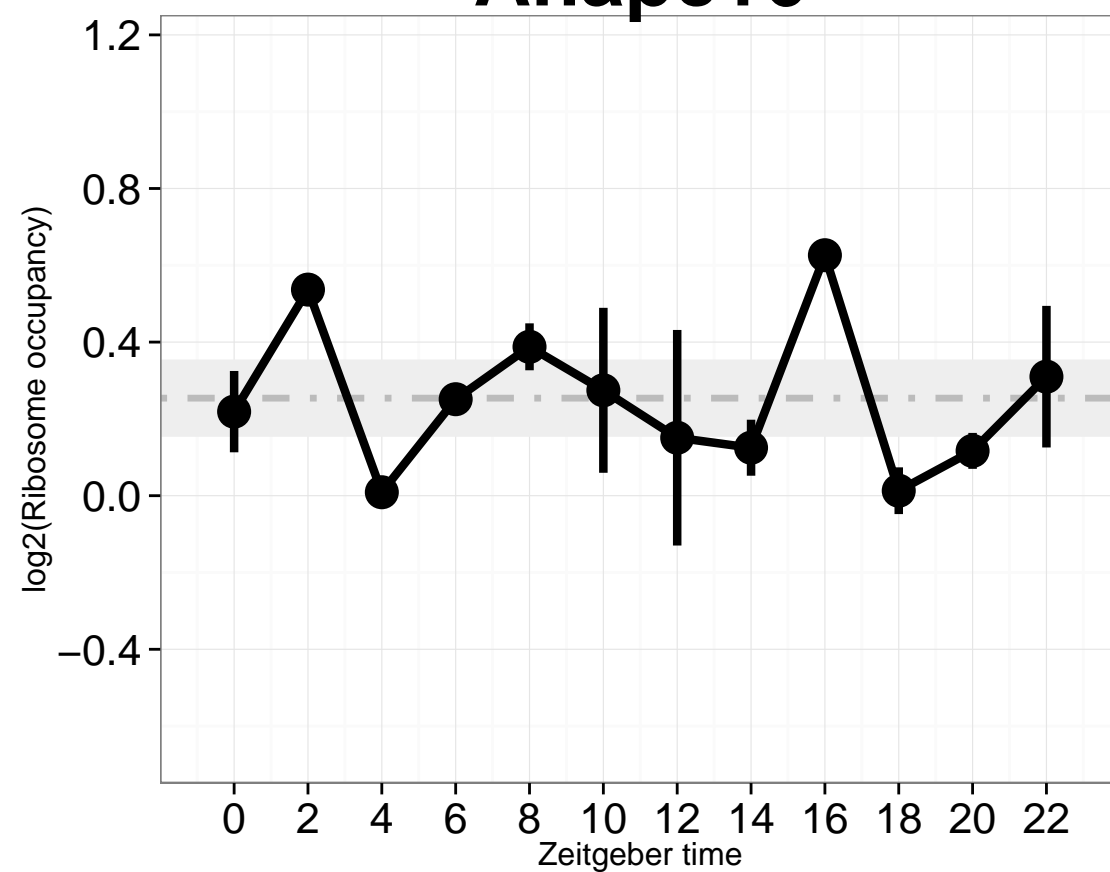

Supplement: Supplementary file 9303 [file 1]

## Lyar

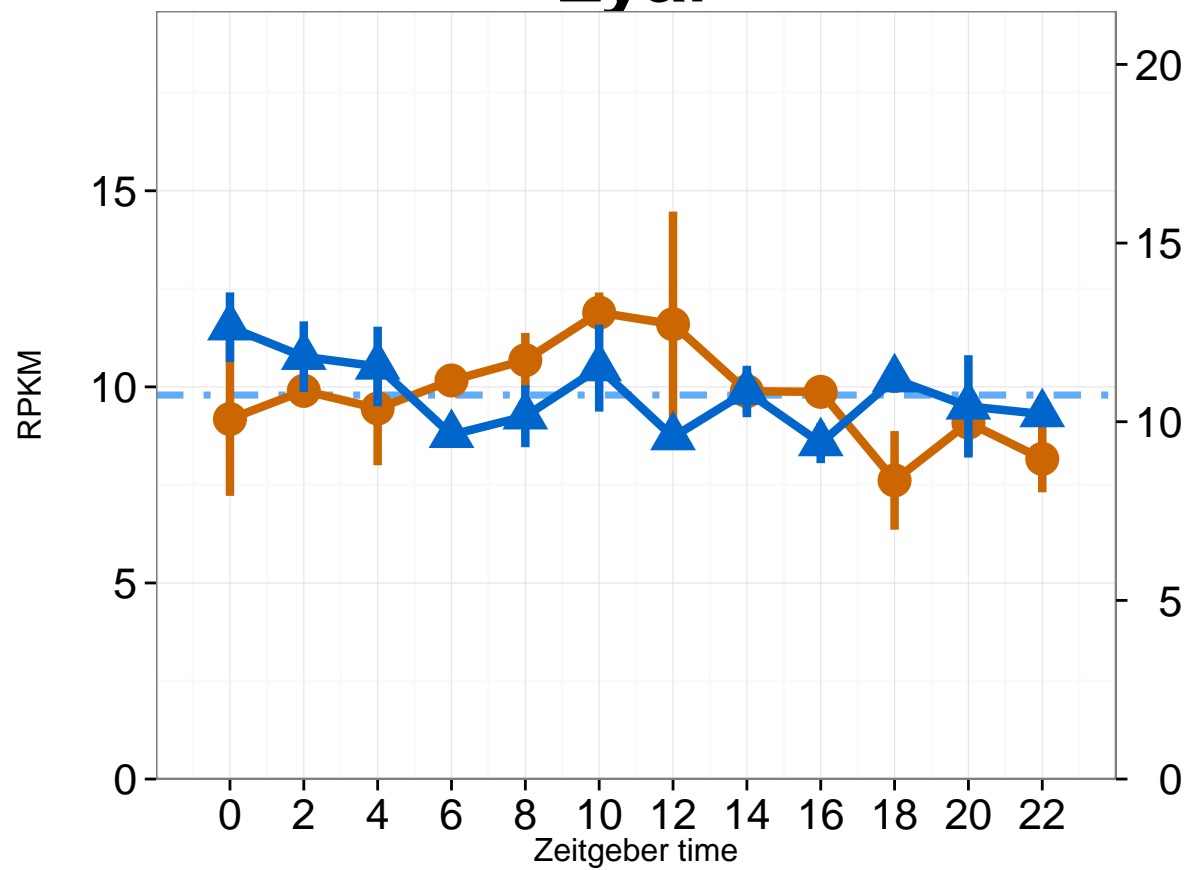

## Lyar

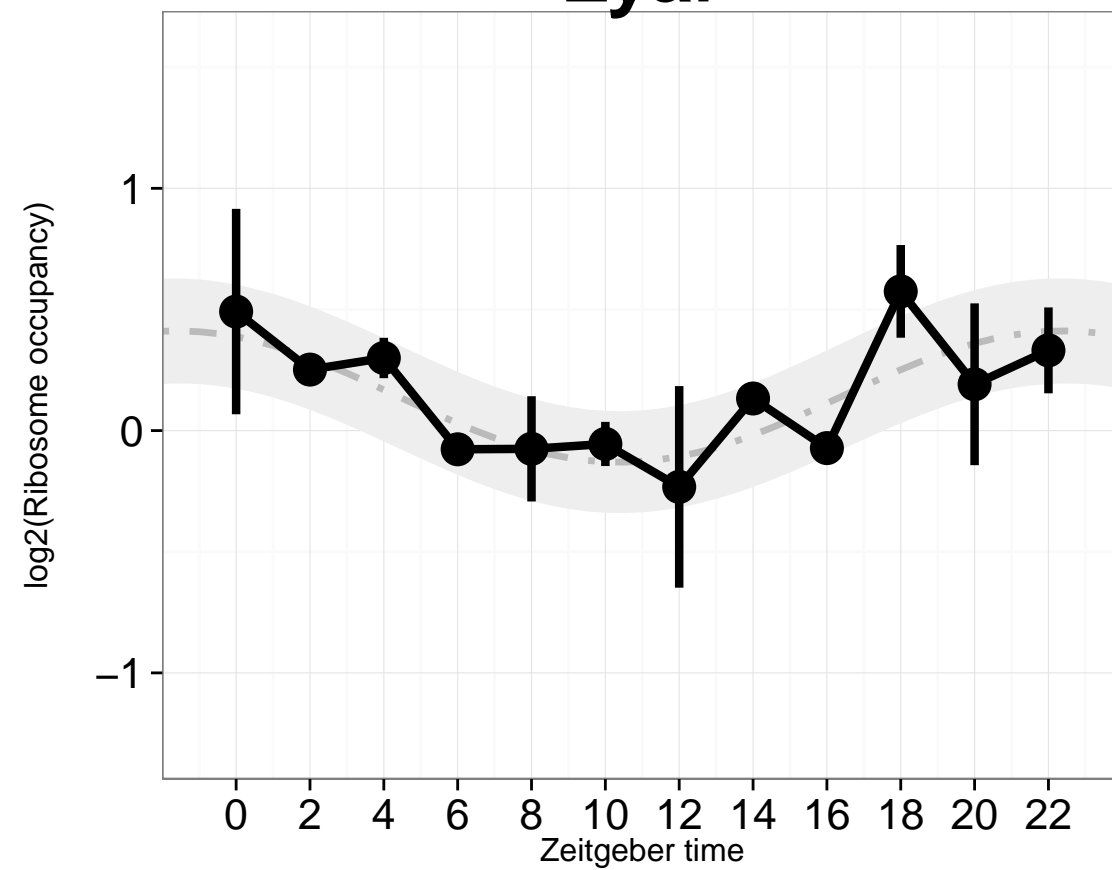

Supplement: Supplementary file 9304 [file 1]

## Brca2

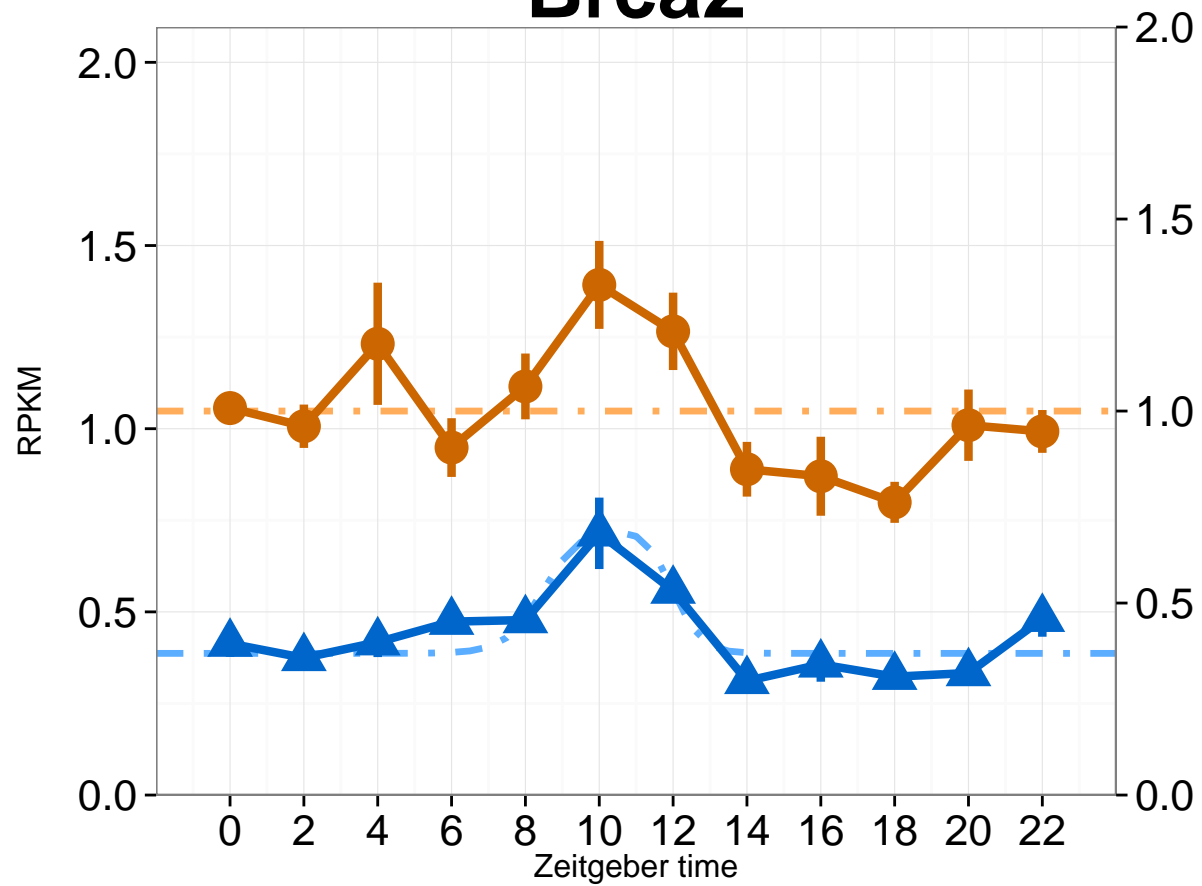

## Brca2

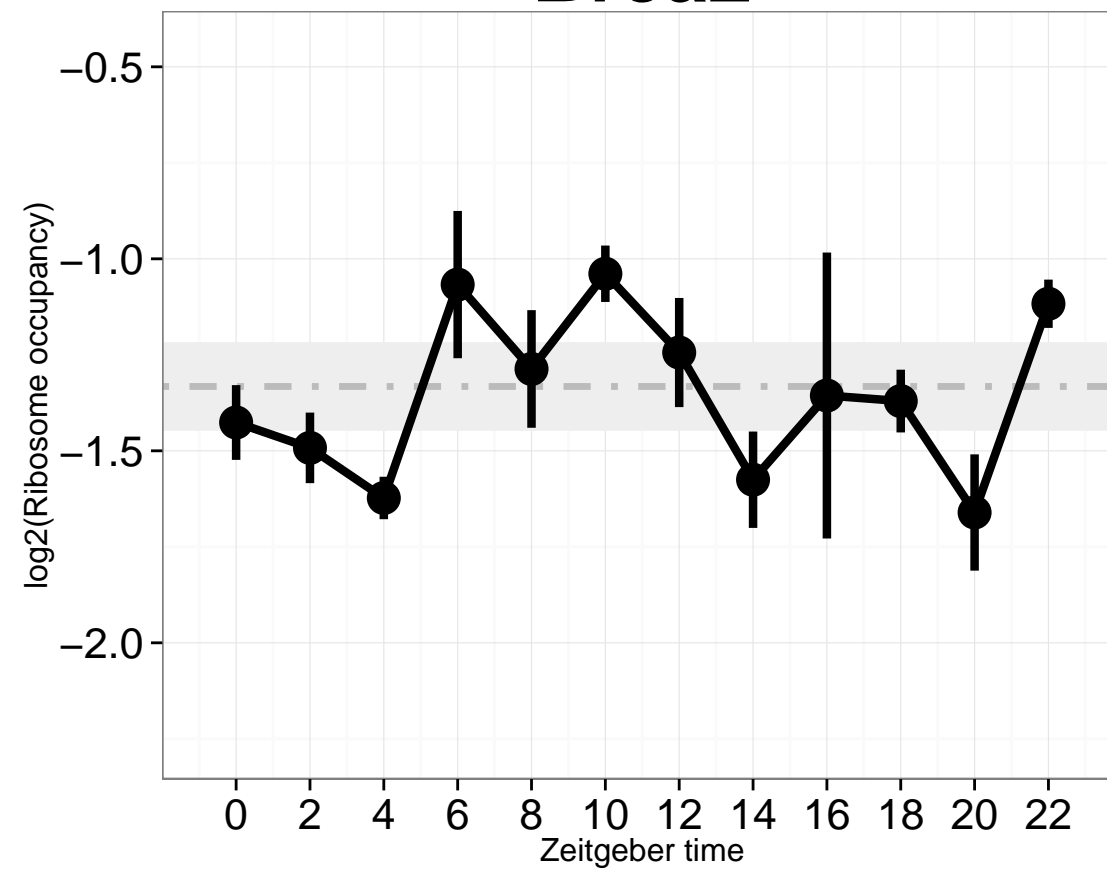

Supplement: Supplementary file 9305 [file 1]

## Slc22a4

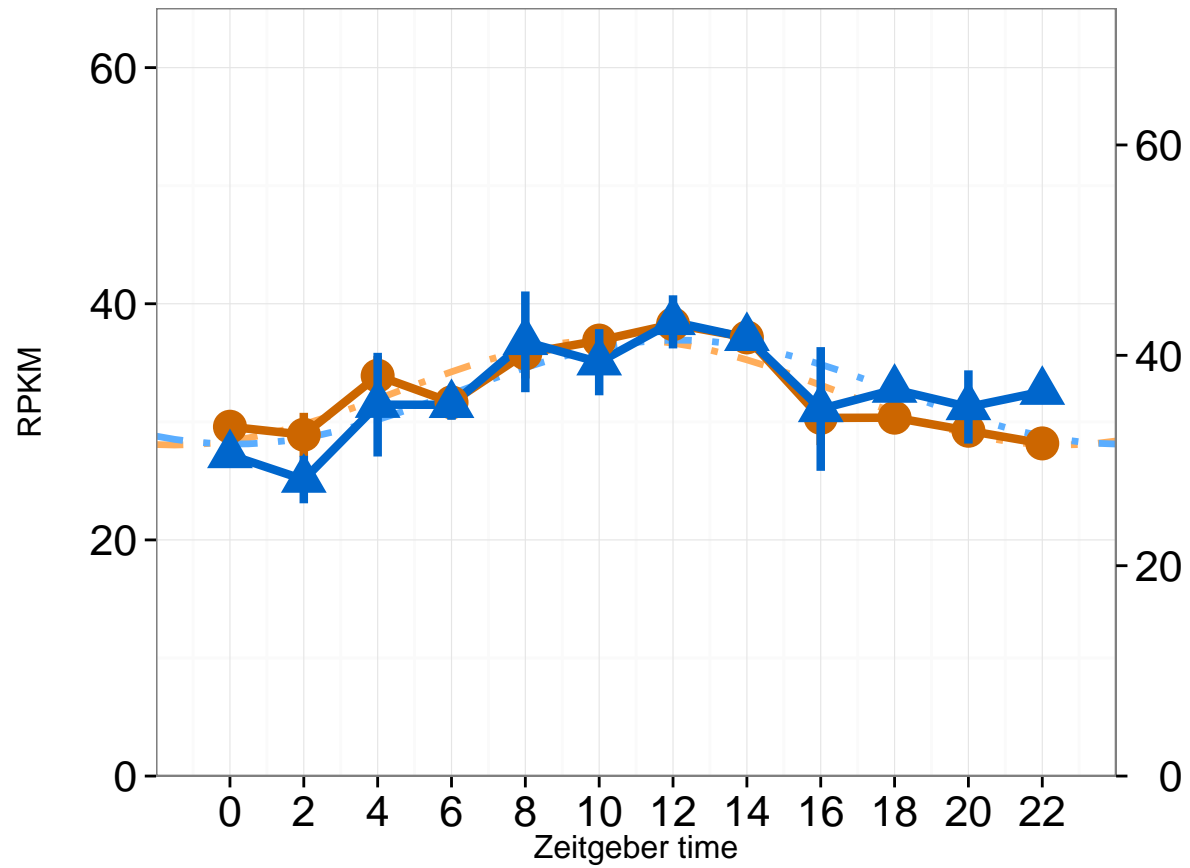

## Slc22a4

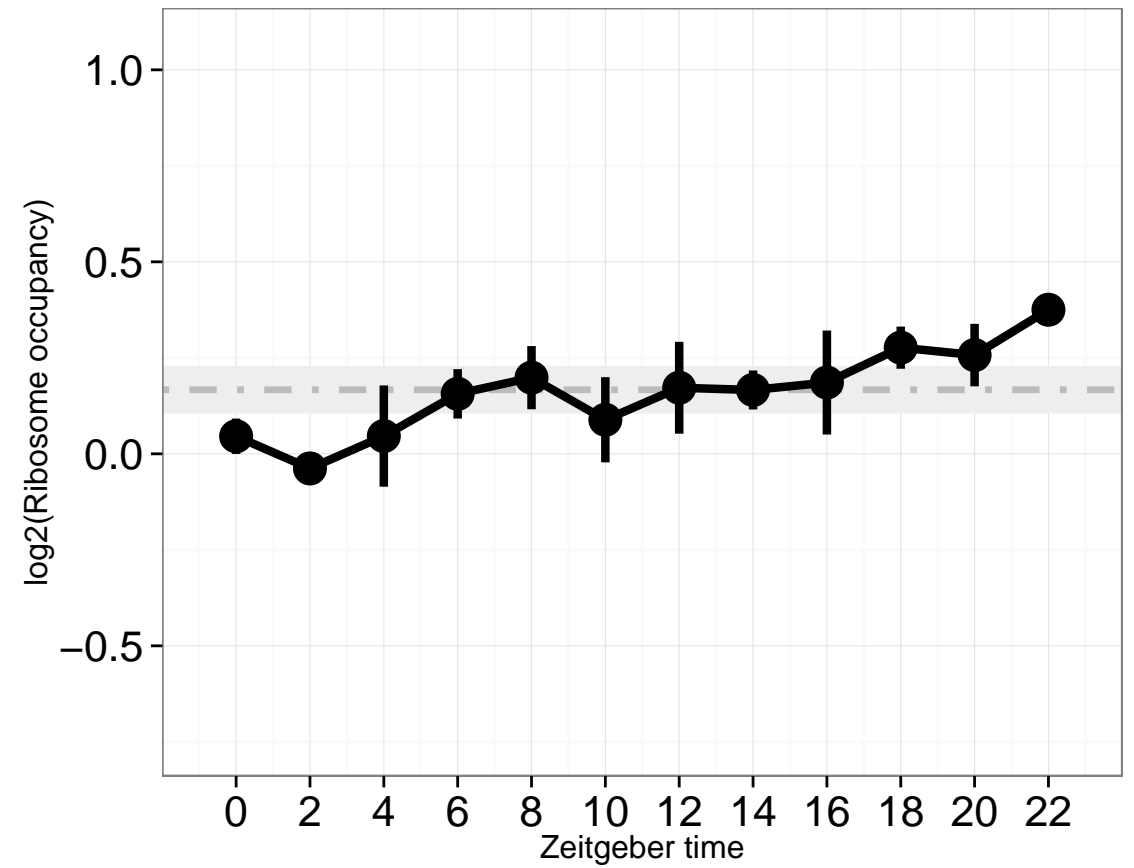

Supplement: Supplementary file 9306 [file 1]

# Cyp4f13

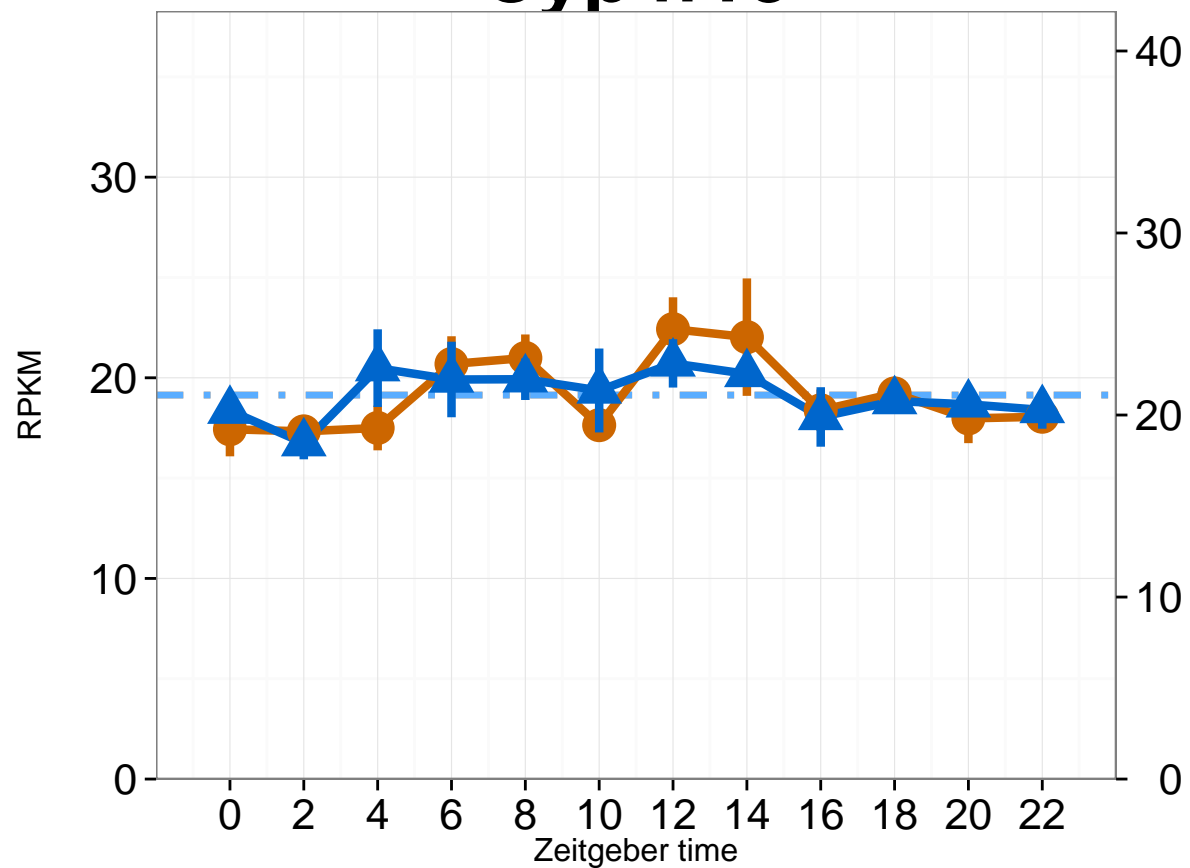

# Cyp4f13

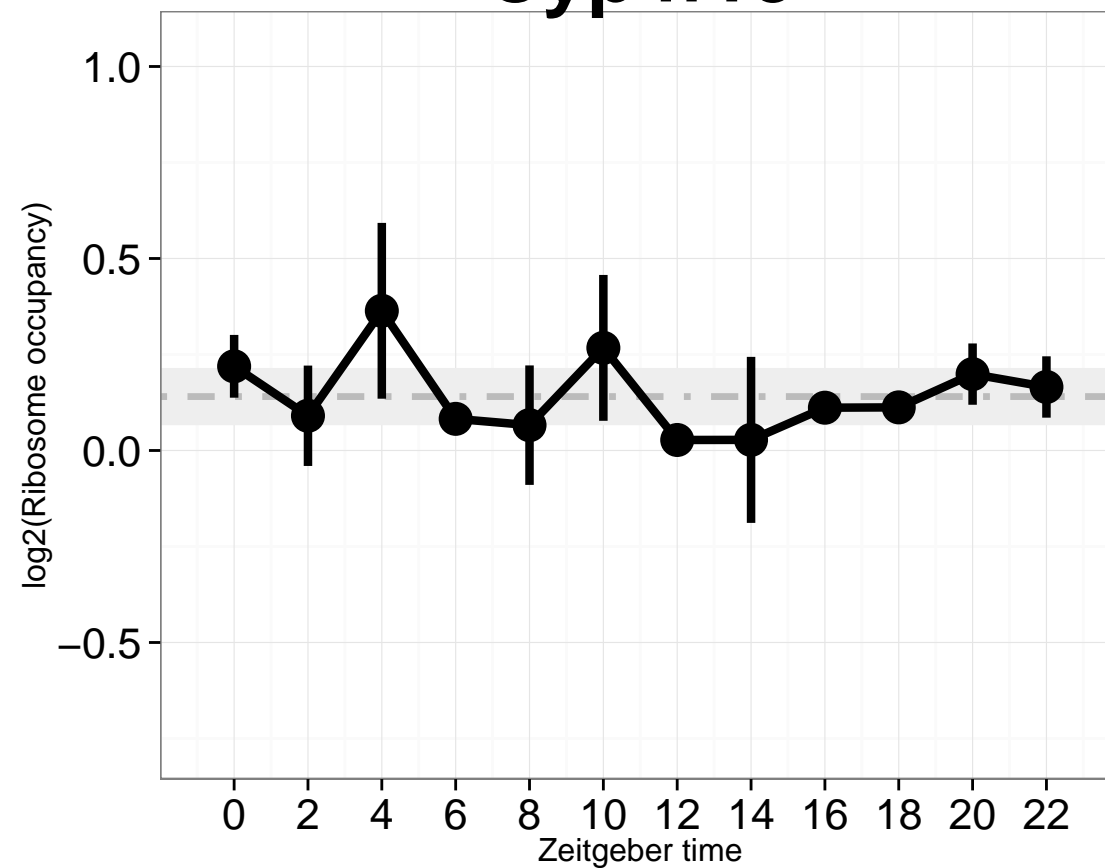

Supplement: Supplementary file 9307 [file 1]

## Vdr

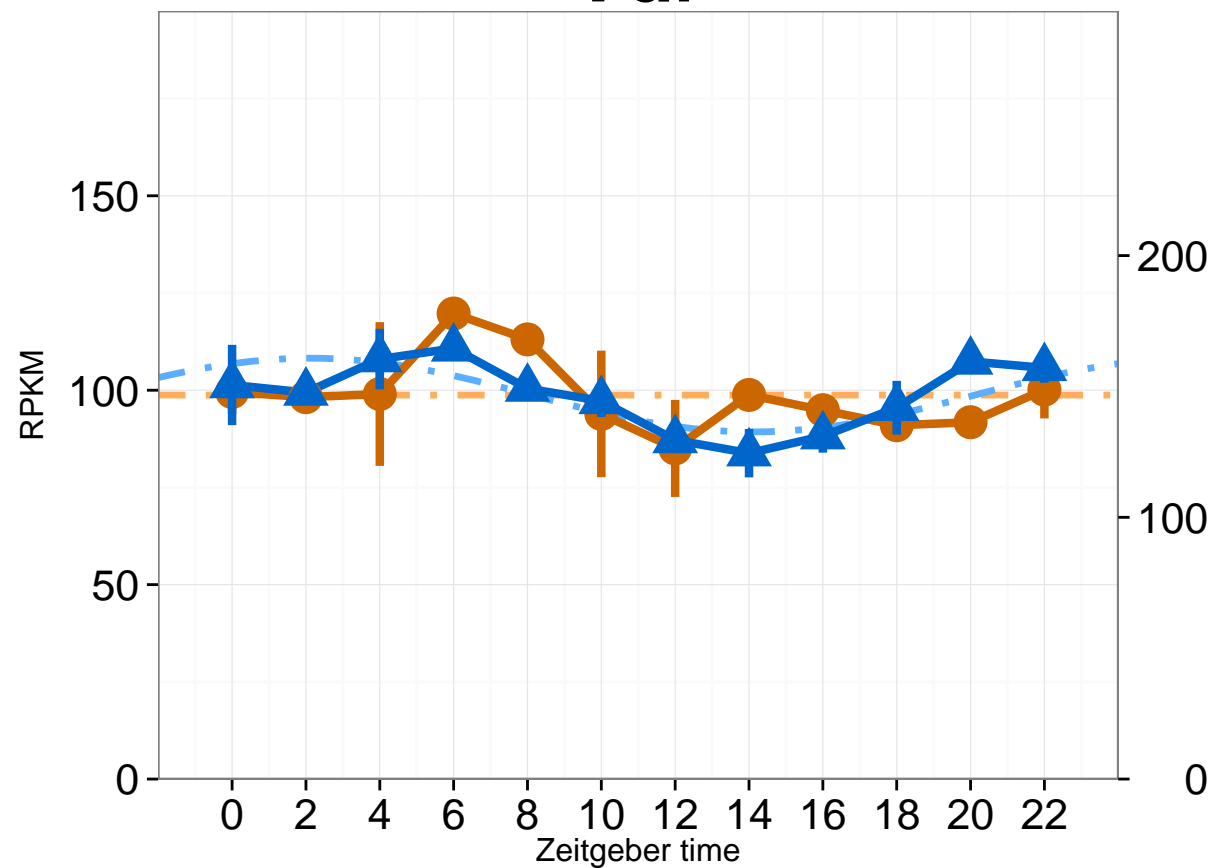

## Vdr

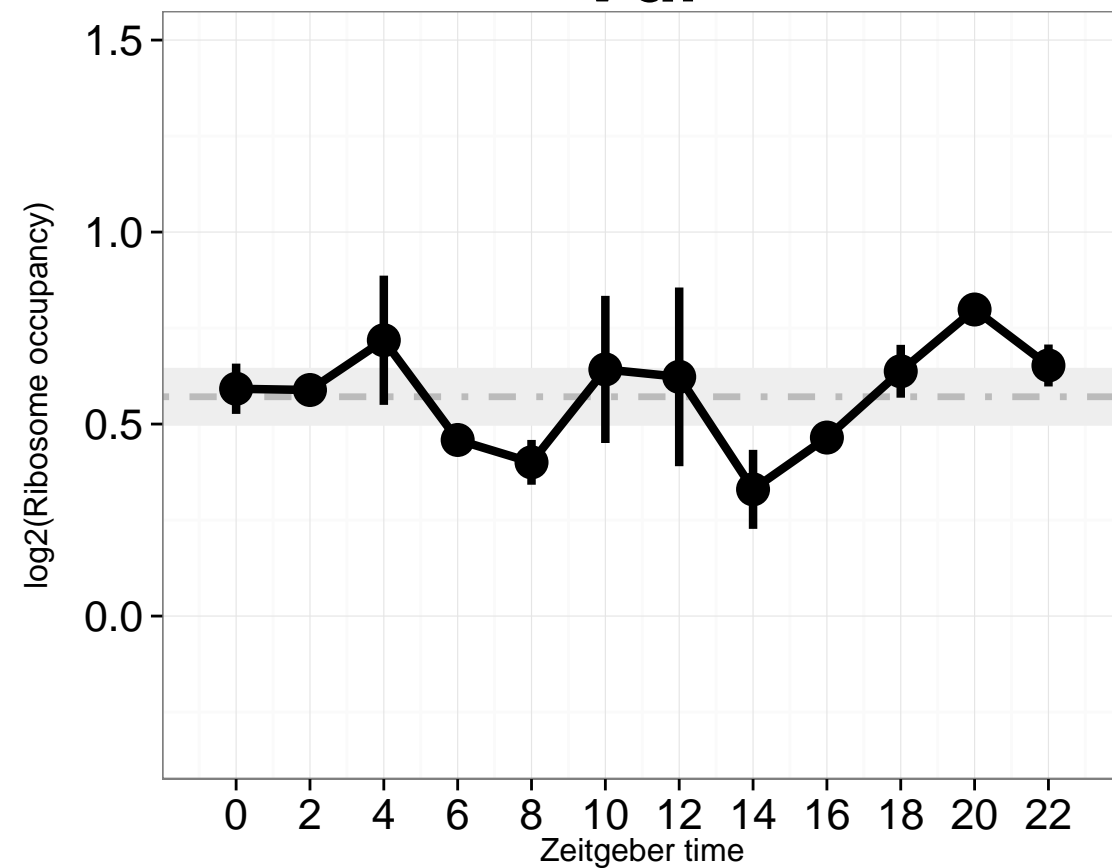

Supplement: Supplementary file 9308 [file 1]

# Tbpl1

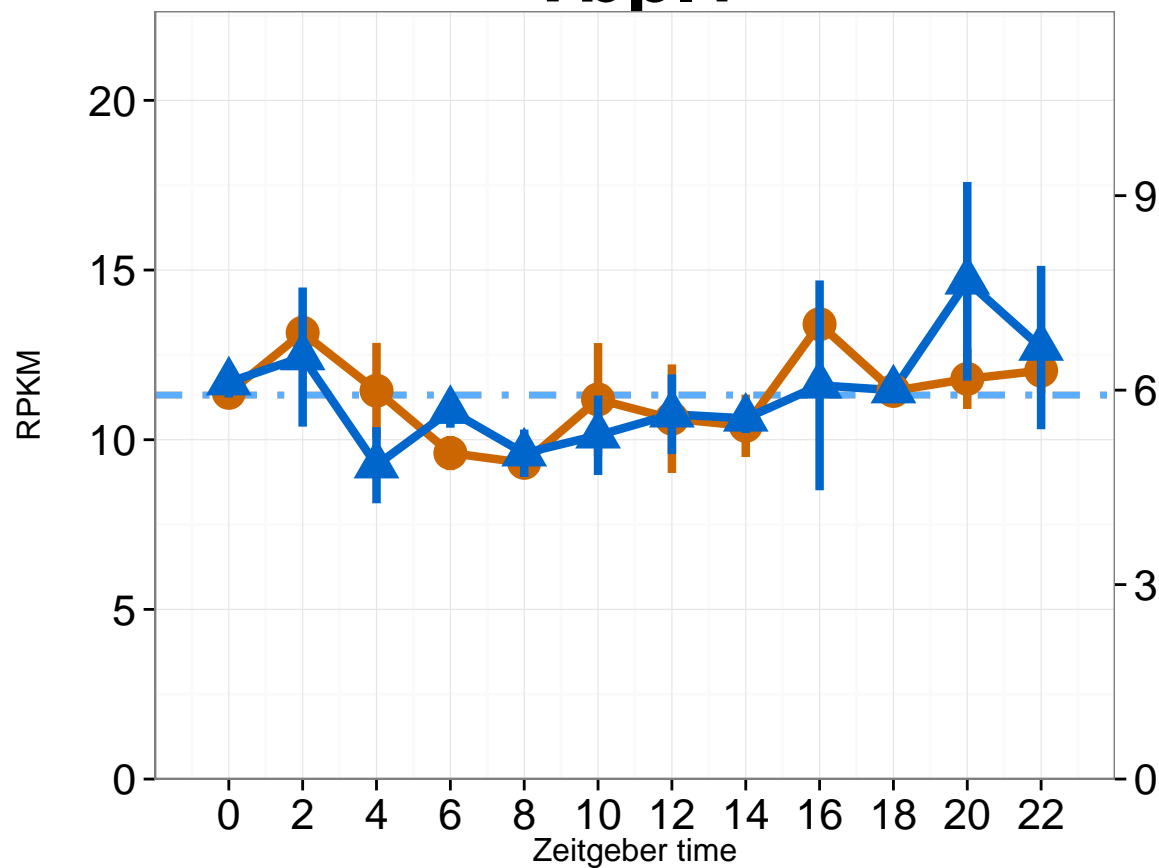

# Tbpl1

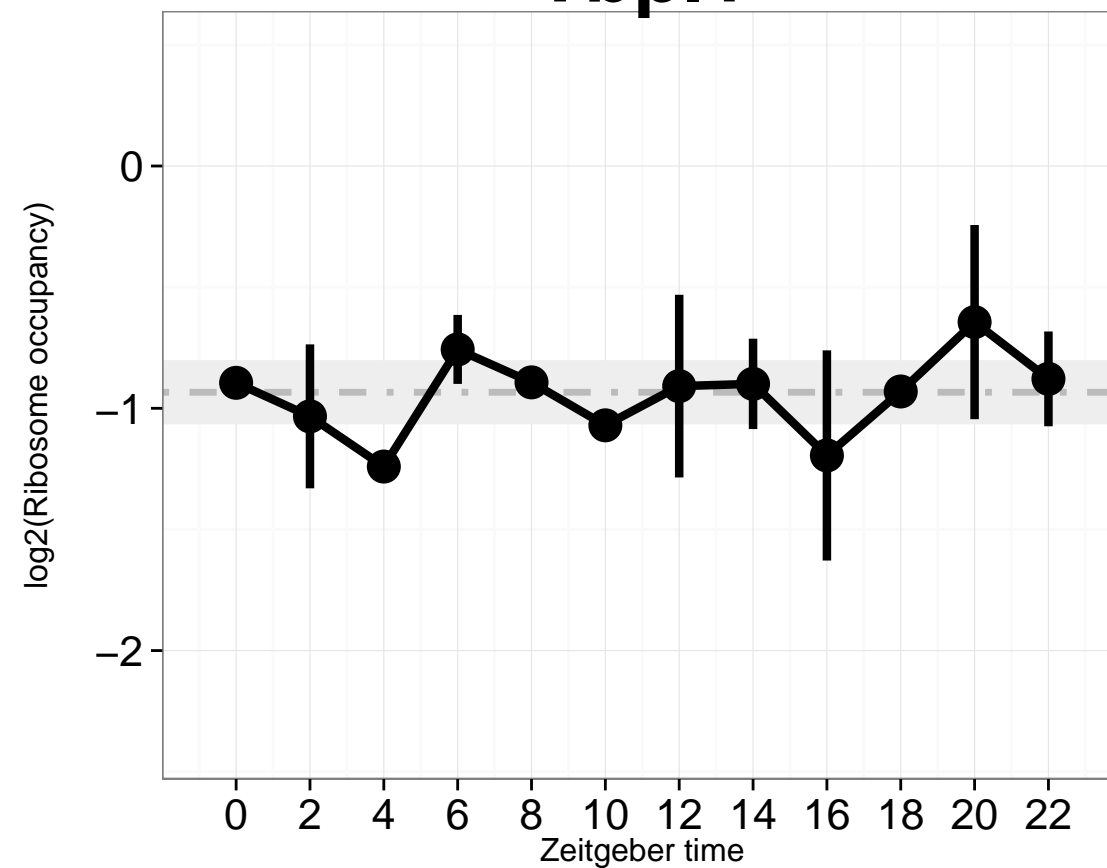

Supplement: Supplementary file 9309 [file 1]

## Mrpl24

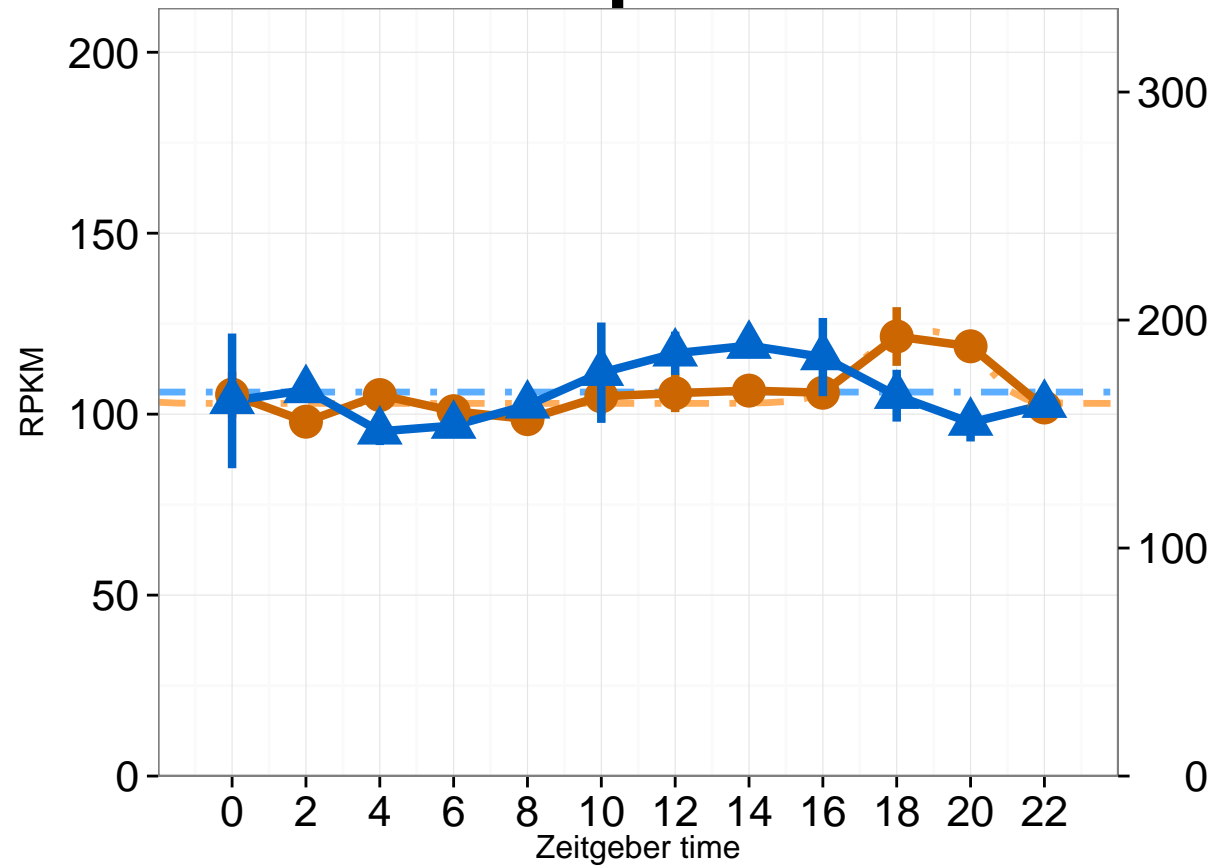

## Mrpl24

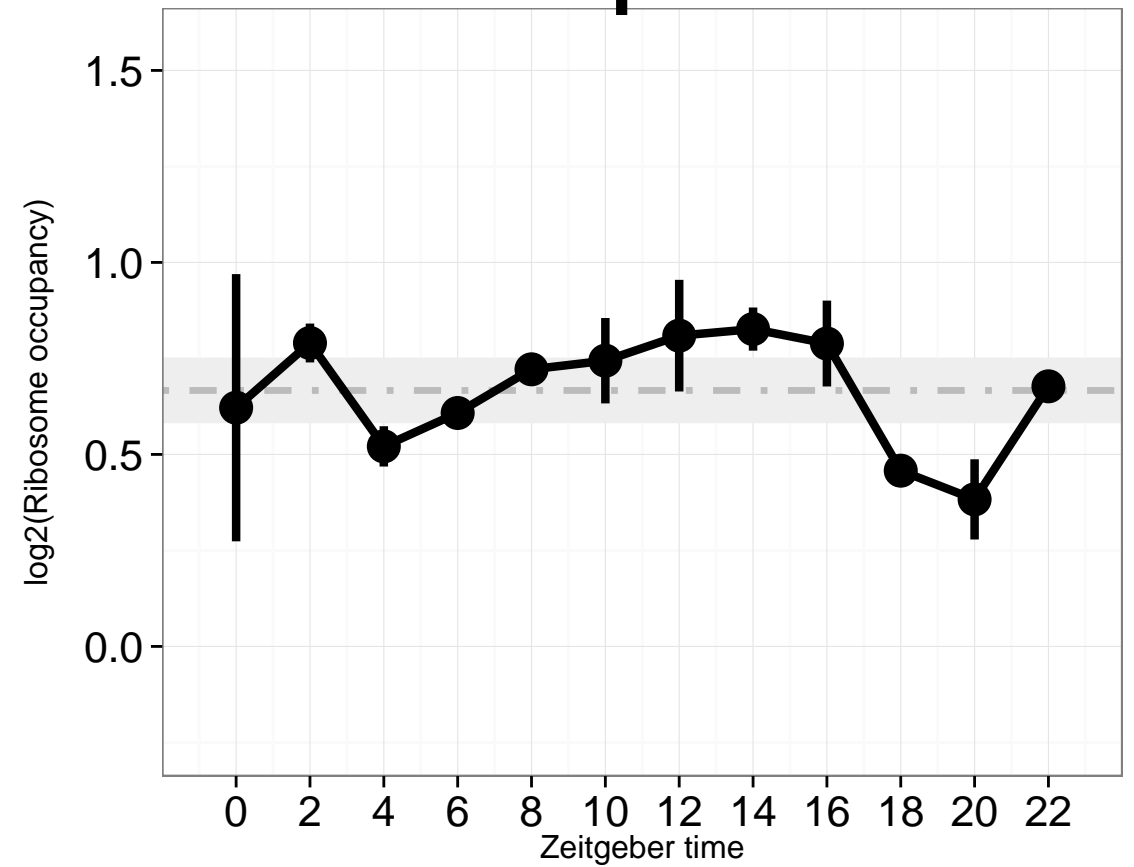

Supplement: Supplementary file 9310 [file 1]

## Vash1

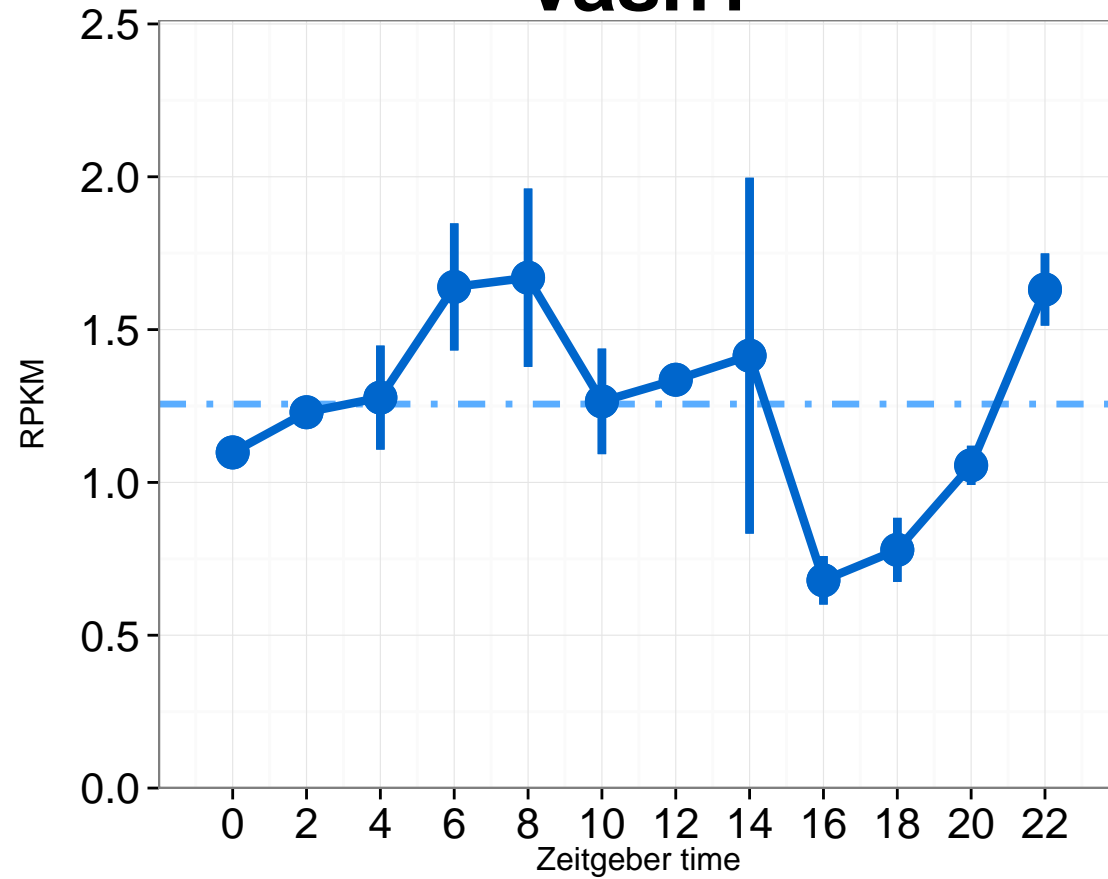

## Vash1 log2(Ribosome occupancy

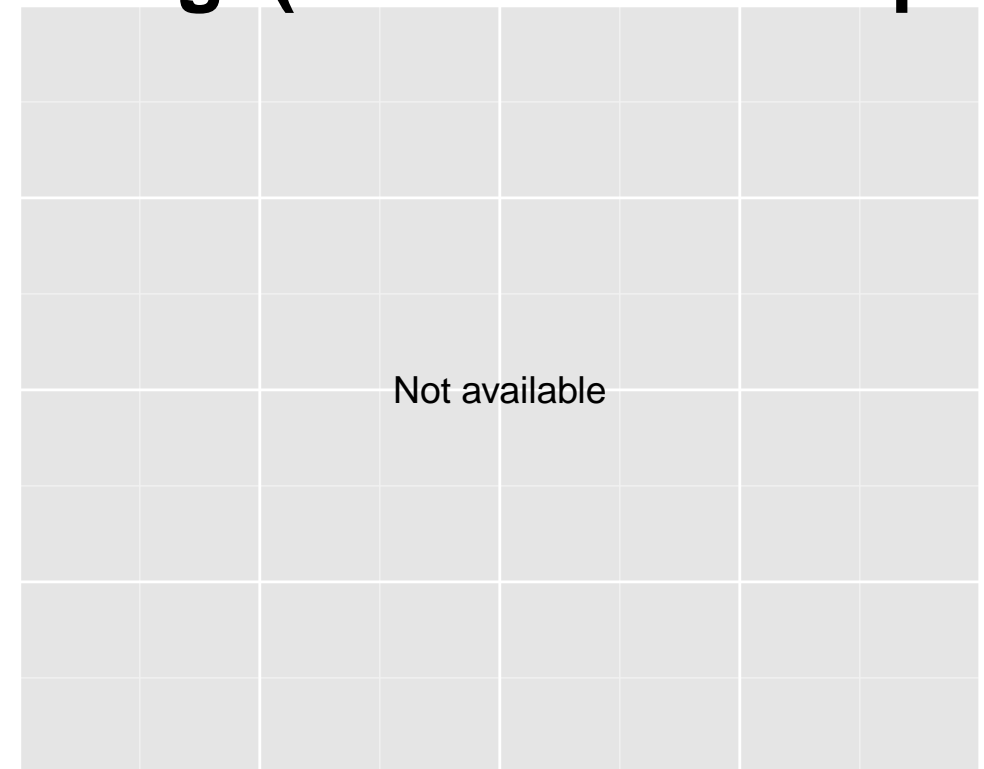

Supplement: Supplementary file 9311 [file 1]

# Akr1c19

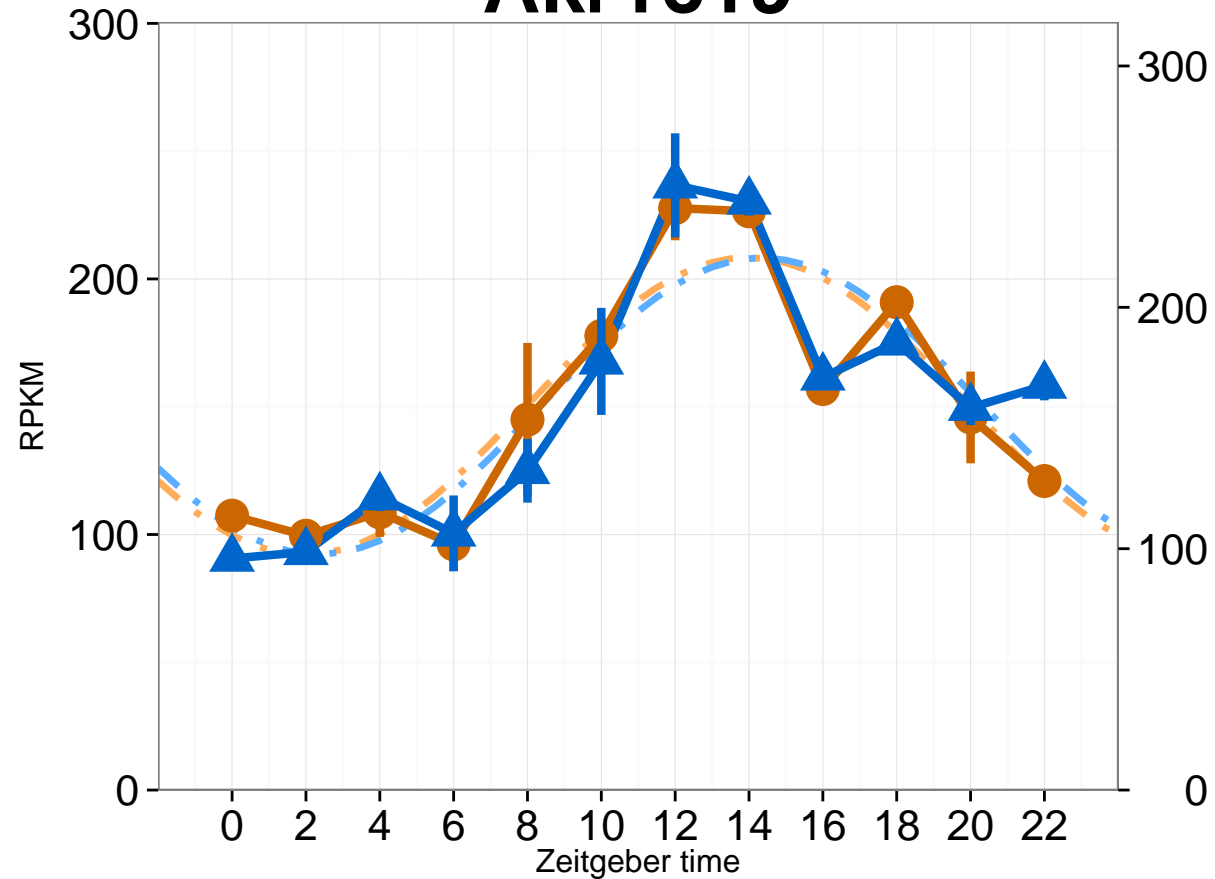

# Akr1c19

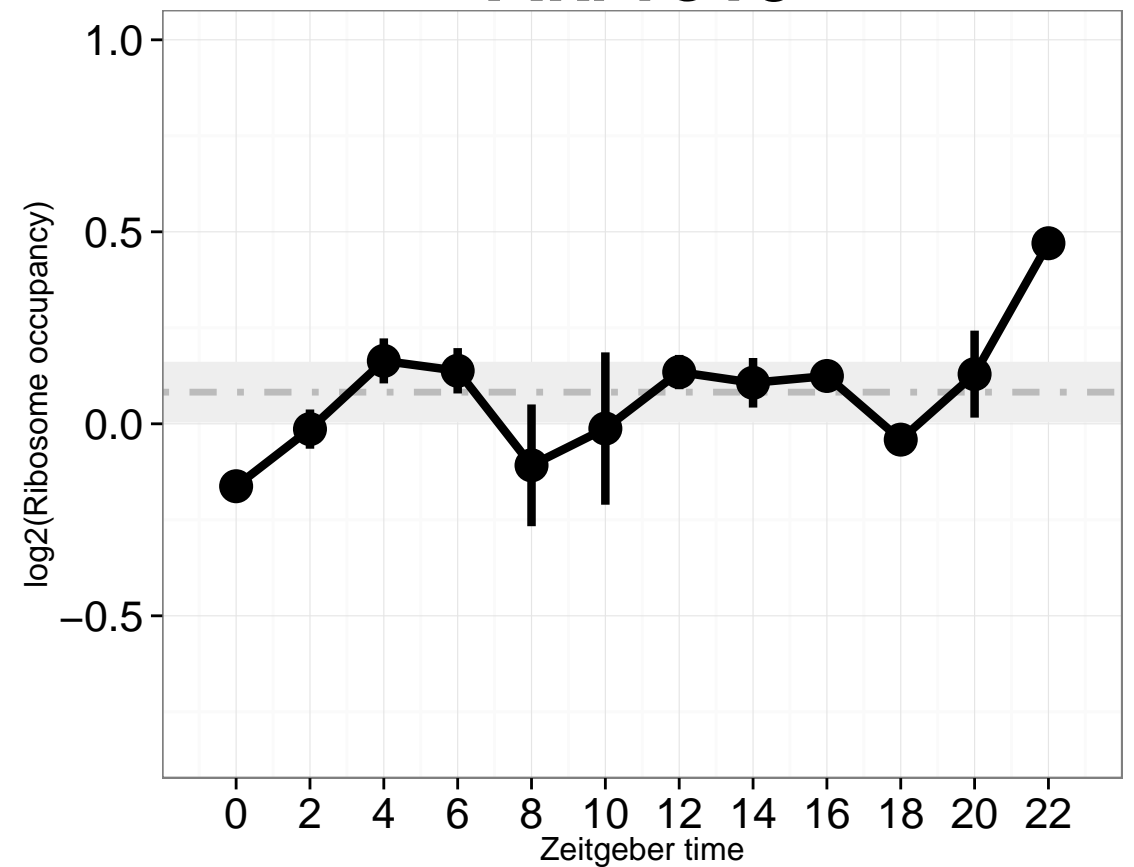

Supplement: Supplementary file 9312 [file 1]

# AW146154

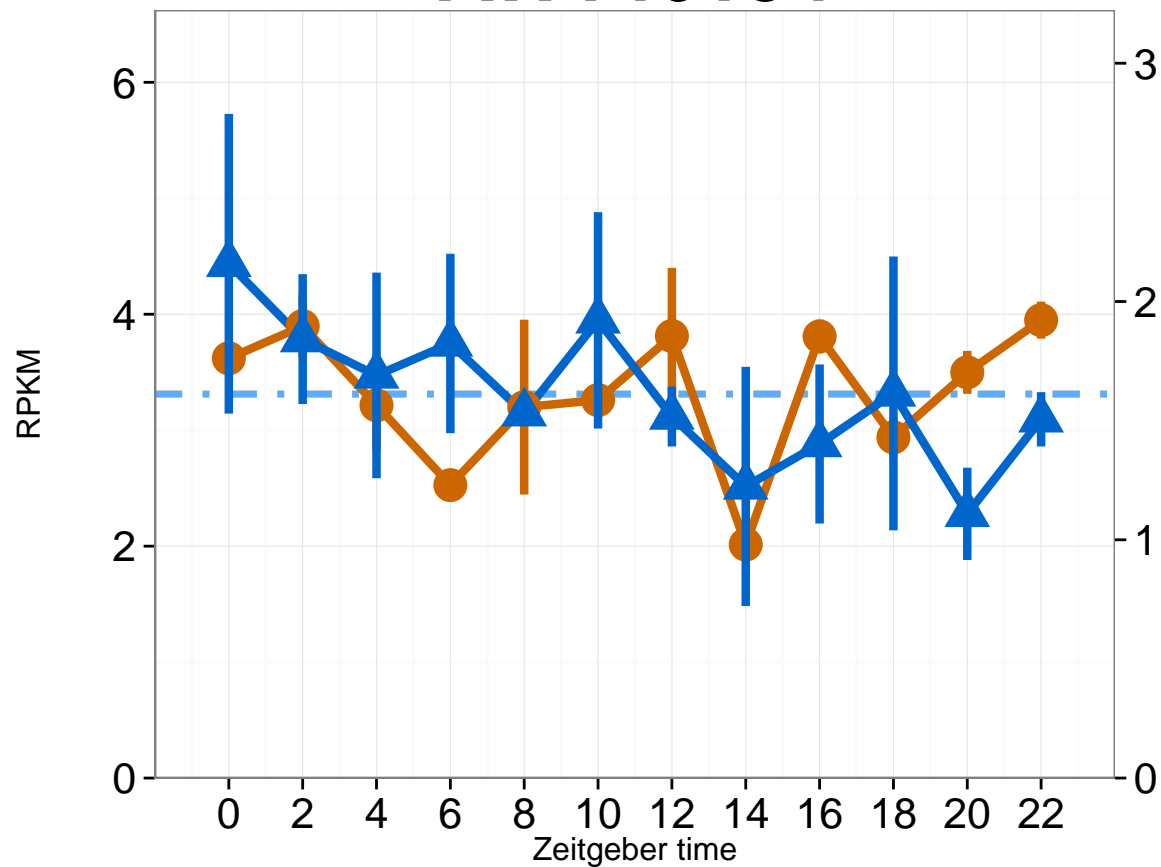

# AW146154

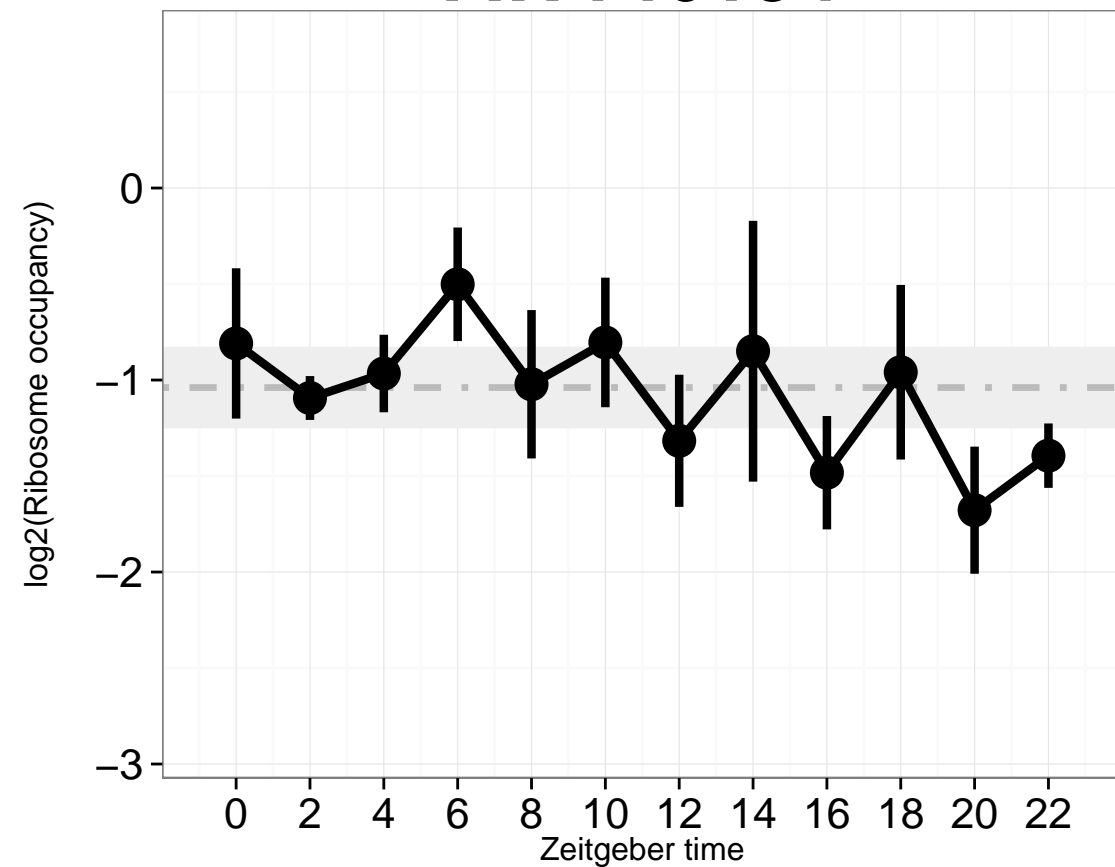

Supplement: Supplementary file 9313 [file 1]

## Dis3

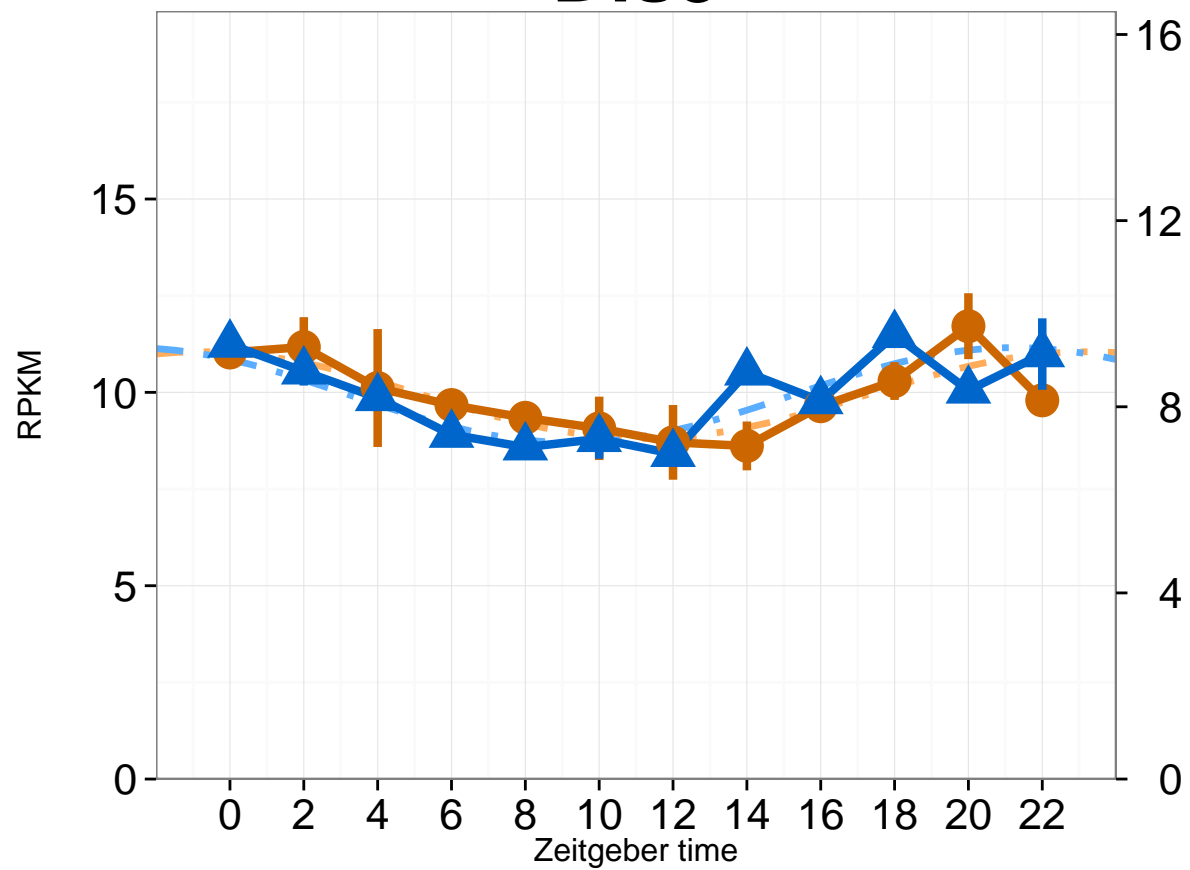

## Dis3

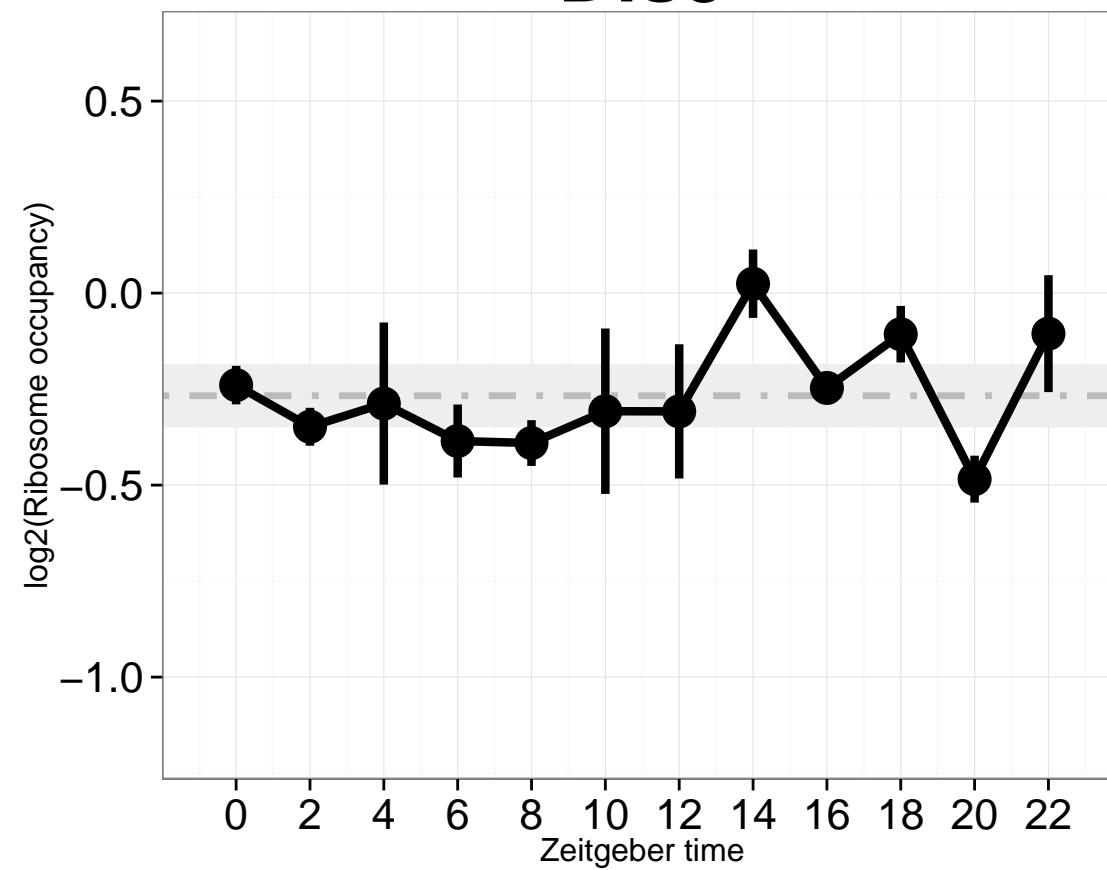

Supplement: Supplementary file 9314 [file 1]

## Dok2

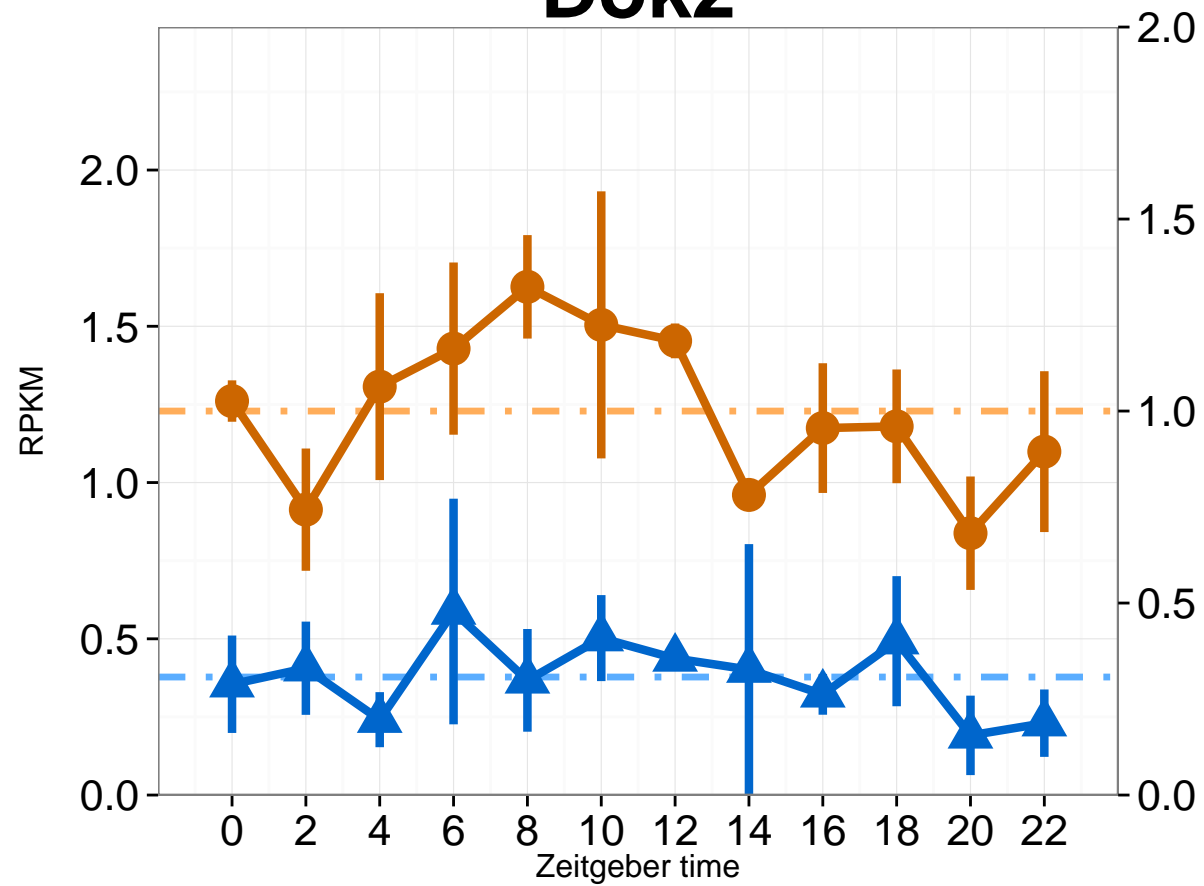

## Dok2

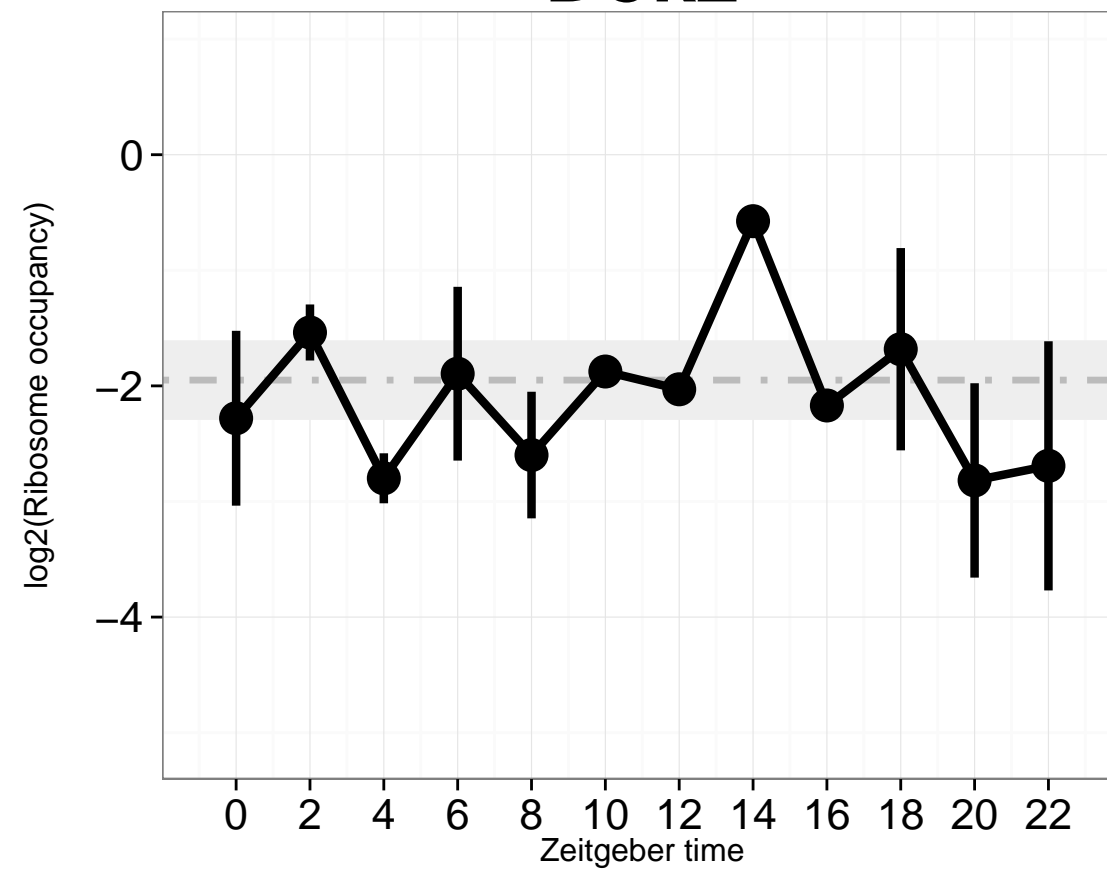

Supplement: Supplementary file 9315 [file 1]

# Fam163a

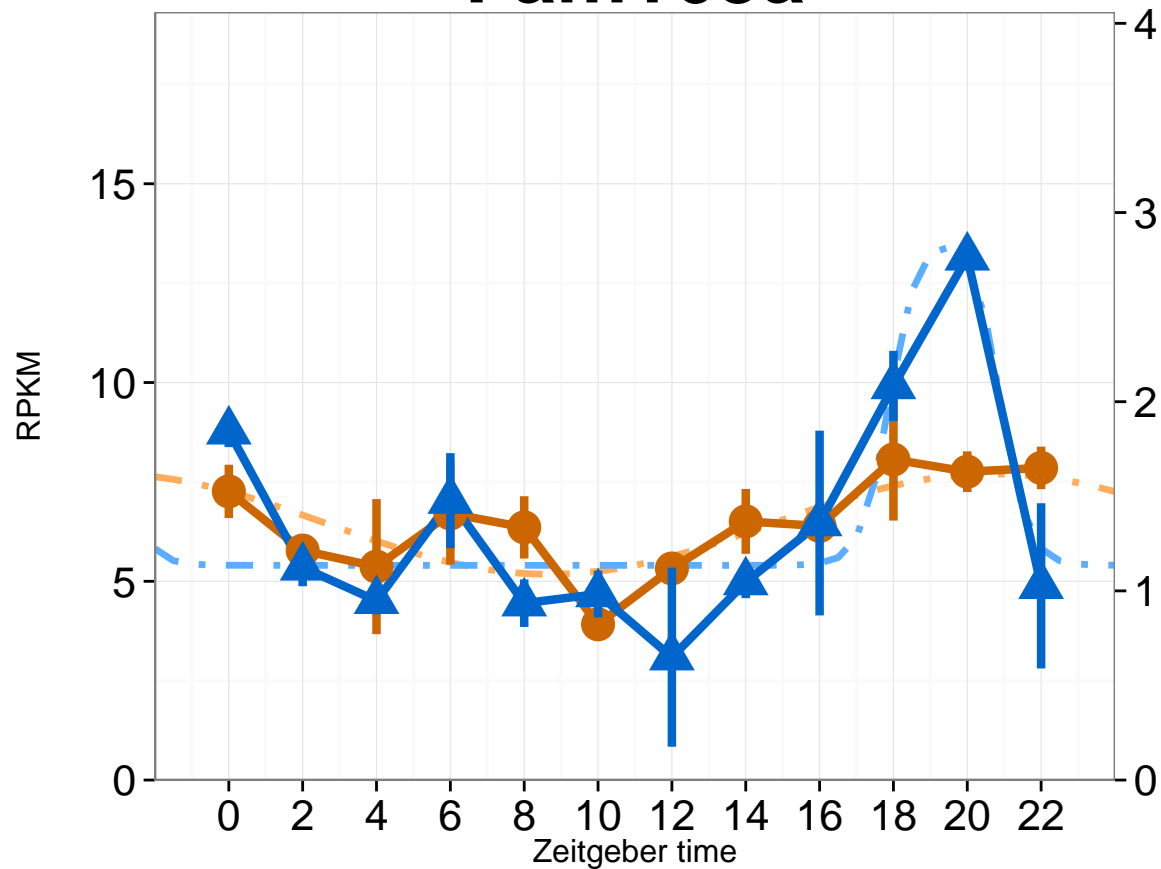

# Fam163a

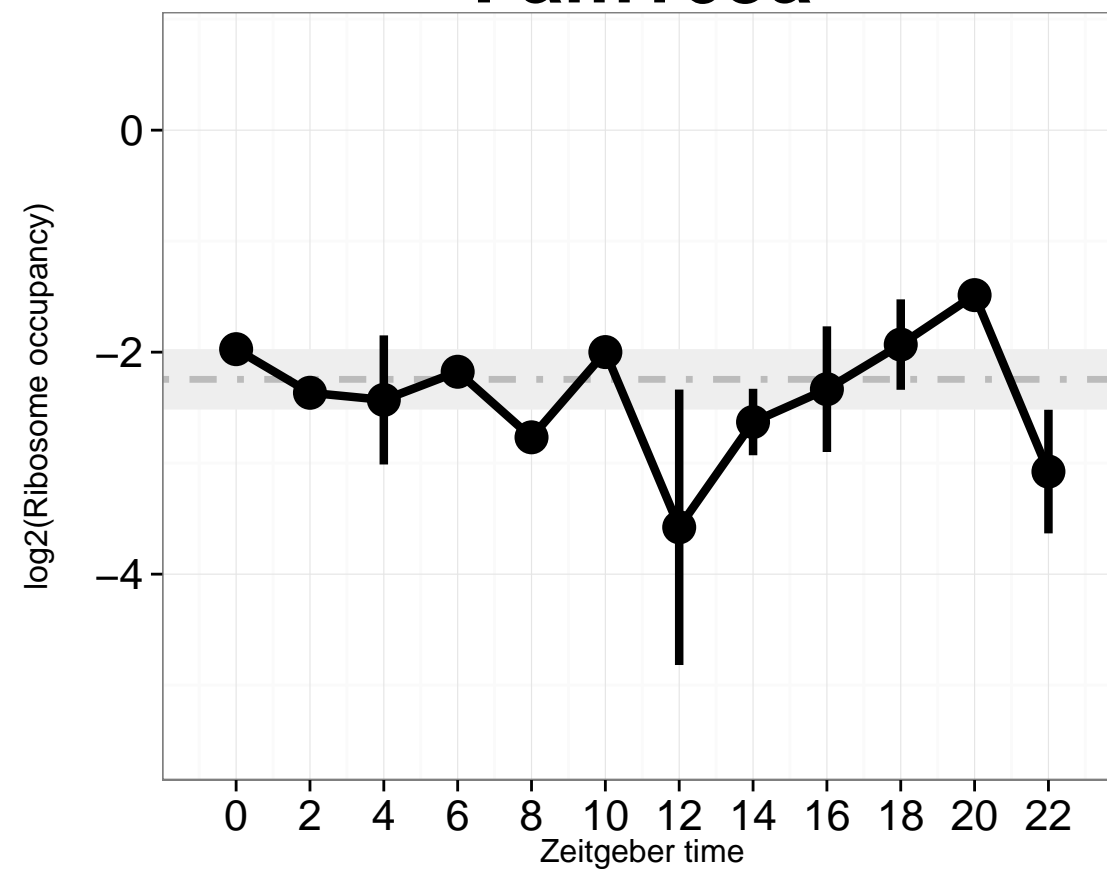

Supplement: Supplementary file 9316 [file 1]

# Cyb5r4

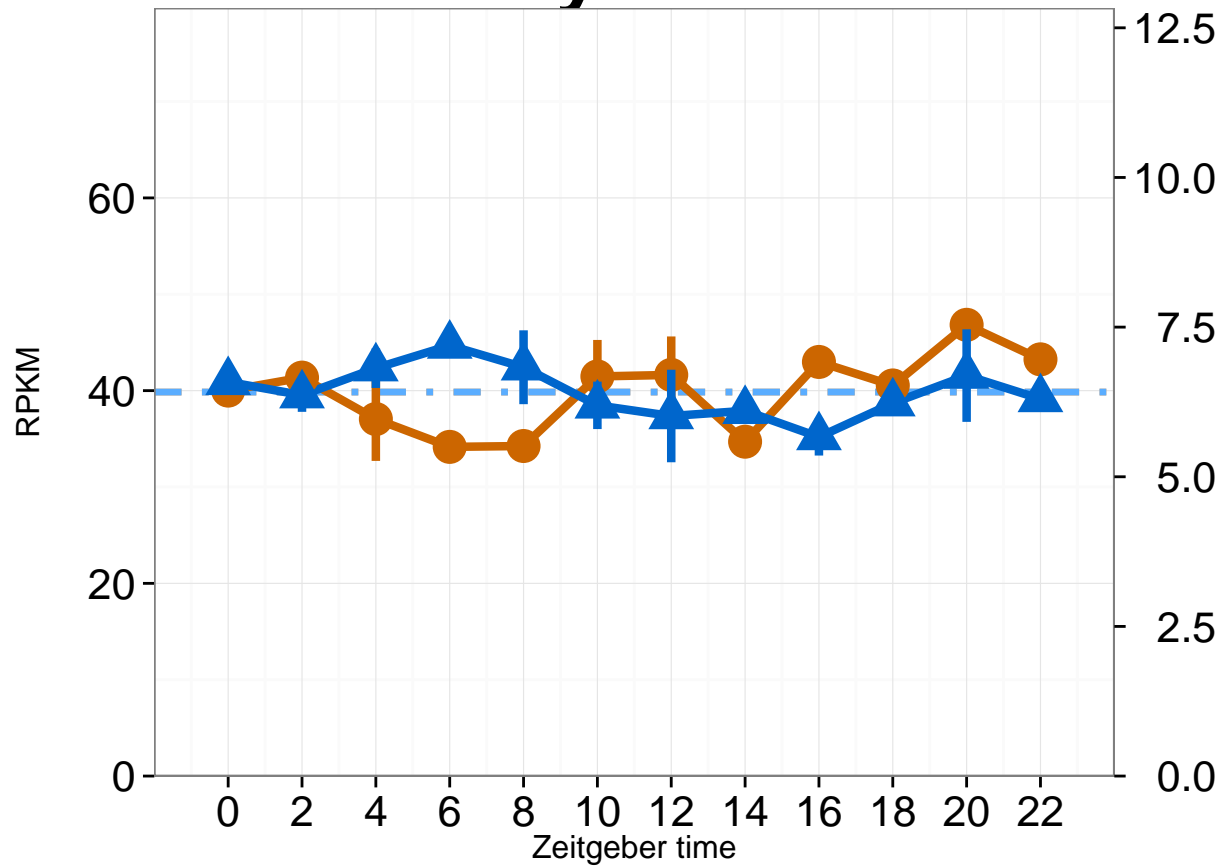

# Cyb5r4

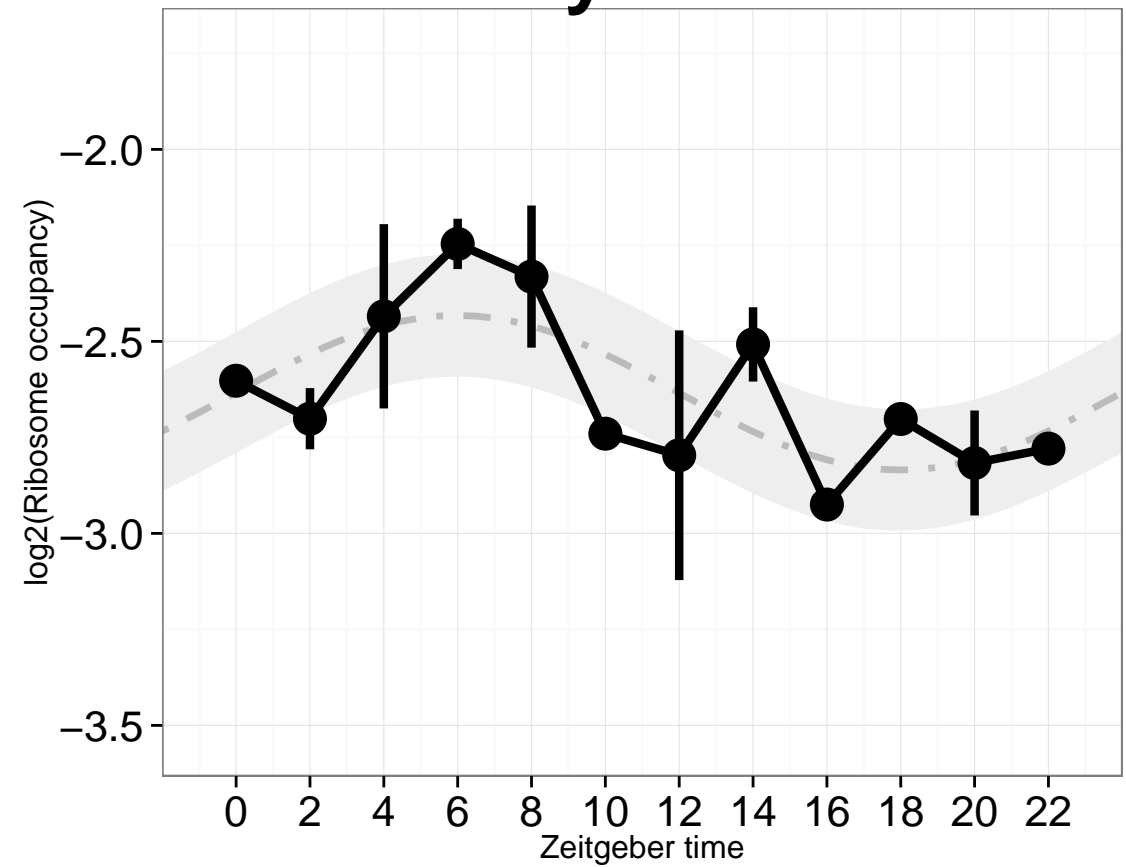

Supplement: Supplementary file 9317 [file 1]

## Il1rl2

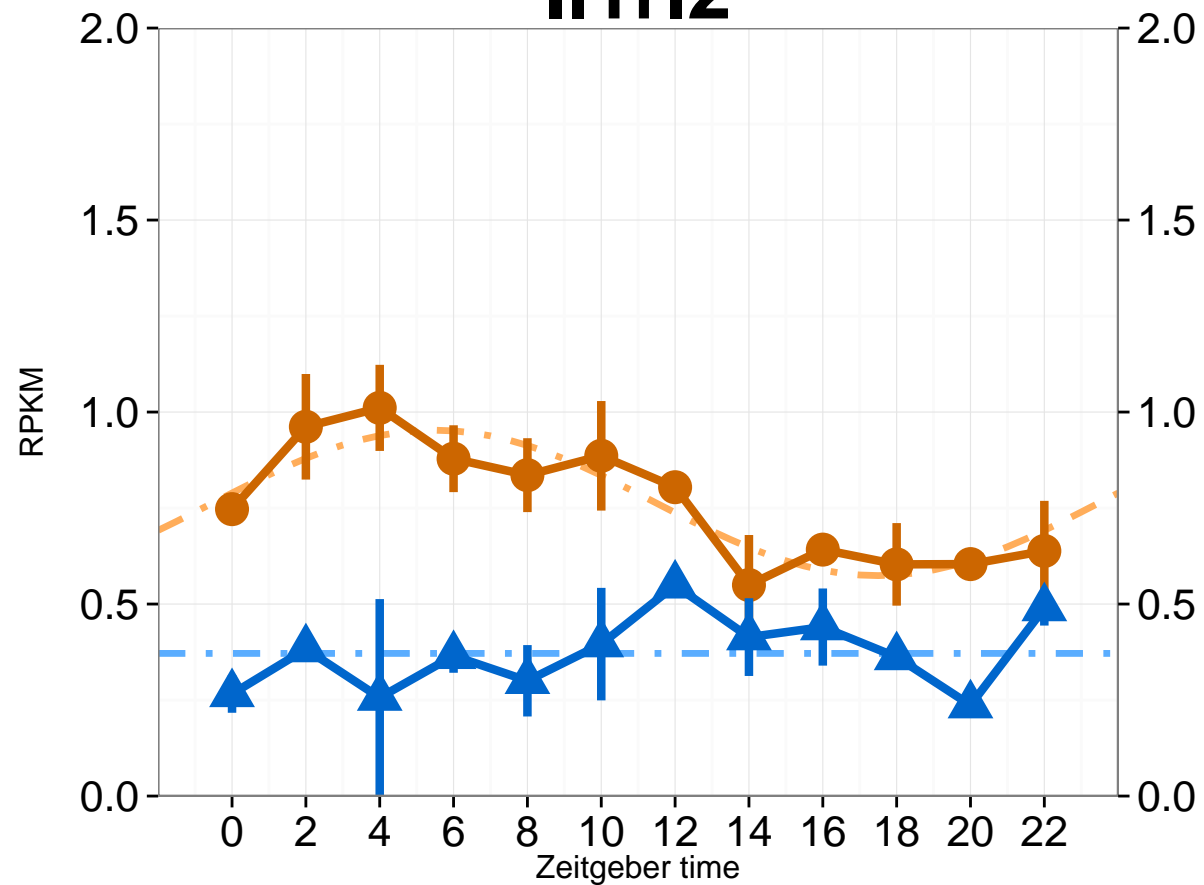

## Il1rl2

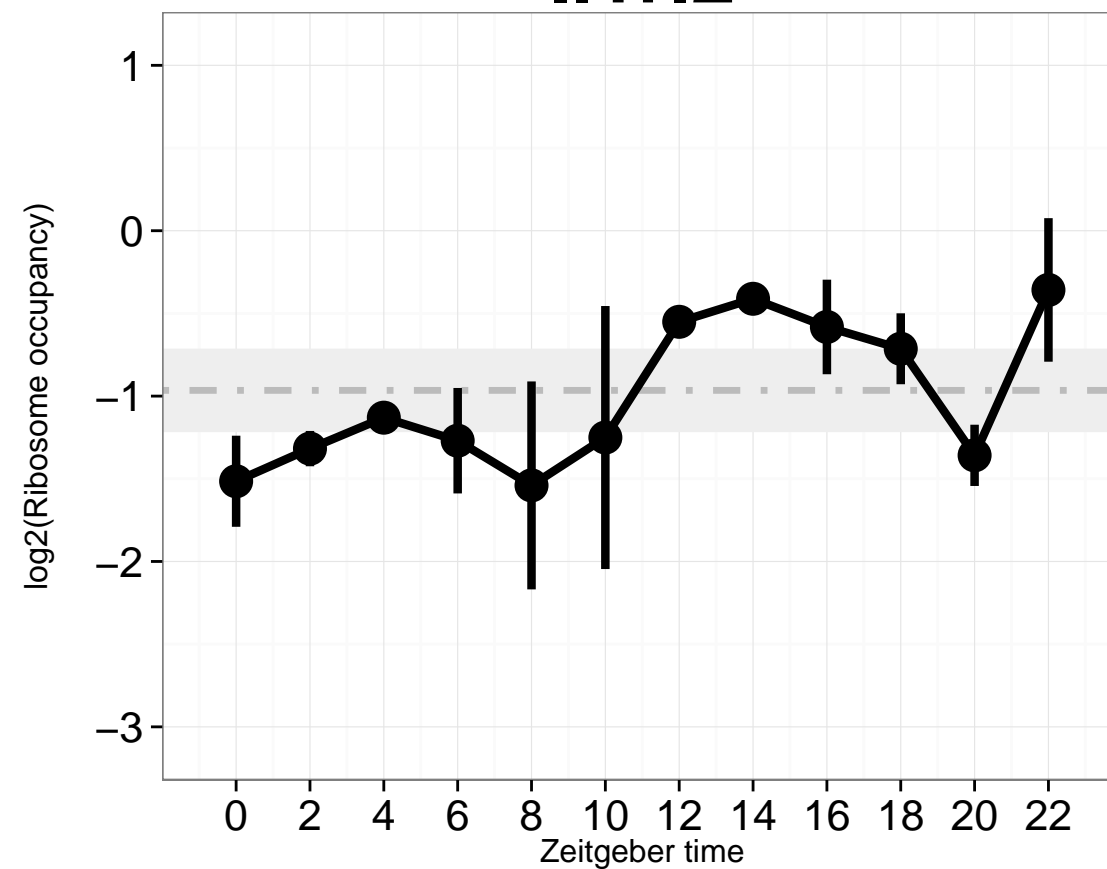

Supplement: Supplementary file 9318 [file 1]

# Usp53

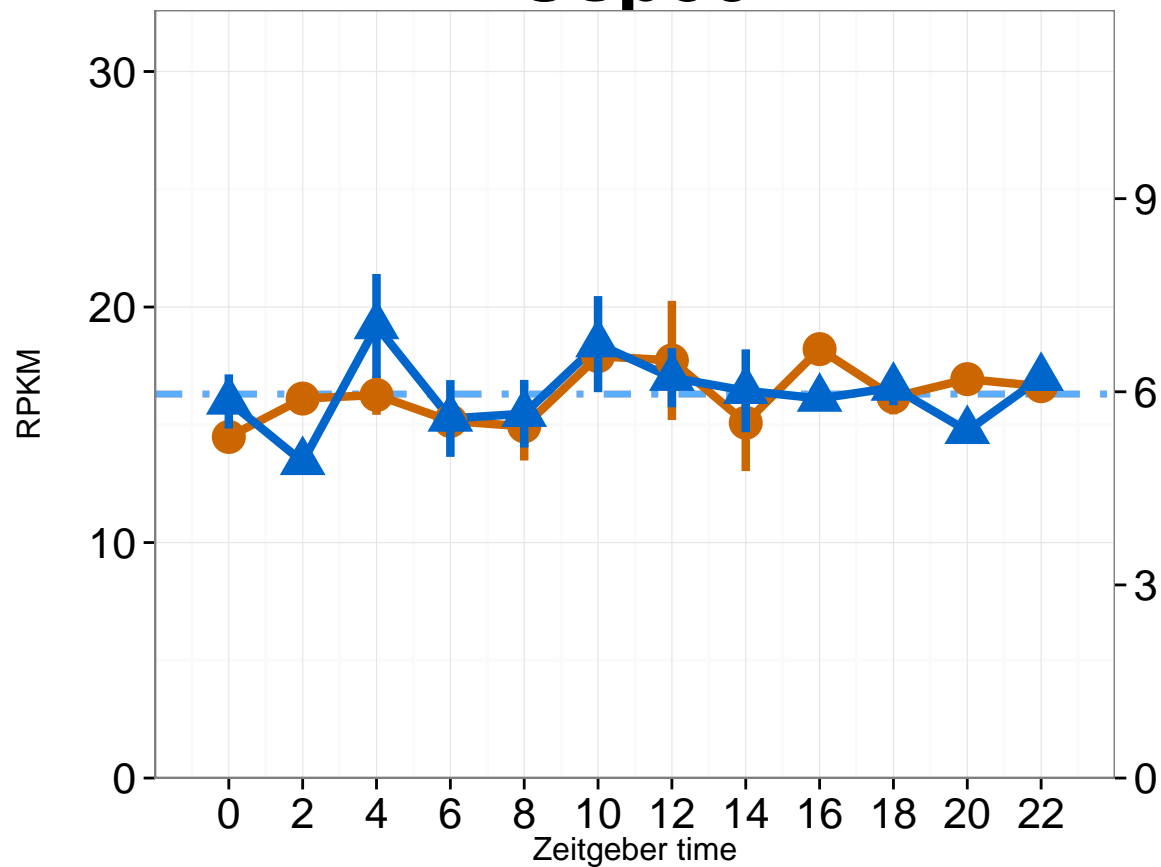

# Usp53

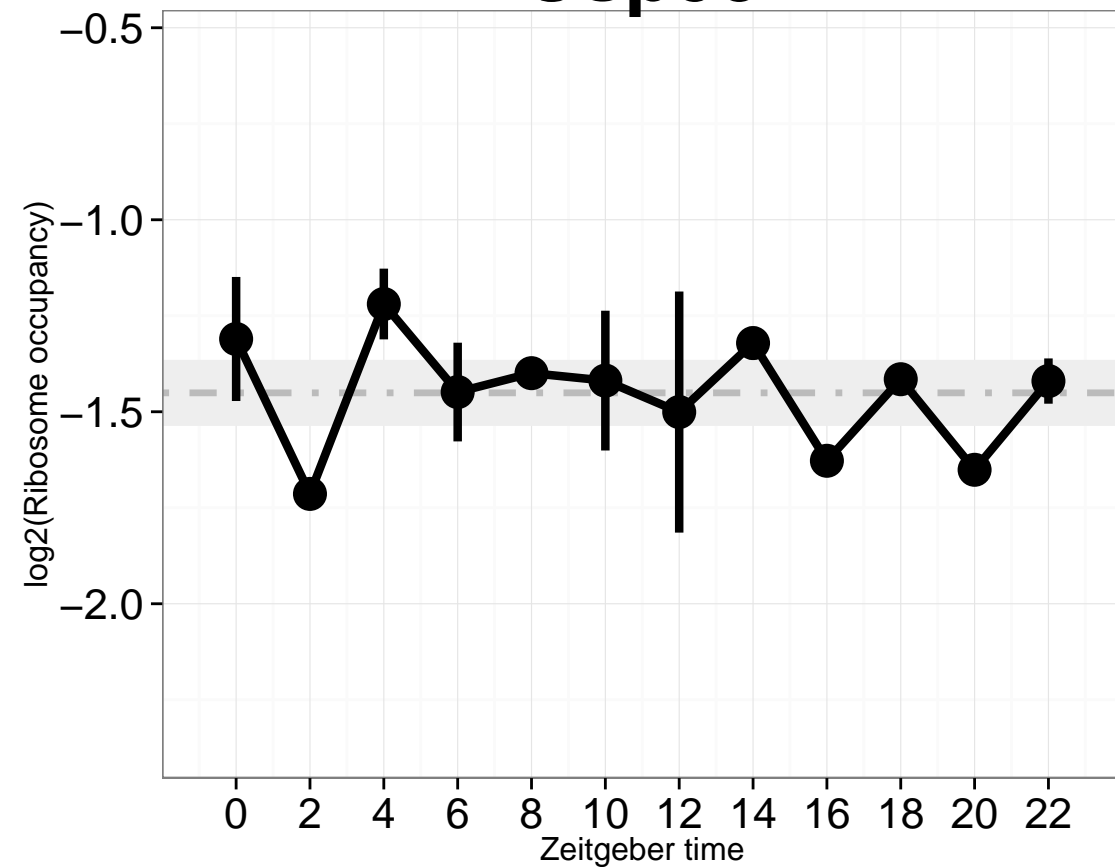

Supplement: Supplementary file 9319 [file 1]

**Angpt4 TR**

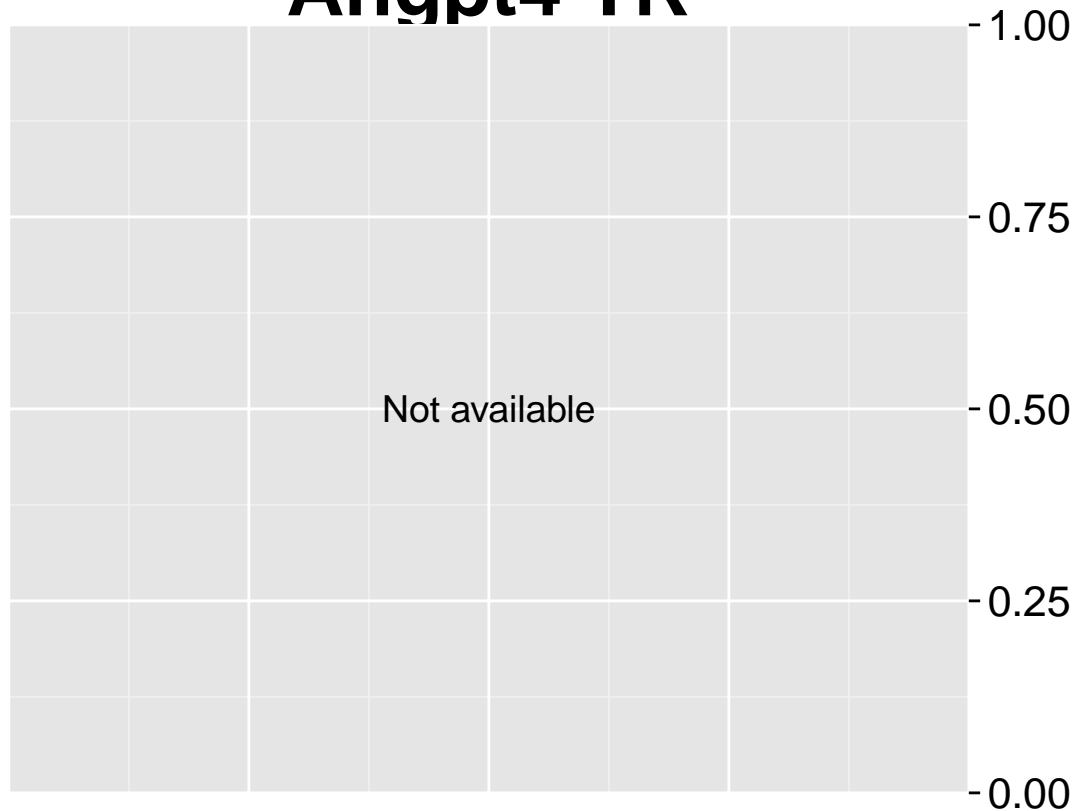

**Angpt4 log2(Ribosome occupancy**

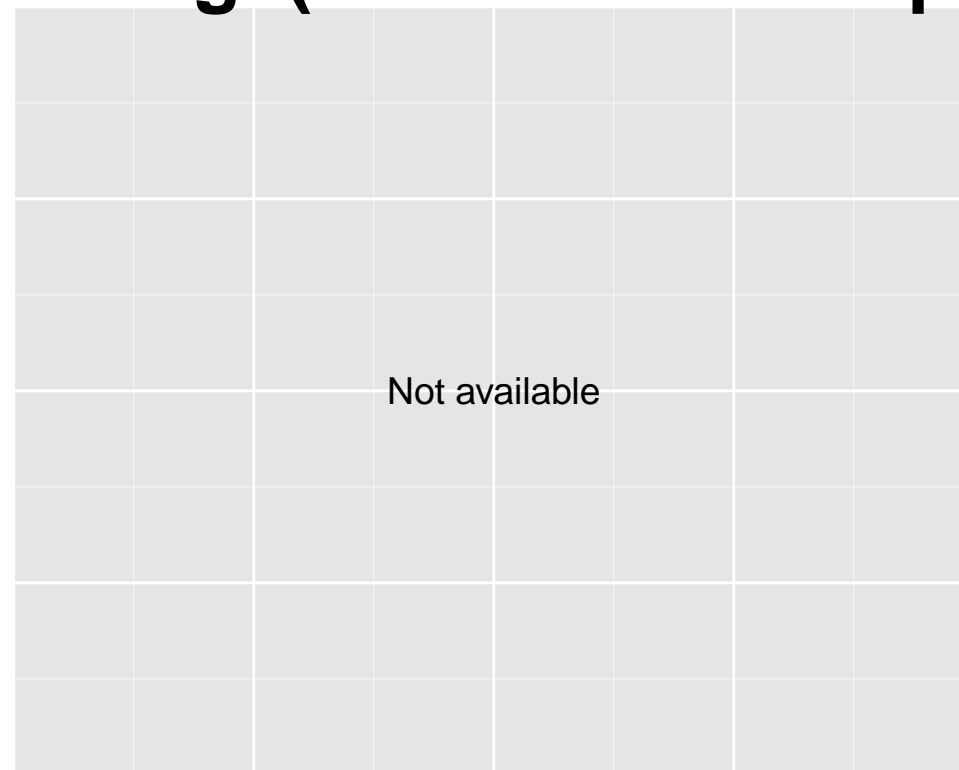

Supplement: Supplementary file 9320 [file 1]

## Ddx46

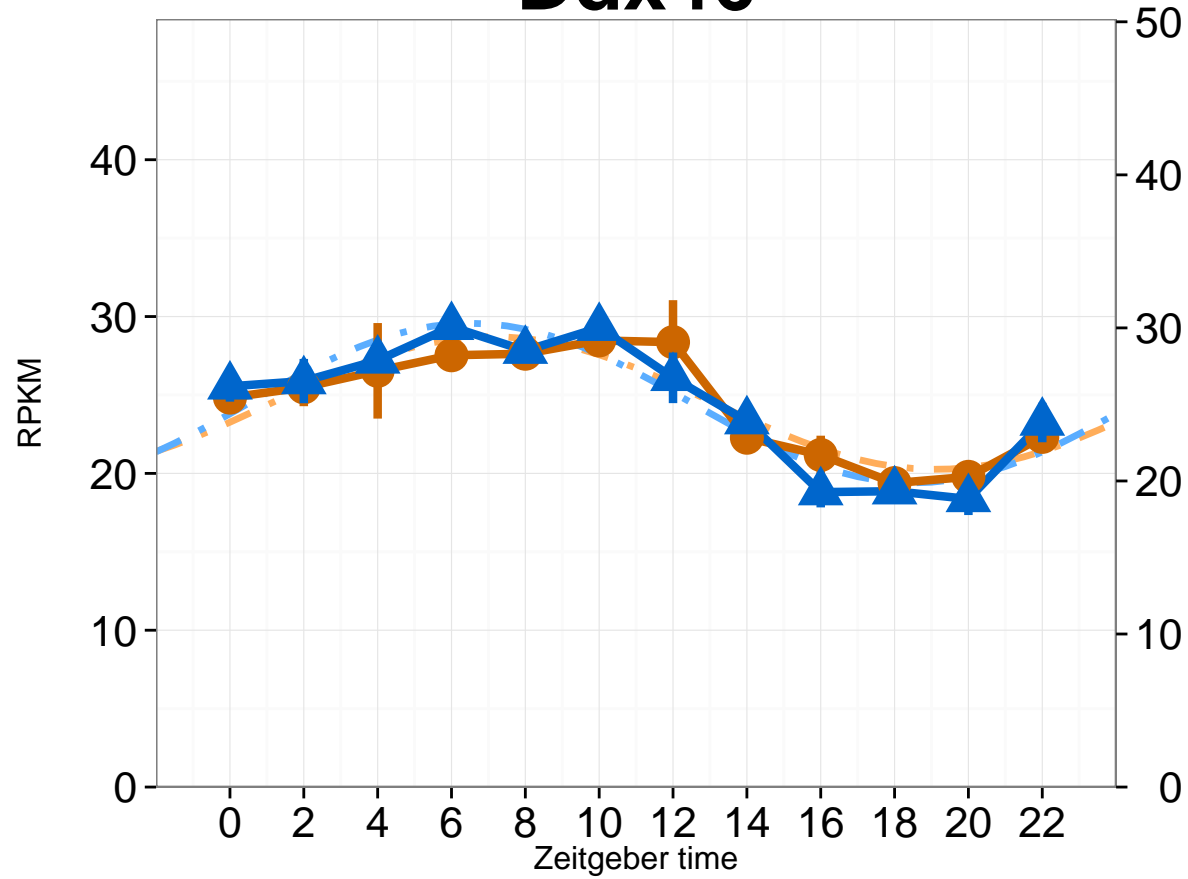

## Ddx46

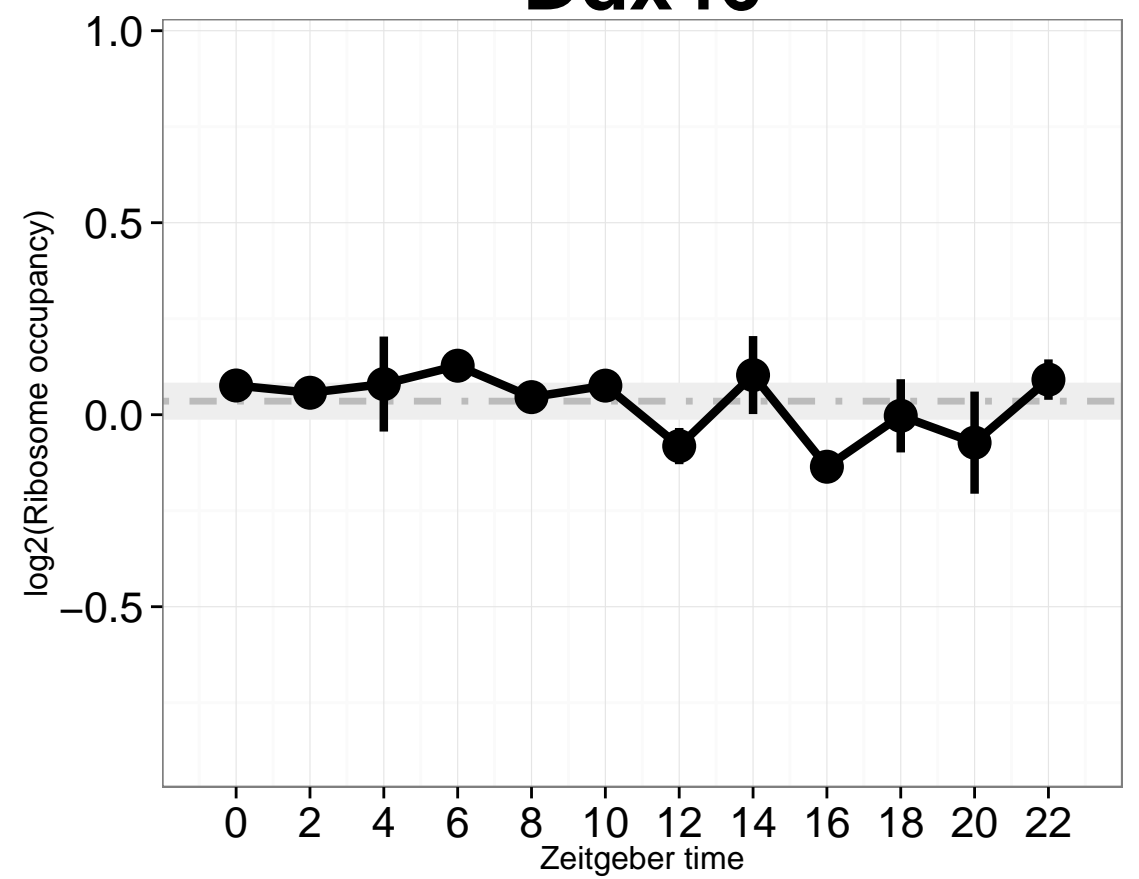

Supplement: Supplementary file 9321 [file 1]

## Smim8

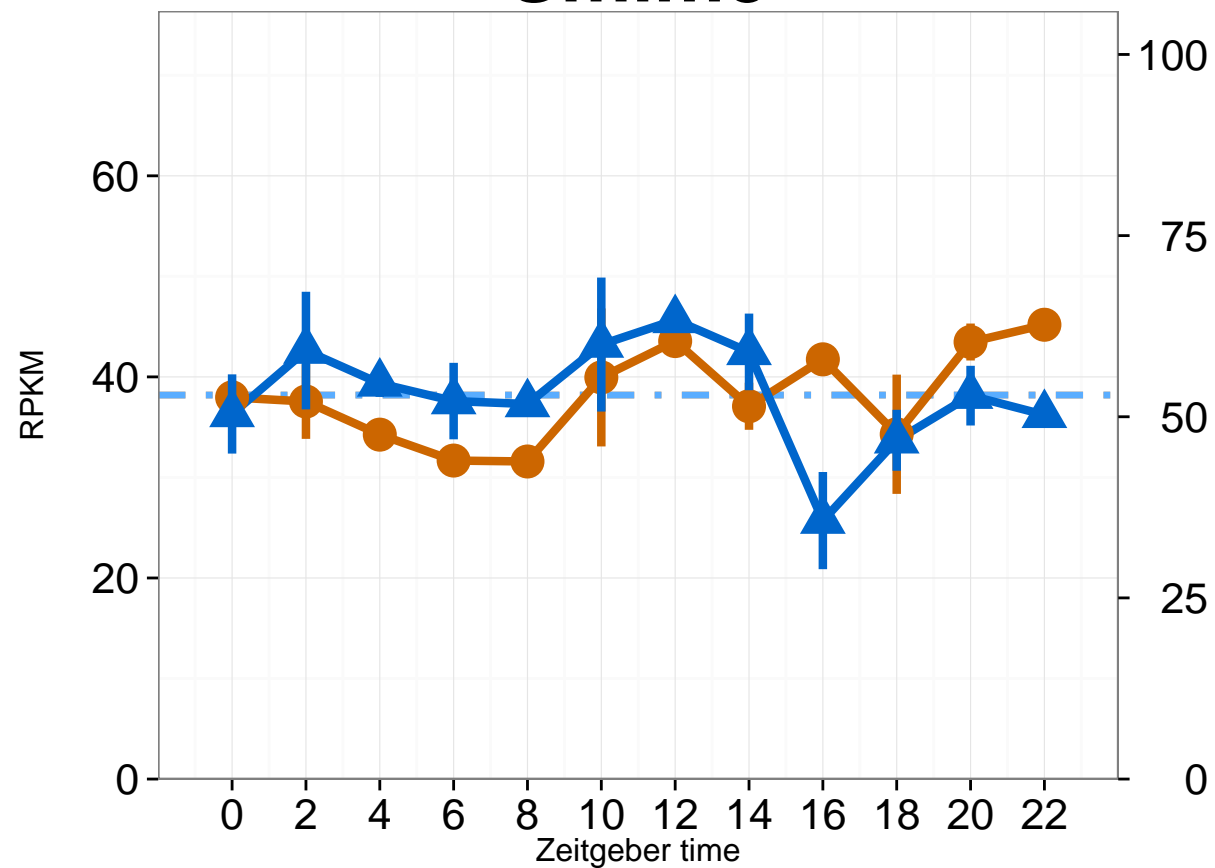

## Smim8

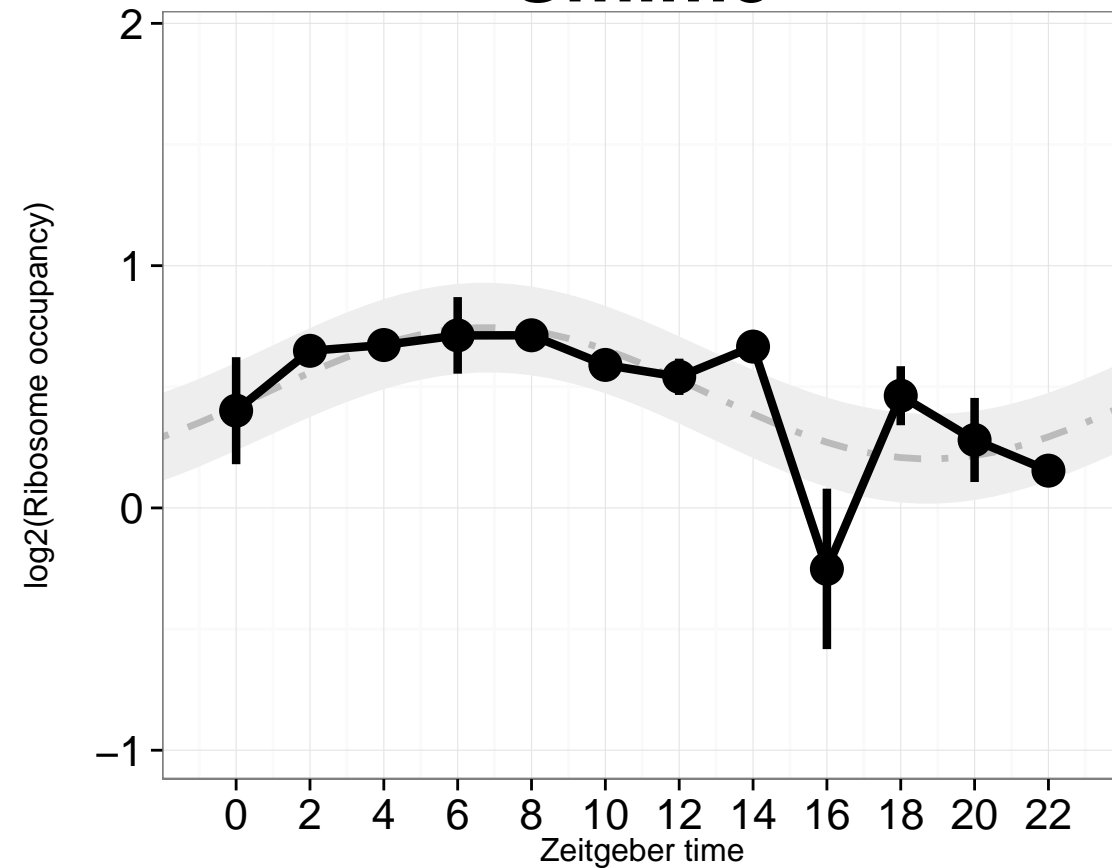

Supplement: Supplementary file 9322 [file 1]

## Baiap2

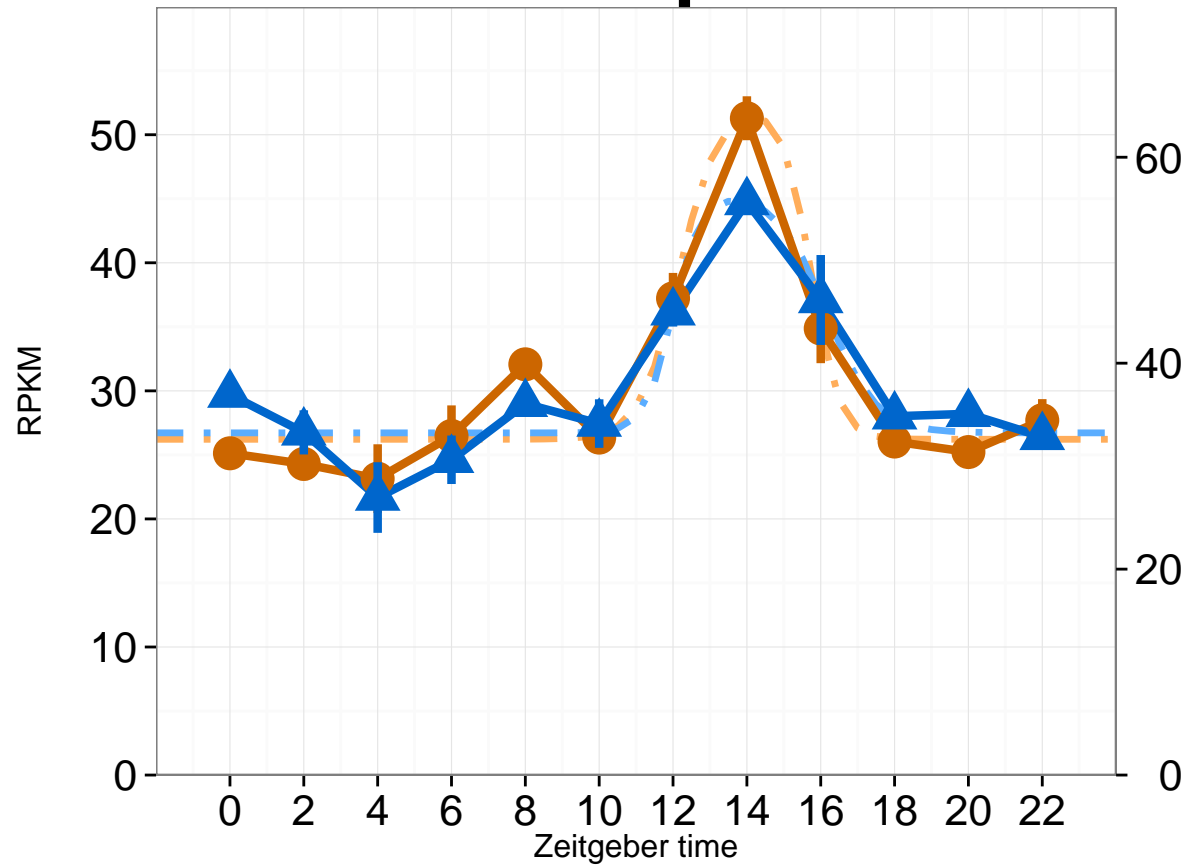

## Baiap2

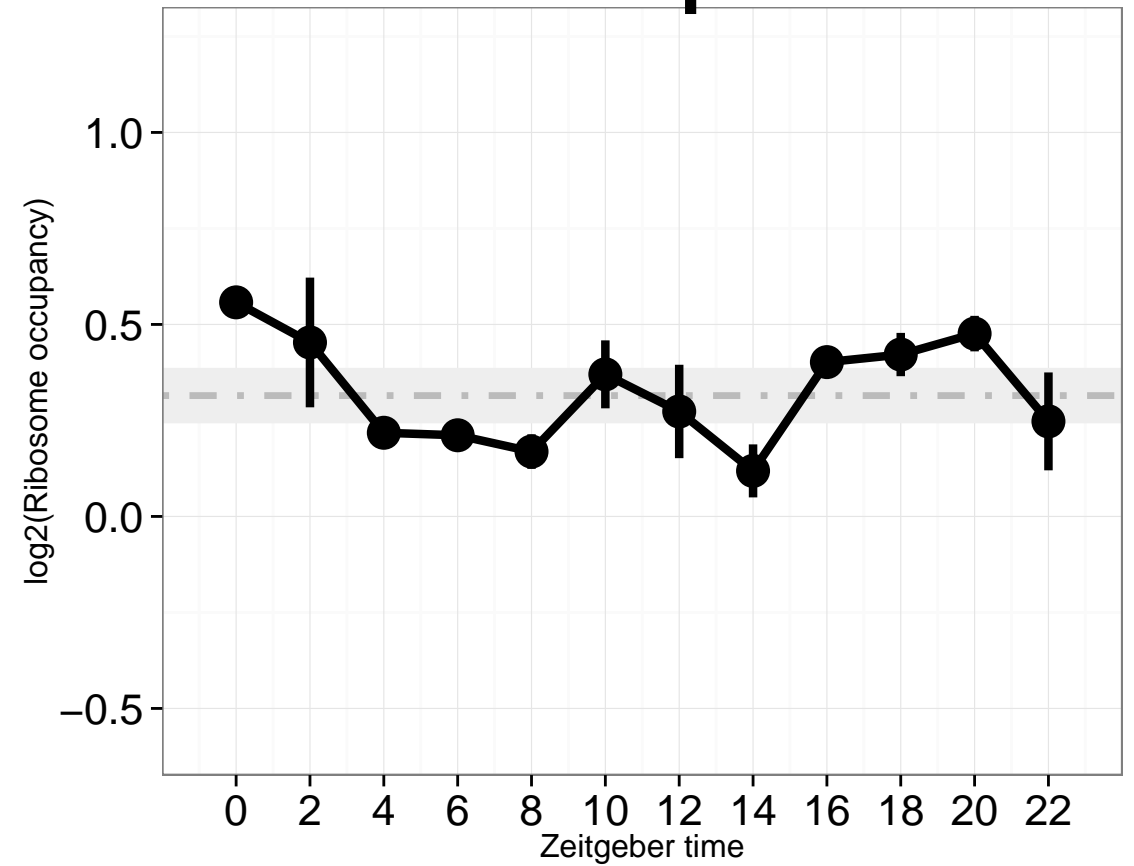

Supplement: Supplementary file 9323 [file 1]

## Mapkapk2

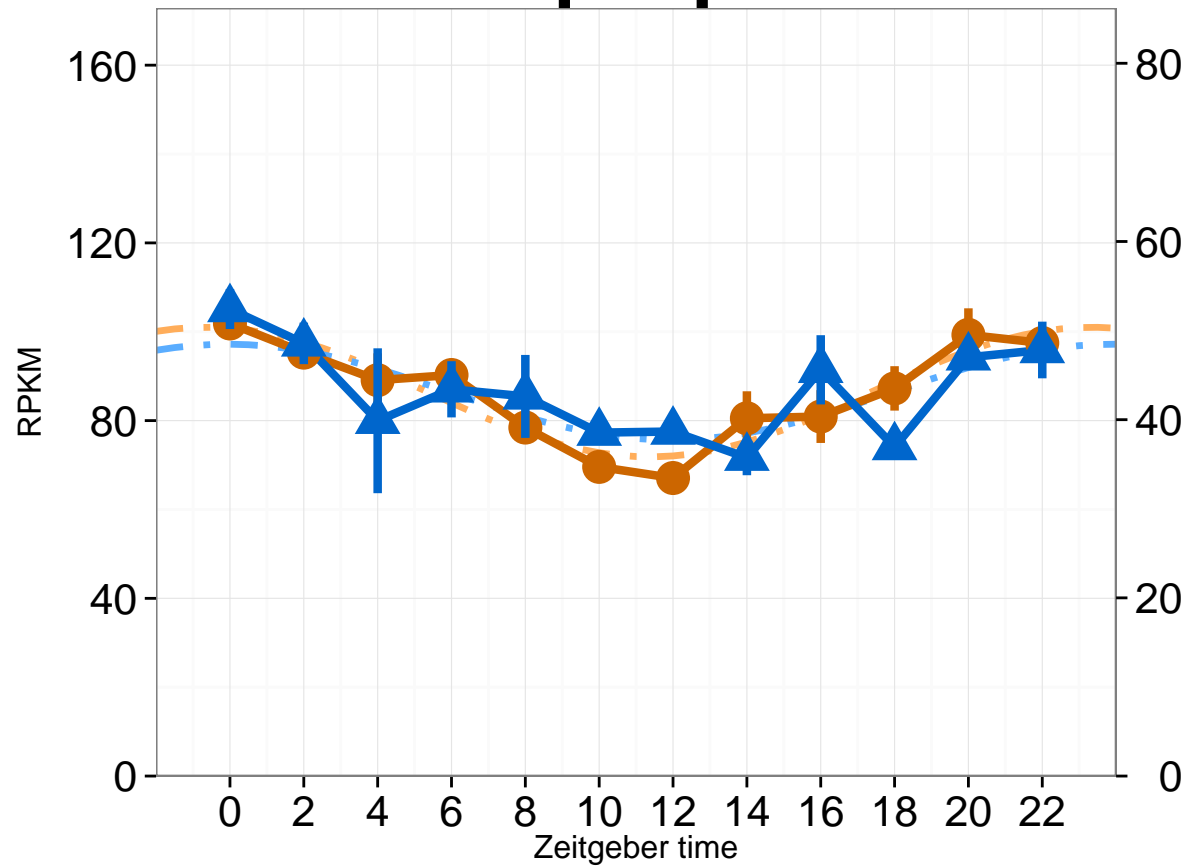

## Mapkapk2

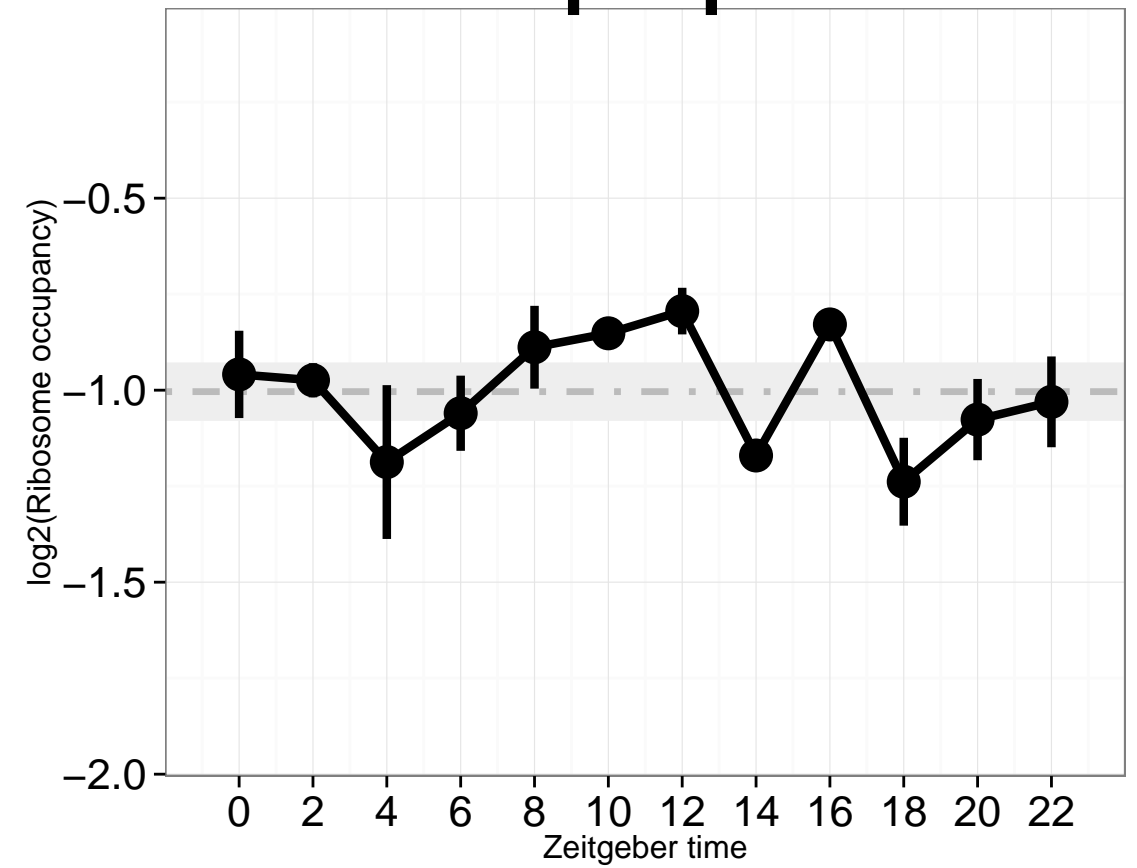

Supplement: Supplementary file 9324 [file 1]

# Sparcl1

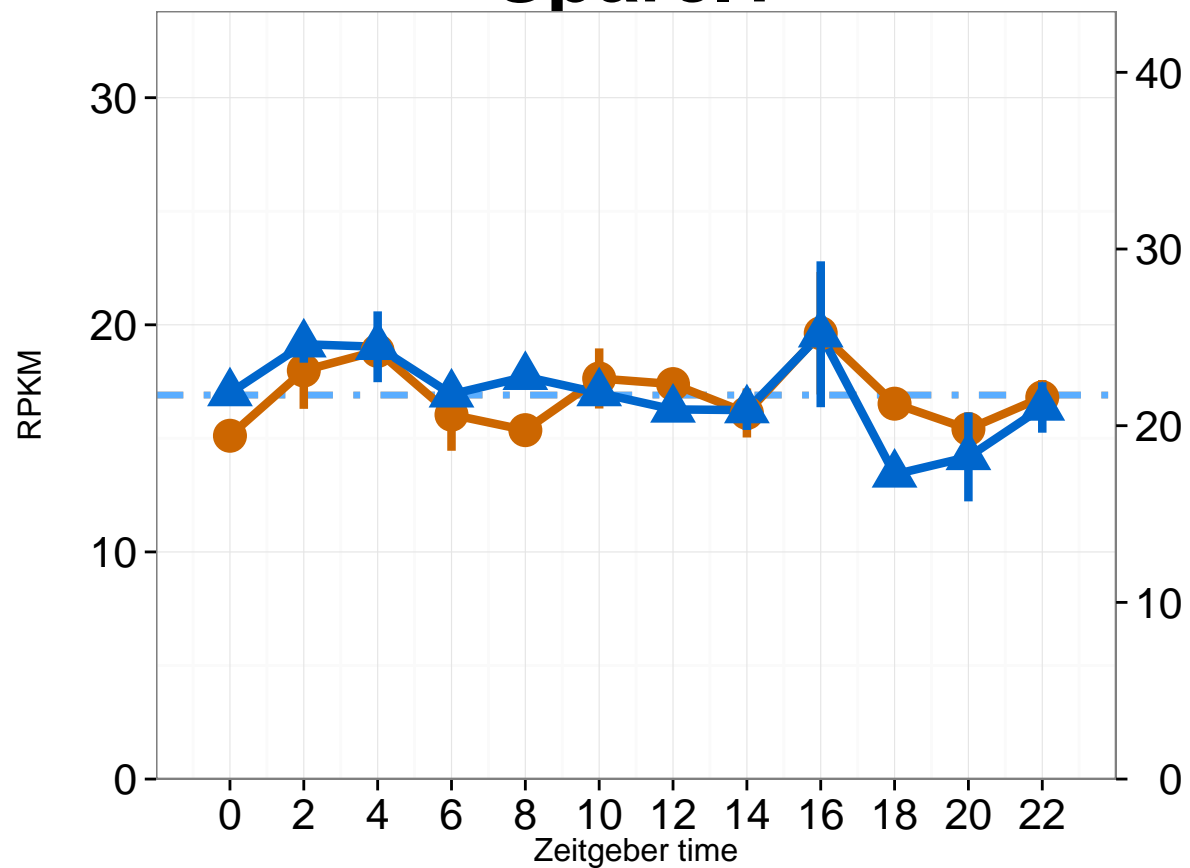

# Sparcl1

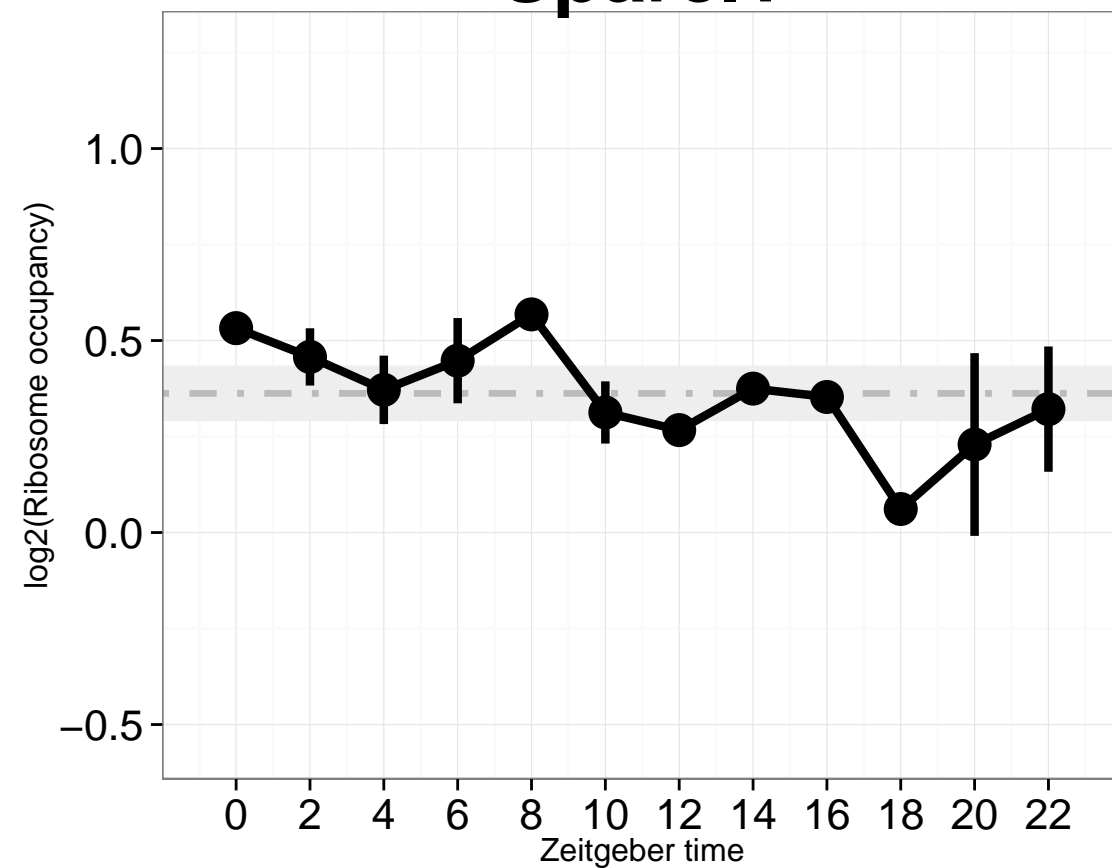

Supplement: Supplementary file 9325 [file 1]

# Grwd1

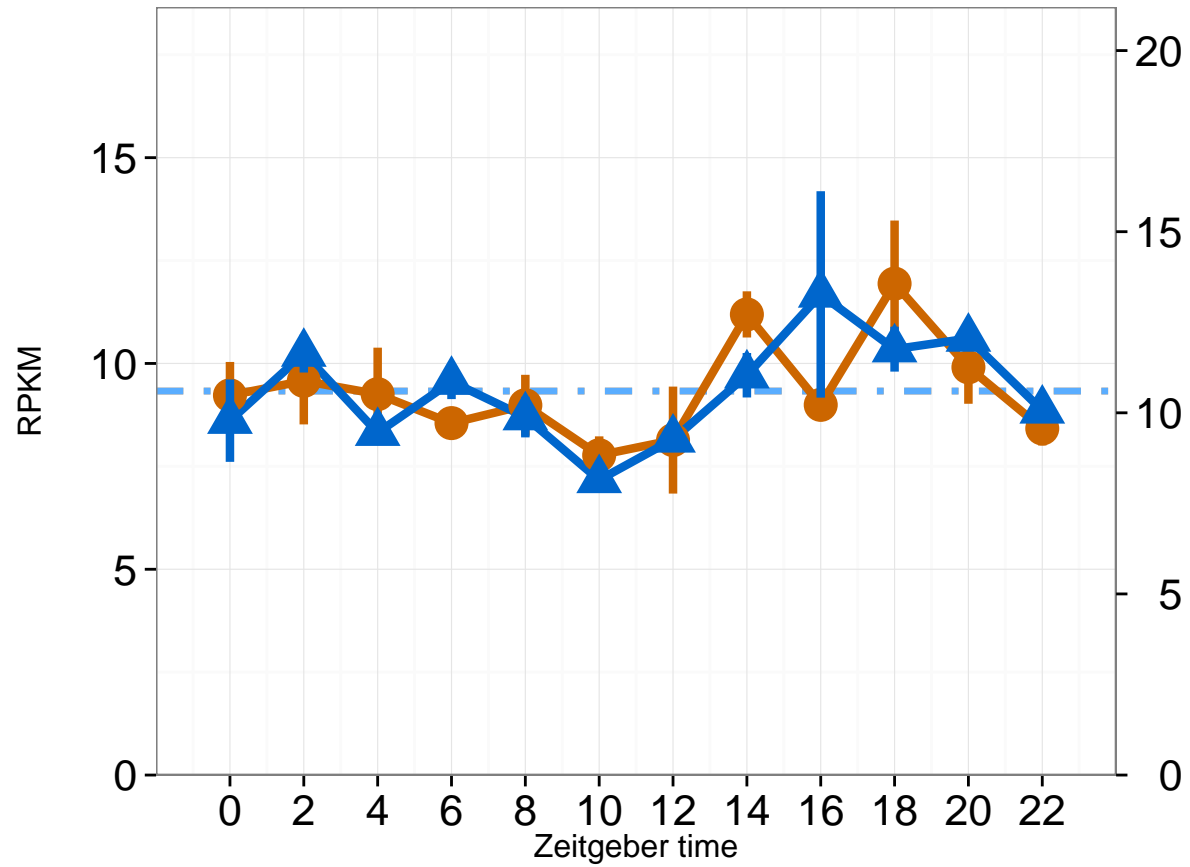

# Grwd1

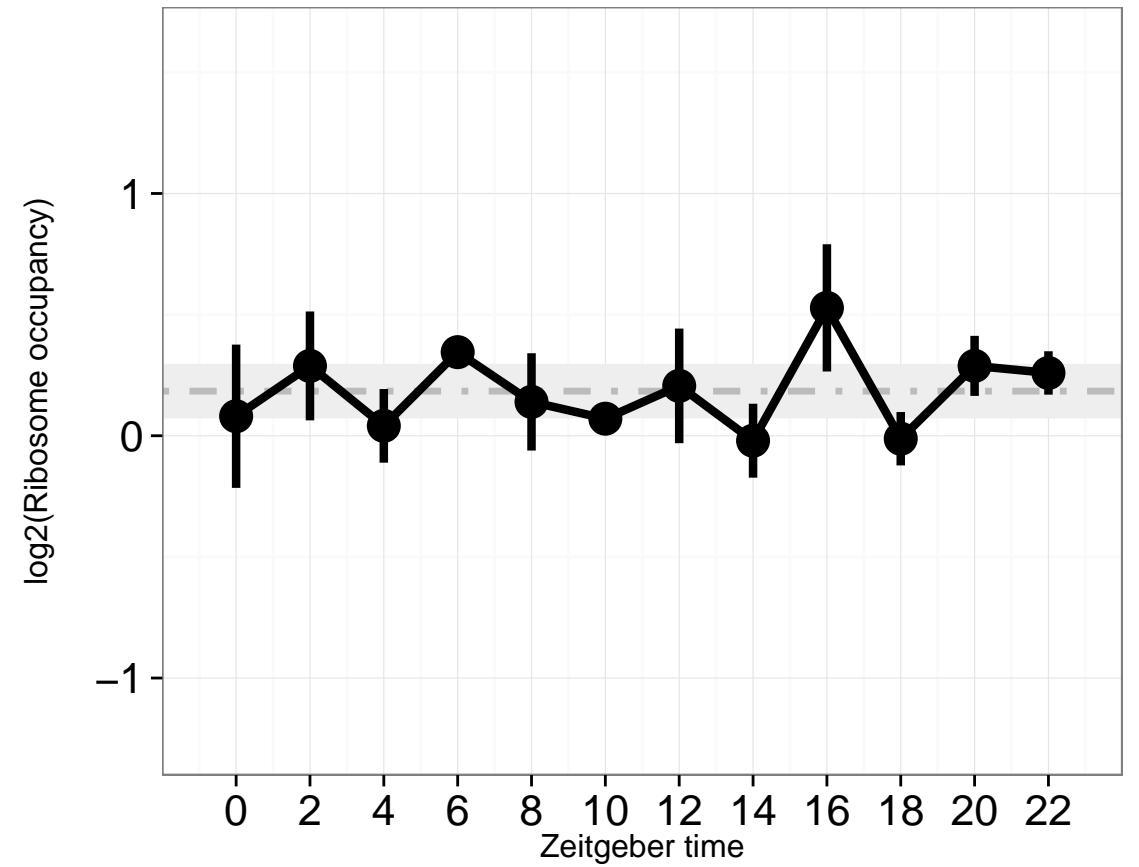

Supplement: Supplementary file 9326 [file 1]

## Zfp655

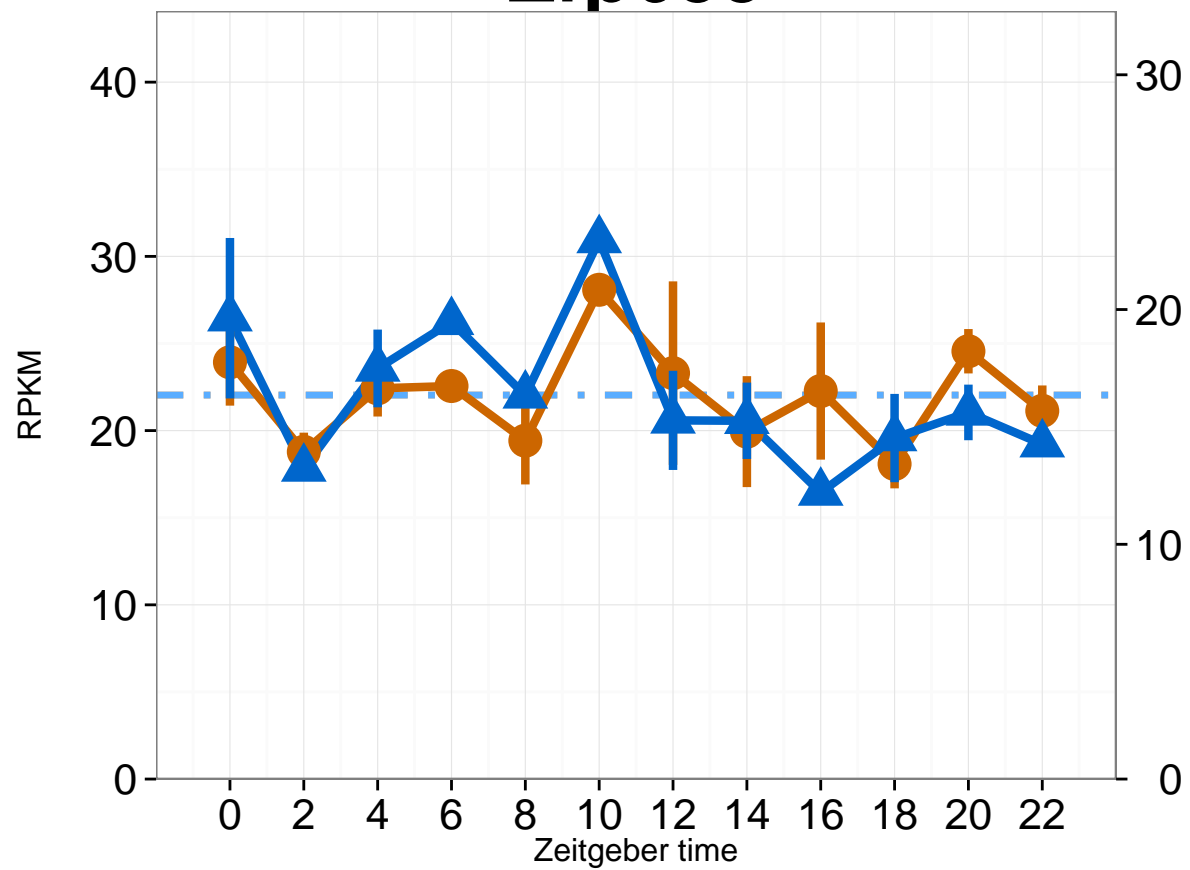

## Zfp655

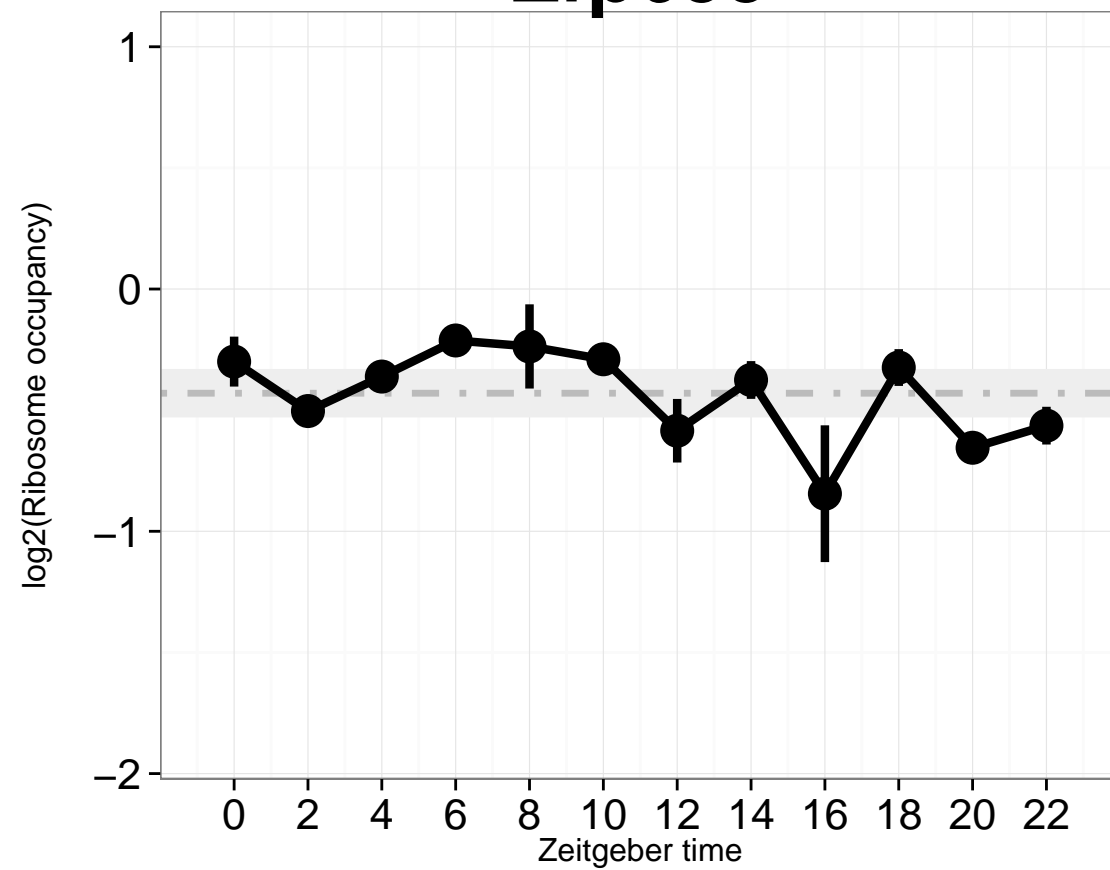

Supplement: Supplementary file 9327 [file 1]

## Cdkl2

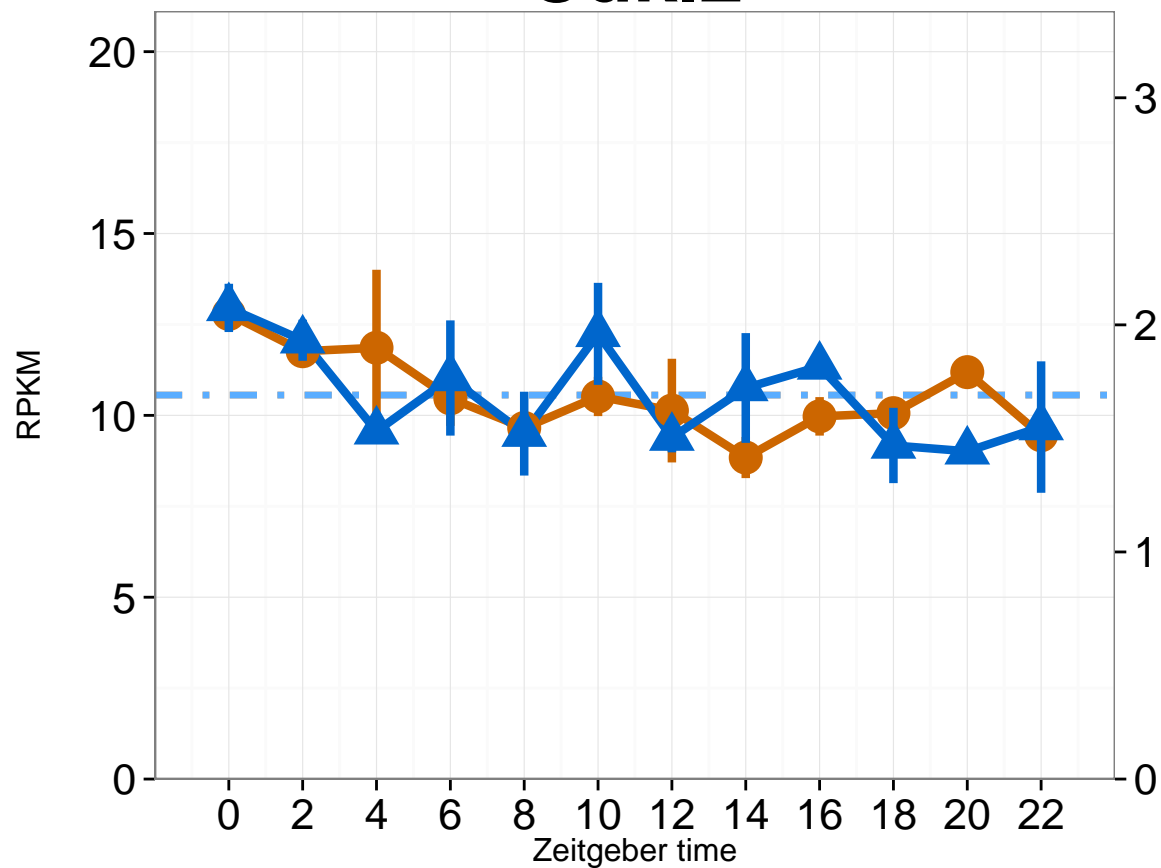

## Cdkl2

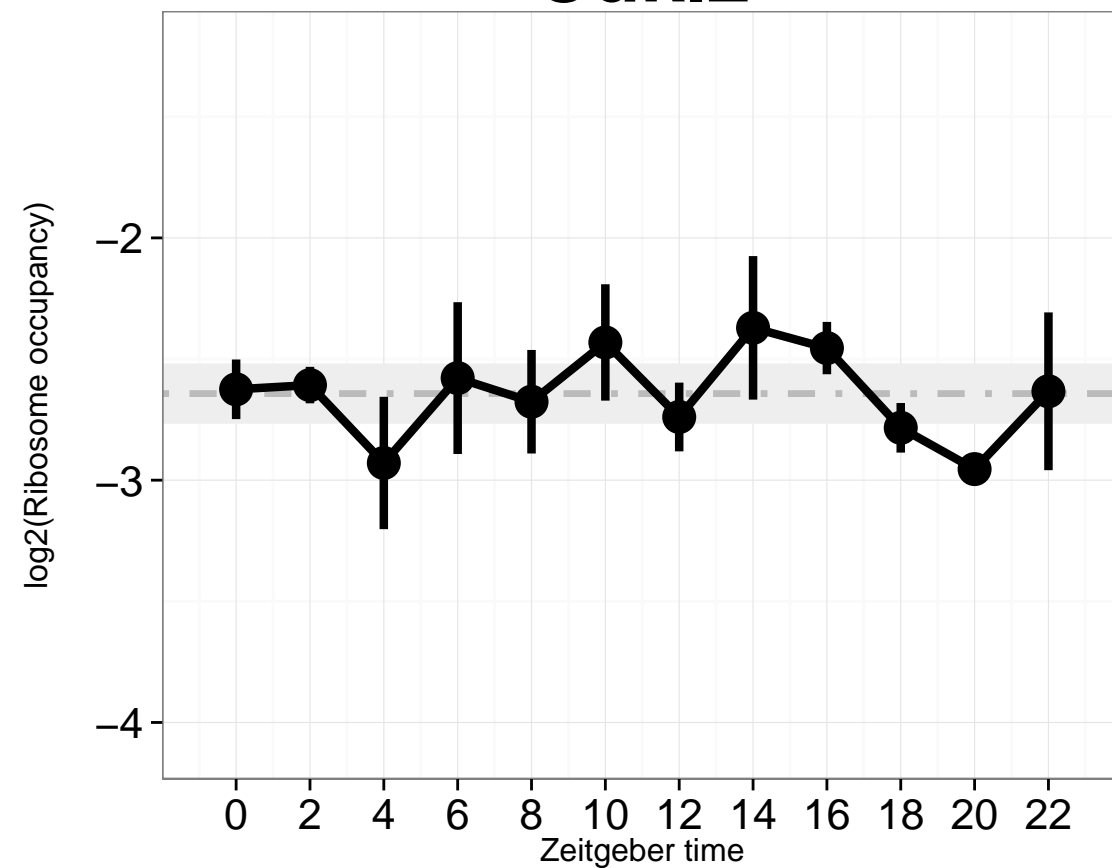

Supplement: Supplementary file 9328 [file 1]

# Agpat6

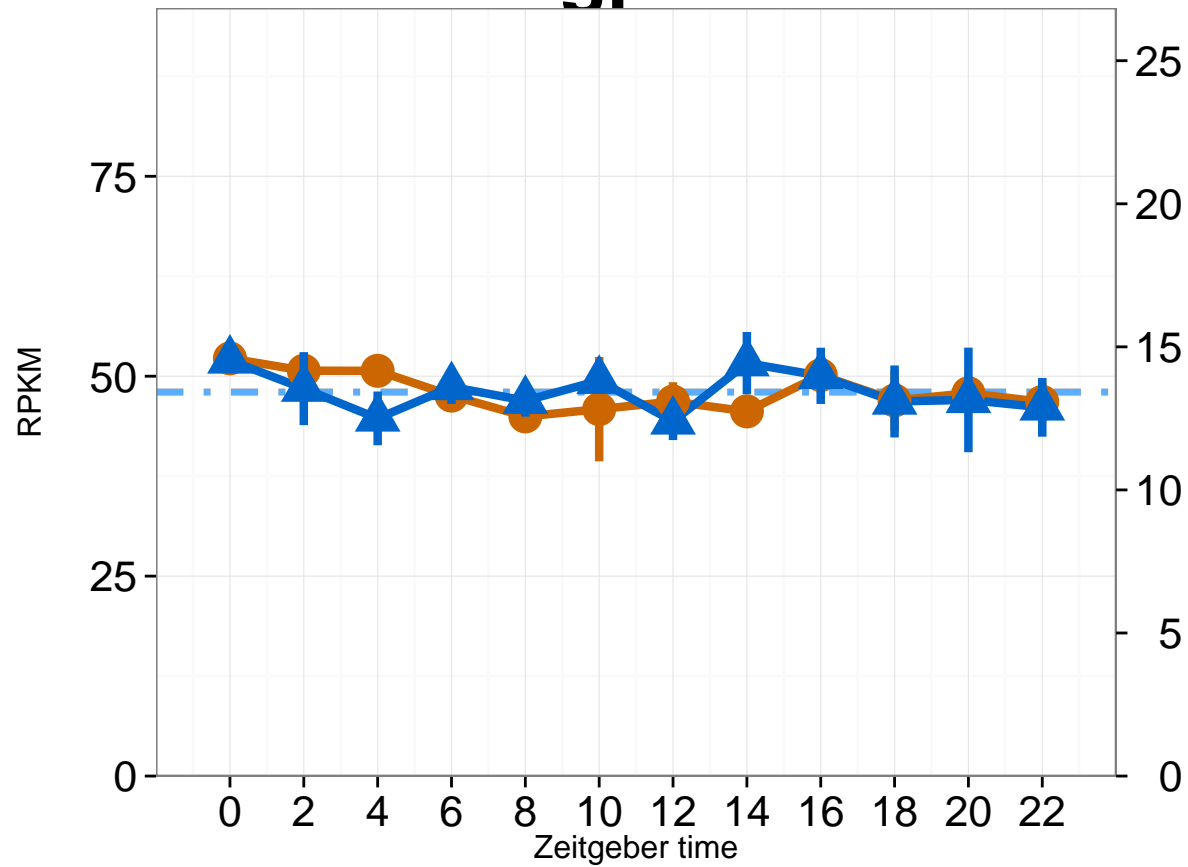

# Agpat6

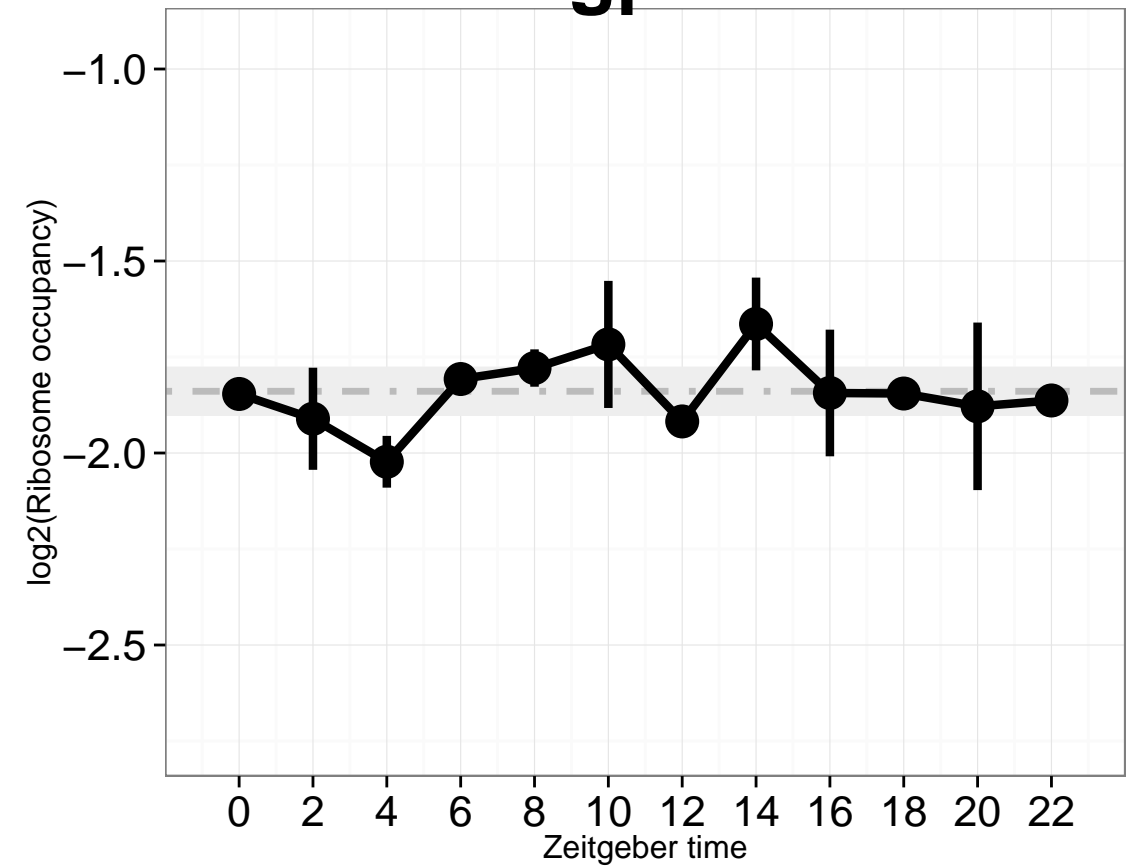

Supplement: Supplementary file 9329 [file 1]

## Akap5

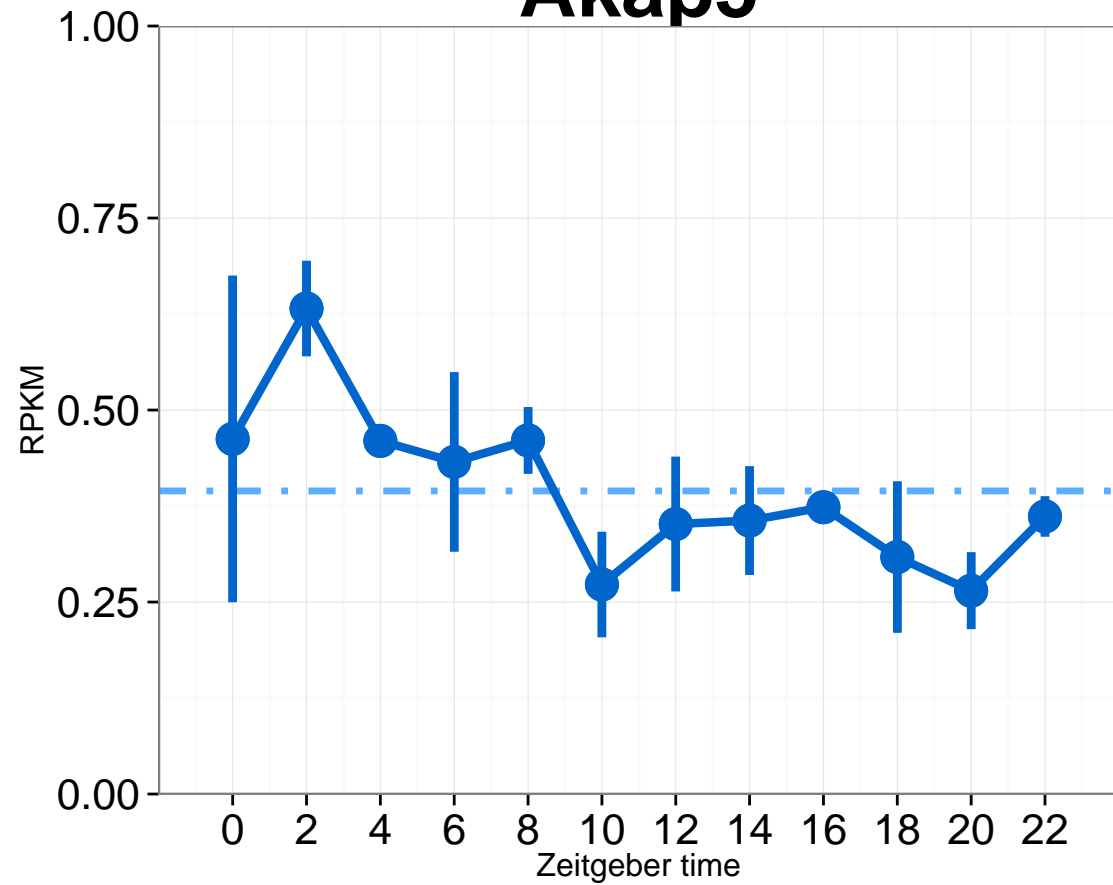

## Akap5 log2(Ribosome occupancy

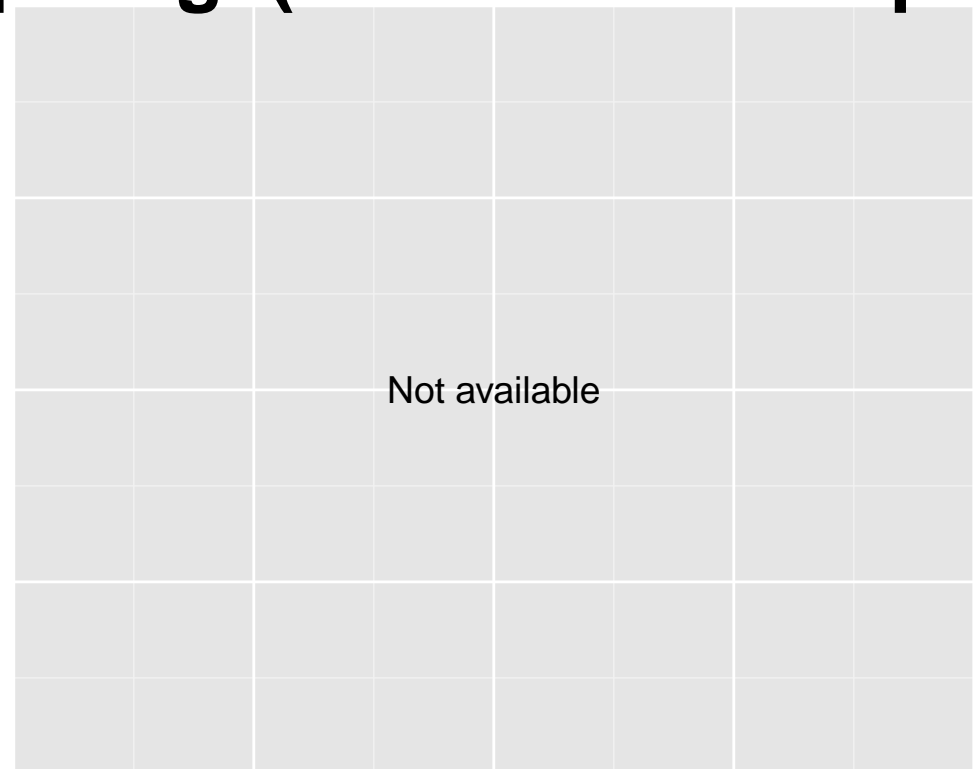

Supplement: Supplementary file 9330 [file 1]

## Dapk1

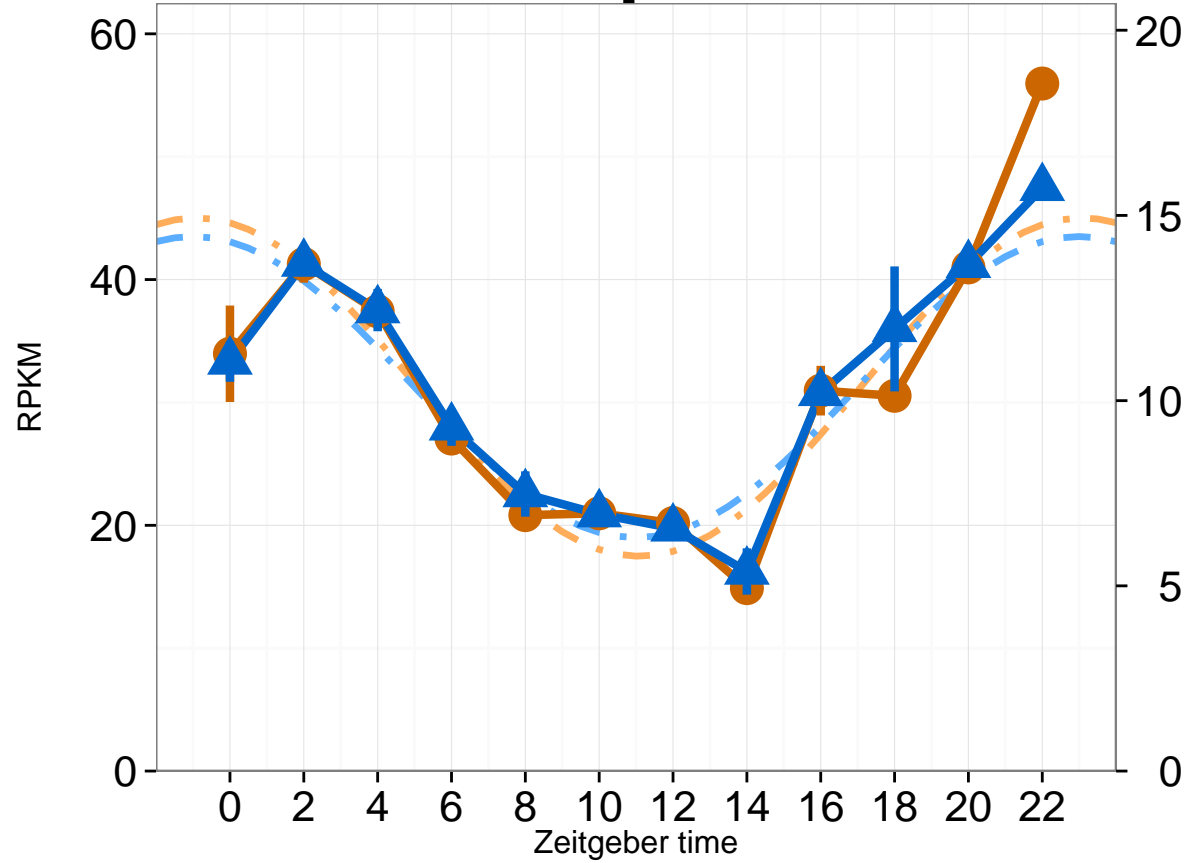

## Dapk1

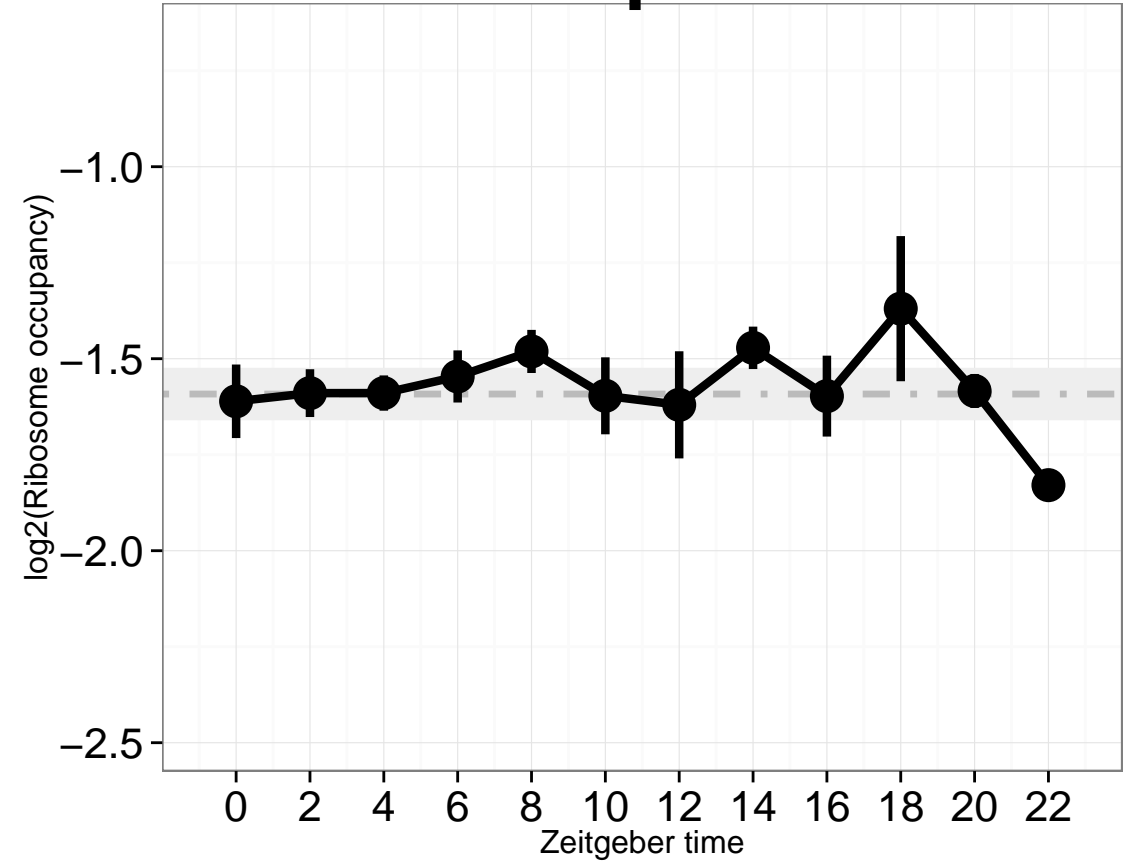

Supplement: Supplementary file 9331 [file 1]

## Hpx

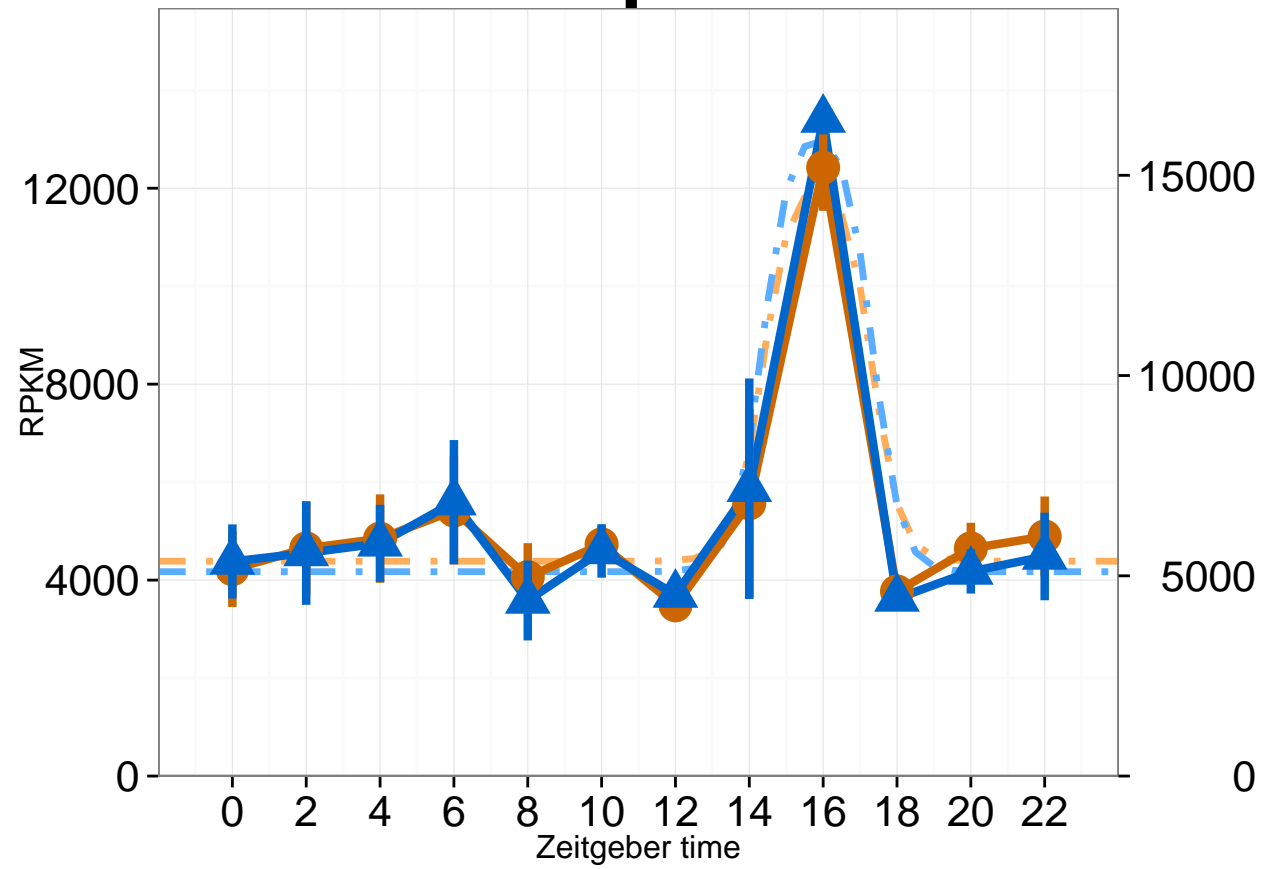

## Hpx

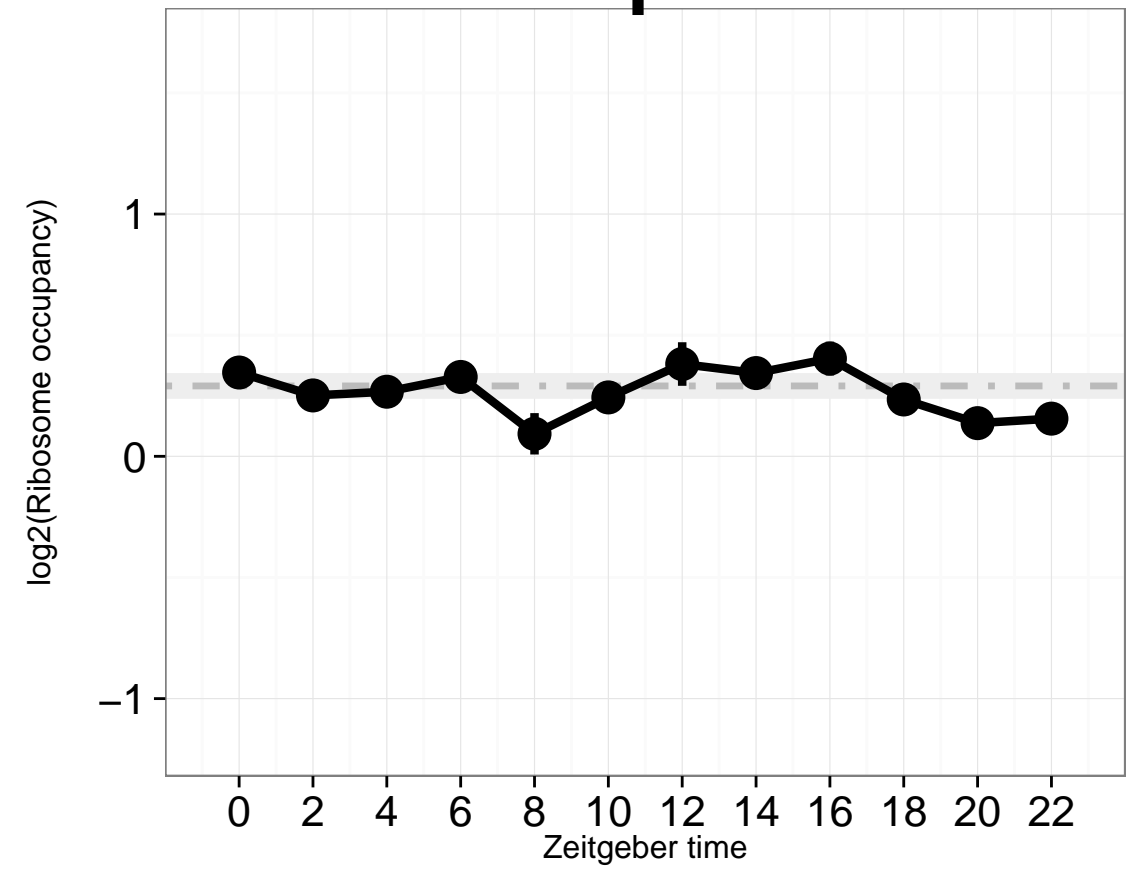

Supplement: Supplementary file 9332 [file 1]

## Setd2

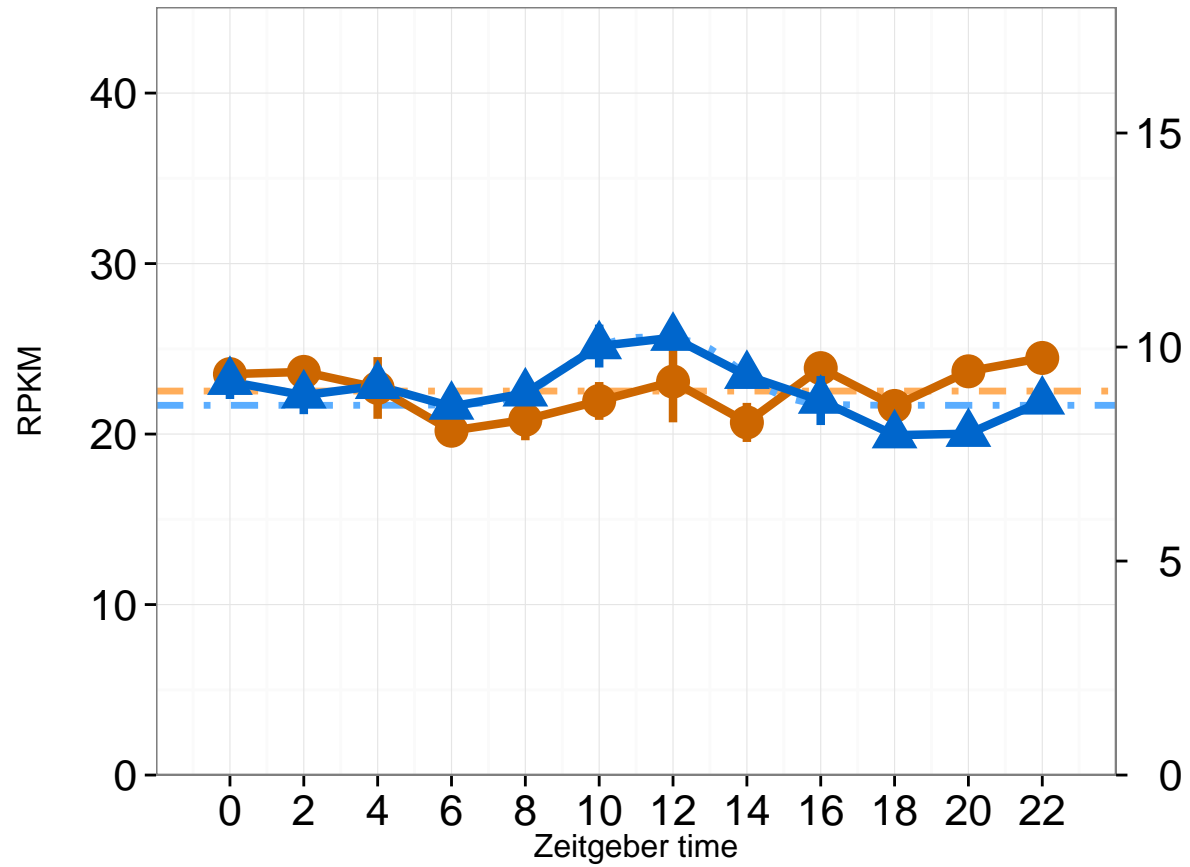

## Setd2

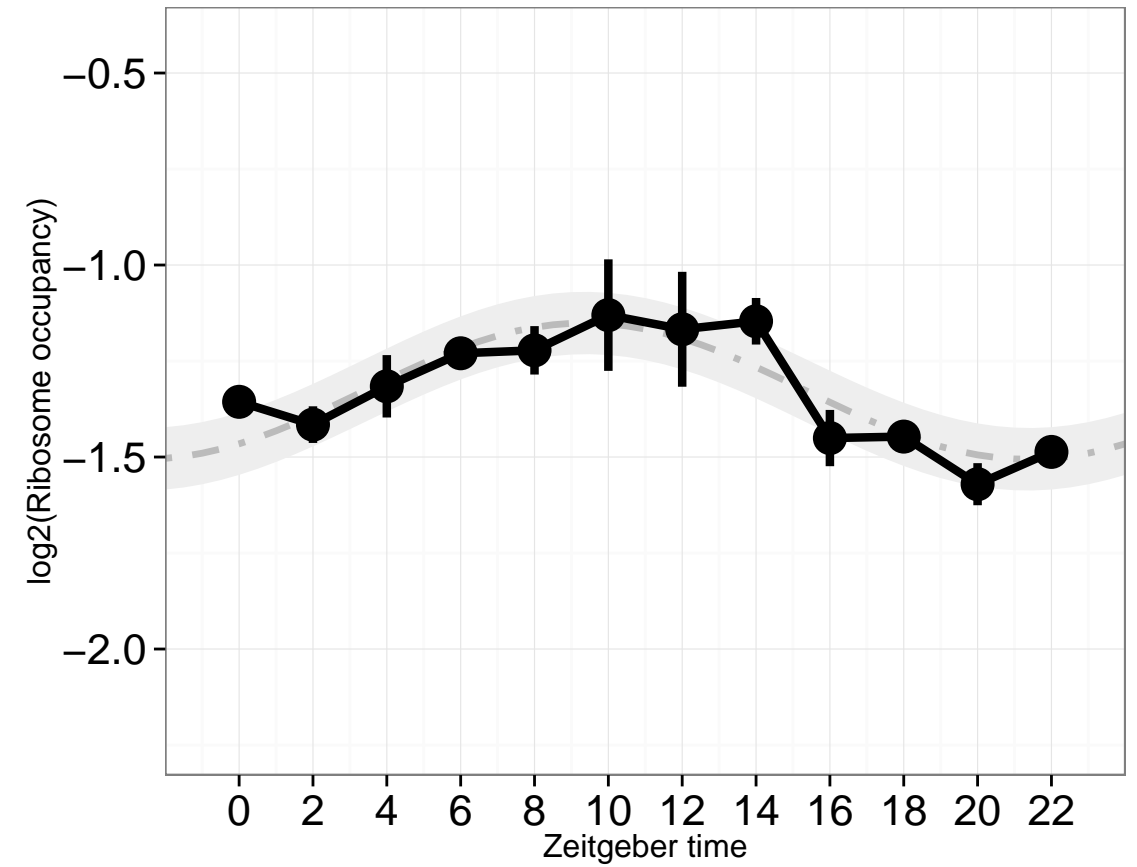

Supplement: Supplementary file 9333 [file 1]

## Med13

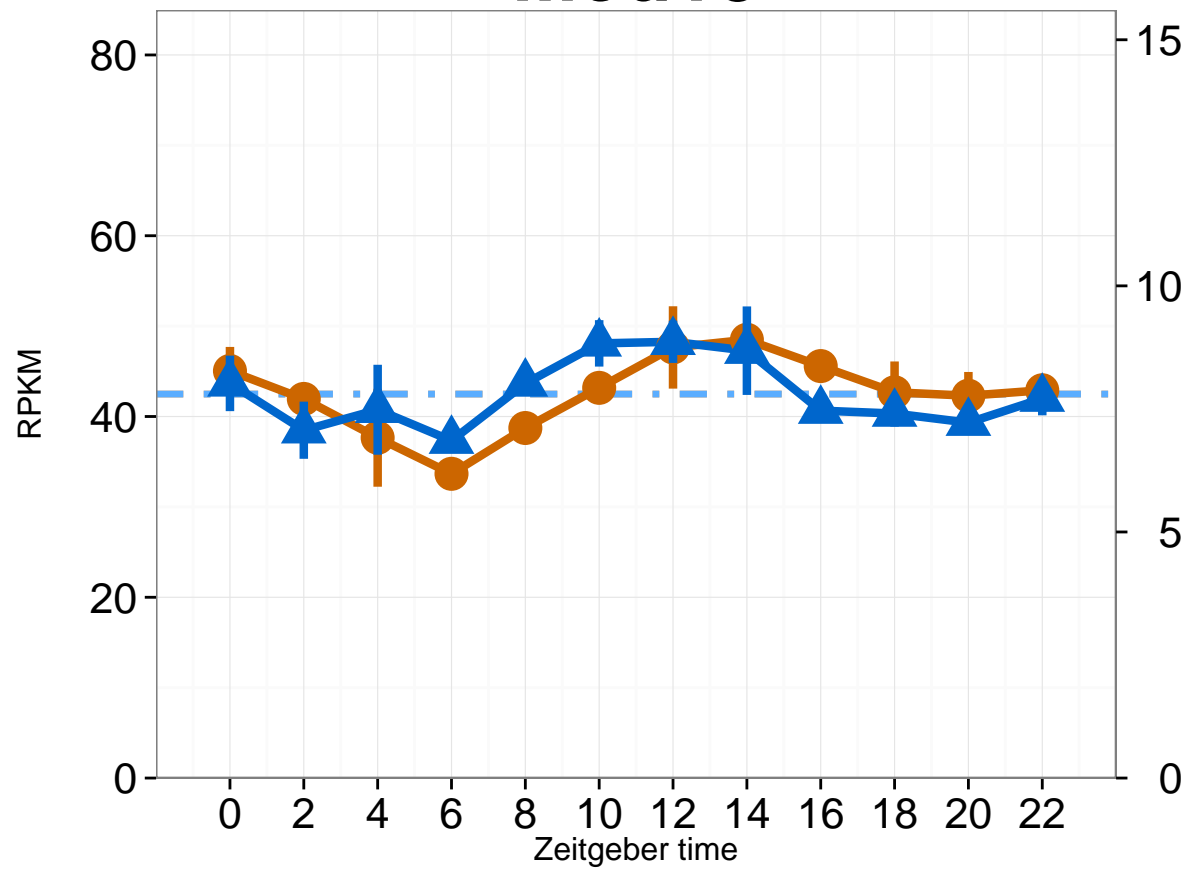

## Med13

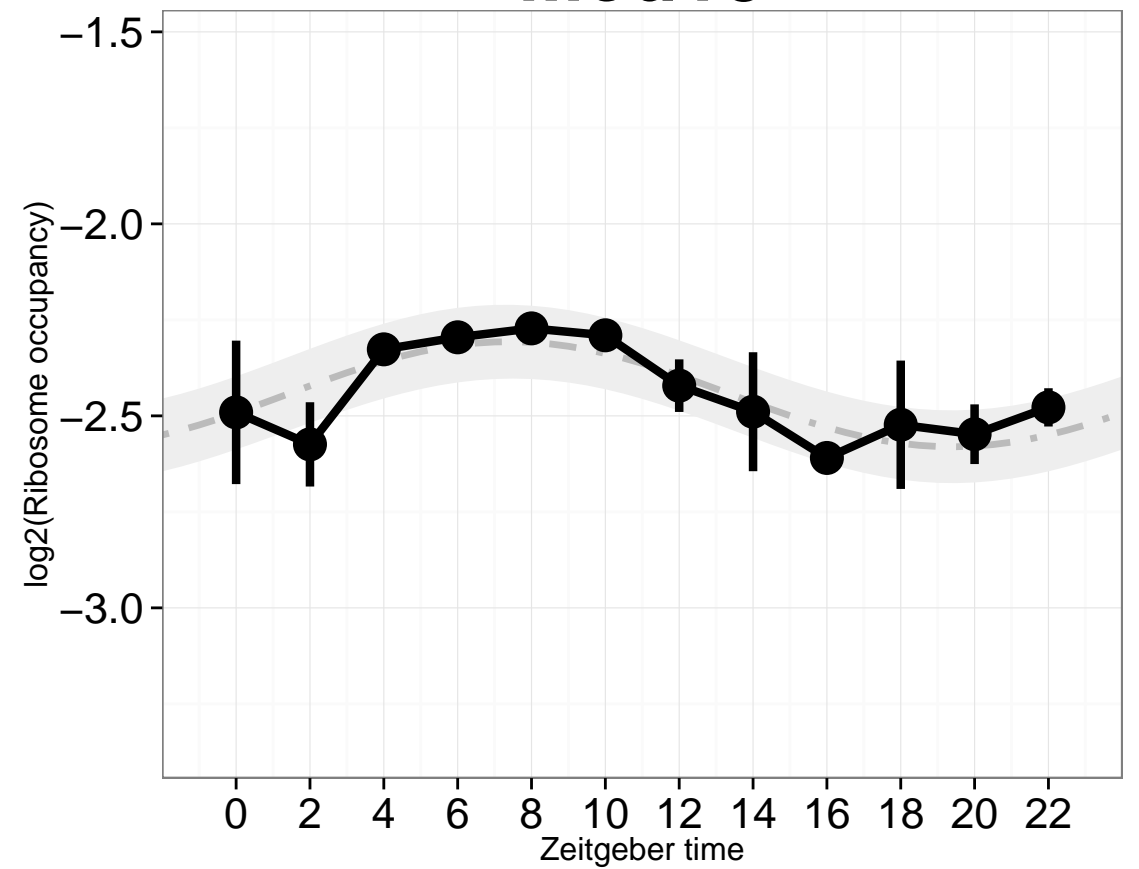

Supplement: Supplementary file 9334 [file 1]

# Tab2

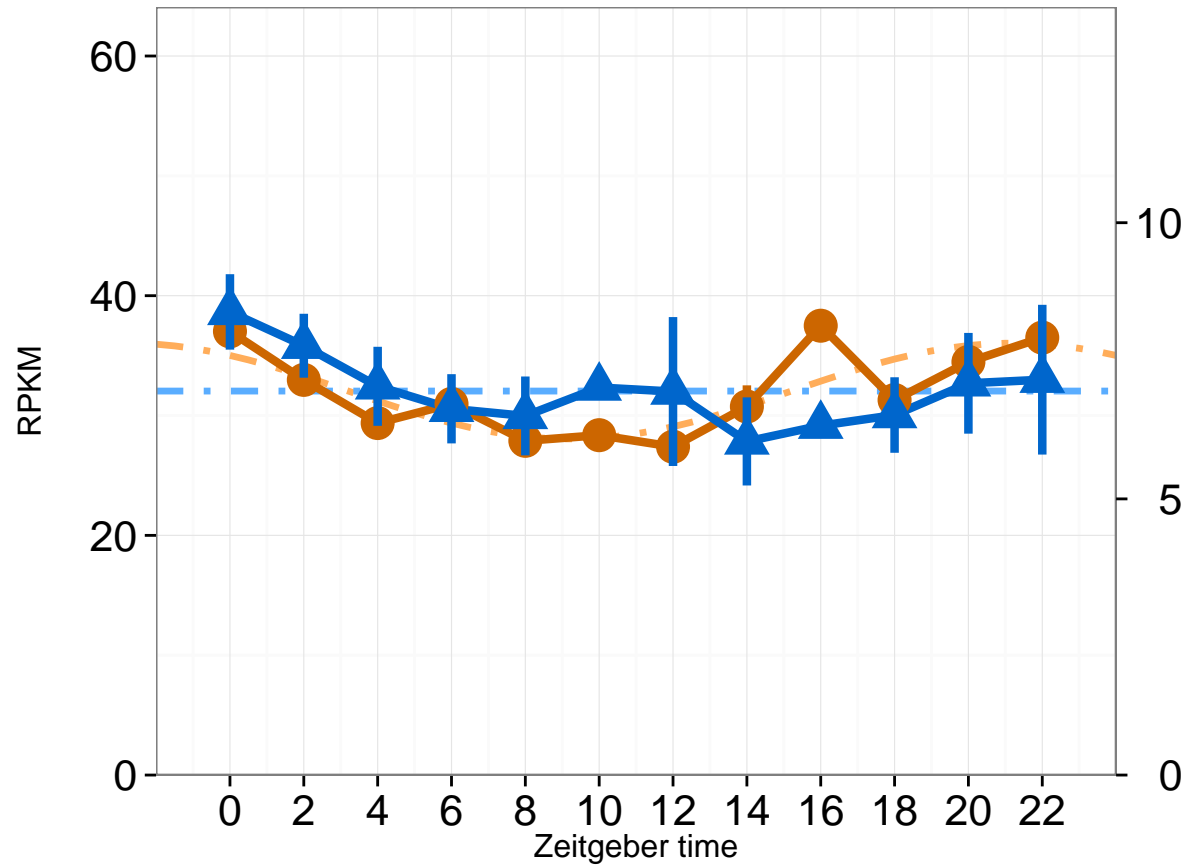

# Tab2

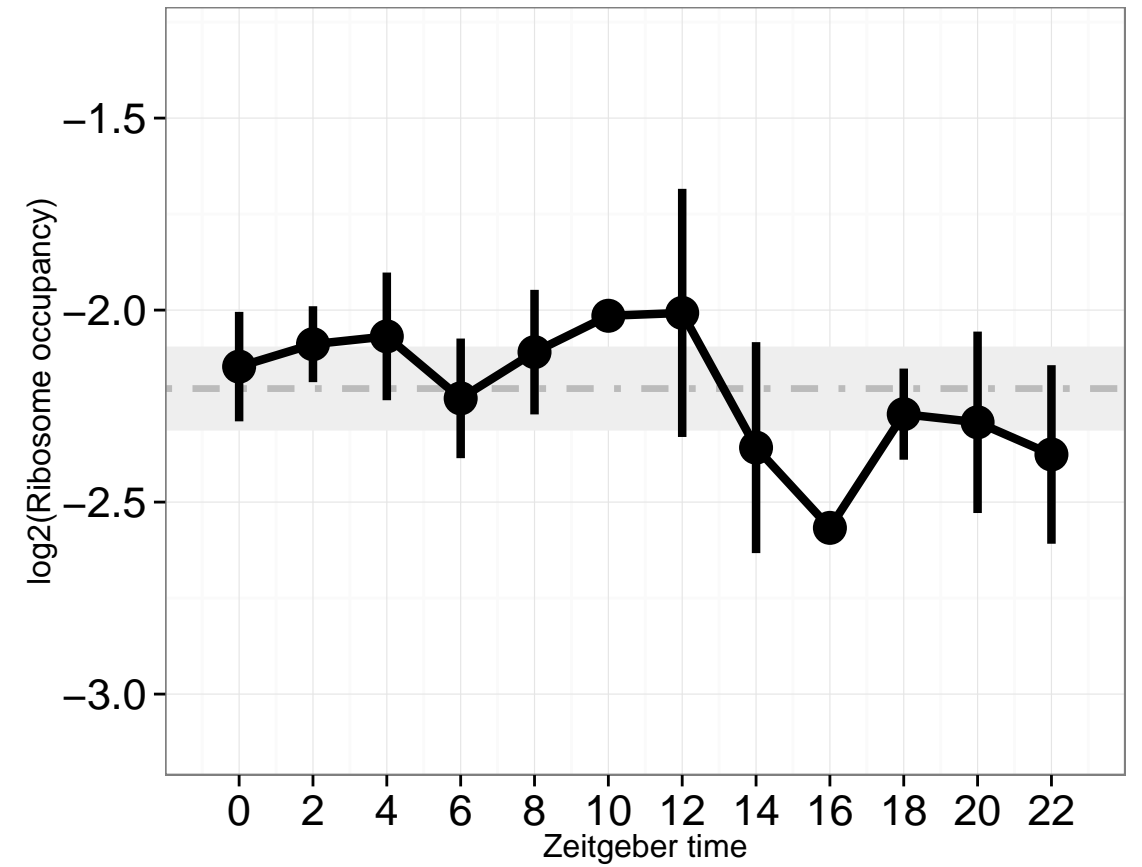

Supplement: Supplementary file 9335 [file 1]
