# Supplementary material (part 94 of 133)
Source: publisher figshare collection journal article supplement (https://springernature.figshare.com/articles/dataset/_/4903193)

## Snn

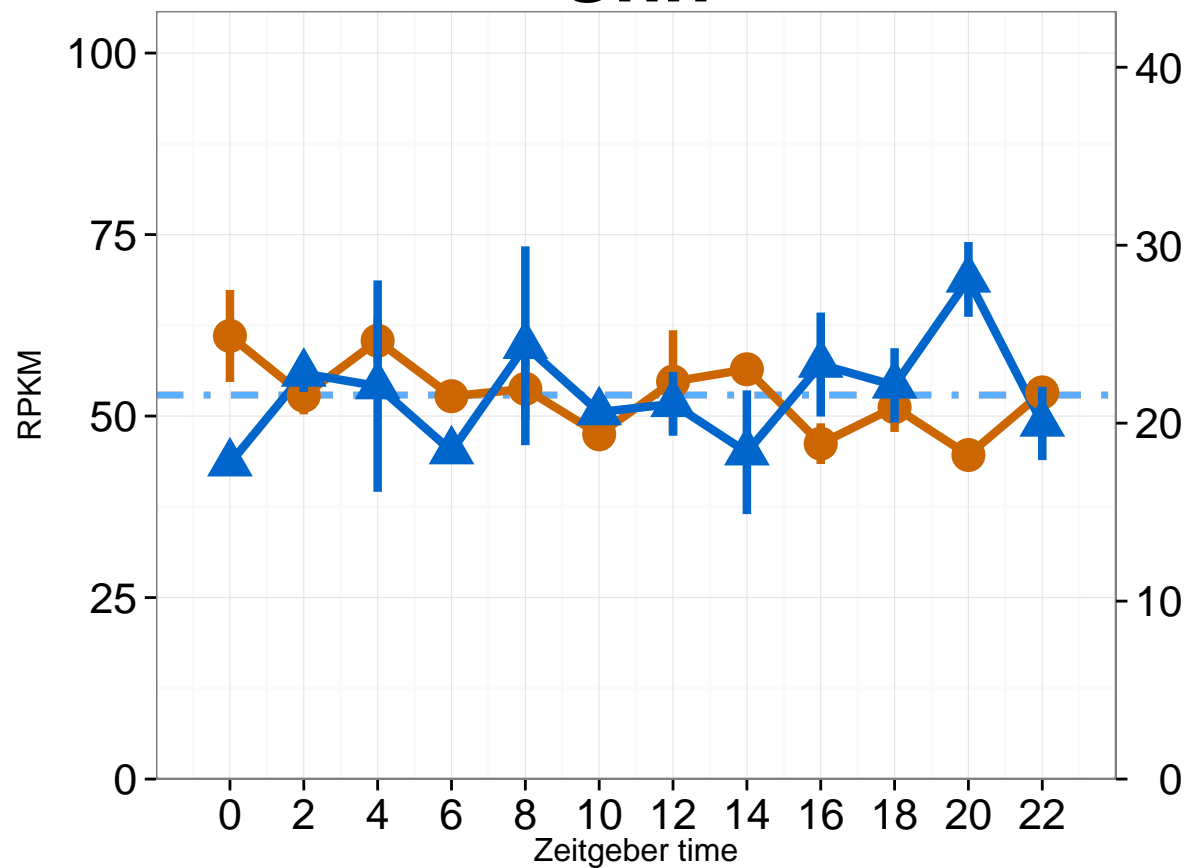

## Snn

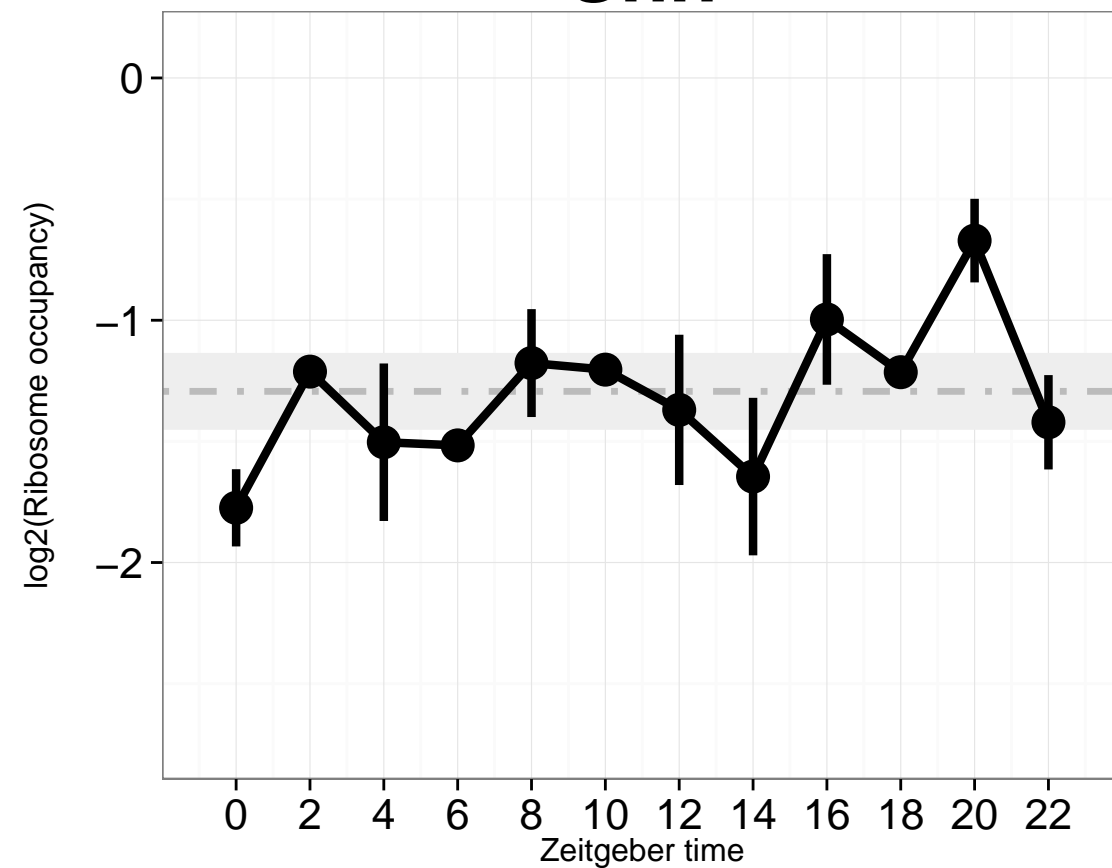

Supplement: Supplementary file 9336 [file 1]

## Suv420h1

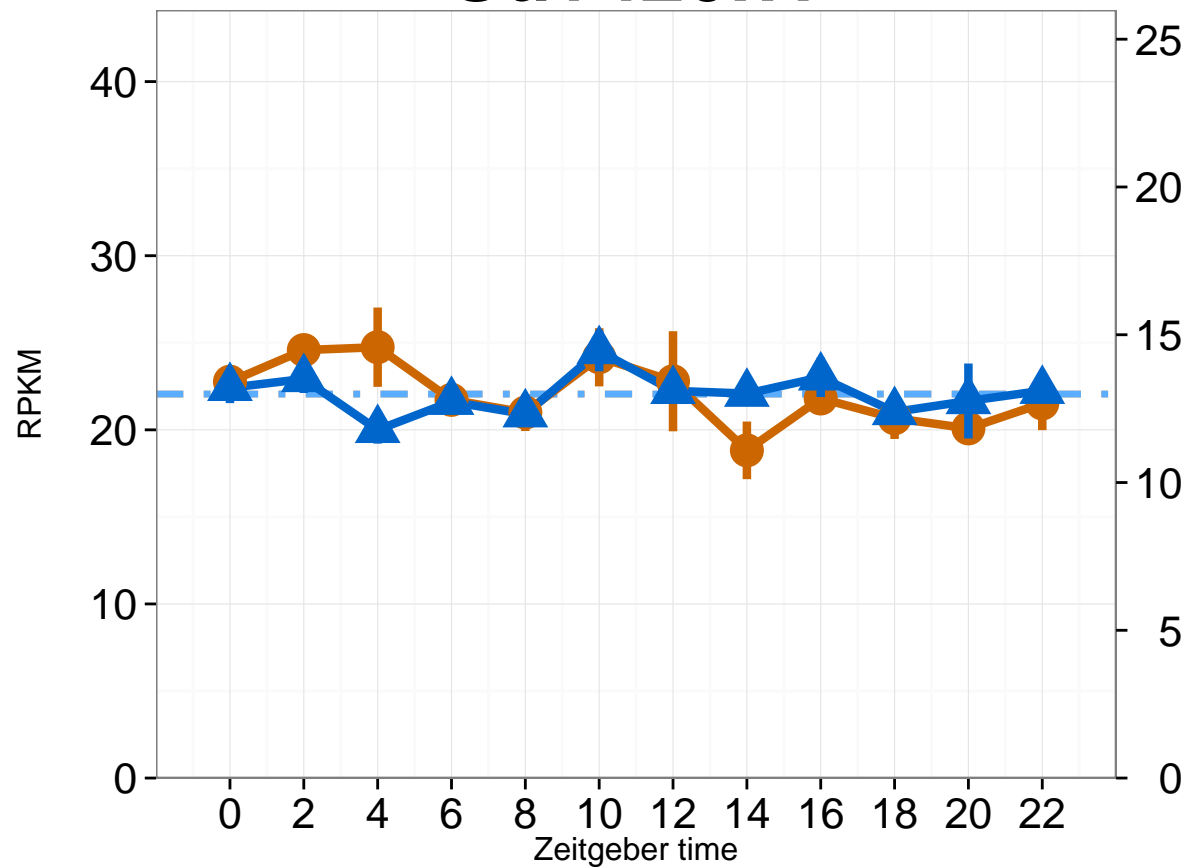

## Suv420h1

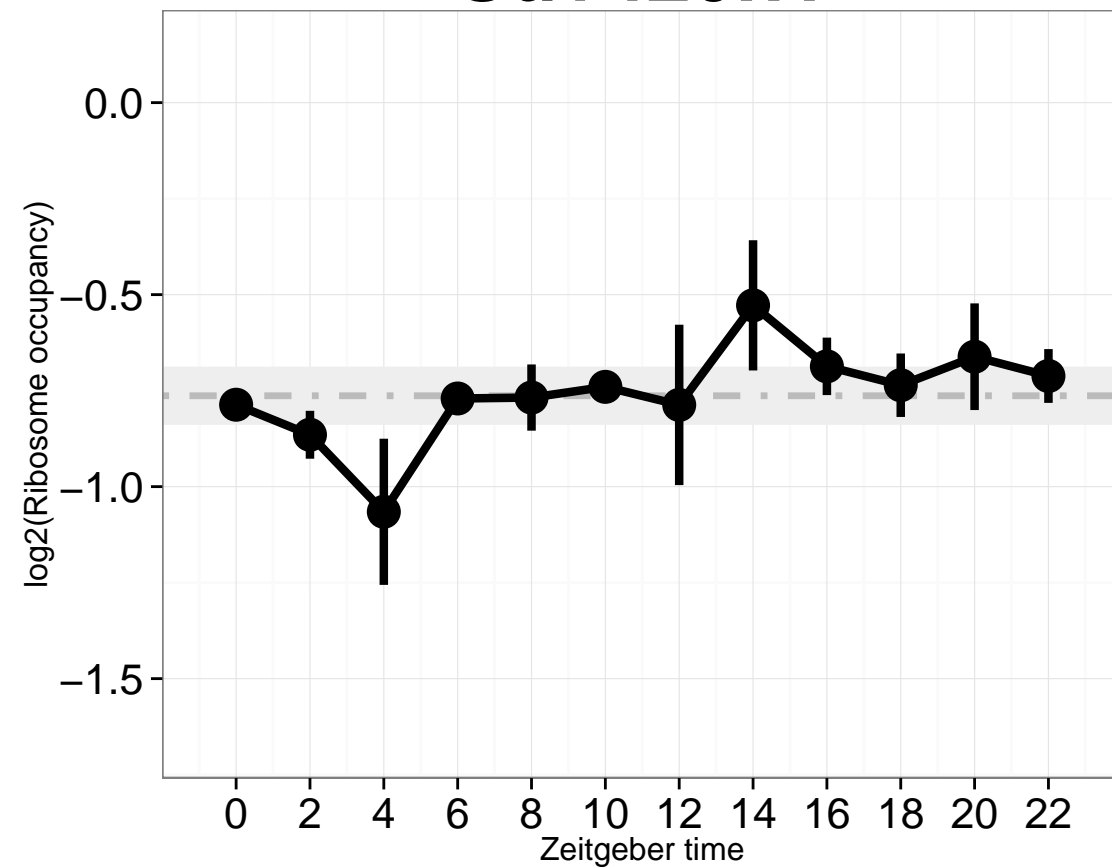

Supplement: Supplementary file 9337 [file 1]

# Zfp266

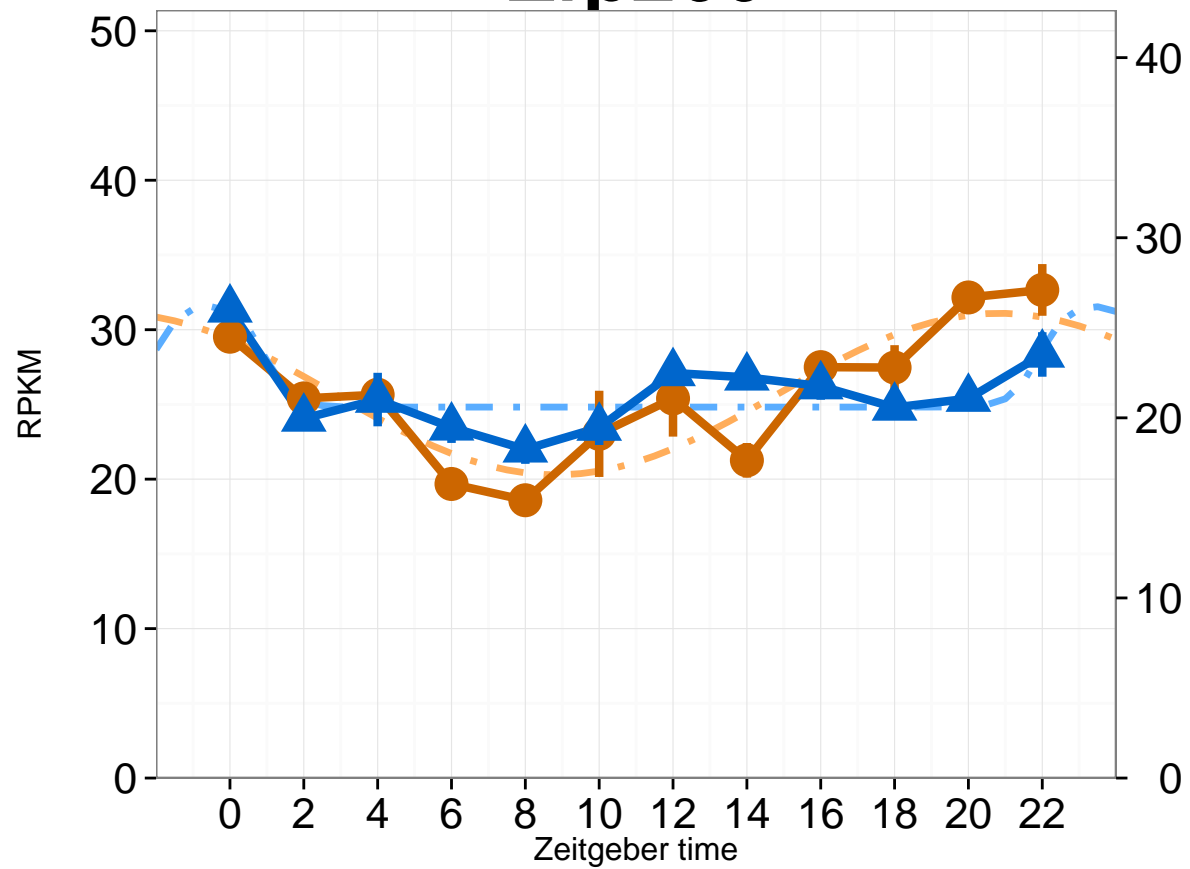

# Zfp266

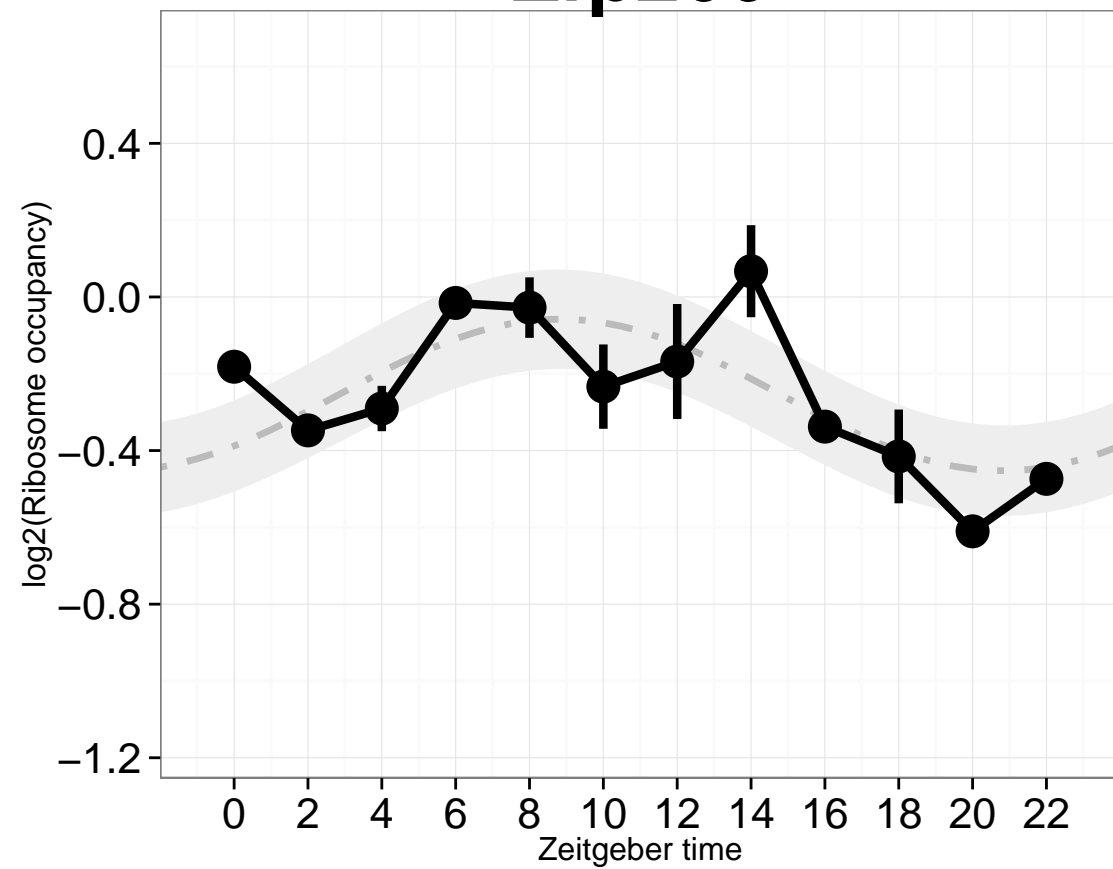

Supplement: Supplementary file 9338 [file 1]

## Enthd2

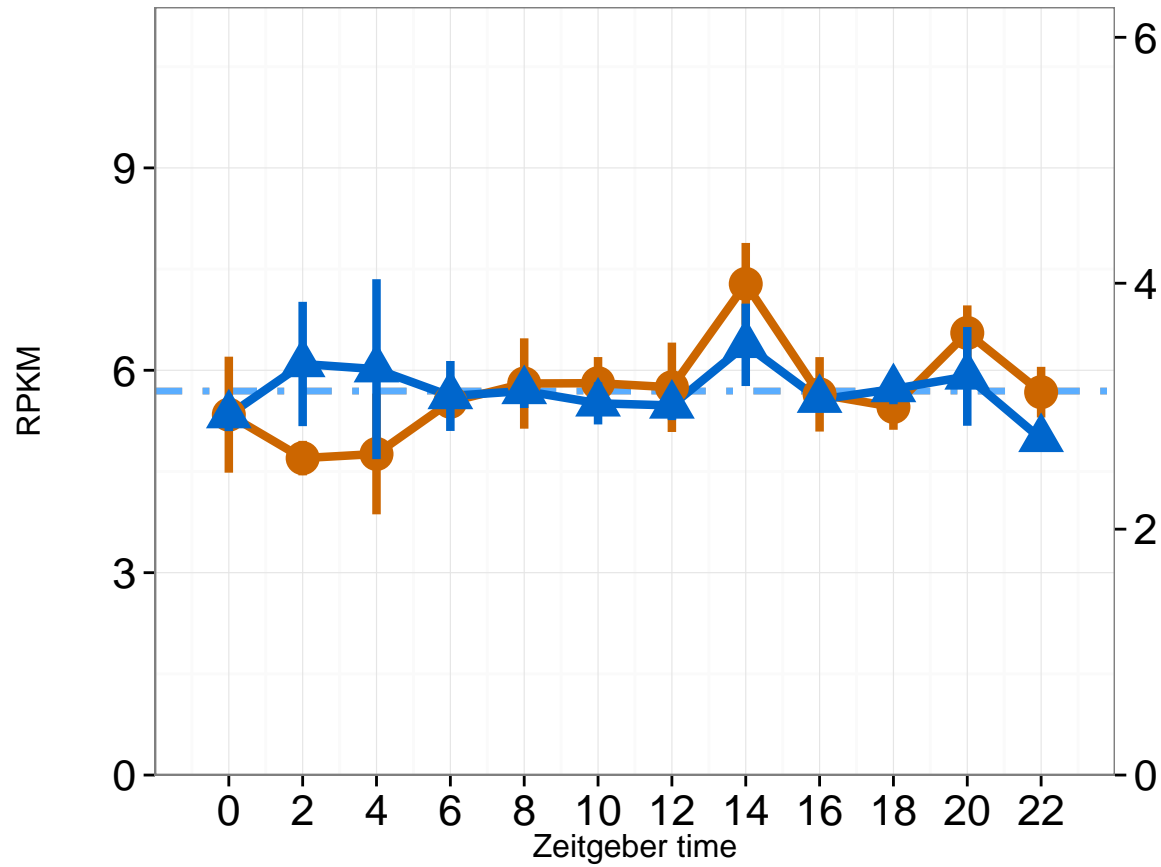

## Enthd2

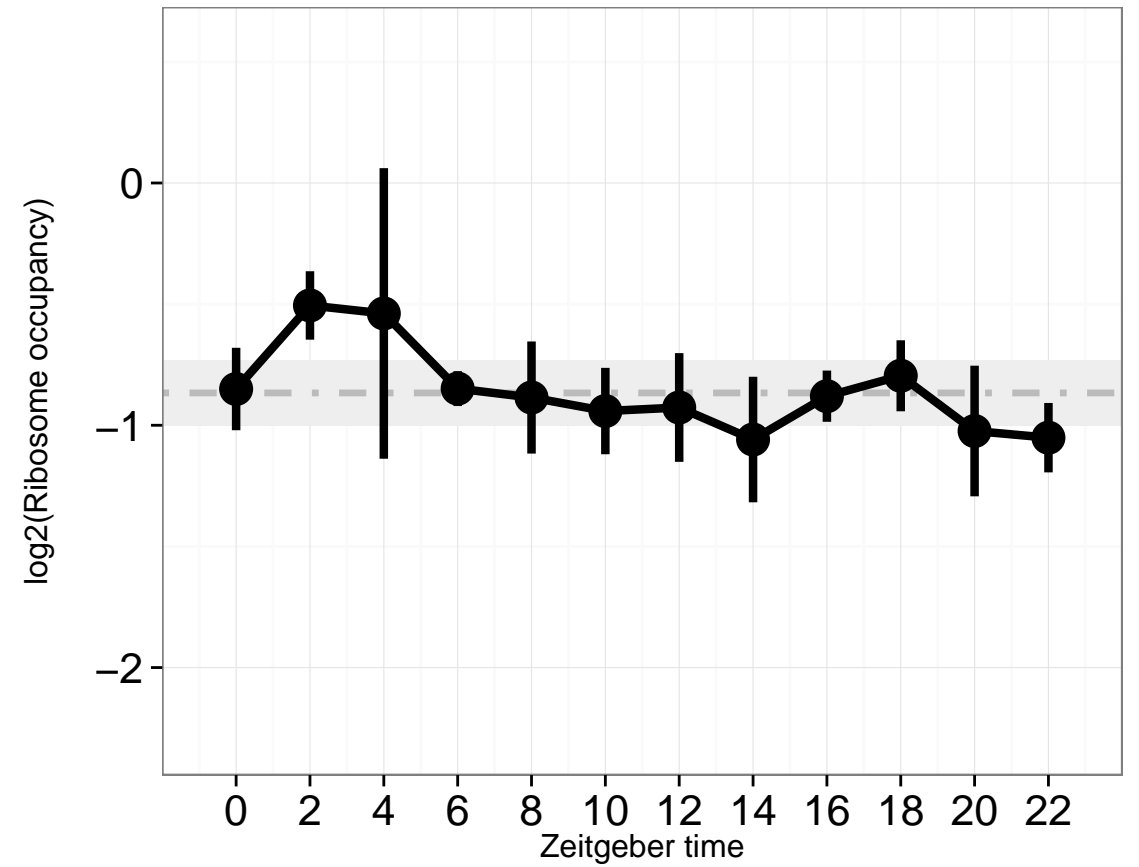

Supplement: Supplementary file 9339 [file 1]

# 1700055N04Rik

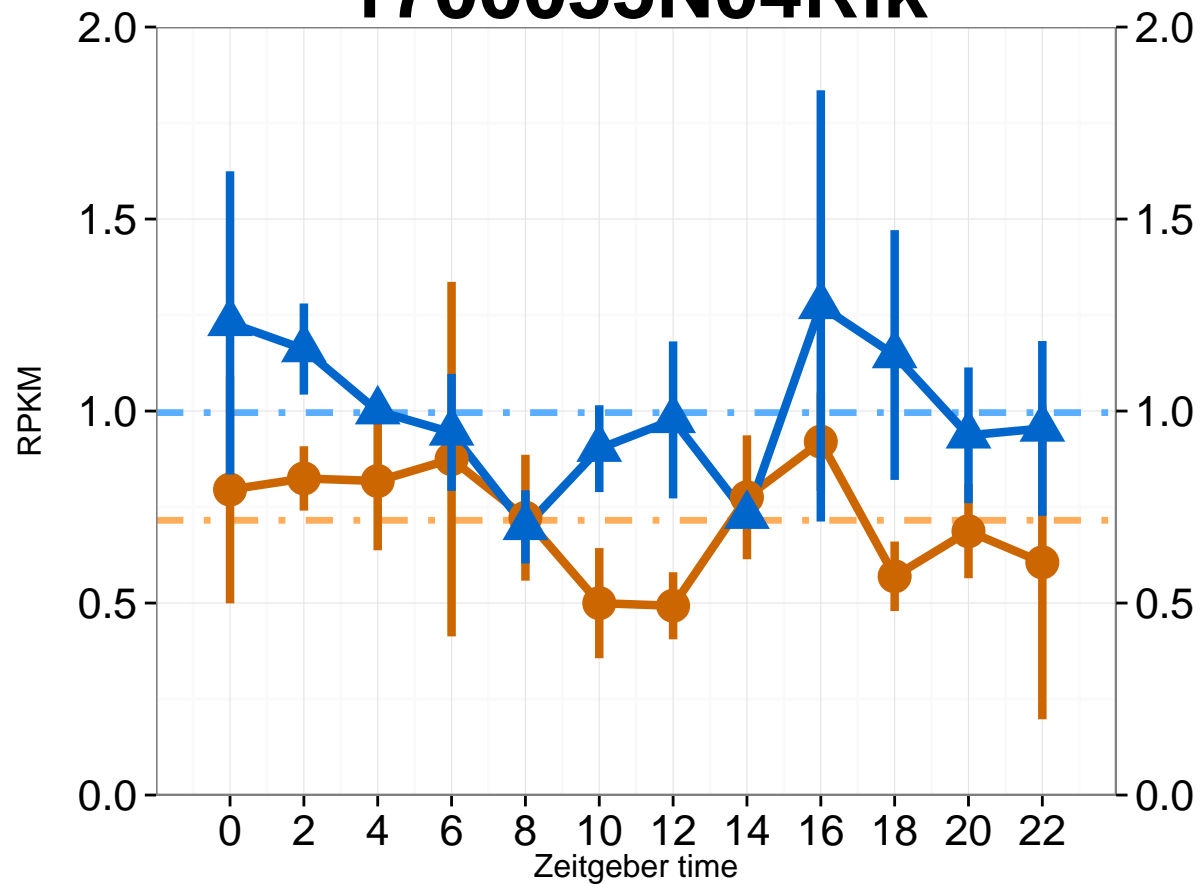

# 1700055N04Rik

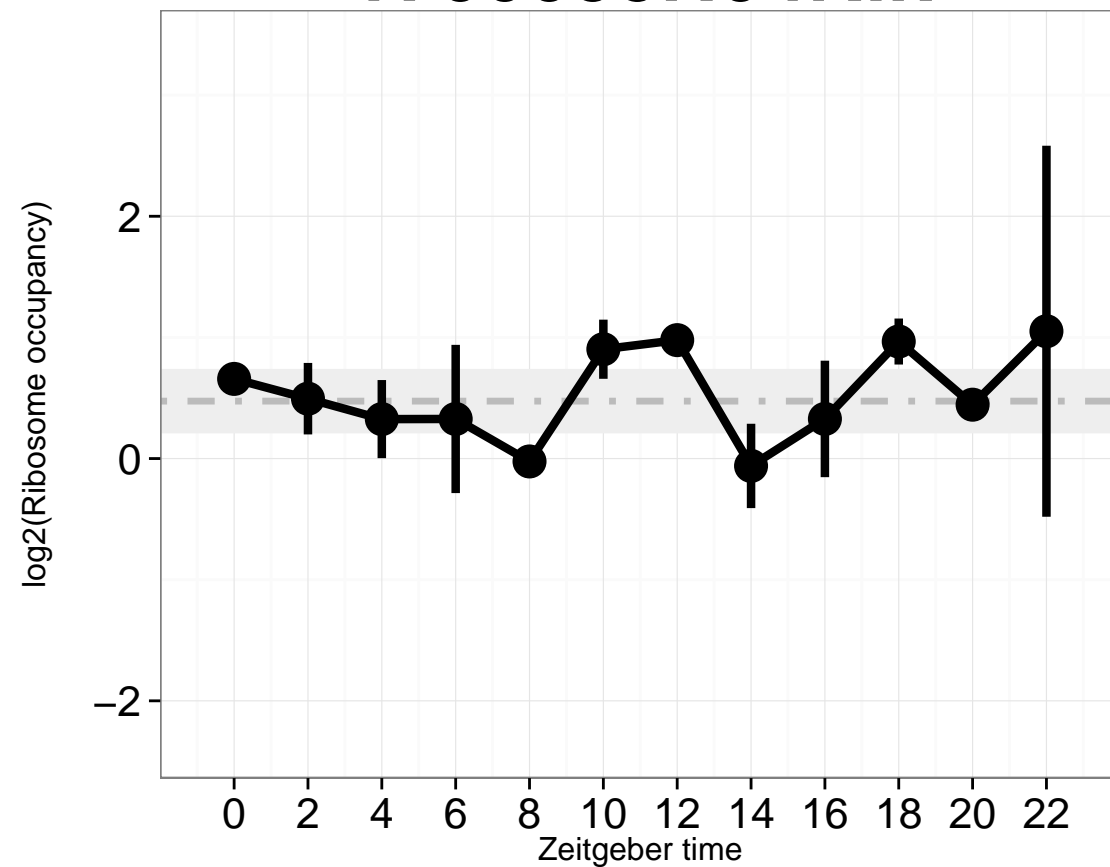

Supplement: Supplementary file 9340 [file 1]

## Ap5b1

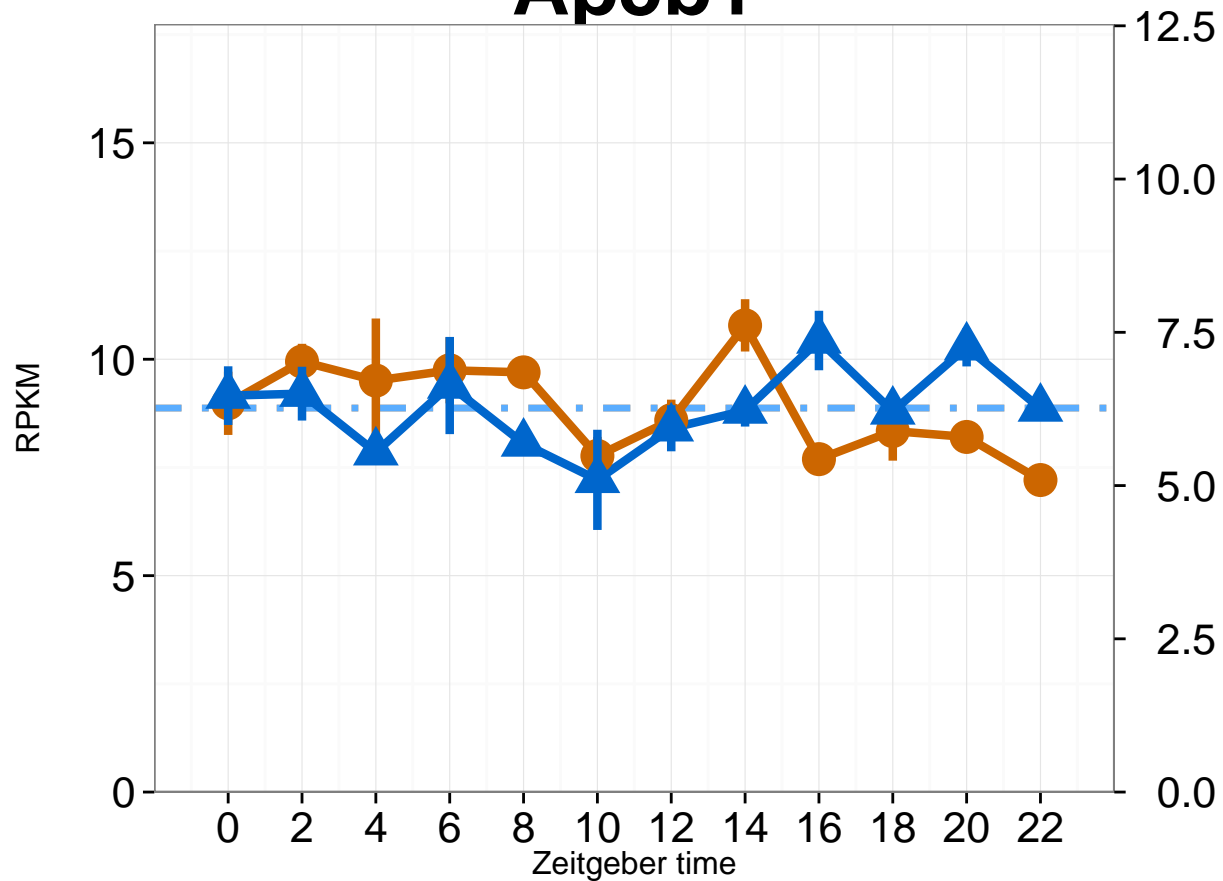

## Ap5b1

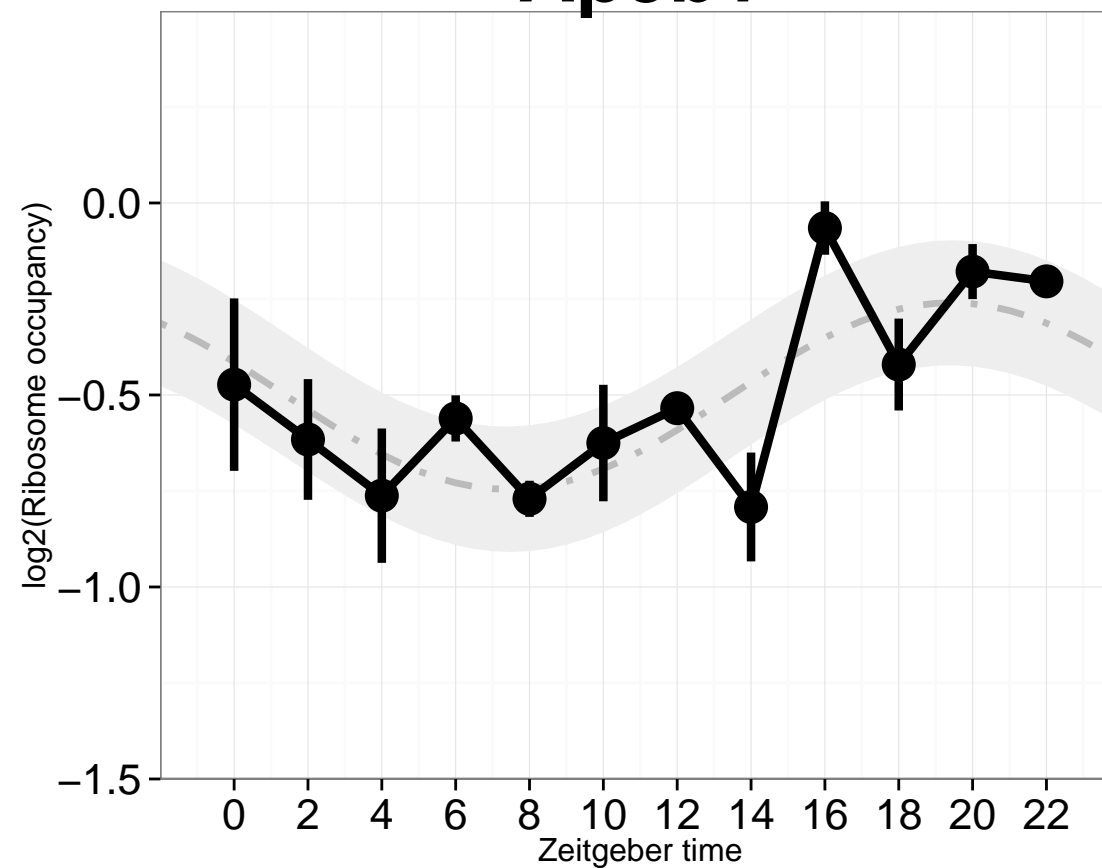

Supplement: Supplementary file 9341 [file 1]

# Rab11fip5

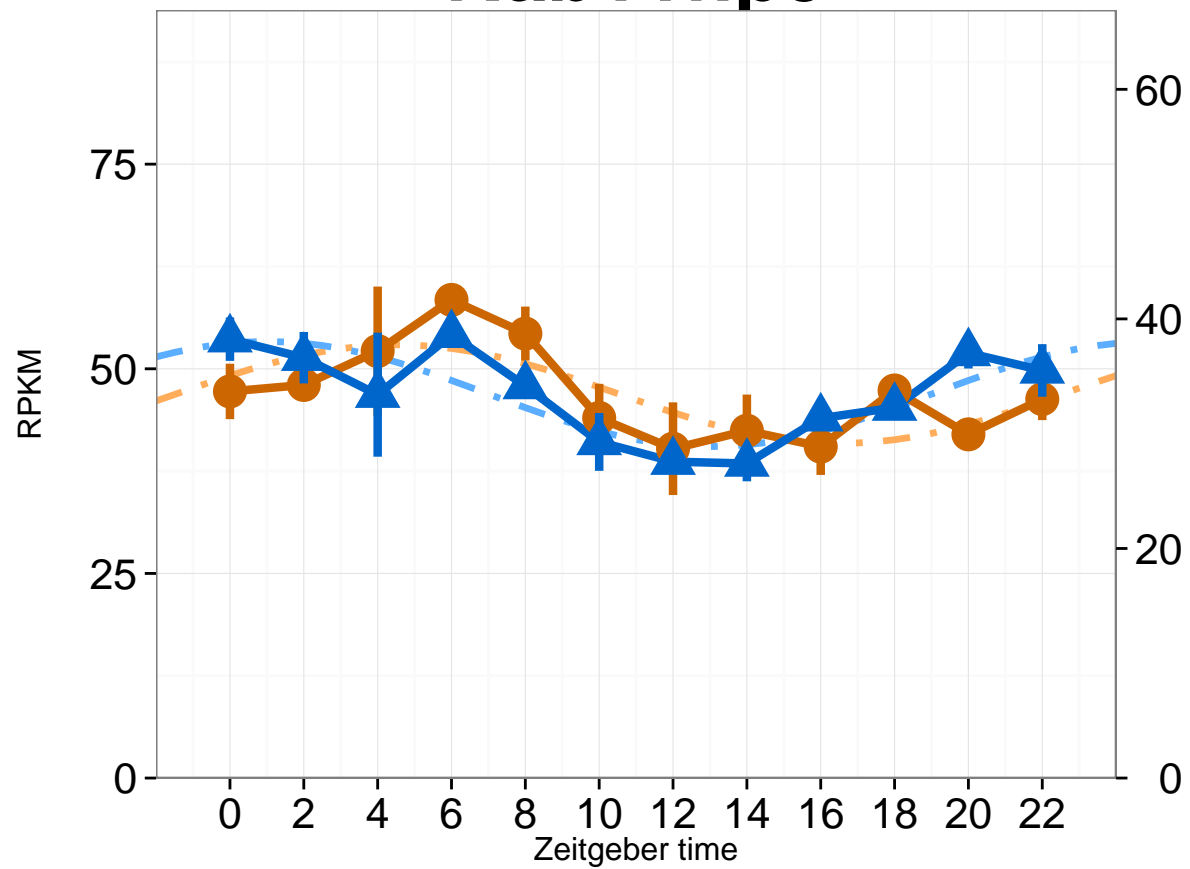

# Rab11fip5

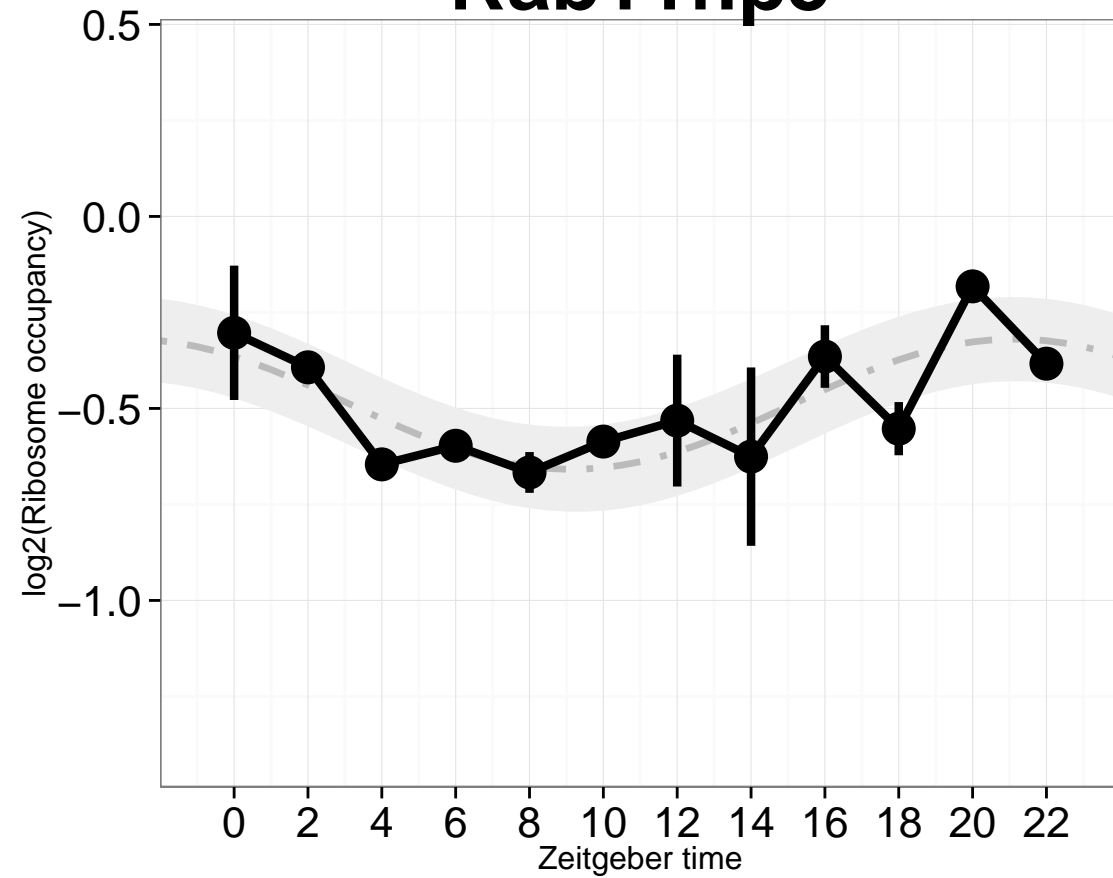

Supplement: Supplementary file 9342 [file 1]

## Sh2d4b

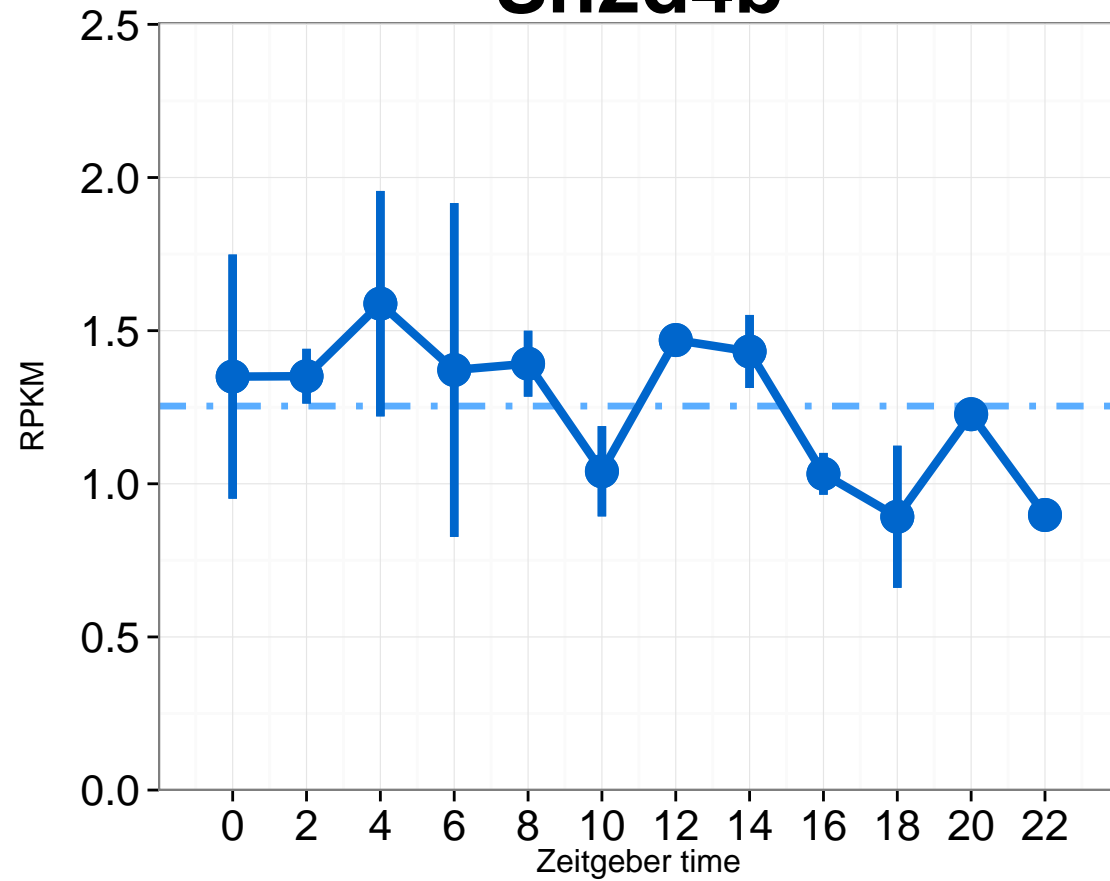

## Sh2d4b log2(Ribosome occupancy)

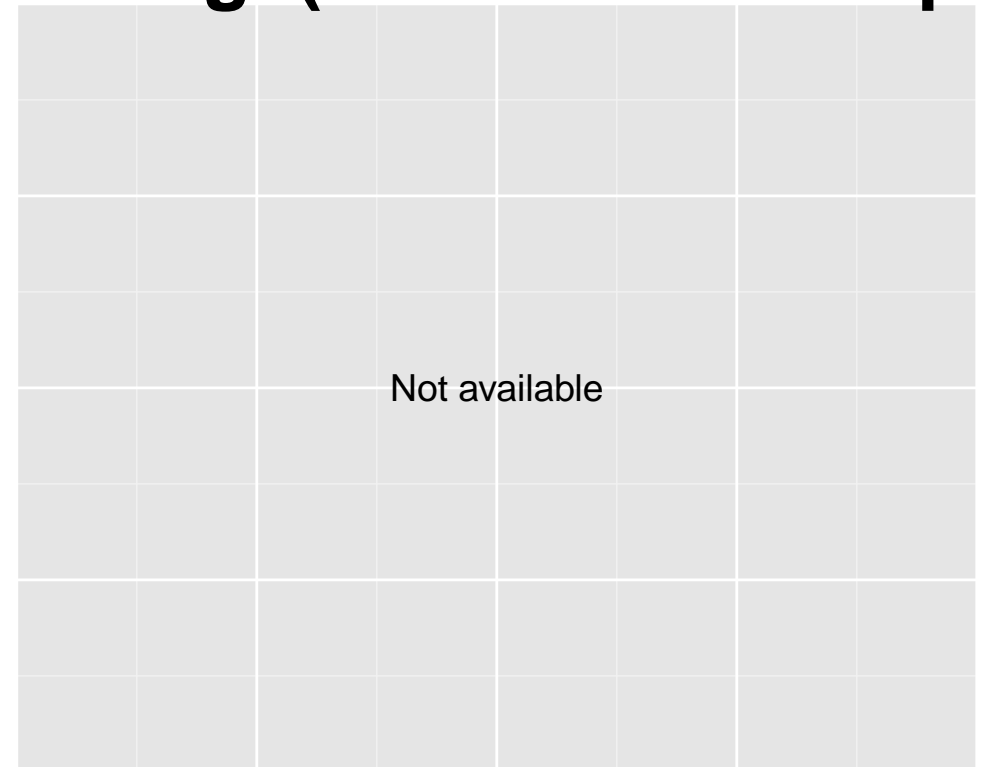

Supplement: Supplementary file 9343 [file 1]

## Chmp3

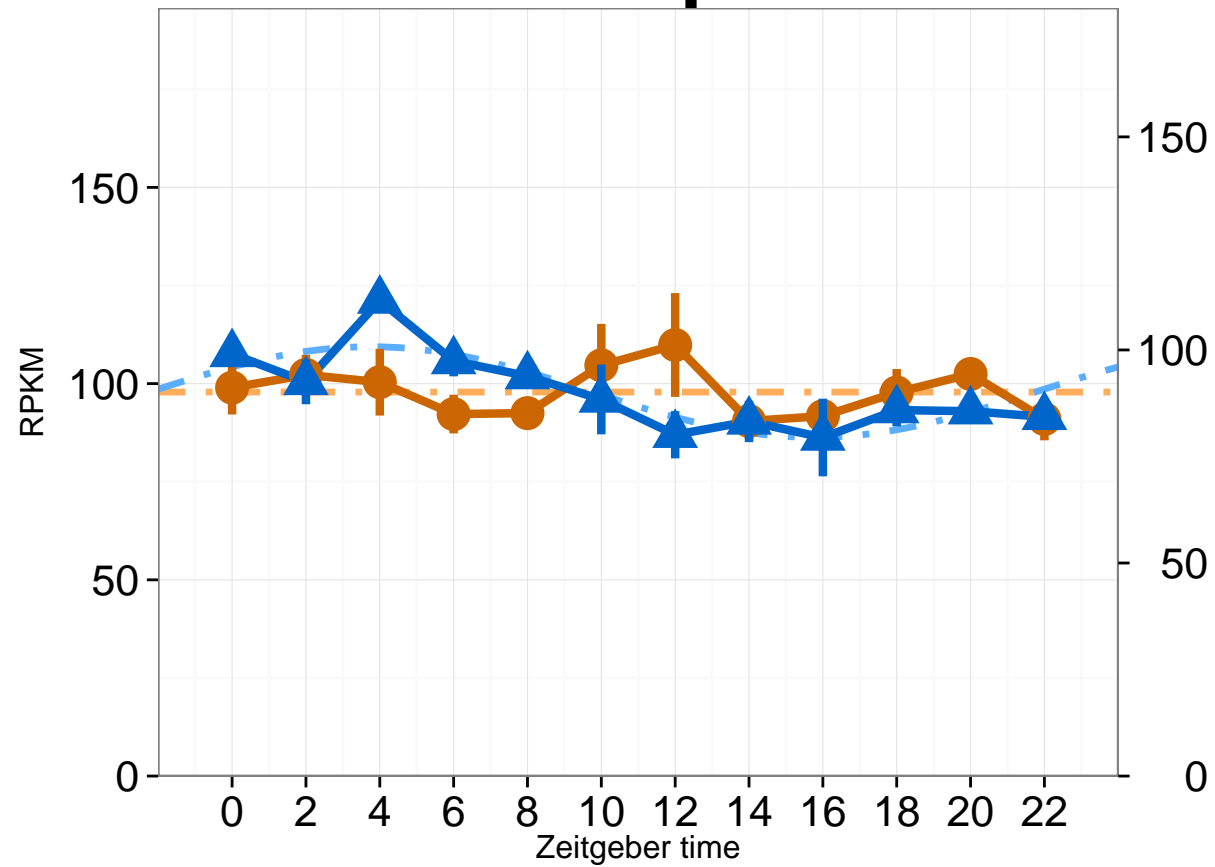

## Chmp3

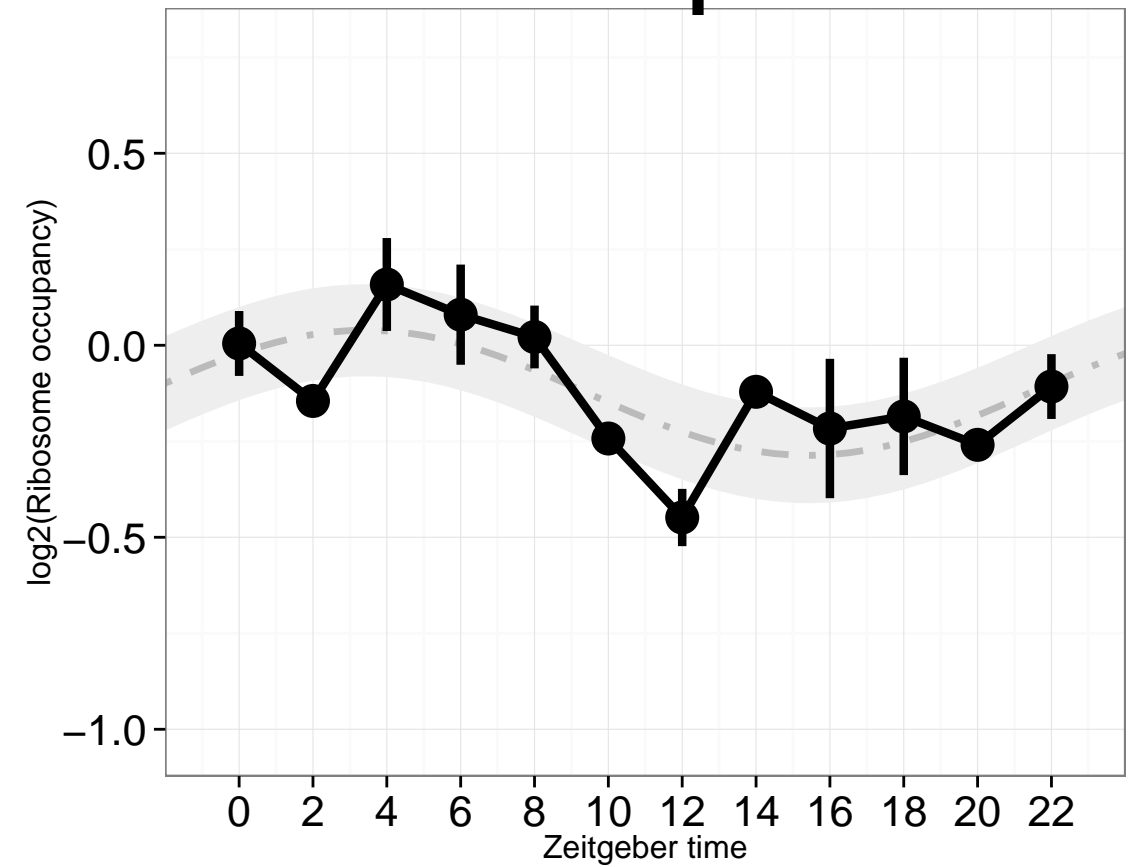

Supplement: Supplementary file 9344 [file 1]

# Ptprg

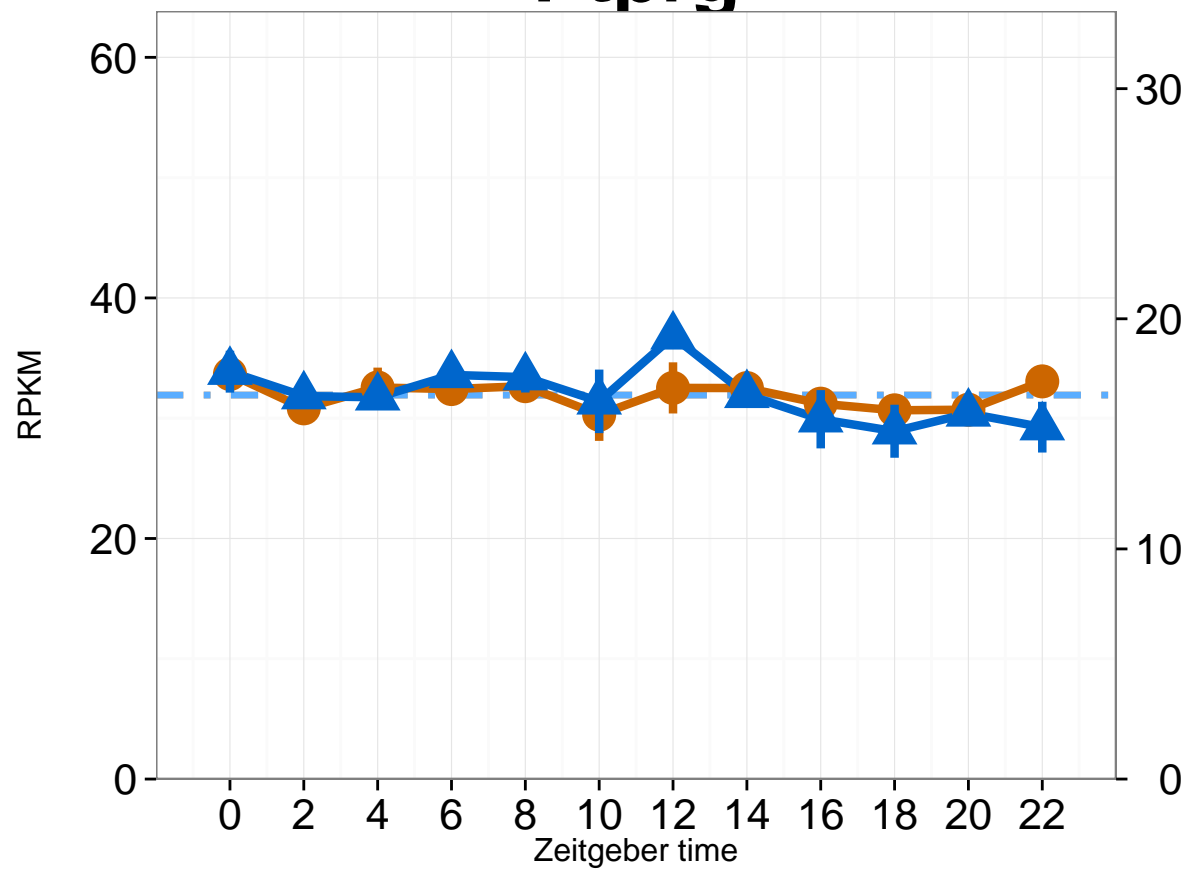

# Ptprg

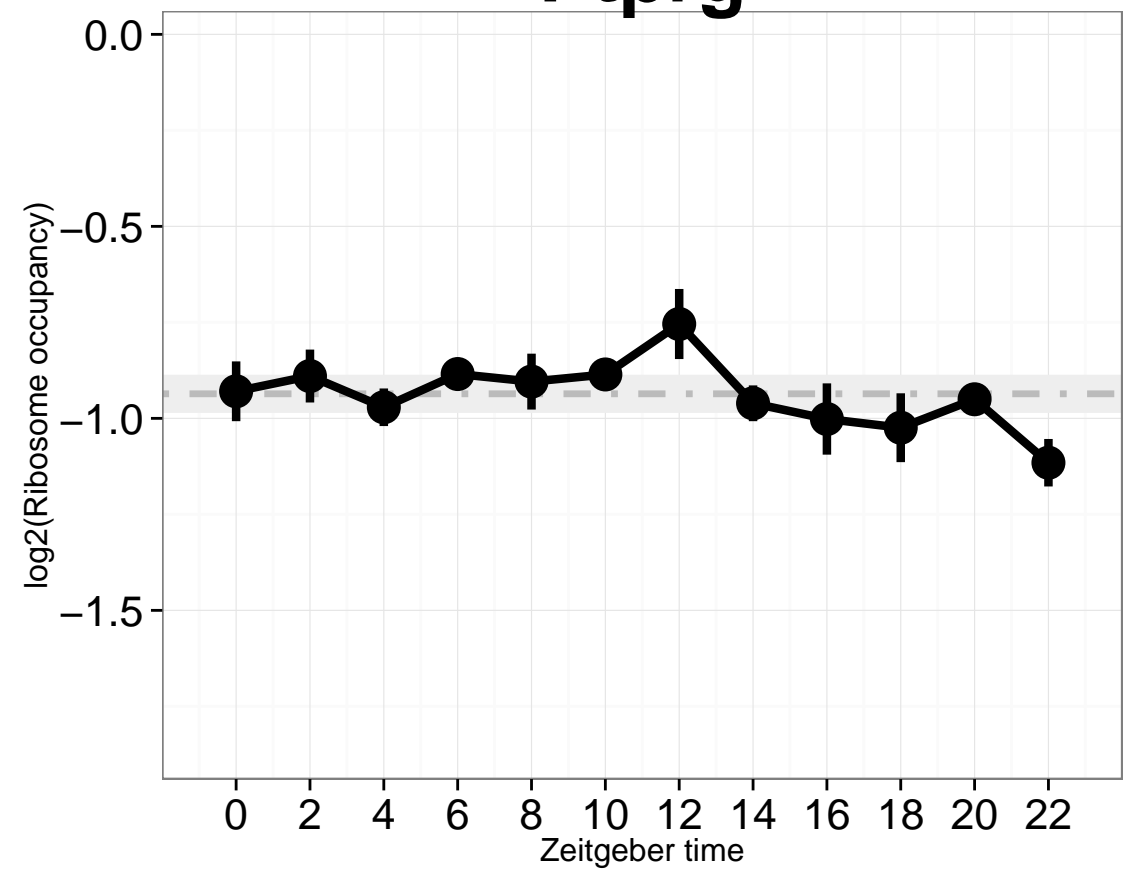

Supplement: Supplementary file 9345 [file 1]

# Pcdhb14

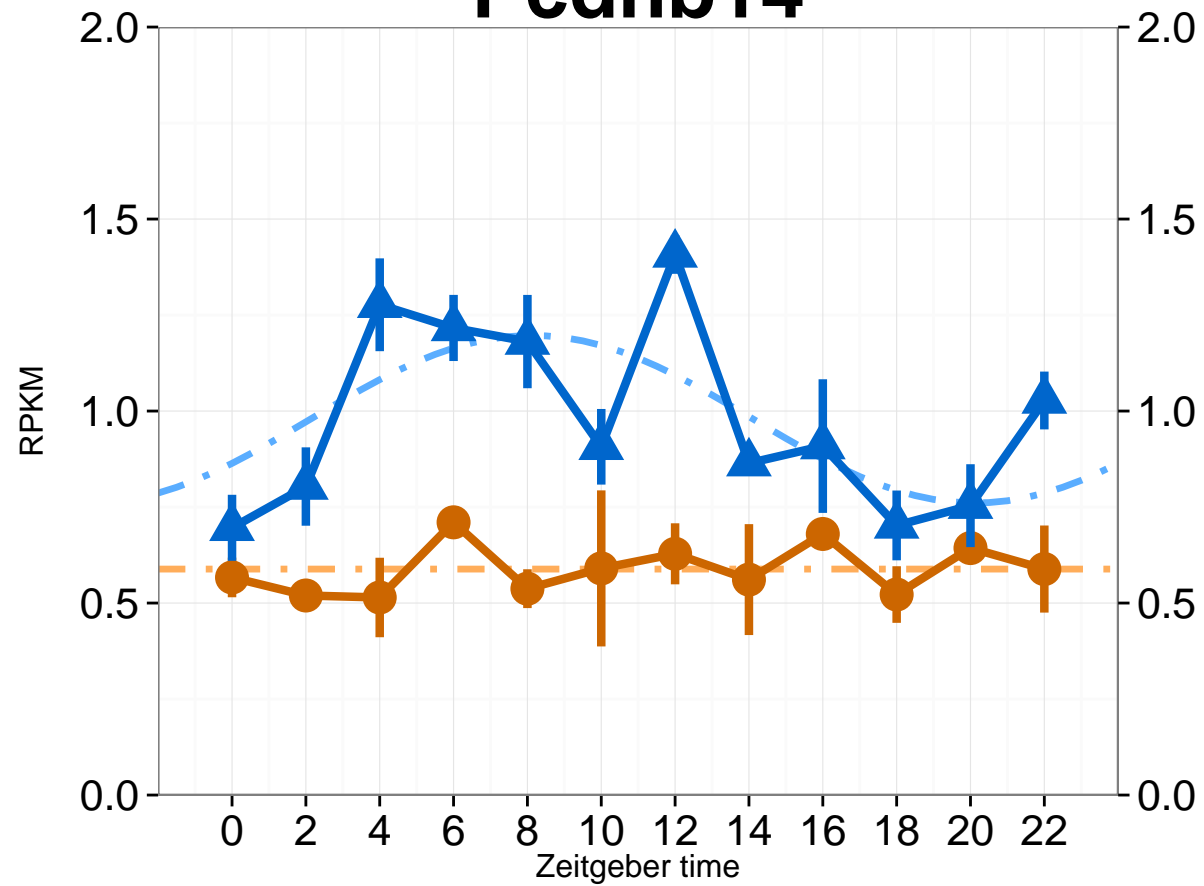

# Pcdhb14

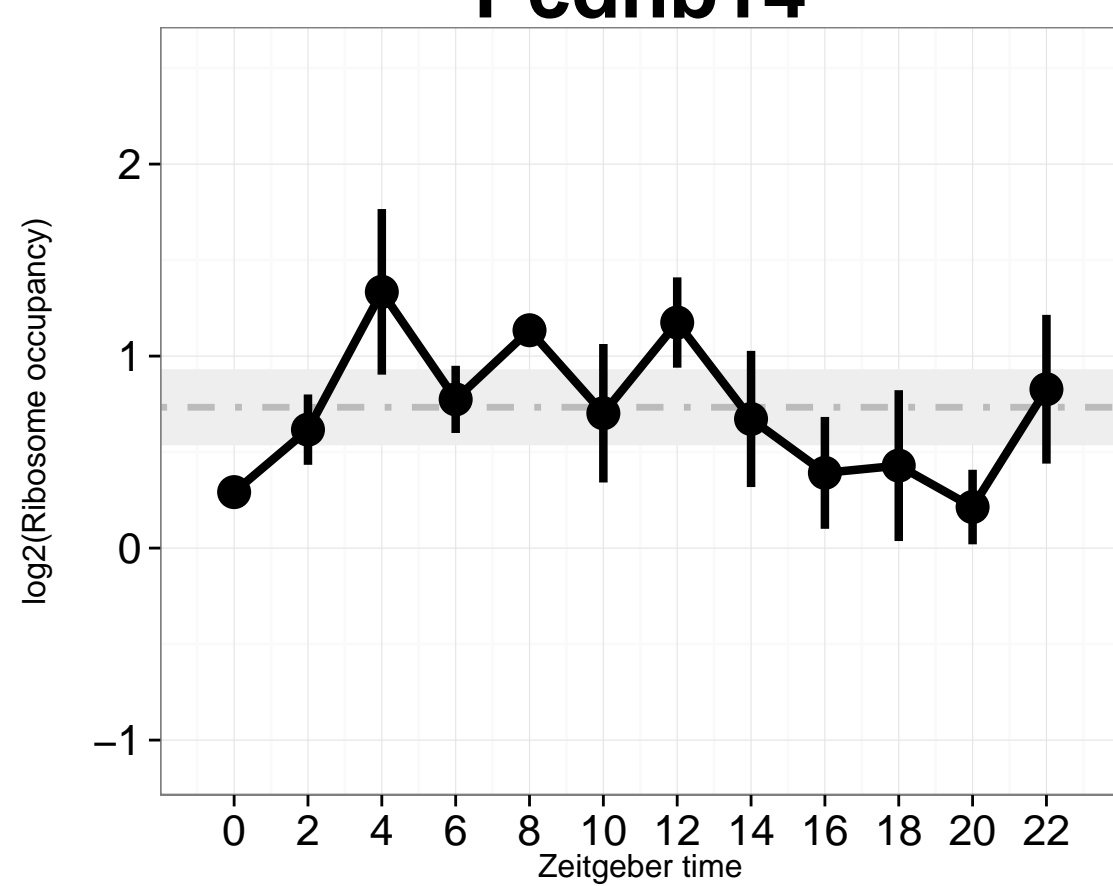

Supplement: Supplementary file 9346 [file 1]

## Ccdc18

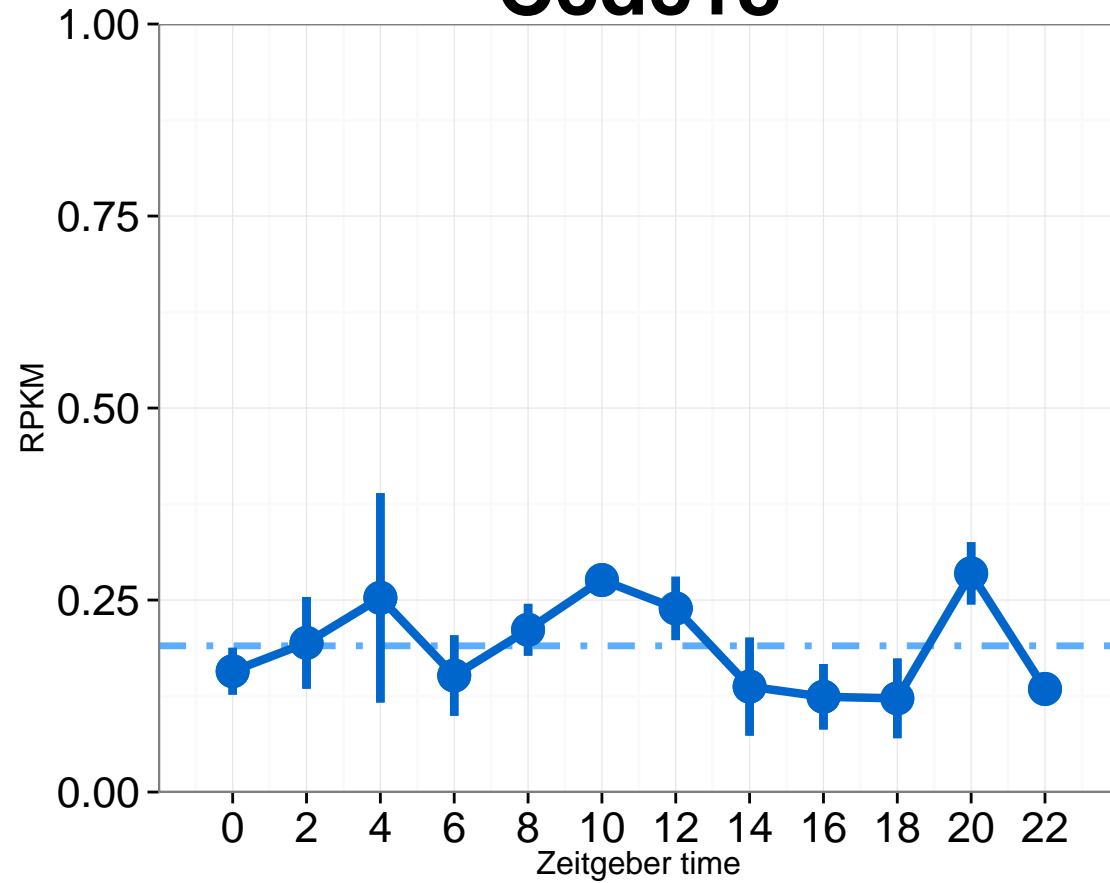

## Ccdc18 log2(Ribosome occupancy)

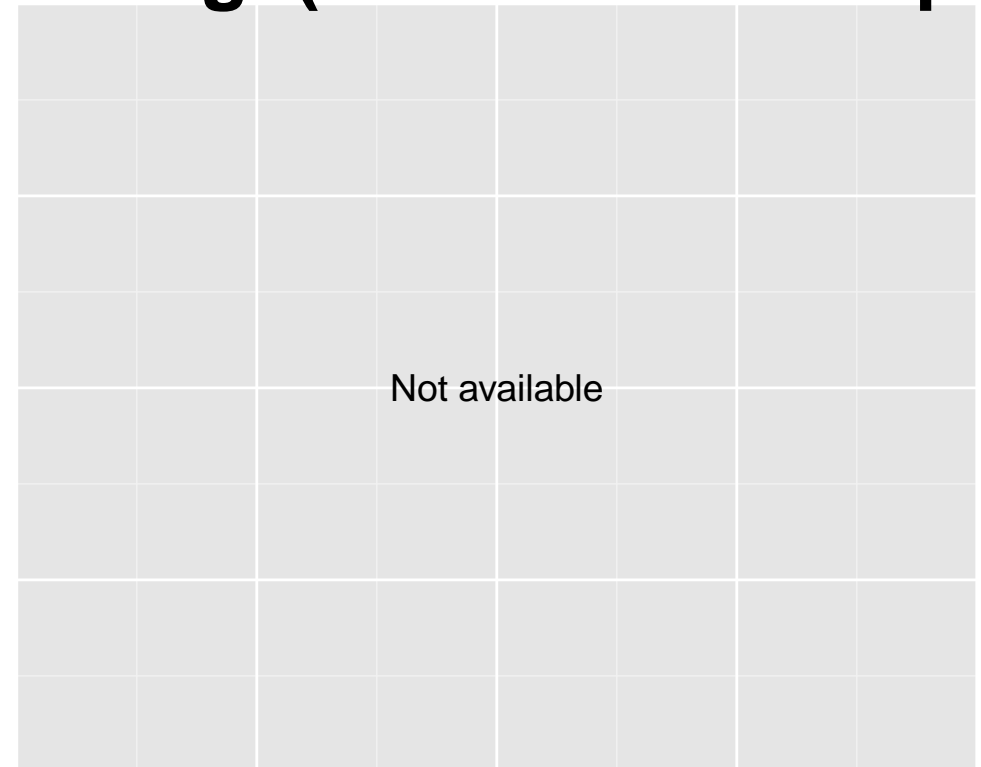

Supplement: Supplementary file 9347 [file 1]

## Rfx3

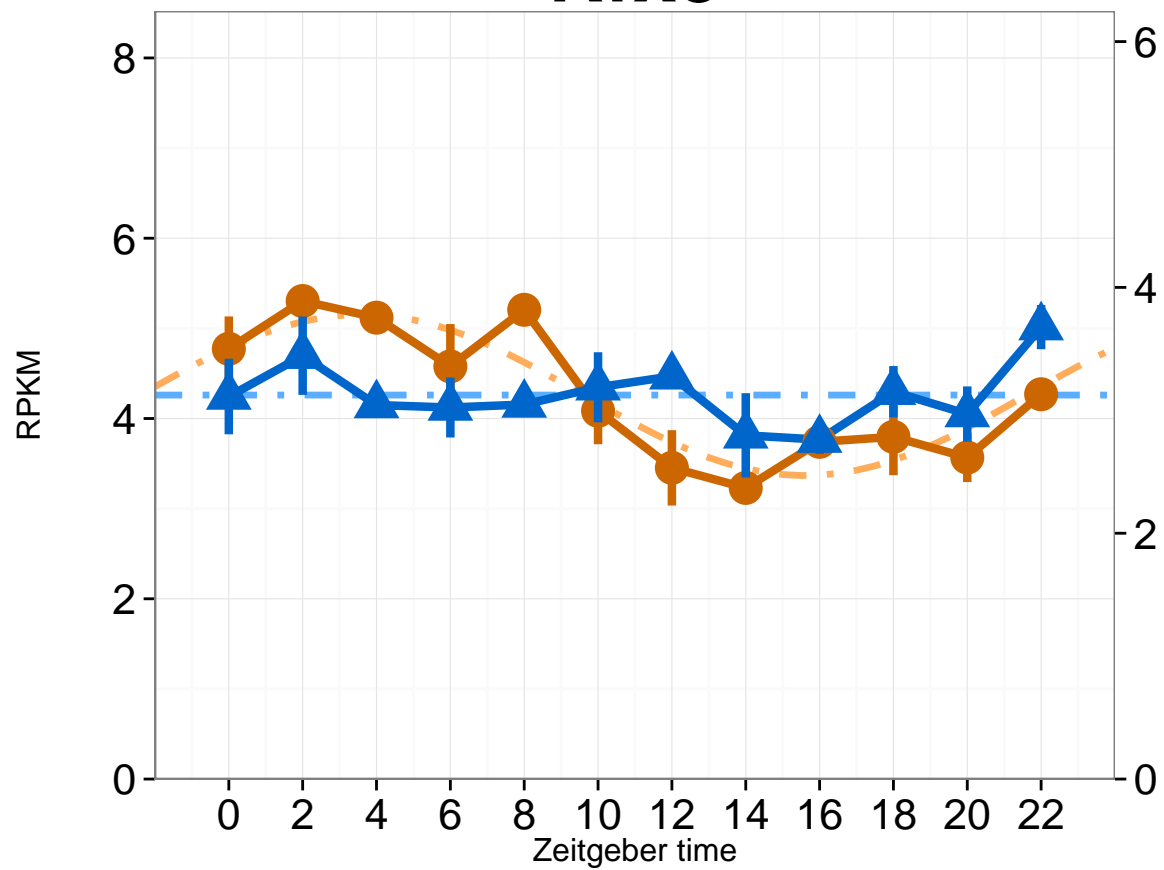

## Rfx3

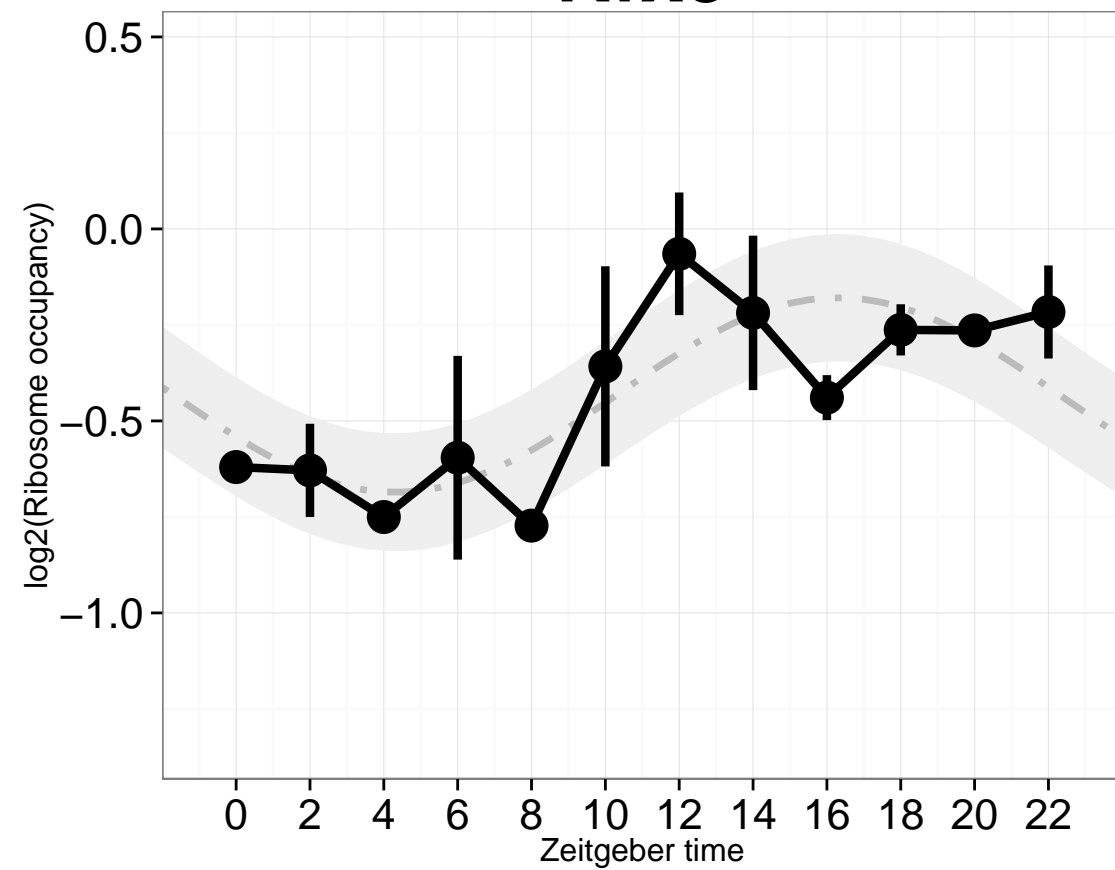

Supplement: Supplementary file 9348 [file 1]

## Tfrc

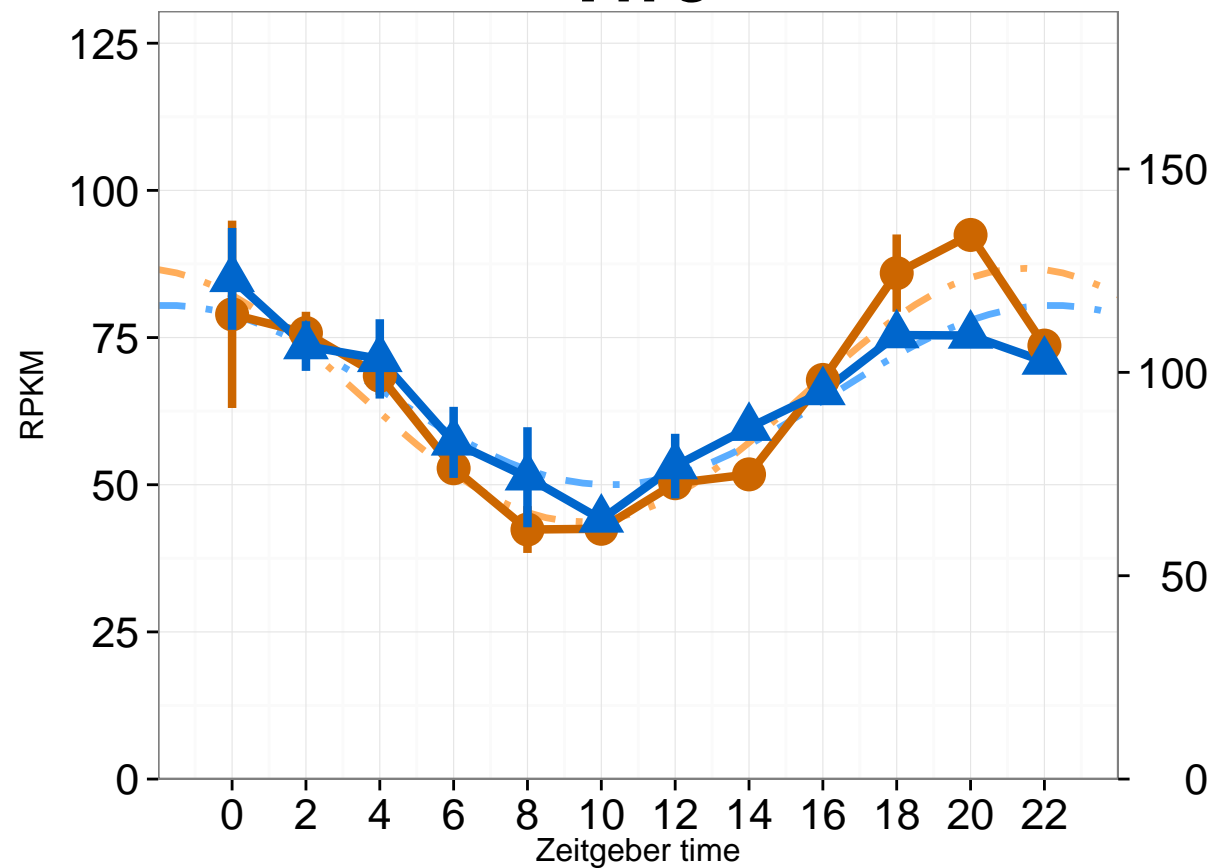

## Tfrc

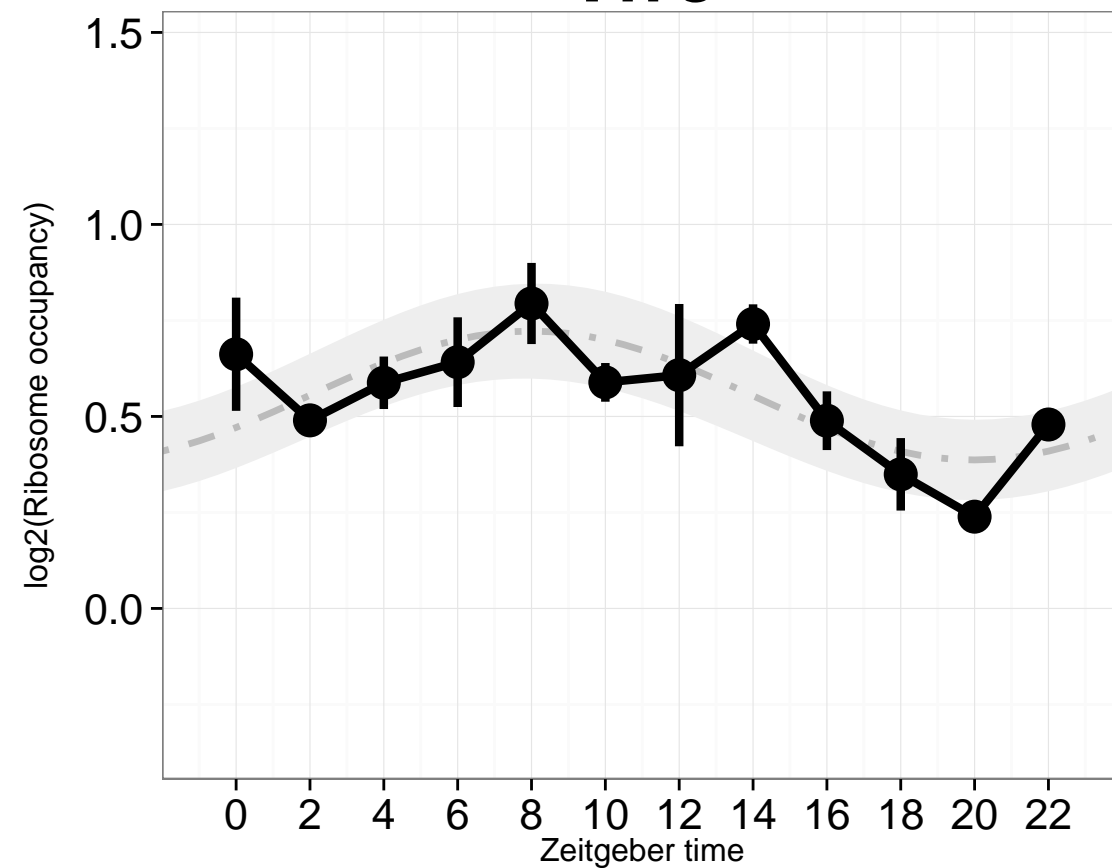

Supplement: Supplementary file 9349 [file 1]

## Ubald1

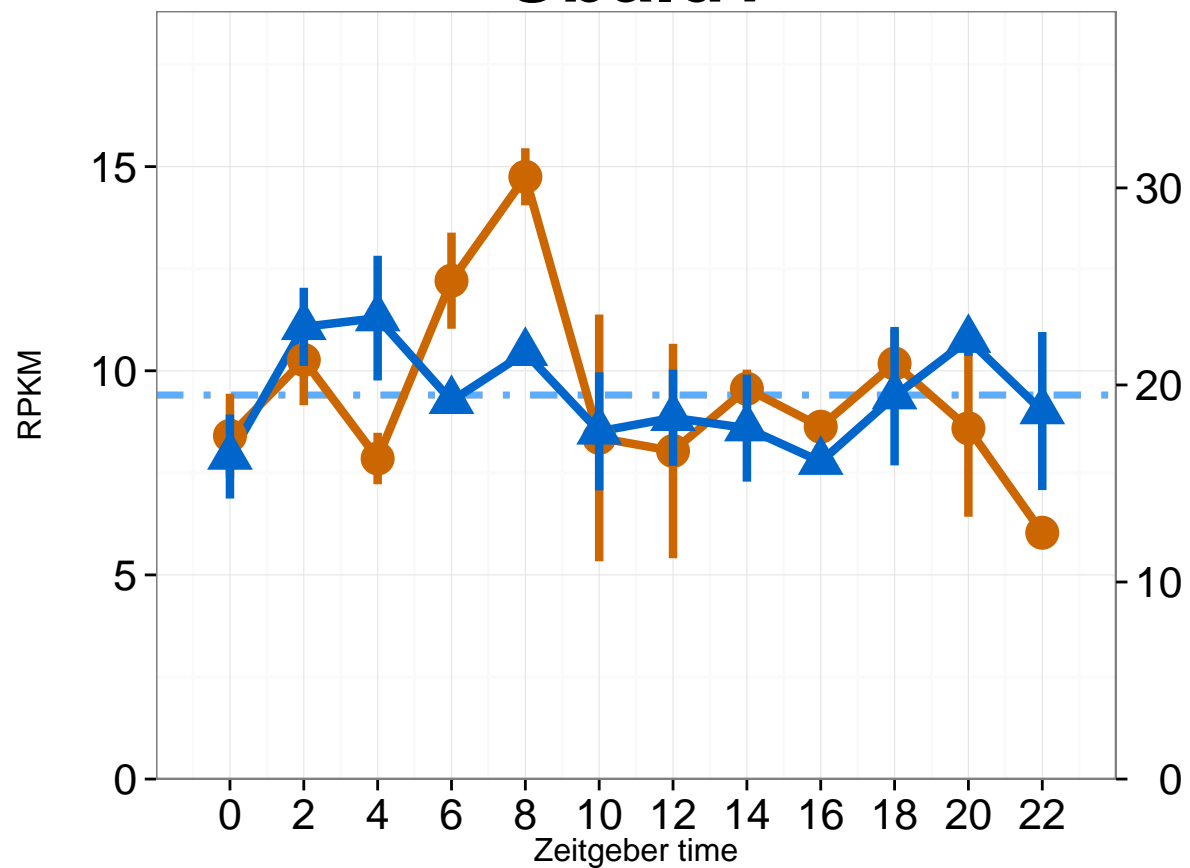

## Ubald1

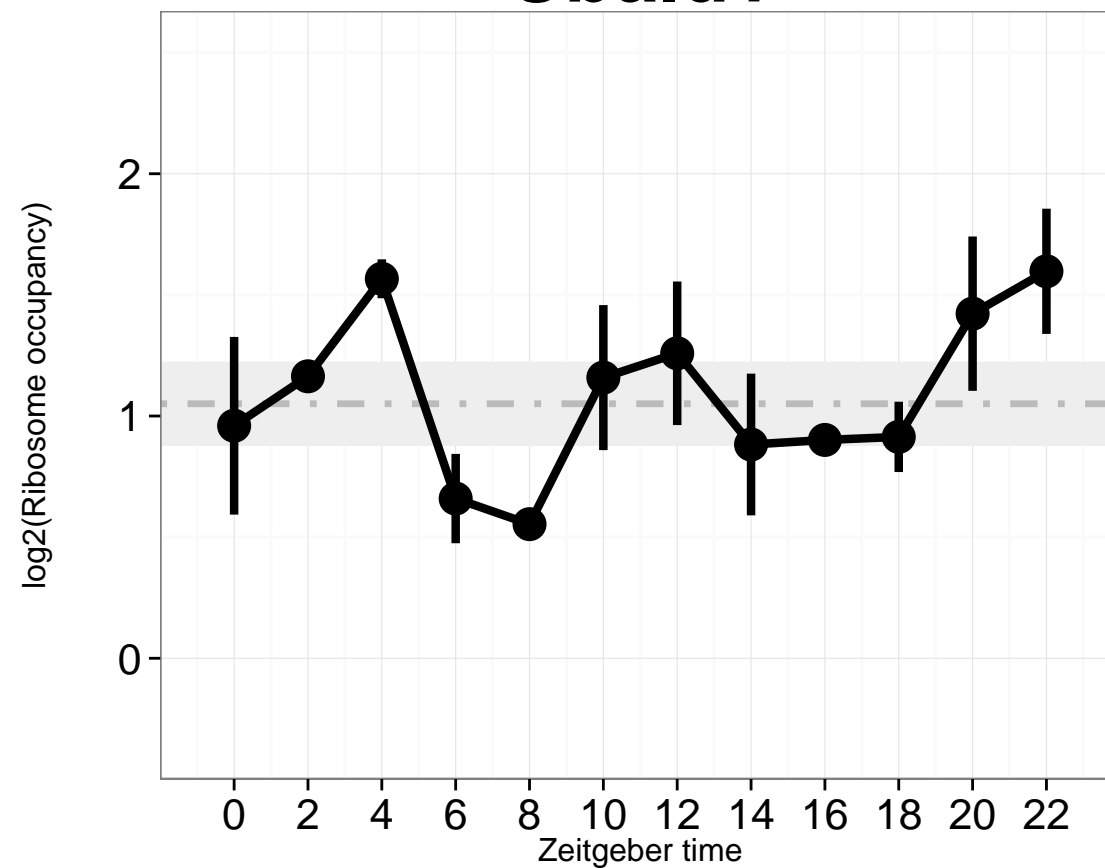

Supplement: Supplementary file 9350 [file 1]

## Rasd2

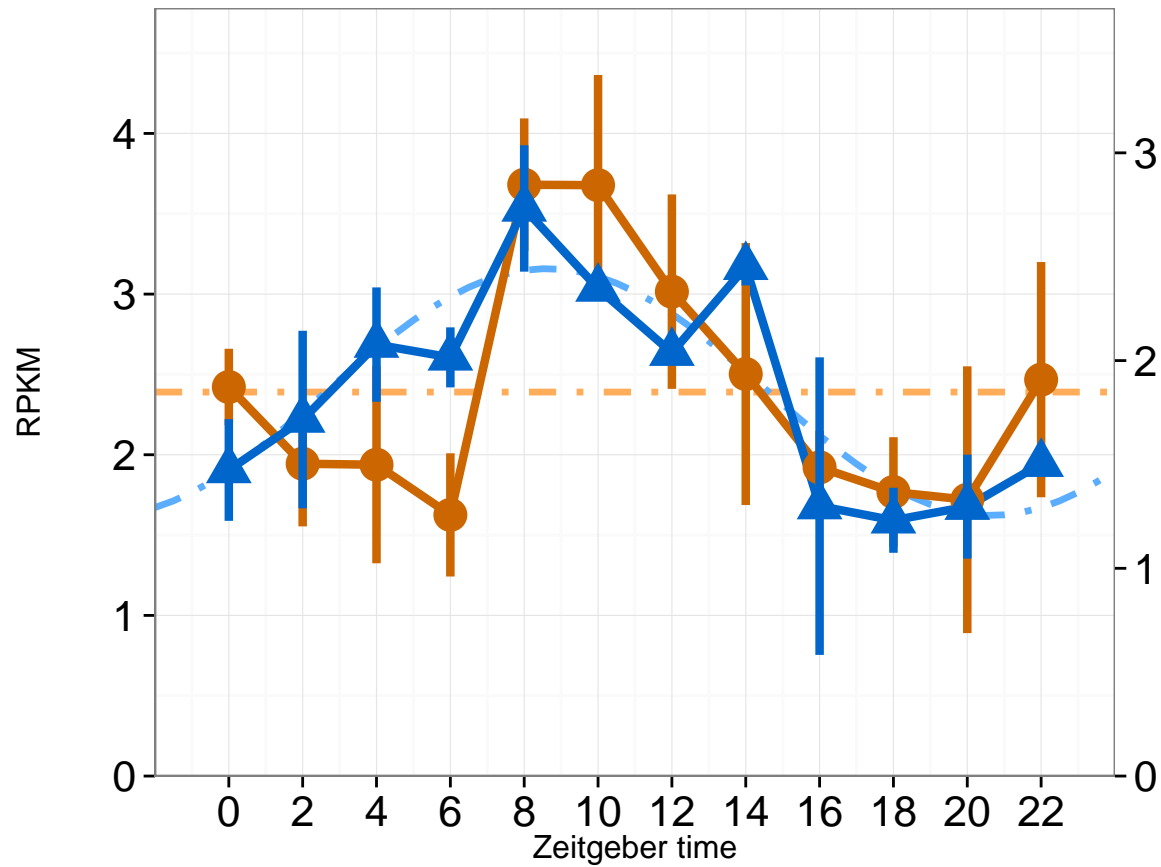

## Rasd2

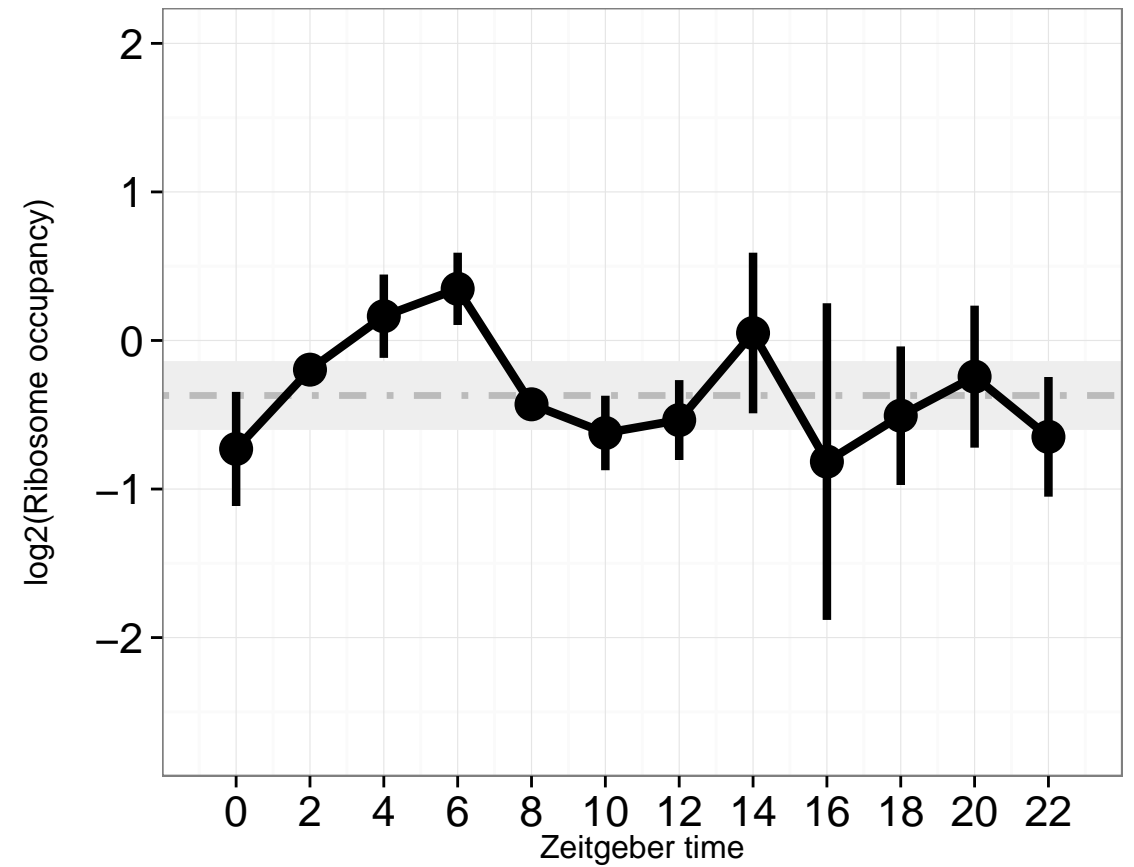

Supplement: Supplementary file 9351 [file 1]

## Sgcb

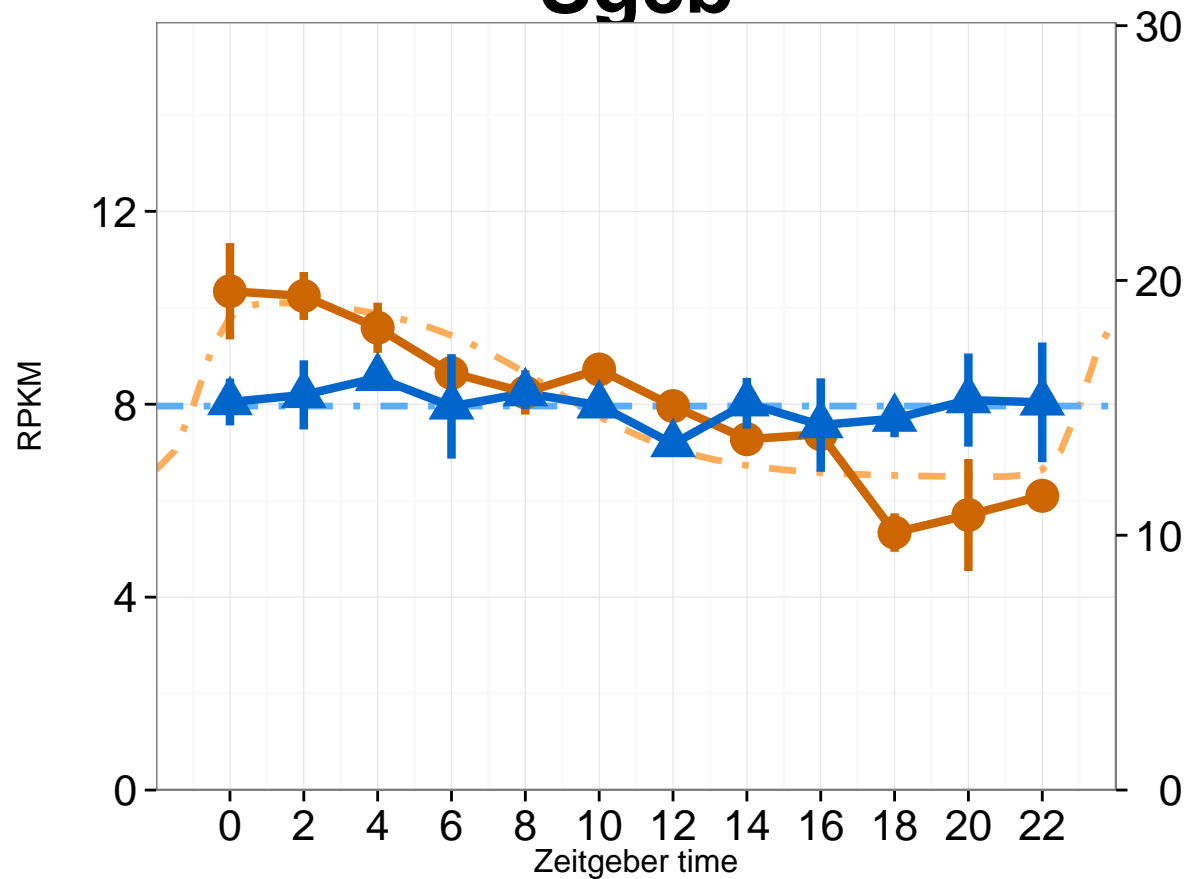

## Sgcb

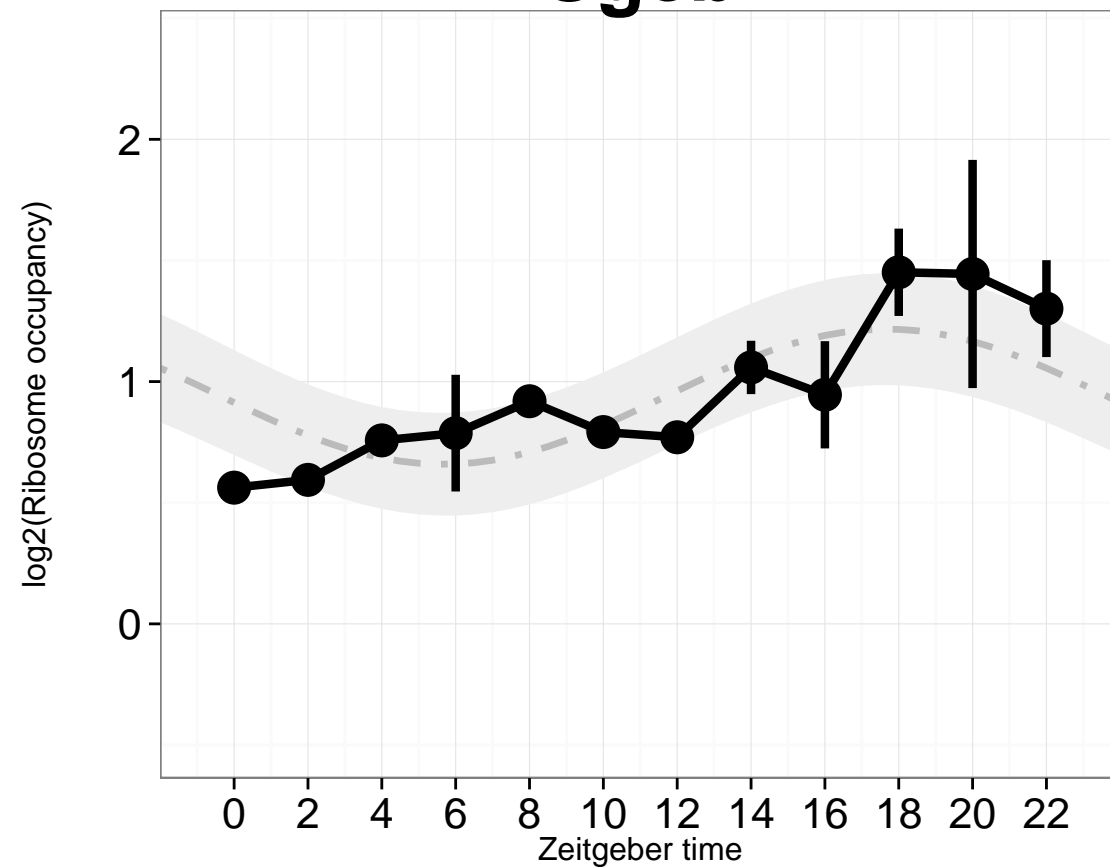

Supplement: Supplementary file 9352 [file 1]

# Tmem126a

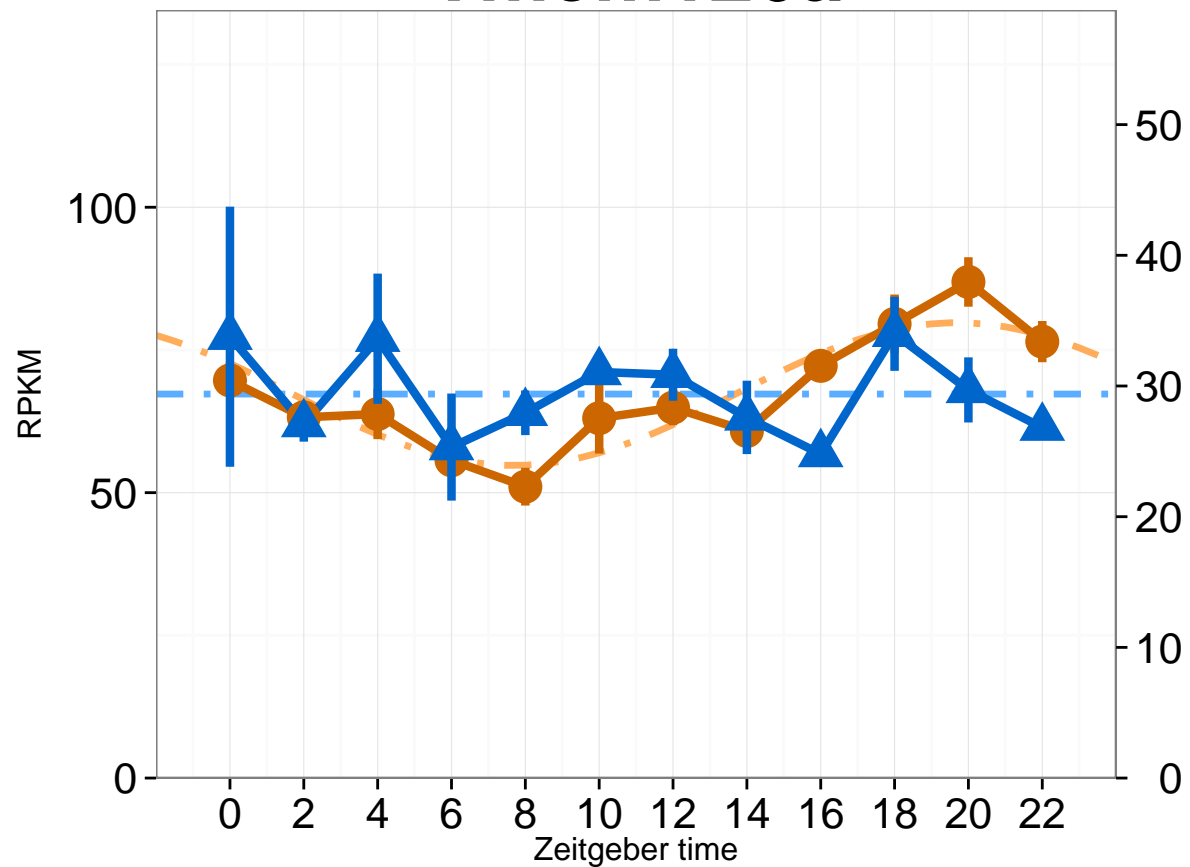

# Tmem126a

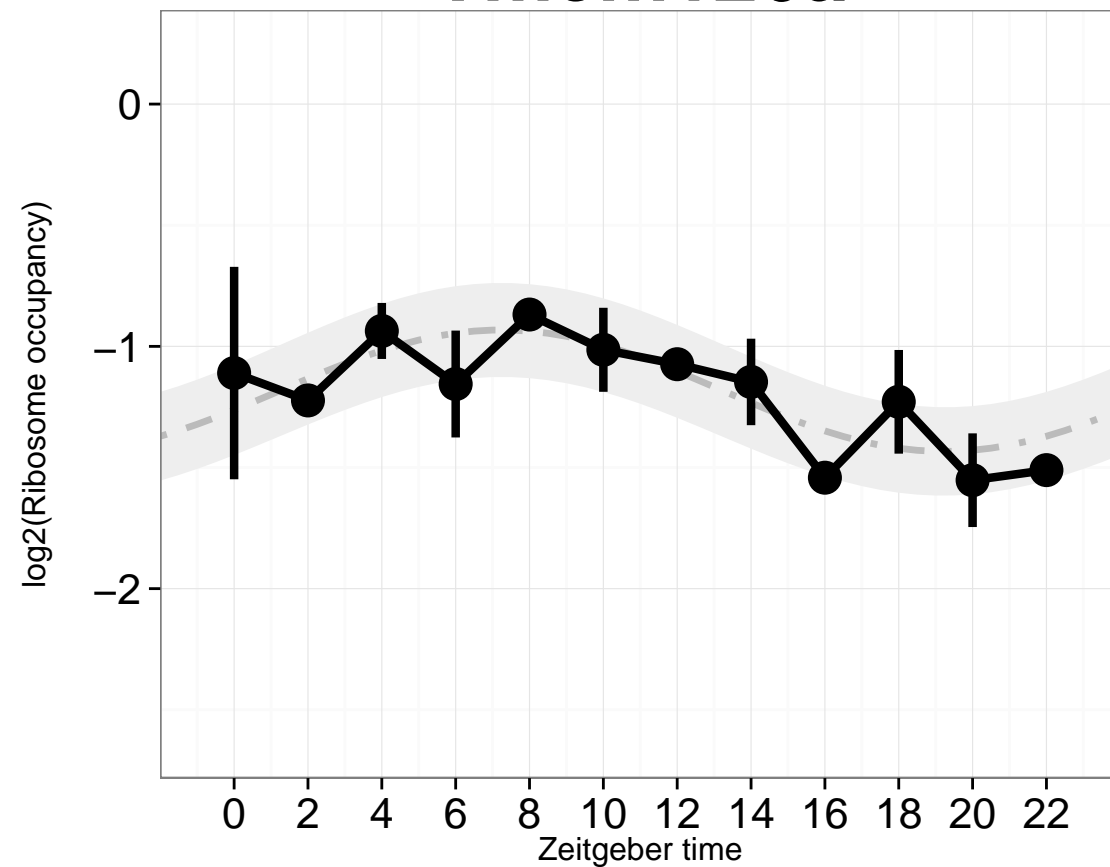

Supplement: Supplementary file 9353 [file 1]

# Camsap1

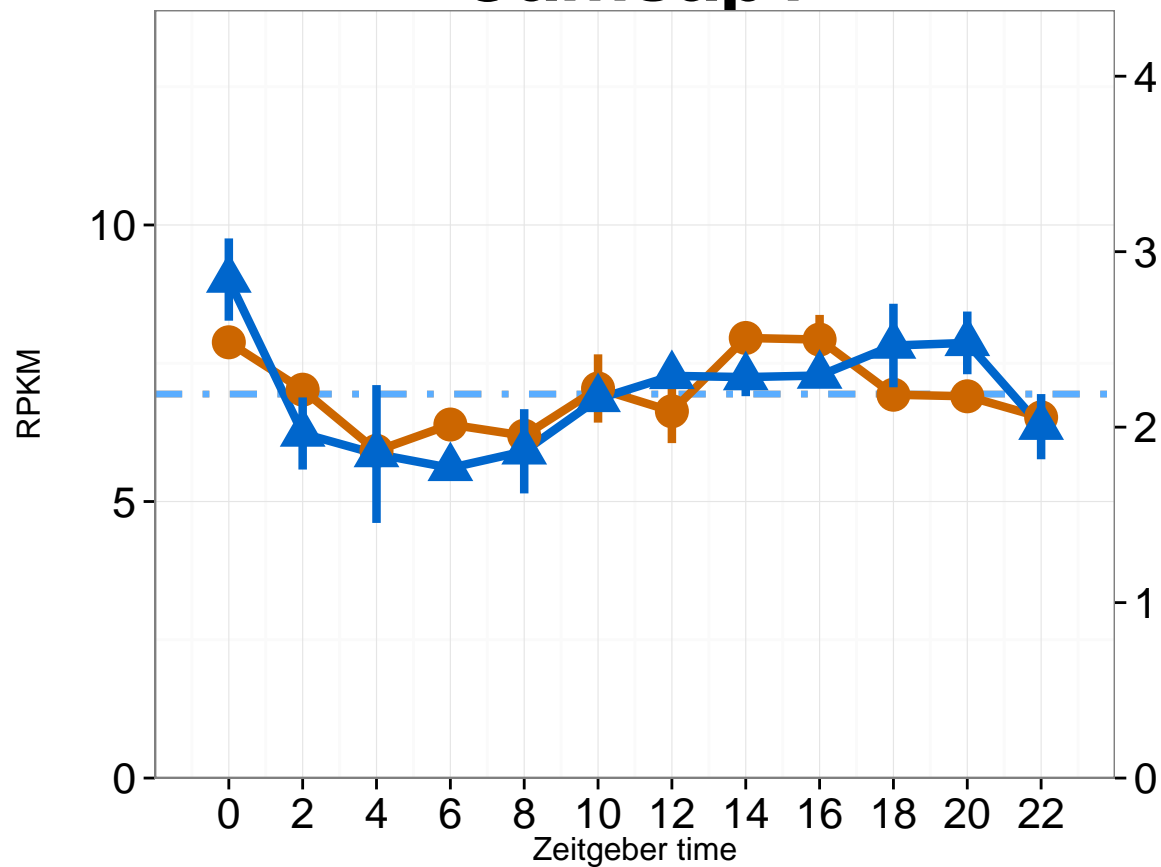

# Camsap1

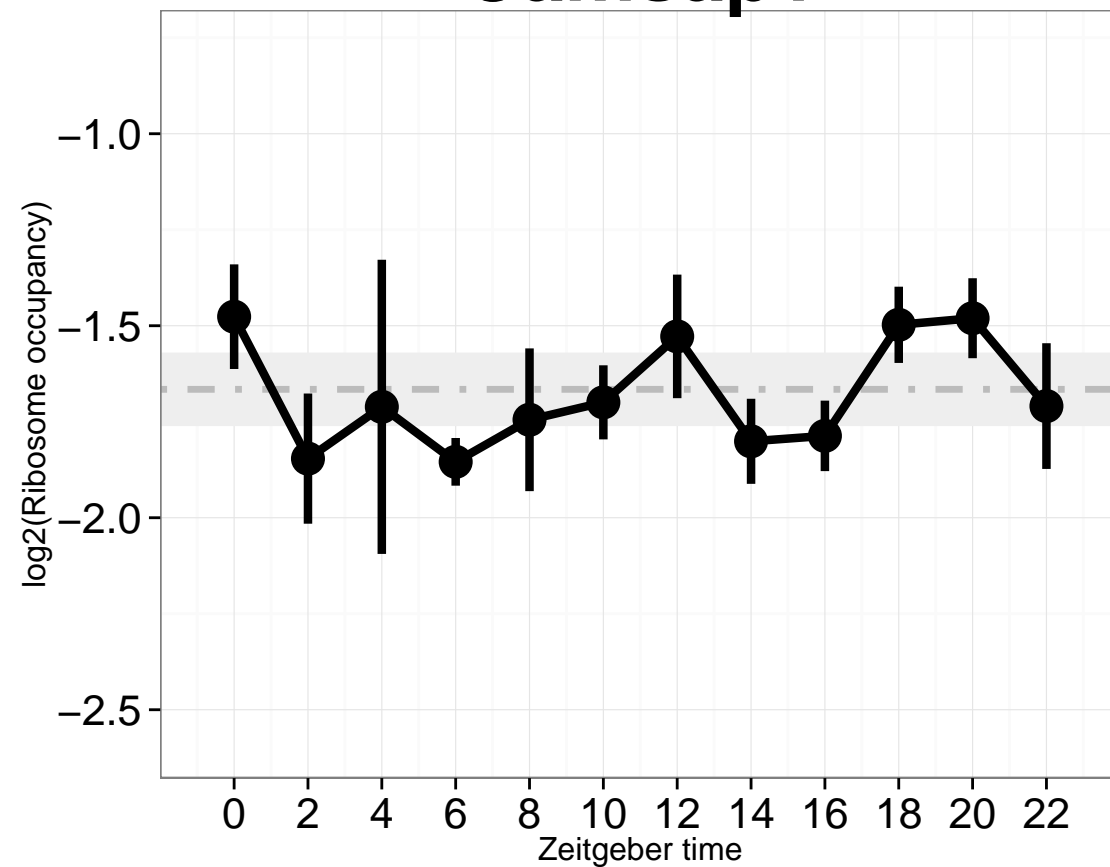

Supplement: Supplementary file 9354 [file 1]

# Zfp574

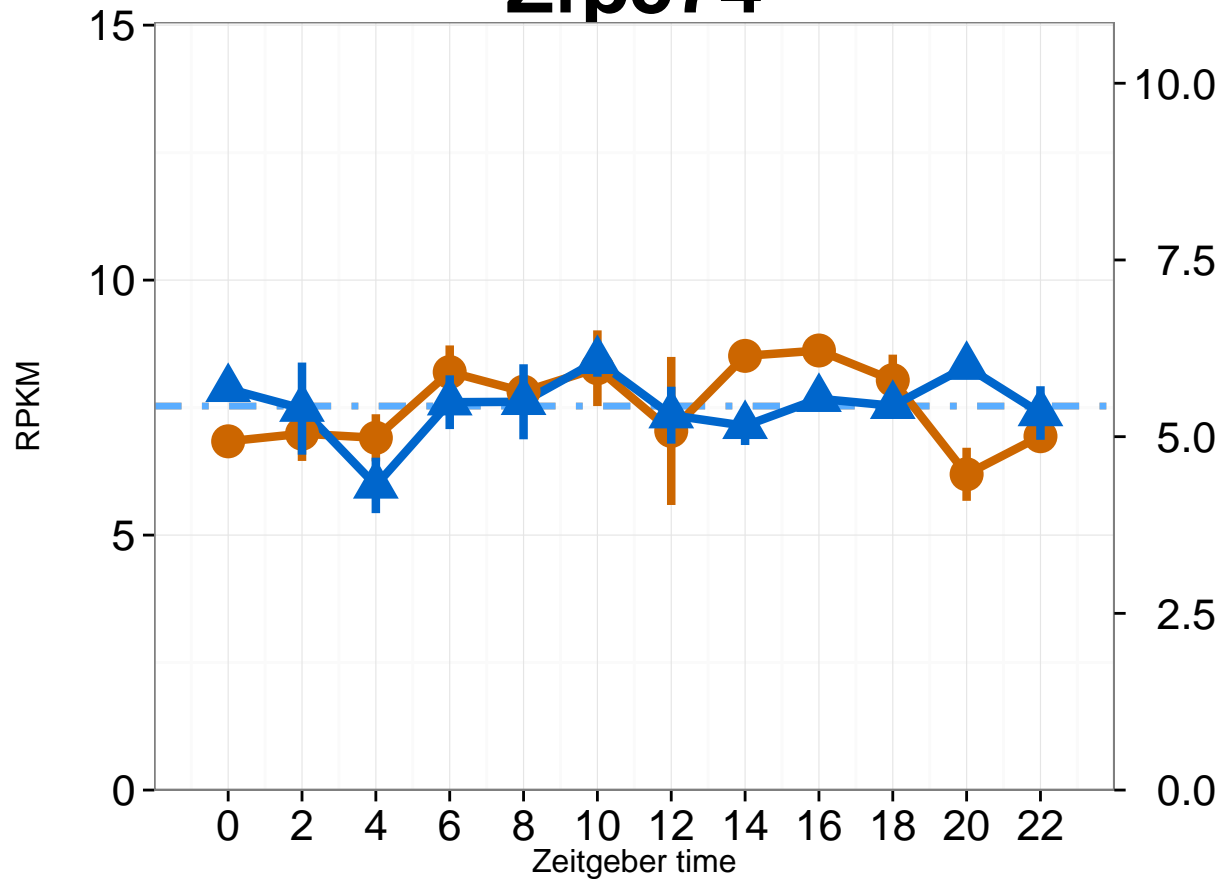

# Zfp574

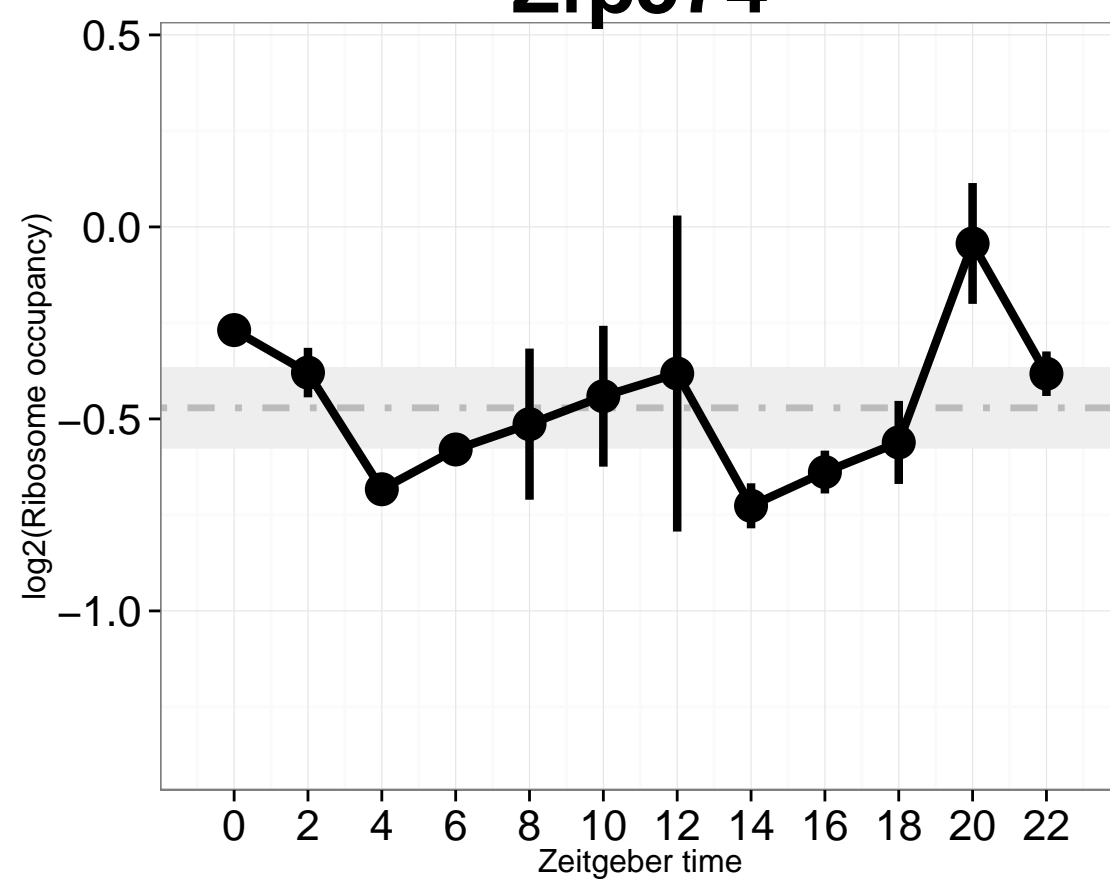

Supplement: Supplementary file 9355 [file 1]

## Fbln2

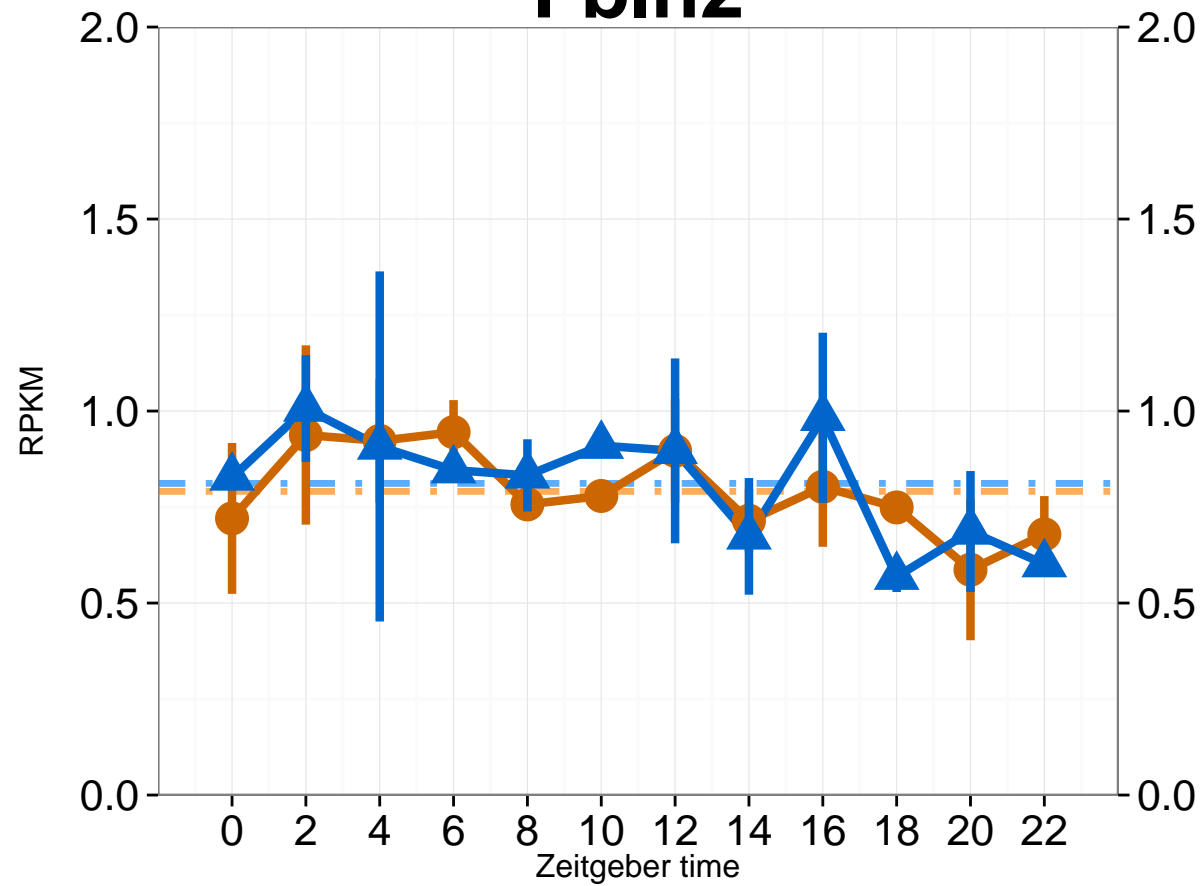

## Fbln2

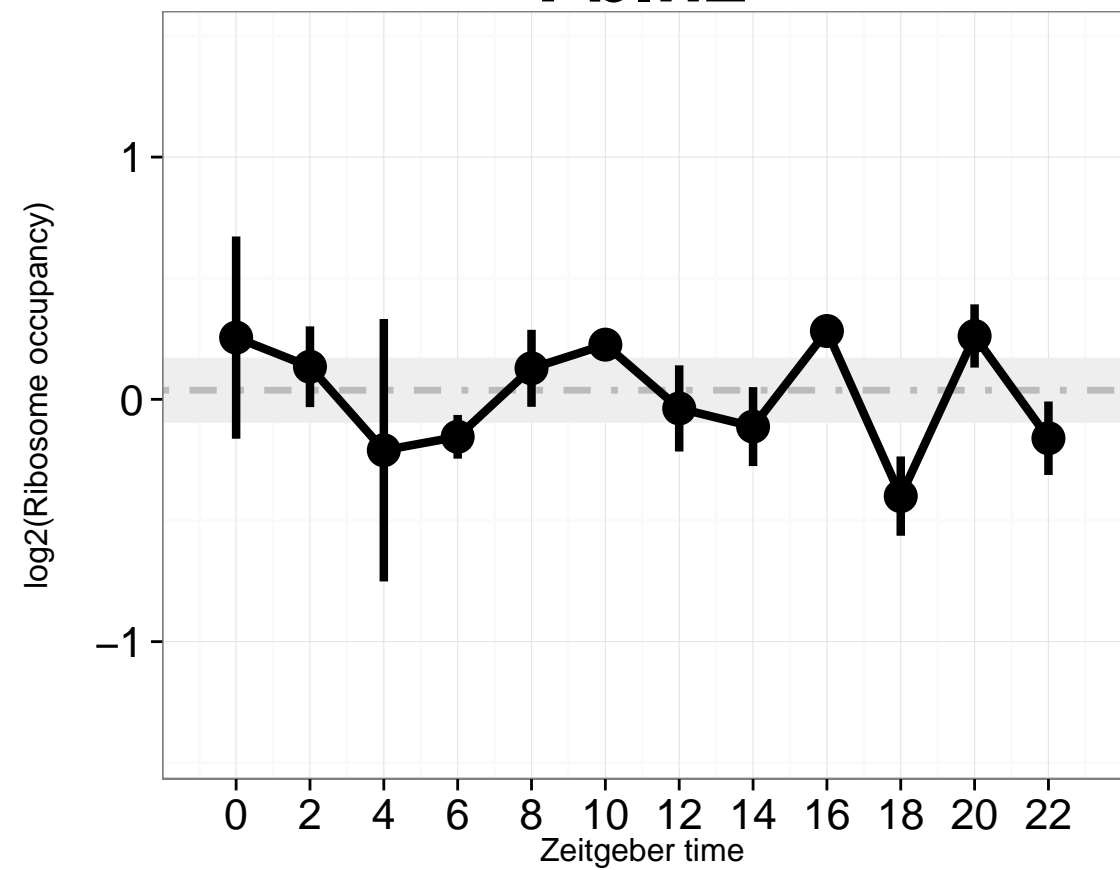

Supplement: Supplementary file 9356 [file 1]

## Xpa

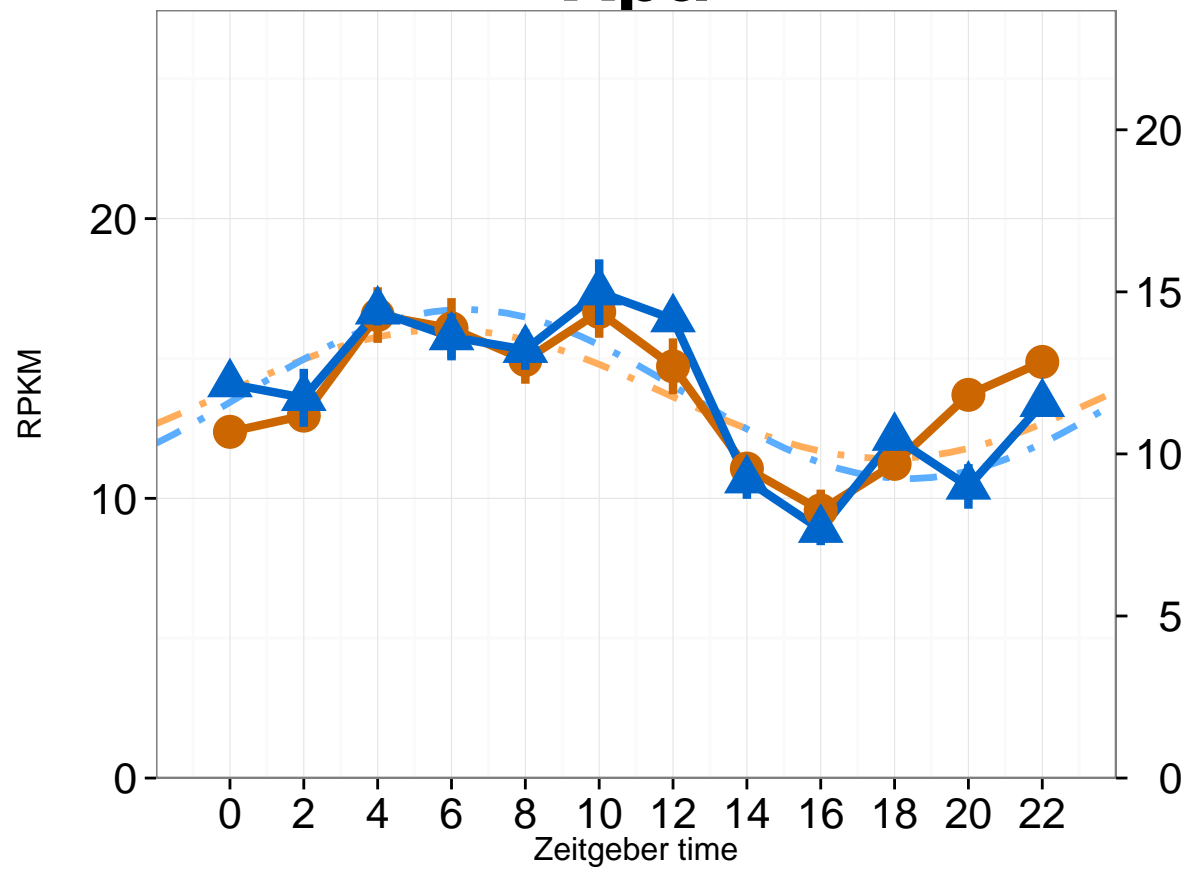

## Xpa

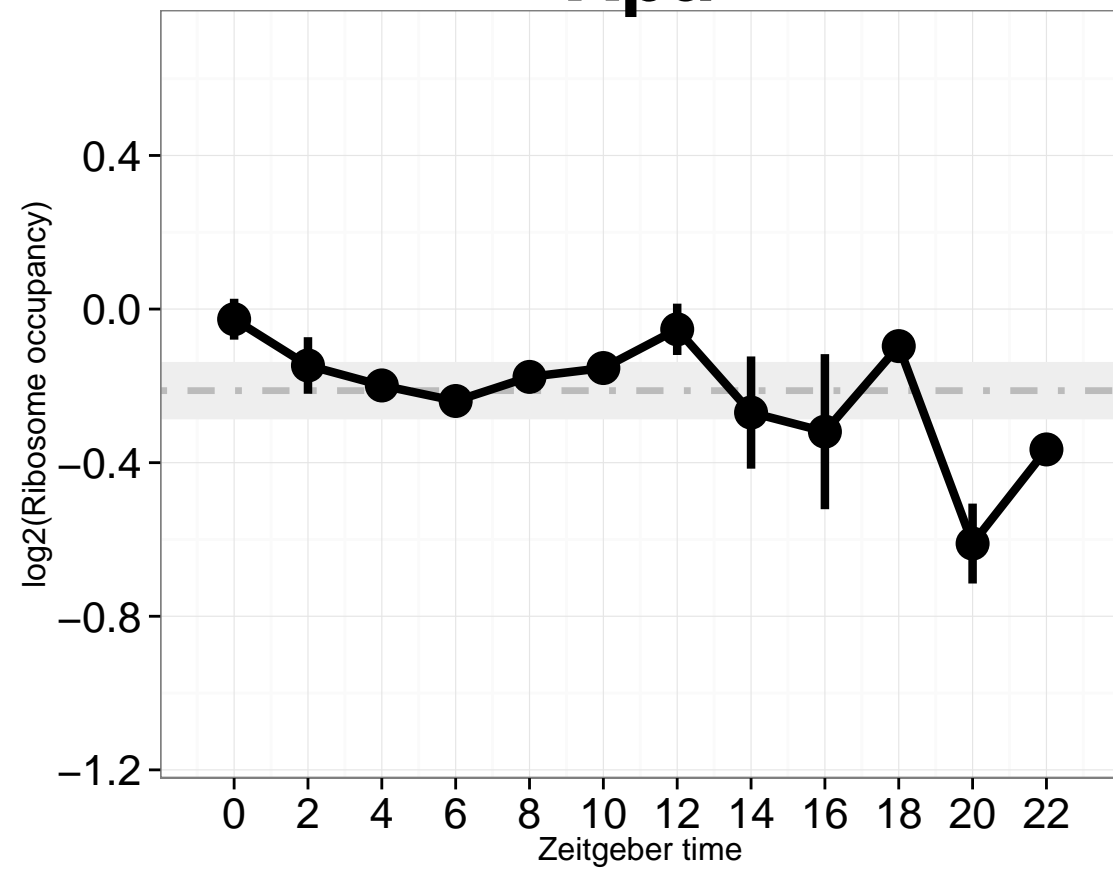

Supplement: Supplementary file 9357 [file 1]

## Ccdc25

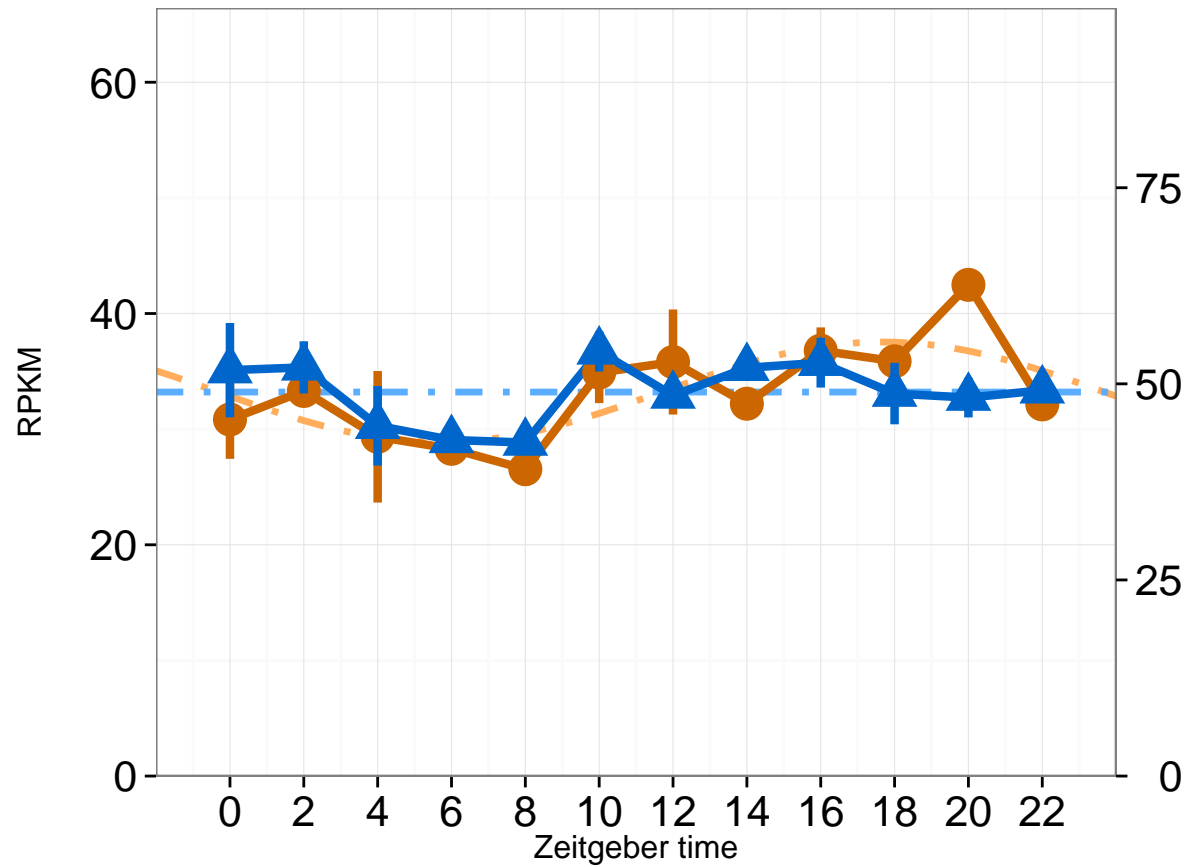

## Ccdc25

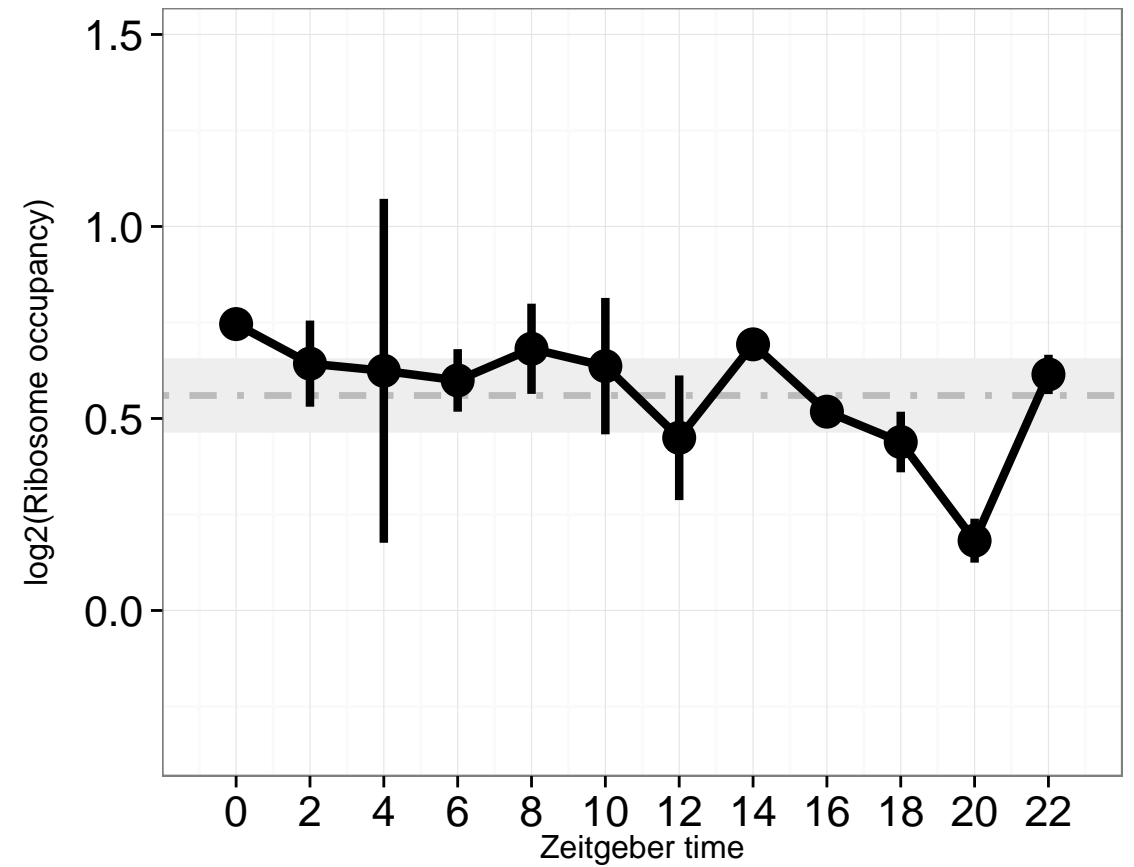

Supplement: Supplementary file 9358 [file 1]

# Kmt2a

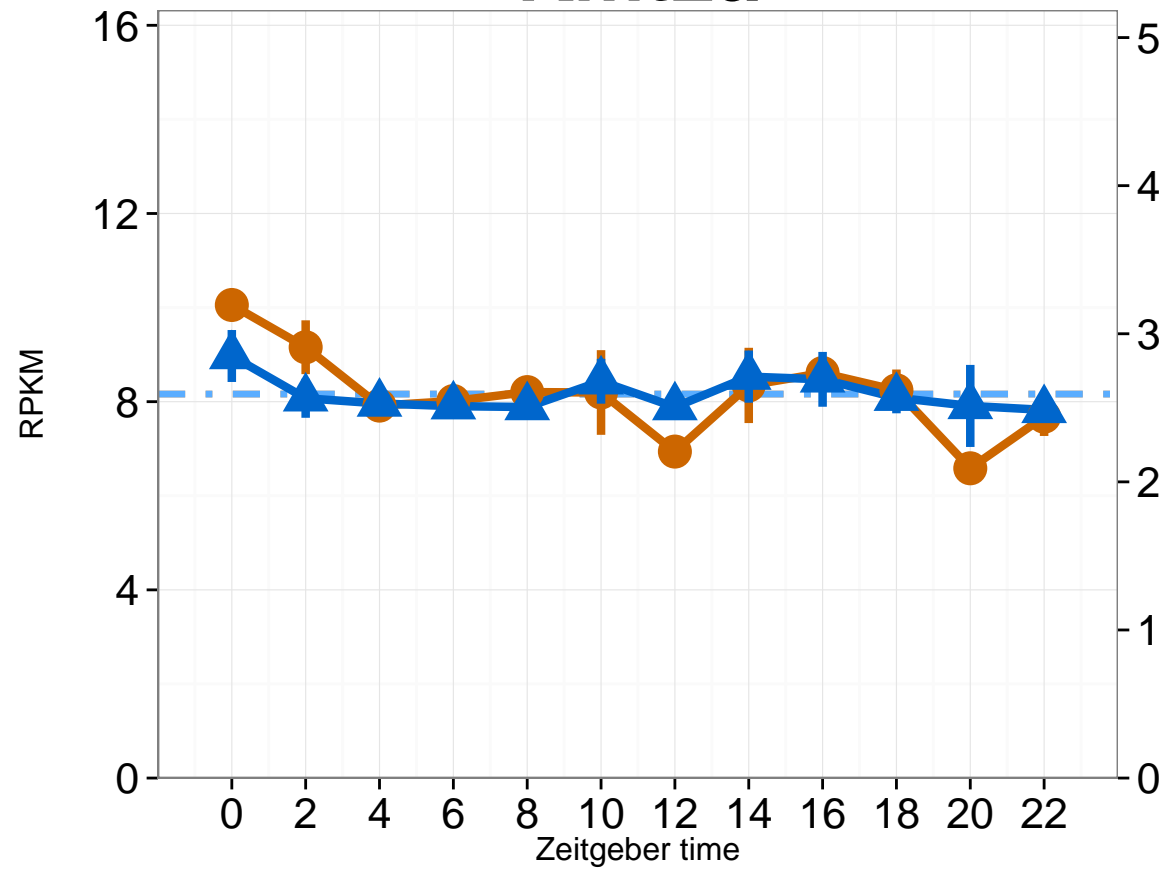

# Kmt2a

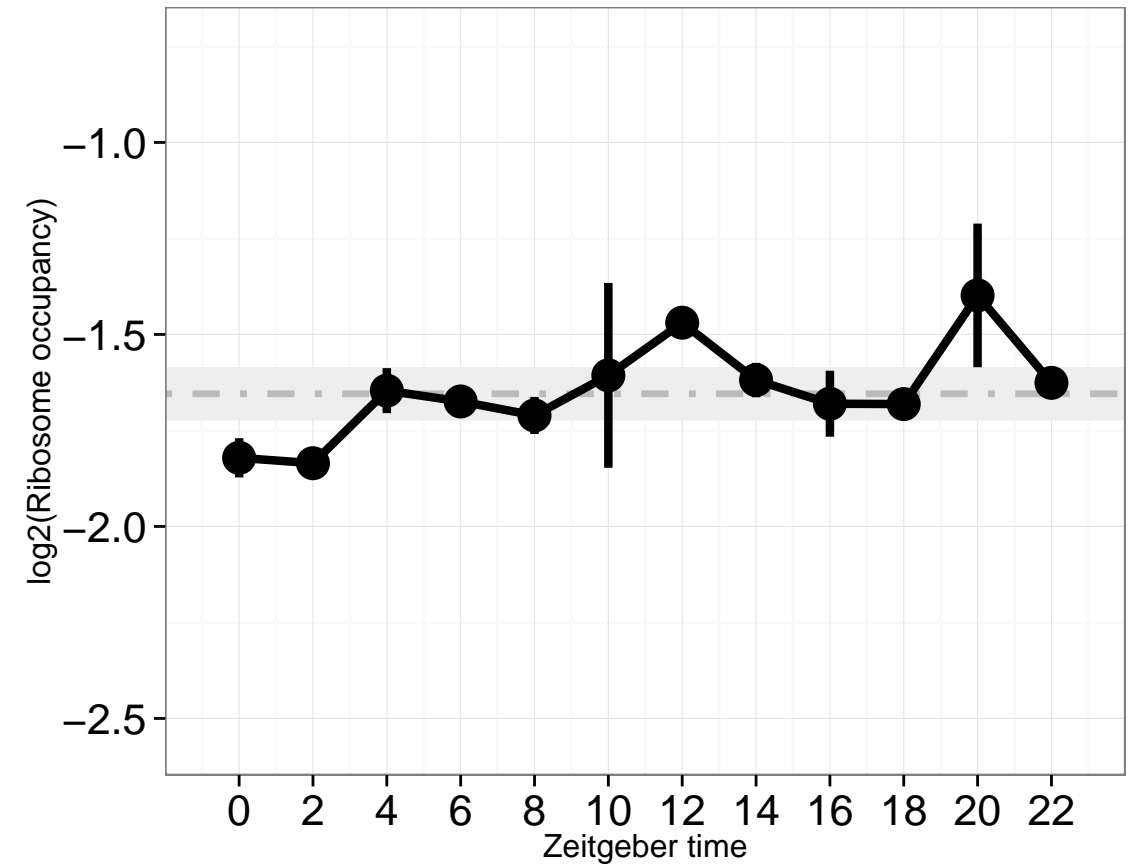

Supplement: Supplementary file 9359 [file 1]

# 4933426M11Rik

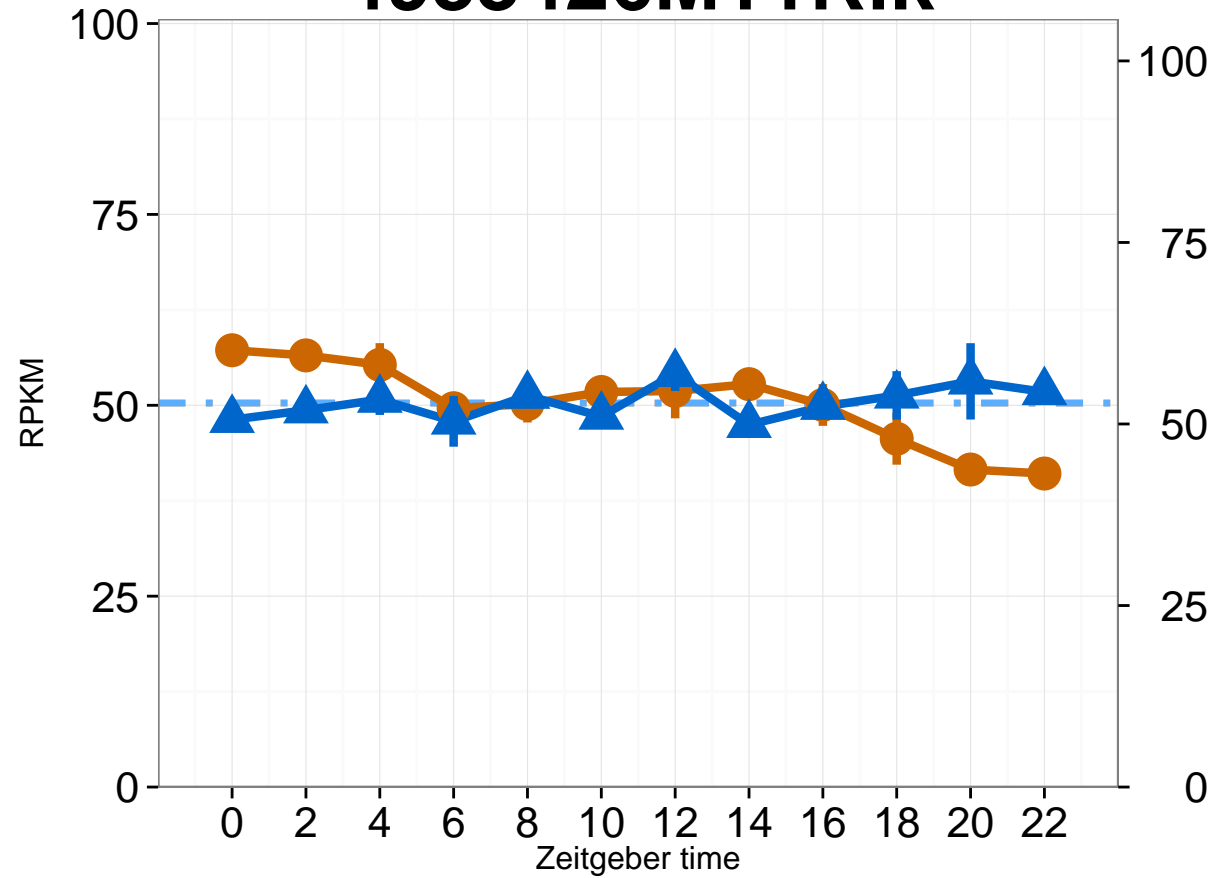

# 4933426M11Rik

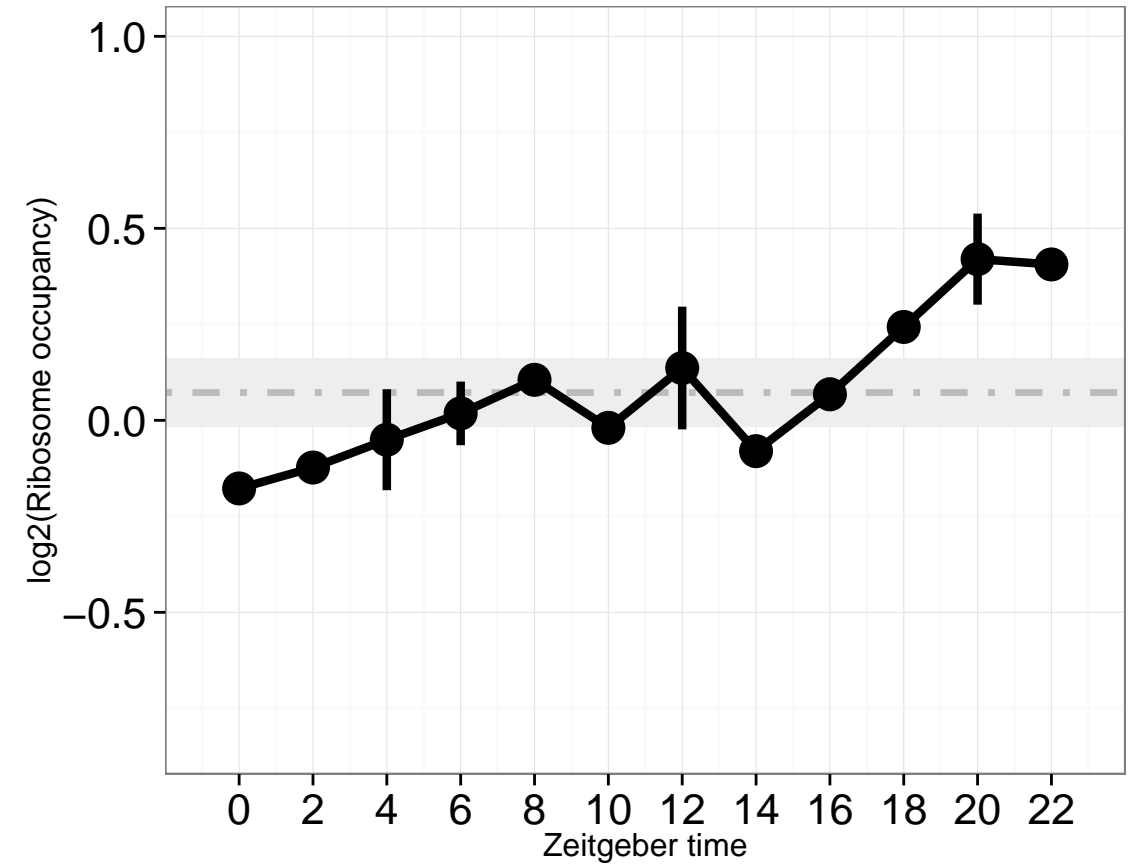

Supplement: Supplementary file 9360 [file 1]

# Sec22a

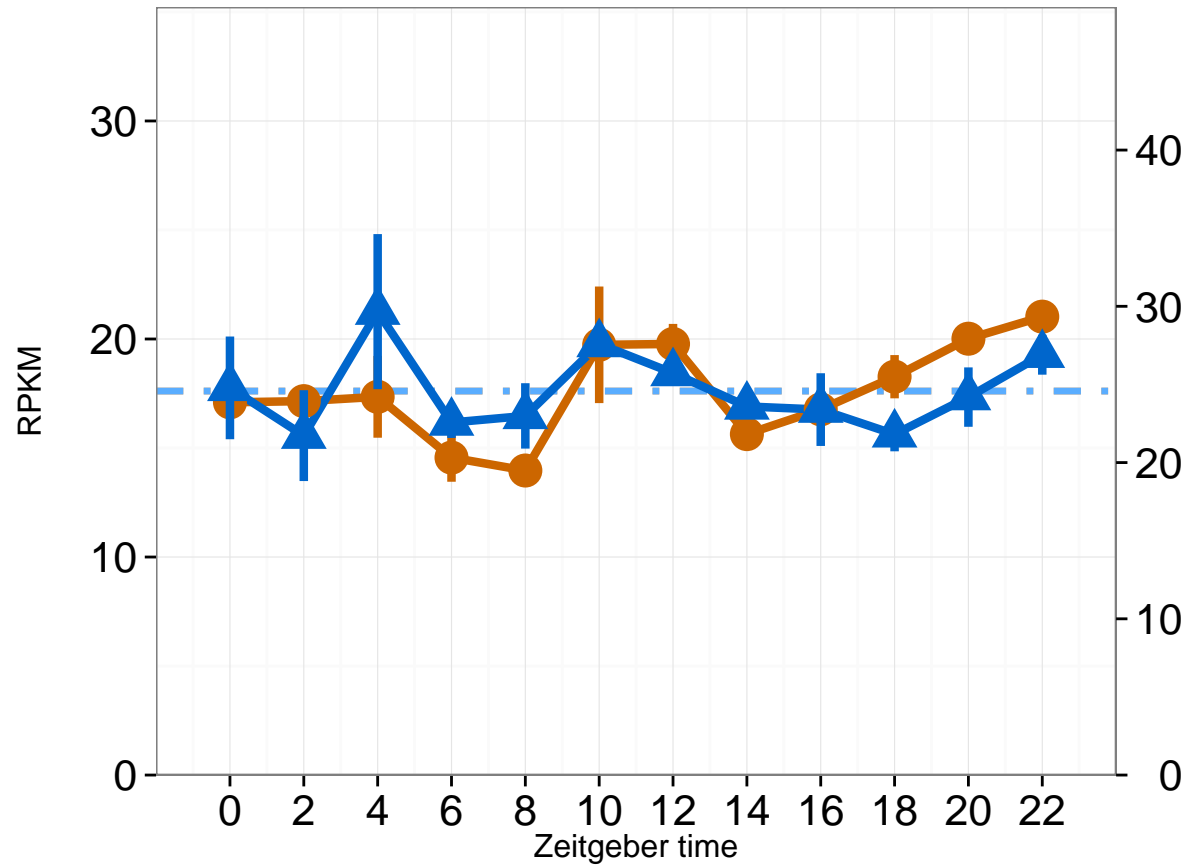

# Sec22a

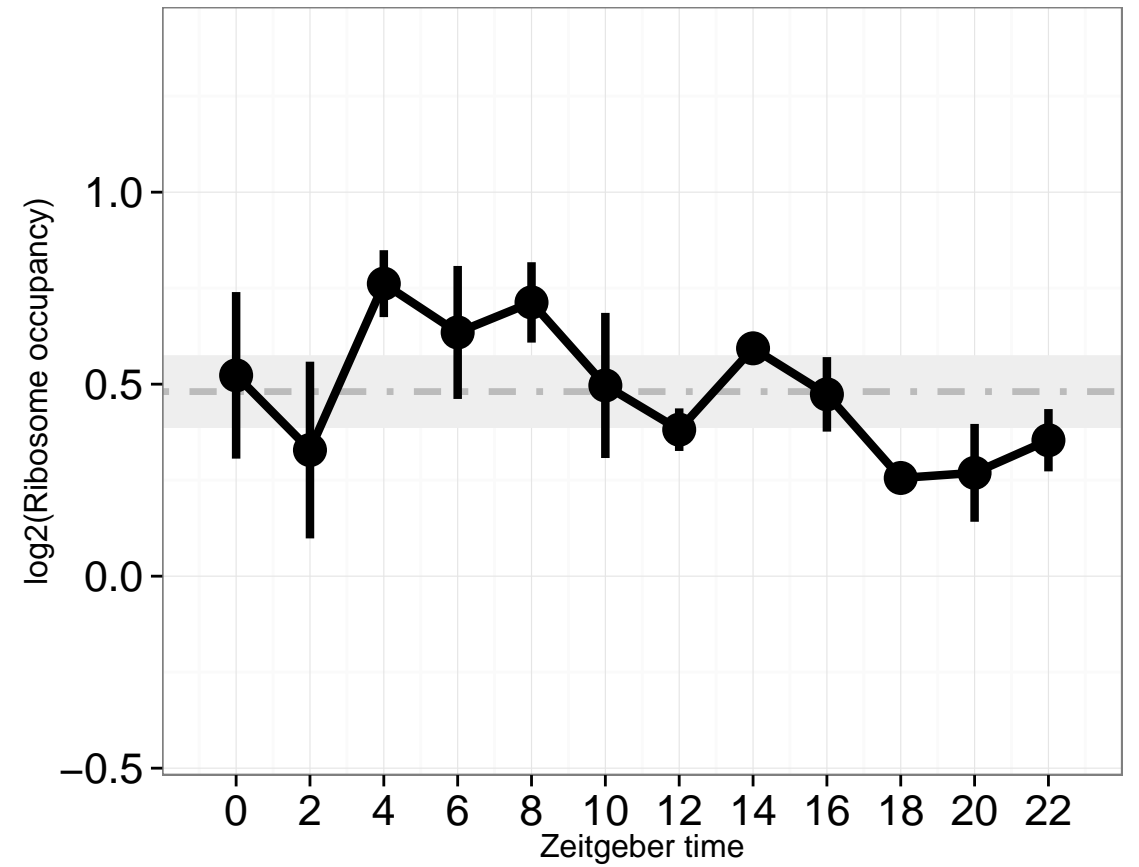

Supplement: Supplementary file 9361 [file 1]

## Isg15

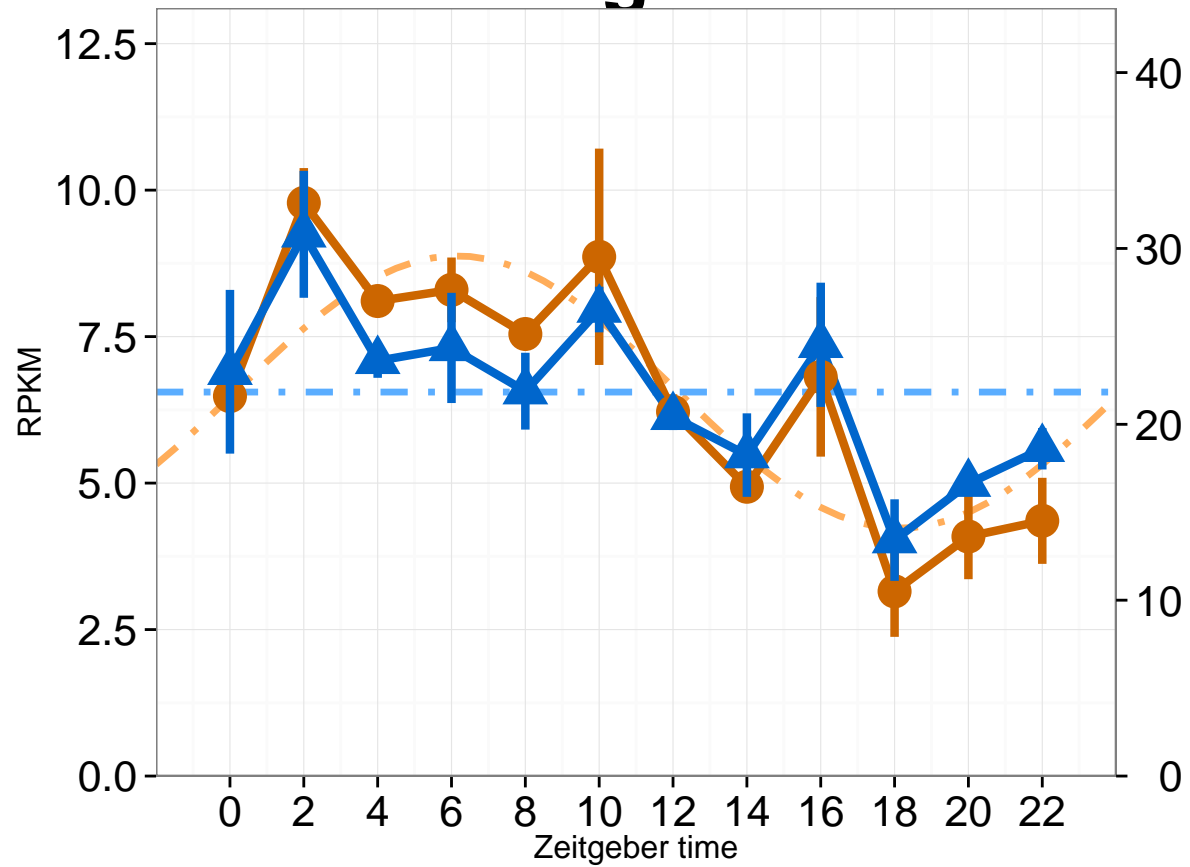

## Isg15

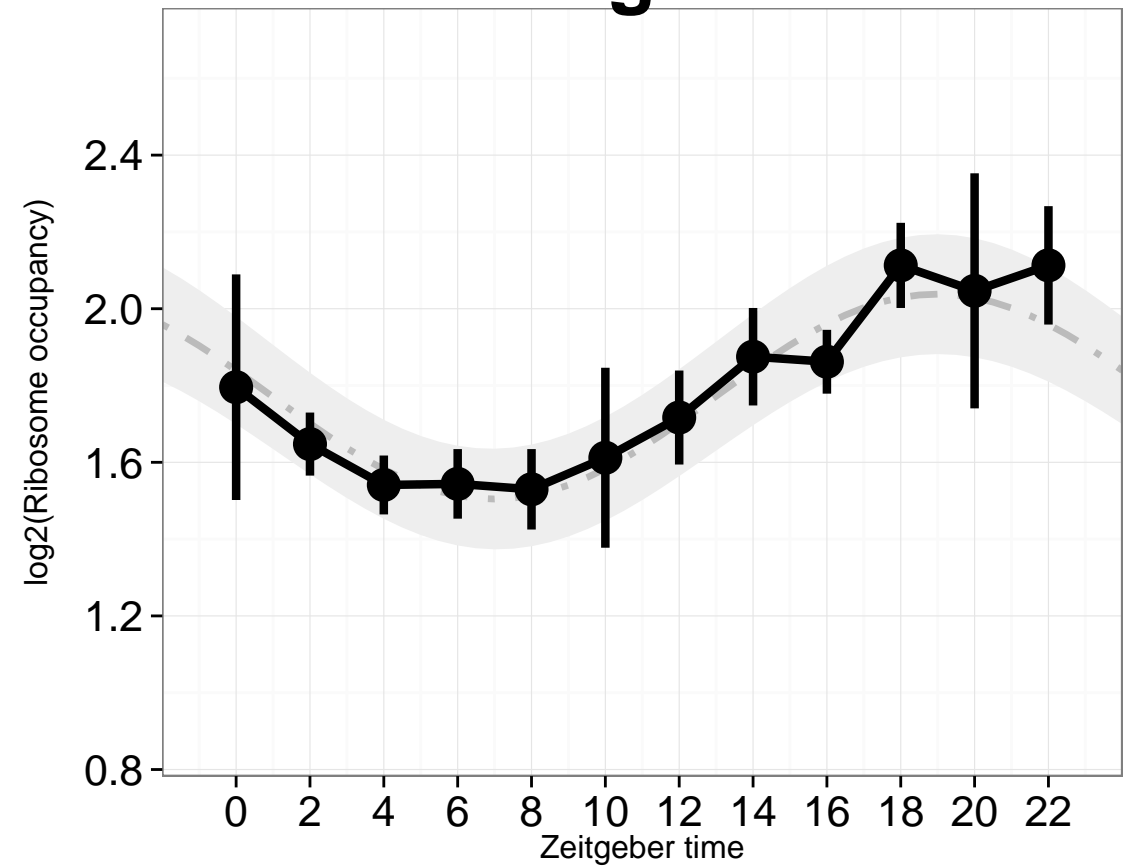

Supplement: Supplementary file 9362 [file 1]

## Hsd11b2

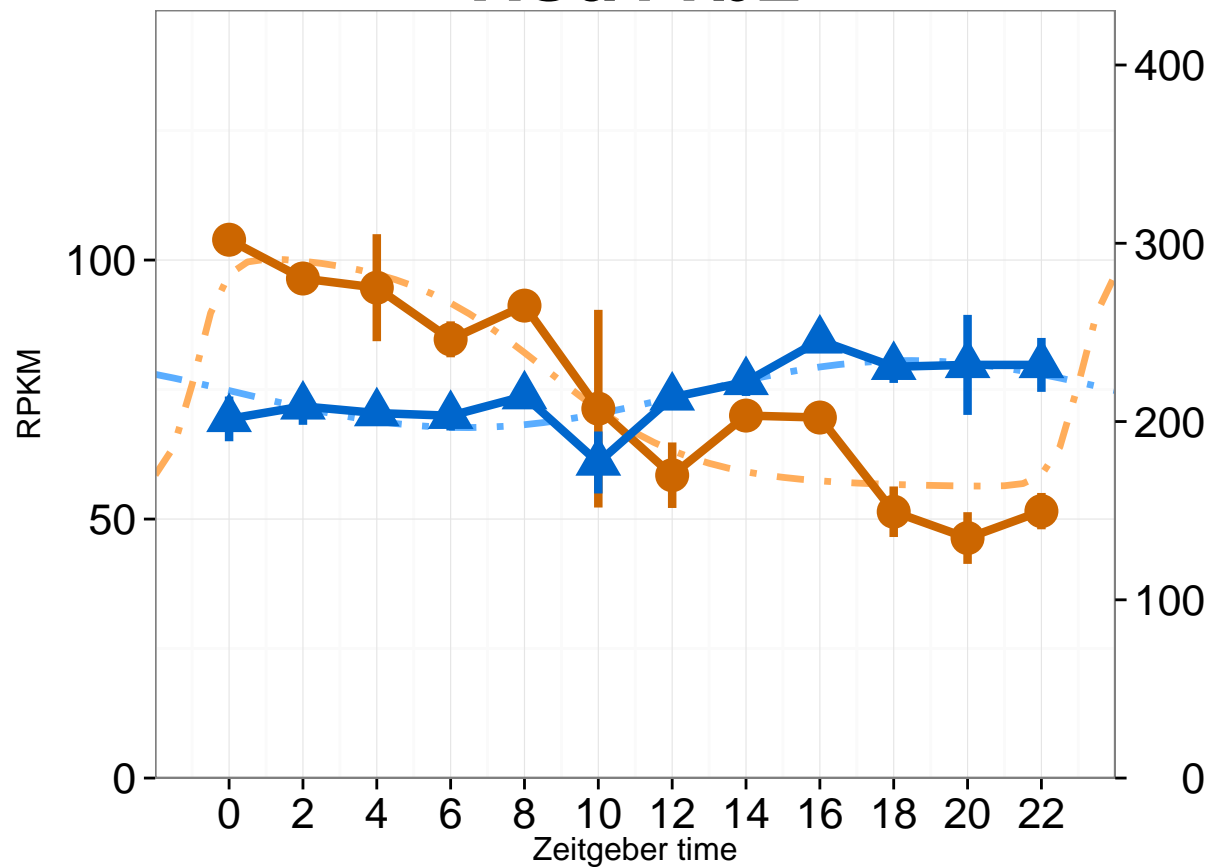

## Hsd11b2

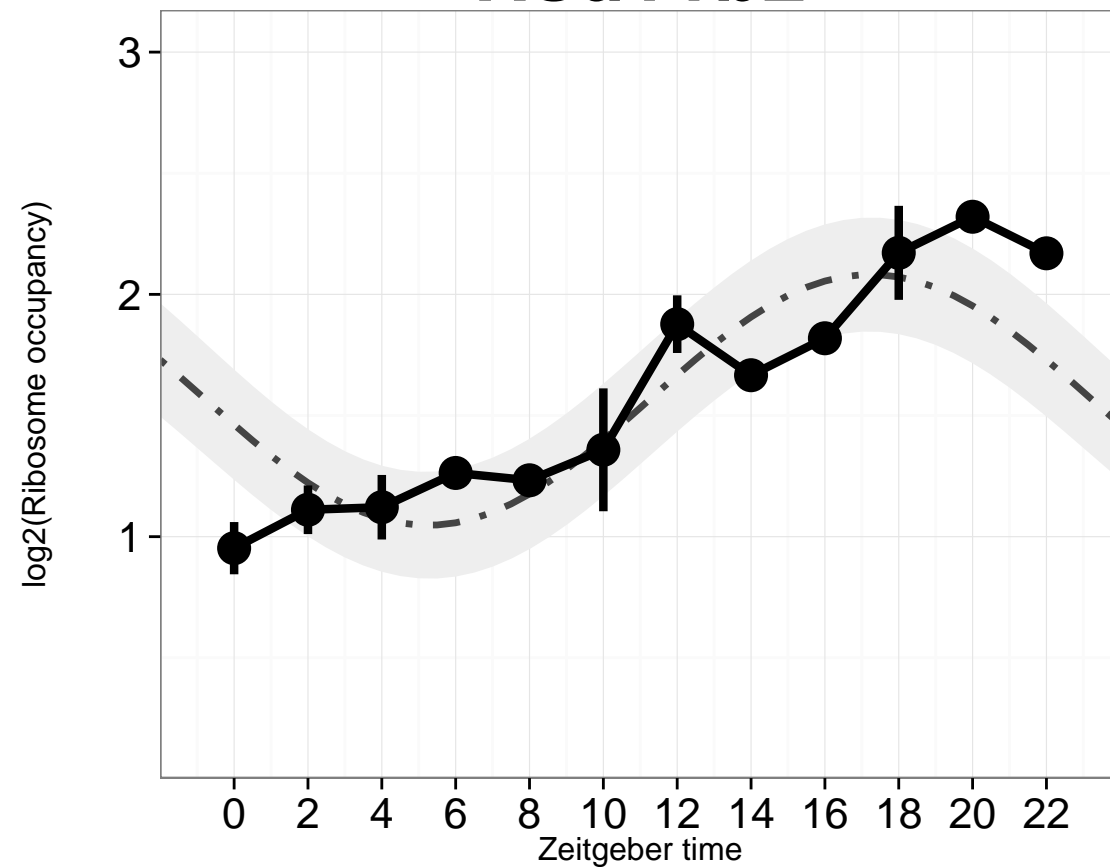

Supplement: Supplementary file 9363 [file 1]

## Rnf38

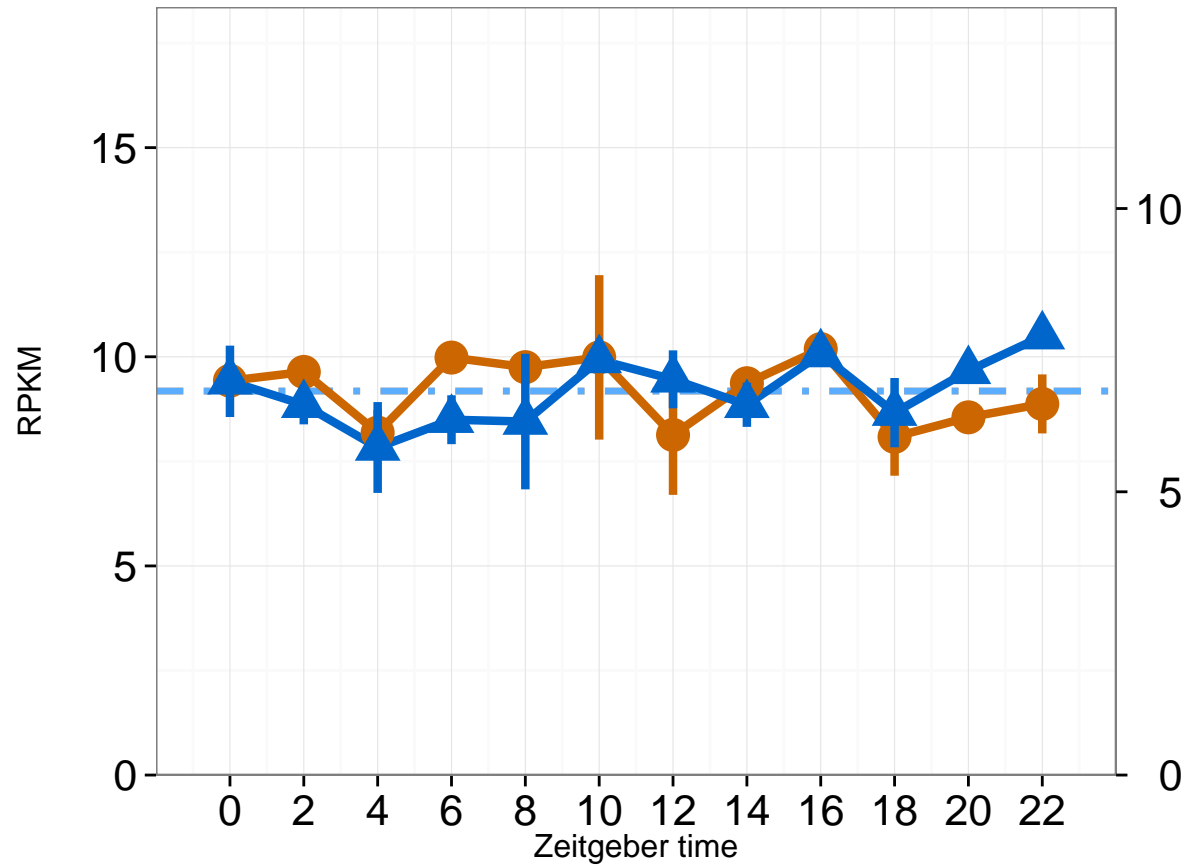

## Rnf38

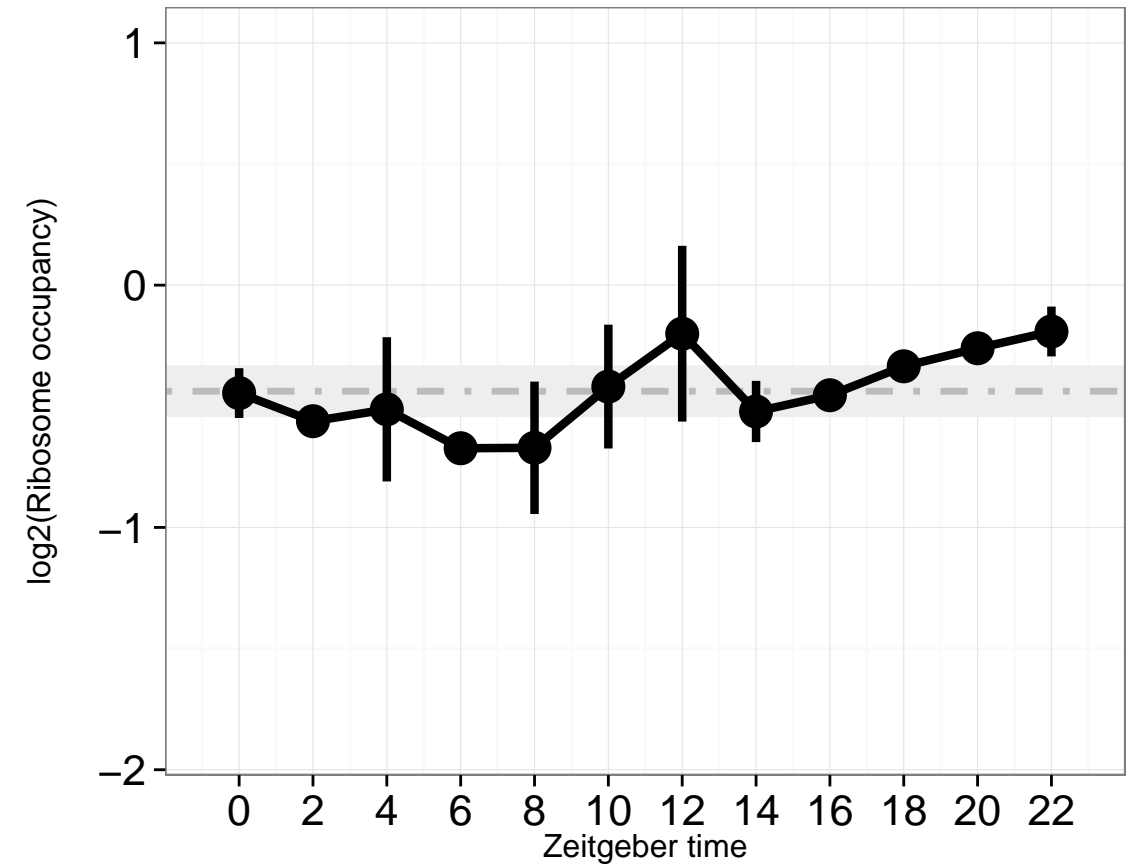

Supplement: Supplementary file 9364 [file 1]

## Plin4

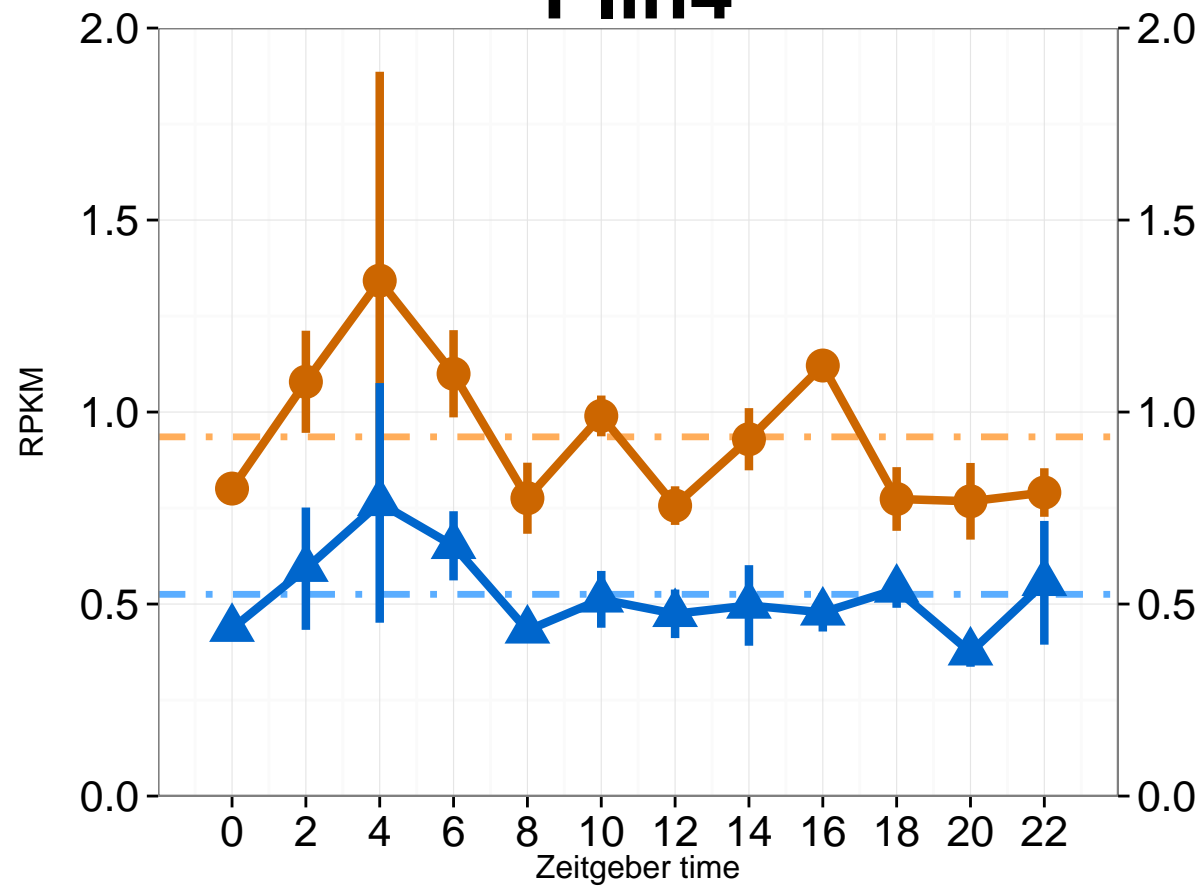

## Plin4

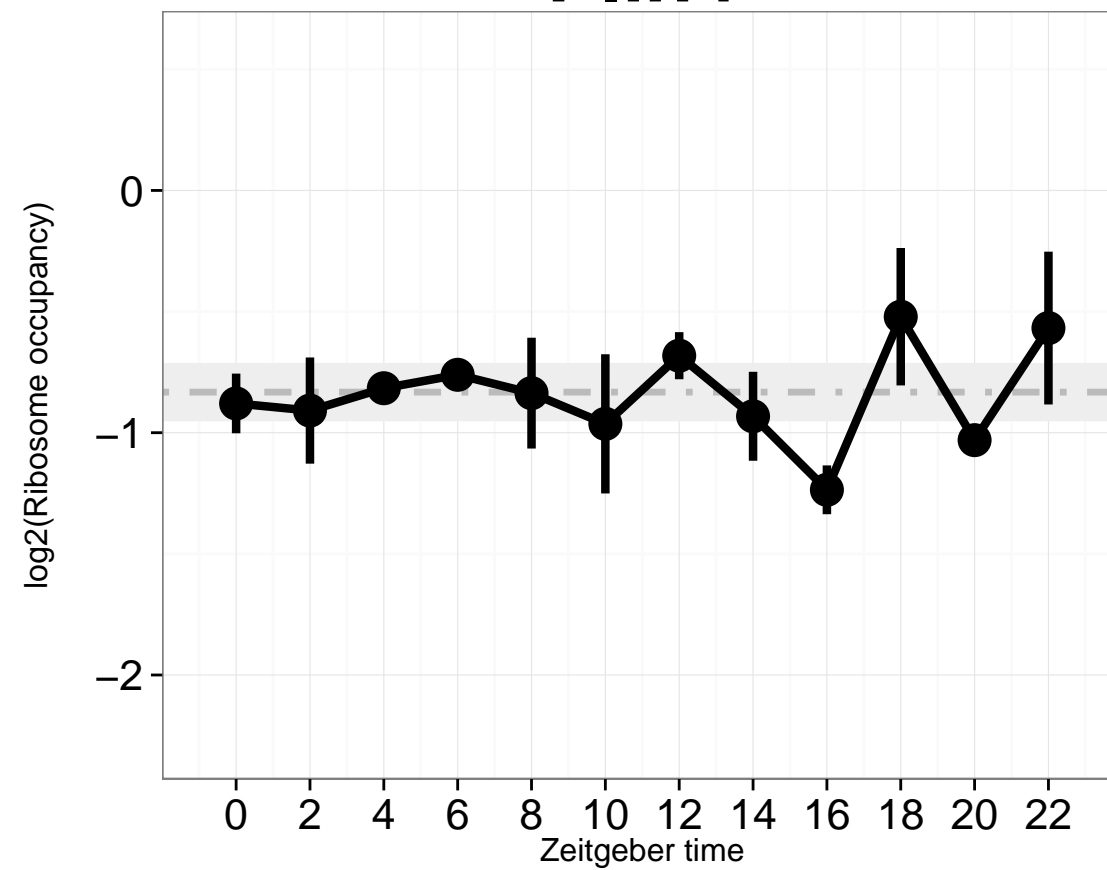

Supplement: Supplementary file 9365 [file 1]

## Mycl

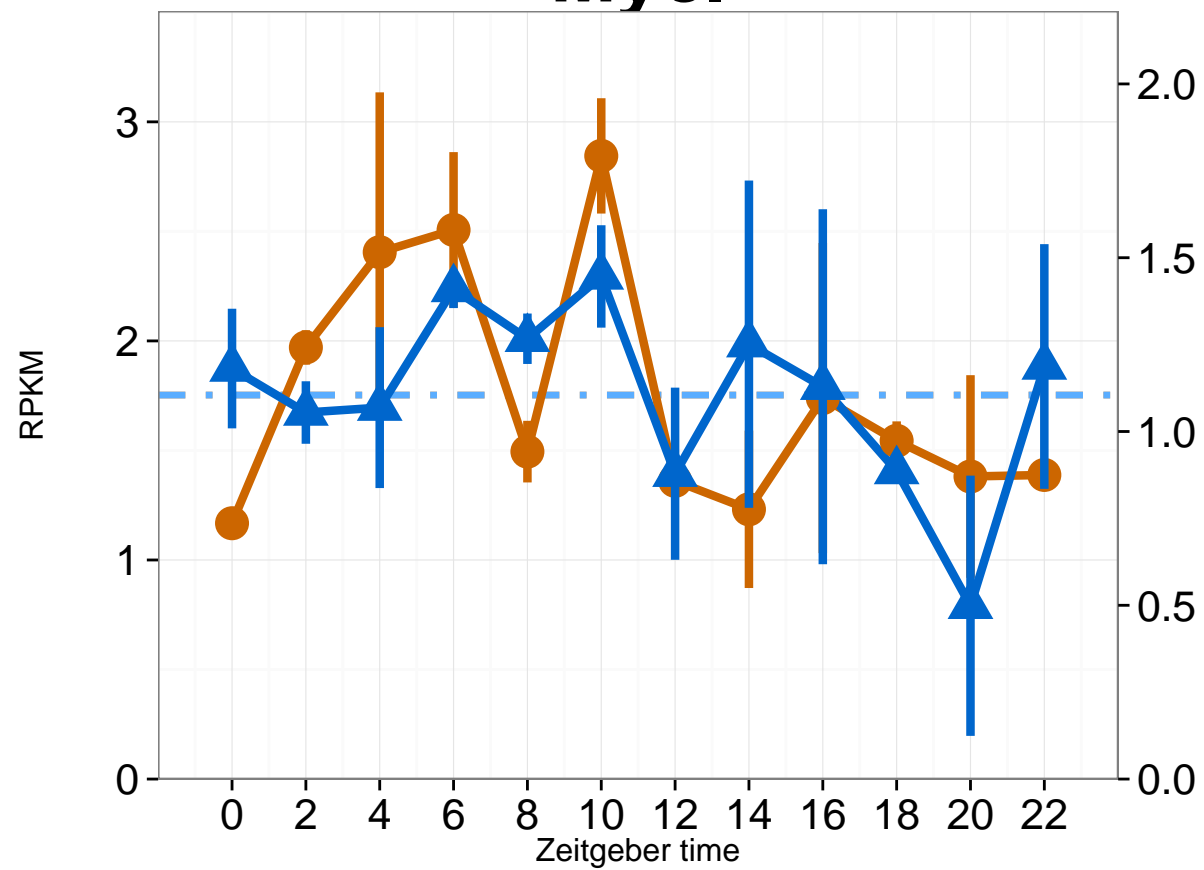

## Mycl

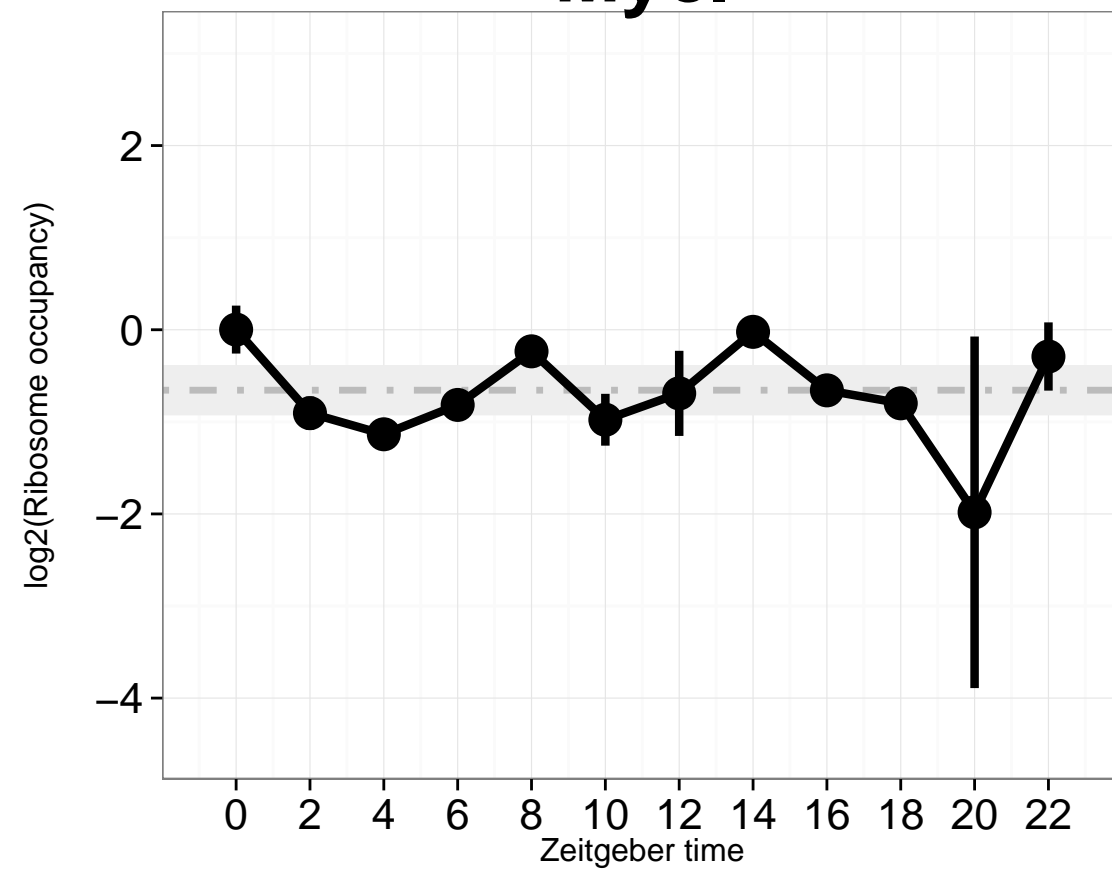

Supplement: Supplementary file 9366 [file 1]

# Apoa1bp

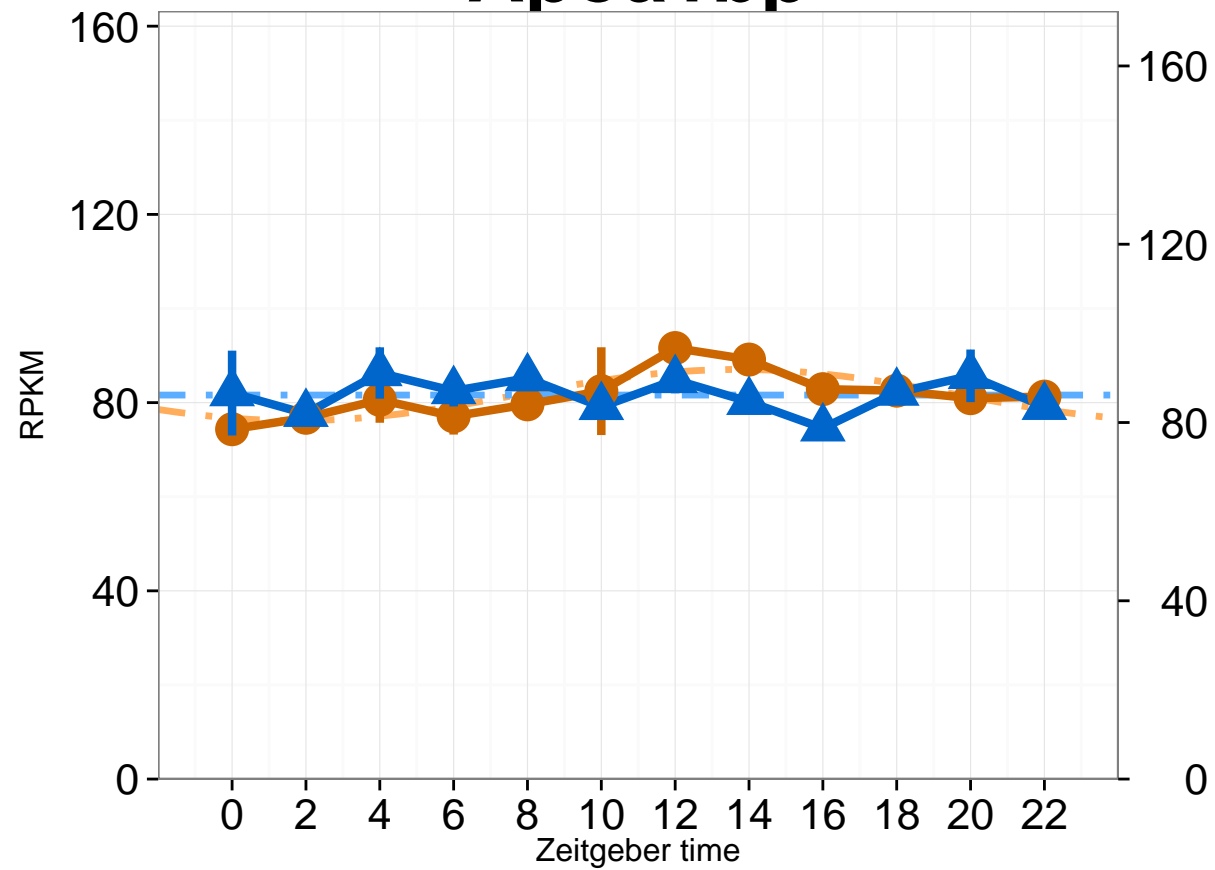

# Apoa1bp

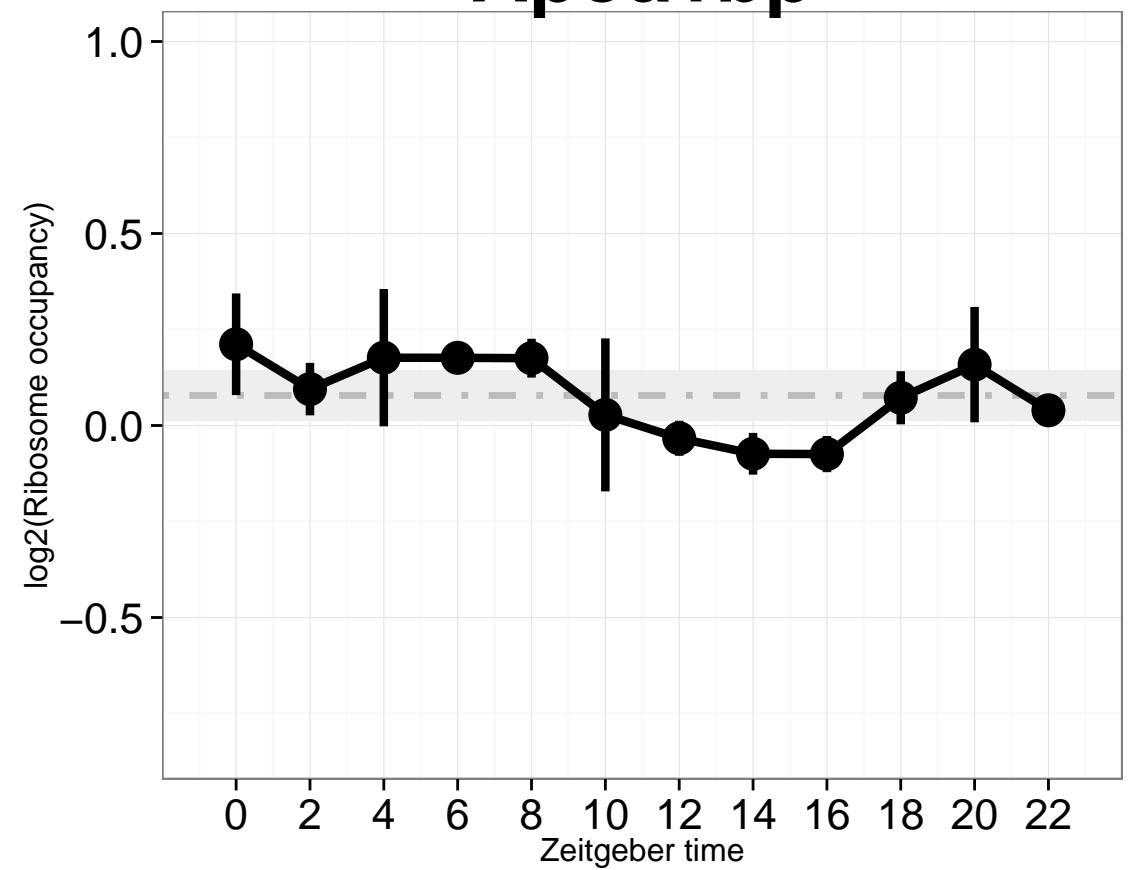

Supplement: Supplementary file 9367 [file 1]

## 0610009B22Rik

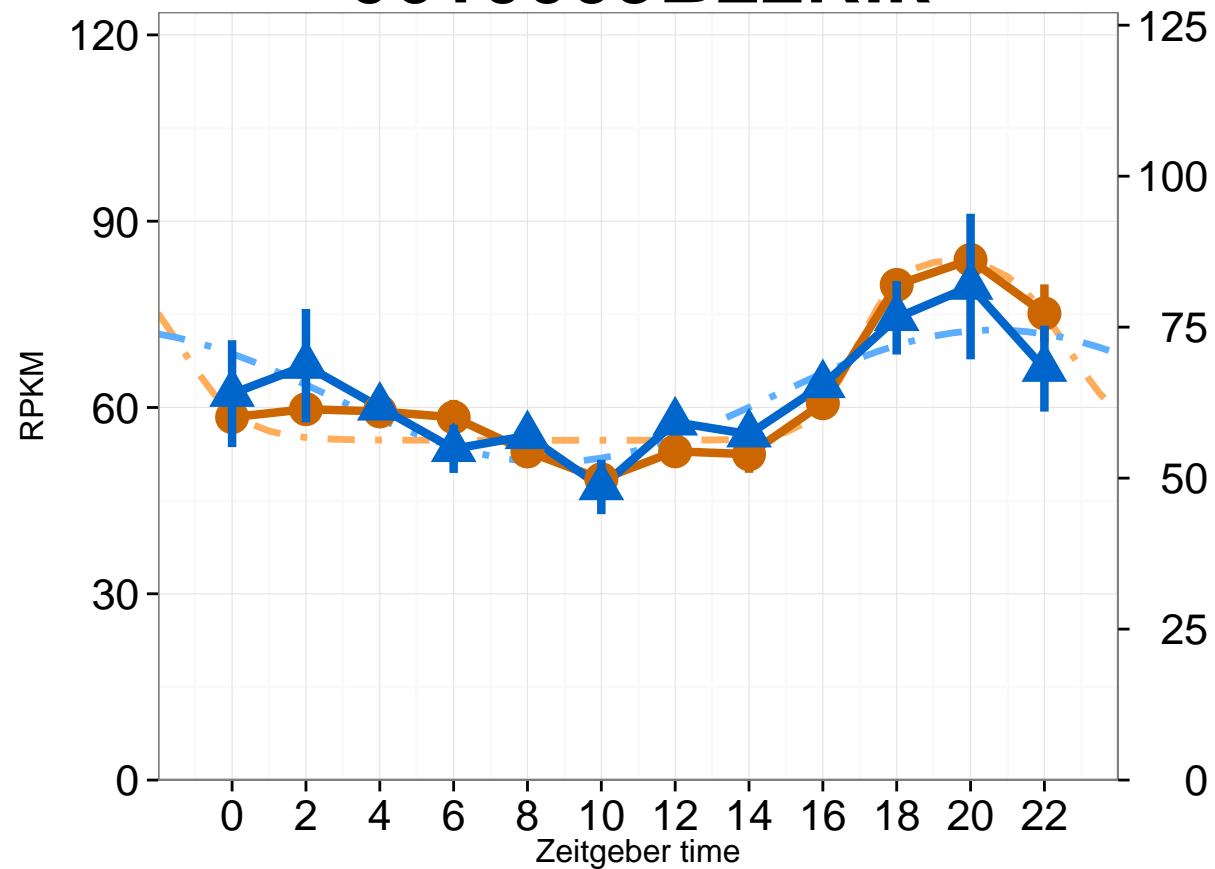

## 0610009B22Rik

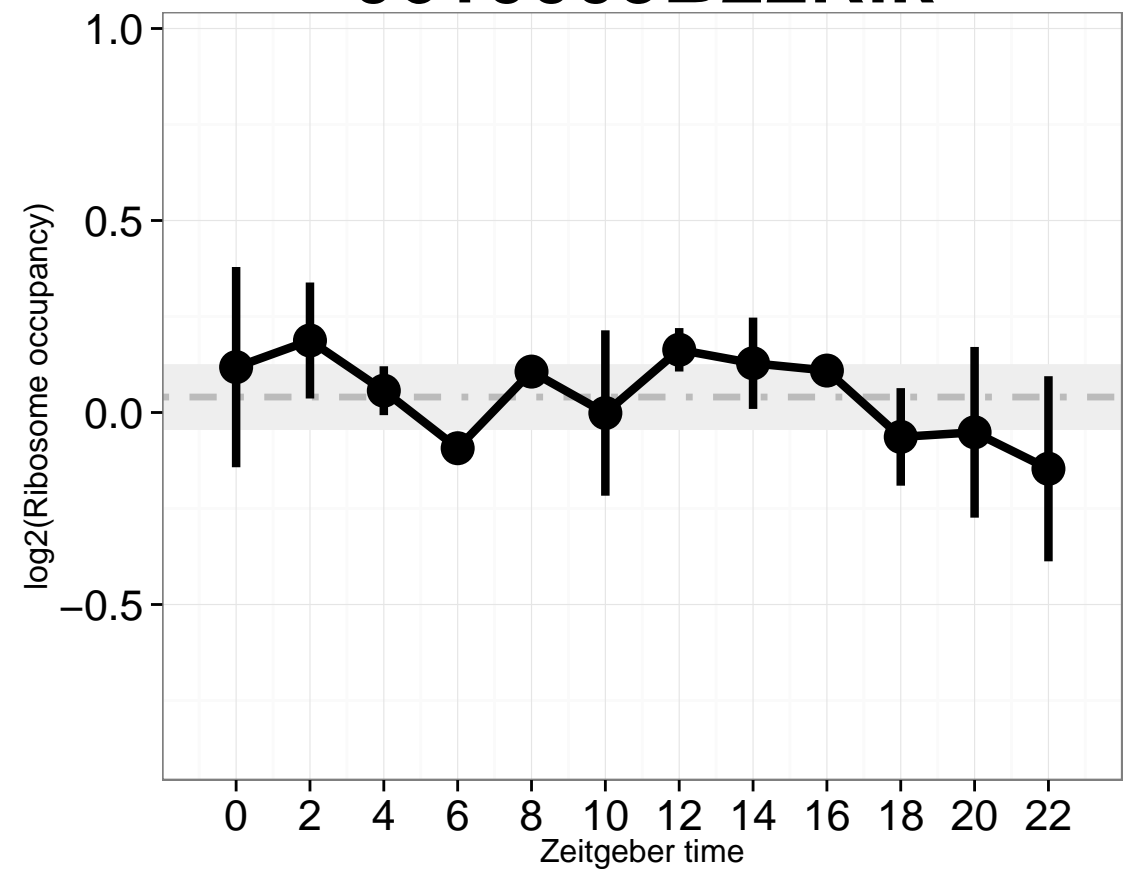

Supplement: Supplementary file 9368 [file 1]

# Chrna4

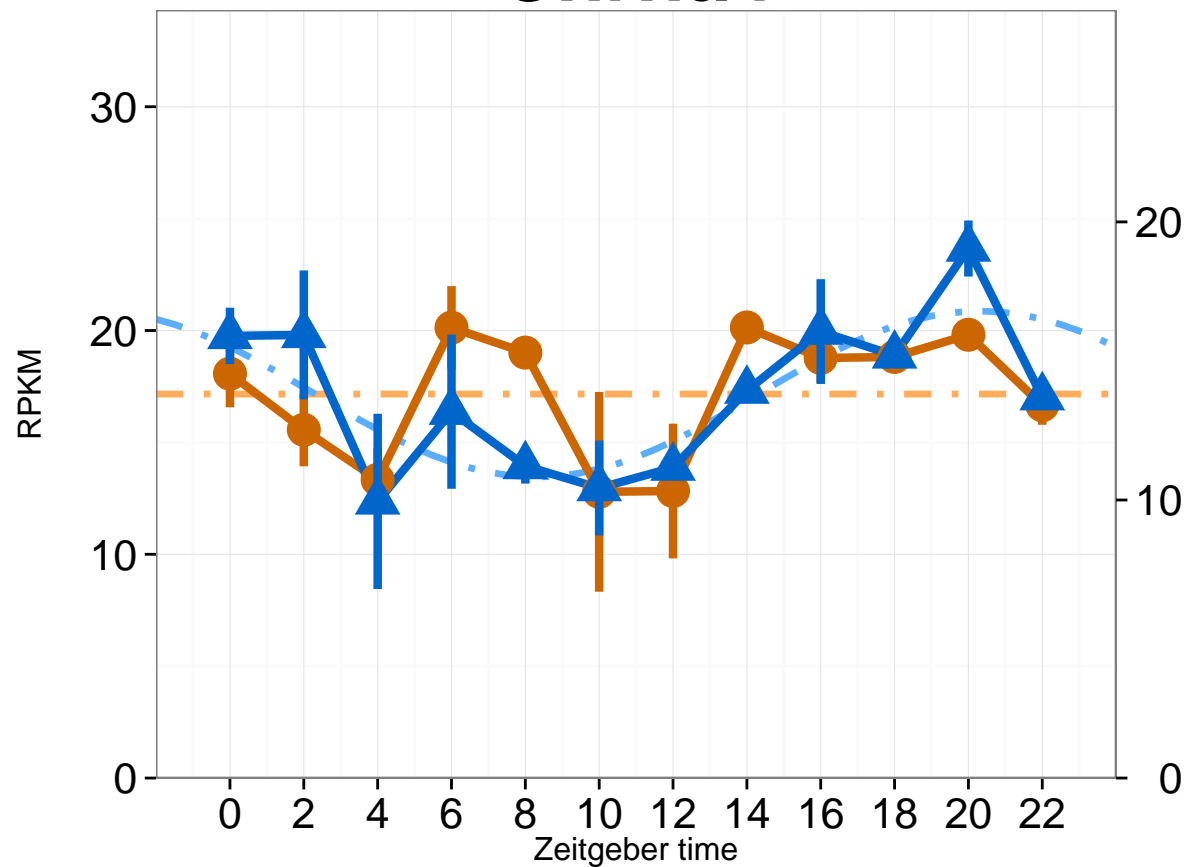

# Chrna4

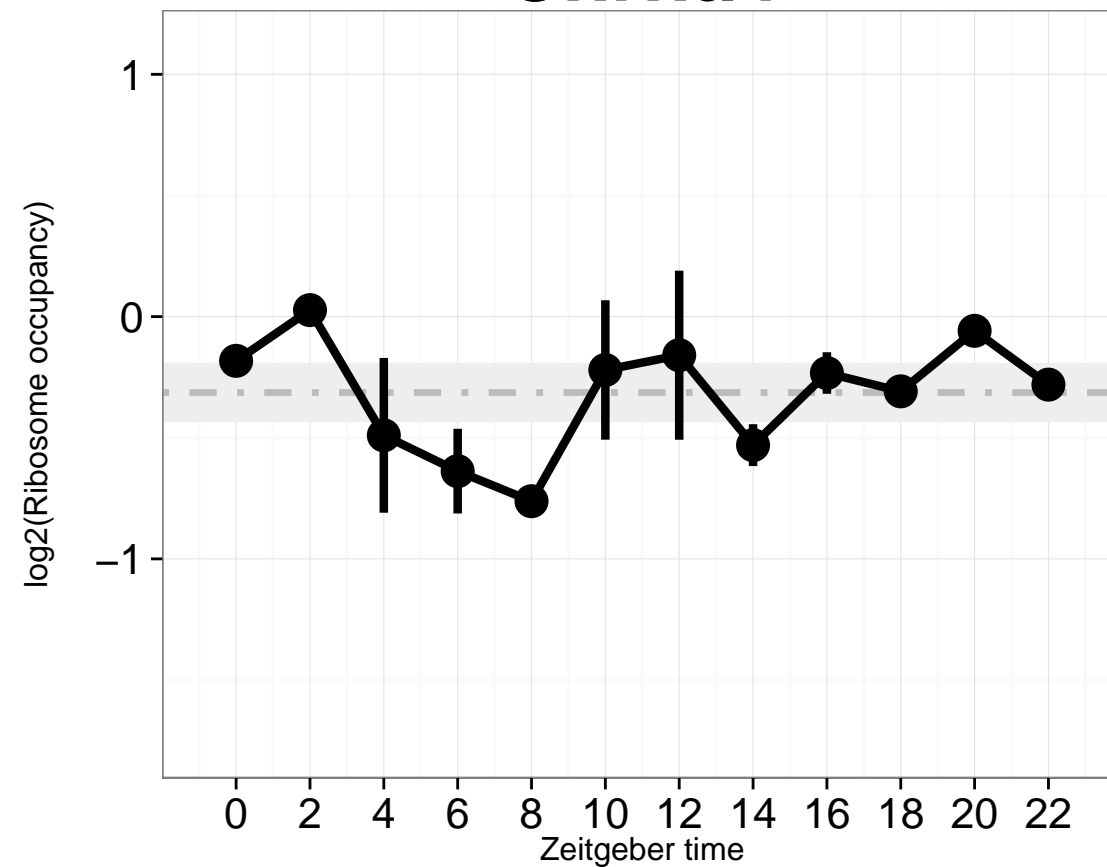

Supplement: Supplementary file 9369 [file 1]

## Calm2

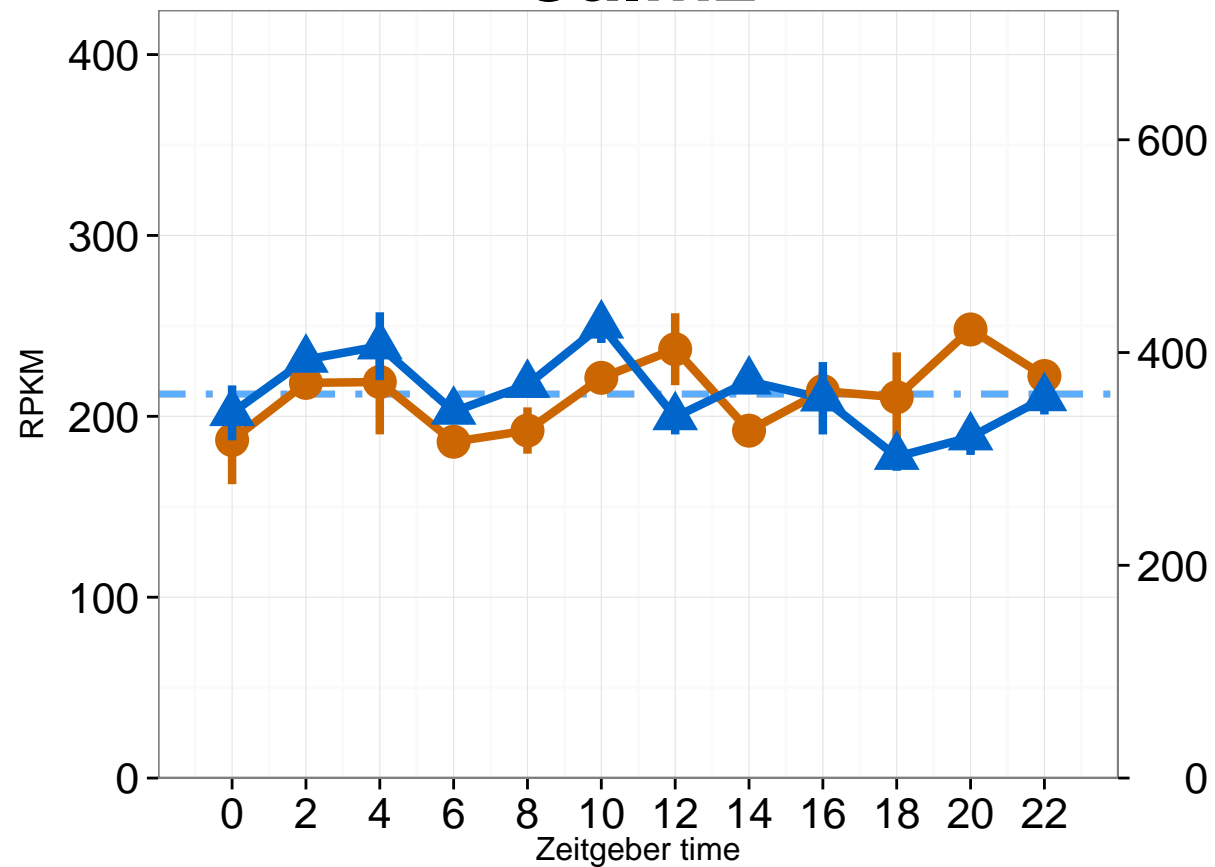

## Calm2

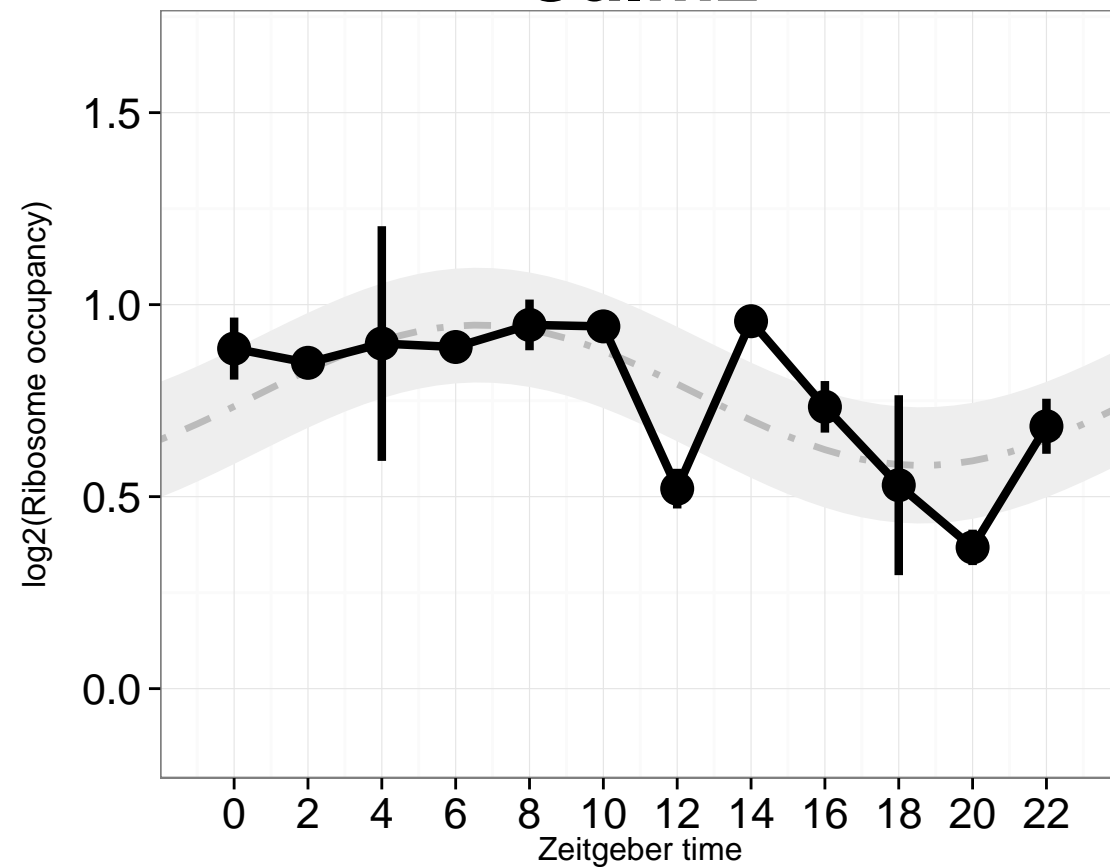

Supplement: Supplementary file 9370 [file 1]

# Tpgs2

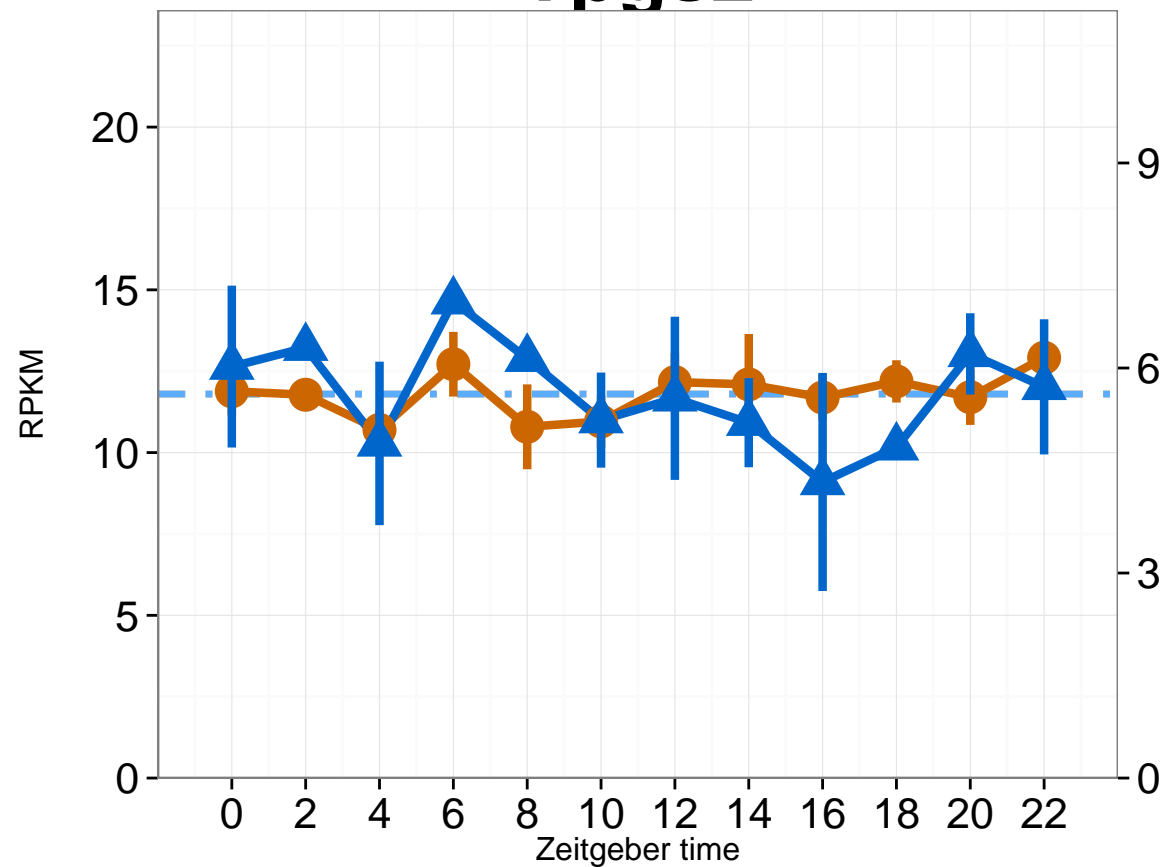

# Tpgs2

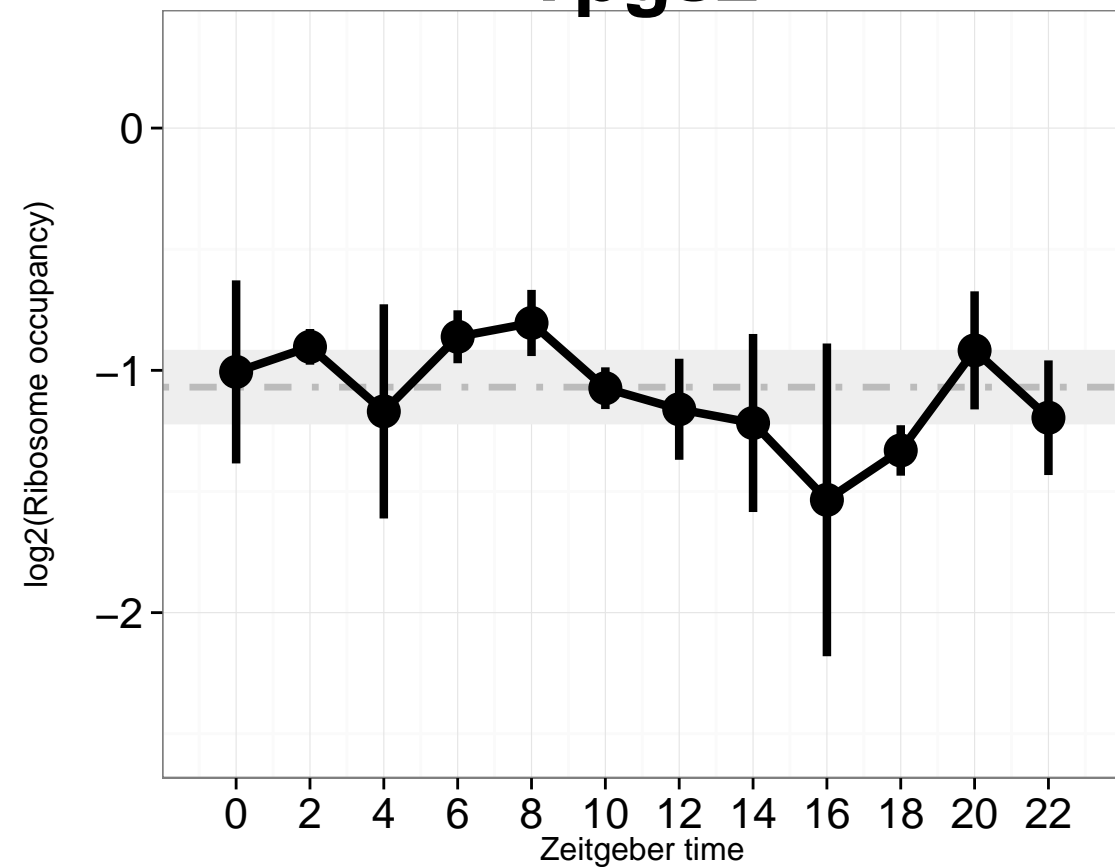

Supplement: Supplementary file 9371 [file 1]

# Zfp956

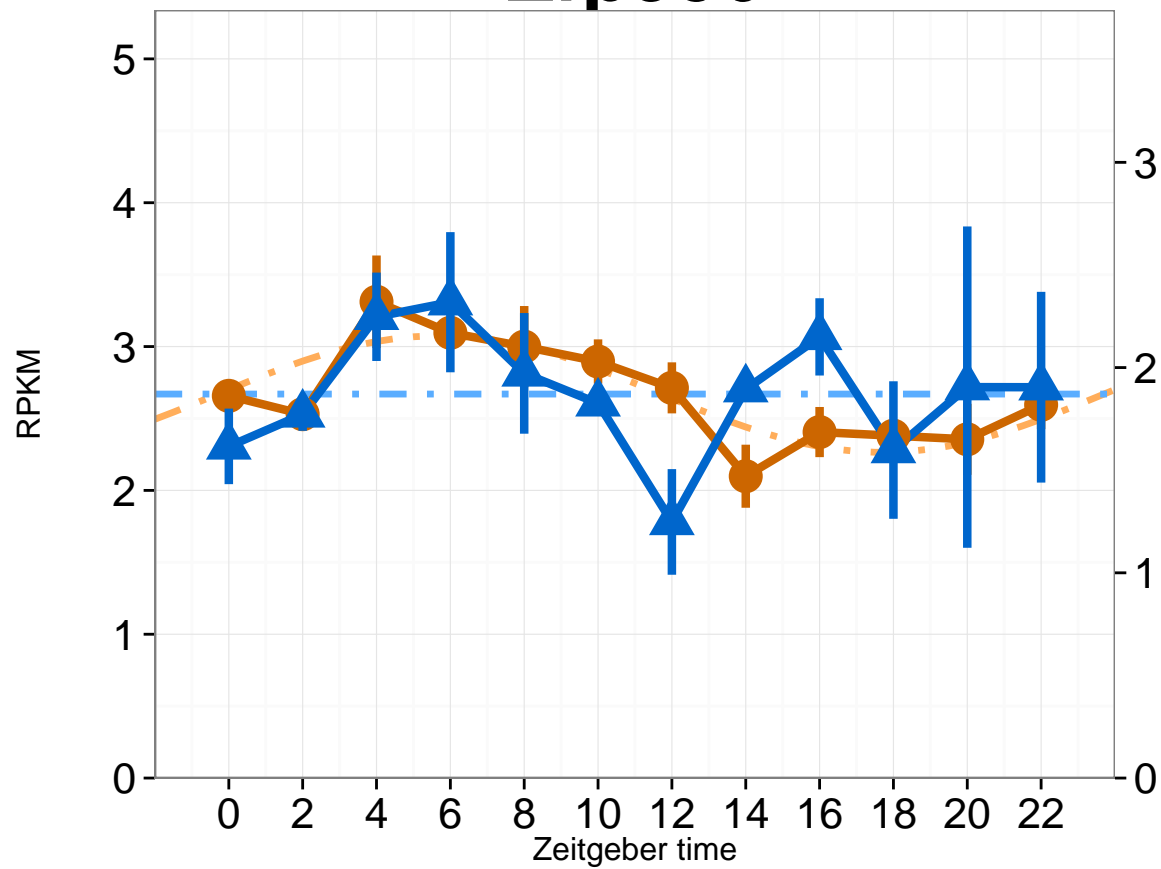

# Zfp956

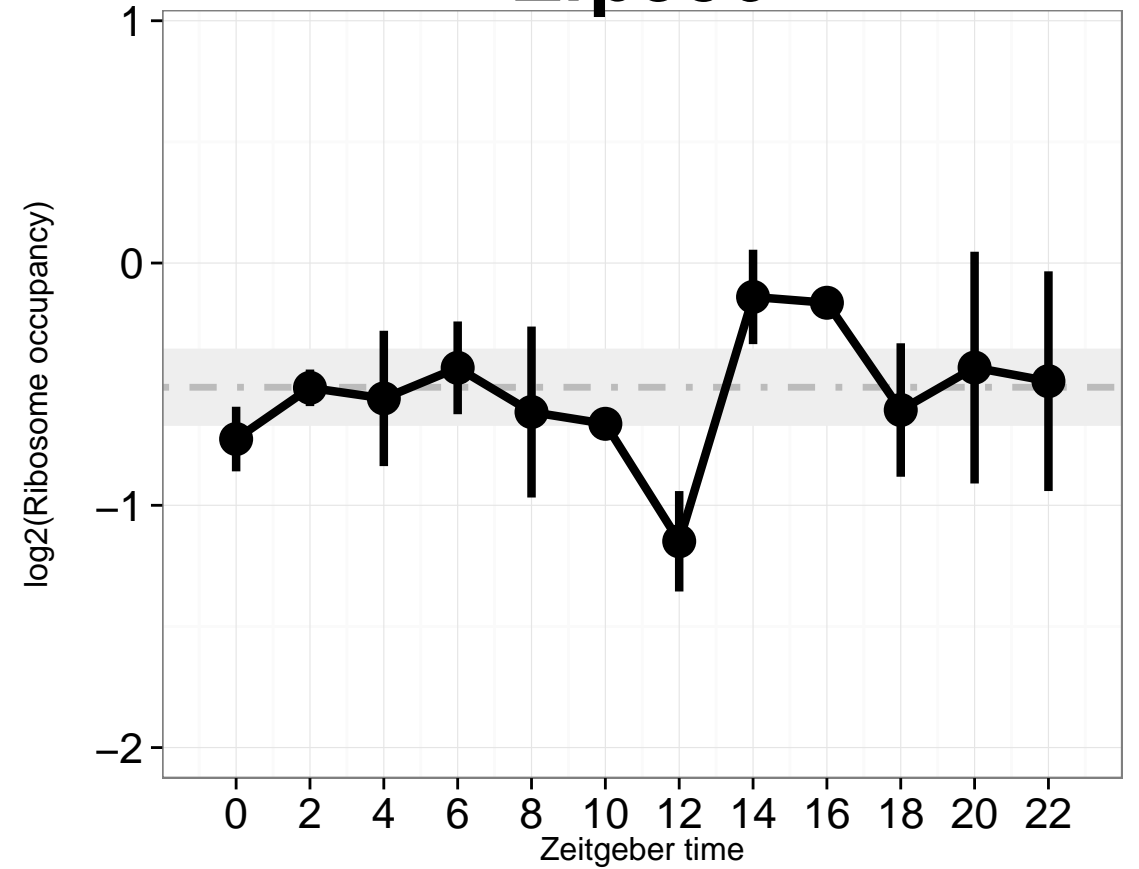

Supplement: Supplementary file 9372 [file 1]

## Rtkn

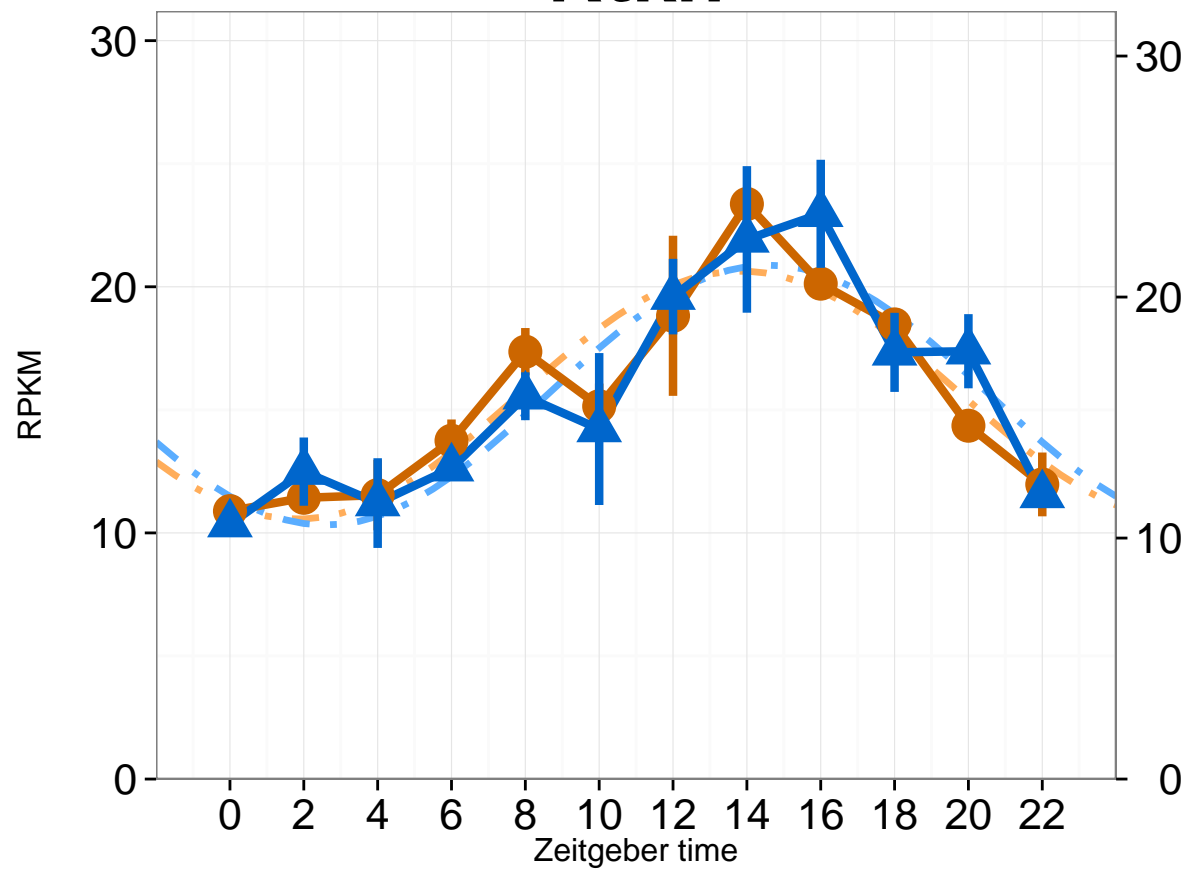

## Rtkn

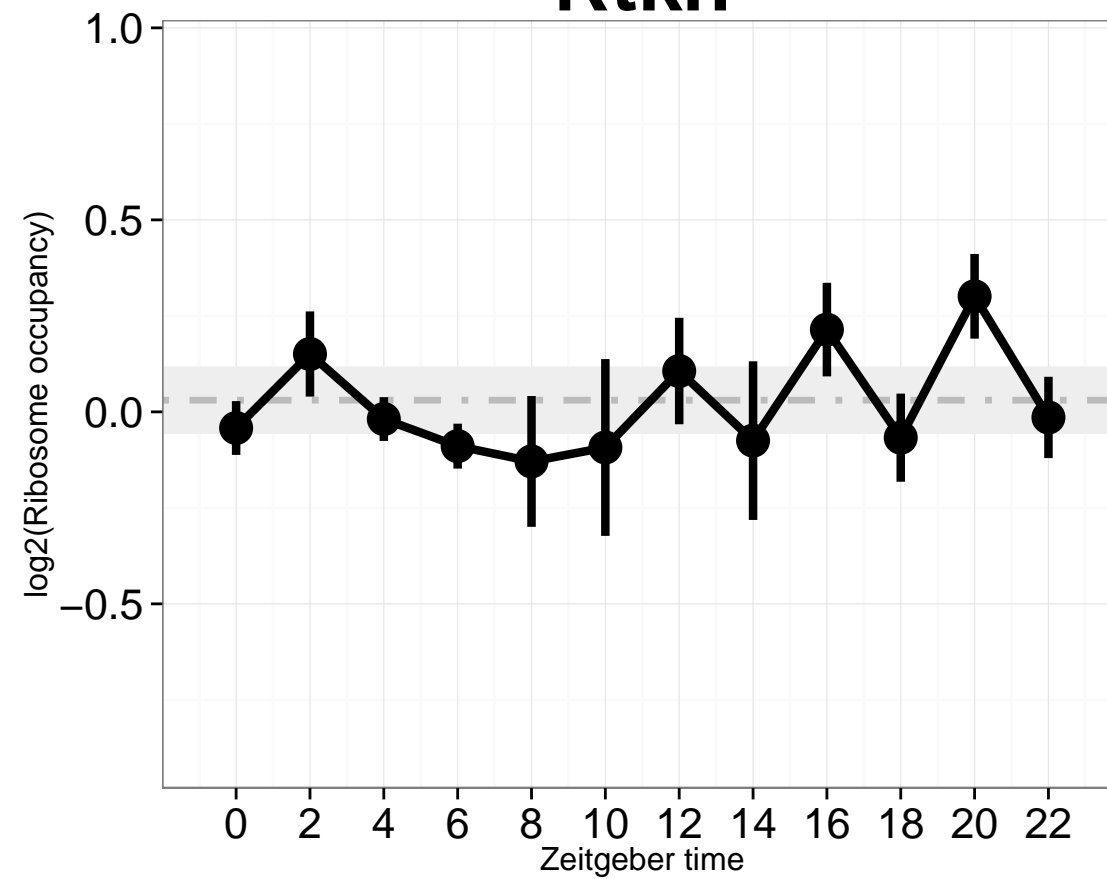

Supplement: Supplementary file 9373 [file 1]

## Slc25a1

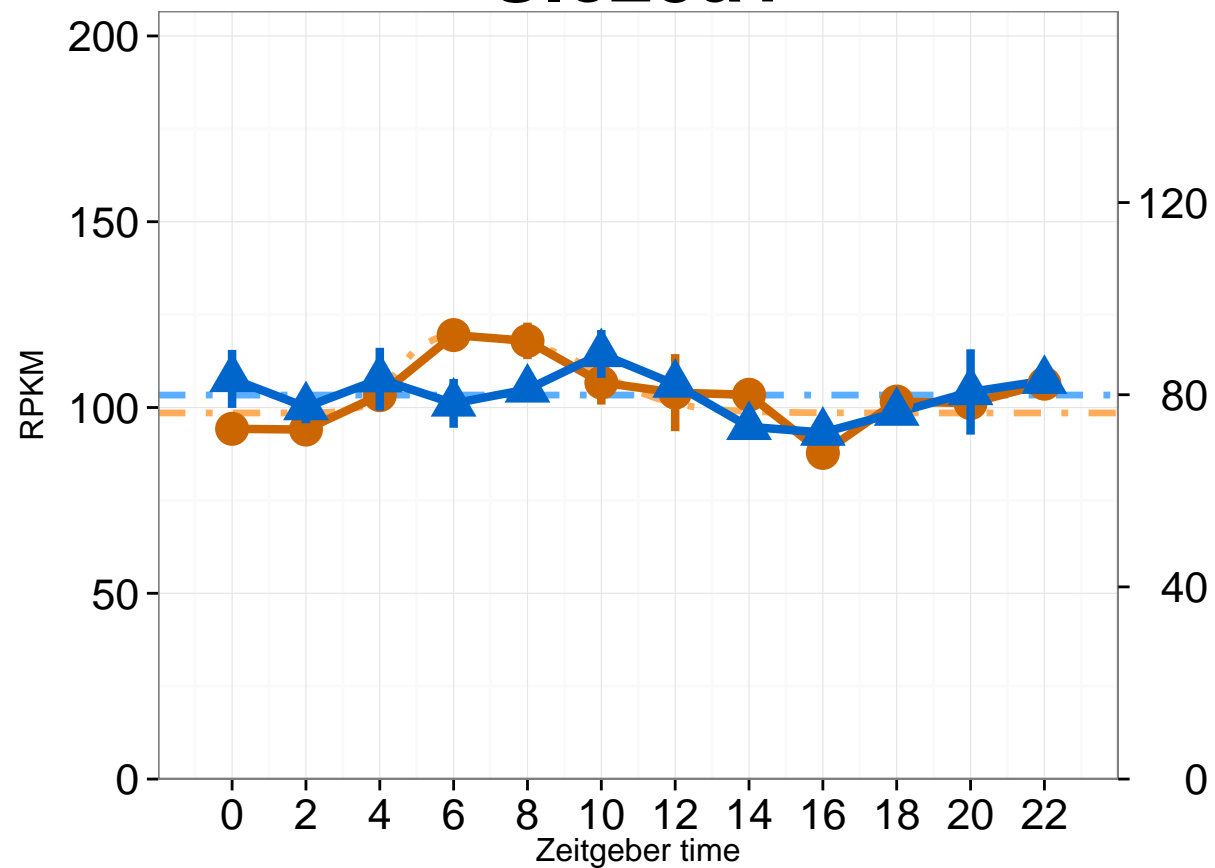

## Slc25a1

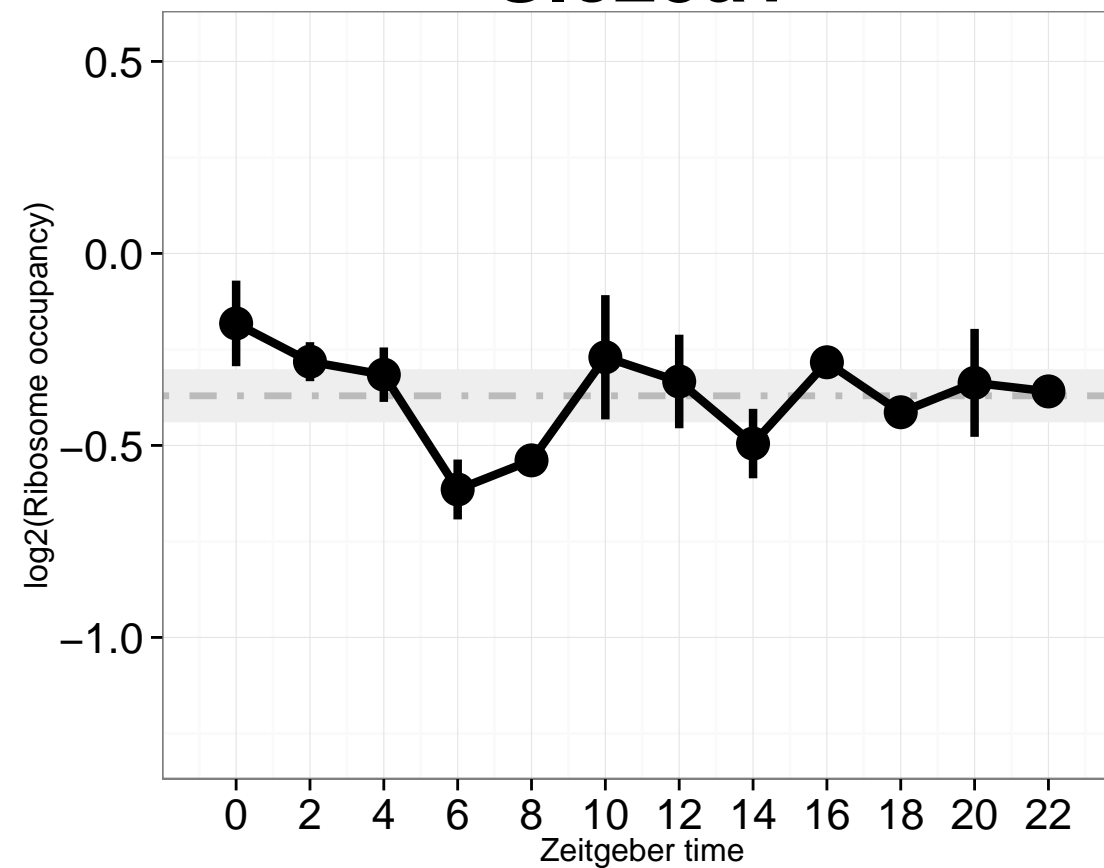

Supplement: Supplementary file 9374 [file 1]

## Prmt7

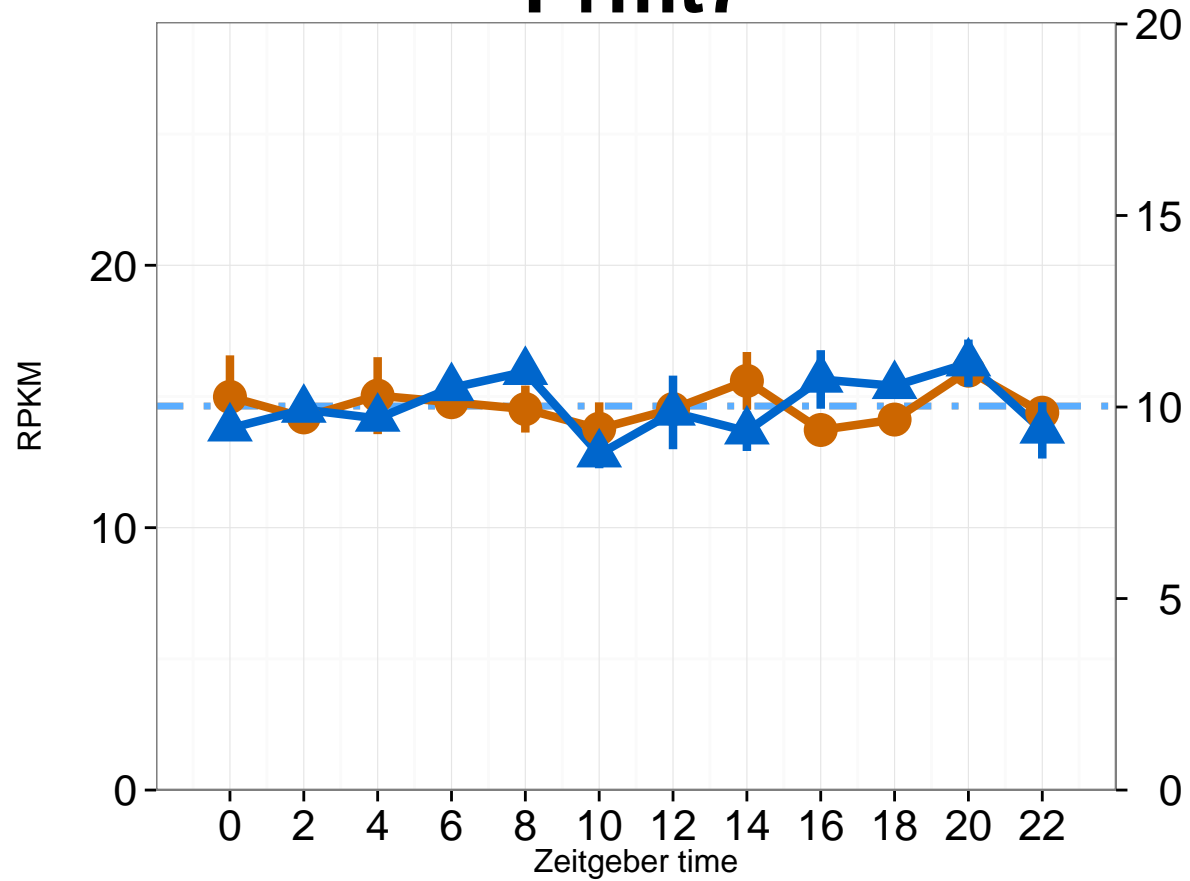

## Prmt7

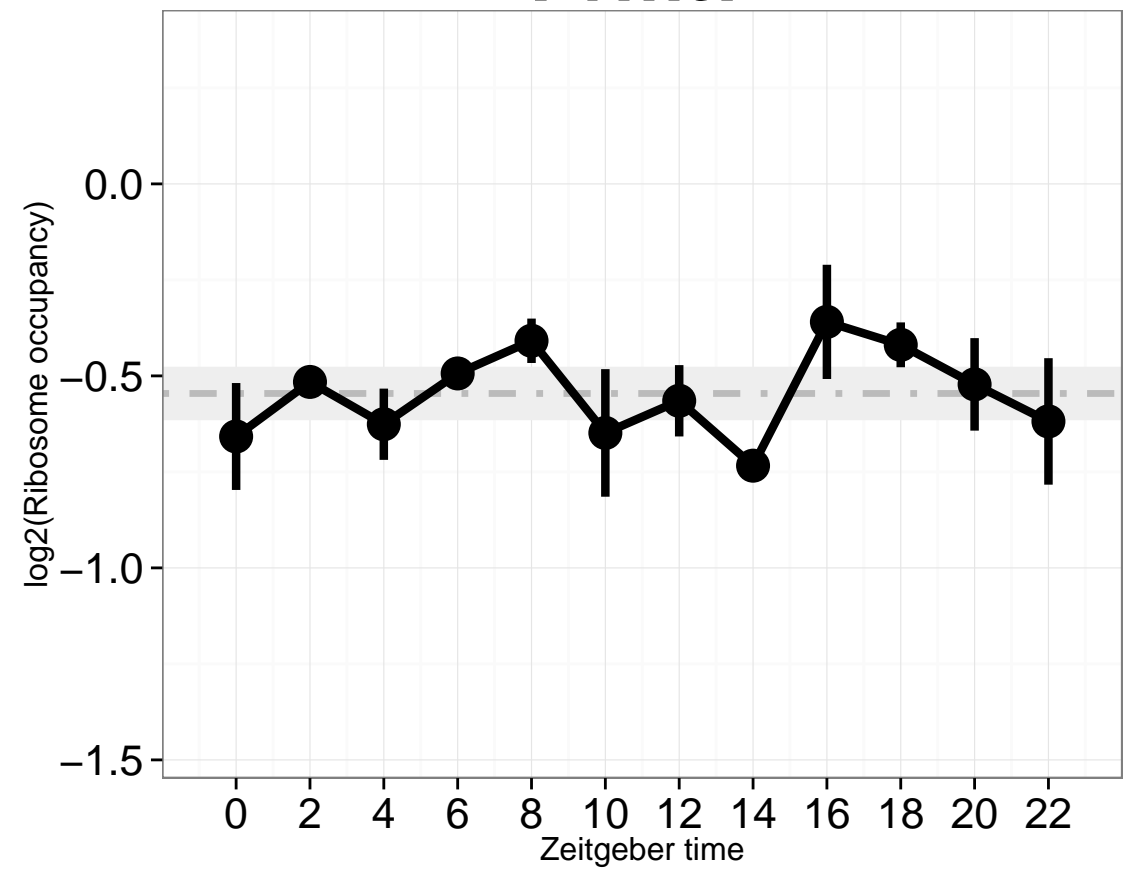

Supplement: Supplementary file 9375 [file 1]

# Ppip5k2

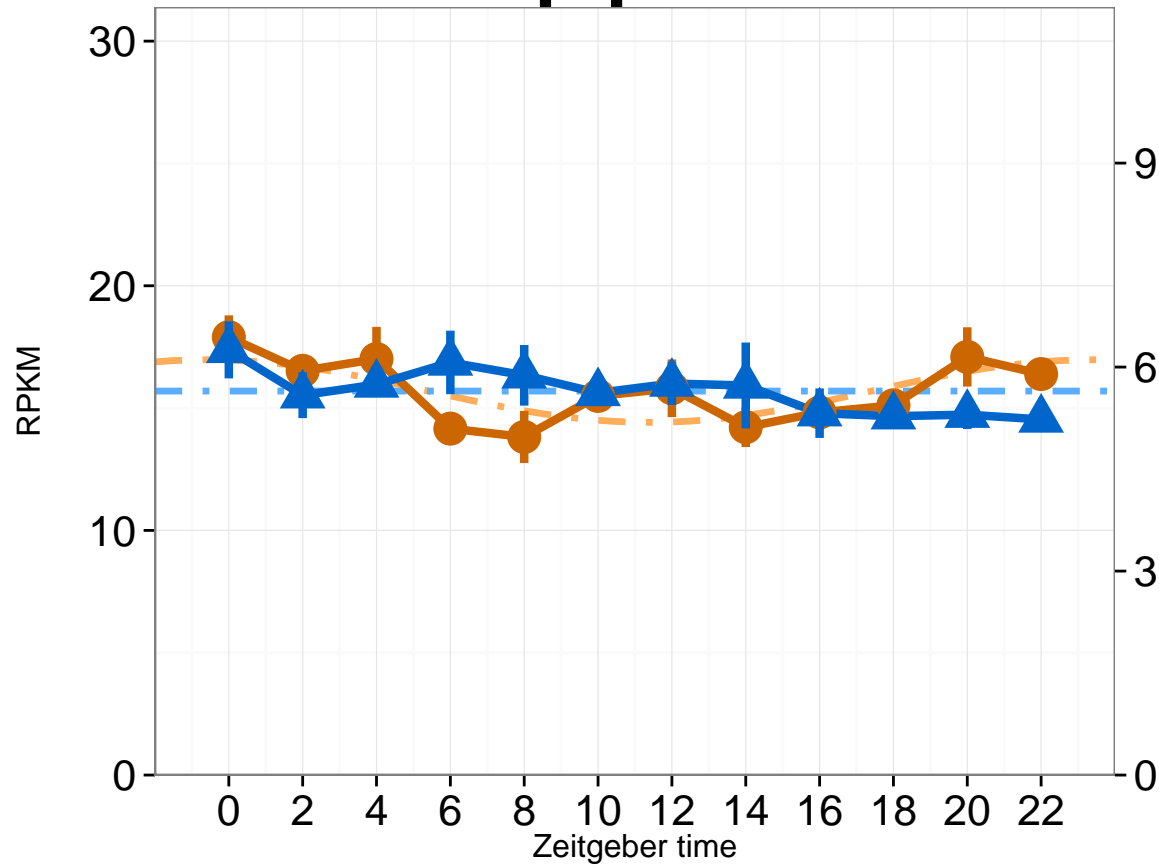

# Ppip5k2

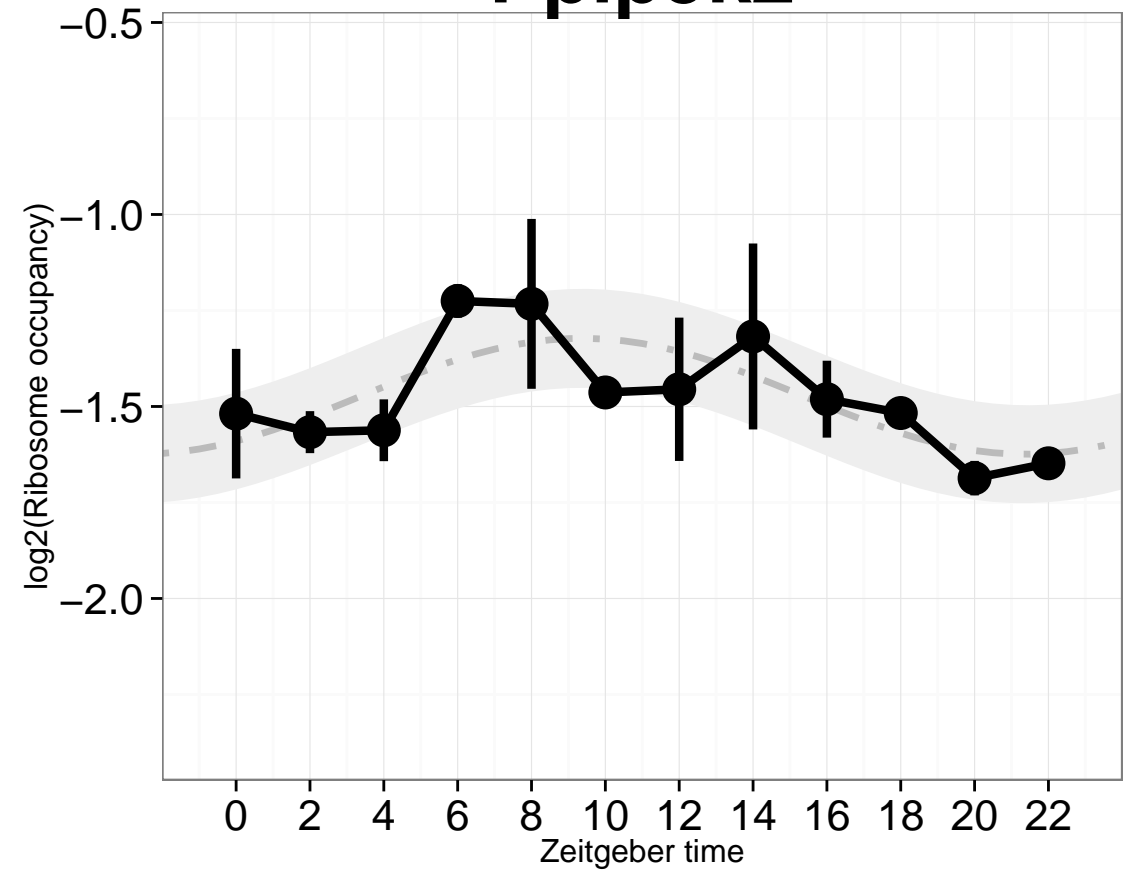

Supplement: Supplementary file 9376 [file 1]

## Clpb

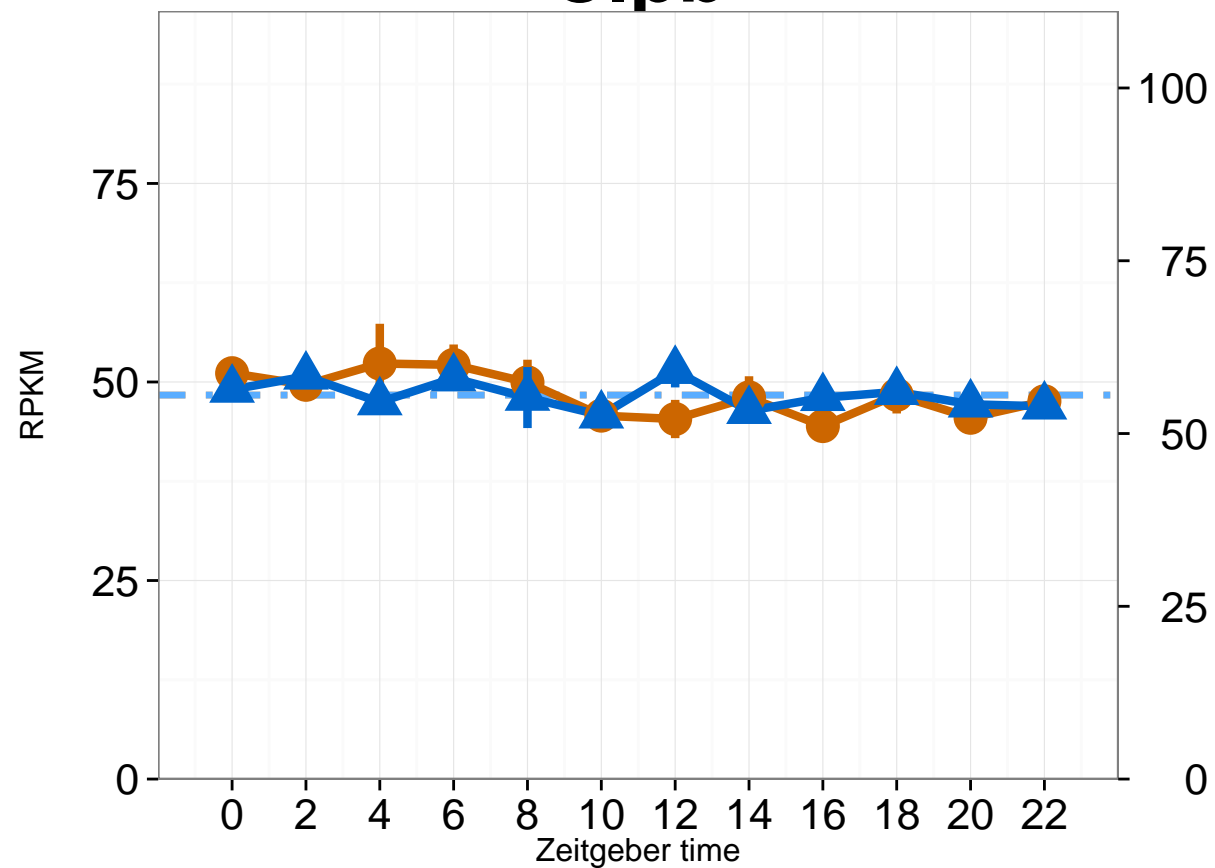

## Clpb

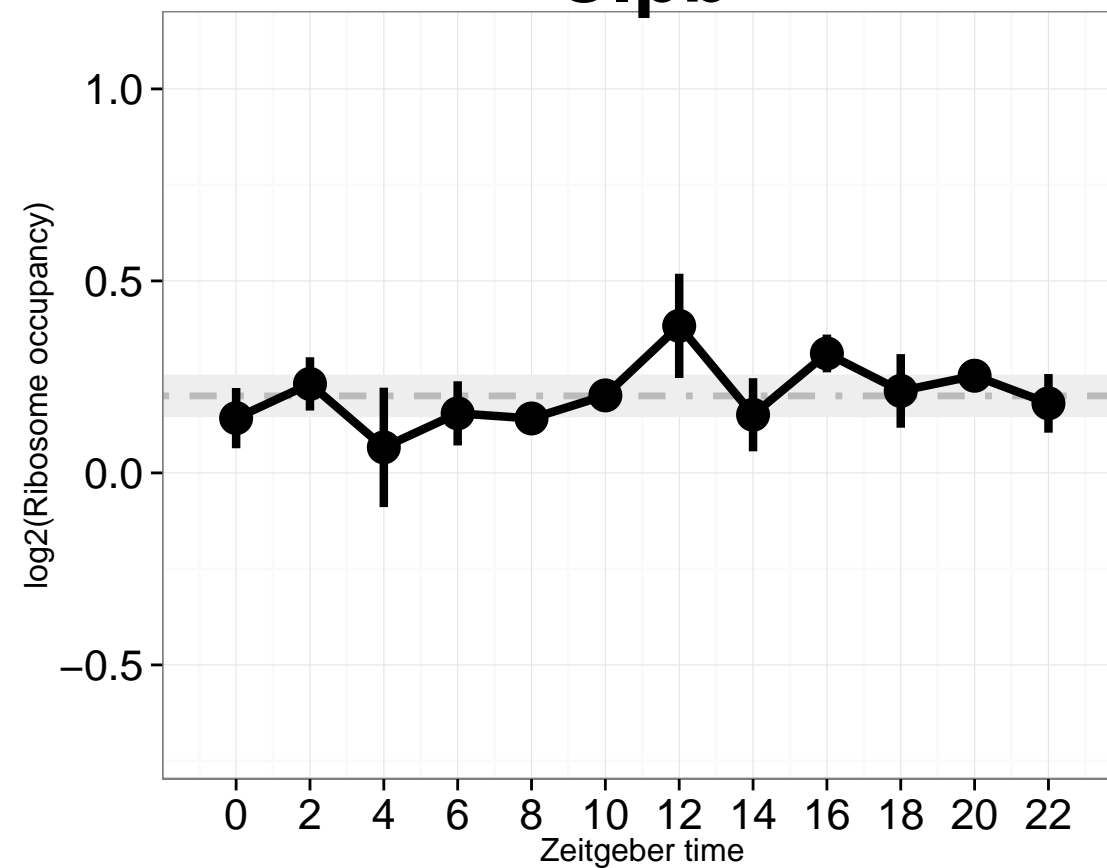

Supplement: Supplementary file 9377 [file 1]

## Cenpk

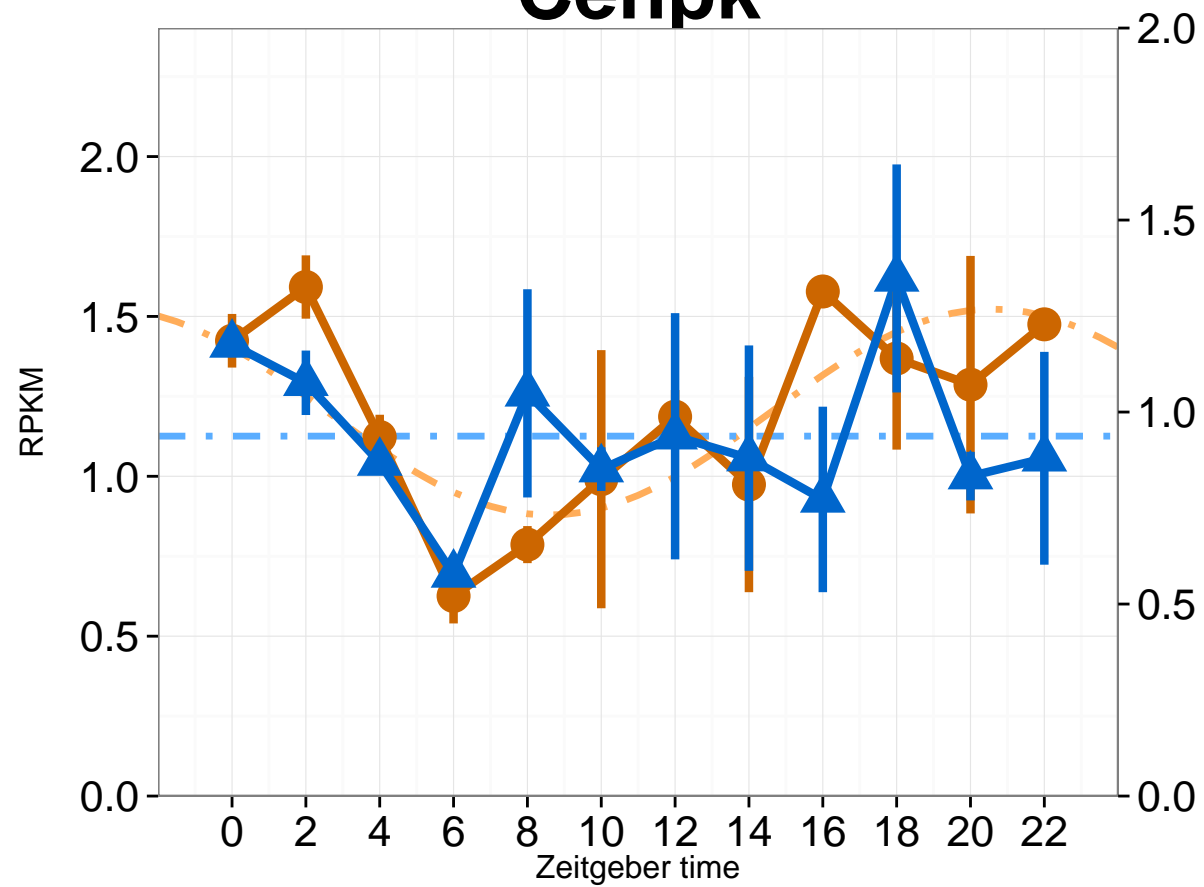

## Cenpk

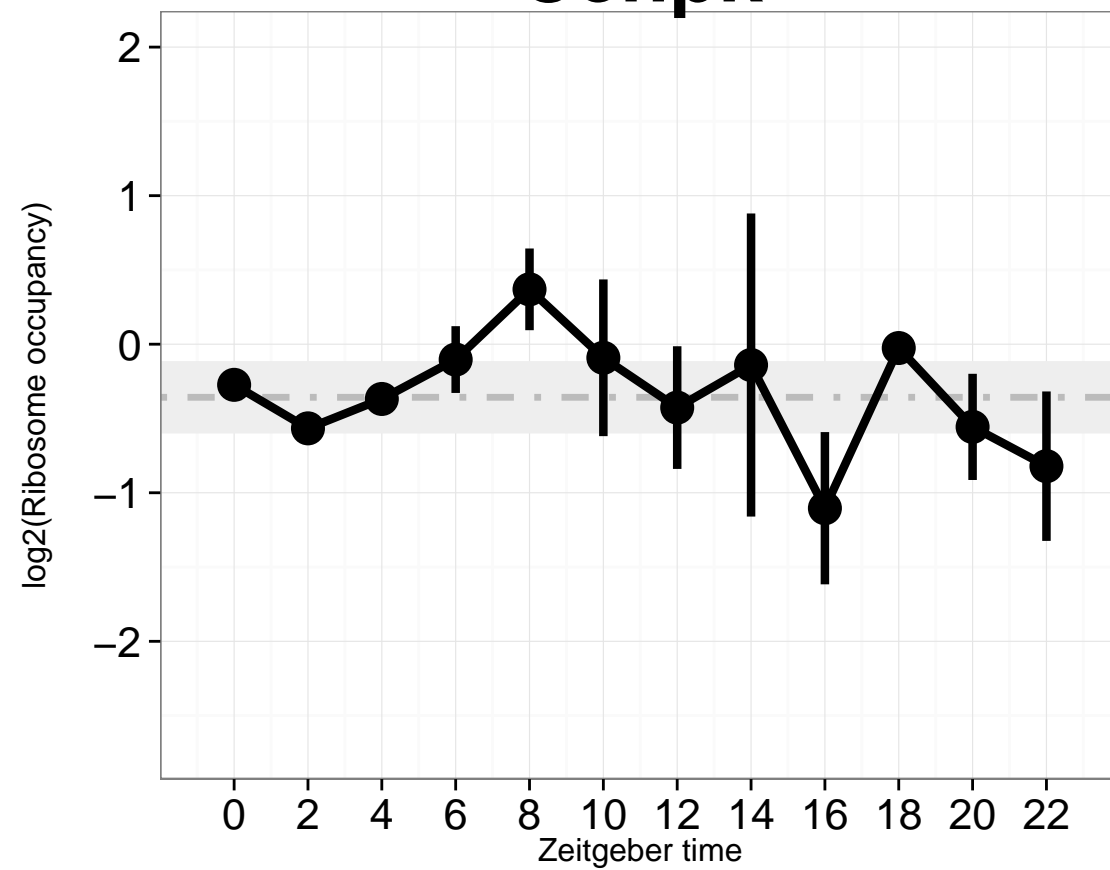

Supplement: Supplementary file 9378 [file 1]

# Phkg1

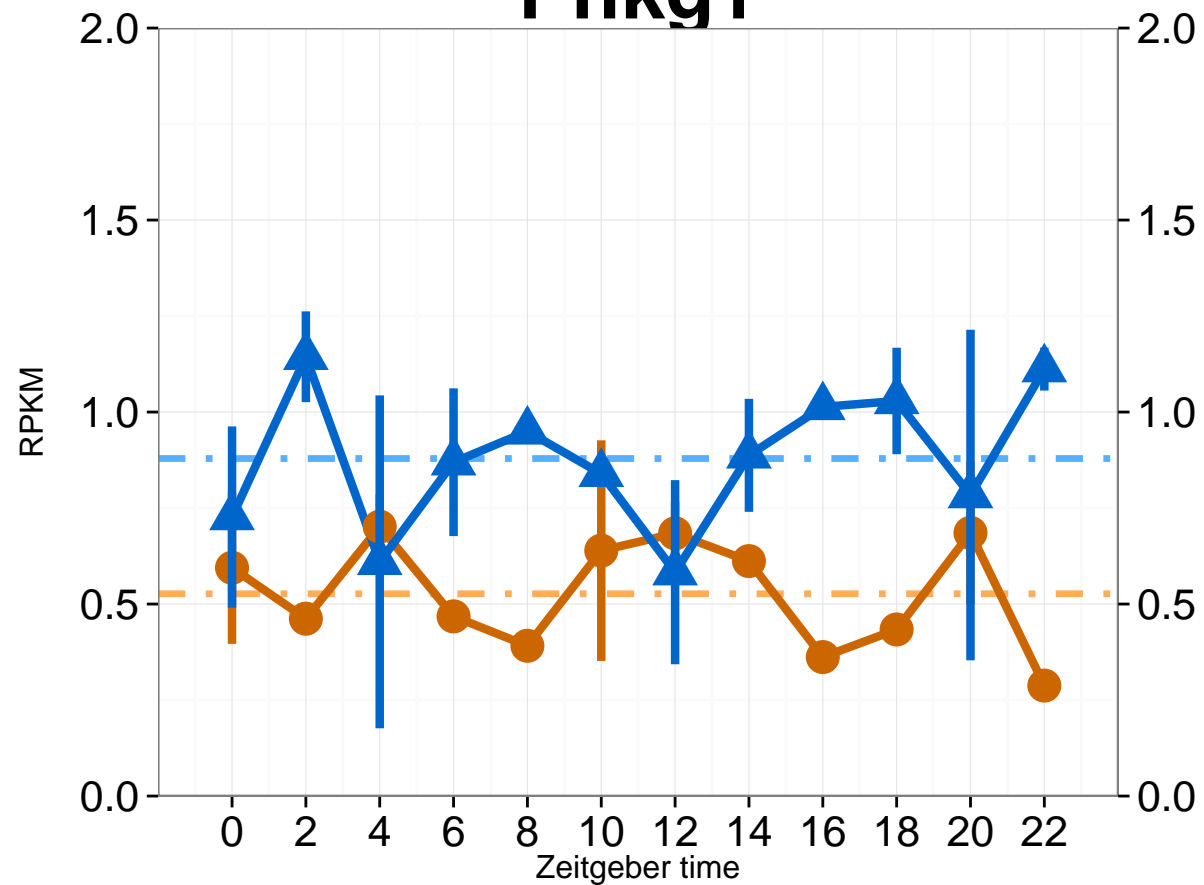

# Phkg1

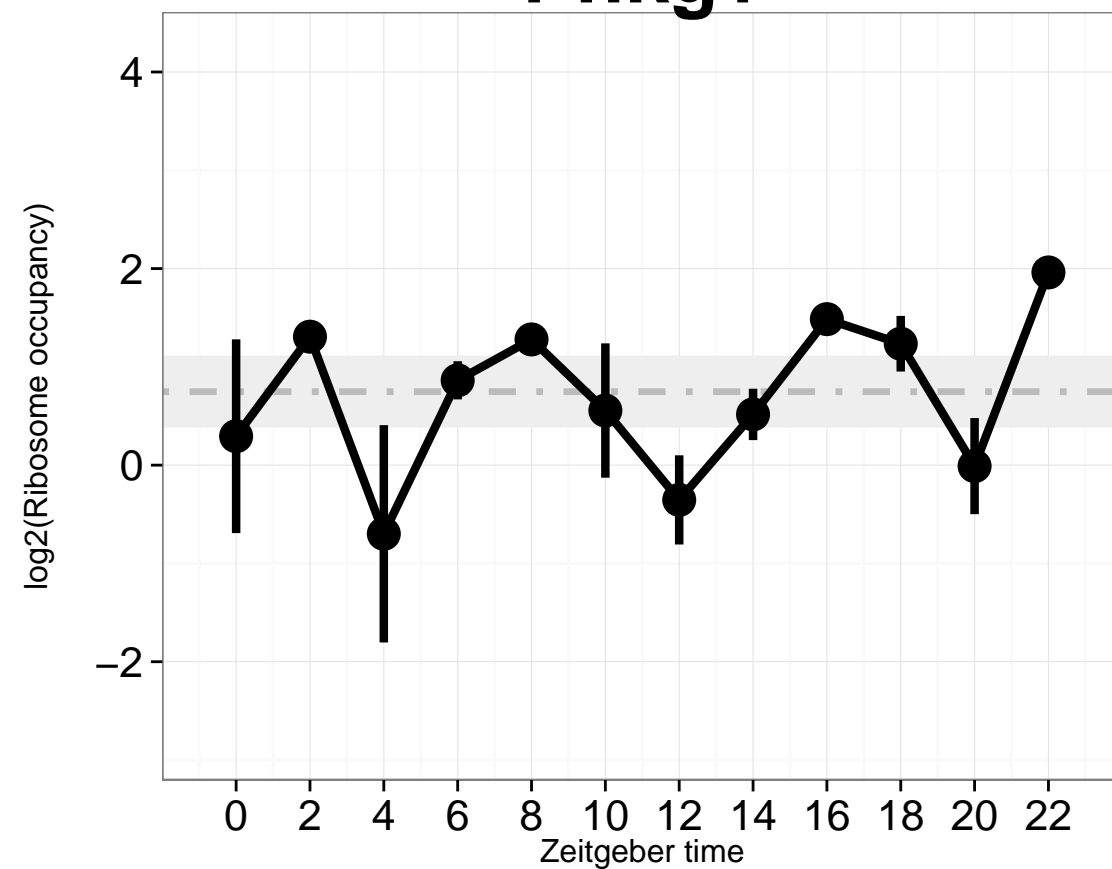

Supplement: Supplementary file 9379 [file 1]

# Homez

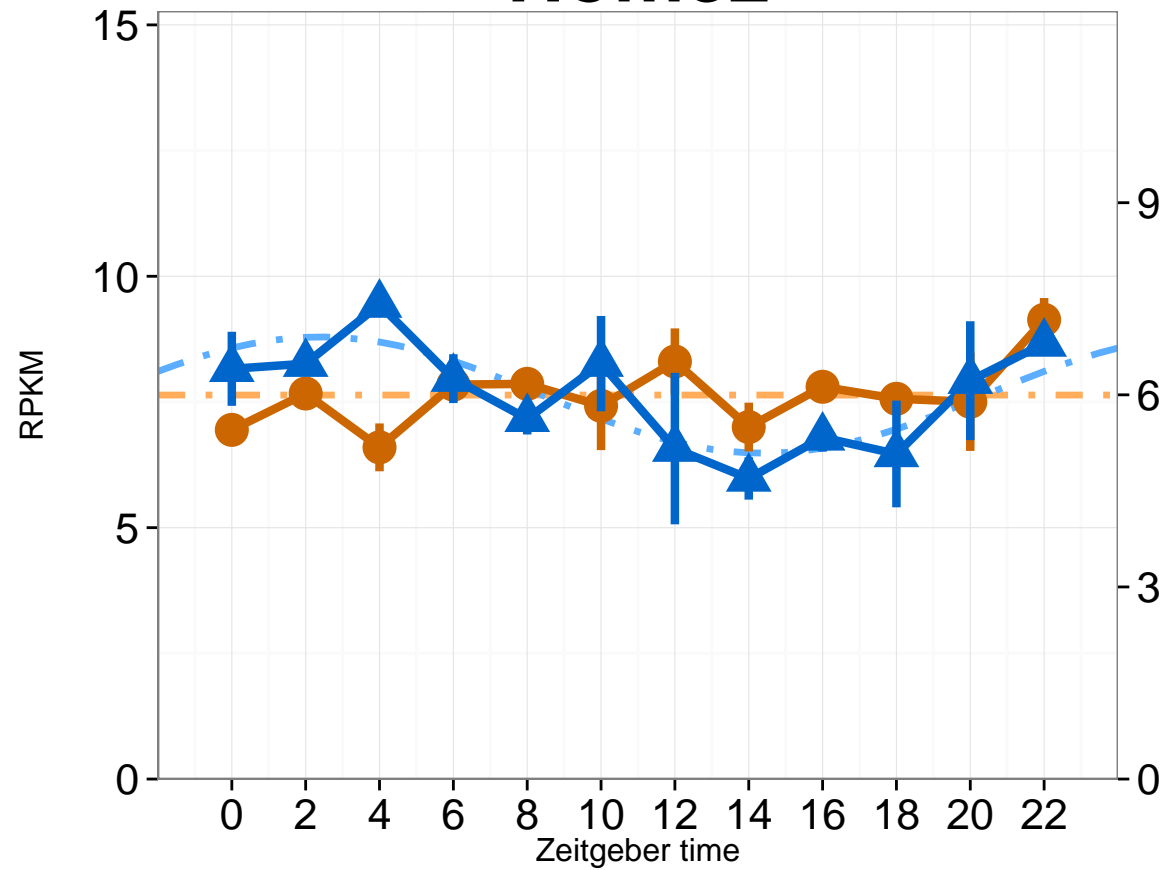

# Homez

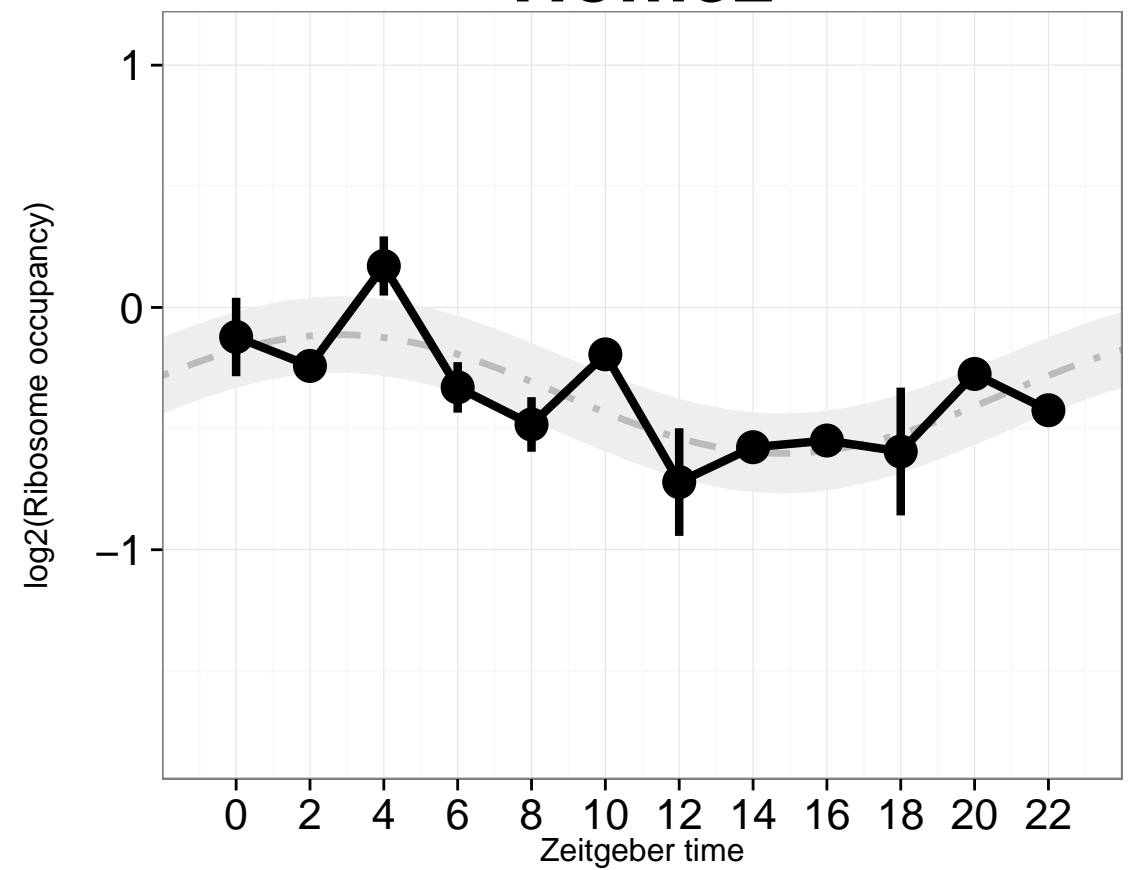

Supplement: Supplementary file 9380 [file 1]

## Podxl2

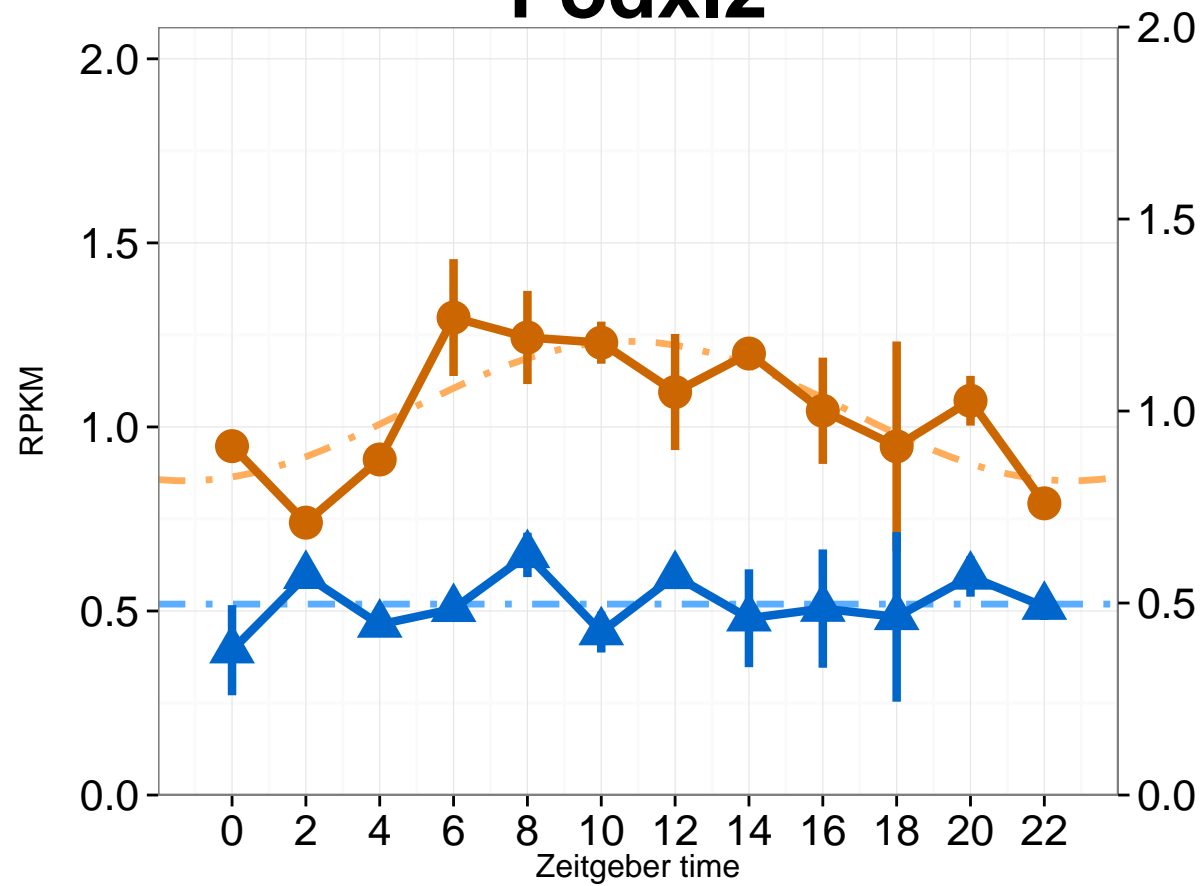

## Podxl2

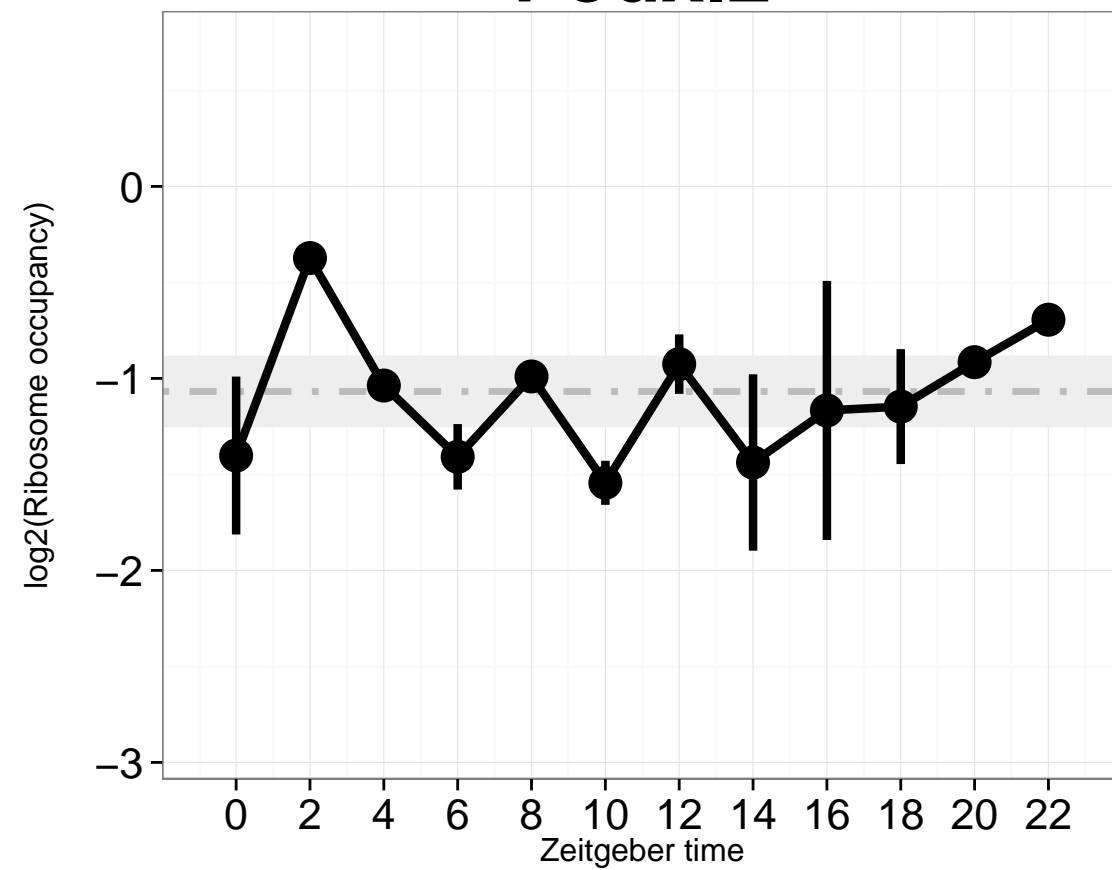

Supplement: Supplementary file 9381 [file 1]

## Maoa

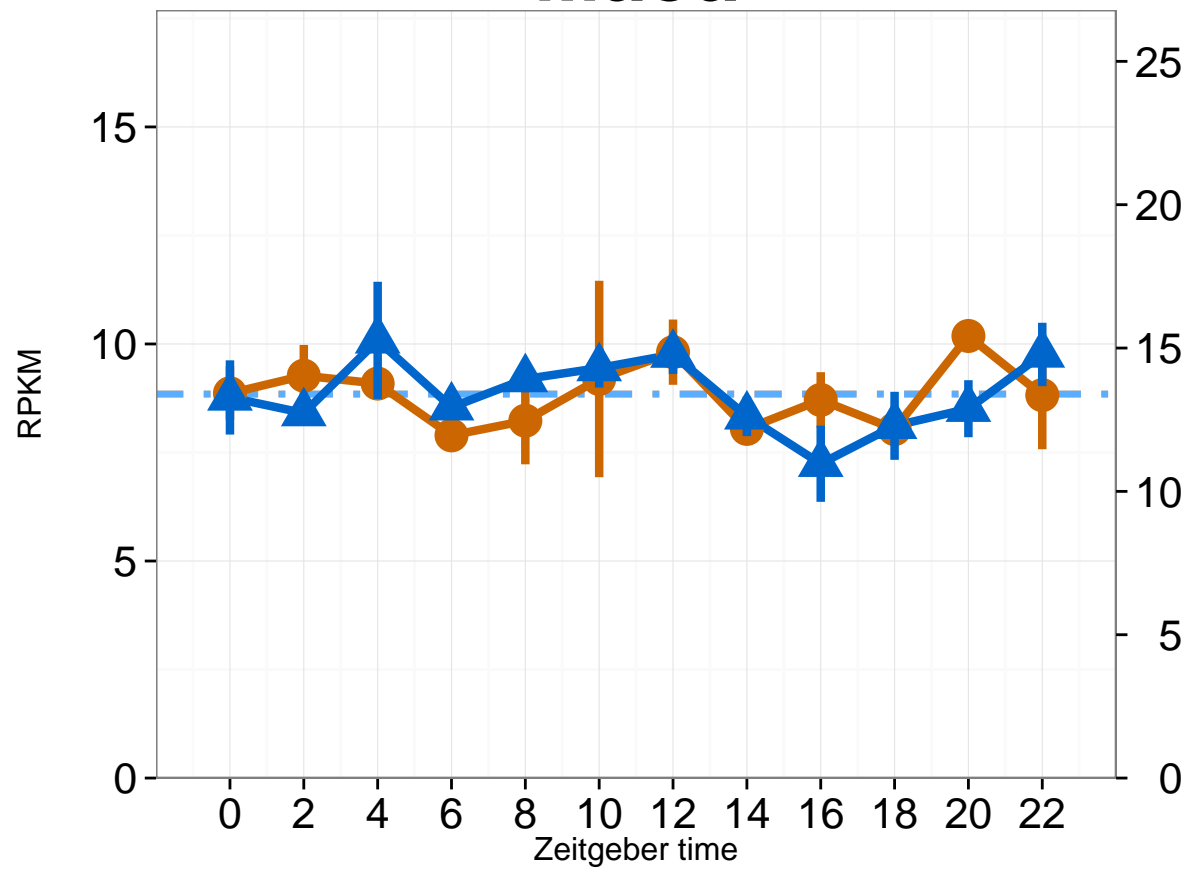

## Maoa

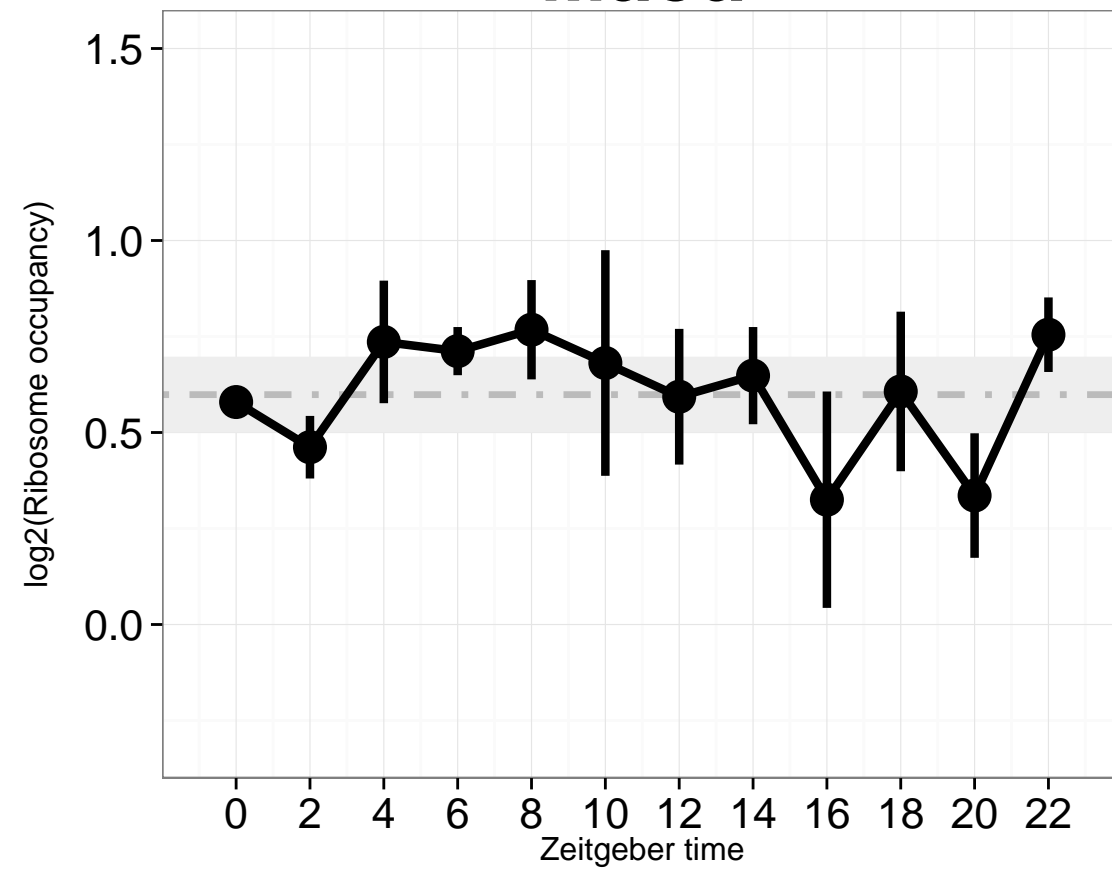

Supplement: Supplementary file 9382 [file 1]

# Grpel1

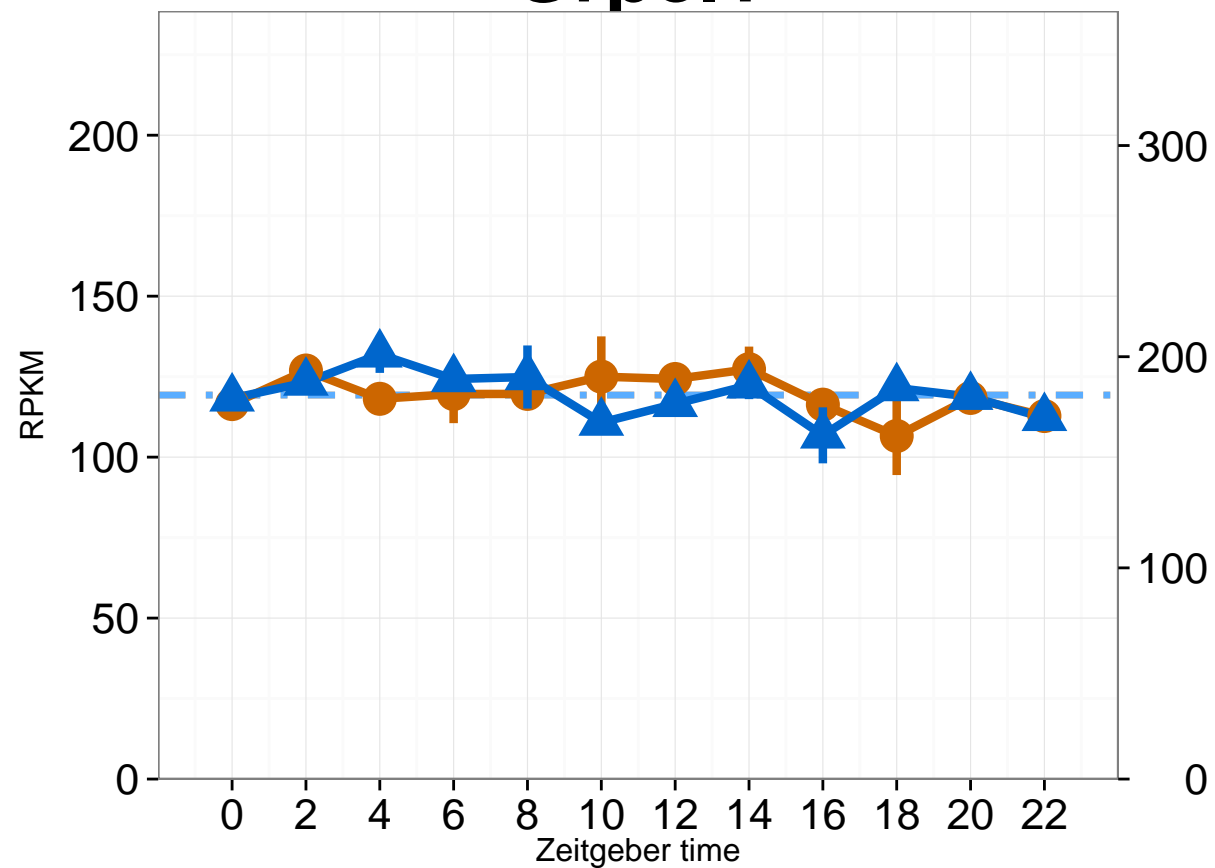

# Grpel1

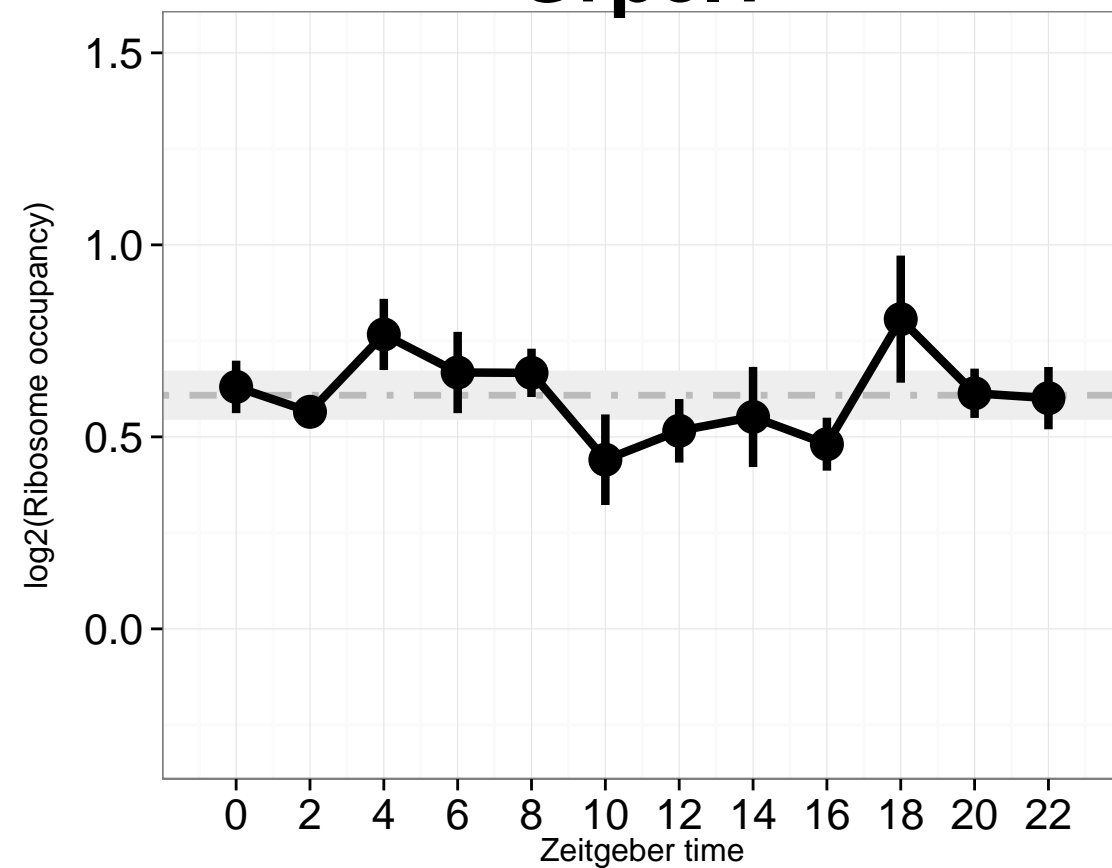

Supplement: Supplementary file 9383 [file 1]

# Col27a1

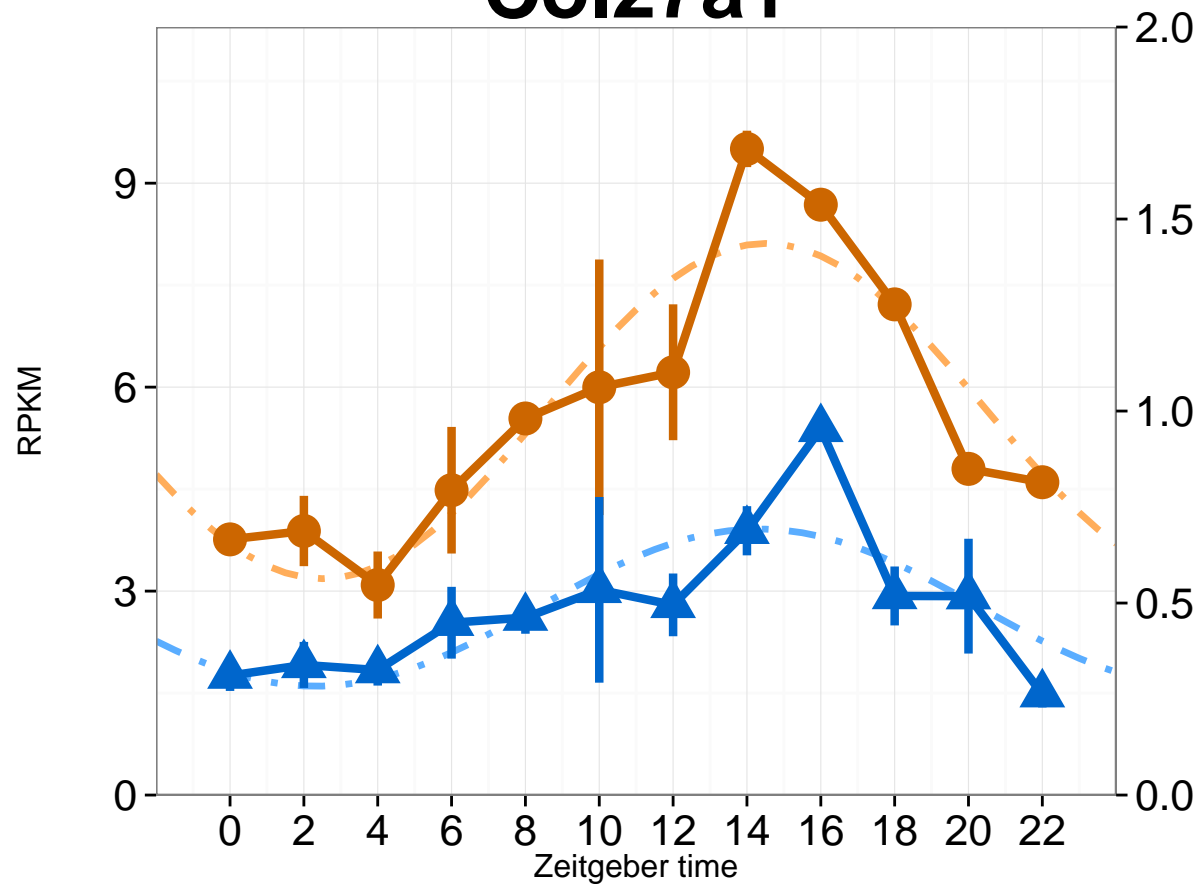

# Col27a1

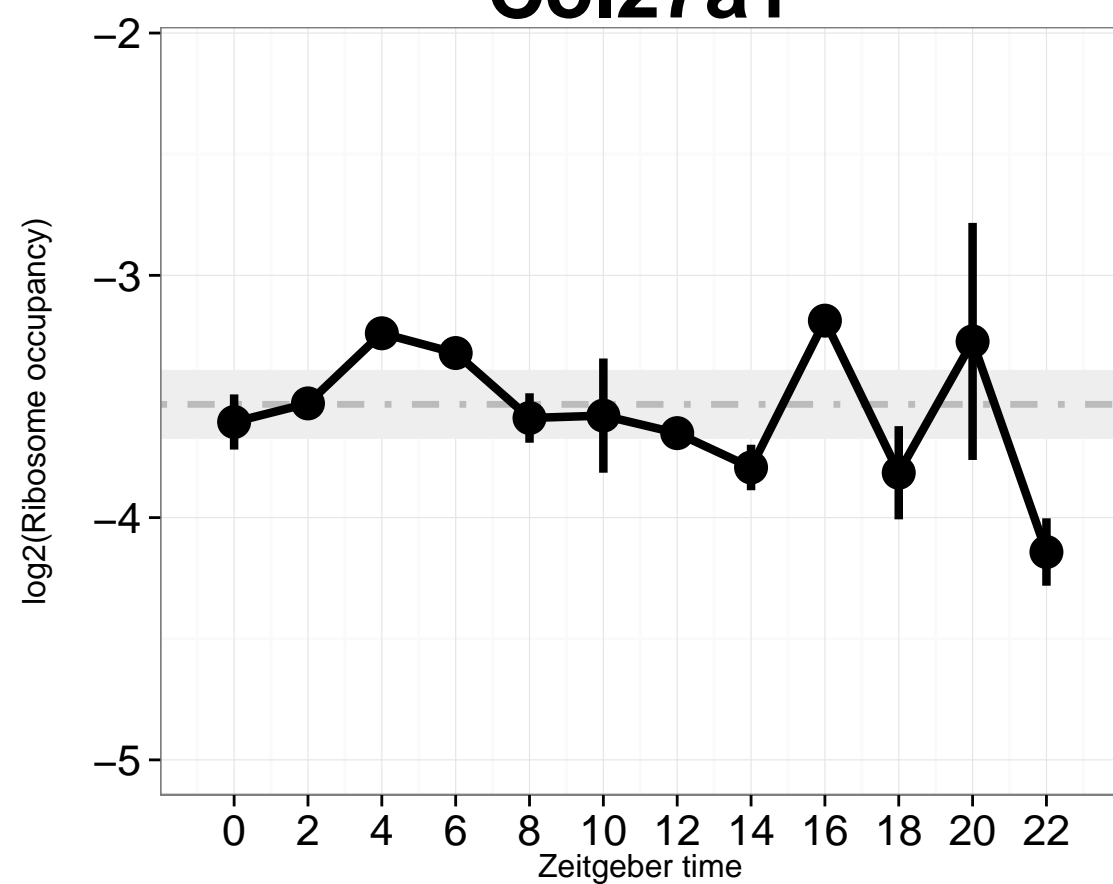

Supplement: Supplementary file 9384 [file 1]

## Abcc4

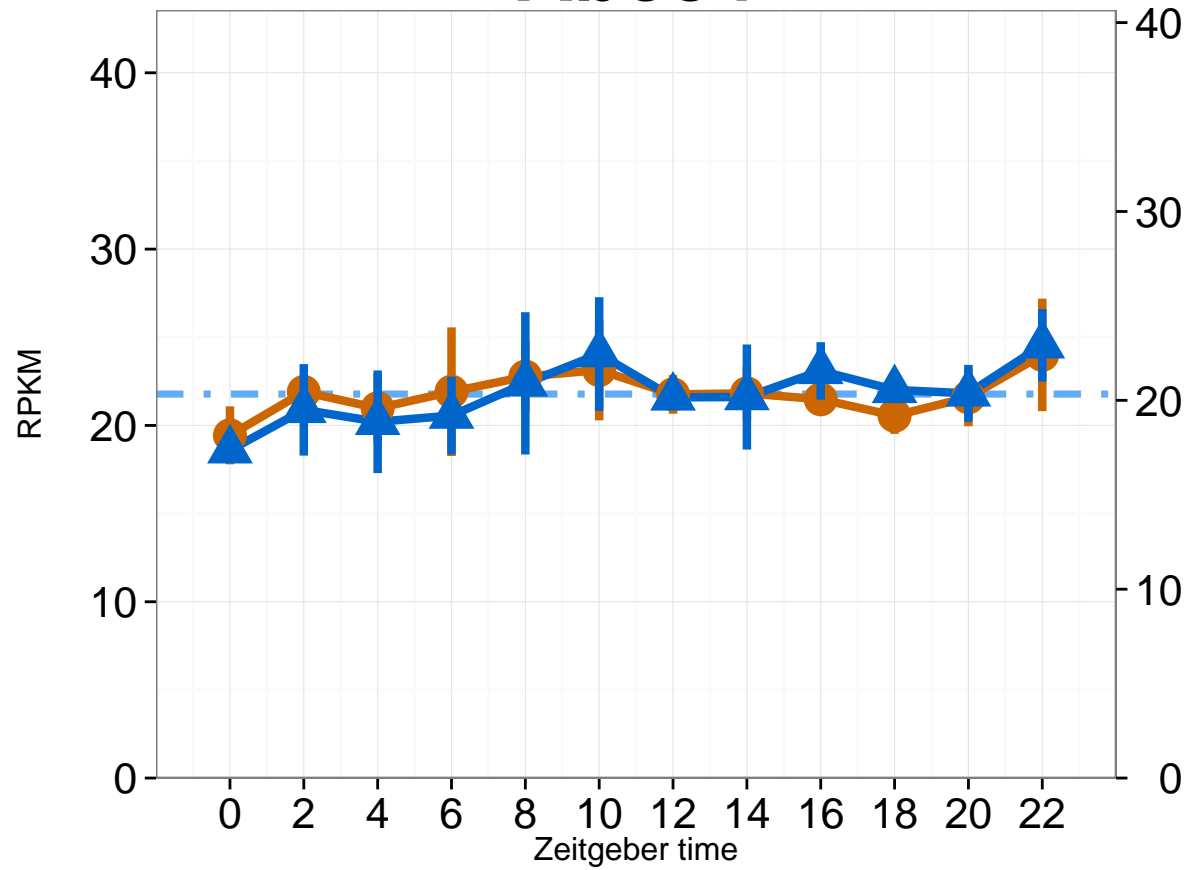

## Abcc4

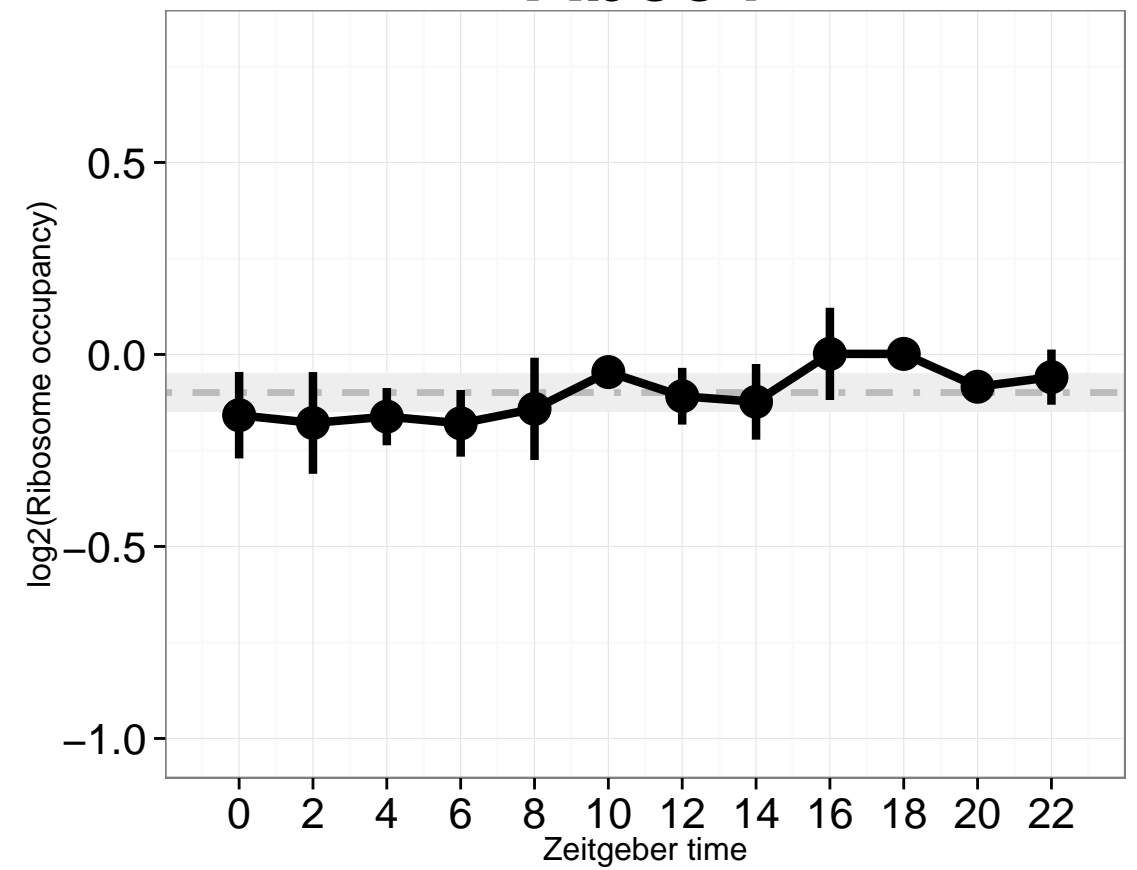

Supplement: Supplementary file 9385 [file 1]

# Galnt10

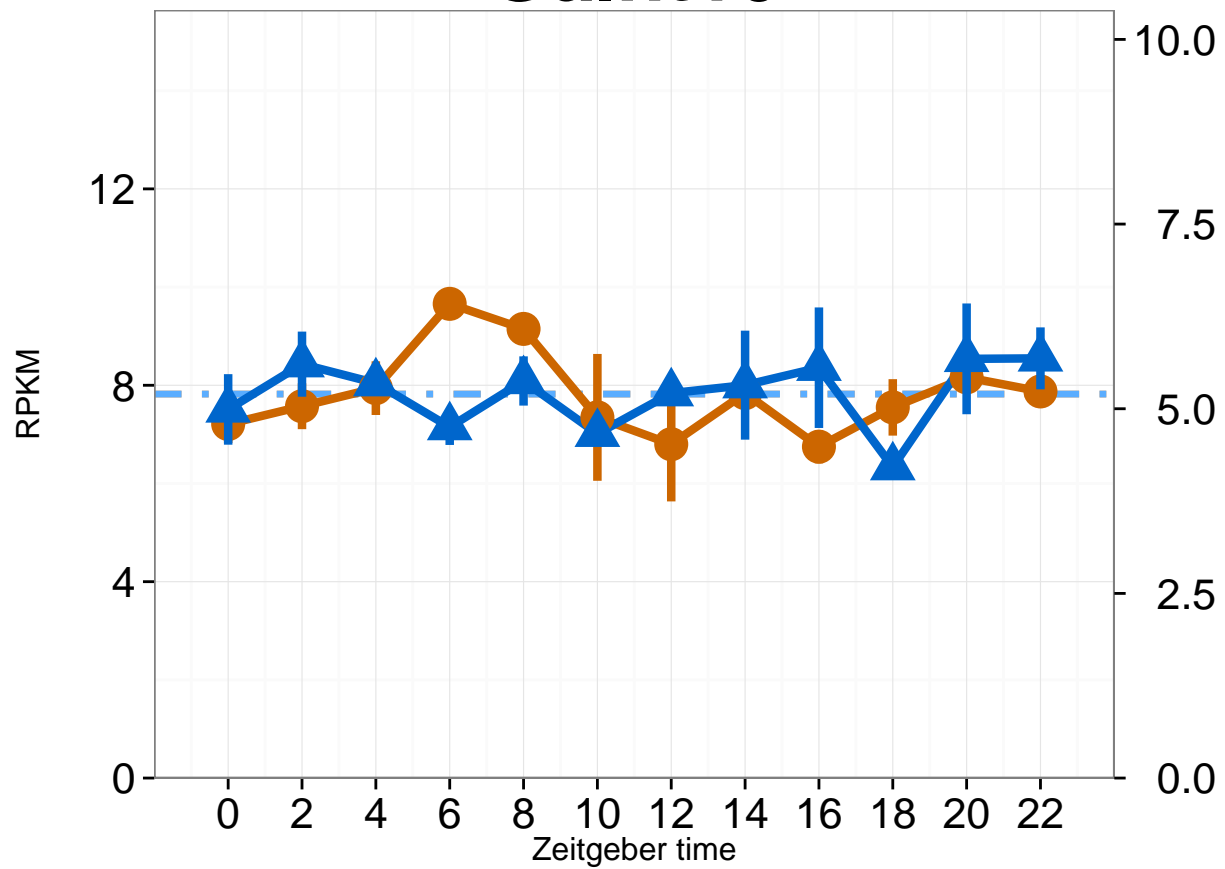

# Galnt10

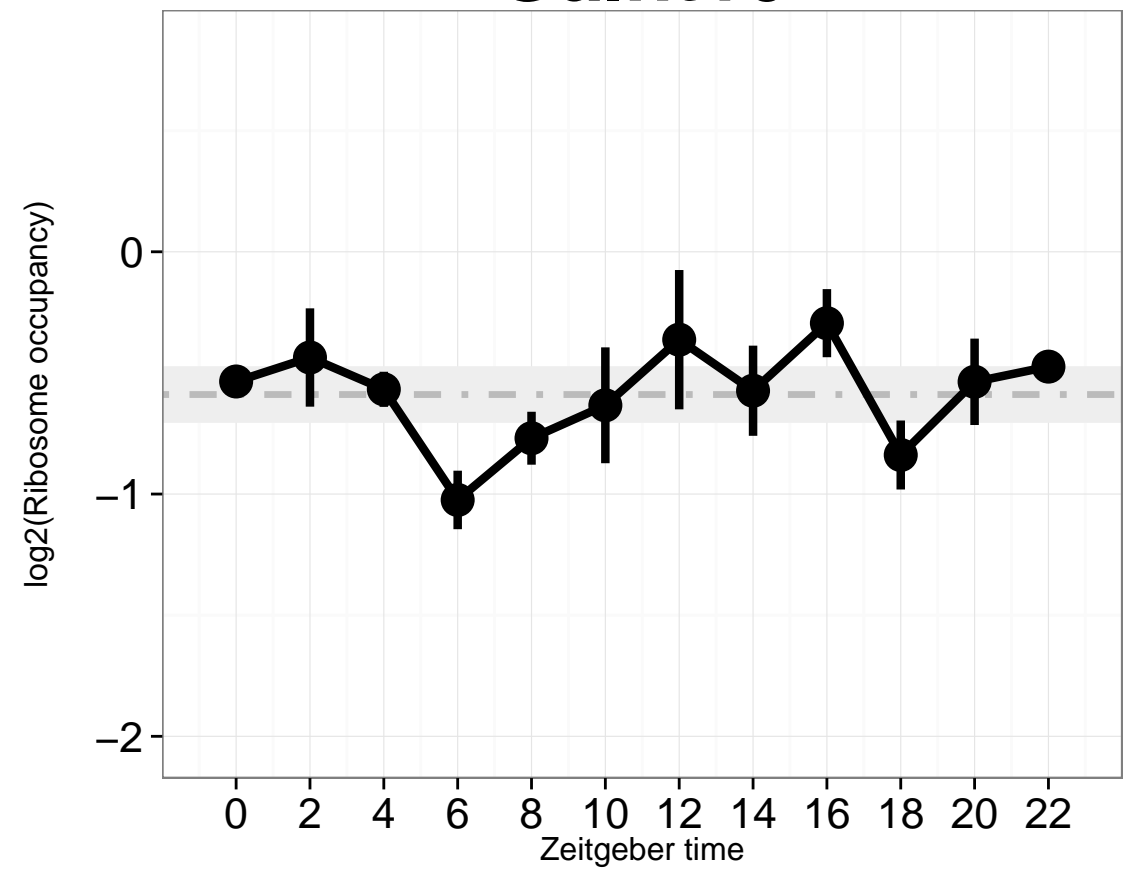

Supplement: Supplementary file 9386 [file 1]

## Sertad1

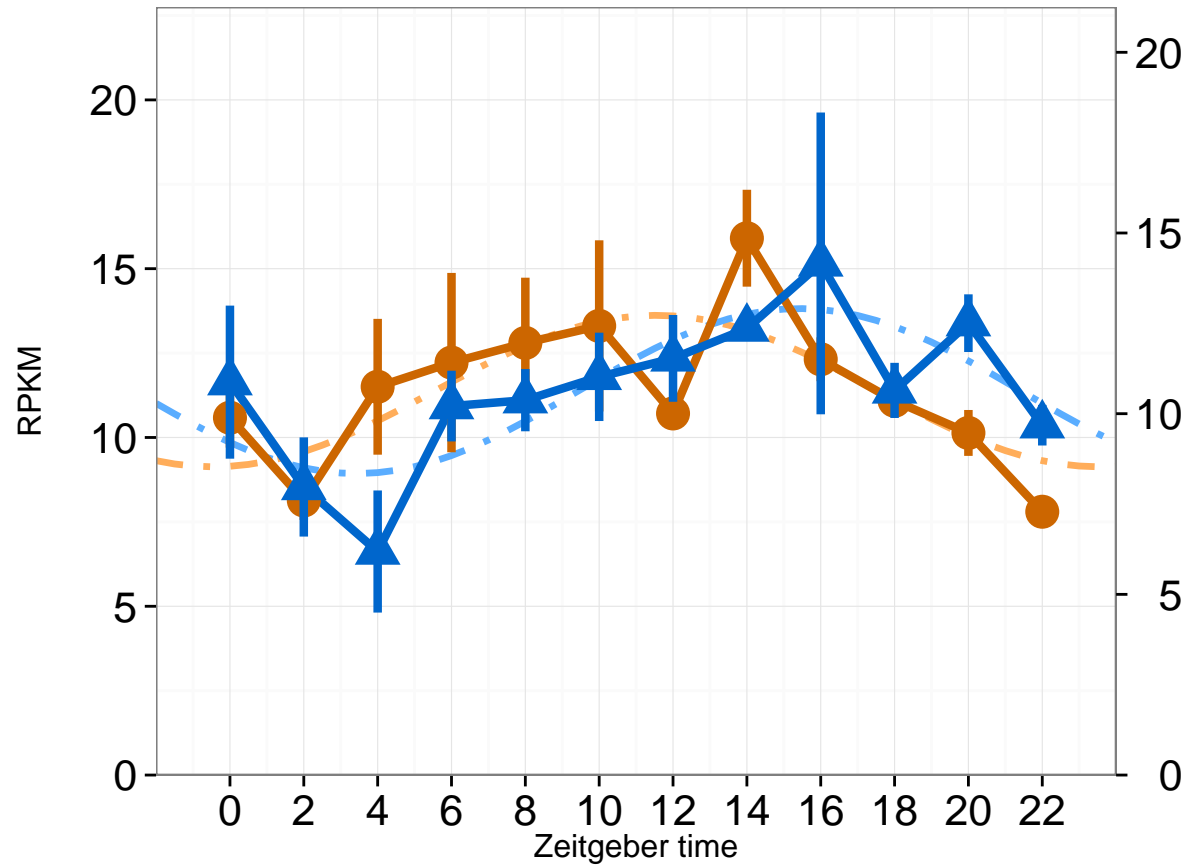

## Sertad1

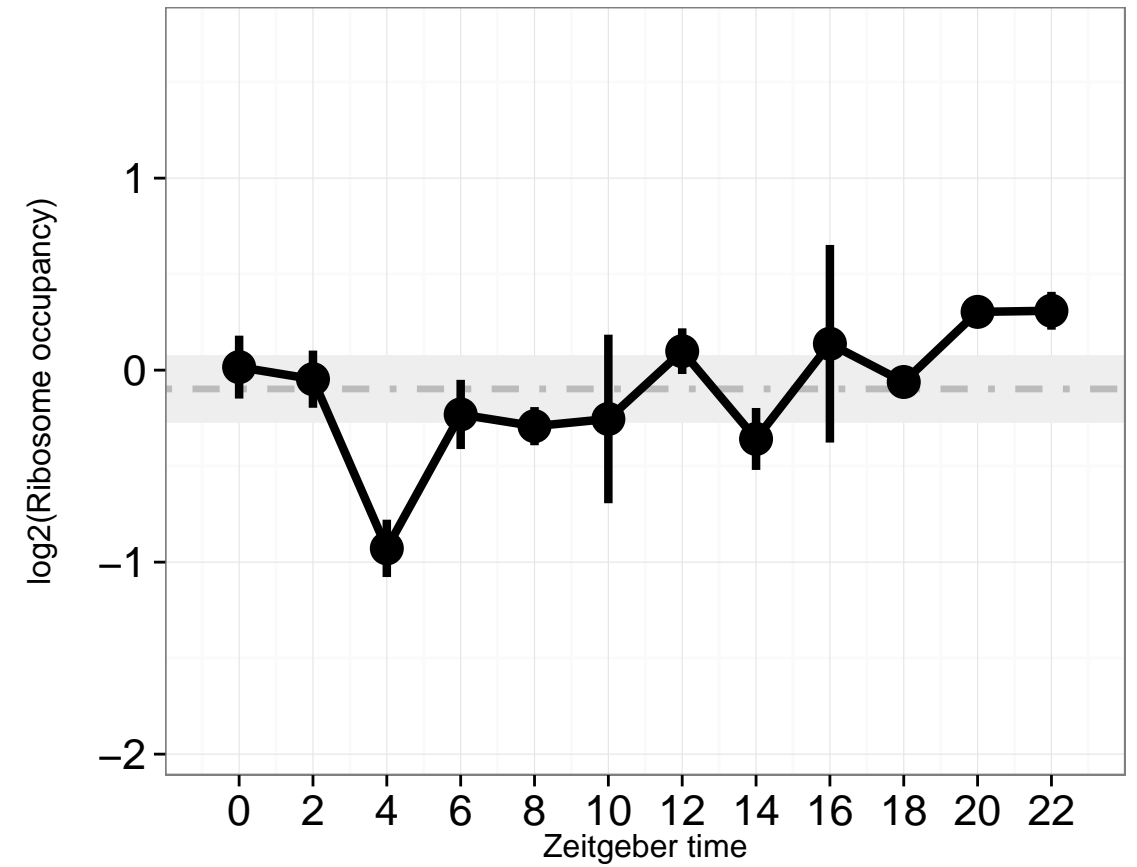

Supplement: Supplementary file 9387 [file 1]

# Itsn1

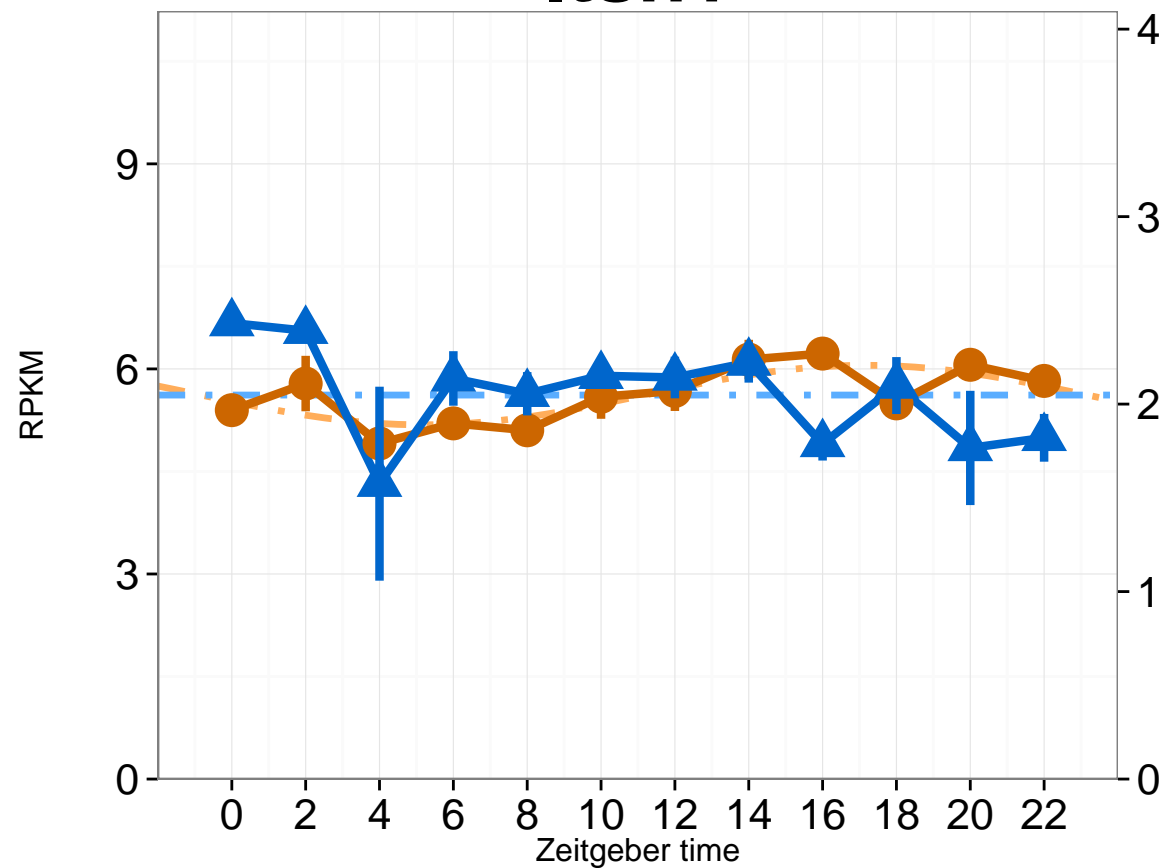

# Itsn1

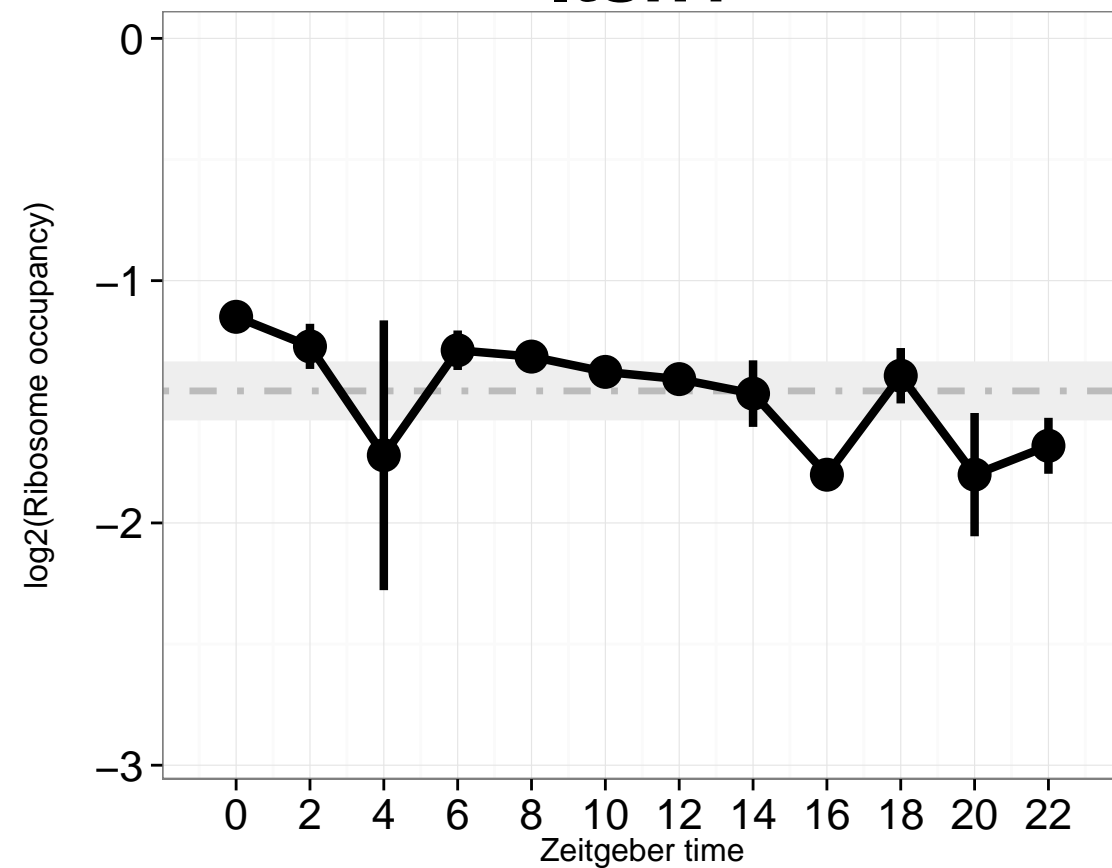

Supplement: Supplementary file 9388 [file 1]

# Baz1b

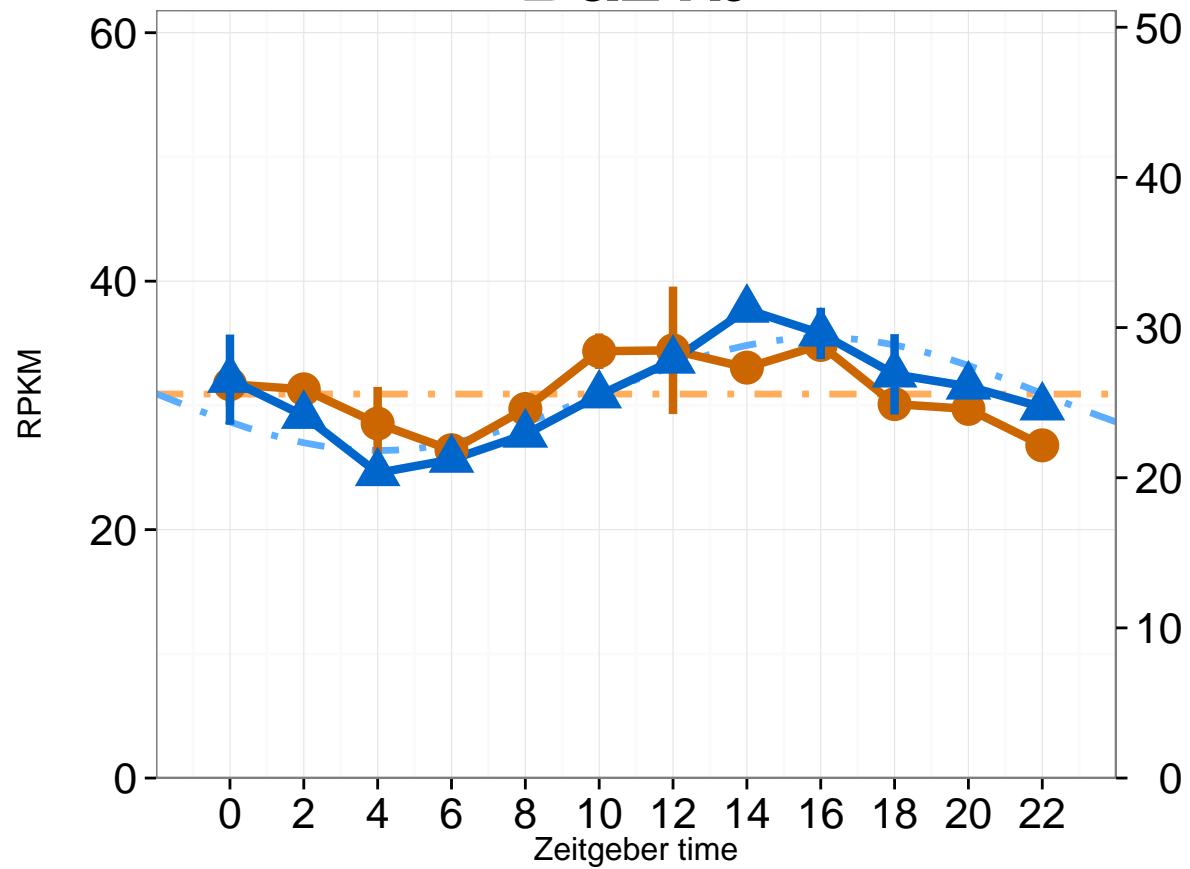

# Baz1b

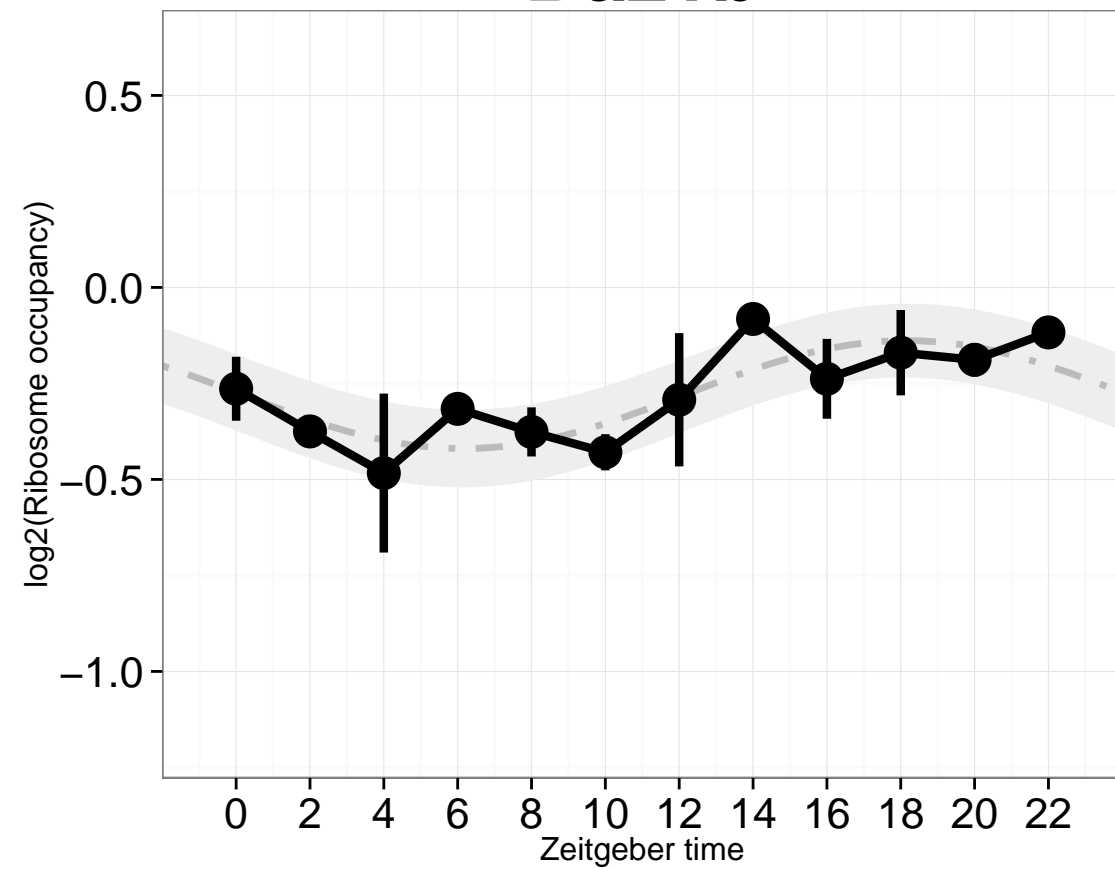

Supplement: Supplementary file 9389 [file 1]

# Zfp607

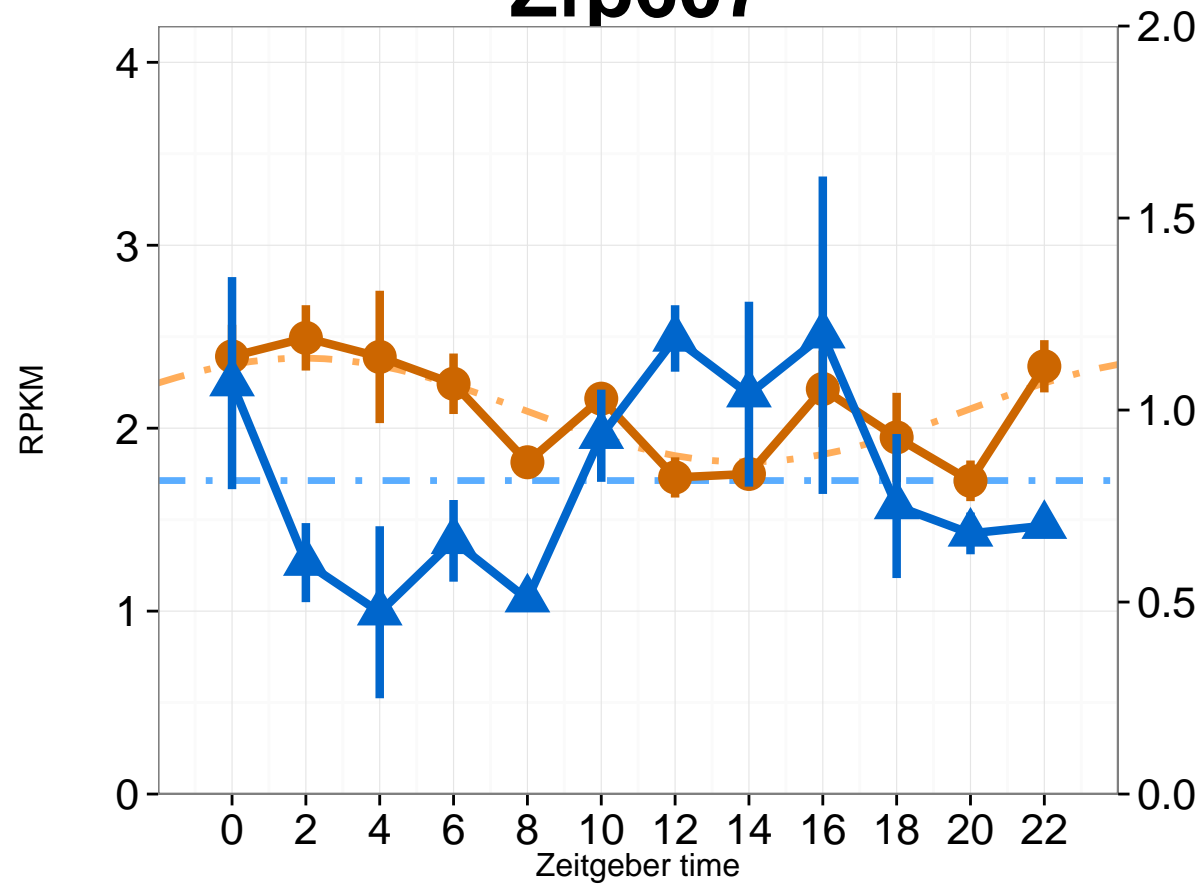

# Zfp607

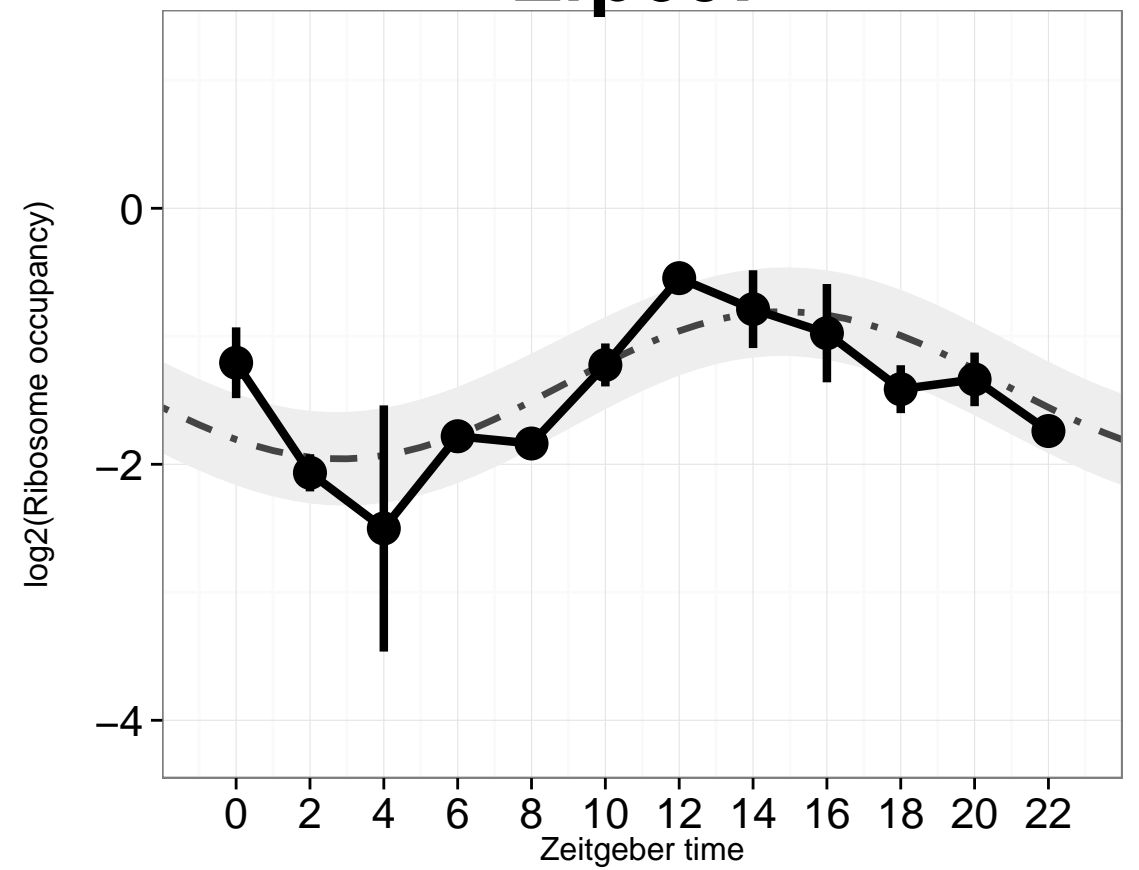

Supplement: Supplementary file 9390 [file 1]

# Hnrnpk

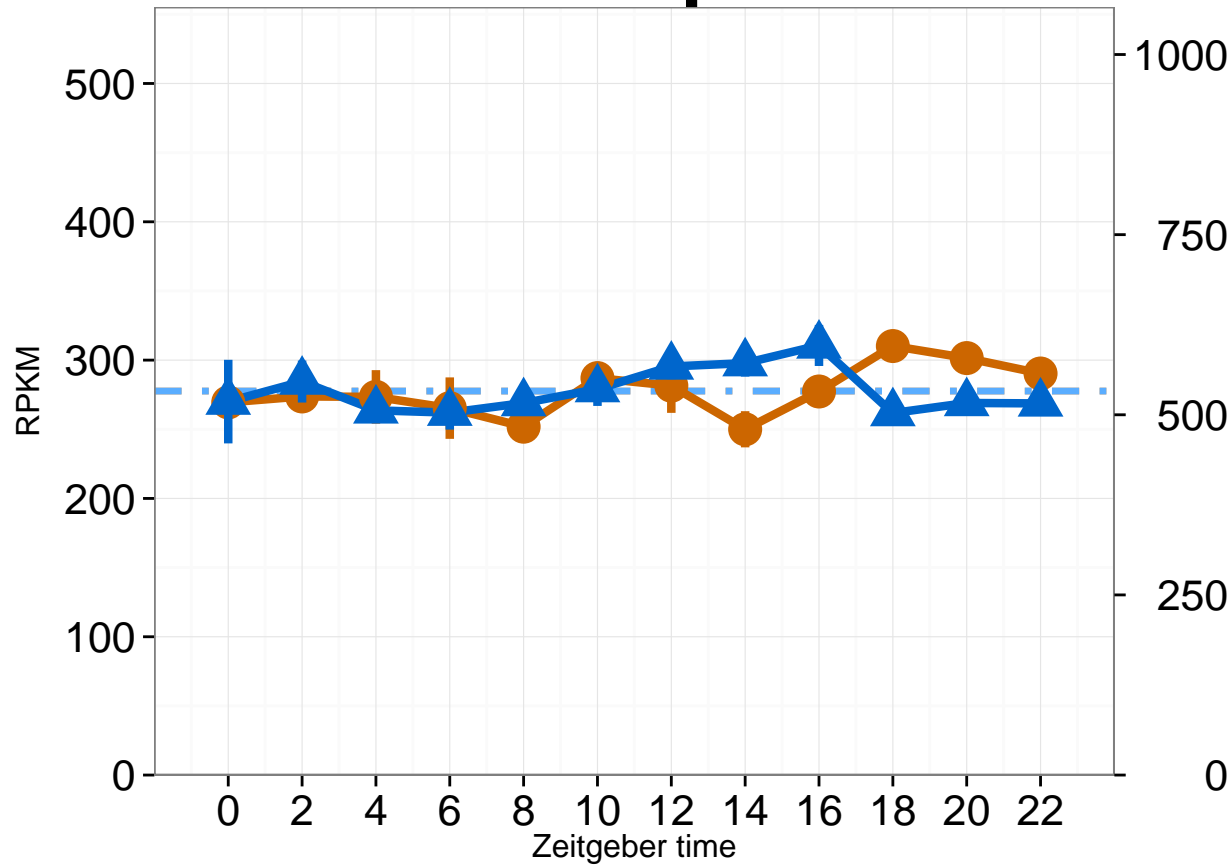

# Hnrnpk

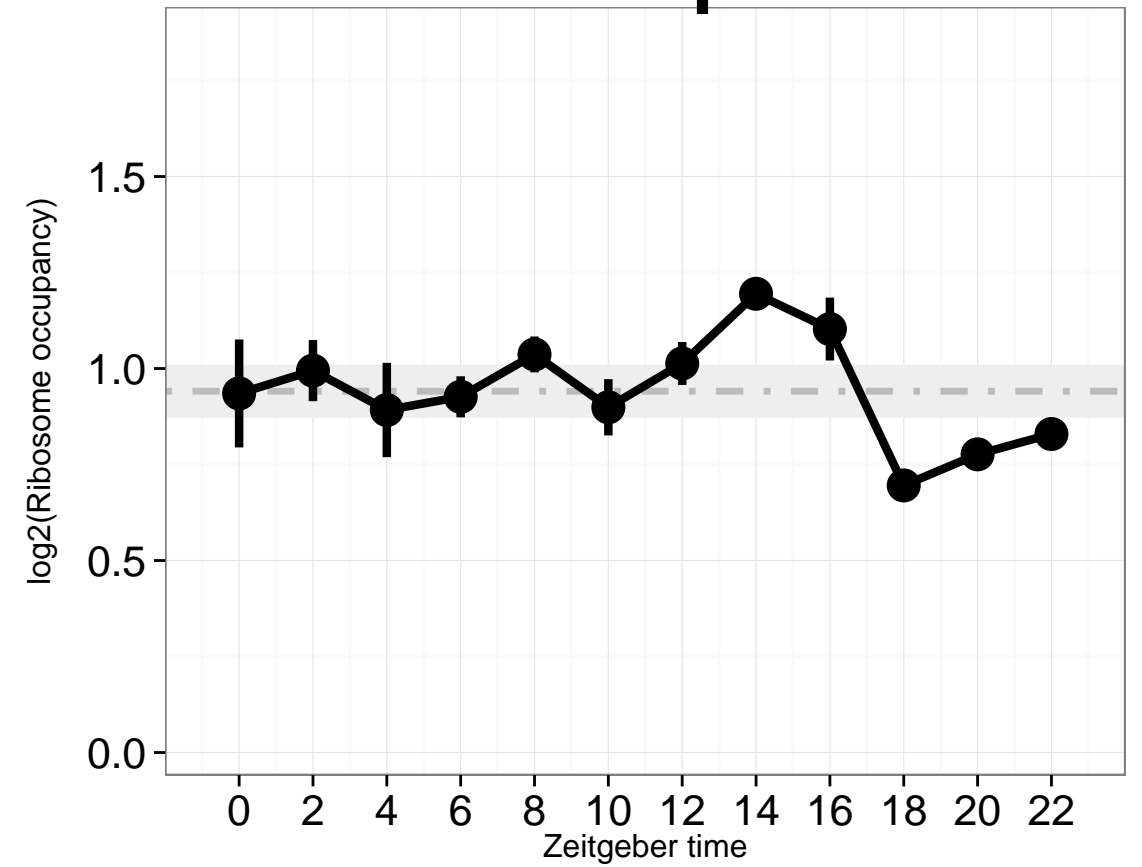

Supplement: Supplementary file 9391 [file 1]

# Wdr44

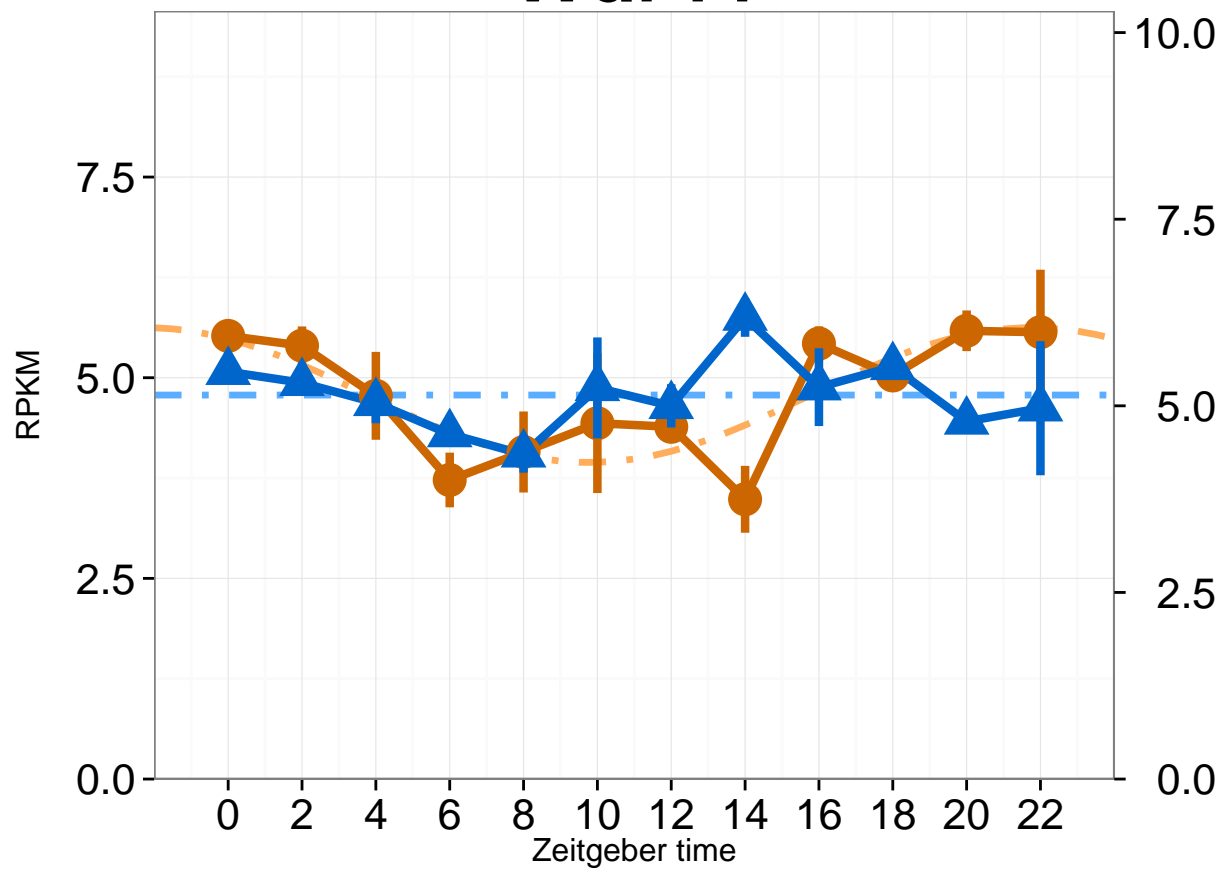

# Wdr44

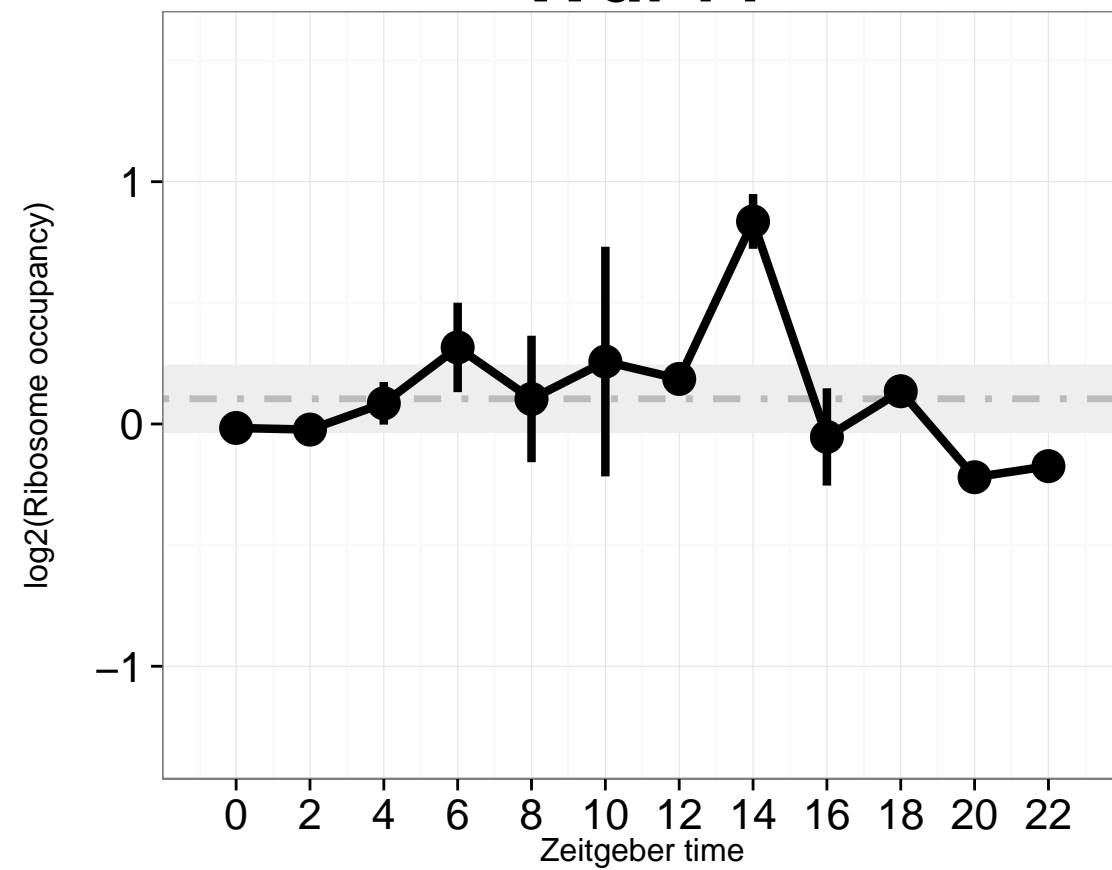

Supplement: Supplementary file 9392 [file 1]

# Ceacam1

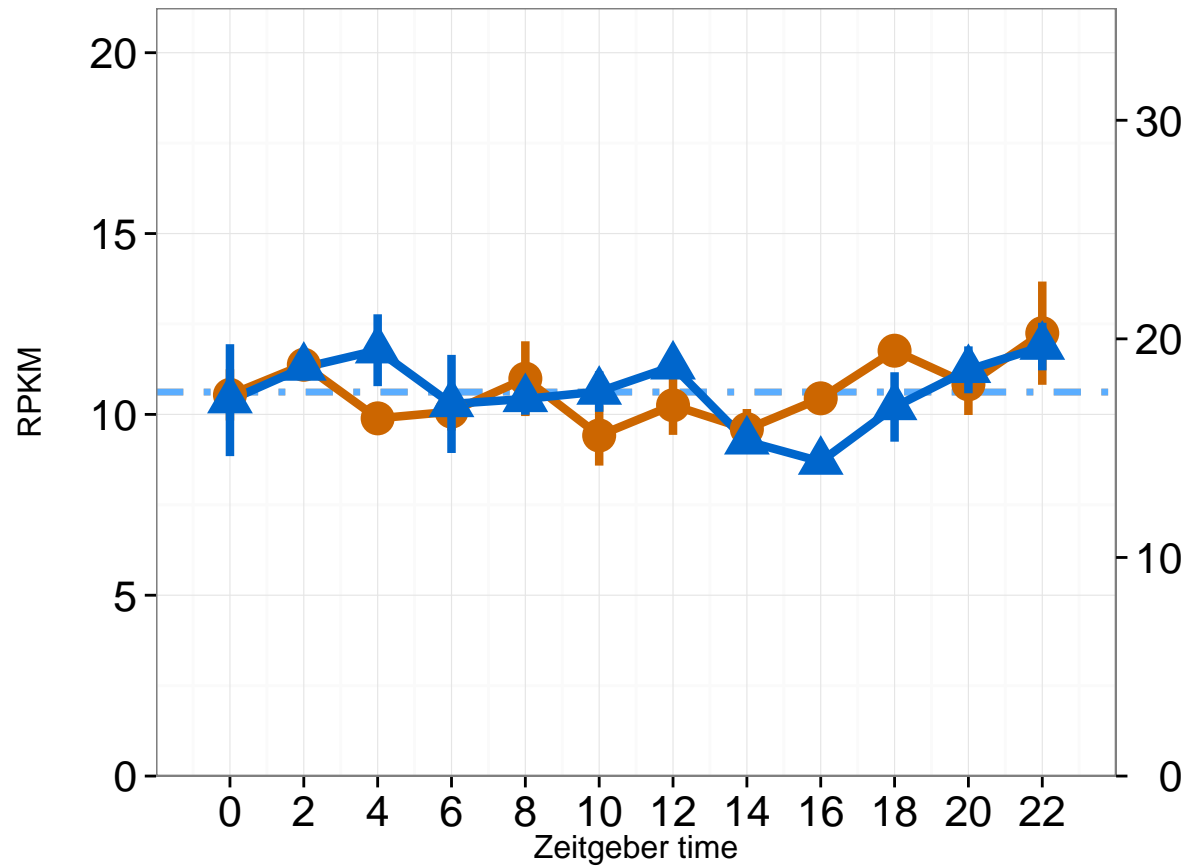

# Ceacam1

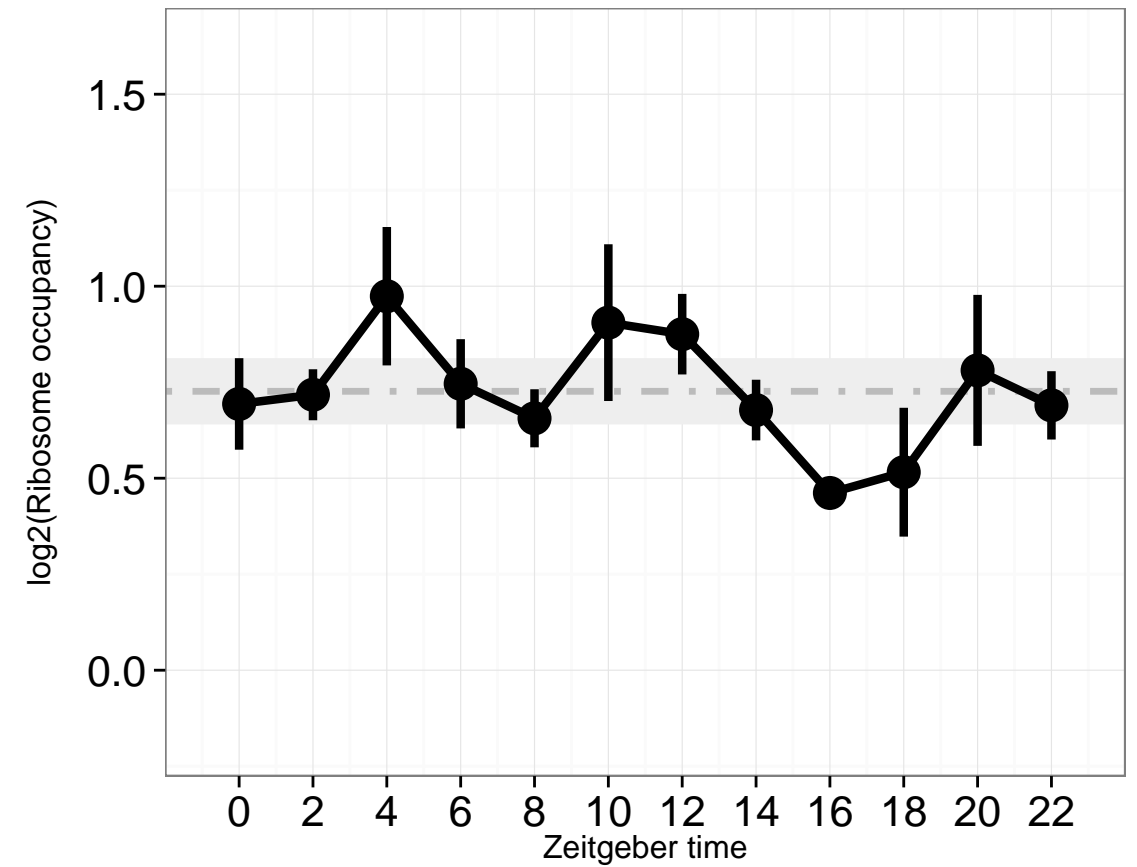

Supplement: Supplementary file 9393 [file 1]

# Ccdc88b

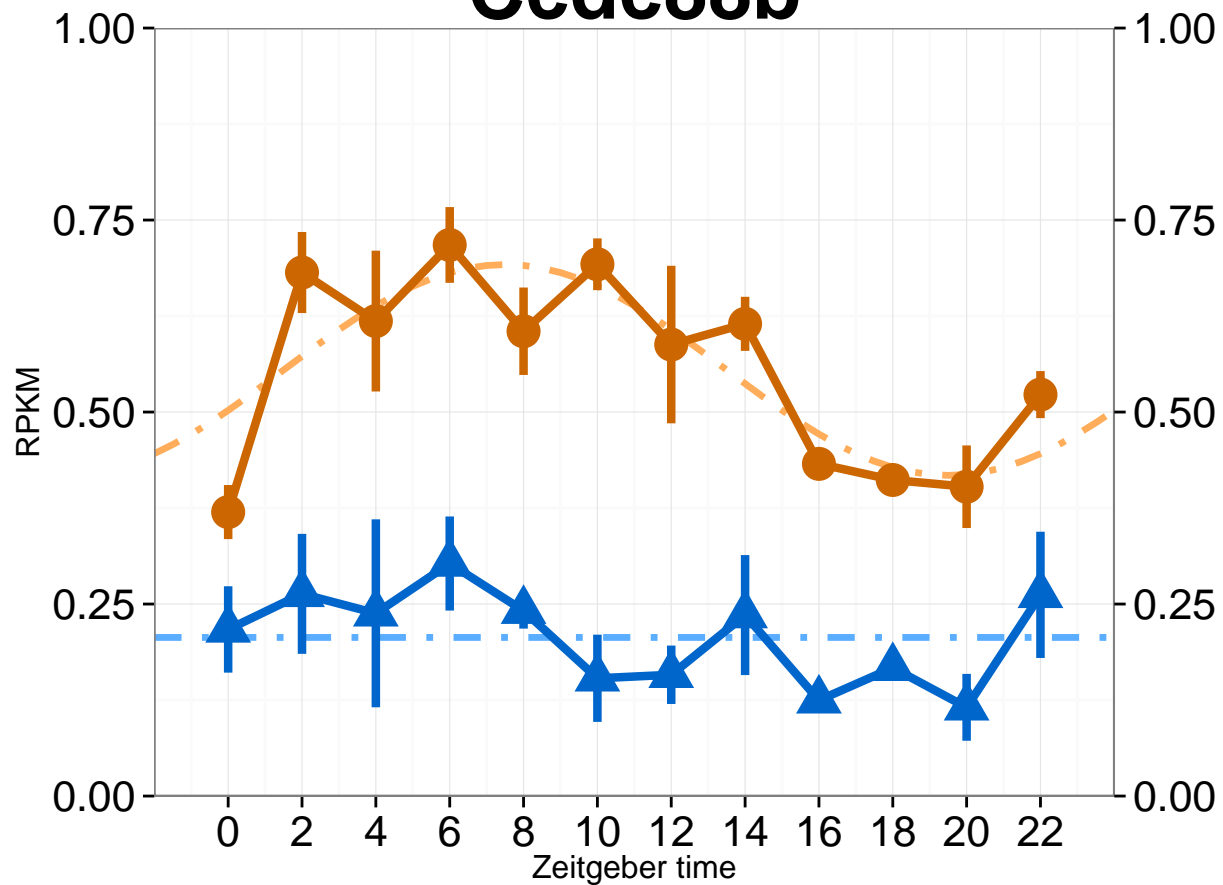

# Ccdc88b

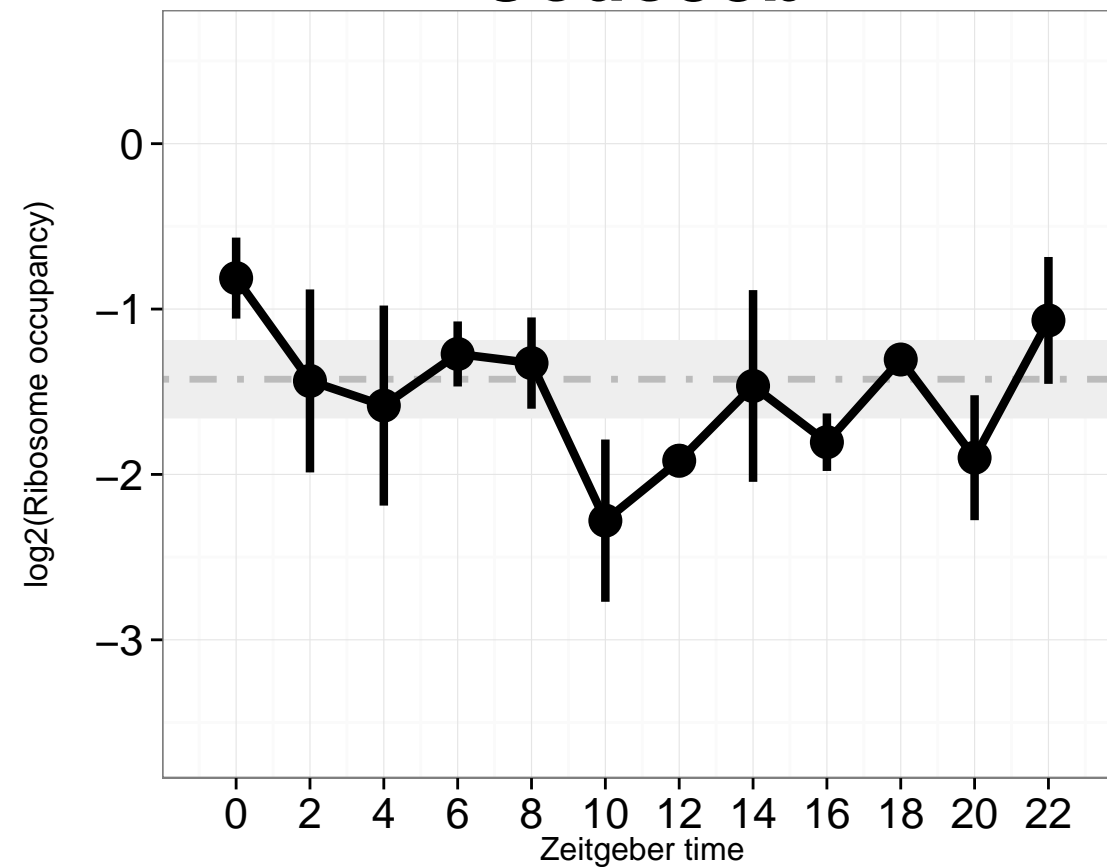

Supplement: Supplementary file 9394 [file 1]

# Ces3a

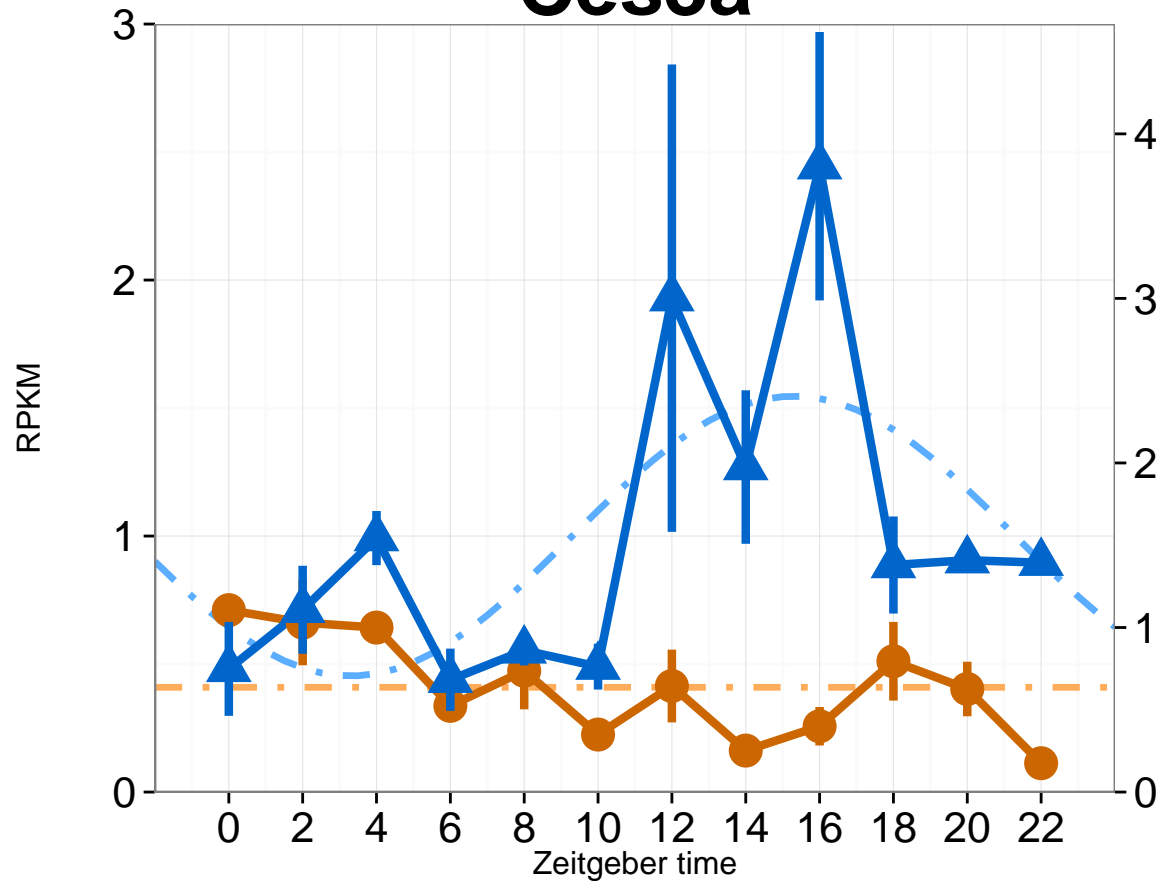

# Ces3a

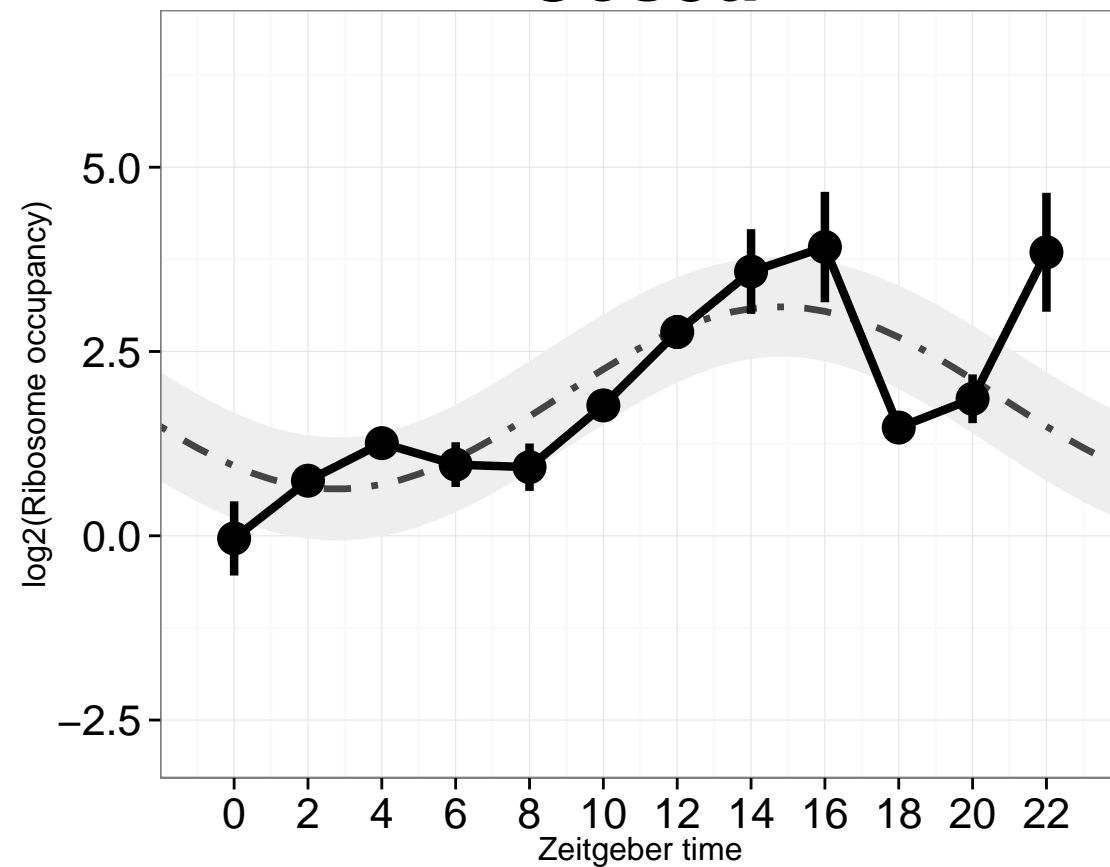

Supplement: Supplementary file 9395 [file 1]

# Ralgps1

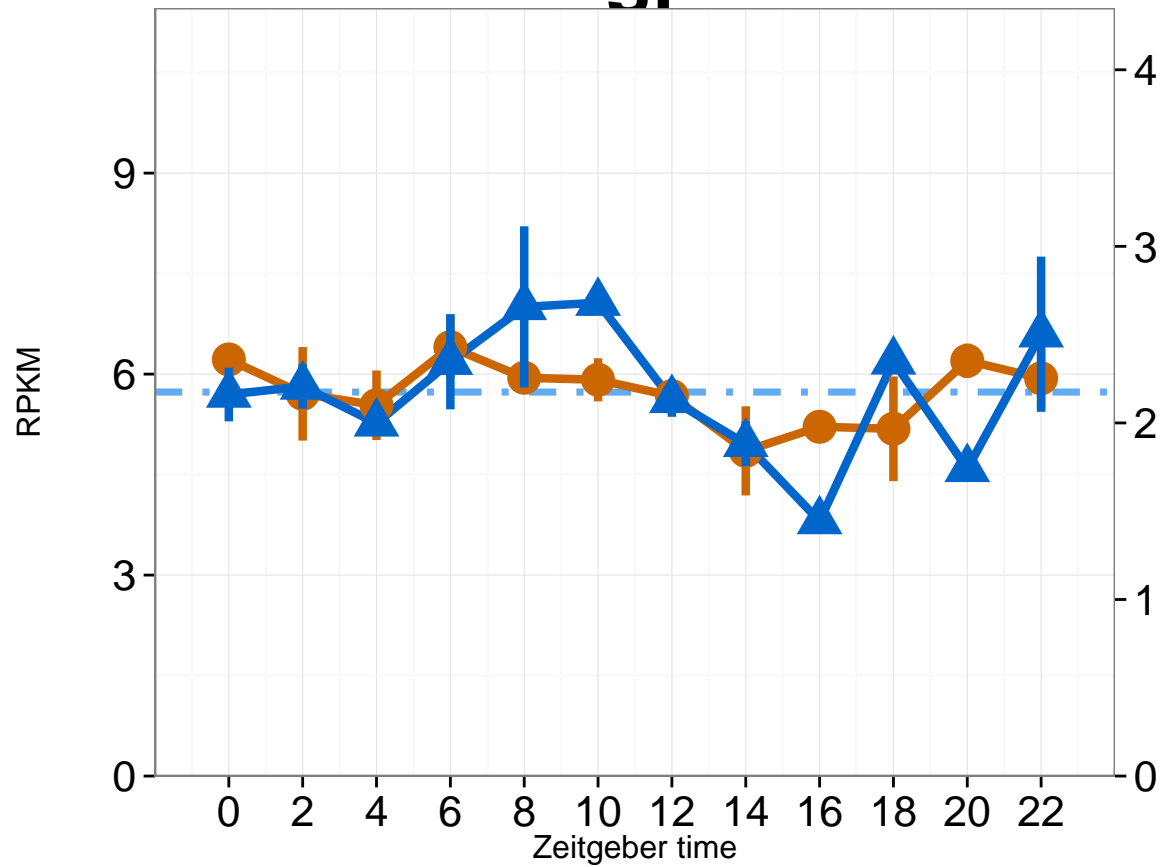

# Ralgps1

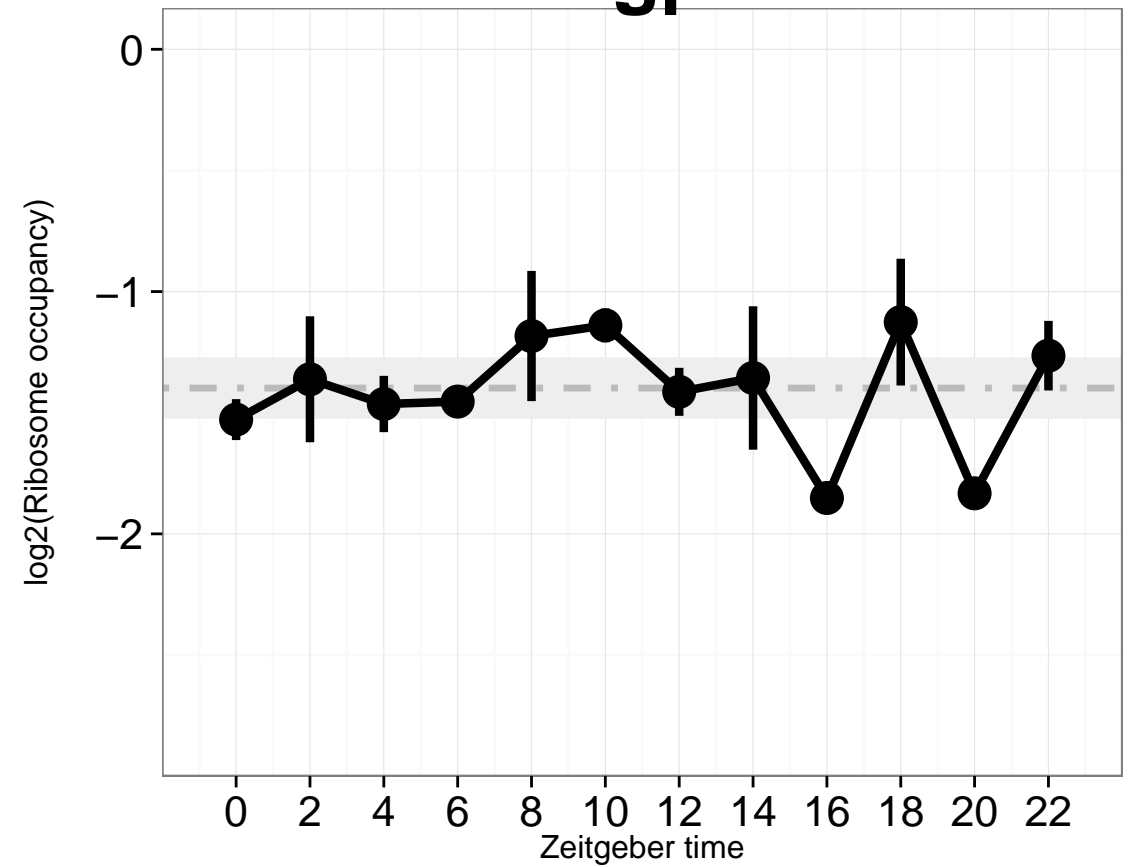

Supplement: Supplementary file 9396 [file 1]

## Cnksr3

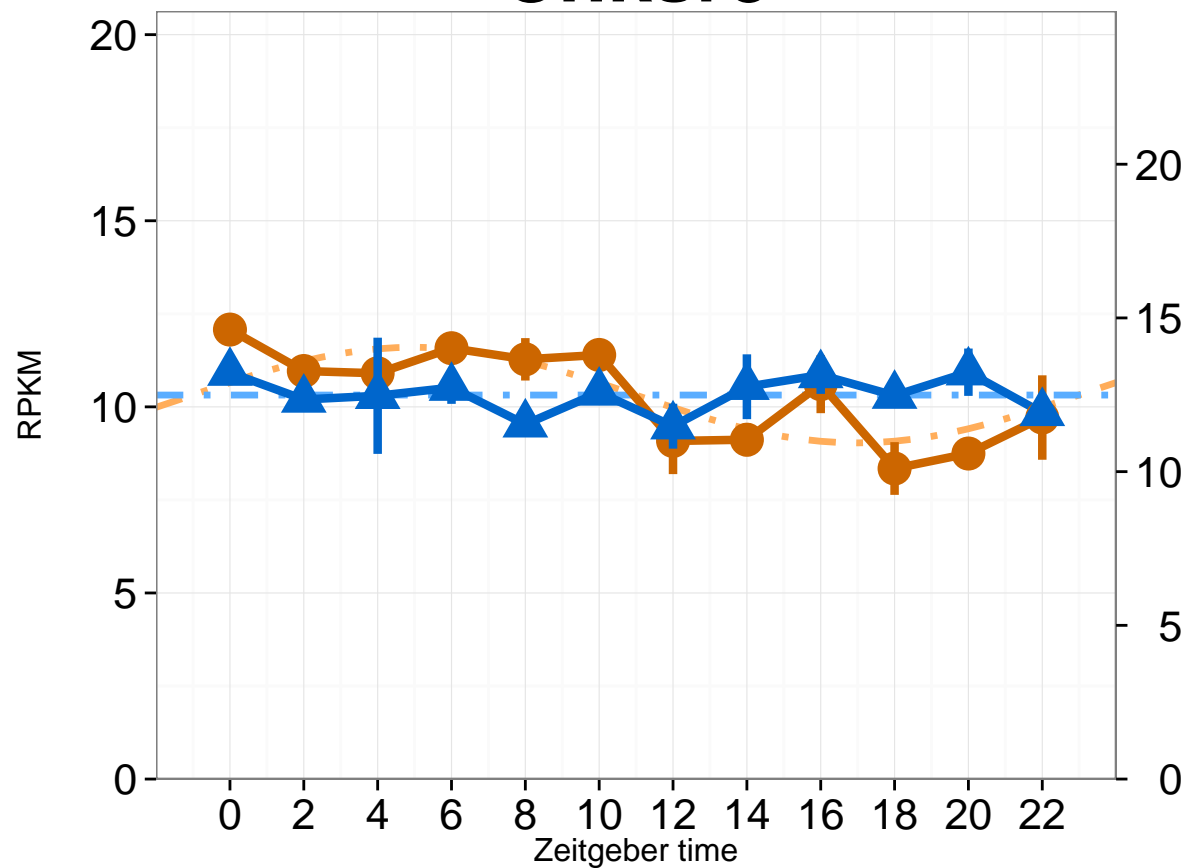

## Cnksr3

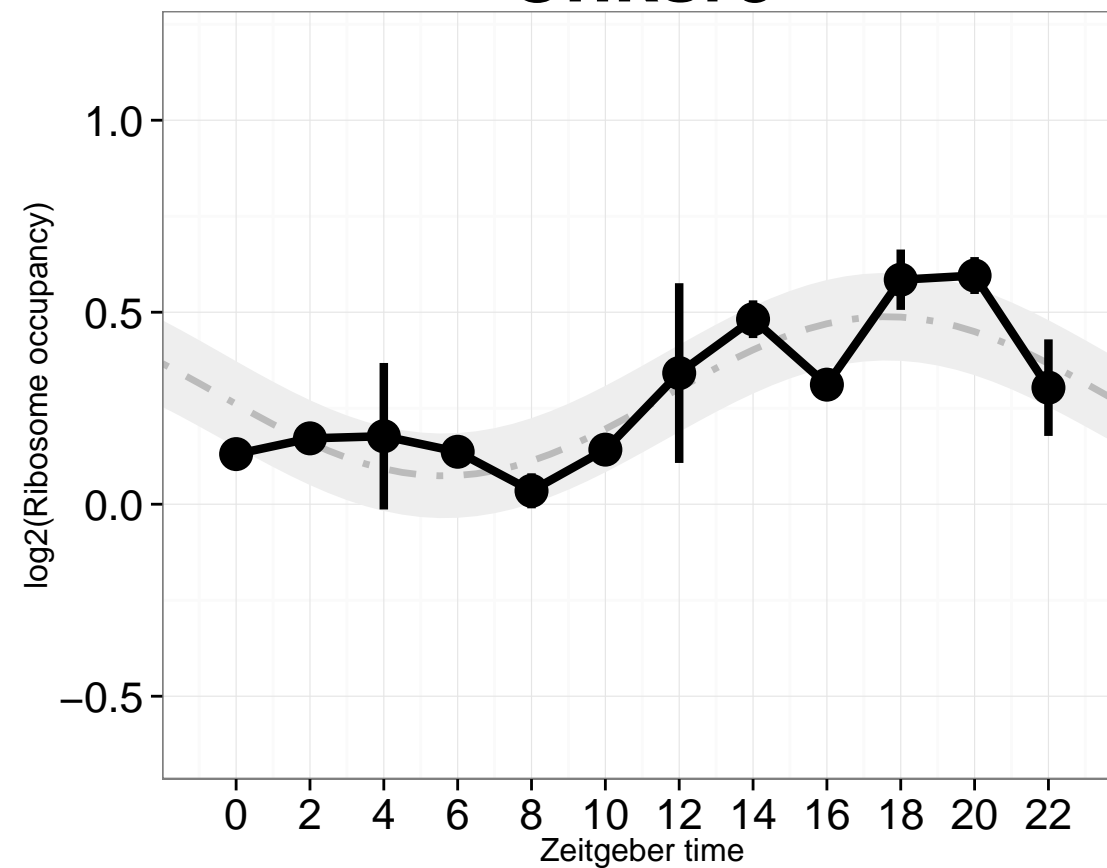

Supplement: Supplementary file 9397 [file 1]

## Gga2

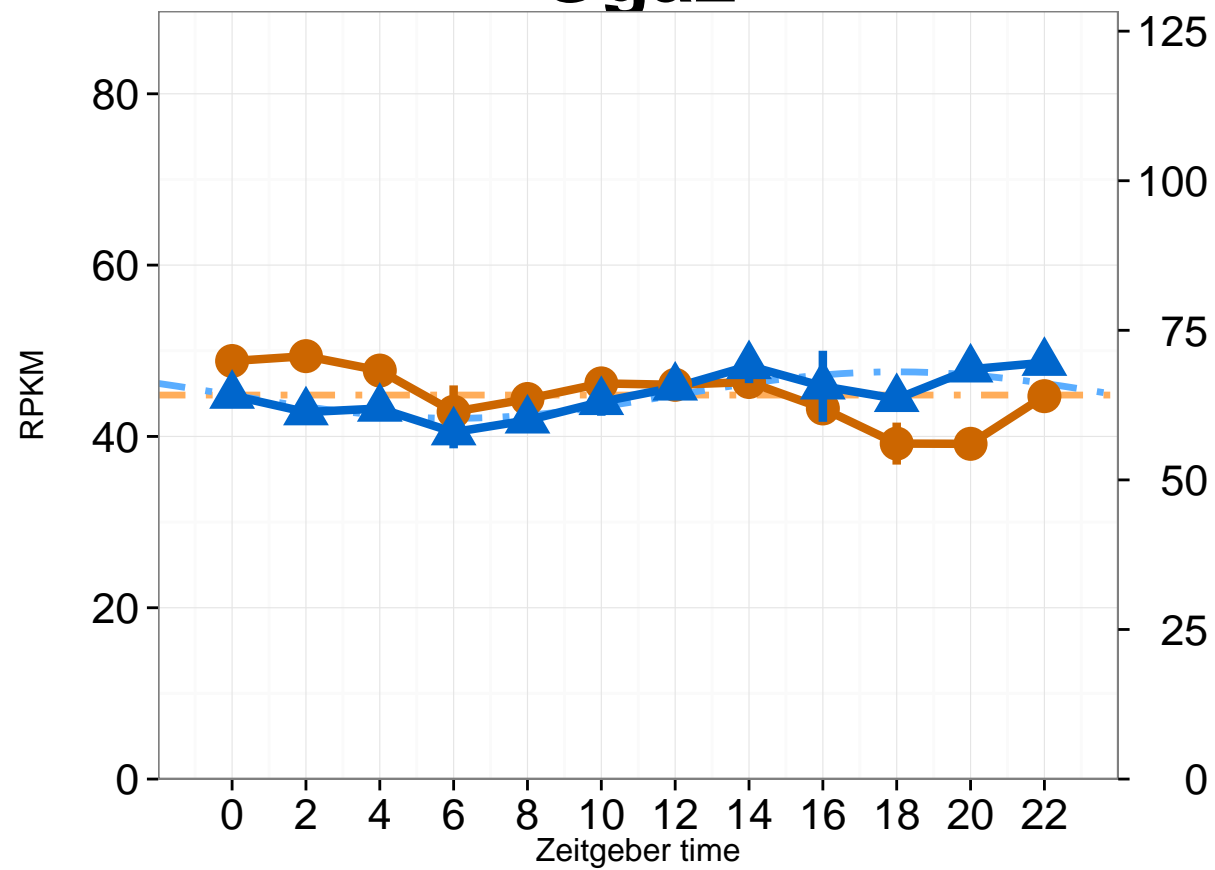

## Gga2

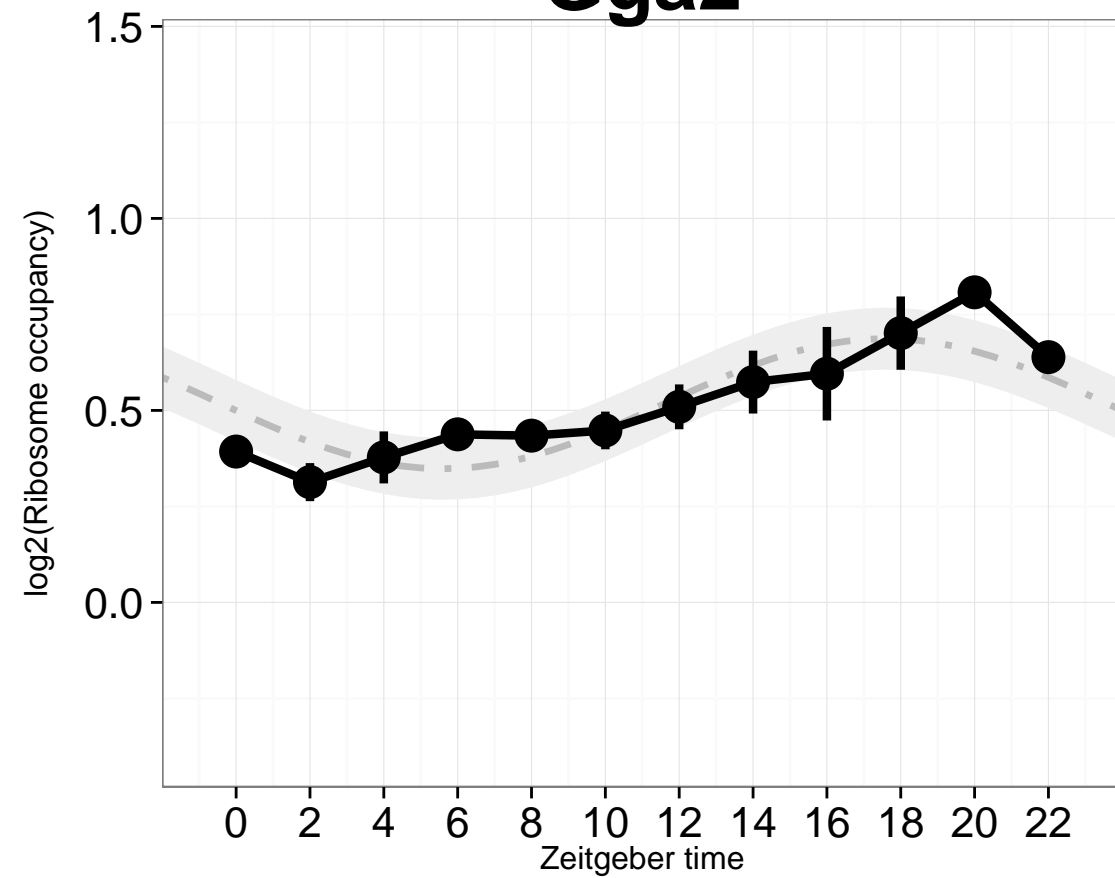

Supplement: Supplementary file 9398 [file 1]

## Usp14

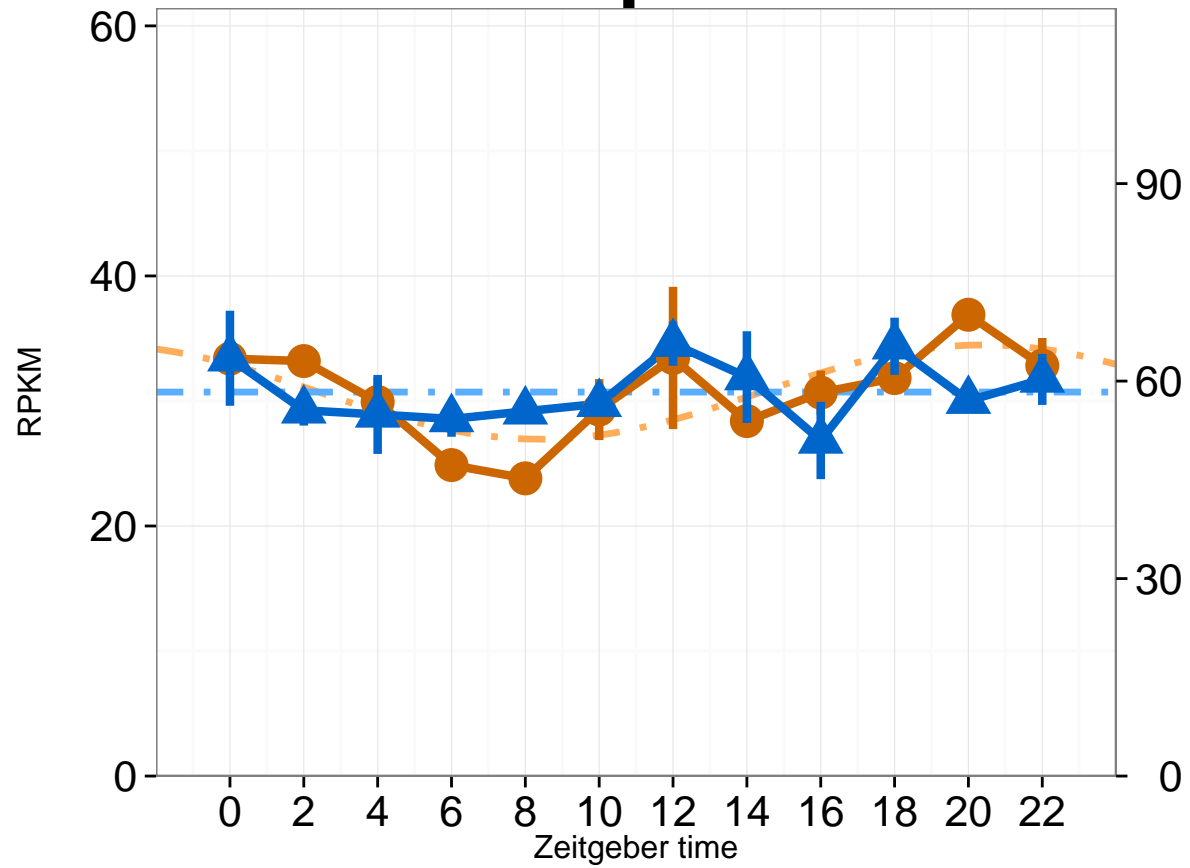

## Usp14

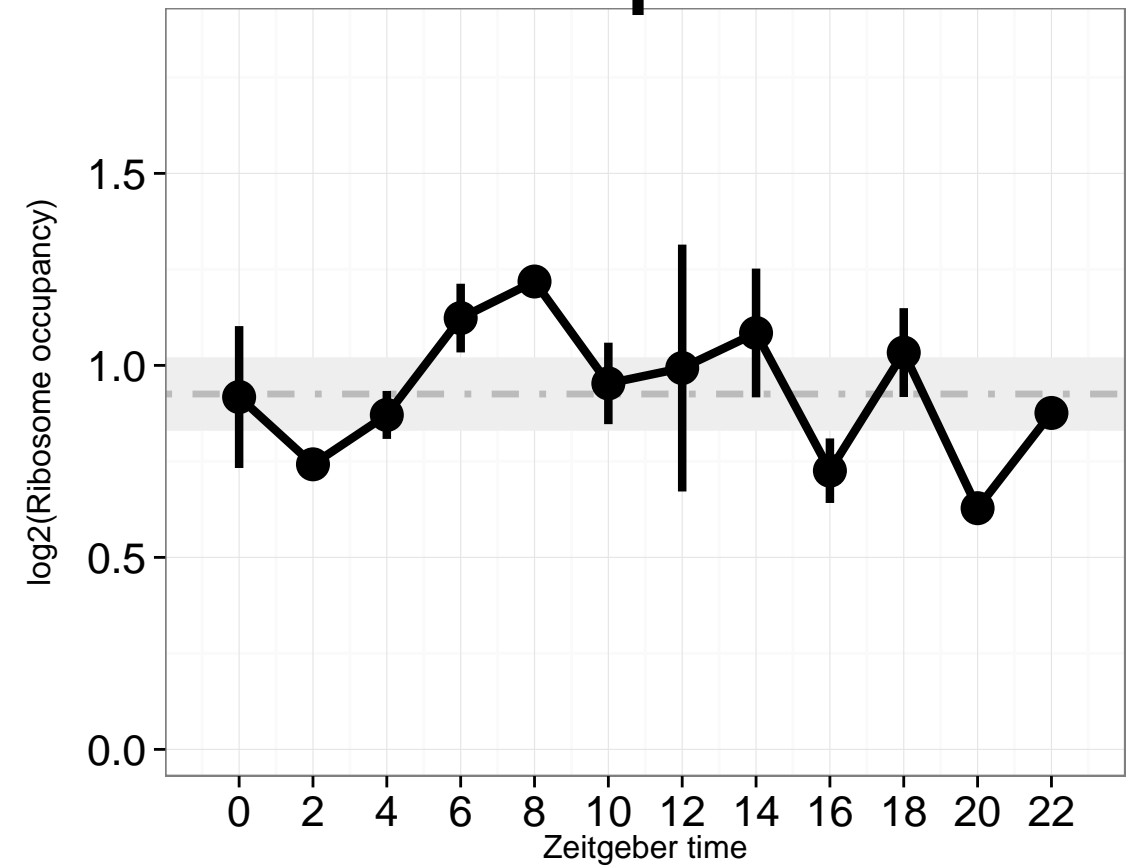

Supplement: Supplementary file 9399 [file 1]

## Klhl6

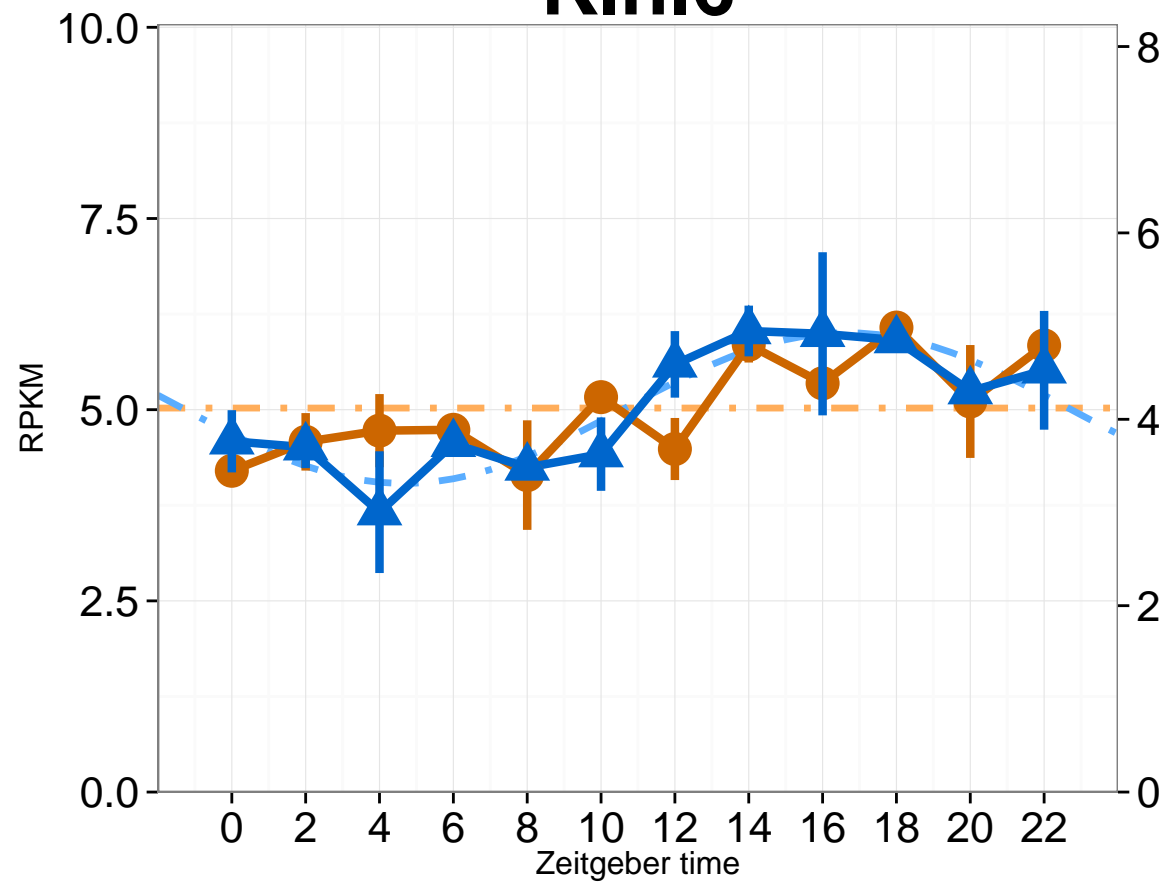

## Klhl6

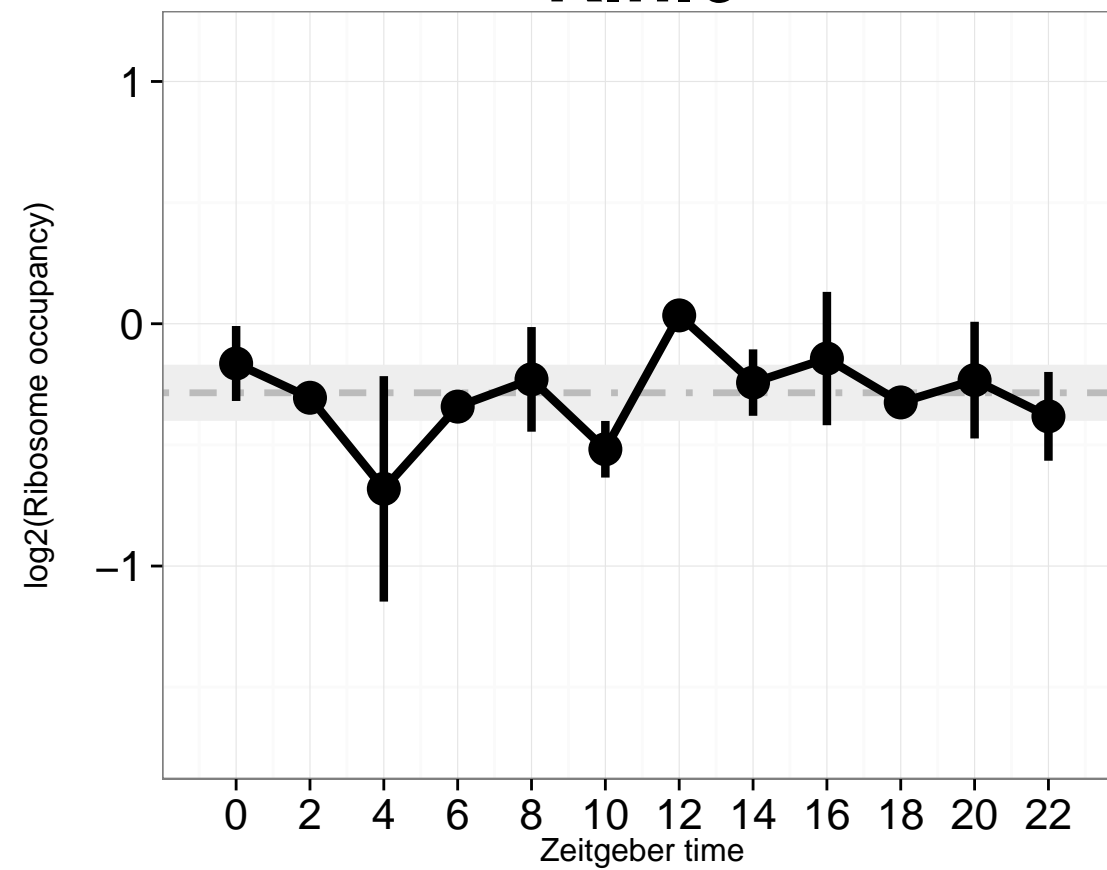

Supplement: Supplementary file 9400 [file 1]

## Cadm4

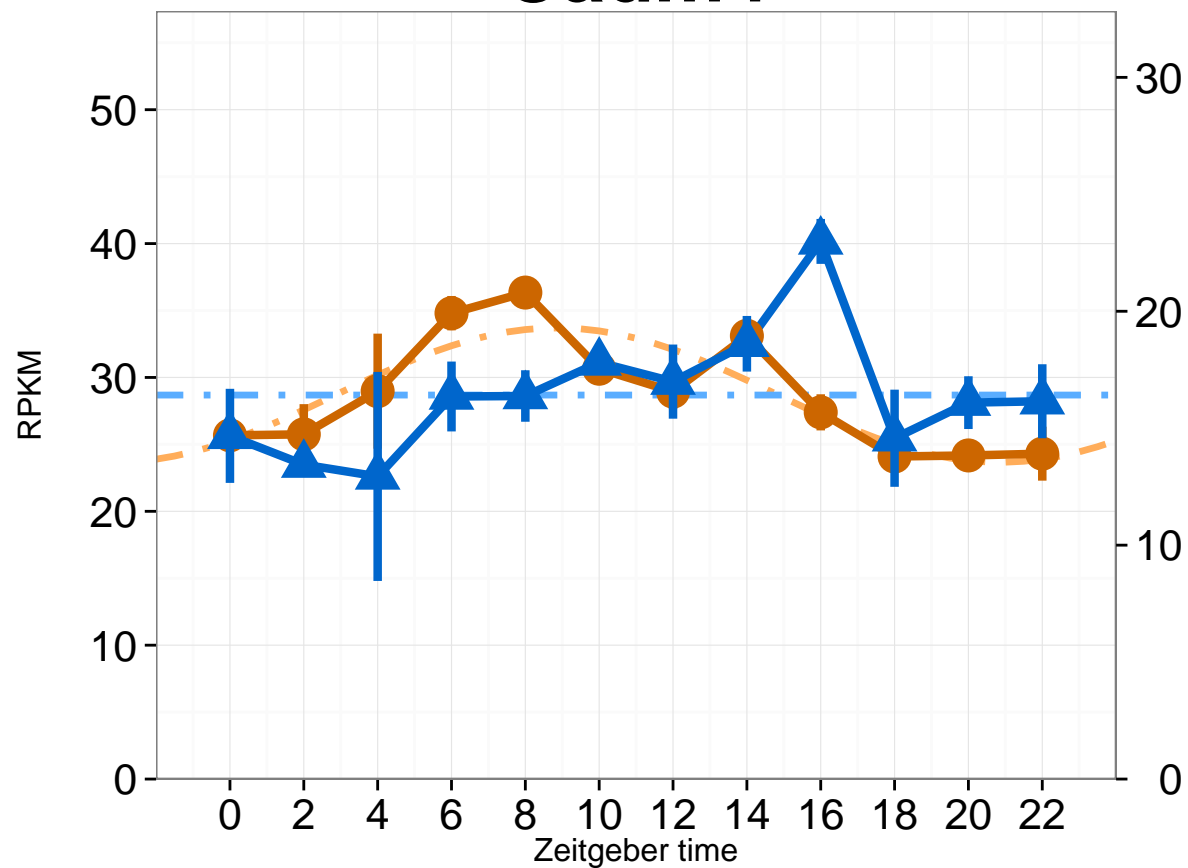

## Cadm4

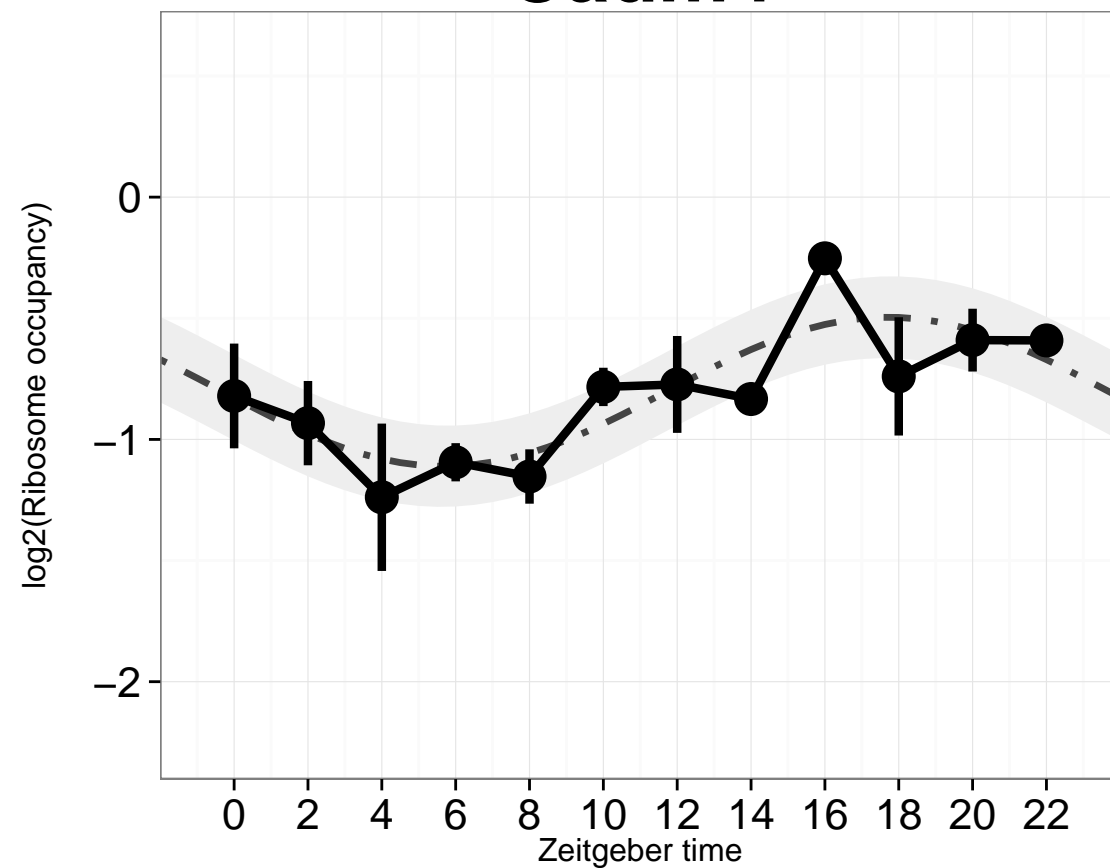

Supplement: Supplementary file 9401 [file 1]

# Sepp1

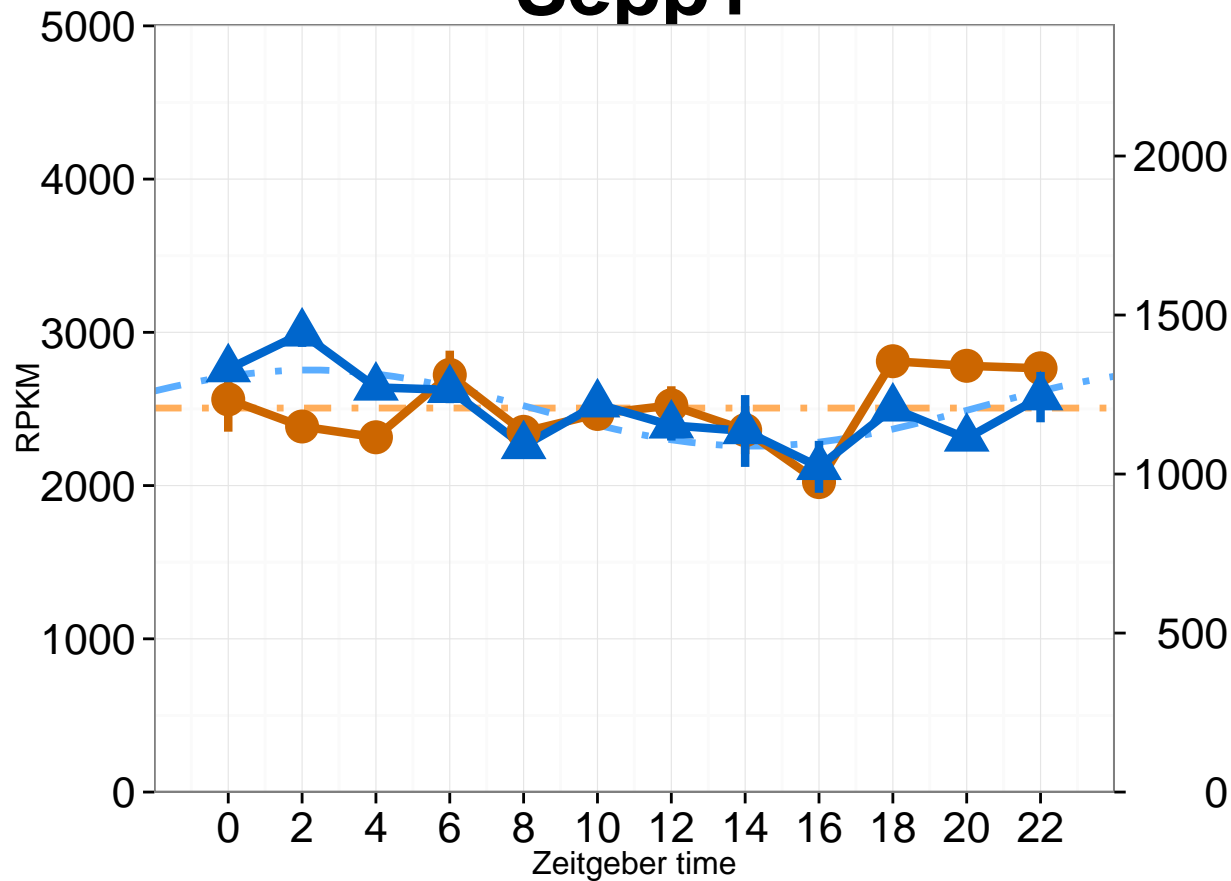

# Sepp1

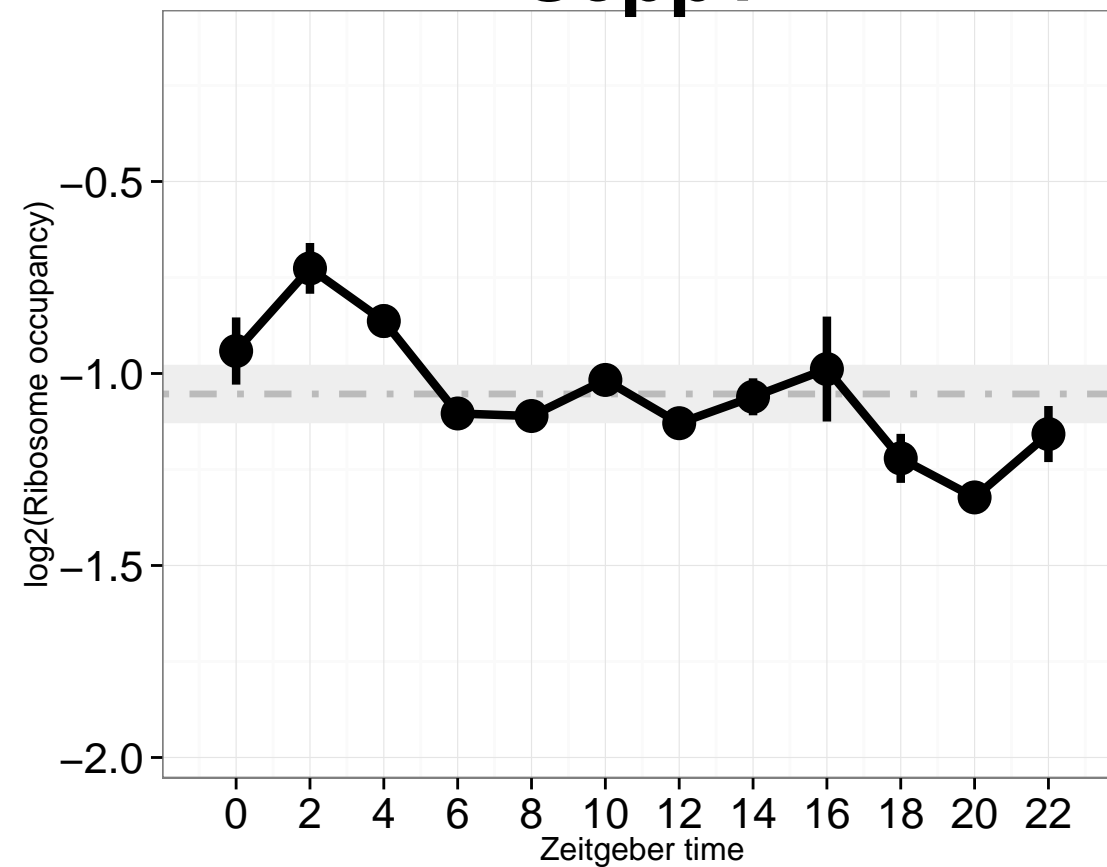

Supplement: Supplementary file 9402 [file 1]

## Spire1

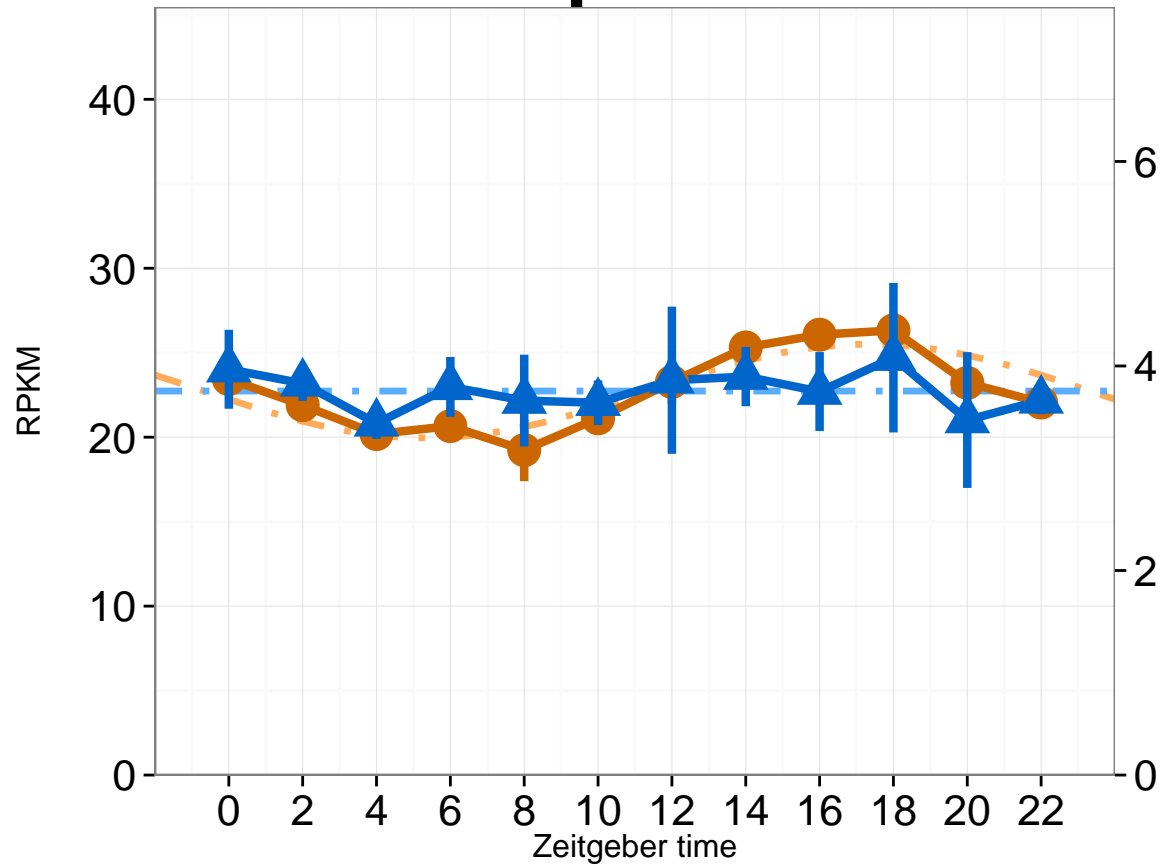

## Spire1

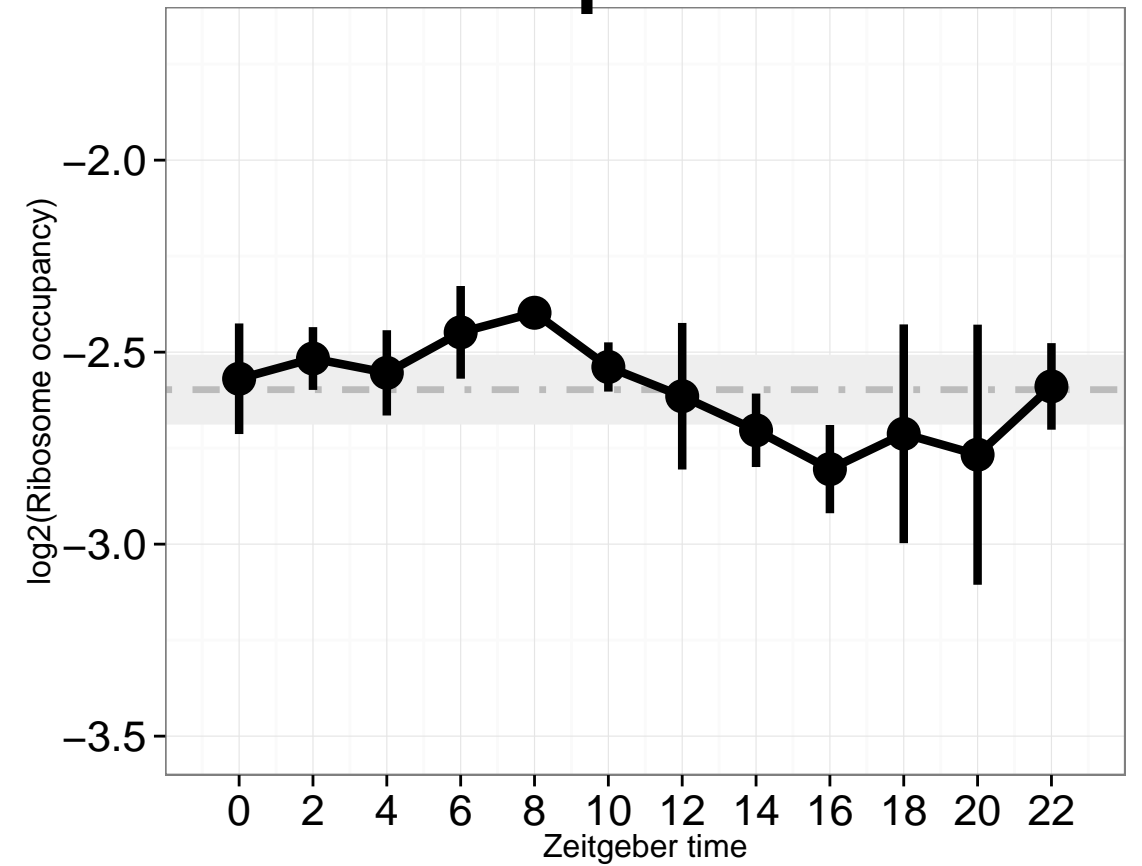

Supplement: Supplementary file 9403 [file 1]

# Tatdn1

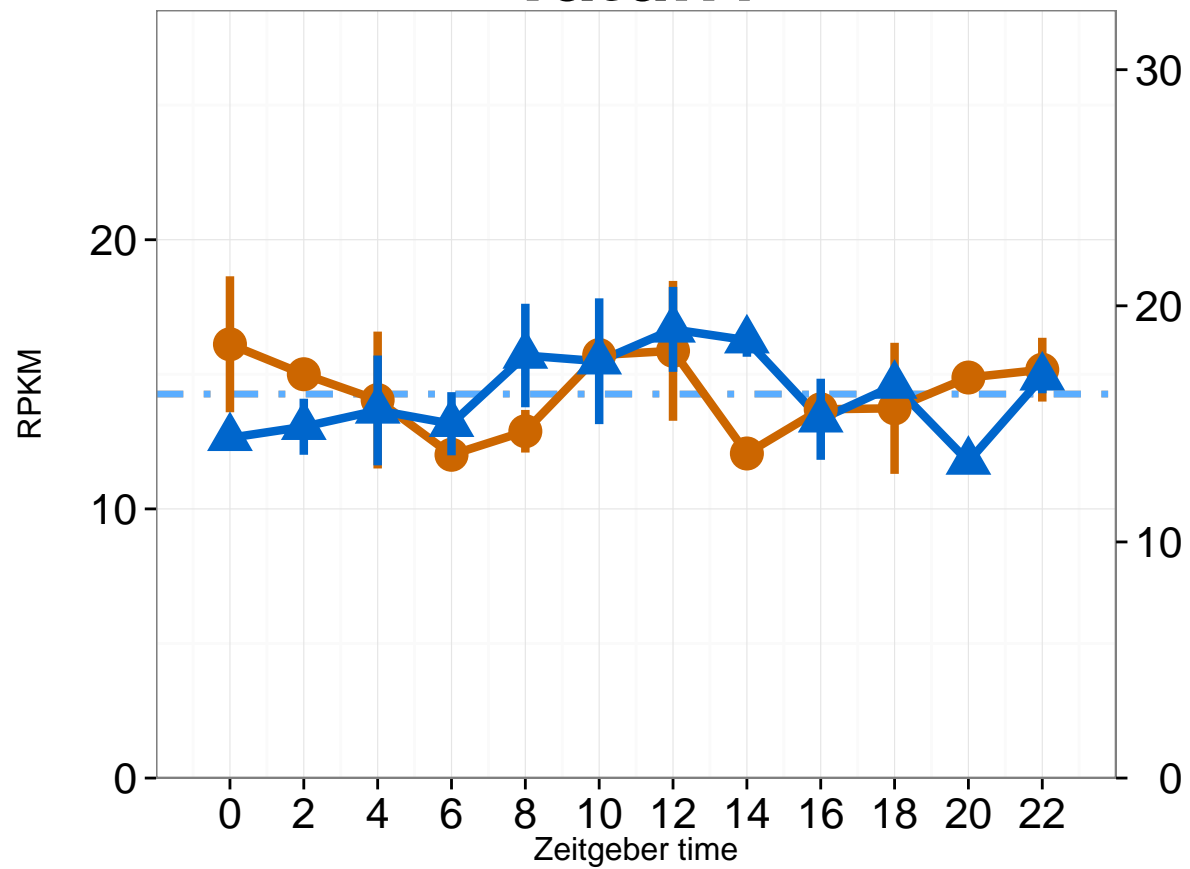

# Tatdn1

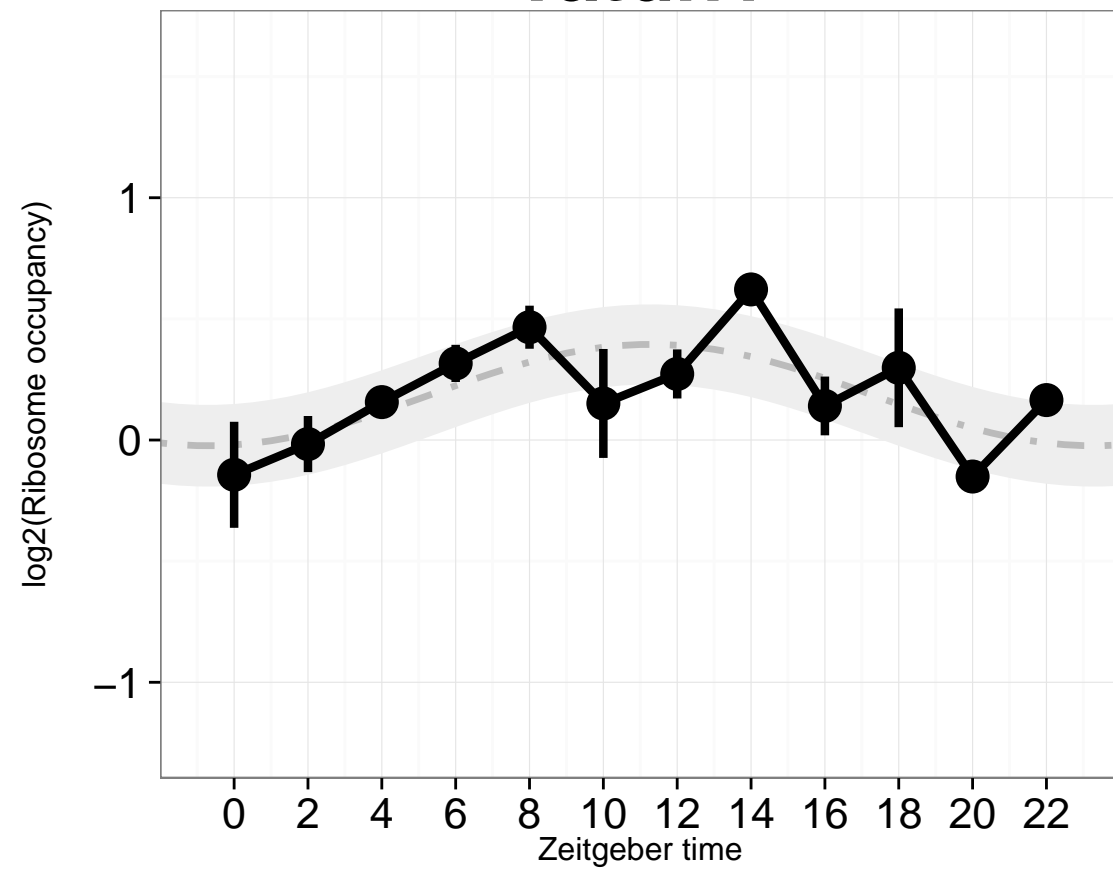

Supplement: Supplementary file 9404 [file 1]

# Trnt1

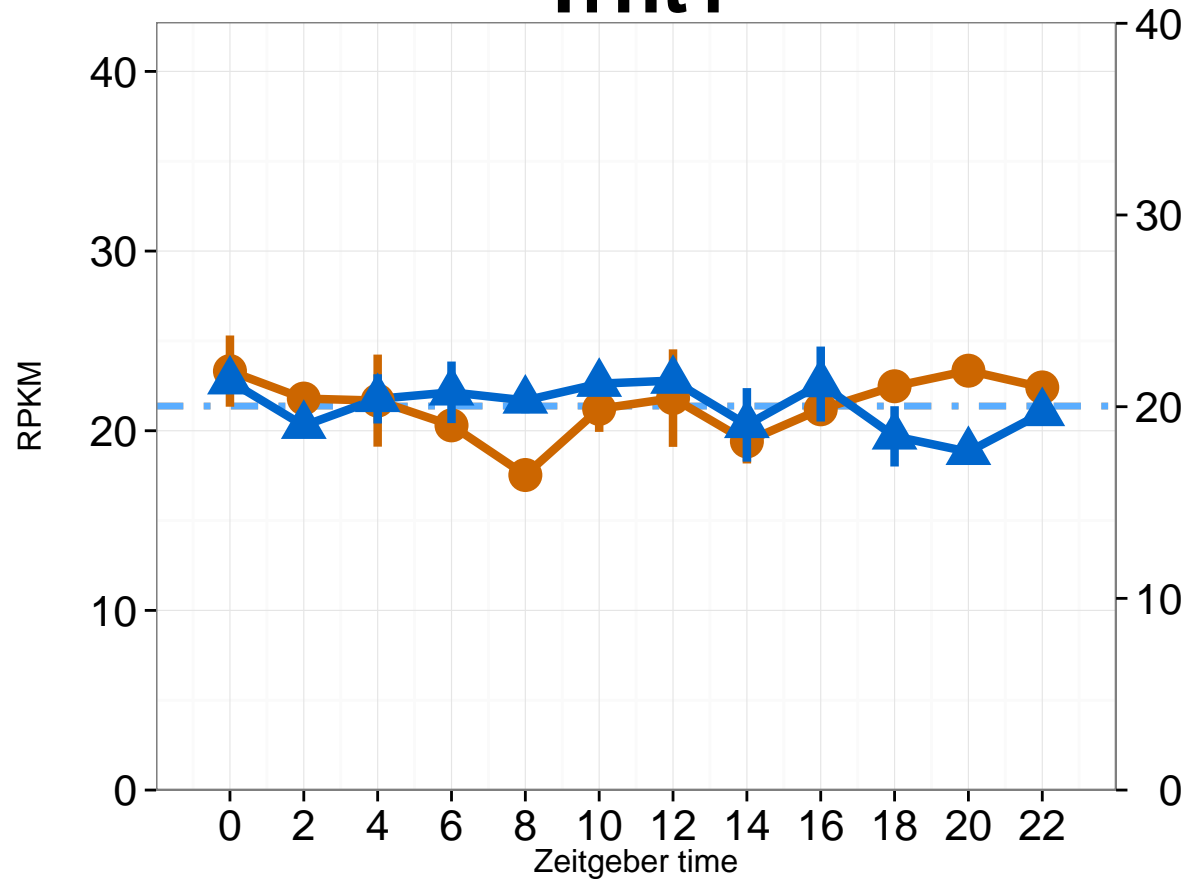

# Trnt1

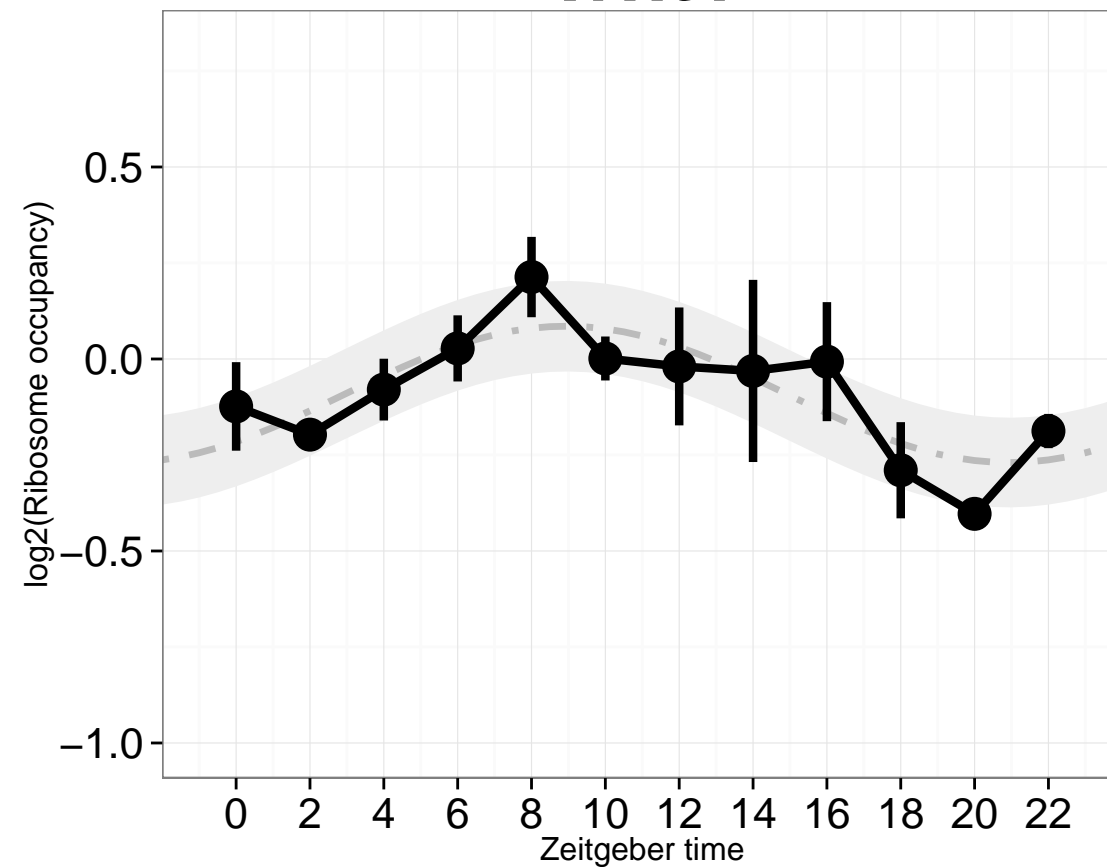

Supplement: Supplementary file 9405 [file 1]

## Ncstn

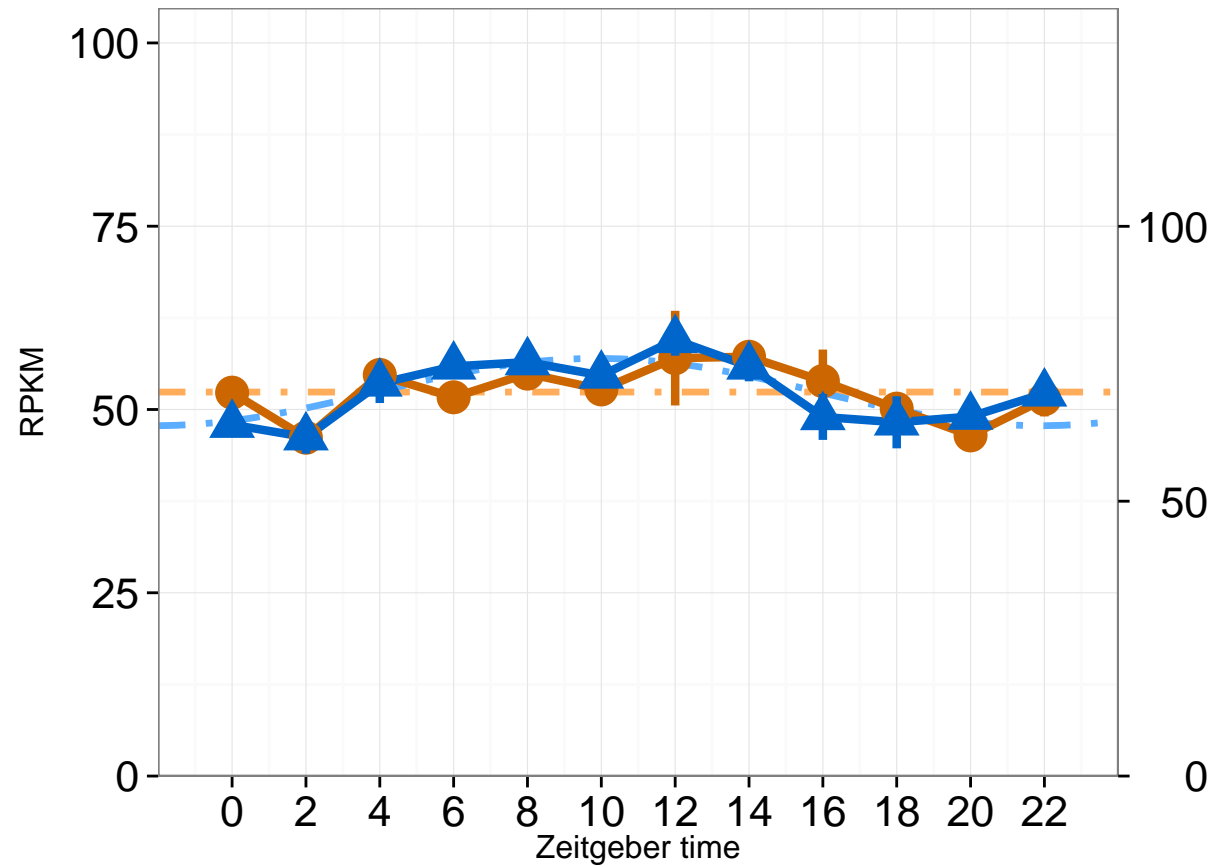

## Ncstn

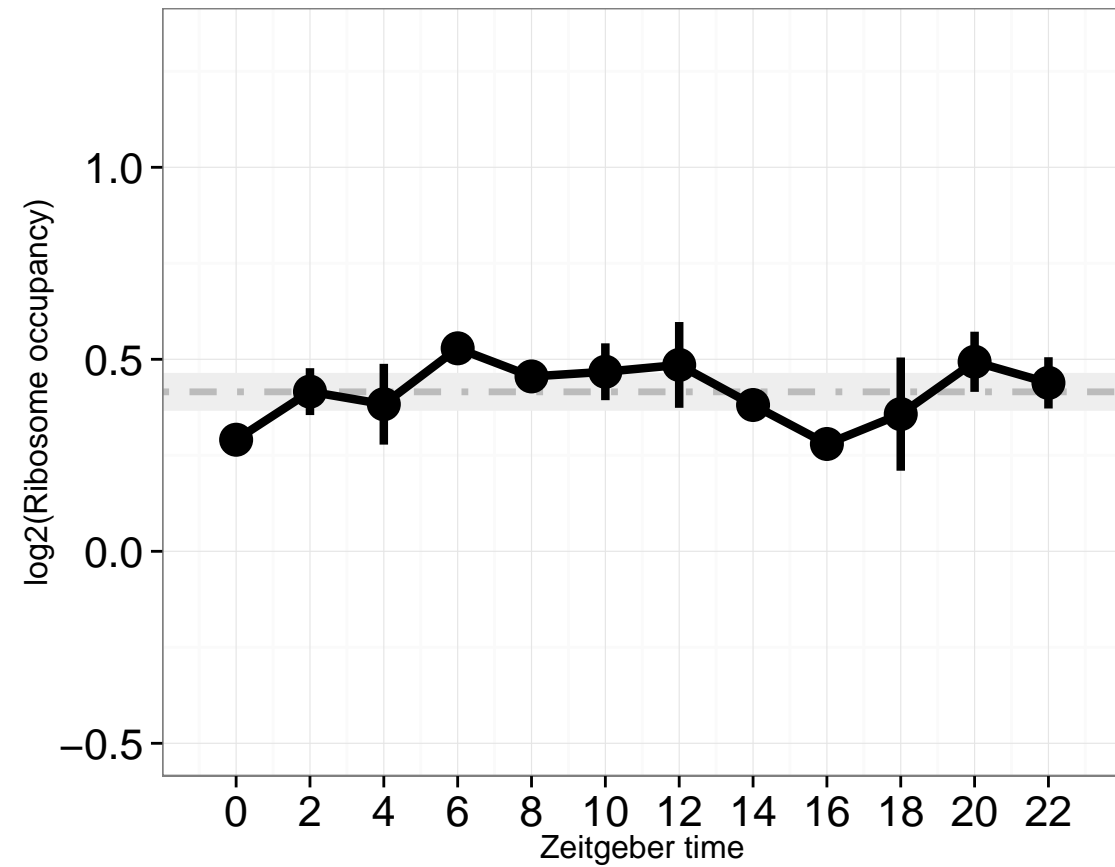

Supplement: Supplementary file 9406 [file 1]

## Tlk1

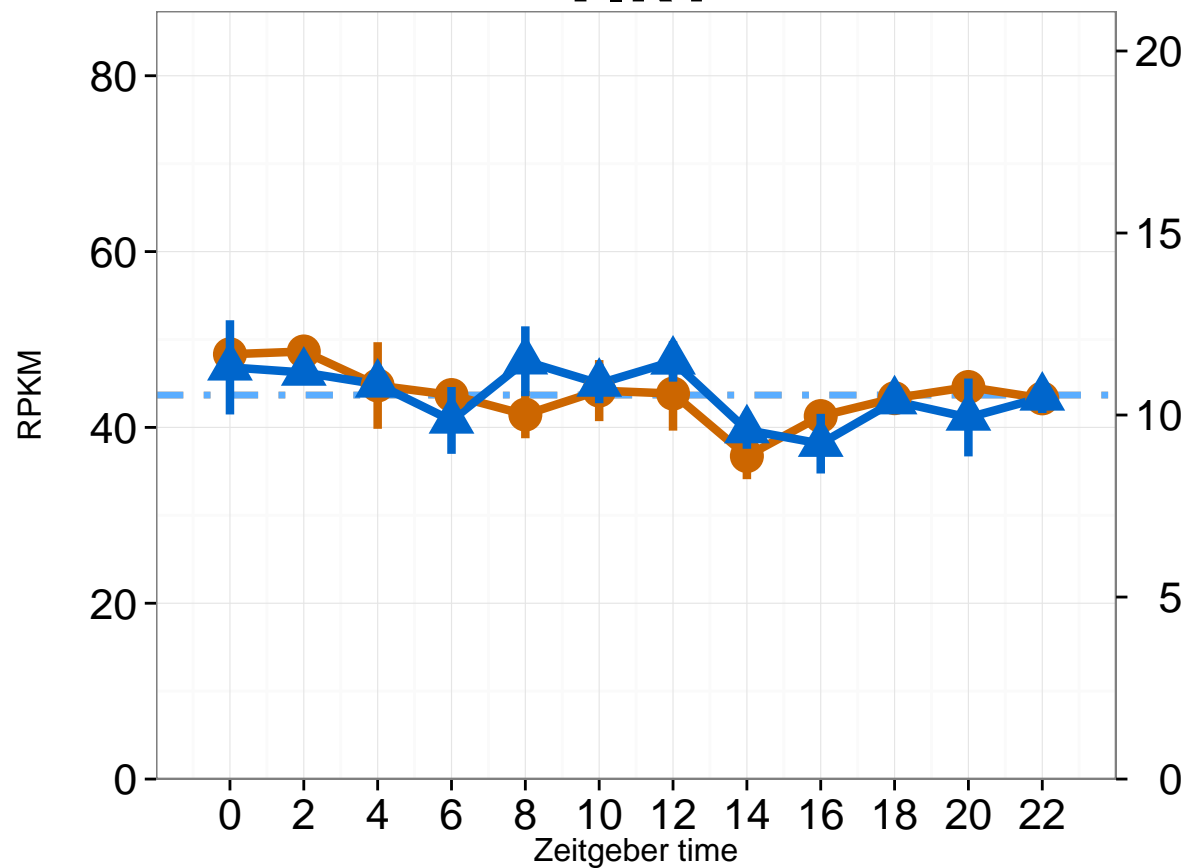

## Tlk1

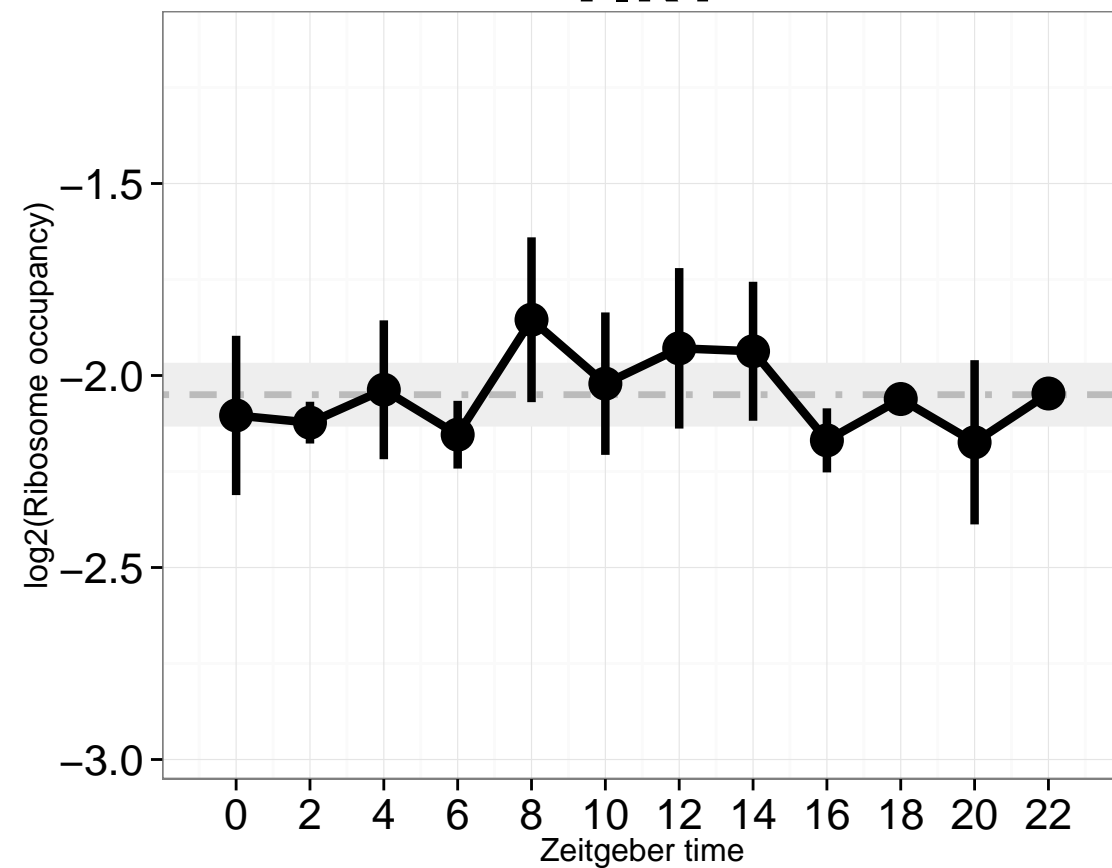

Supplement: Supplementary file 9407 [file 1]

## Casp7

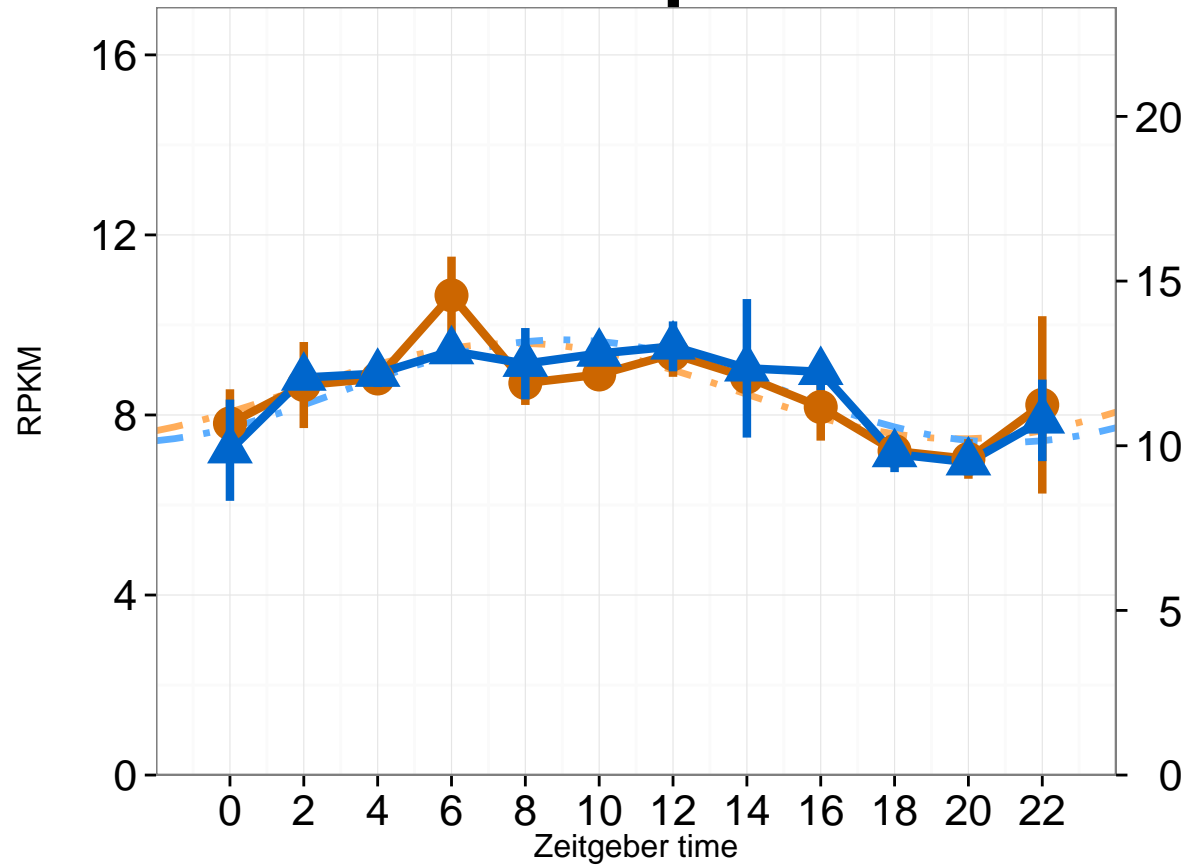

## Casp7

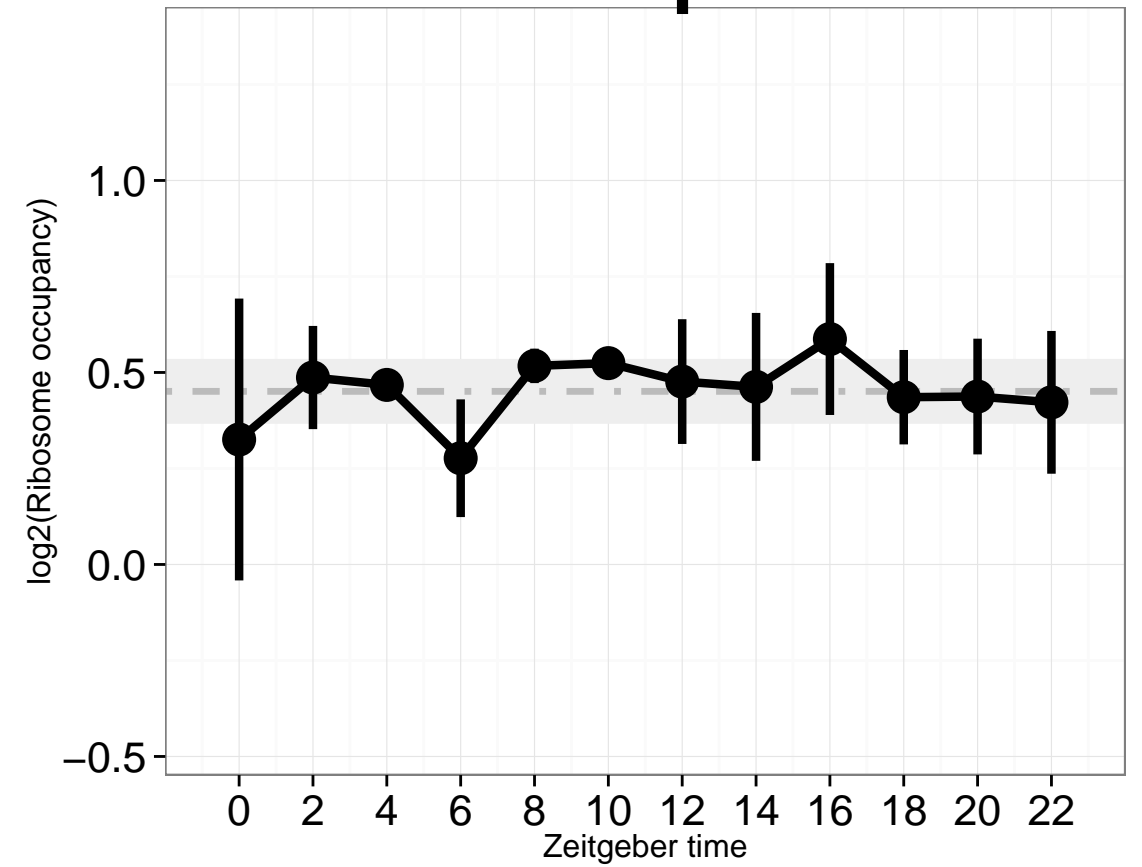

Supplement: Supplementary file 9408 [file 1]

## Gm9964

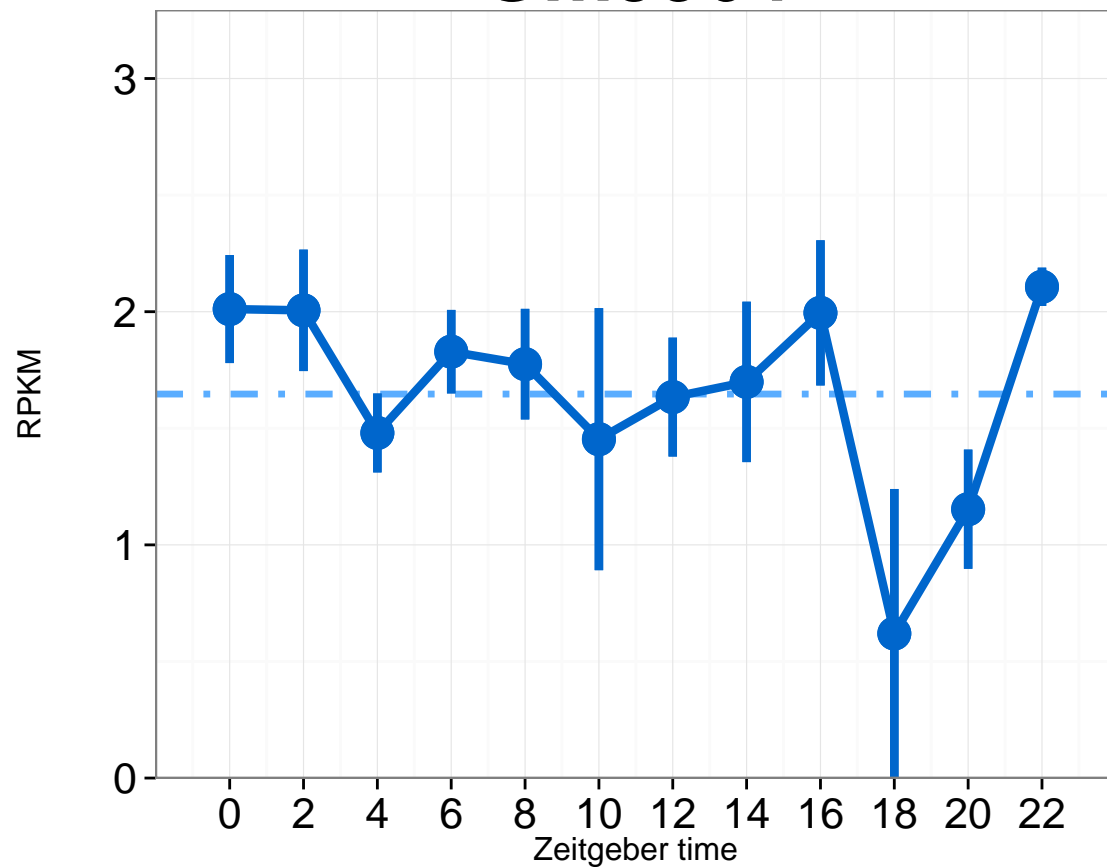

## Gm9964 log2(Ribosome occupanc

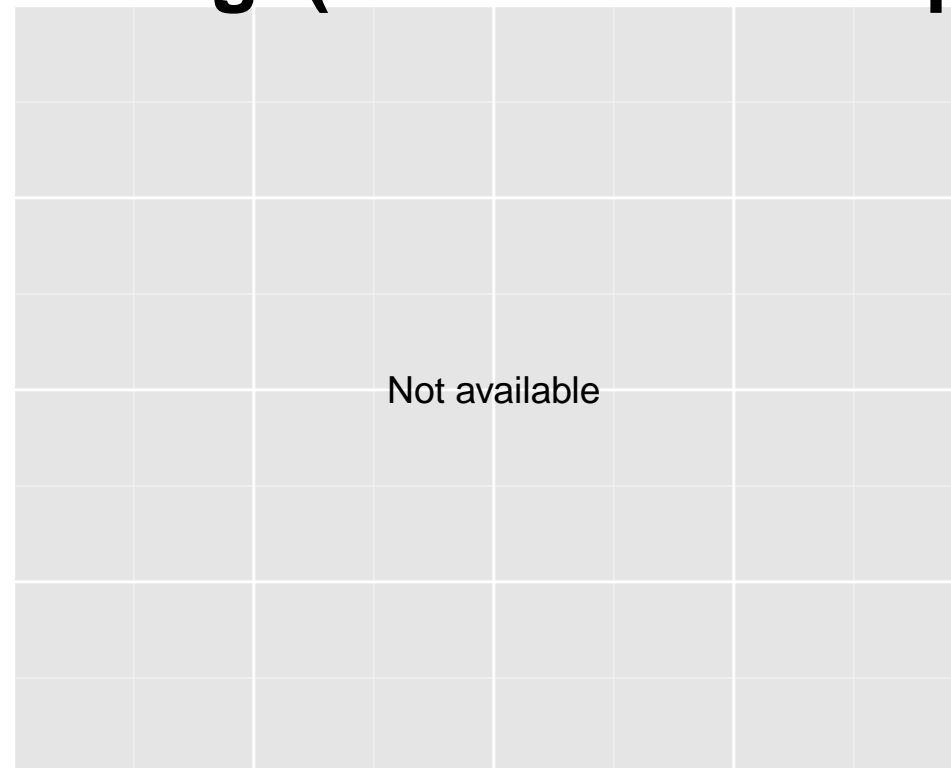

Supplement: Supplementary file 9409 [file 1]

# Lrg1

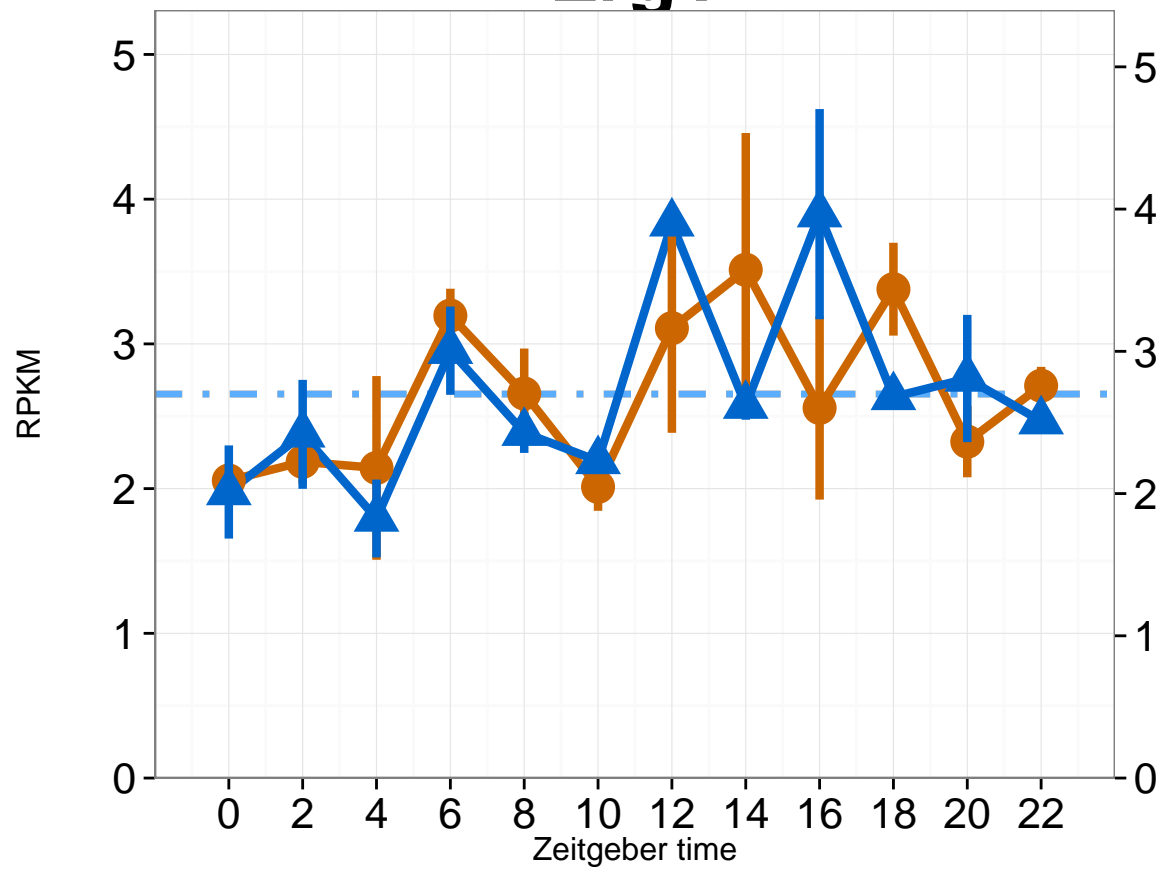

# Lrg1

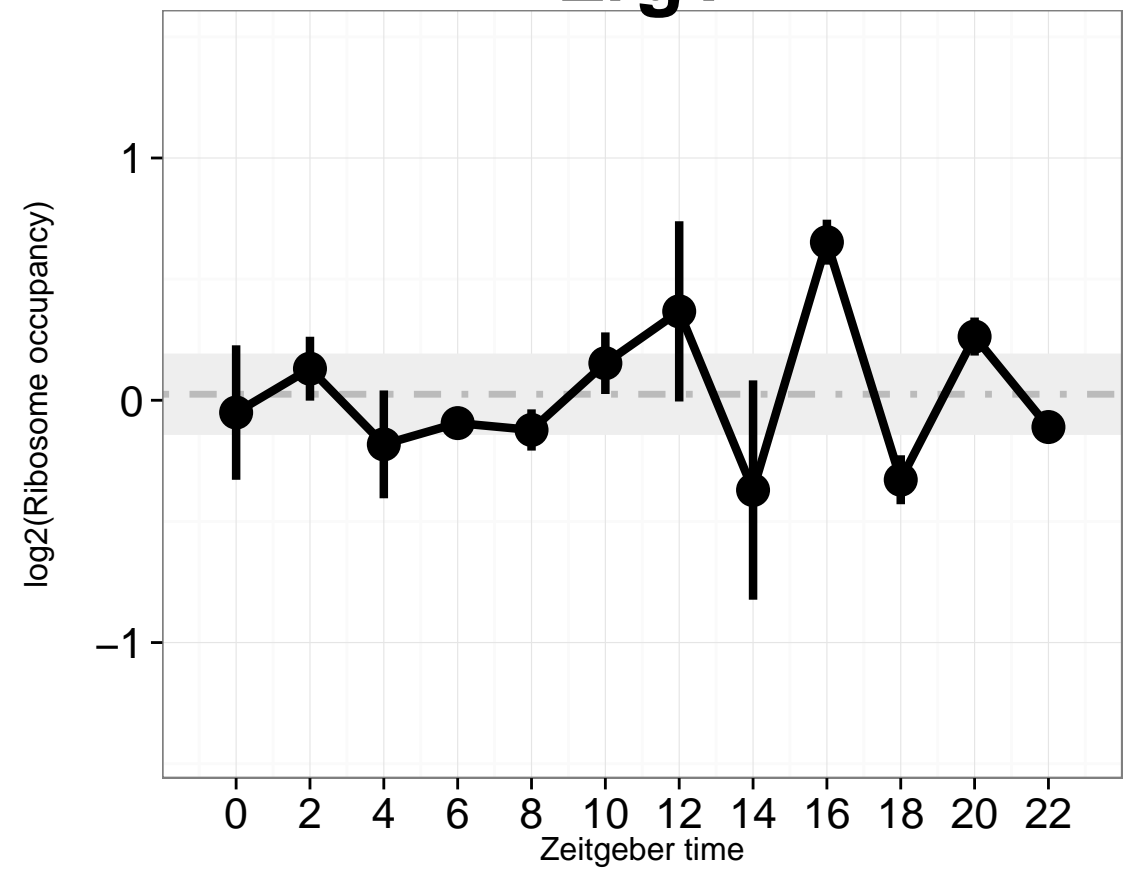

Supplement: Supplementary file 9410 [file 1]

# Flywch1

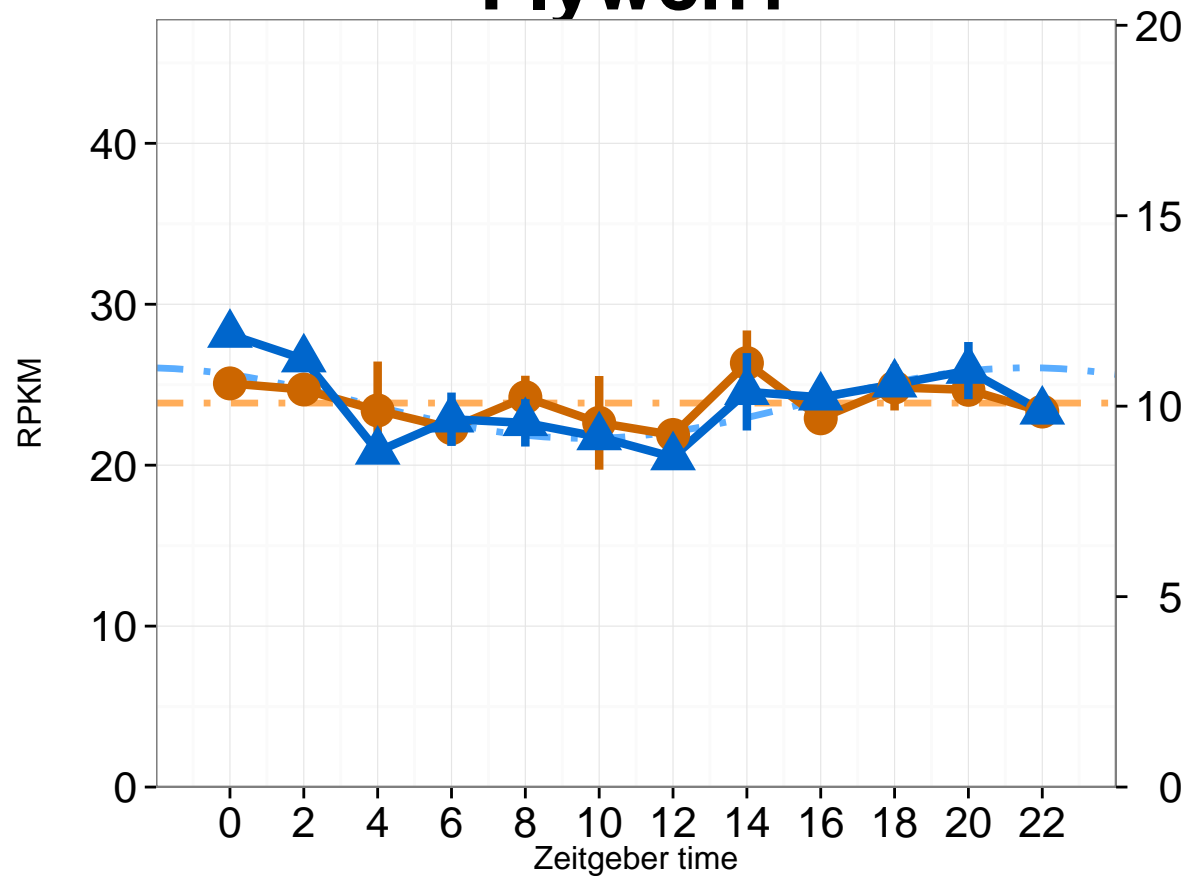

# Flywch1

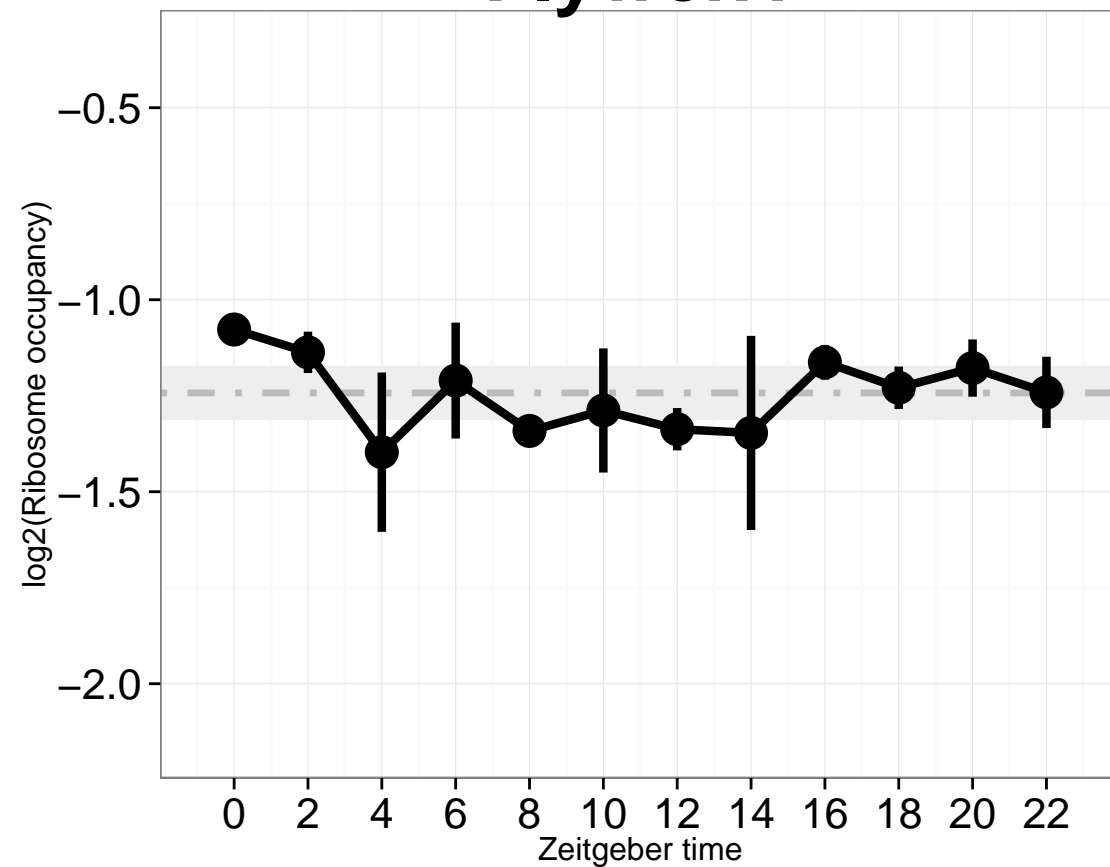

Supplement: Supplementary file 9411 [file 1]

## Fgf11

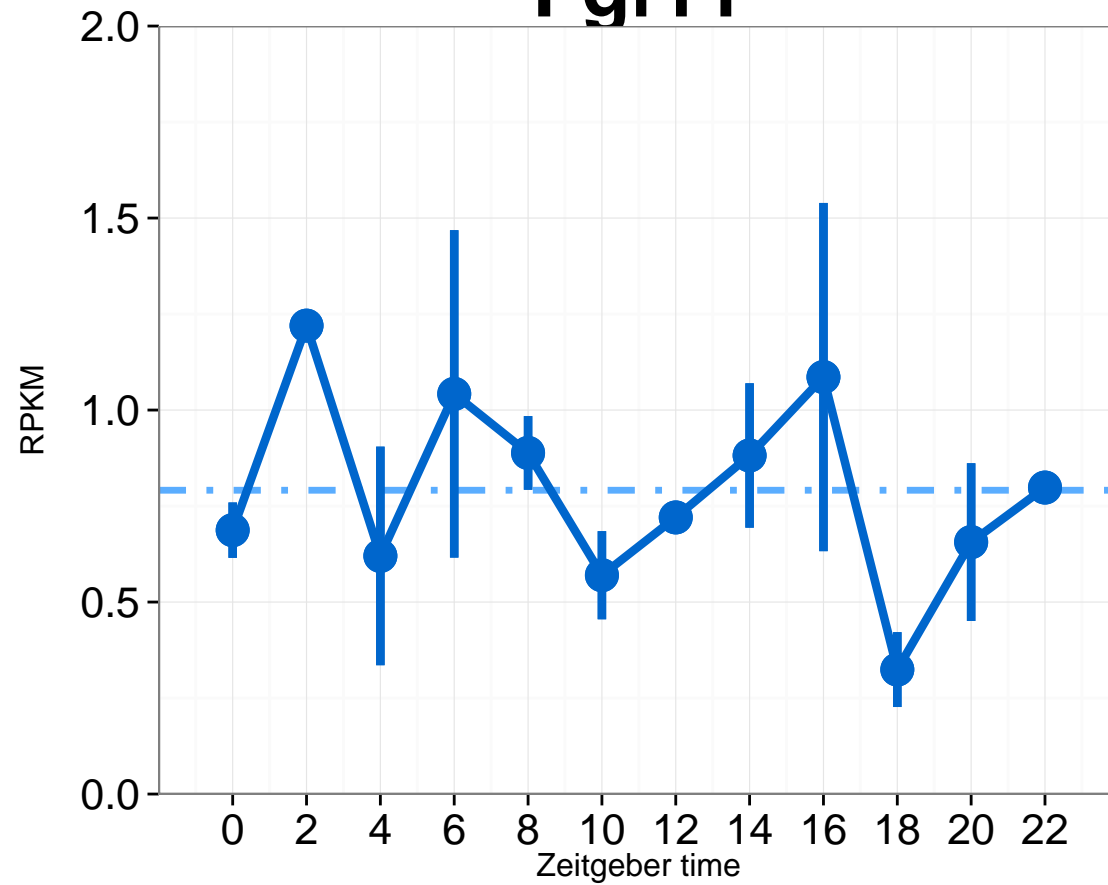

## Fgf11 log2(Ribosome occupancy)

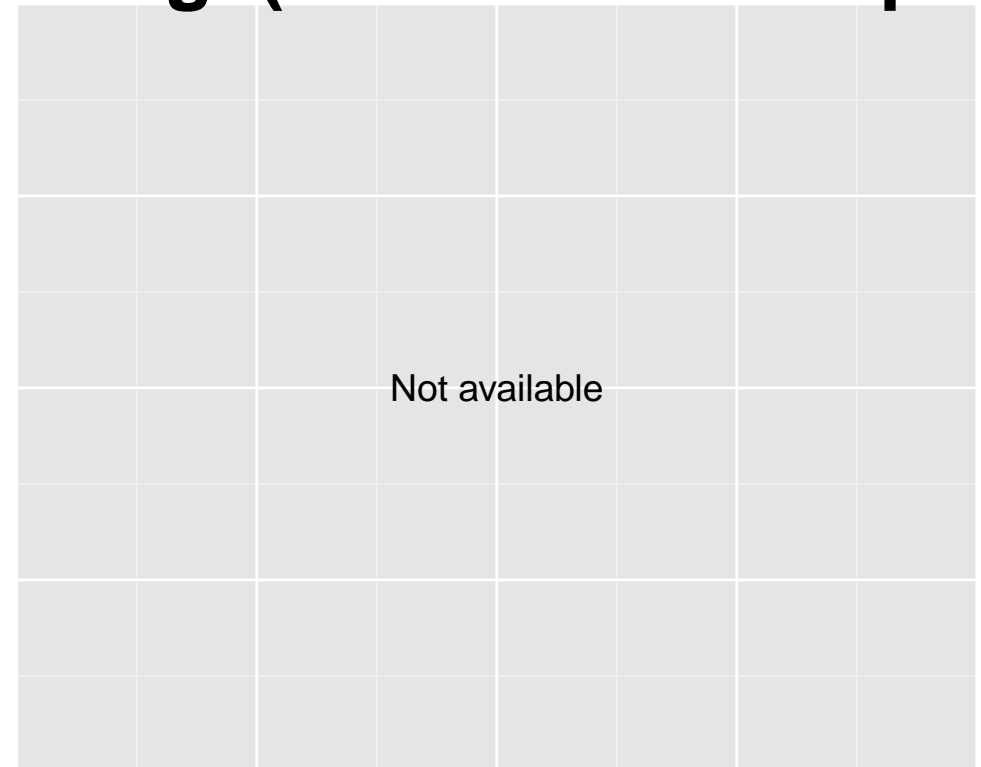

Supplement: Supplementary file 9412 [file 1]

# Foxq1

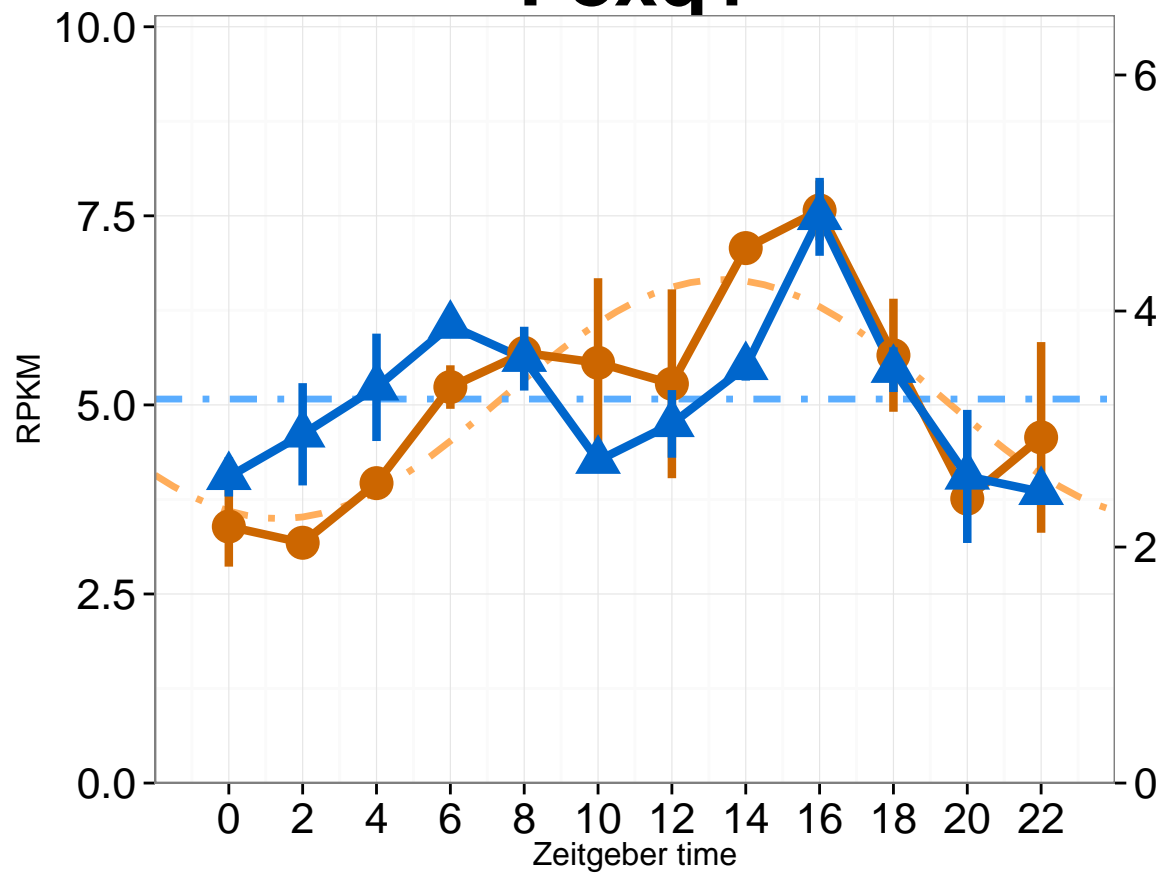

# Foxq1

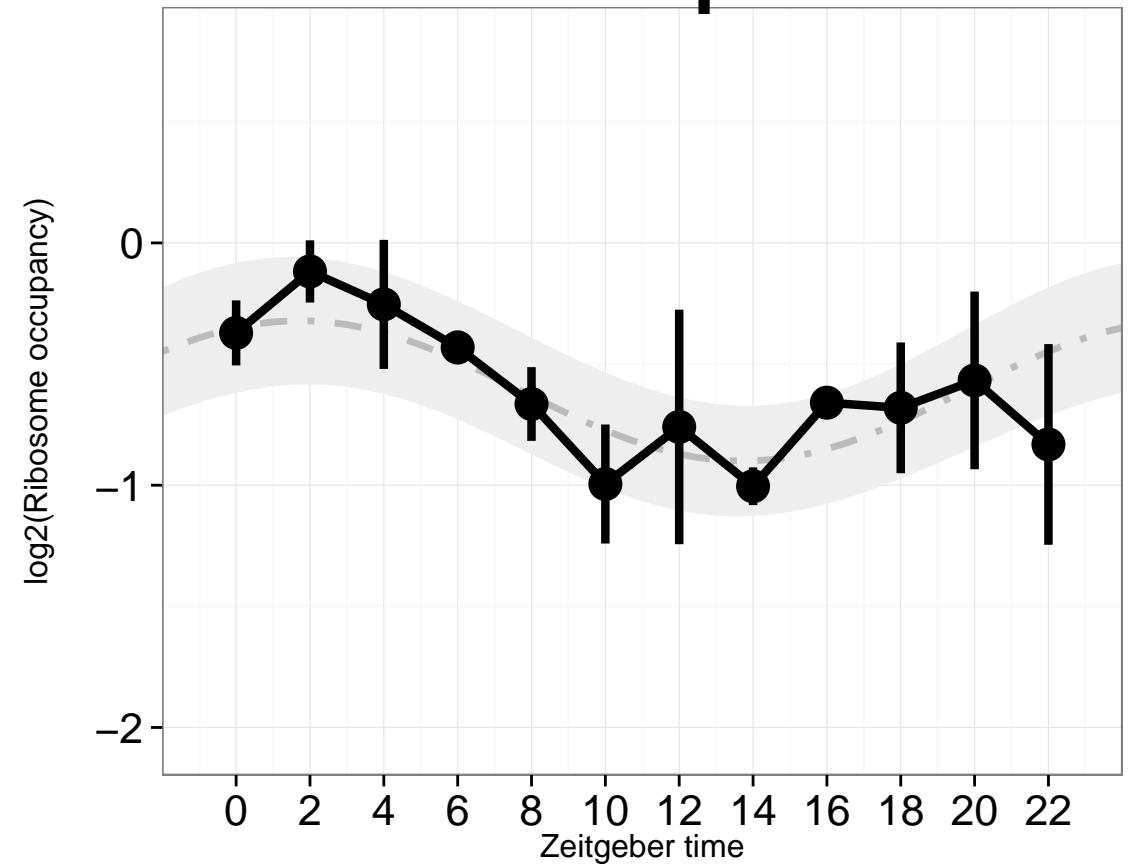

Supplement: Supplementary file 9413 [file 1]

## Arf3

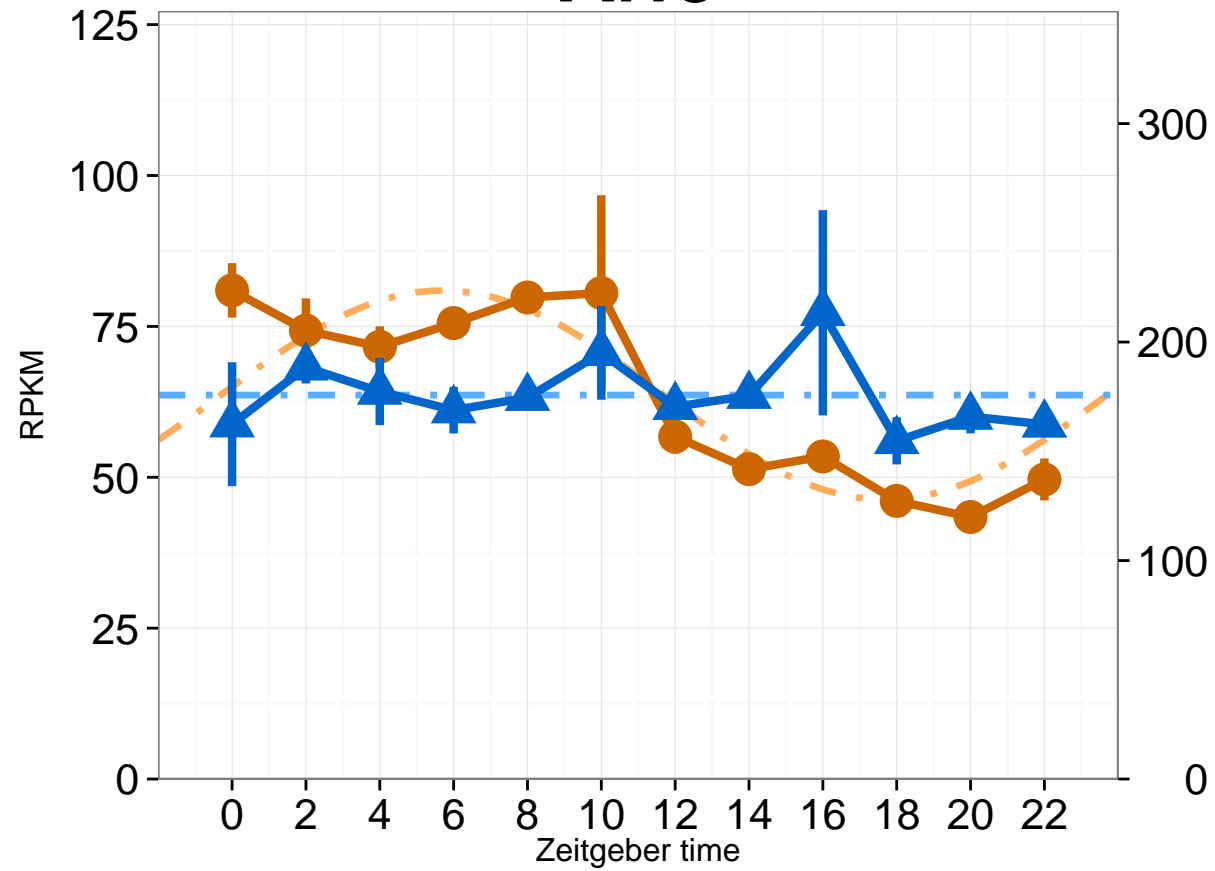

## Arf3

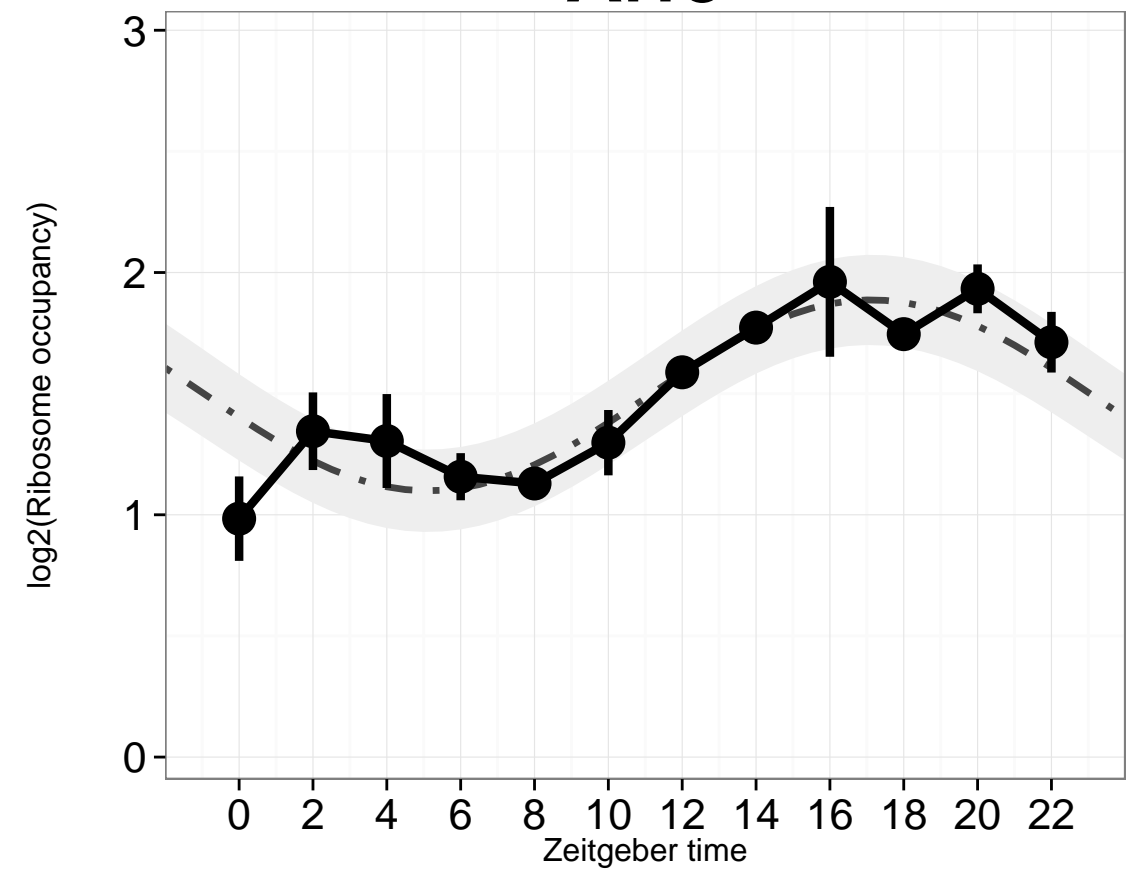

Supplement: Supplementary file 9414 [file 1]

# Sult1c2

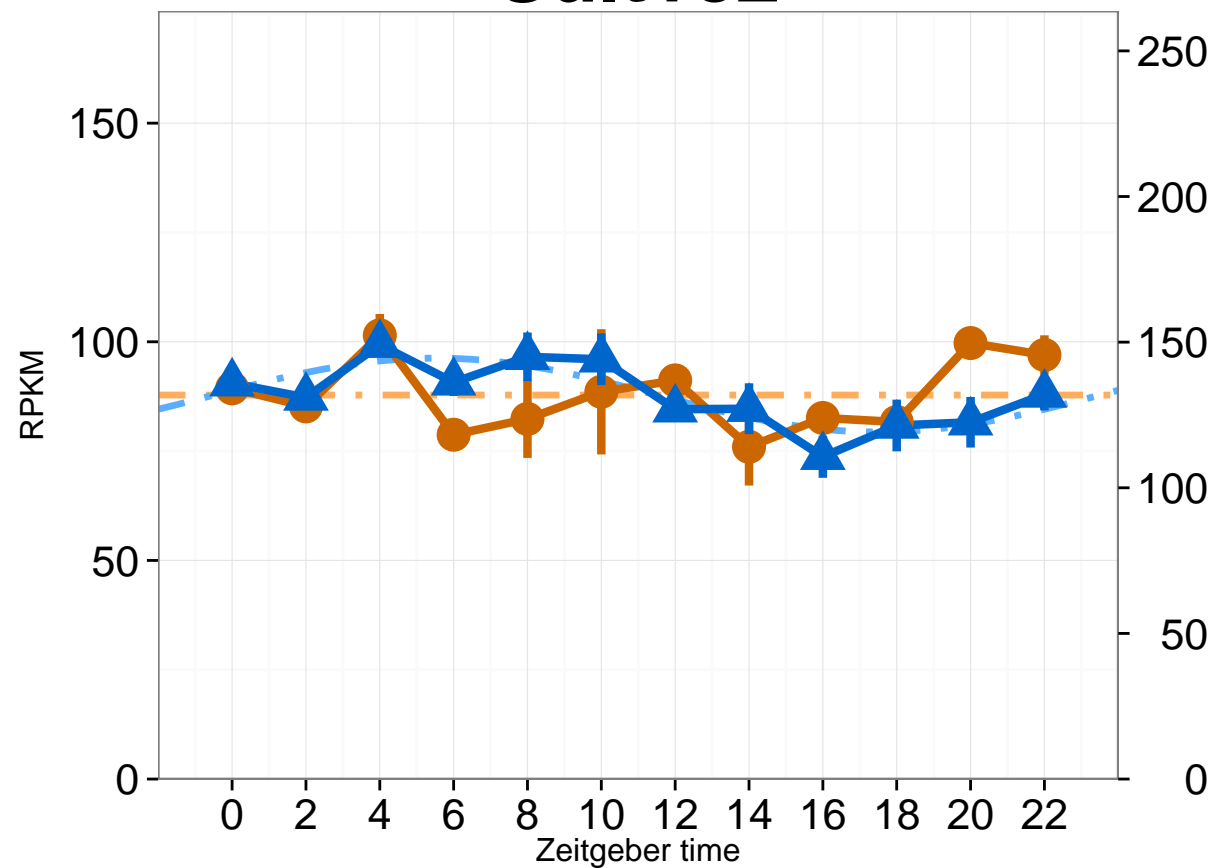

# Sult1c2

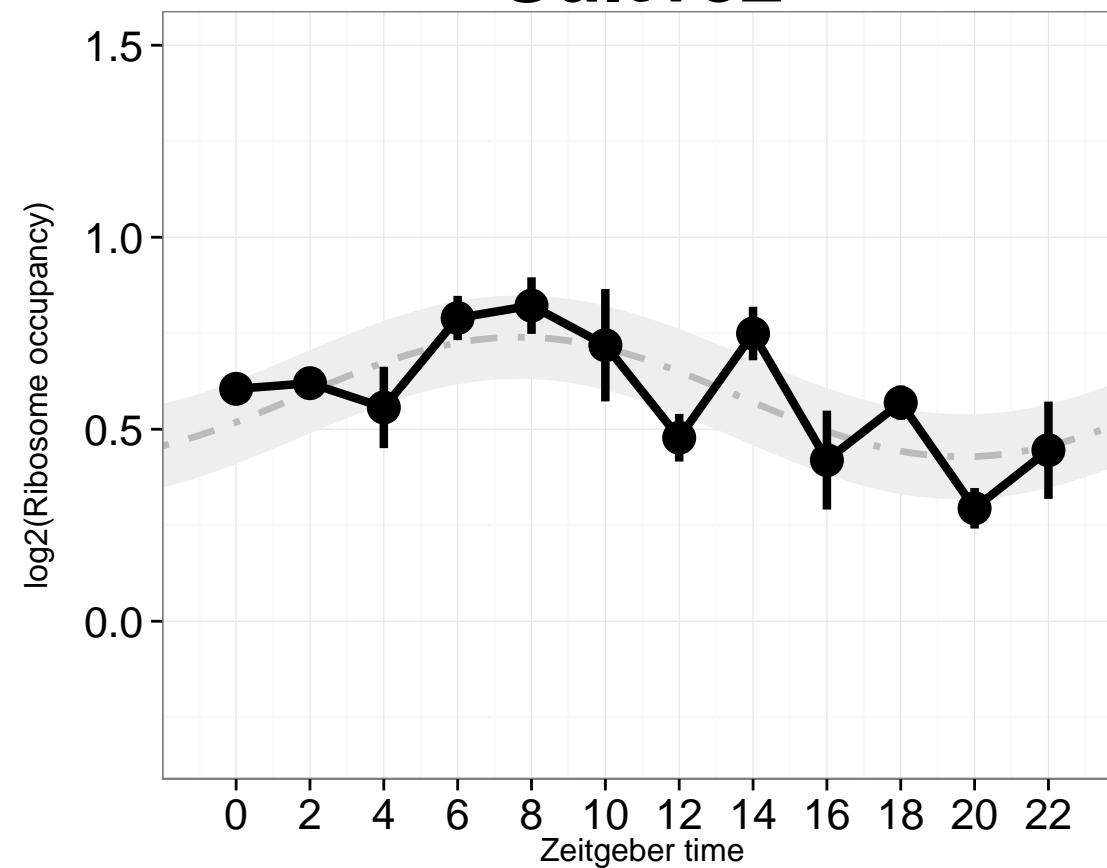

Supplement: Supplementary file 9415 [file 1]

# Ndufs3

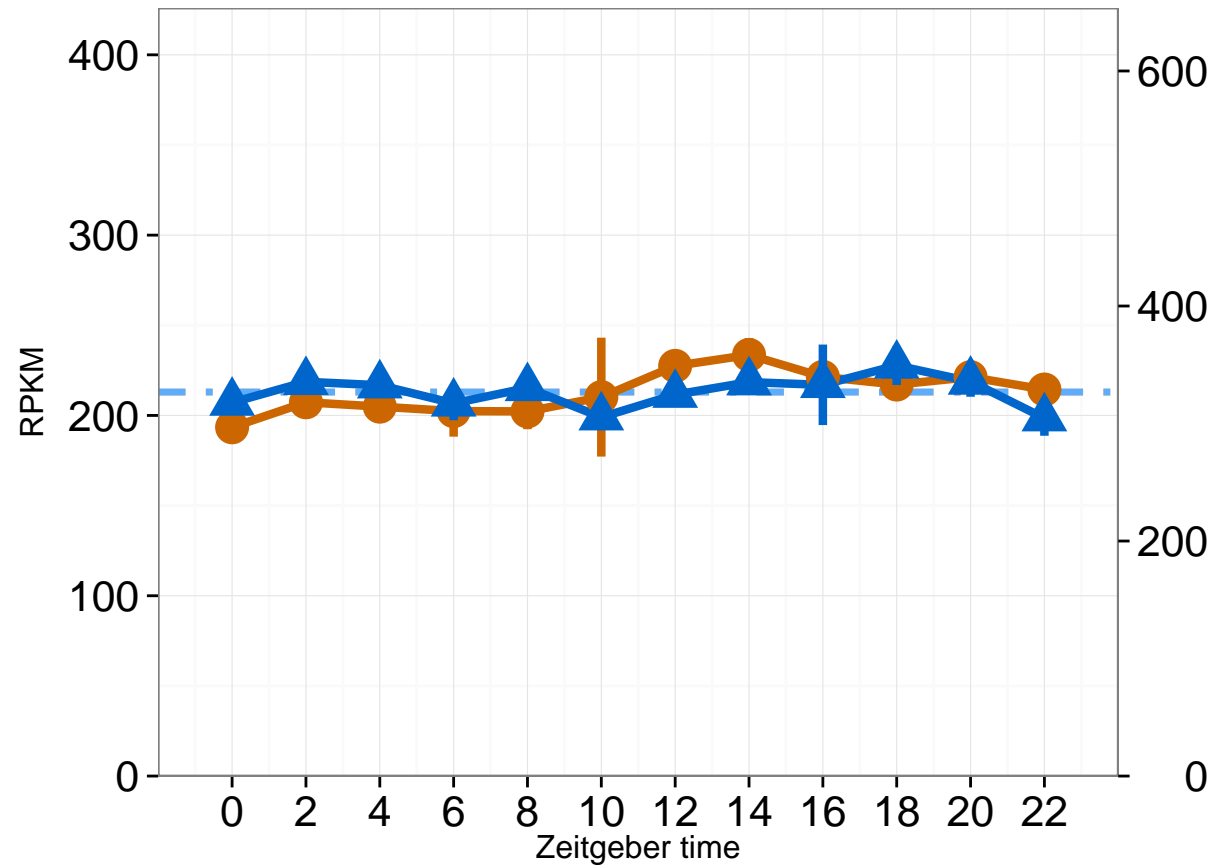

# Ndufs3

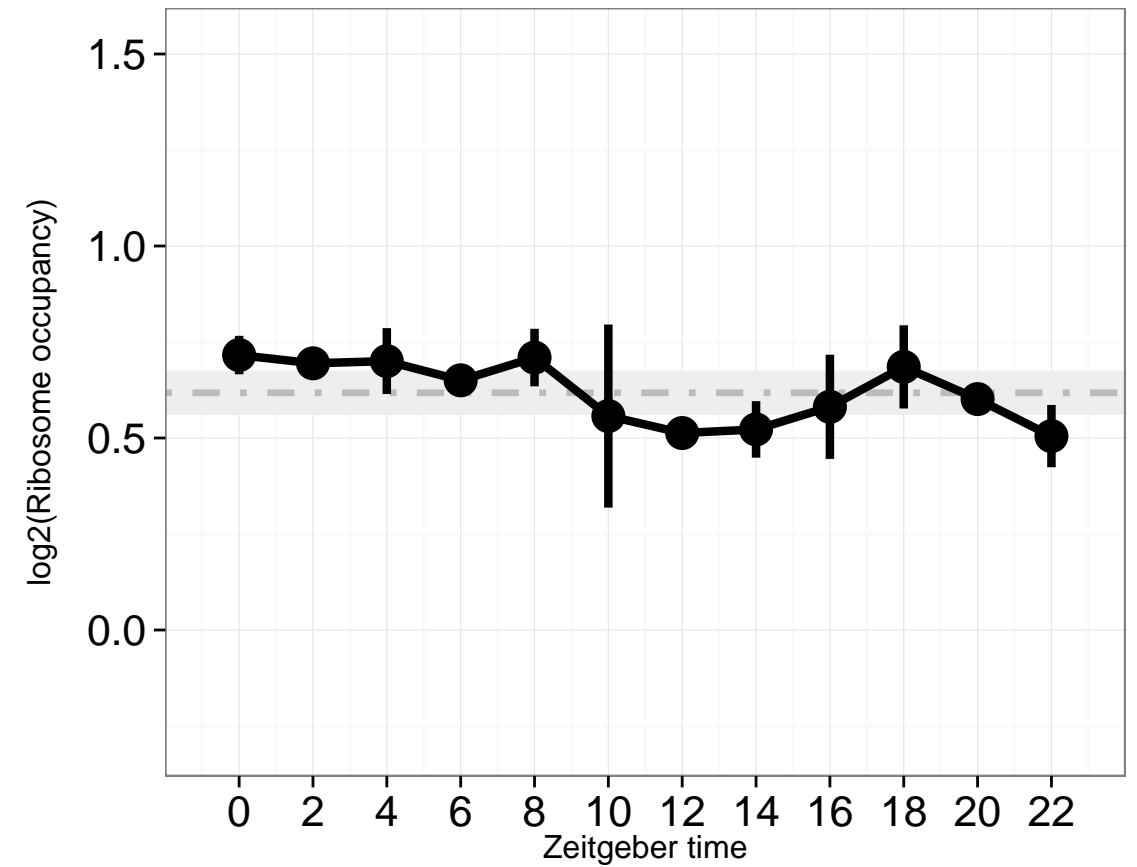

Supplement: Supplementary file 9416 [file 1]

# Fam50a

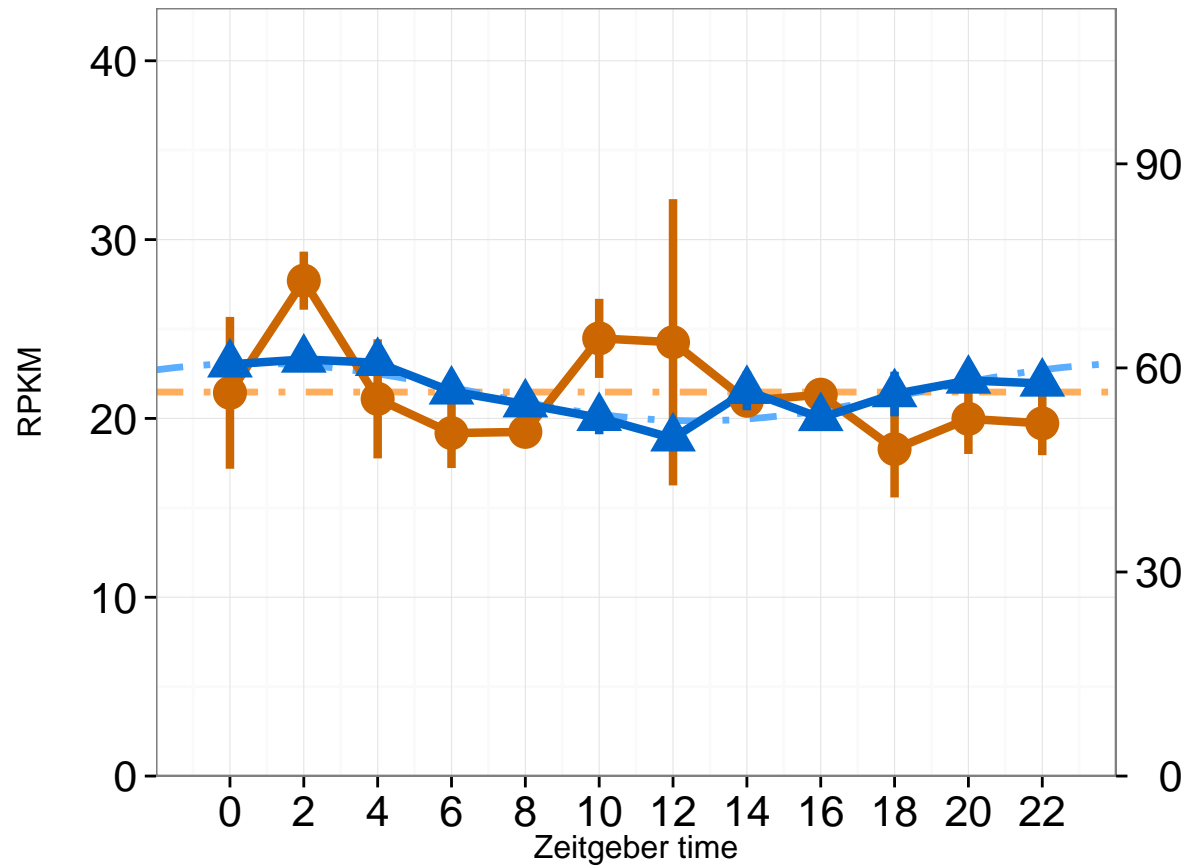

# Fam50a

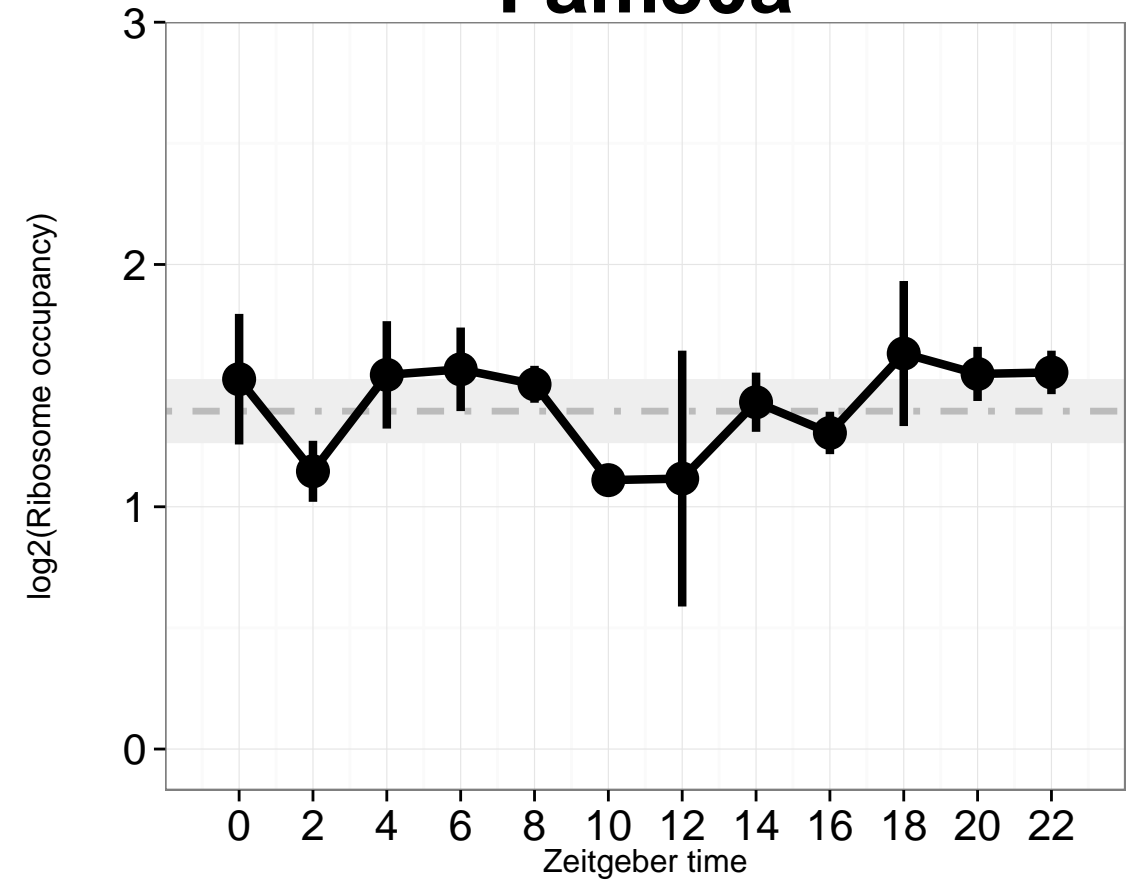

Supplement: Supplementary file 9417 [file 1]

## Acvrl1

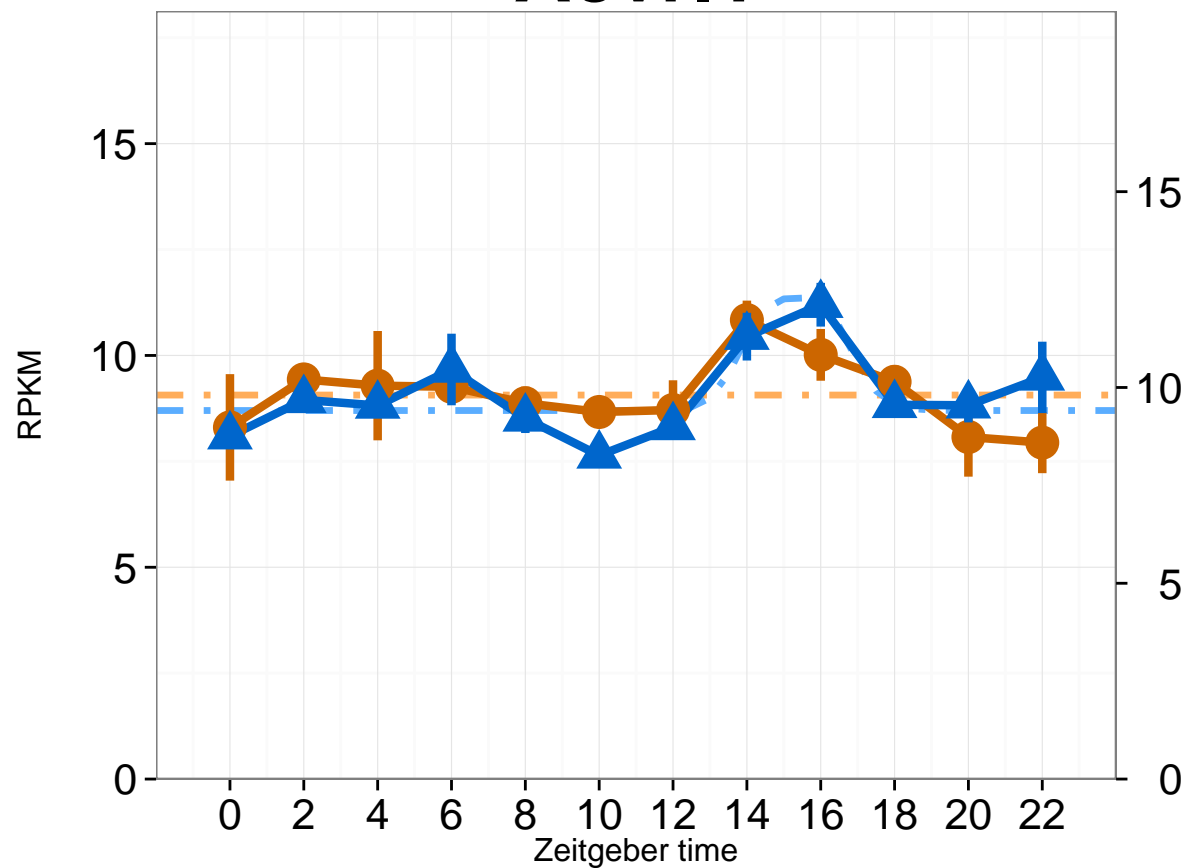

## Acvrl1

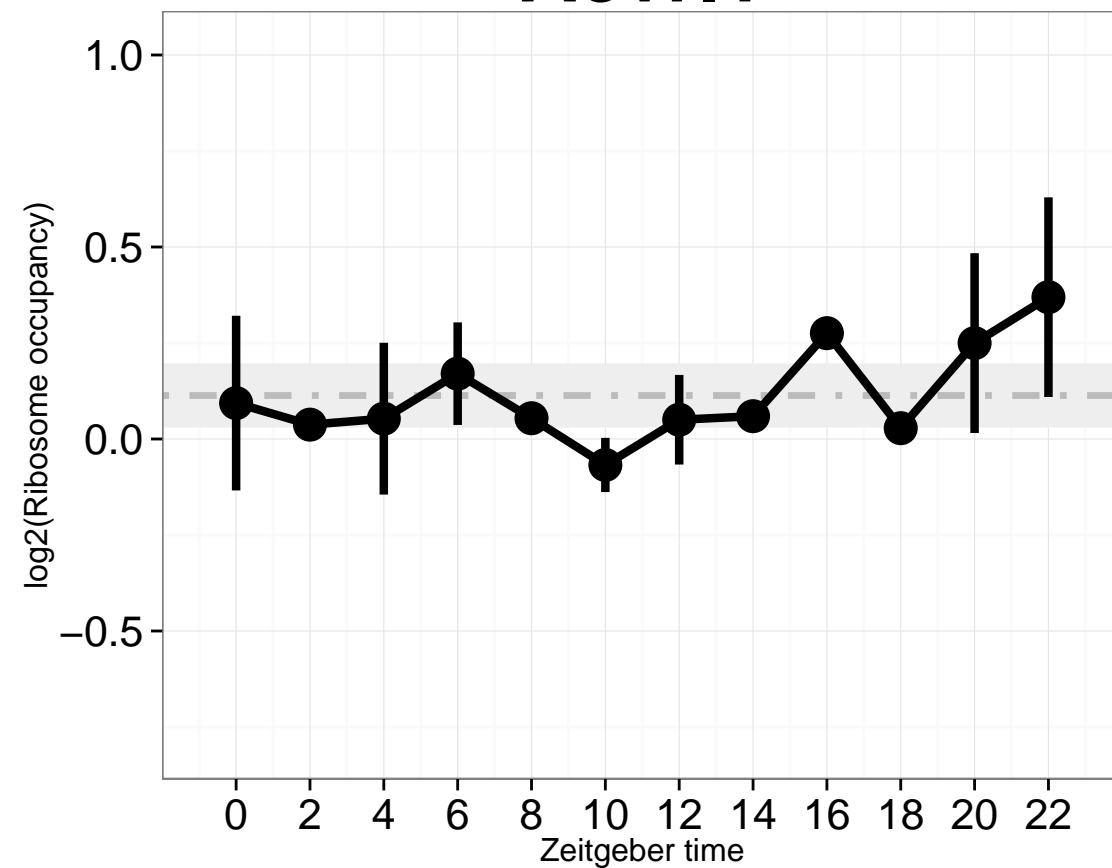

Supplement: Supplementary file 9418 [file 1]

## Rcn1

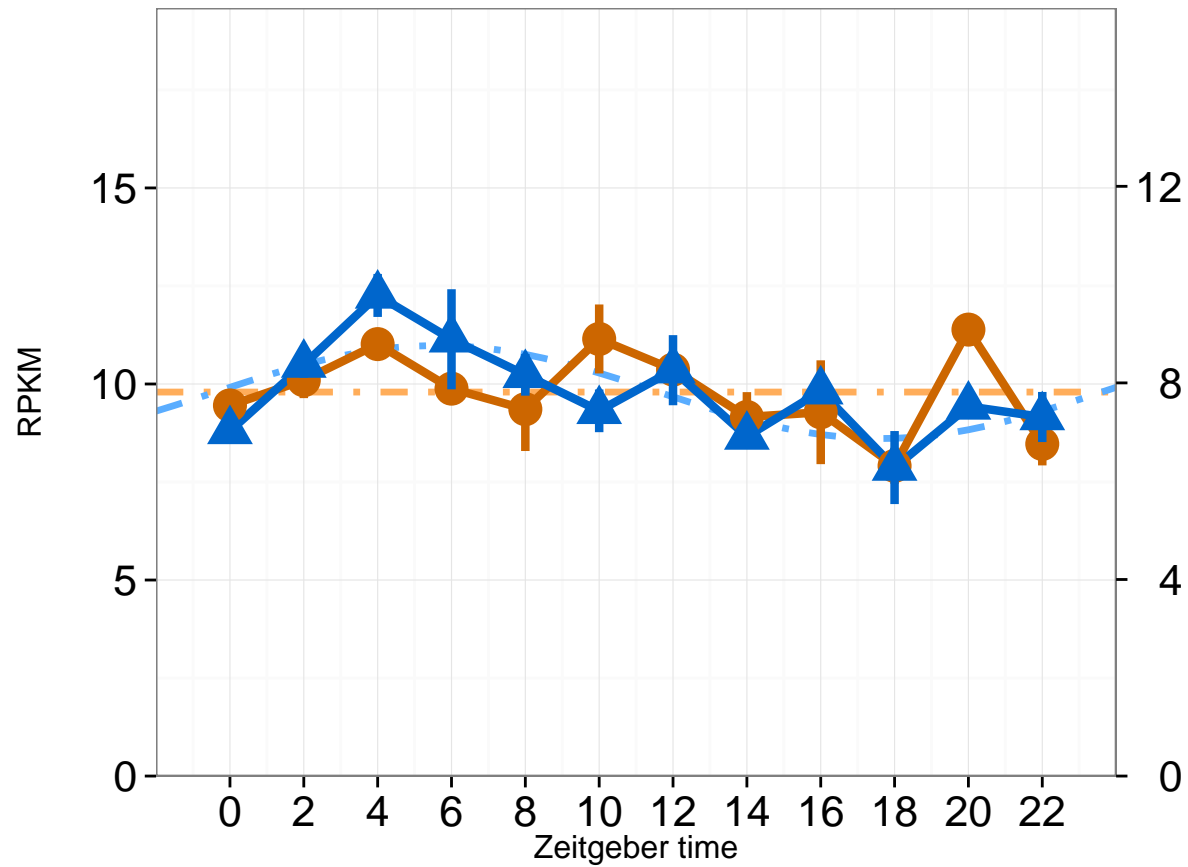

## Rcn1

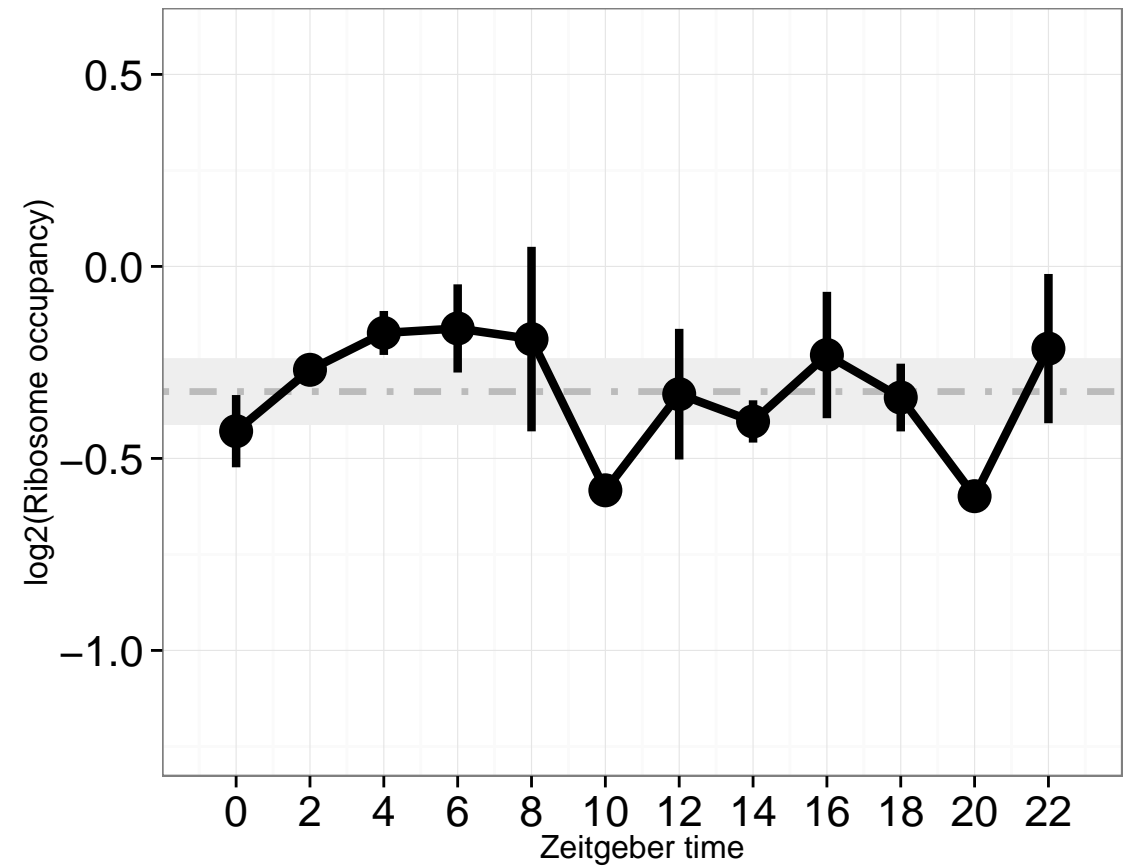

Supplement: Supplementary file 9419 [file 1]

## Klhl25

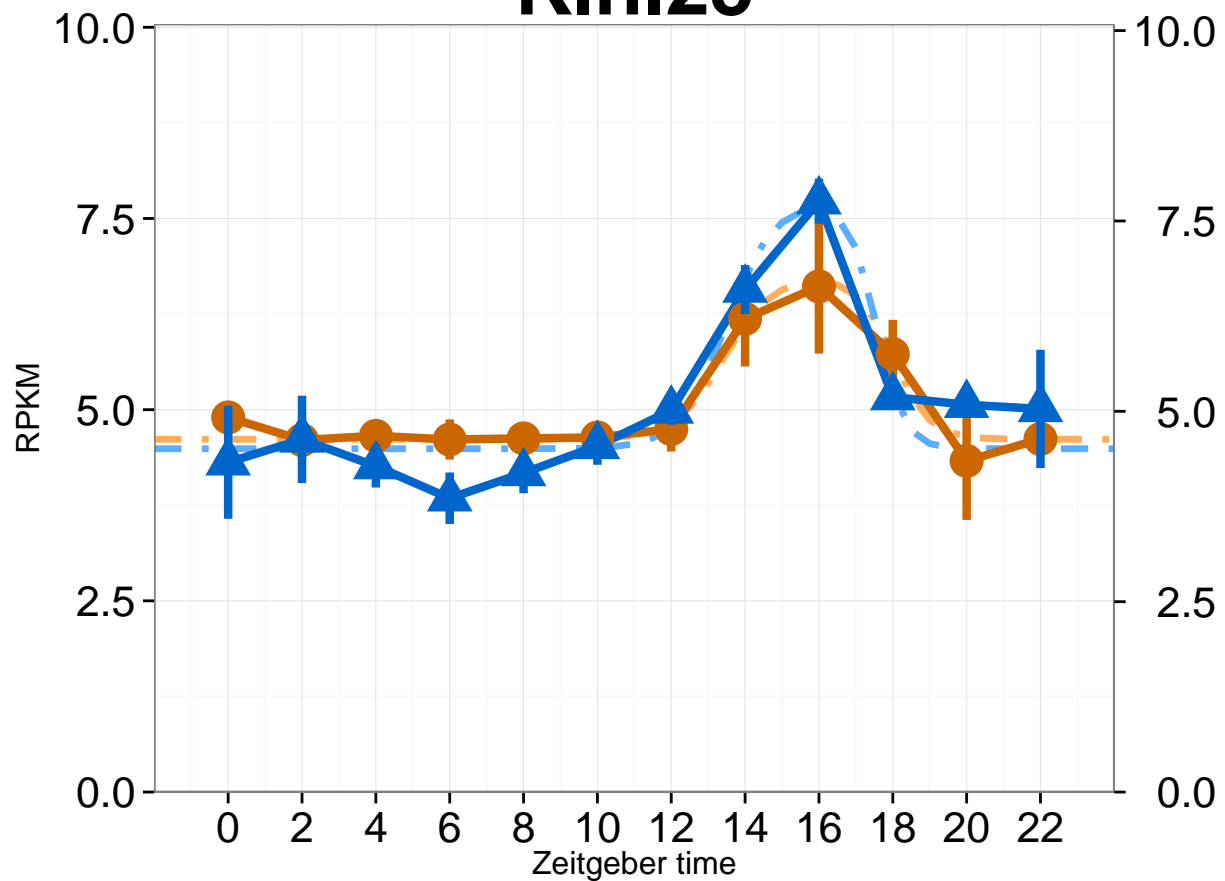

## Klhl25

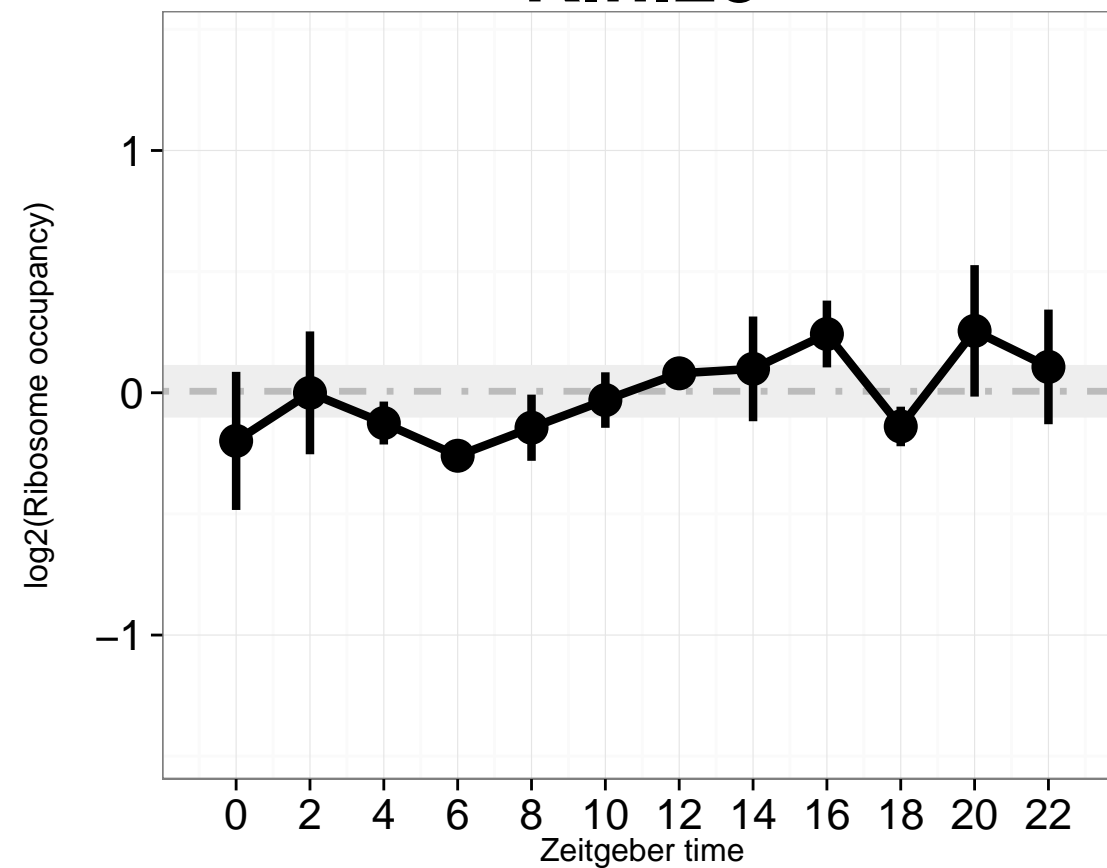

Supplement: Supplementary file 9420 [file 1]

# Cyp2j9

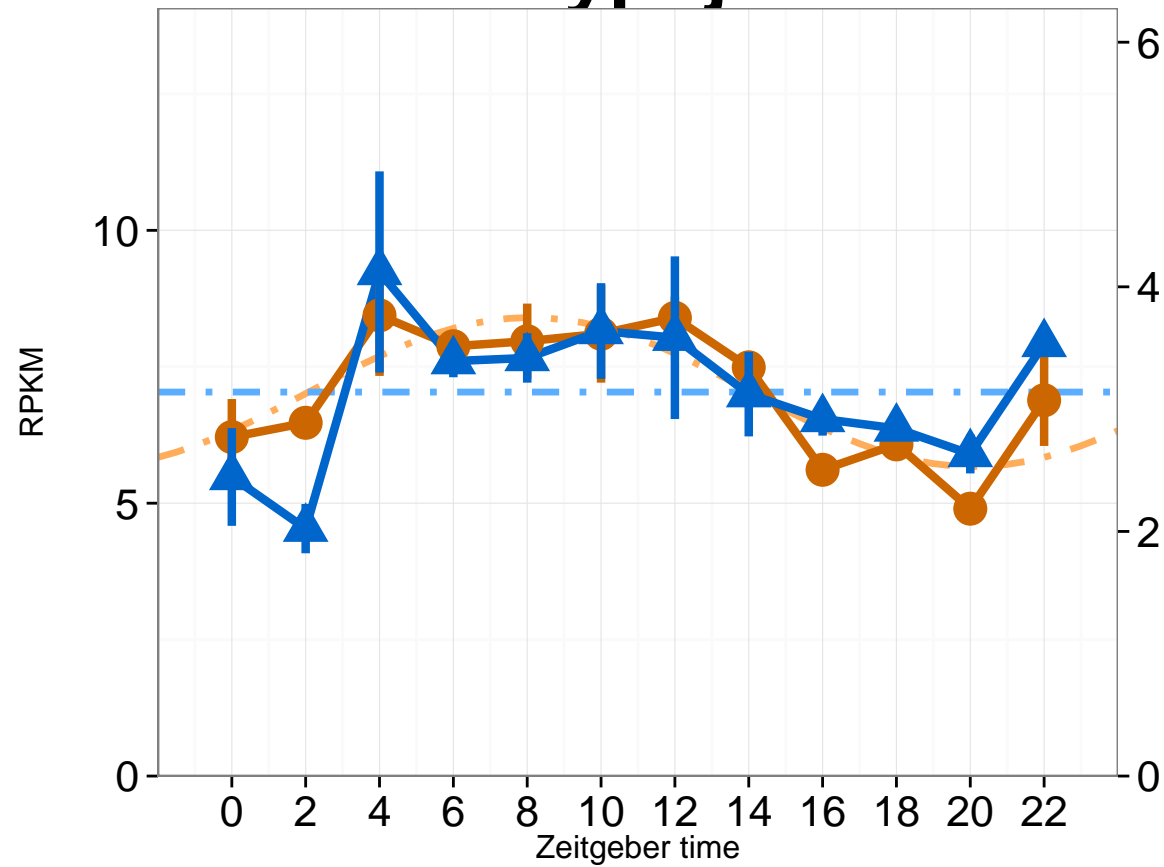

# Cyp2j9

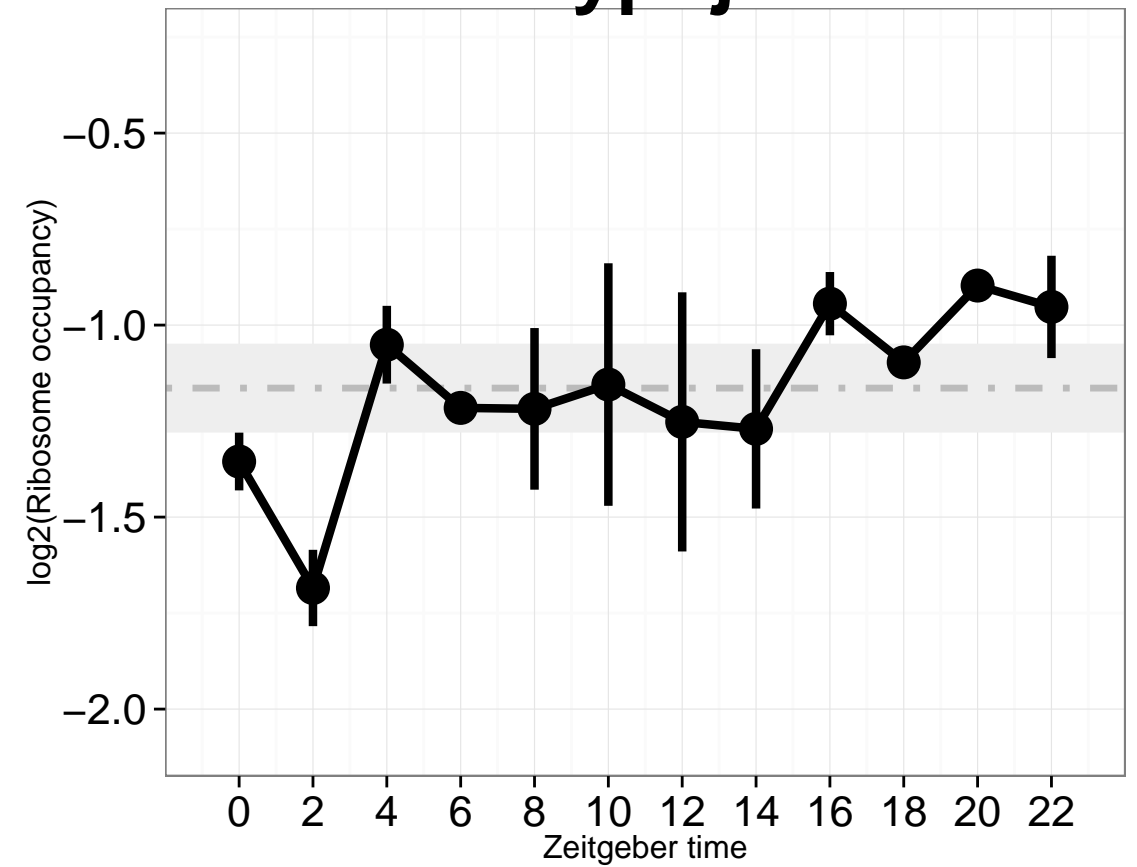

Supplement: Supplementary file 9421 [file 1]

# Irak1bp1

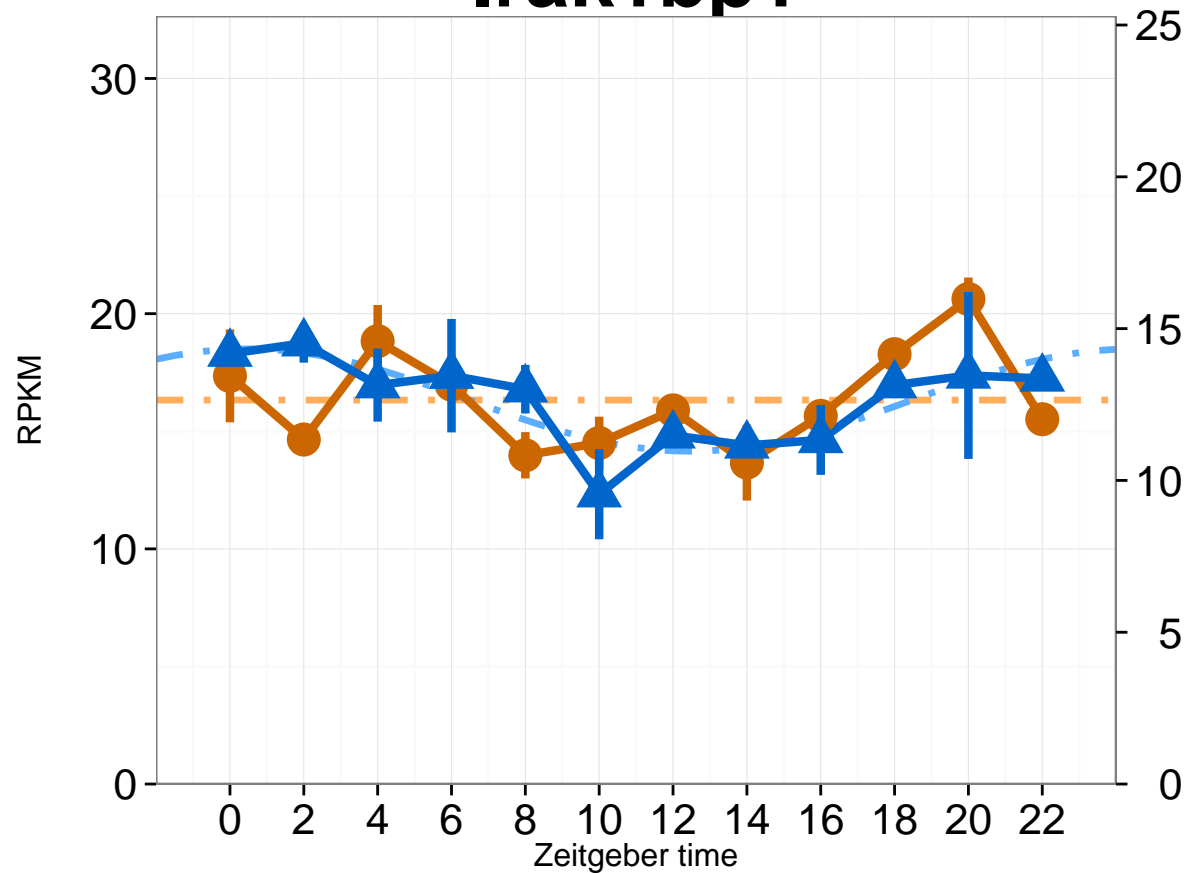

# Irak1bp1

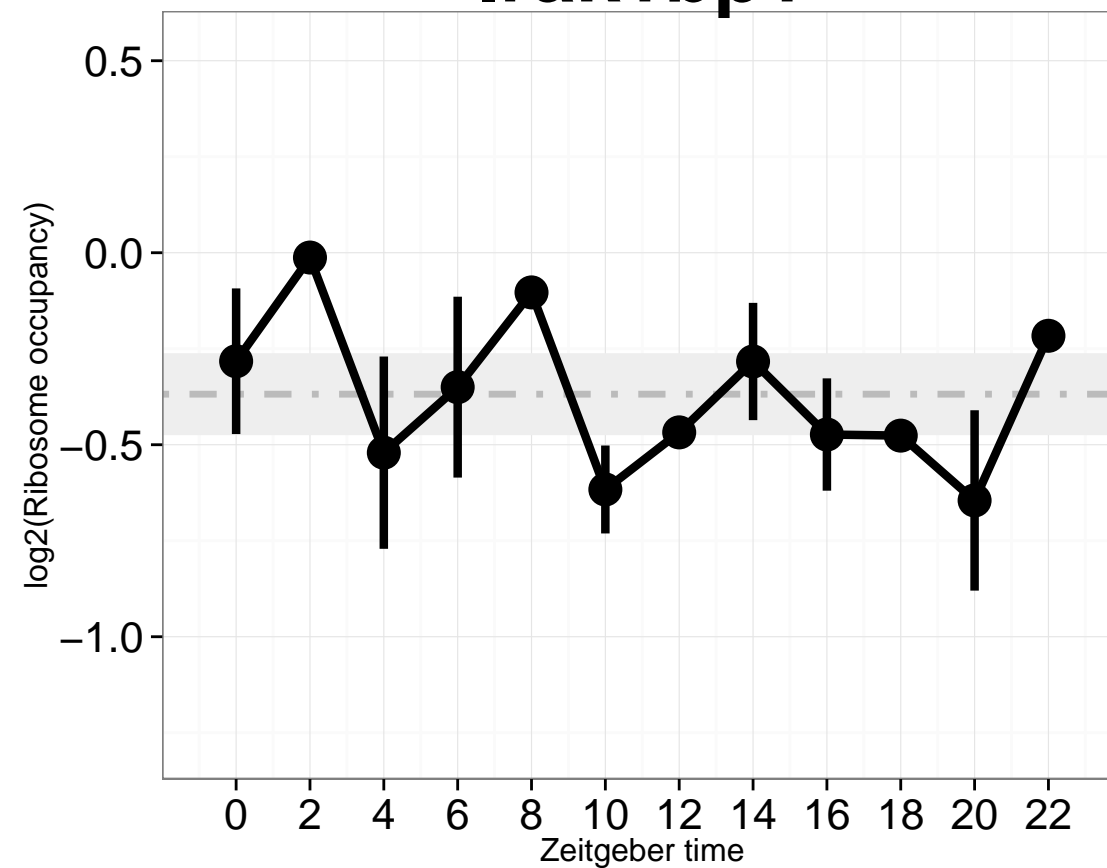

Supplement: Supplementary file 9422 [file 1]

# Cops8

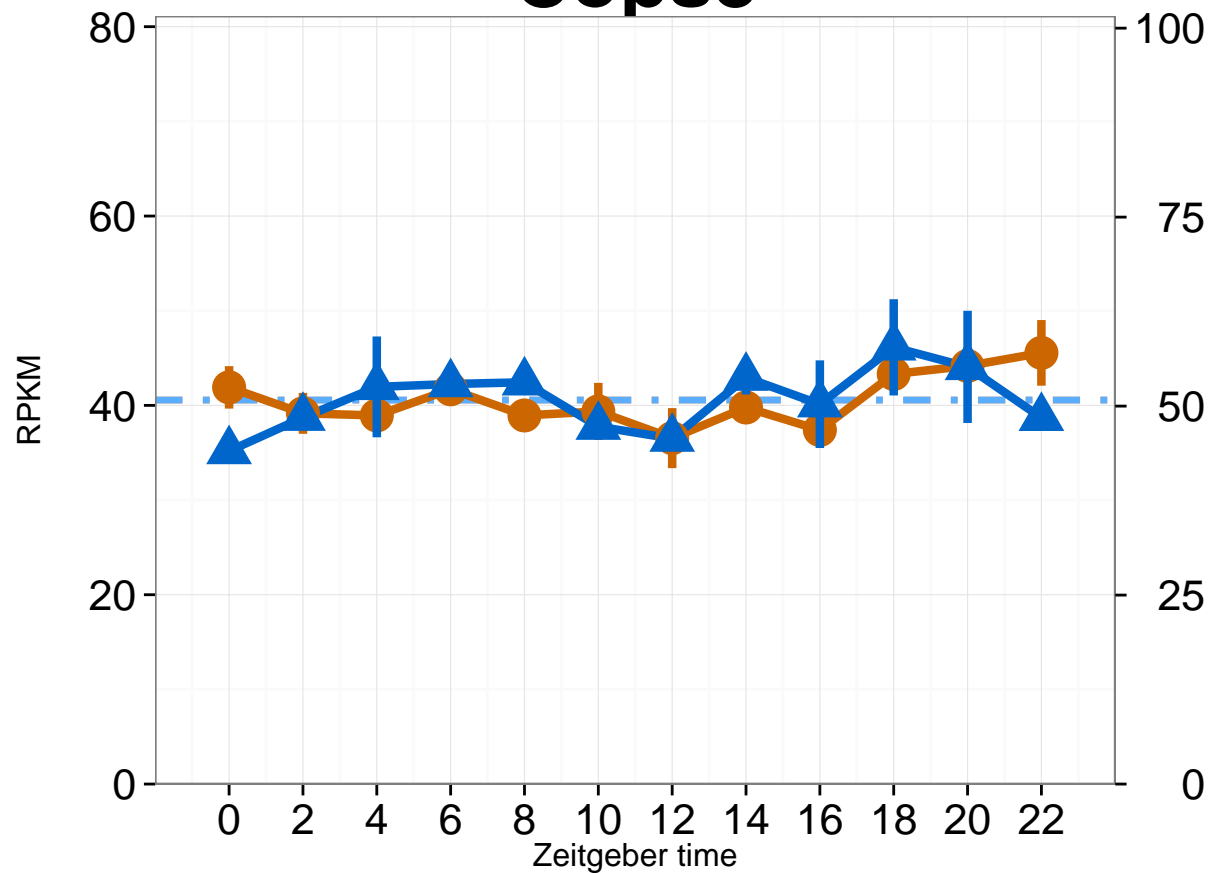

# Cops8

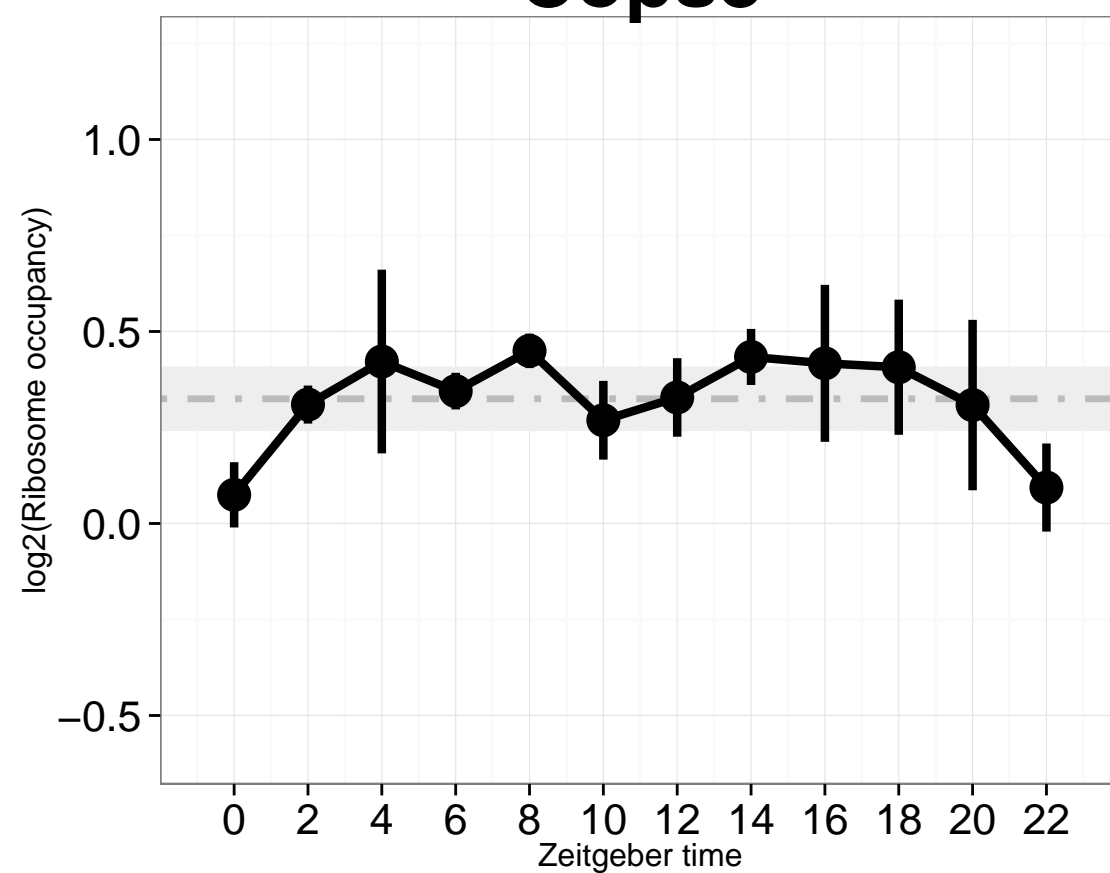

Supplement: Supplementary file 9423 [file 1]

# Lrrc45

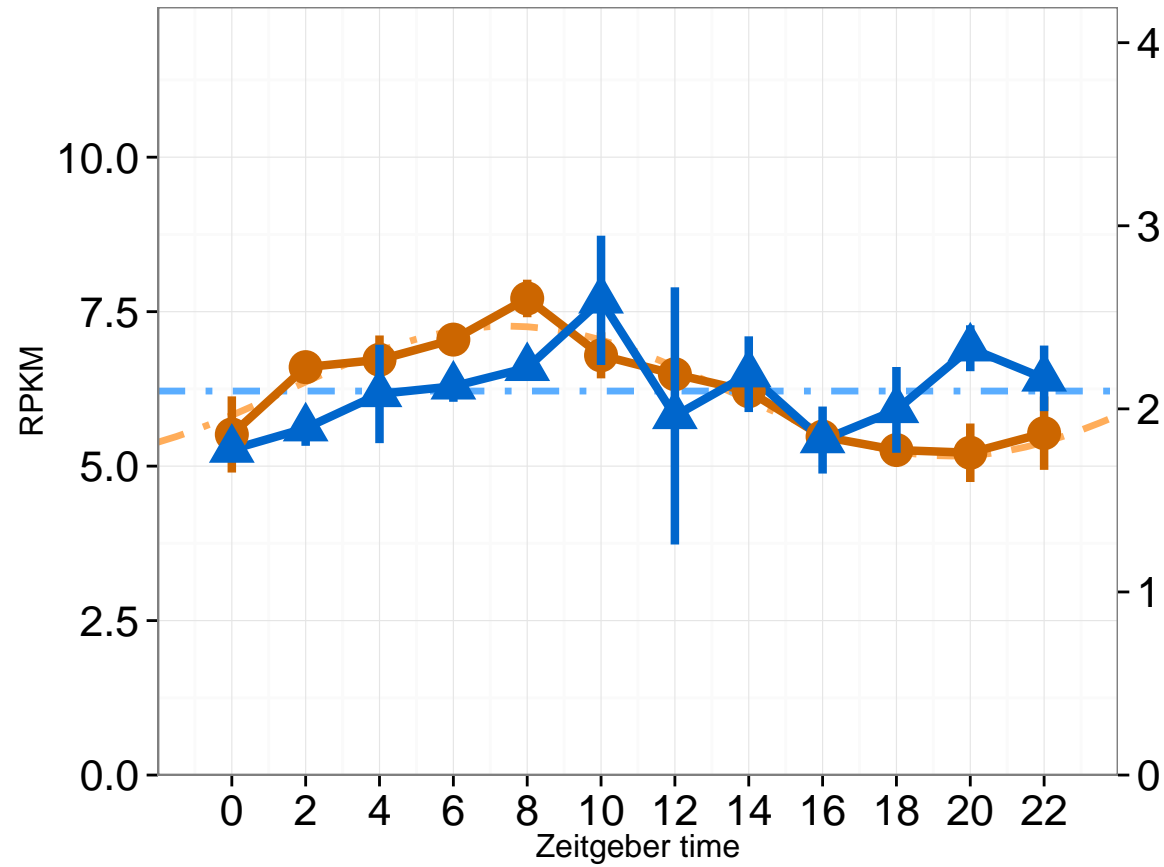

# Lrrc45

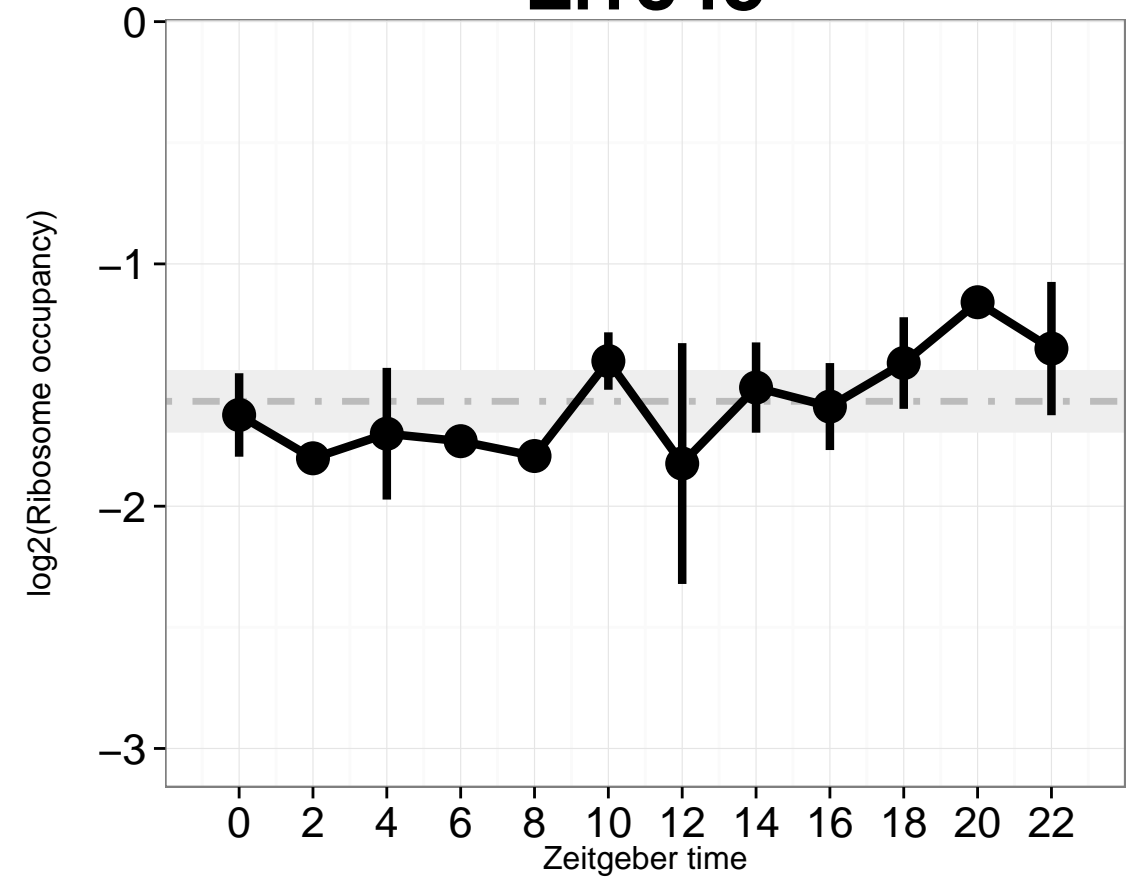

Supplement: Supplementary file 9424 [file 1]

## Slc5a6

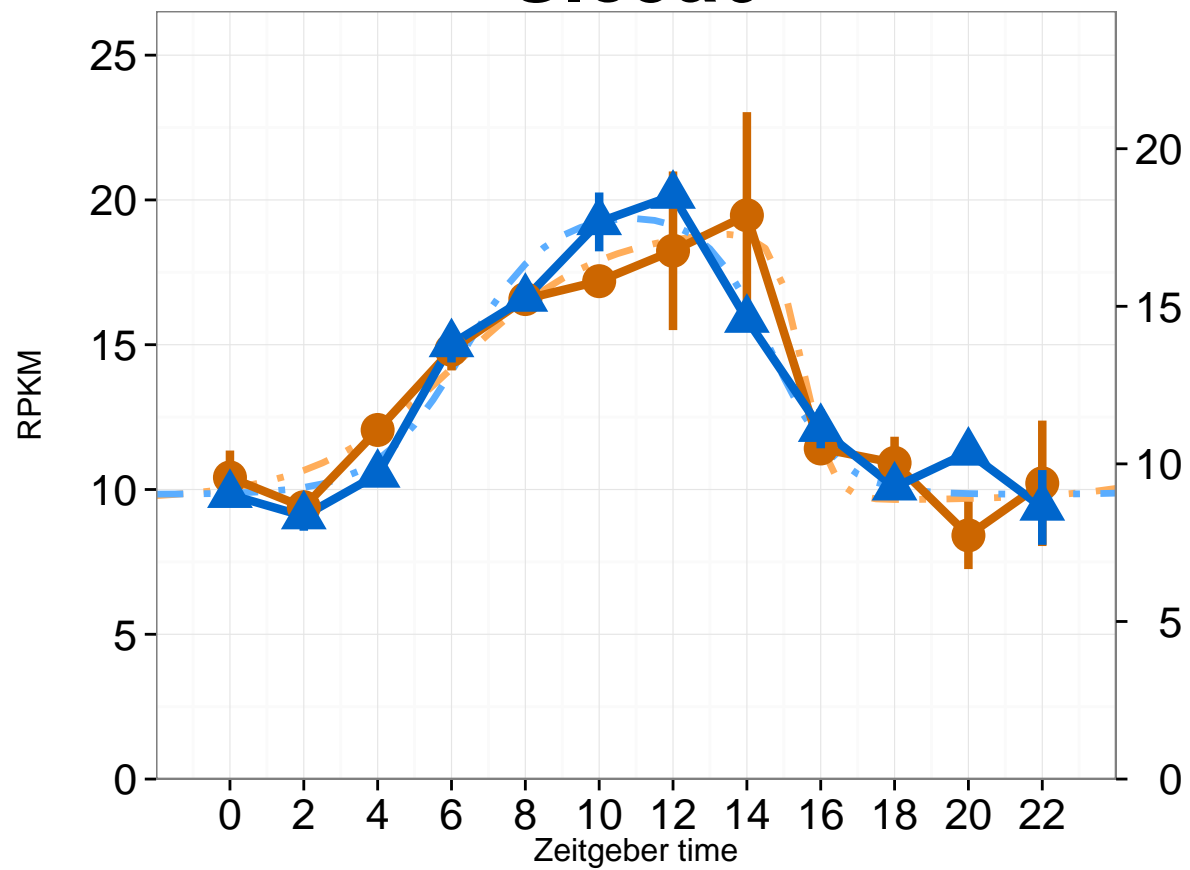

## Slc5a6

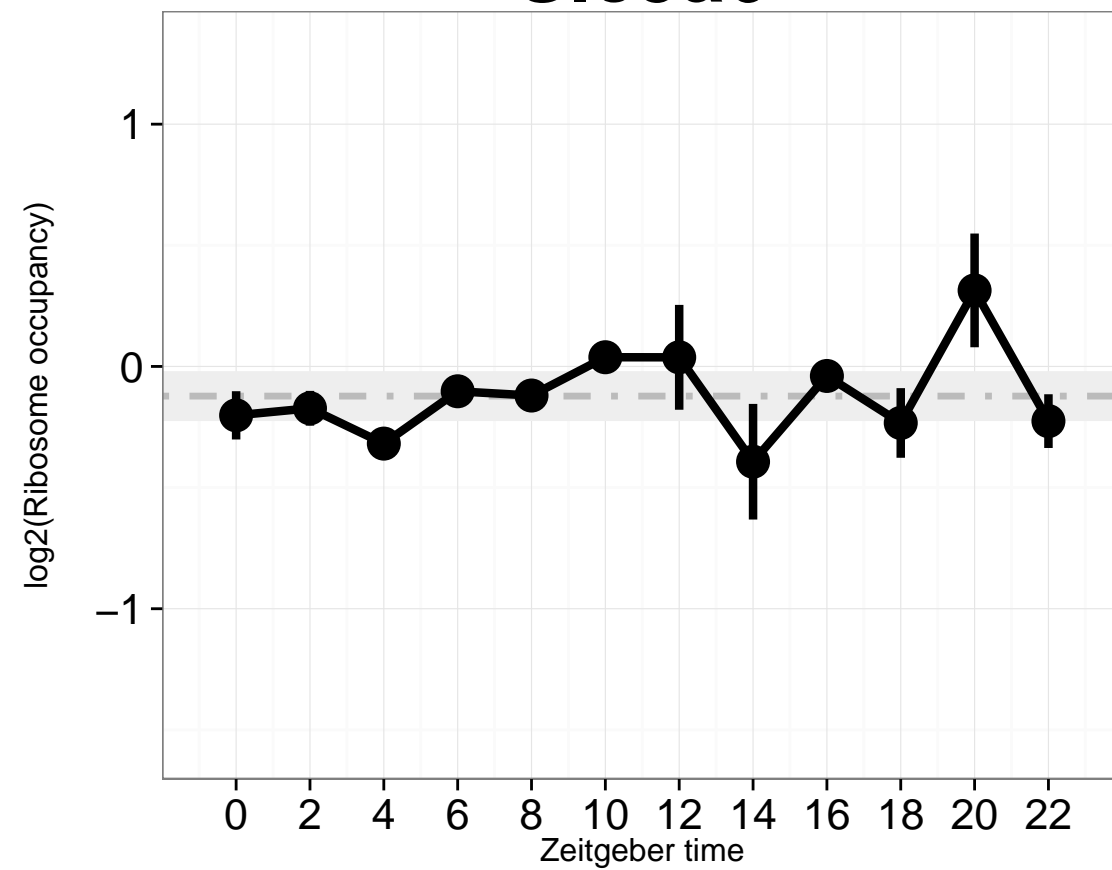

Supplement: Supplementary file 9425 [file 1]

## Clta

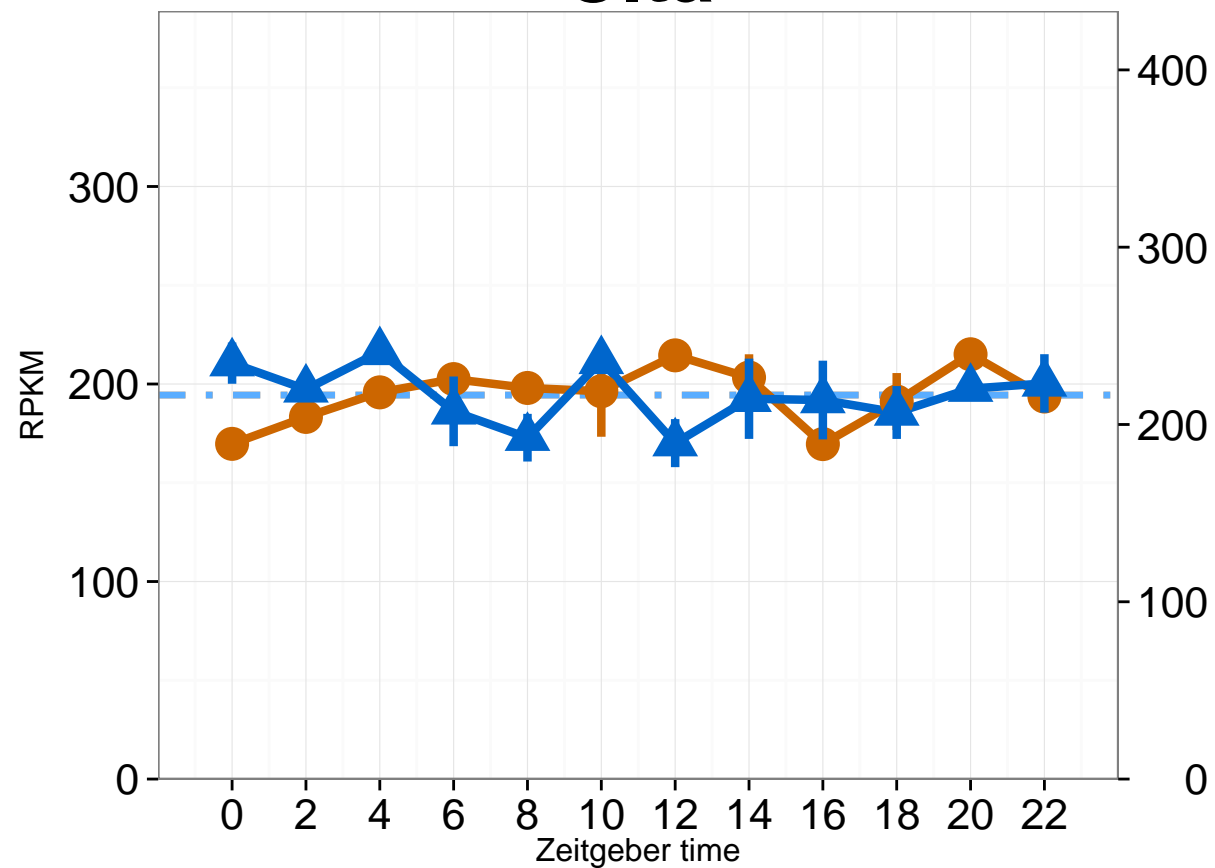

## Clta

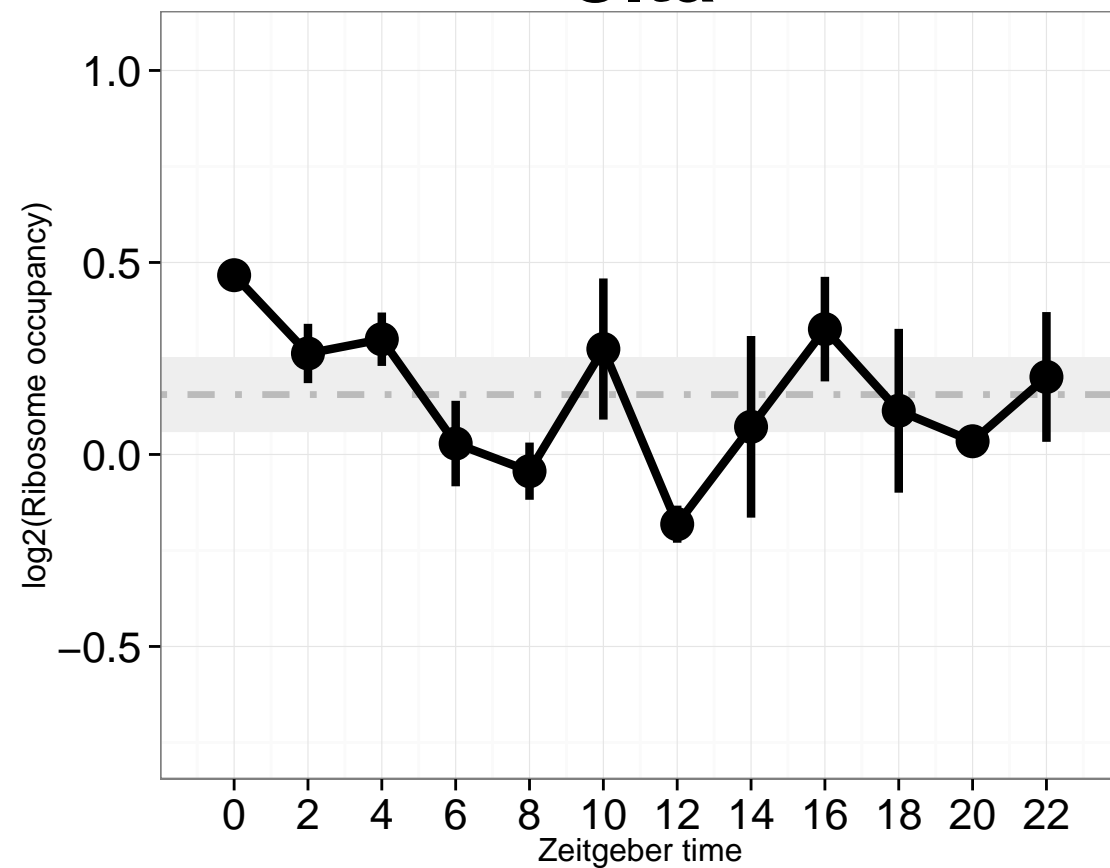

Supplement: Supplementary file 9426 [file 1]

# Tmem169

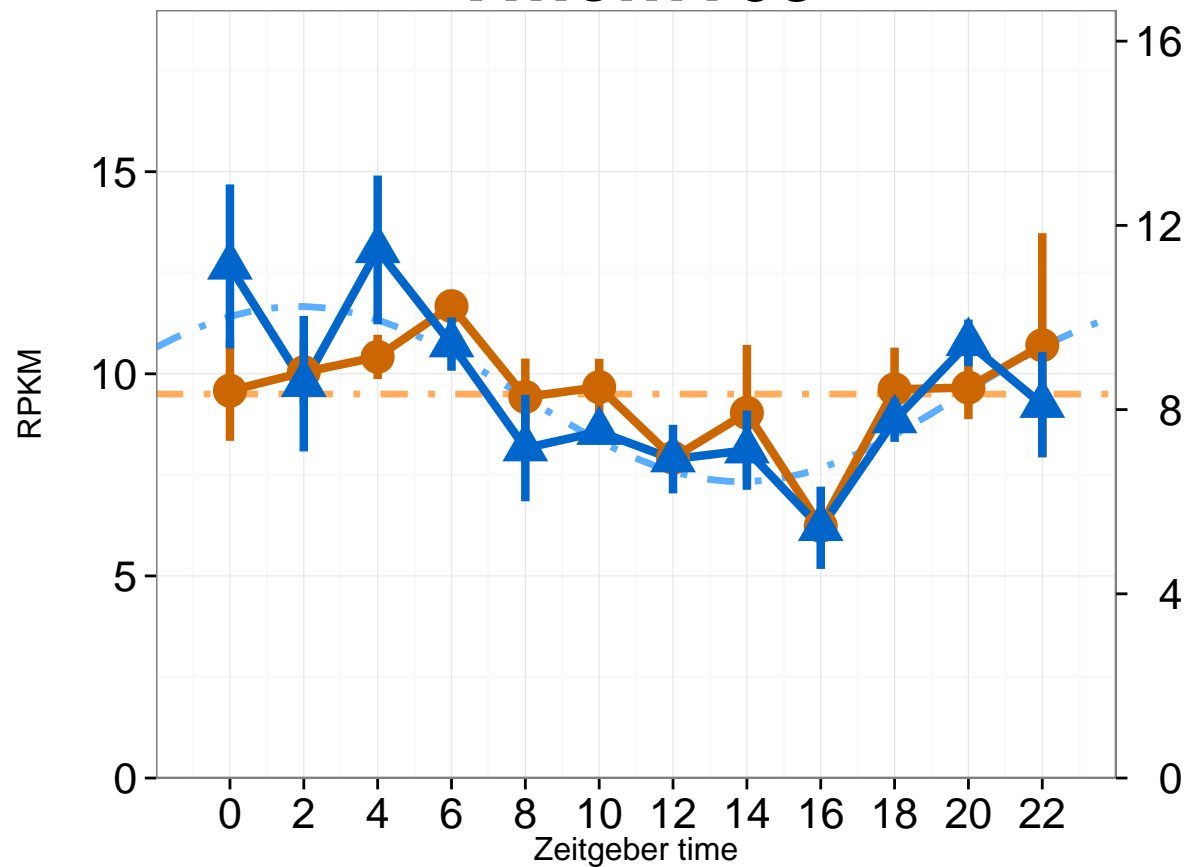

# Tmem169

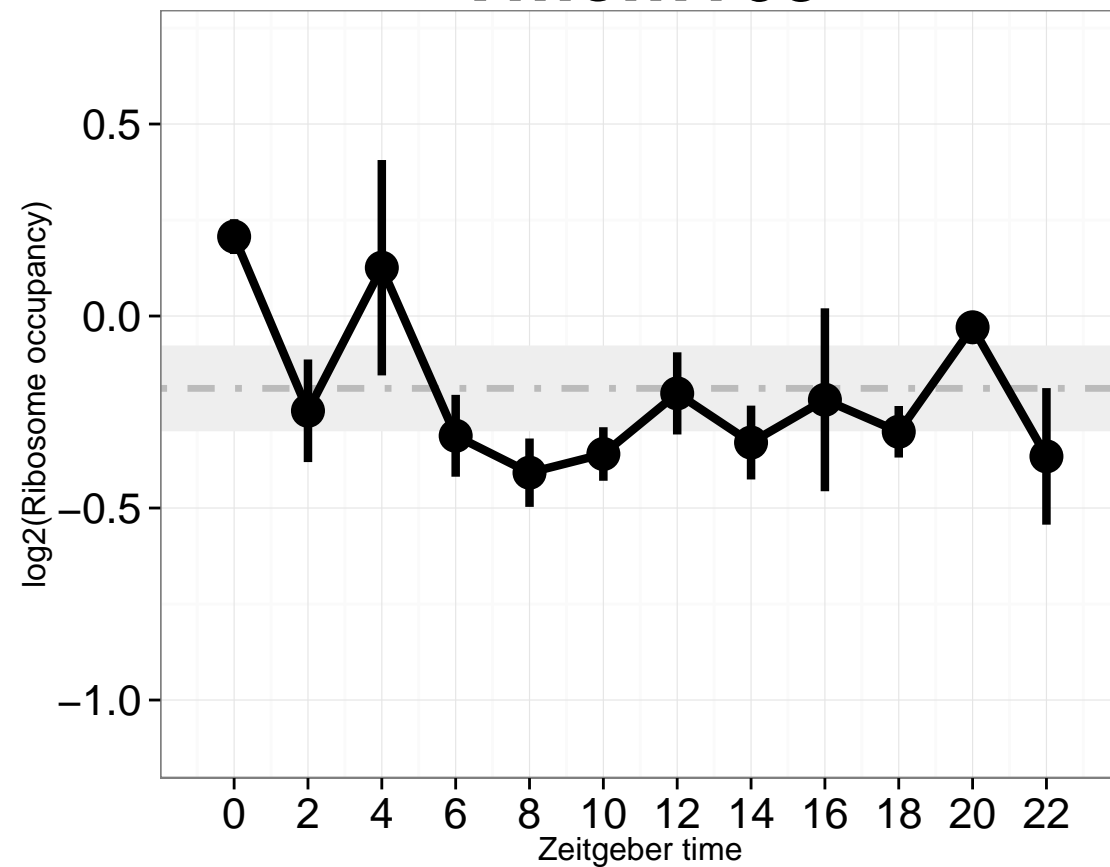

Supplement: Supplementary file 9427 [file 1]

## Cdyl

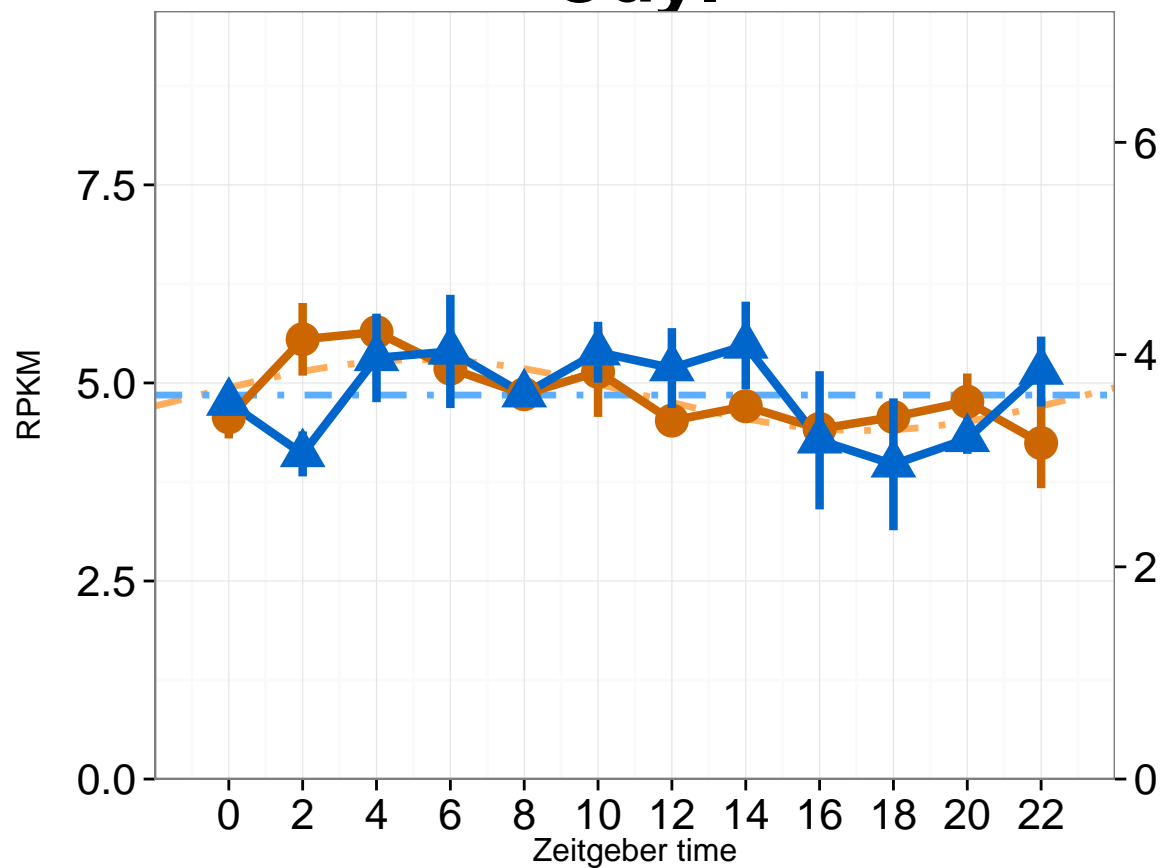

## Cdyl

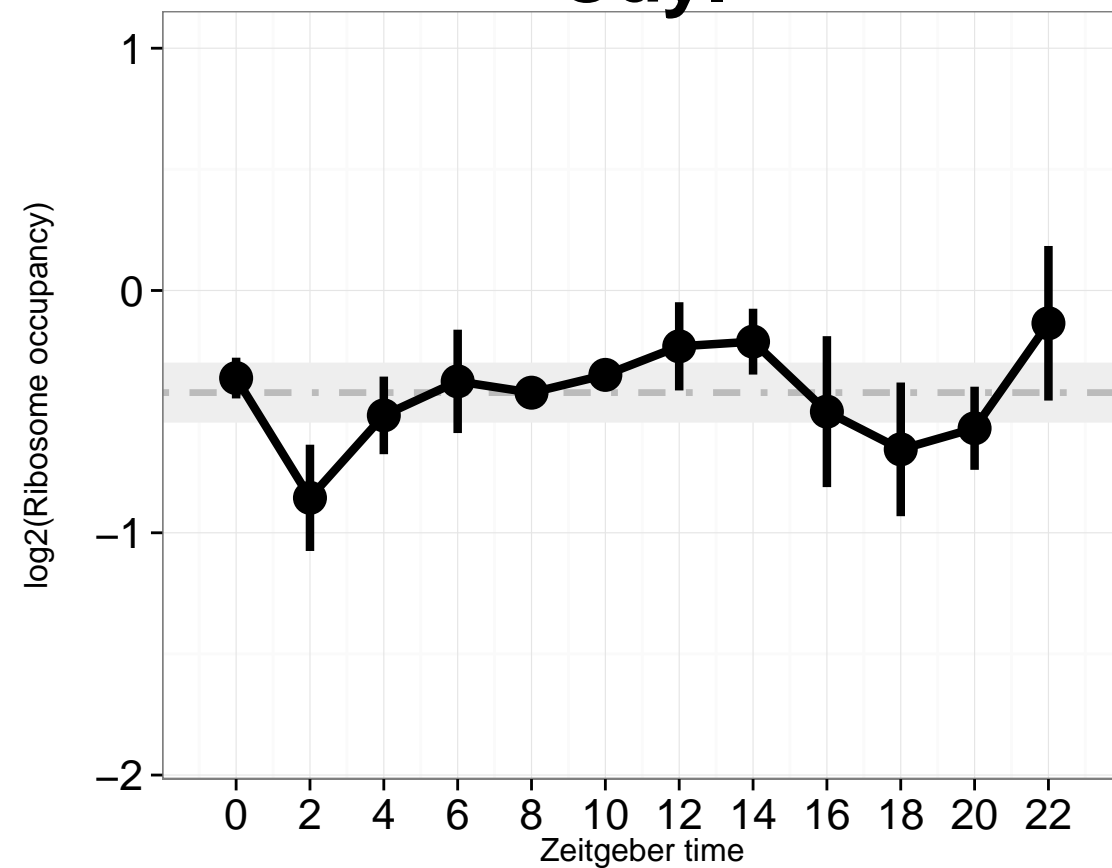

Supplement: Supplementary file 9428 [file 1]

# Per2

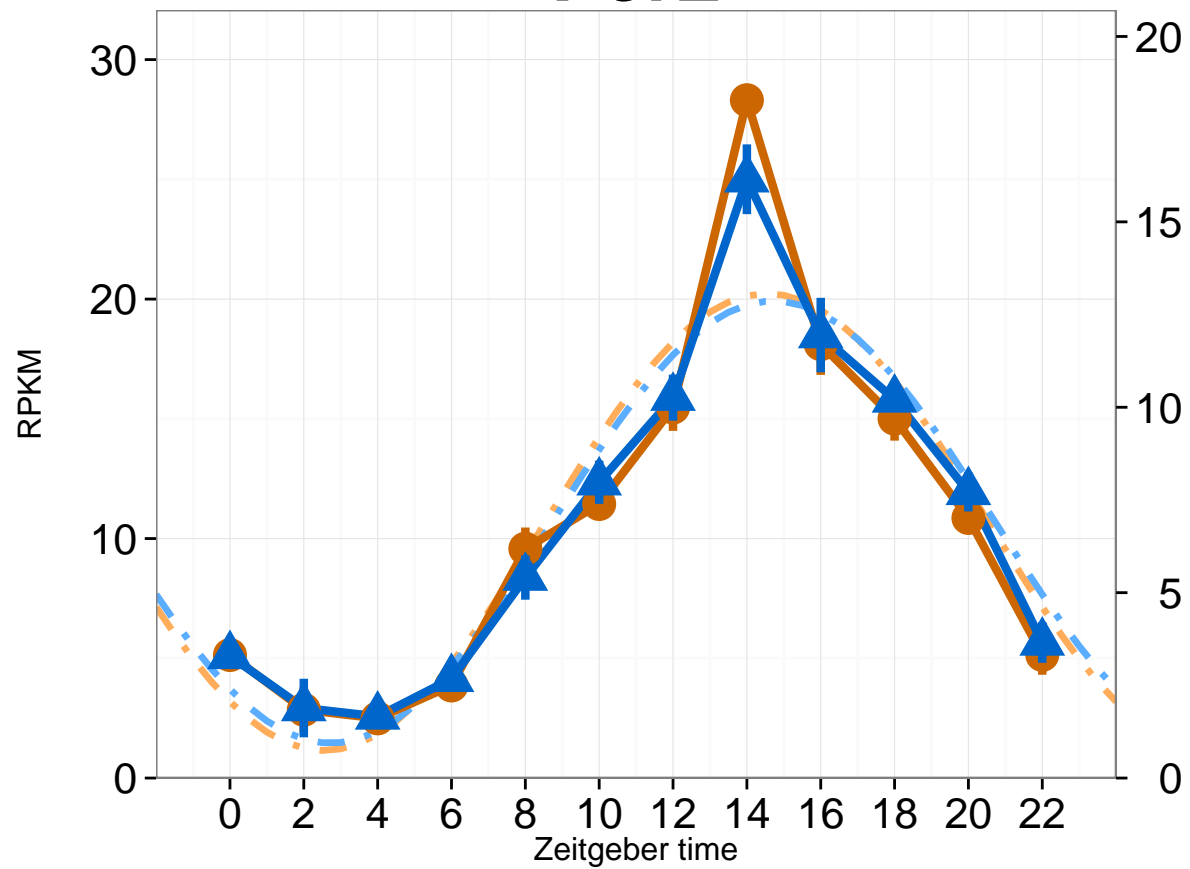

# Per2

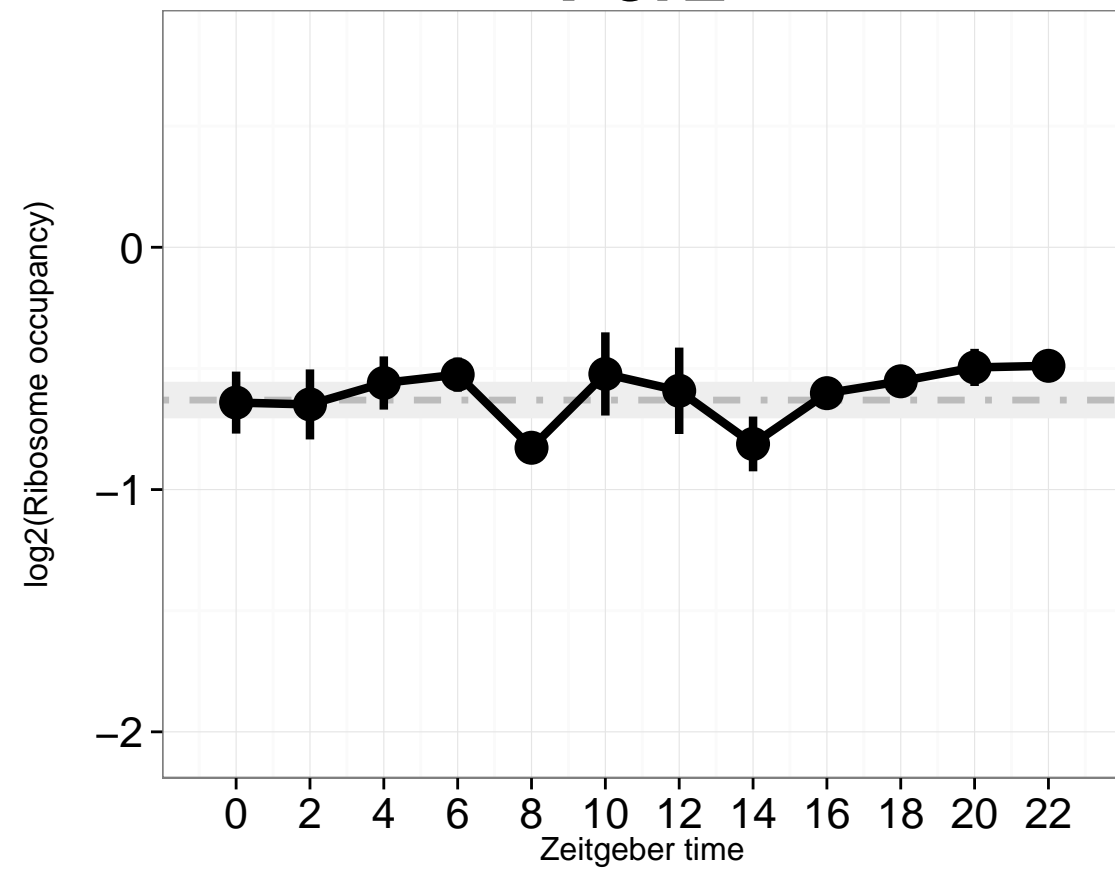

Supplement: Supplementary file 9429 [file 1]

## Tln2

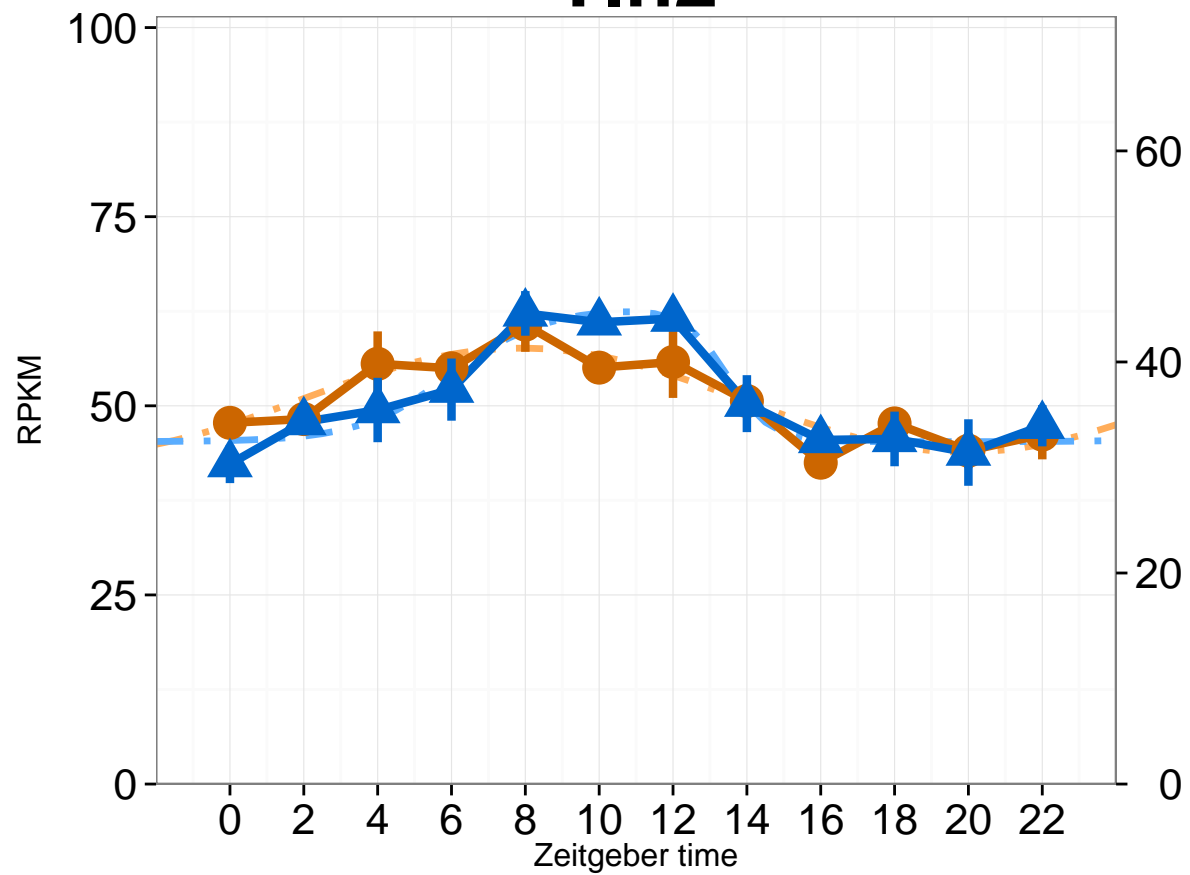

## Tln2

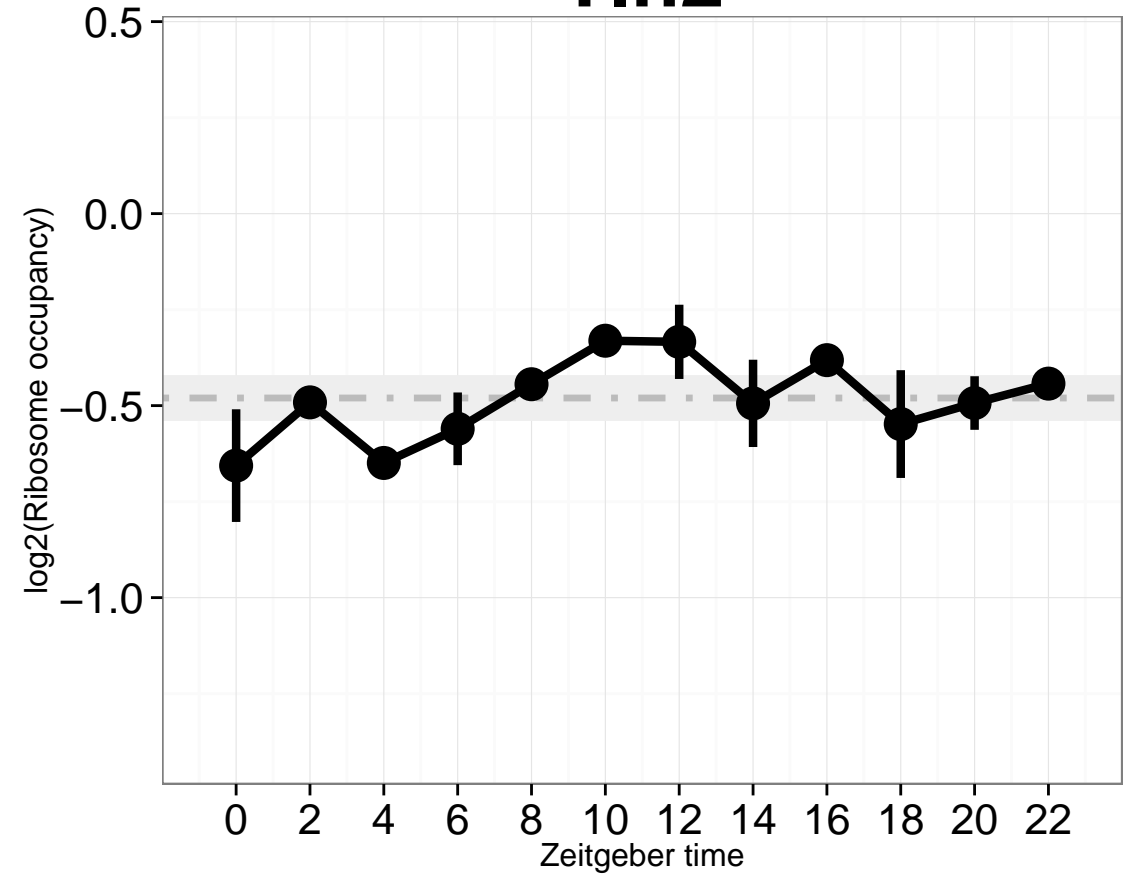

Supplement: Supplementary file 9430 [file 1]

## Nenf

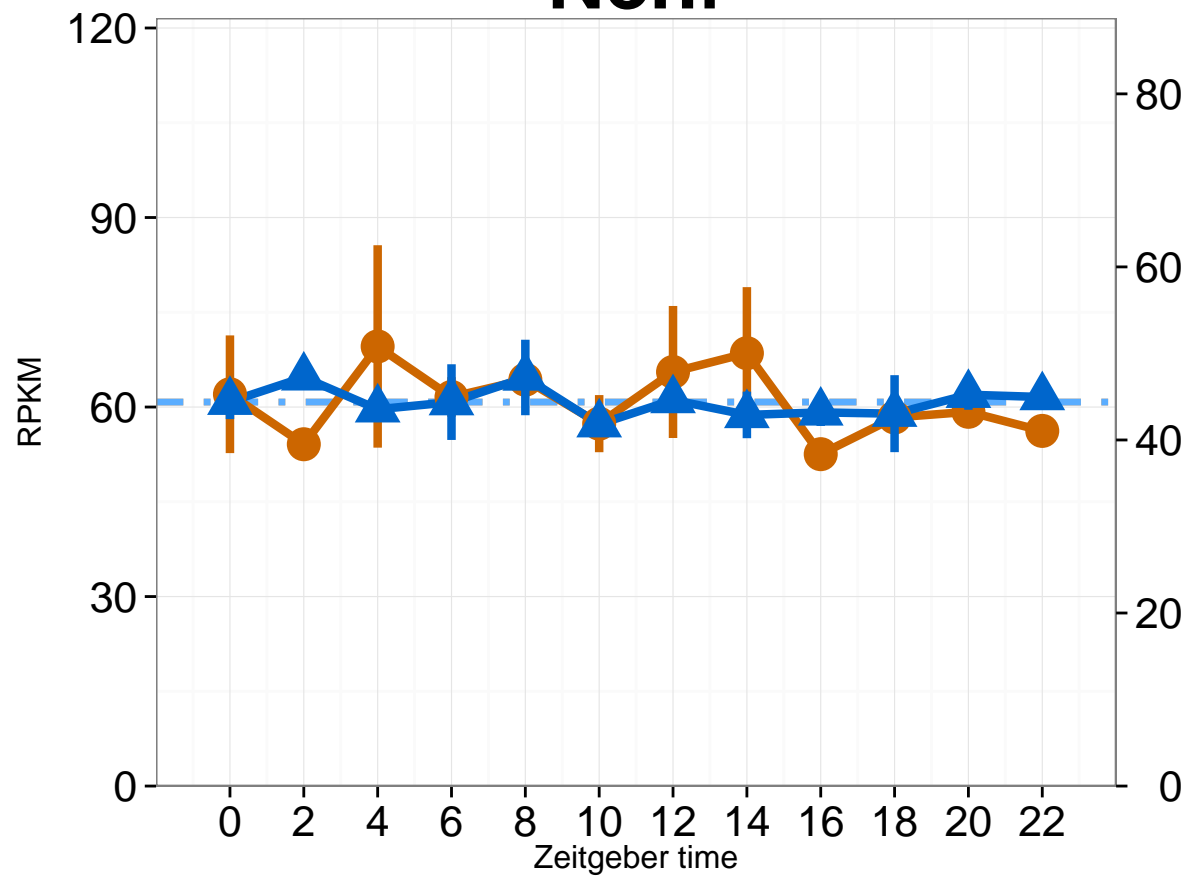

## Nenf

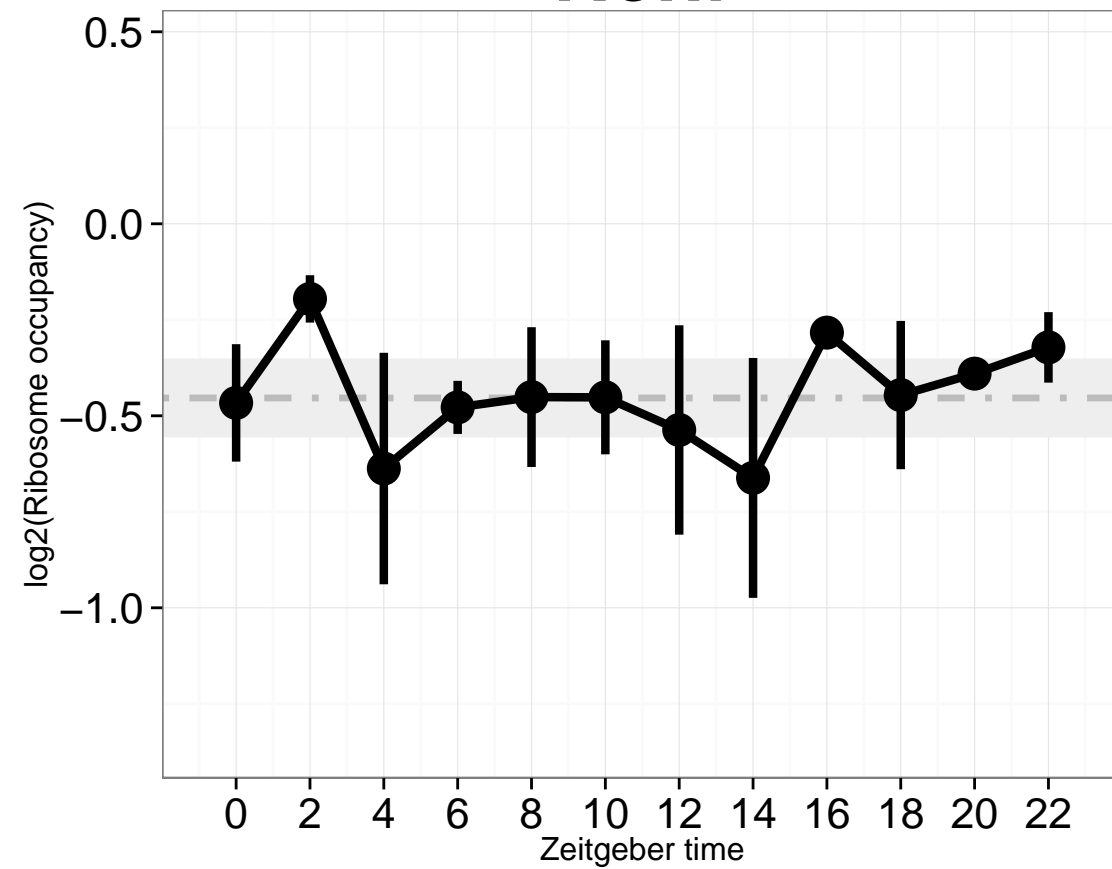

Supplement: Supplementary file 9431 [file 1]

## Leo1

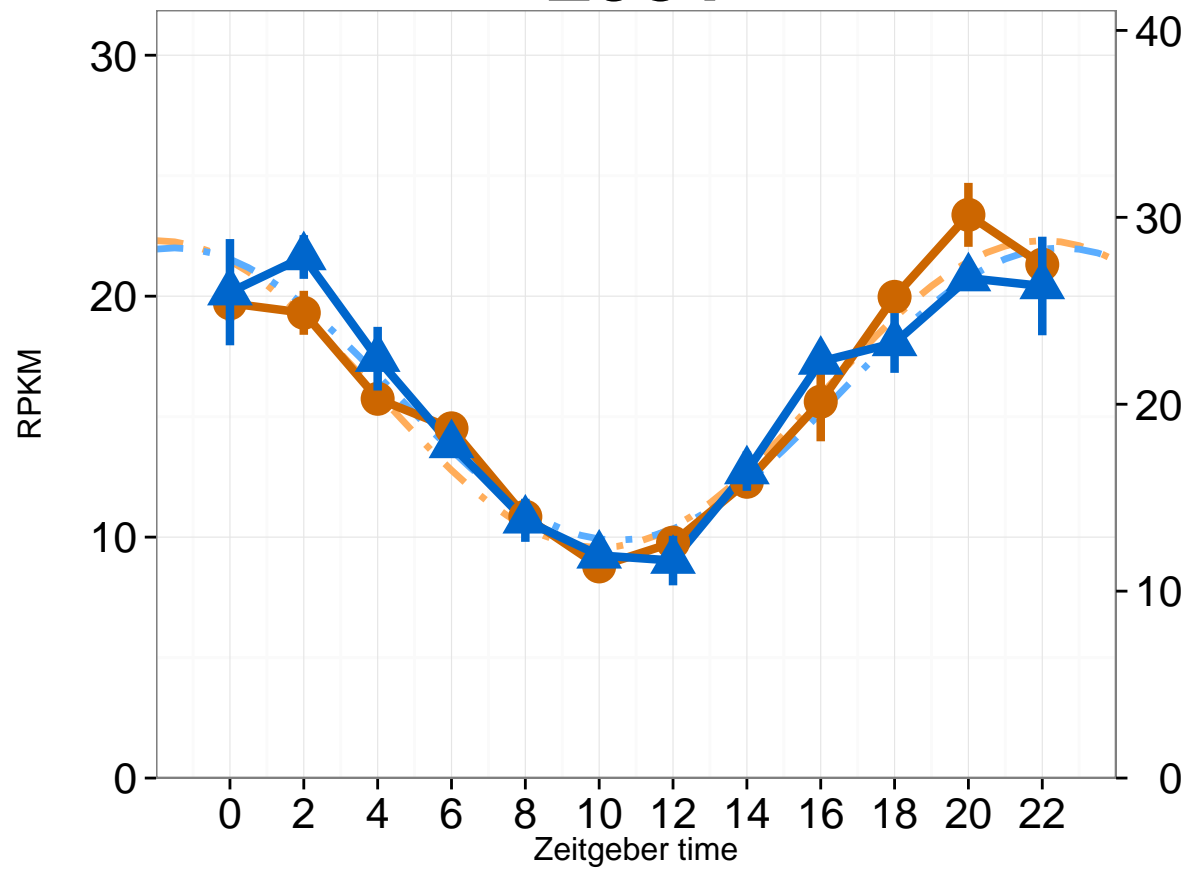

## Leo1

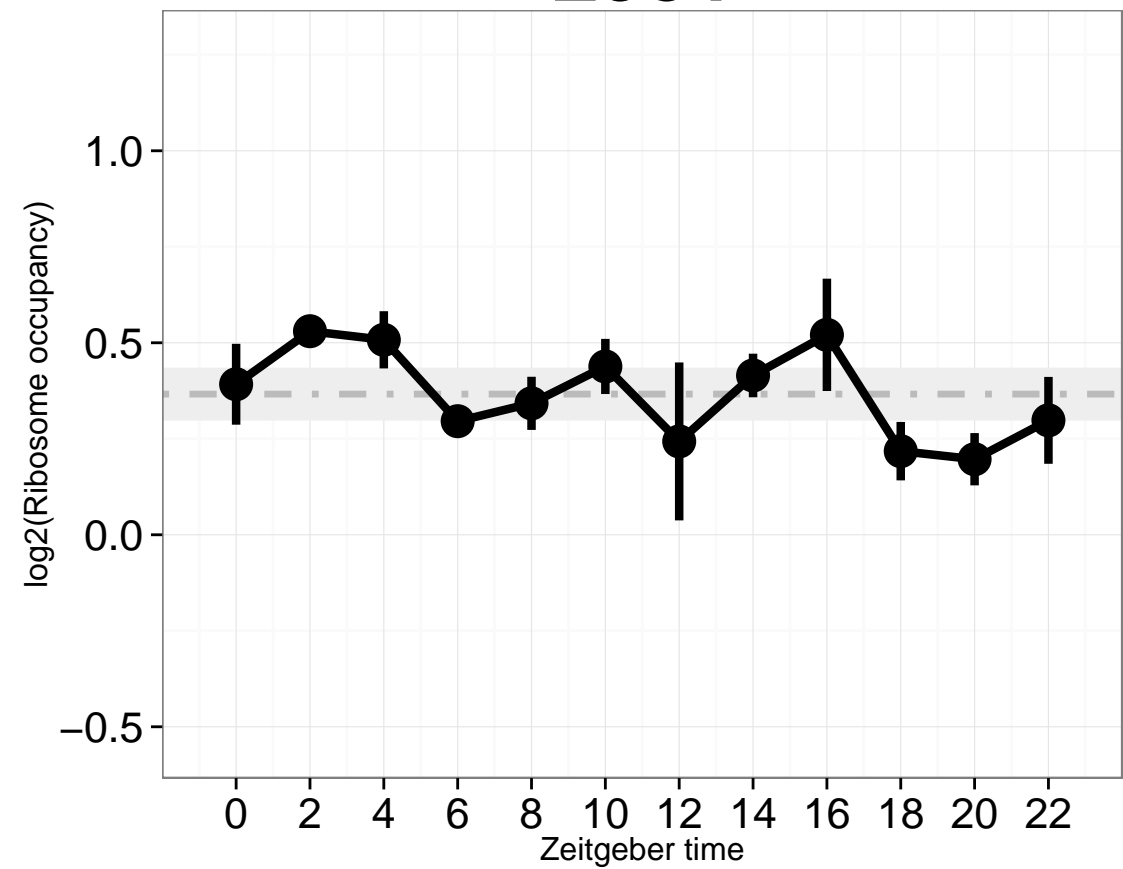

Supplement: Supplementary file 9432 [file 1]

# Psmb5

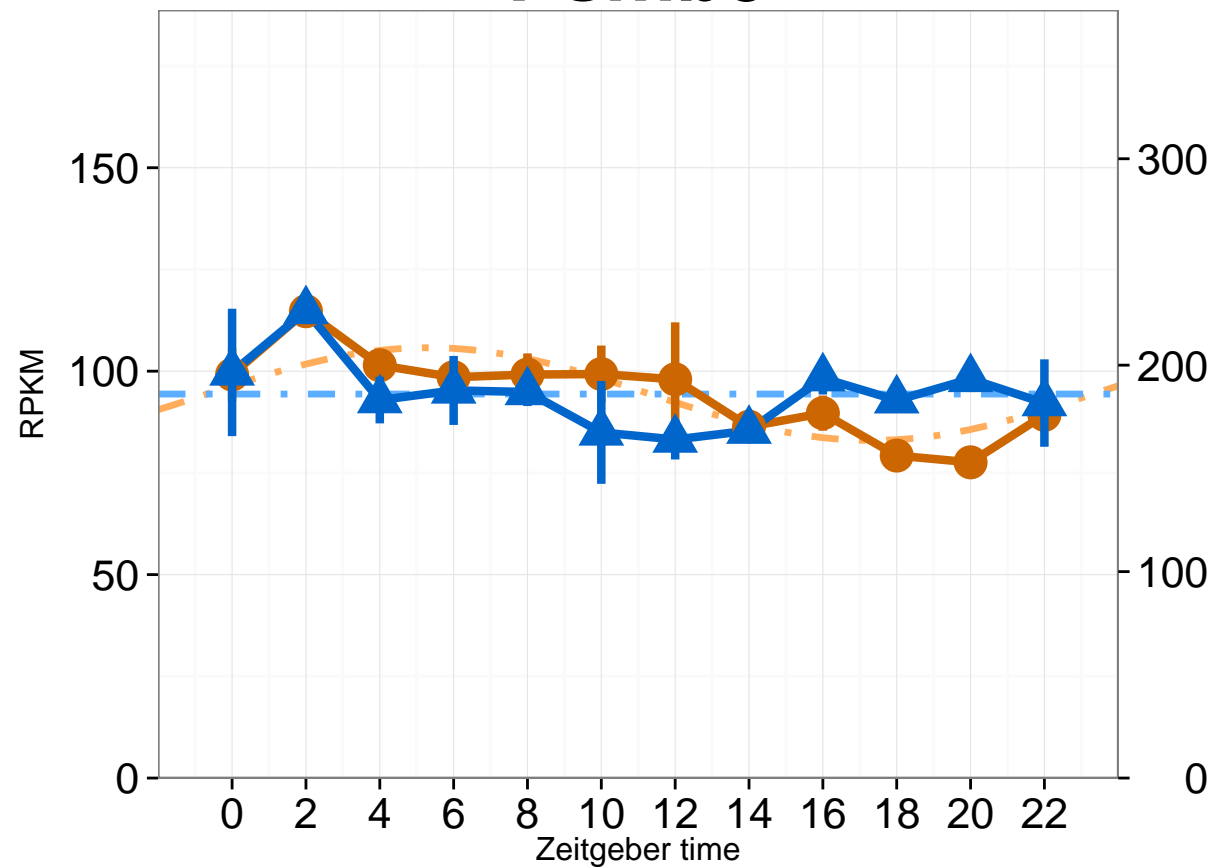

# Psmb5

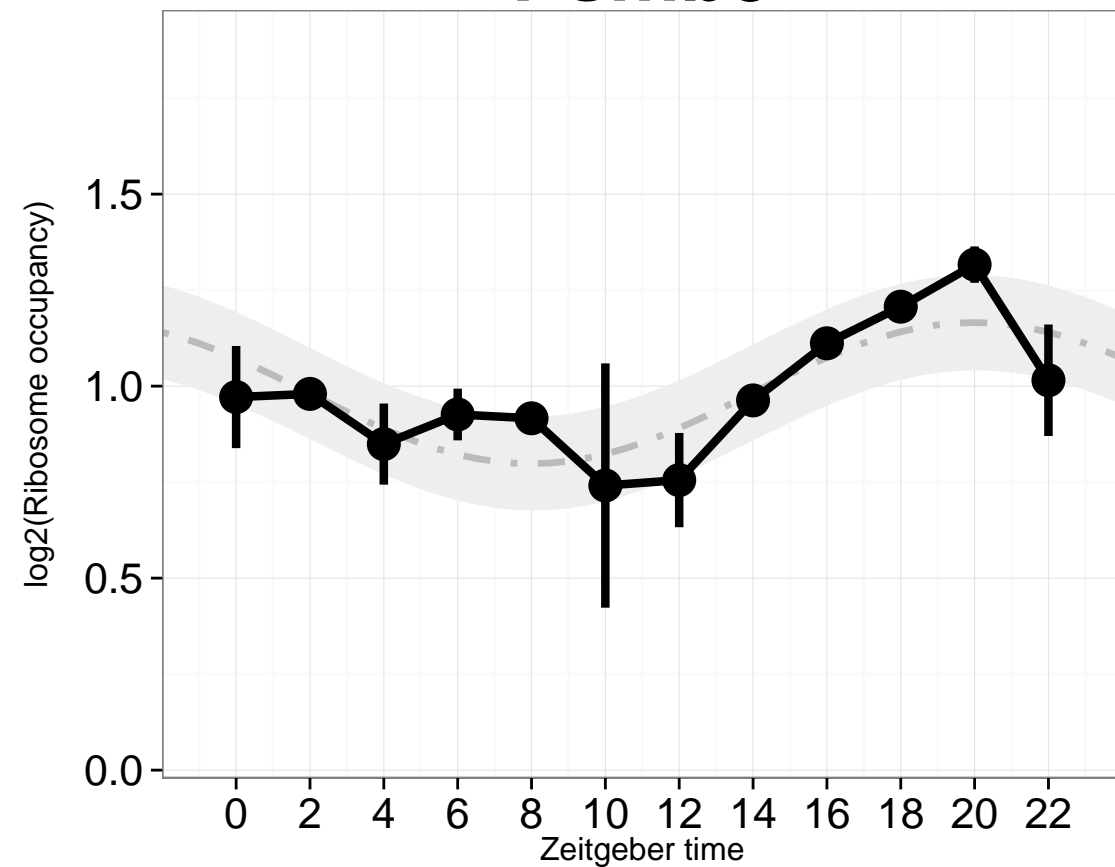

Supplement: Supplementary file 9433 [file 1]

# Cox10

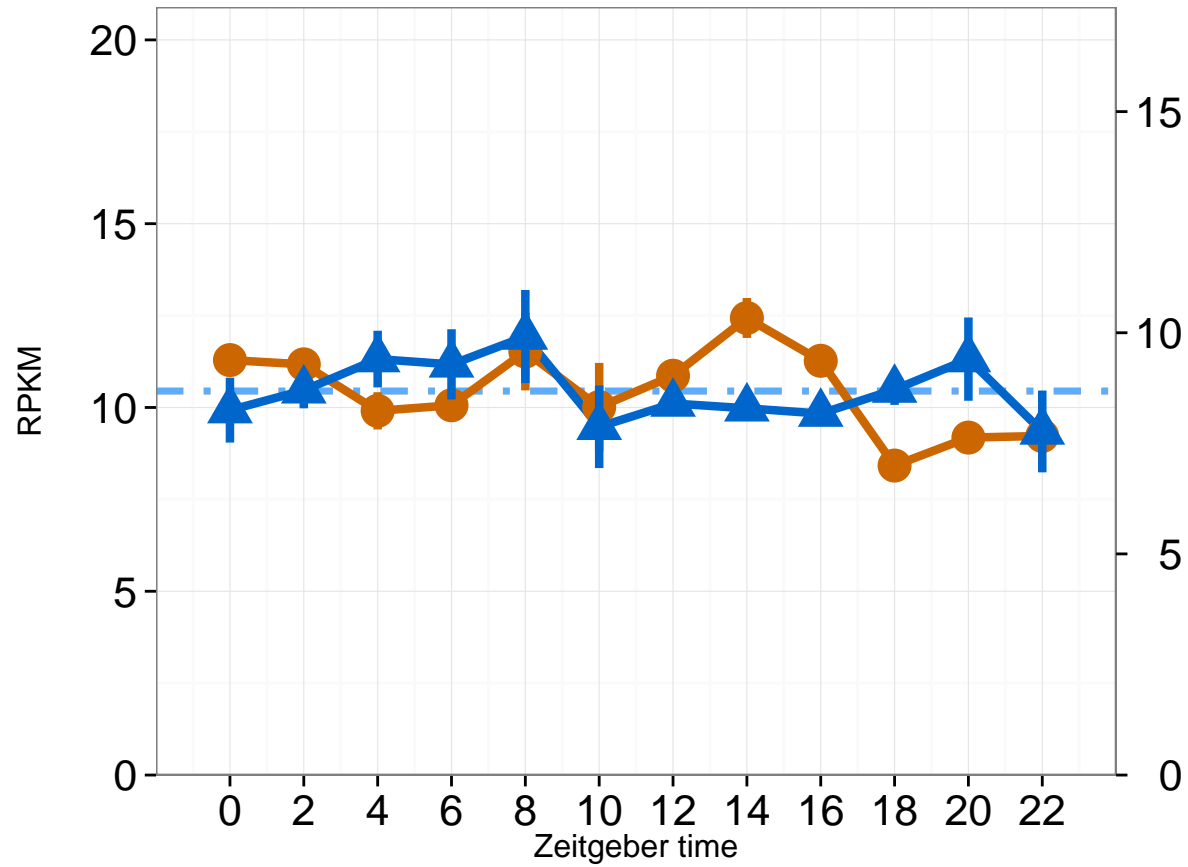

# Cox10

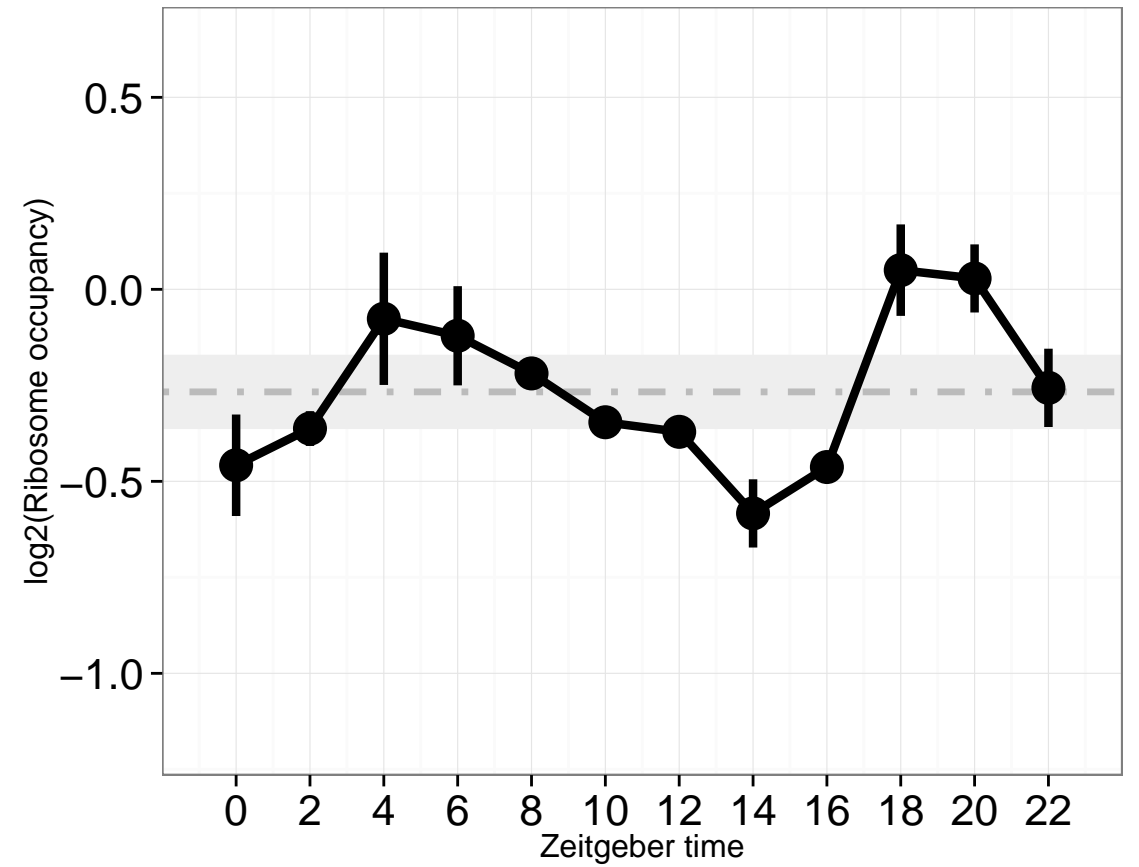

Supplement: Supplementary file 9434 [file 1]

# Aggf1

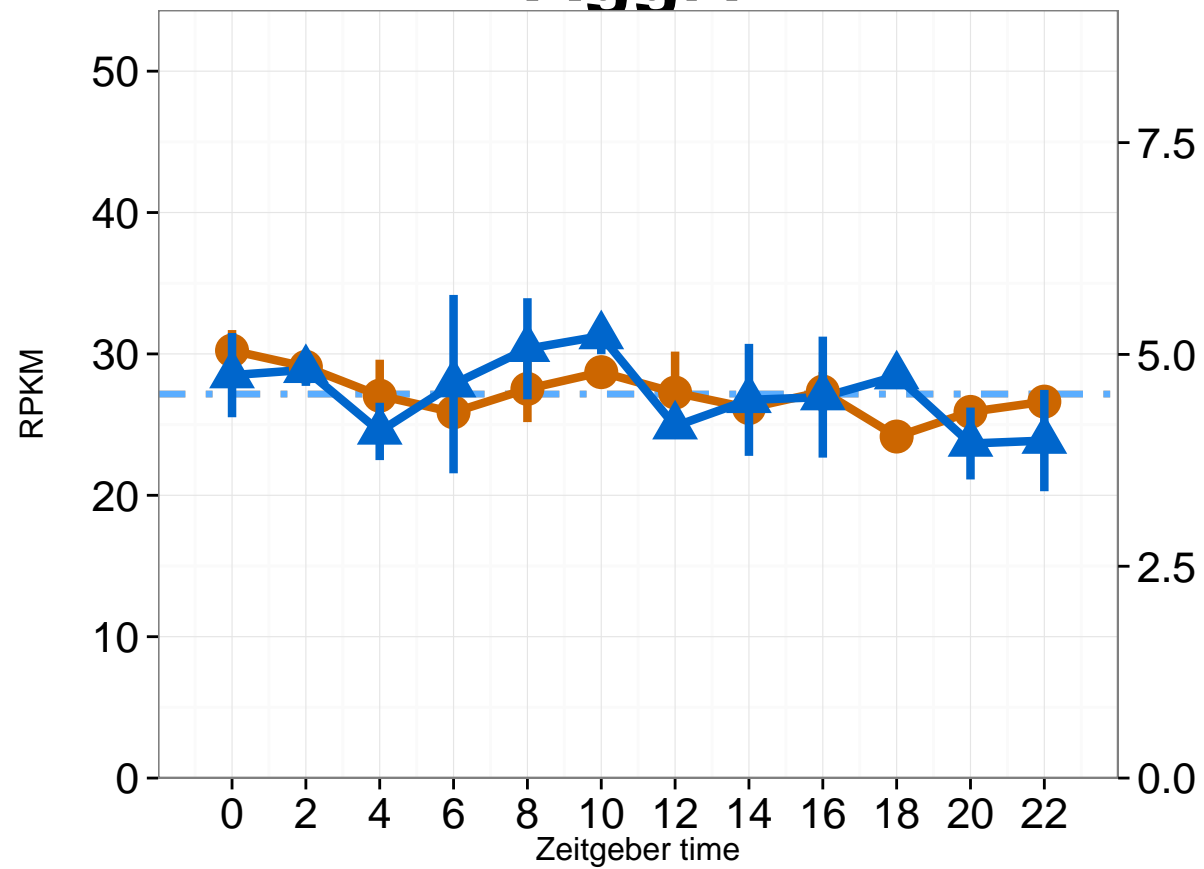

# Aggf1

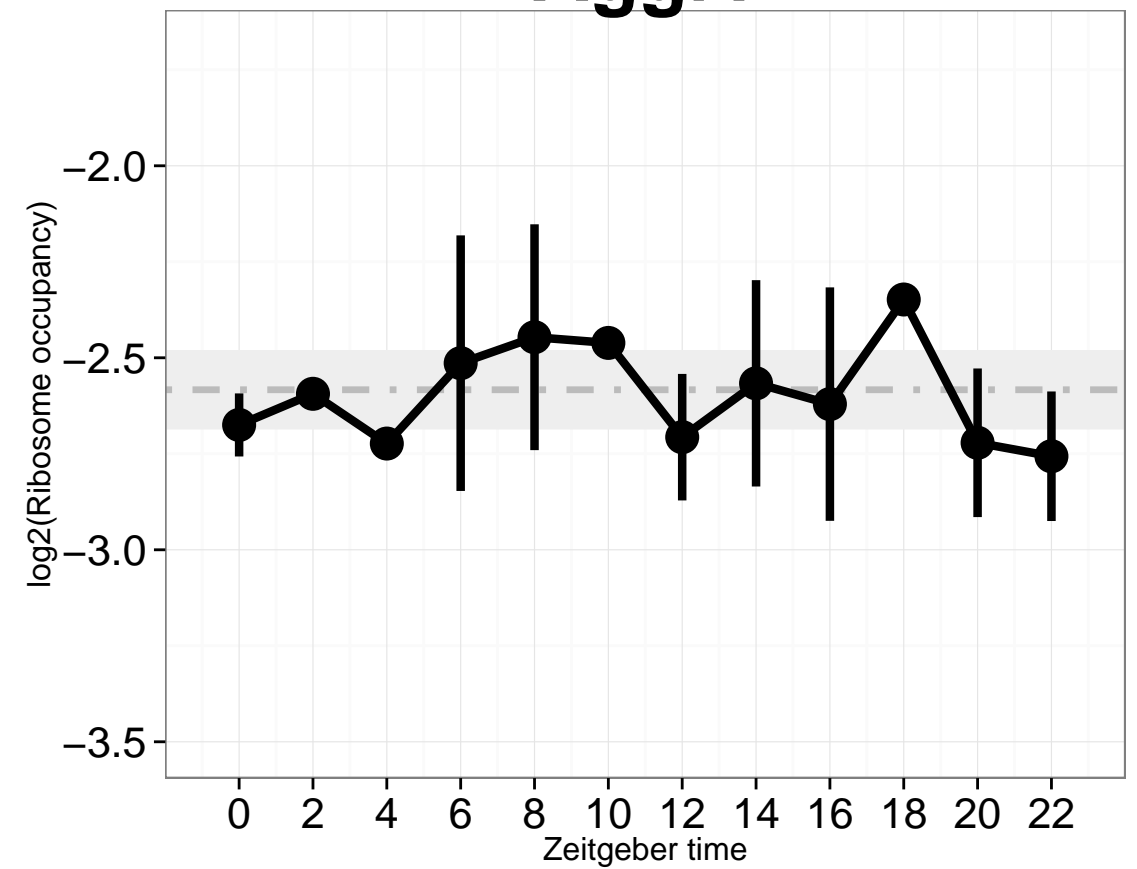

Supplement: Supplementary file 9435 [file 1]
