# Supplementary material (part 95 of 133)
Source: publisher figshare collection journal article supplement (https://springernature.figshare.com/articles/dataset/_/4903193)

## Foxn3

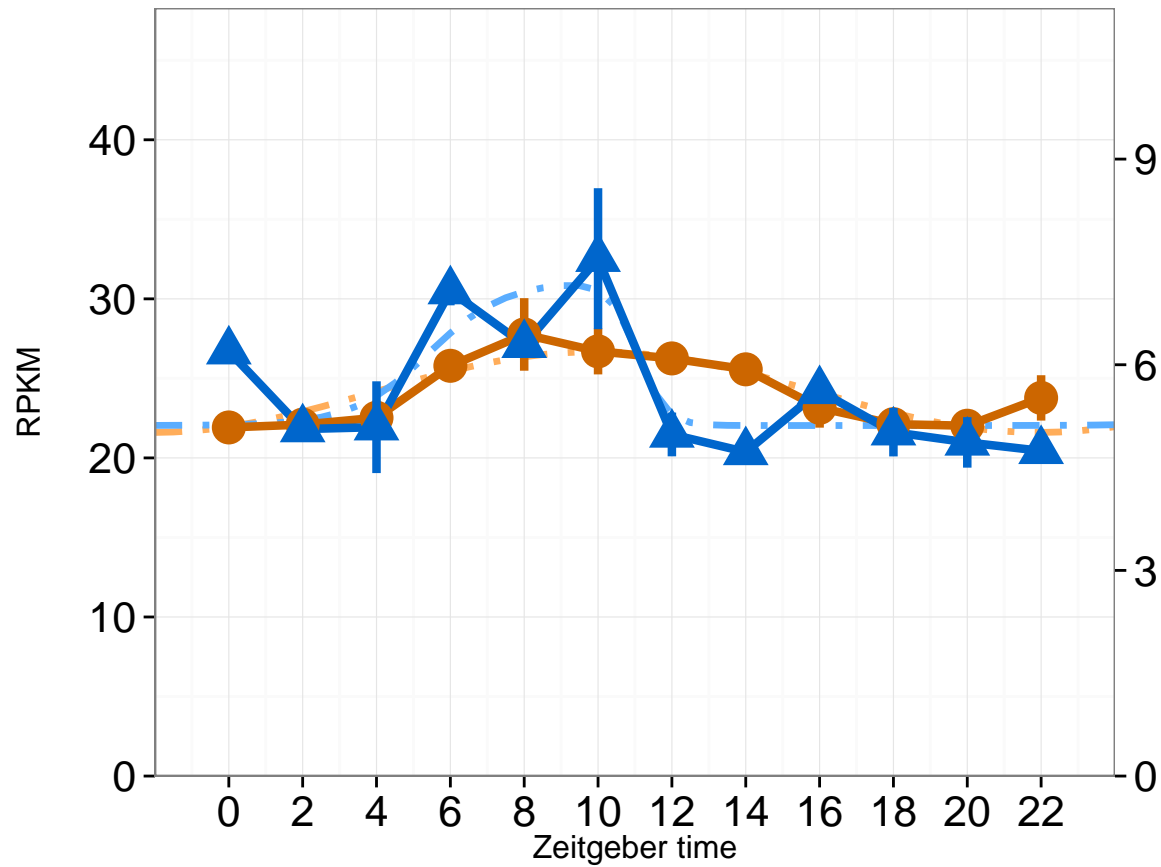

## Foxn3

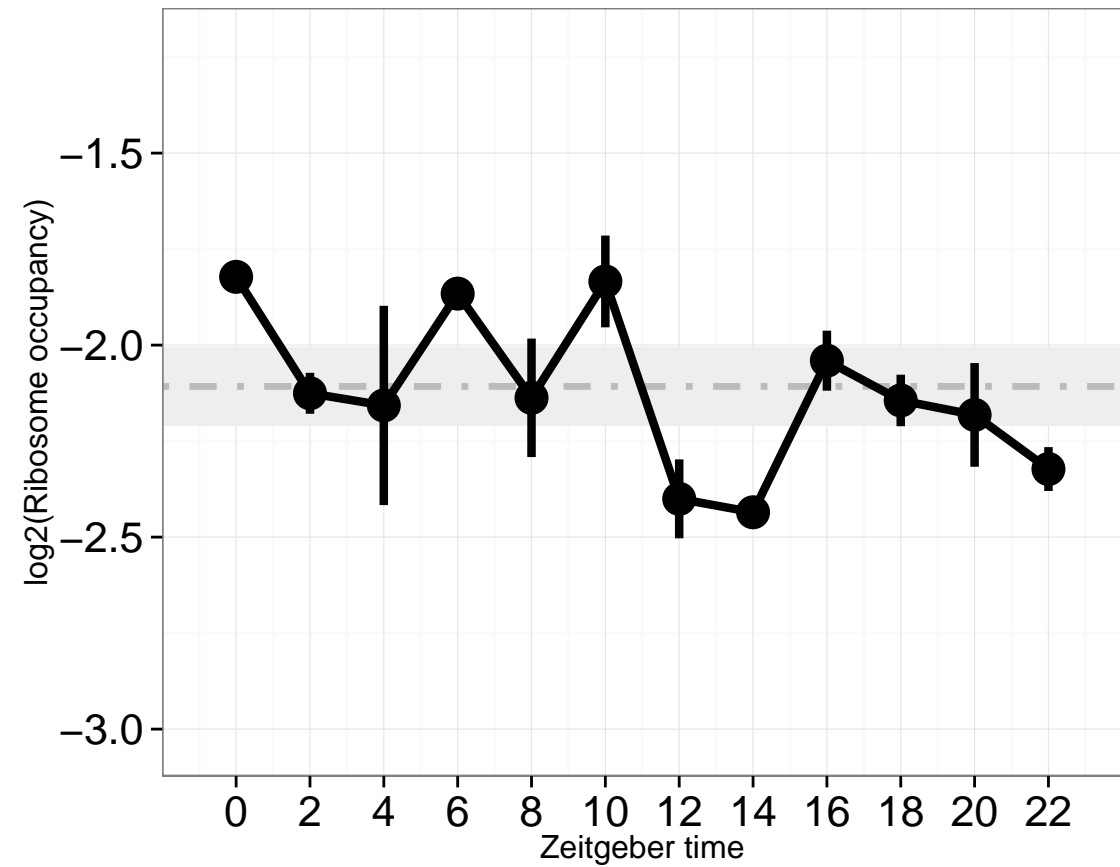

Supplement: Supplementary file 9436 [file 1]

## Prkab2

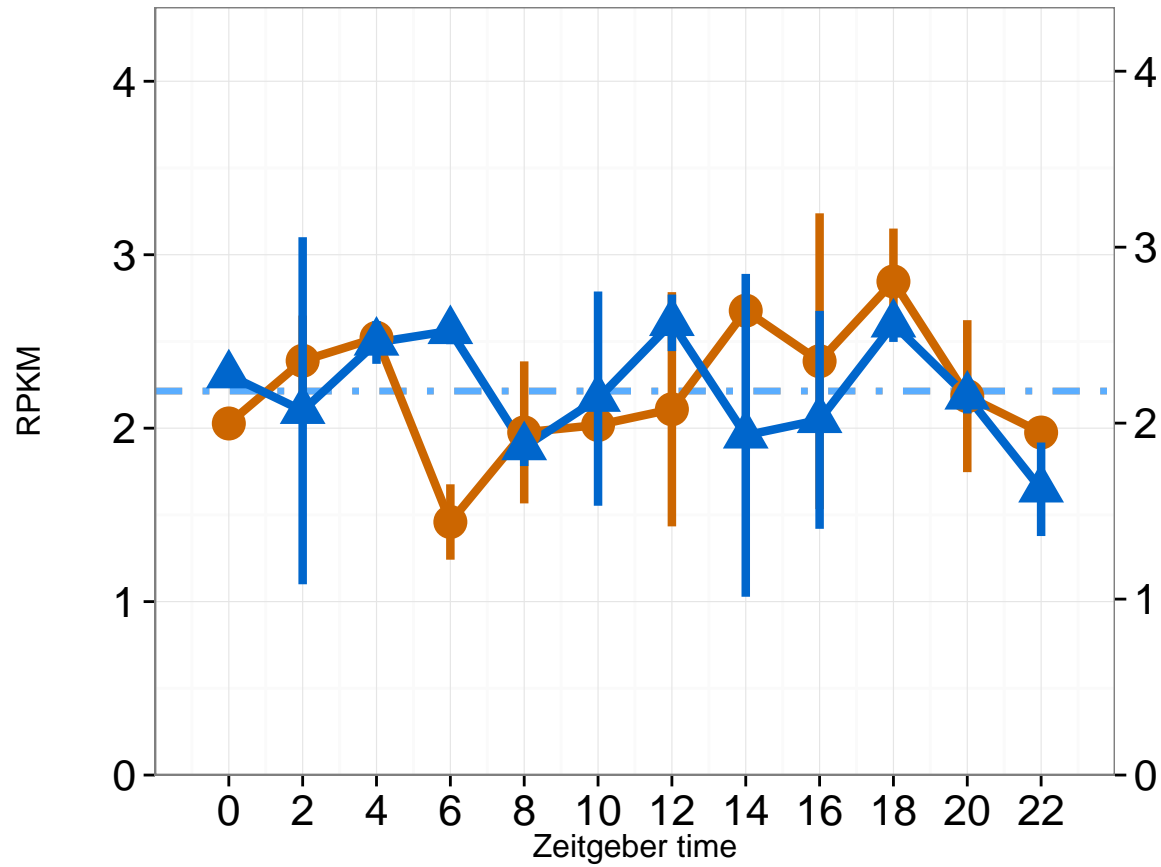

## Prkab2

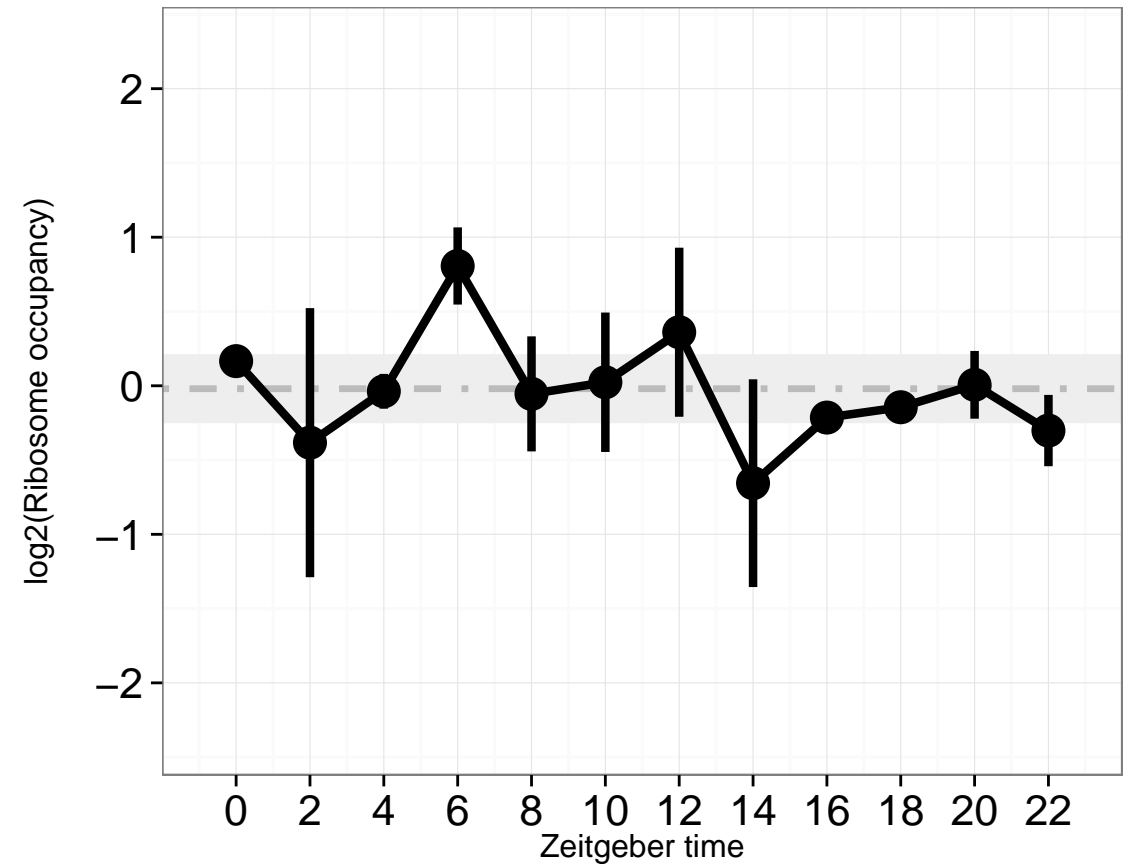

Supplement: Supplementary file 9437 [file 1]

## Zbtb21

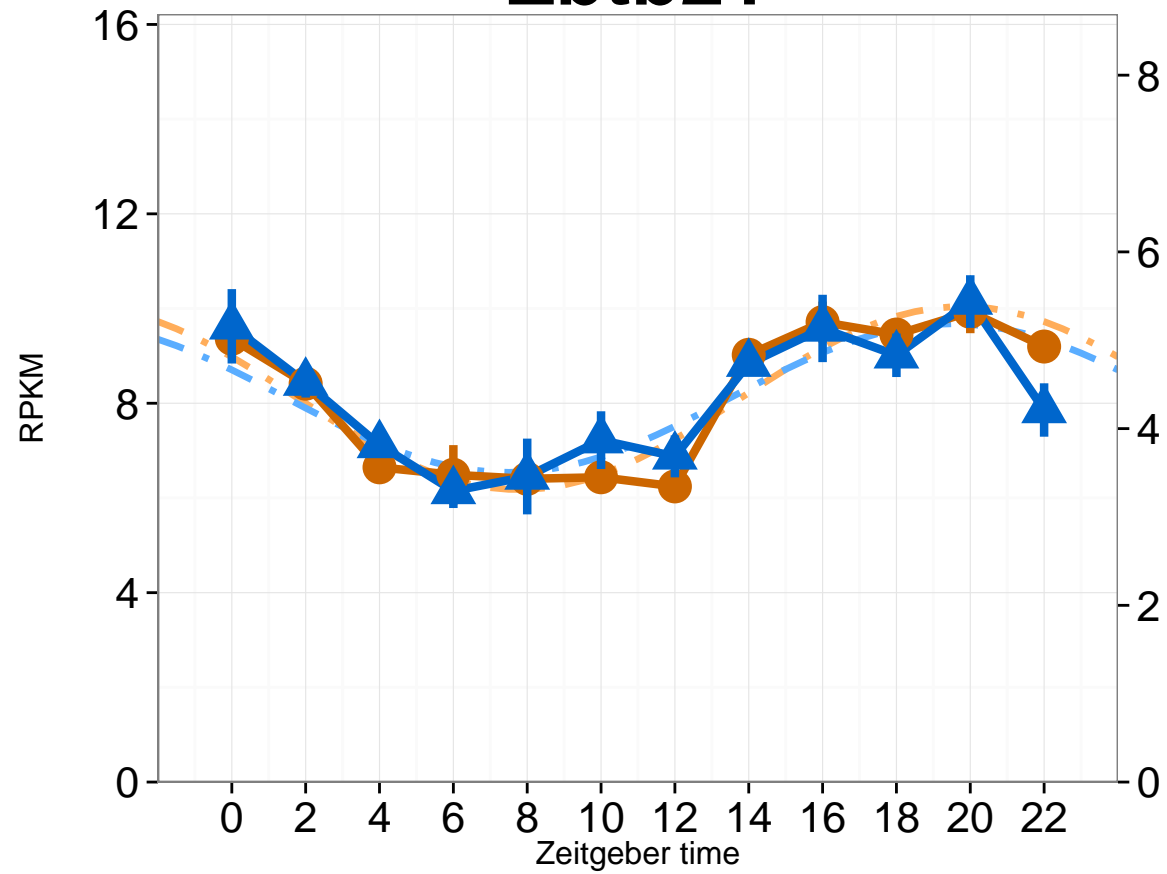

## Zbtb21

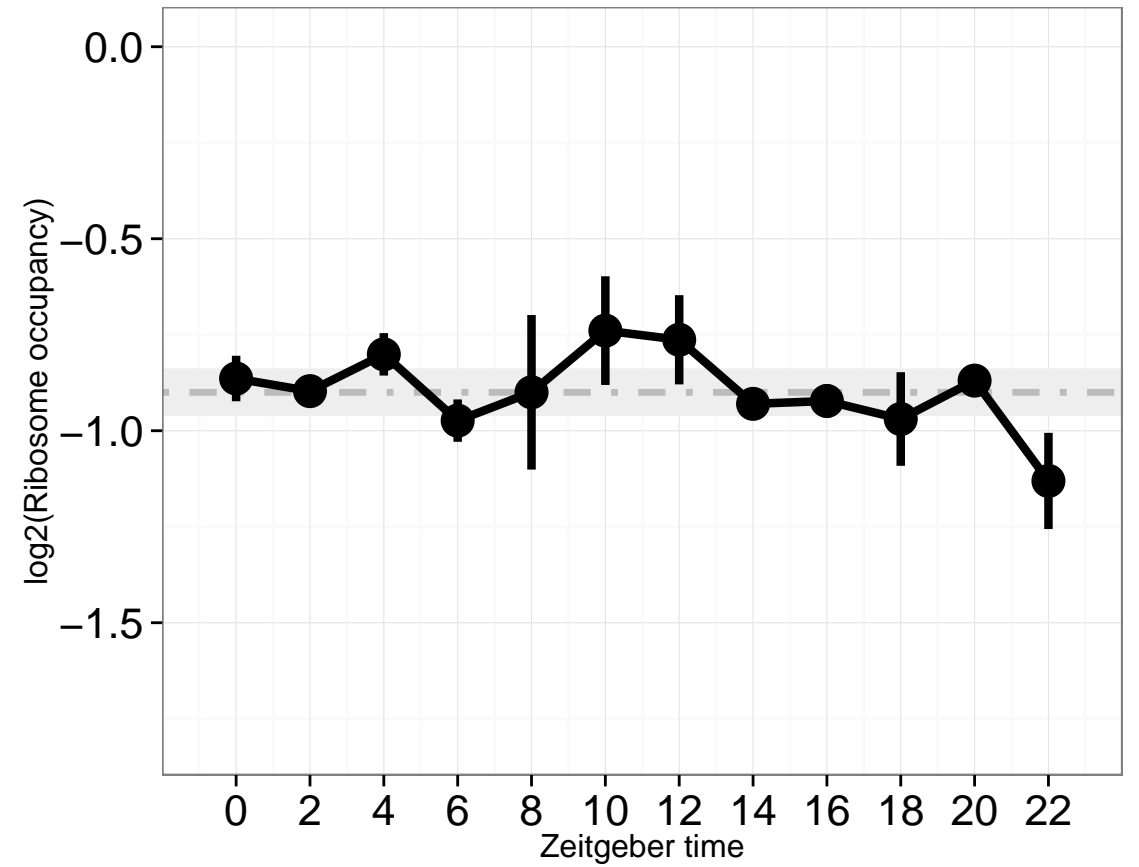

Supplement: Supplementary file 9438 [file 1]

# Tmed6

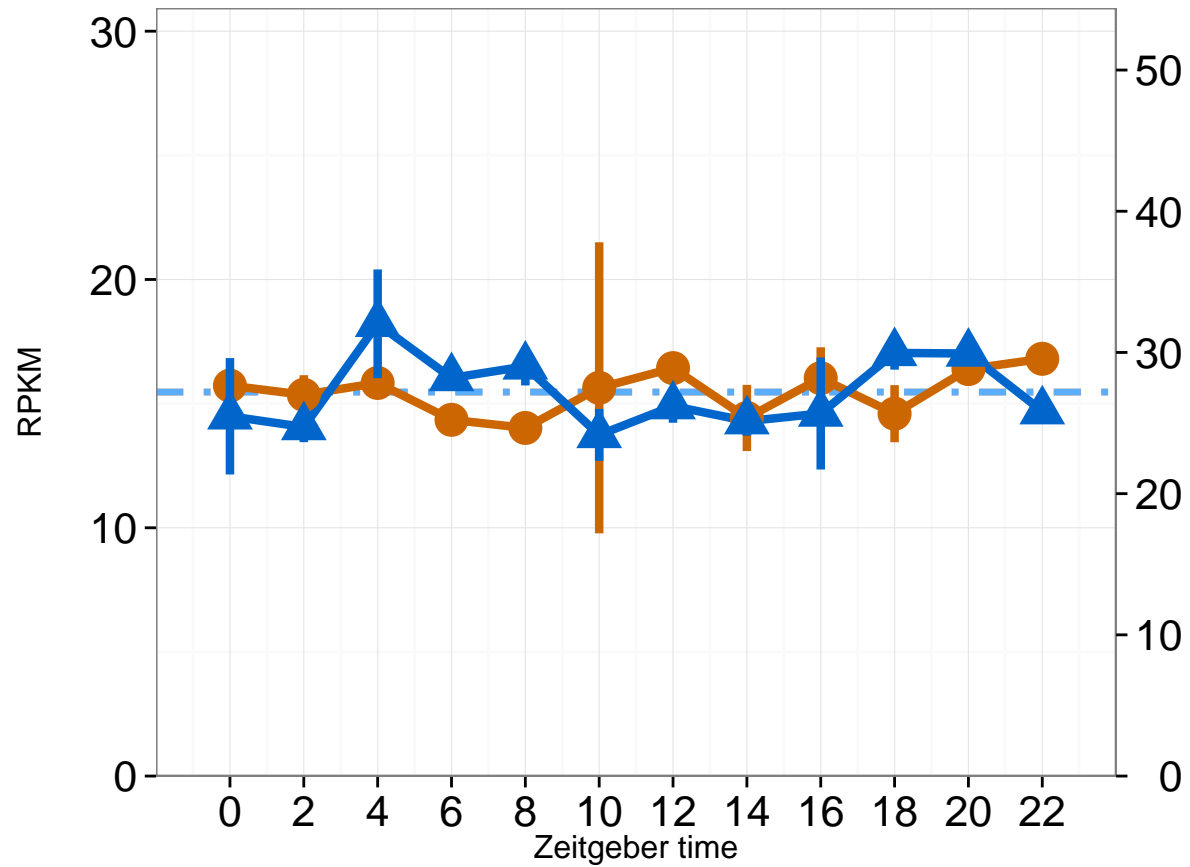

# Tmed6

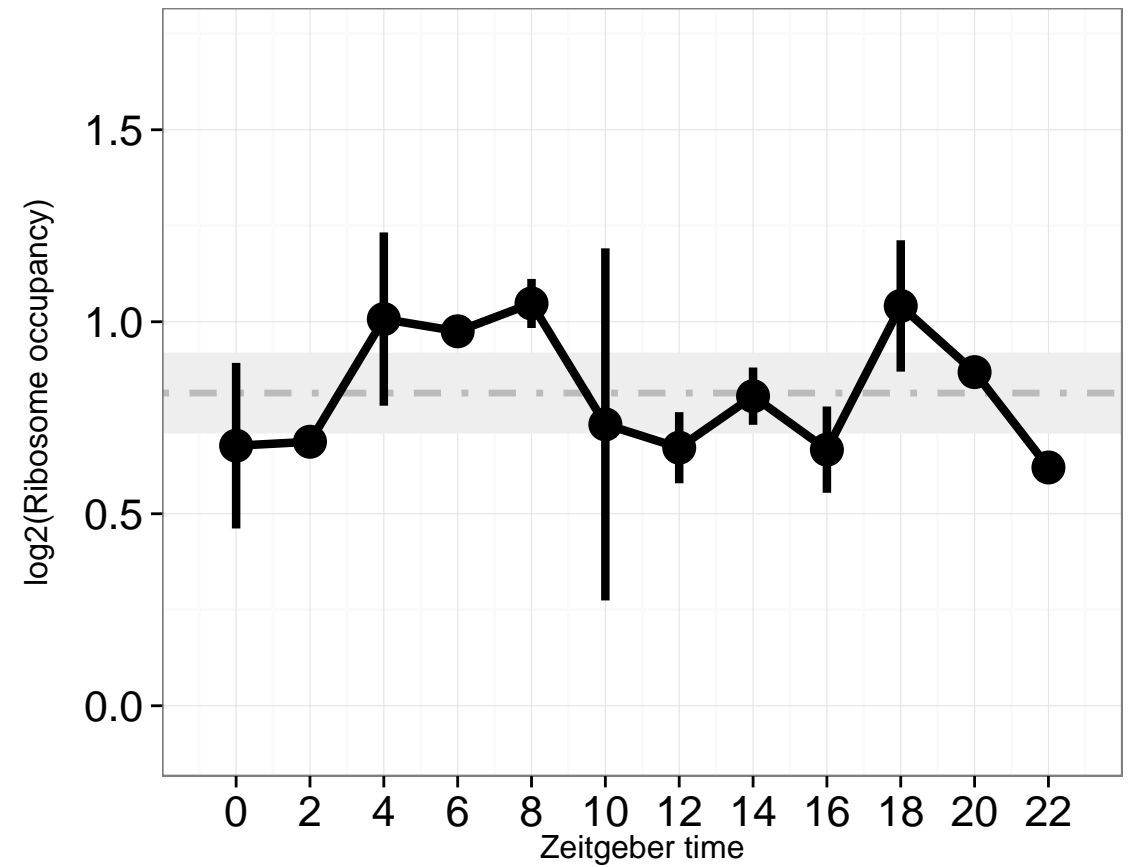

Supplement: Supplementary file 9439 [file 1]

# D630023F18Rik

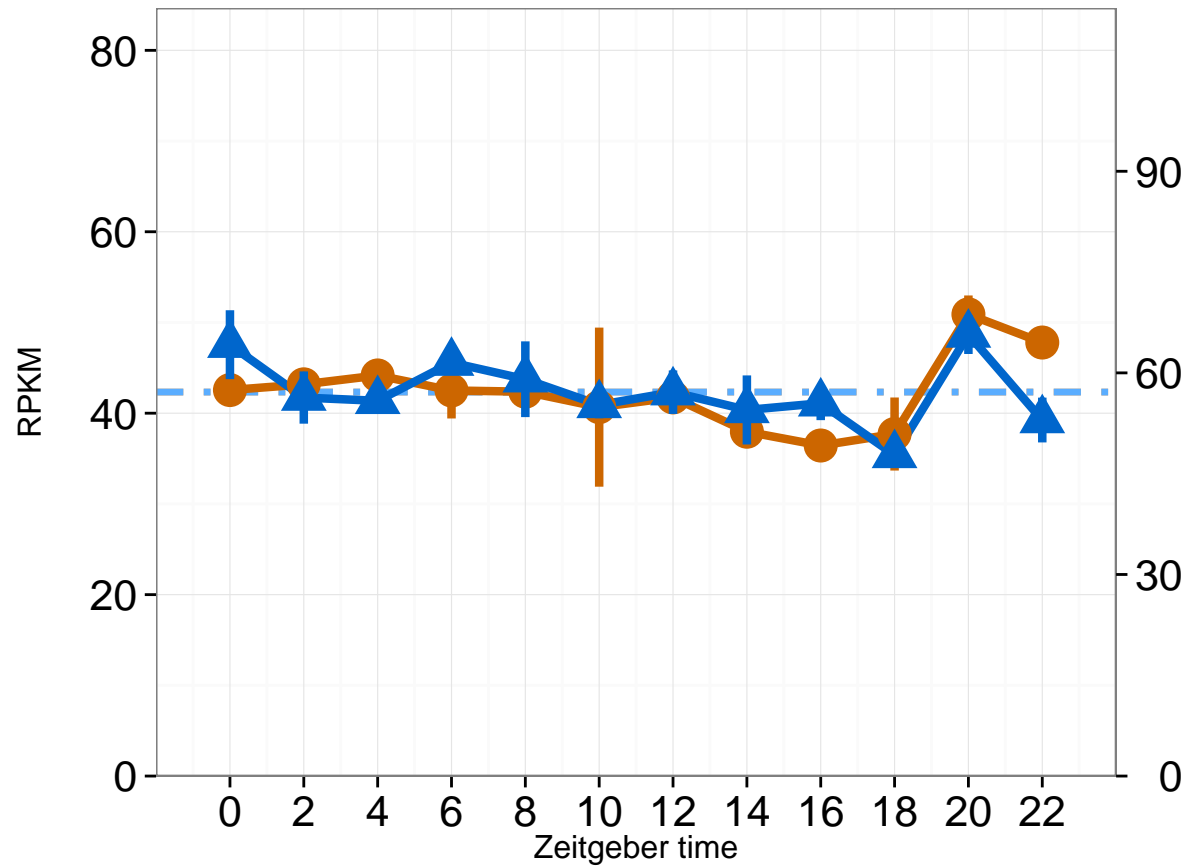

# D630023F18Rik

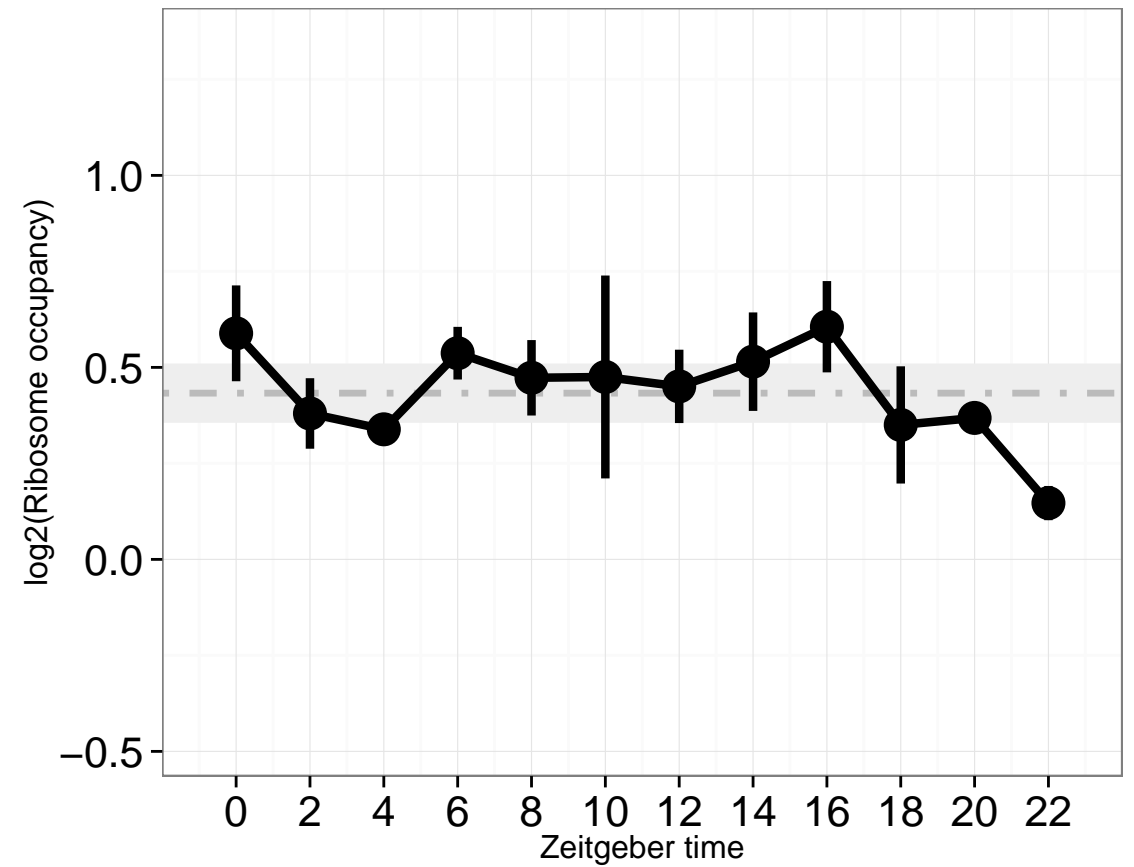

Supplement: Supplementary file 9440 [file 1]

## Sbds

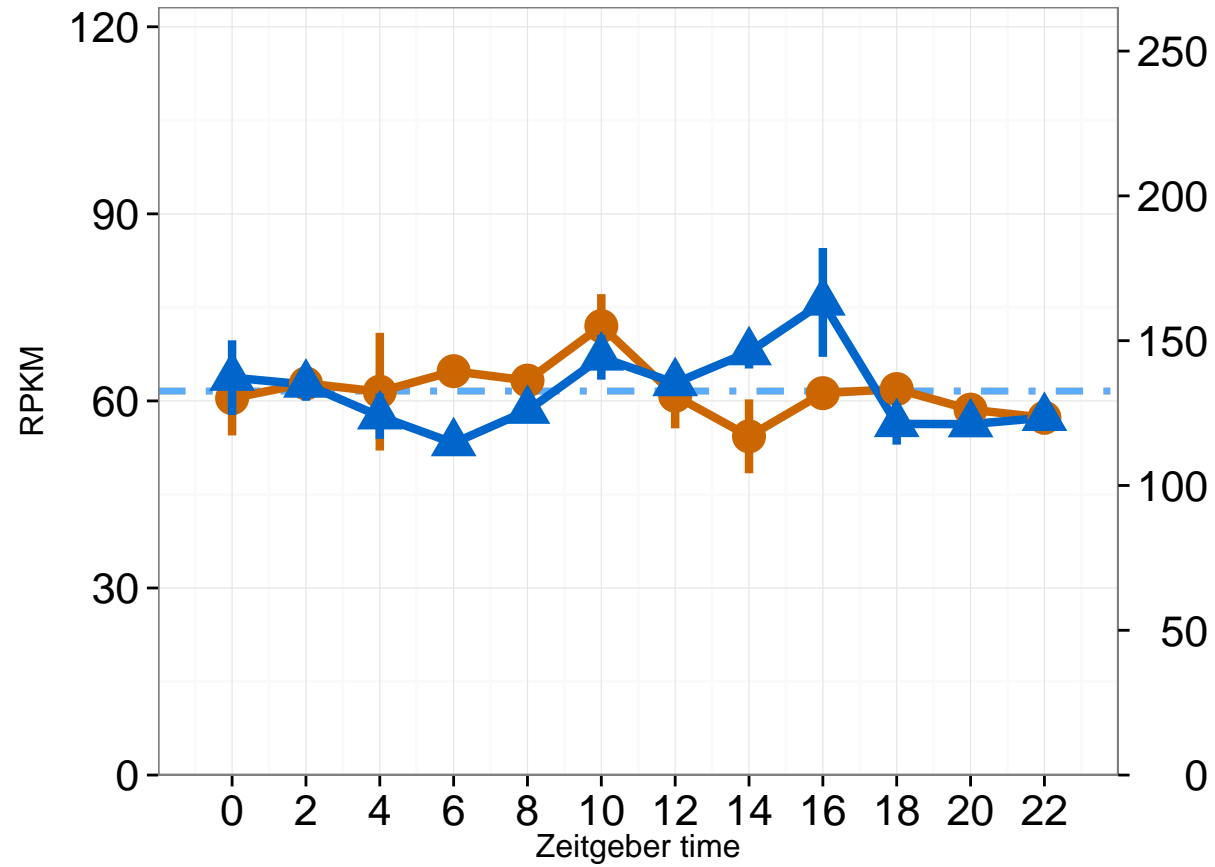

## Sbds

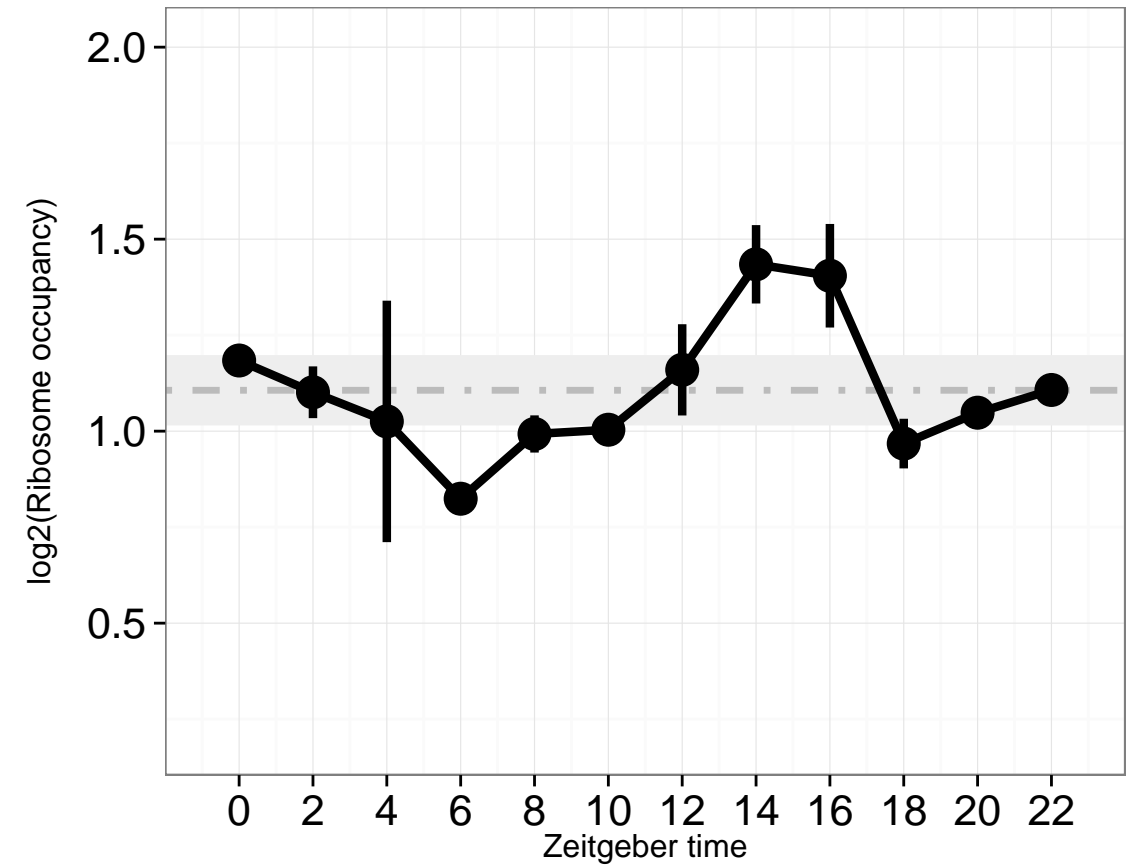

Supplement: Supplementary file 9441 [file 1]

# Rbp1

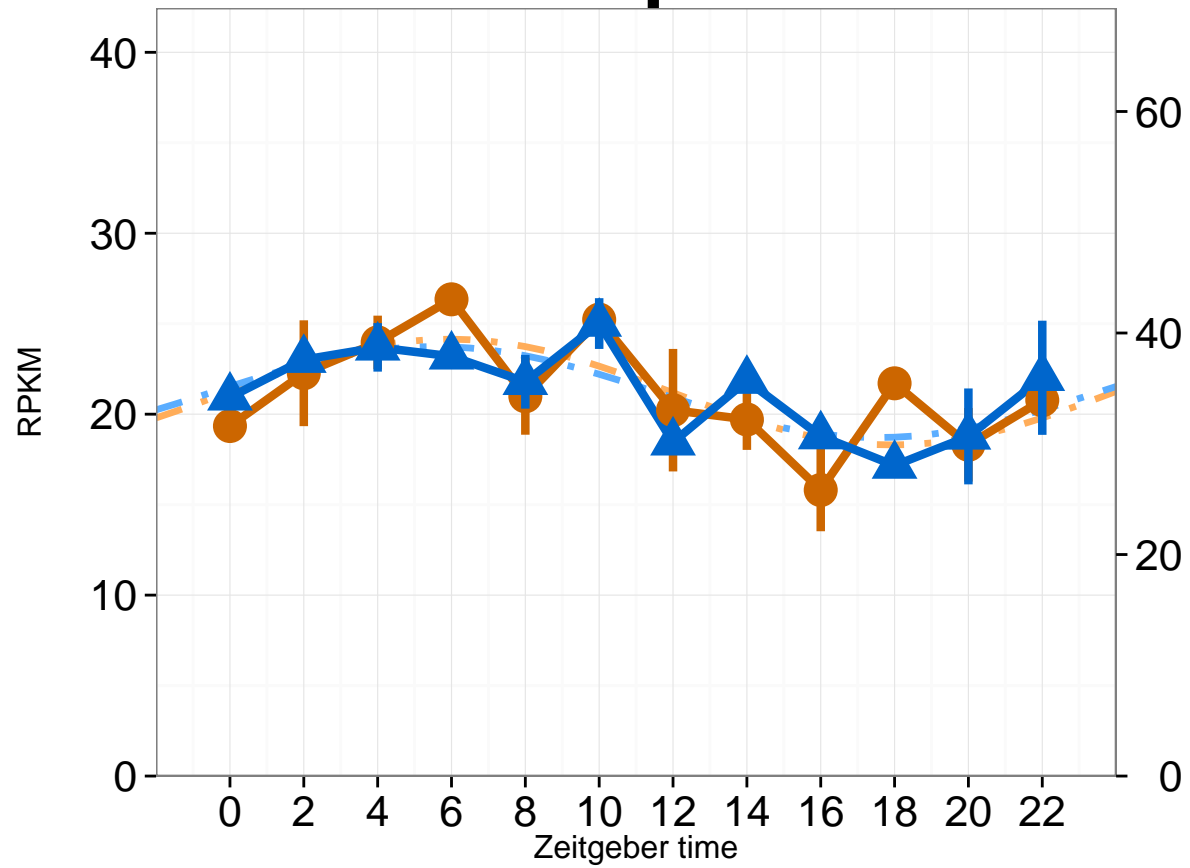

# Rbp1

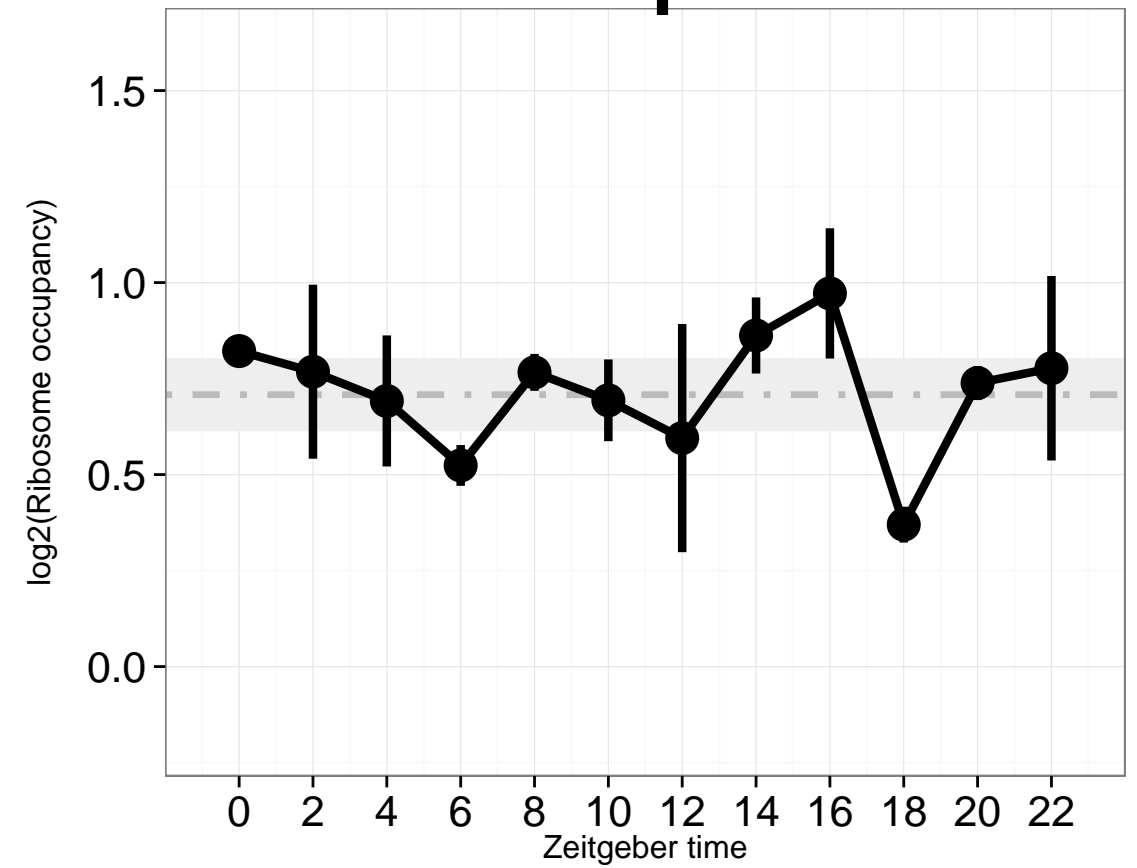

Supplement: Supplementary file 9442 [file 1]

## Nf2

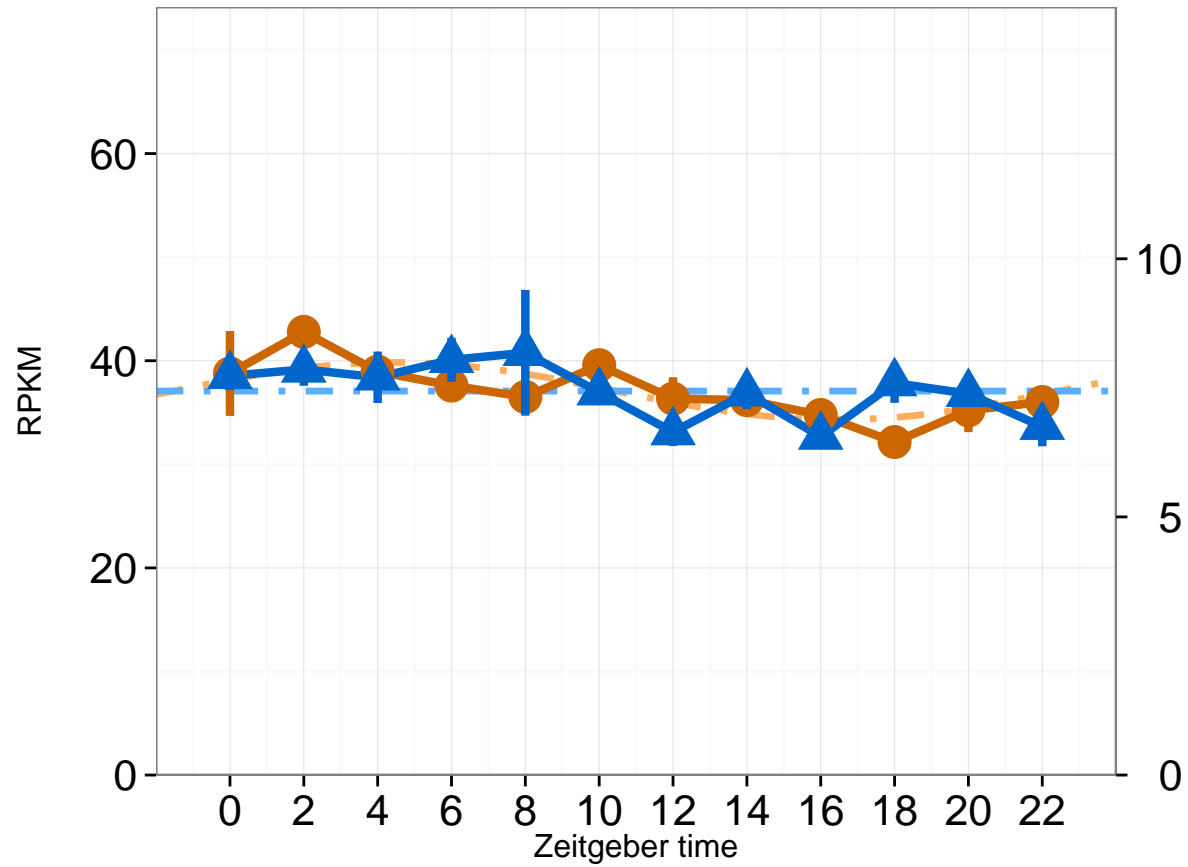

## Nf2

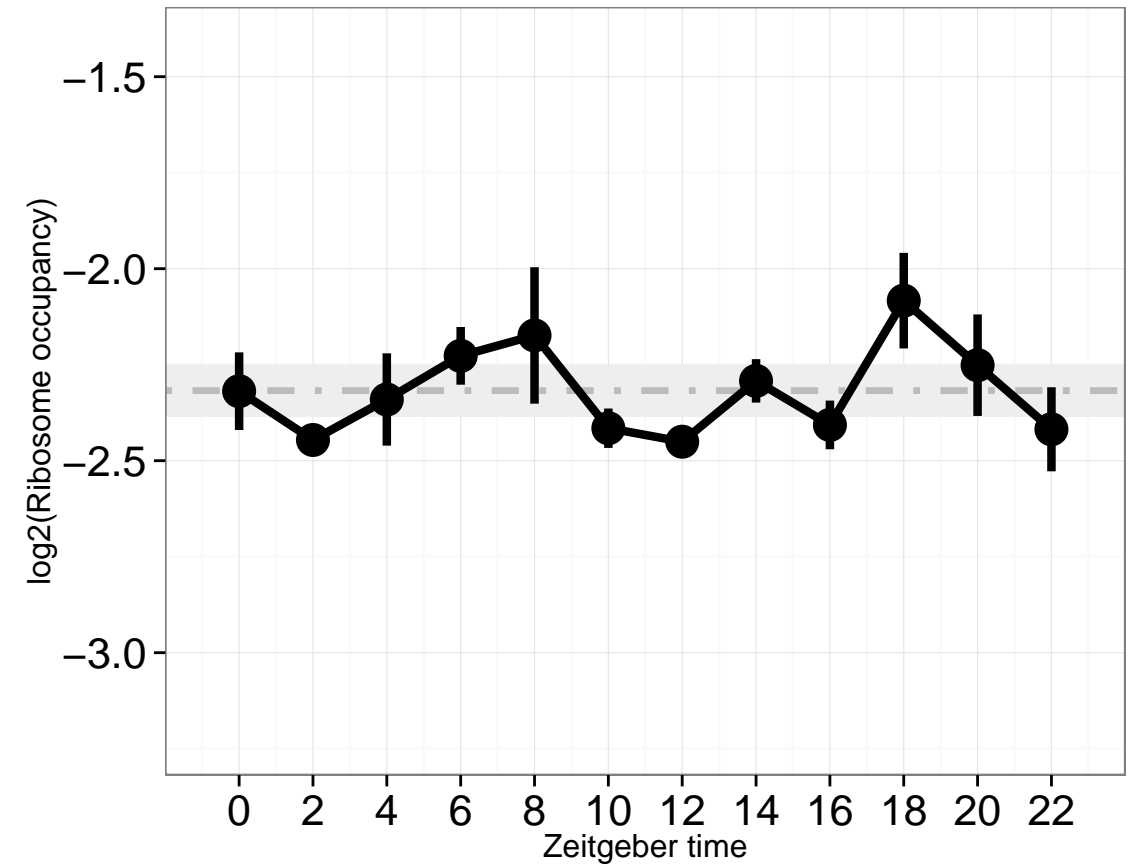

Supplement: Supplementary file 9443 [file 1]

## Mrpl43

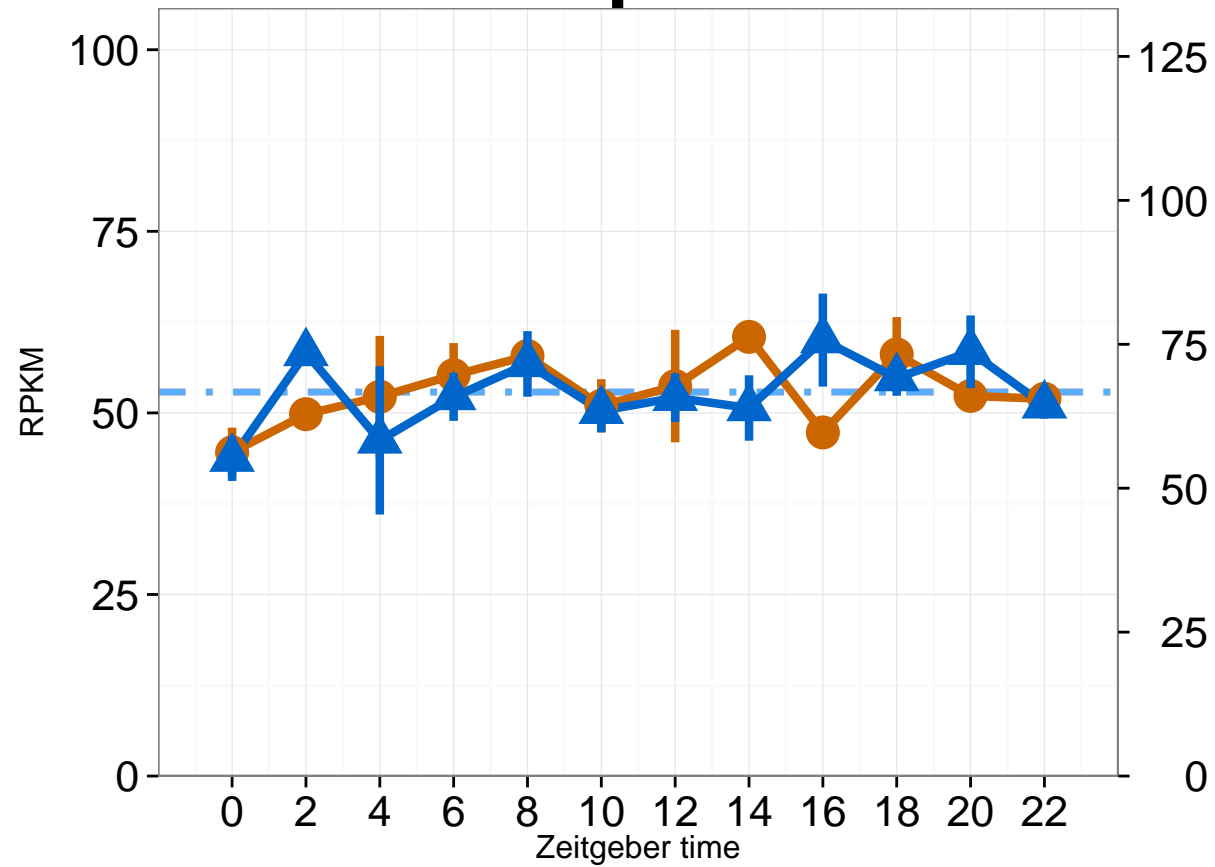

## Mrpl43

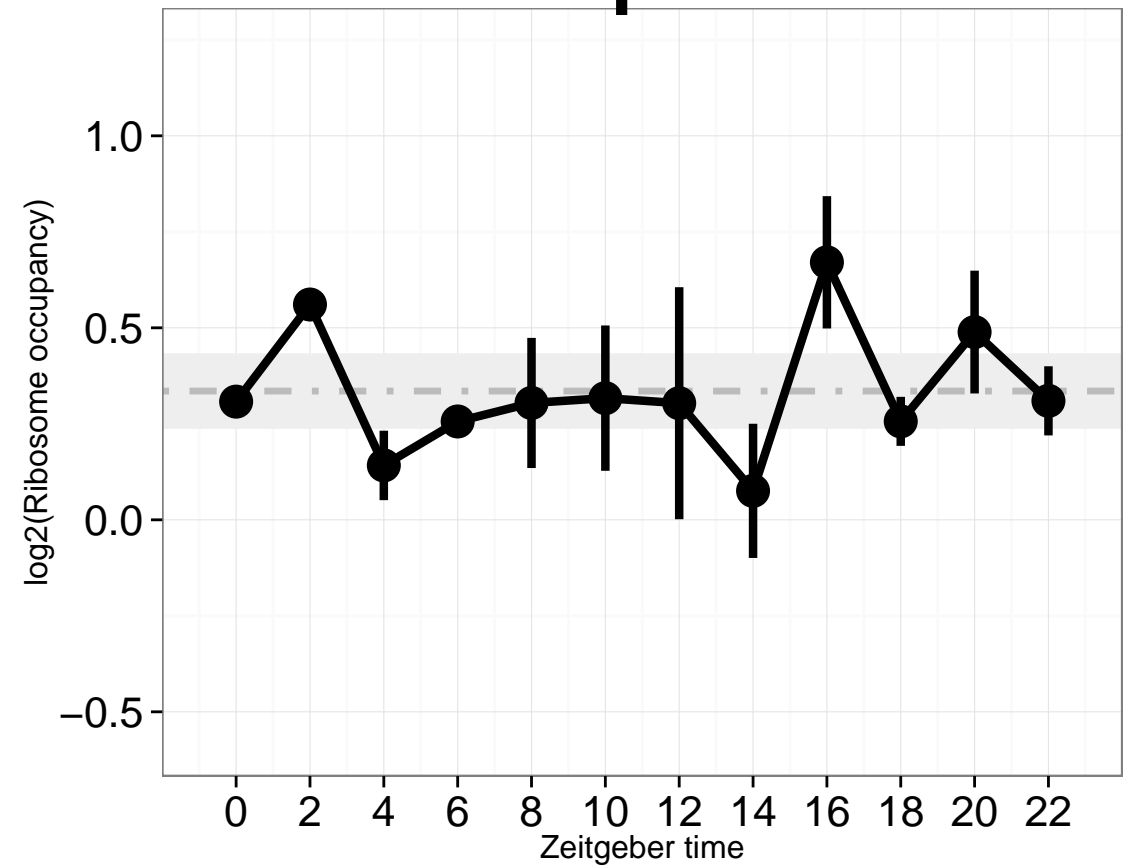

Supplement: Supplementary file 9444 [file 1]

## Eri3

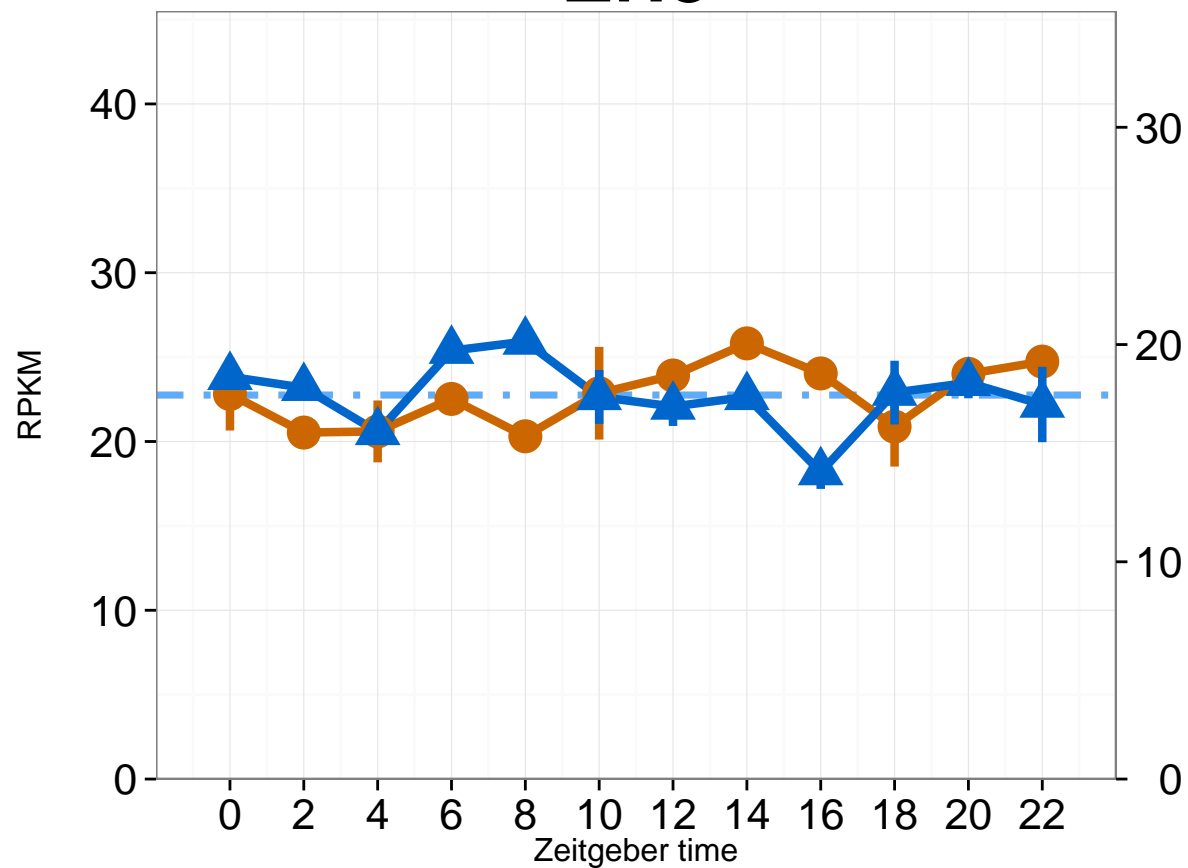

## Eri3

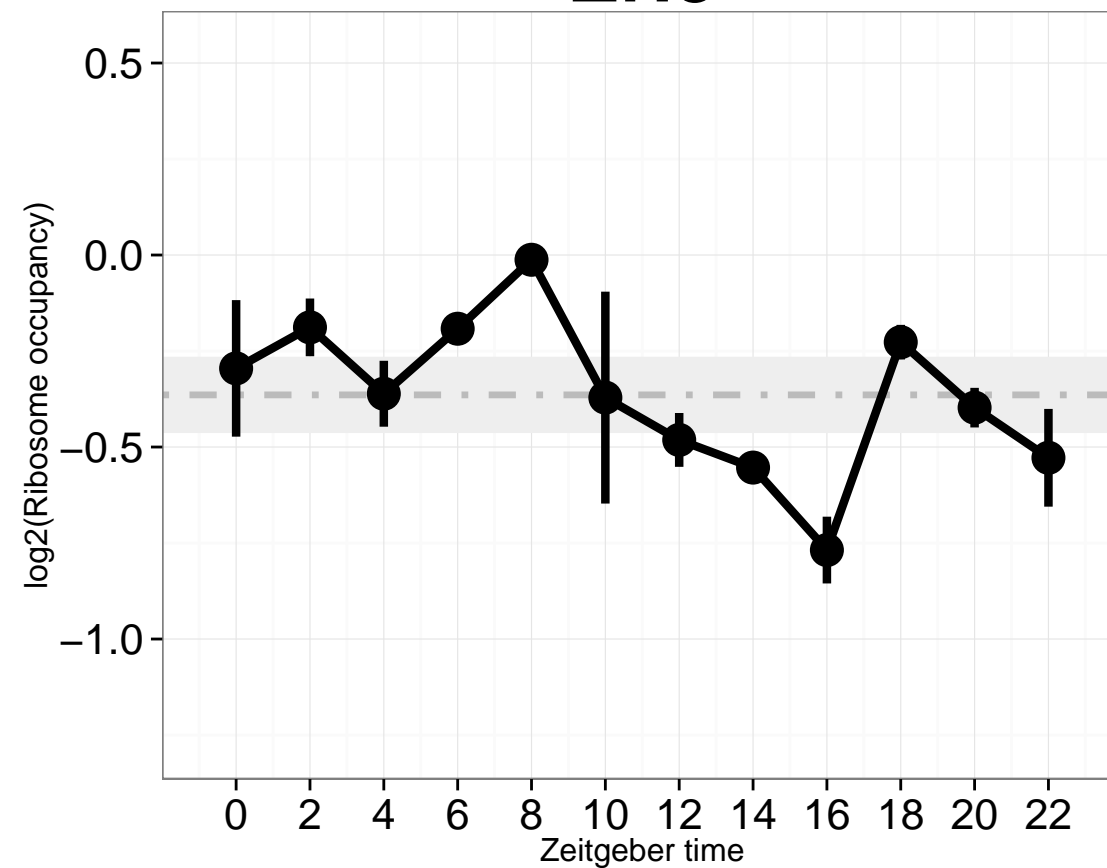

Supplement: Supplementary file 9445 [file 1]

# lqsec1

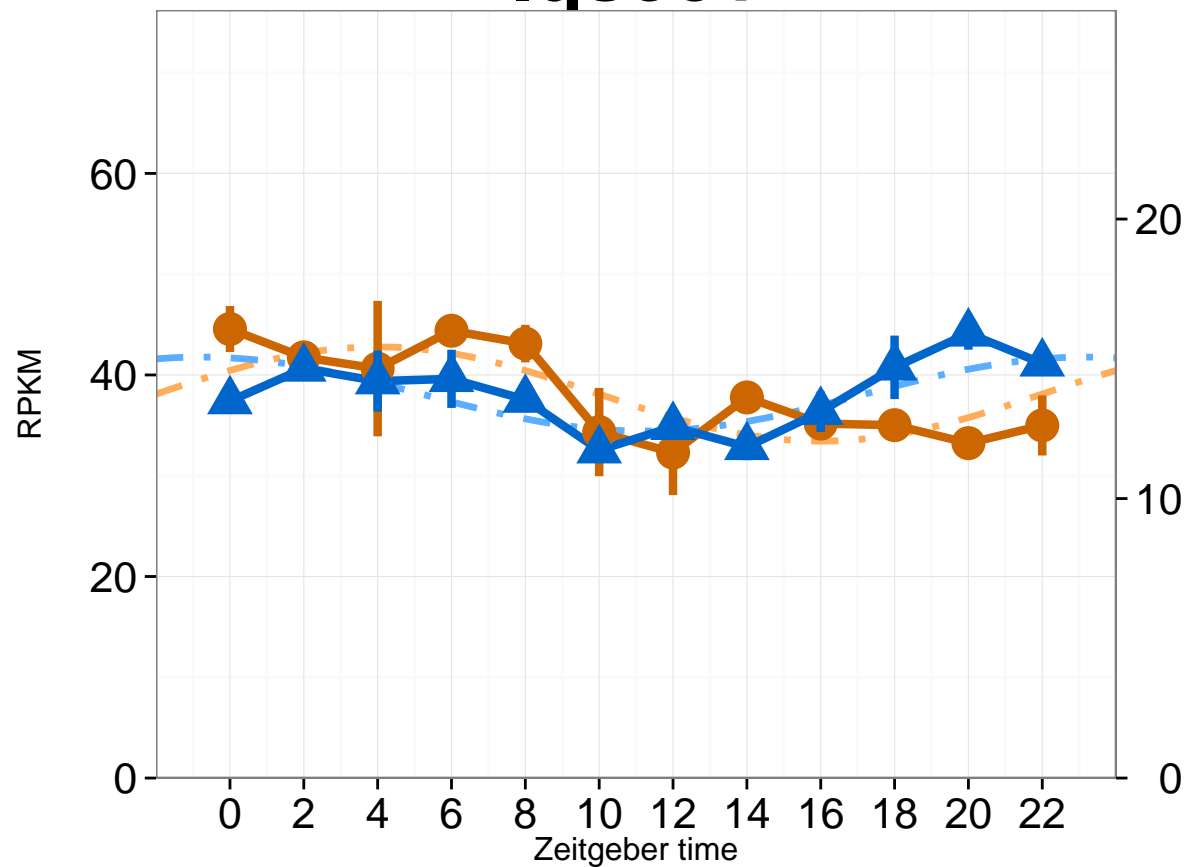

# lqsec1

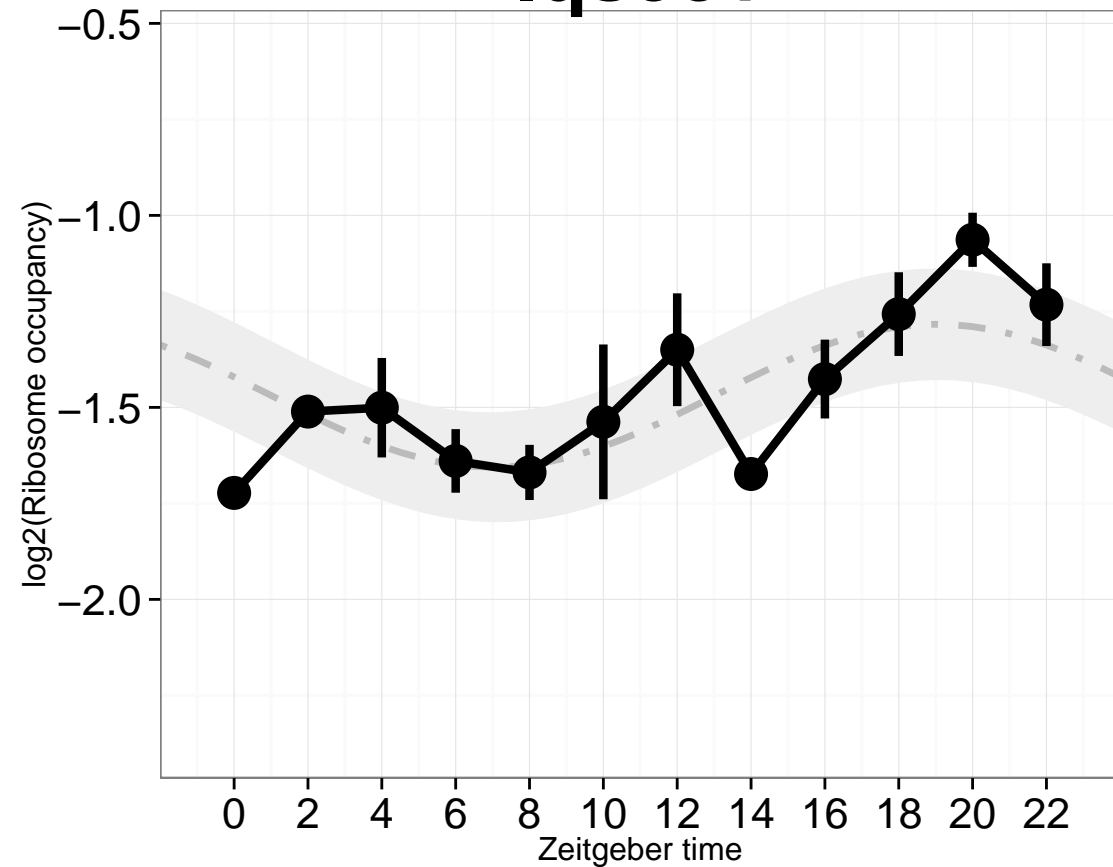

Supplement: Supplementary file 9446 [file 1]

# 1110065P20Rik

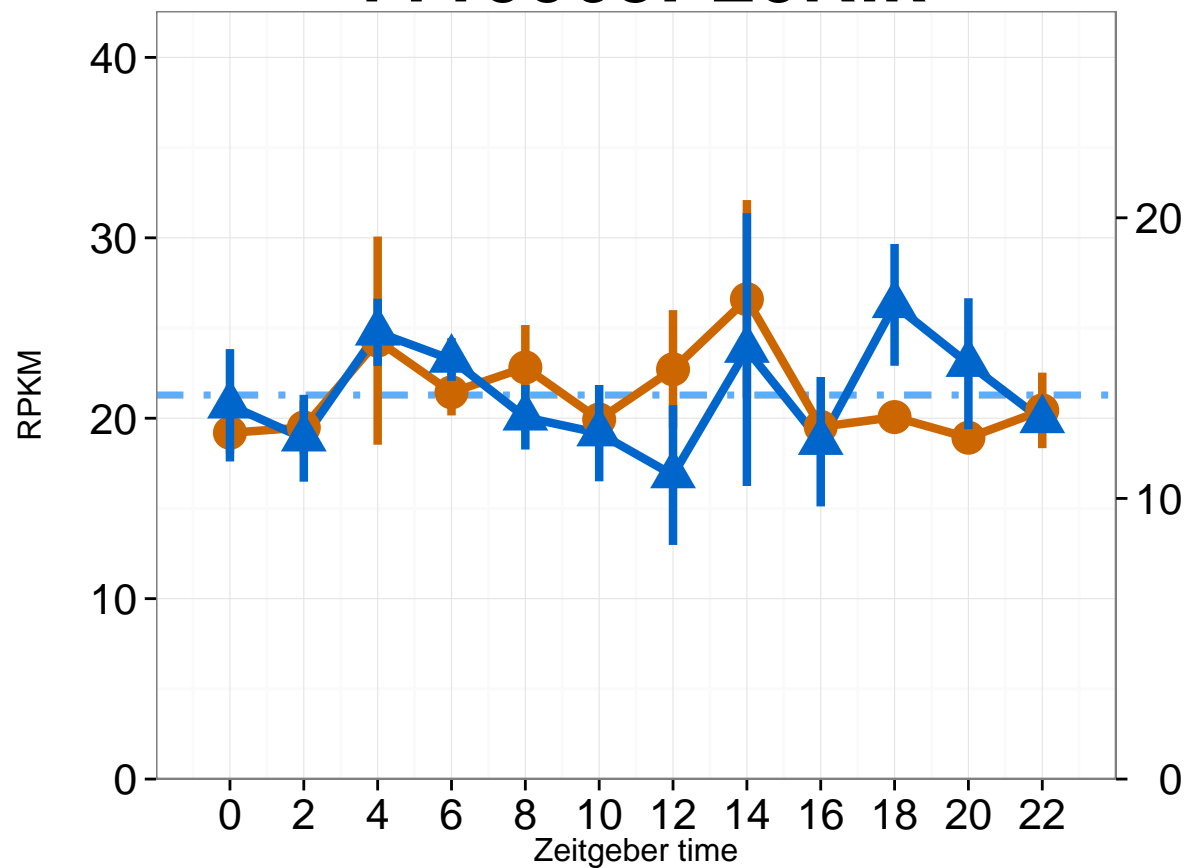

# 1110065P20Rik

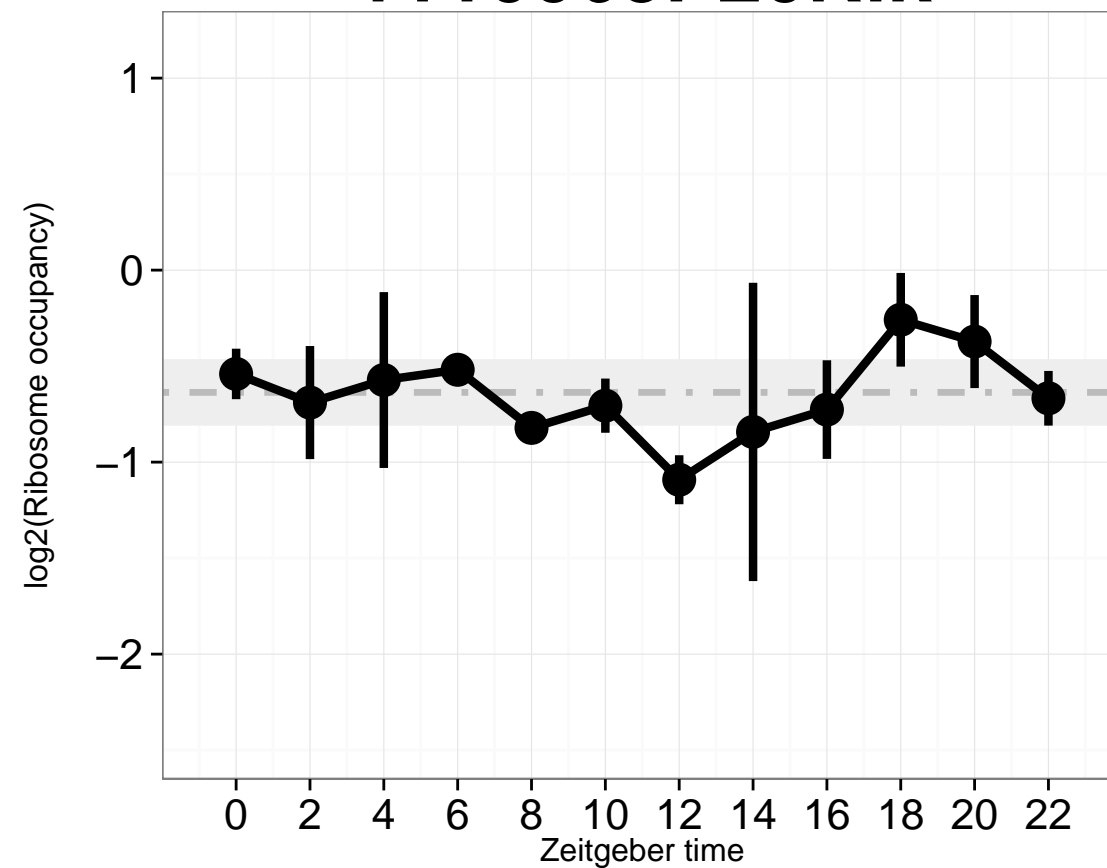

Supplement: Supplementary file 9447 [file 1]

# Ptma

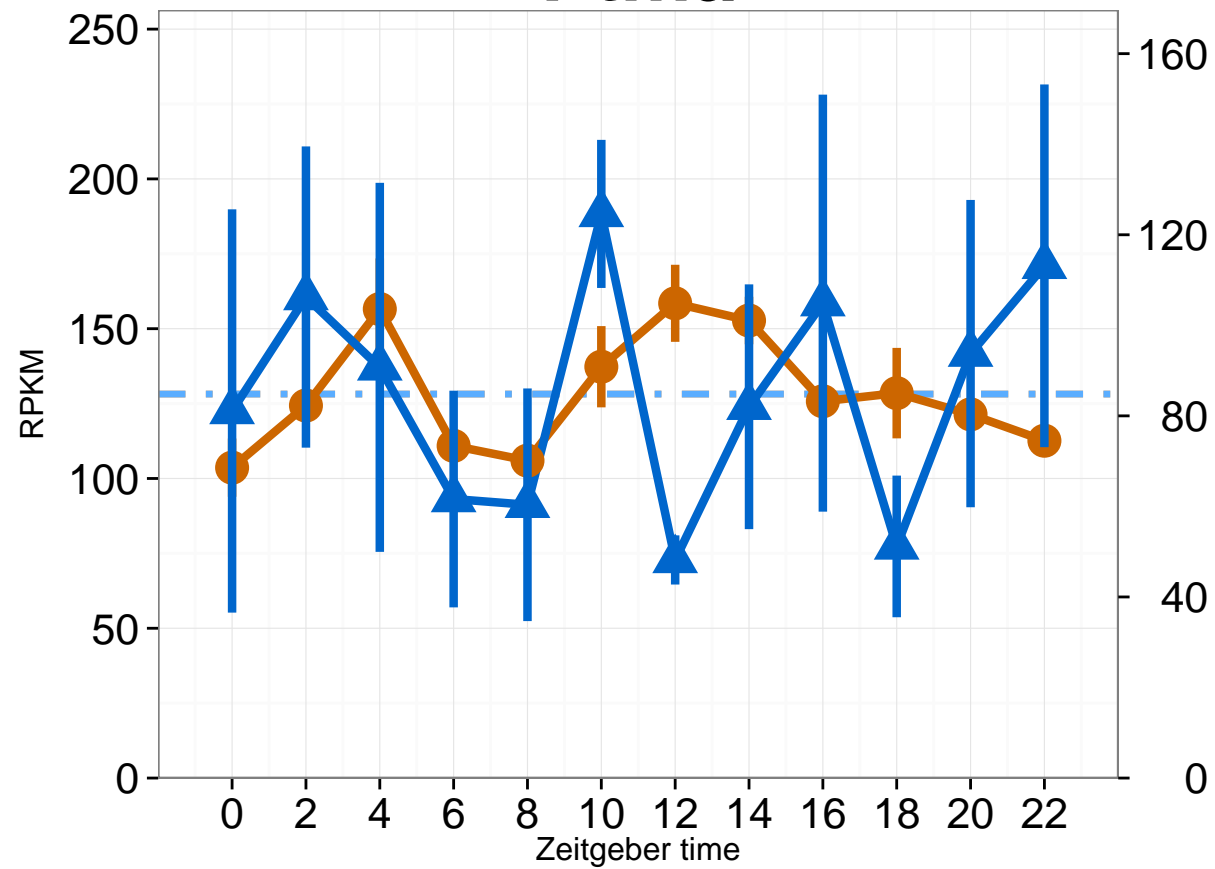

# Ptma

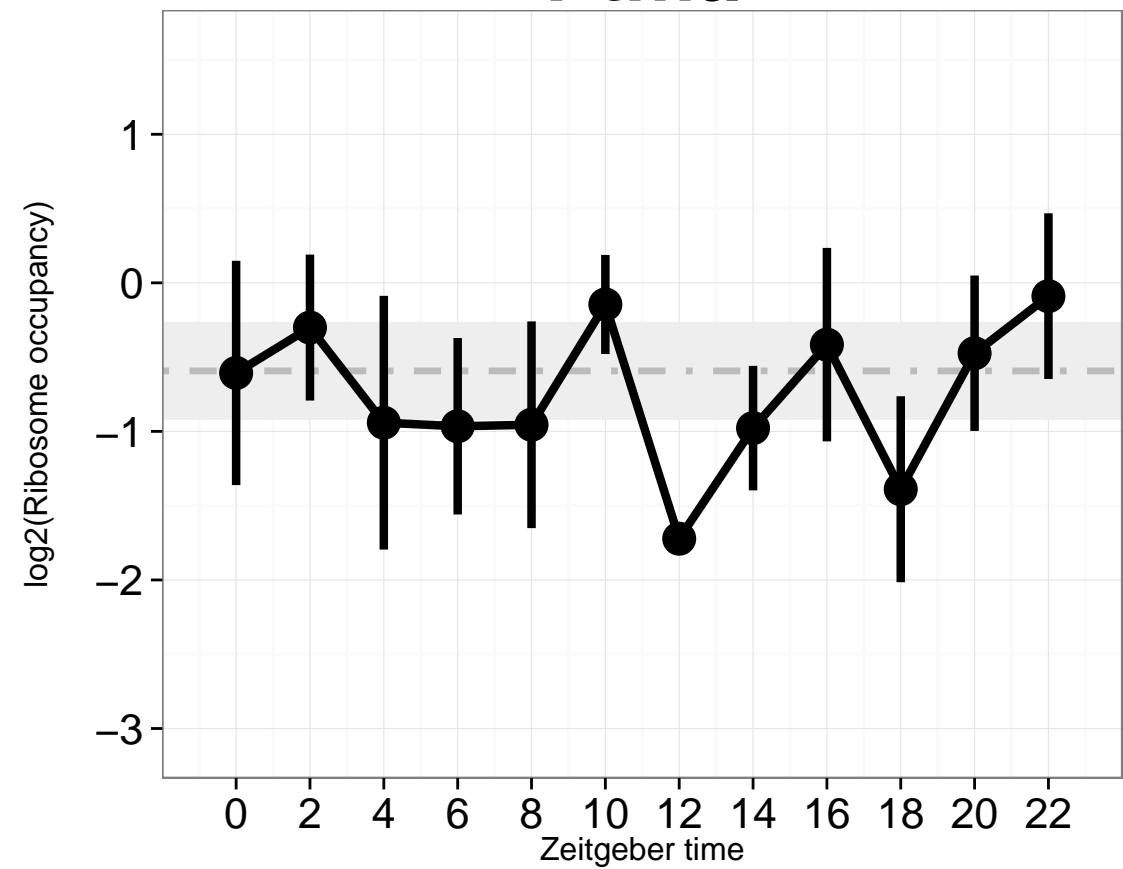

Supplement: Supplementary file 9448 [file 1]

# Tm2d1

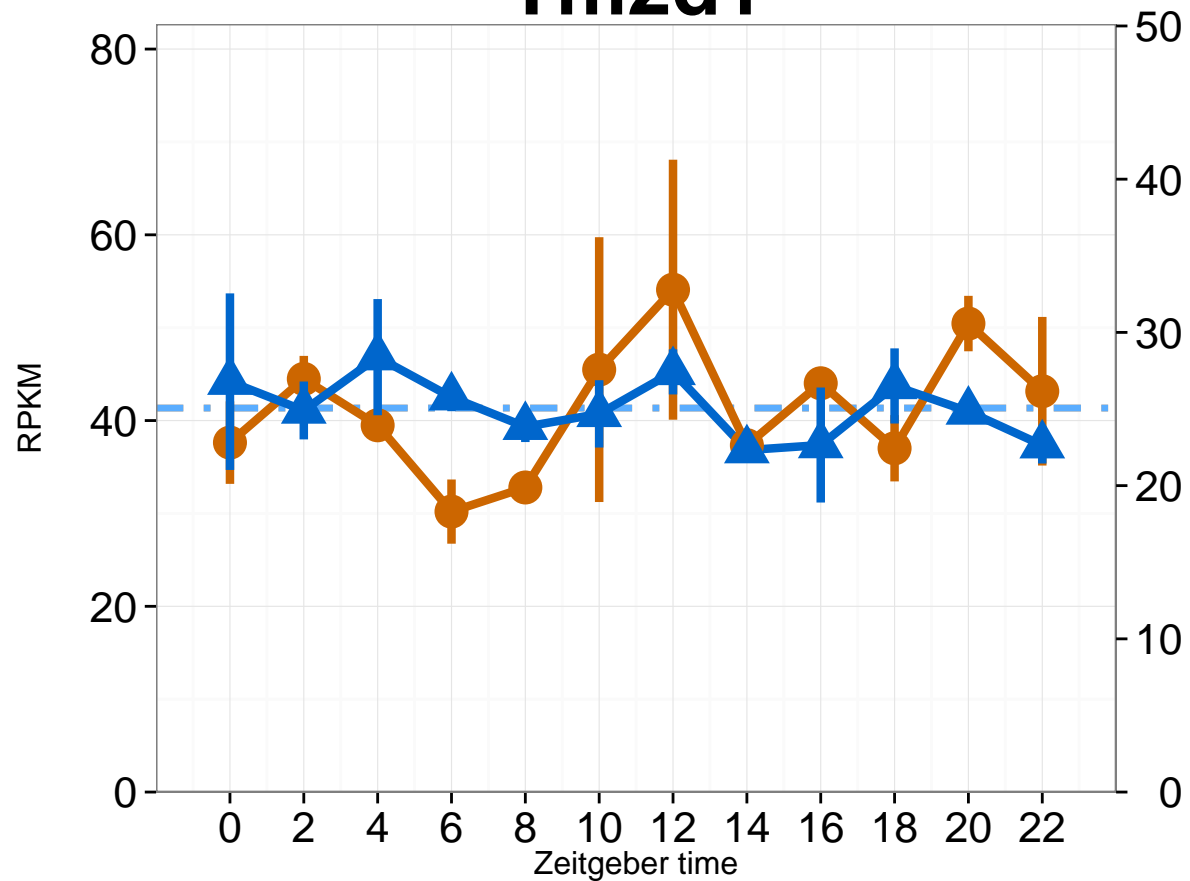

# Tm2d1

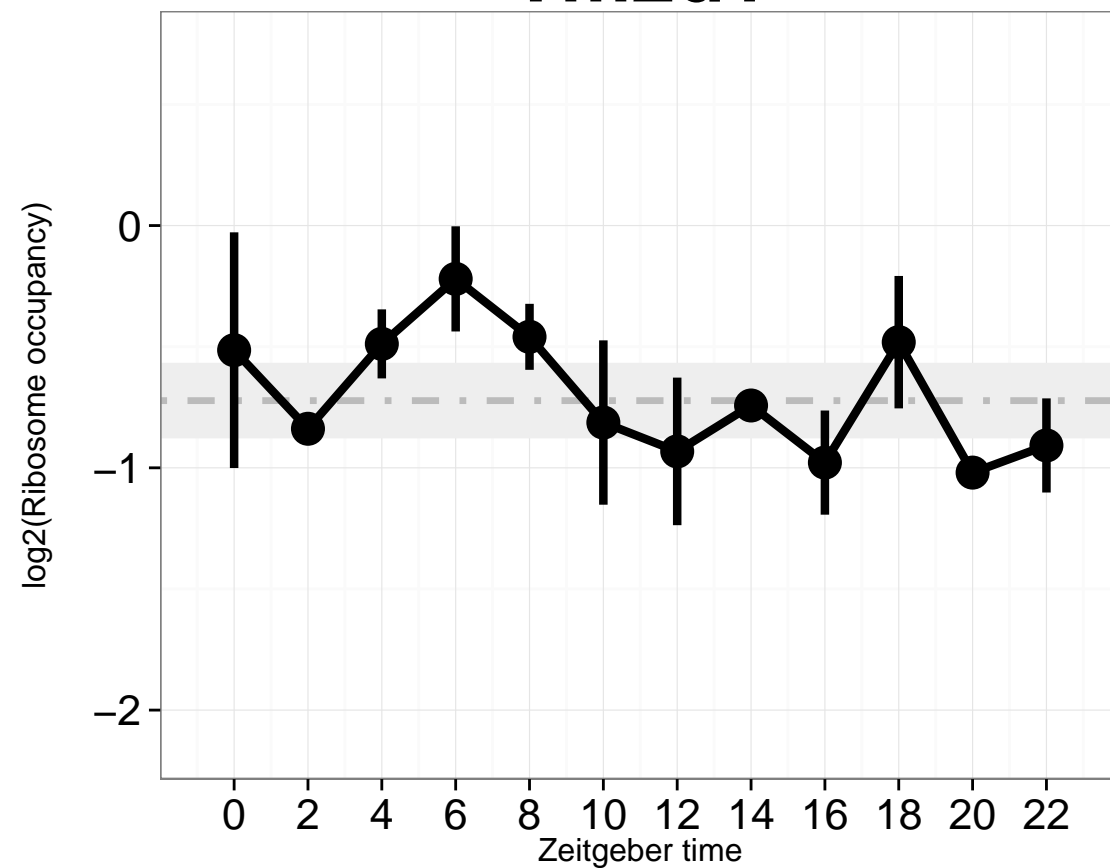

Supplement: Supplementary file 9449 [file 1]

## Neu2

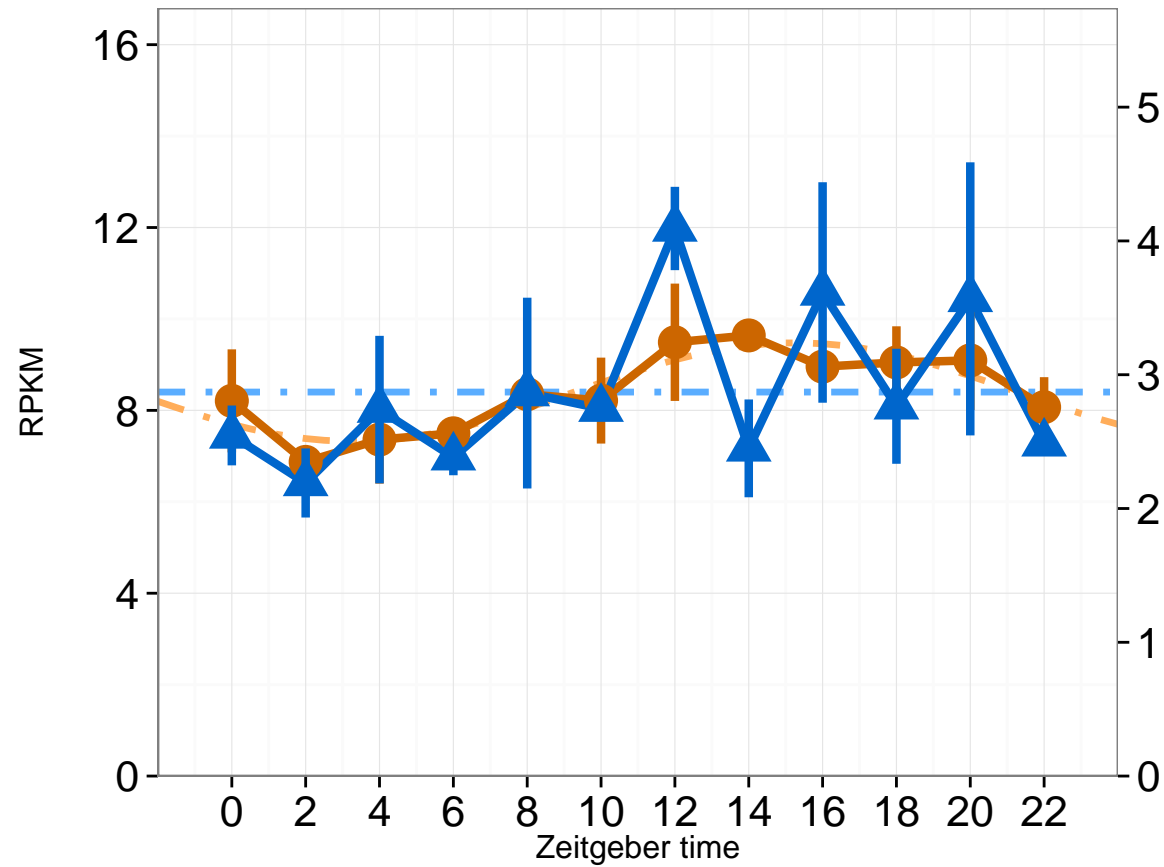

## Neu2

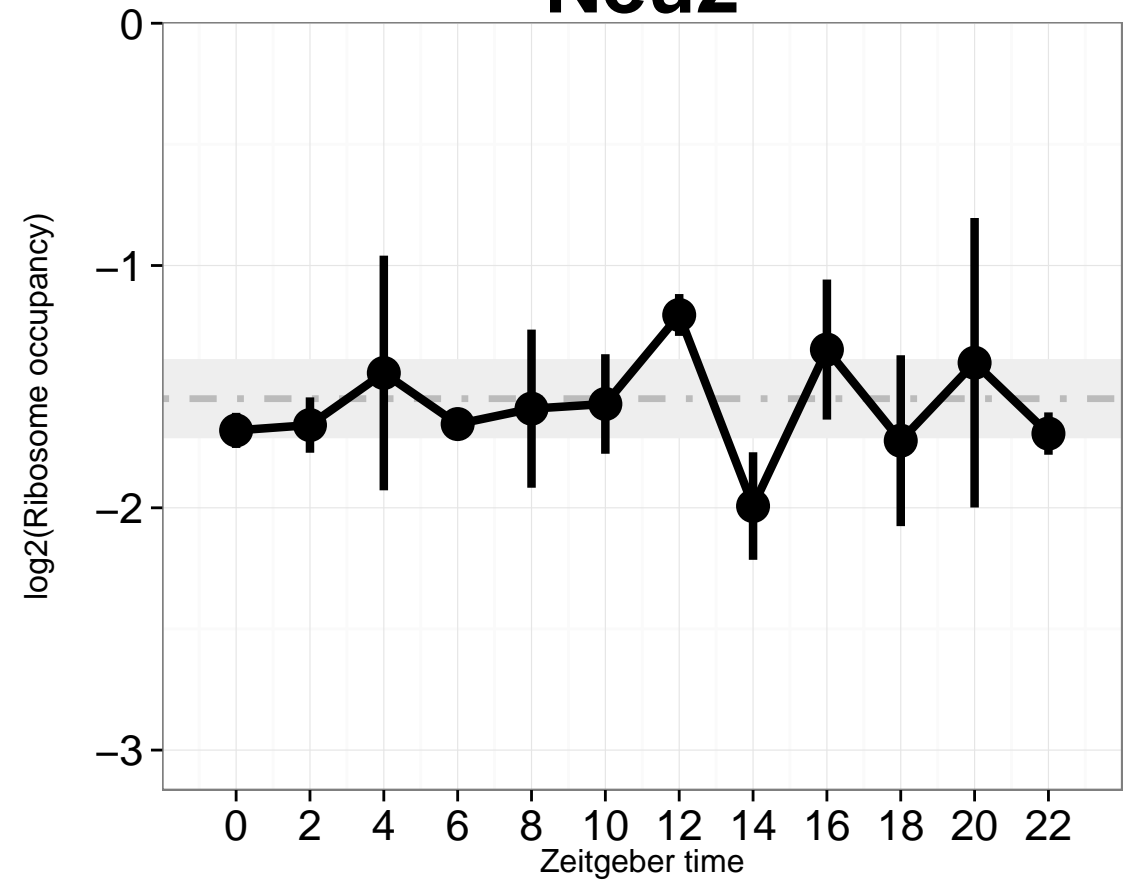

Supplement: Supplementary file 9450 [file 1]

## Klhl32

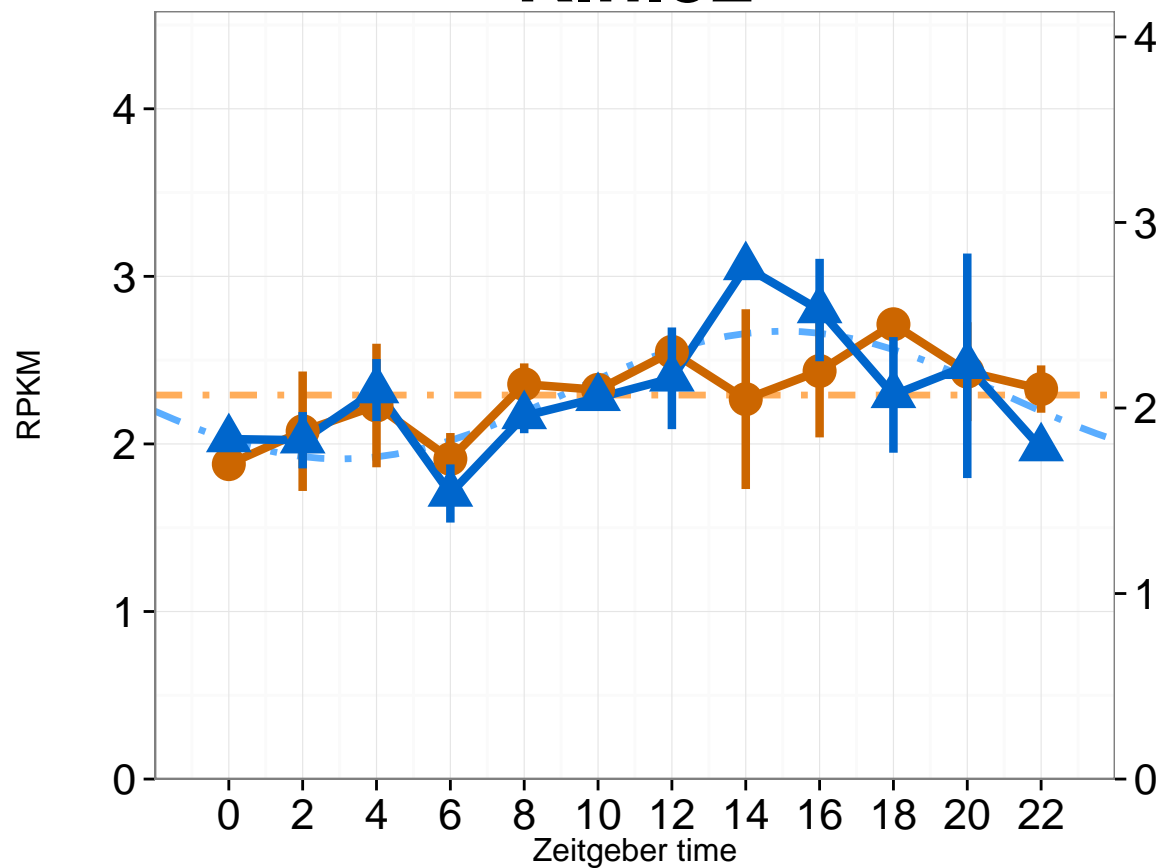

## Klhl32

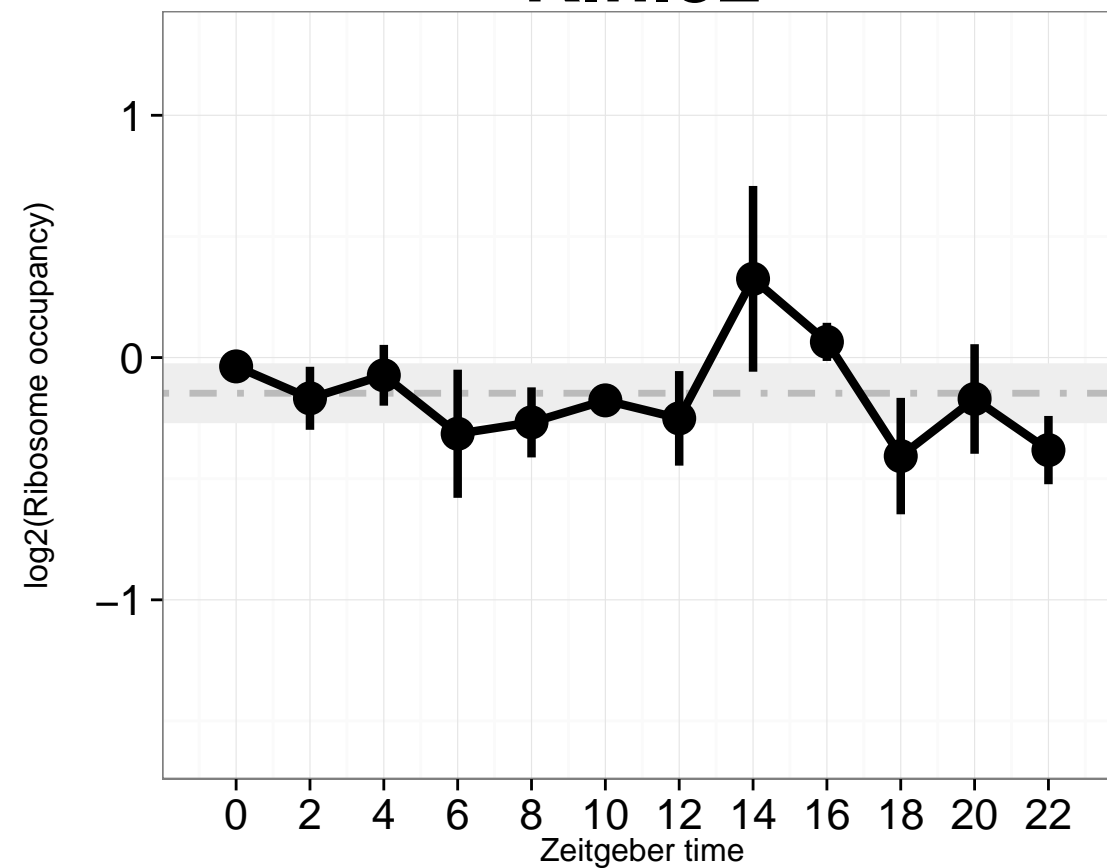

Supplement: Supplementary file 9451 [file 1]

## Tef

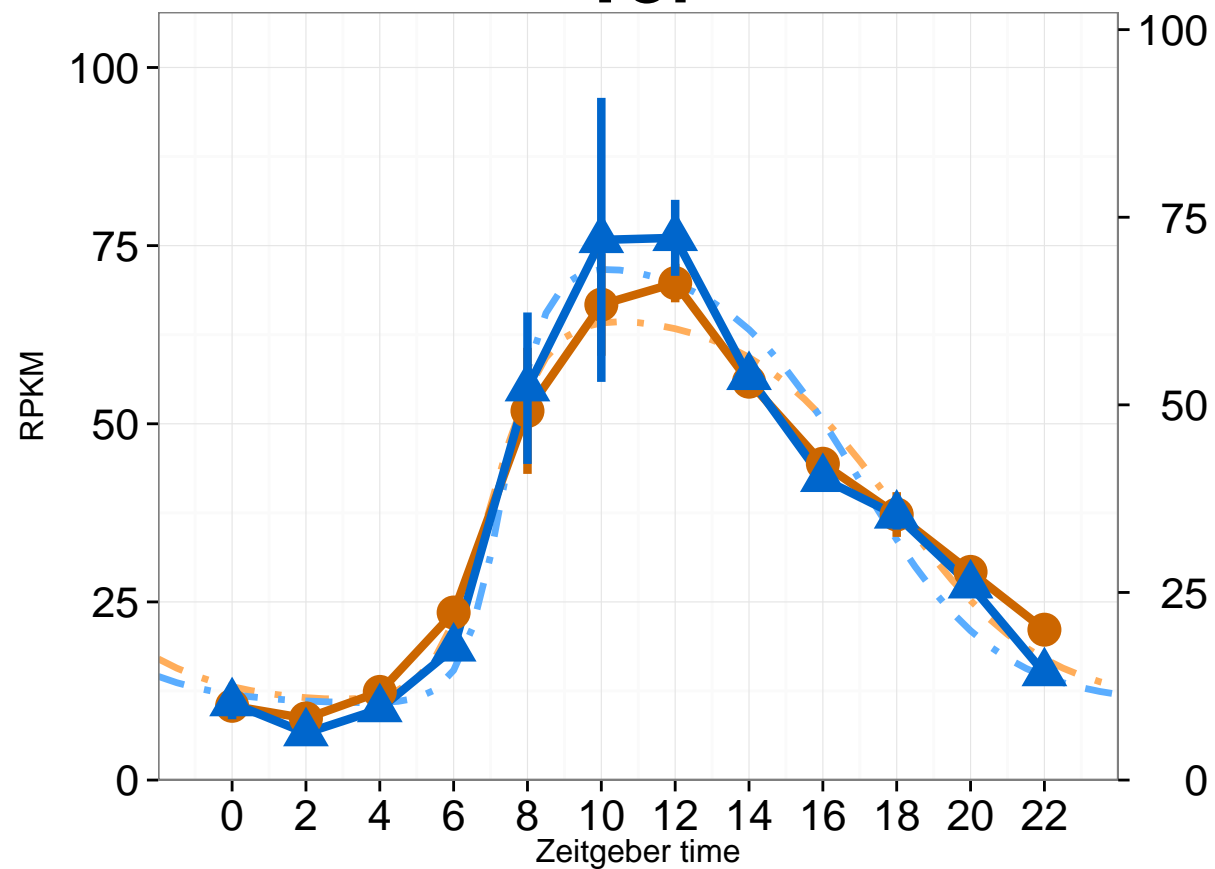

## Tef

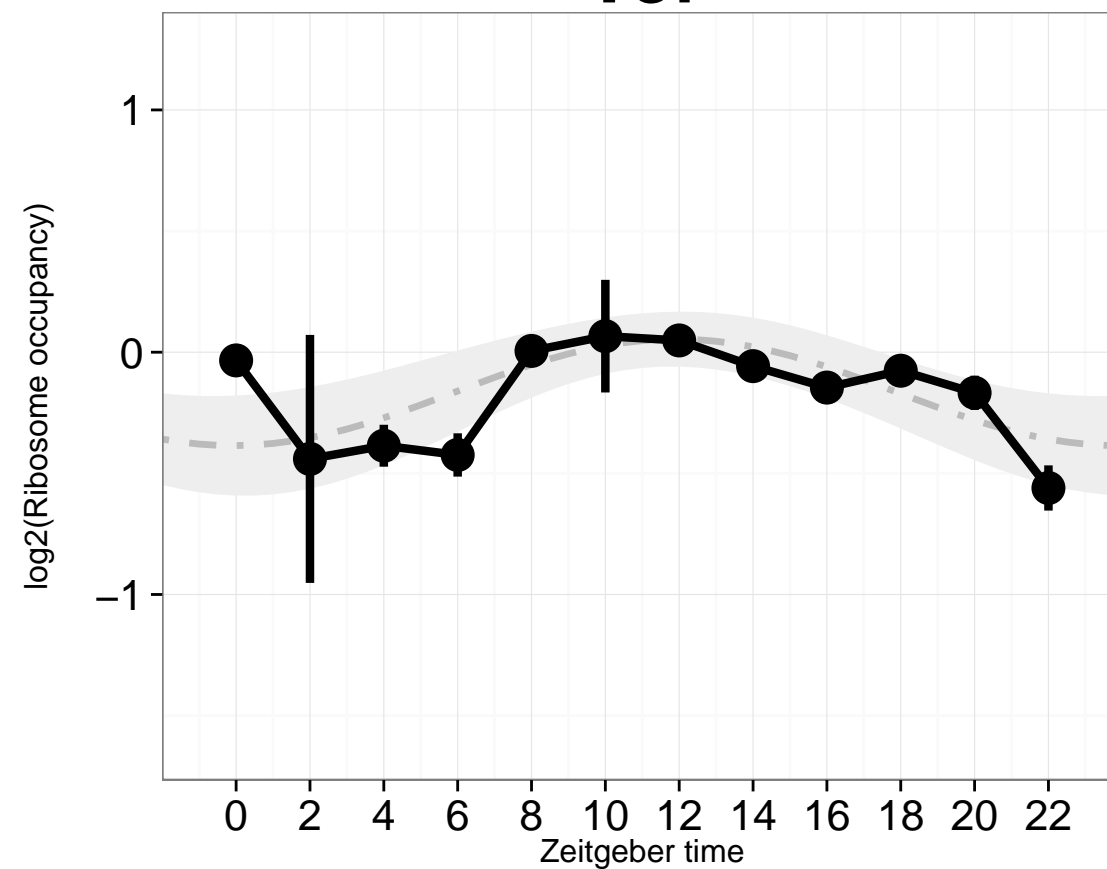

Supplement: Supplementary file 9452 [file 1]

# M6pr

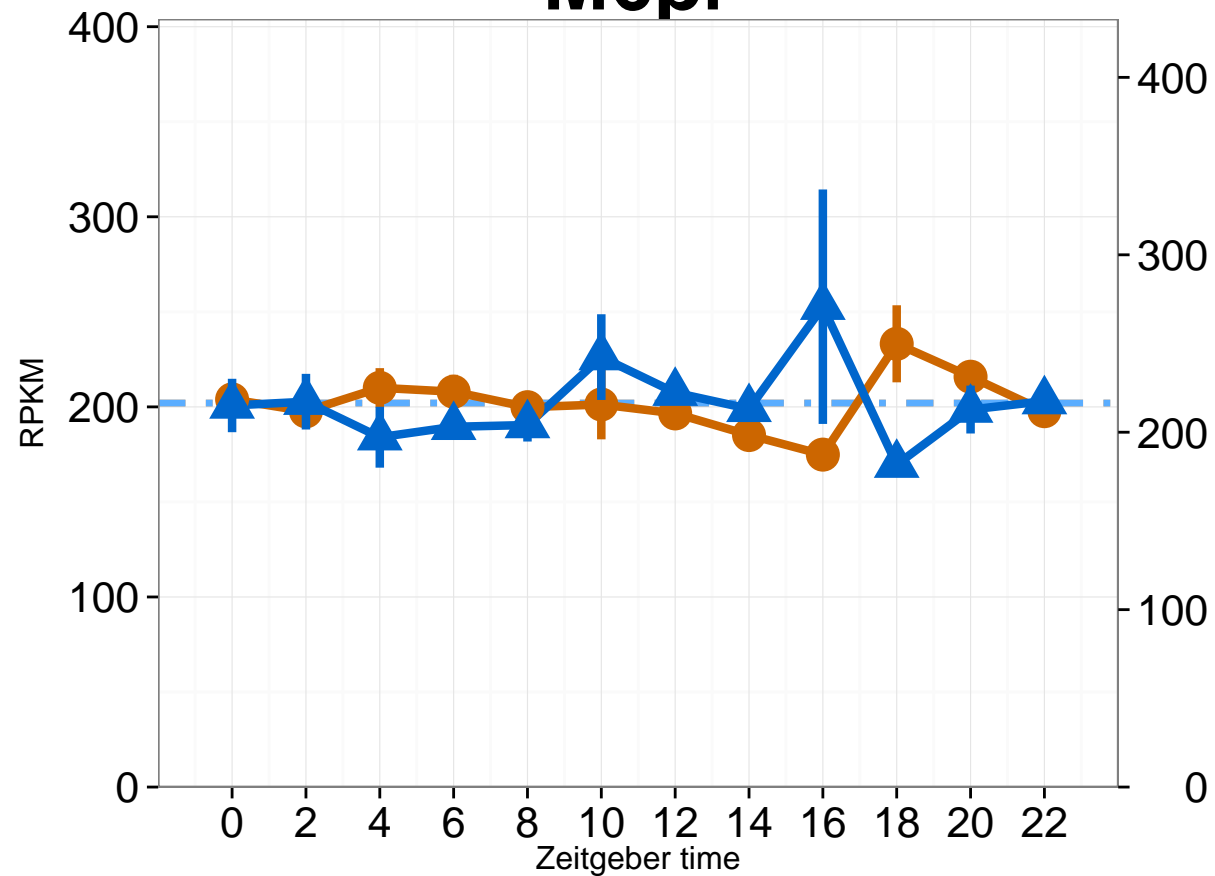

# M6pr

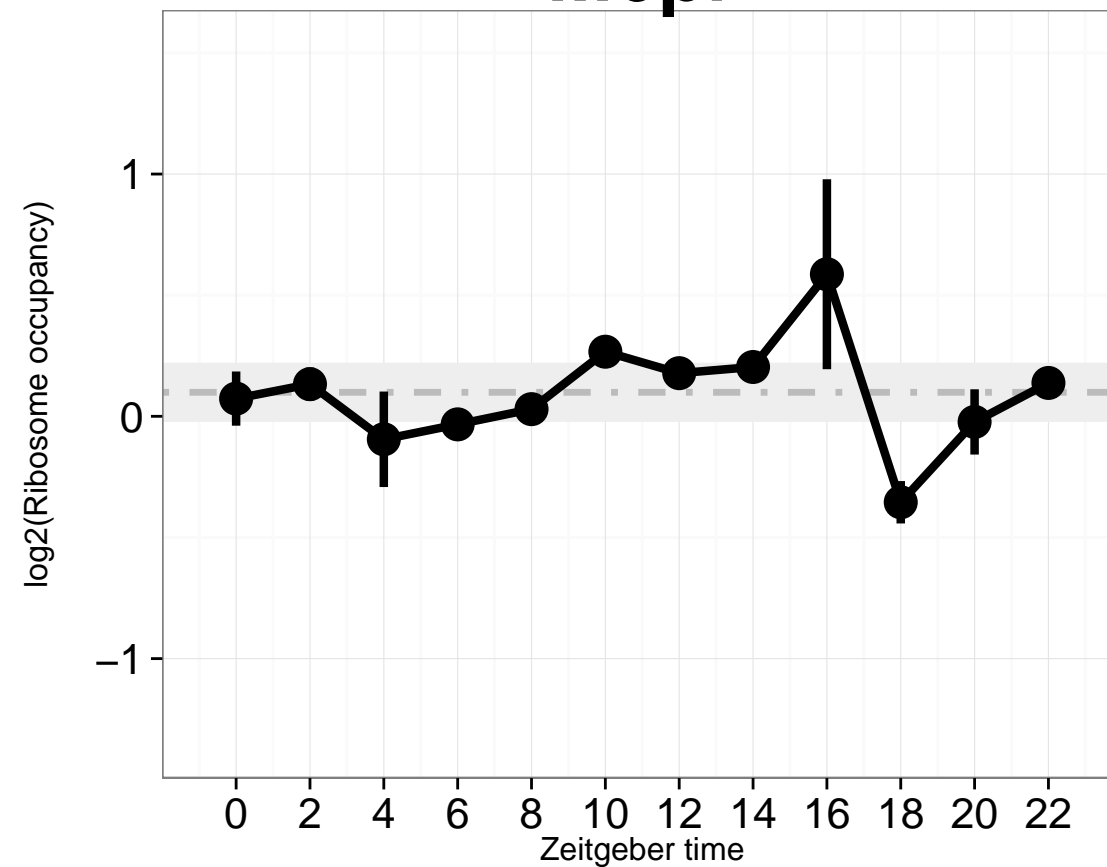

Supplement: Supplementary file 9453 [file 1]

## Rad21

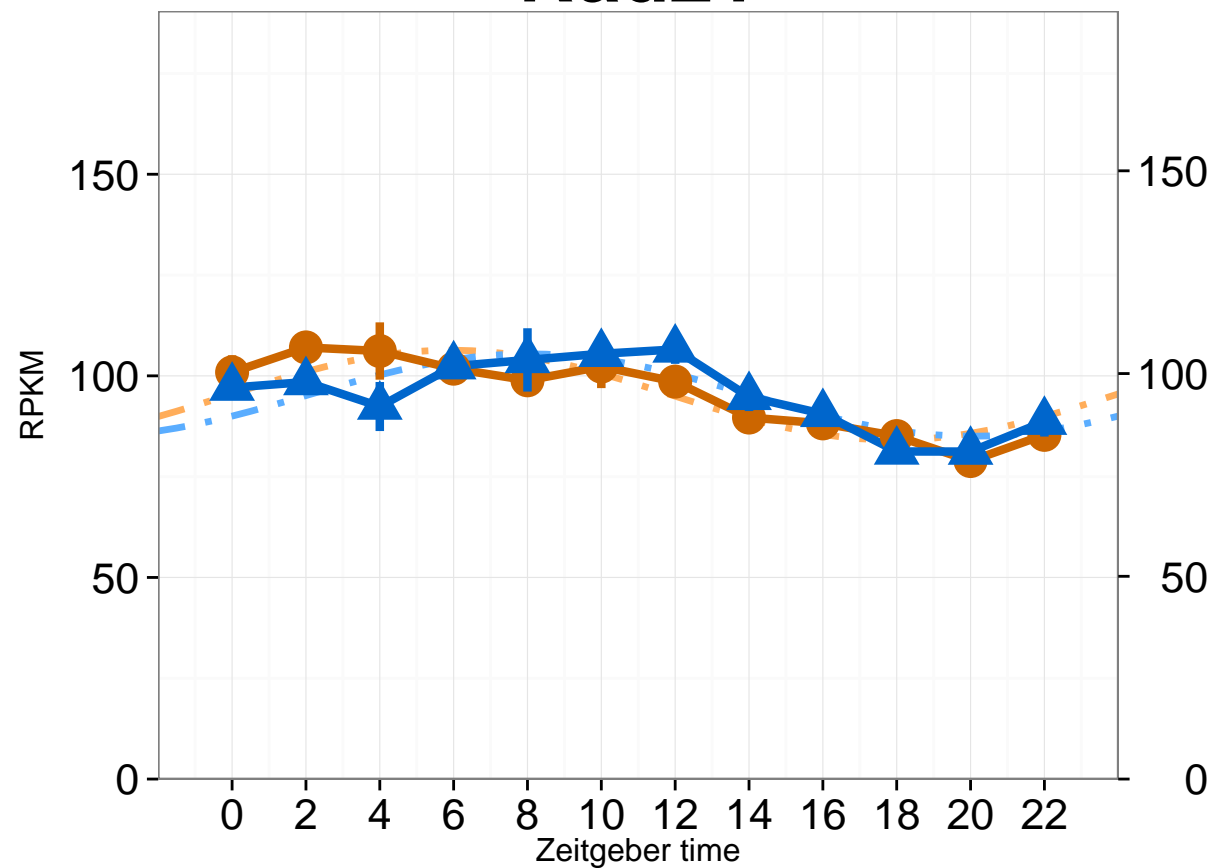

## Rad21

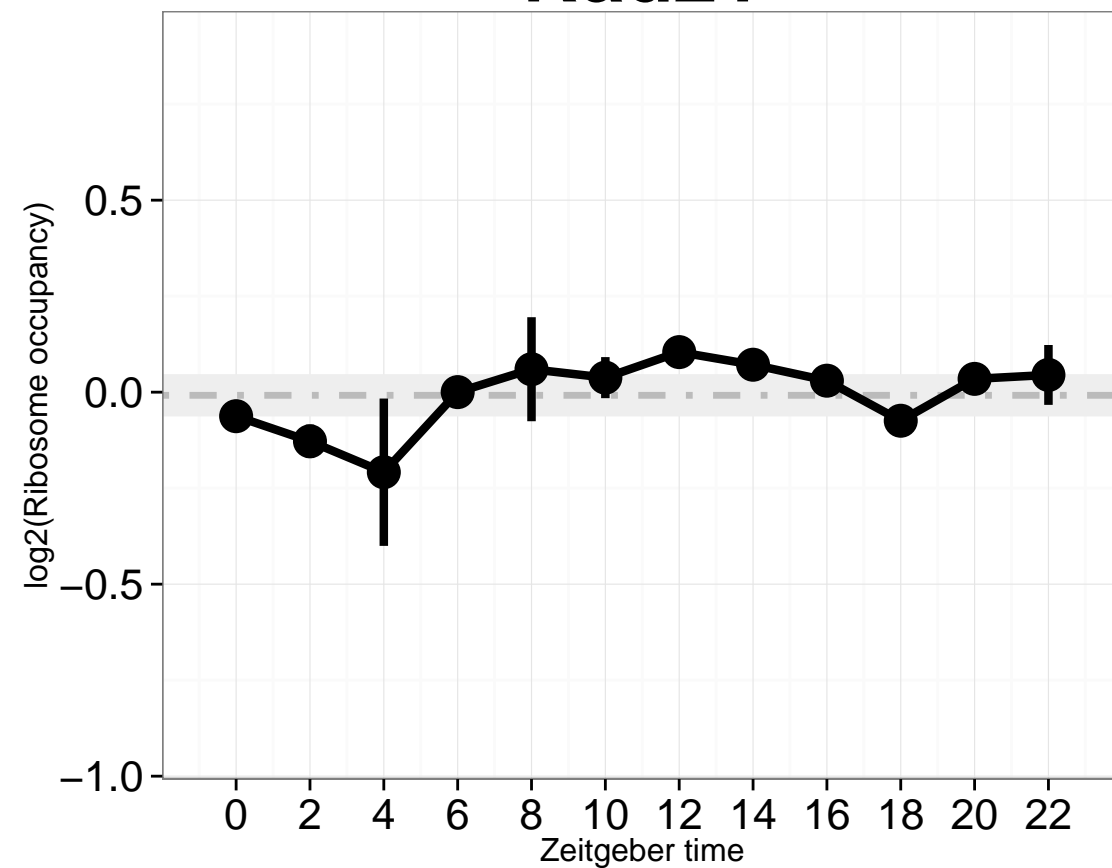

Supplement: Supplementary file 9454 [file 1]

## Rpl22

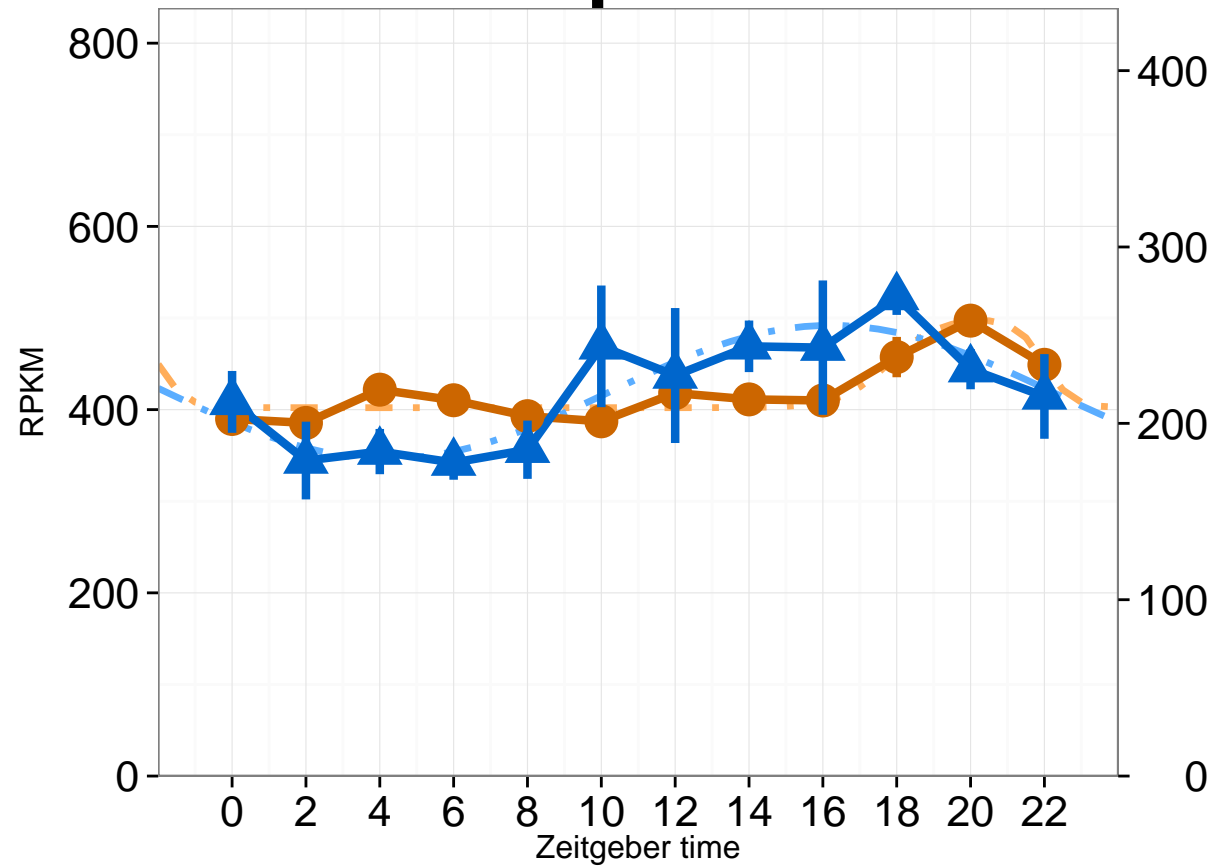

## Rpl22

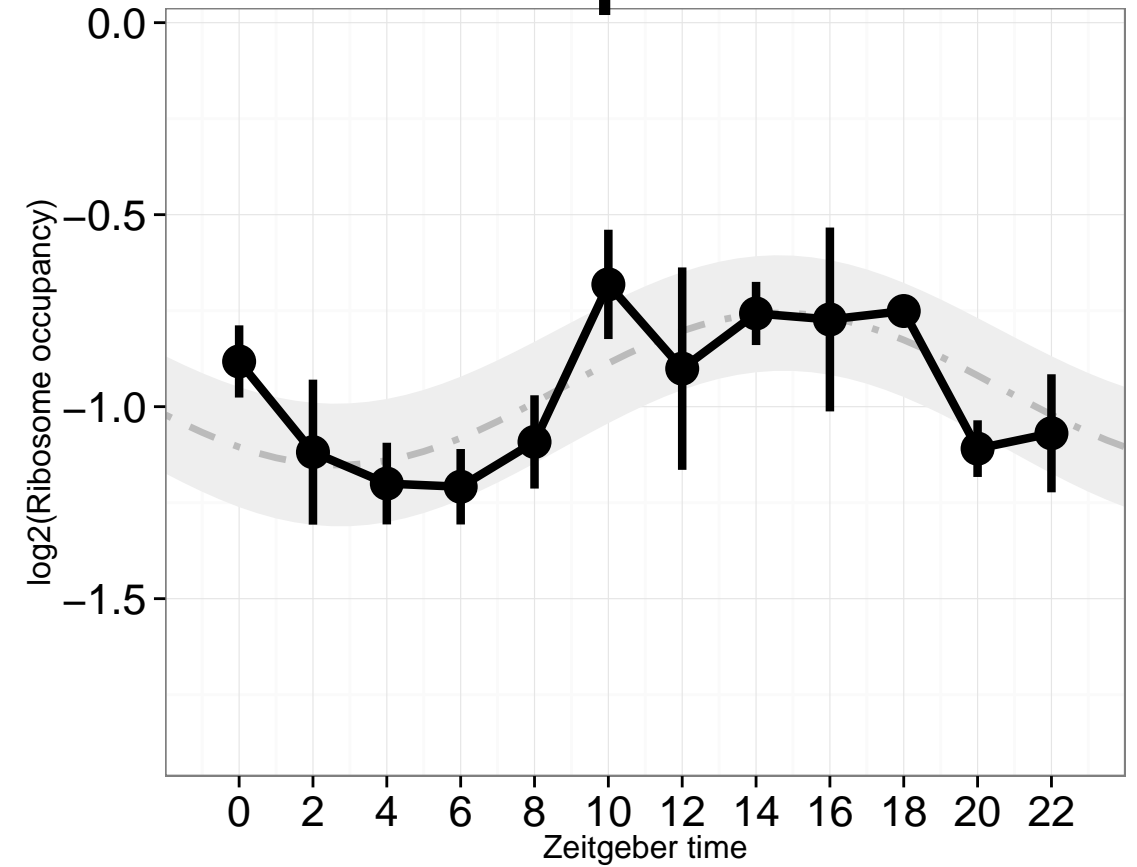

Supplement: Supplementary file 9455 [file 1]

## Slc35a4

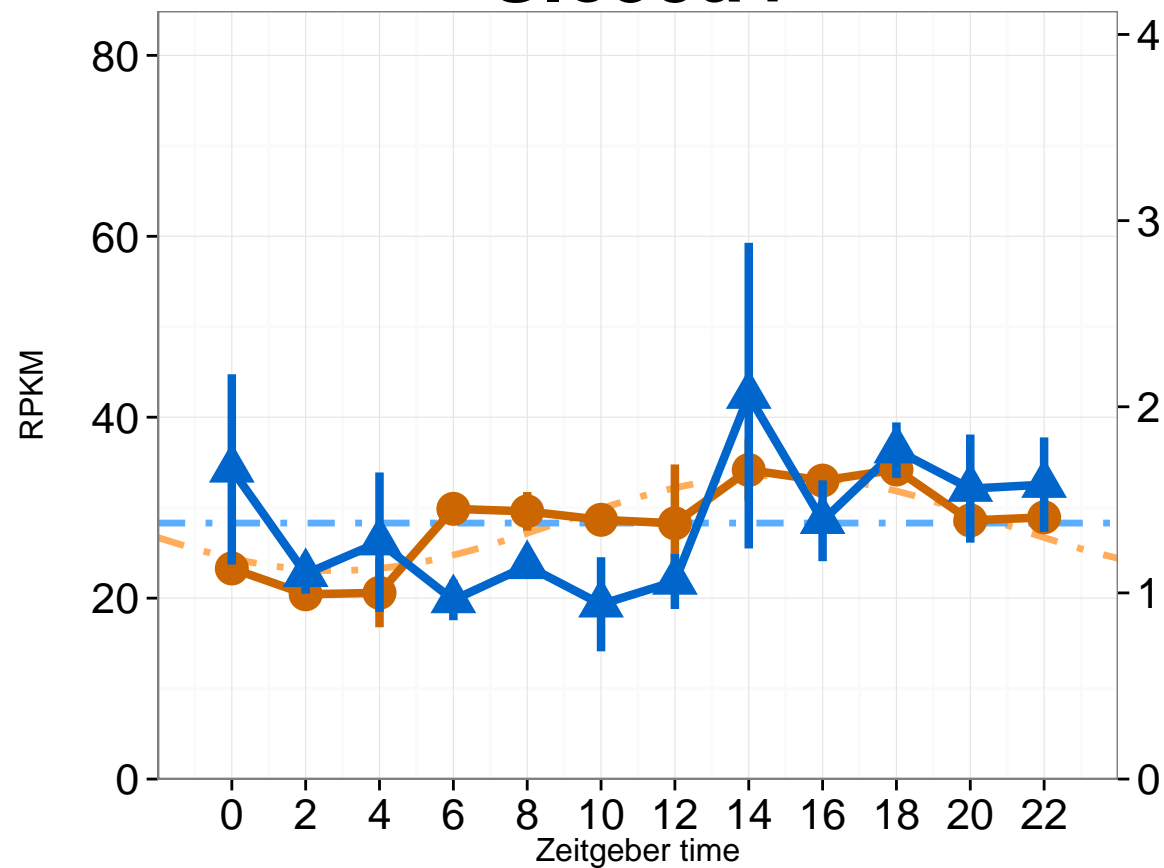

## Slc35a4

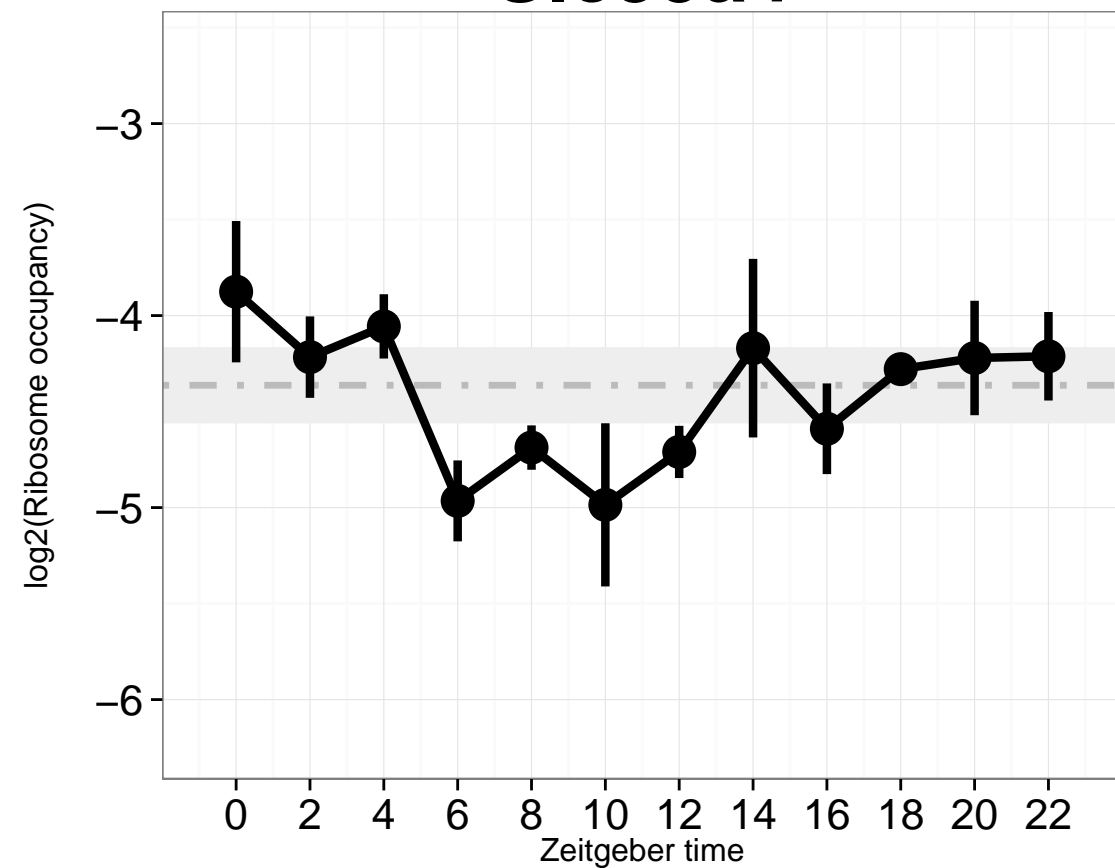

Supplement: Supplementary file 9456 [file 1]

# Il4i1

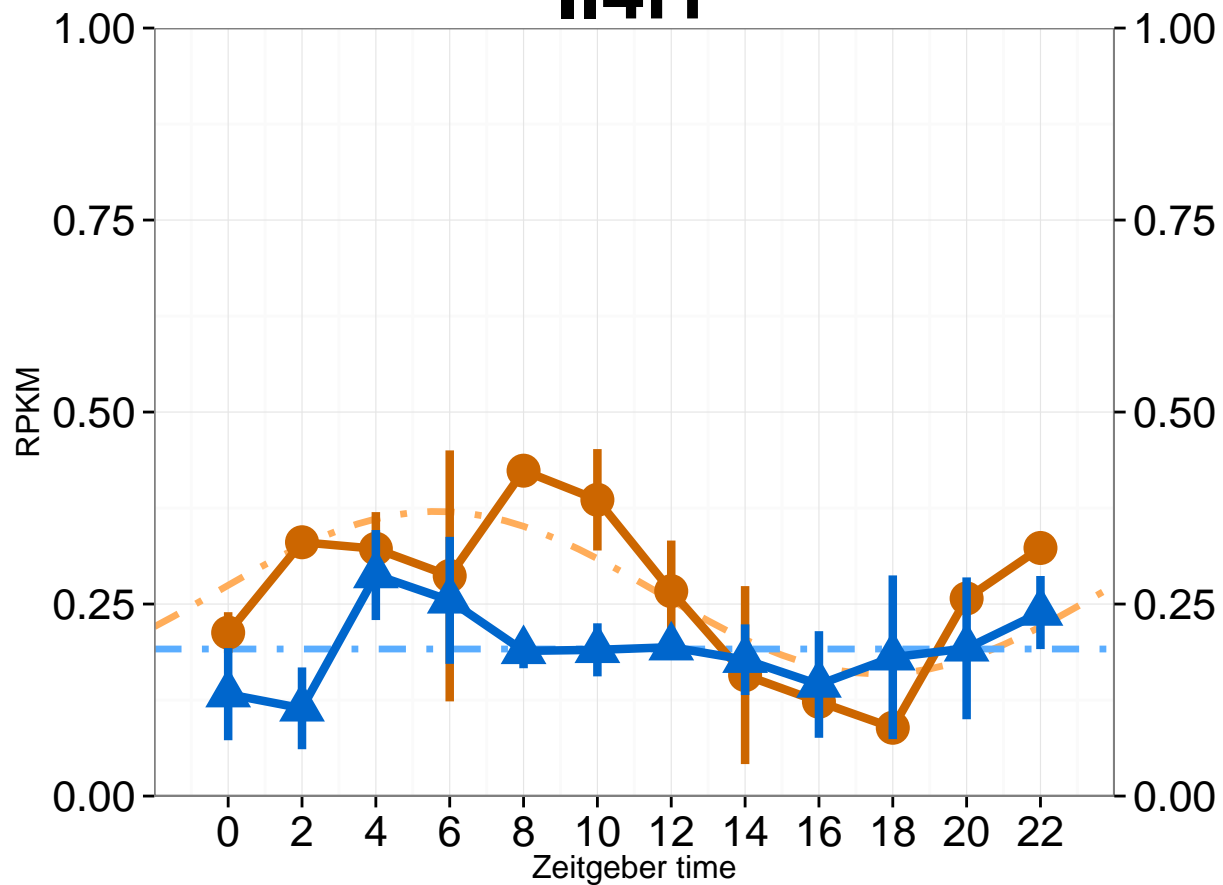

# Il4i1

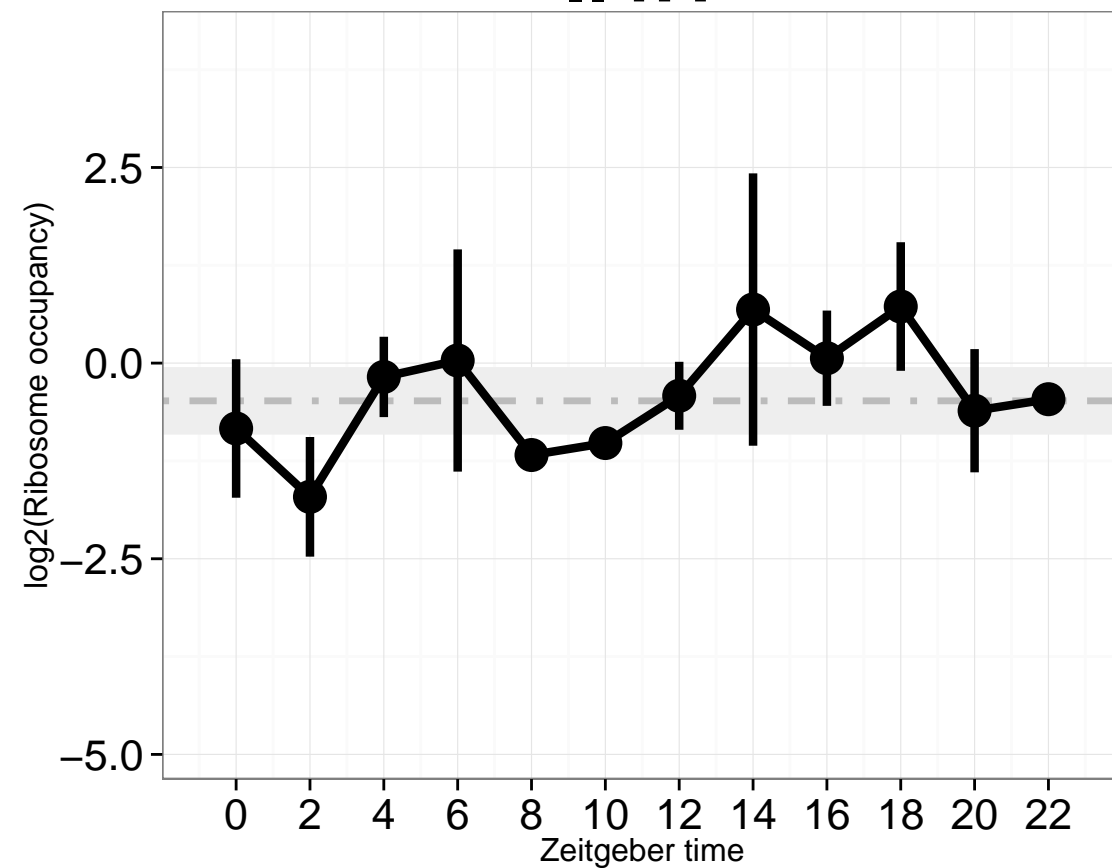

Supplement: Supplementary file 9457 [file 1]

## Limk1

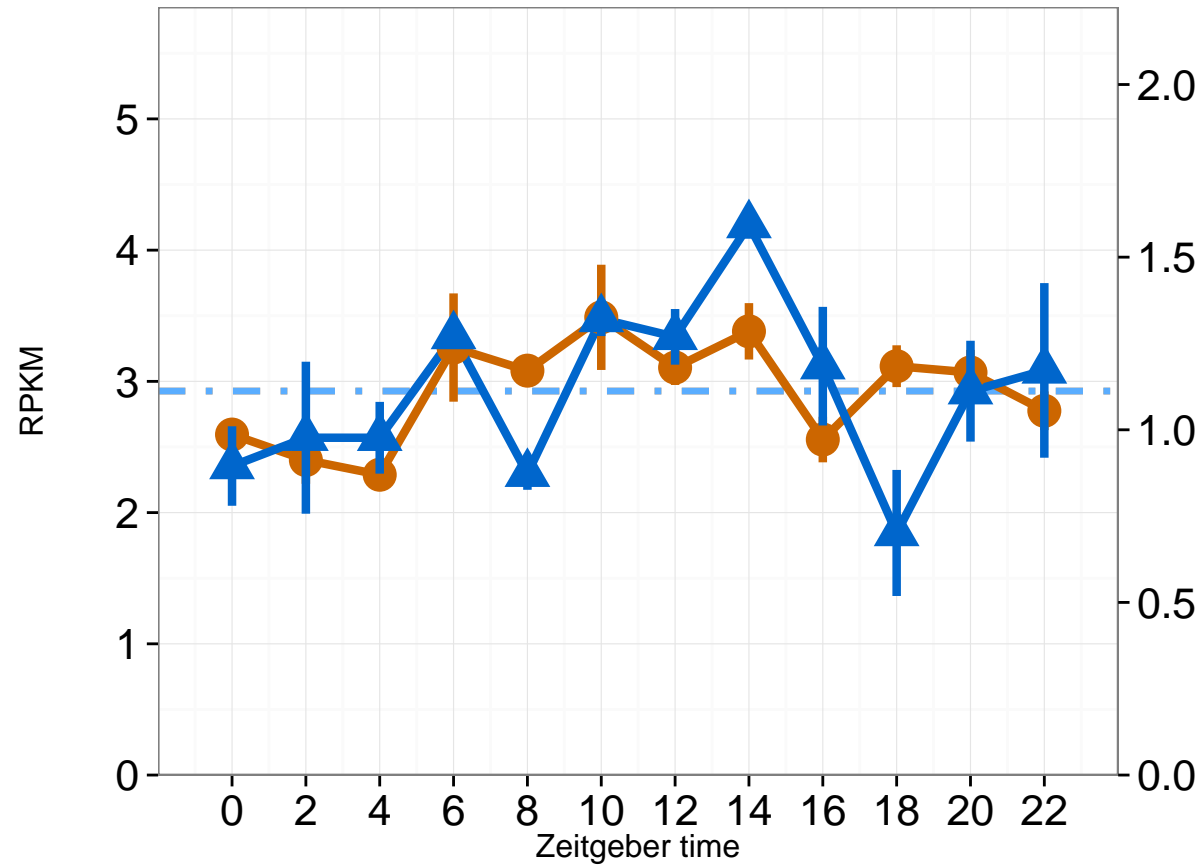

## Limk1

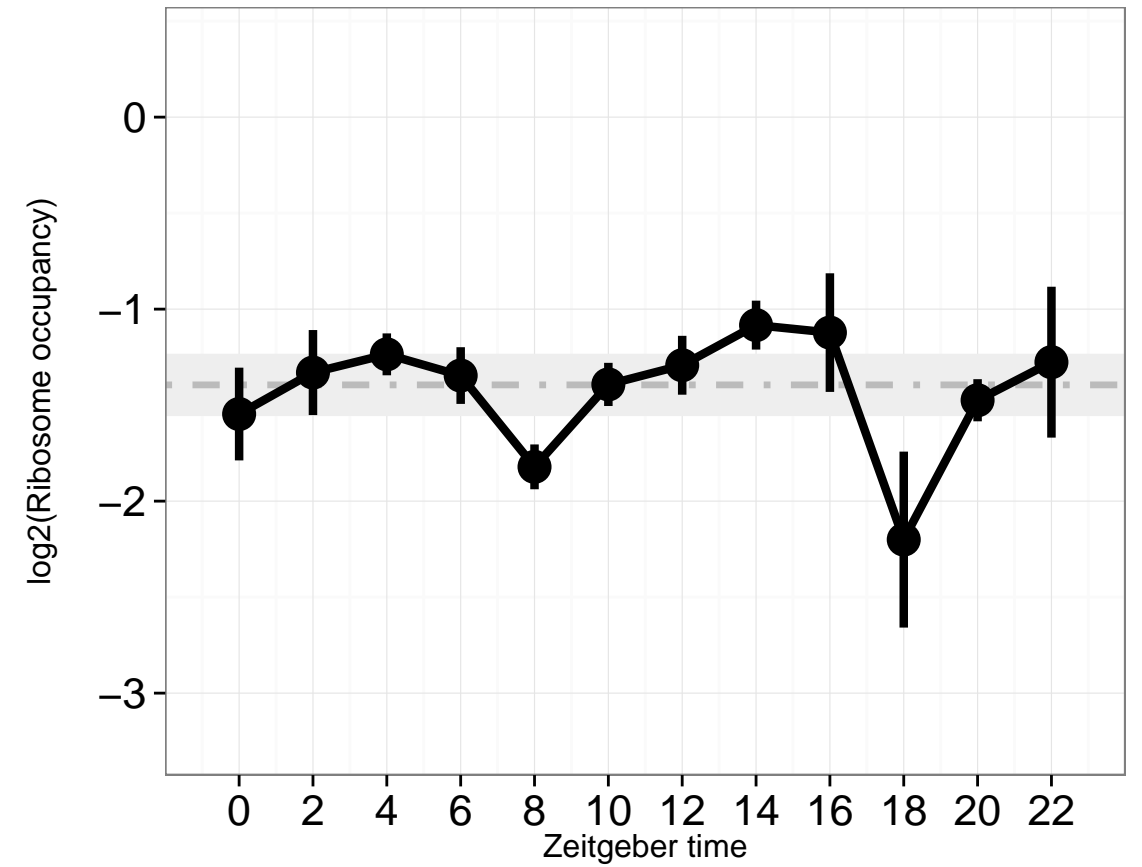

Supplement: Supplementary file 9458 [file 1]

## Hdac11

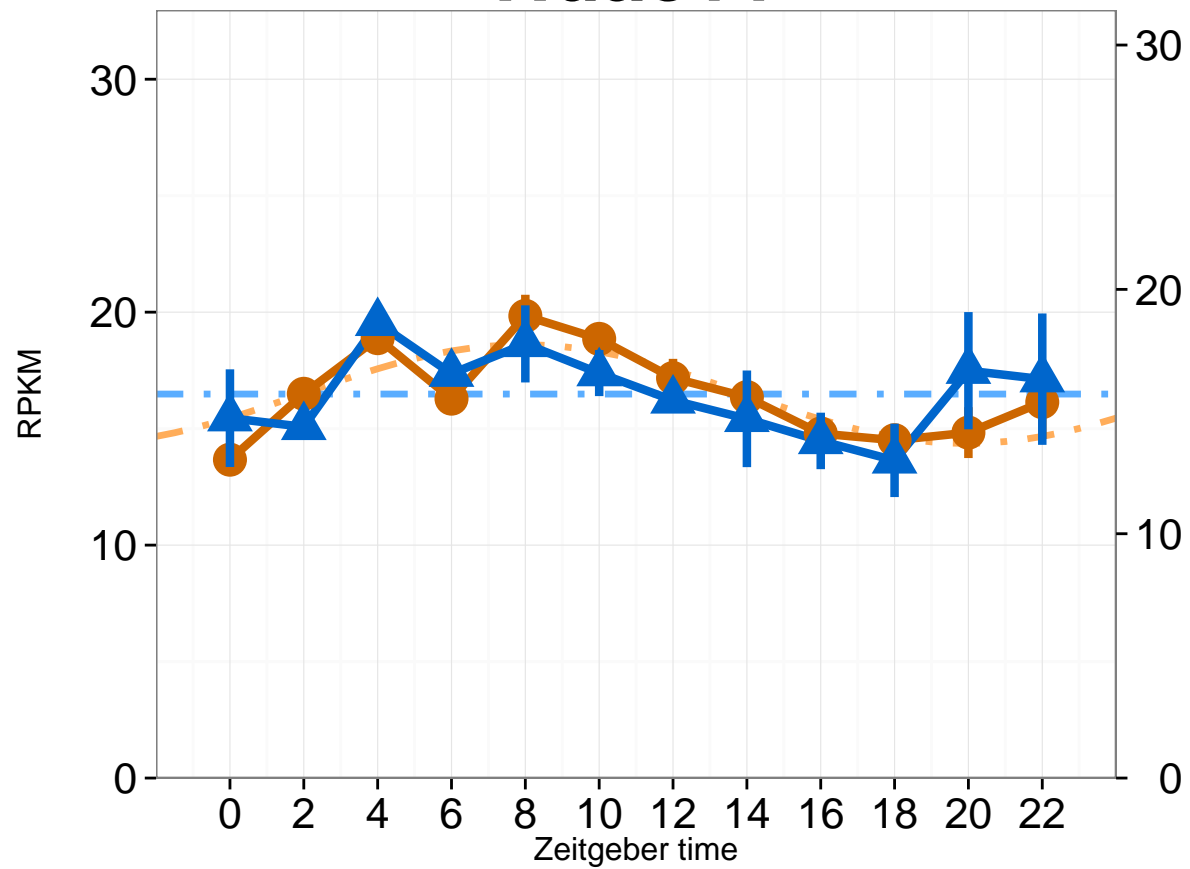

## Hdac11

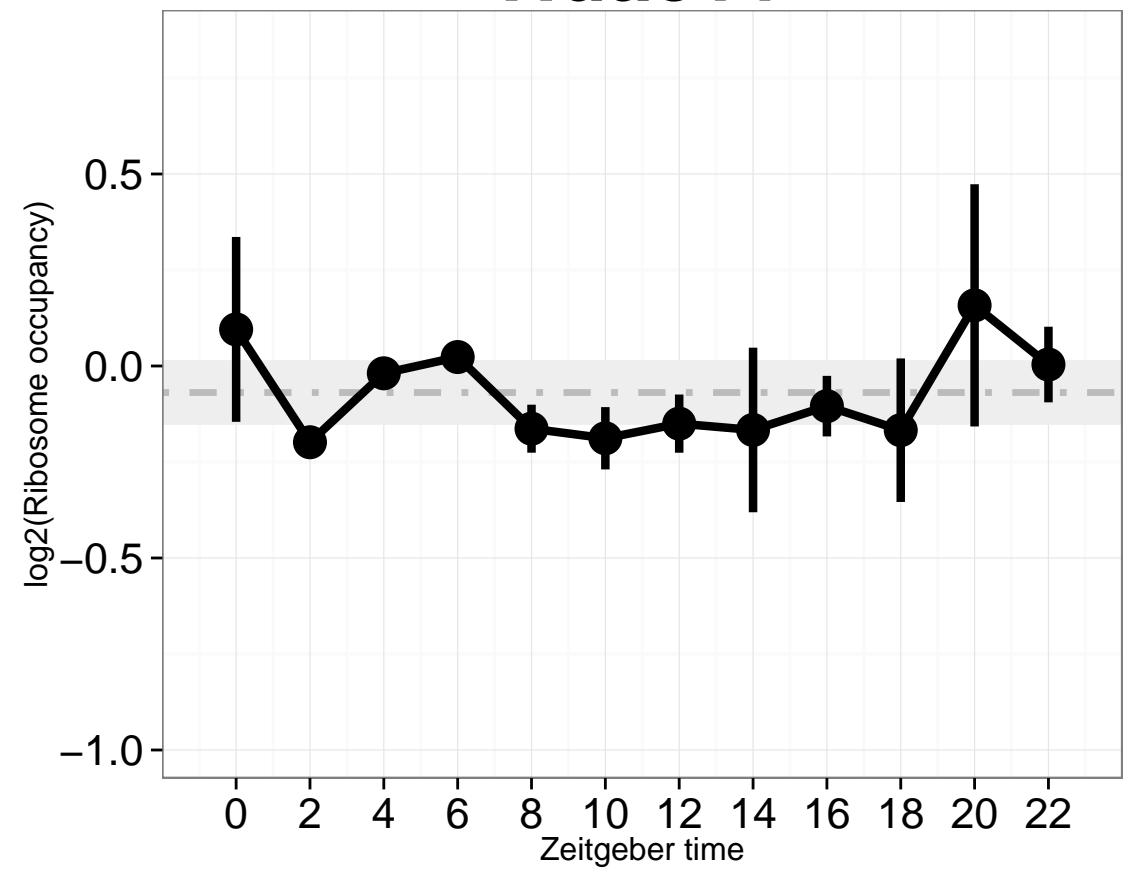

Supplement: Supplementary file 9459 [file 1]

## Sgms2

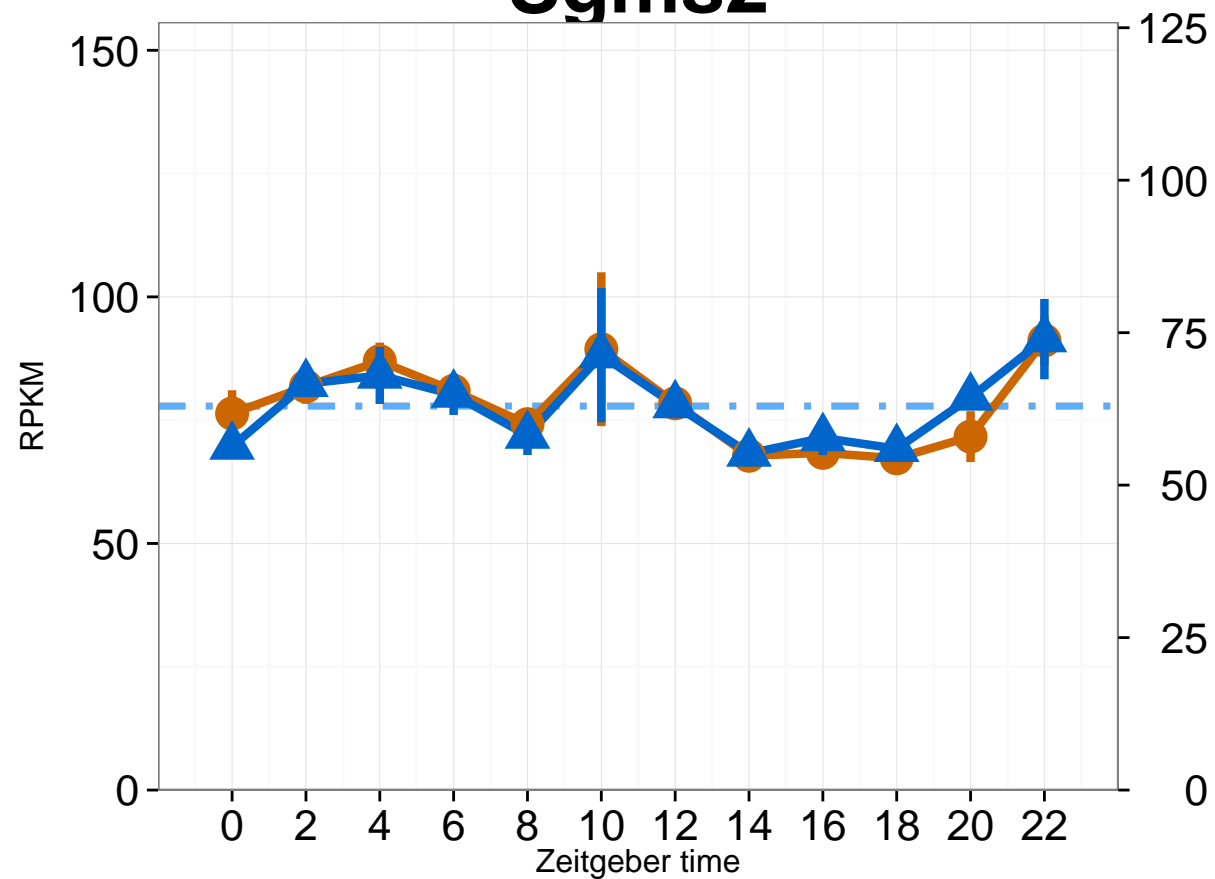

## Sgms2

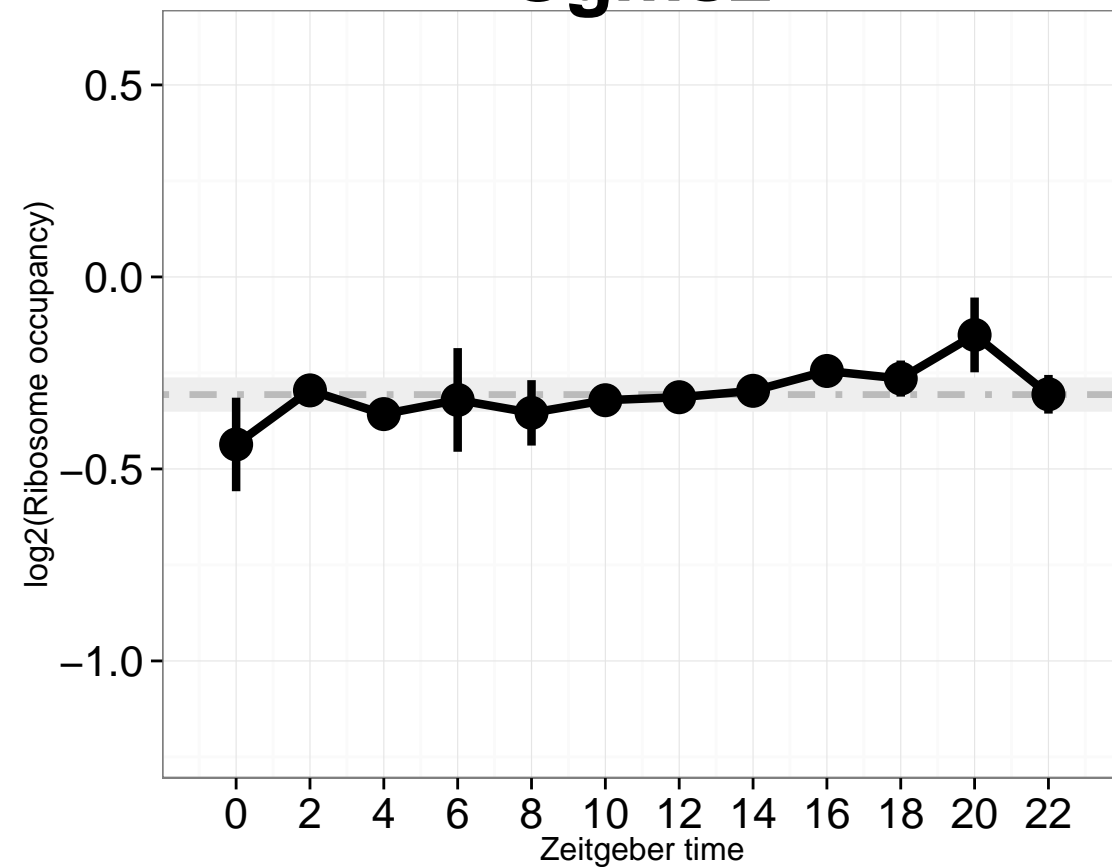

Supplement: Supplementary file 9460 [file 1]

# Nt5dc3

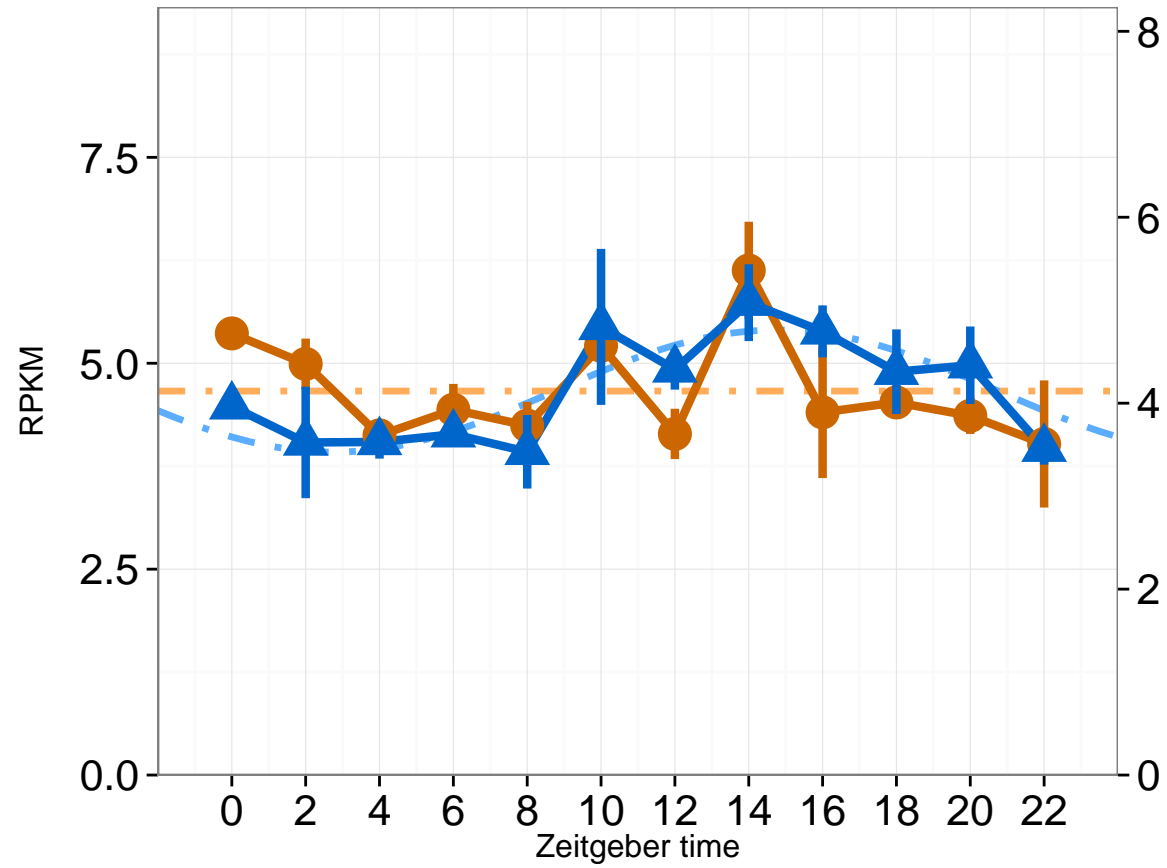

# Nt5dc3

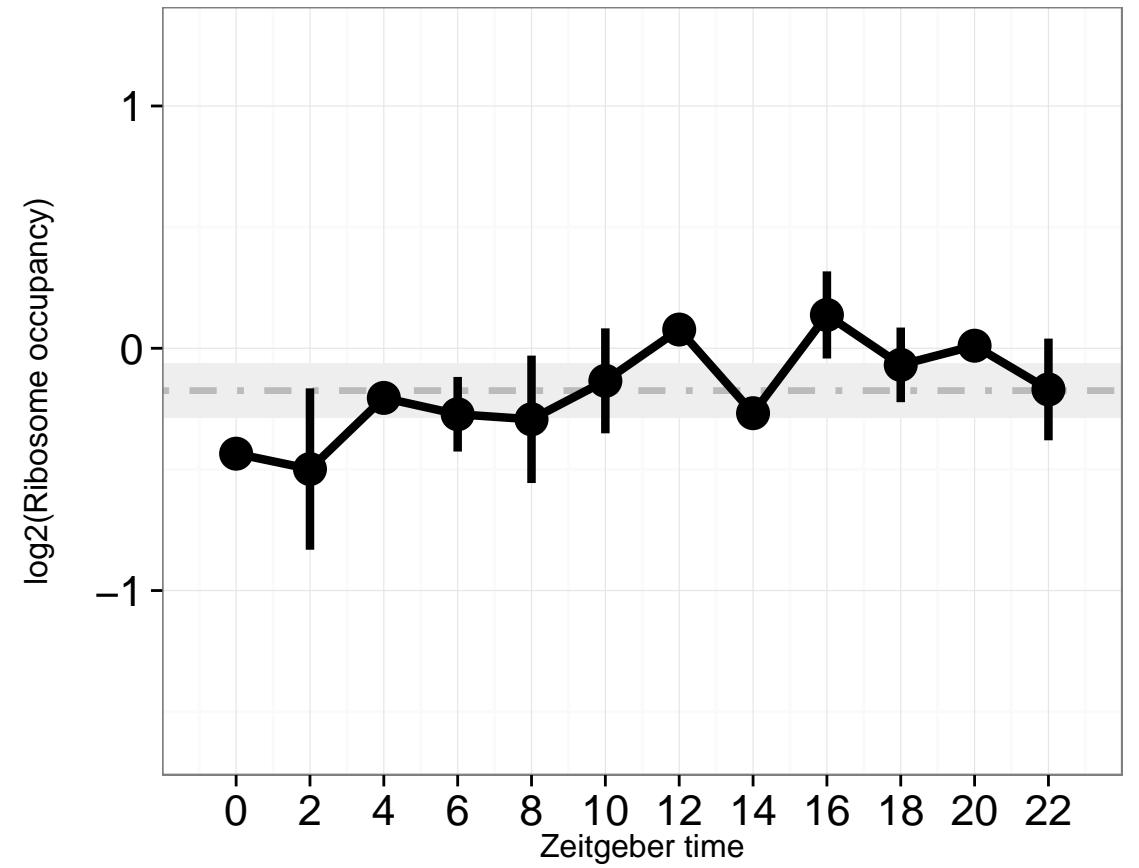

Supplement: Supplementary file 9461 [file 1]

## Wipi1

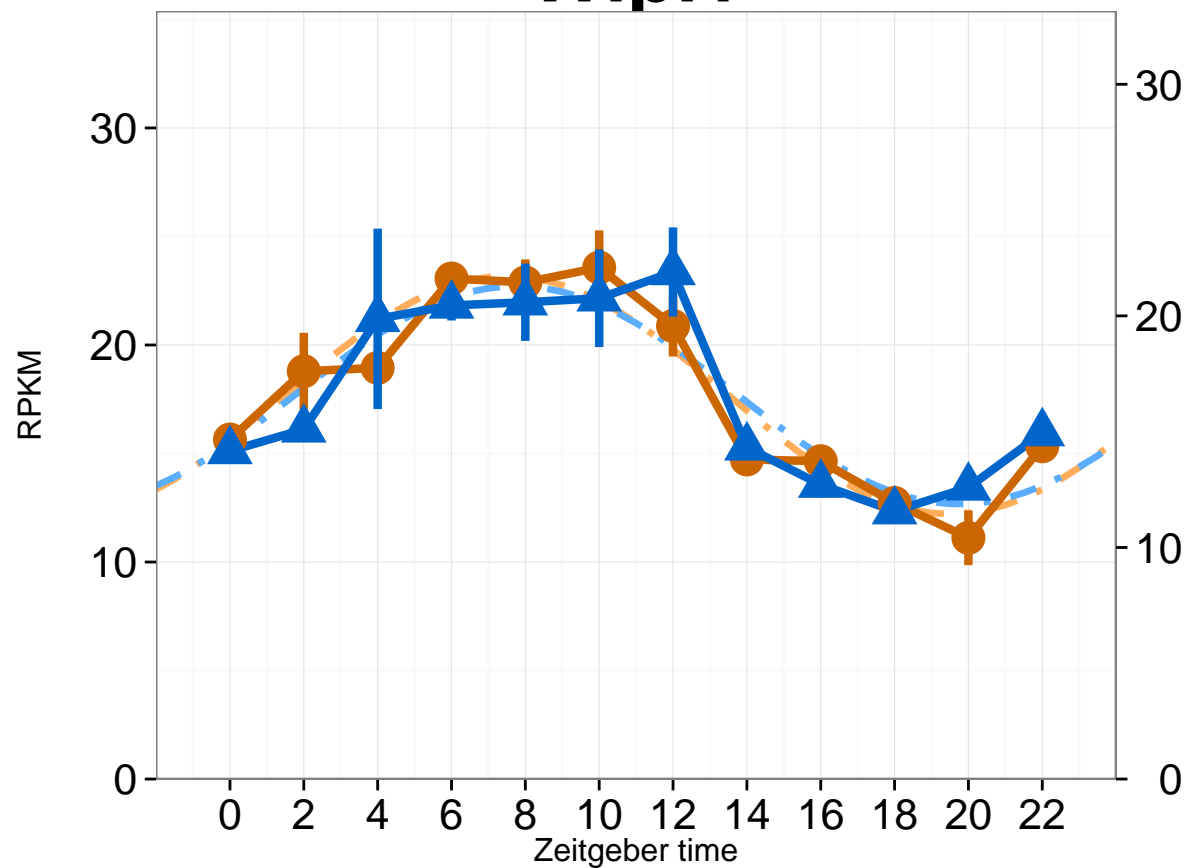

## Wipi1

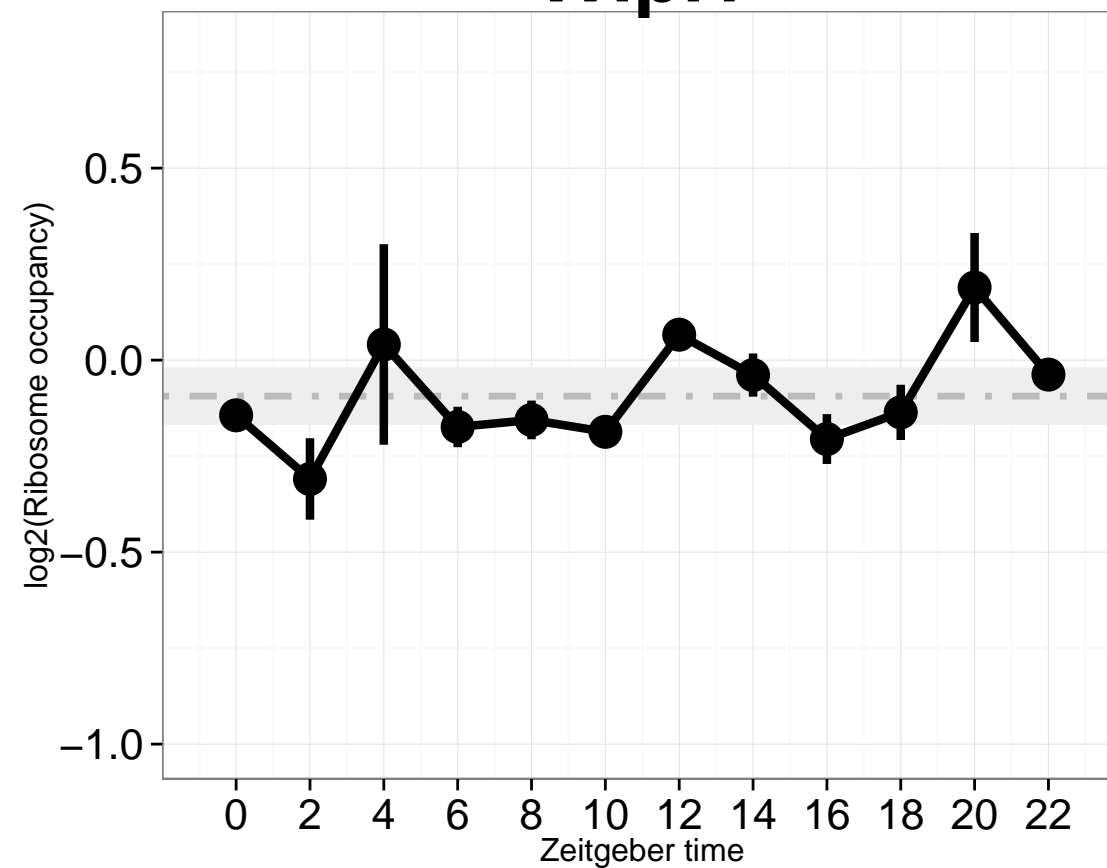

Supplement: Supplementary file 9462 [file 1]

# 5830411N06Rik

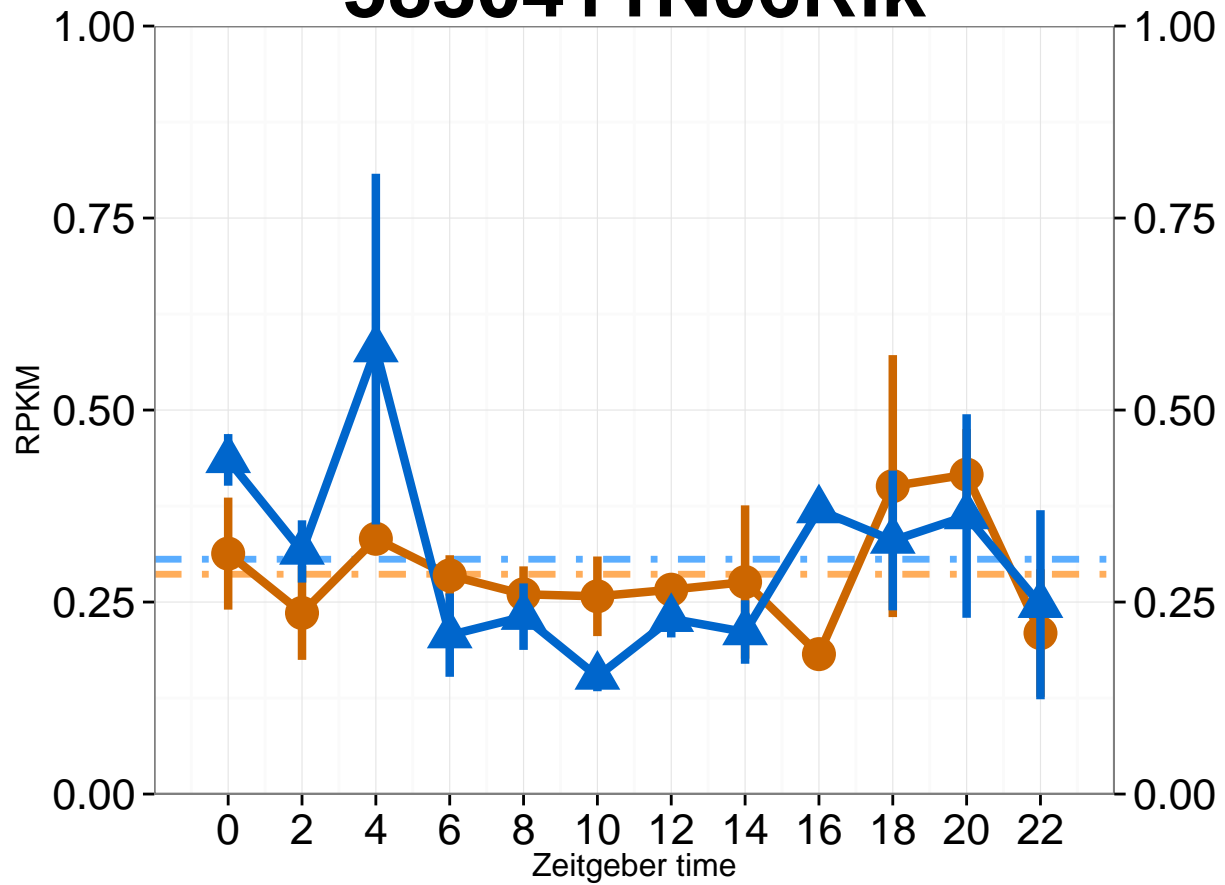

# 5830411N06Rik

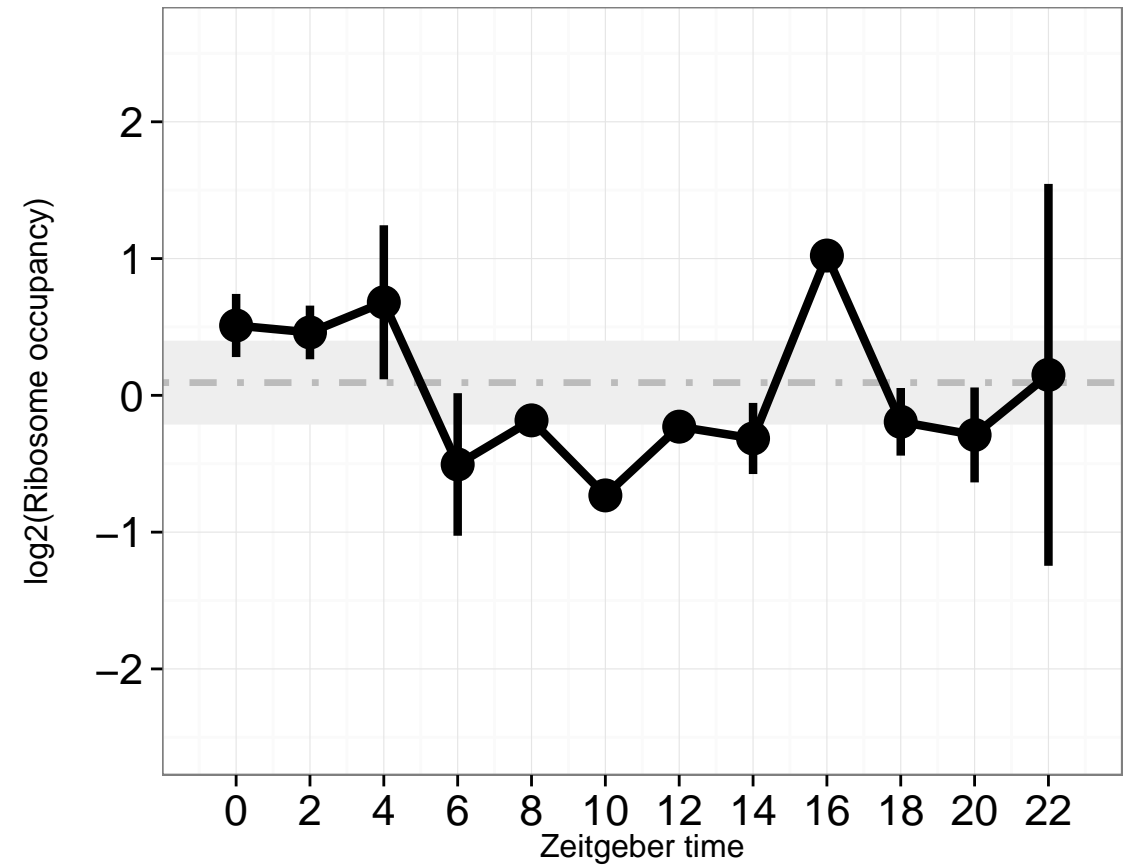

Supplement: Supplementary file 9463 [file 1]

## Tollip

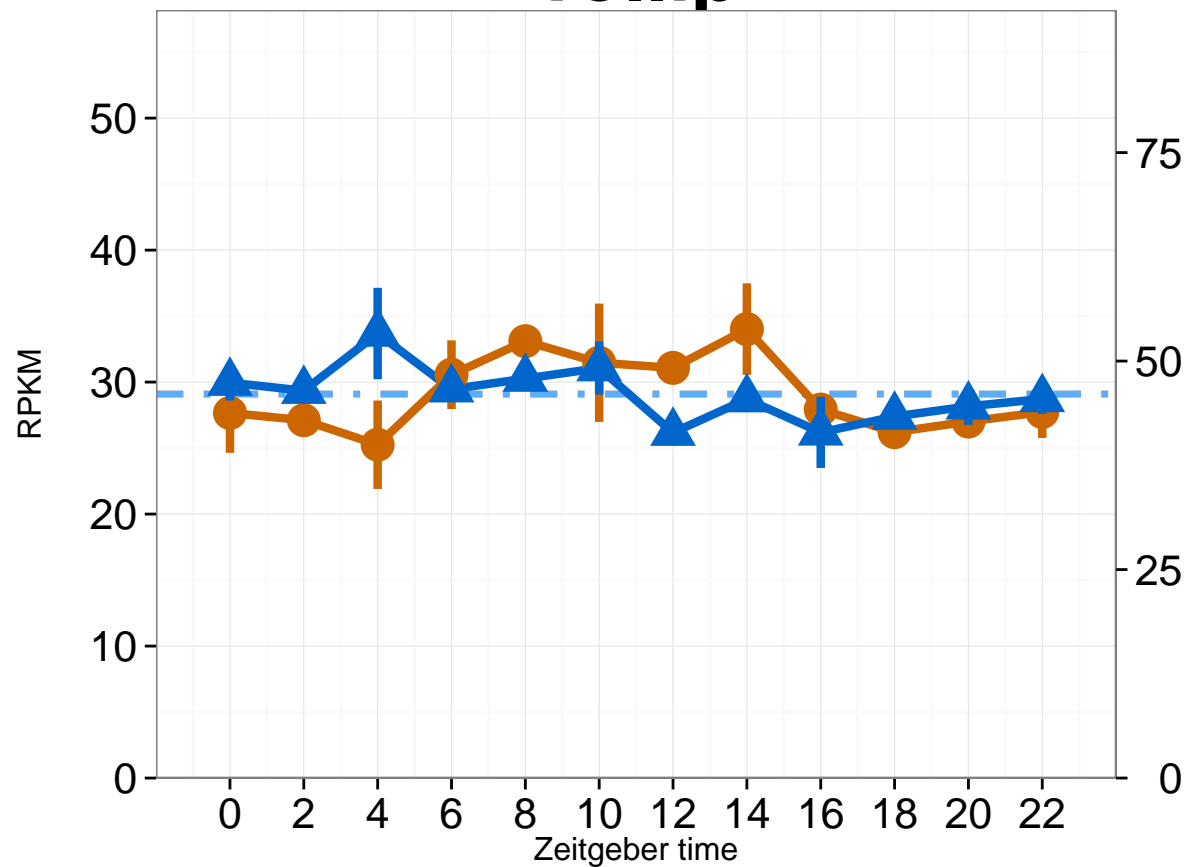

## Tollip

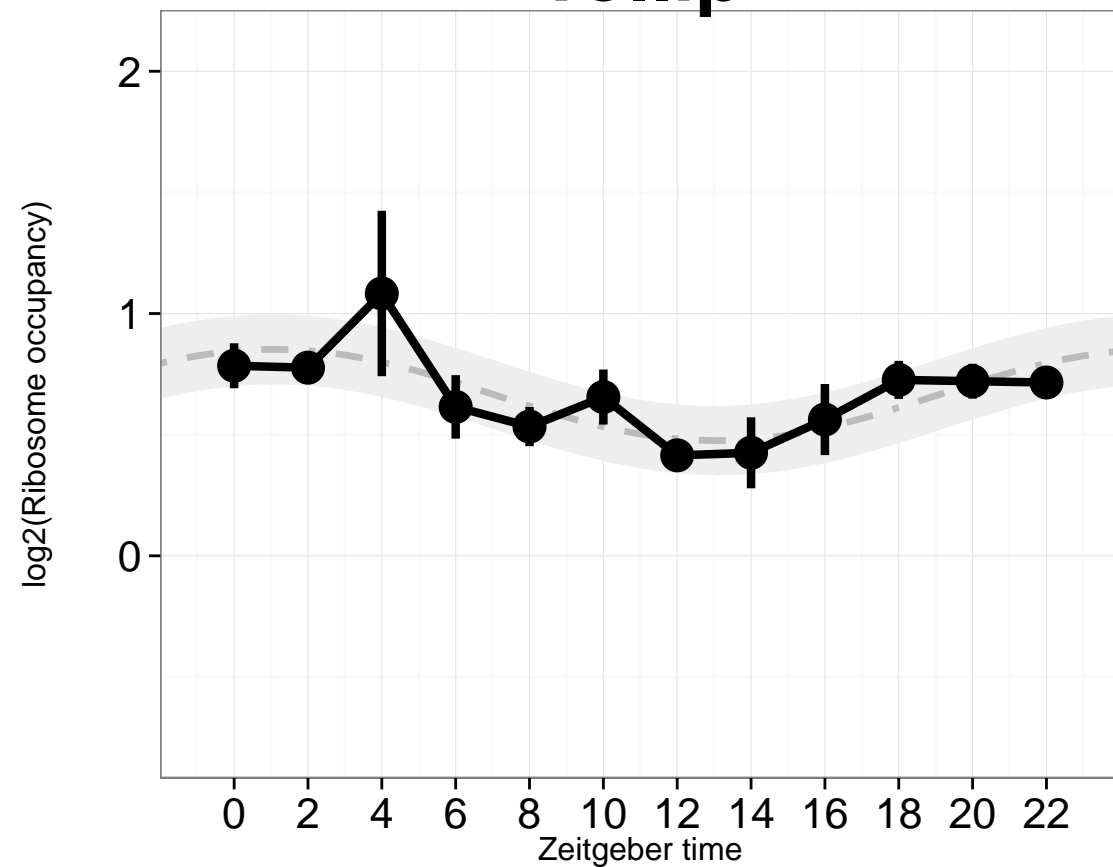

Supplement: Supplementary file 9464 [file 1]

## Apom

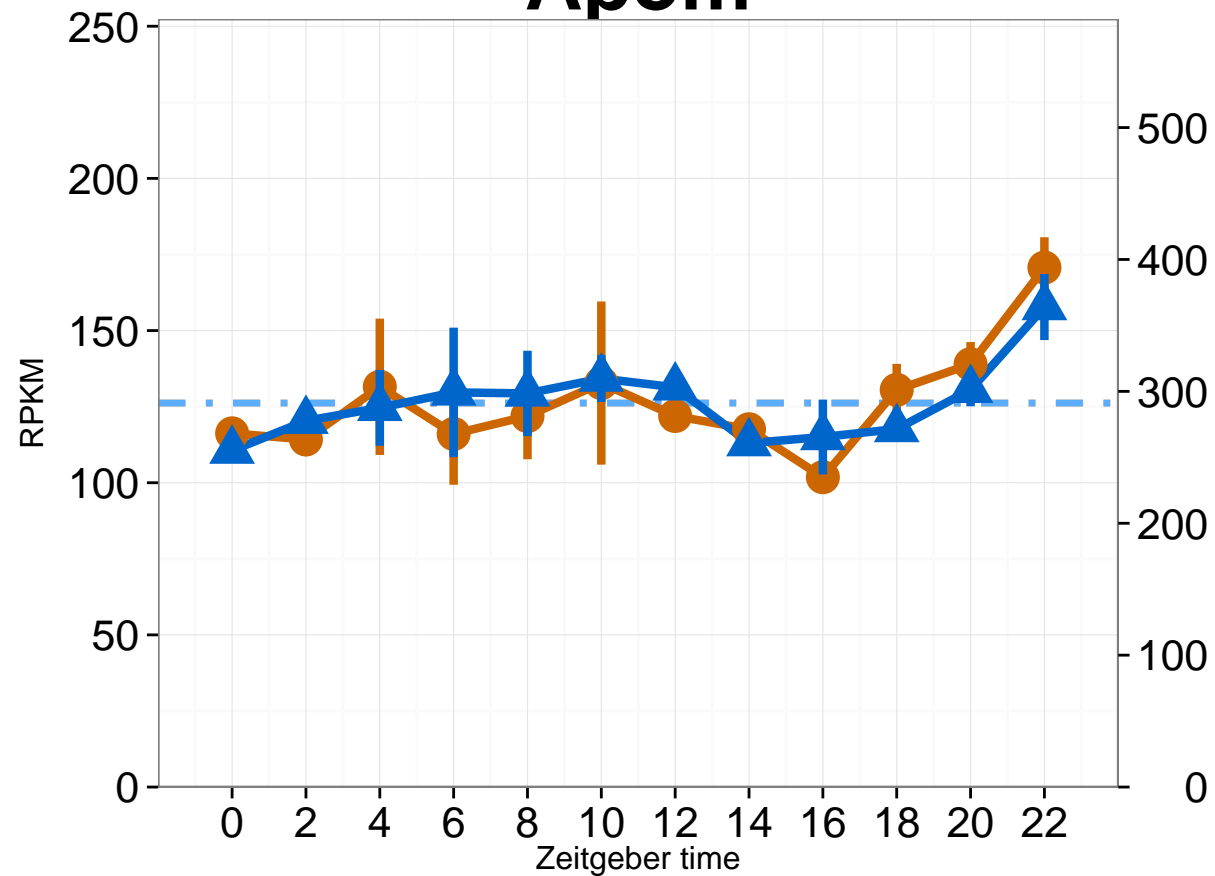

## Apom

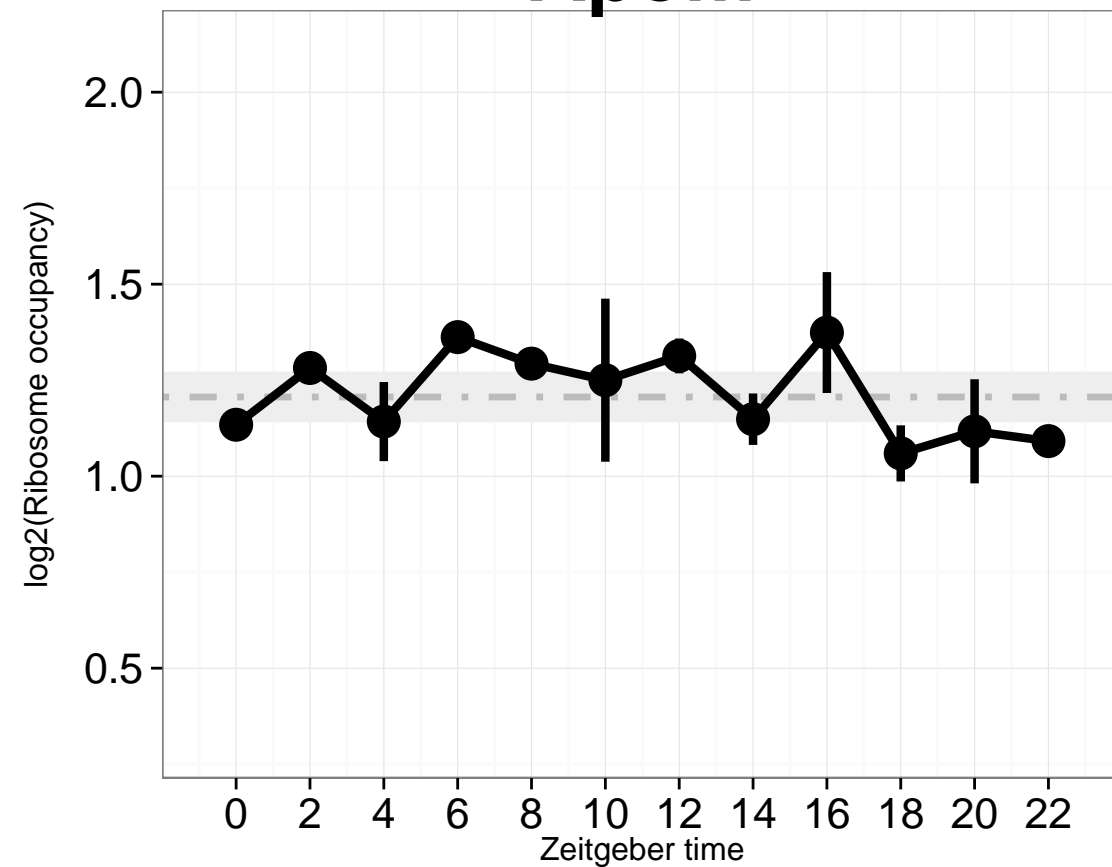

Supplement: Supplementary file 9465 [file 1]

## Snapin

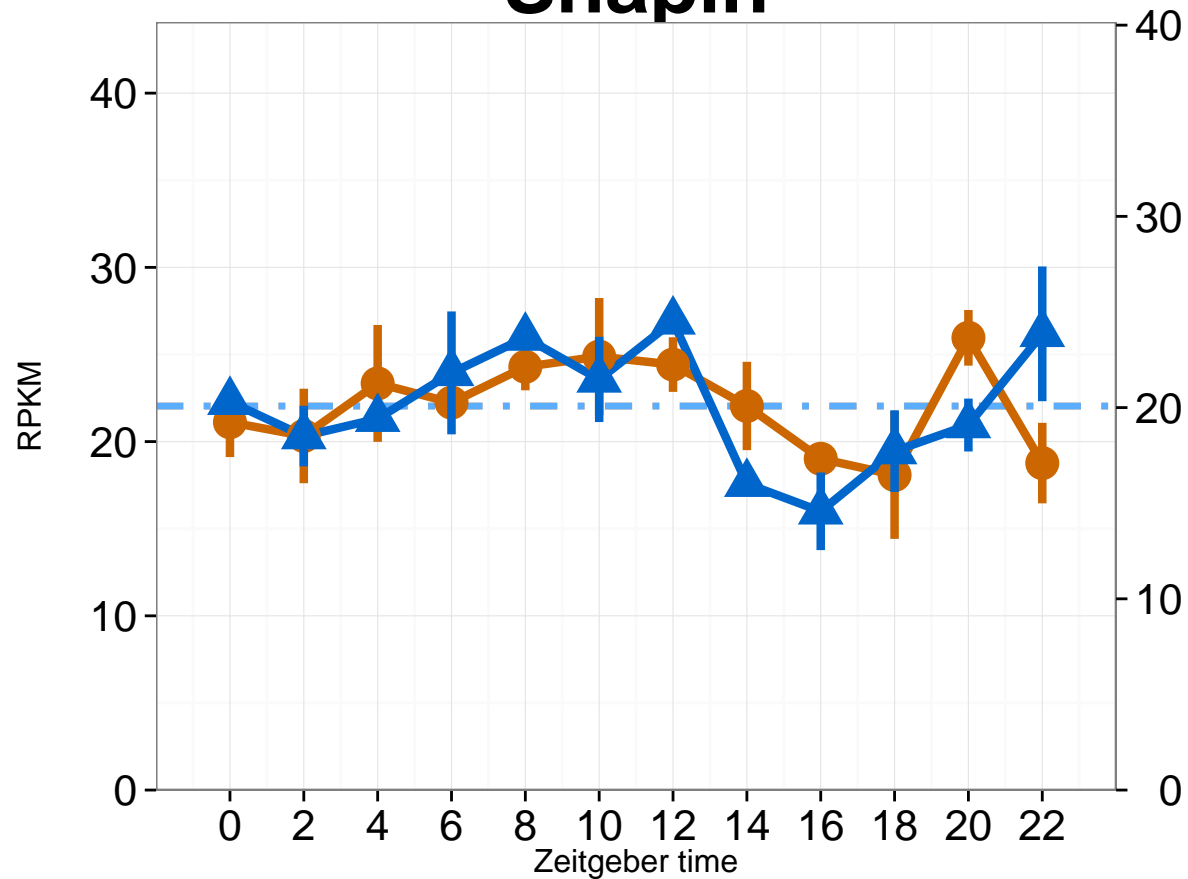

## Snapin

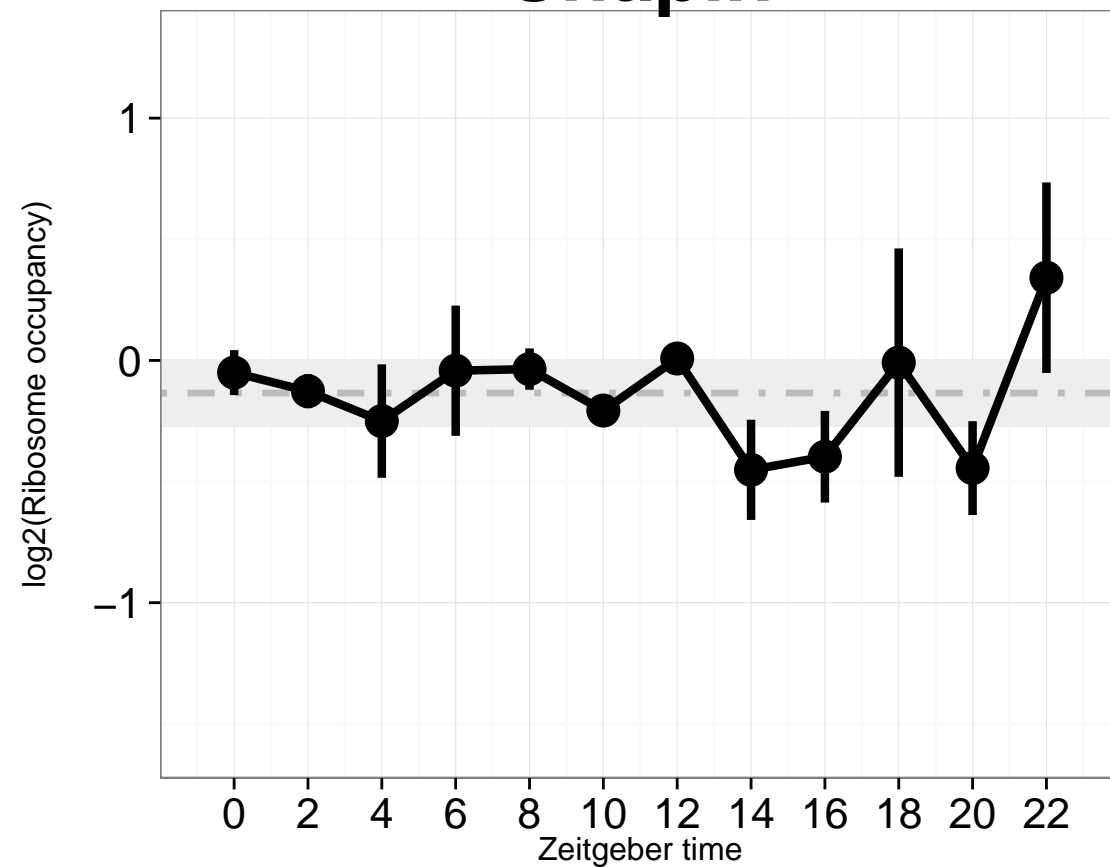

Supplement: Supplementary file 9466 [file 1]

## Stap1

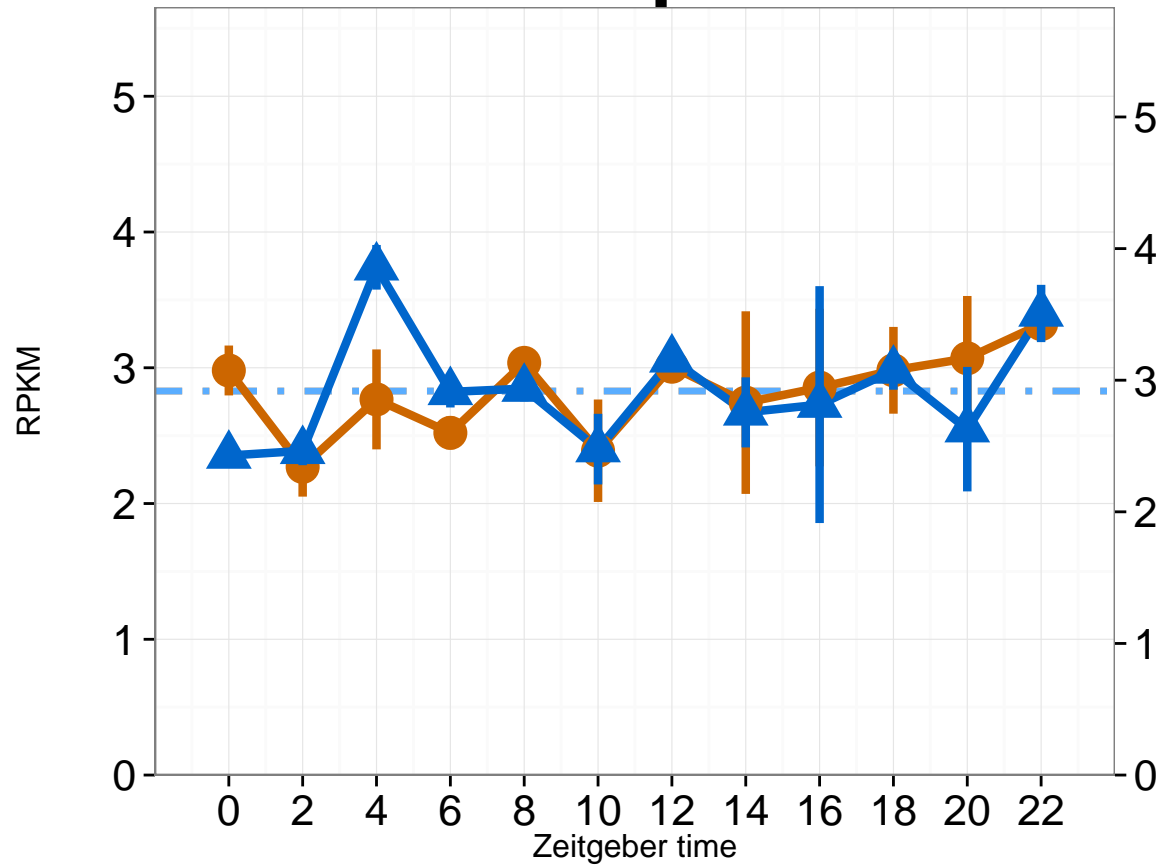

## Stap1

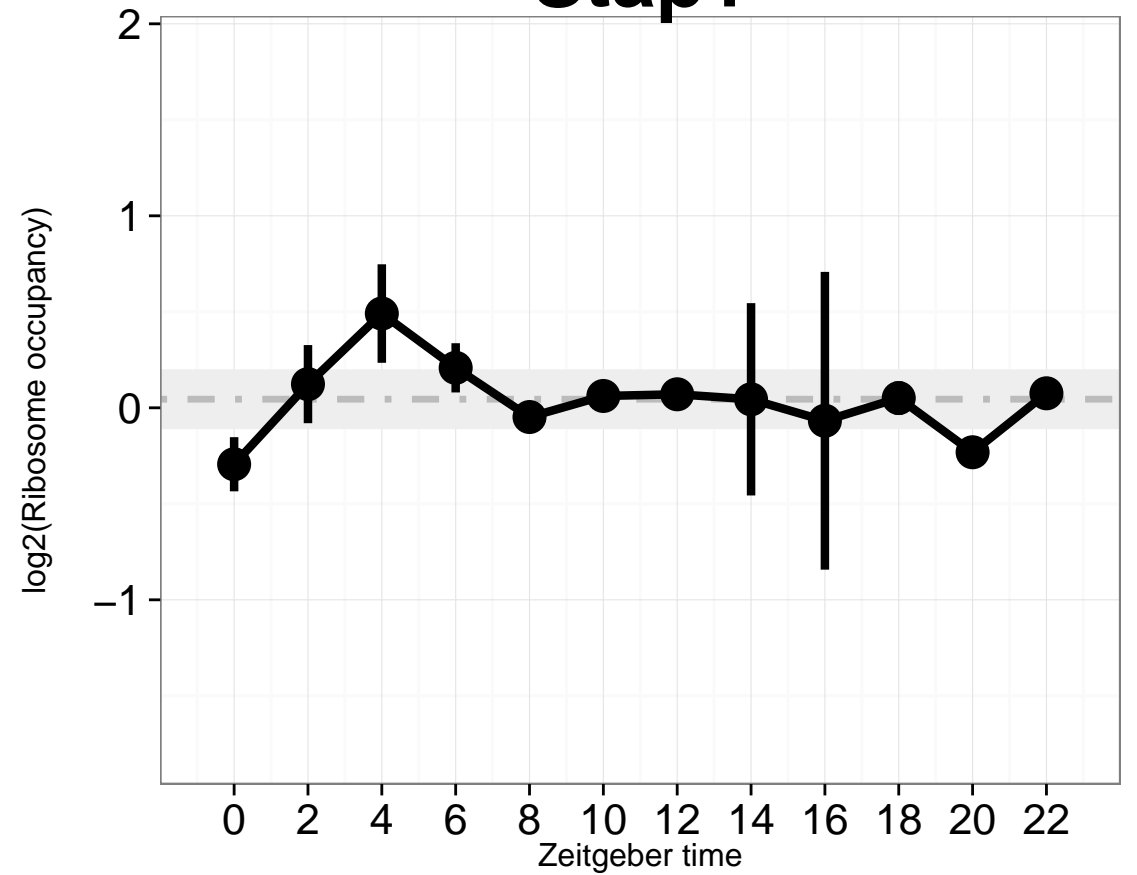

Supplement: Supplementary file 9467 [file 1]

## Hdhd3

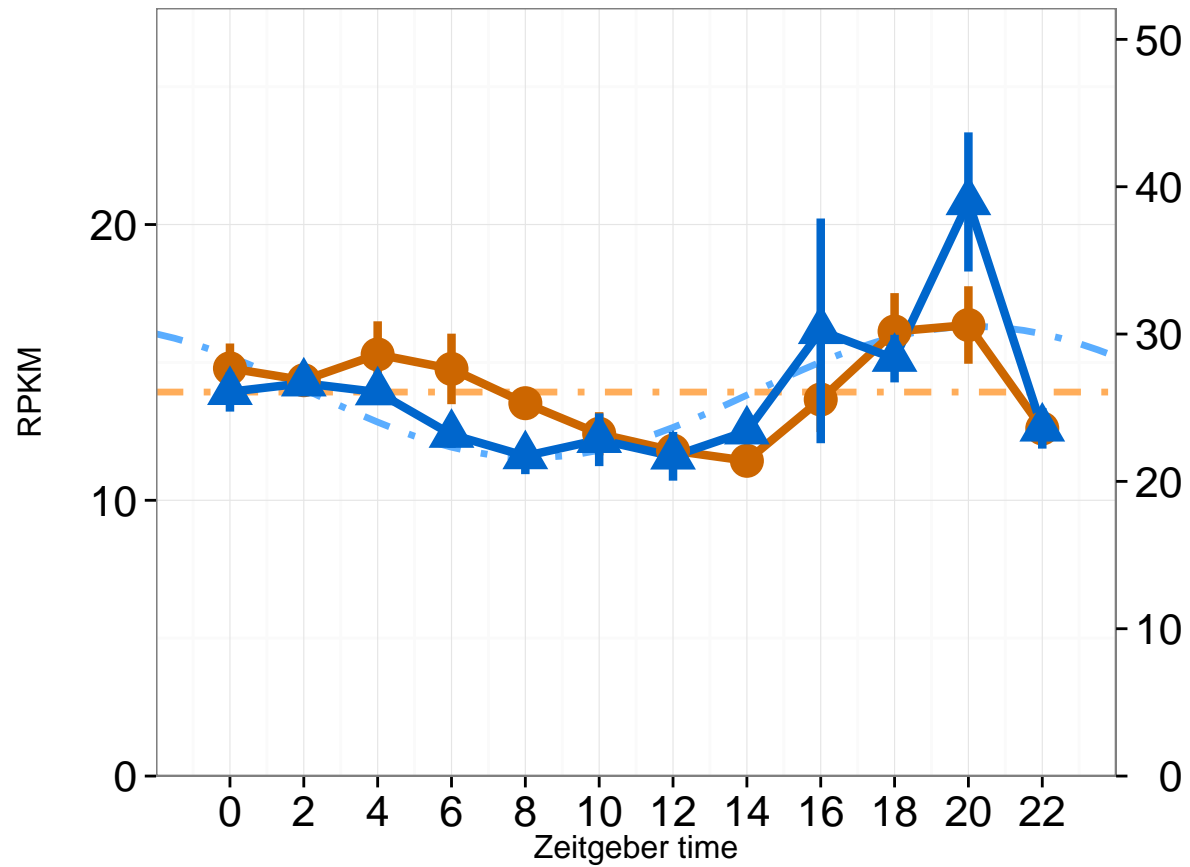

## Hdhd3

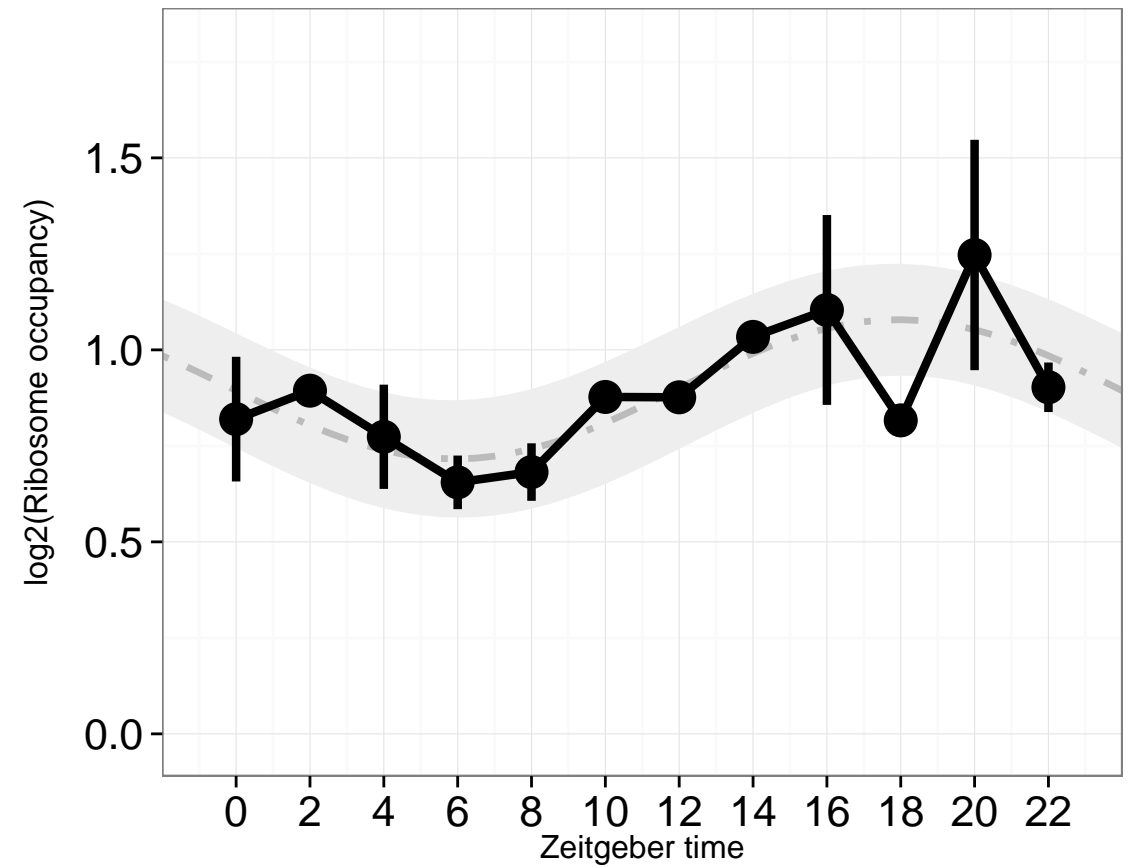

Supplement: Supplementary file 9468 [file 1]

# Ppp1r3e

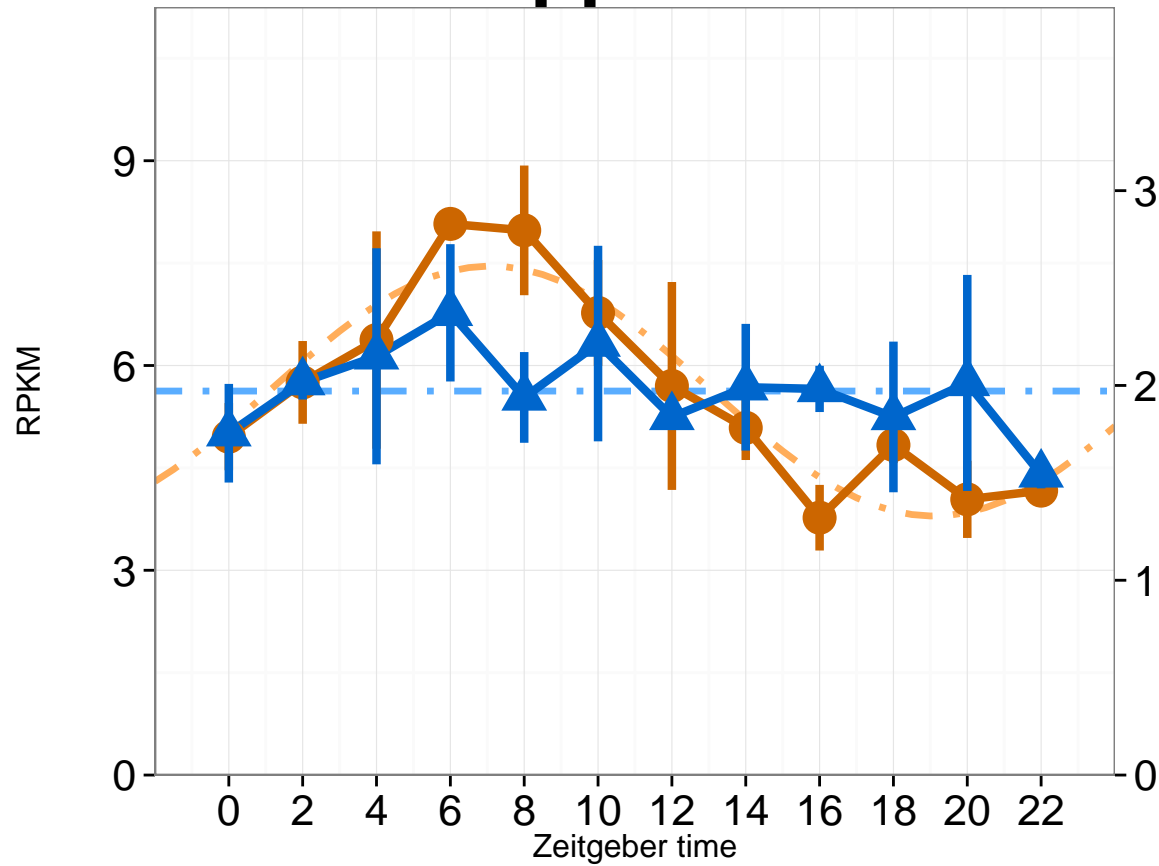

# Ppp1r3e

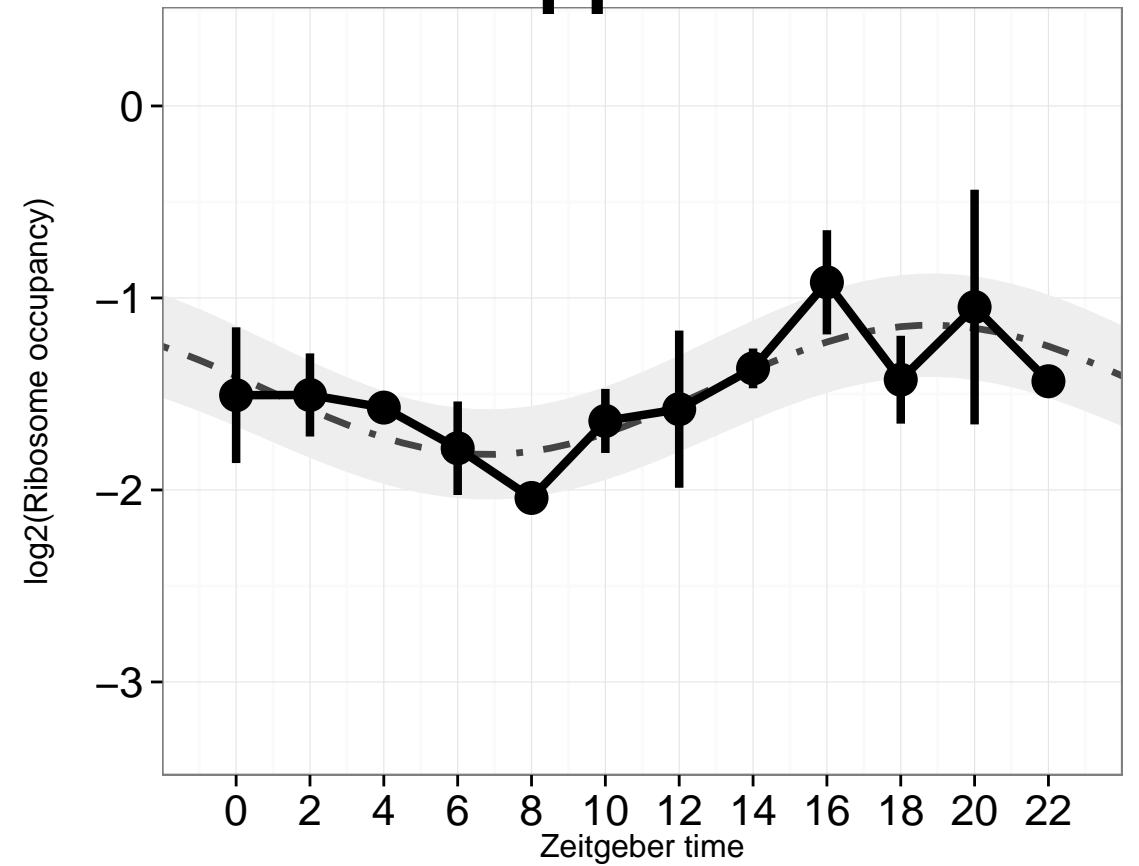

Supplement: Supplementary file 9469 [file 1]

# Rab30

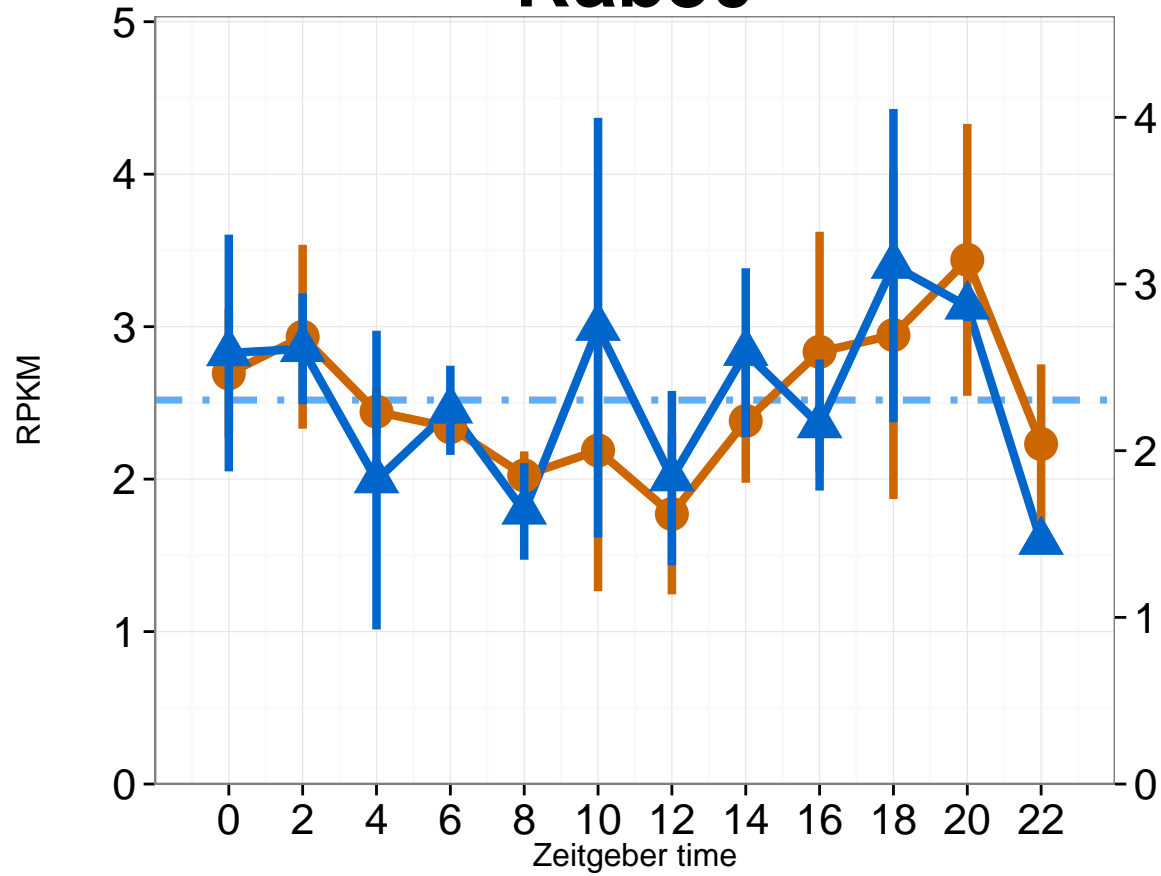

# Rab30

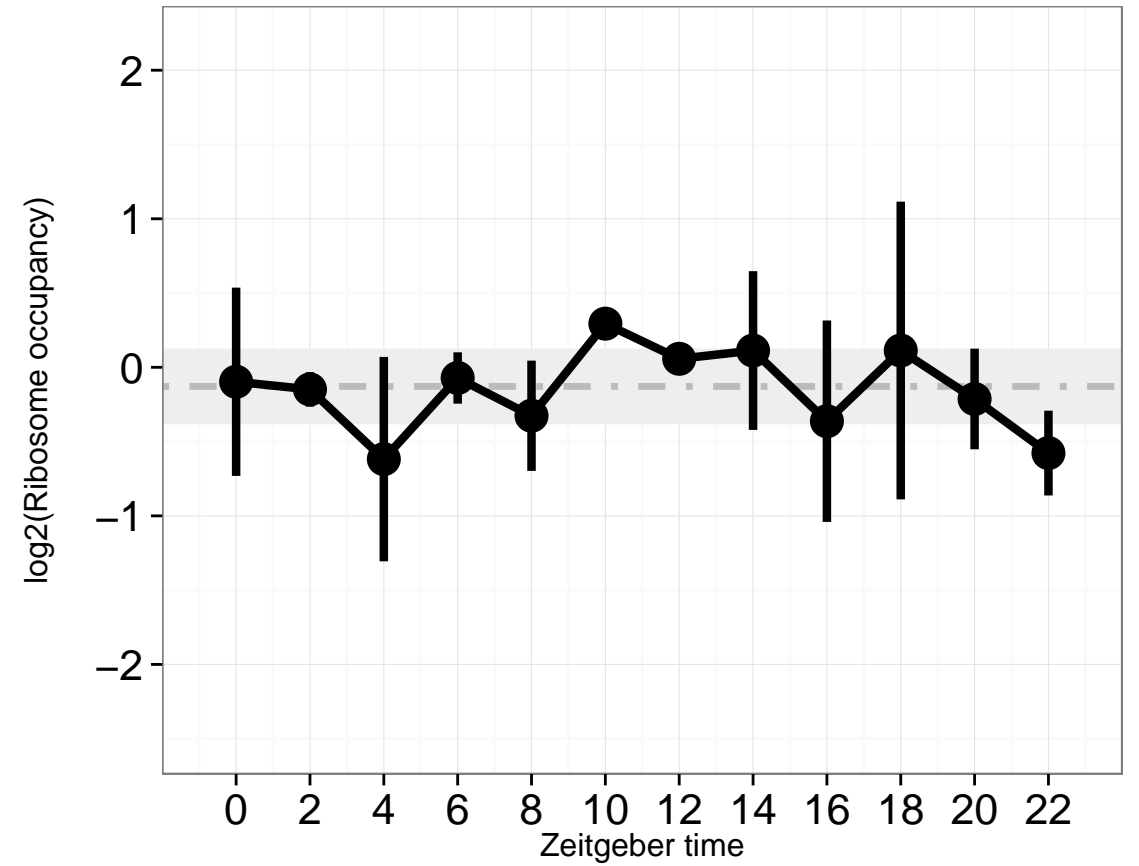

Supplement: Supplementary file 9470 [file 1]

# Ninj1

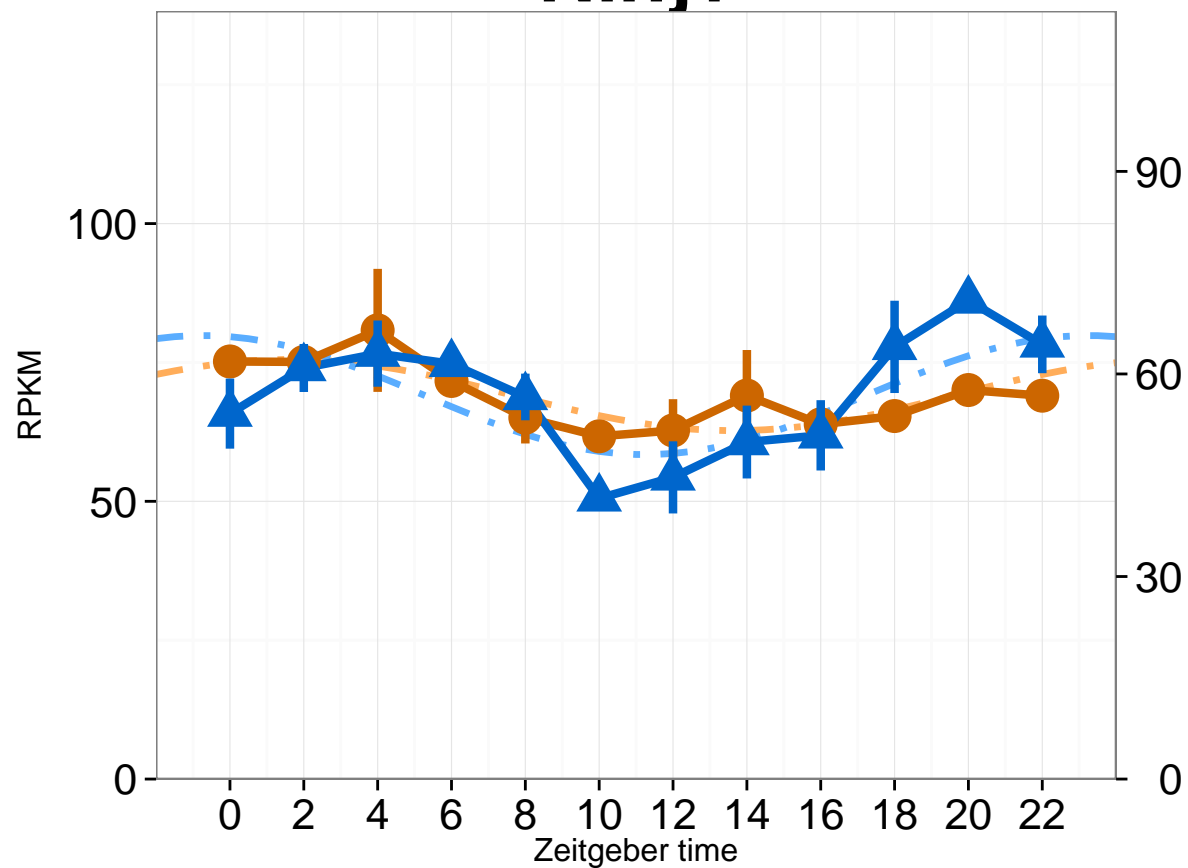

# Ninj1

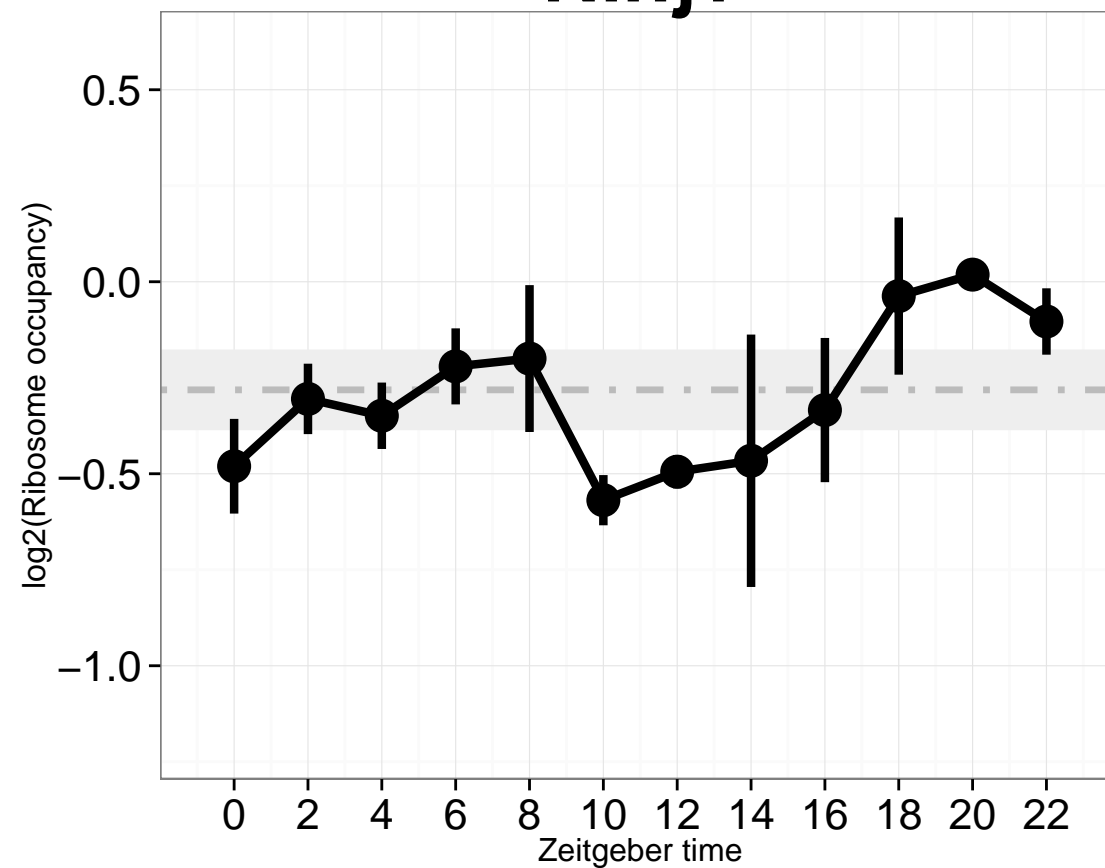

Supplement: Supplementary file 9471 [file 1]

# Usp35

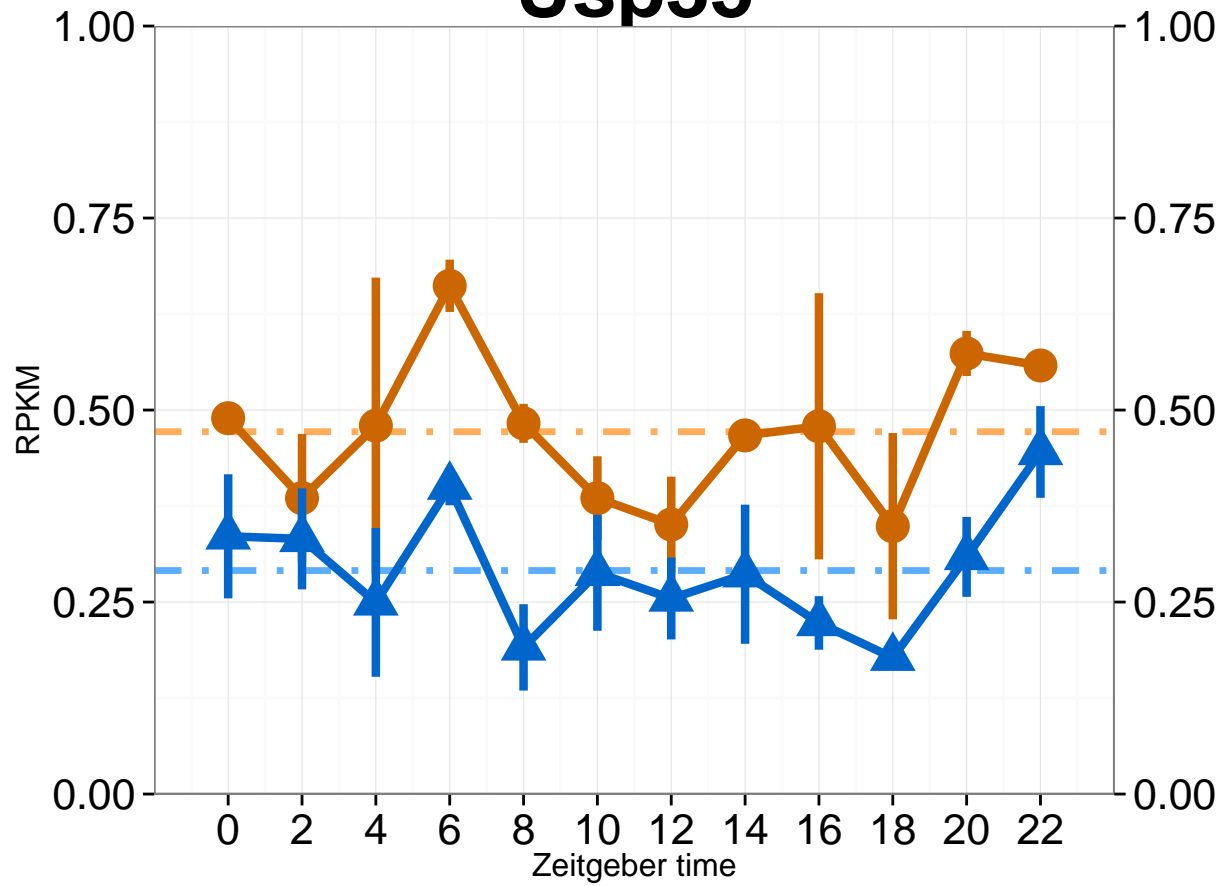

# Usp35

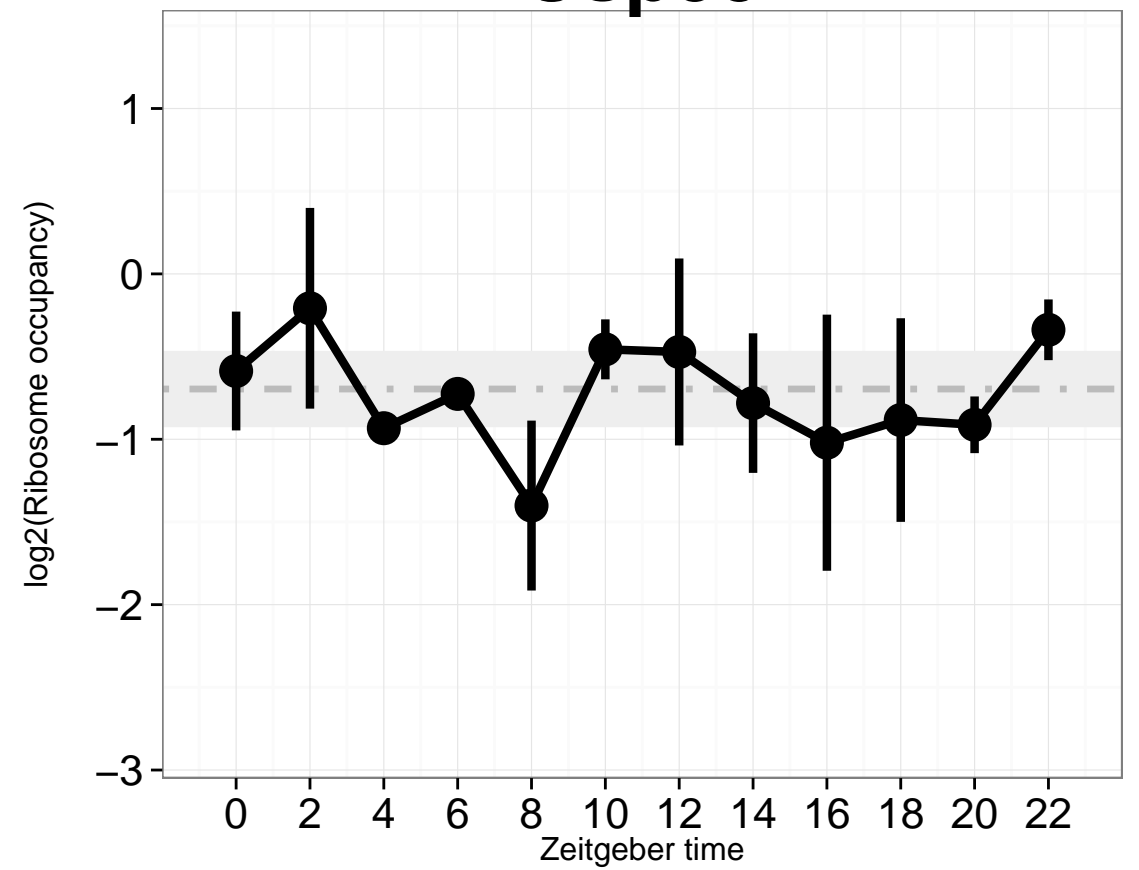

Supplement: Supplementary file 9472 [file 1]

## Fbxo7

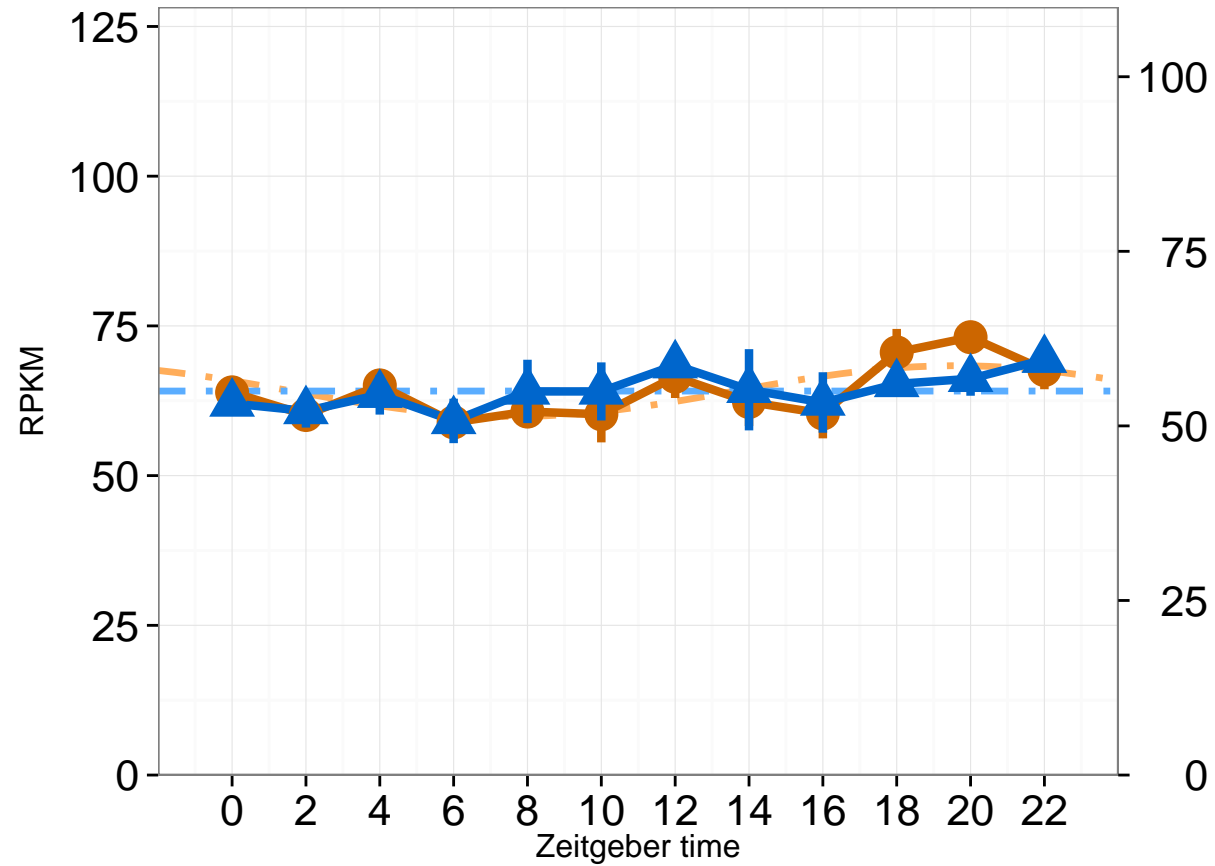

## Fbxo7

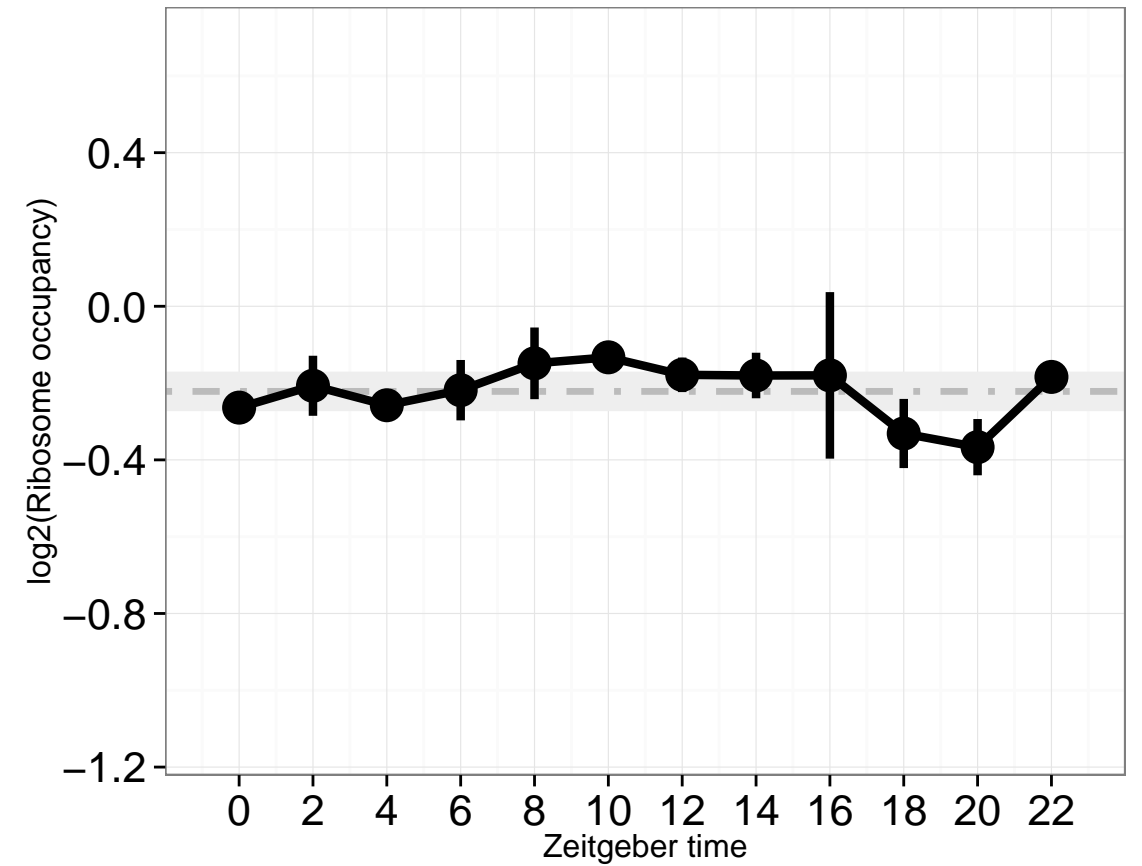

Supplement: Supplementary file 9473 [file 1]

## Hddc3

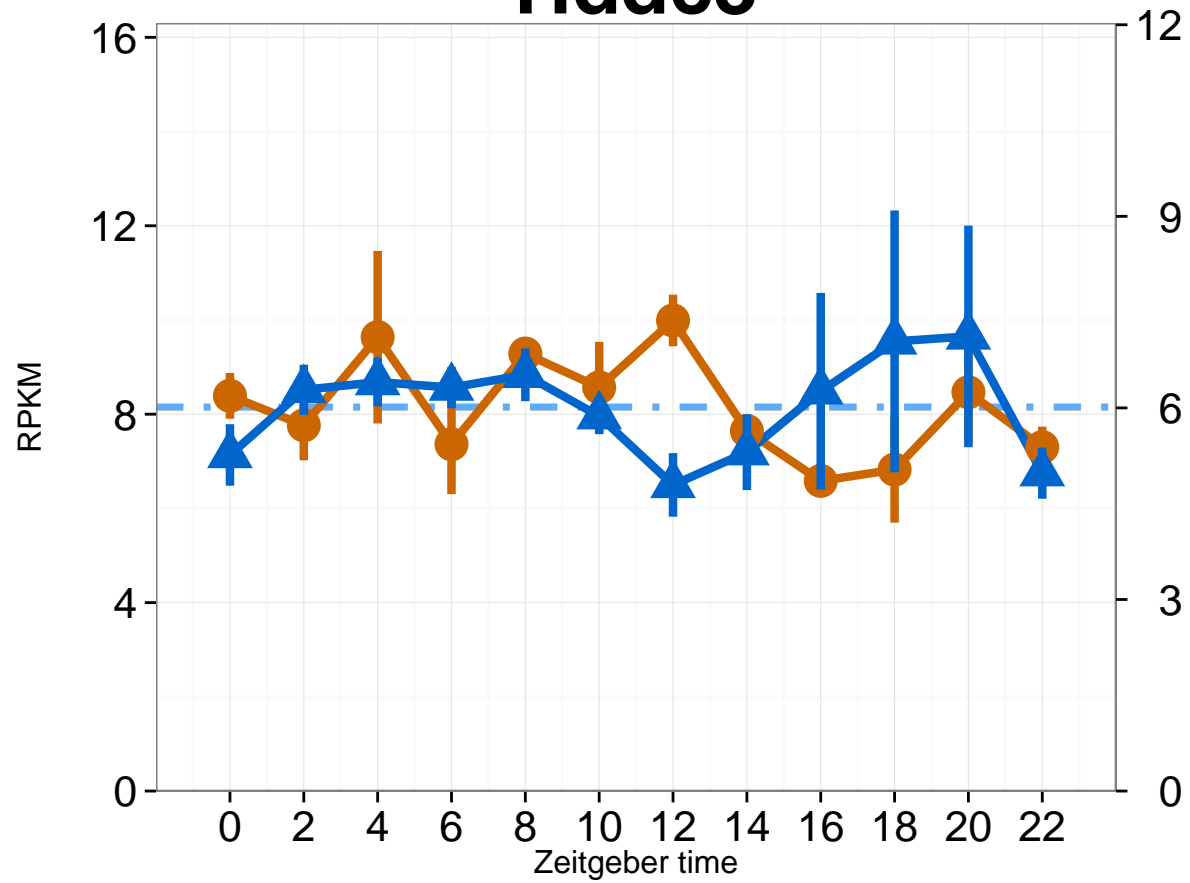

## Hddc3

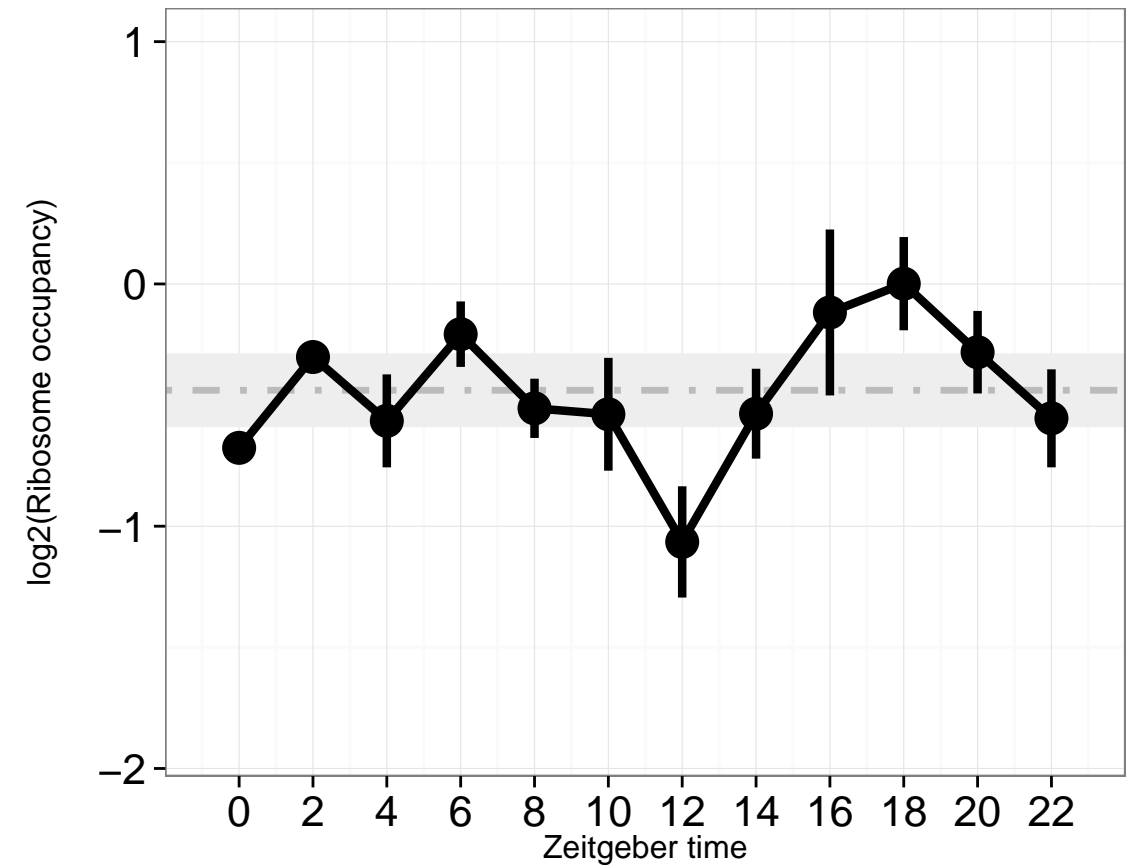

Supplement: Supplementary file 9474 [file 1]

## Erf

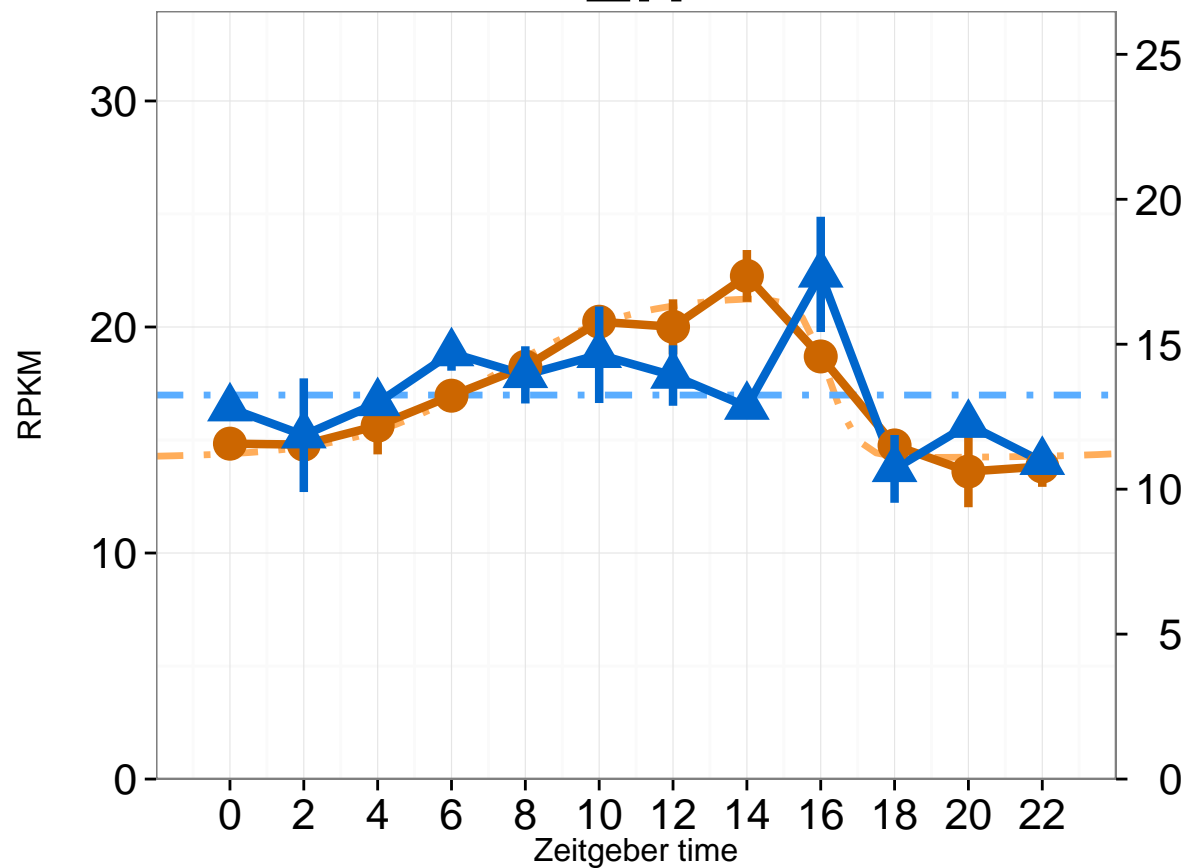

## Erf

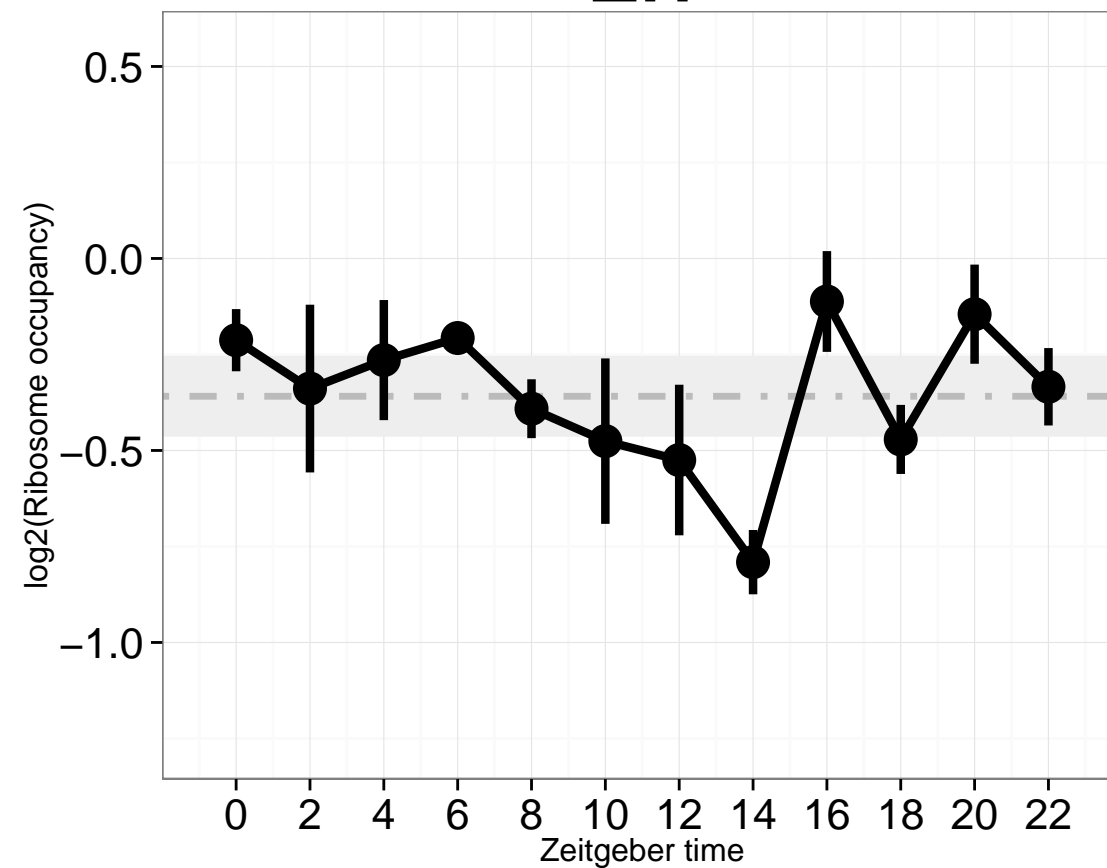

Supplement: Supplementary file 9475 [file 1]

## Yipf4

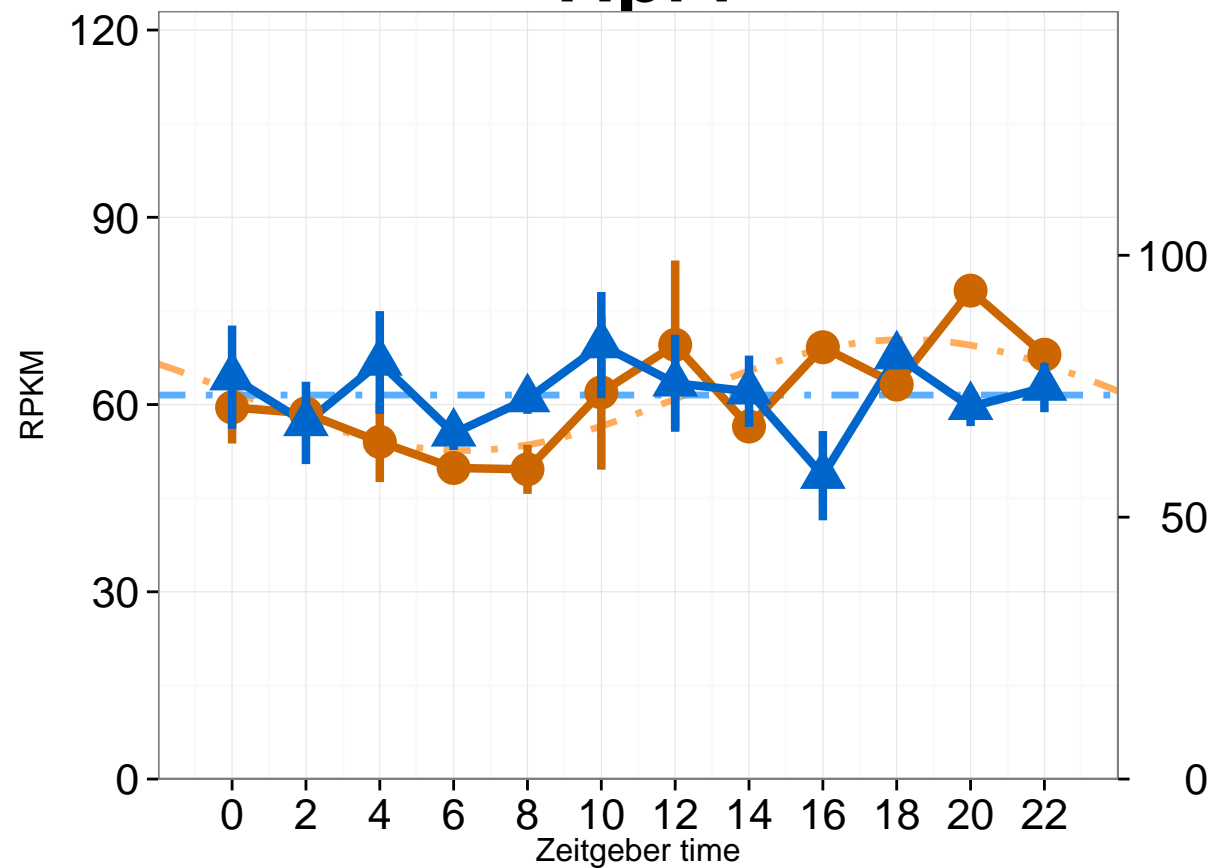

## Yipf4

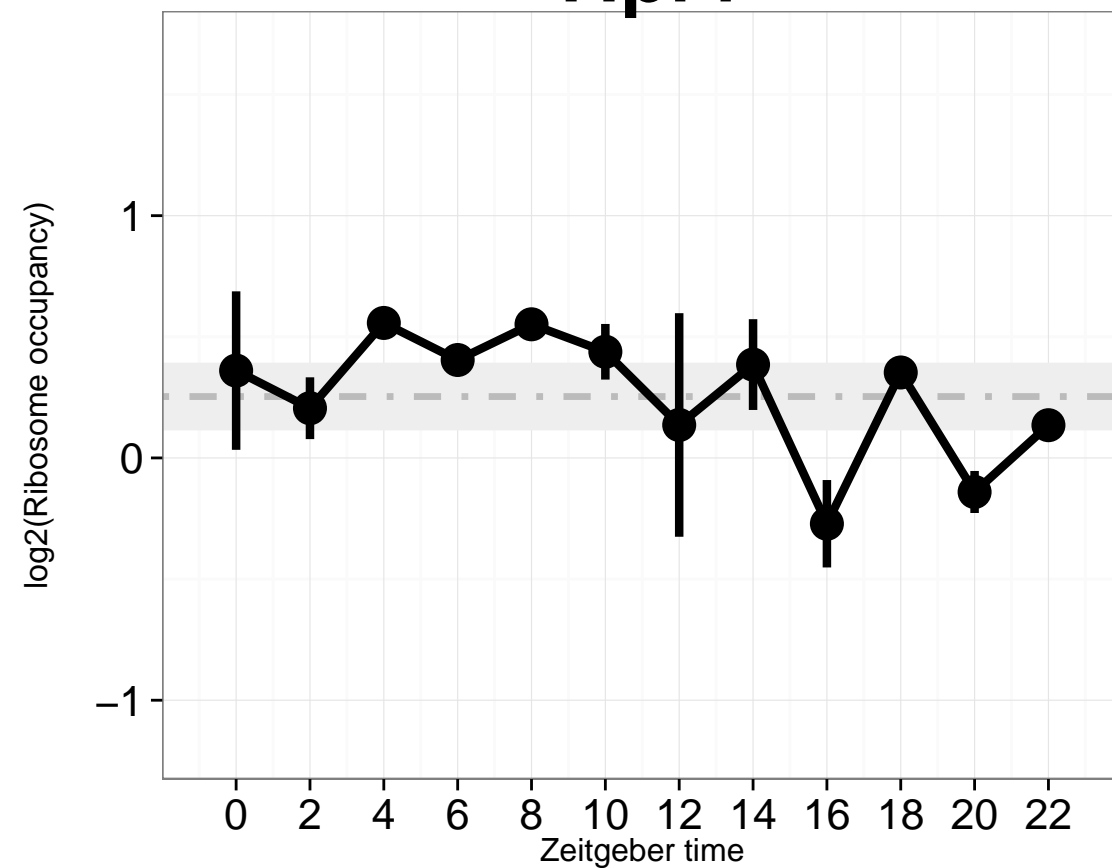

Supplement: Supplementary file 9476 [file 1]

# Sh3bp1

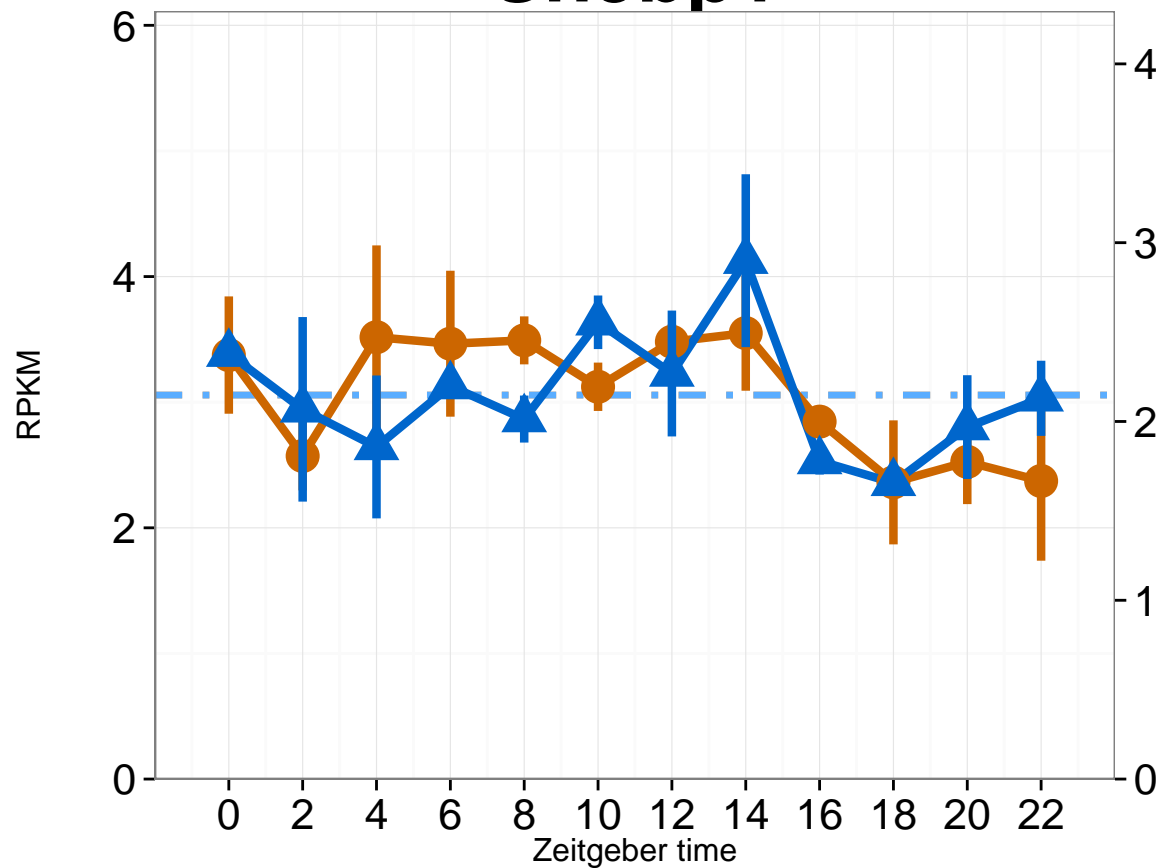

# Sh3bp1

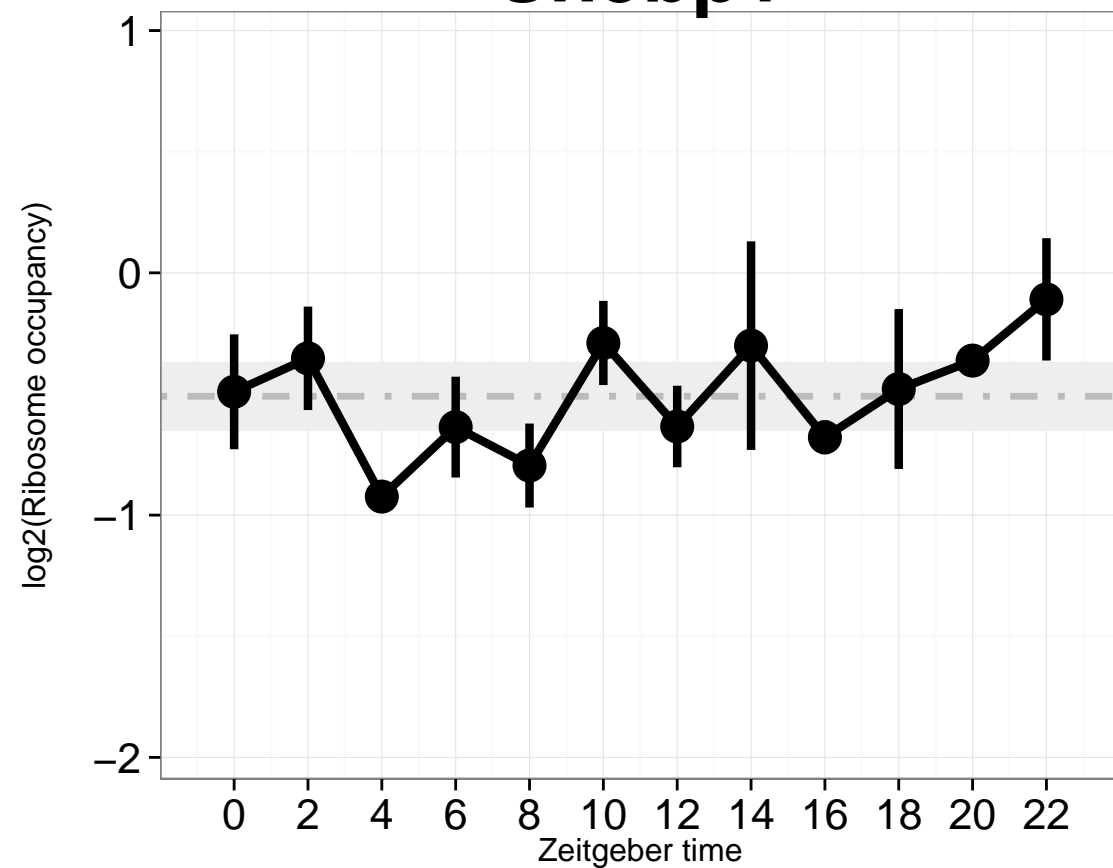

Supplement: Supplementary file 9477 [file 1]

## Hdac9

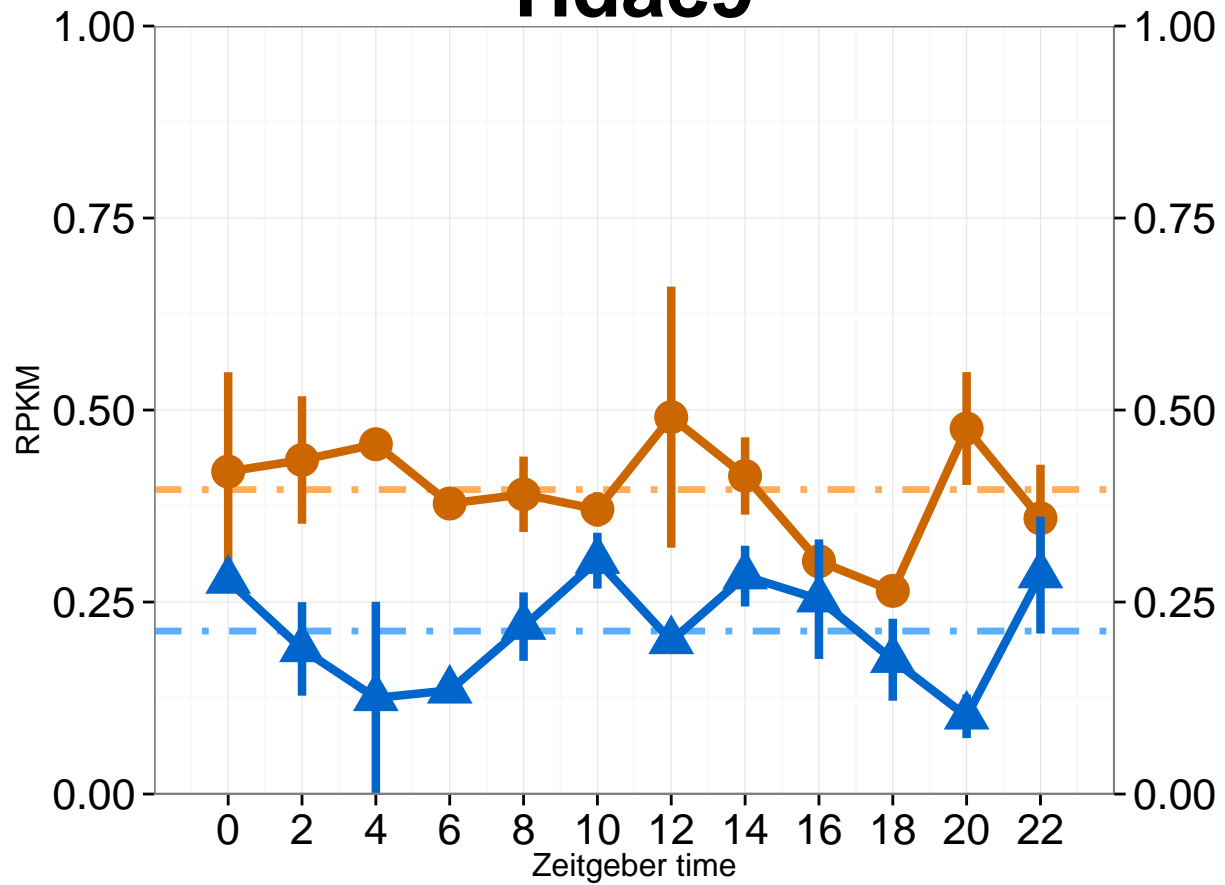

## Hdac9

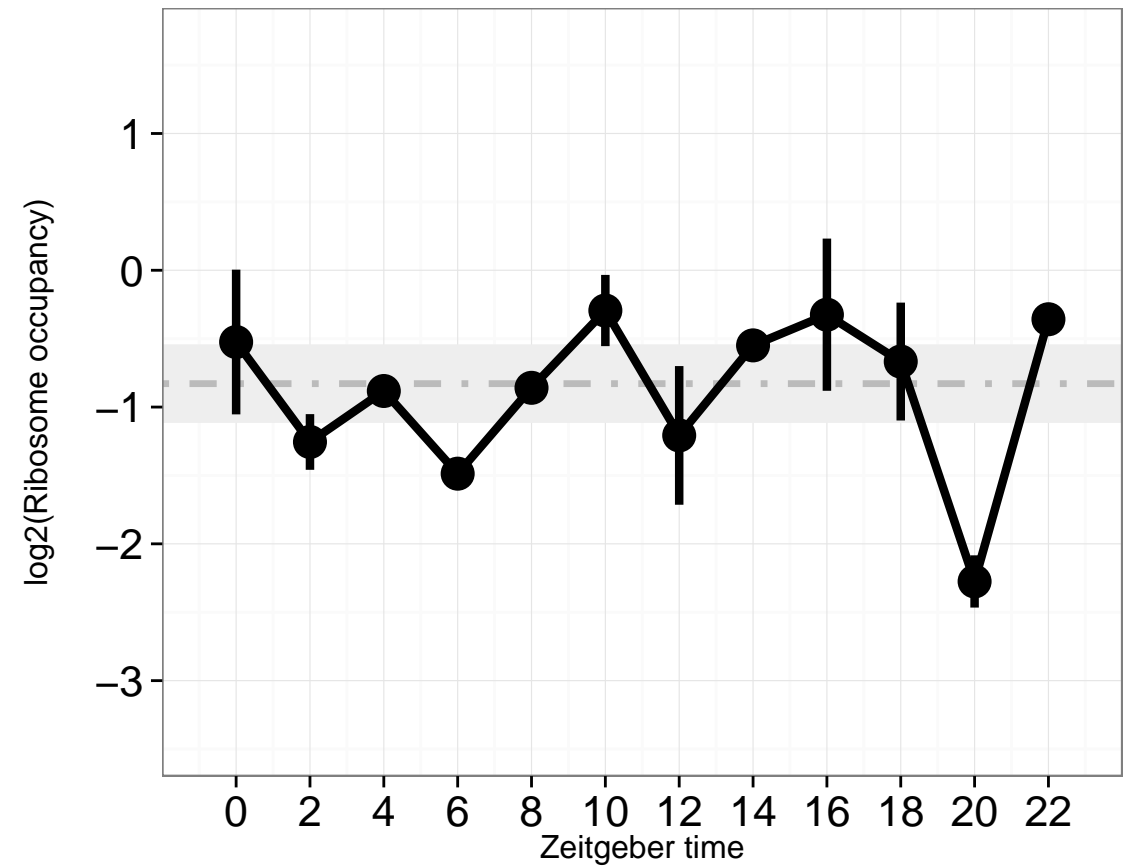

Supplement: Supplementary file 9478 [file 1]

## Alms1

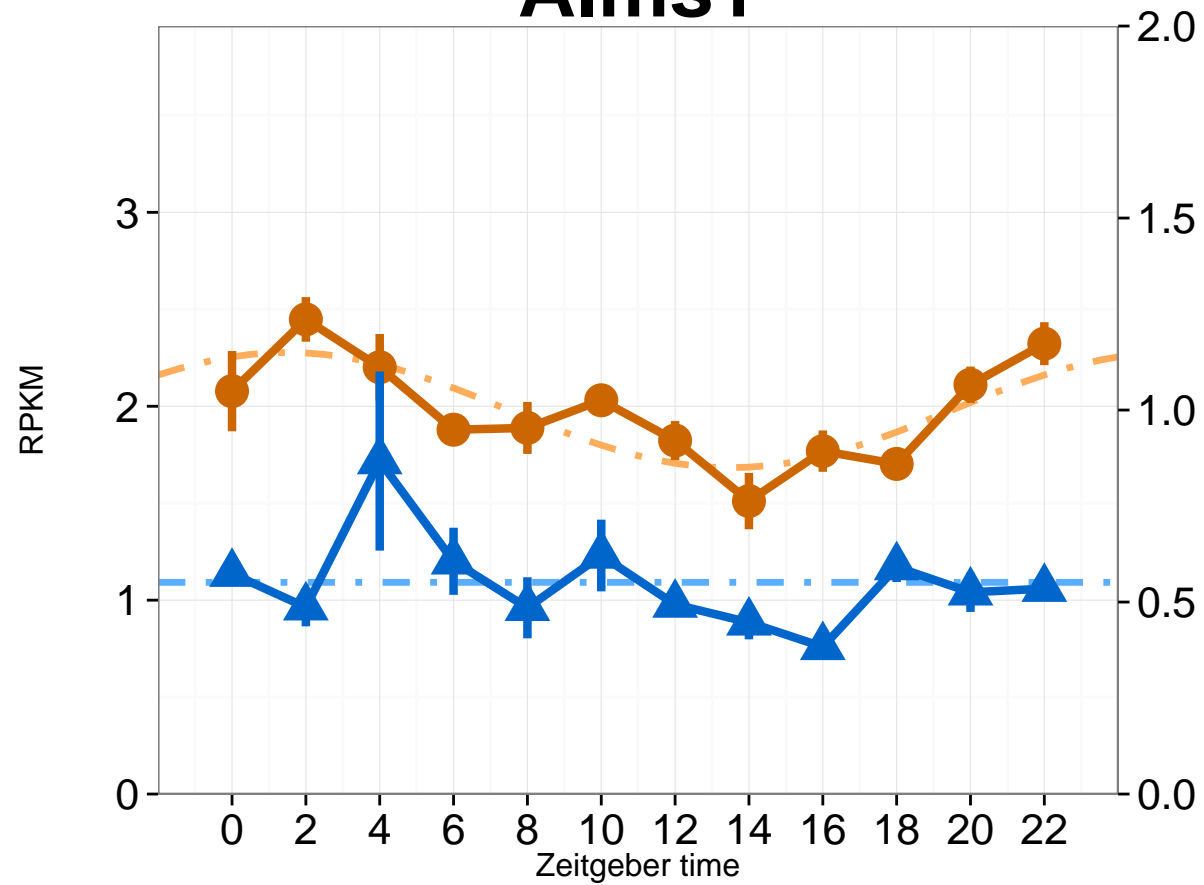

## Alms1

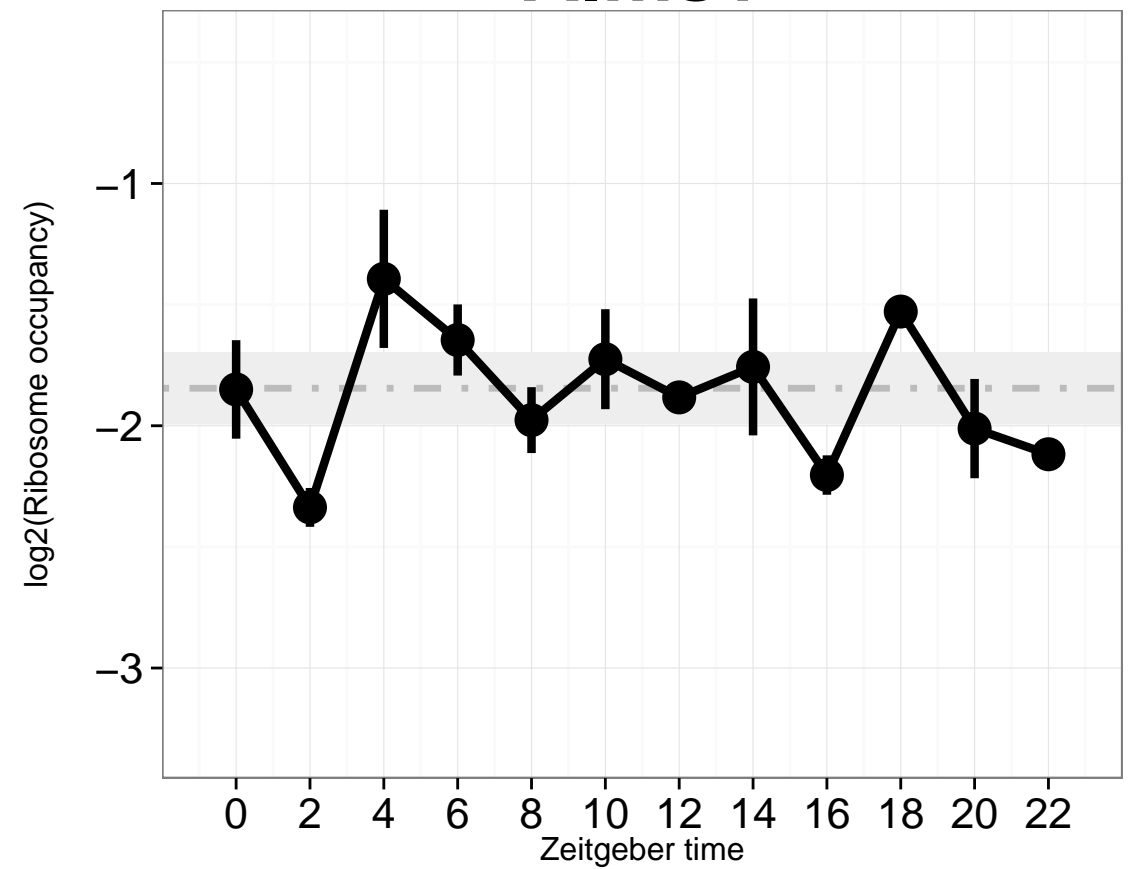

Supplement: Supplementary file 9479 [file 1]

## Lpar1

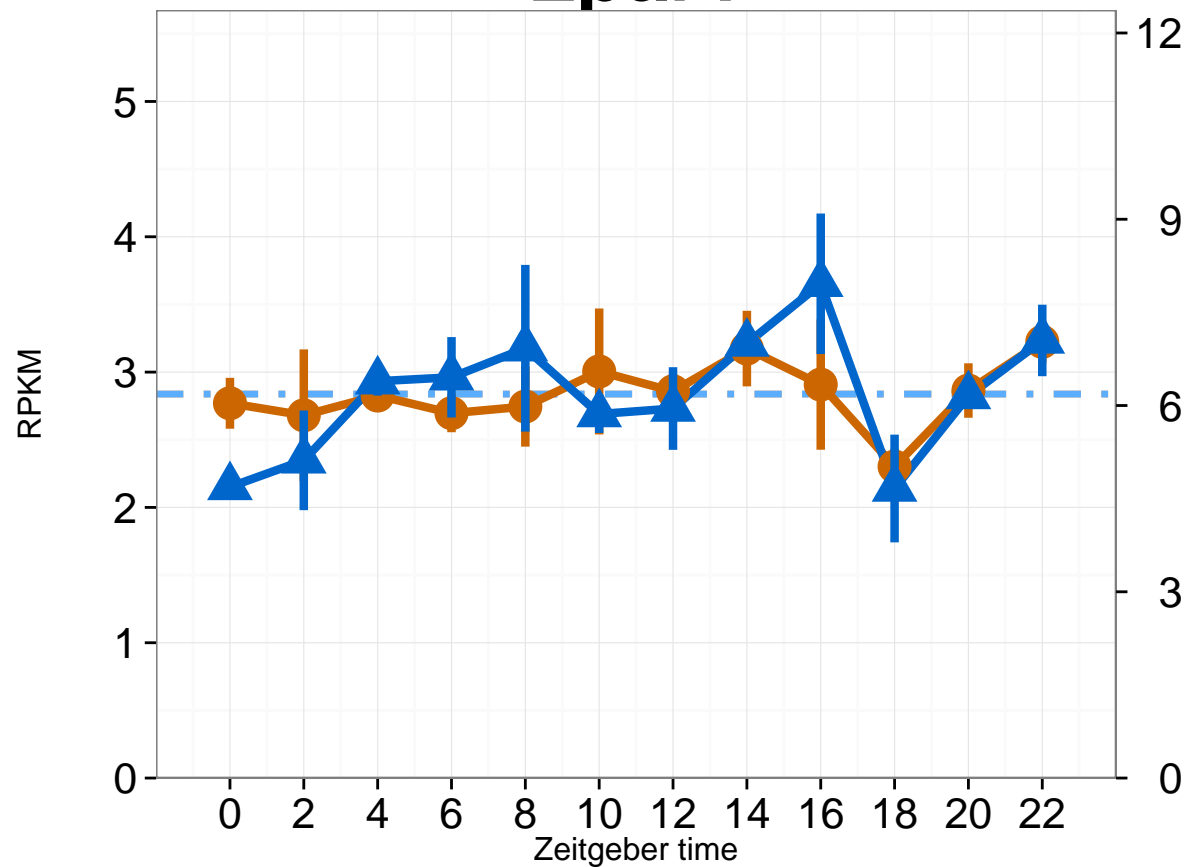

## Lpar1

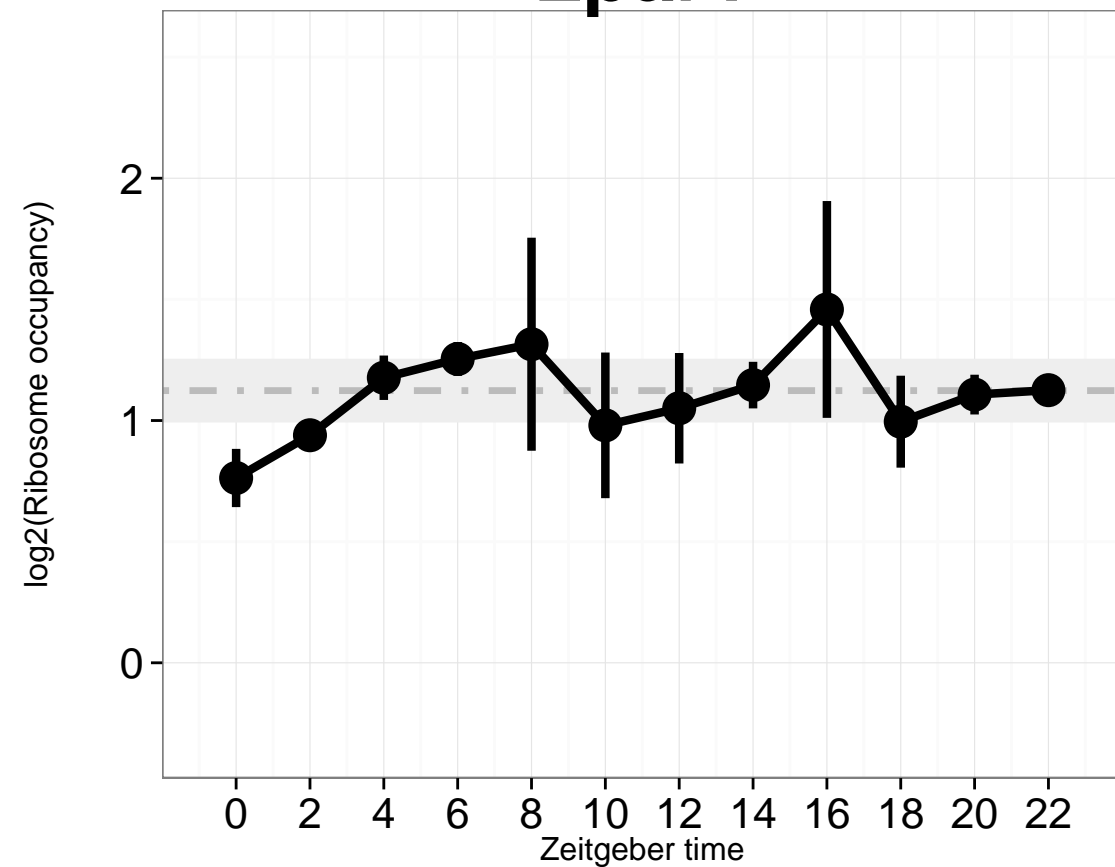

Supplement: Supplementary file 9480 [file 1]

# Atp13a3

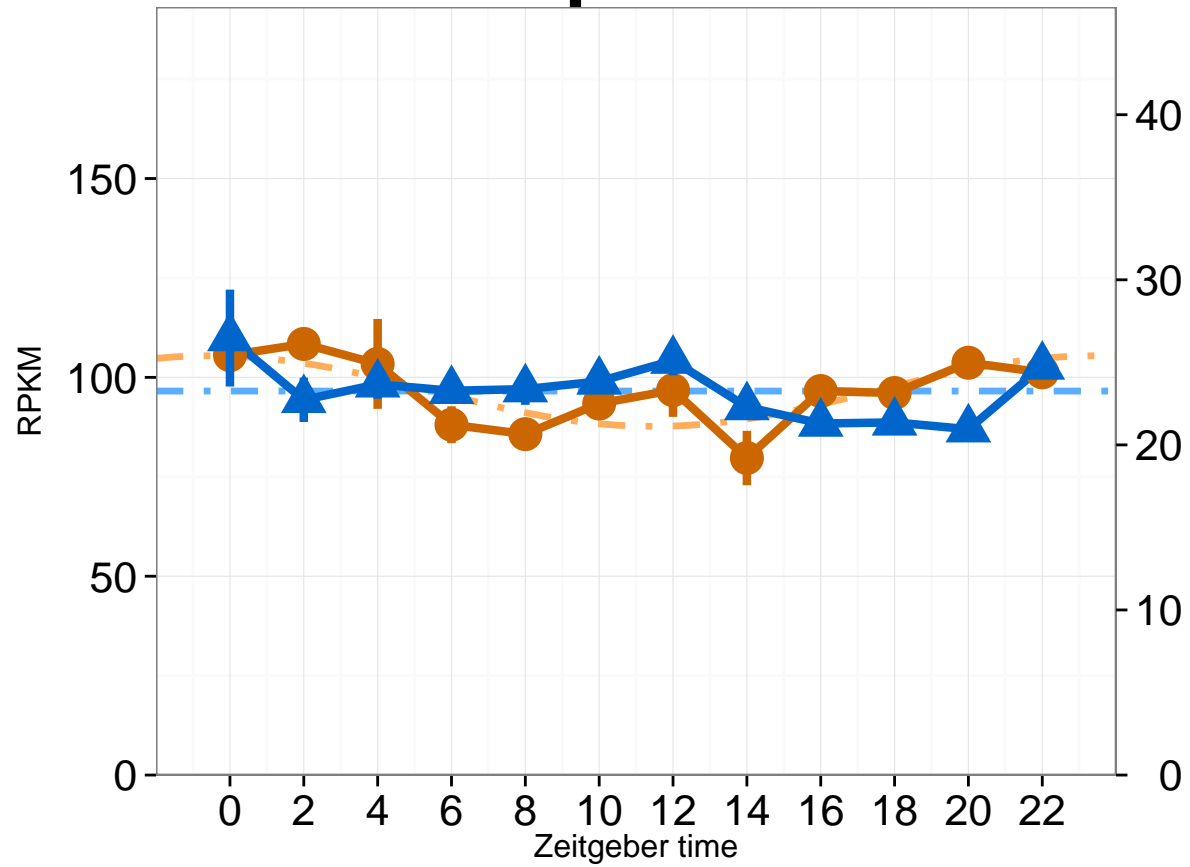

# Atp13a3

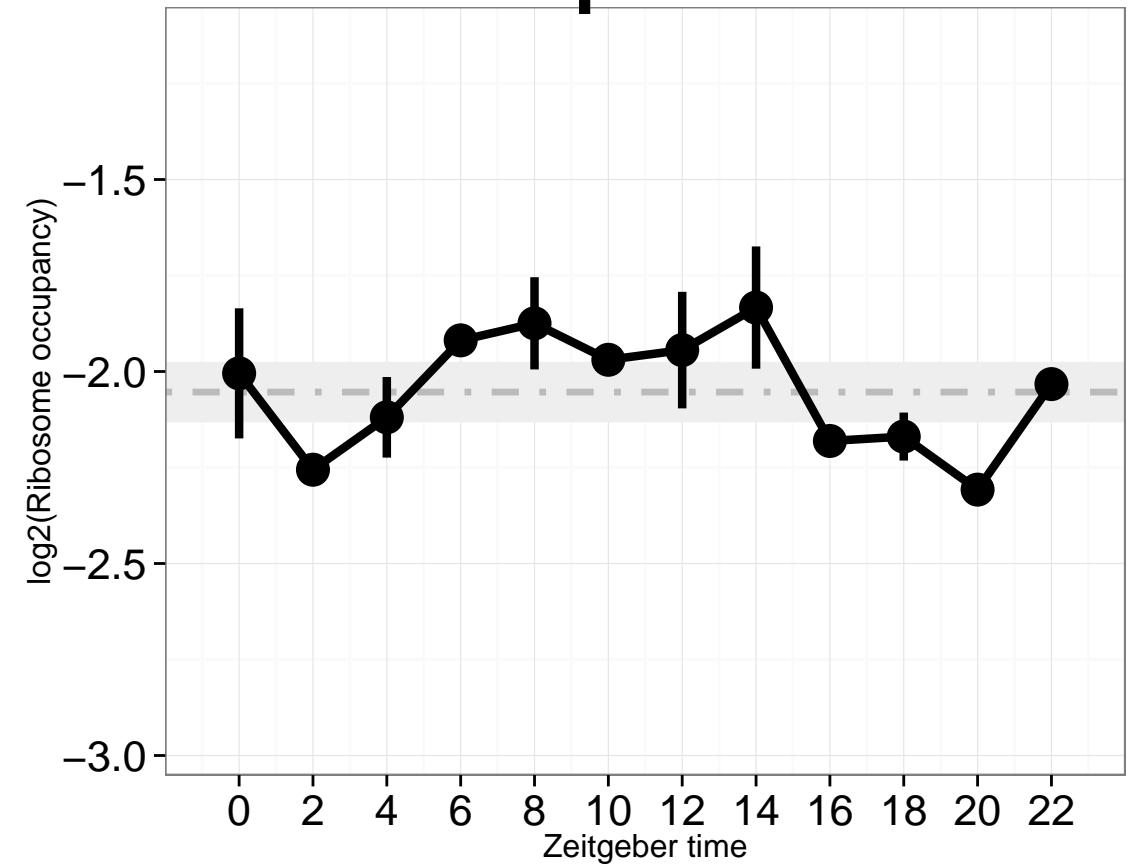

Supplement: Supplementary file 9481 [file 1]

# Atg13

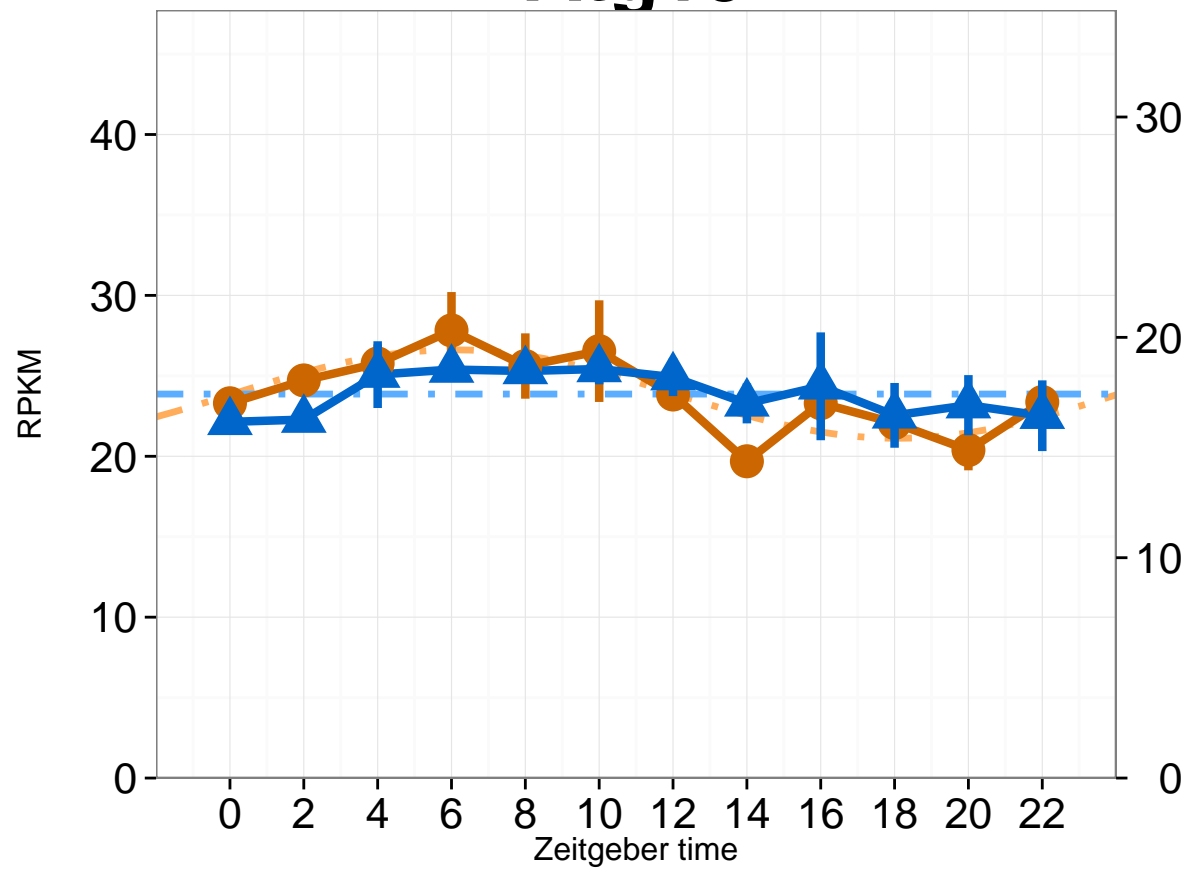

# Atg13

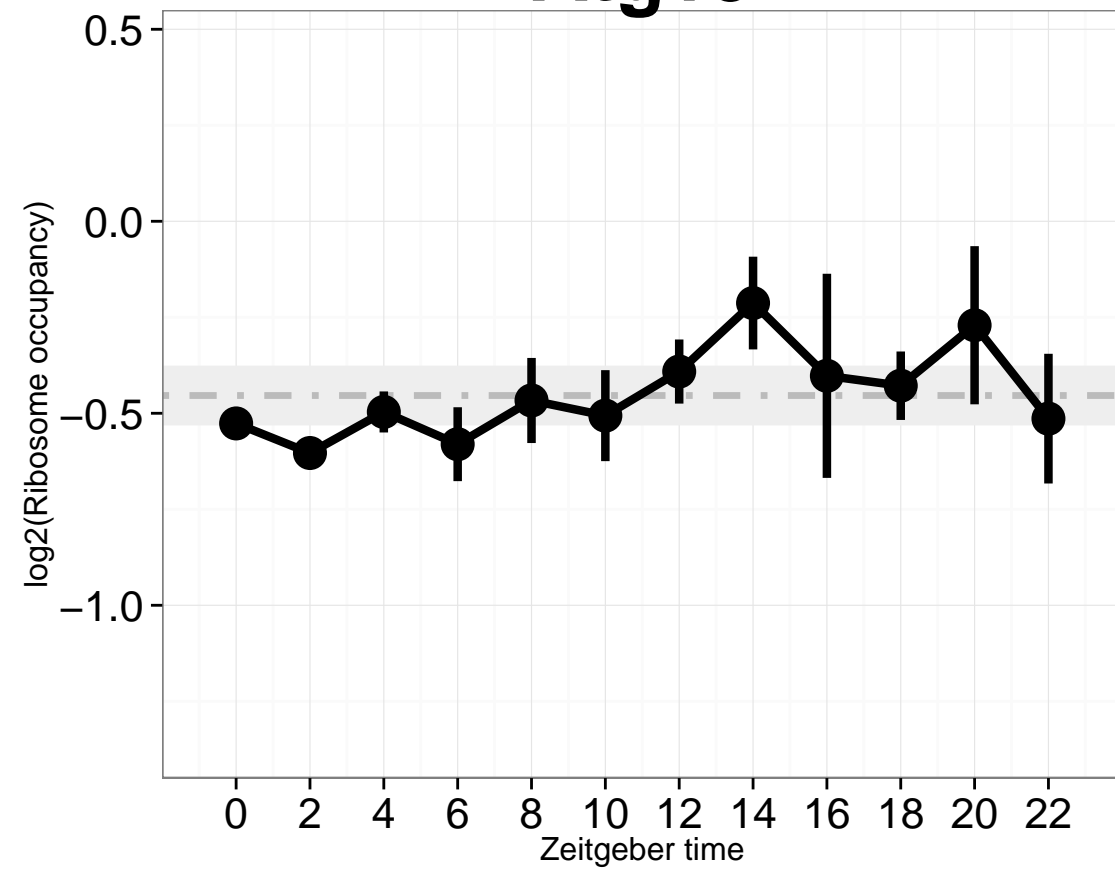

Supplement: Supplementary file 9482 [file 1]

## Fibp

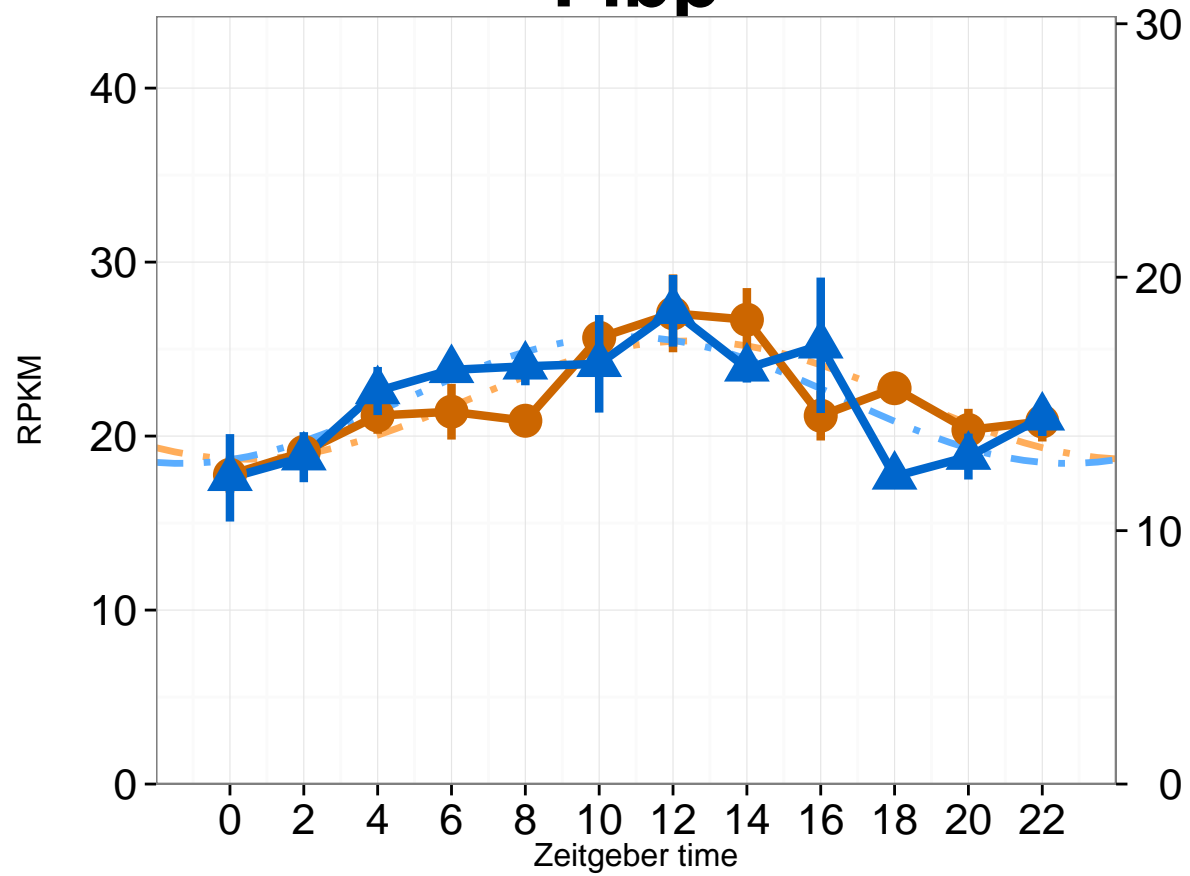

## Fibp

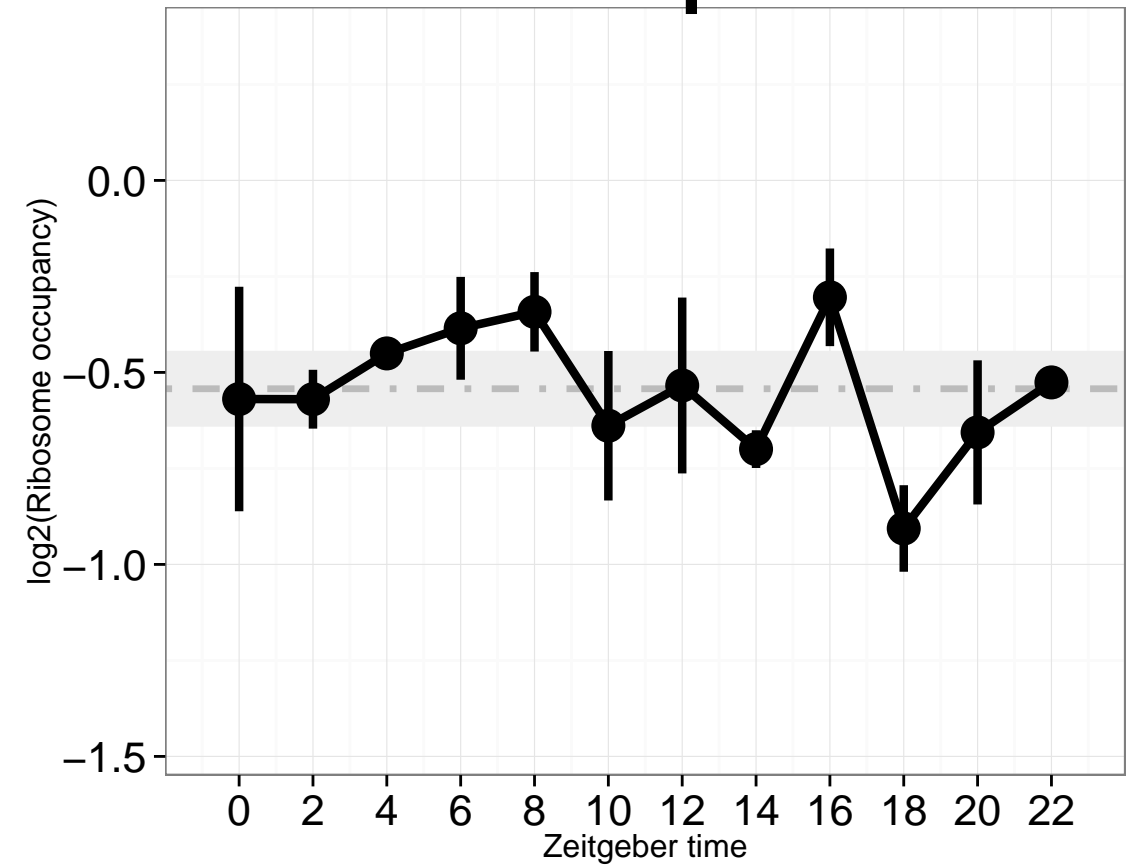

Supplement: Supplementary file 9483 [file 1]

## Epn2

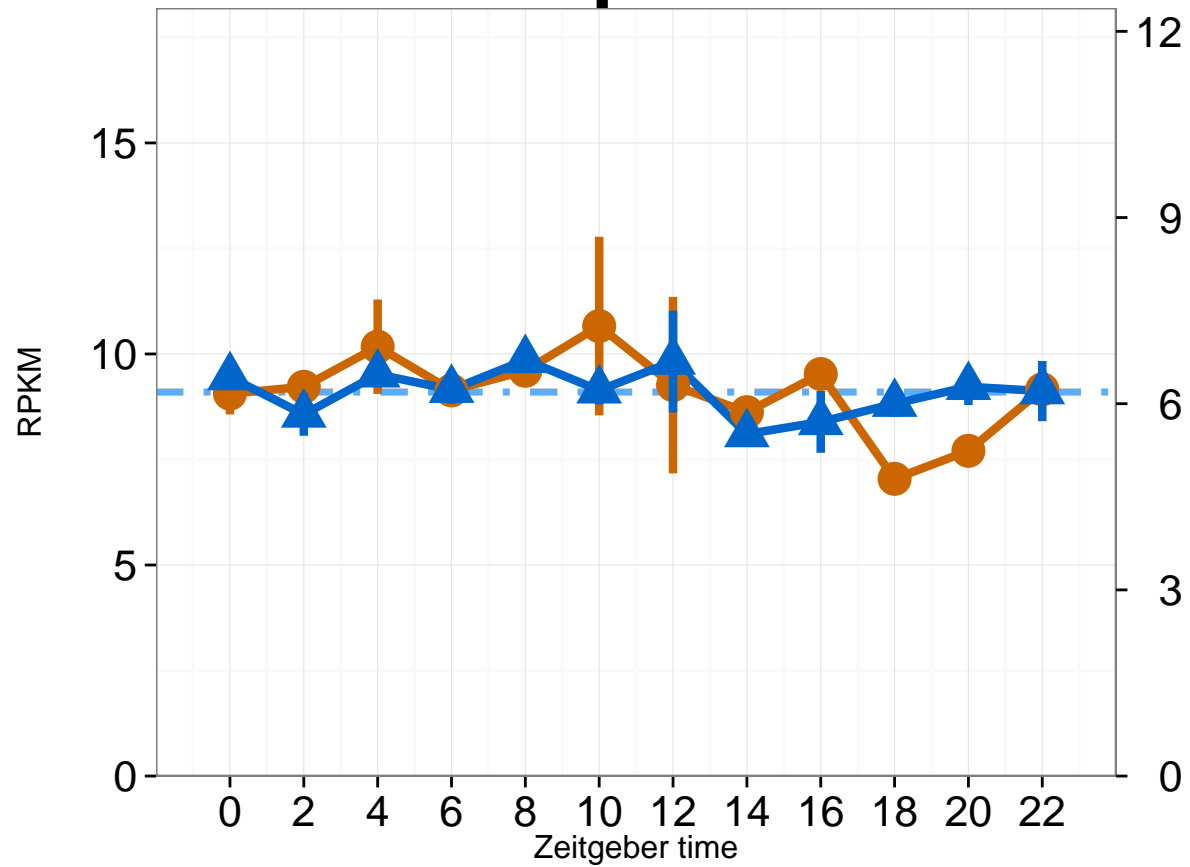

## Epn2

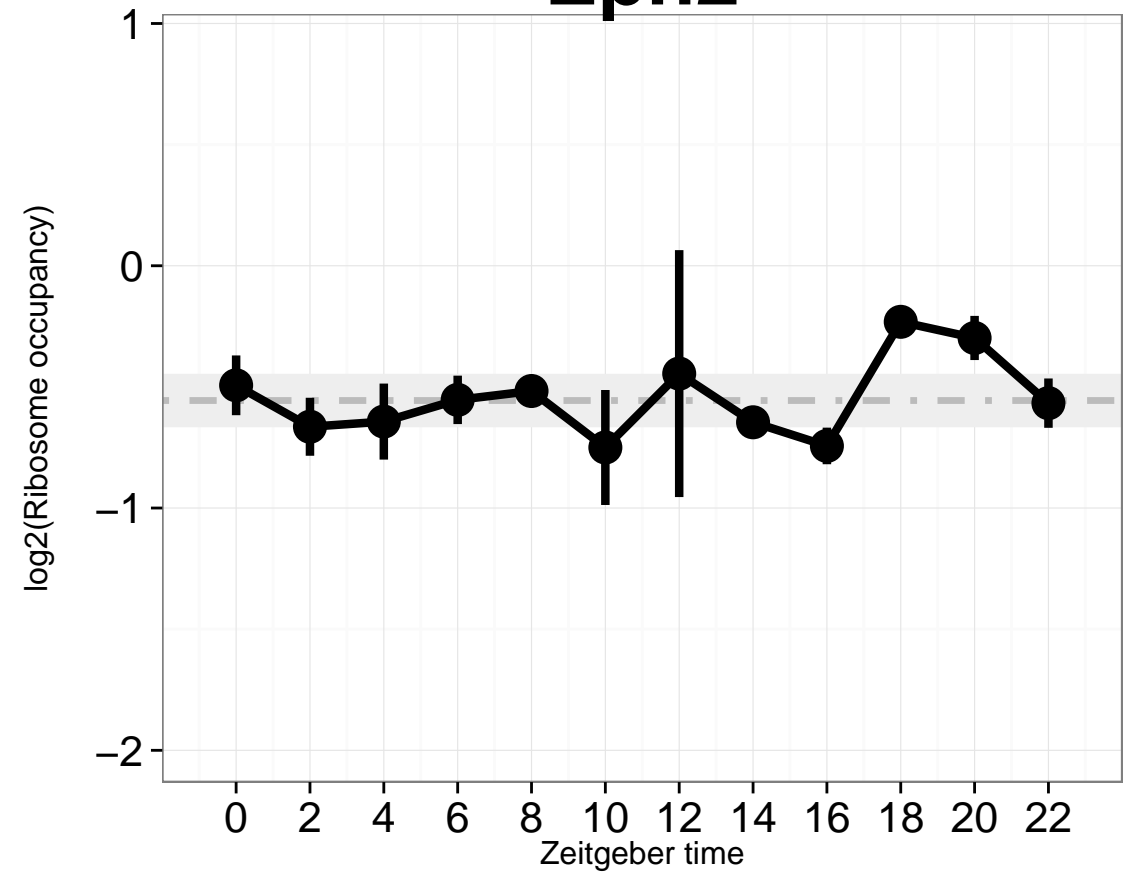

Supplement: Supplementary file 9484 [file 1]

## Pde4c

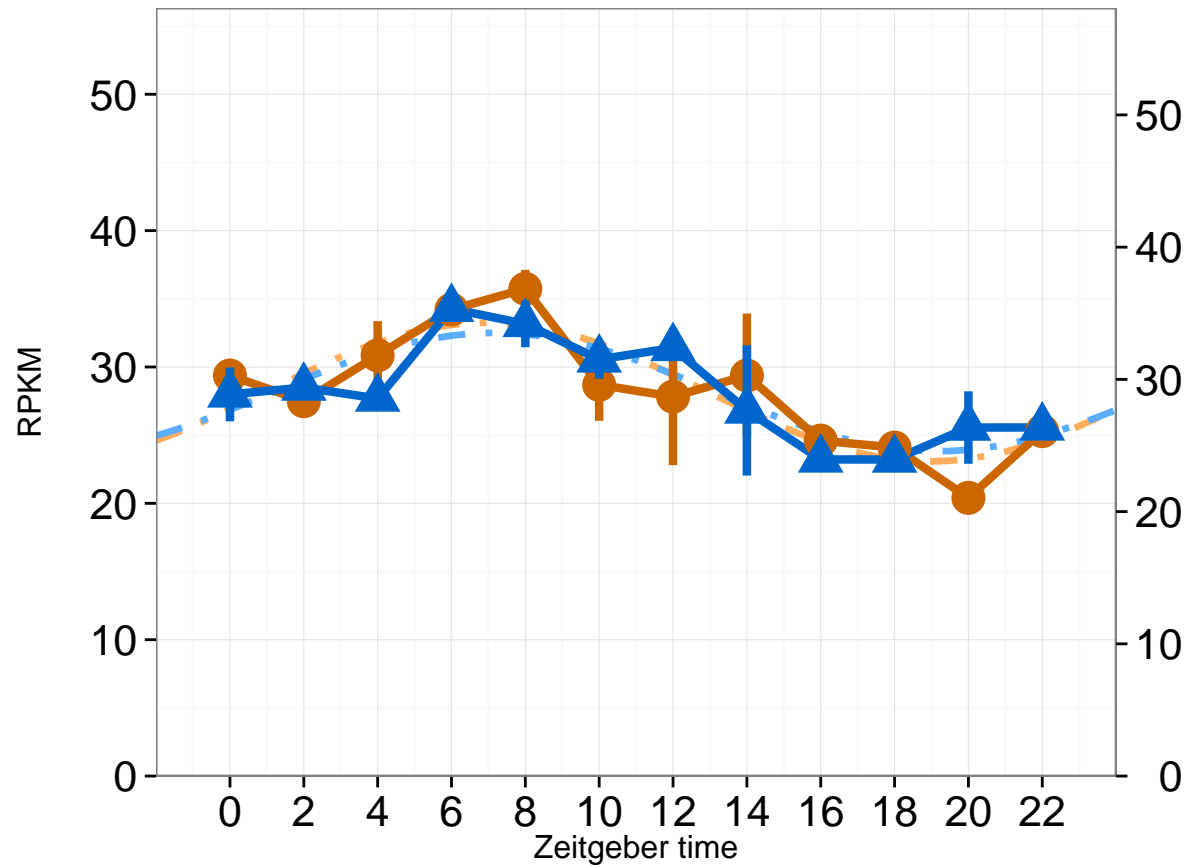

## Pde4c

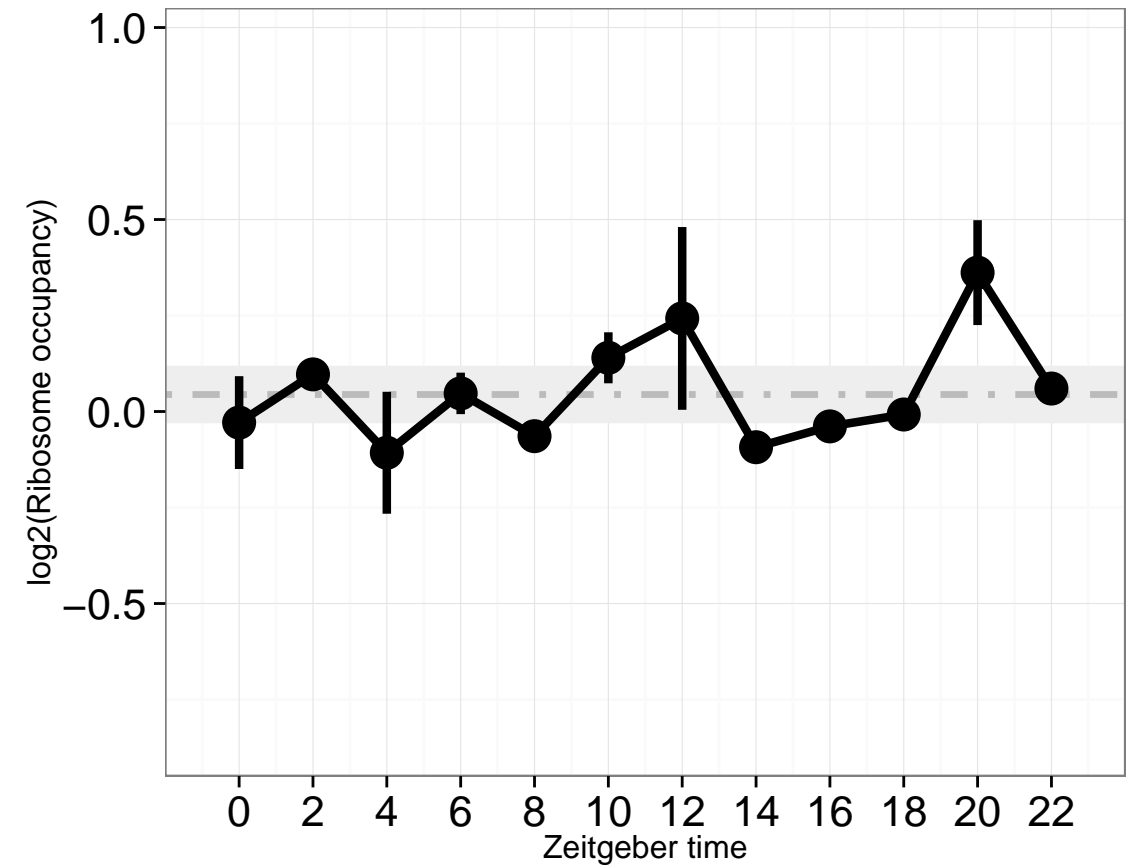

Supplement: Supplementary file 9485 [file 1]

## Wrap53

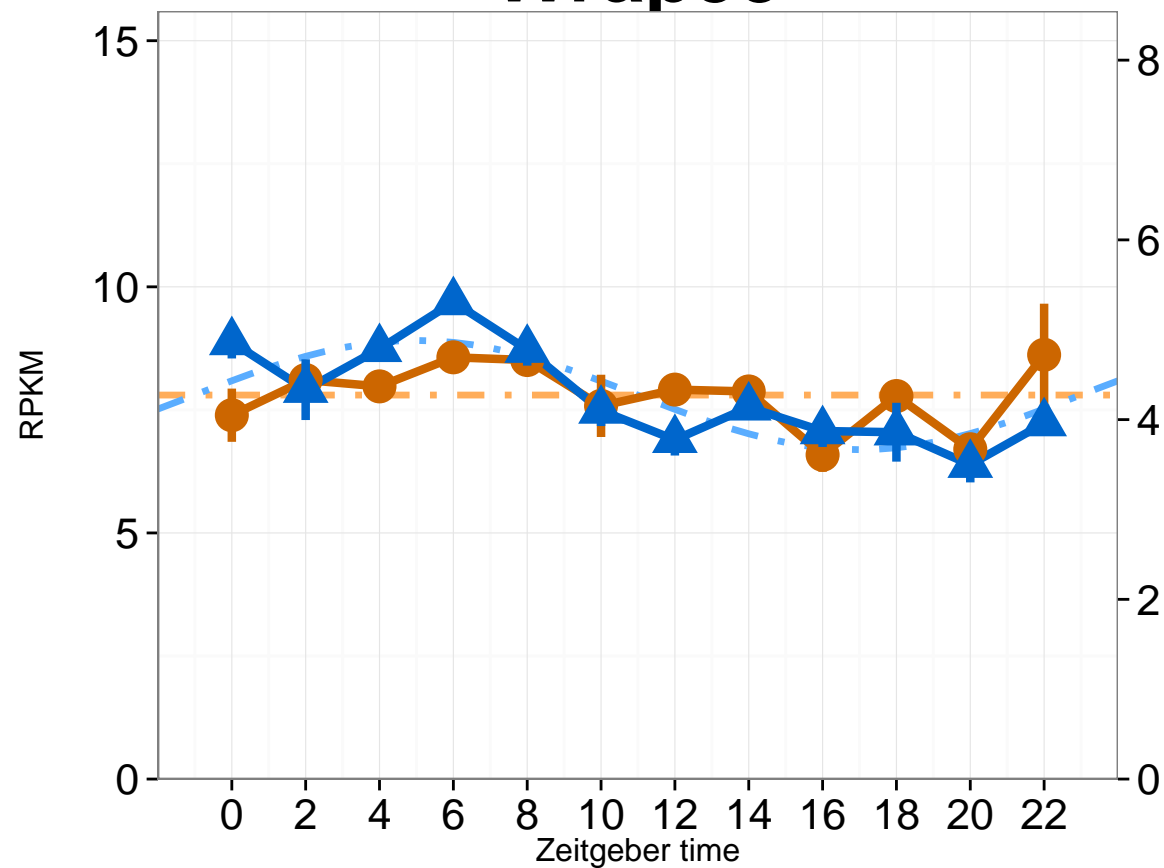

## Wrap53

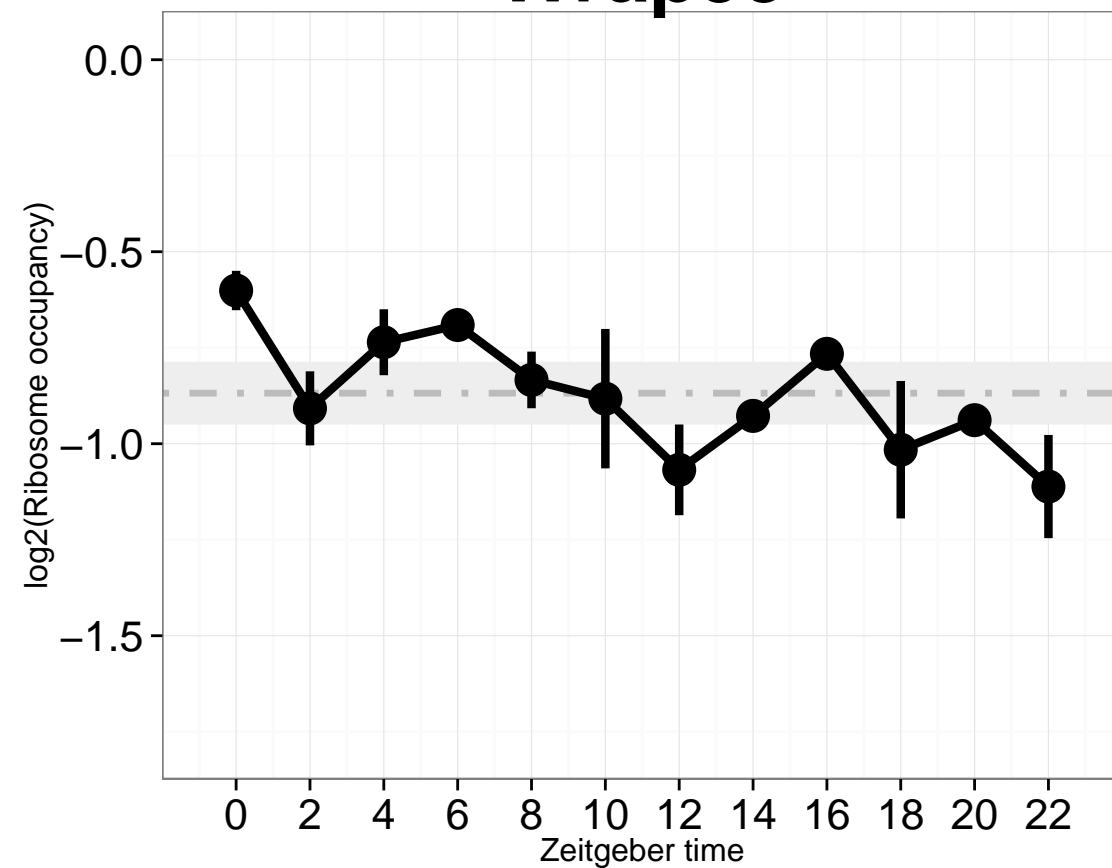

Supplement: Supplementary file 9486 [file 1]

# Map2k1

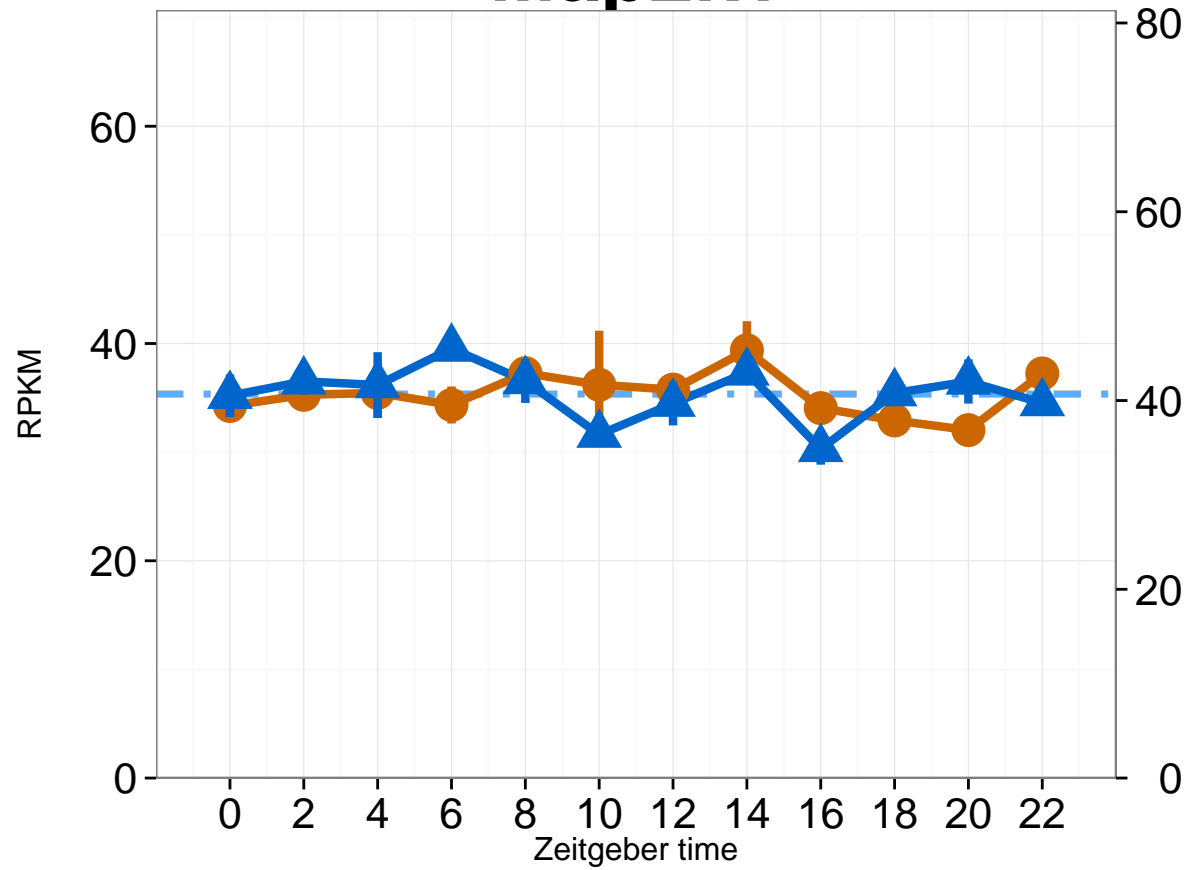

# Map2k1

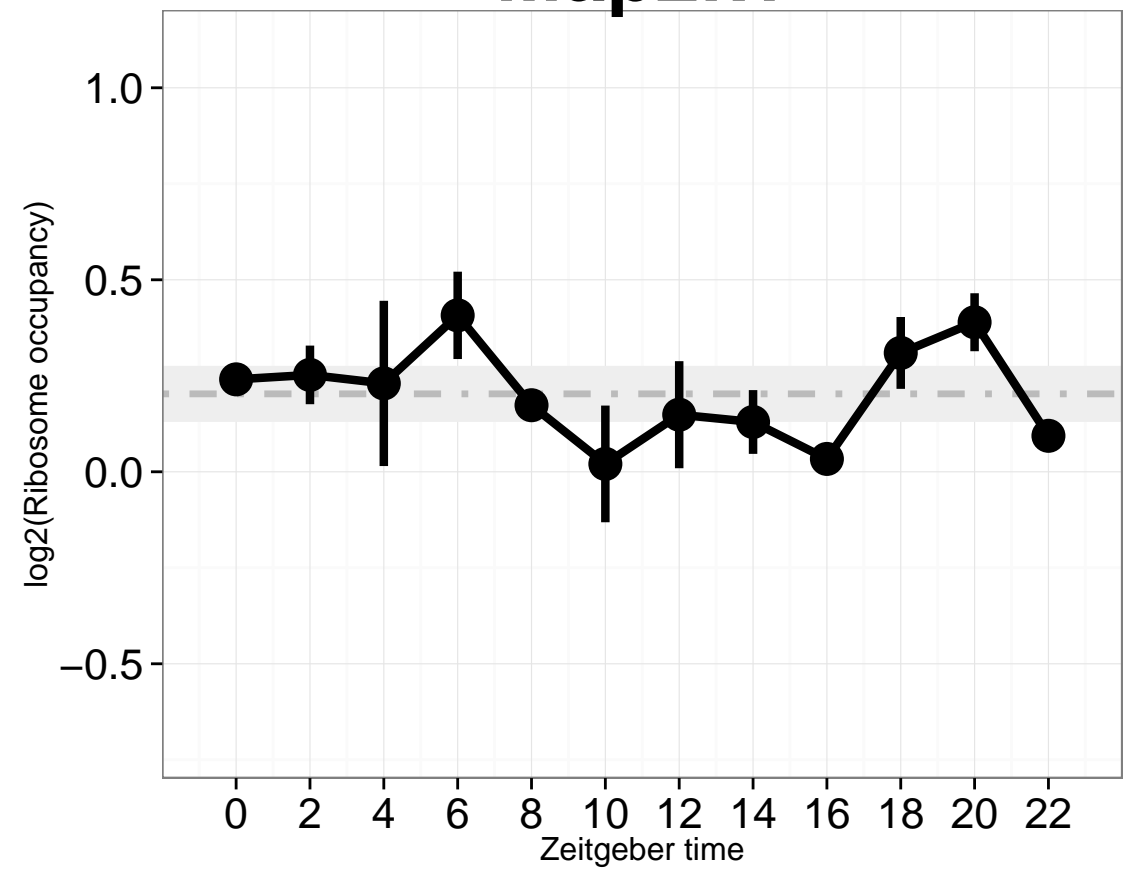

Supplement: Supplementary file 9487 [file 1]

## Ntan1

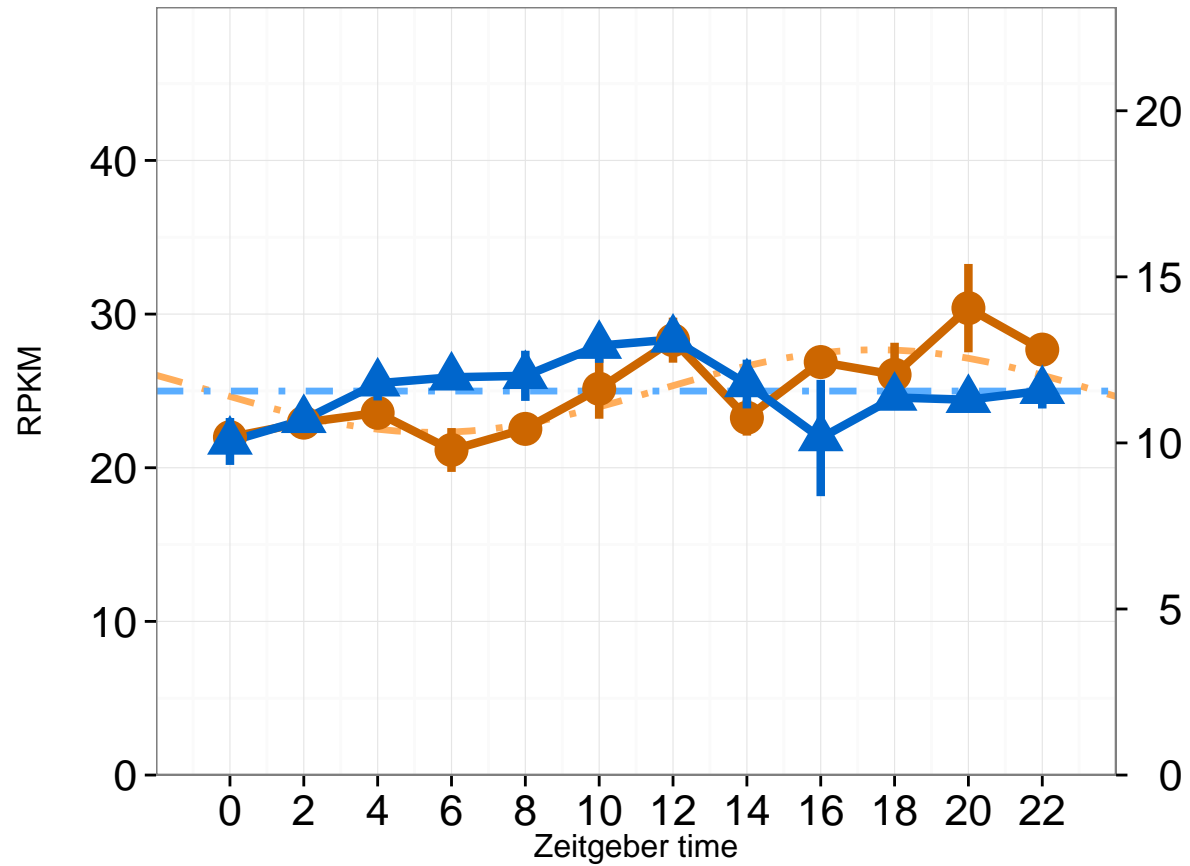

## Ntan1

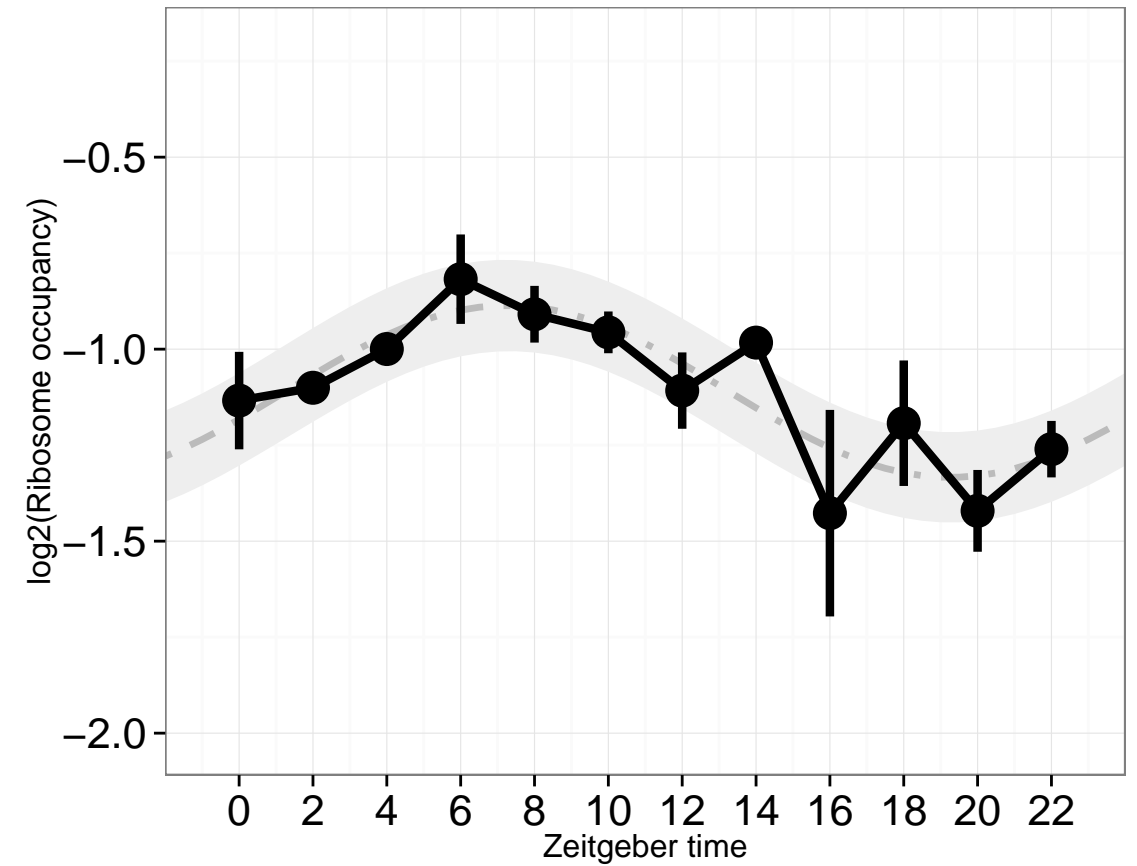

Supplement: Supplementary file 9488 [file 1]

## Nt5c2

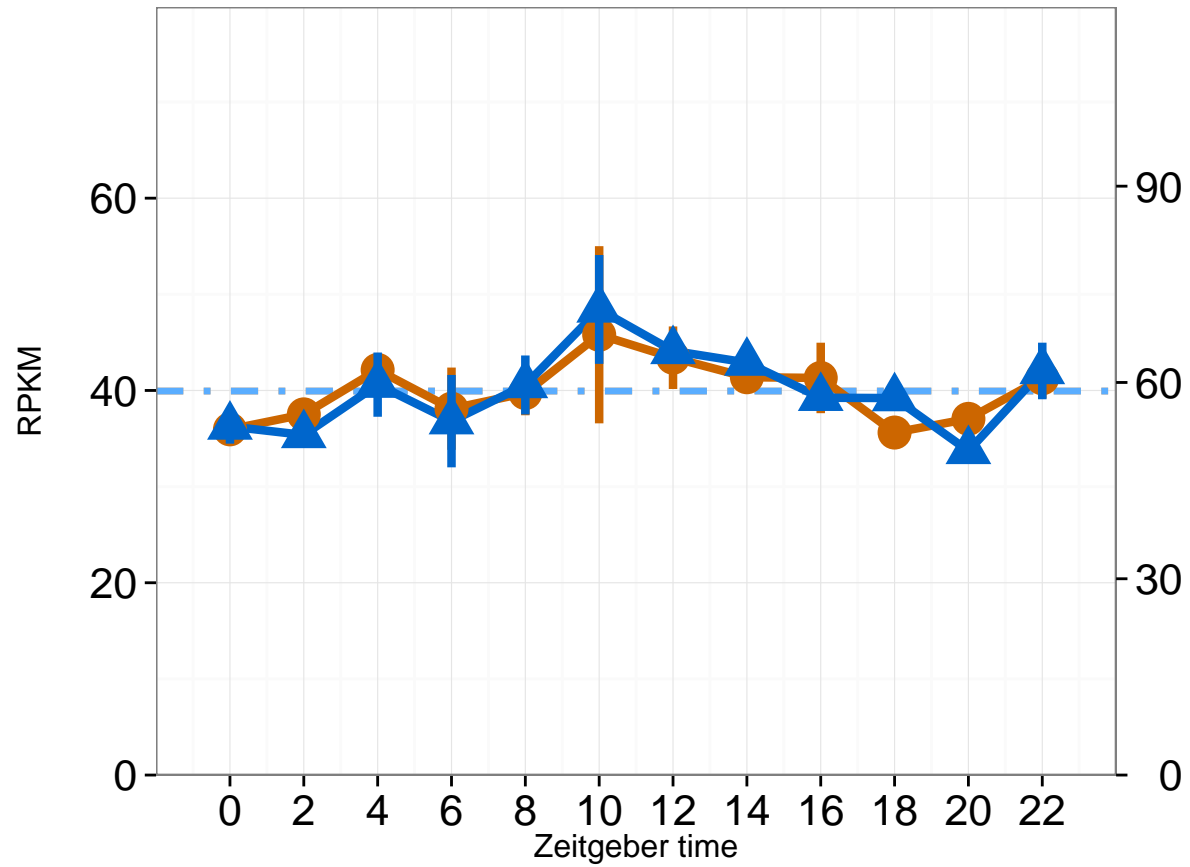

## Nt5c2

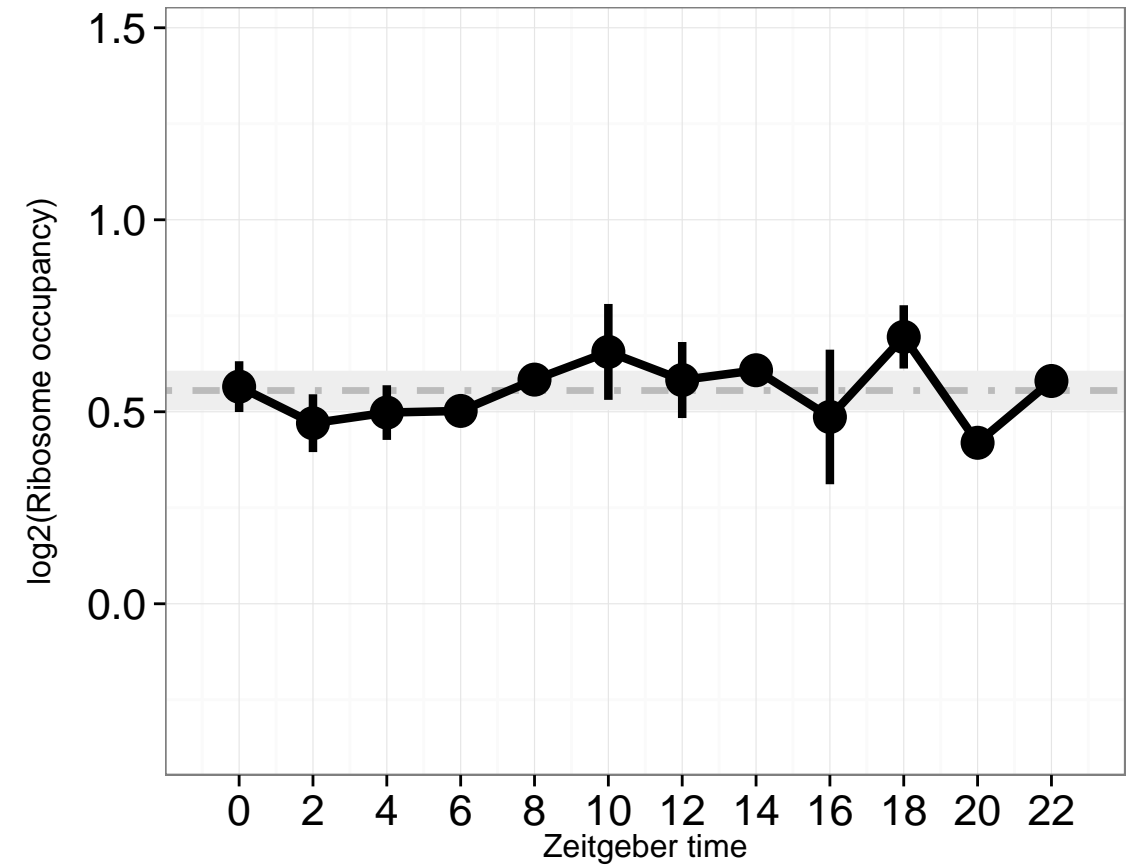

Supplement: Supplementary file 9489 [file 1]

# Rbm12b1

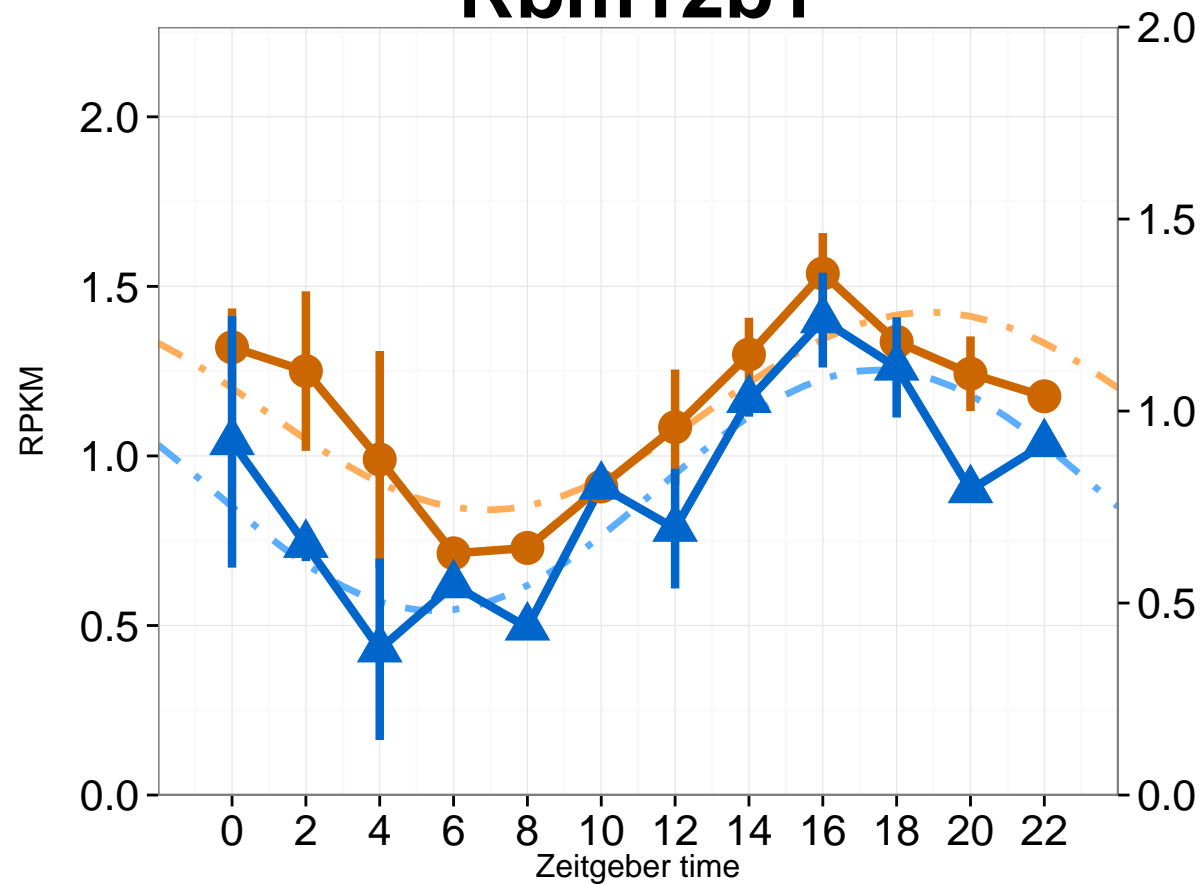

# Rbm12b1

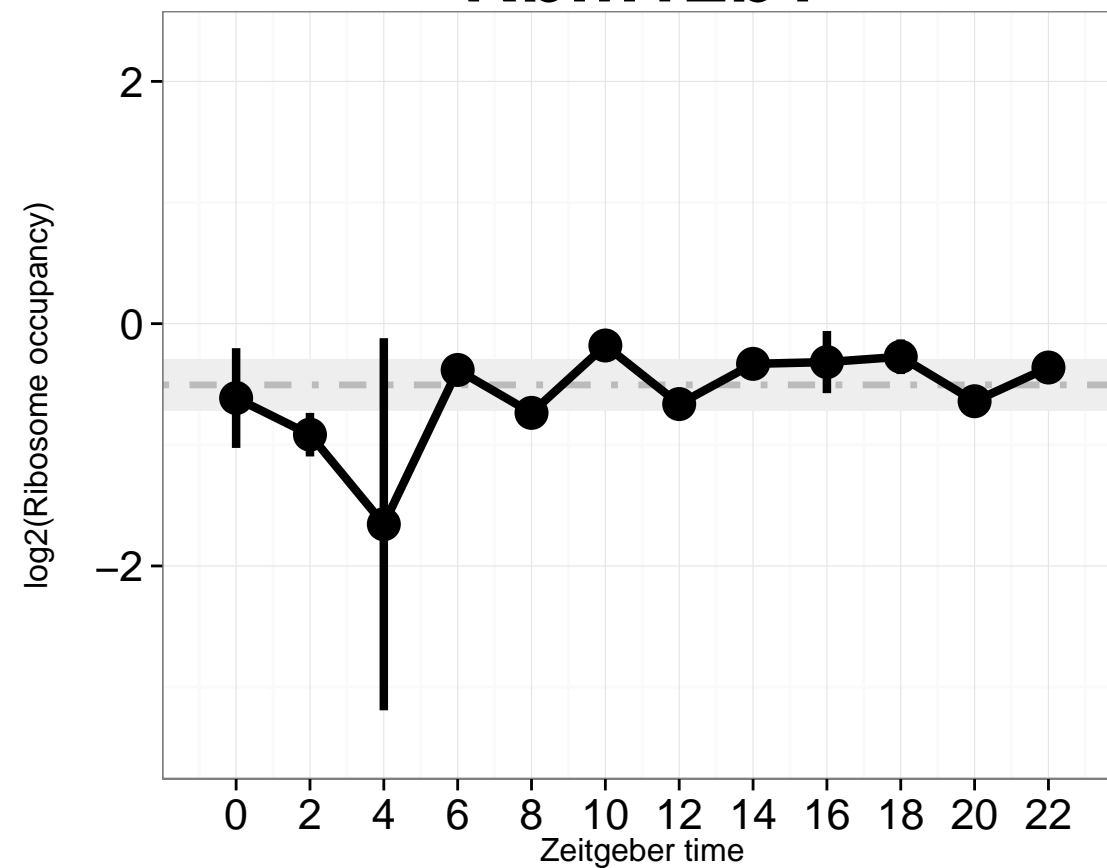

Supplement: Supplementary file 9490 [file 1]

## Acss1

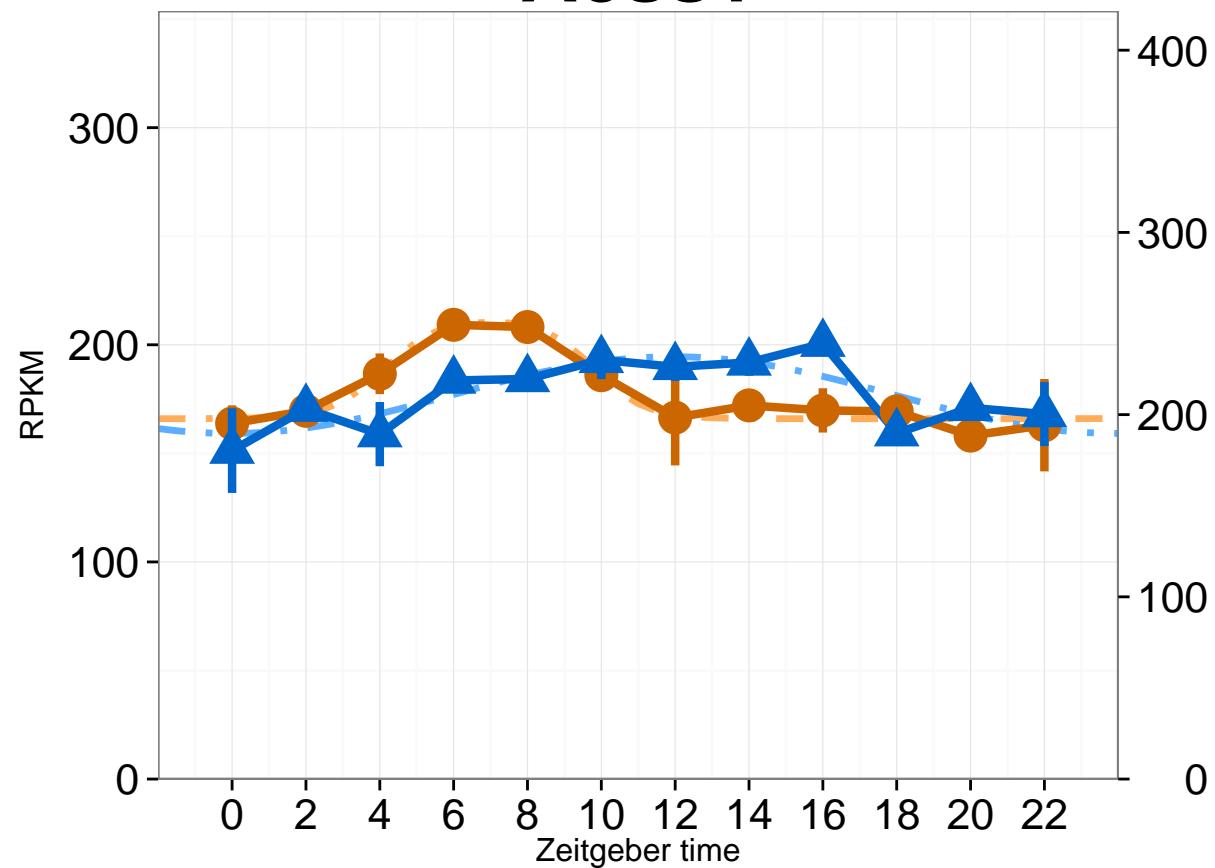

## Acss1

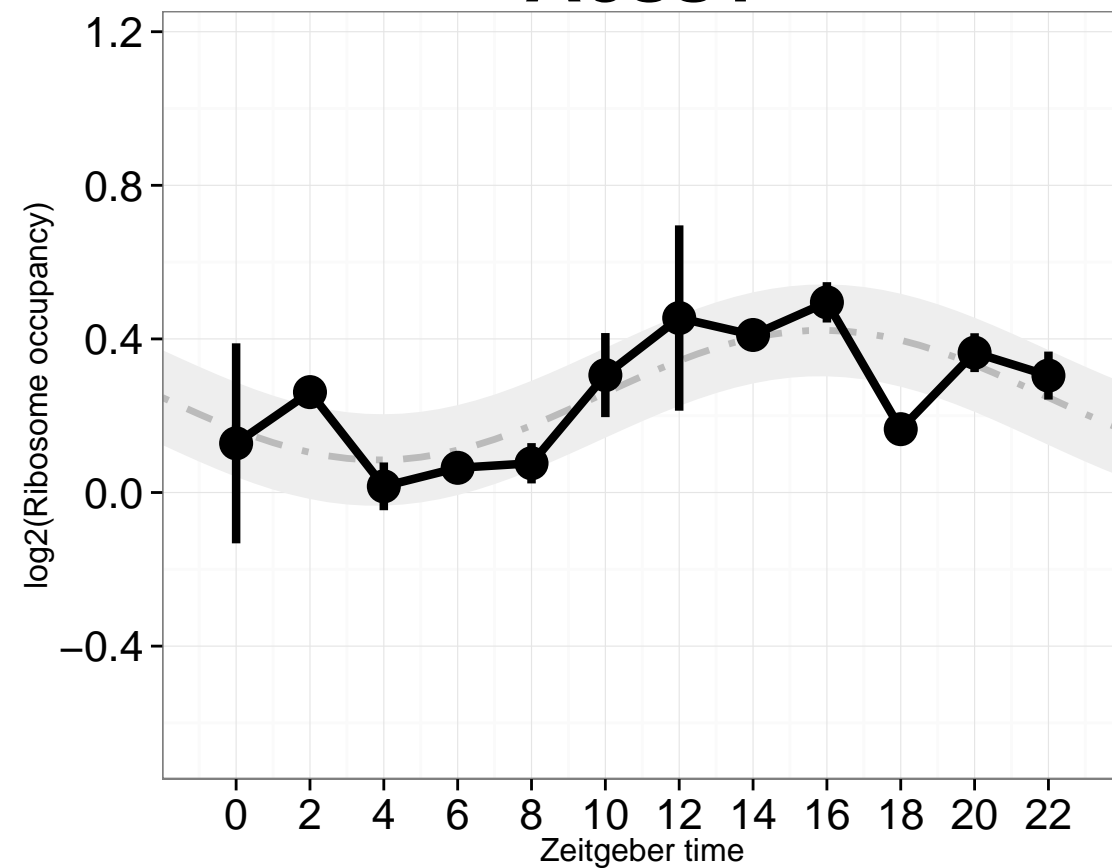

Supplement: Supplementary file 9491 [file 1]

## Gm20878

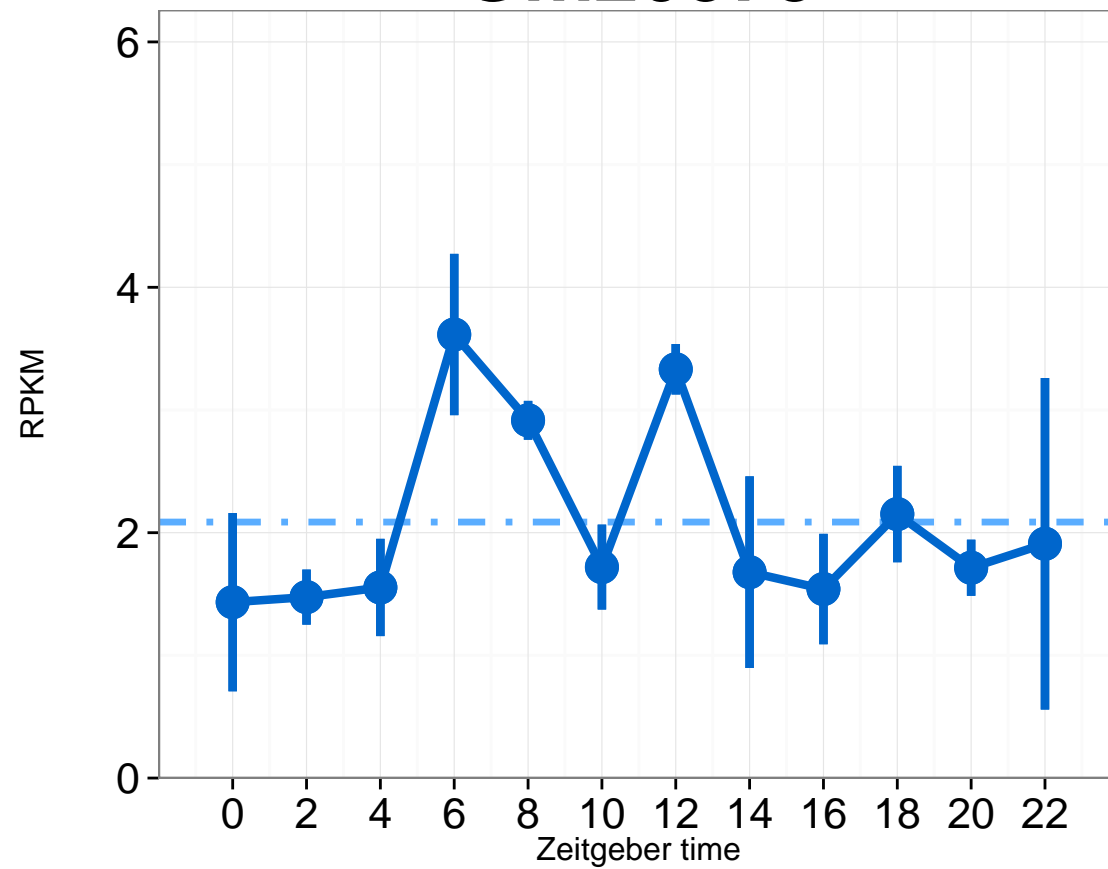

## Gm20878 log<sub>2</sub>(Ribosome occupancy)

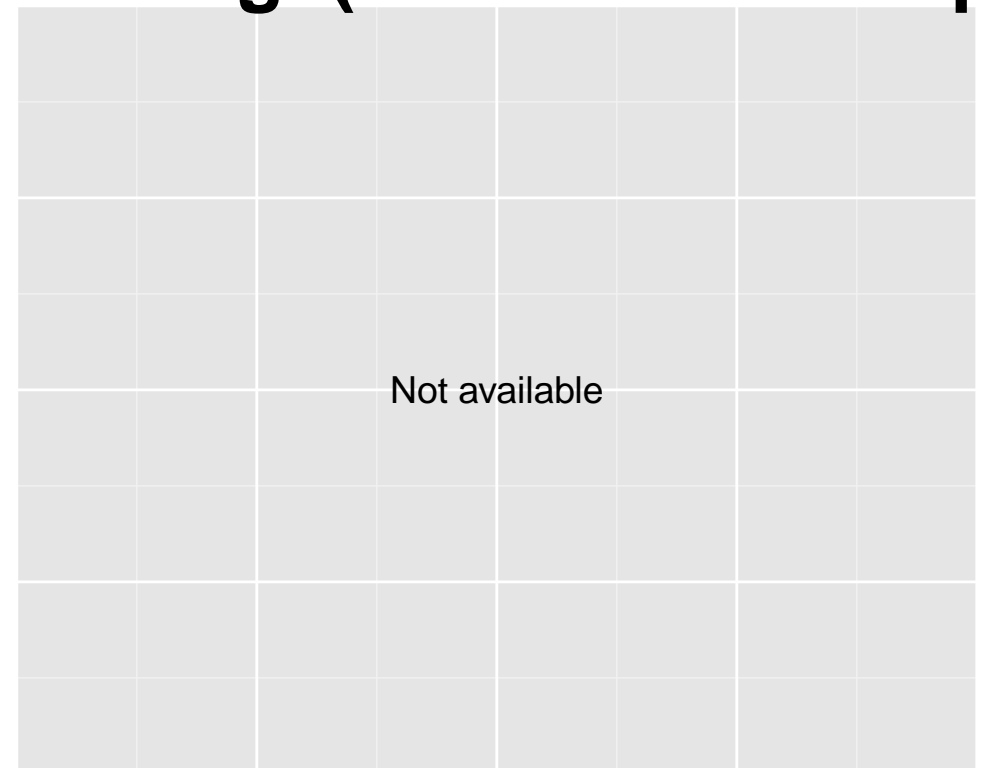

Supplement: Supplementary file 9492 [file 1]

# Ccser1

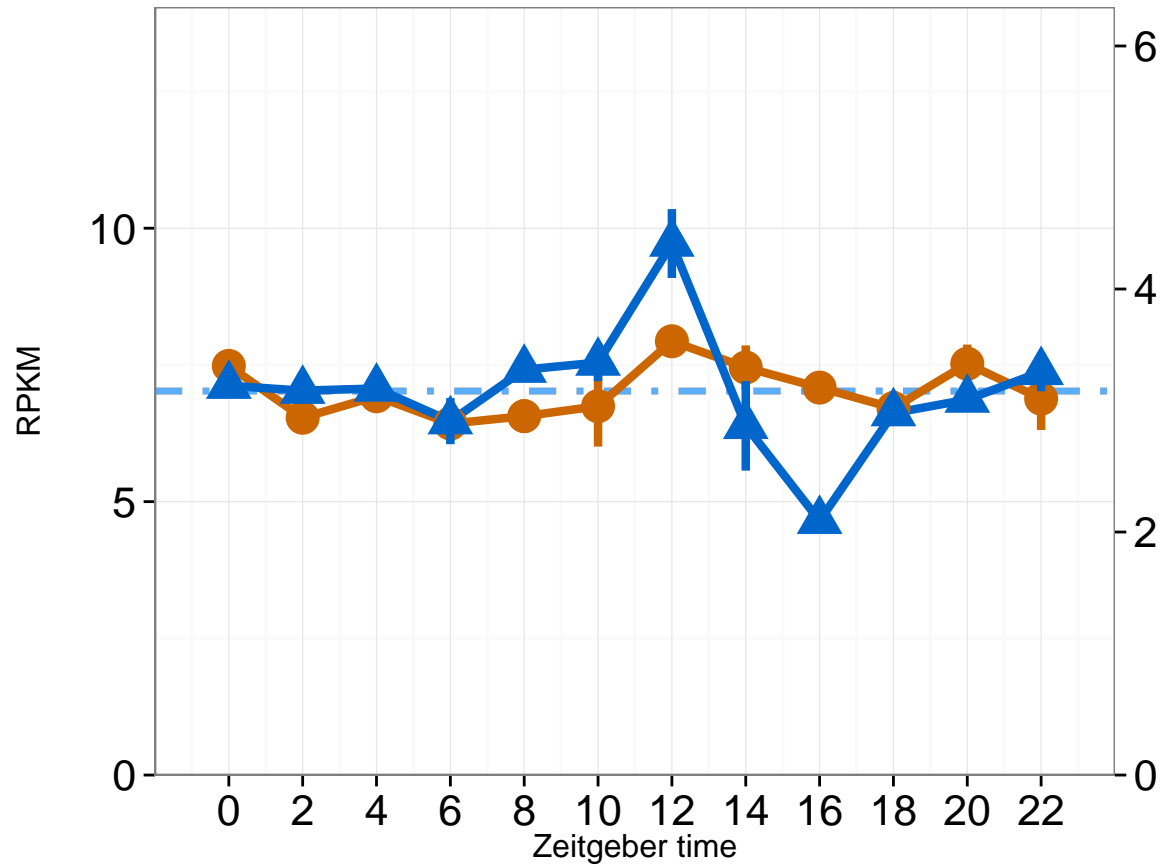

# Ccser1

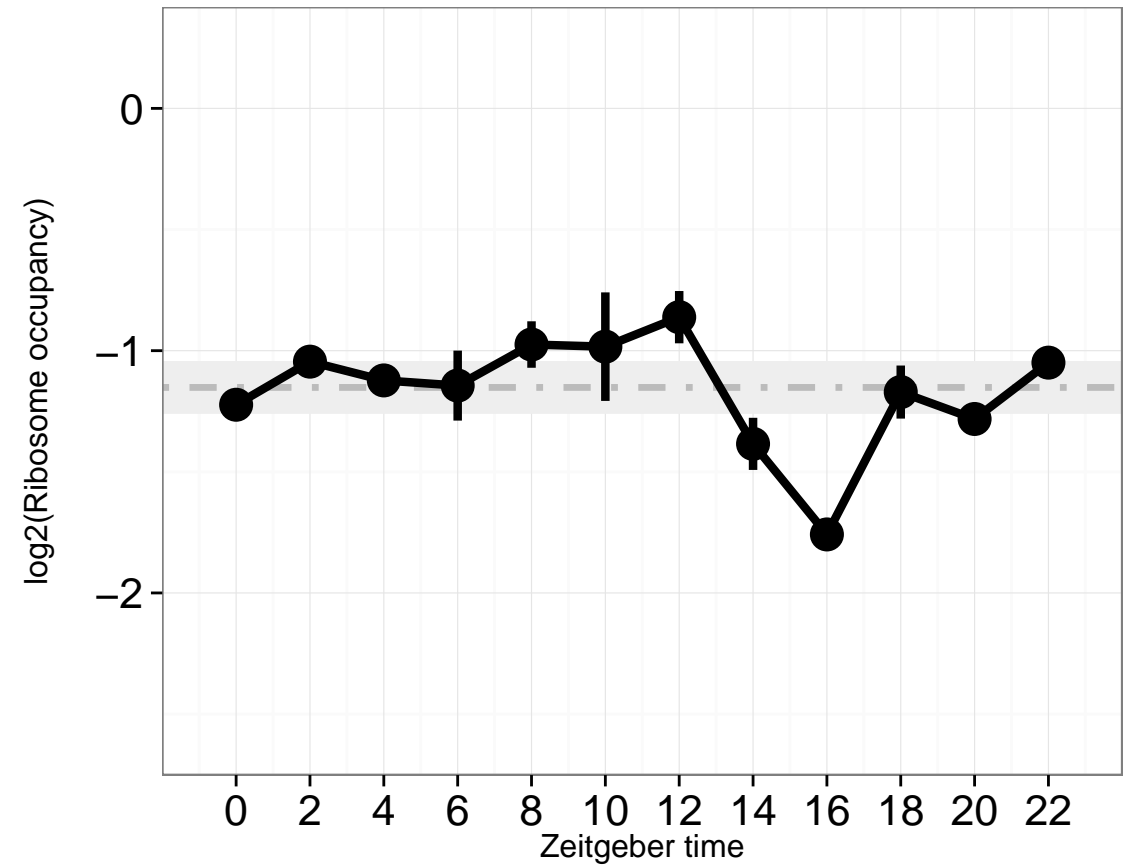

Supplement: Supplementary file 9493 [file 1]

## Gatad2b

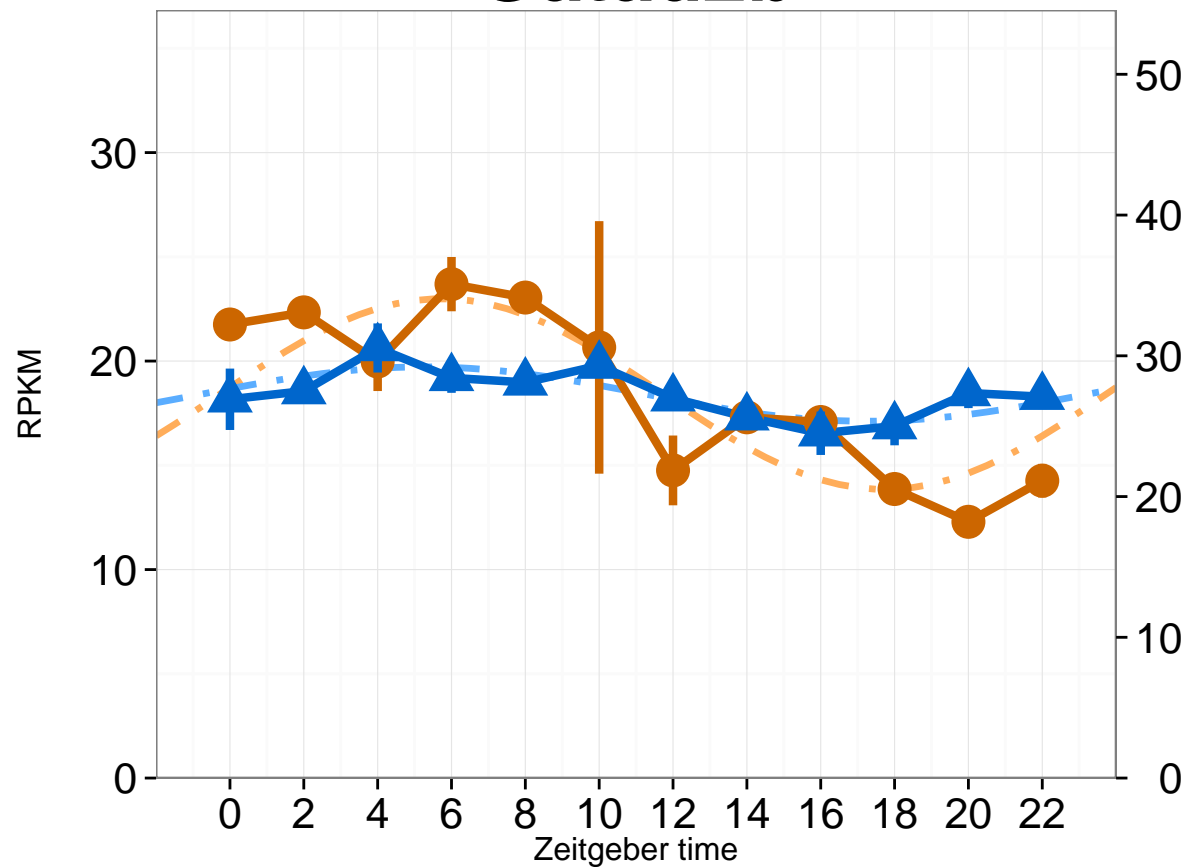

## Gatad2b

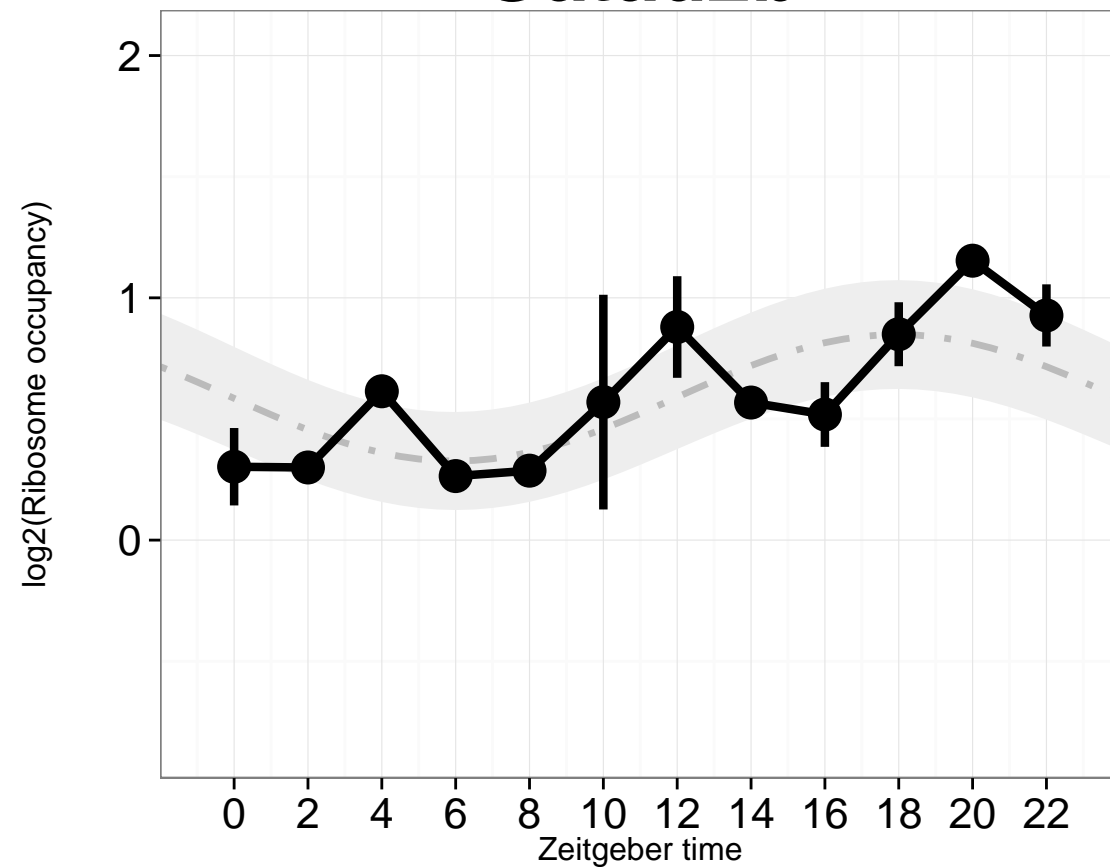

Supplement: Supplementary file 9494 [file 1]

## Igtp

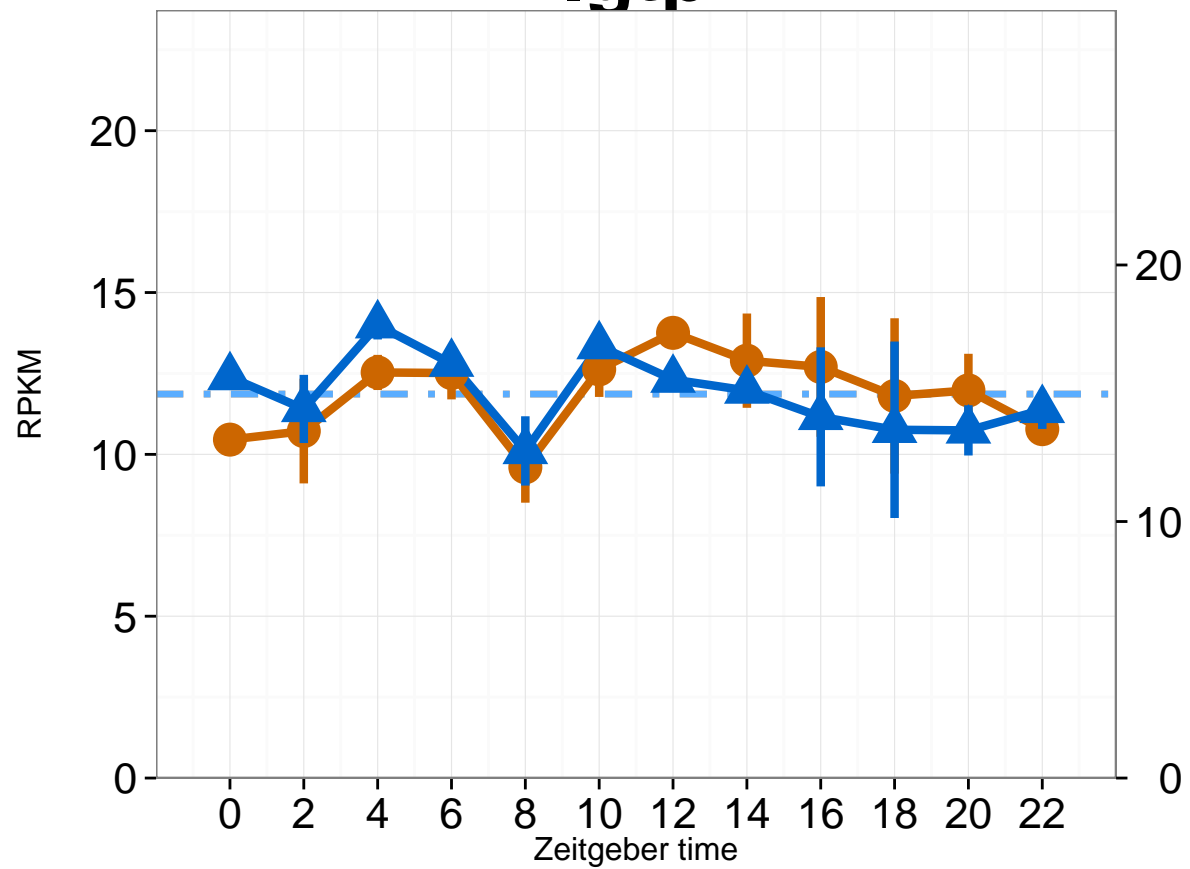

## Igtp

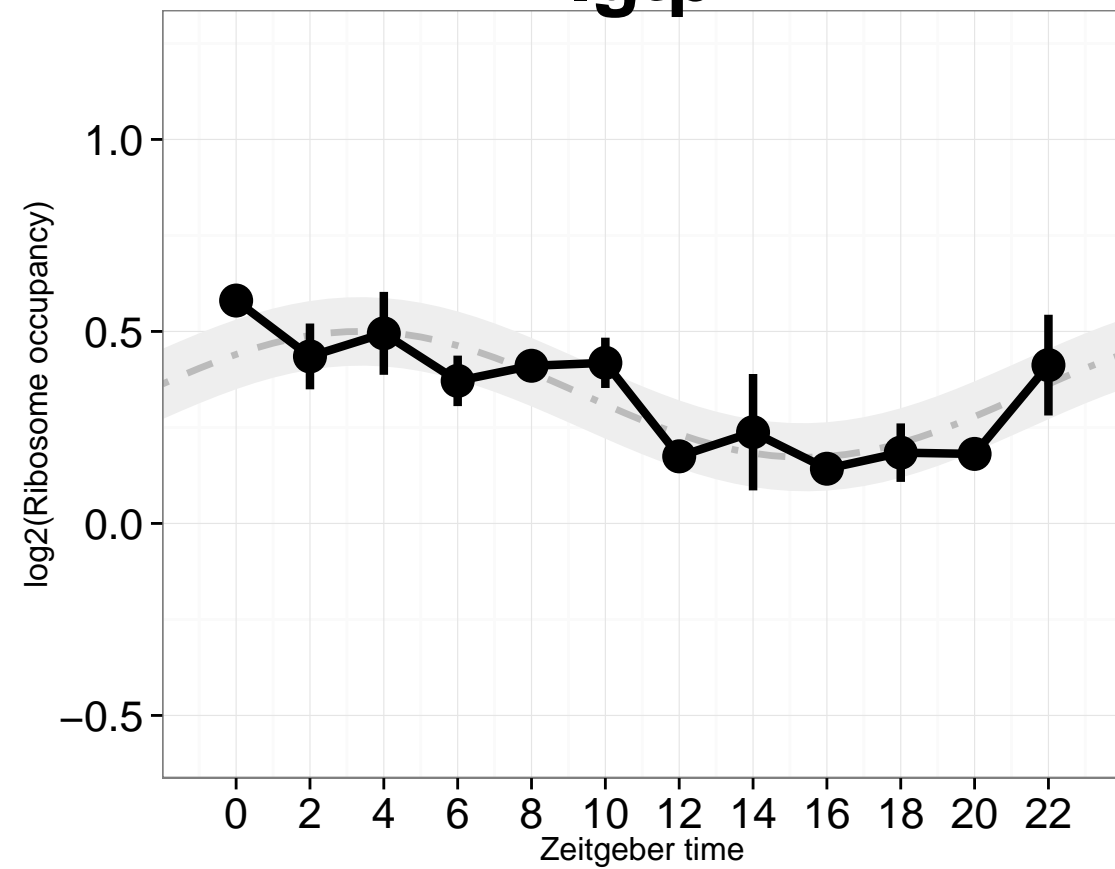

Supplement: Supplementary file 9495 [file 1]

## Ube2h

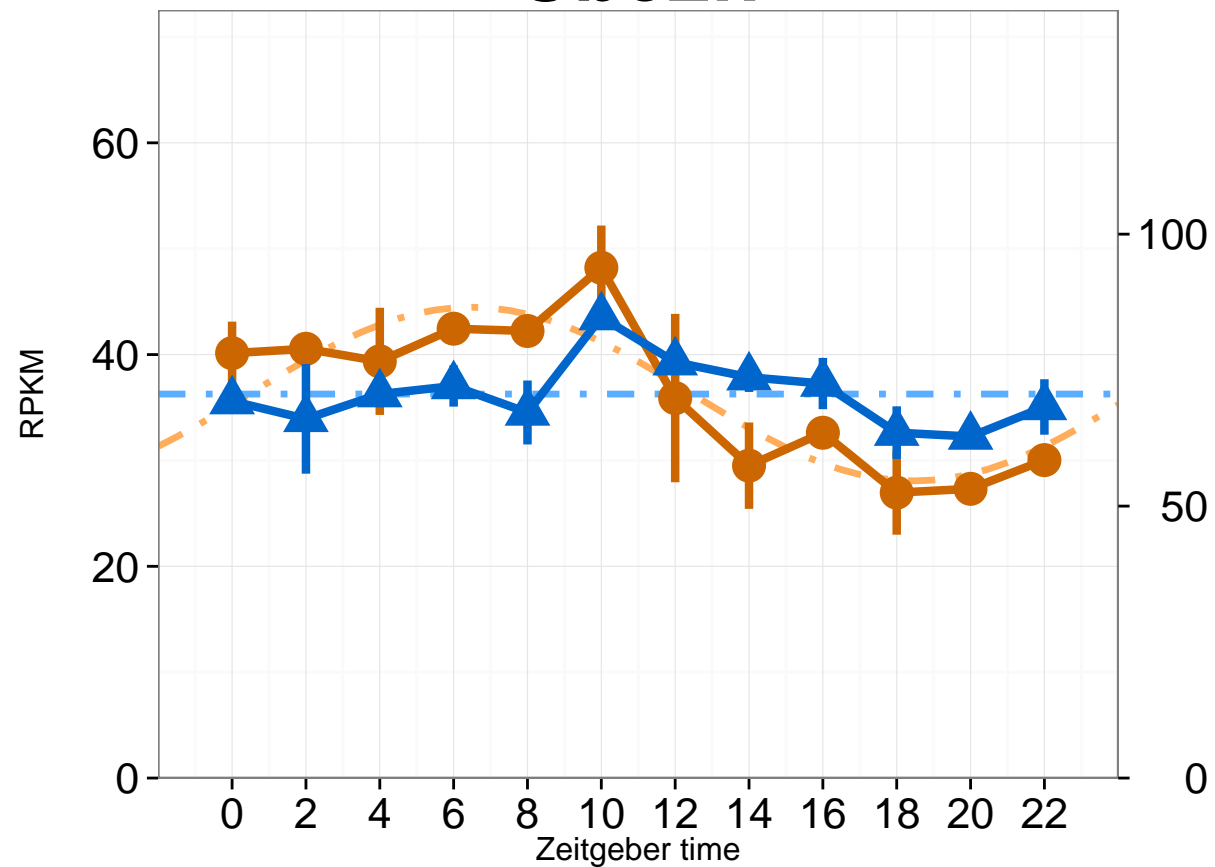

## Ube2h

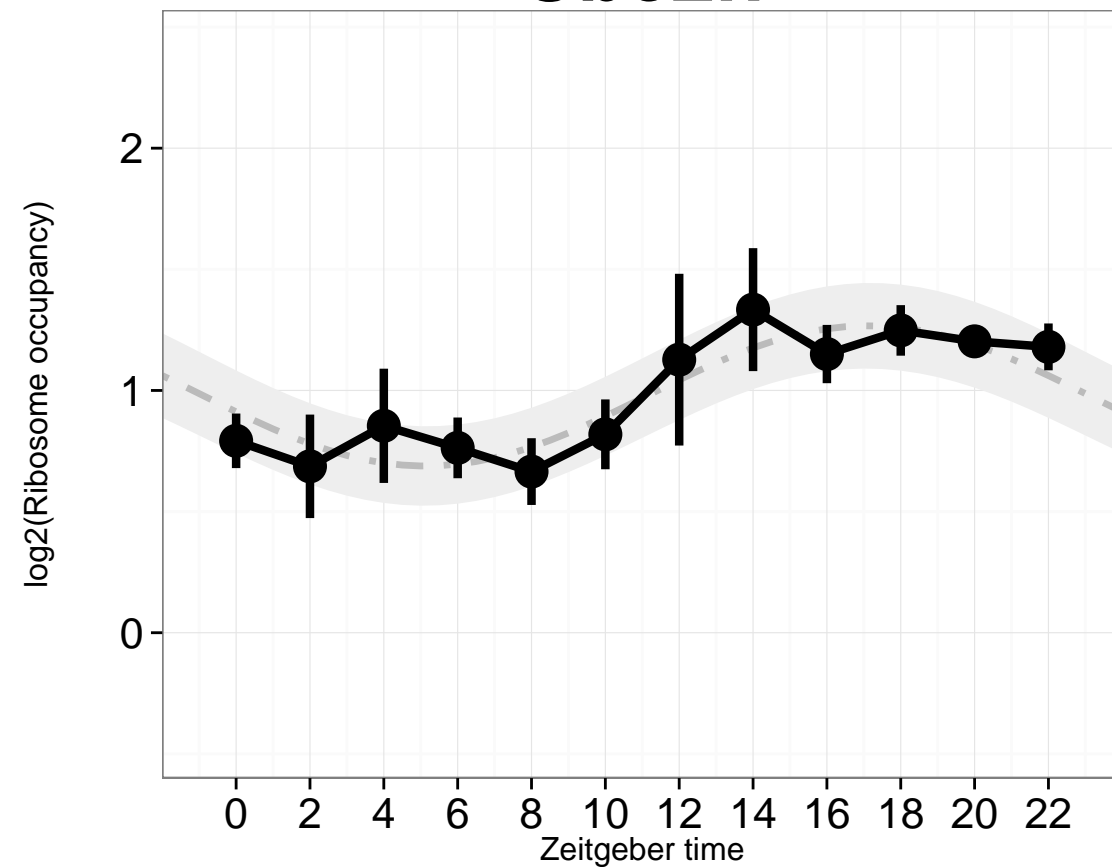

Supplement: Supplementary file 9496 [file 1]

## Tmem72

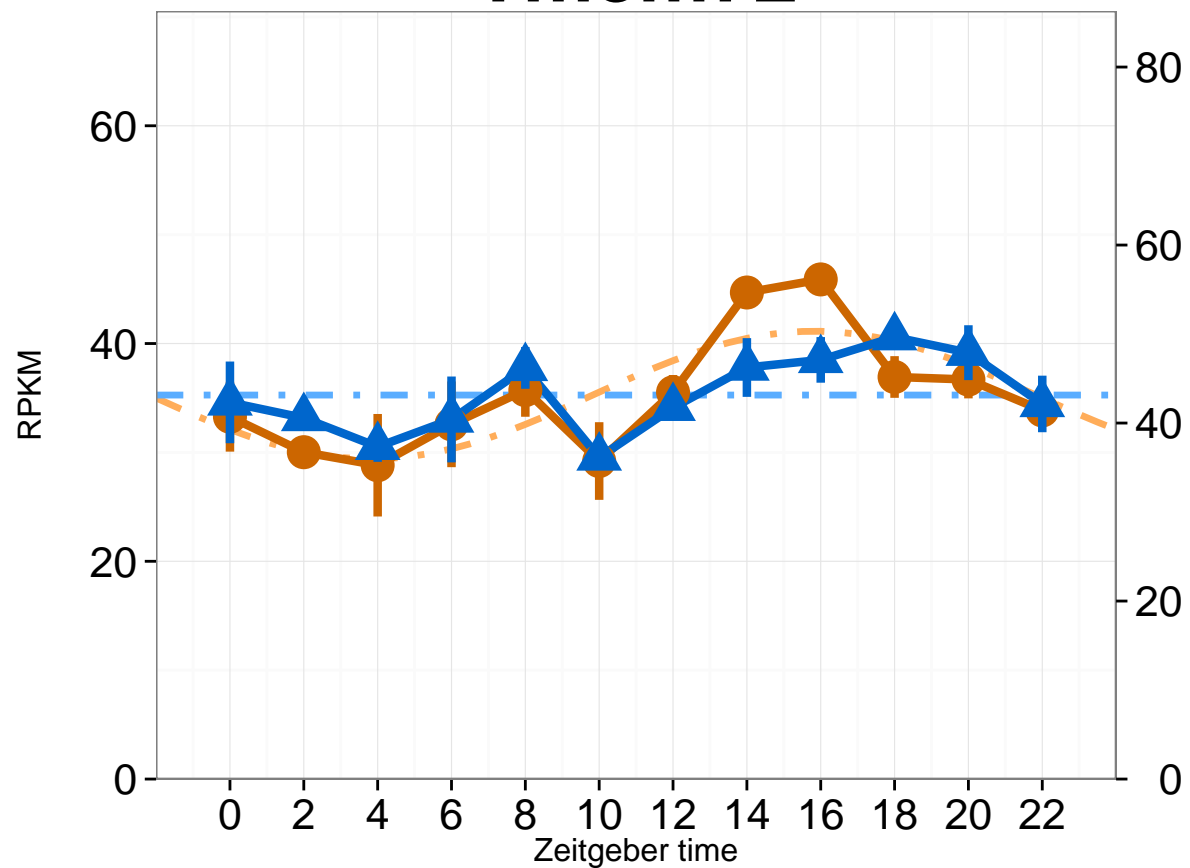

## Tmem72

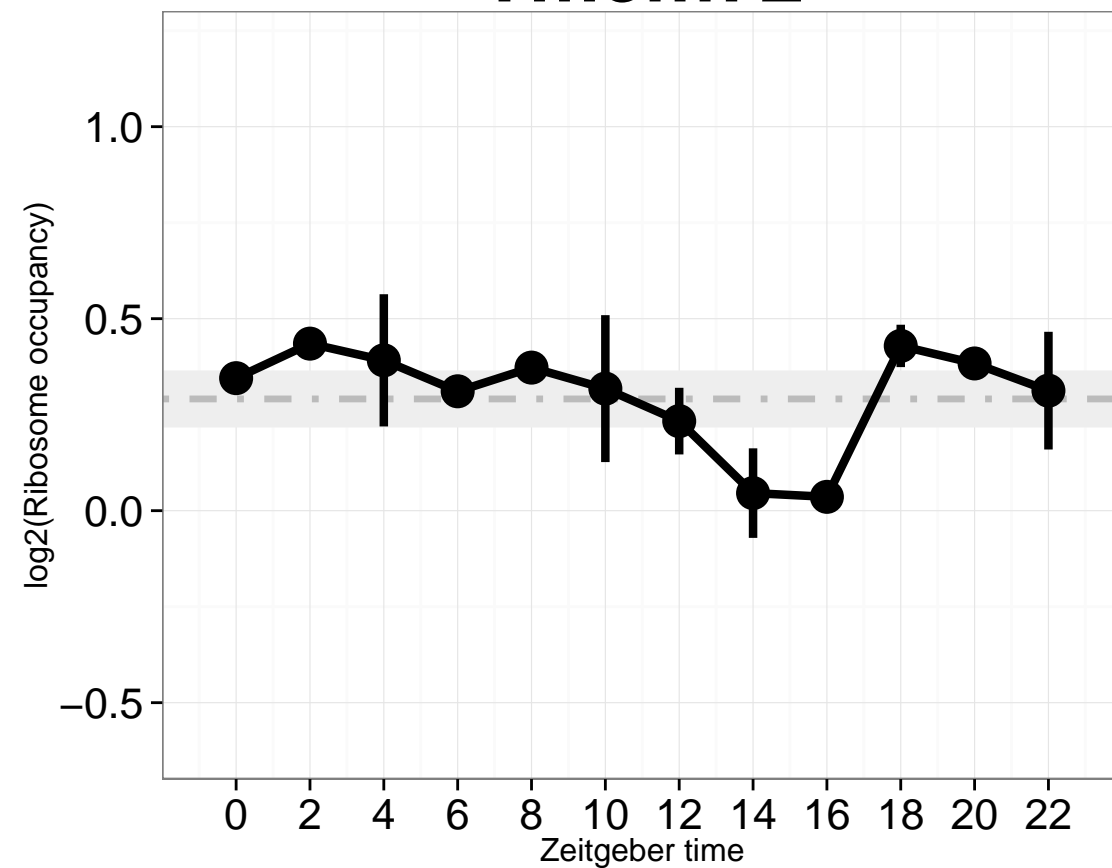

Supplement: Supplementary file 9497 [file 1]

## Spag7

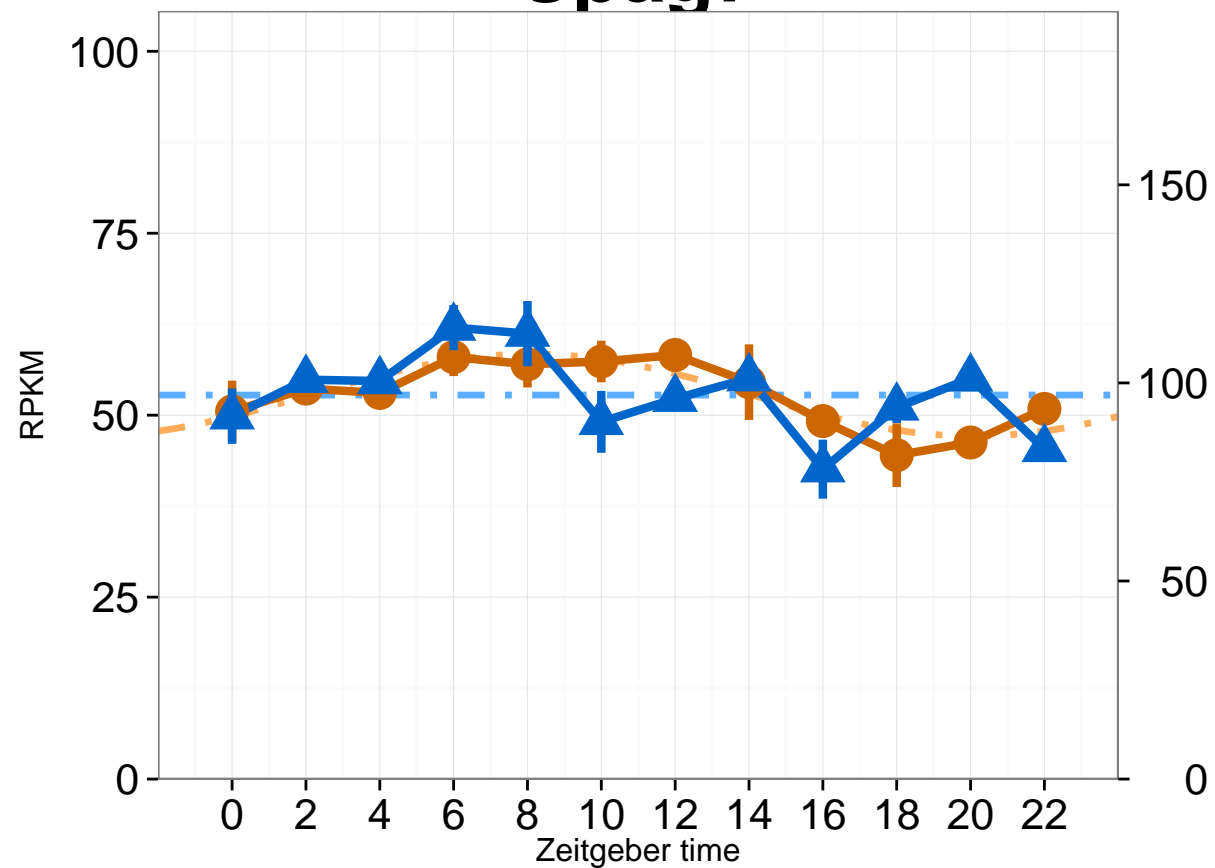

## Spag7

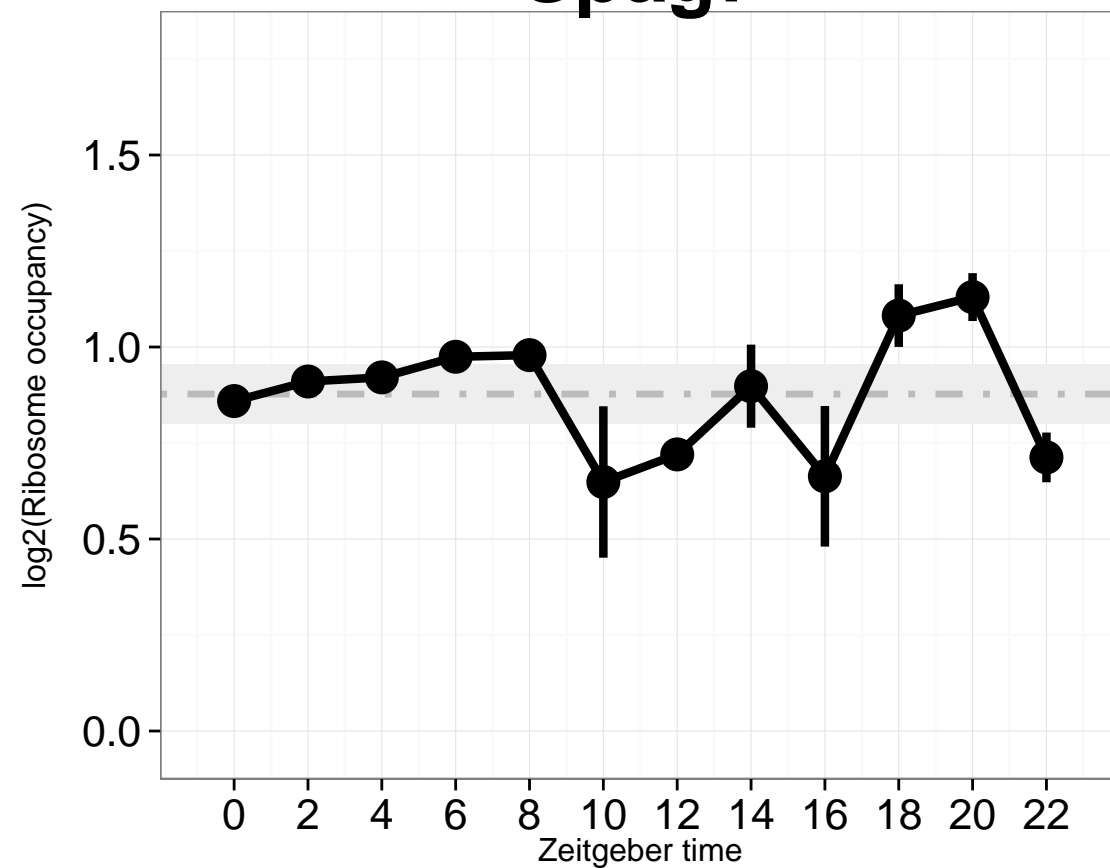

Supplement: Supplementary file 9498 [file 1]

## Pes1

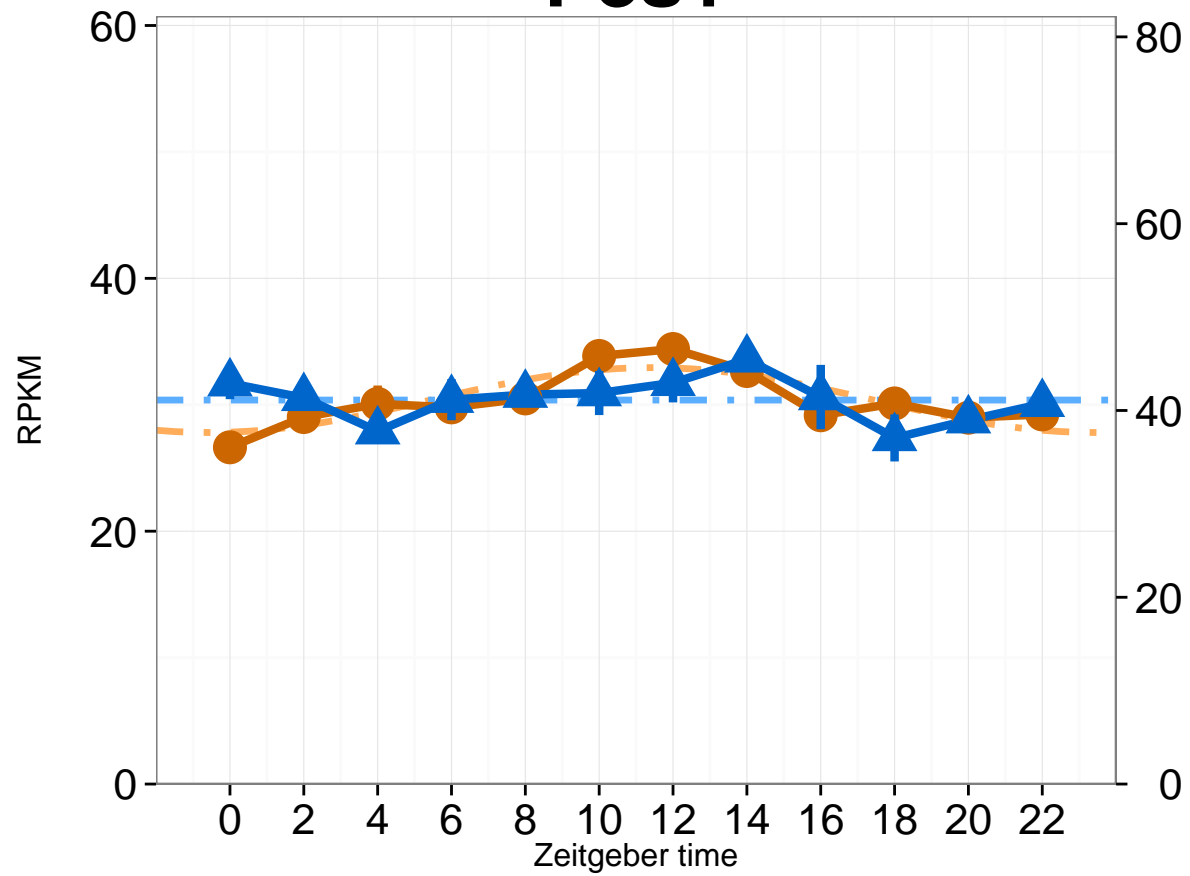

## Pes1

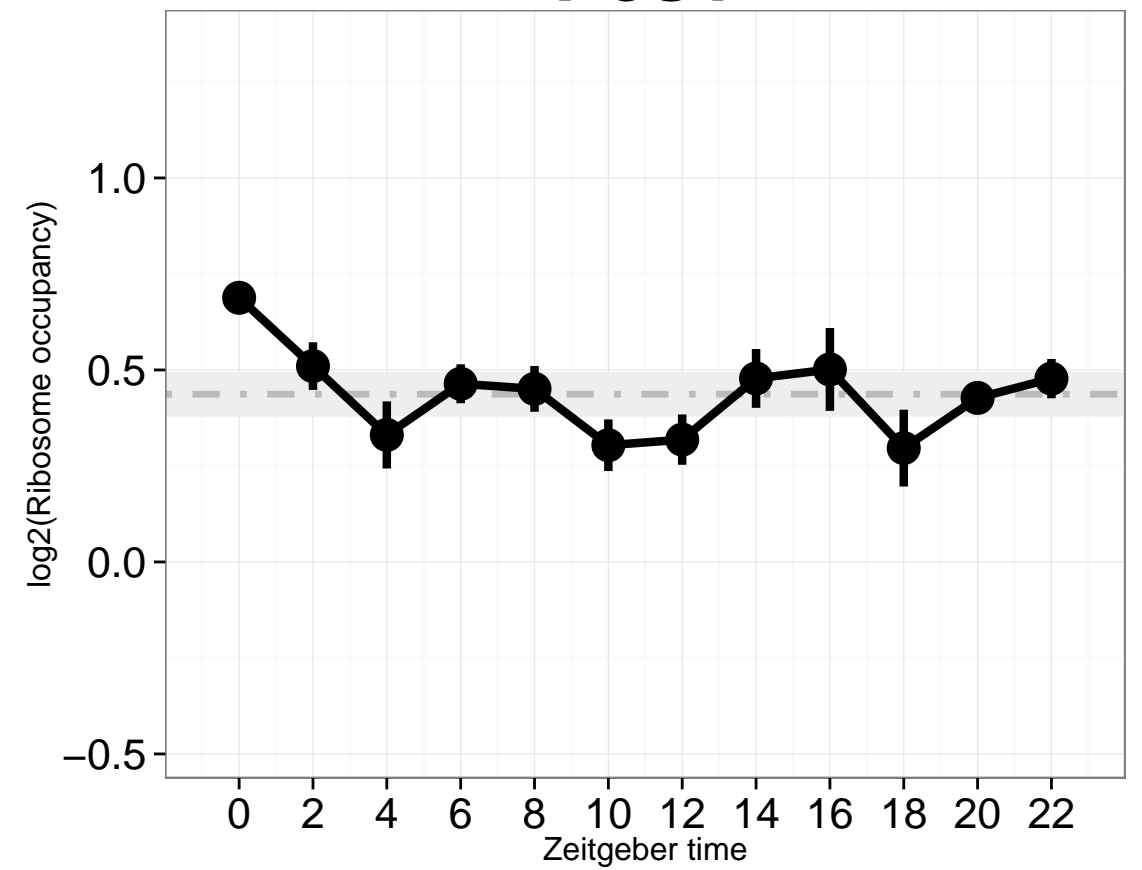

Supplement: Supplementary file 9499 [file 1]

# Arap3

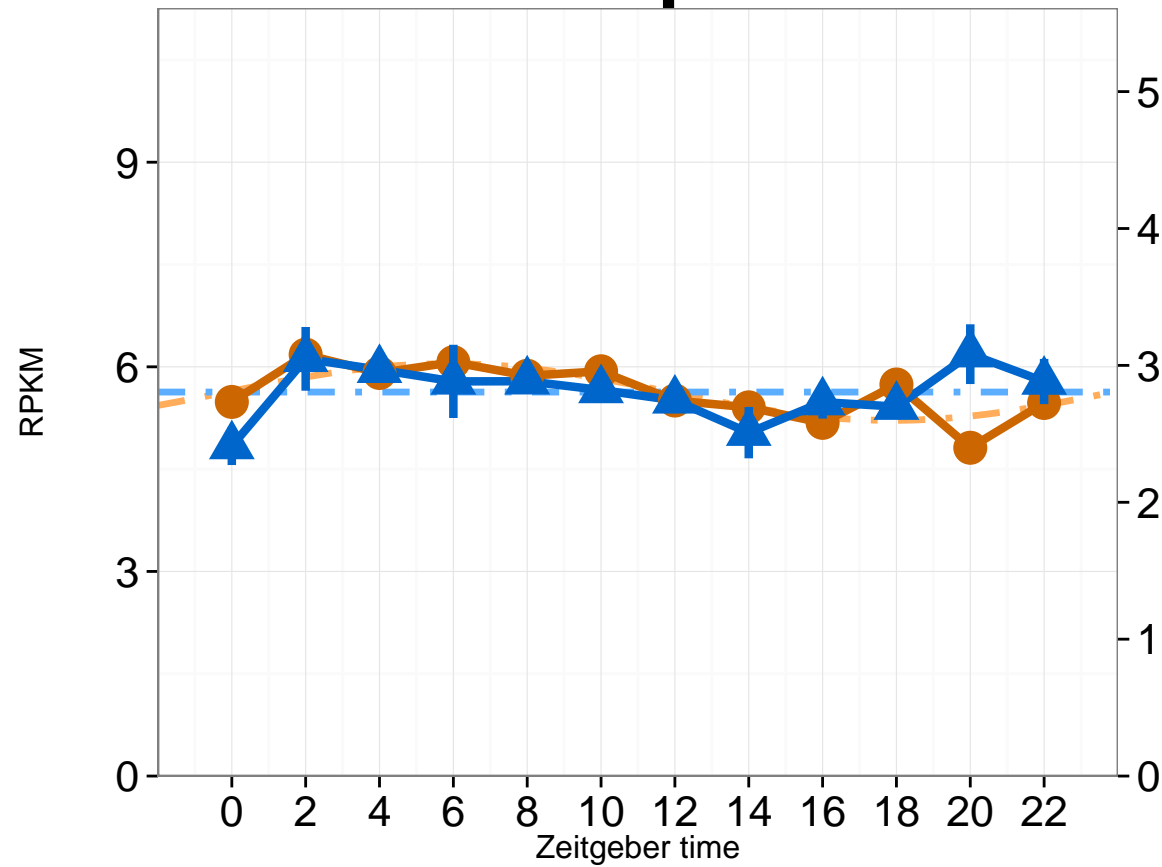

# Arap3

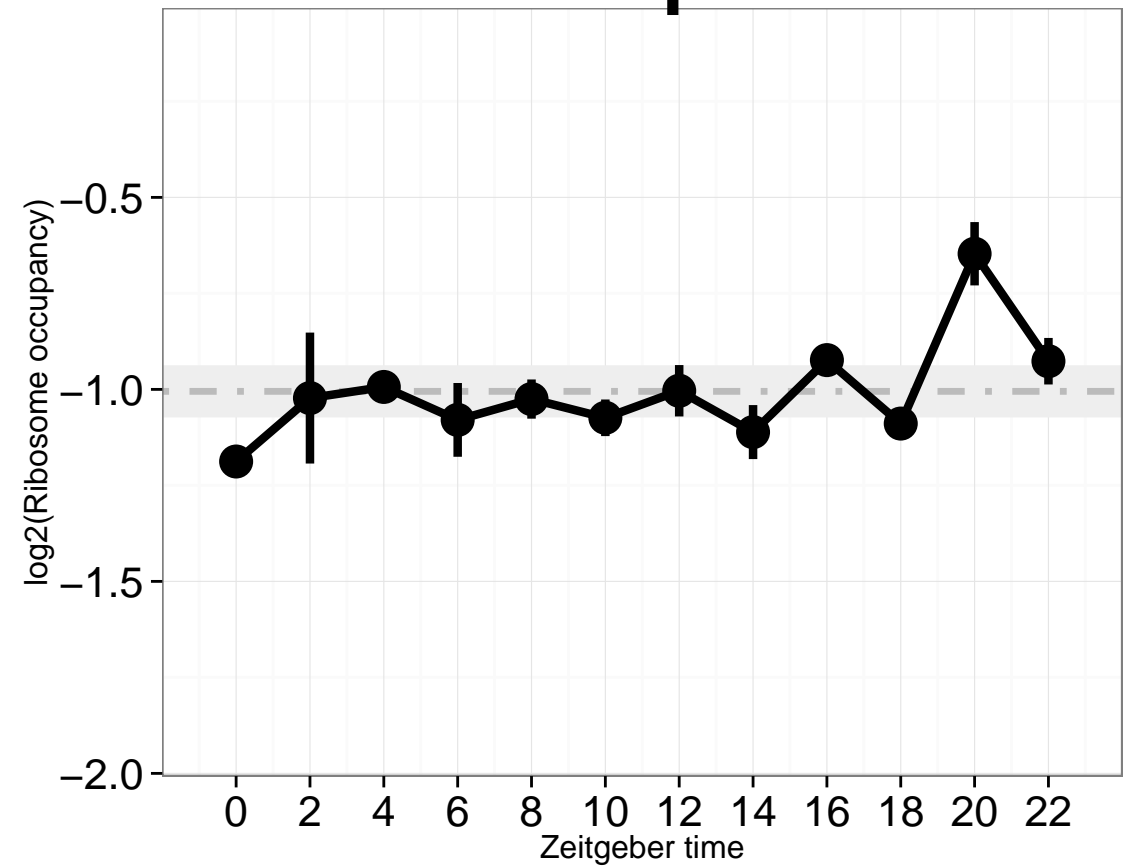

Supplement: Supplementary file 9500 [file 1]

## Coa5

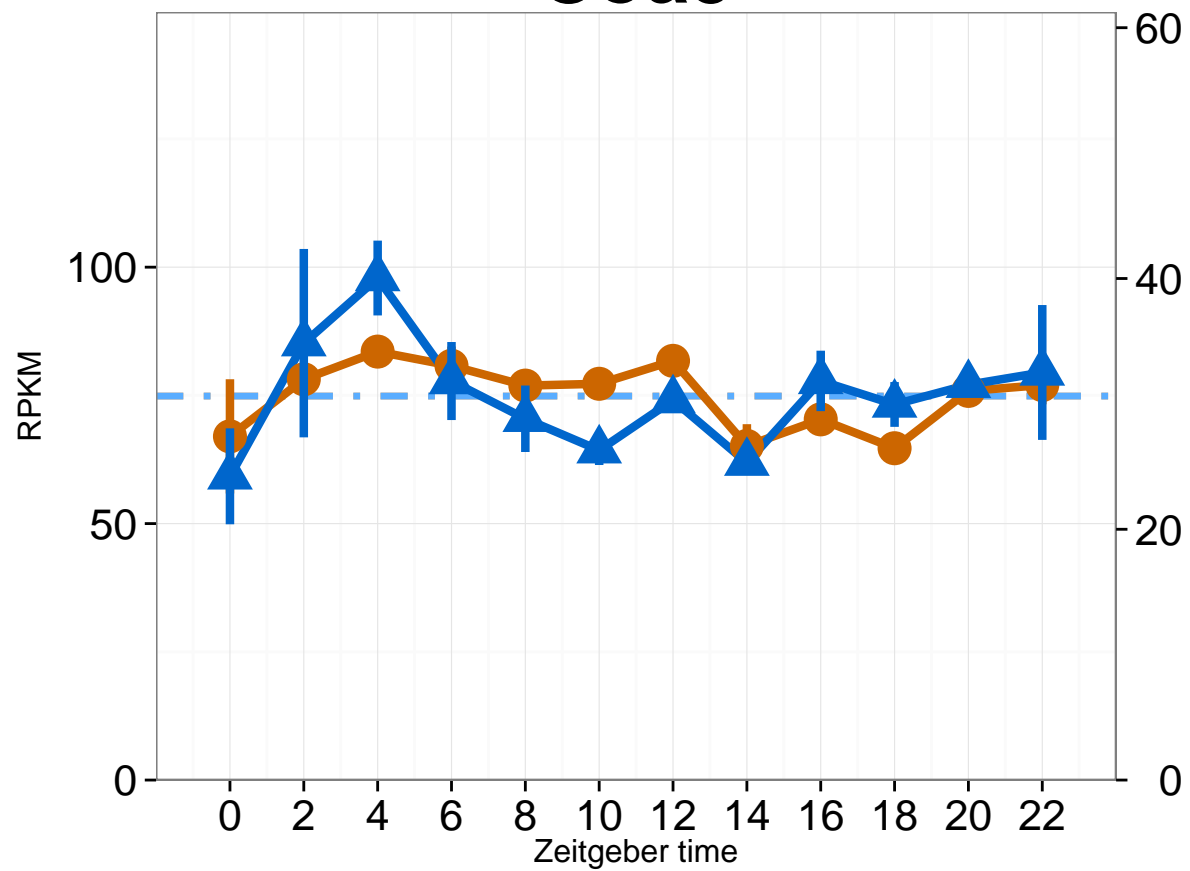

## Coa5

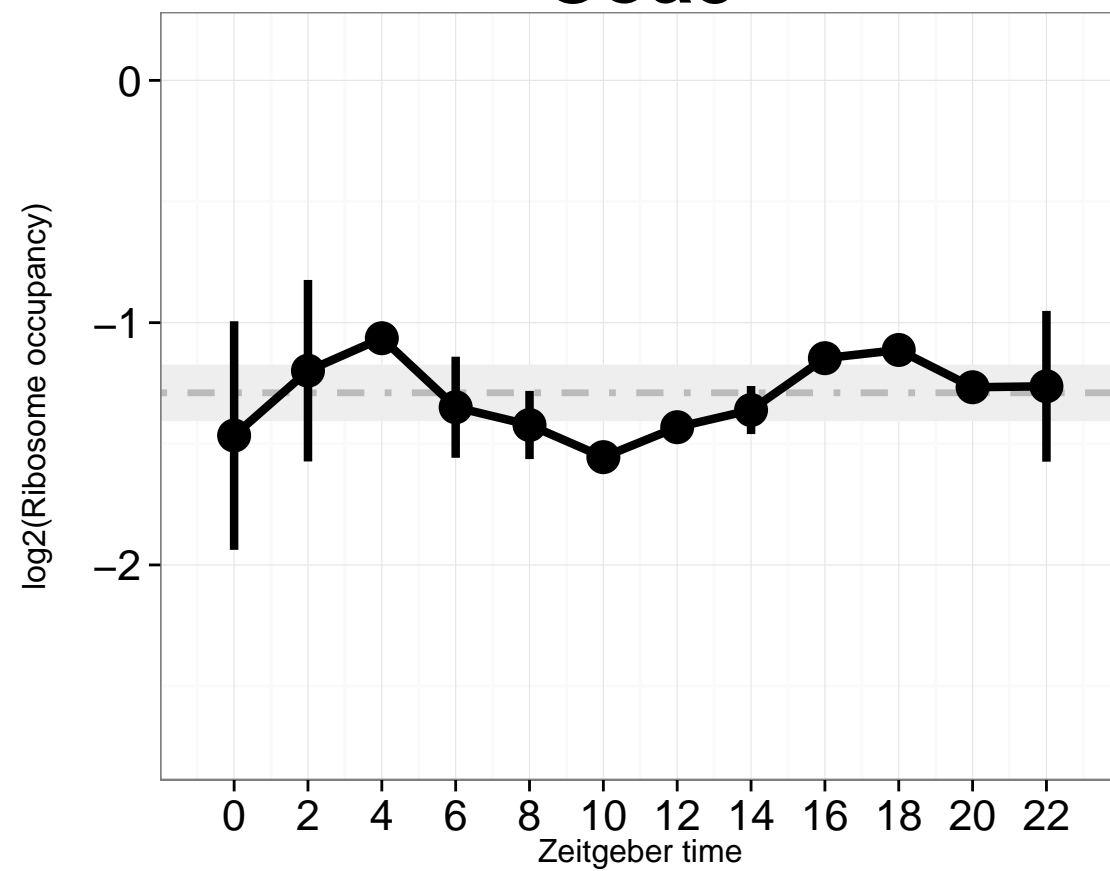

Supplement: Supplementary file 9501 [file 1]

## Mef2c

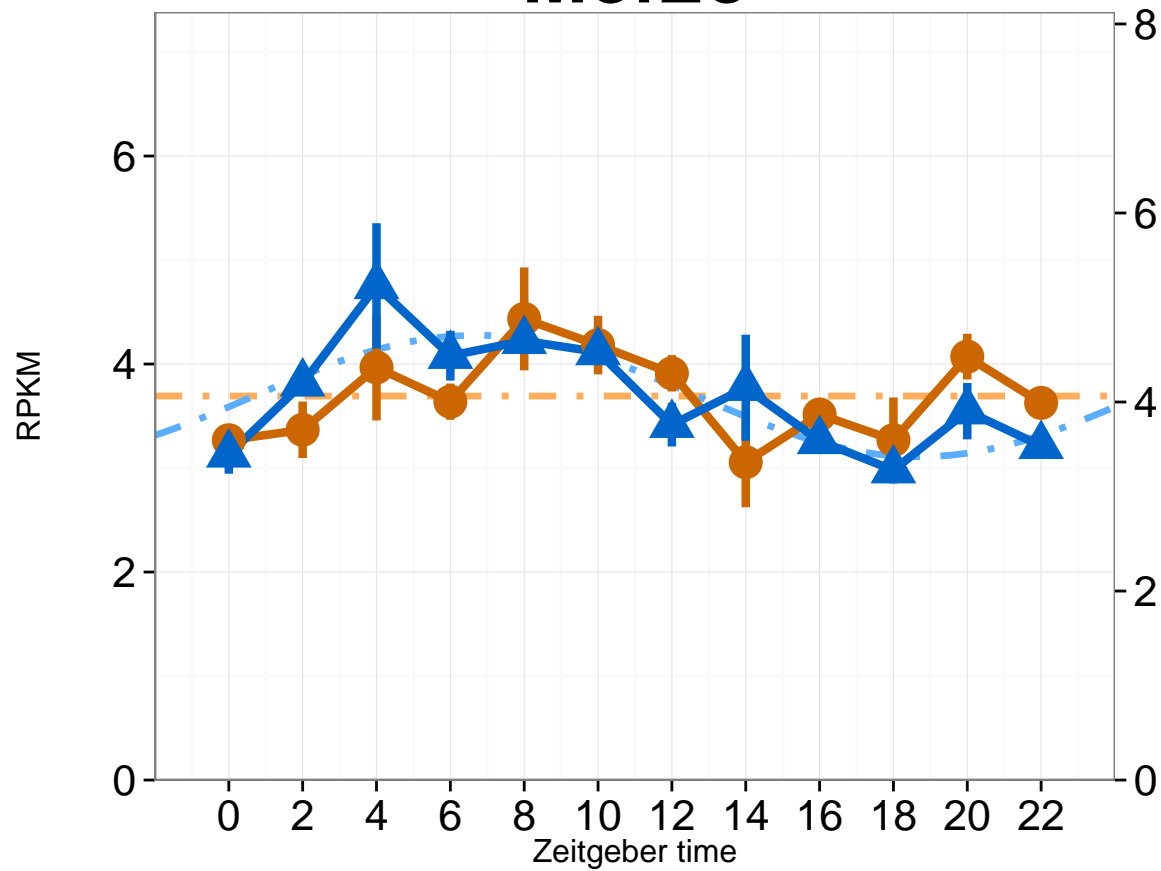

## Mef2c

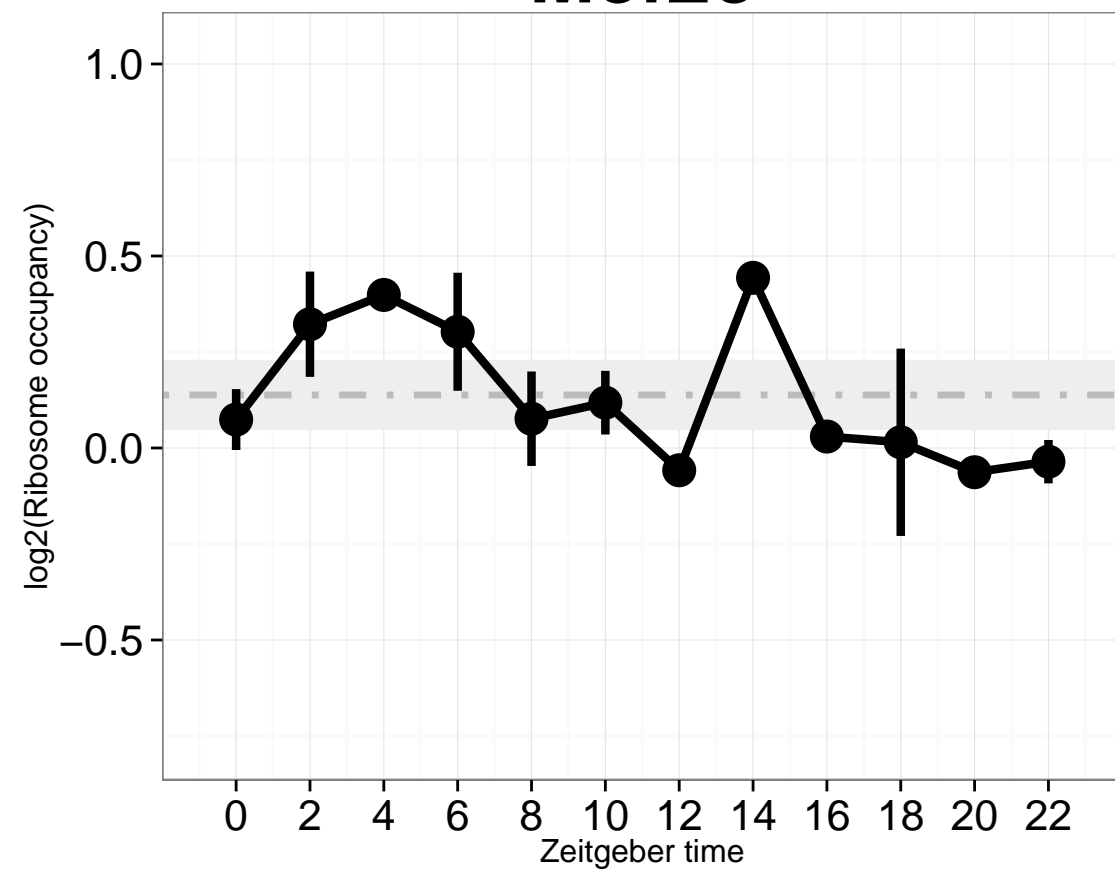

Supplement: Supplementary file 9502 [file 1]

## Yod1

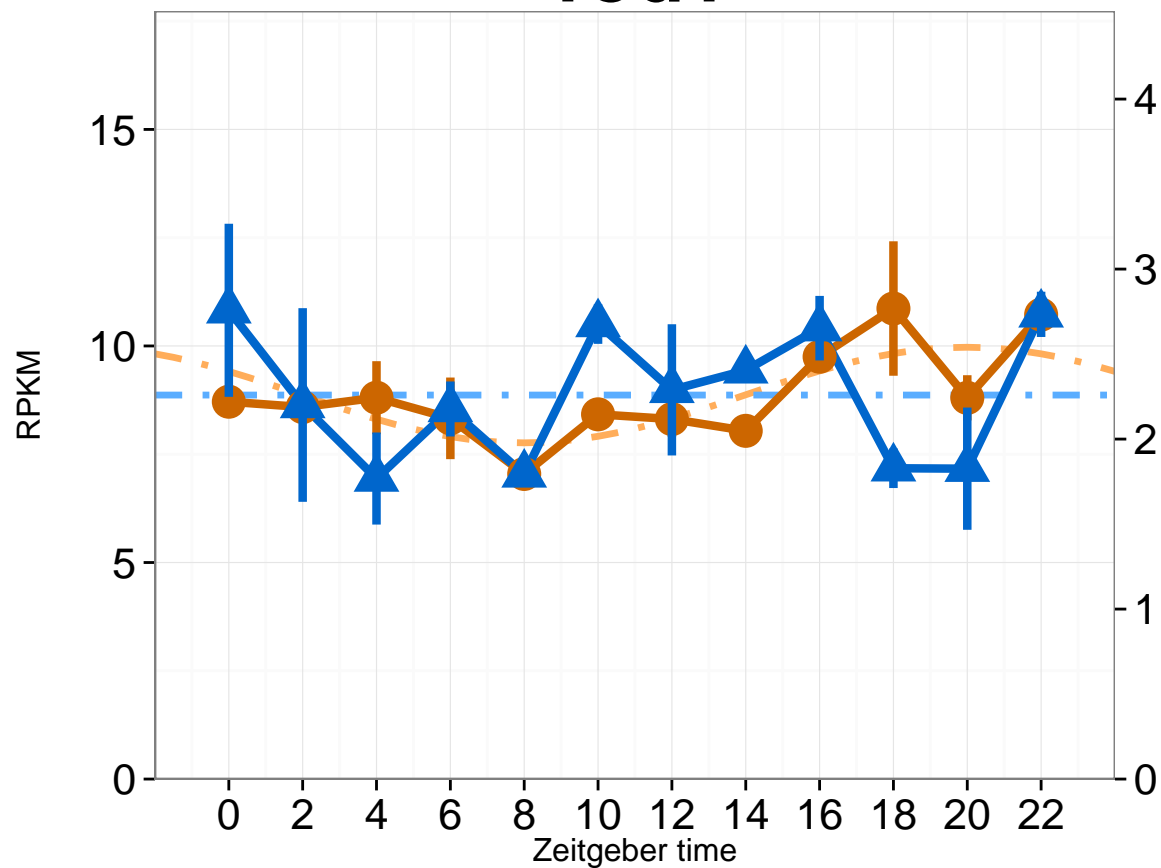

## Yod1

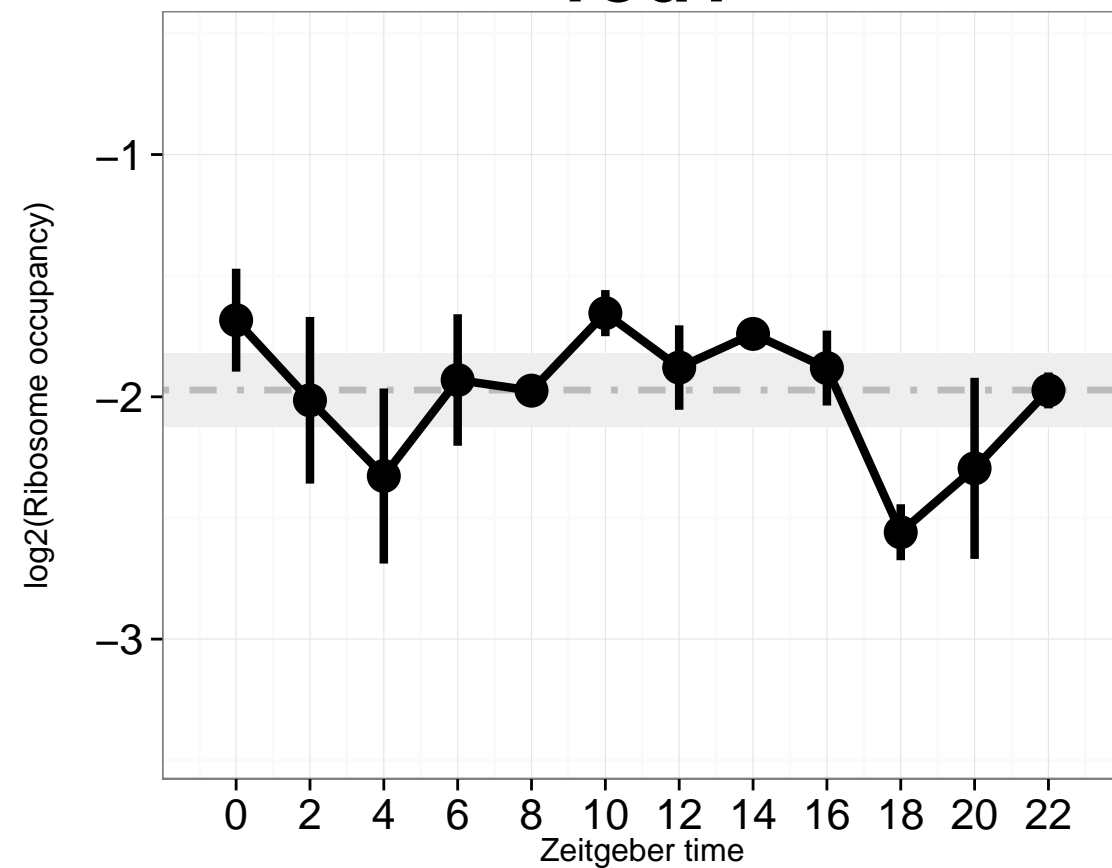

Supplement: Supplementary file 9503 [file 1]

## Ctsd

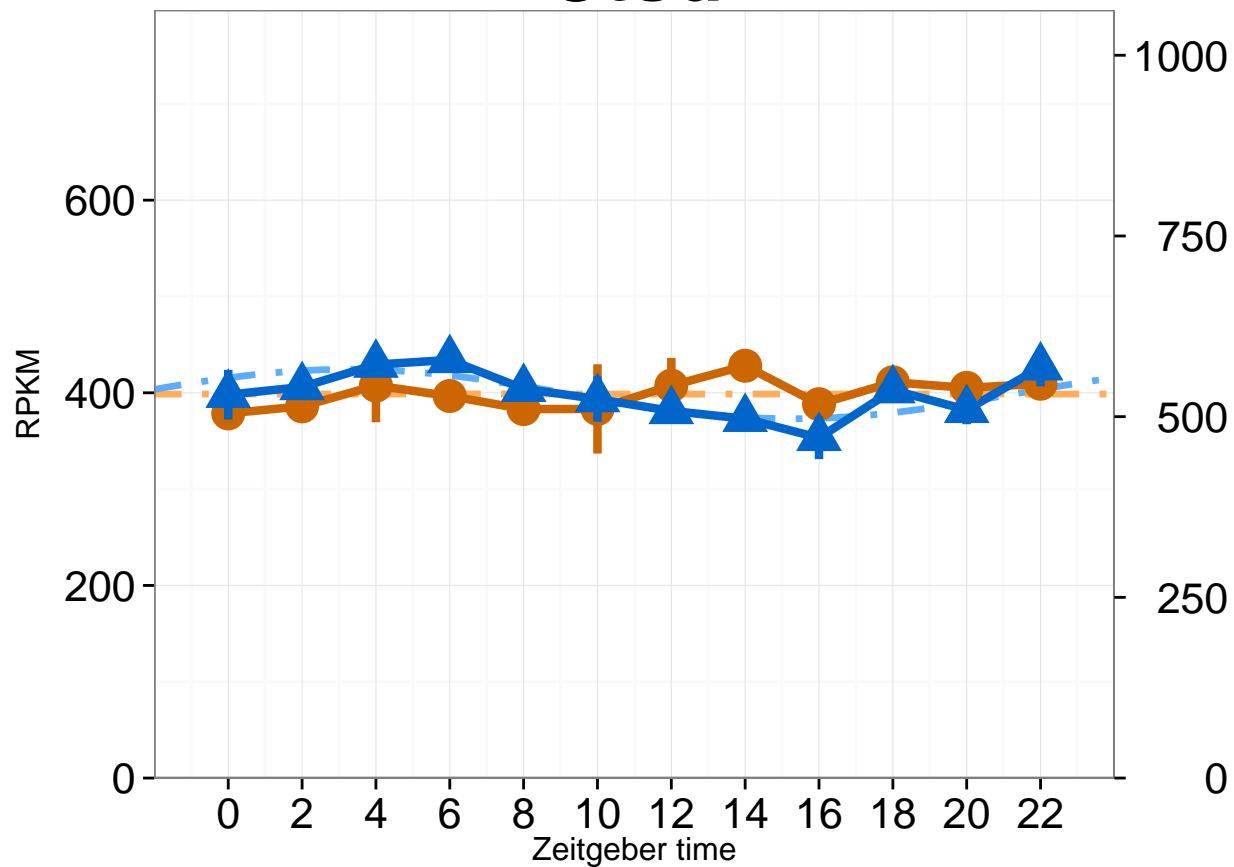

## Ctsd

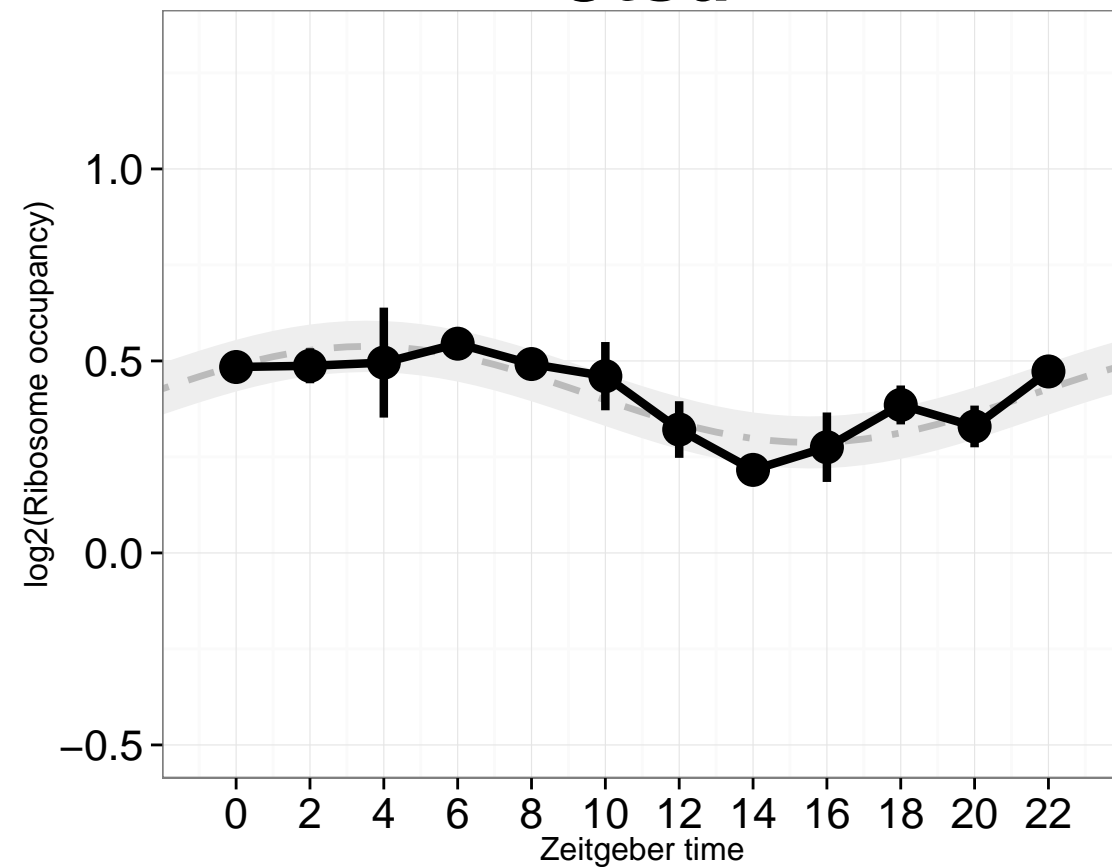

Supplement: Supplementary file 9504 [file 1]

## Thbs2

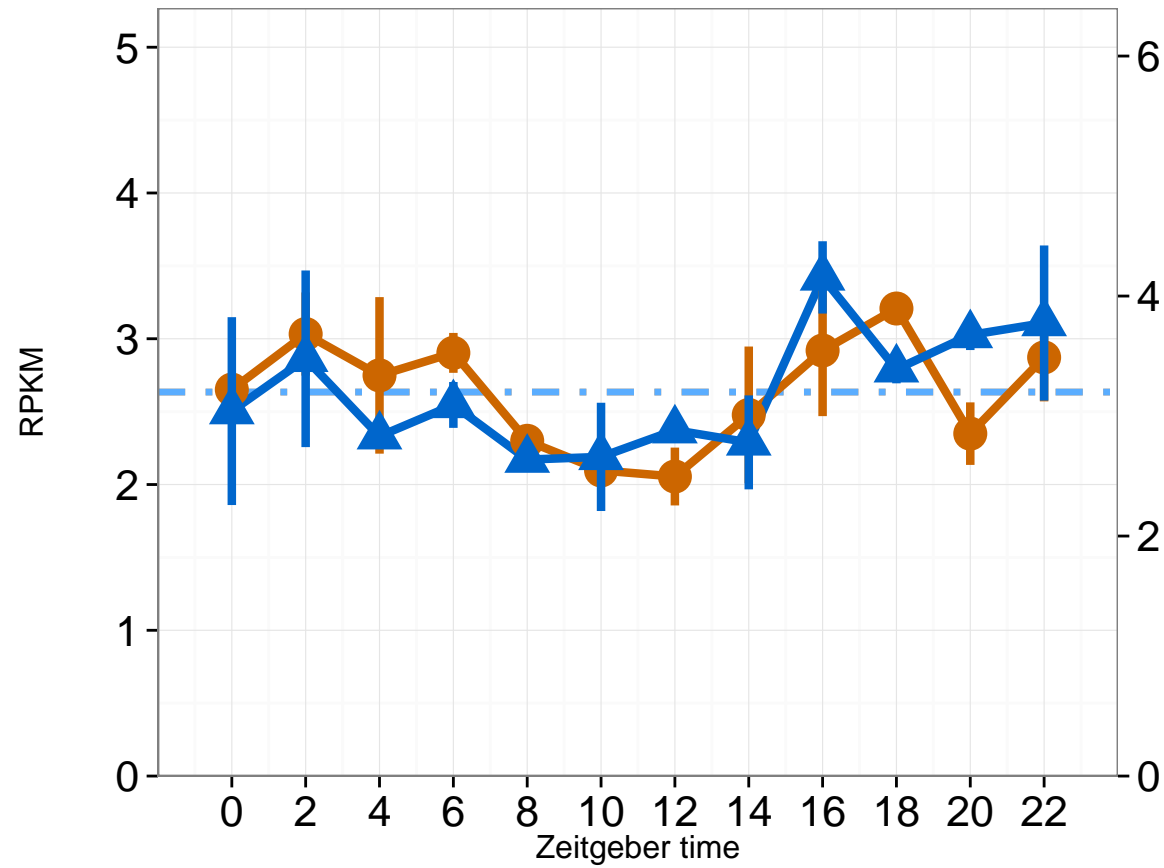

## Thbs2

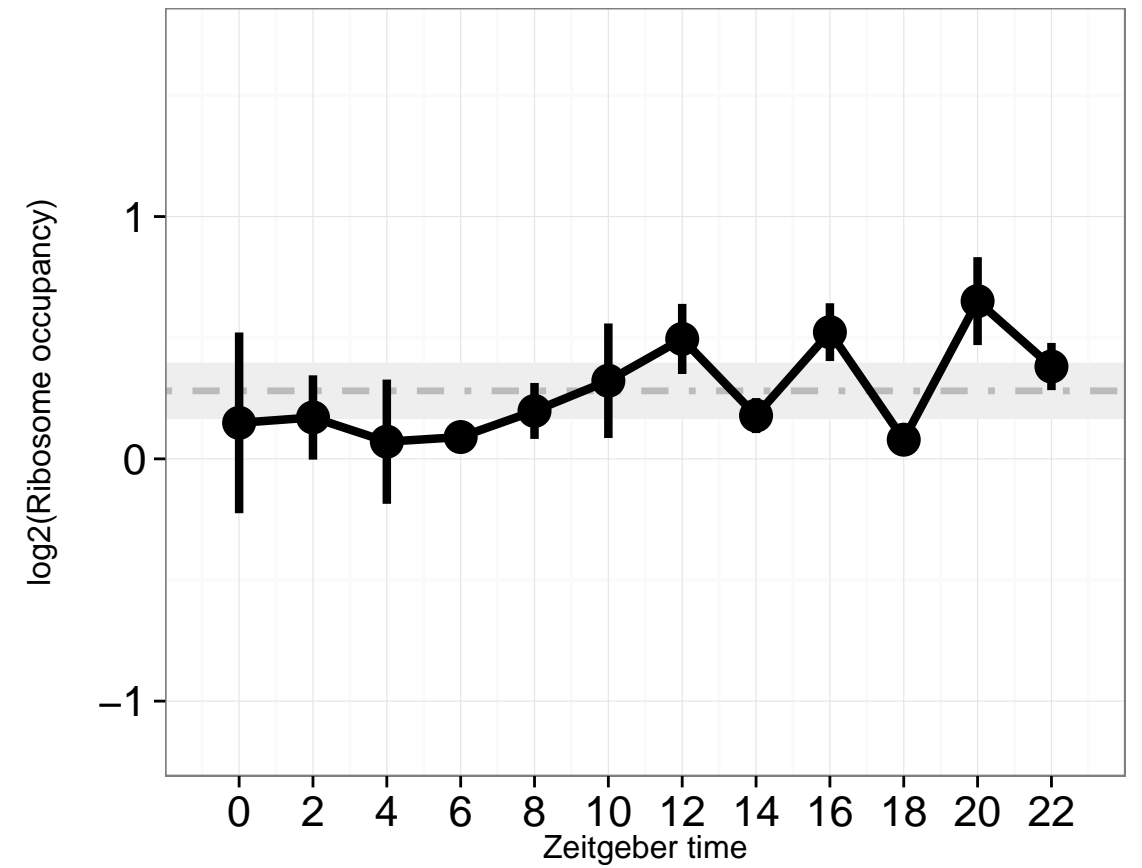

Supplement: Supplementary file 9505 [file 1]

# Cyb5r3

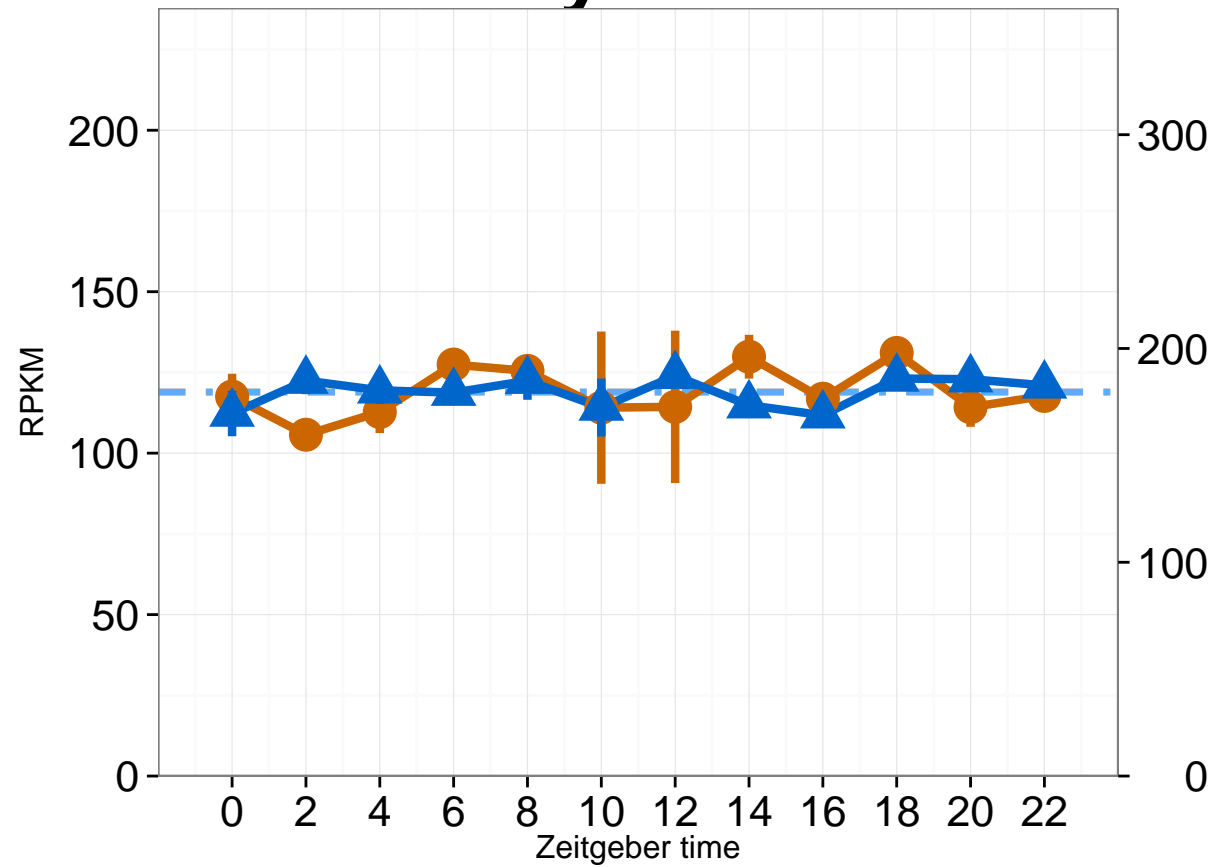

# Cyb5r3

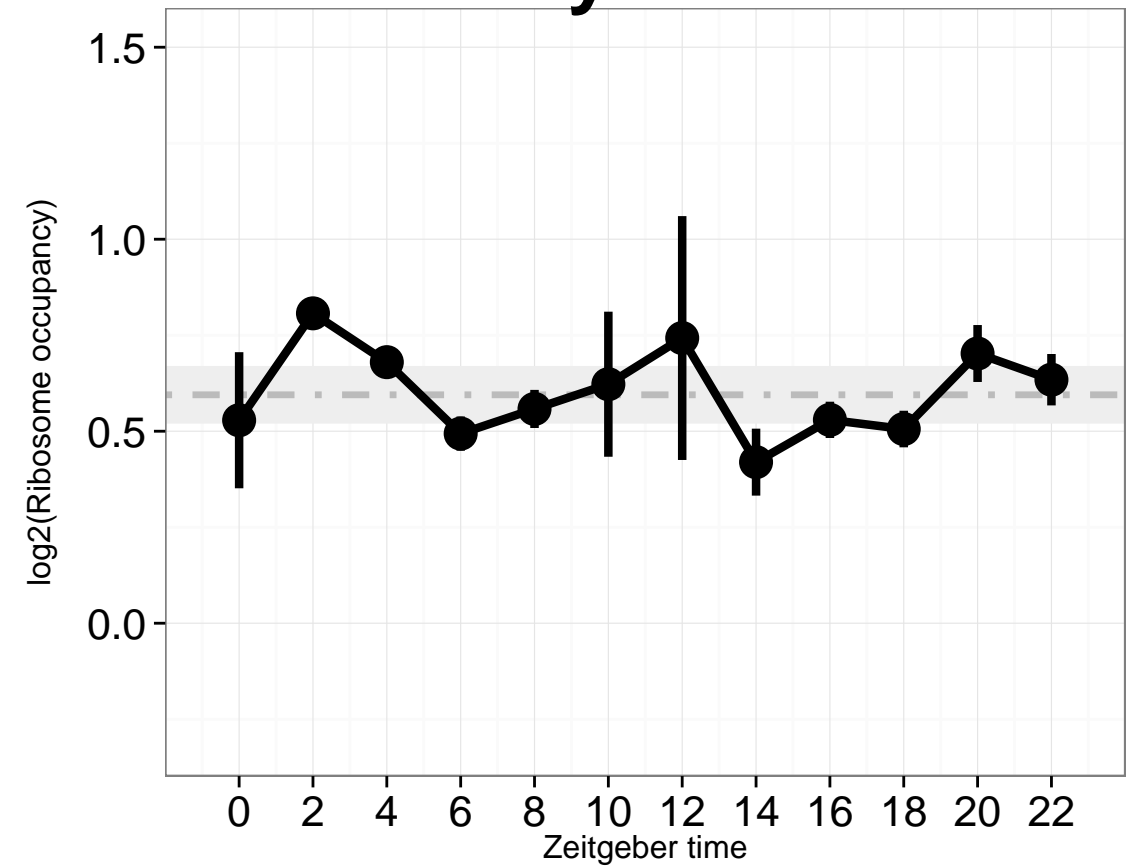

Supplement: Supplementary file 9506 [file 1]

## Bambi

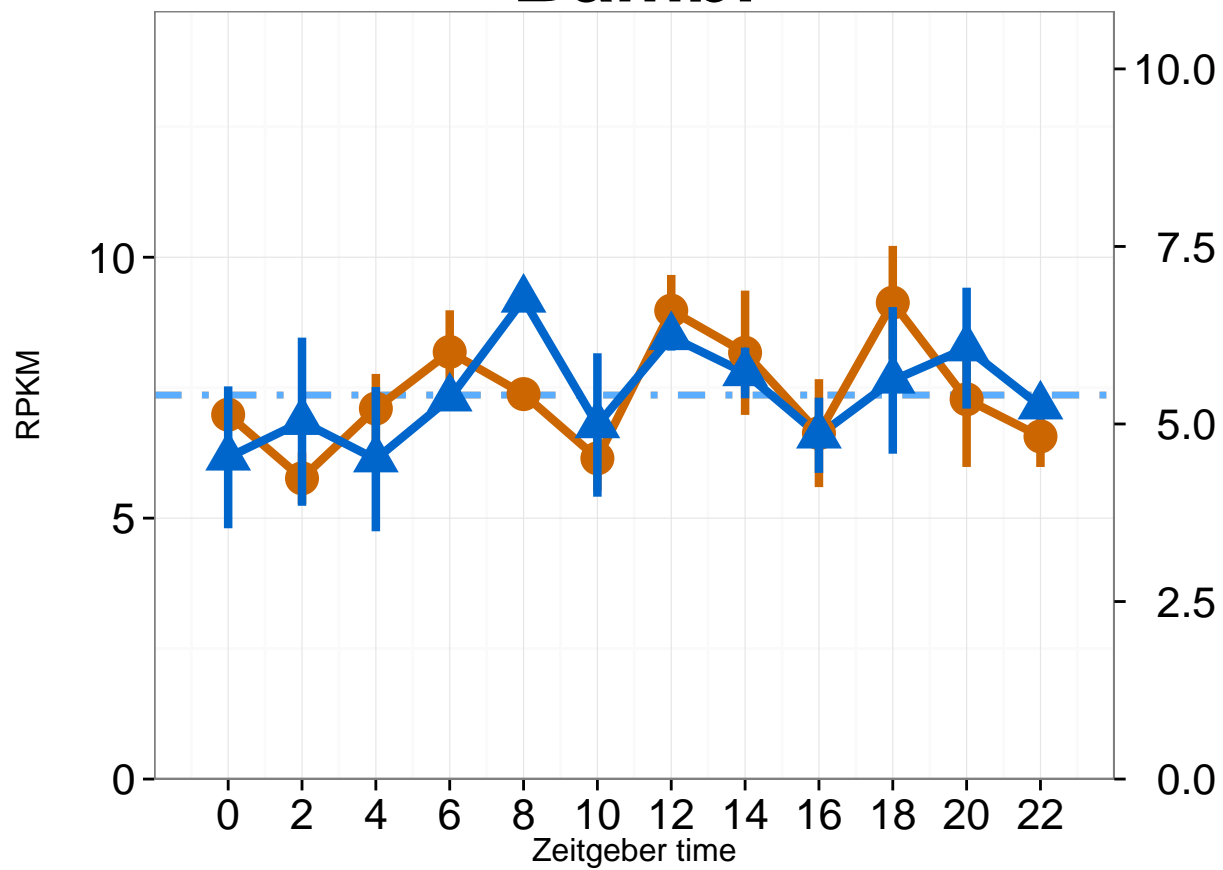

## Bambi

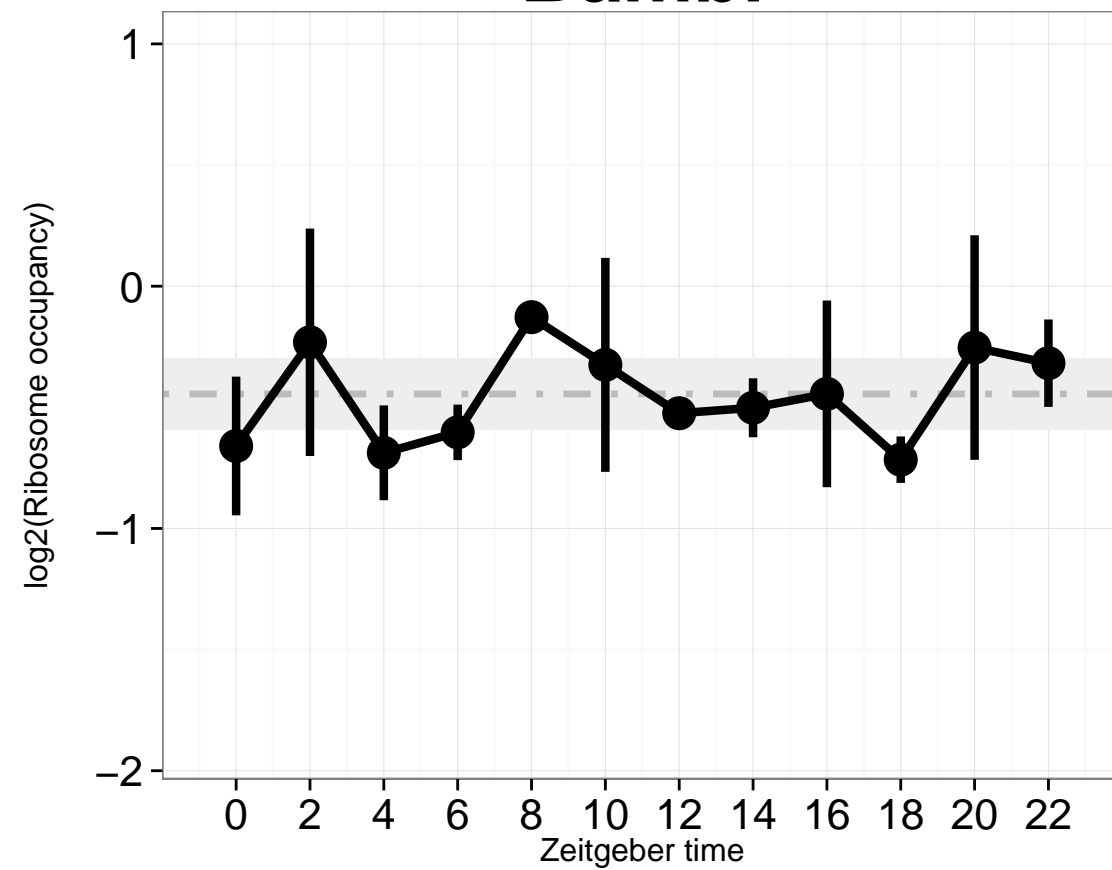

Supplement: Supplementary file 9507 [file 1]

## Ddhd2

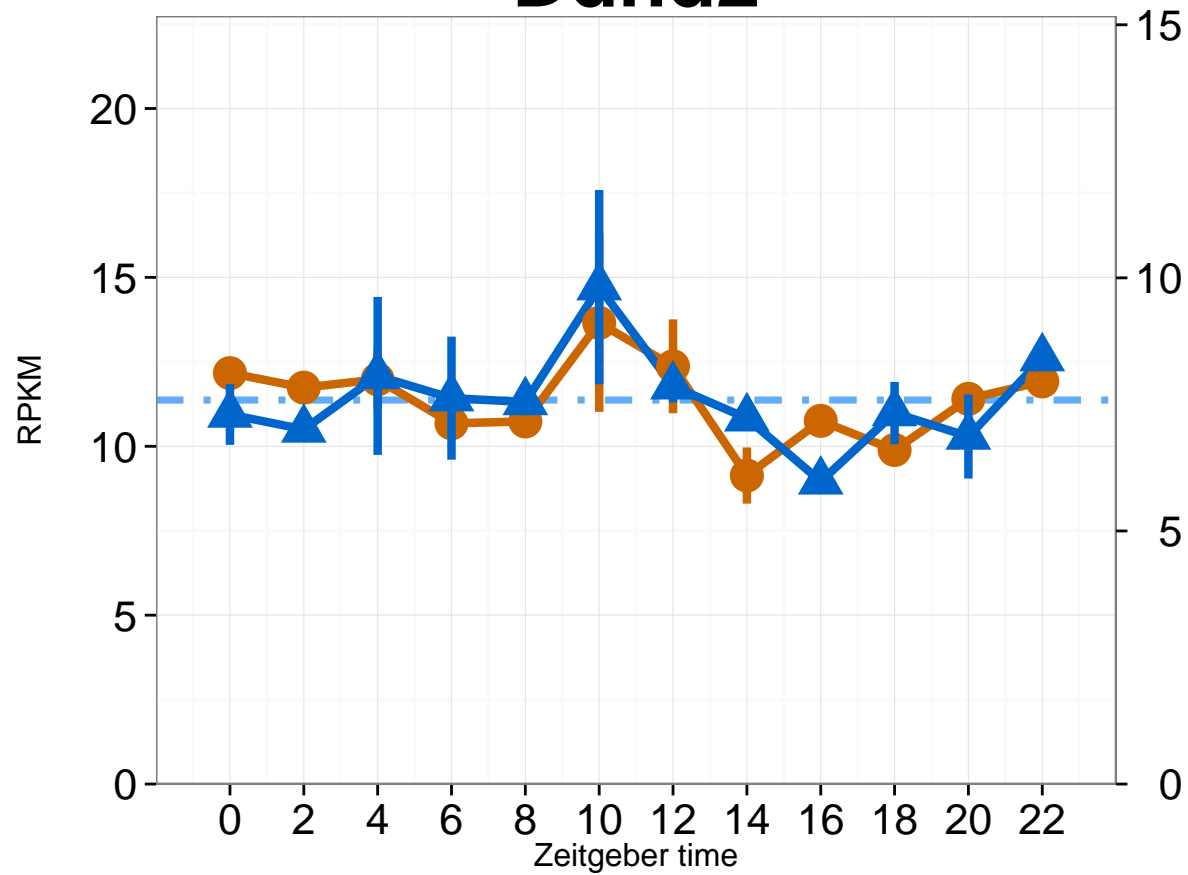

## Ddhd2

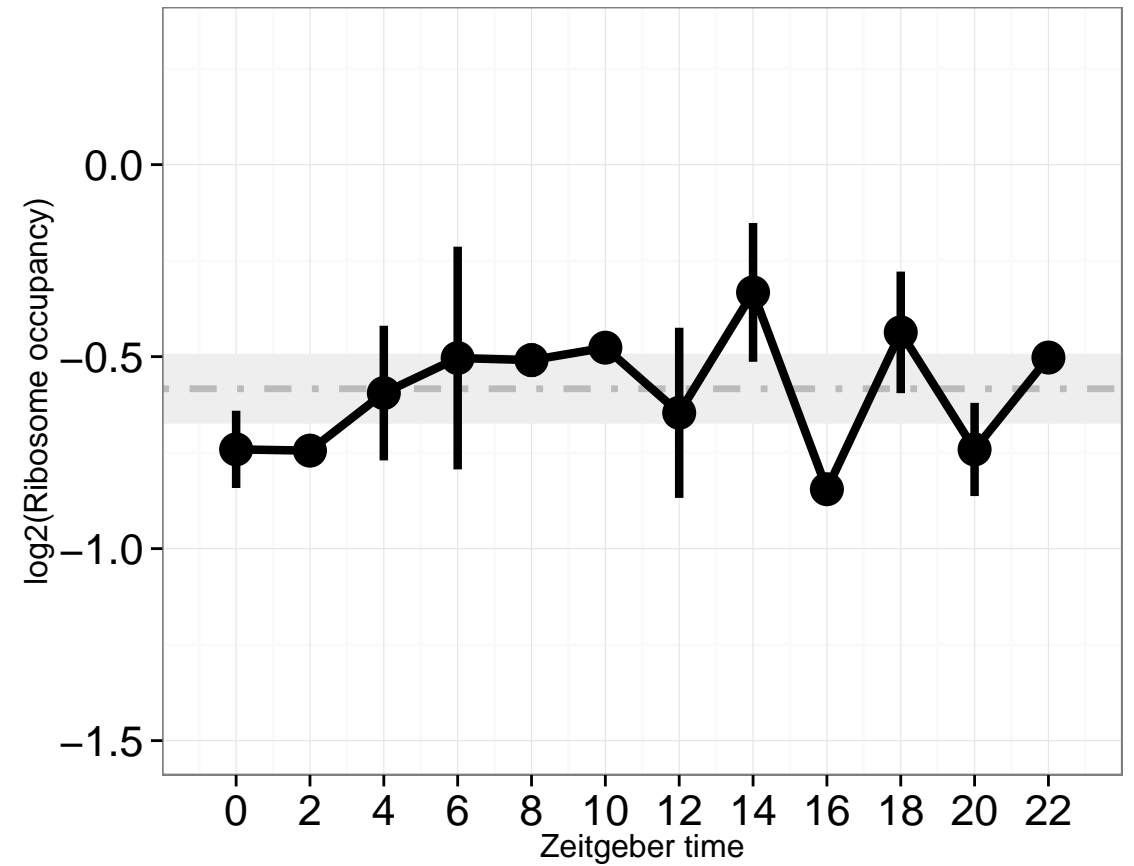

Supplement: Supplementary file 9508 [file 1]

## Dhodh

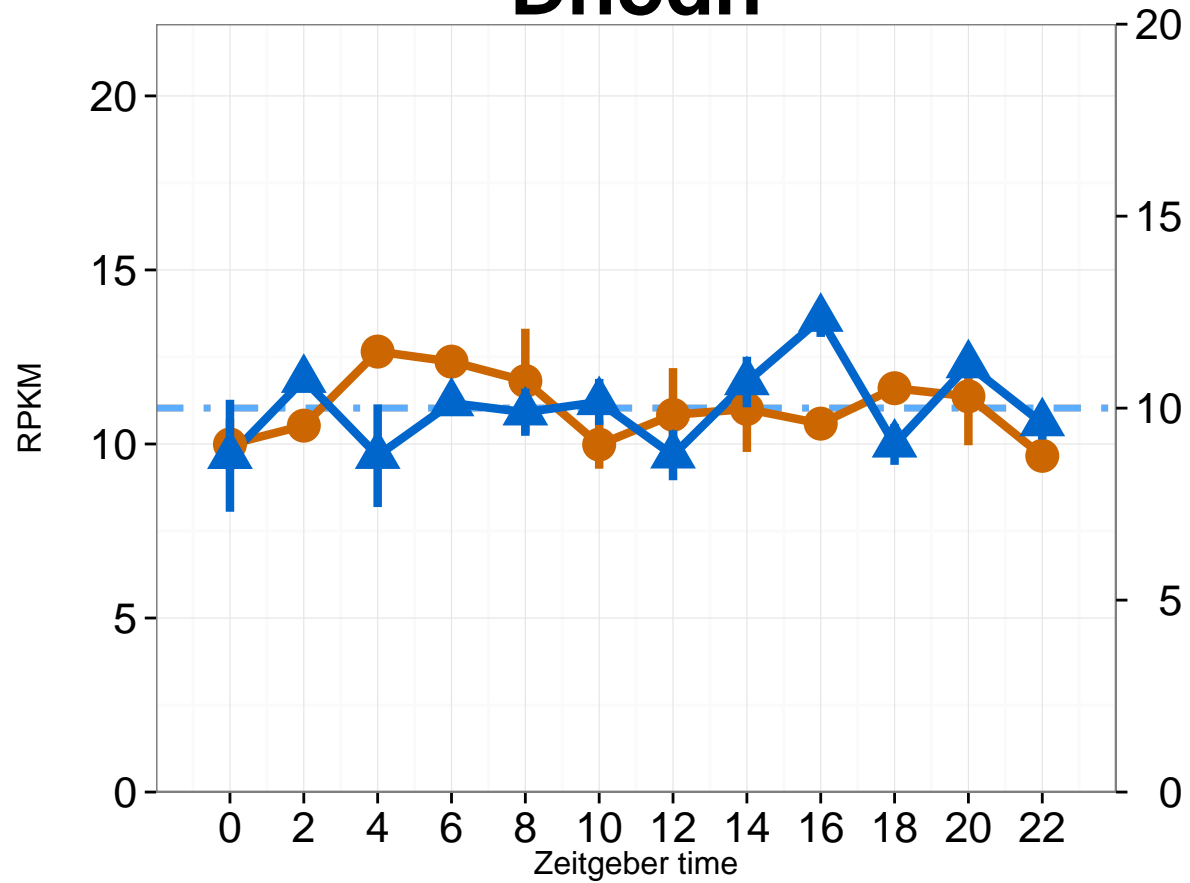

## Dhodh

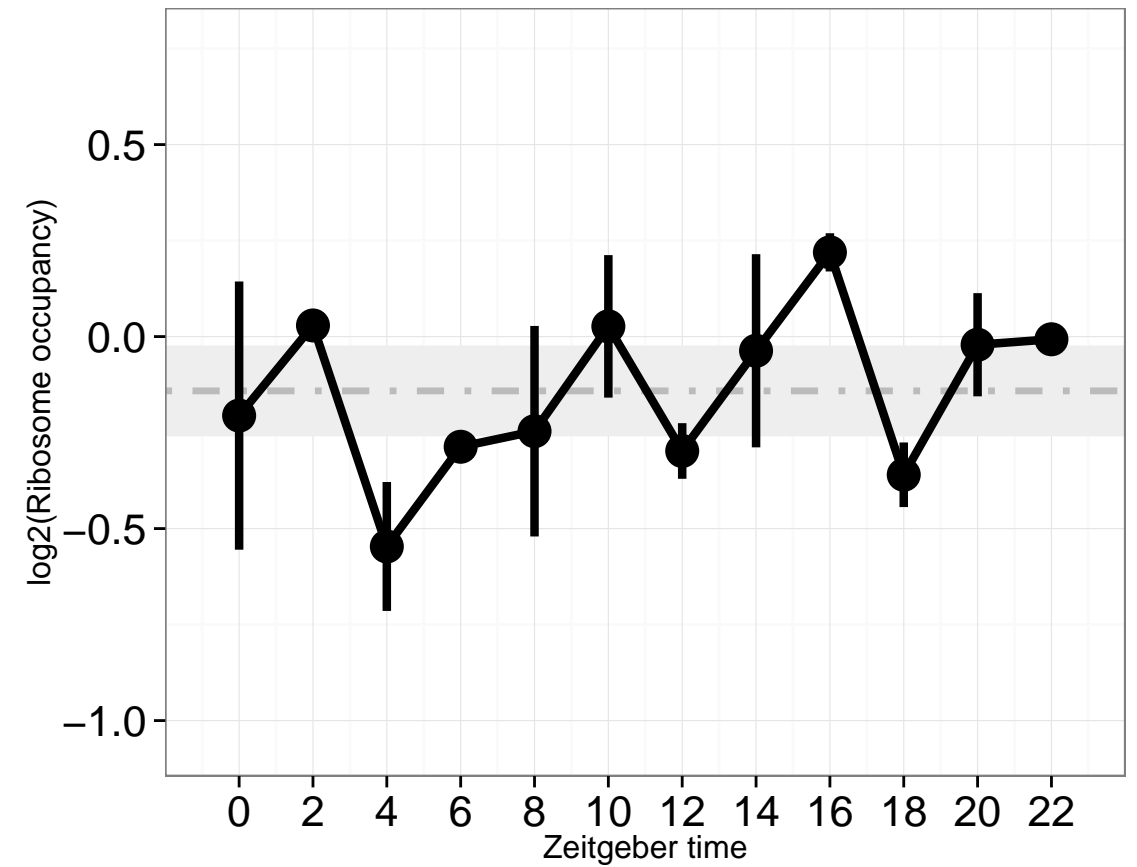

Supplement: Supplementary file 9509 [file 1]

## Parva

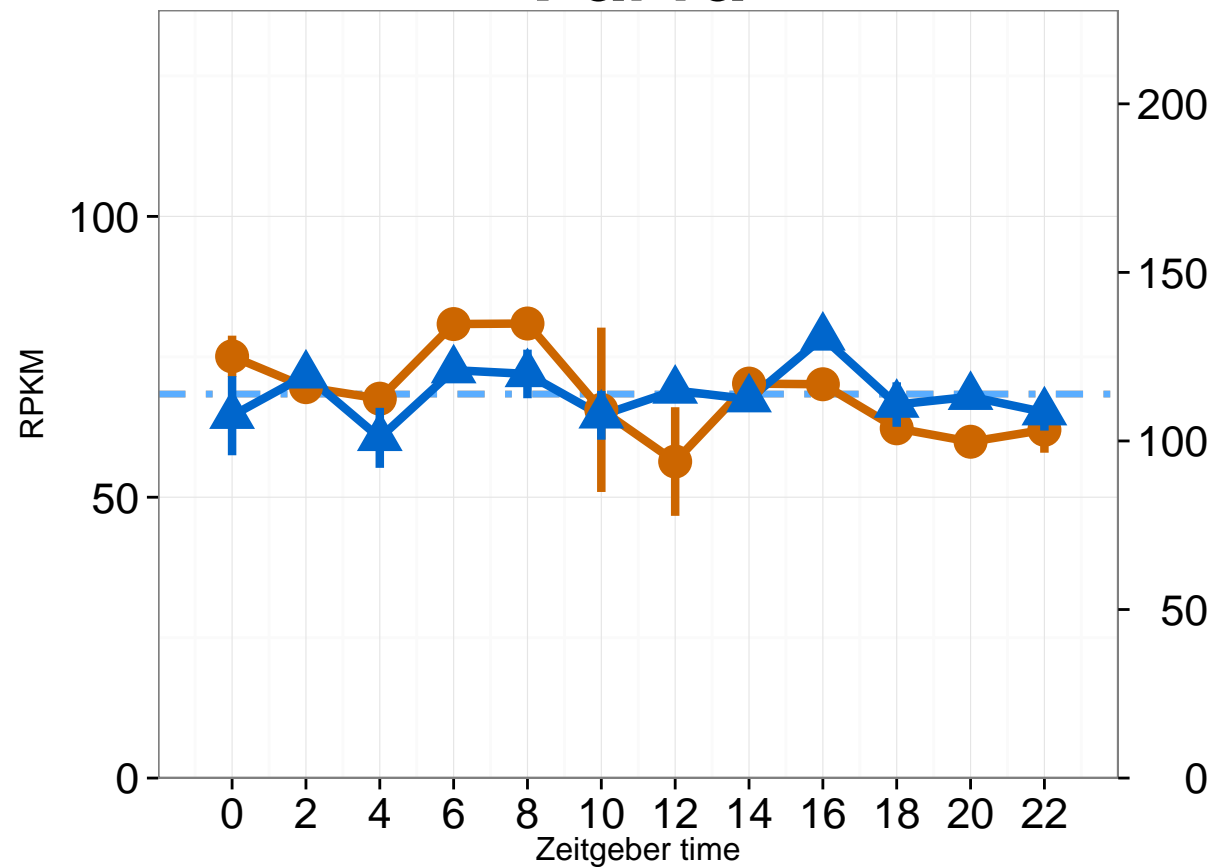

## Parva

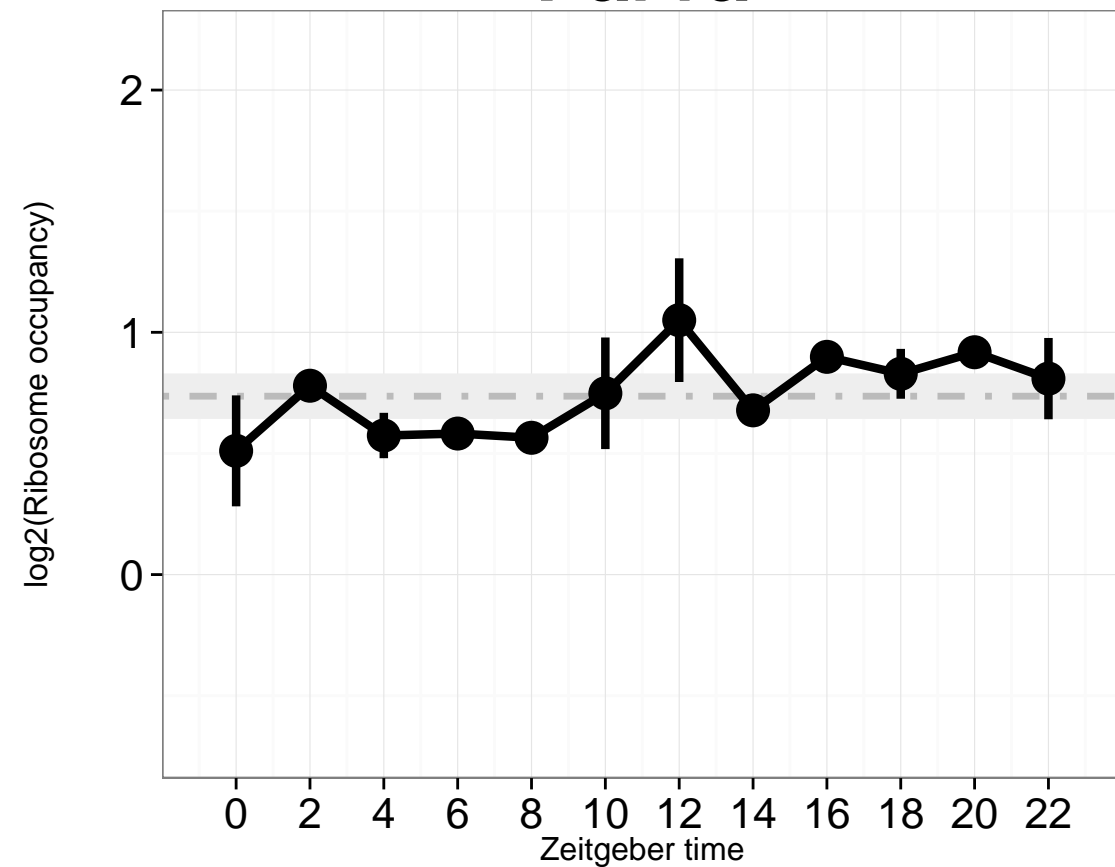

Supplement: Supplementary file 9510 [file 1]

**Tpd52l1**

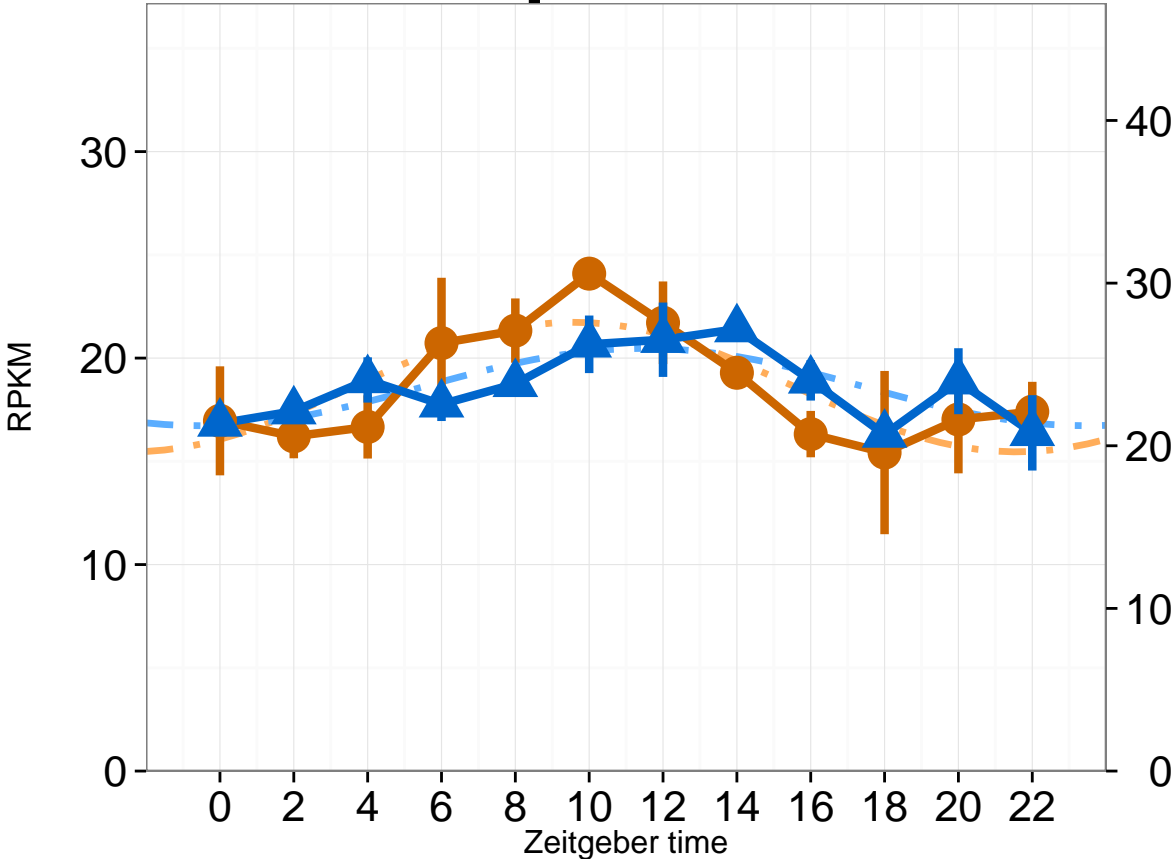

**Tpd52l1**

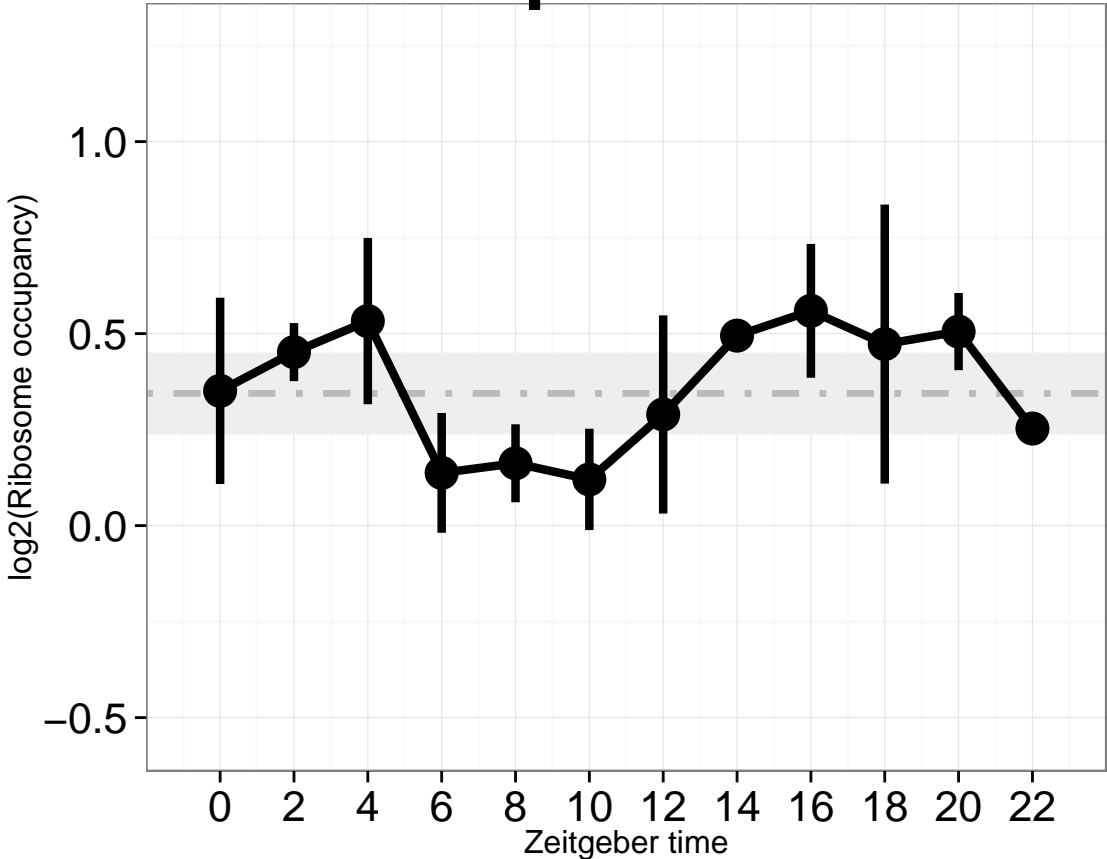

Supplement: Supplementary file 9511 [file 1]

**Tm4sf20 TR**

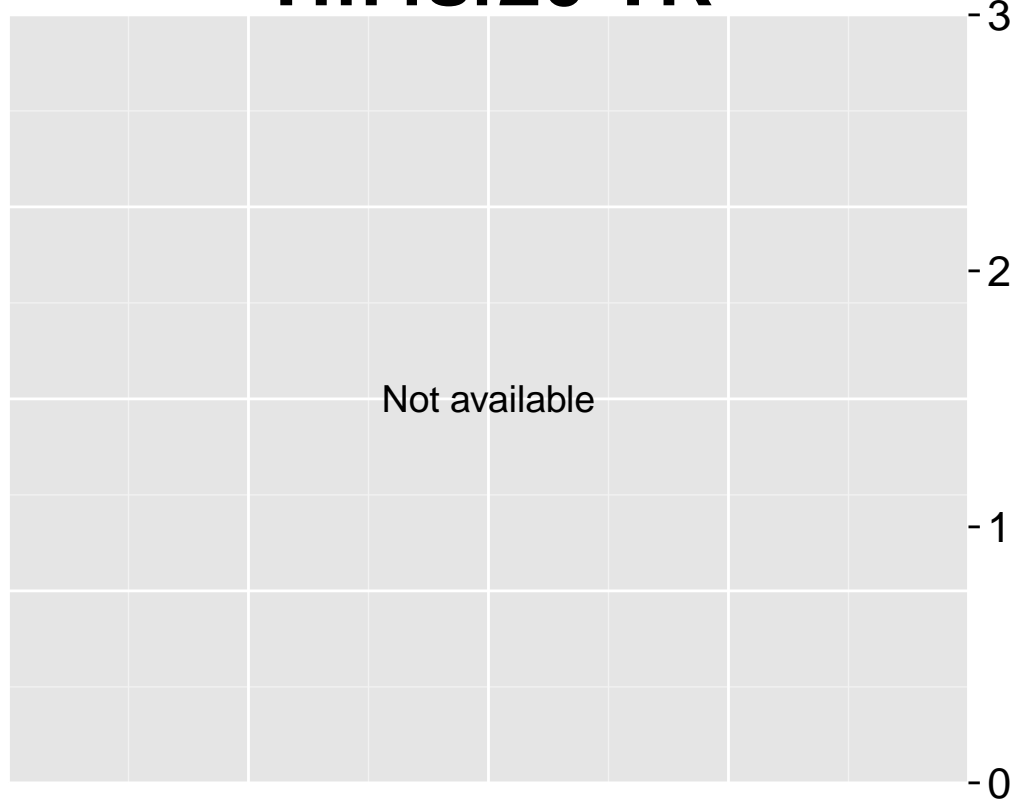

**Tm4sf20 log2(Ribosome occupanc**

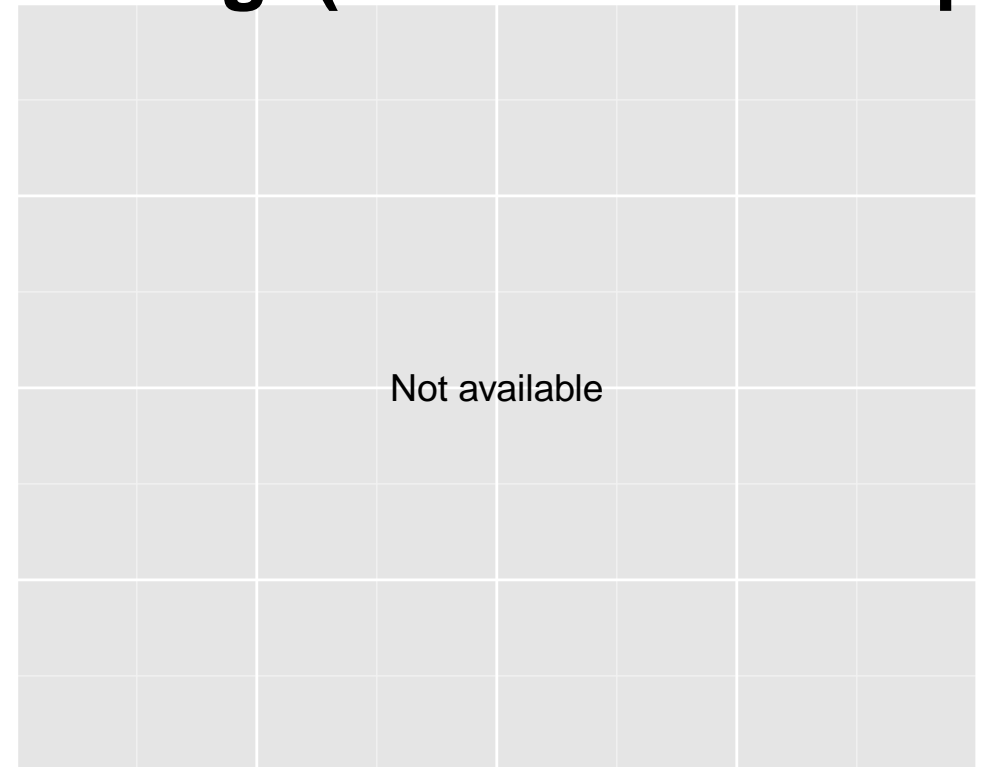

Supplement: Supplementary file 9512 [file 1]

# Ddx60

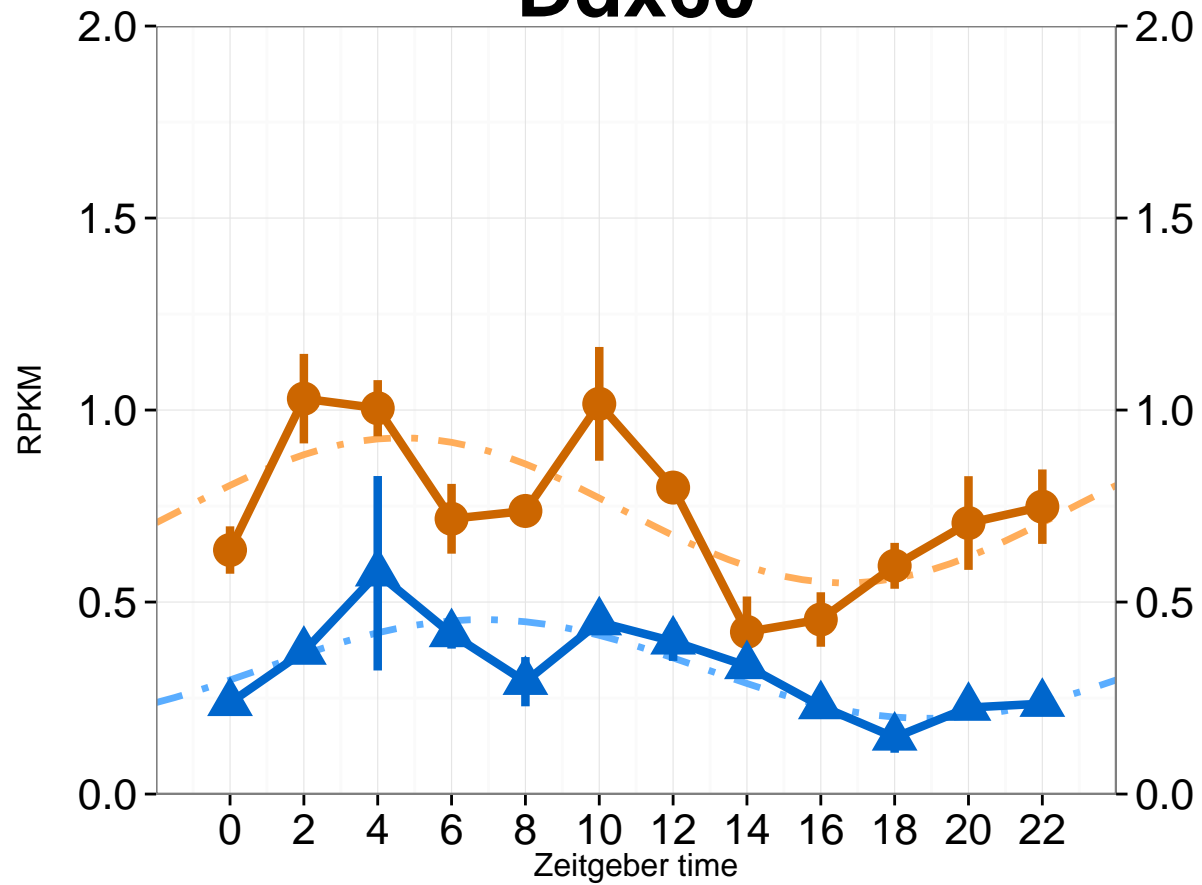

# Ddx60

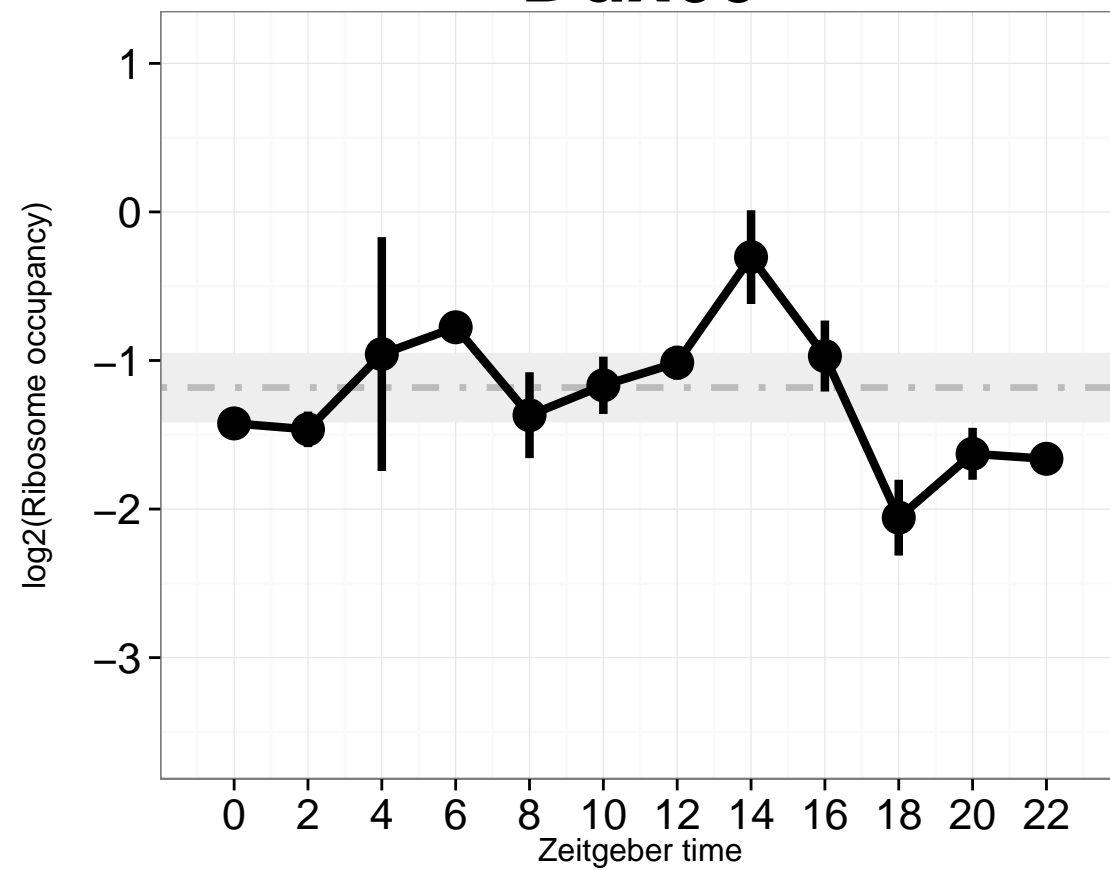

Supplement: Supplementary file 9513 [file 1]

# Atp1b2

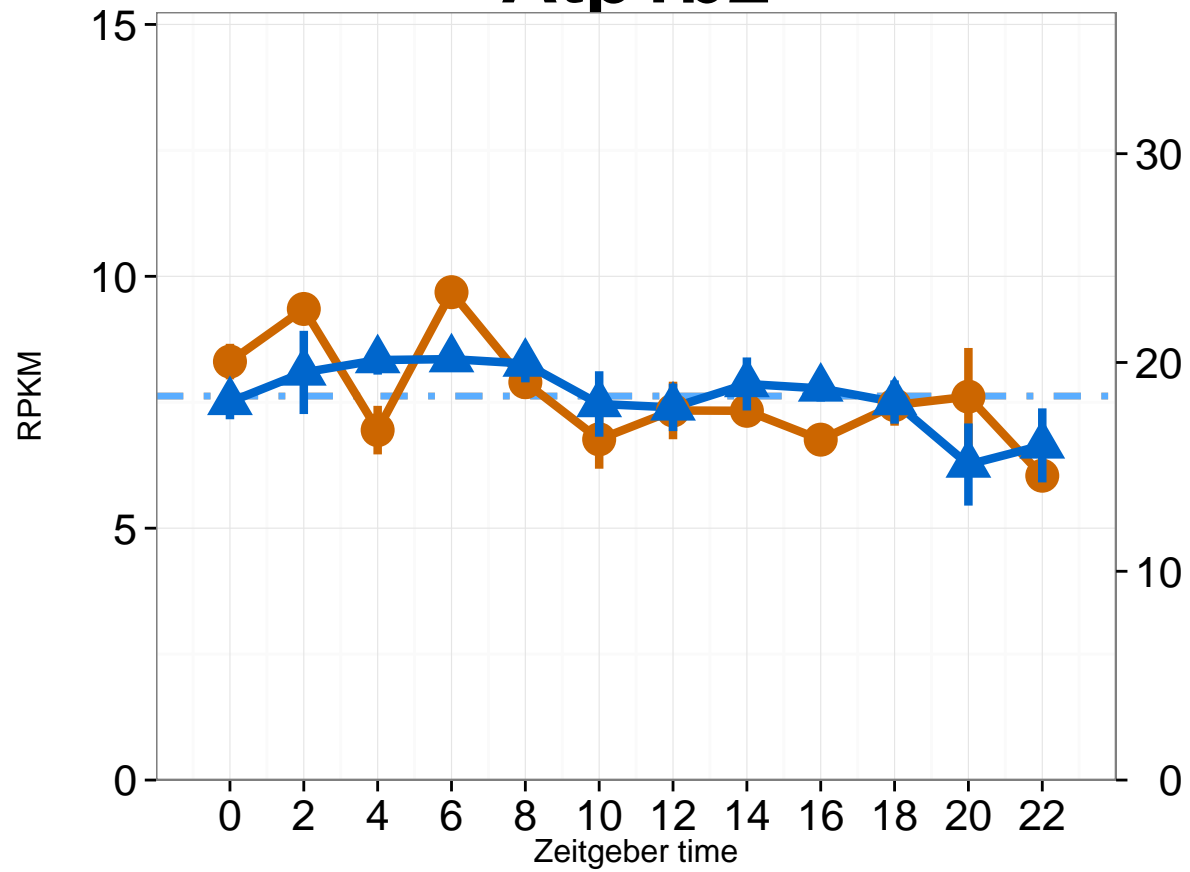

# Atp1b2

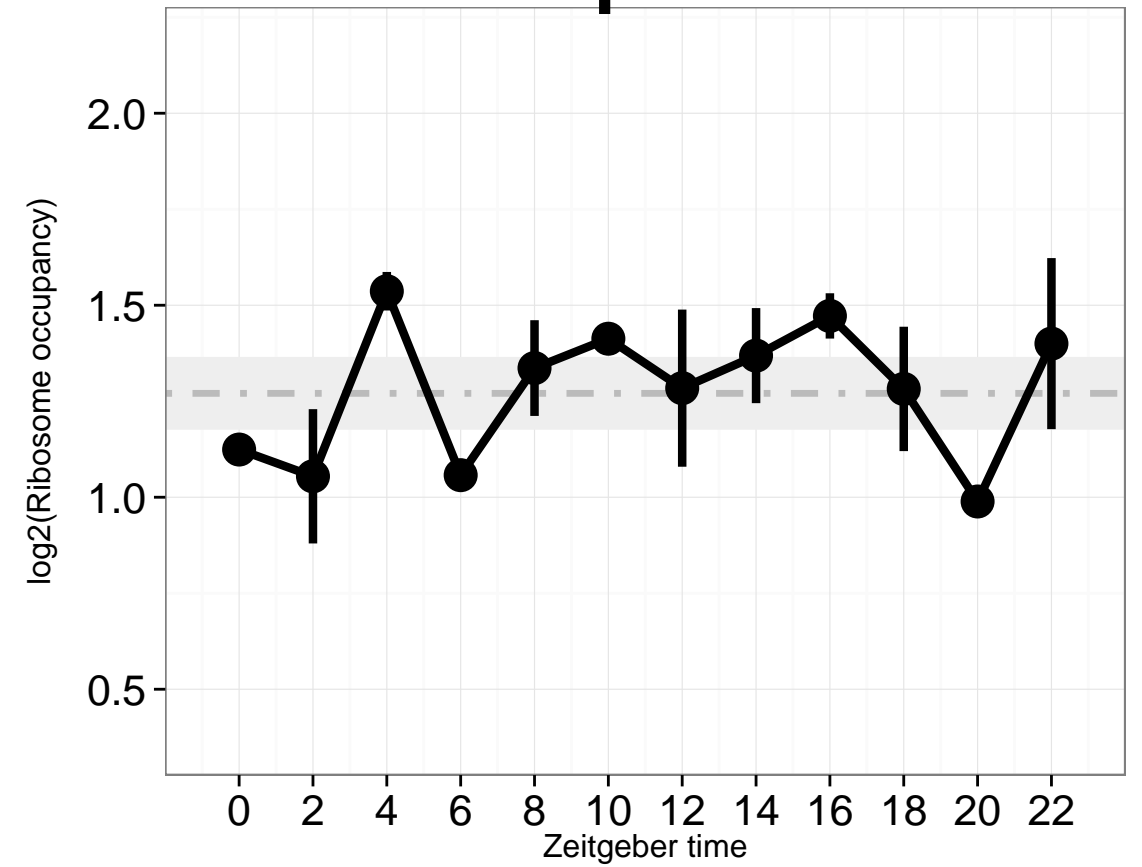

Supplement: Supplementary file 9514 [file 1]

# Ccdc96

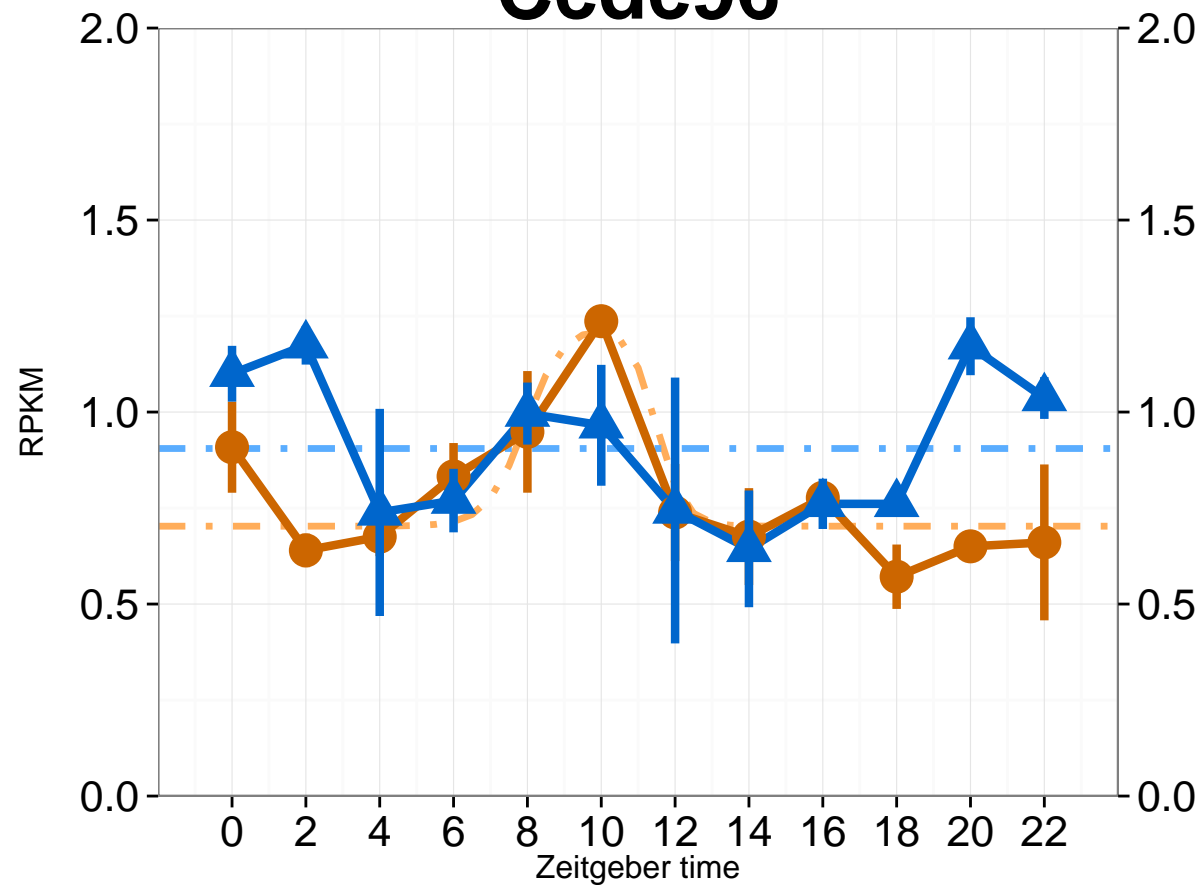

# Ccdc96

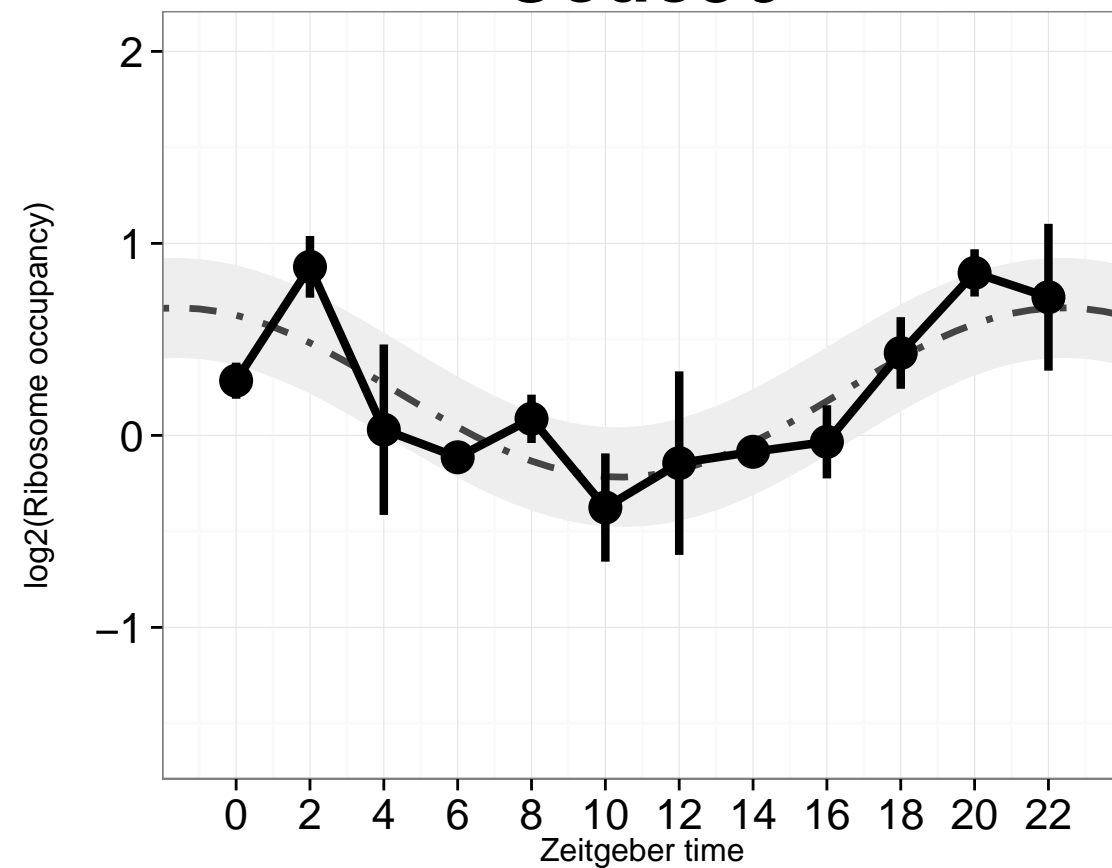

Supplement: Supplementary file 9515 [file 1]

## Cebpg

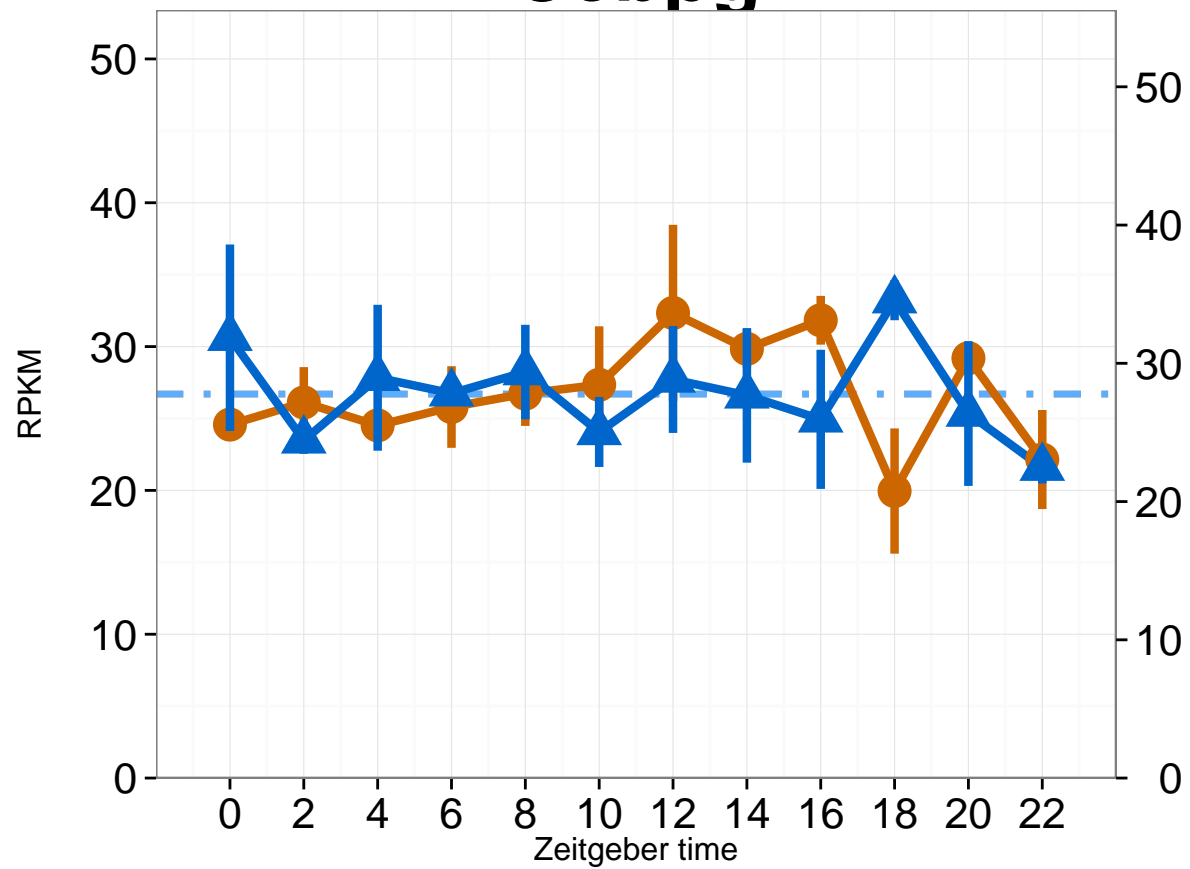

## Cebpg

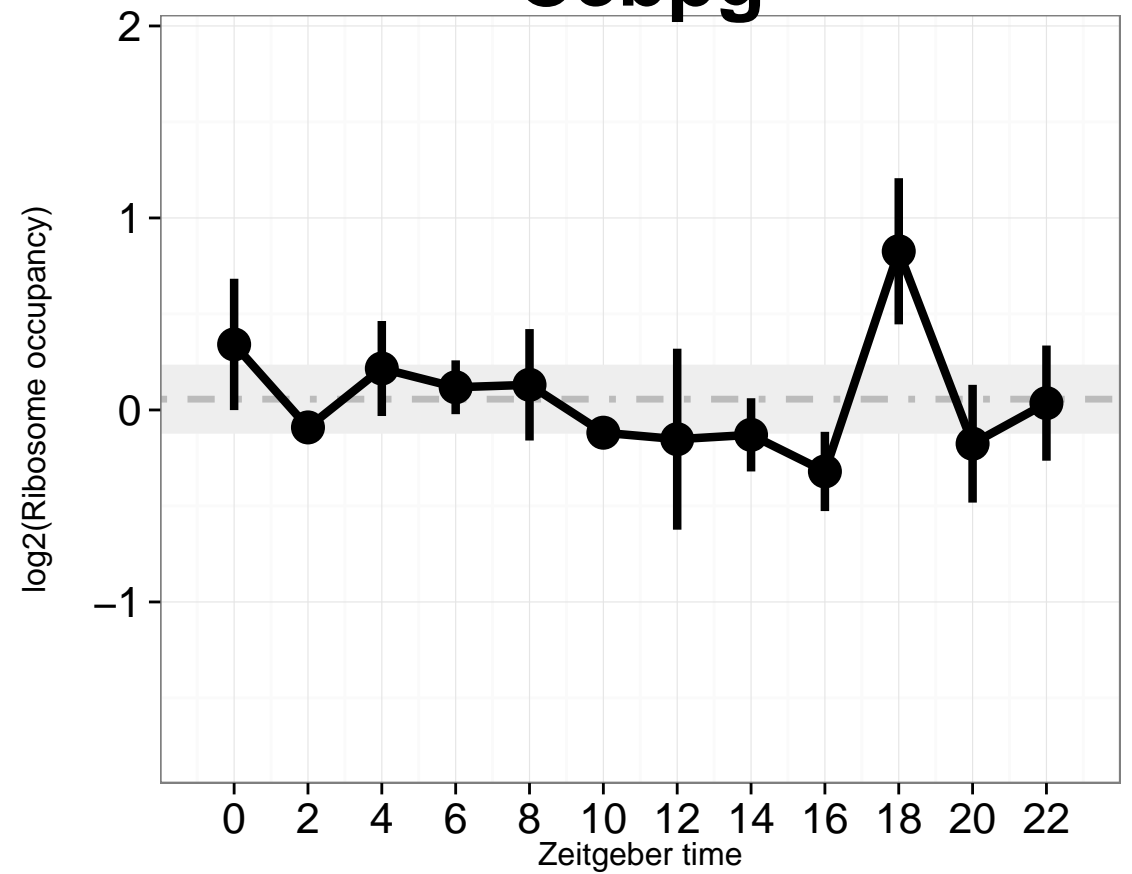

Supplement: Supplementary file 9516 [file 1]

## Ptpn2

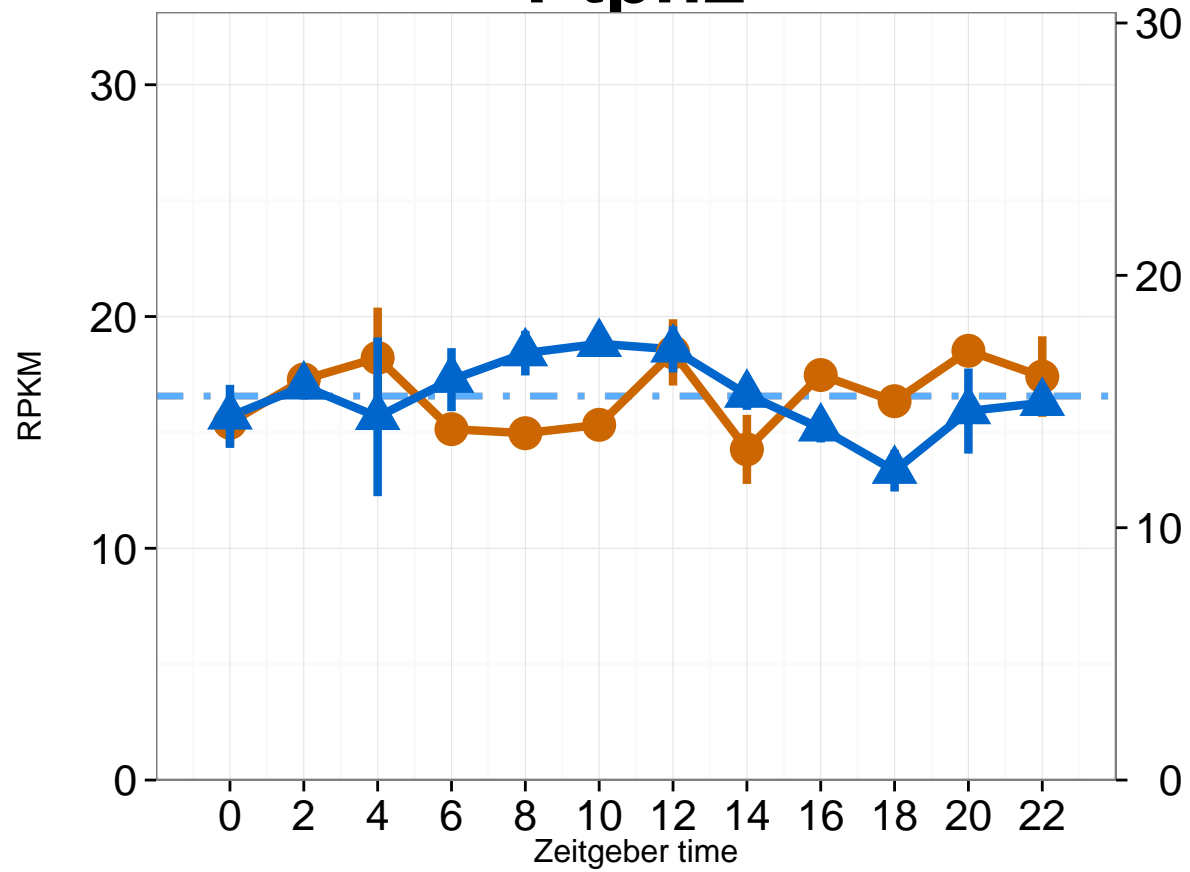

## Ptpn2

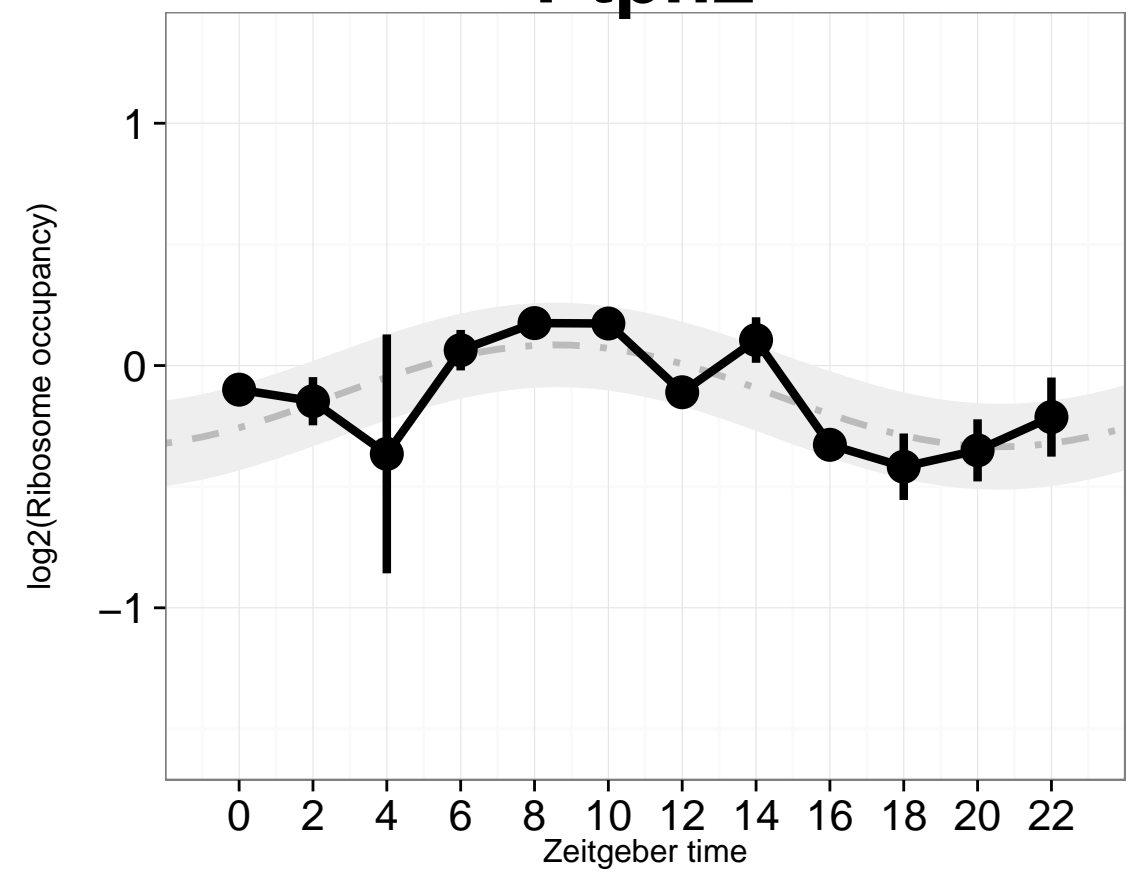

Supplement: Supplementary file 9517 [file 1]

# Thy1

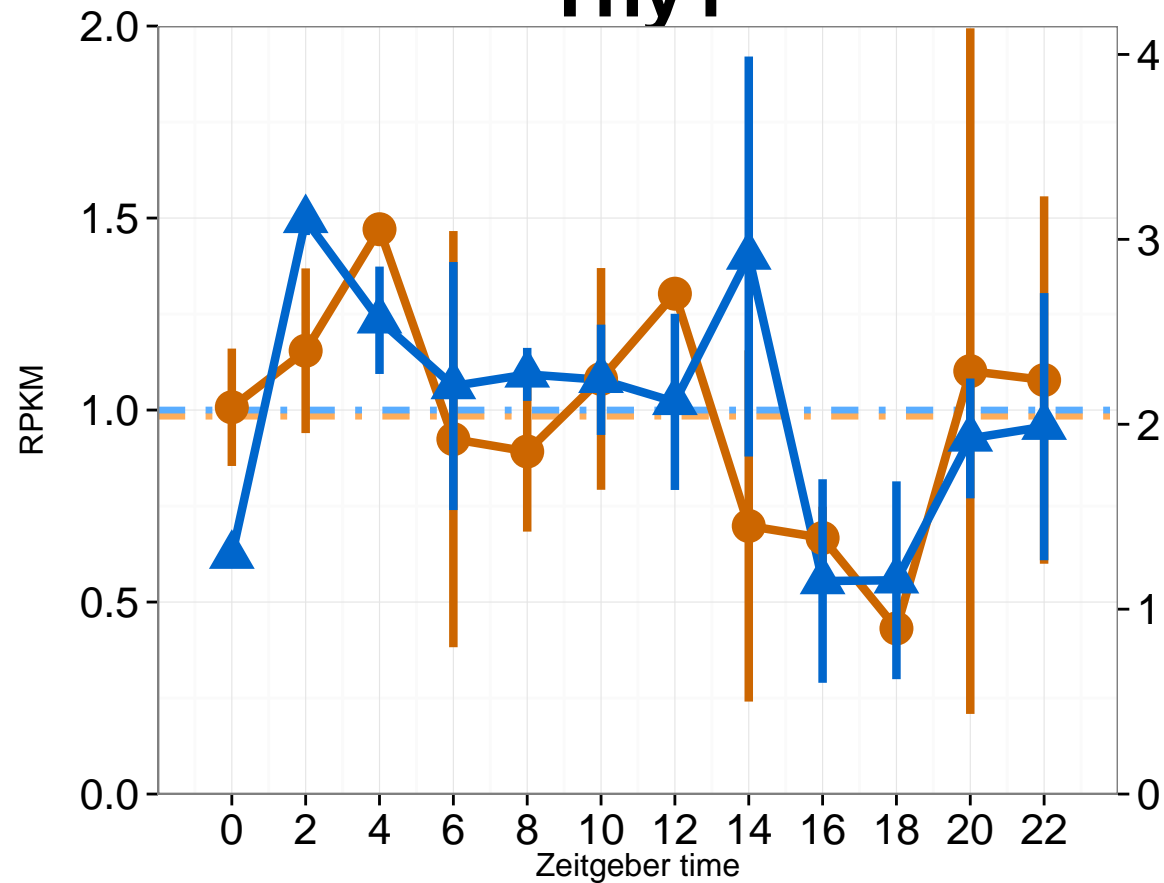

# Thy1

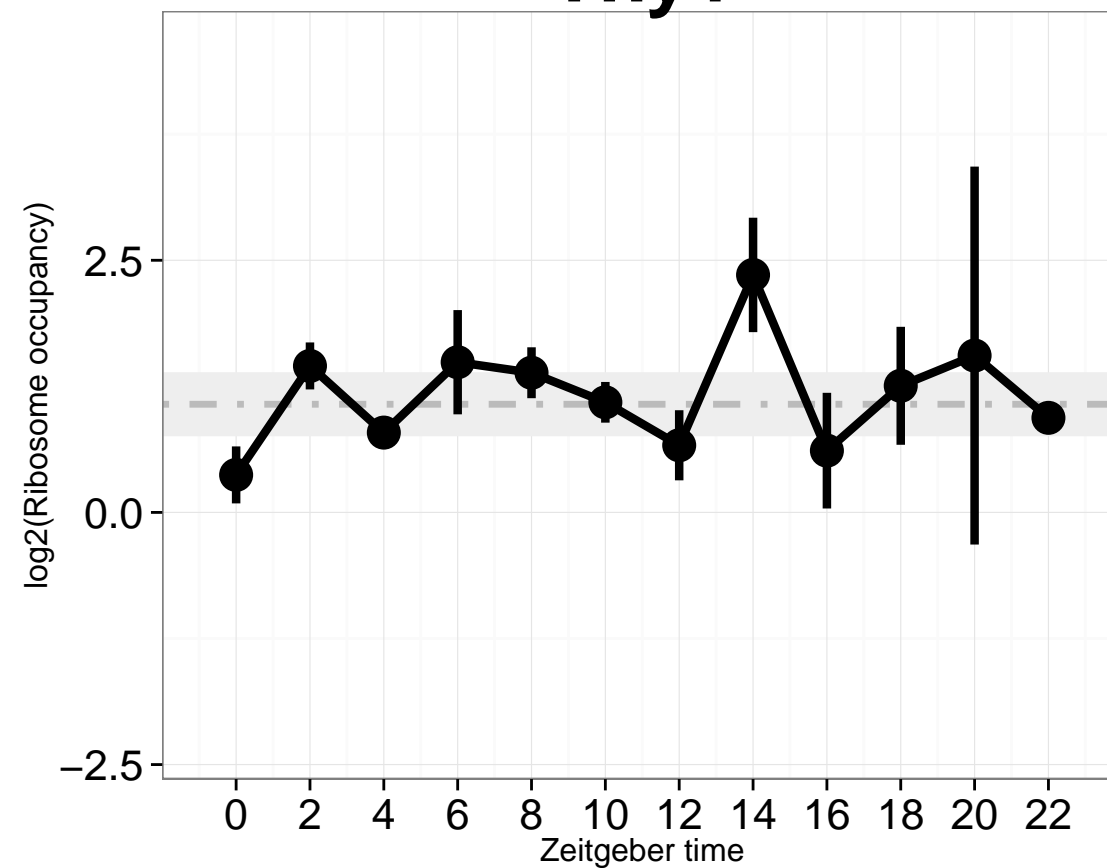

Supplement: Supplementary file 9518 [file 1]

# Slc37a4

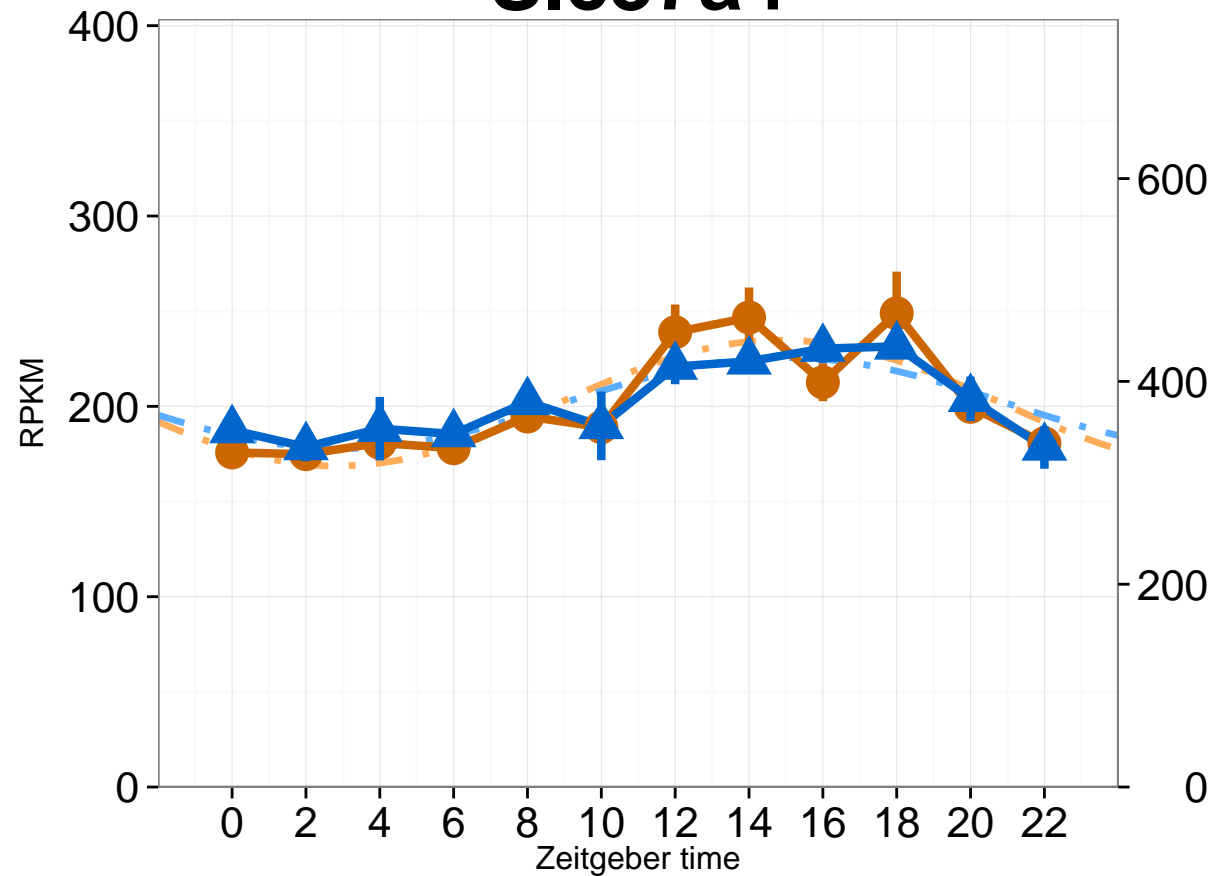

# Slc37a4

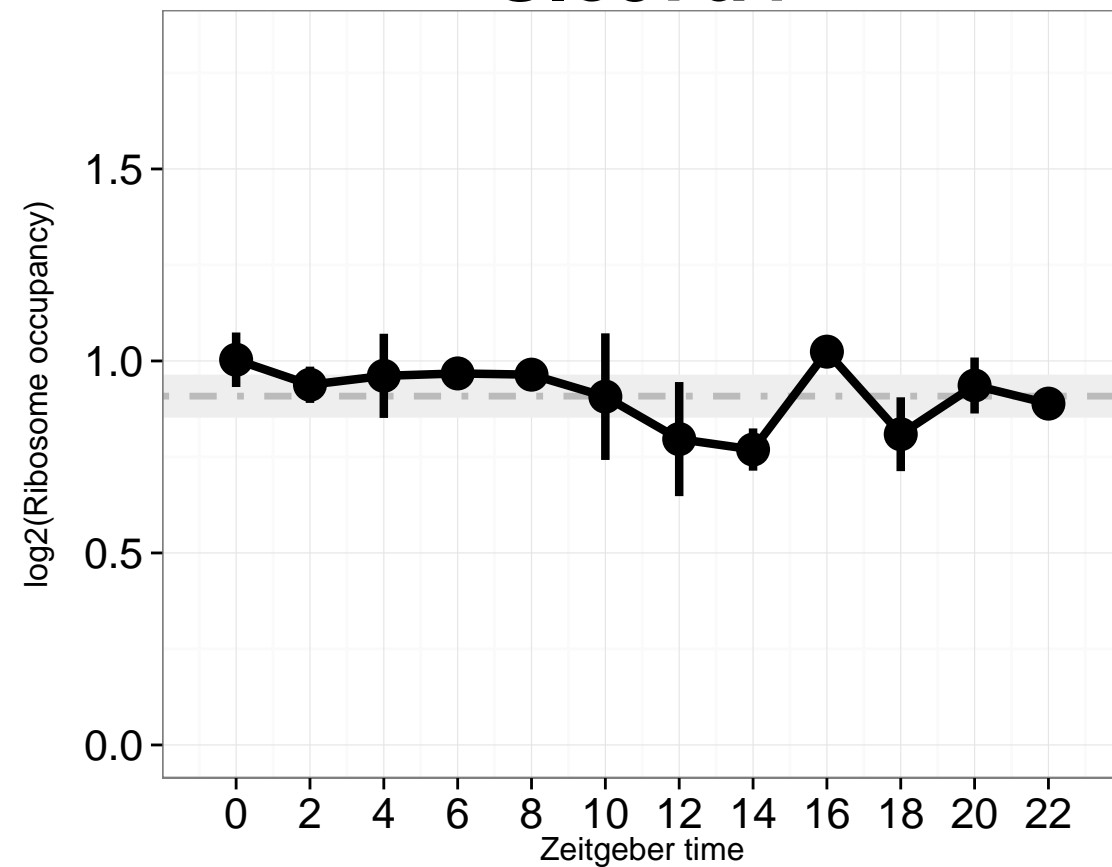

Supplement: Supplementary file 9519 [file 1]

# Fgd2

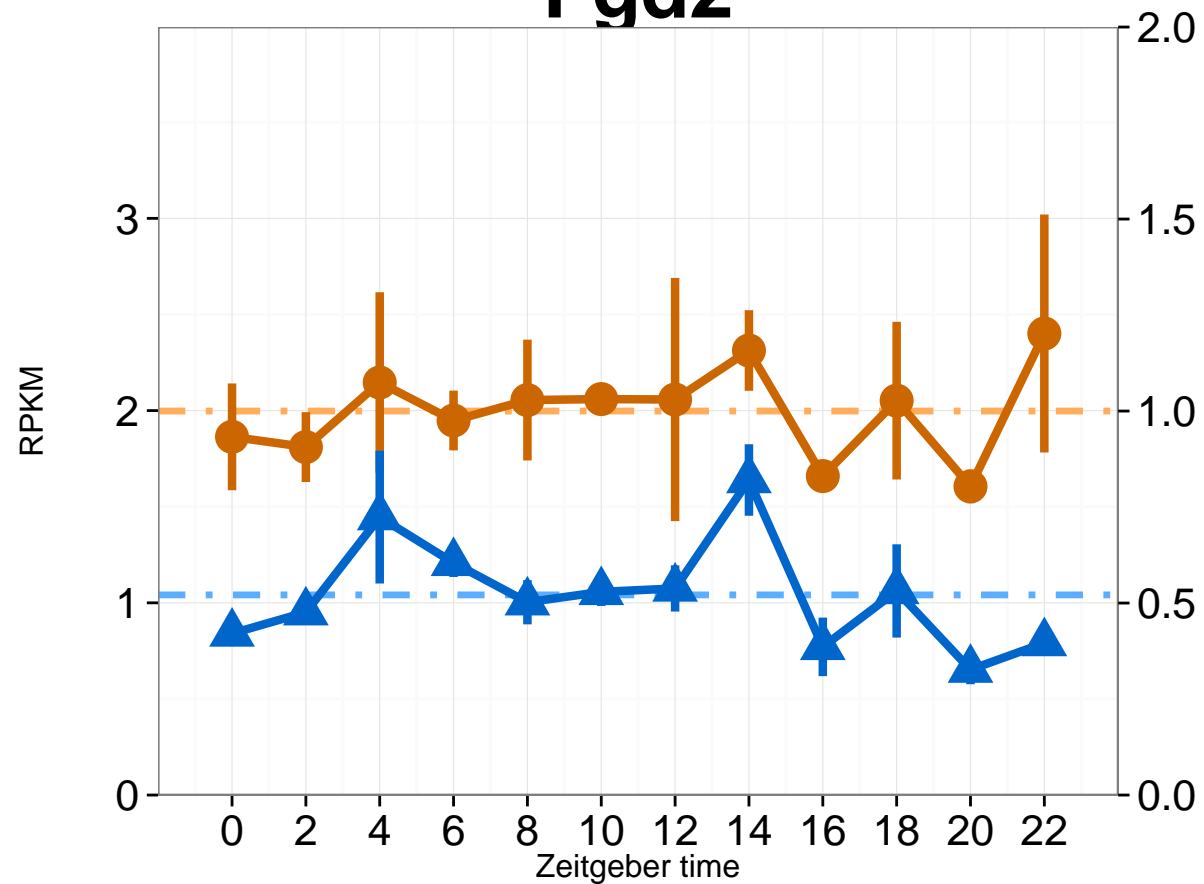

# Fgd2

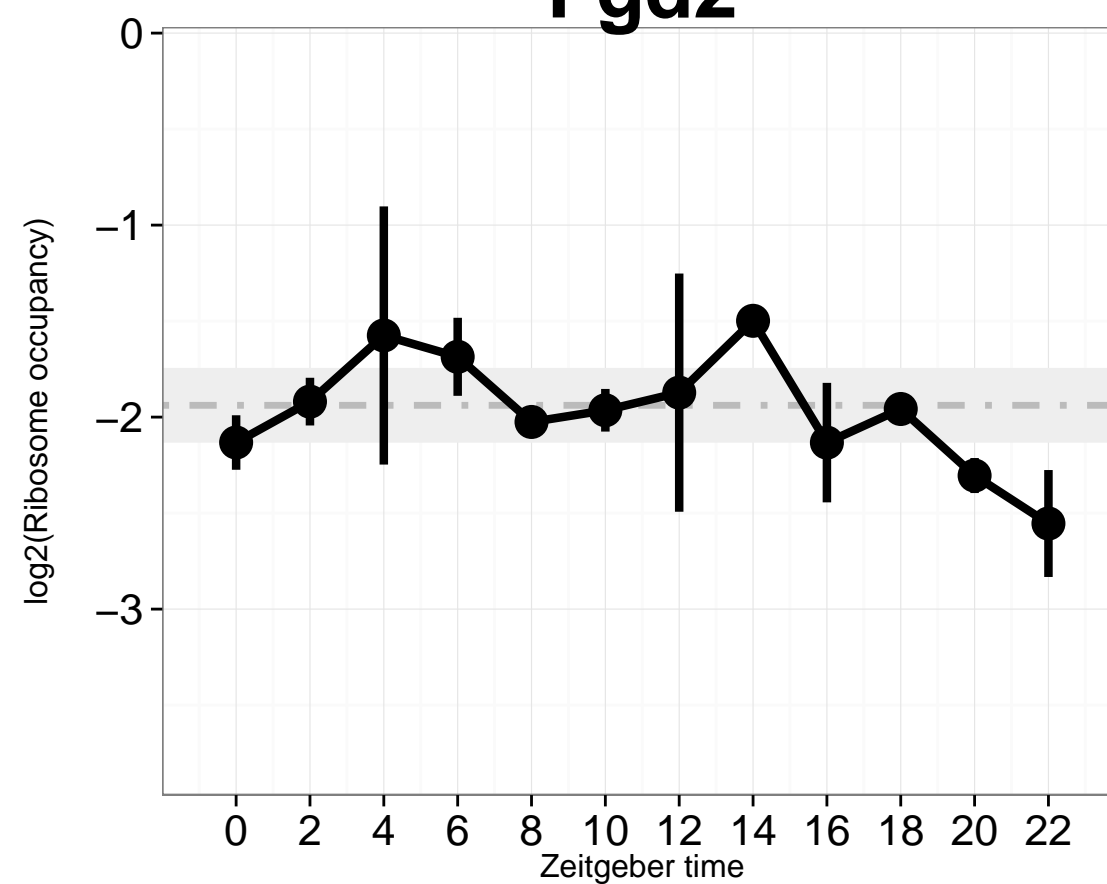

Supplement: Supplementary file 9520 [file 1]

## Ilkap

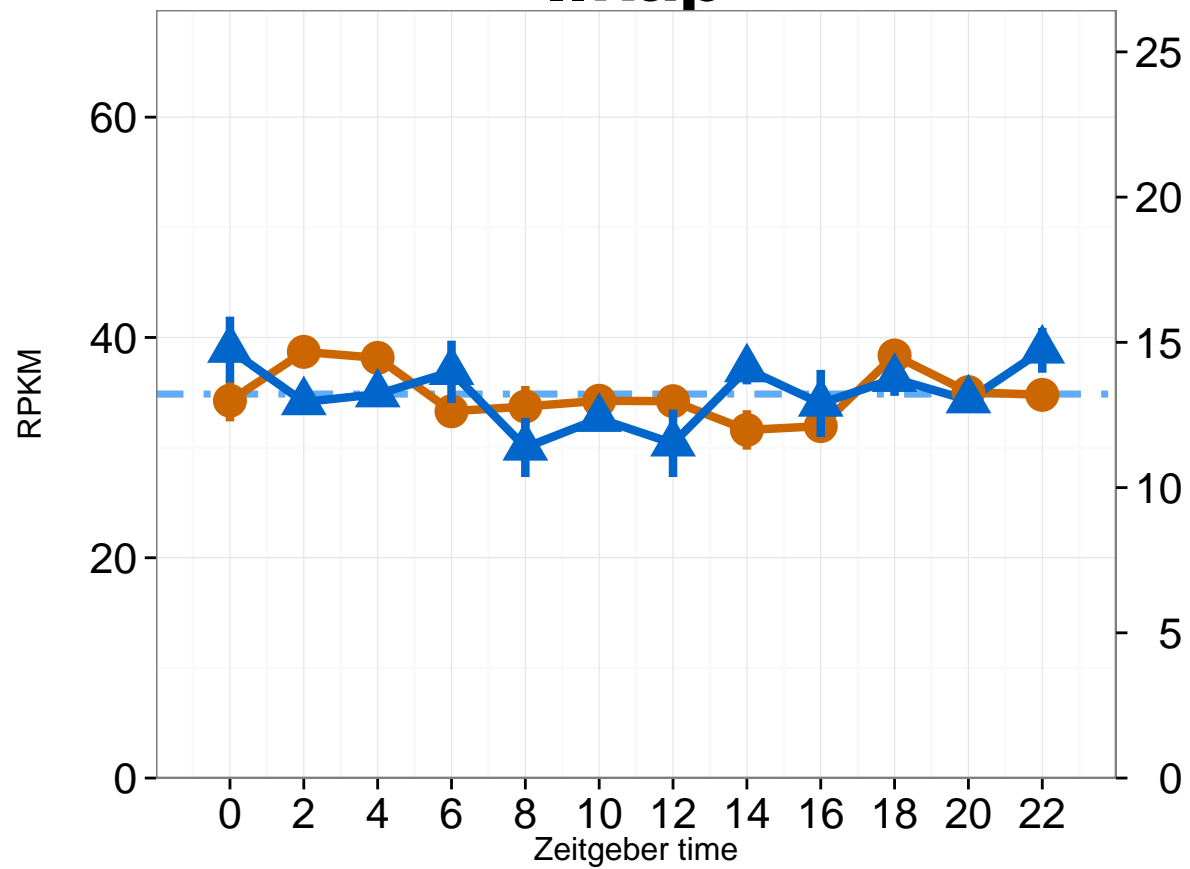

## Ilkap

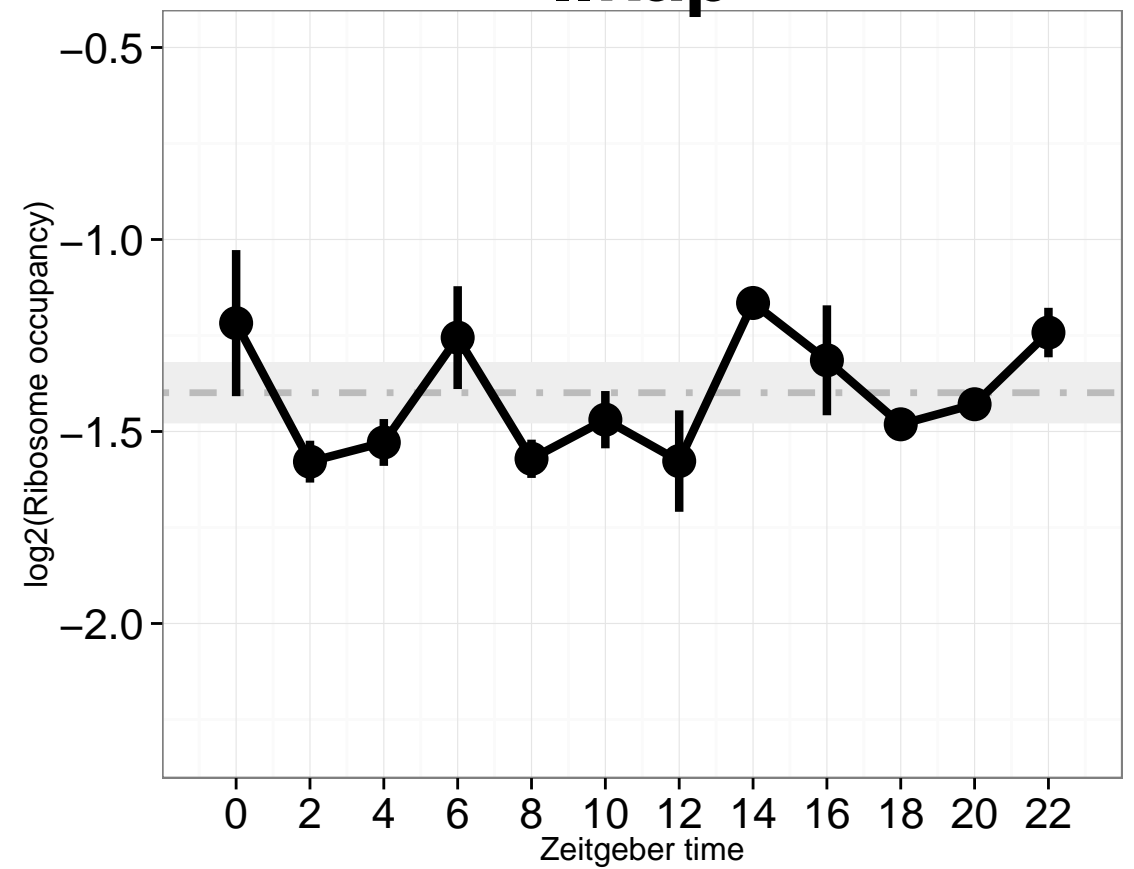

Supplement: Supplementary file 9521 [file 1]

## Gnaz

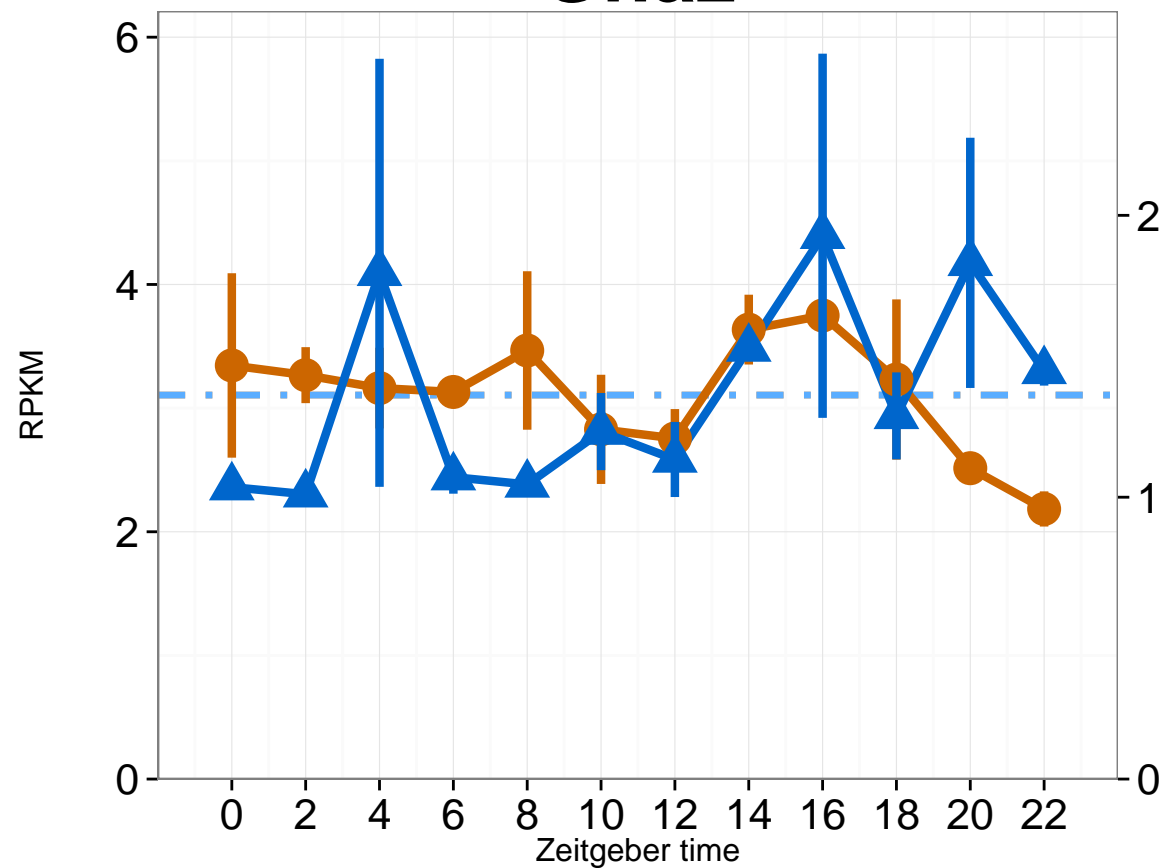

## Gnaz

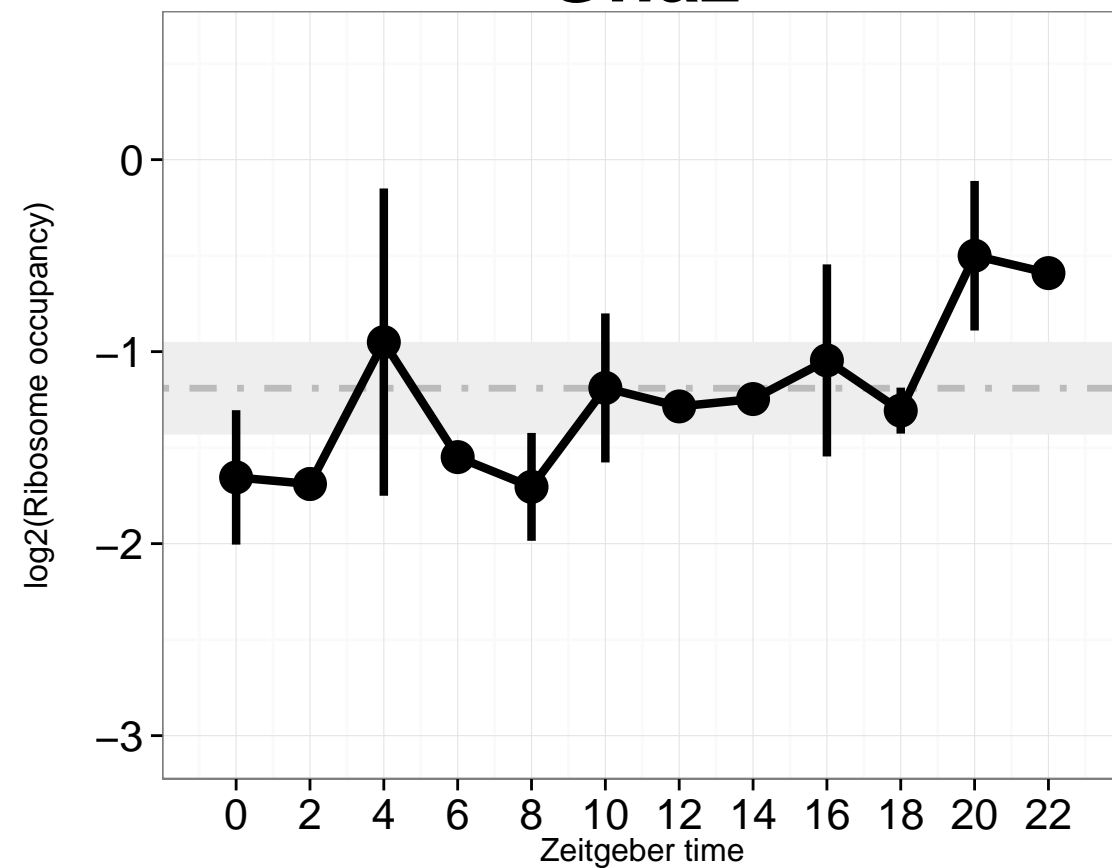

Supplement: Supplementary file 9522 [file 1]

**1700037C18Rik**

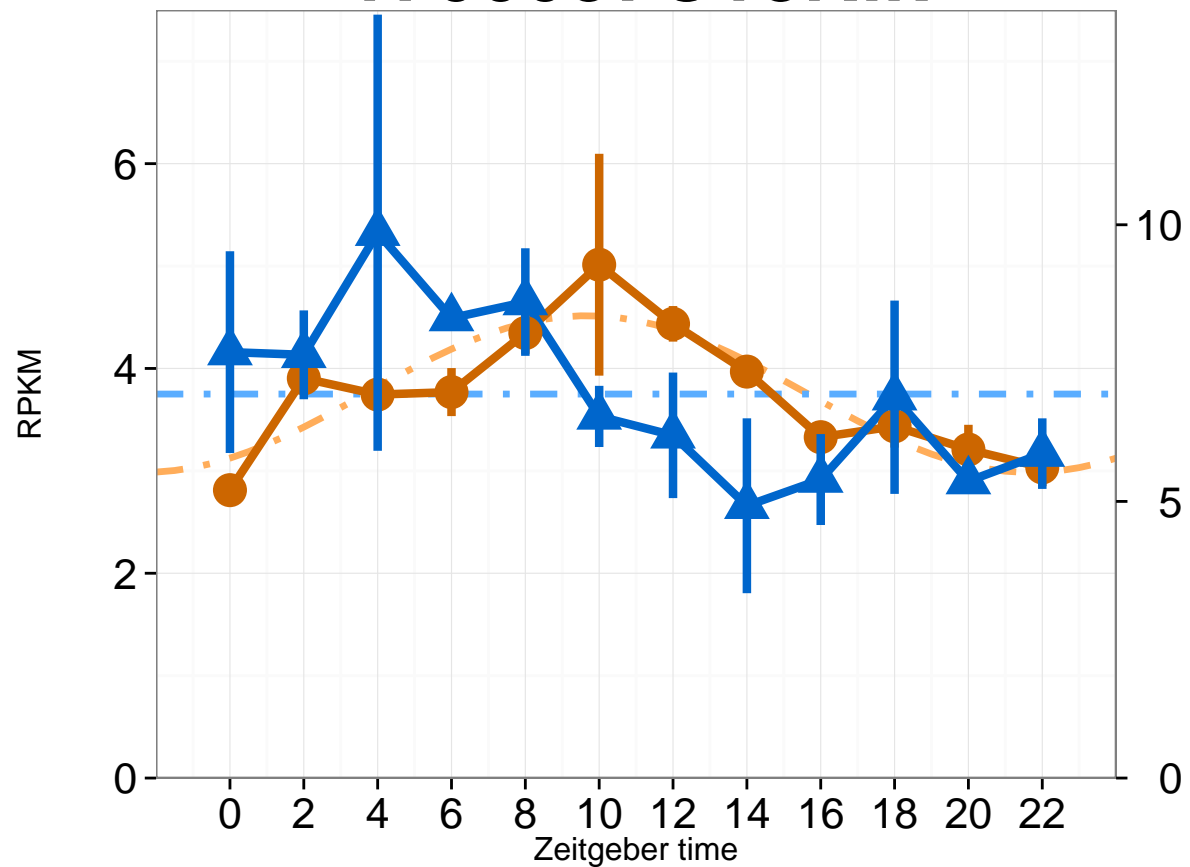

**1700037C18Rik**

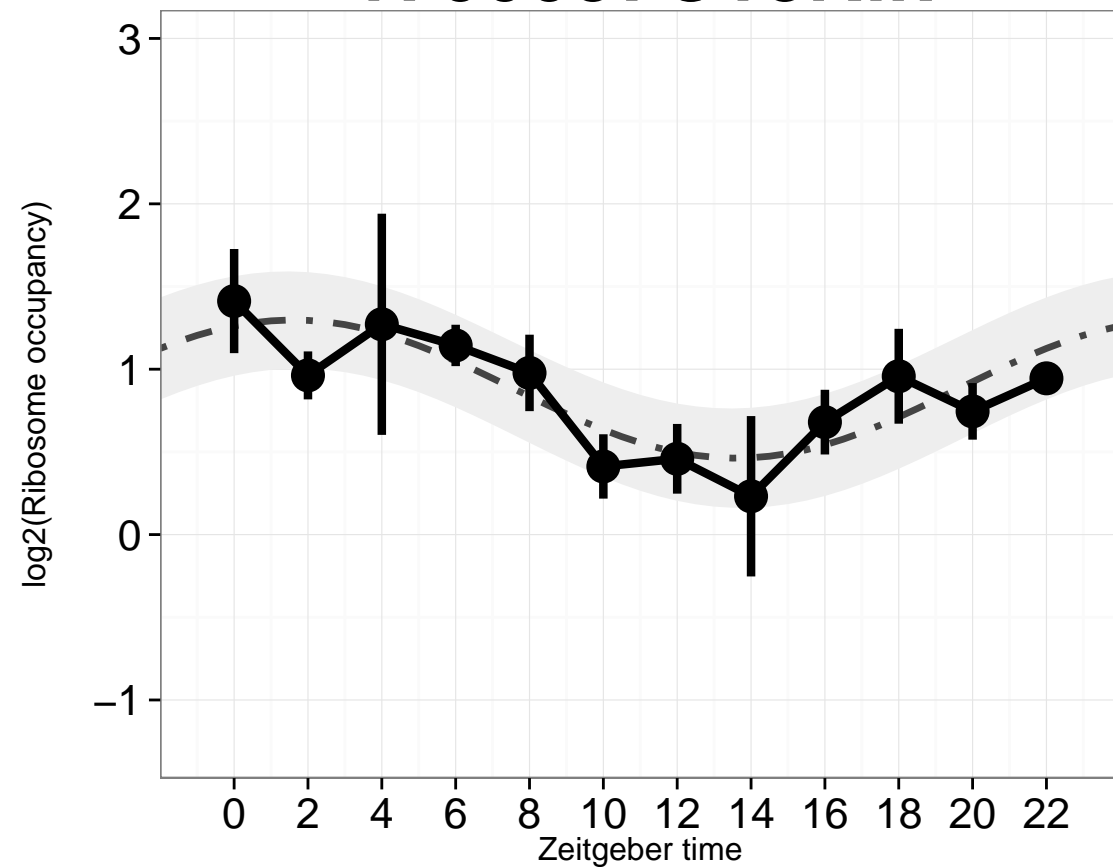

Supplement: Supplementary file 9523 [file 1]

## Gemin8

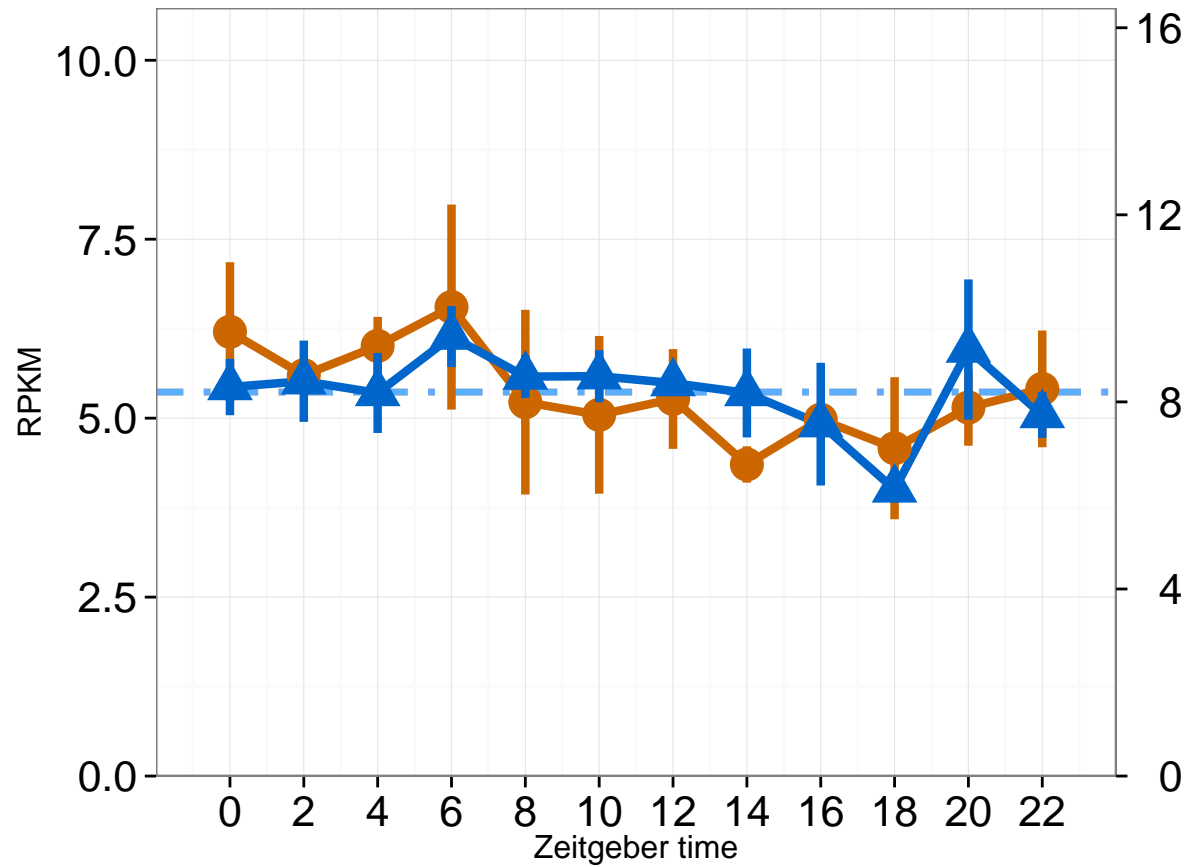

## Gemin8

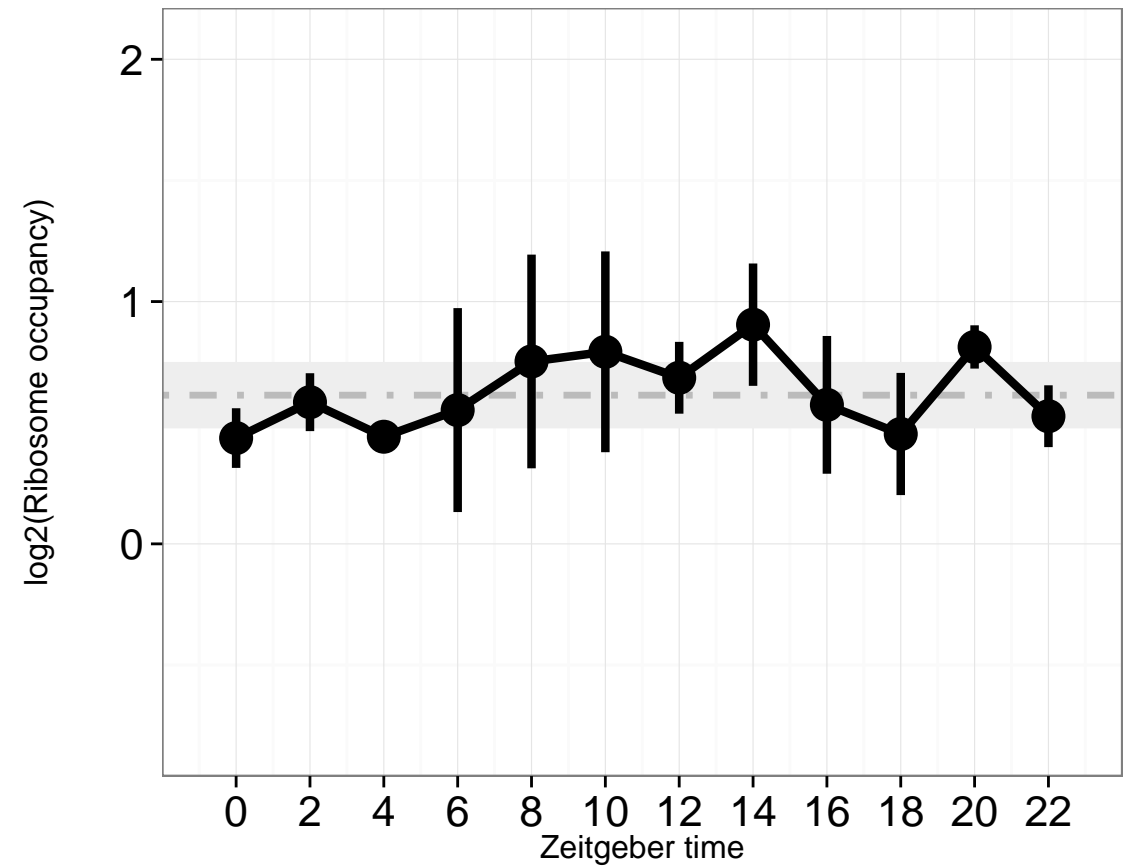

Supplement: Supplementary file 9524 [file 1]

# Spty2d1

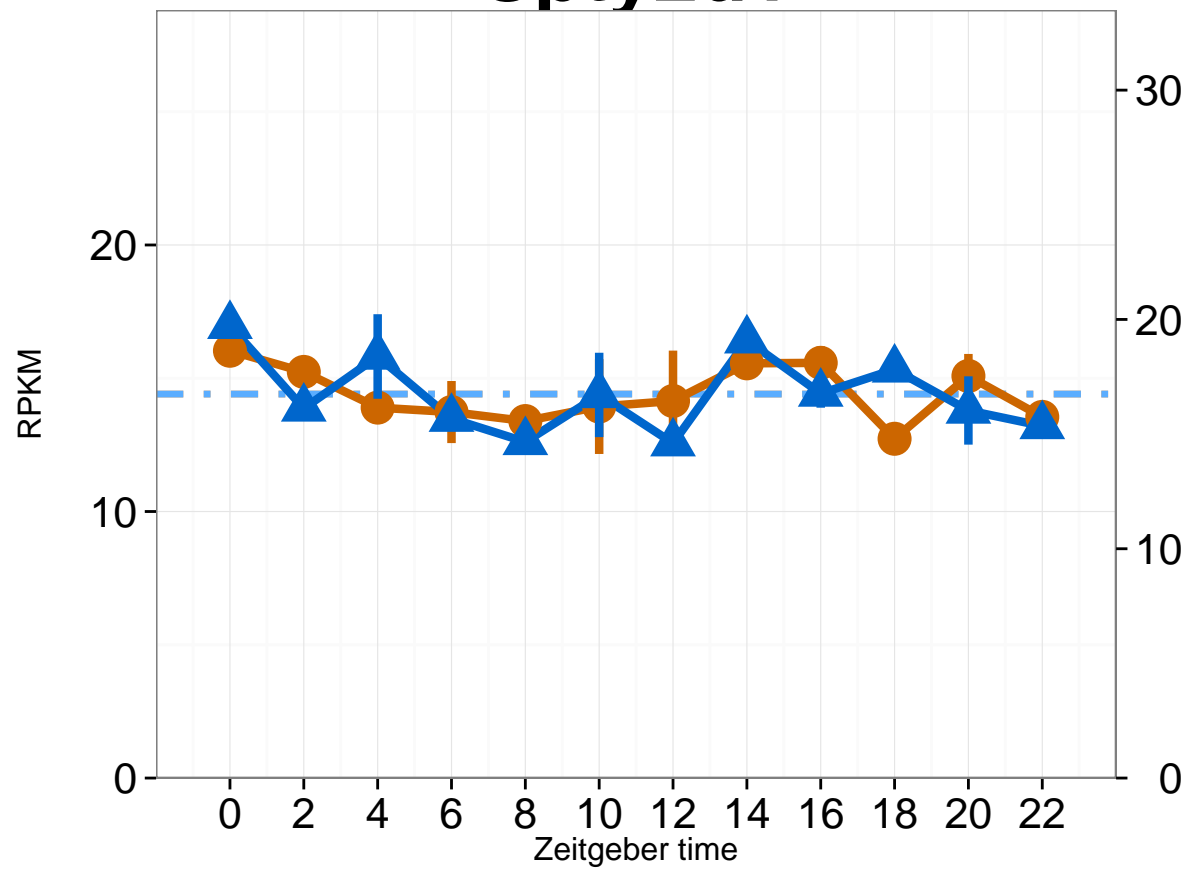

# Spty2d1

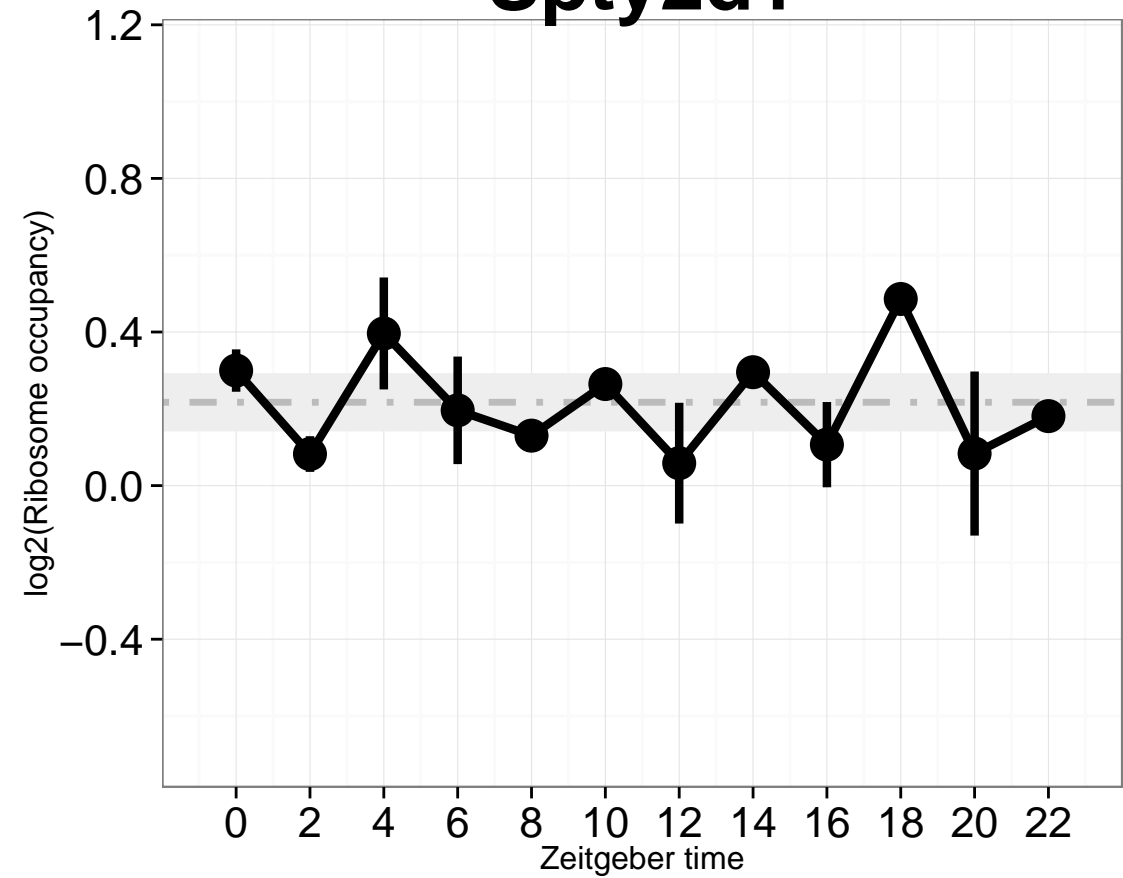

Supplement: Supplementary file 9525 [file 1]

# Pbx2

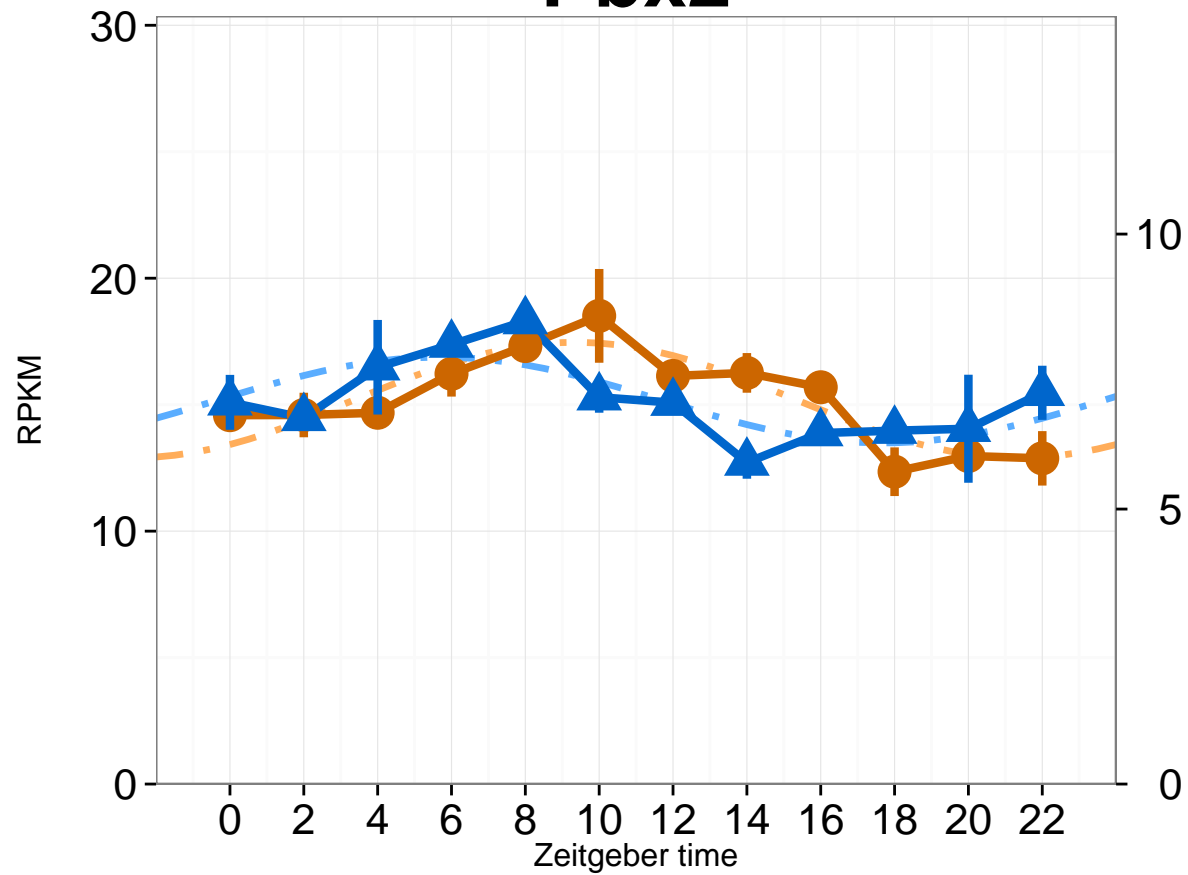

# Pbx2

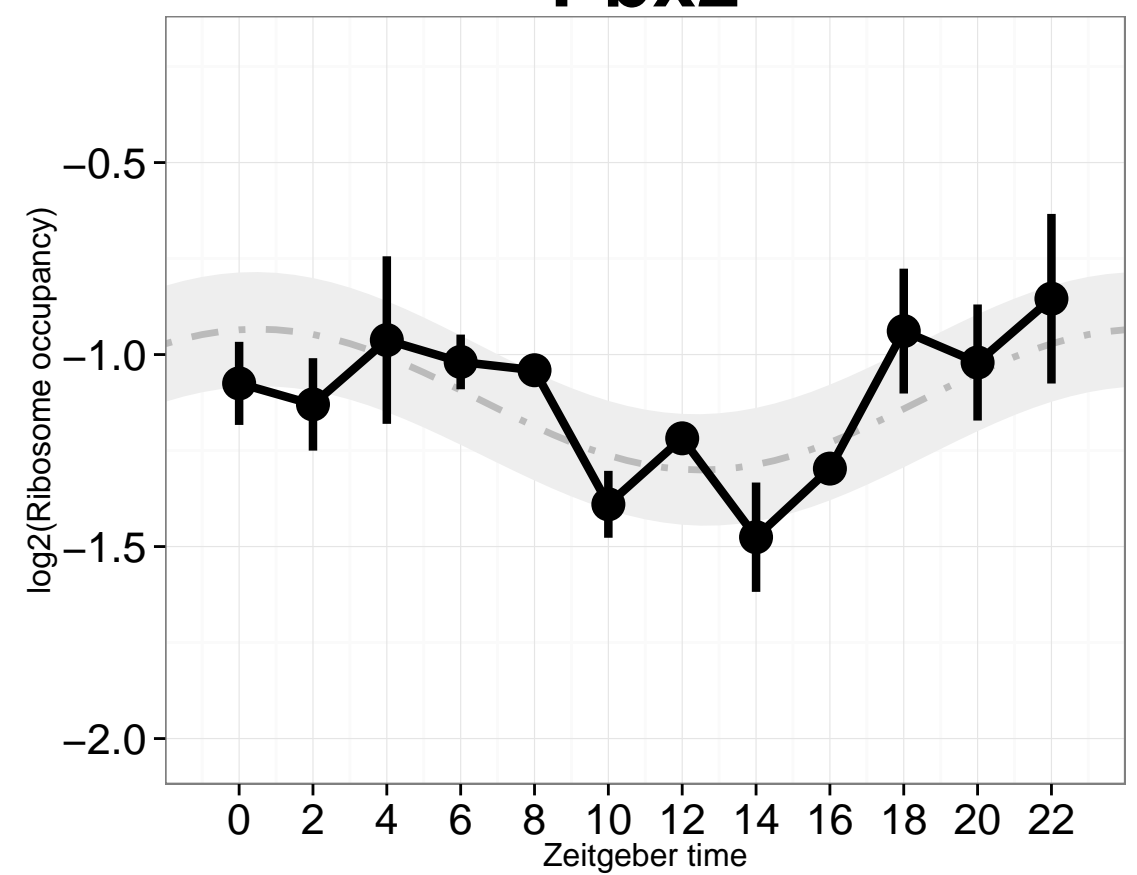

Supplement: Supplementary file 9526 [file 1]

# S100a4

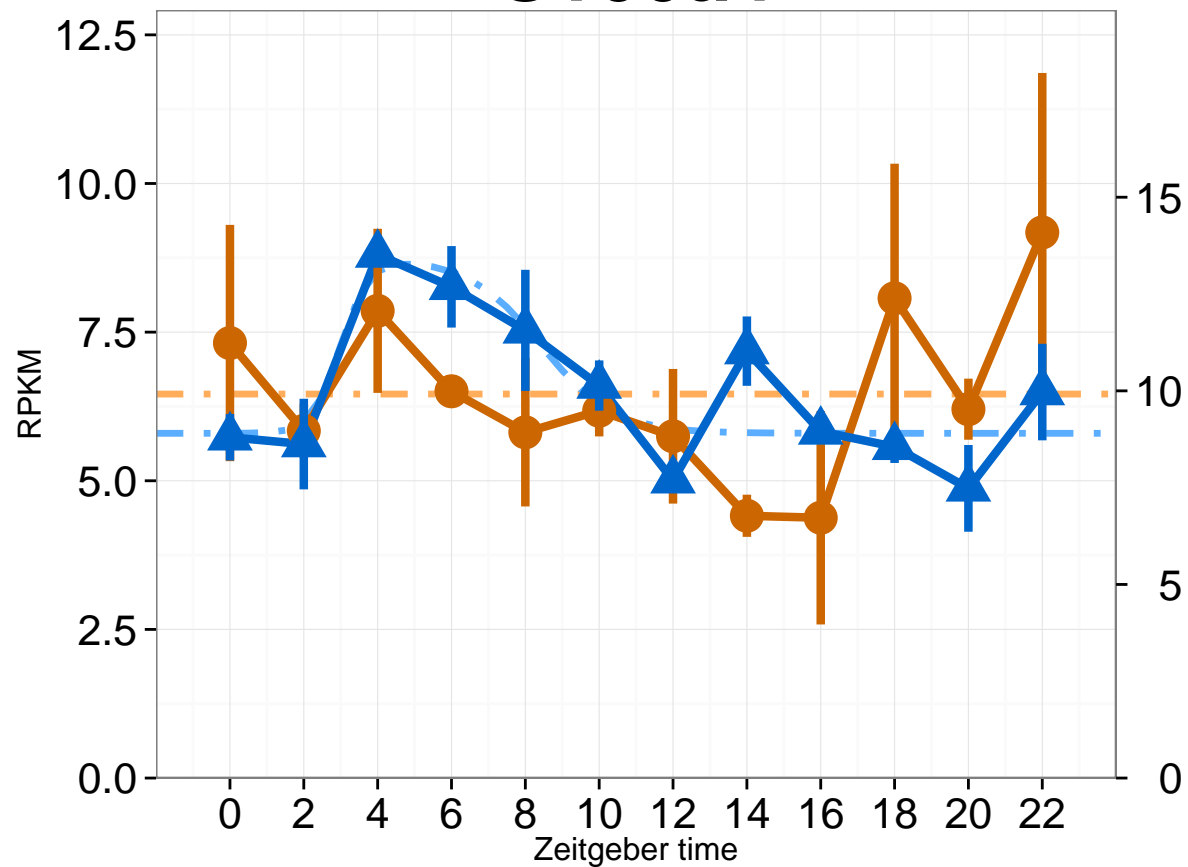

# S100a4

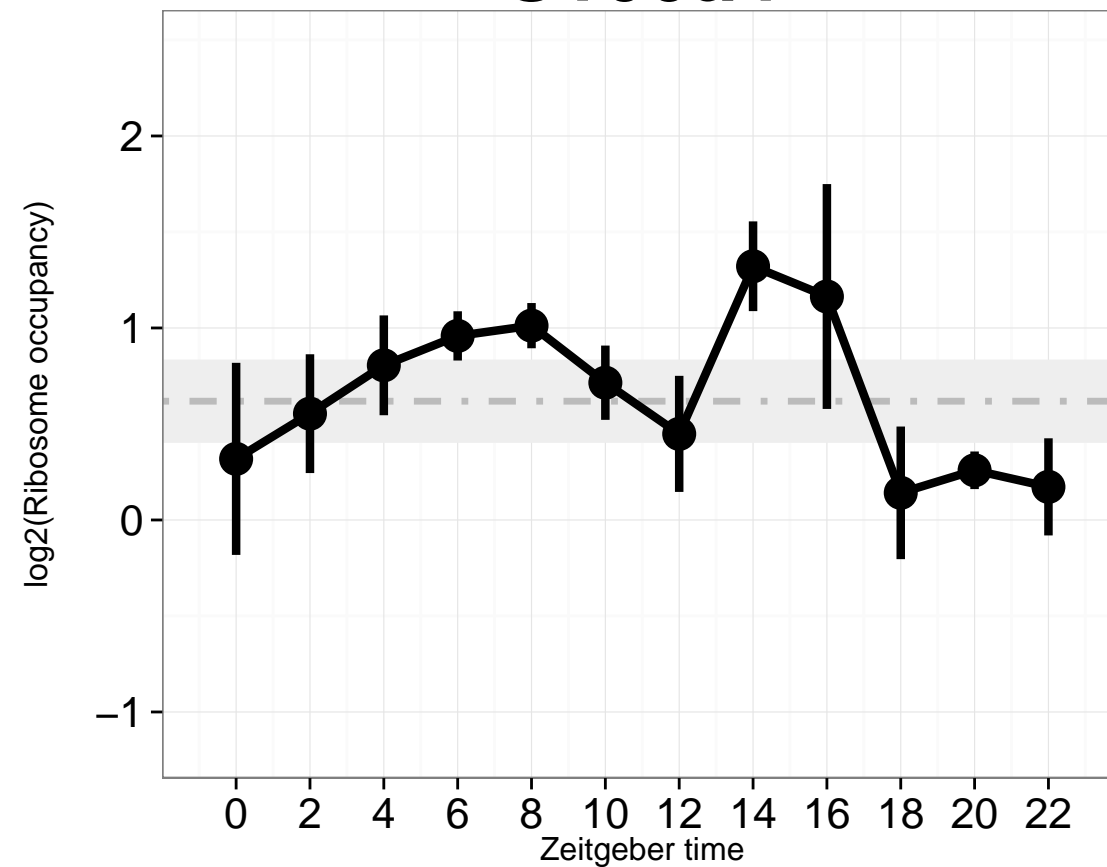

Supplement: Supplementary file 9527 [file 1]

# Extl2

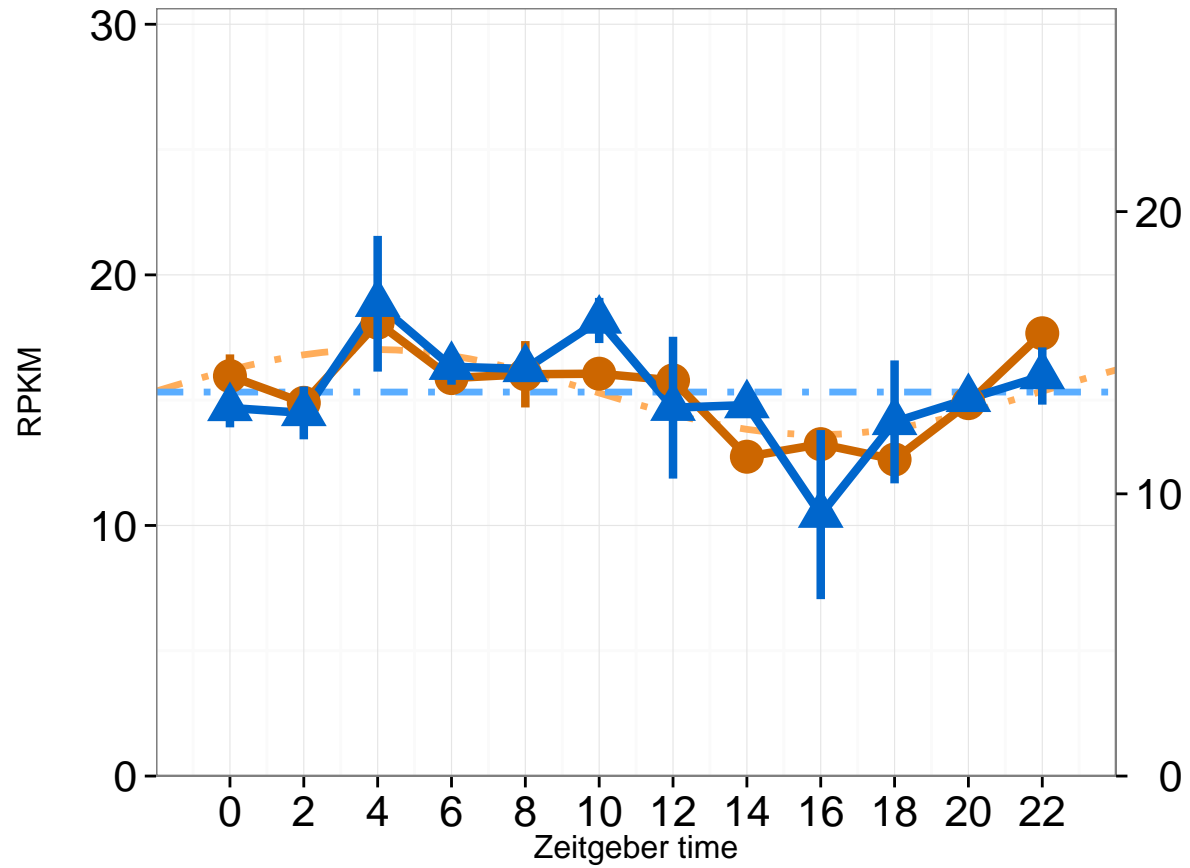

# Extl2

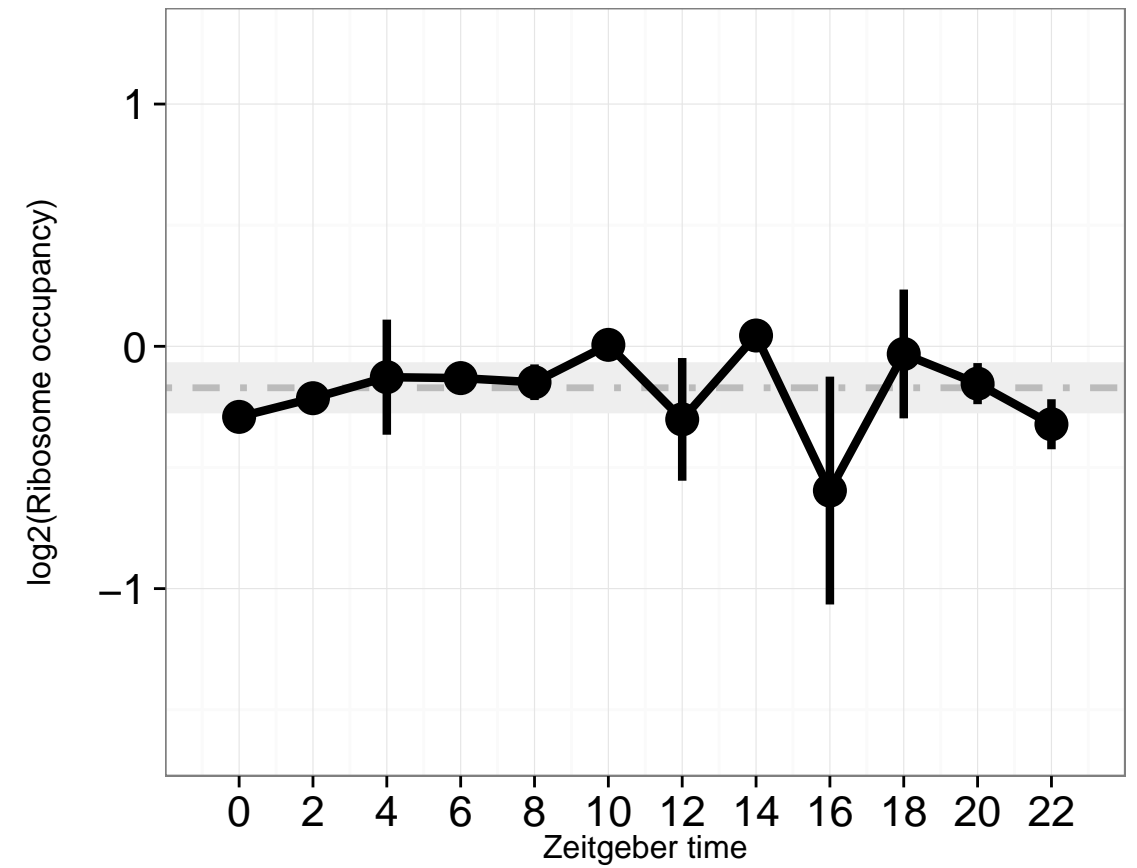

Supplement: Supplementary file 9528 [file 1]

# Smim14

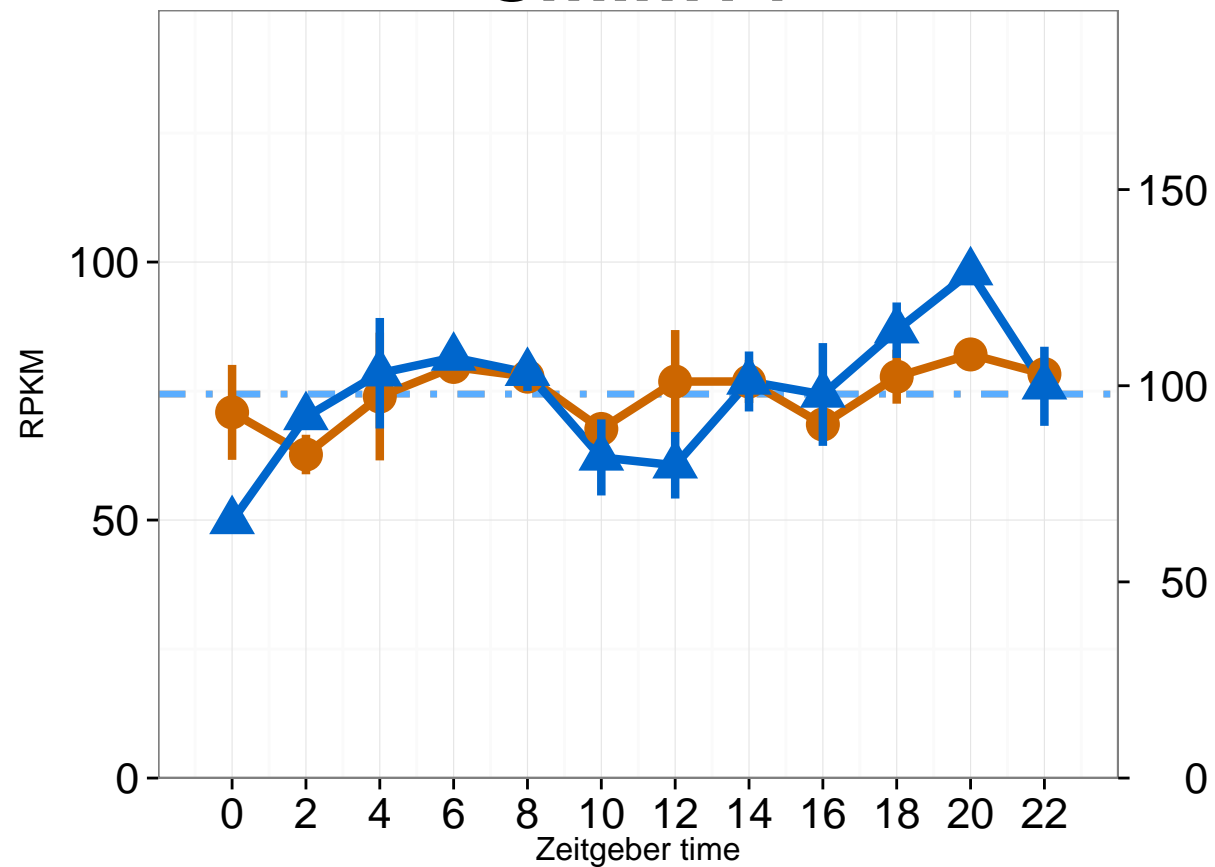

# Smim14

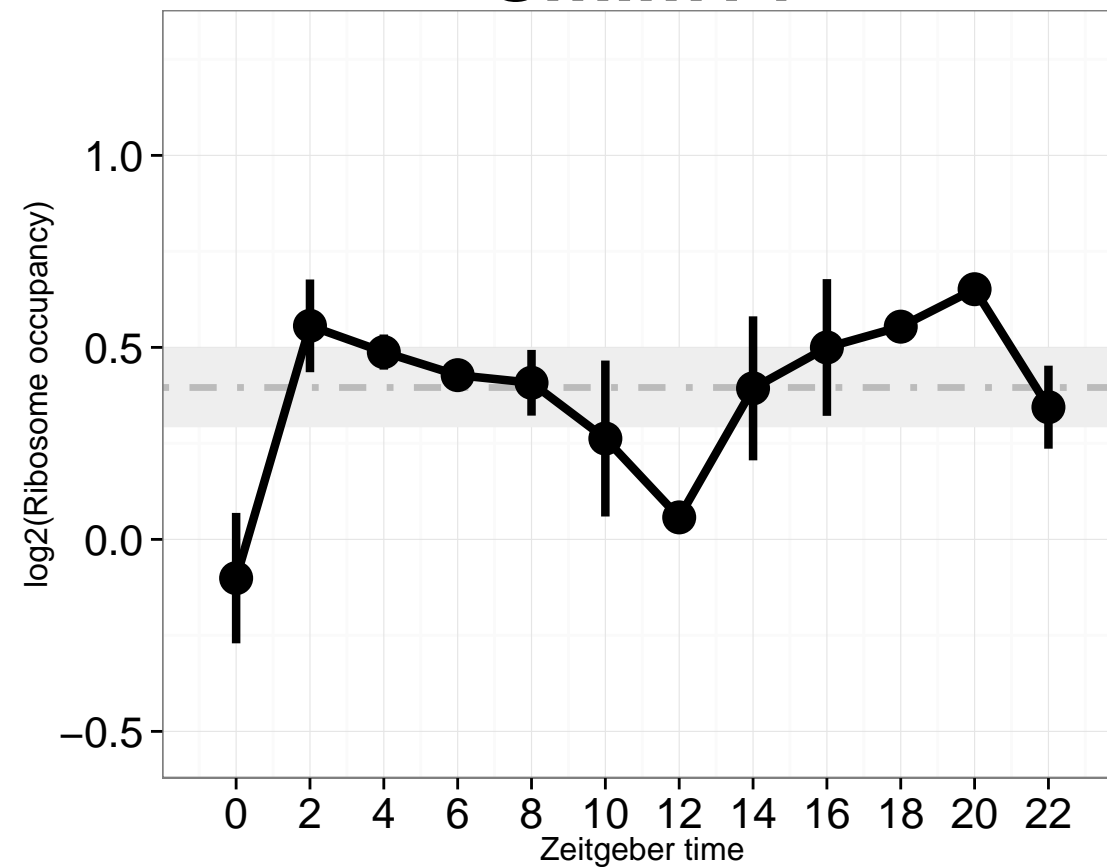

Supplement: Supplementary file 9529 [file 1]

# Timm21

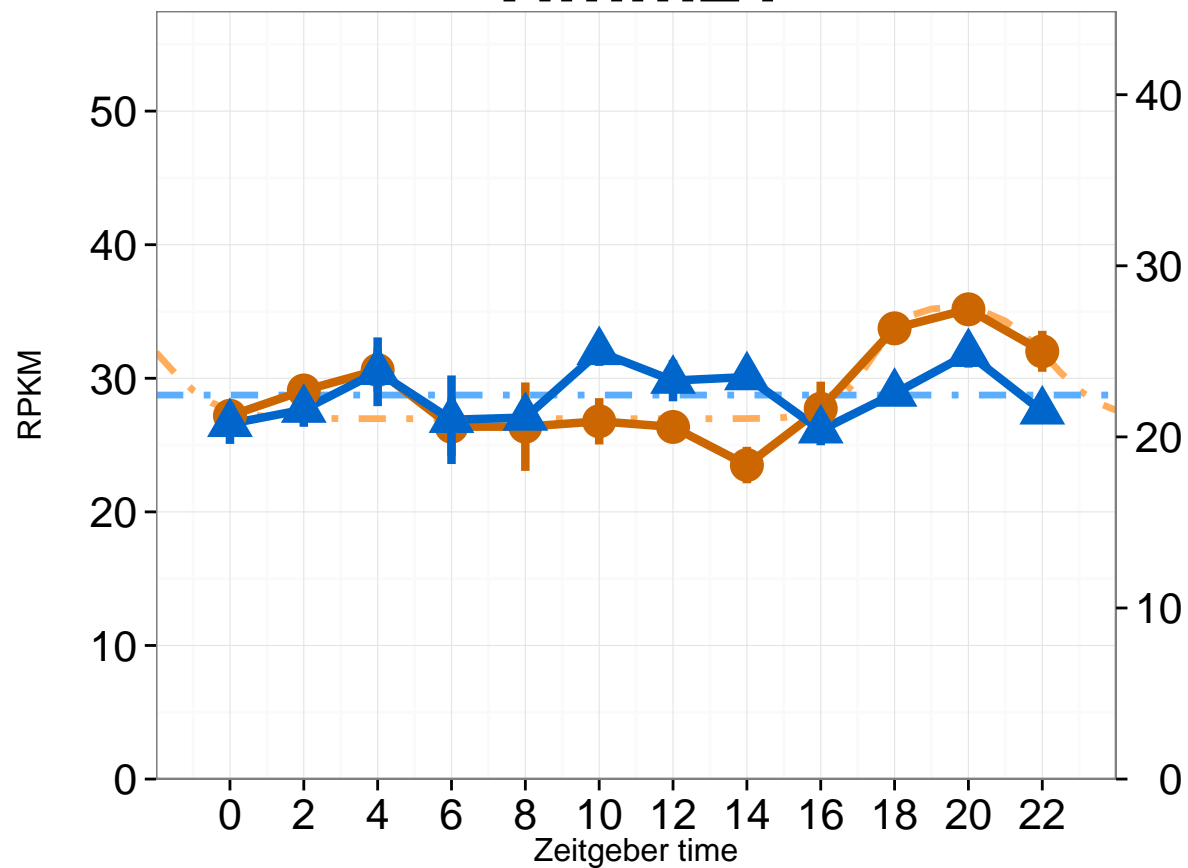

# Timm21

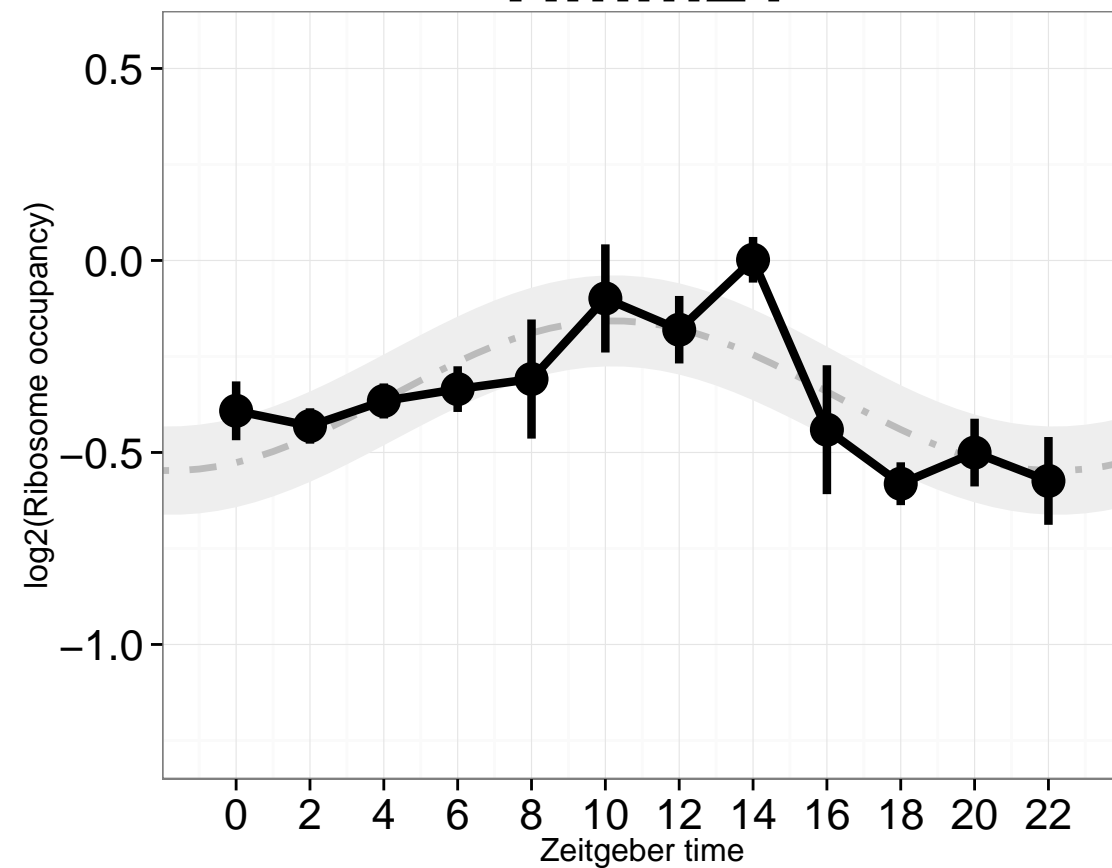

Supplement: Supplementary file 9530 [file 1]

# Dhrs1

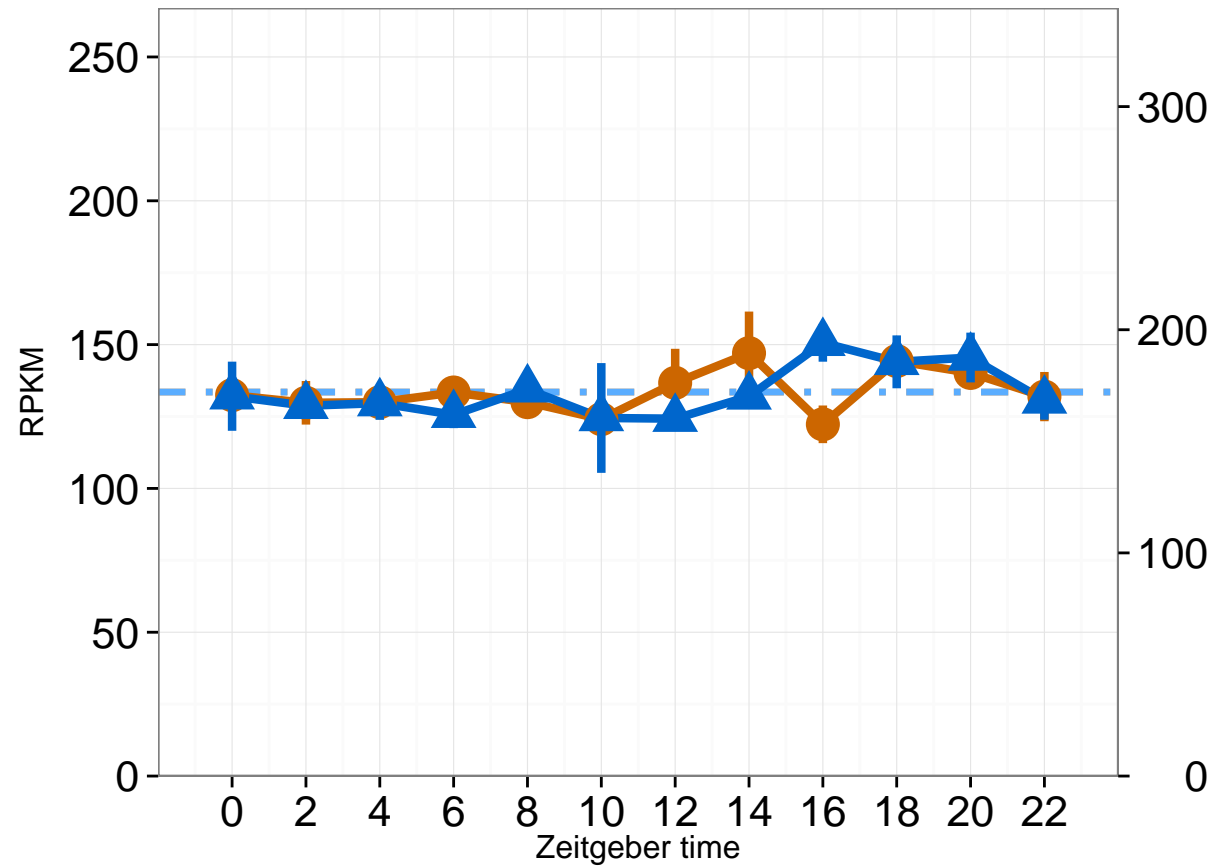

# Dhrs1

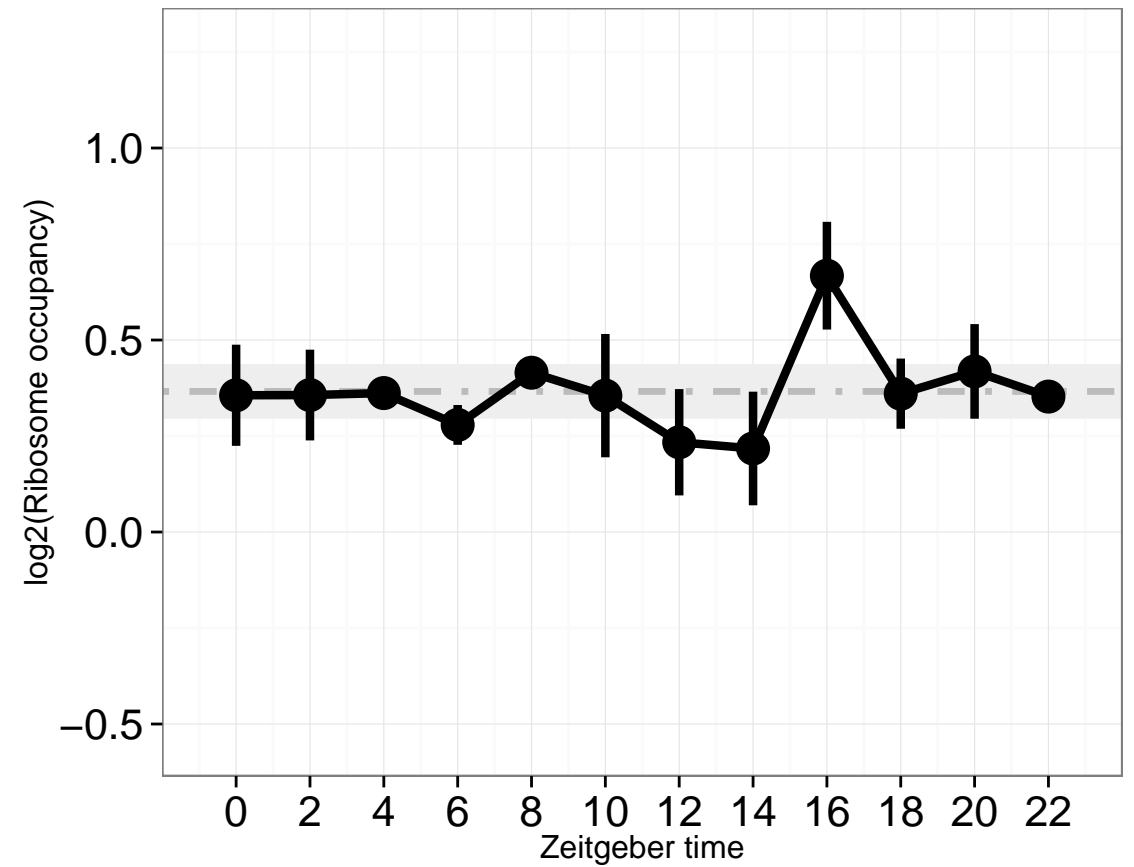

Supplement: Supplementary file 9531 [file 1]

## Aldob

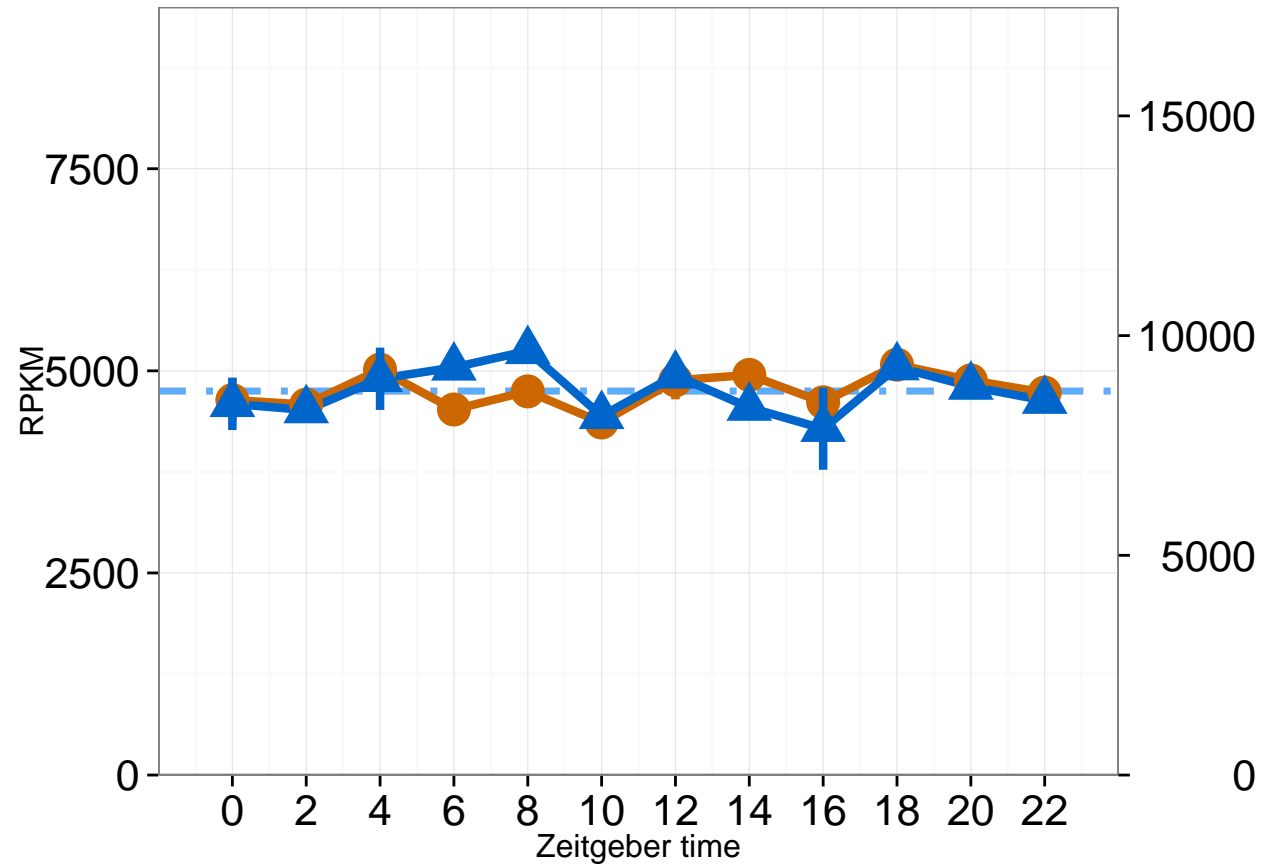

## Aldob

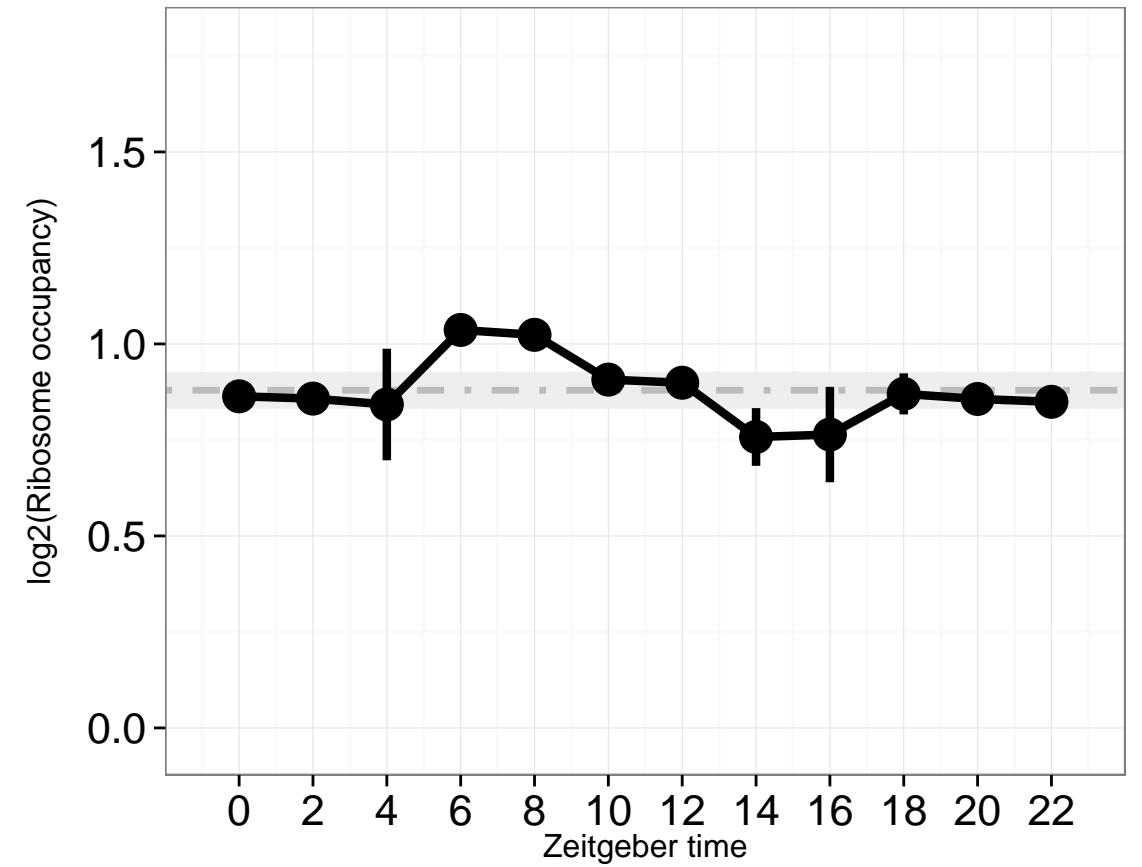

Supplement: Supplementary file 9532 [file 1]

# Aifm3

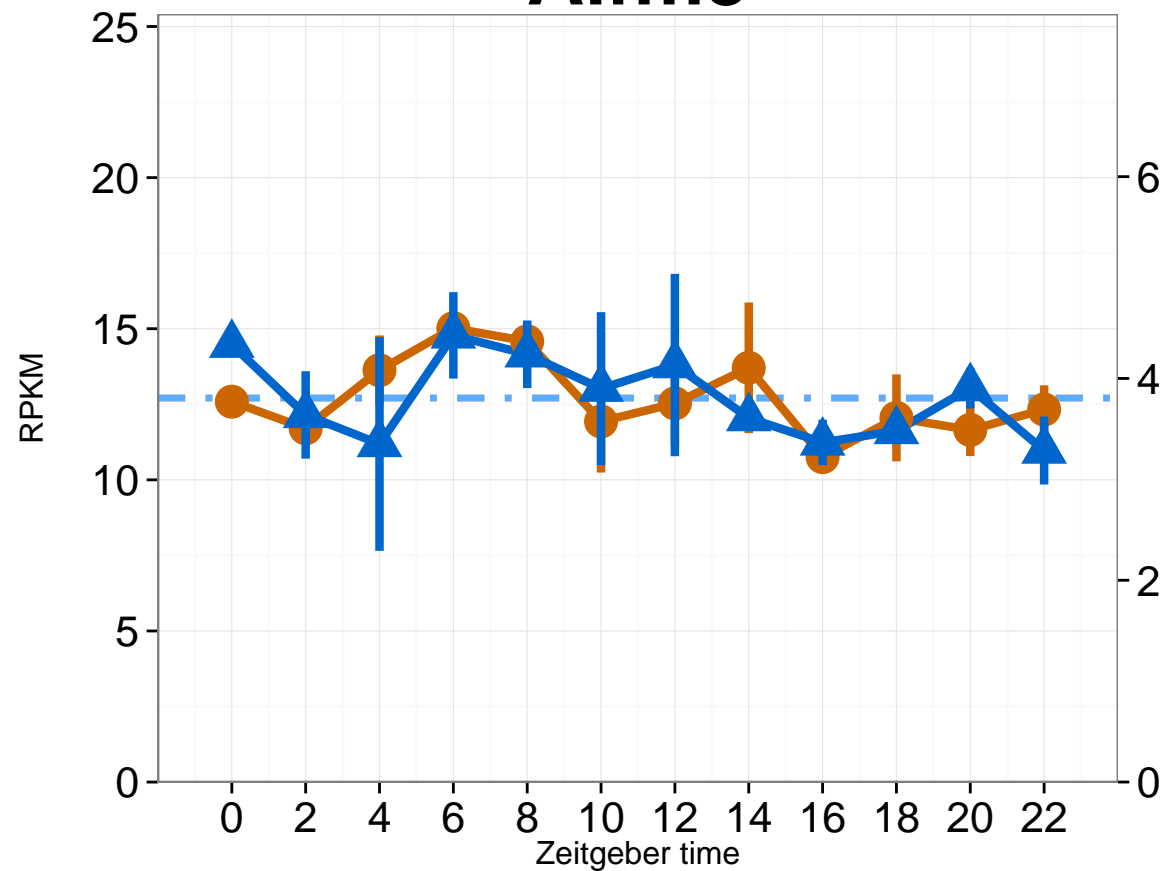

# Aifm3

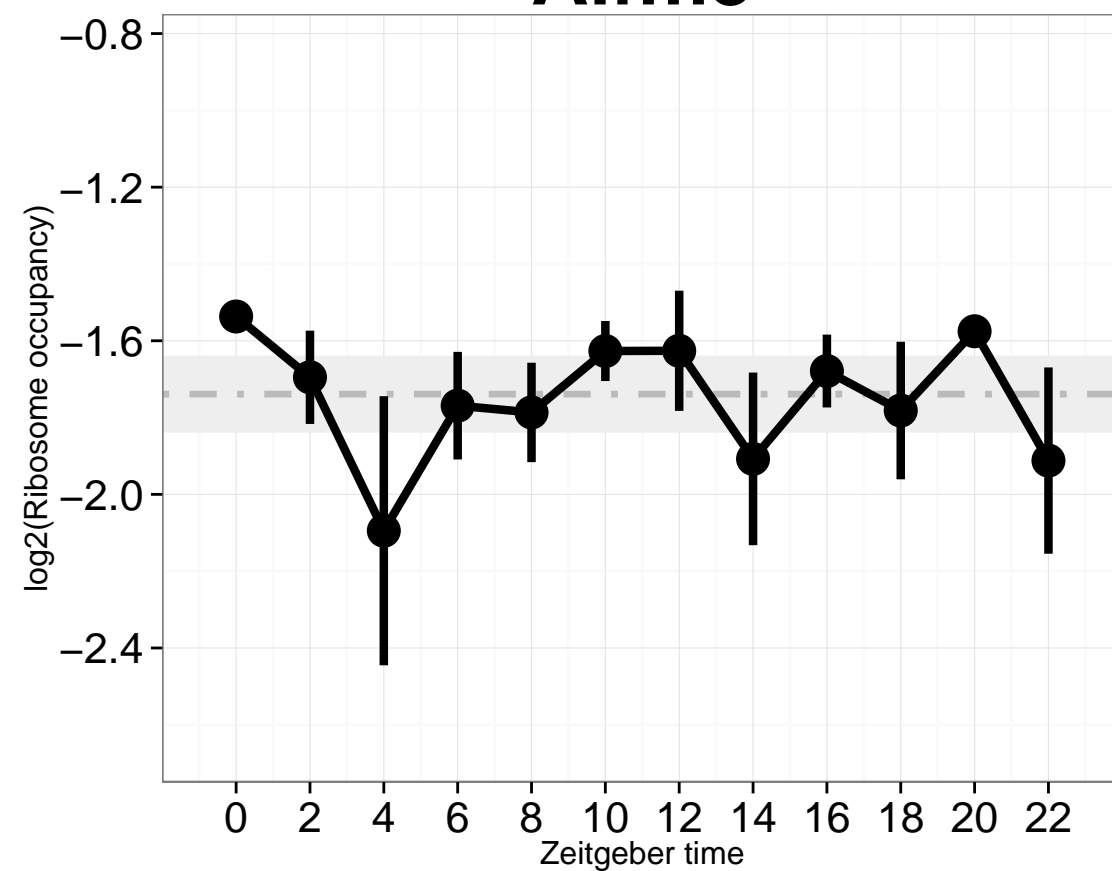

Supplement: Supplementary file 9533 [file 1]

## Kcnc2

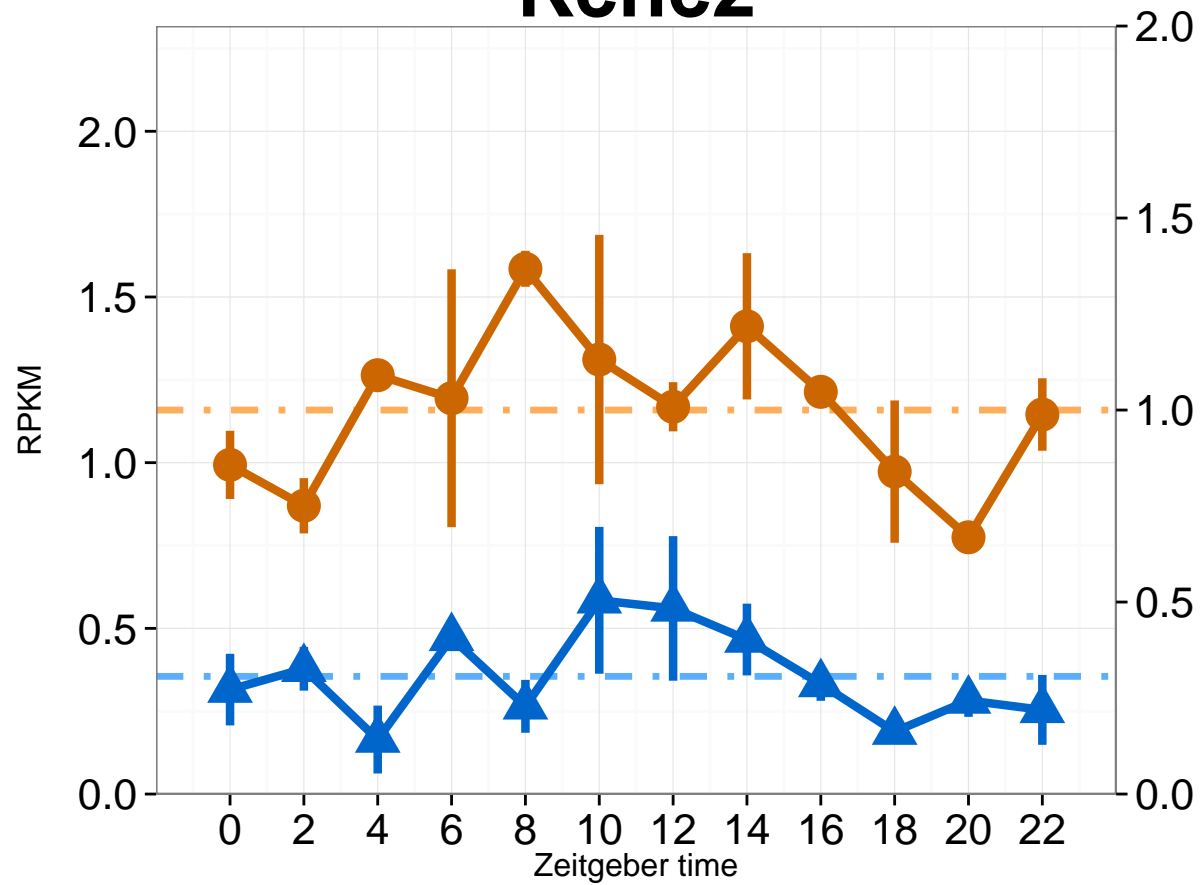

## Kcnc2

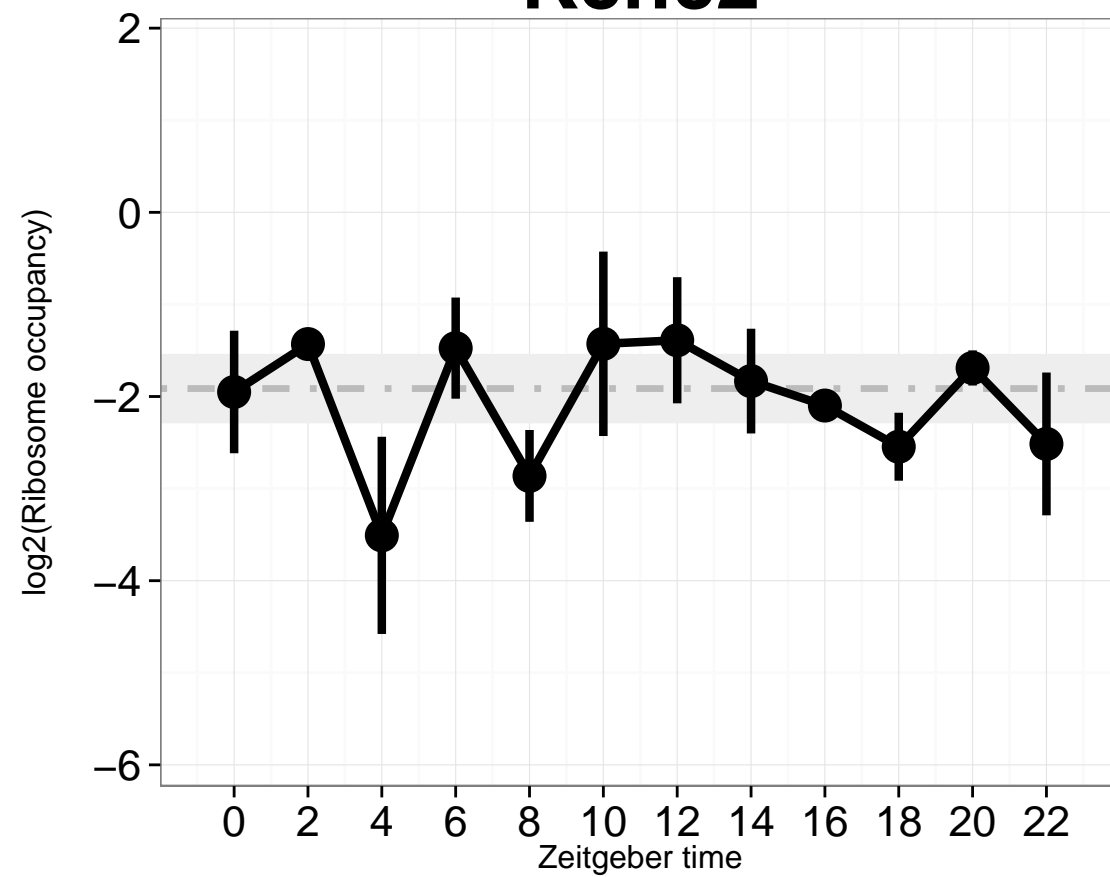

Supplement: Supplementary file 9534 [file 1]

## Ralbp1

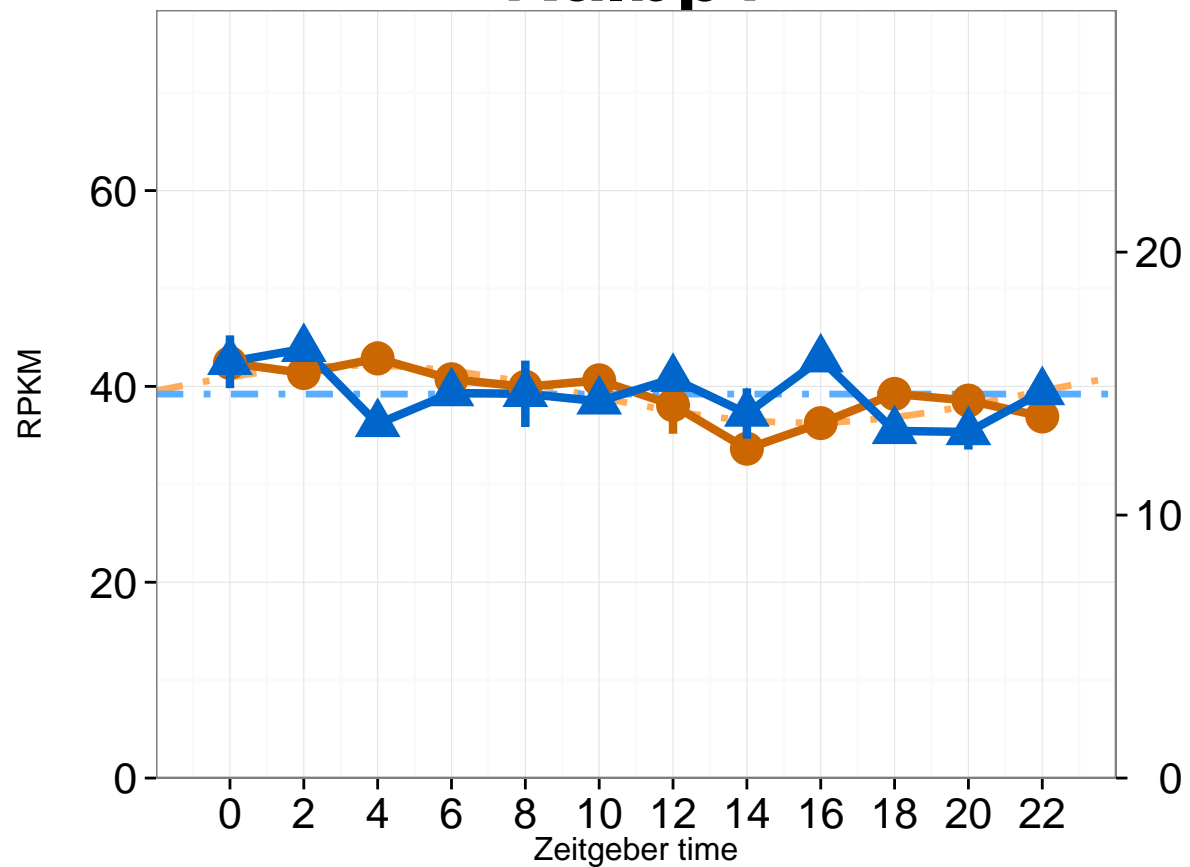

## Ralbp1

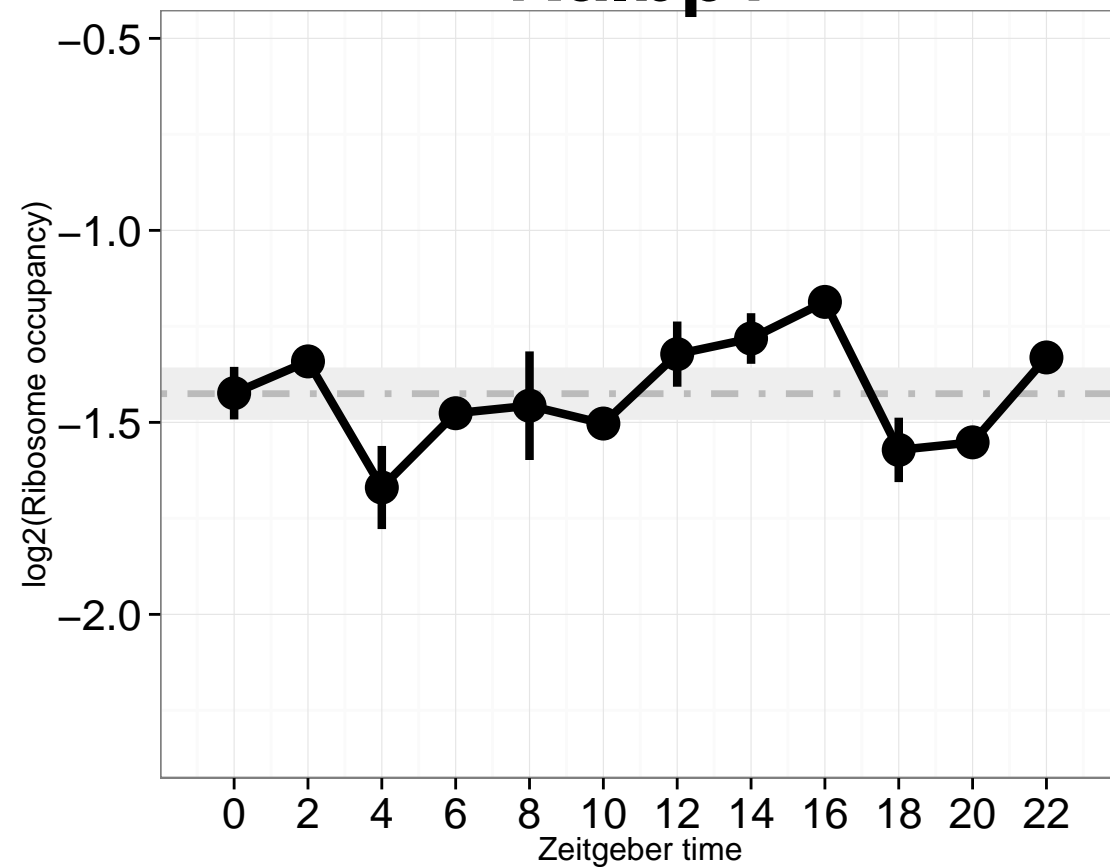

Supplement: Supplementary file 9535 [file 1]
