# Supplementary material (part 96 of 133)
Source: publisher figshare collection journal article supplement (https://springernature.figshare.com/articles/dataset/_/4903193)

# Pias1

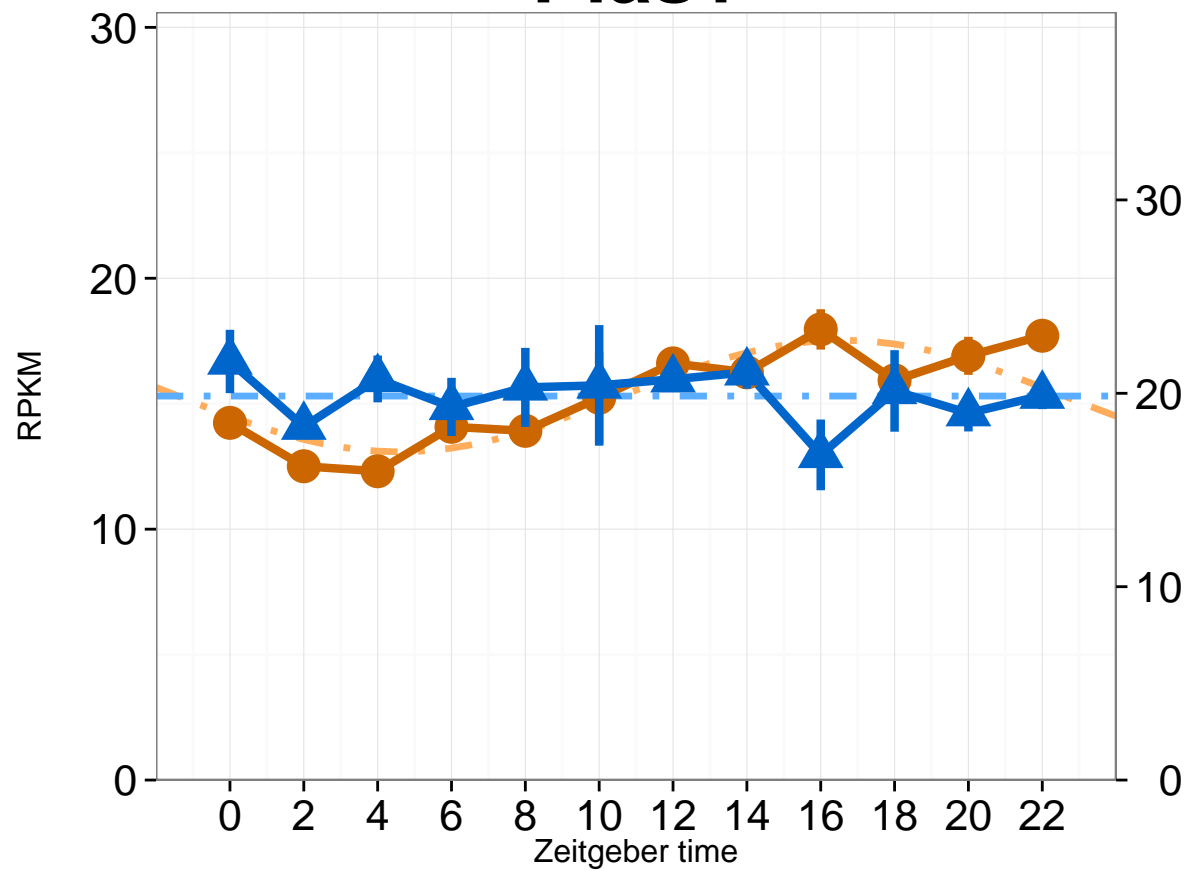

# Pias1

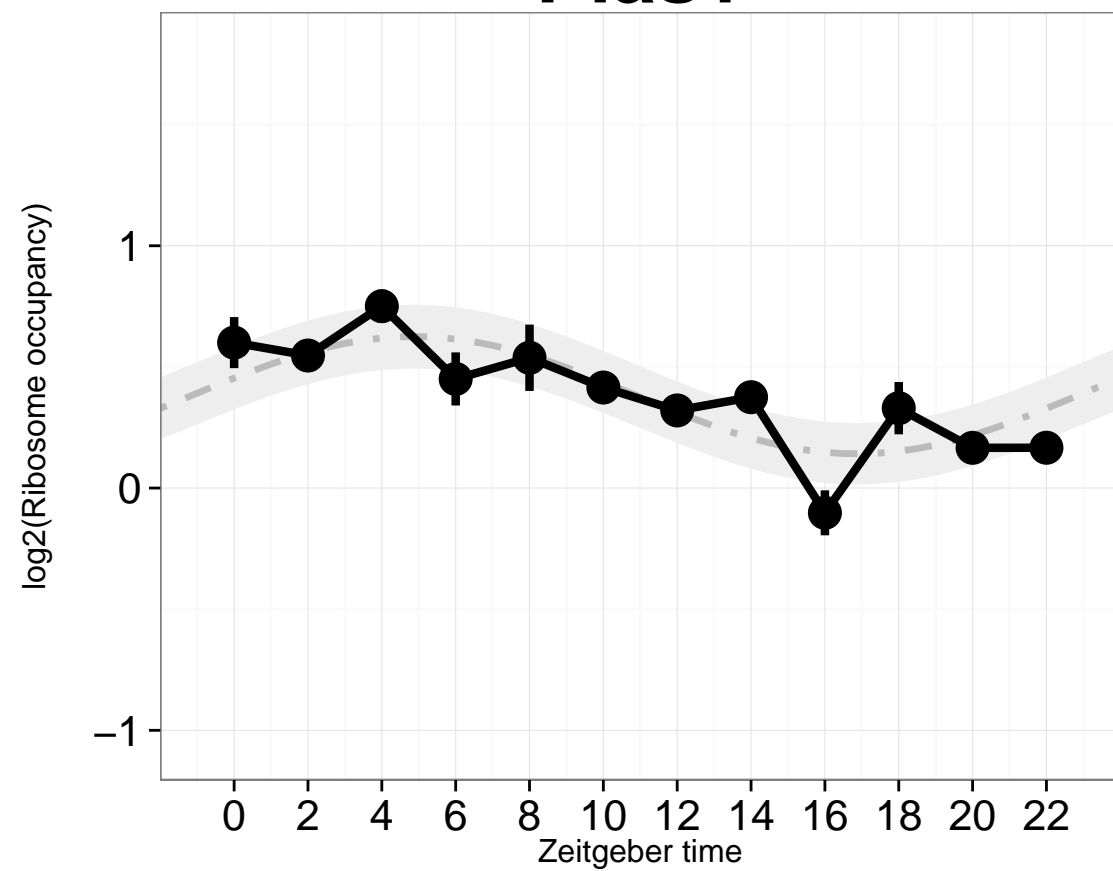

Supplement: Supplementary file 9536 [file 1]

## Zbtb20

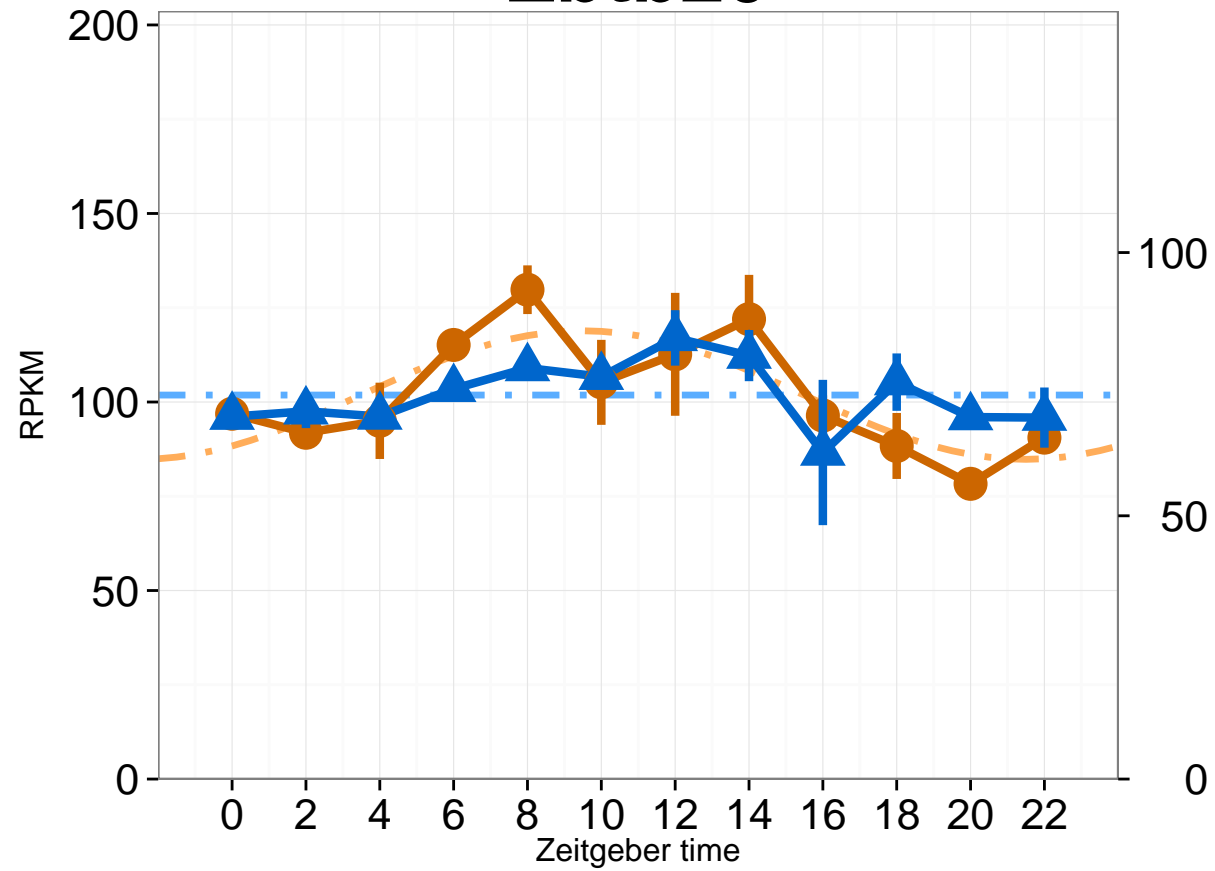

## Zbtb20

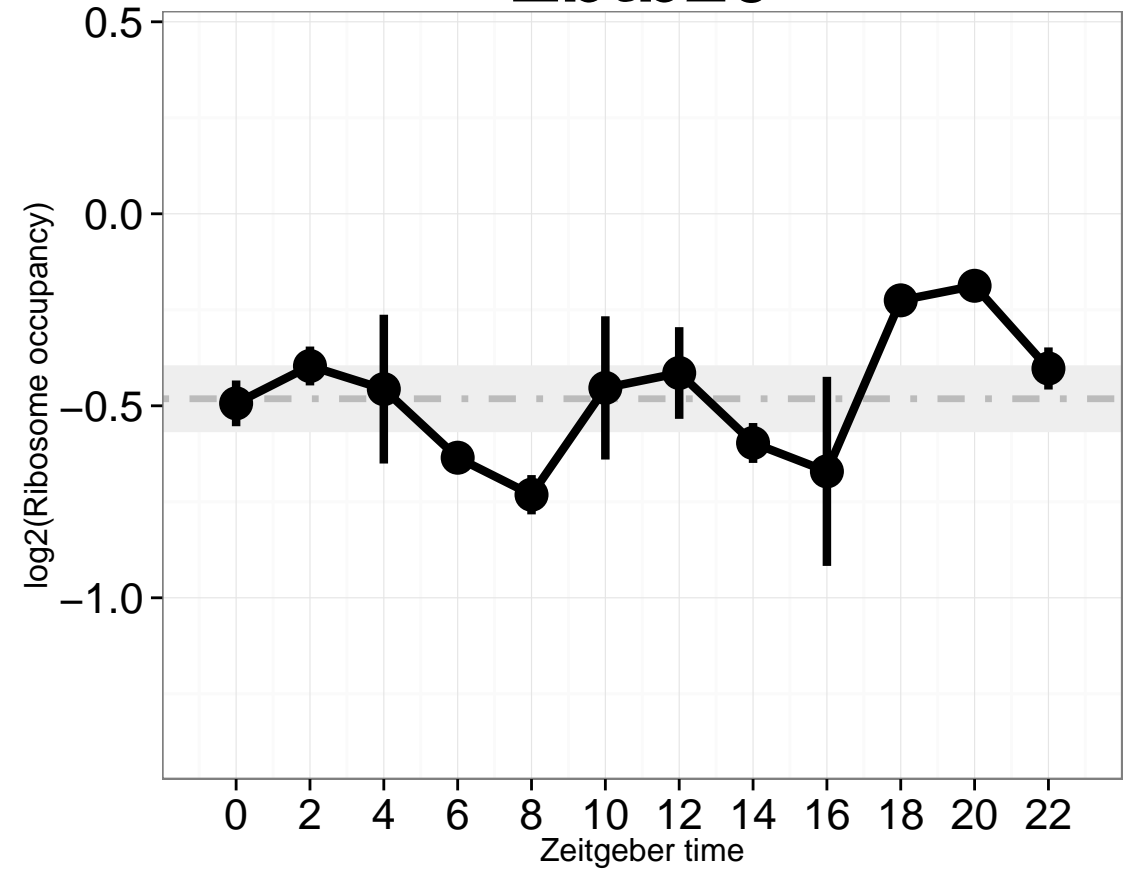

Supplement: Supplementary file 9537 [file 1]

# Fam173b

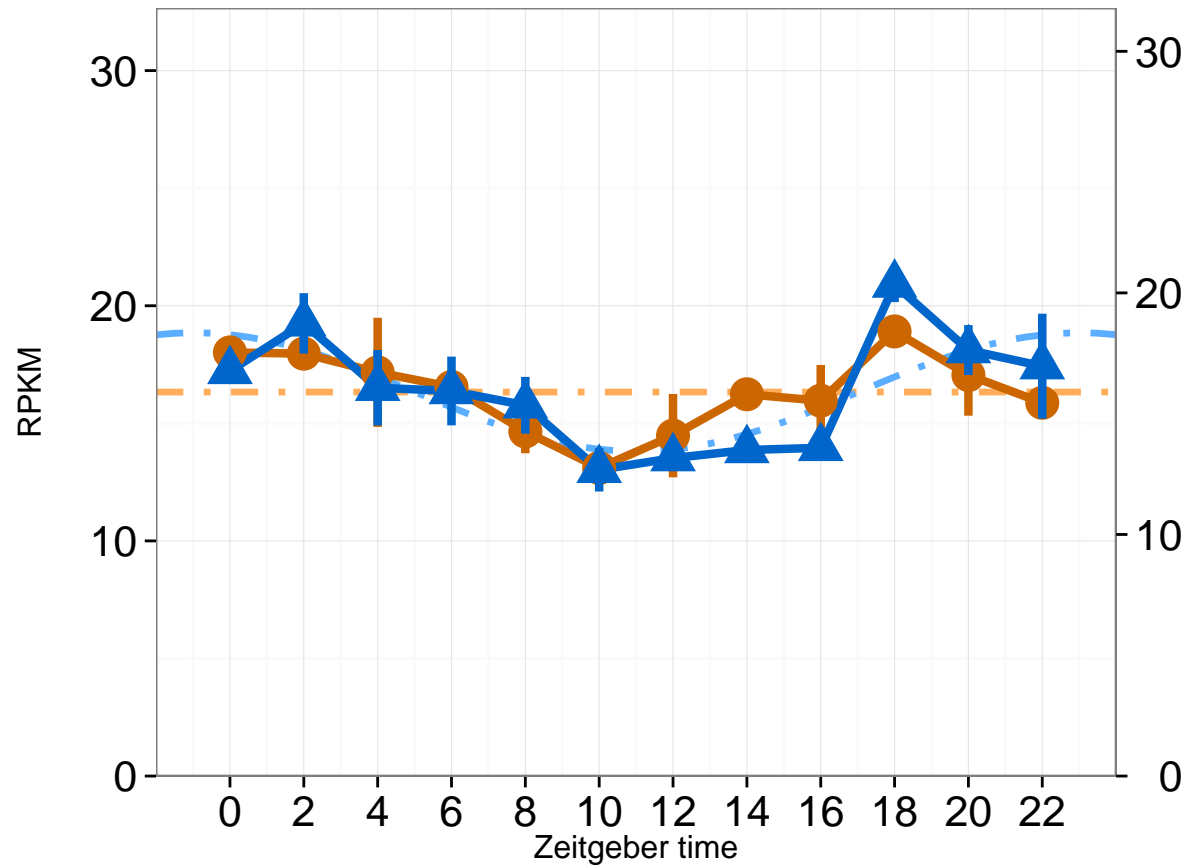

# Fam173b

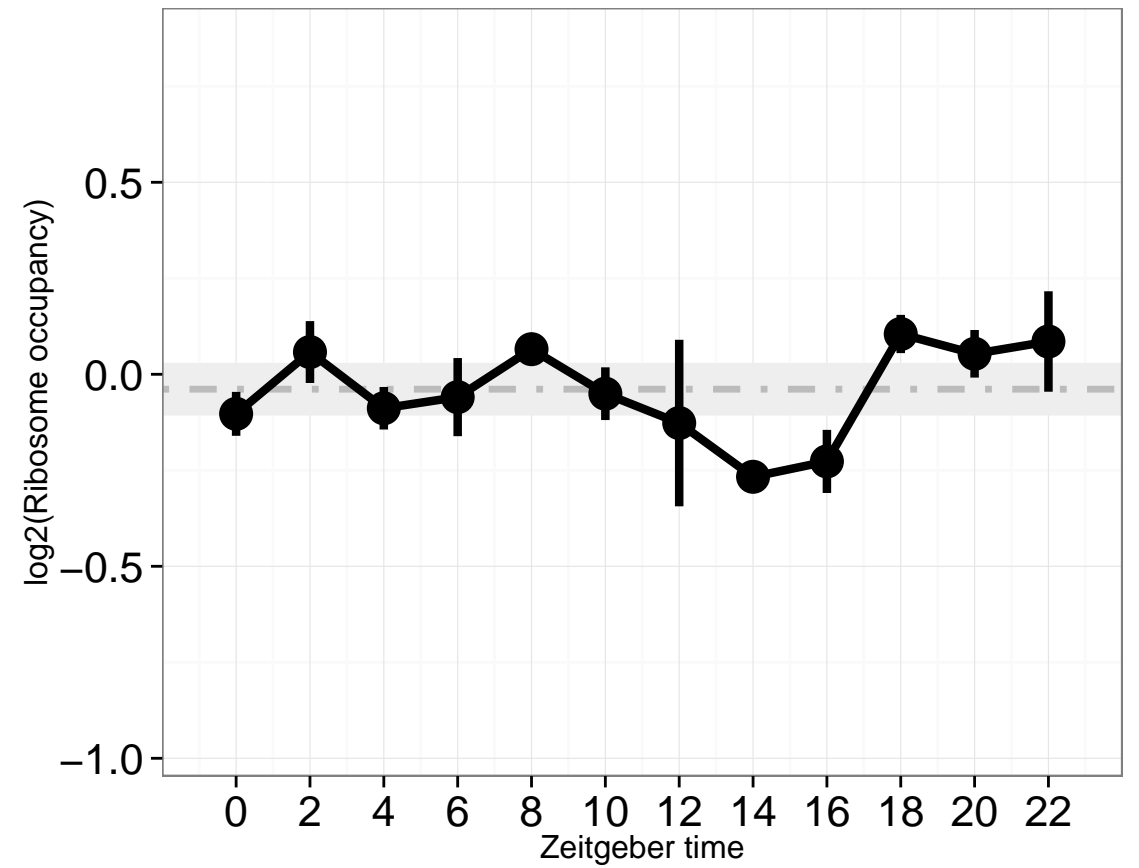

Supplement: Supplementary file 9538 [file 1]

## Rchy1

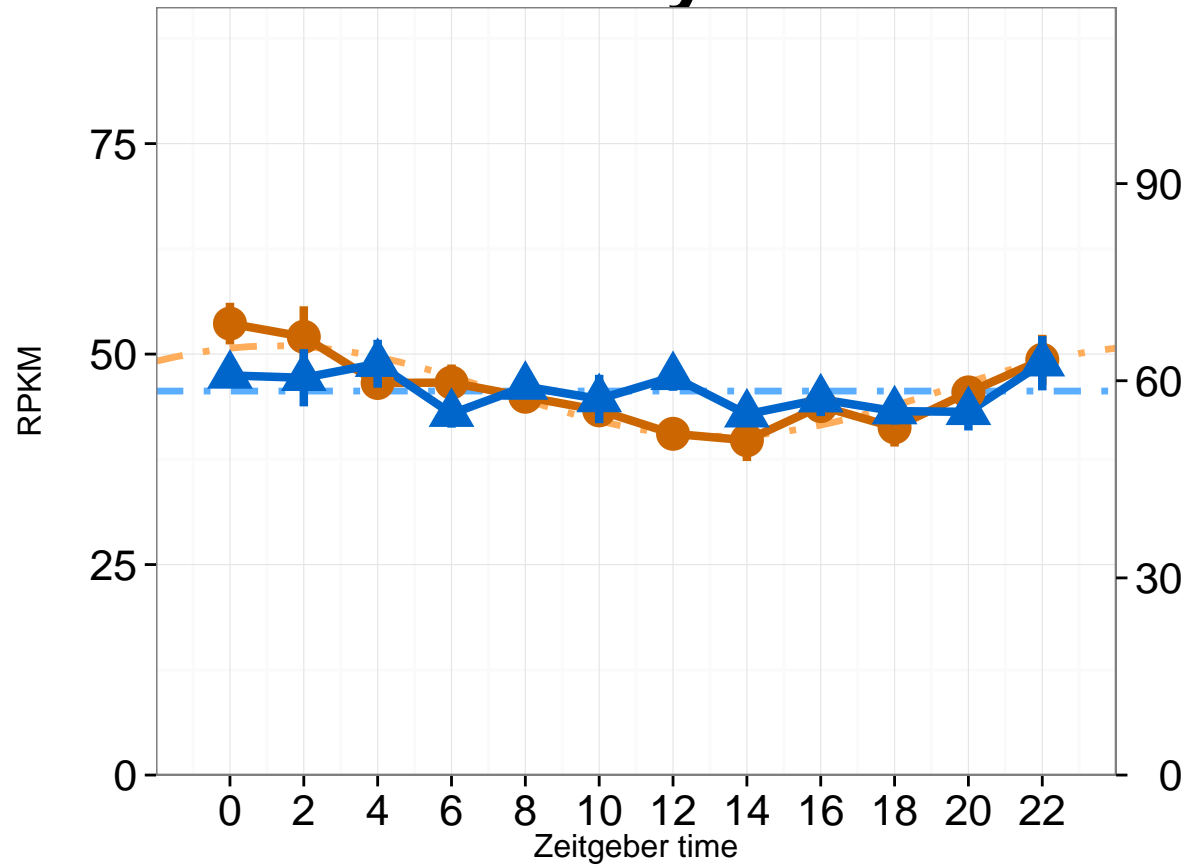

## Rchy1

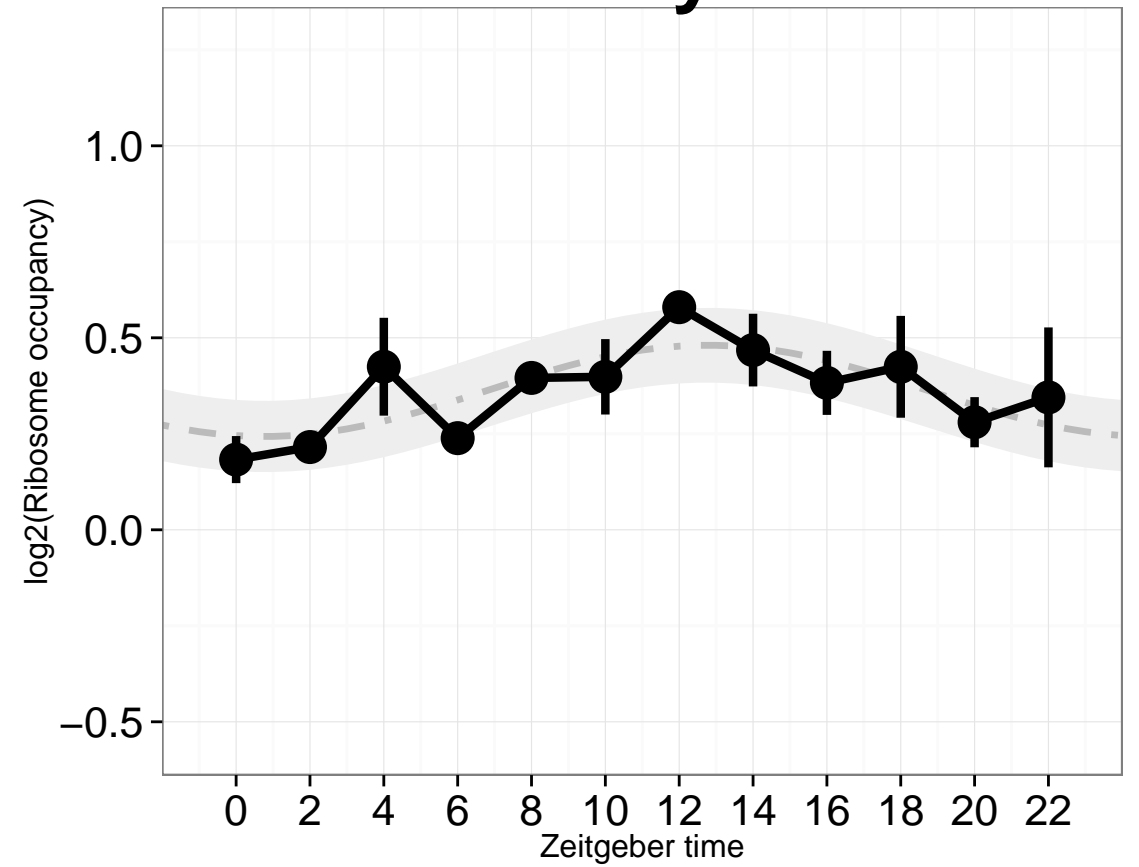

Supplement: Supplementary file 9539 [file 1]

# Tmem201

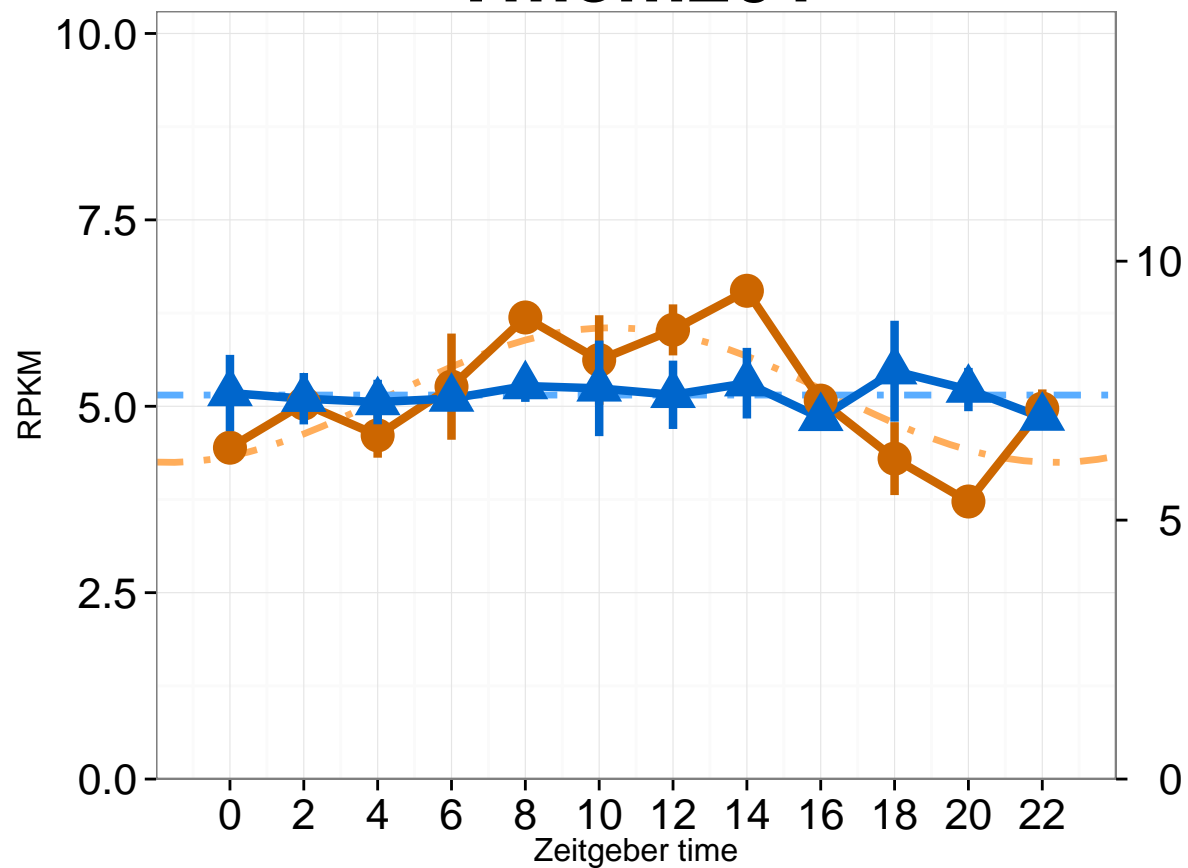

# Tmem201

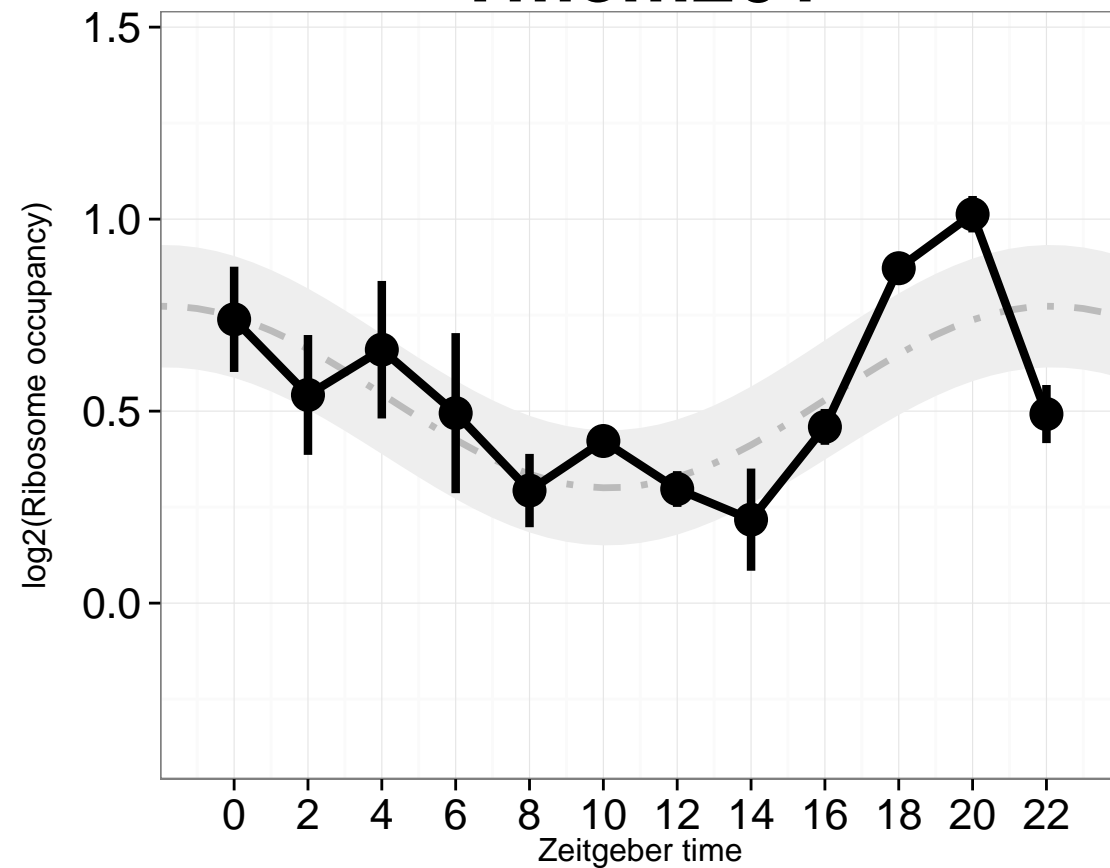

Supplement: Supplementary file 9540 [file 1]

## Acot9

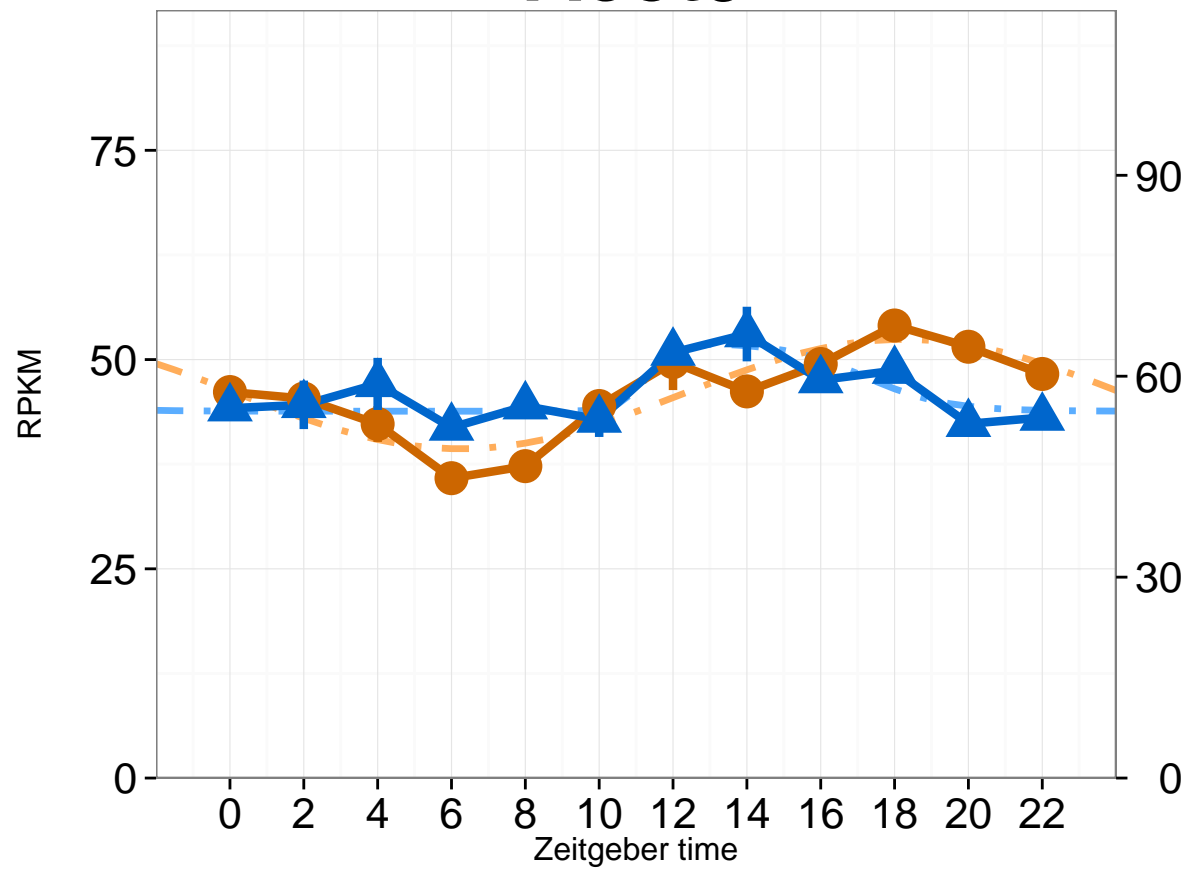

## Acot9

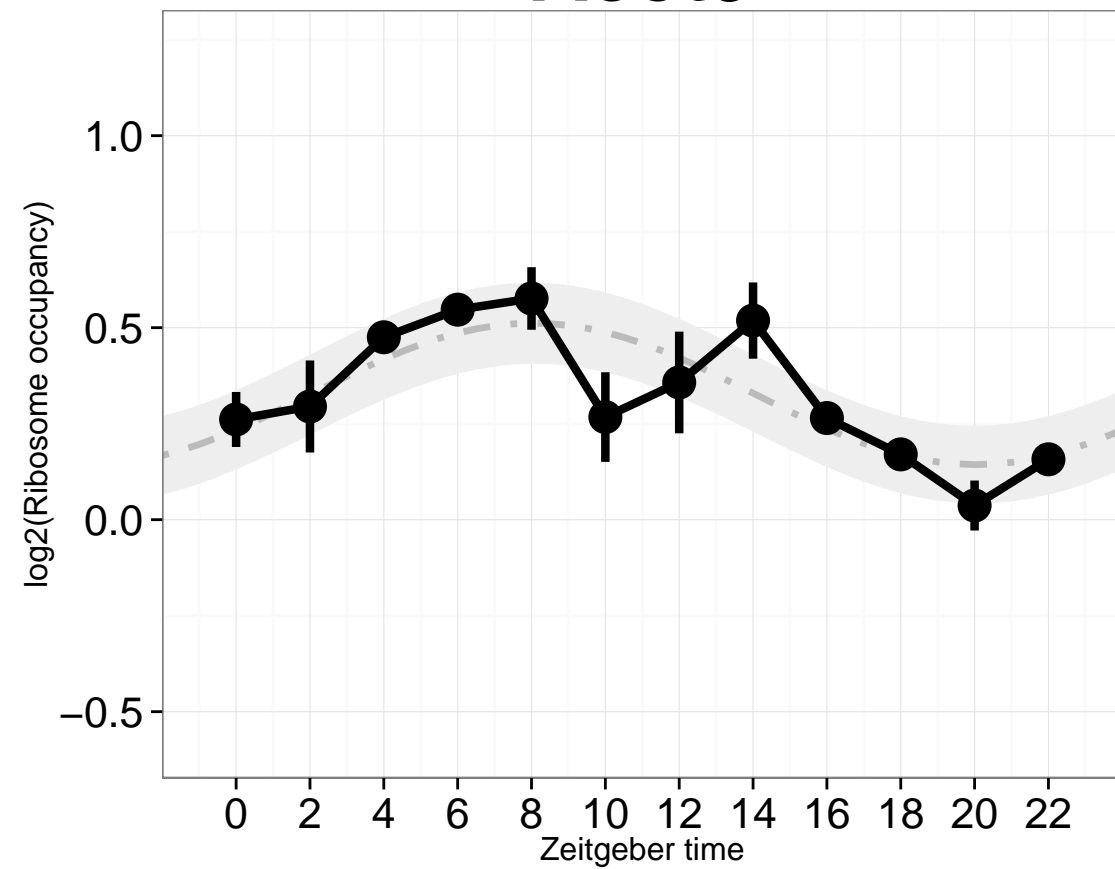

Supplement: Supplementary file 9541 [file 1]

## BC030307

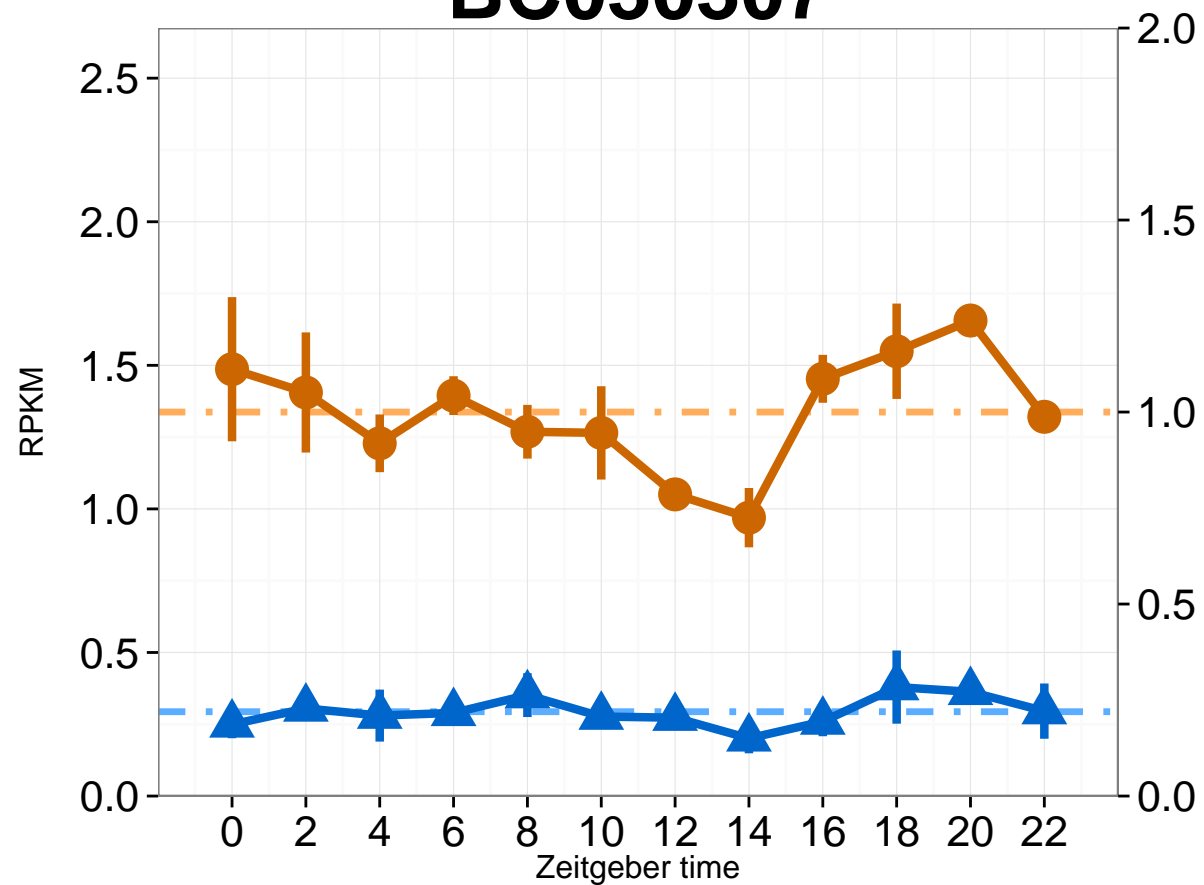

## BC030307

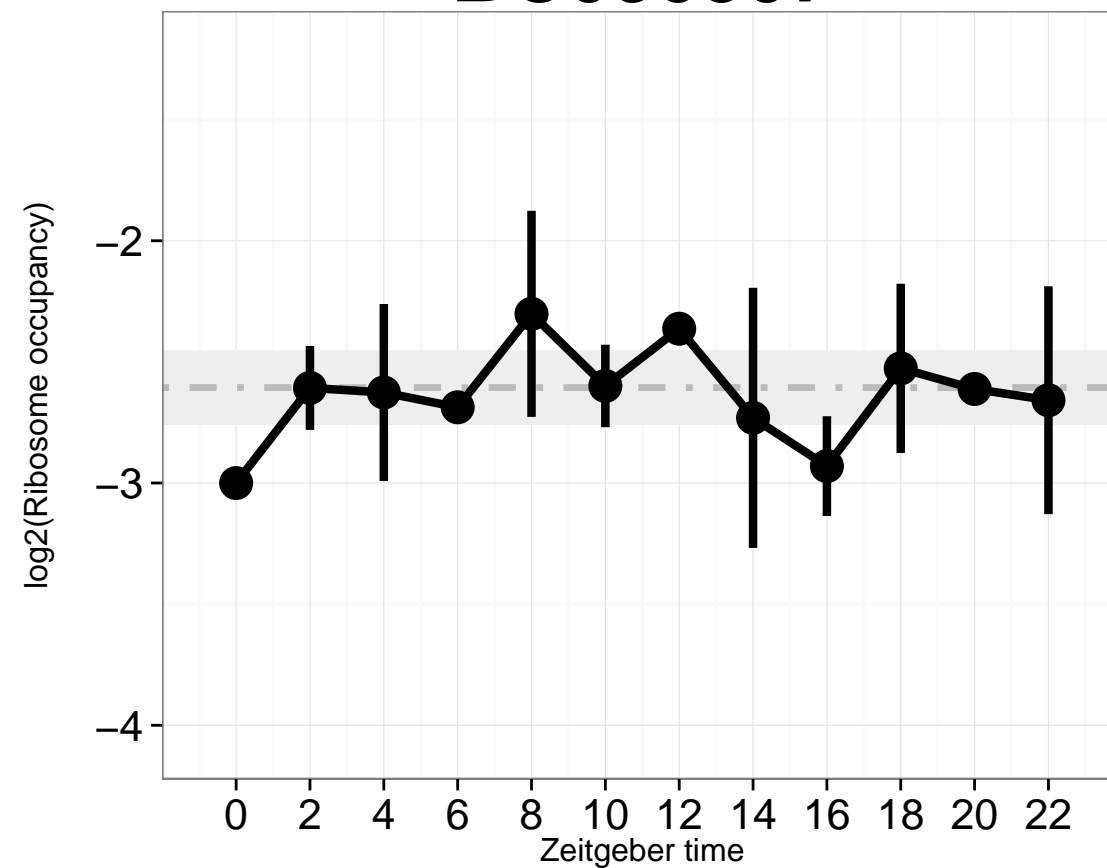

Supplement: Supplementary file 9542 [file 1]

# Mgea5

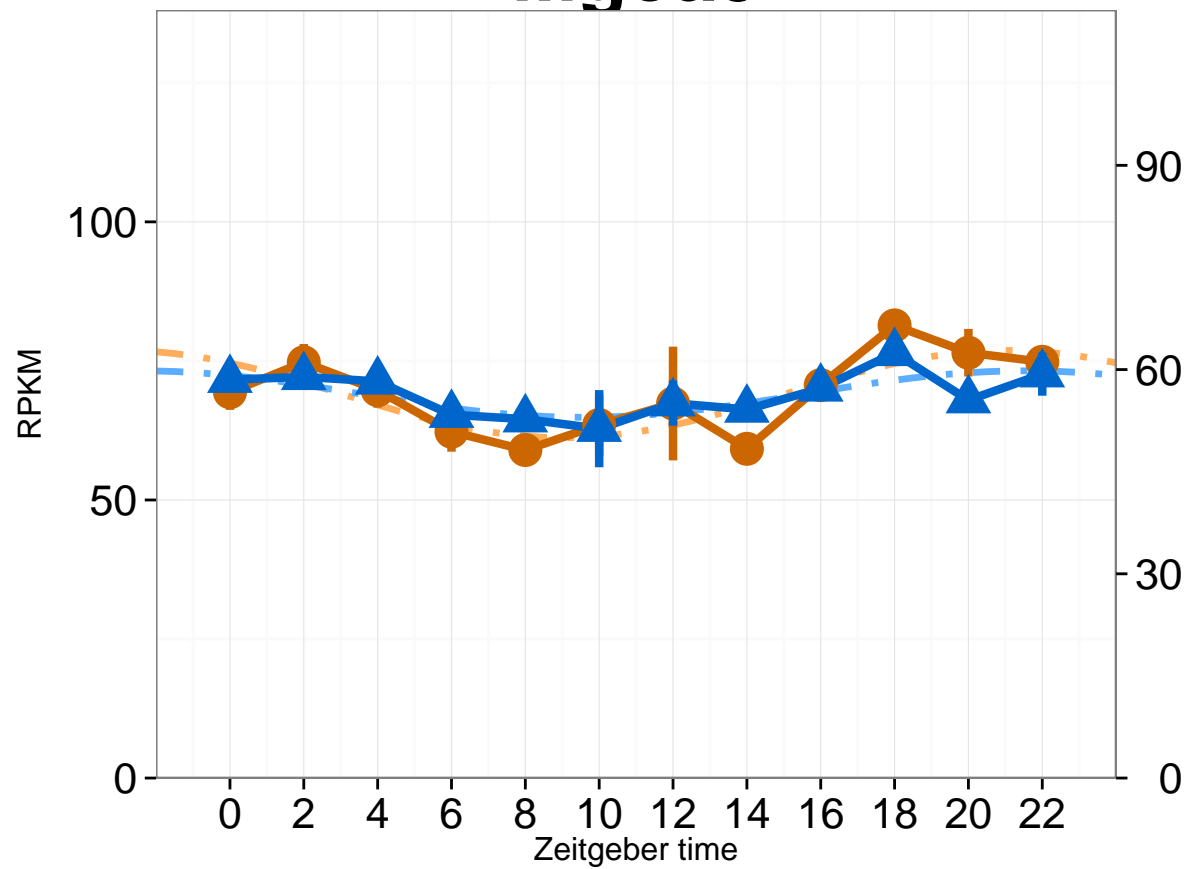

# Mgea5

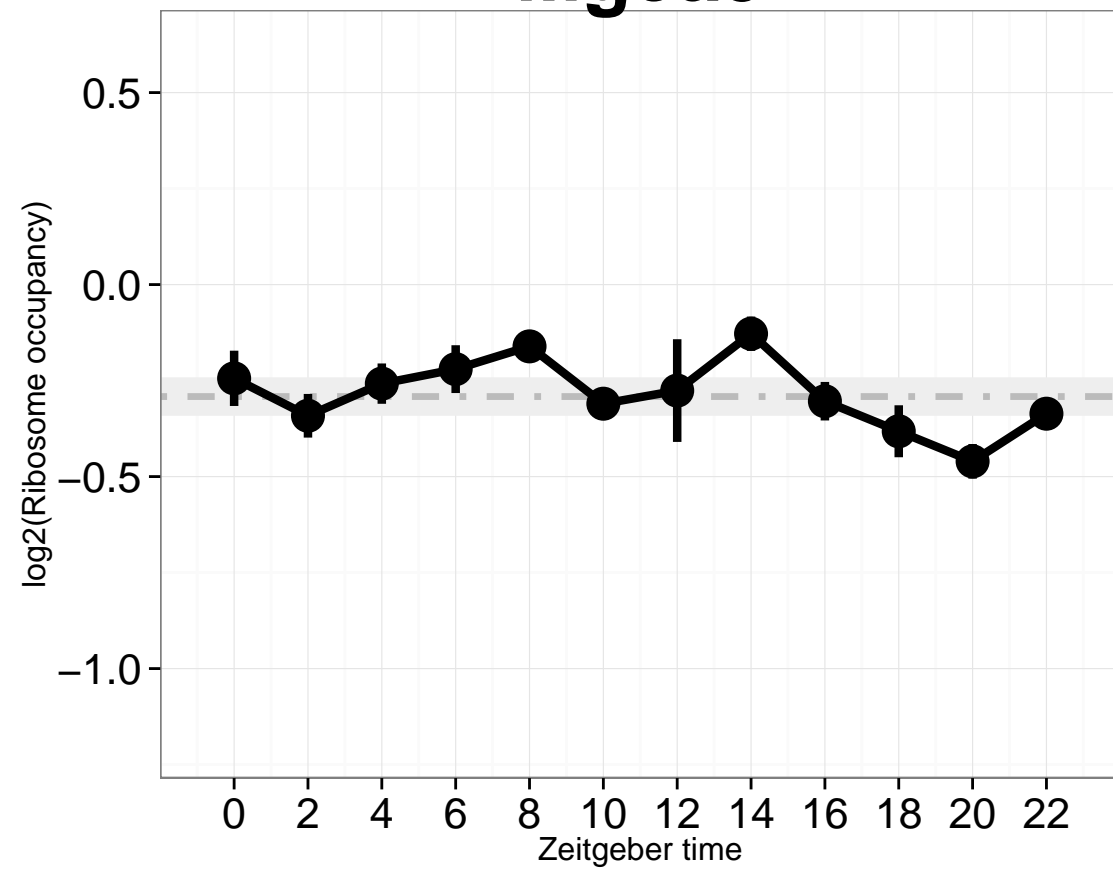

Supplement: Supplementary file 9543 [file 1]

## Ypel2

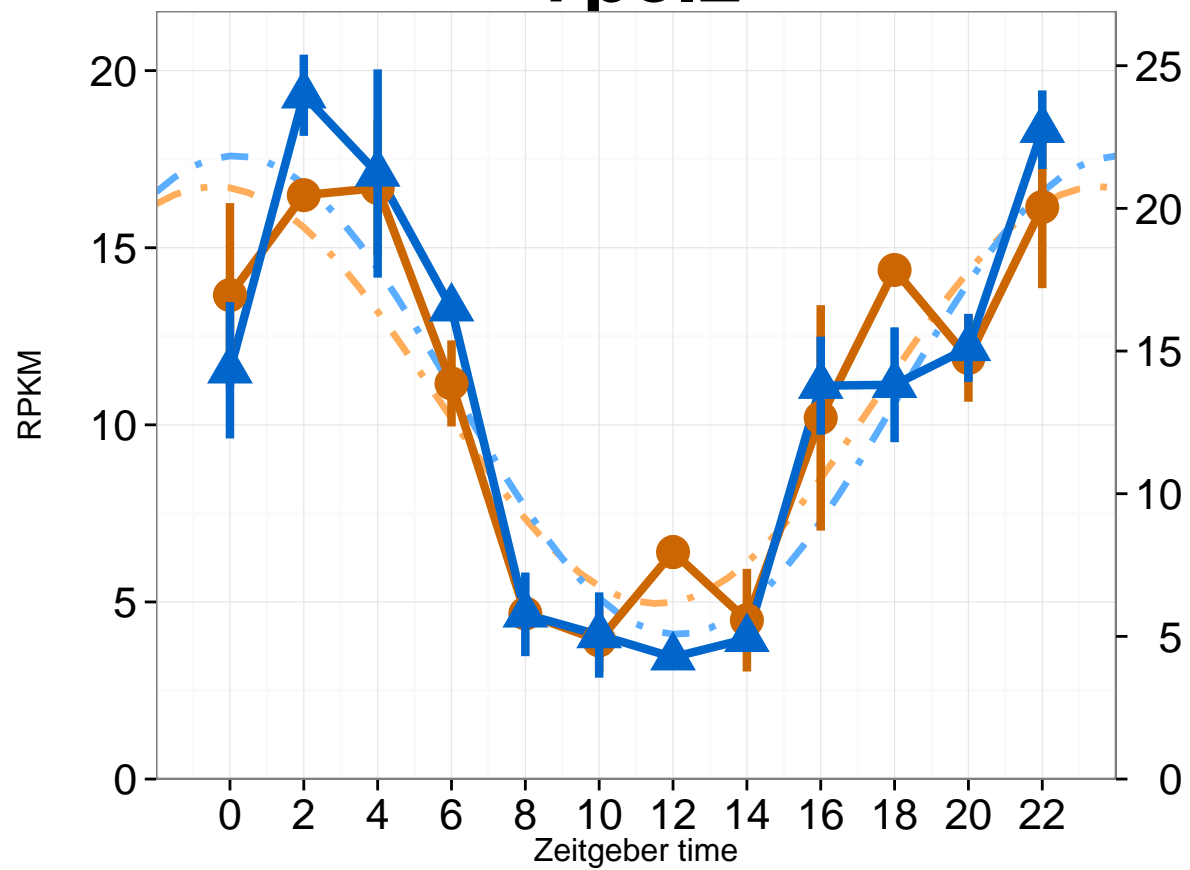

## Ypel2

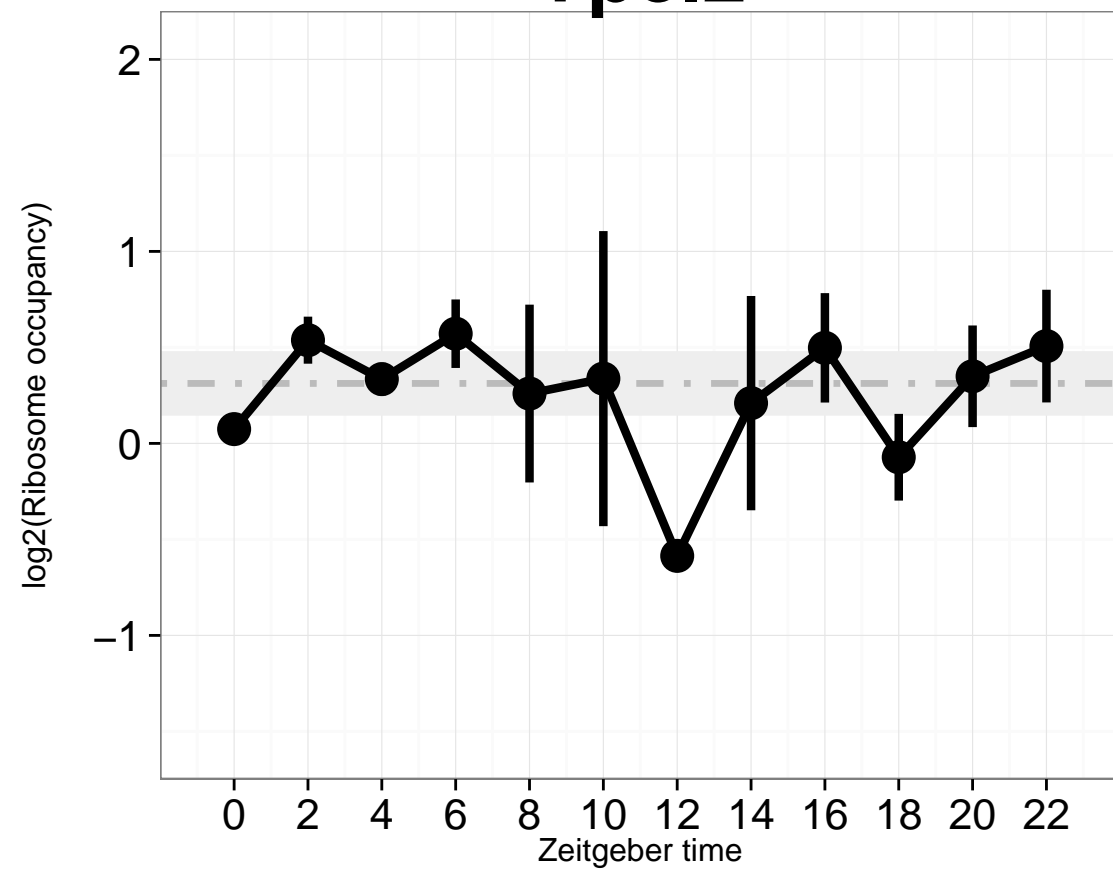

Supplement: Supplementary file 9544 [file 1]

**9930012K11Rik**

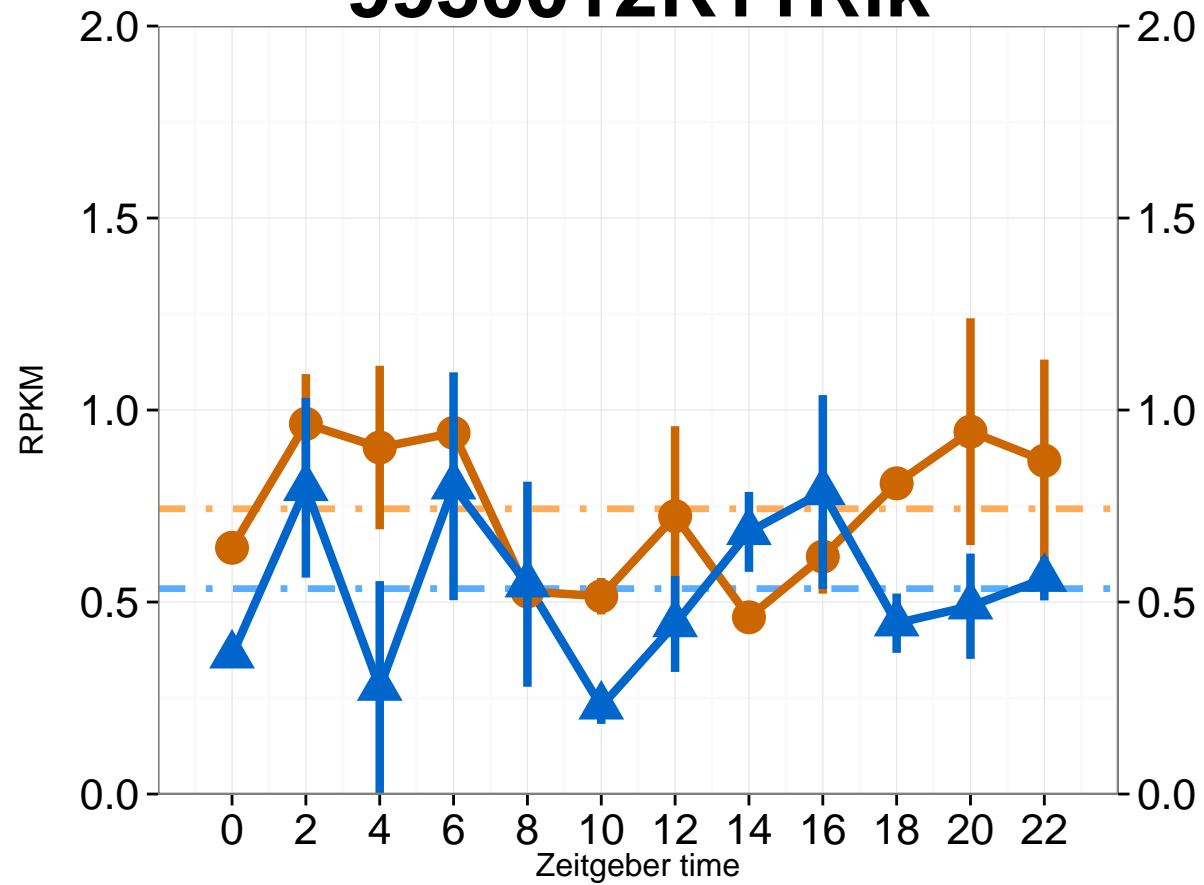

**9930012K11Rik**

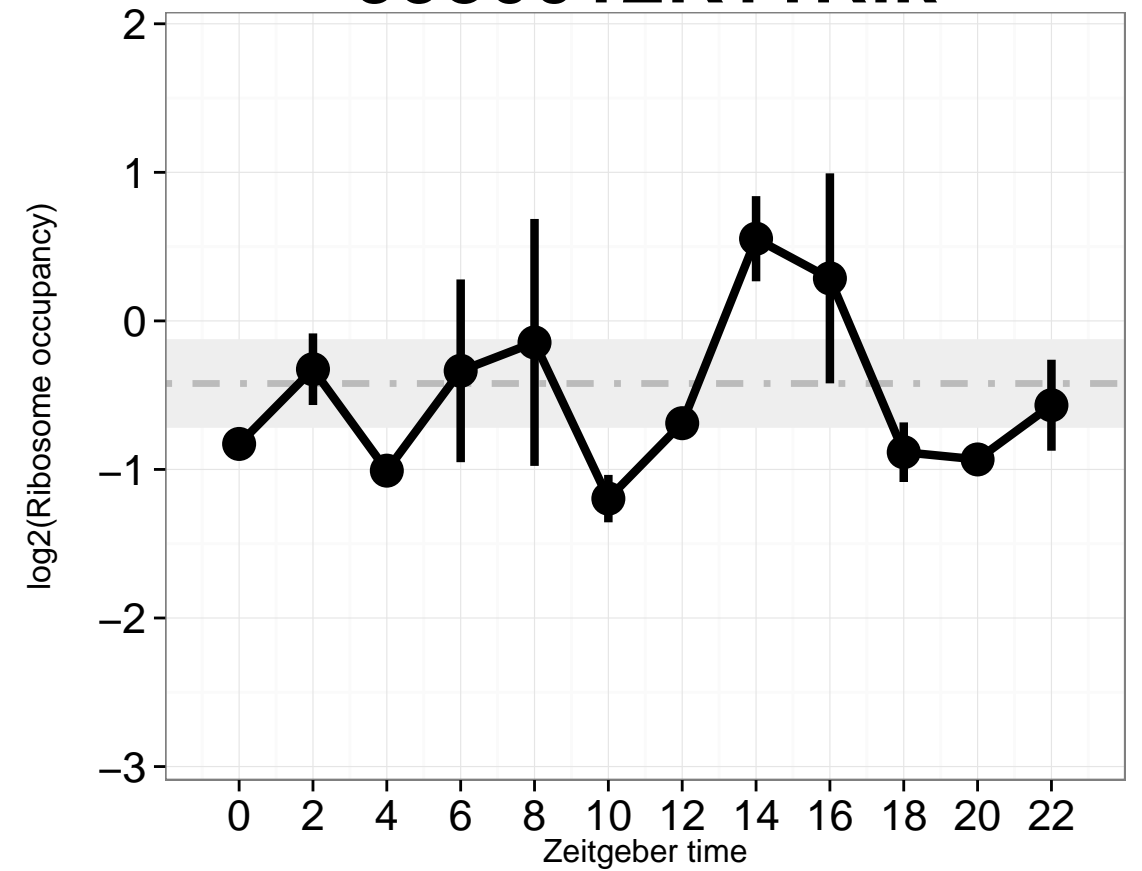

Supplement: Supplementary file 9545 [file 1]

# Fdxacb1

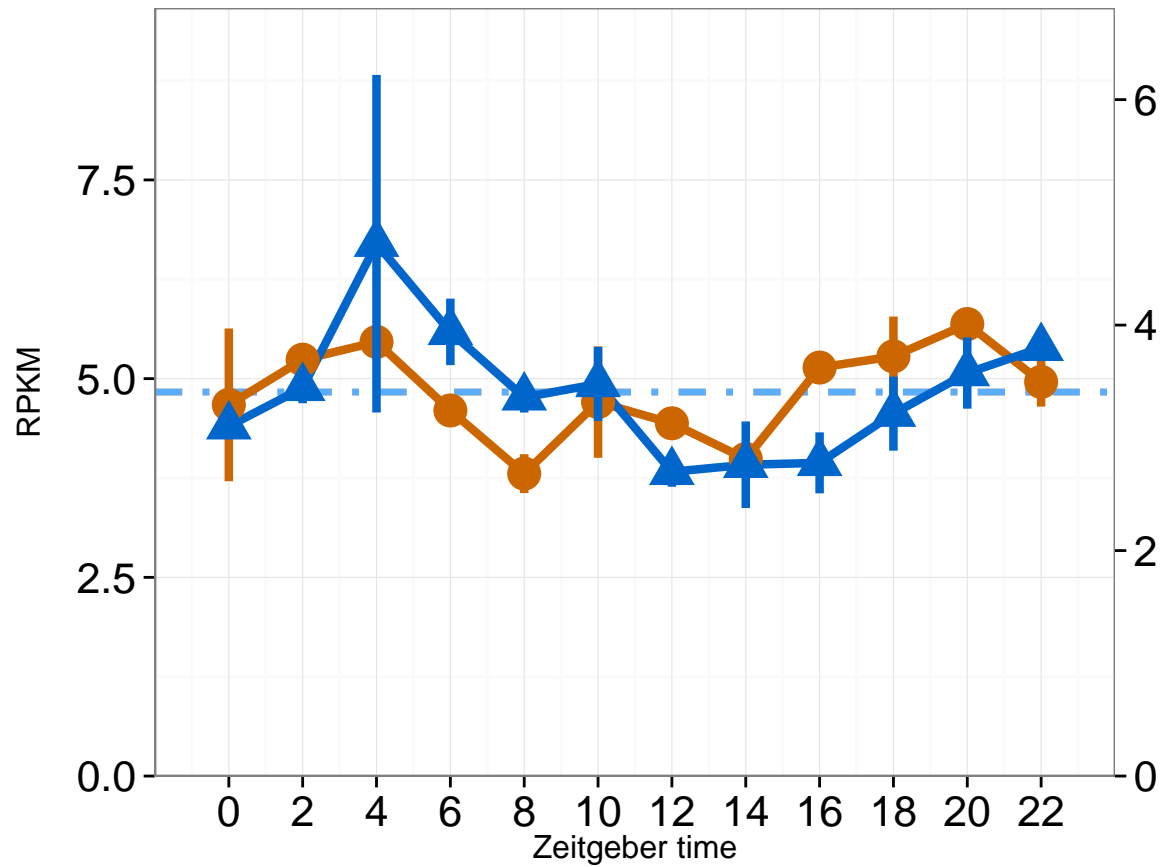

# Fdxacb1

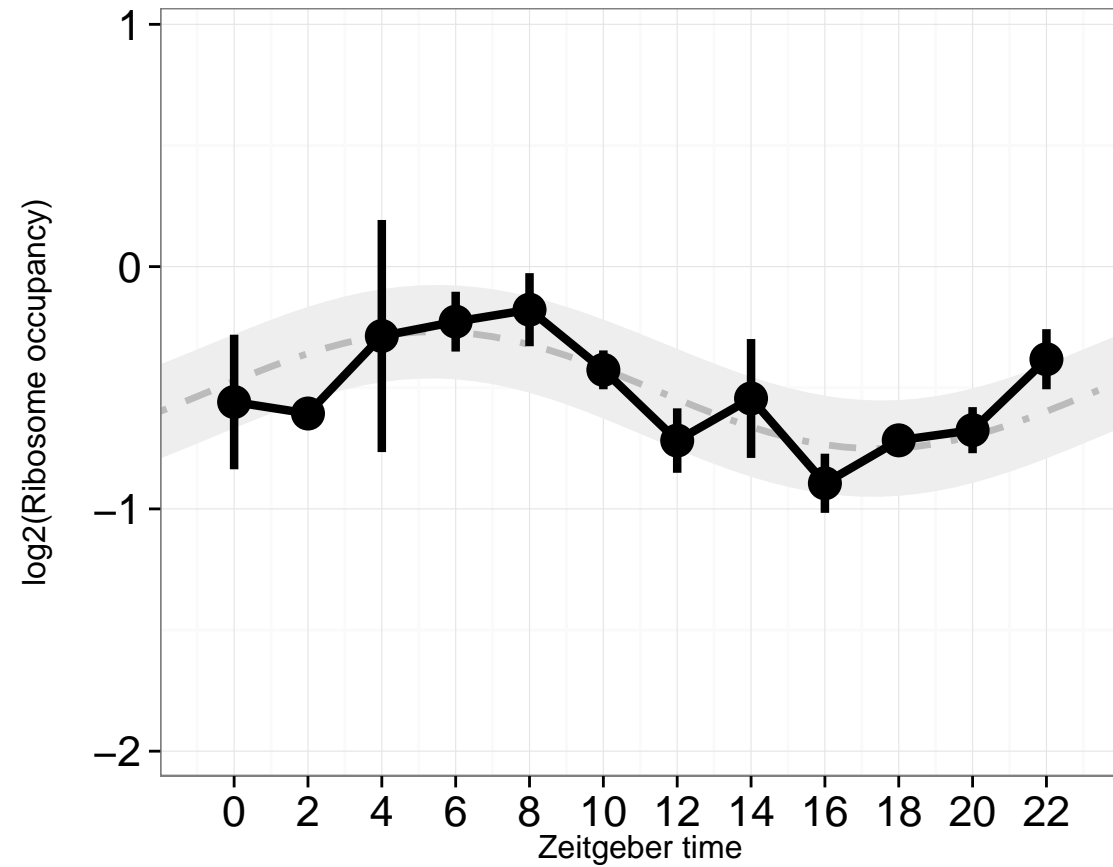

Supplement: Supplementary file 9546 [file 1]

## Hpgd

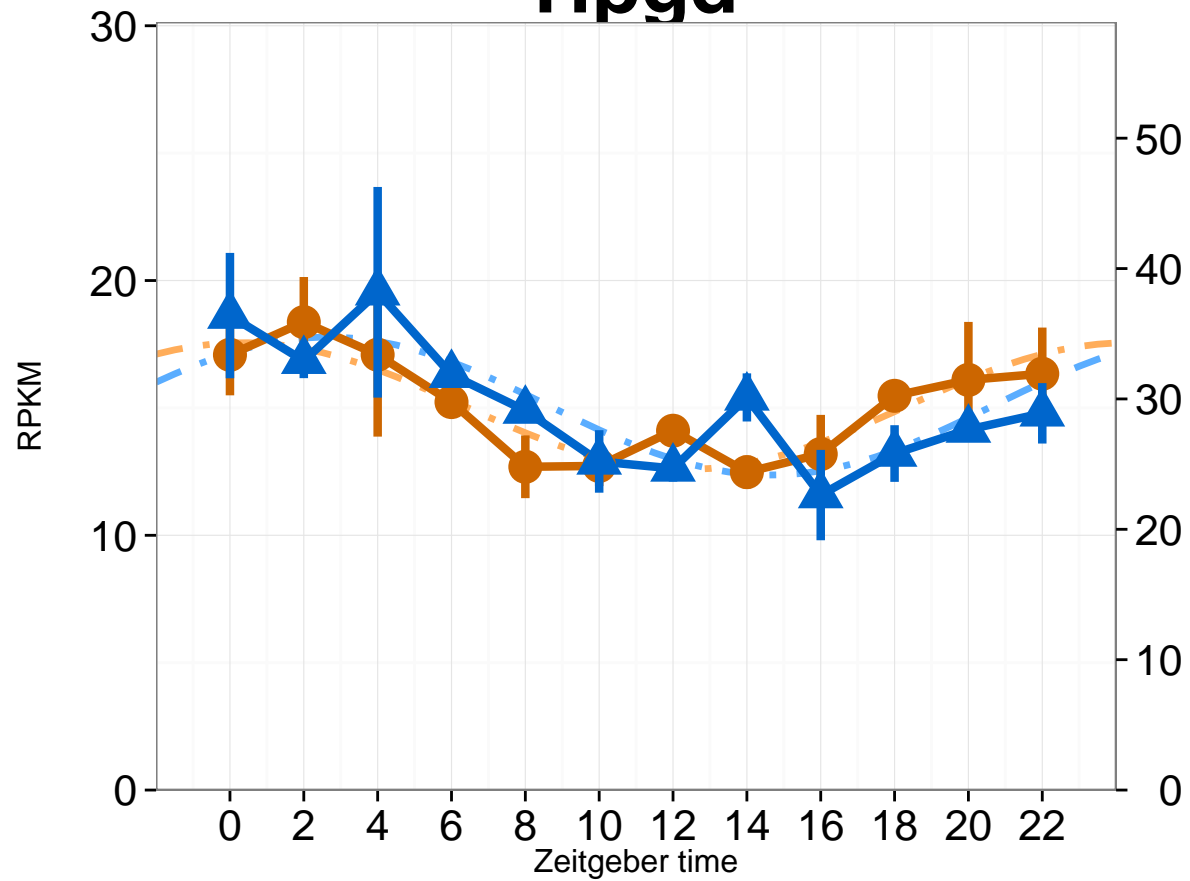

## Hpgd

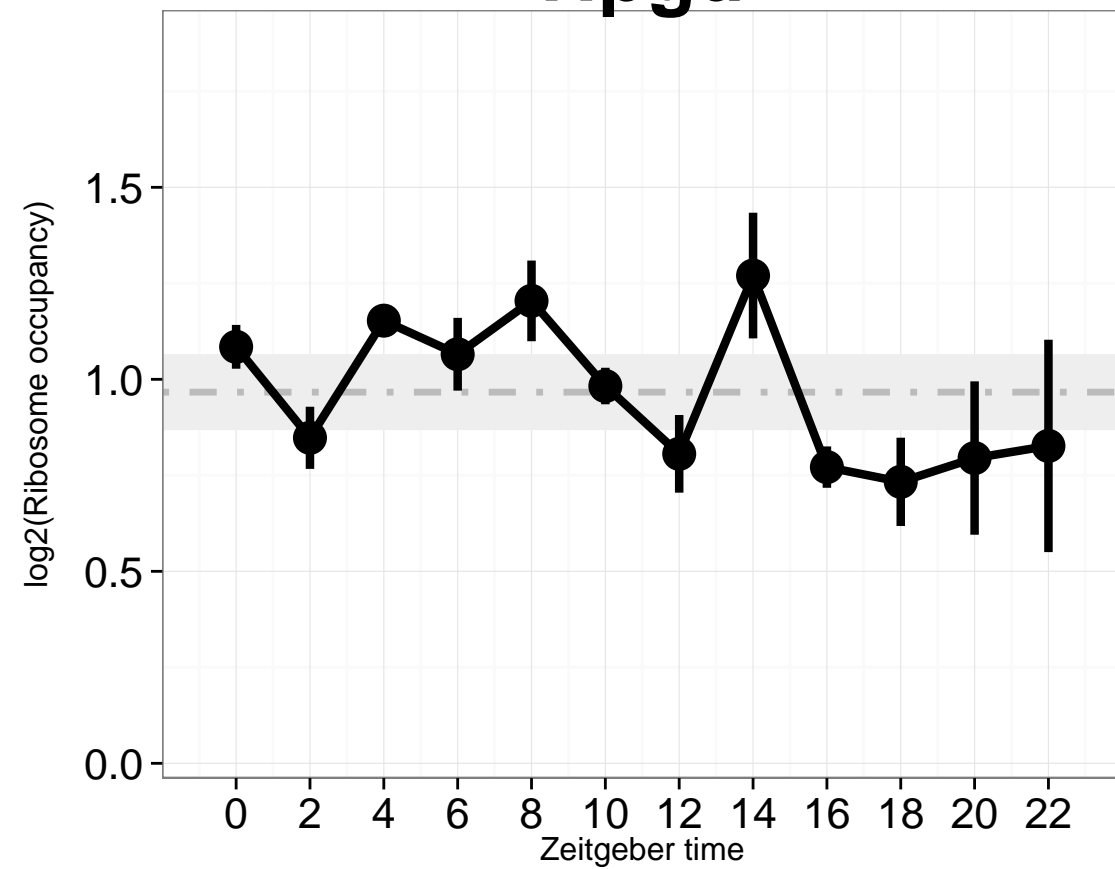

Supplement: Supplementary file 9547 [file 1]

## Tnk1

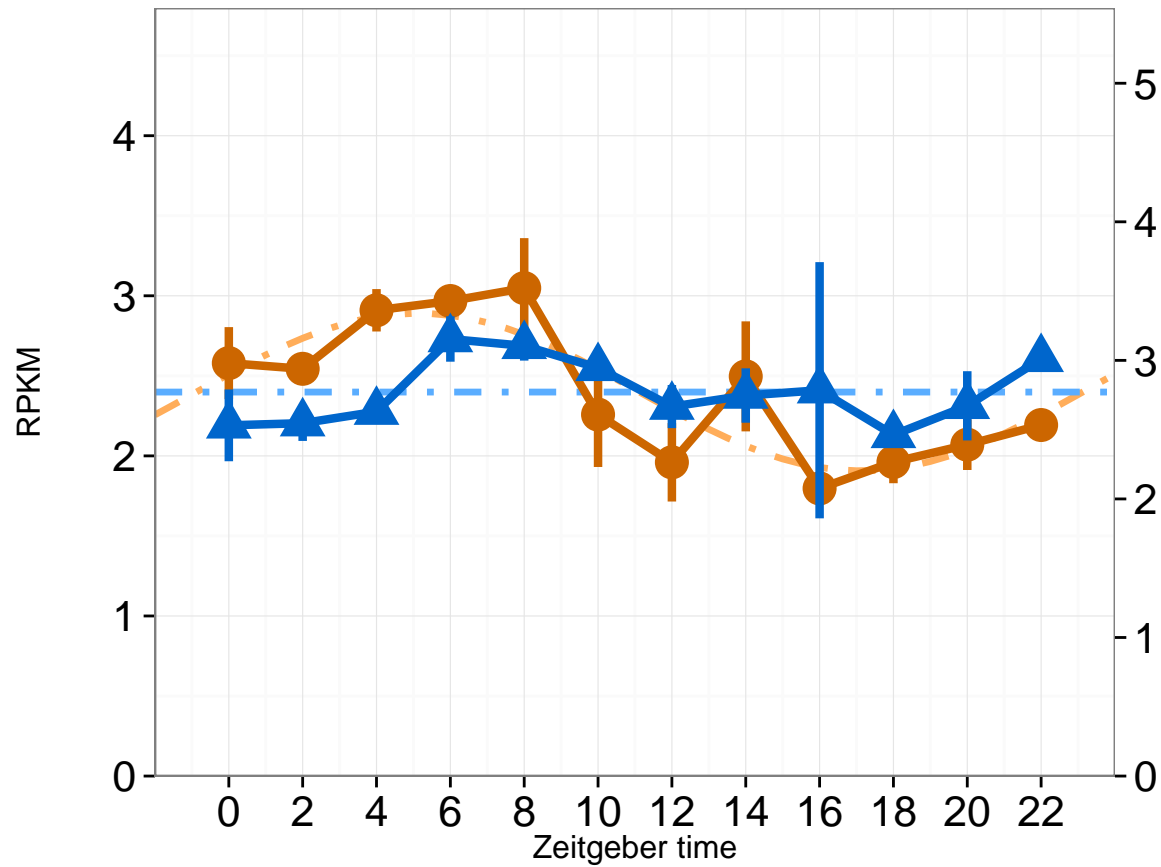

## Tnk1

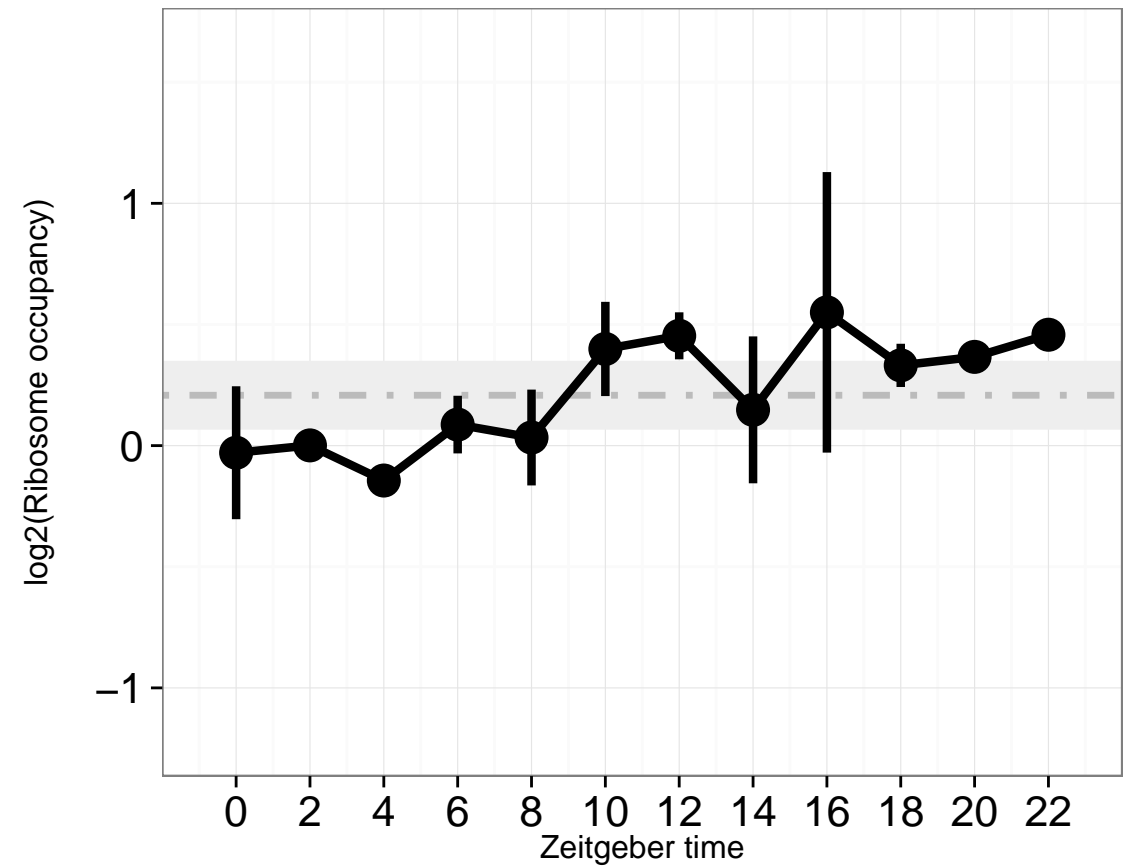

Supplement: Supplementary file 9548 [file 1]

# lfitm1

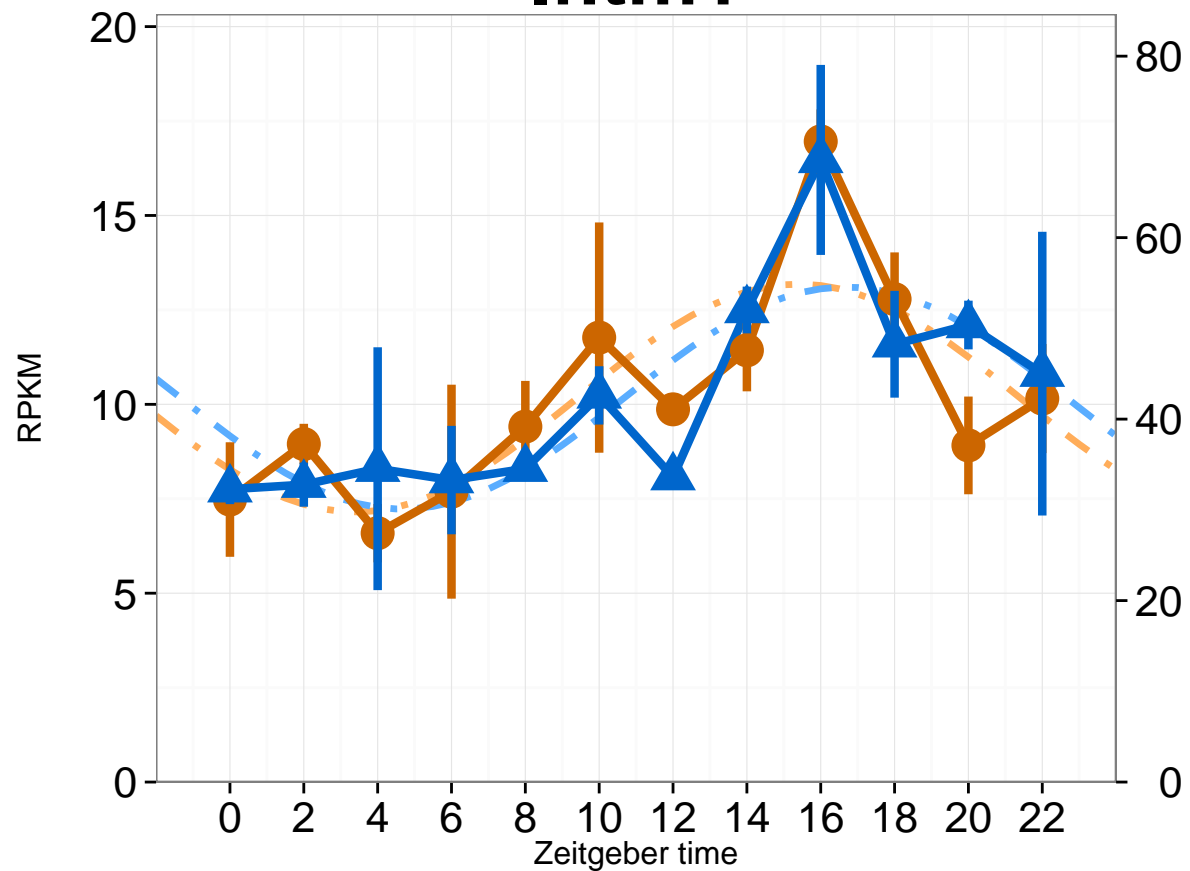

# lfitm1

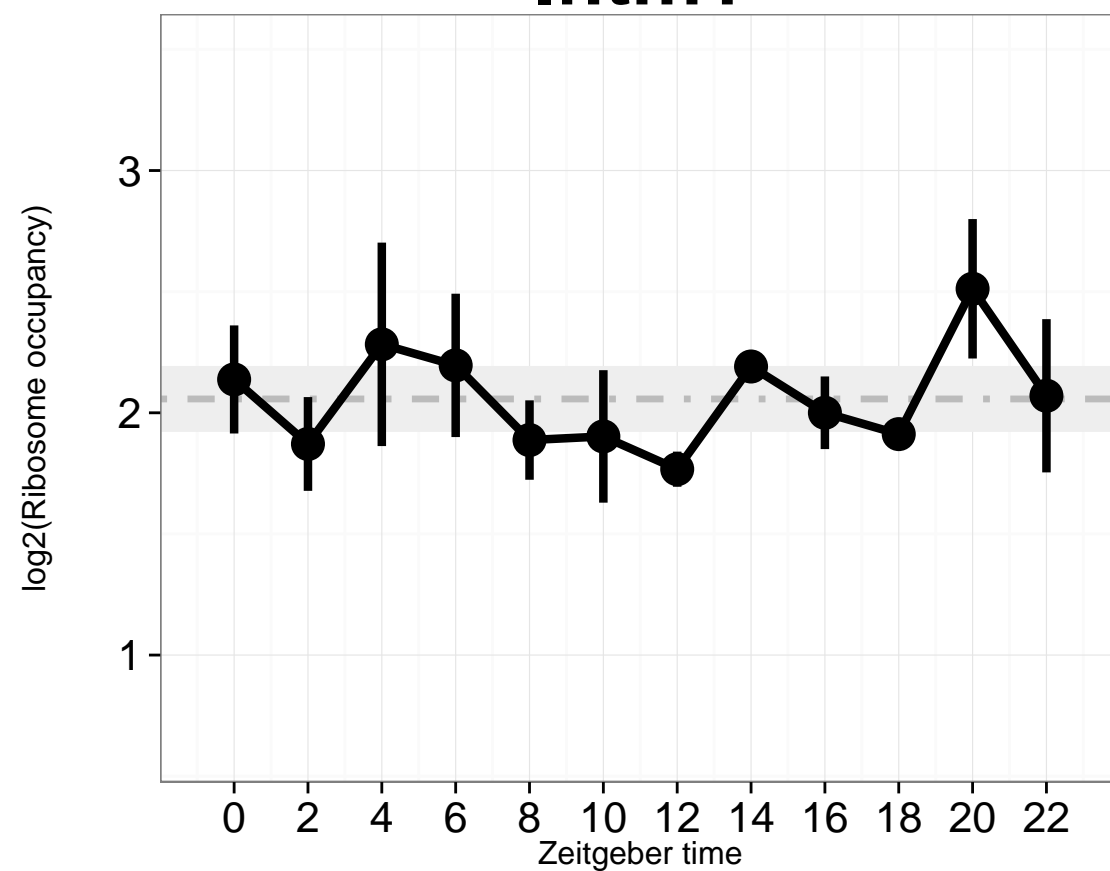

Supplement: Supplementary file 9549 [file 1]

## Mms19

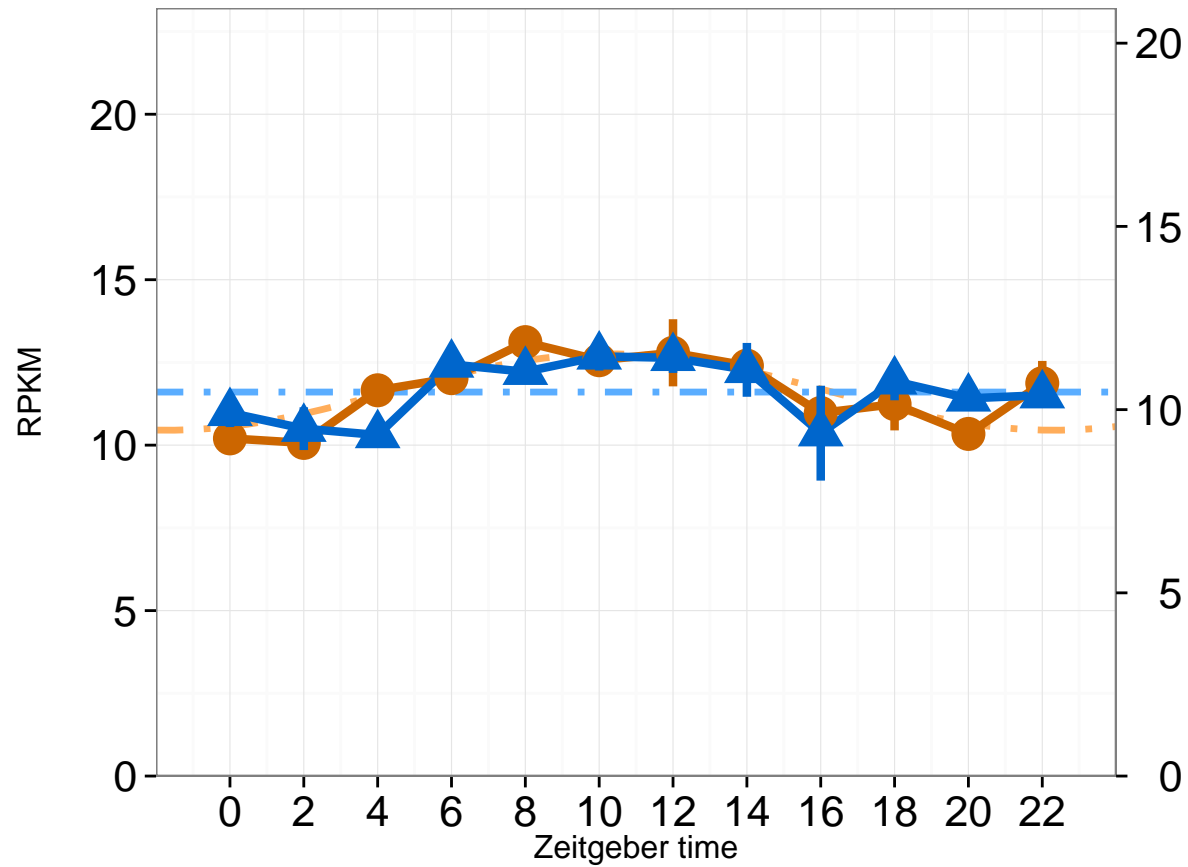

## Mms19

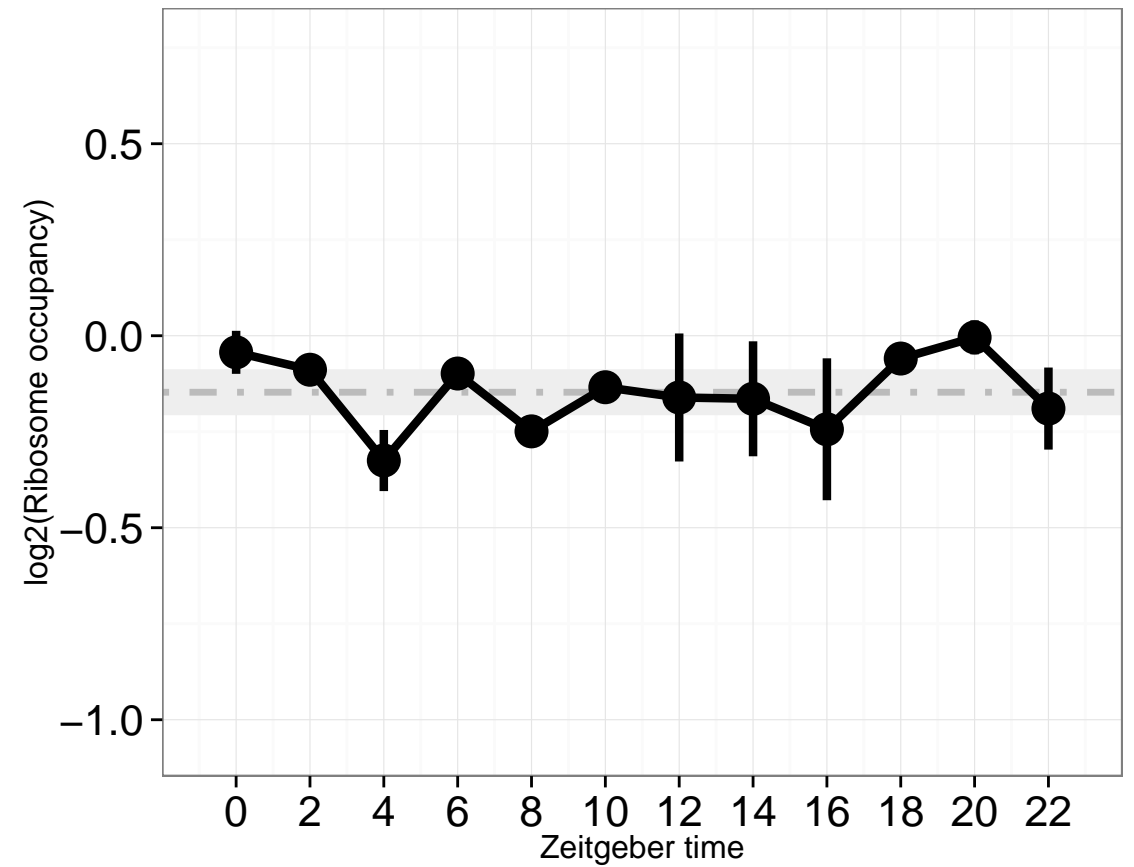

Supplement: Supplementary file 9550 [file 1]

## Alcam

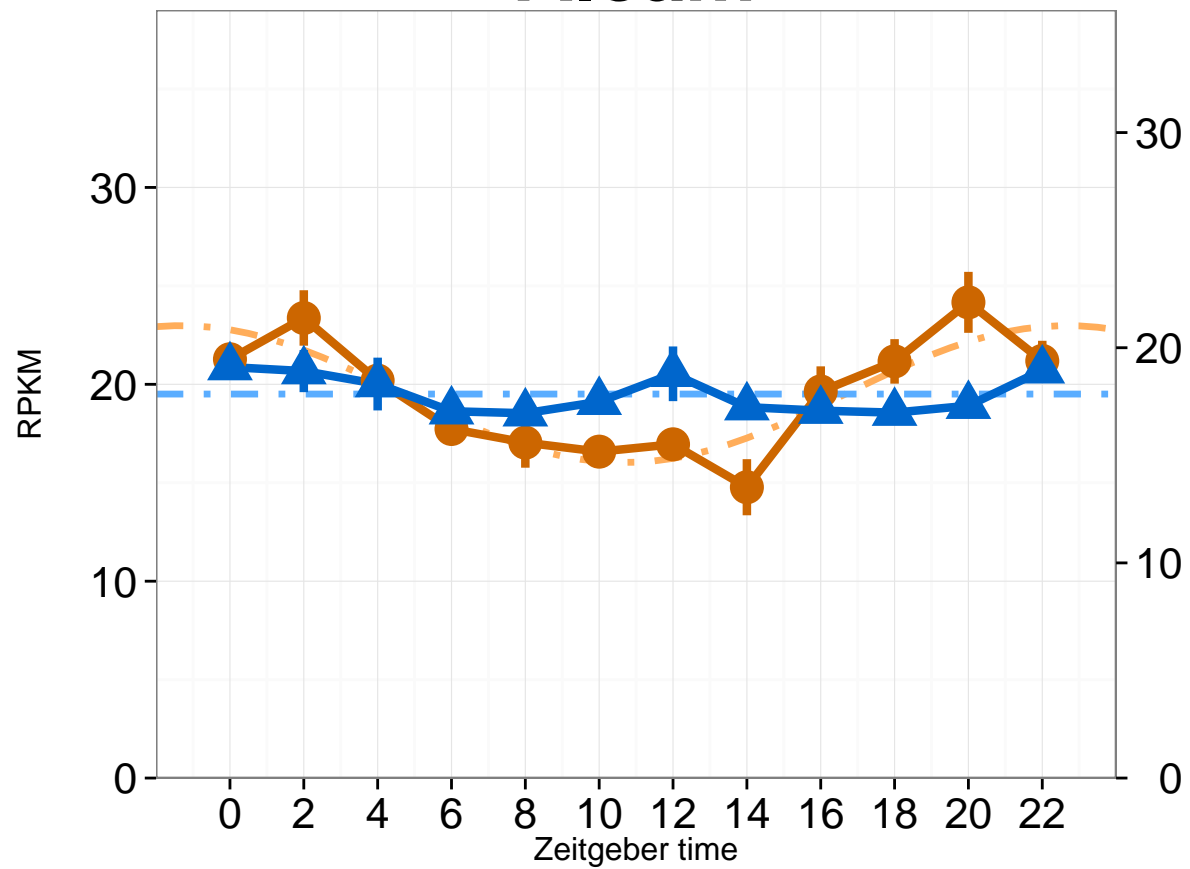

## Alcam

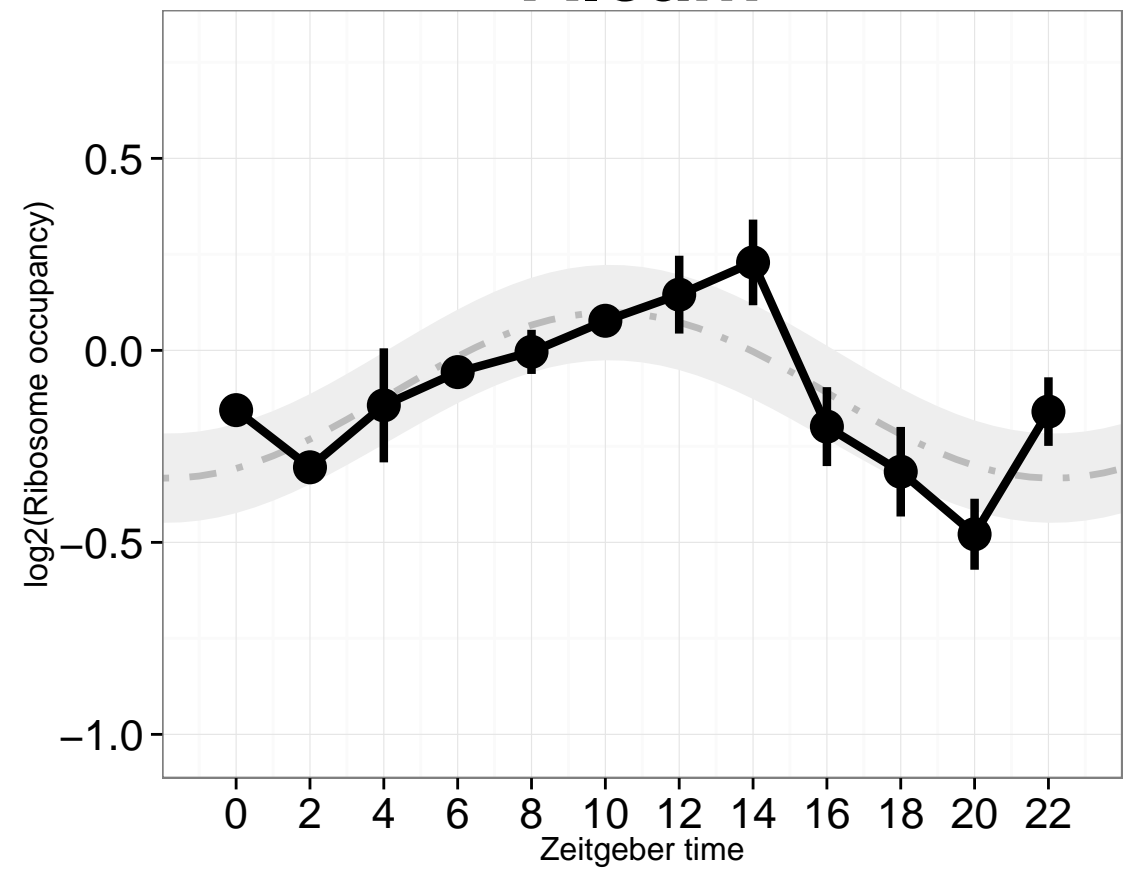

Supplement: Supplementary file 9551 [file 1]

## Oxgr1

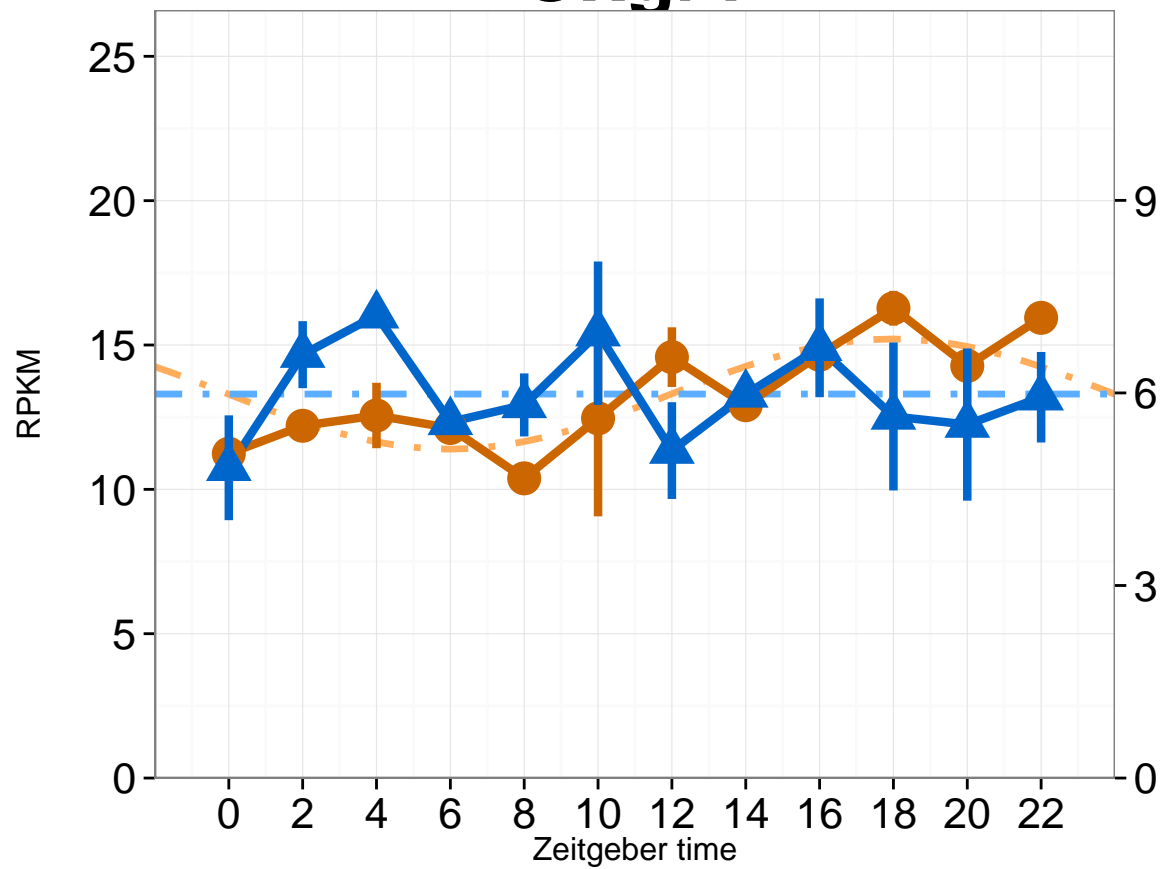

## Oxgr1

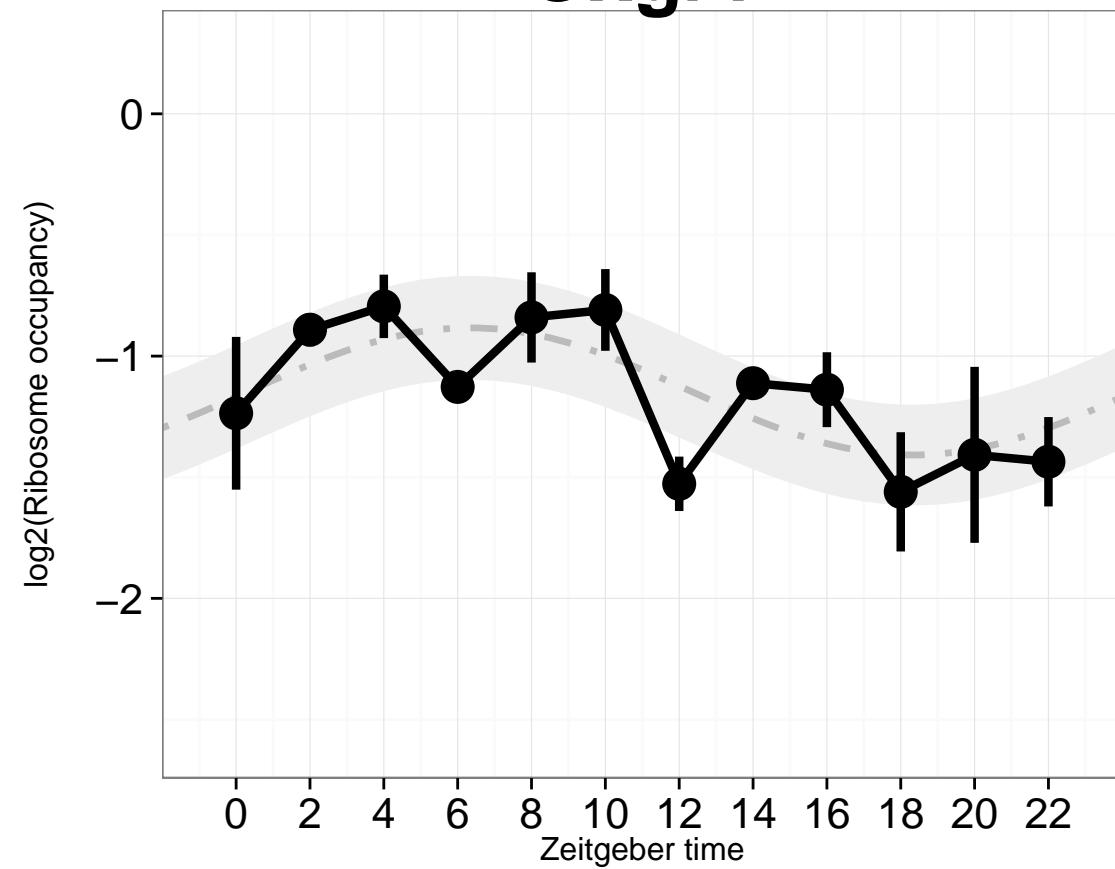

Supplement: Supplementary file 9552 [file 1]

## Akap9

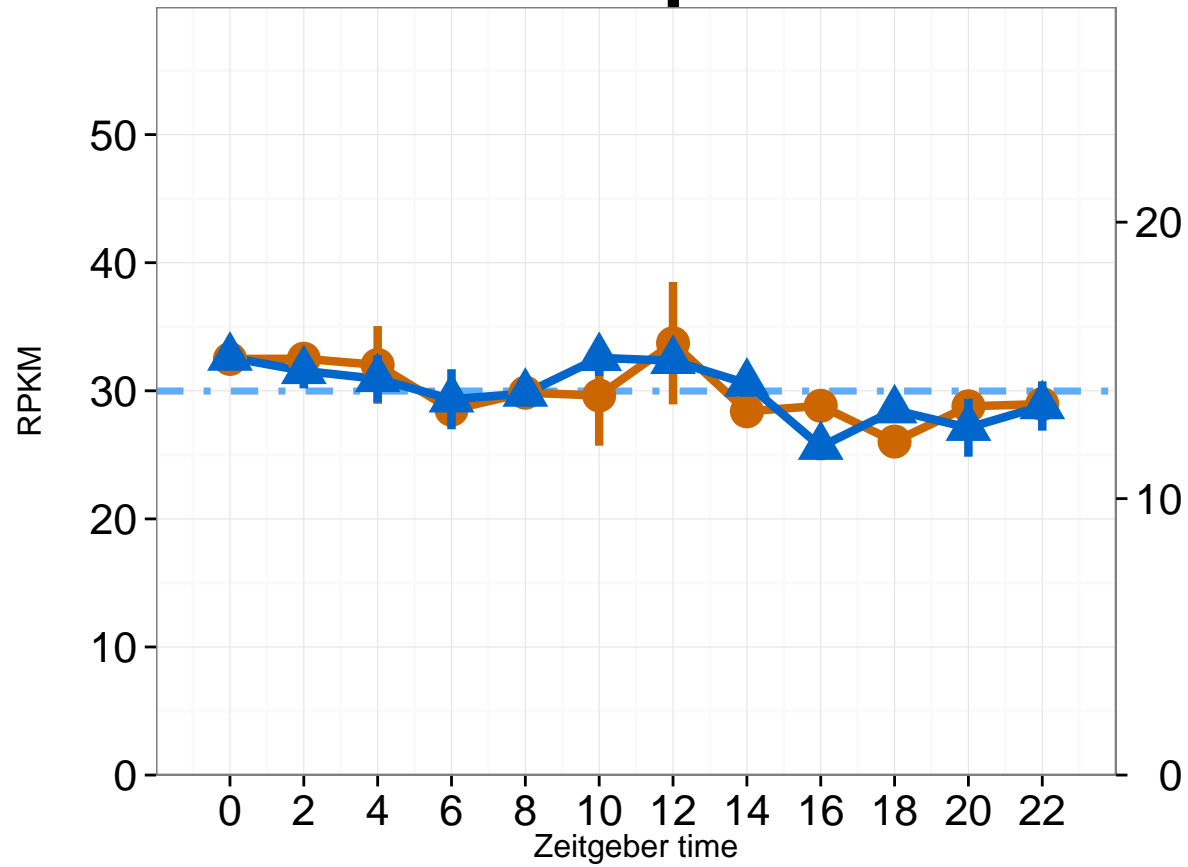

## Akap9

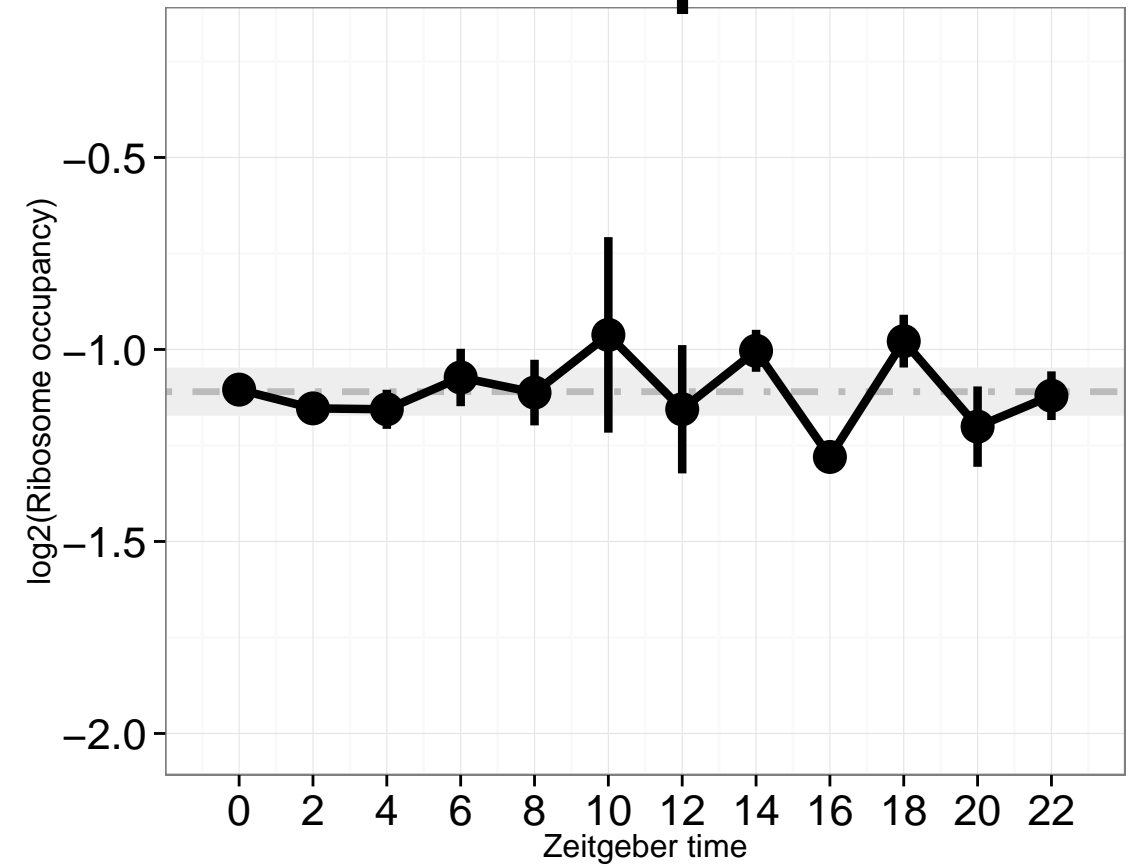

Supplement: Supplementary file 9553 [file 1]

## Cutal

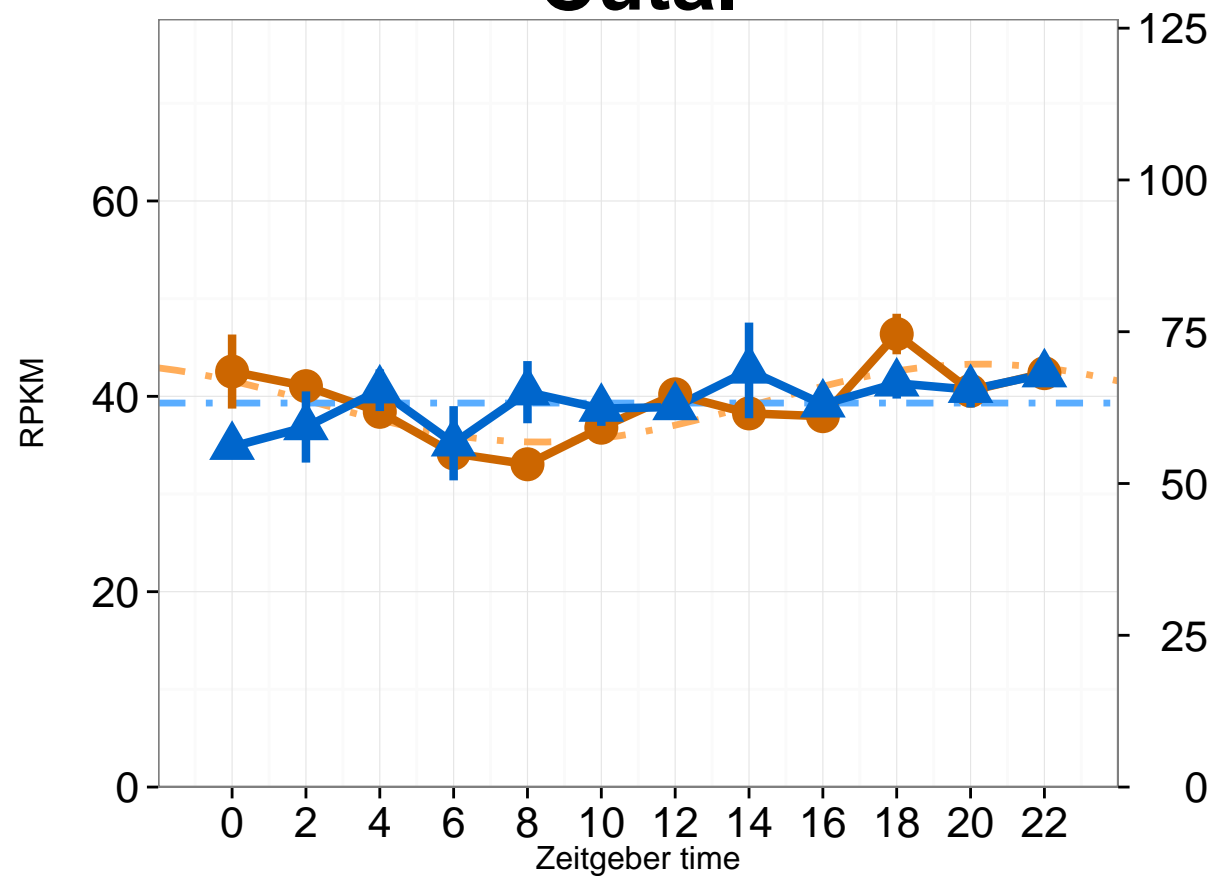

## Cutal

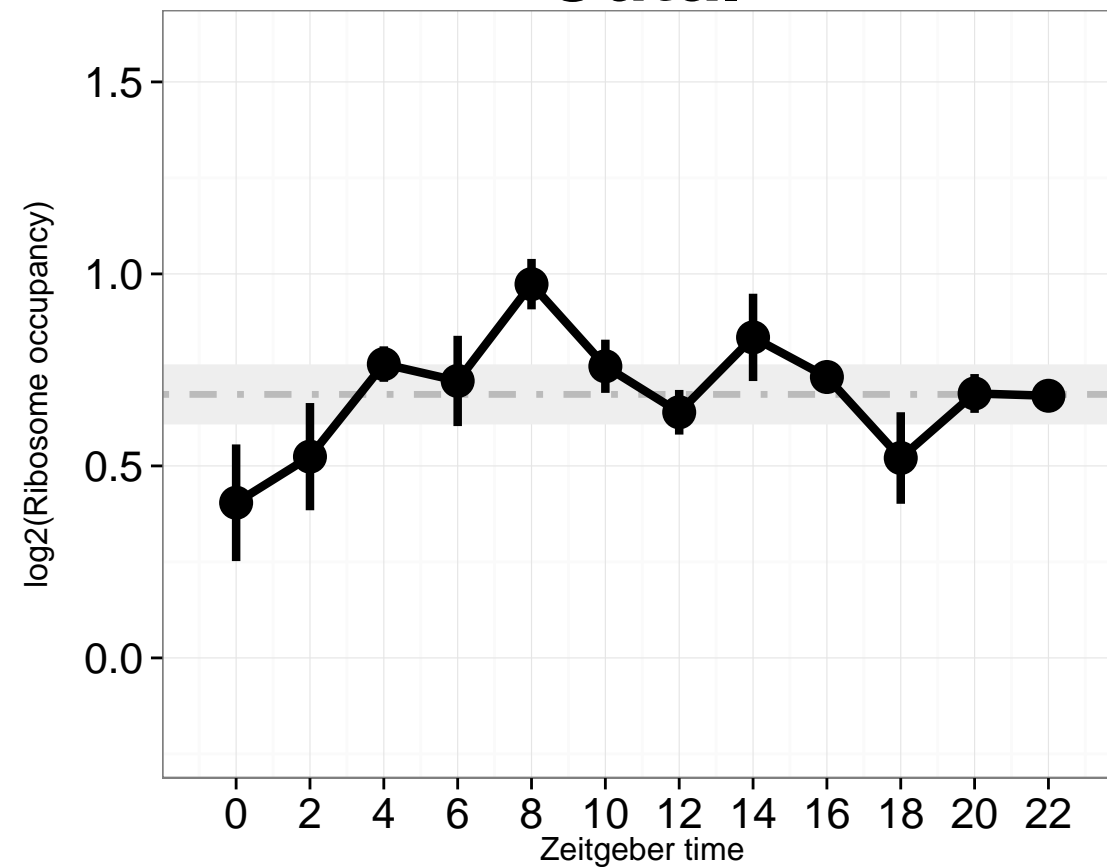

Supplement: Supplementary file 9554 [file 1]

# Map1lc3a

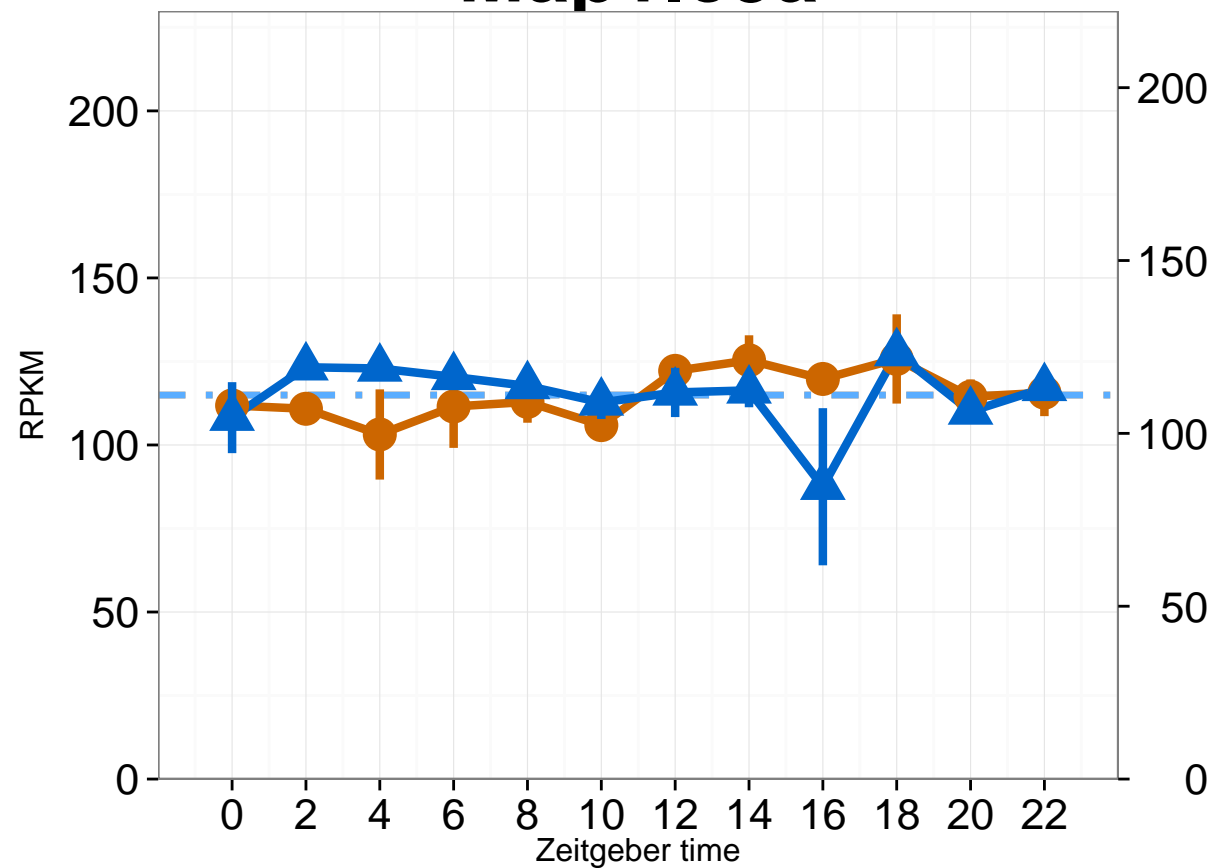

# Map1lc3a

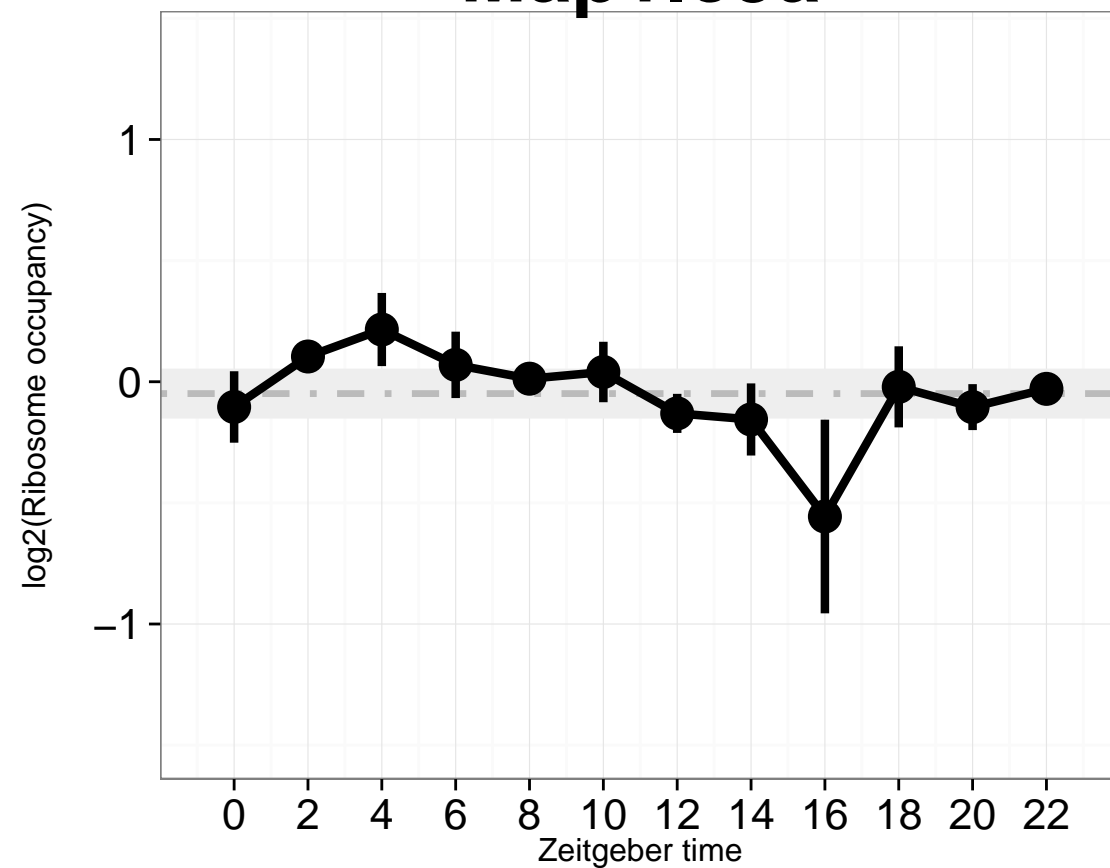

Supplement: Supplementary file 9555 [file 1]

## Whsc1l1

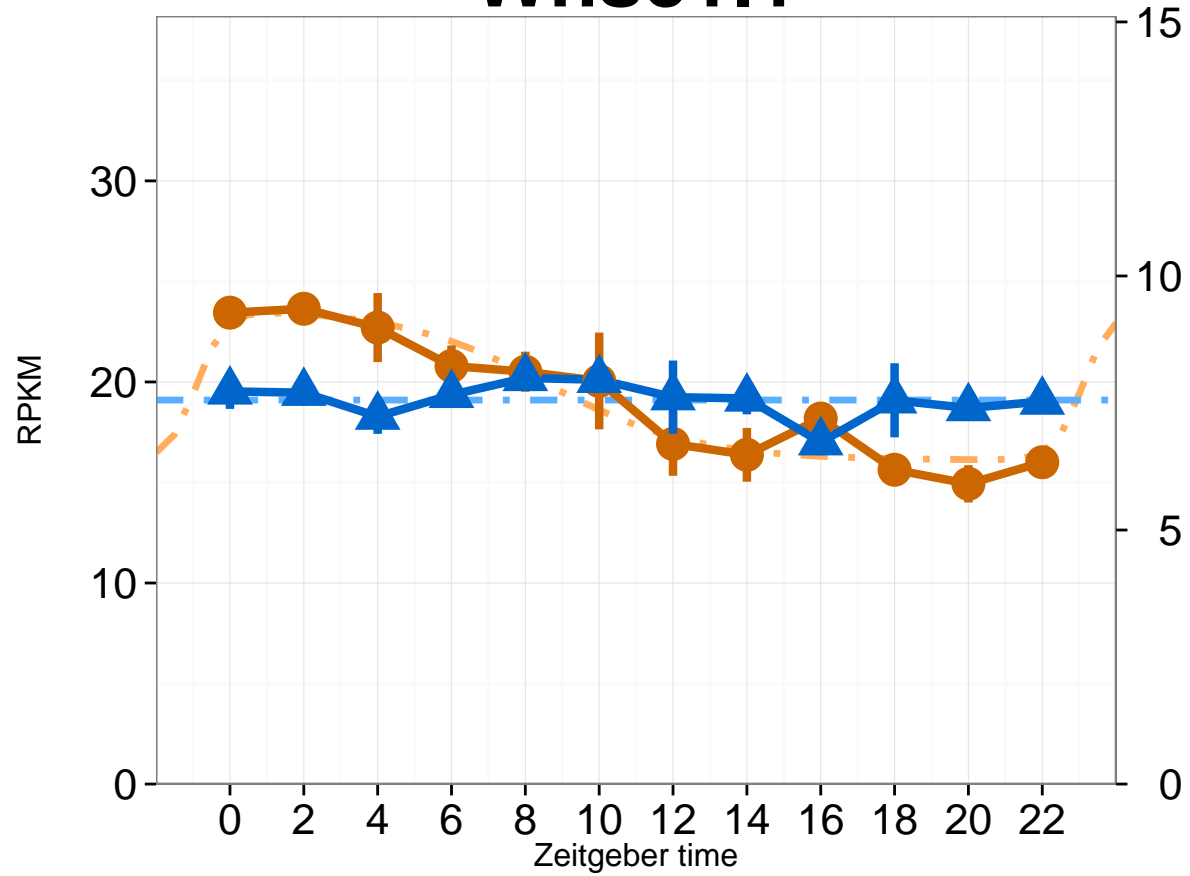

## Whsc1l1

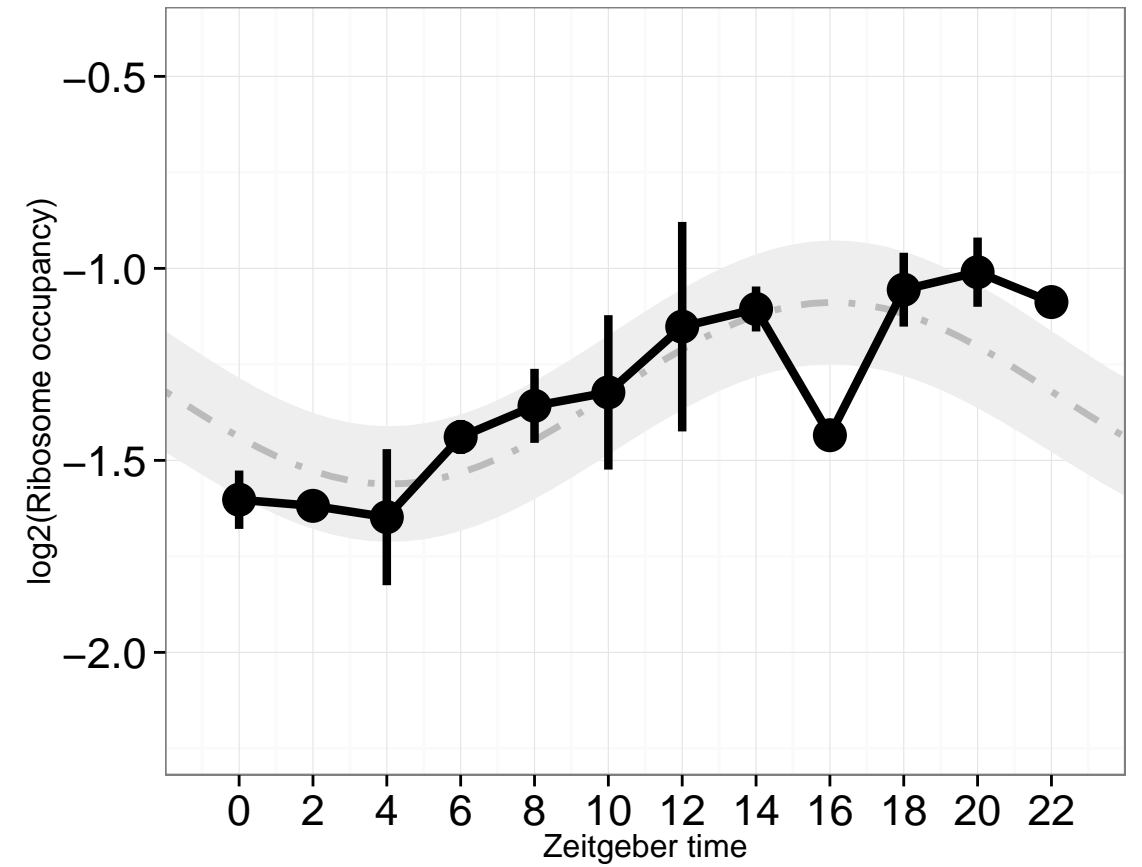

Supplement: Supplementary file 9556 [file 1]

# Uqcrfs1

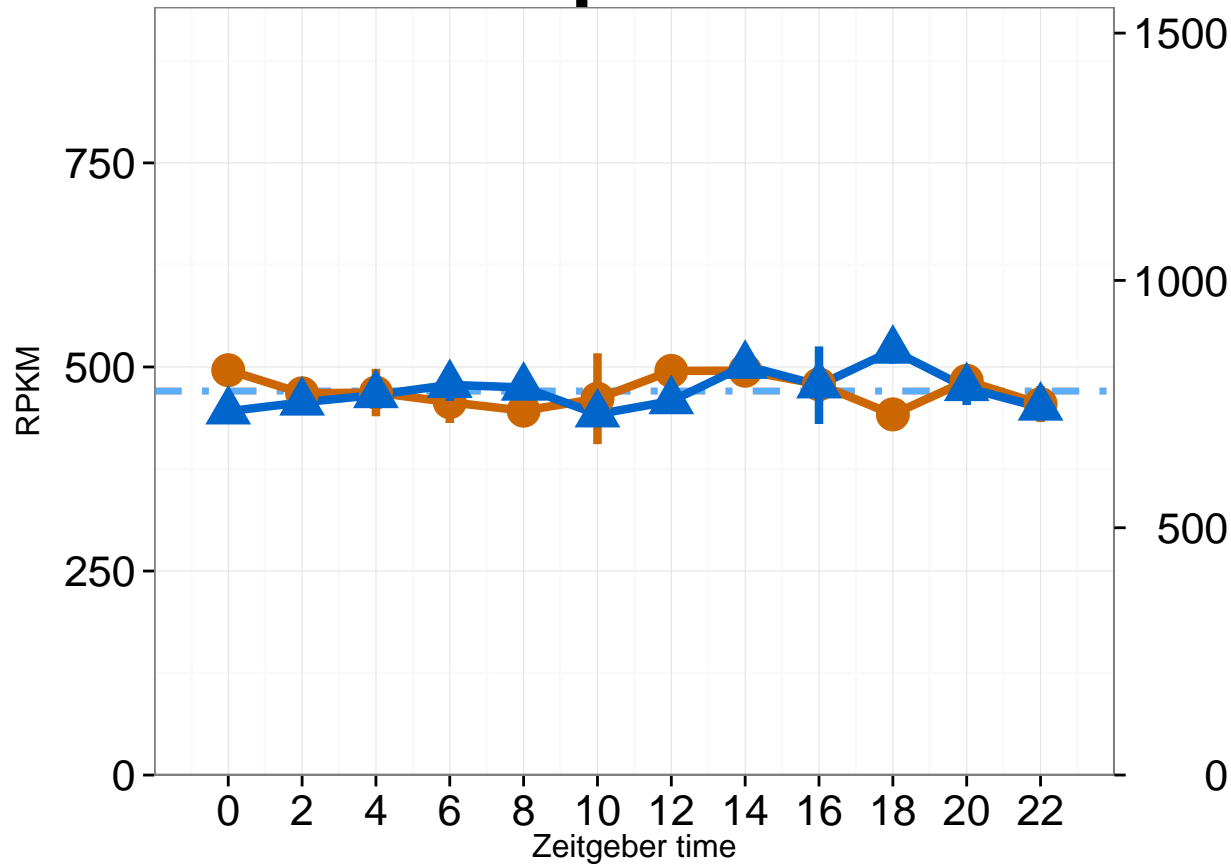

# Uqcrfs1

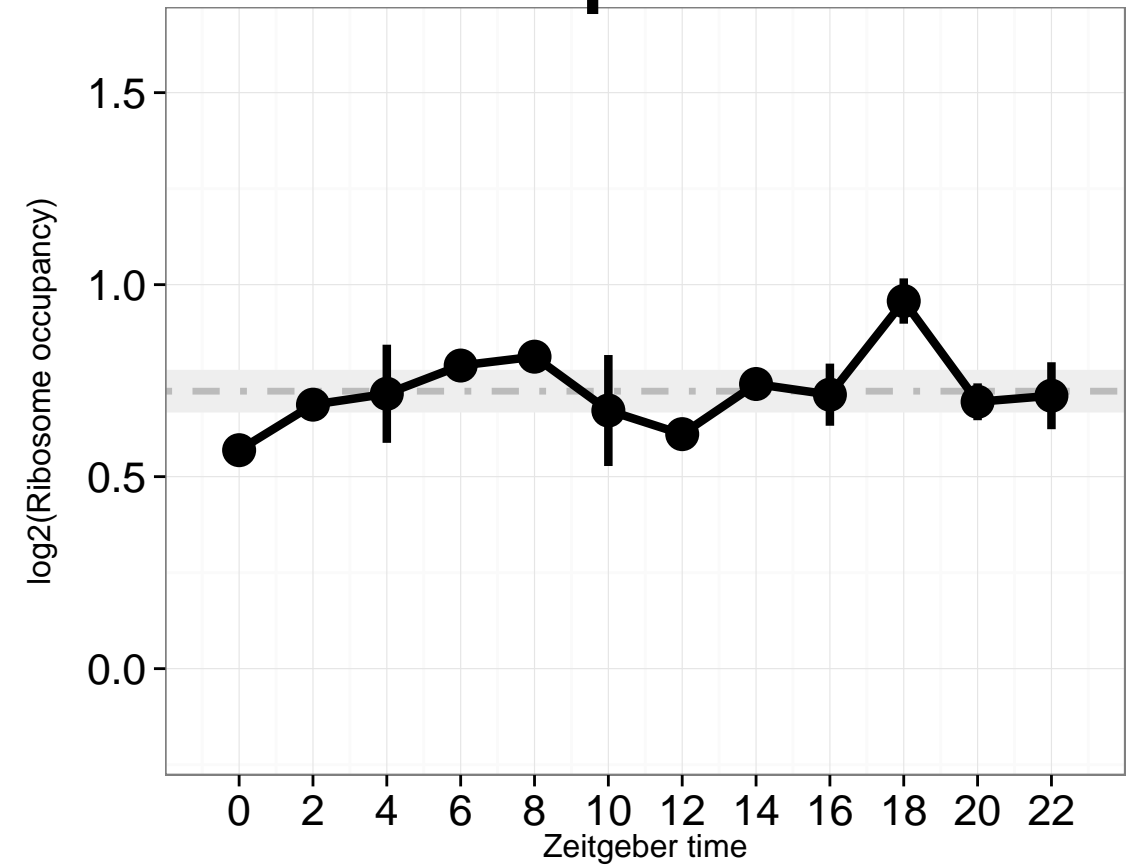

Supplement: Supplementary file 9557 [file 1]

## Anxa7

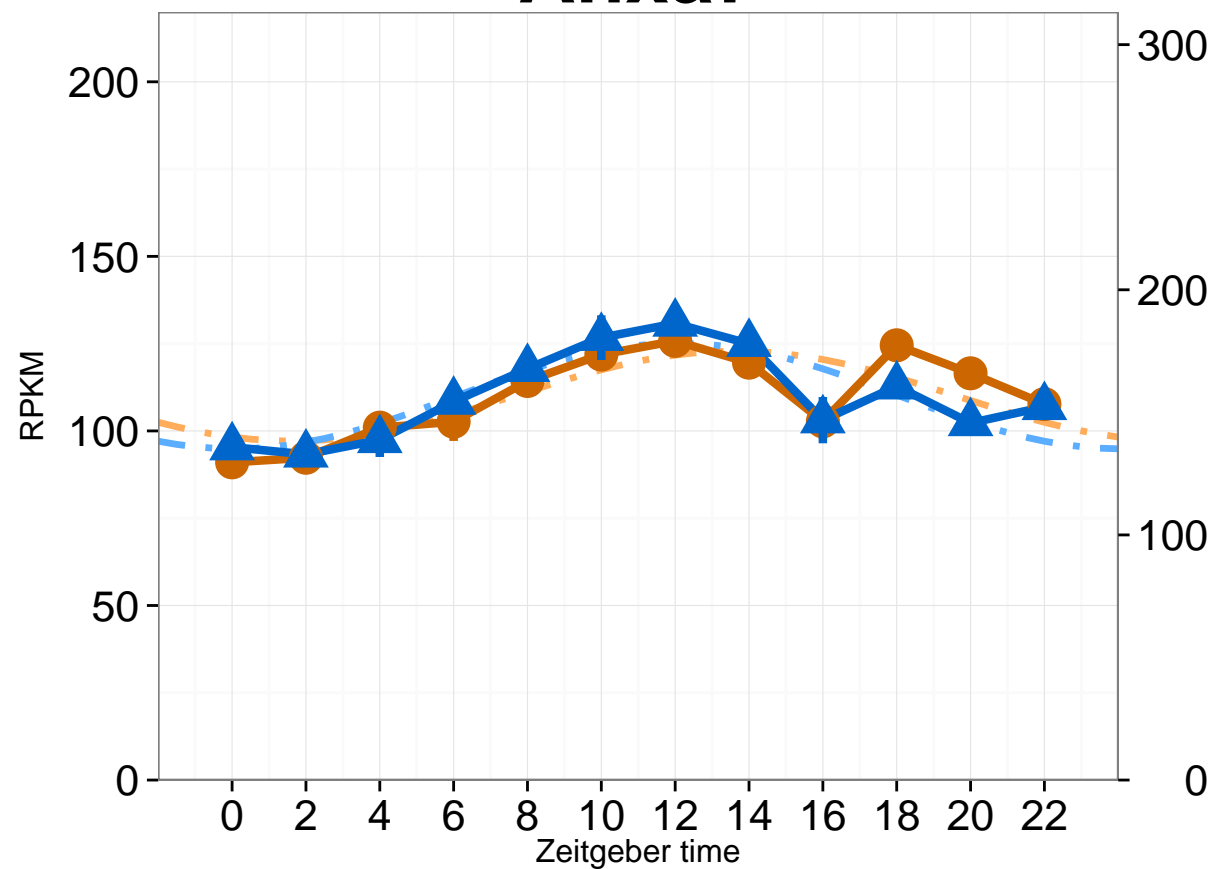

## Anxa7

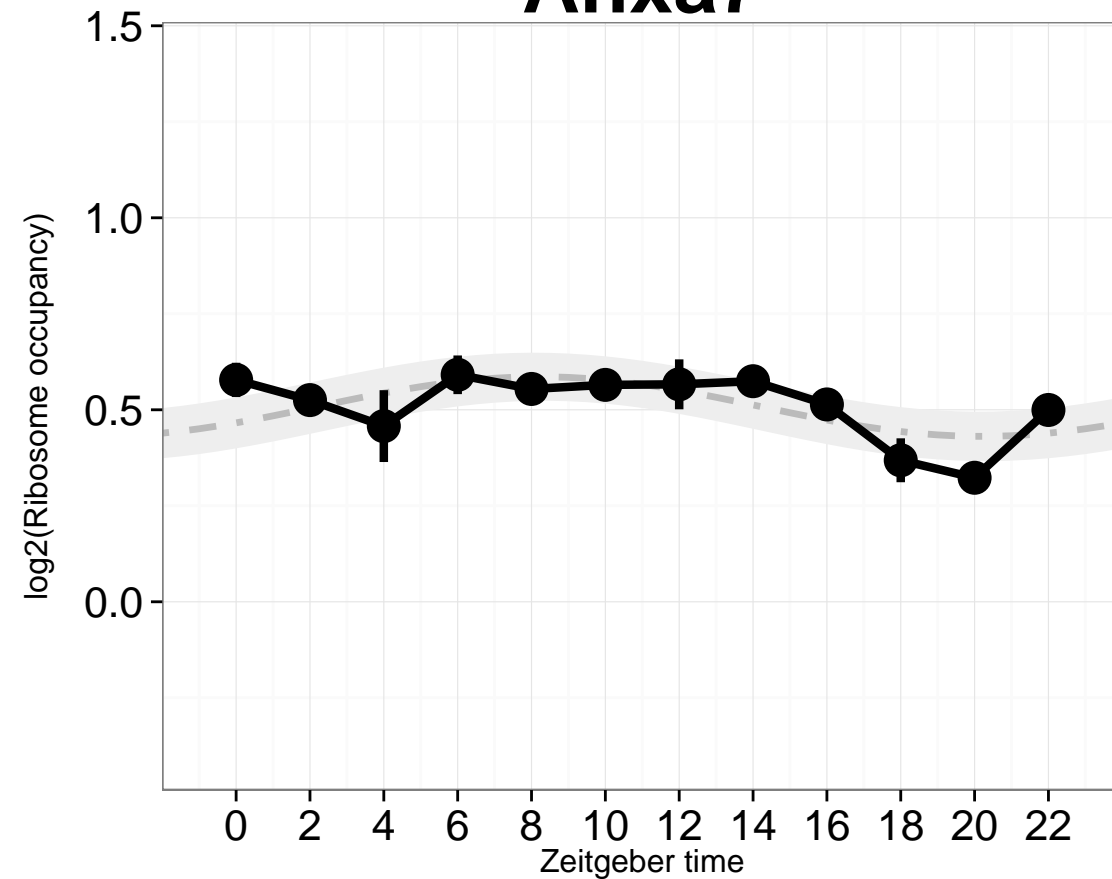

Supplement: Supplementary file 9558 [file 1]

# Bcmo1

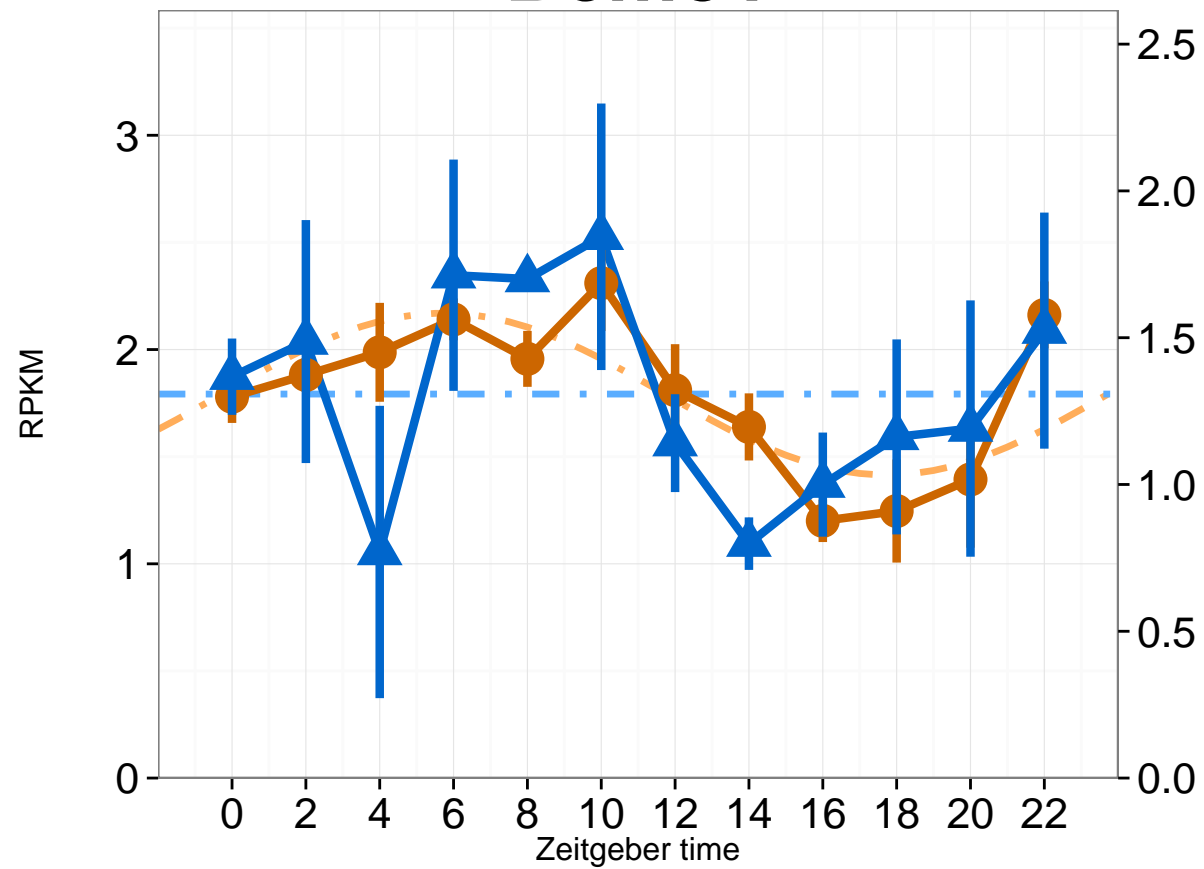

# Bcmo1

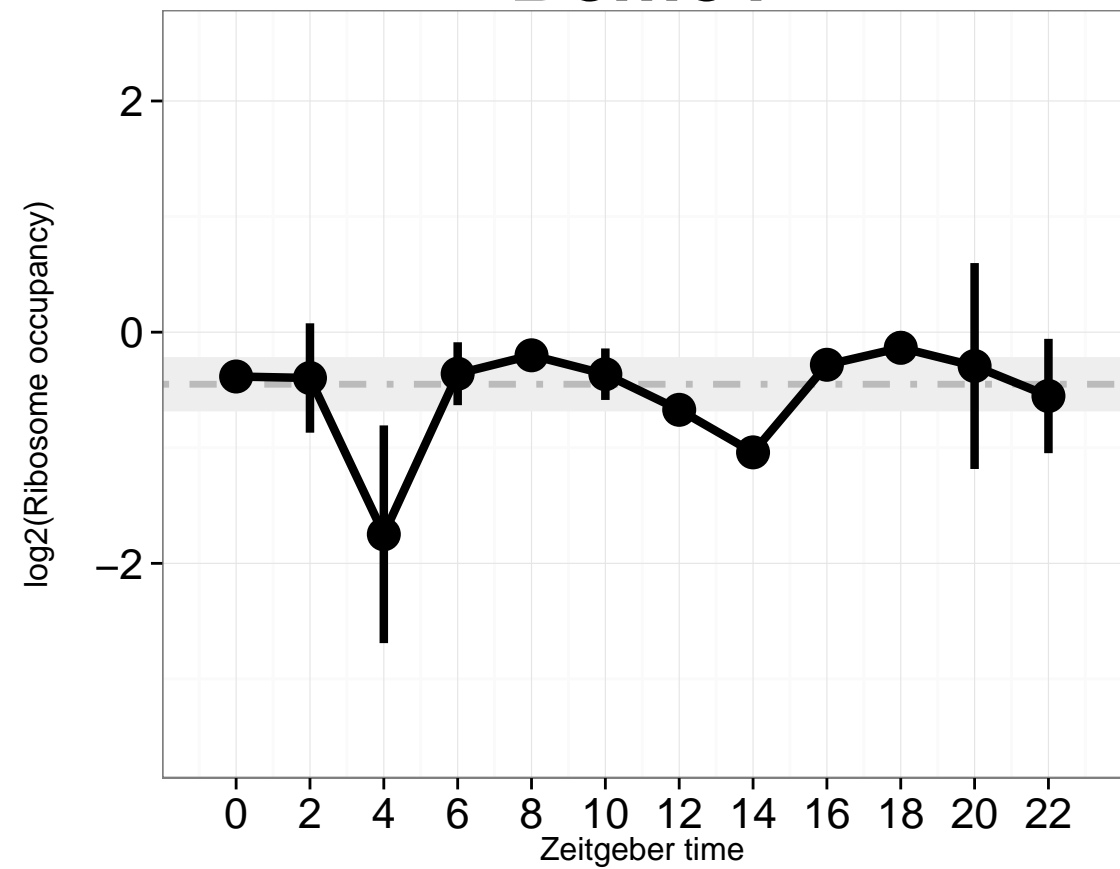

Supplement: Supplementary file 9559 [file 1]

## Triobp

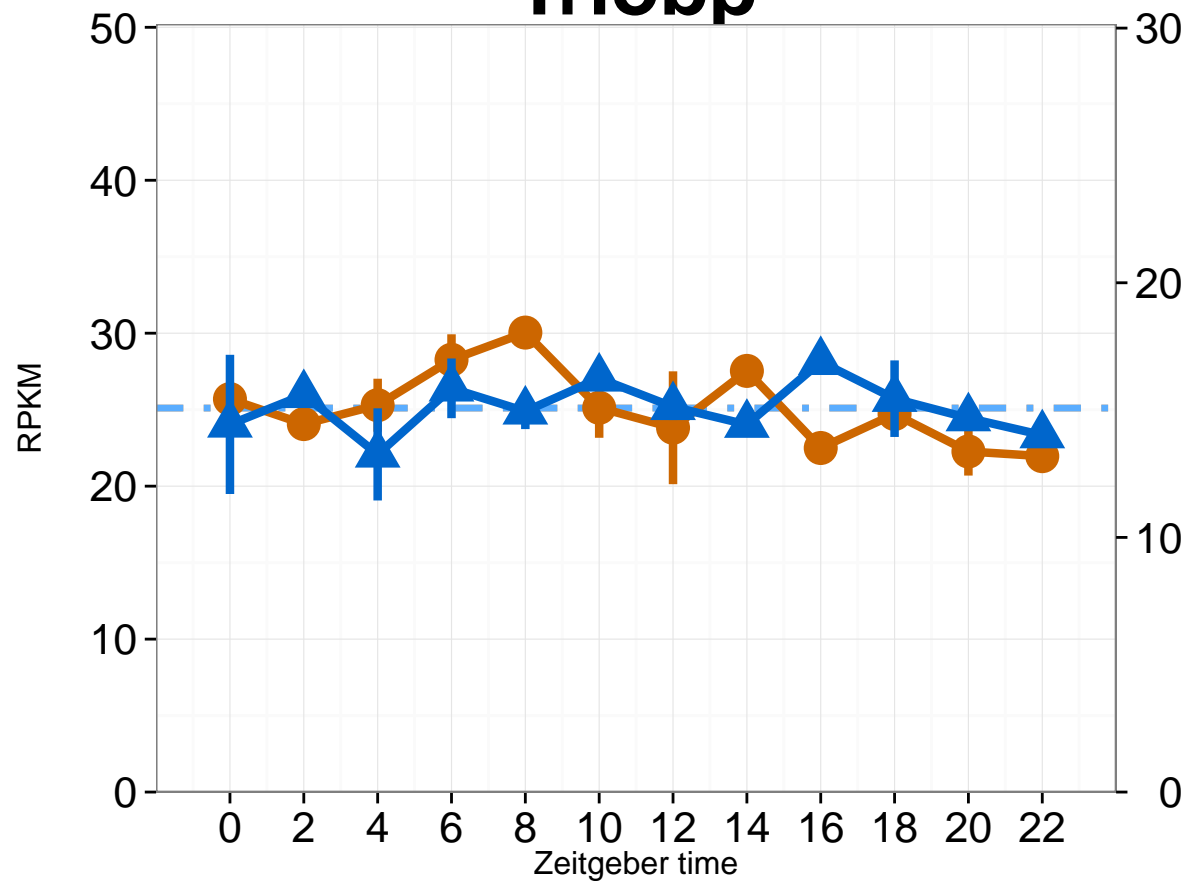

## Triobp

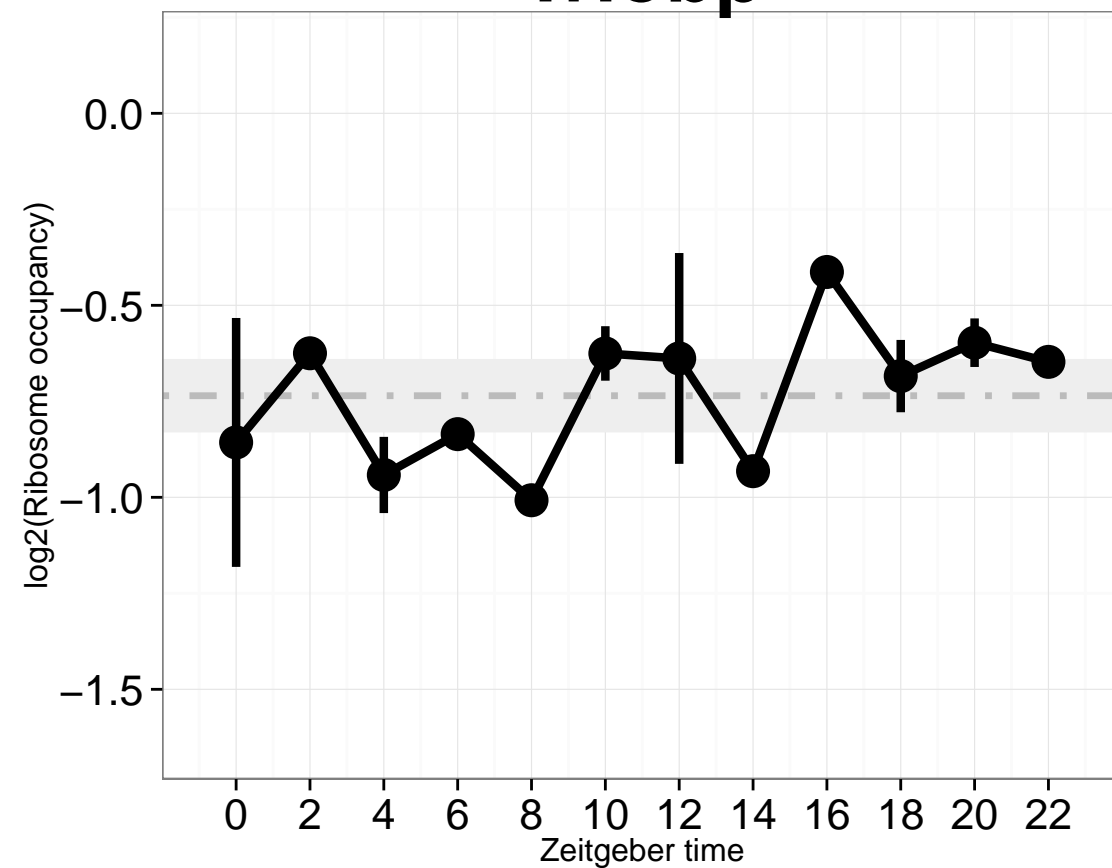

Supplement: Supplementary file 9560 [file 1]

# Psmb6

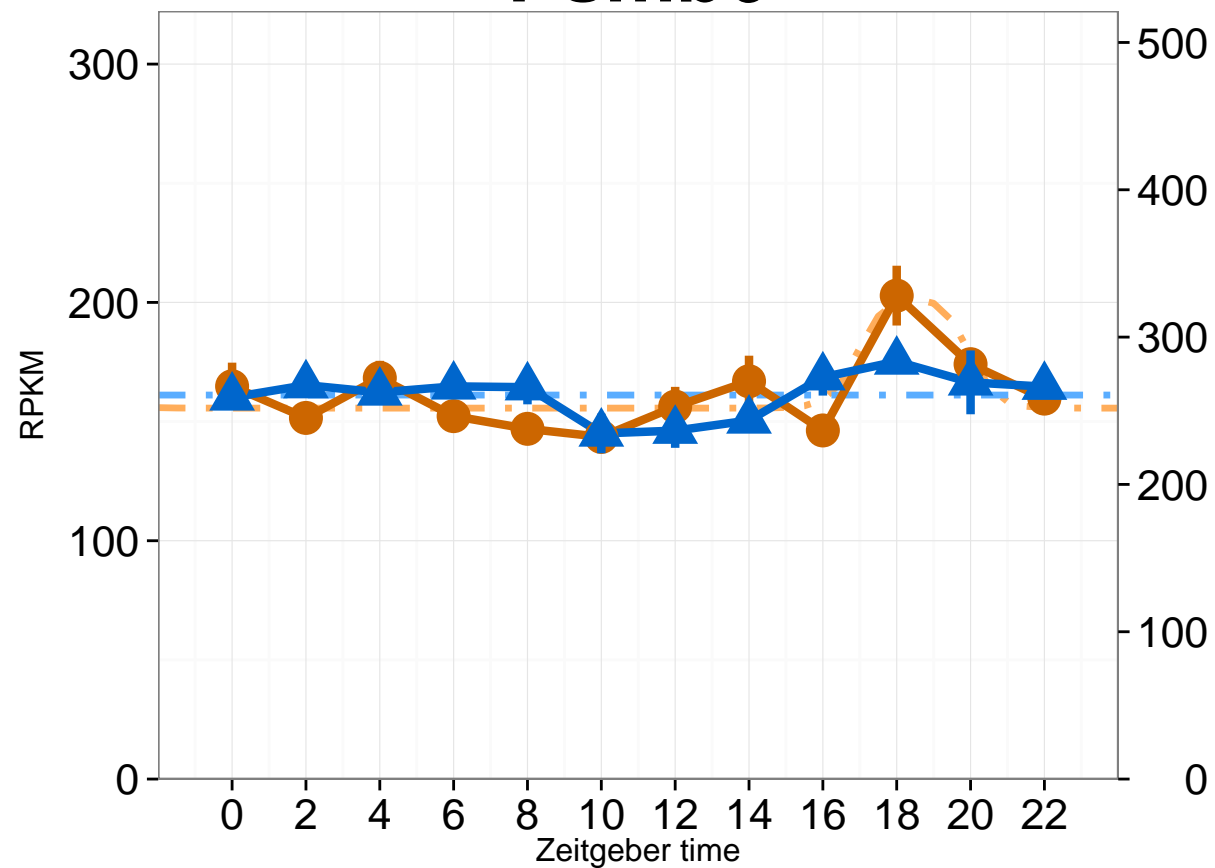

# Psmb6

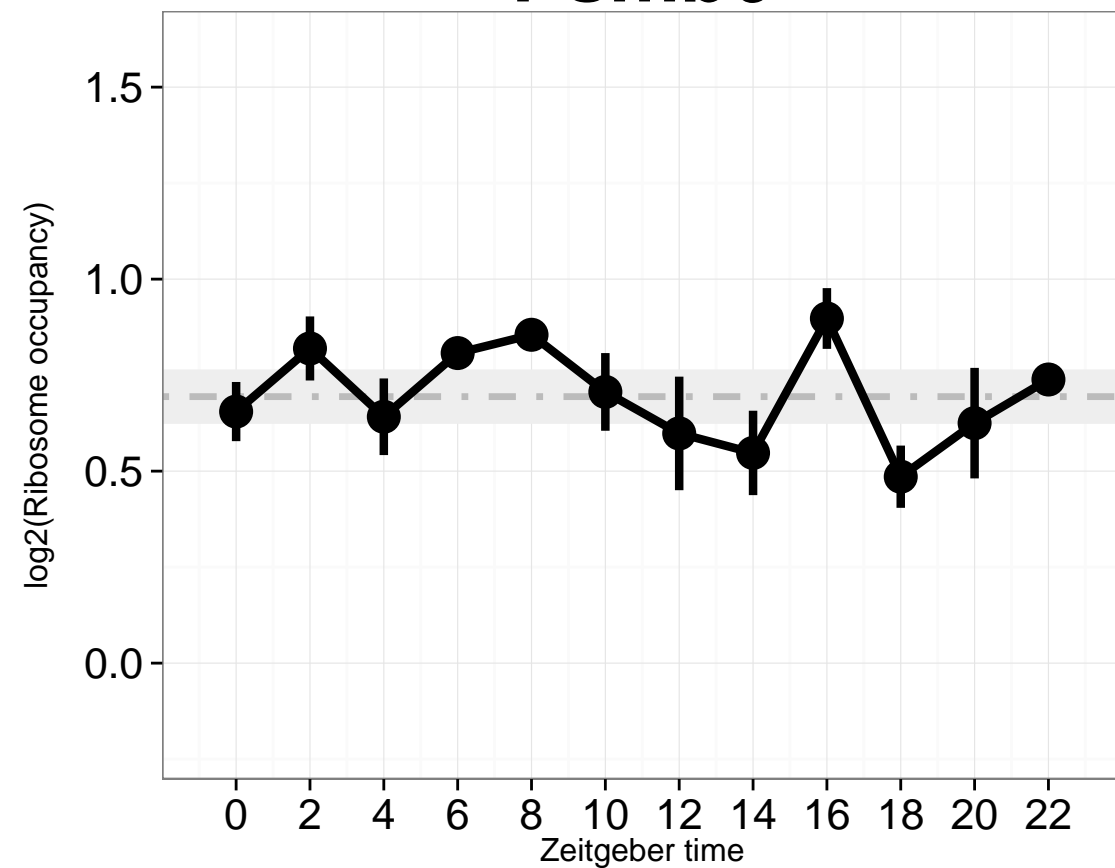

Supplement: Supplementary file 9561 [file 1]

# Colec11

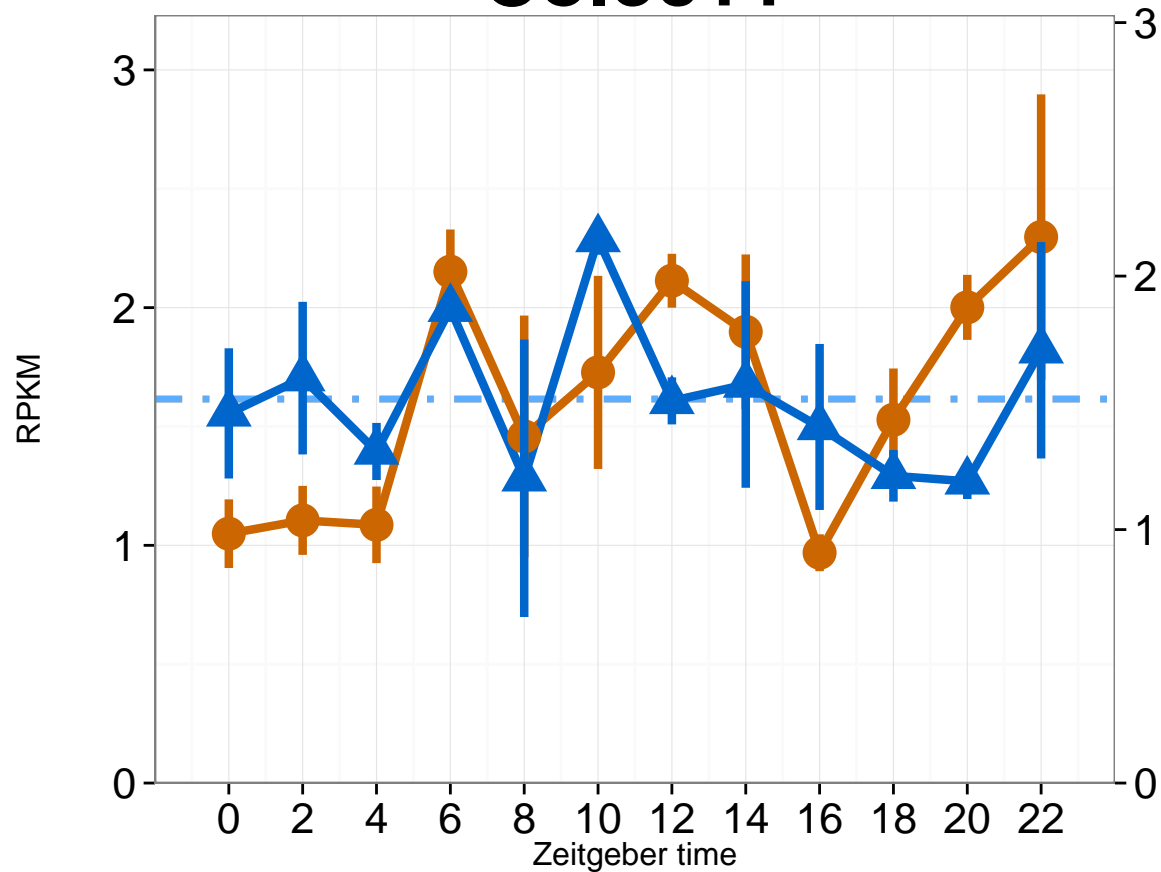

# Colec11

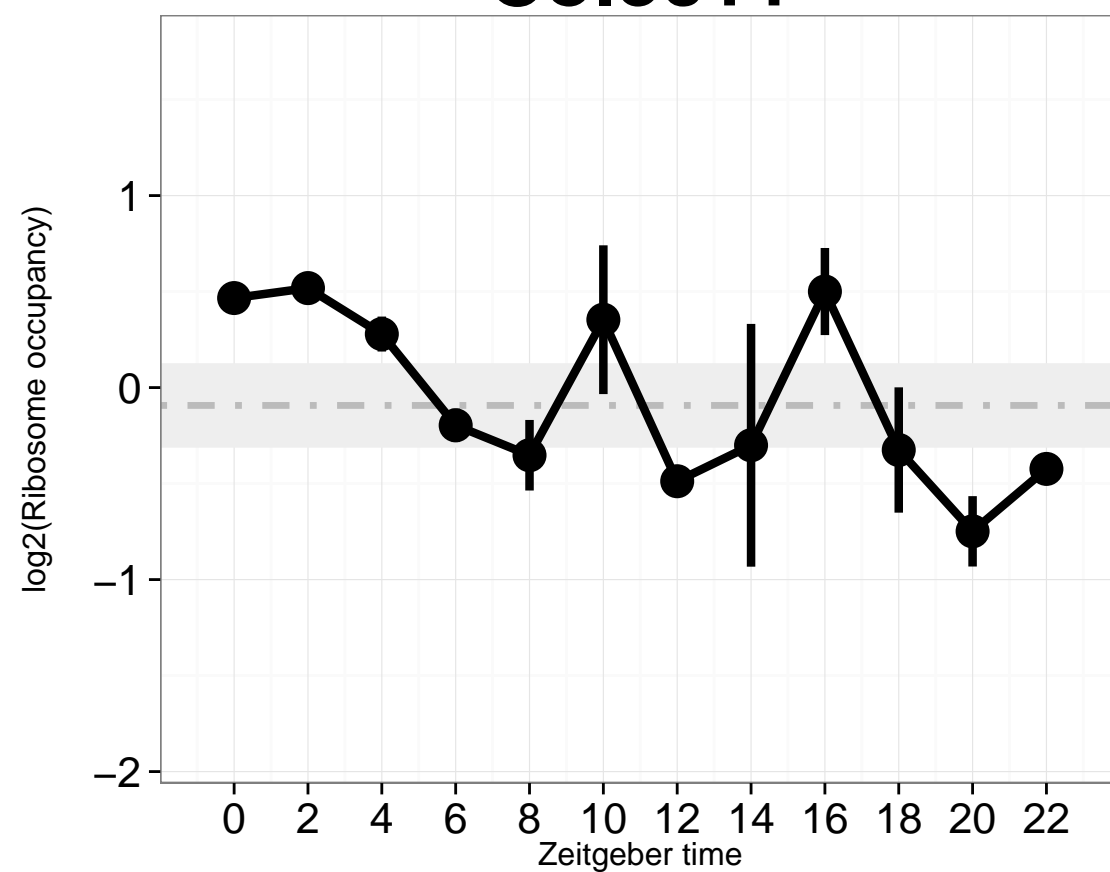

Supplement: Supplementary file 9562 [file 1]

Ube2ql1 TR

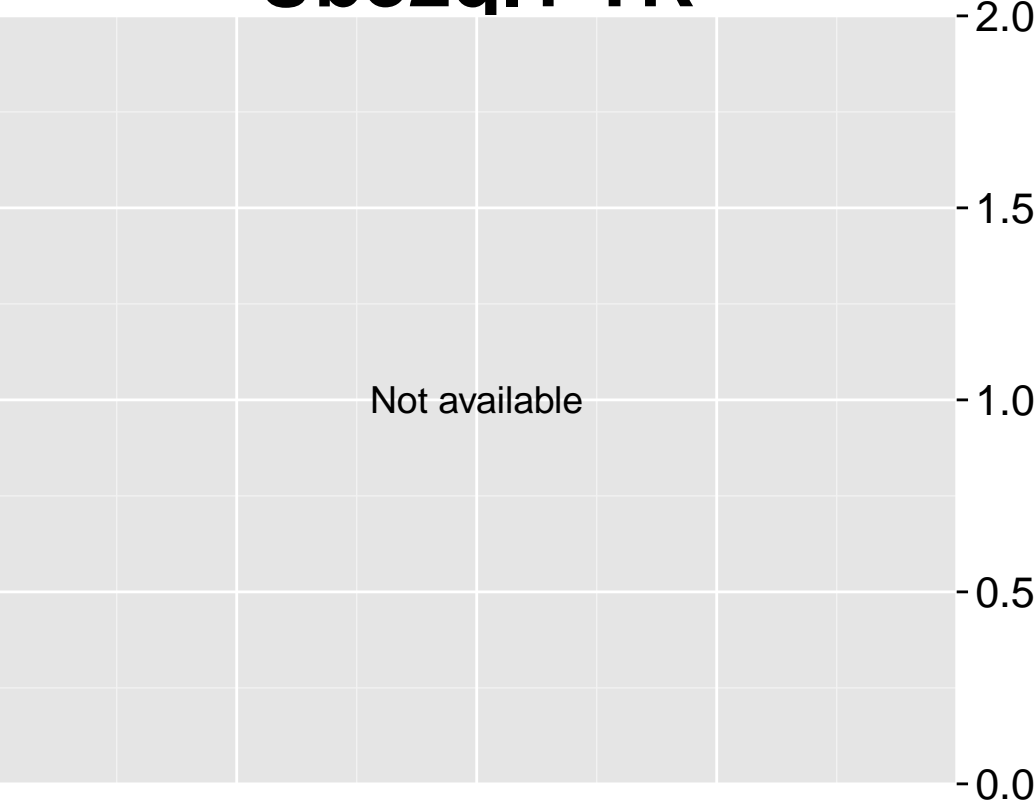

Ube2ql1 log2(Ribosome occupanc

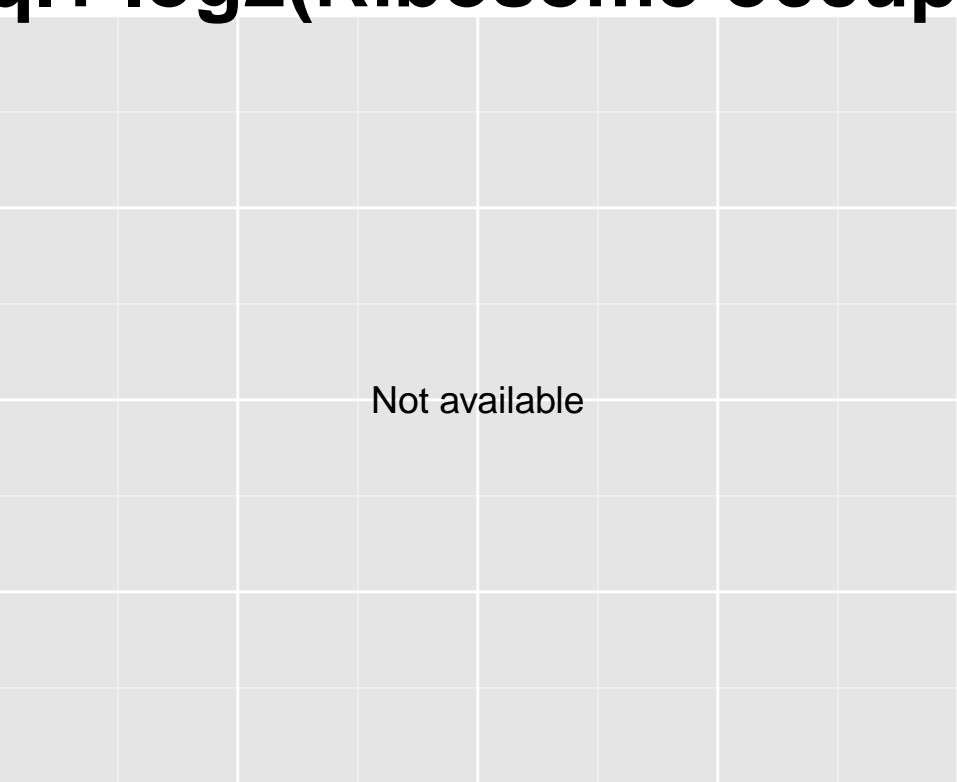

Supplement: Supplementary file 9563 [file 1]

## Cml5

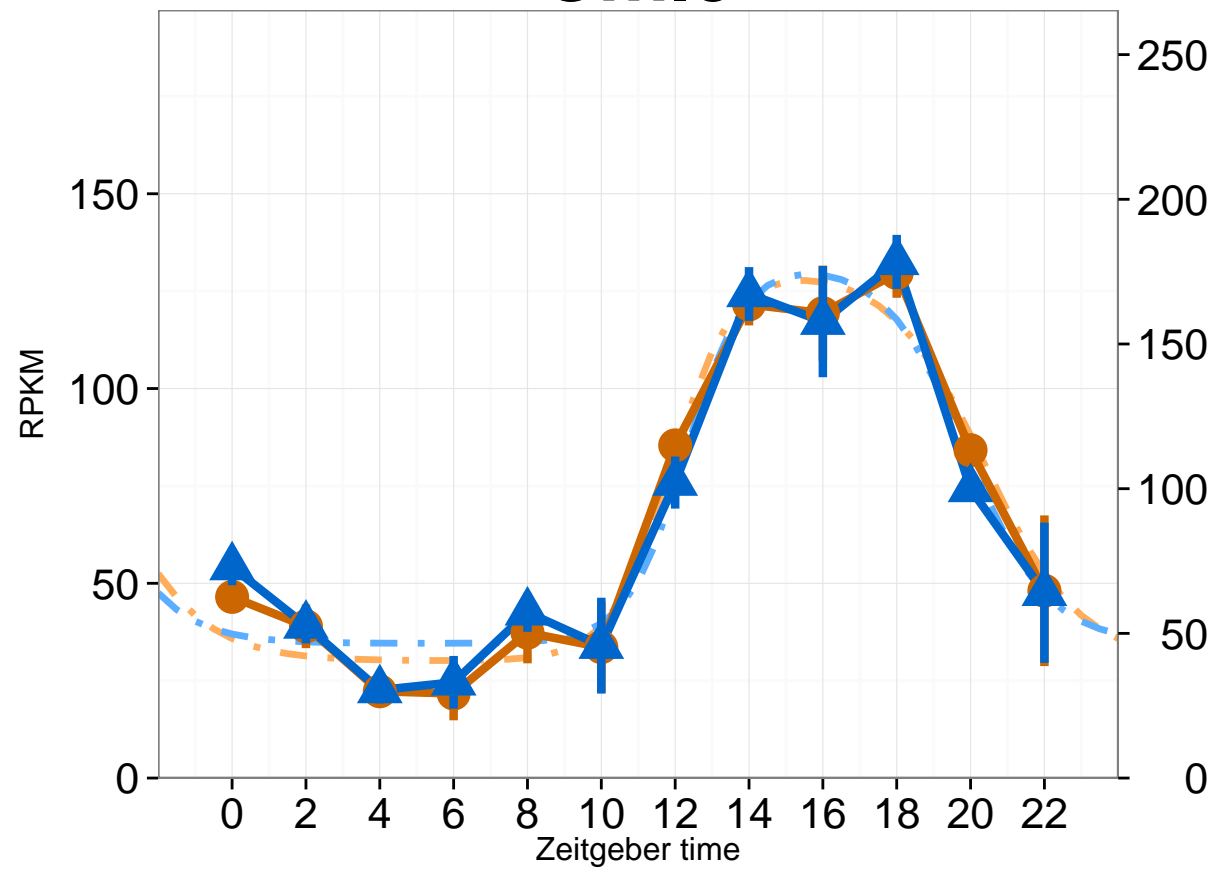

## Cml5

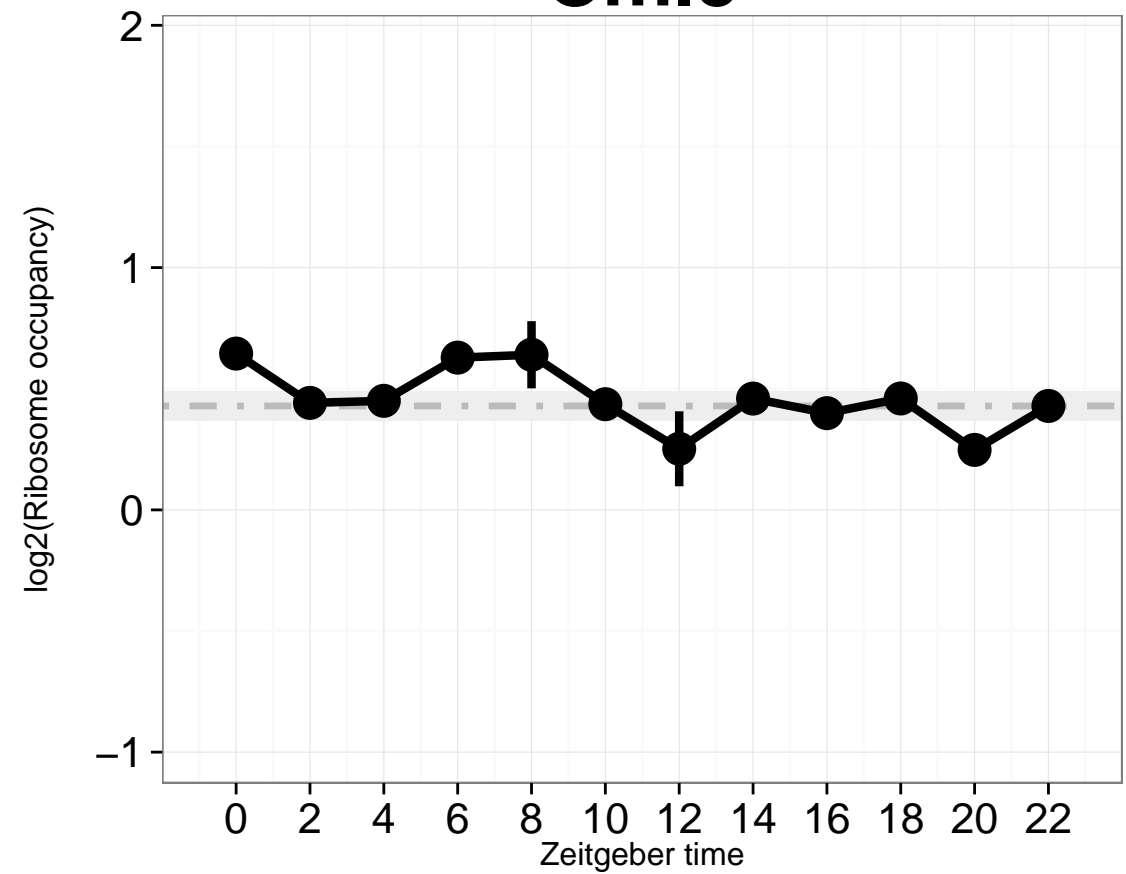

Supplement: Supplementary file 9564 [file 1]

# Gmfg

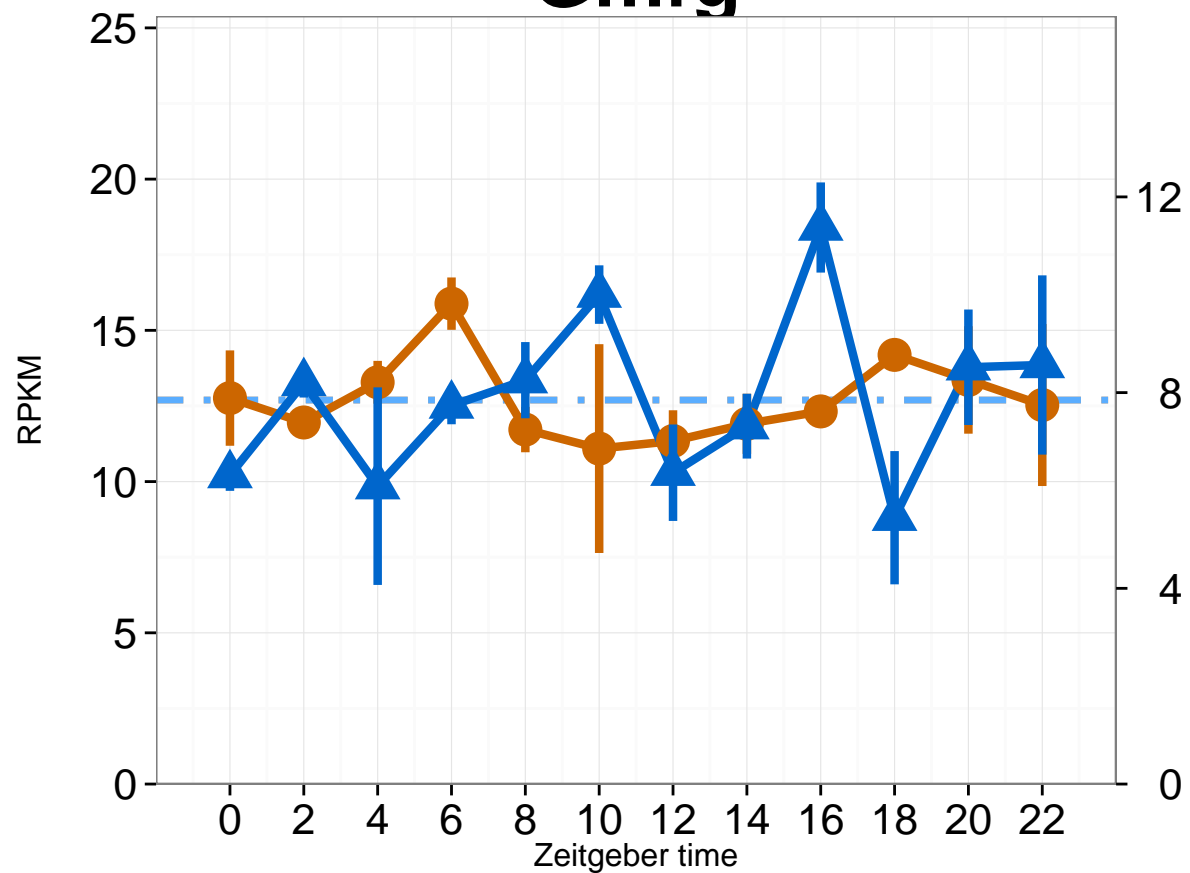

# Gmfg

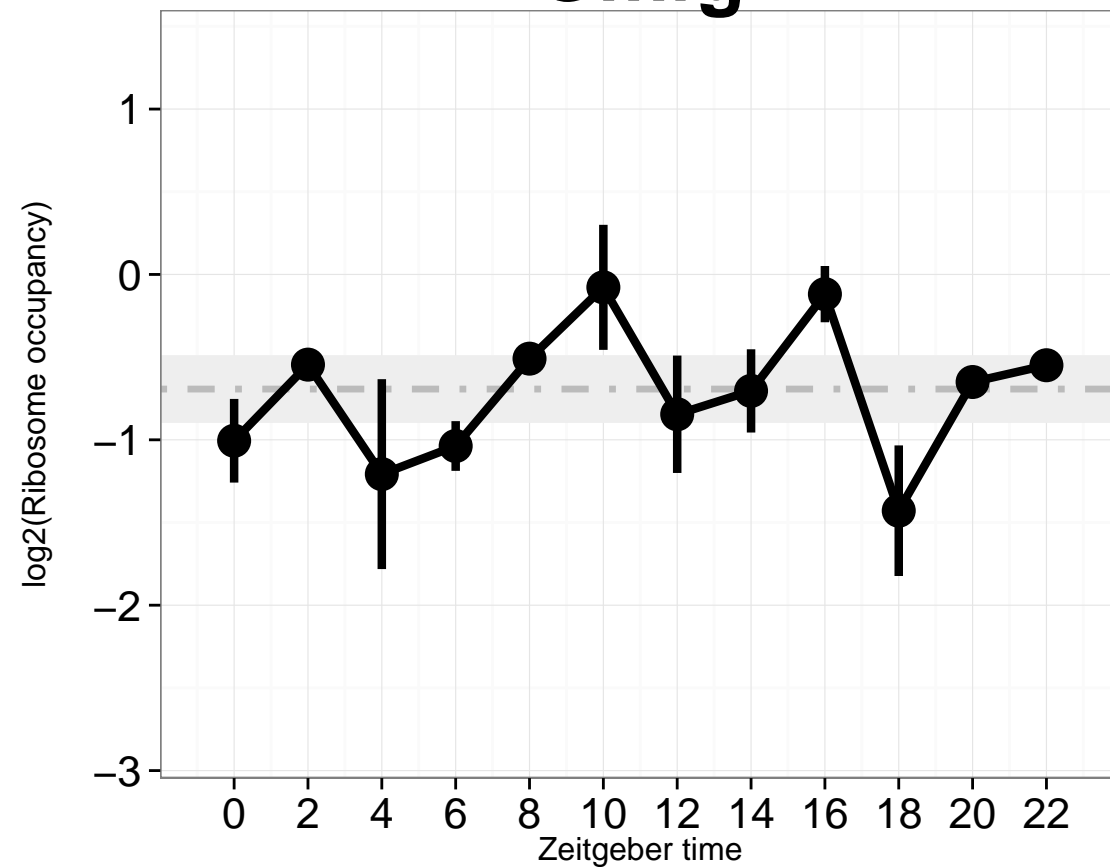

Supplement: Supplementary file 9565 [file 1]

# Aldh1a2

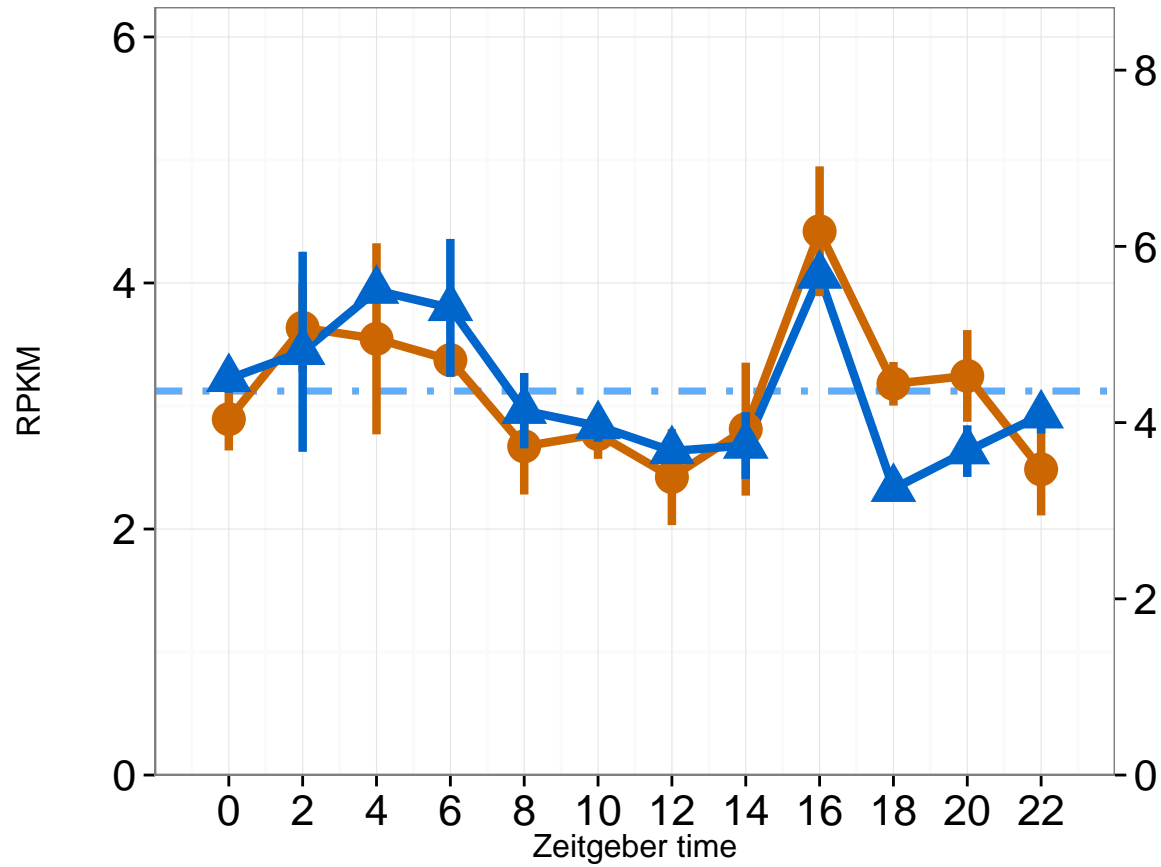

# Aldh1a2

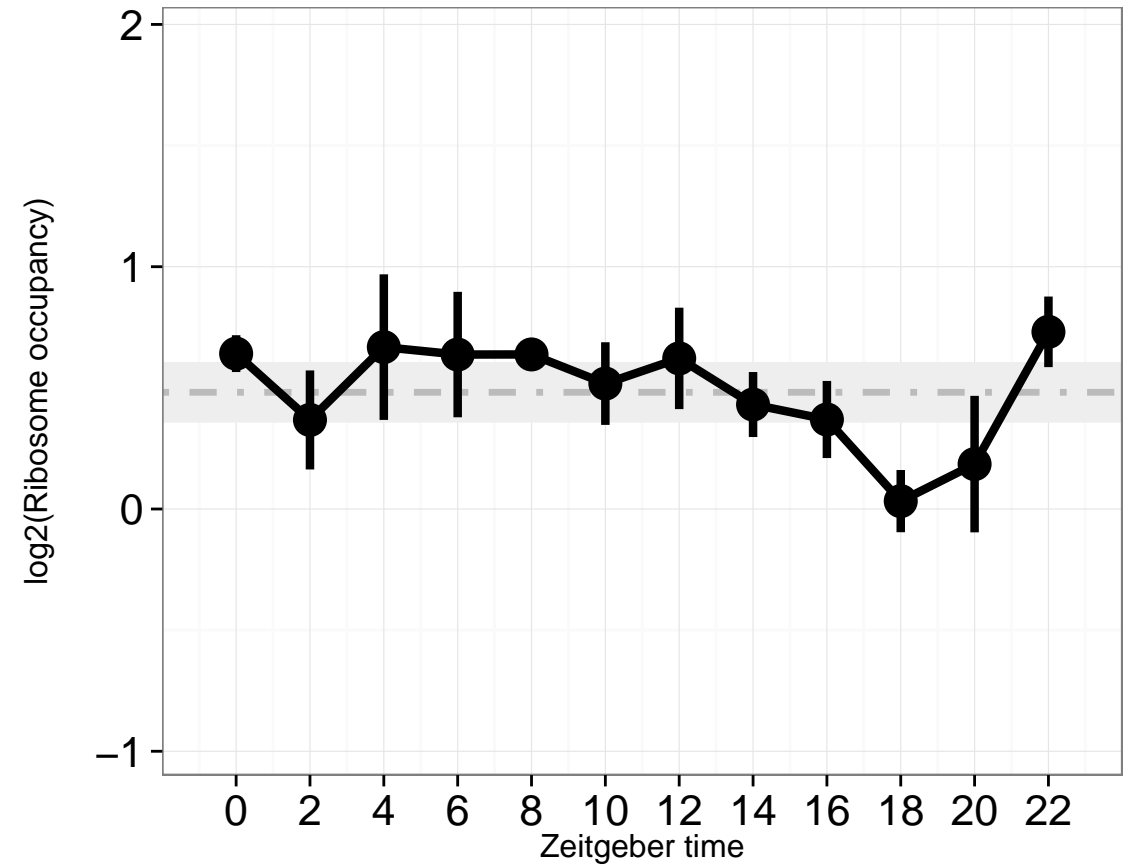

Supplement: Supplementary file 9566 [file 1]

## Acmsd

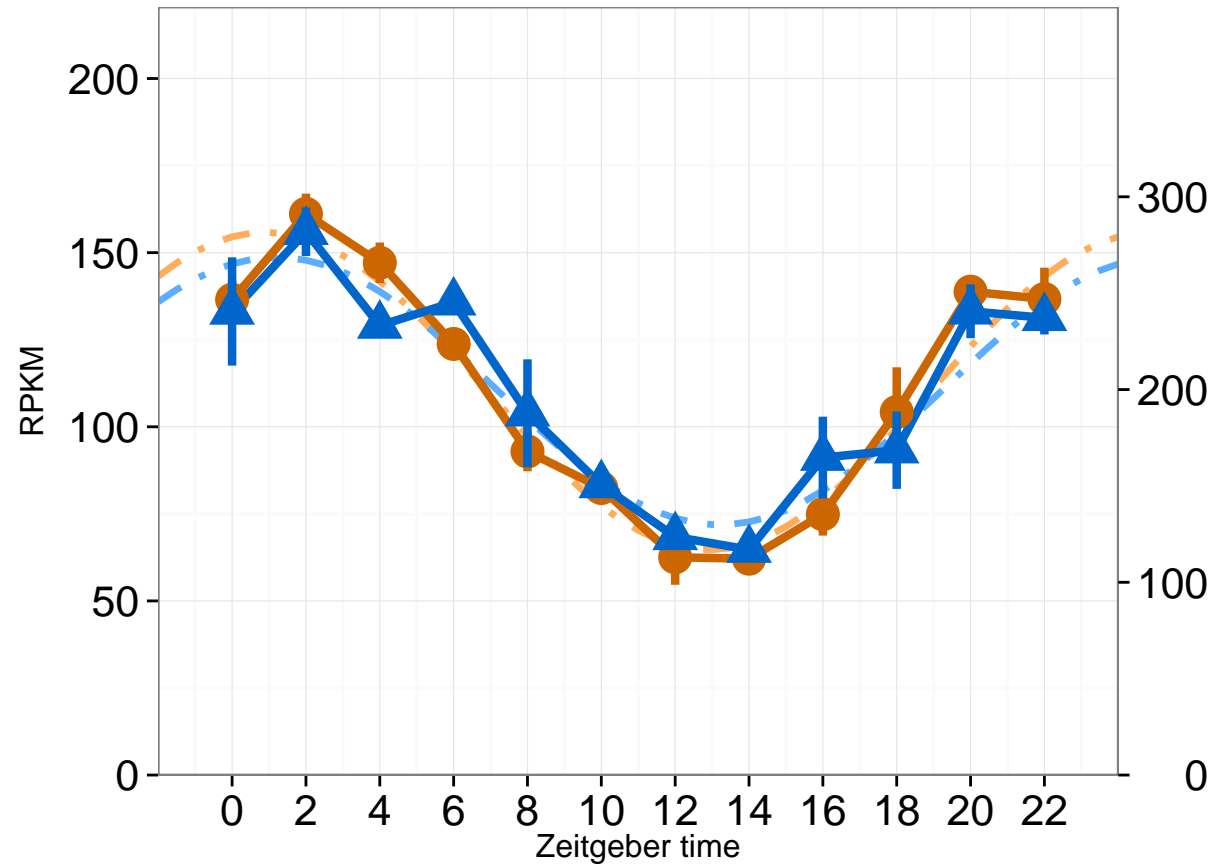

## Acmsd

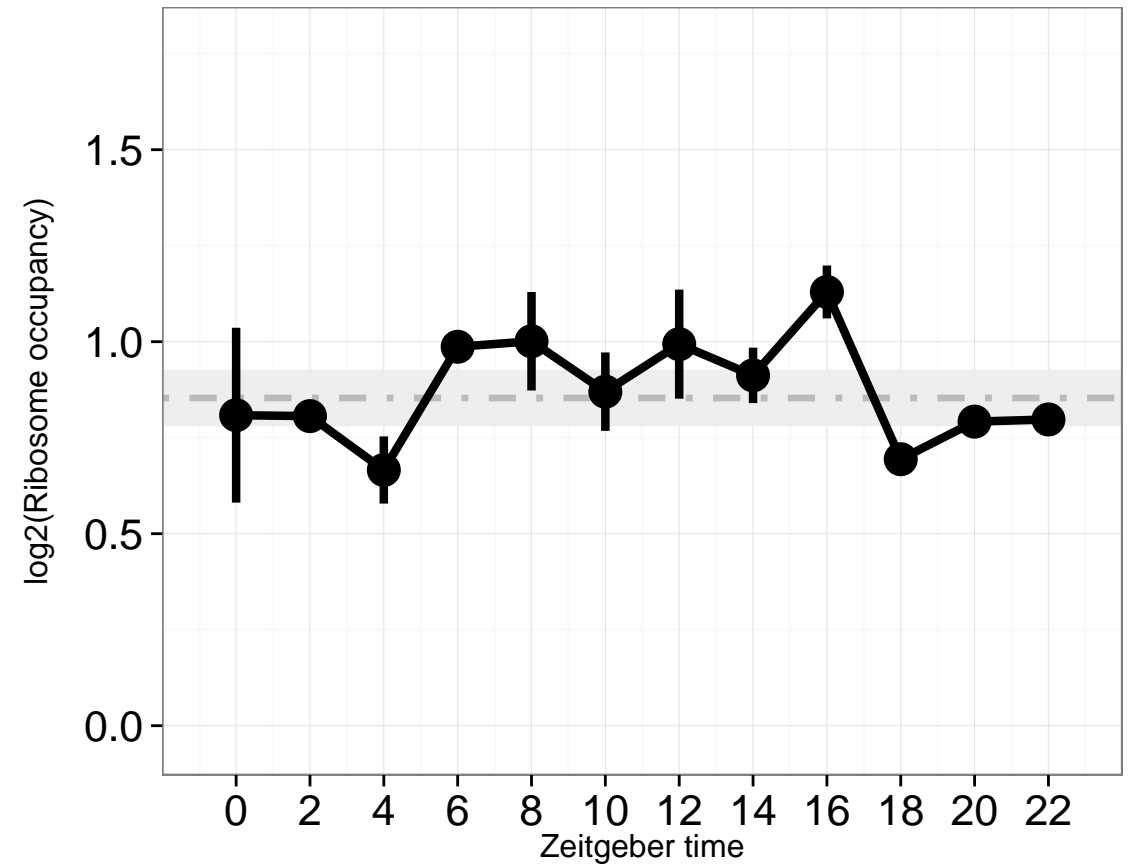

Supplement: Supplementary file 9567 [file 1]

## Dnm1l

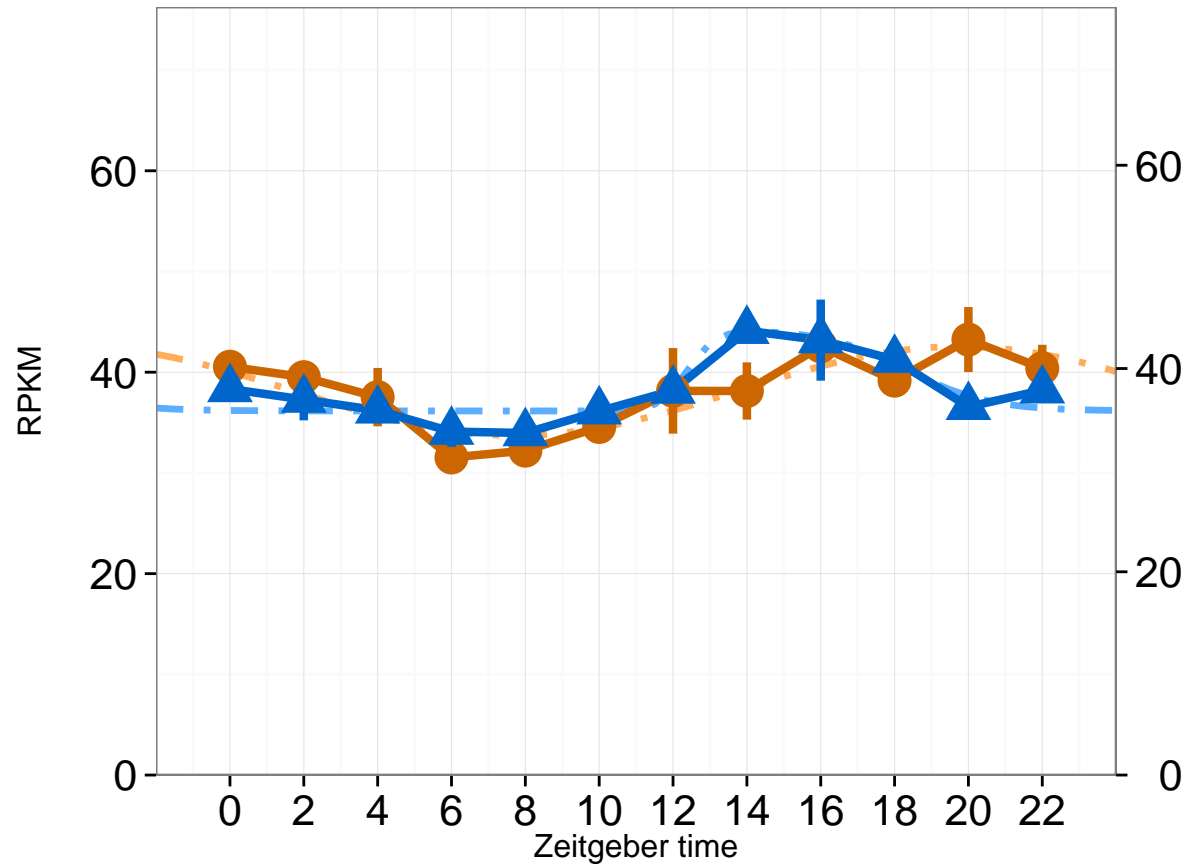

## Dnm1l

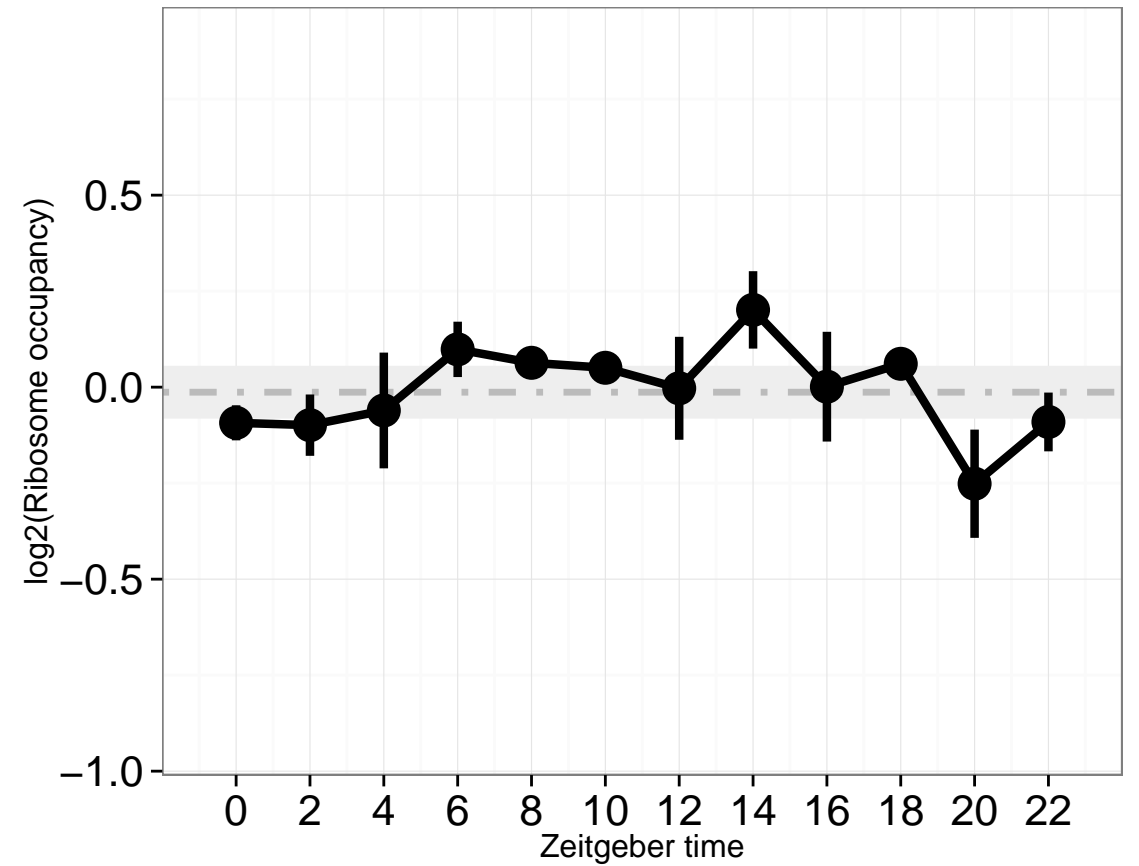

Supplement: Supplementary file 9568 [file 1]

# Hap1

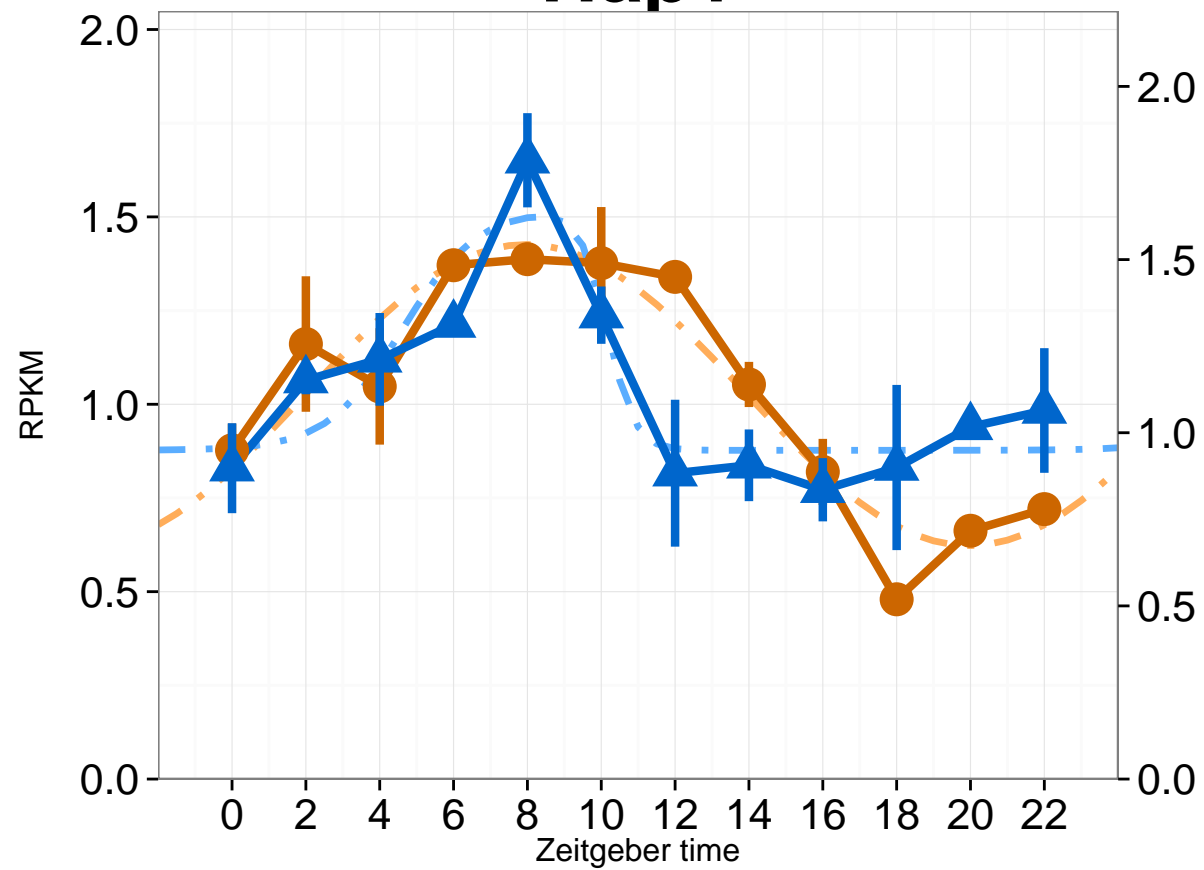

# Hap1

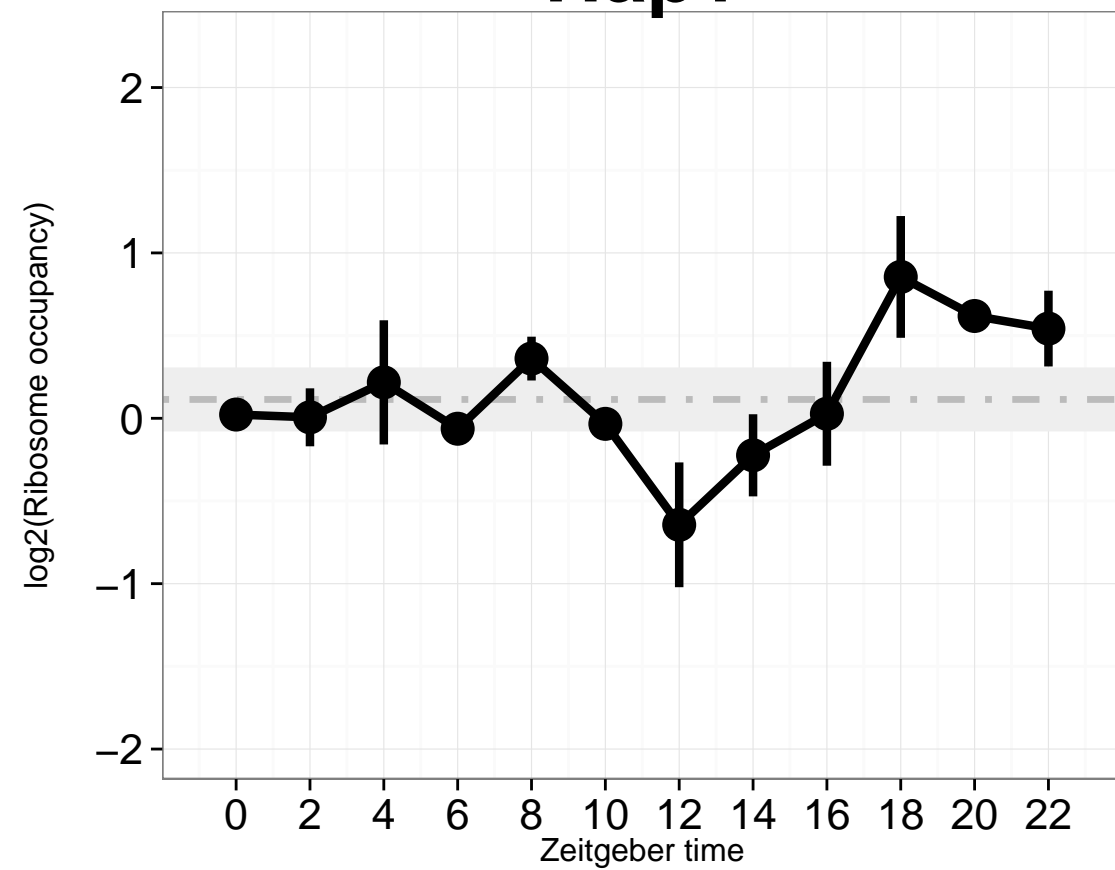

Supplement: Supplementary file 9569 [file 1]

# Rps19

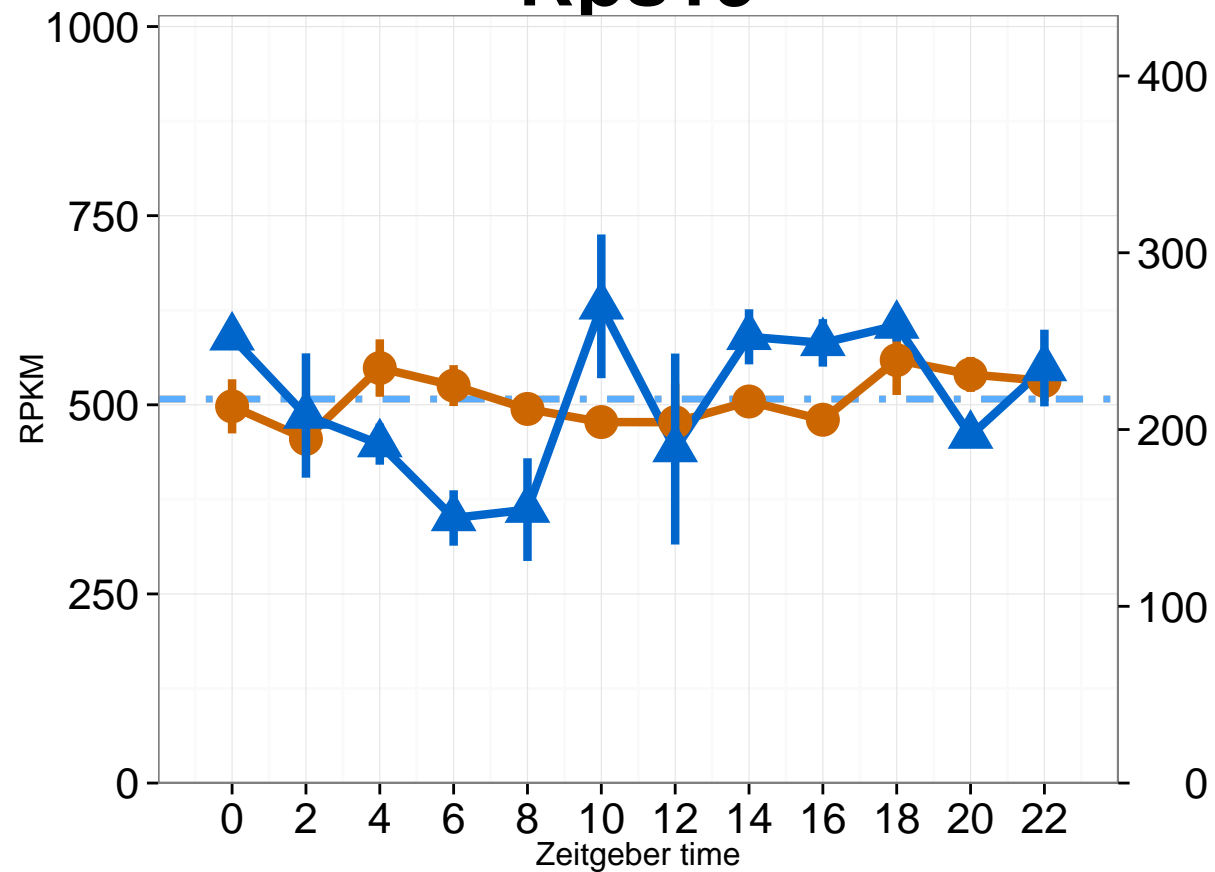

# Rps19

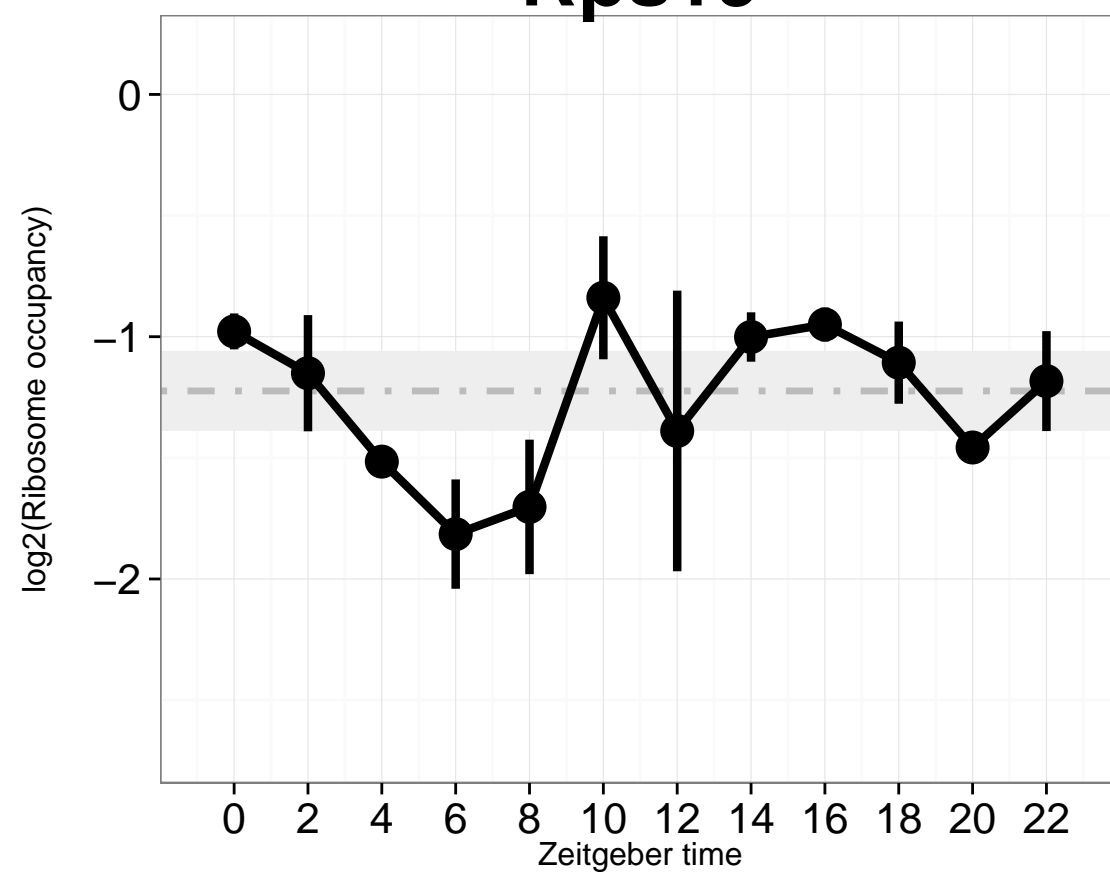

Supplement: Supplementary file 9570 [file 1]

# Taf15

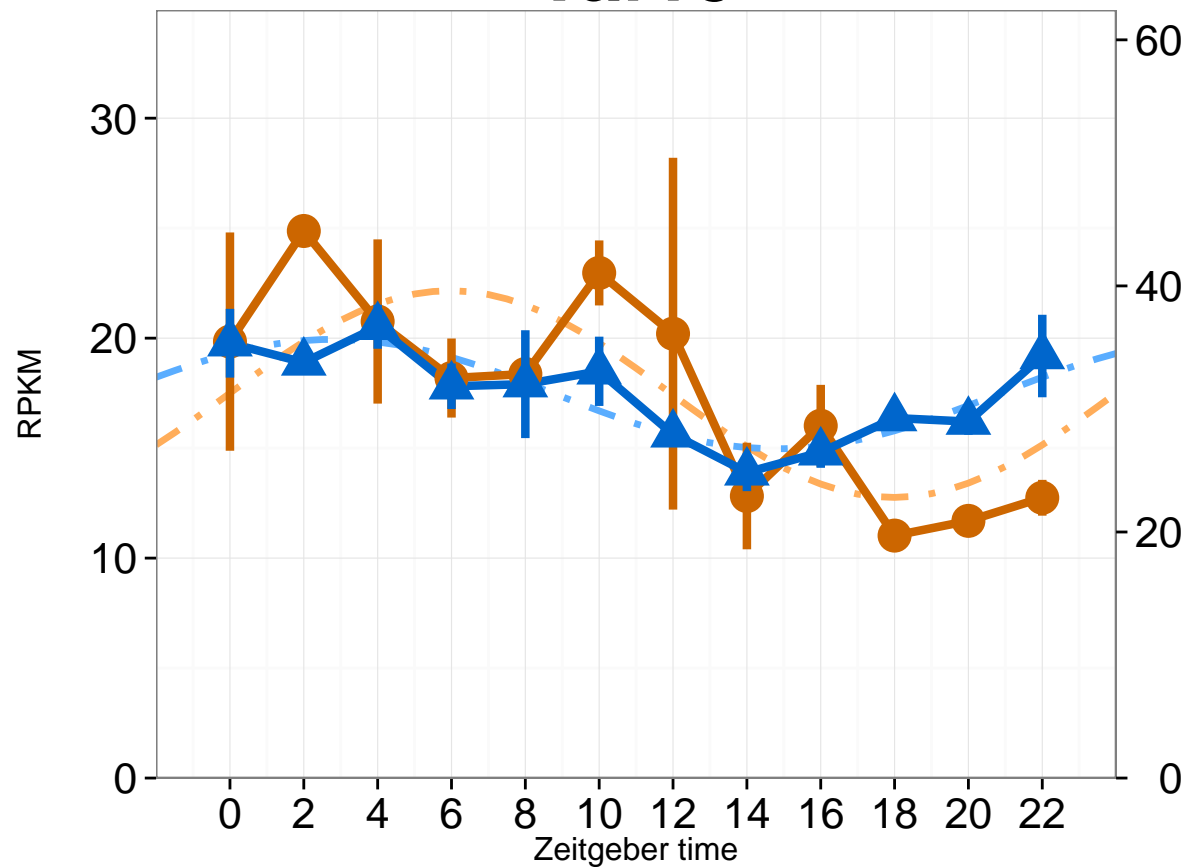

# Taf15

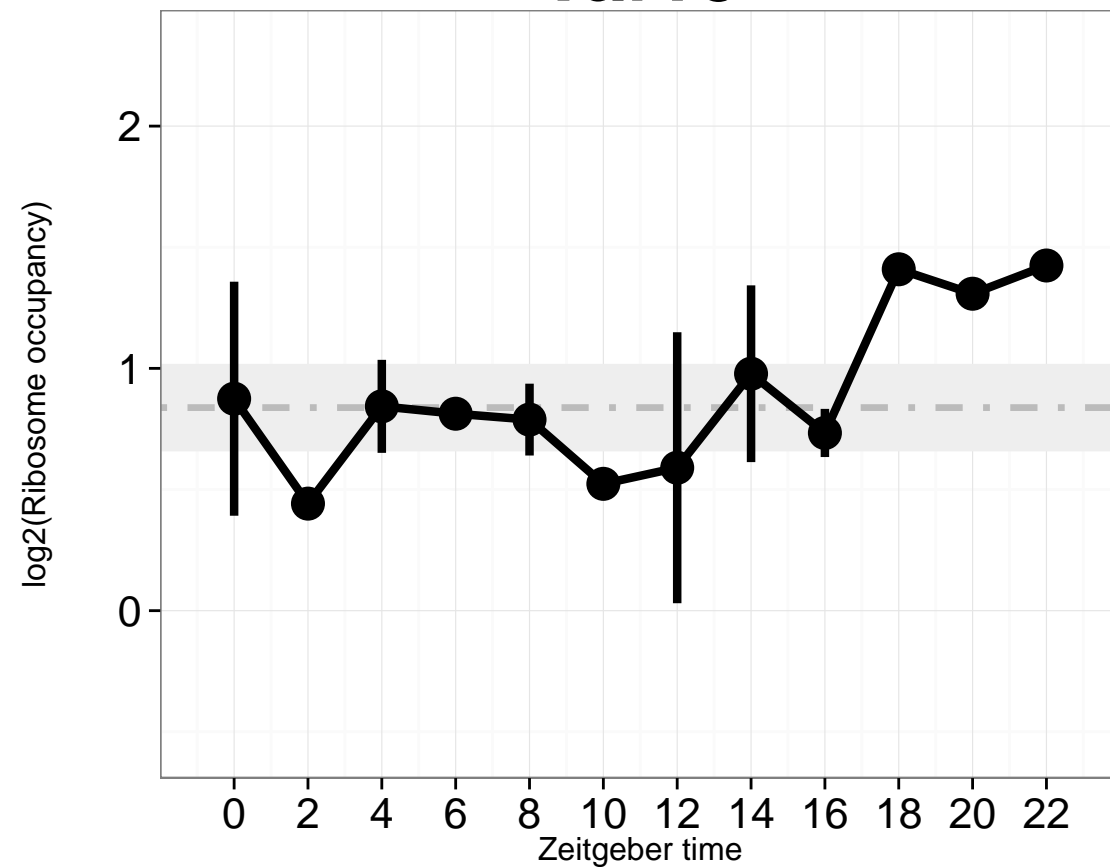

Supplement: Supplementary file 9571 [file 1]

## TtII12

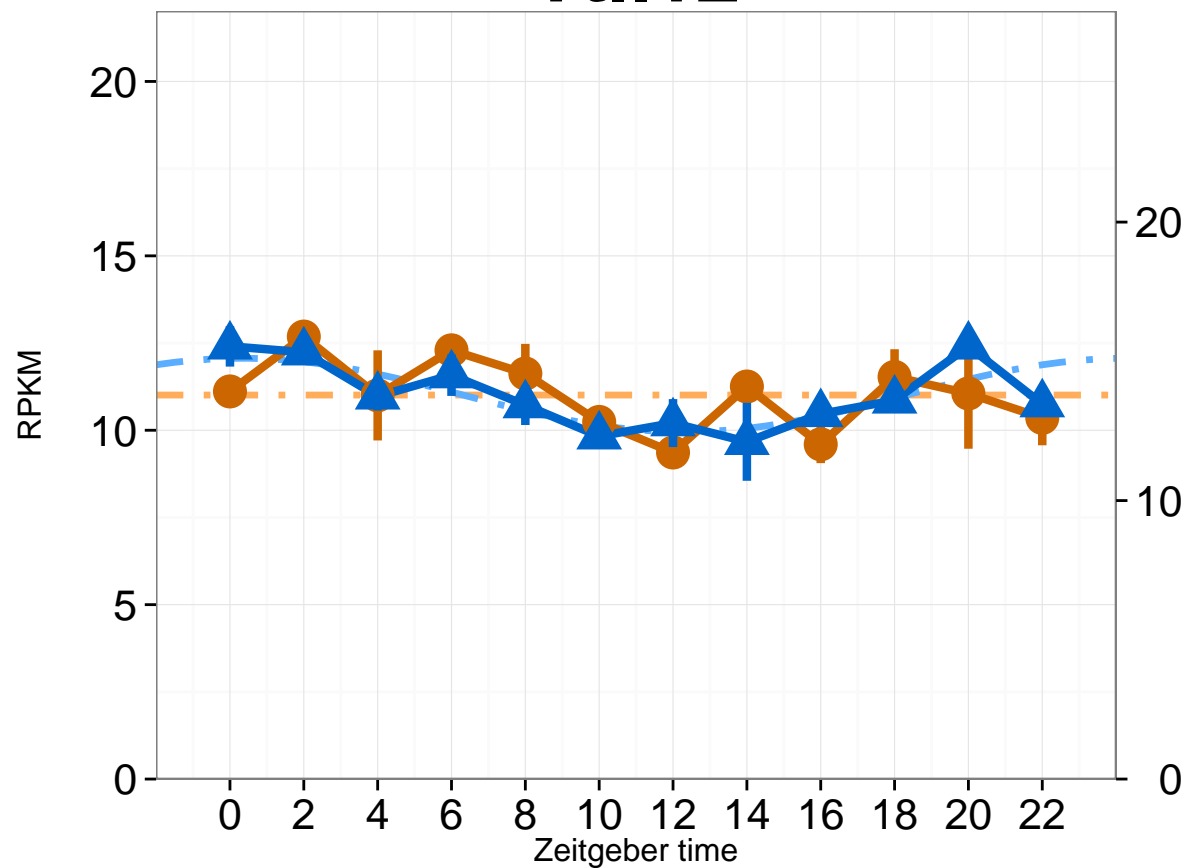

## TtII12

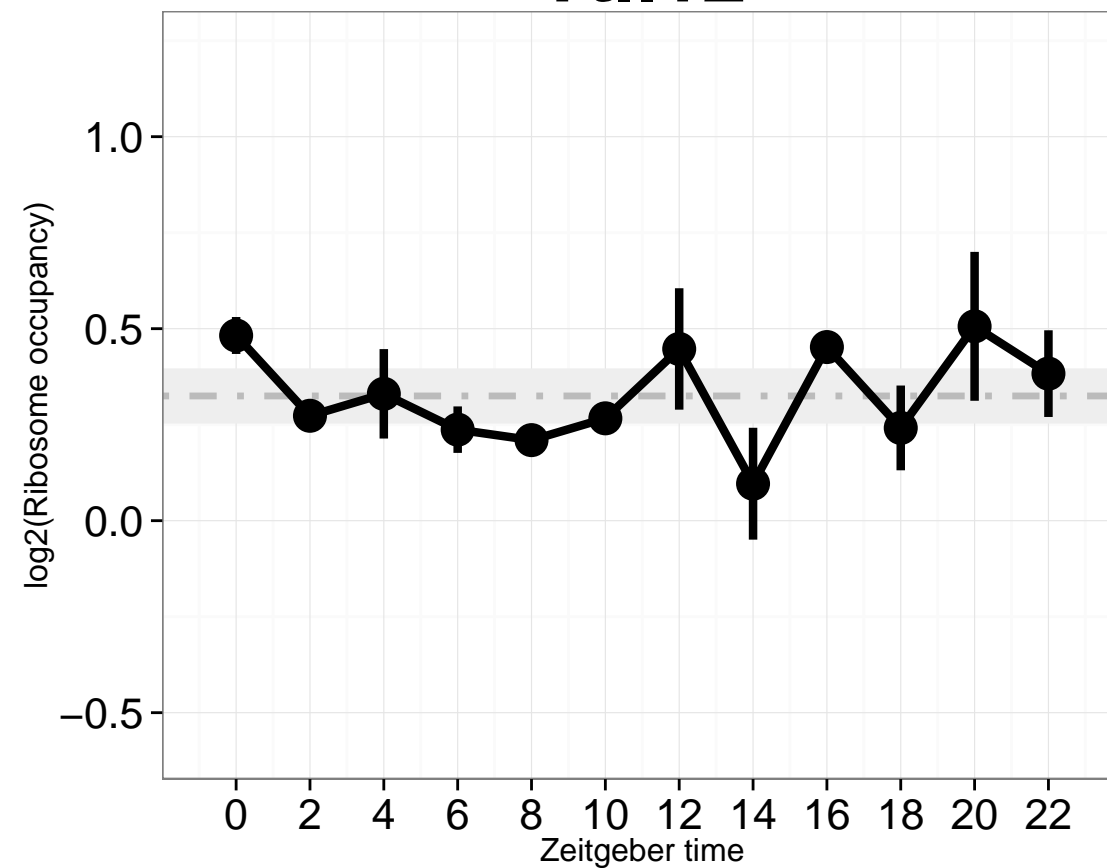

Supplement: Supplementary file 9572 [file 1]

## Magi1

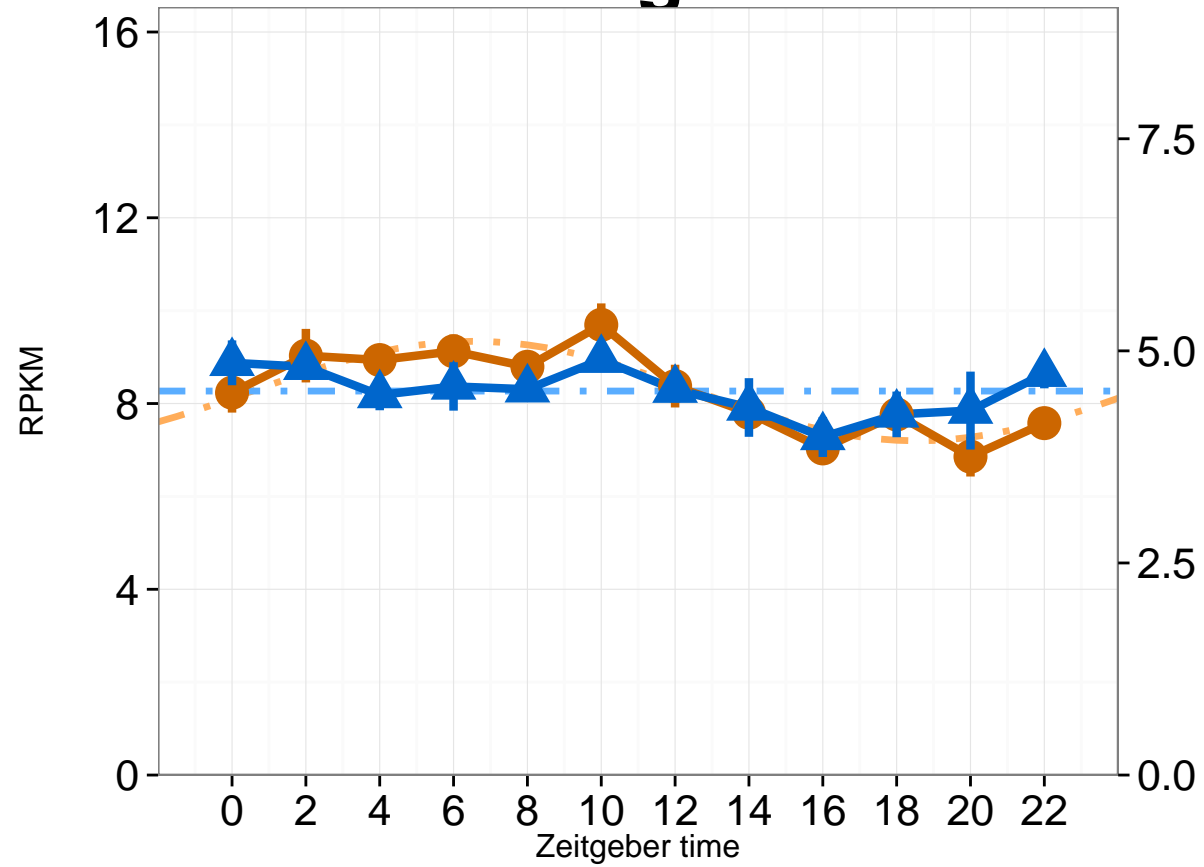

## Magi1

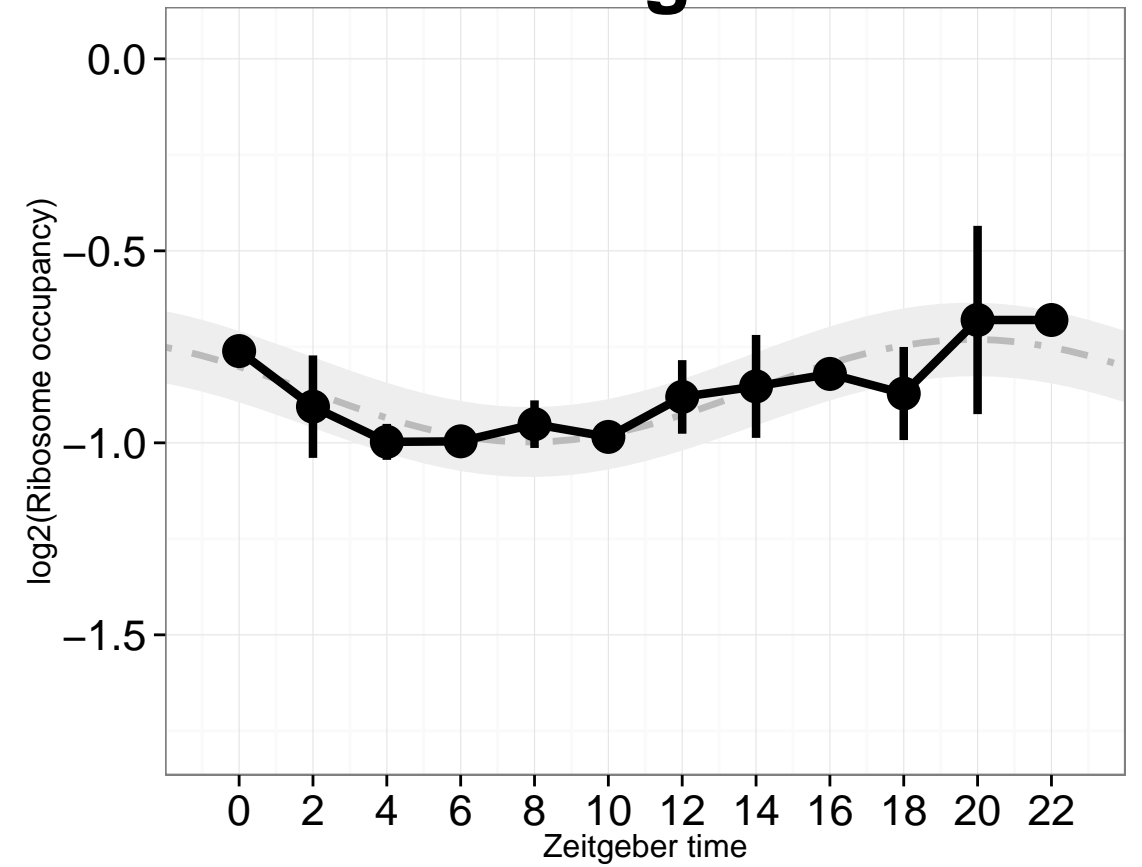

Supplement: Supplementary file 9573 [file 1]

## Epb4.1I2

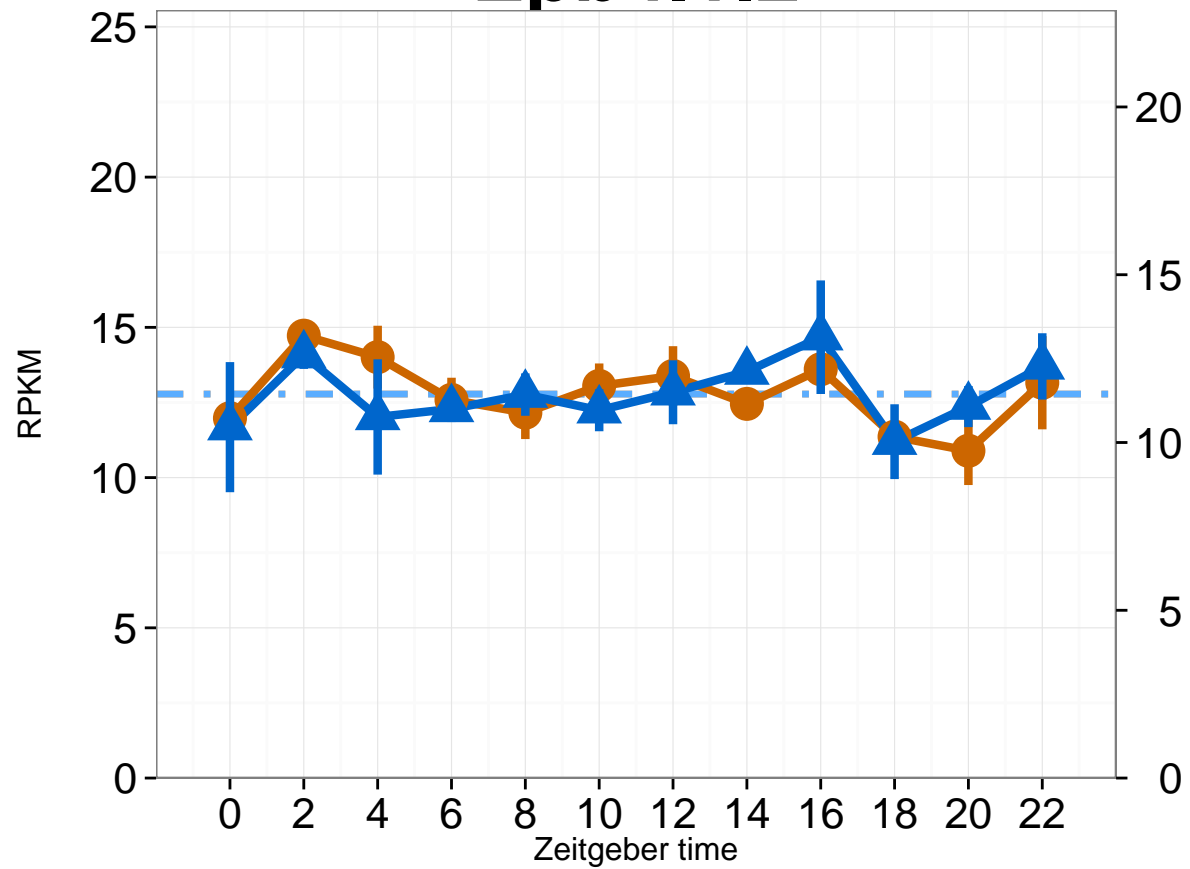

## Epb4.1I2

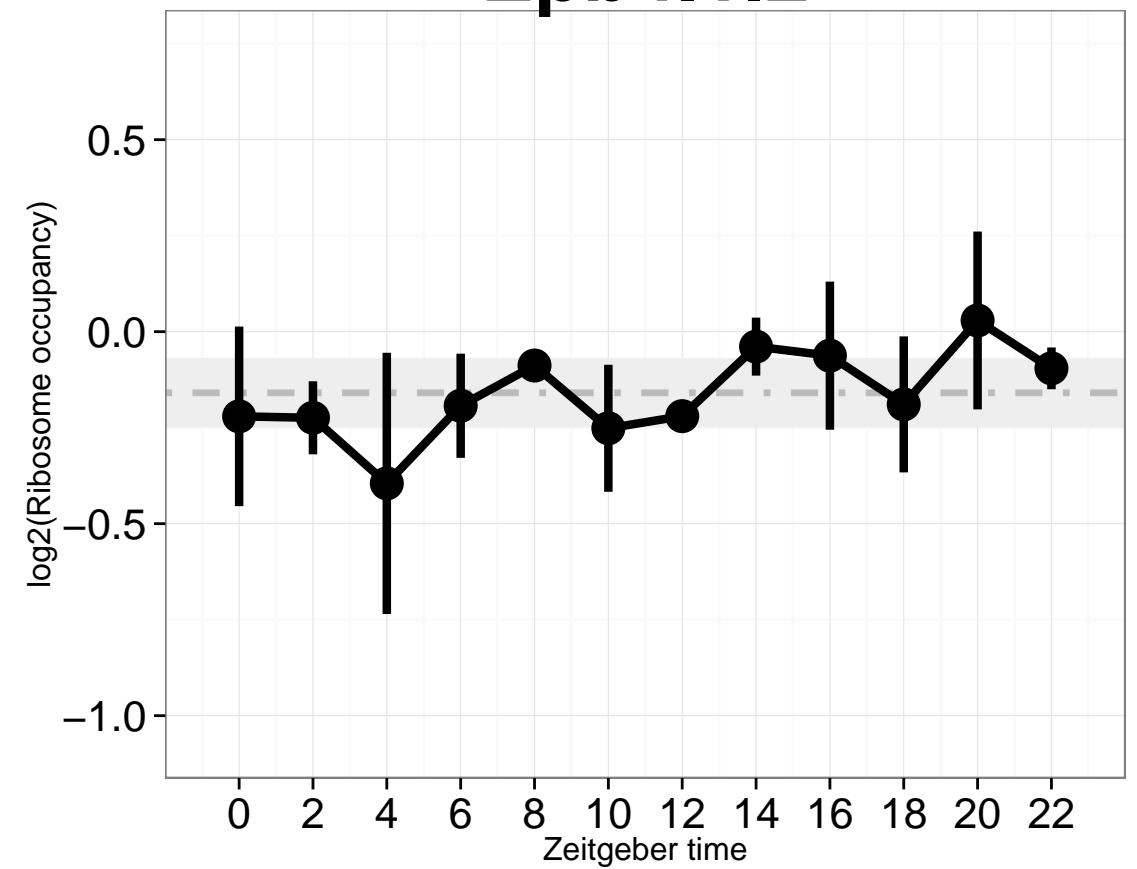

Supplement: Supplementary file 9574 [file 1]

# Stk35

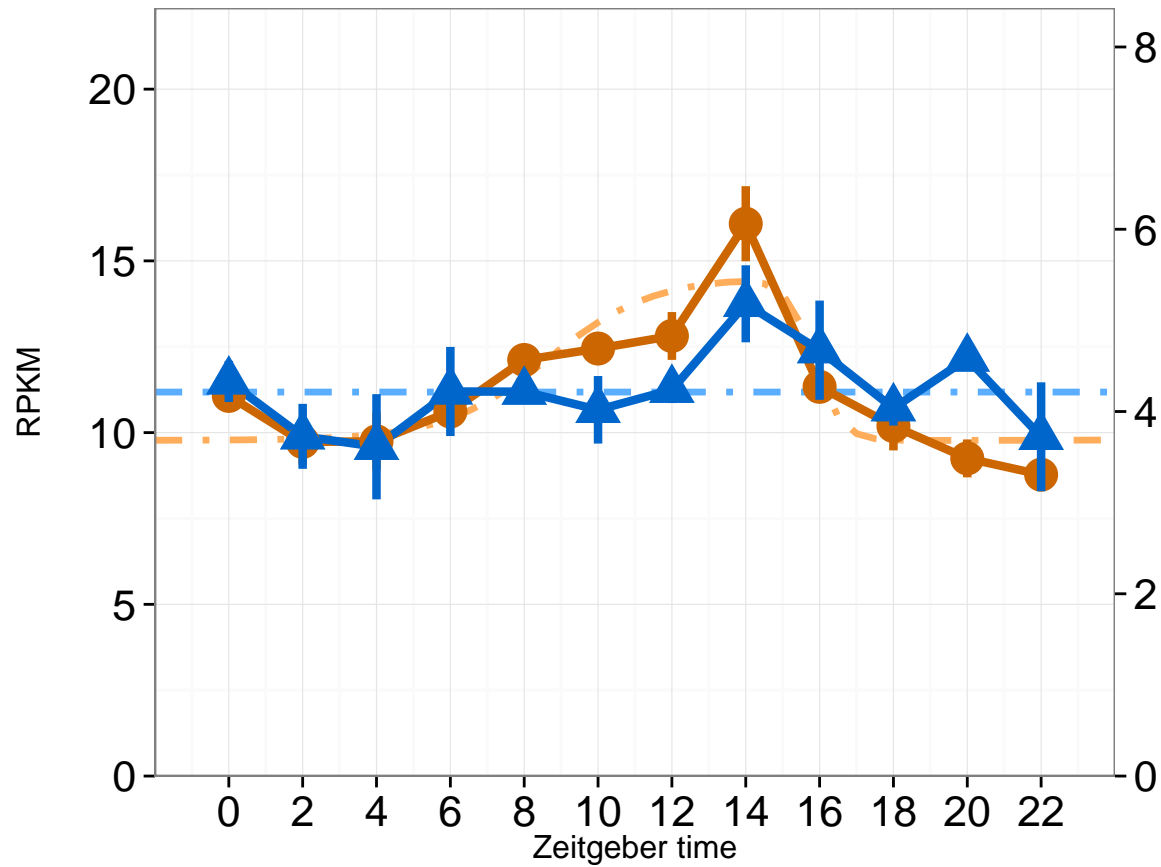

# Stk35

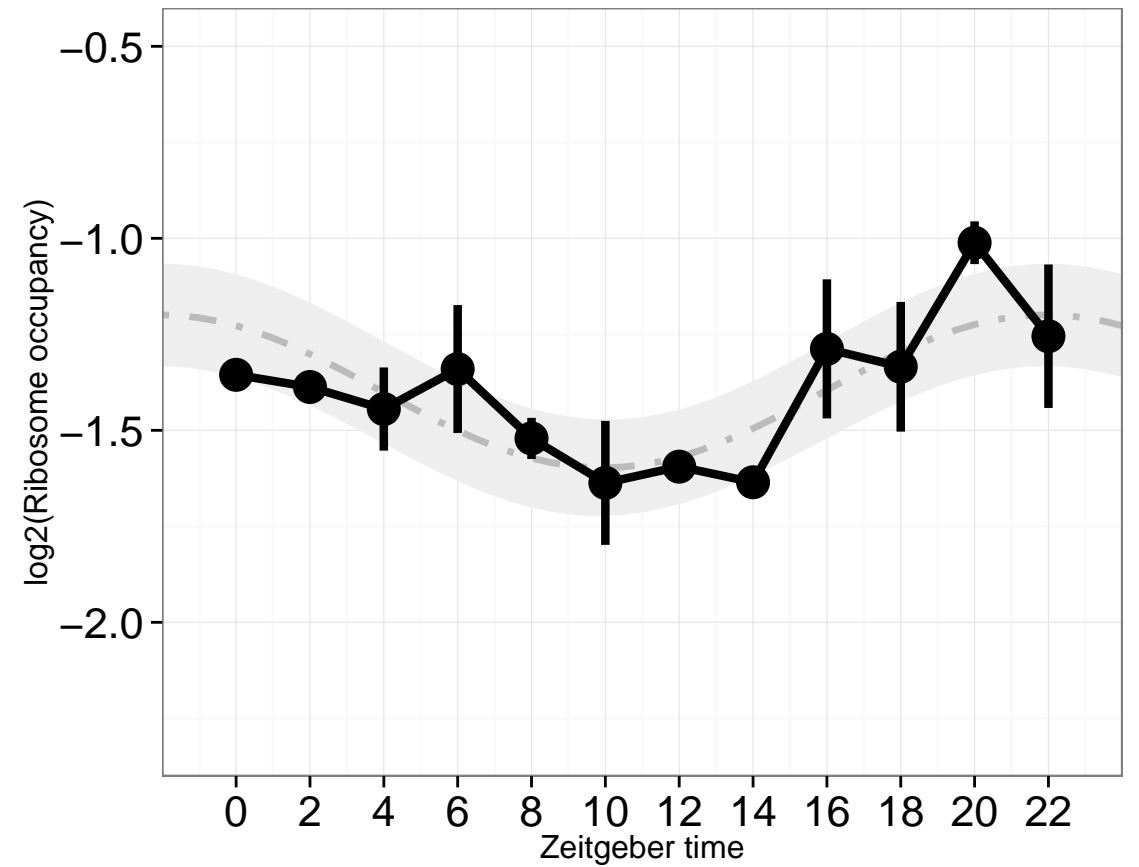

Supplement: Supplementary file 9575 [file 1]

# Zc3h6

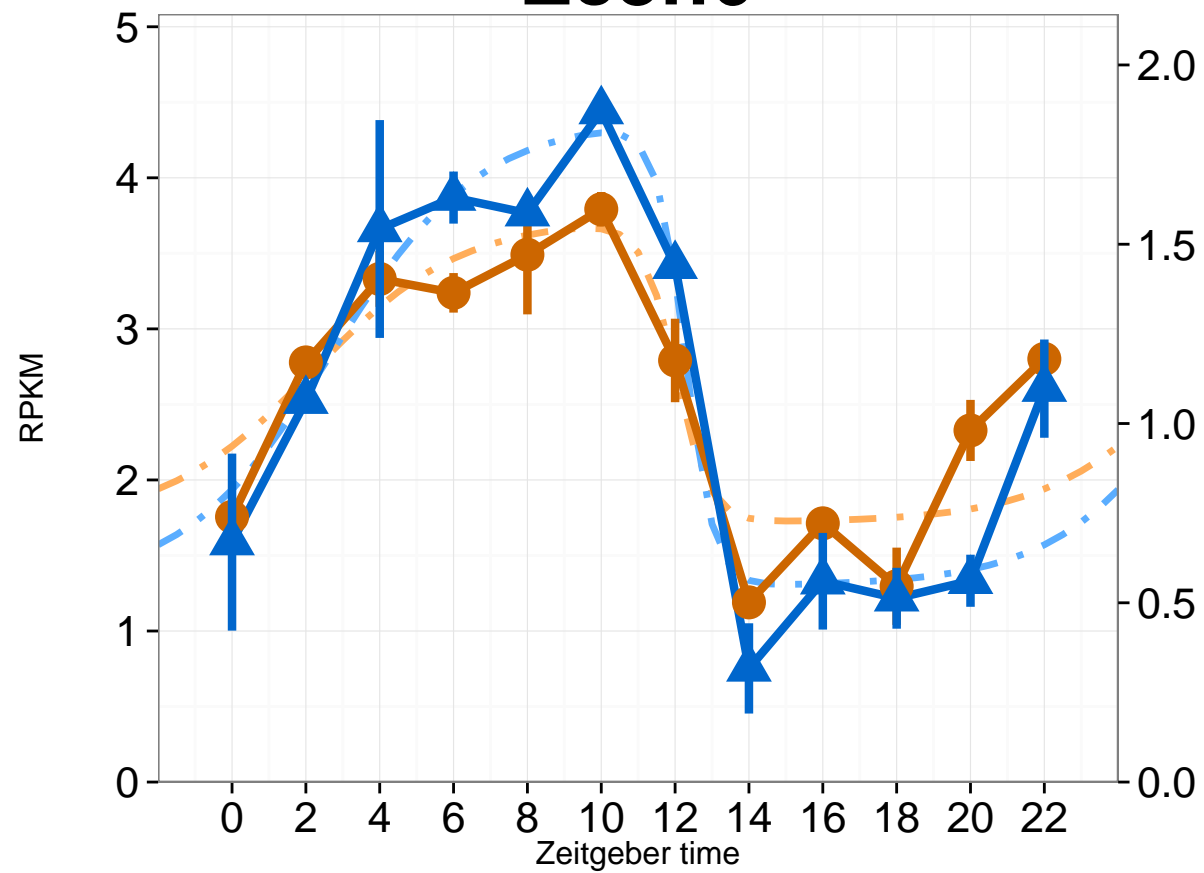

# Zc3h6

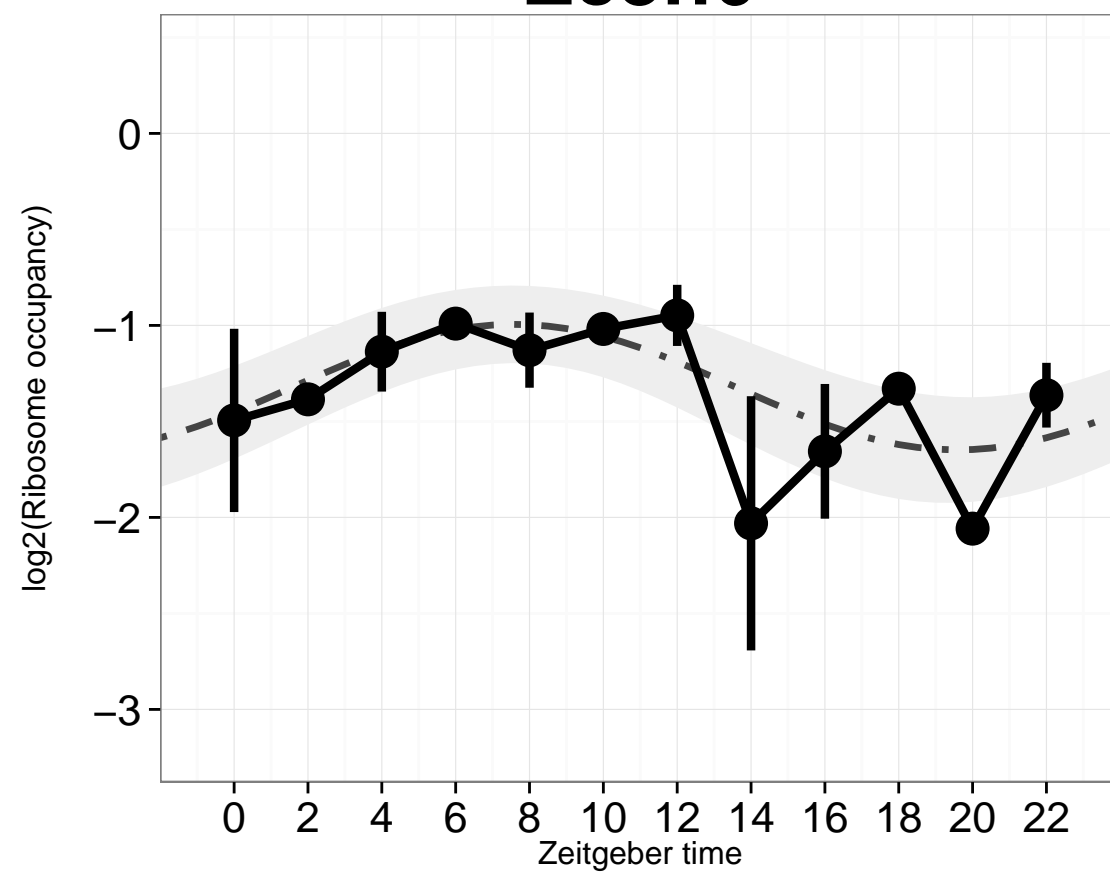

Supplement: Supplementary file 9576 [file 1]

## Mal

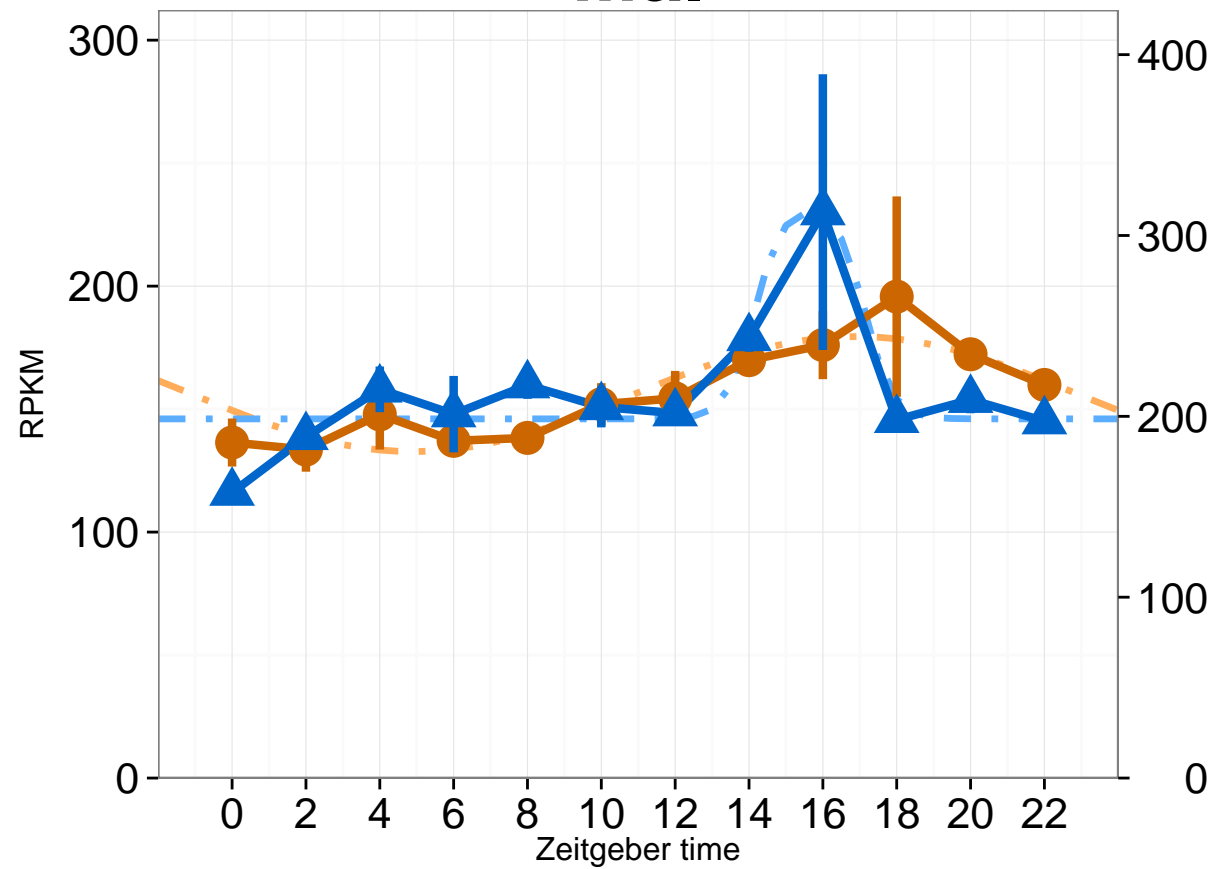

## Mal

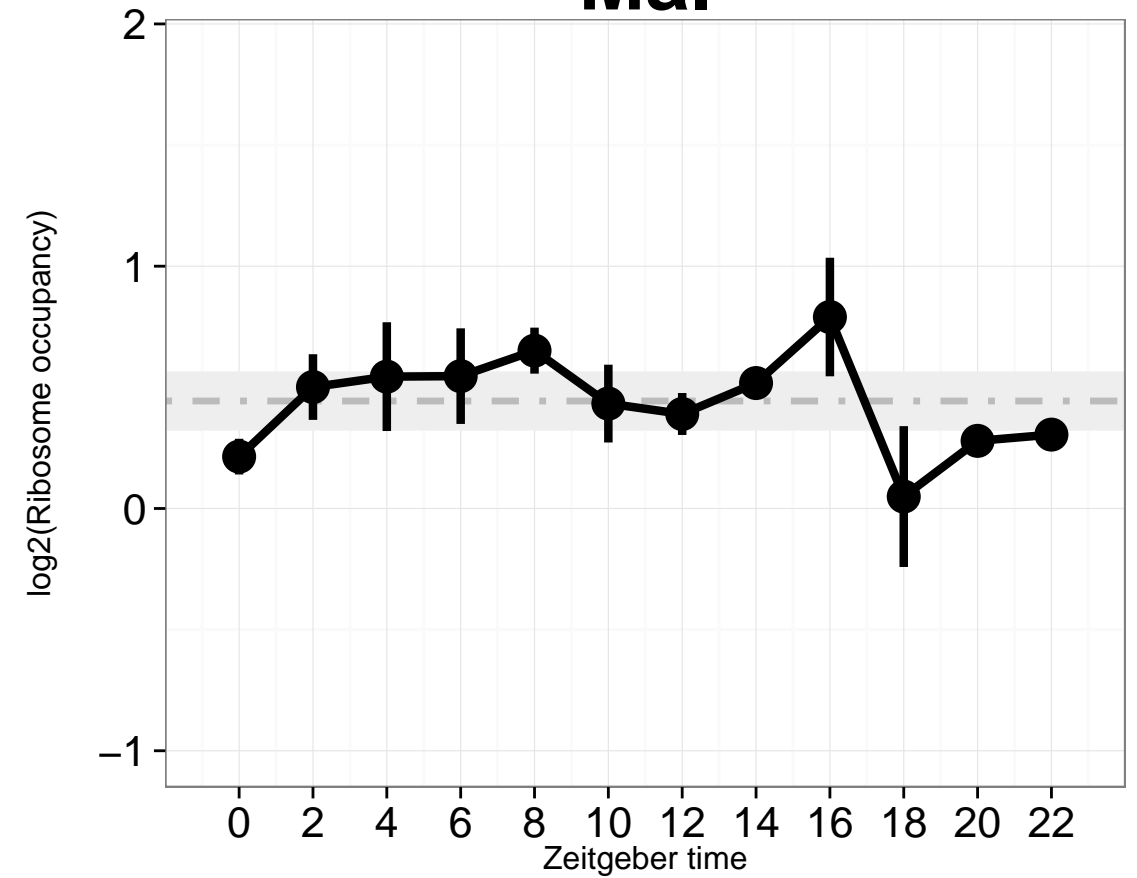

Supplement: Supplementary file 9577 [file 1]

## Fhod3

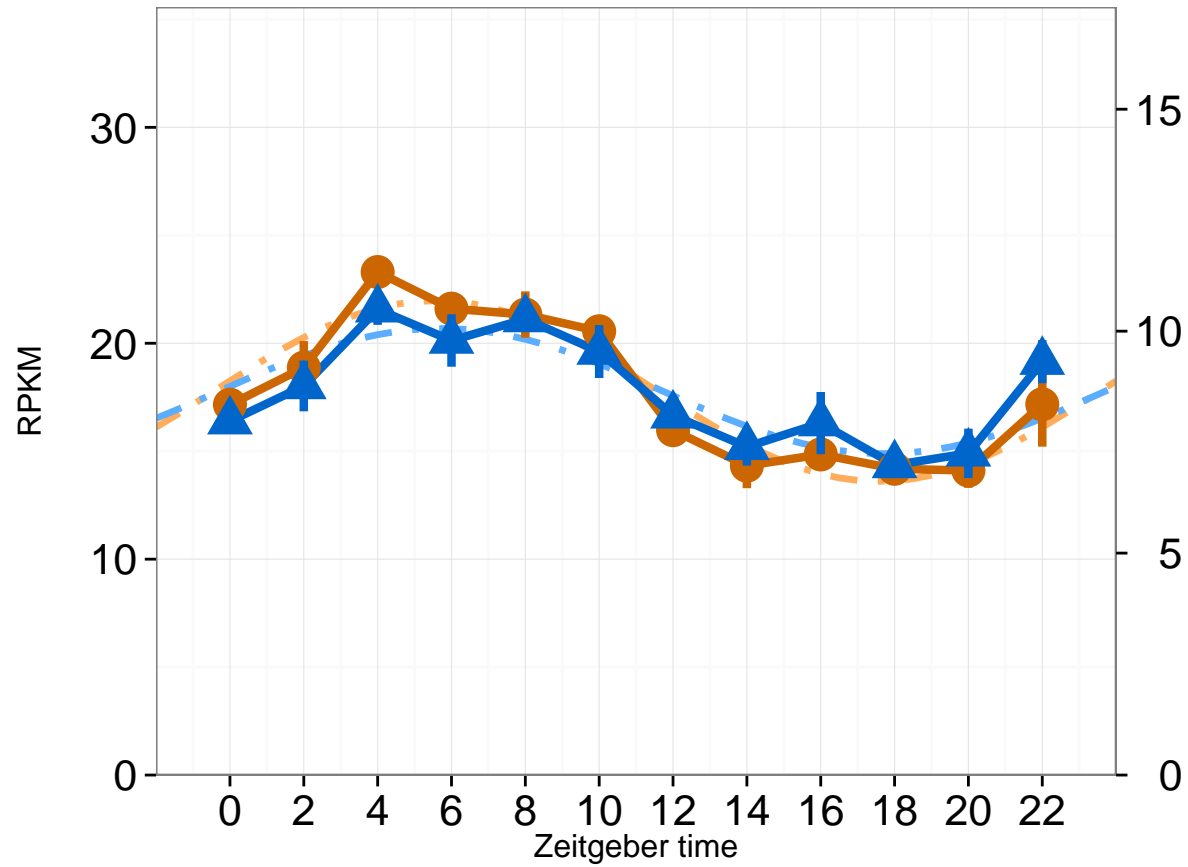

## Fhod3

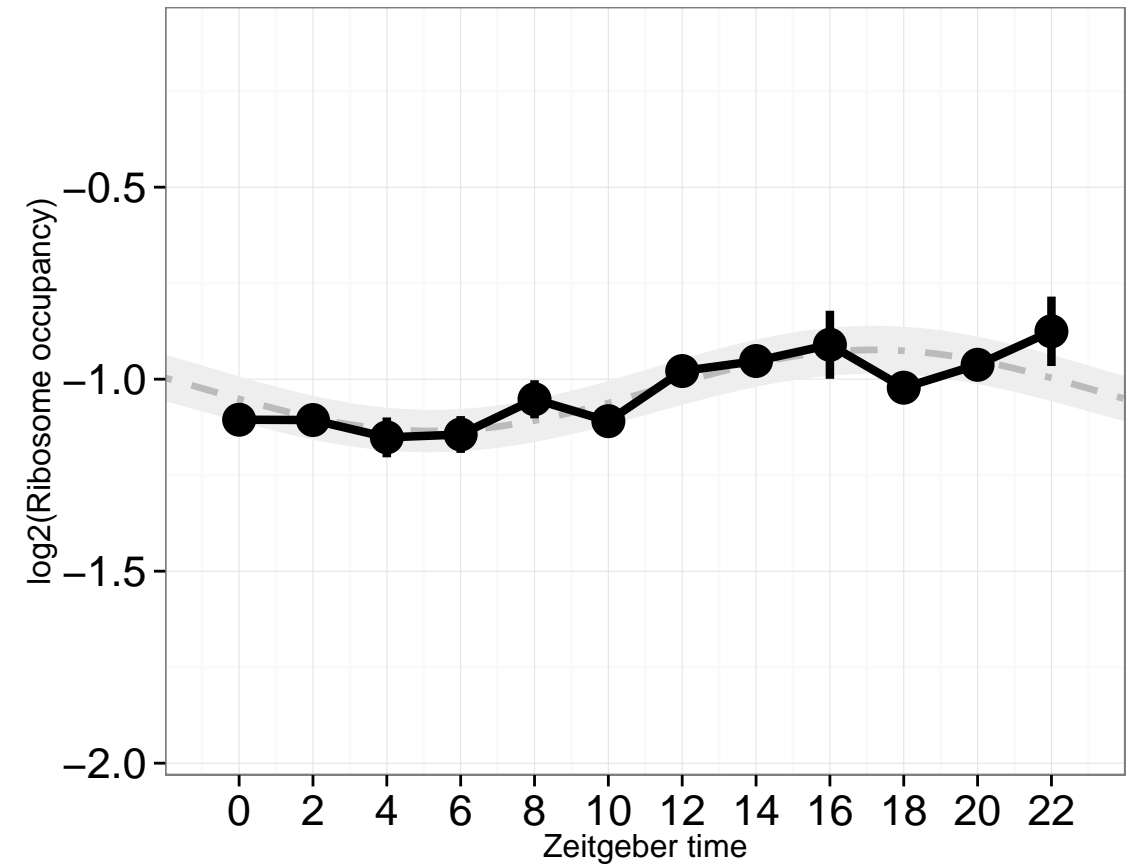

Supplement: Supplementary file 9578 [file 1]

## Plscr4

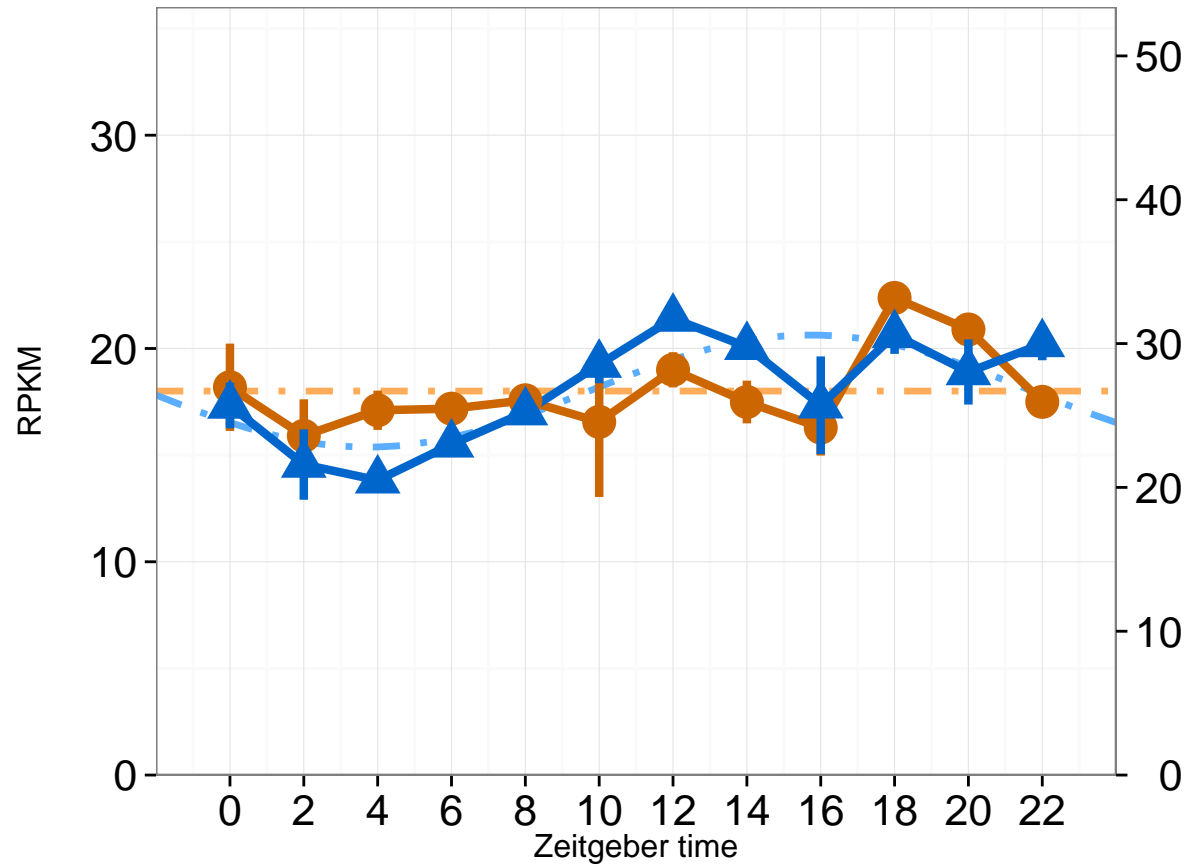

## Plscr4

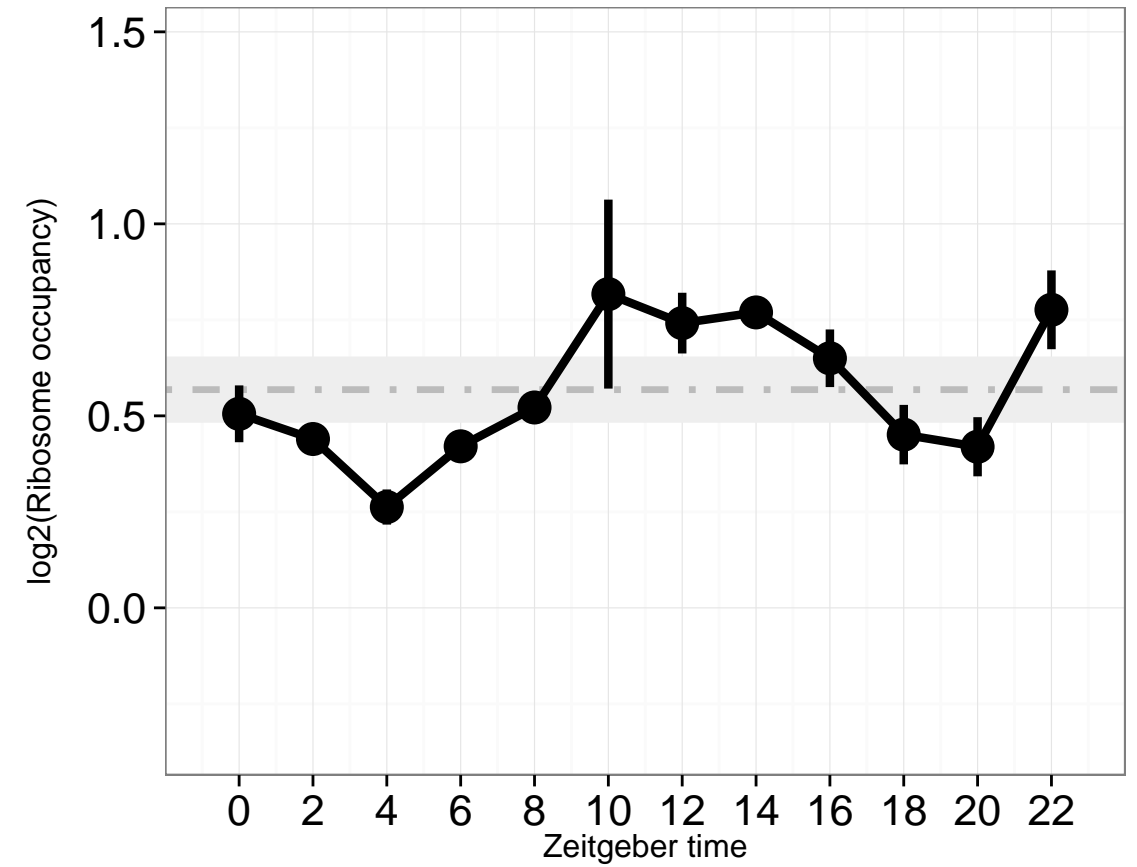

Supplement: Supplementary file 9579 [file 1]

## Mib2

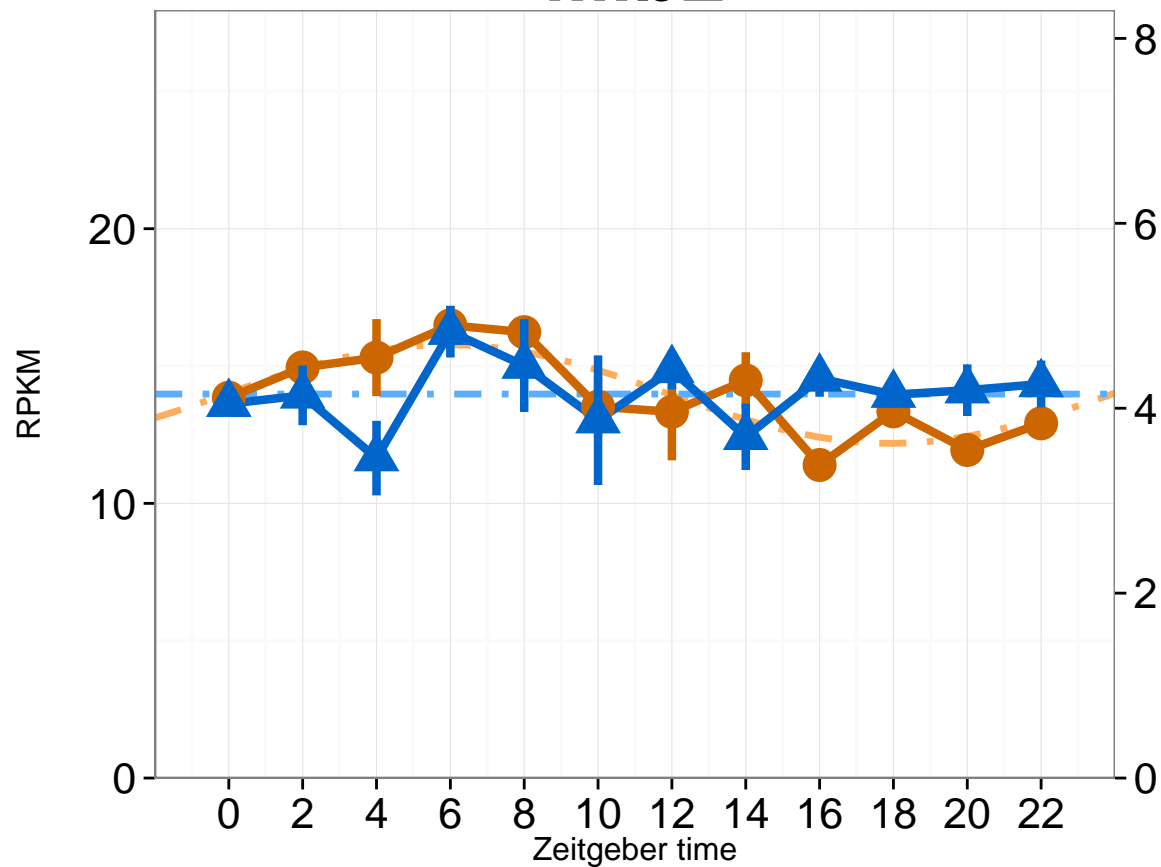

## Mib2

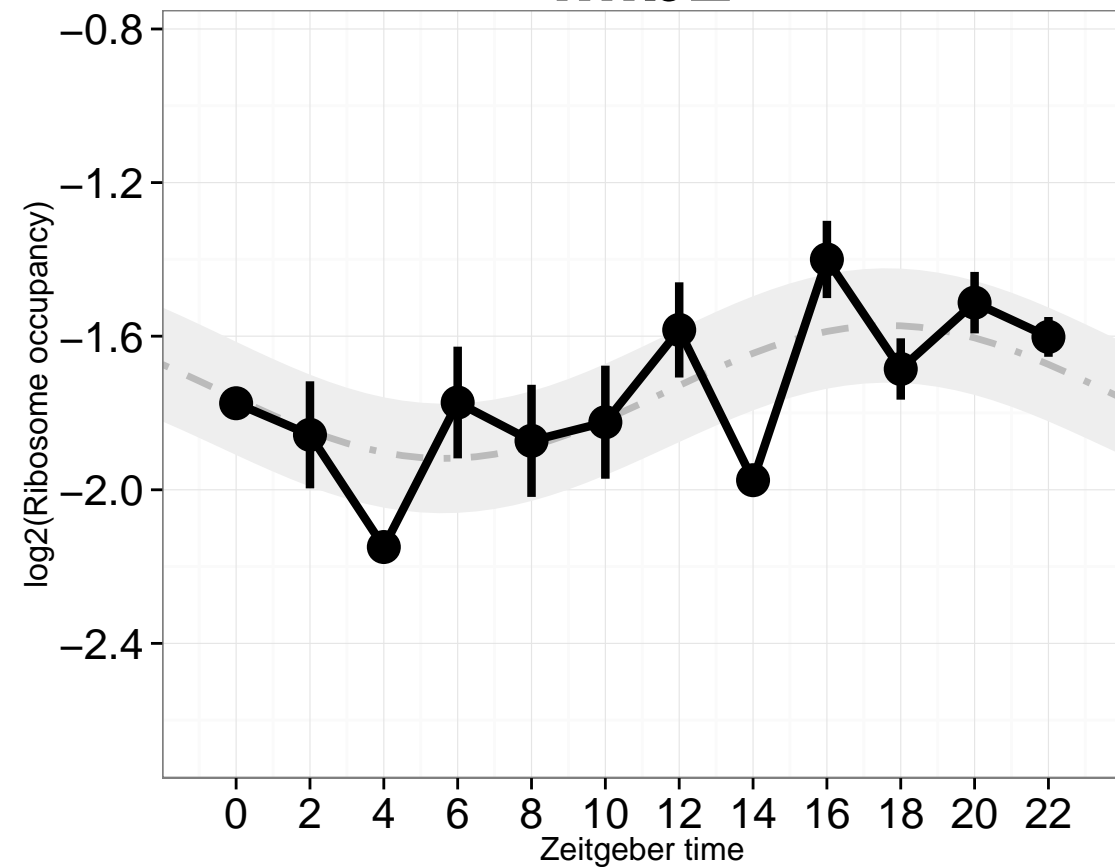

Supplement: Supplementary file 9580 [file 1]

## Pex12

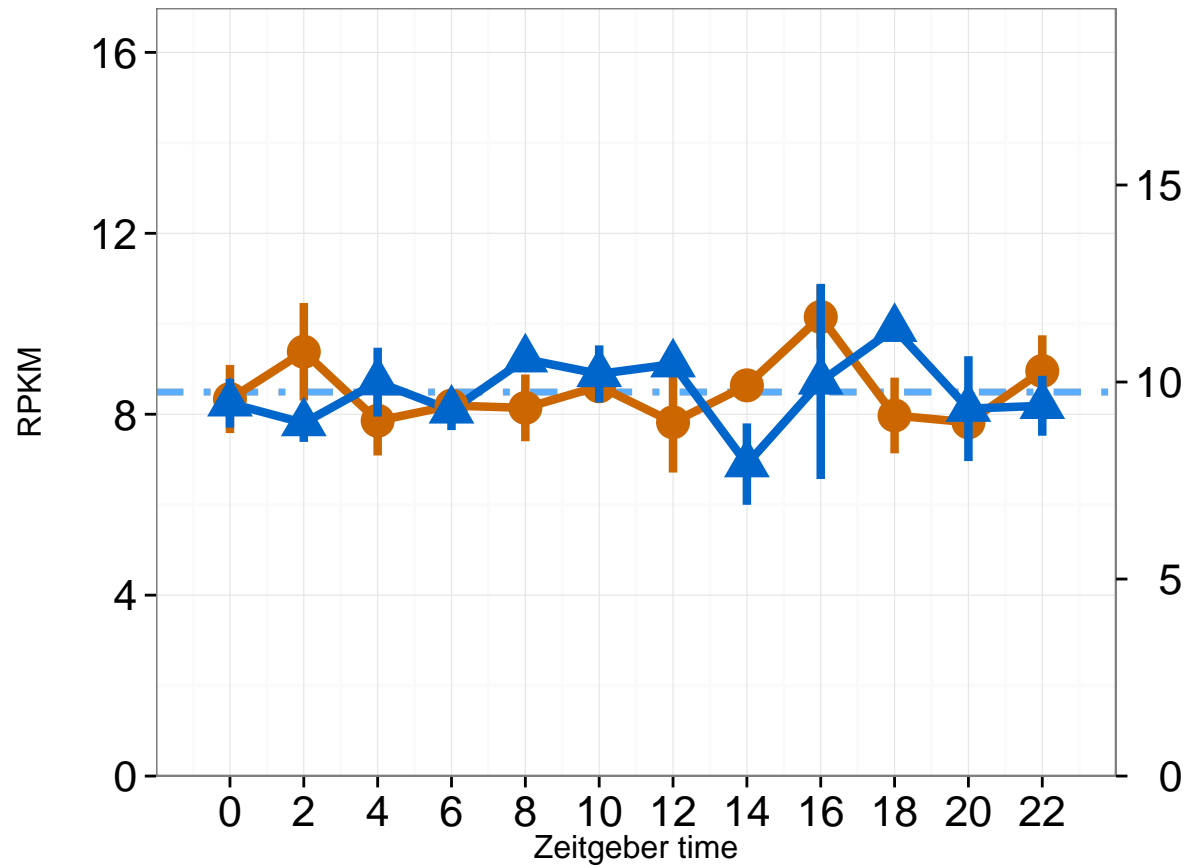

## Pex12

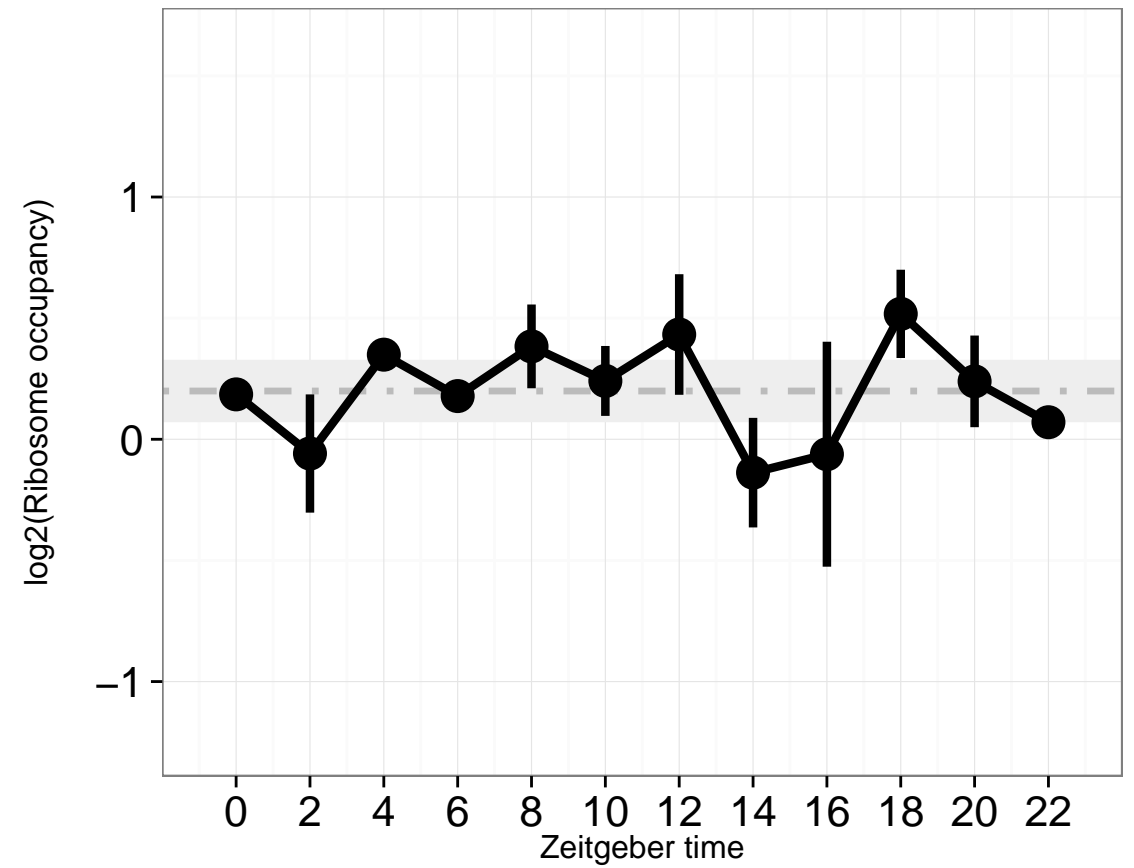

Supplement: Supplementary file 9581 [file 1]

## Amd1

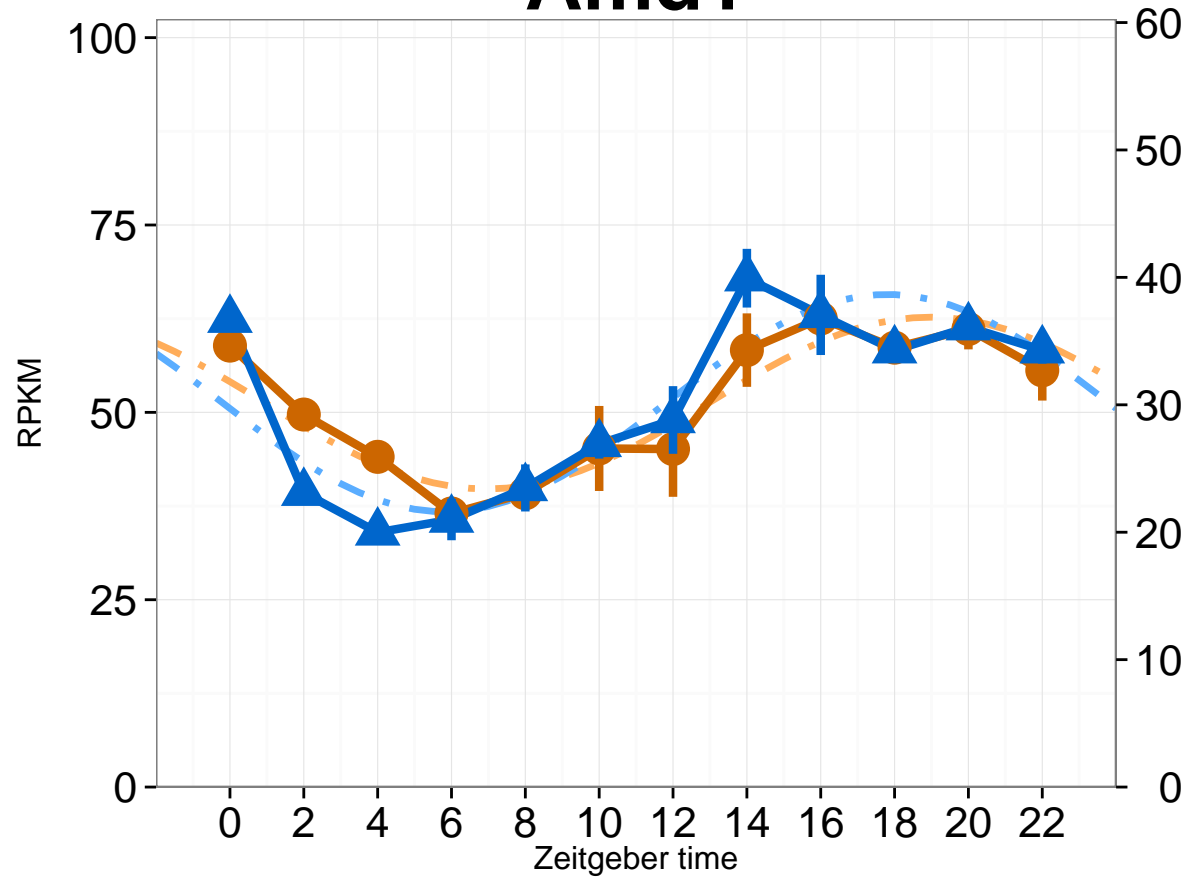

## Amd1

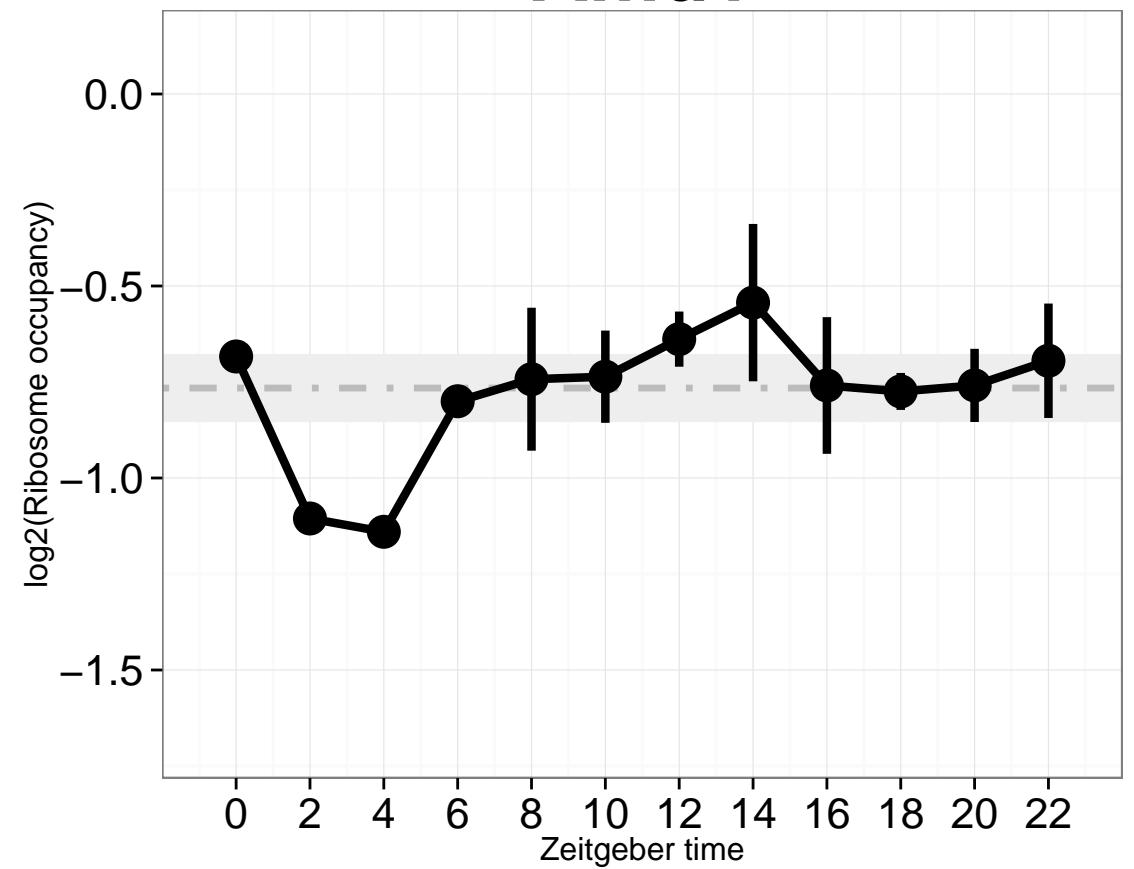

Supplement: Supplementary file 9582 [file 1]

## Zscan26

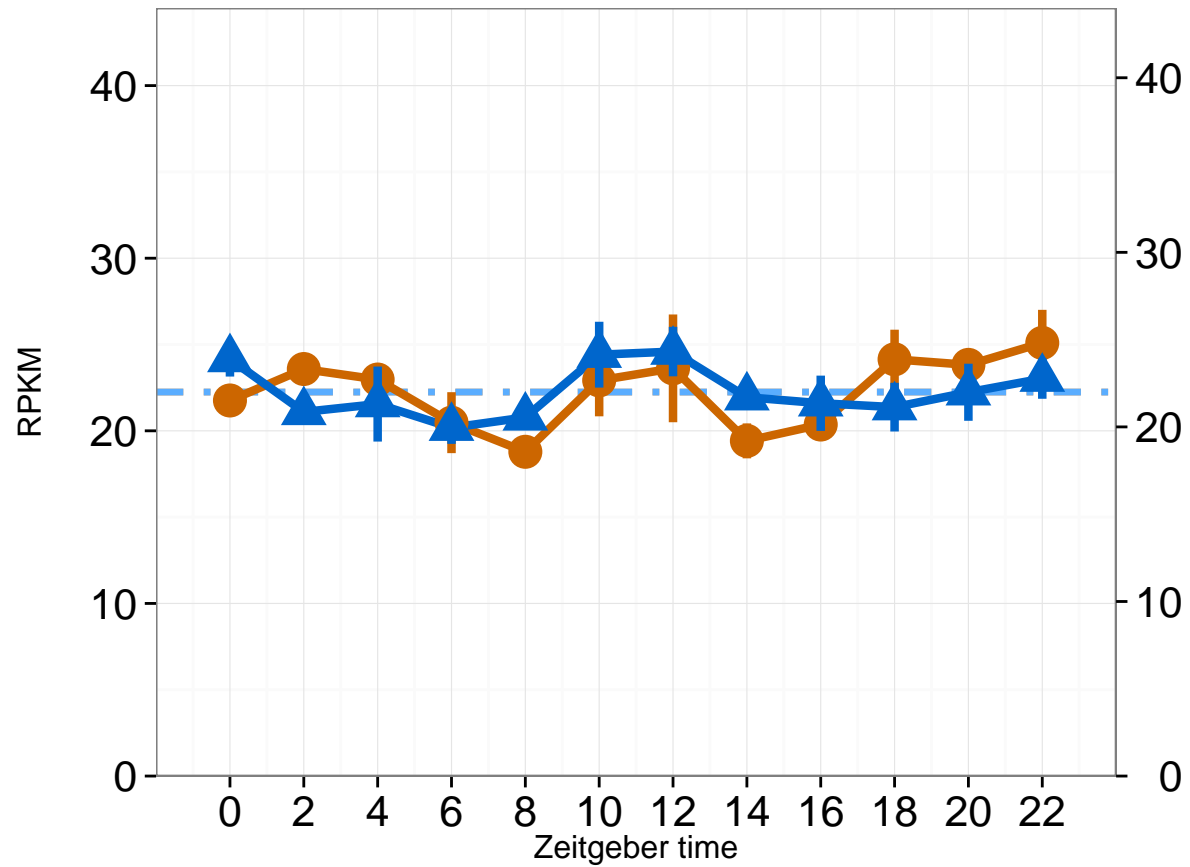

## Zscan26

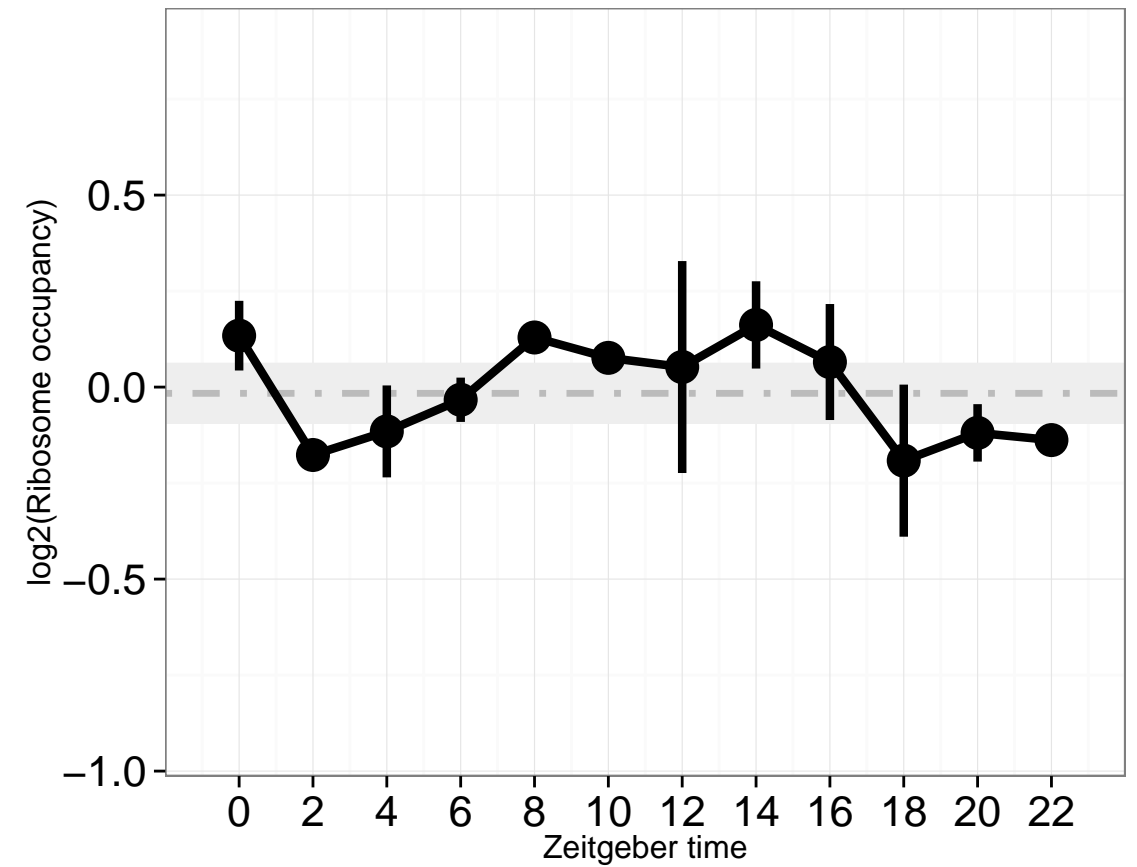

Supplement: Supplementary file 9583 [file 1]

## Usp47

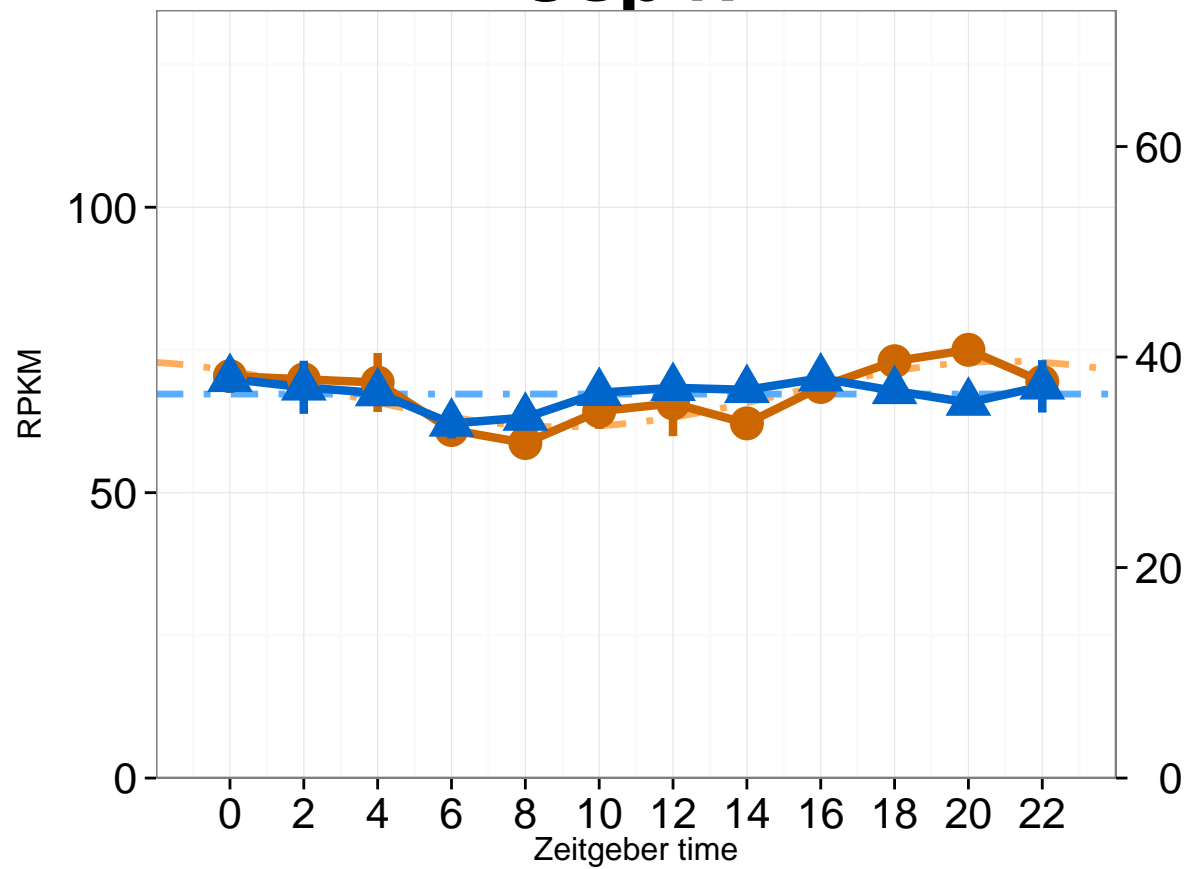

## Usp47

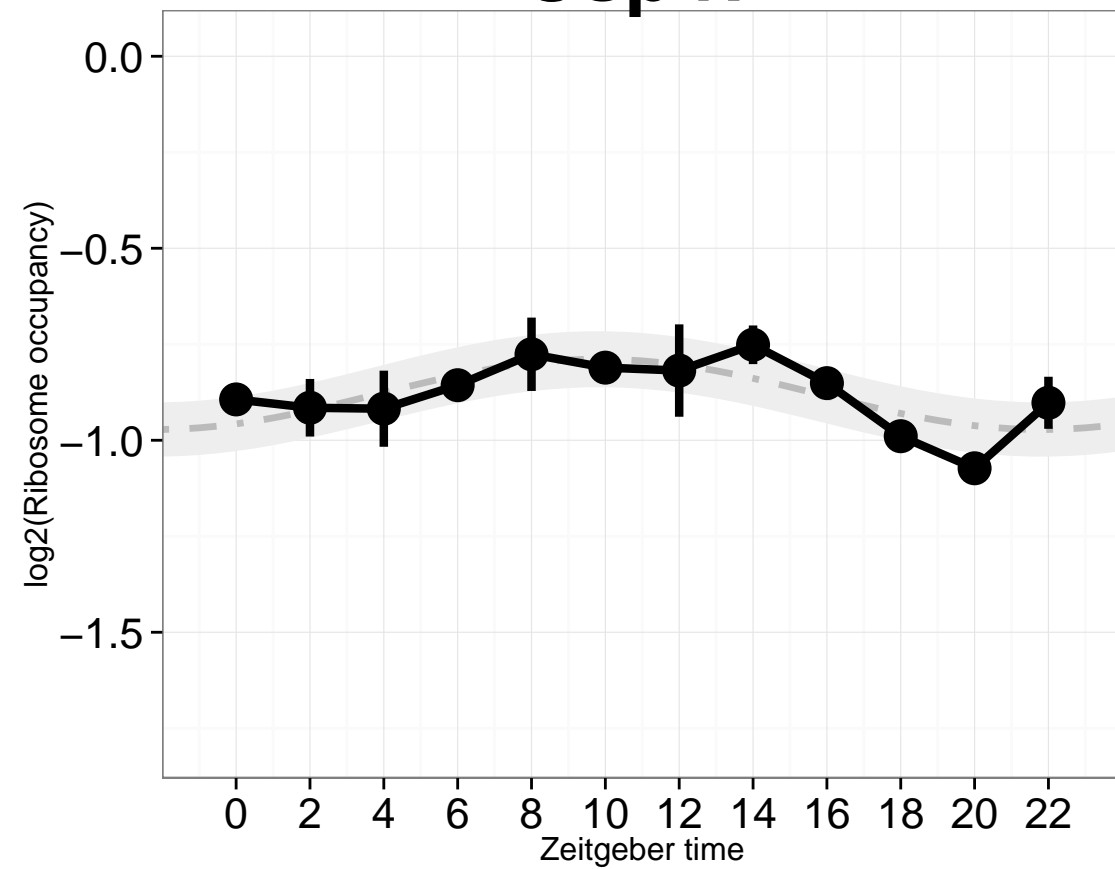

Supplement: Supplementary file 9584 [file 1]

## Ddr1

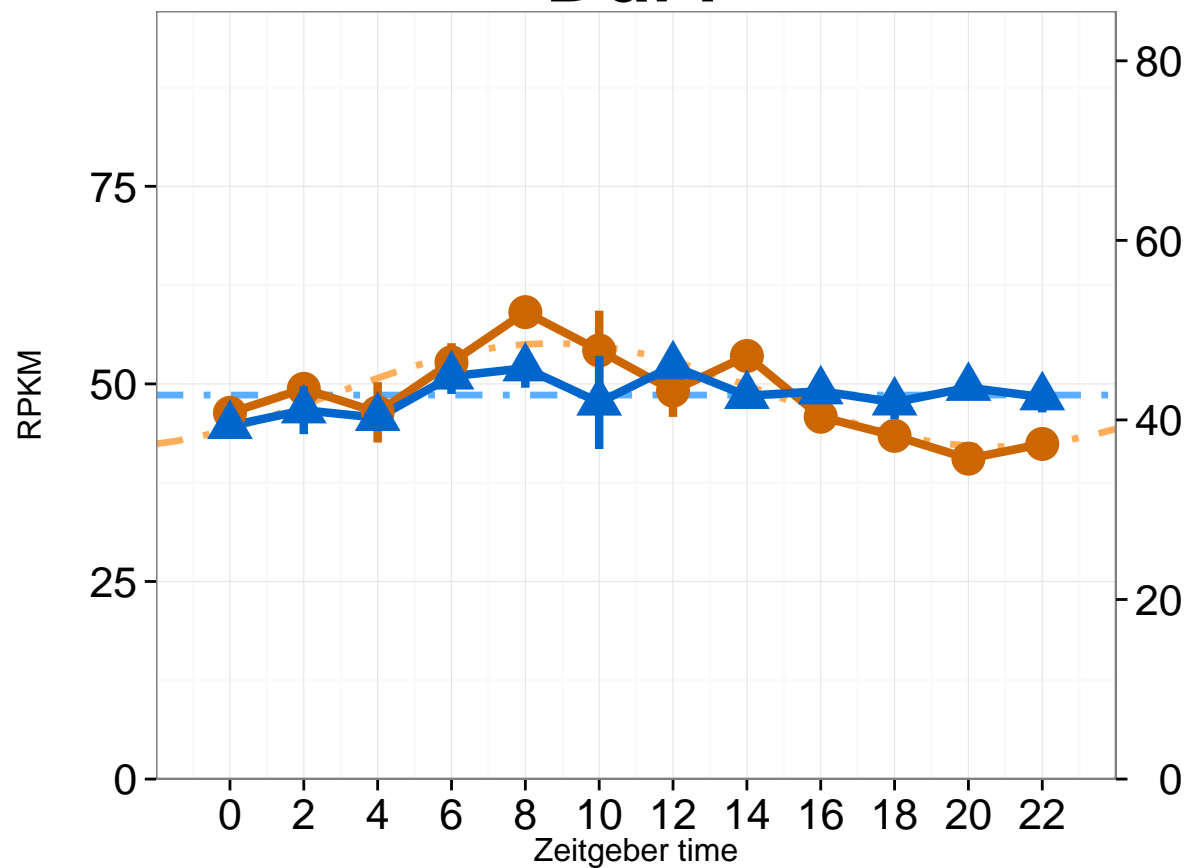

## Ddr1

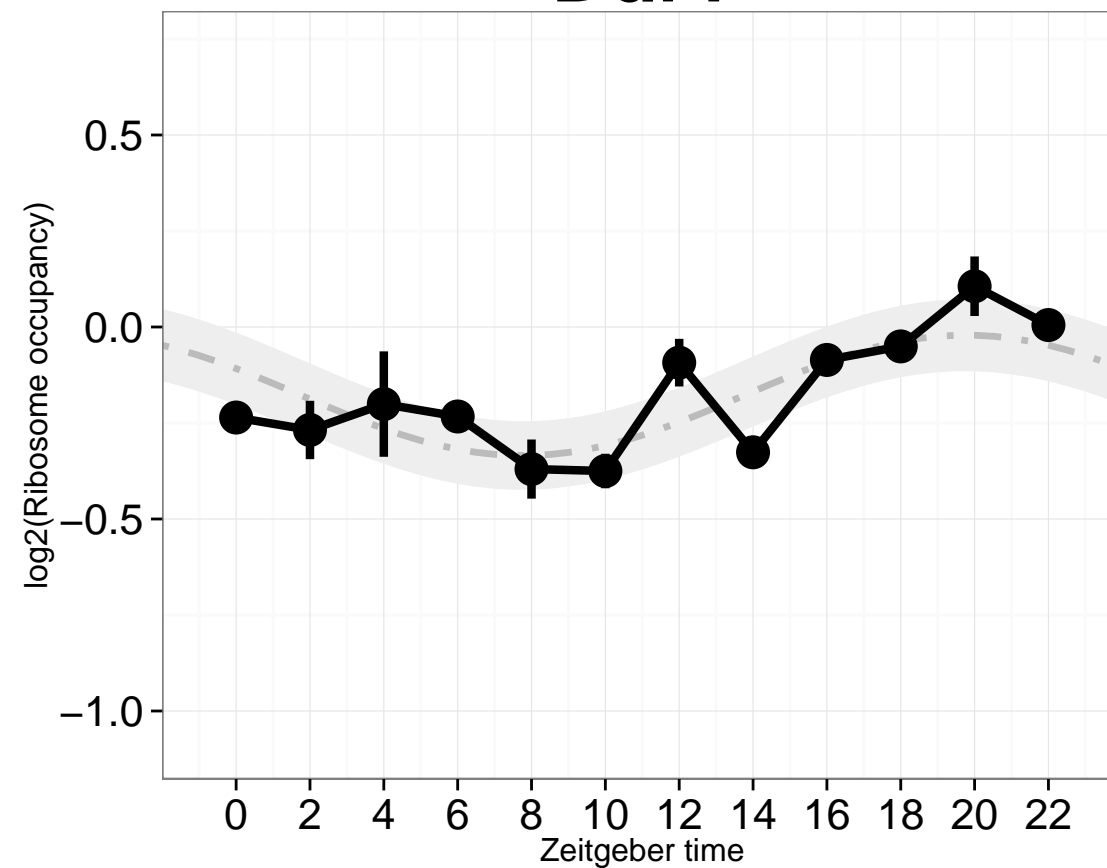

Supplement: Supplementary file 9585 [file 1]

# 9230112E08Rik

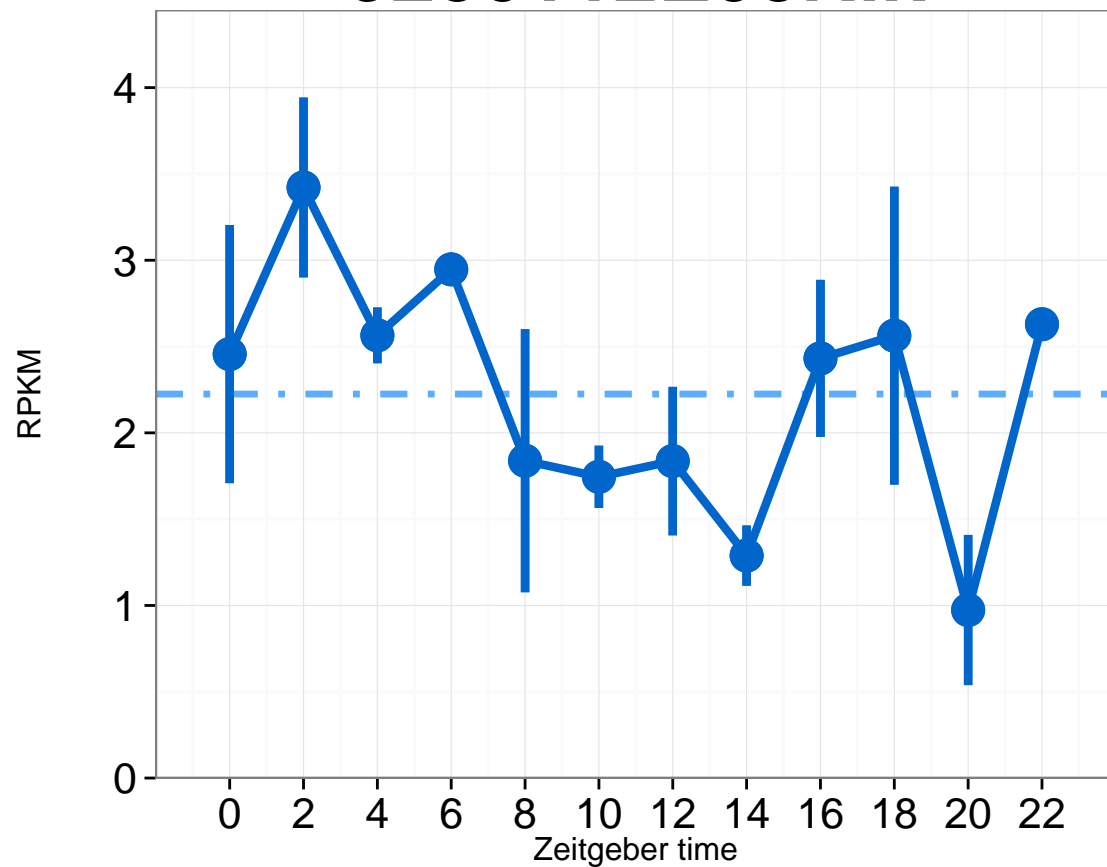

# 9230112E08Rik log2(Ribosome occup

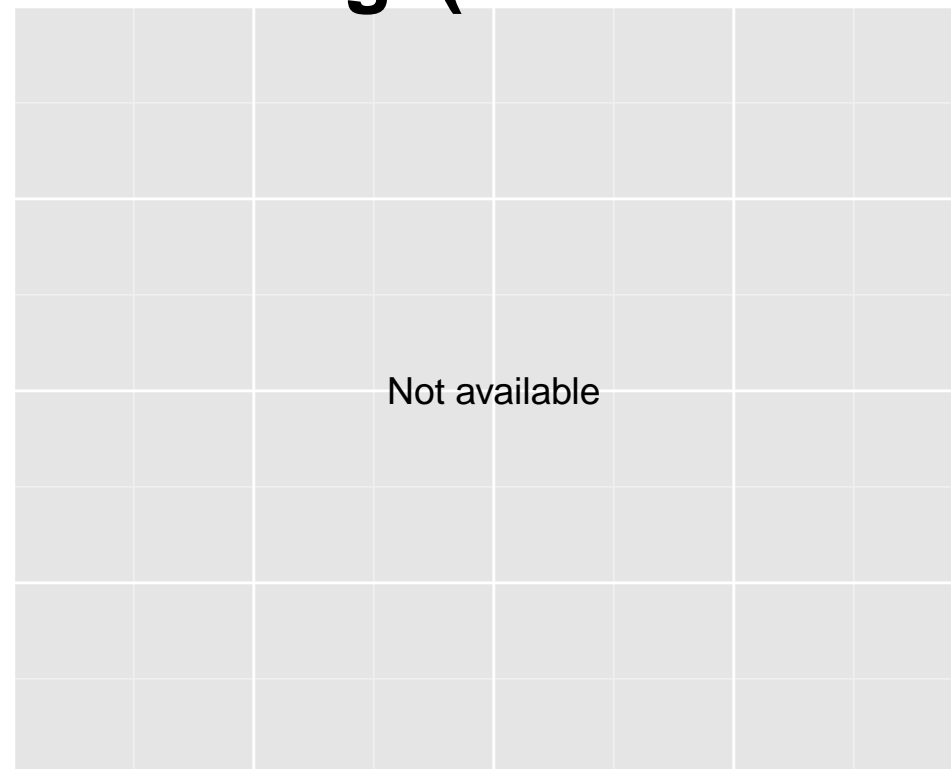

Supplement: Supplementary file 9586 [file 1]

# S100a1

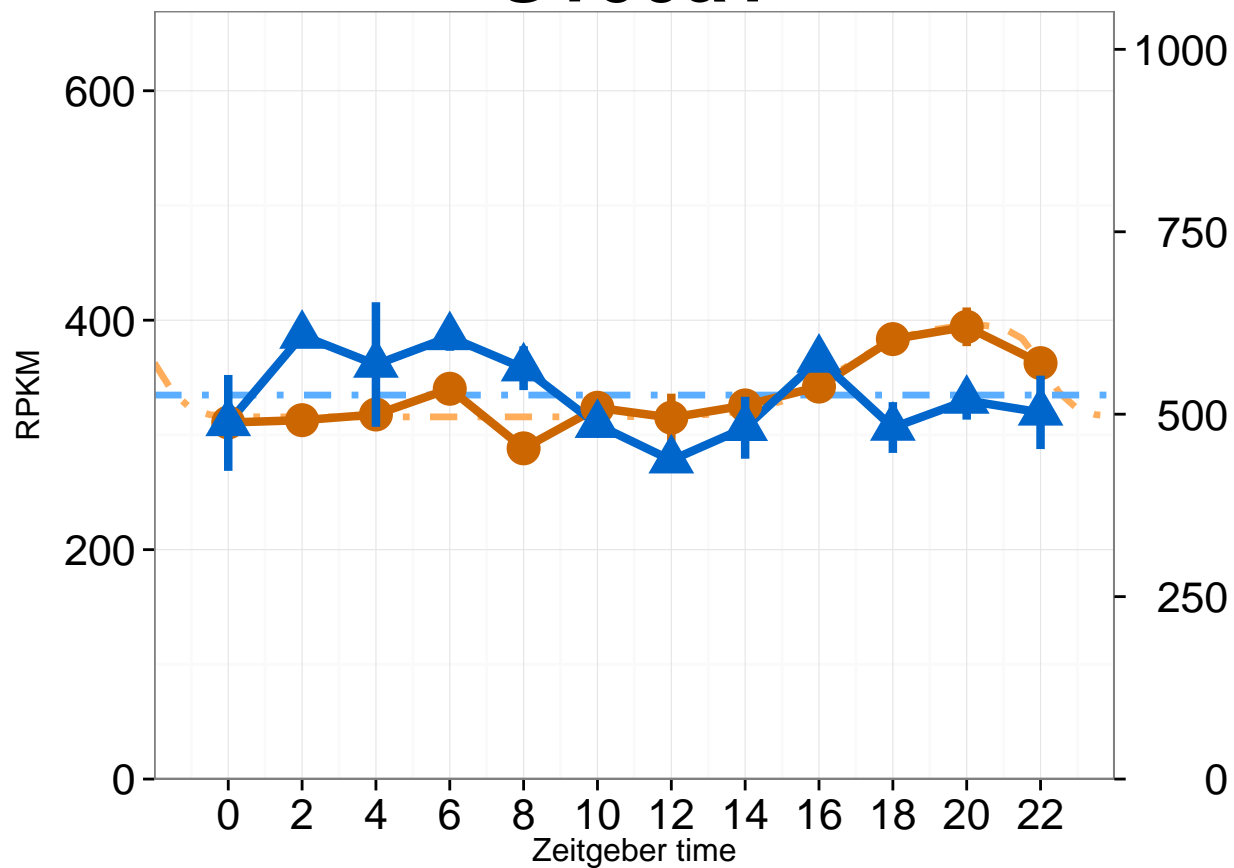

# S100a1

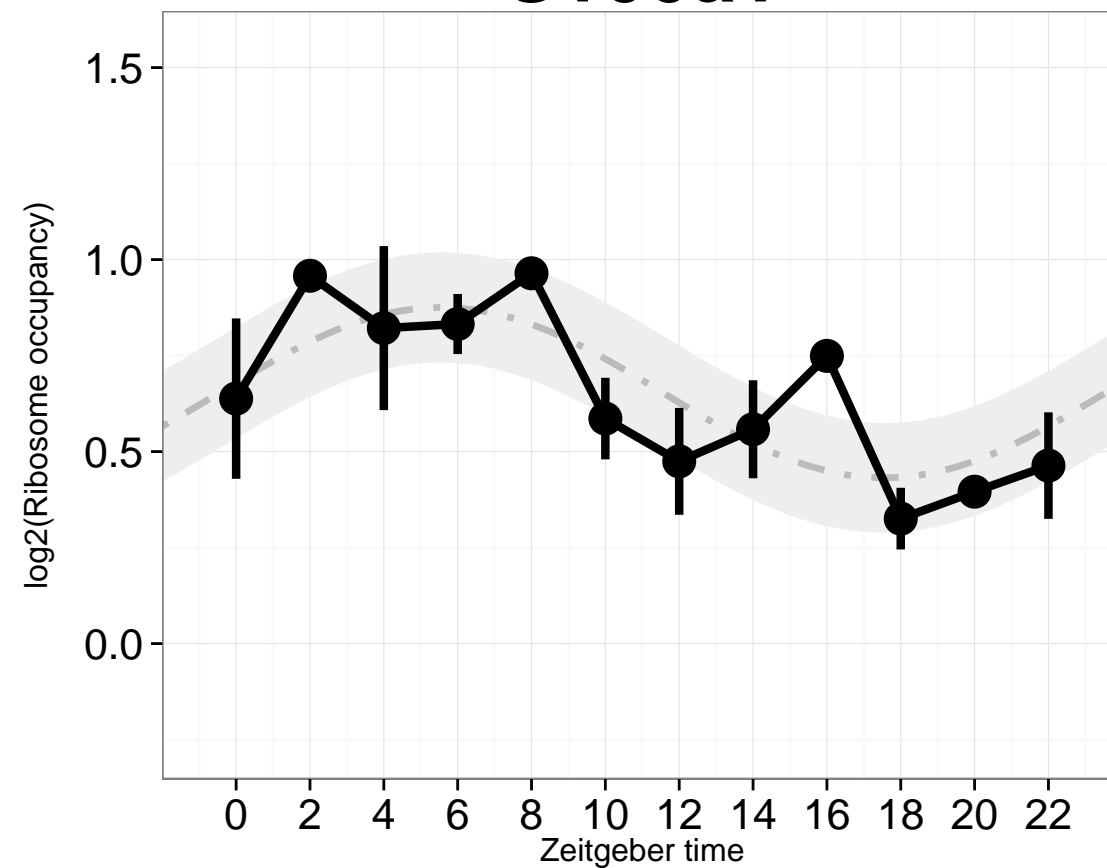

Supplement: Supplementary file 9587 [file 1]

# Zfp704

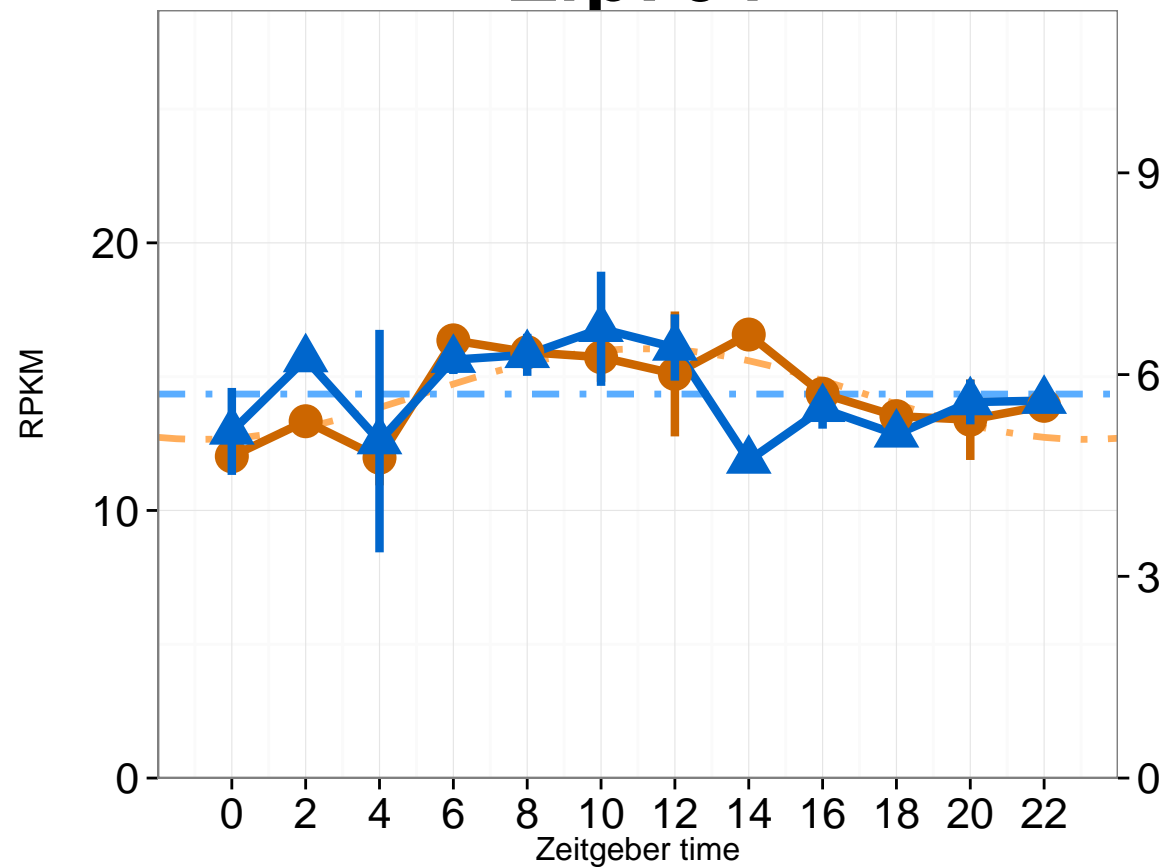

# Zfp704

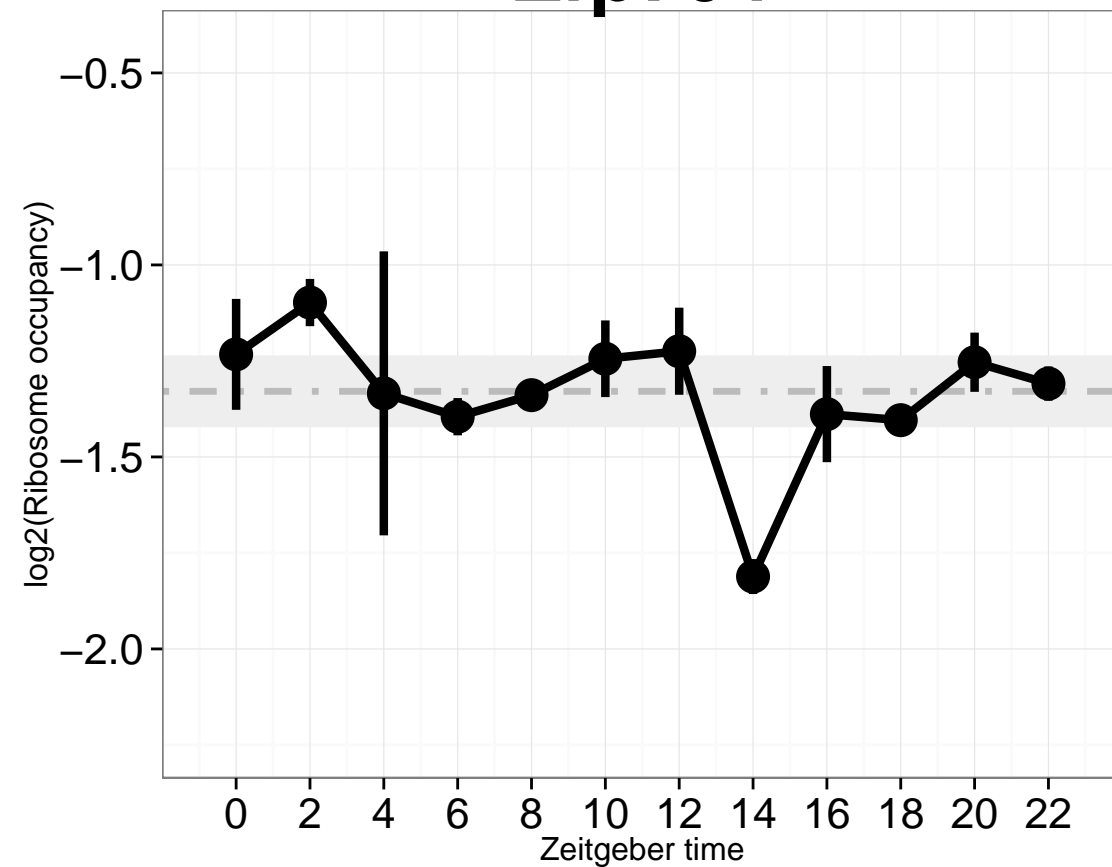

Supplement: Supplementary file 9588 [file 1]

# Syt11

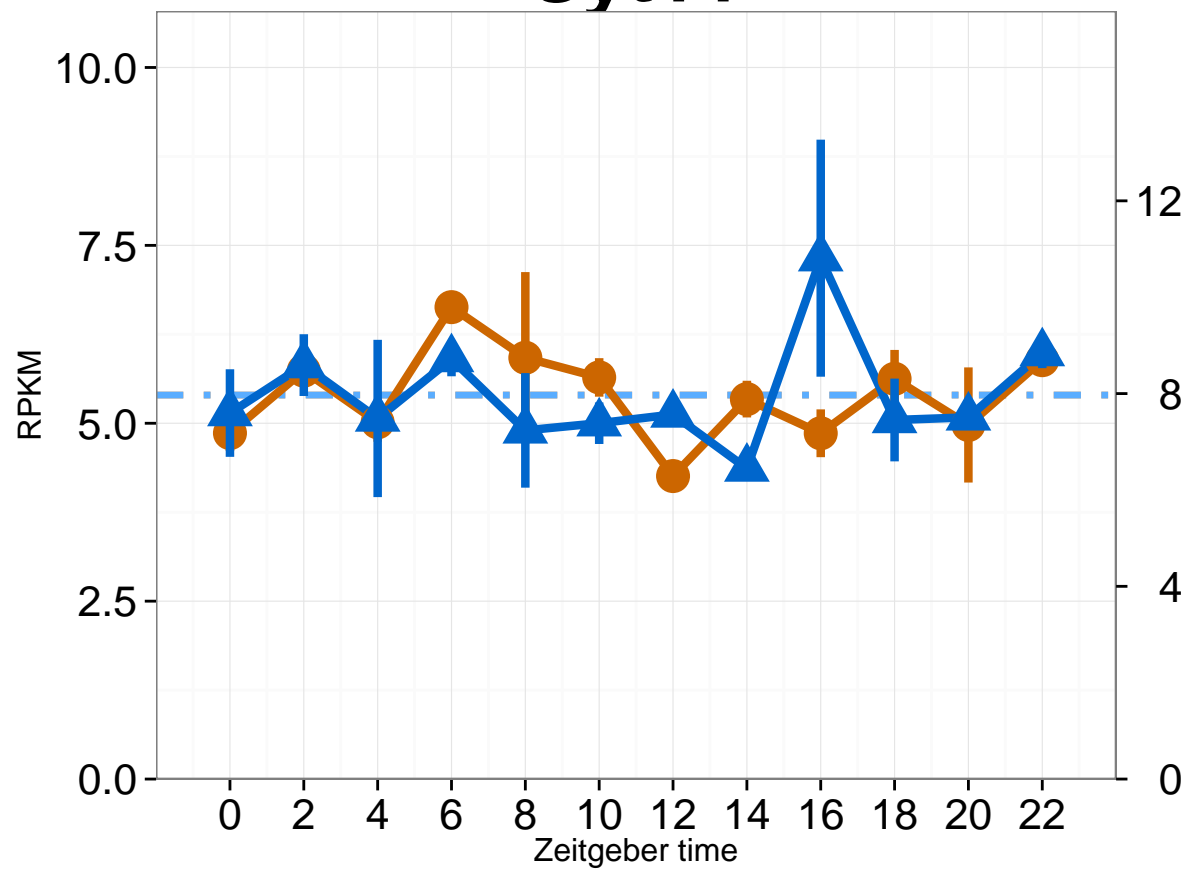

# Syt11

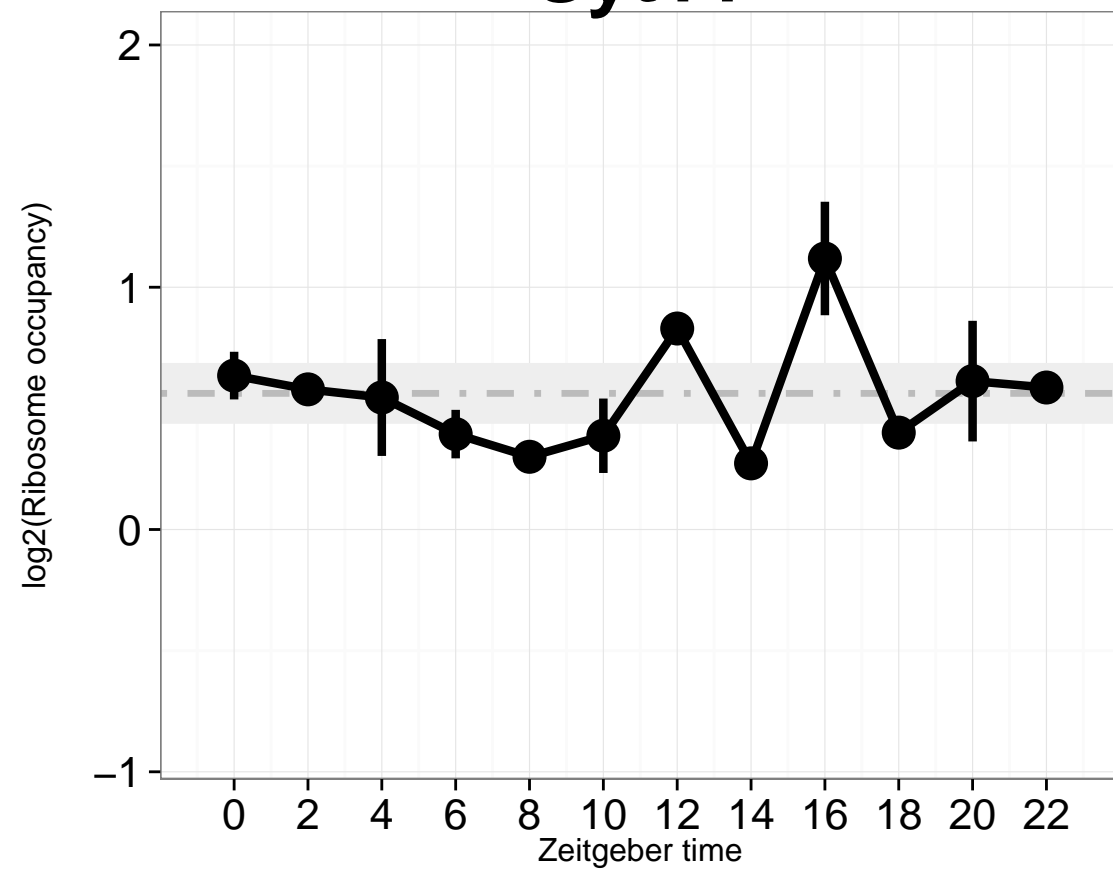

Supplement: Supplementary file 9589 [file 1]

## Ube2k

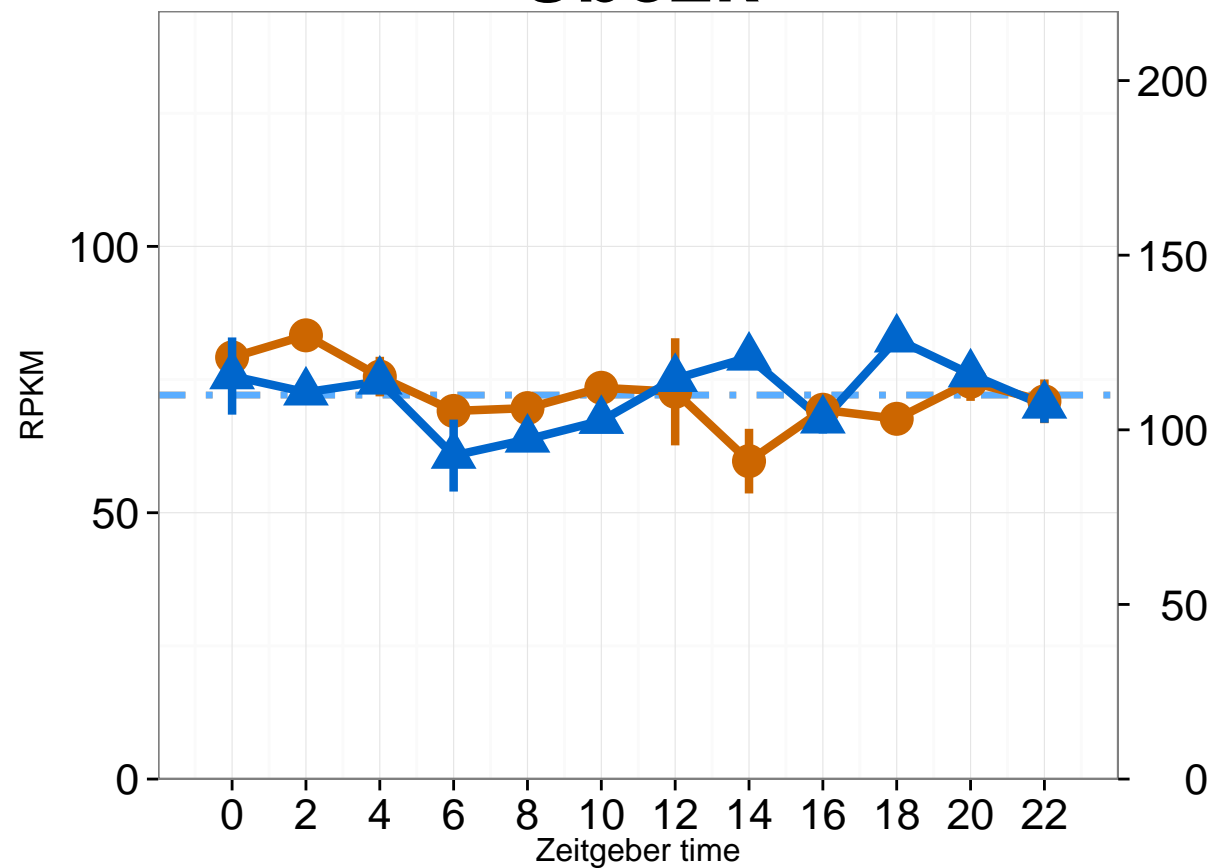

## Ube2k

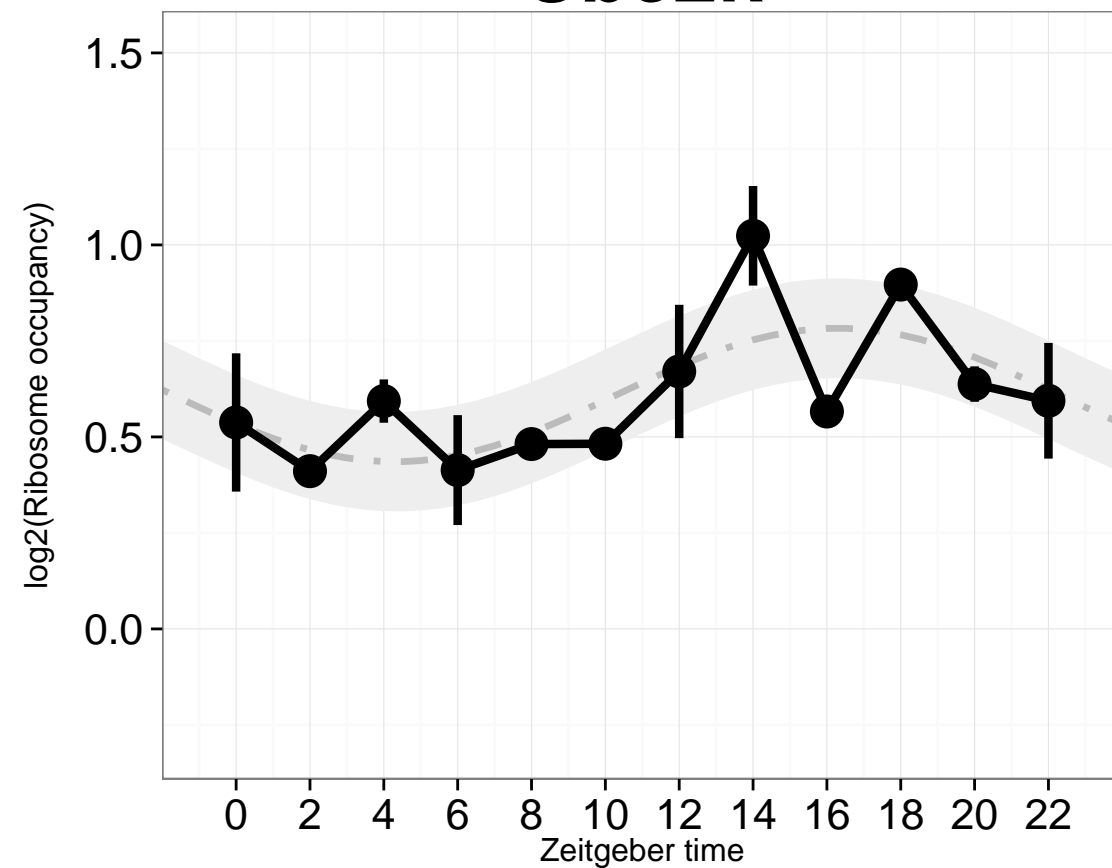

Supplement: Supplementary file 9590 [file 1]

## Rsbn1

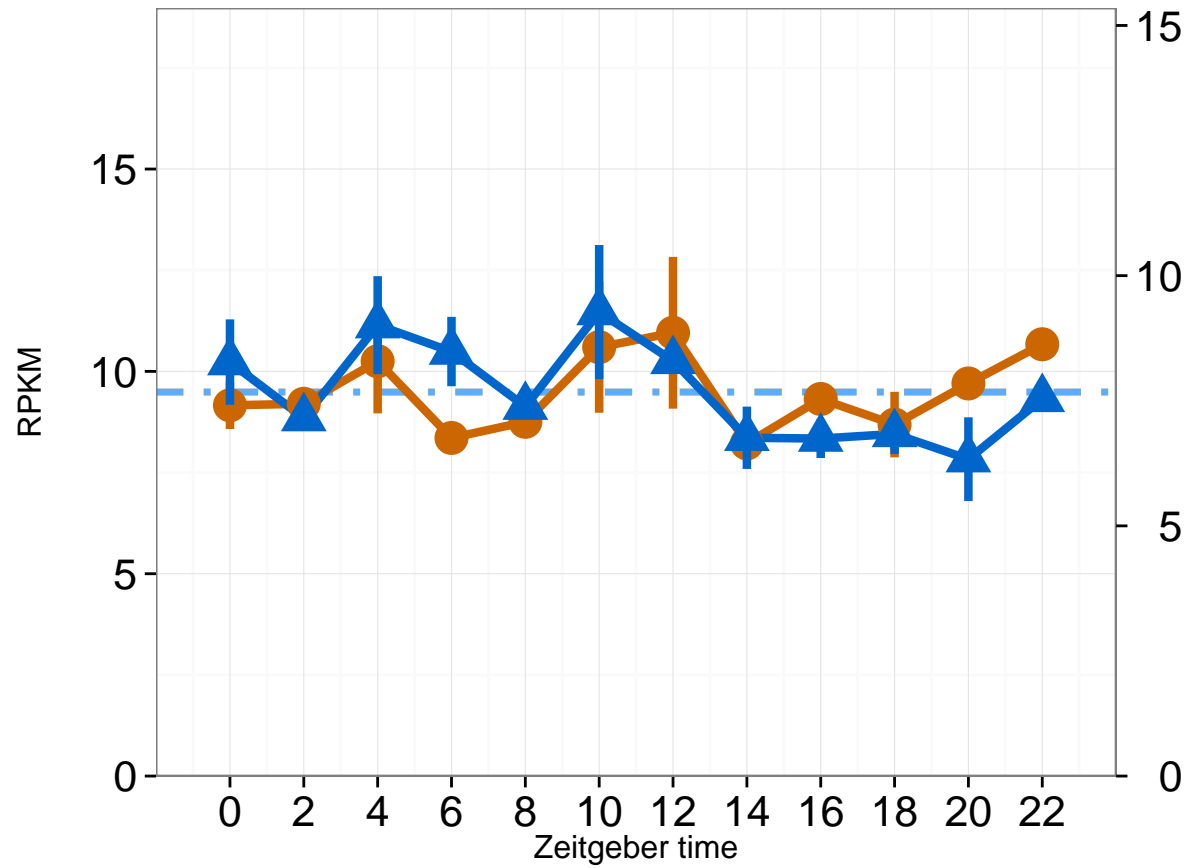

## Rsbn1

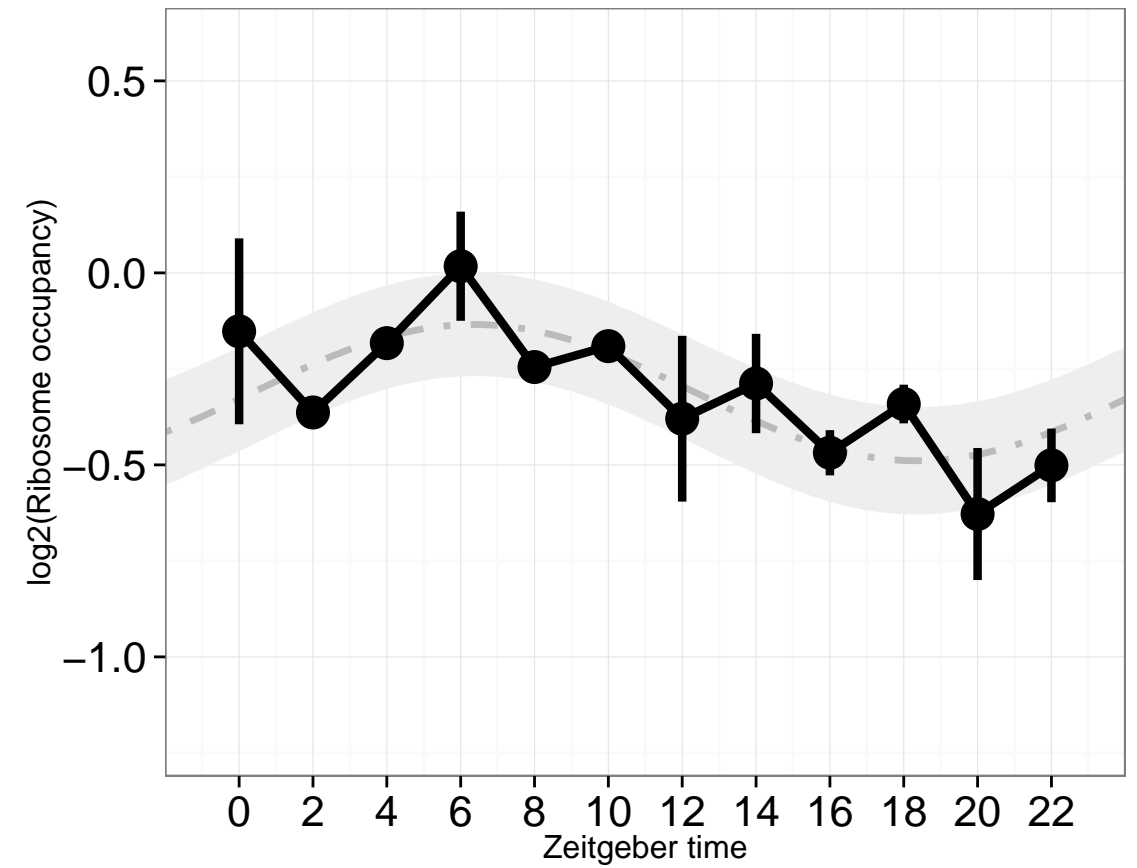

Supplement: Supplementary file 9591 [file 1]

## Fcho2

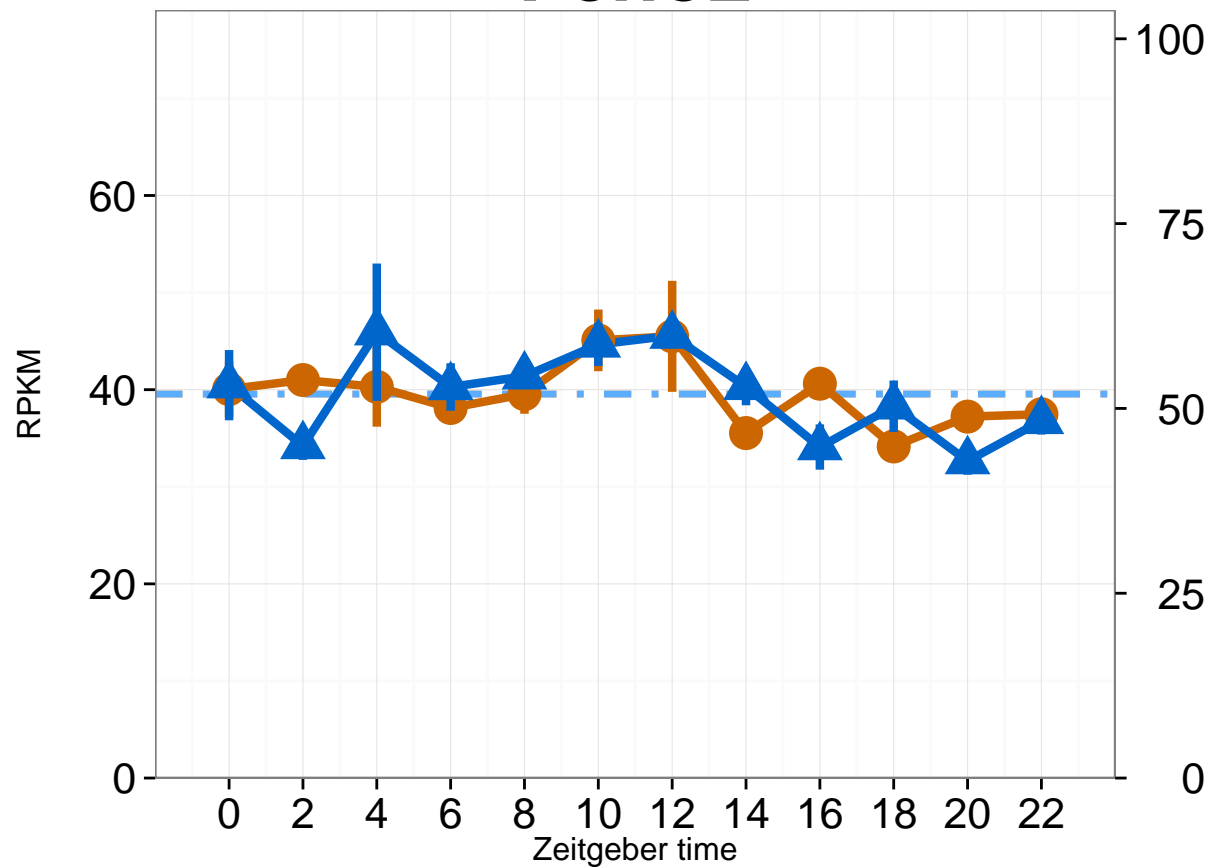

## Fcho2

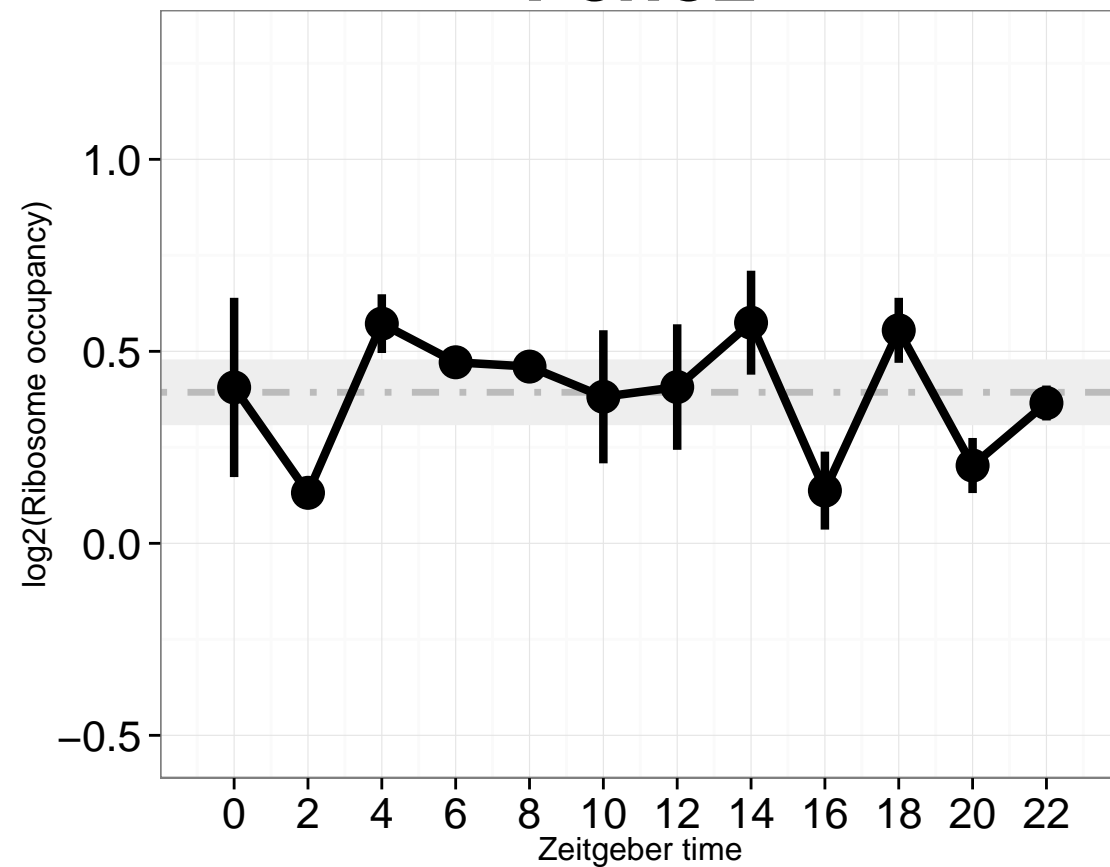

Supplement: Supplementary file 9592 [file 1]

## Habp2

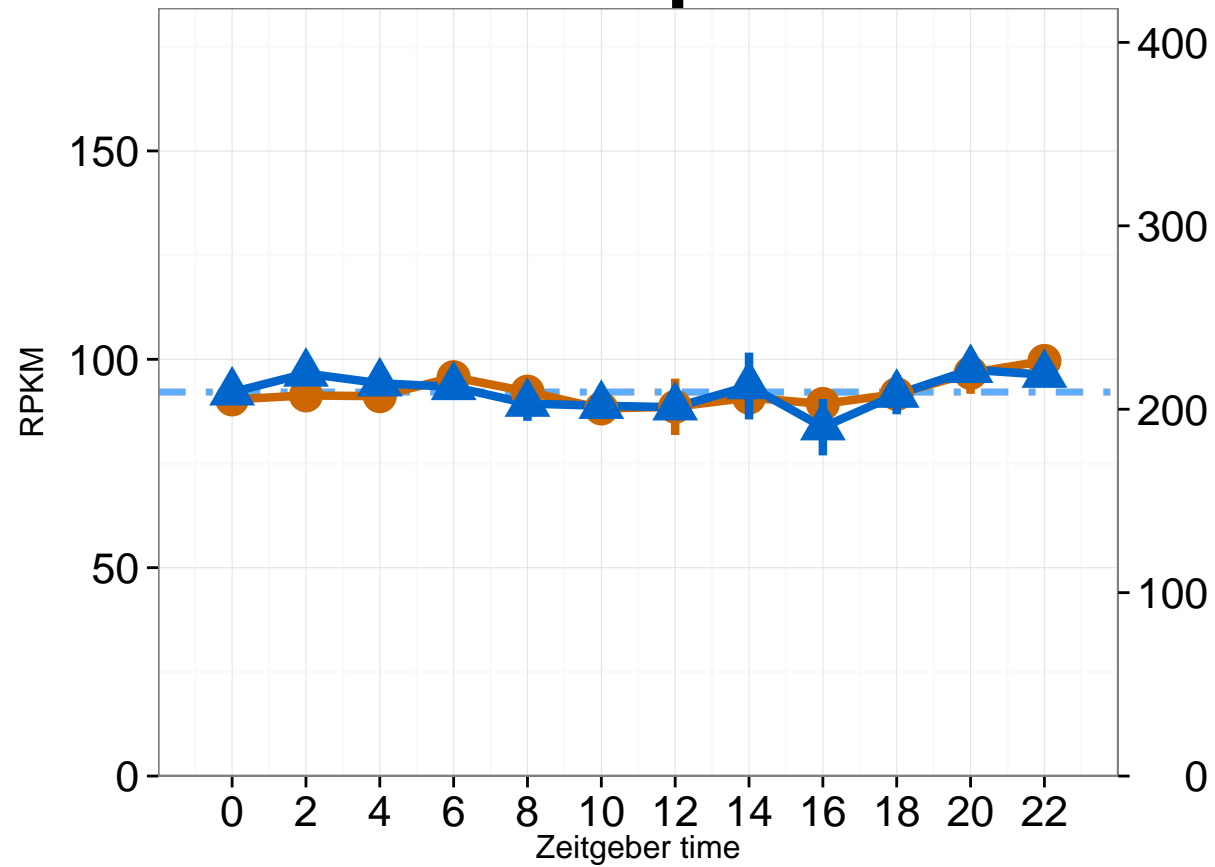

## Habp2

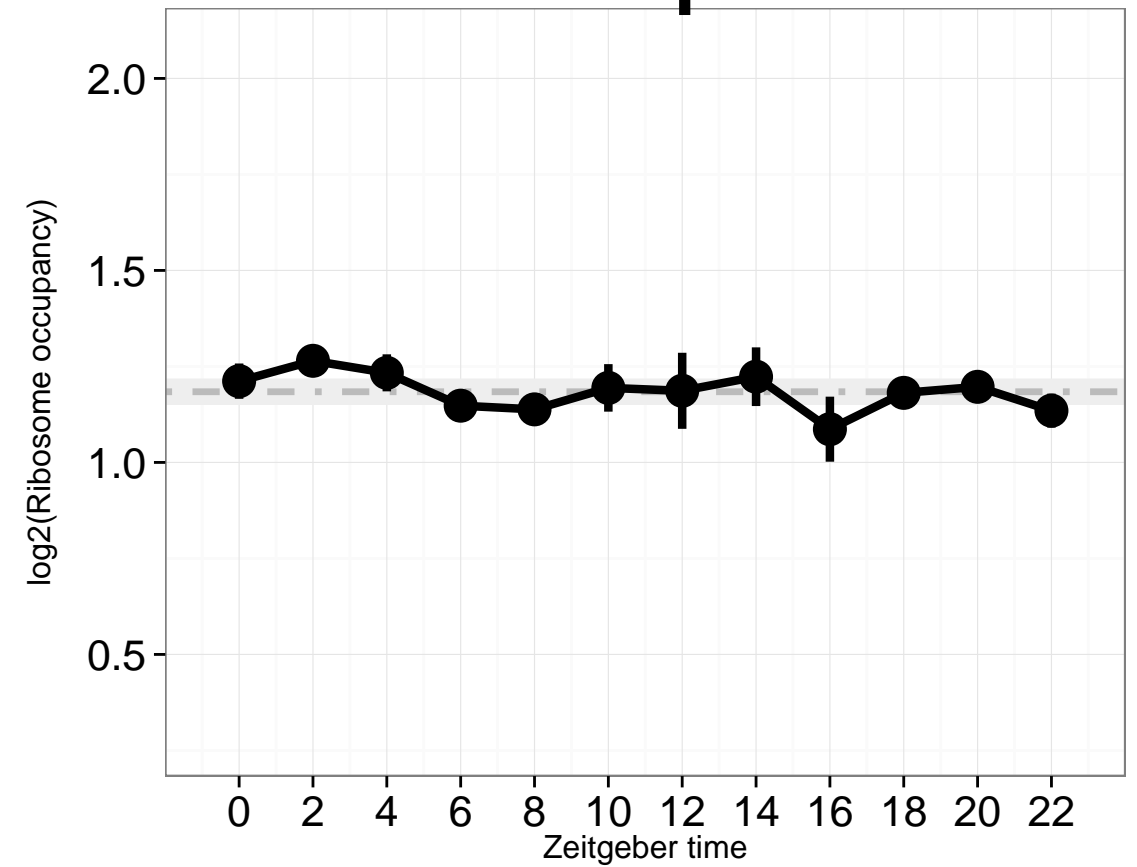

Supplement: Supplementary file 9593 [file 1]

# Snx11

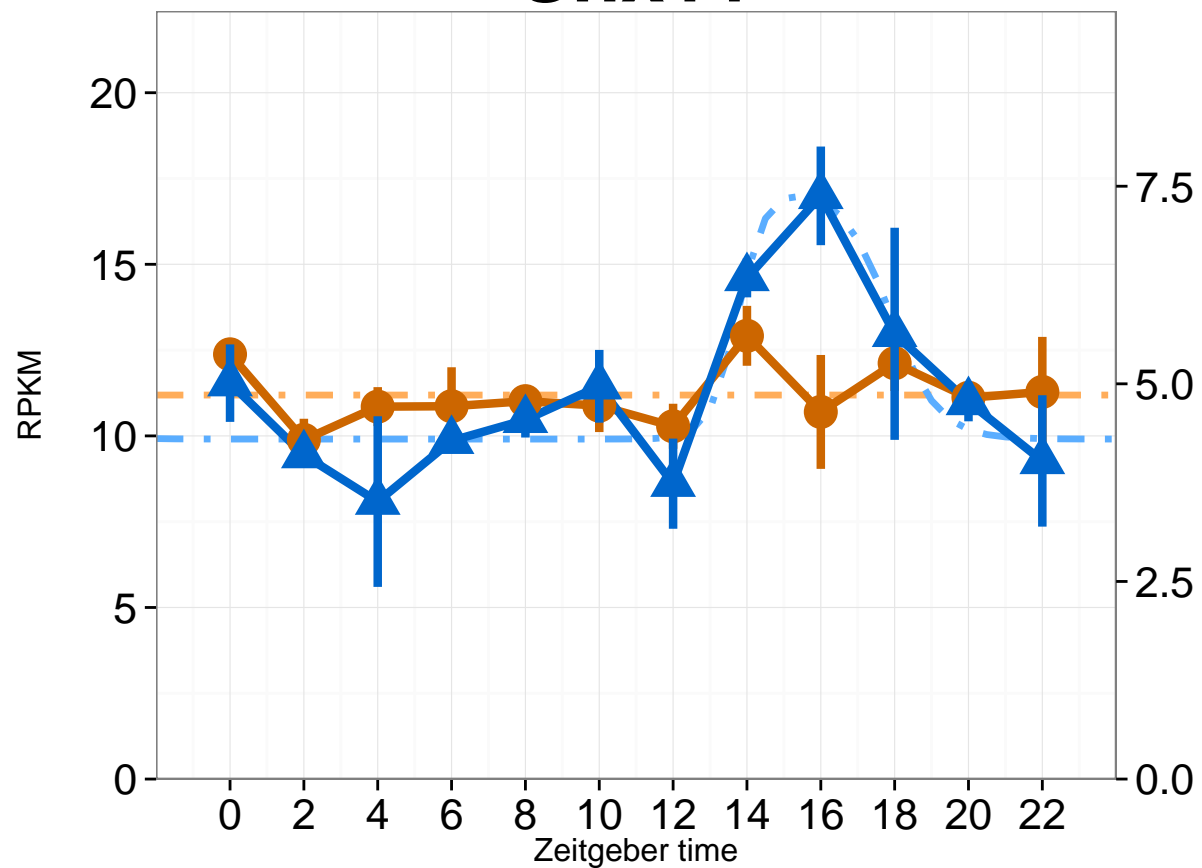

# Snx11

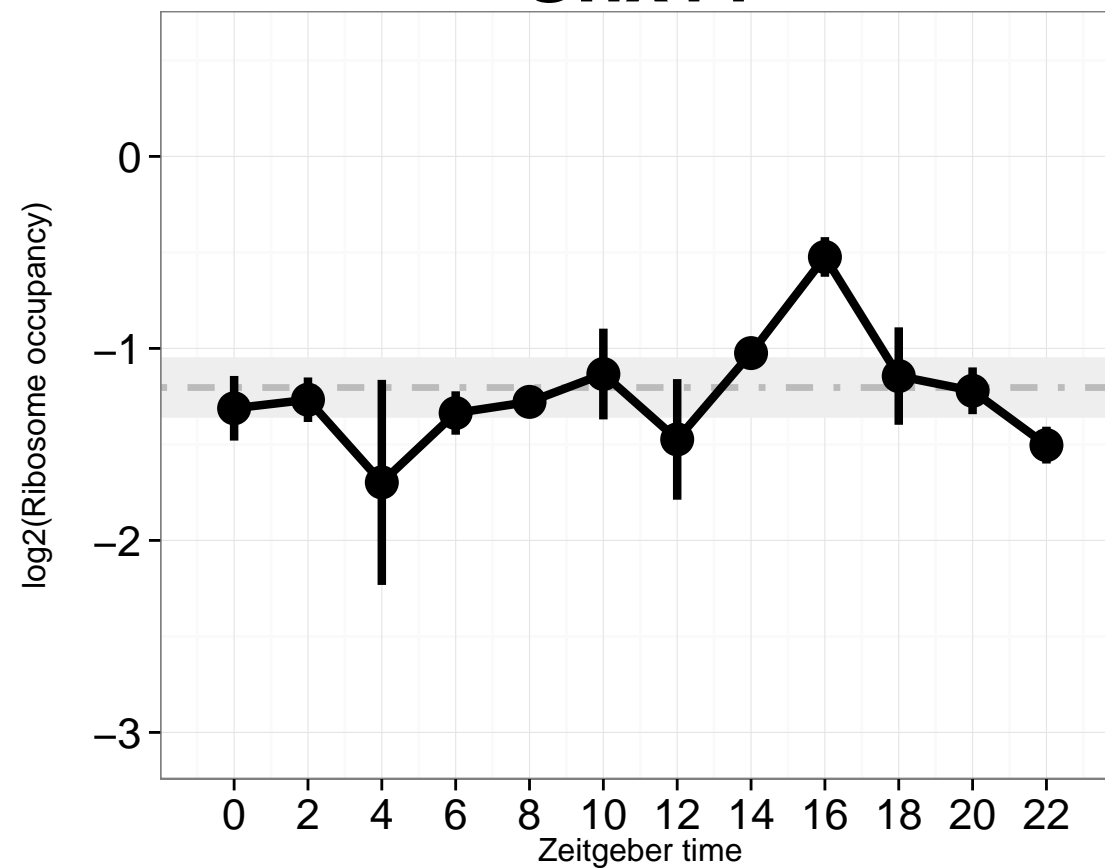

Supplement: Supplementary file 9594 [file 1]

## Pias4

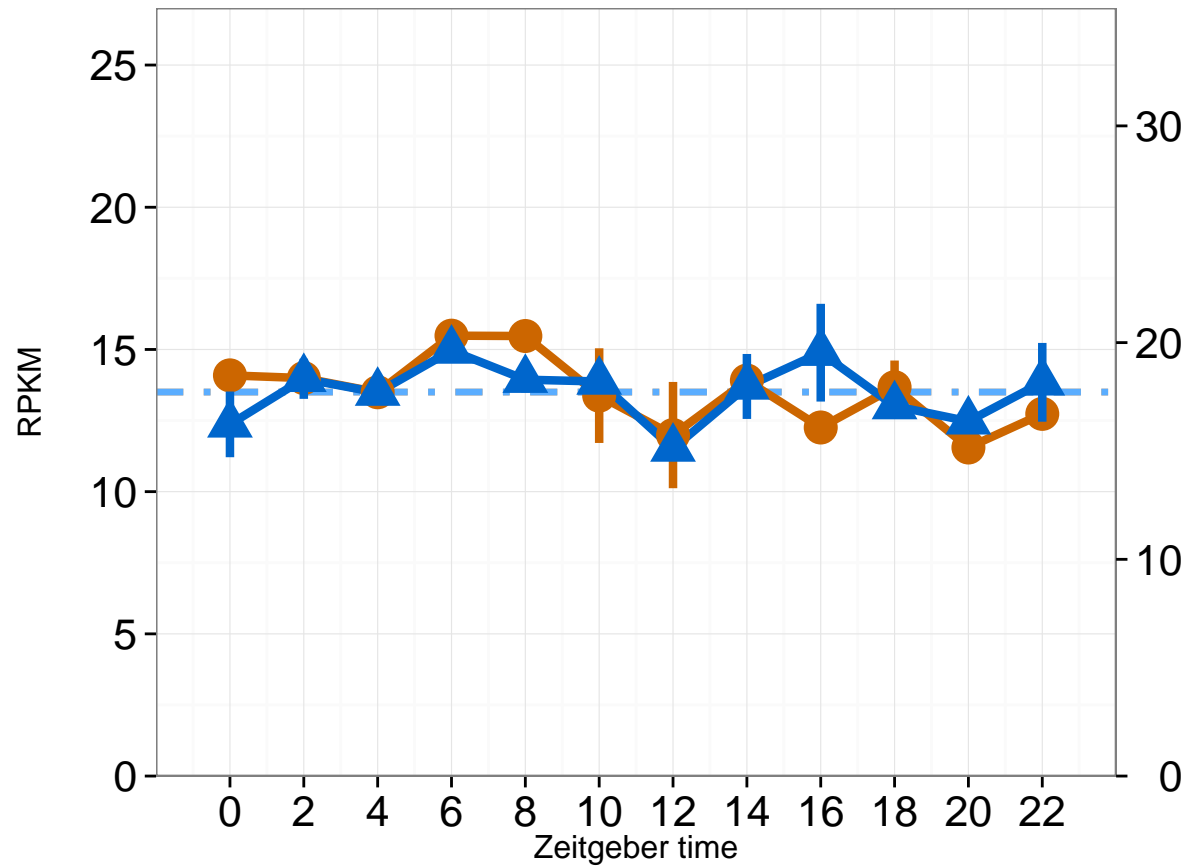

## Pias4

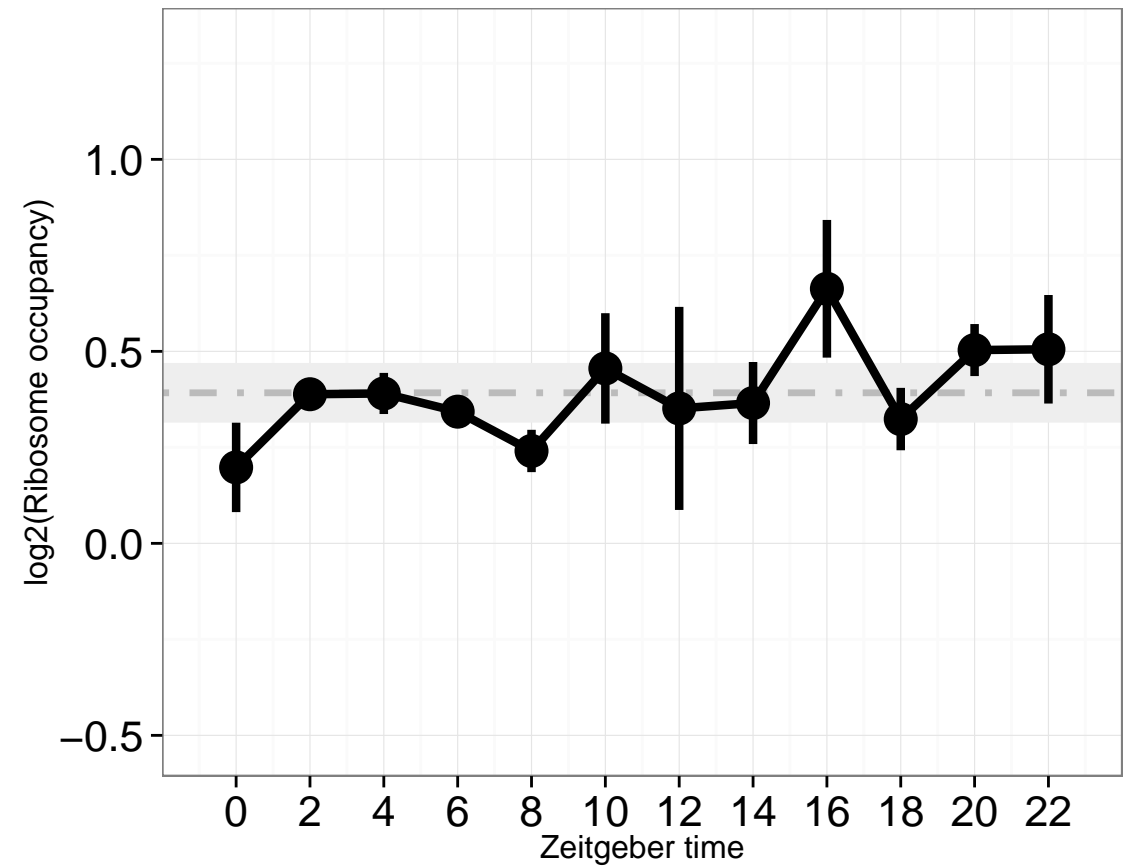

Supplement: Supplementary file 9595 [file 1]

## Anapc4

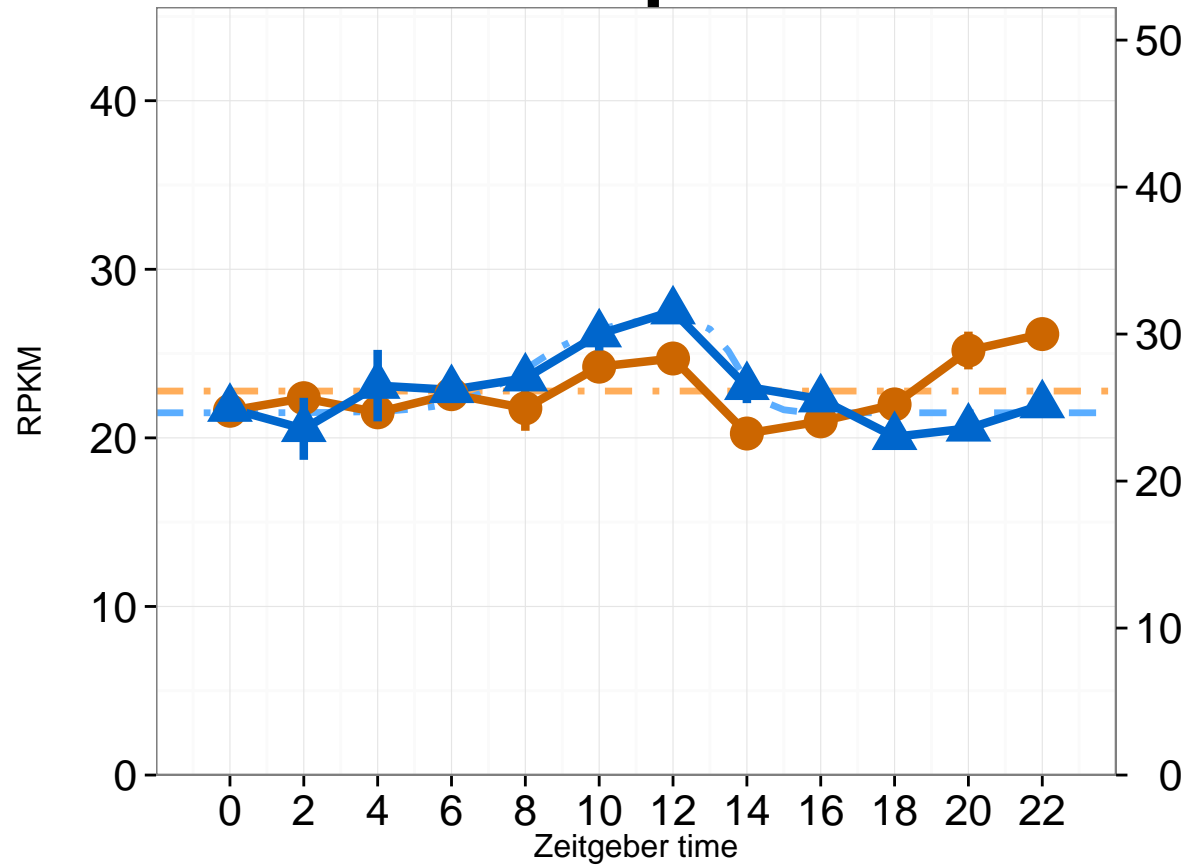

## Anapc4

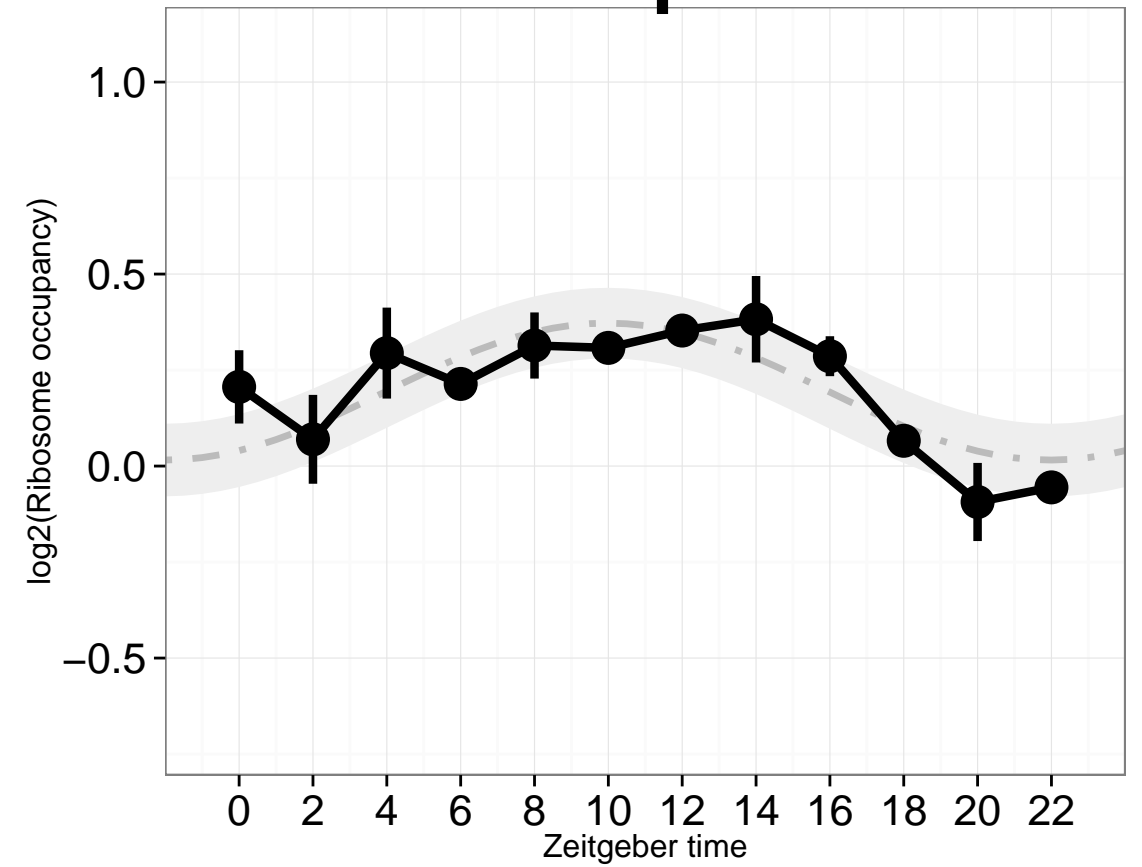

Supplement: Supplementary file 9596 [file 1]

## Gnai3

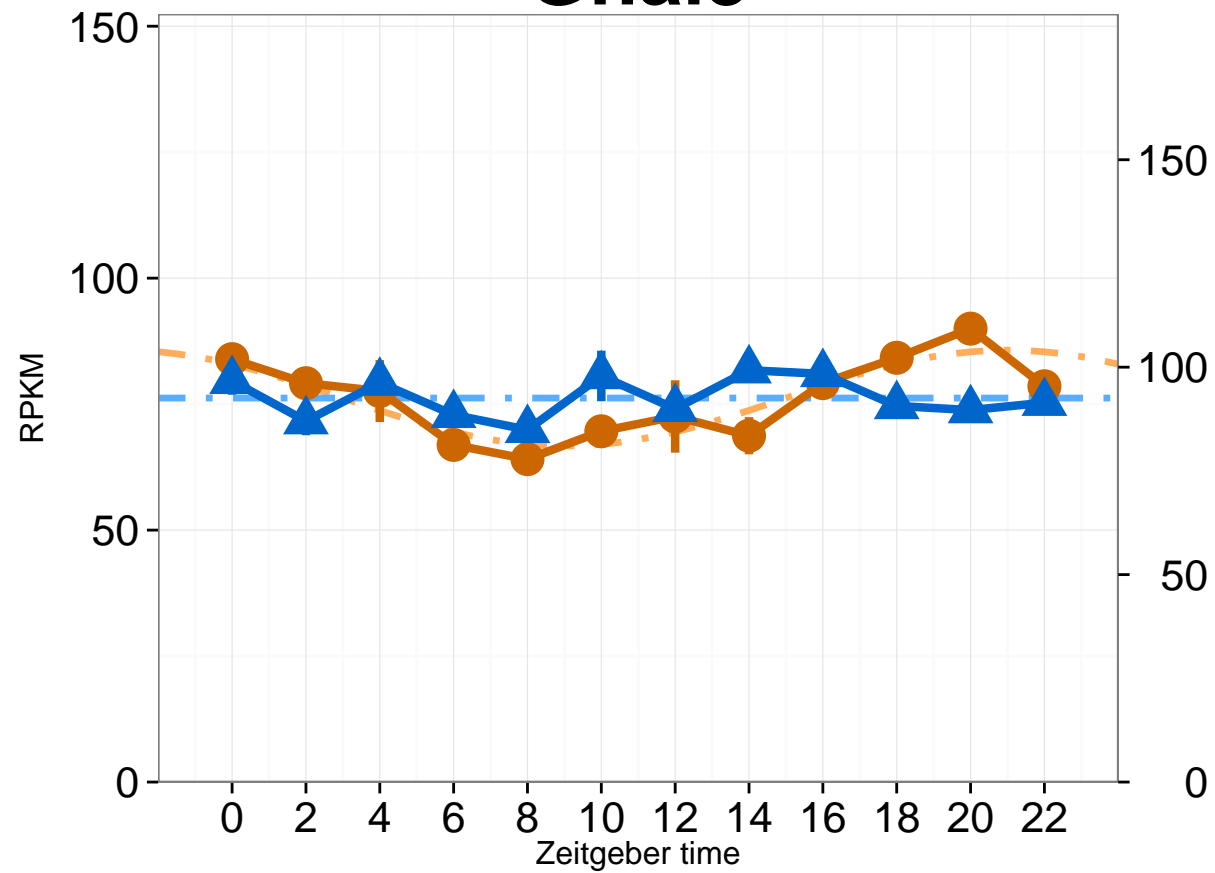

## Gnai3

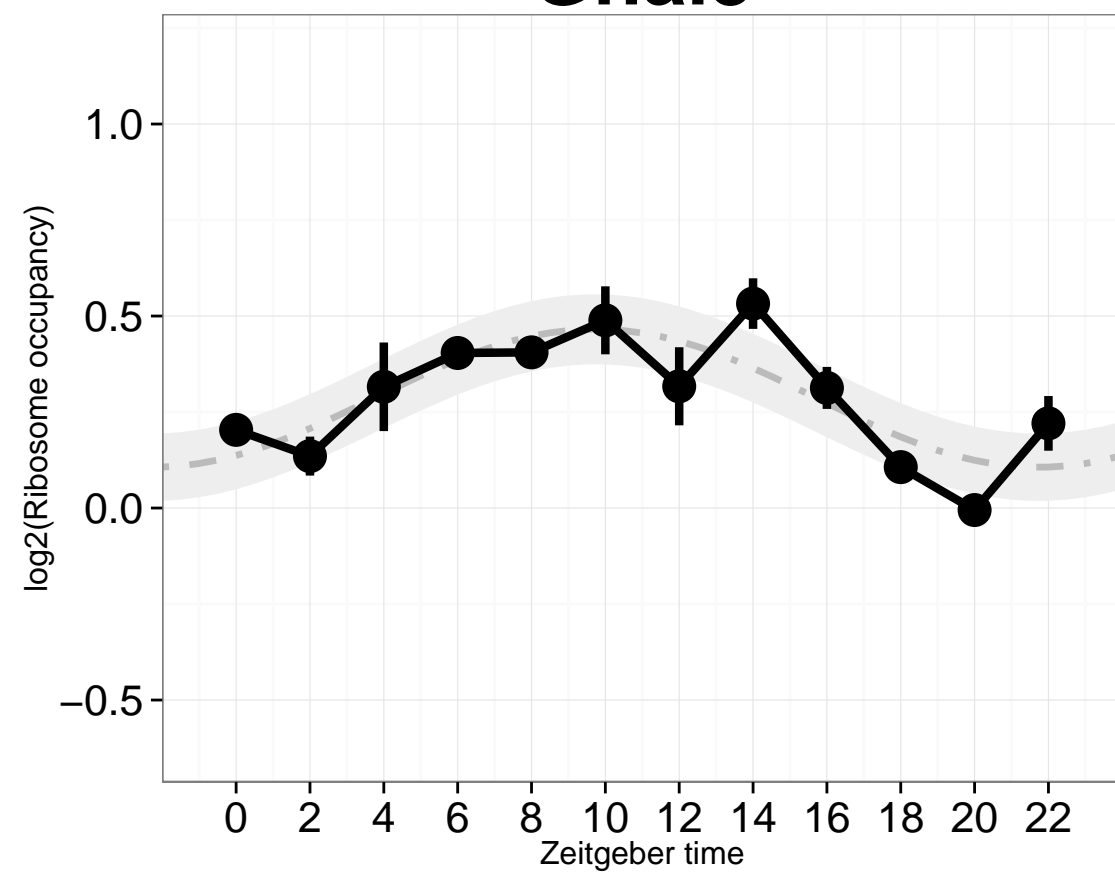

Supplement: Supplementary file 9597 [file 1]

## Mdh1

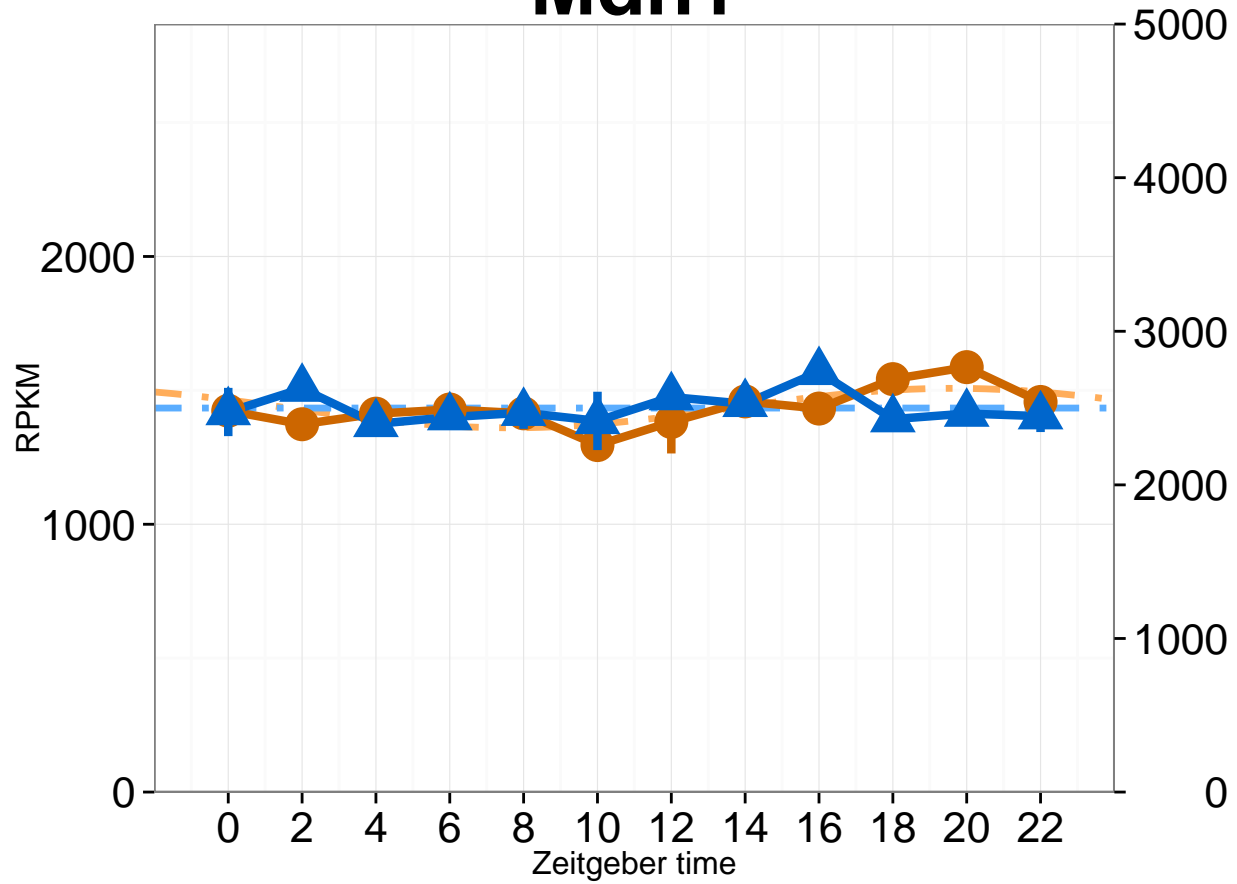

## Mdh1

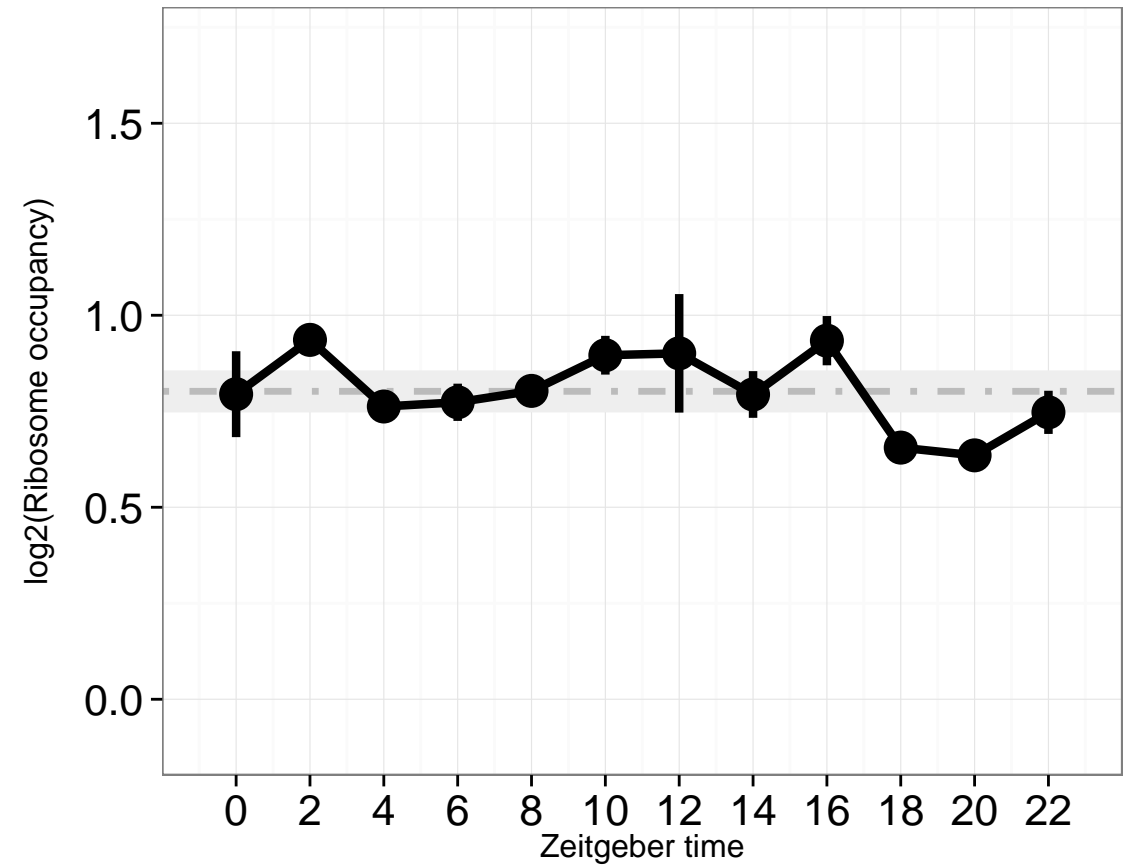

Supplement: Supplementary file 9598 [file 1]

## Arfp1

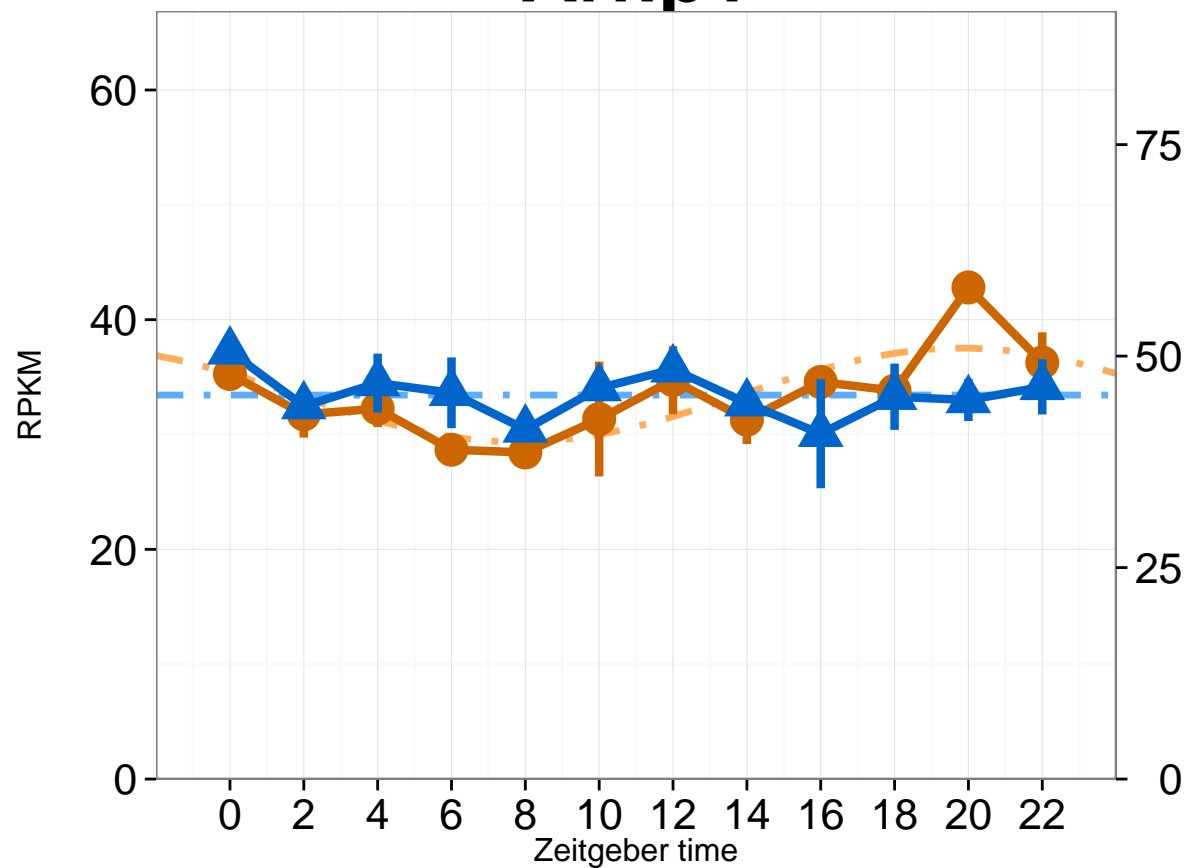

## Arfp1

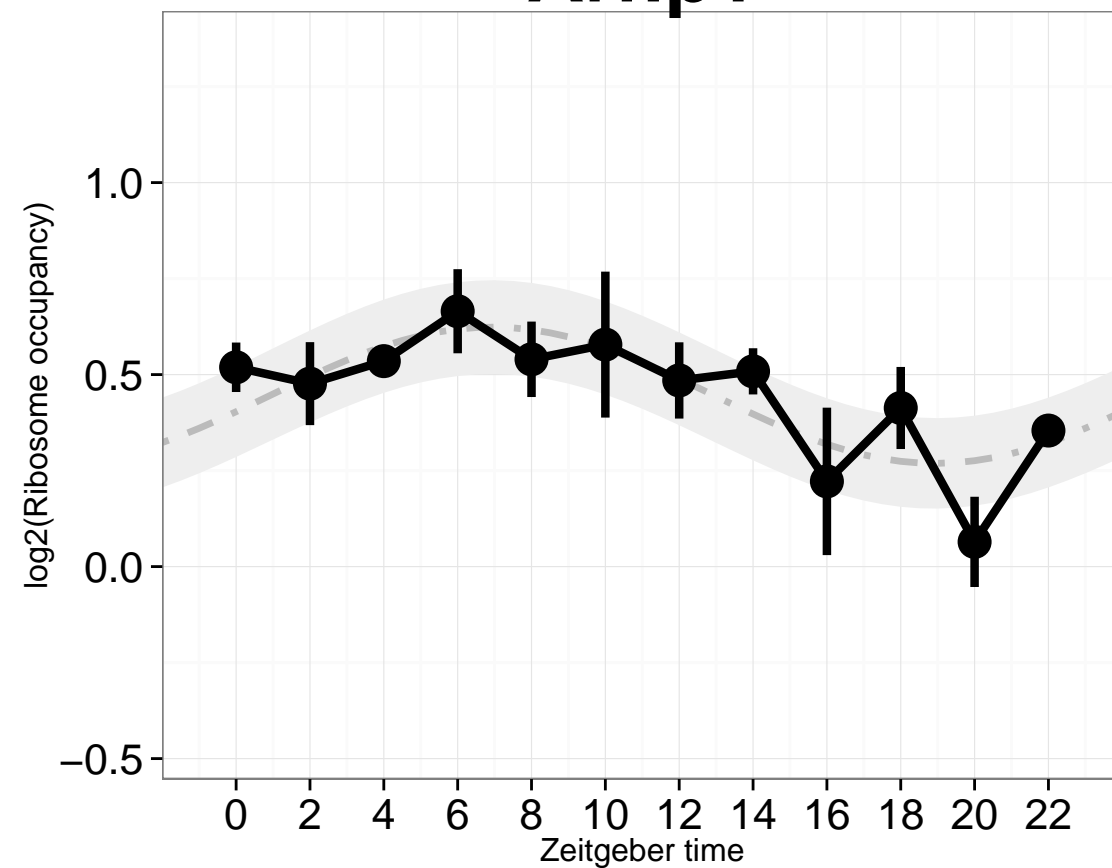

Supplement: Supplementary file 9599 [file 1]

**Id1**

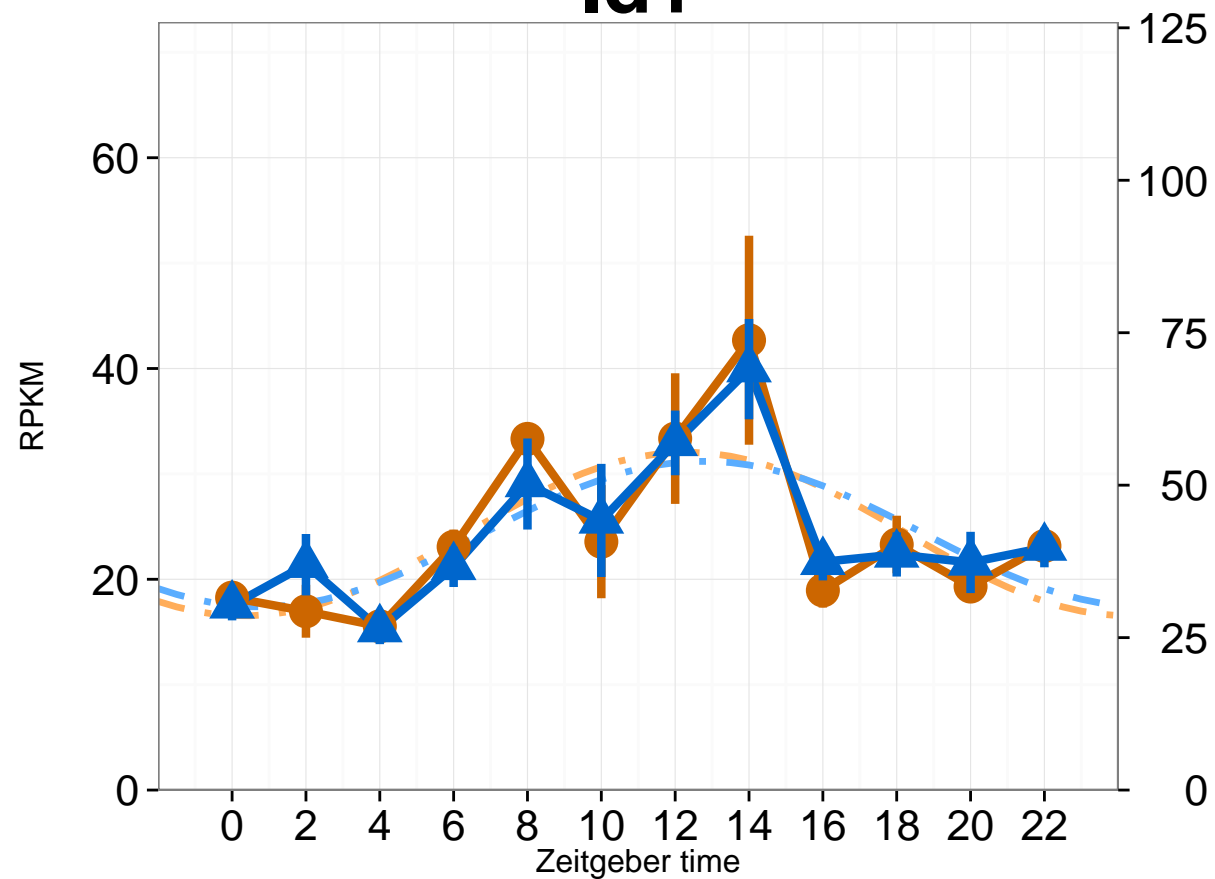

**Id1**

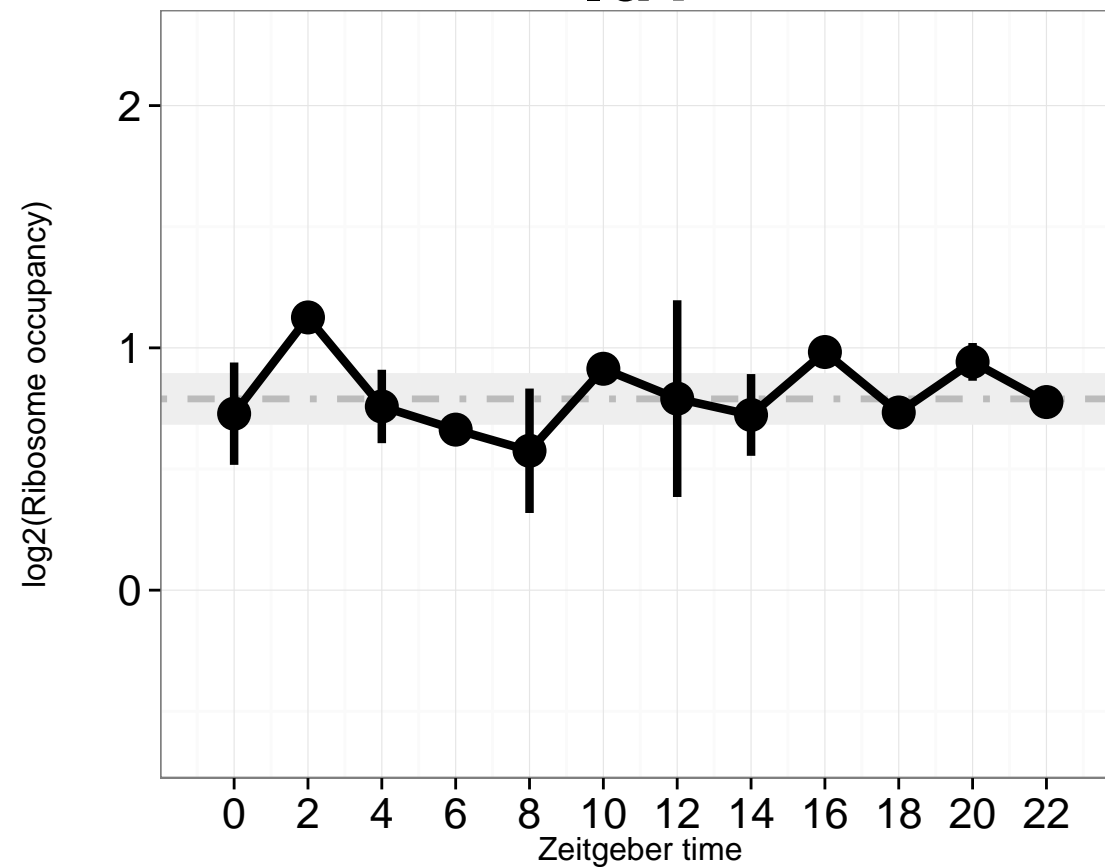

Supplement: Supplementary file 9600 [file 1]

## Mfsd12

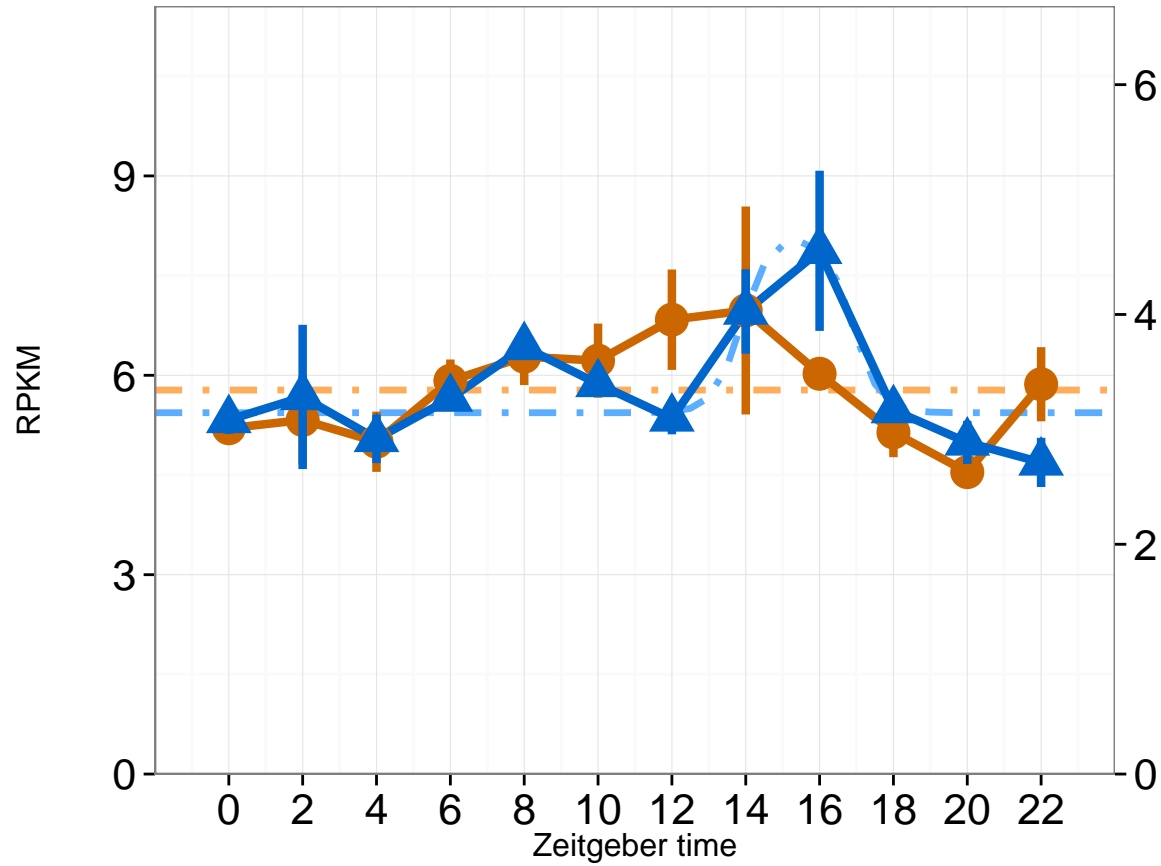

## Mfsd12

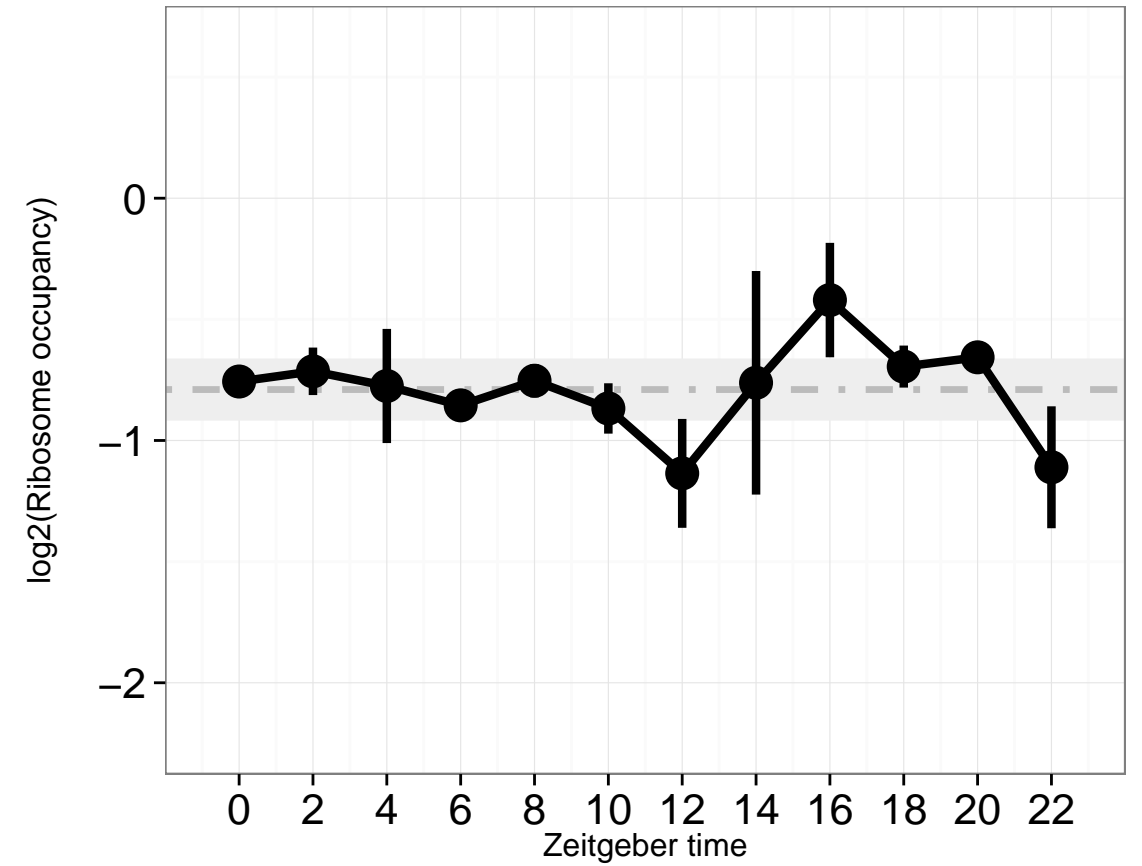

Supplement: Supplementary file 9601 [file 1]

# Fbp1

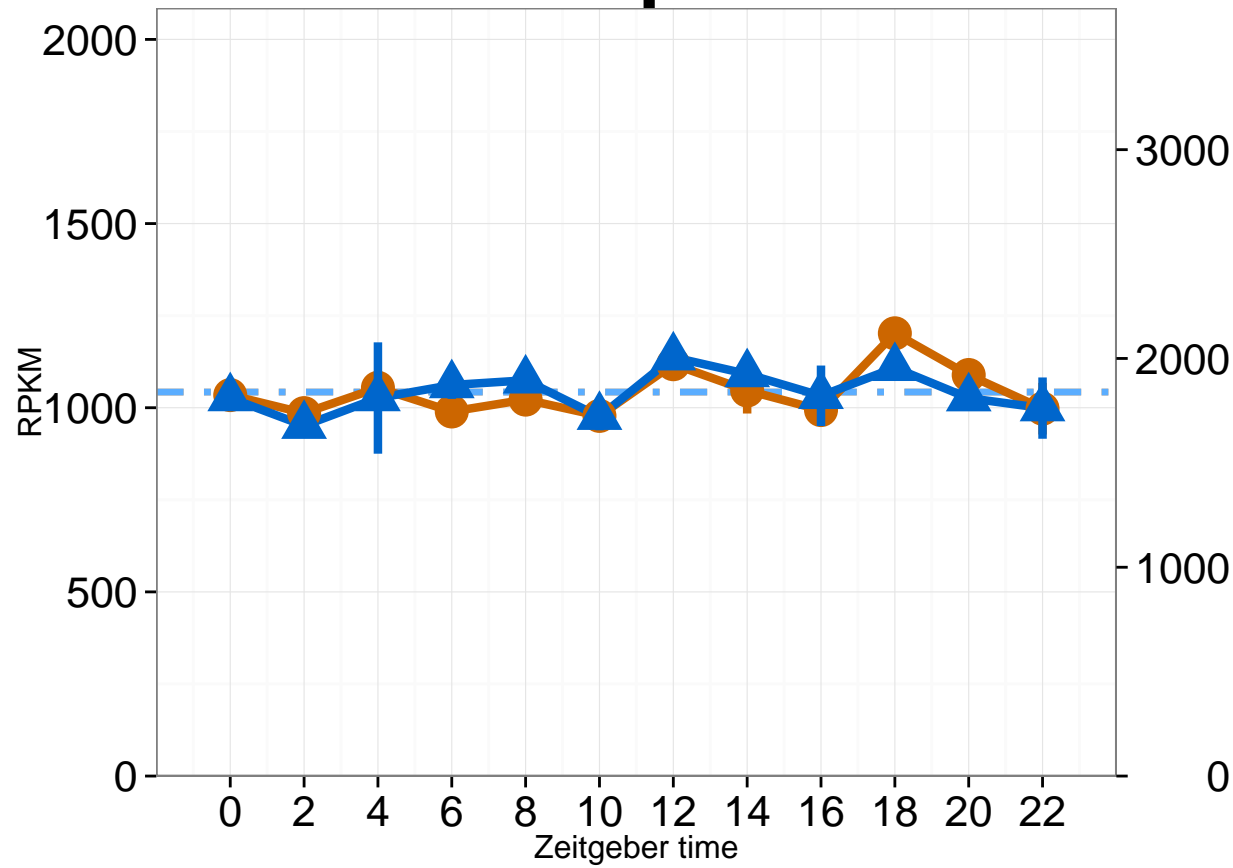

# Fbp1

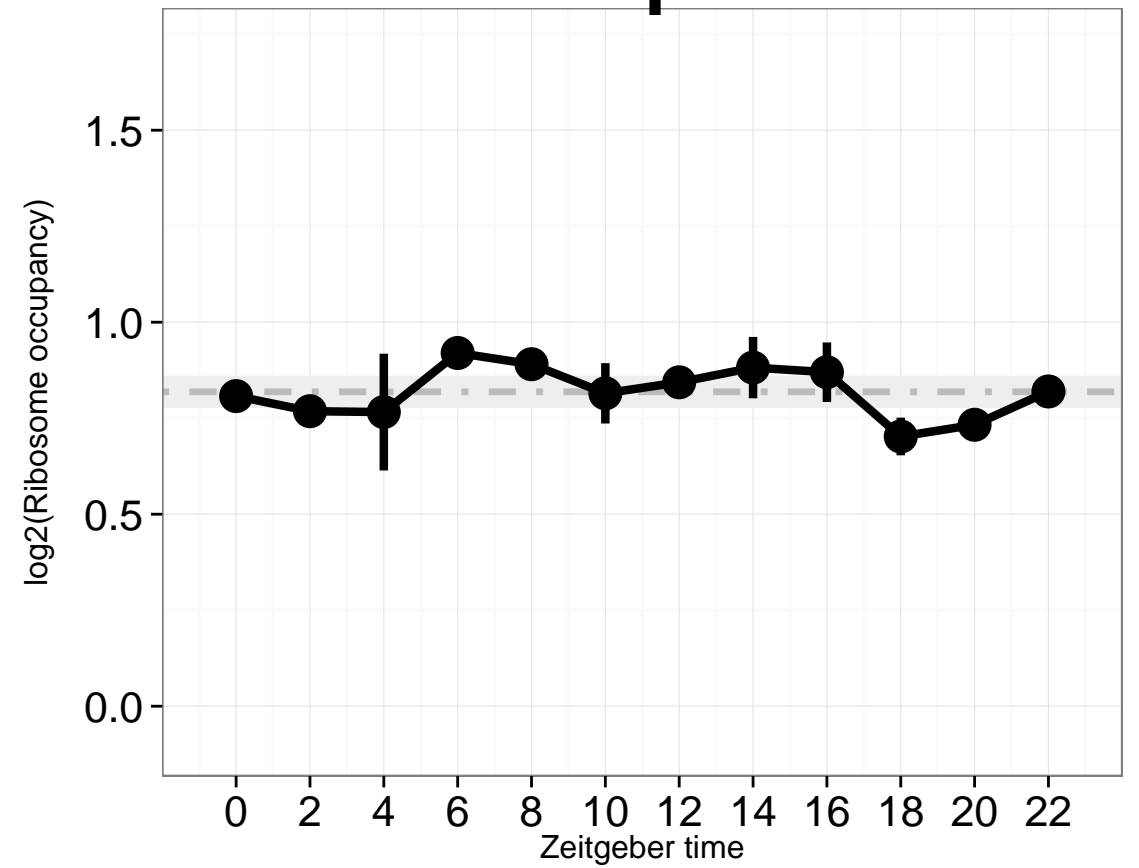

Supplement: Supplementary file 9602 [file 1]

## Tnks2

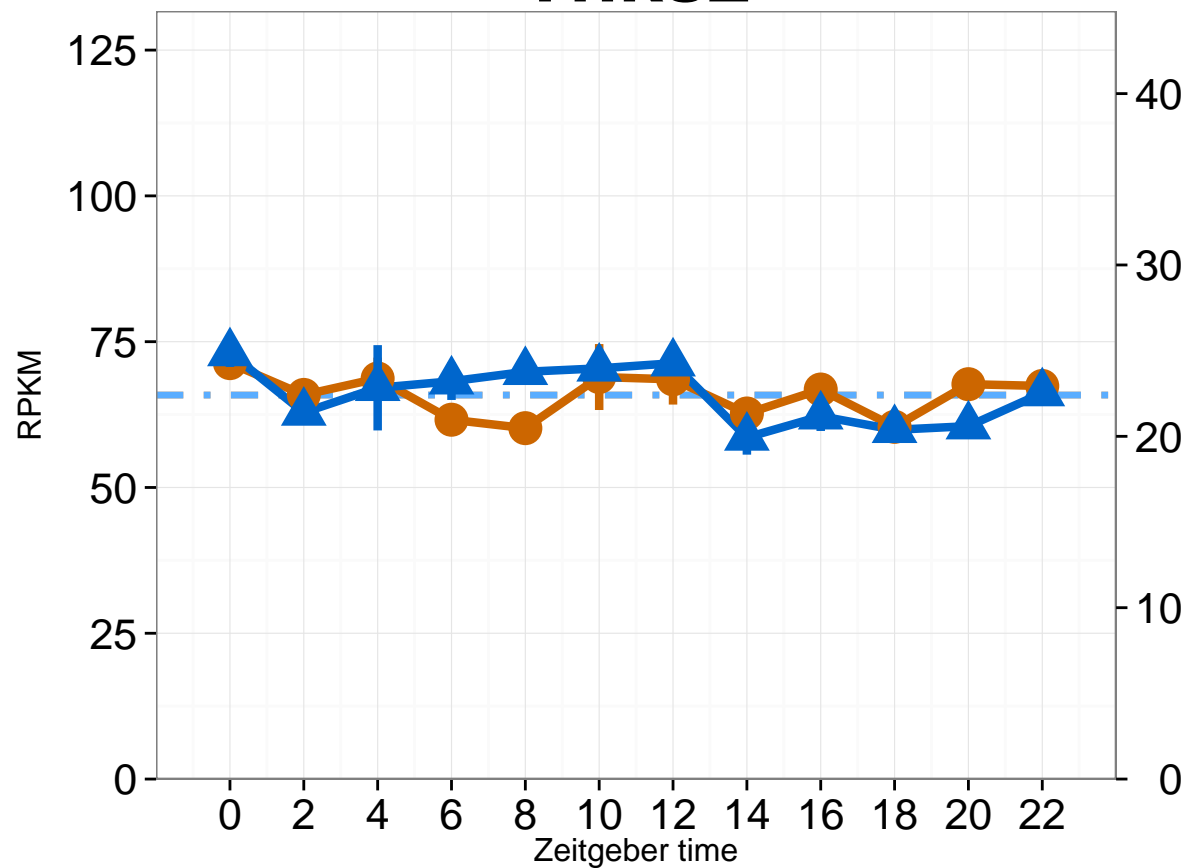

## Tnks2

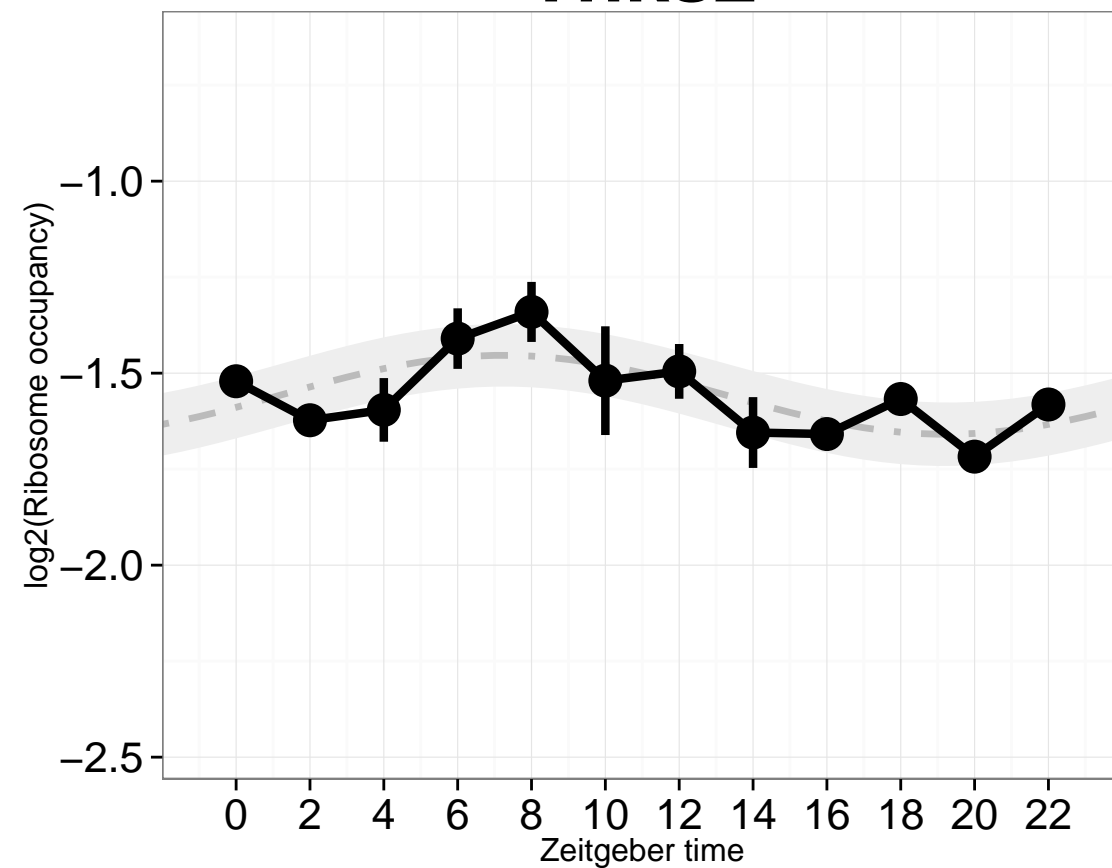

Supplement: Supplementary file 9603 [file 1]

# Ube2l6

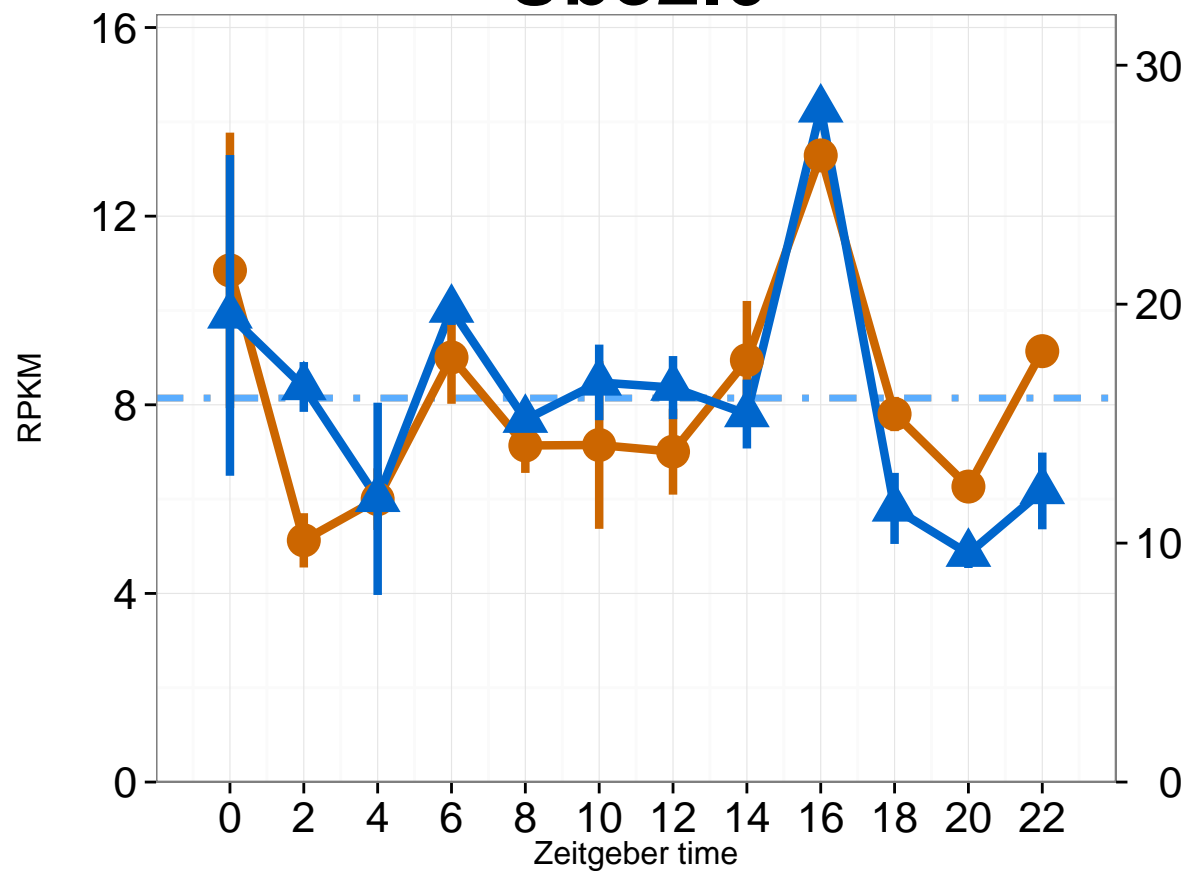

# Ube2l6

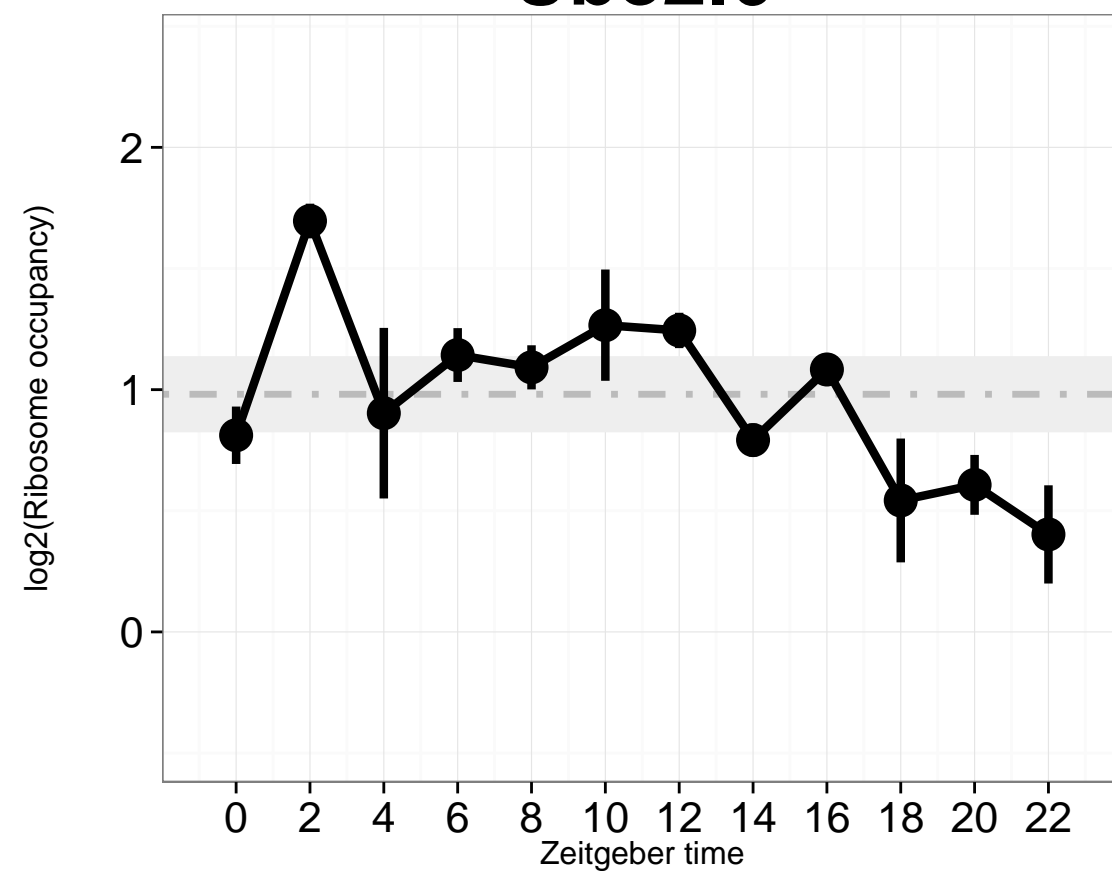

Supplement: Supplementary file 9604 [file 1]

## Tmem9

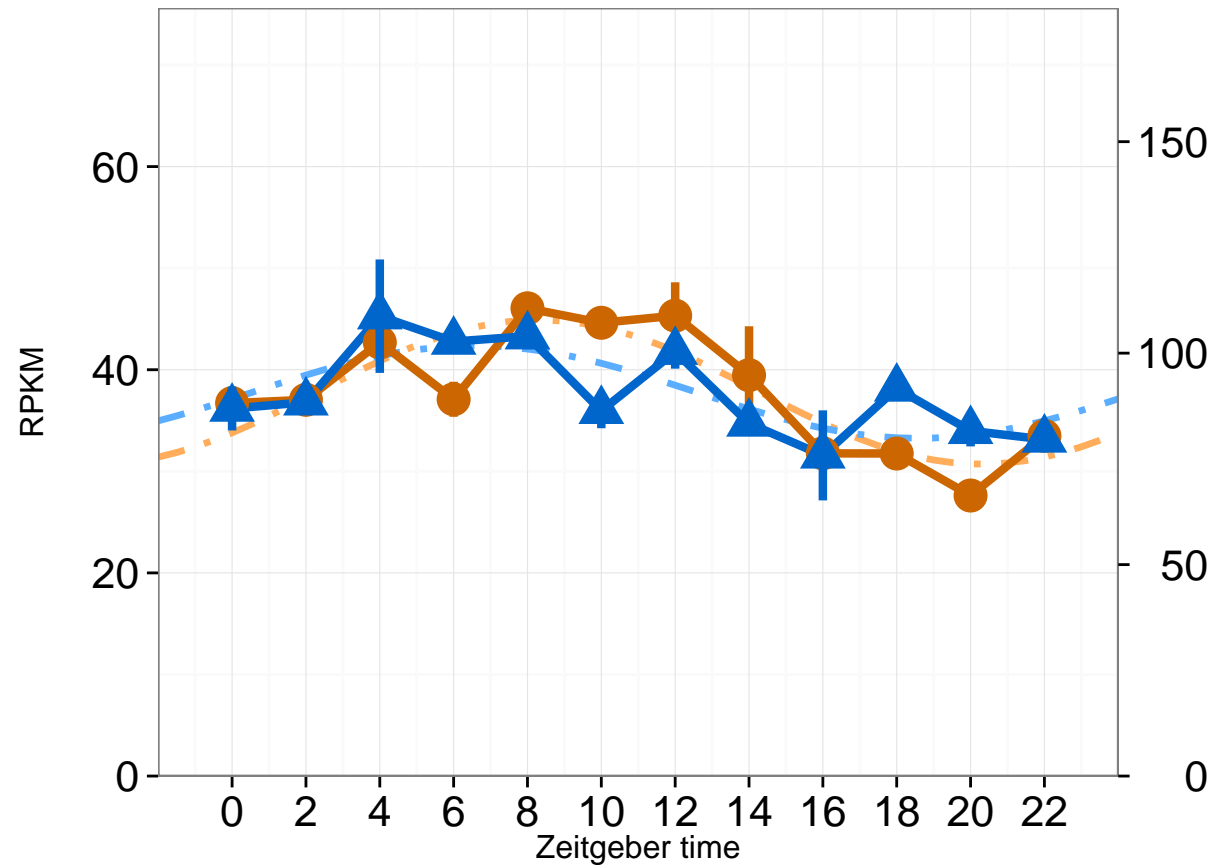

## Tmem9

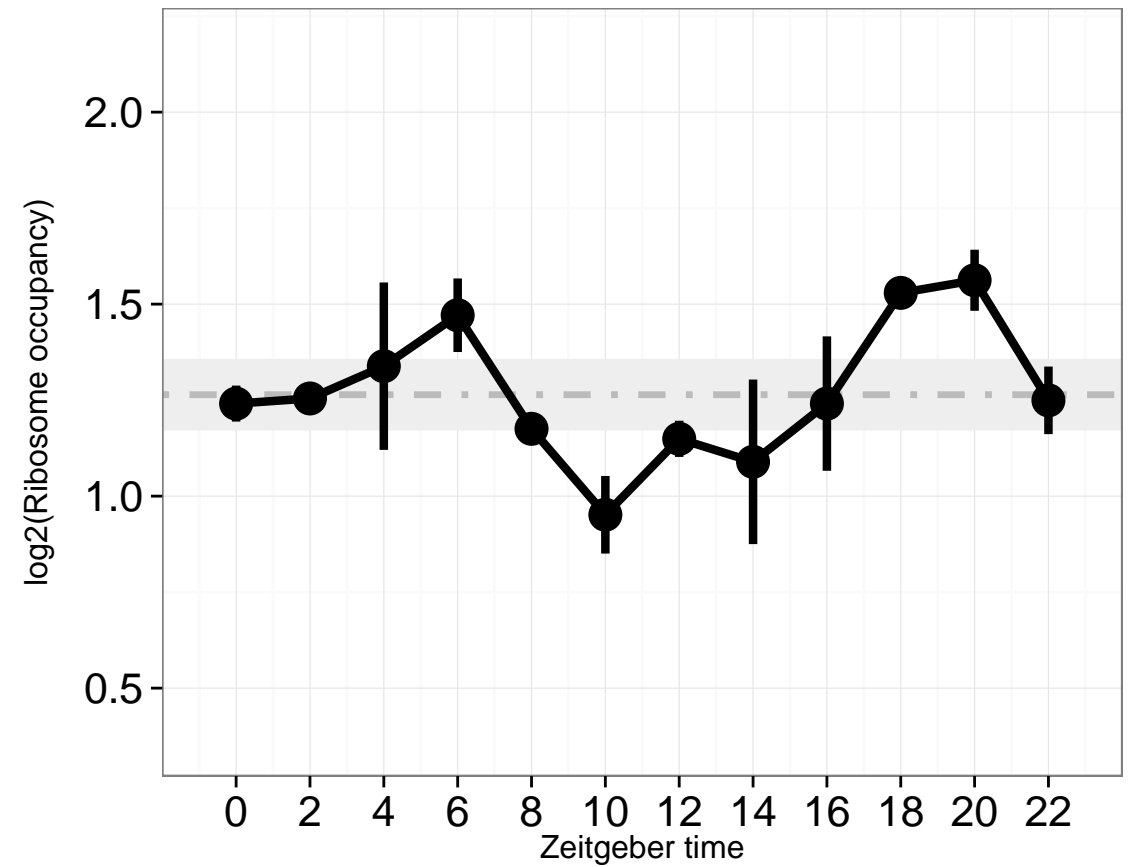

Supplement: Supplementary file 9605 [file 1]

## Arpc5l

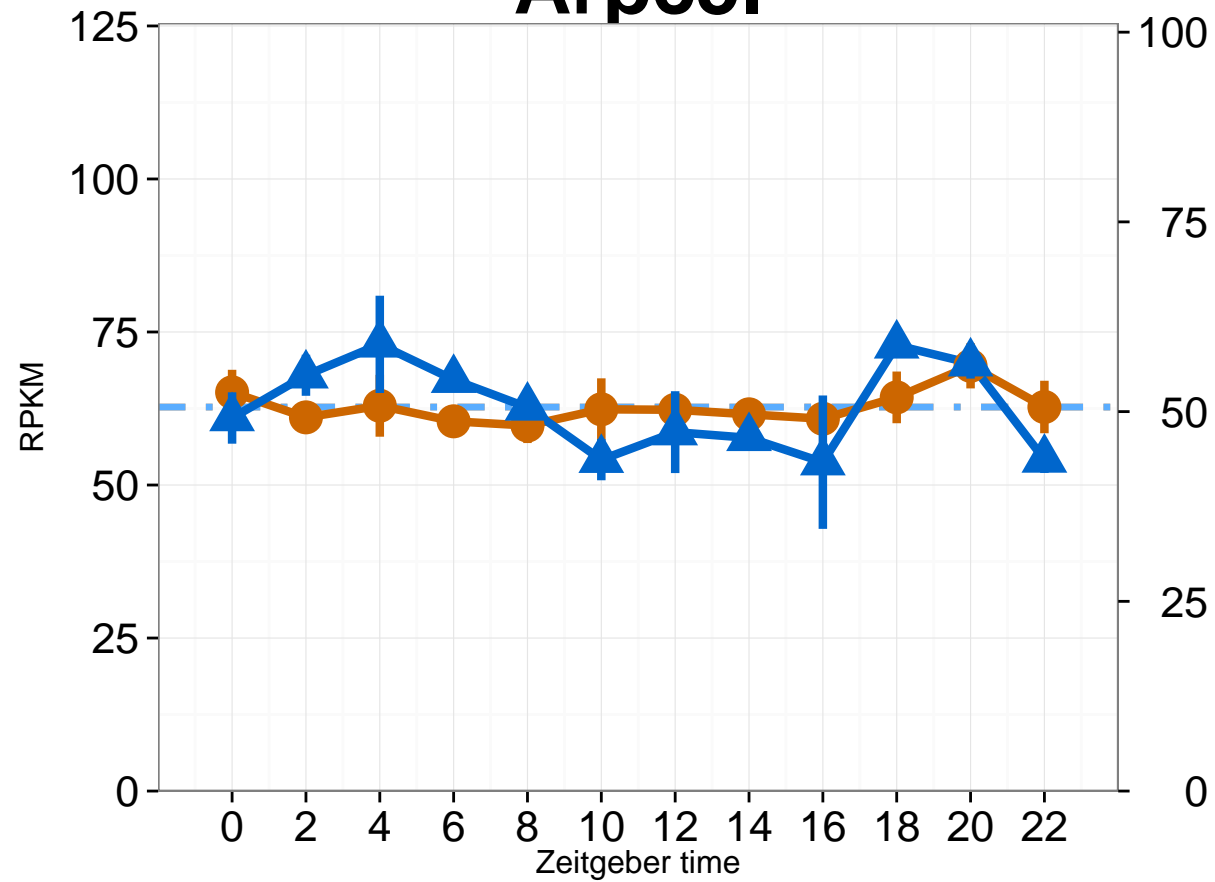

## Arpc5l

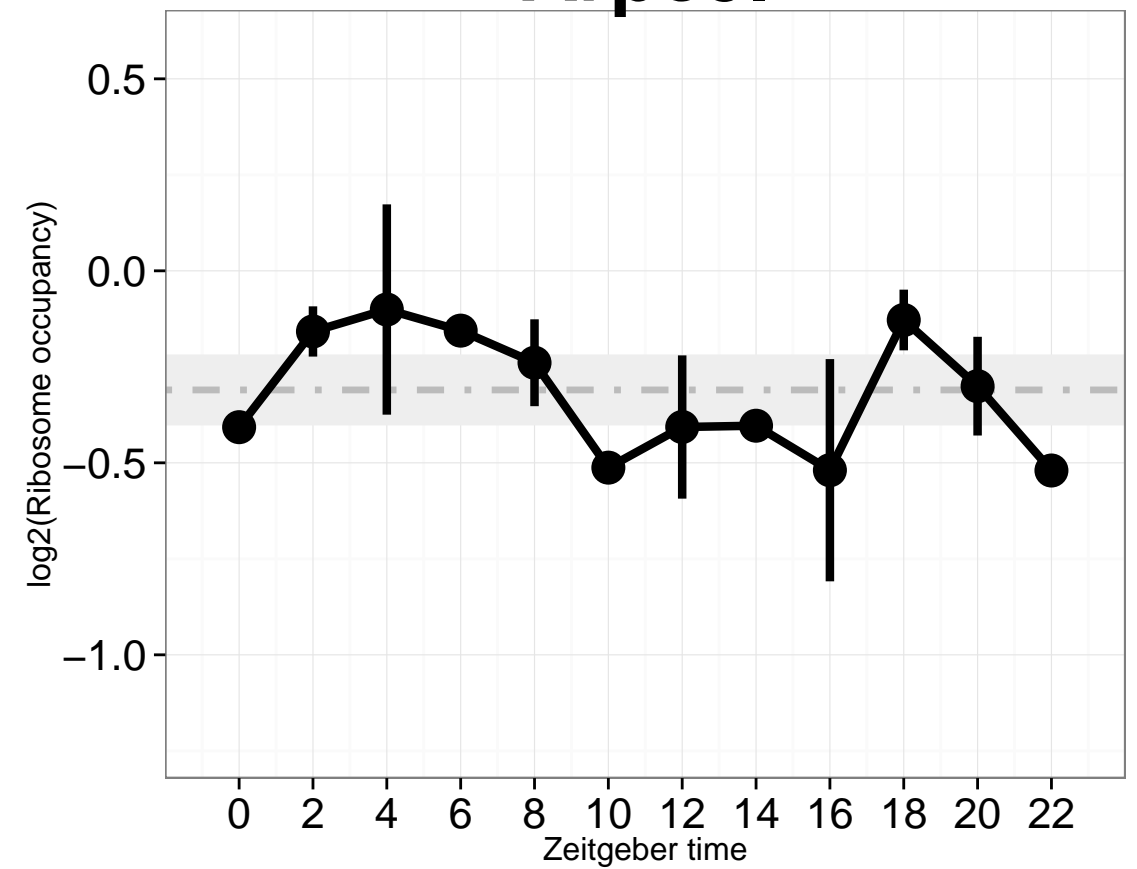

Supplement: Supplementary file 9606 [file 1]

## Dnttip2

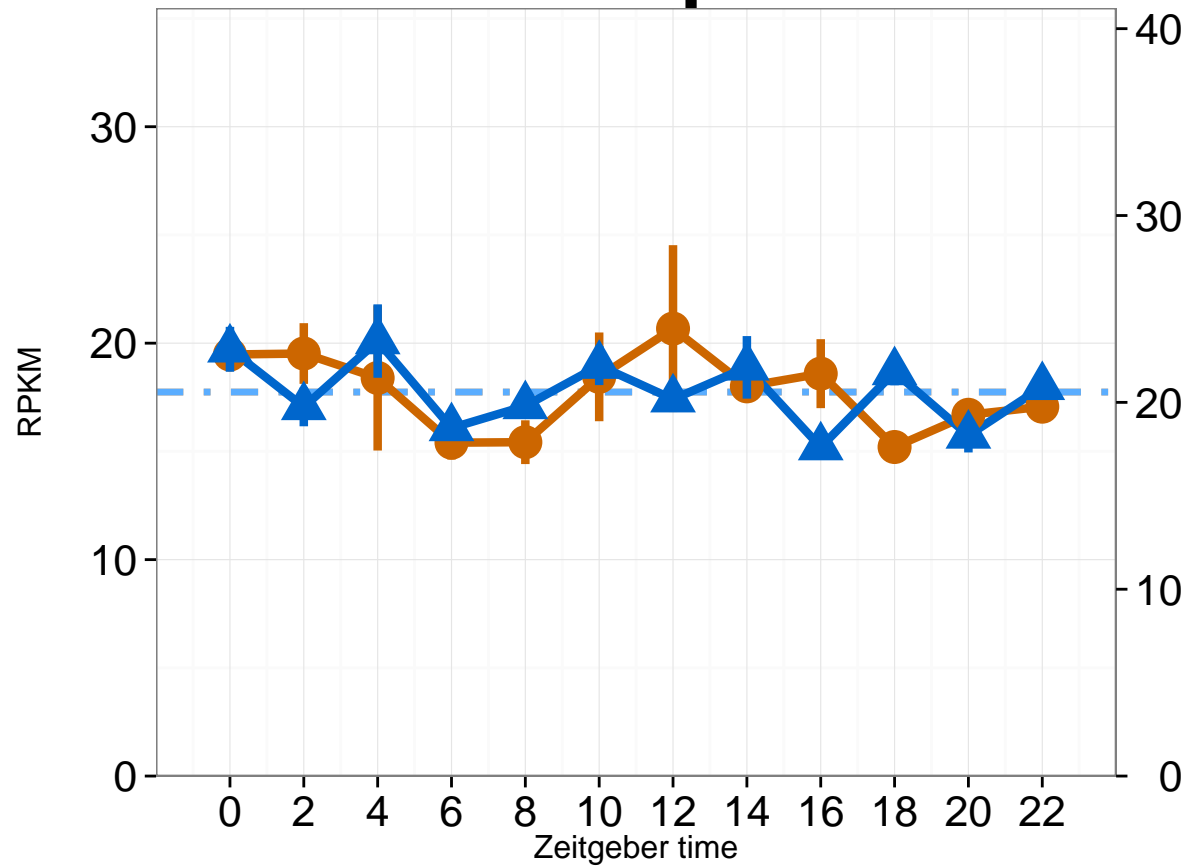

## Dnttip2

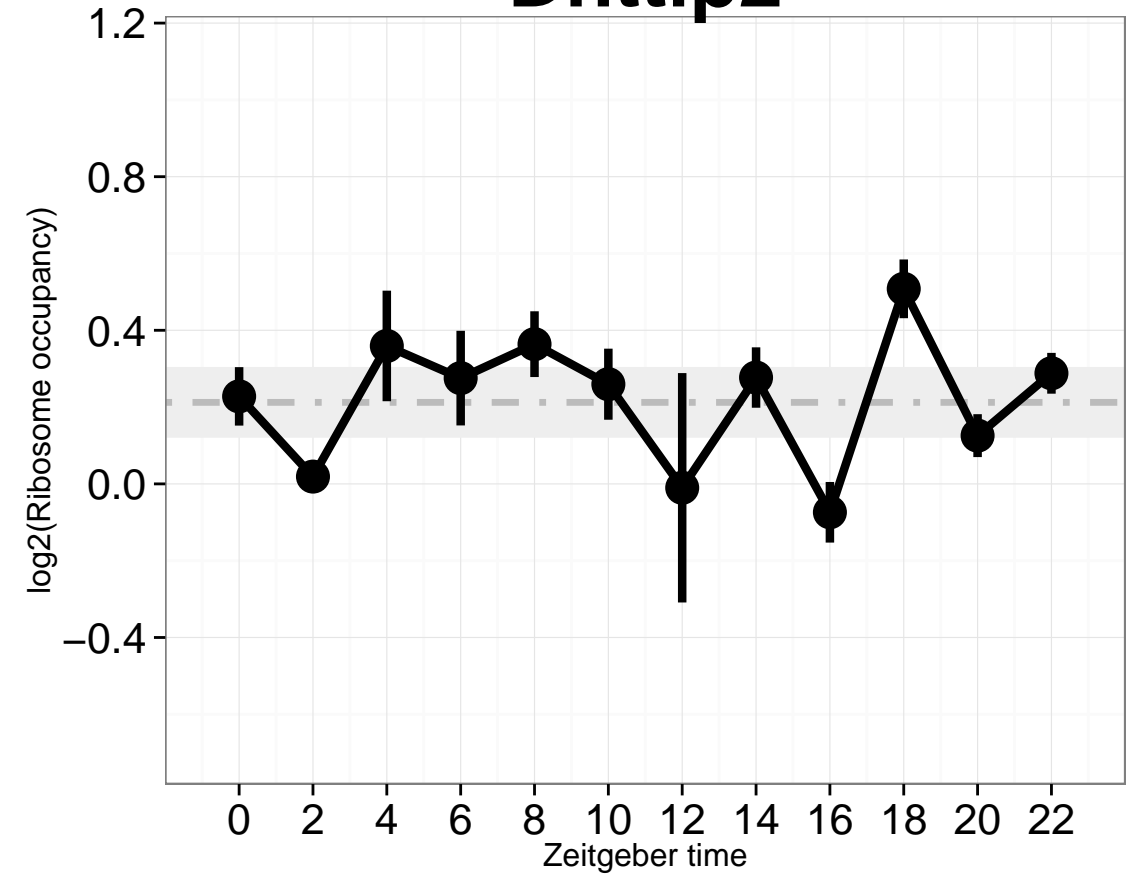

Supplement: Supplementary file 9607 [file 1]

## Xdh

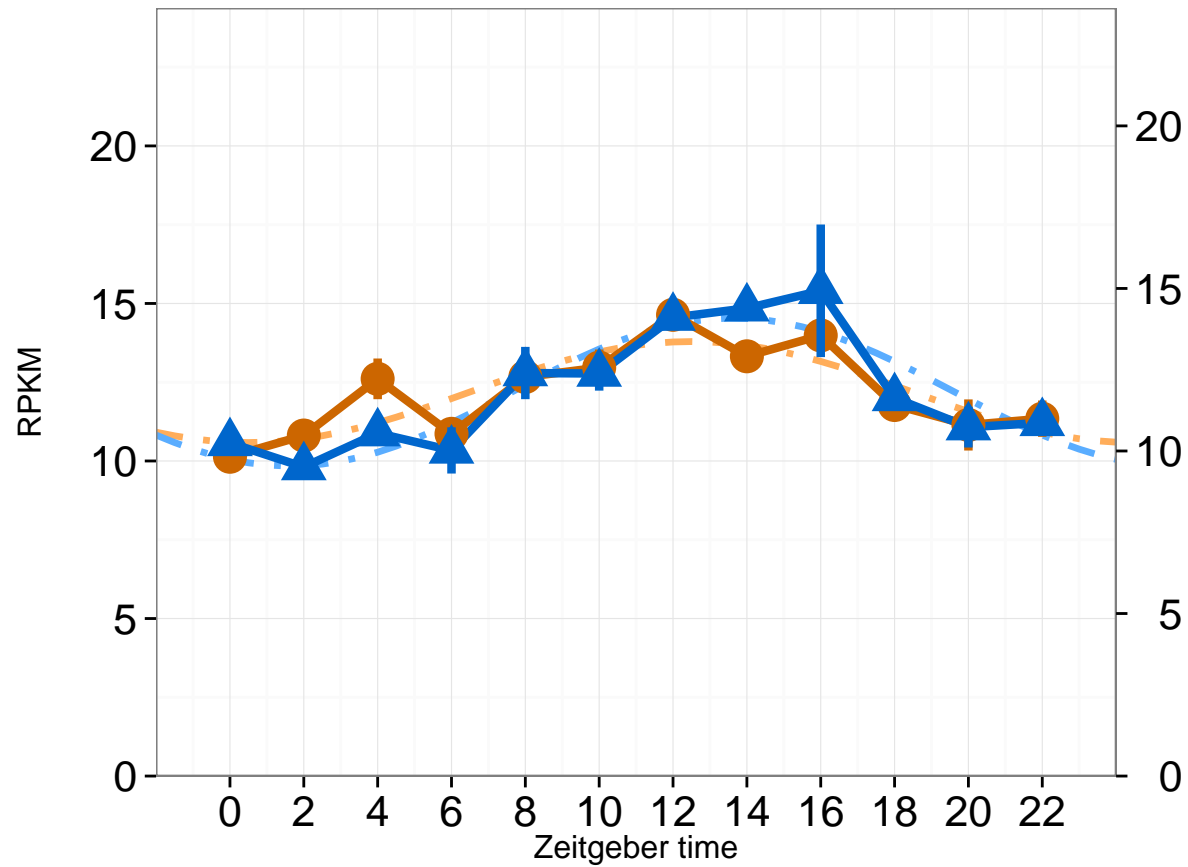

## Xdh

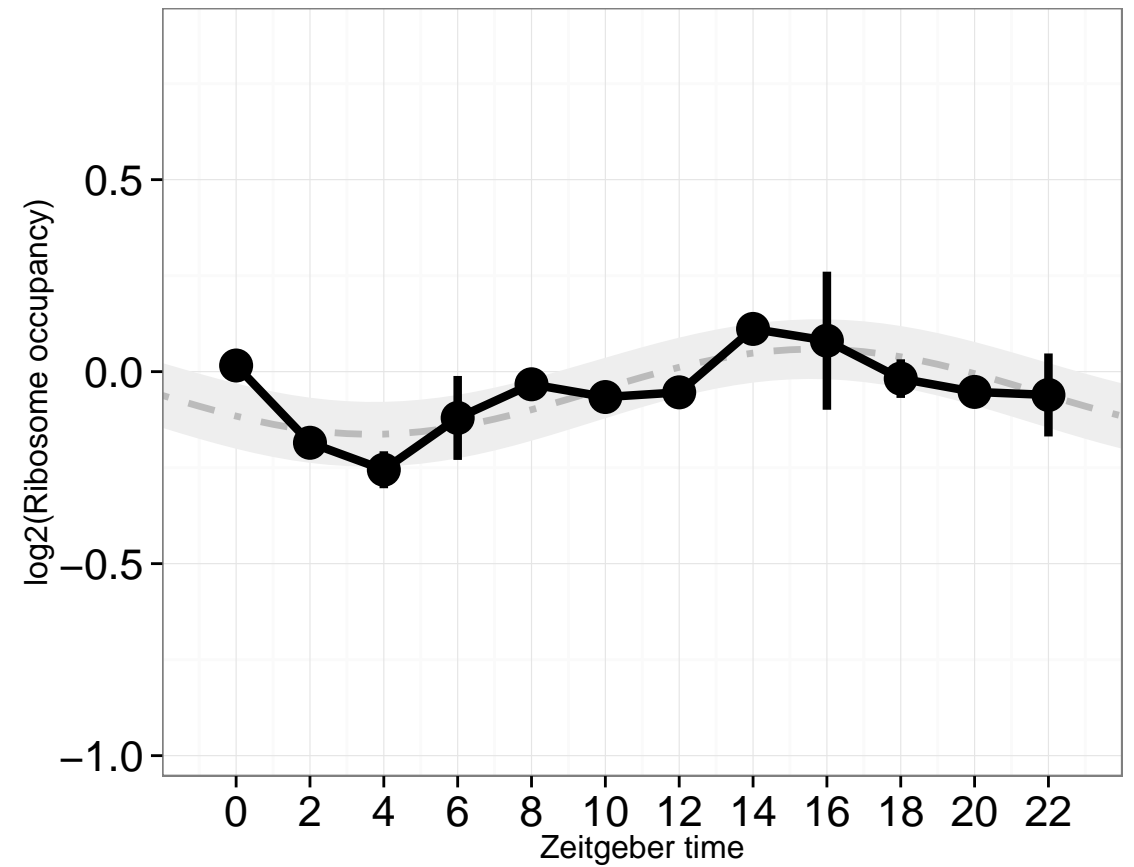

Supplement: Supplementary file 9608 [file 1]

## Rnf114

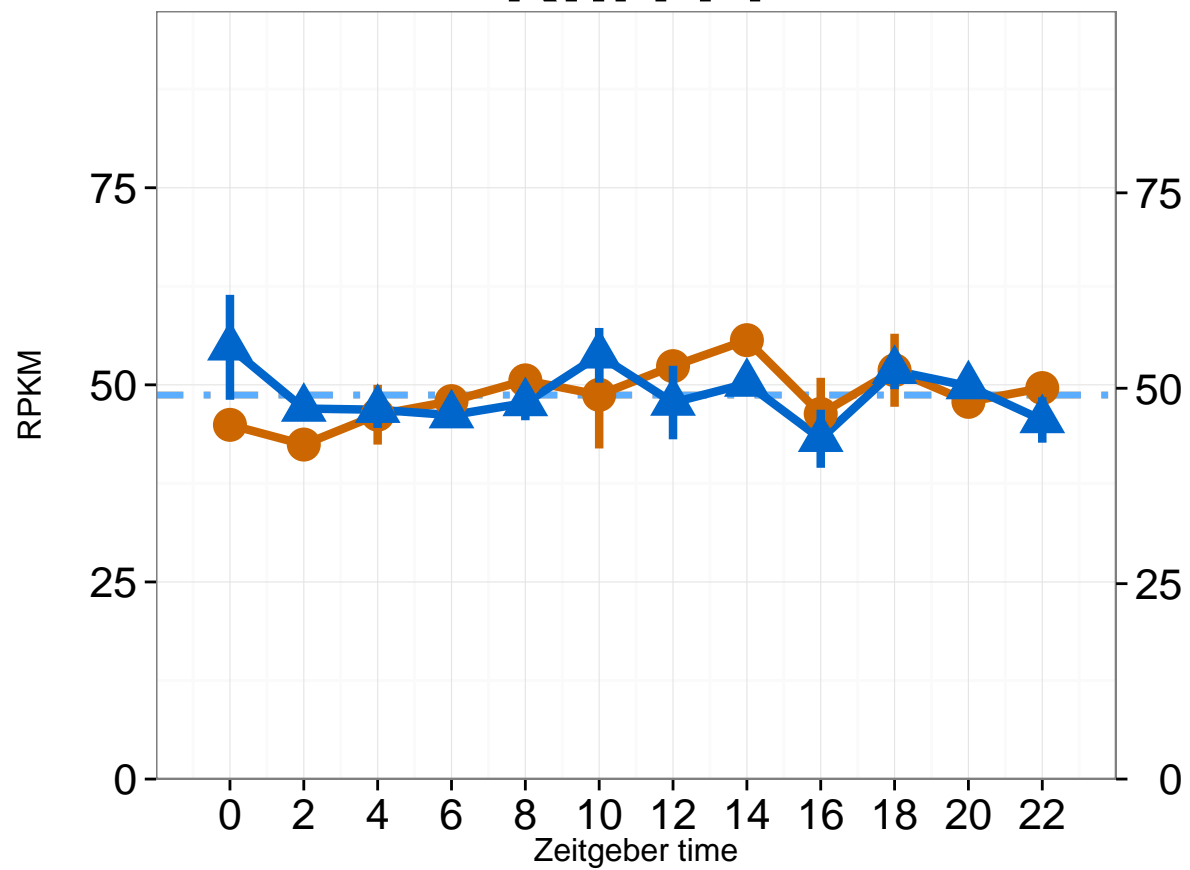

## Rnf114

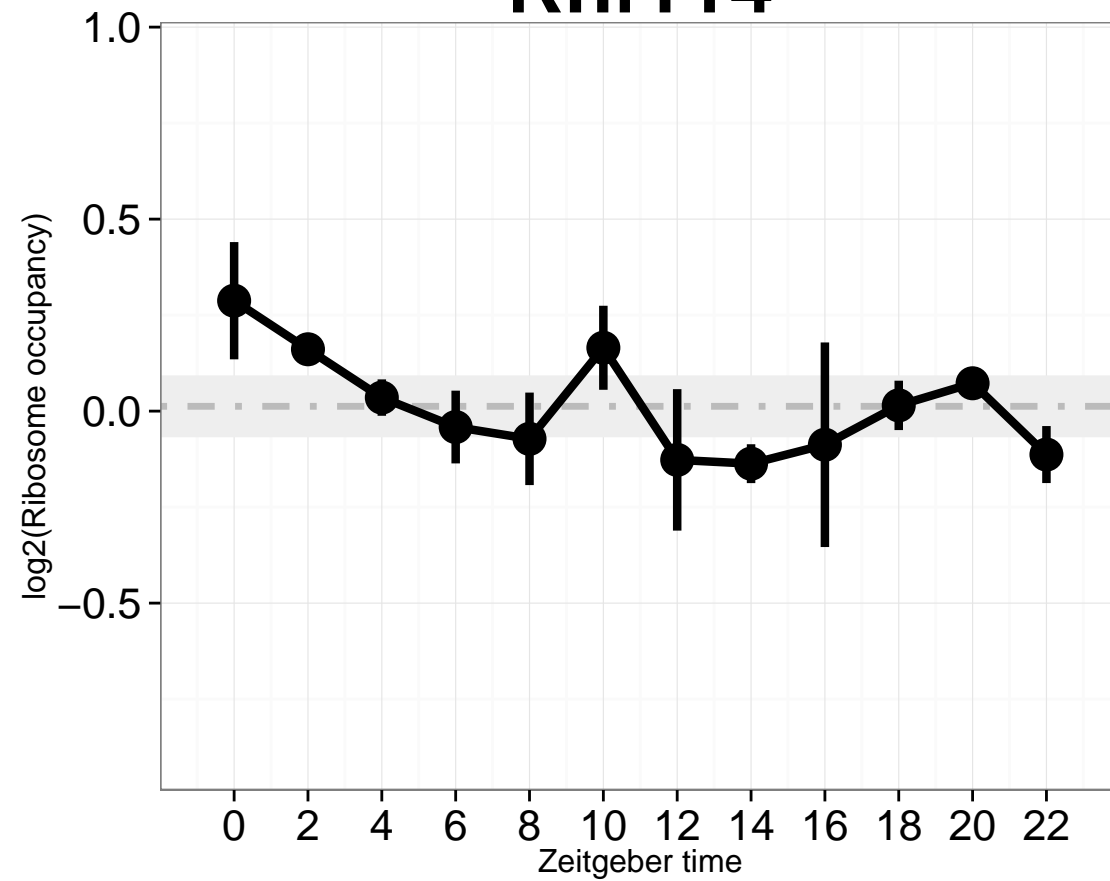

Supplement: Supplementary file 9609 [file 1]

## Rtn4

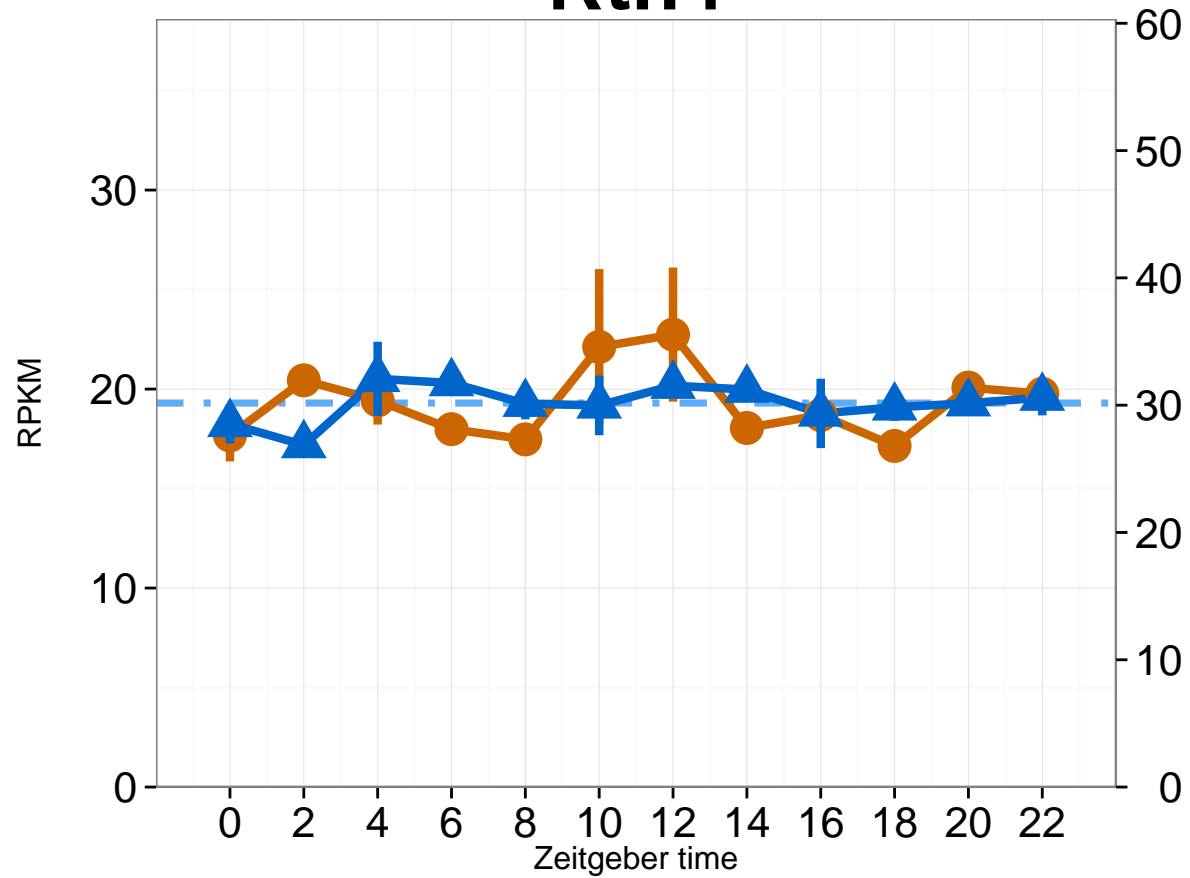

## Rtn4

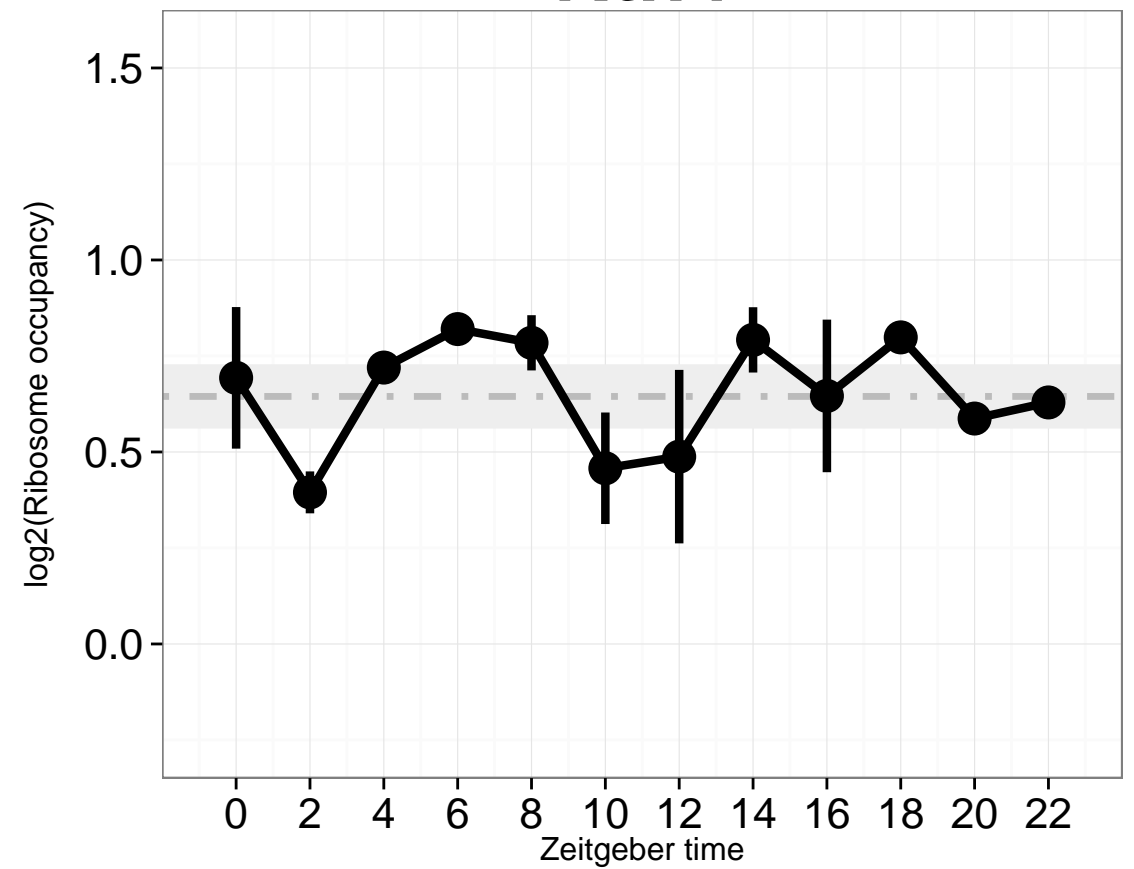

Supplement: Supplementary file 9610 [file 1]

# Fam174a

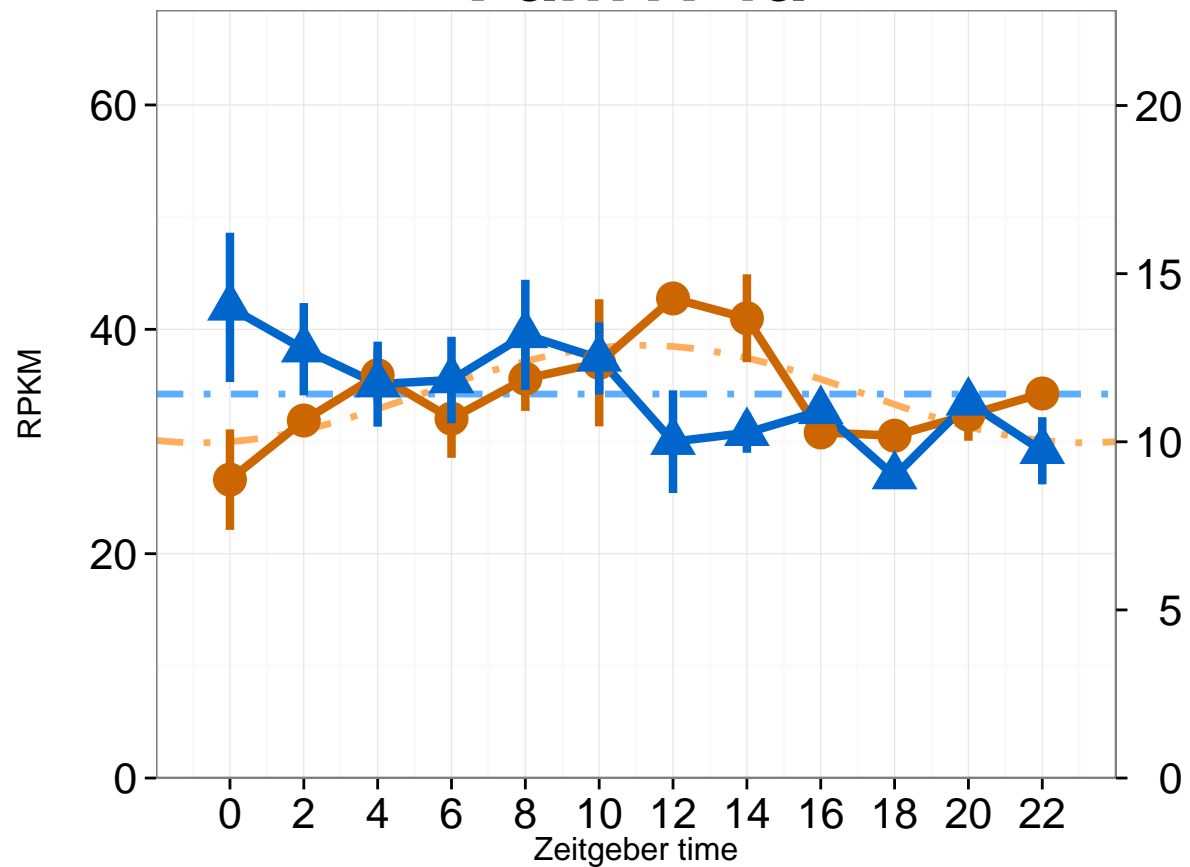

# Fam174a

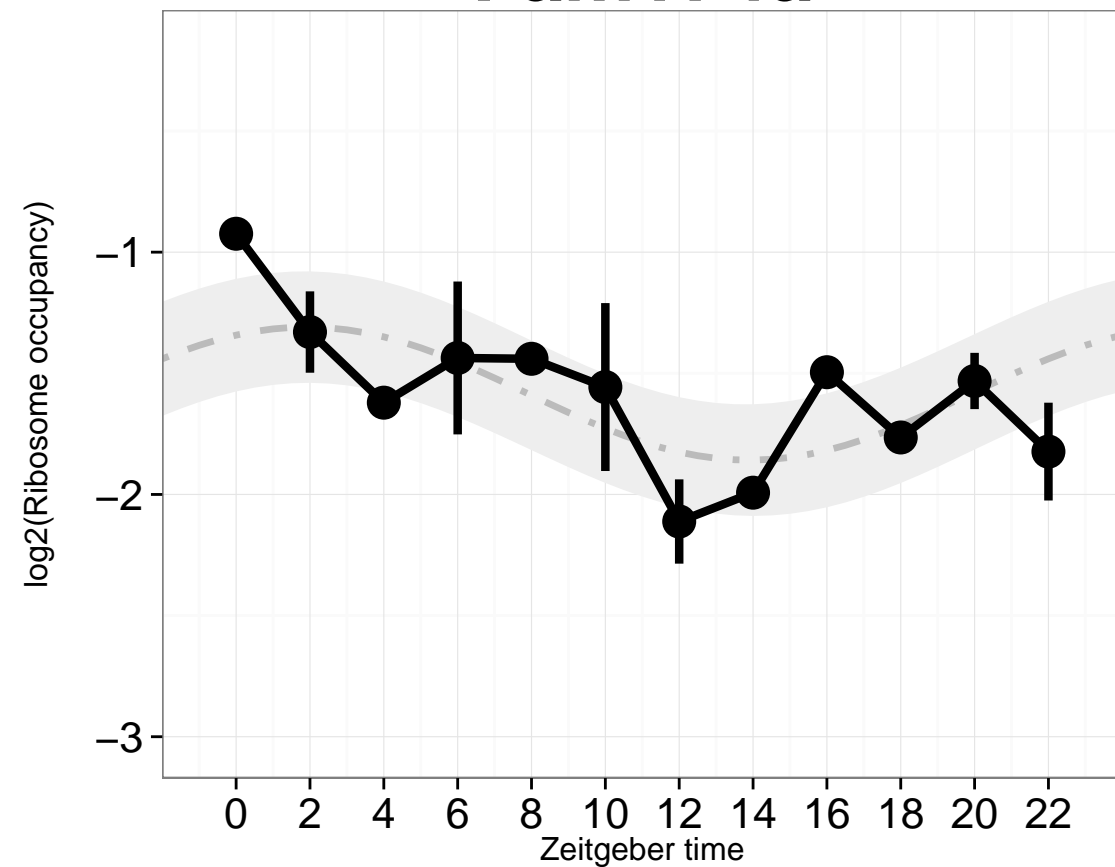

Supplement: Supplementary file 9611 [file 1]

# Ndufa7

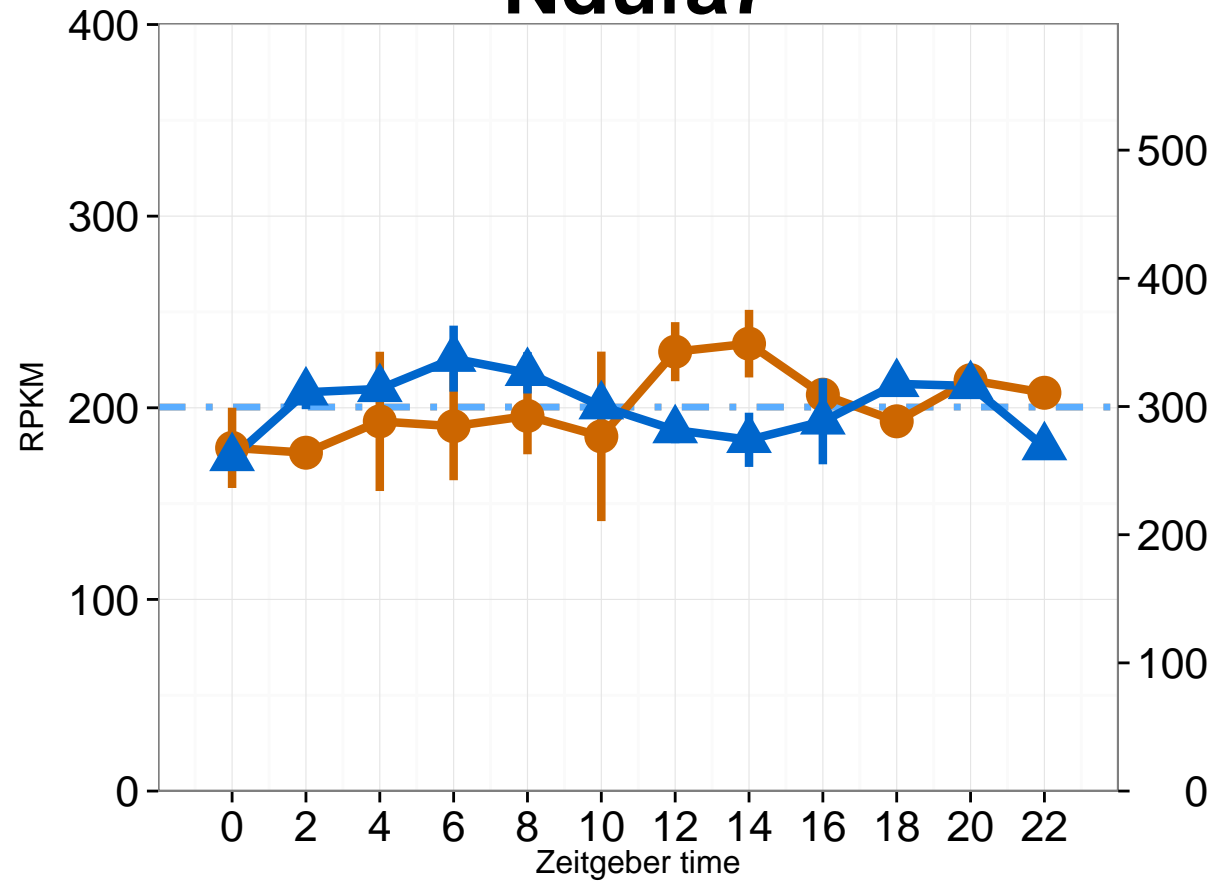

# Ndufa7

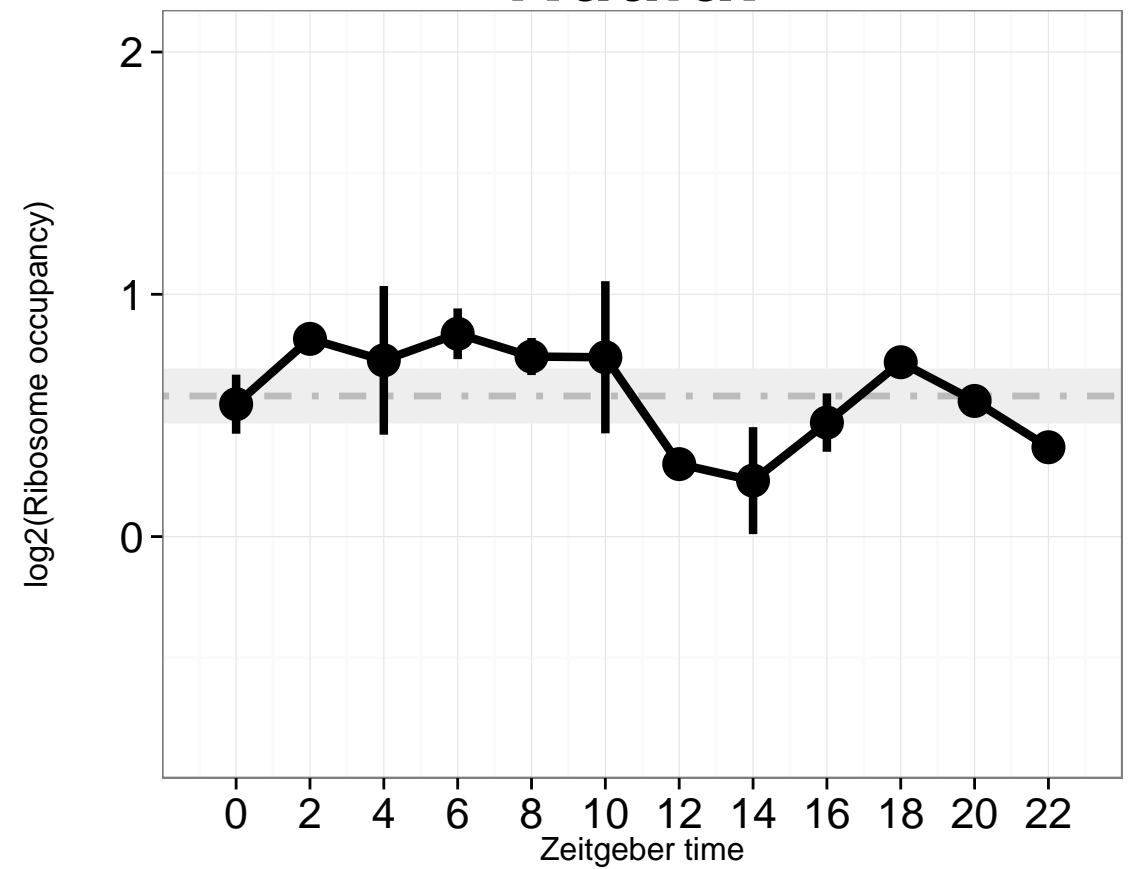

Supplement: Supplementary file 9612 [file 1]

## Prpf2

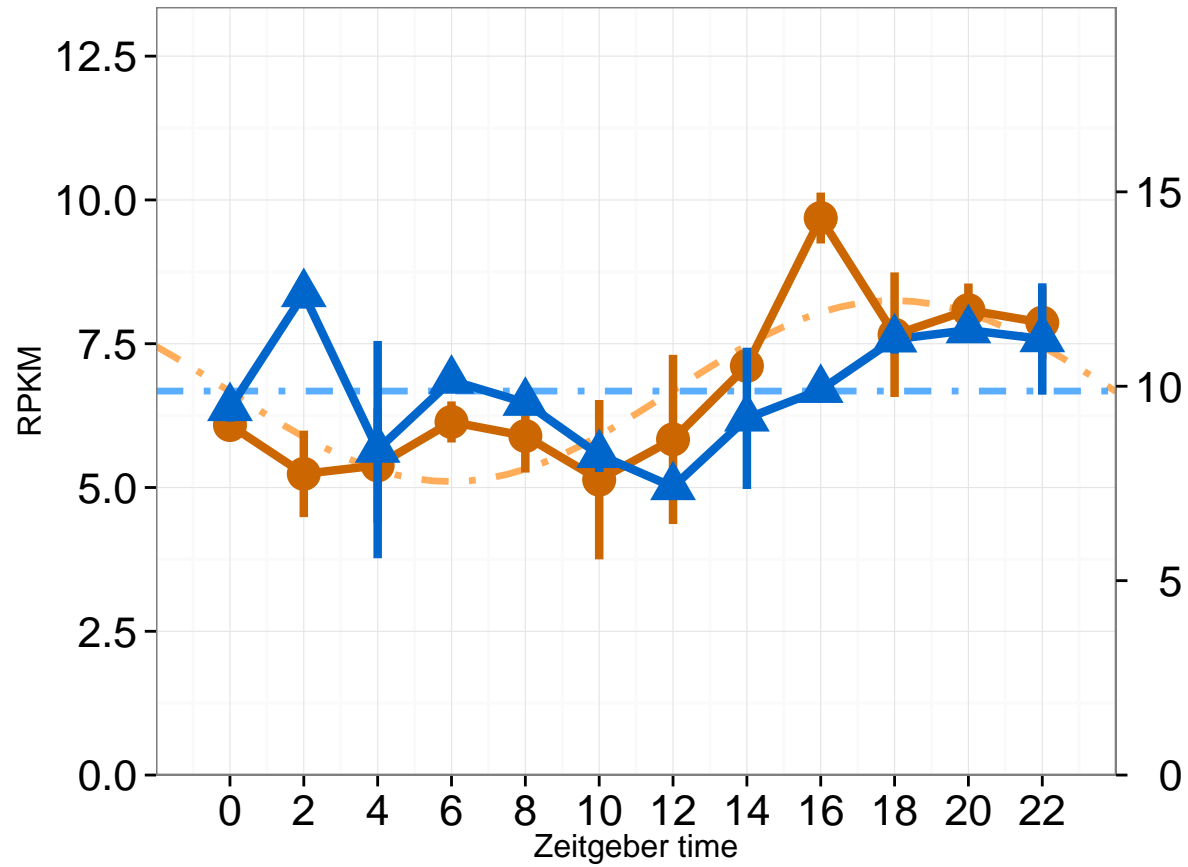

## Prpf2

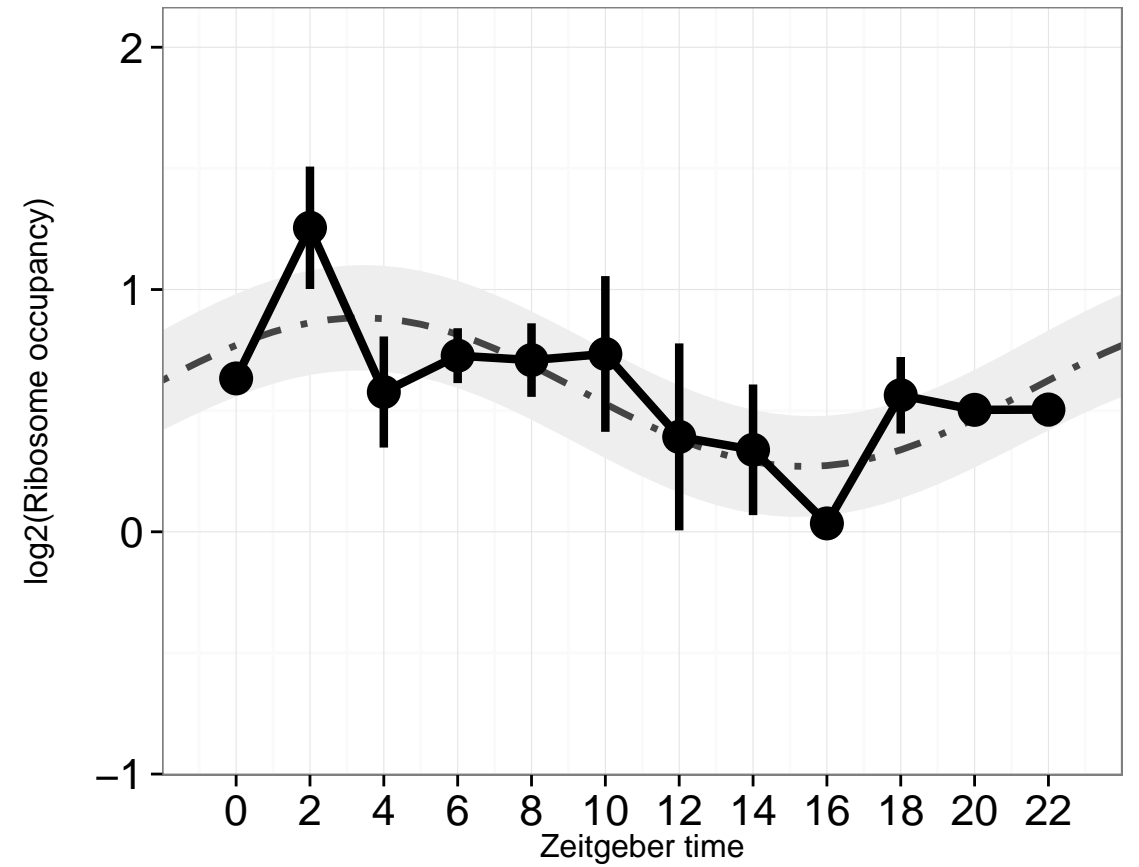

Supplement: Supplementary file 9613 [file 1]

## Tlr4

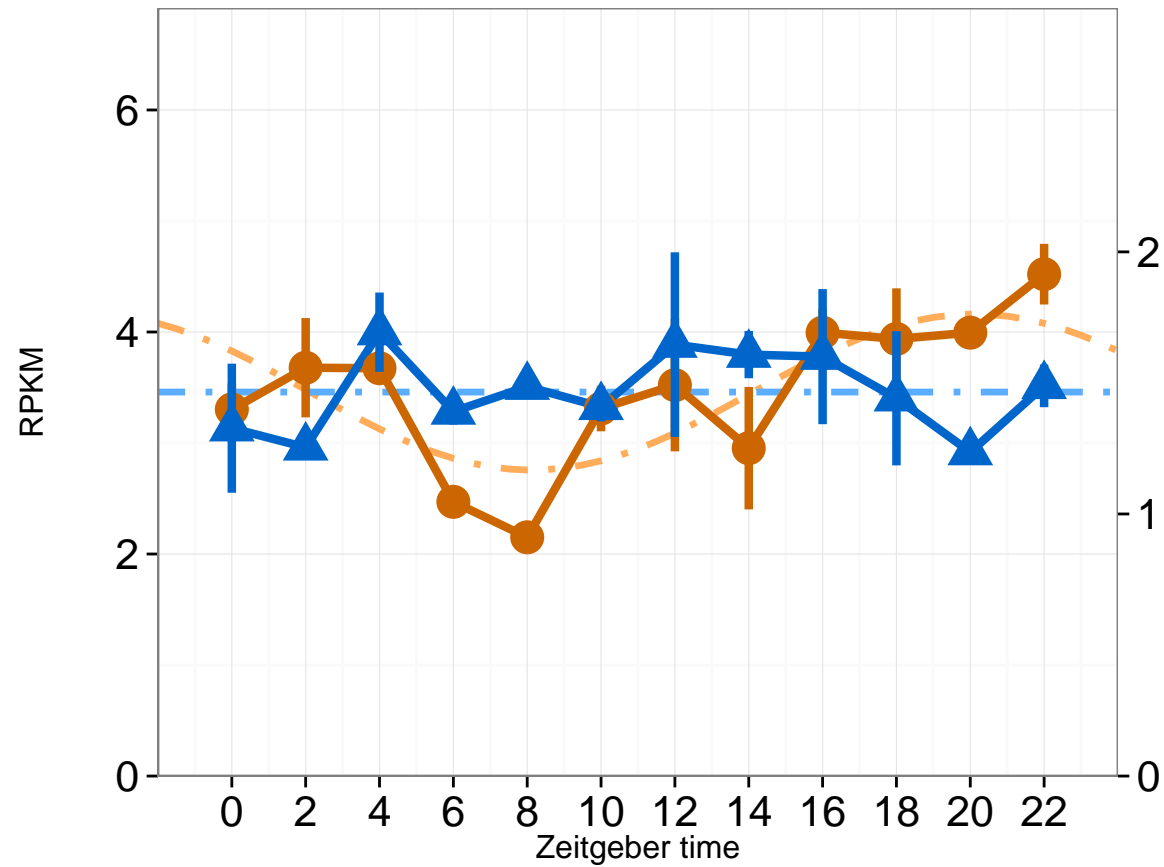

## Tlr4

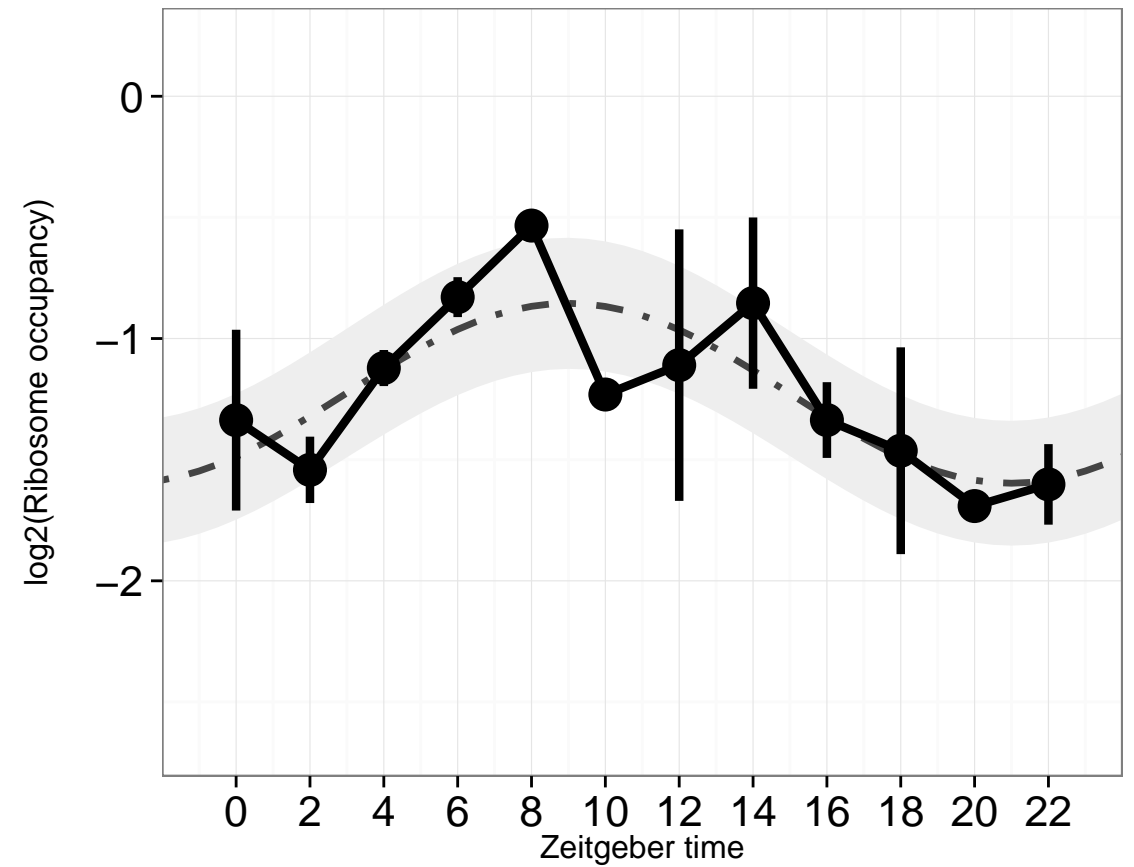

Supplement: Supplementary file 9614 [file 1]

## Aff4

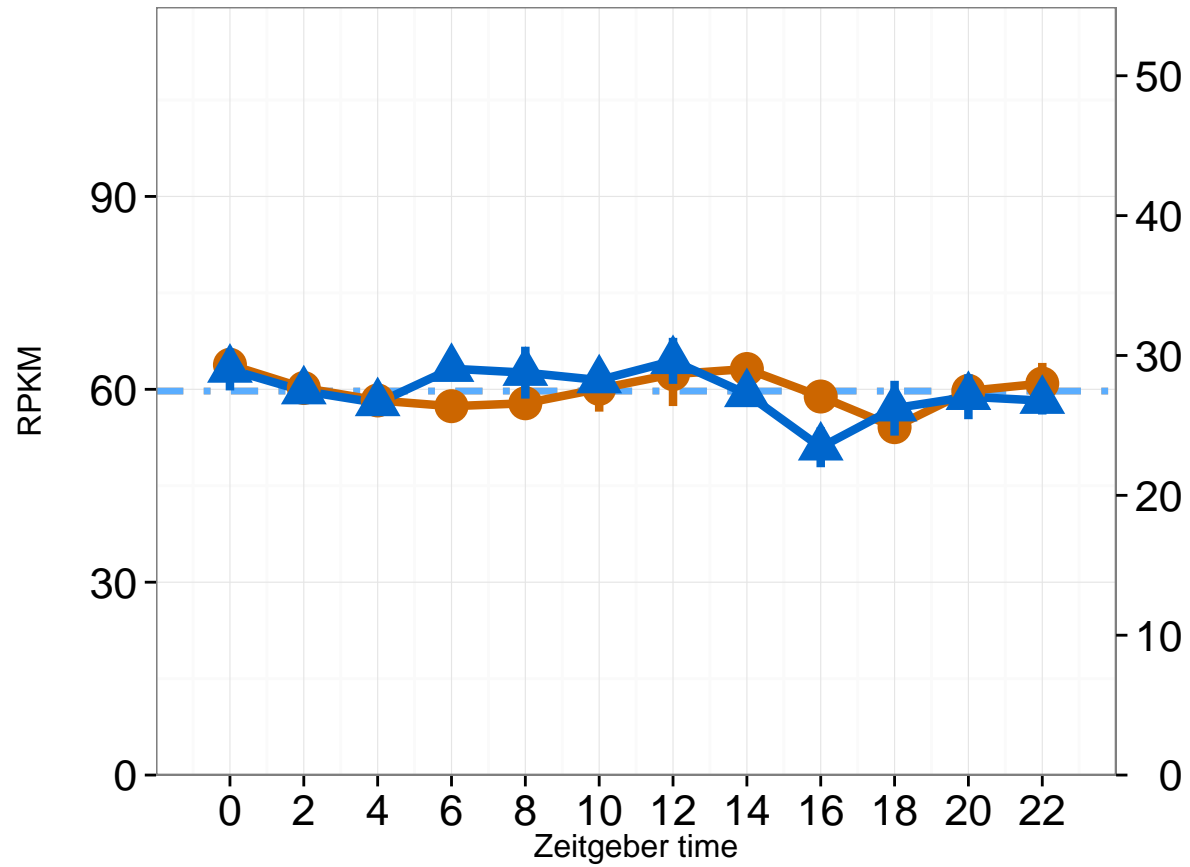

## Aff4

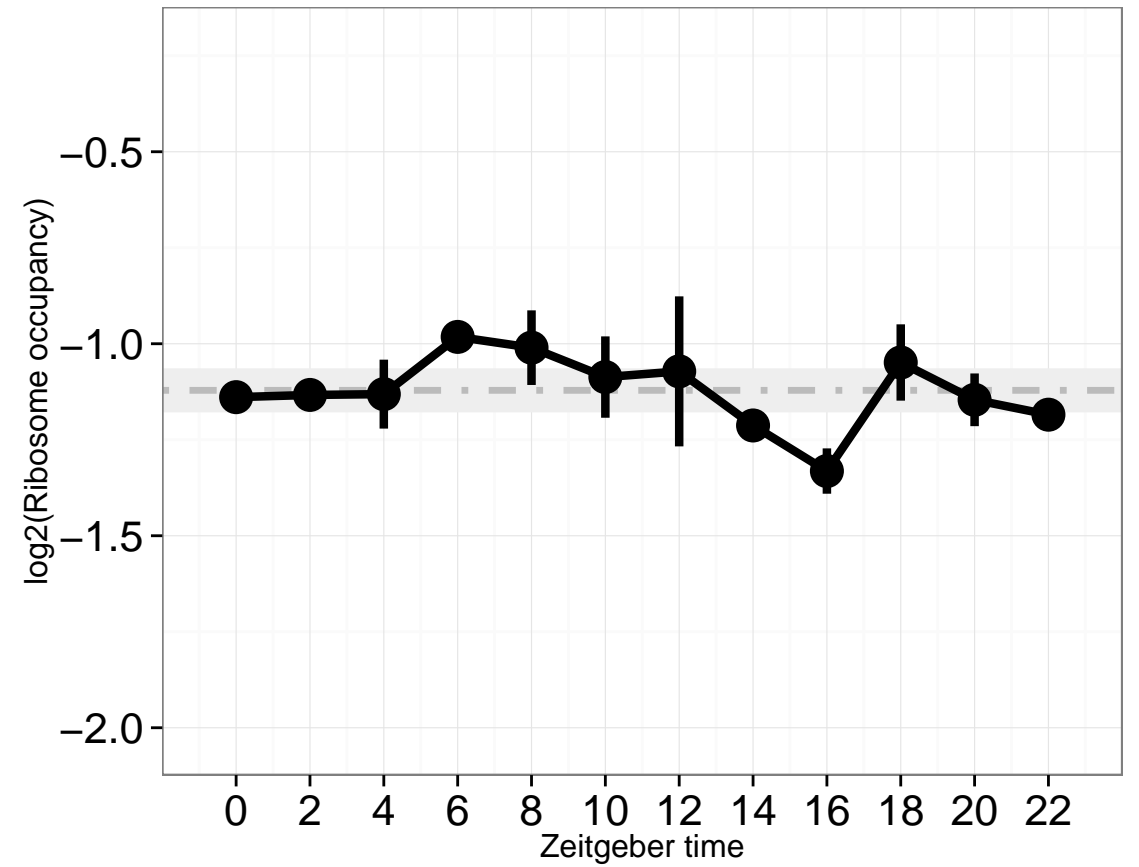

Supplement: Supplementary file 9615 [file 1]

# Ccdc71

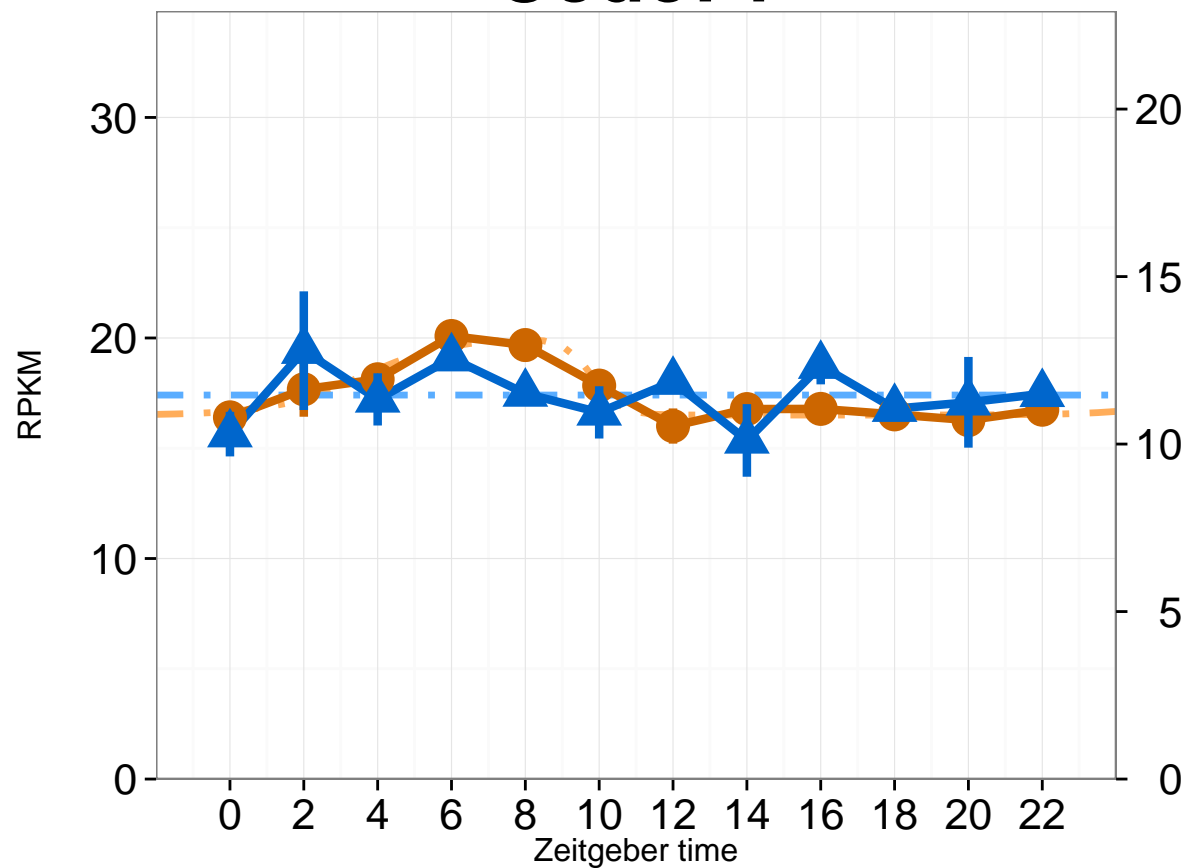

# Ccdc71

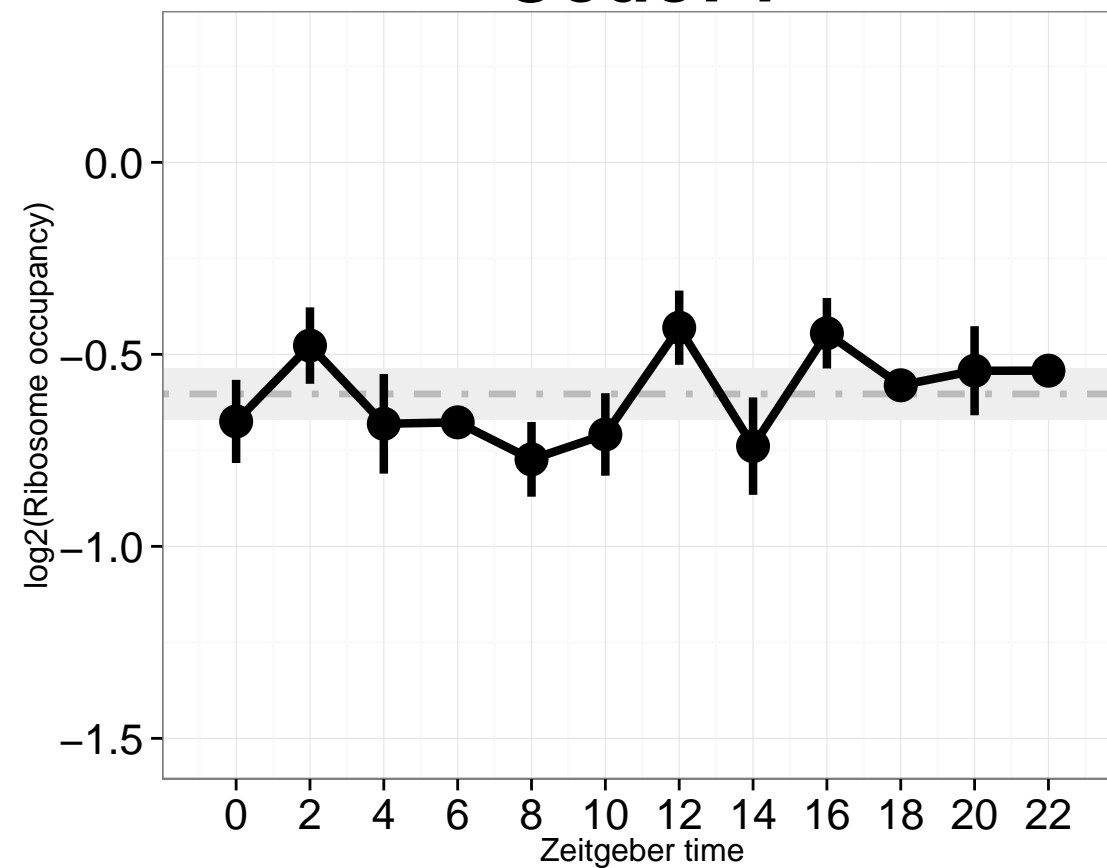

Supplement: Supplementary file 9616 [file 1]

## Arf6

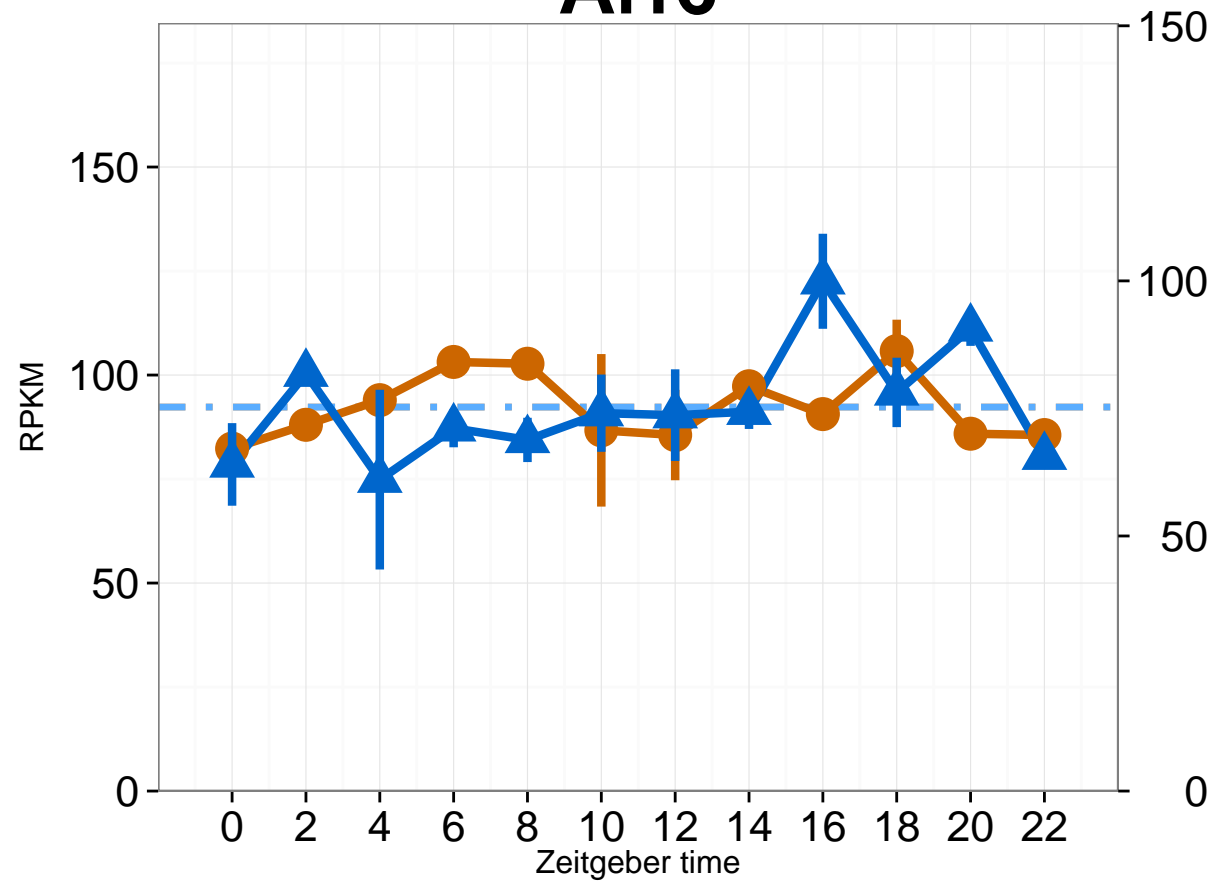

## Arf6

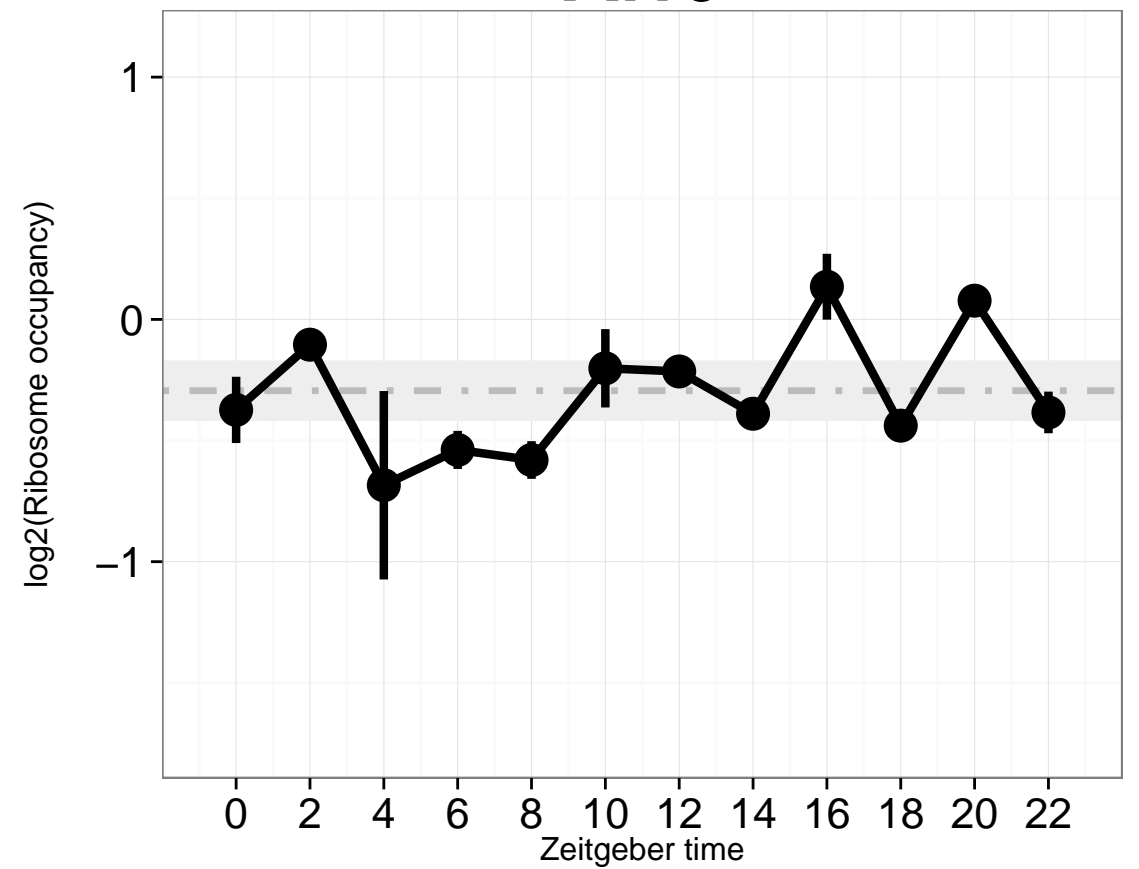

Supplement: Supplementary file 9617 [file 1]

## Eif2ak2

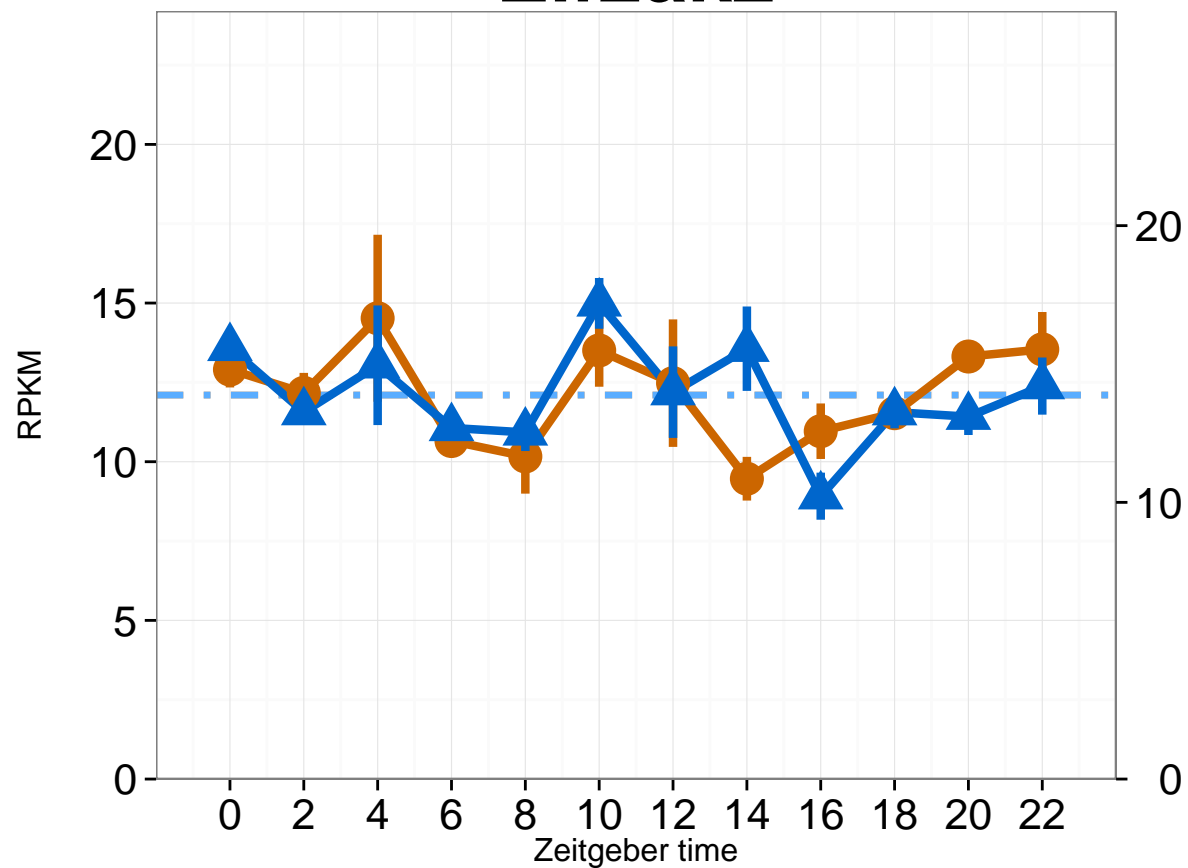

## Eif2ak2

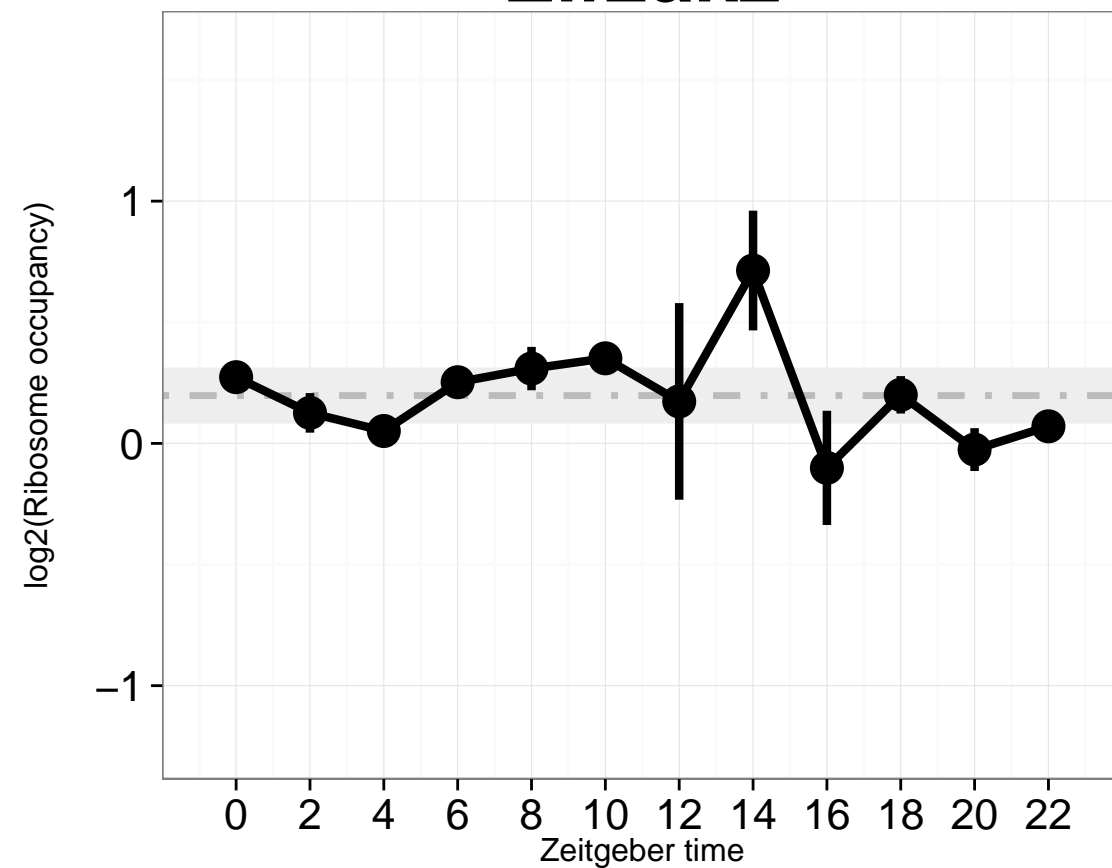

Supplement: Supplementary file 9618 [file 1]

## Sec24a

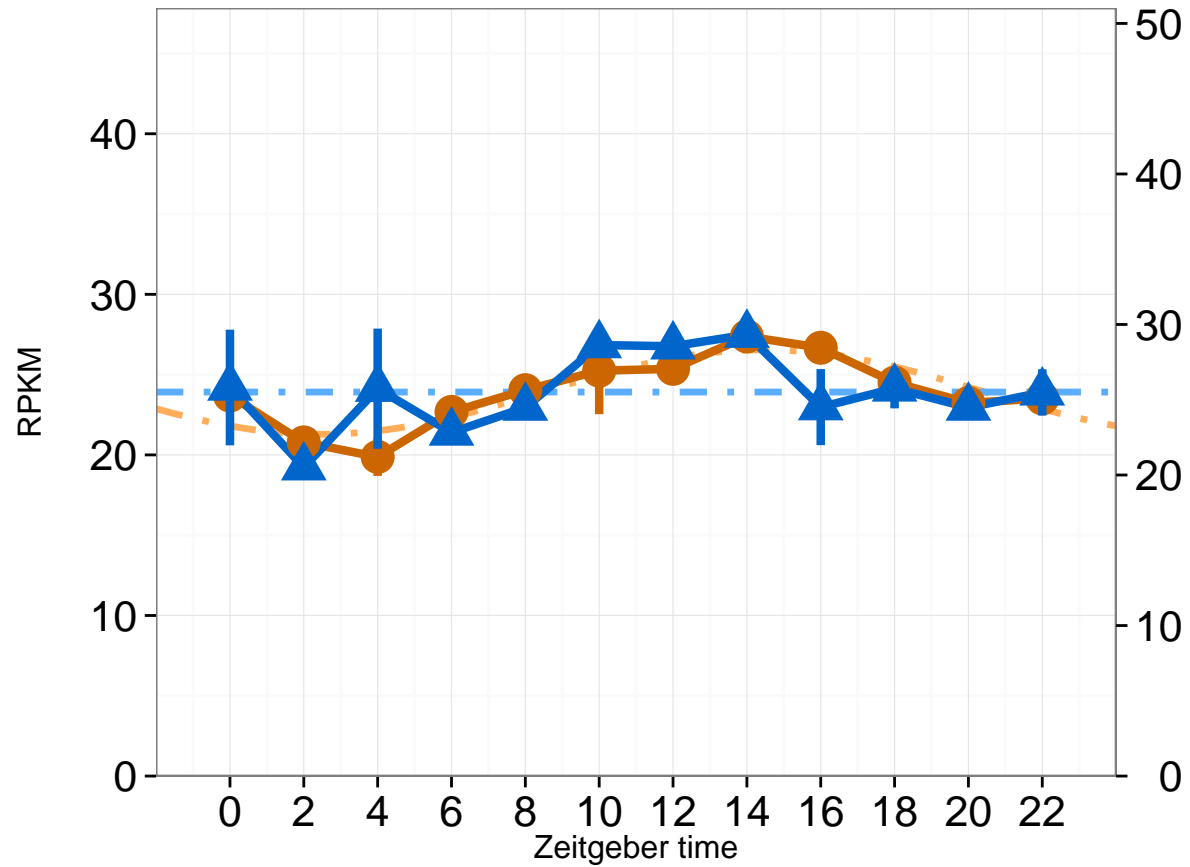

## Sec24a

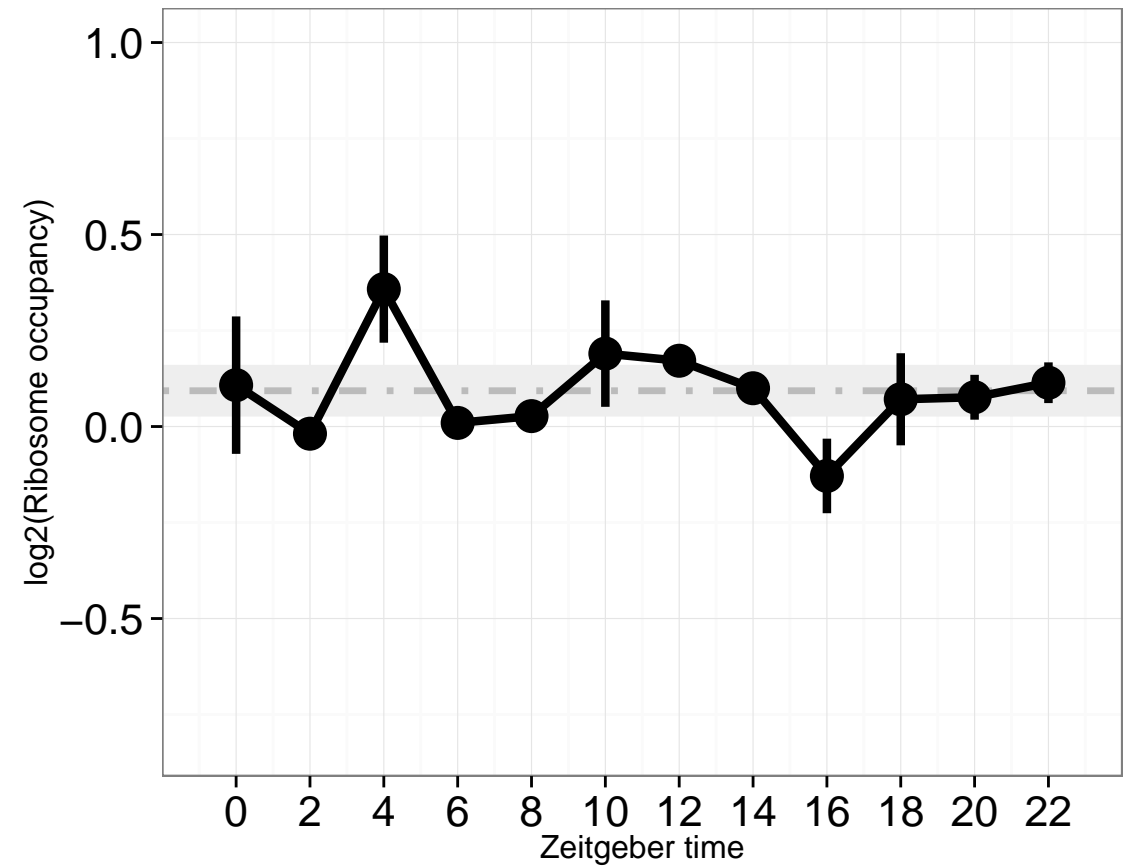

Supplement: Supplementary file 9619 [file 1]

# Actr1a

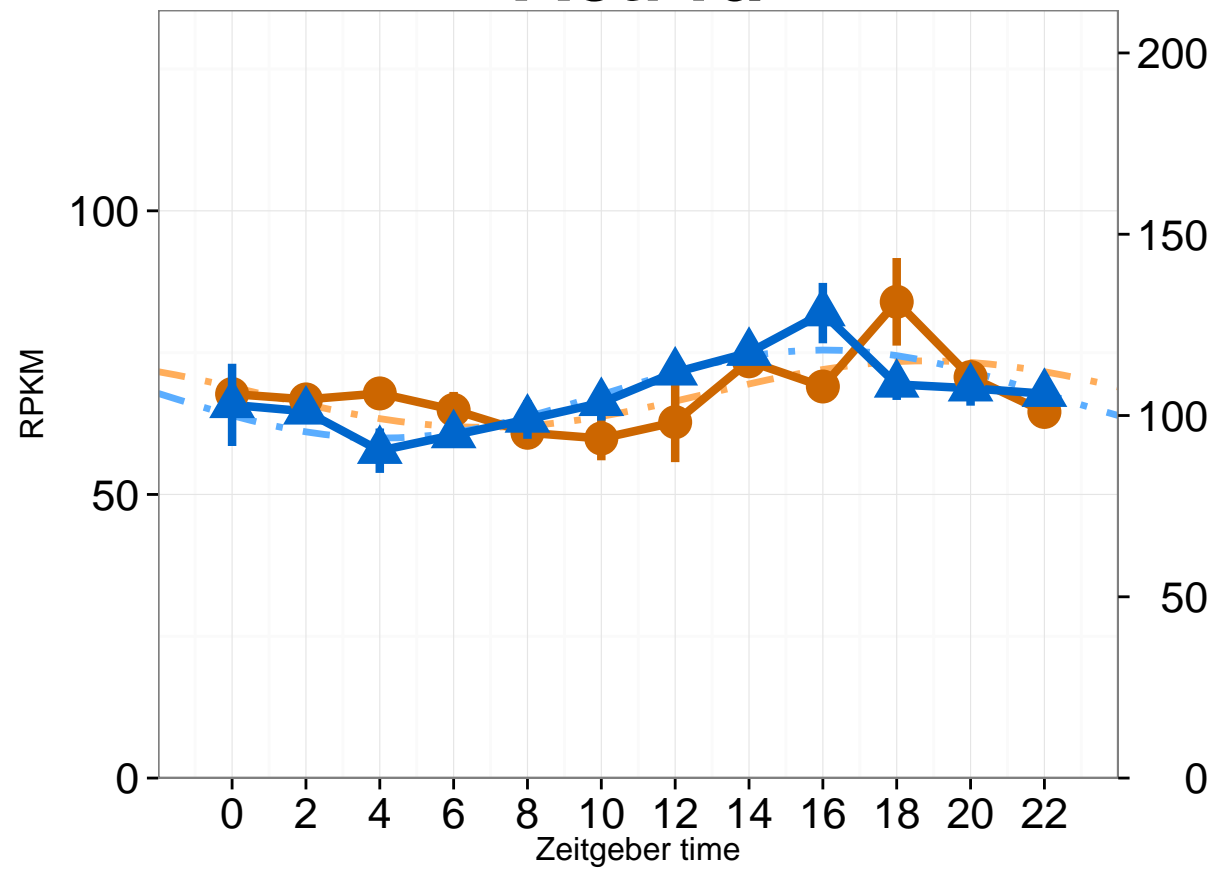

# Actr1a

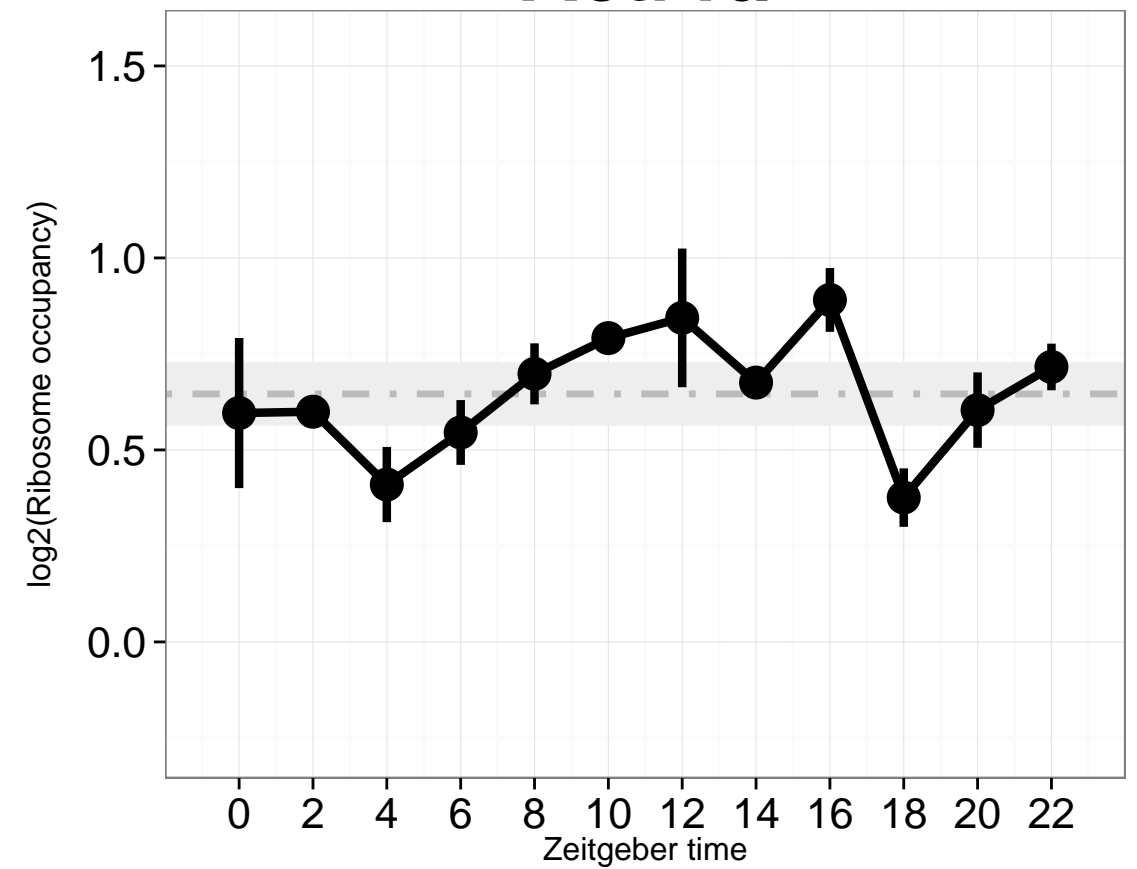

Supplement: Supplementary file 9620 [file 1]

## Lifr

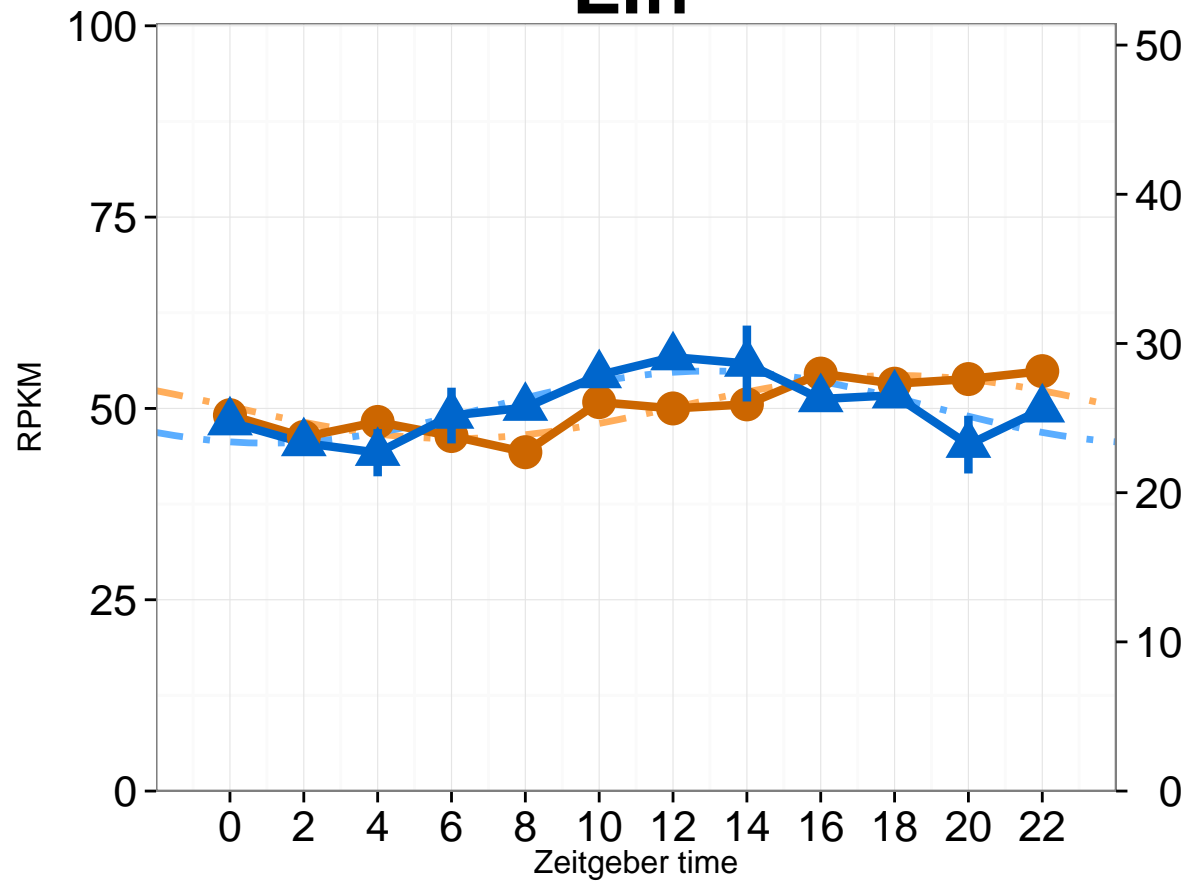

## Lifr

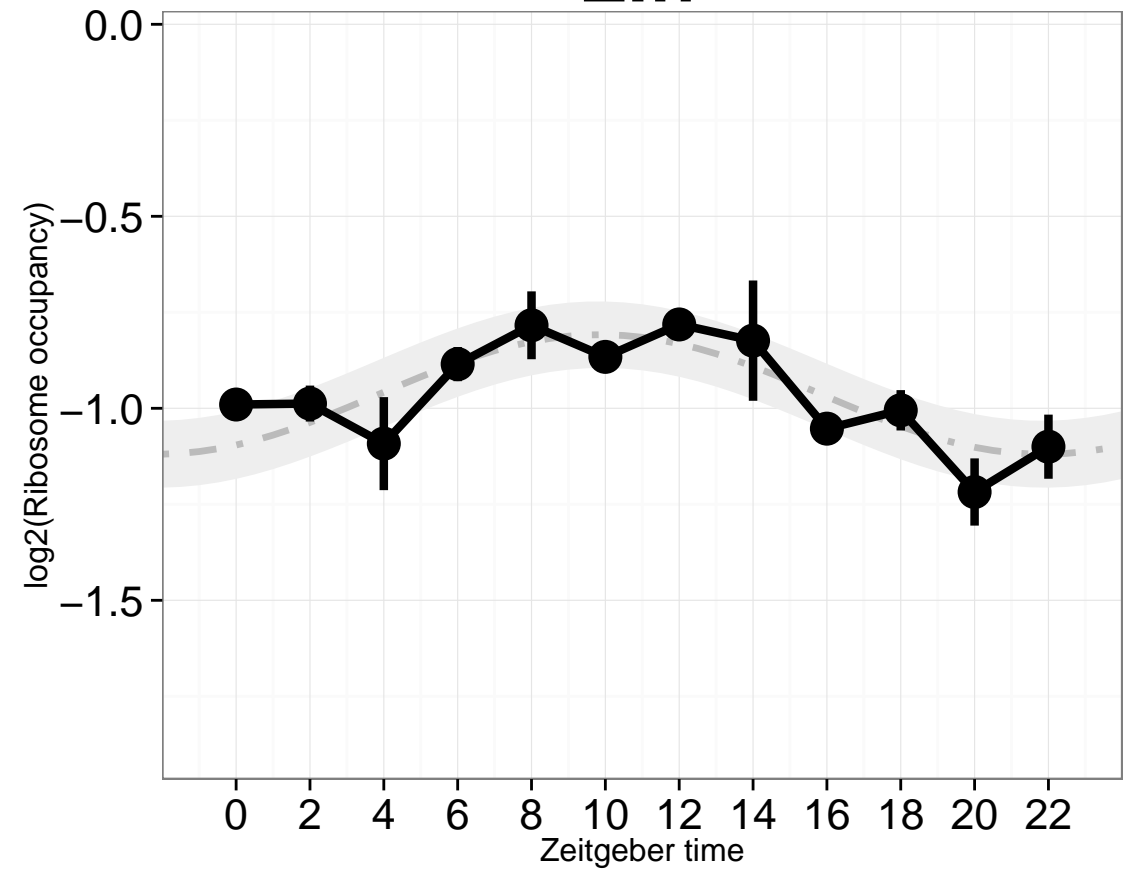

Supplement: Supplementary file 9621 [file 1]

## Pole3

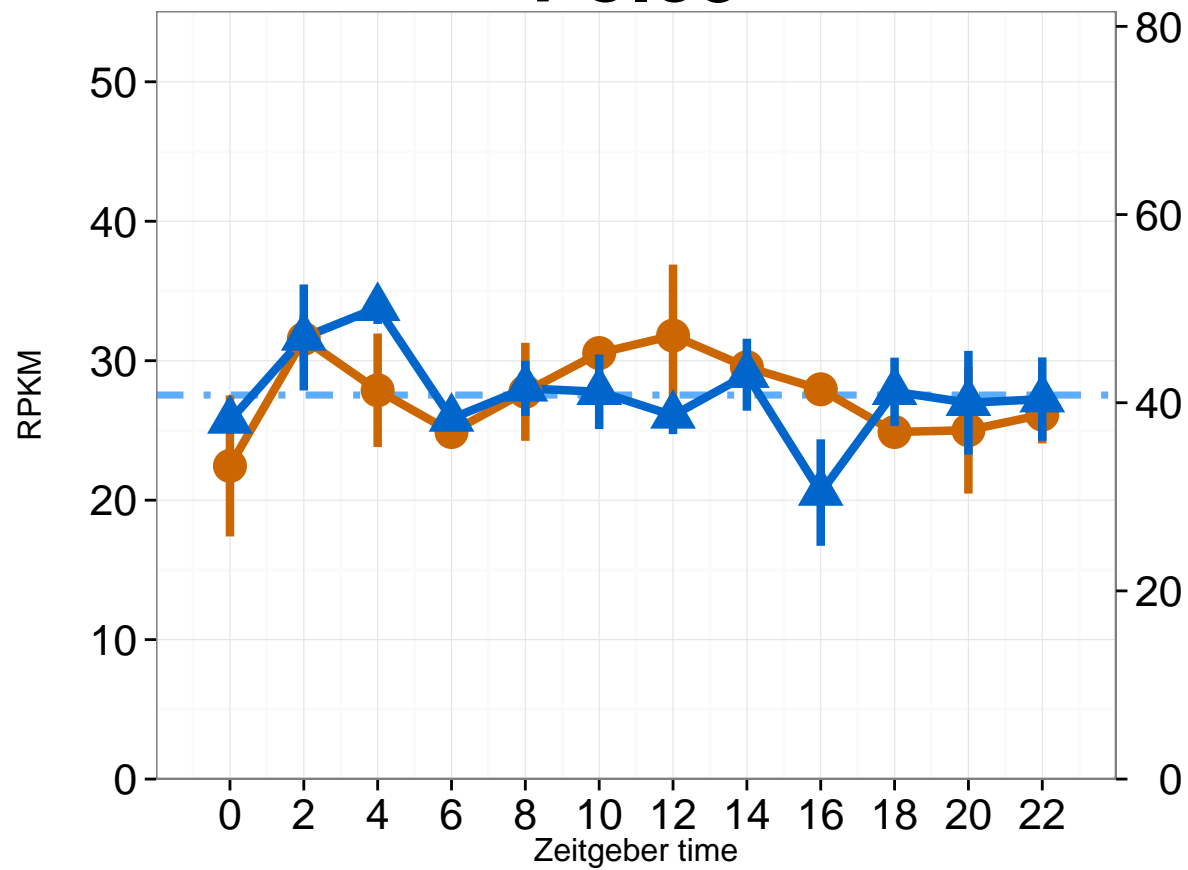

## Pole3

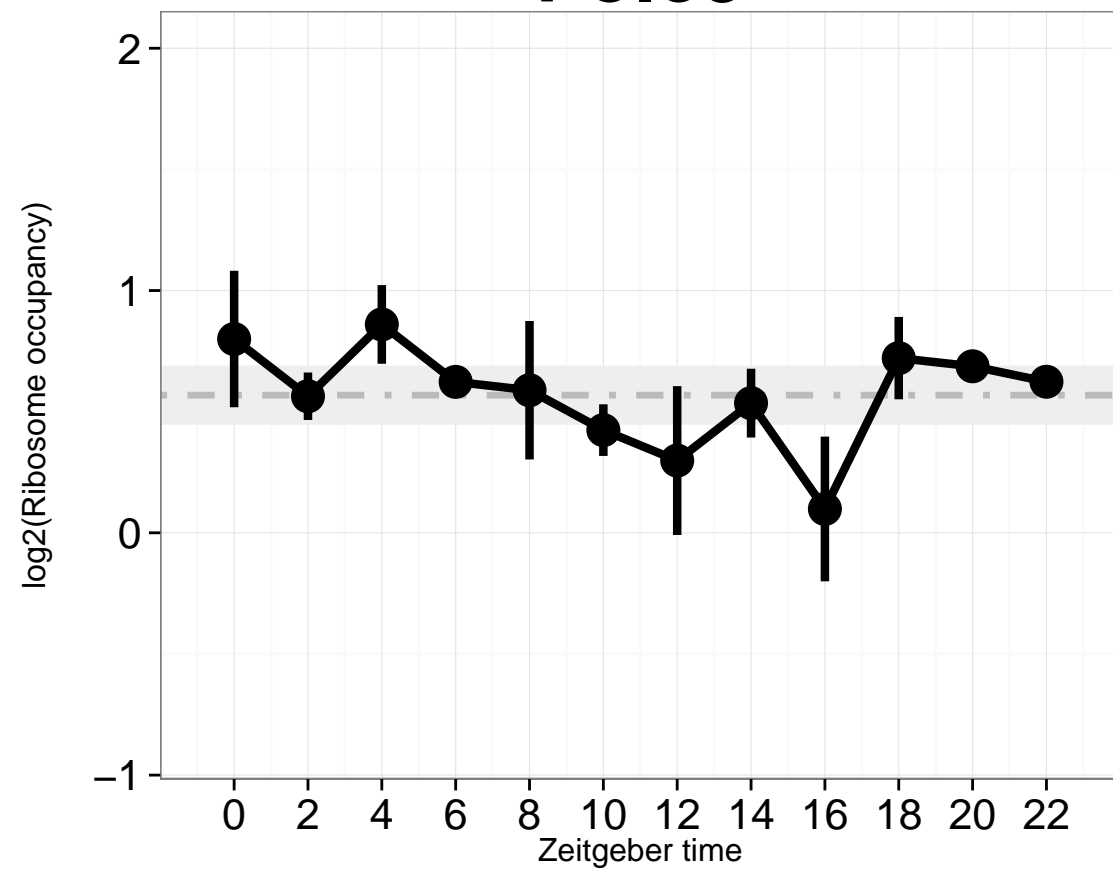

Supplement: Supplementary file 9622 [file 1]

## Pigz

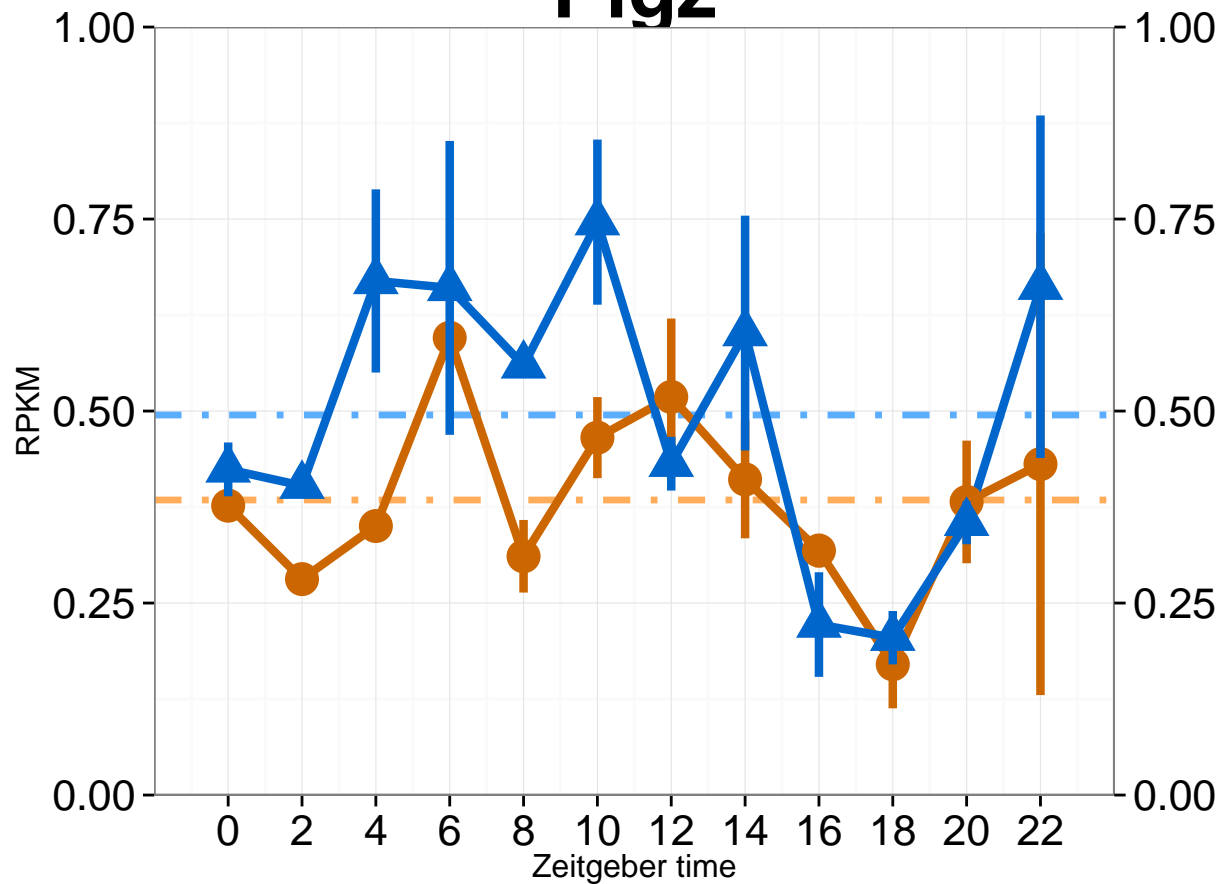

## Pigz

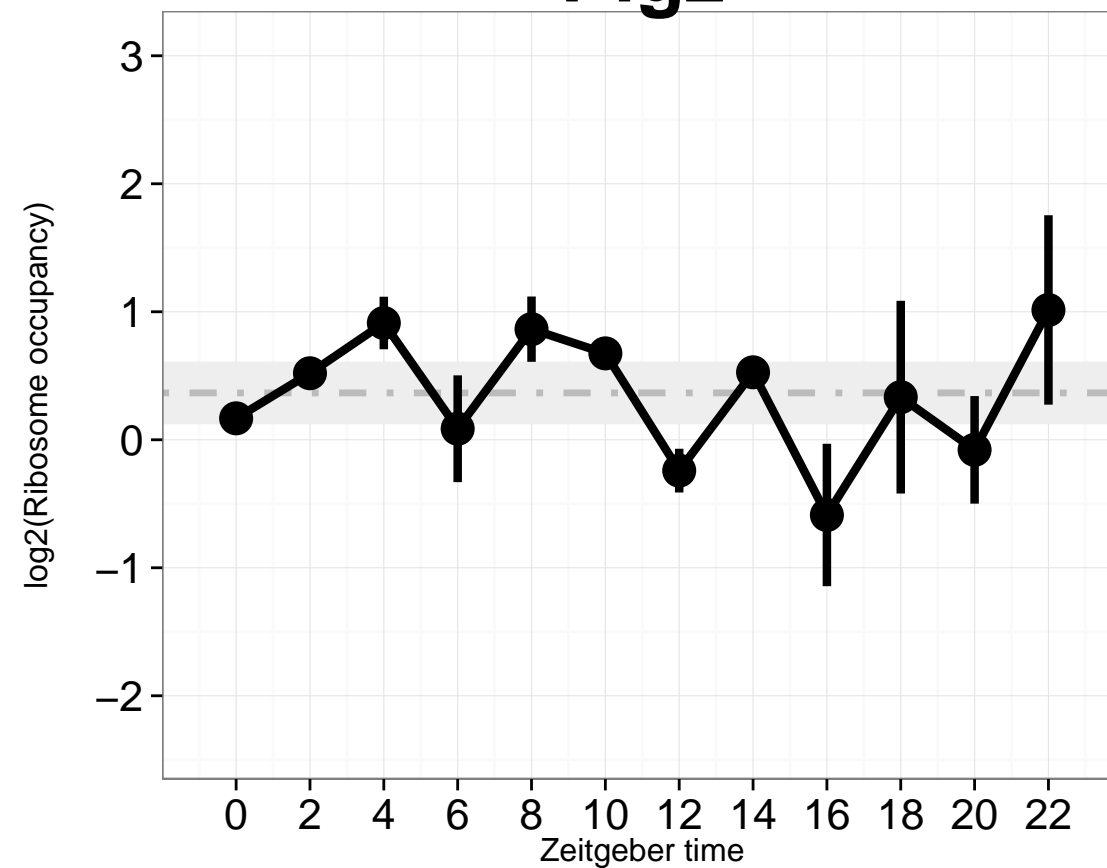

Supplement: Supplementary file 9623 [file 1]

## Exosc2

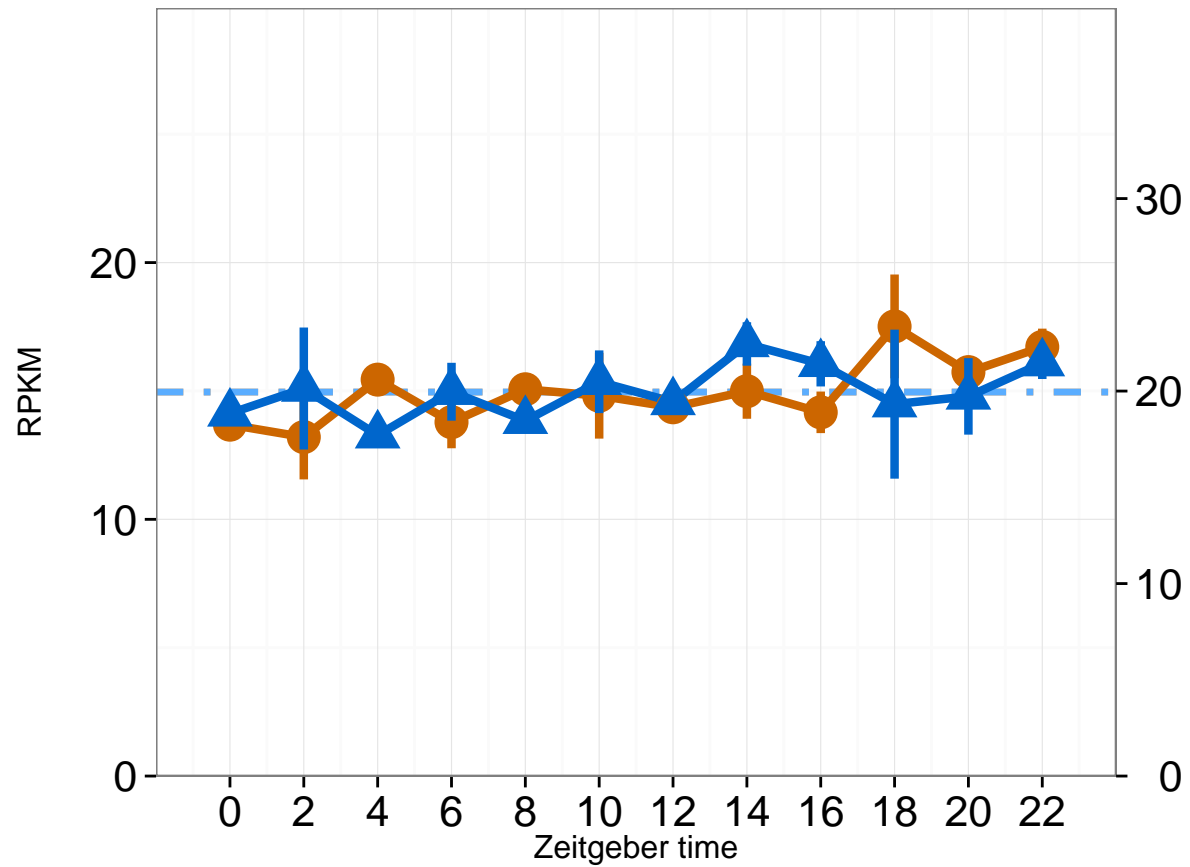

## Exosc2

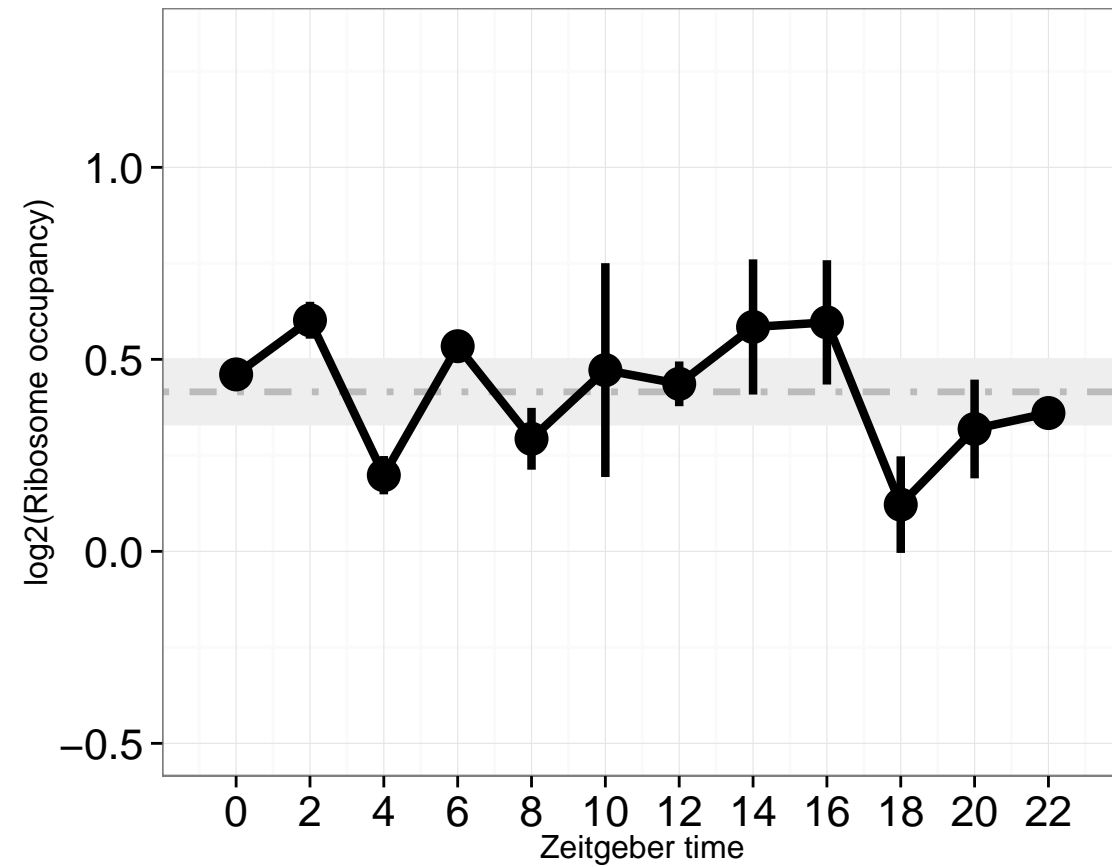

Supplement: Supplementary file 9624 [file 1]

# Hnf1b

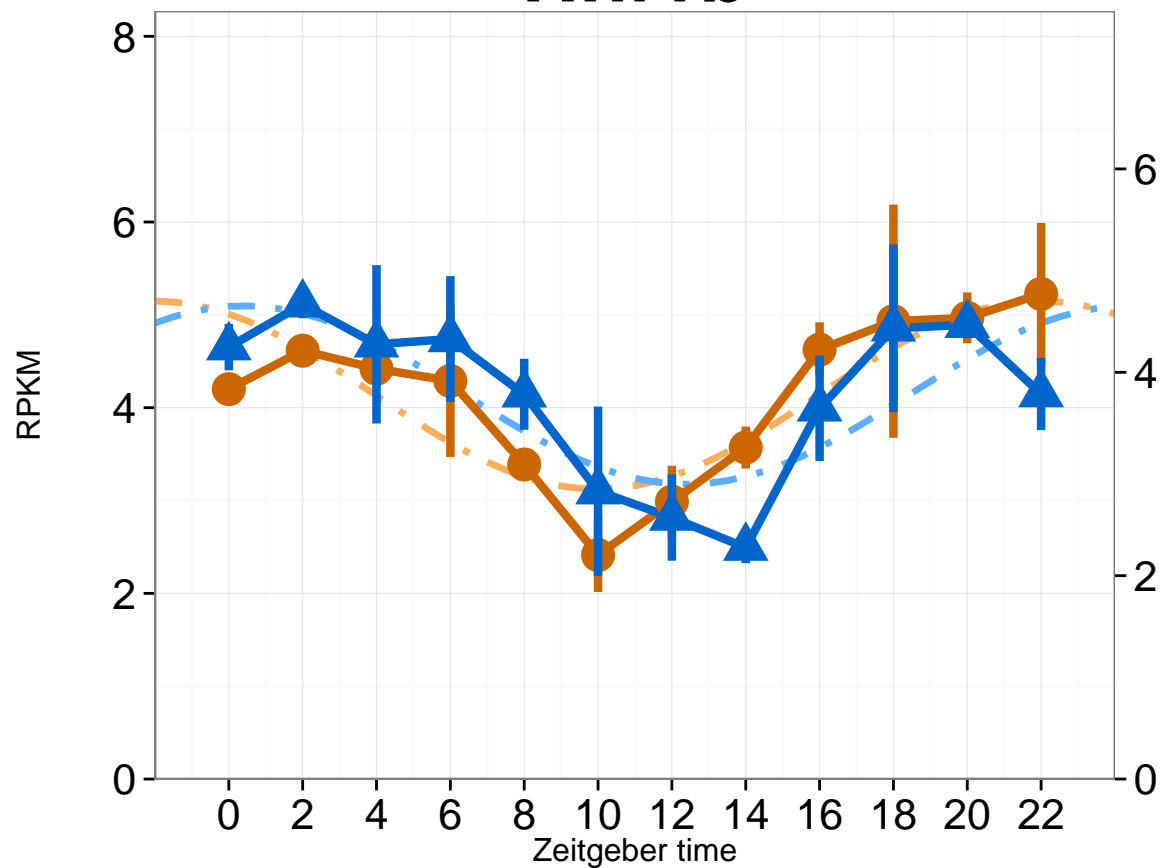

# Hnf1b

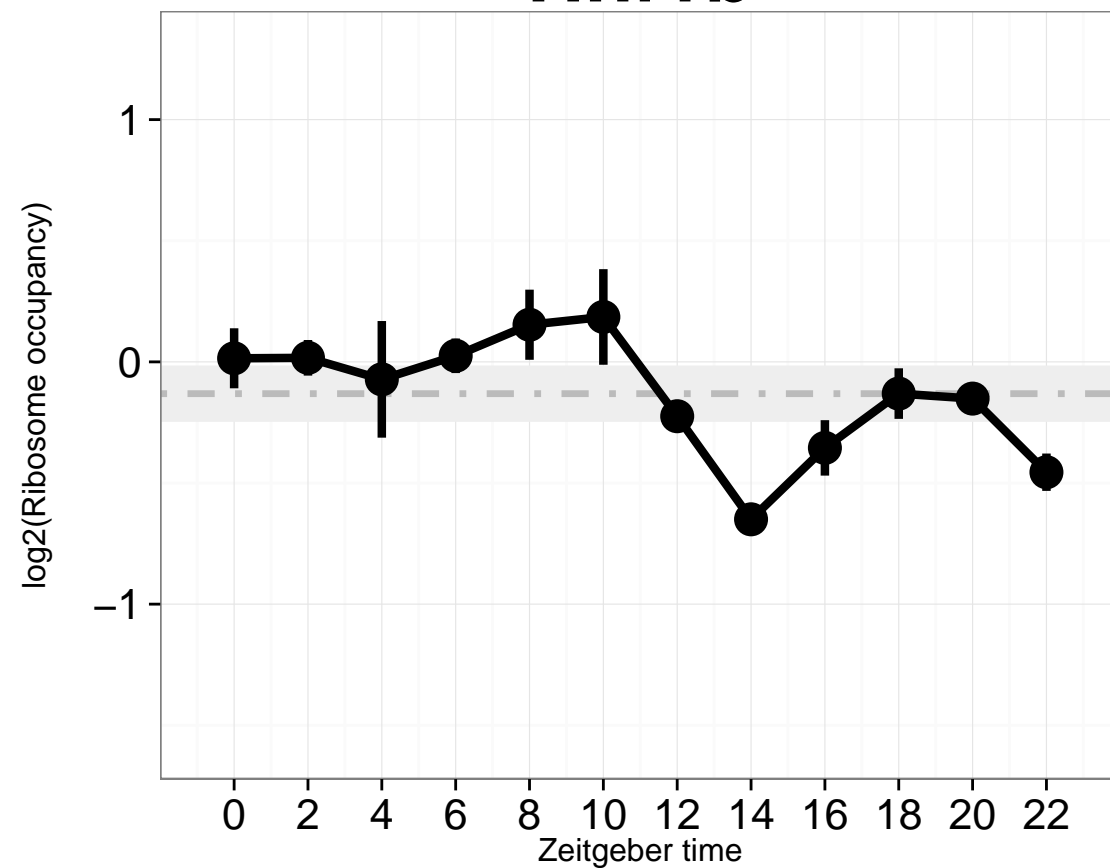

Supplement: Supplementary file 9625 [file 1]

## Hip1r

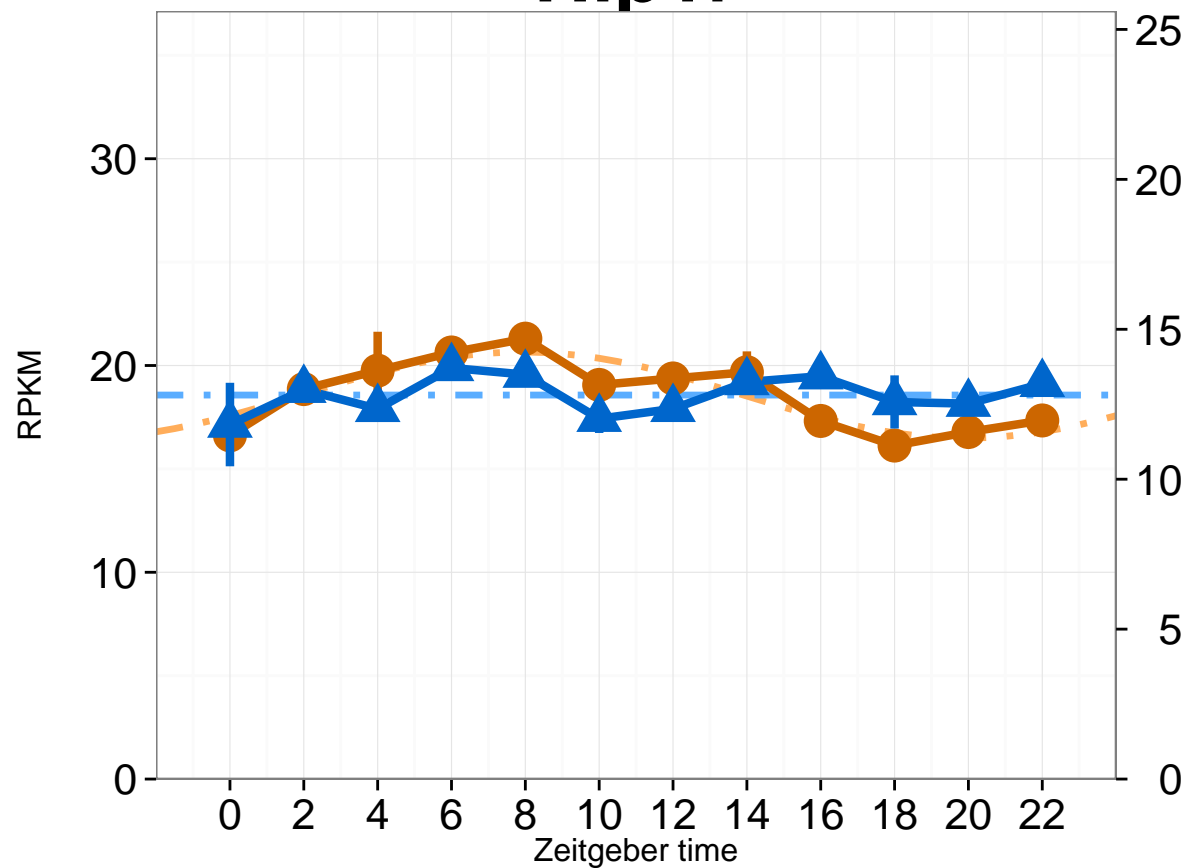

## Hip1r

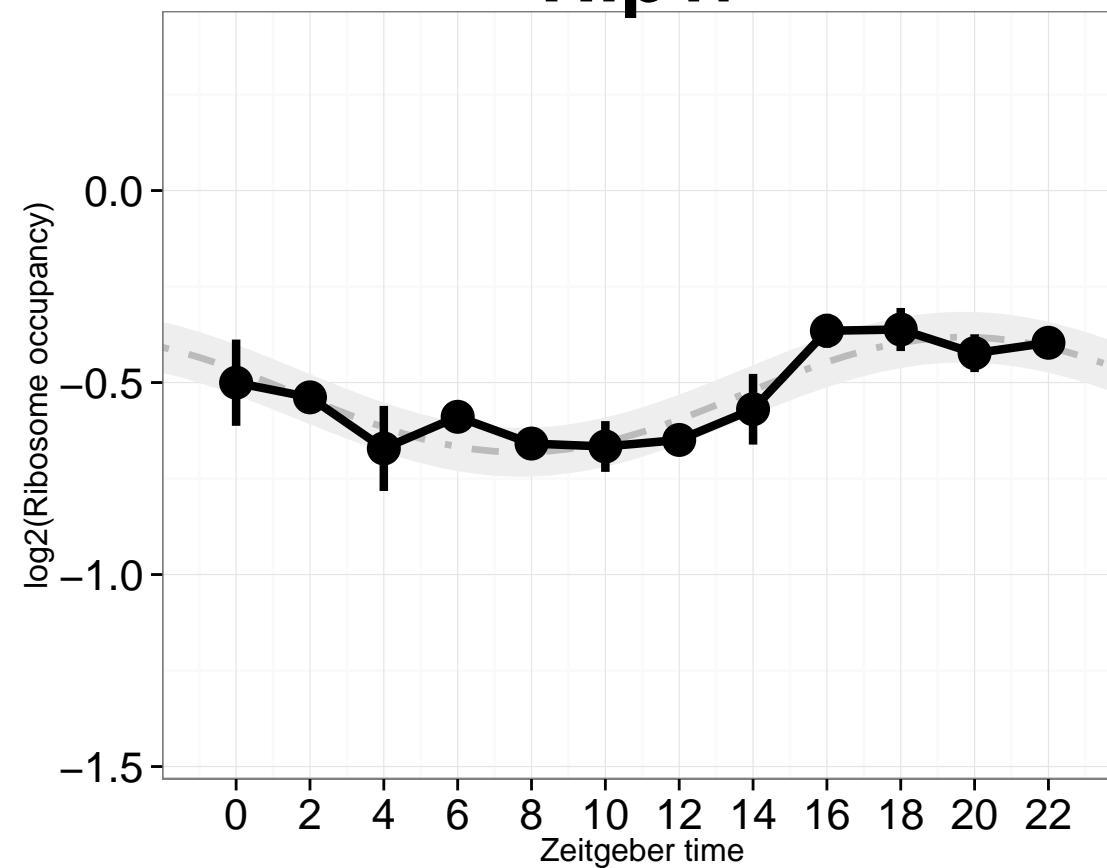

Supplement: Supplementary file 9626 [file 1]

## Mkrn2

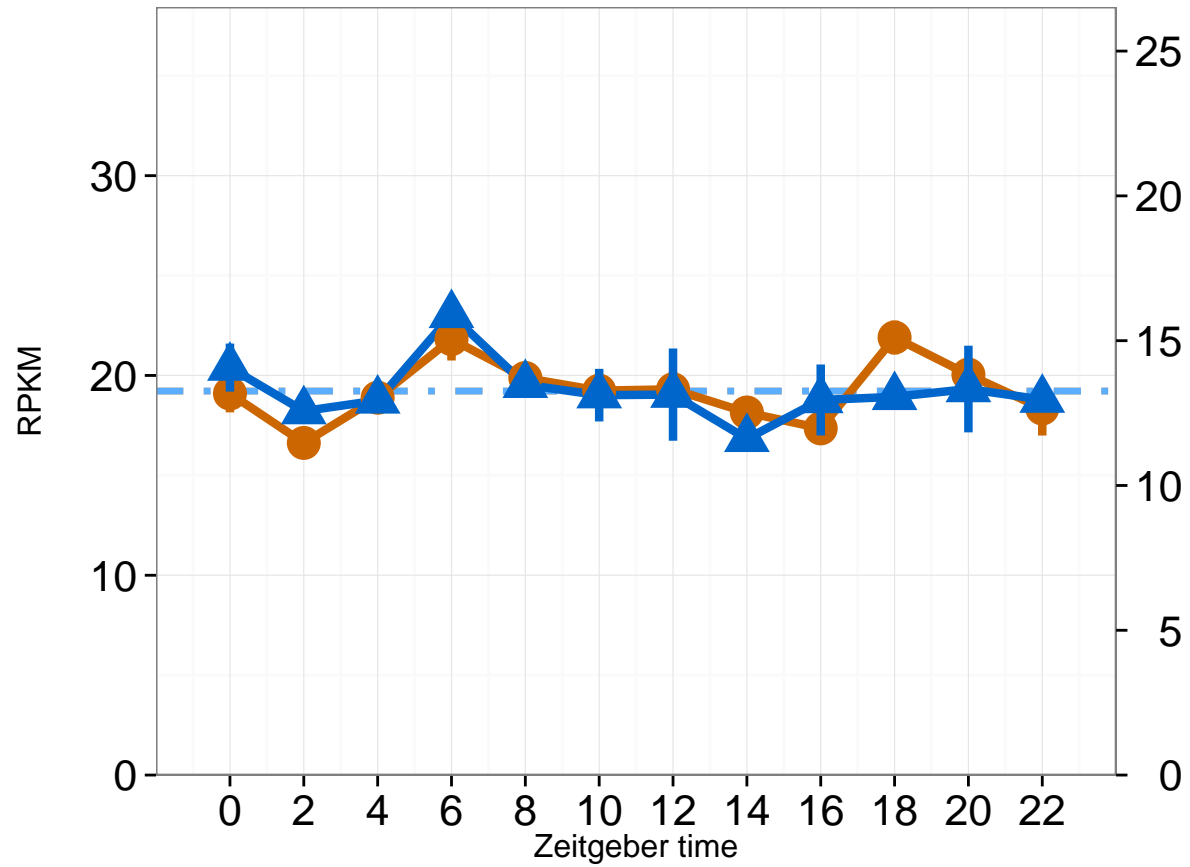

## Mkrn2

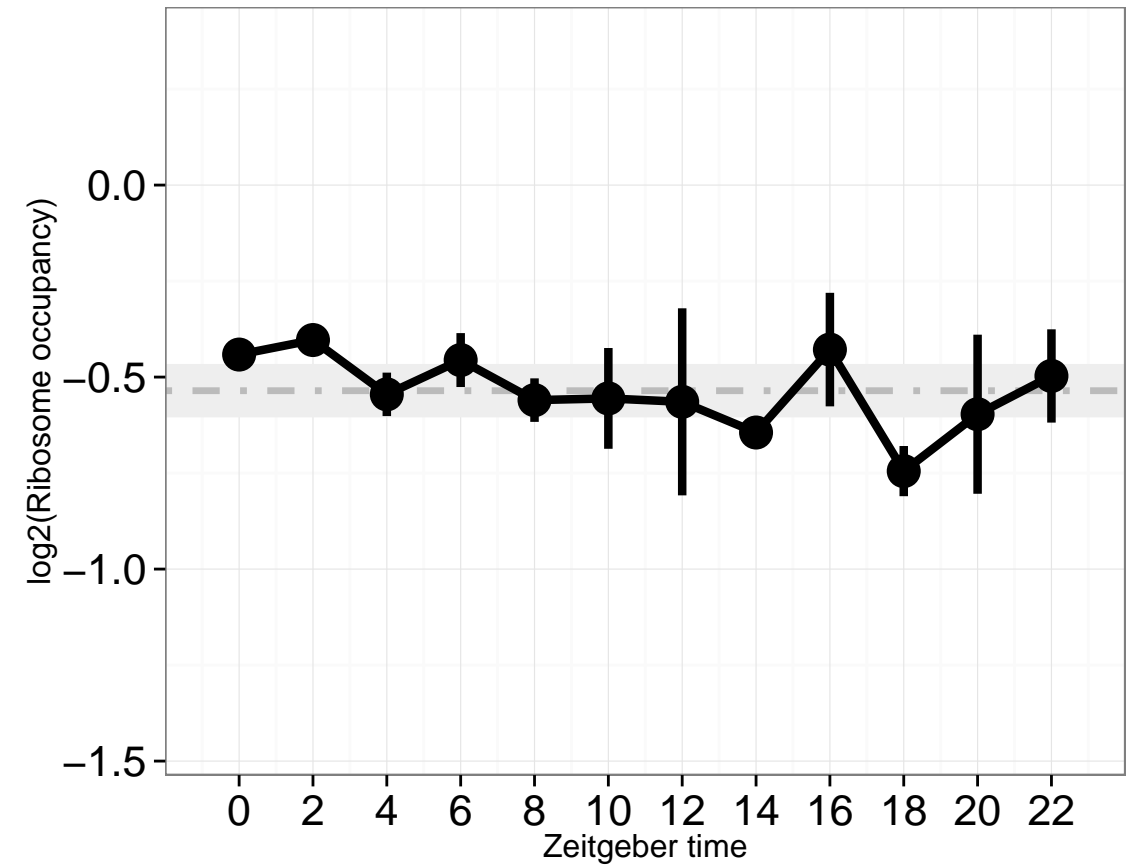

Supplement: Supplementary file 9627 [file 1]

## Hdhd2

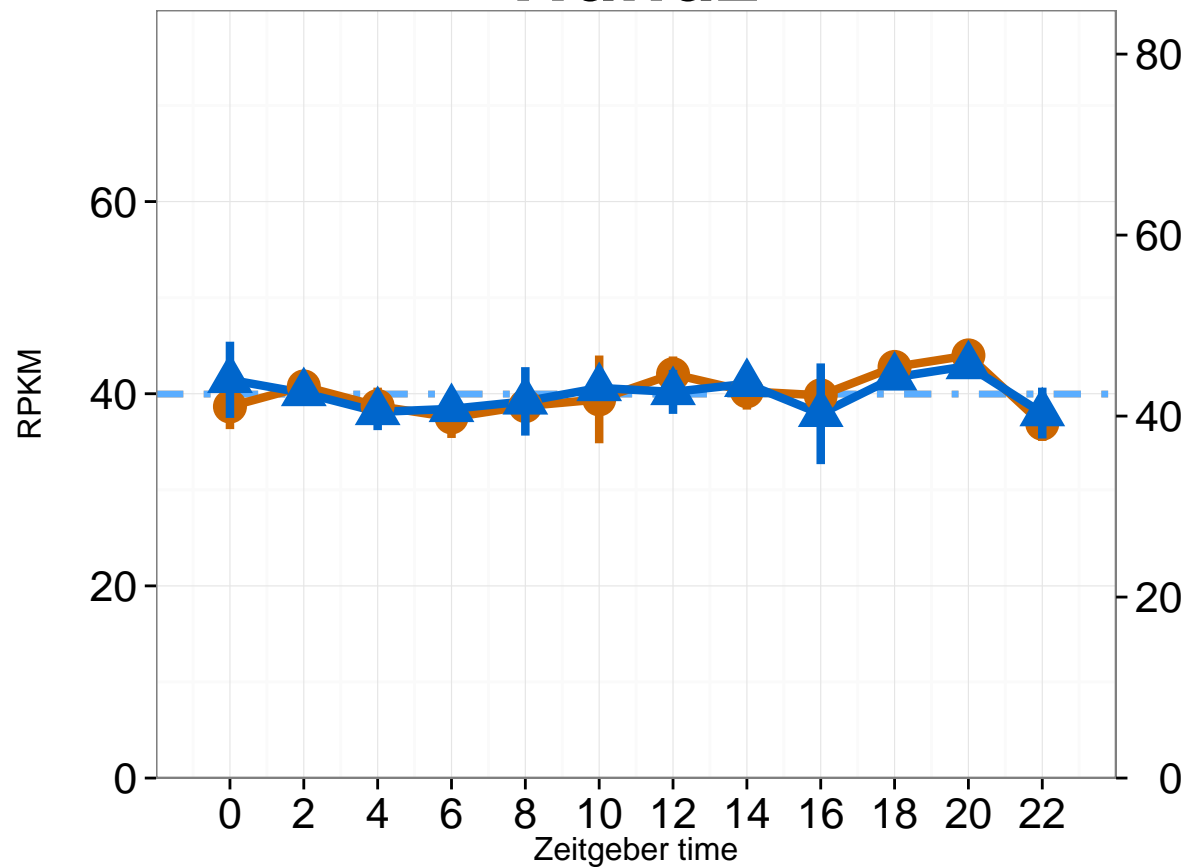

## Hdhd2

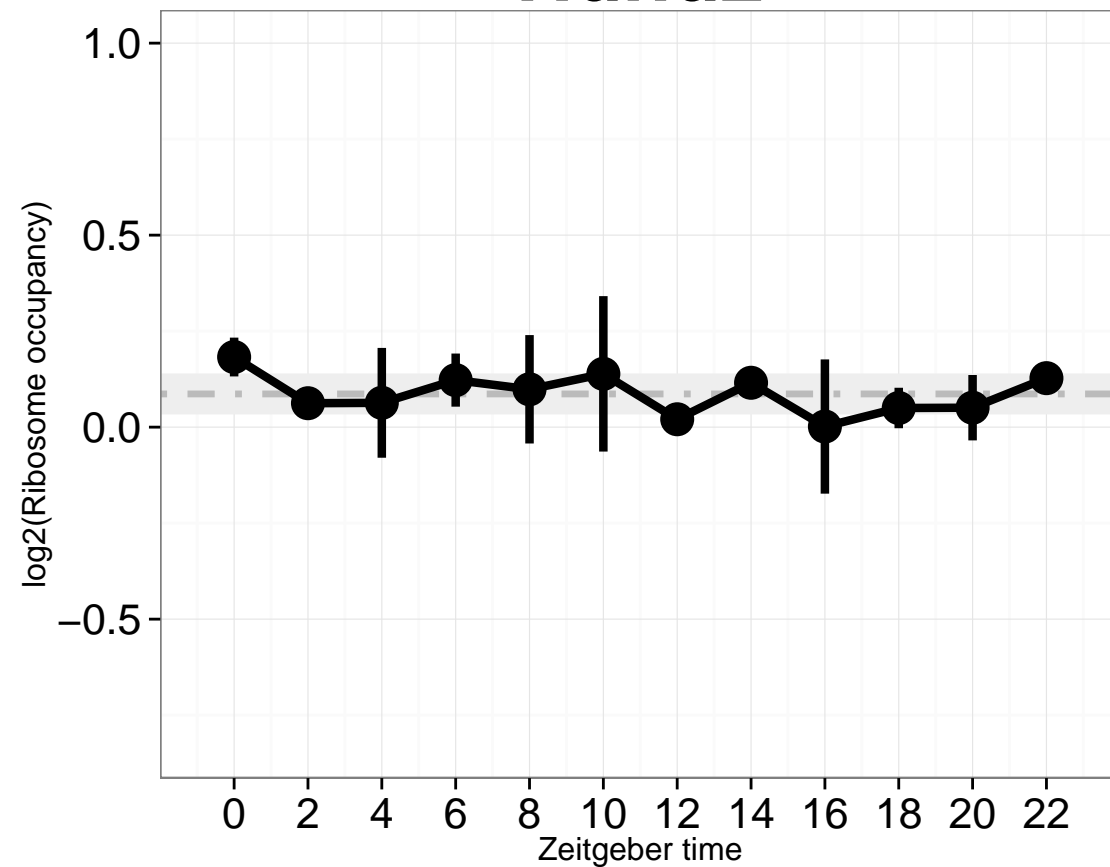

Supplement: Supplementary file 9628 [file 1]

# Myg1

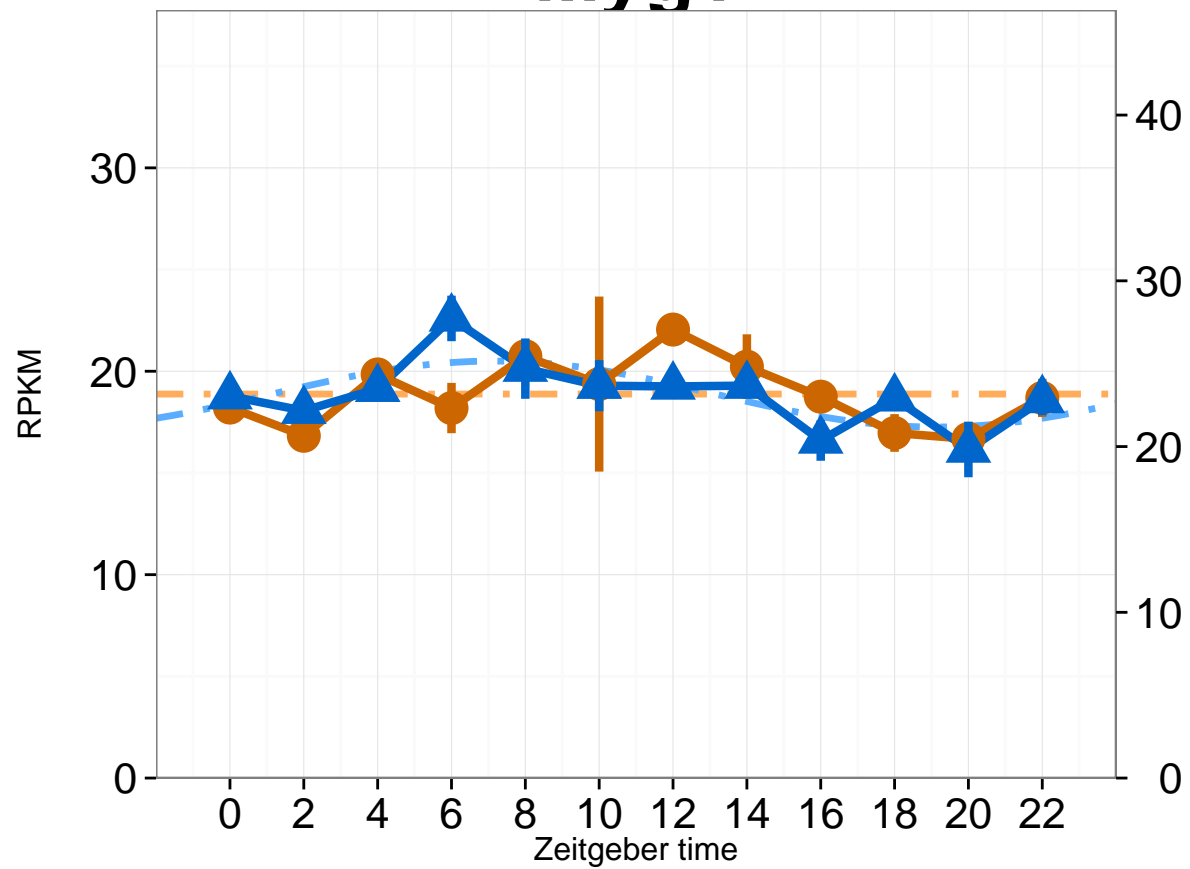

# Myg1

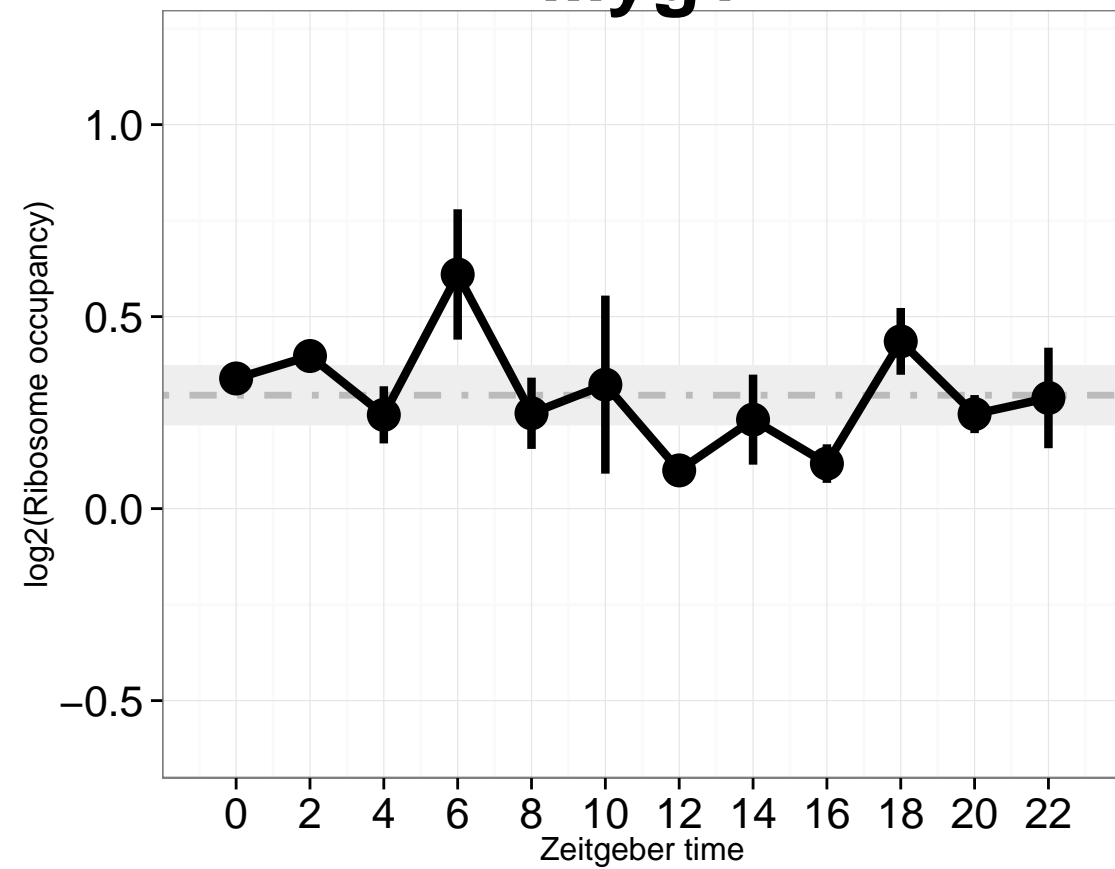

Supplement: Supplementary file 9629 [file 1]

# Zbtb7c

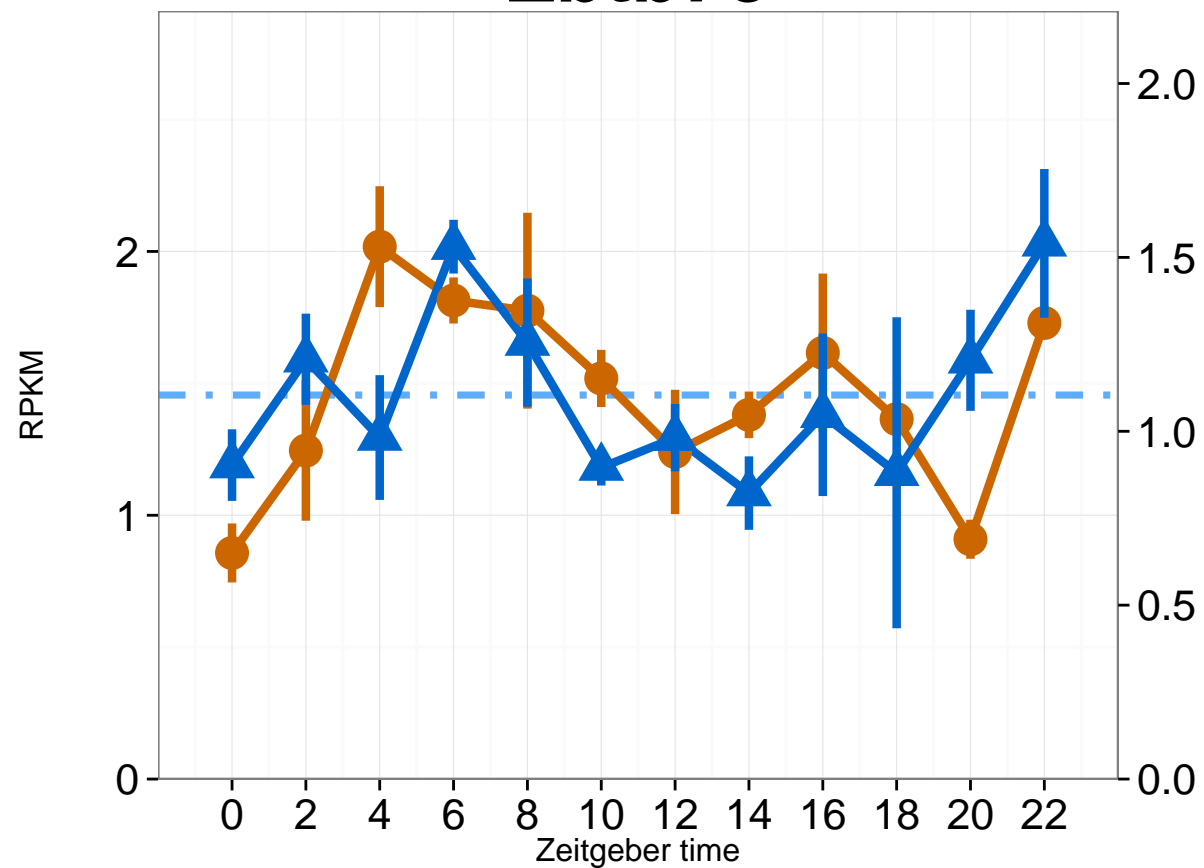

# Zbtb7c

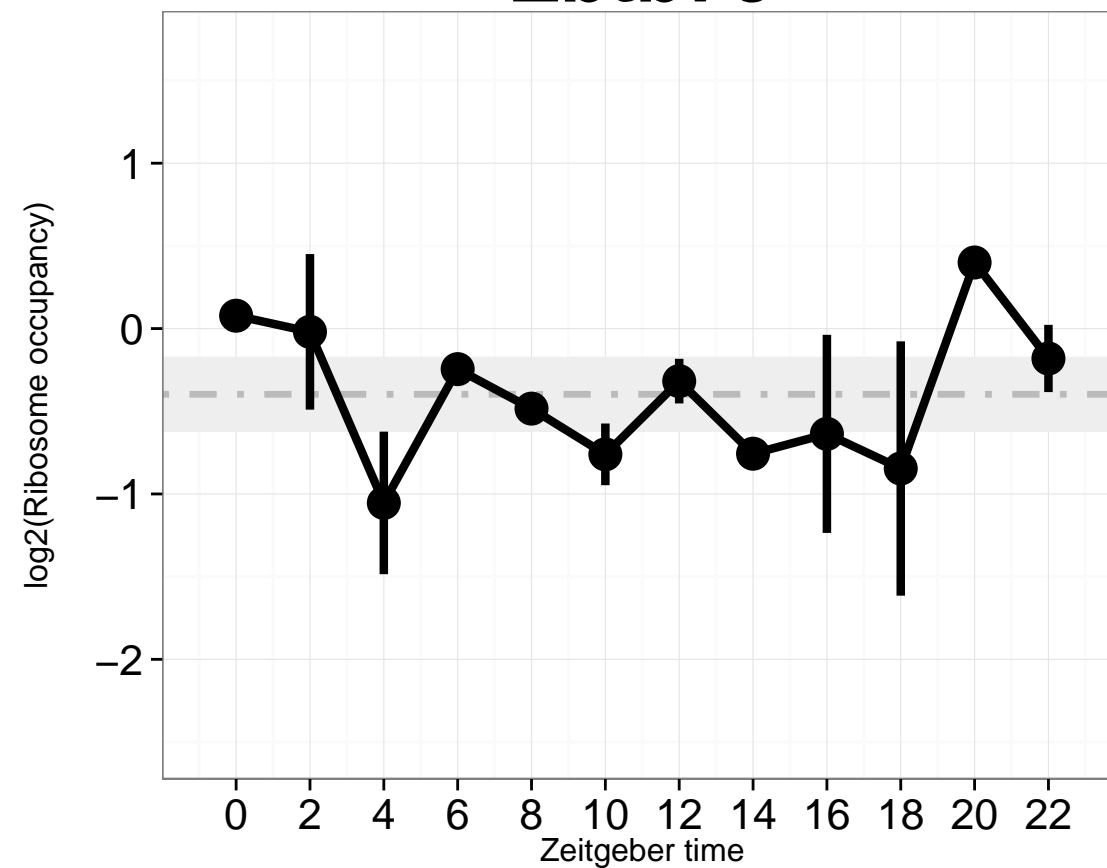

Supplement: Supplementary file 9630 [file 1]

# Psen1

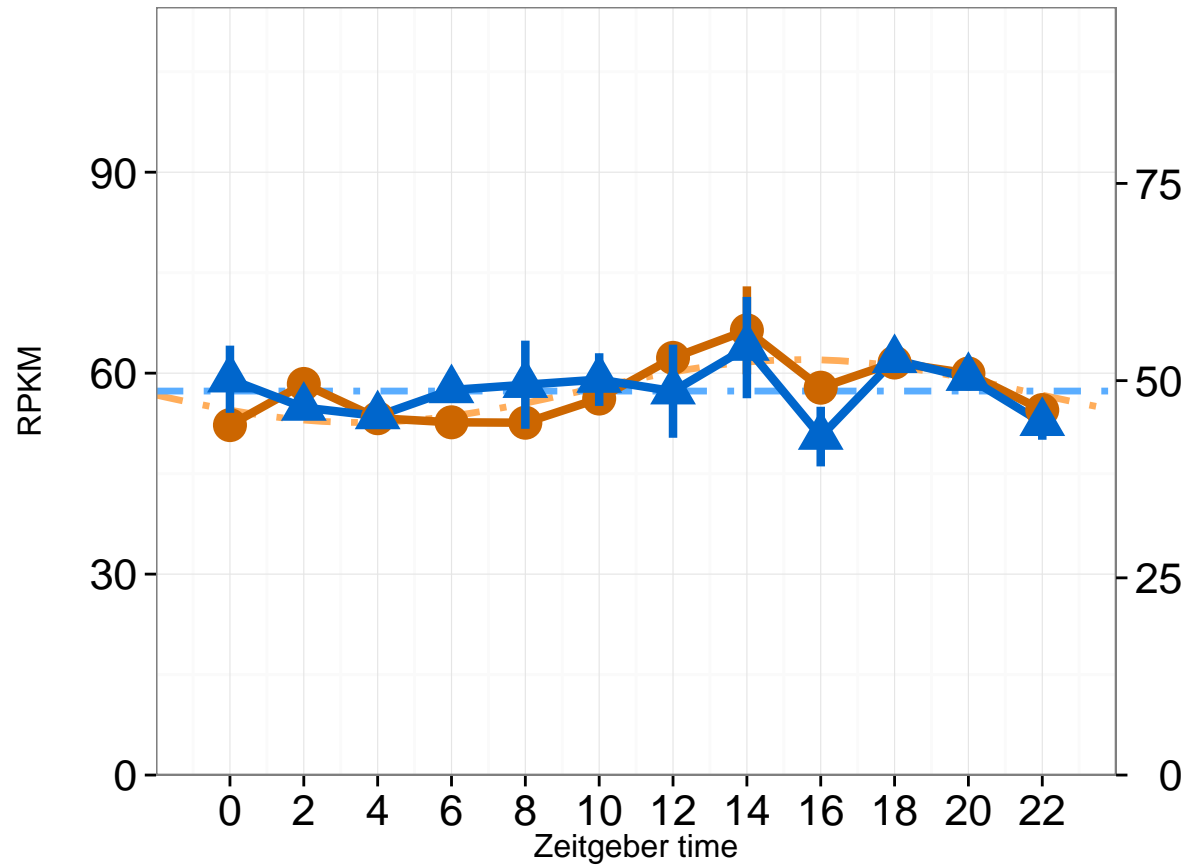

# Psen1

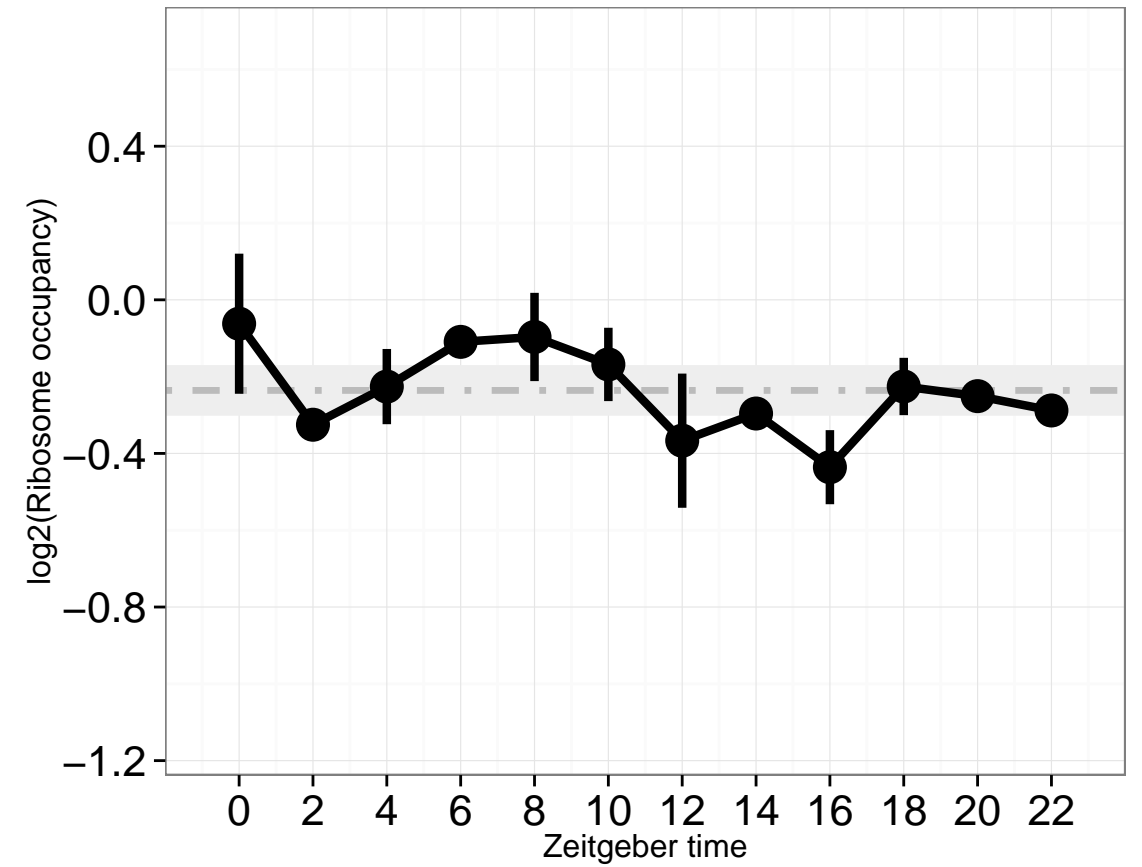

Supplement: Supplementary file 9631 [file 1]

# Capn7

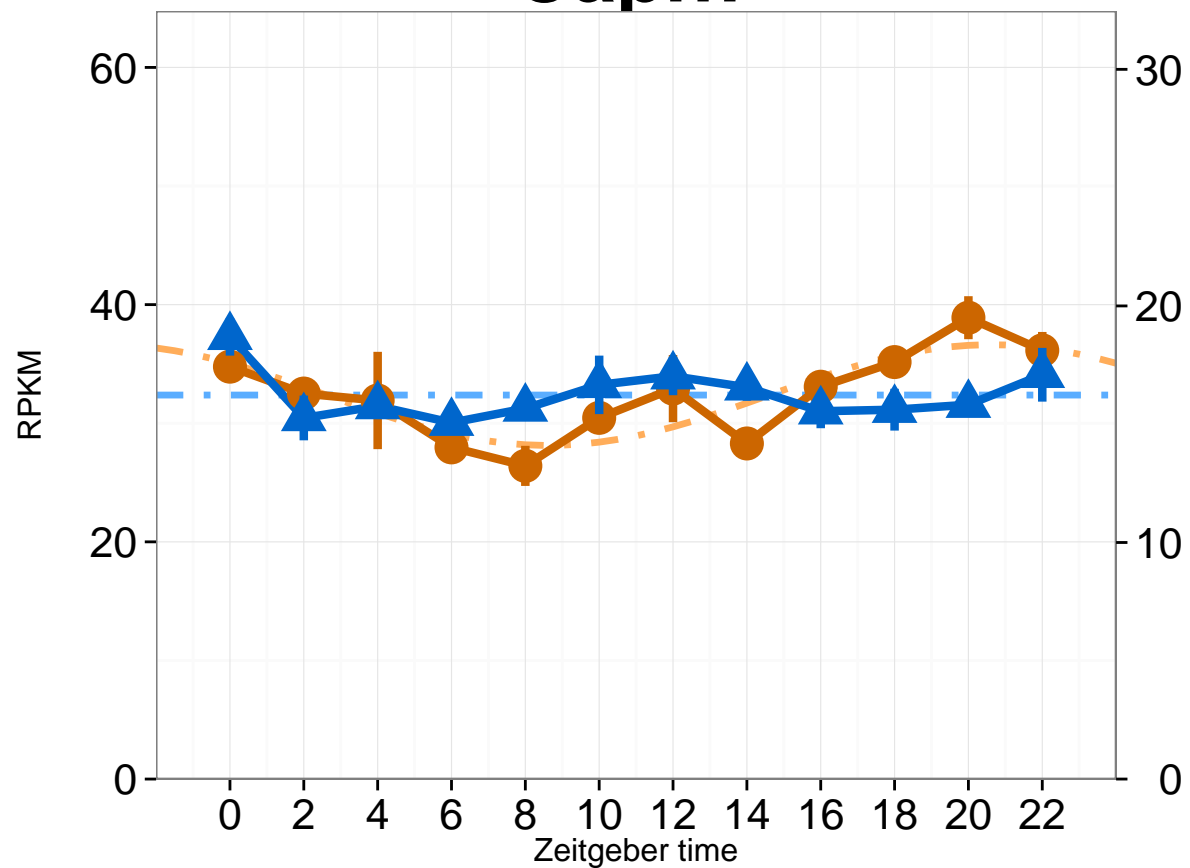

# Capn7

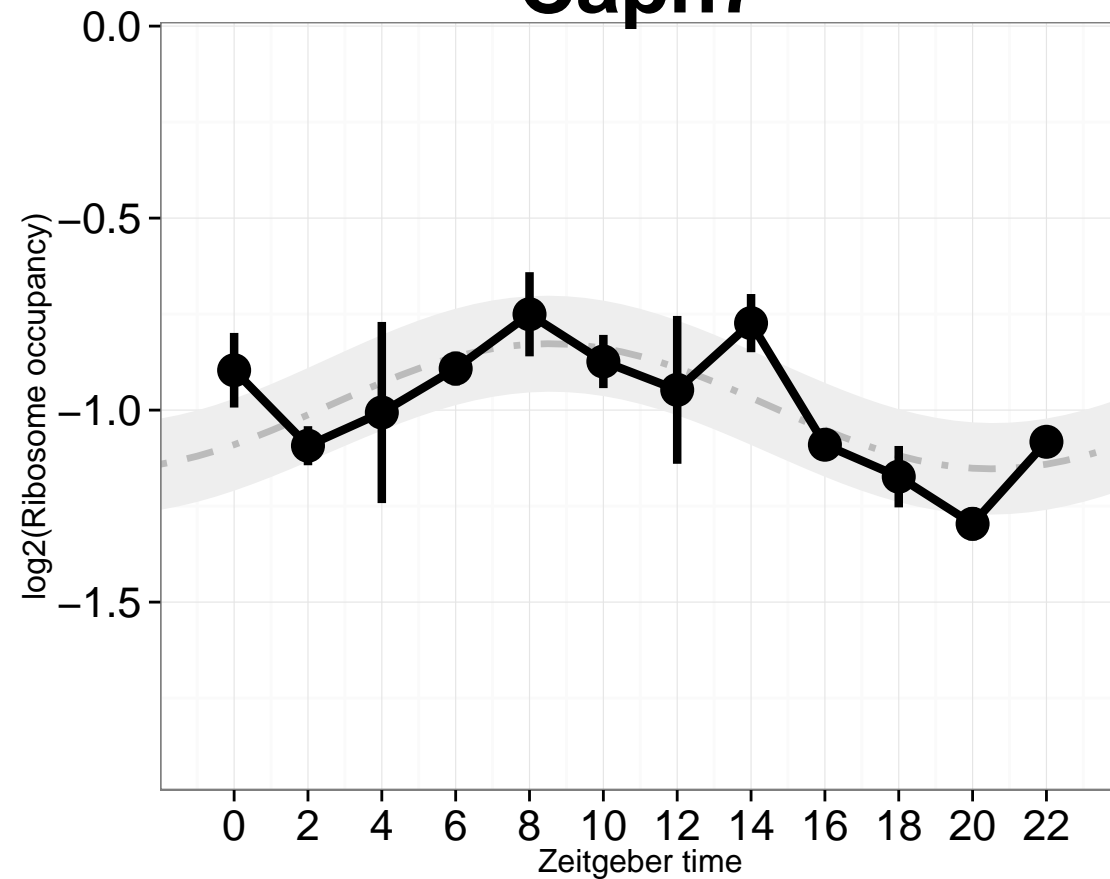

Supplement: Supplementary file 9632 [file 1]

# Nr1d2

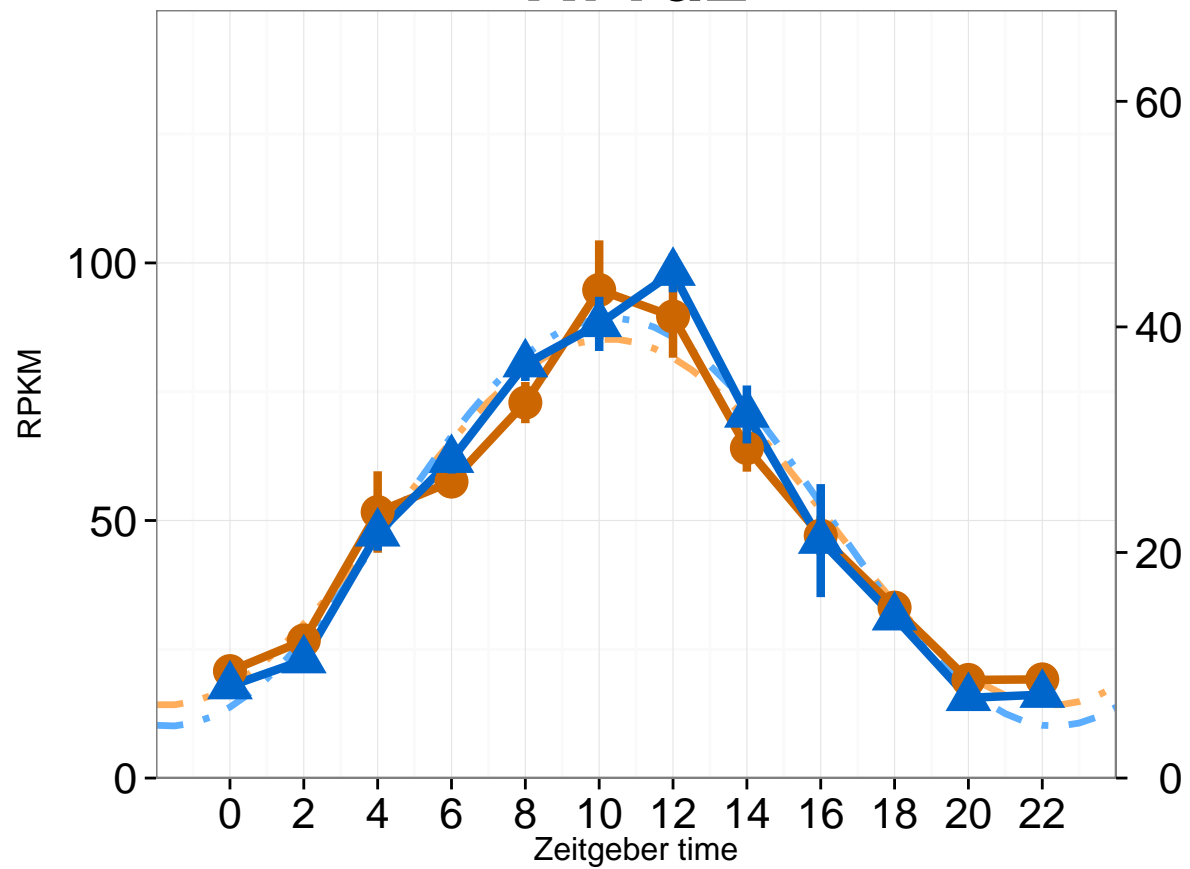

# Nr1d2

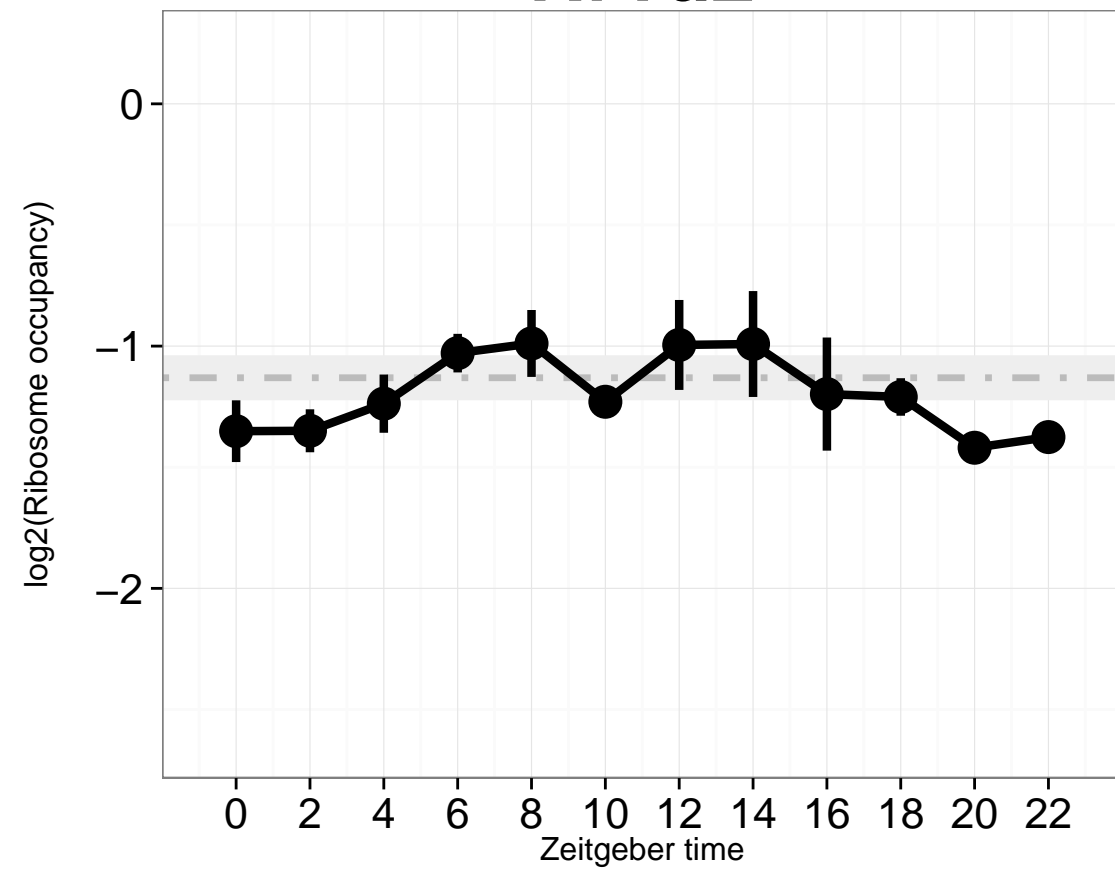

Supplement: Supplementary file 9633 [file 1]

## Wdr11

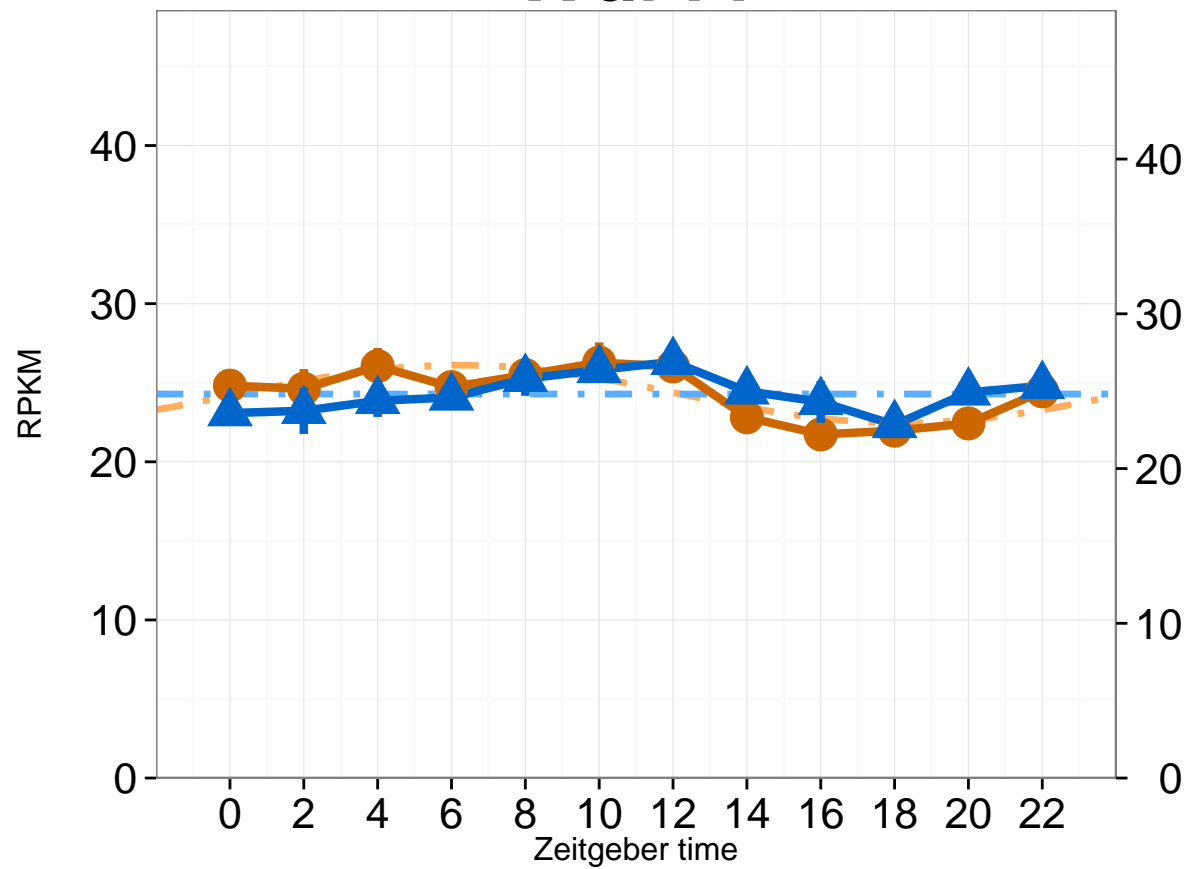

## Wdr11

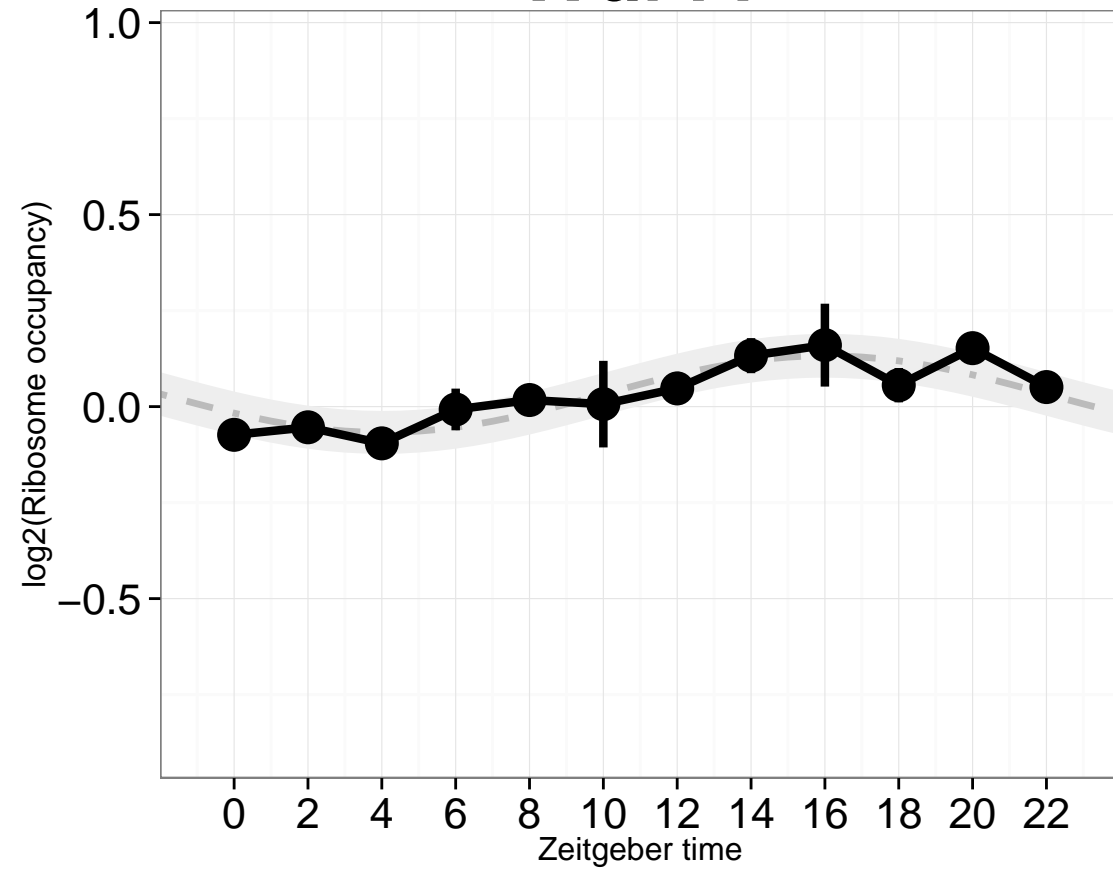

Supplement: Supplementary file 9634 [file 1]

# Zfp451

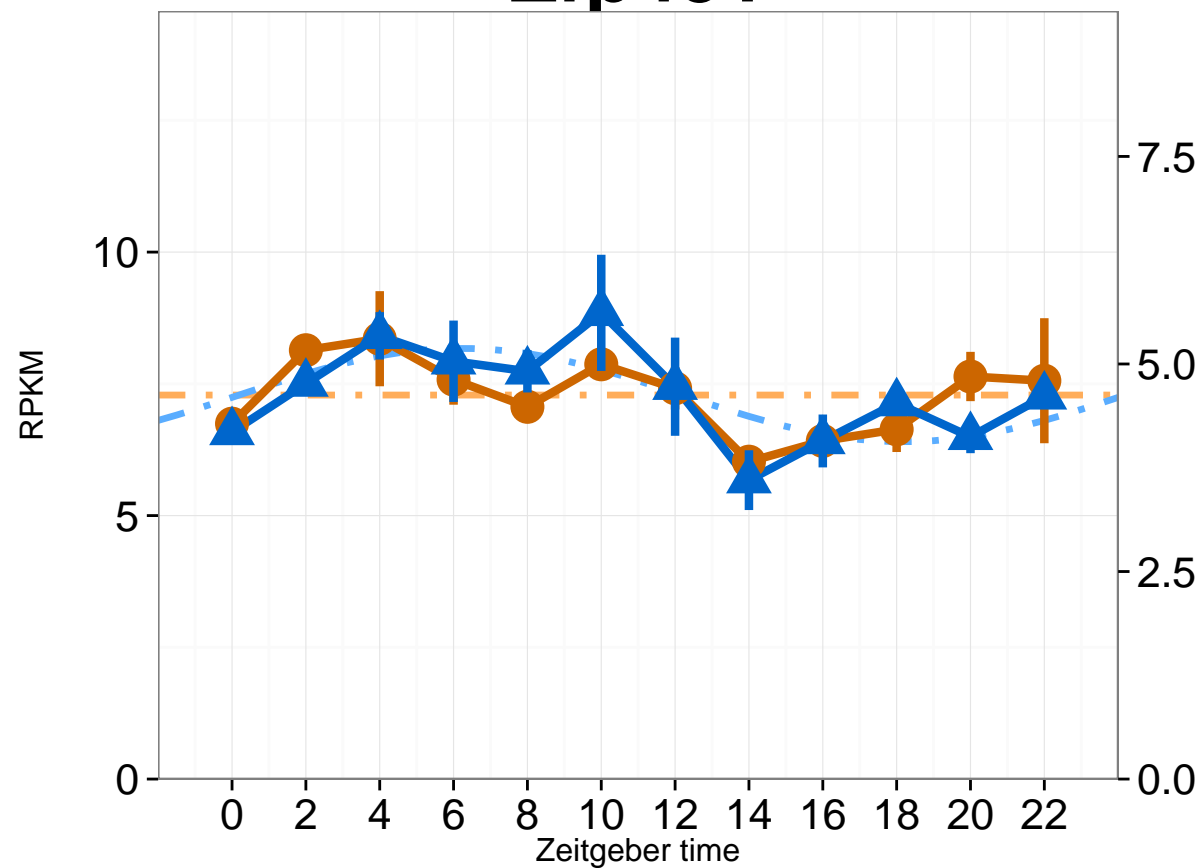

# Zfp451

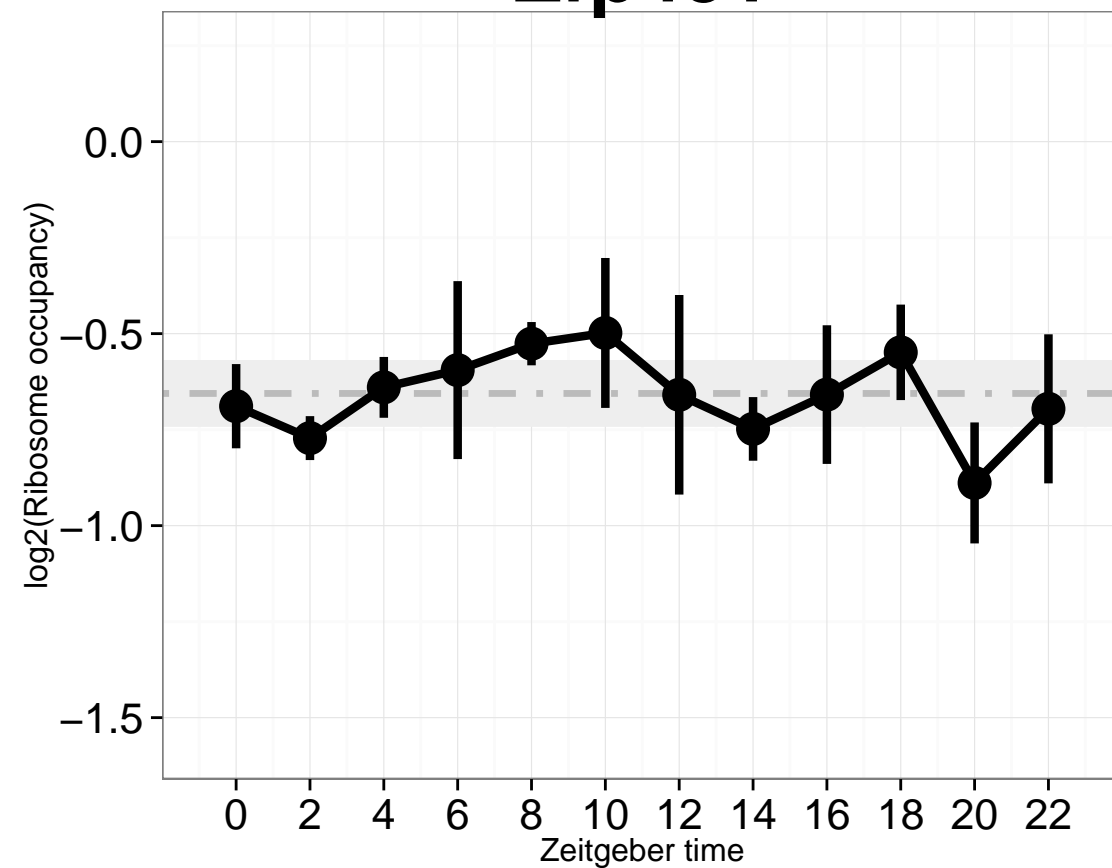

Supplement: Supplementary file 9635 [file 1]
