# Supplementary material (part 97 of 133)
Source: publisher figshare collection journal article supplement (https://springernature.figshare.com/articles/dataset/_/4903193)

## Lyz2

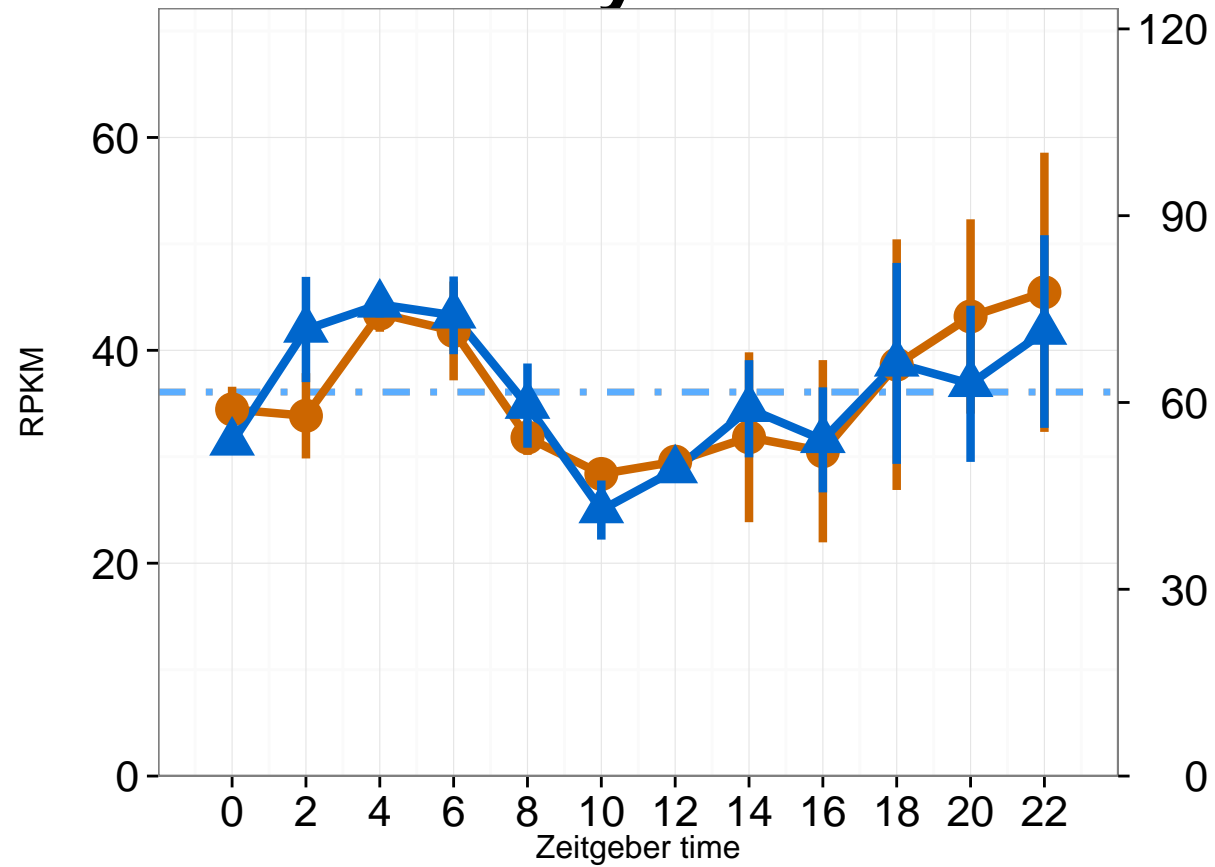

## Lyz2

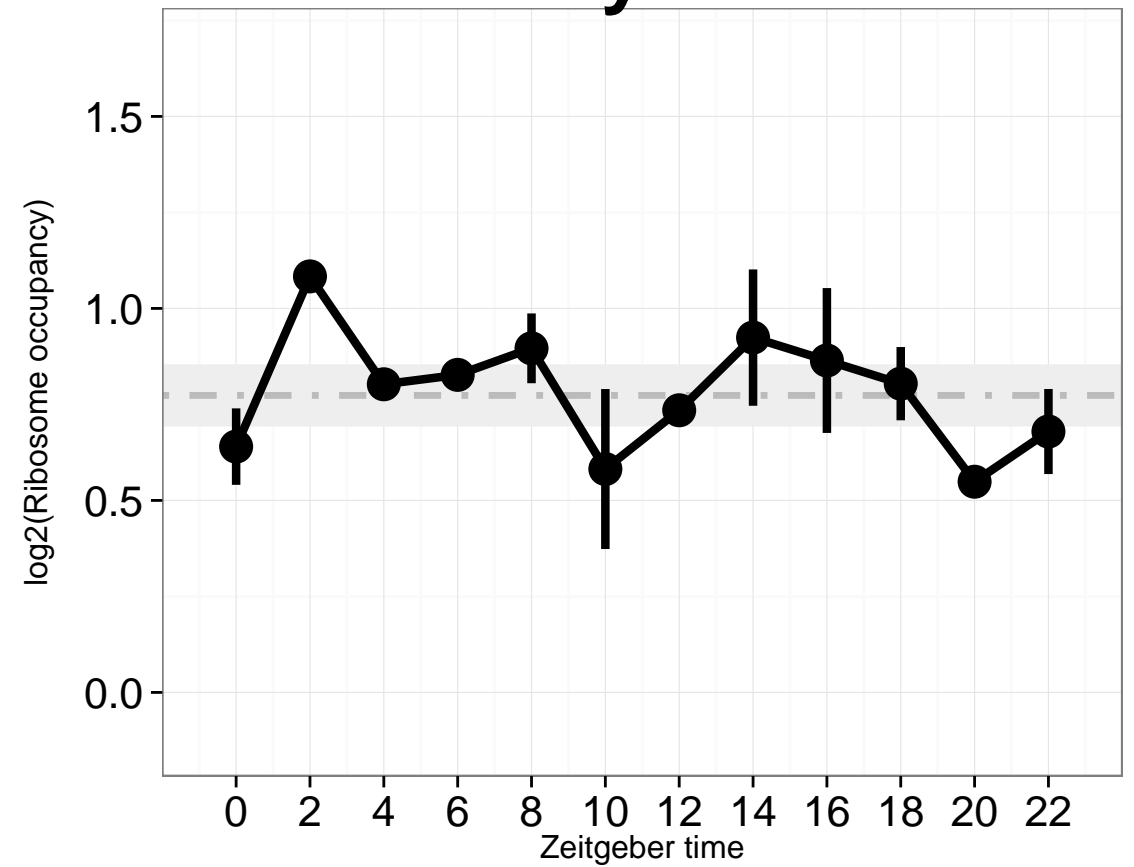

Supplement: Supplementary file 9636 [file 1]

# Dnajc15

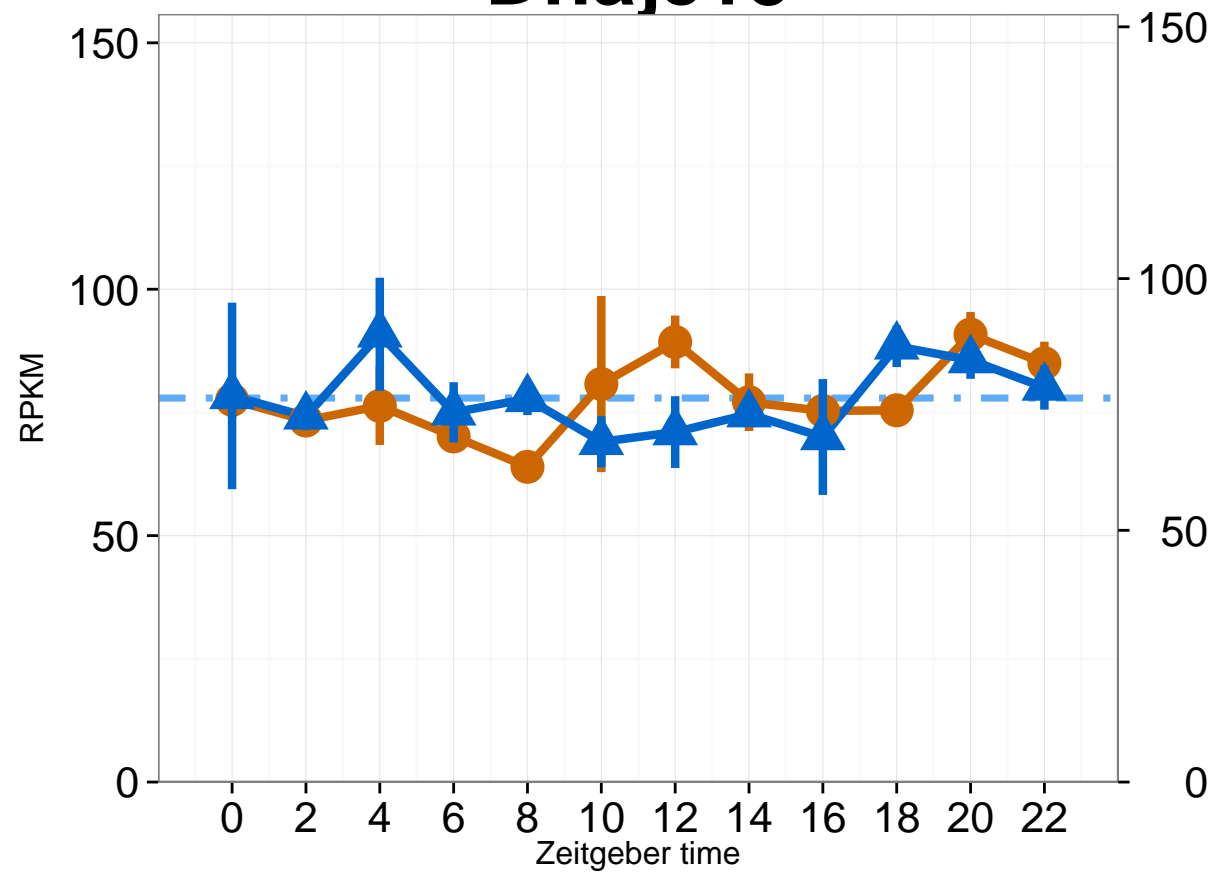

# Dnajc15

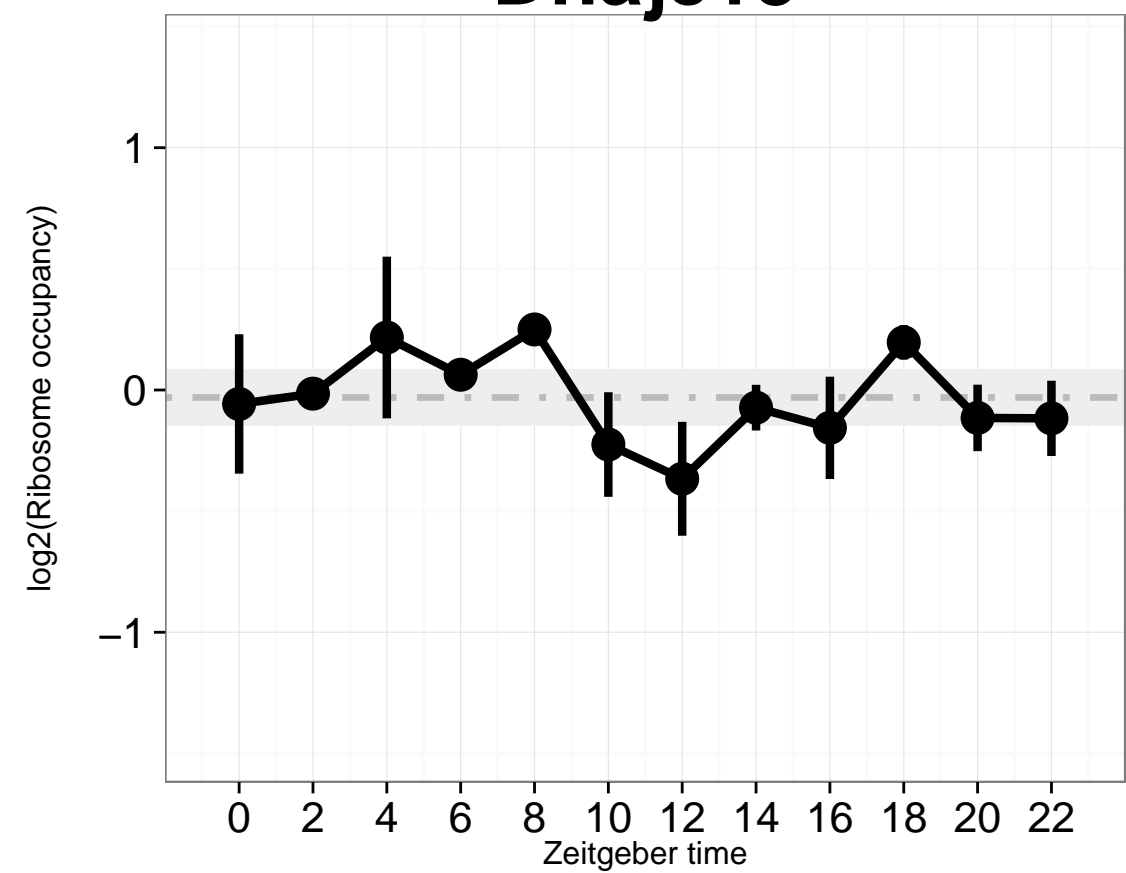

Supplement: Supplementary file 9637 [file 1]

## Tarsl2

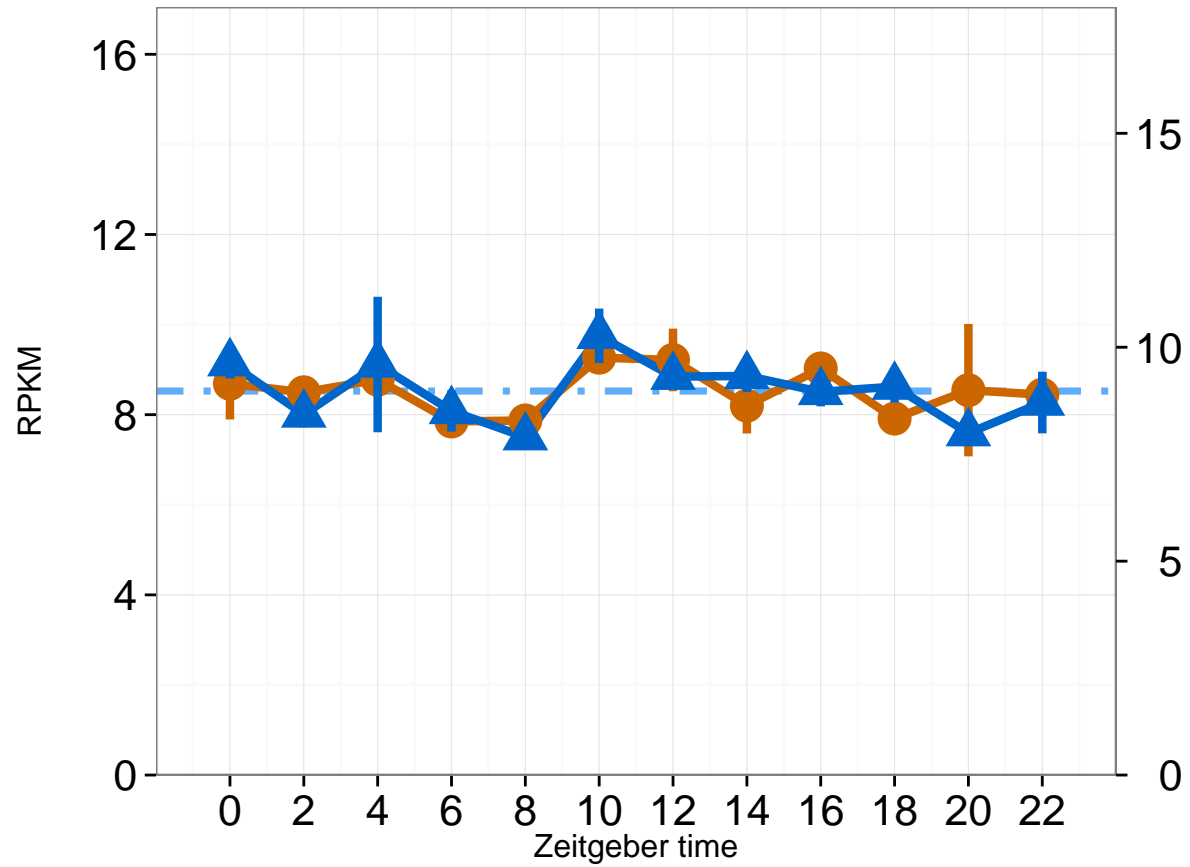

## Tarsl2

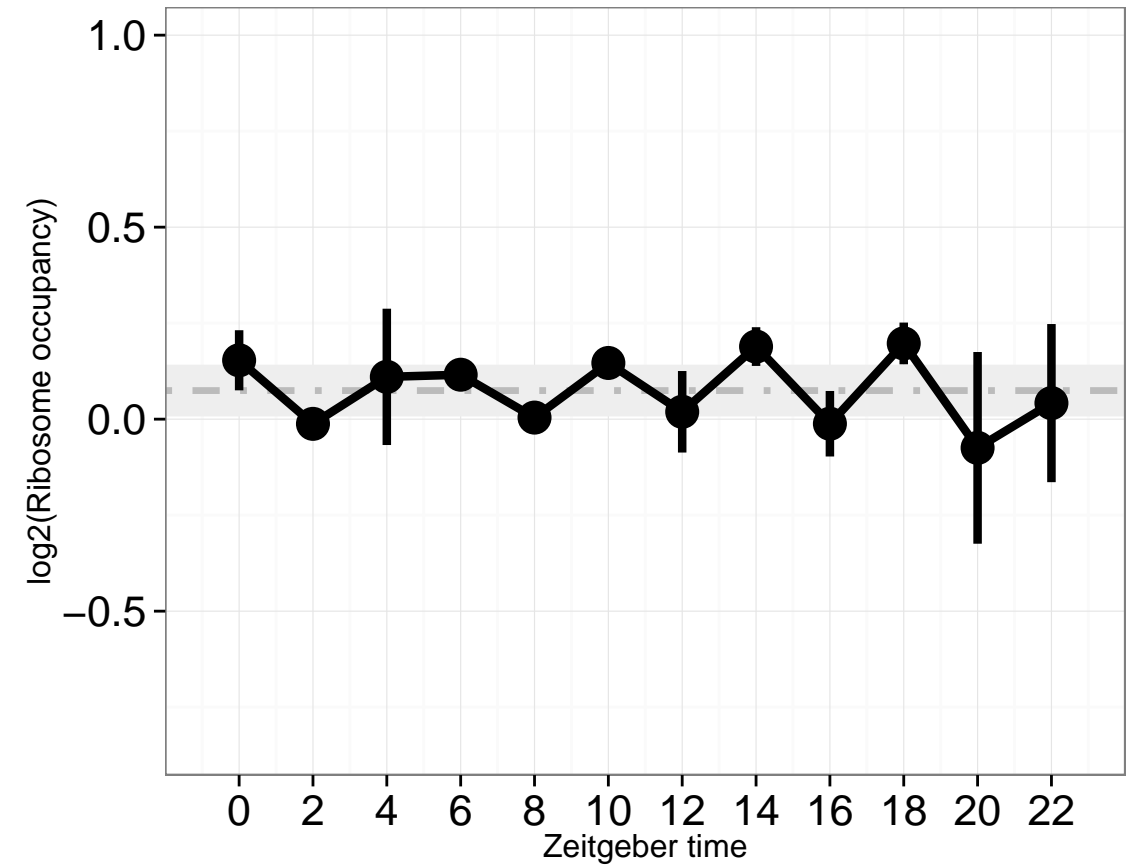

Supplement: Supplementary file 9638 [file 1]

# Rhpn2

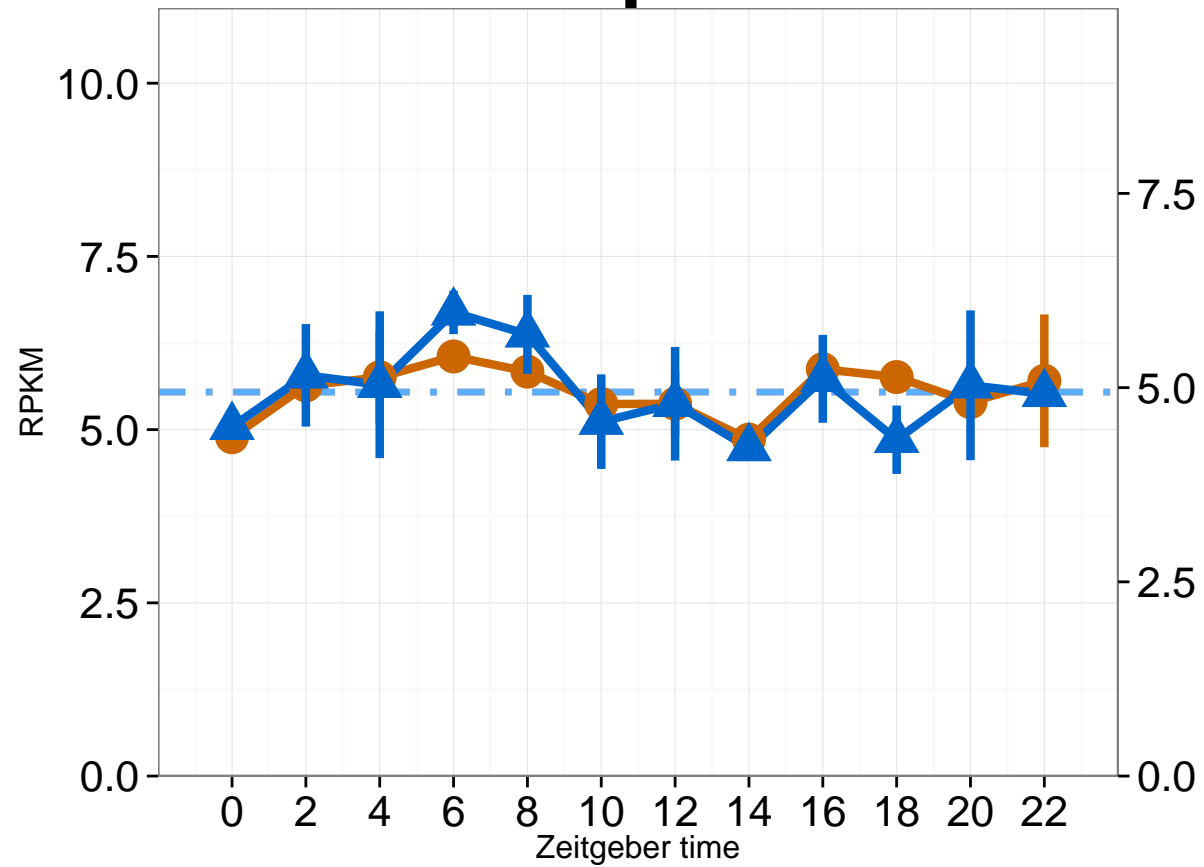

# Rhpn2

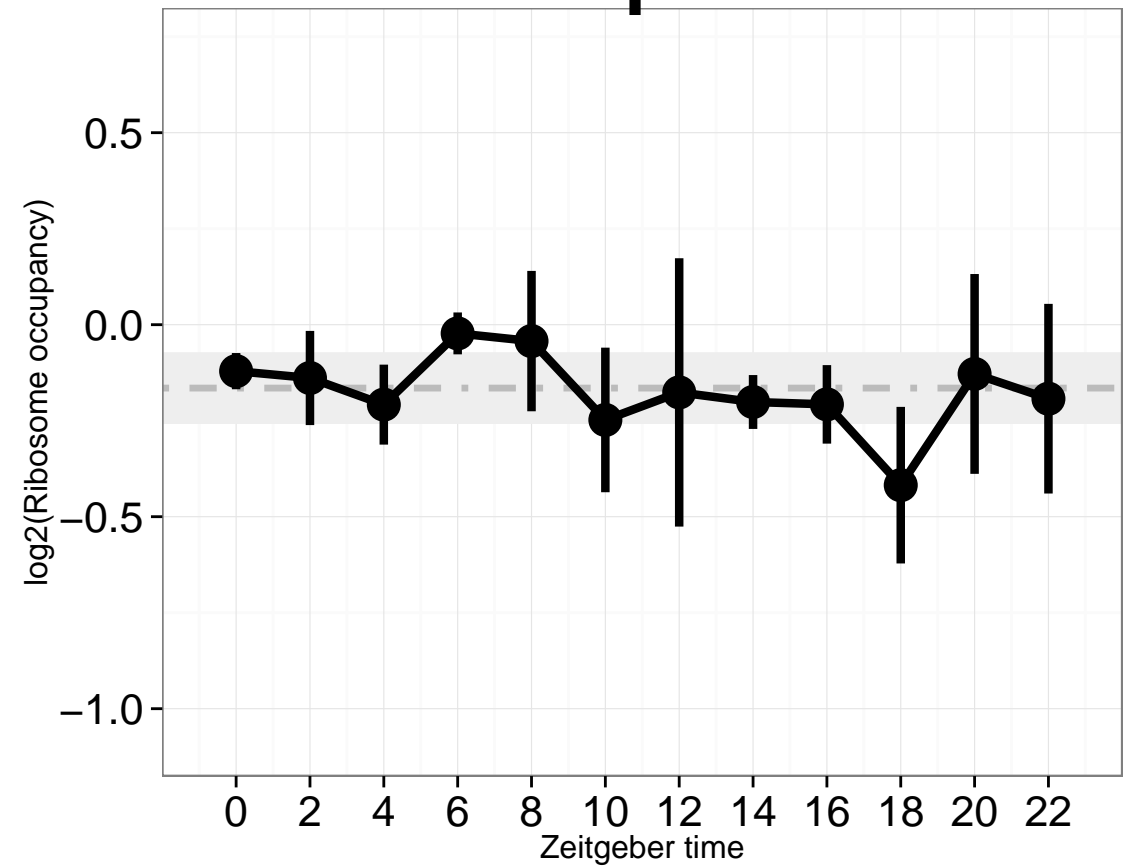

Supplement: Supplementary file 9639 [file 1]

# Drg1

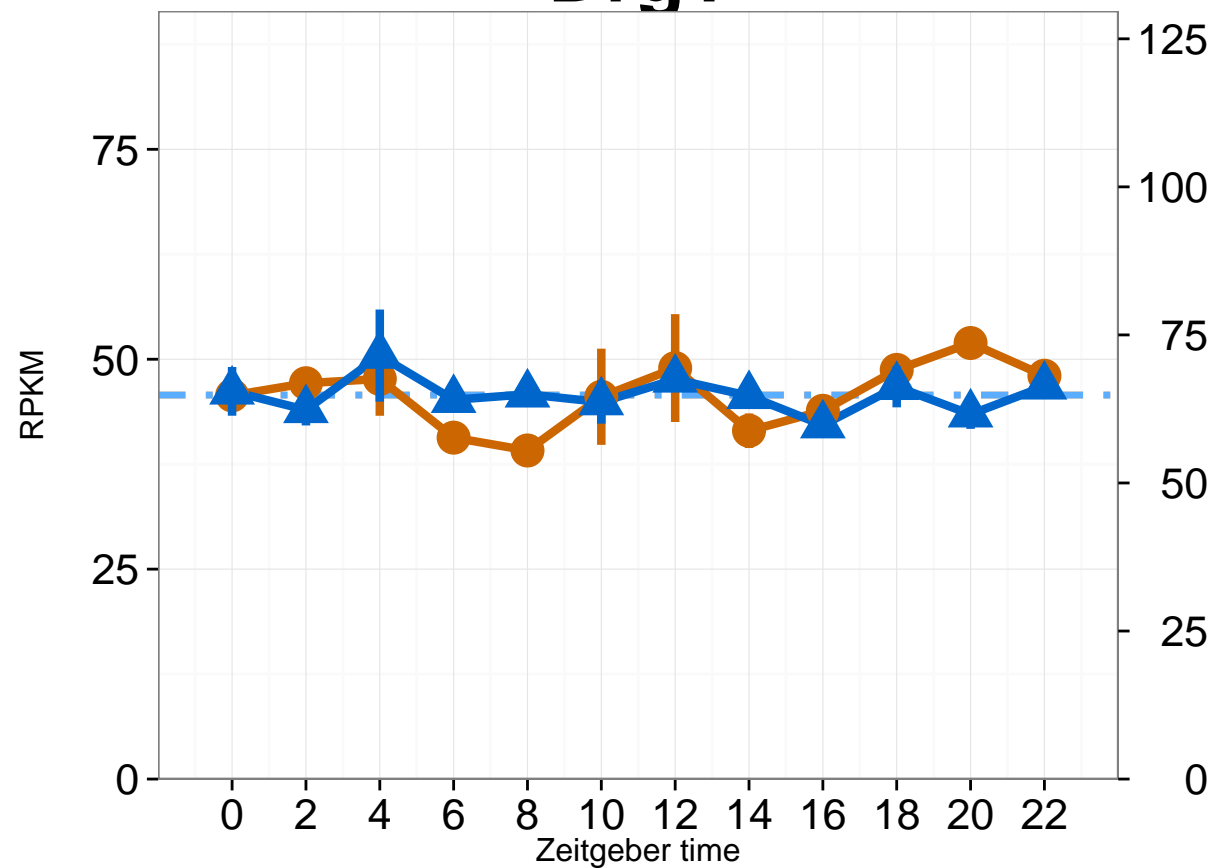

# Drg1

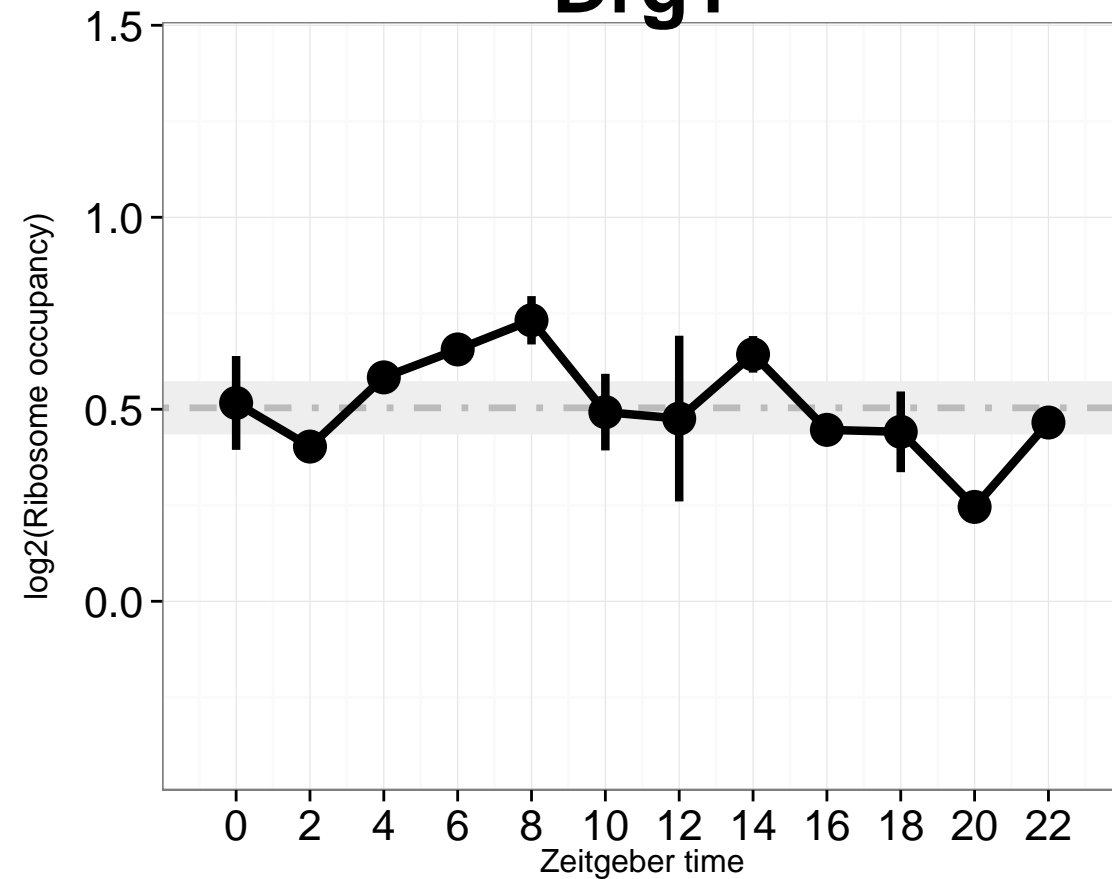

Supplement: Supplementary file 9640 [file 1]

# Zfp711

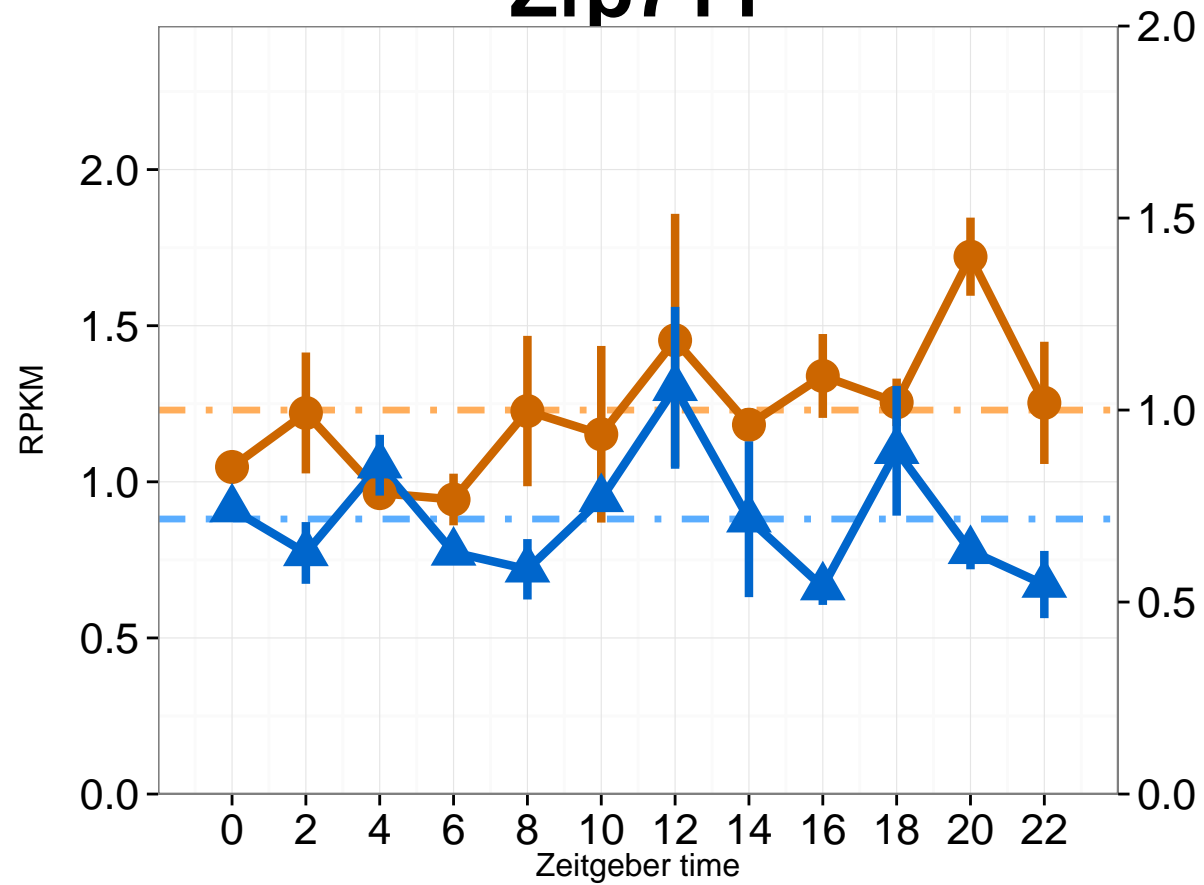

# Zfp711

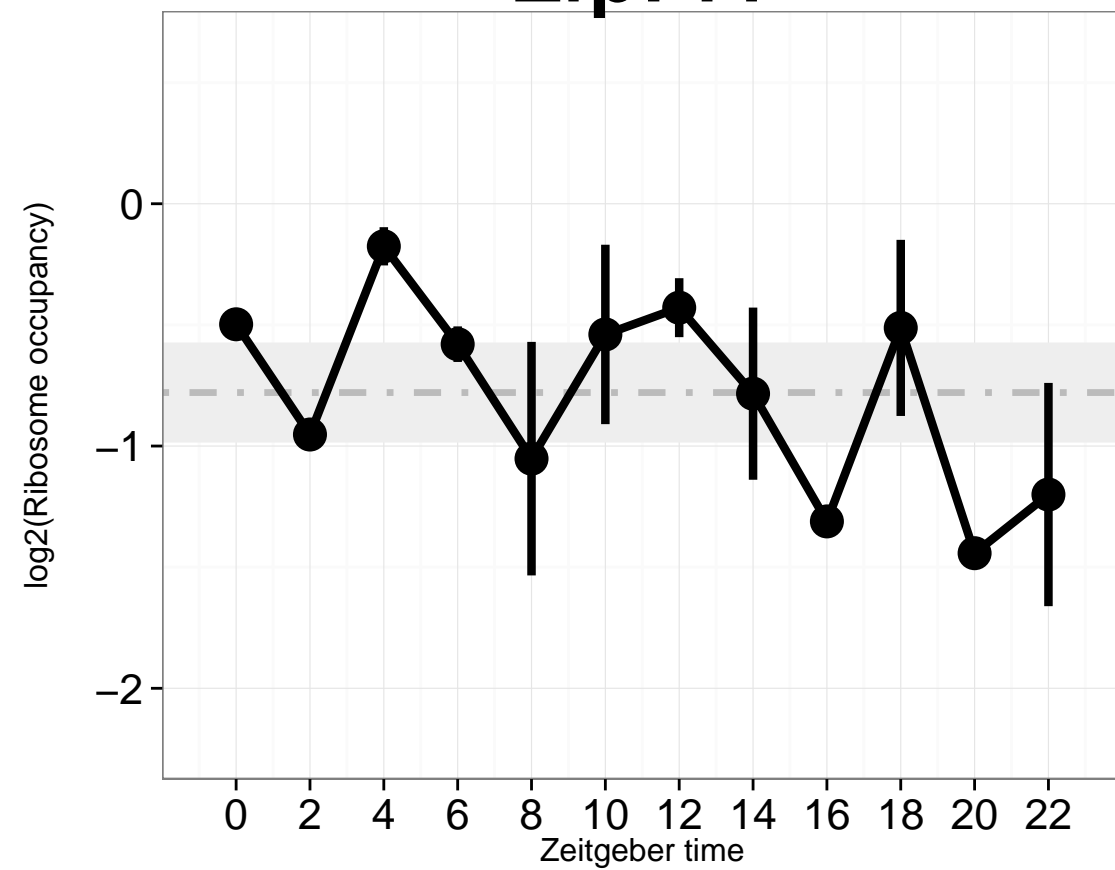

Supplement: Supplementary file 9641 [file 1]

# Paqr9

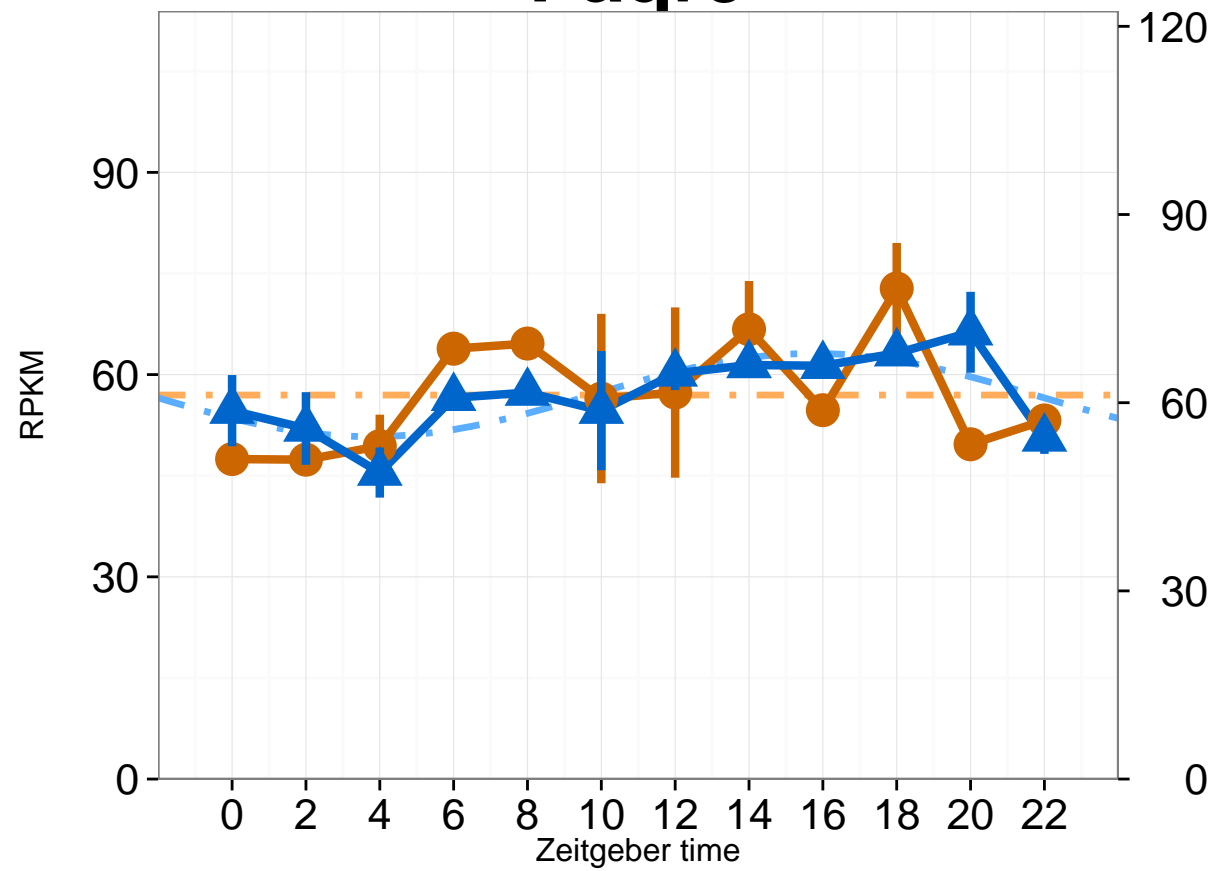

# Paqr9

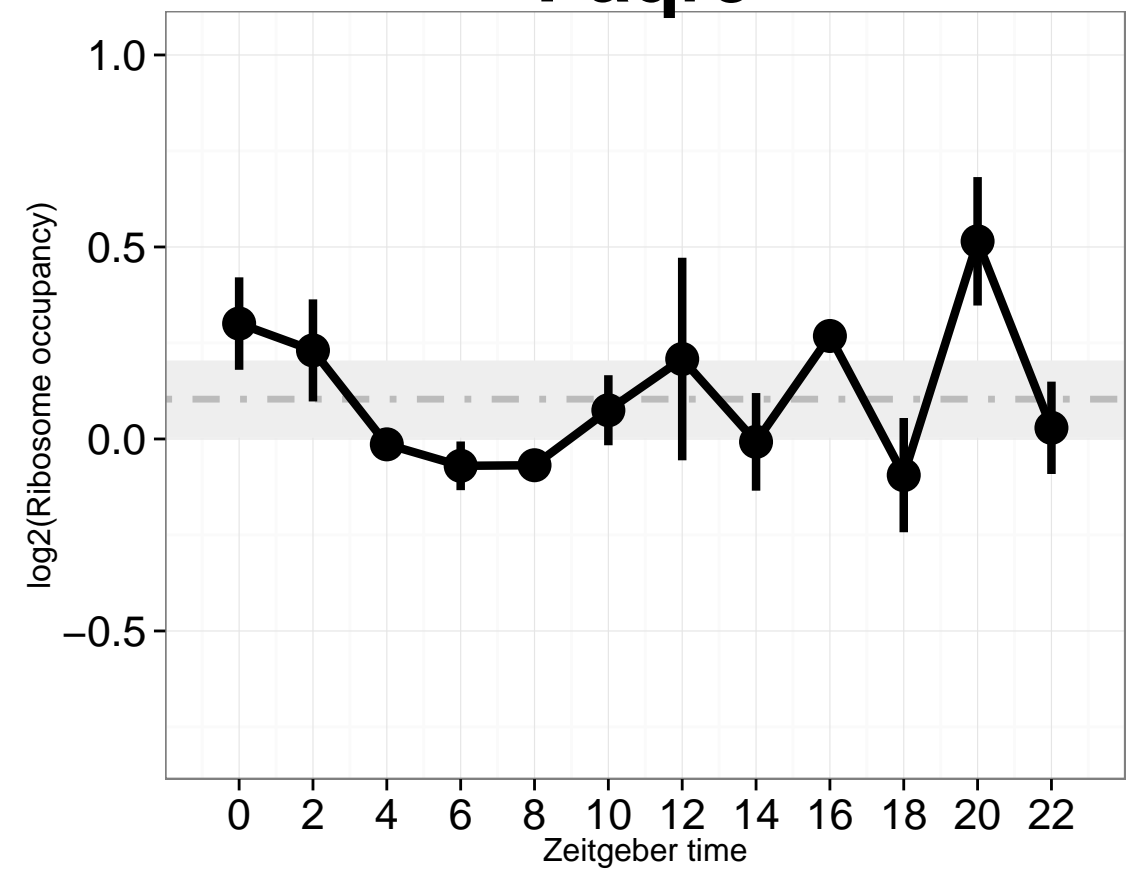

Supplement: Supplementary file 9642 [file 1]

## Cyrr1

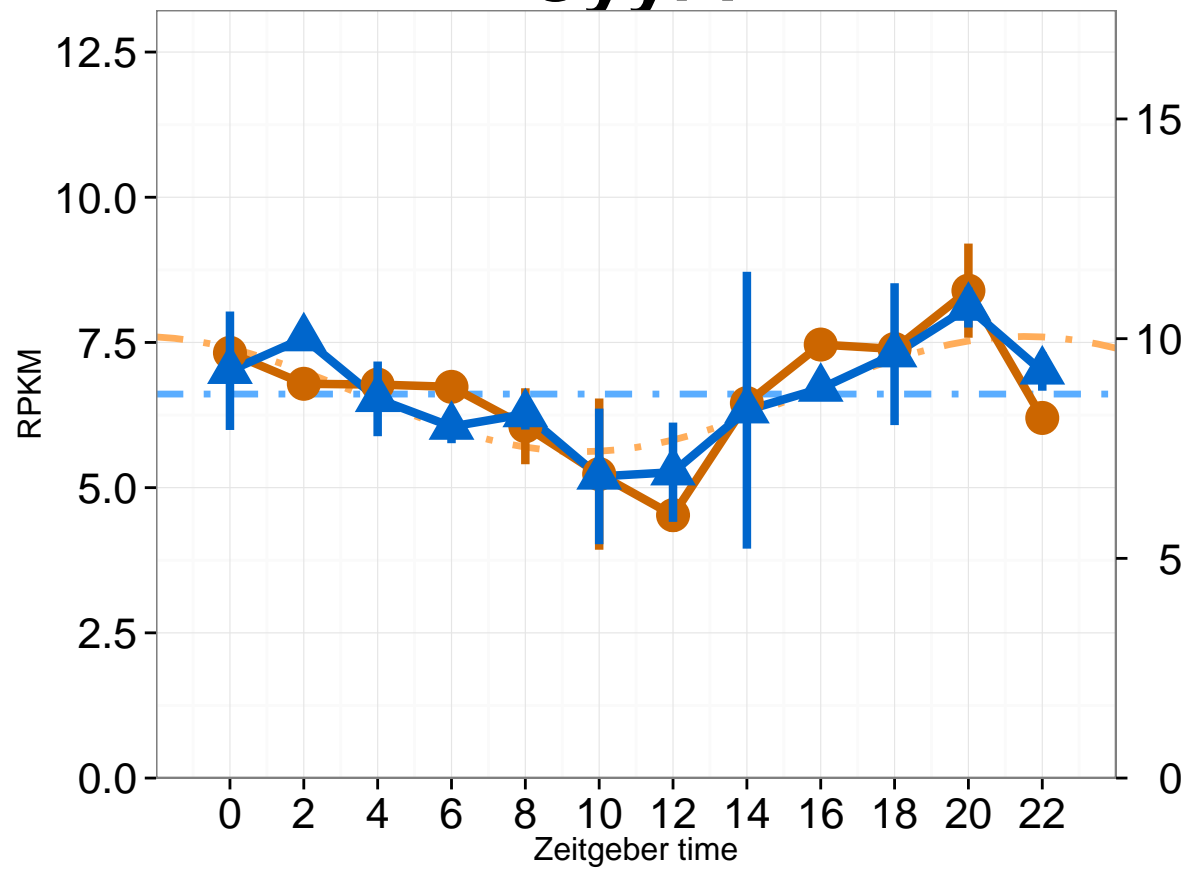

## Cyrr1

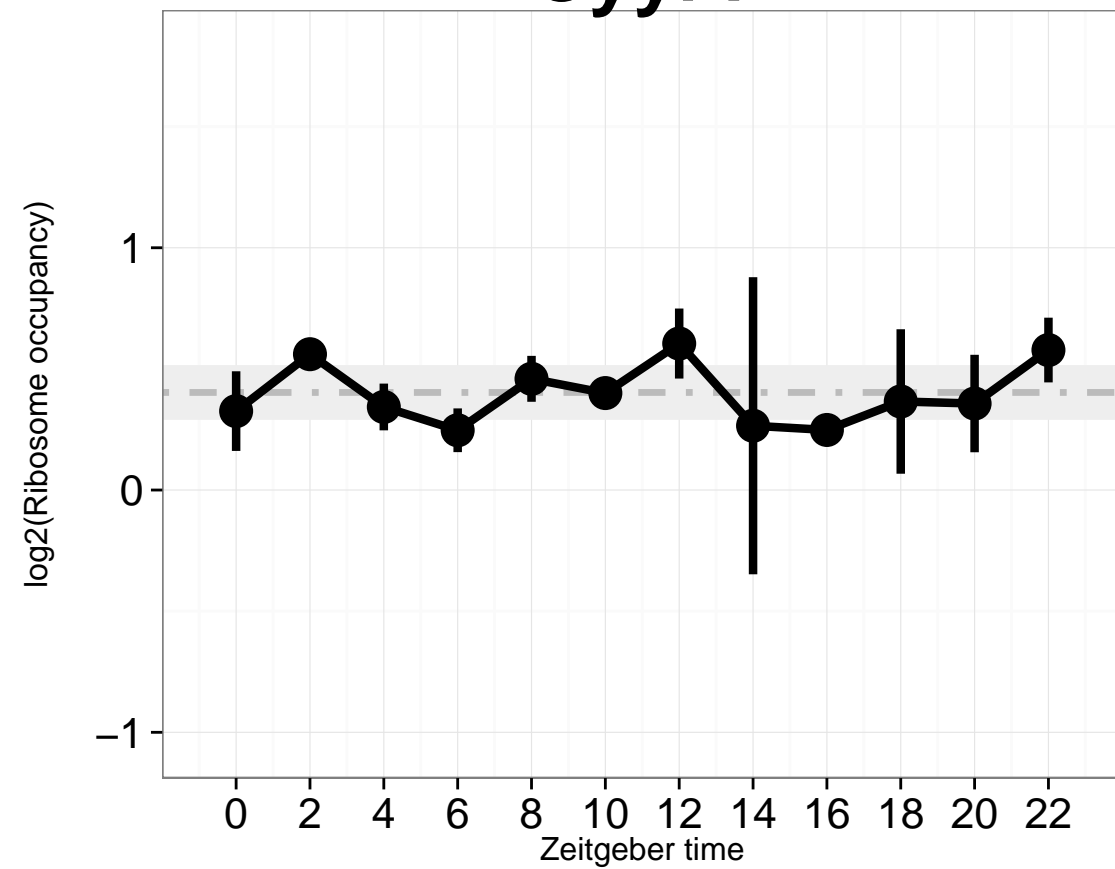

Supplement: Supplementary file 9643 [file 1]

# Ppp2ca

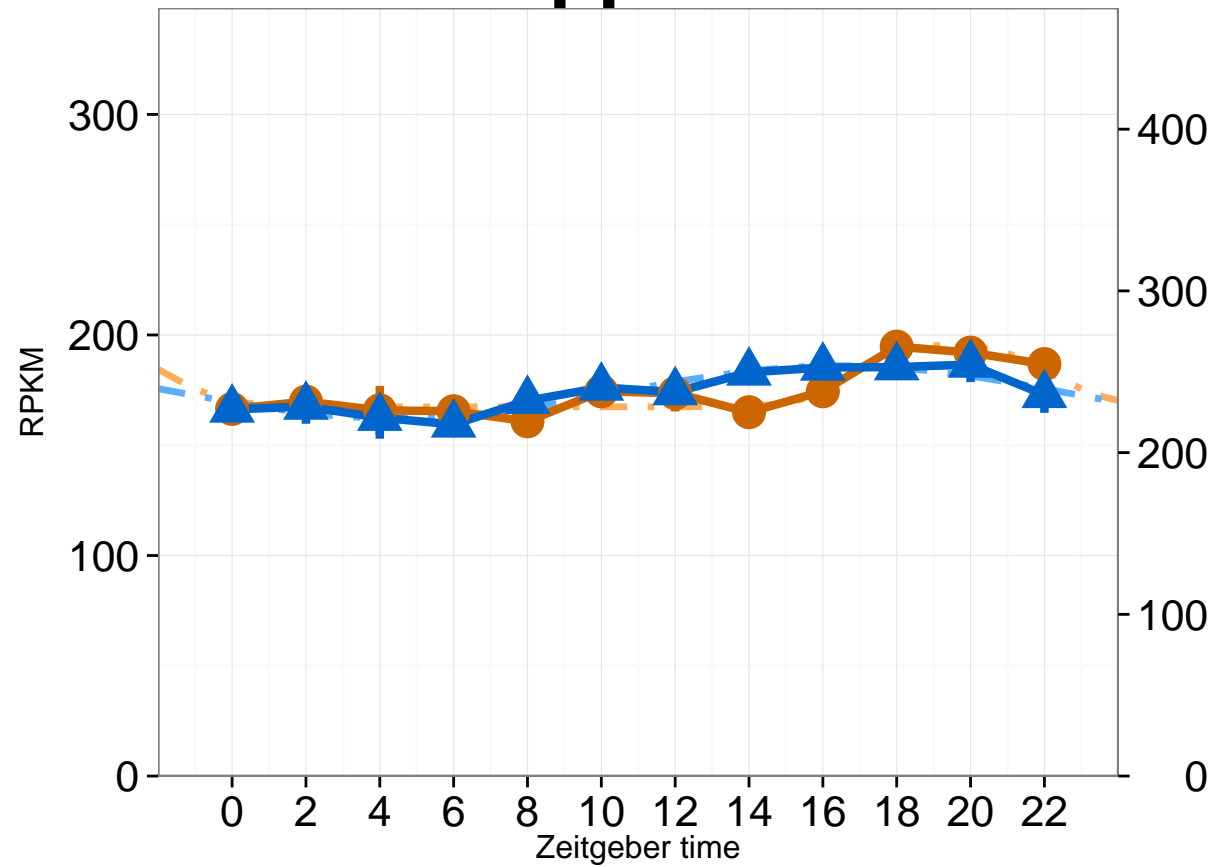

# Ppp2ca

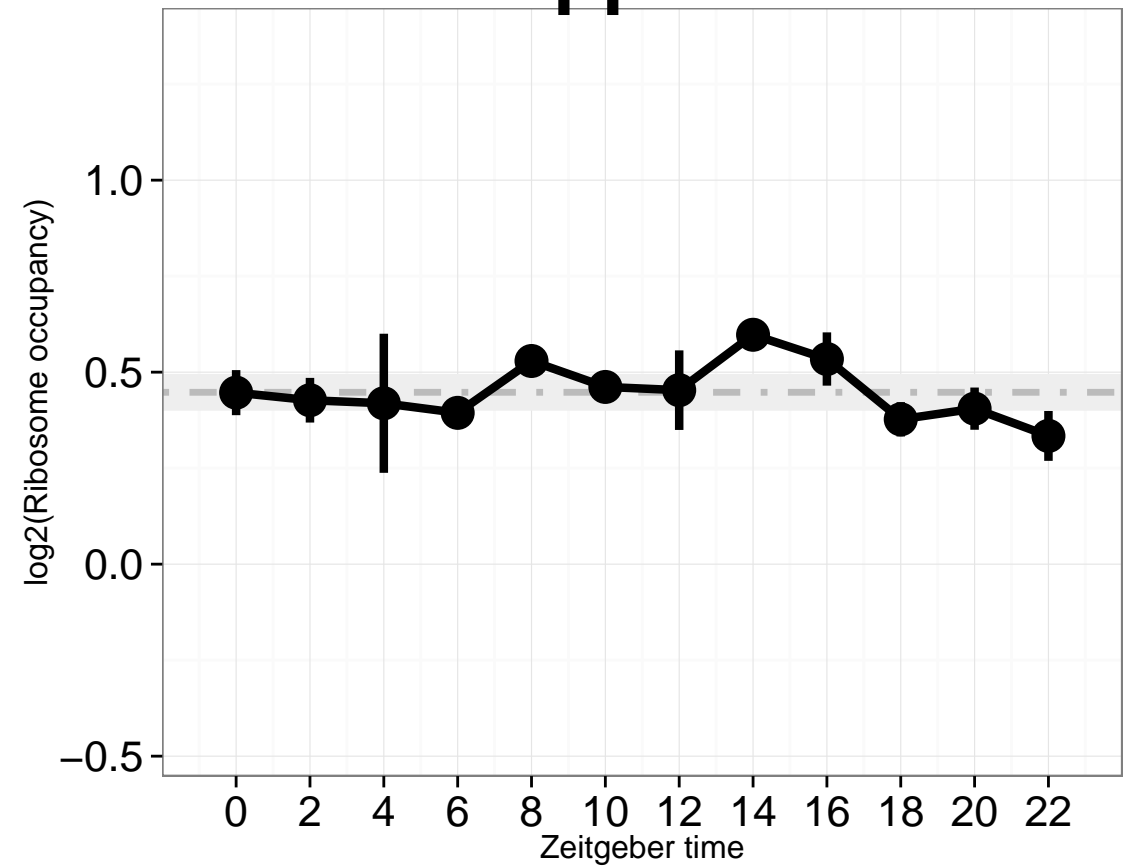

Supplement: Supplementary file 9644 [file 1]

# Zfp644

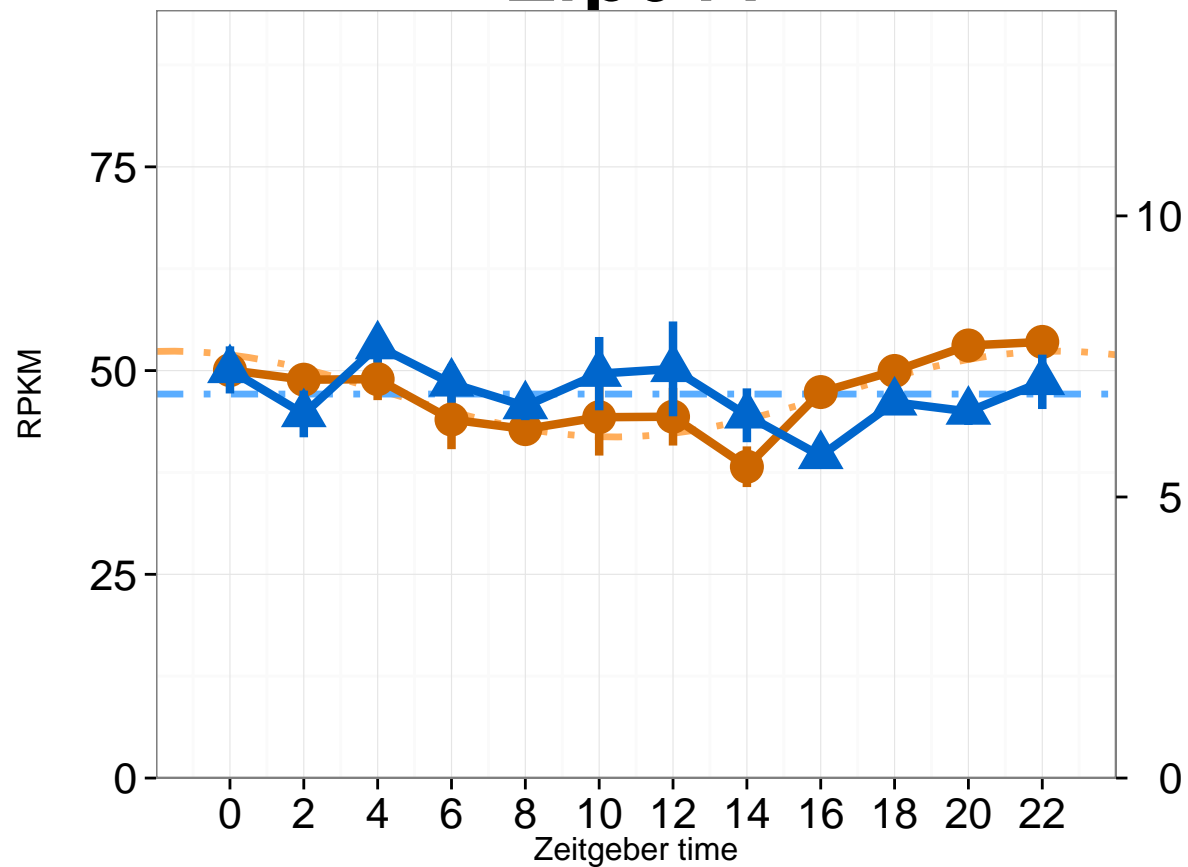

# Zfp644

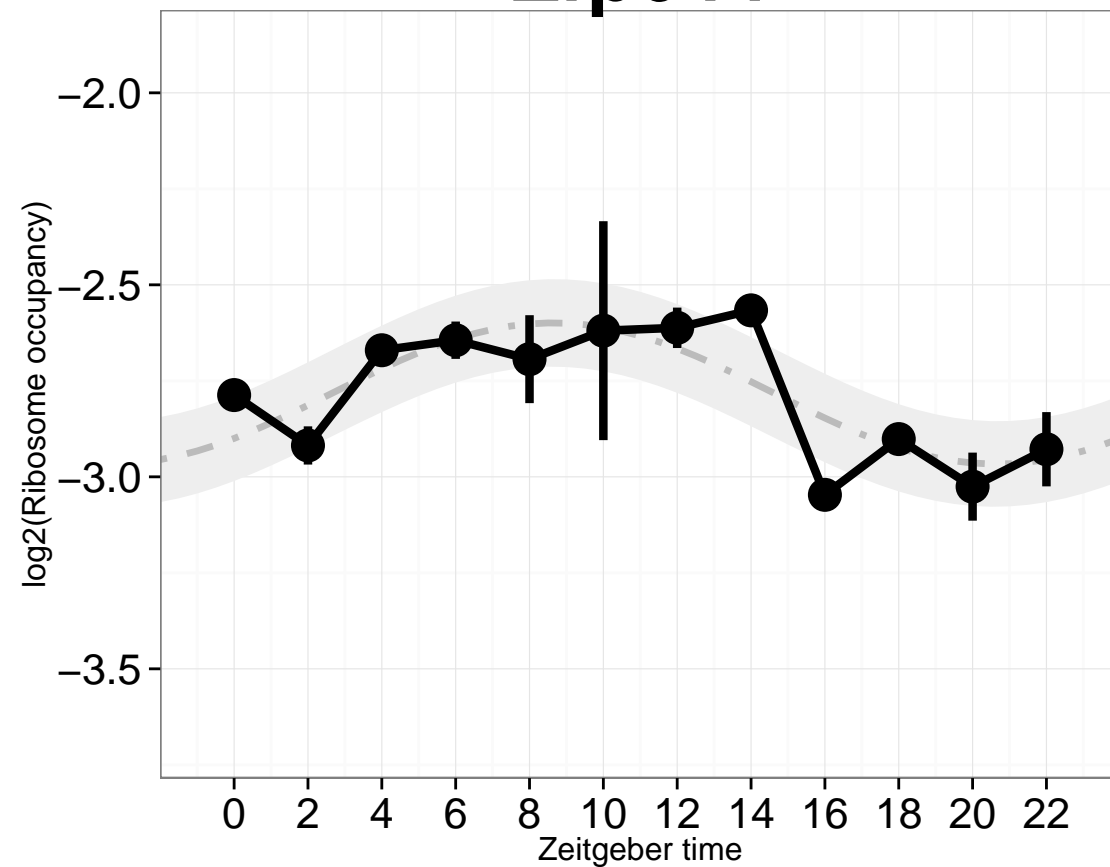

Supplement: Supplementary file 9645 [file 1]

## Gstt1

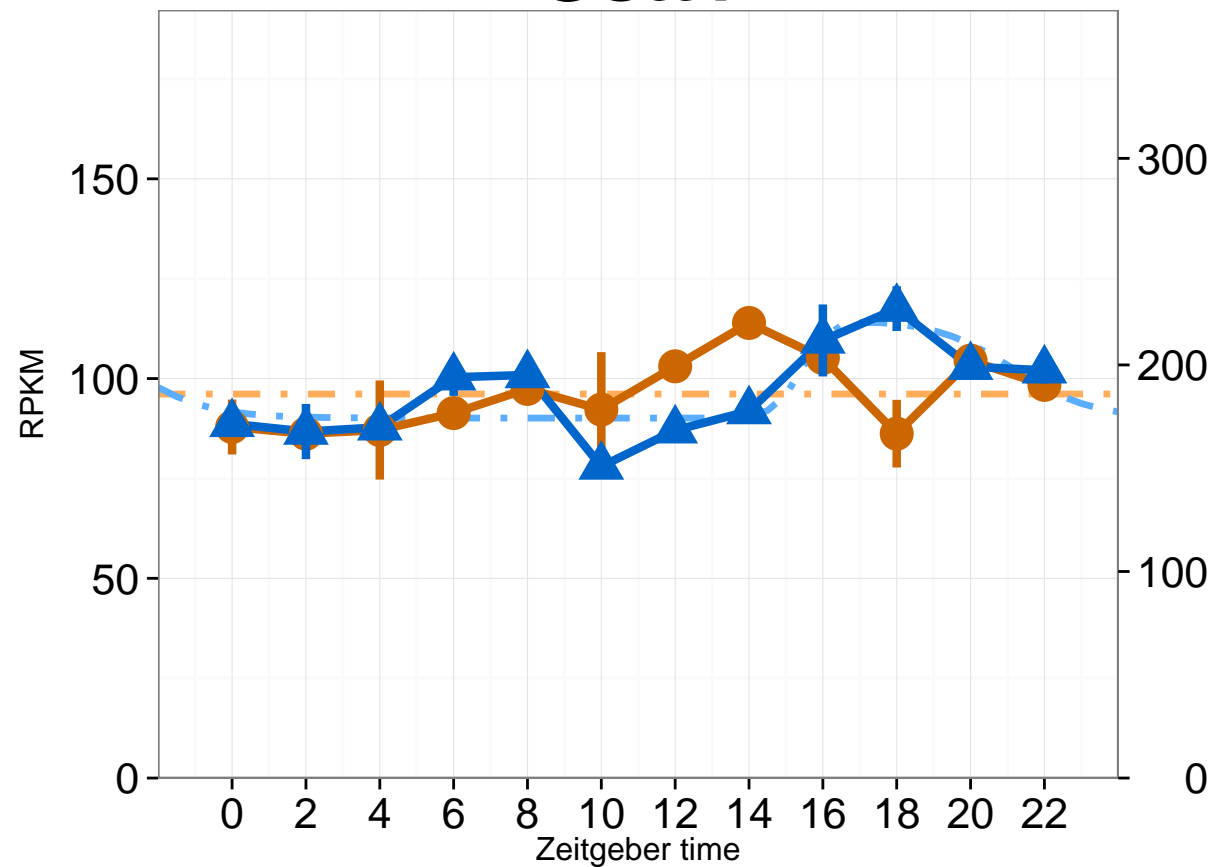

## Gstt1

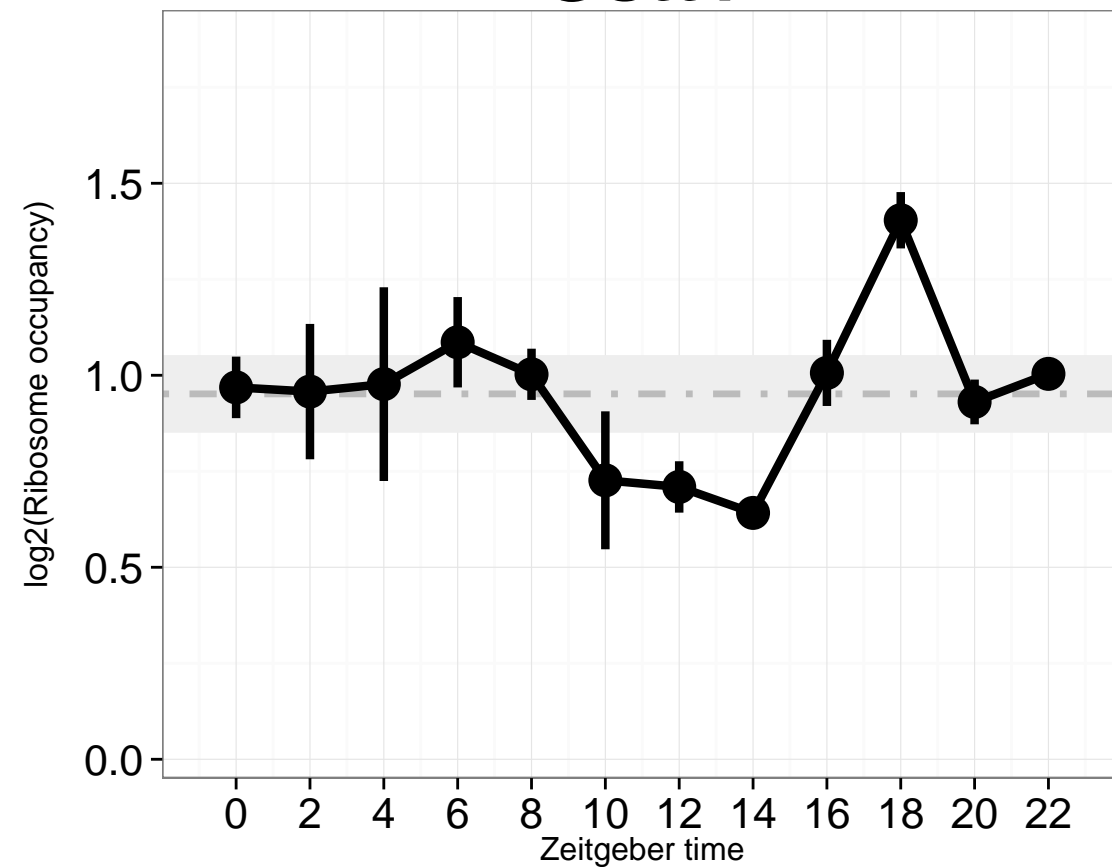

Supplement: Supplementary file 9646 [file 1]

## Tmem5

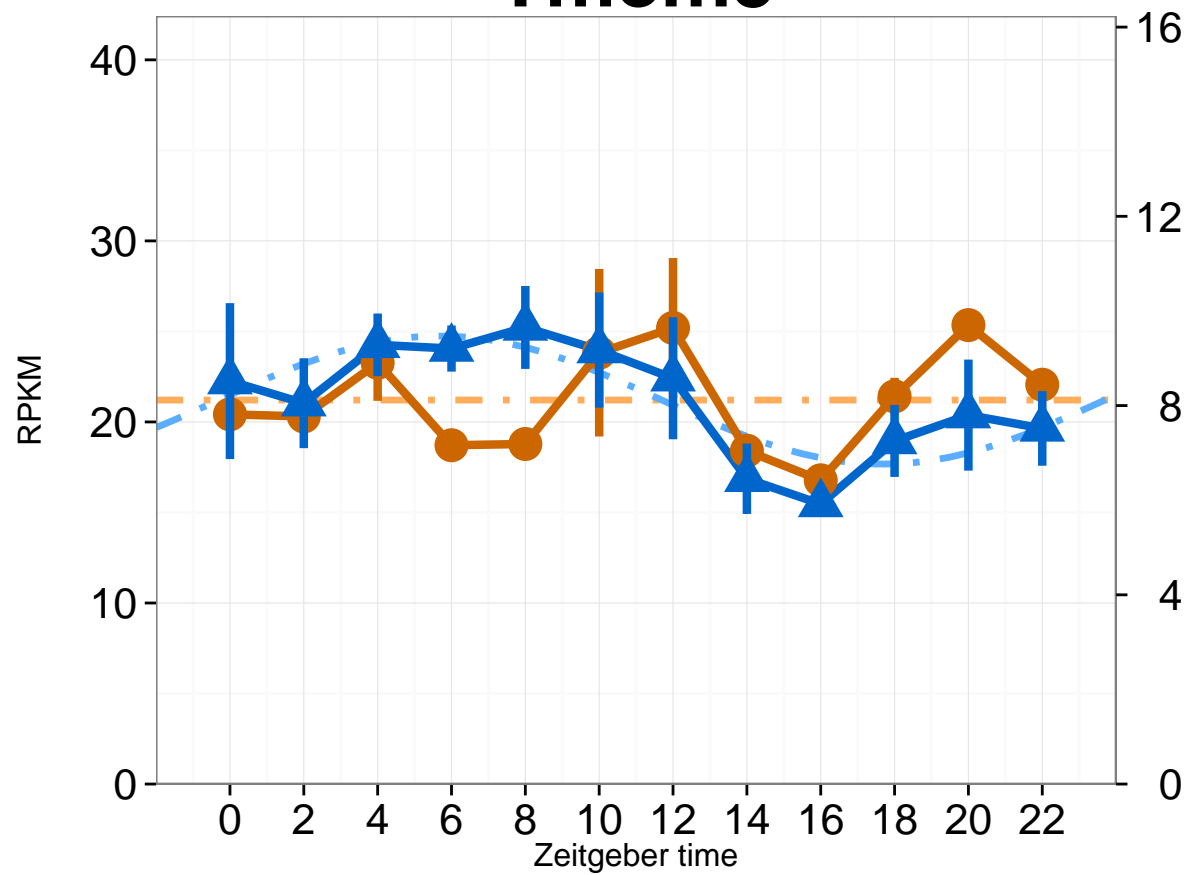

## Tmem5

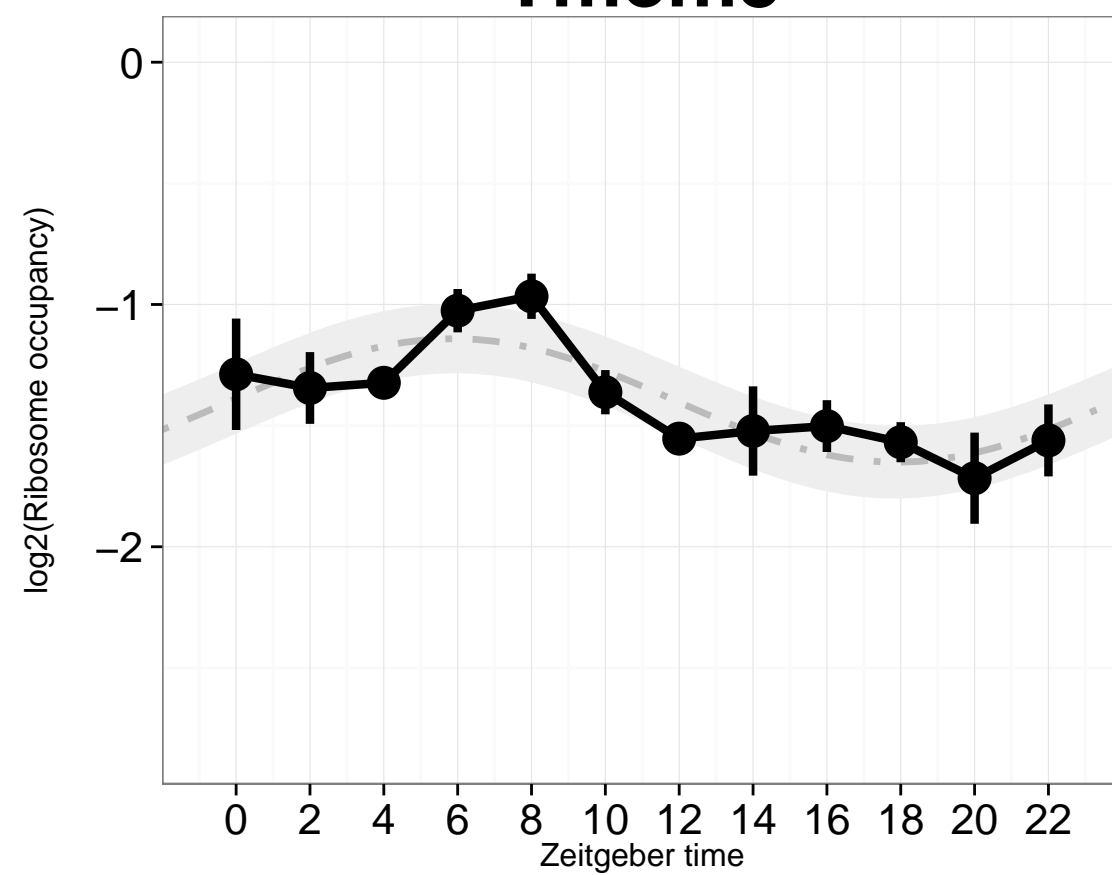

Supplement: Supplementary file 9647 [file 1]

# Tmem170

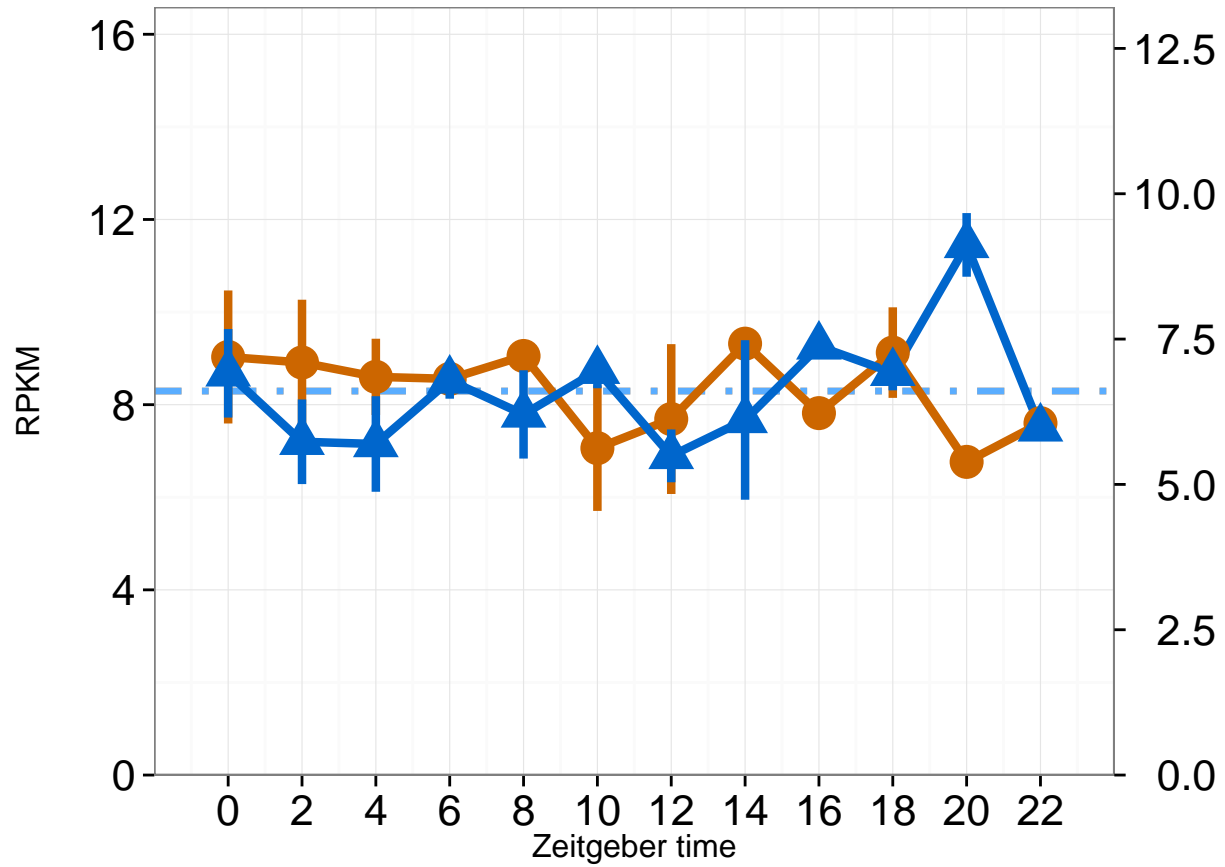

# Tmem170

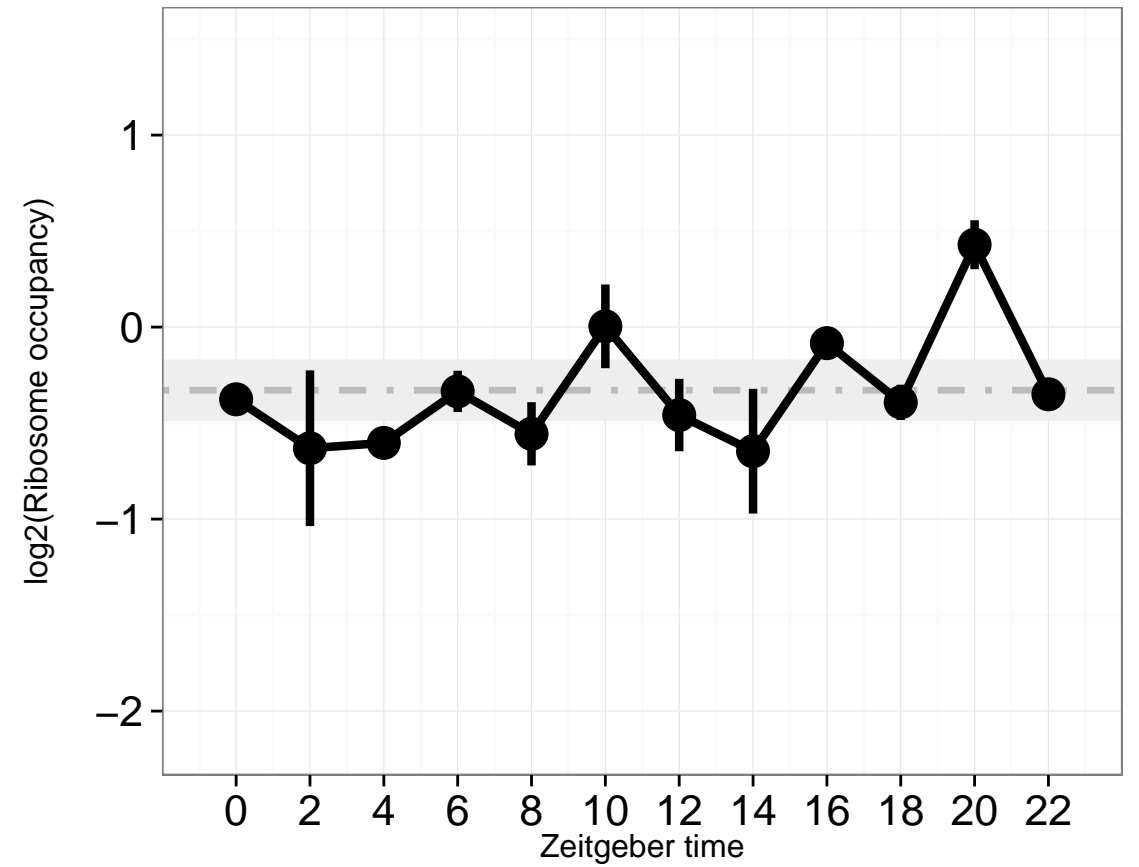

Supplement: Supplementary file 9648 [file 1]

# Rad23a

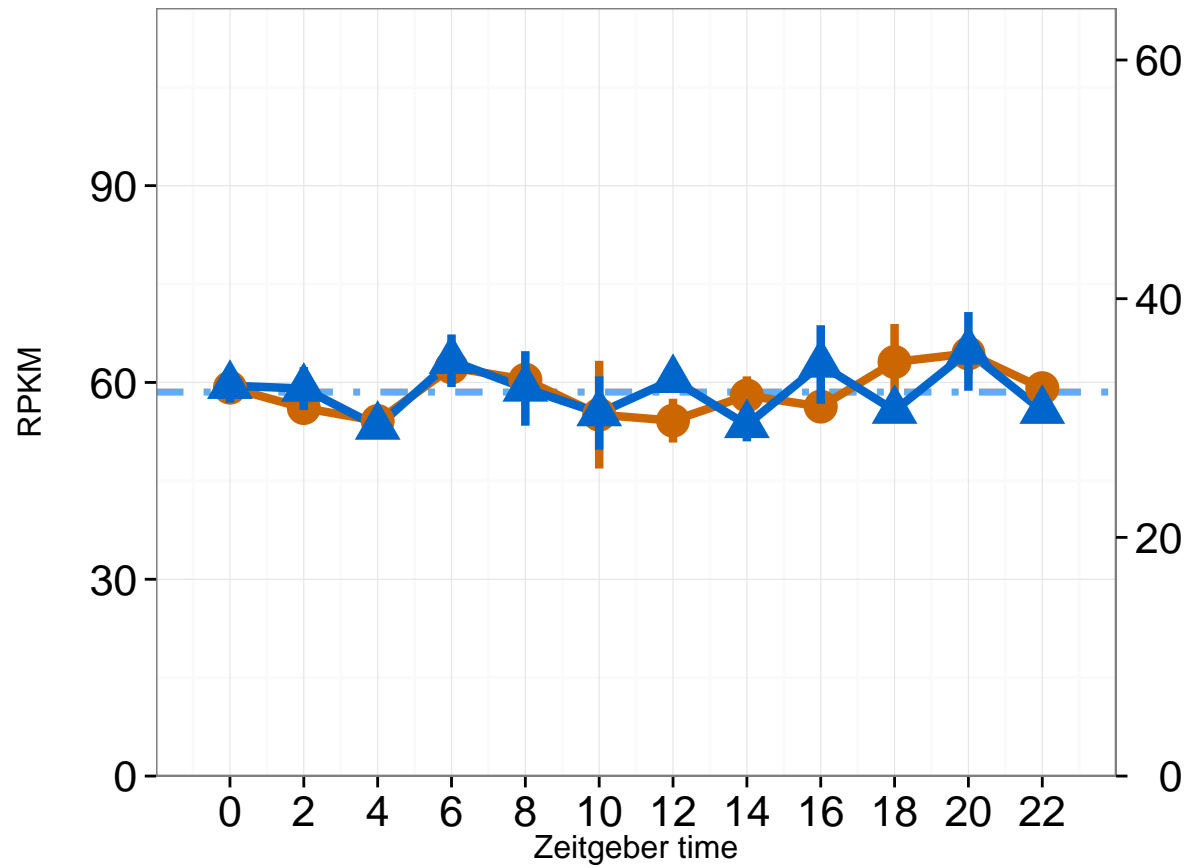

# Rad23a

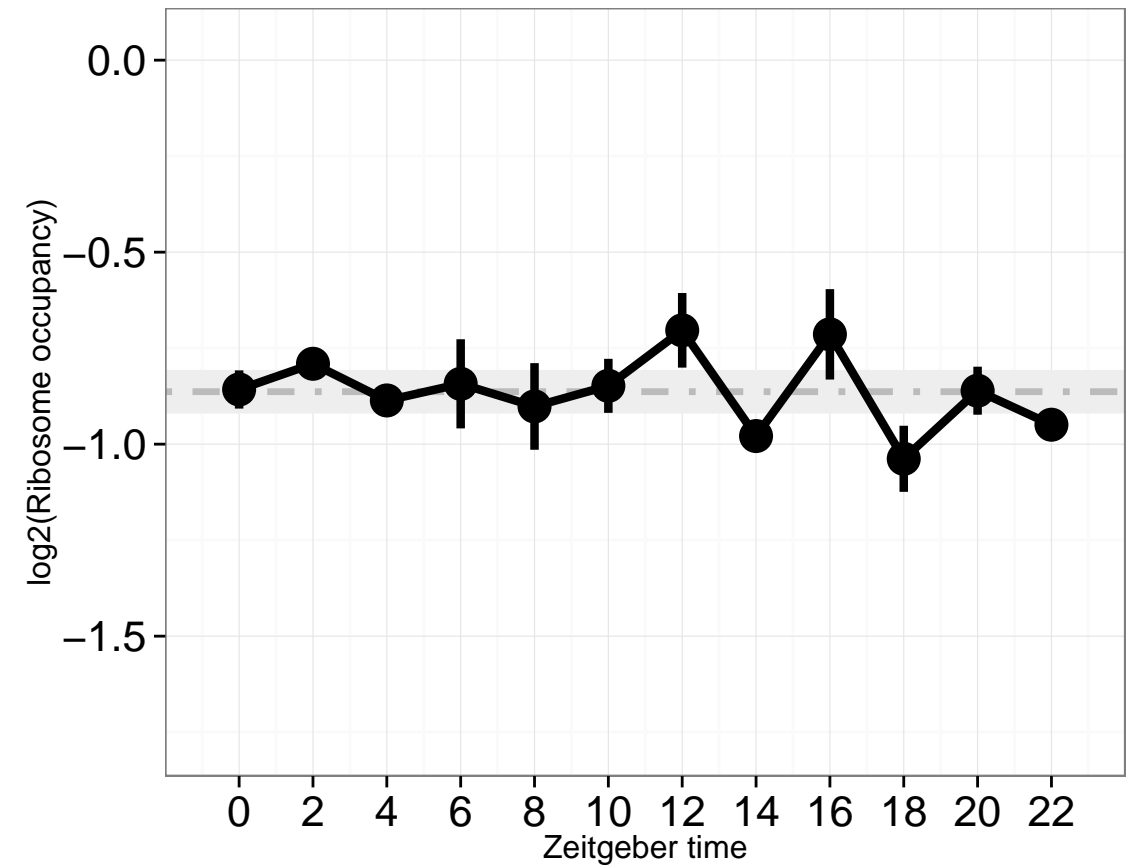

Supplement: Supplementary file 9649 [file 1]

## Kif22

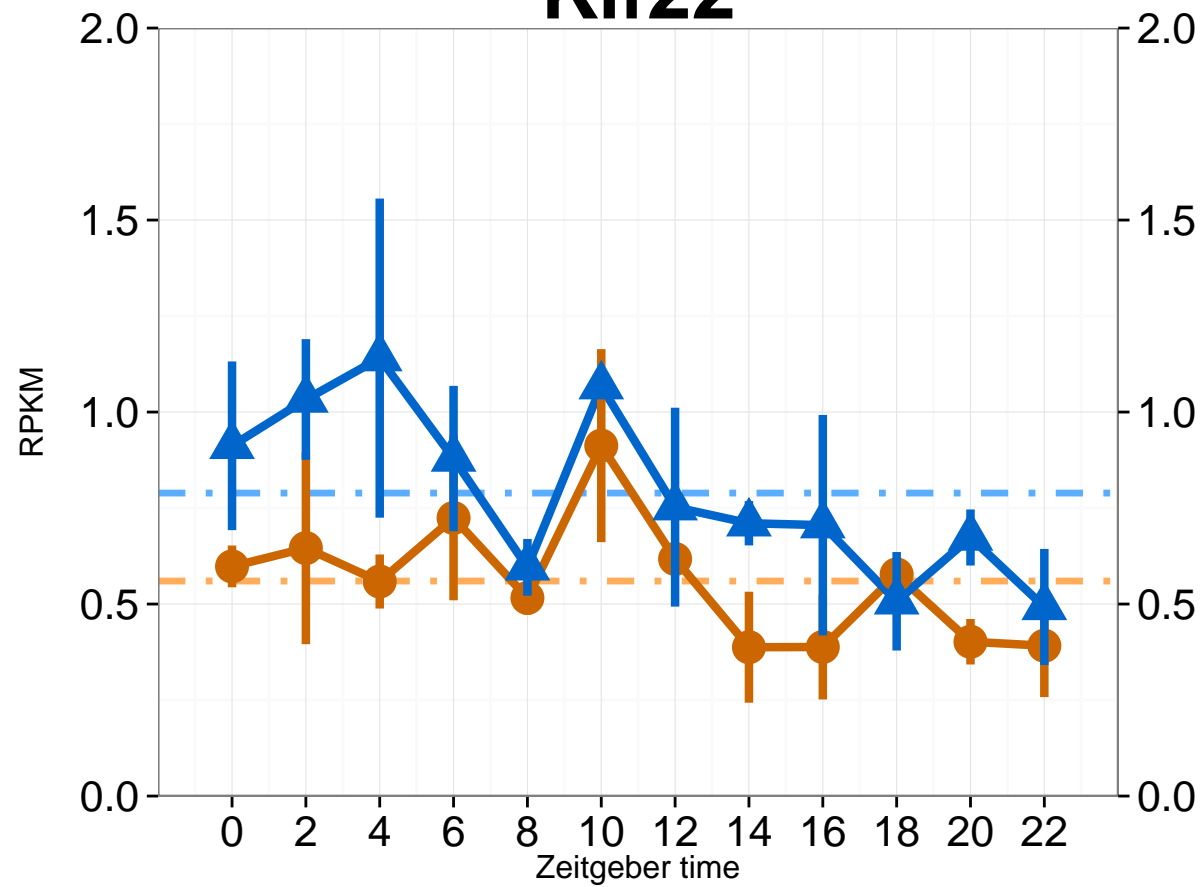

## Kif22

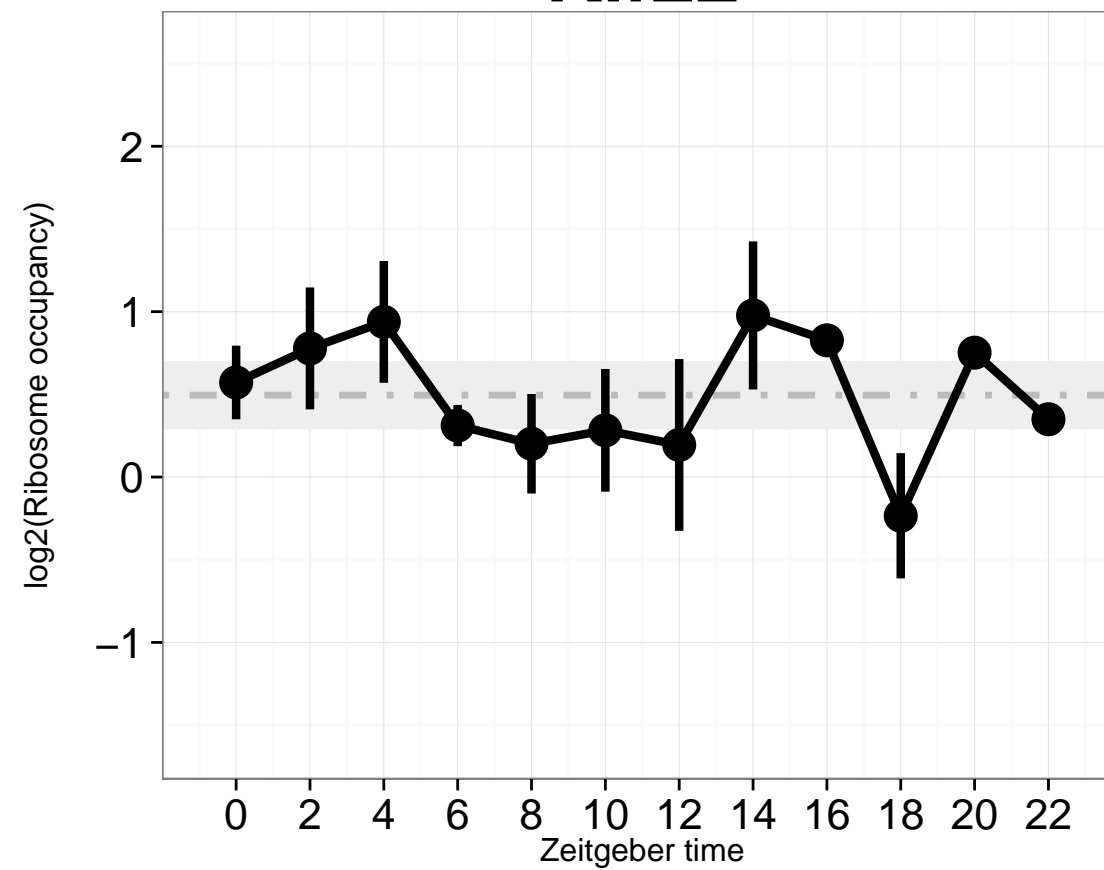

Supplement: Supplementary file 9650 [file 1]

# Clca2

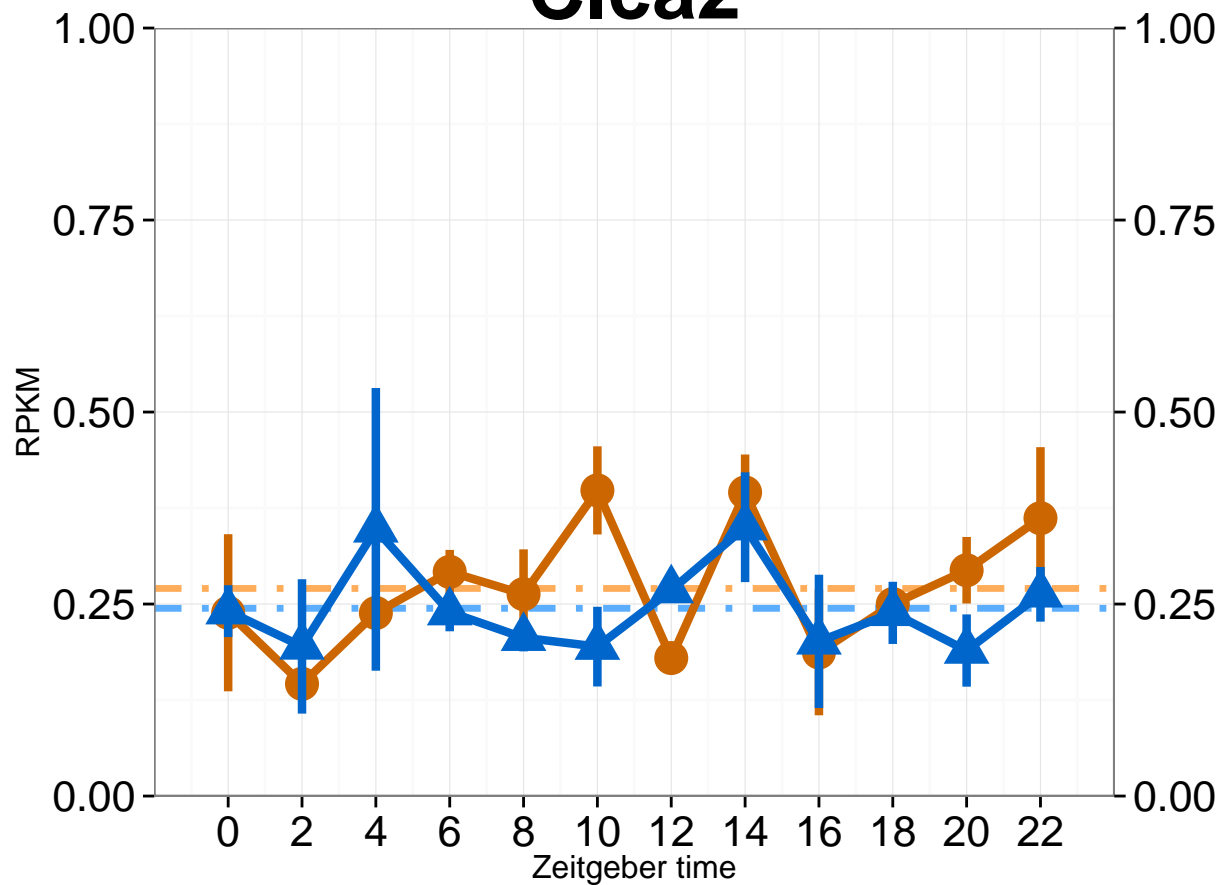

# Clca2

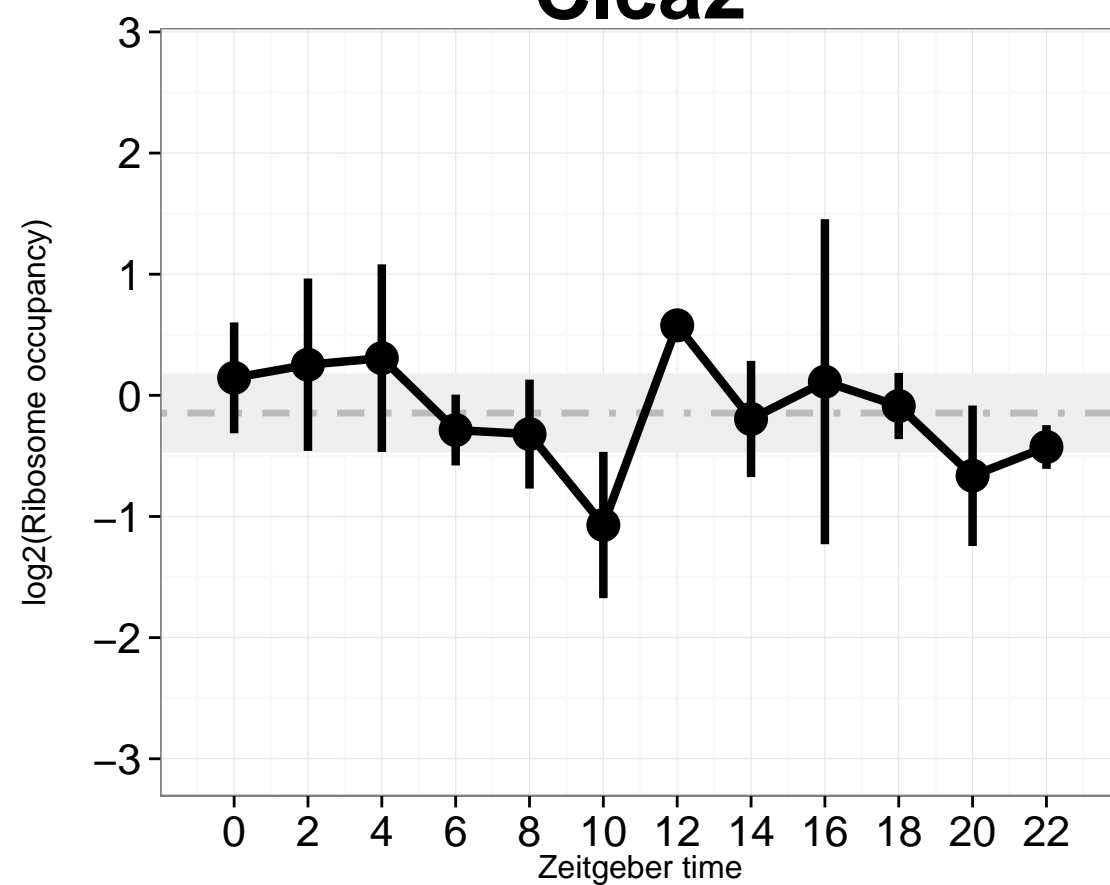

Supplement: Supplementary file 9651 [file 1]

## Dtx3

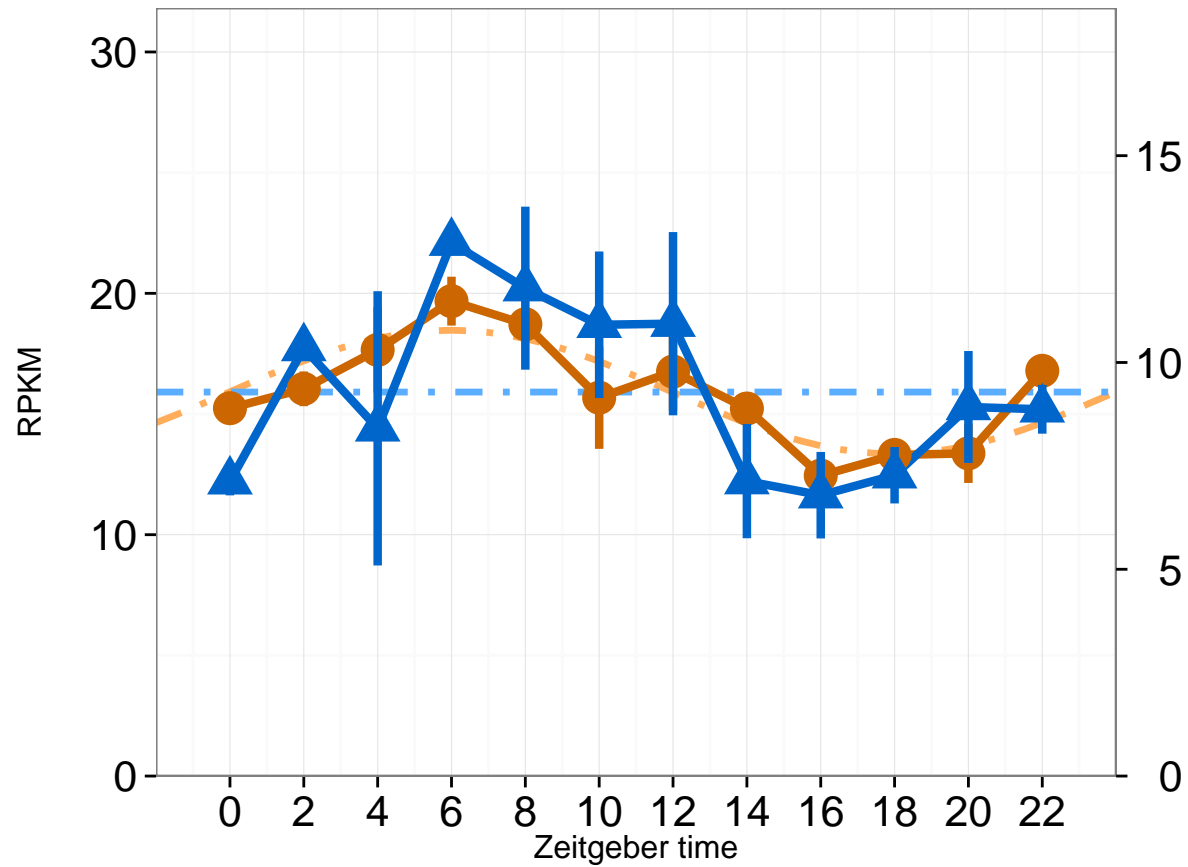

## Dtx3

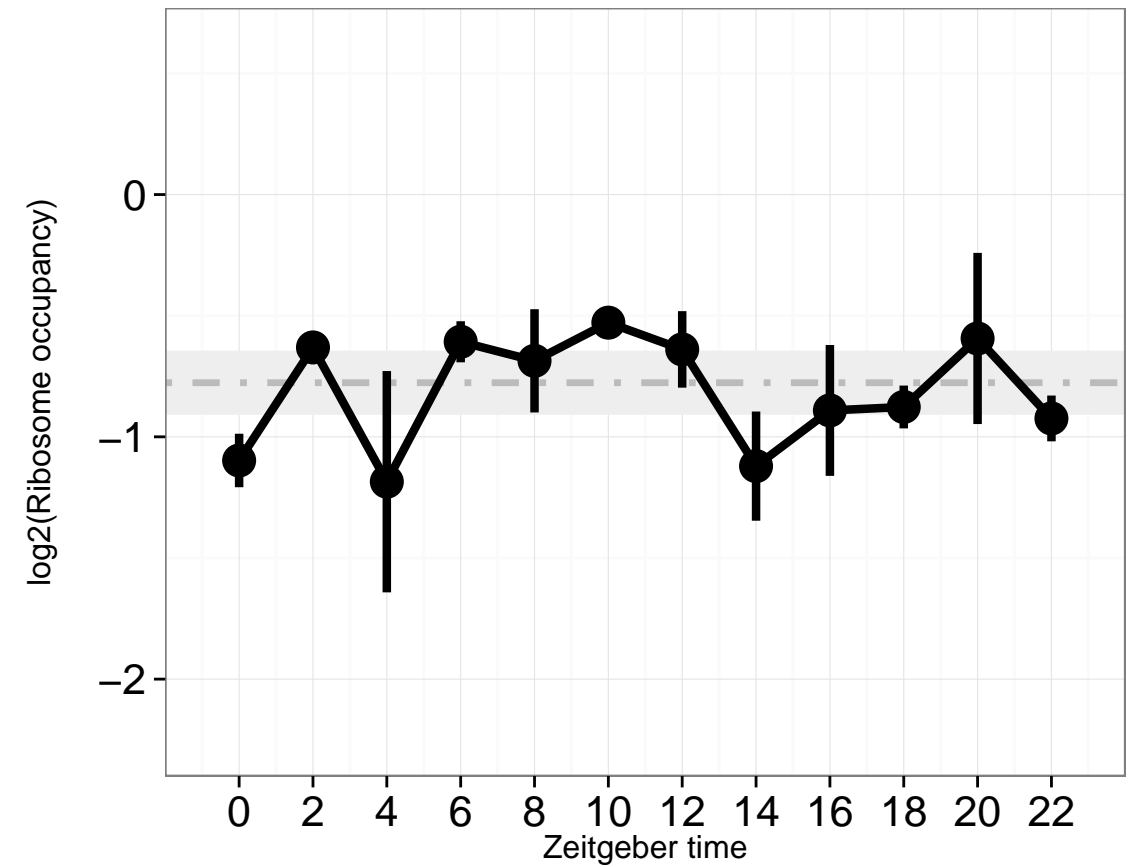

Supplement: Supplementary file 9652 [file 1]

# Timm8b

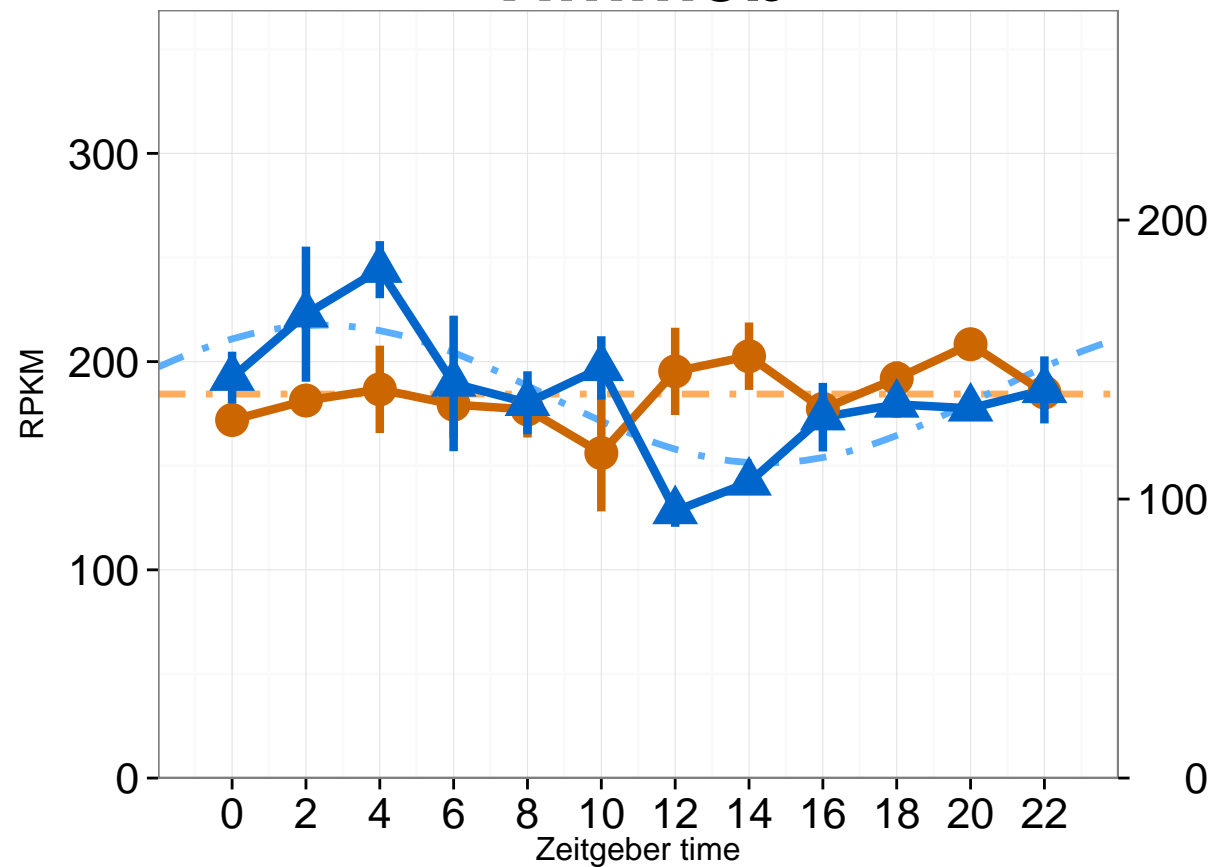

# Timm8b

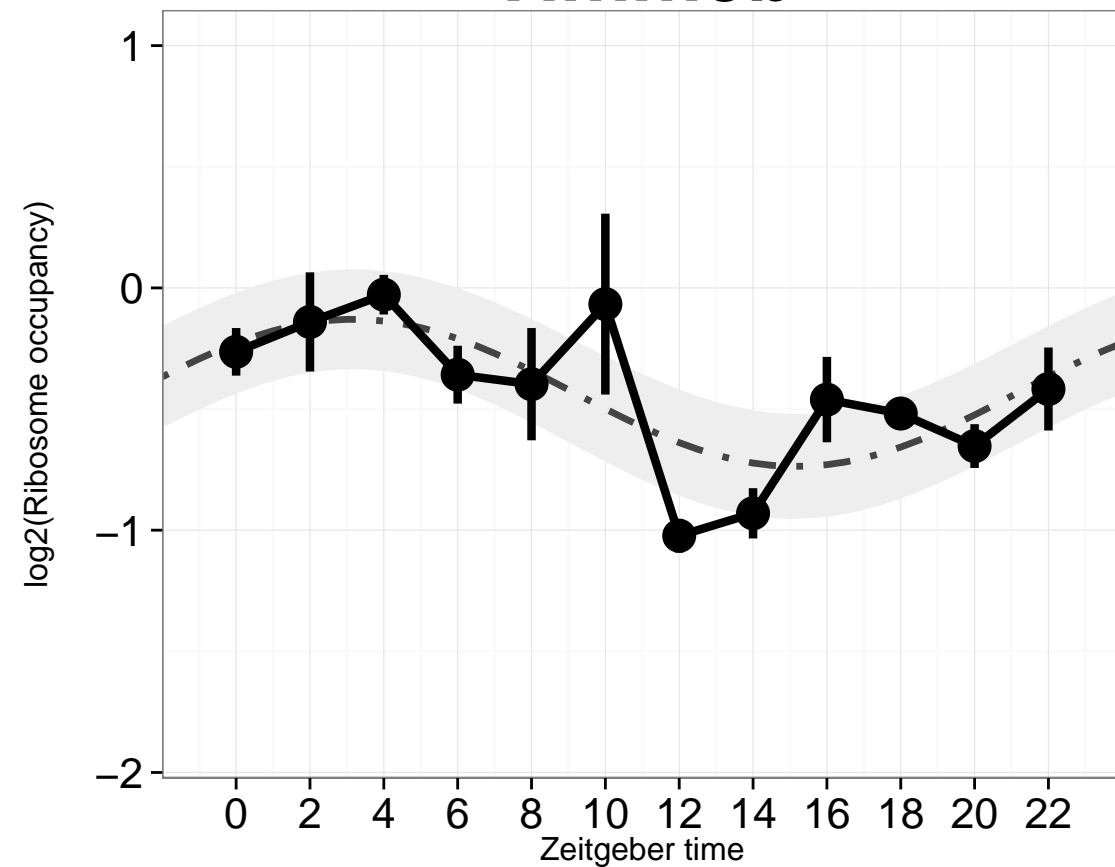

Supplement: Supplementary file 9653 [file 1]

# Rnf41

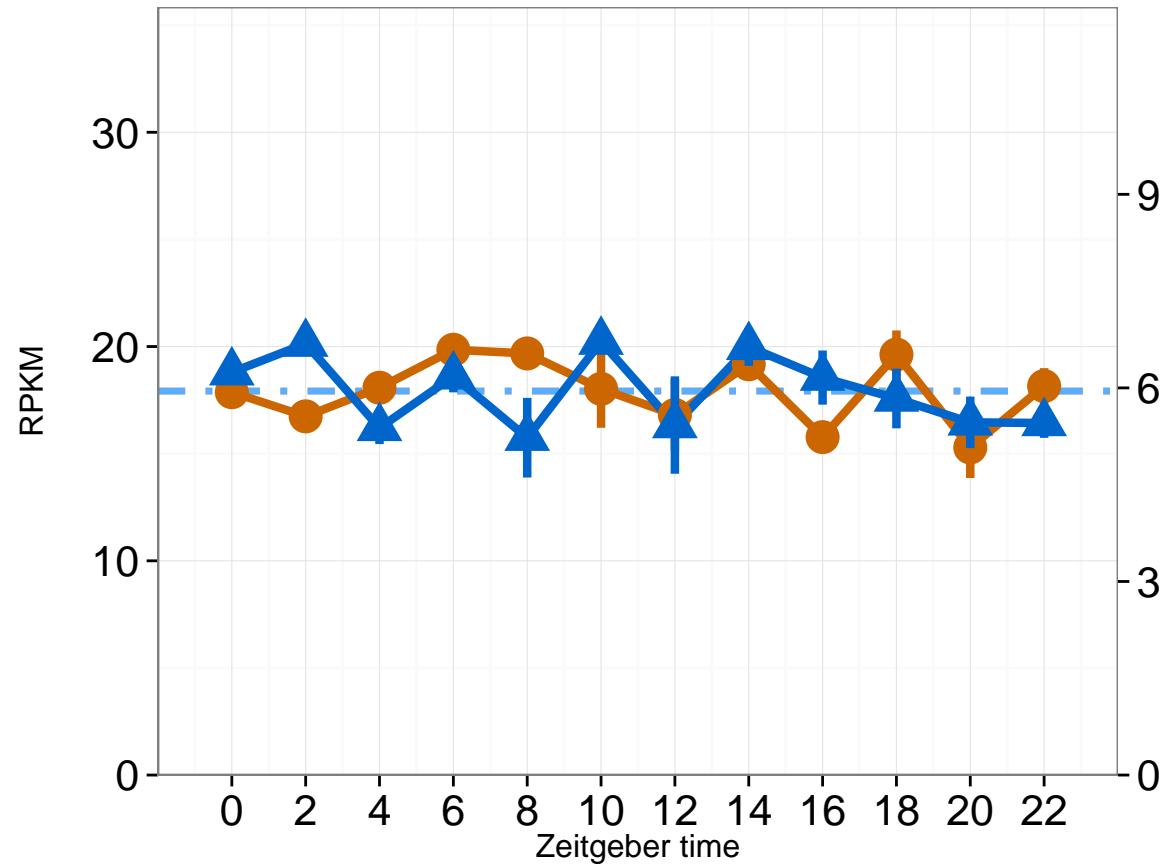

# Rnf41

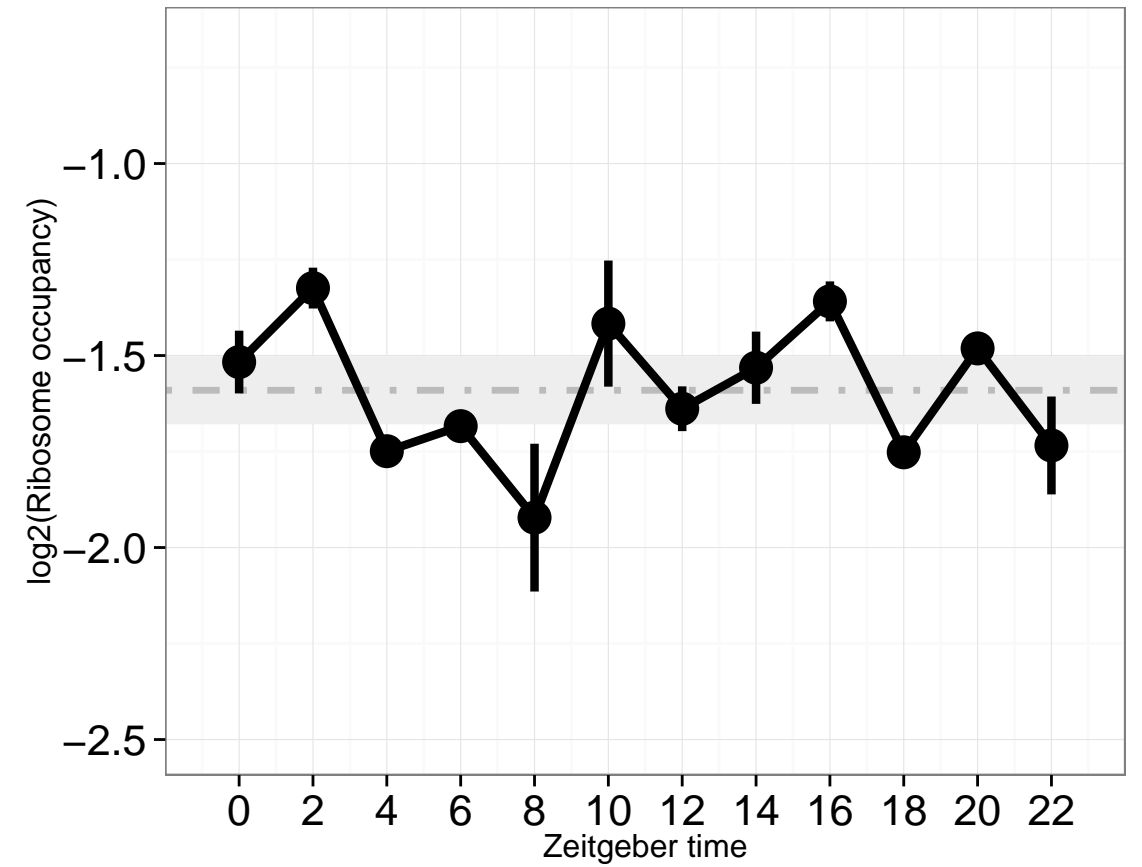

Supplement: Supplementary file 9654 [file 1]

## Psma7

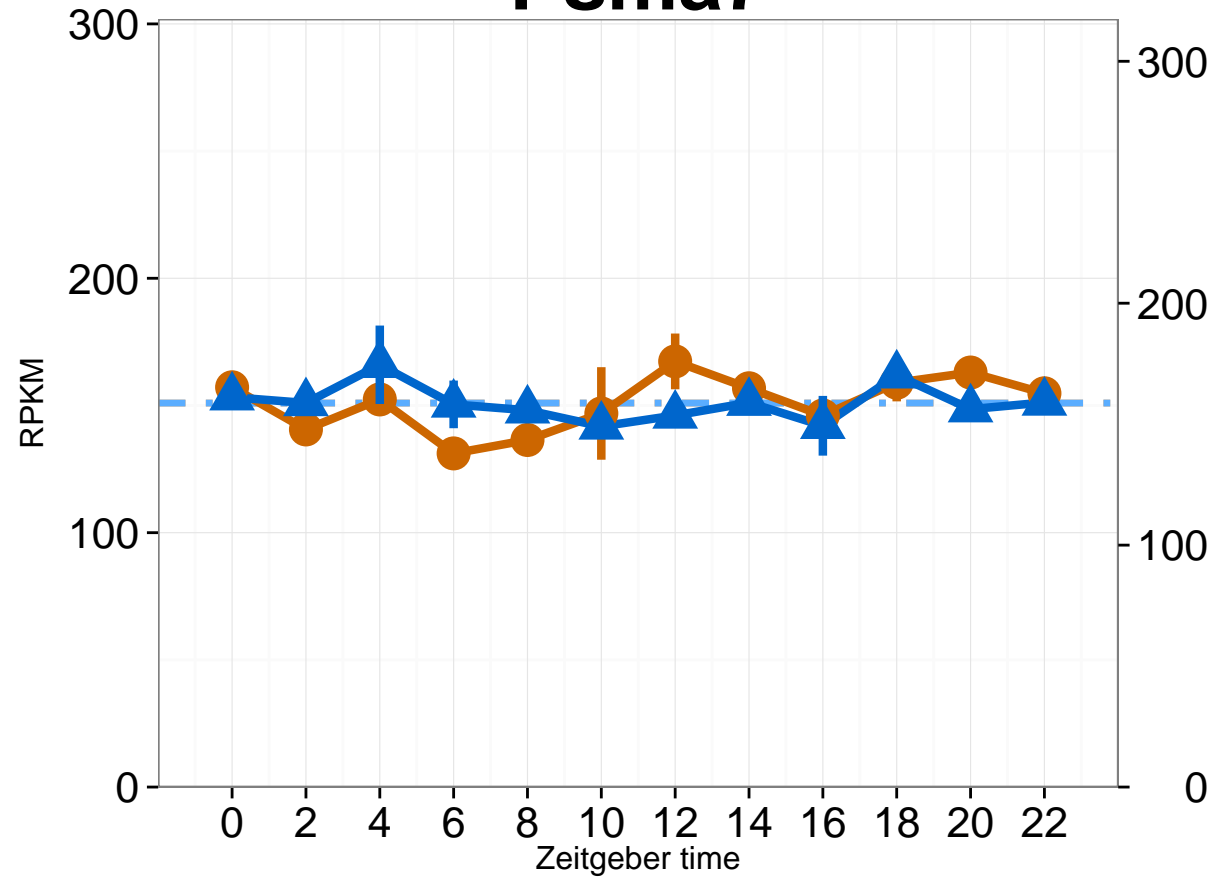

## Psma7

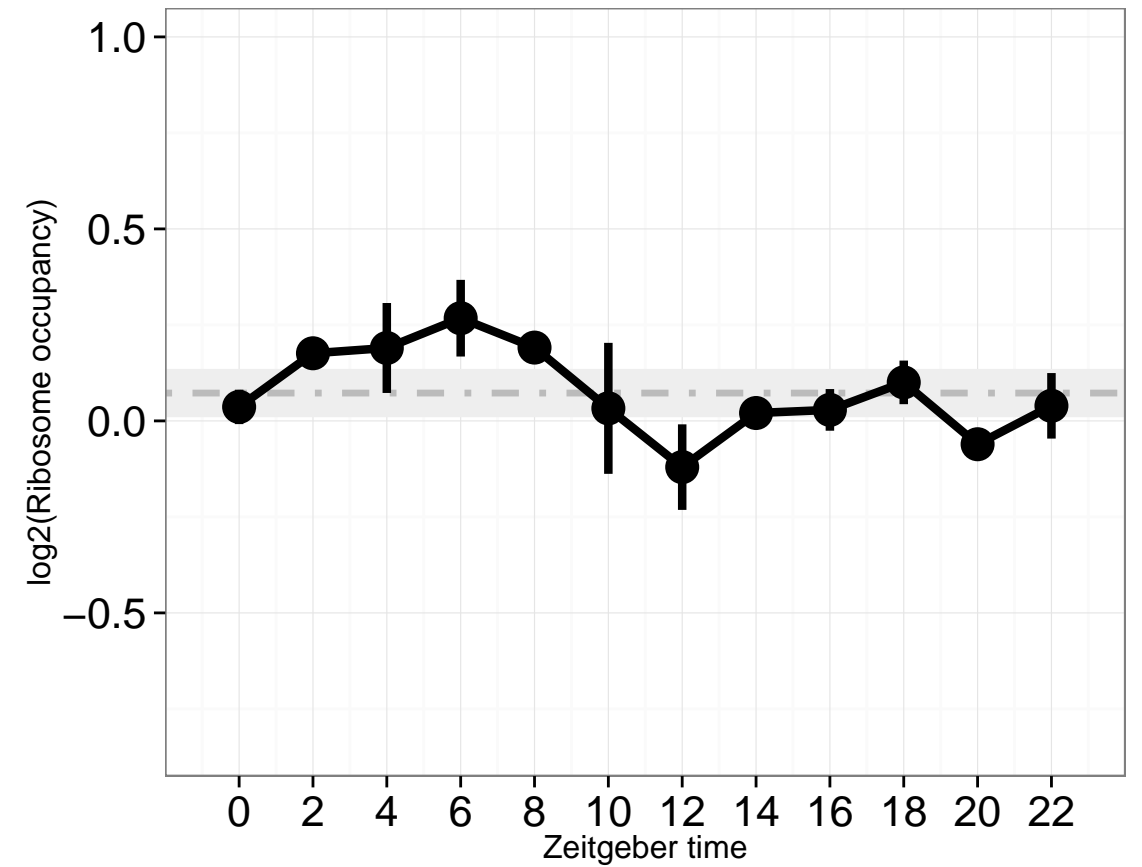

Supplement: Supplementary file 9655 [file 1]

# Znhit1

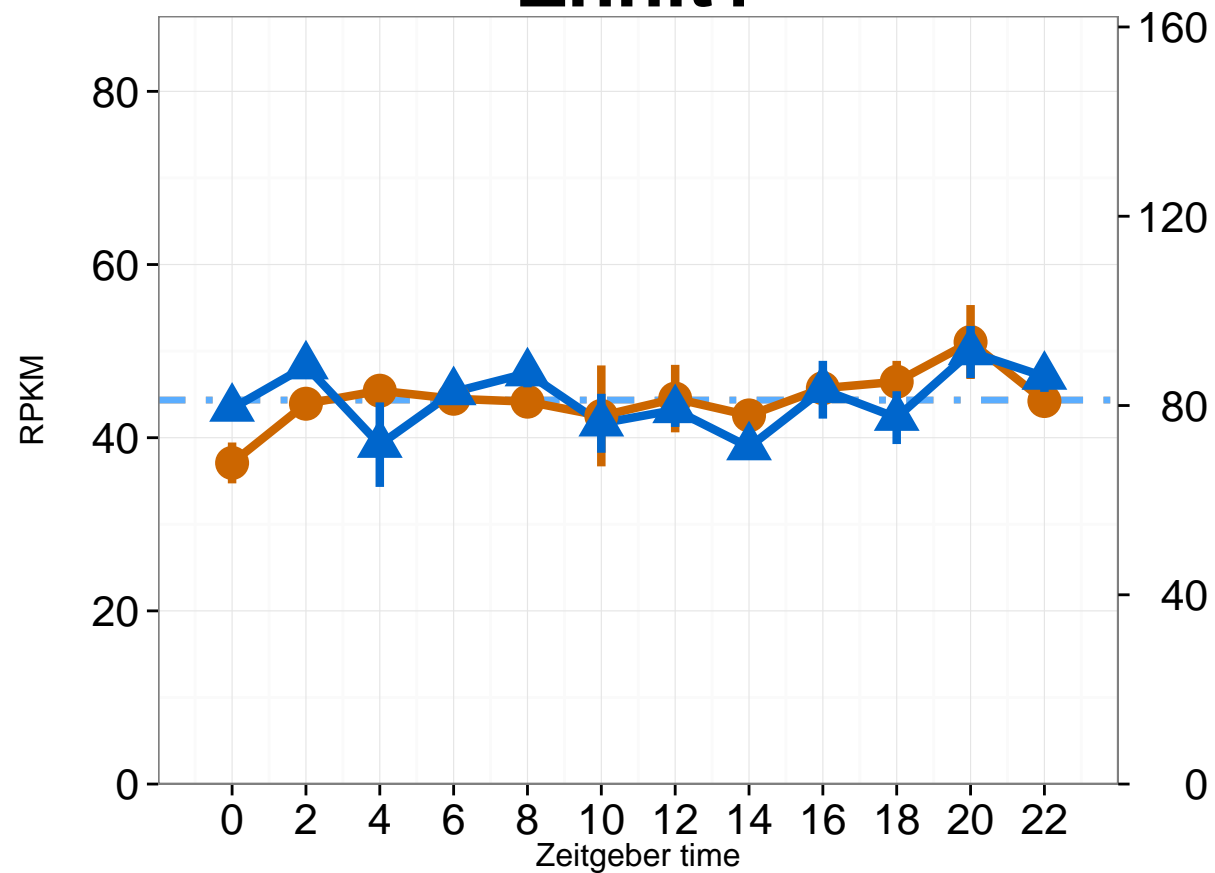

# Znhit1

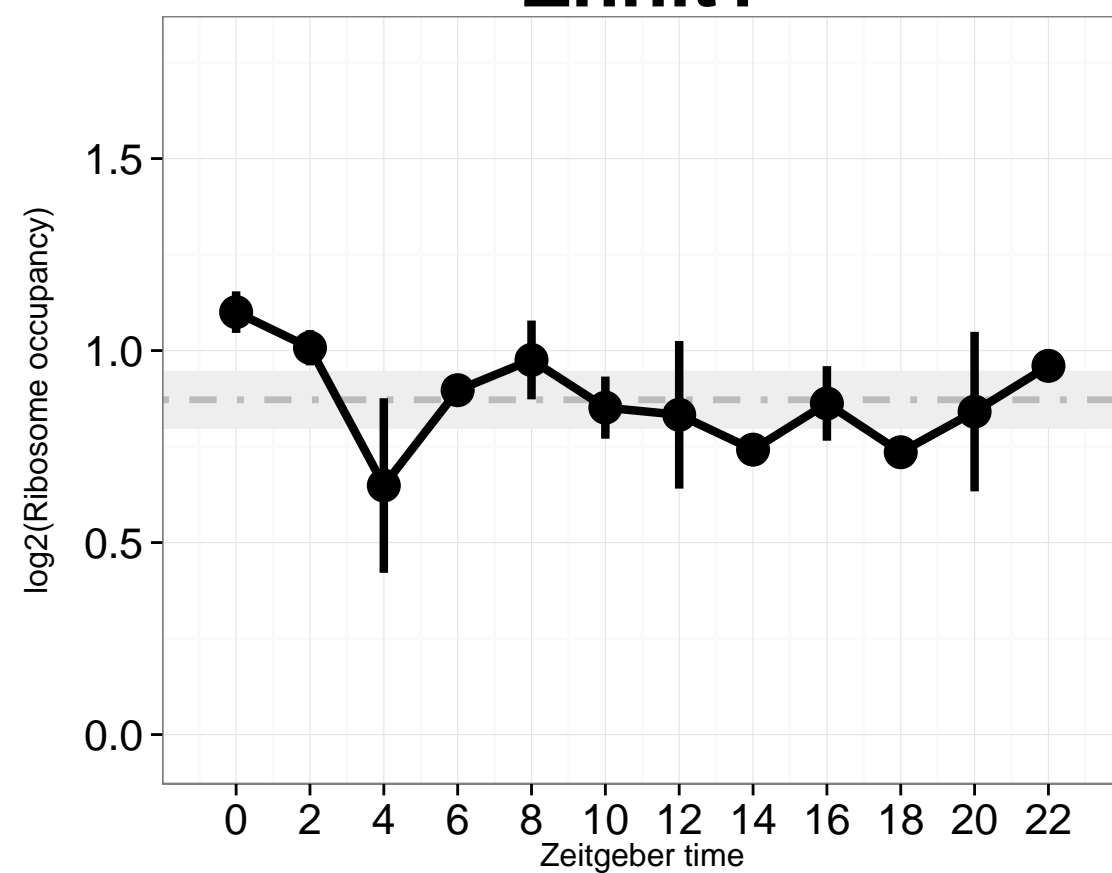

Supplement: Supplementary file 9656 [file 1]

## Casd1

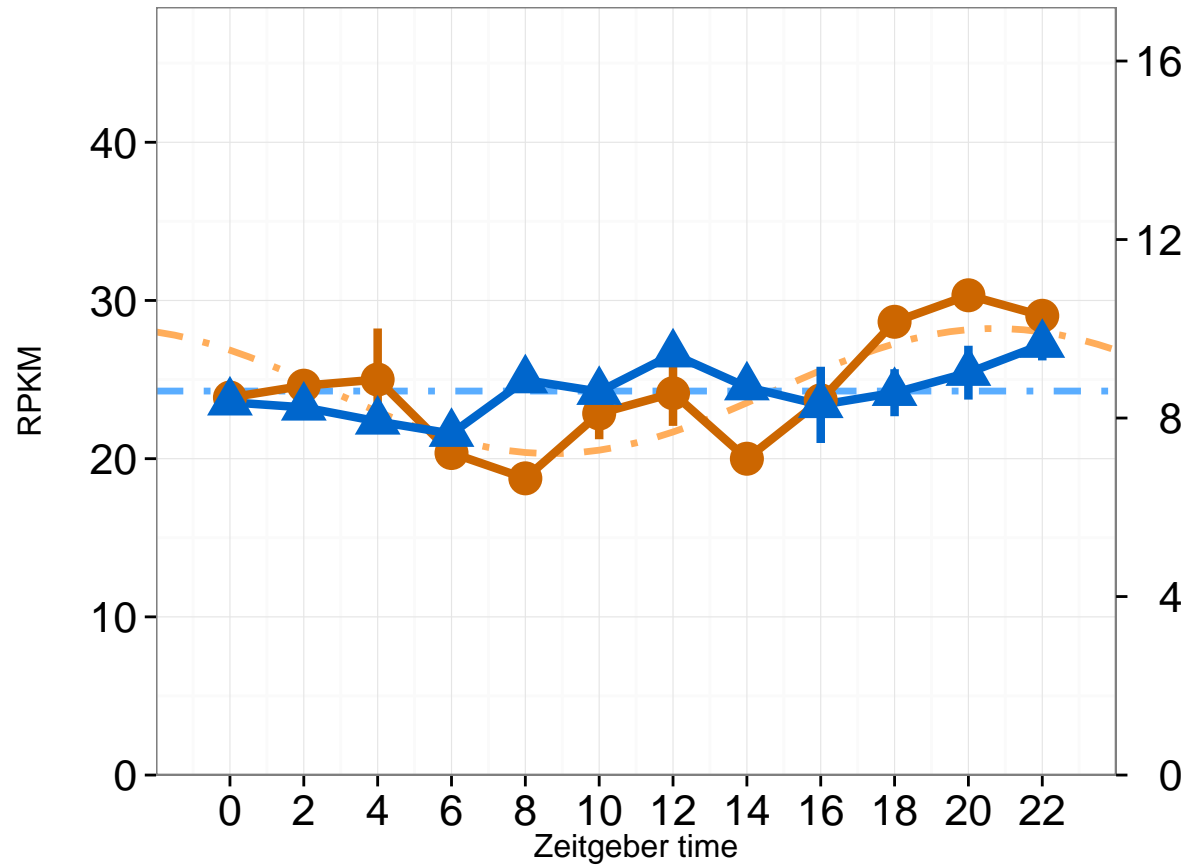

## Casd1

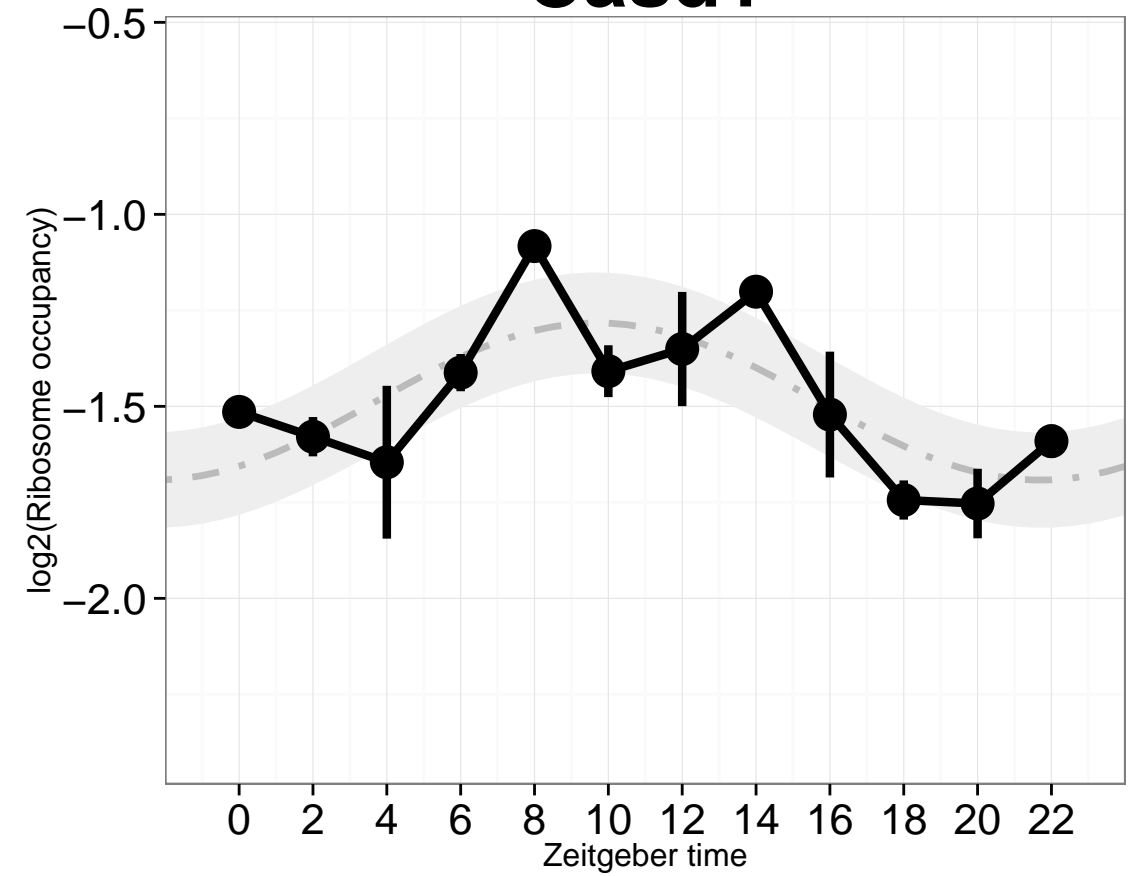

Supplement: Supplementary file 9657 [file 1]

## Rbak

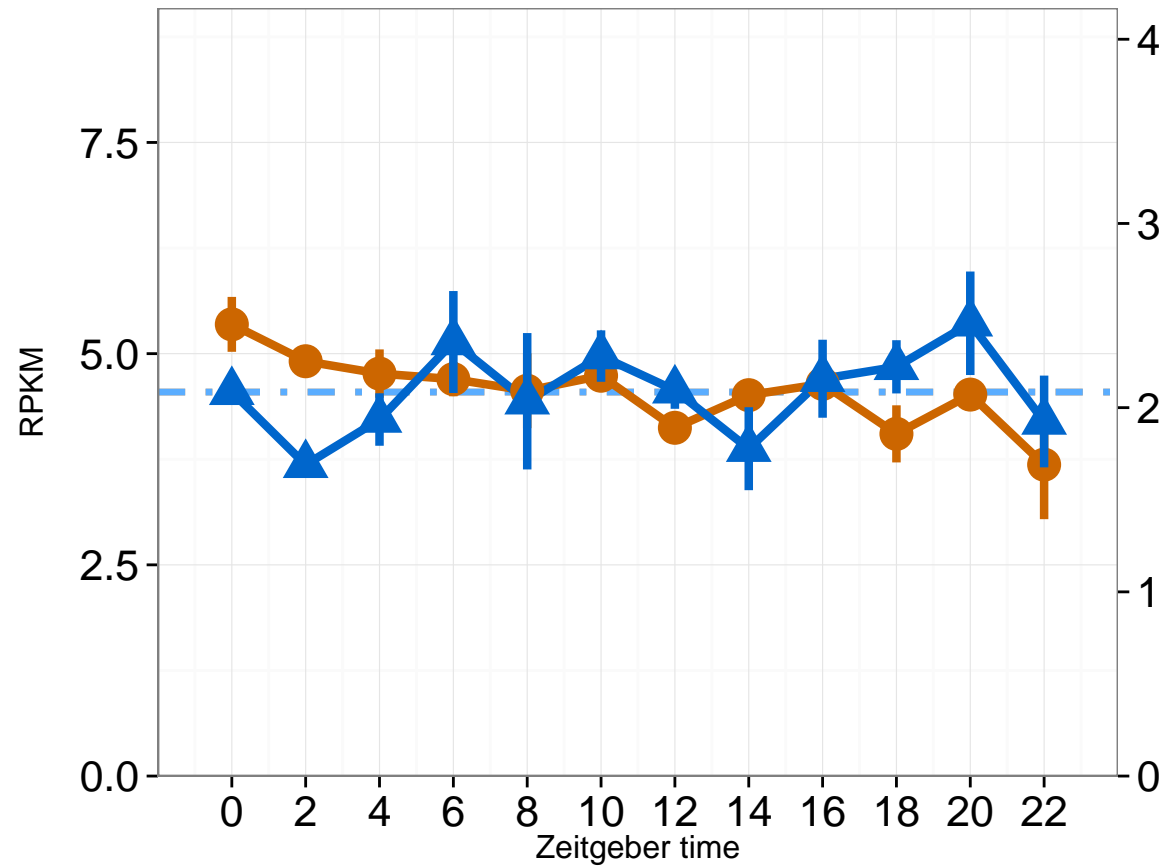

## Rbak

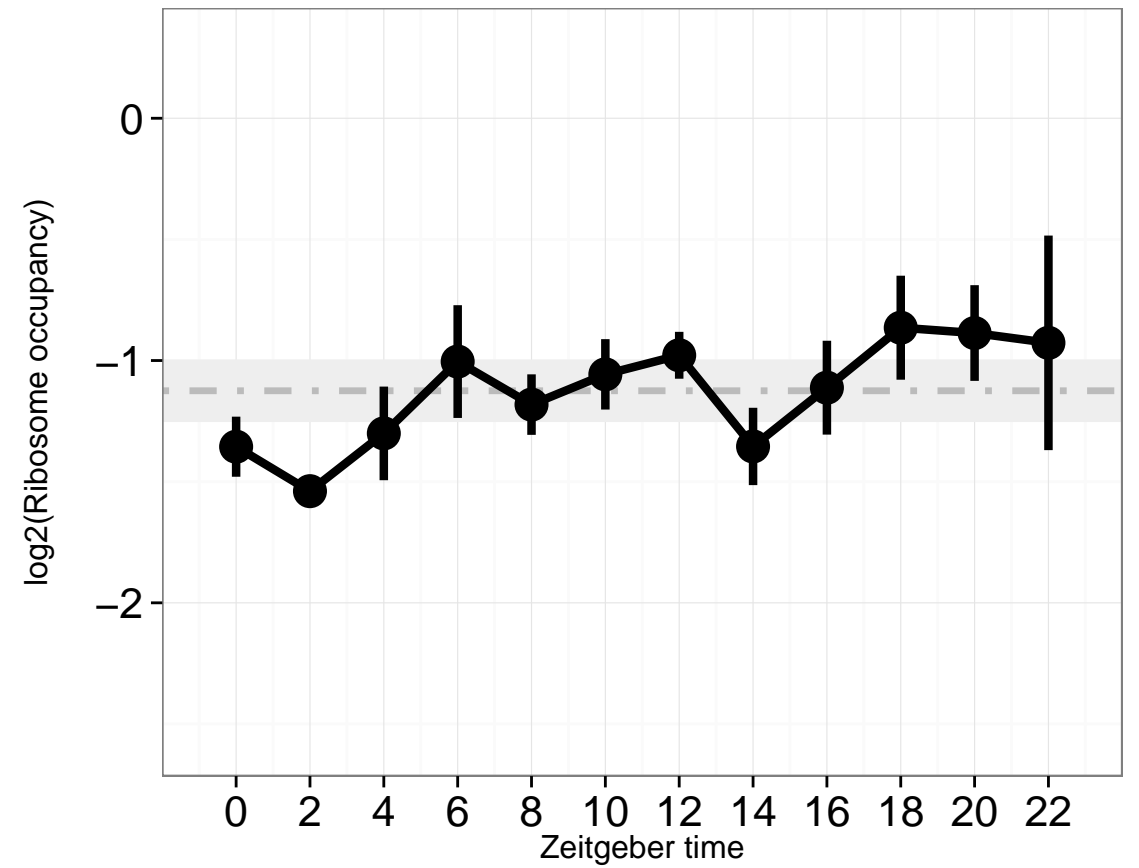

Supplement: Supplementary file 9658 [file 1]

## Sbf2

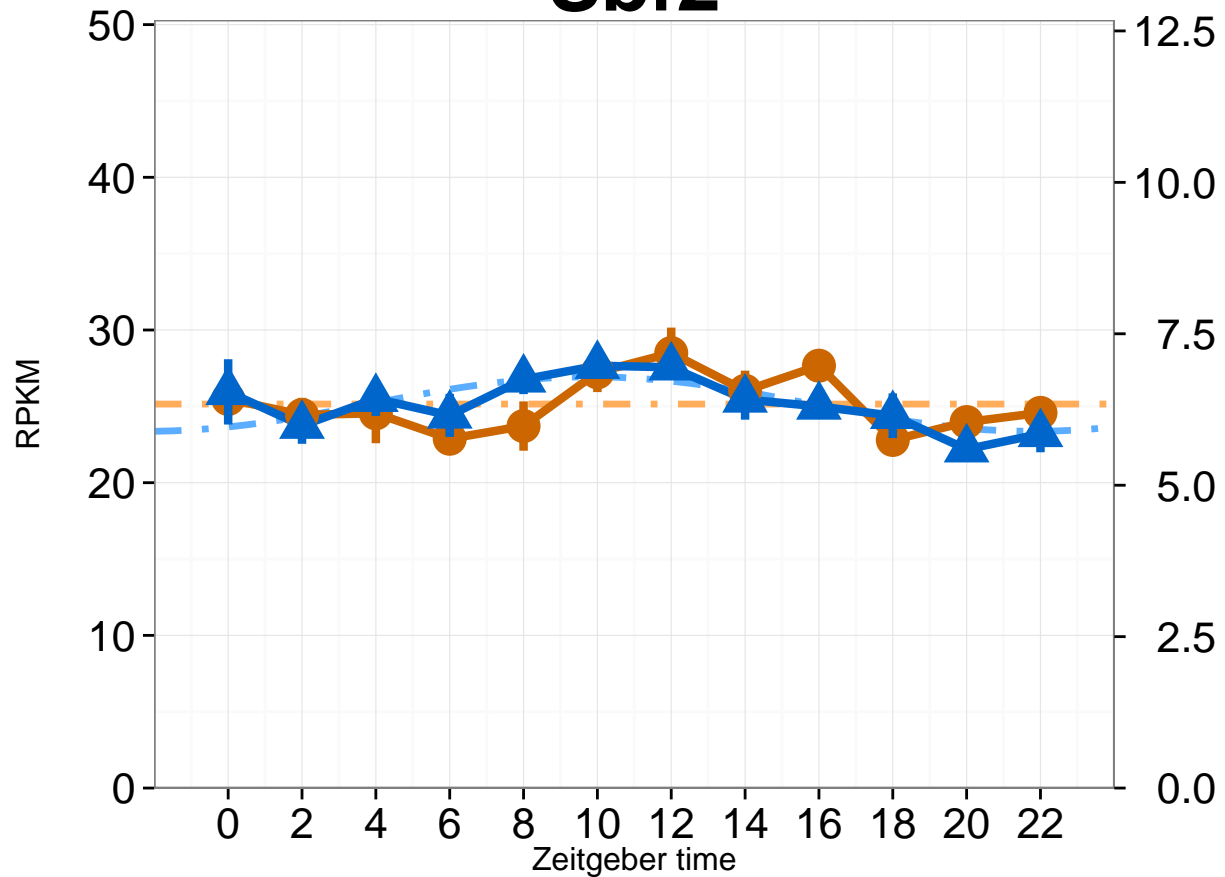

## Sbf2

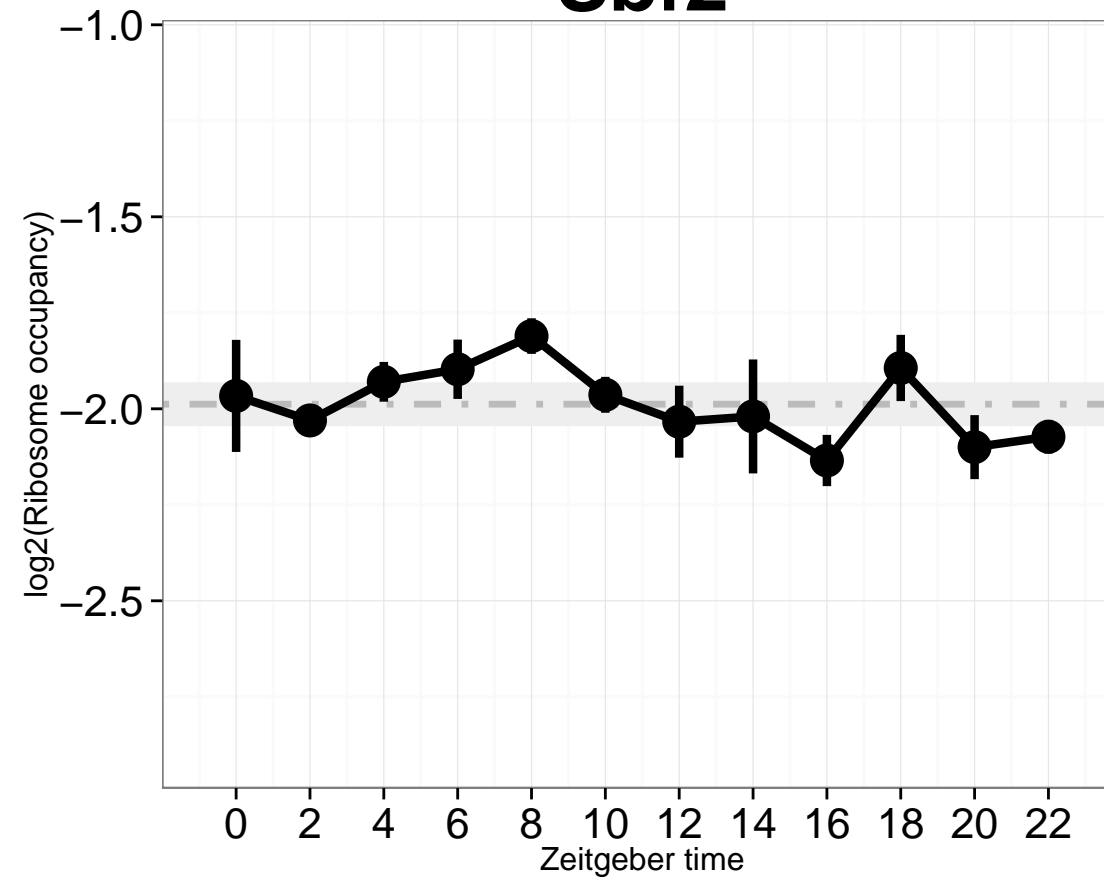

Supplement: Supplementary file 9659 [file 1]

## Plcb2

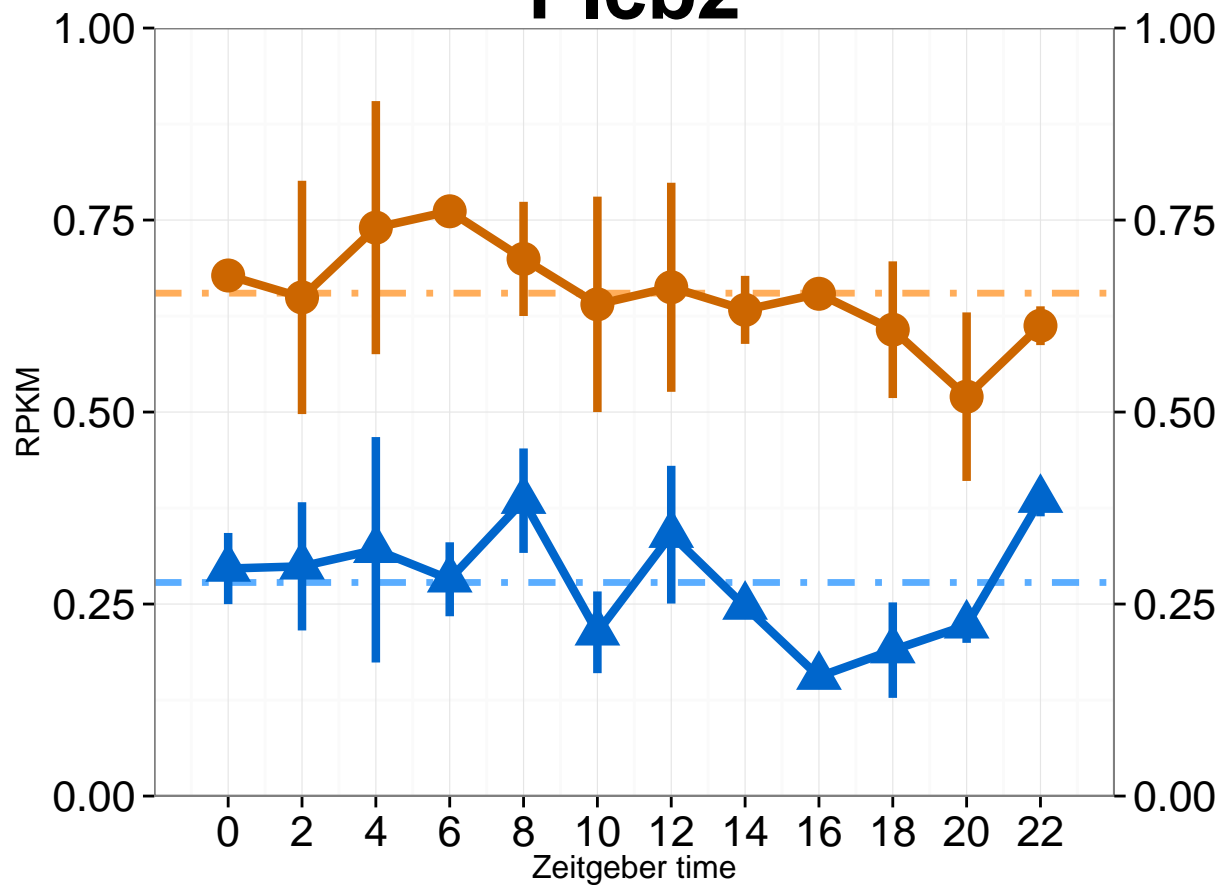

## Plcb2

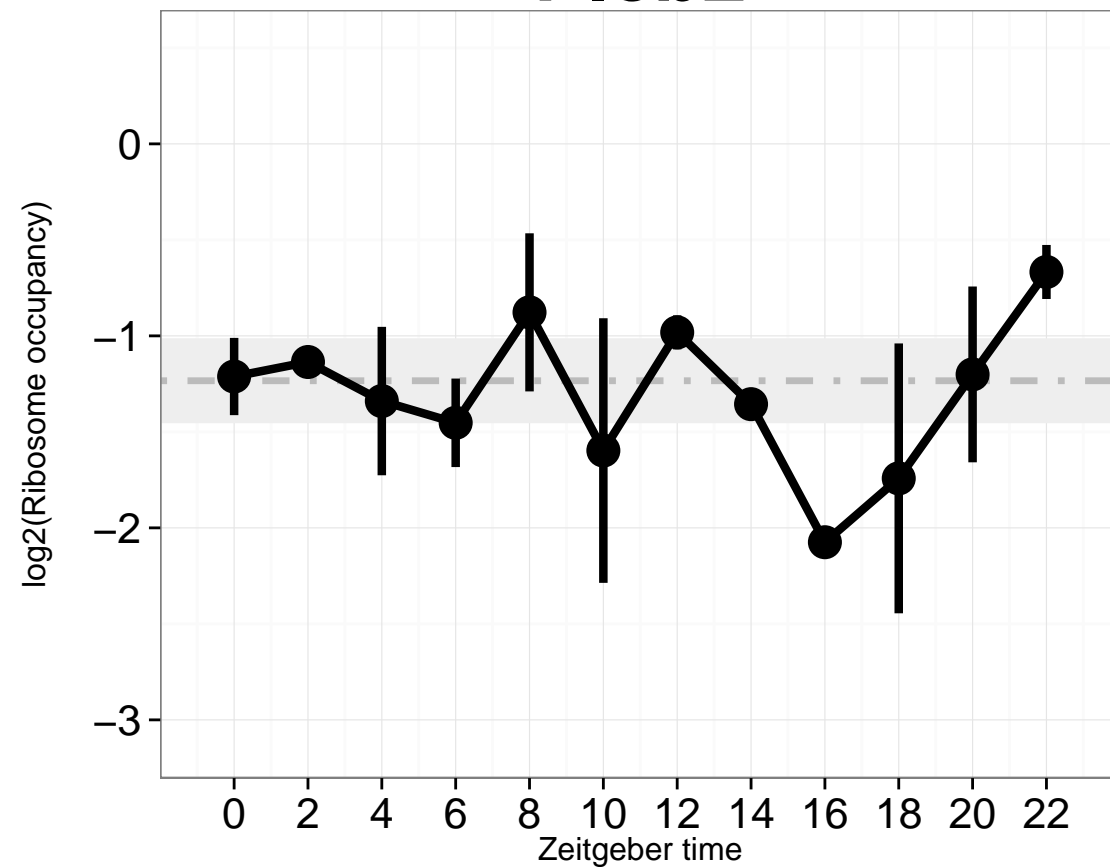

Supplement: Supplementary file 9660 [file 1]

# Fitm2

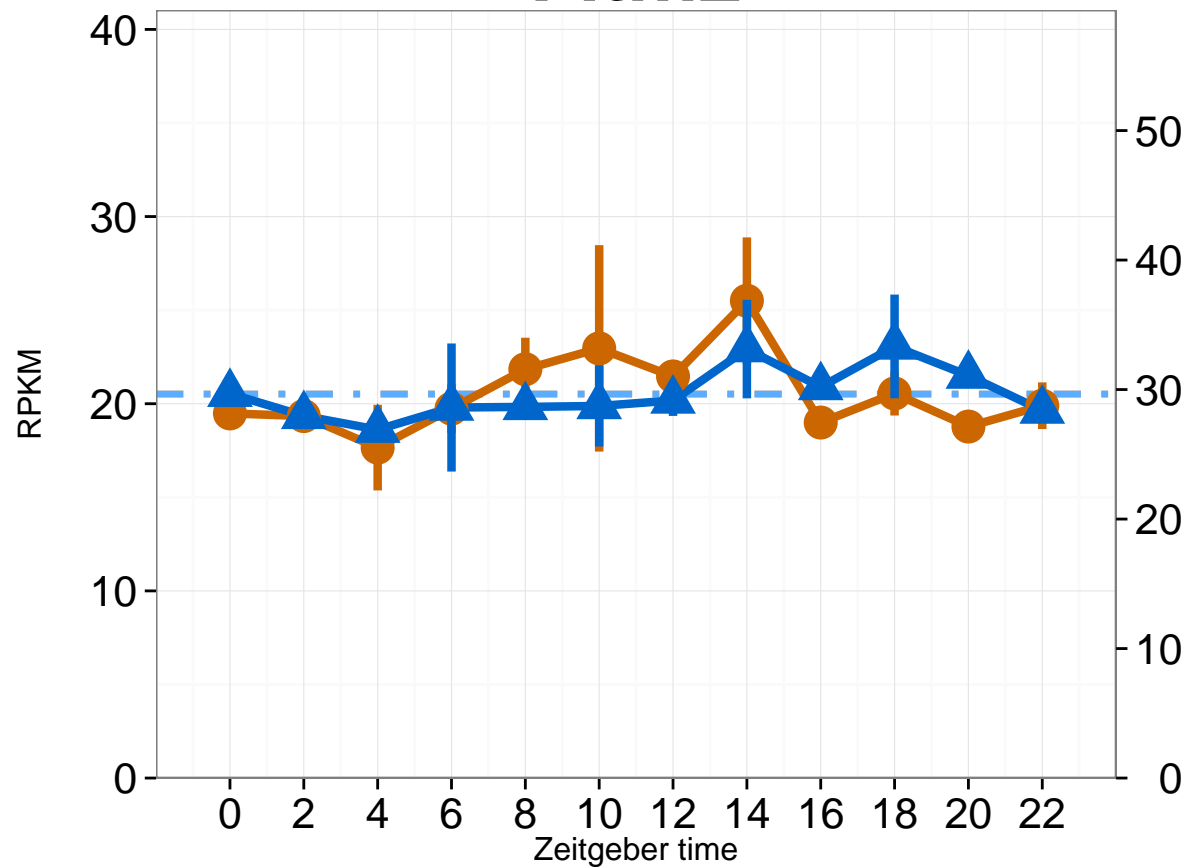

# Fitm2

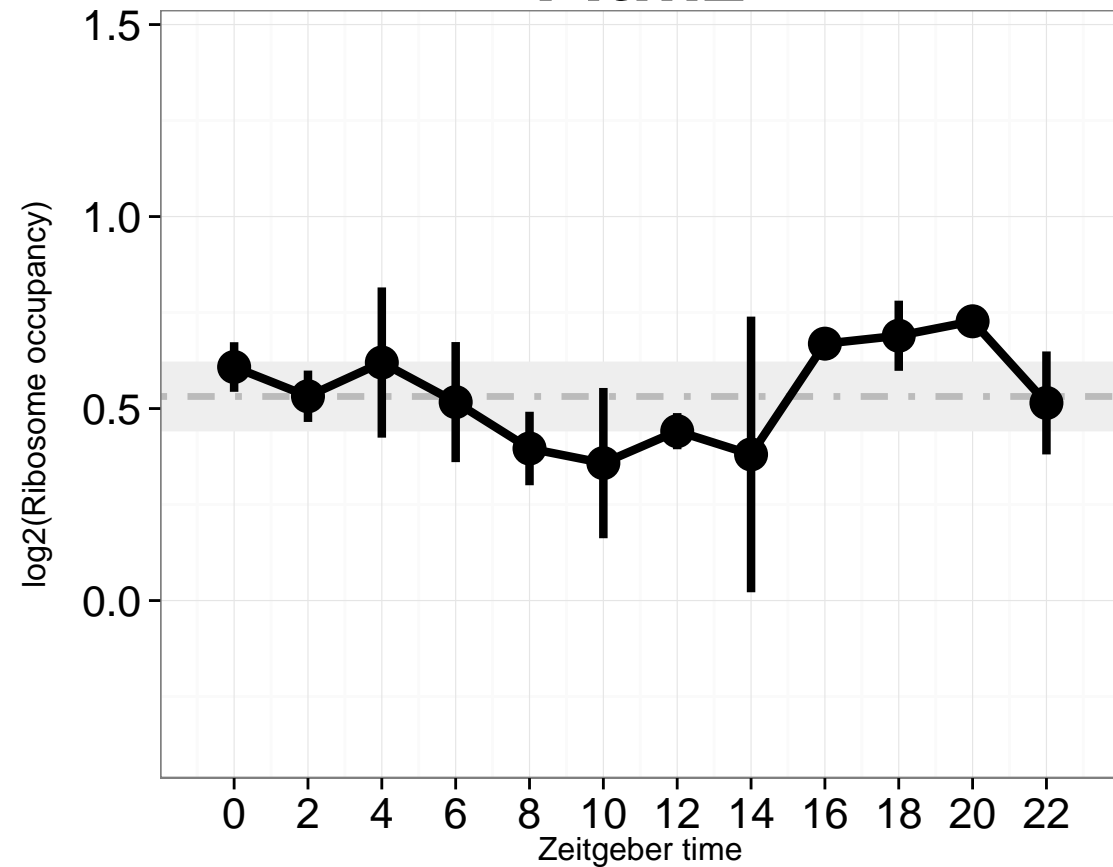

Supplement: Supplementary file 9661 [file 1]

## Rpf1

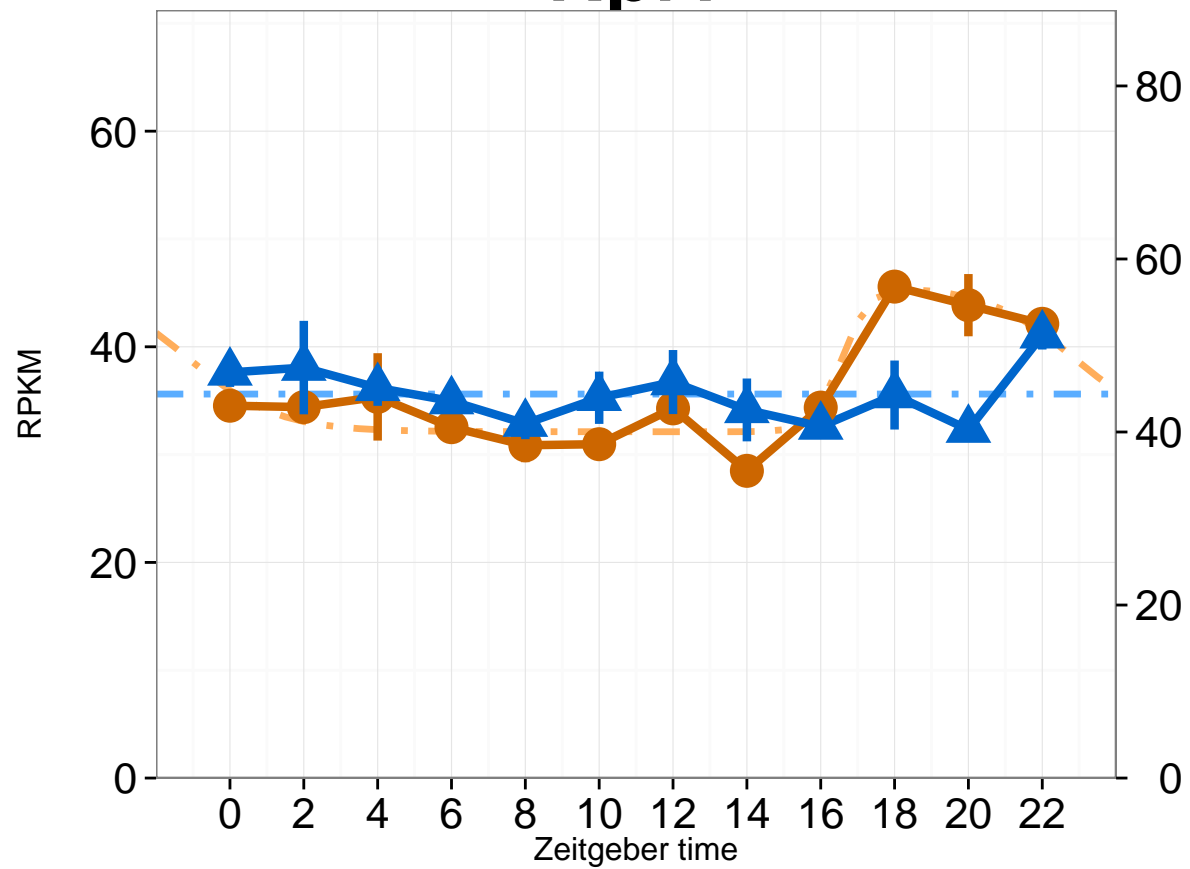

## Rpf1

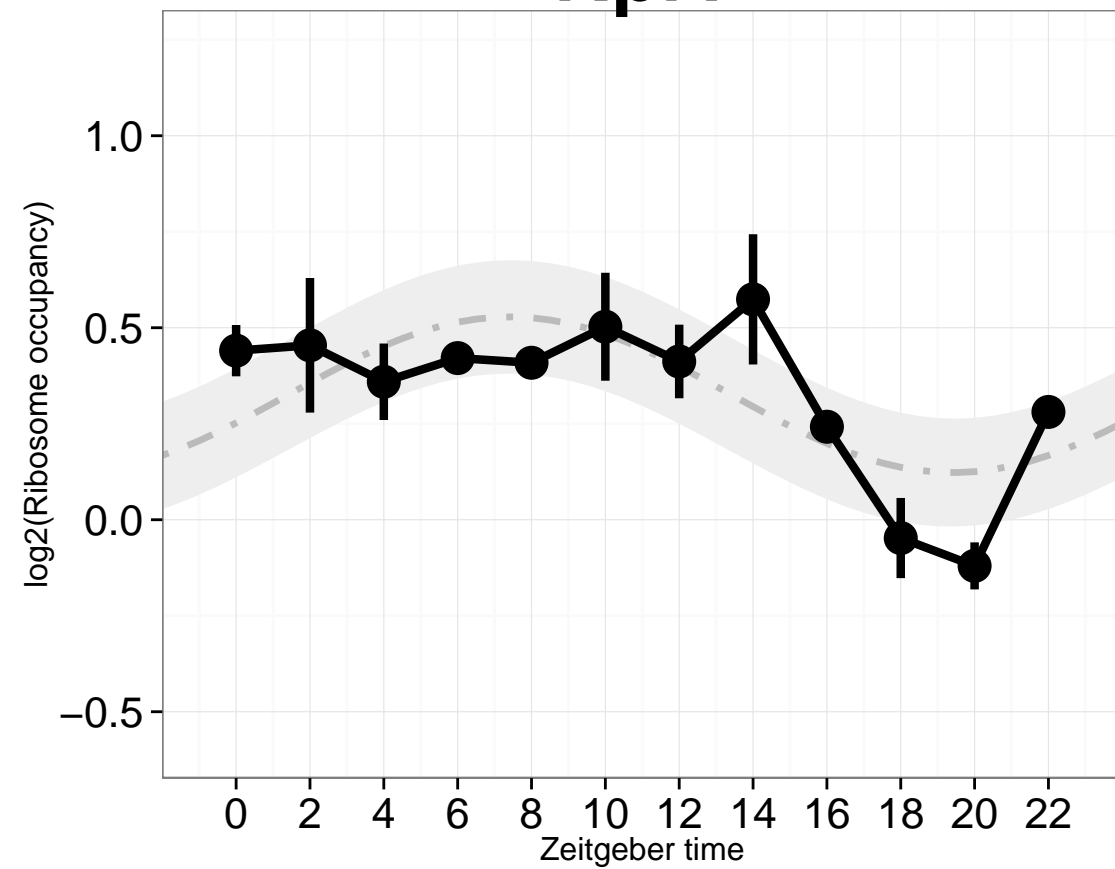

Supplement: Supplementary file 9662 [file 1]

## Mettl6

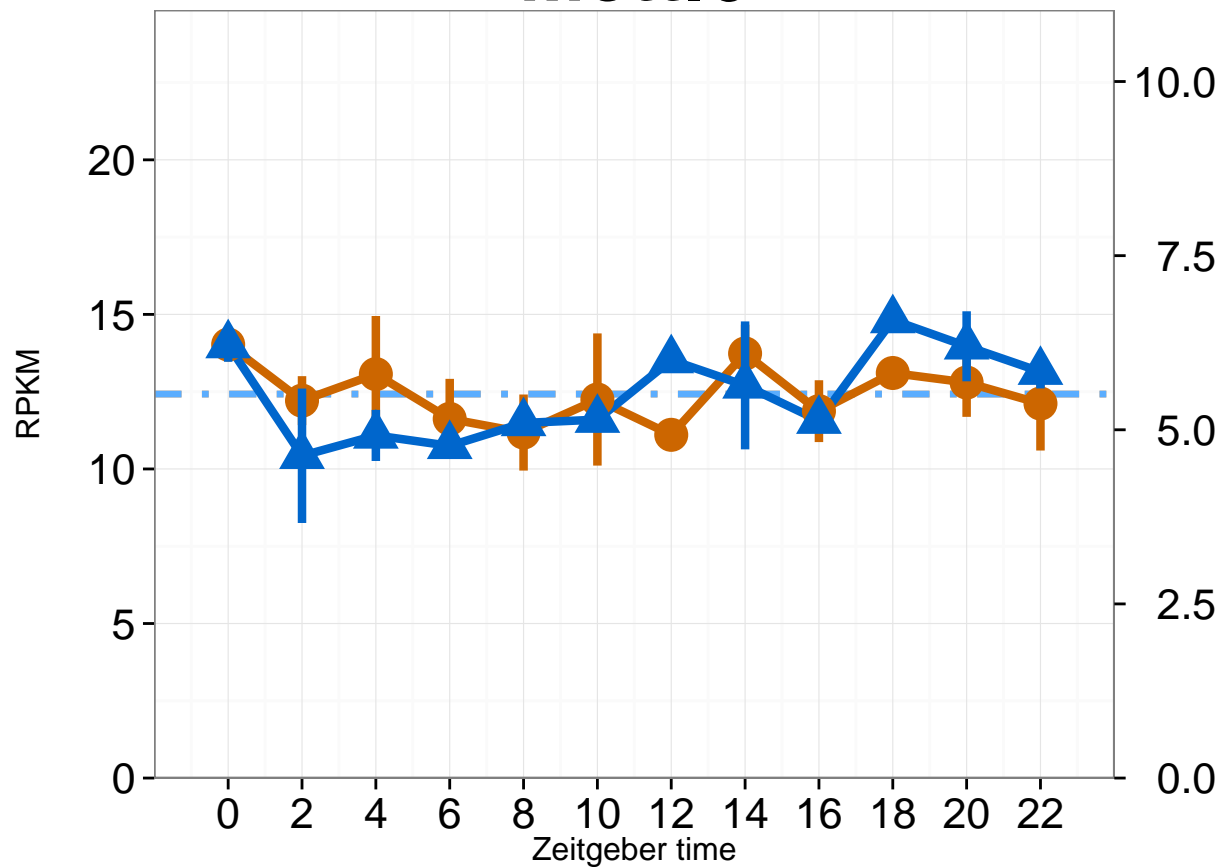

## Mettl6

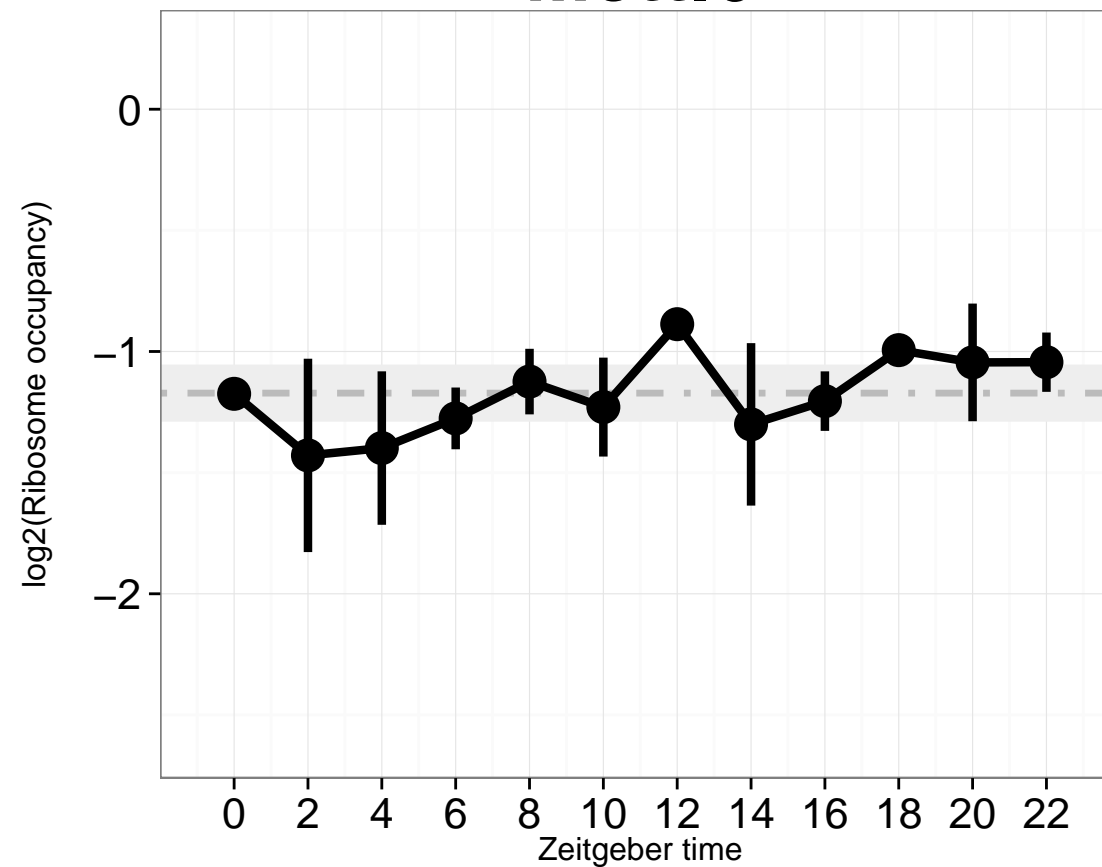

Supplement: Supplementary file 9663 [file 1]

## Fmnl2

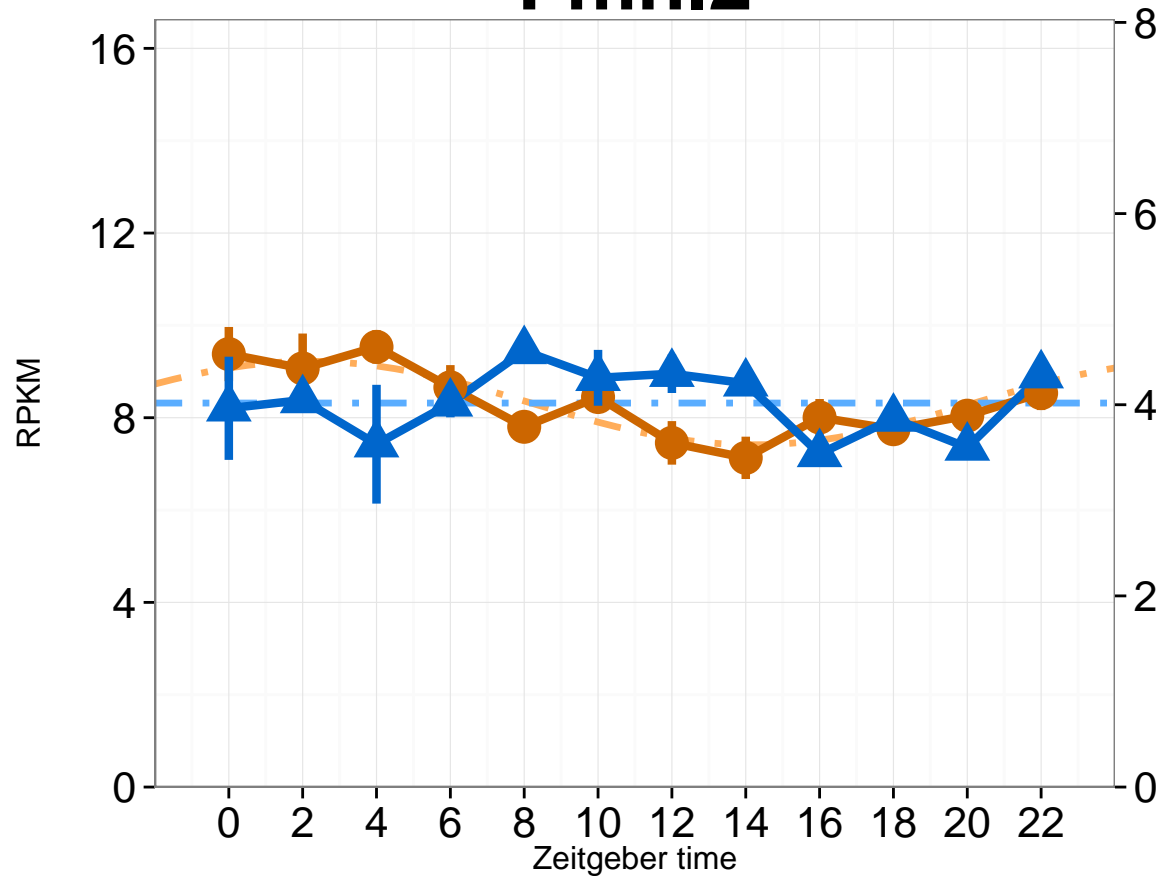

## Fmnl2

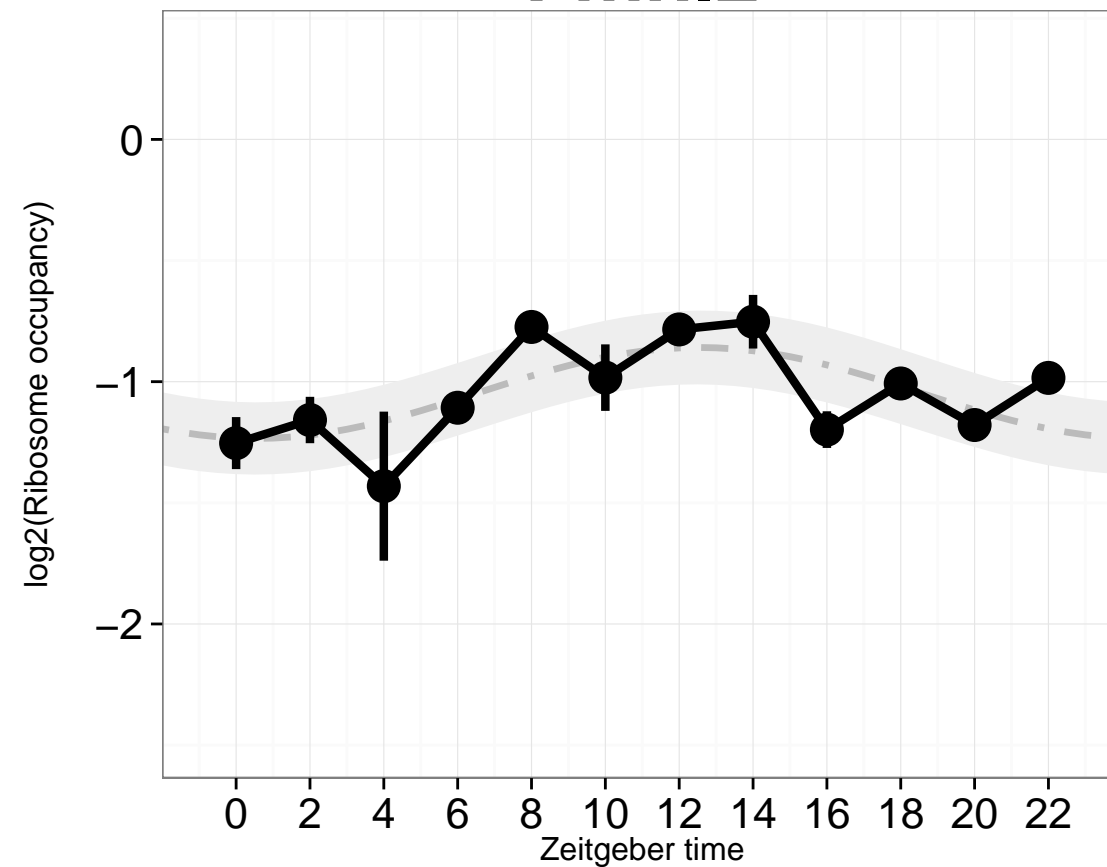

Supplement: Supplementary file 9664 [file 1]

# Rps18

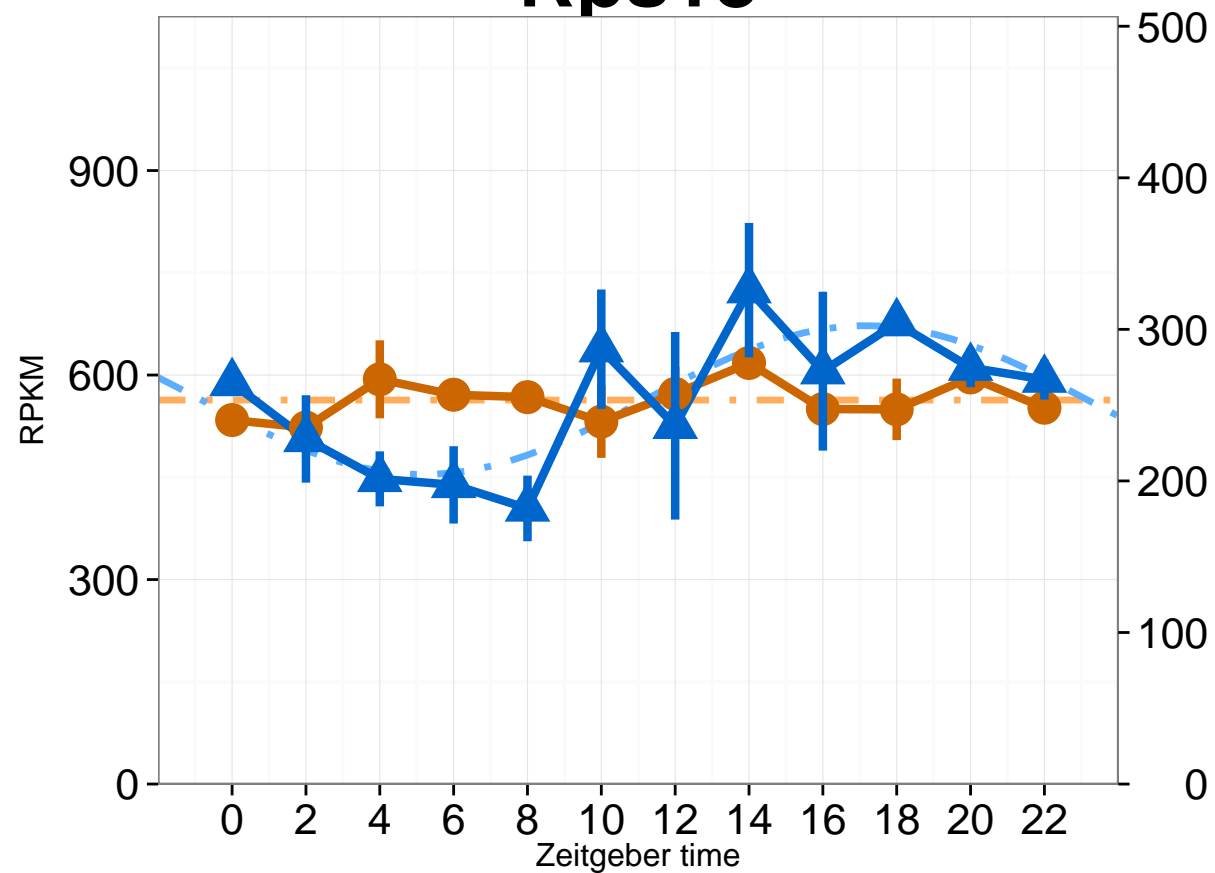

# Rps18

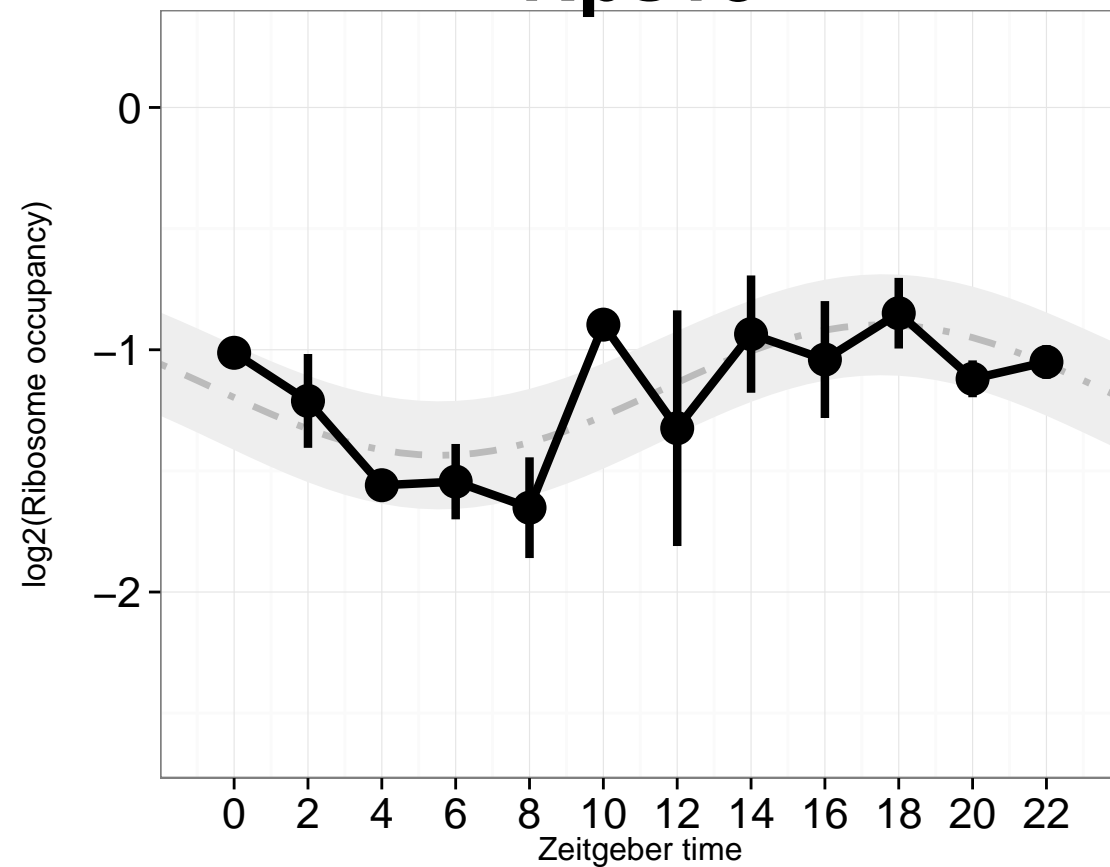

Supplement: Supplementary file 9665 [file 1]

## Cd164l2

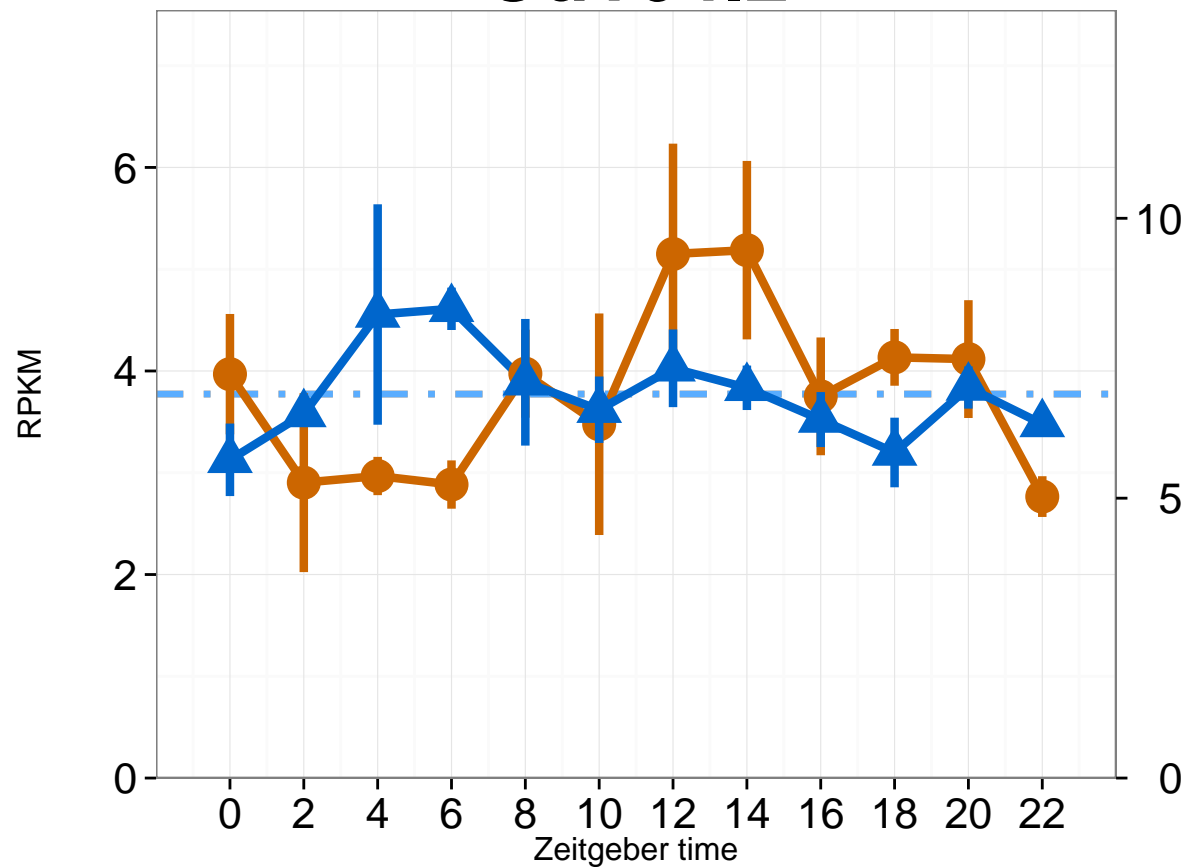

## Cd164l2

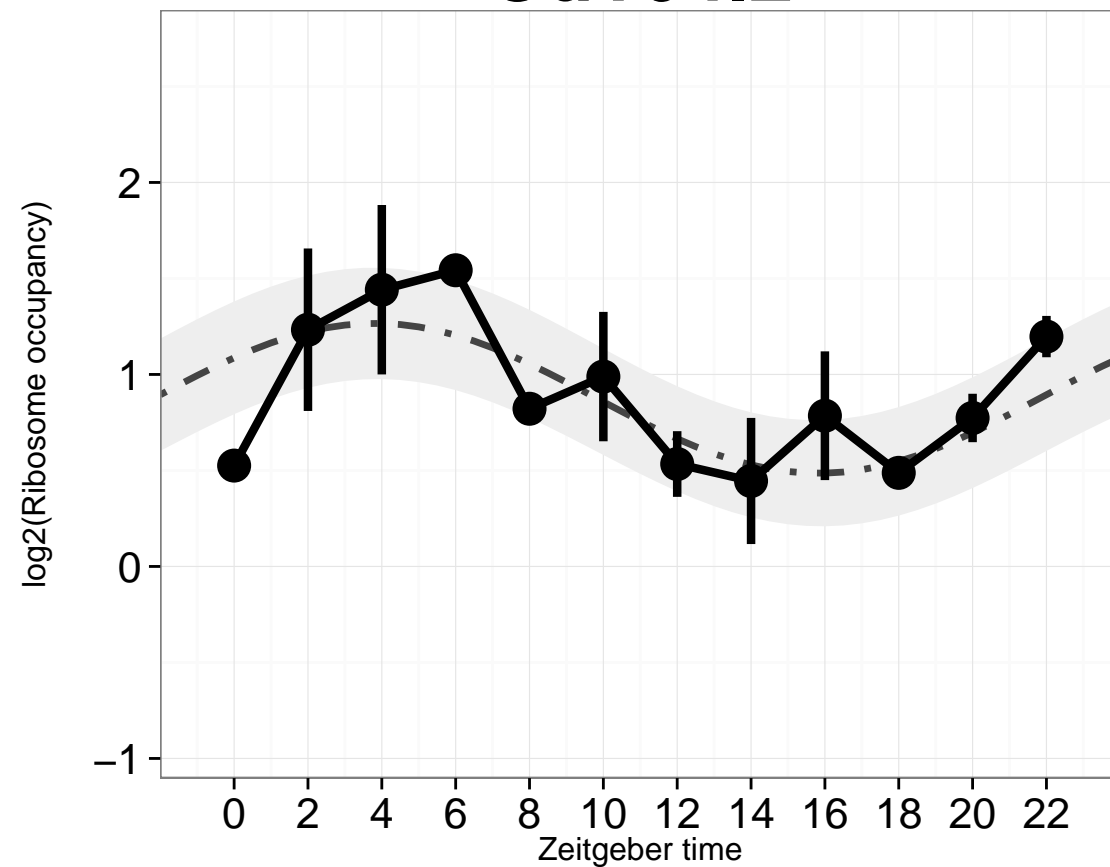

Supplement: Supplementary file 9666 [file 1]

# SImap

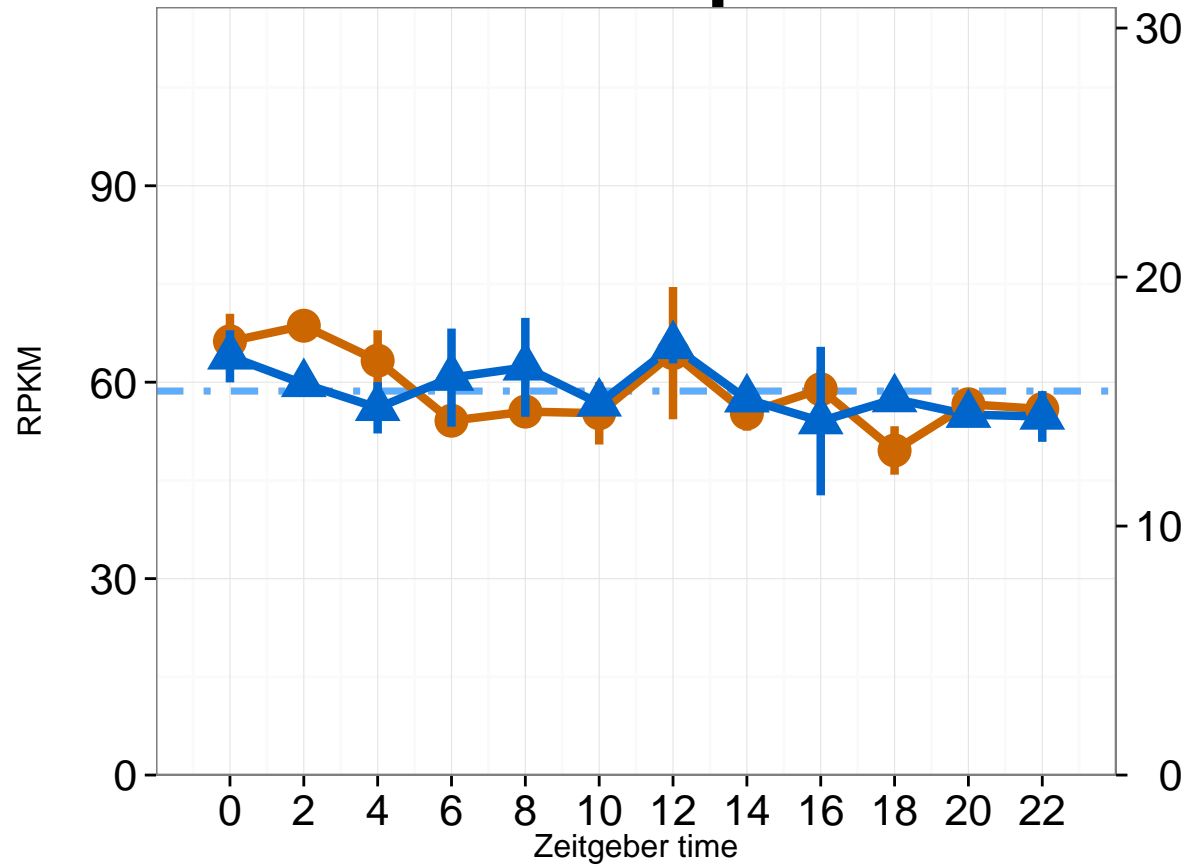

# SImap

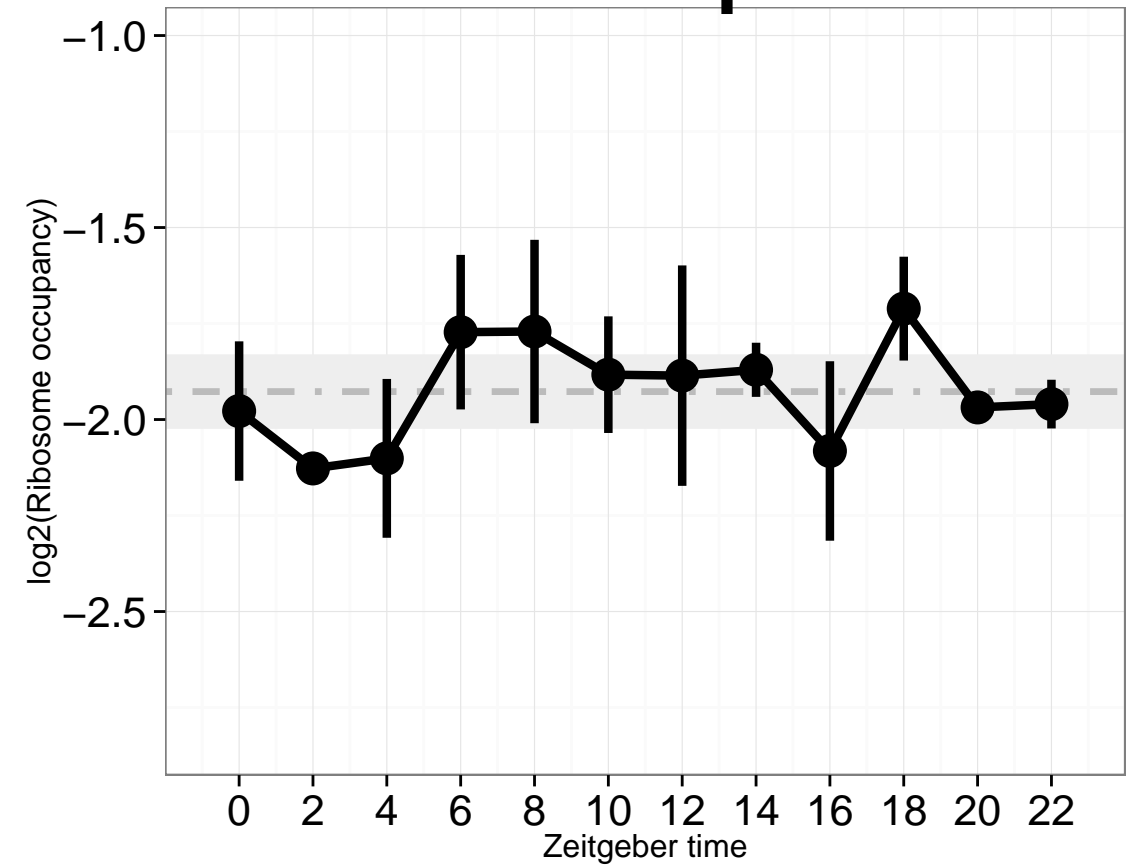

Supplement: Supplementary file 9667 [file 1]

# 1700010I14Rik

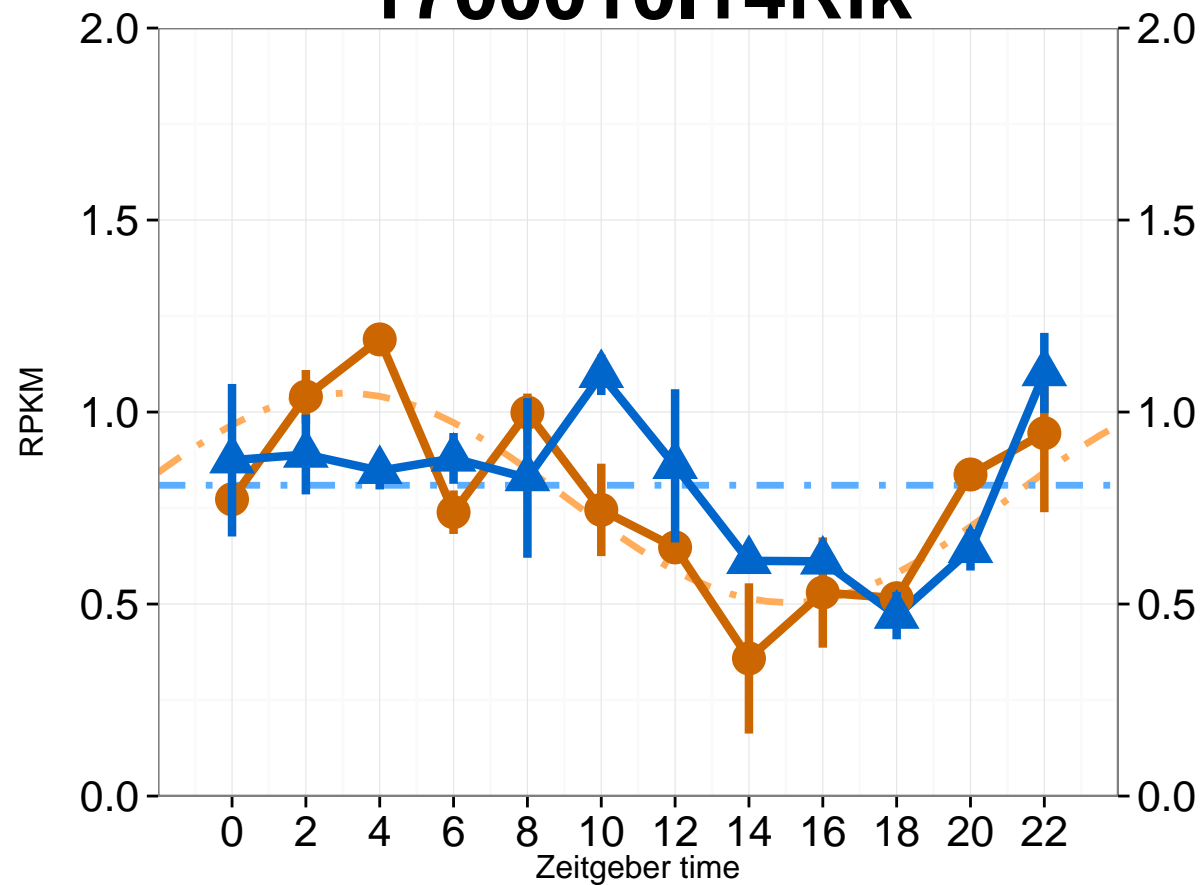

# 1700010I14Rik

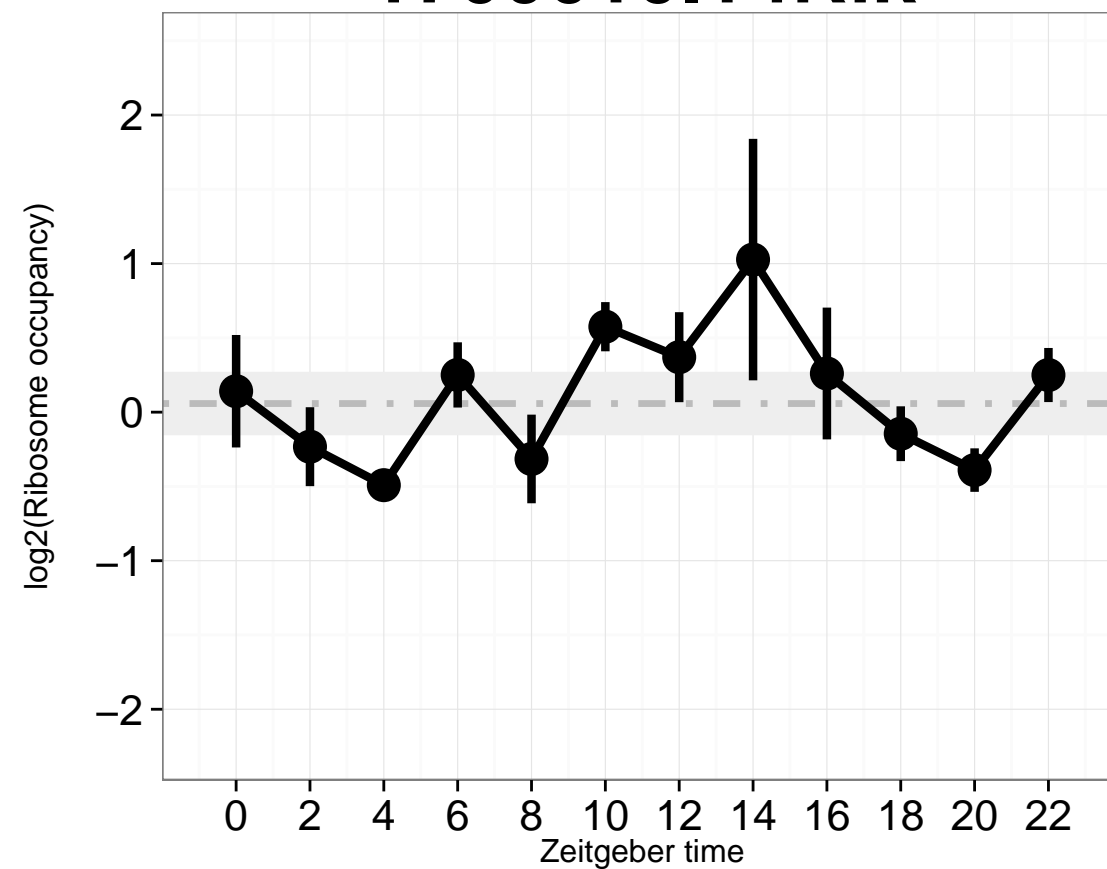

Supplement: Supplementary file 9668 [file 1]

## Acp2

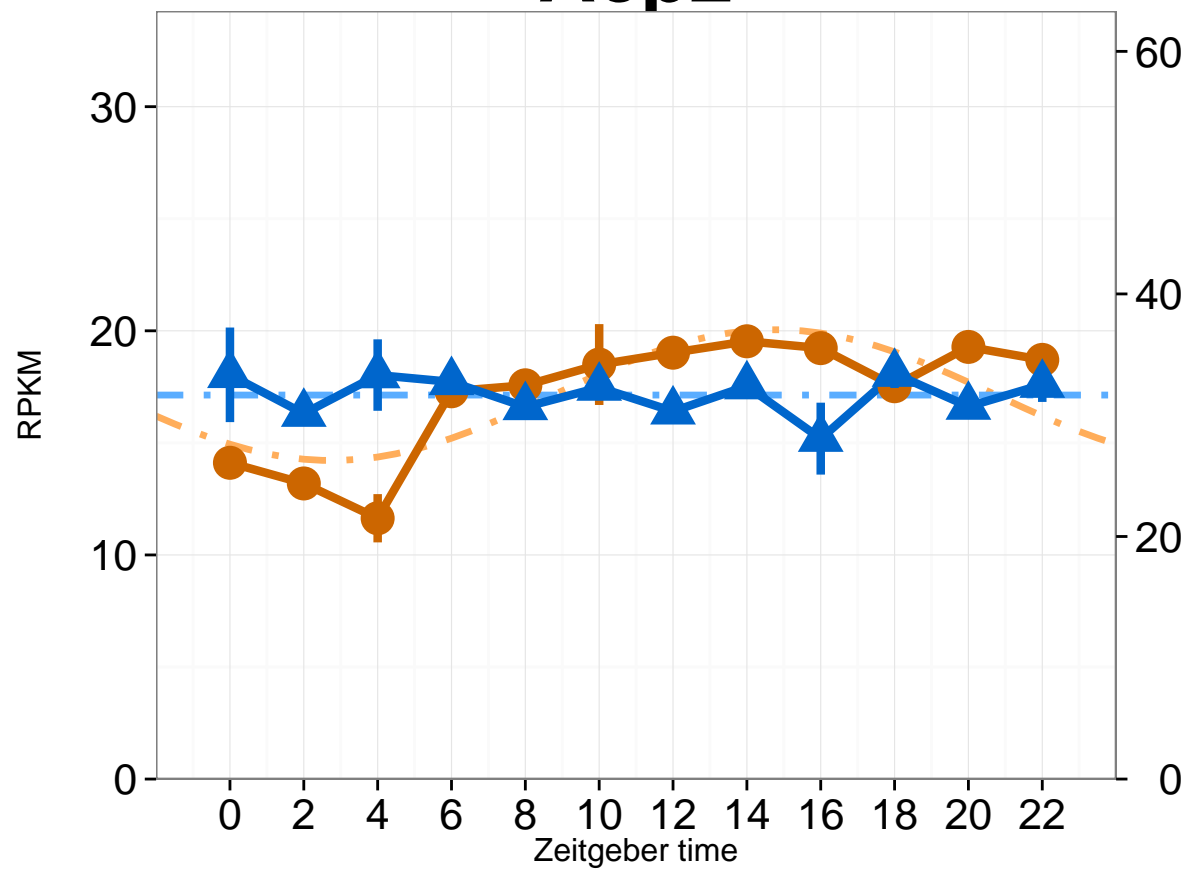

## Acp2

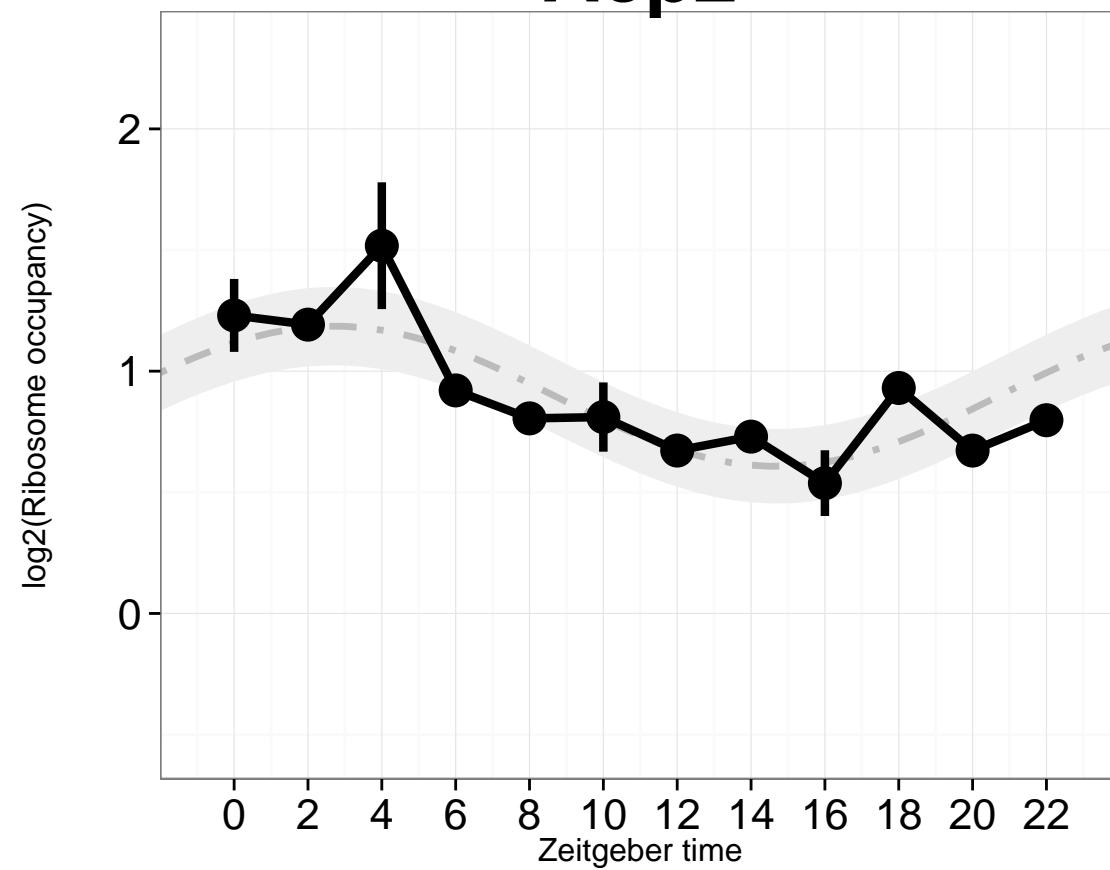

Supplement: Supplementary file 9669 [file 1]

## Ccdc97

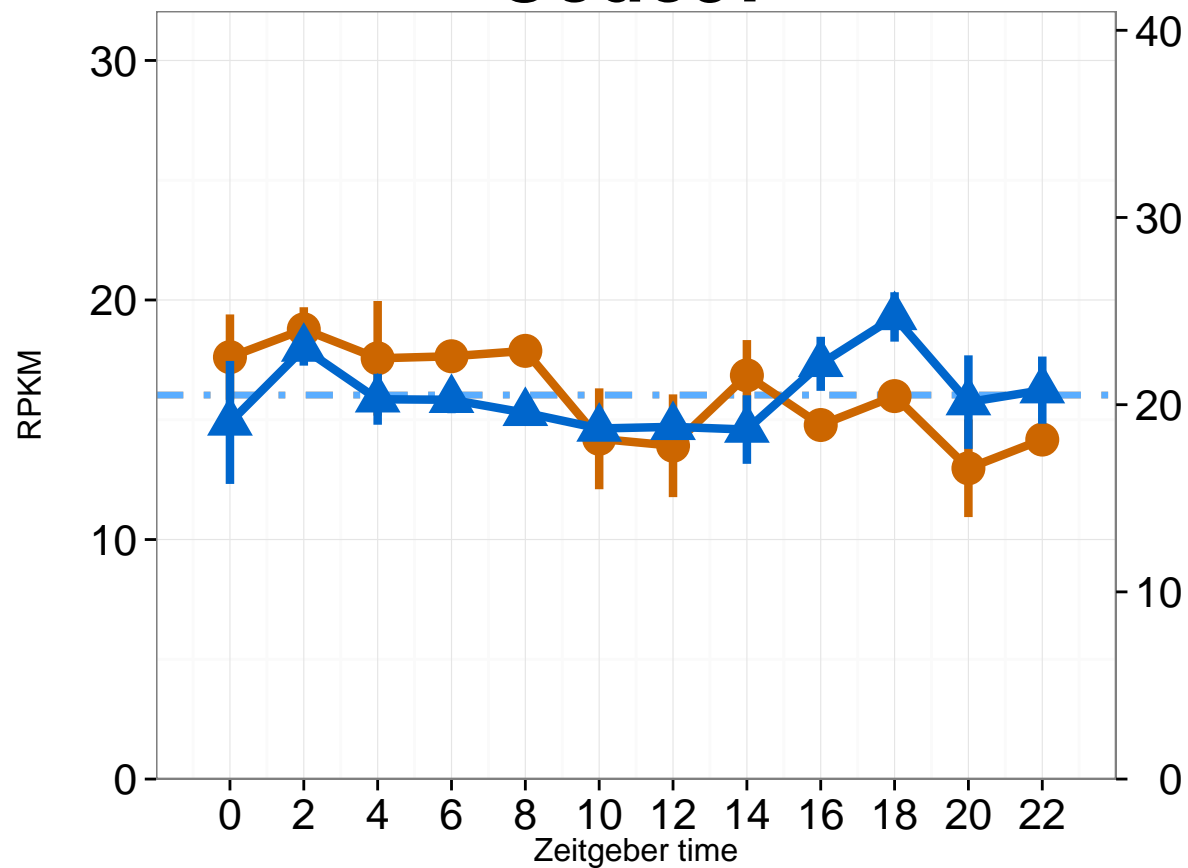

## Ccdc97

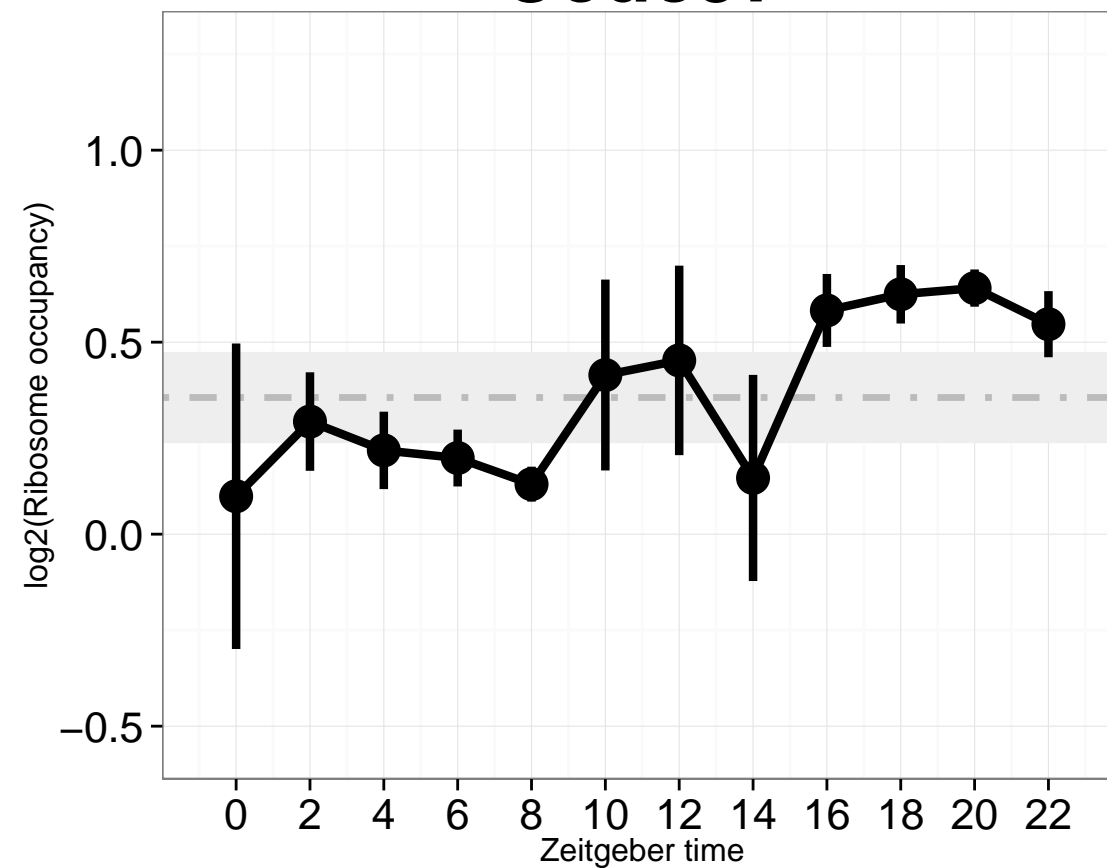

Supplement: Supplementary file 9670 [file 1]

## Zc4h2

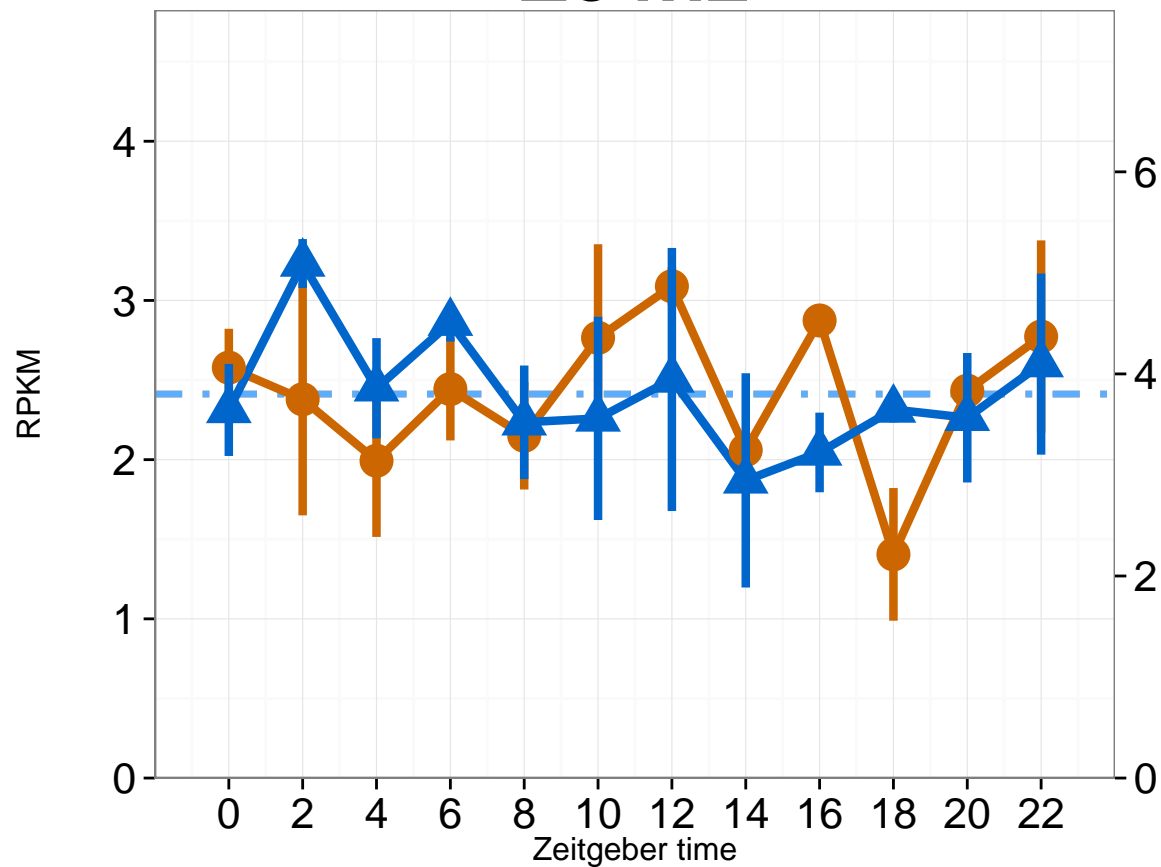

## Zc4h2

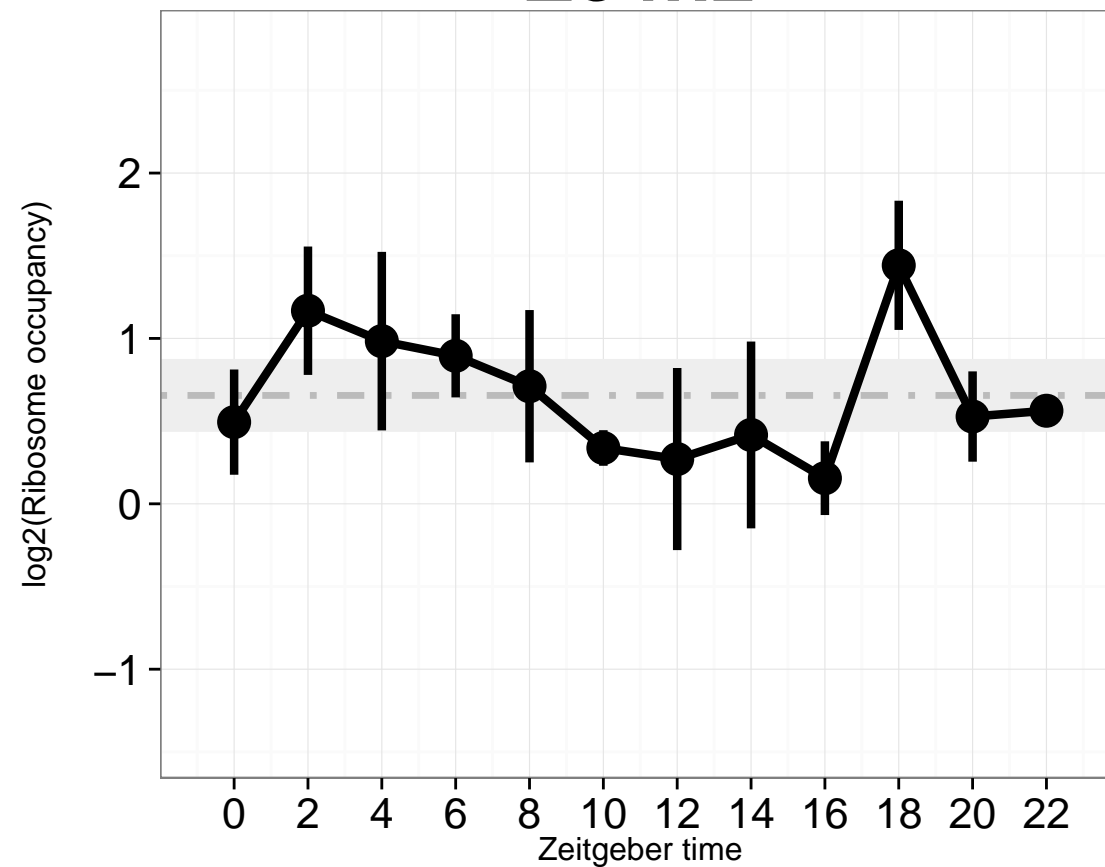

Supplement: Supplementary file 9671 [file 1]

## Rpap3

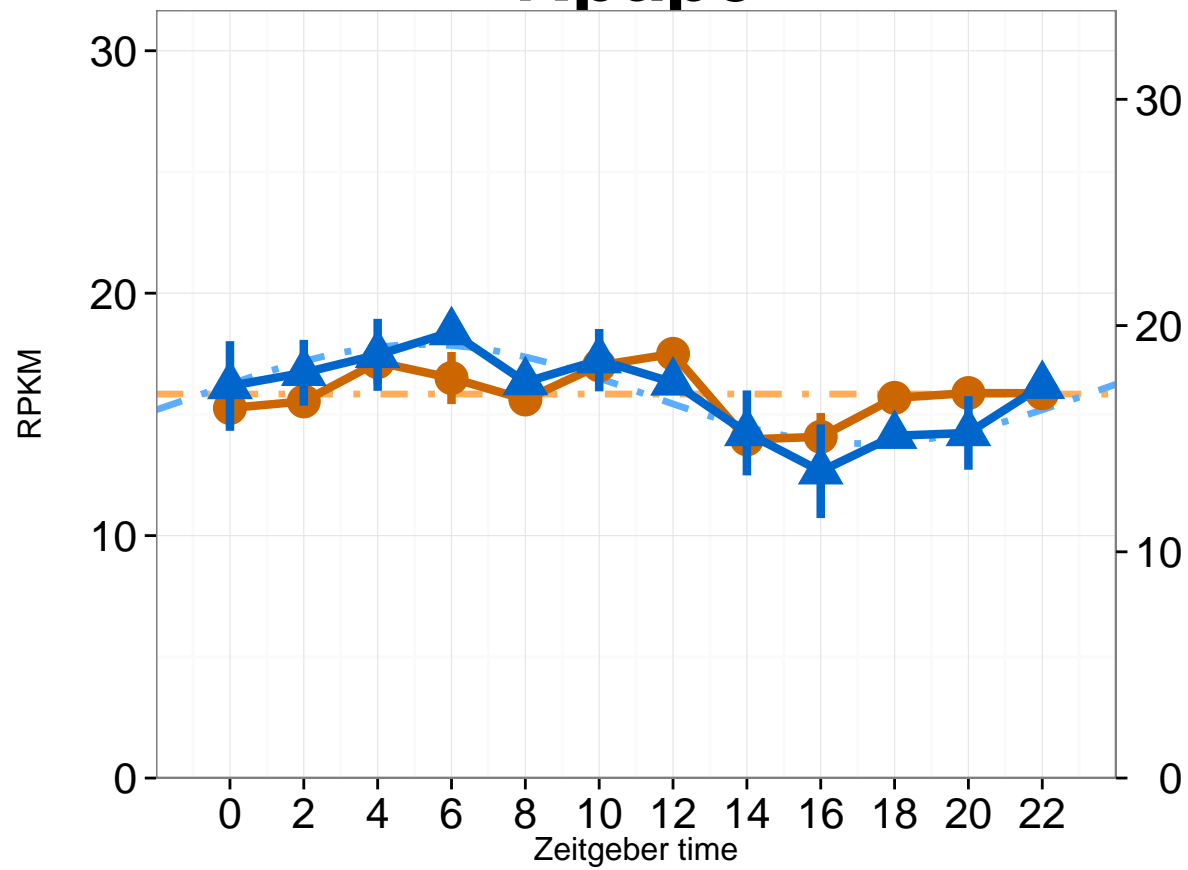

## Rpap3

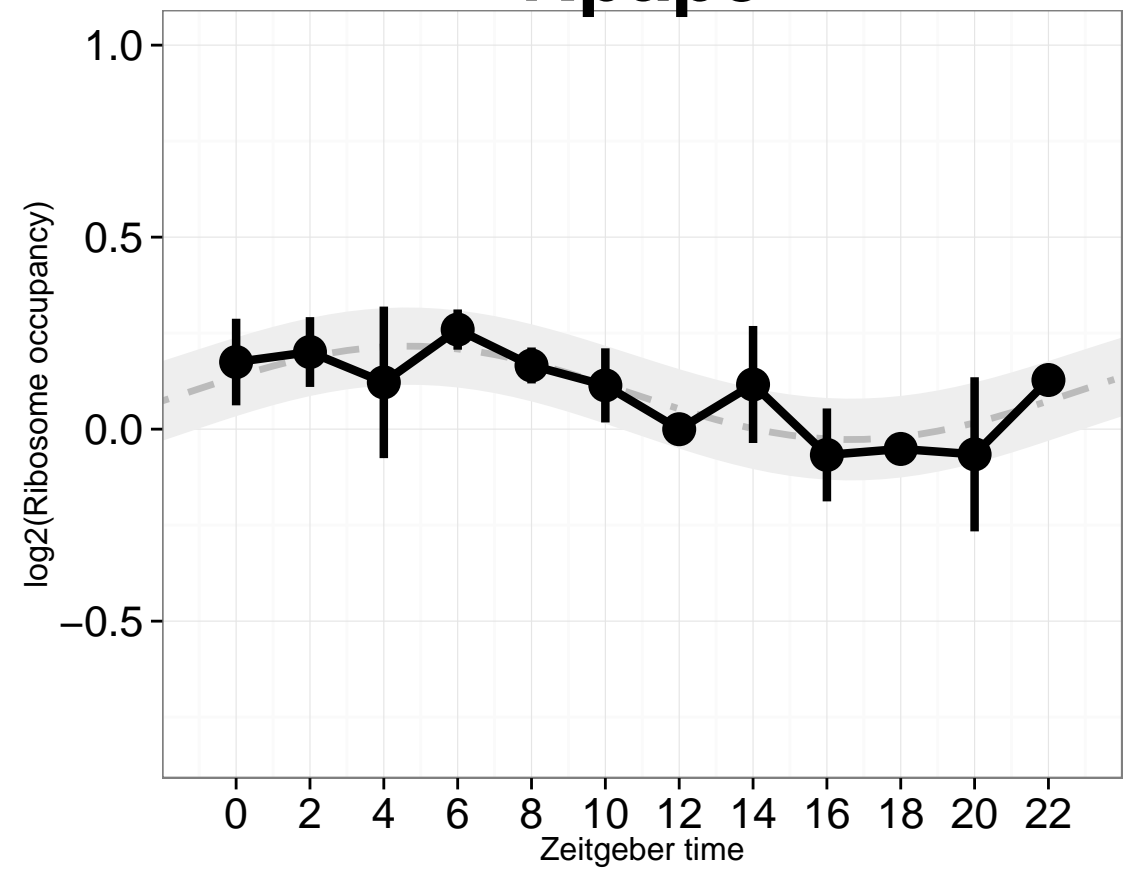

Supplement: Supplementary file 9672 [file 1]

# Lzts1

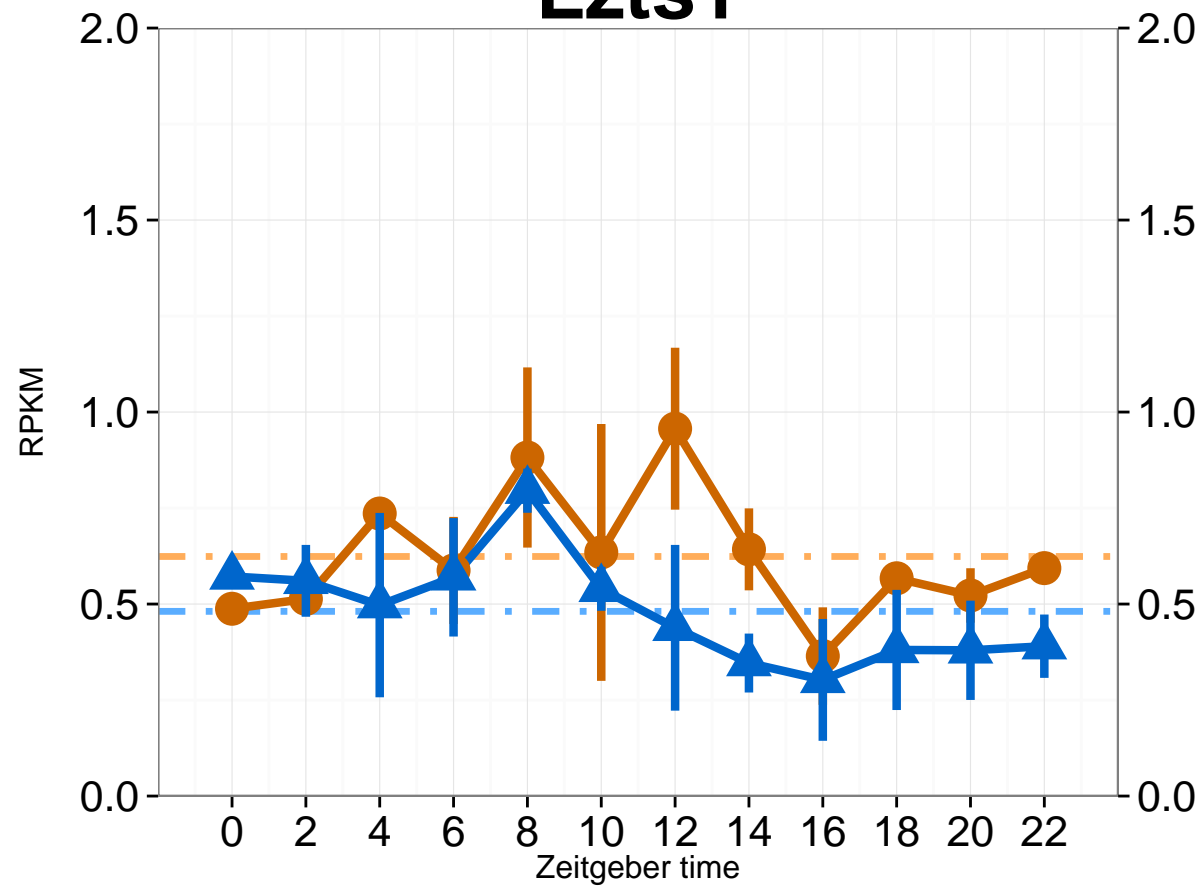

# Lzts1

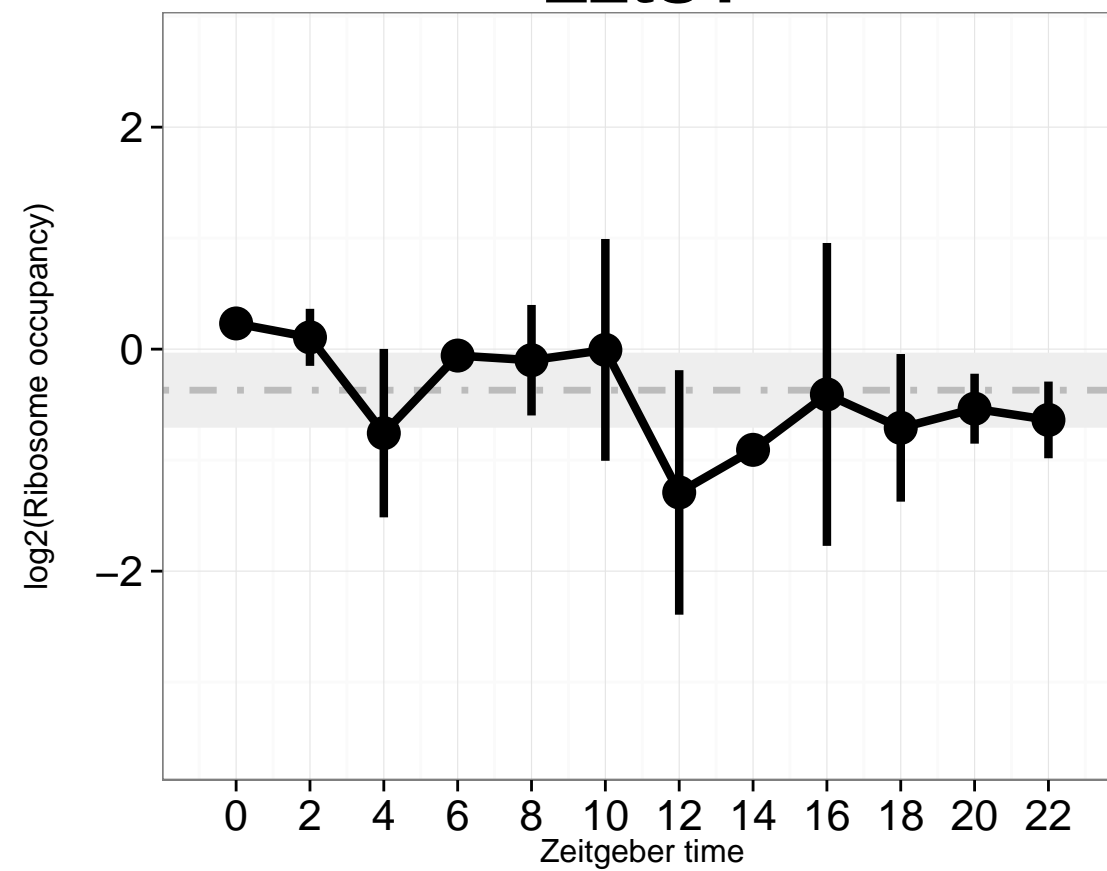

Supplement: Supplementary file 9673 [file 1]

## Tfam

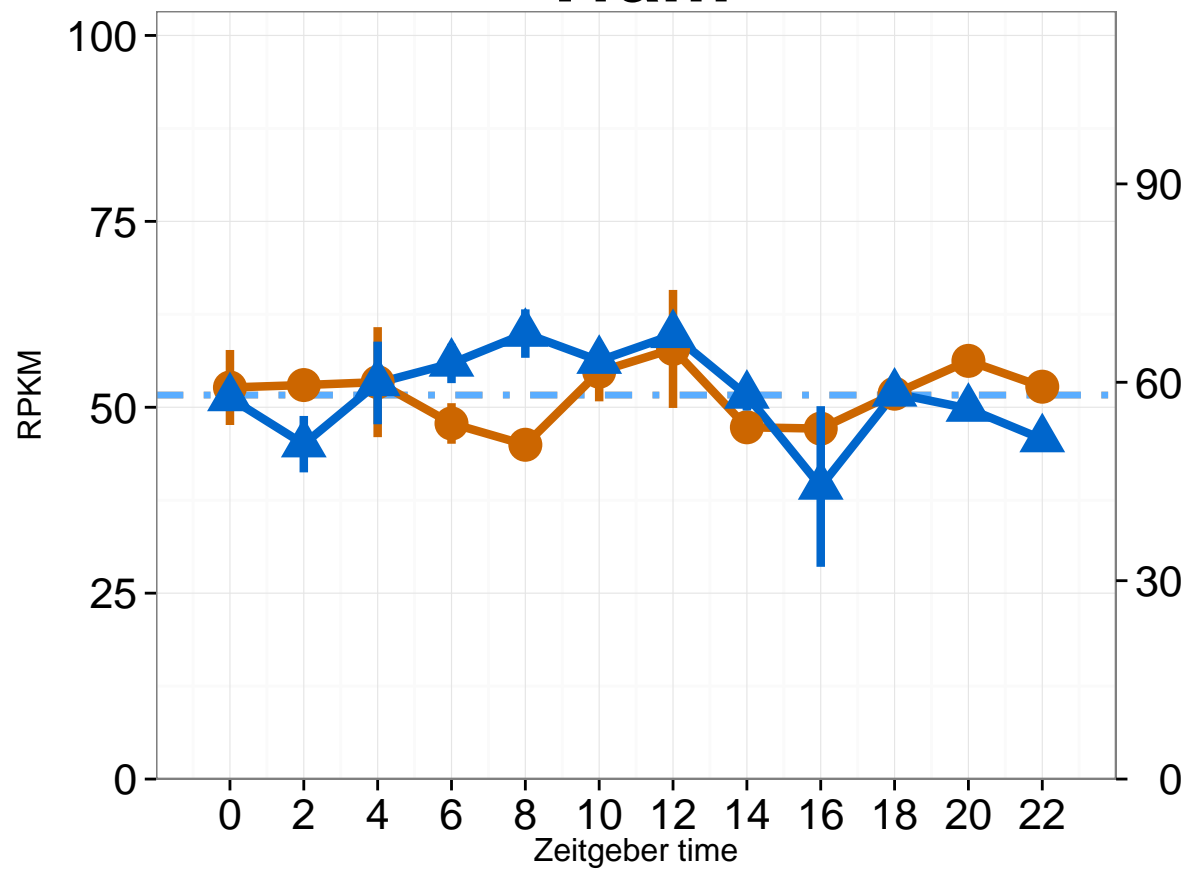

## Tfam

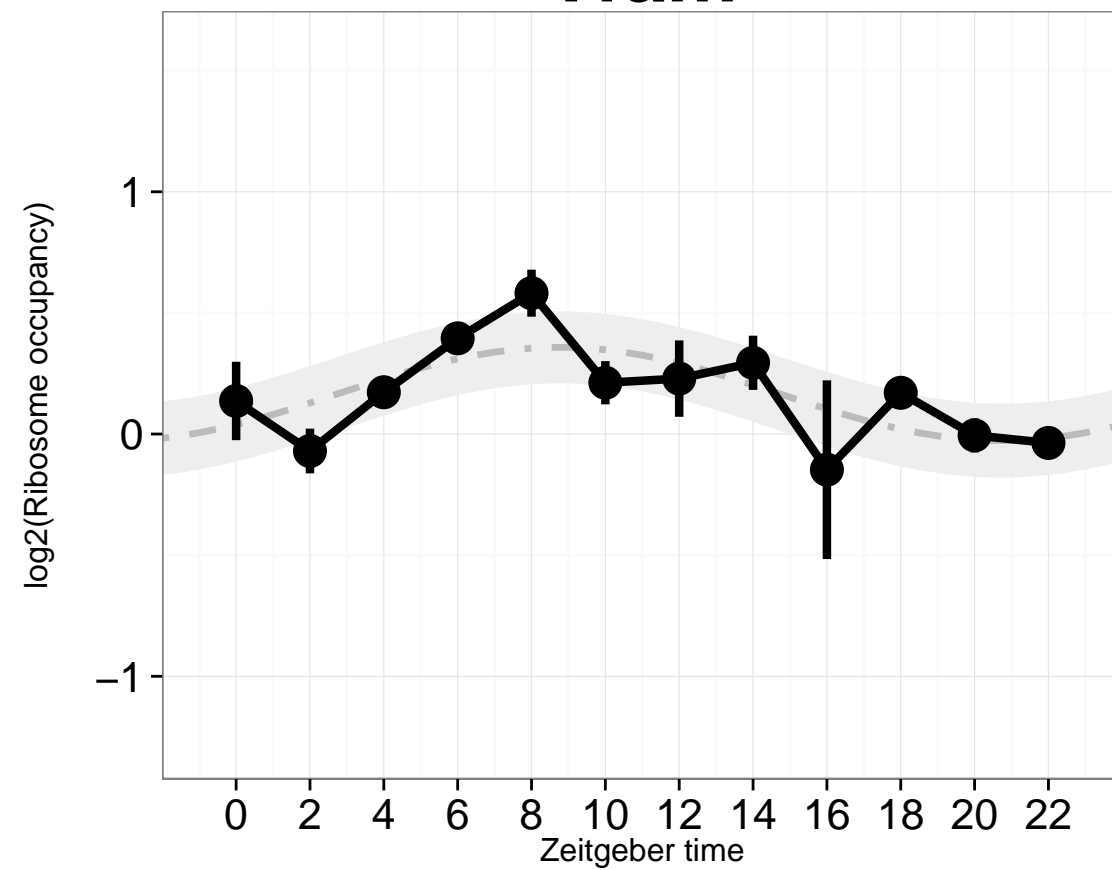

Supplement: Supplementary file 9674 [file 1]

## Chmp7

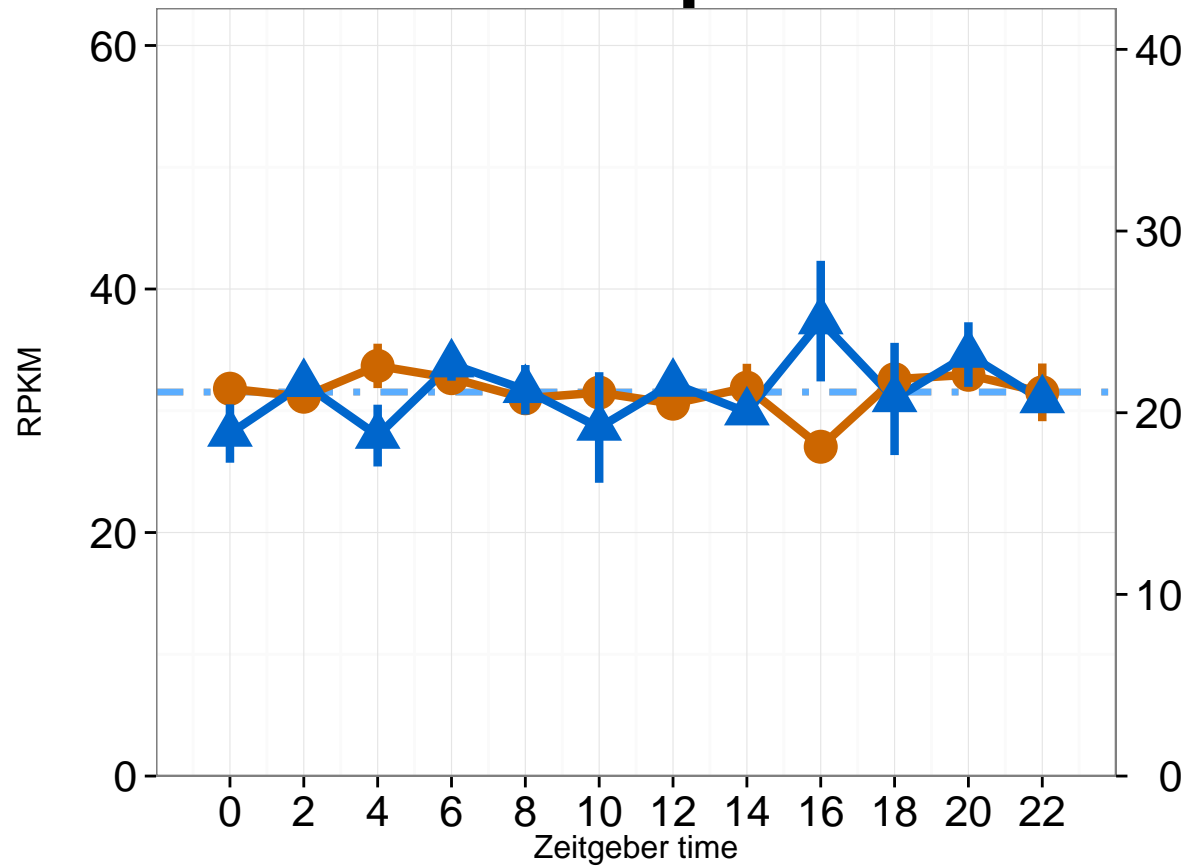

## Chmp7

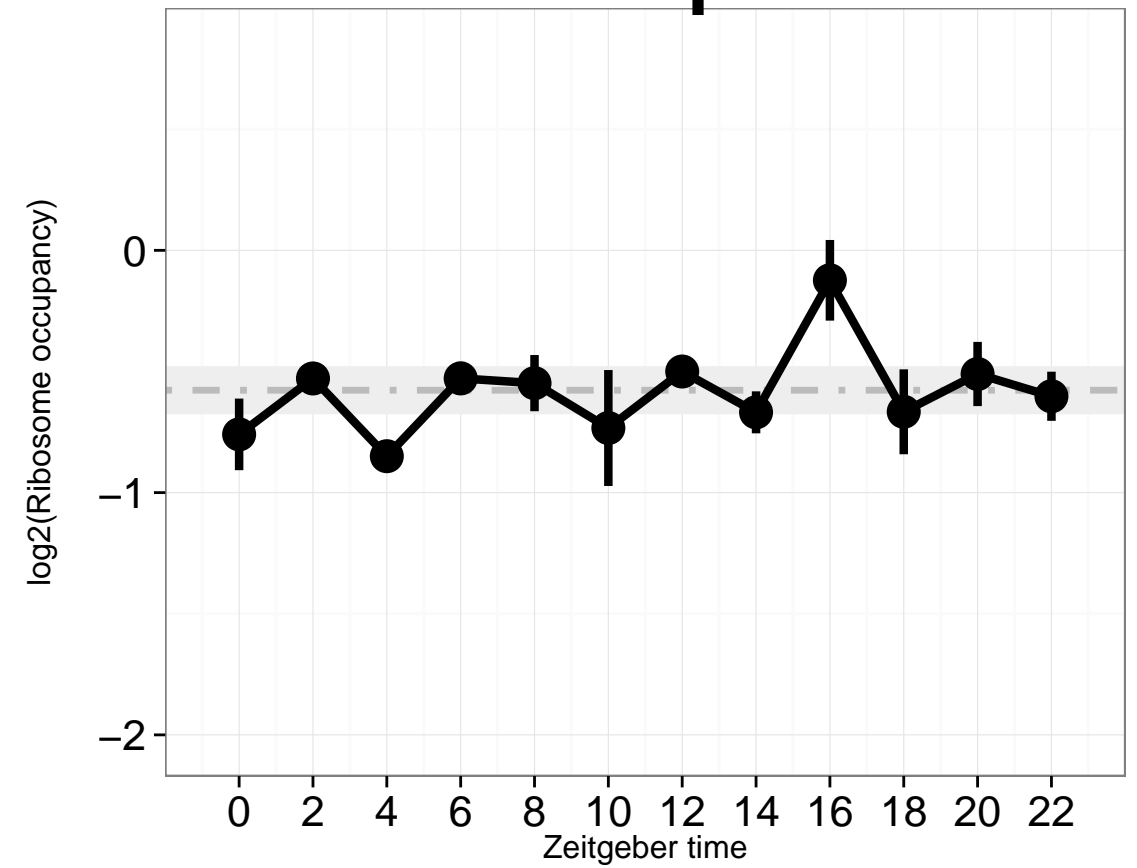

Supplement: Supplementary file 9675 [file 1]

# Opa1

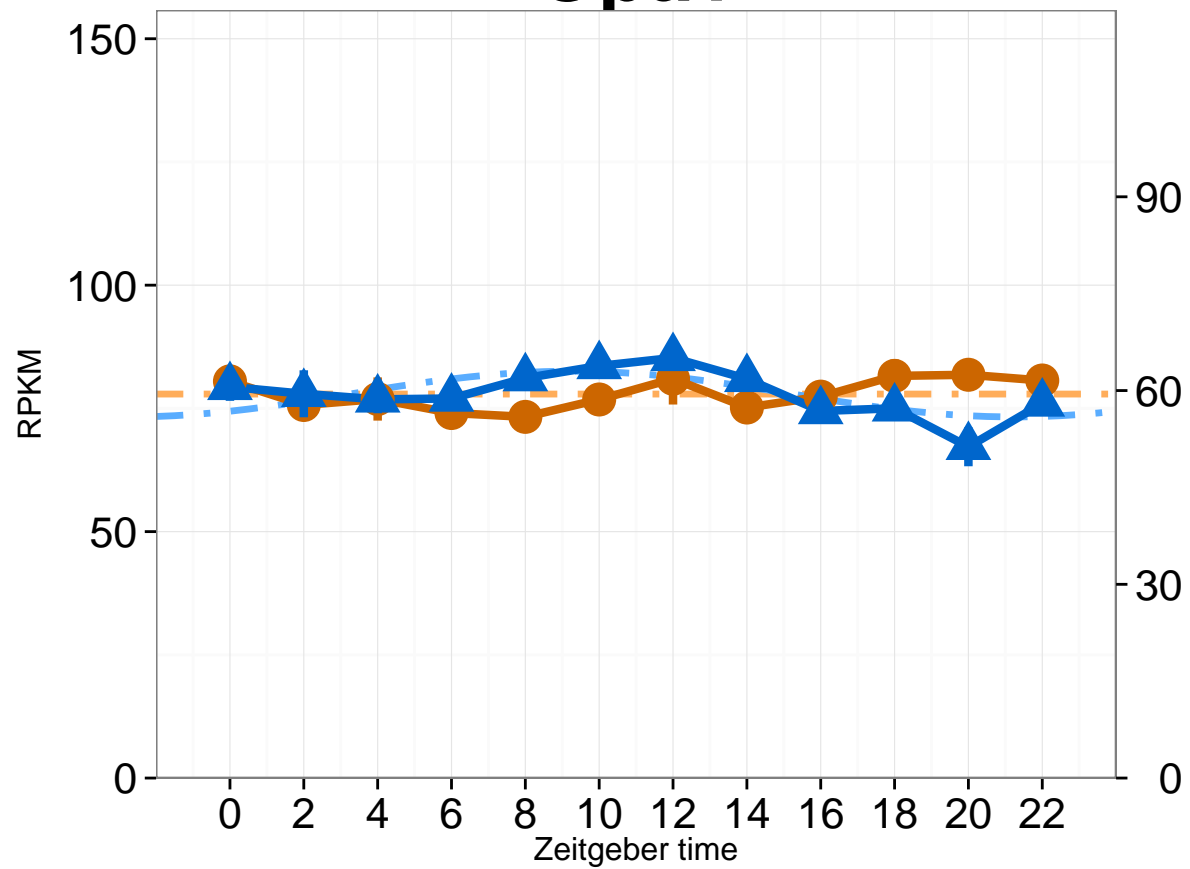

# Opa1

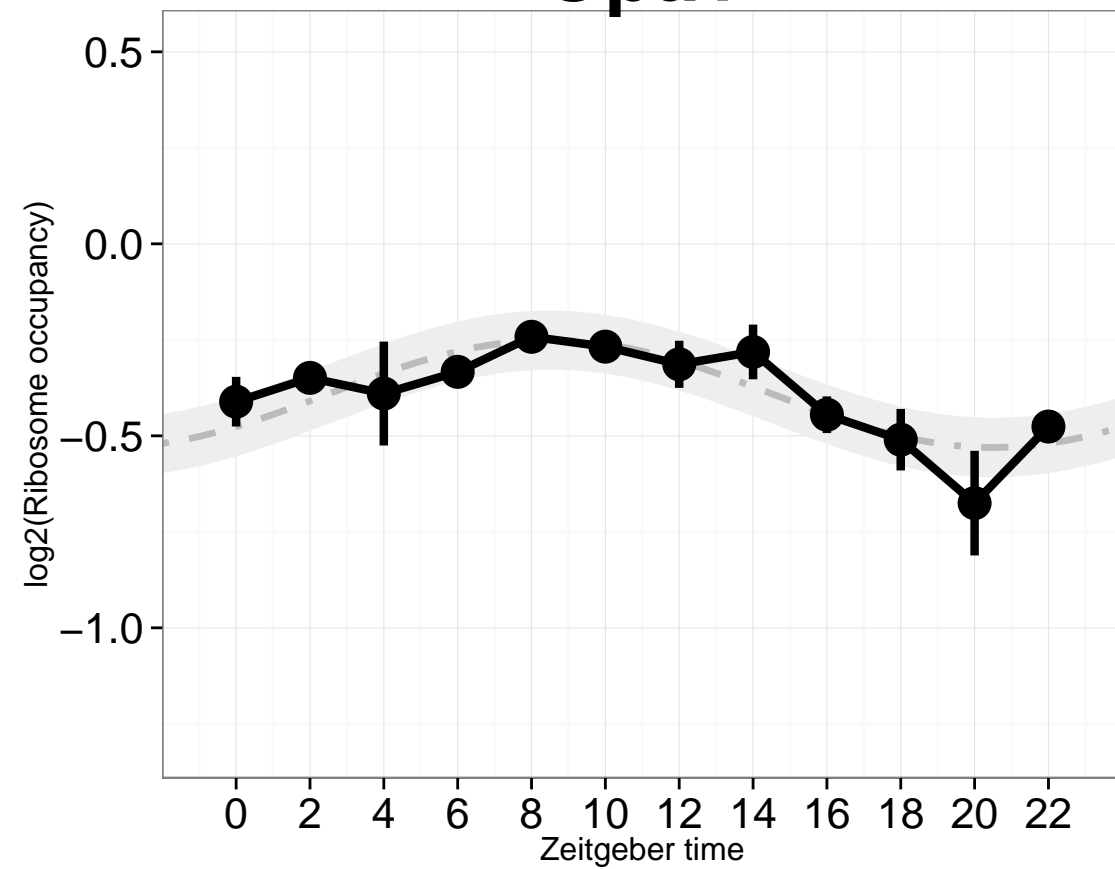

Supplement: Supplementary file 9676 [file 1]

# Ntmt1

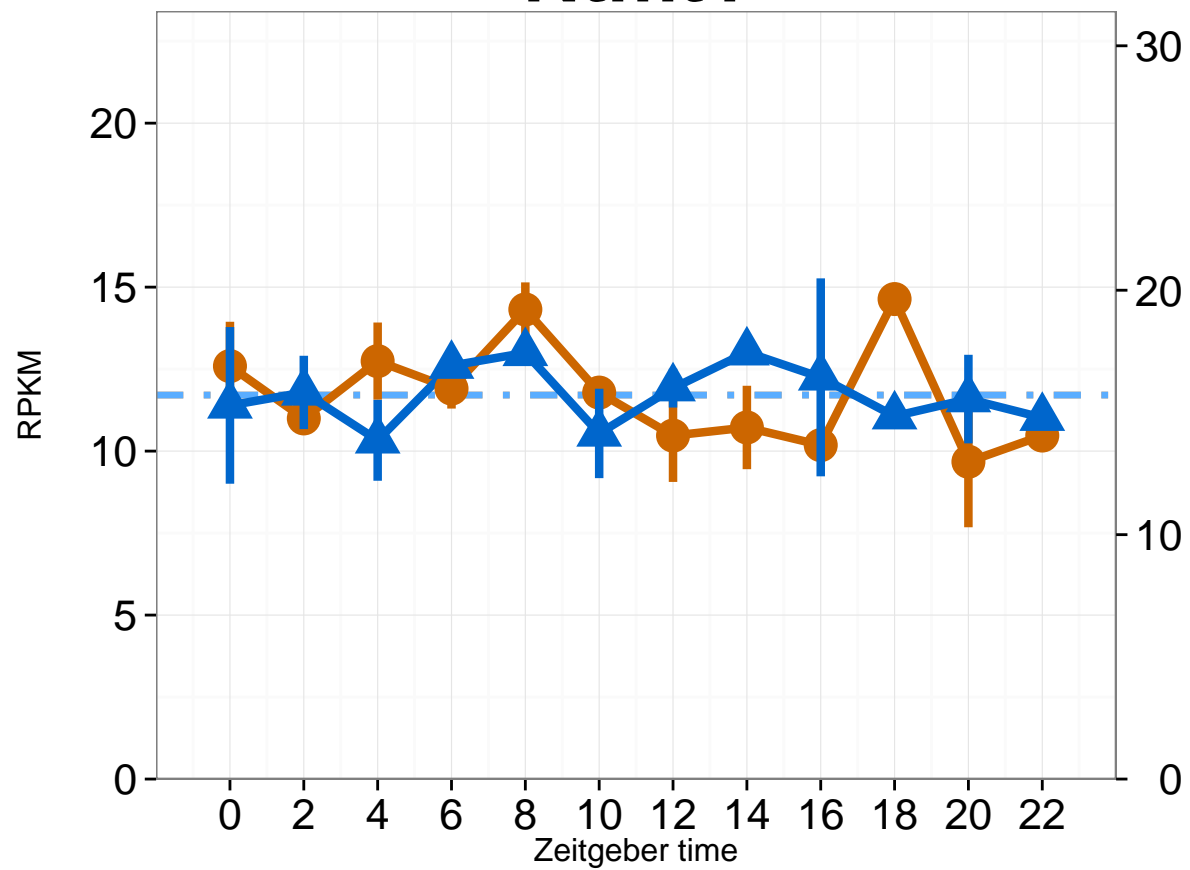

# Ntmt1

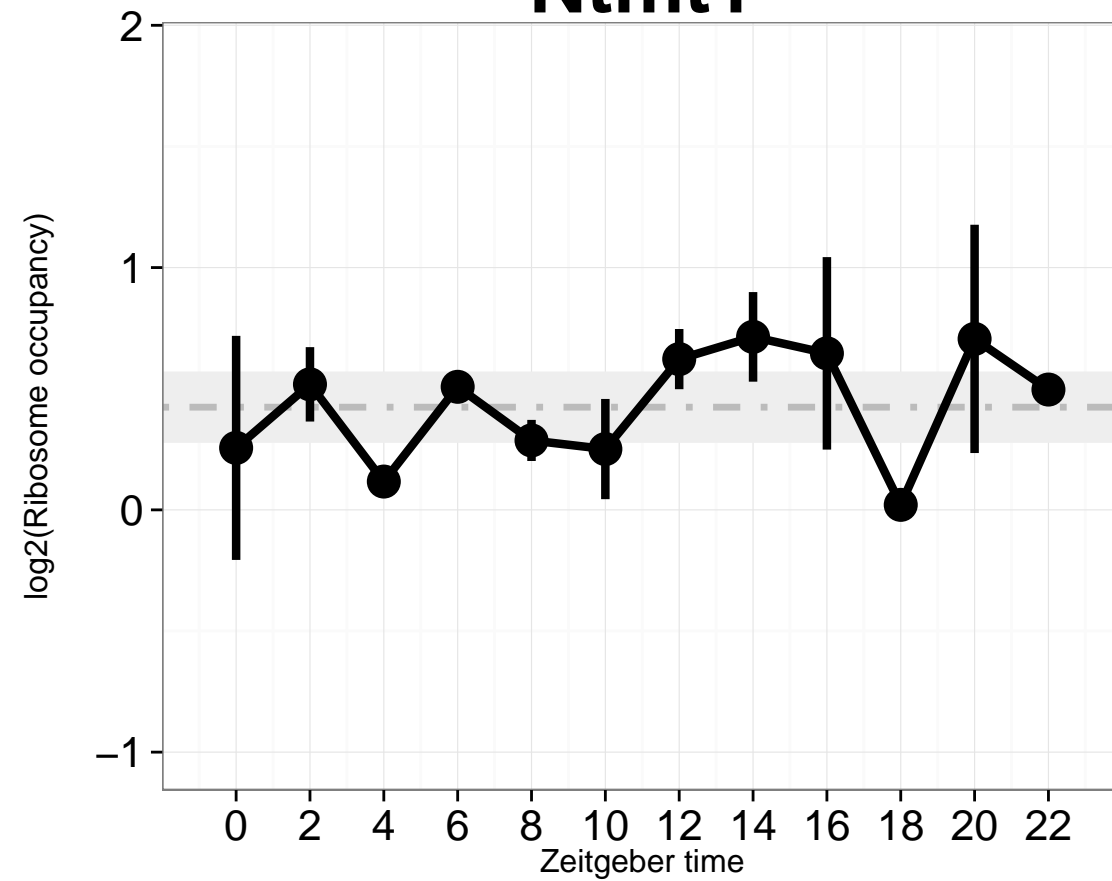

Supplement: Supplementary file 9677 [file 1]

# Tmem38b

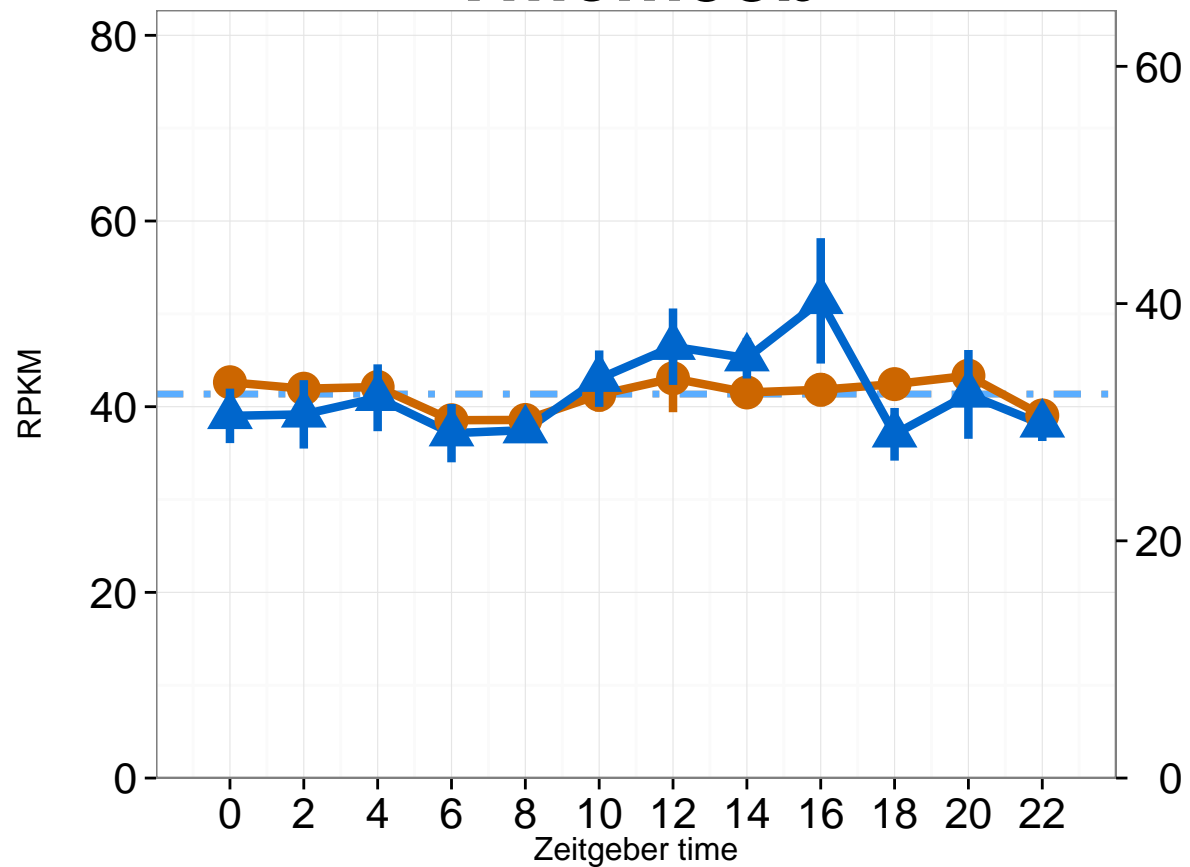

# Tmem38b

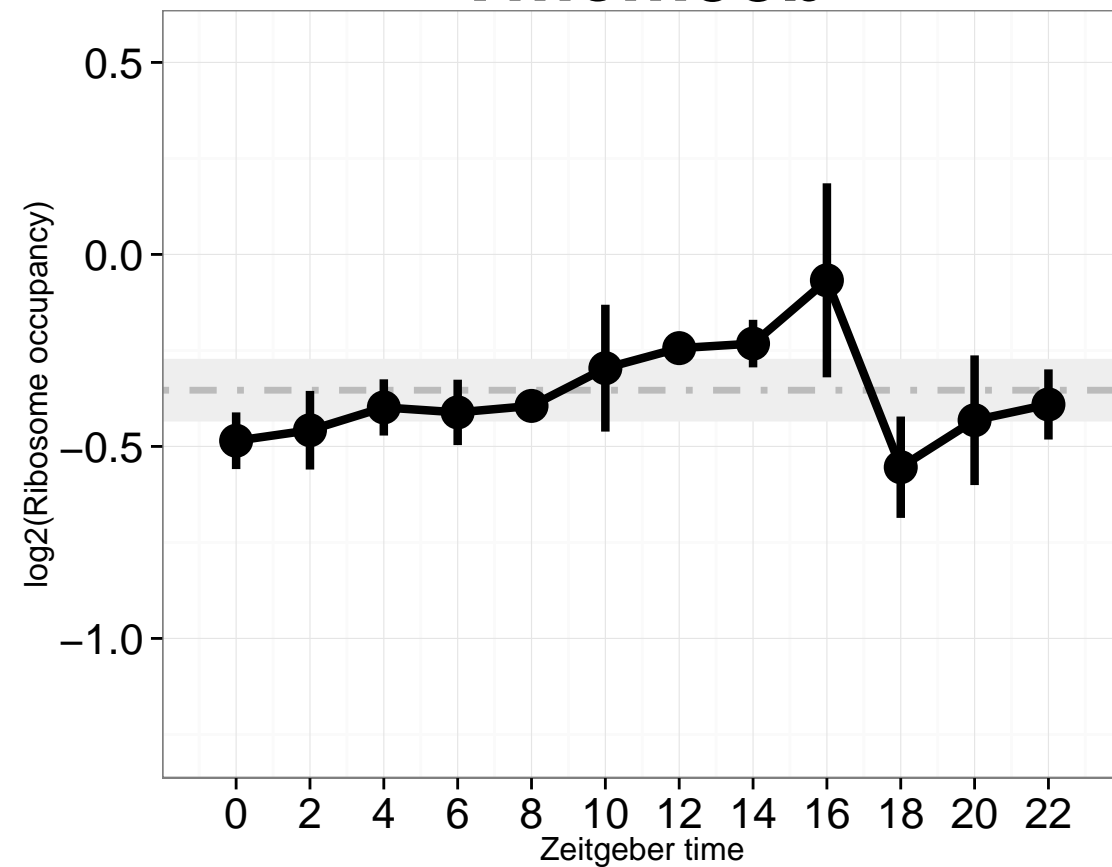

Supplement: Supplementary file 9678 [file 1]

# Atp1b1

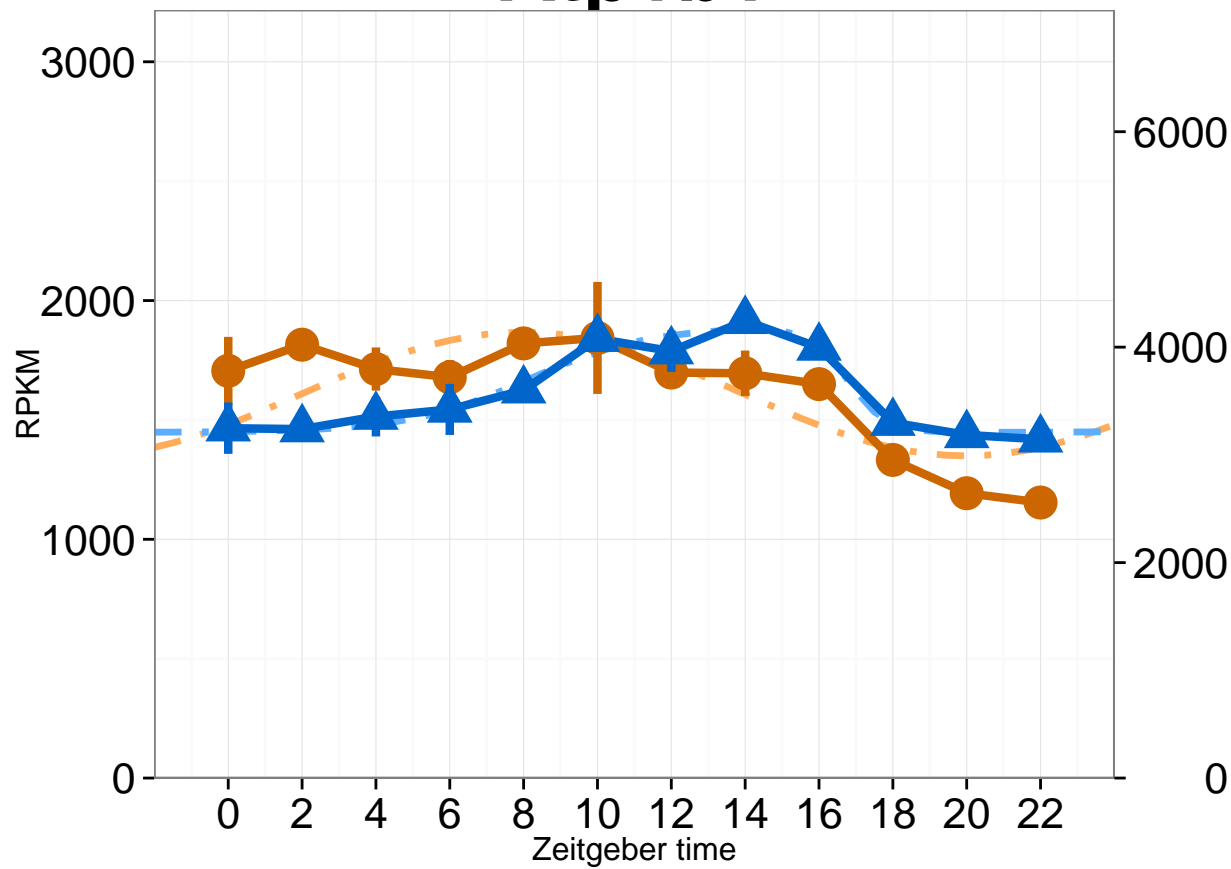

# Atp1b1

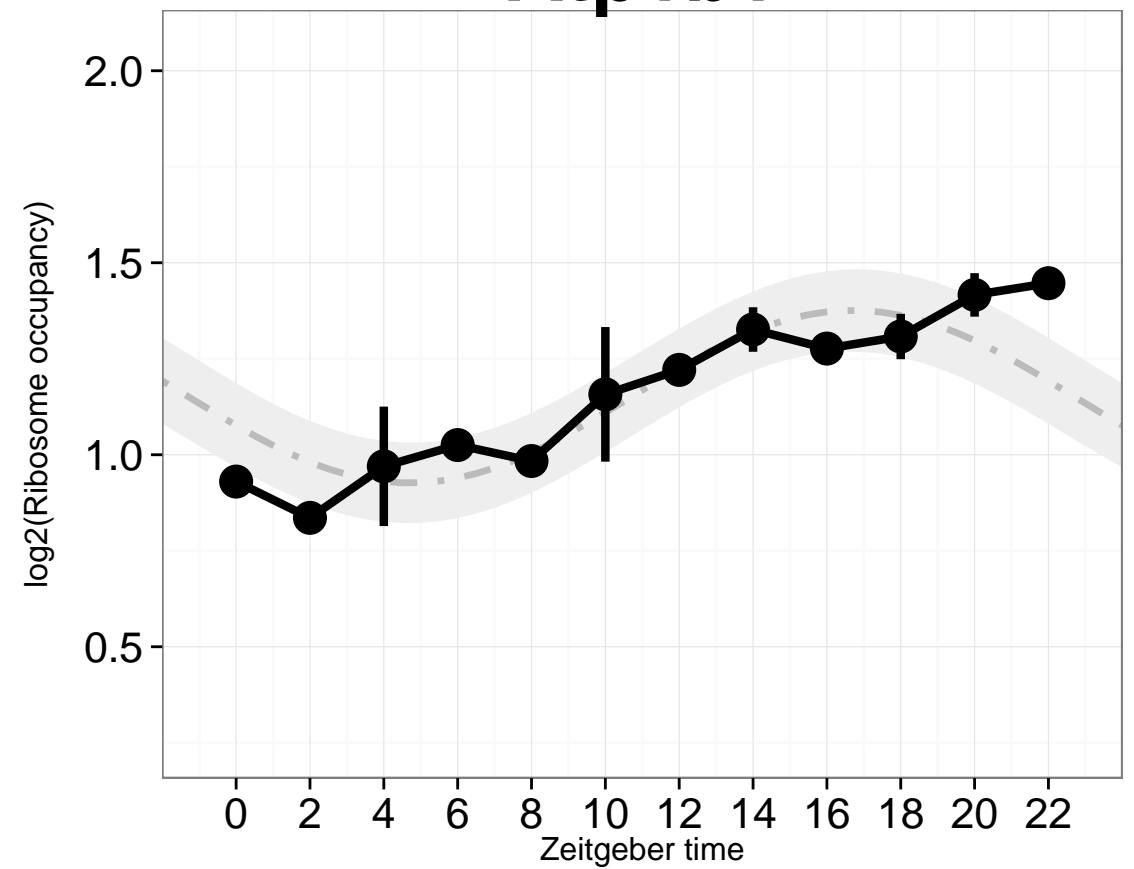

Supplement: Supplementary file 9679 [file 1]

# Angpt1

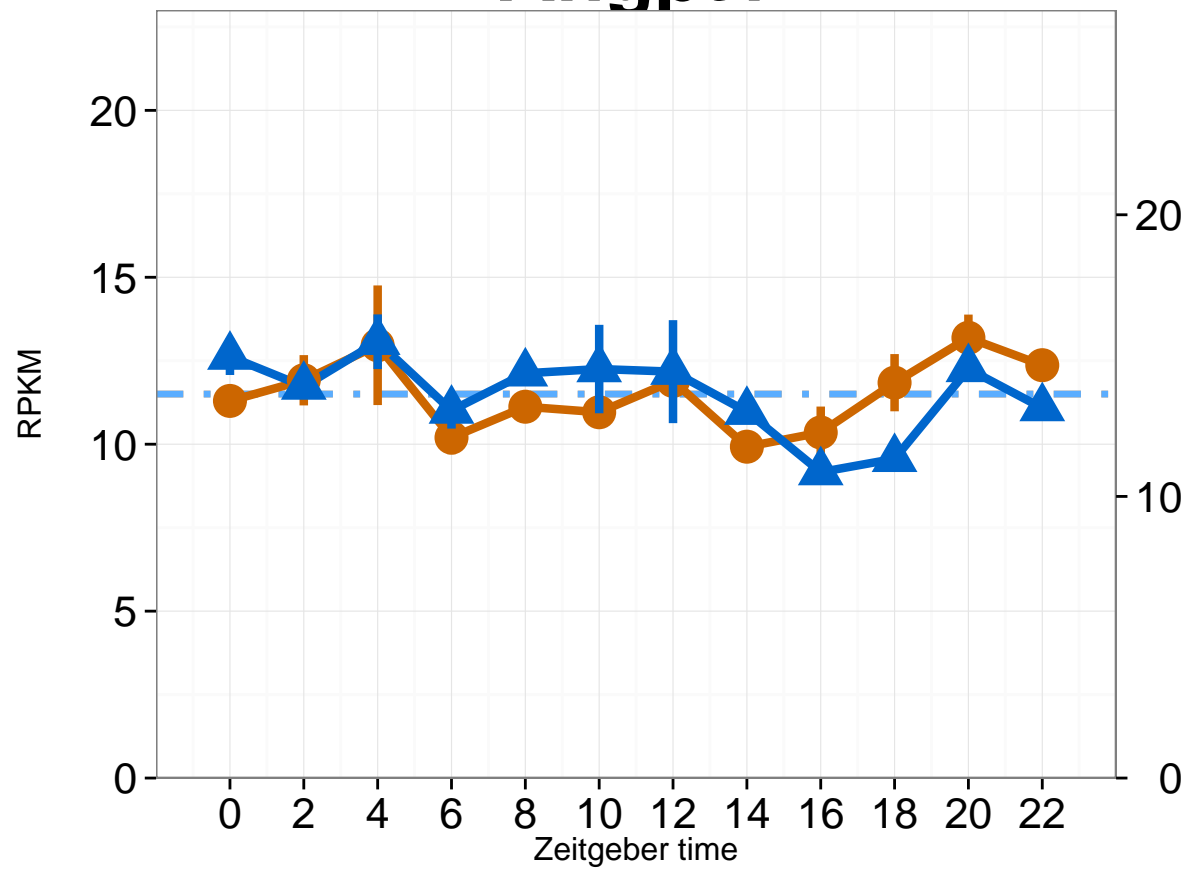

# Angpt1

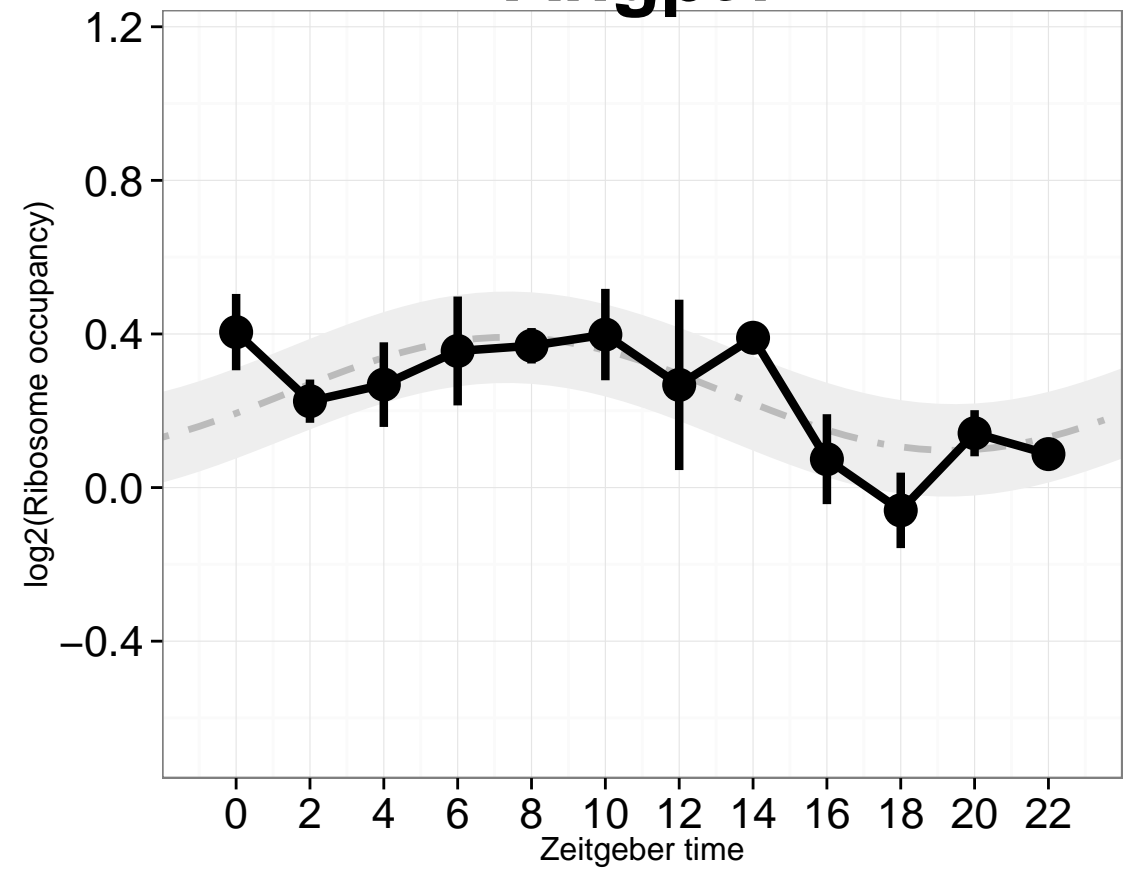

Supplement: Supplementary file 9680 [file 1]

# Rnpepl1

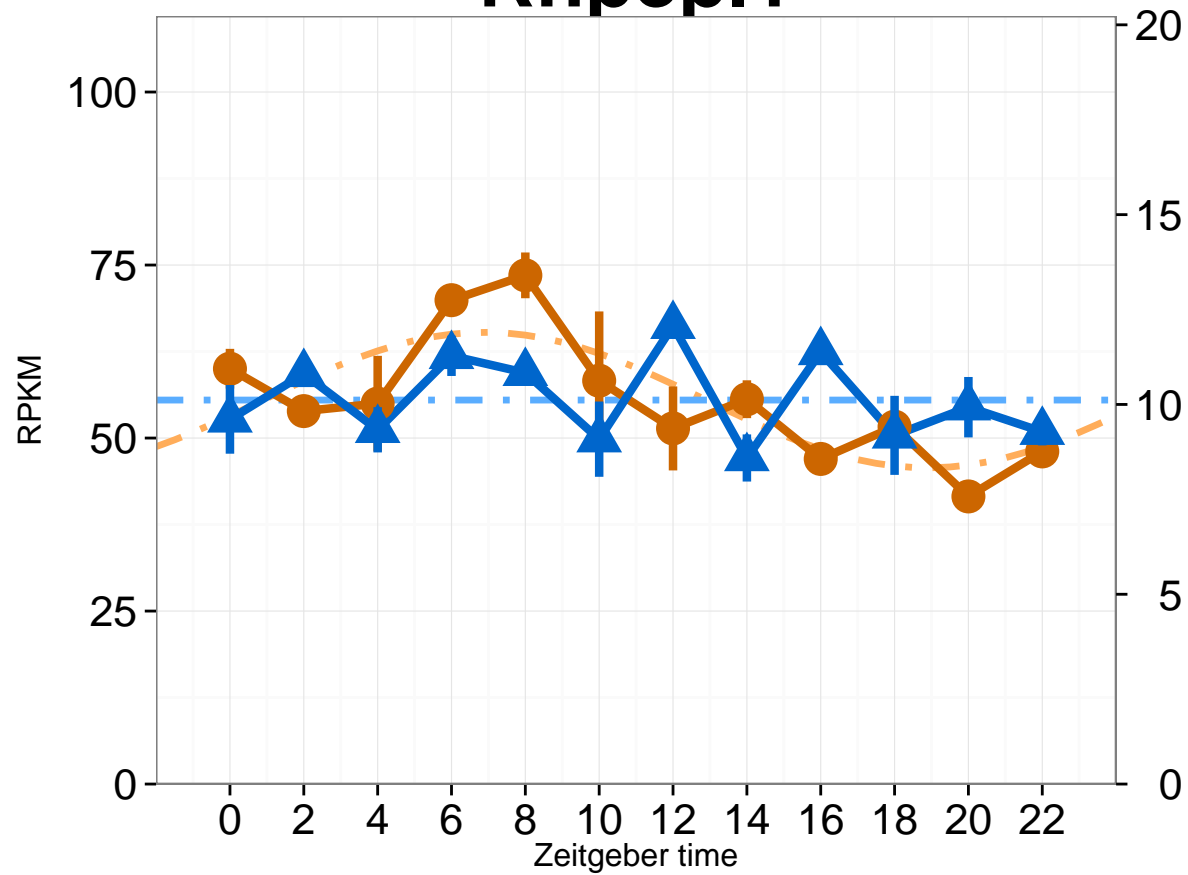

# Rnpepl1

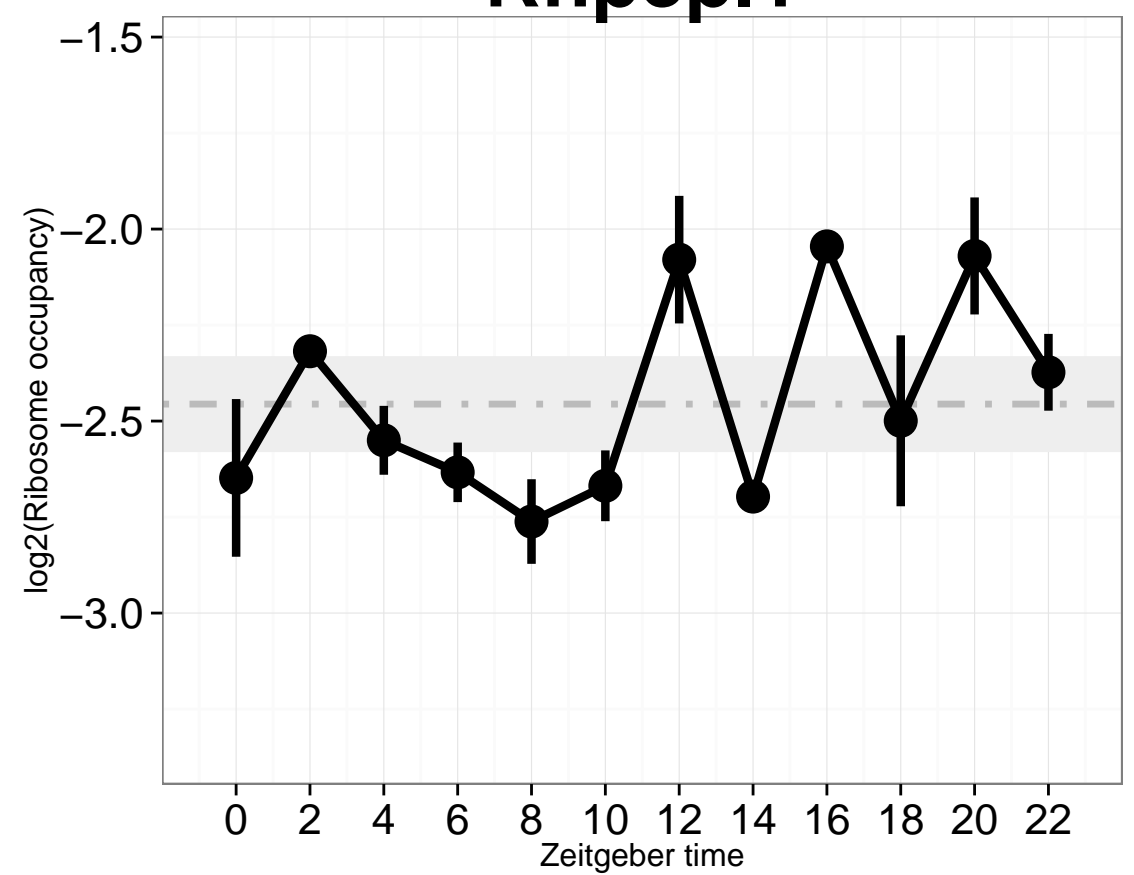

Supplement: Supplementary file 9681 [file 1]

## Car3

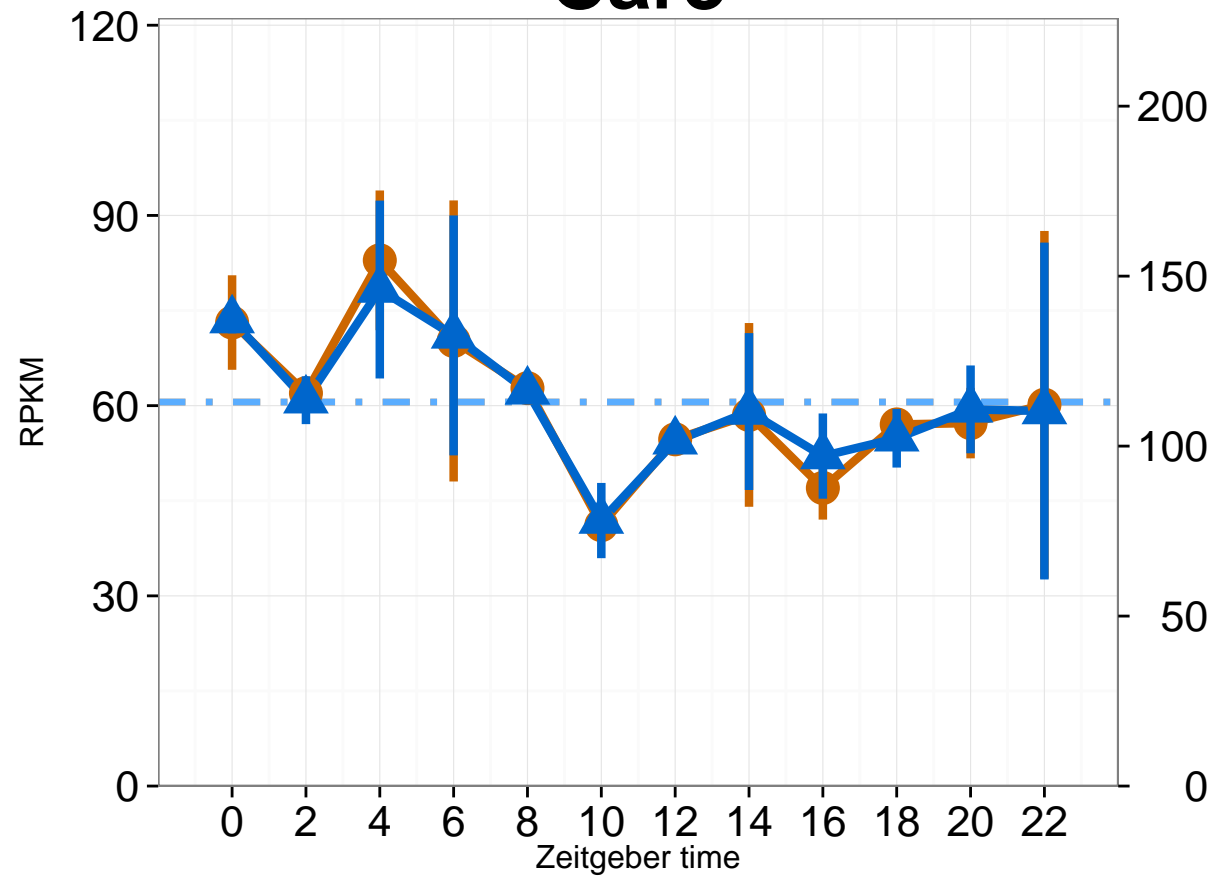

## Car3

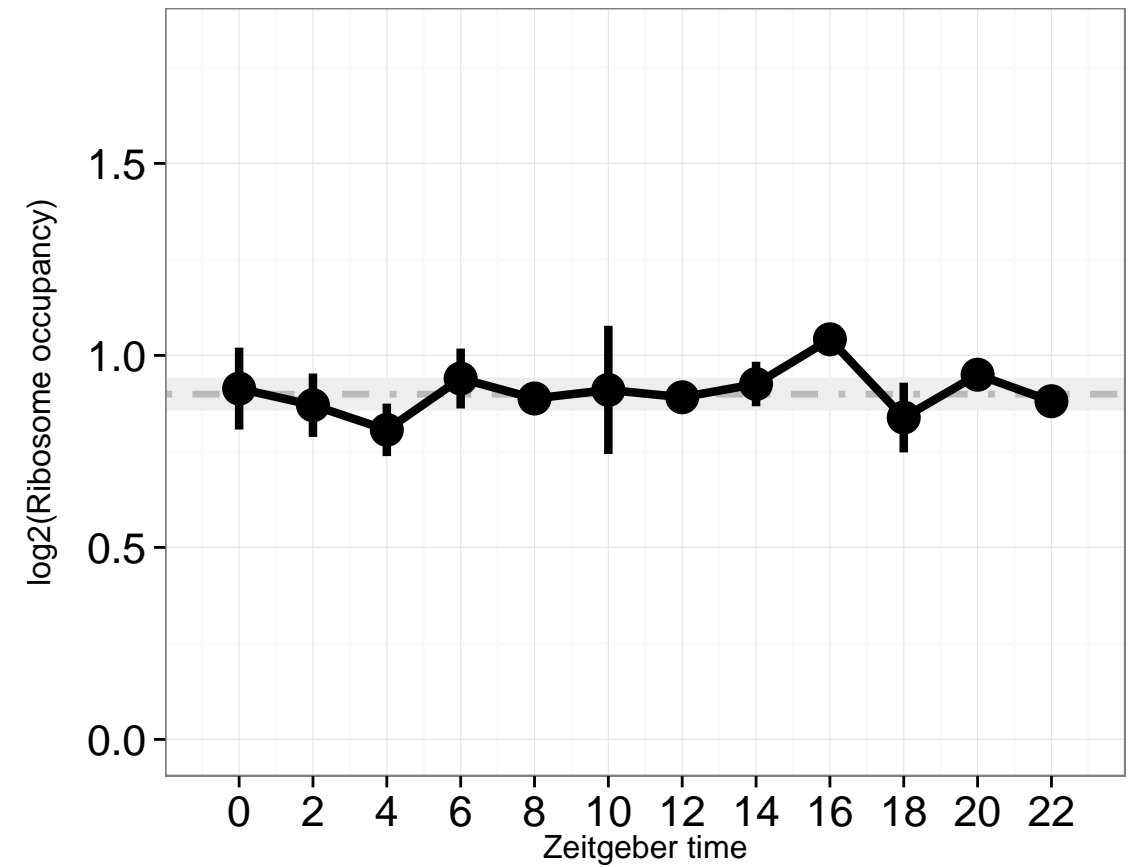

Supplement: Supplementary file 9682 [file 1]

# Irf2bp1

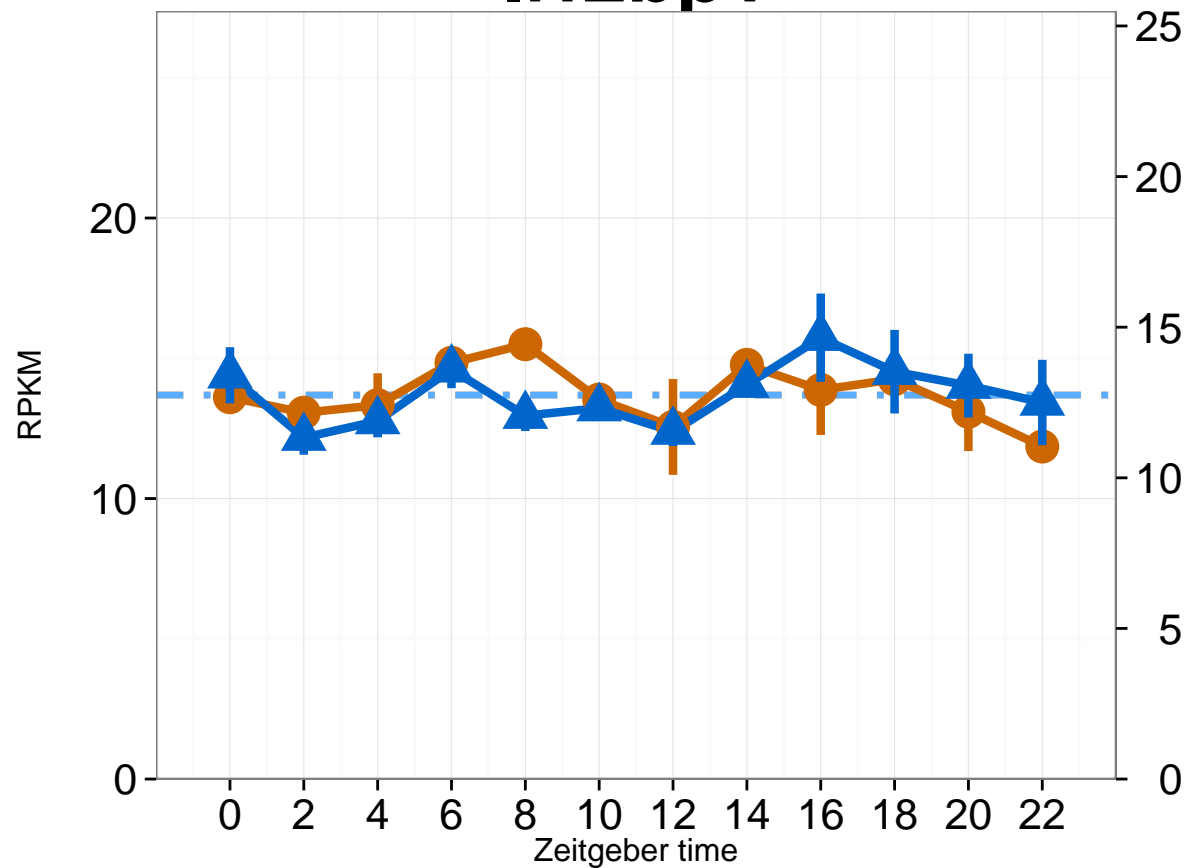

# Irf2bp1

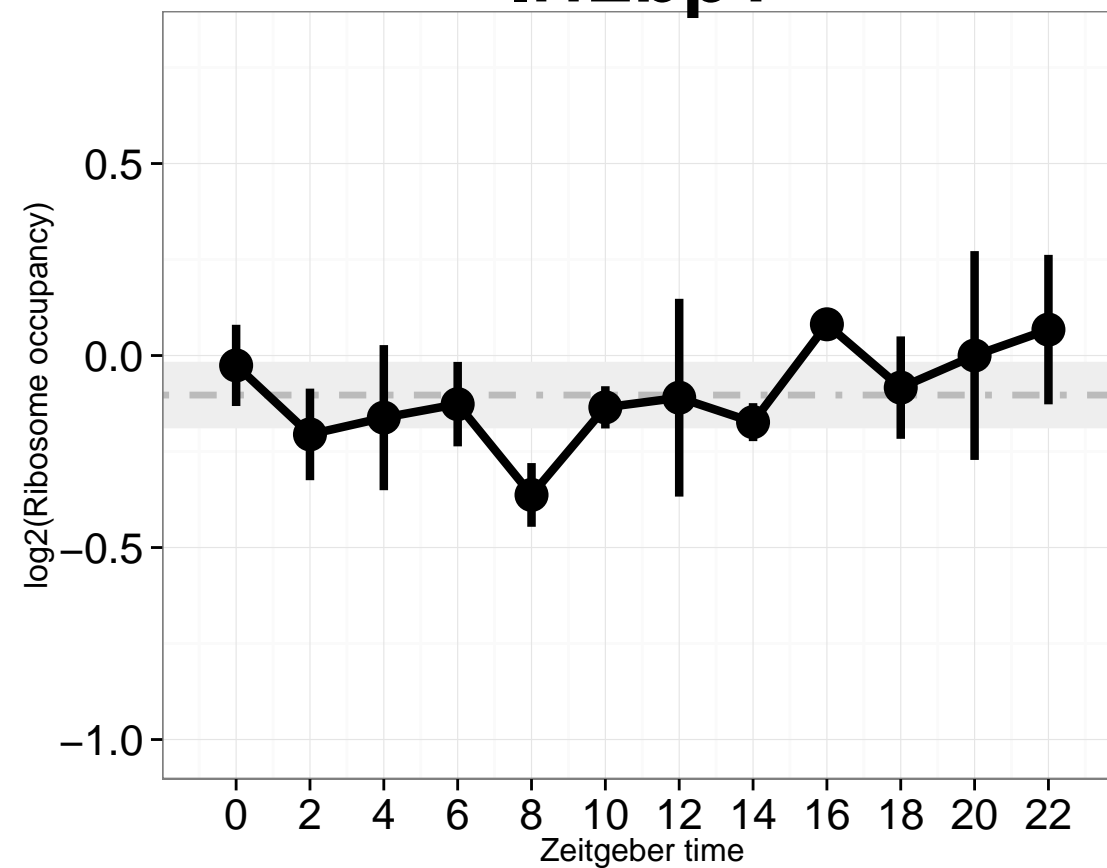

Supplement: Supplementary file 9683 [file 1]

## Apobr

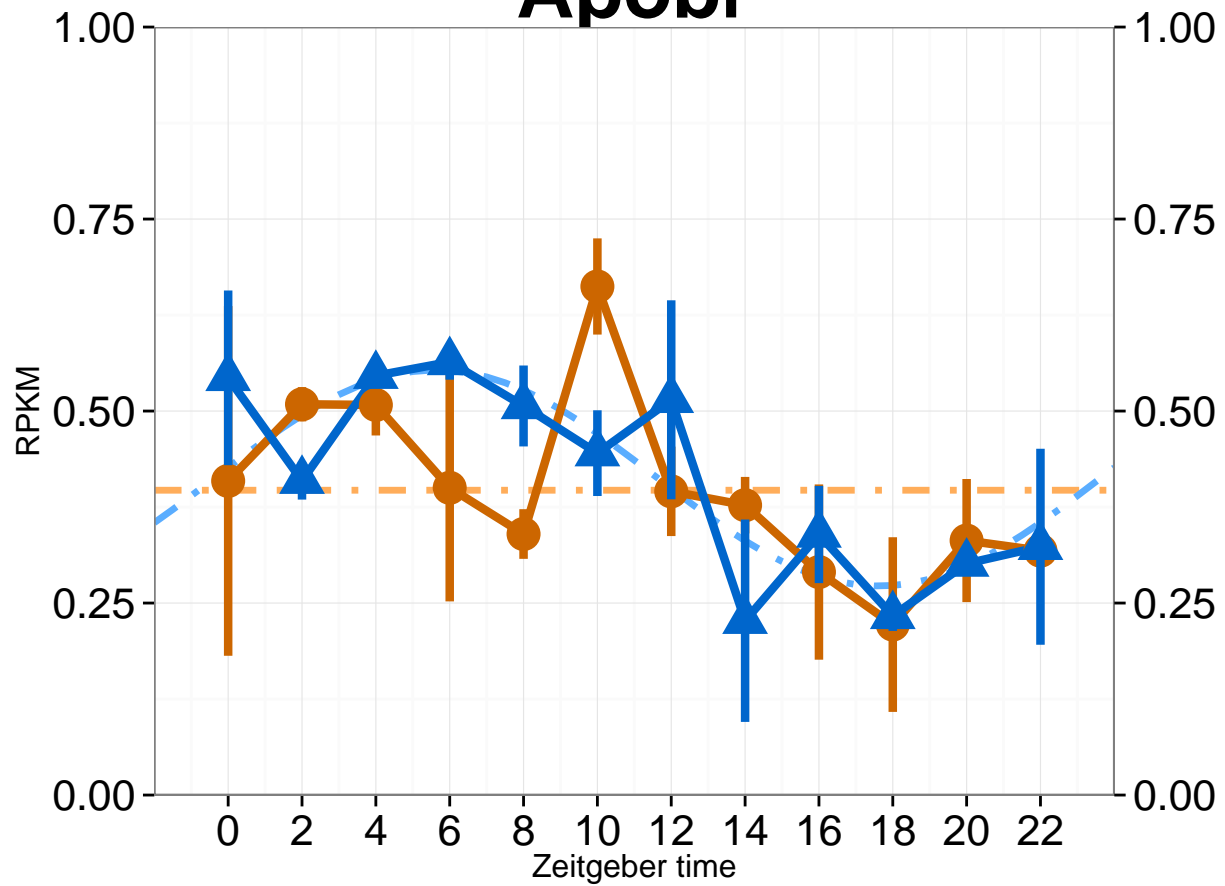

## Apobr

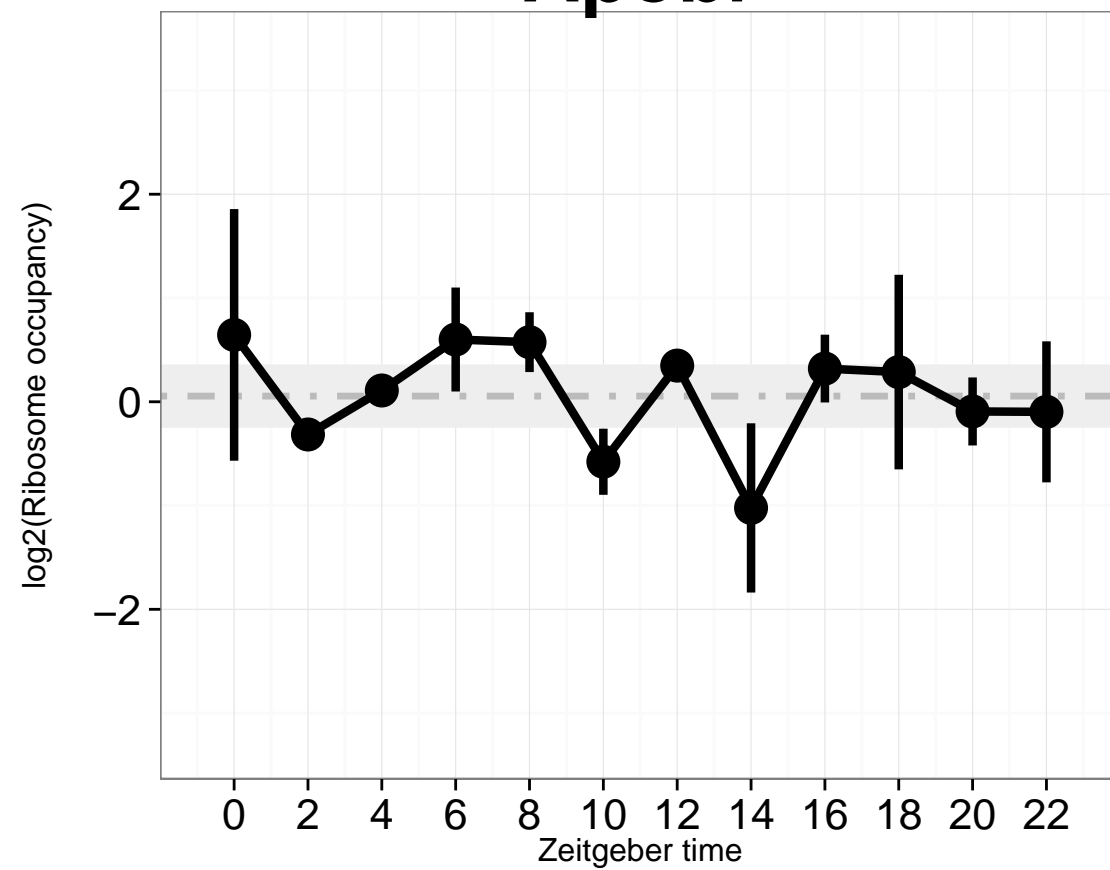

Supplement: Supplementary file 9684 [file 1]

## Ndfip1

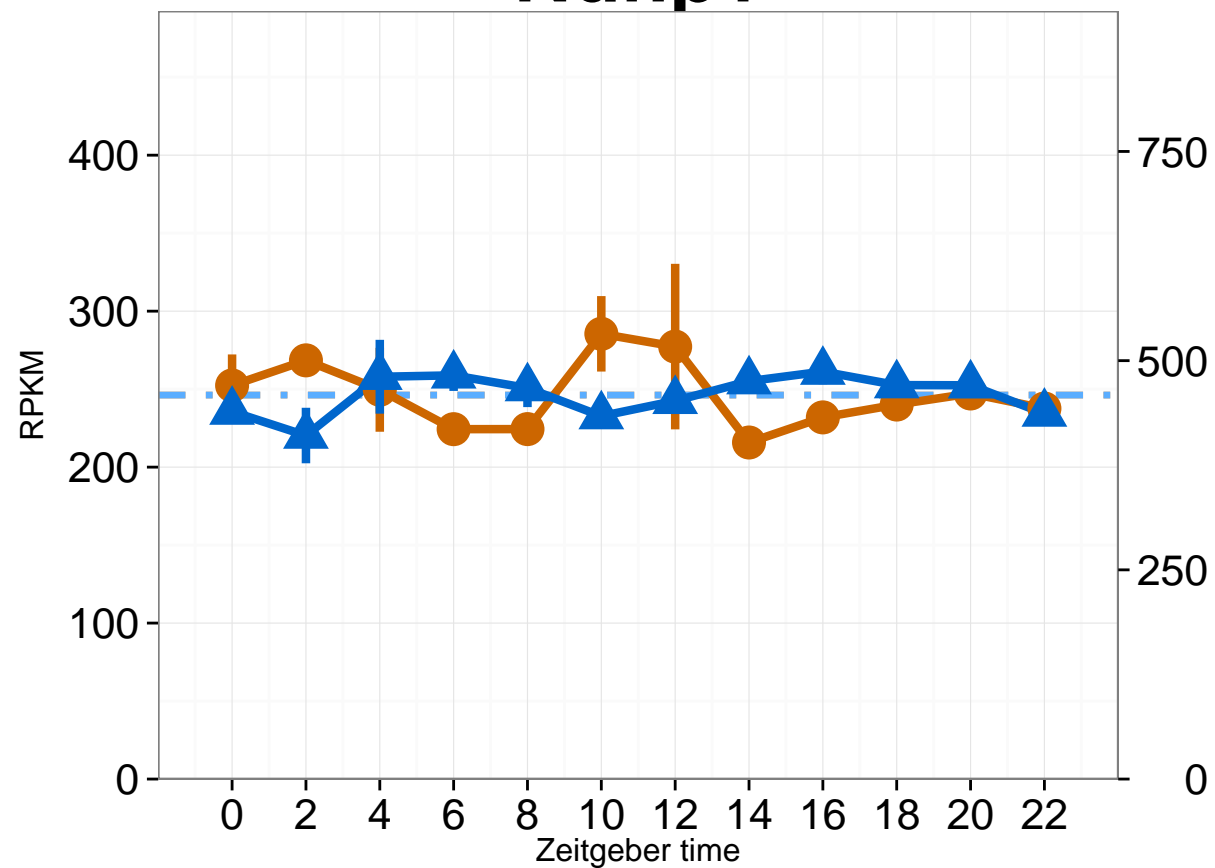

## Ndfip1

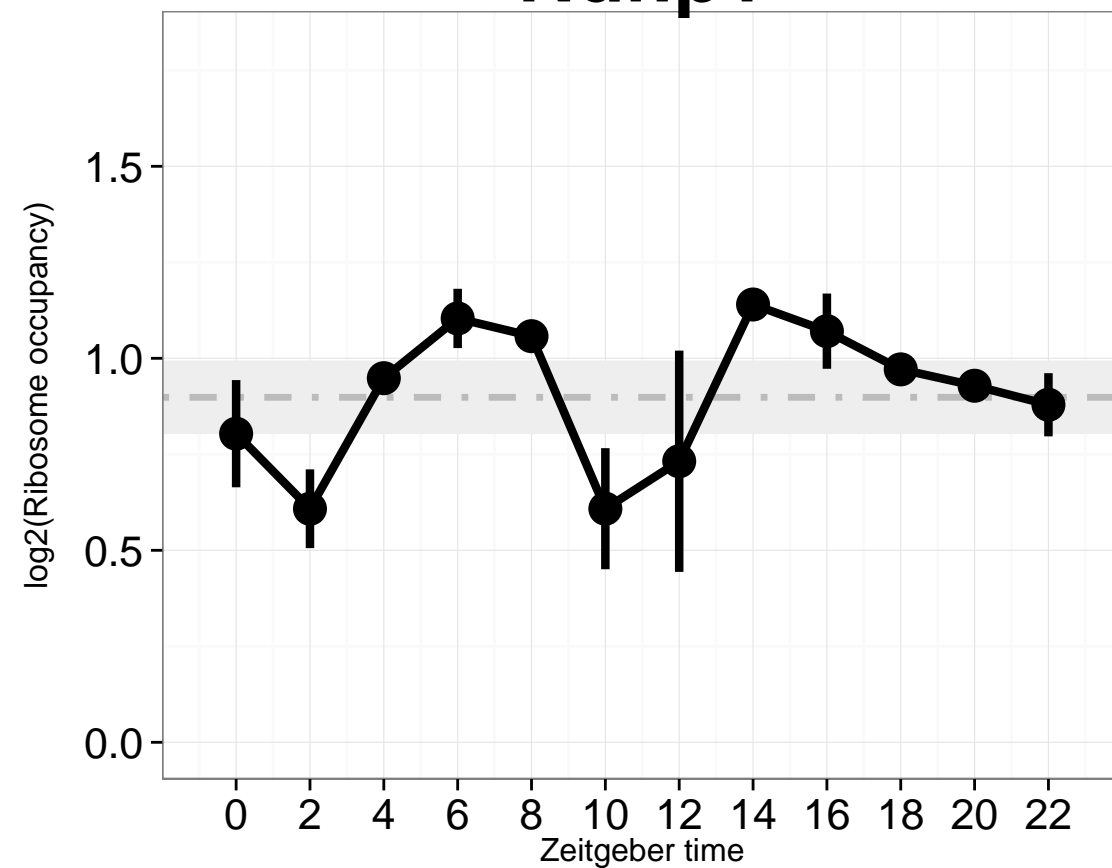

Supplement: Supplementary file 9685 [file 1]

## Jarid2

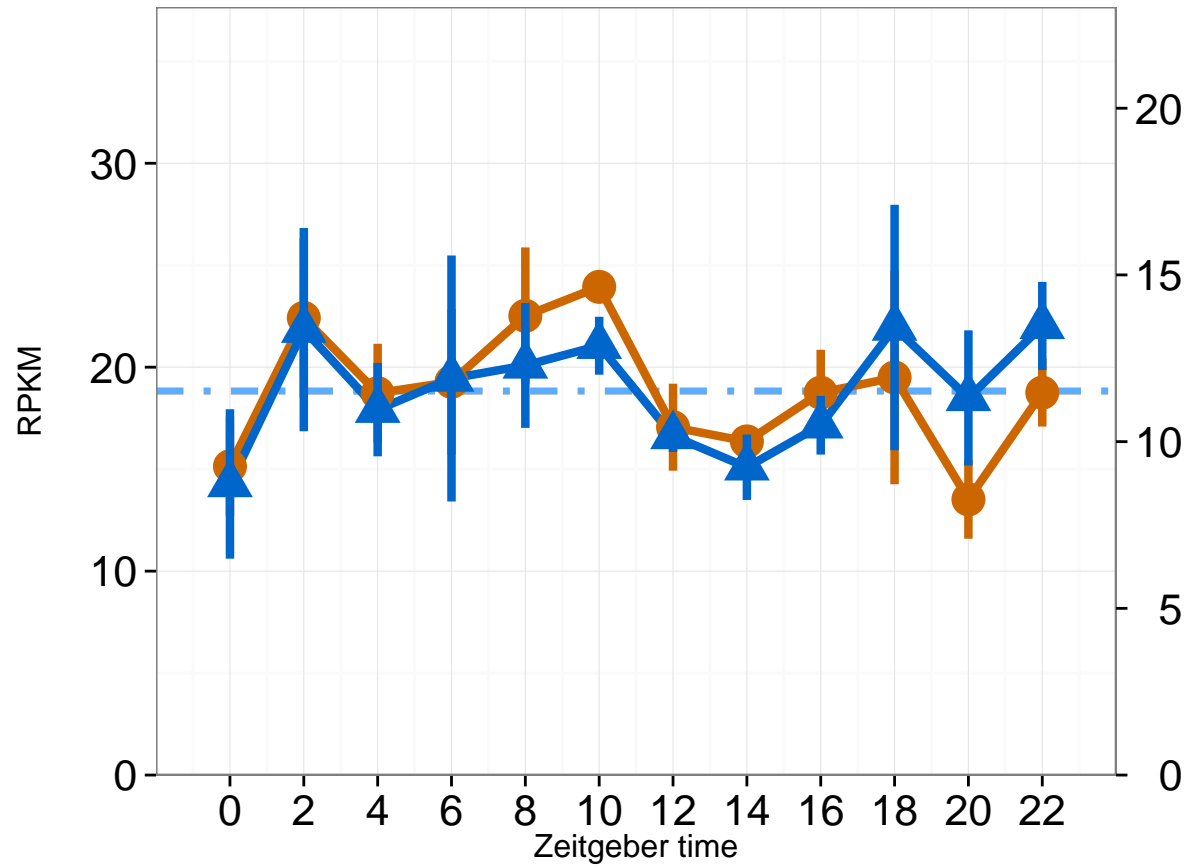

## Jarid2

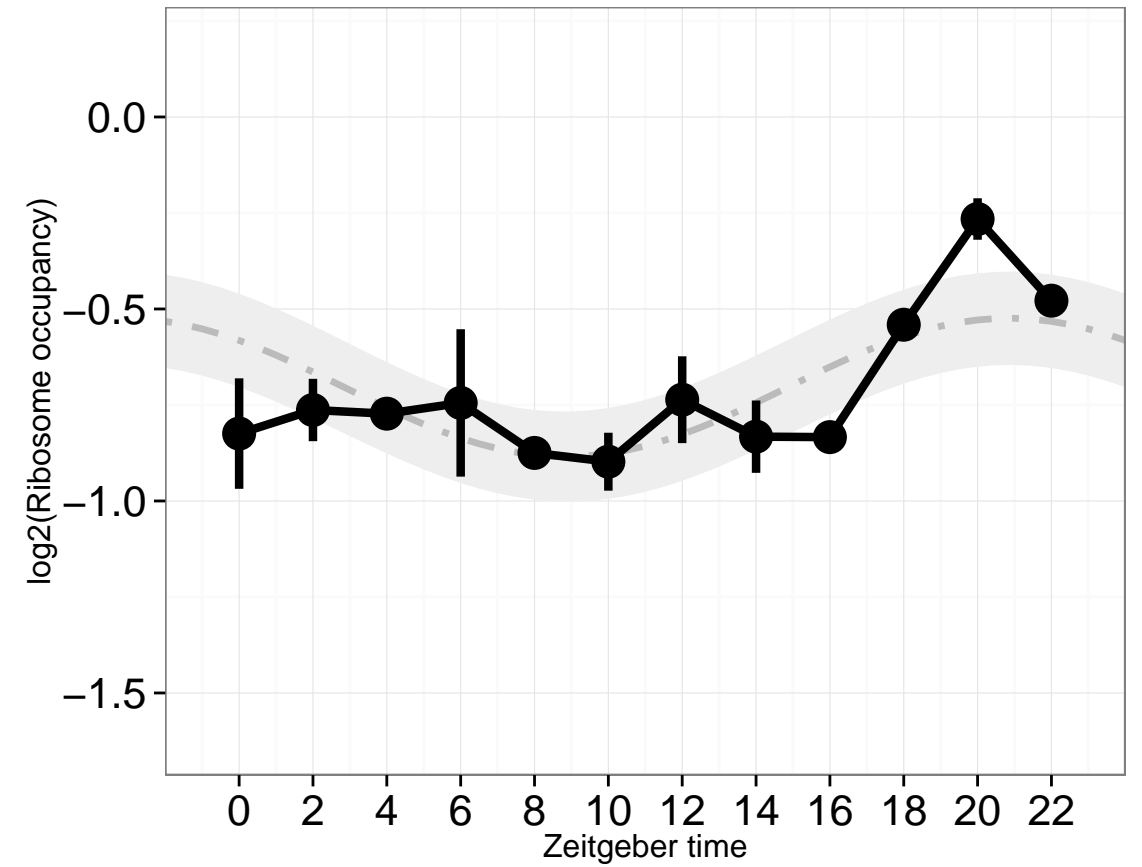

Supplement: Supplementary file 9686 [file 1]

## Crb1

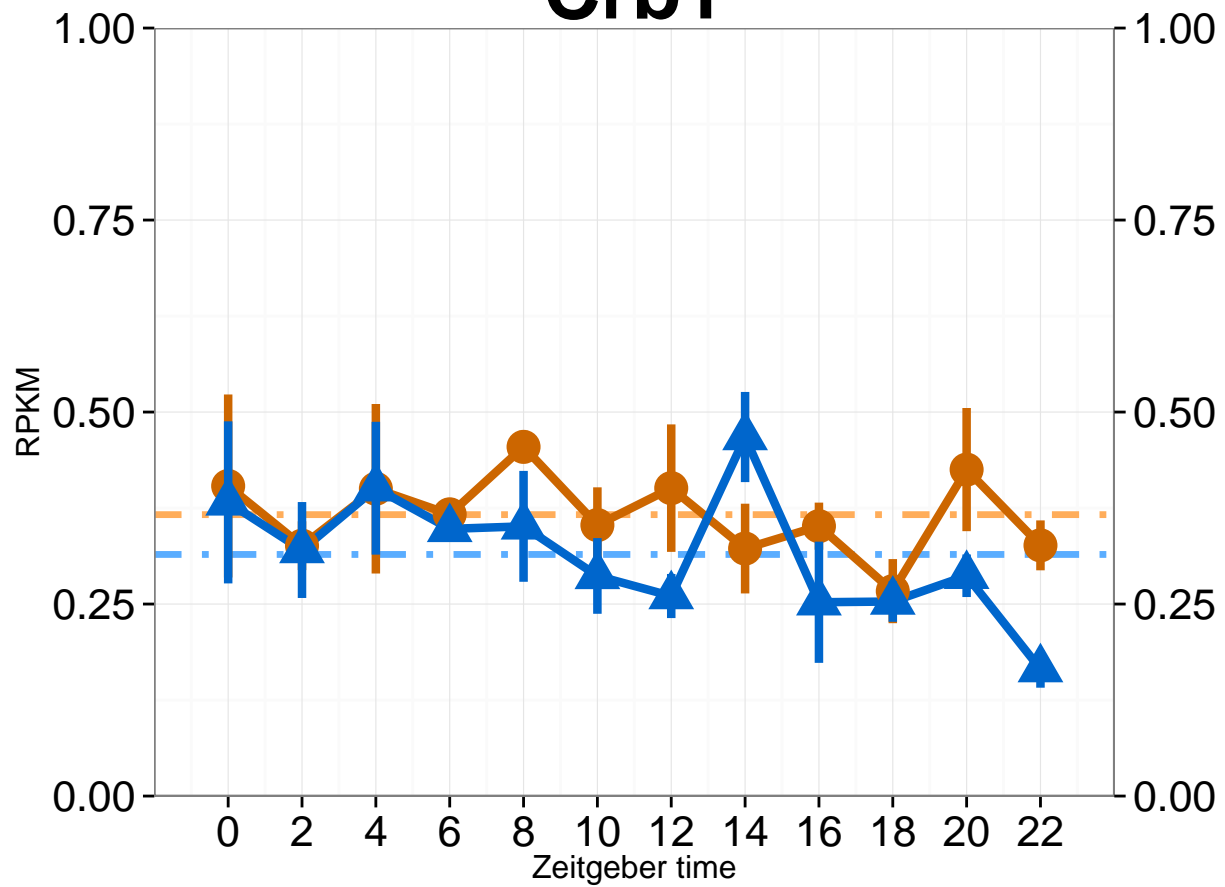

## Crb1

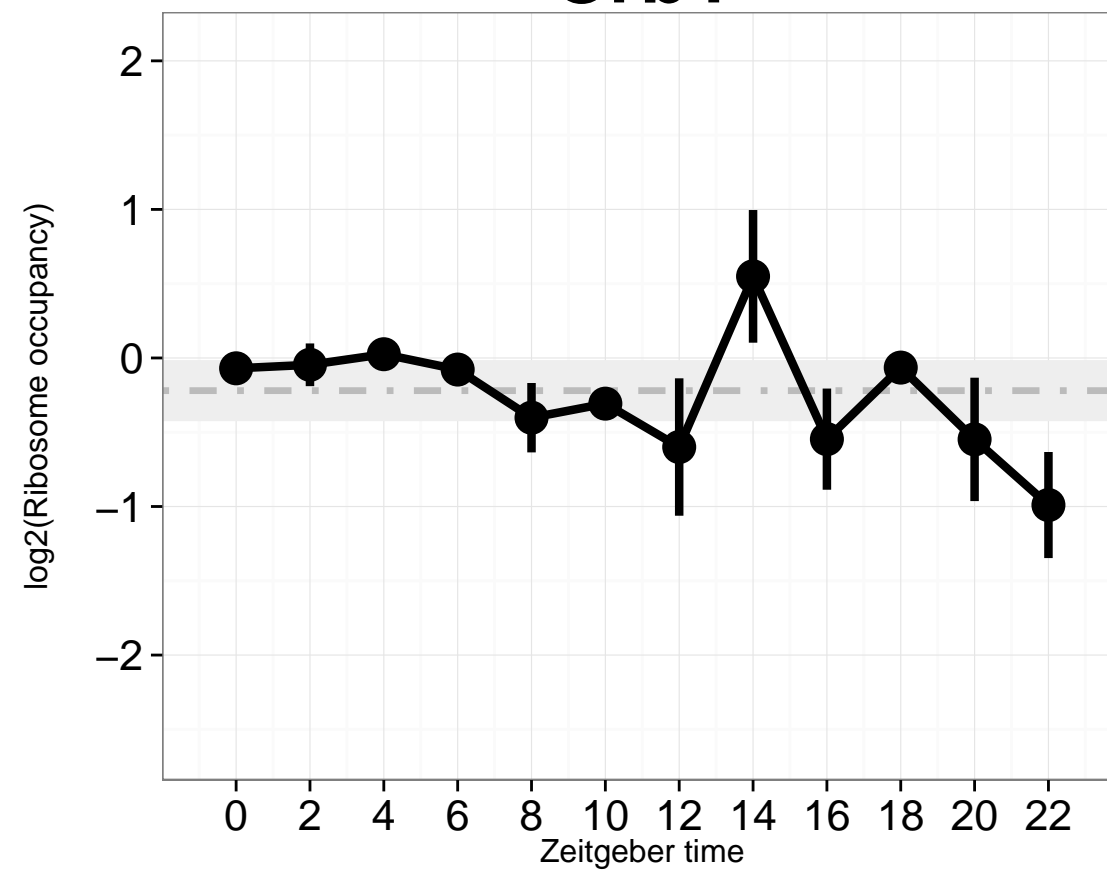

Supplement: Supplementary file 9687 [file 1]

## Vbp1

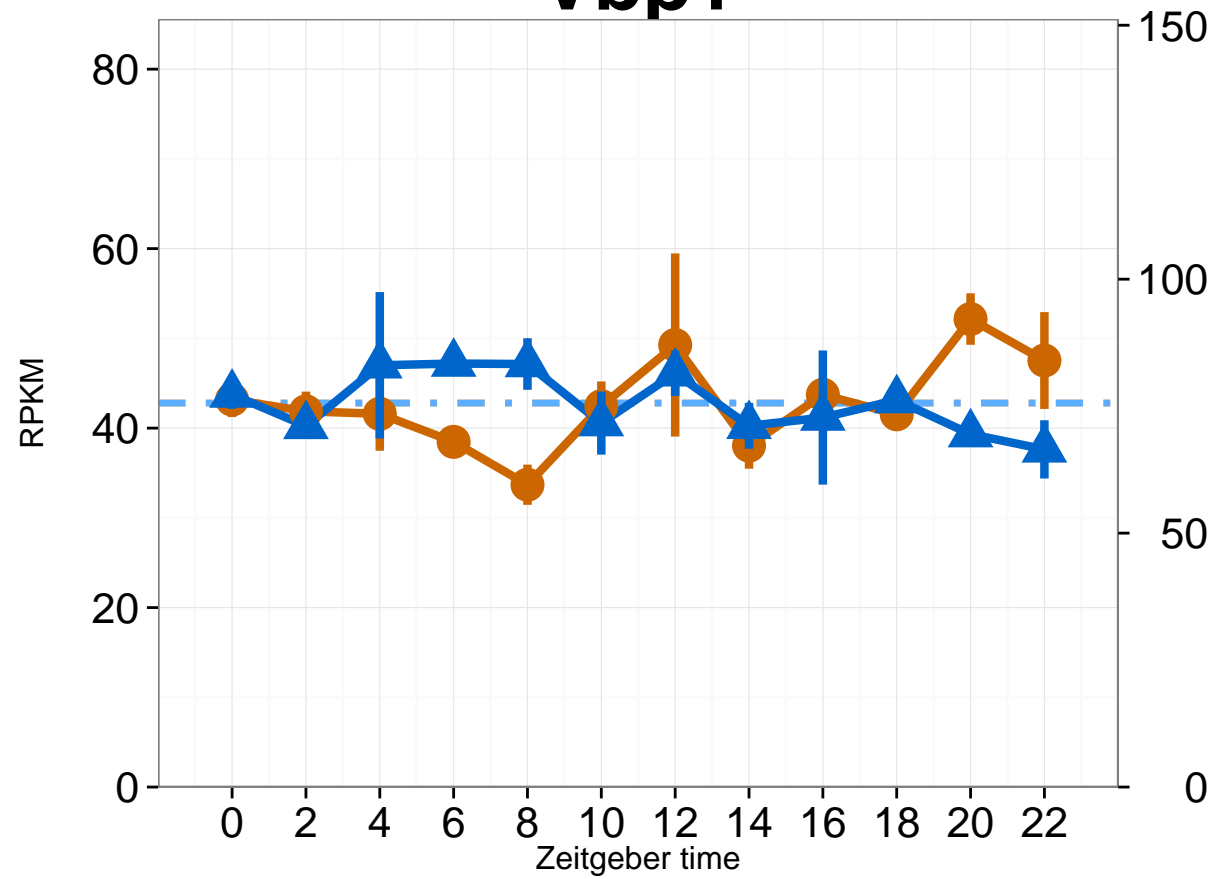

## Vbp1

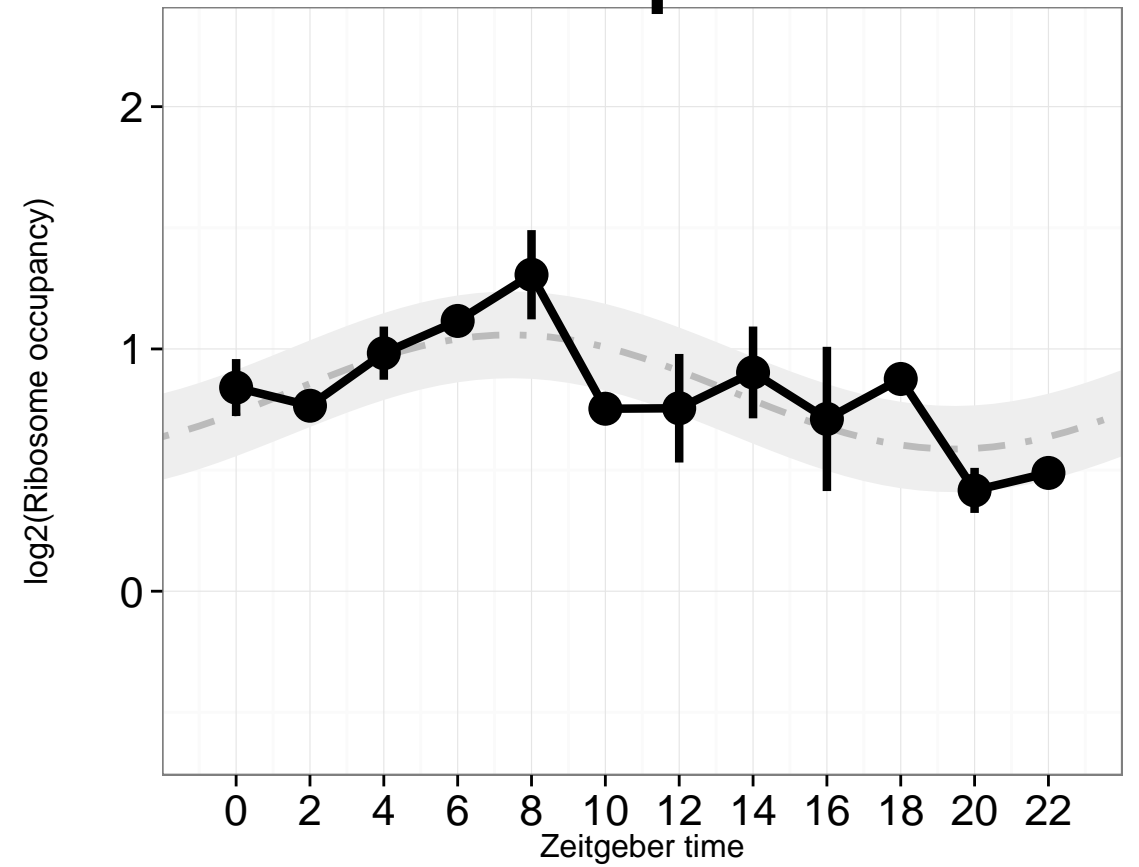

Supplement: Supplementary file 9688 [file 1]

## Ruvbl2

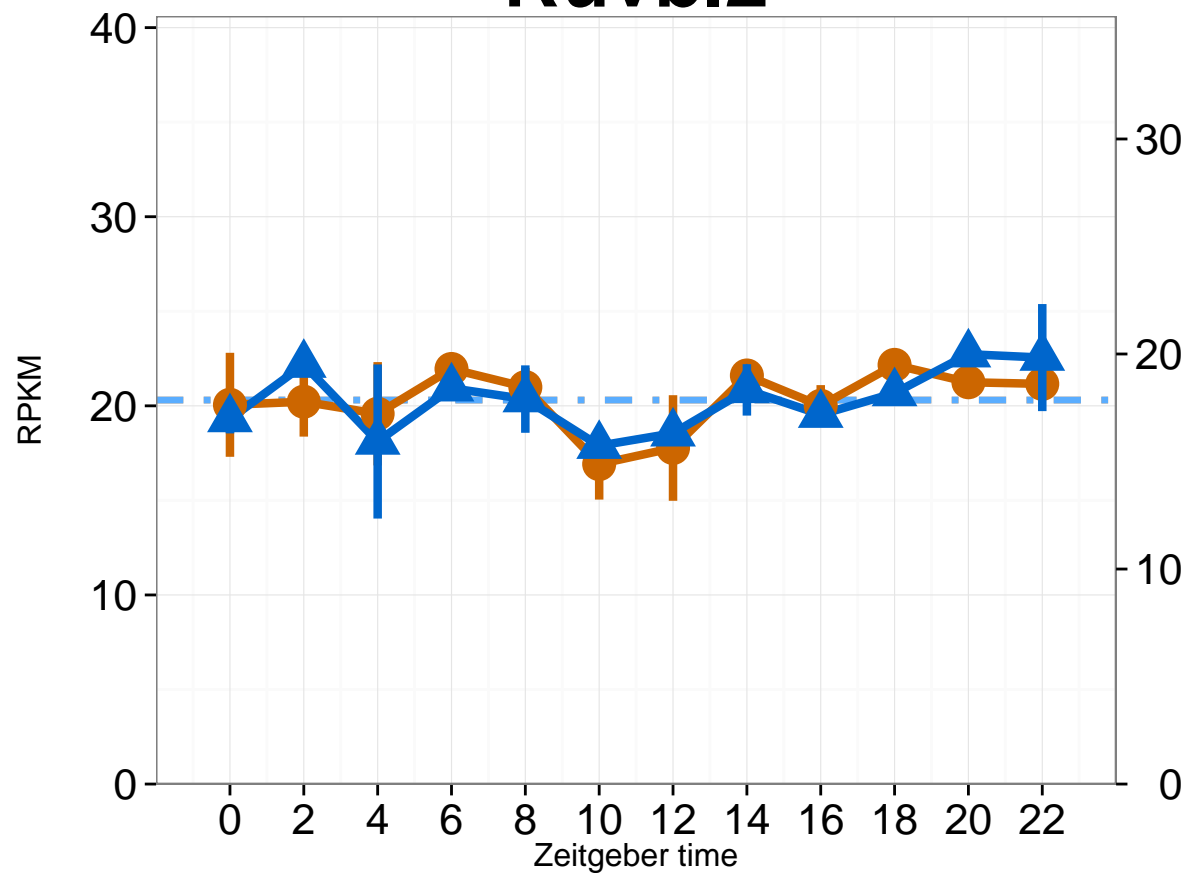

## Ruvbl2

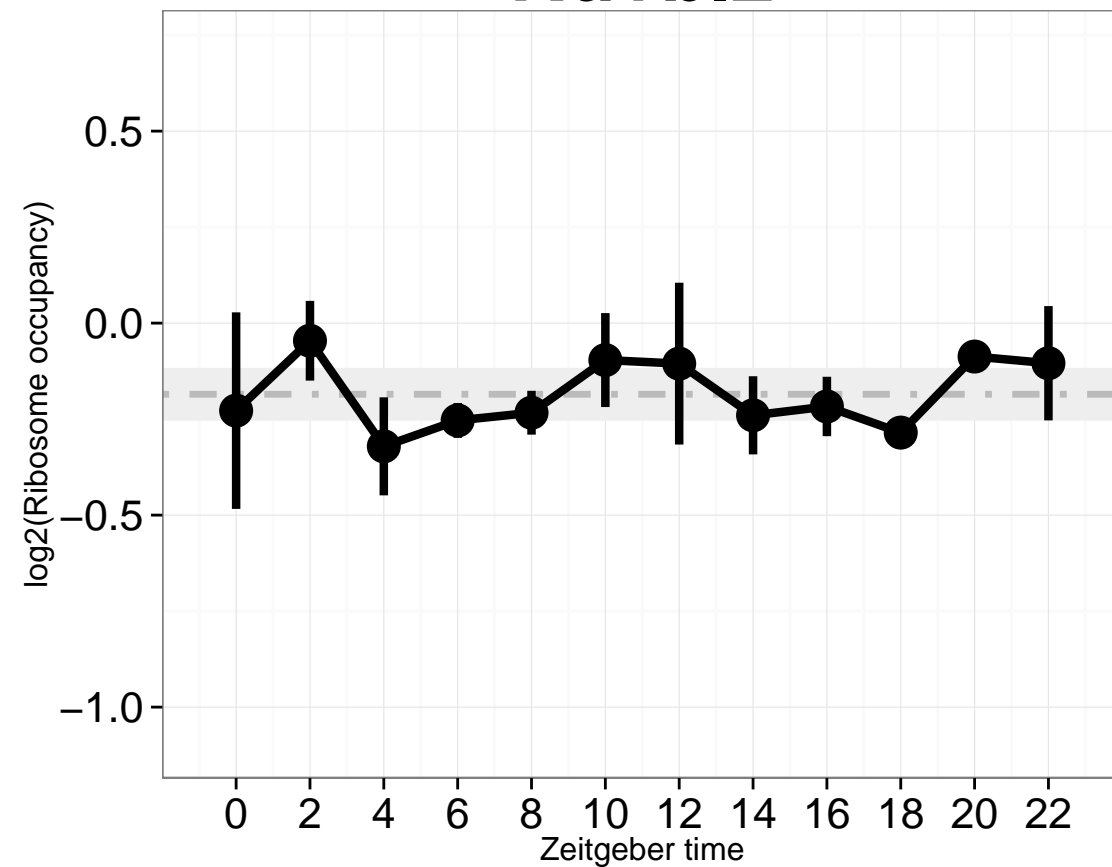

Supplement: Supplementary file 9689 [file 1]

## Hdgf

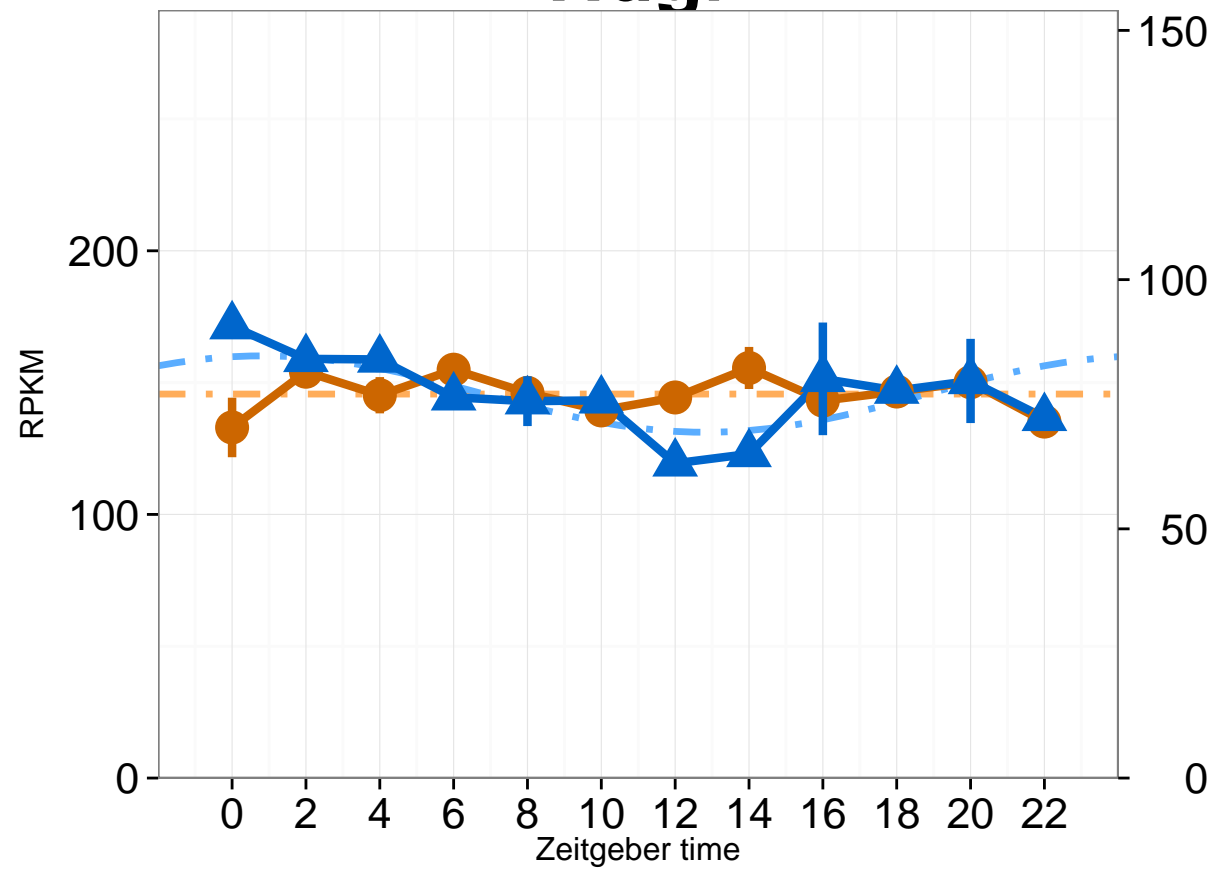

## Hdgf

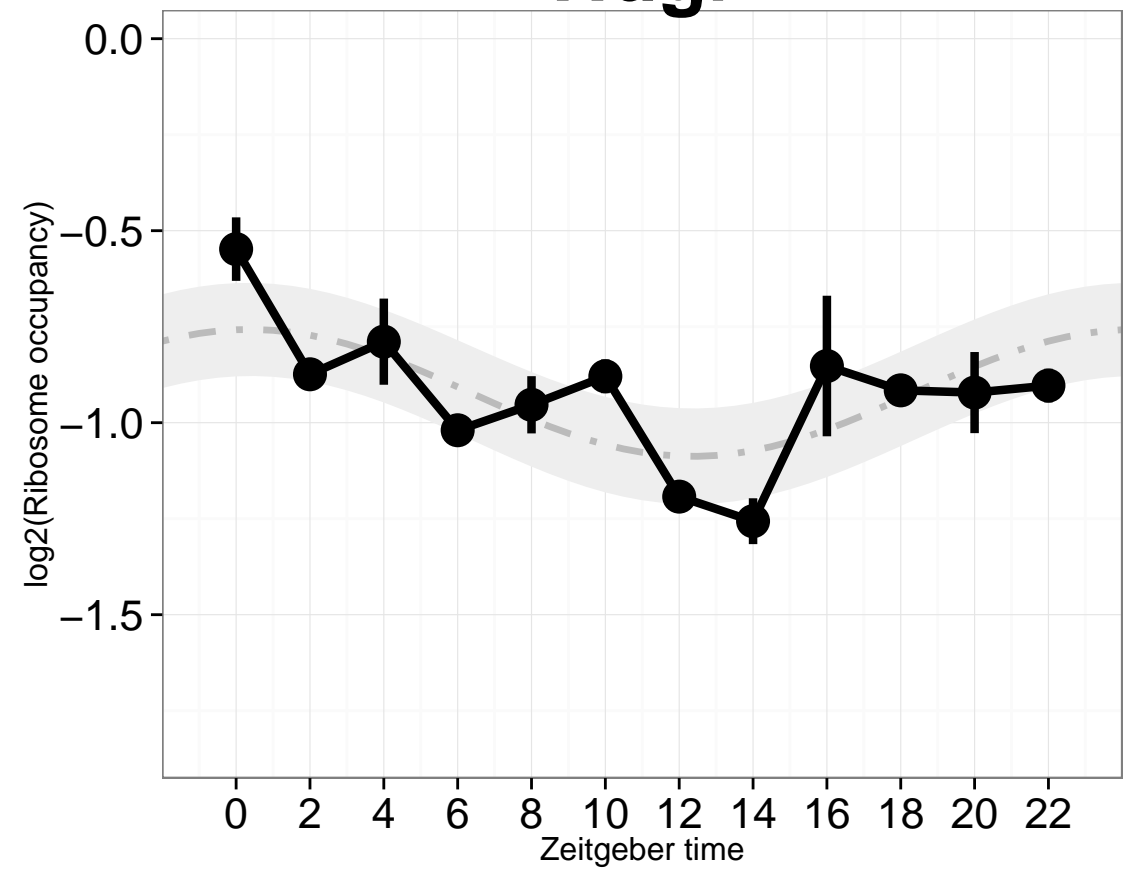

Supplement: Supplementary file 9690 [file 1]

## Pecam1

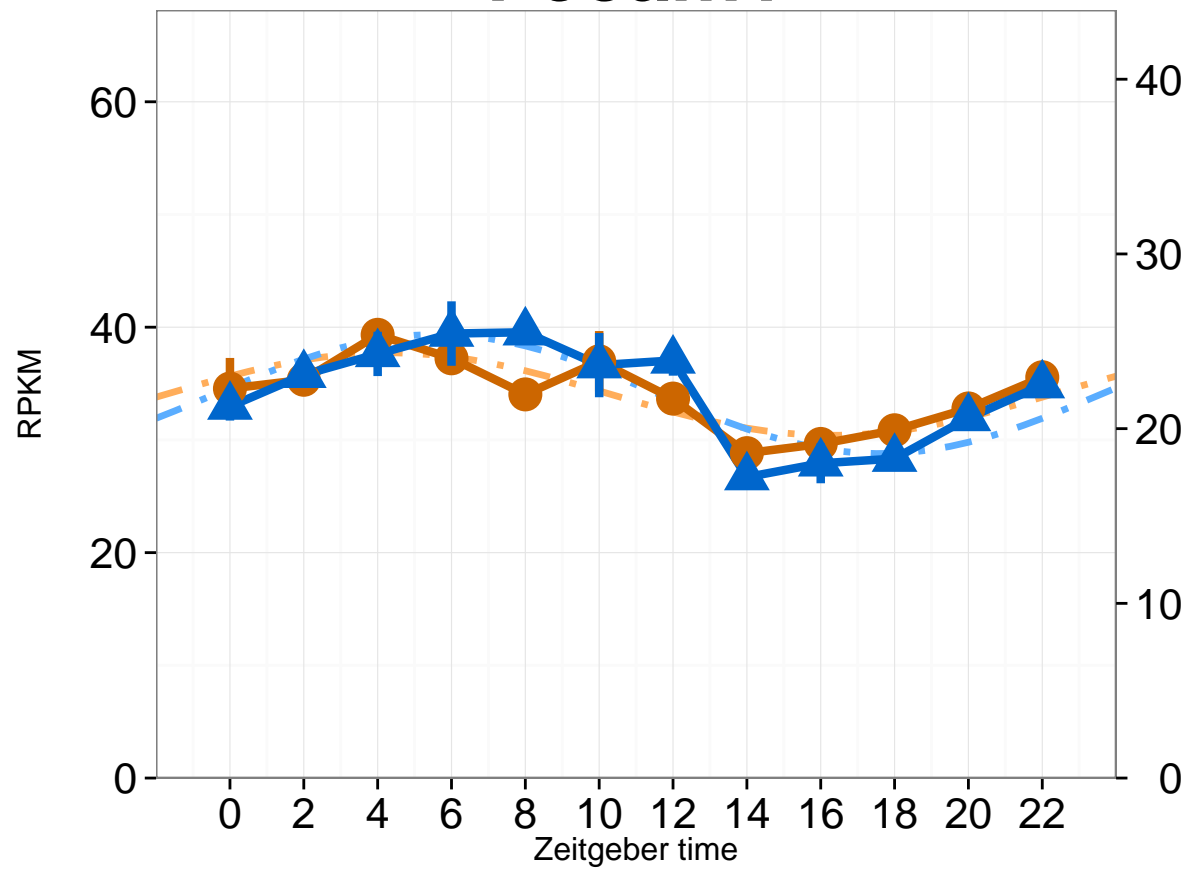

## Pecam1

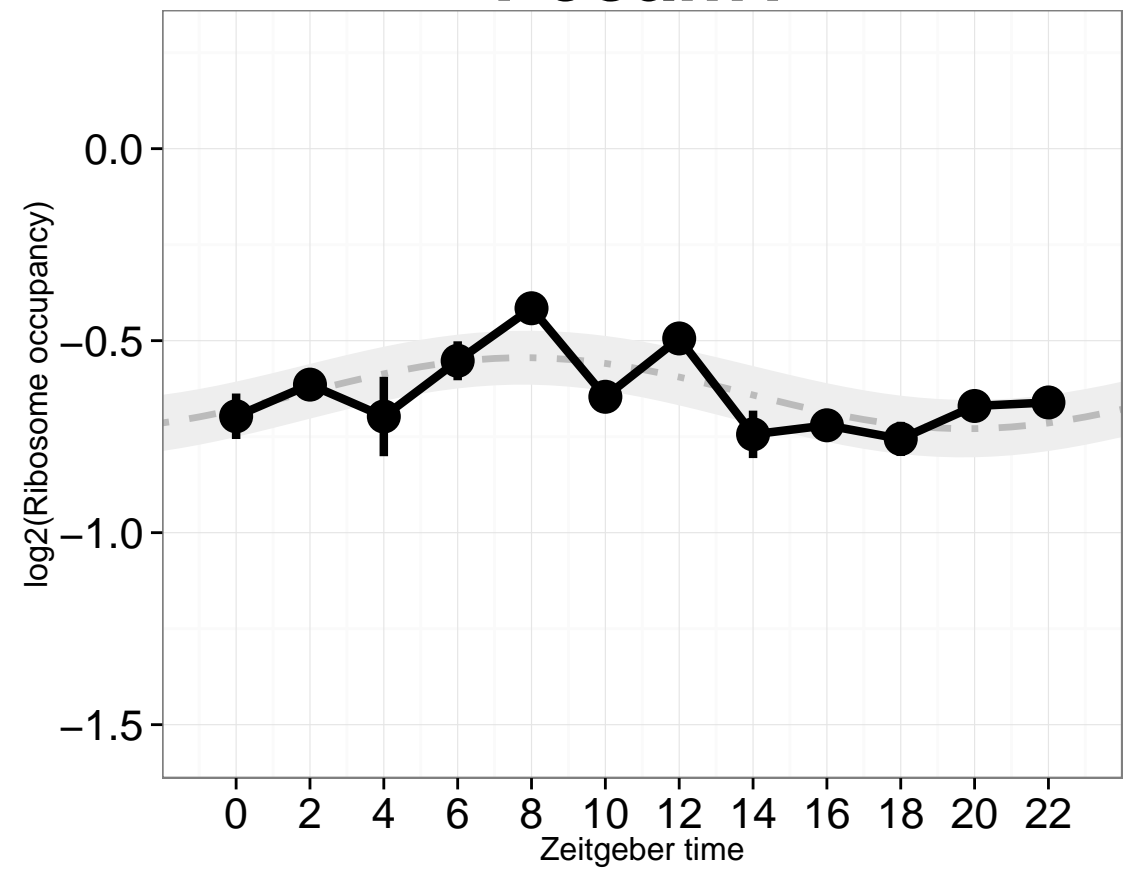

Supplement: Supplementary file 9691 [file 1]

## Armxc3

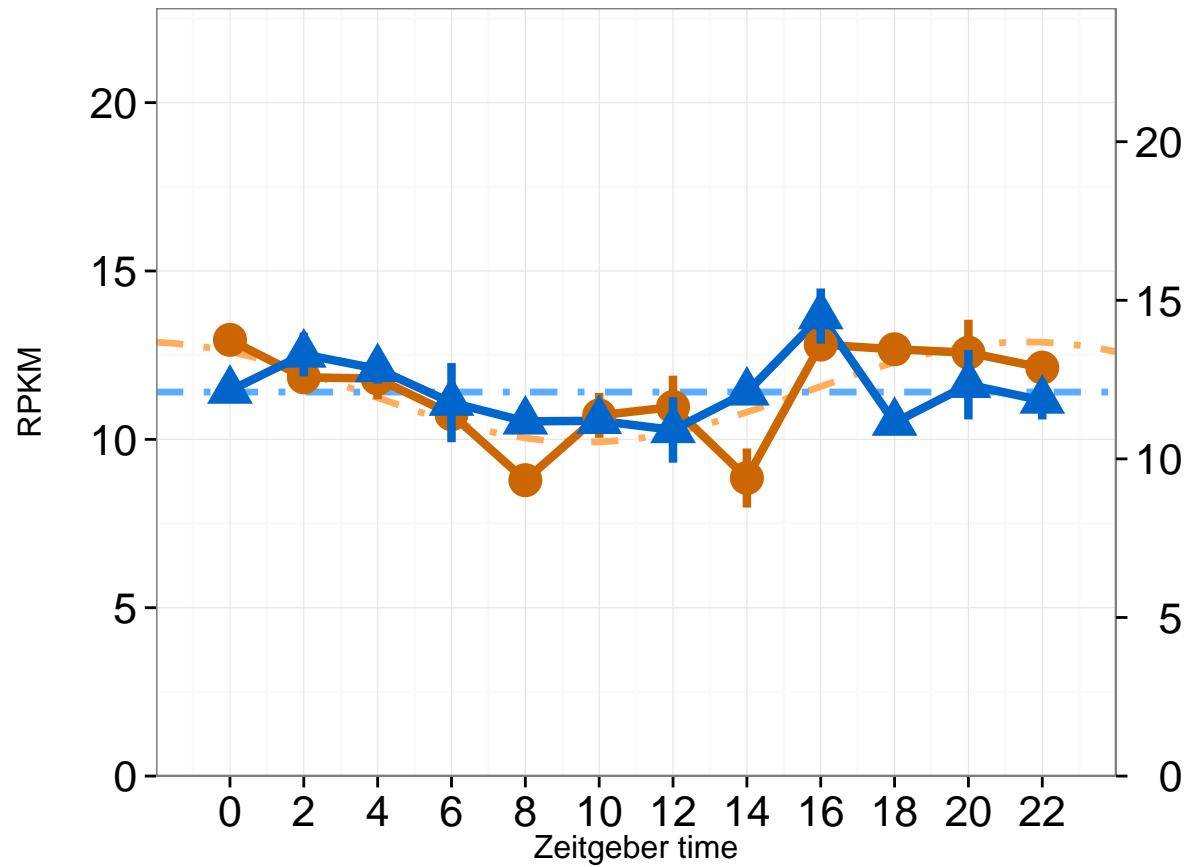

## Armxc3

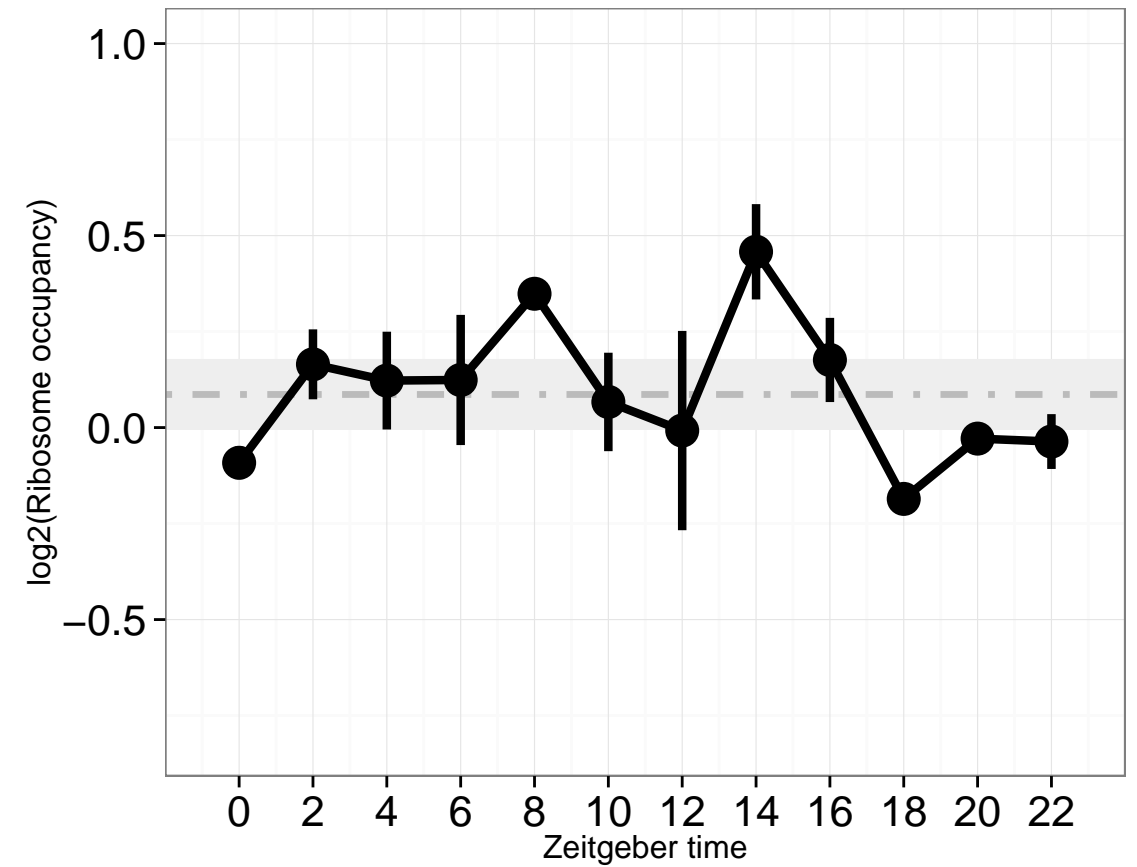

Supplement: Supplementary file 9692 [file 1]

## Ogfod3

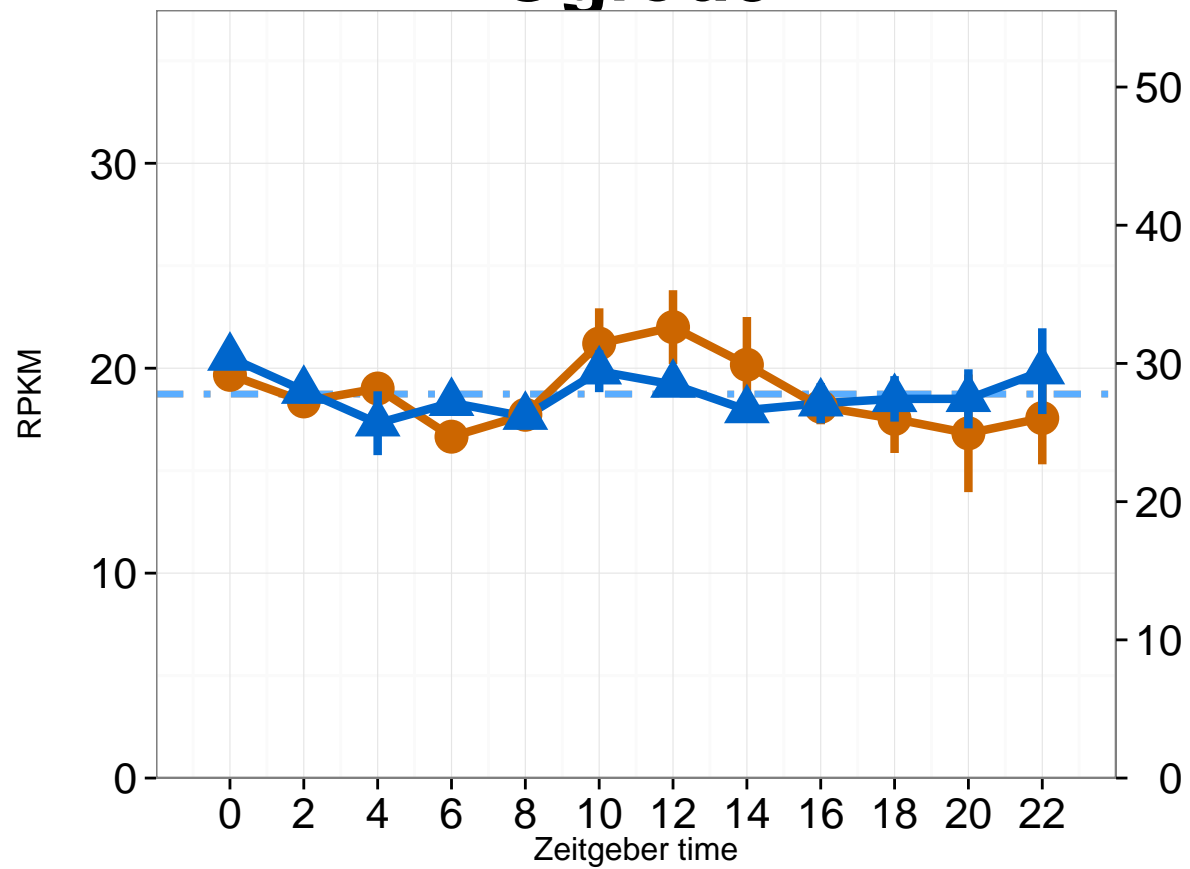

## Ogfod3

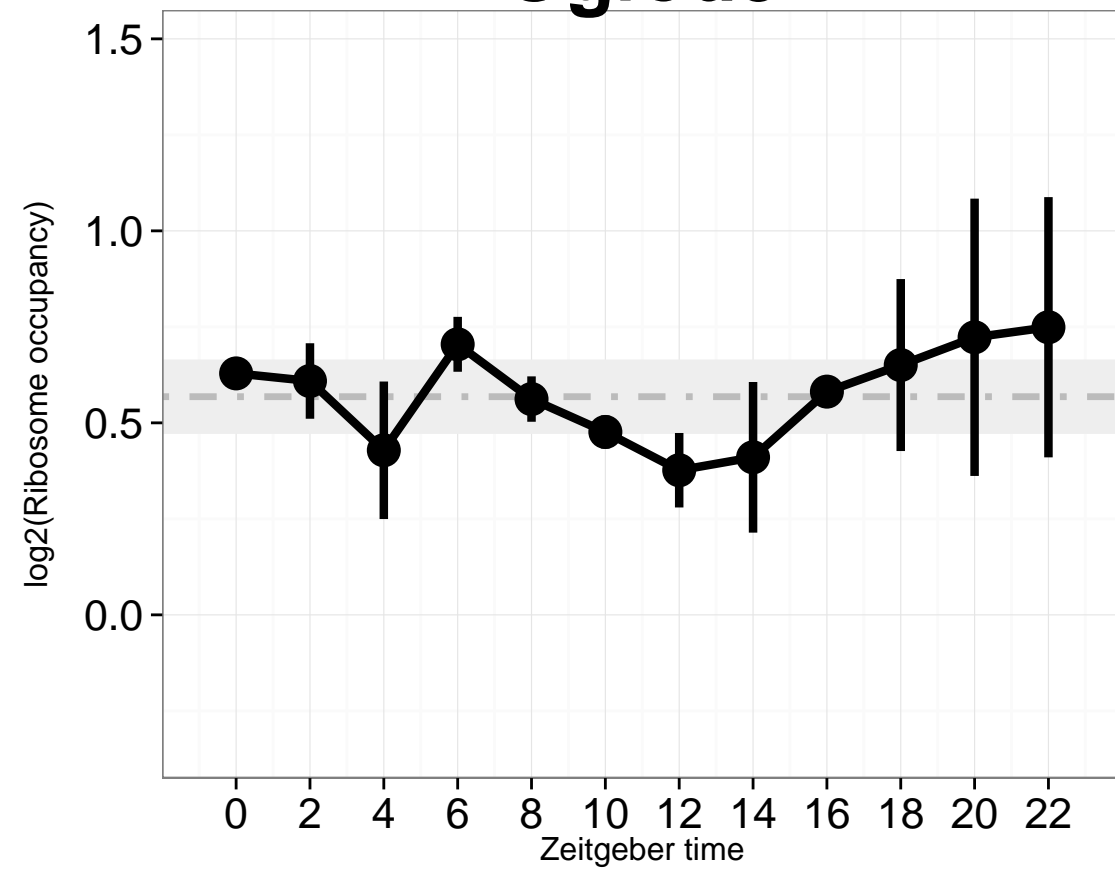

Supplement: Supplementary file 9693 [file 1]

# Man1b1

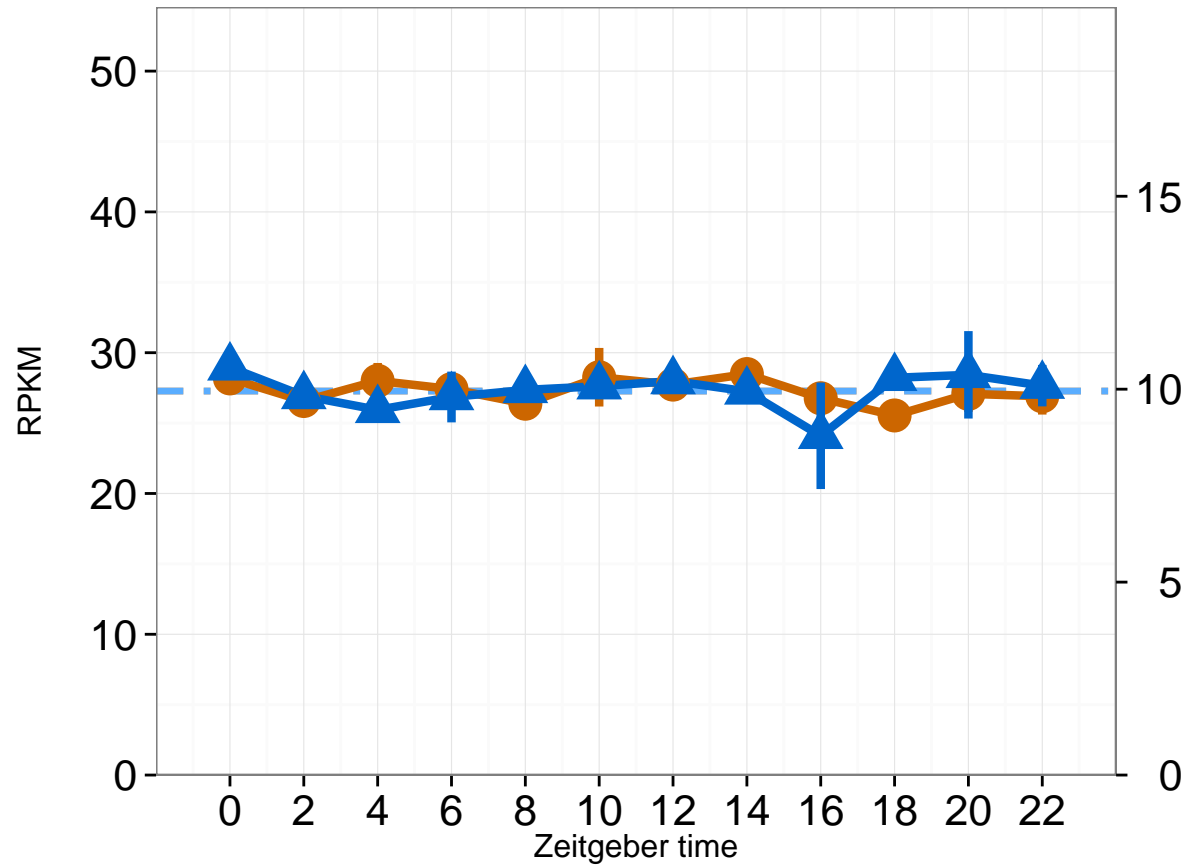

# Man1b1

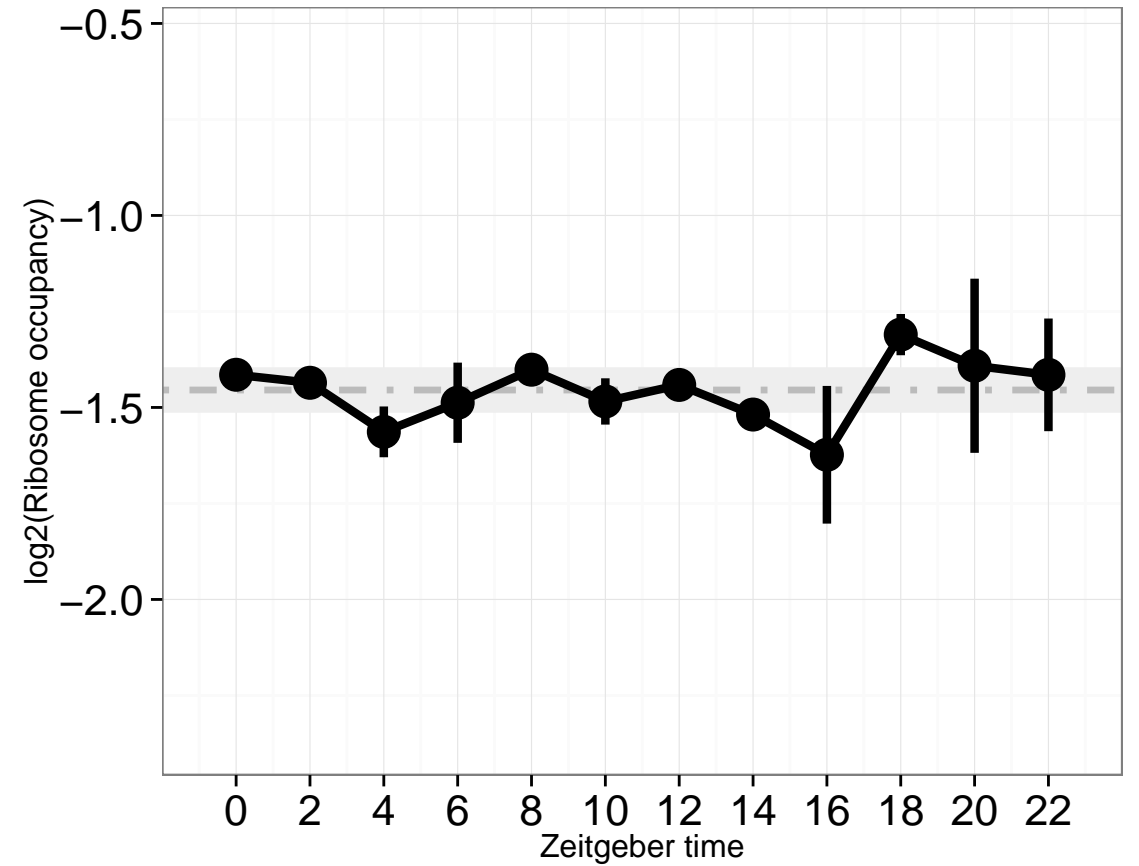

Supplement: Supplementary file 9694 [file 1]

## Fdxr

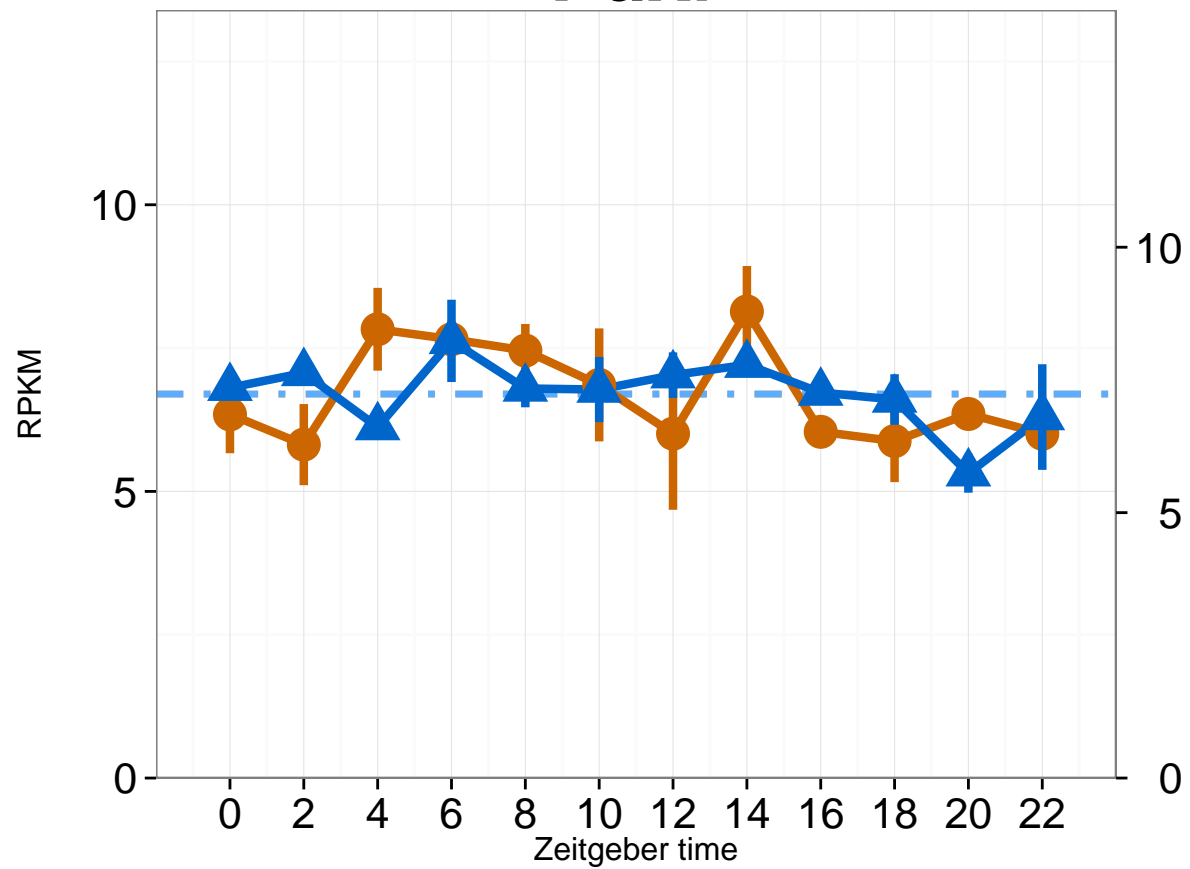

## Fdxr

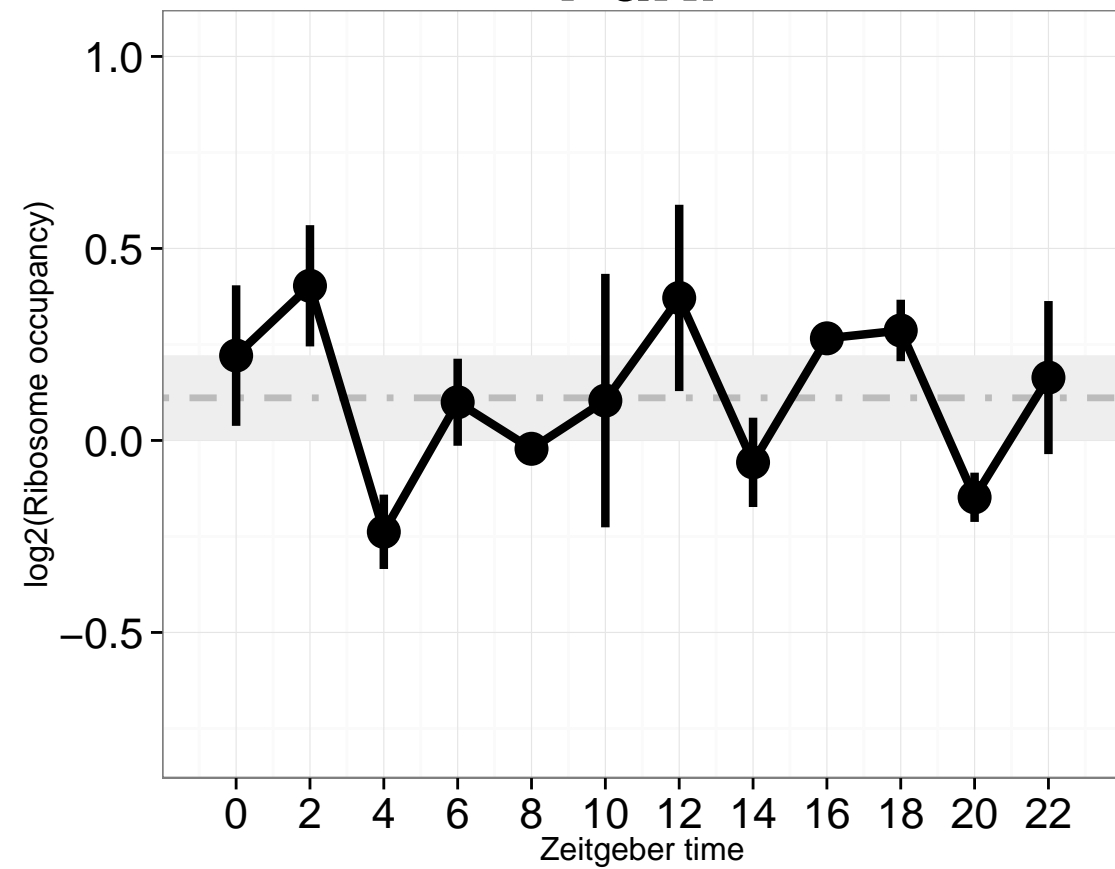

Supplement: Supplementary file 9695 [file 1]

## Spen

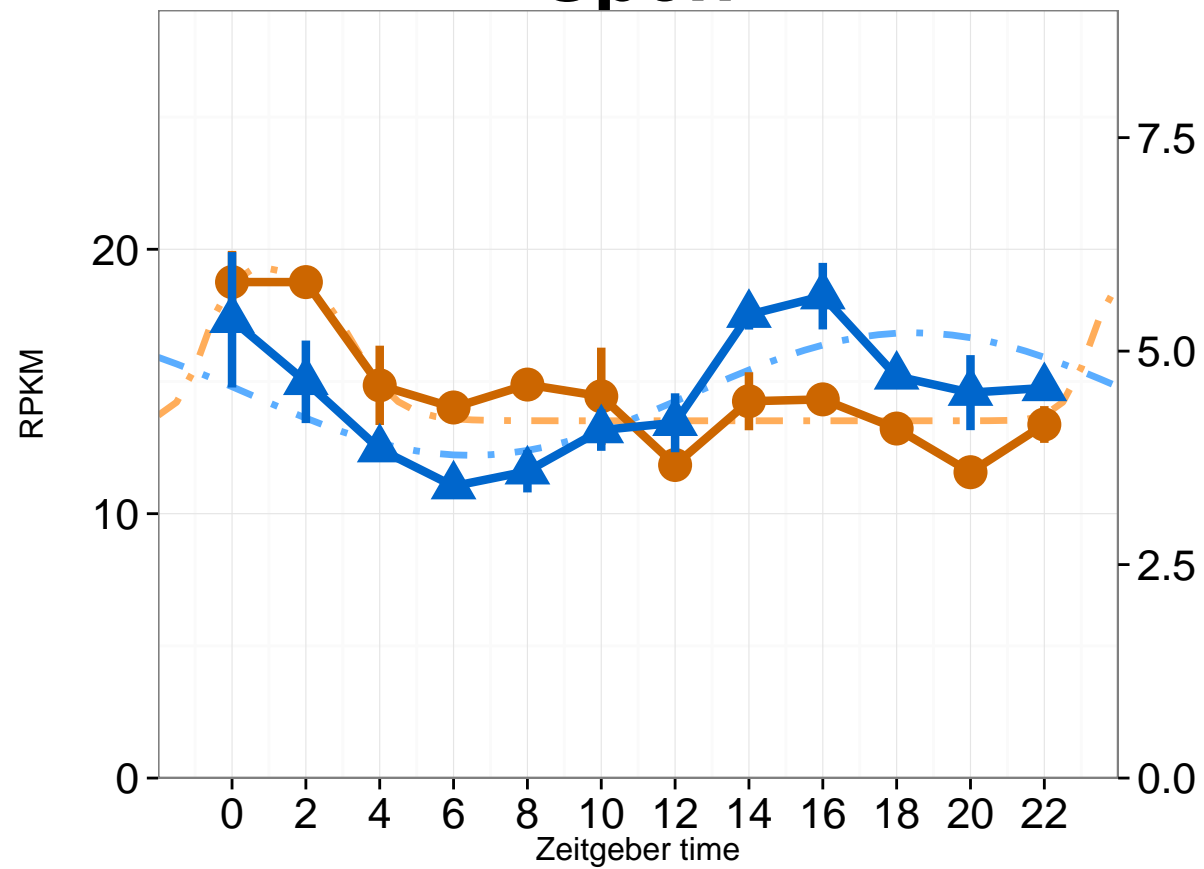

## Spen

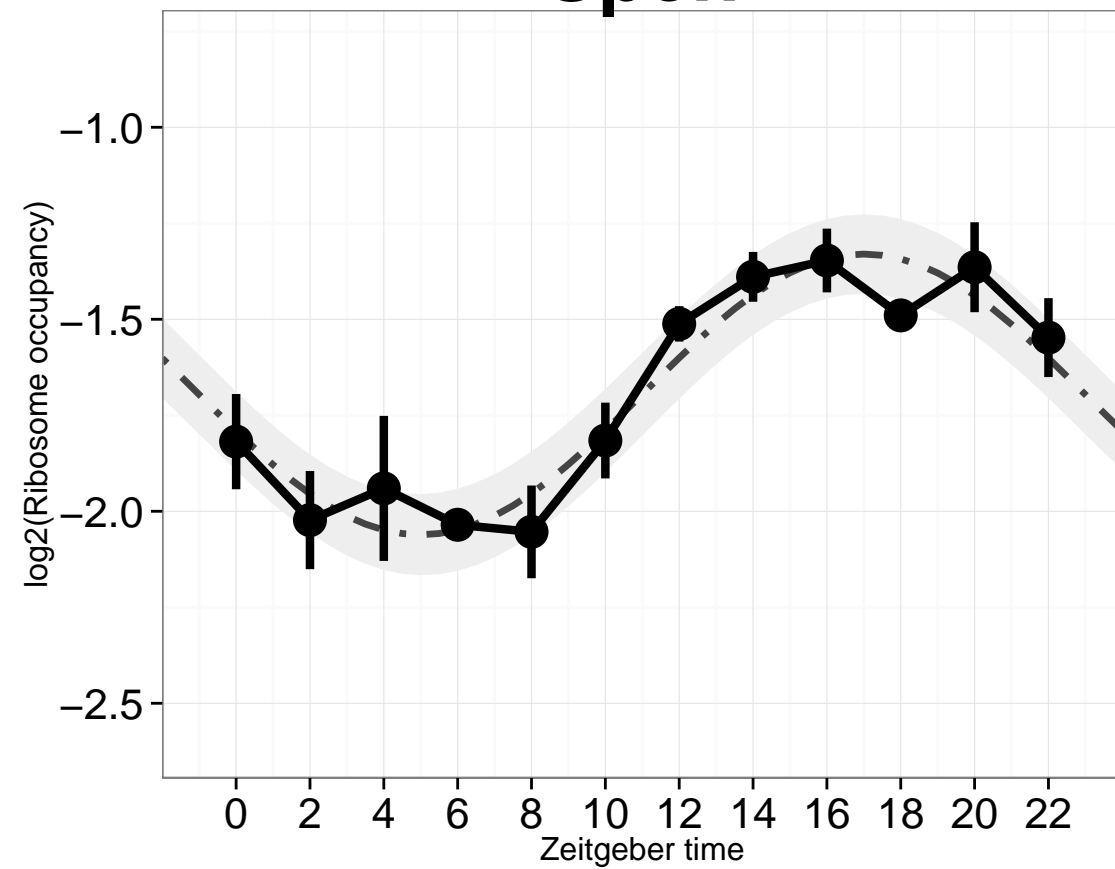

Supplement: Supplementary file 9696 [file 1]

# Zfp219

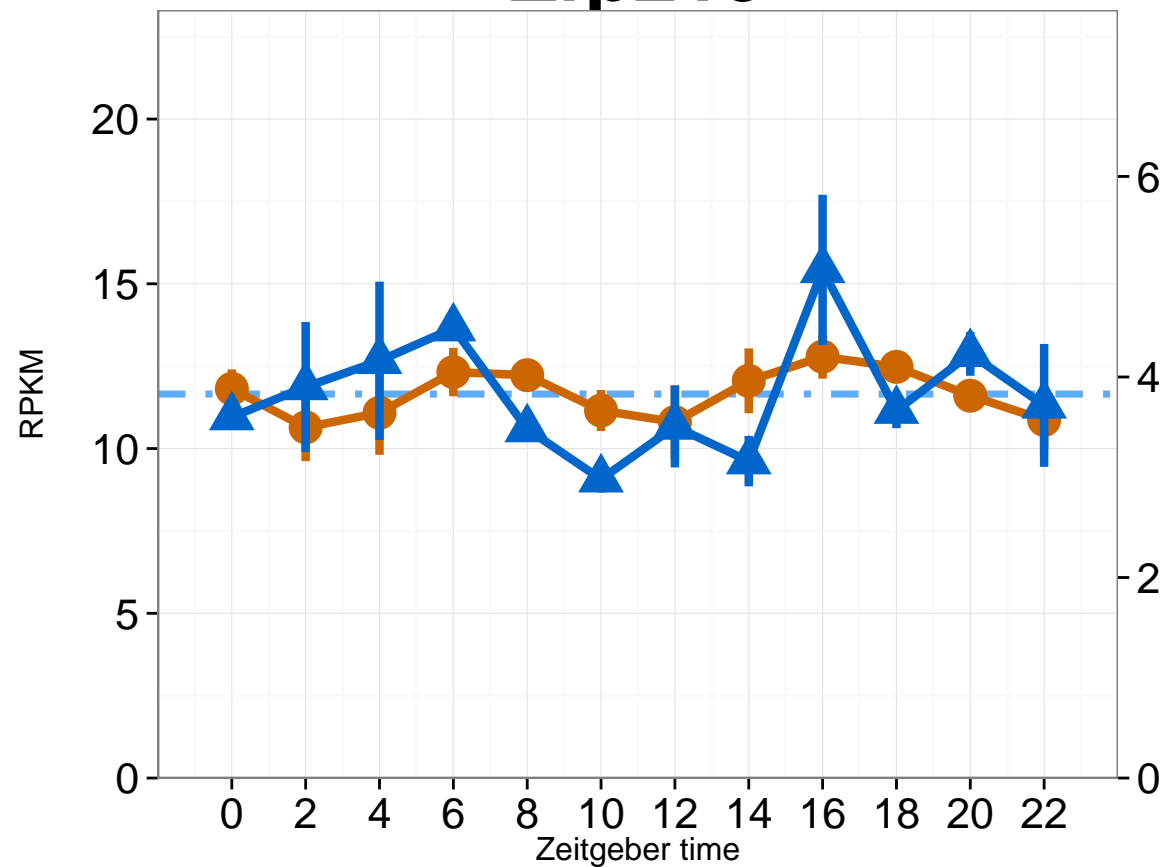

# Zfp219

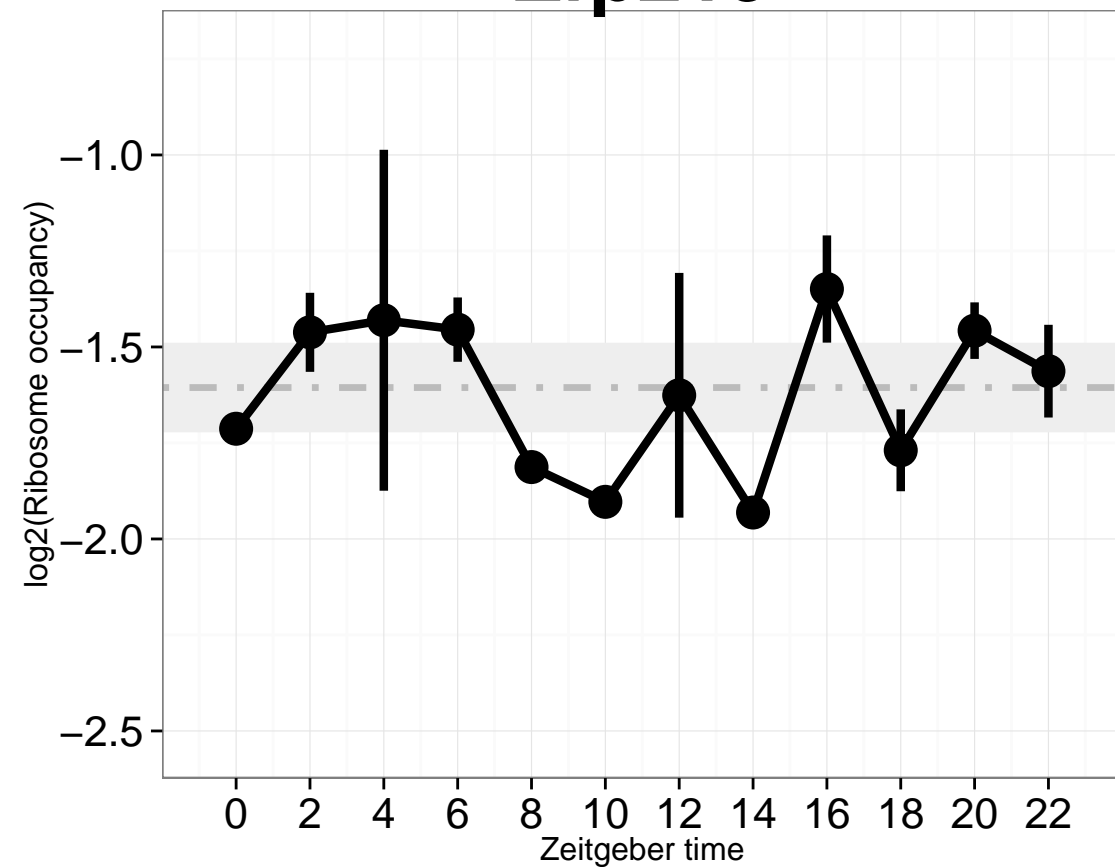

Supplement: Supplementary file 9697 [file 1]

**Ppp1r3f**

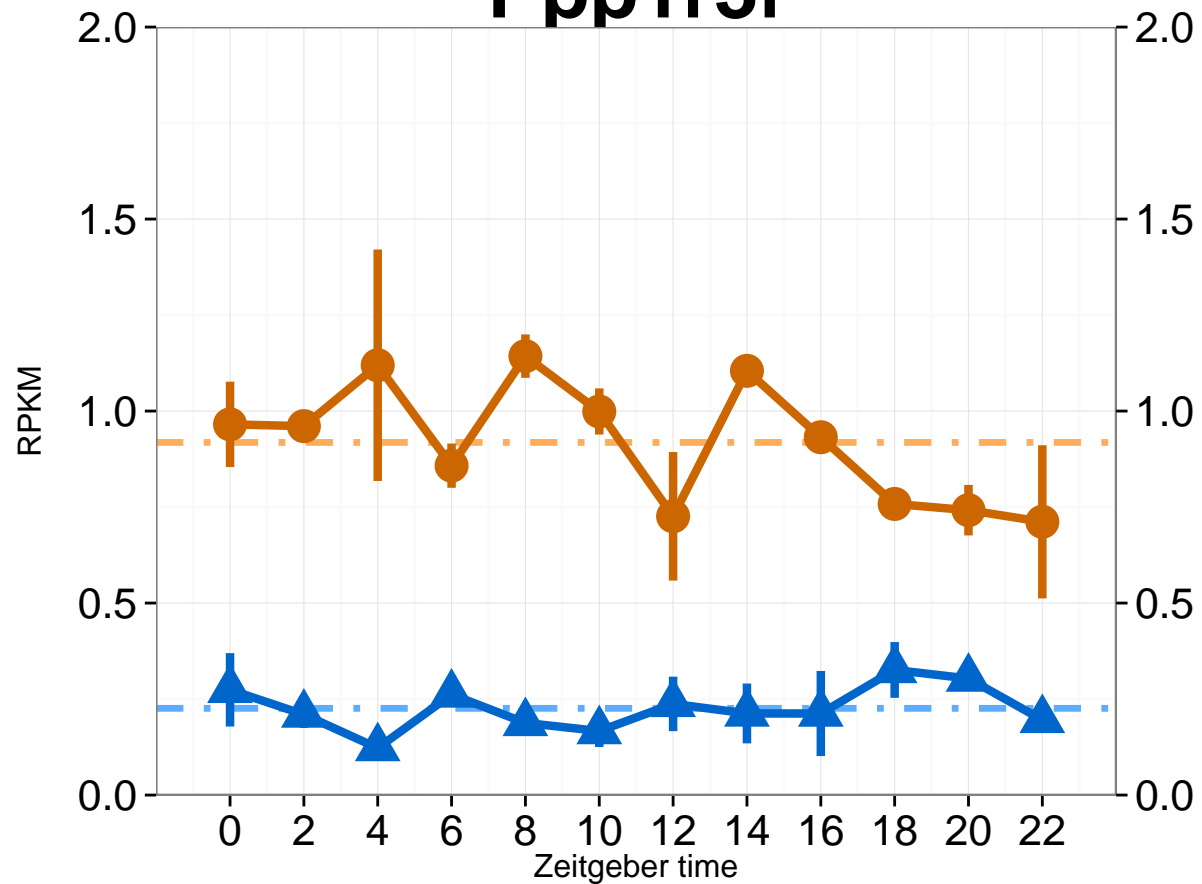

**Ppp1r3f**

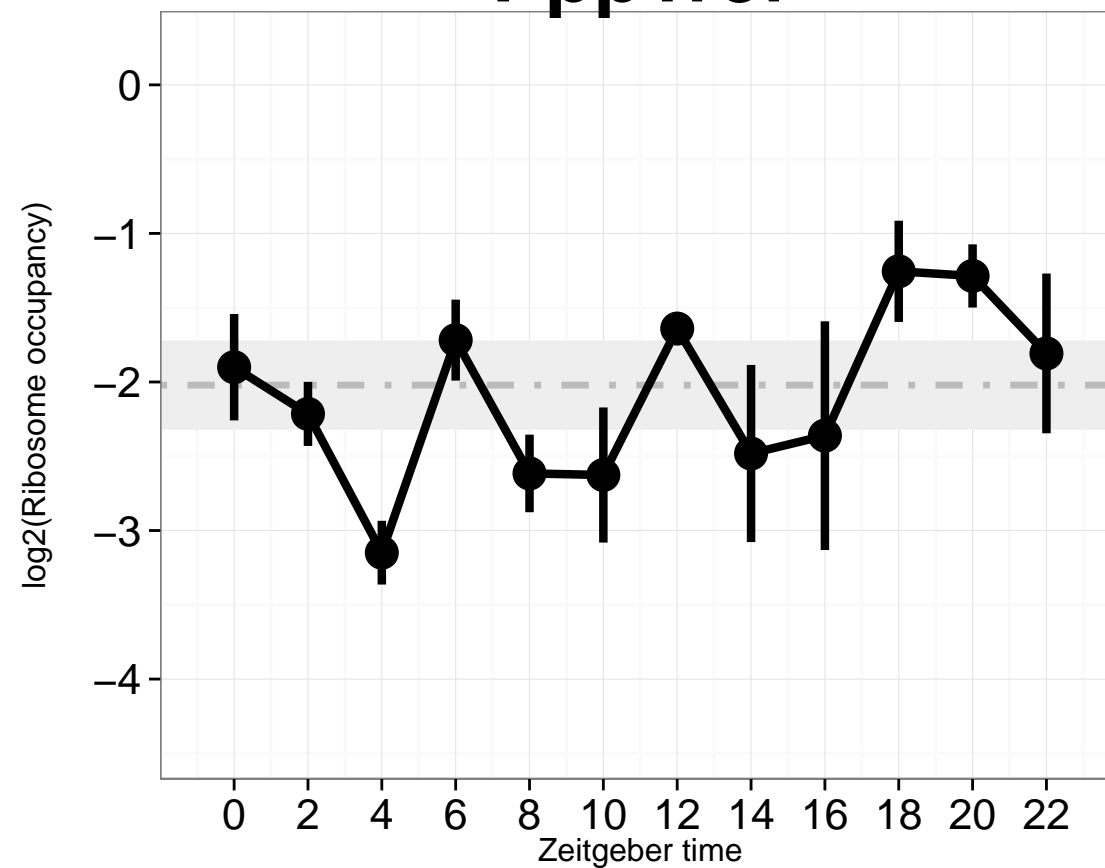

Supplement: Supplementary file 9698 [file 1]

# Cyp4f15

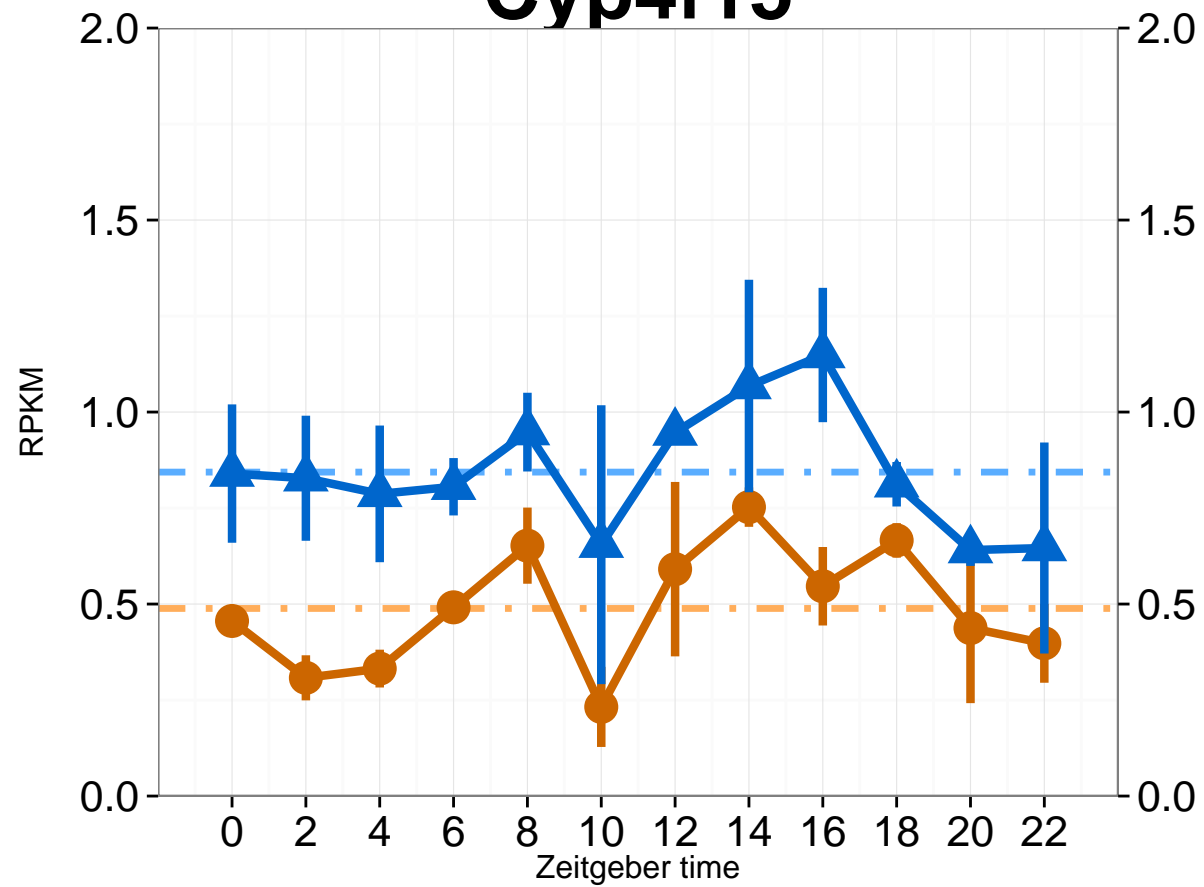

# Cyp4f15

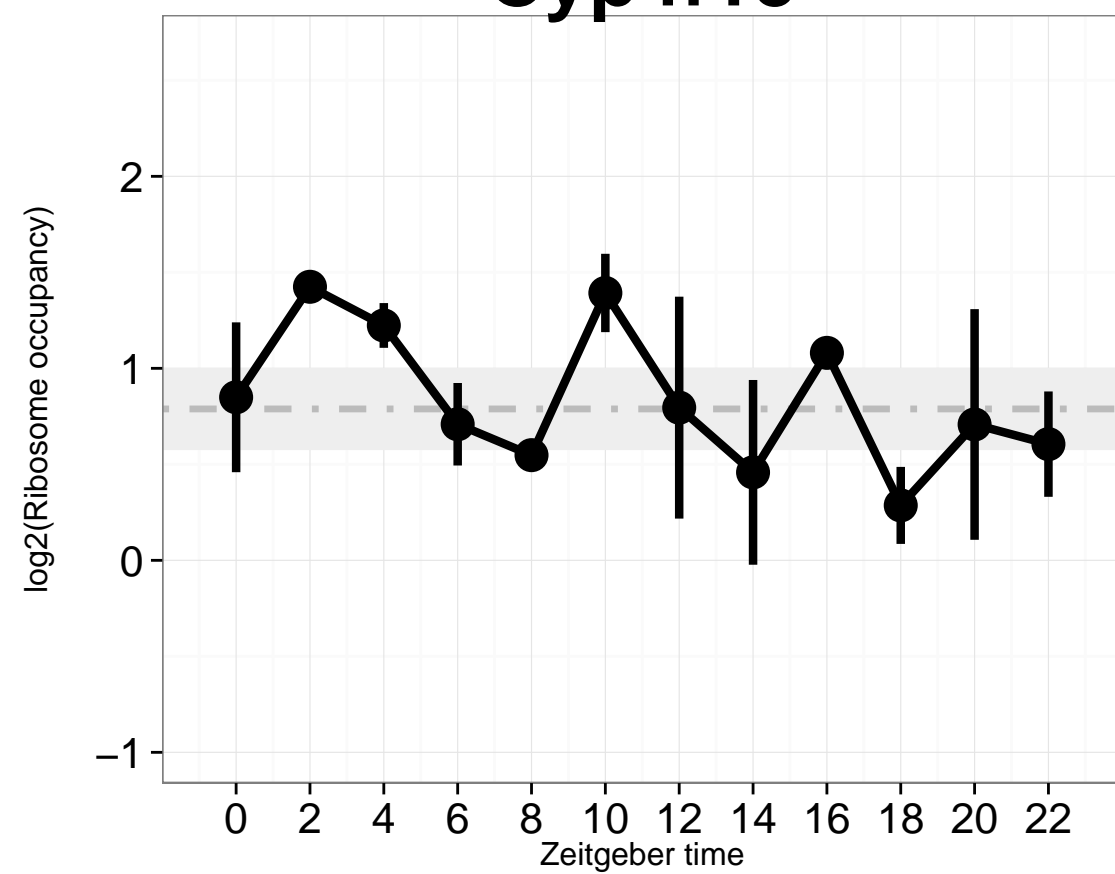

Supplement: Supplementary file 9699 [file 1]

# Gpr35

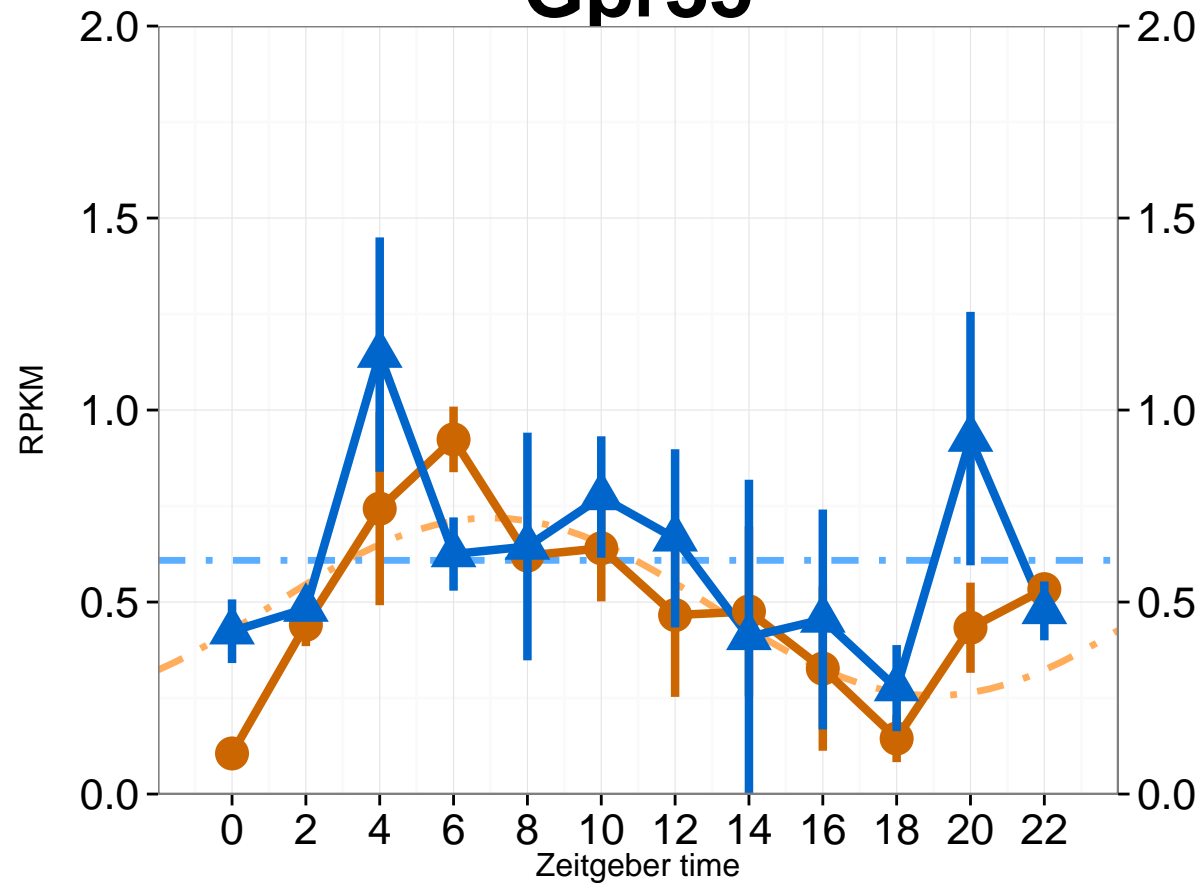

# Gpr35

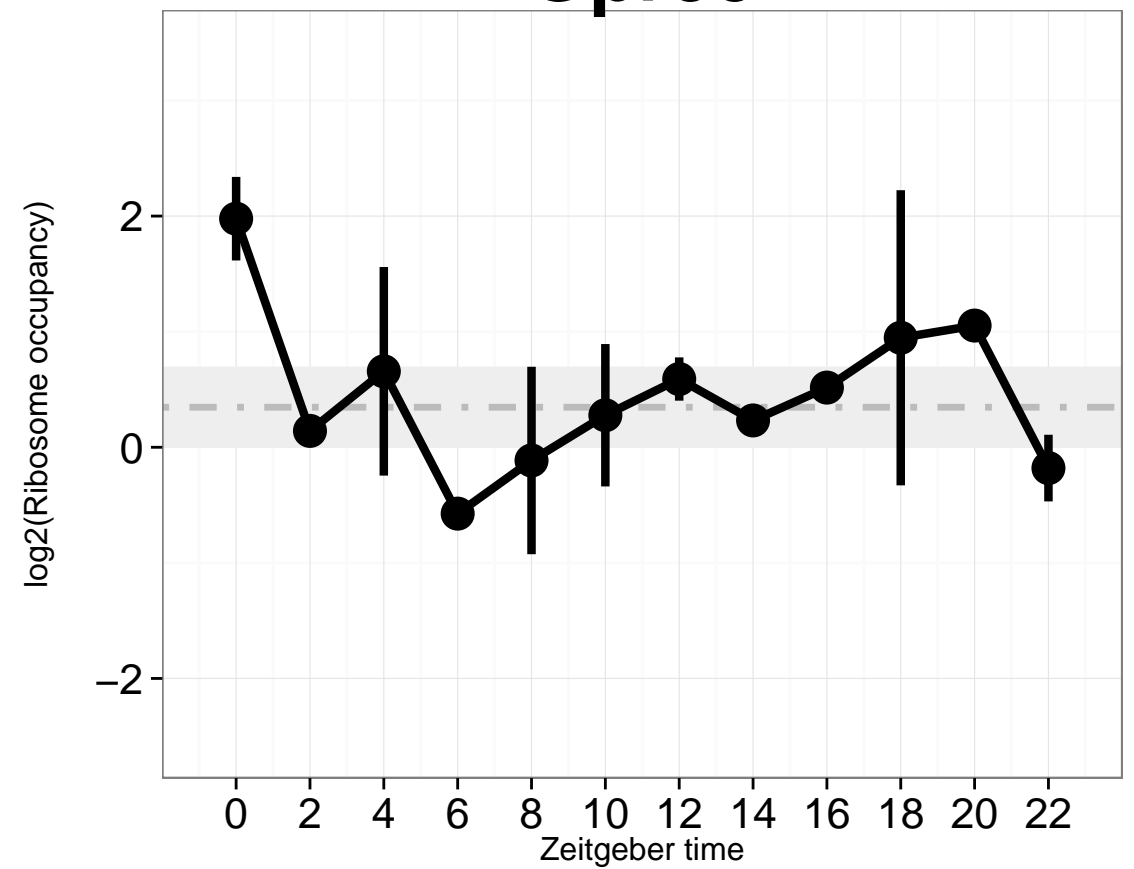

Supplement: Supplementary file 9700 [file 1]

## Snx18

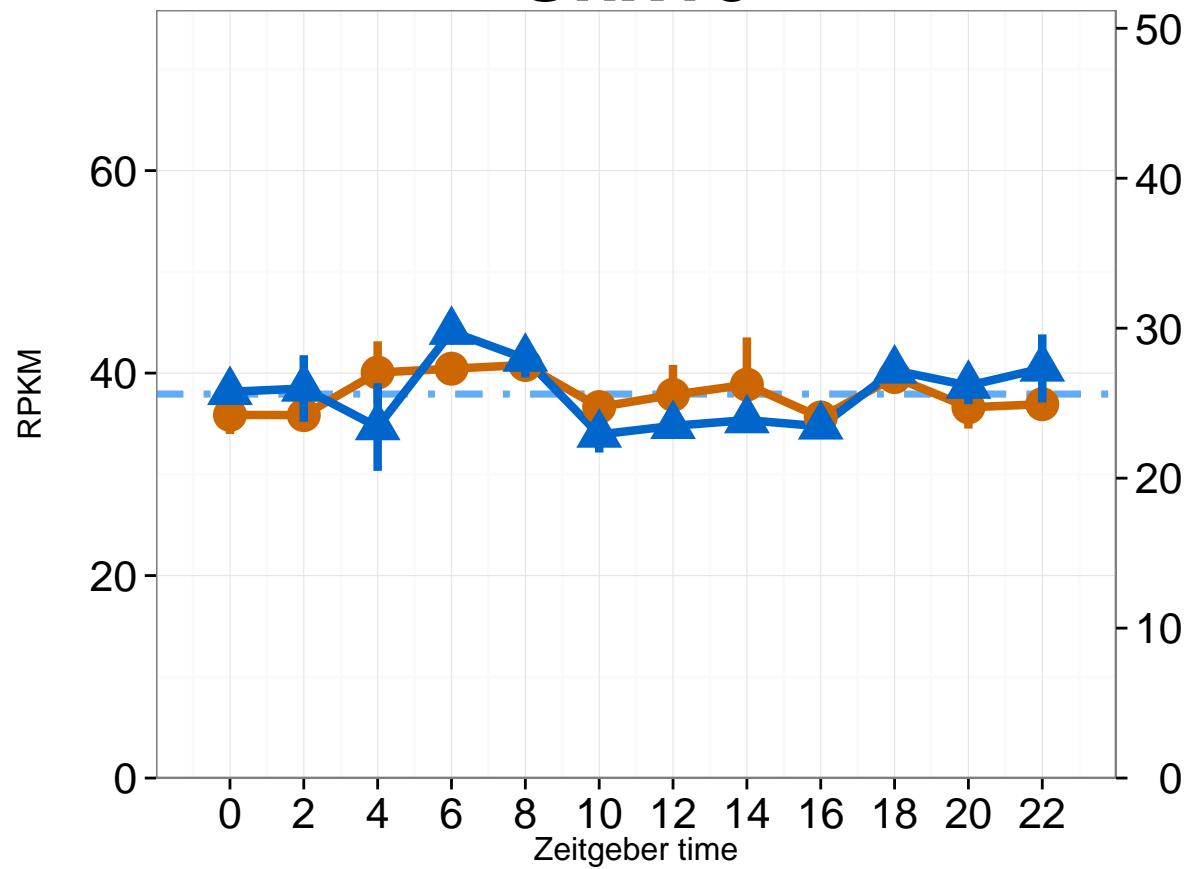

## Snx18

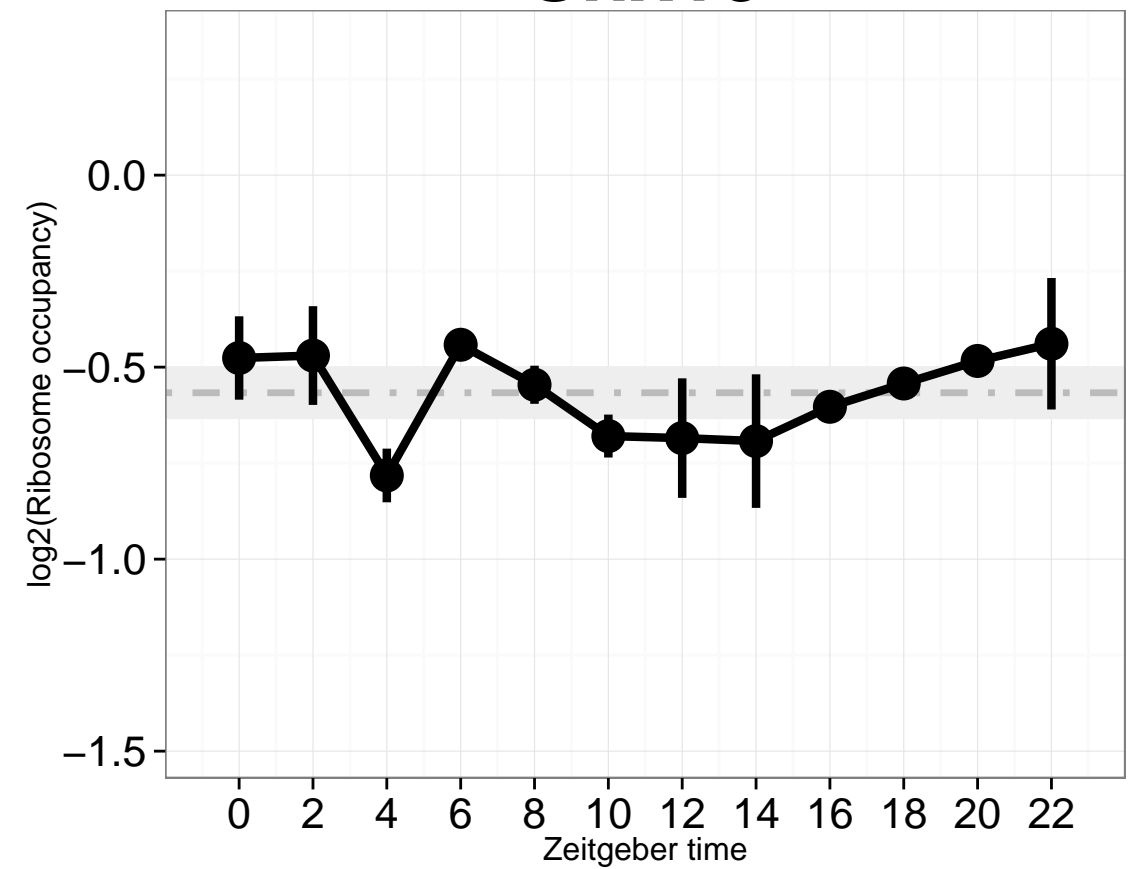

Supplement: Supplementary file 9701 [file 1]

# Magt1

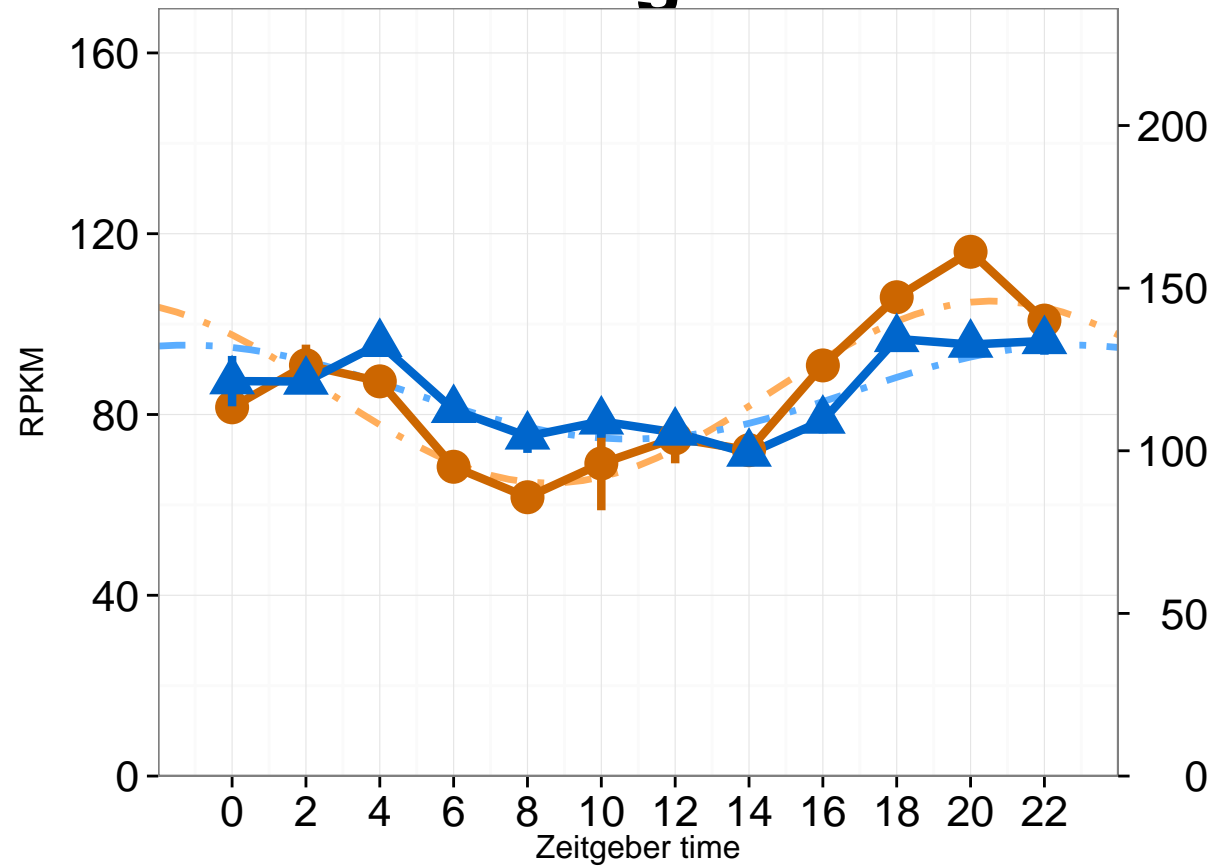

# Magt1

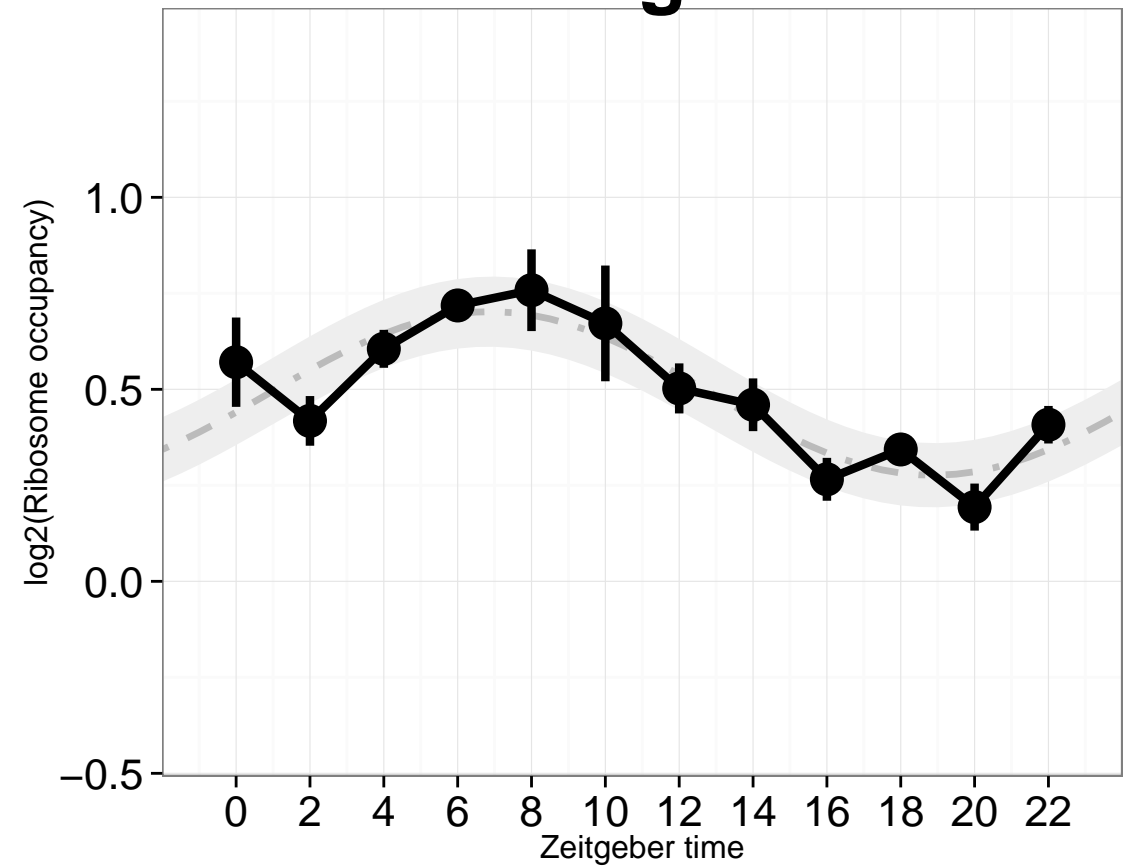

Supplement: Supplementary file 9702 [file 1]

# Zcchc2

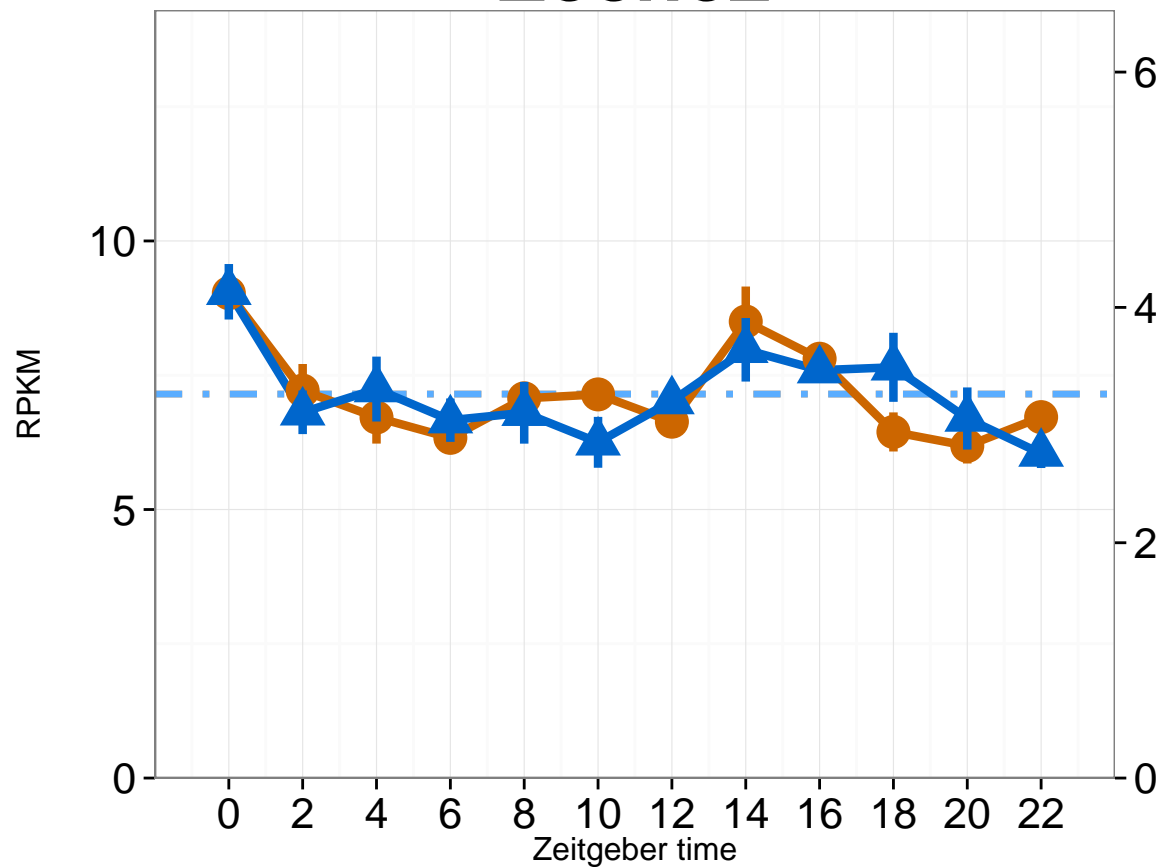

# Zcchc2

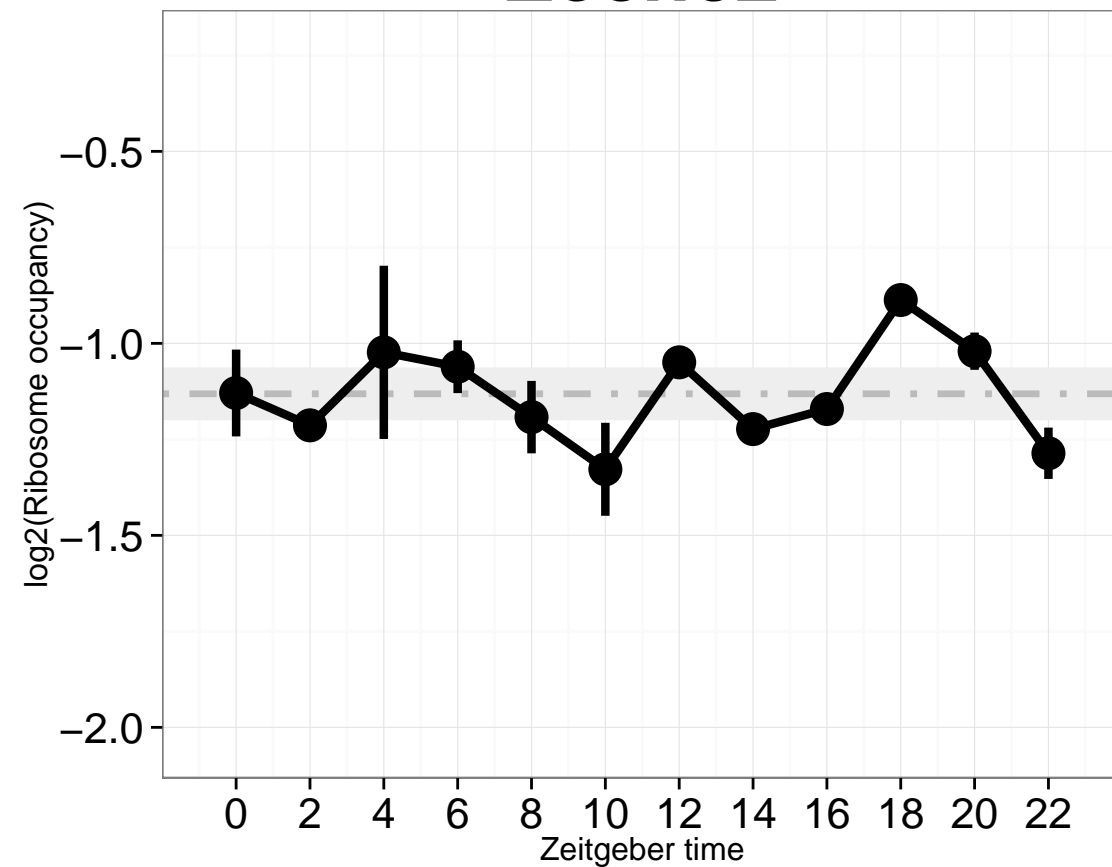

Supplement: Supplementary file 9703 [file 1]

# Gpcpd1

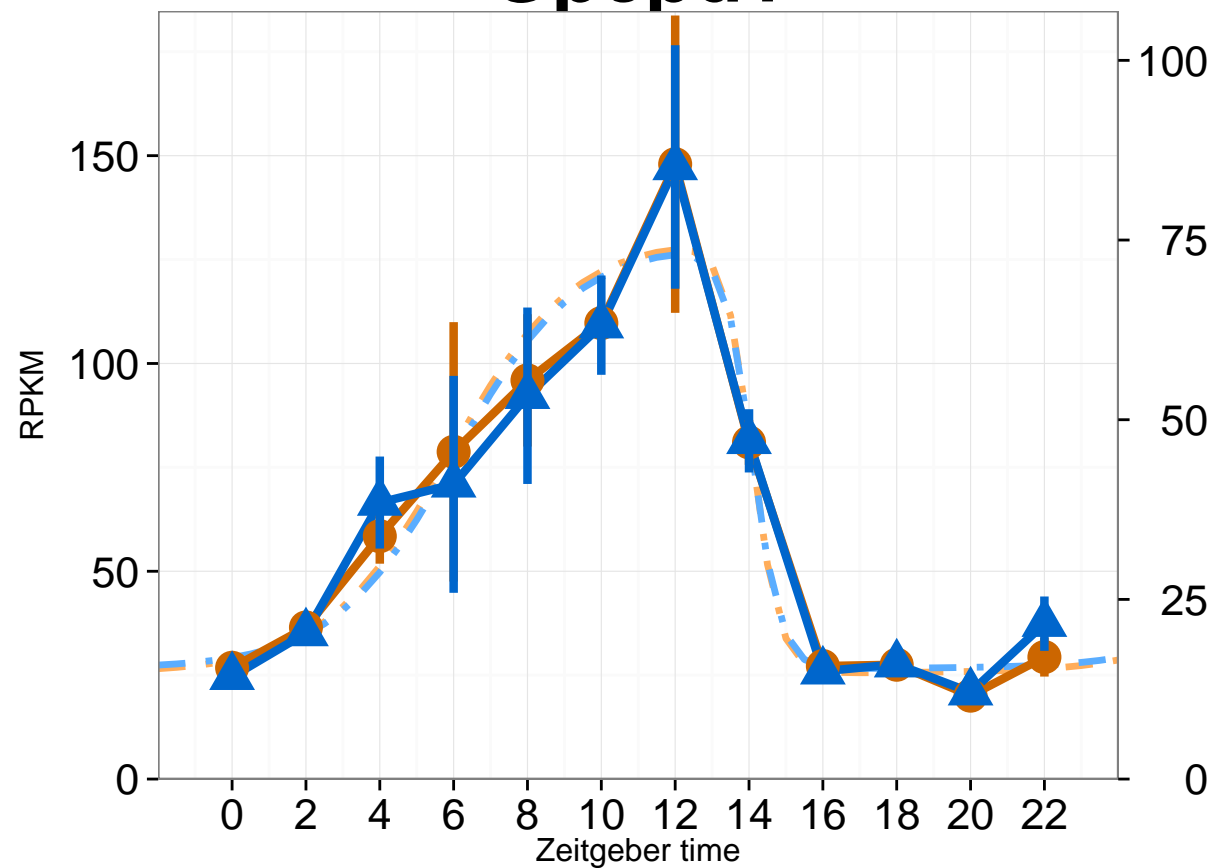

# Gpcpd1

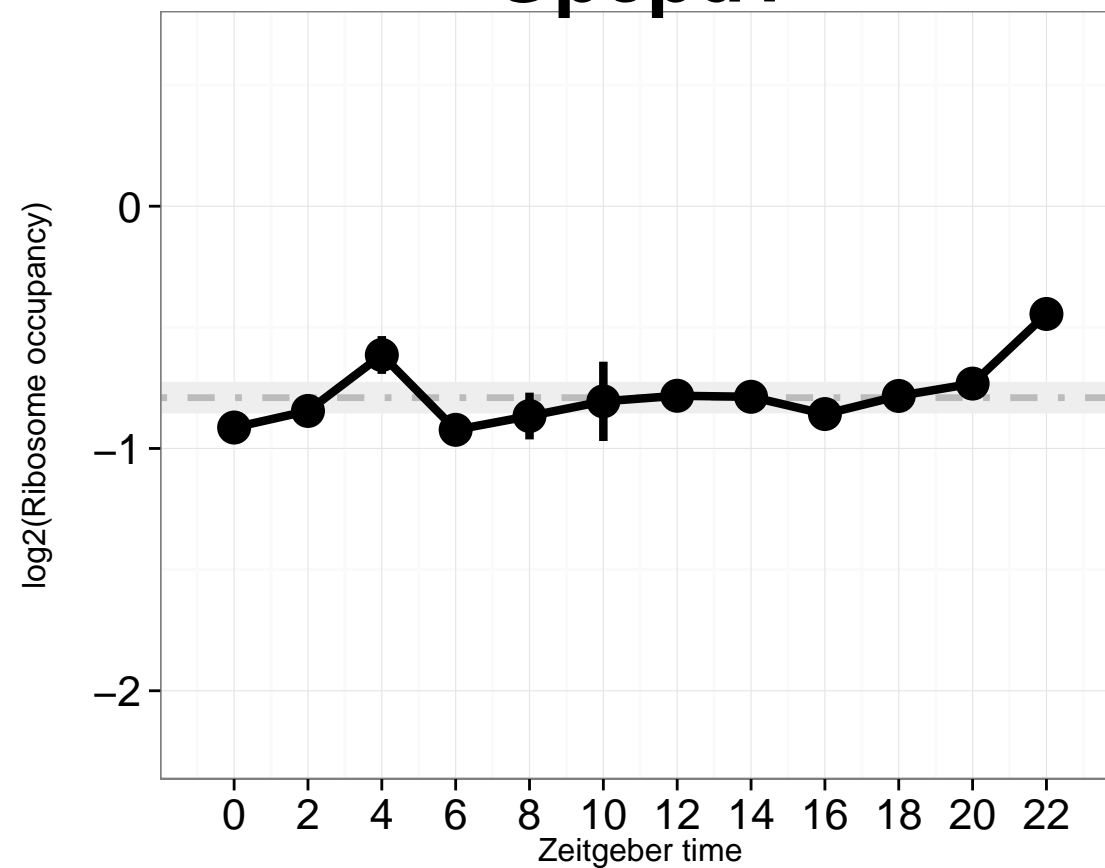

Supplement: Supplementary file 9704 [file 1]

## Ccdc92

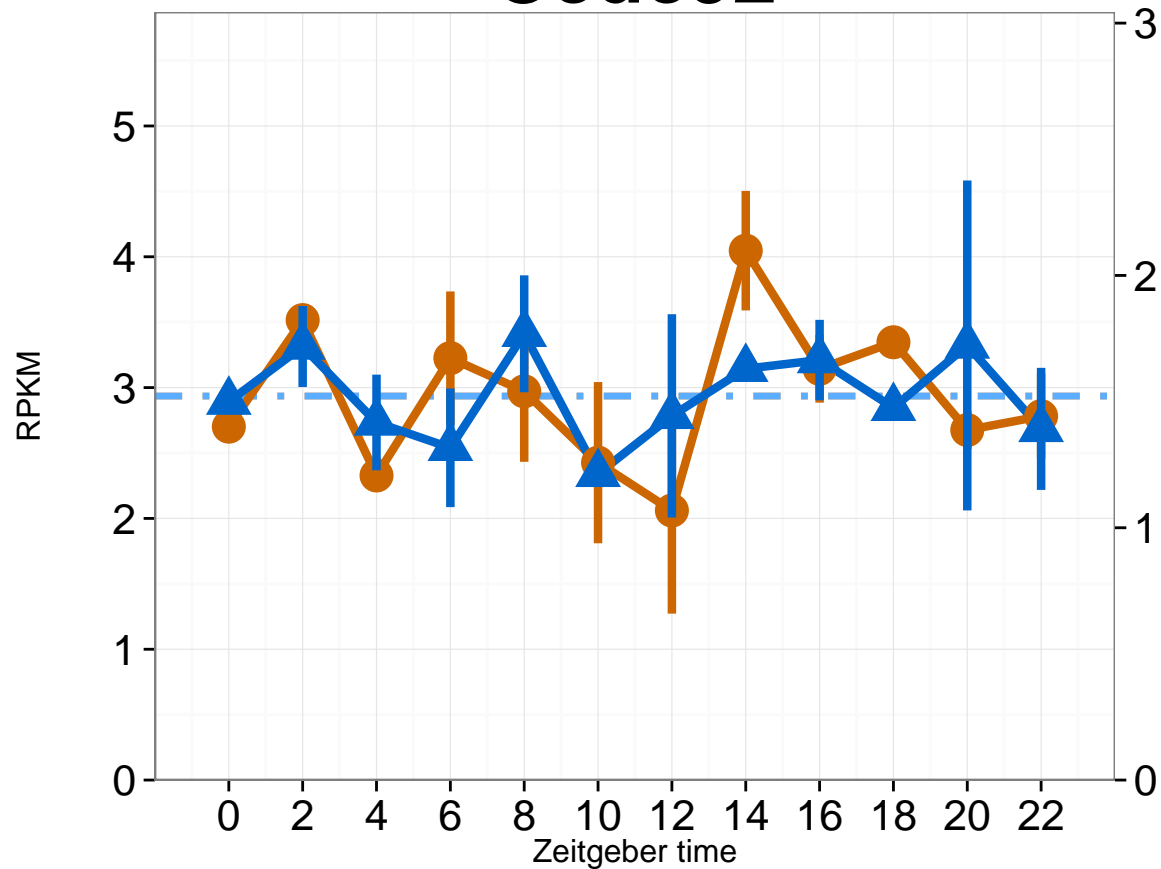

## Ccdc92

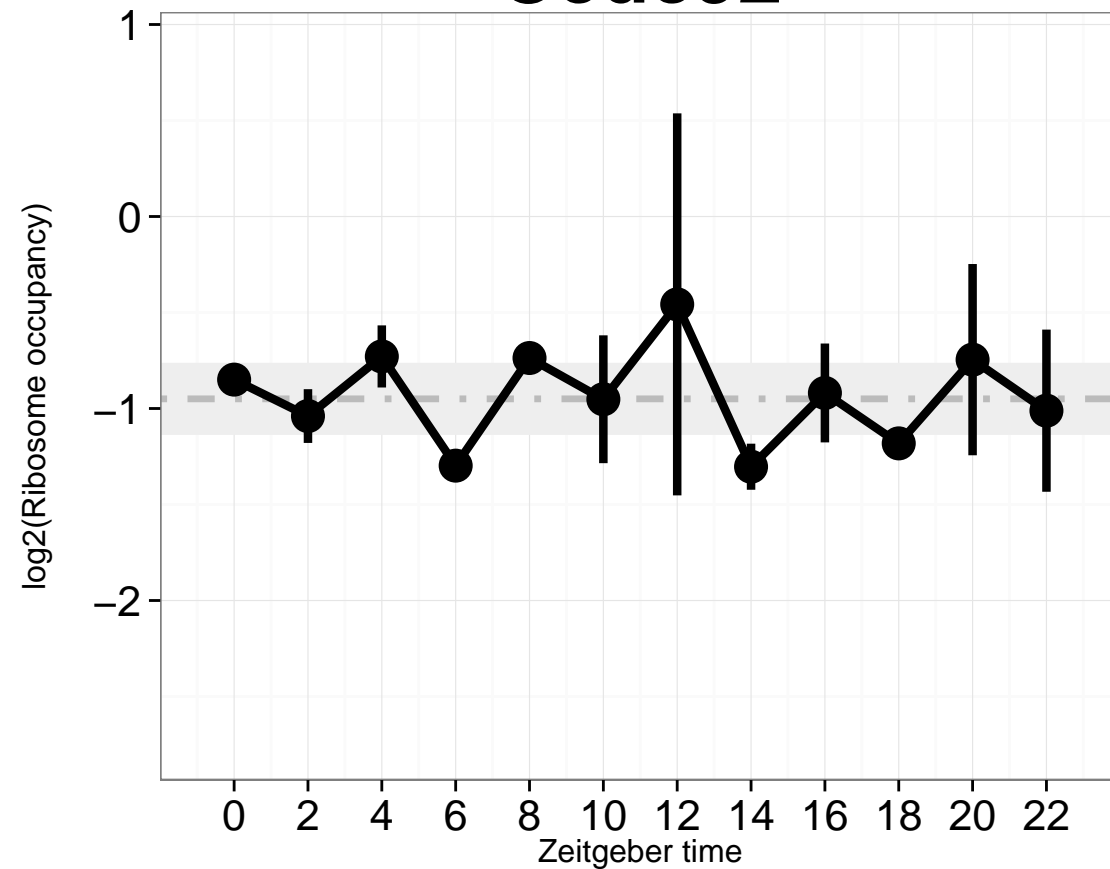

Supplement: Supplementary file 9705 [file 1]

# Pfkfb1

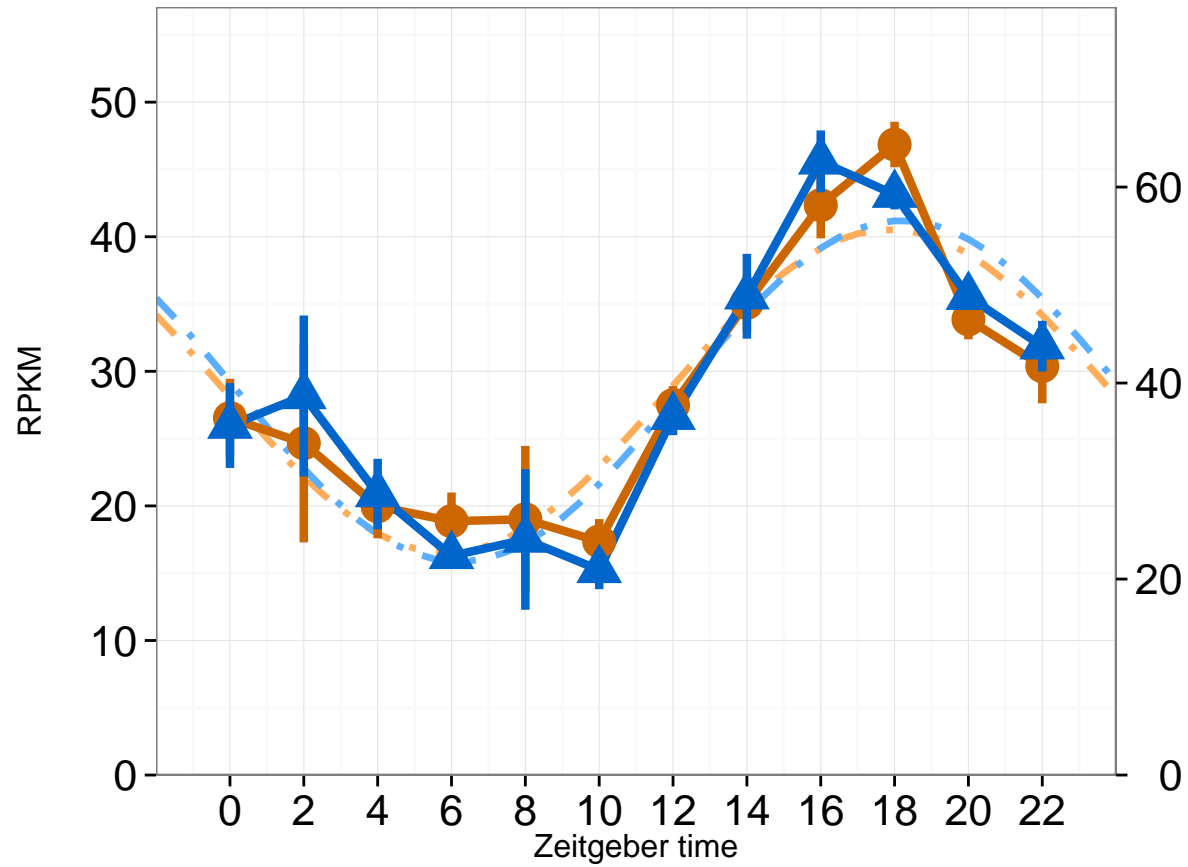

# Pfkfb1

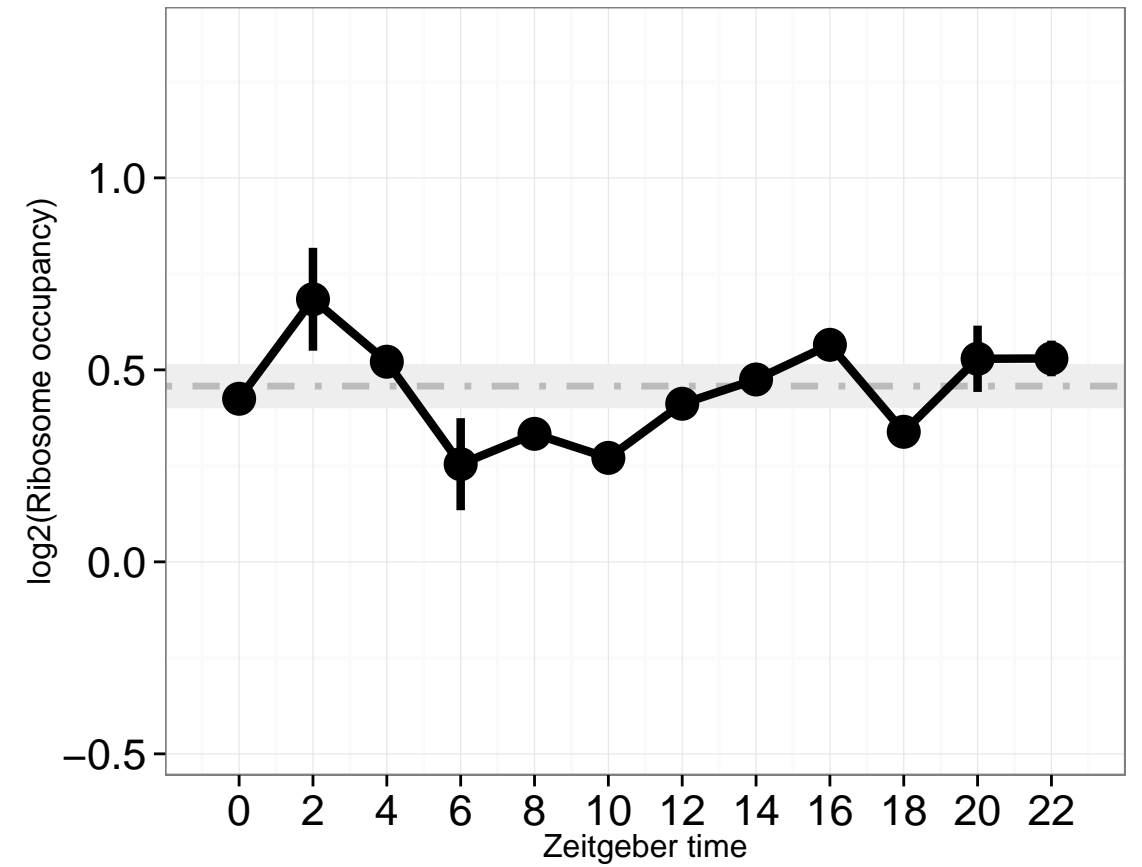

Supplement: Supplementary file 9706 [file 1]

# Rint1

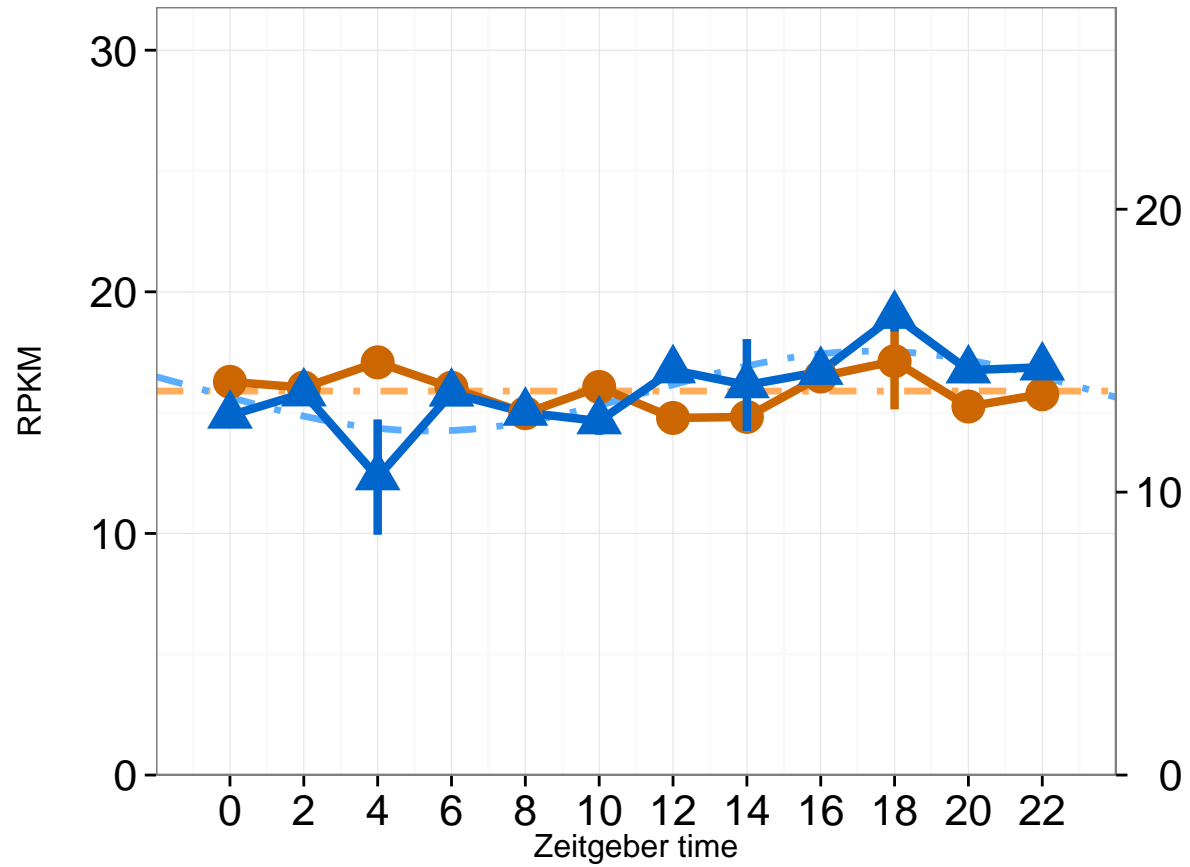

# Rint1

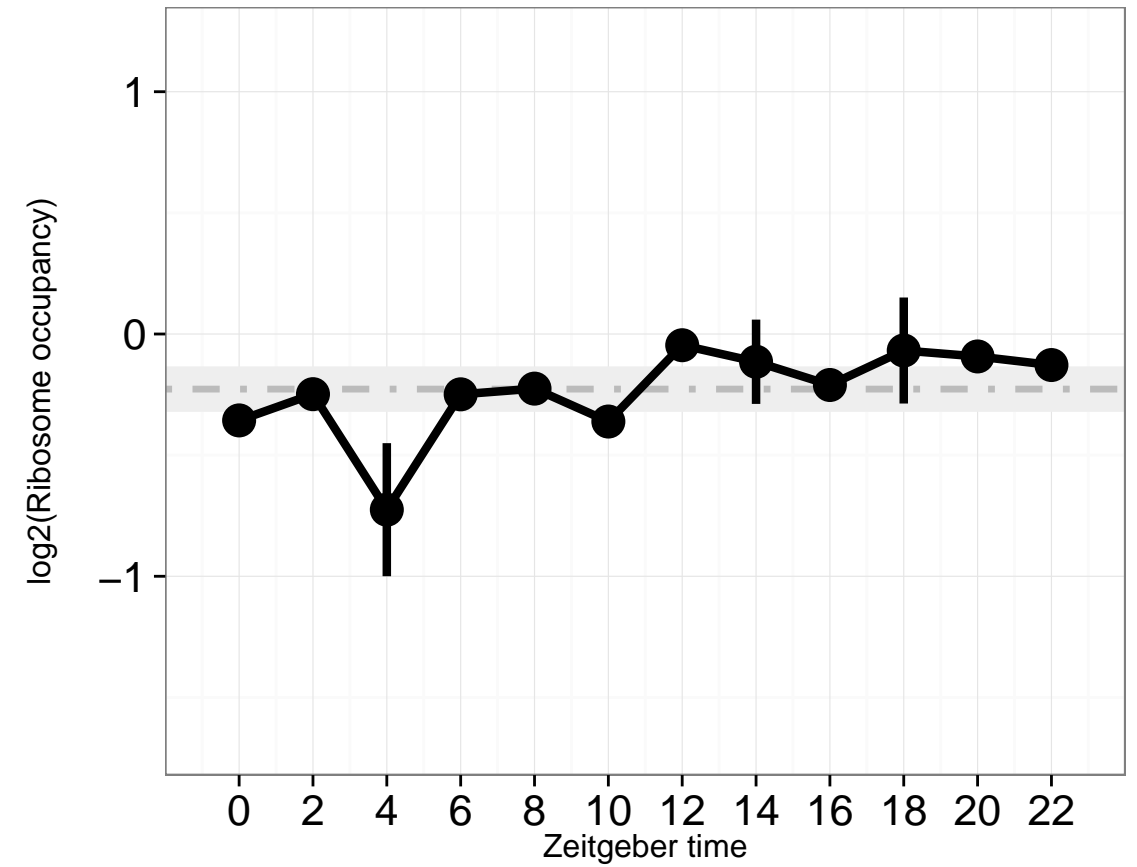

Supplement: Supplementary file 9707 [file 1]

# Wdr13

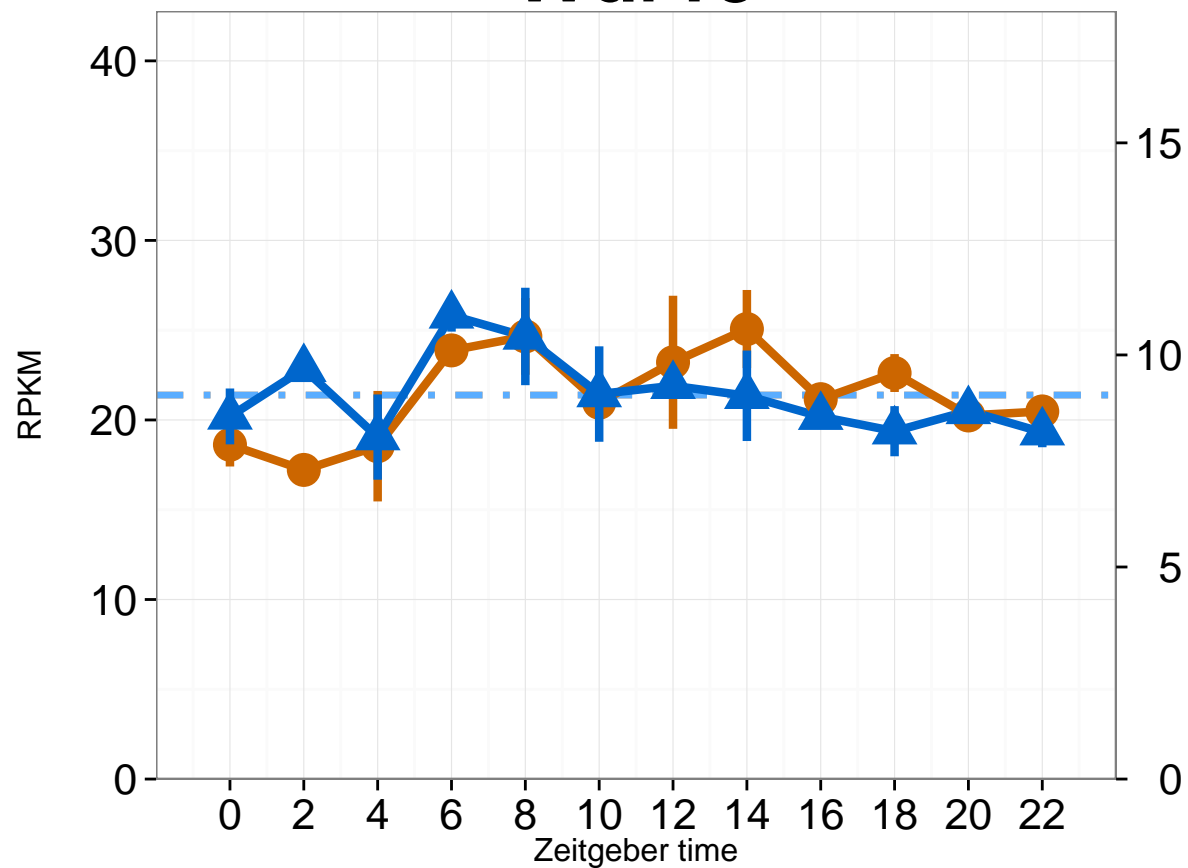

# Wdr13

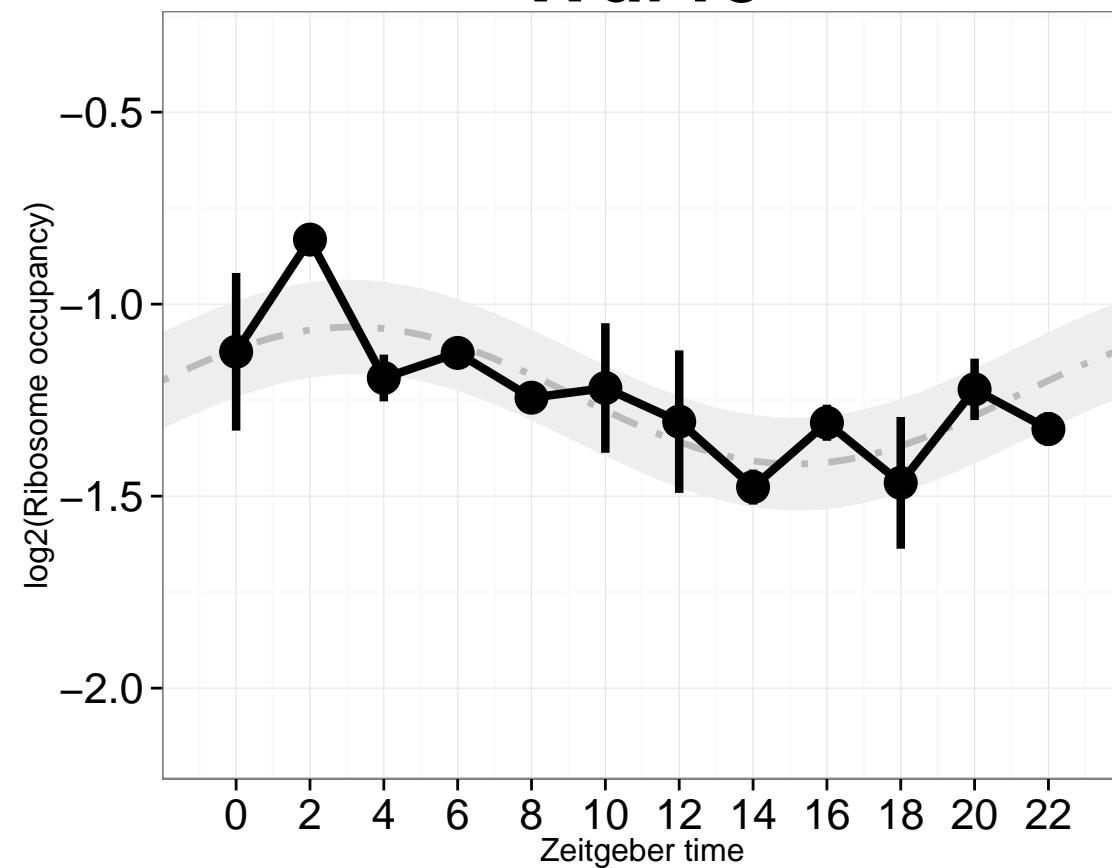

Supplement: Supplementary file 9708 [file 1]

## Mthfr

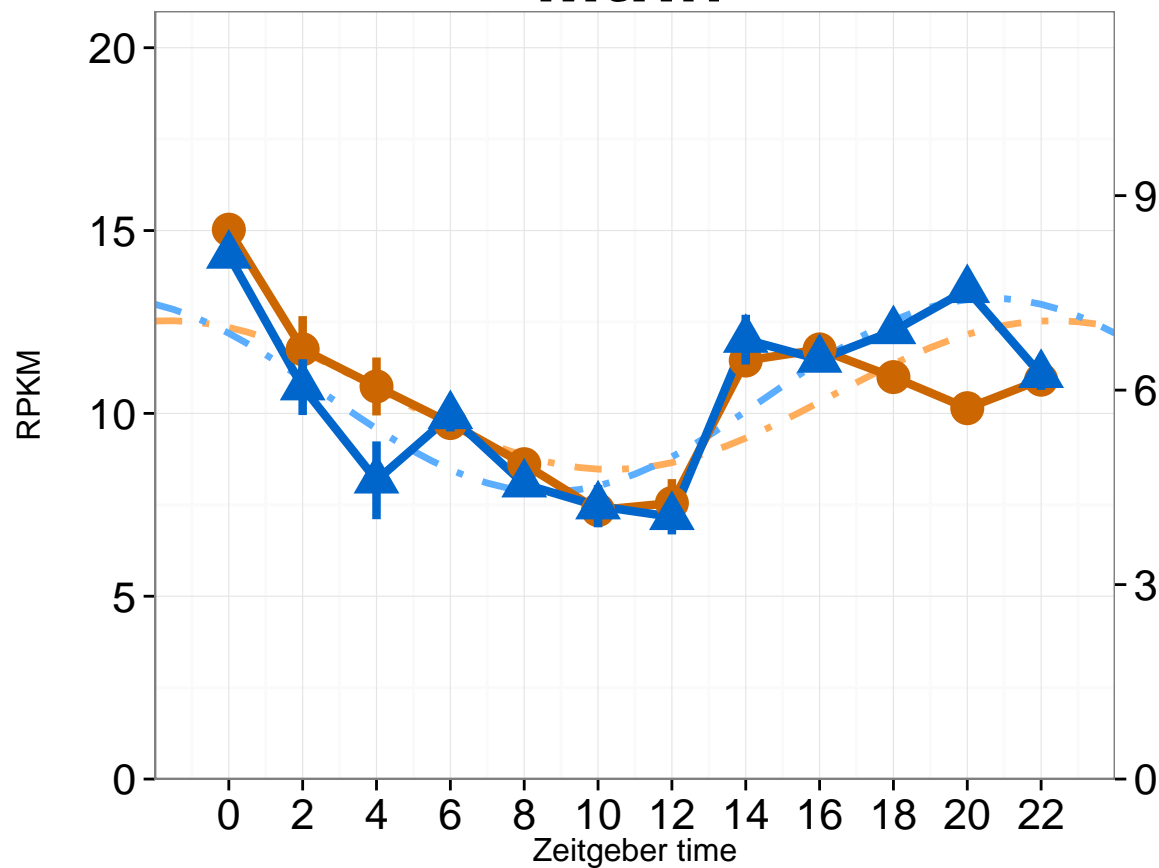

## Mthfr

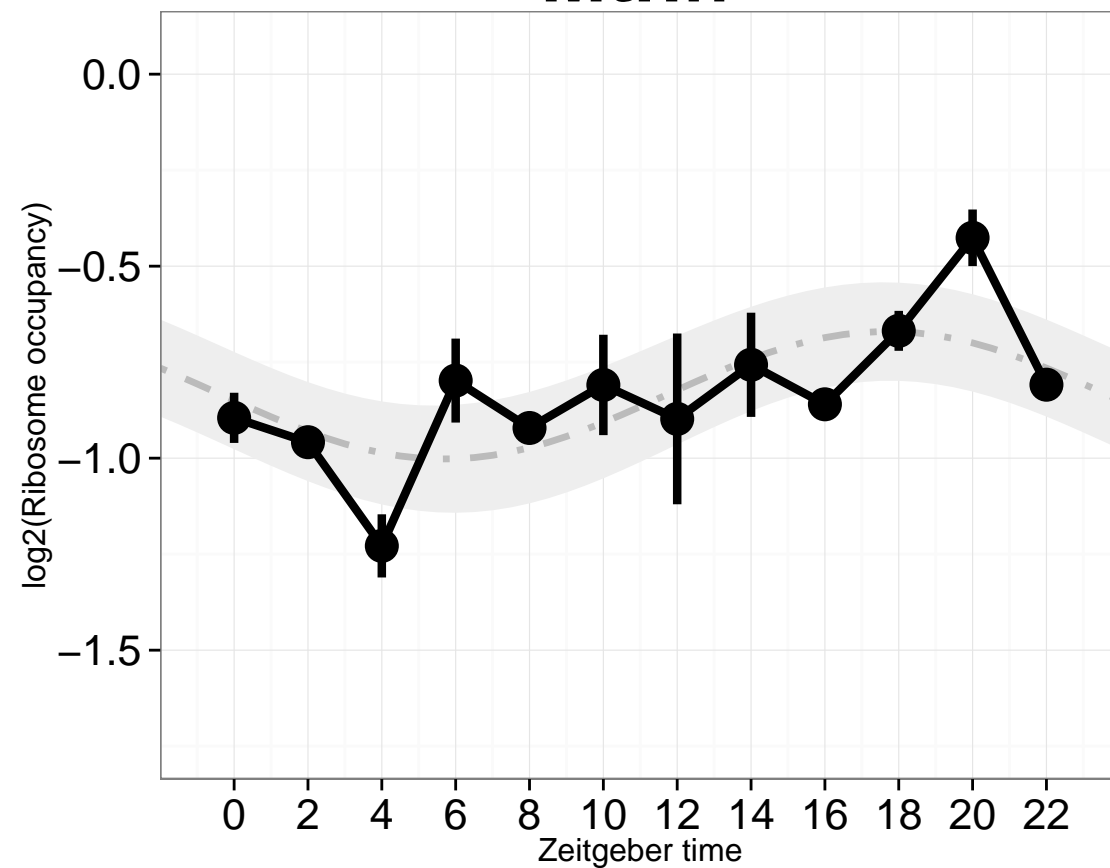

Supplement: Supplementary file 9709 [file 1]

## Nfix

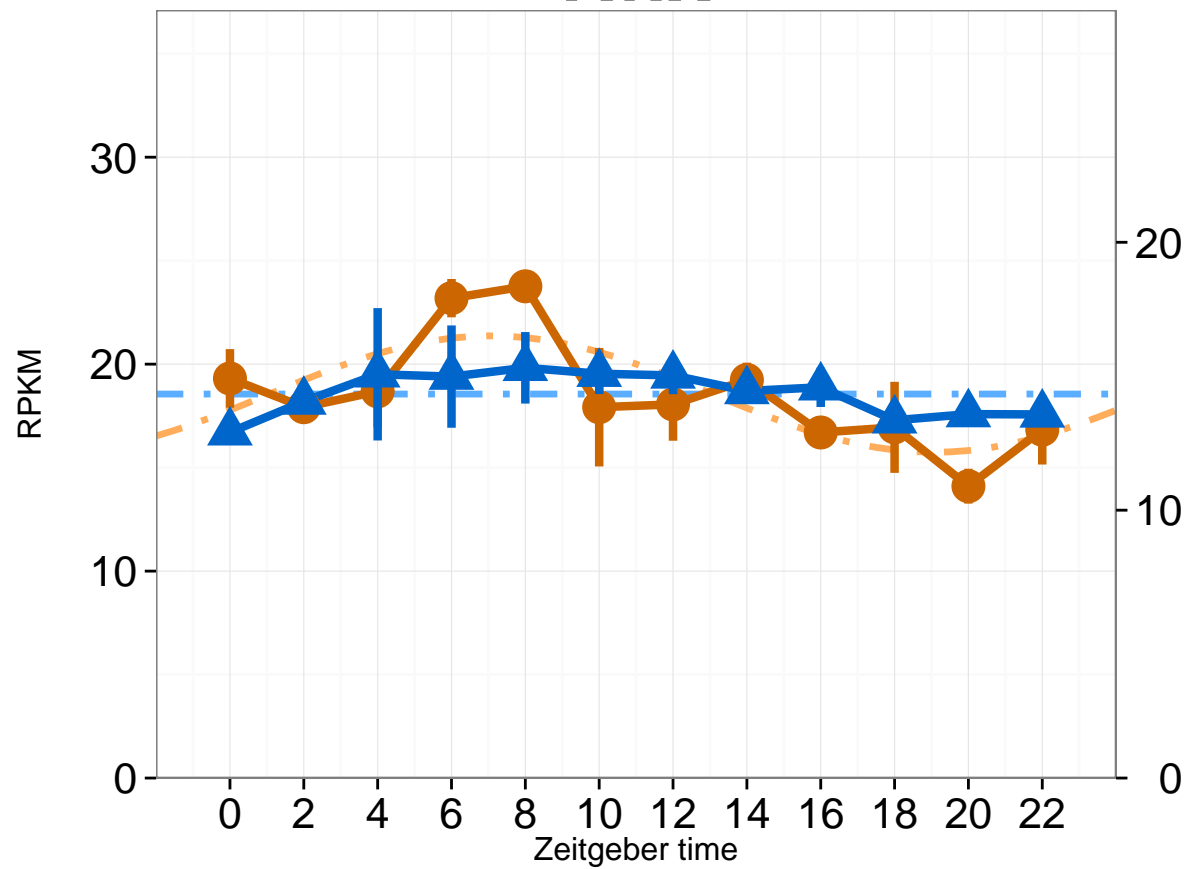

## Nfix

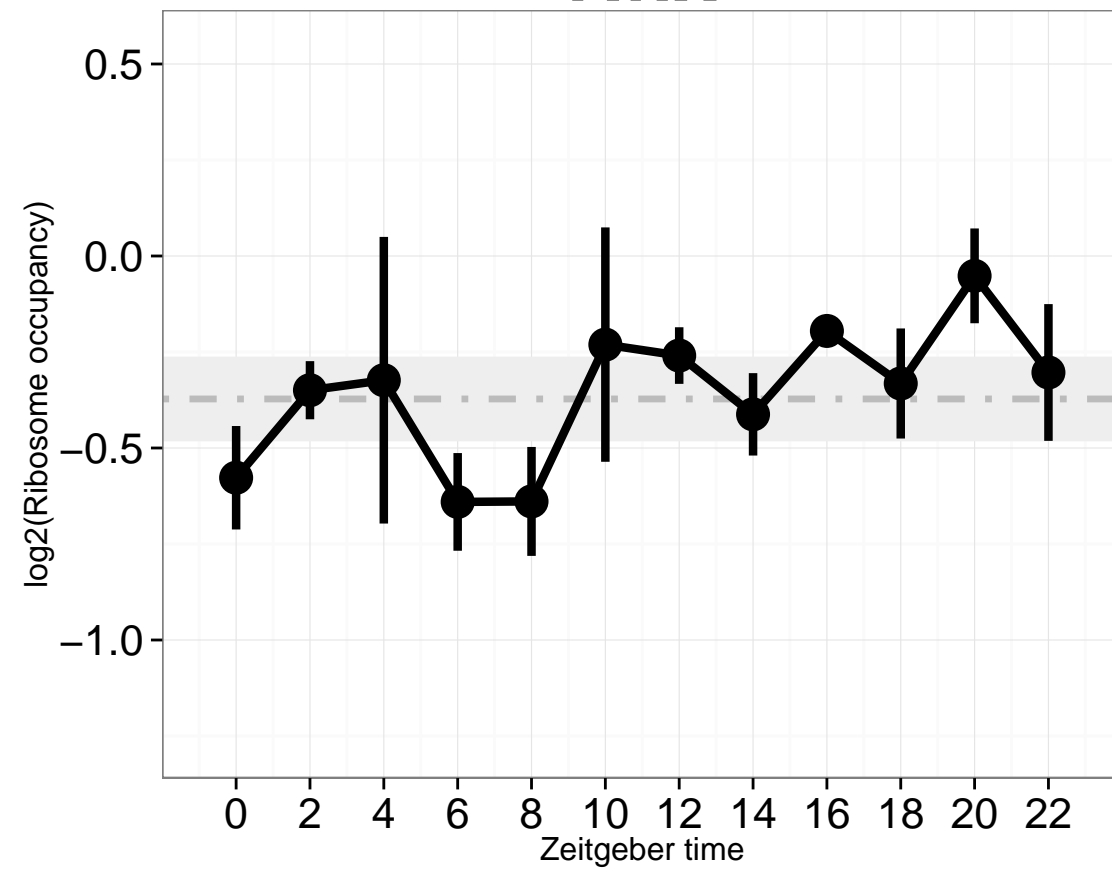

Supplement: Supplementary file 9710 [file 1]

## Sptlc2

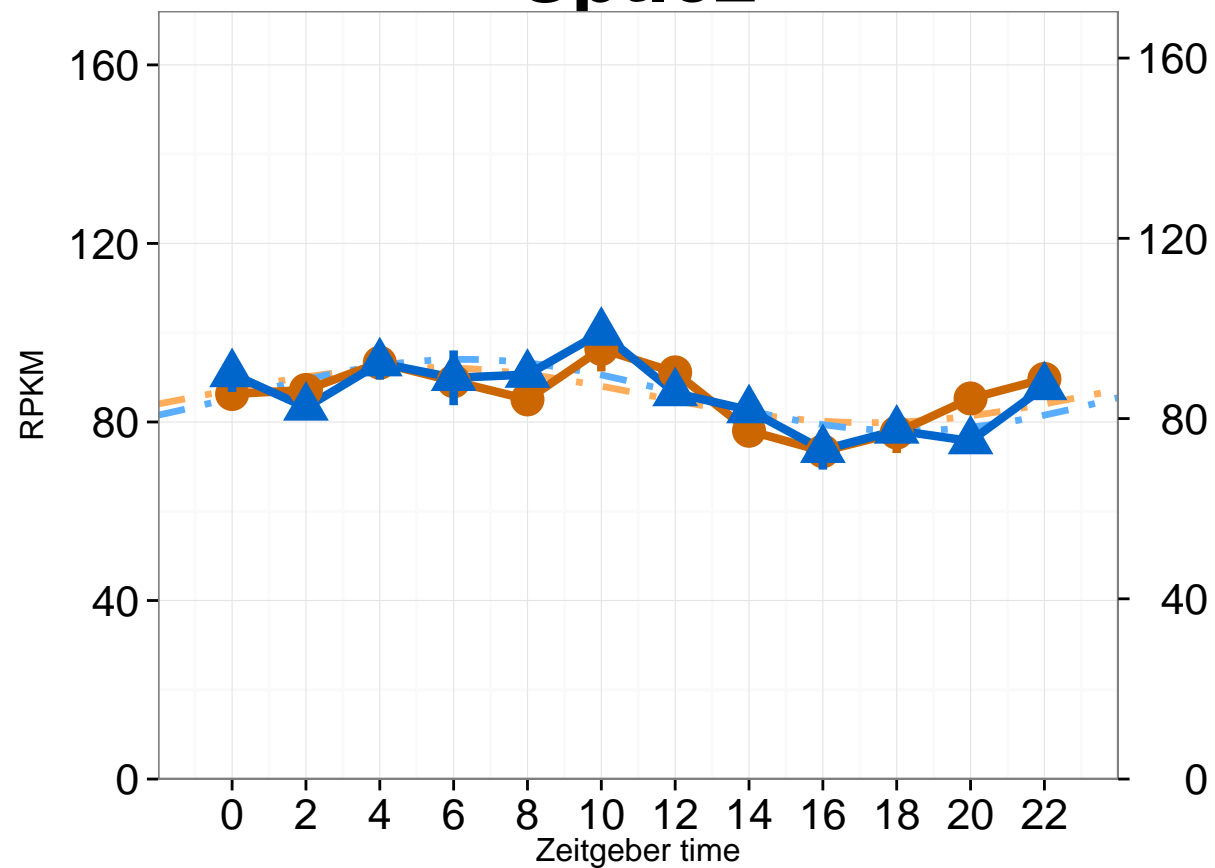

## Sptlc2

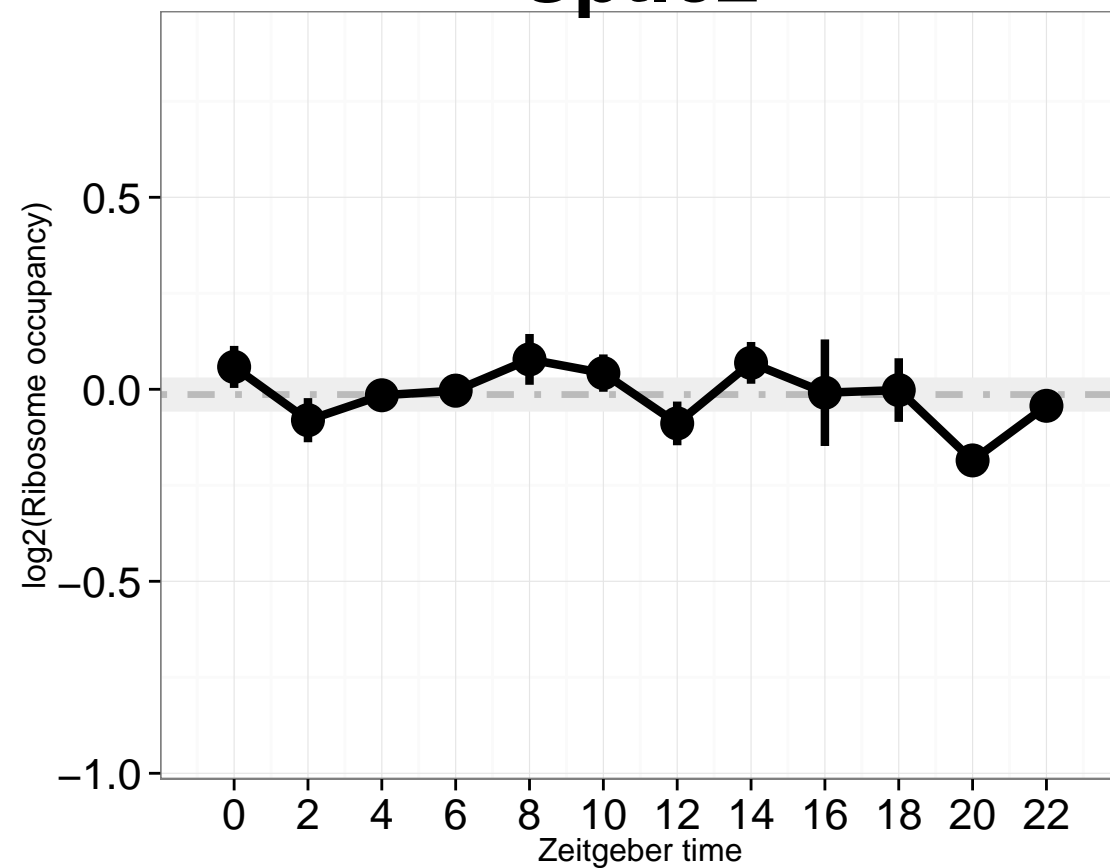

Supplement: Supplementary file 9711 [file 1]

# N4bp2l1

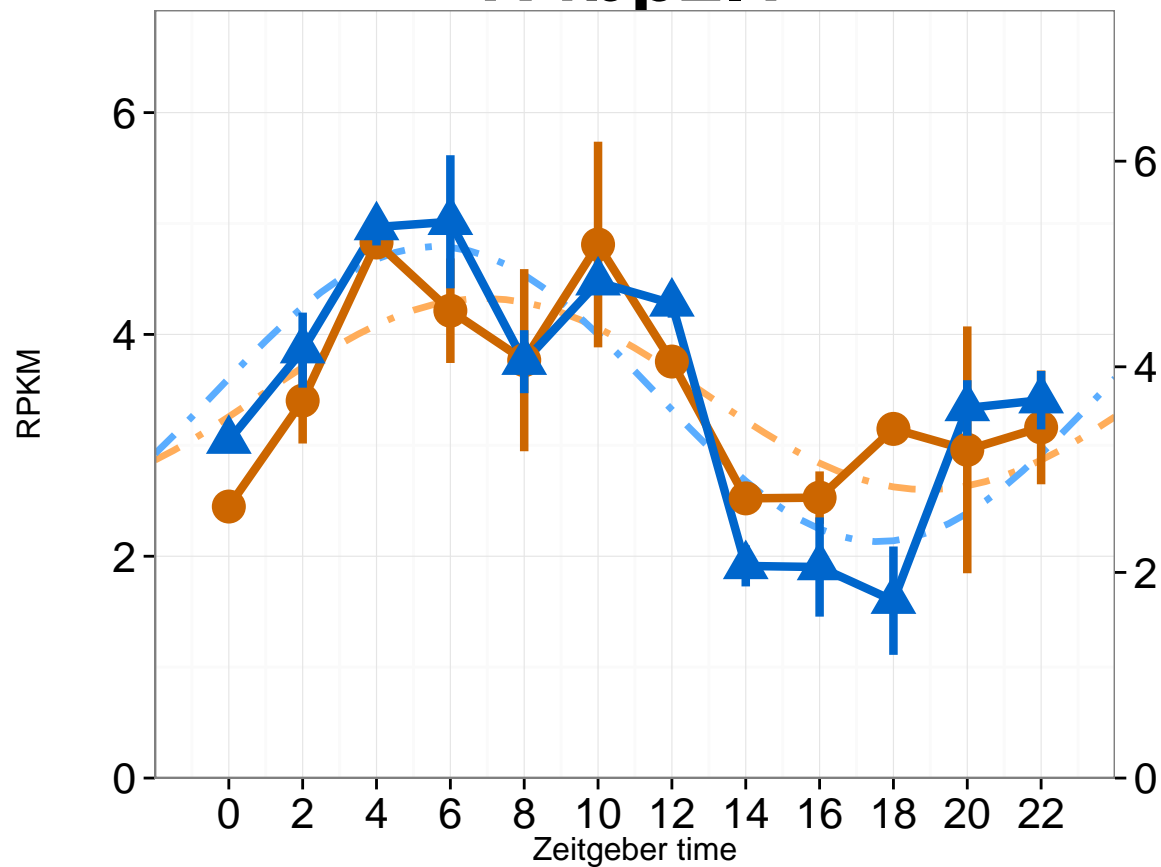

# N4bp2l1

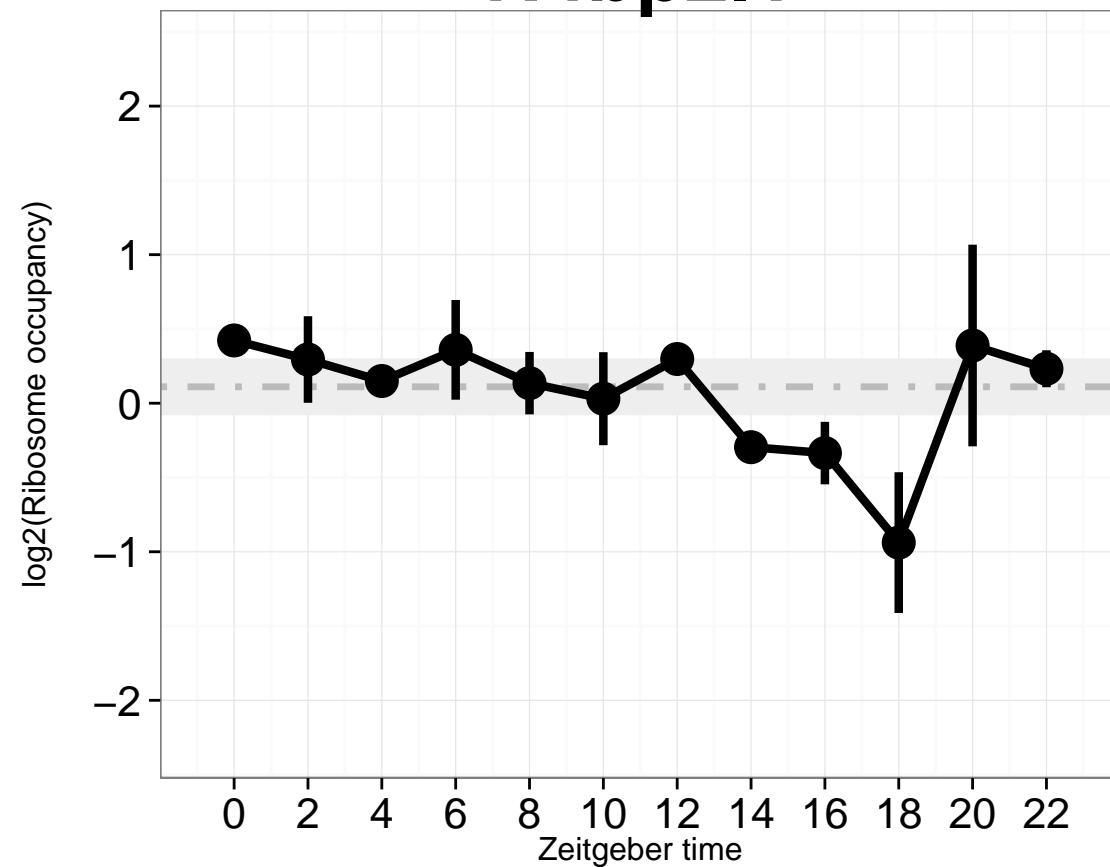

Supplement: Supplementary file 9712 [file 1]

# Pop5

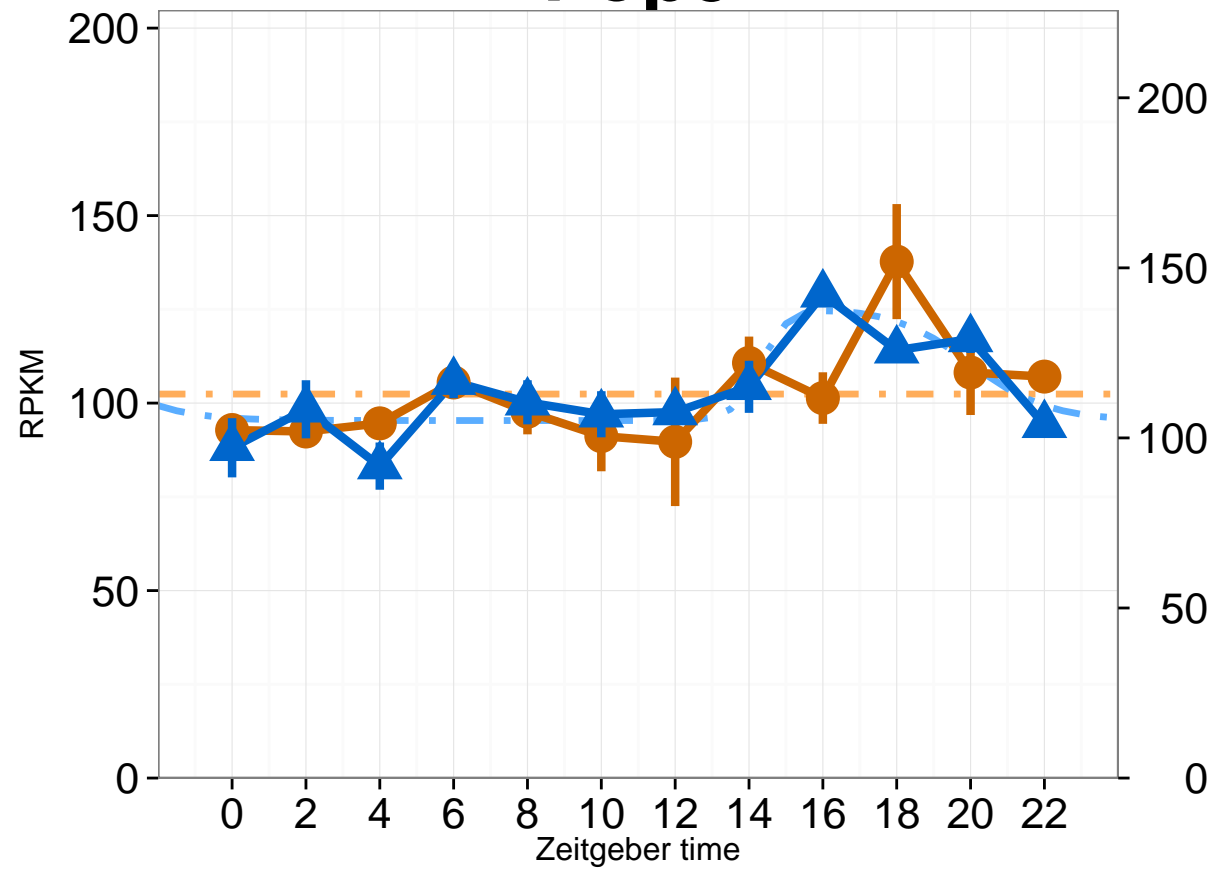

# Pop5

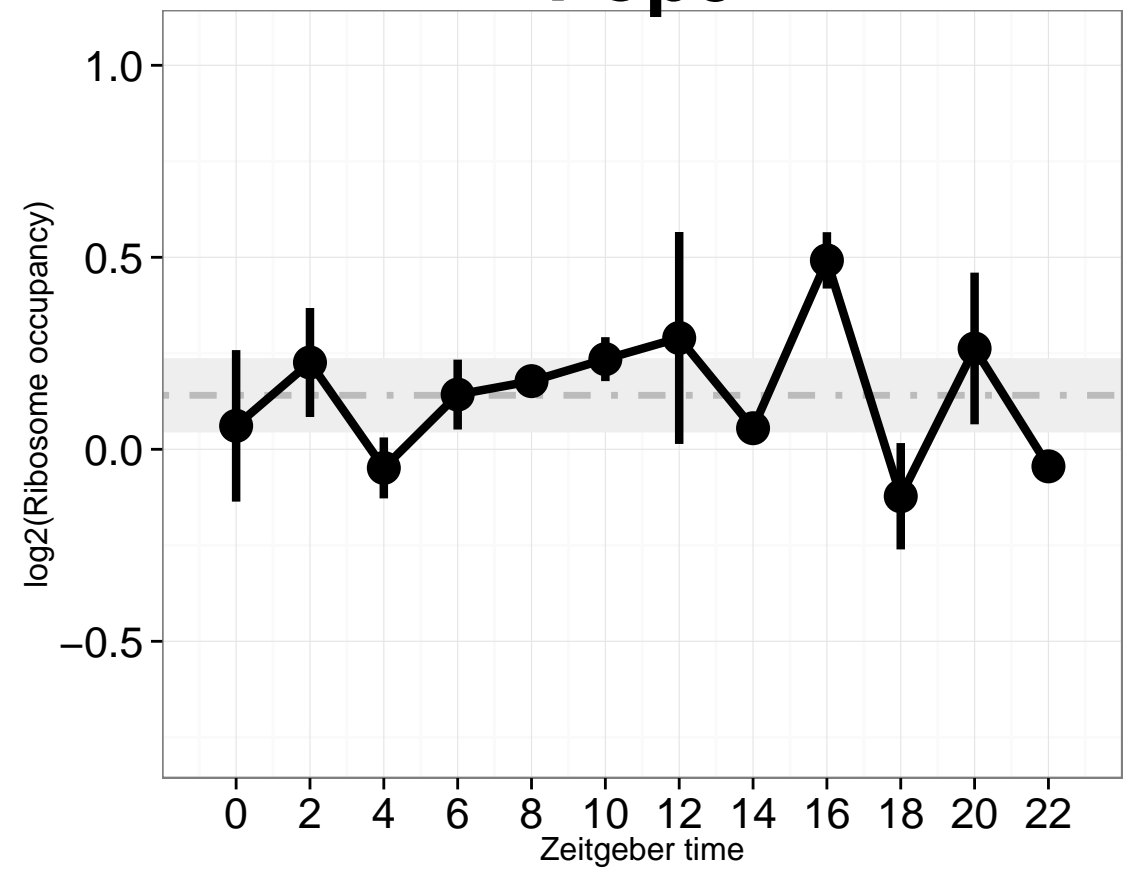

Supplement: Supplementary file 9713 [file 1]

# Fam189b

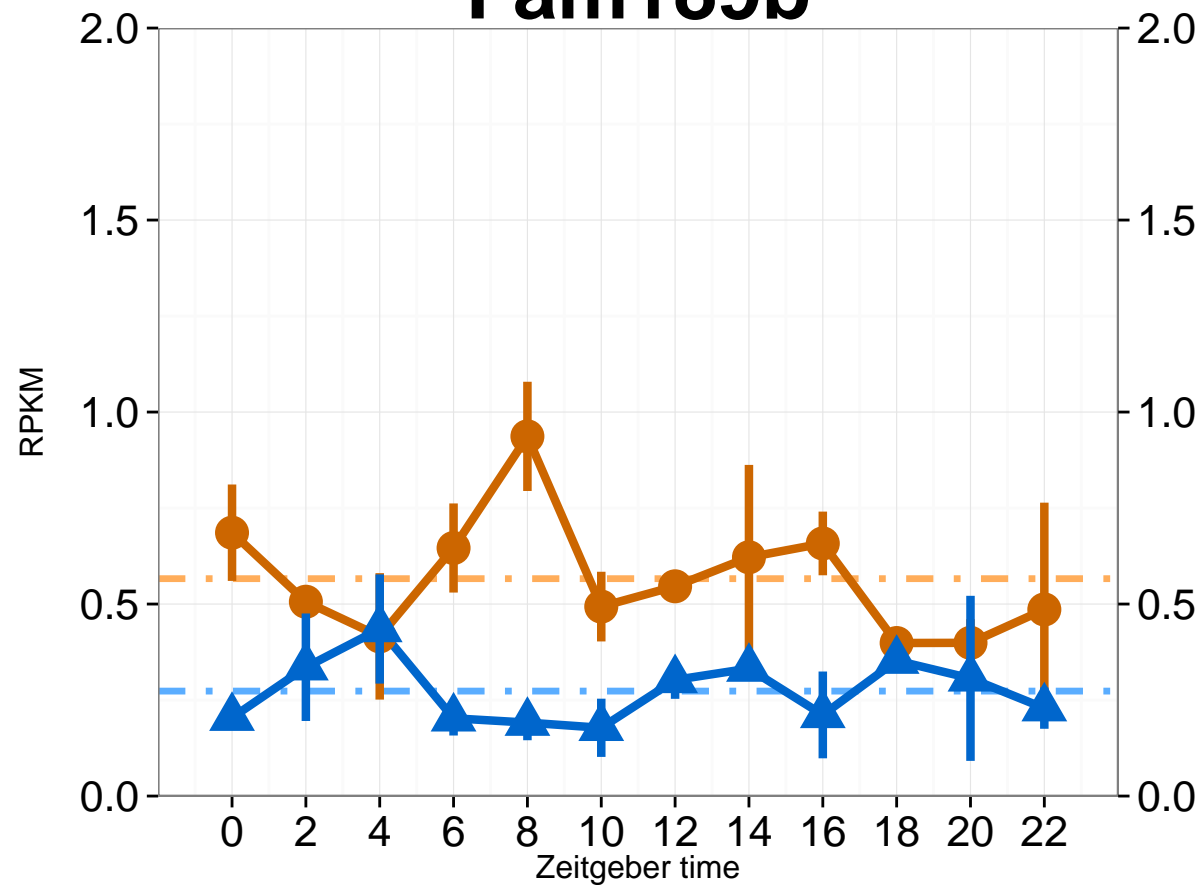

# Fam189b

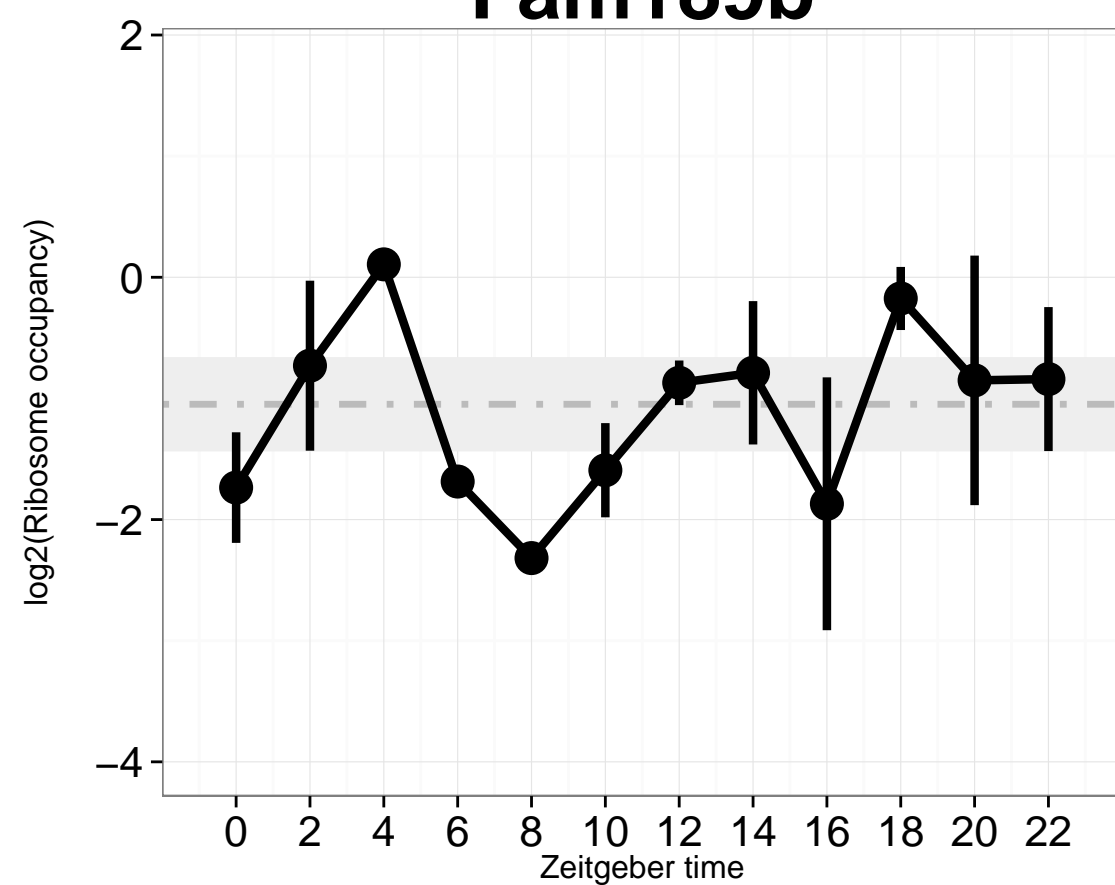

Supplement: Supplementary file 9714 [file 1]

## Zhx2

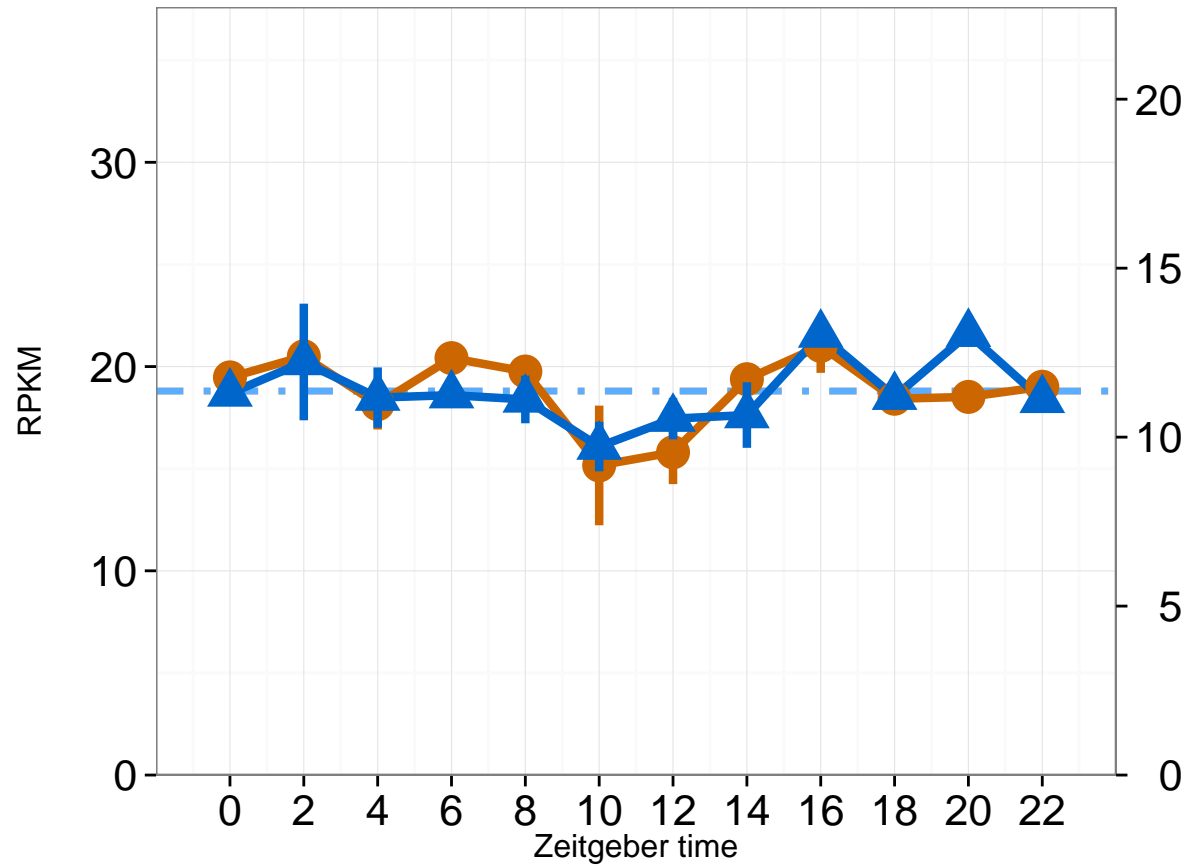

## Zhx2

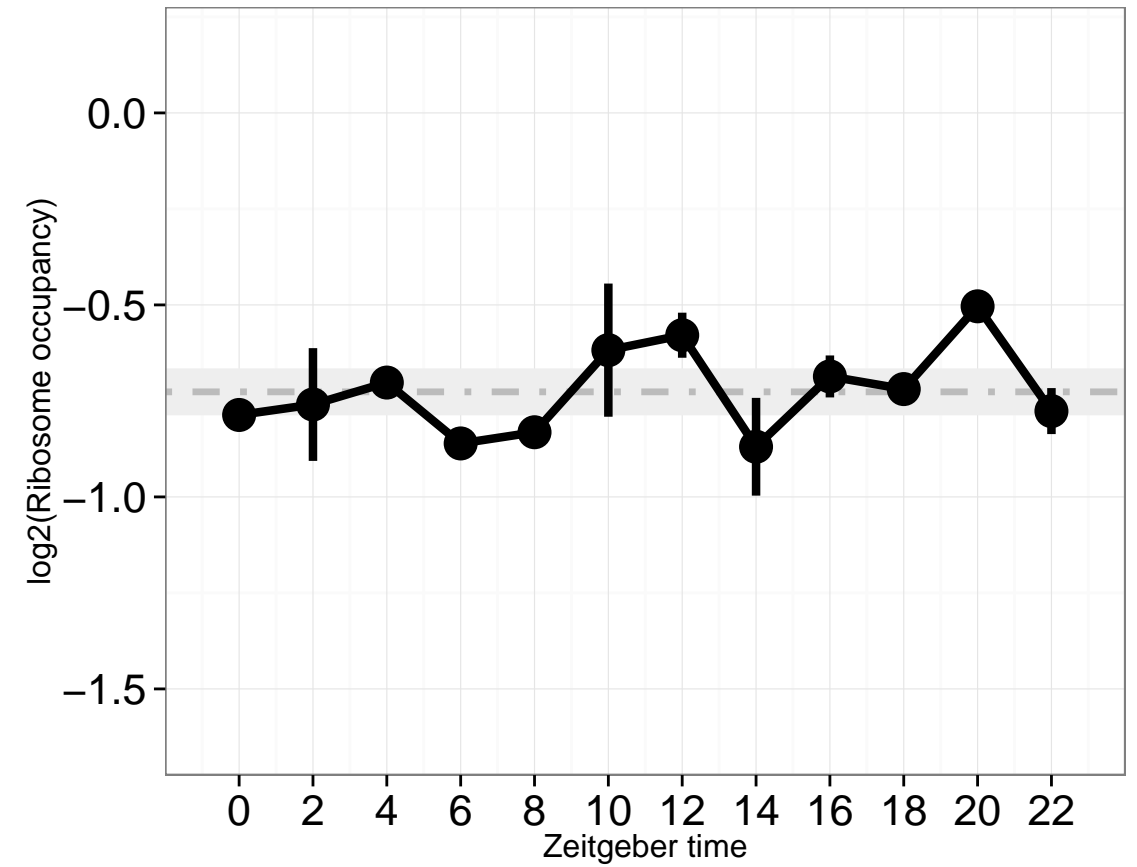

Supplement: Supplementary file 9715 [file 1]

## Itga10

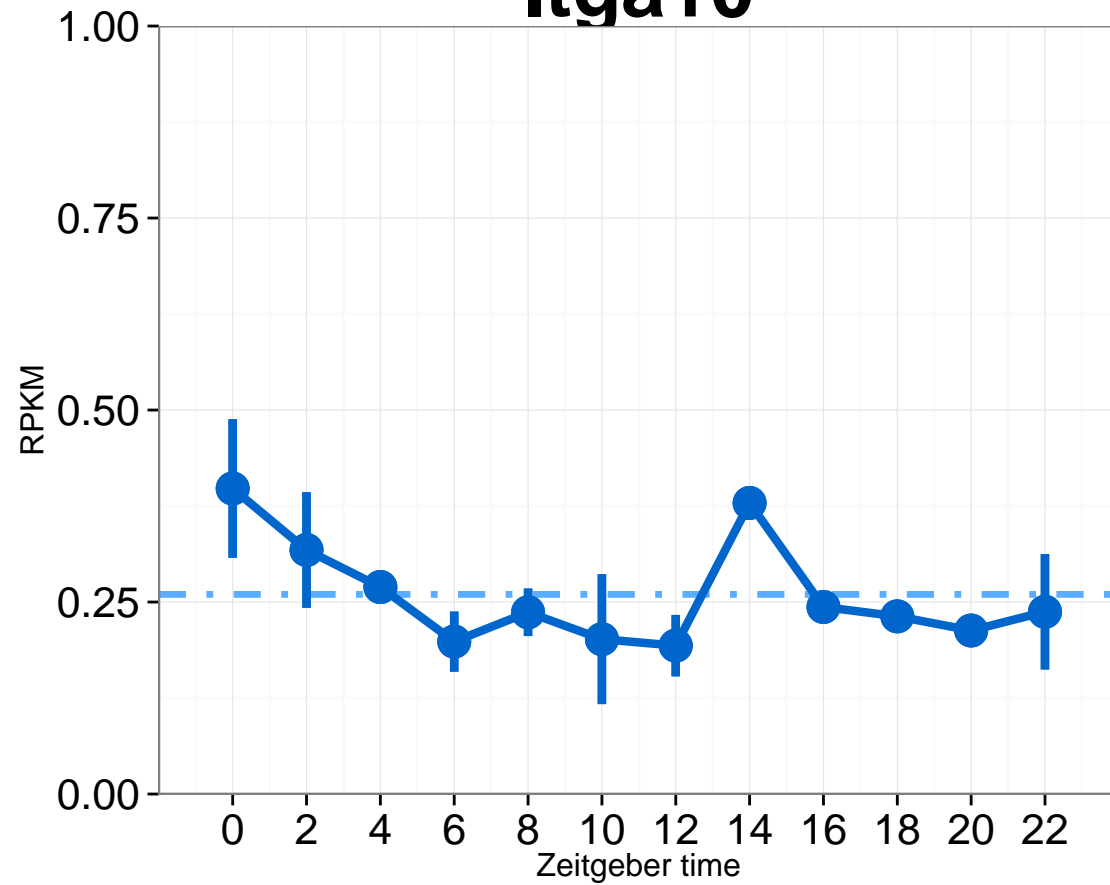

## Itga10 log2(Ribosome occupancy

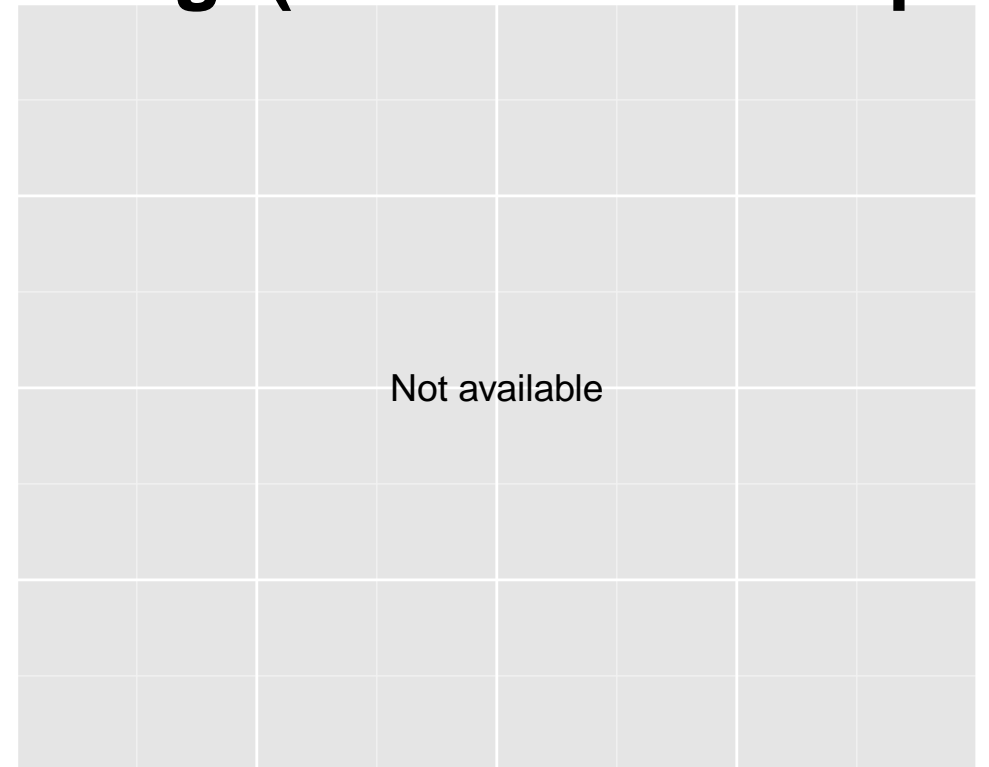

Supplement: Supplementary file 9716 [file 1]

**0610009L18Rik**

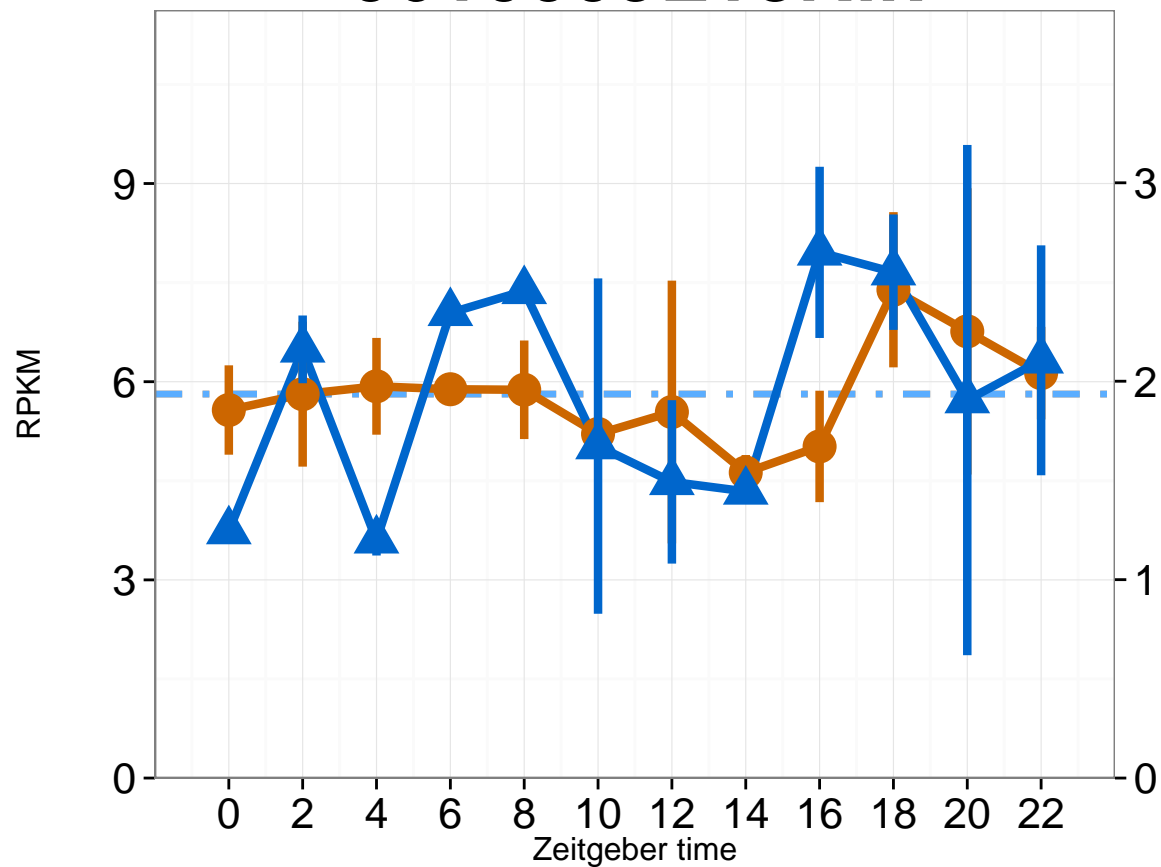

**0610009L18Rik**

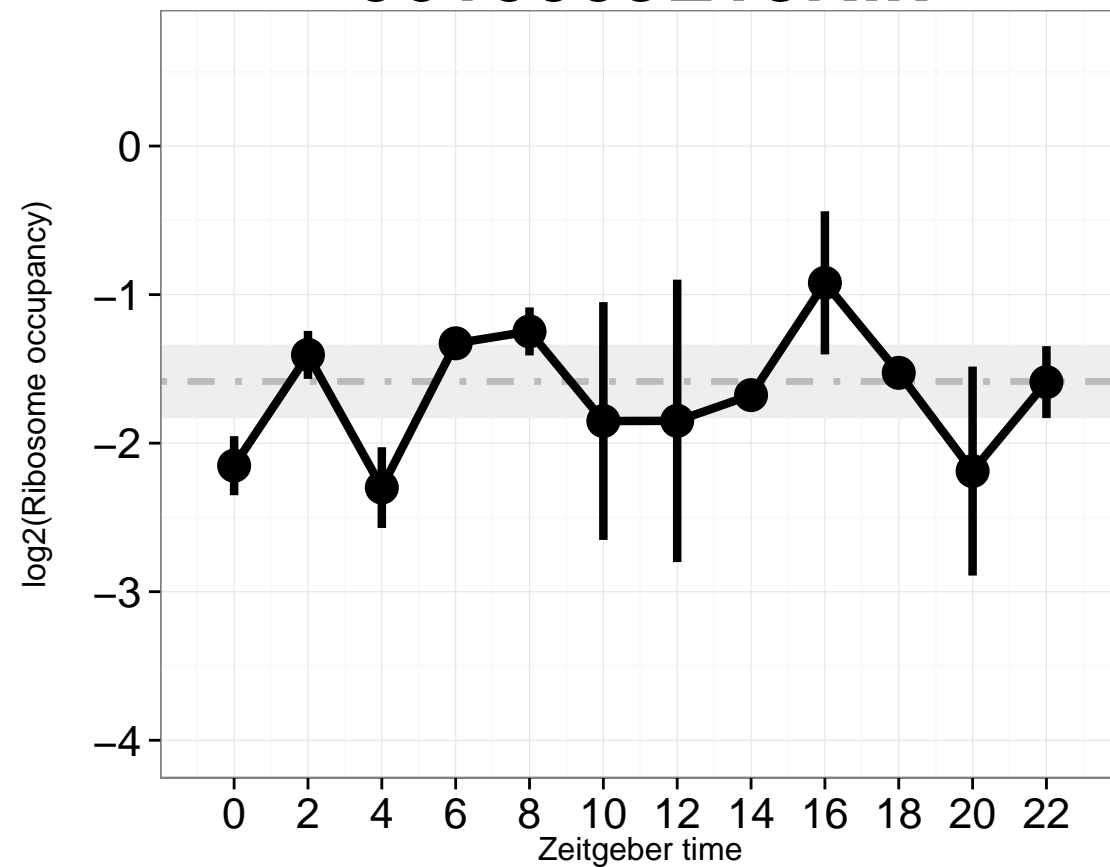

Supplement: Supplementary file 9717 [file 1]

# Top2b

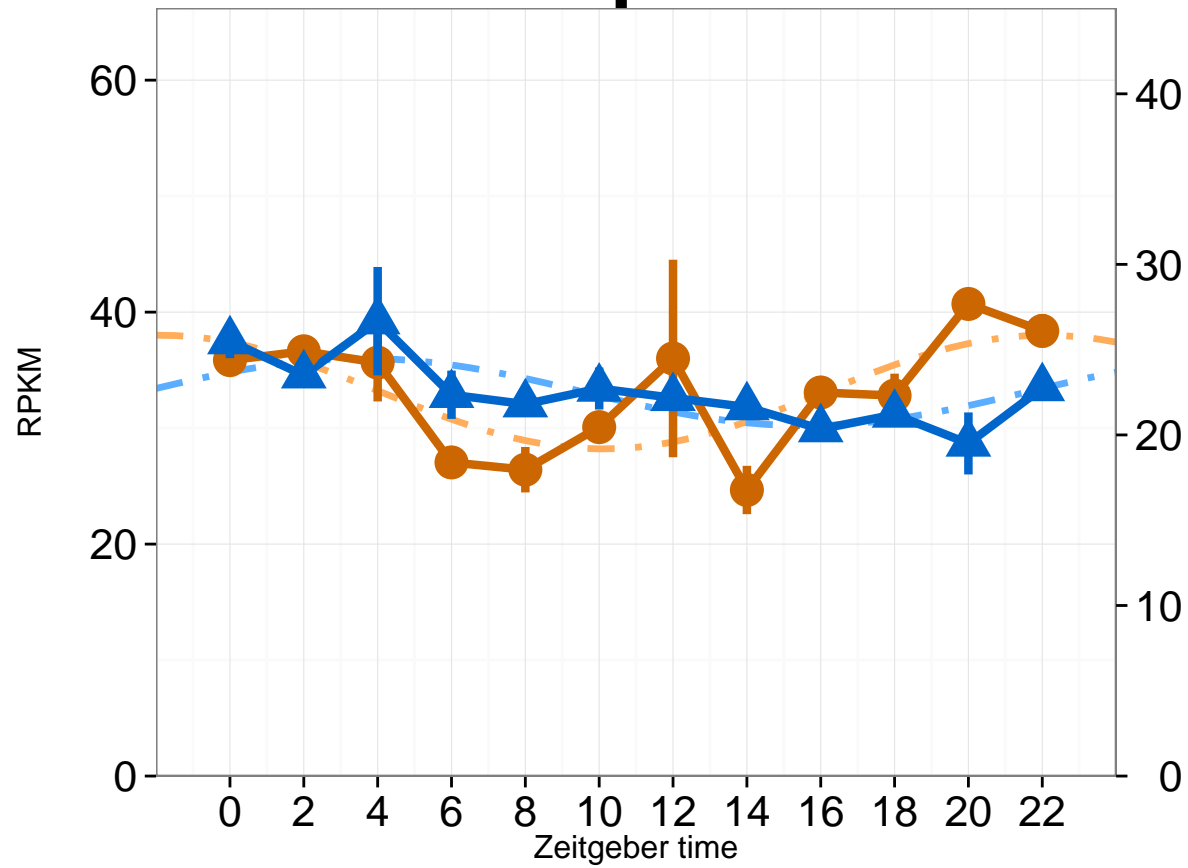

# Top2b

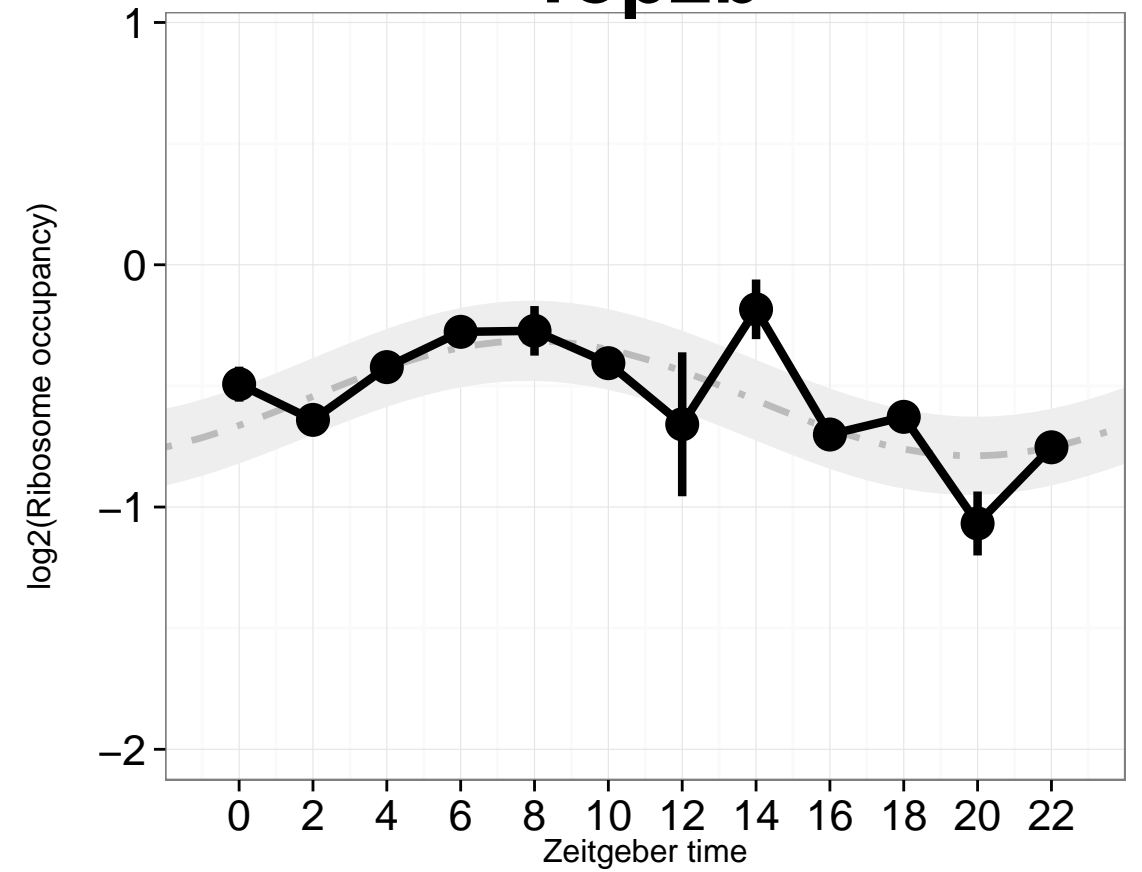

Supplement: Supplementary file 9718 [file 1]

# Tmed2

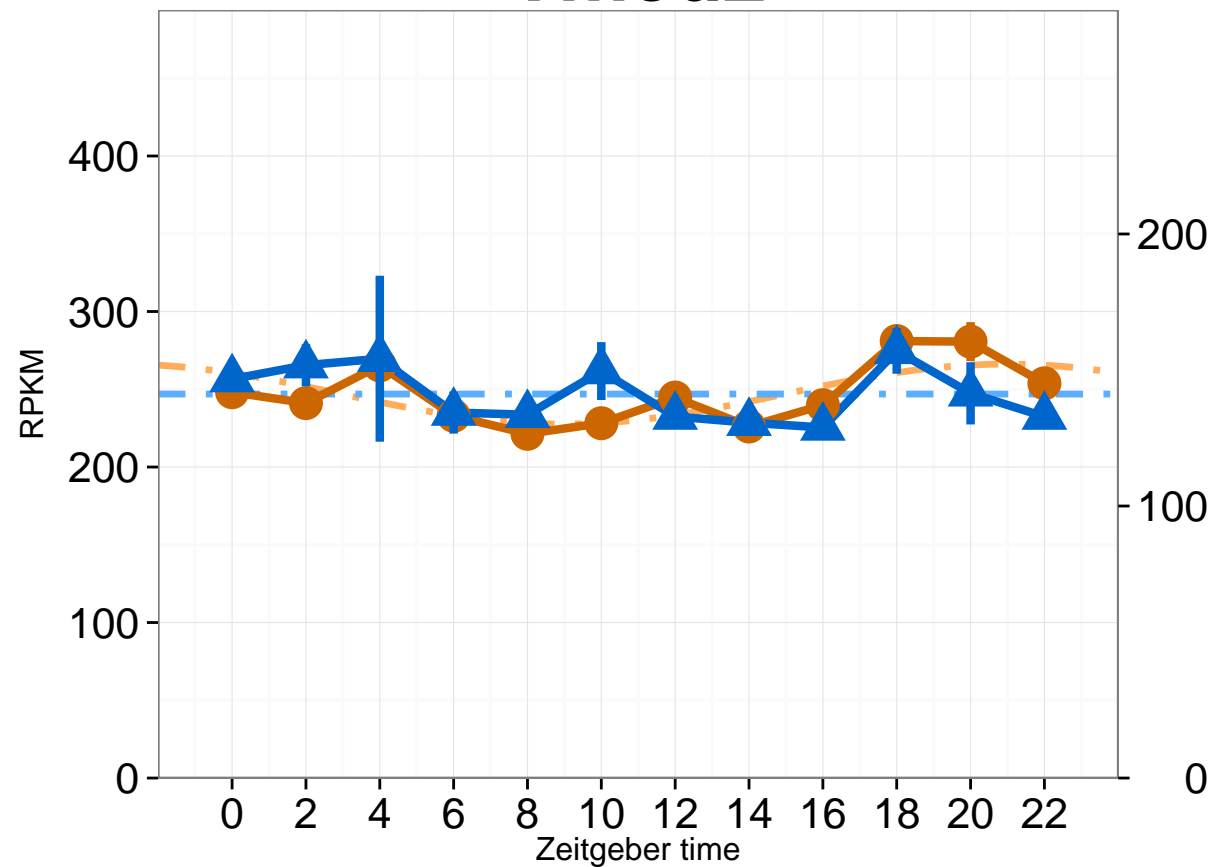

# Tmed2

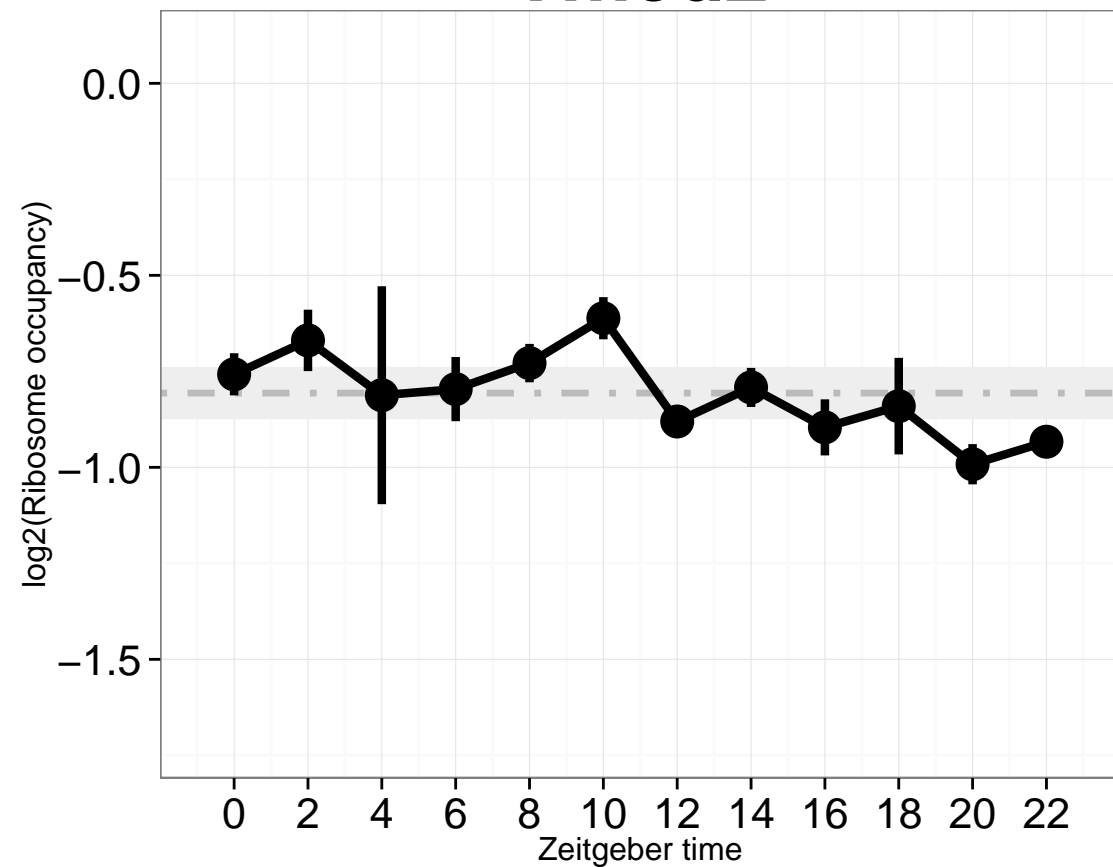

Supplement: Supplementary file 9719 [file 1]

## Zswim4

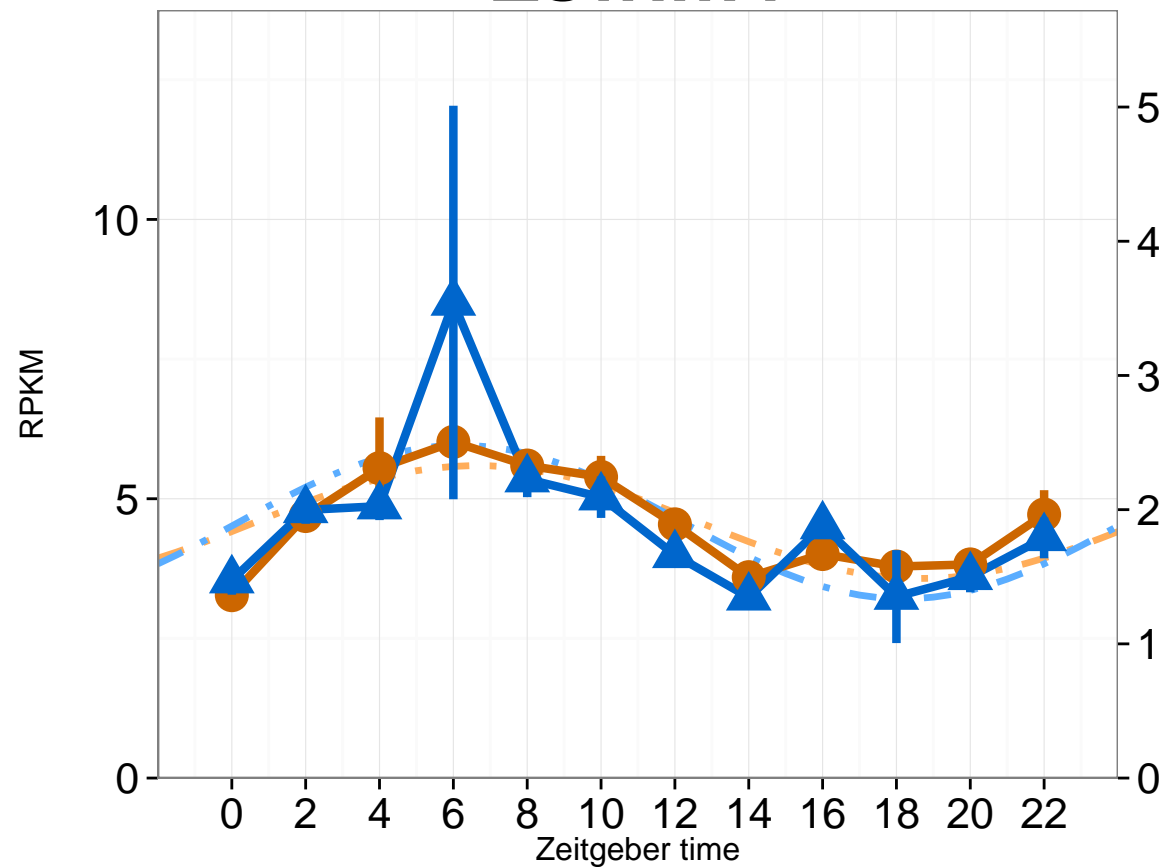

## Zswim4

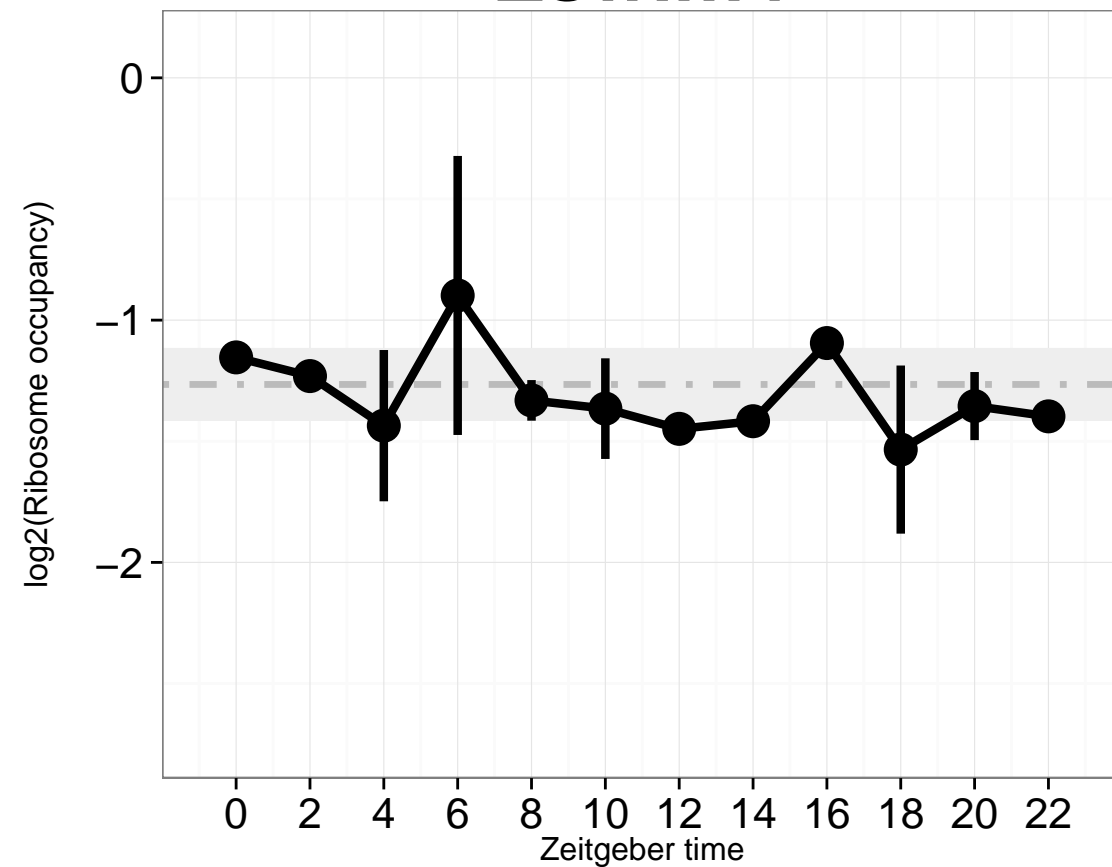

Supplement: Supplementary file 9720 [file 1]

## Ttyh3

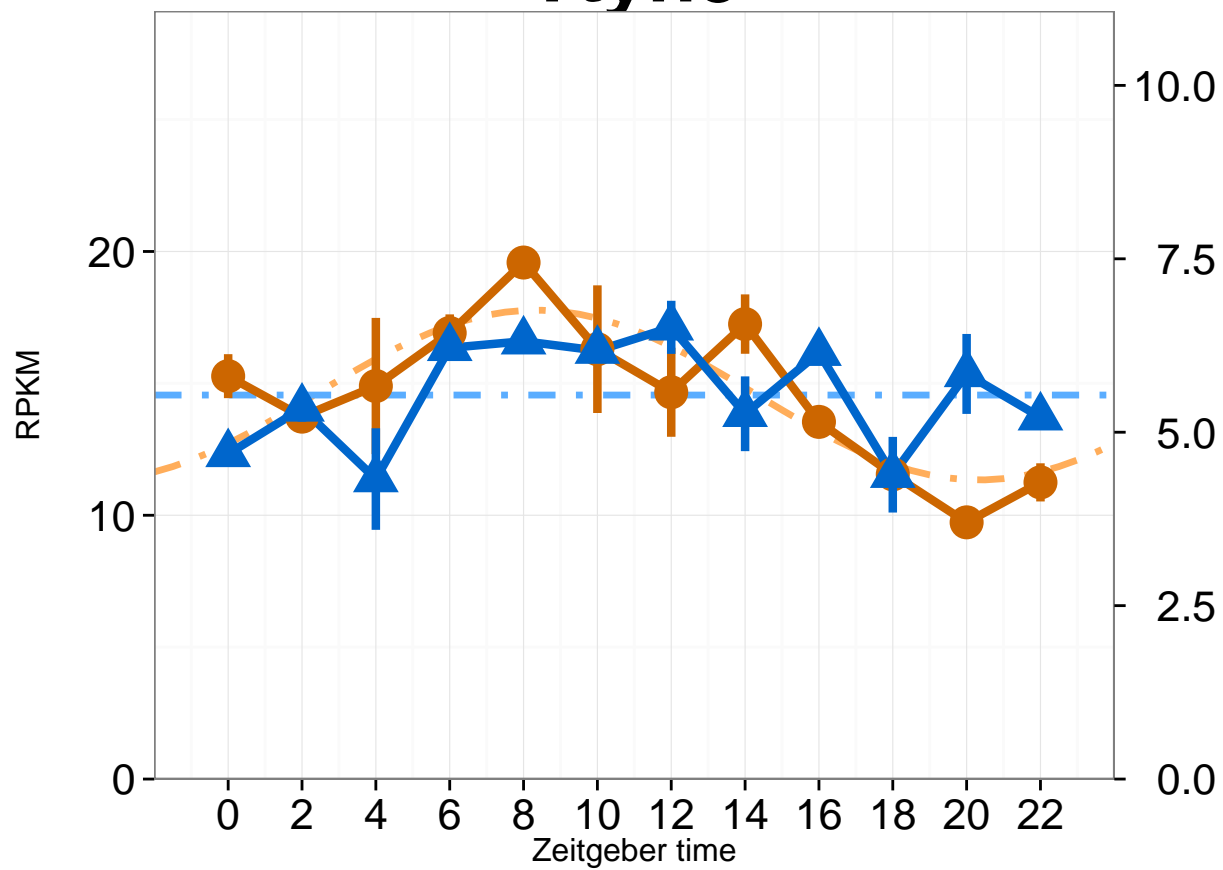

## Ttyh3

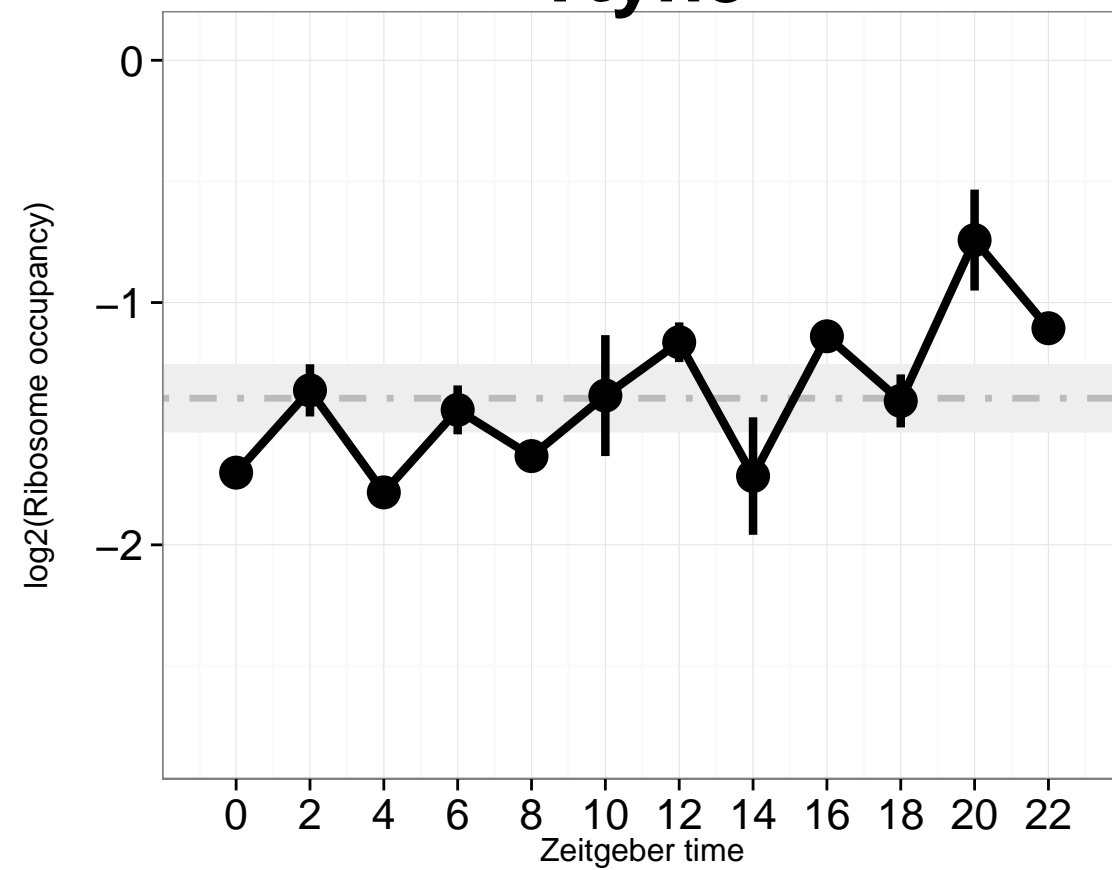

Supplement: Supplementary file 9721 [file 1]

# lars

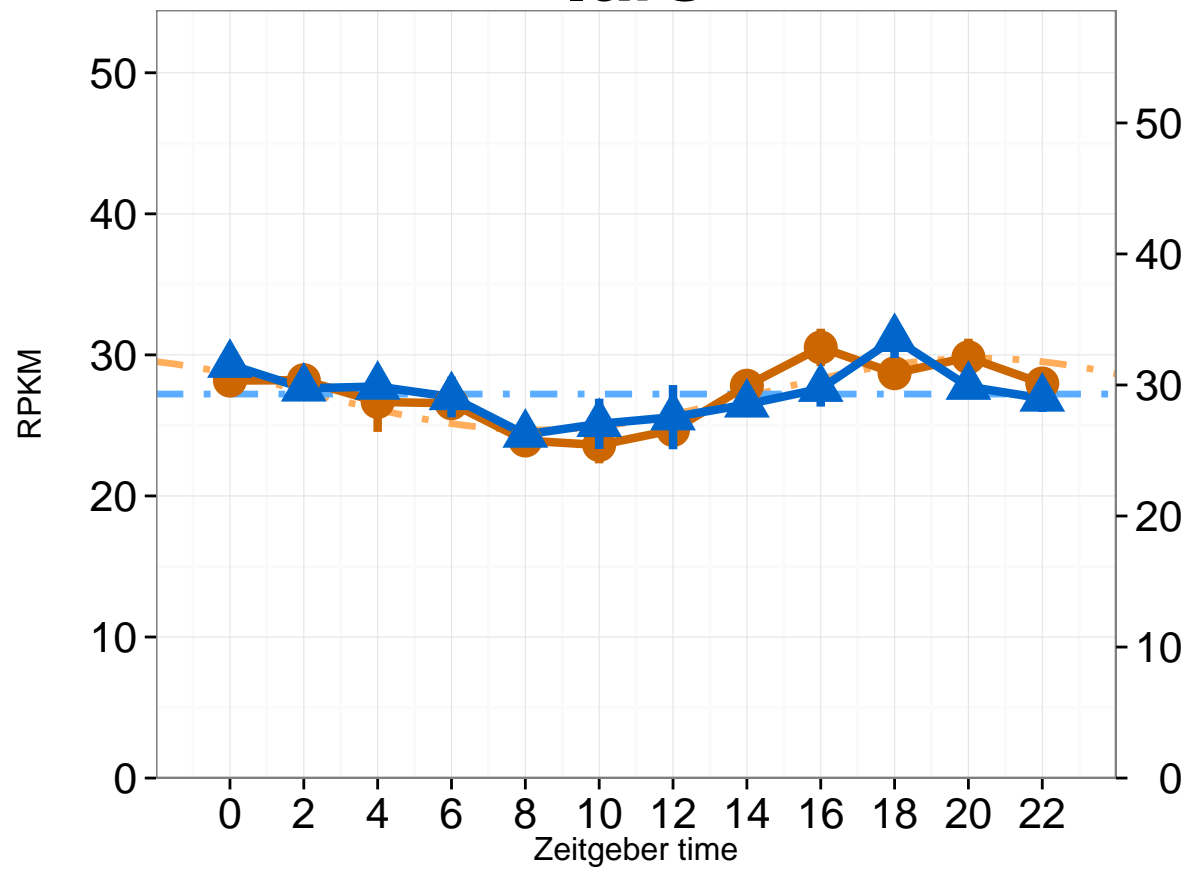

# lars

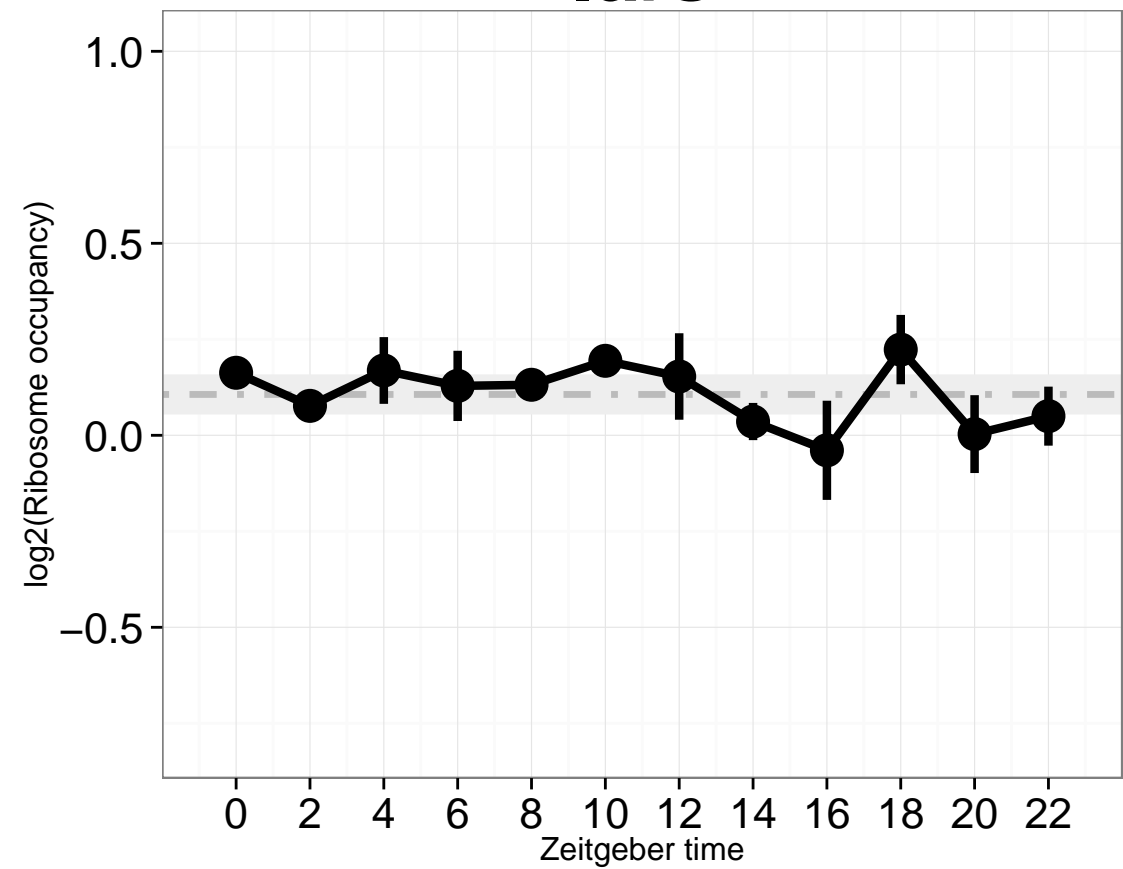

Supplement: Supplementary file 9722 [file 1]

## Srebf1

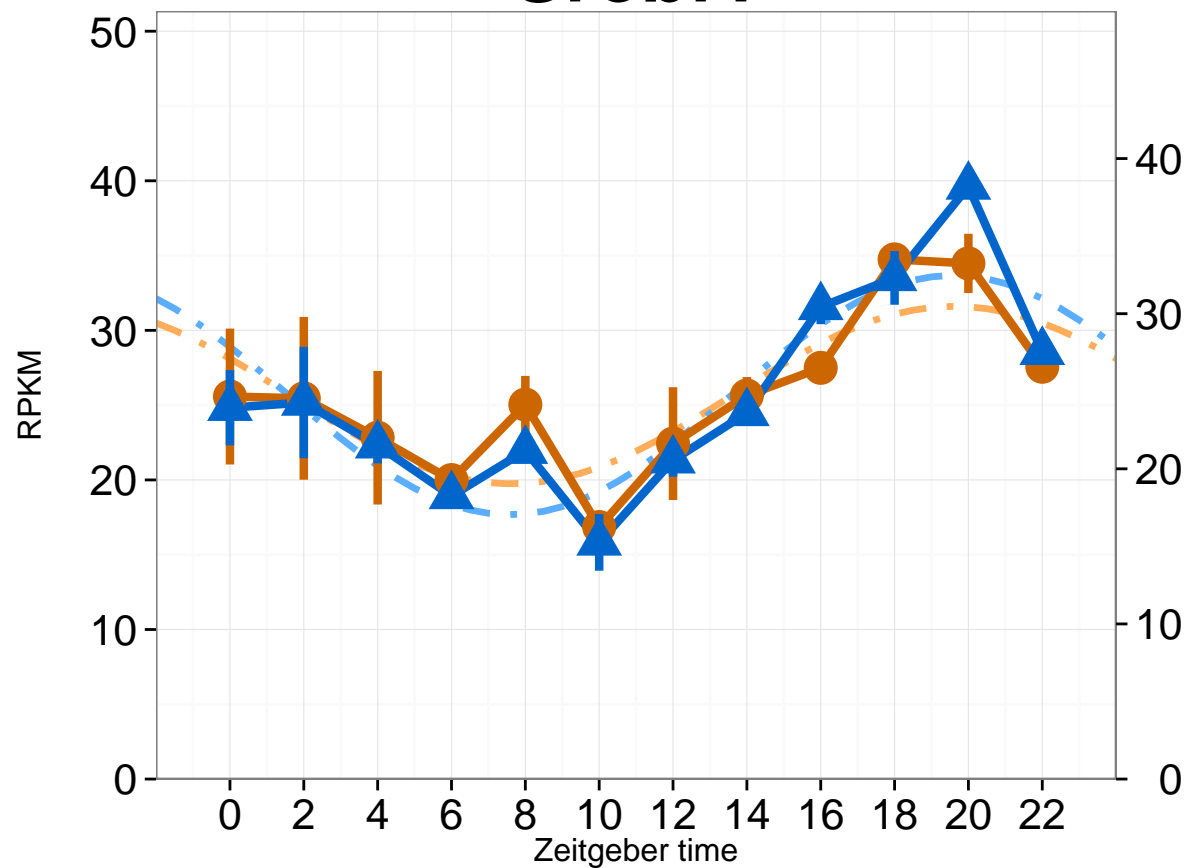

## Srebf1

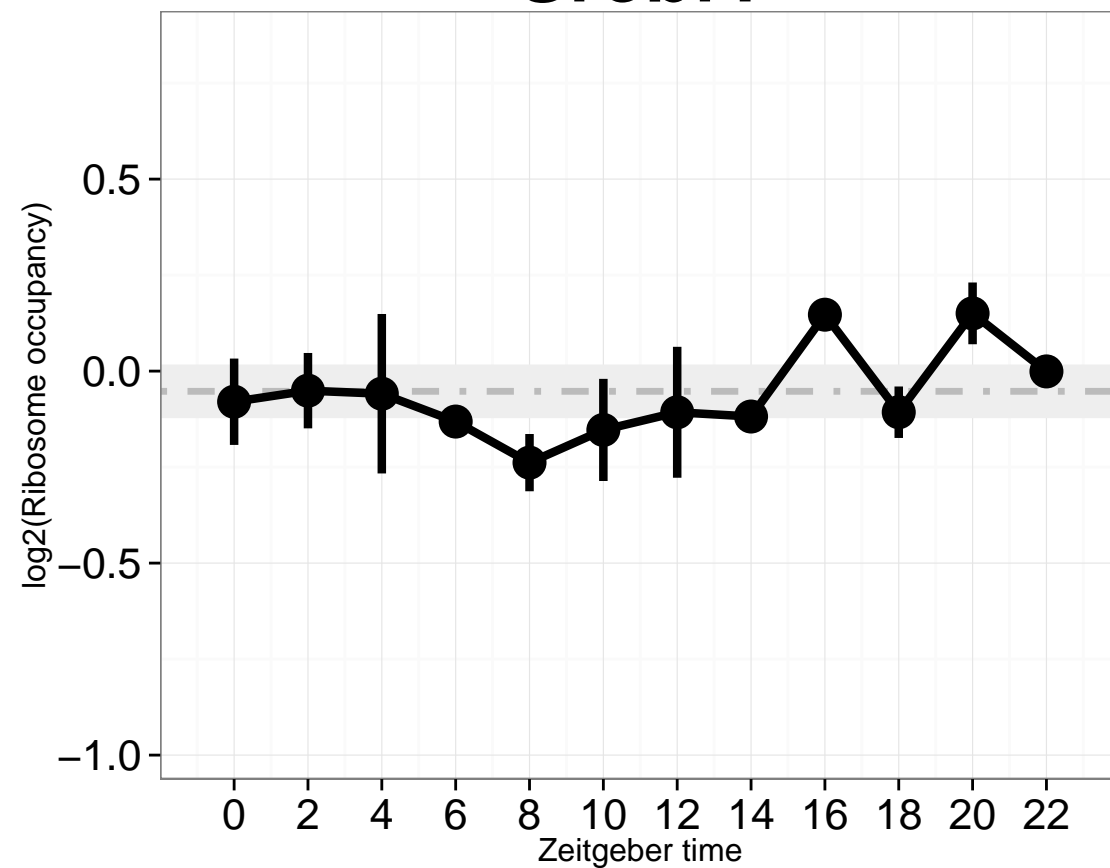

Supplement: Supplementary file 9723 [file 1]

## Magi2

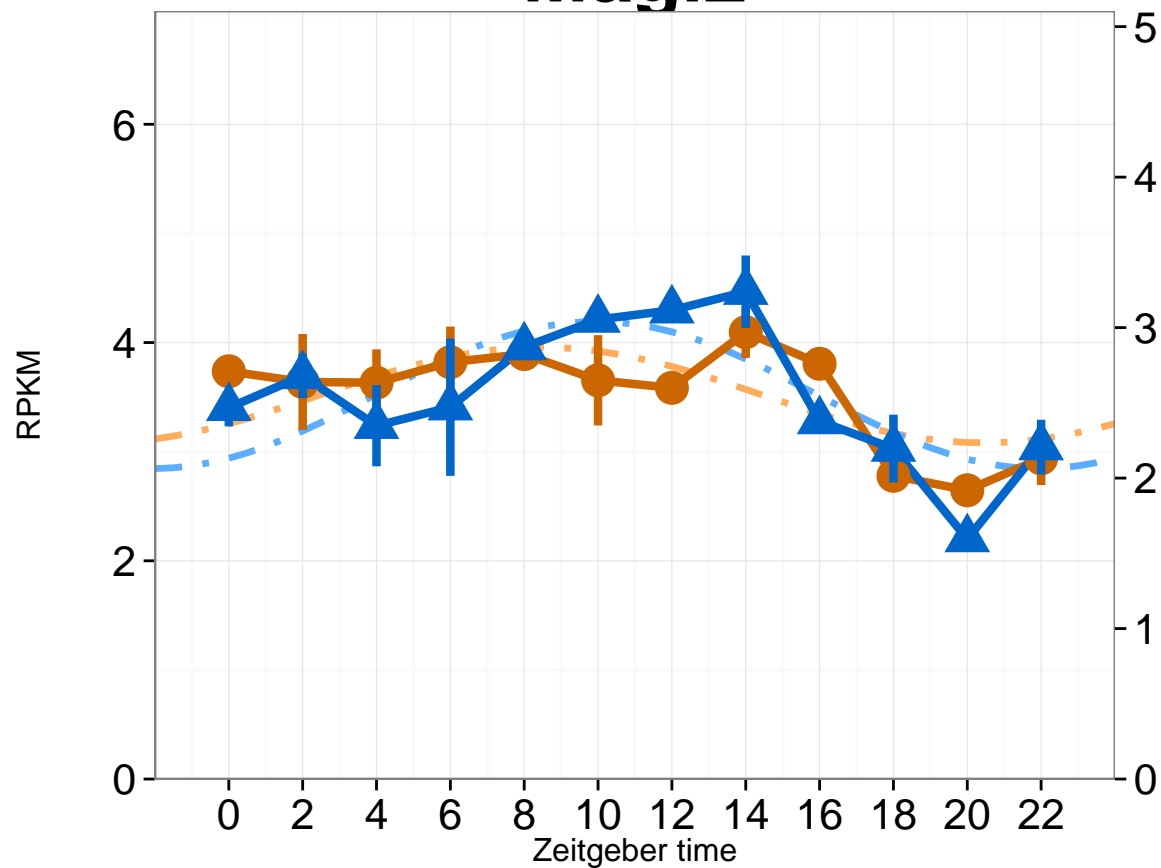

## Magi2

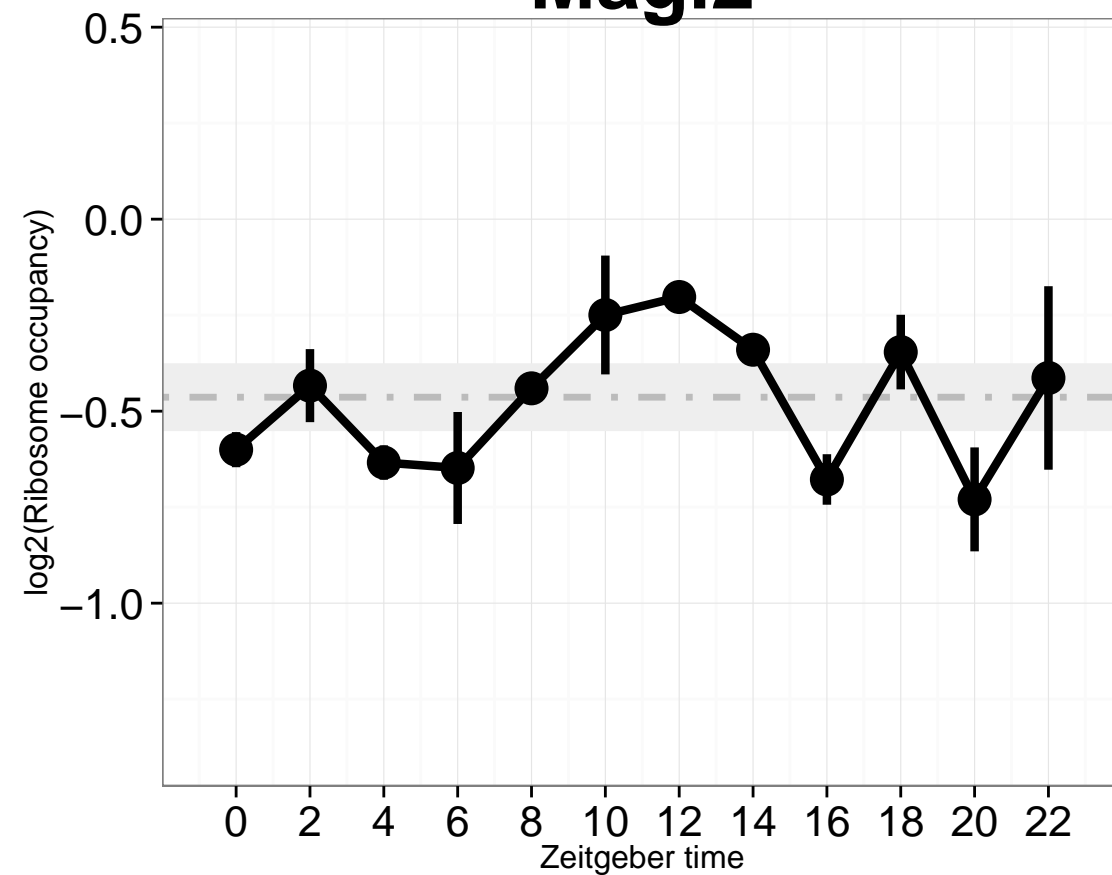

Supplement: Supplementary file 9724 [file 1]

## Cd86

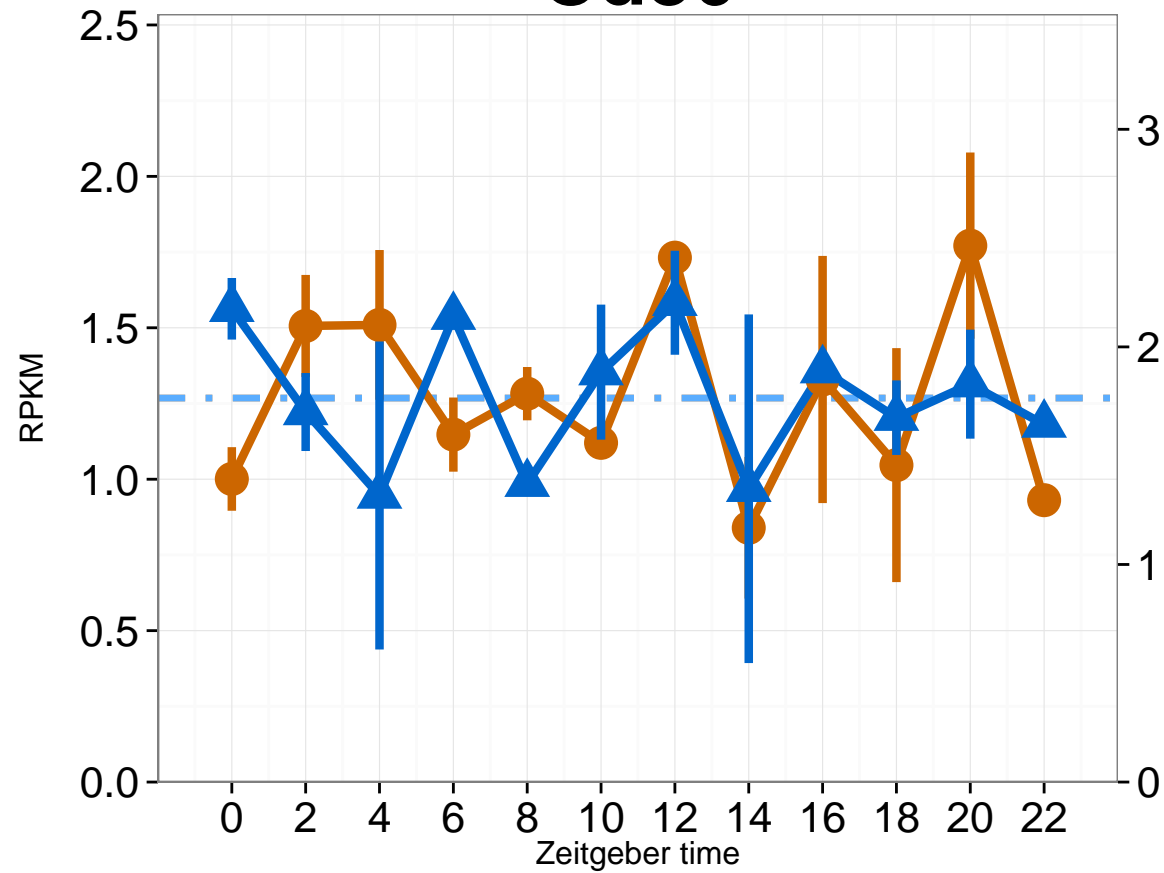

## Cd86

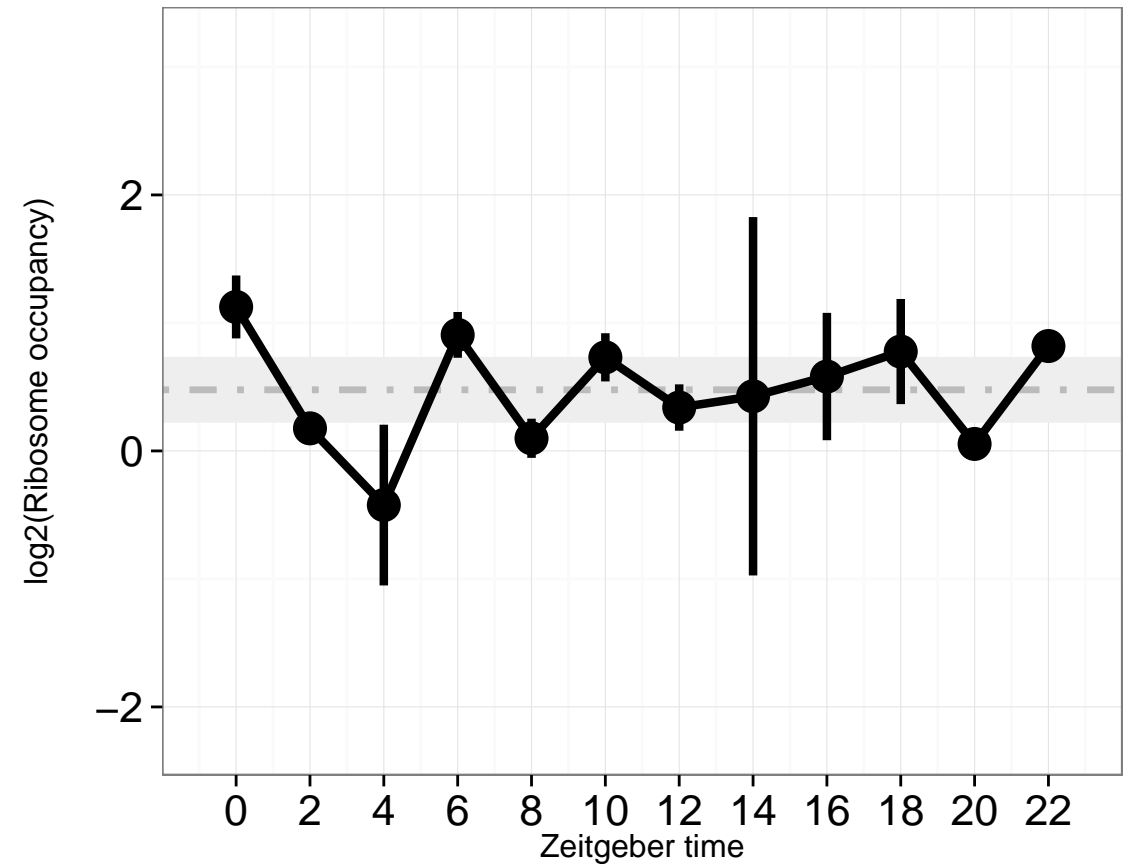

Supplement: Supplementary file 9725 [file 1]

## Cfd

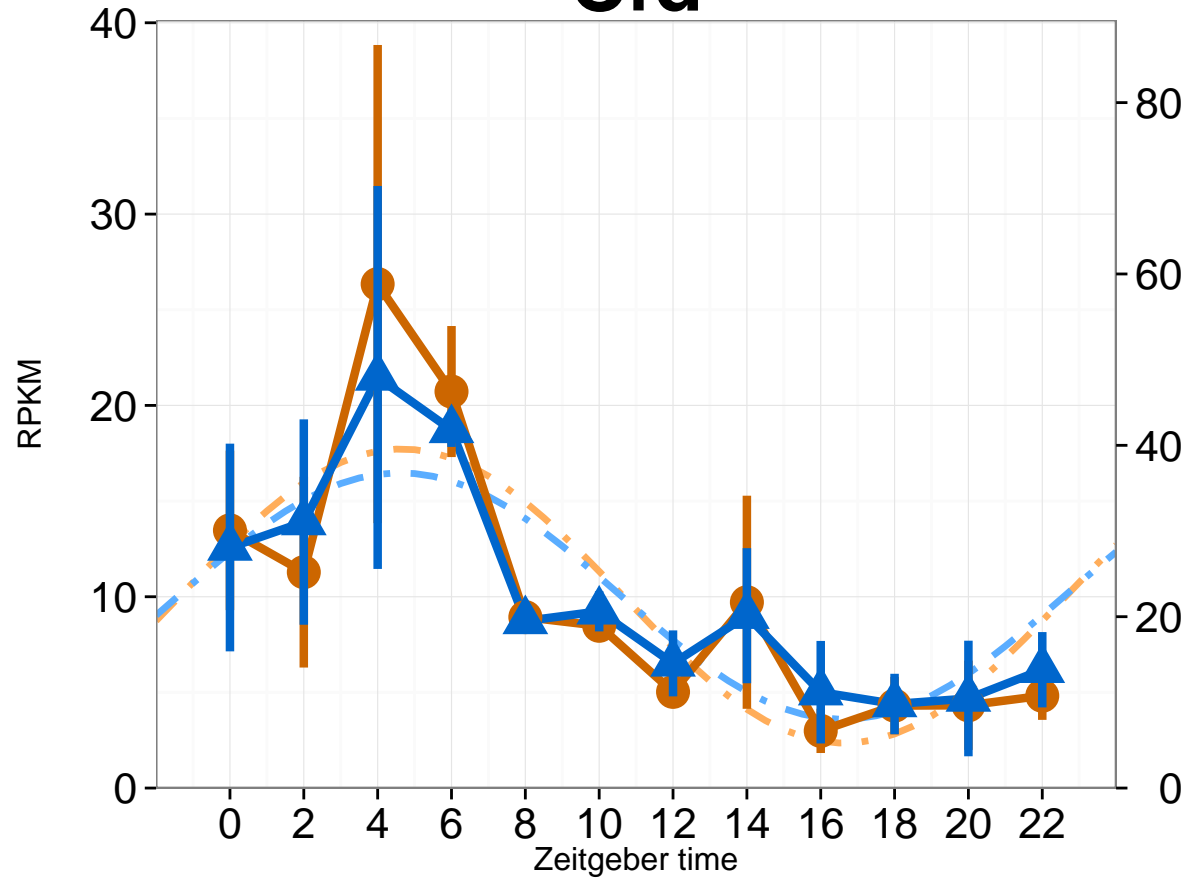

## Cfd

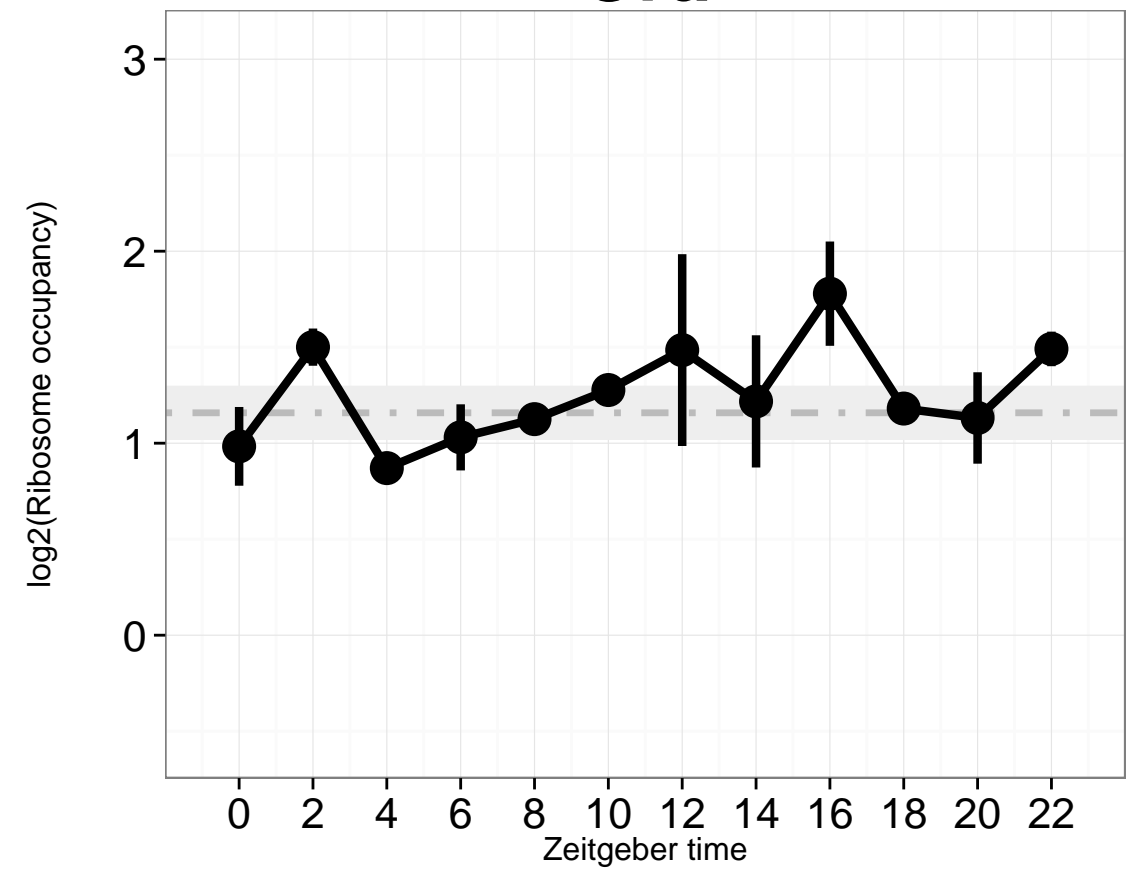

Supplement: Supplementary file 9726 [file 1]

# Traf3ip2

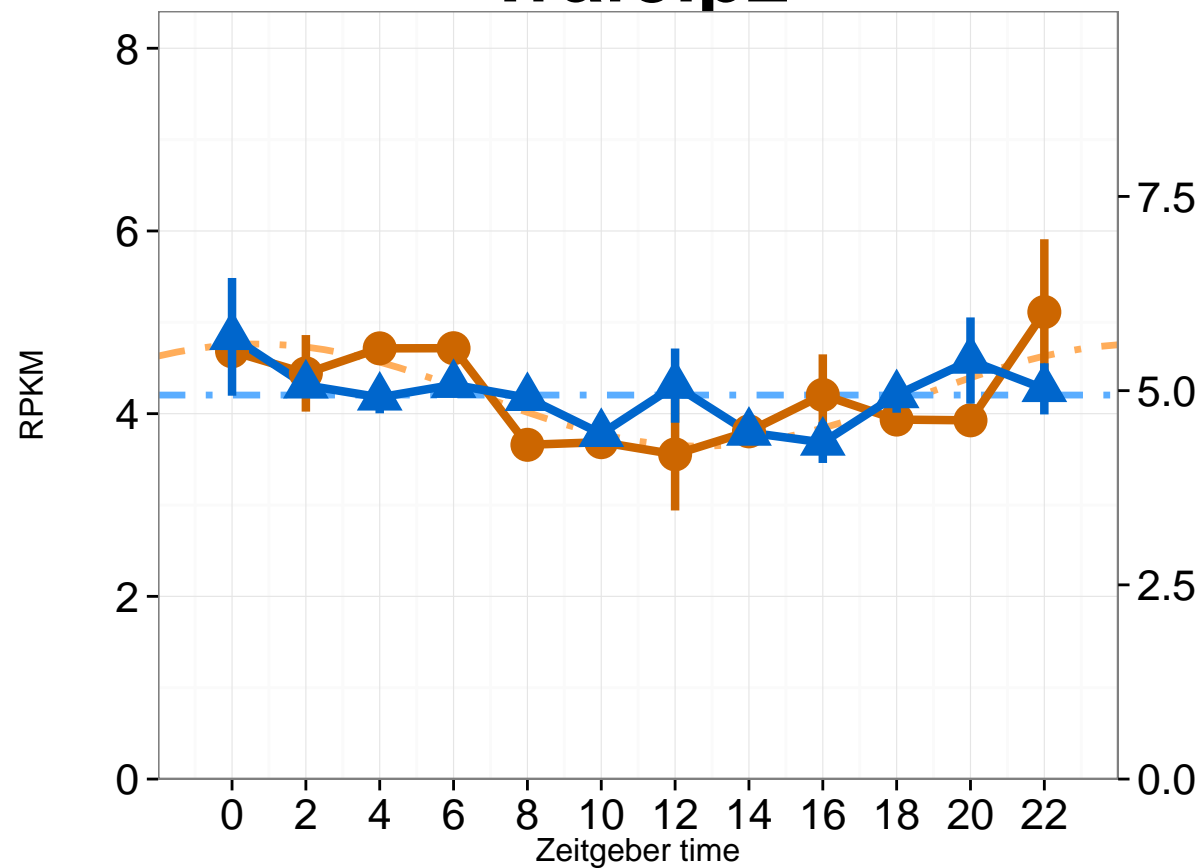

# Traf3ip2

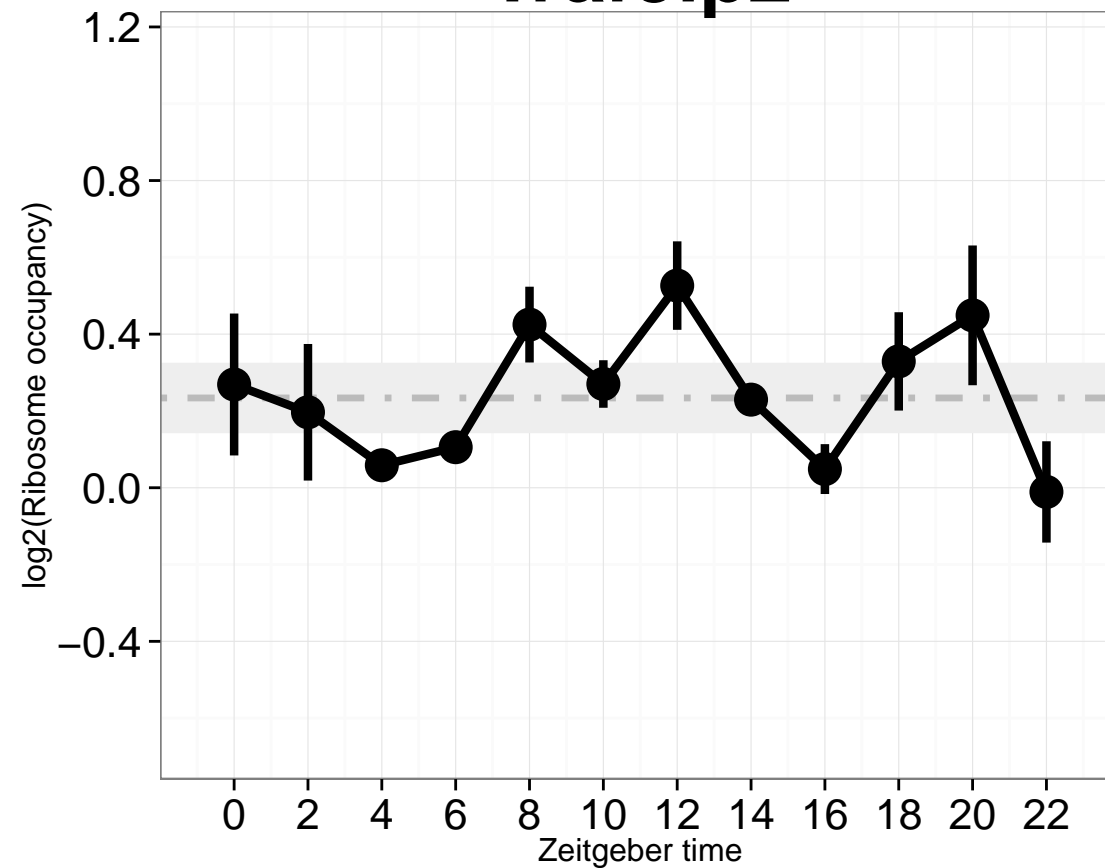

Supplement: Supplementary file 9727 [file 1]

## Lysmd3

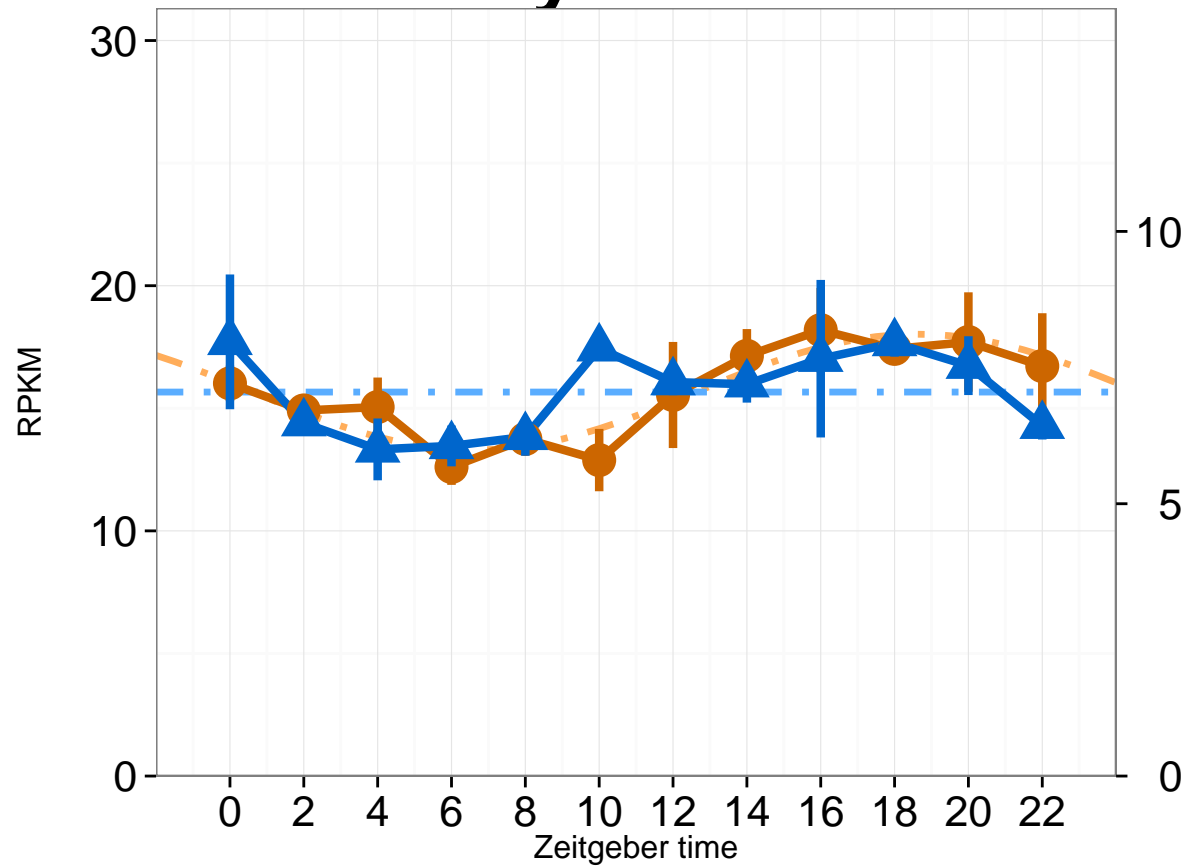

## Lysmd3

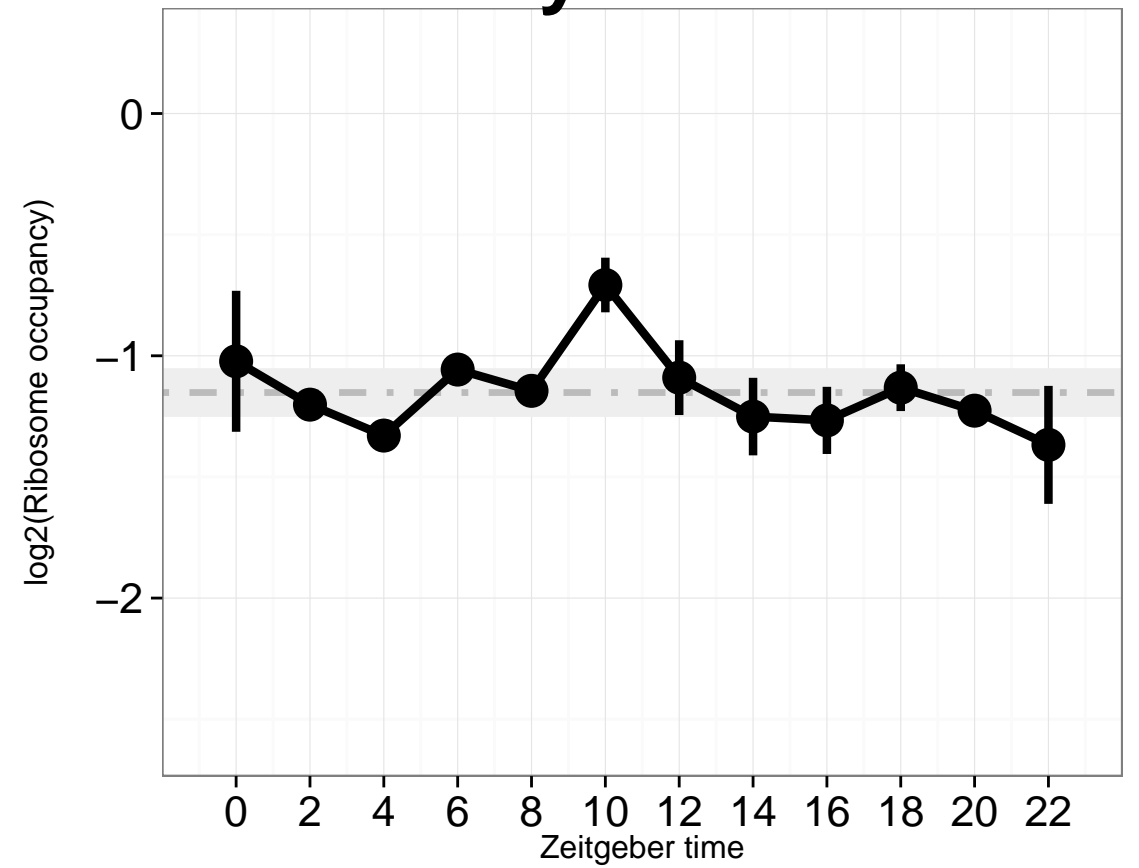

Supplement: Supplementary file 9728 [file 1]

## Stt3b

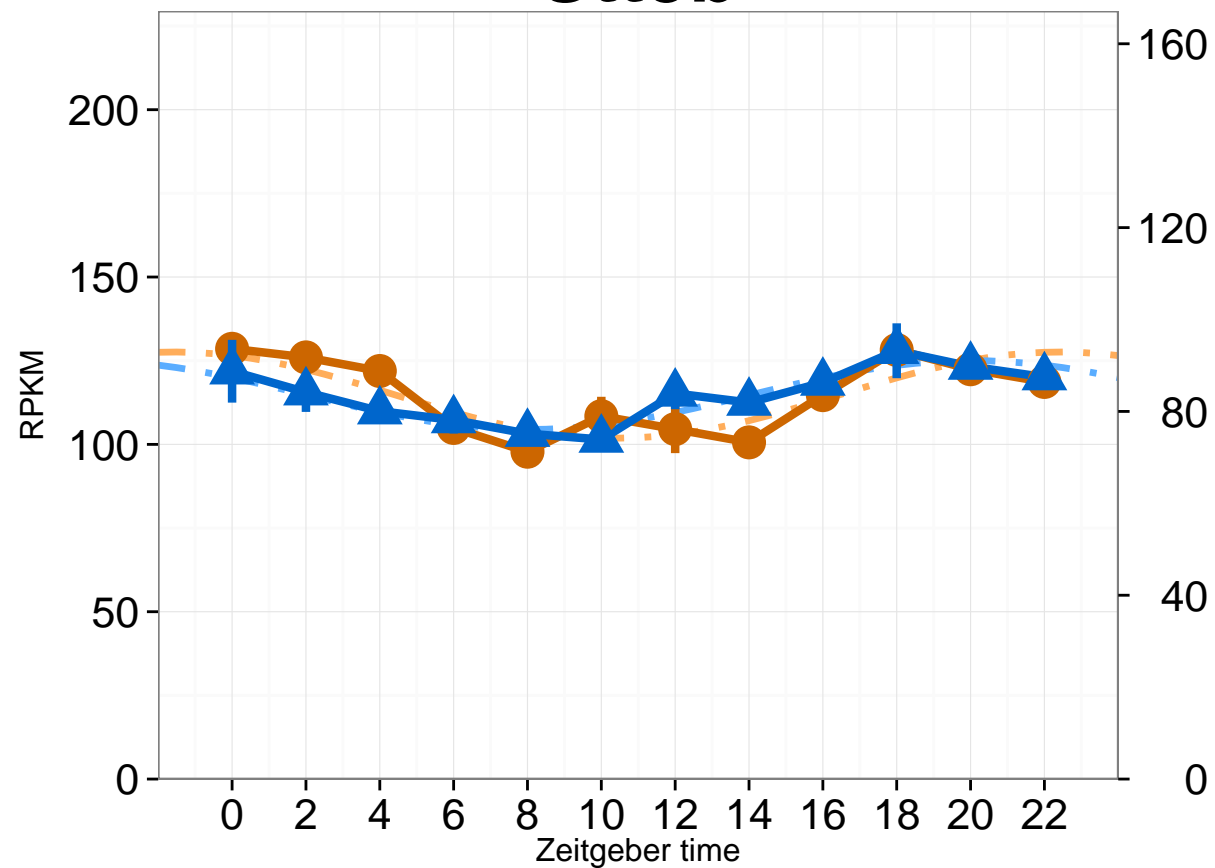

## Stt3b

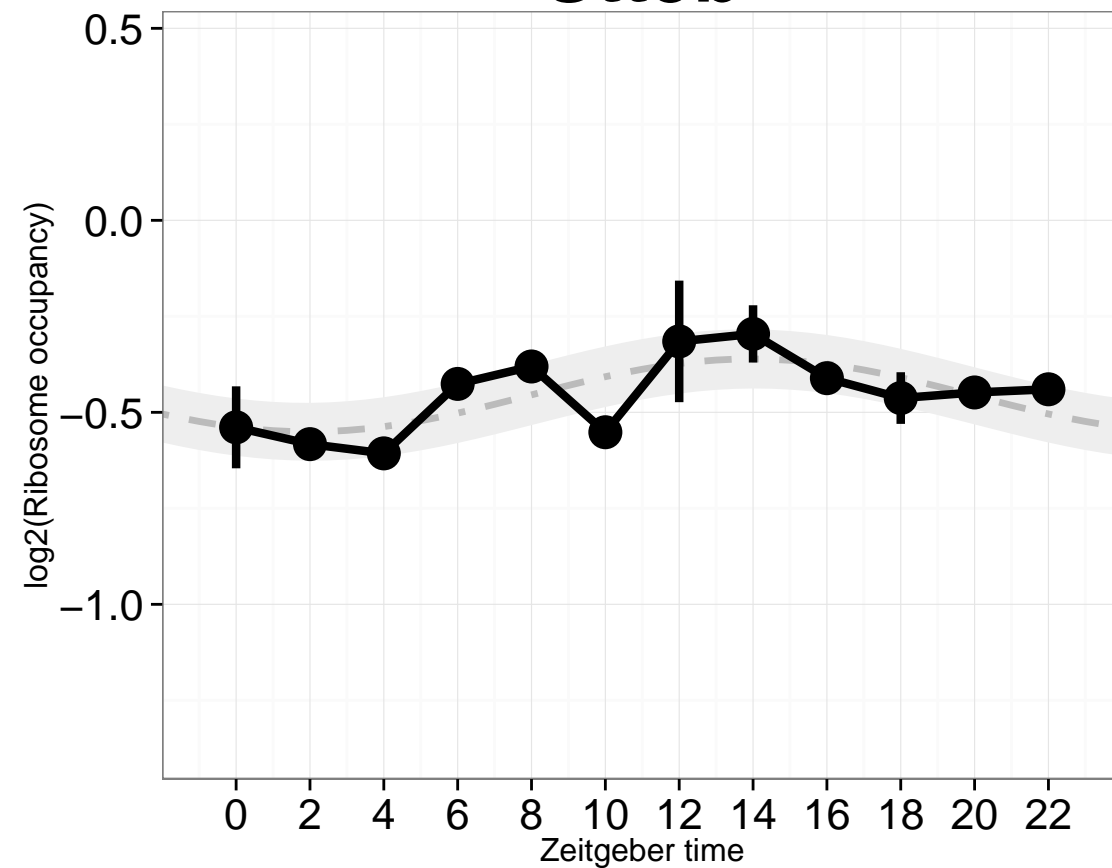

Supplement: Supplementary file 9729 [file 1]

## Wtip

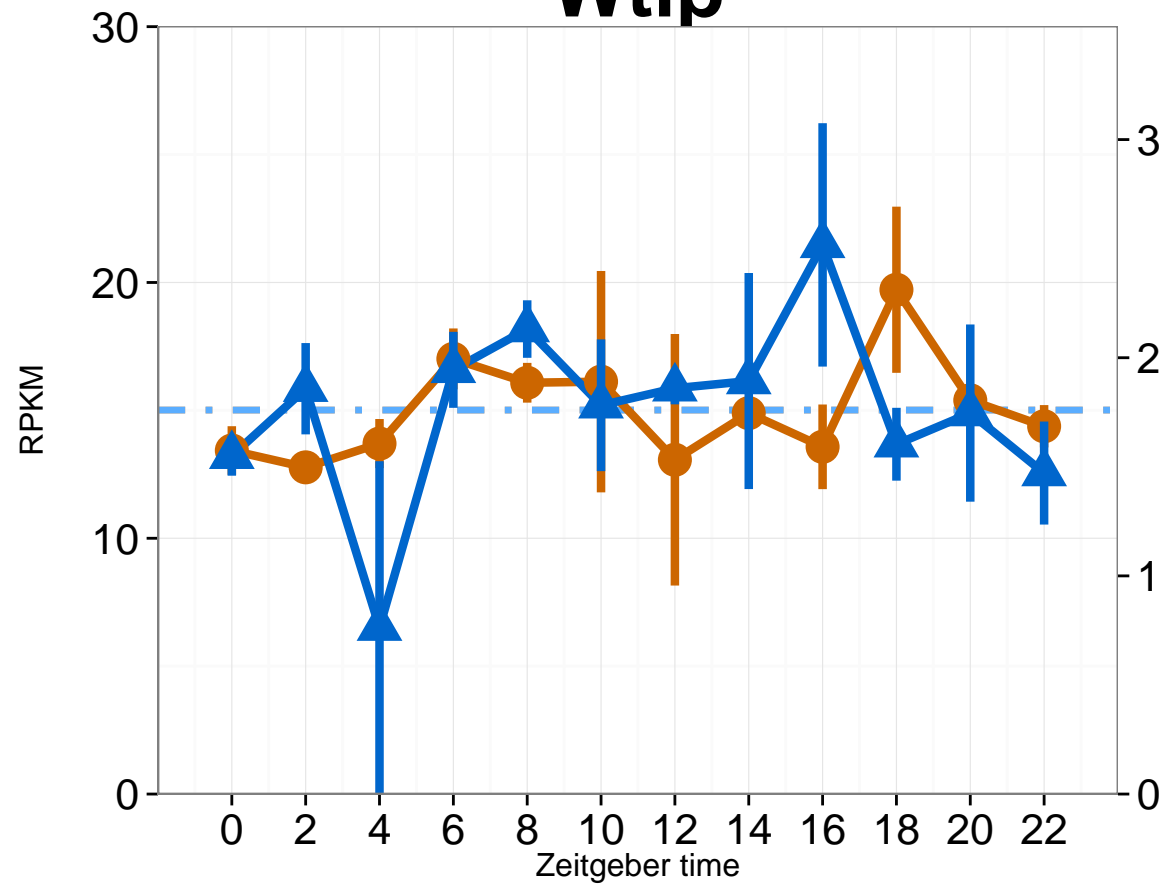

## Wtip

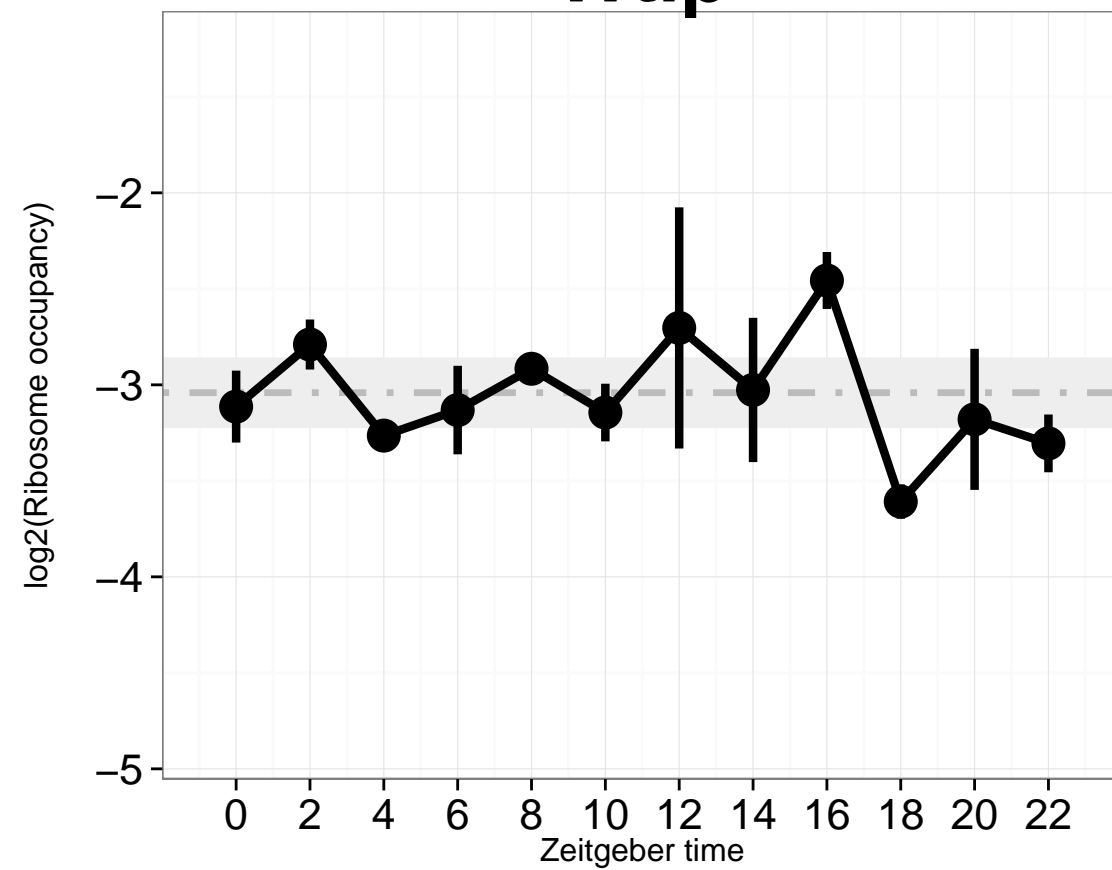

Supplement: Supplementary file 9730 [file 1]

# Tmem26

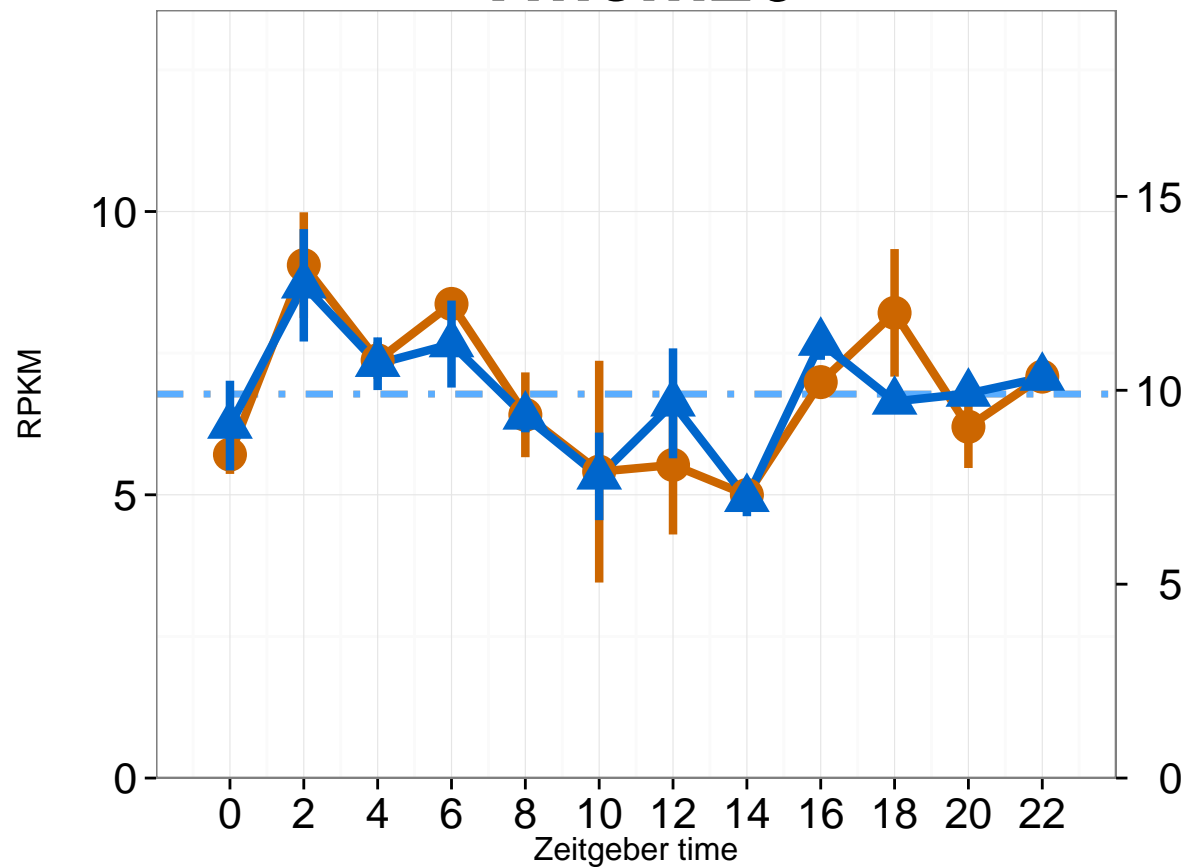

# Tmem26

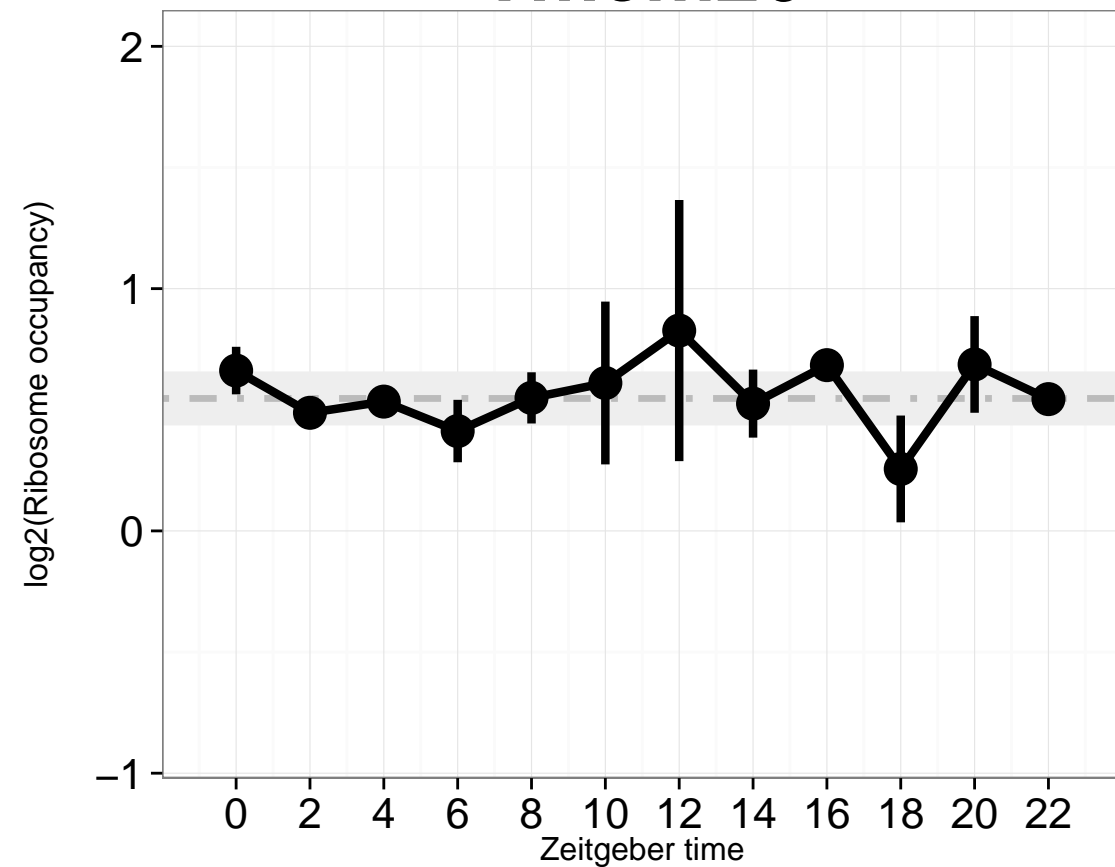

Supplement: Supplementary file 9731 [file 1]

# Camk2n1

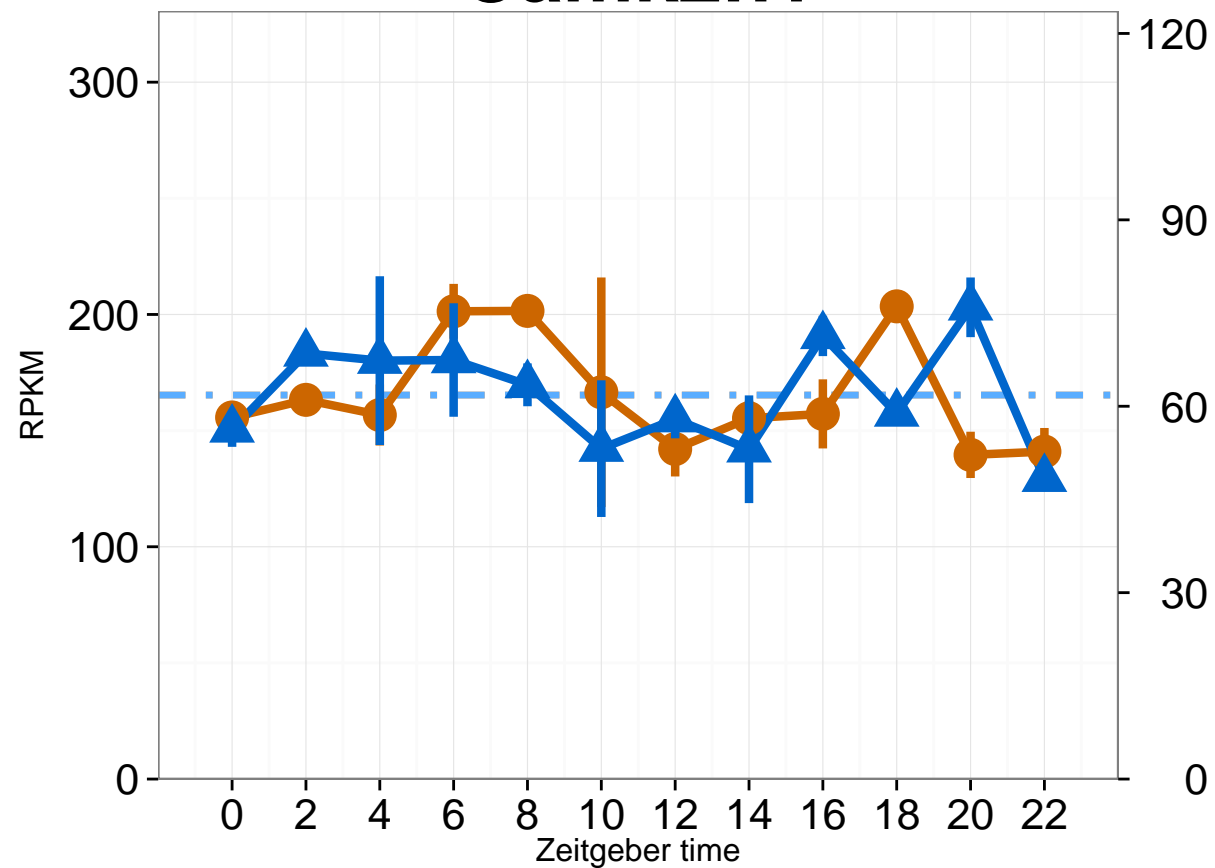

# Camk2n1

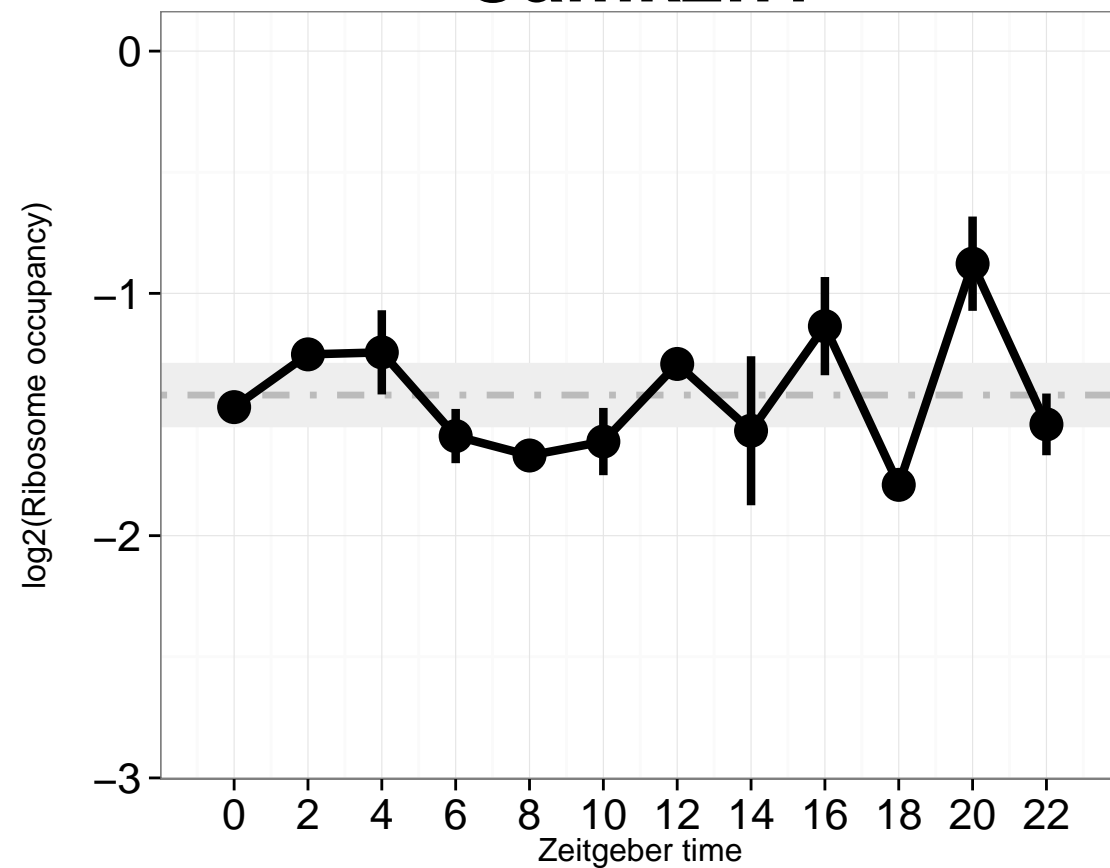

Supplement: Supplementary file 9732 [file 1]

# Rpl28

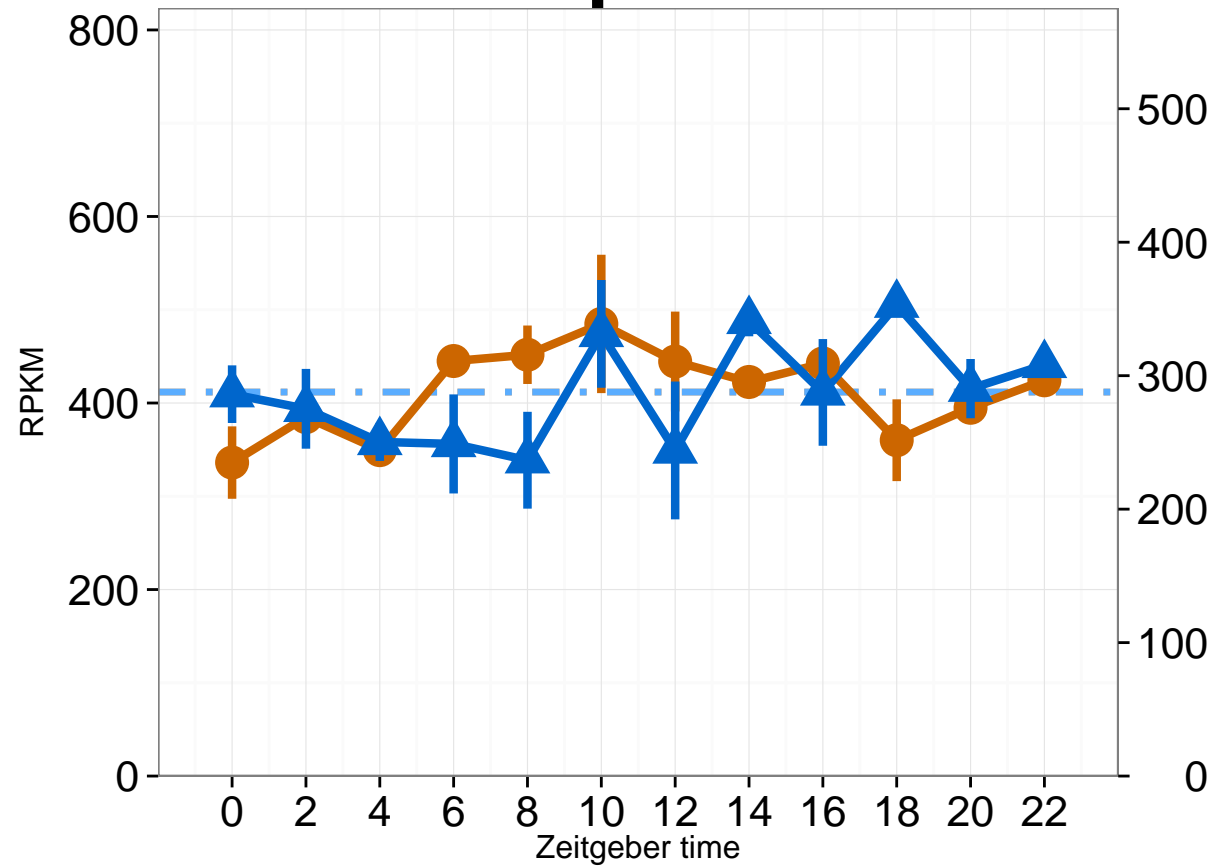

# Rpl28

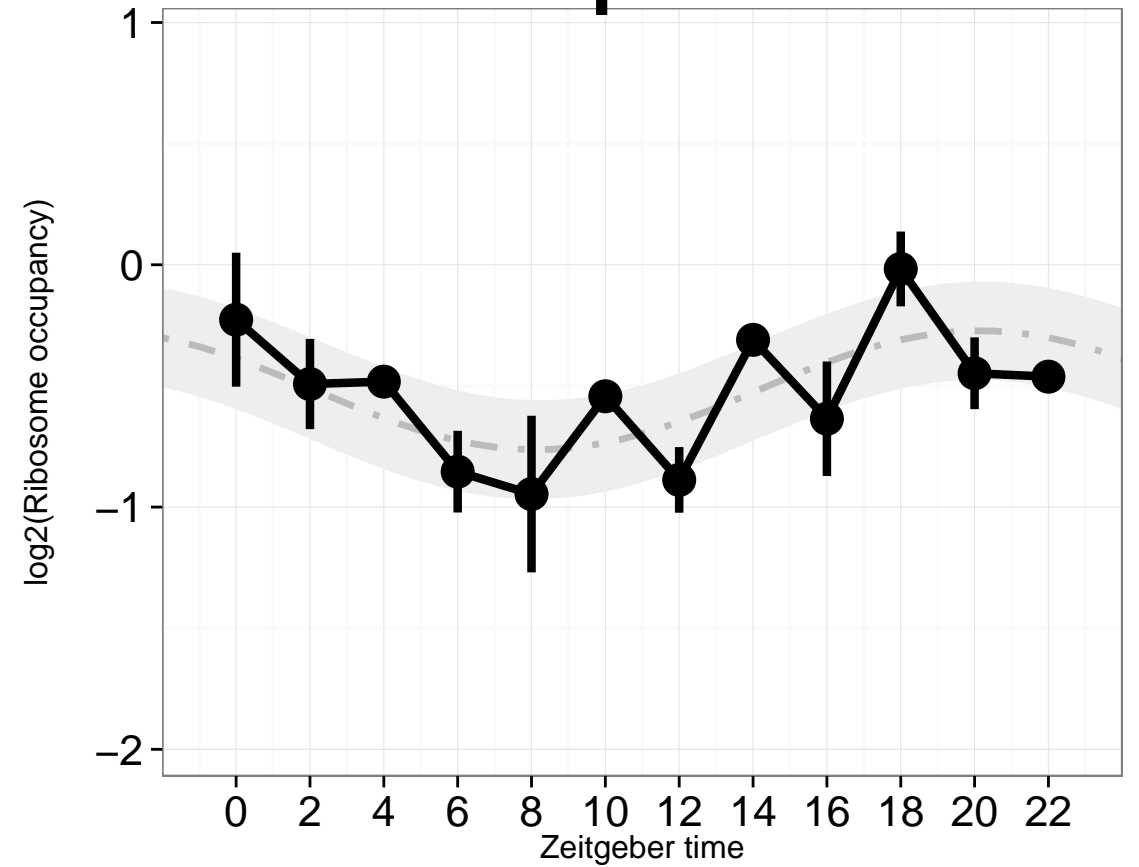

Supplement: Supplementary file 9733 [file 1]

## Ankrd28

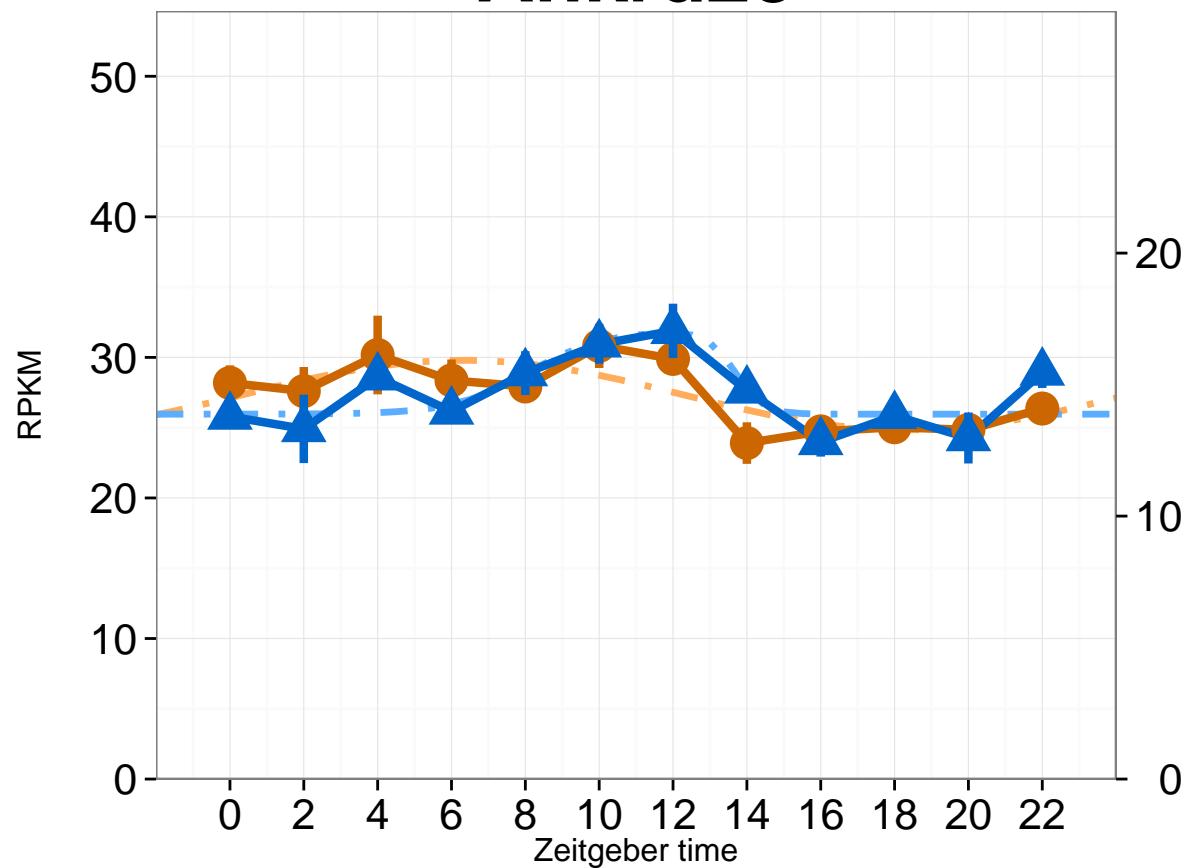

## Ankrd28

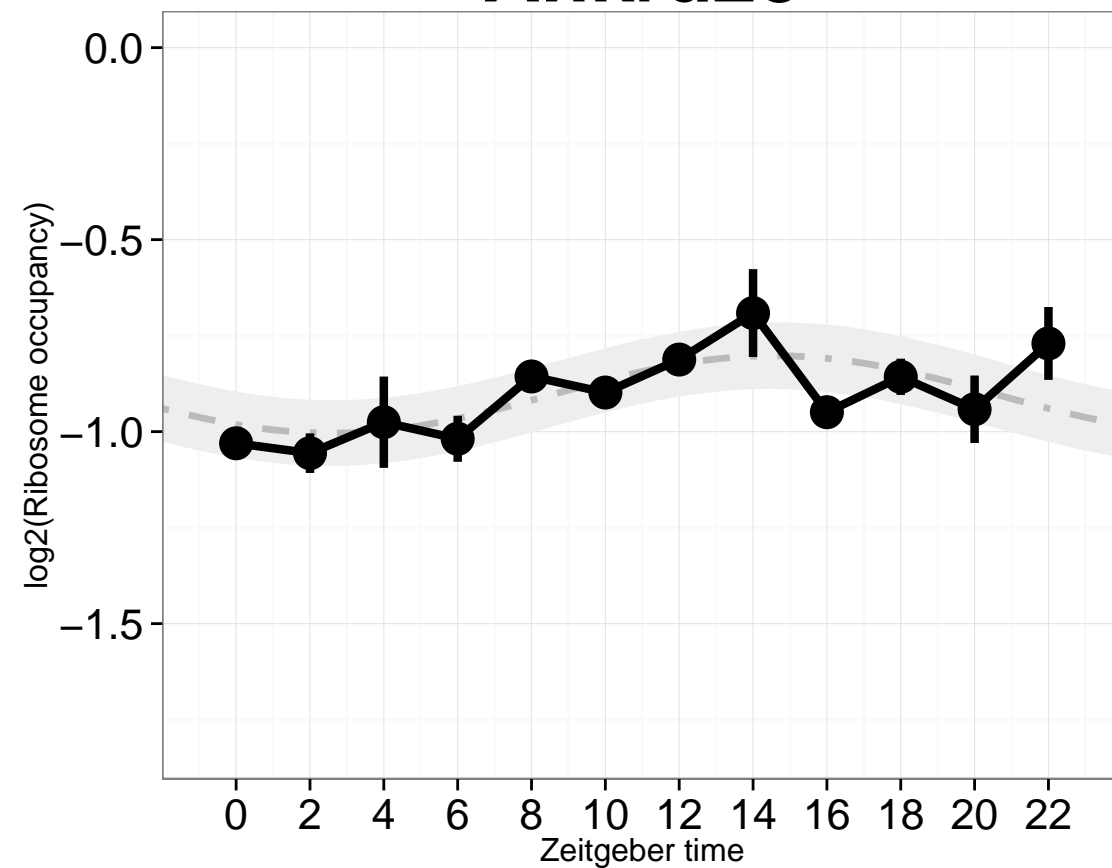

Supplement: Supplementary file 9734 [file 1]

# Igf1r

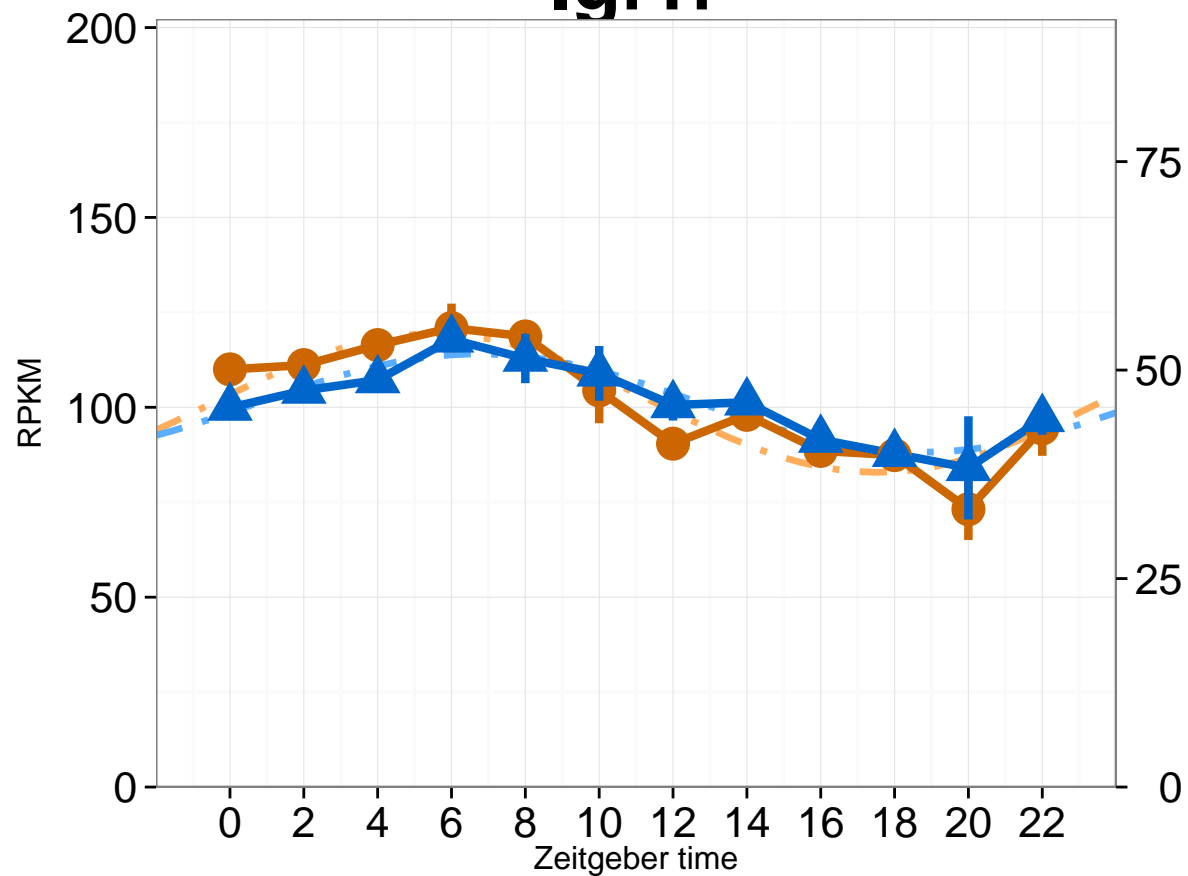

# Igf1r

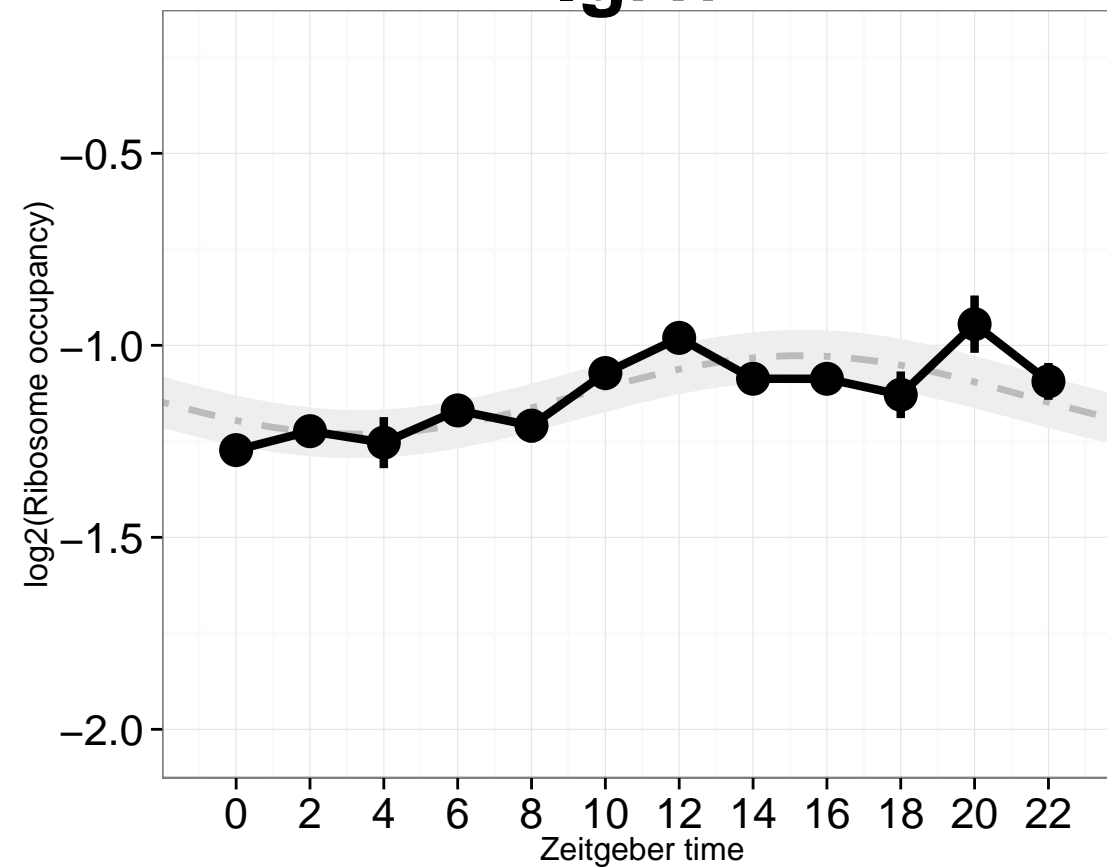

Supplement: Supplementary file 9735 [file 1]
