# Supplementary material (part 98 of 133)
Source: publisher figshare collection journal article supplement (https://springernature.figshare.com/articles/dataset/_/4903193)

# Atpif1

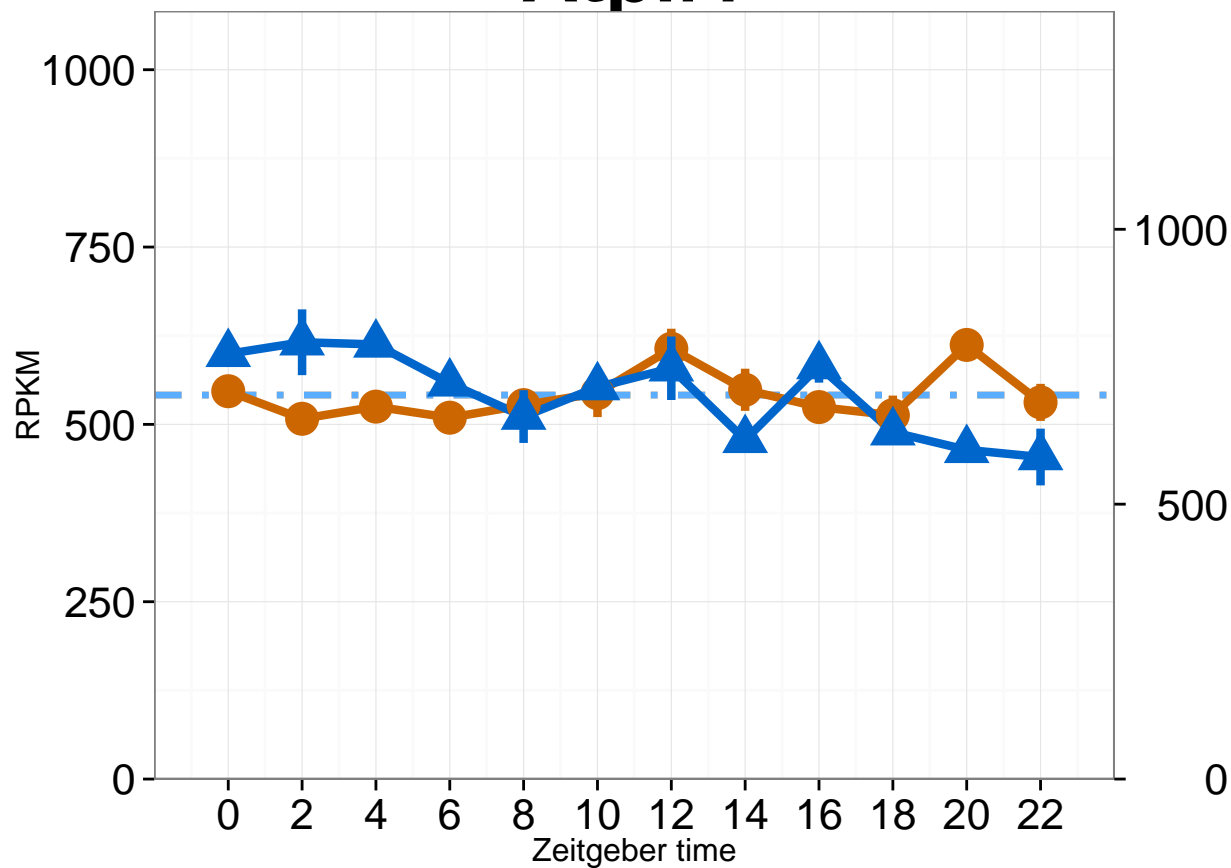

# Atpif1

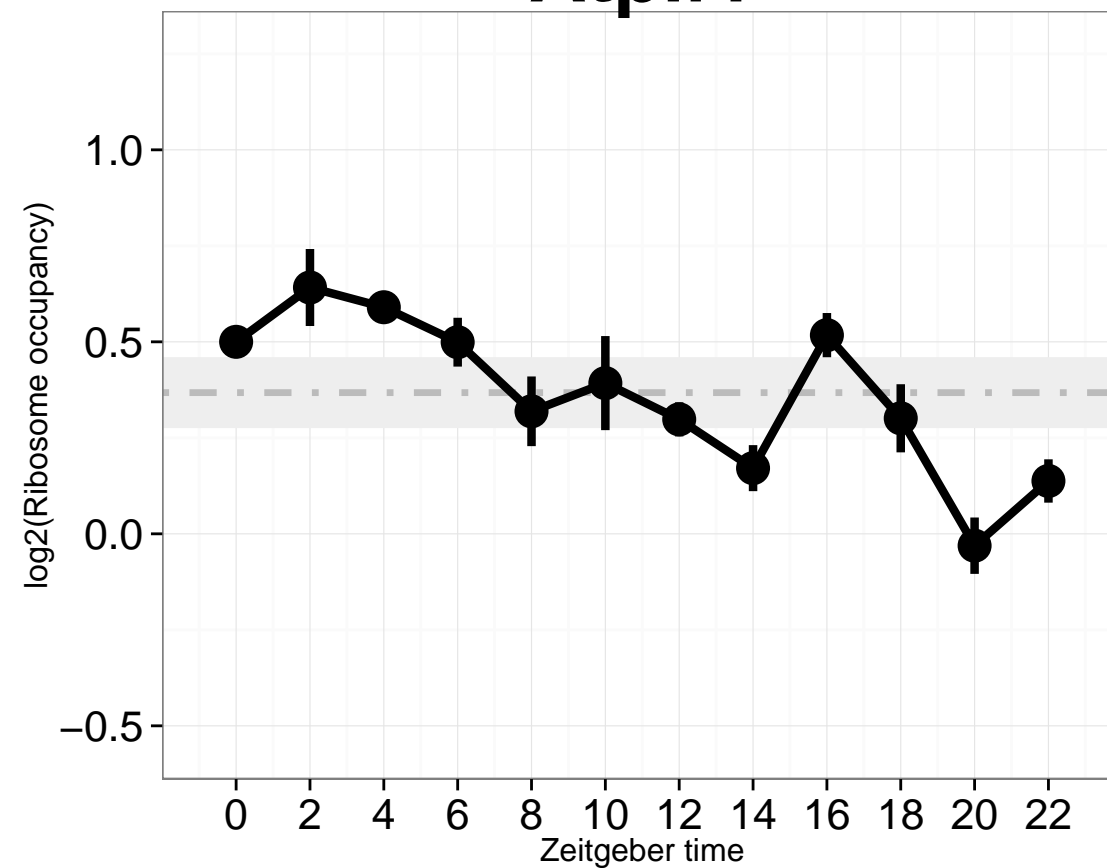

Supplement: Supplementary file 9736 [file 1]

## Sdpr

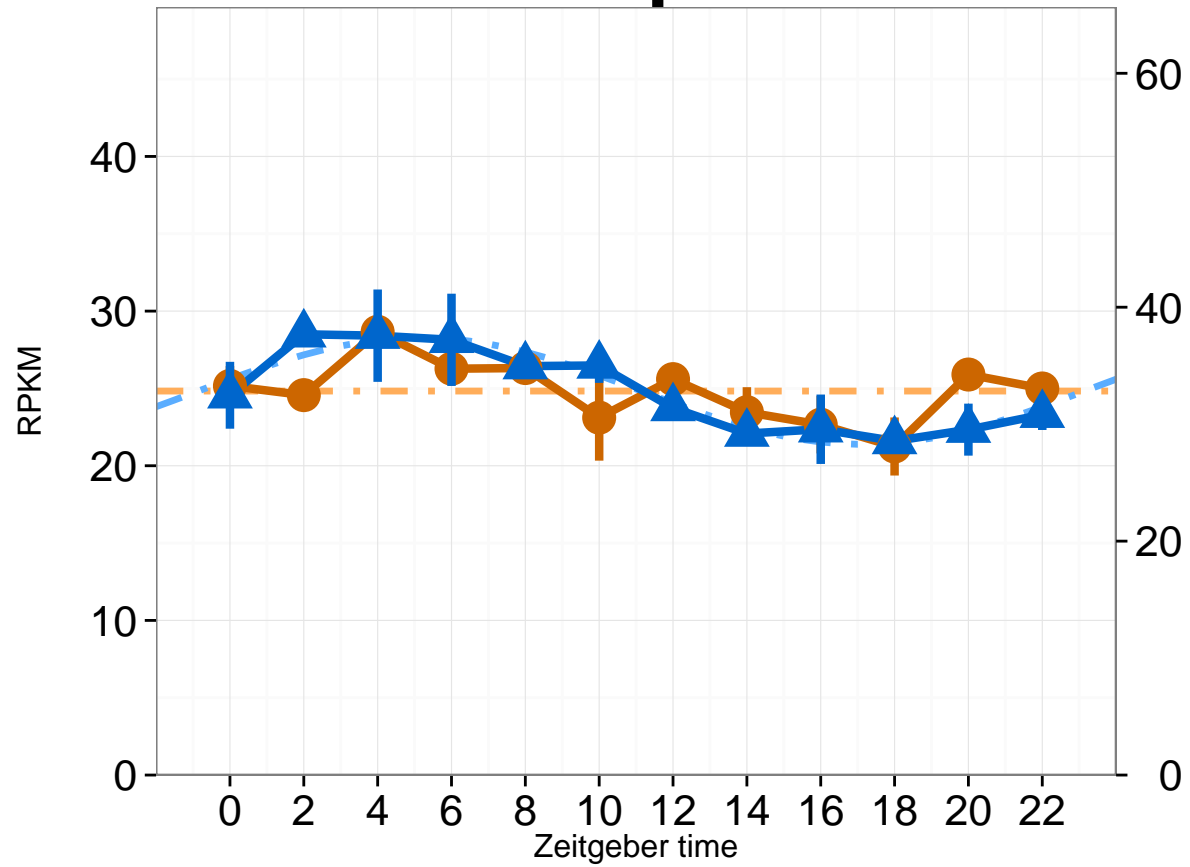

## Sdpr

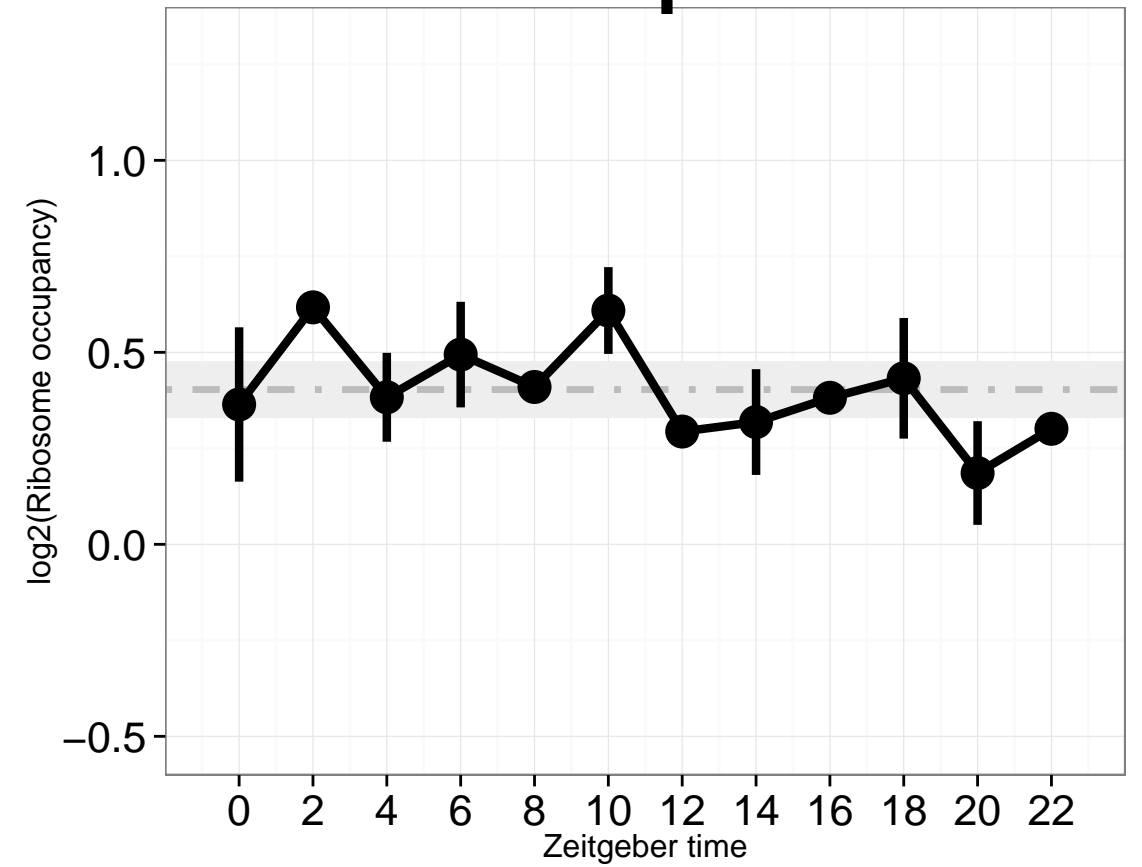

Supplement: Supplementary file 9737 [file 1]

## FancI

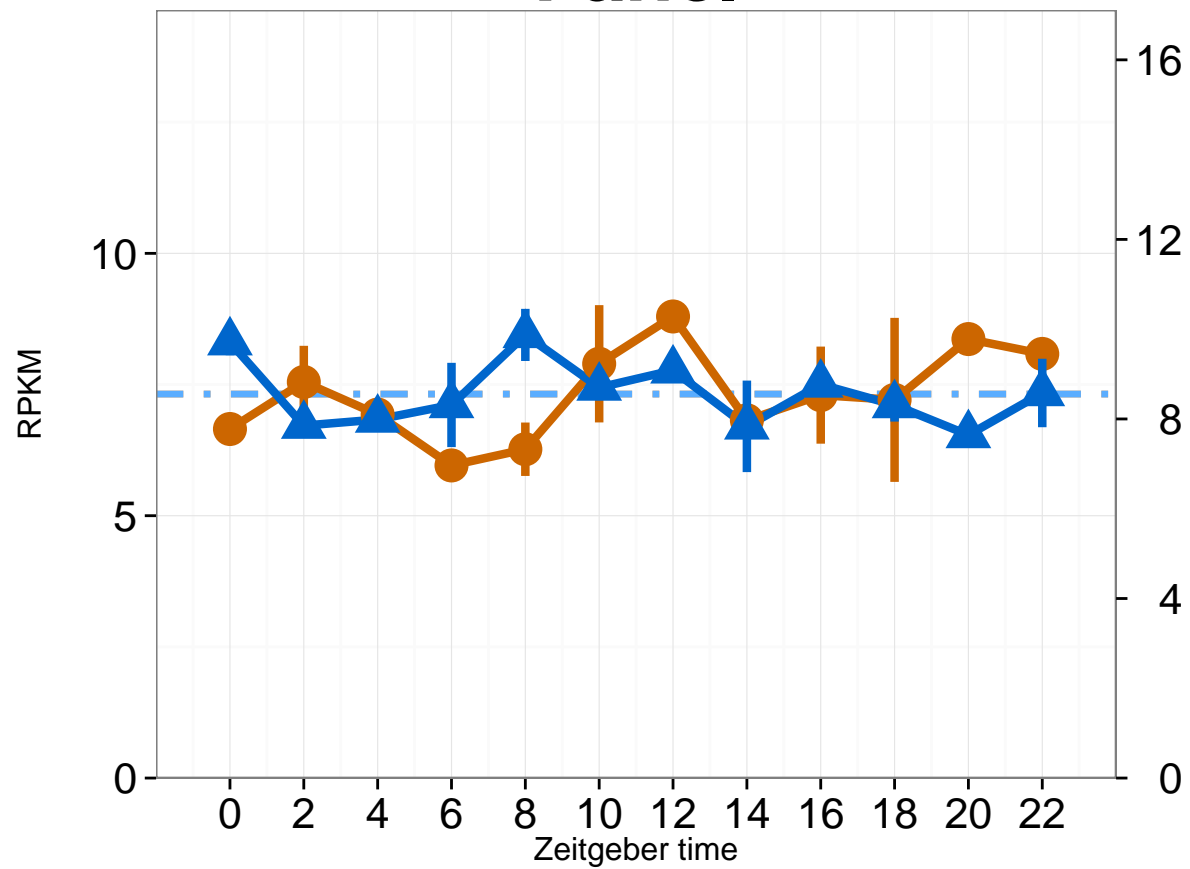

## FancI

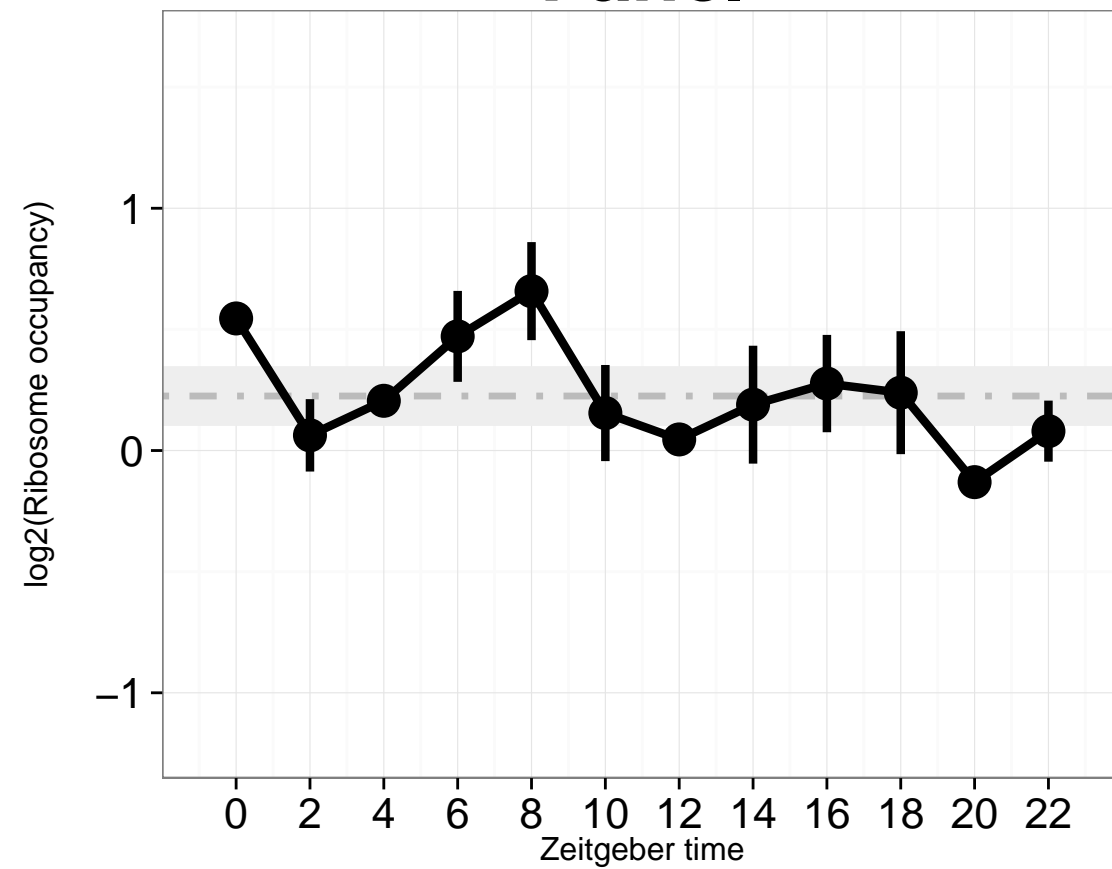

Supplement: Supplementary file 9738 [file 1]

# Rab22a

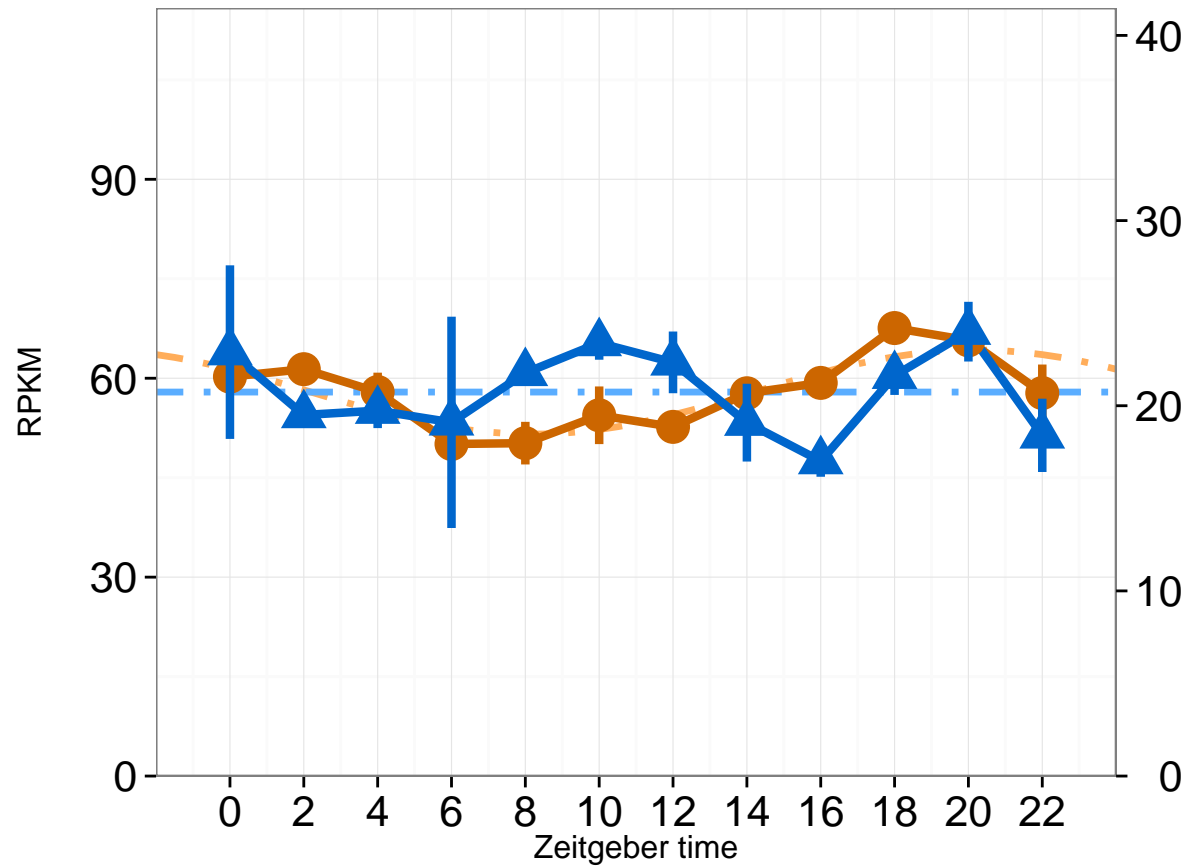

# Rab22a

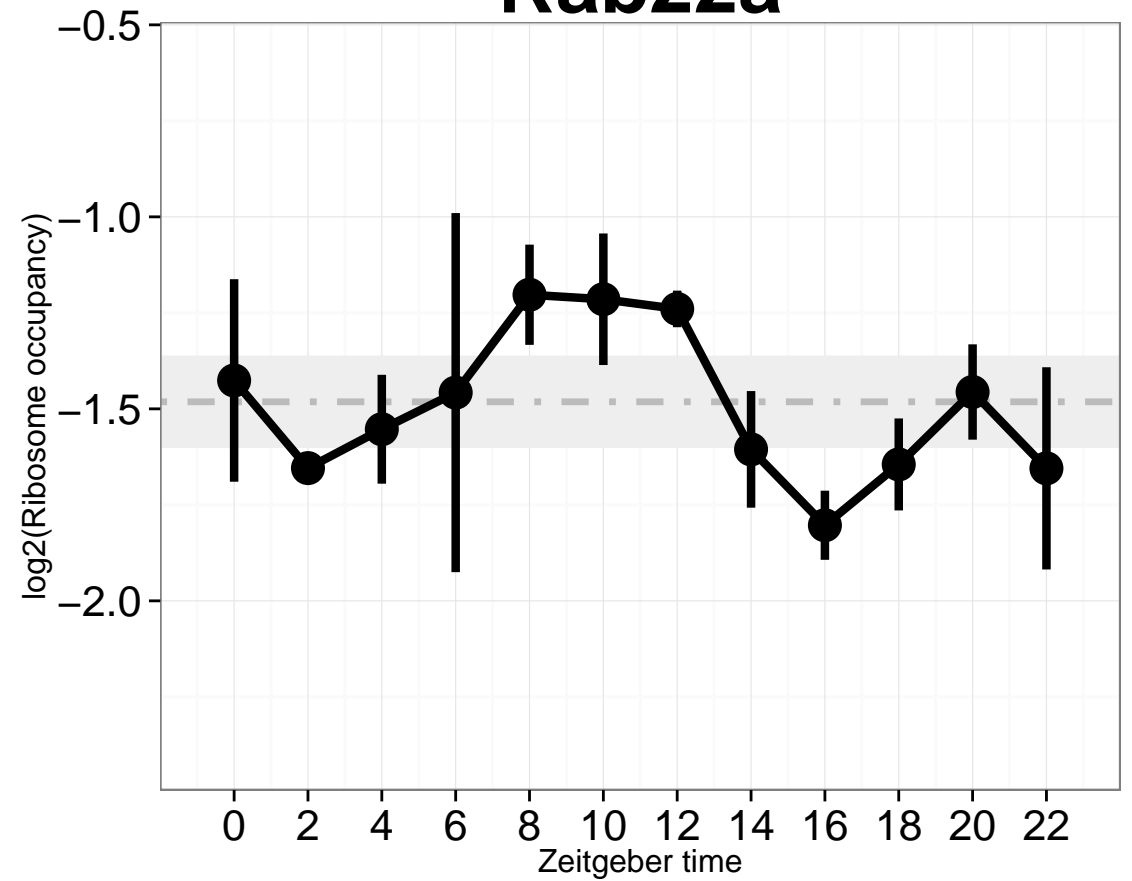

Supplement: Supplementary file 9739 [file 1]

## Nme7

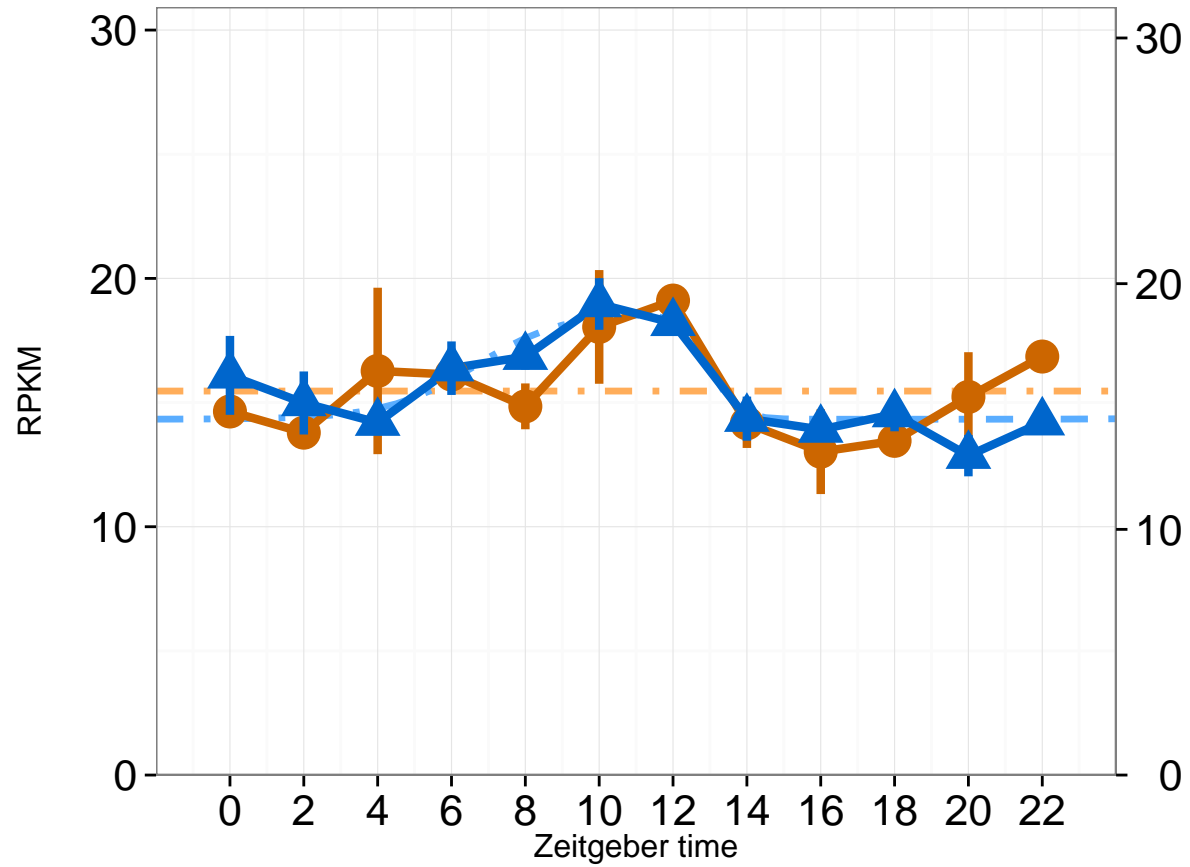

## Nme7

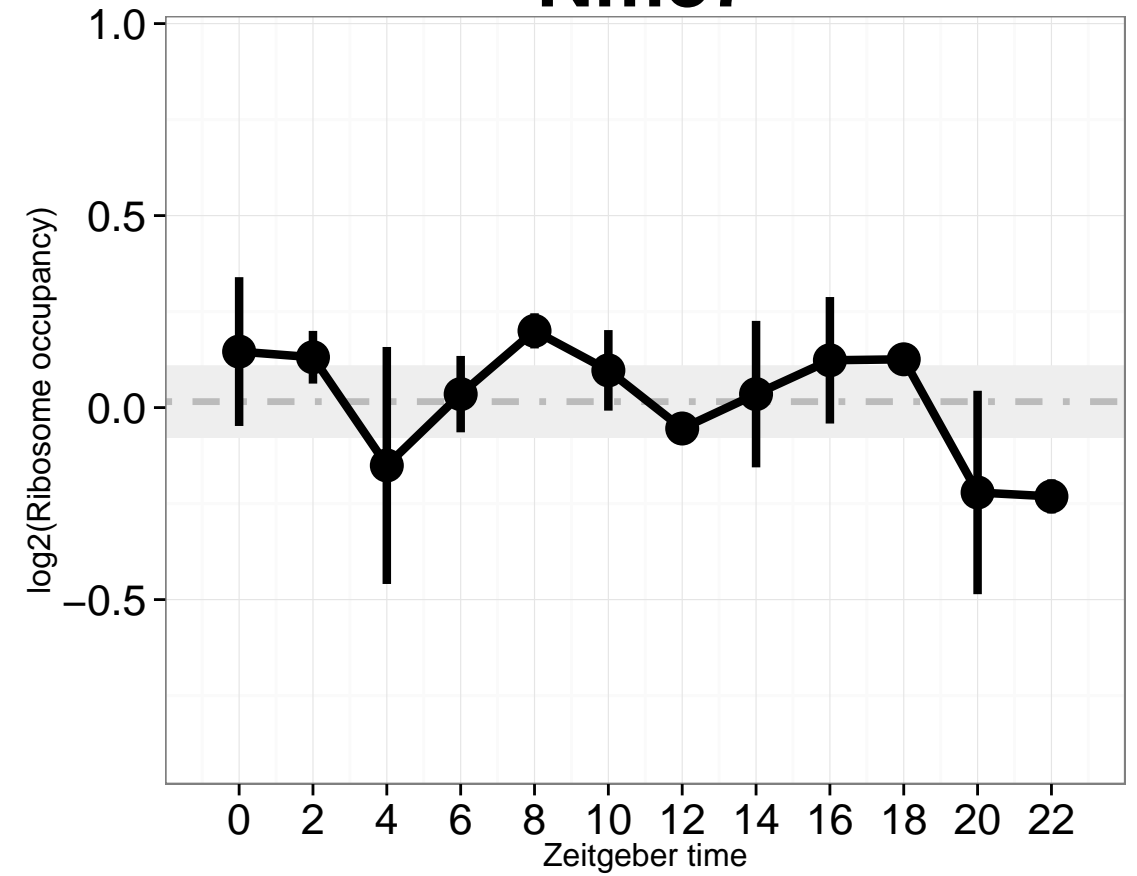

Supplement: Supplementary file 9740 [file 1]

# Tmem214

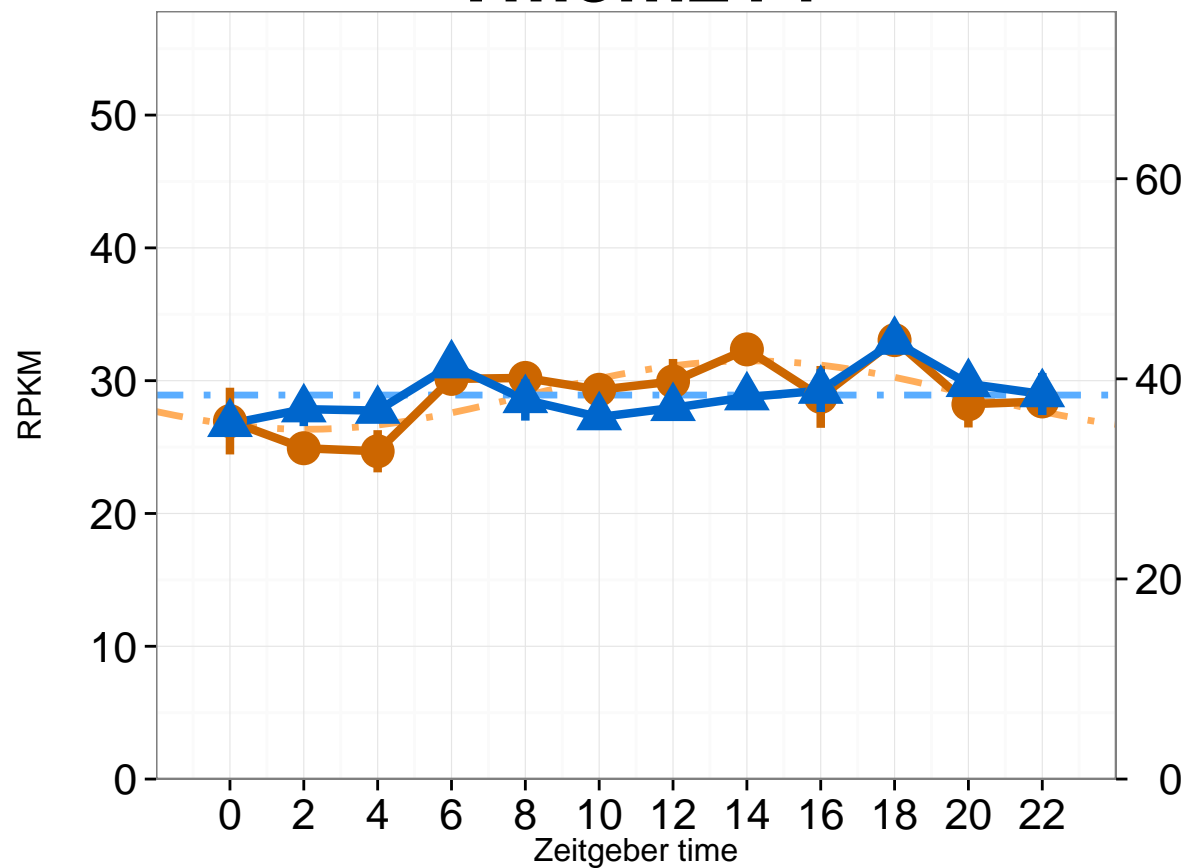

# Tmem214

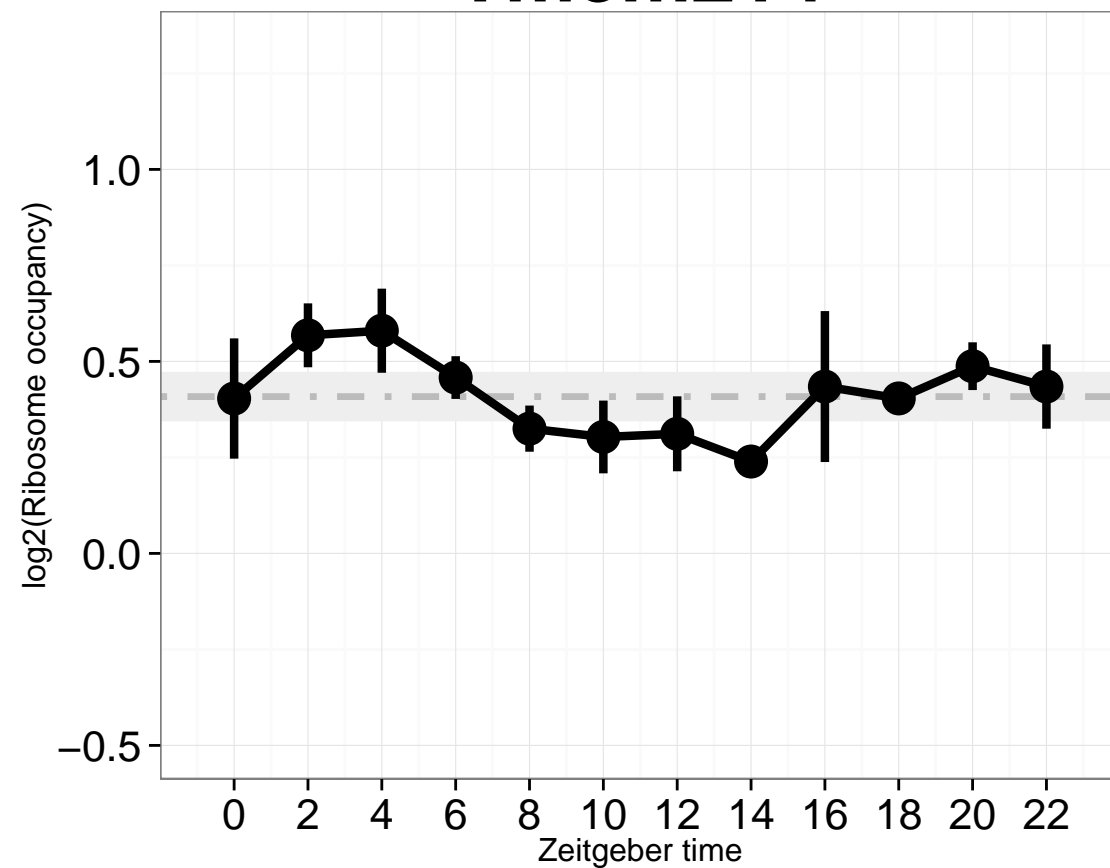

Supplement: Supplementary file 9741 [file 1]

## Mpzi1

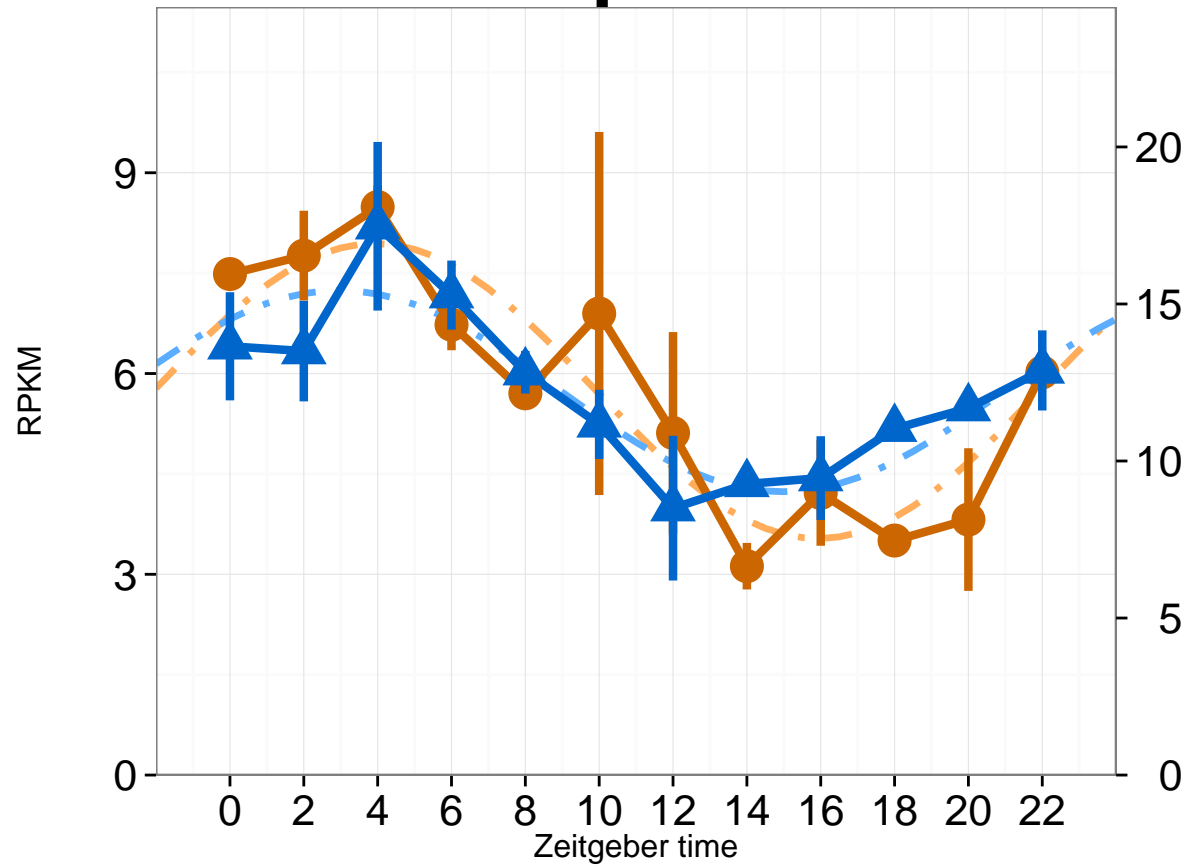

## Mpzi1

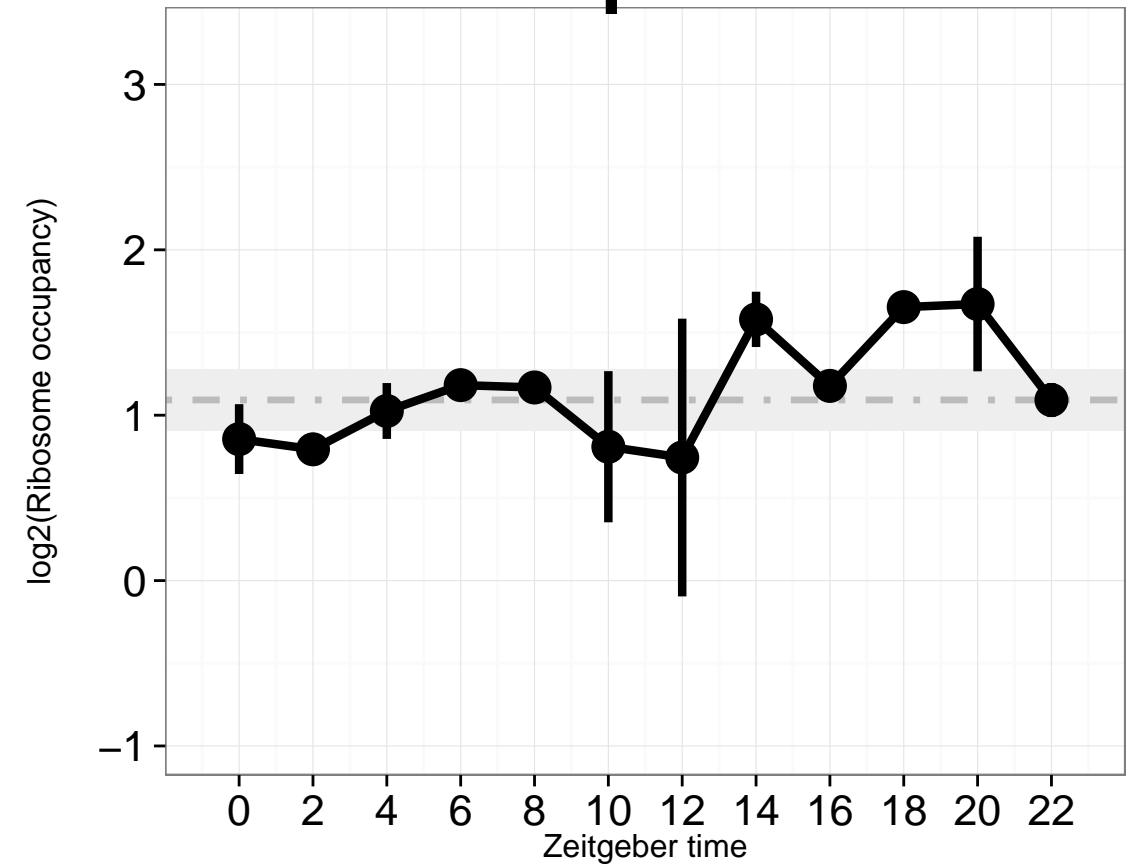

Supplement: Supplementary file 9742 [file 1]

## Apip

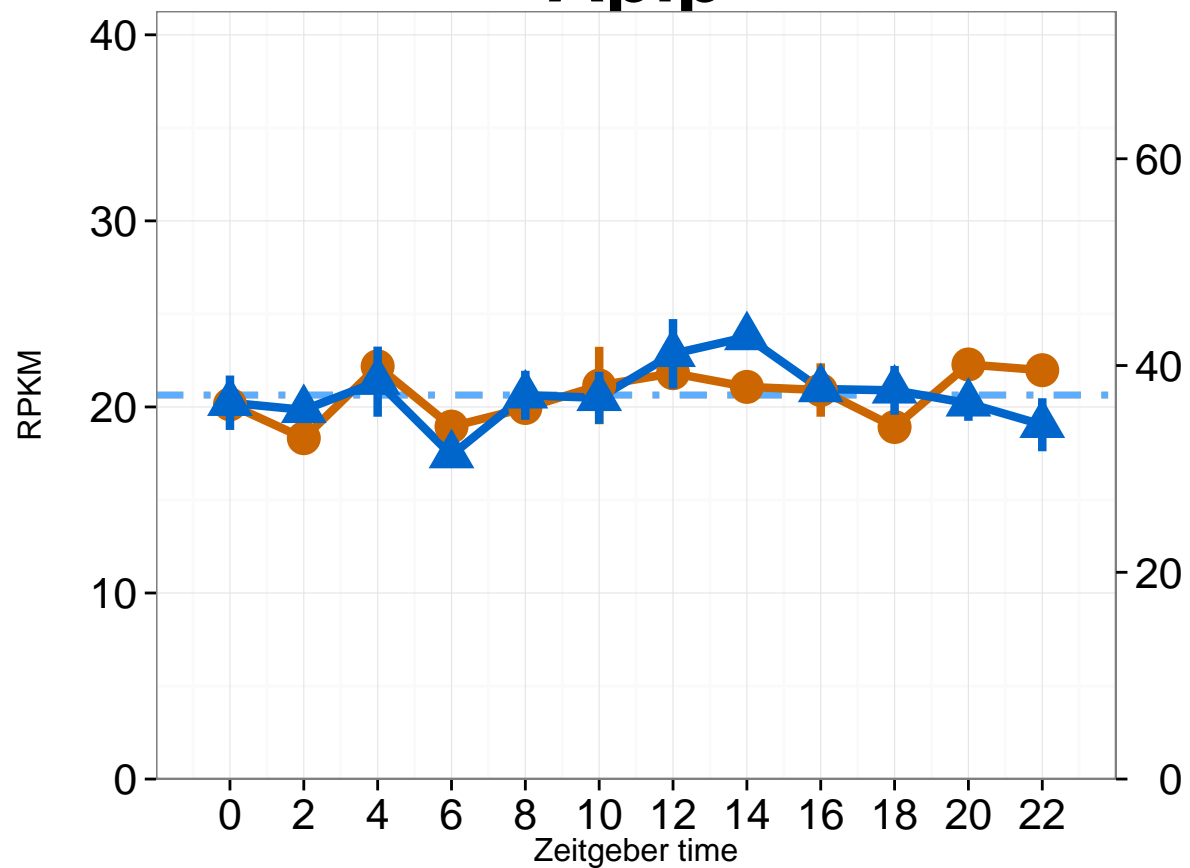

## Apip

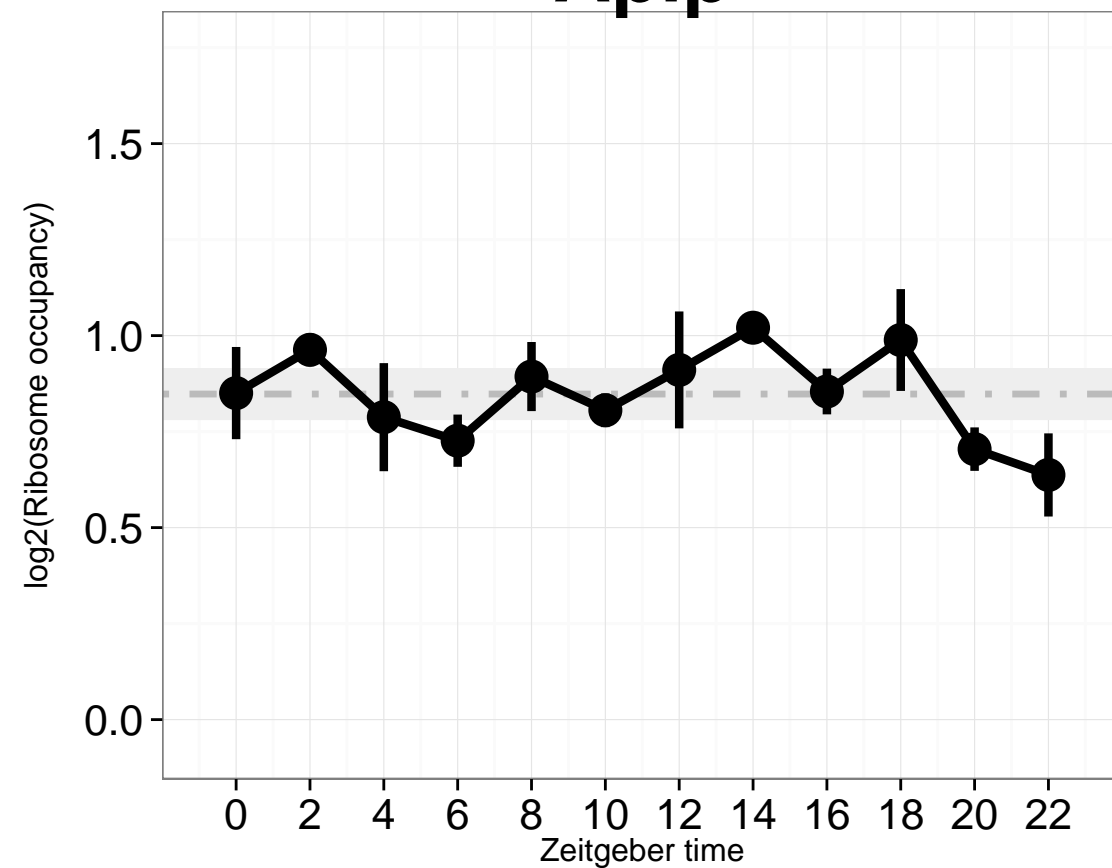

Supplement: Supplementary file 9743 [file 1]

# Kpna6

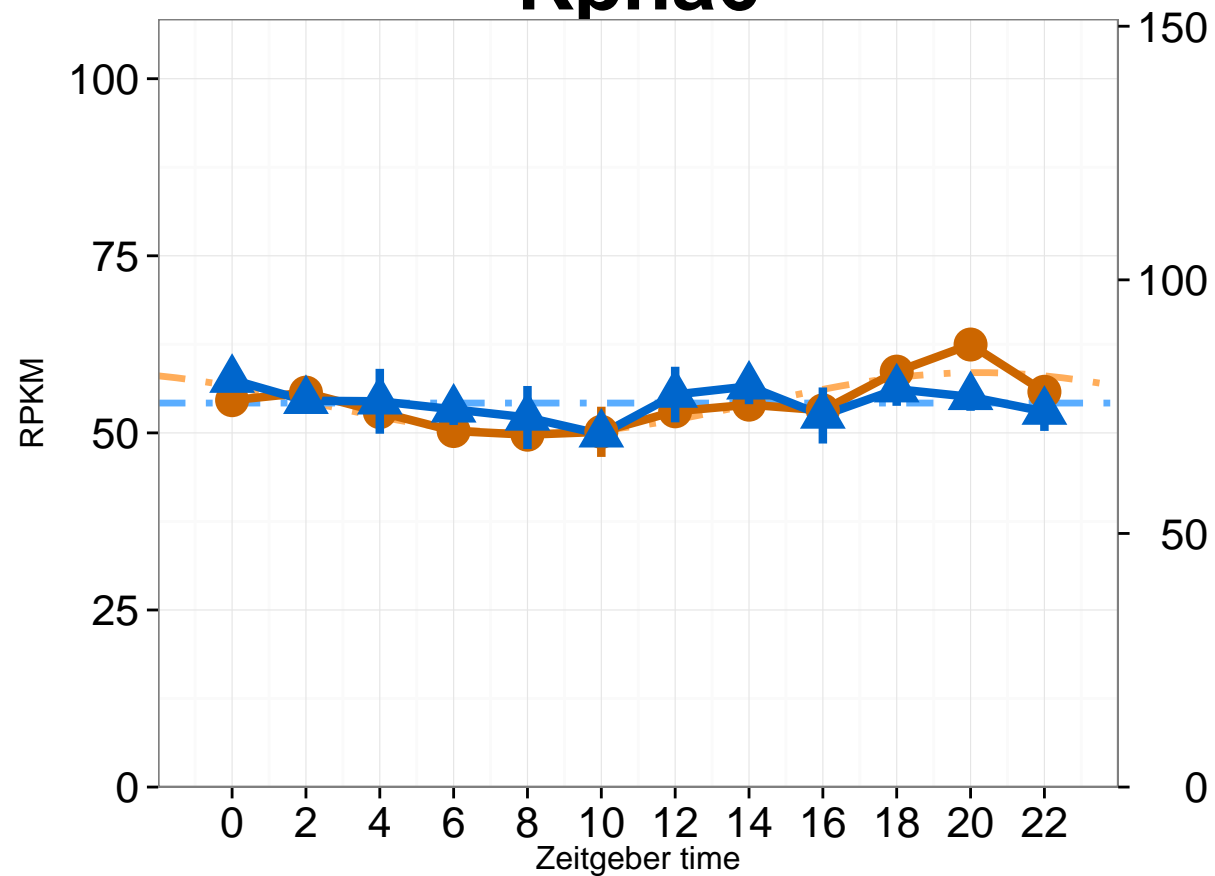

# Kpna6

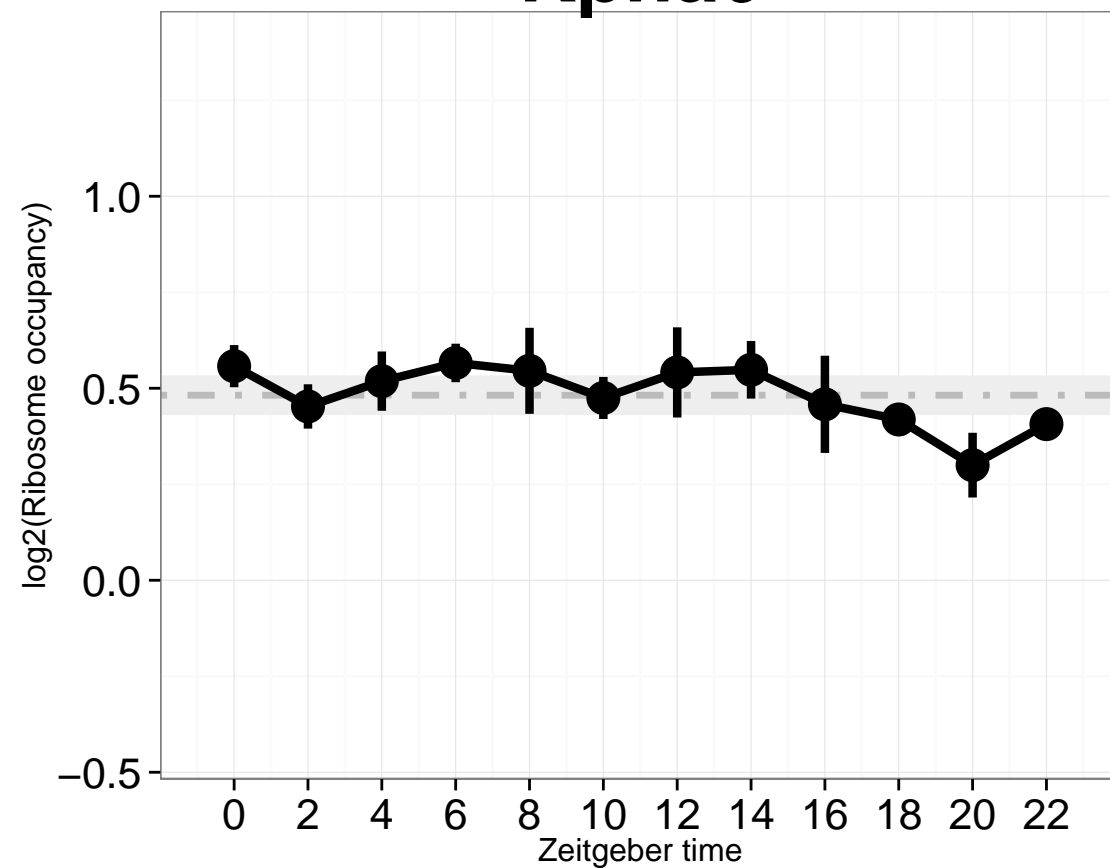

Supplement: Supplementary file 9744 [file 1]

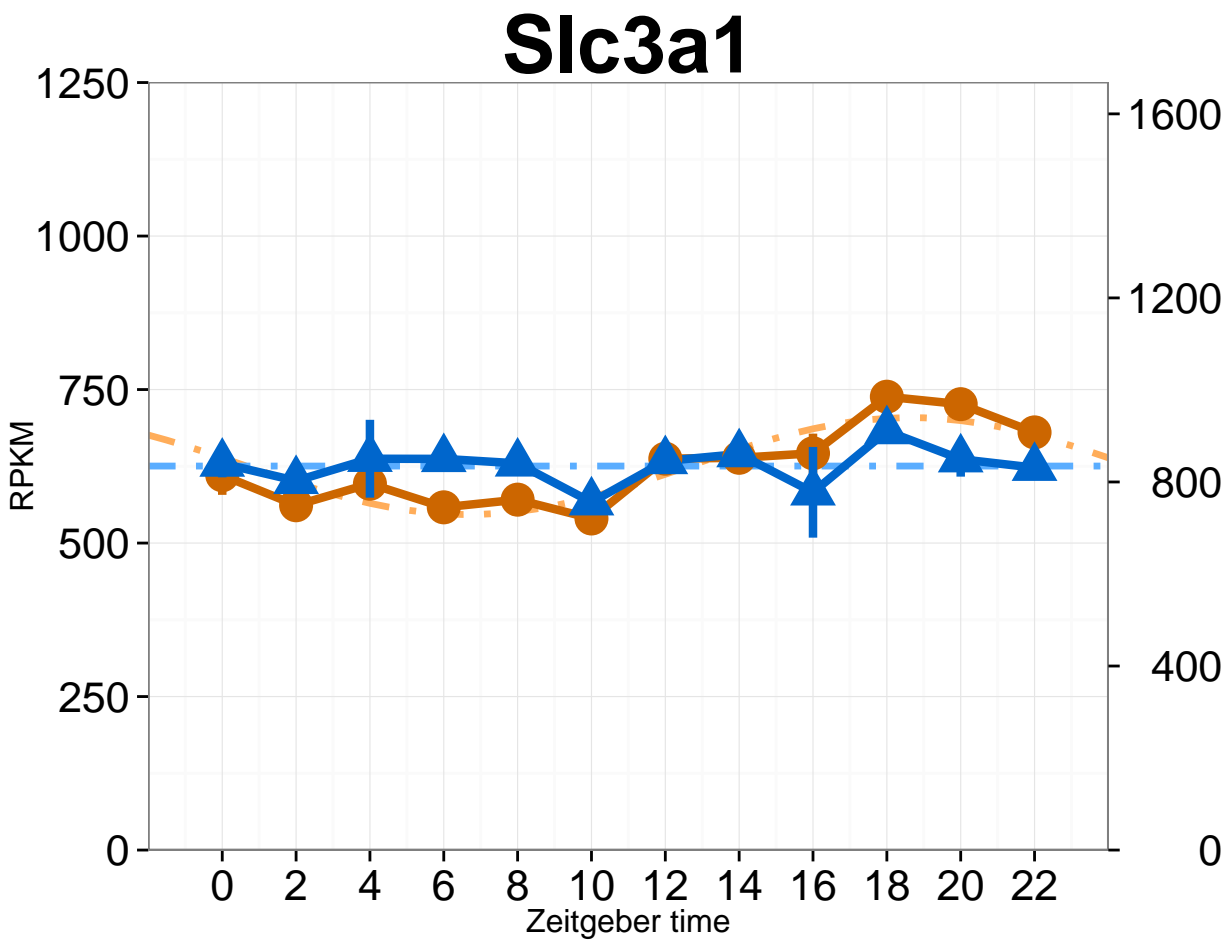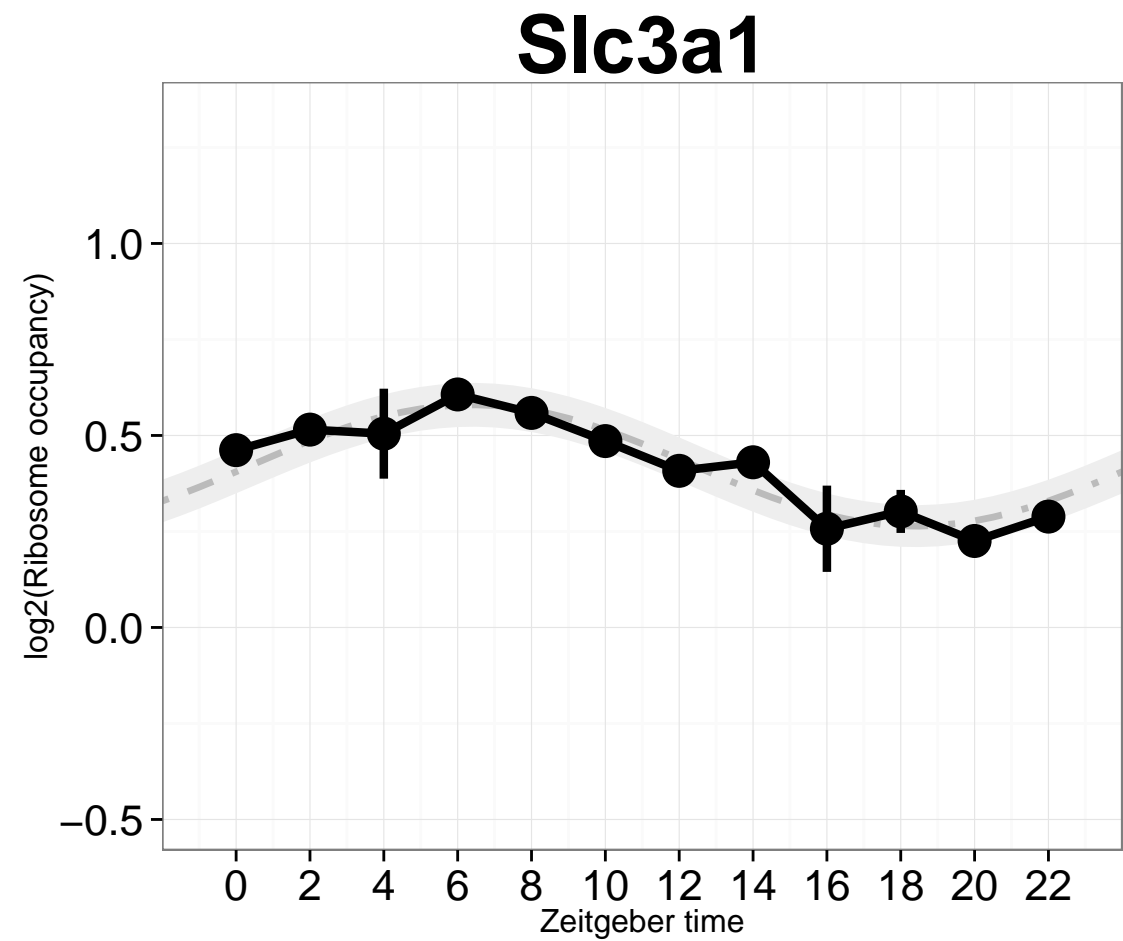

Supplement: Supplementary file 9745 [file 1]

# Fubp1

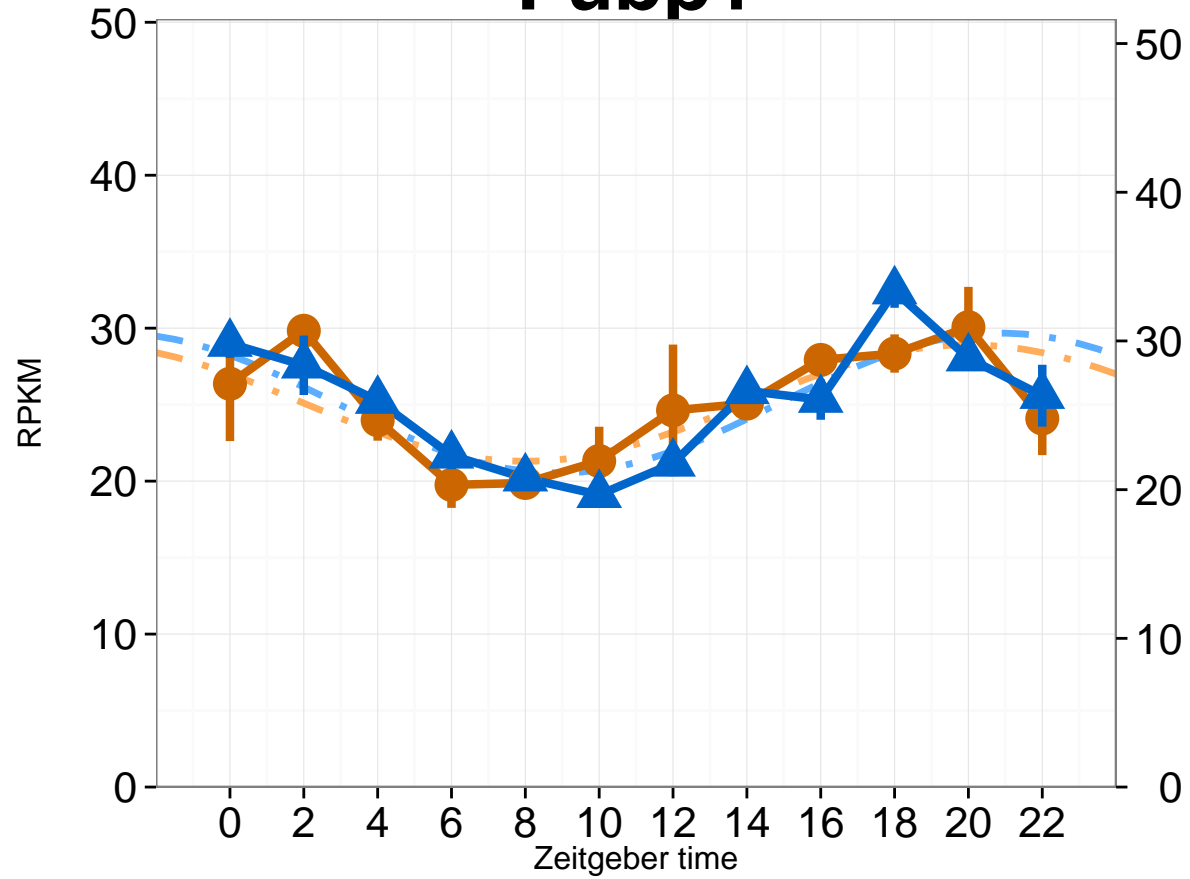

# Fubp1

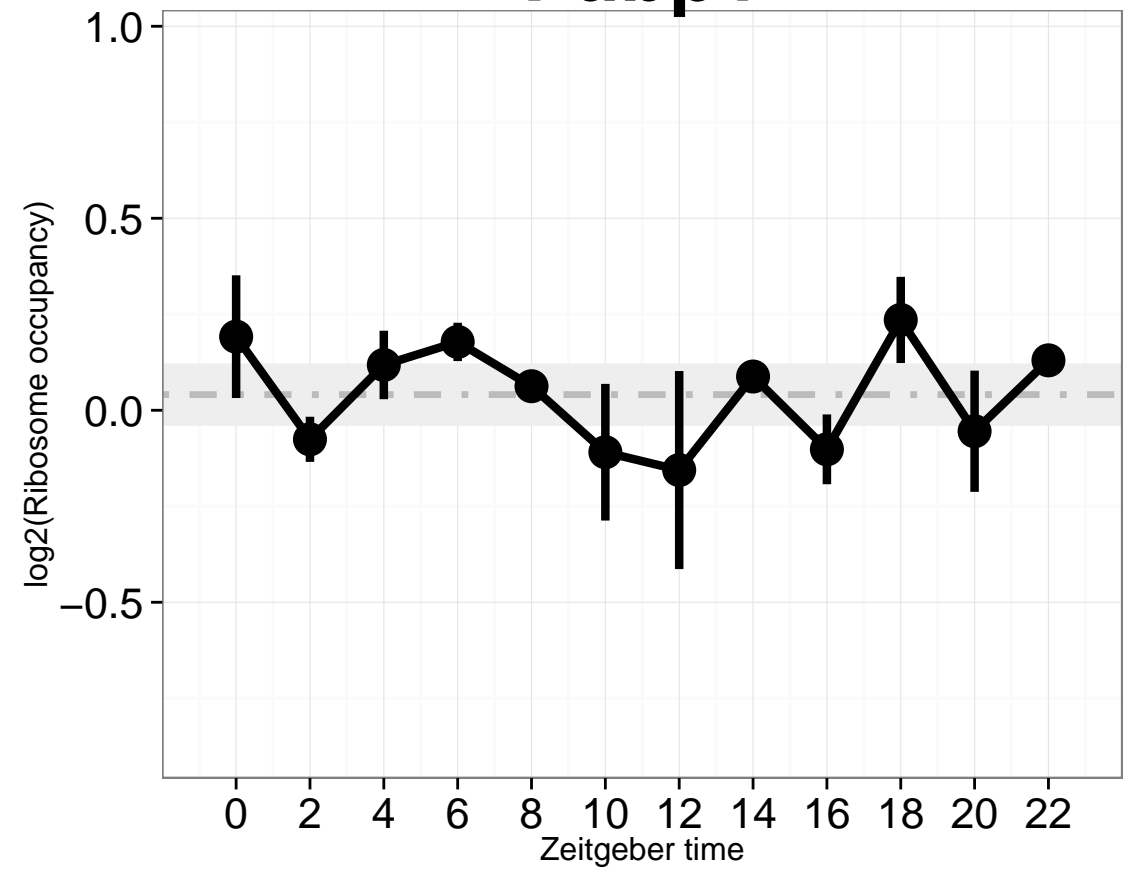

Supplement: Supplementary file 9746 [file 1]

# Thoc1

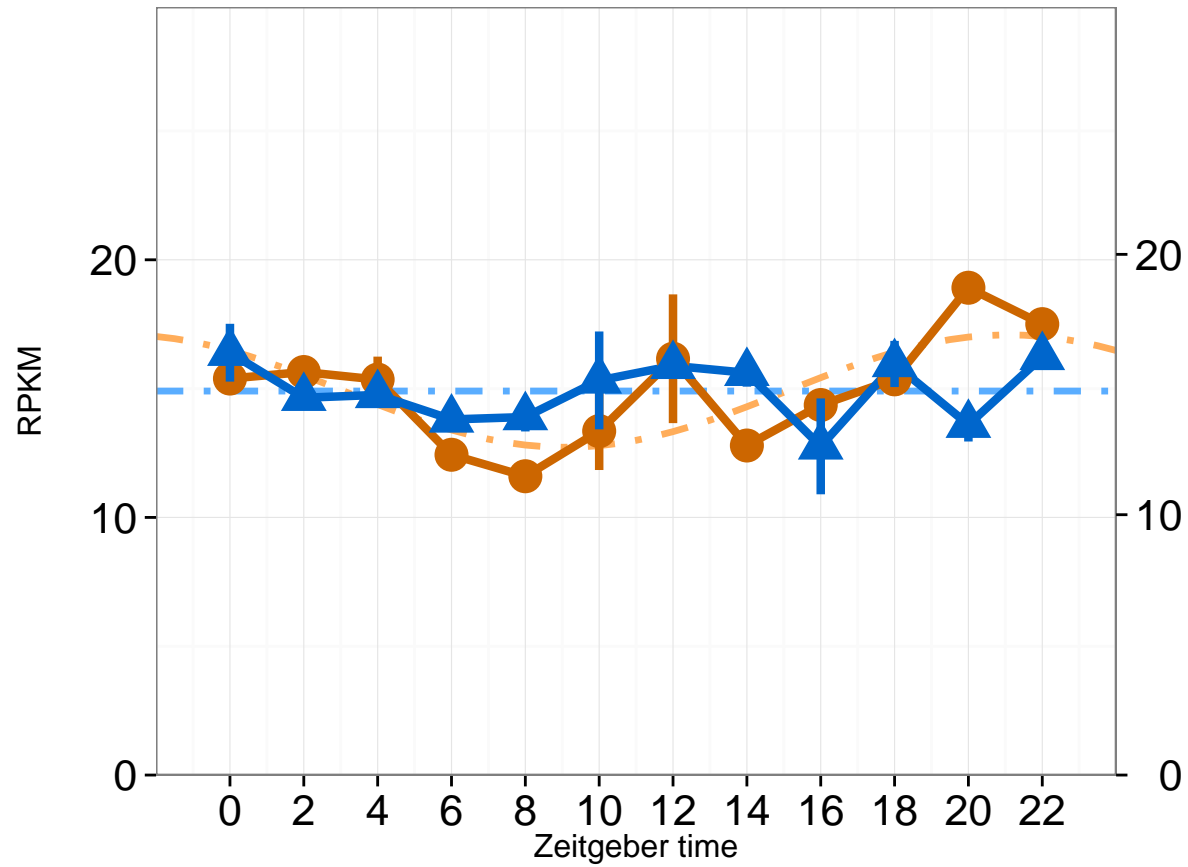

# Thoc1

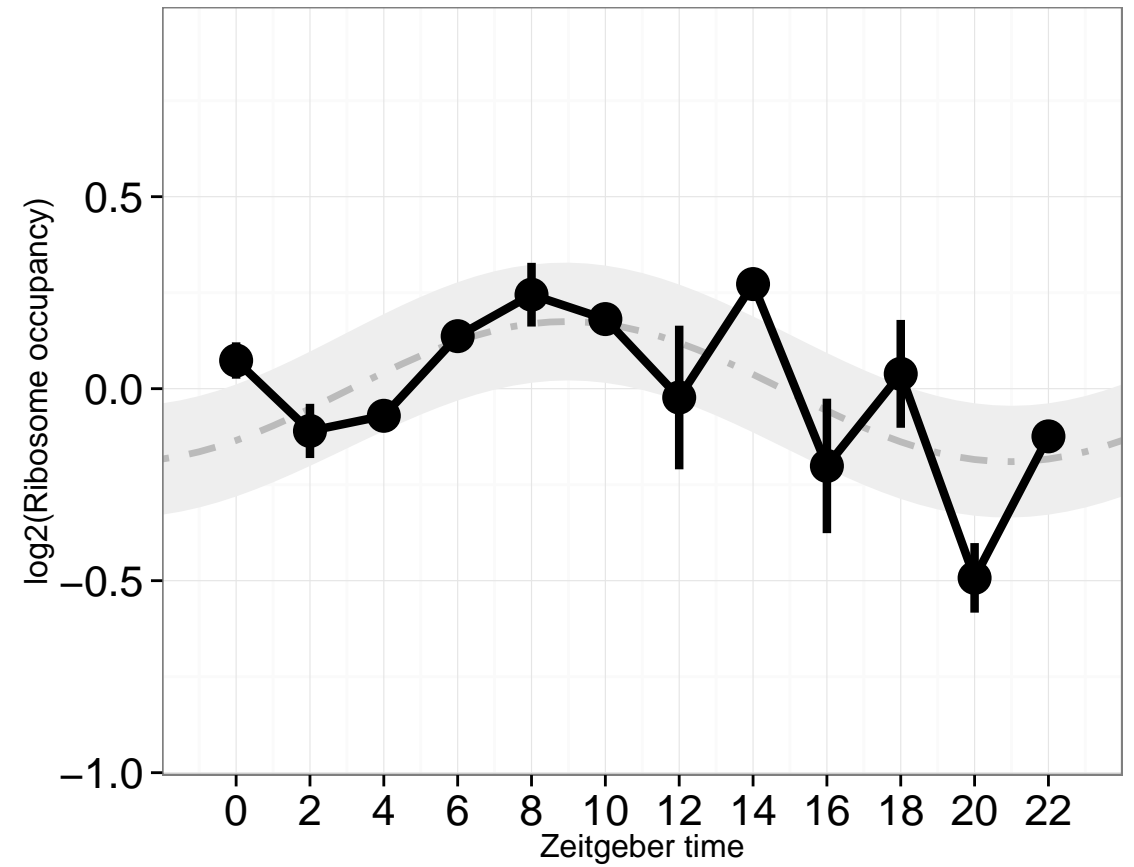

Supplement: Supplementary file 9747 [file 1]

# Pik3r5

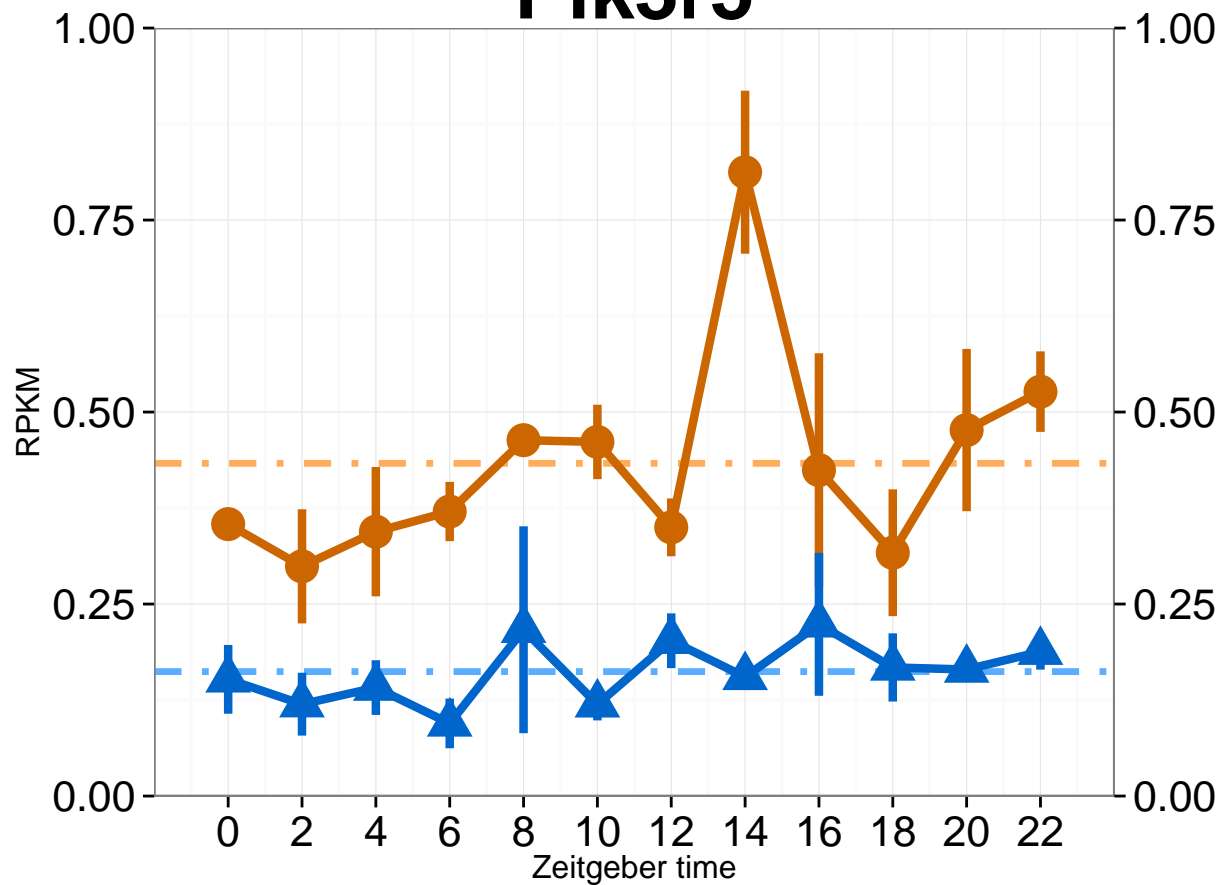

# Pik3r5

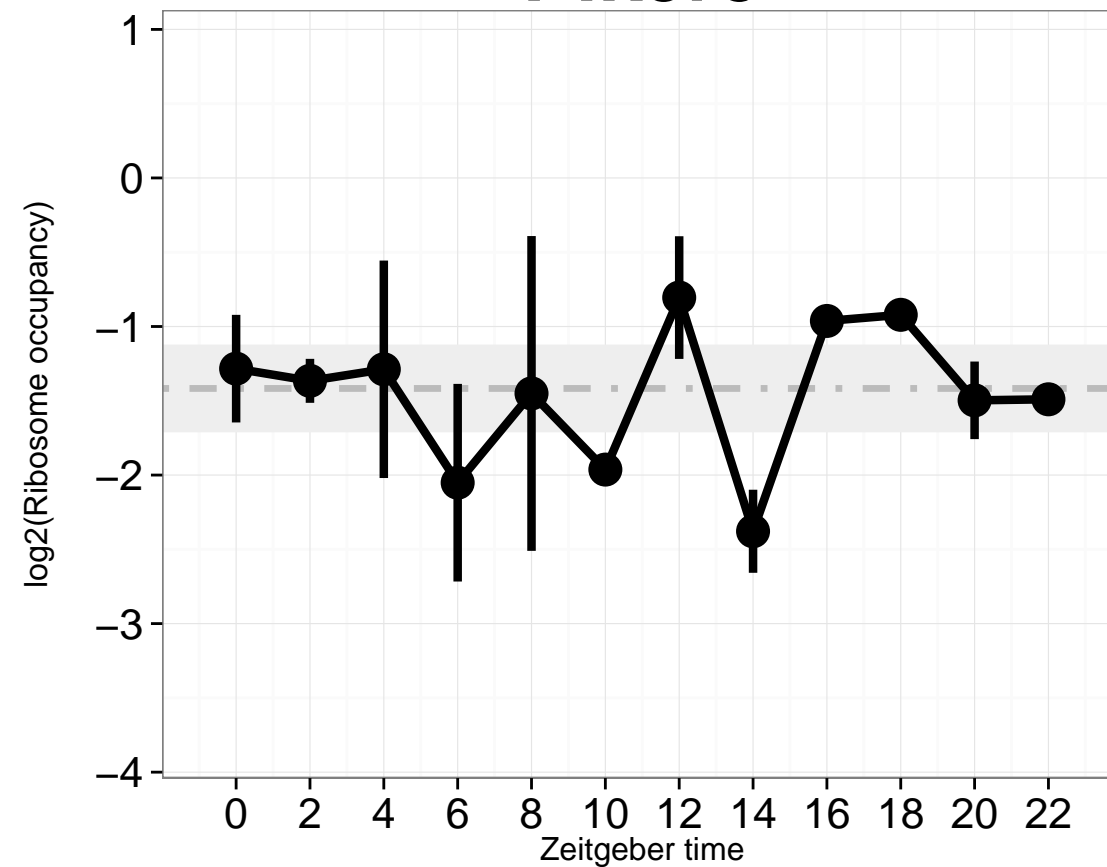

Supplement: Supplementary file 9748 [file 1]

## Ctdsp1

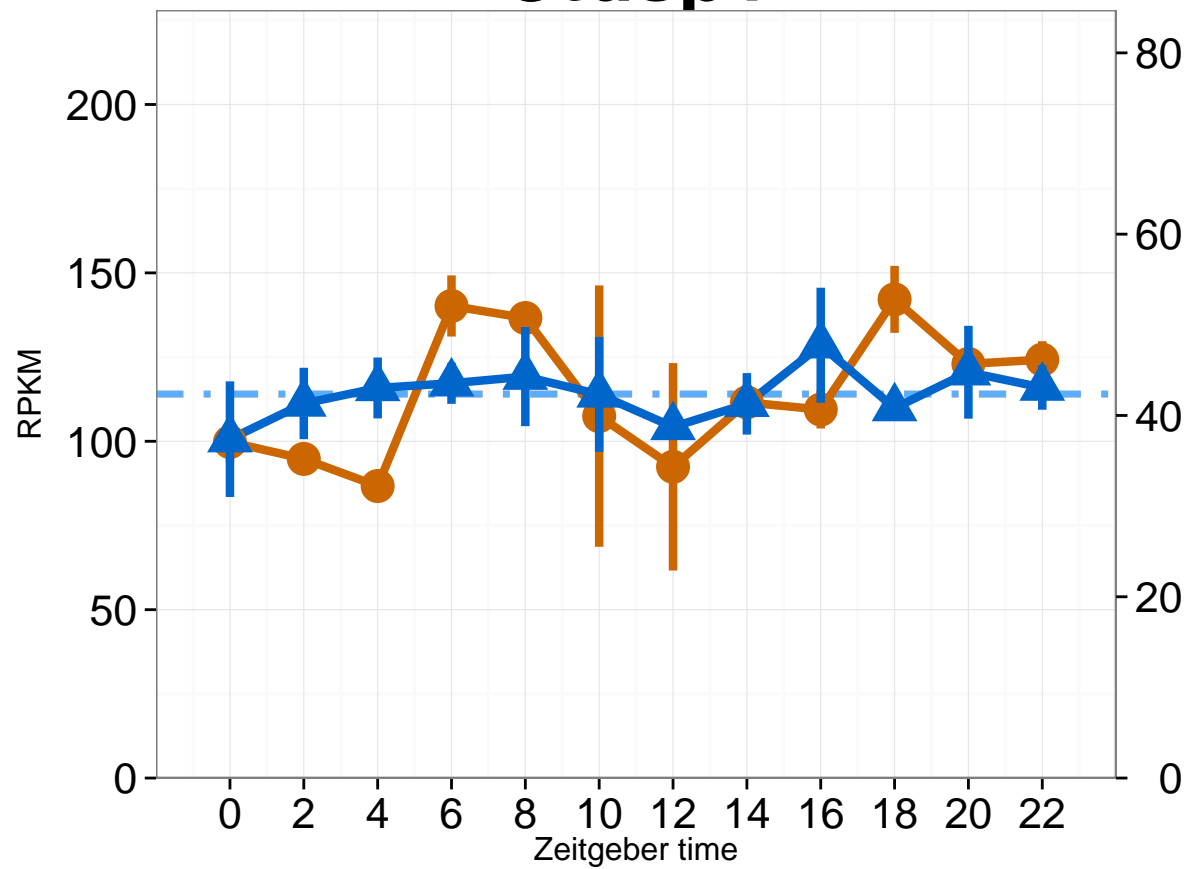

## Ctdsp1

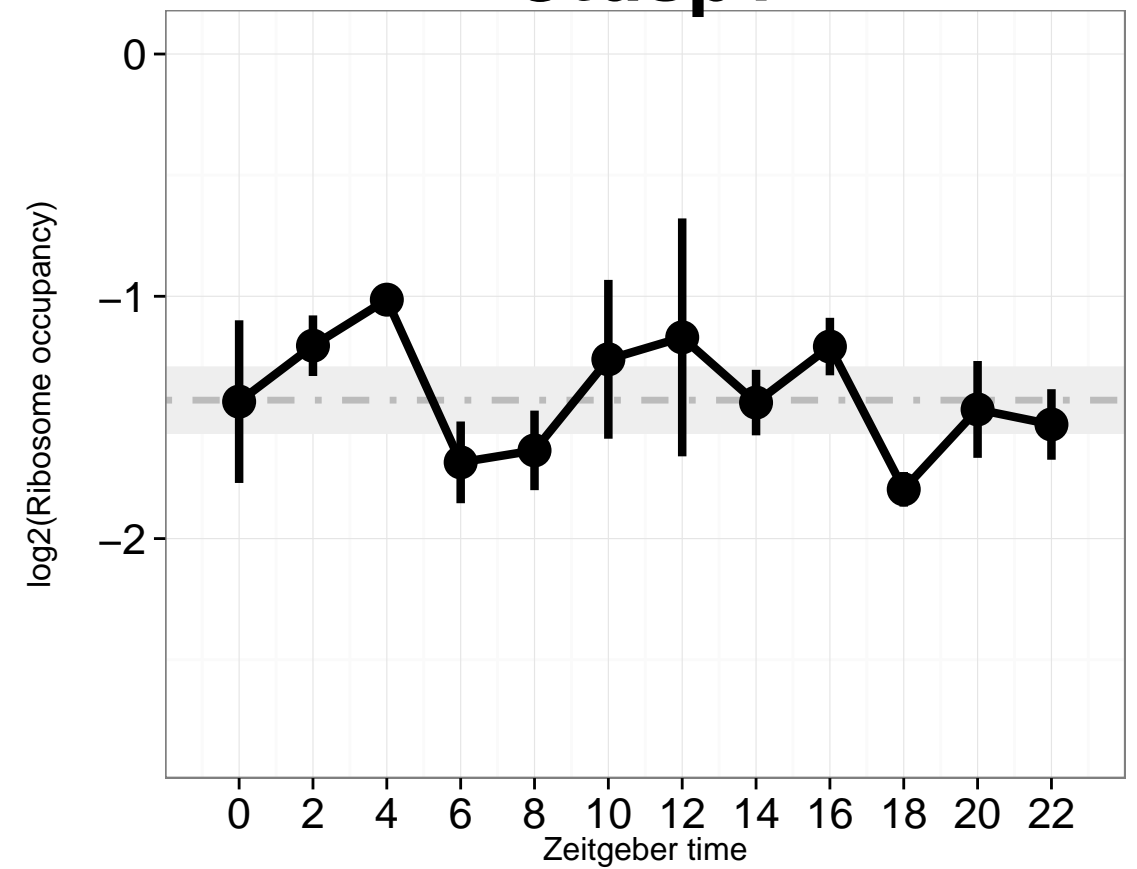

Supplement: Supplementary file 9749 [file 1]

# March2

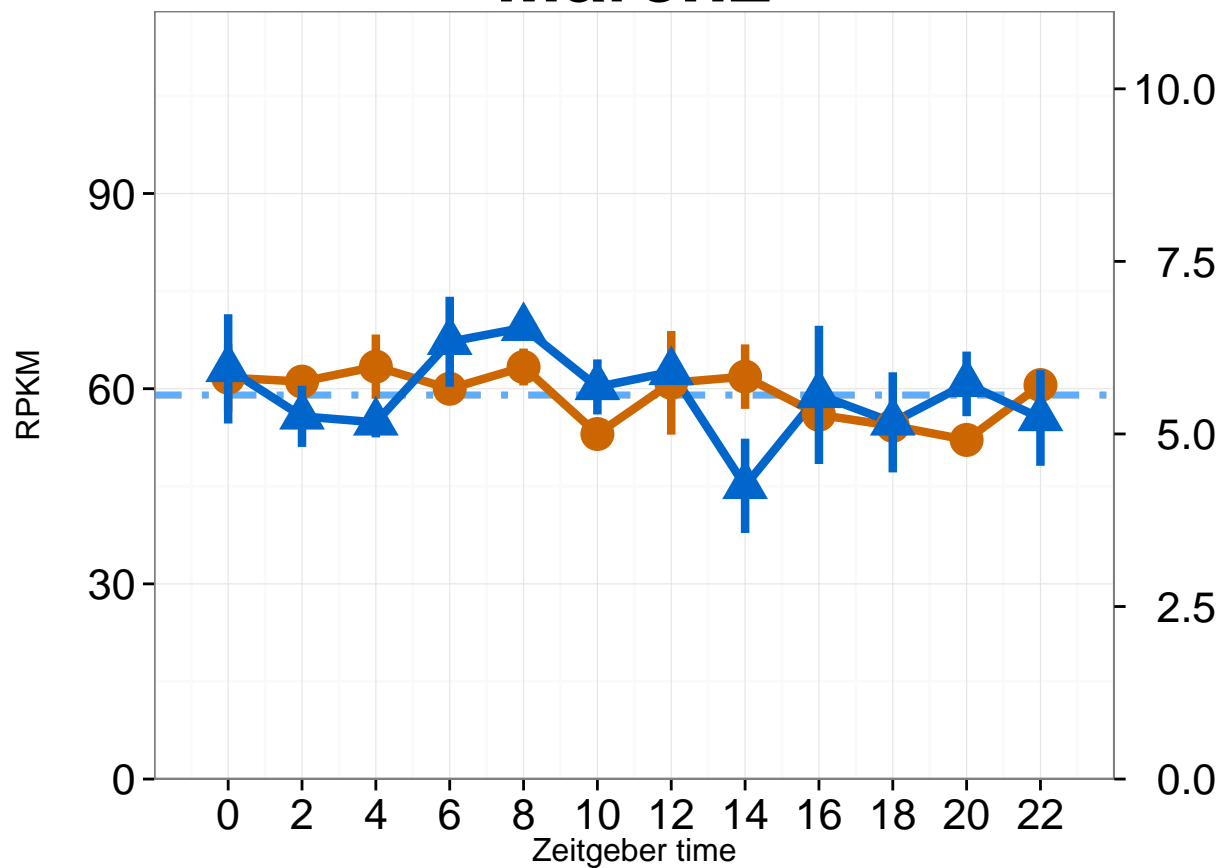

# March2

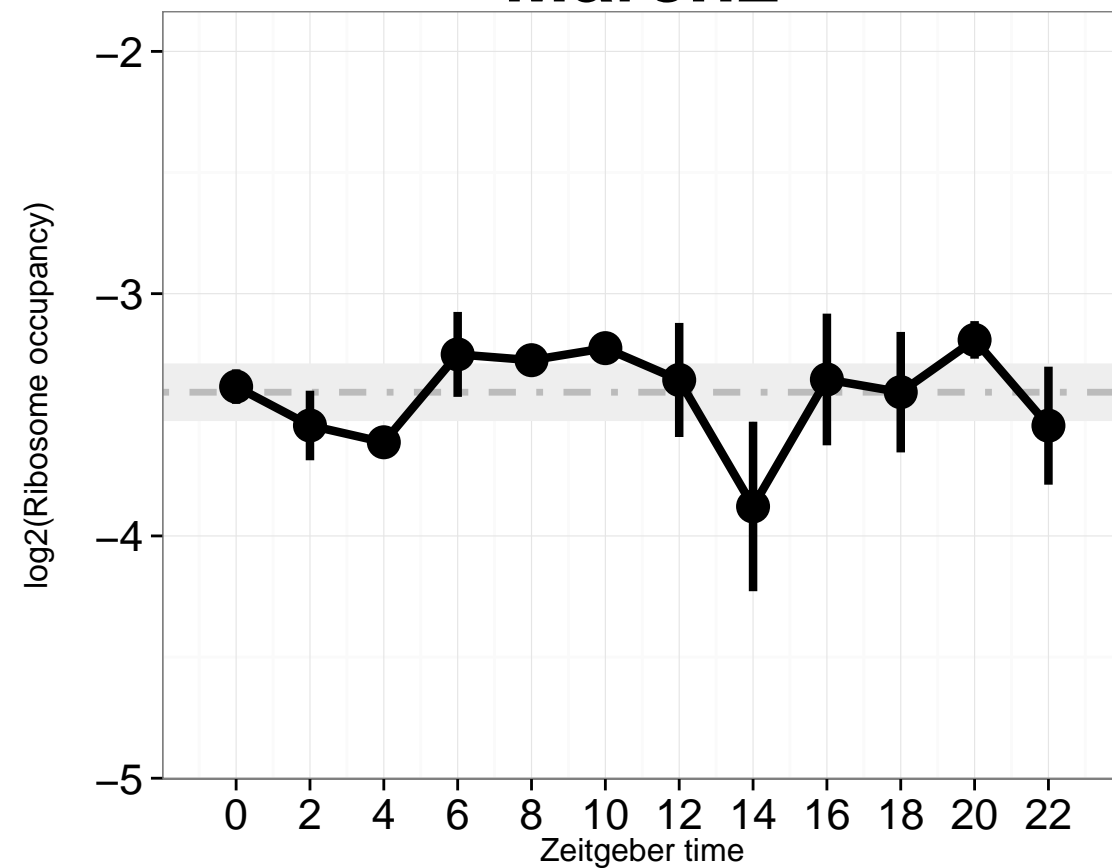

Supplement: Supplementary file 9750 [file 1]

## Tns1

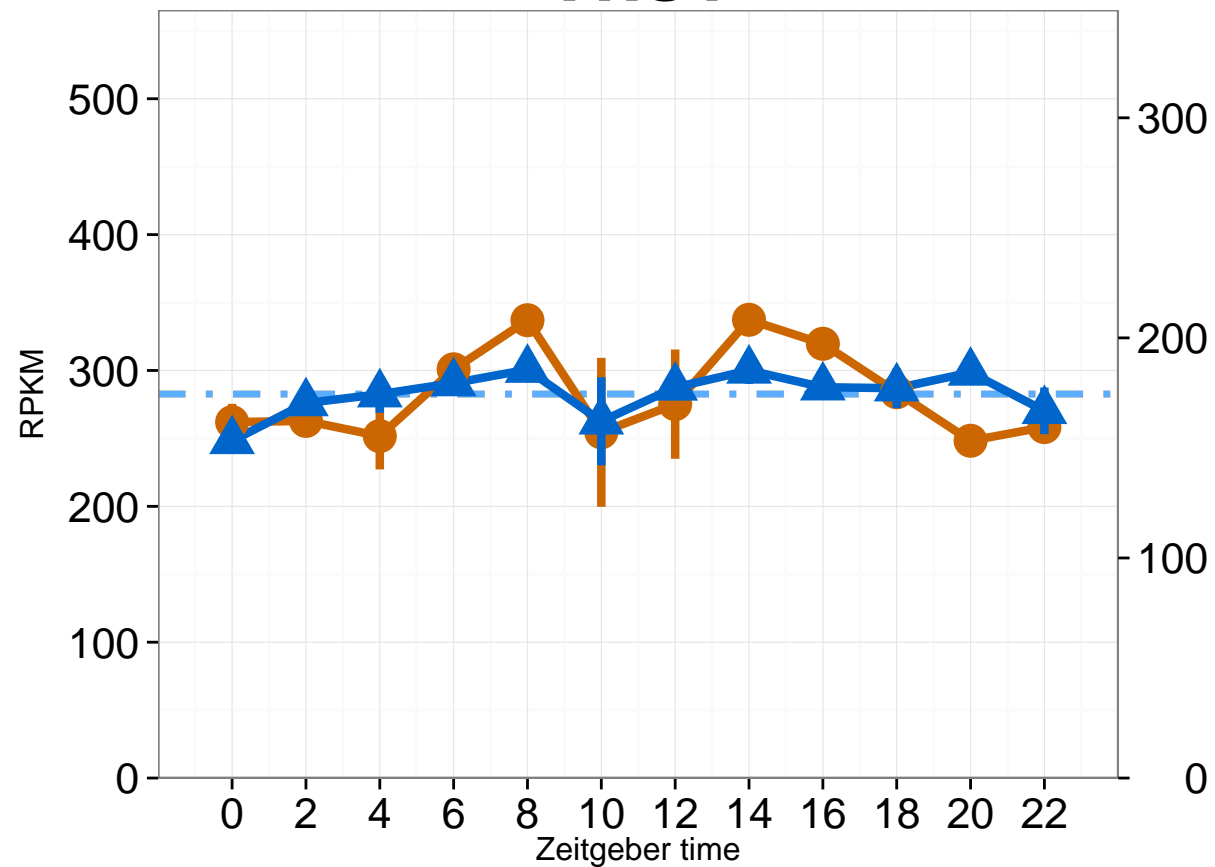

## Tns1

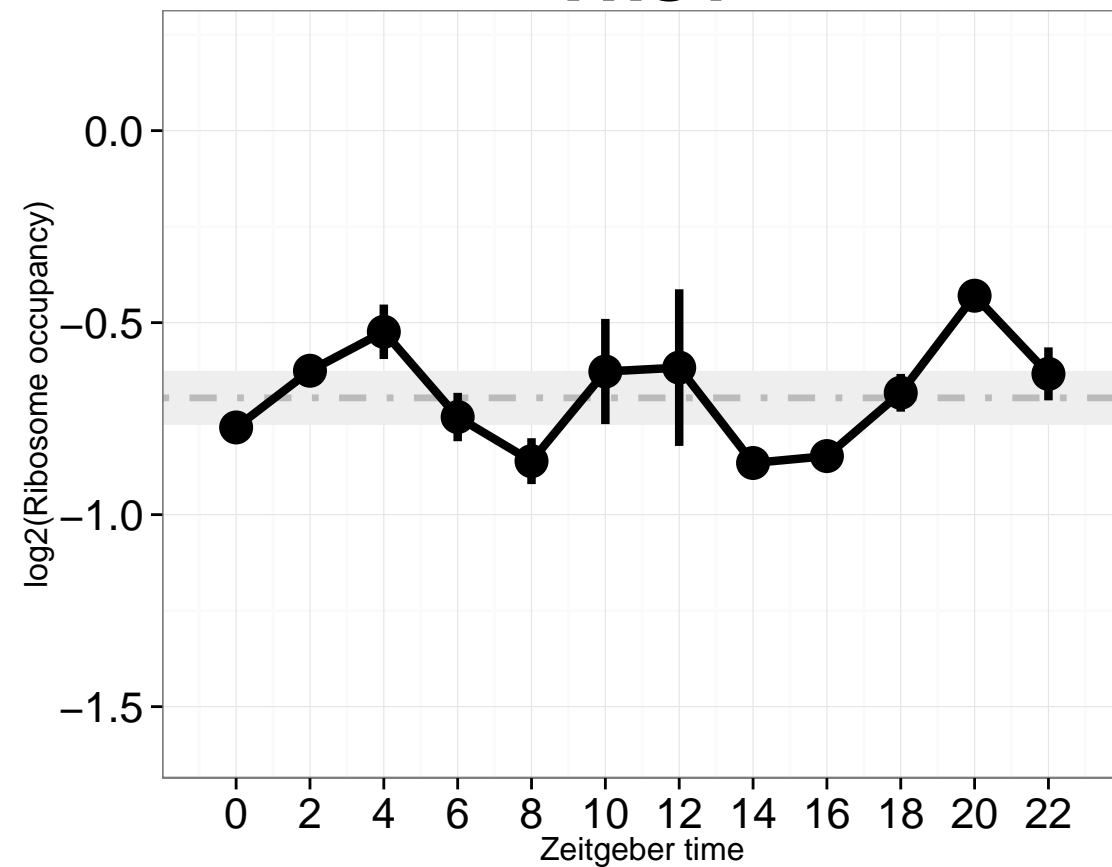

Supplement: Supplementary file 9751 [file 1]

## Frs3

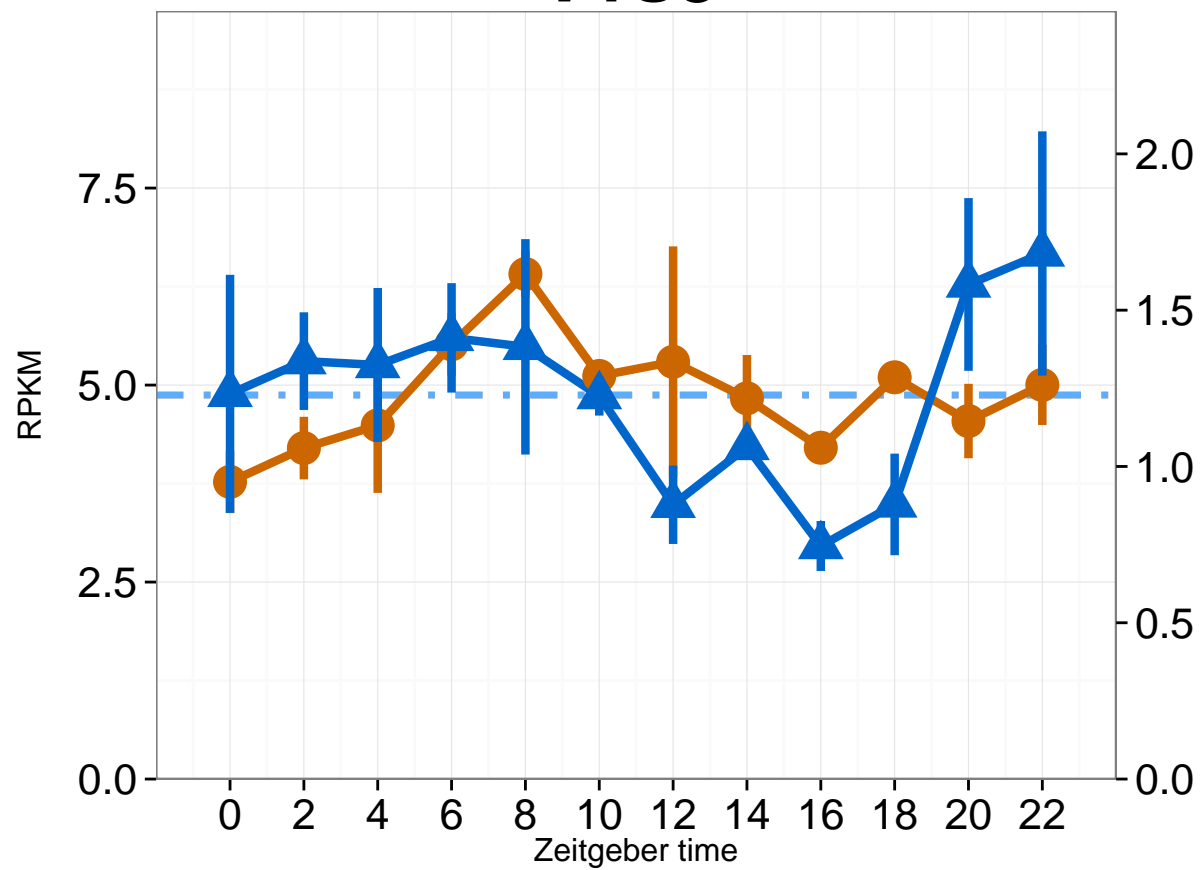

## Frs3

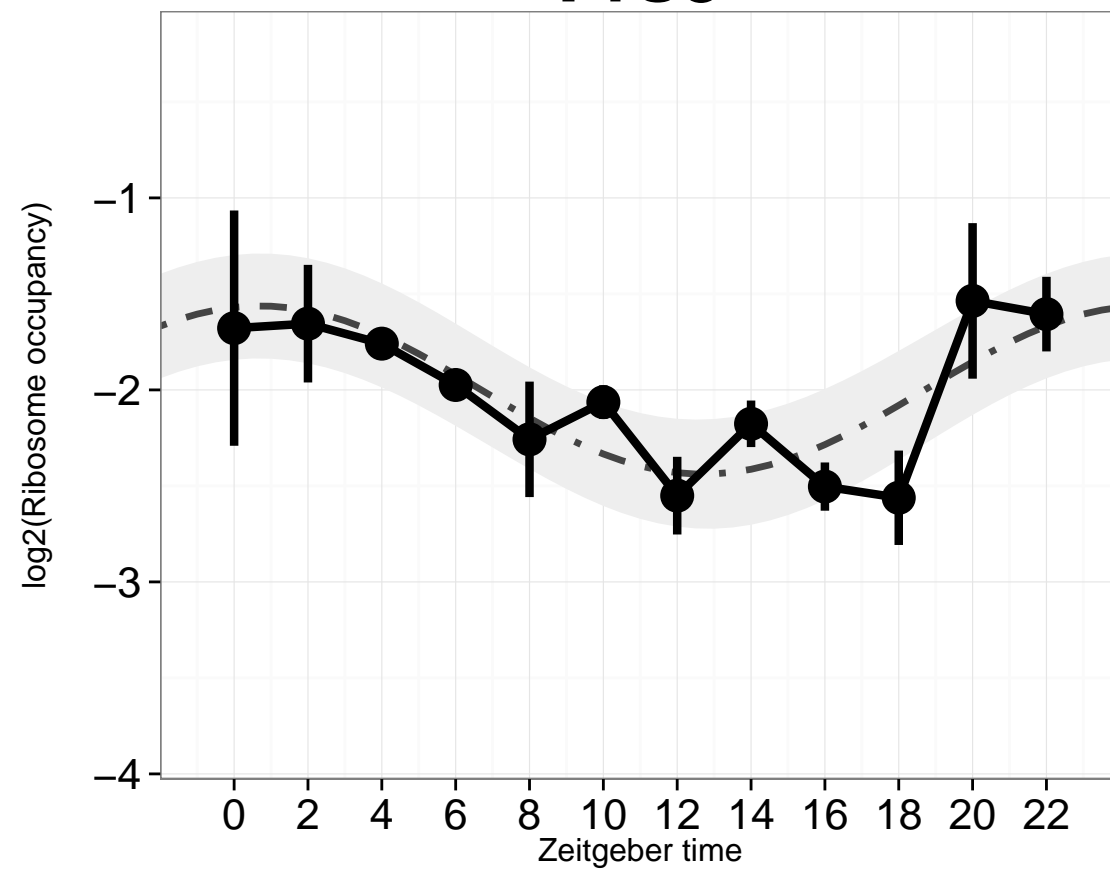

Supplement: Supplementary file 9752 [file 1]

# Ahsa1

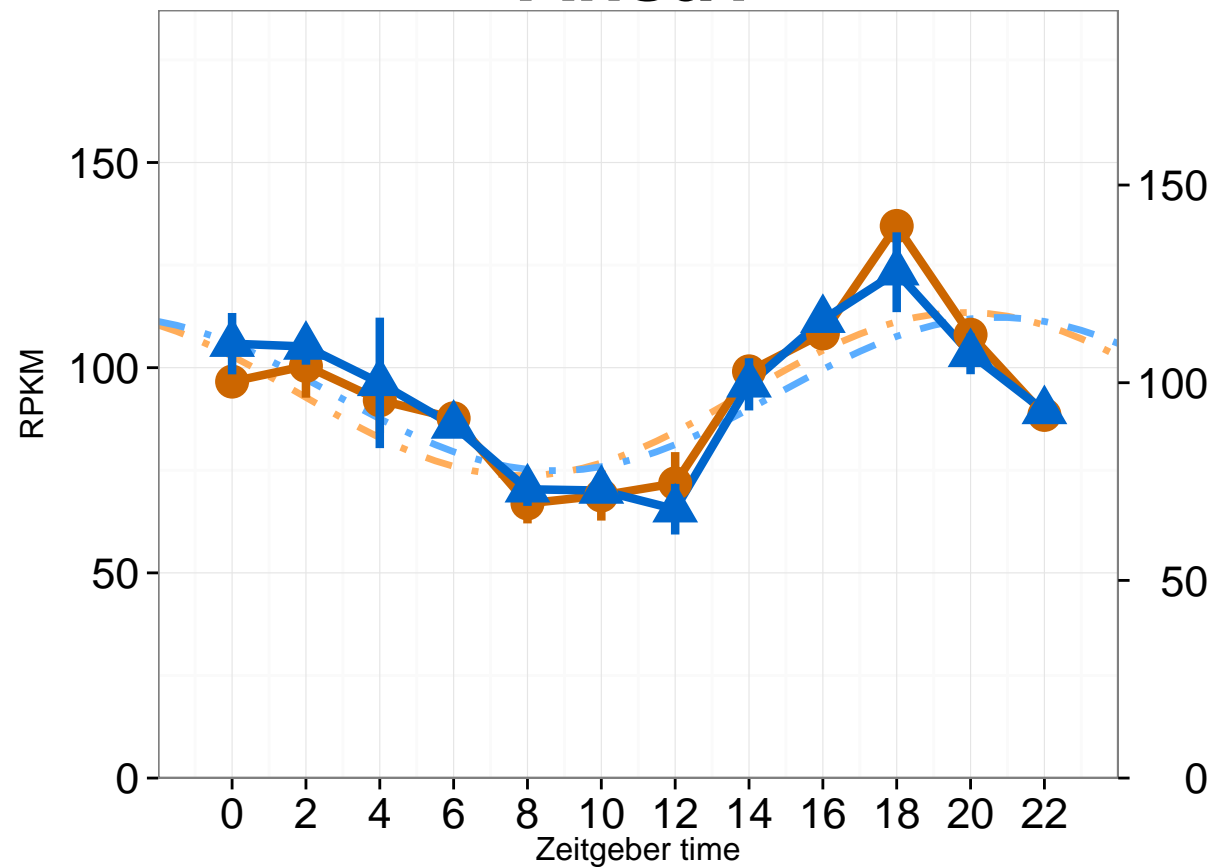

# Ahsa1

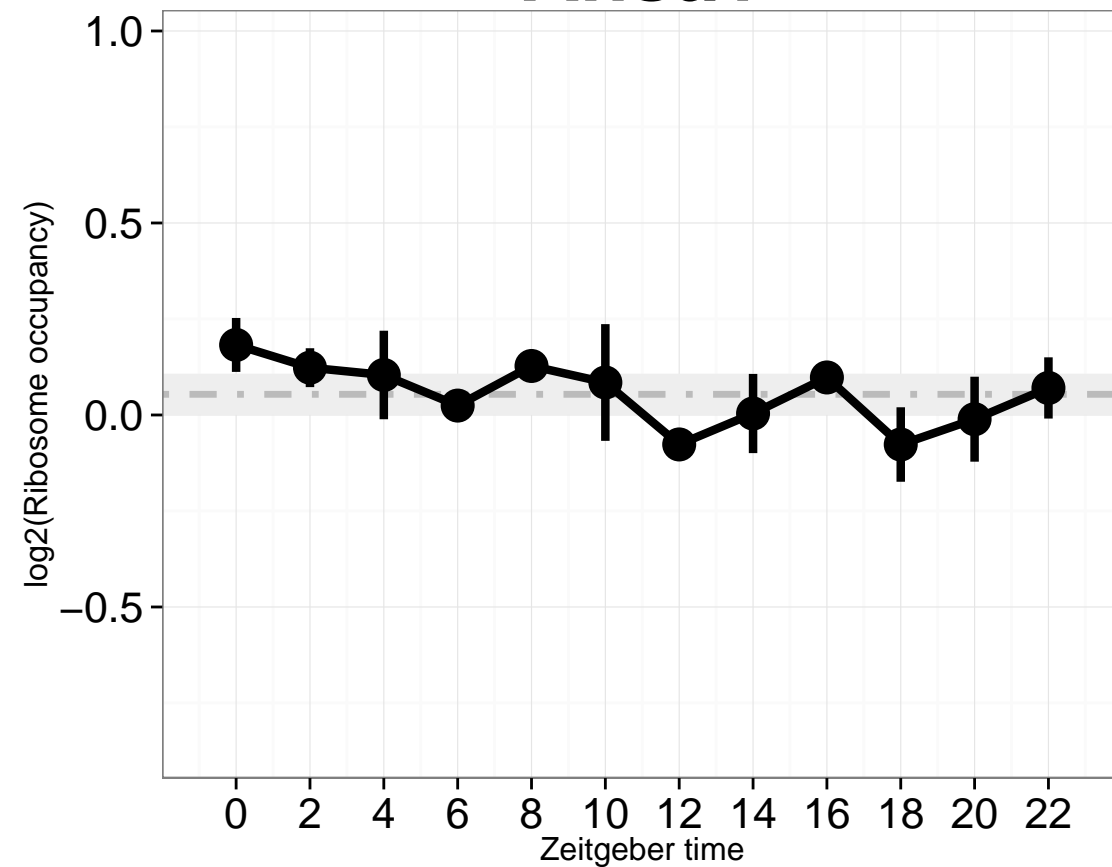

Supplement: Supplementary file 9753 [file 1]

# Rbm4b

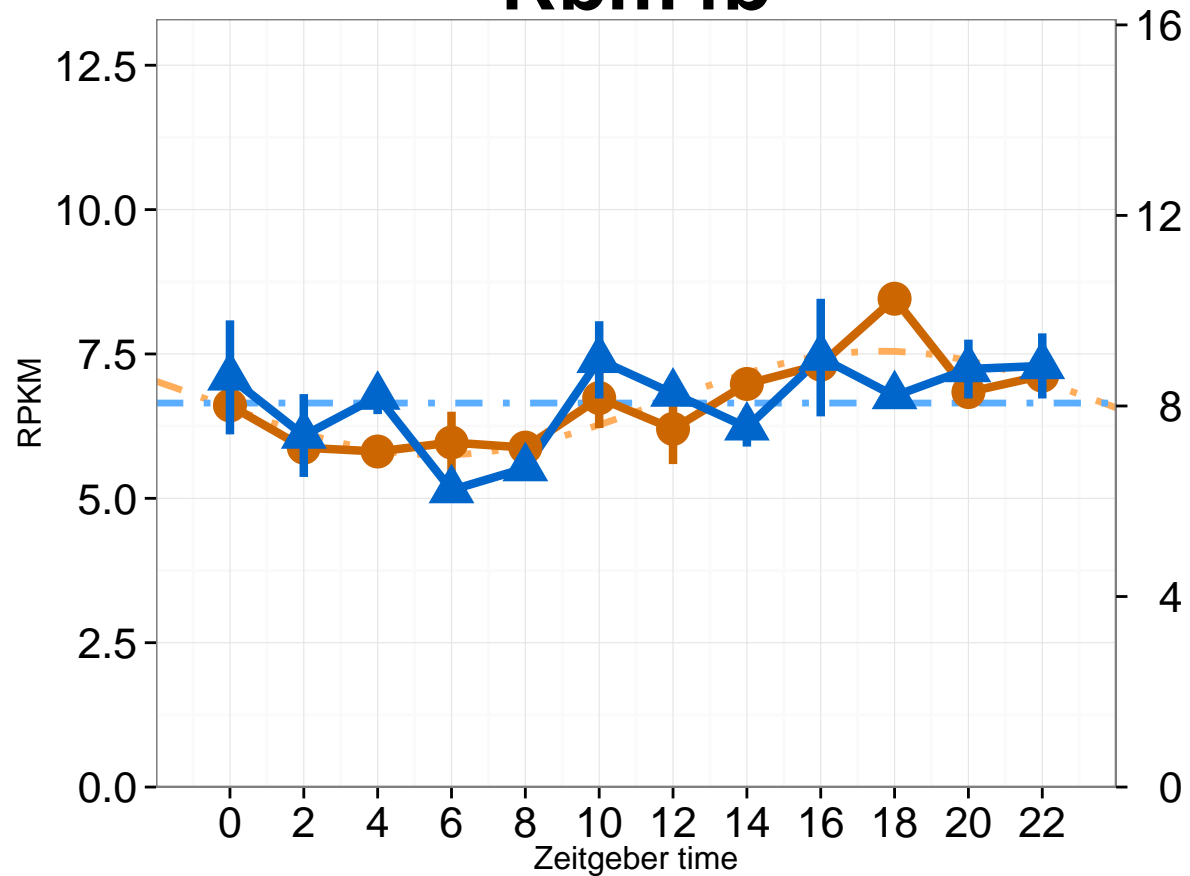

# Rbm4b

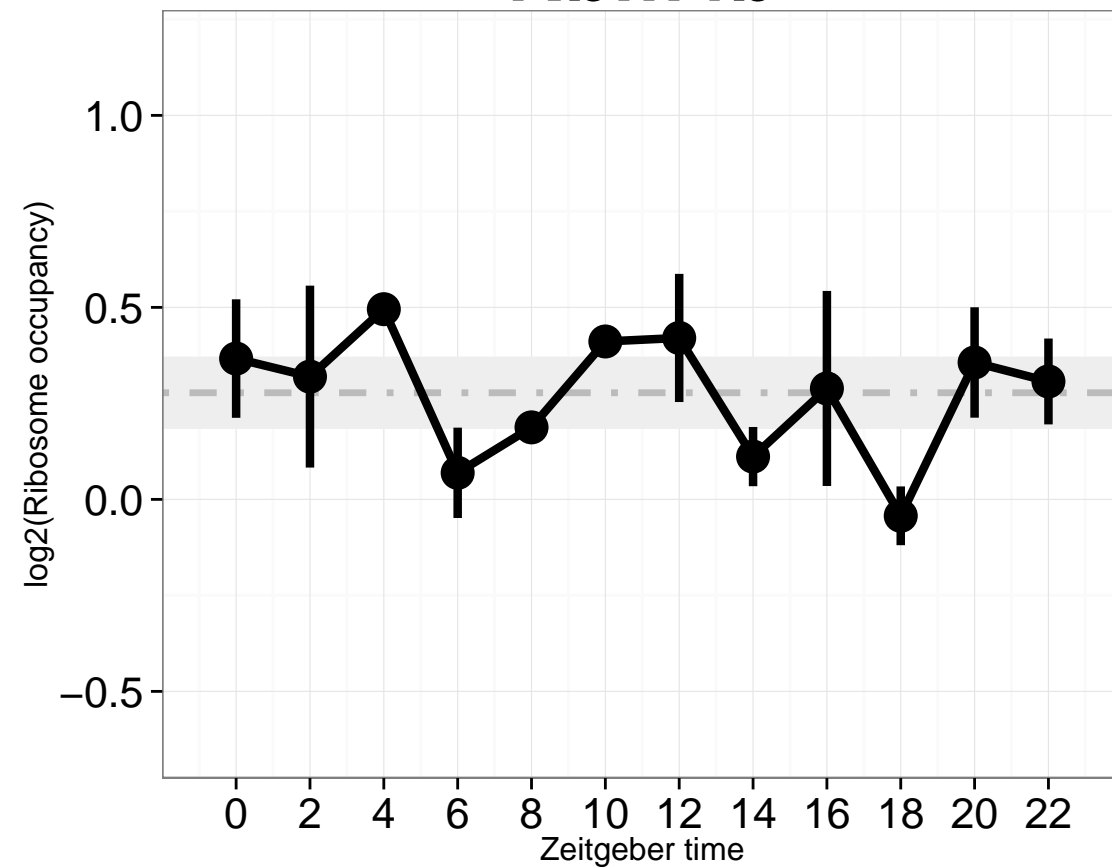

Supplement: Supplementary file 9754 [file 1]

## Mlt6

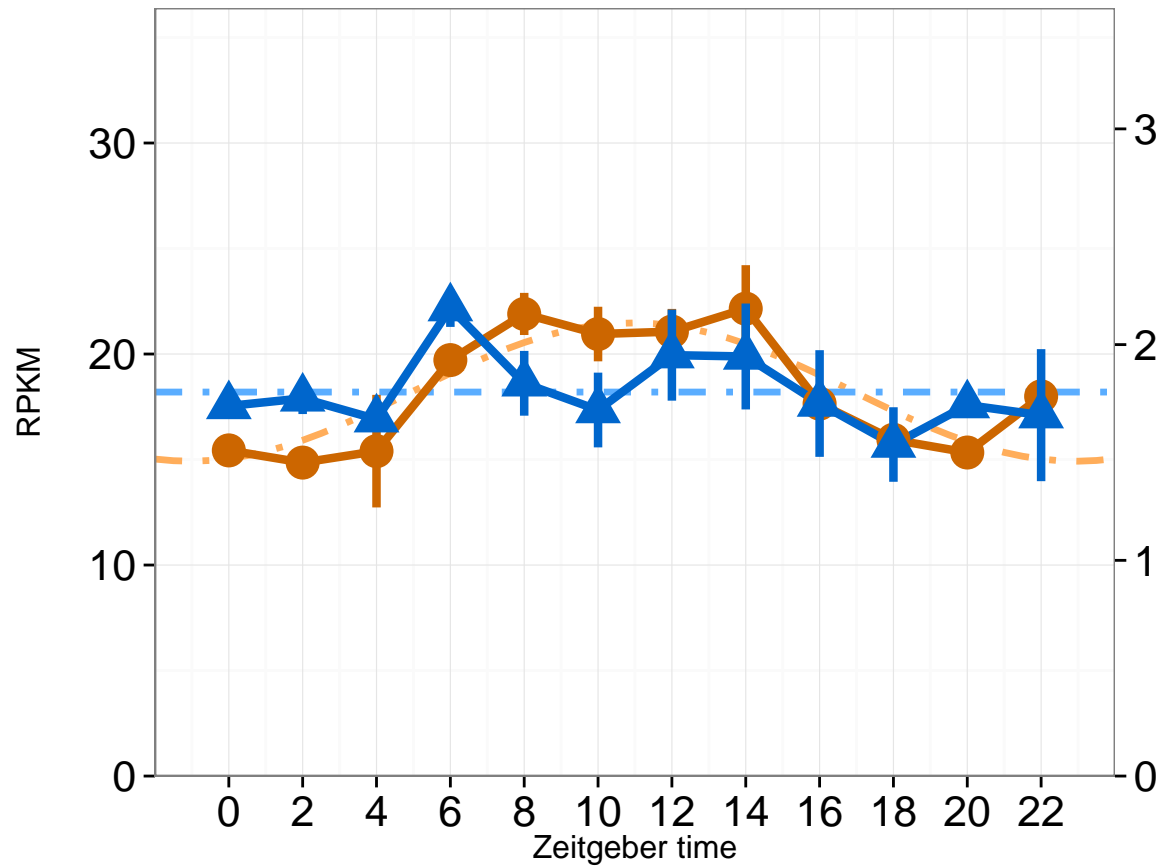

## Mlt6

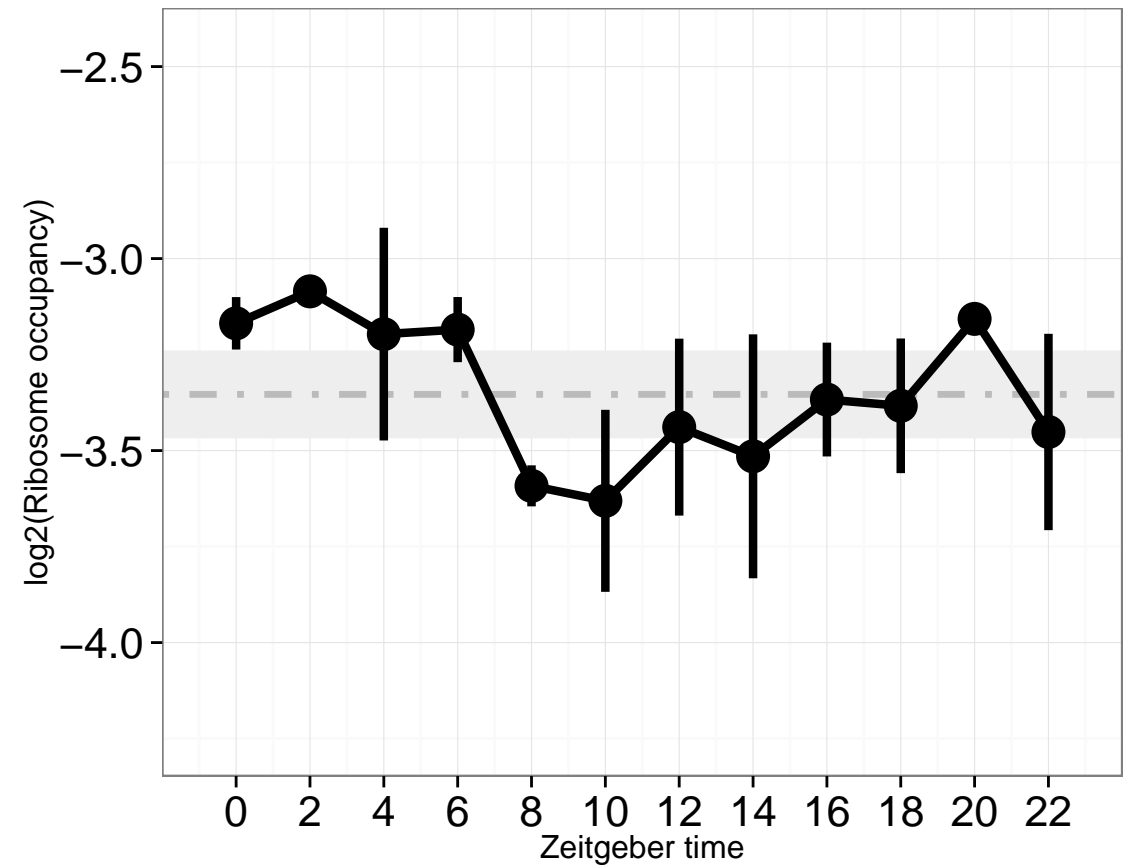

Supplement: Supplementary file 9755 [file 1]

## Ap1g2

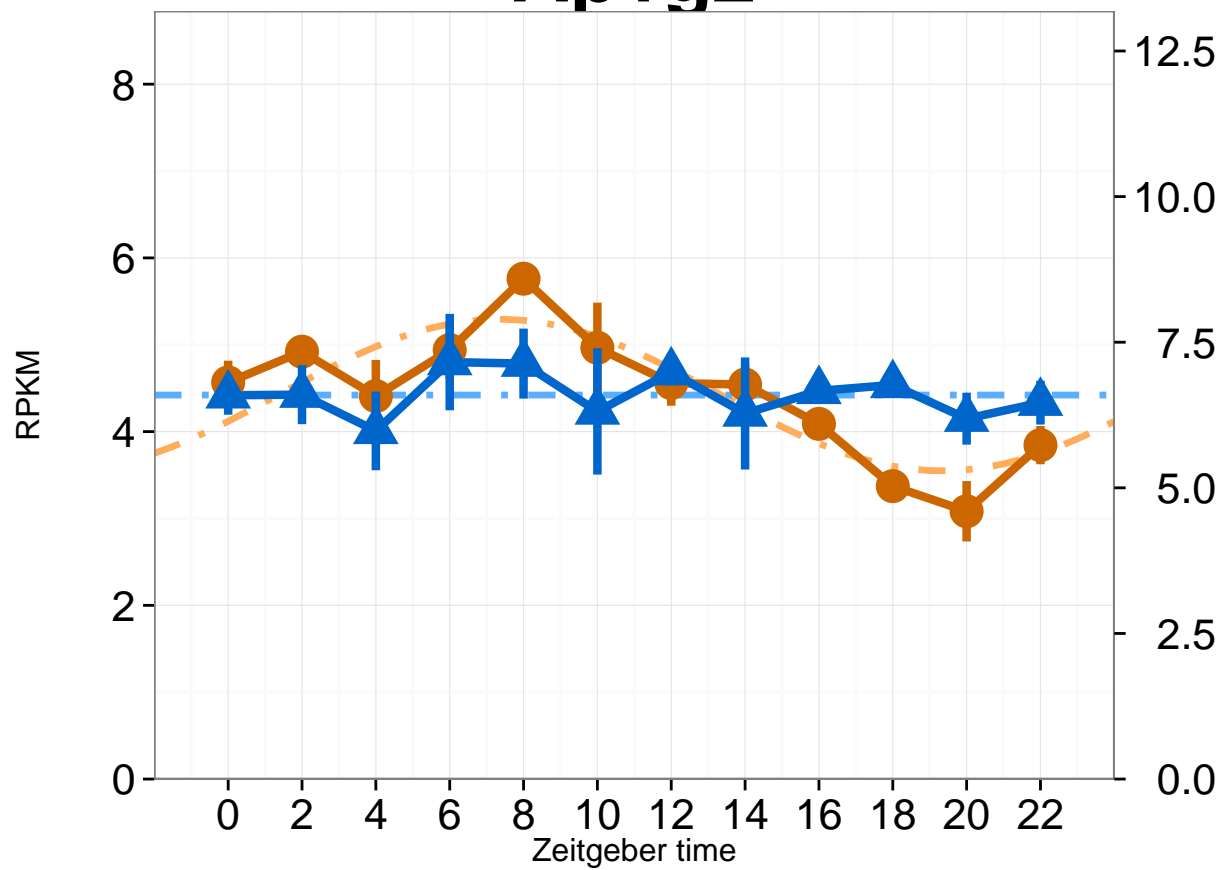

## Ap1g2

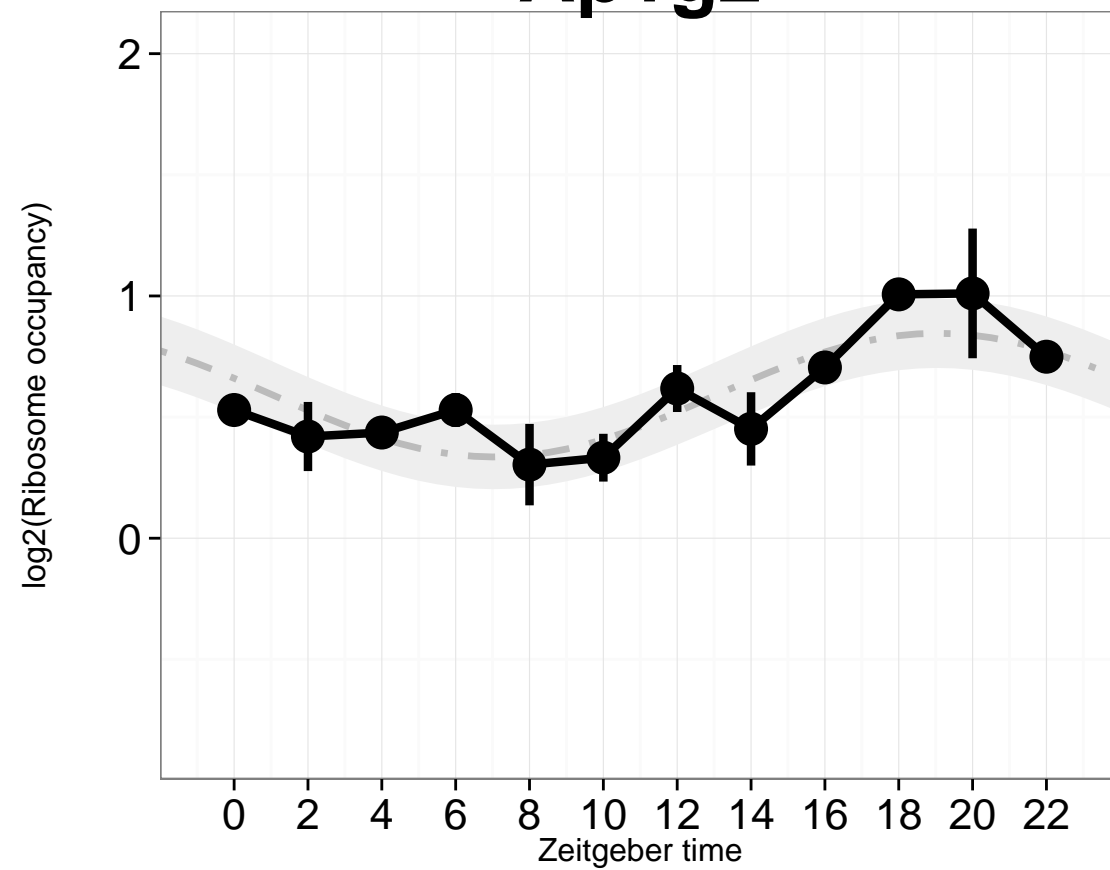

Supplement: Supplementary file 9756 [file 1]

# Ptpdc1

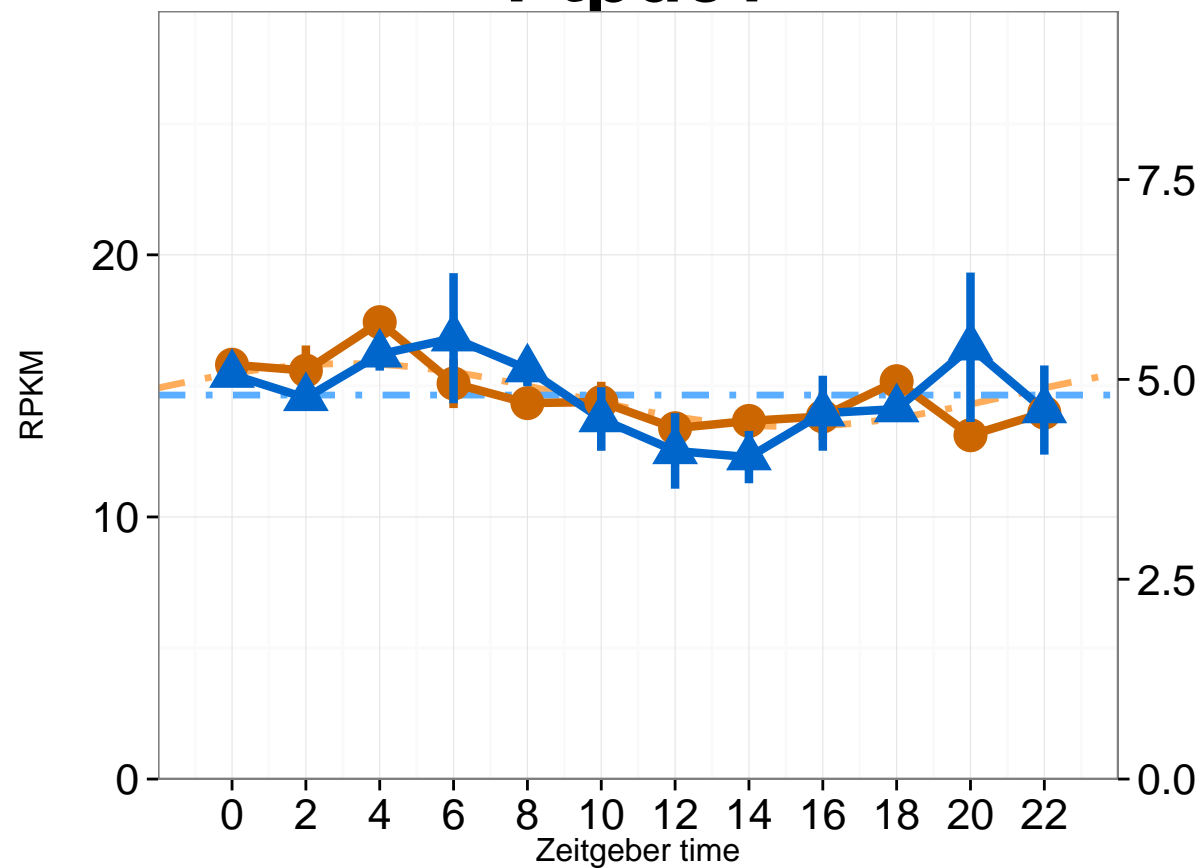

# Ptpdc1

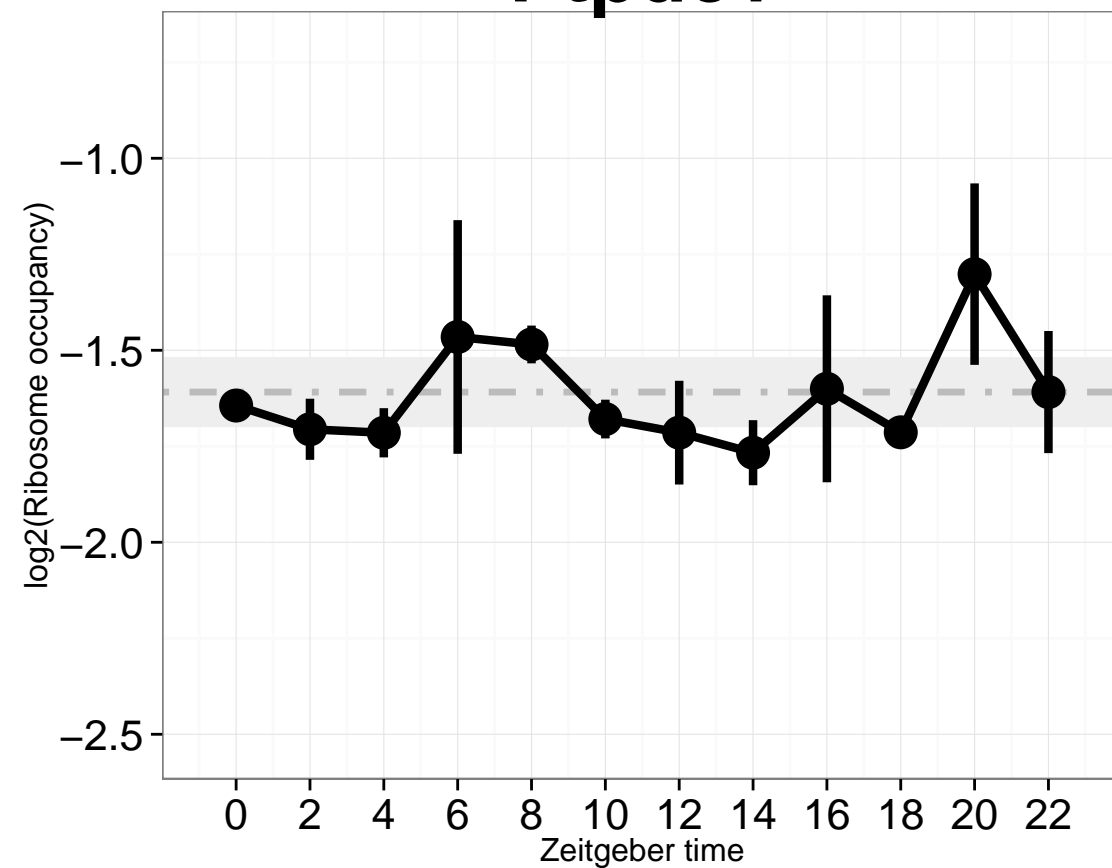

Supplement: Supplementary file 9757 [file 1]

## 5730559C18Rik

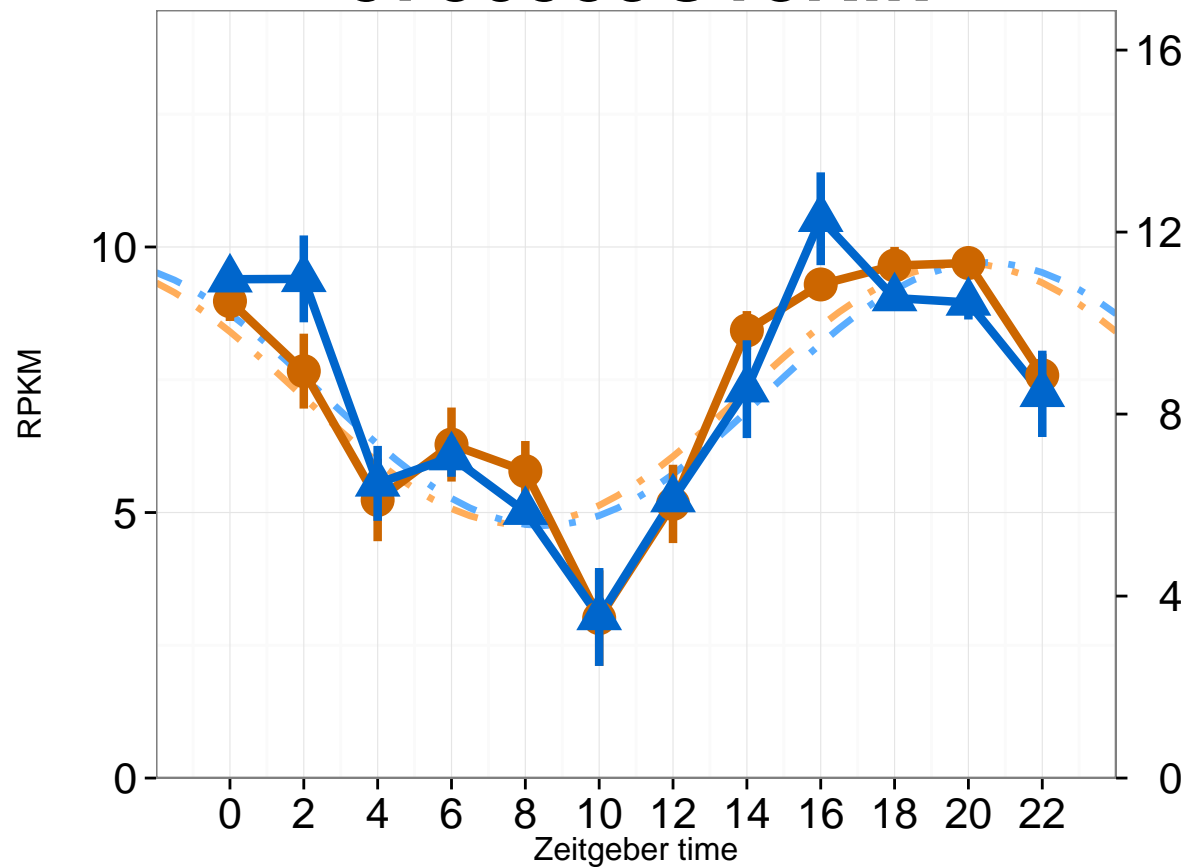

## 5730559C18Rik

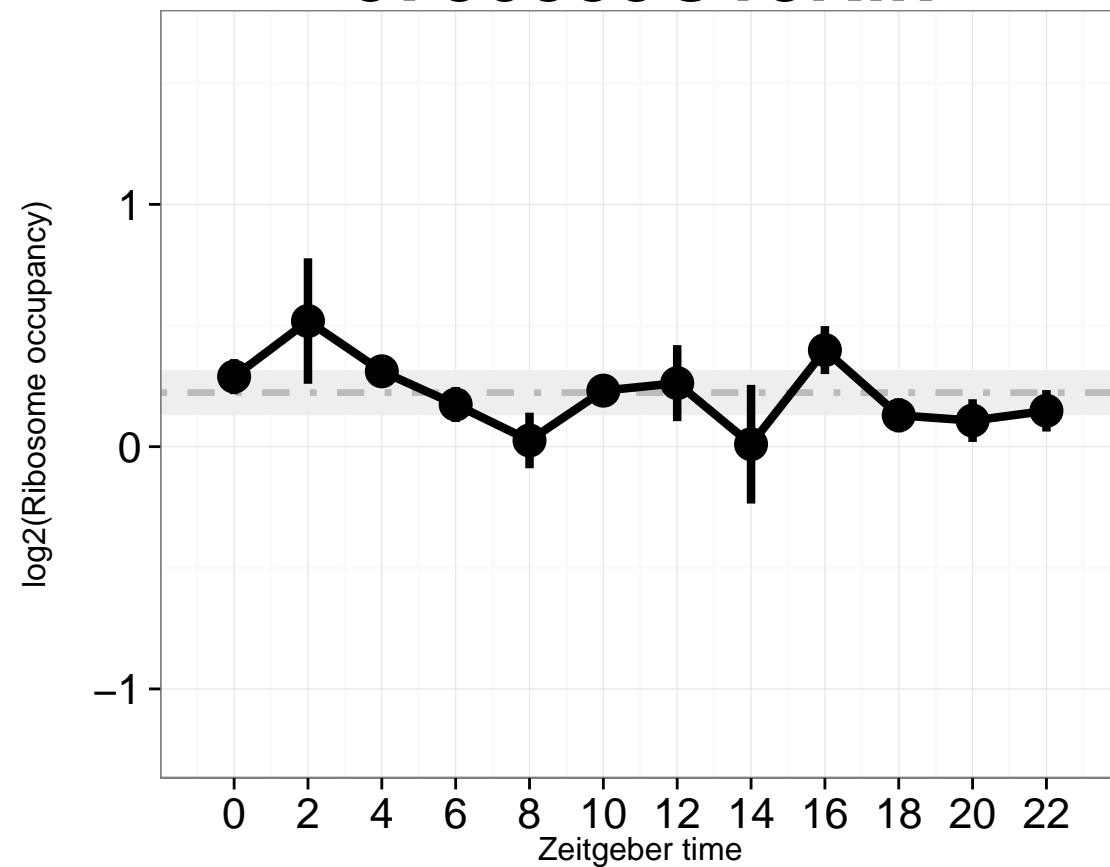

Supplement: Supplementary file 9758 [file 1]

## Frem2

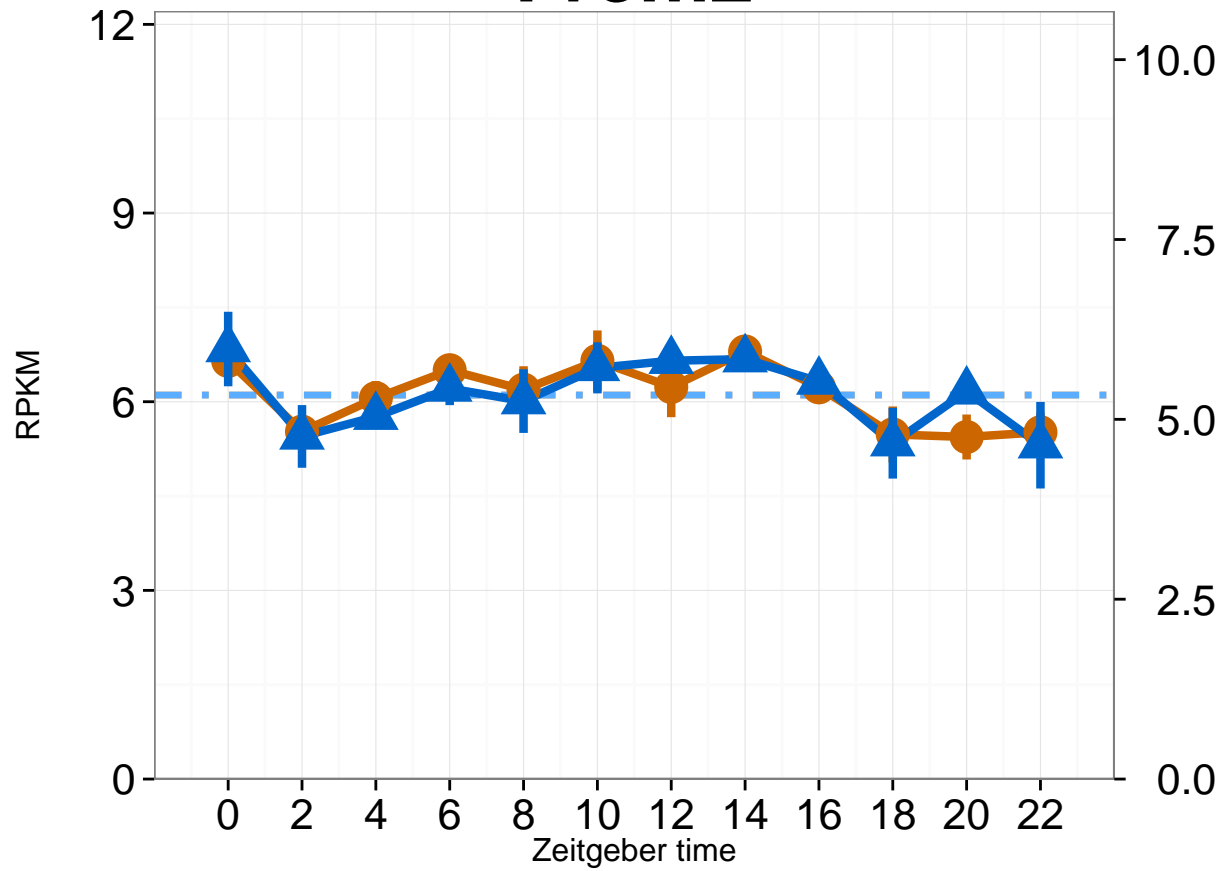

## Frem2

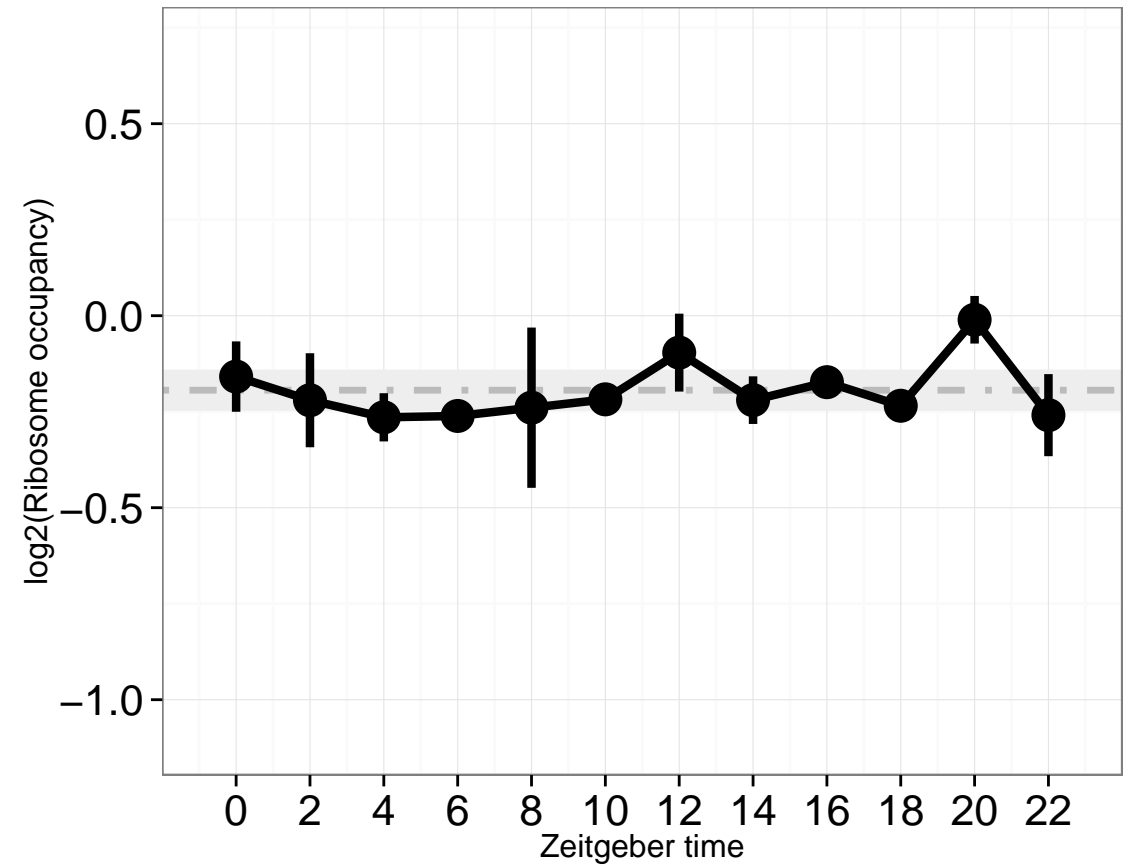

Supplement: Supplementary file 9759 [file 1]

## Creld2

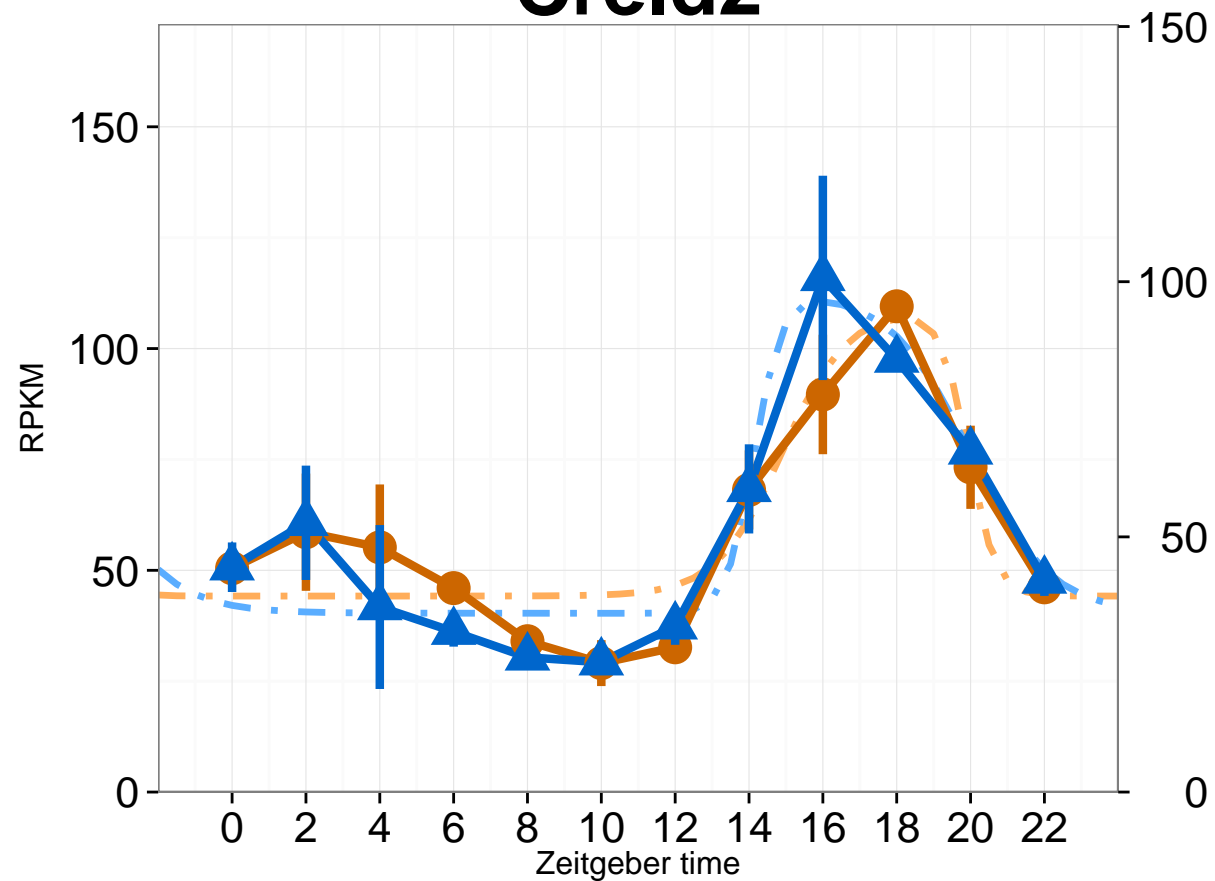

## Creld2

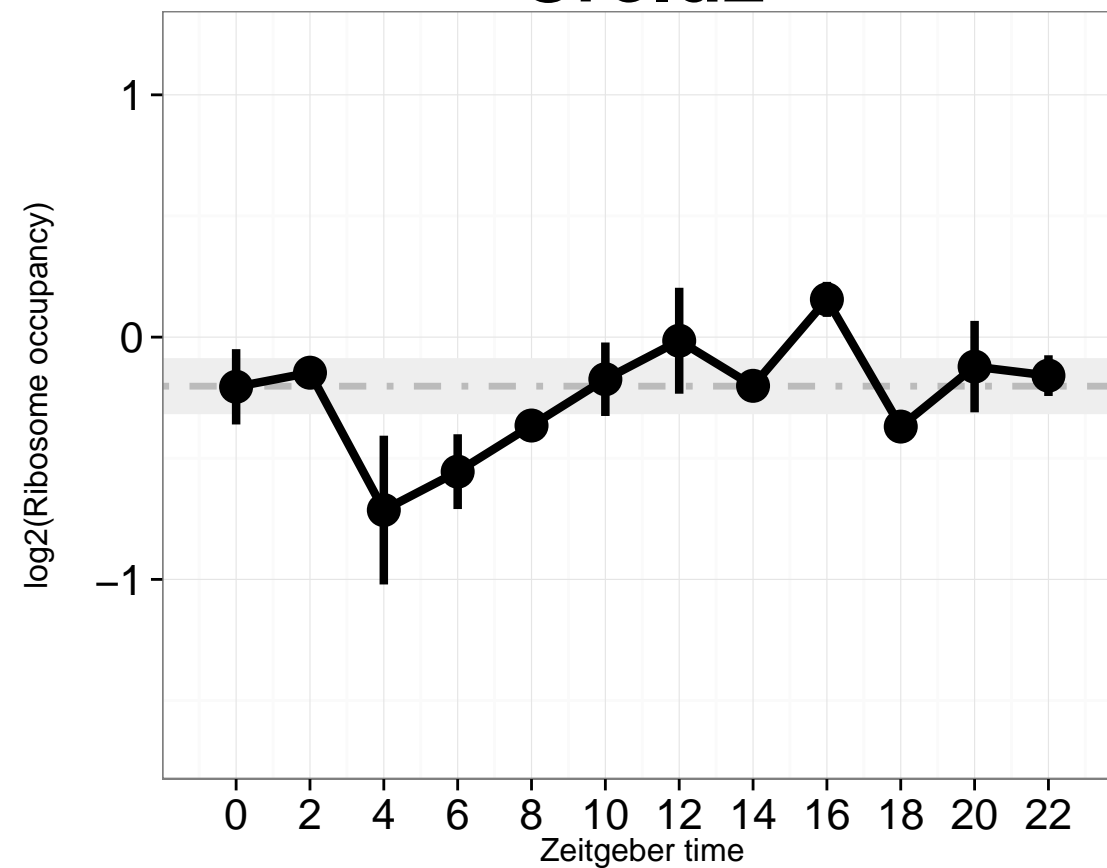

Supplement: Supplementary file 9760 [file 1]

## Mrpl11

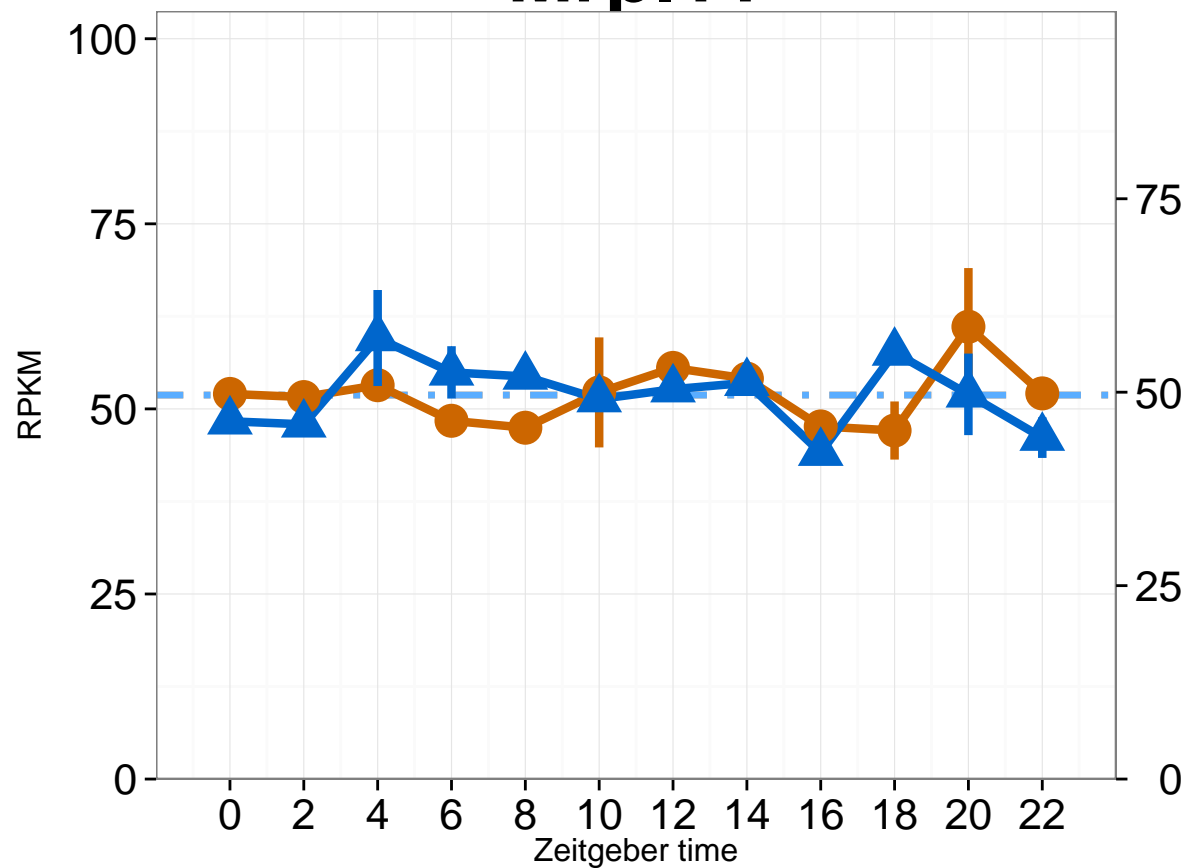

## Mrpl11

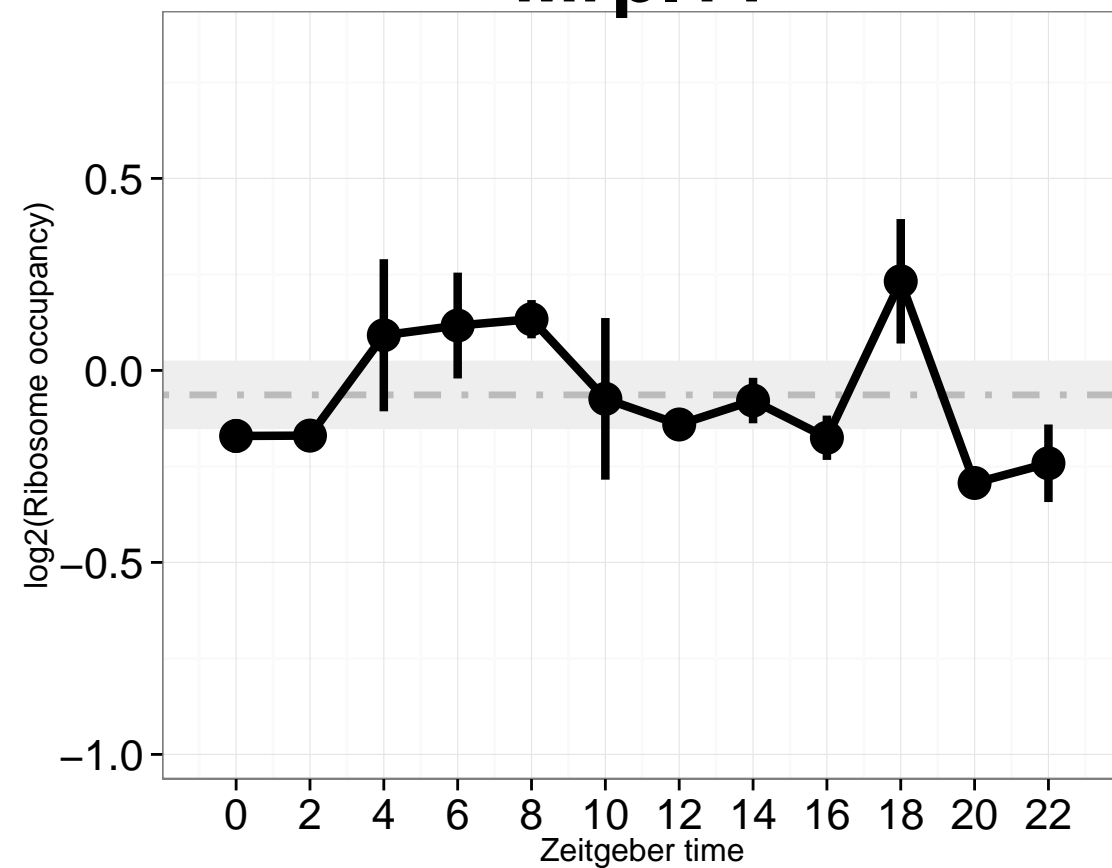

Supplement: Supplementary file 9761 [file 1]

## Mthfd2l

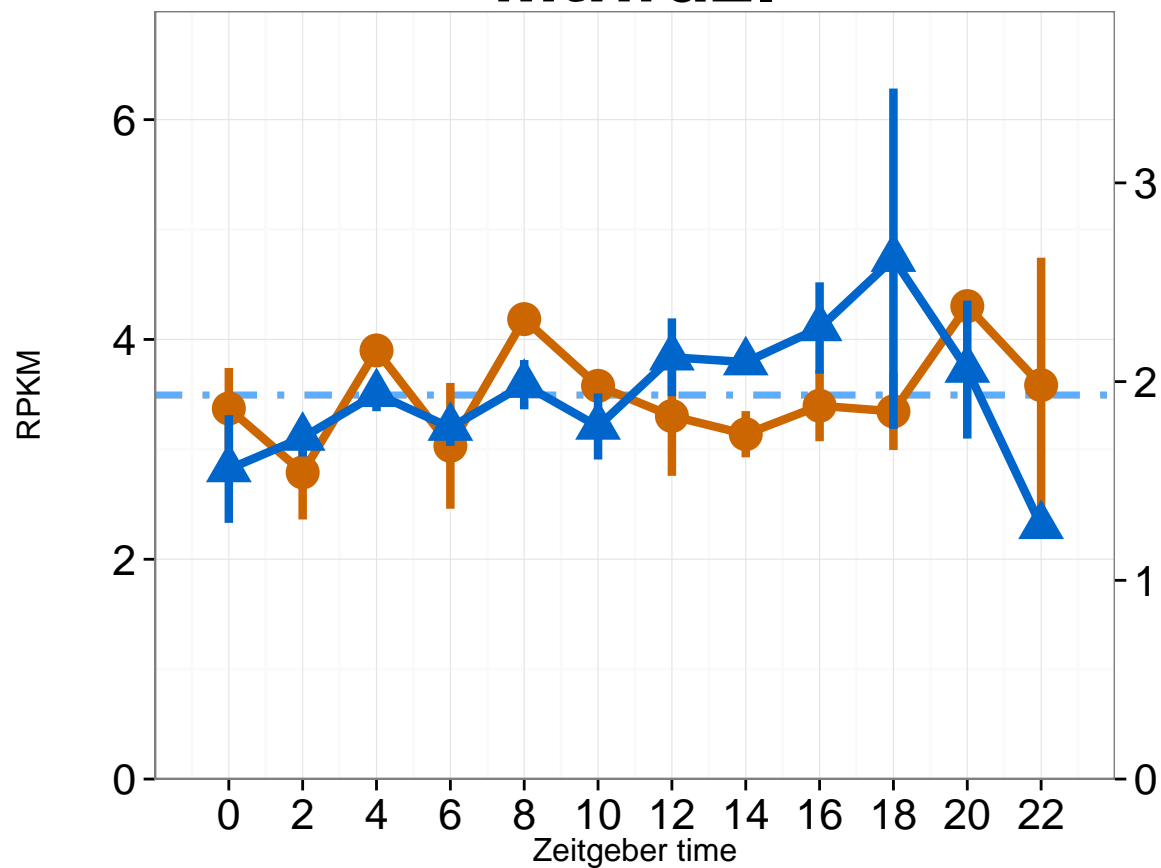

## Mthfd2l

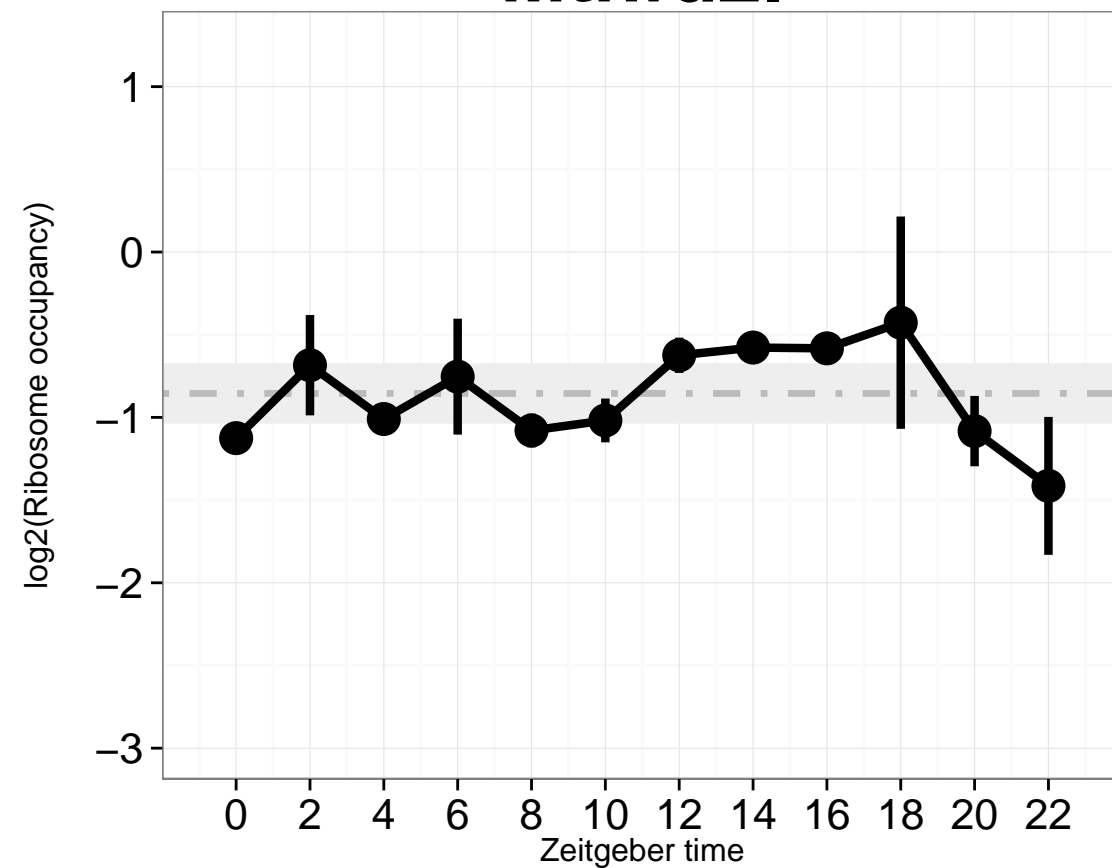

Supplement: Supplementary file 9762 [file 1]

## Bzw2

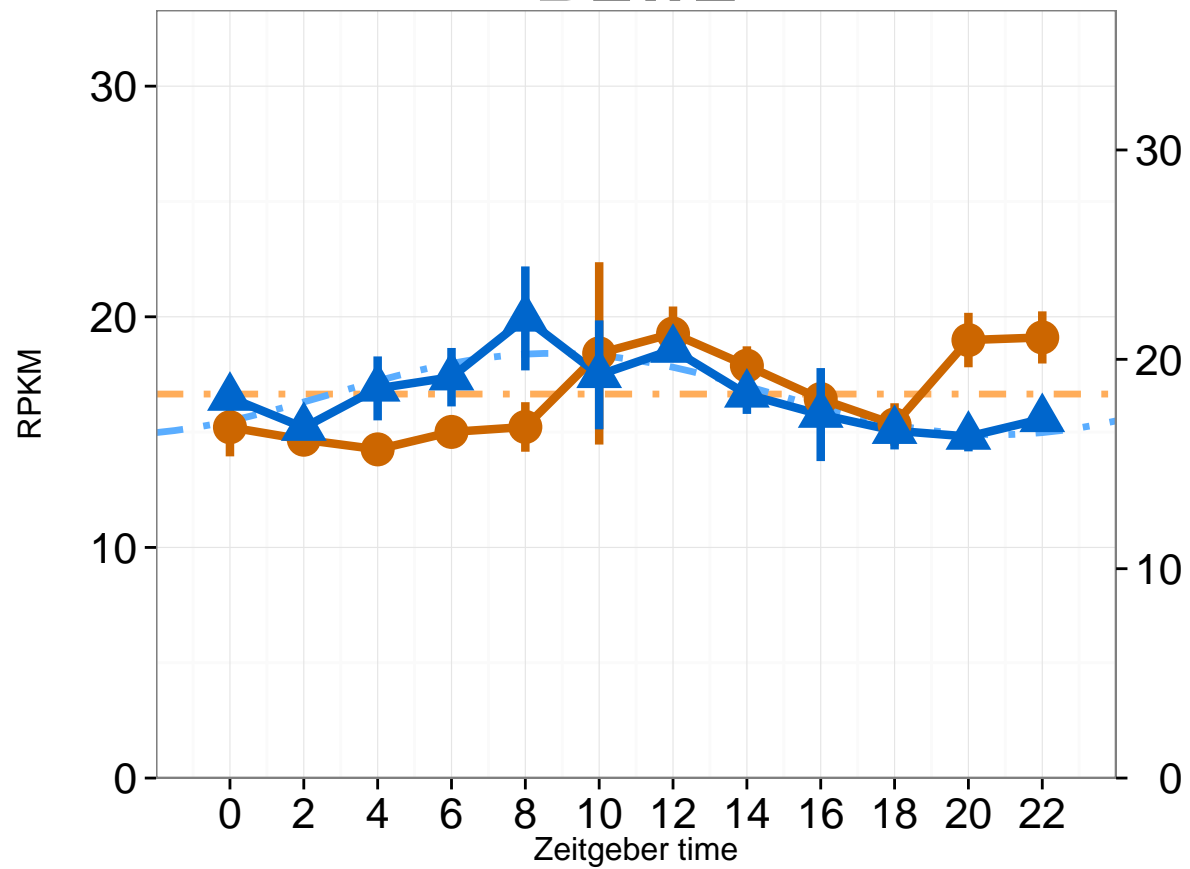

## Bzw2

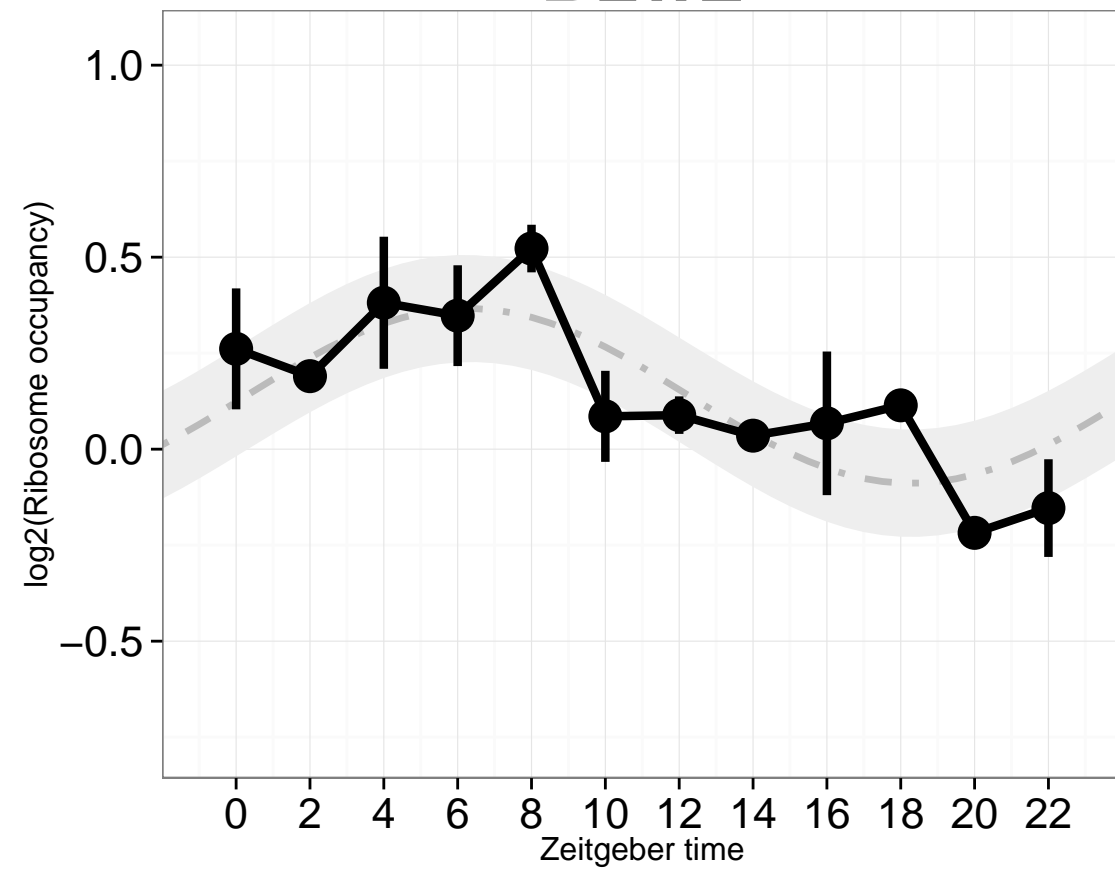

Supplement: Supplementary file 9763 [file 1]

# Tmem120a

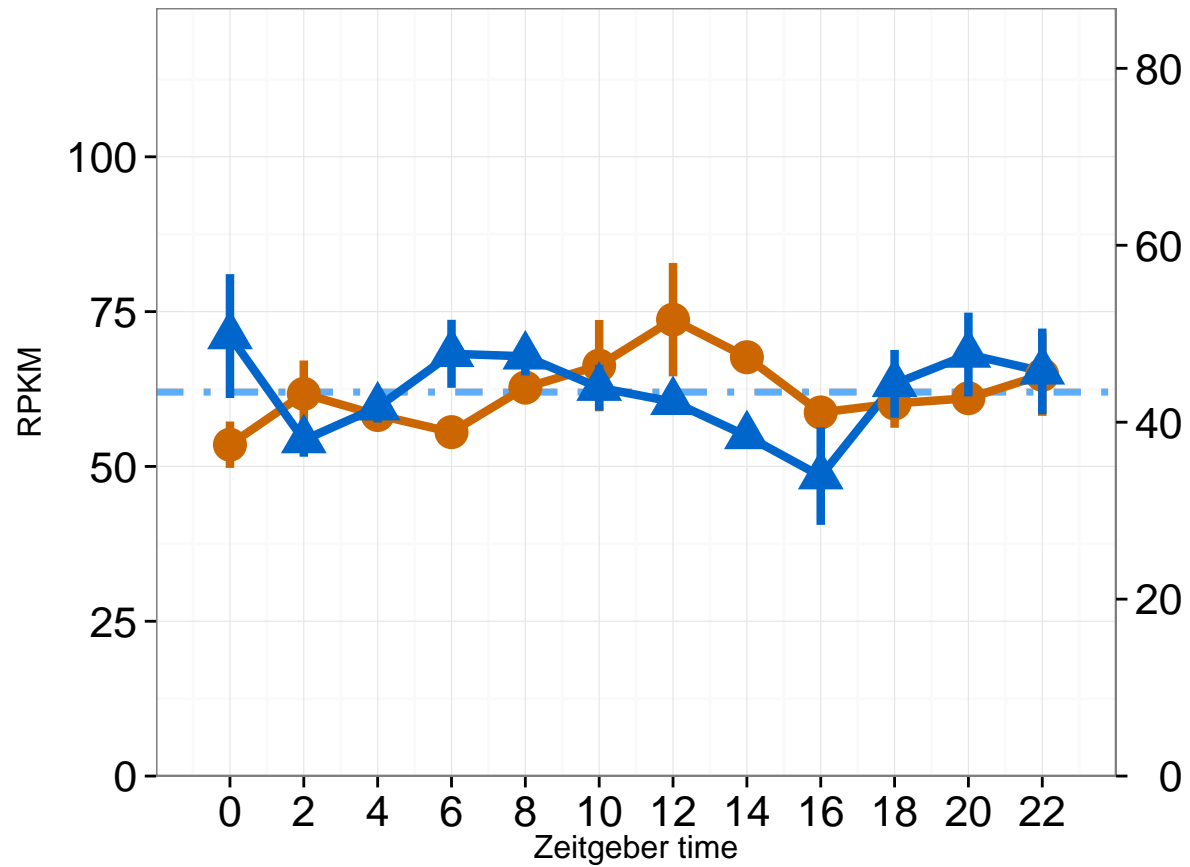

# Tmem120a

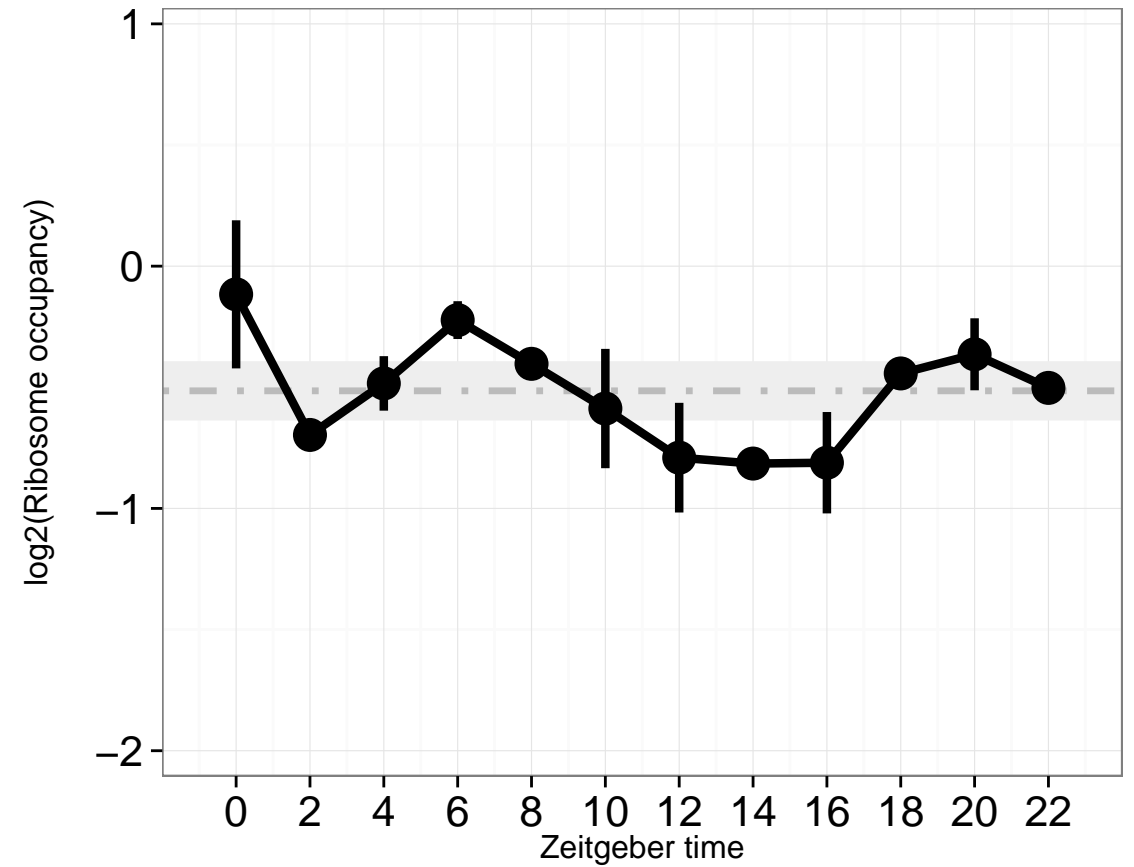

Supplement: Supplementary file 9764 [file 1]

# Srp54b

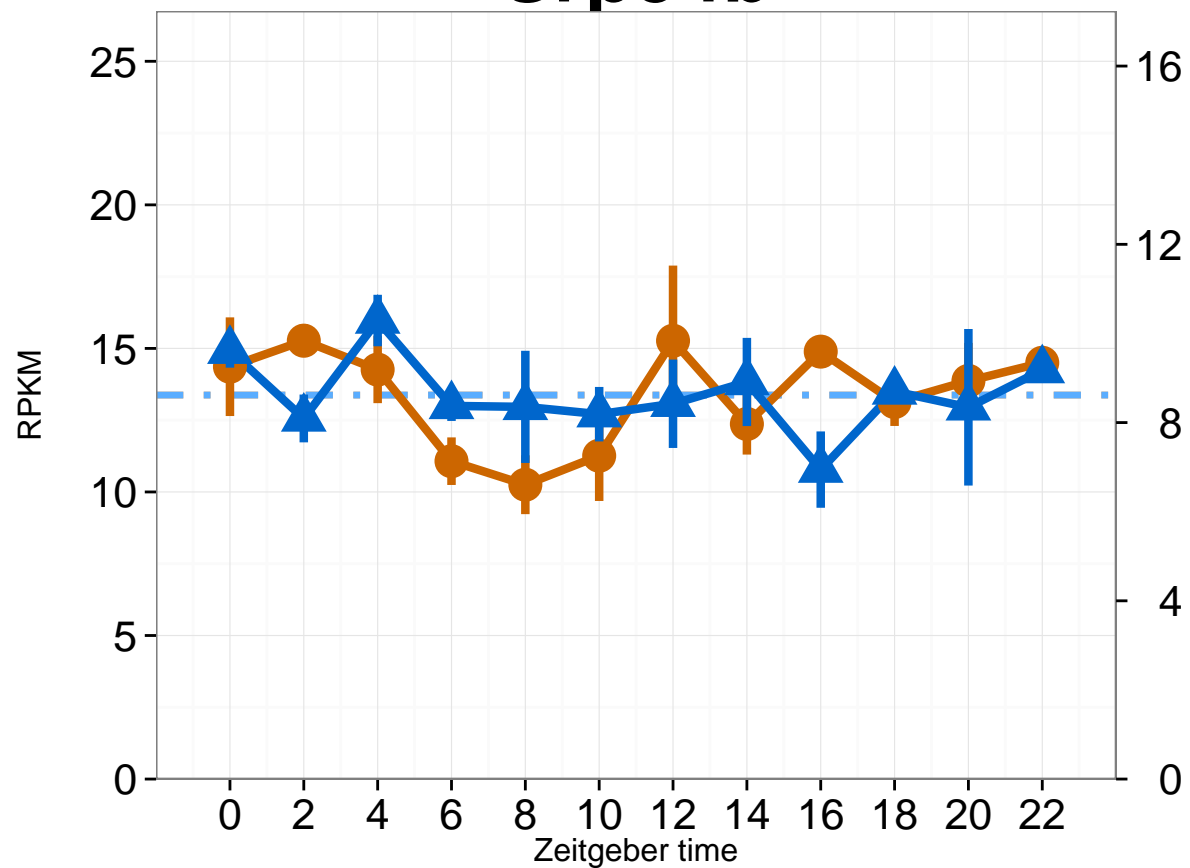

# Srp54b

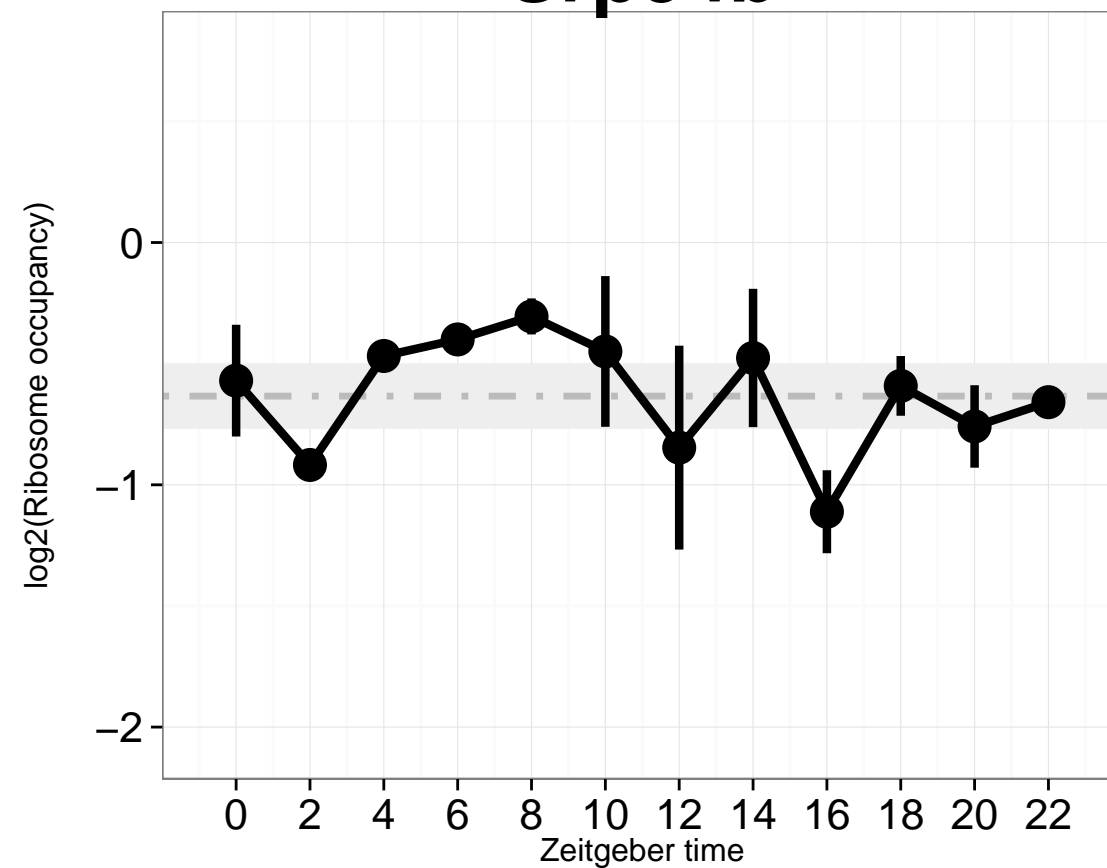

Supplement: Supplementary file 9765 [file 1]

## Lpgat1

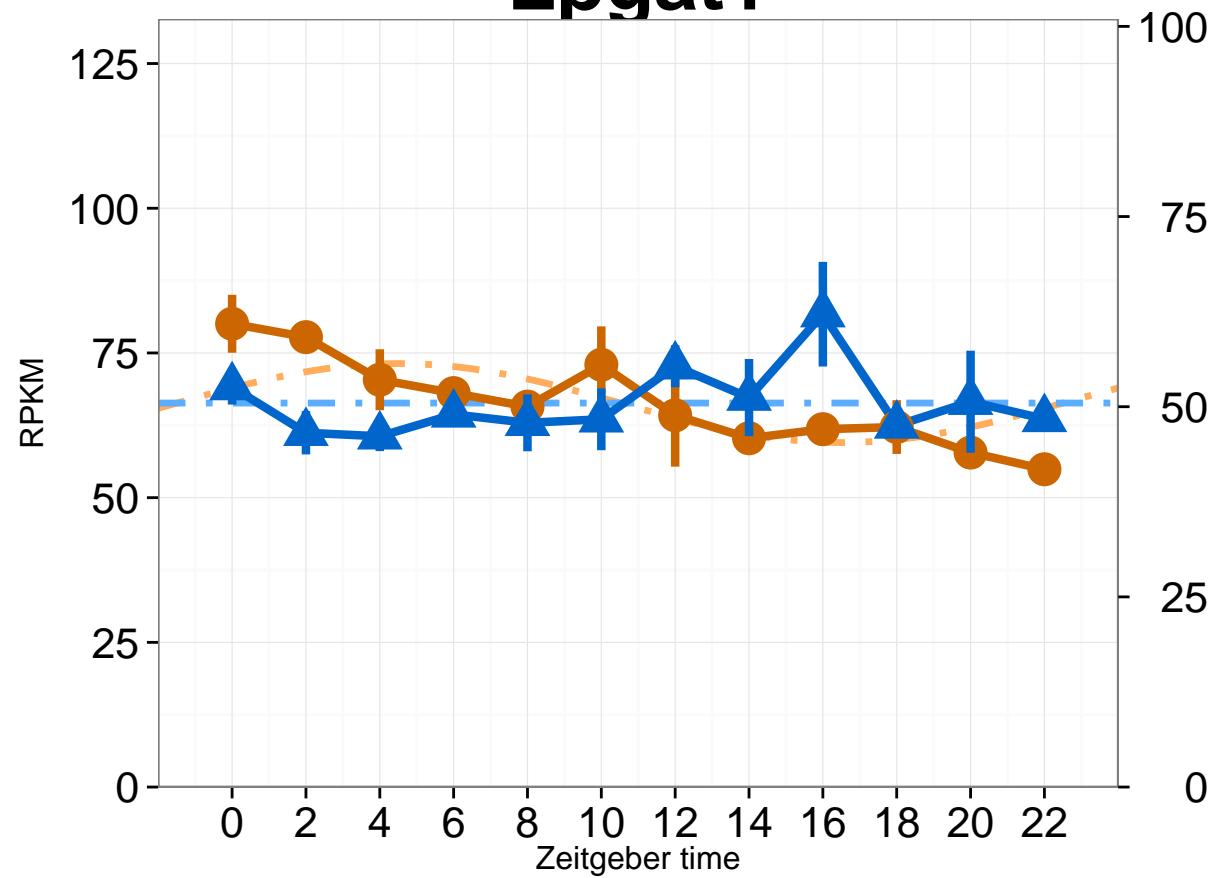

## Lpgat1

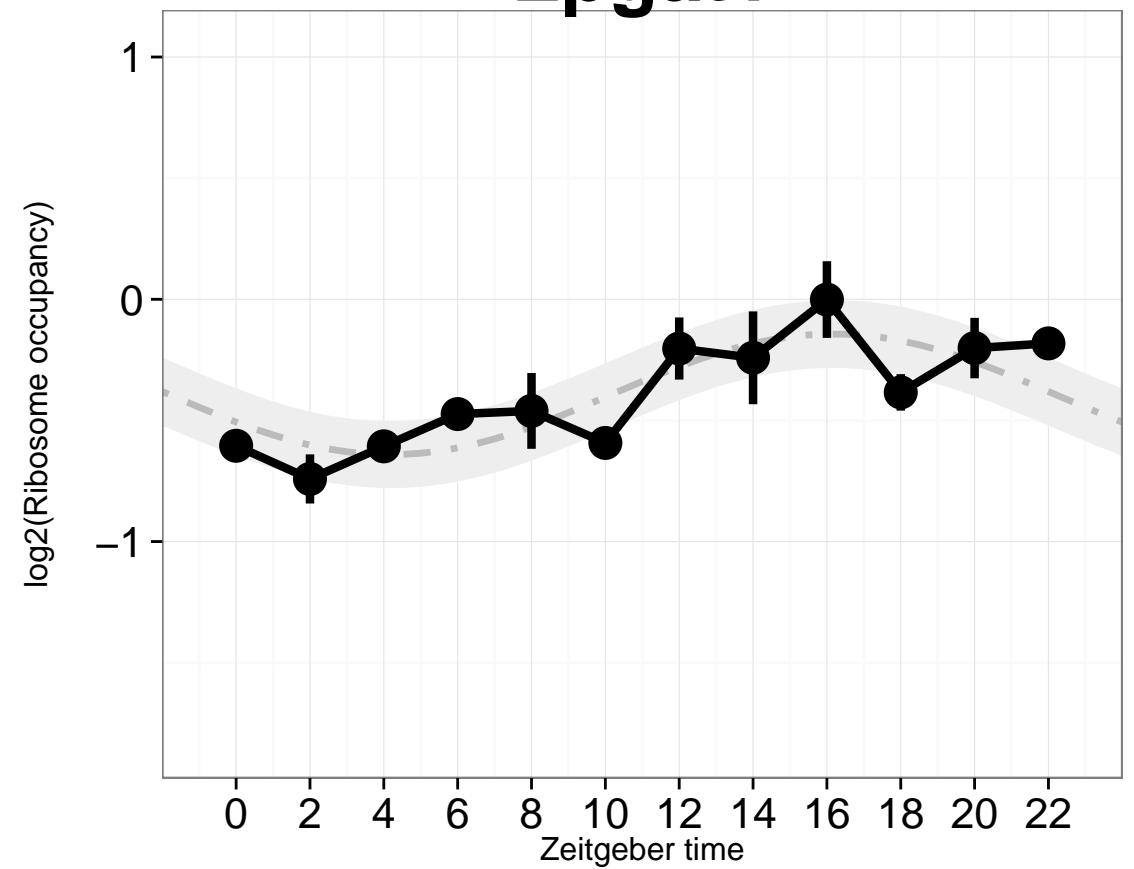

Supplement: Supplementary file 9766 [file 1]

# Mob1b

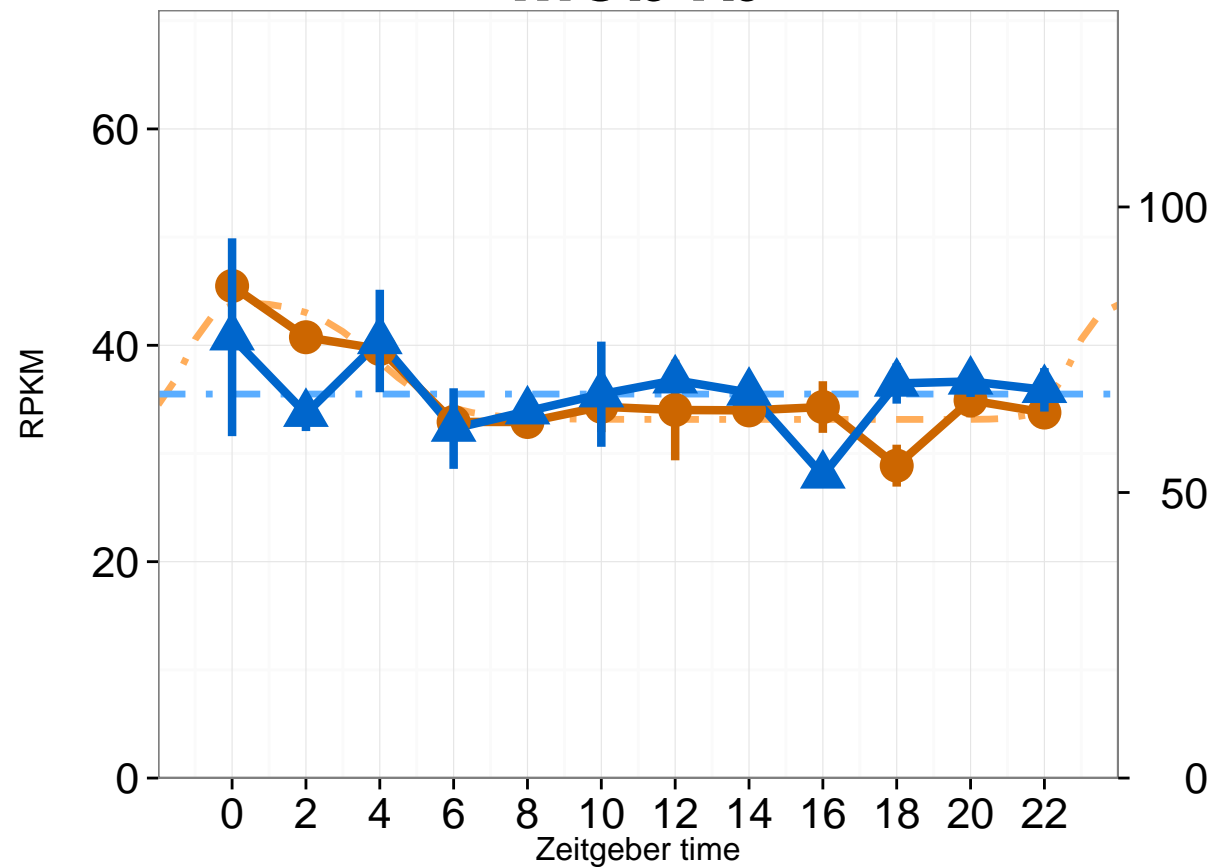

# Mob1b

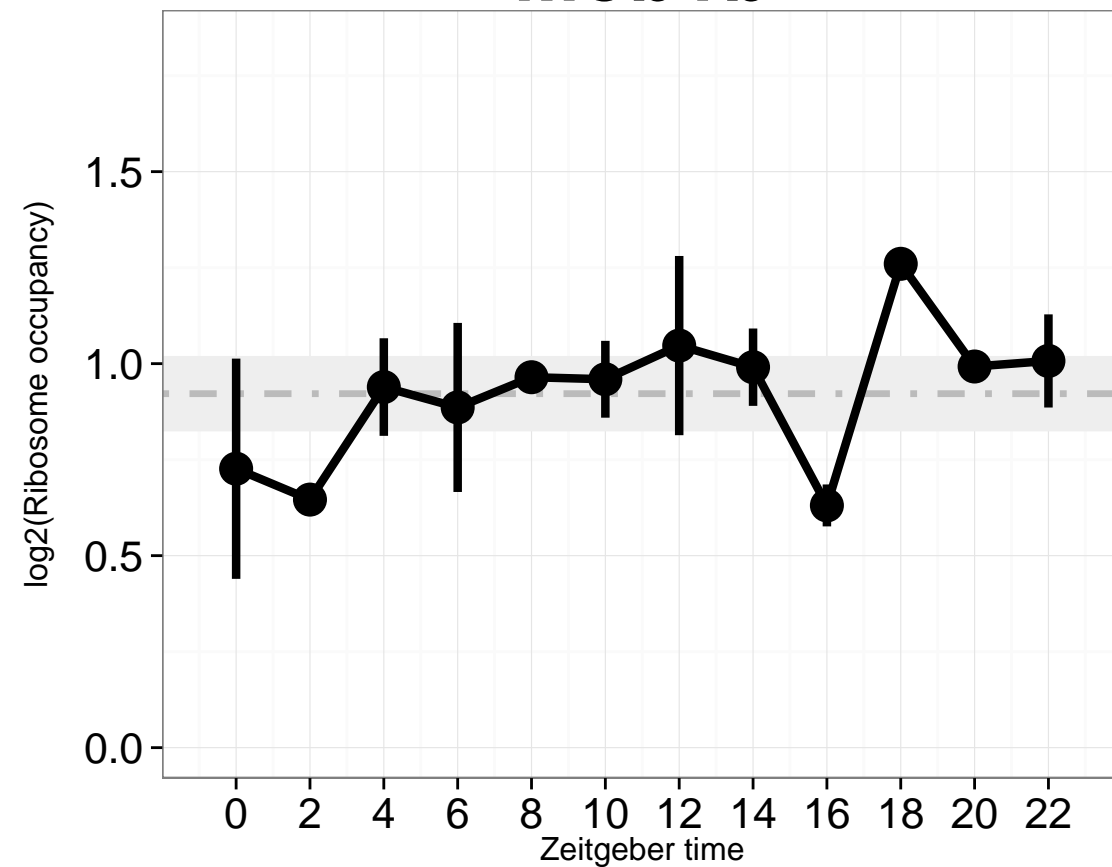

Supplement: Supplementary file 9767 [file 1]

## Tet3

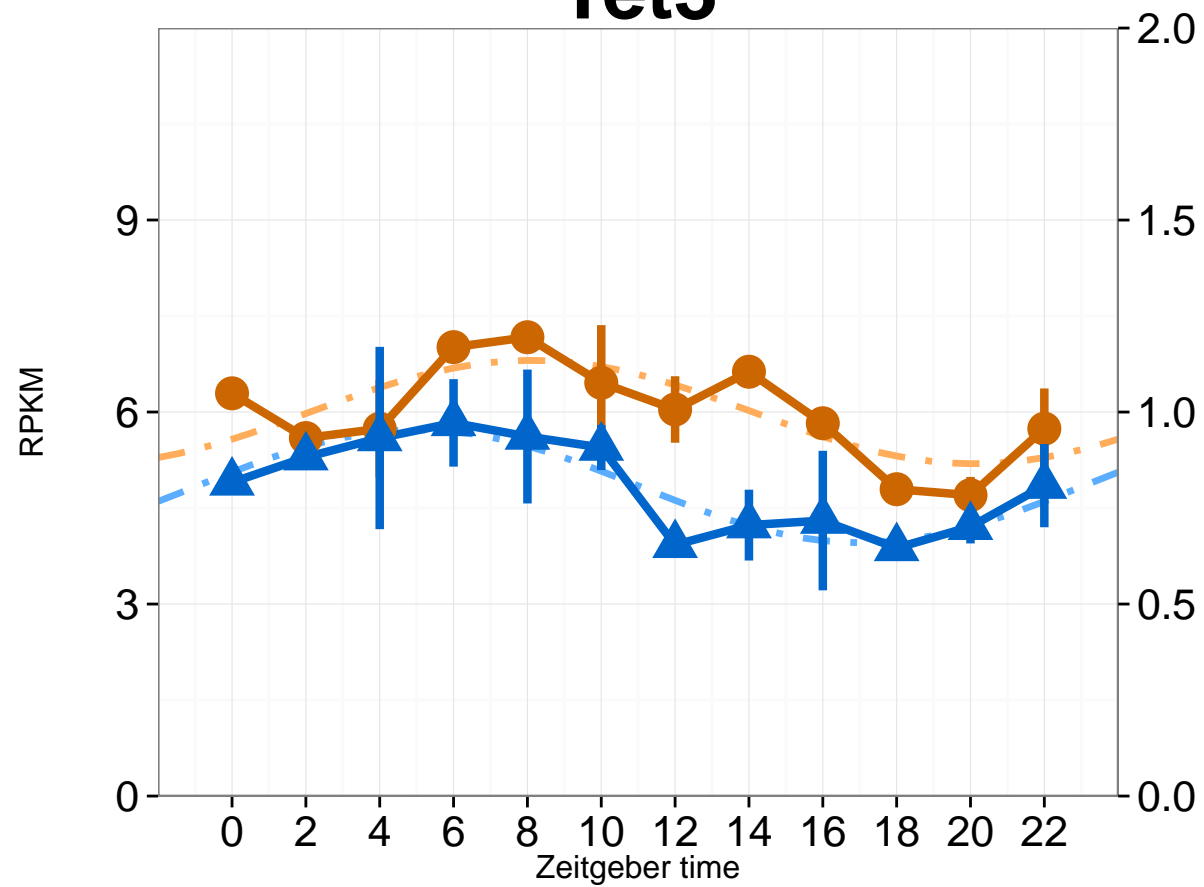

## Tet3

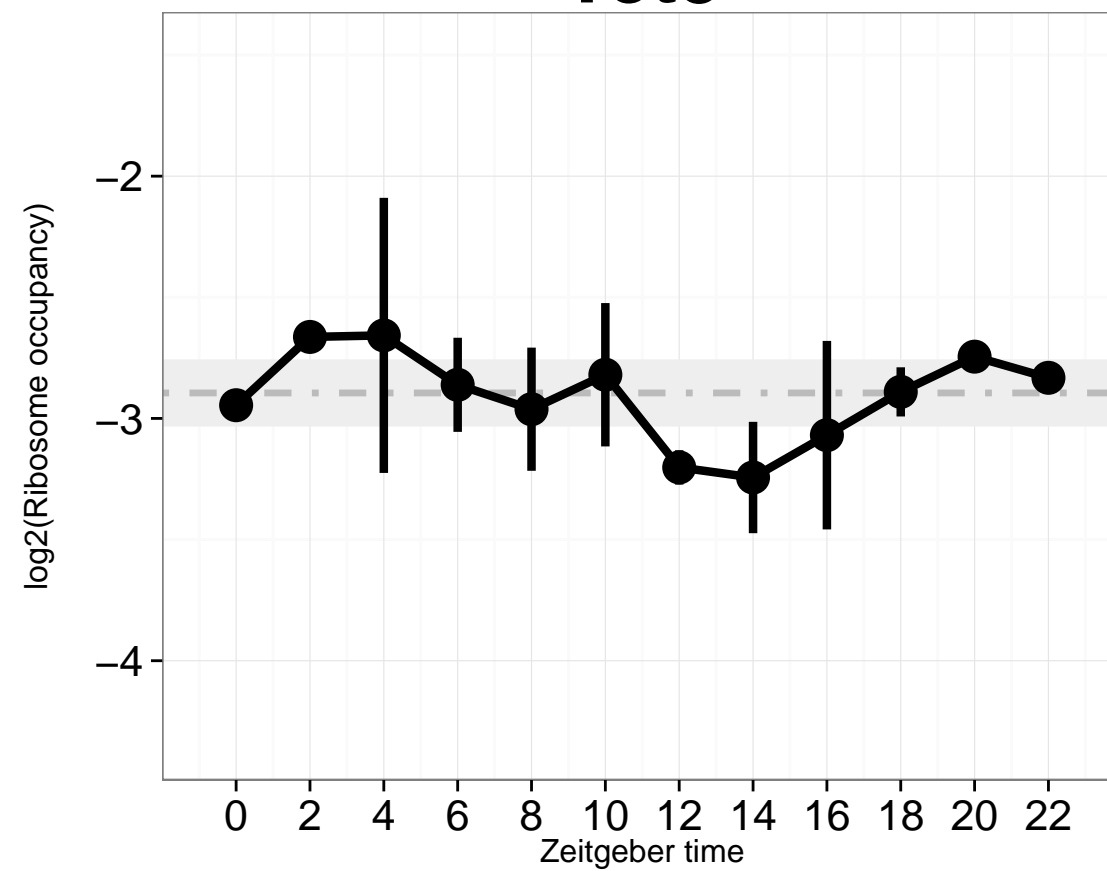

Supplement: Supplementary file 9768 [file 1]

# Nat10

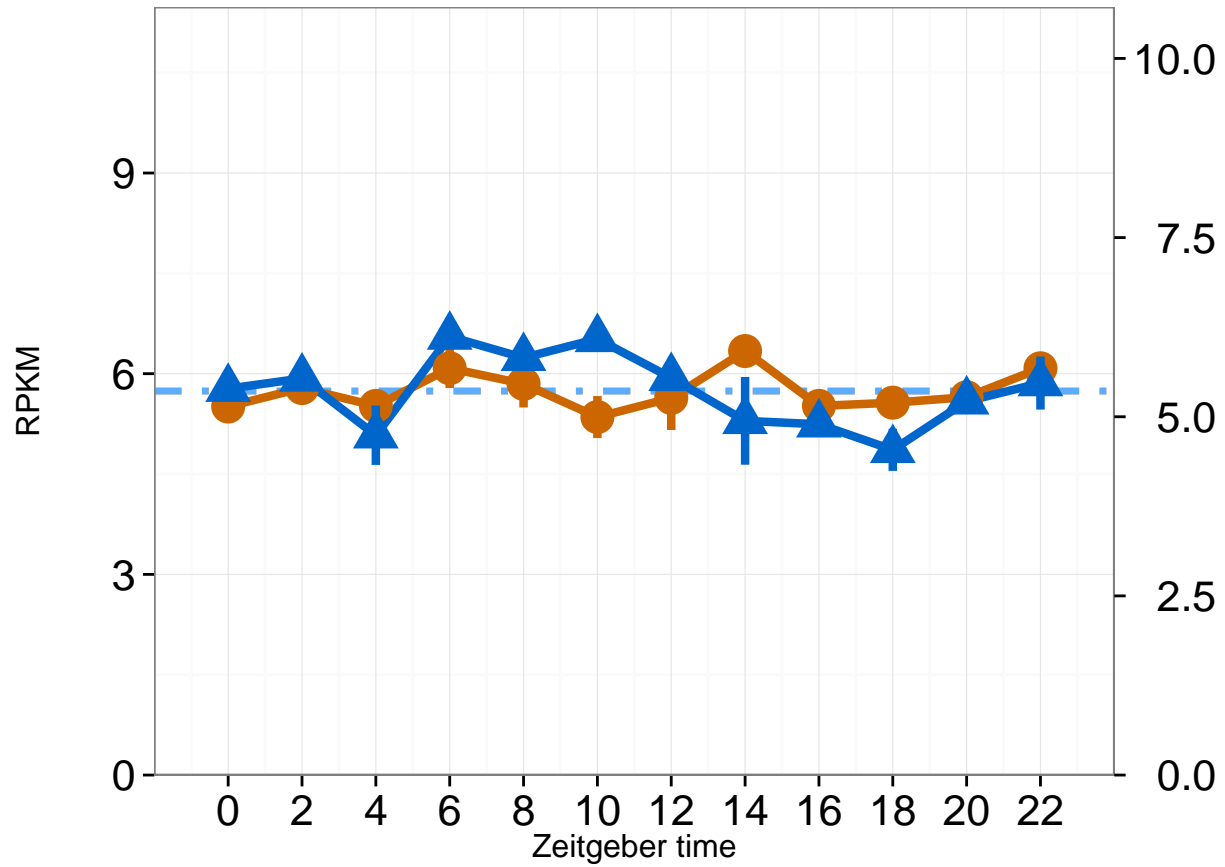

# Nat10

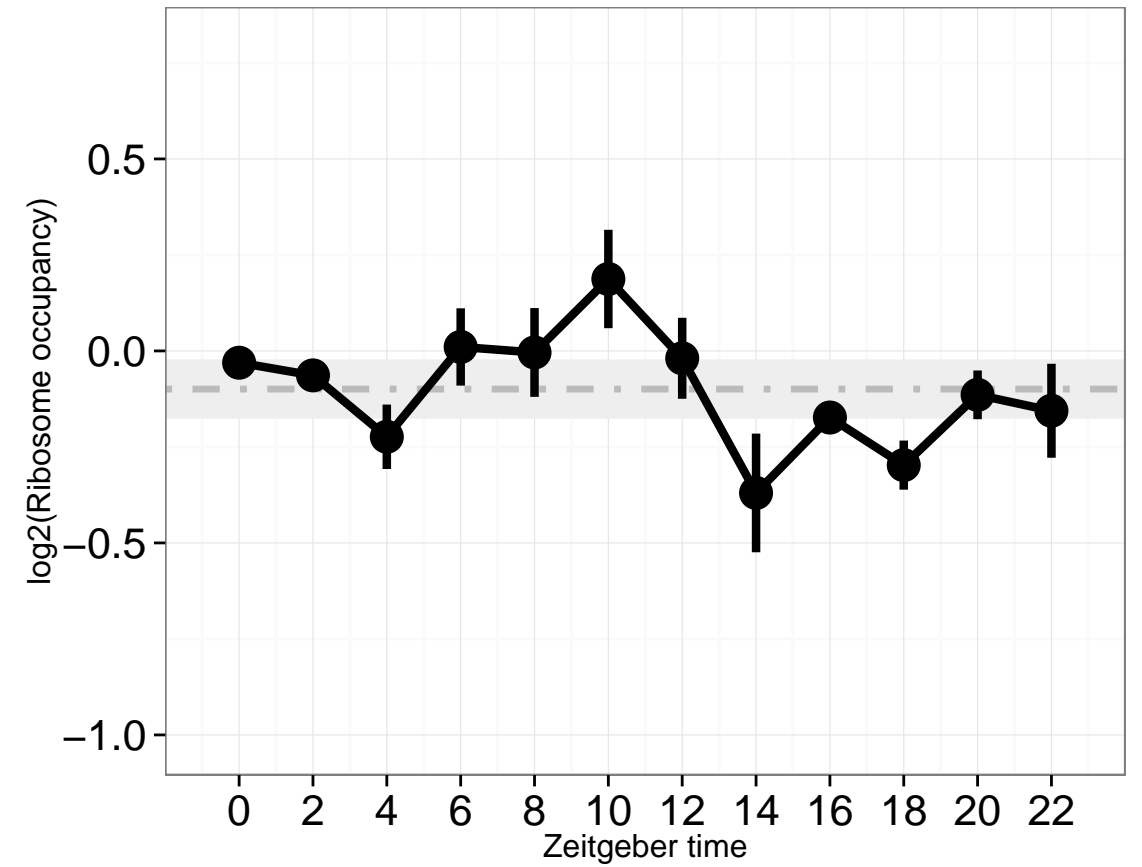

Supplement: Supplementary file 9769 [file 1]

# Anks4b

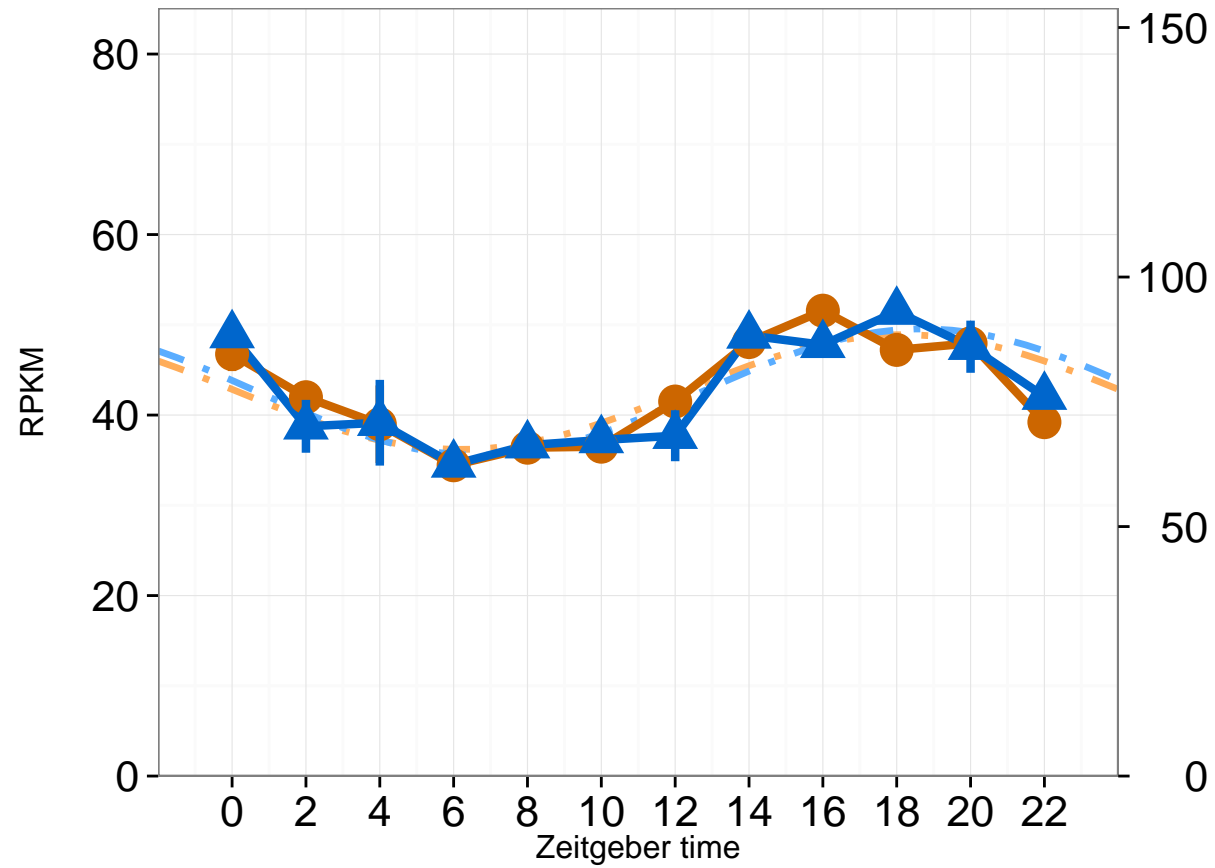

# Anks4b

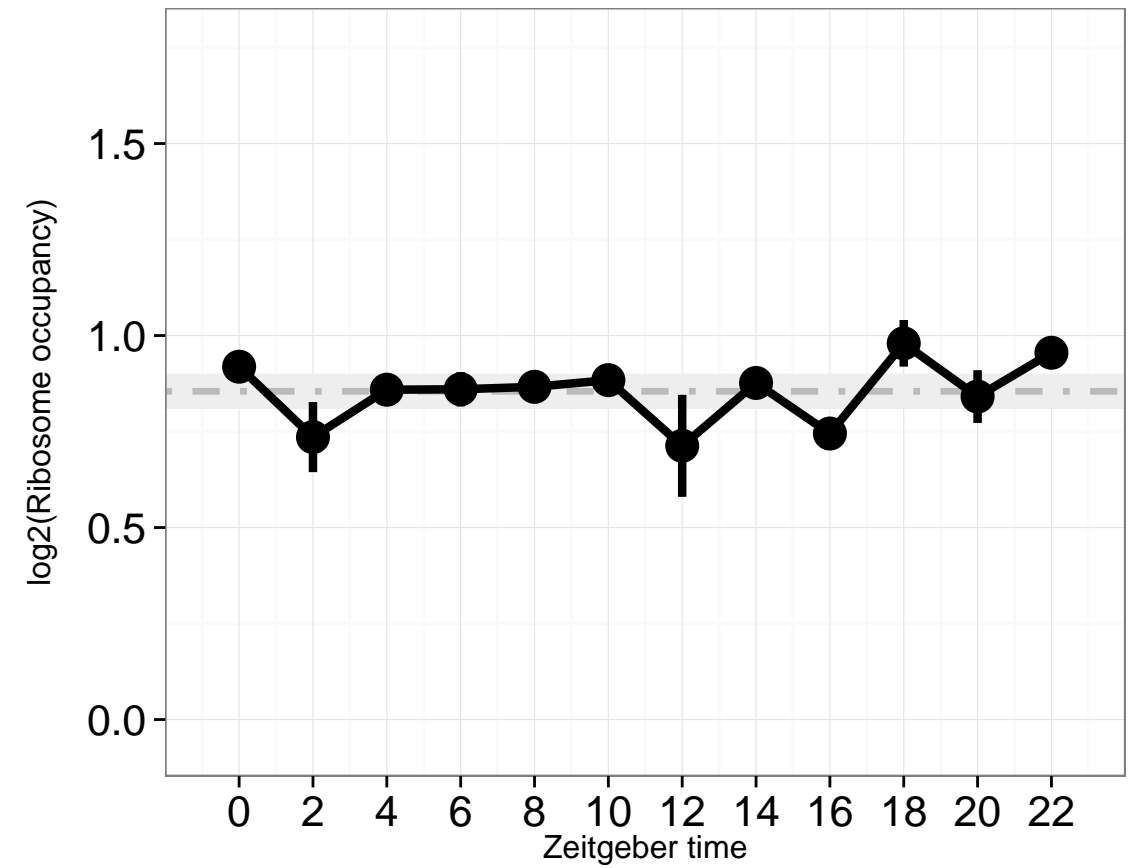

Supplement: Supplementary file 9770 [file 1]

## Csk

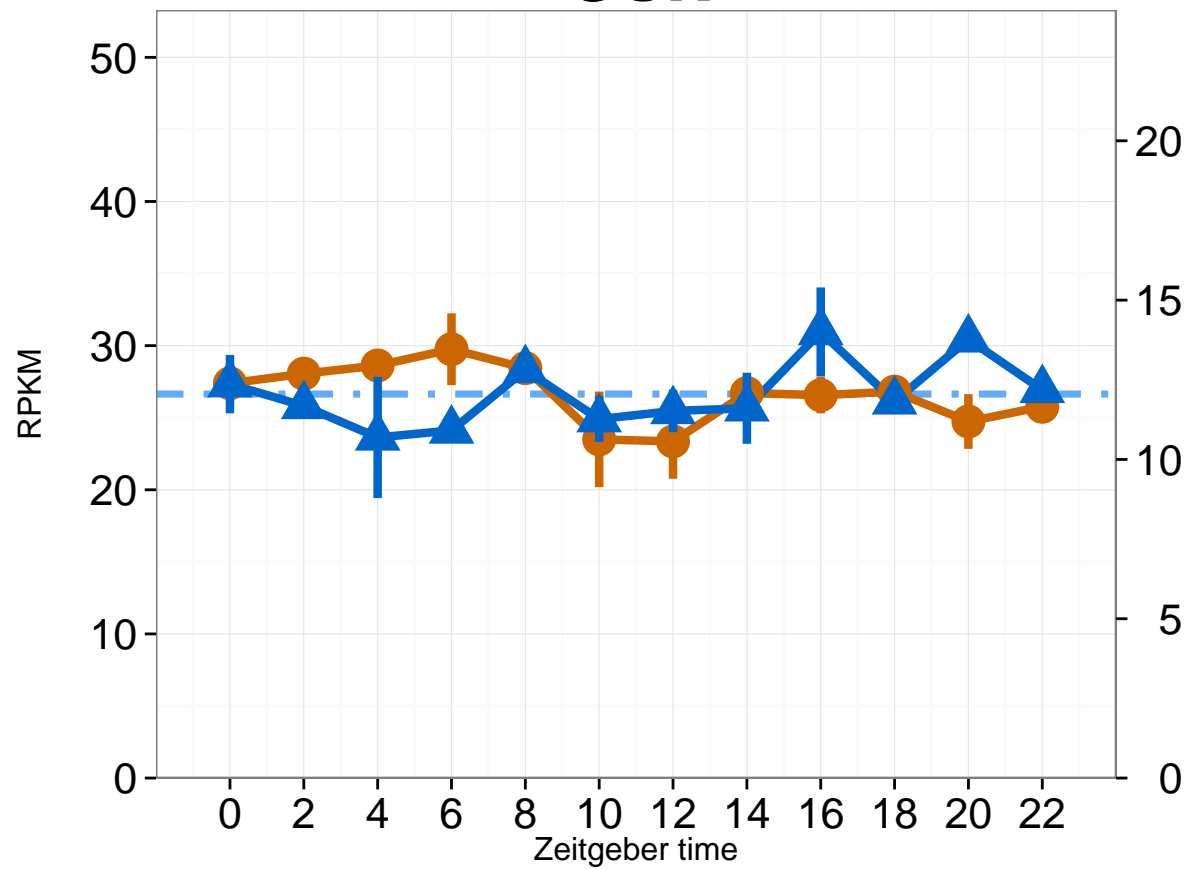

## Csk

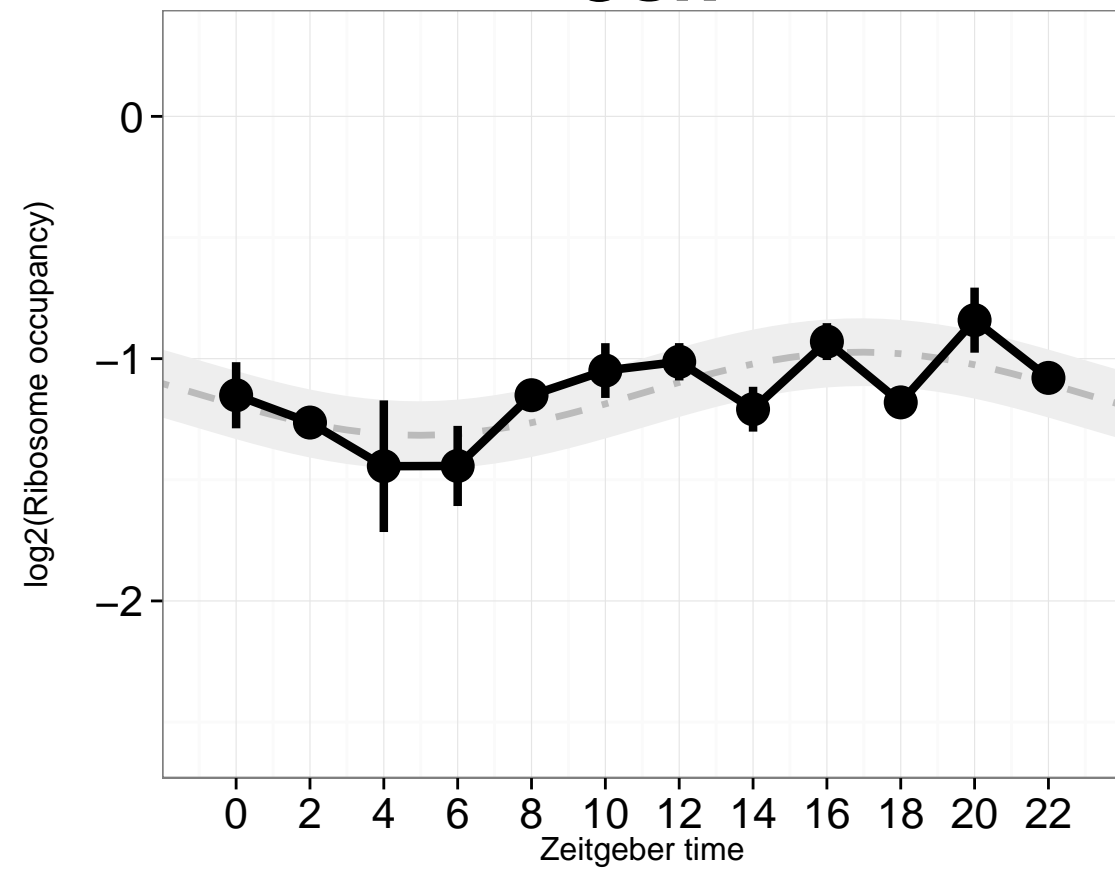

Supplement: Supplementary file 9771 [file 1]

# Itgb7

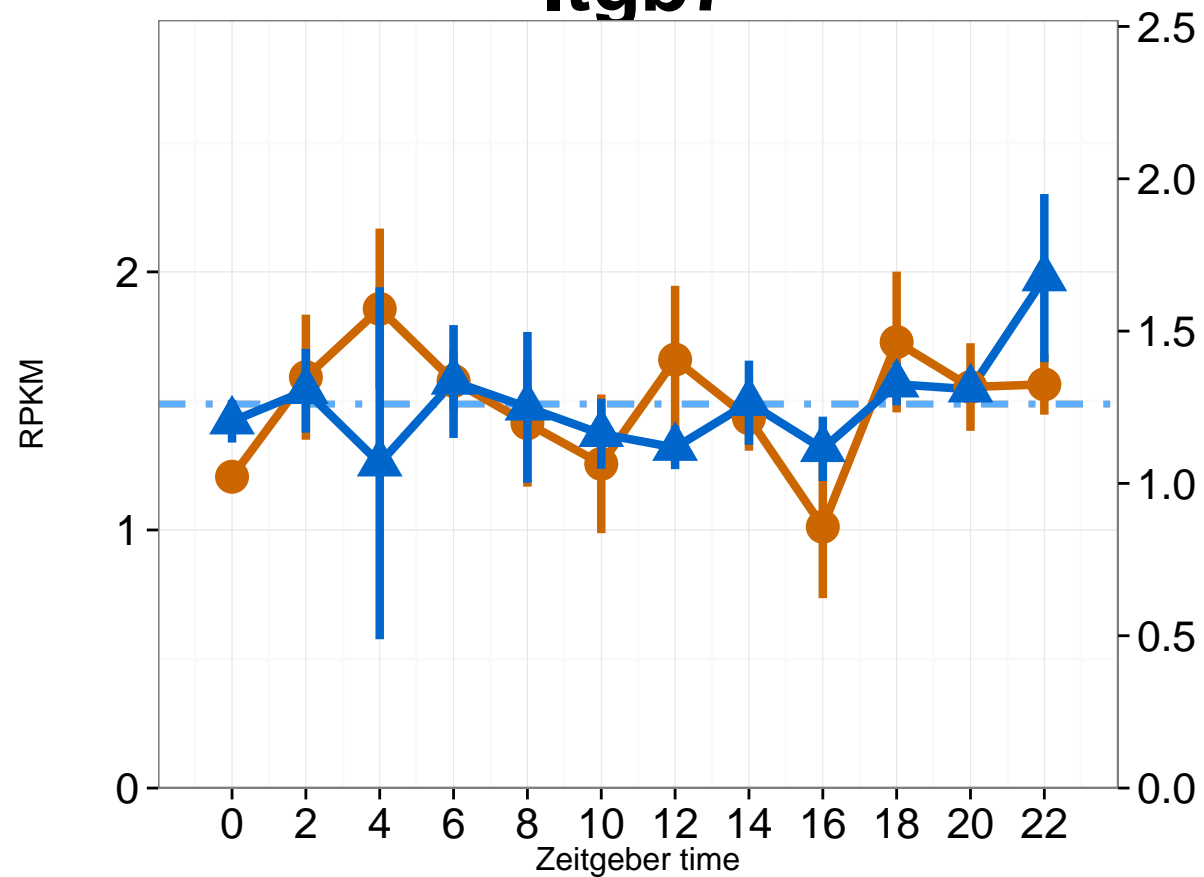

# Itgb7

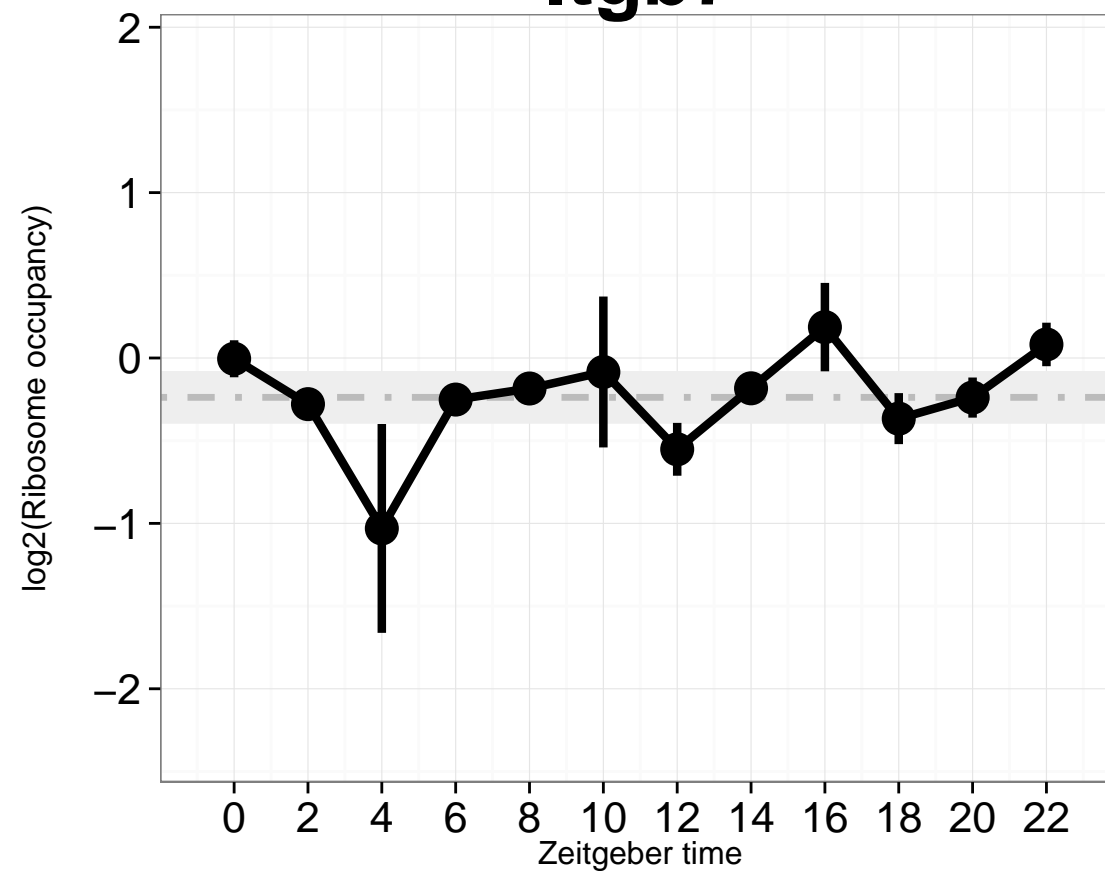

Supplement: Supplementary file 9772 [file 1]

# Slc16a5

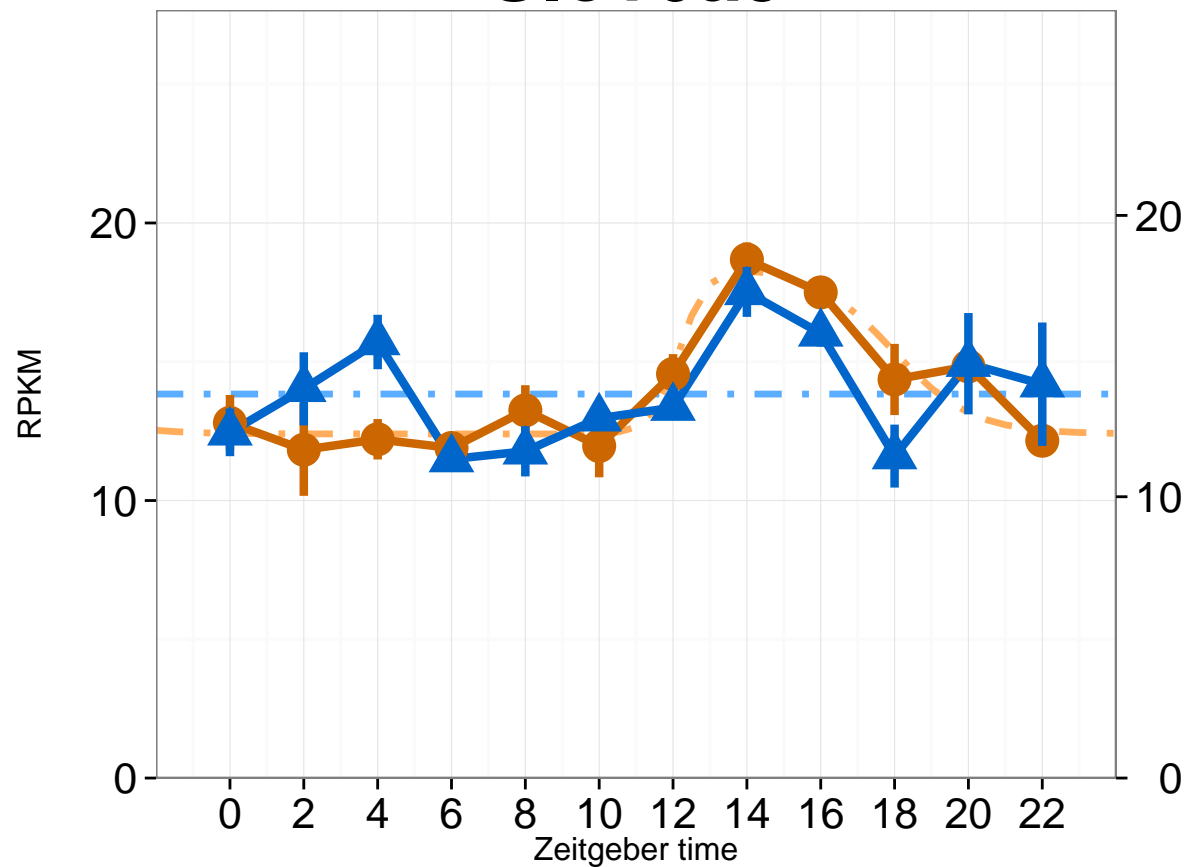

# Slc16a5

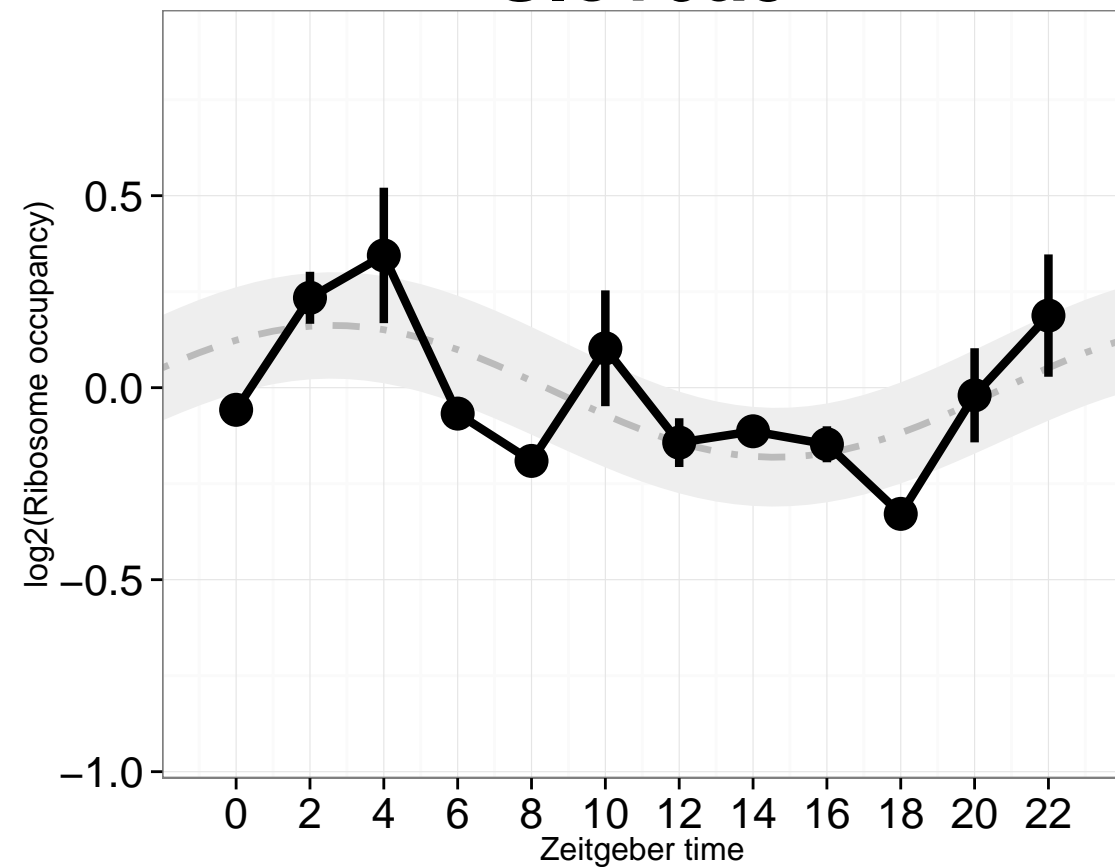

Supplement: Supplementary file 9773 [file 1]

## Zfp513

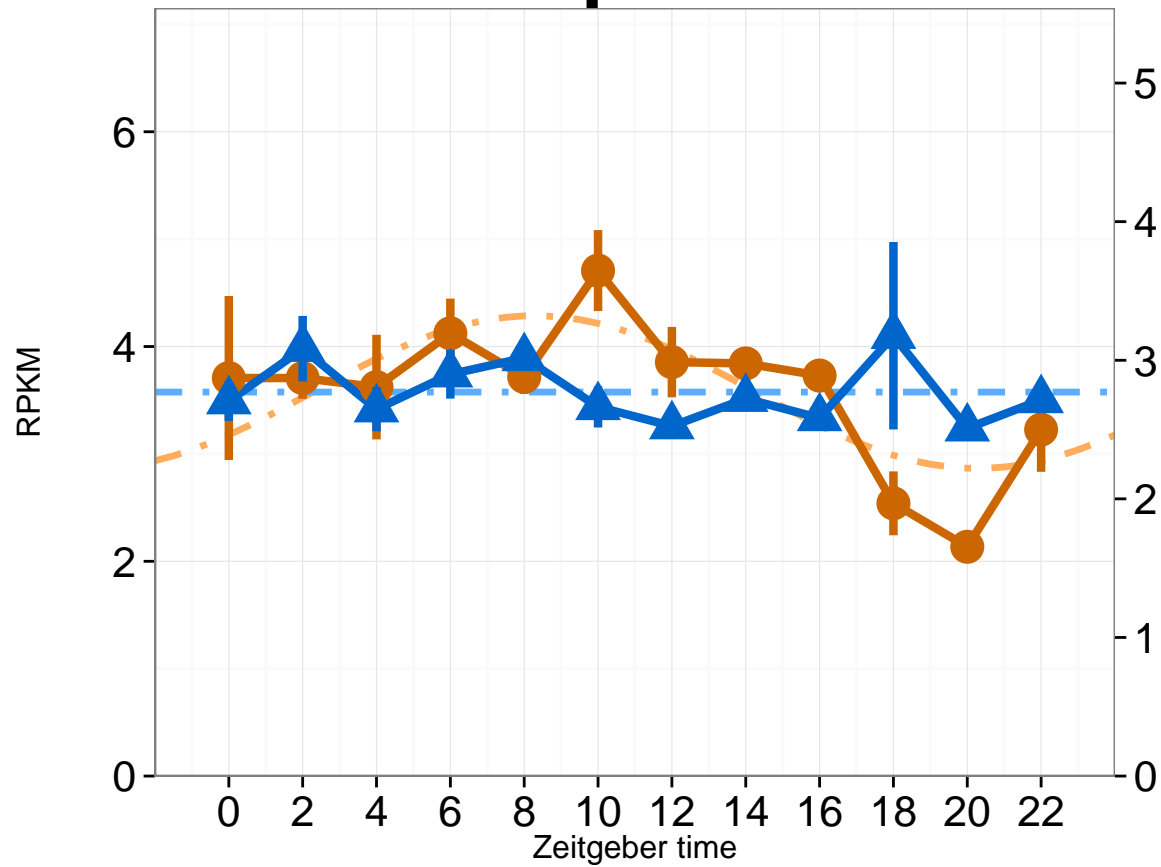

## Zfp513

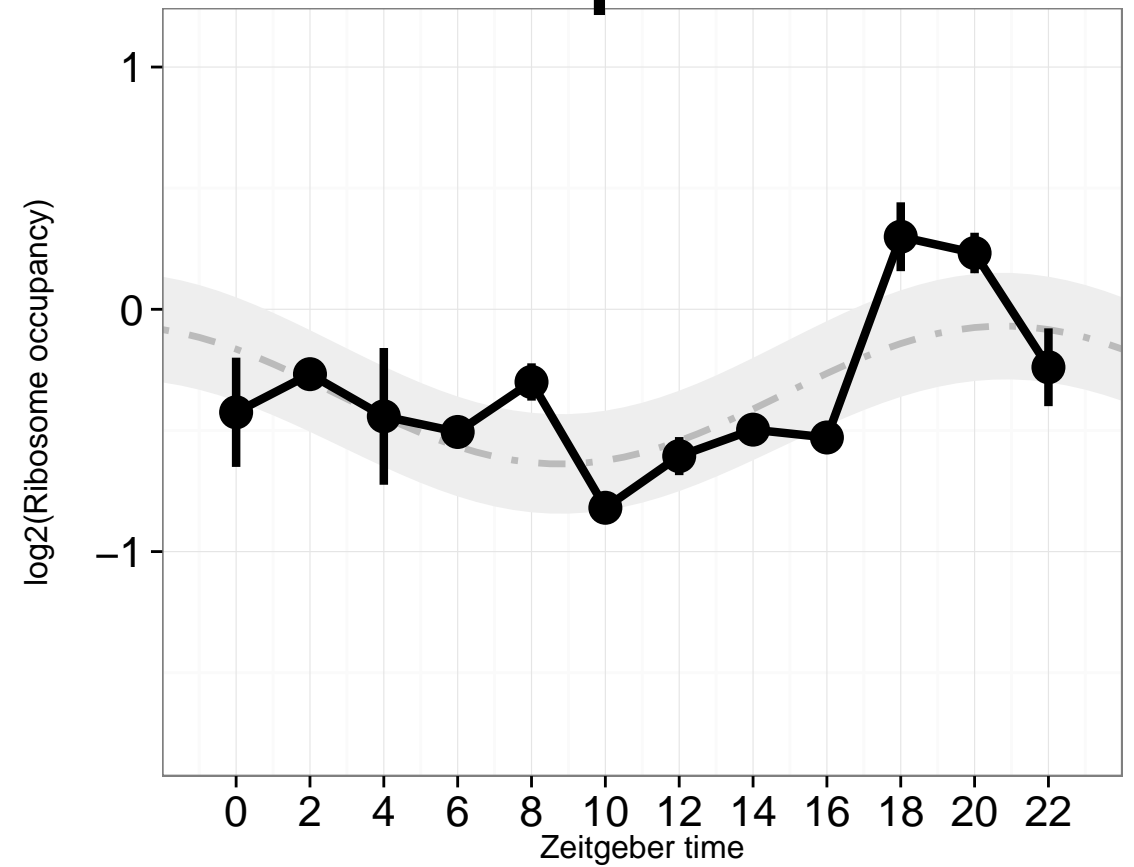

Supplement: Supplementary file 9774 [file 1]

## Bet1l

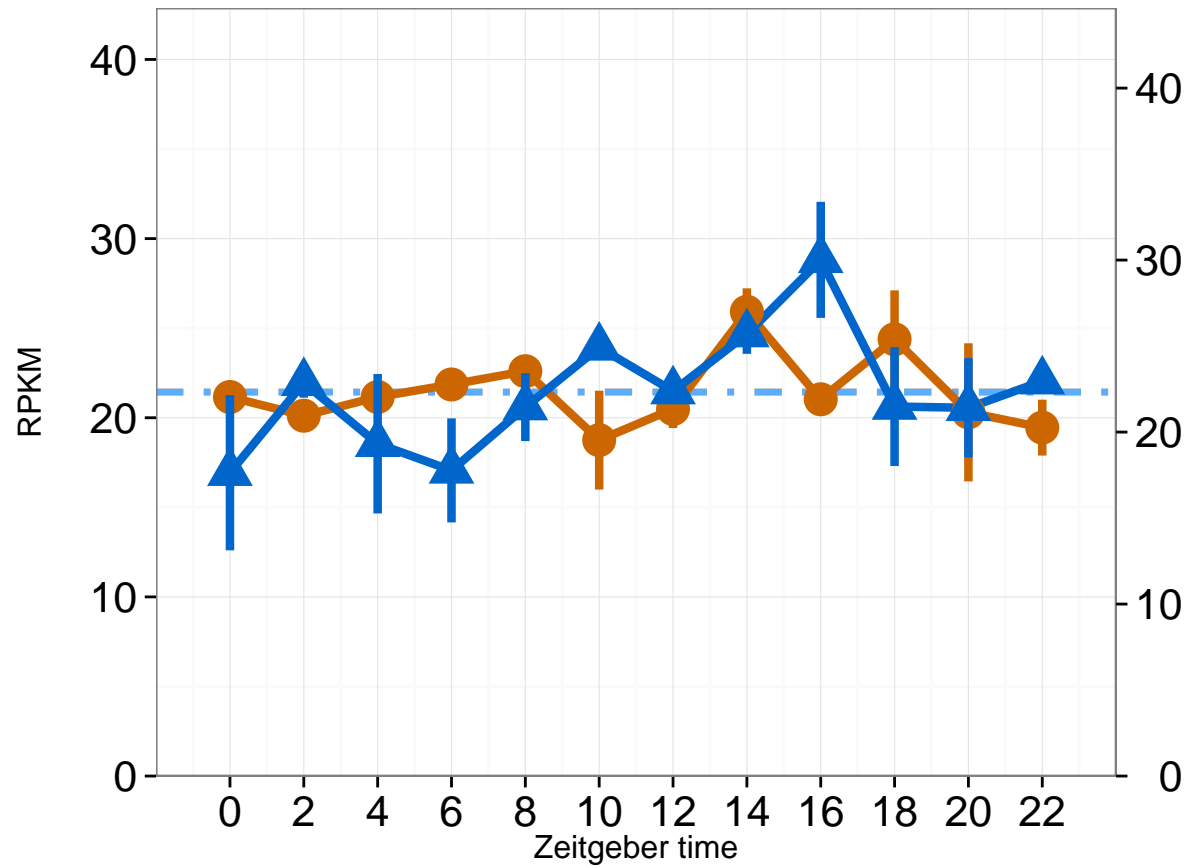

## Bet1l

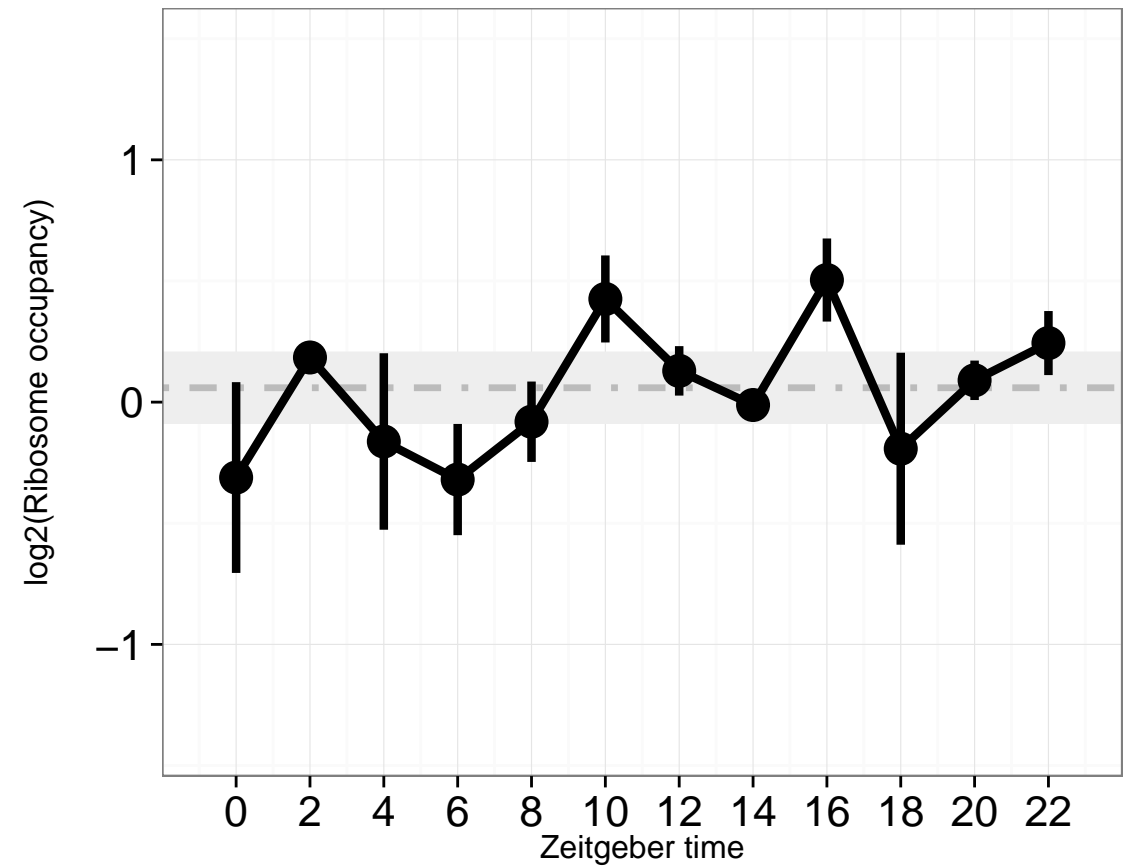

Supplement: Supplementary file 9775 [file 1]

# Bcl7a

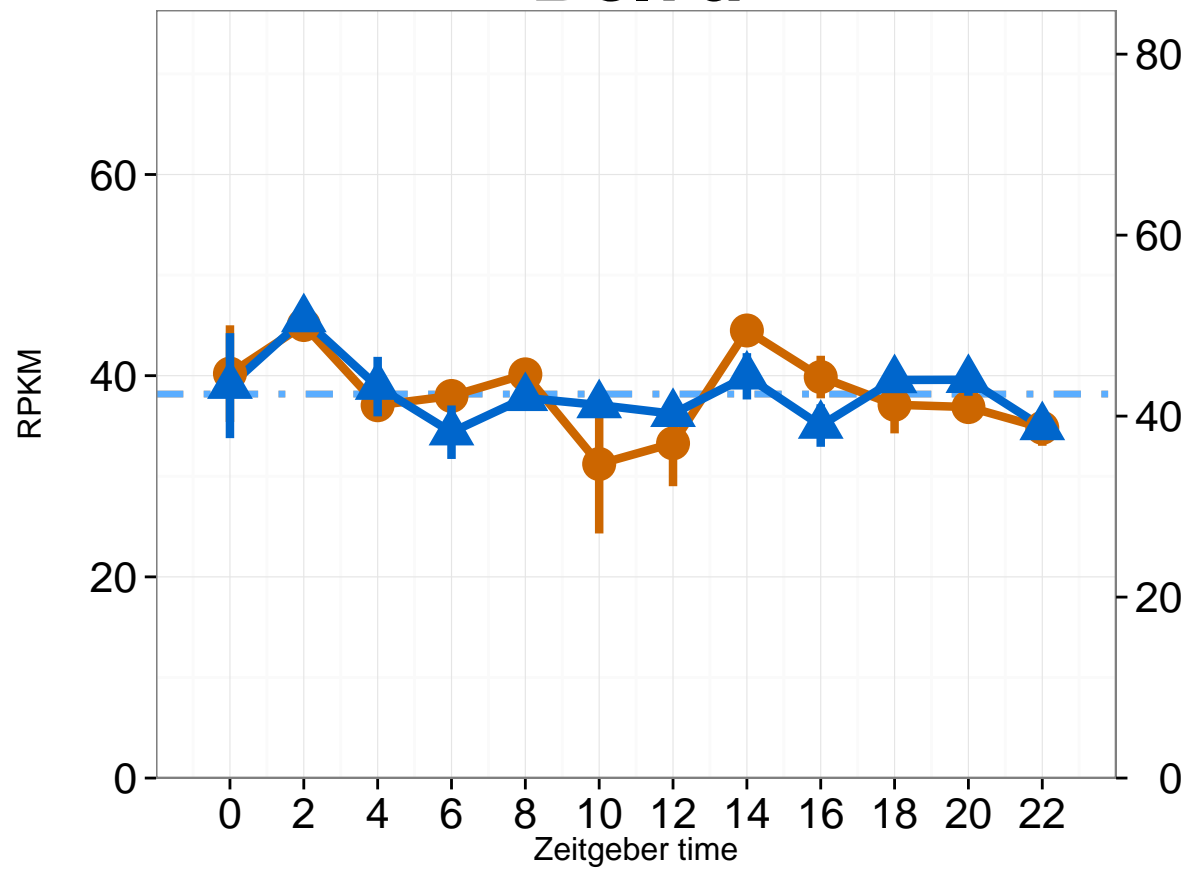

# Bcl7a

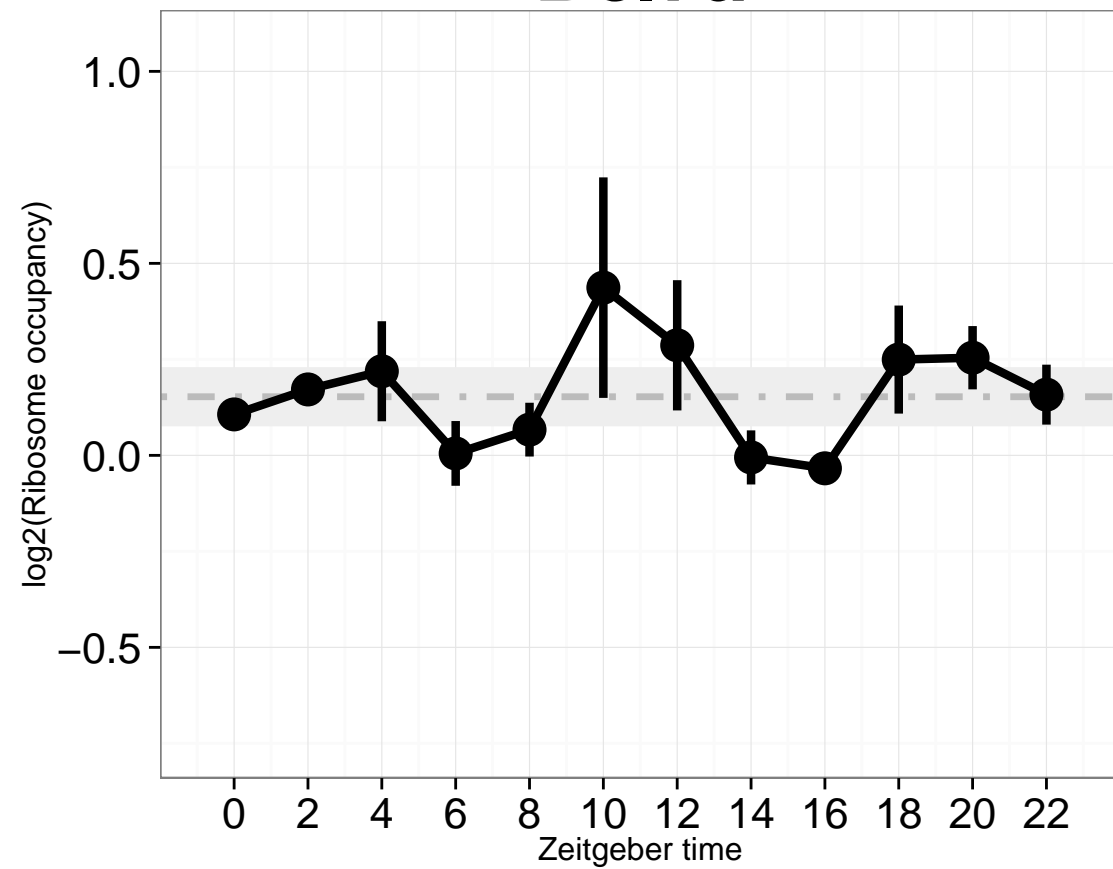

Supplement: Supplementary file 9776 [file 1]

## Aplf

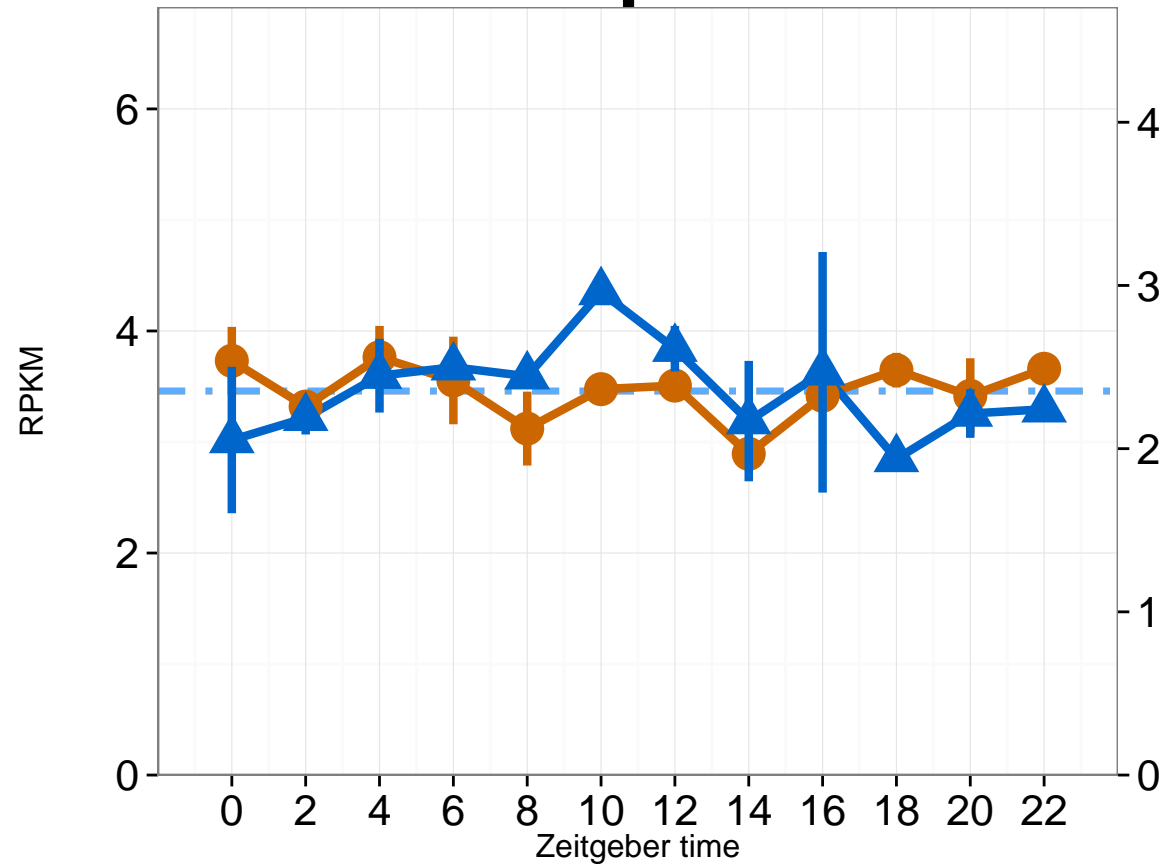

## Aplf

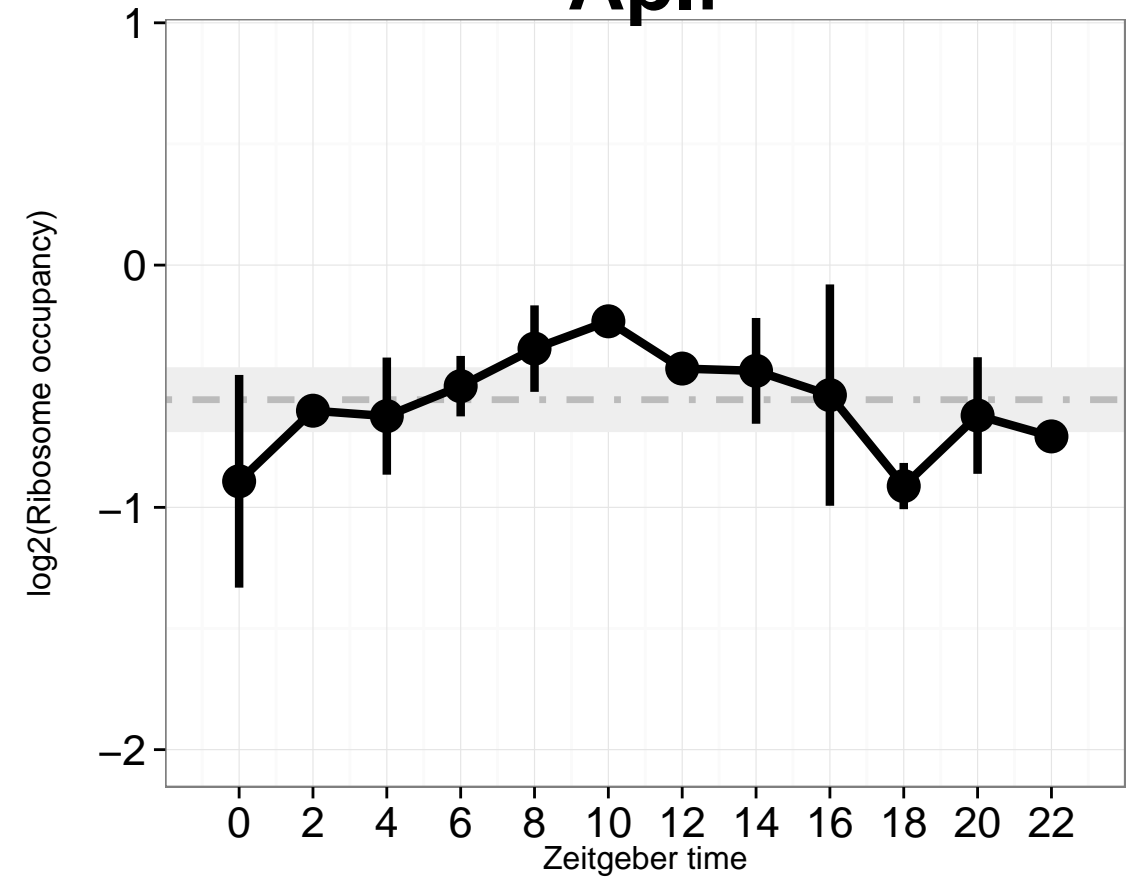

Supplement: Supplementary file 9777 [file 1]

# Tomm40

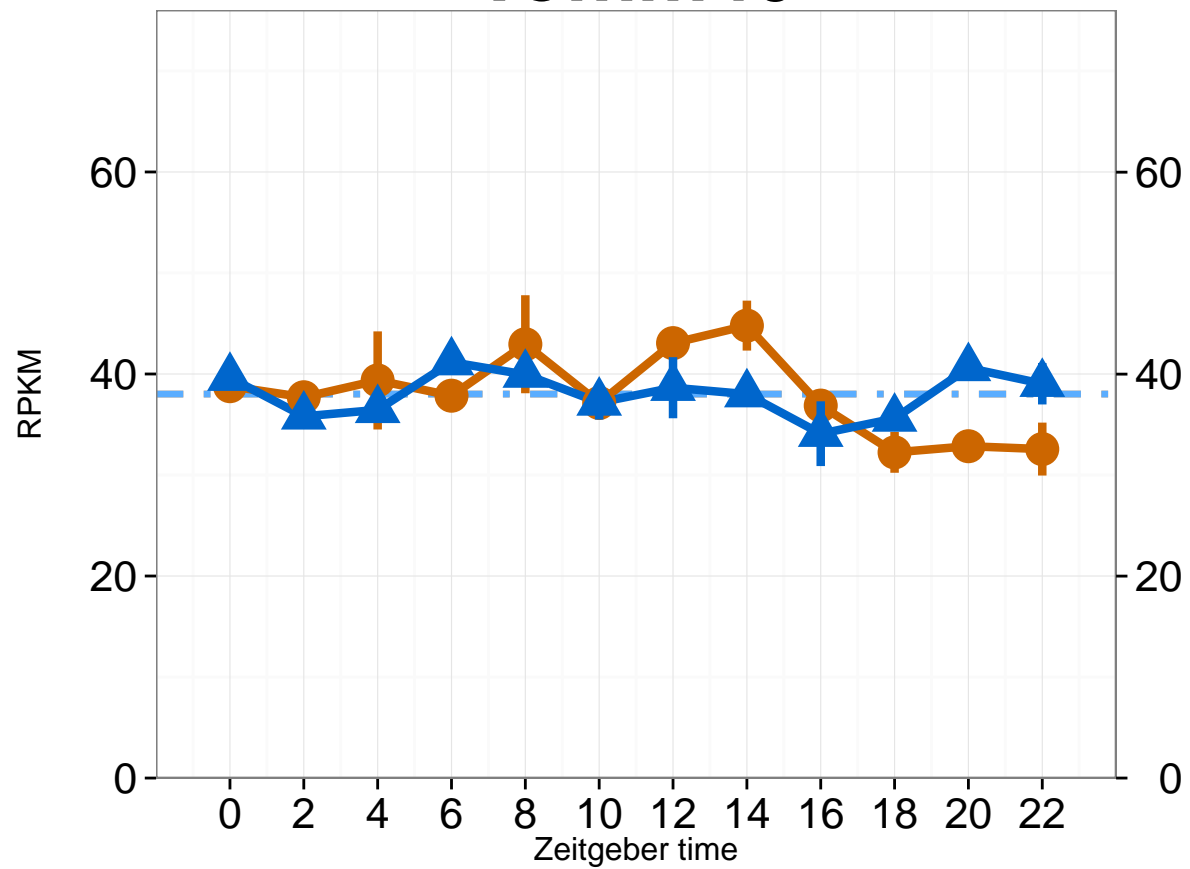

# Tomm40

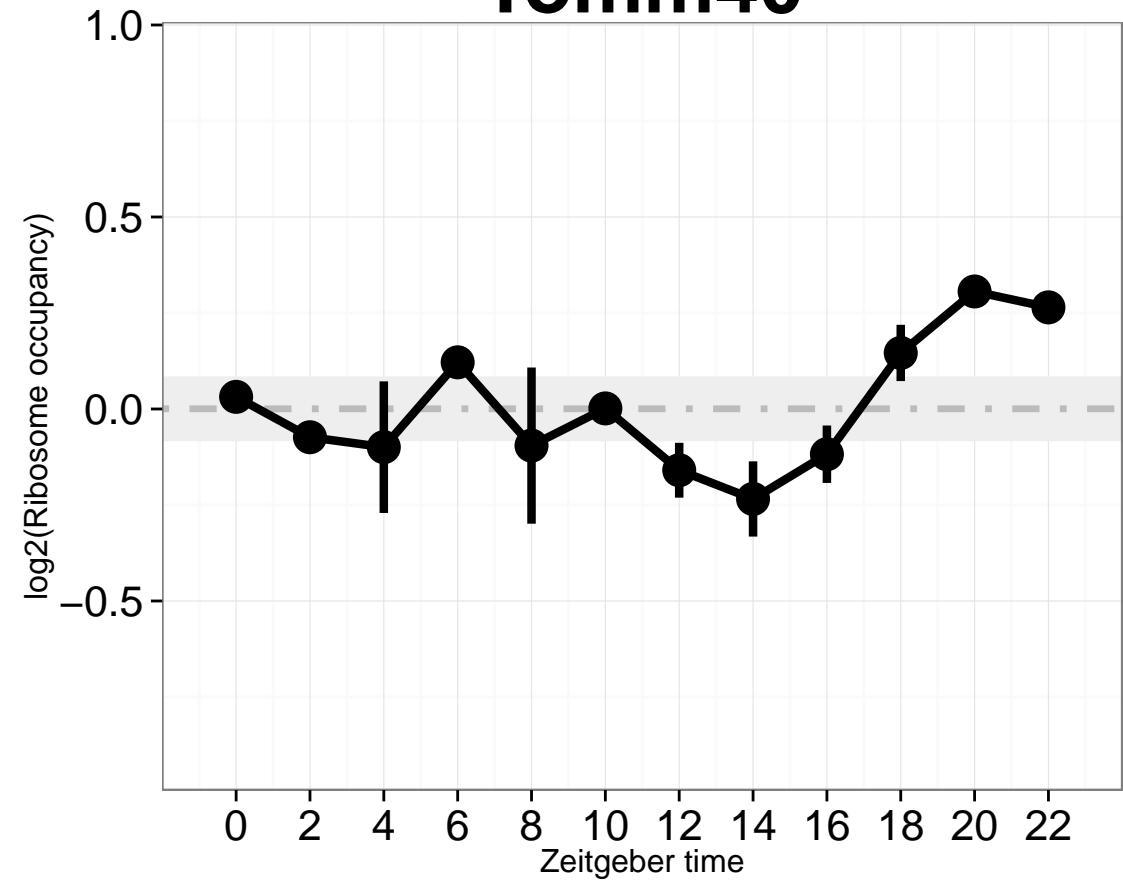

Supplement: Supplementary file 9778 [file 1]

## Crybg3

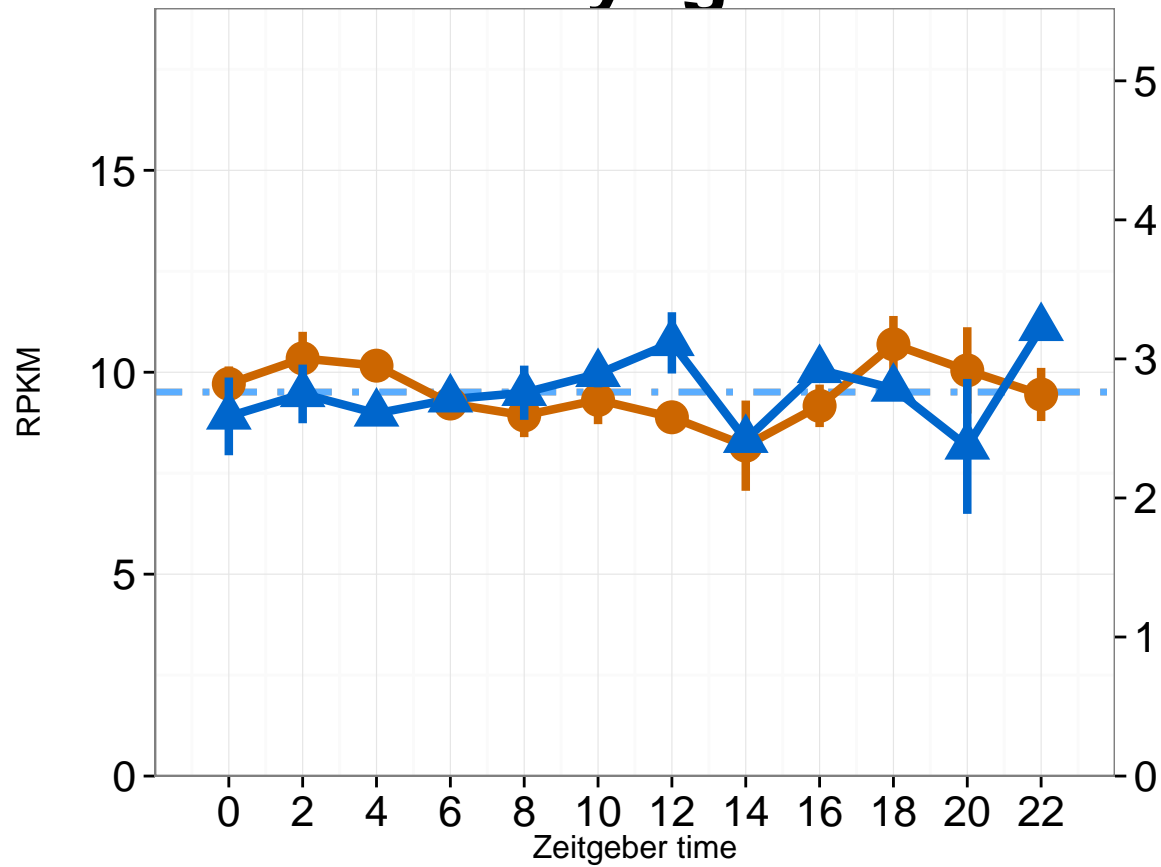

## Crybg3

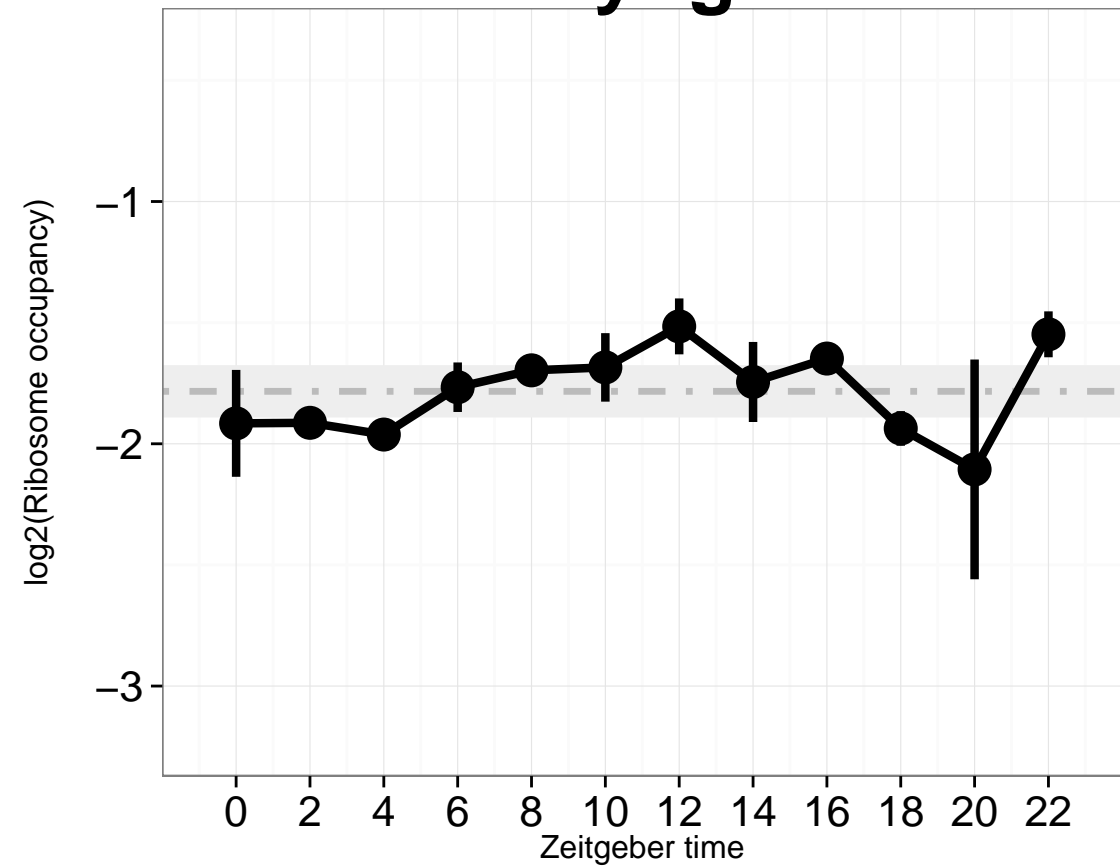

Supplement: Supplementary file 9779 [file 1]

# Dpcd

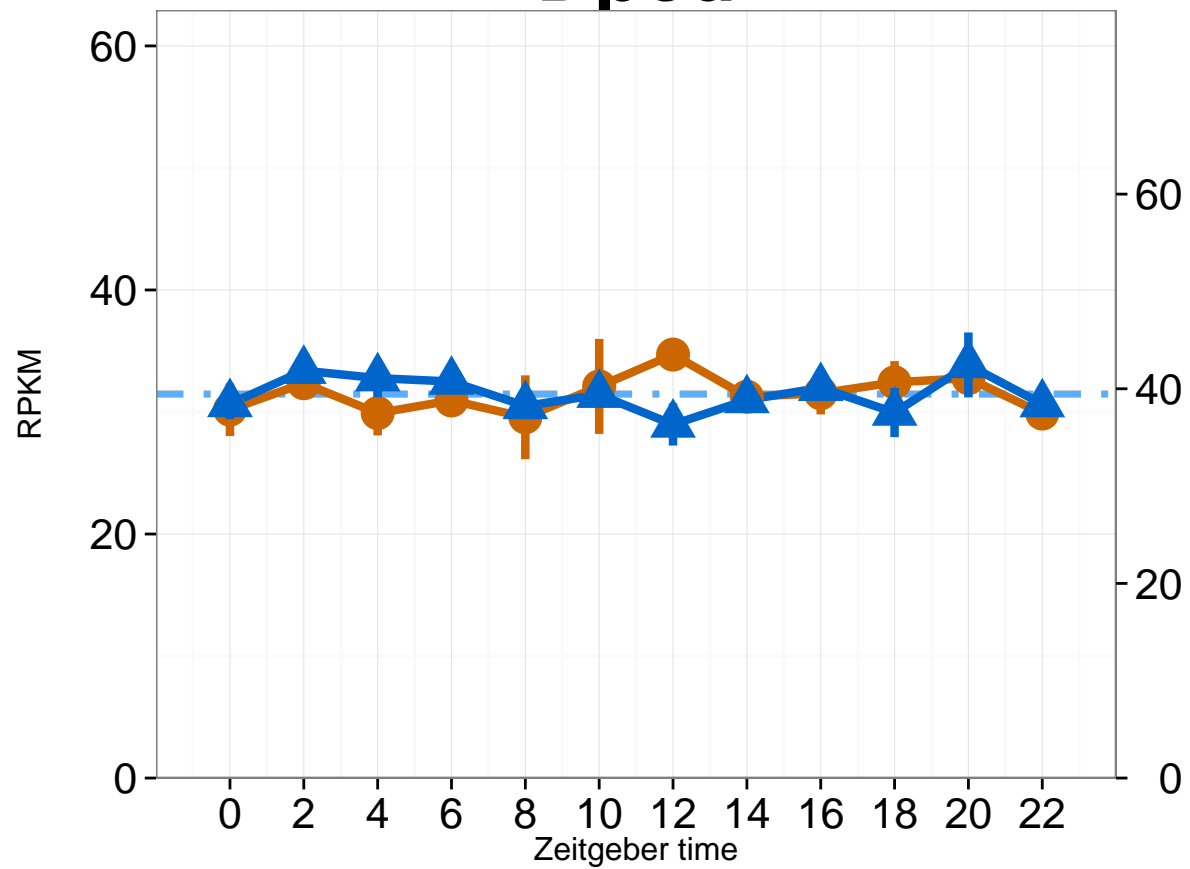

# Dpcd

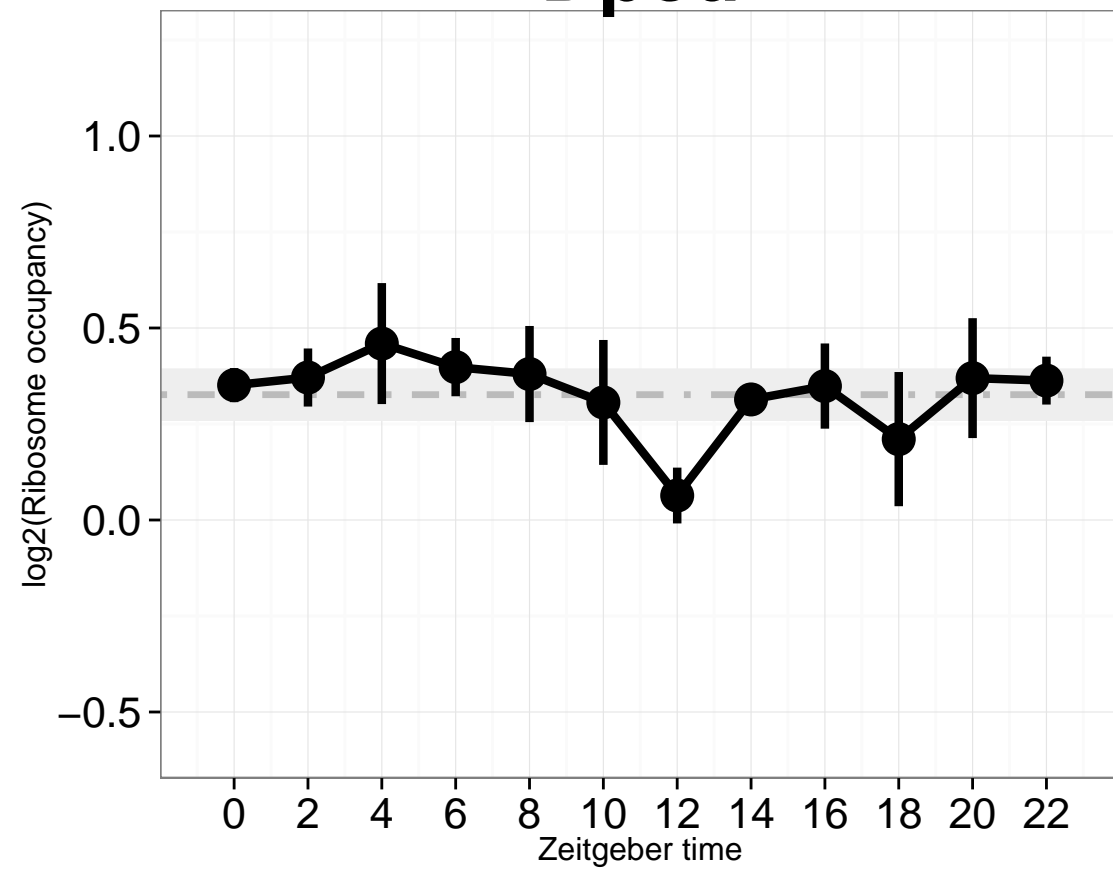

Supplement: Supplementary file 9780 [file 1]

# Gja5

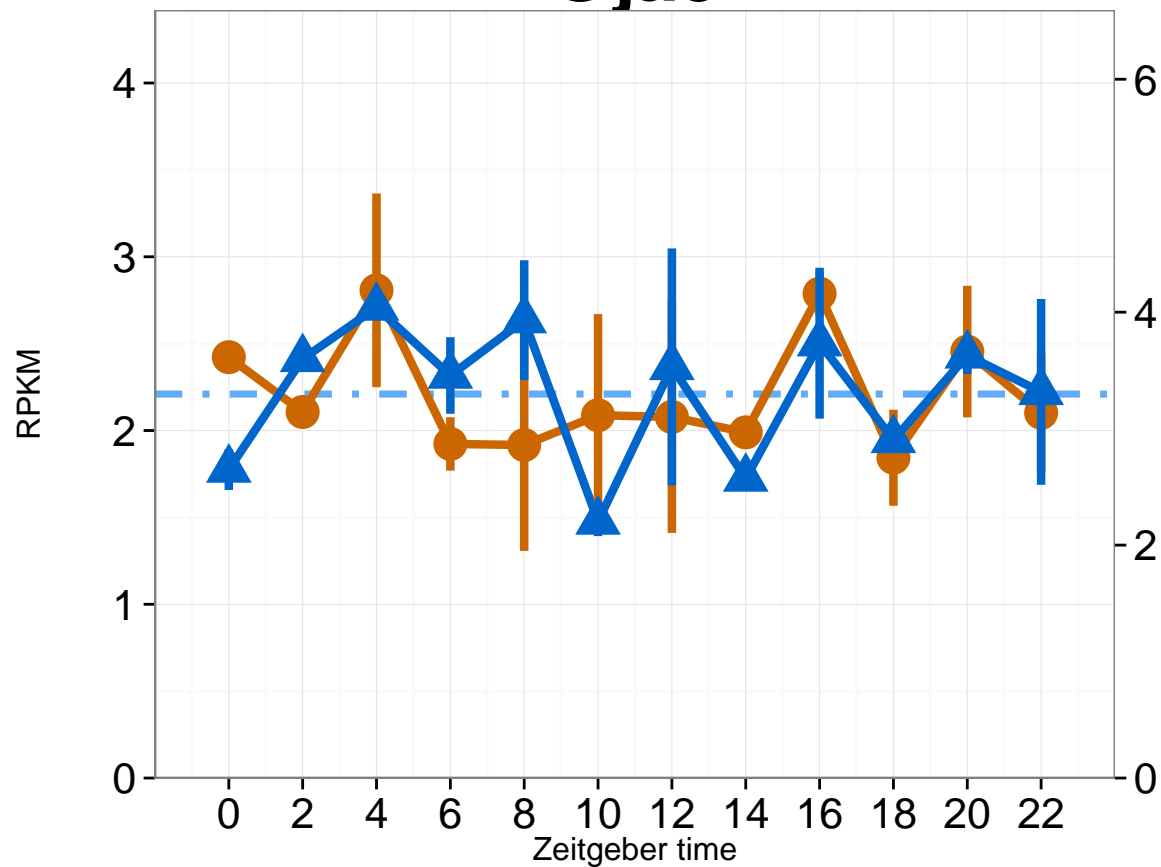

# Gja5

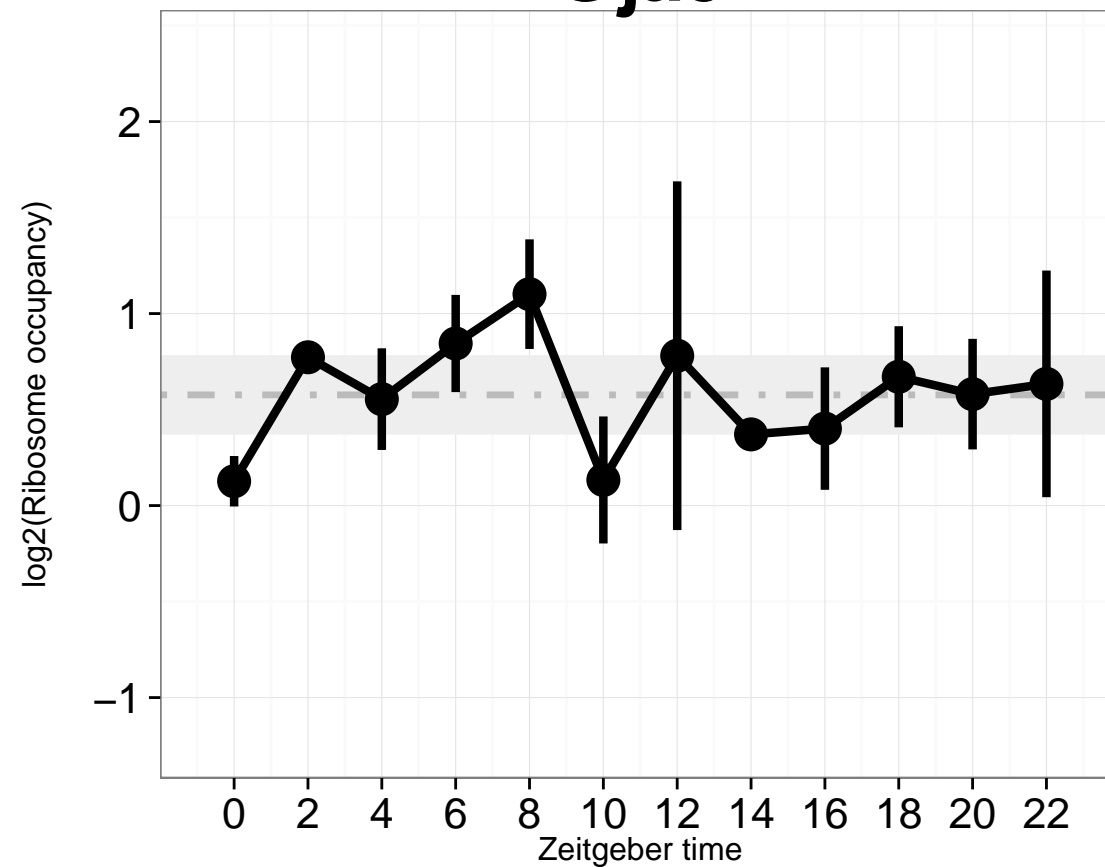

Supplement: Supplementary file 9781 [file 1]

# 2810004N23Rik

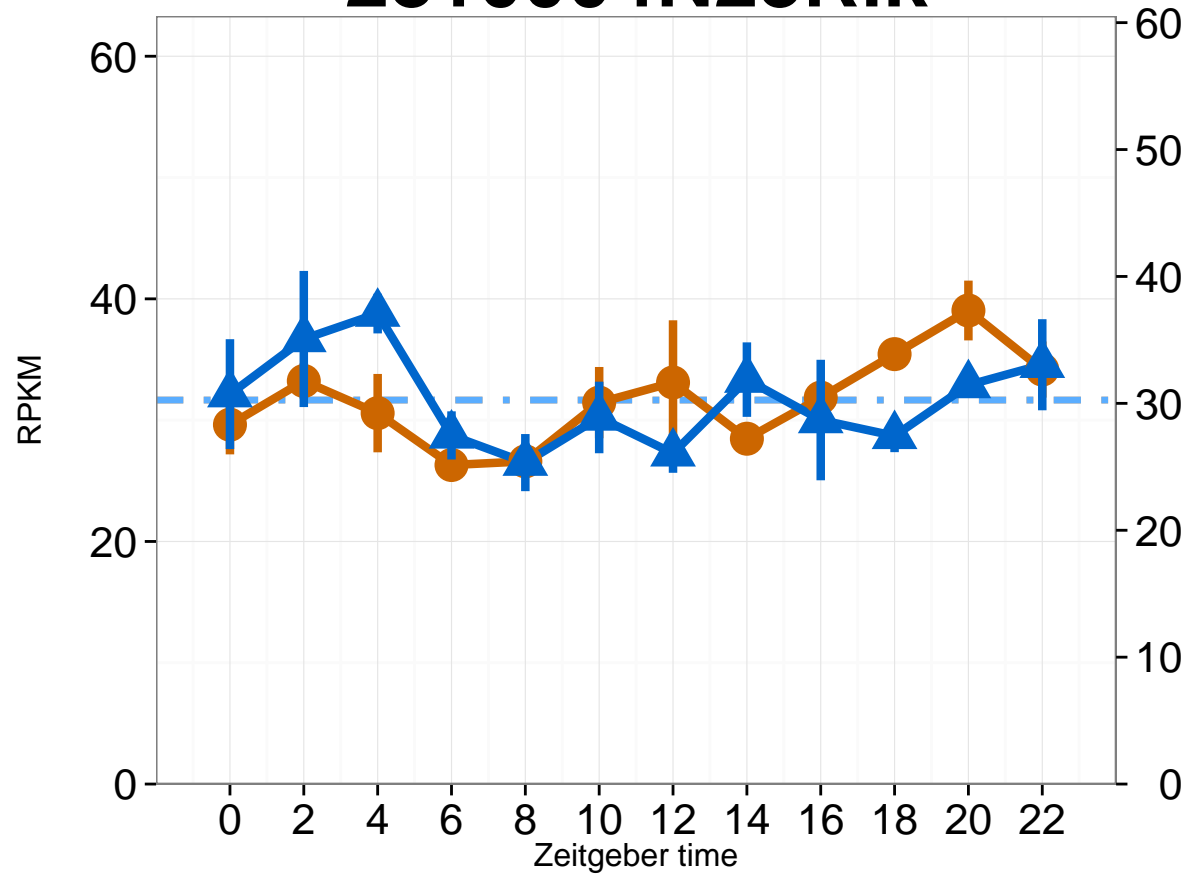

# 2810004N23Rik

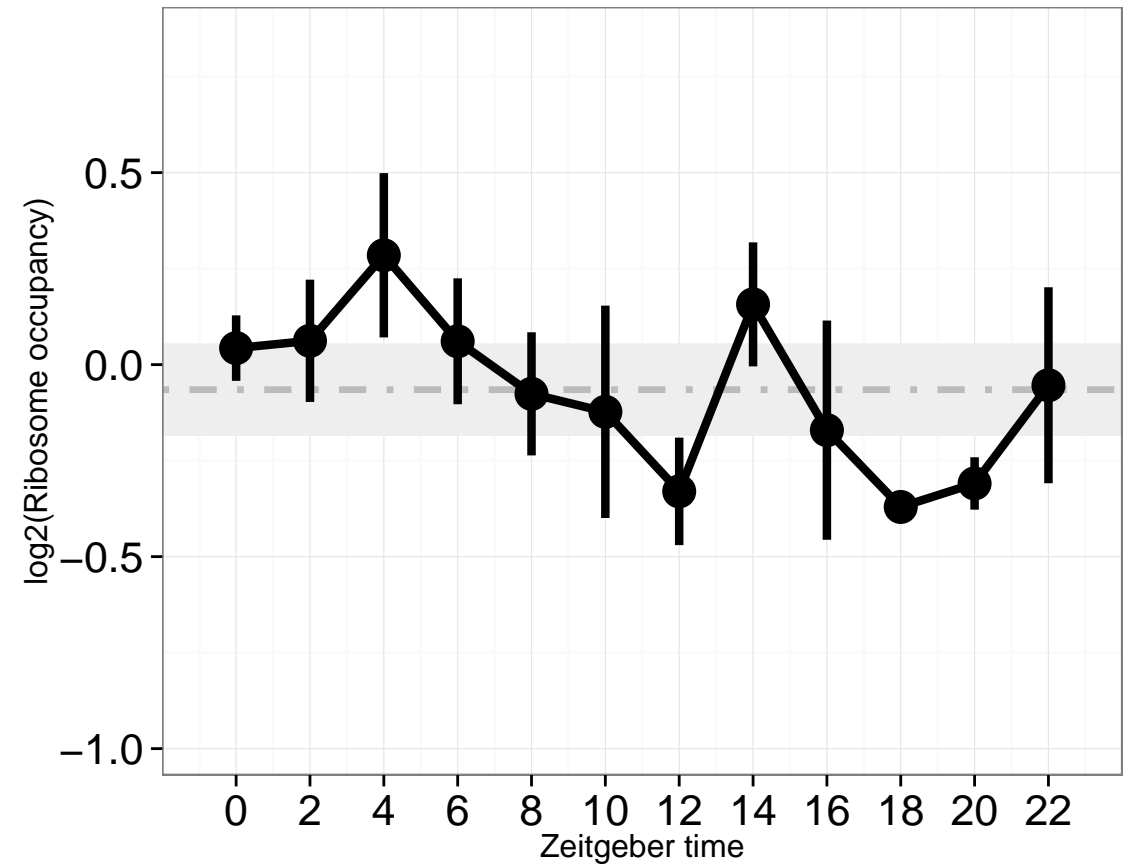

Supplement: Supplementary file 9782 [file 1]

# Vangl1

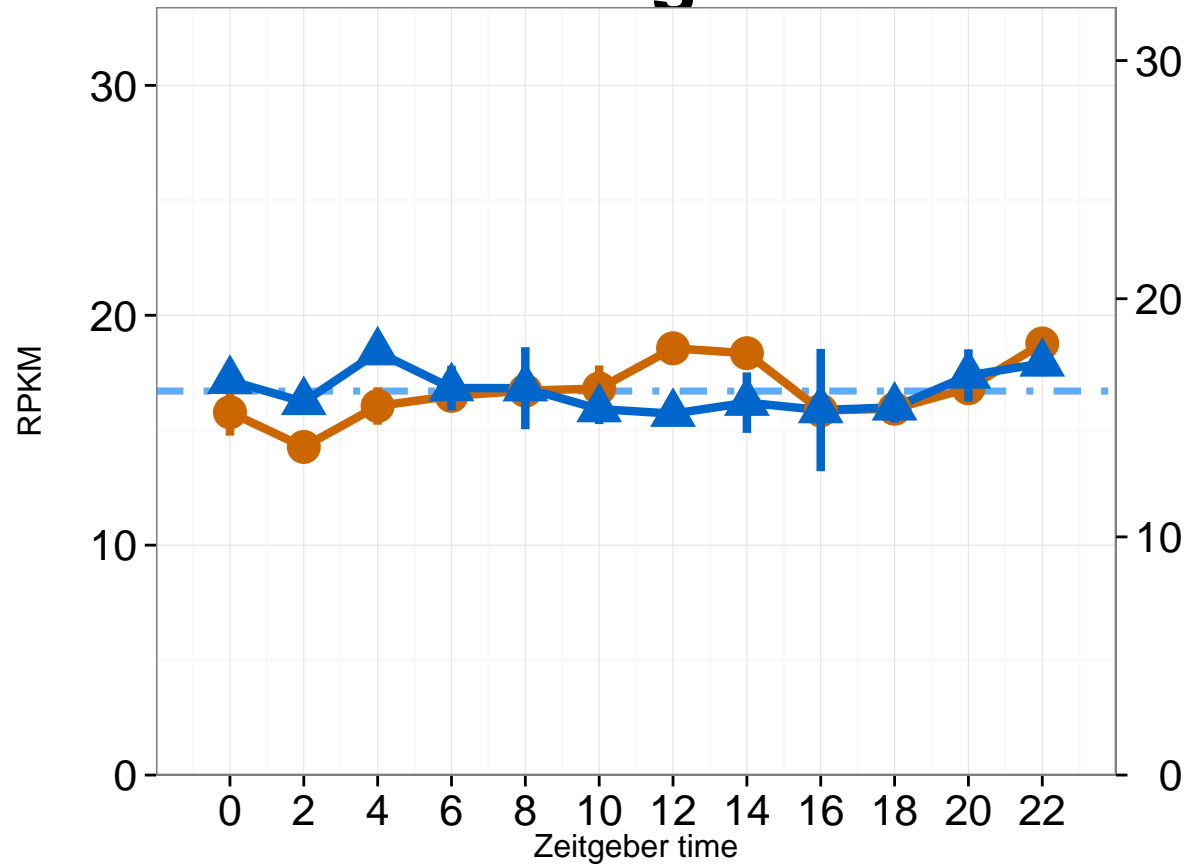

# Vangl1

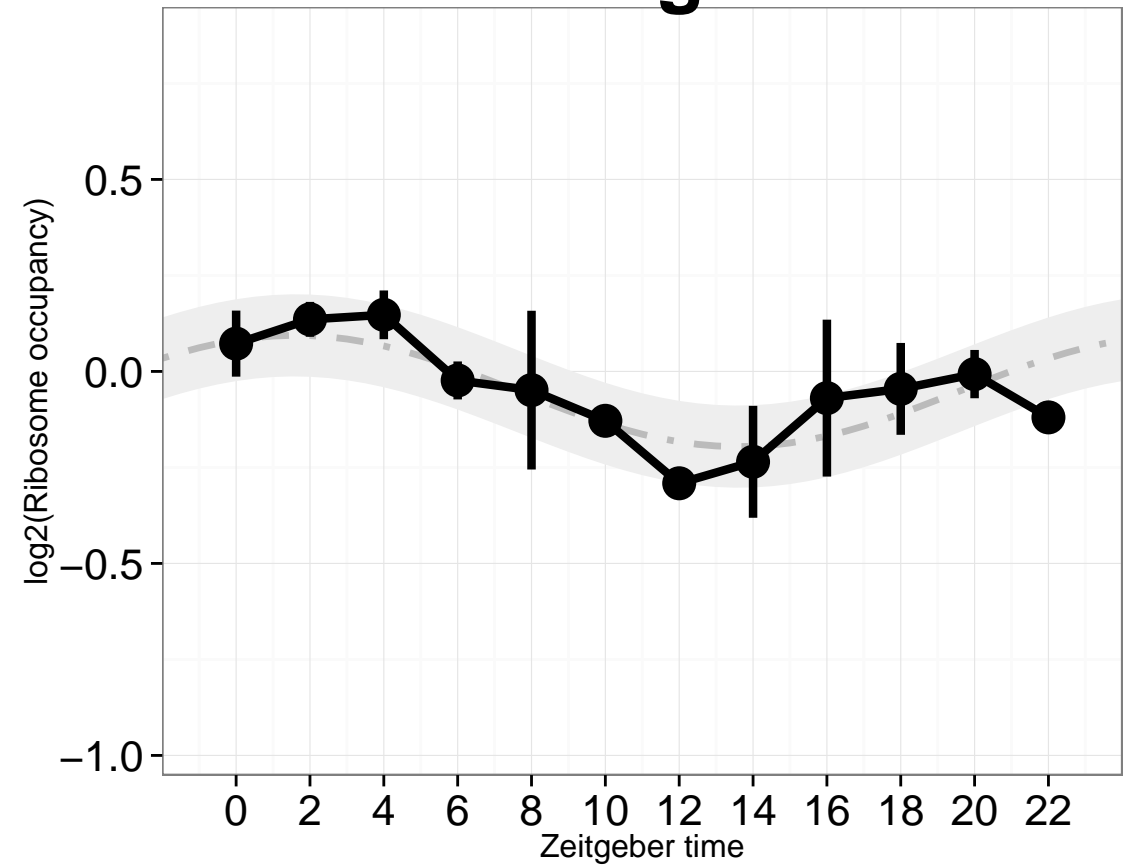

Supplement: Supplementary file 9783 [file 1]

## Phldb2

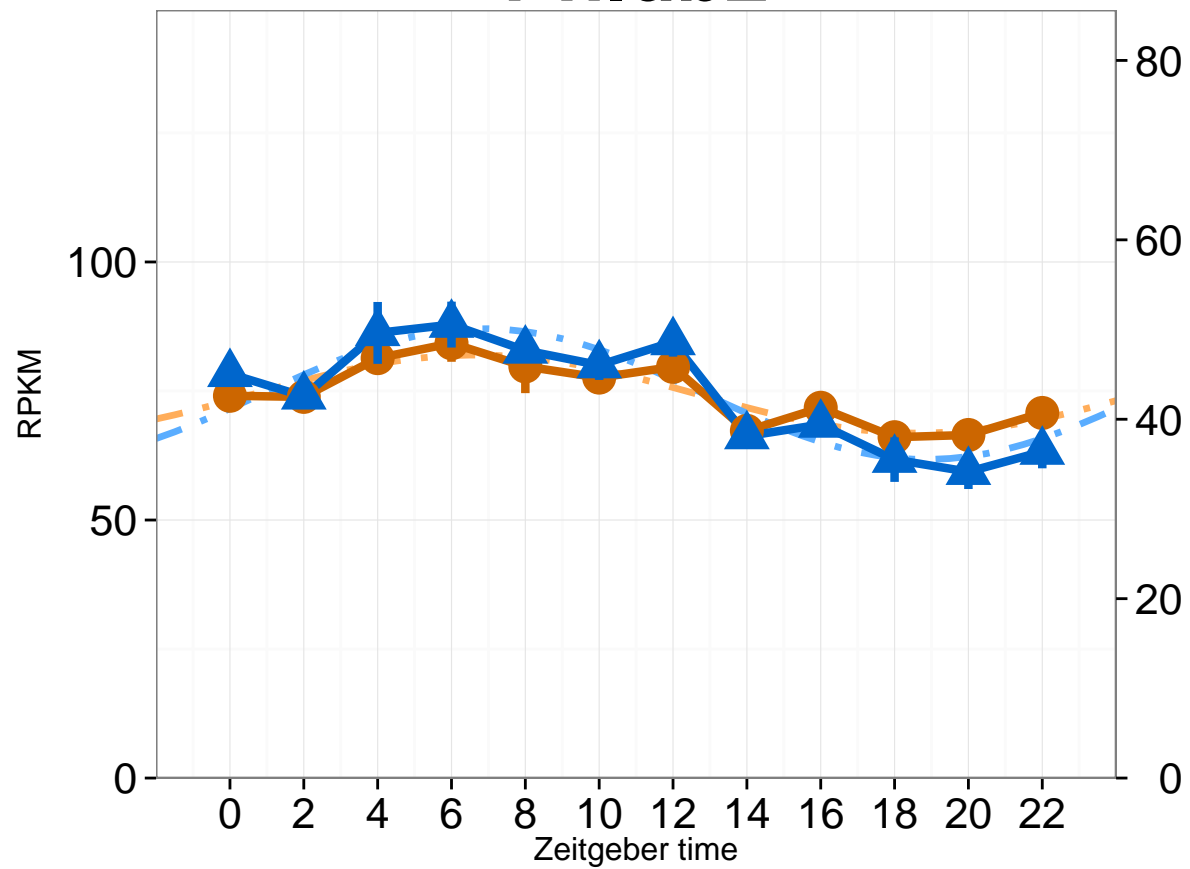

## Phldb2

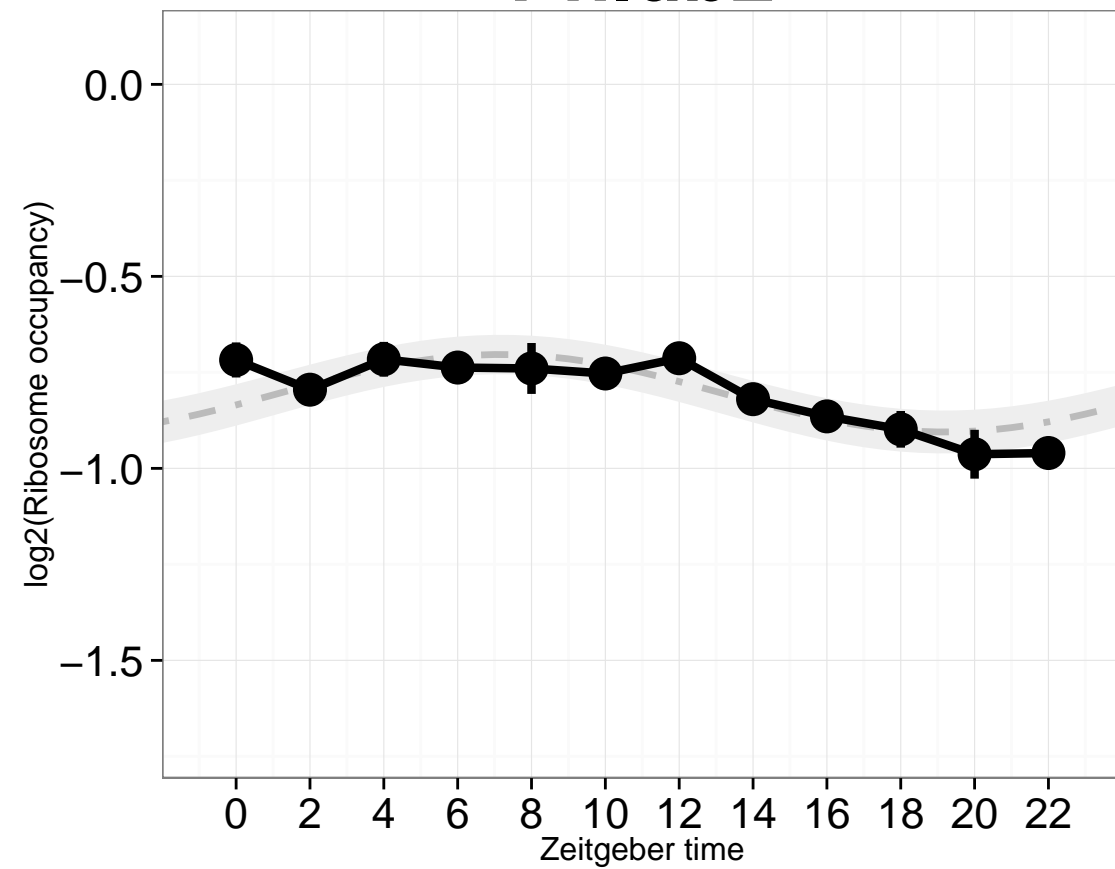

Supplement: Supplementary file 9784 [file 1]

# Rbm20

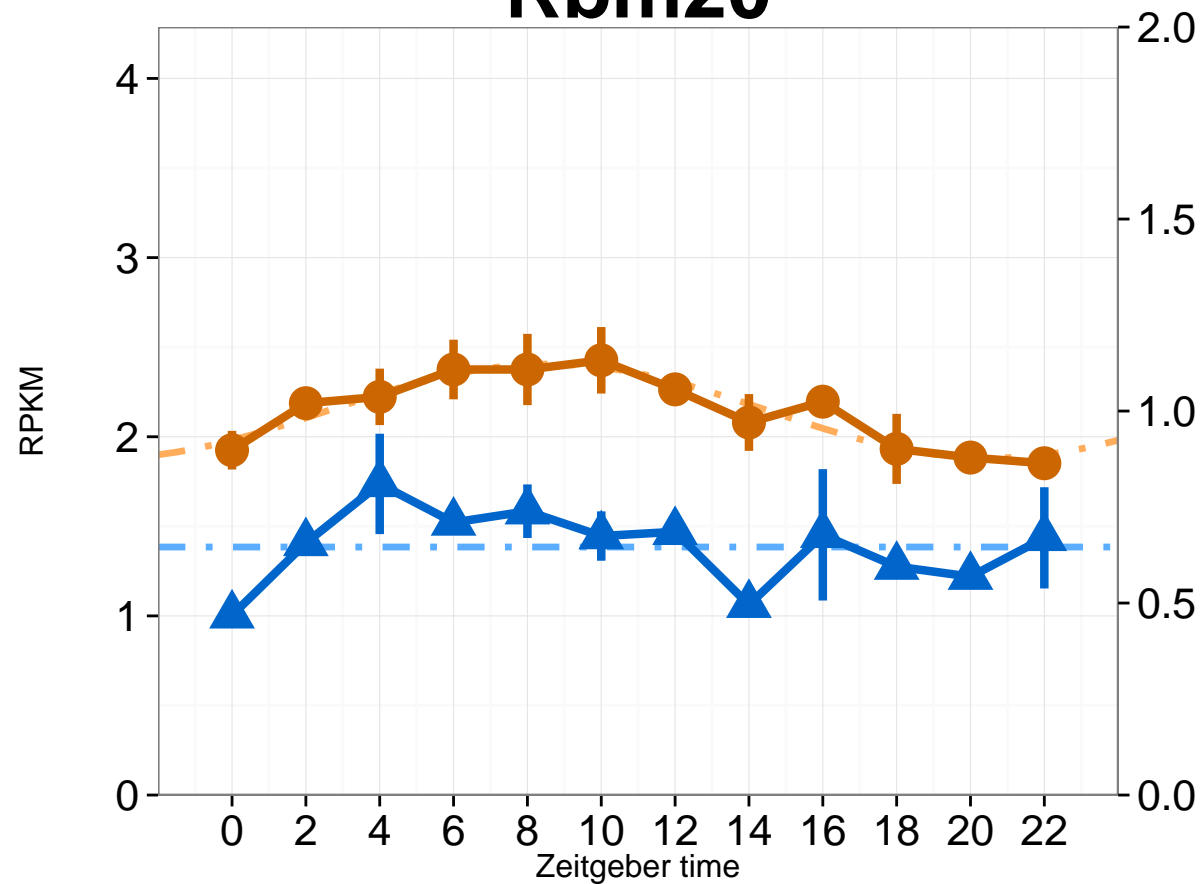

# Rbm20

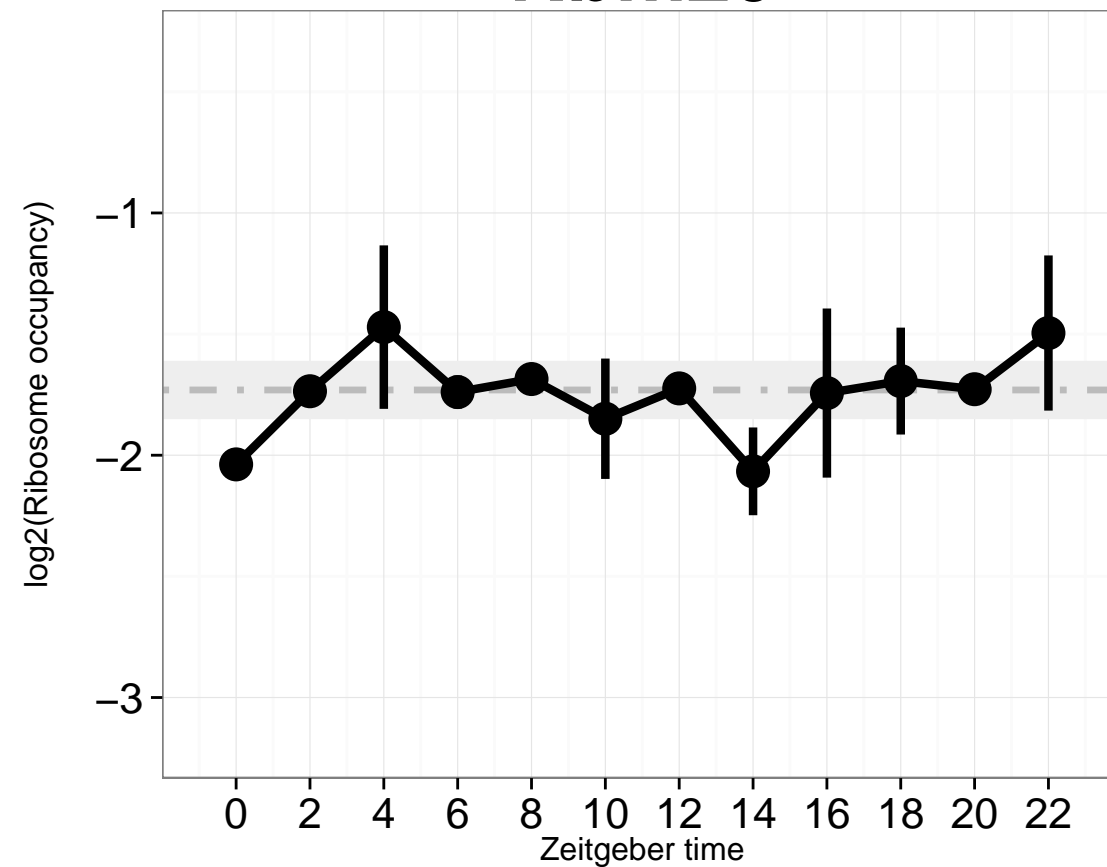

Supplement: Supplementary file 9785 [file 1]

## Tcf7l2

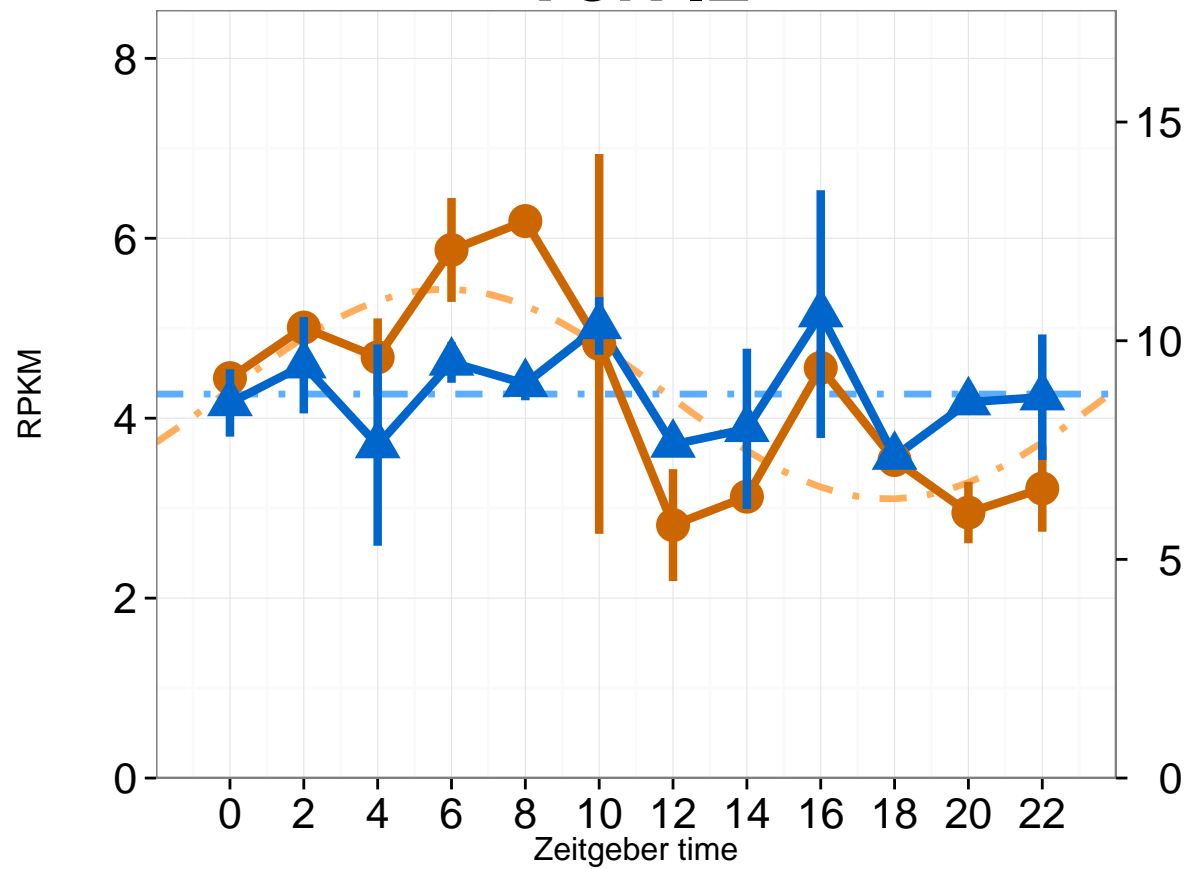

## Tcf7l2

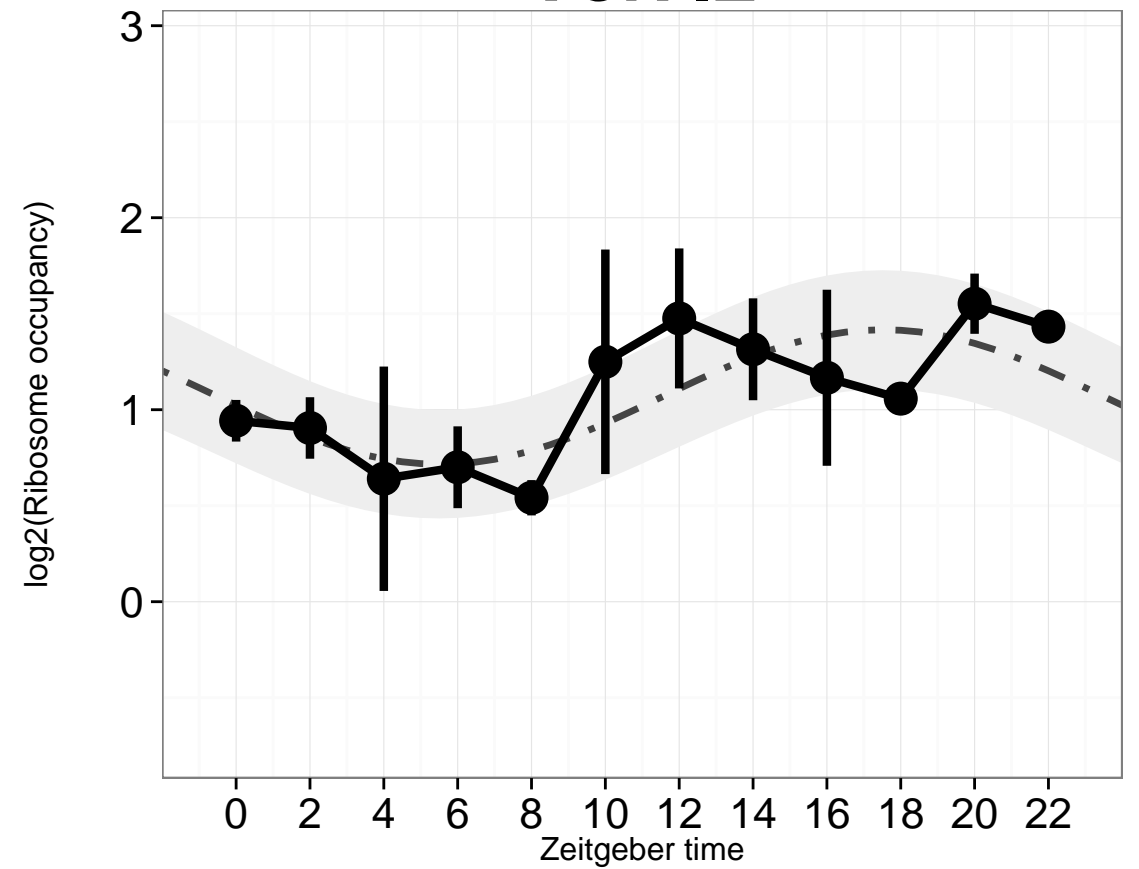

Supplement: Supplementary file 9786 [file 1]

# Ptpn21

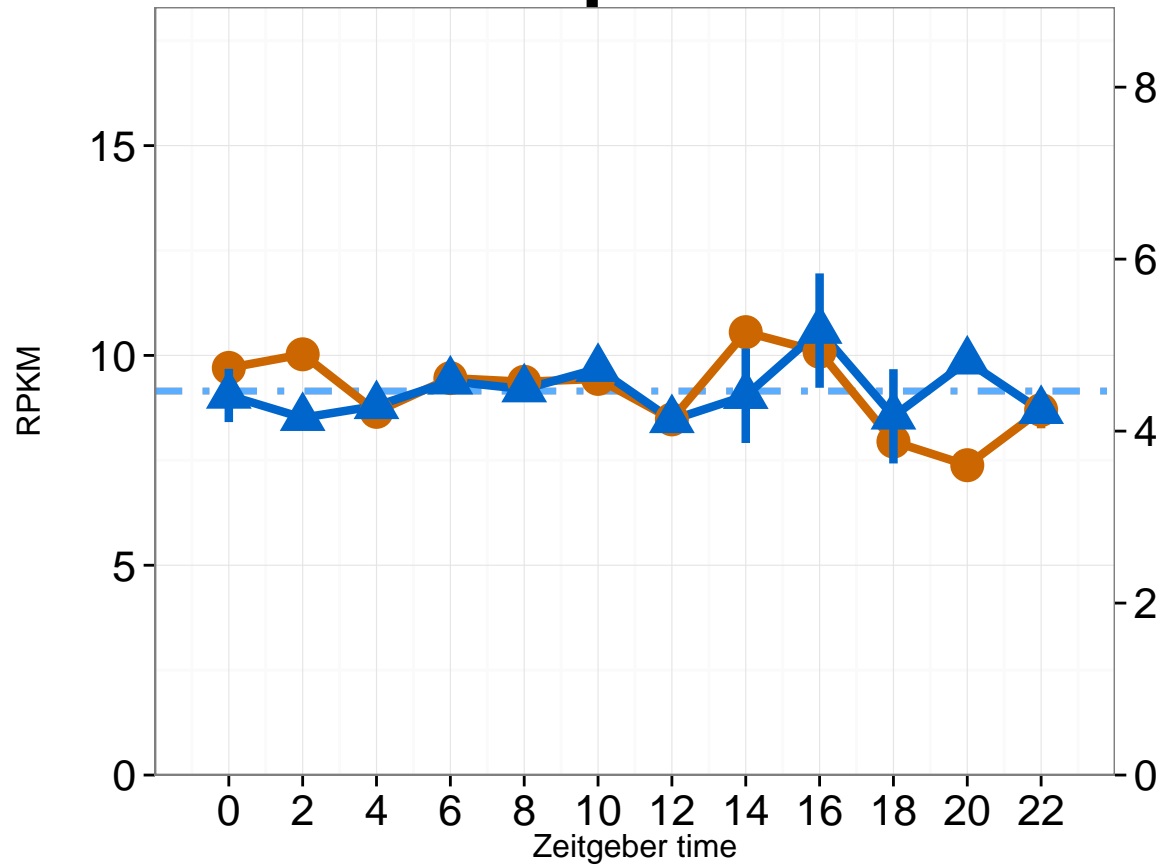

# Ptpn21

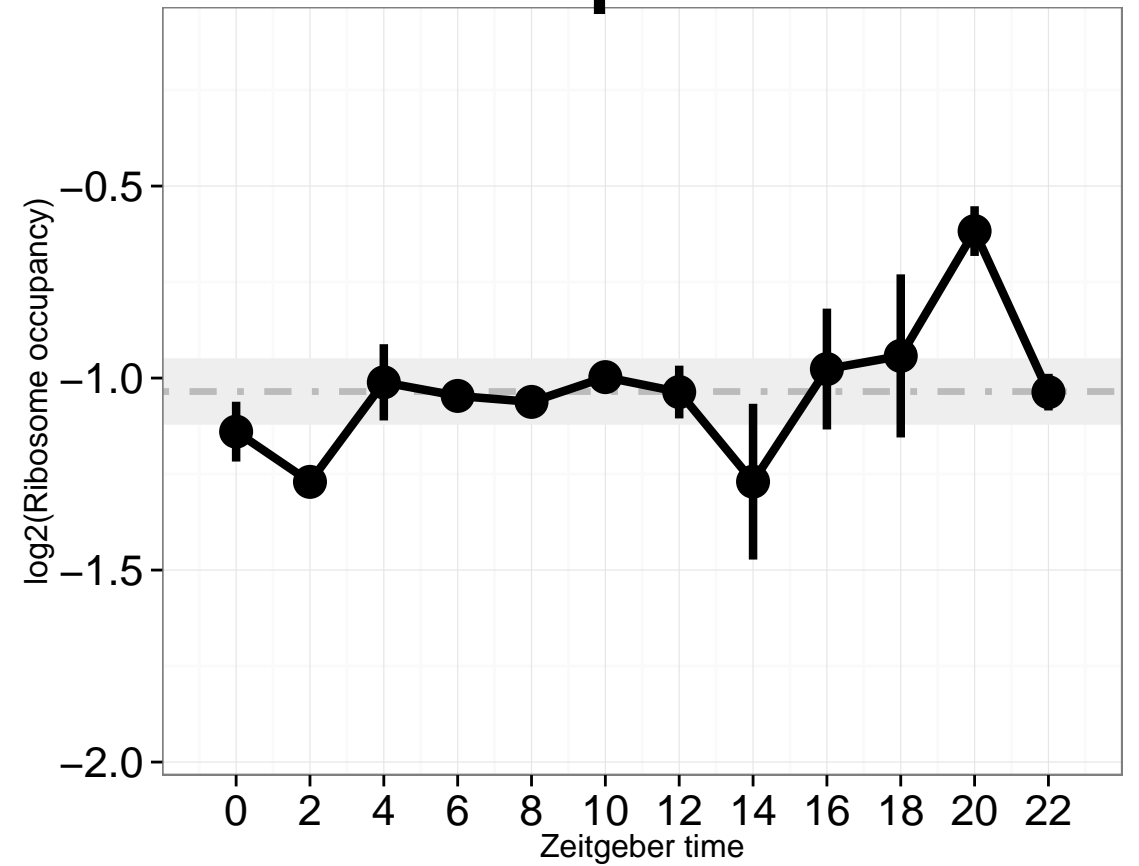

Supplement: Supplementary file 9787 [file 1]

# Zfhx2

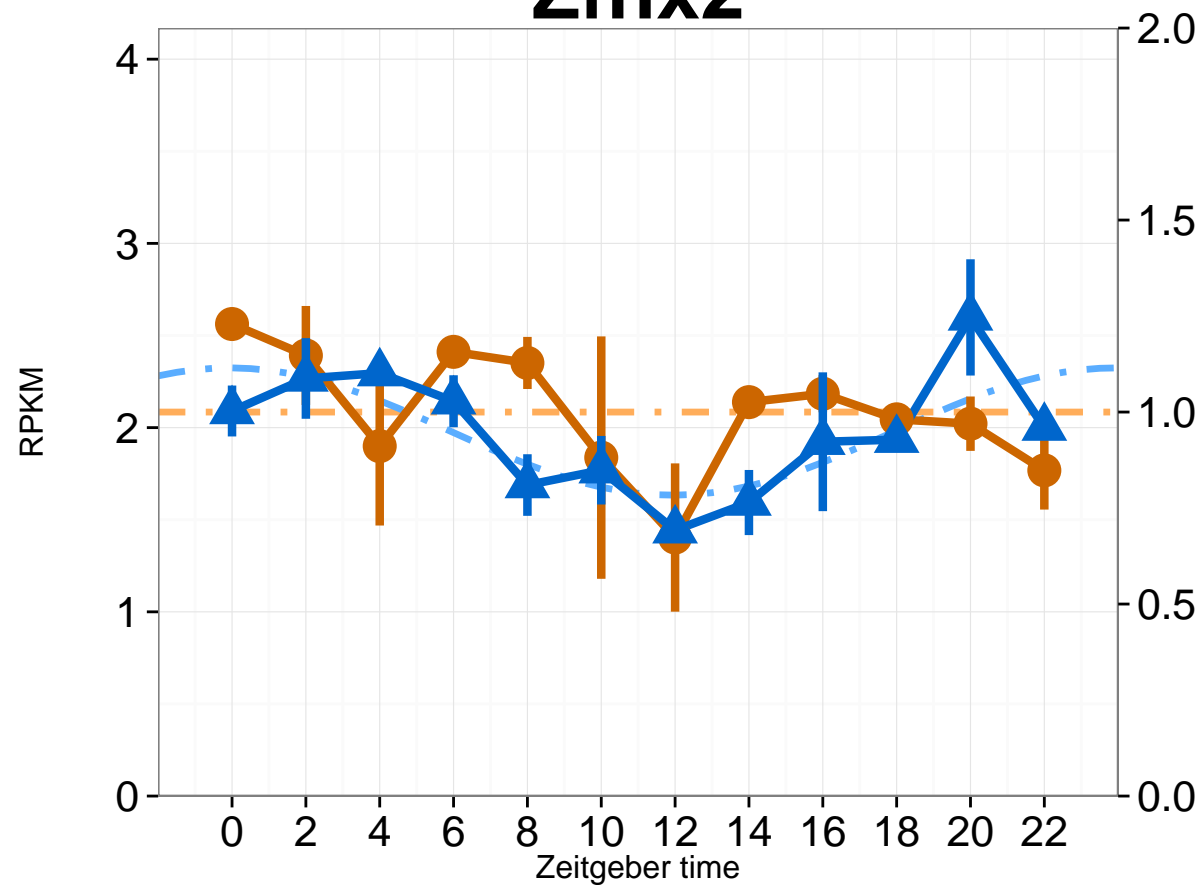

# Zfhx2

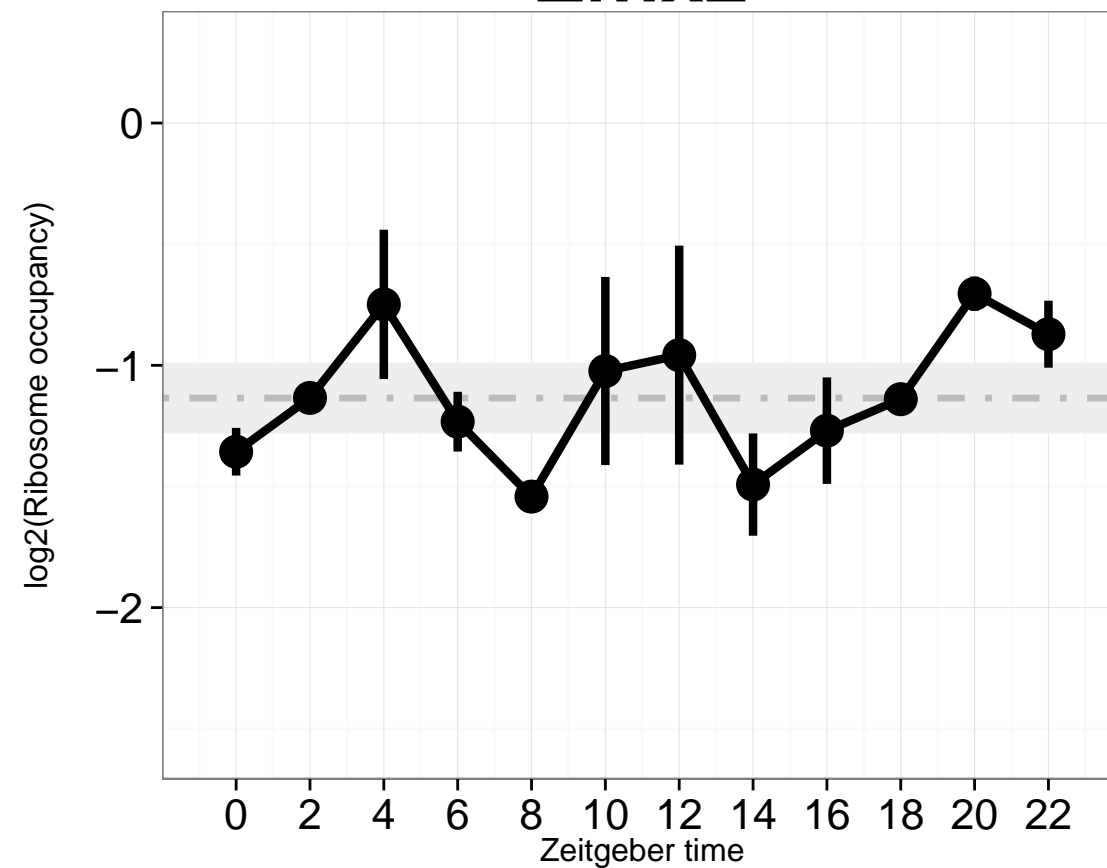

Supplement: Supplementary file 9788 [file 1]

## Rbpj

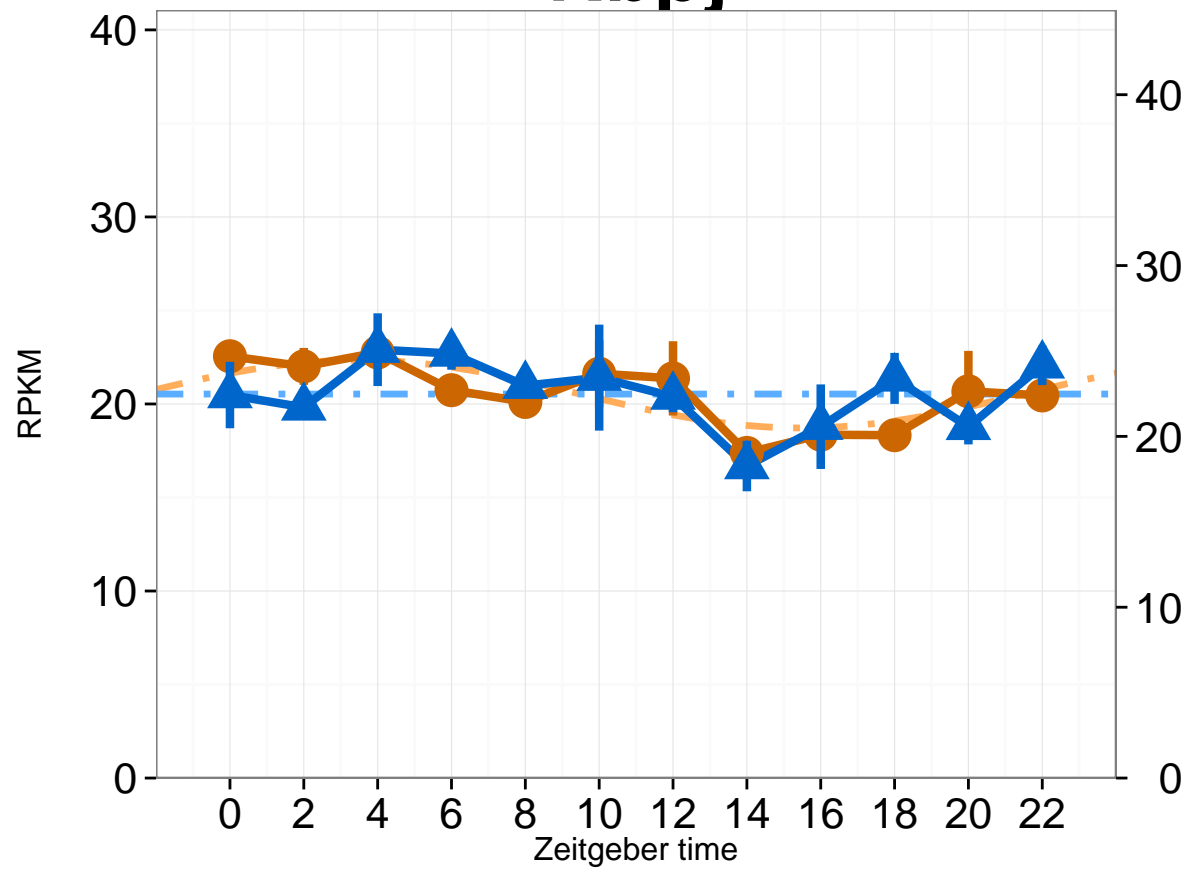

## Rbpj

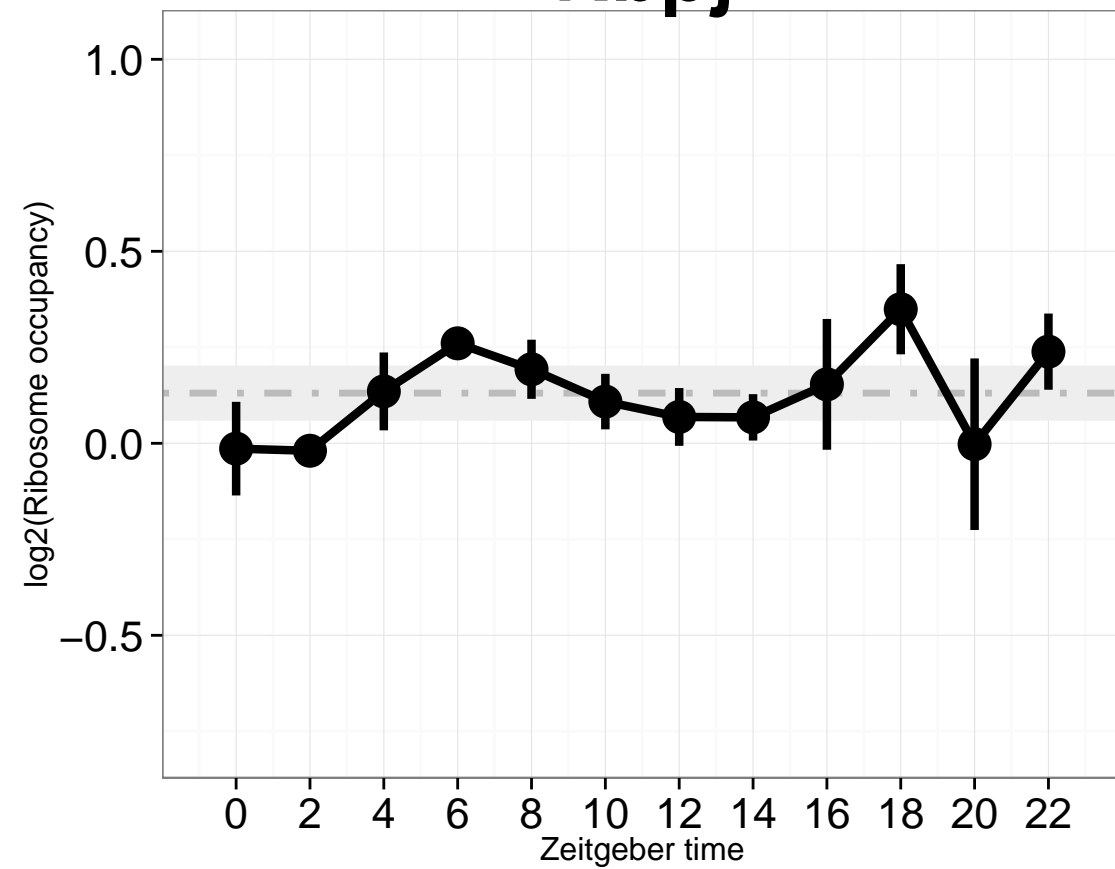

Supplement: Supplementary file 9789 [file 1]

## Kcnj10

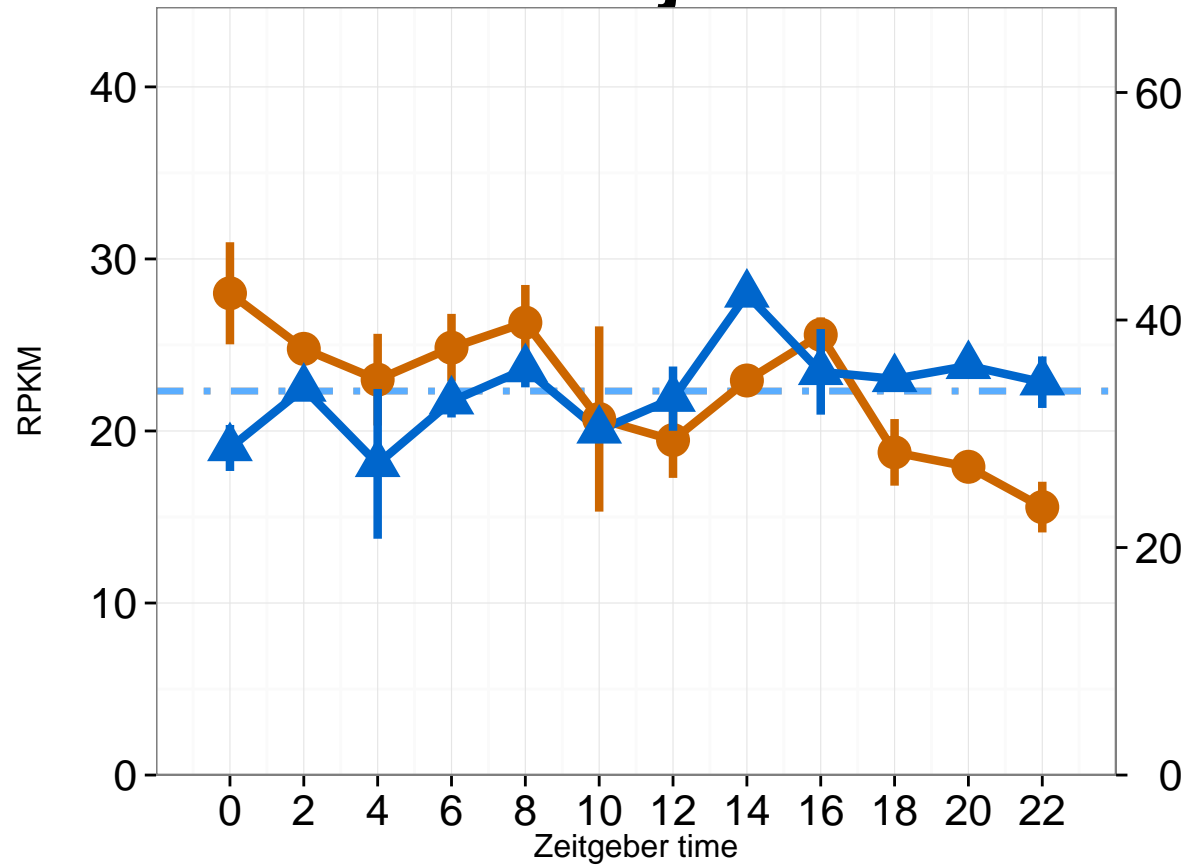

## Kcnj10

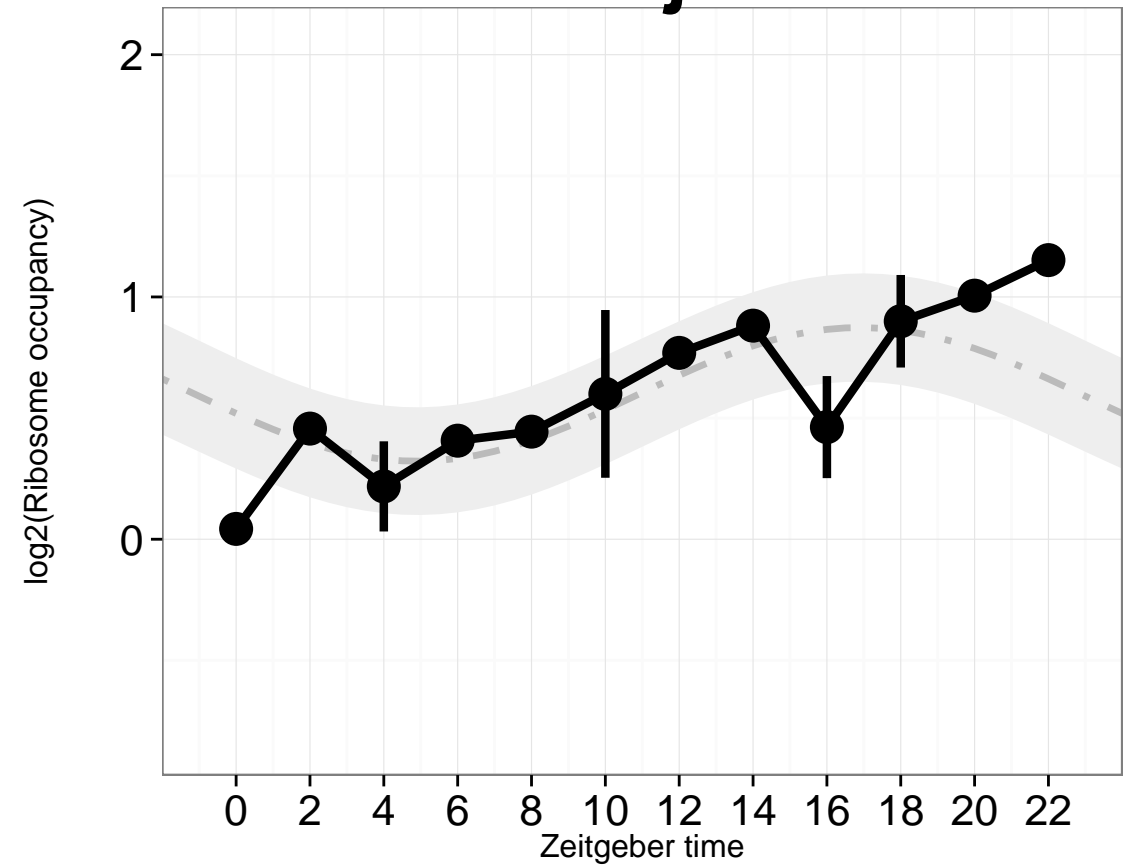

Supplement: Supplementary file 9790 [file 1]

## Adh7 TR

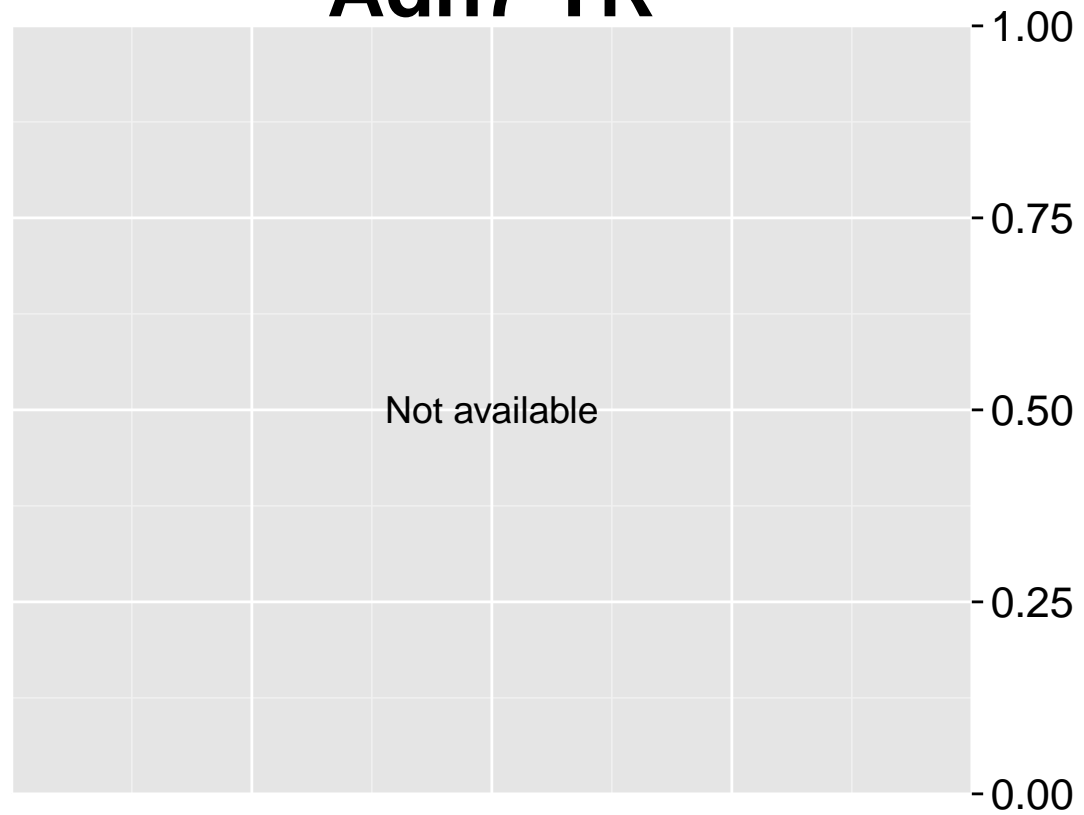

## Adh7 log2(Ribosome occupancy)

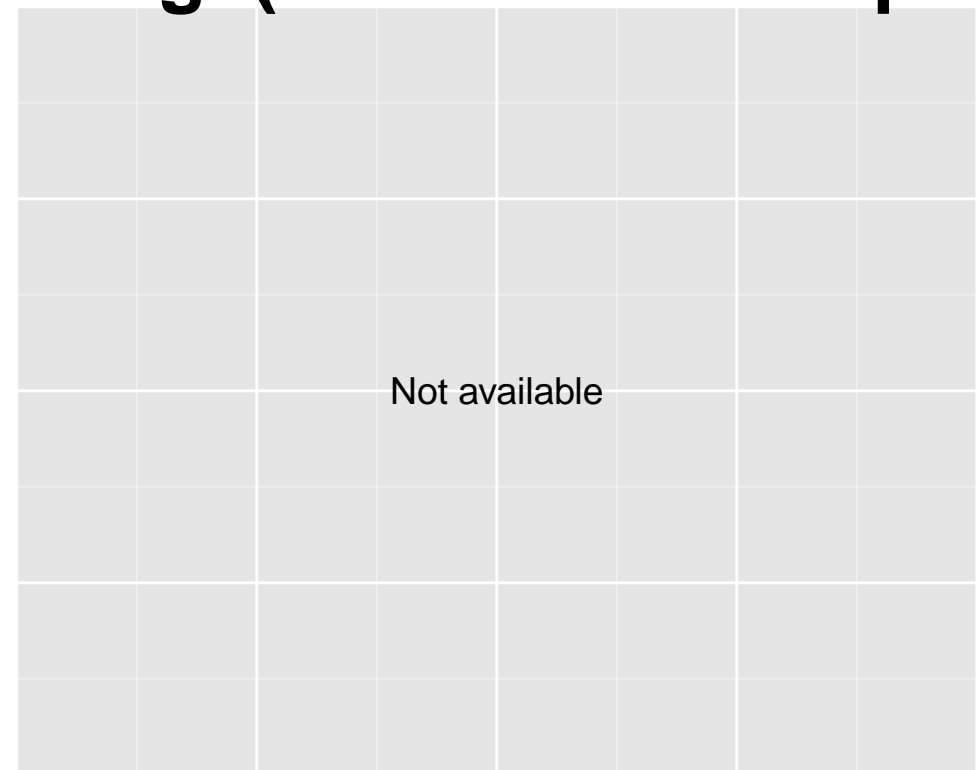

Supplement: Supplementary file 9791 [file 1]

## Elk4

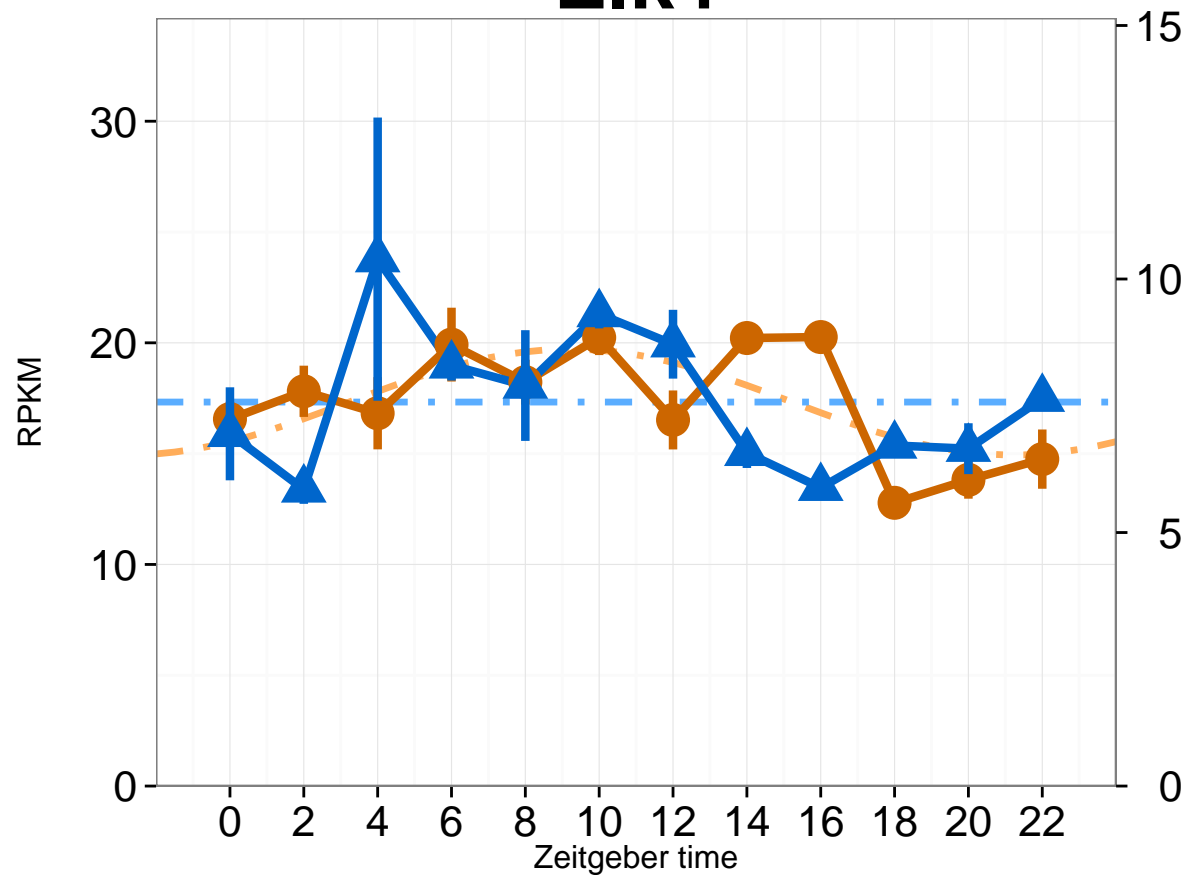

## Elk4

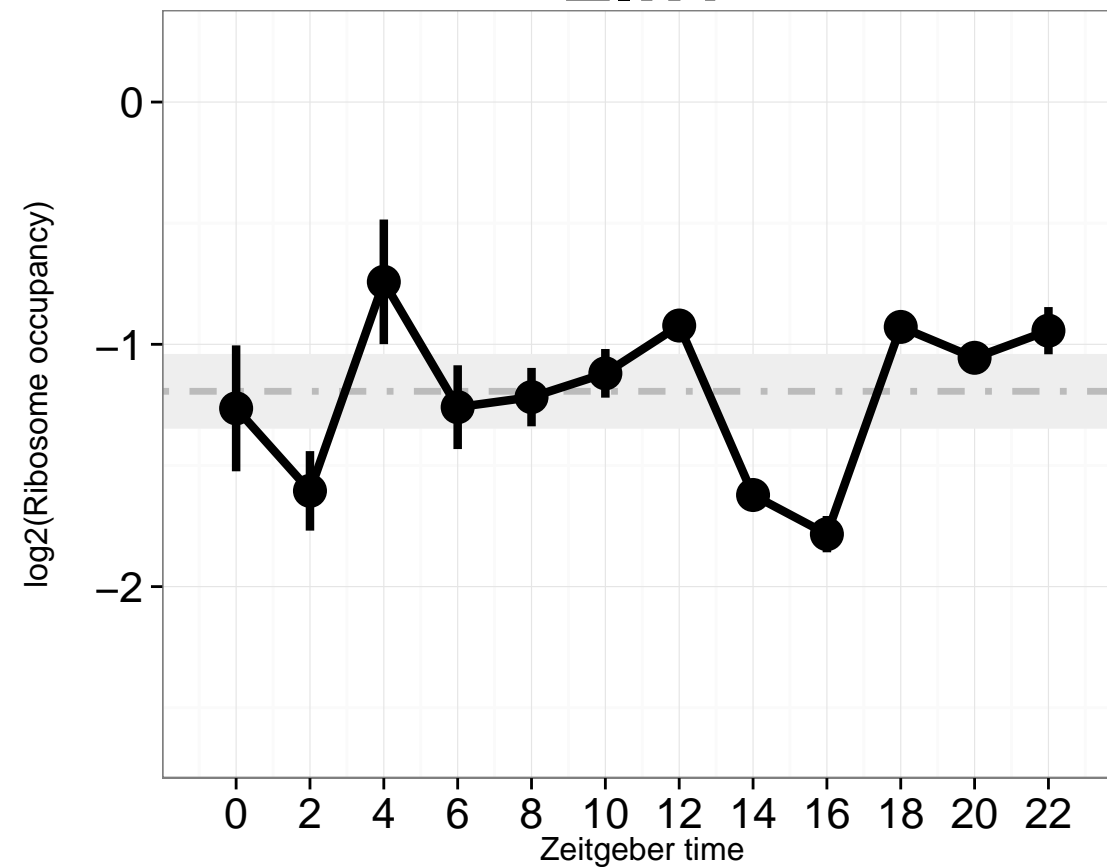

Supplement: Supplementary file 9792 [file 1]

## H6pd

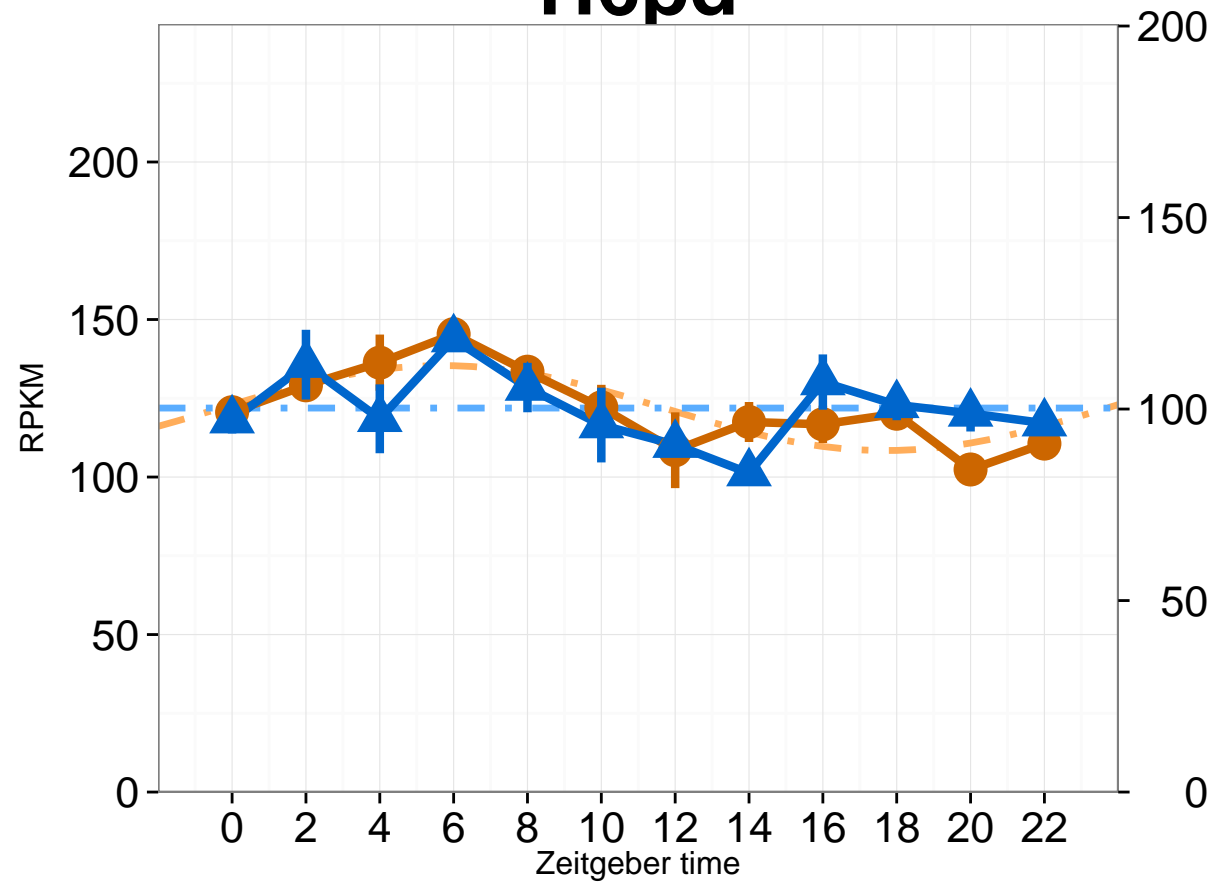

## H6pd

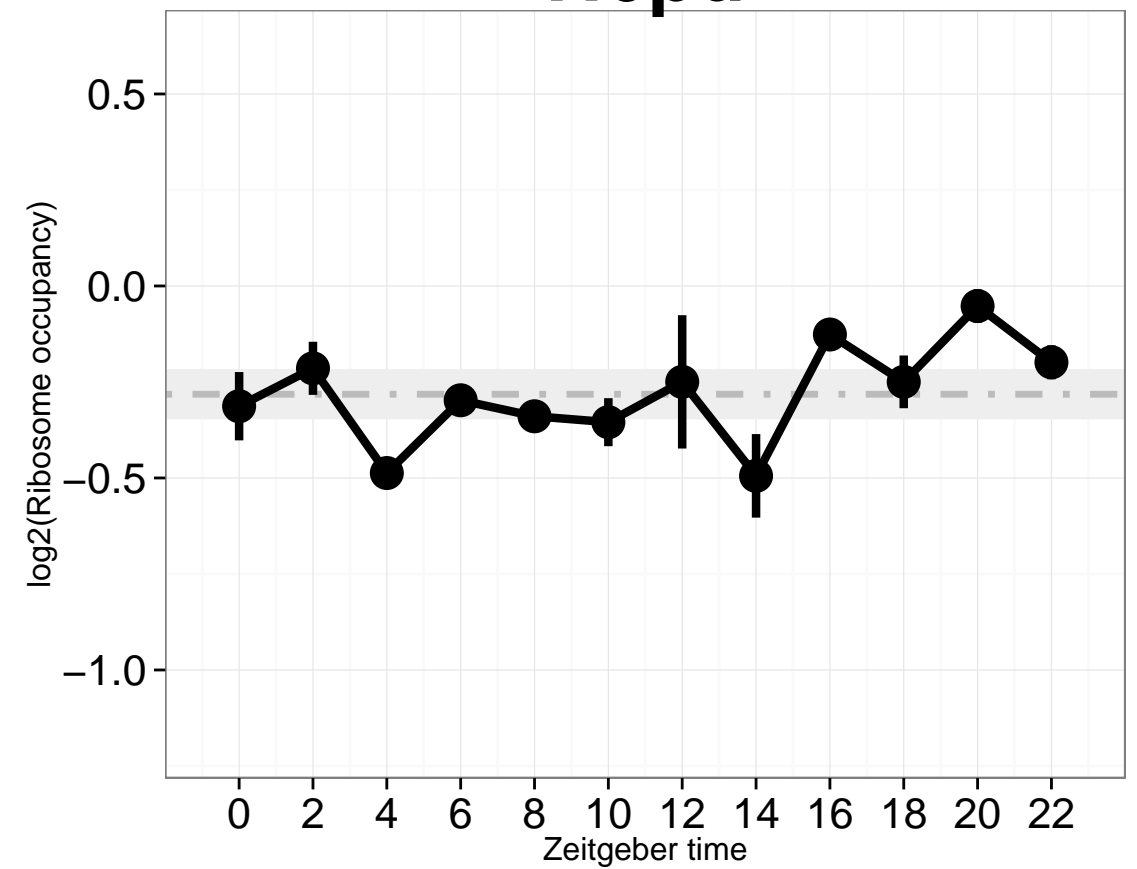

Supplement: Supplementary file 9794 [file 1]

# Zfp458

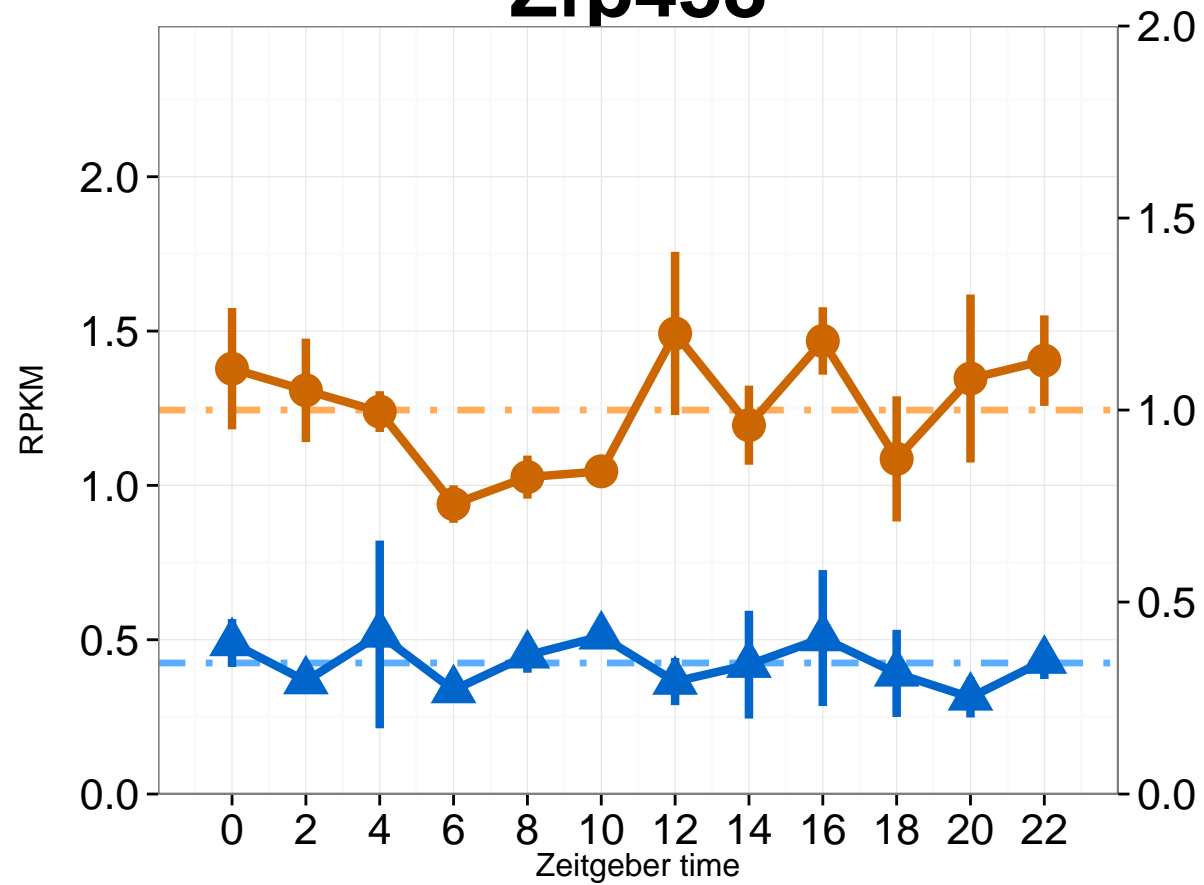

# Zfp458

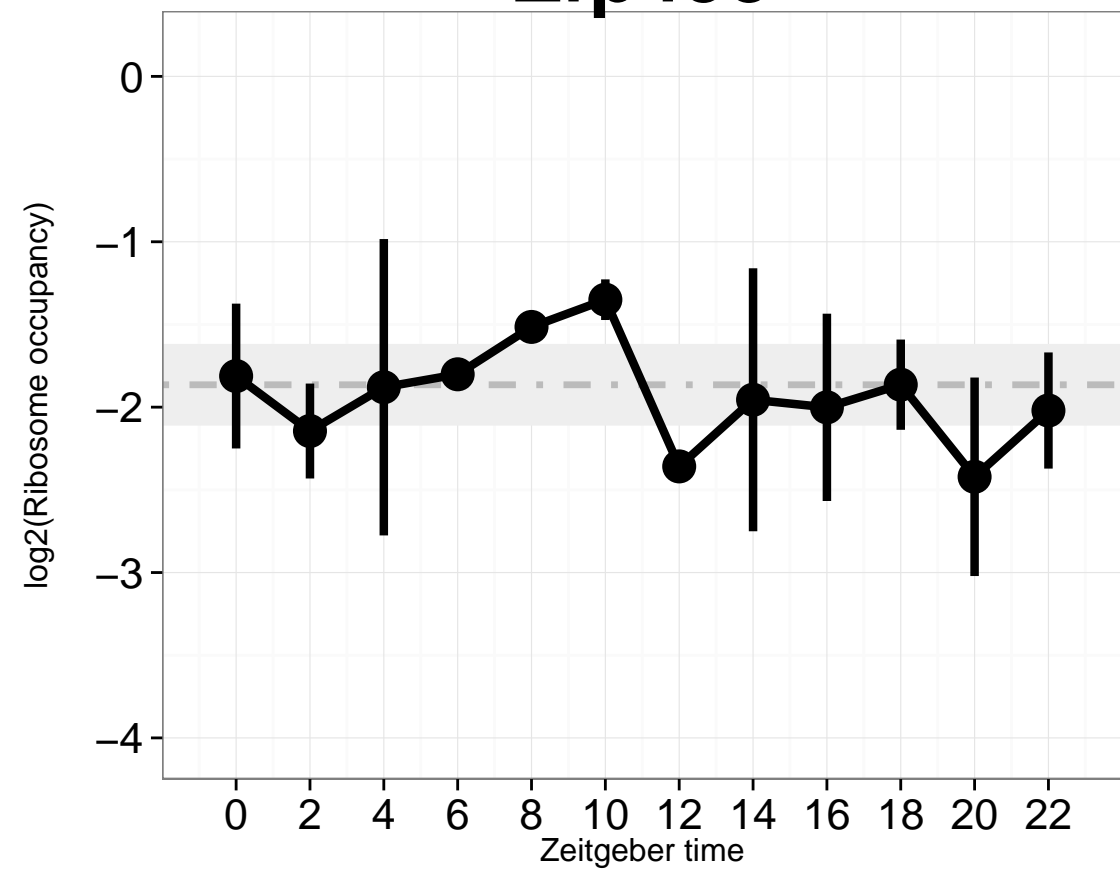

Supplement: Supplementary file 9795 [file 1]

# Fam171a2

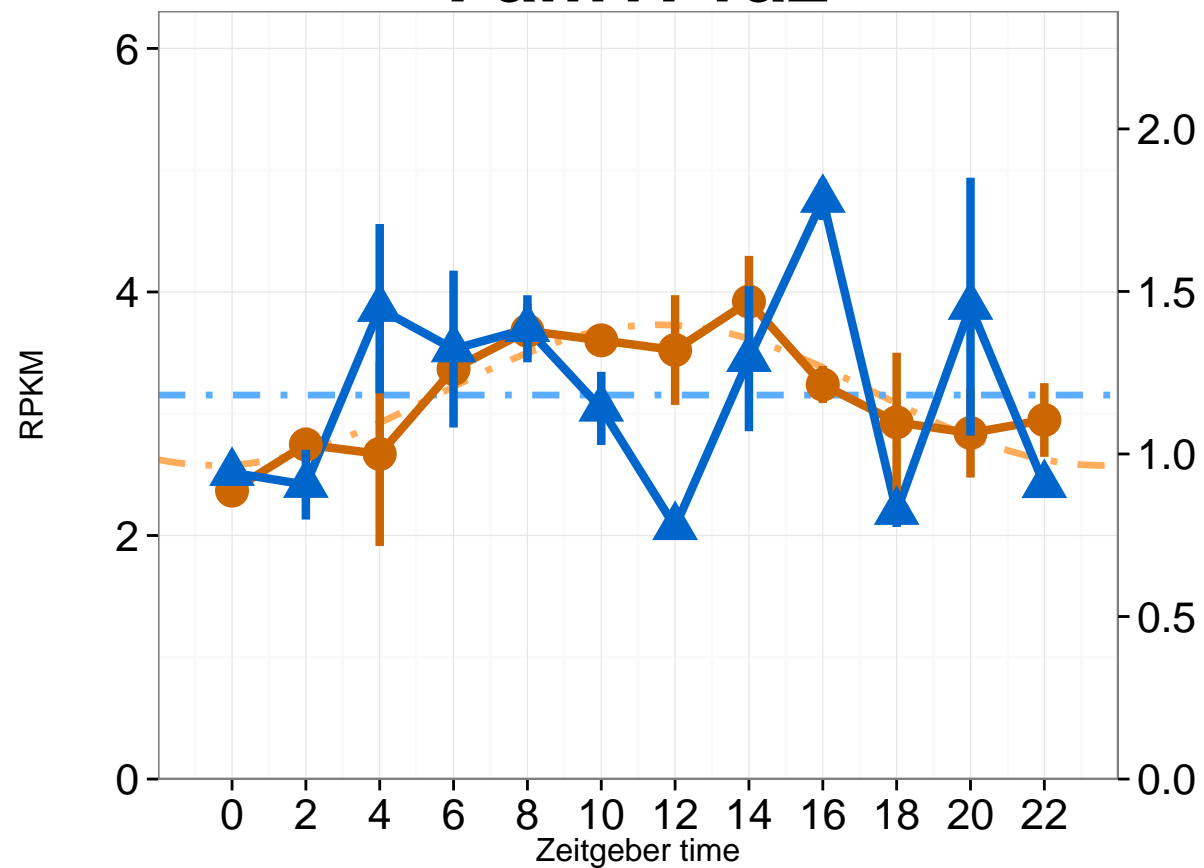

# Fam171a2

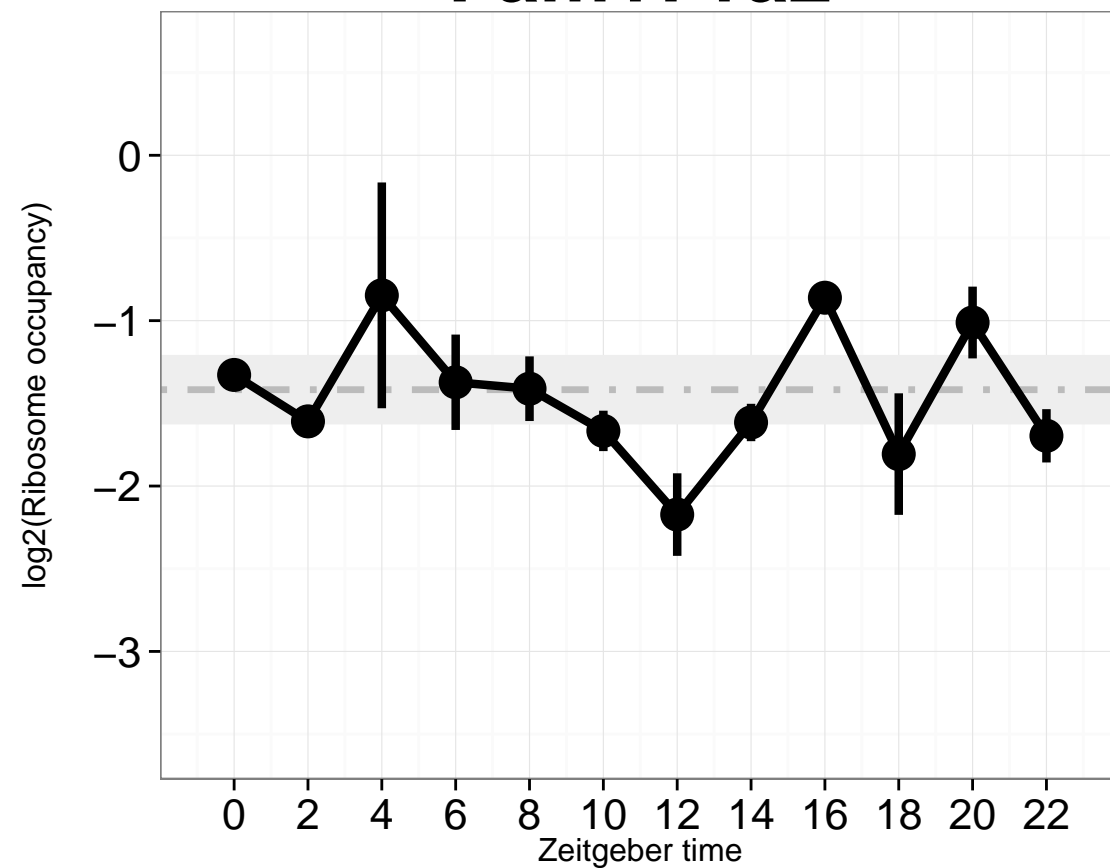

Supplement: Supplementary file 9796 [file 1]

# Tial1

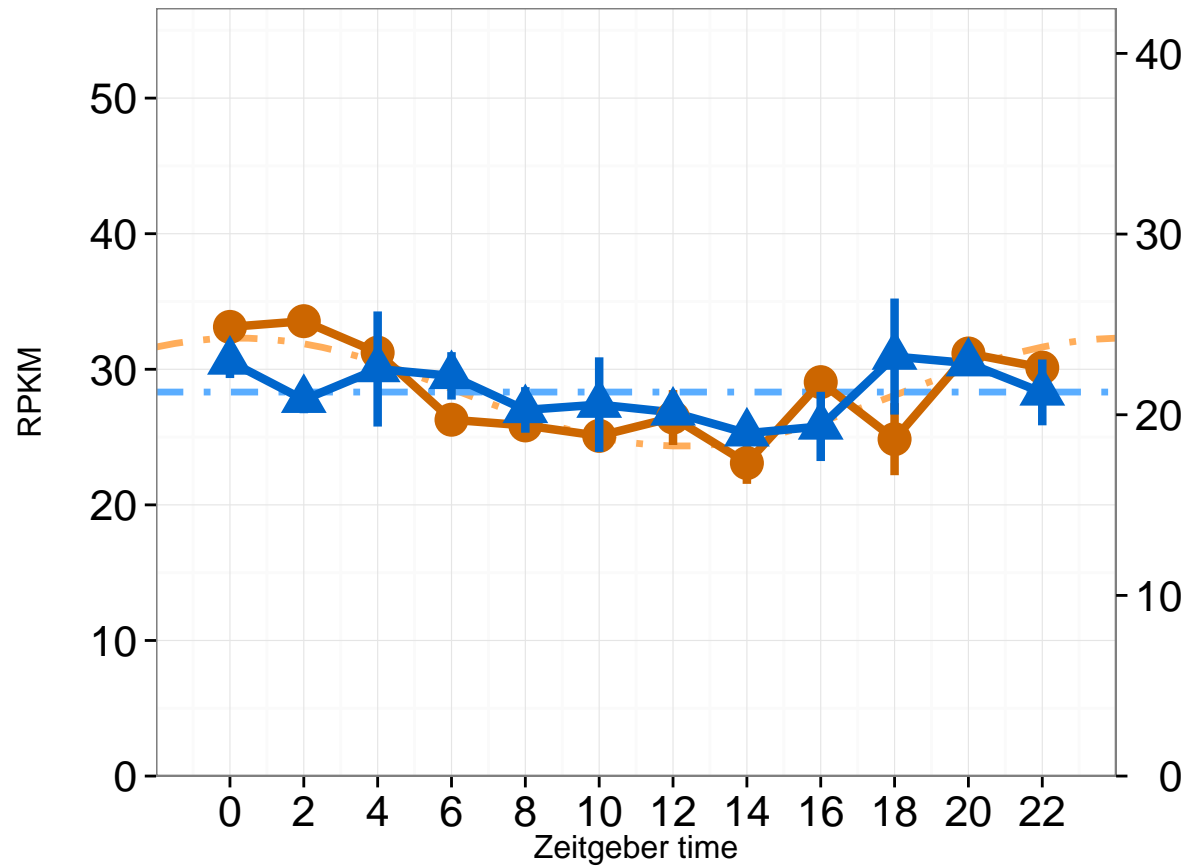

# Tial1

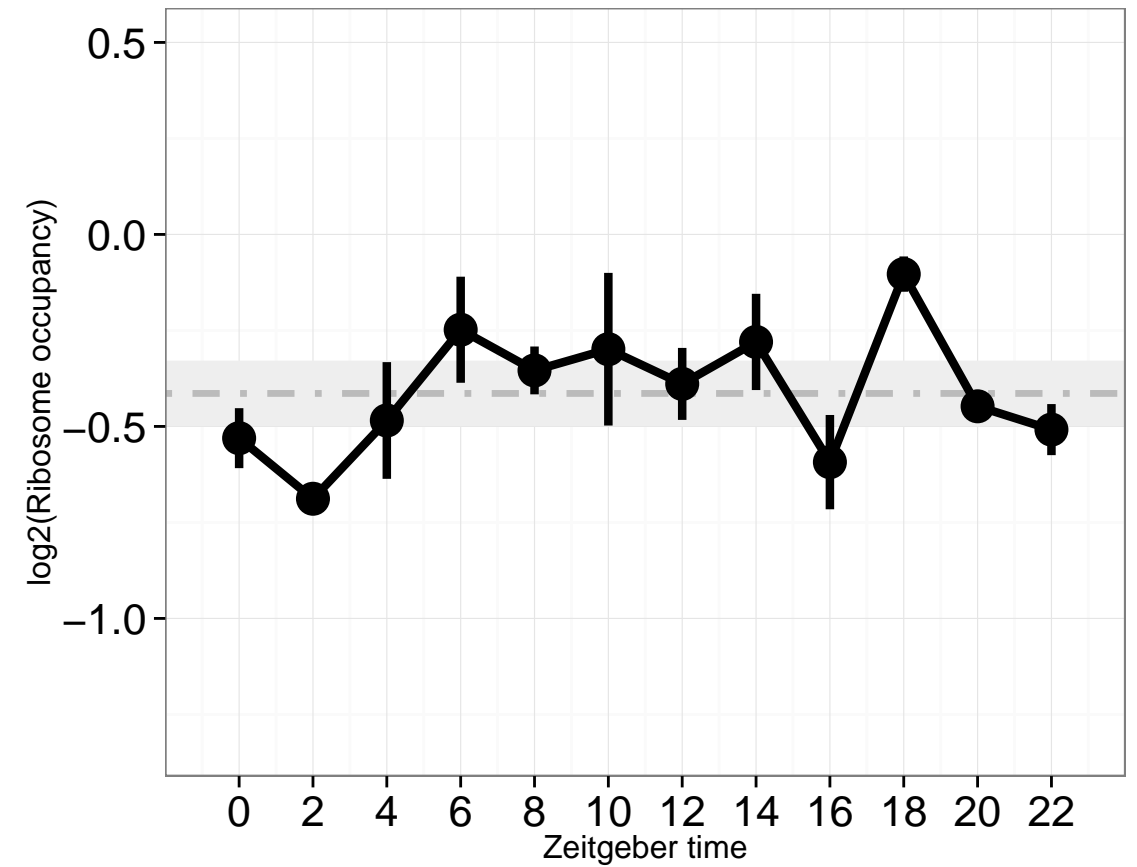

Supplement: Supplementary file 9797 [file 1]

## Slain2

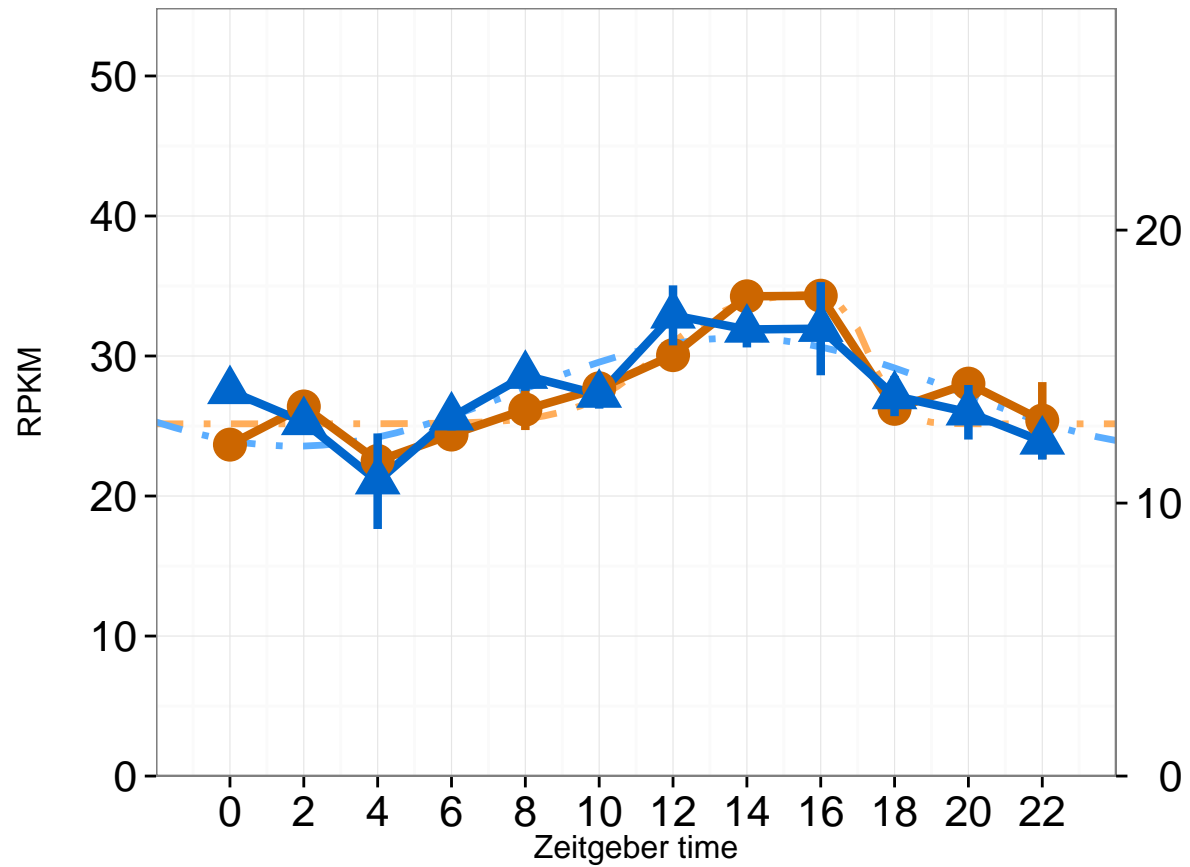

## Slain2

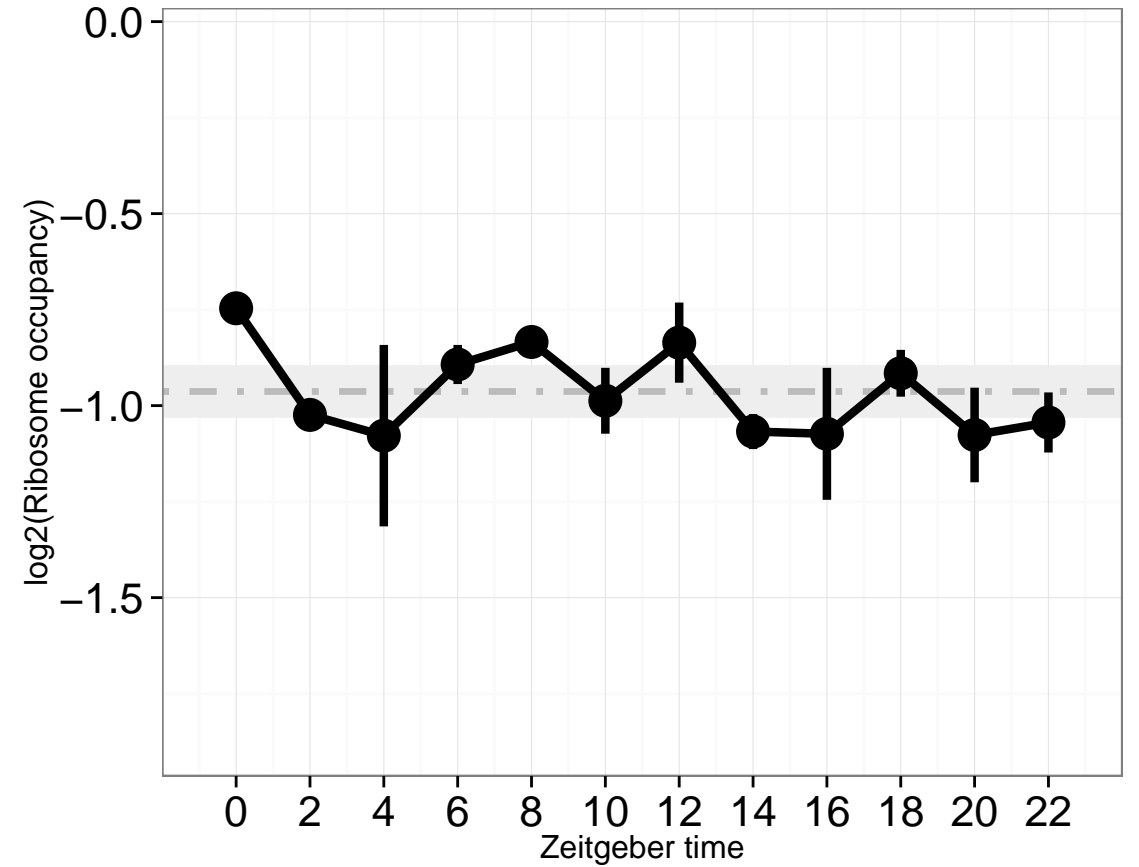

Supplement: Supplementary file 9798 [file 1]

## Arl6ip4

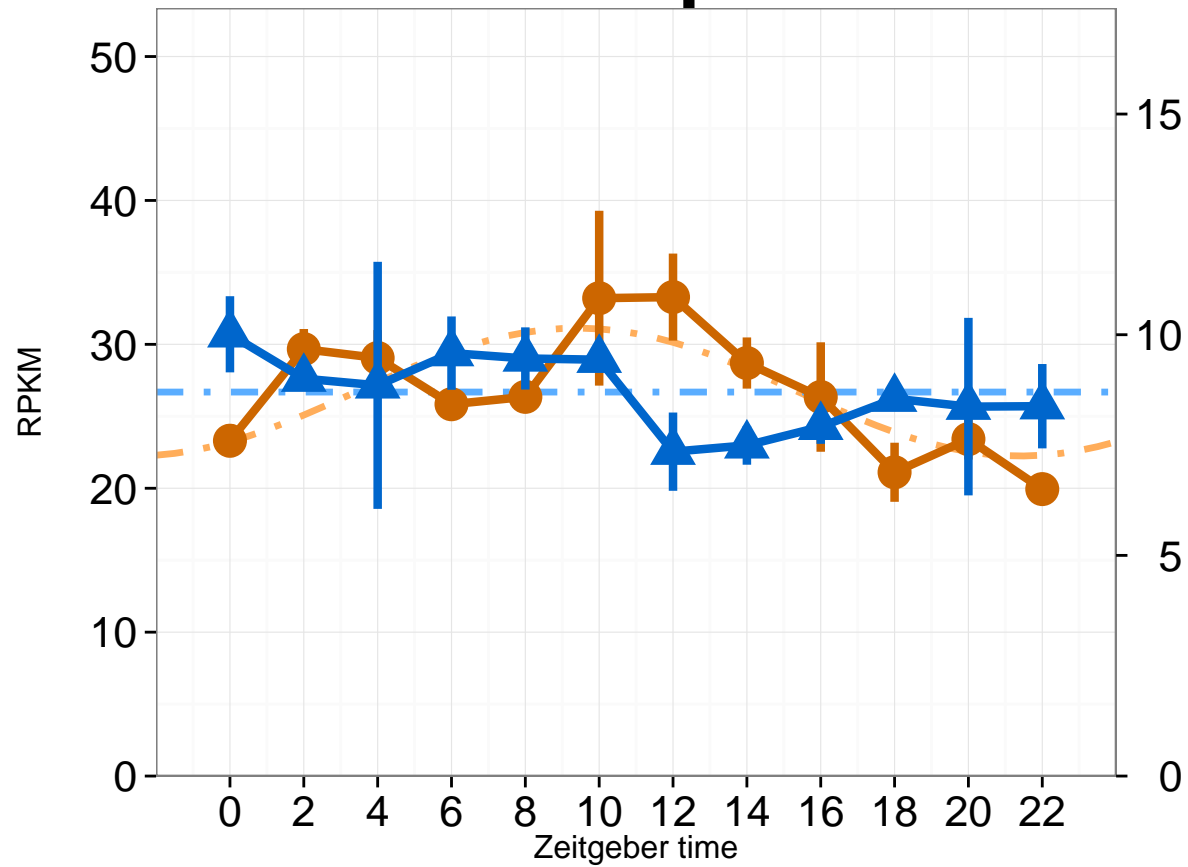

## Arl6ip4

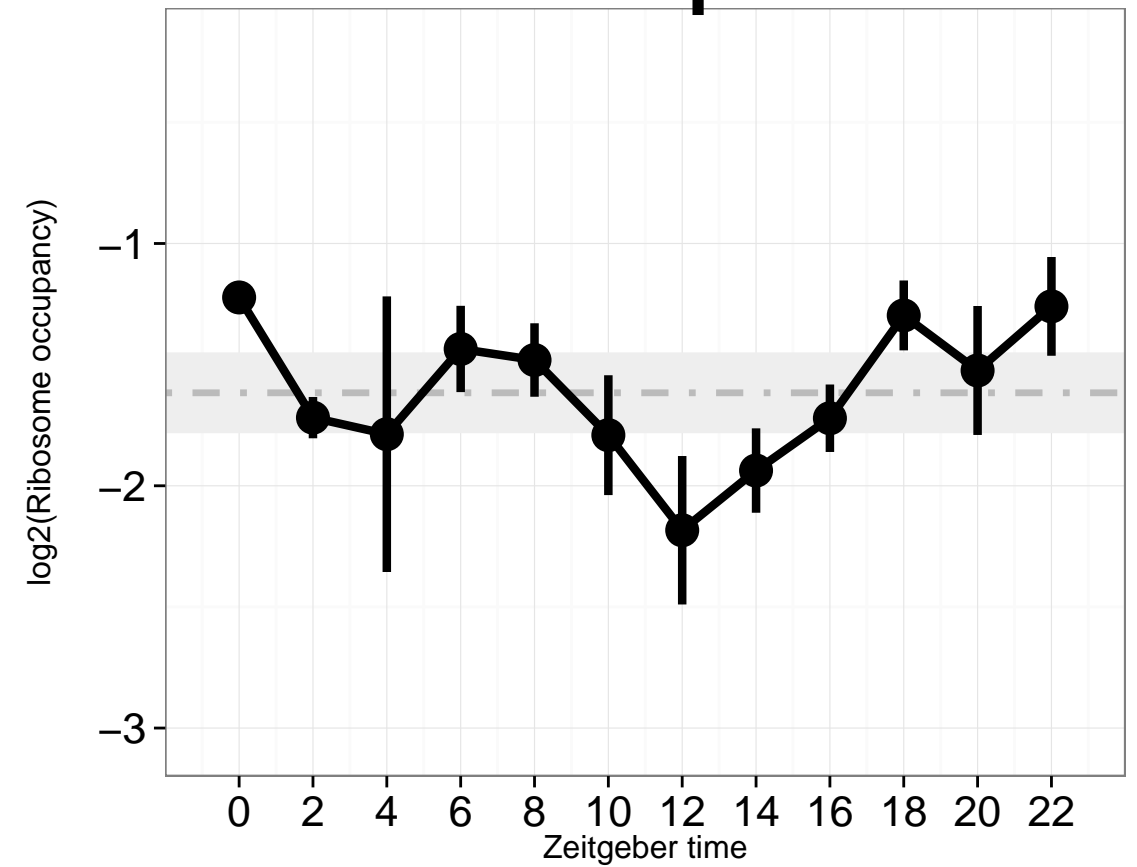

Supplement: Supplementary file 9799 [file 1]

## BC018242

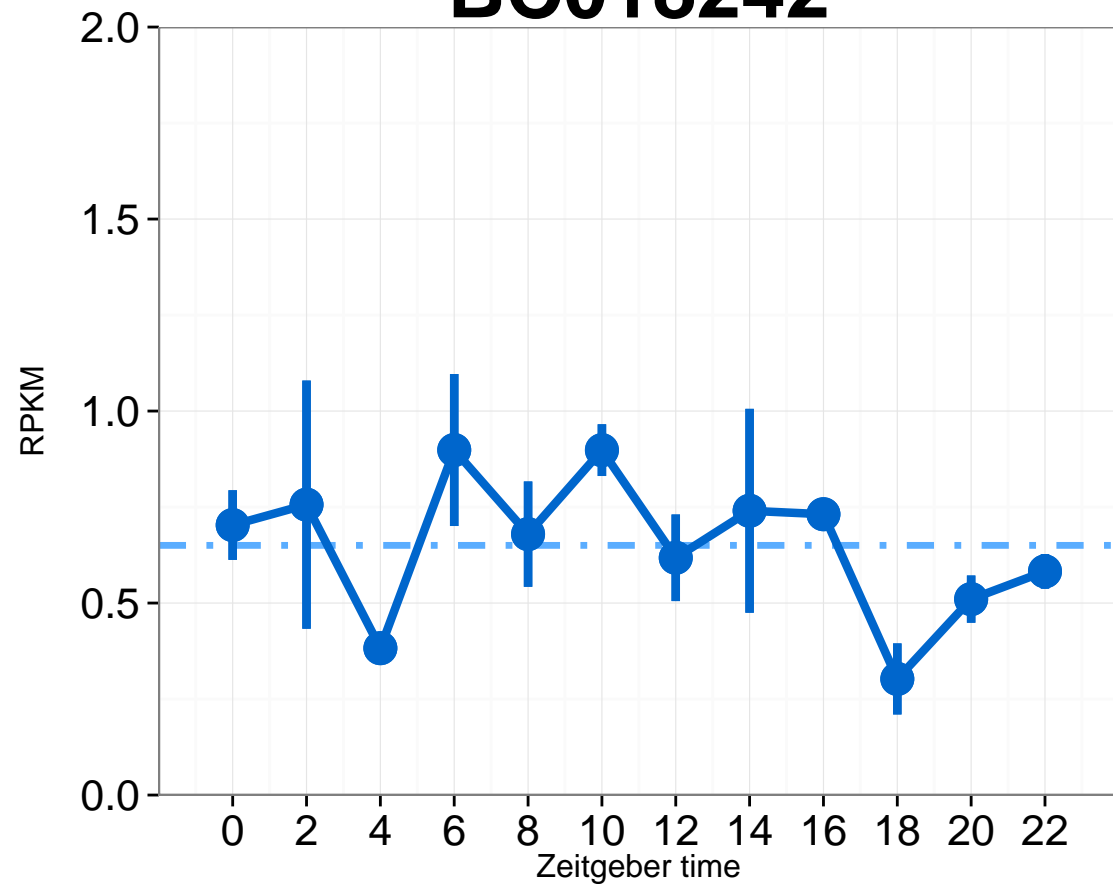

## BC018242 log2(Ribosome occupancy)

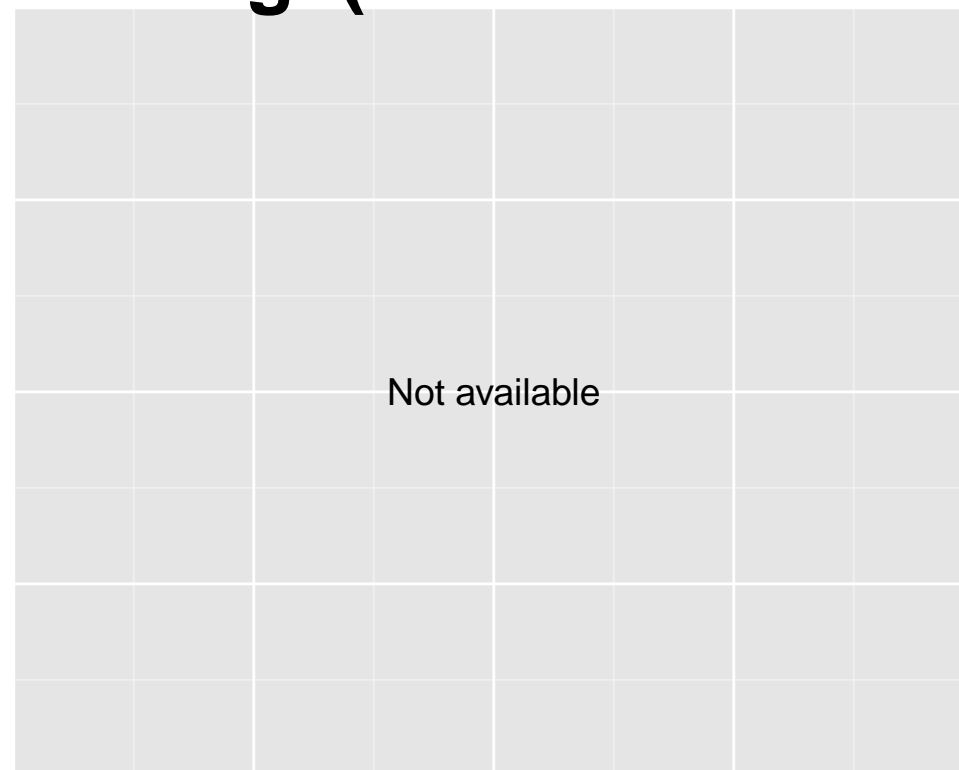

Supplement: Supplementary file 9800 [file 1]

## Gbf1

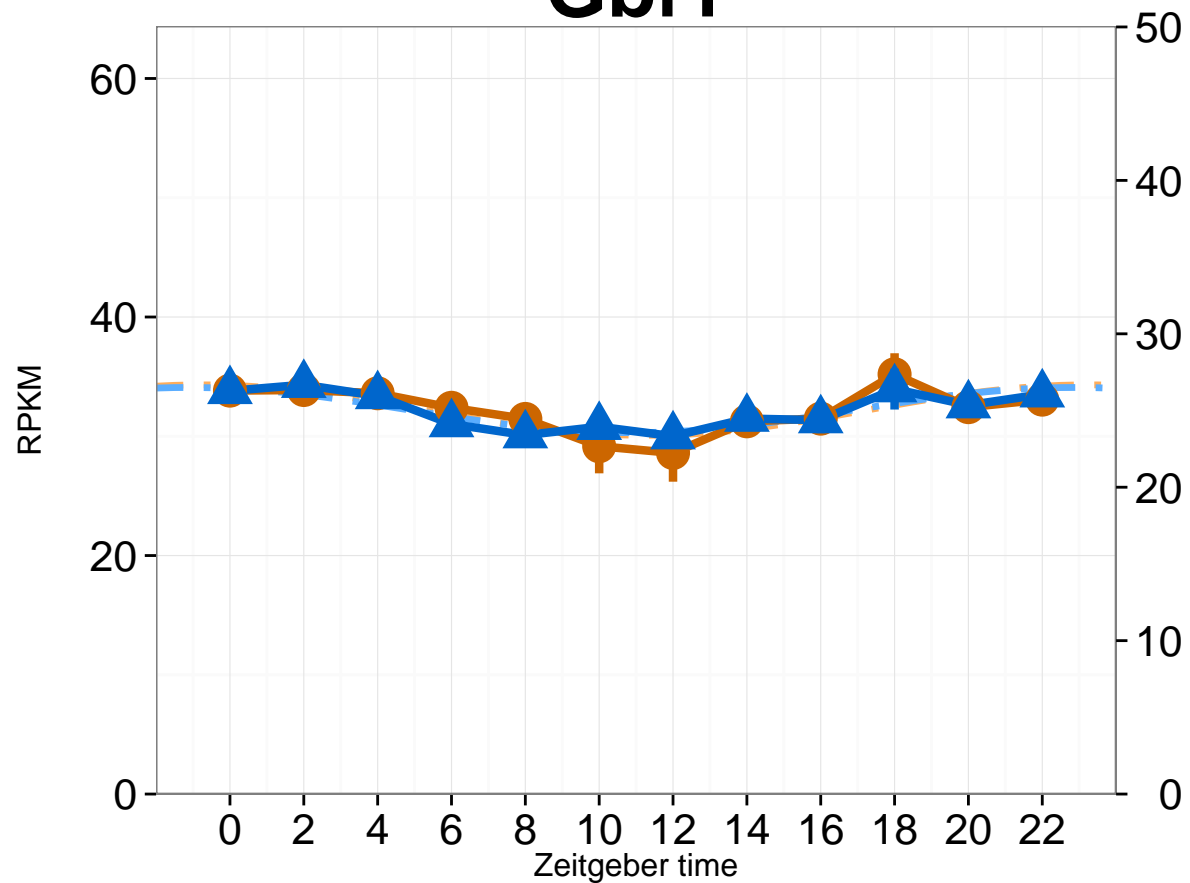

## Gbf1

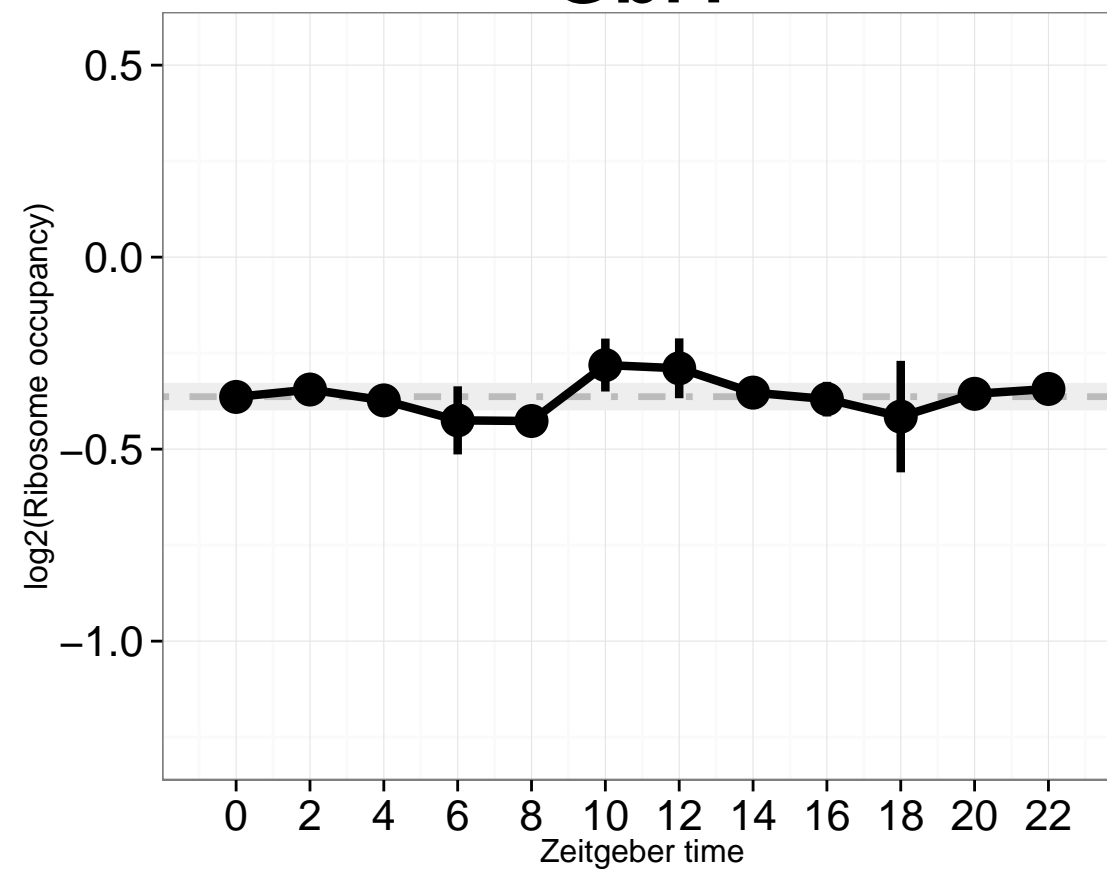

Supplement: Supplementary file 9801 [file 1]

# Pafah1b1

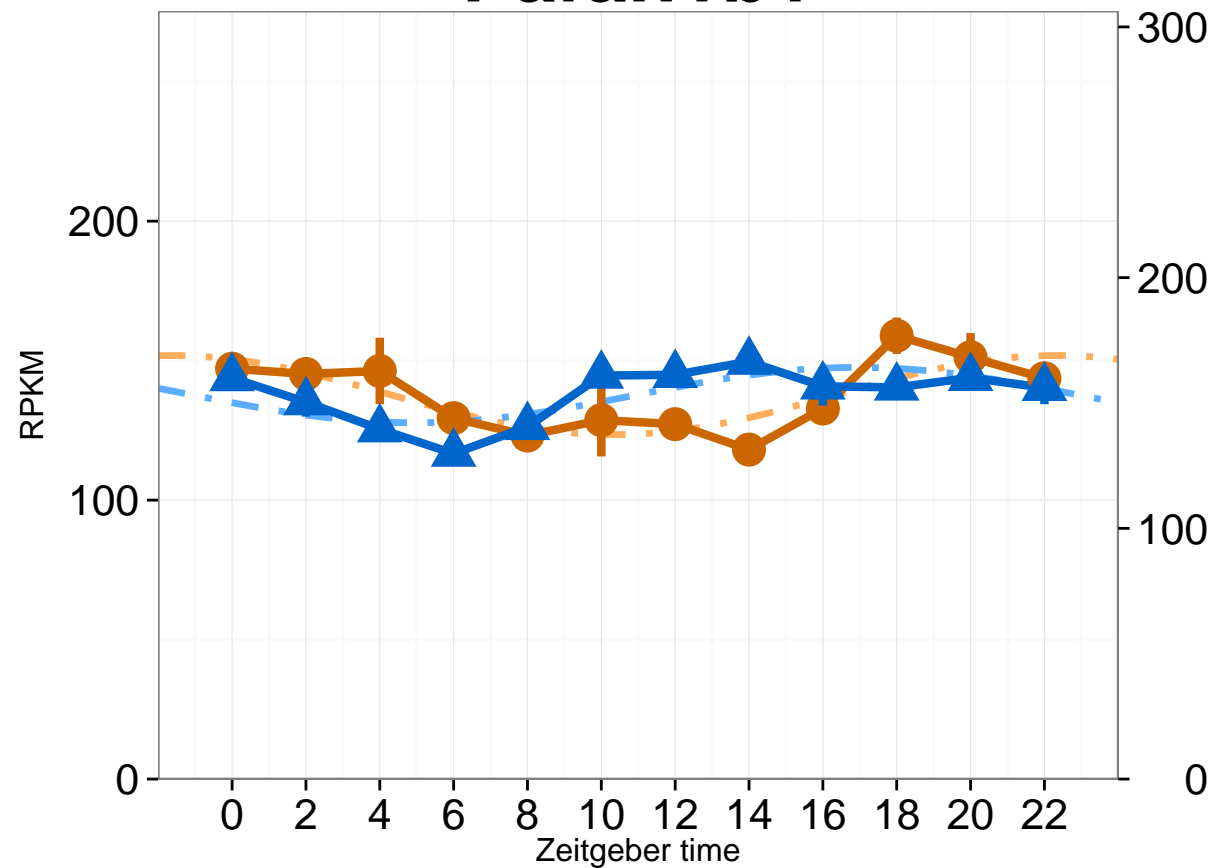

# Pafah1b1

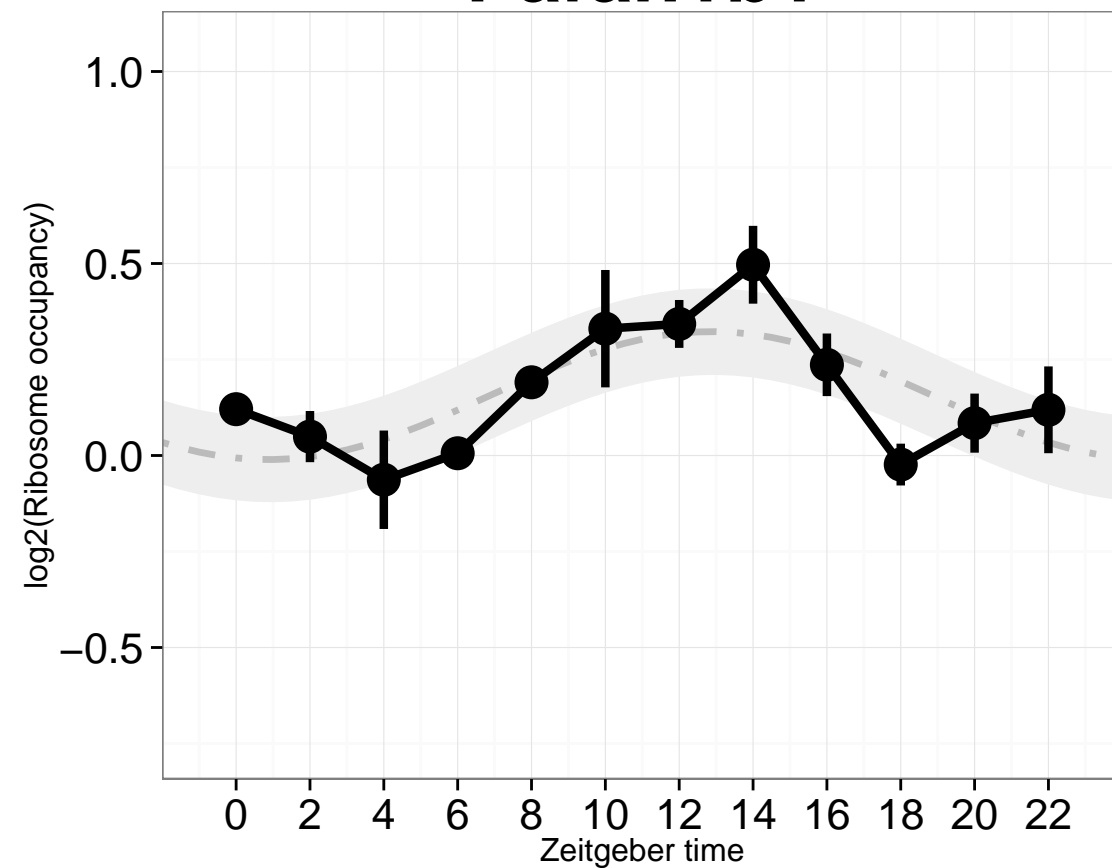

Supplement: Supplementary file 9802 [file 1]

## Nrd1

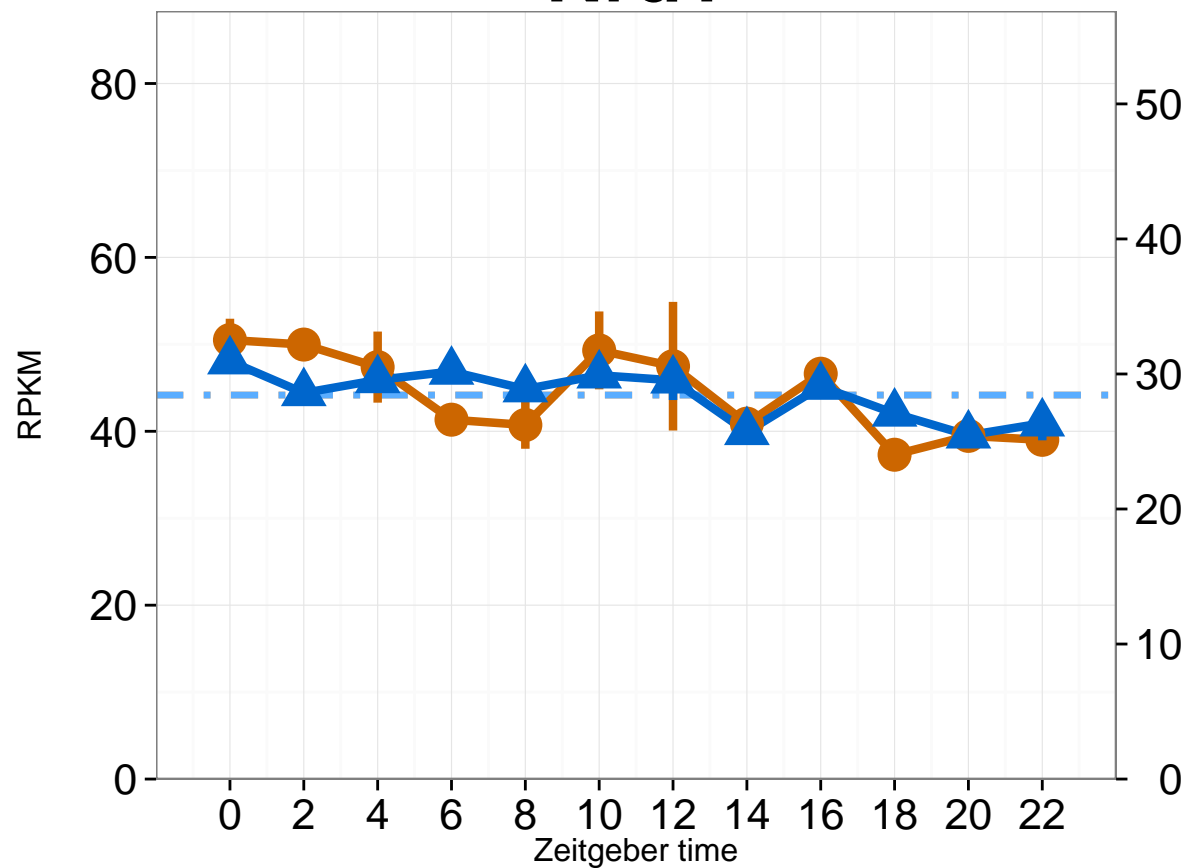

## Nrd1

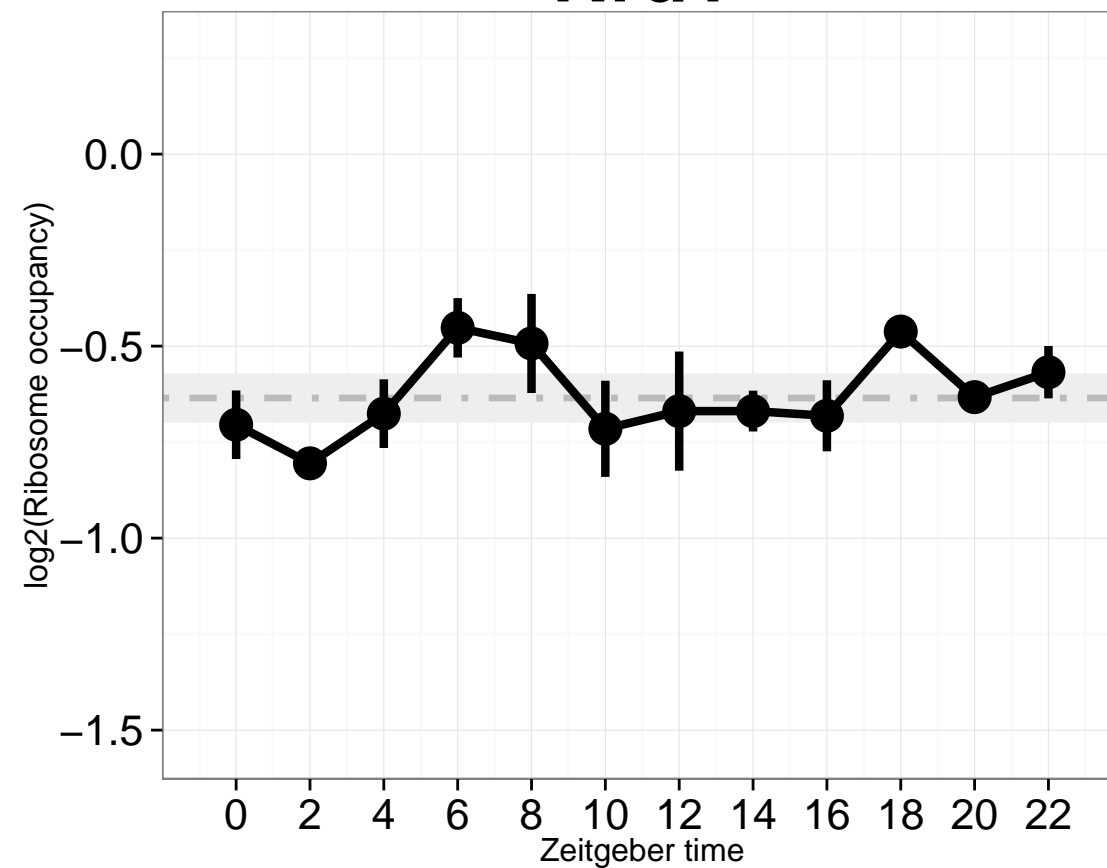

Supplement: Supplementary file 9803 [file 1]

## Meis1

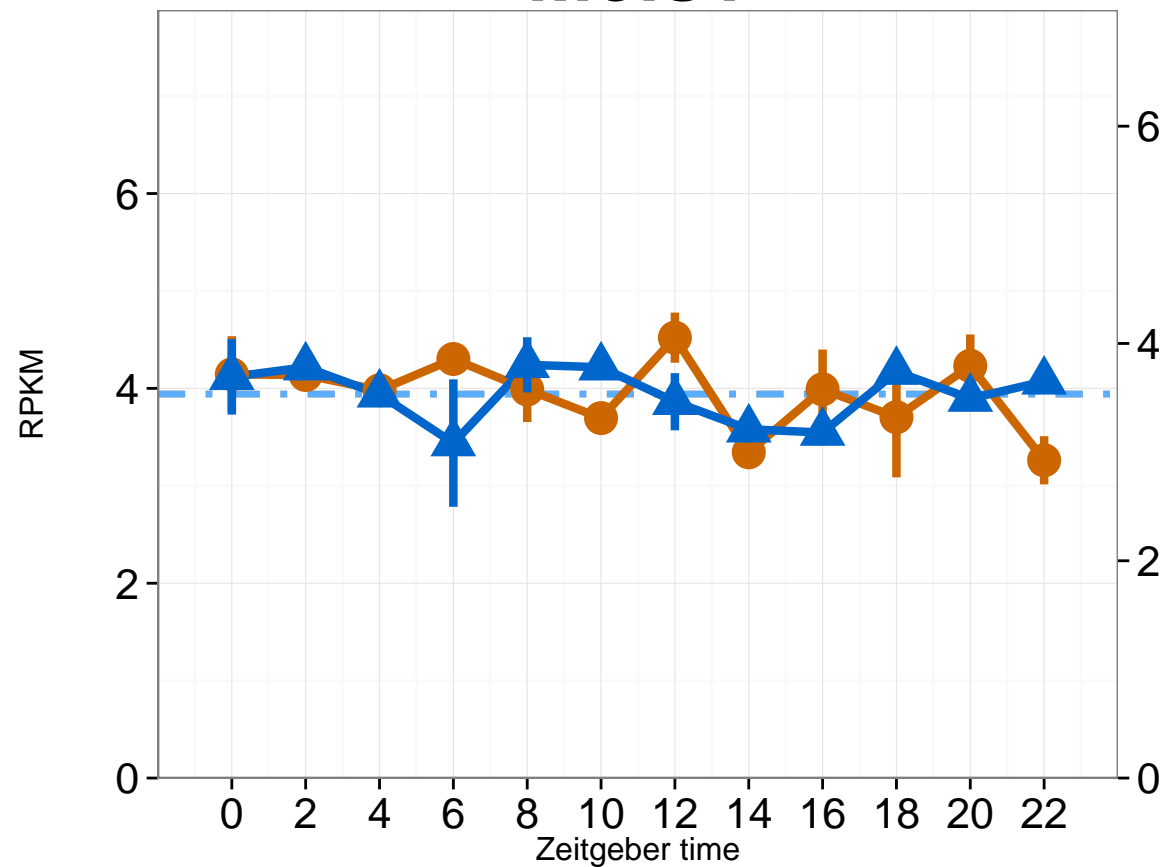

## Meis1

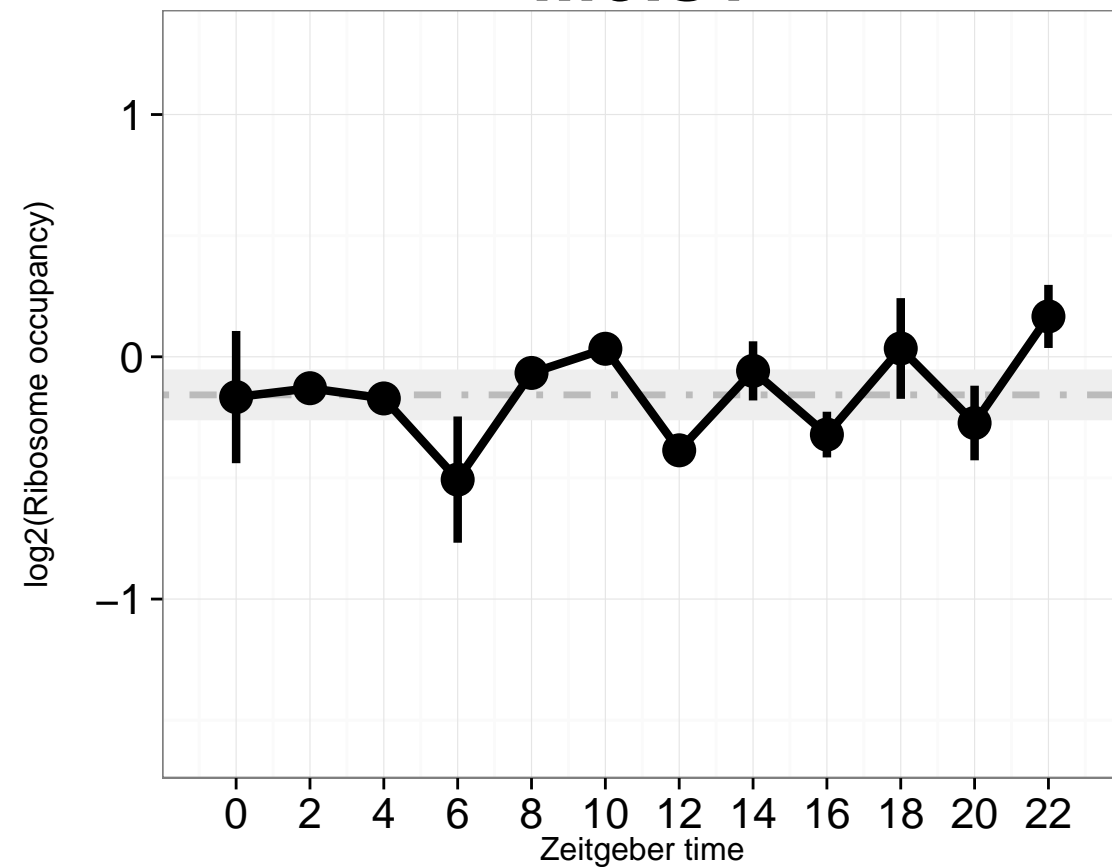

Supplement: Supplementary file 9804 [file 1]

# Rnf180

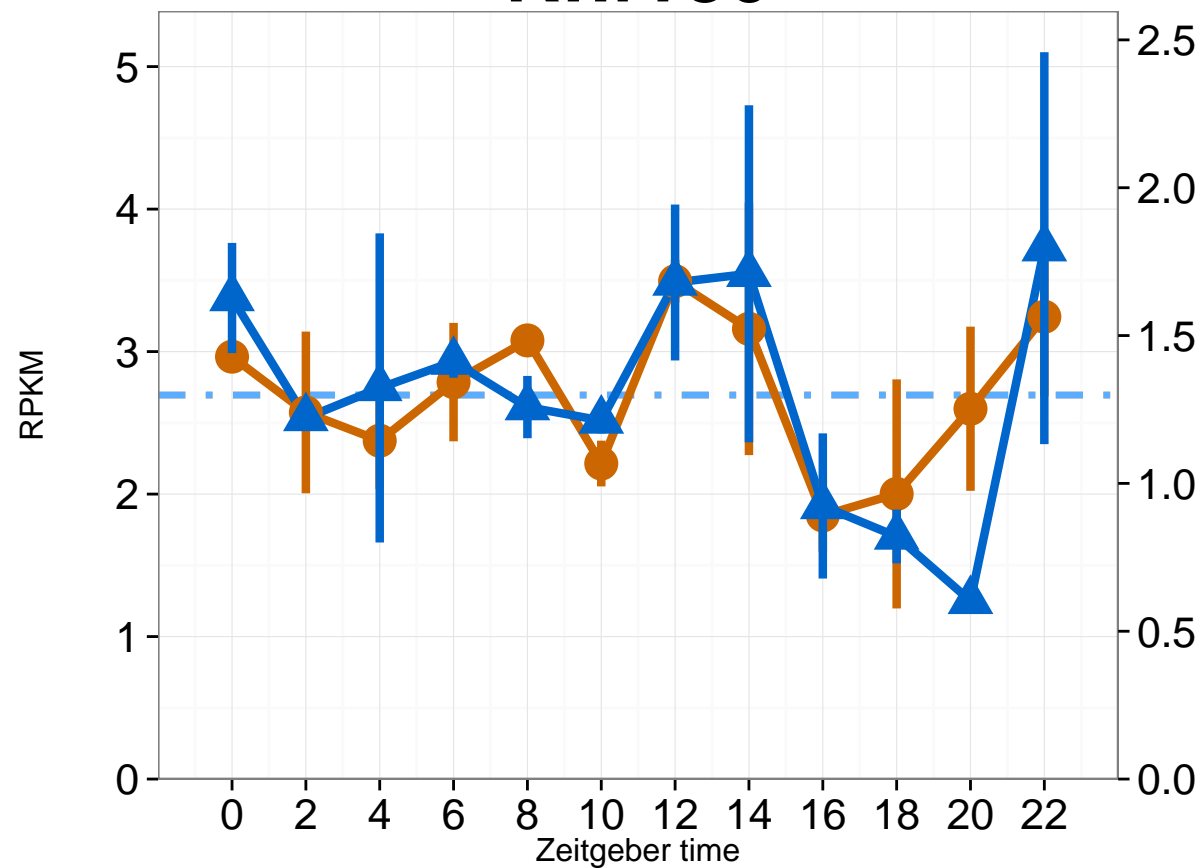

# Rnf180

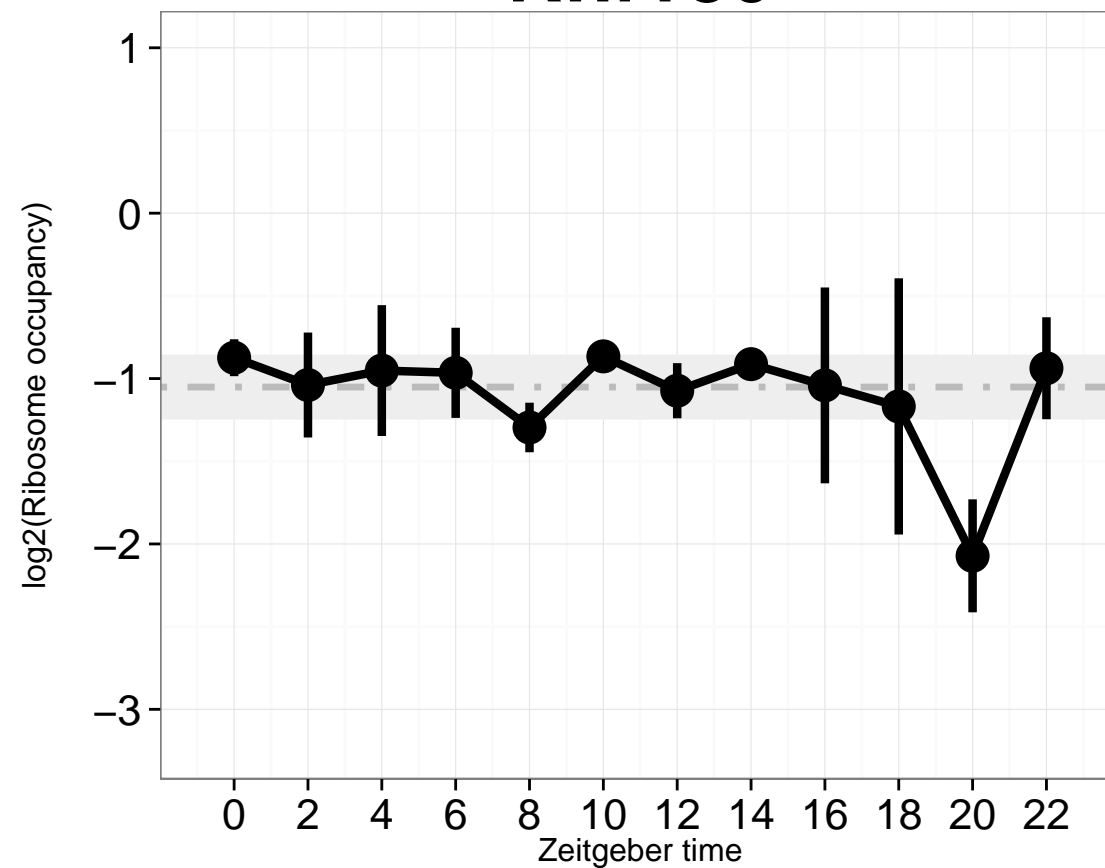

Supplement: Supplementary file 9805 [file 1]

## Pigr

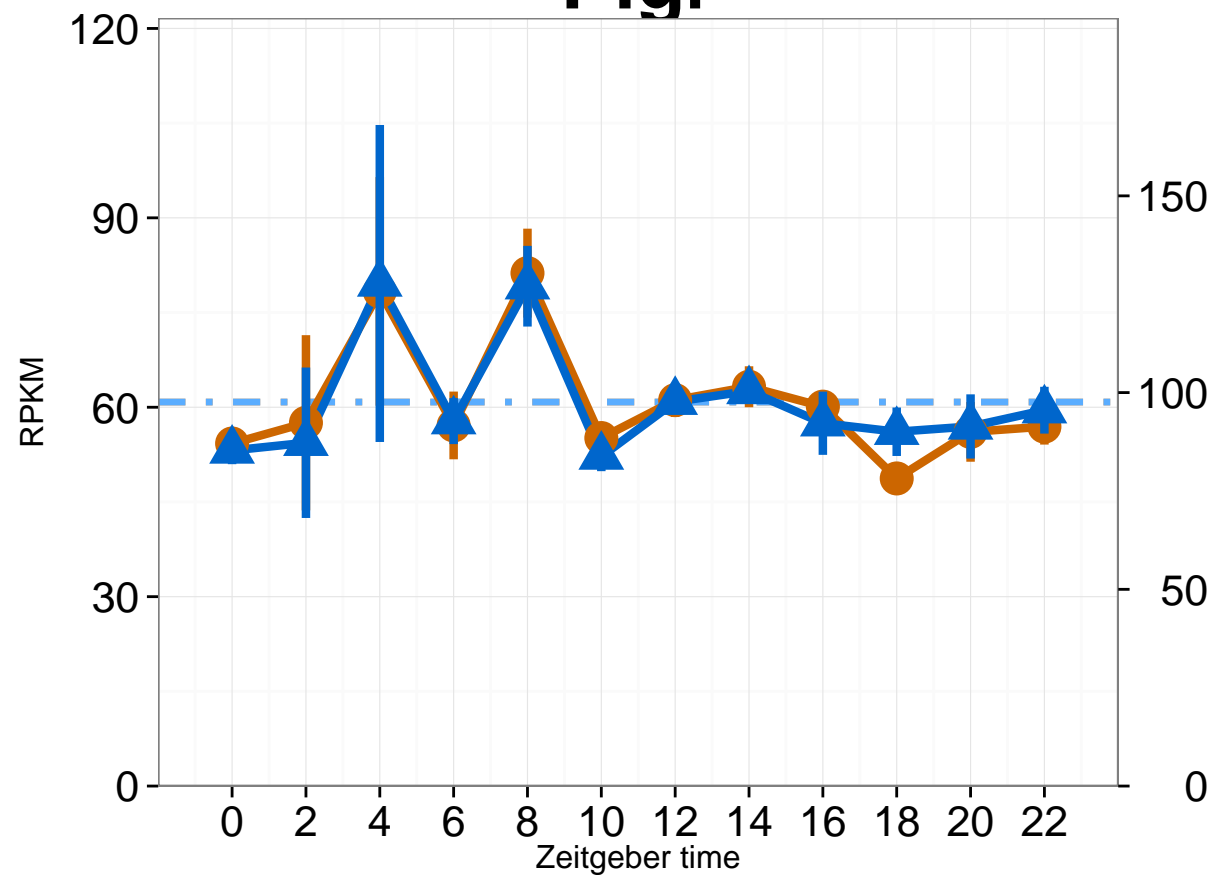

## Pigr

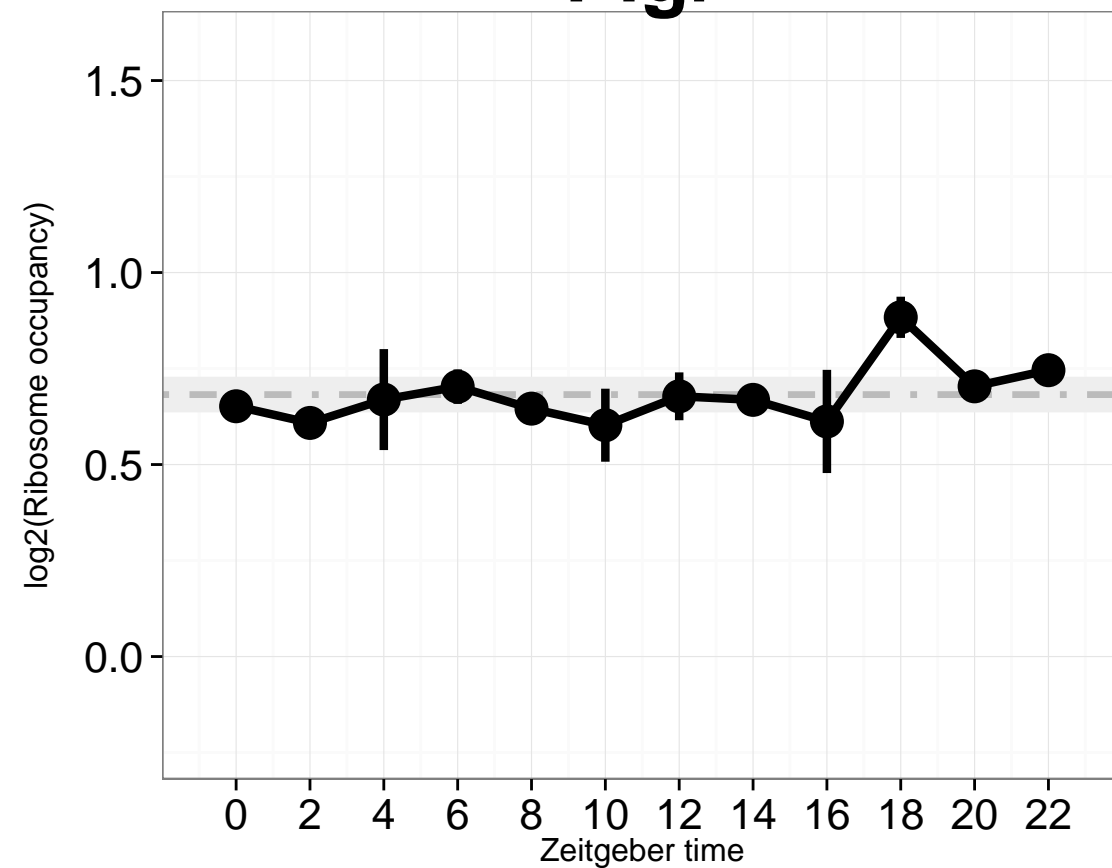

Supplement: Supplementary file 9806 [file 1]

## Unc5b

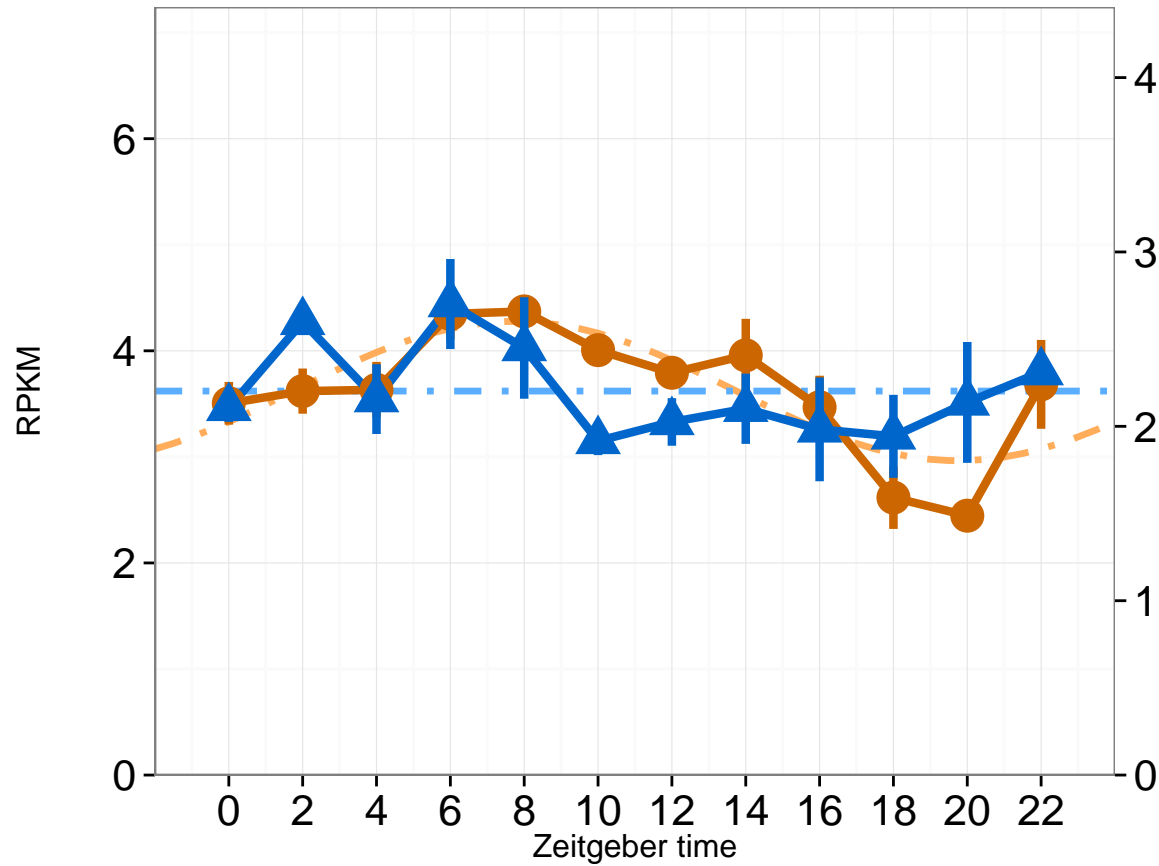

## Unc5b

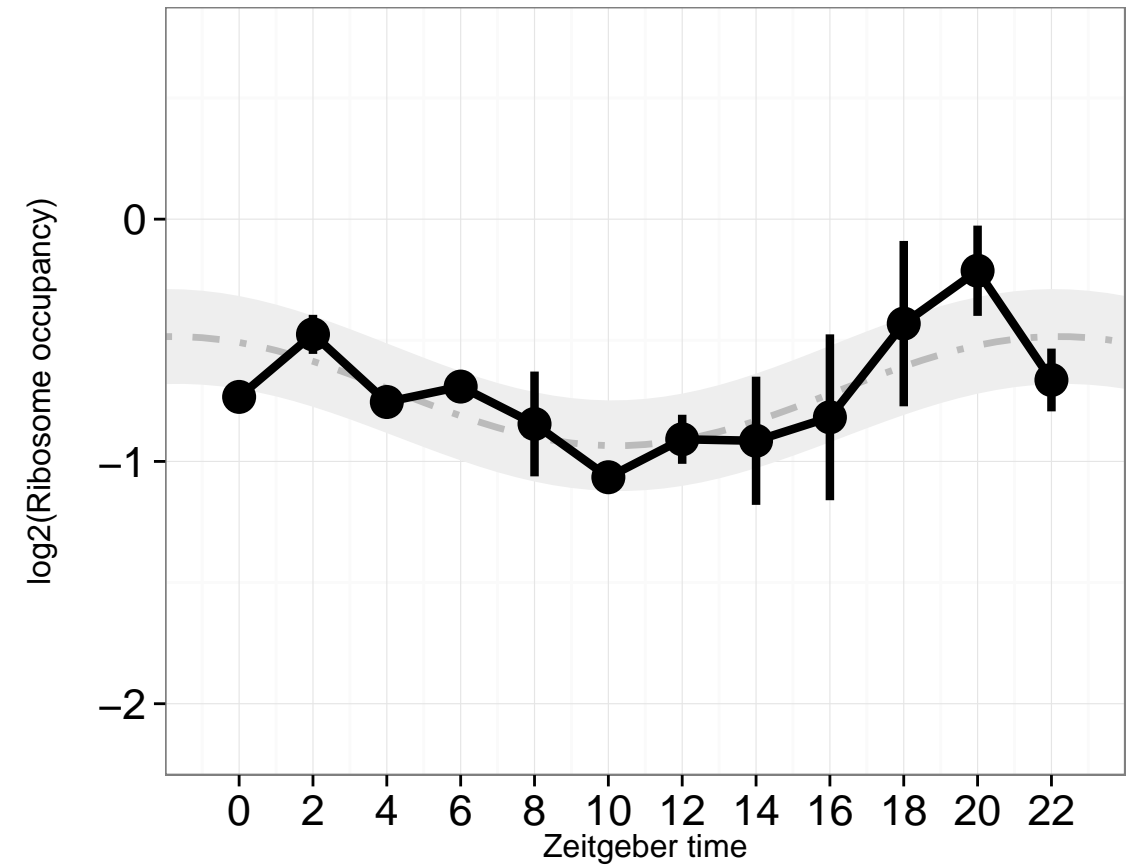

Supplement: Supplementary file 9807 [file 1]

## Slamf7

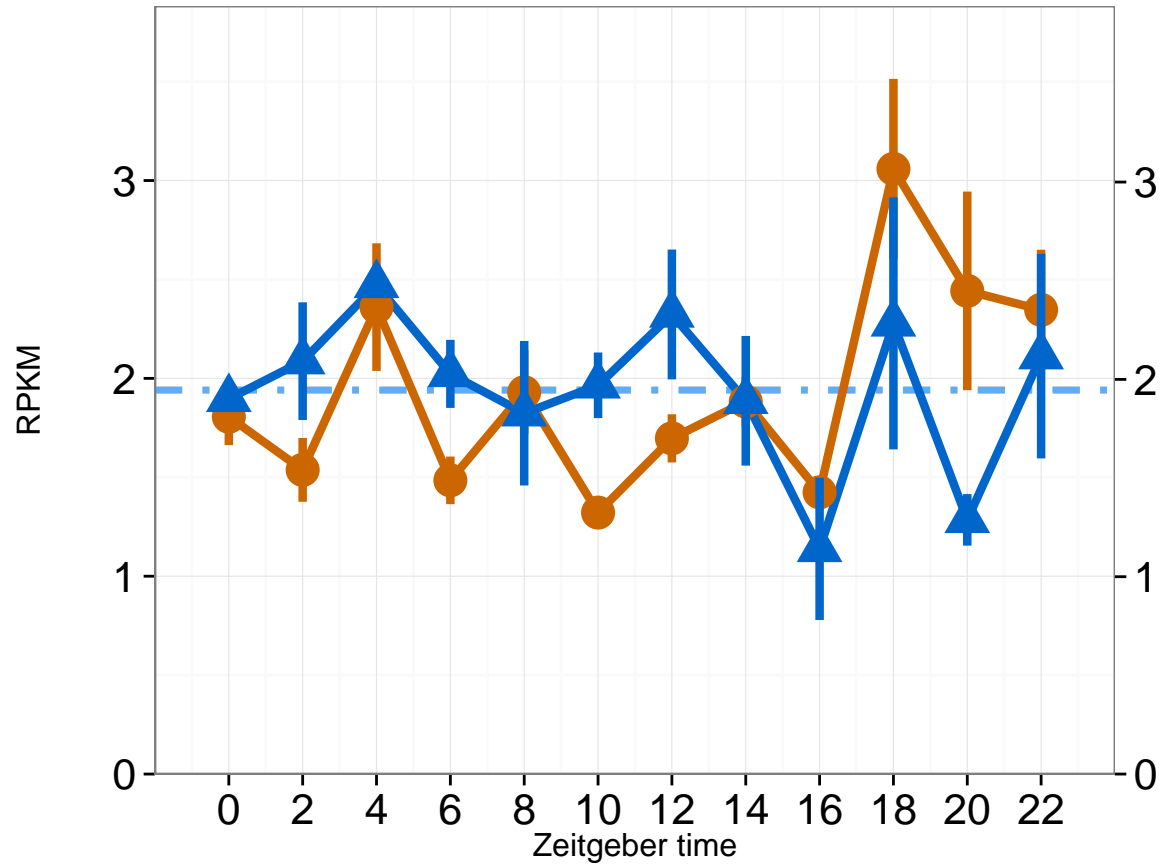

## Slamf7

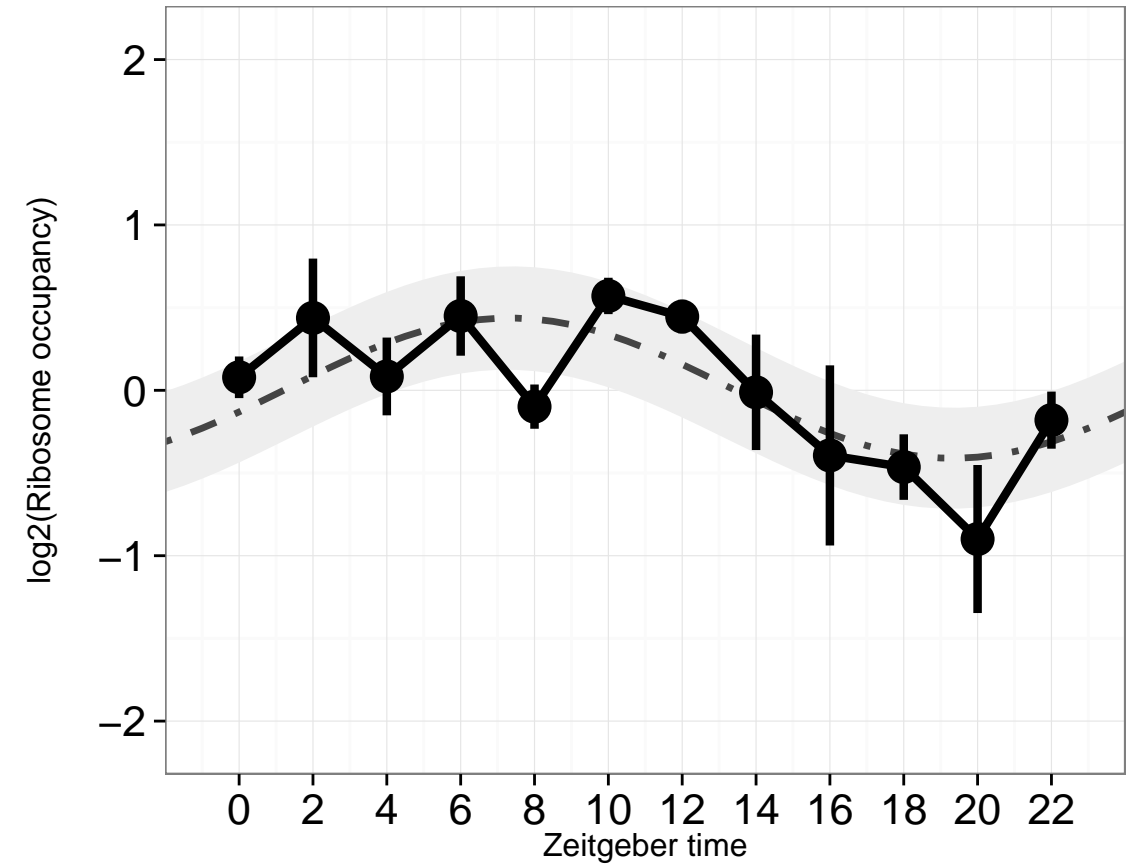

Supplement: Supplementary file 9808 [file 1]

## Pam

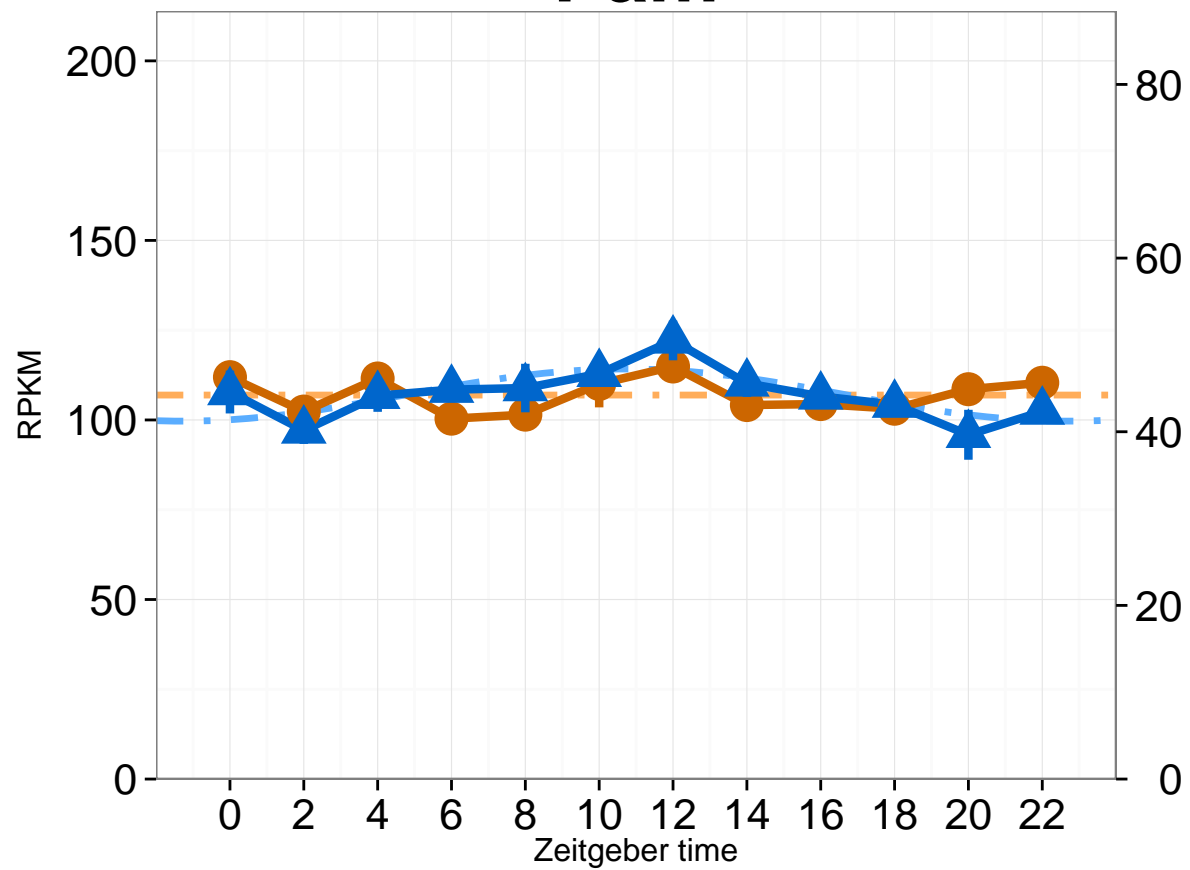

## Pam

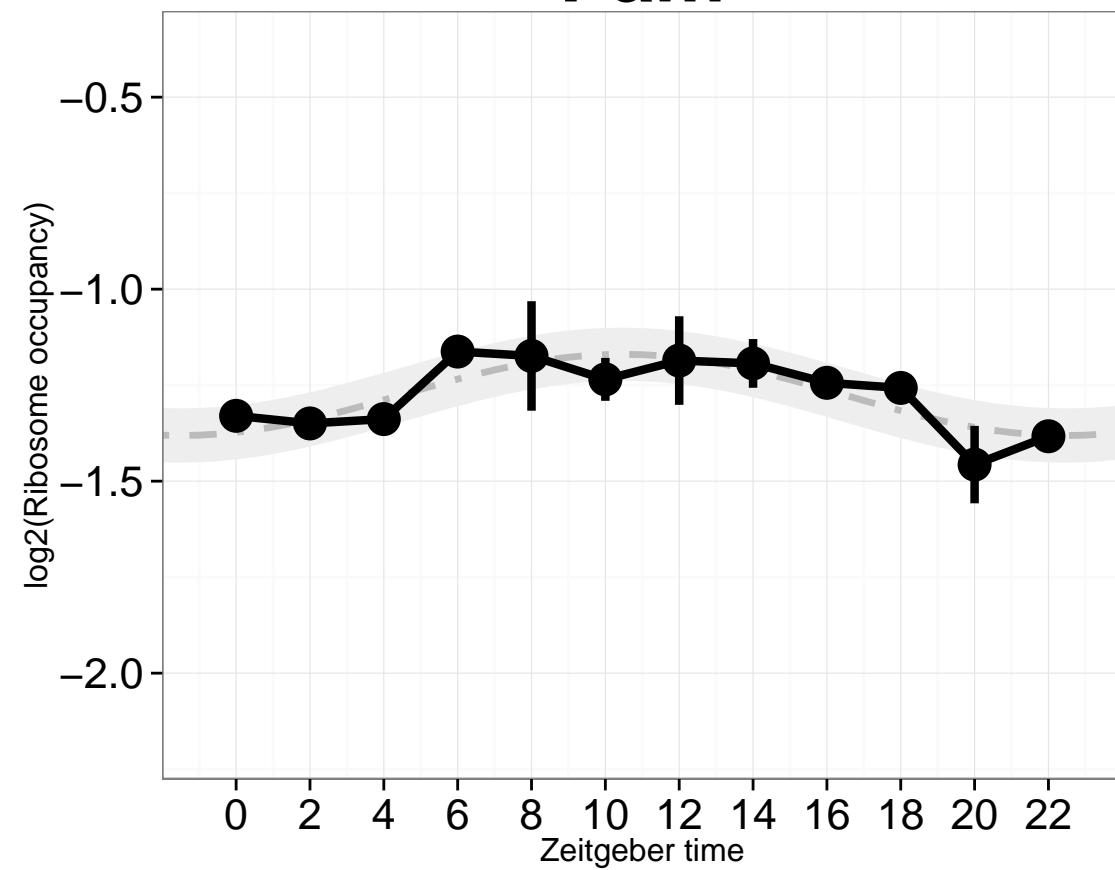

Supplement: Supplementary file 9809 [file 1]

## Ggact

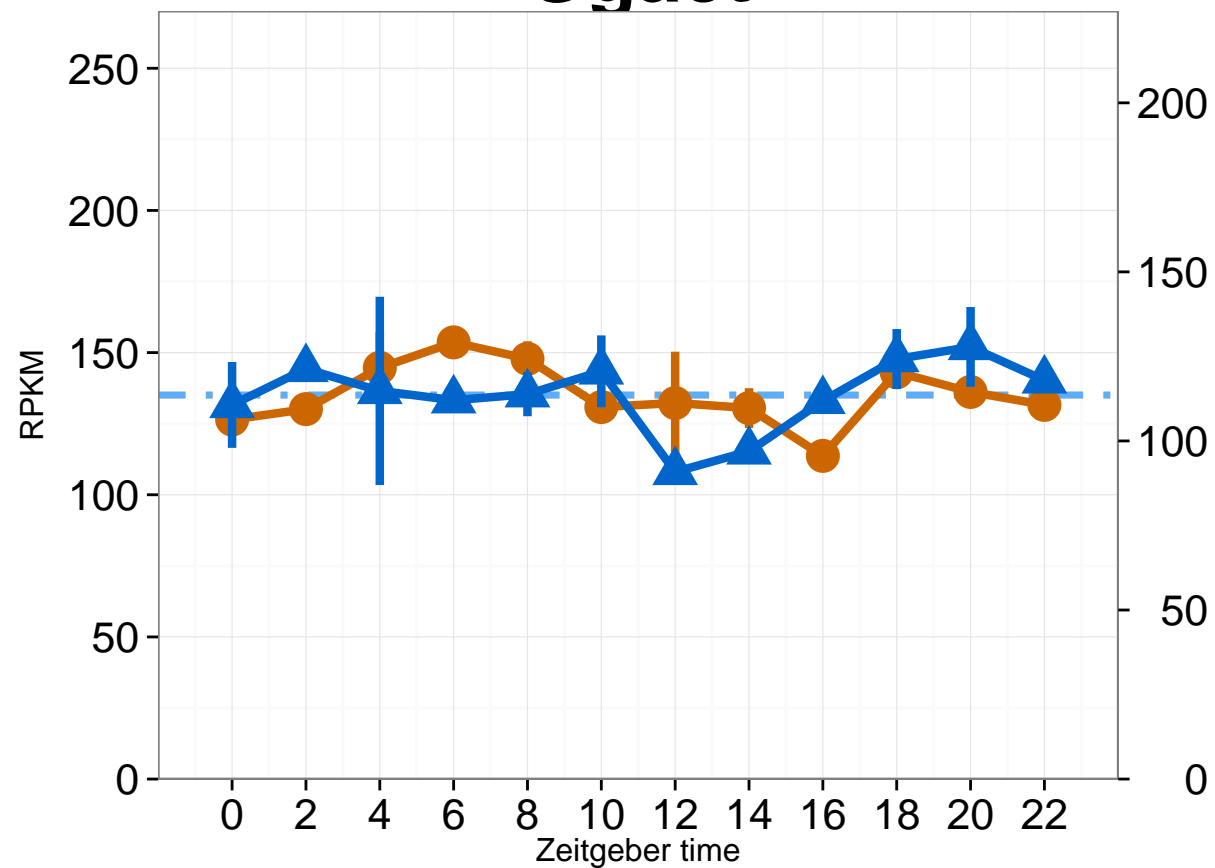

## Ggact

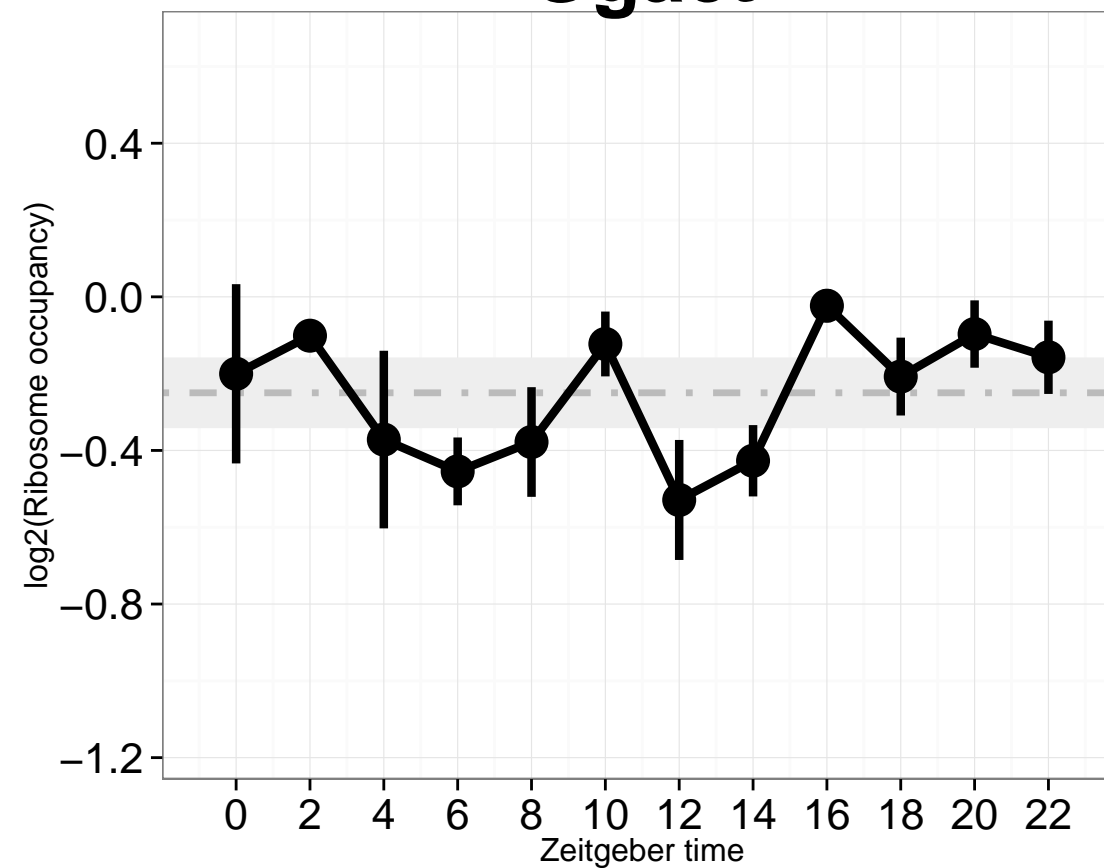

Supplement: Supplementary file 9810 [file 1]

## Pccb

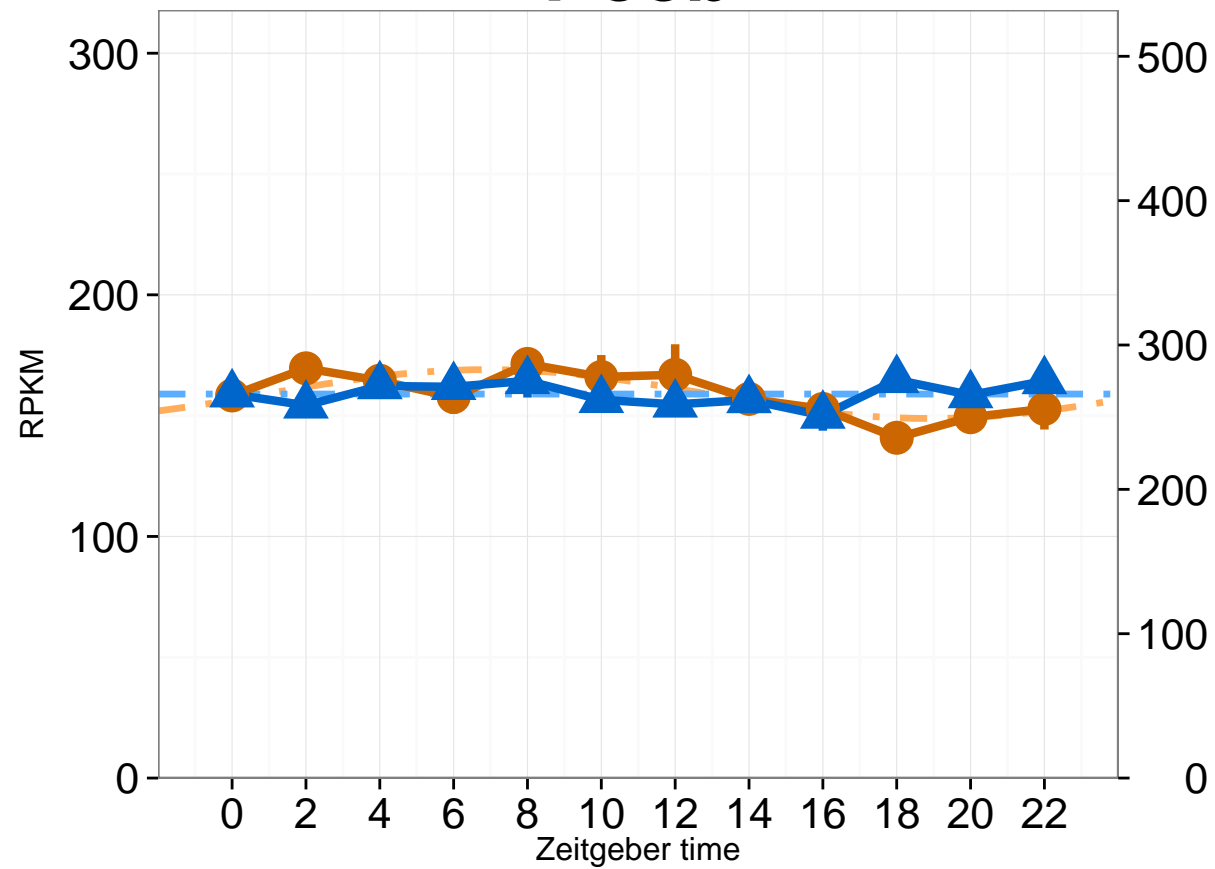

## Pccb

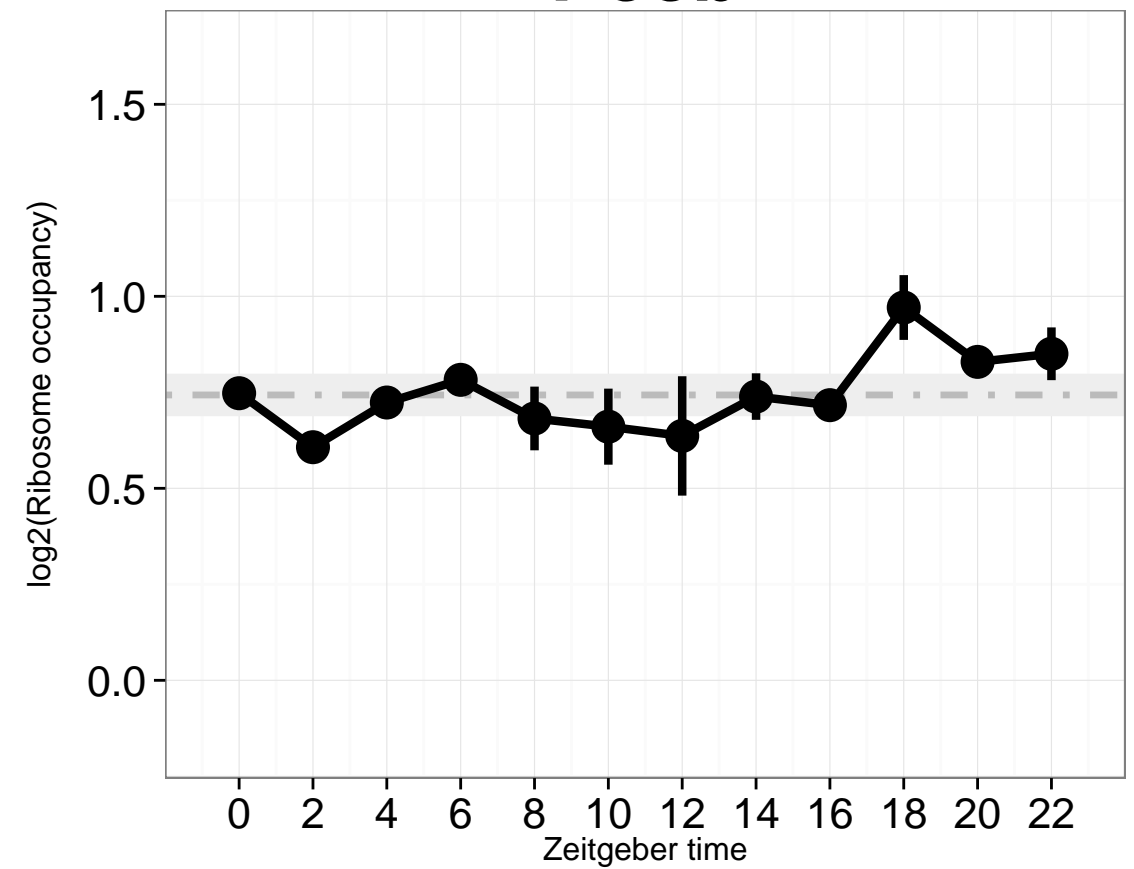

Supplement: Supplementary file 9811 [file 1]

## Wnk1

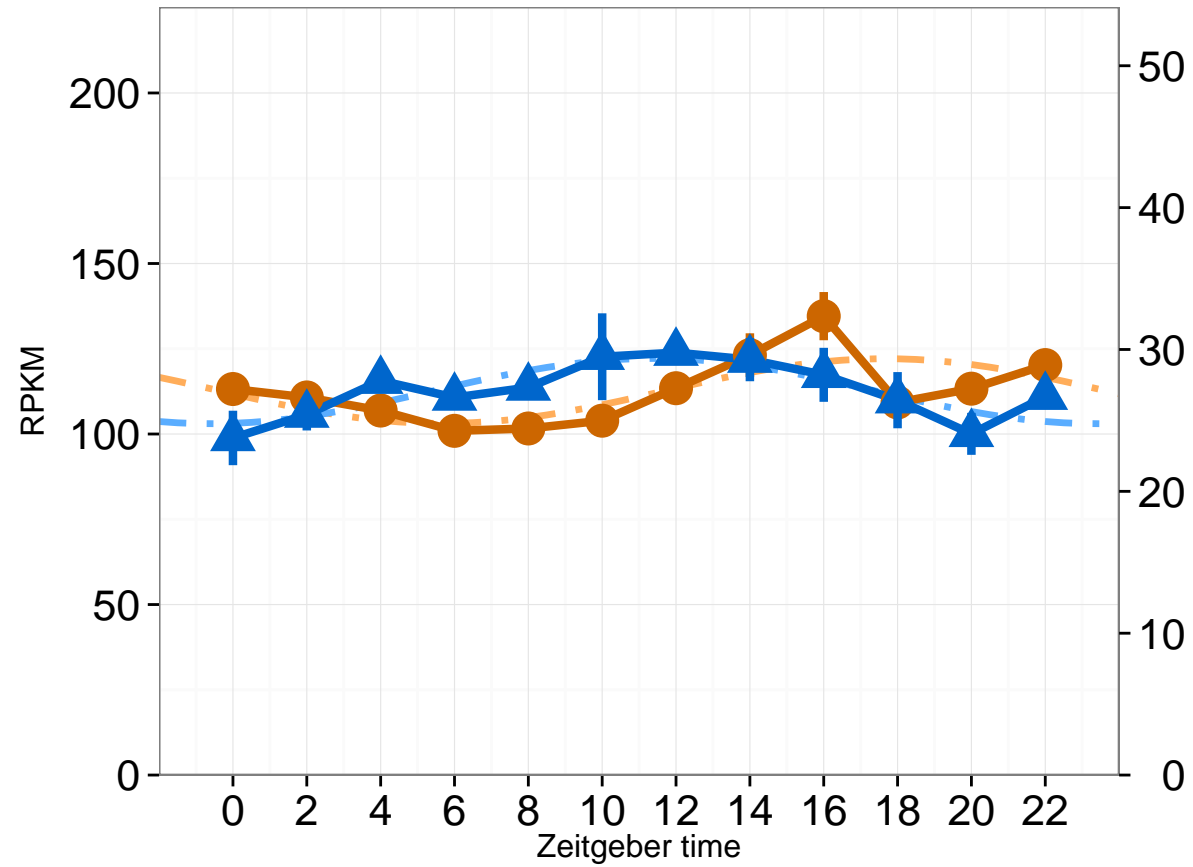

## Wnk1

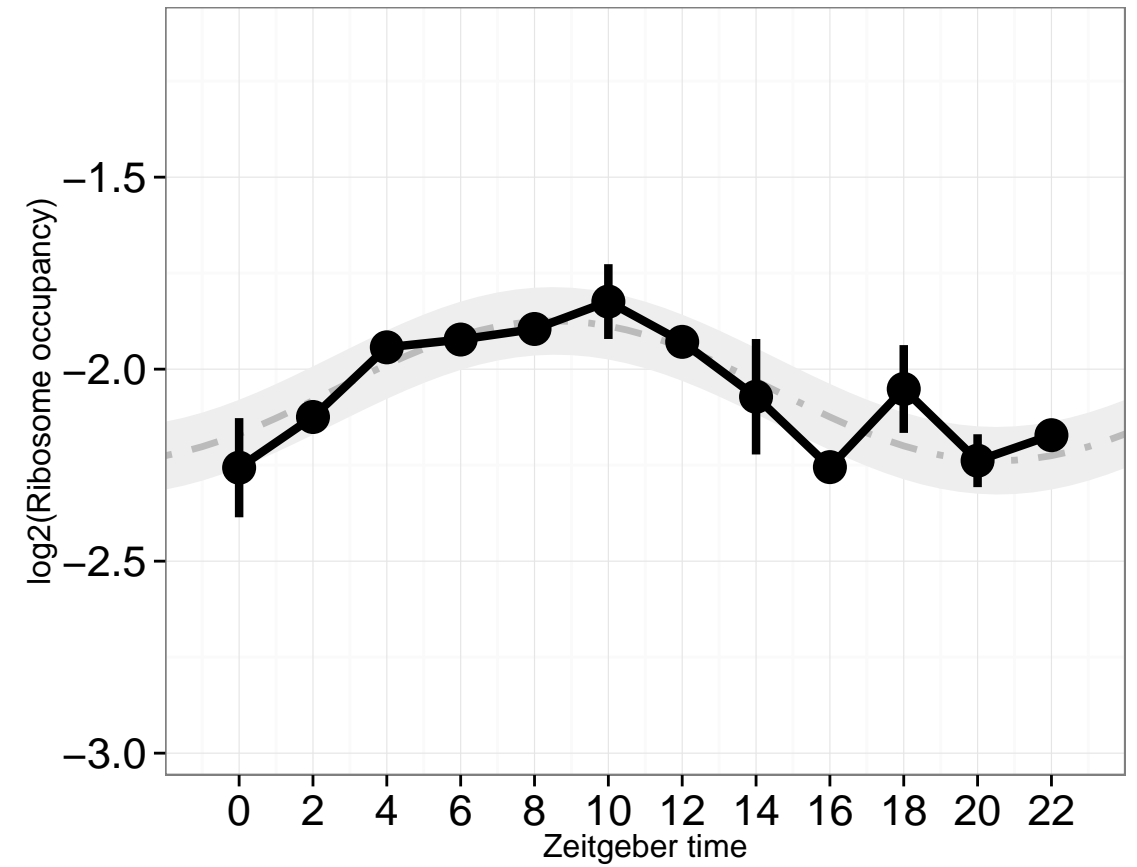

Supplement: Supplementary file 9812 [file 1]

**Creb3l3 TR**

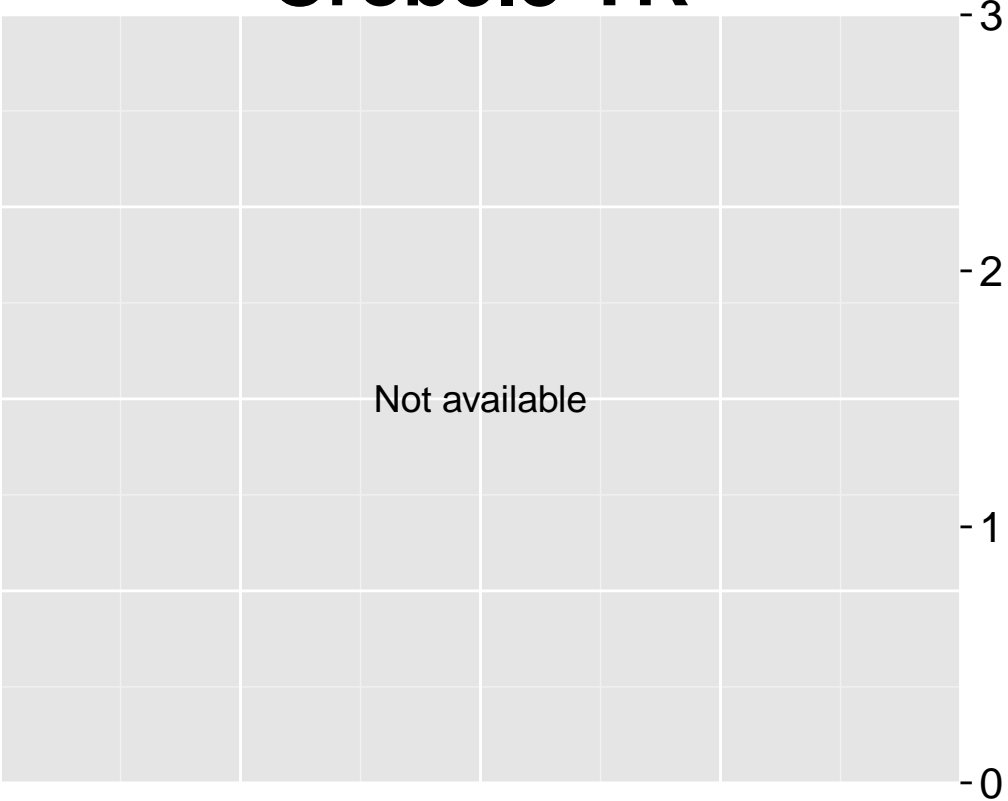

**Creb3l3 log2(Ribosome occupancy**

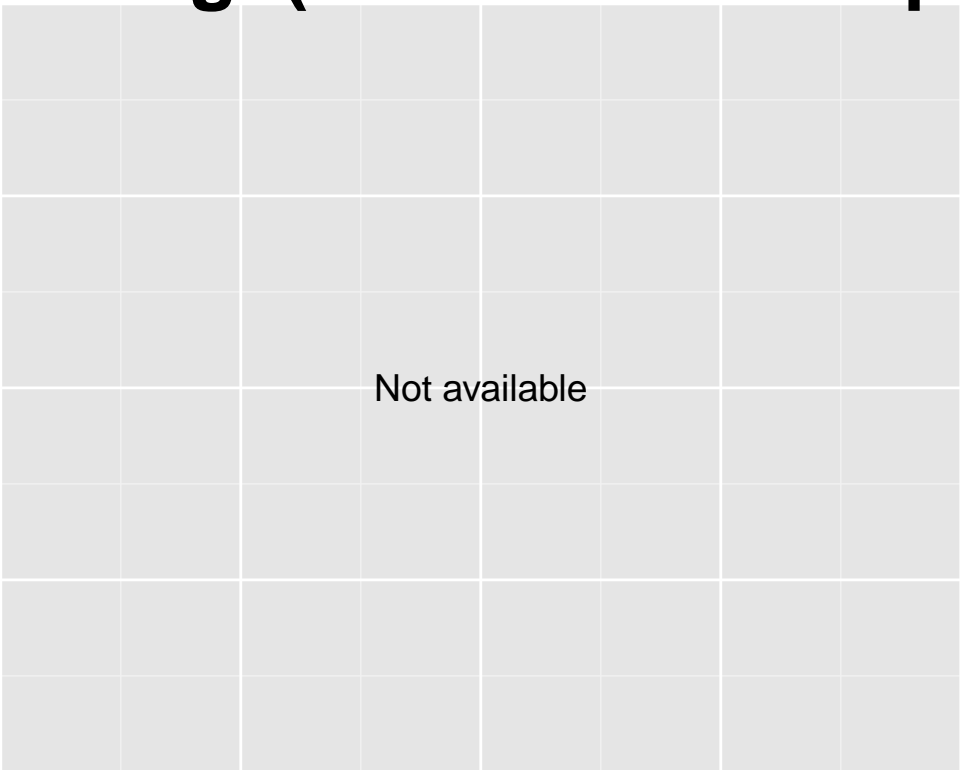

Supplement: Supplementary file 9813 [file 1]

## Adipor1

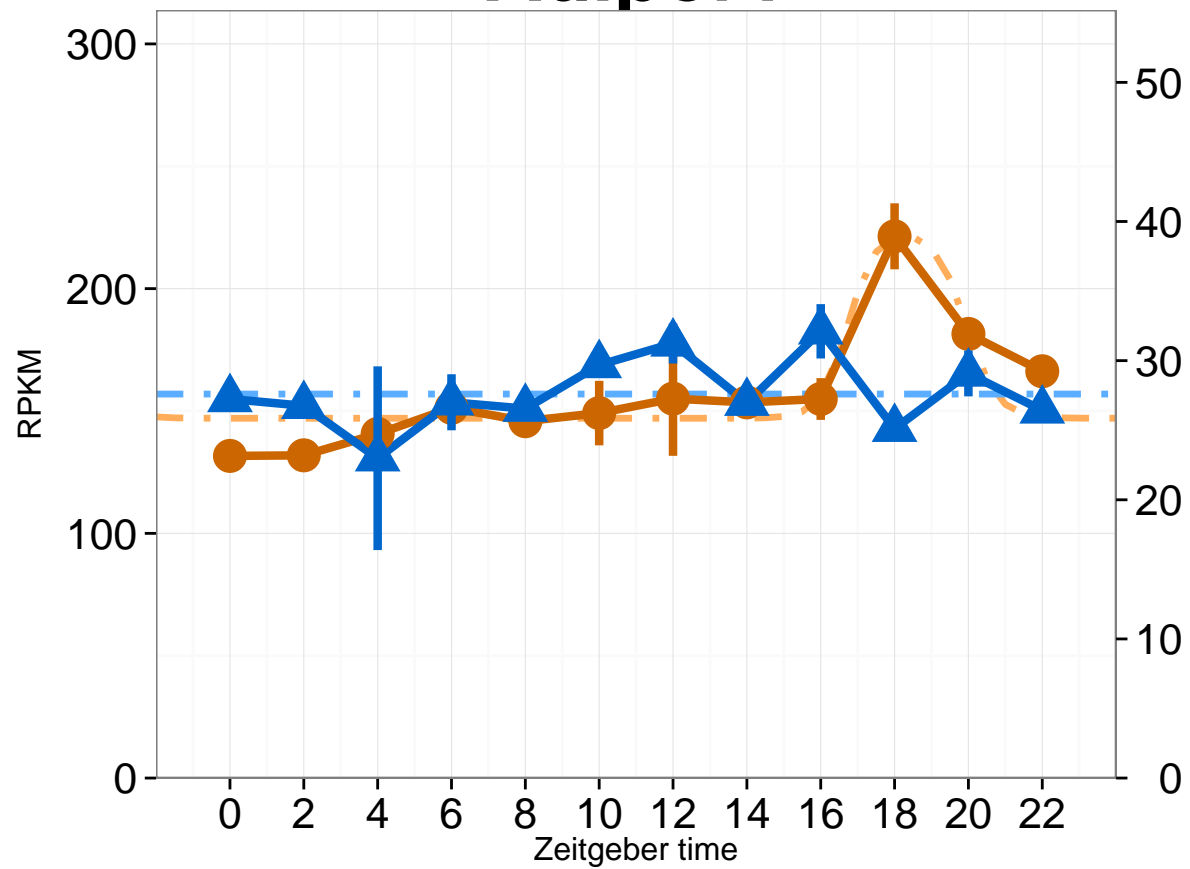

## Adipor1

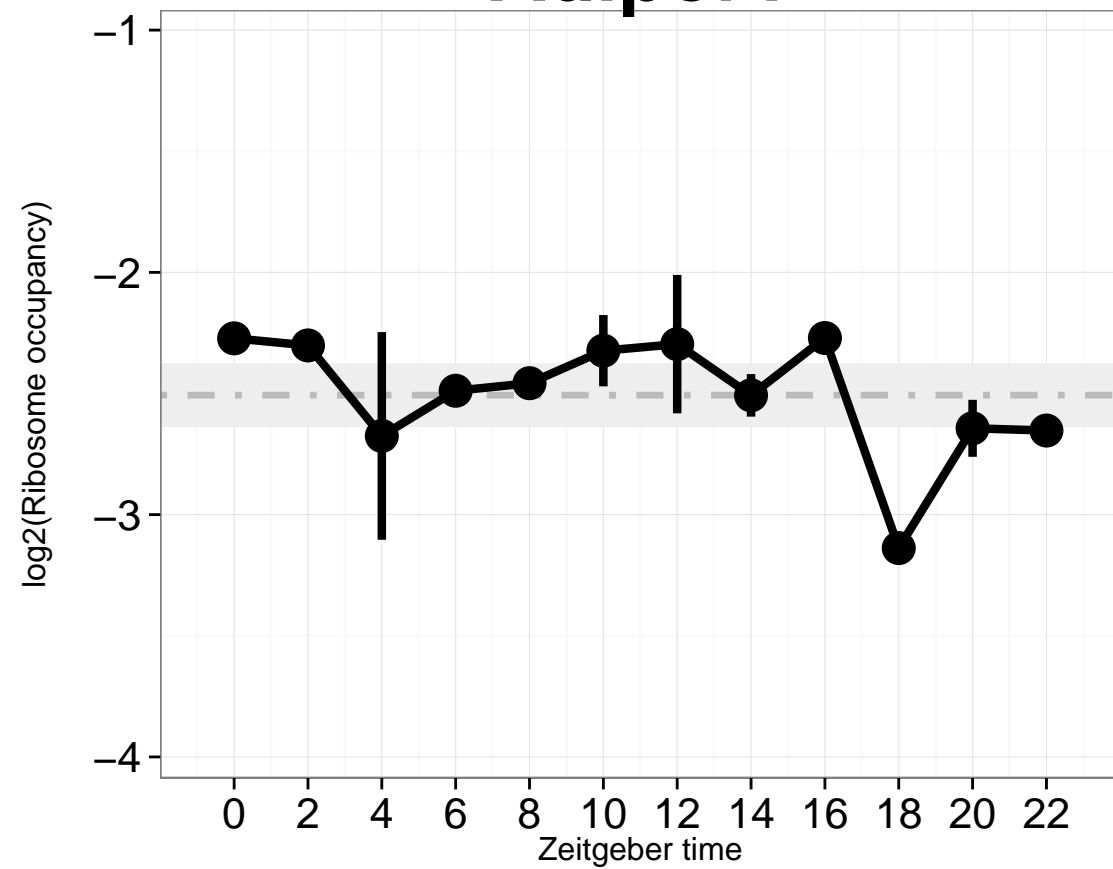

Supplement: Supplementary file 9814 [file 1]

# Fhdc1

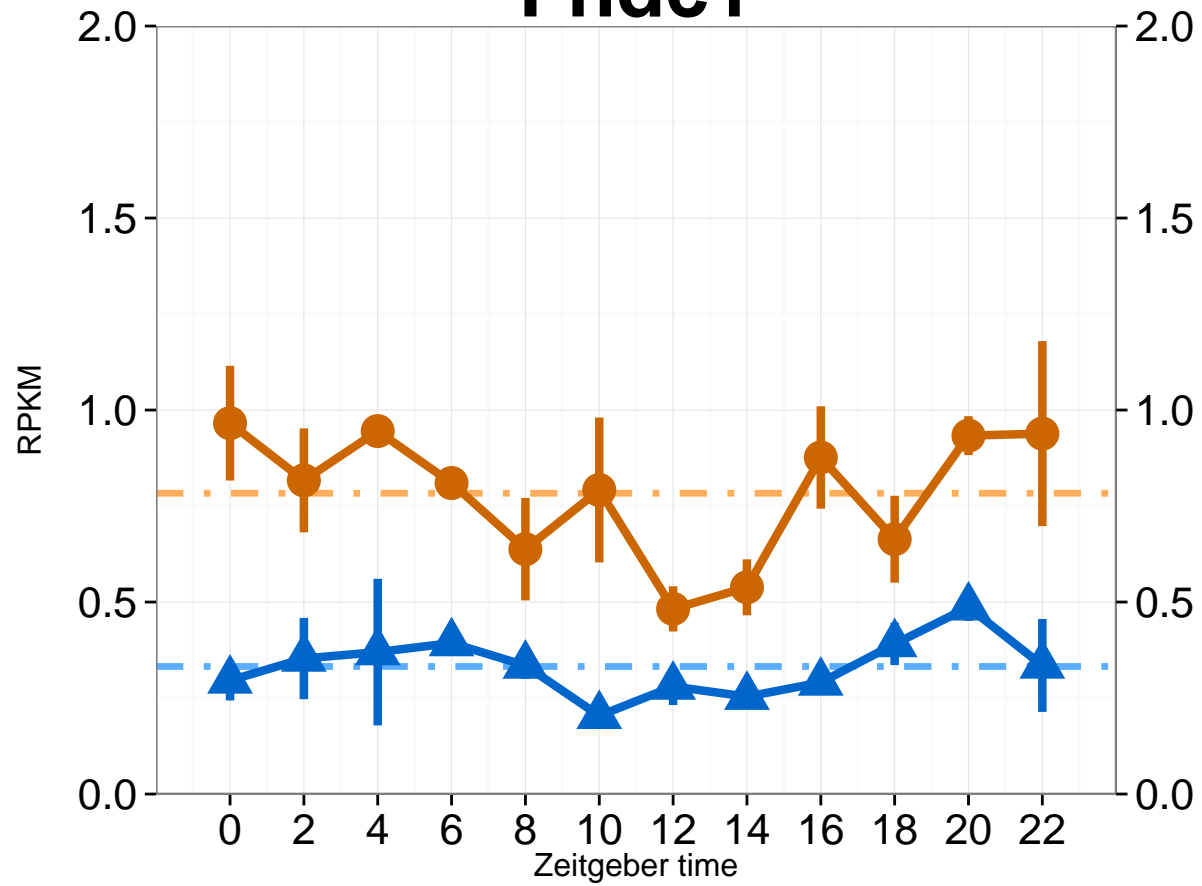

# Fhdc1

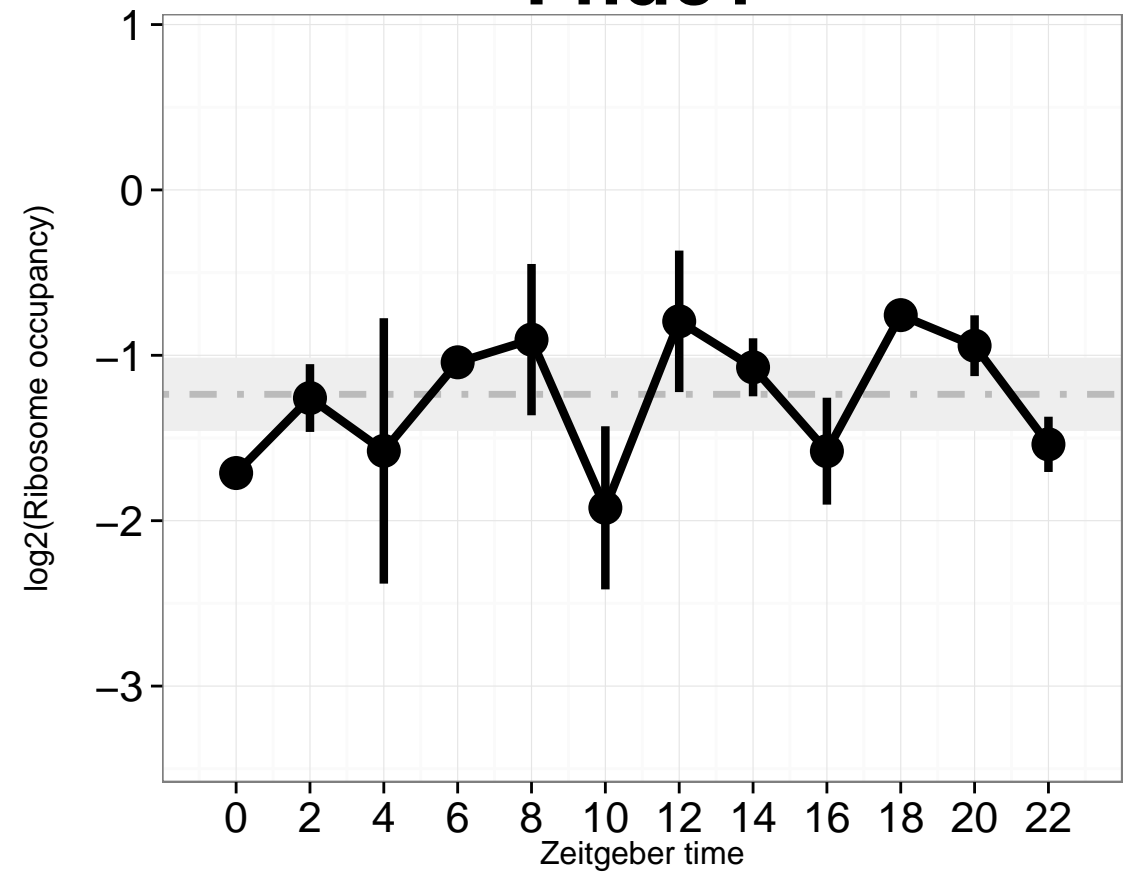

Supplement: Supplementary file 9815 [file 1]

## Sgtb

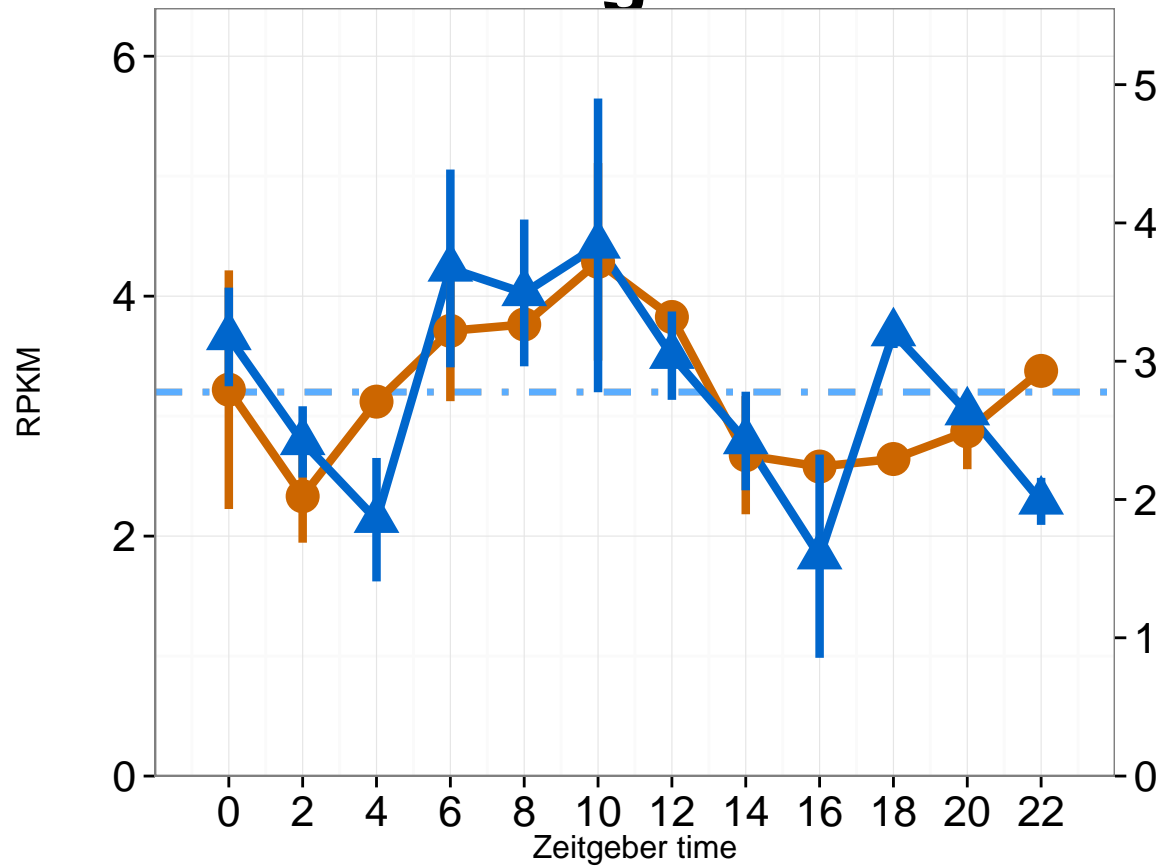

## Sgtb

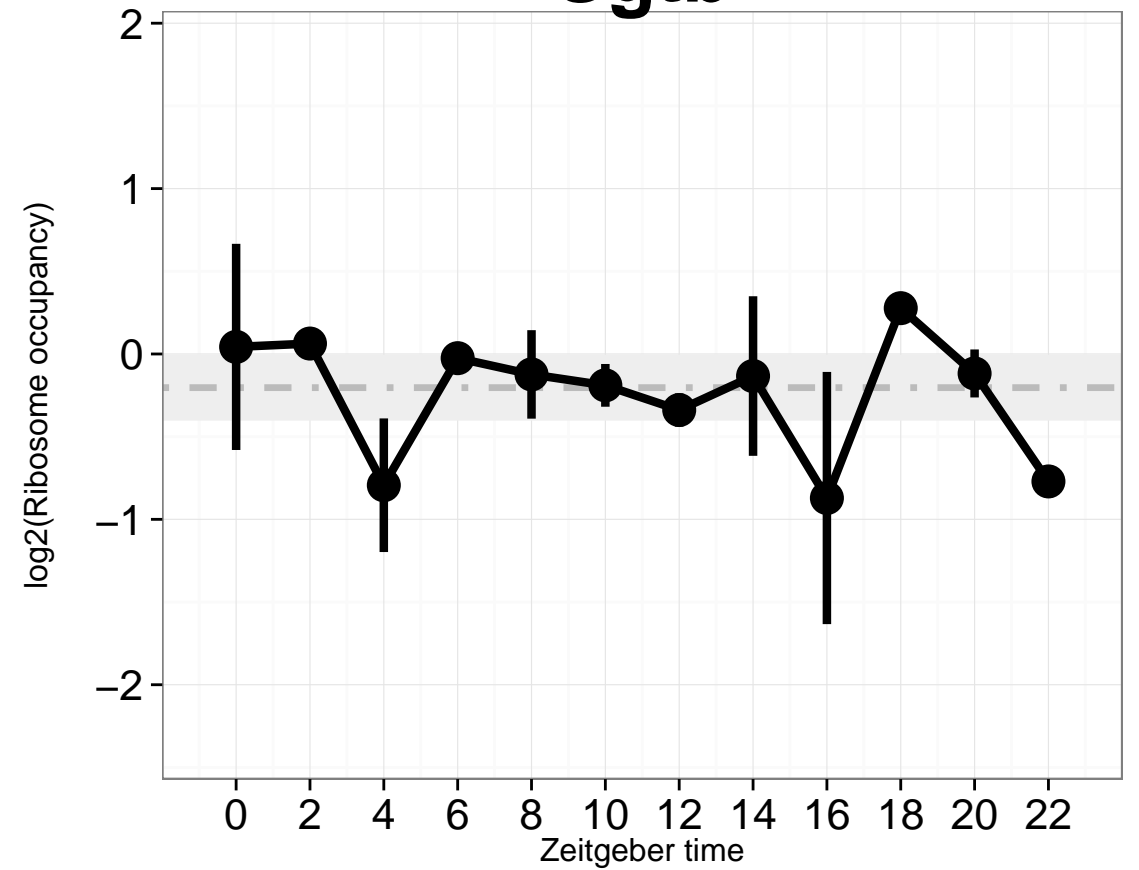

Supplement: Supplementary file 9816 [file 1]

# Anks6

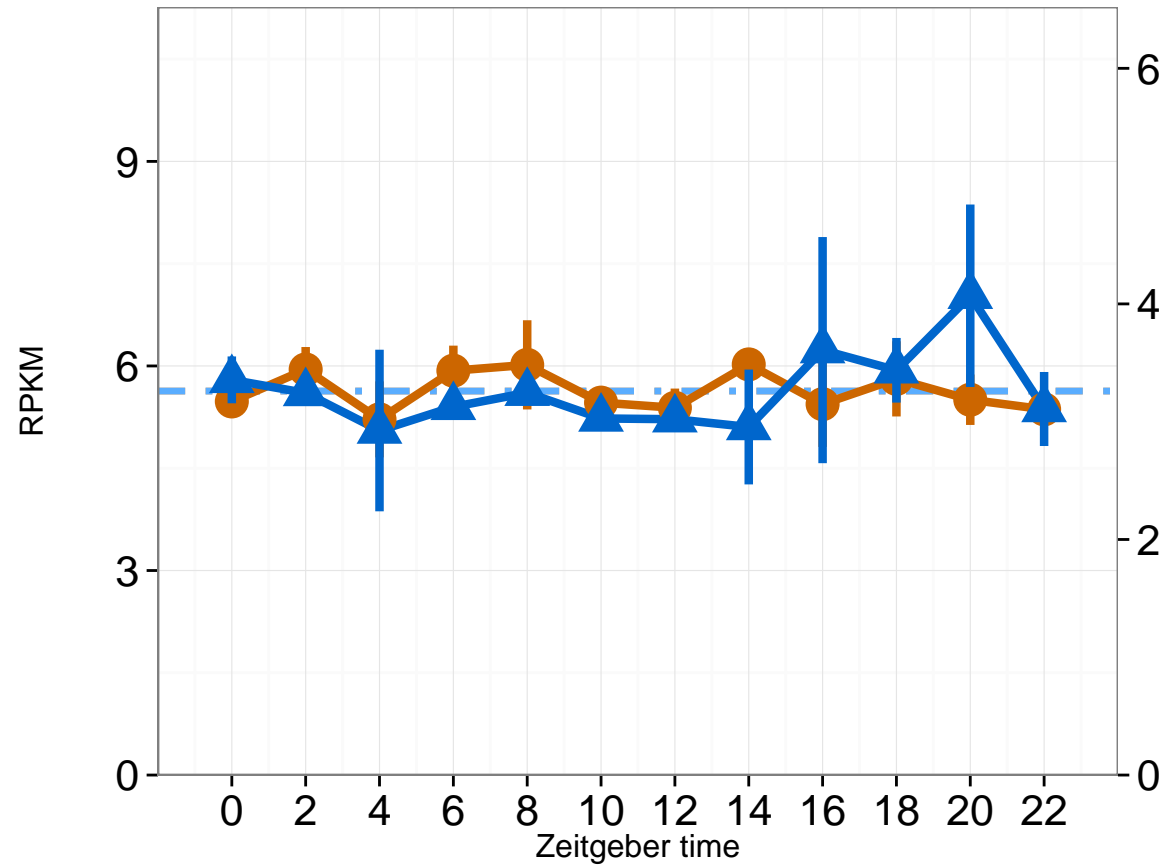

# Anks6

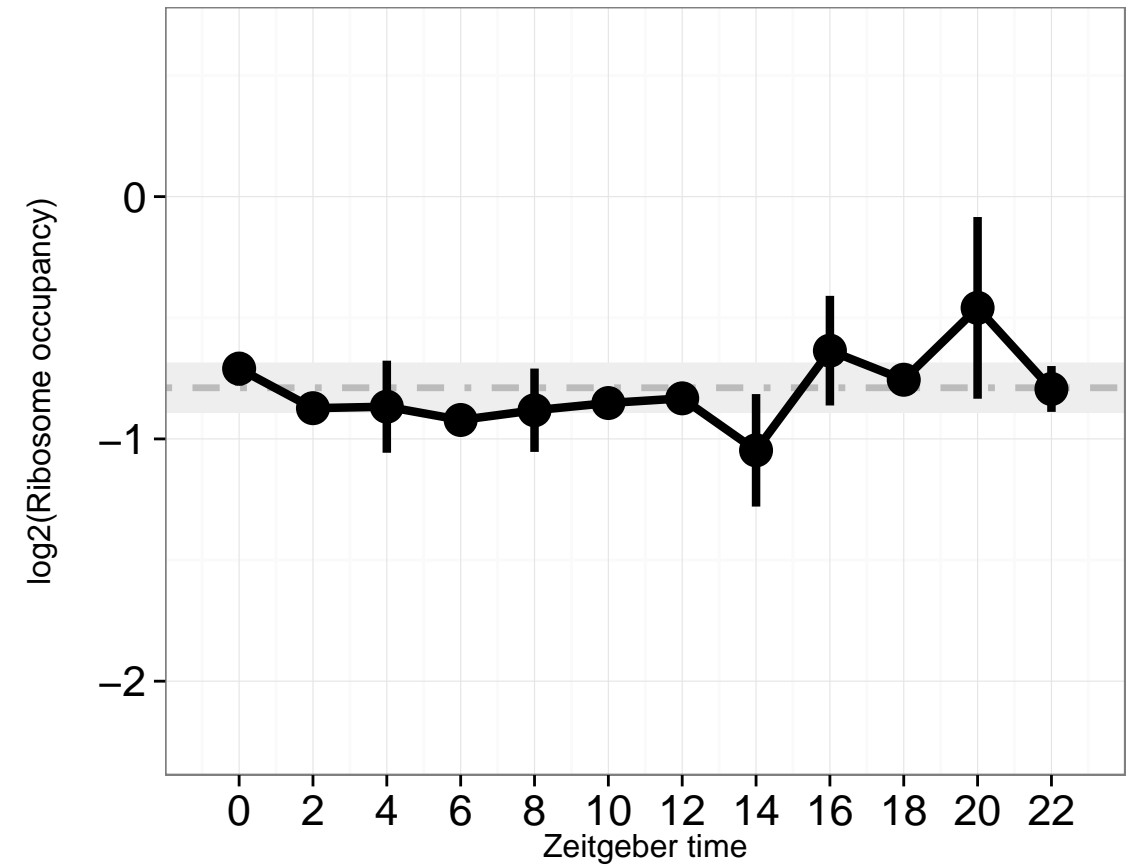

Supplement: Supplementary file 9817 [file 1]

## Srsf4

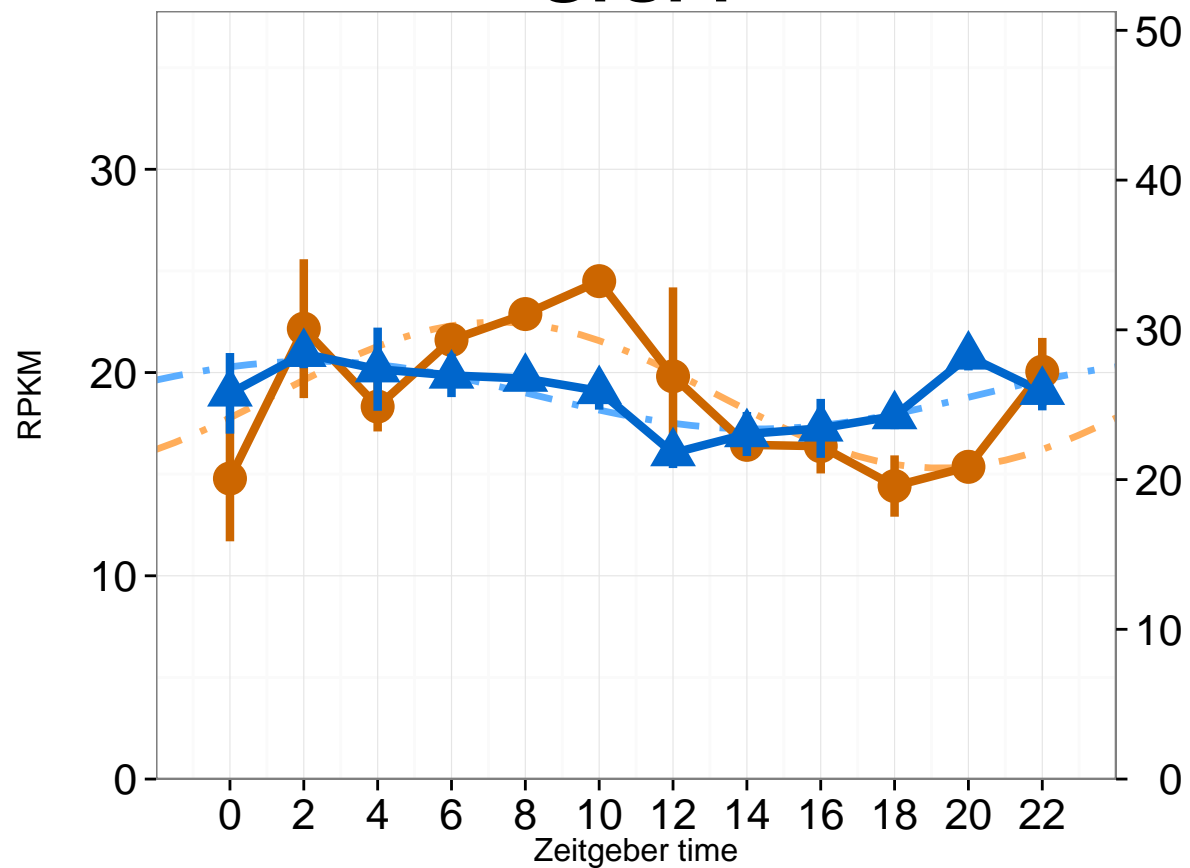

## Srsf4

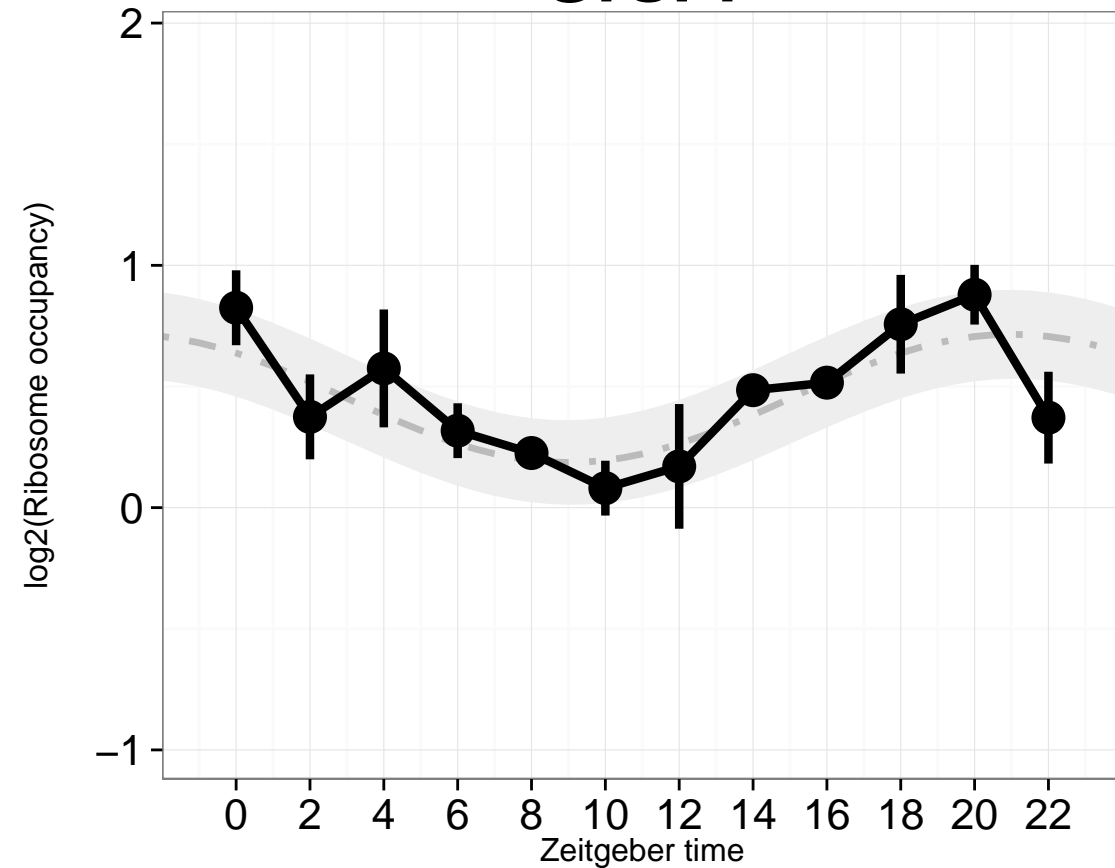

Supplement: Supplementary file 9818 [file 1]

## A430005L14Rik

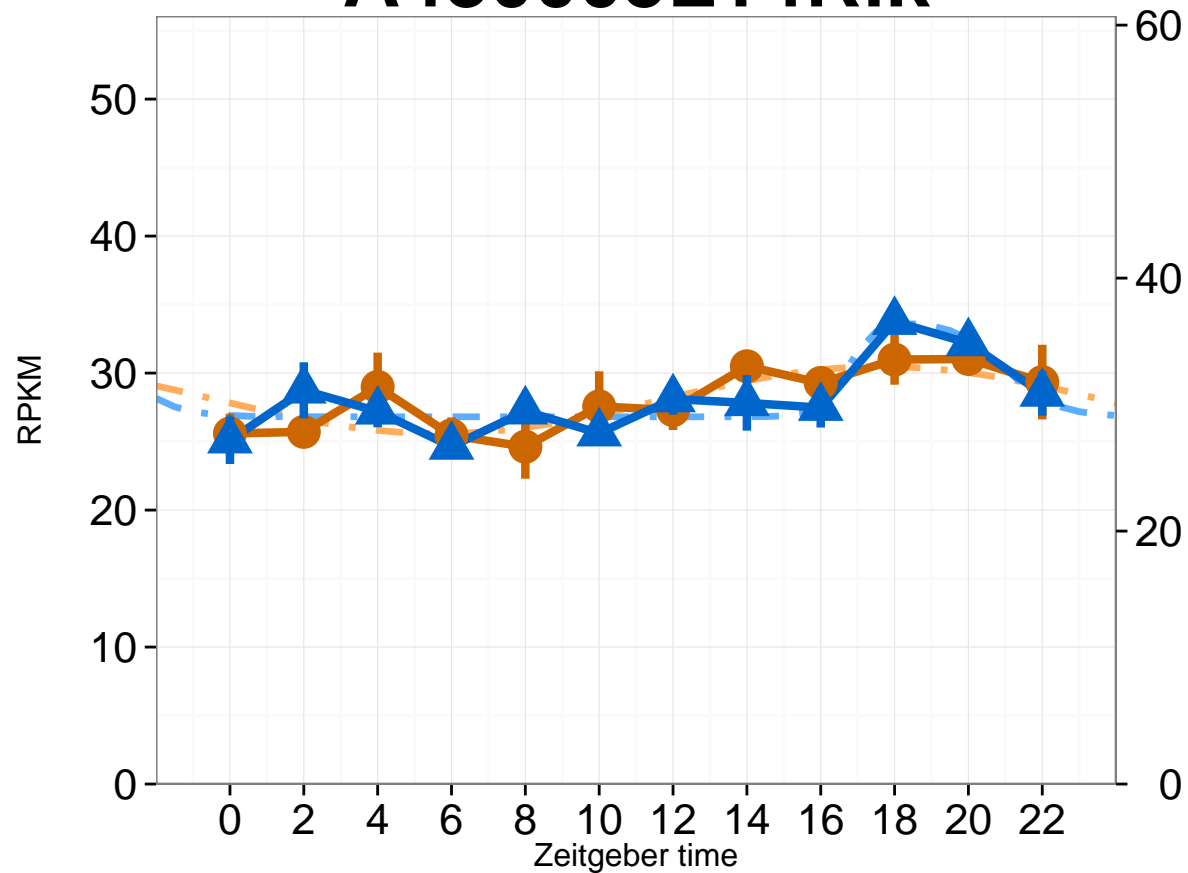

## A430005L14Rik

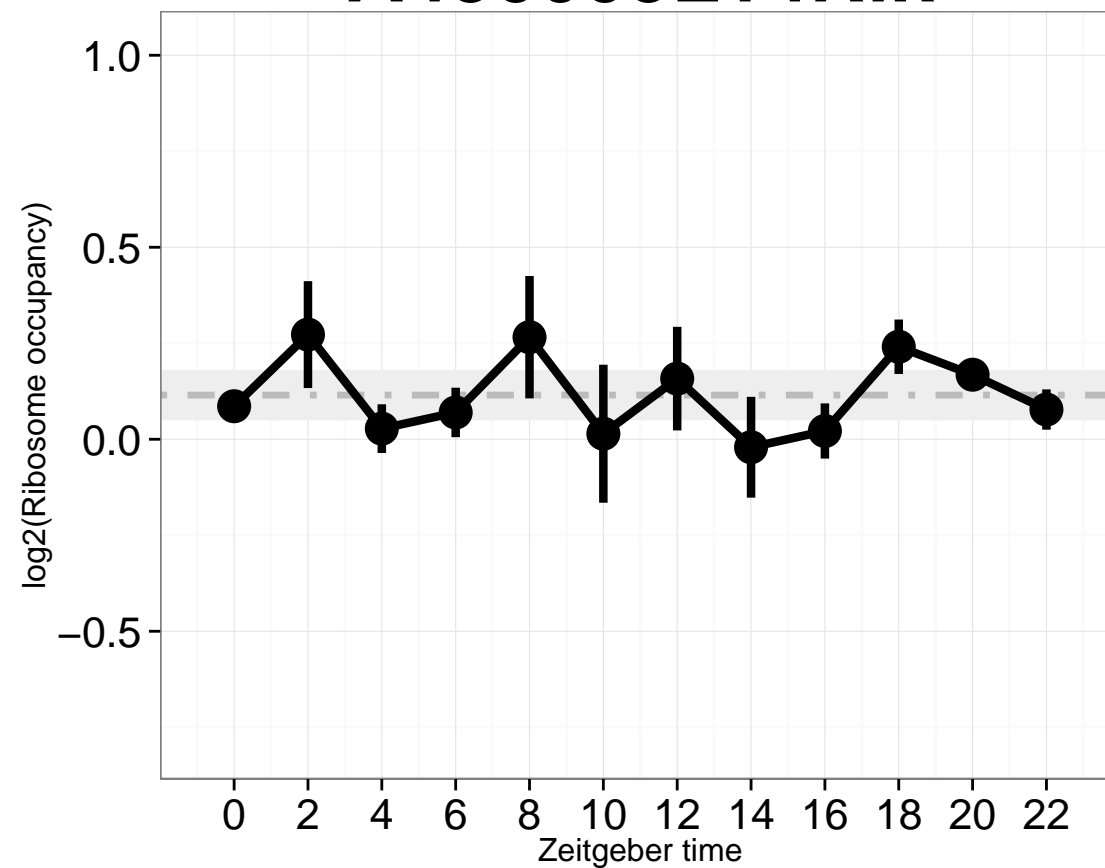

Supplement: Supplementary file 9819 [file 1]

## Atraid

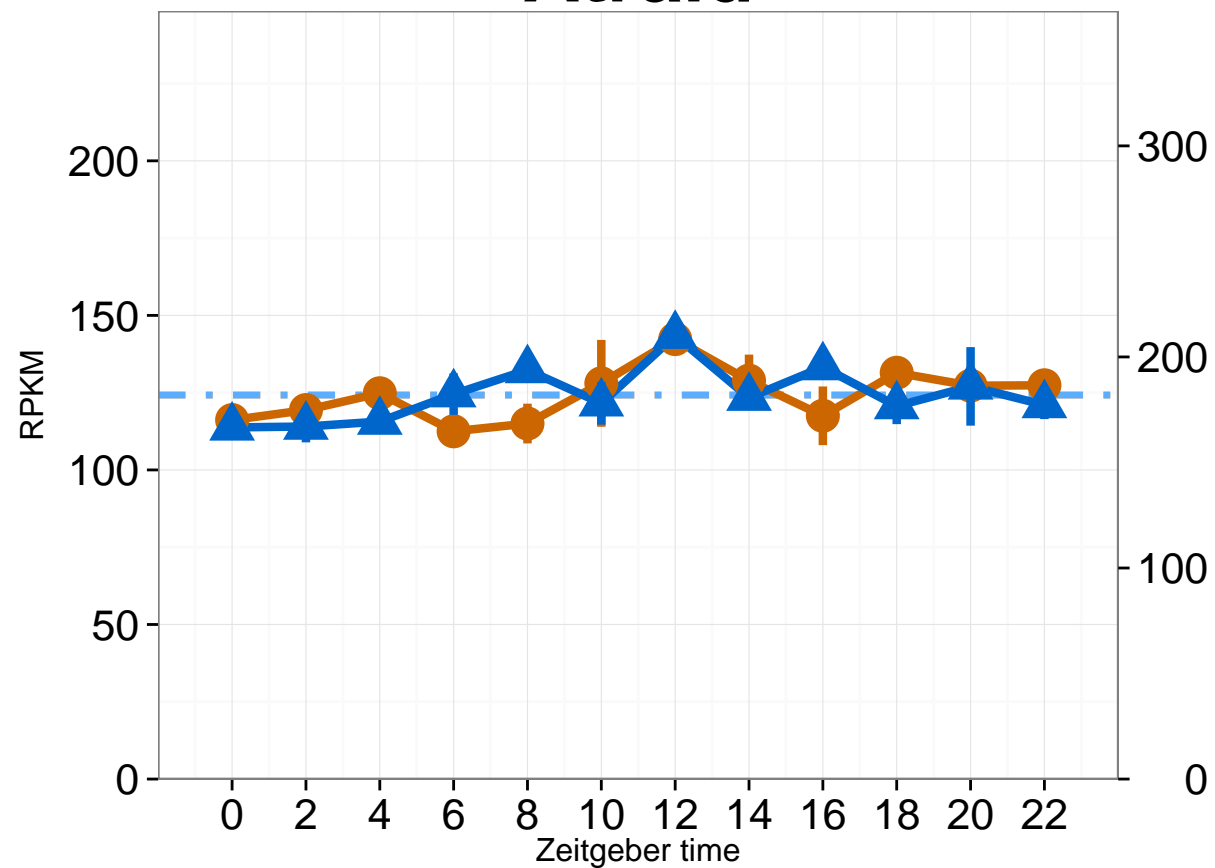

## Atraid

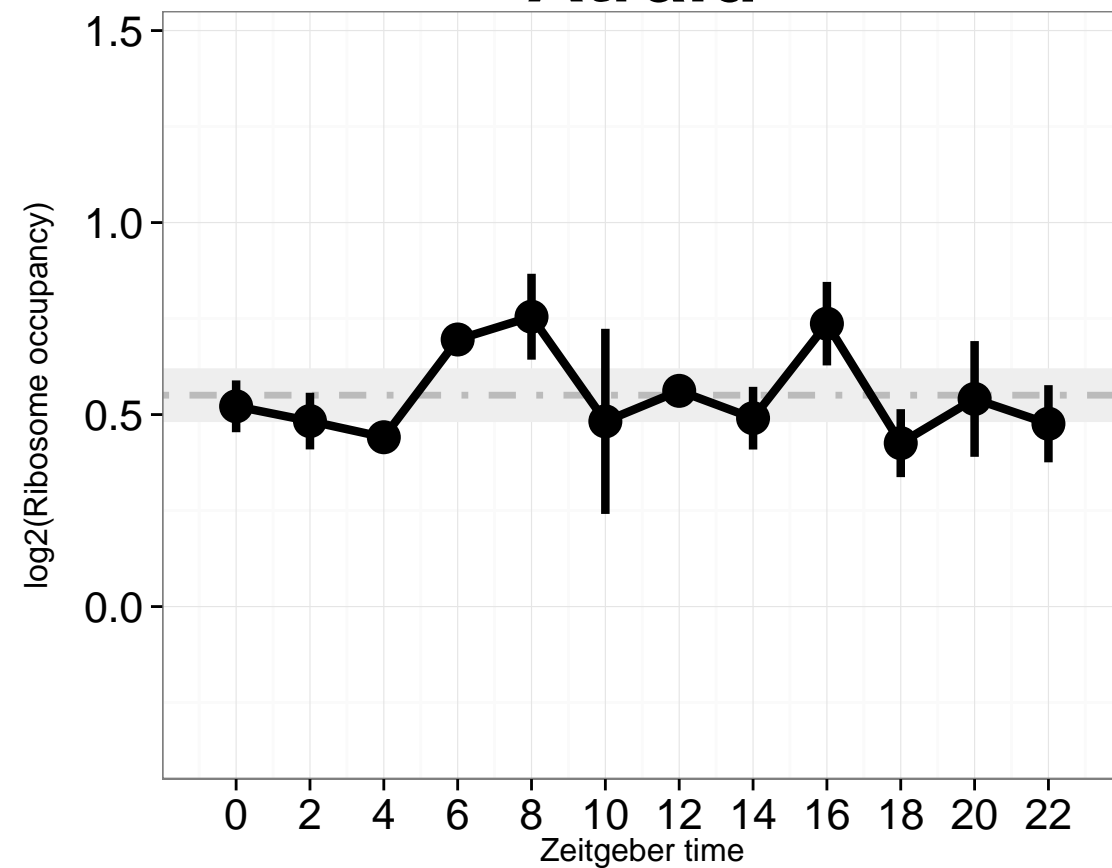

Supplement: Supplementary file 9820 [file 1]

# St3gal6

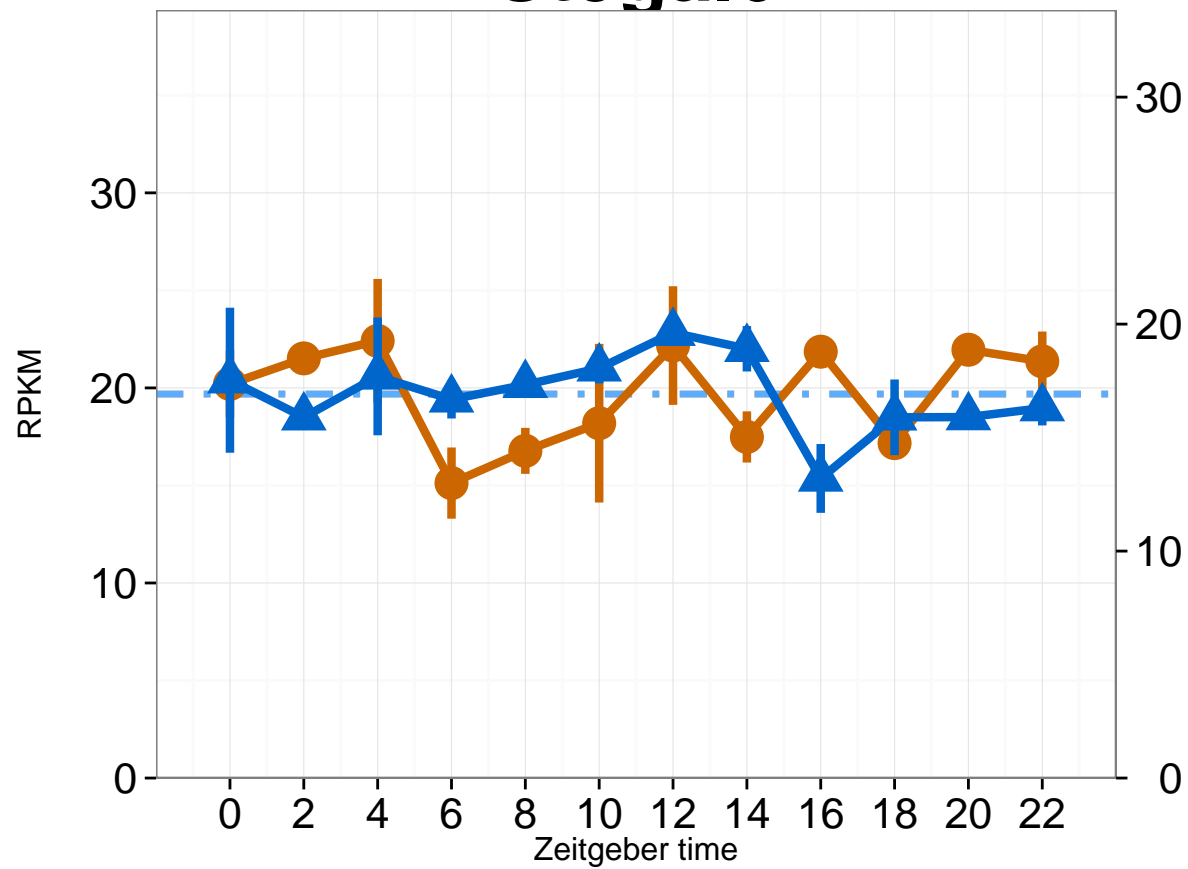

# St3gal6

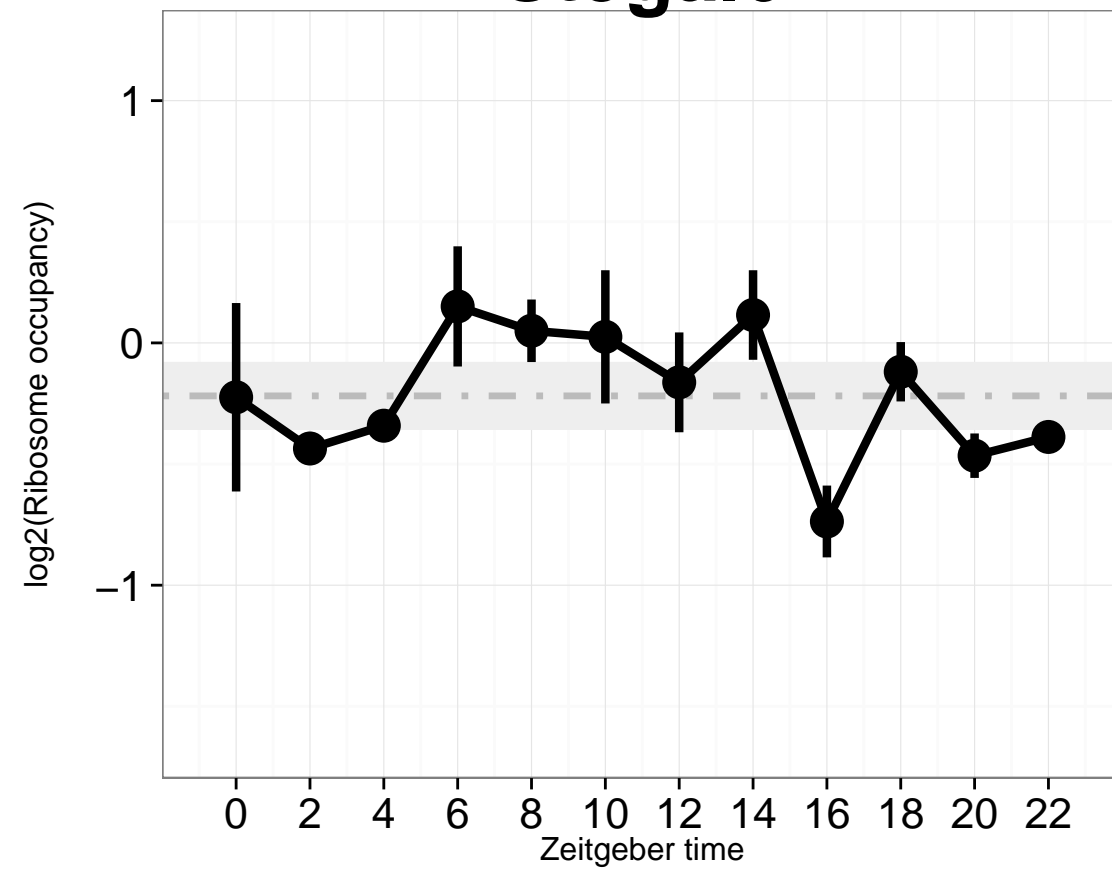

Supplement: Supplementary file 9821 [file 1]

# Cox6b2

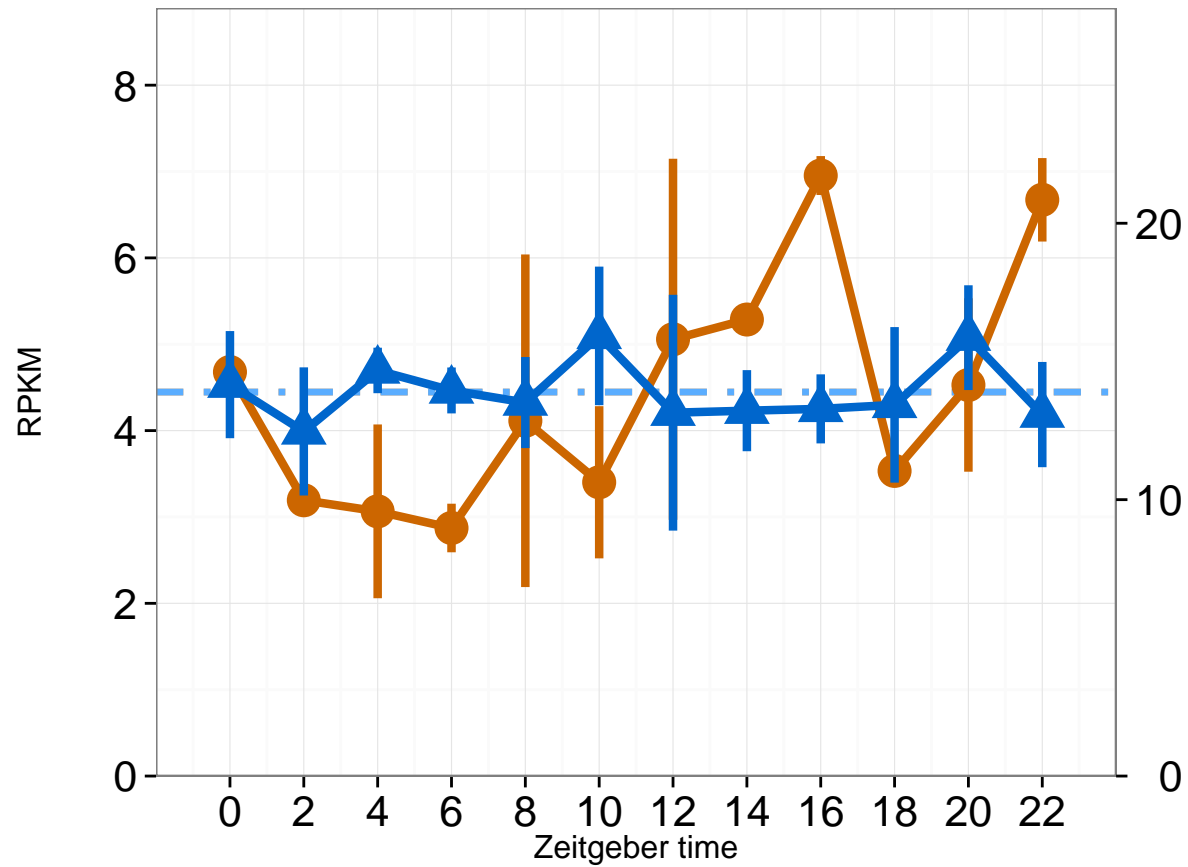

# Cox6b2

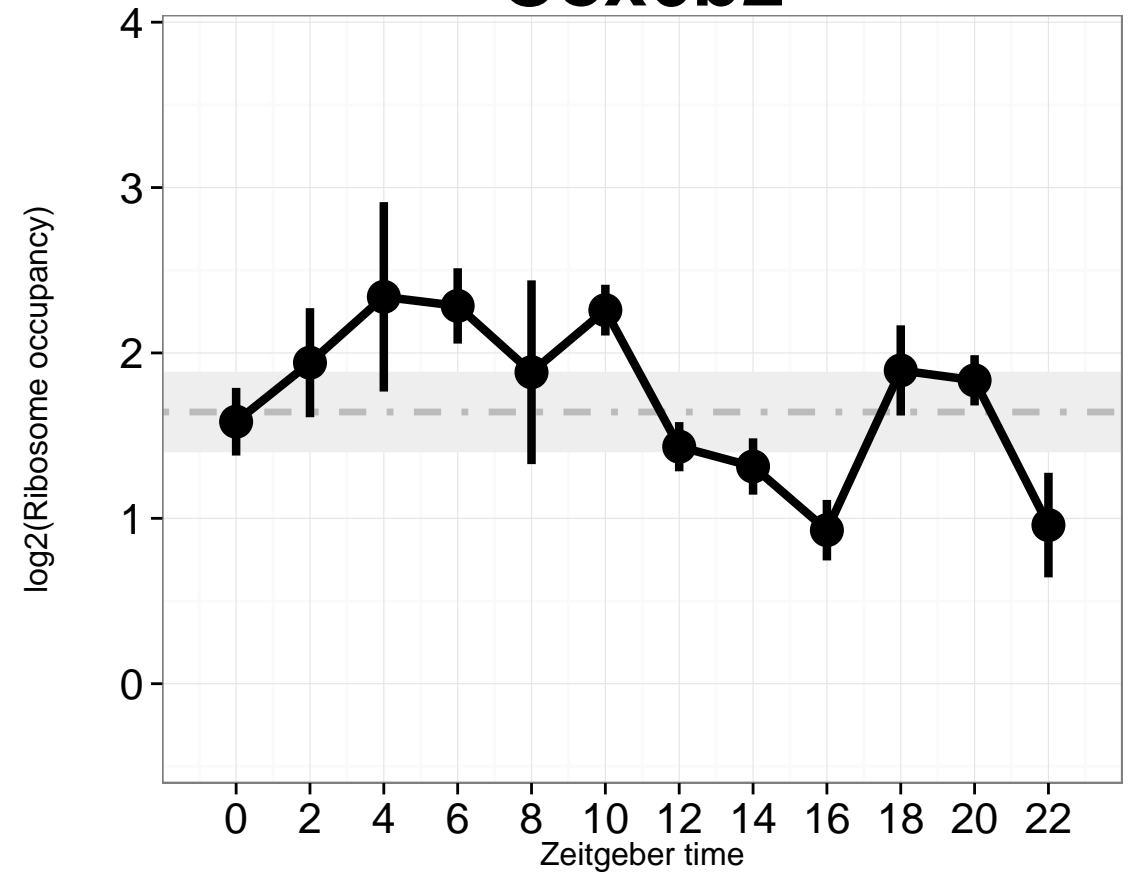

Supplement: Supplementary file 9822 [file 1]

# Tarbp2

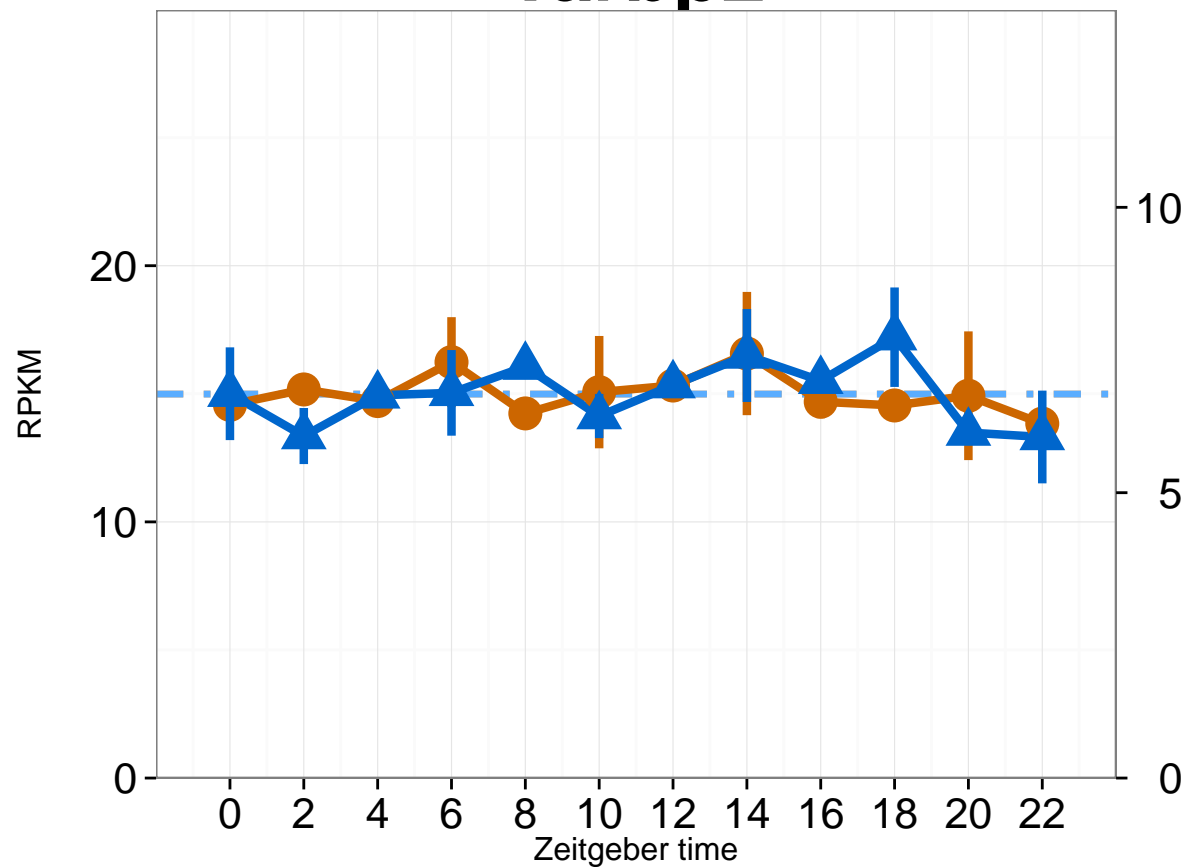

# Tarbp2

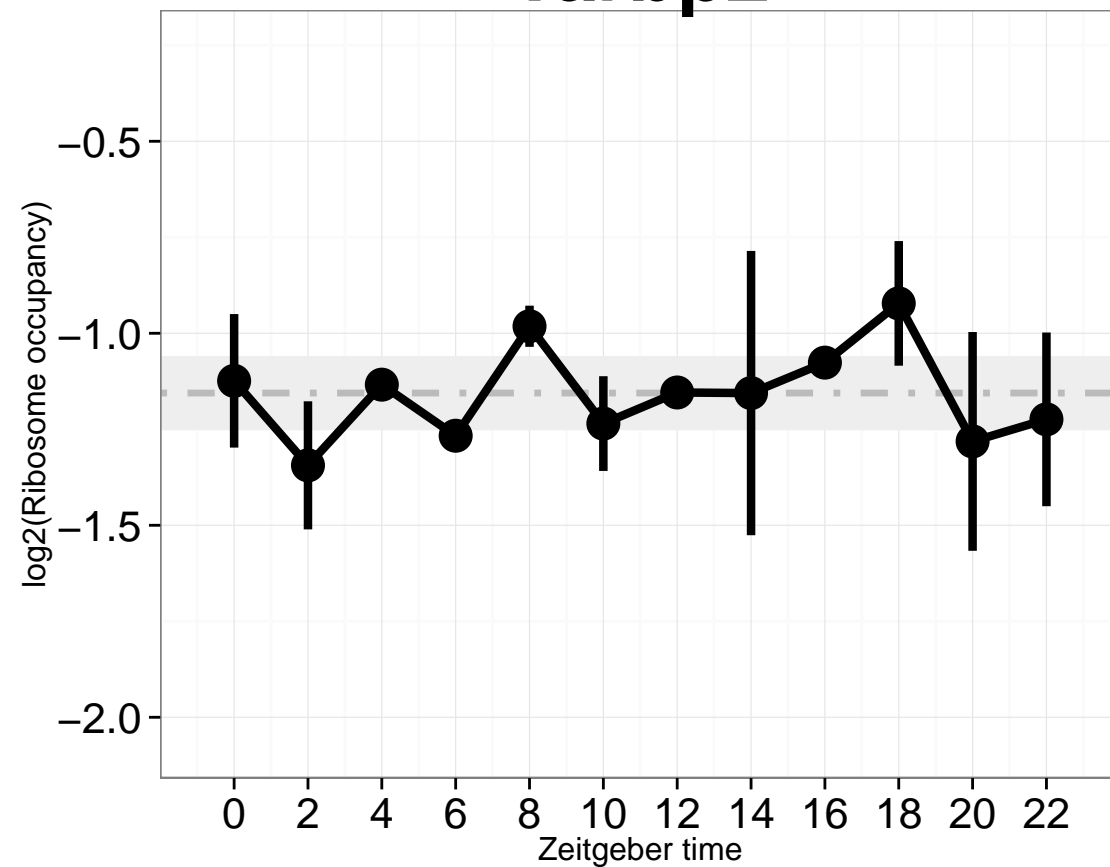

Supplement: Supplementary file 9823 [file 1]

# Hsp90aa1

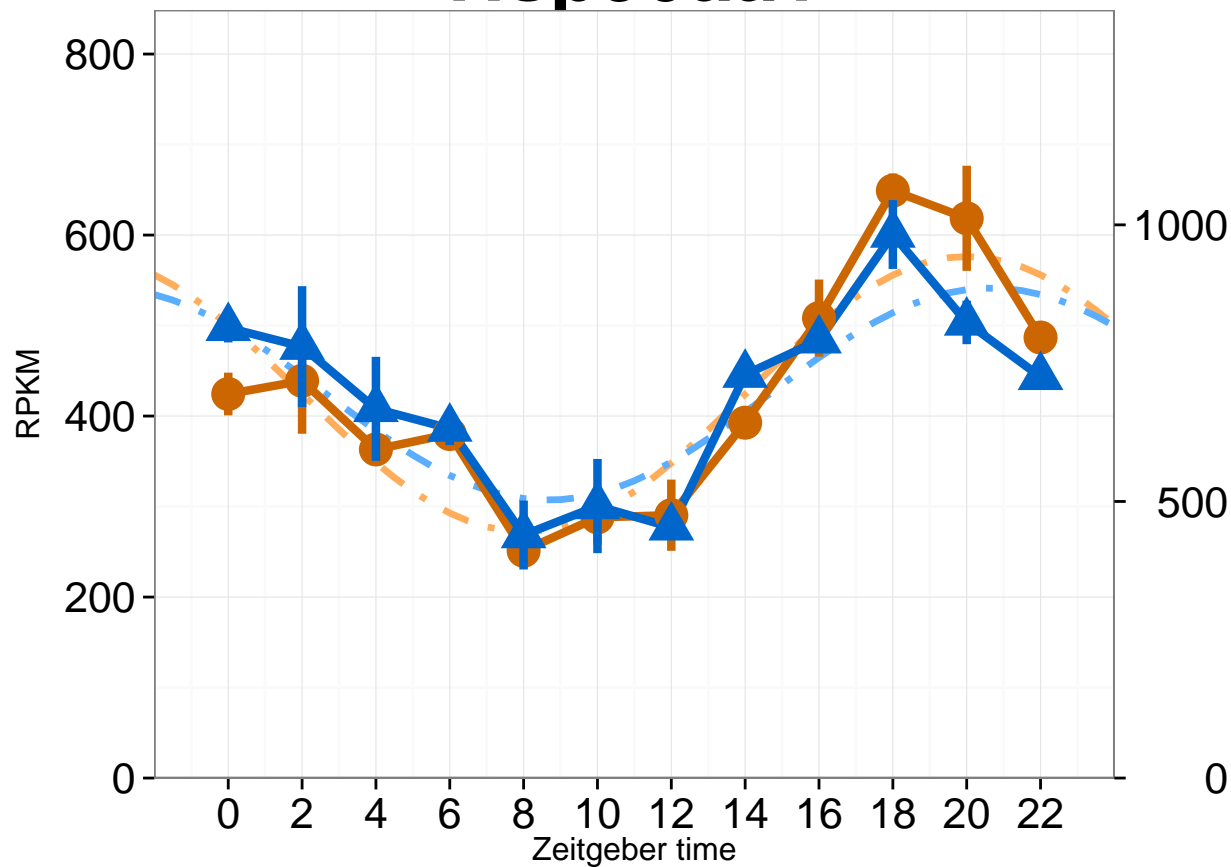

# Hsp90aa1

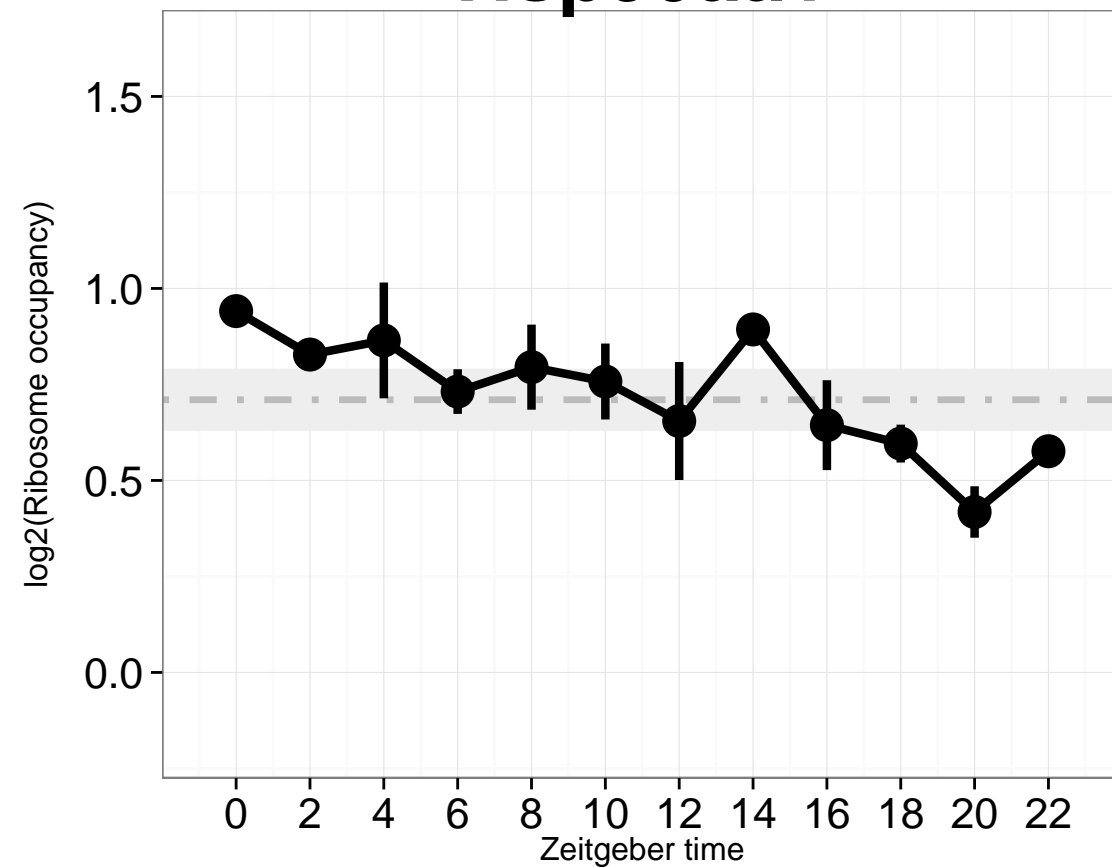

Supplement: Supplementary file 9824 [file 1]

## Polh

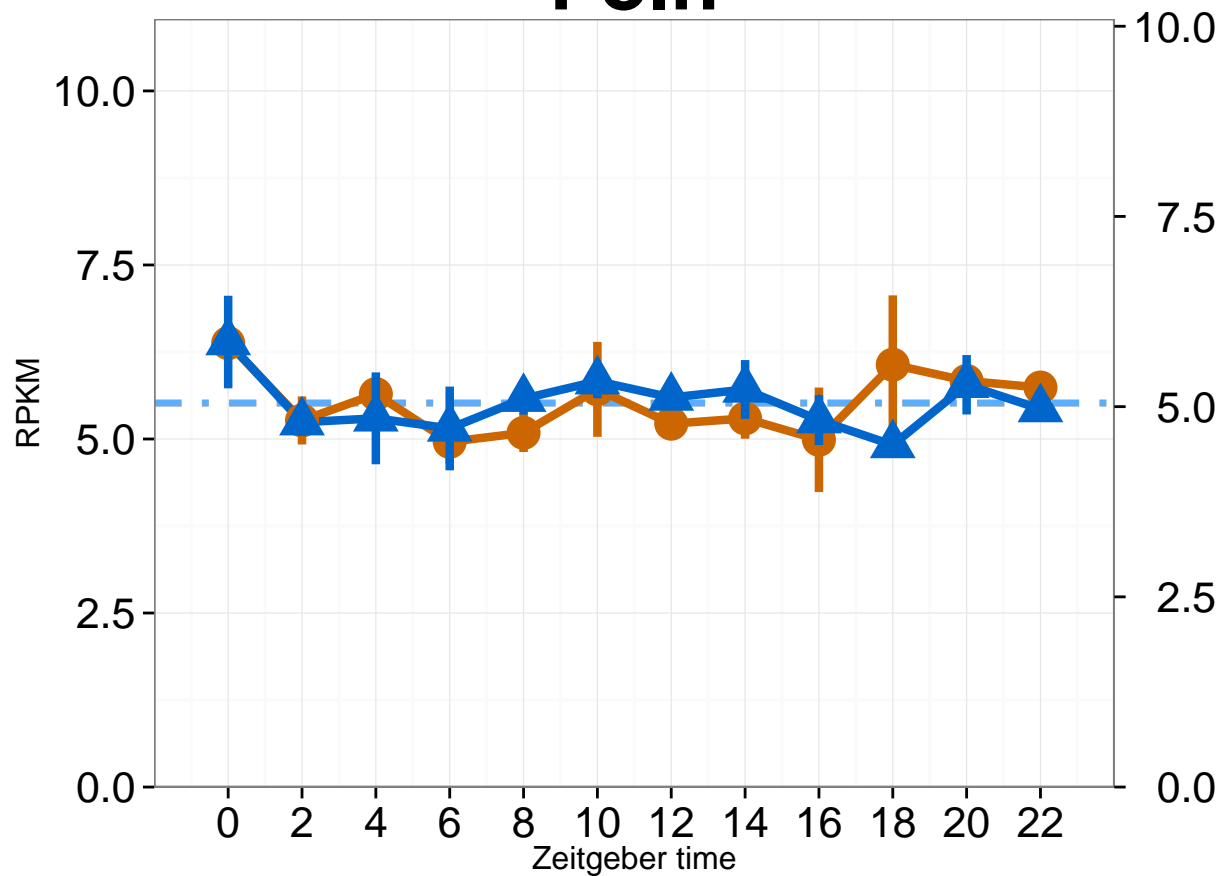

## Polh

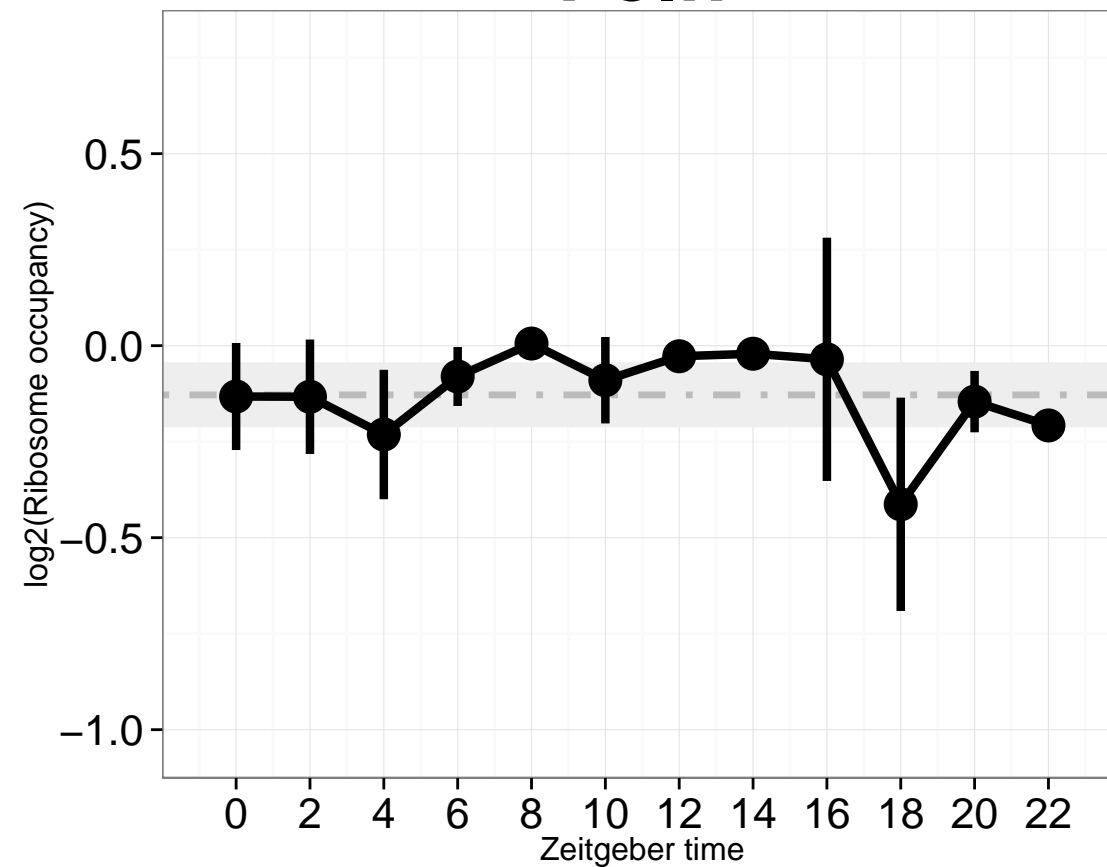

Supplement: Supplementary file 9825 [file 1]

# Katnb1

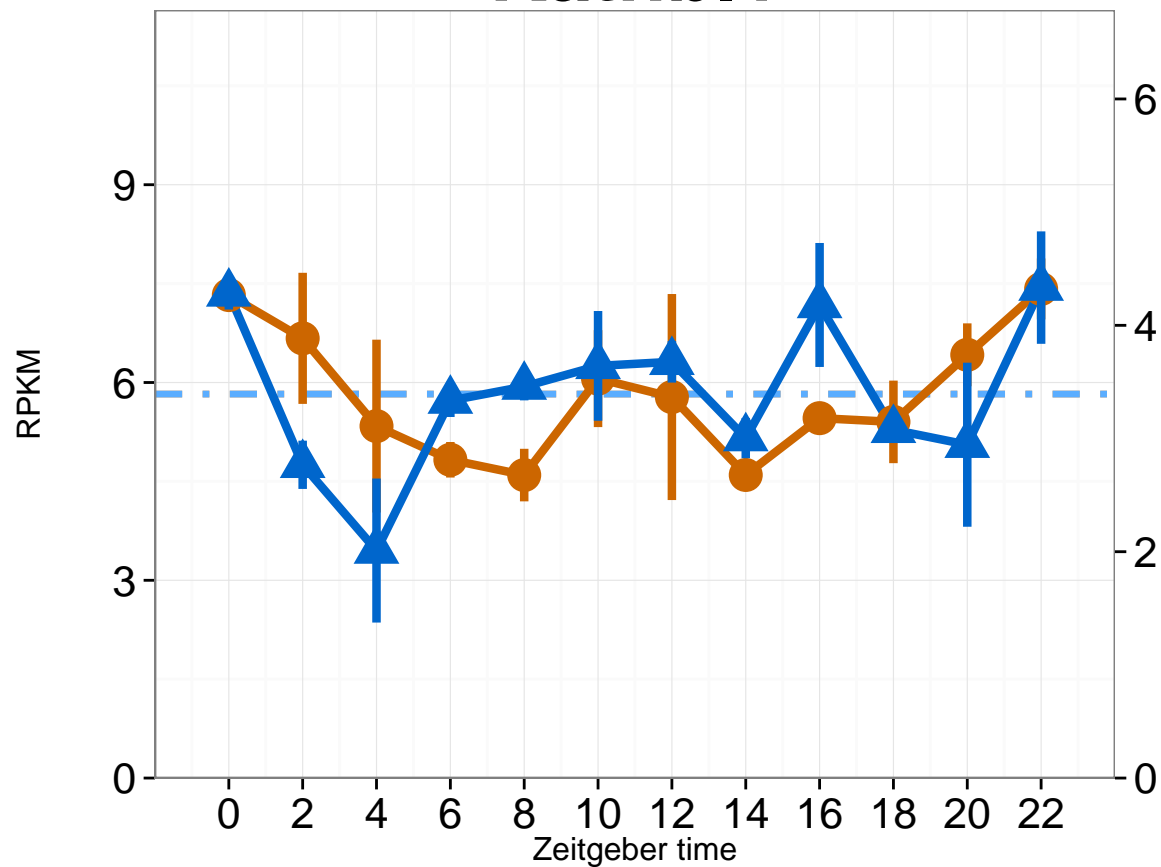

# Katnb1

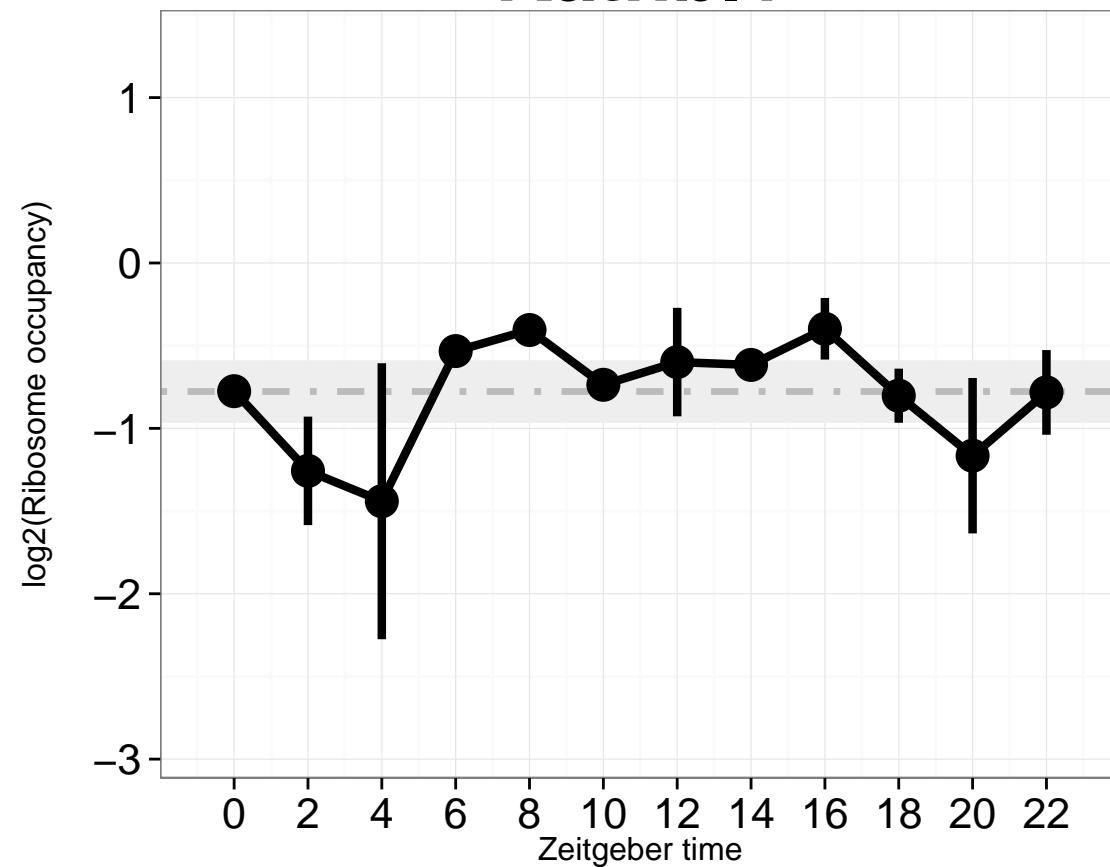

Supplement: Supplementary file 9826 [file 1]

## Rheb

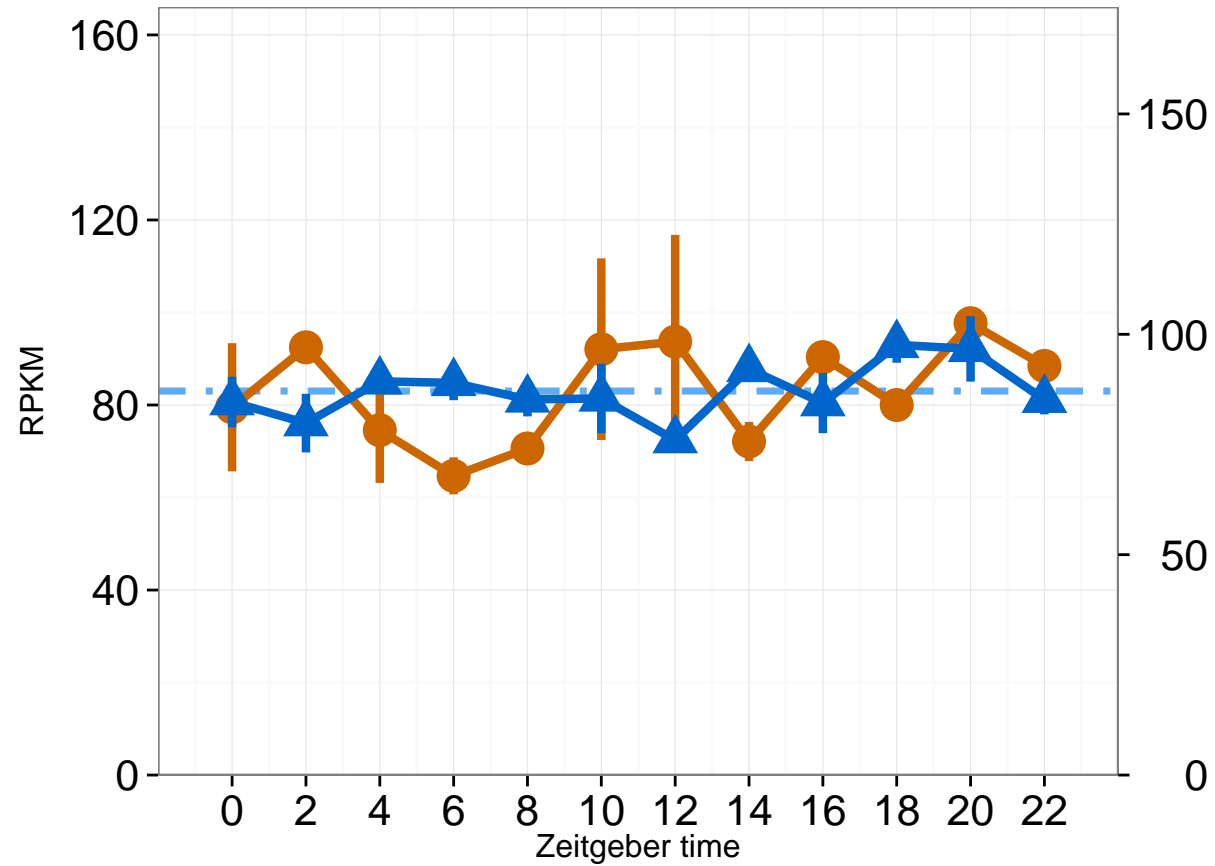

## Rheb

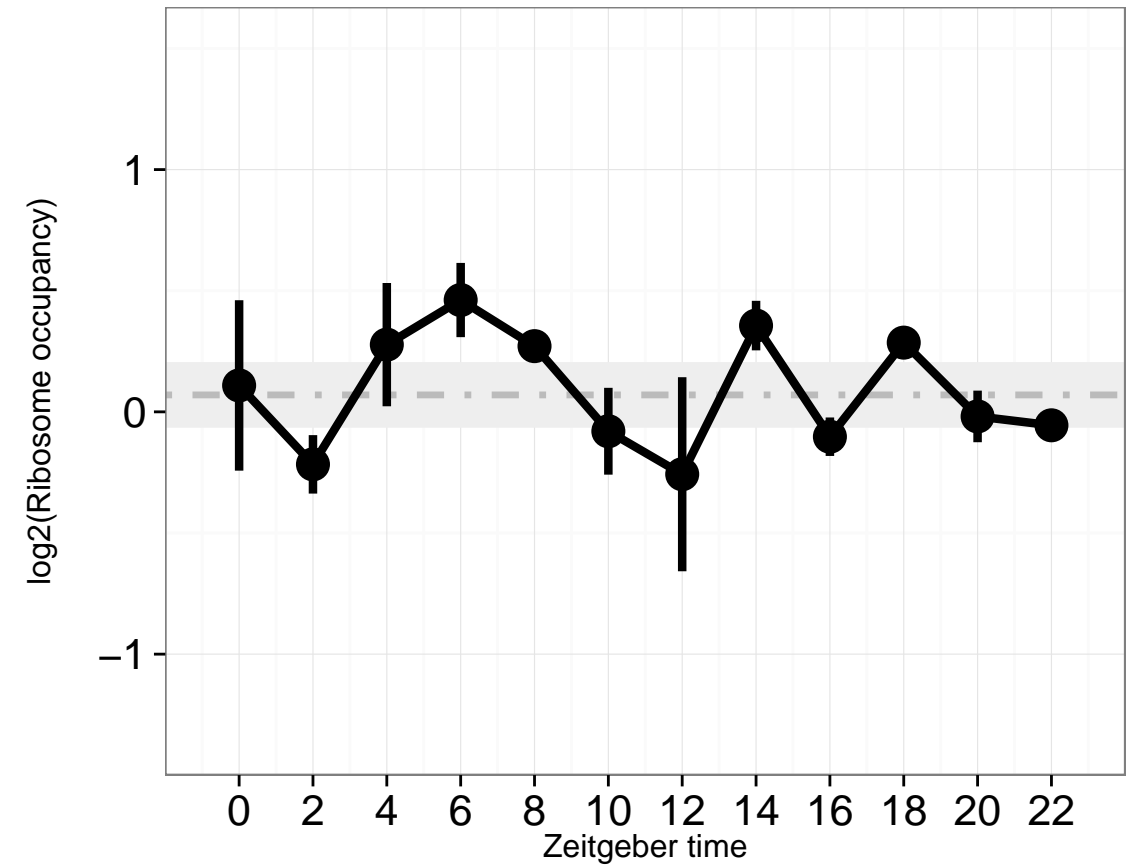

Supplement: Supplementary file 9827 [file 1]

## Nckipsd

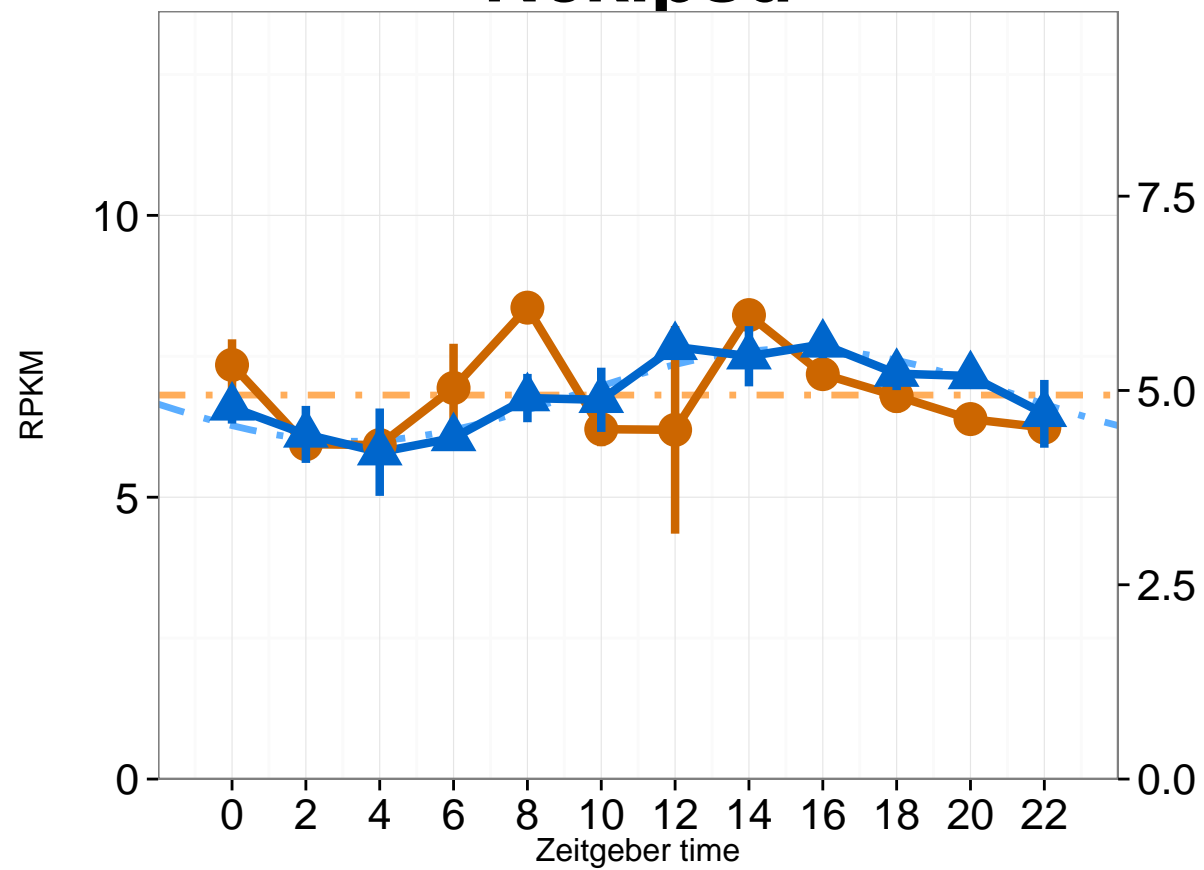

## Nckipsd

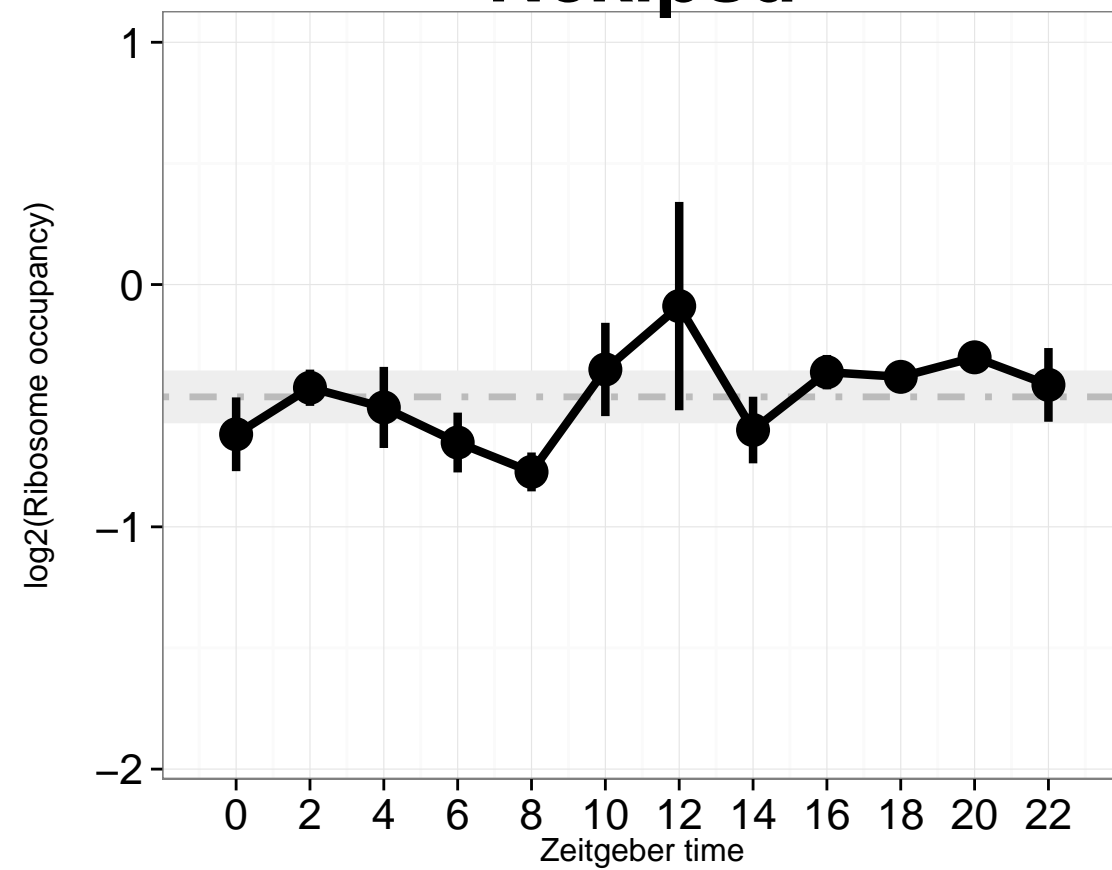

Supplement: Supplementary file 9828 [file 1]

# Serpina6b

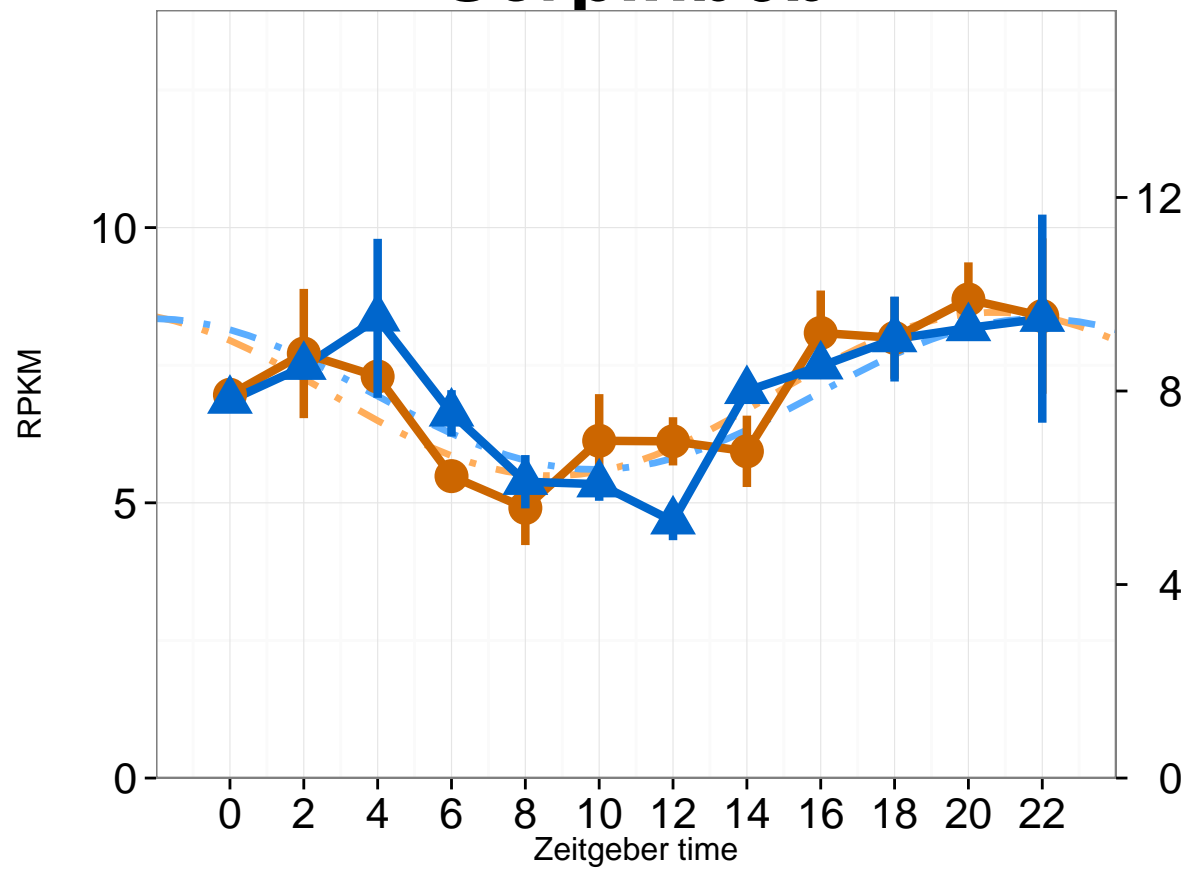

# Serpina6b

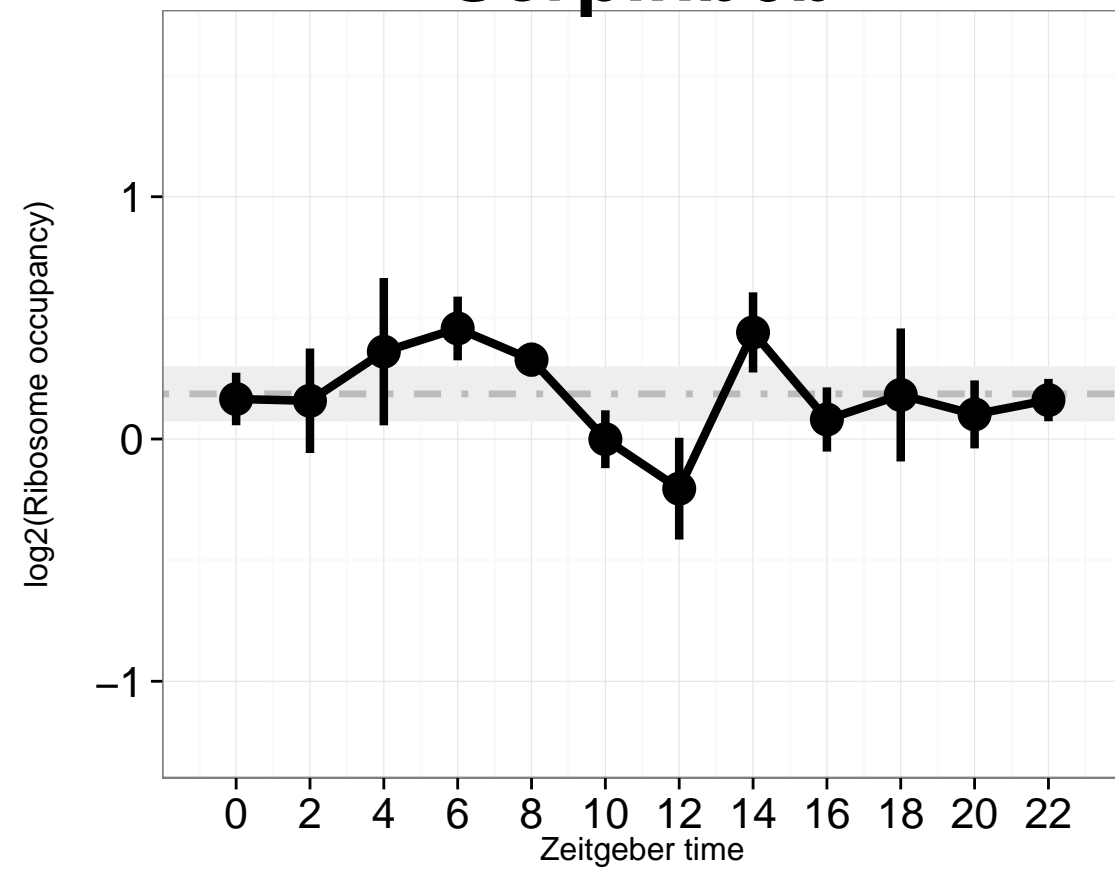

Supplement: Supplementary file 9829 [file 1]

## Fbxo40

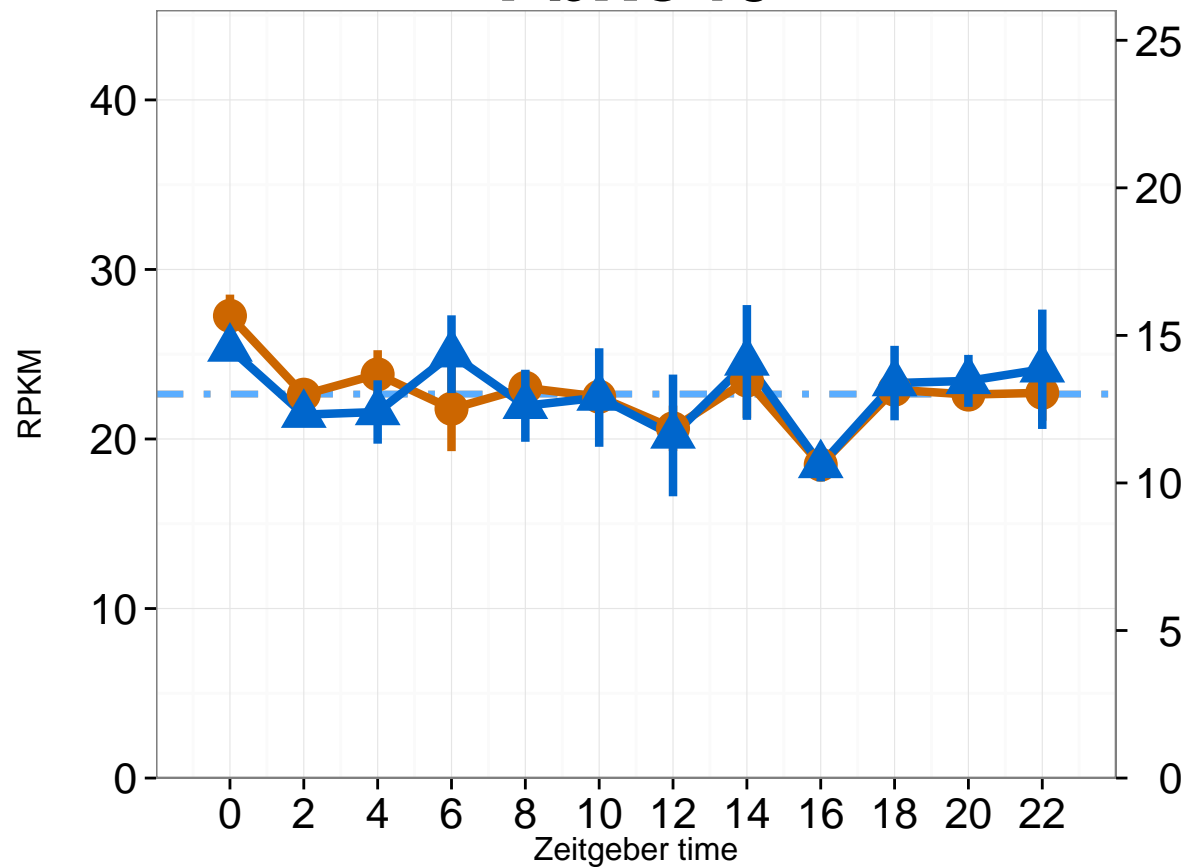

## Fbxo40

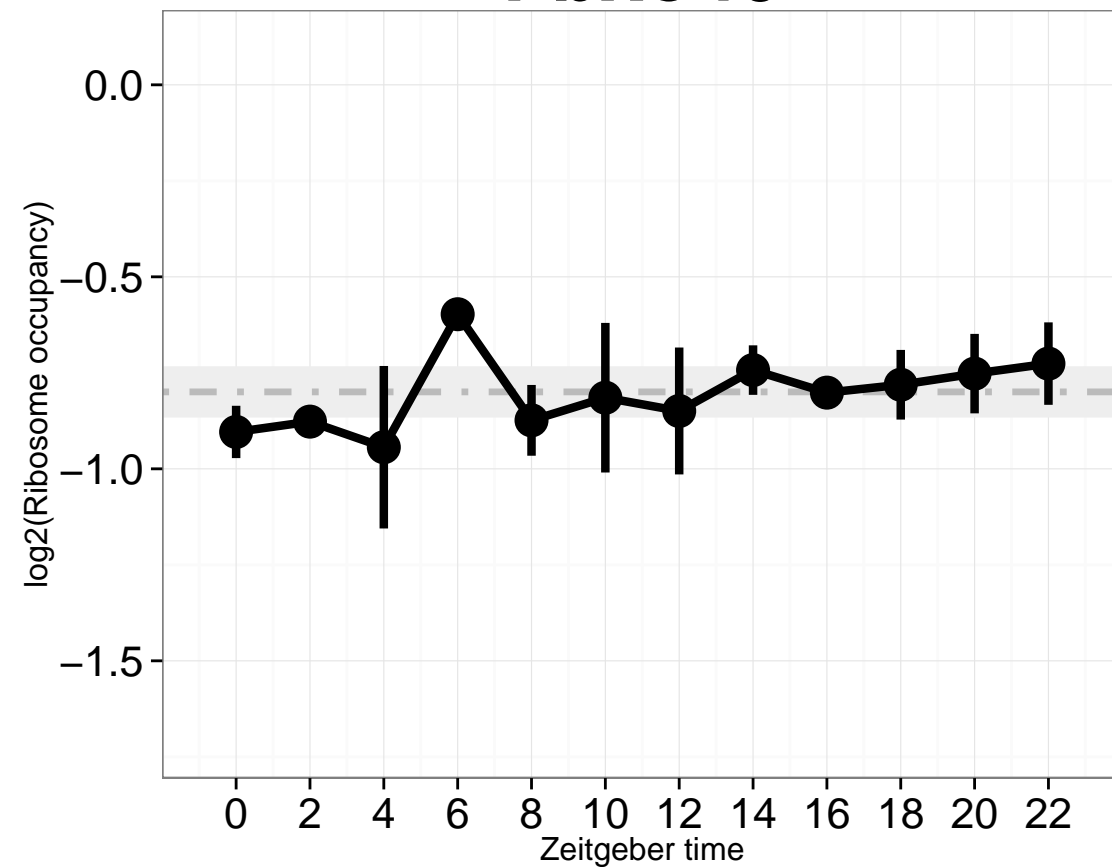

Supplement: Supplementary file 9830 [file 1]

# Scaf8

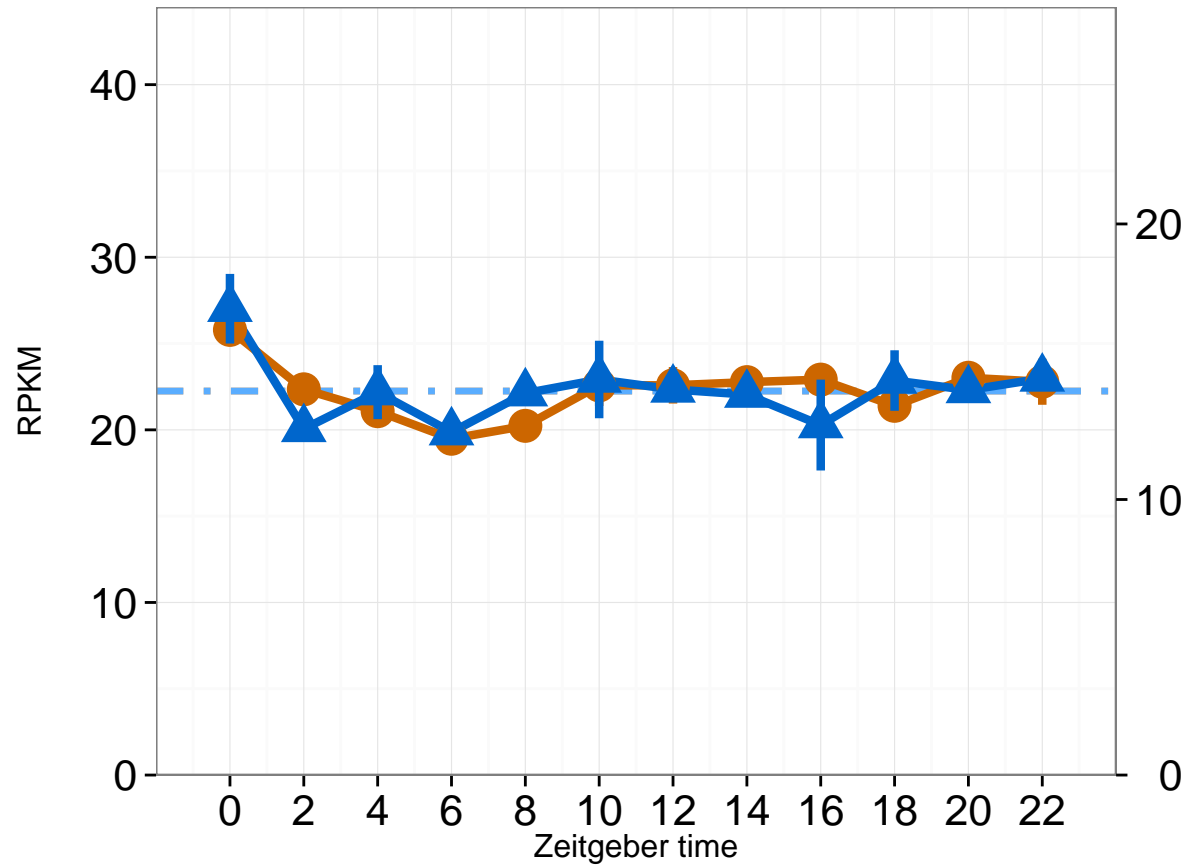

# Scaf8

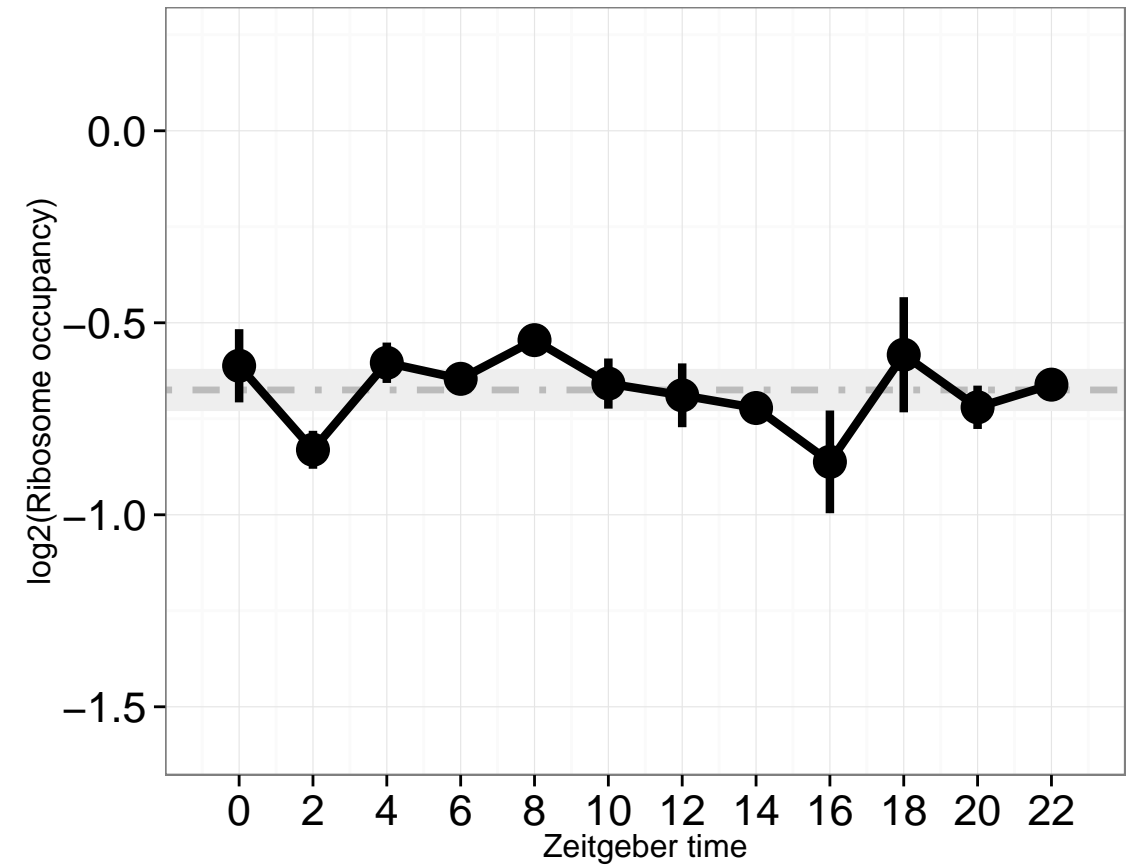

Supplement: Supplementary file 9831 [file 1]

## Cblb

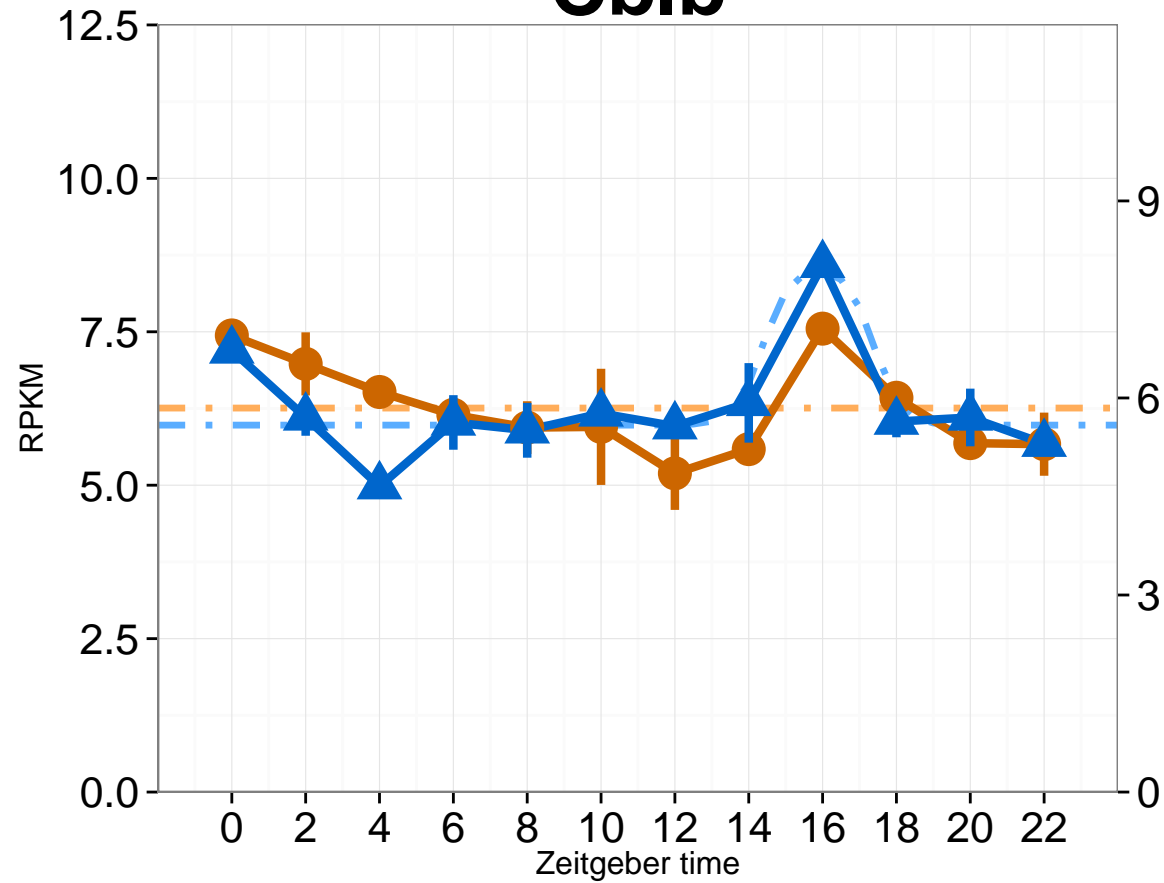

## Cblb

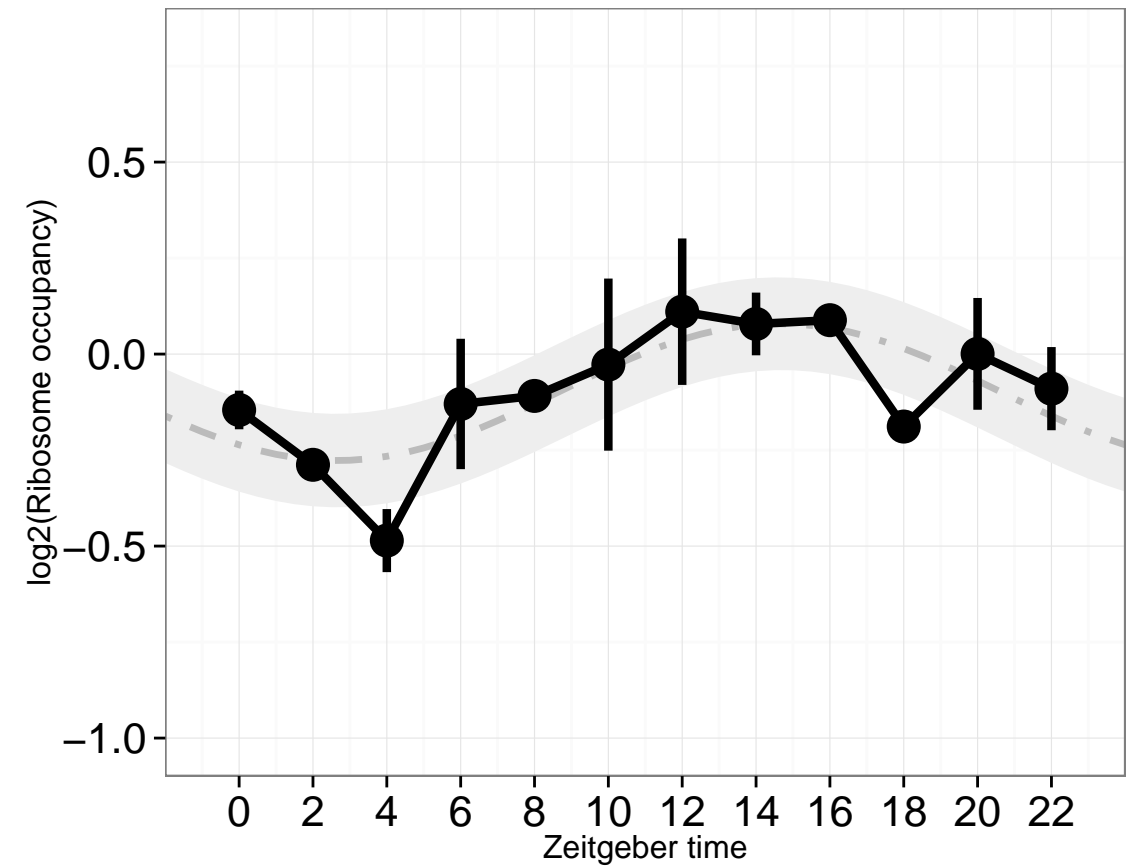

Supplement: Supplementary file 9832 [file 1]

# Zfp78

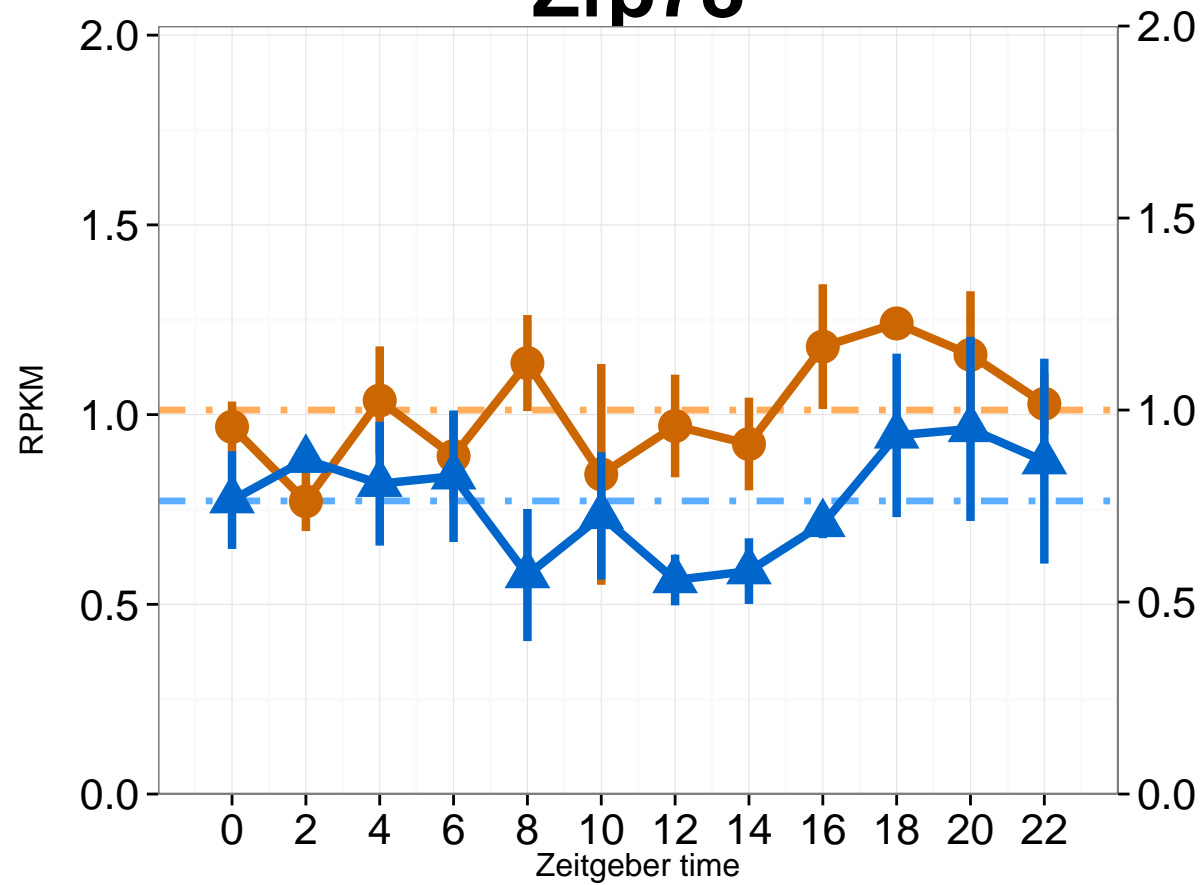

# Zfp78

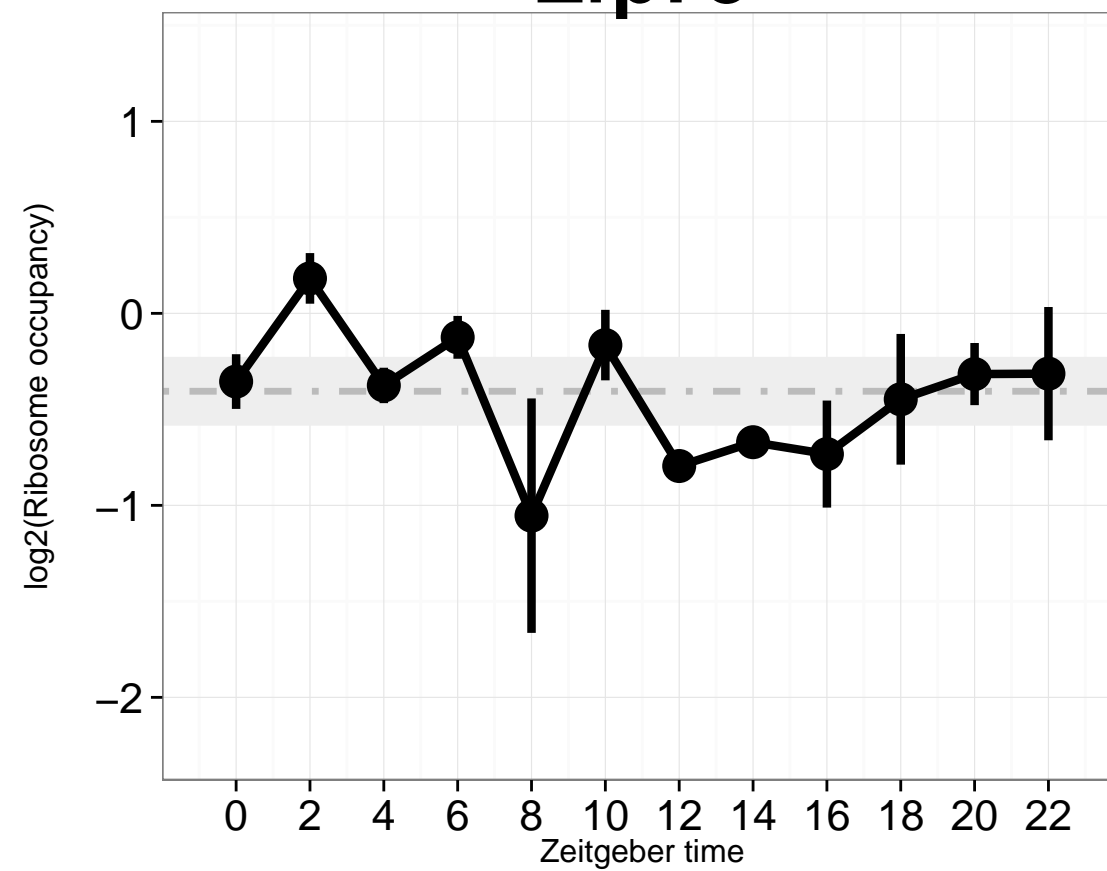

Supplement: Supplementary file 9833 [file 1]

## Alkbh7

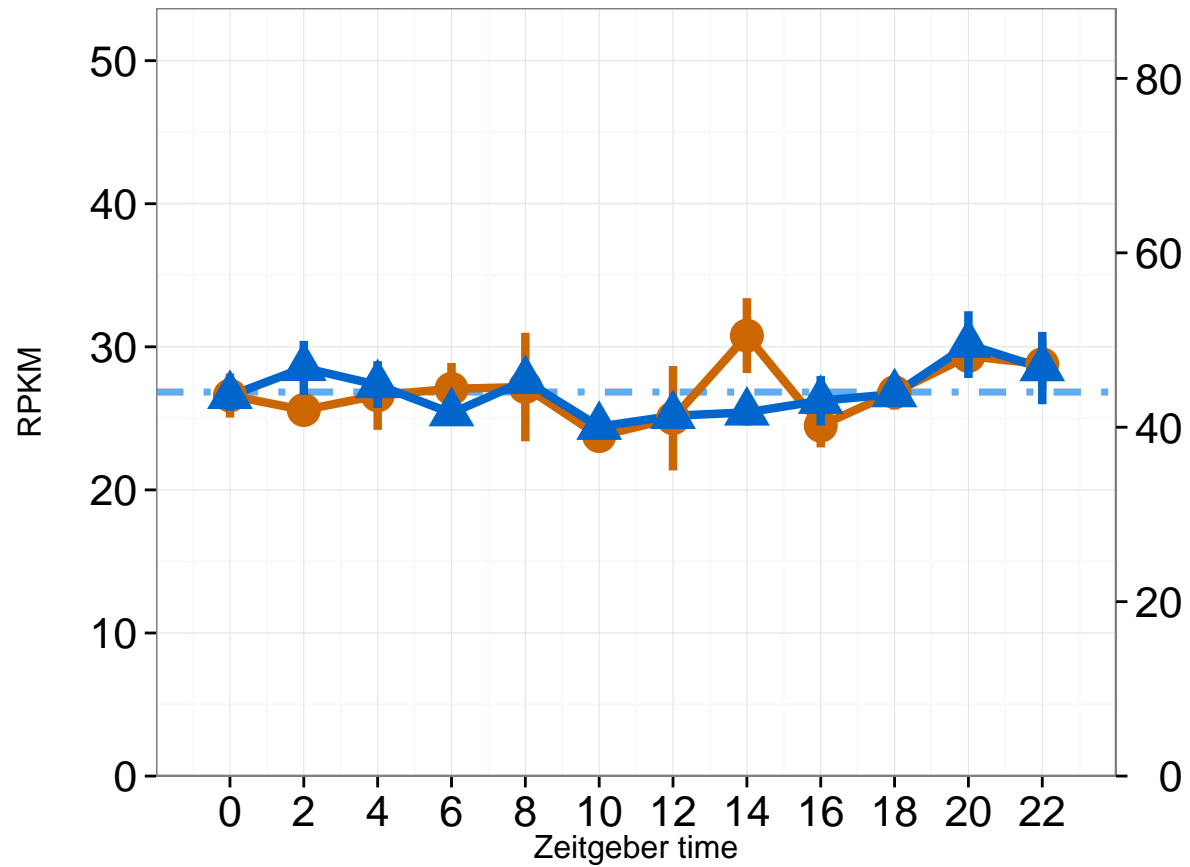

## Alkbh7

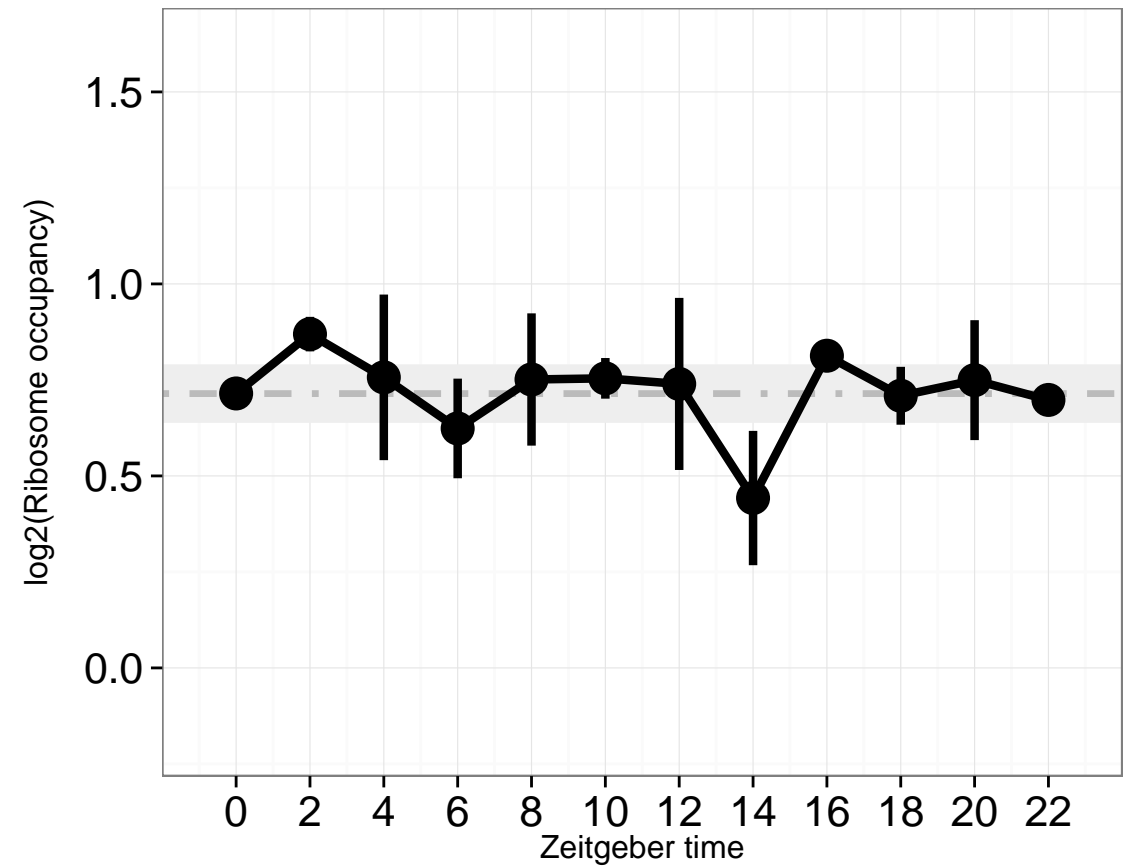

Supplement: Supplementary file 9834 [file 1]

## PIk3

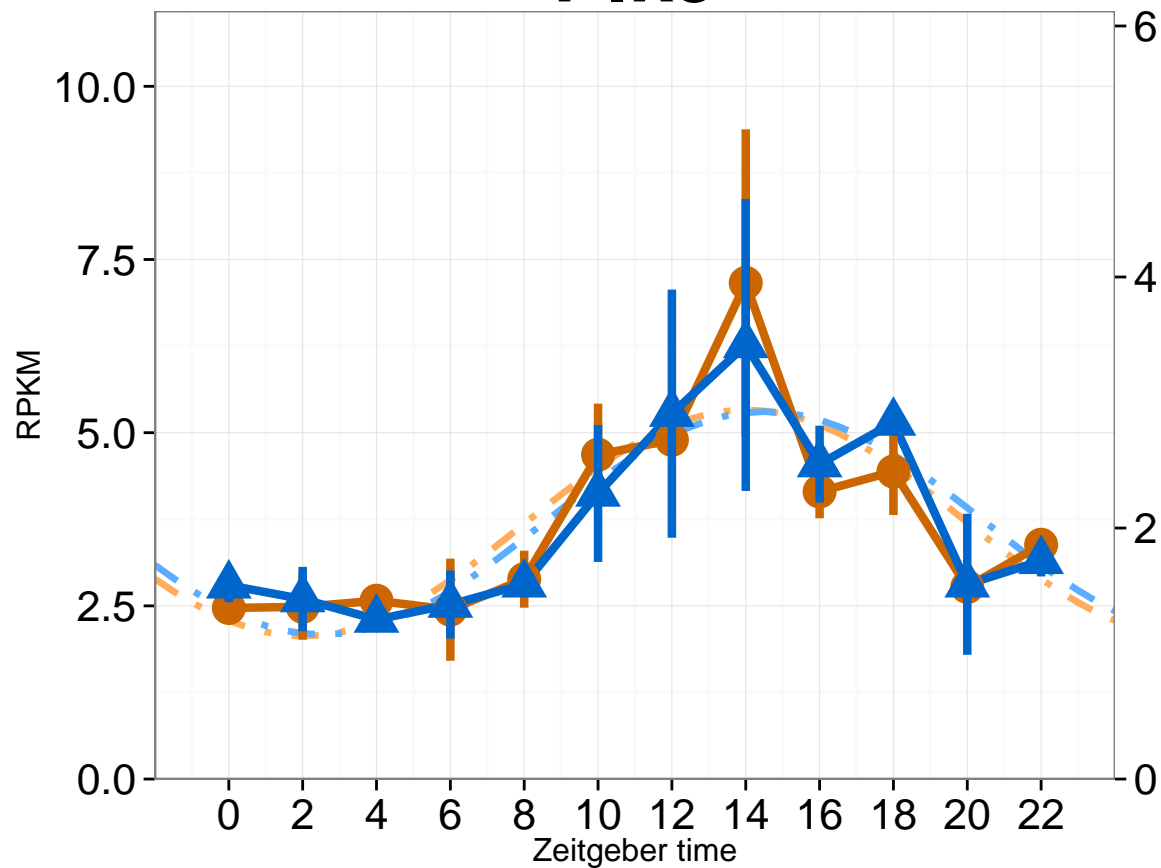

## PIk3

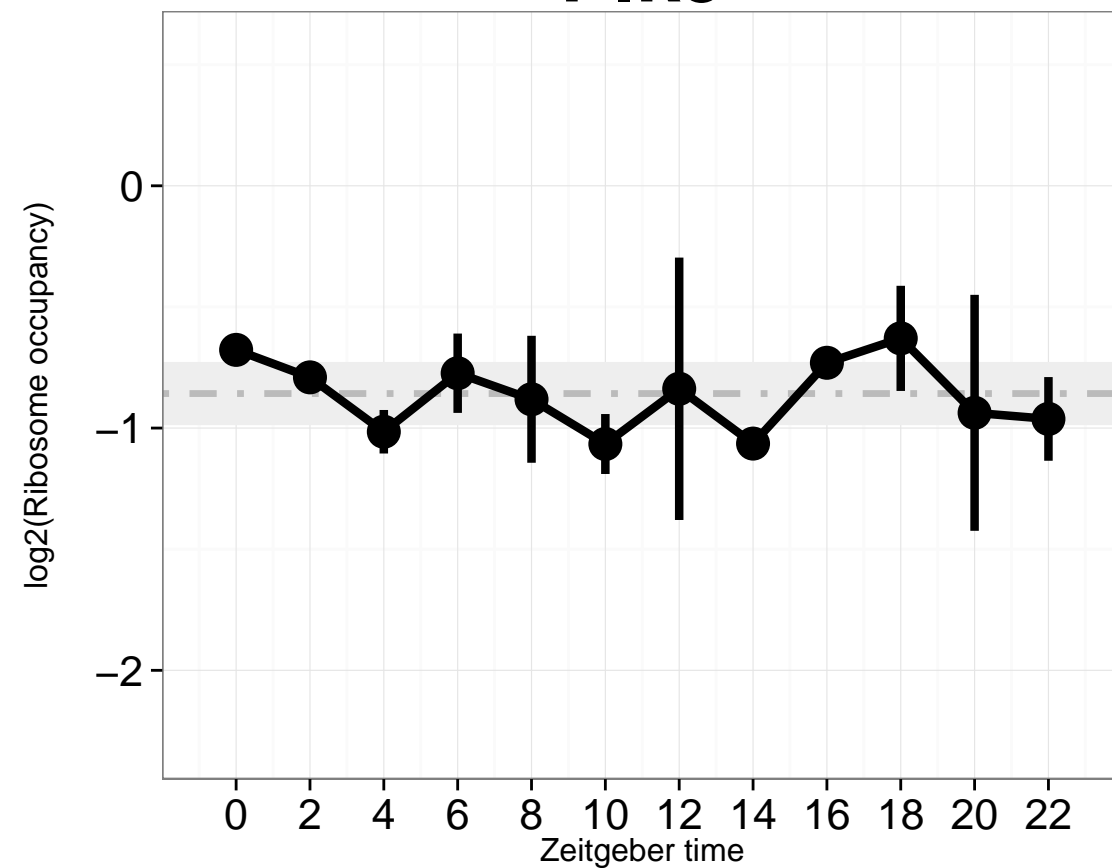

Supplement: Supplementary file 9835 [file 1]

# Mrps17

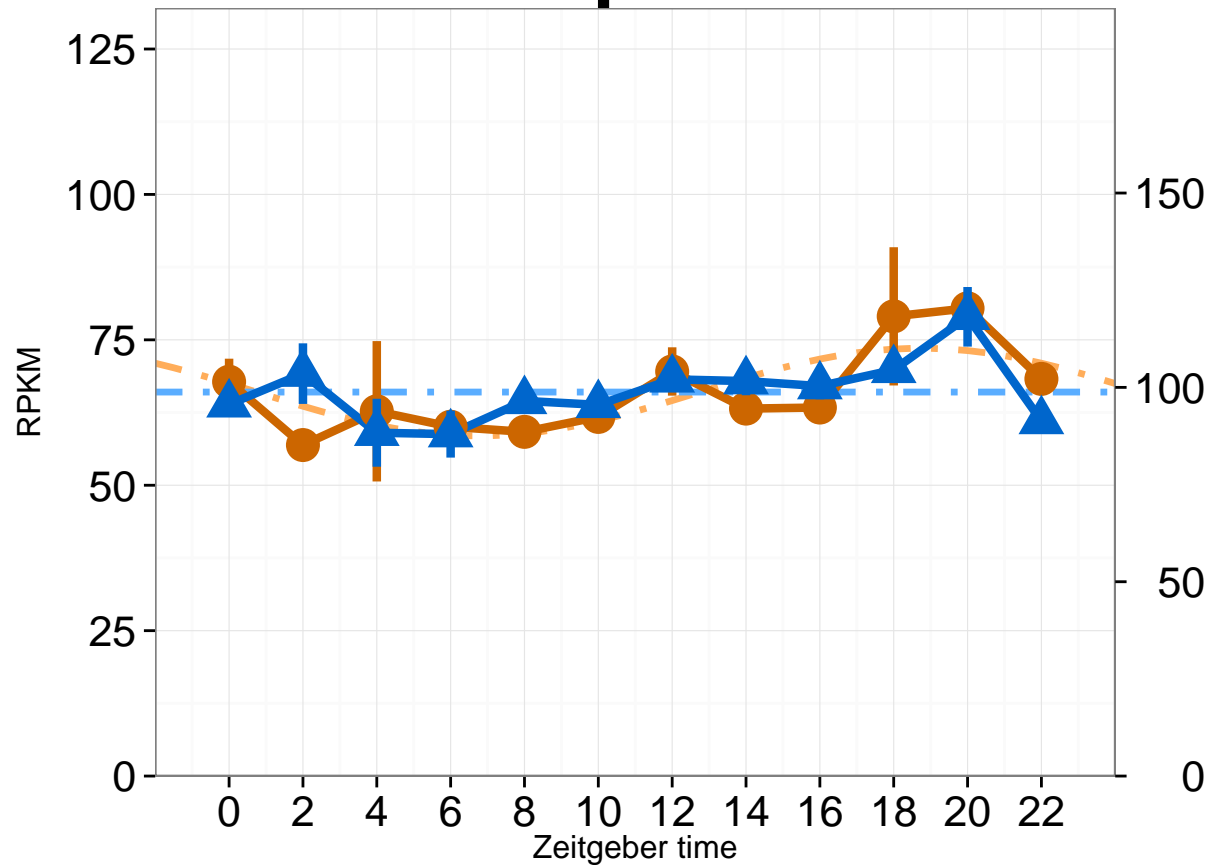

# Mrps17

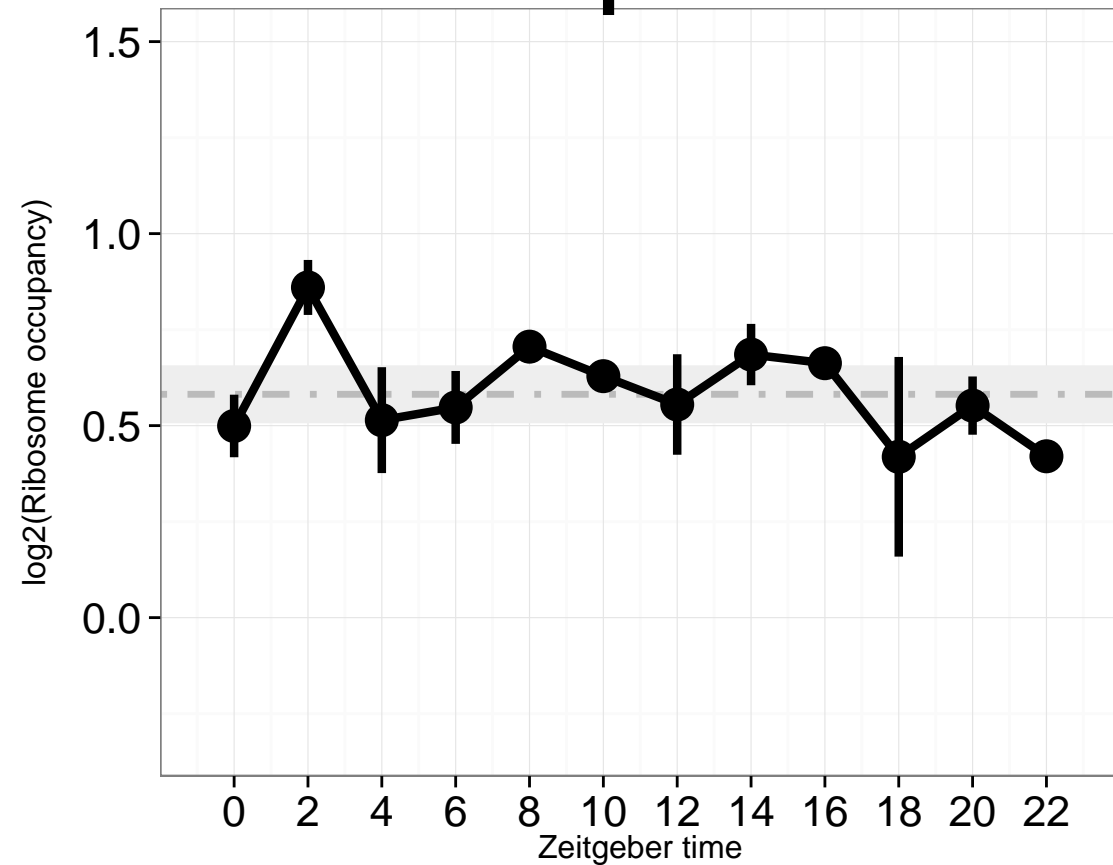

Supplement: Supplementary file 9836 [file 1]
