# Supplementary material (part 99 of 133)
Source: publisher figshare collection journal article supplement (https://springernature.figshare.com/articles/dataset/_/4903193)

# Tspan12

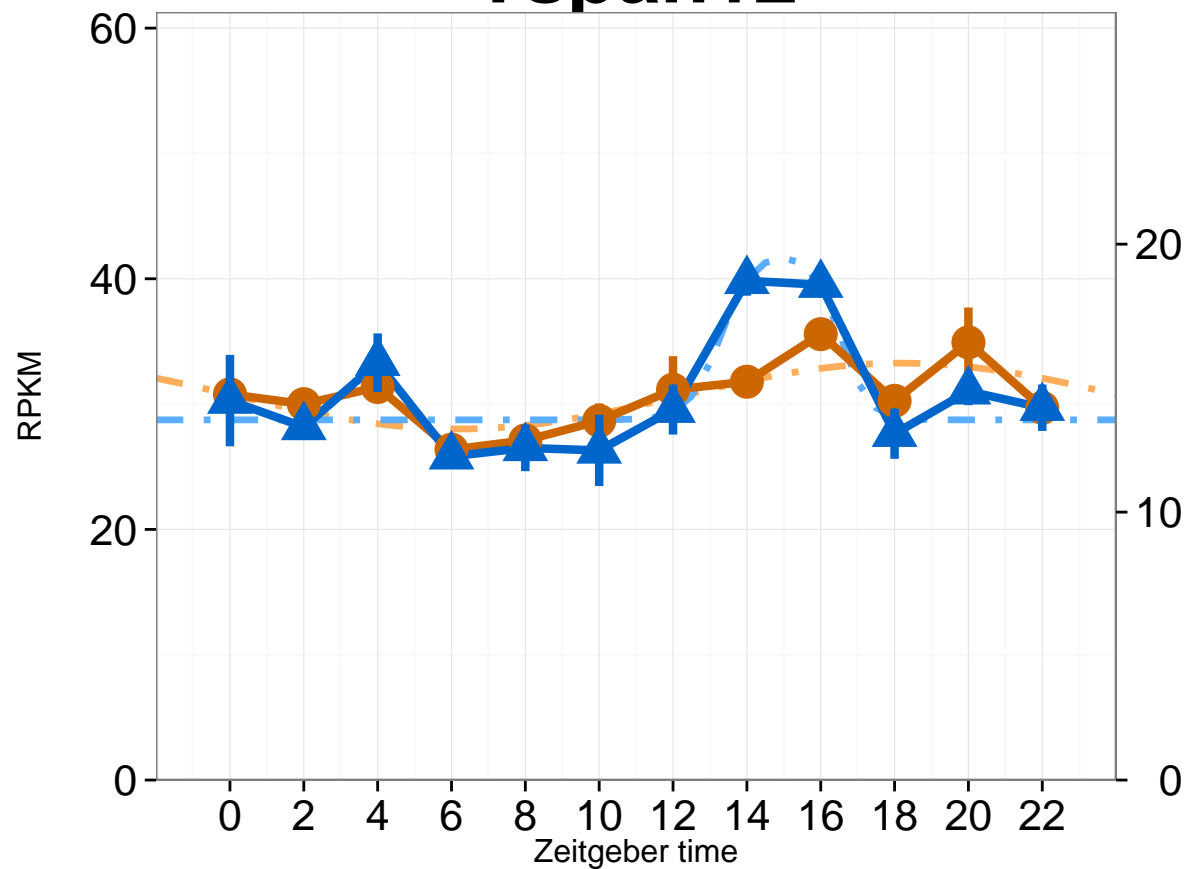

# Tspan12

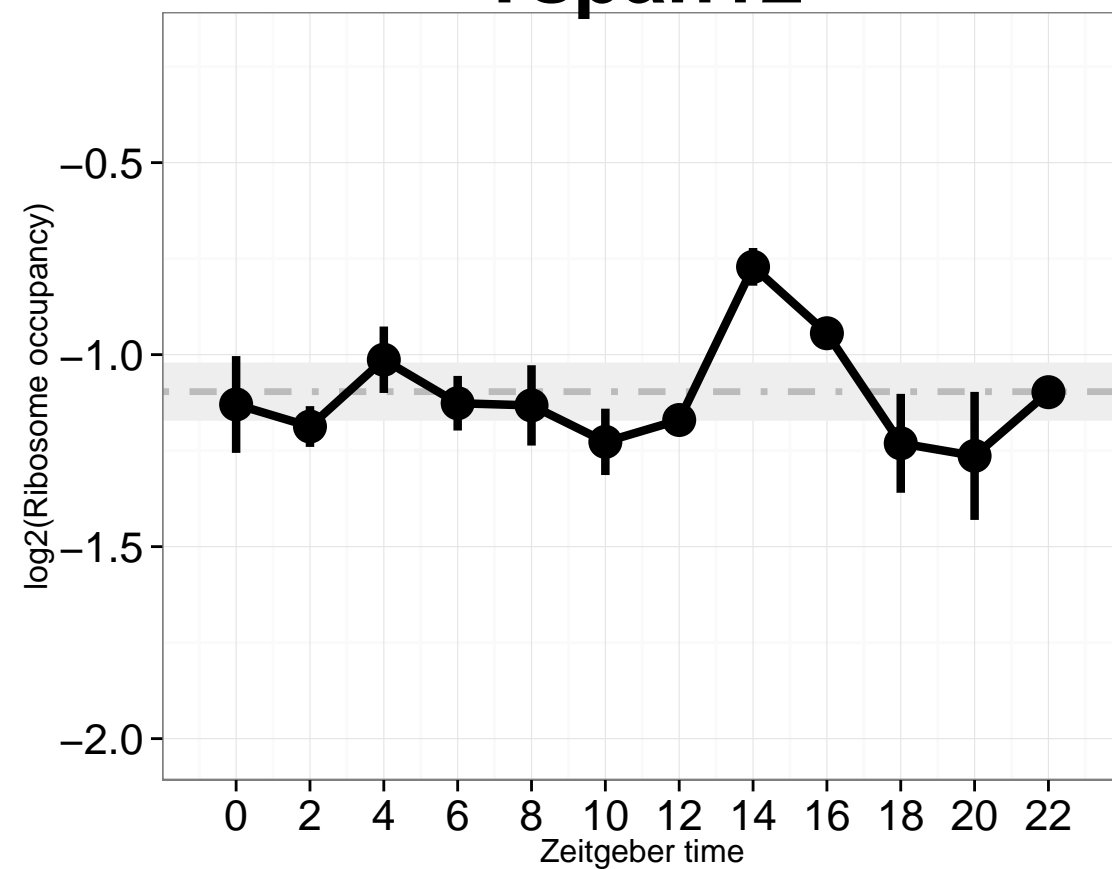

Supplement: Supplementary file 9837 [file 1]

# Acp5

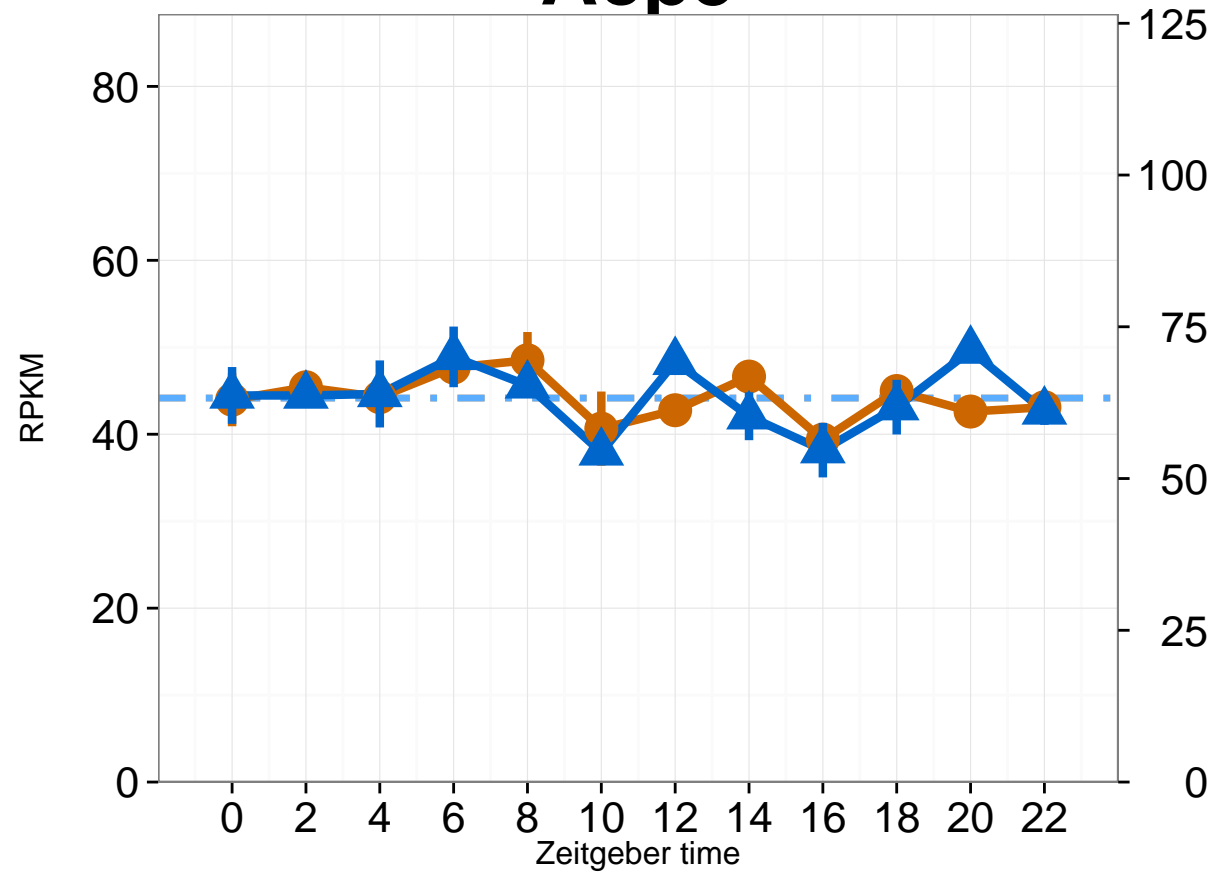

# Acp5

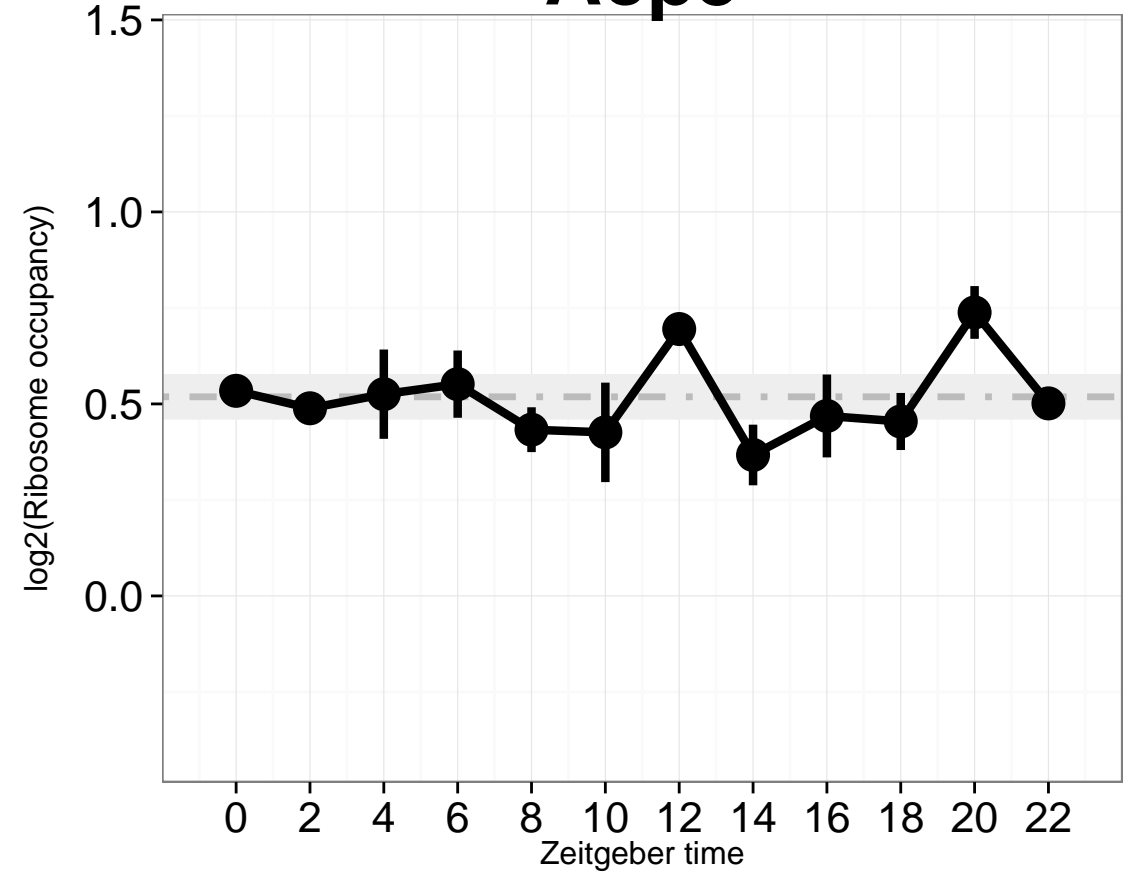

Supplement: Supplementary file 9838 [file 1]

# Poglut1

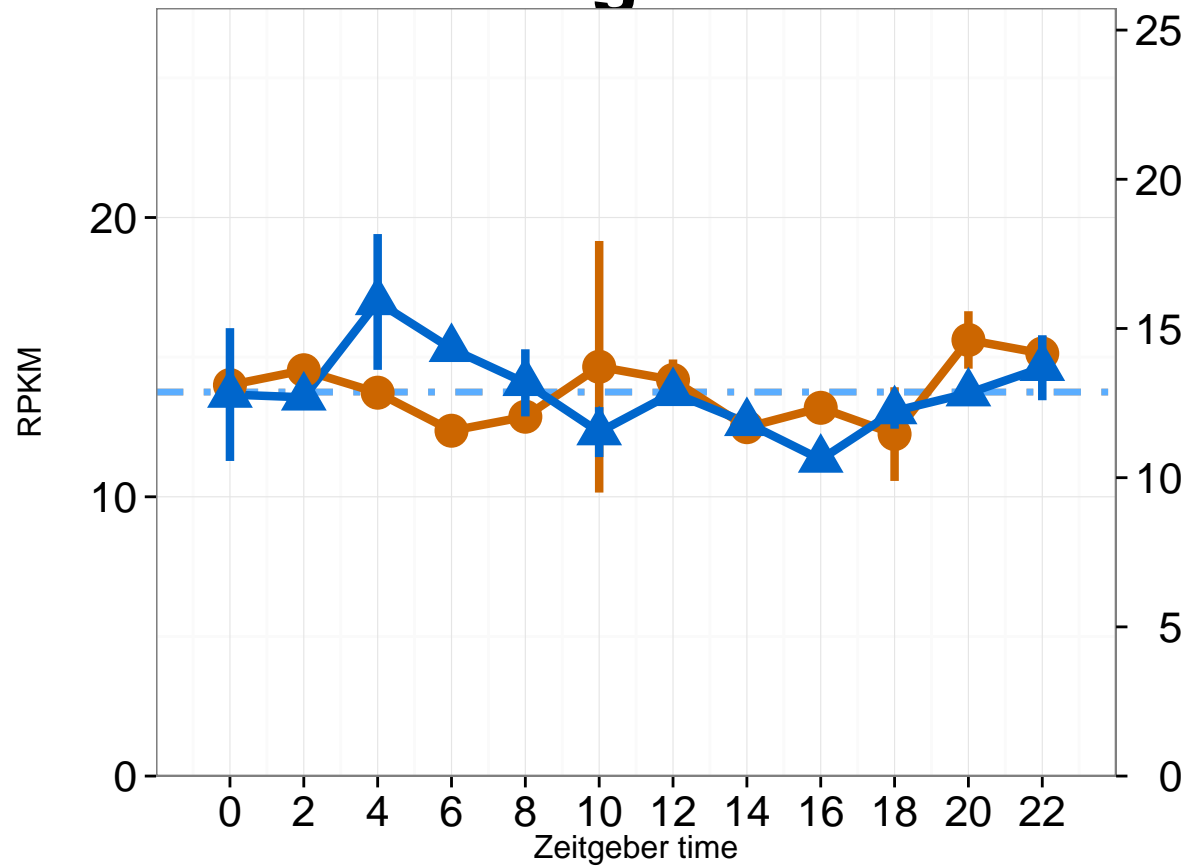

# Poglut1

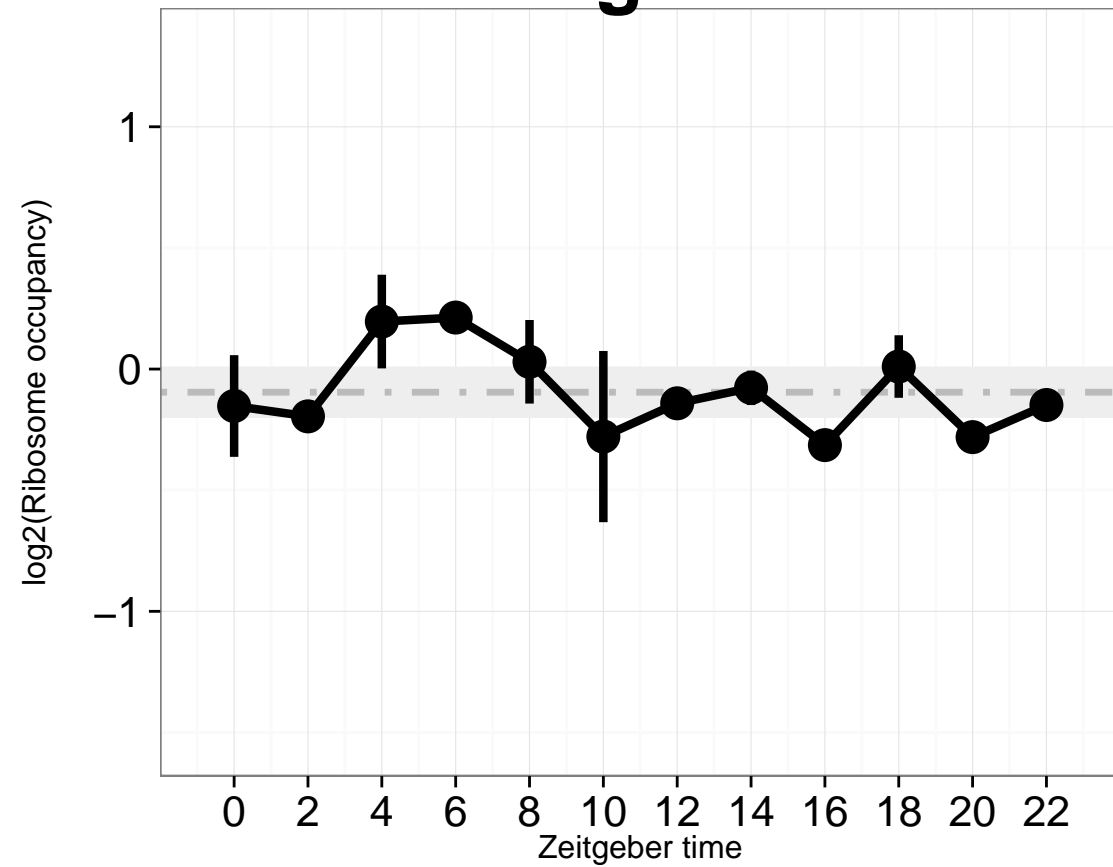

Supplement: Supplementary file 9839 [file 1]

## Slc41a2

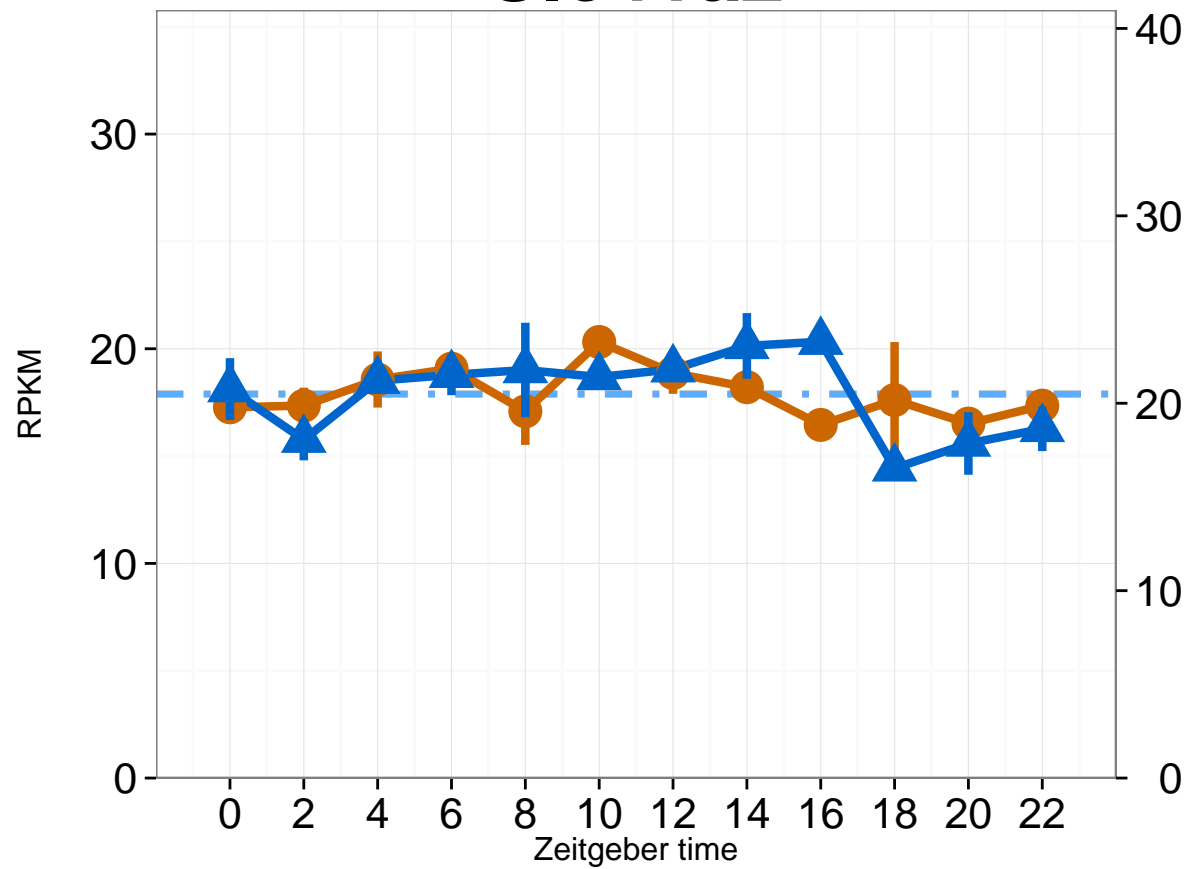

## Slc41a2

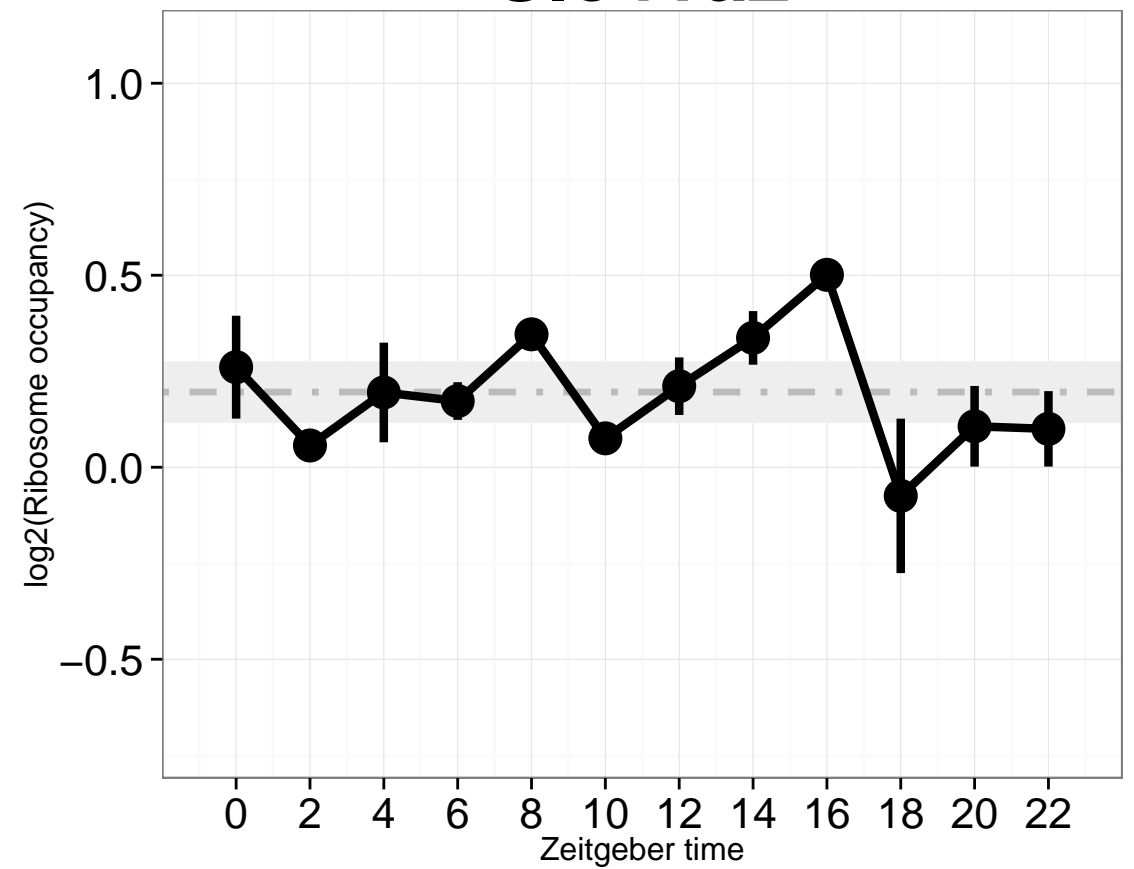

Supplement: Supplementary file 9840 [file 1]

# Zfp771

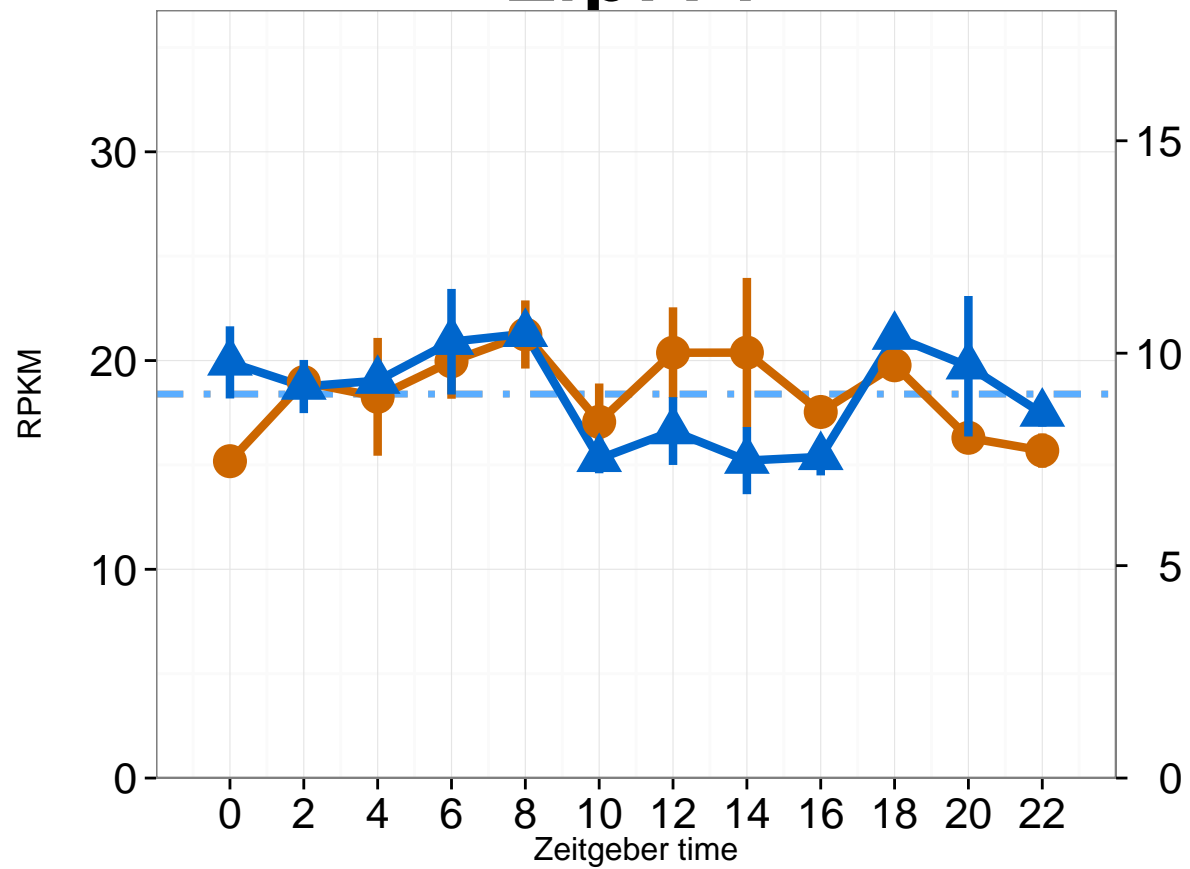

# Zfp771

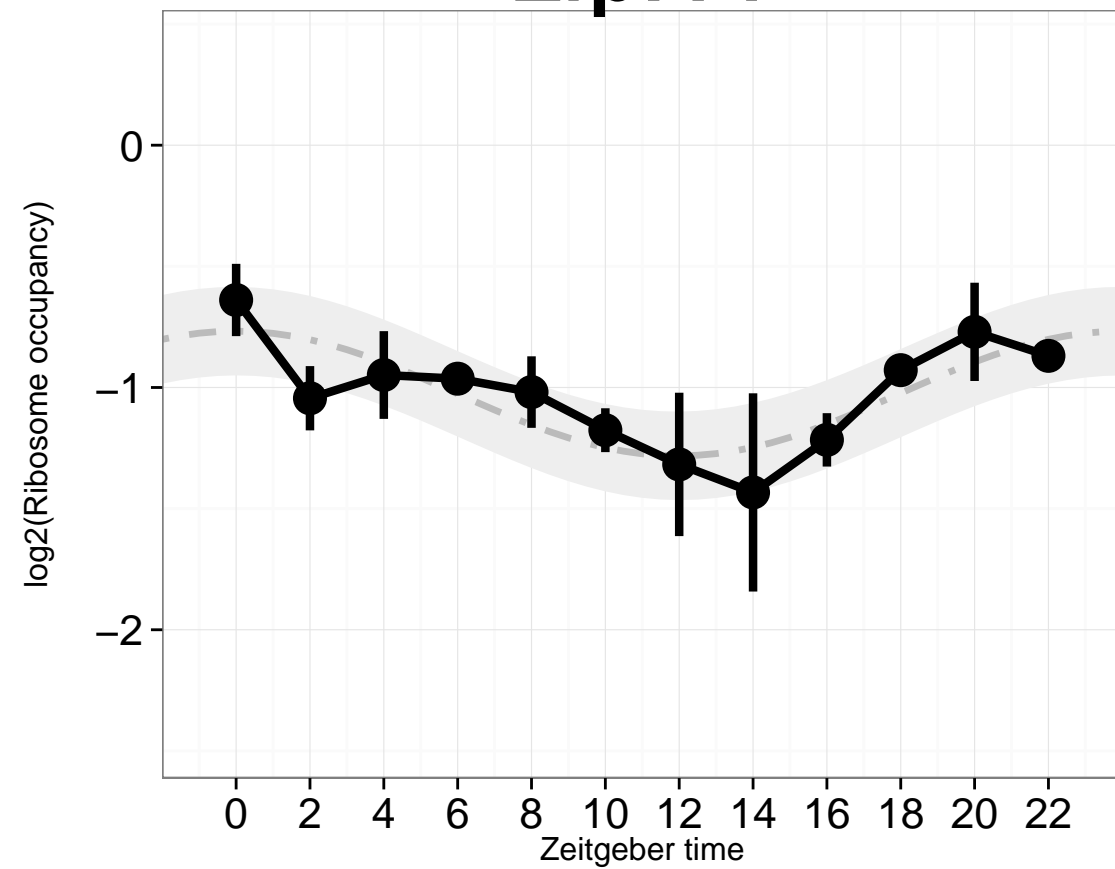

Supplement: Supplementary file 9841 [file 1]

# Ssc5d

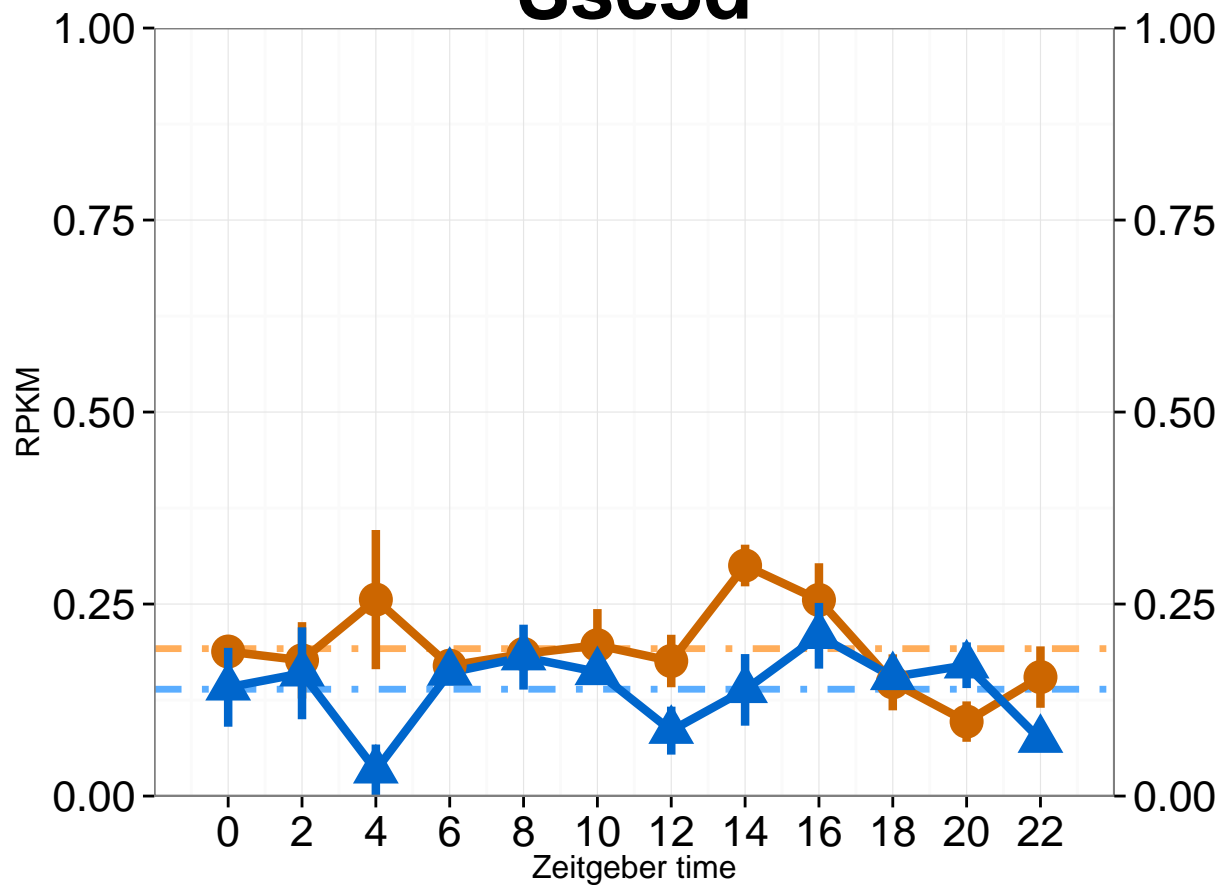

# Ssc5d

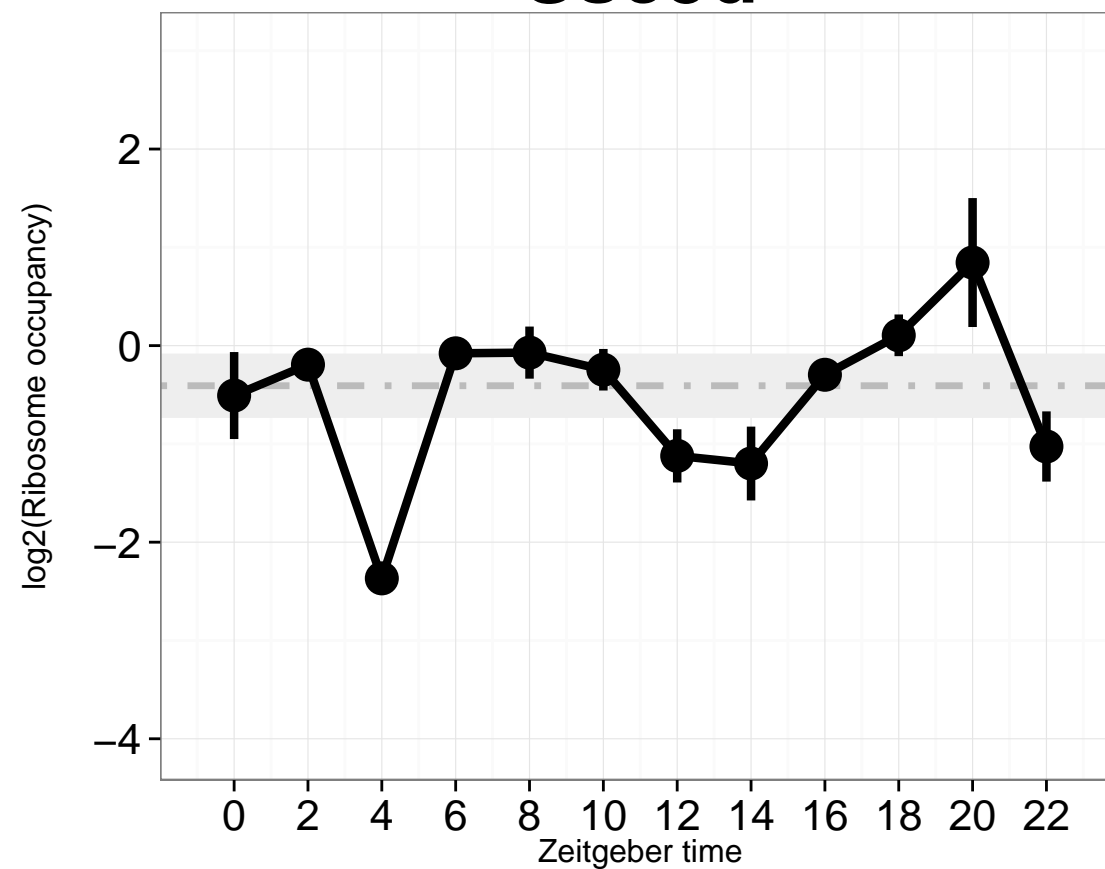

Supplement: Supplementary file 9842 [file 1]

# Abcd3

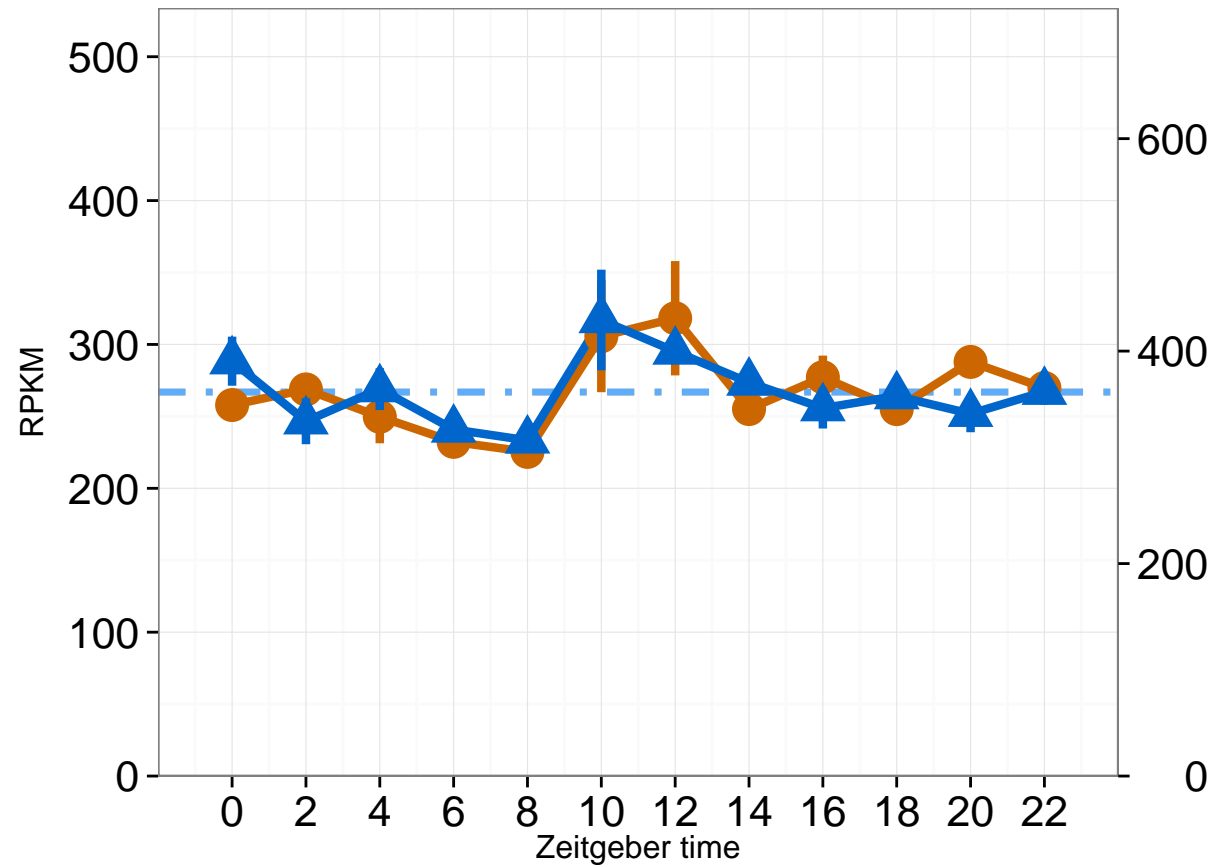

# Abcd3

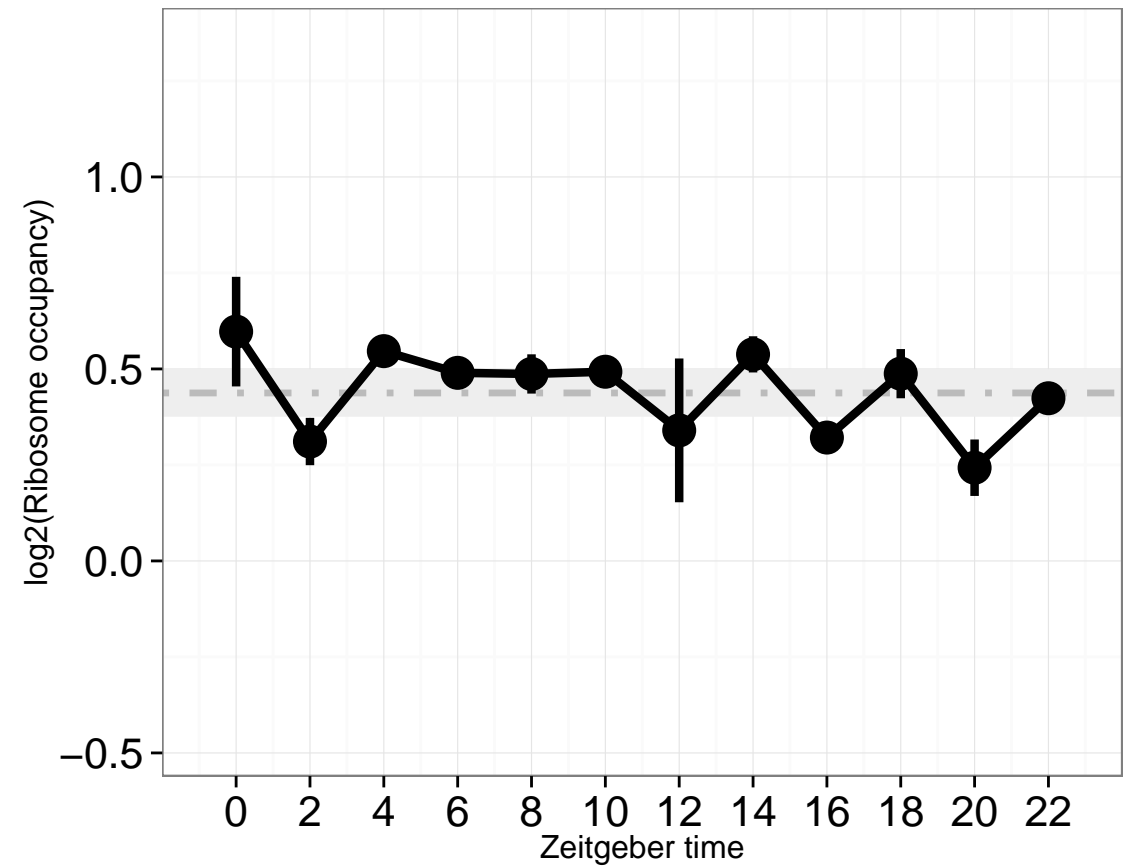

Supplement: Supplementary file 9843 [file 1]

# Atg3

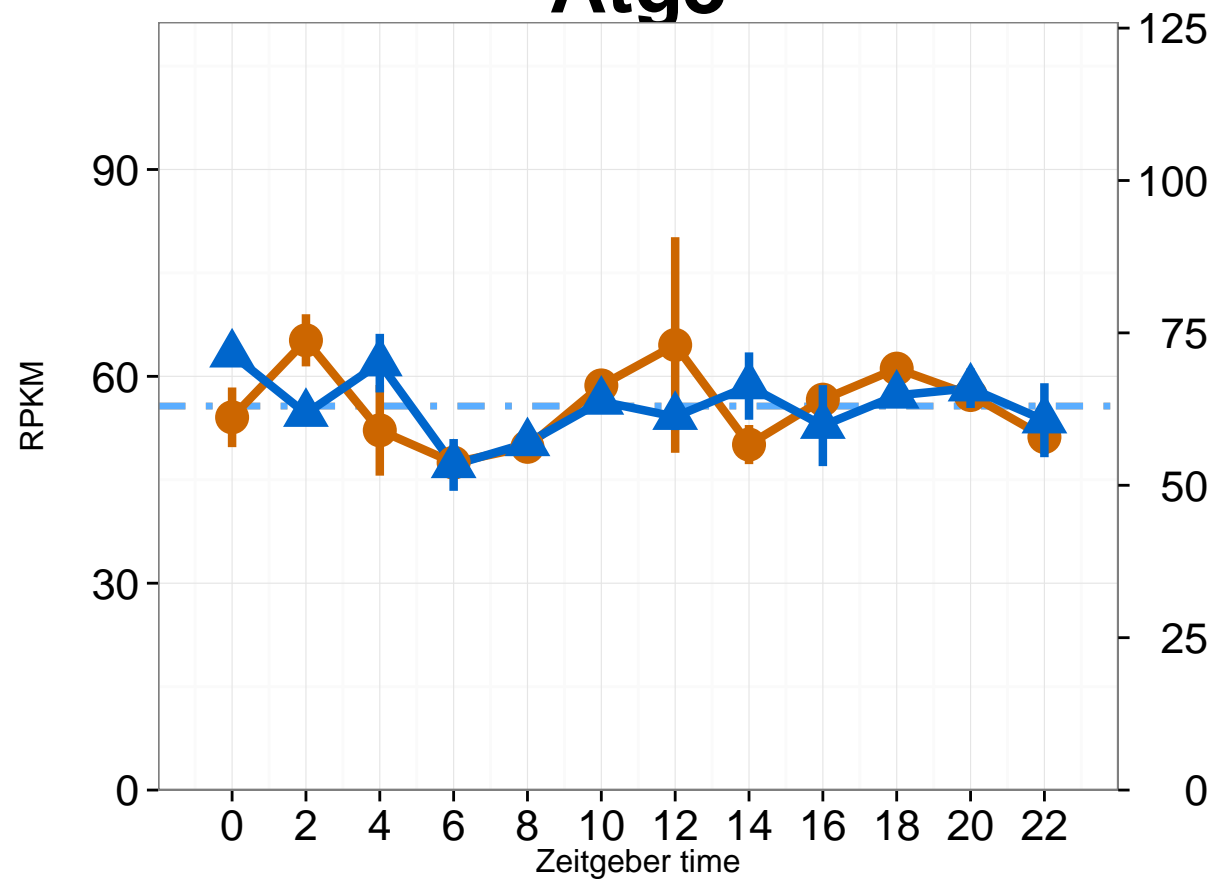

# Atg3

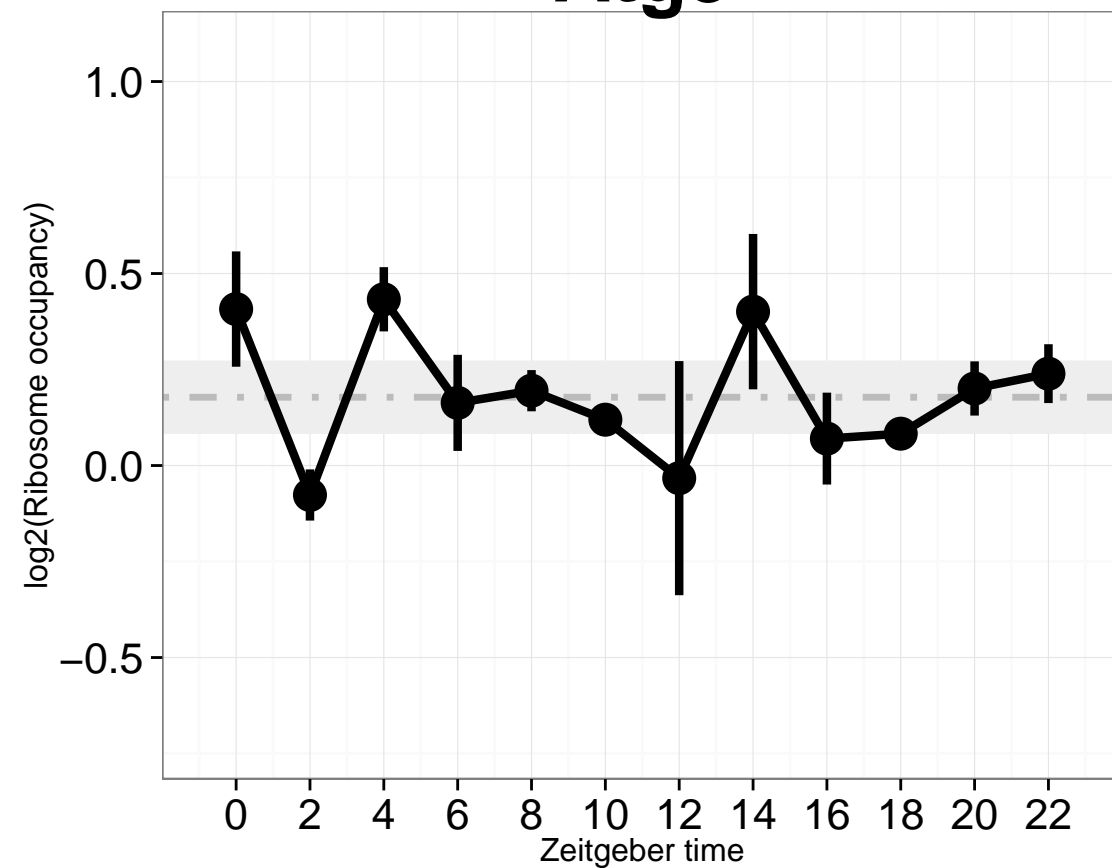

Supplement: Supplementary file 9844 [file 1]

# Papd4

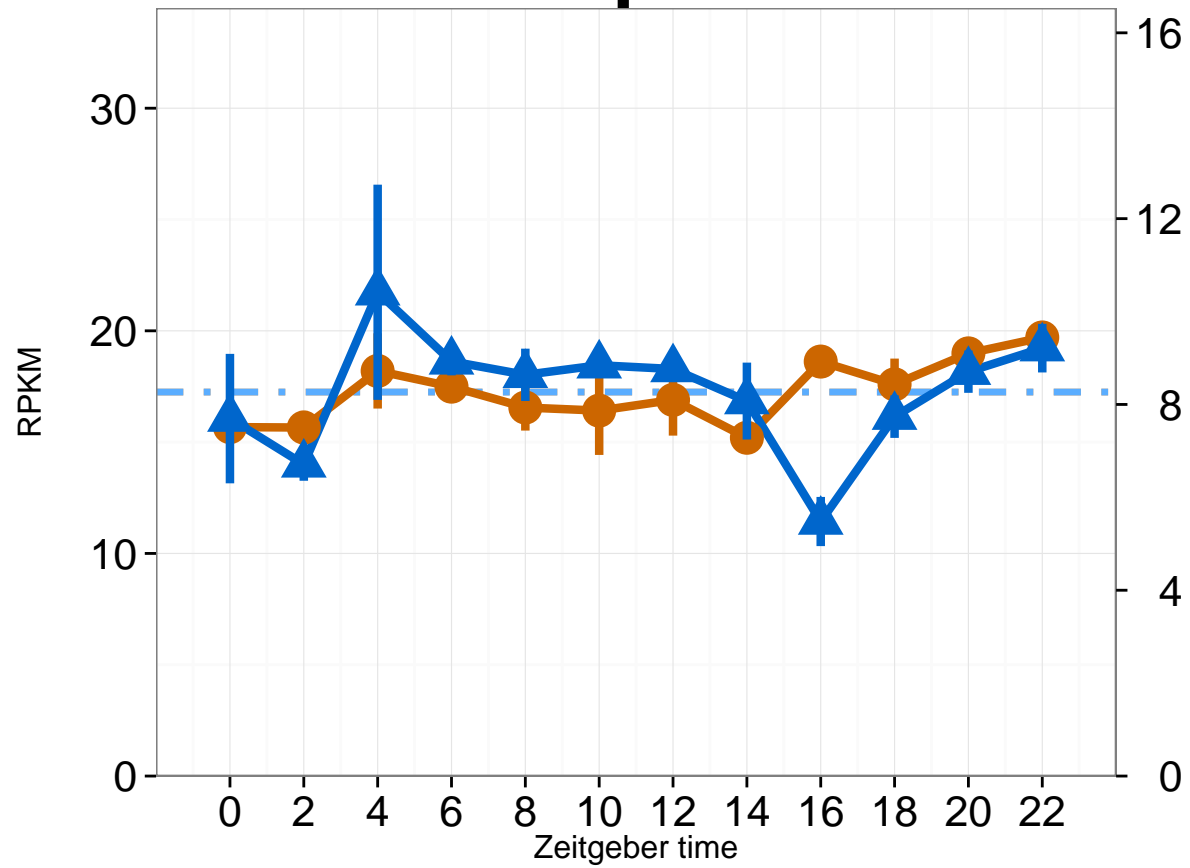

# Papd4

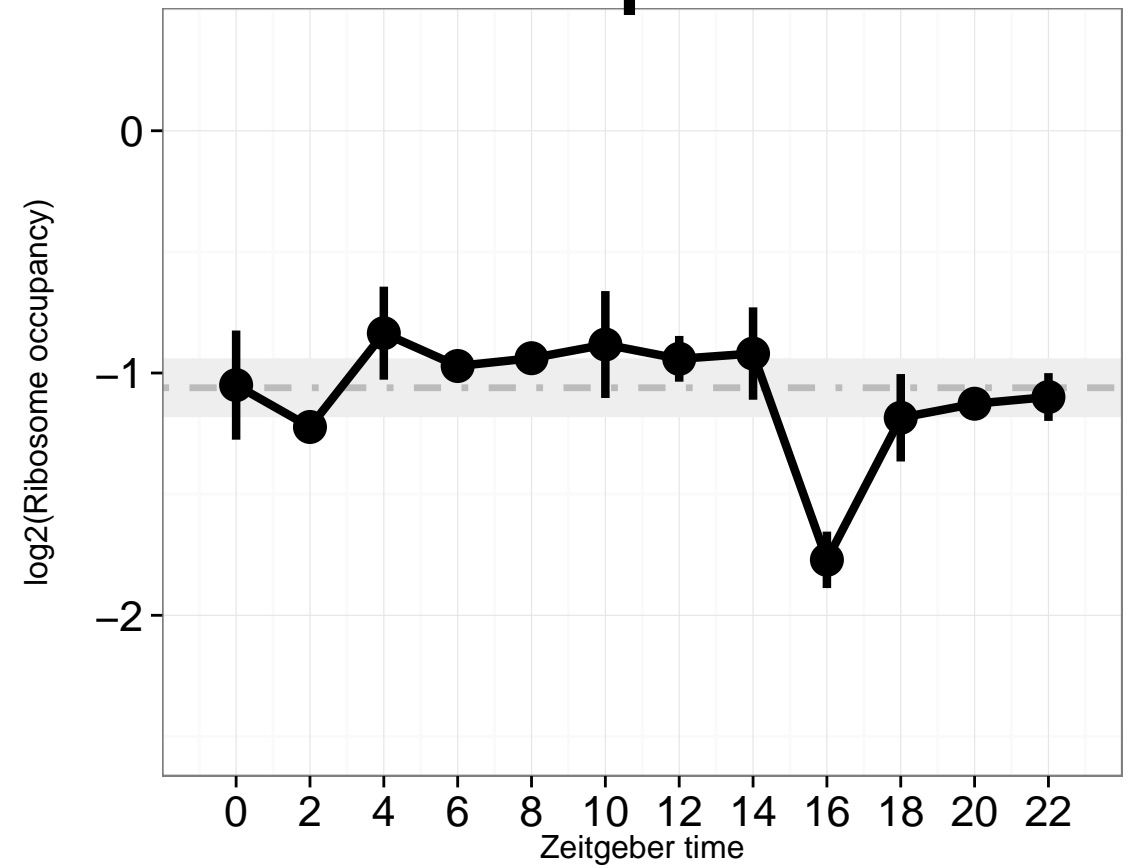

Supplement: Supplementary file 9845 [file 1]

# Sepw1

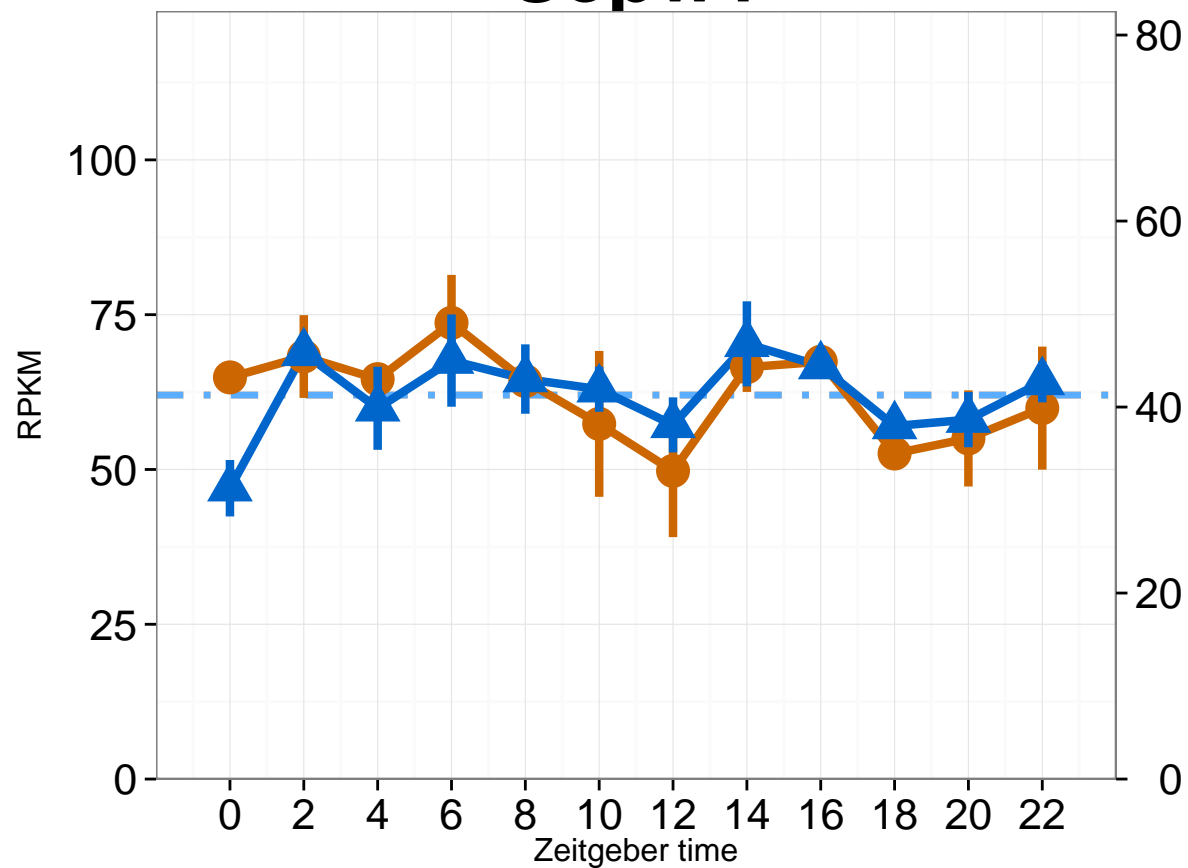

# Sepw1

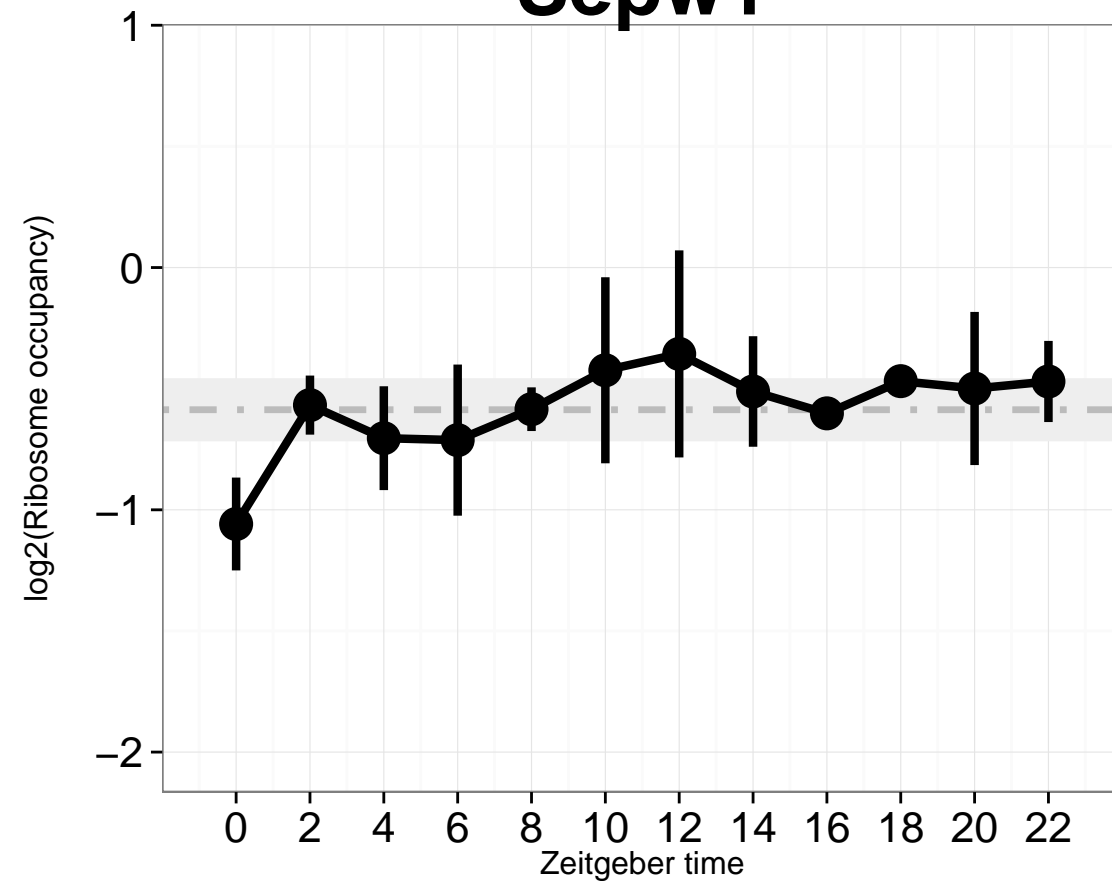

Supplement: Supplementary file 9846 [file 1]

## Anks3

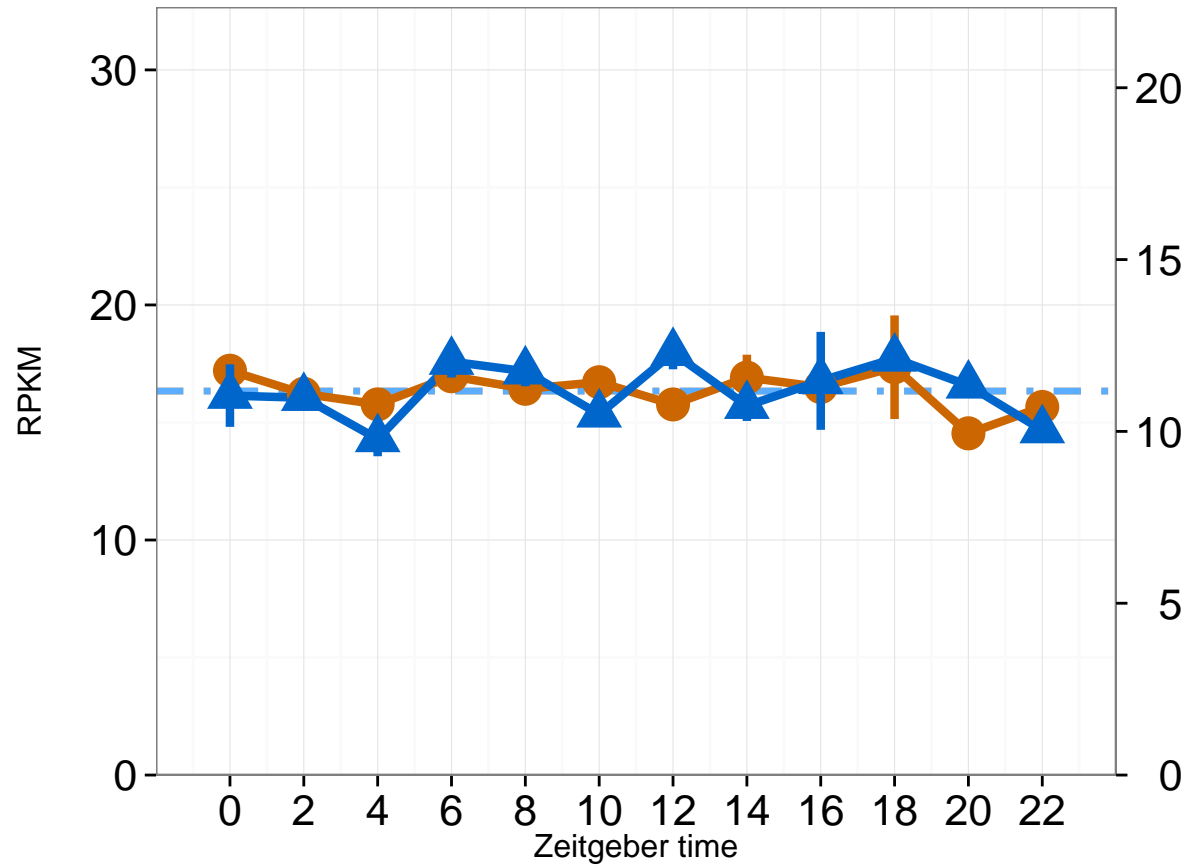

## Anks3

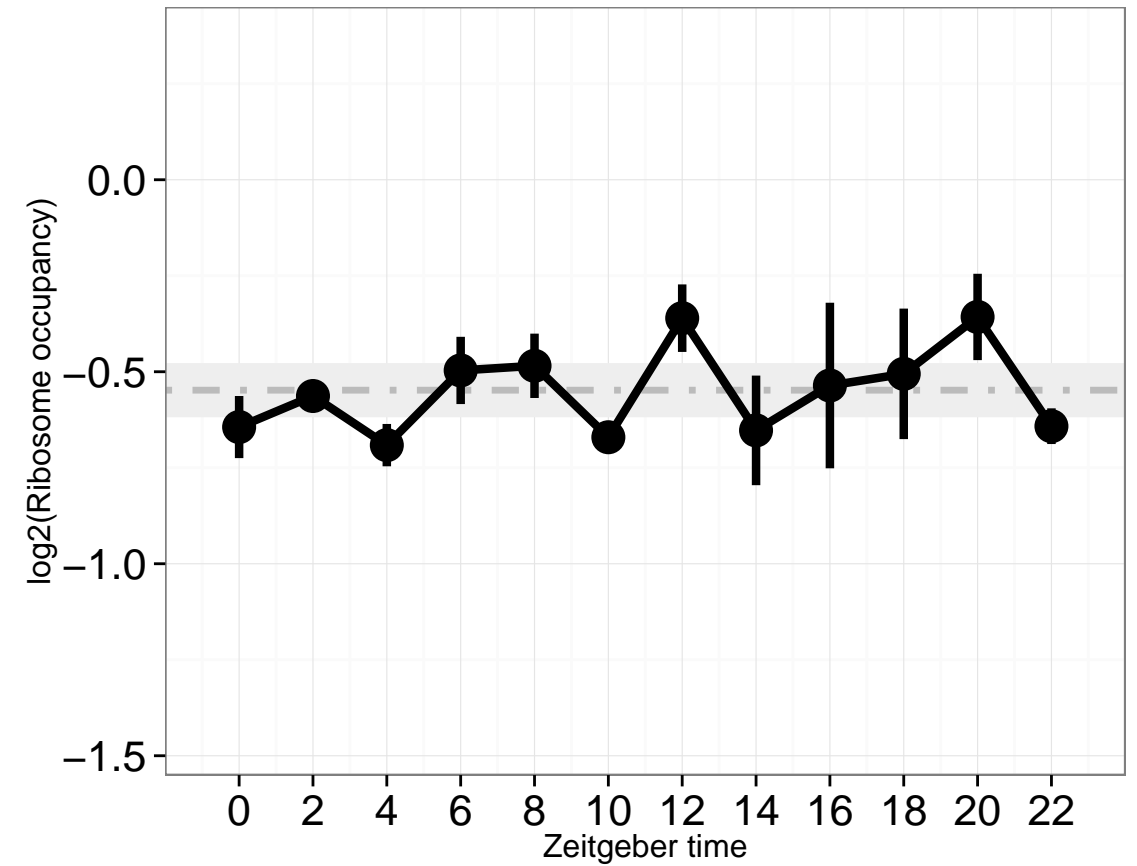

Supplement: Supplementary file 9847 [file 1]

## Ammecr1l

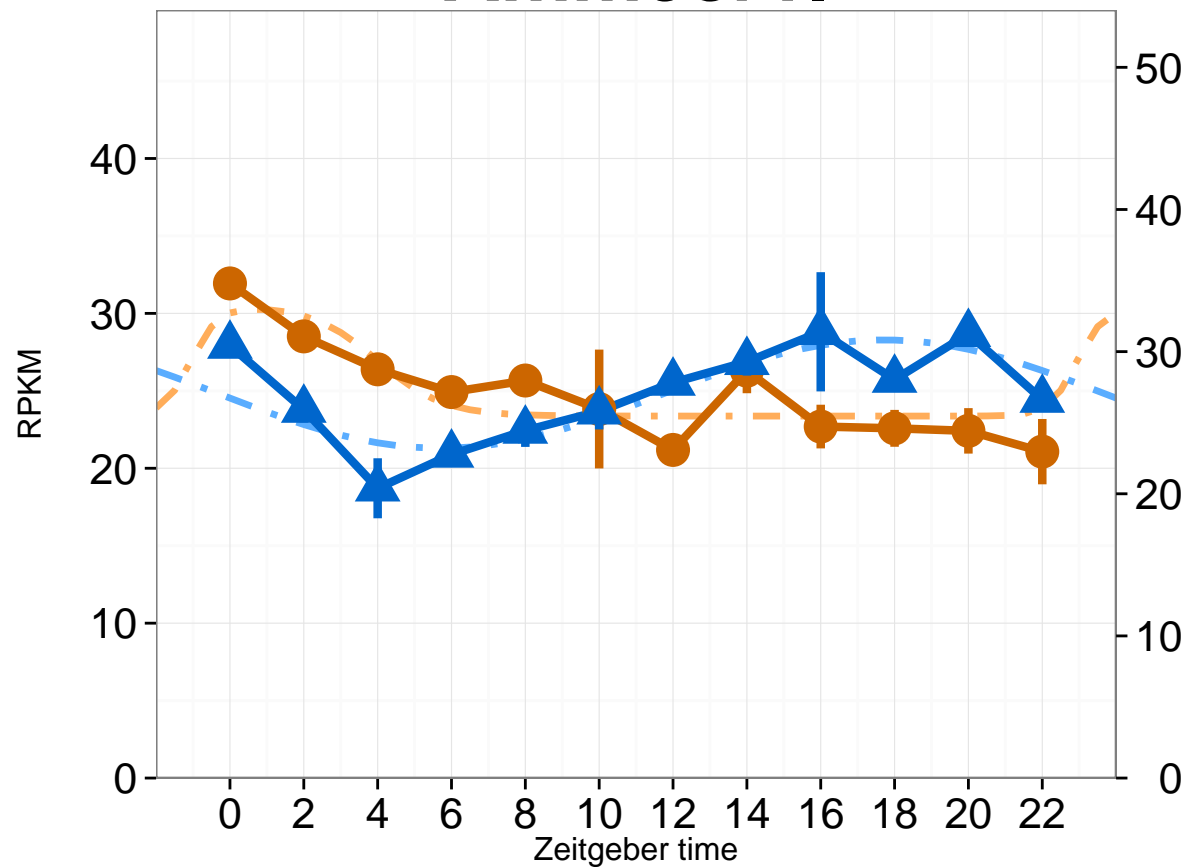

## Ammecr1l

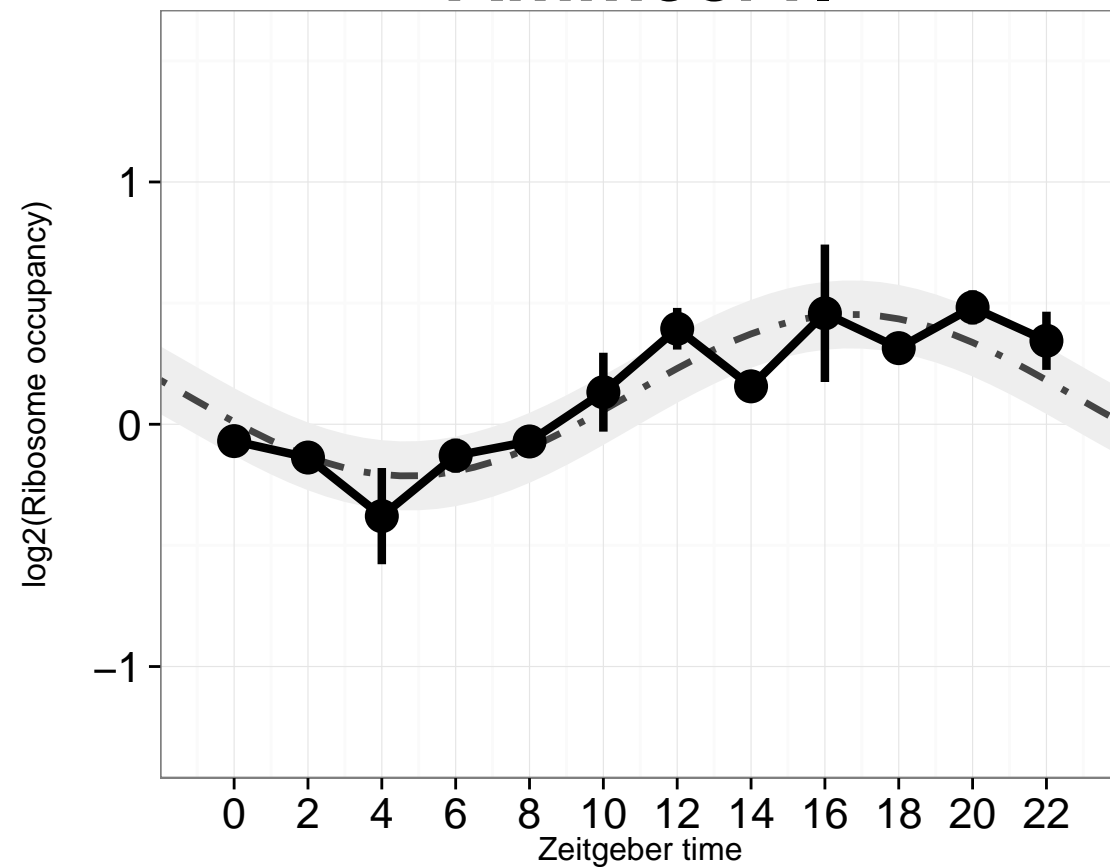

Supplement: Supplementary file 9848 [file 1]

# Ercc1

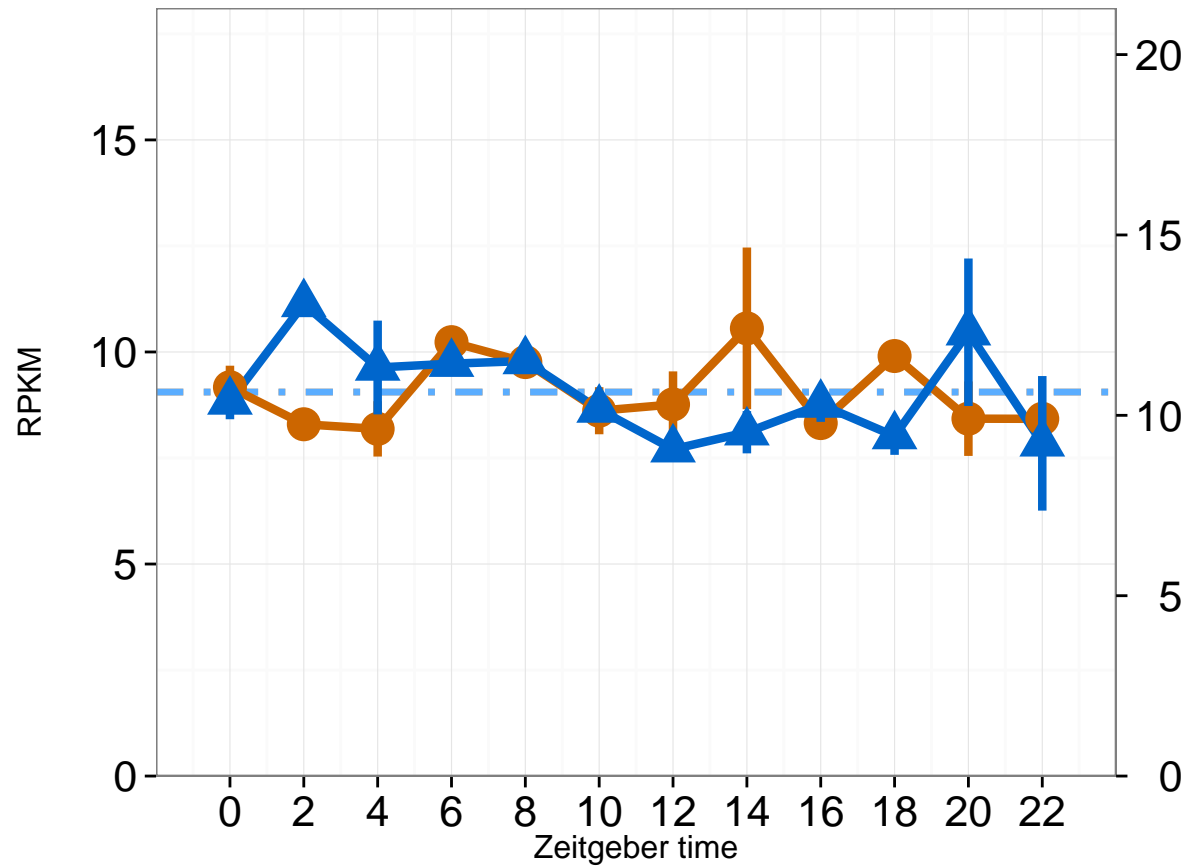

# Ercc1

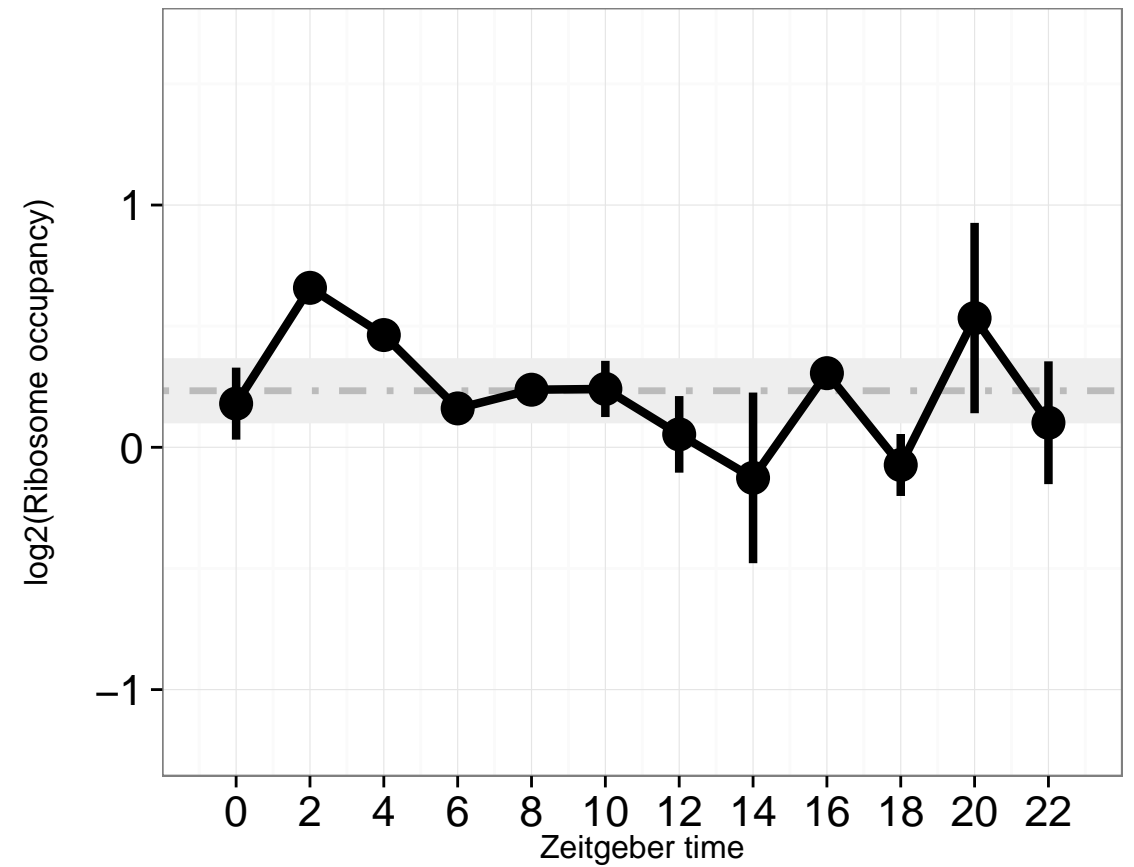

Supplement: Supplementary file 9849 [file 1]

## Loxl2

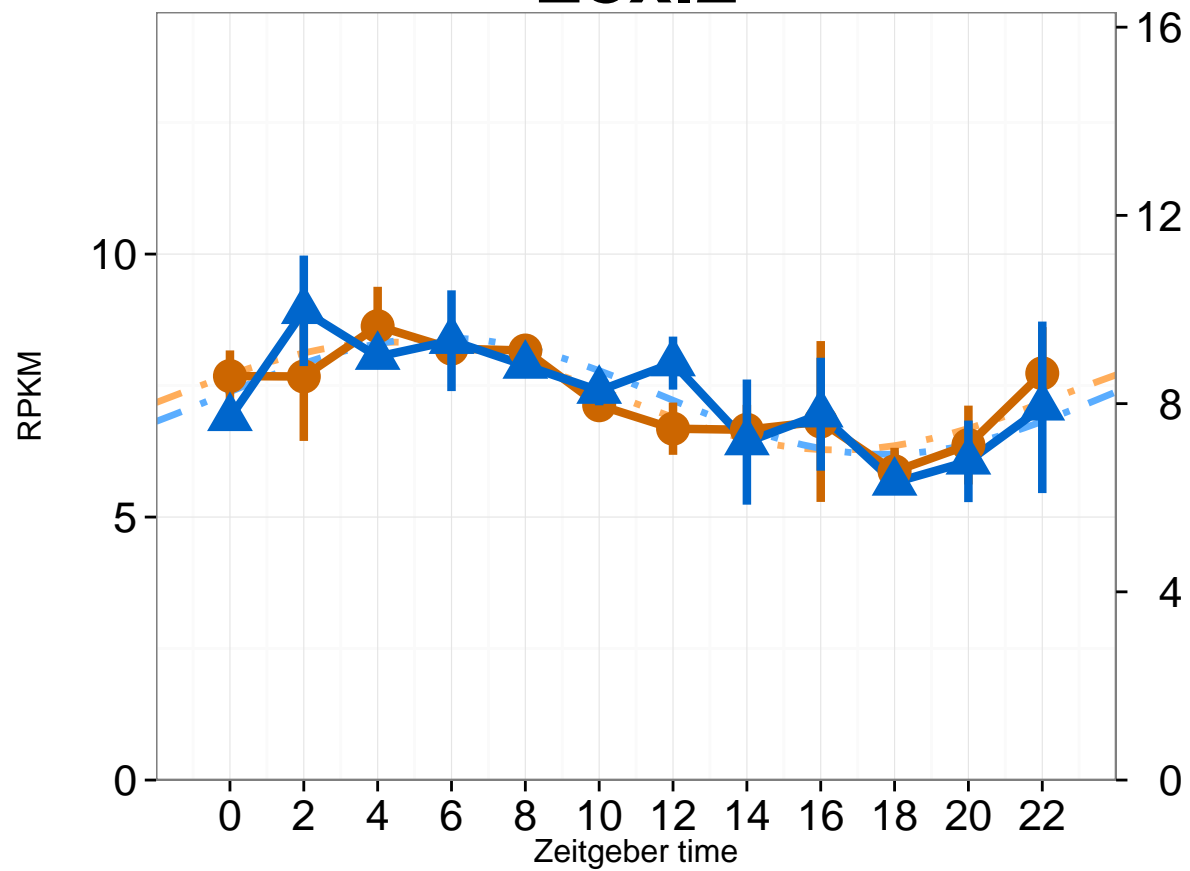

## Loxl2

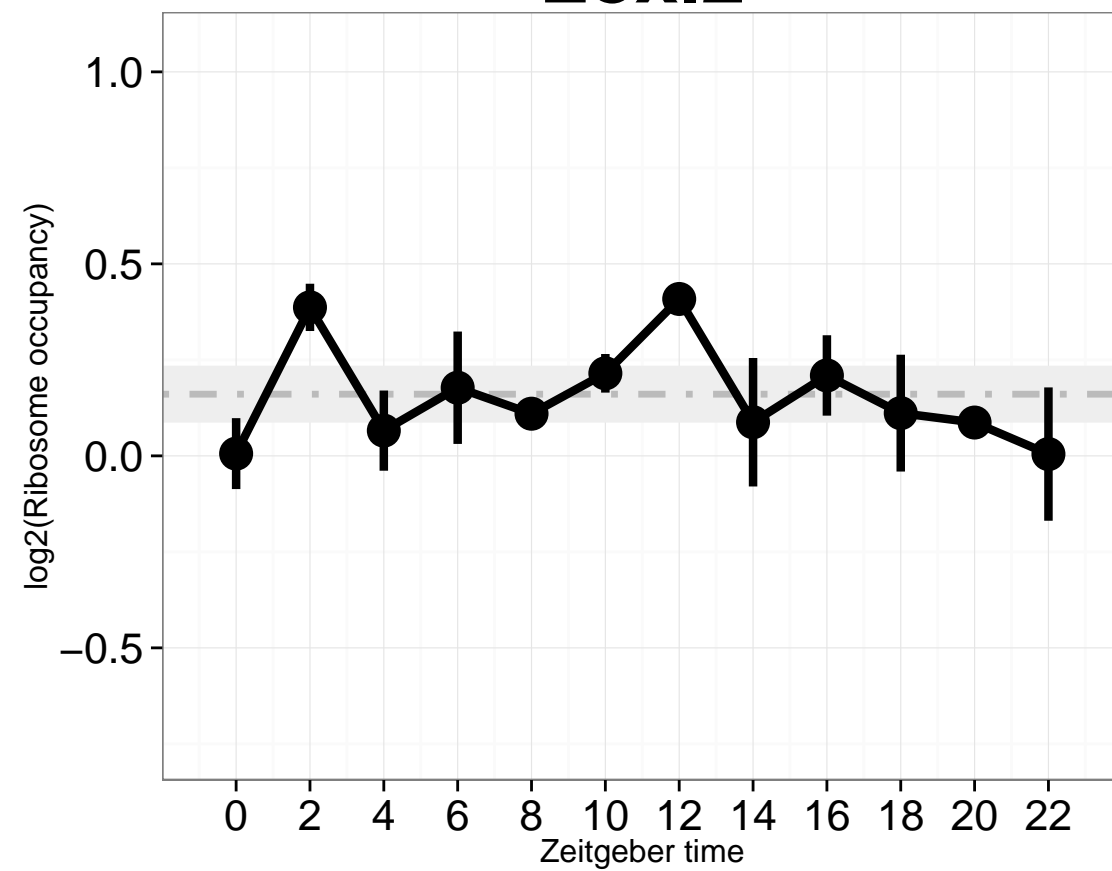

Supplement: Supplementary file 9850 [file 1]

## Prkag2

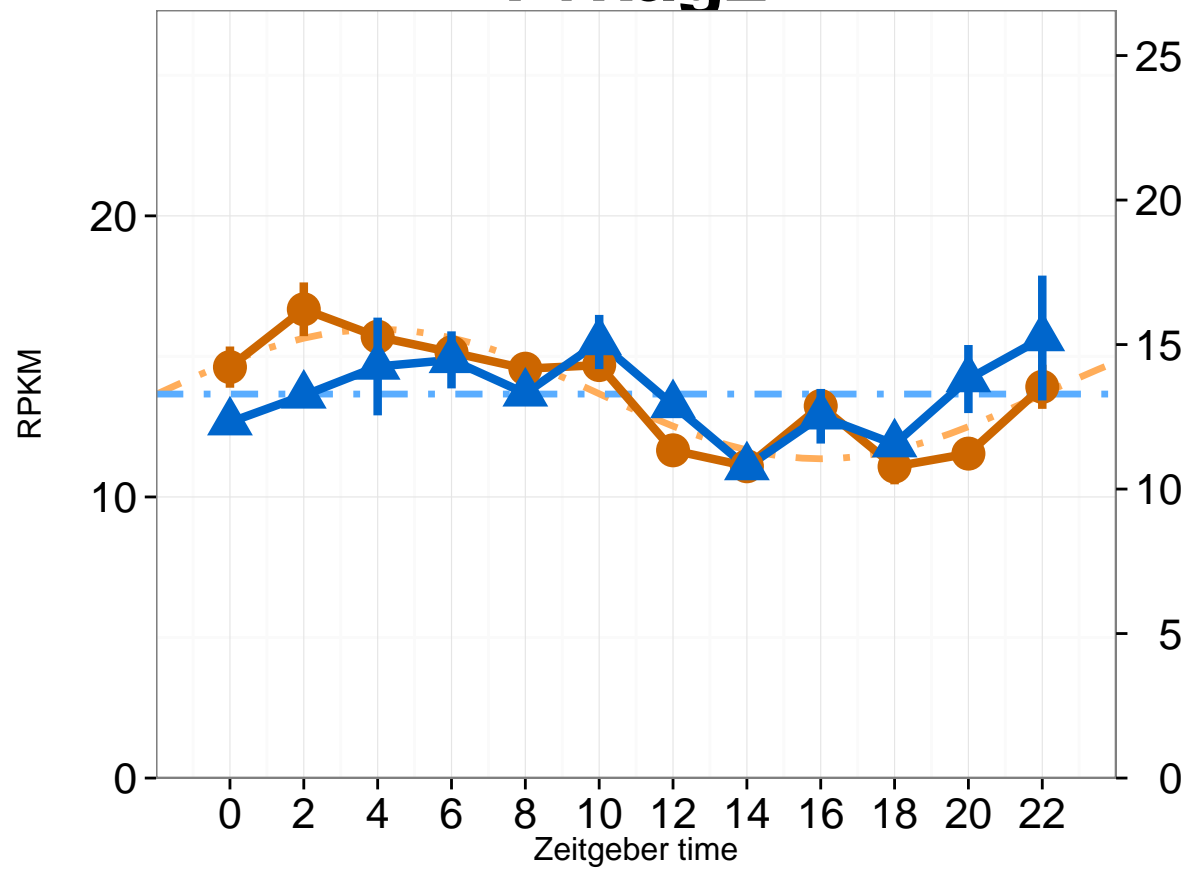

## Prkag2

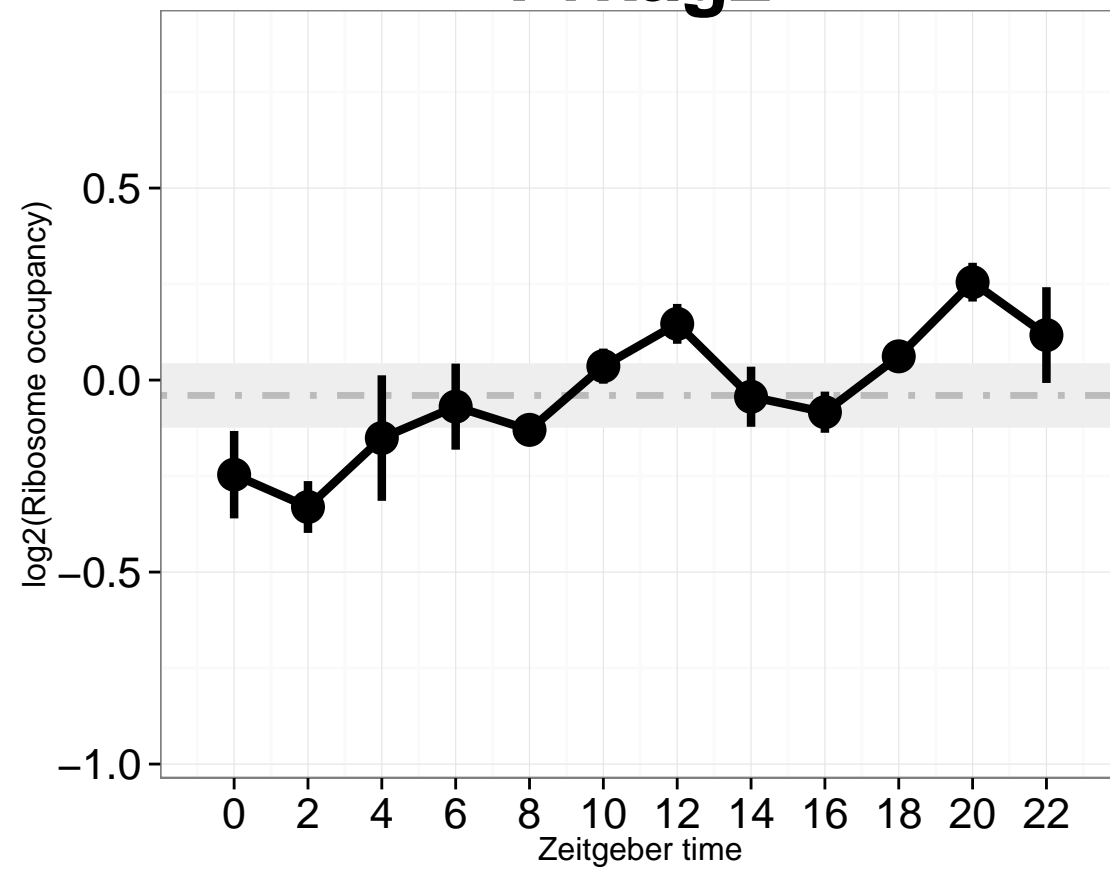

Supplement: Supplementary file 9851 [file 1]

# Serp**in**b6a

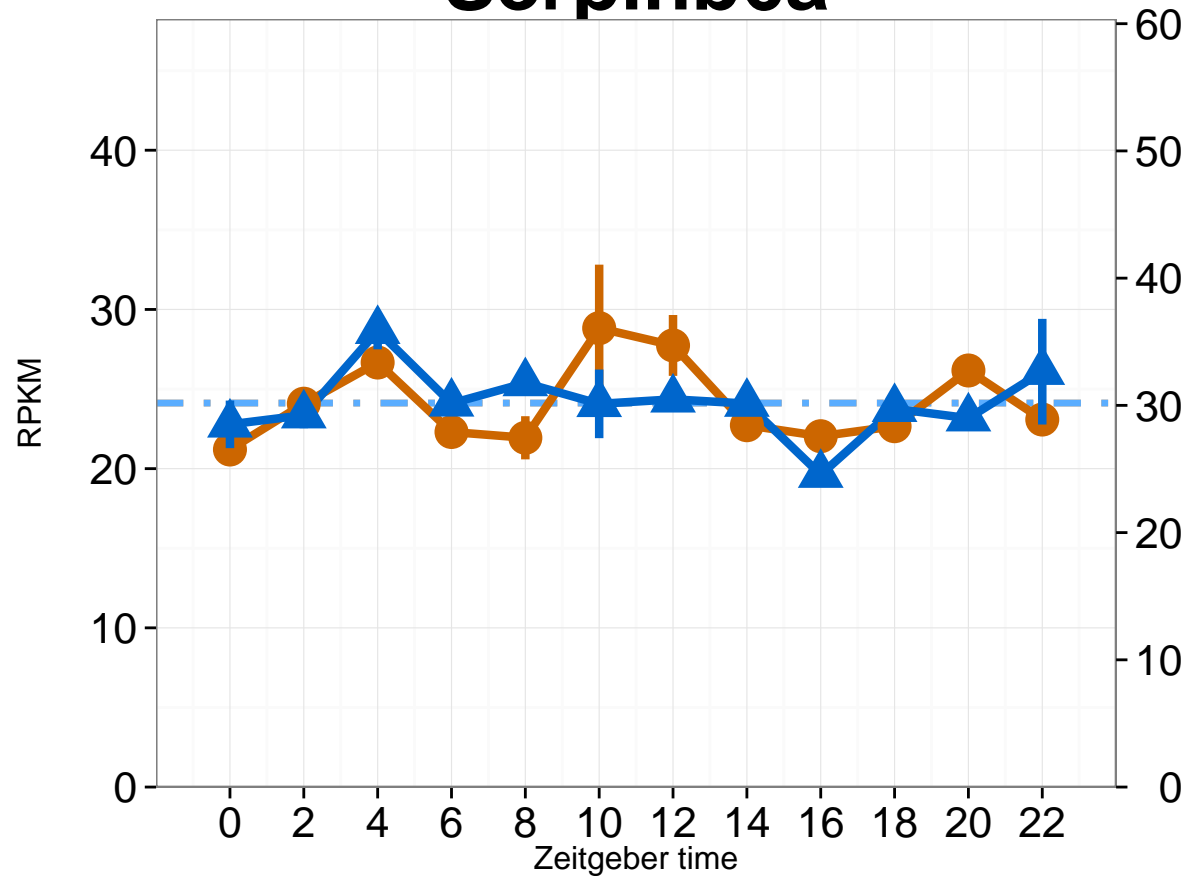

# Serp**in**b6a

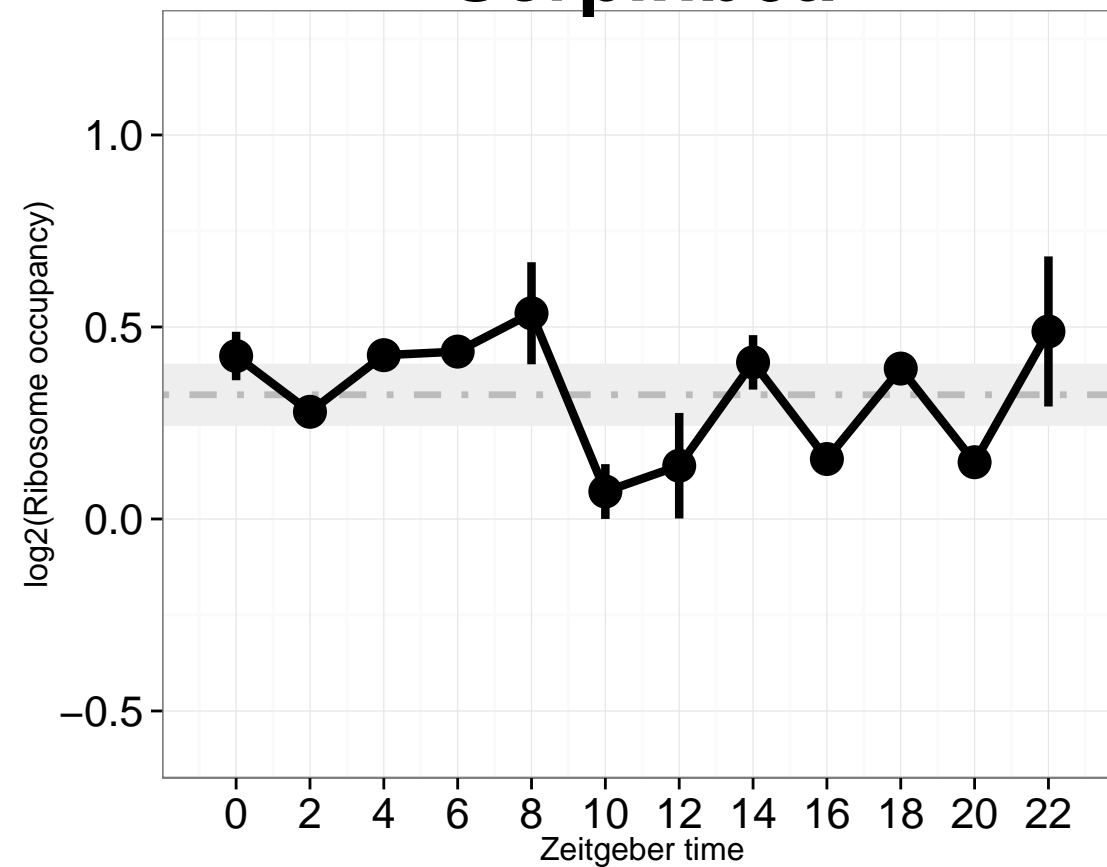

Supplement: Supplementary file 9852 [file 1]

## Nxf1

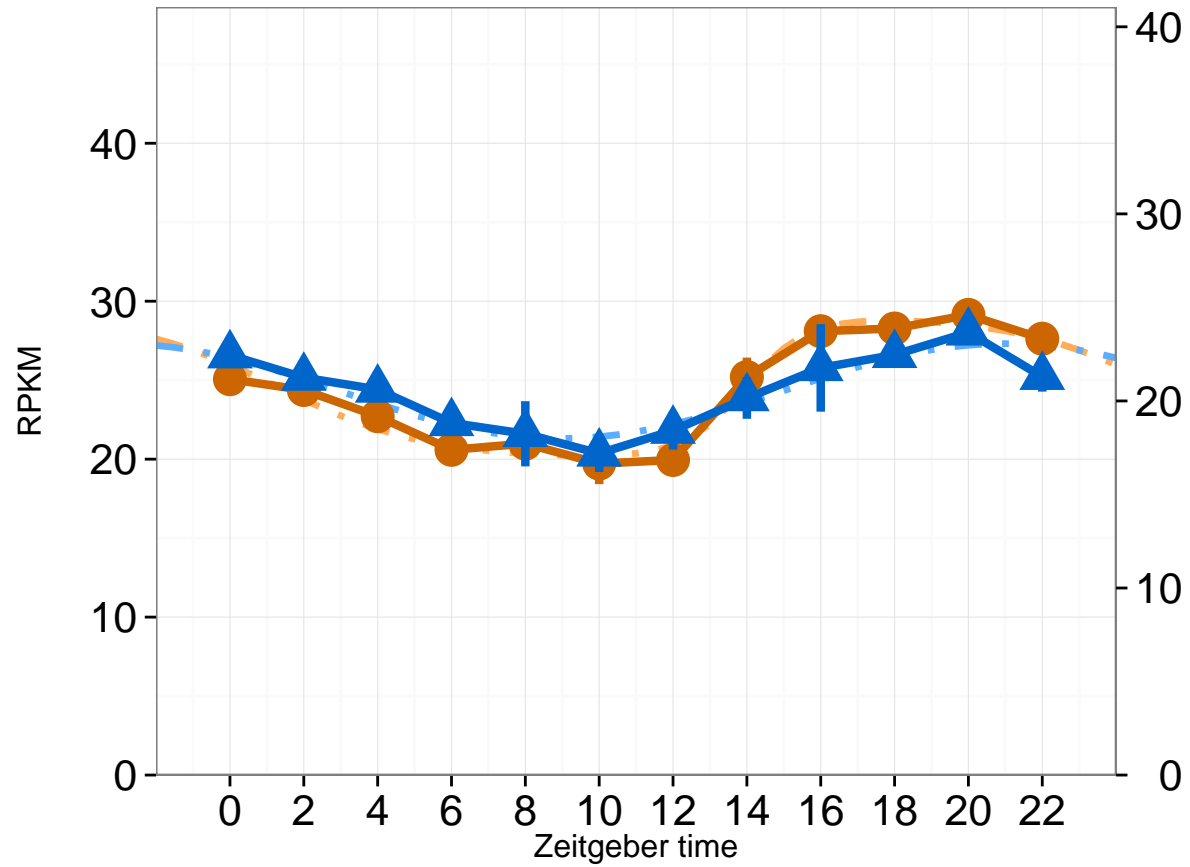

## Nxf1

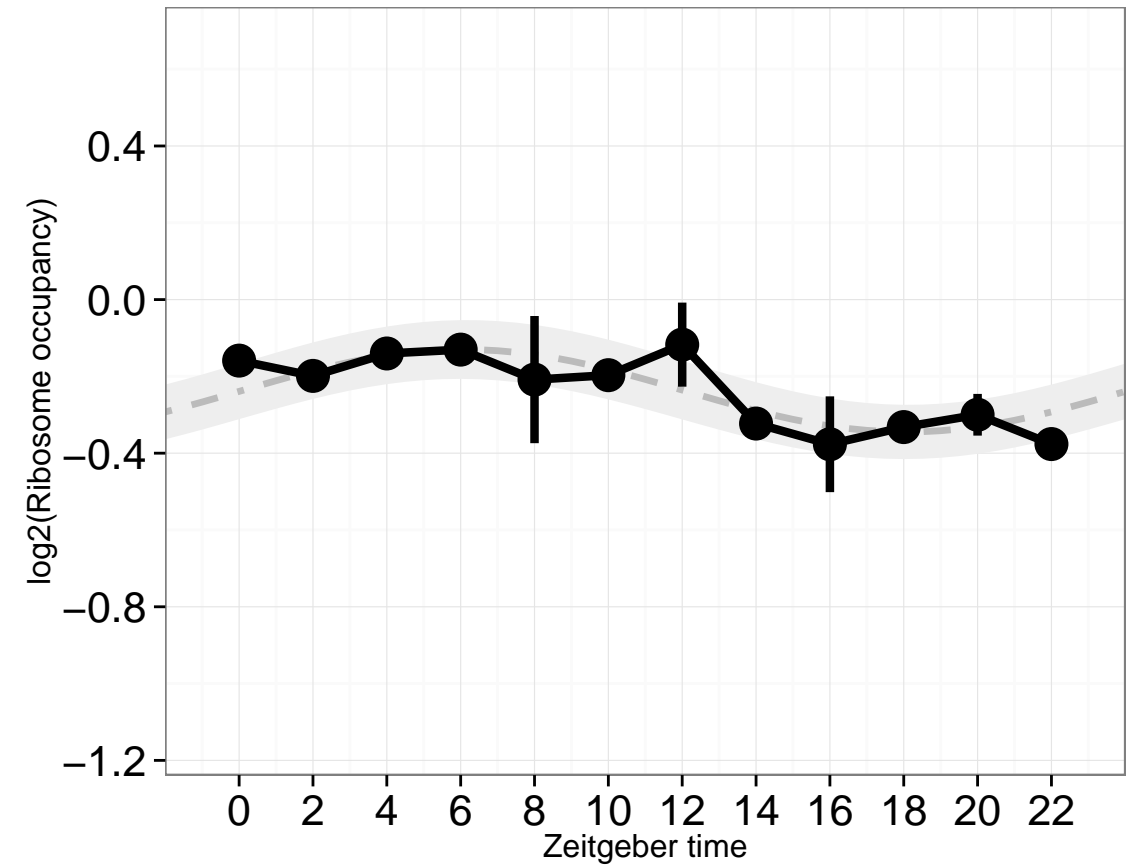

Supplement: Supplementary file 9853 [file 1]

# Col4a6

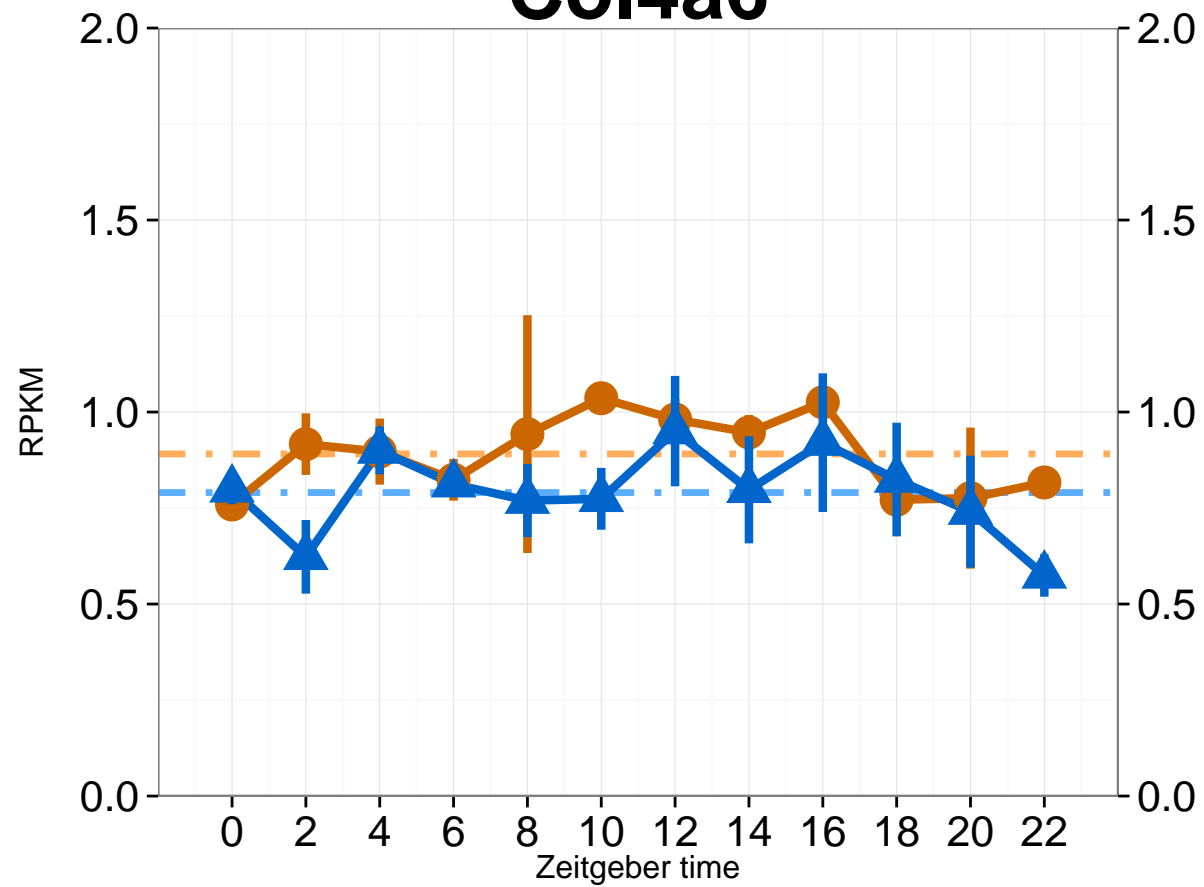

# Col4a6

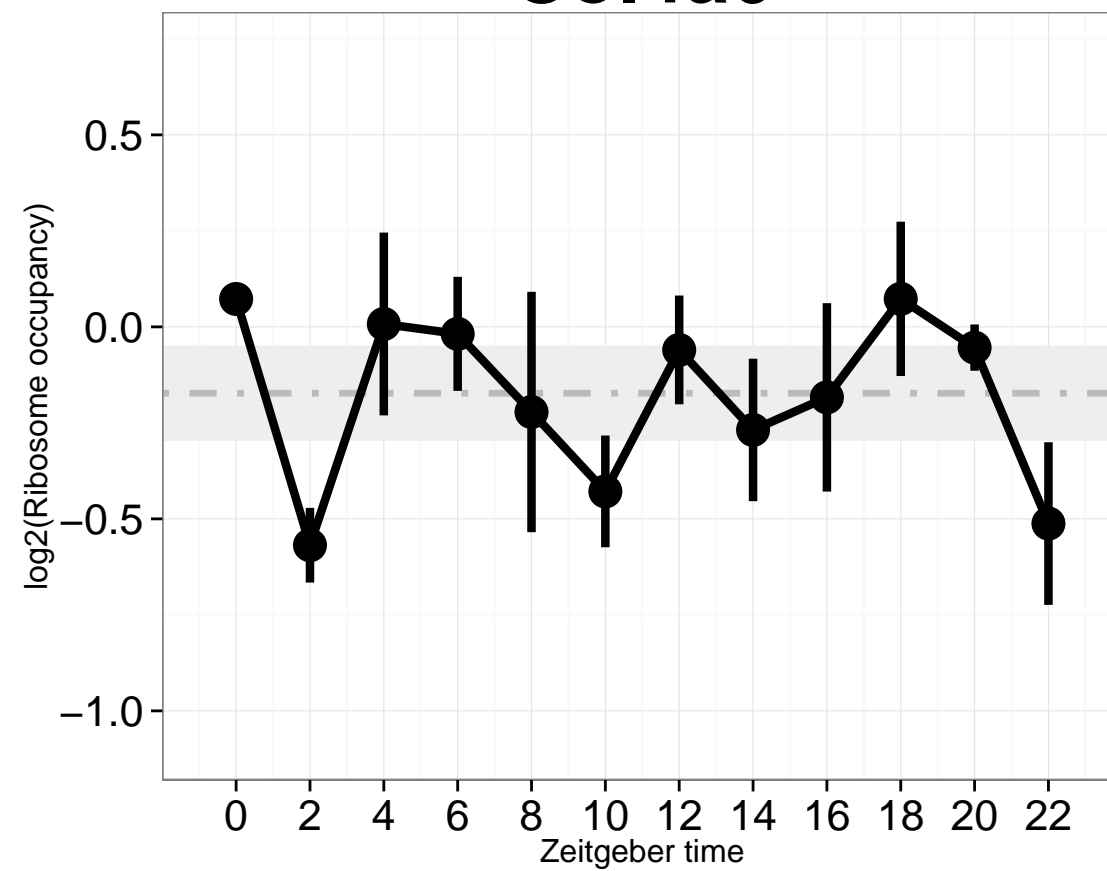

Supplement: Supplementary file 9854 [file 1]

# Ppp2r5a

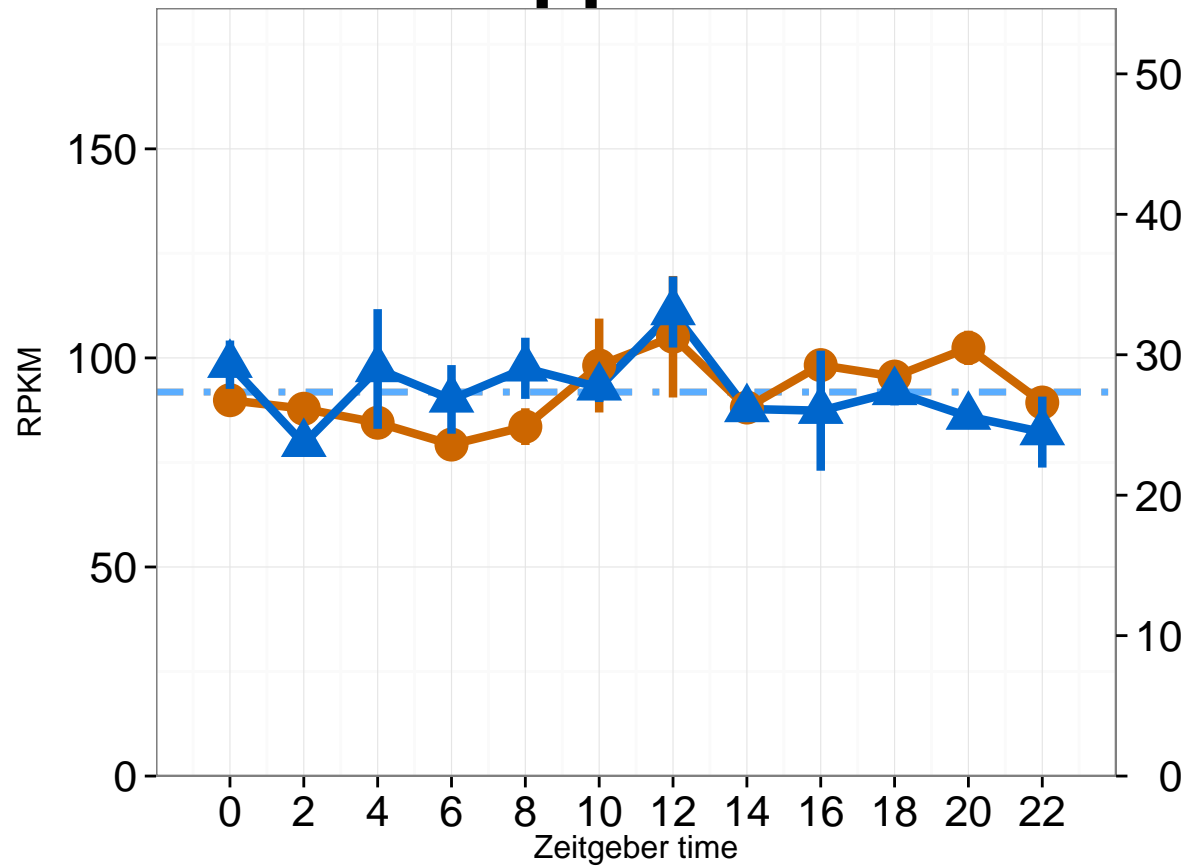

# Ppp2r5a

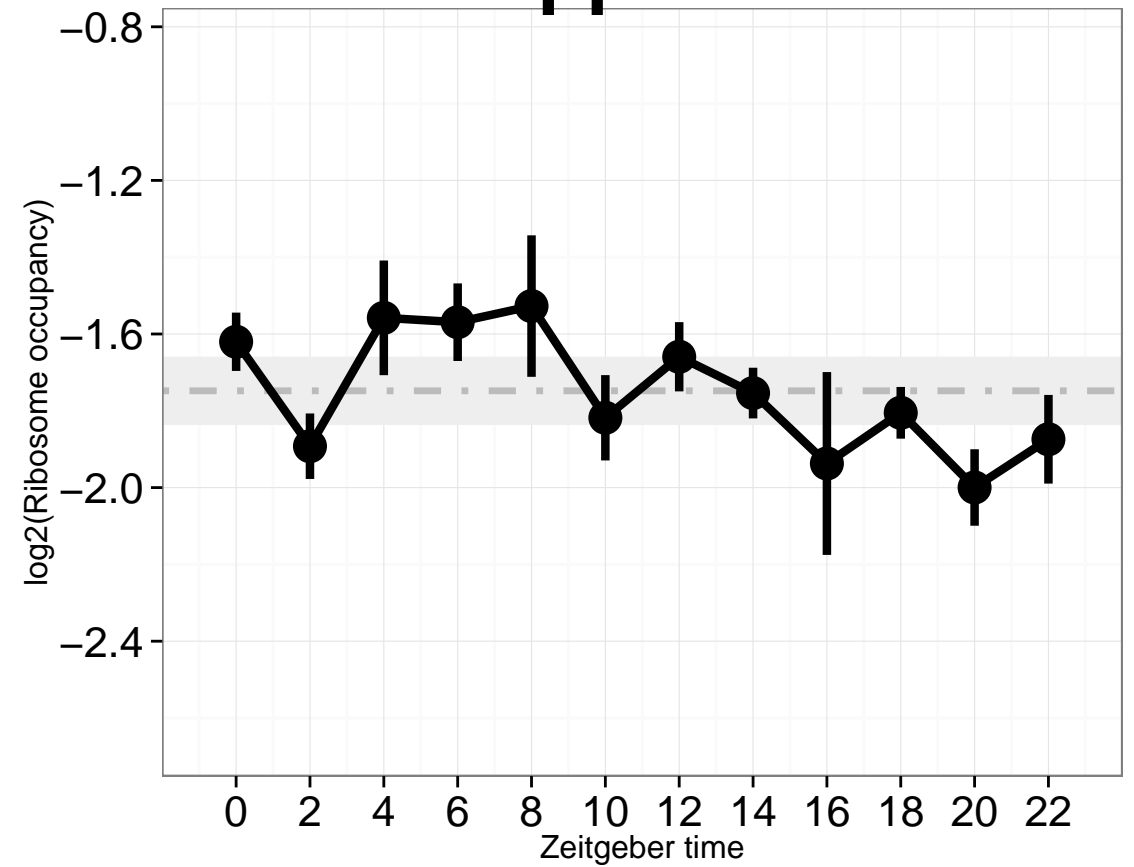

Supplement: Supplementary file 9855 [file 1]

# Gosr1

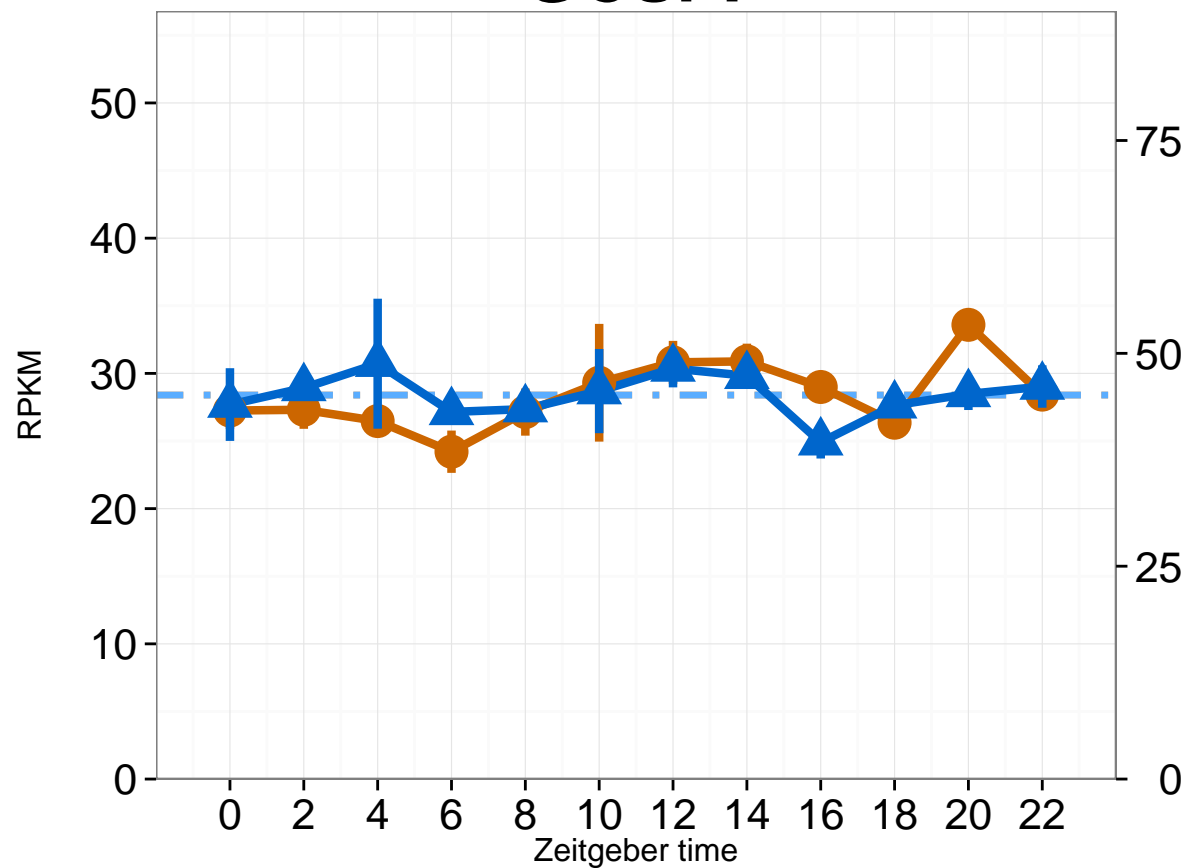

# Gosr1

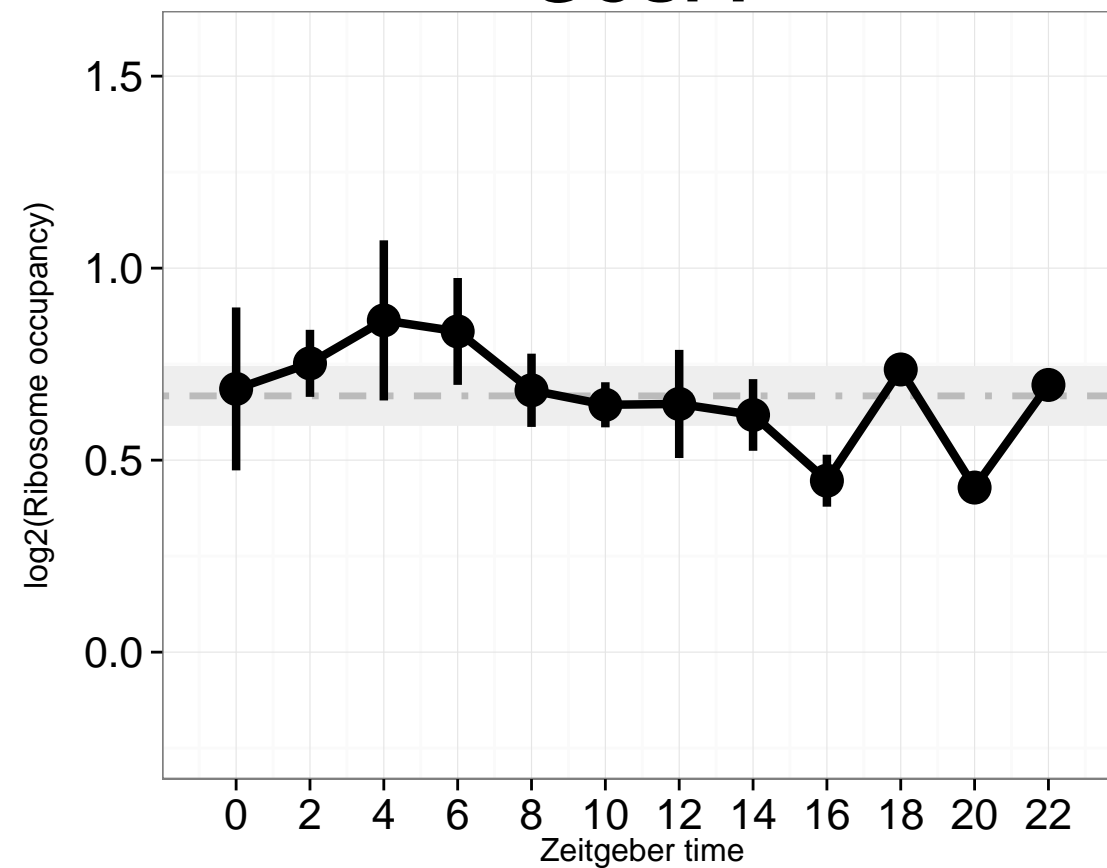

Supplement: Supplementary file 9856 [file 1]

## Prr5

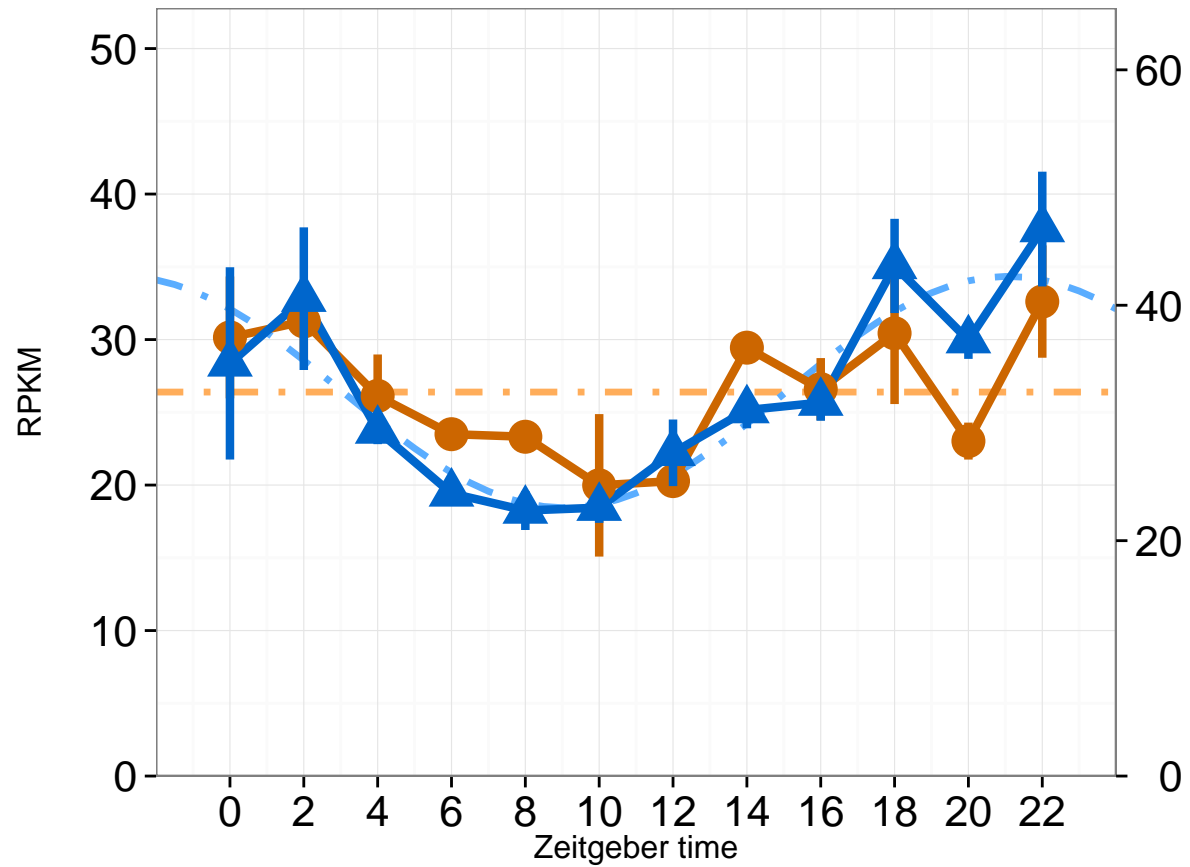

## Prr5

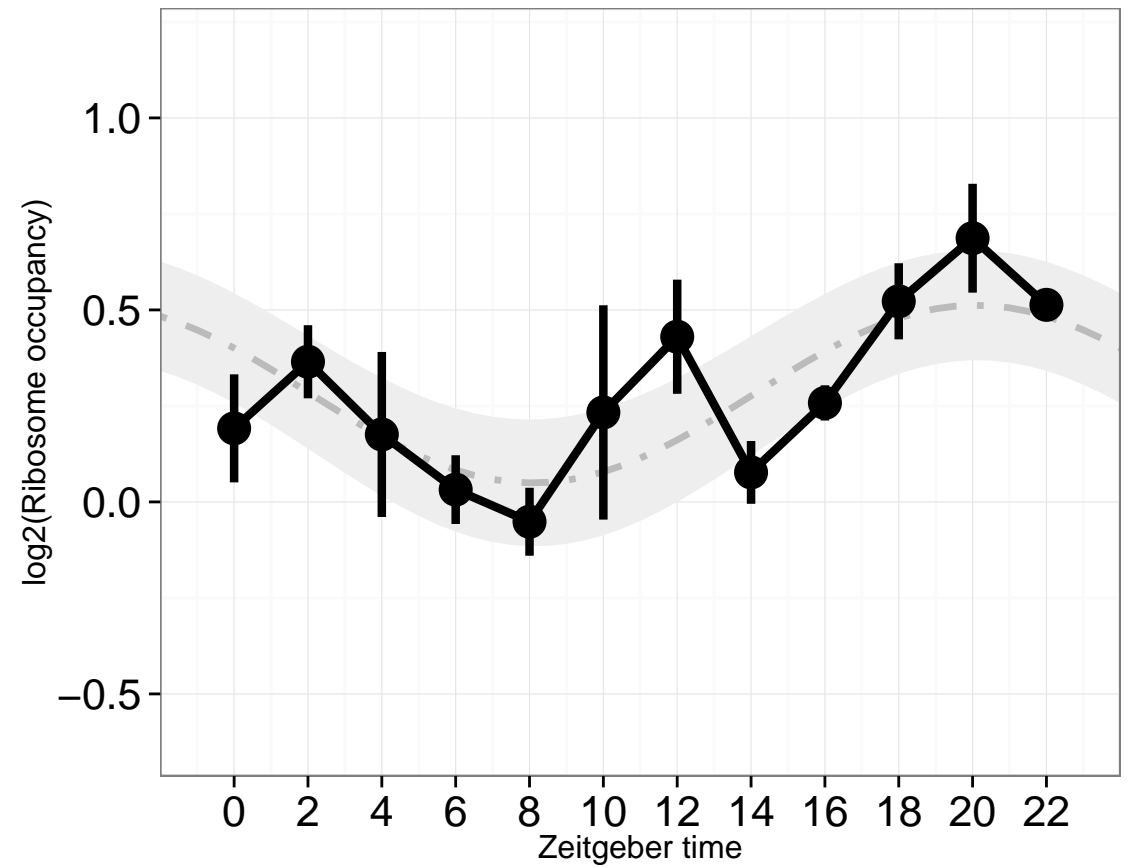

Supplement: Supplementary file 9857 [file 1]

## Pdk3

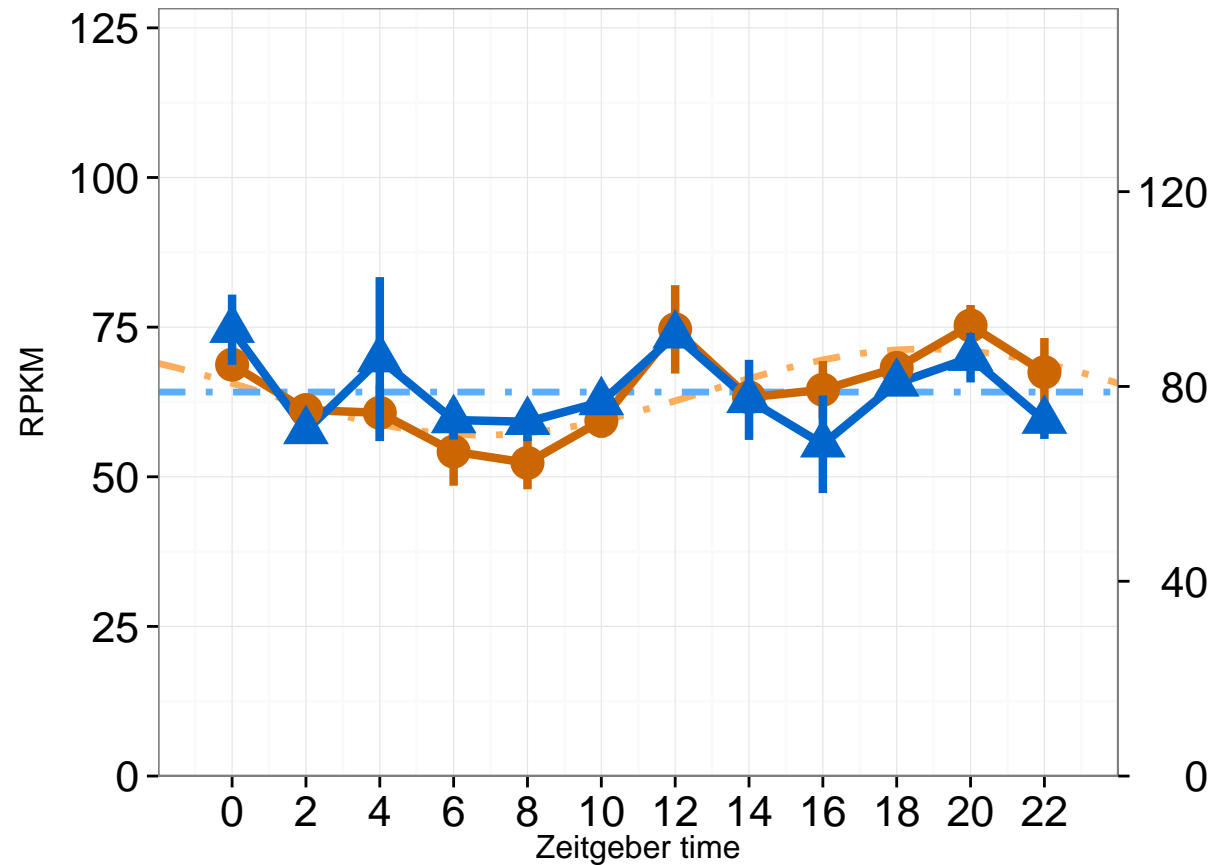

## Pdk3

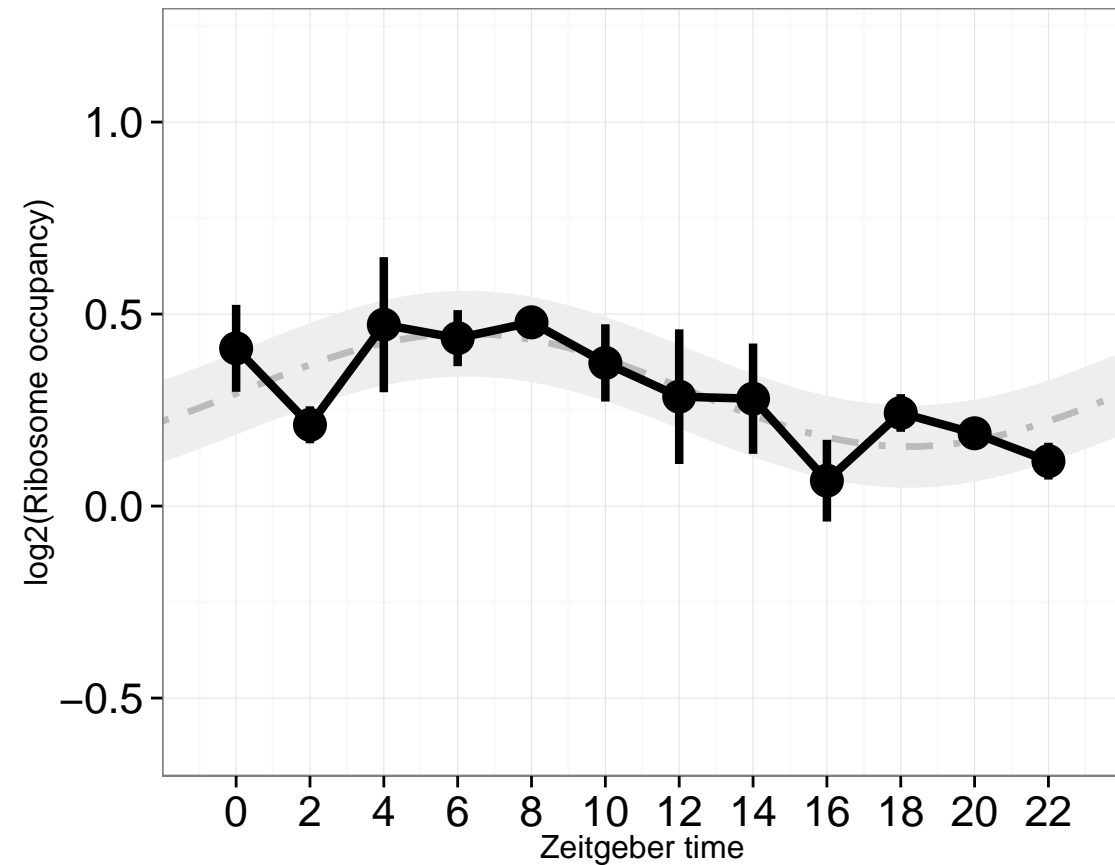

Supplement: Supplementary file 9858 [file 1]

# Per1

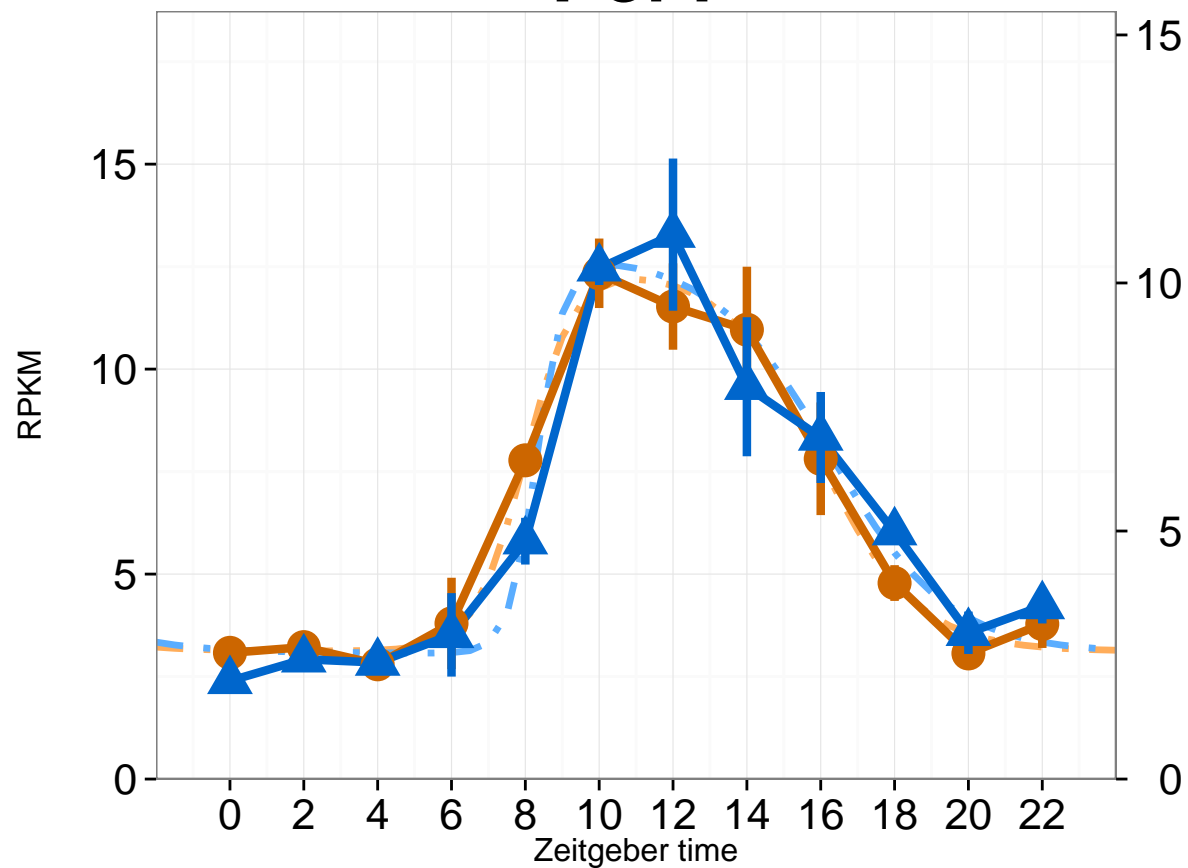

# Per1

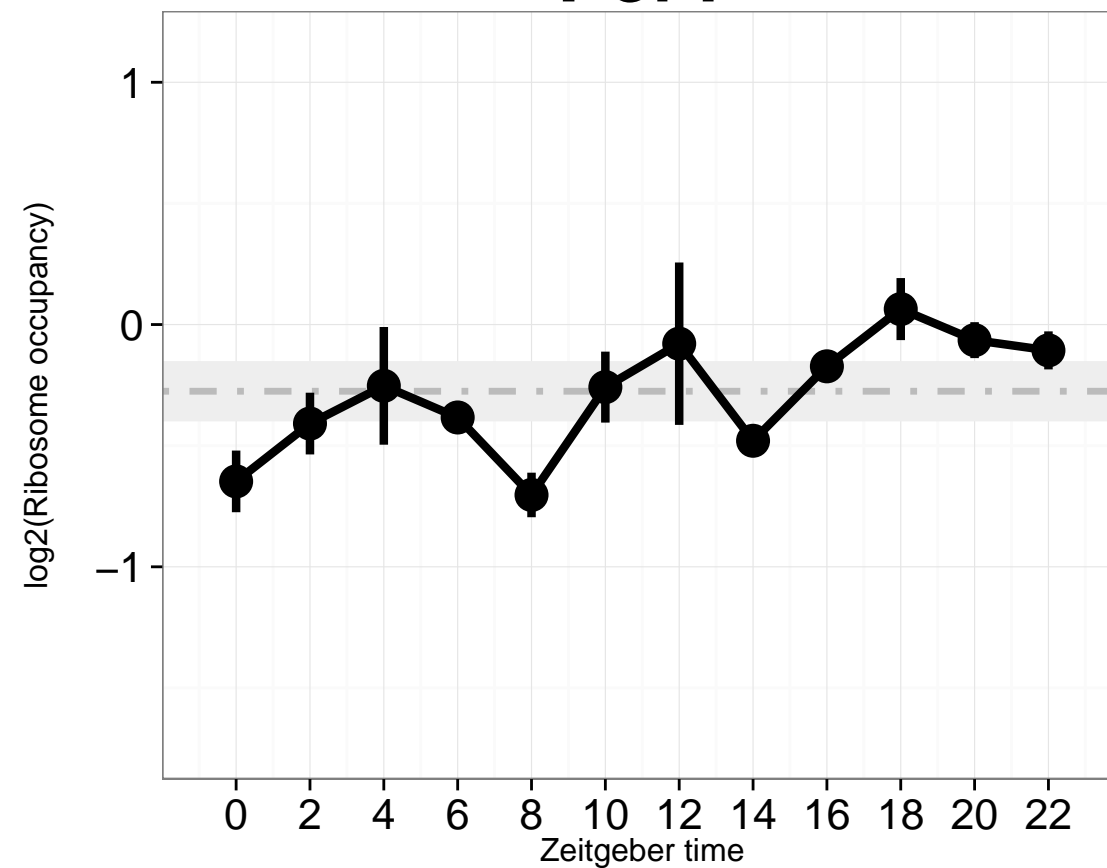

Supplement: Supplementary file 9859 [file 1]

## Tars2

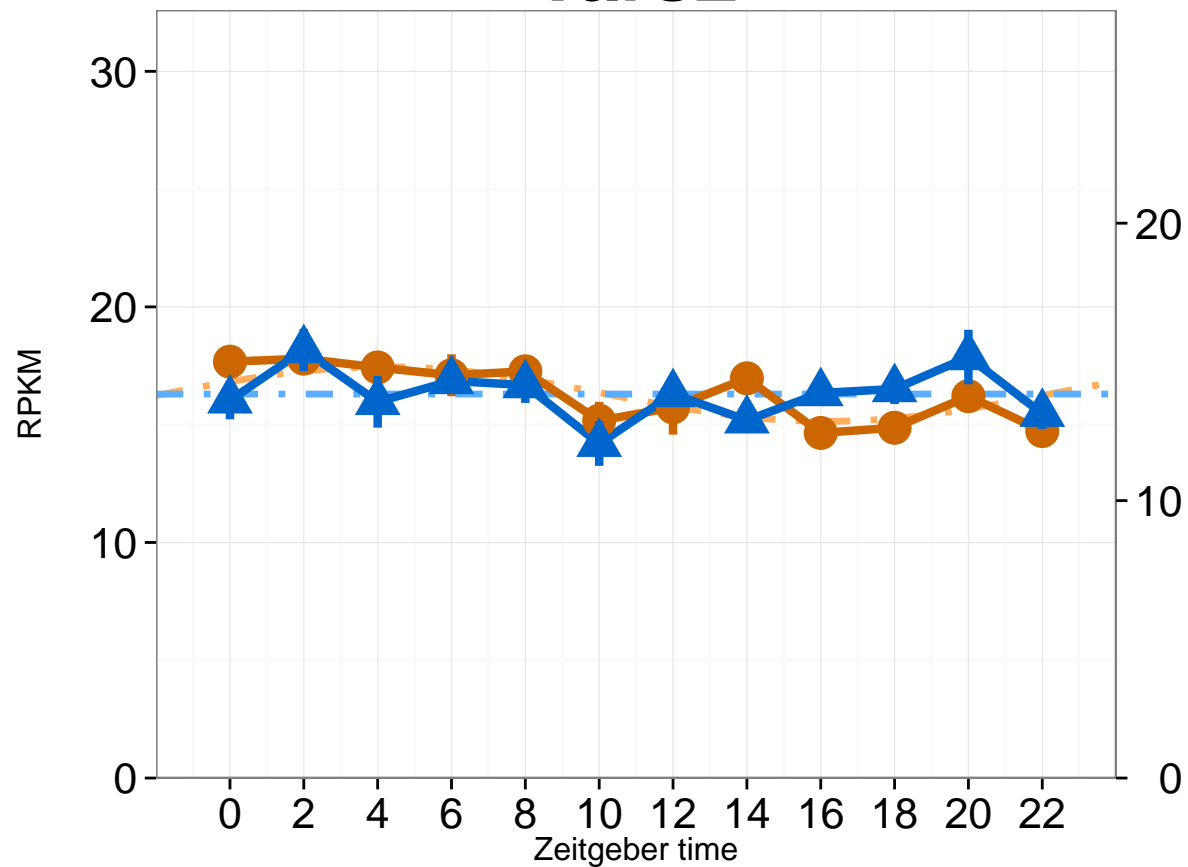

## Tars2

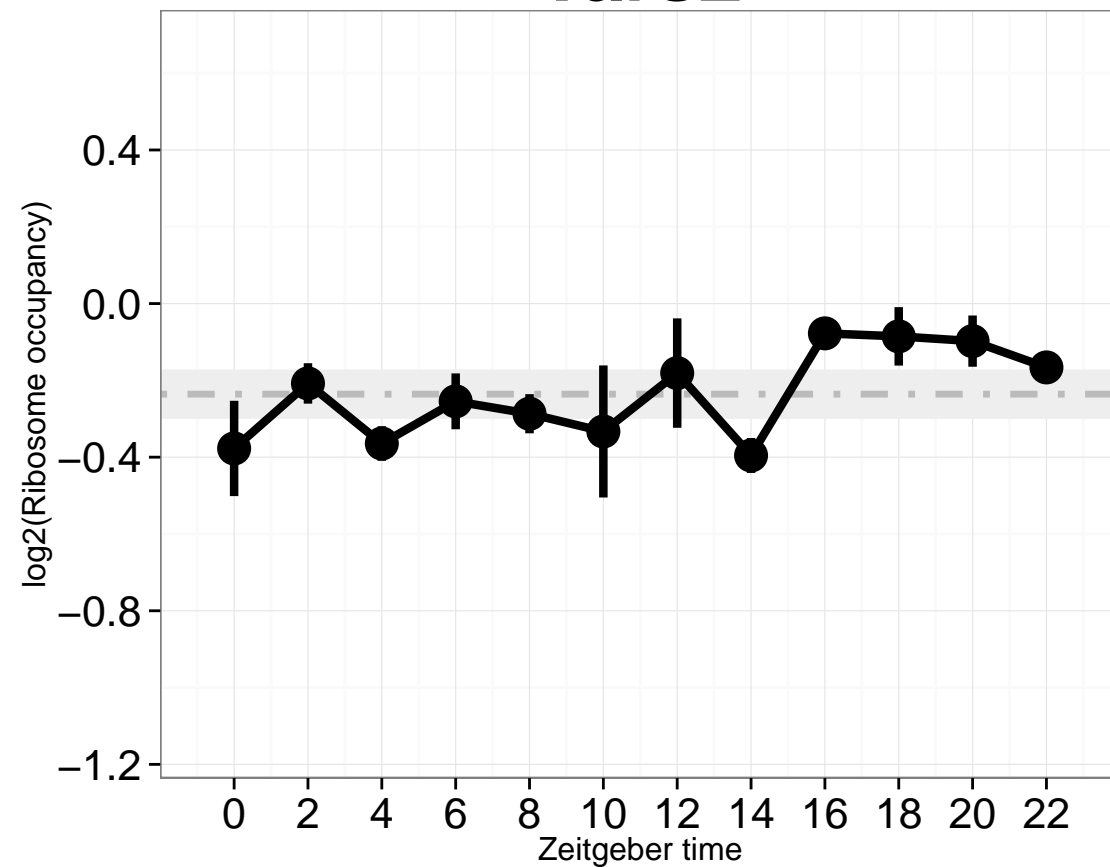

Supplement: Supplementary file 9860 [file 1]

# Slc33a1

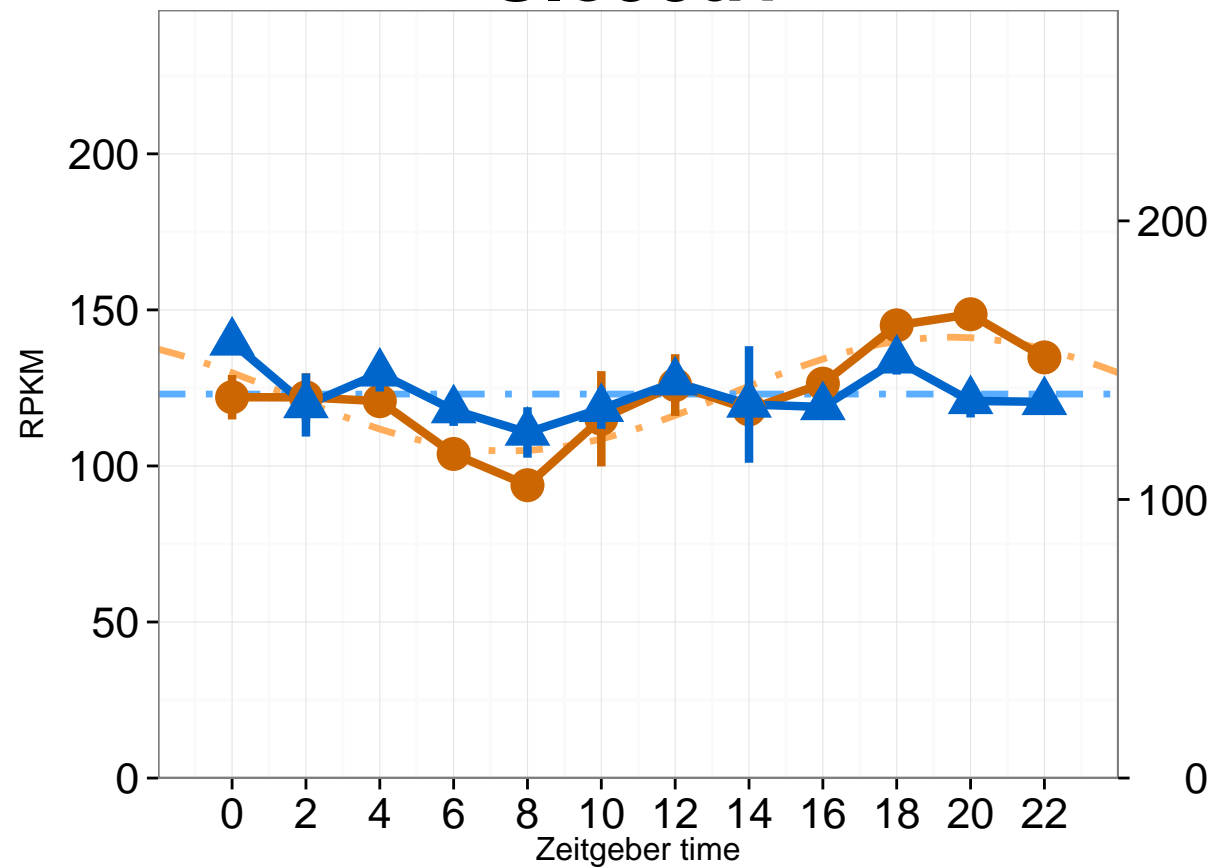

# Slc33a1

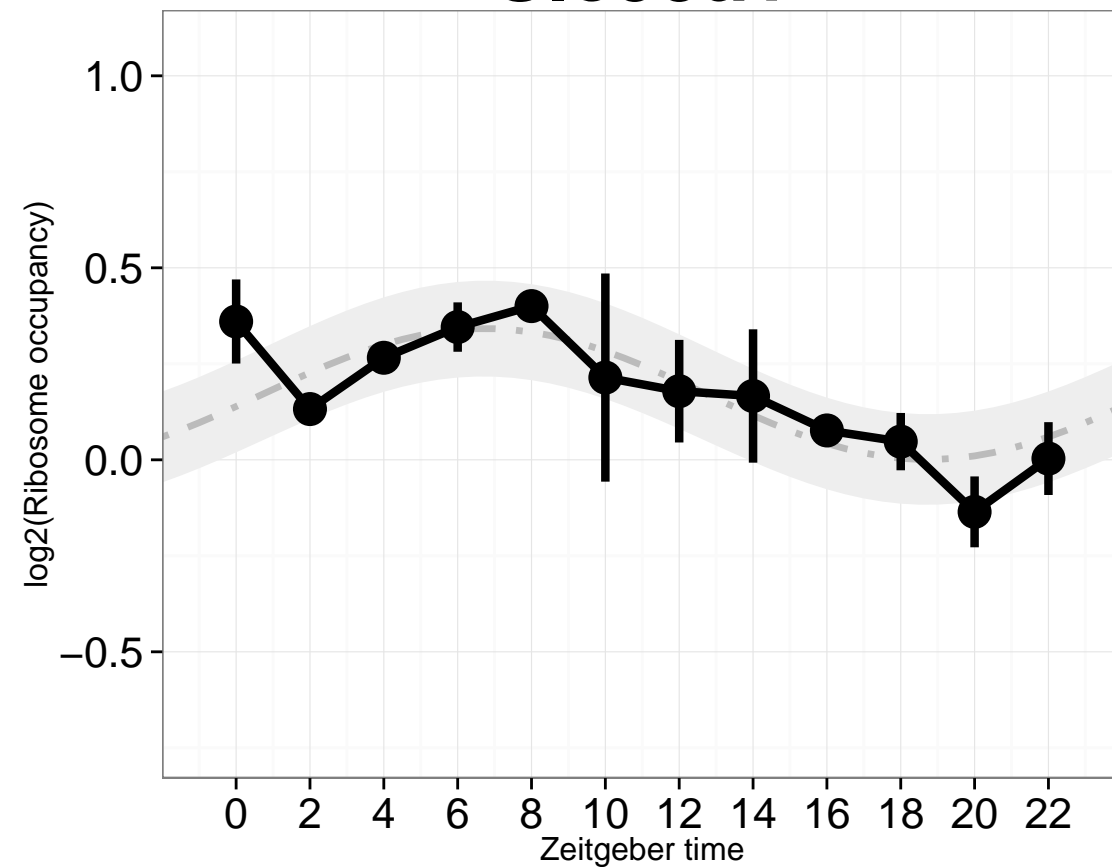

Supplement: Supplementary file 9861 [file 1]

# Actr1b

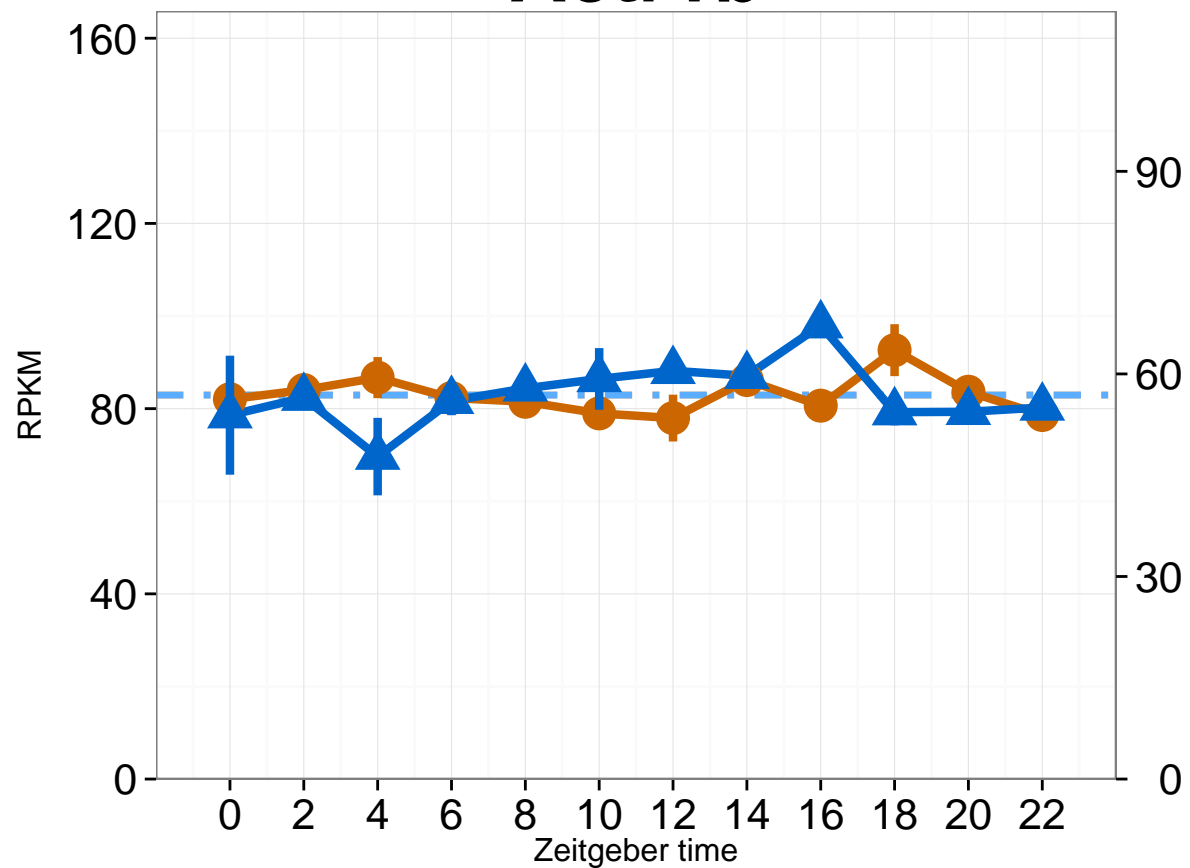

# Actr1b

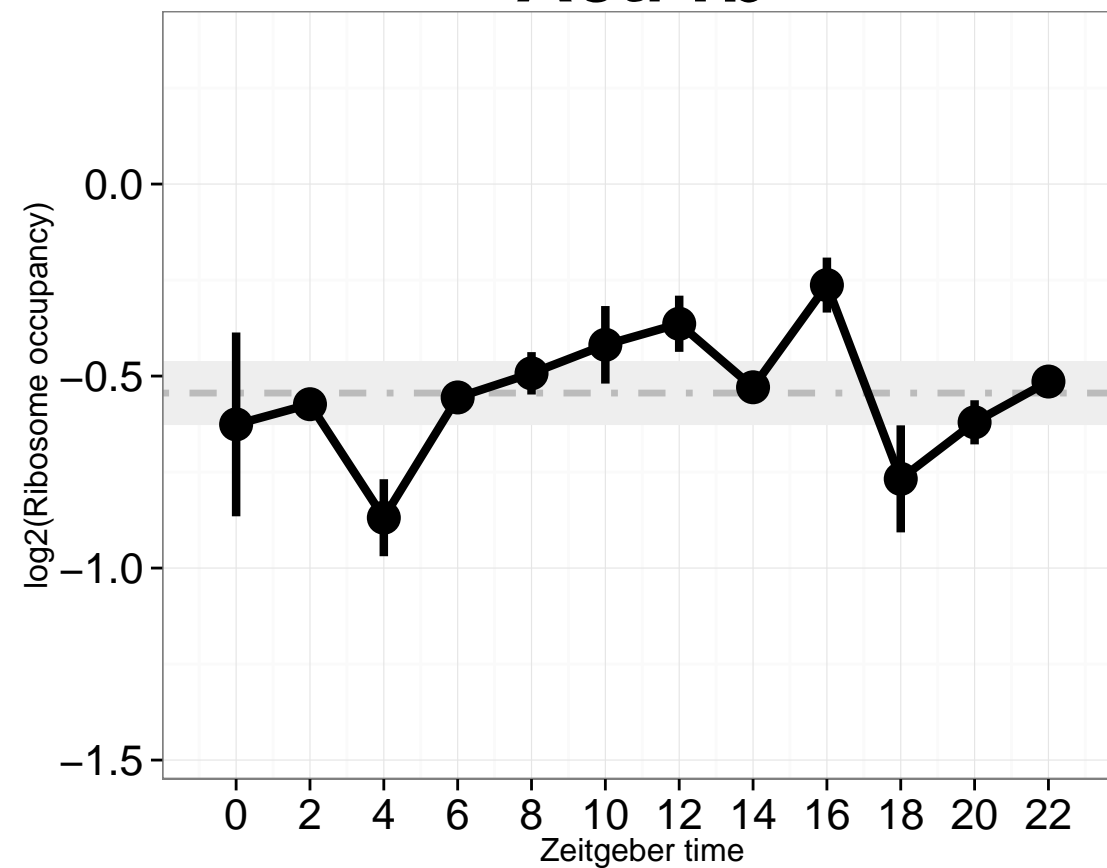

Supplement: Supplementary file 9862 [file 1]

## Atrip

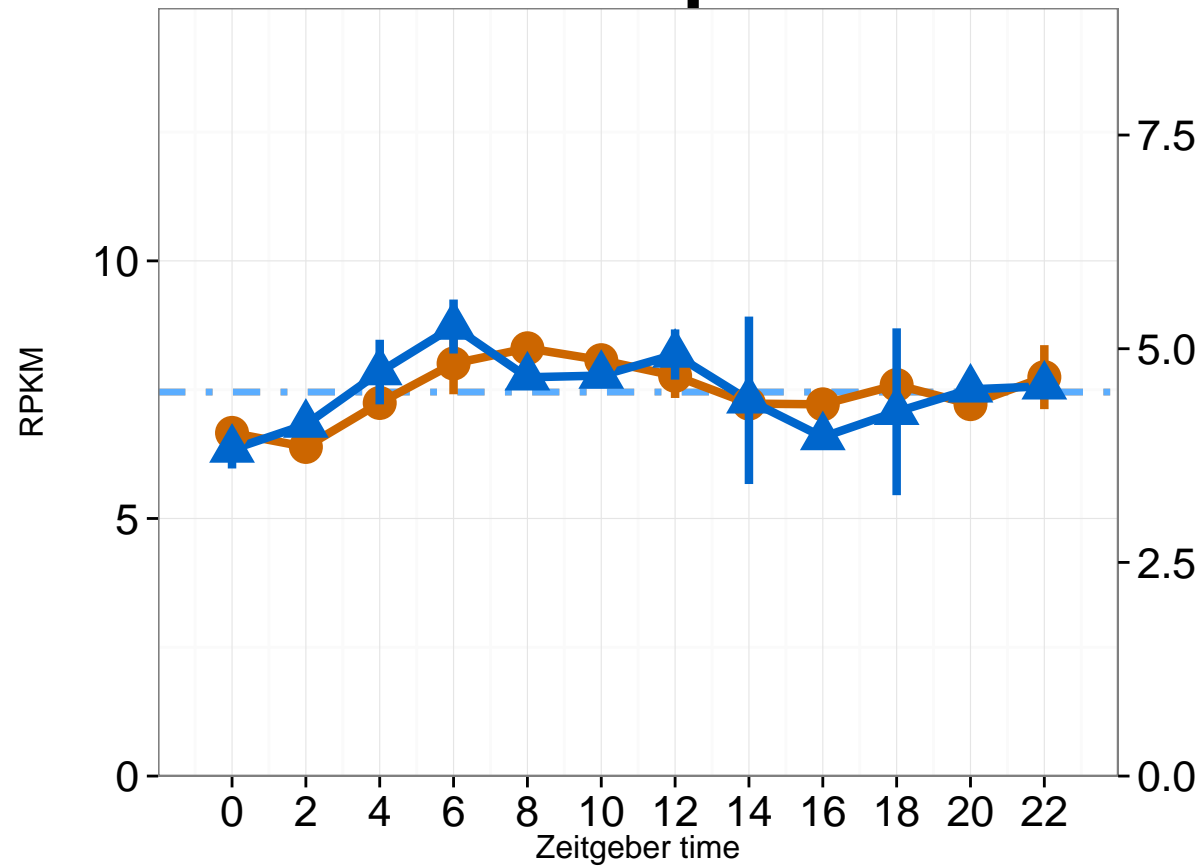

## Atrip

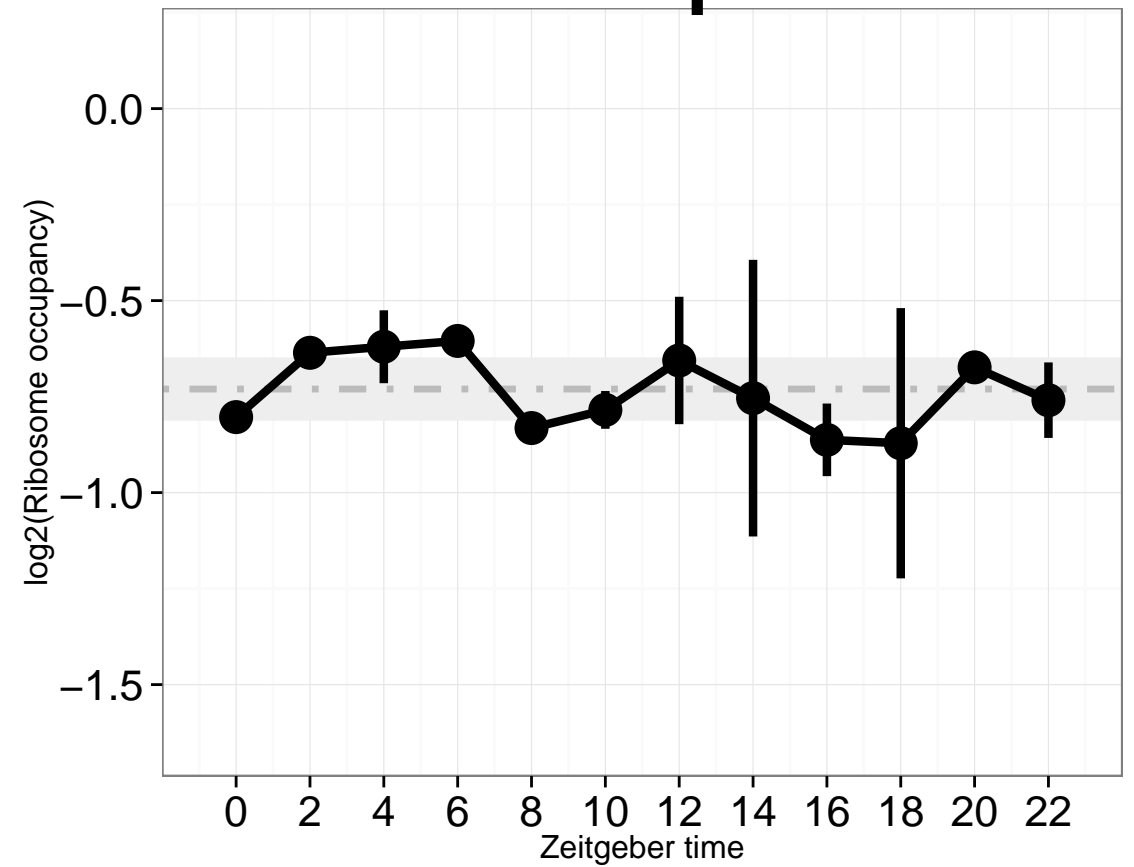

Supplement: Supplementary file 9863 [file 1]

# Fam185a

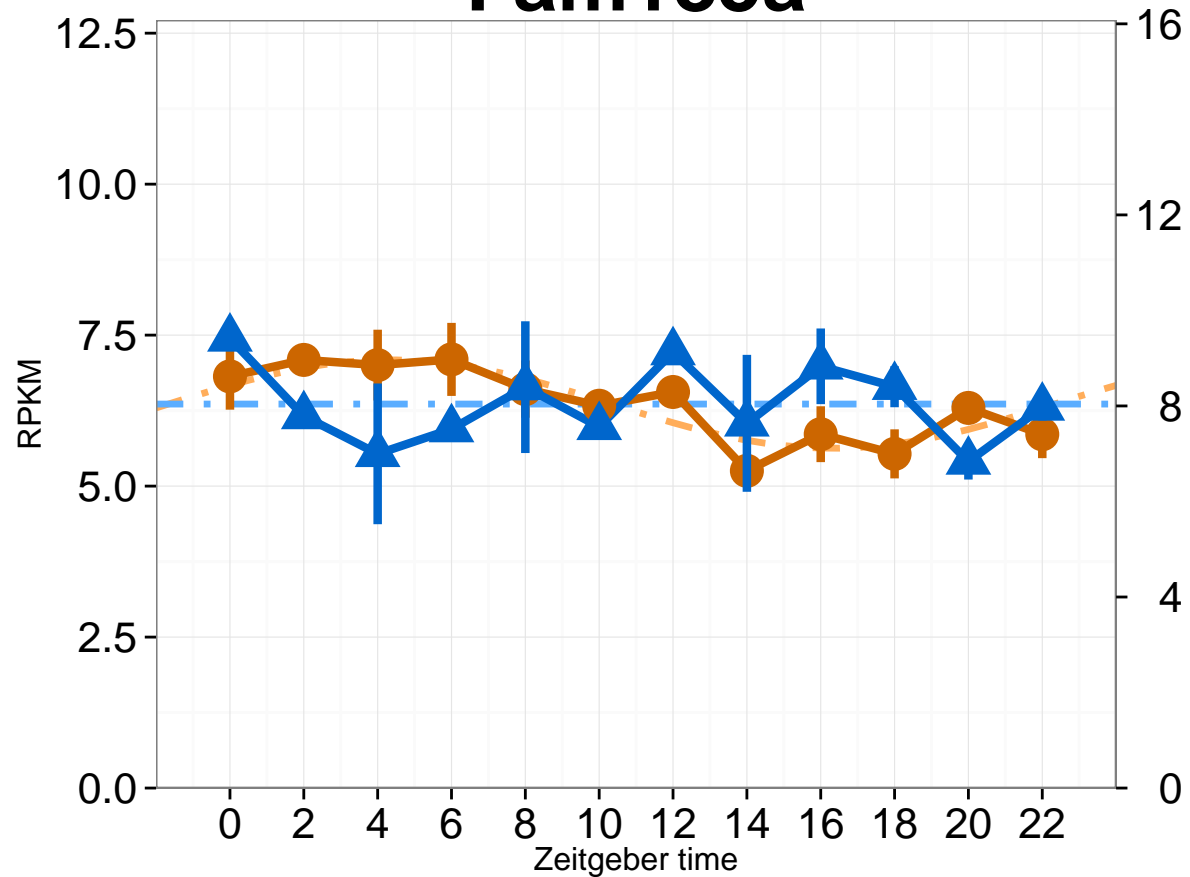

# Fam185a

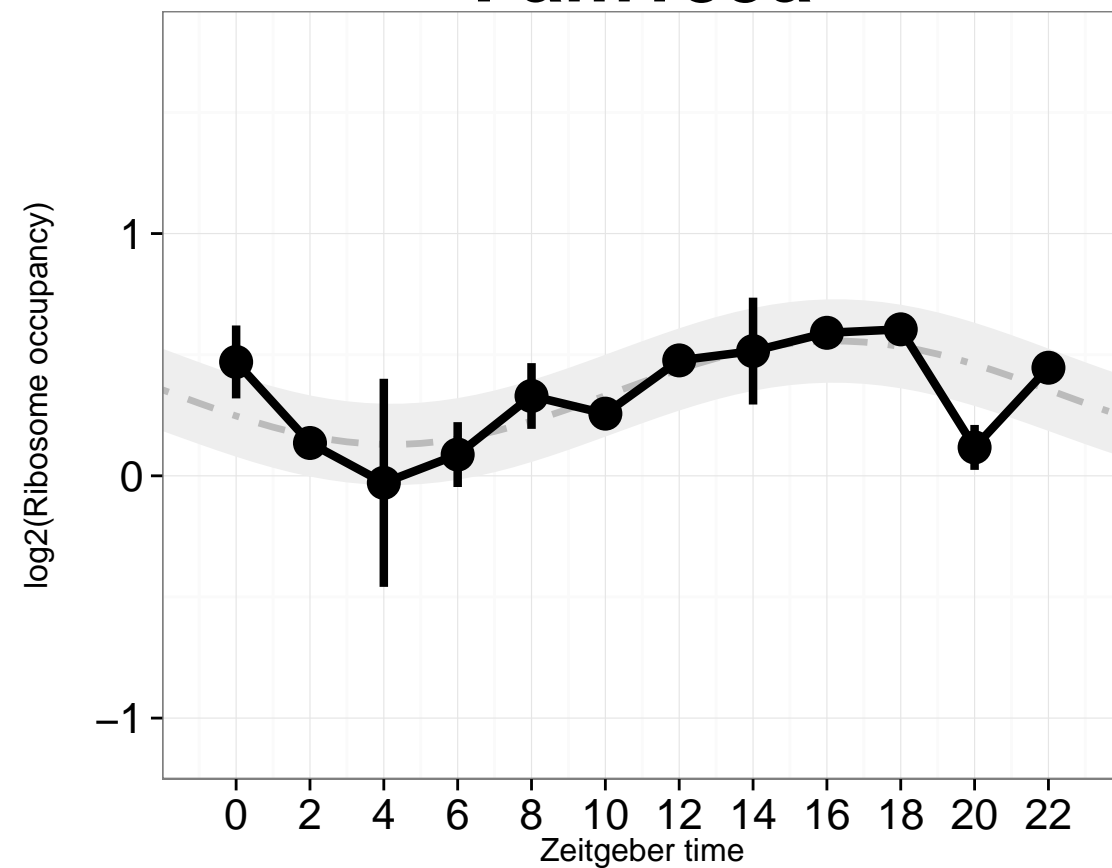

Supplement: Supplementary file 9864 [file 1]

# Adamts10

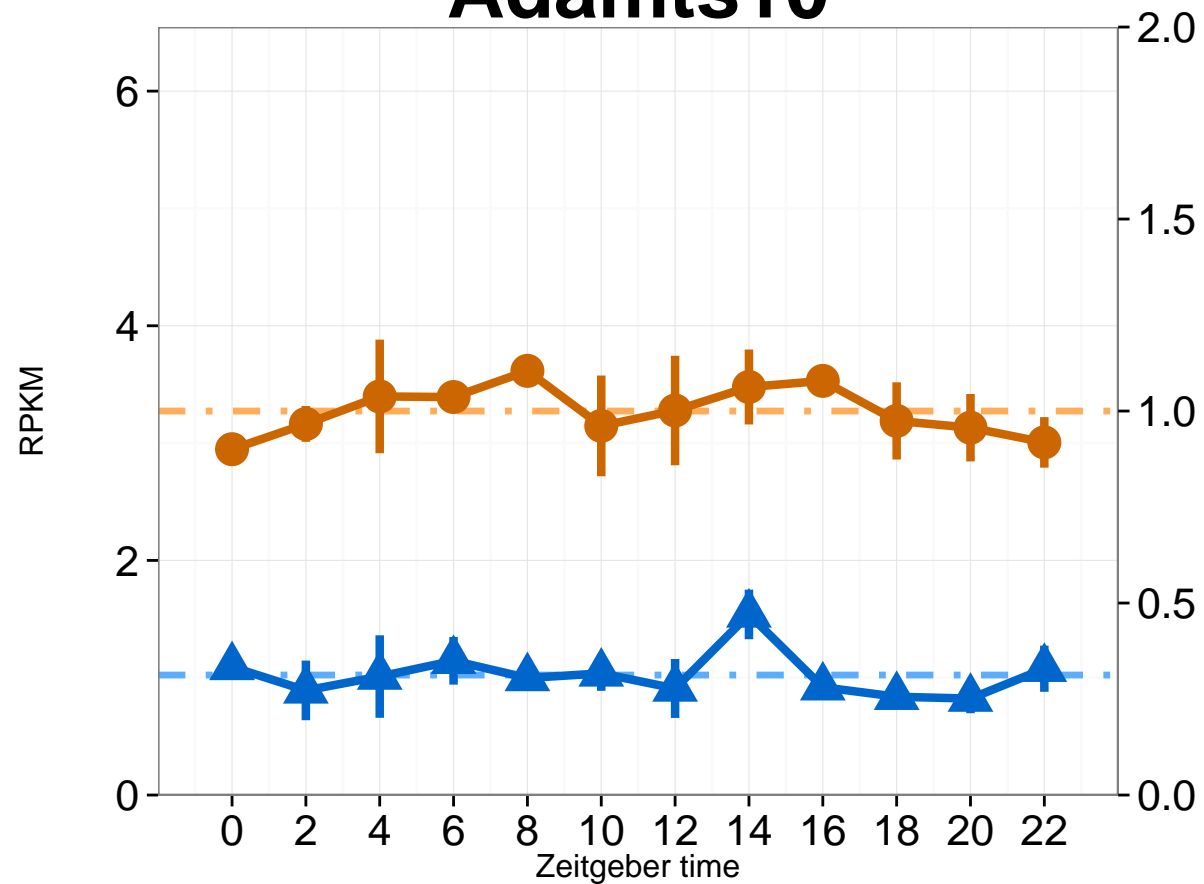

# Adamts10

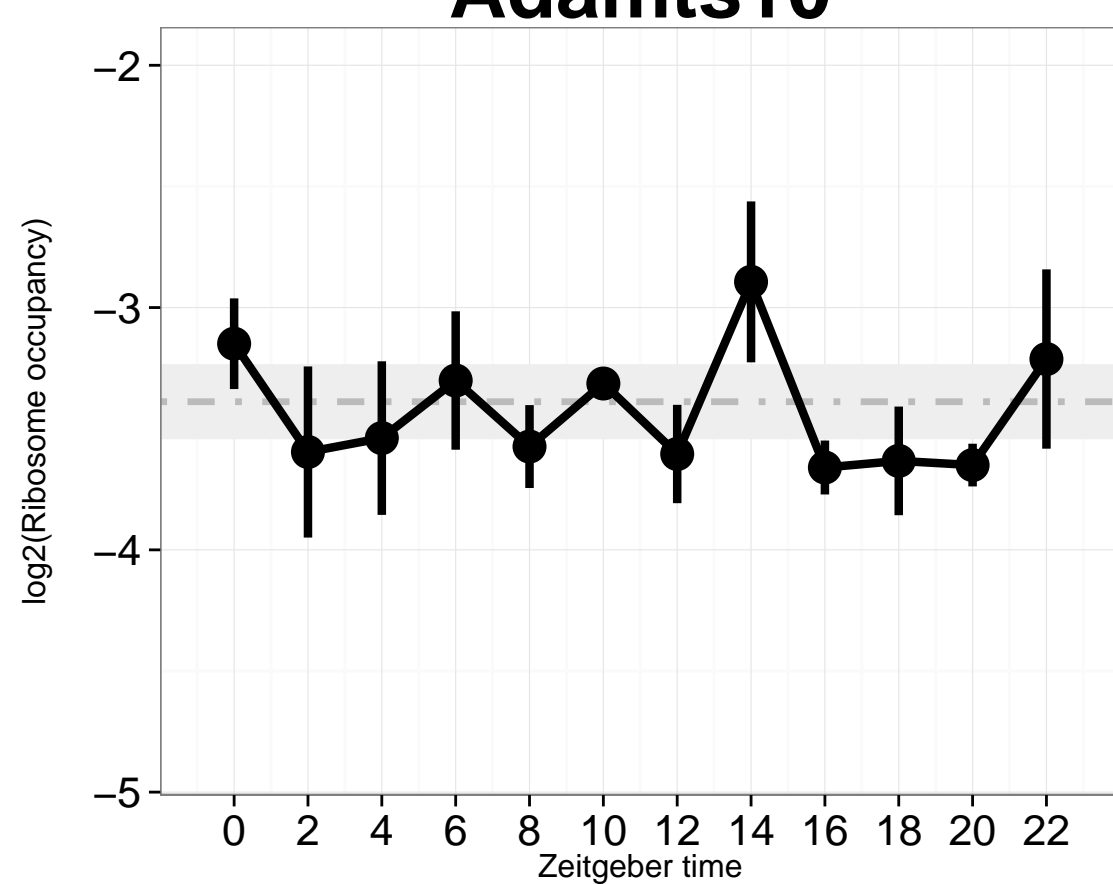

Supplement: Supplementary file 9865 [file 1]

# Mettl21d

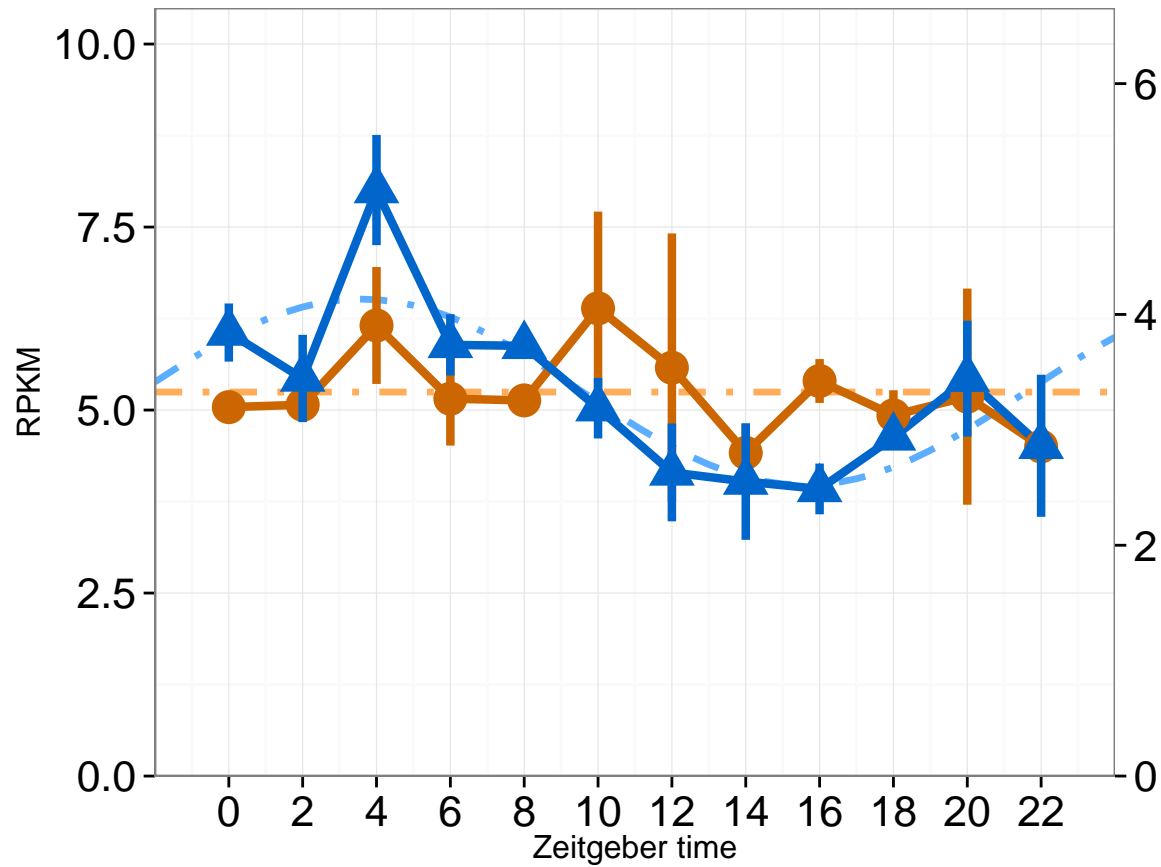

# Mettl21d

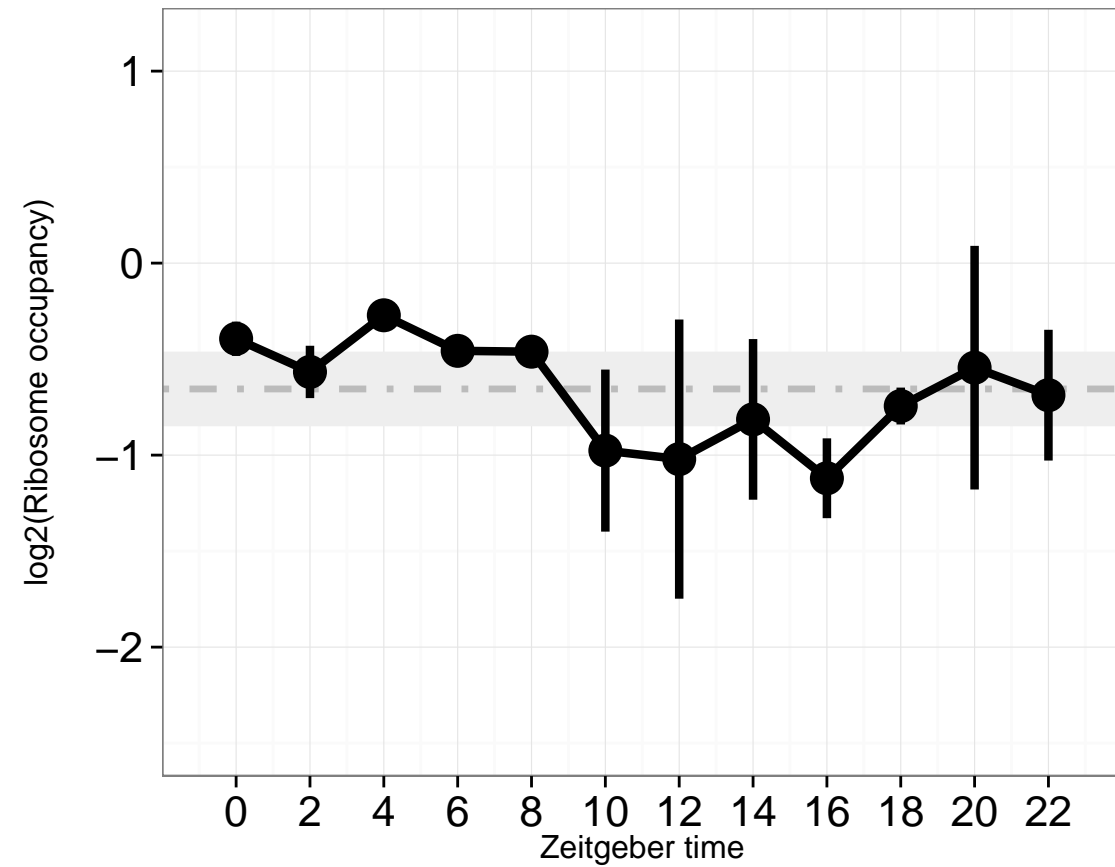

Supplement: Supplementary file 9866 [file 1]

# Gprc5c

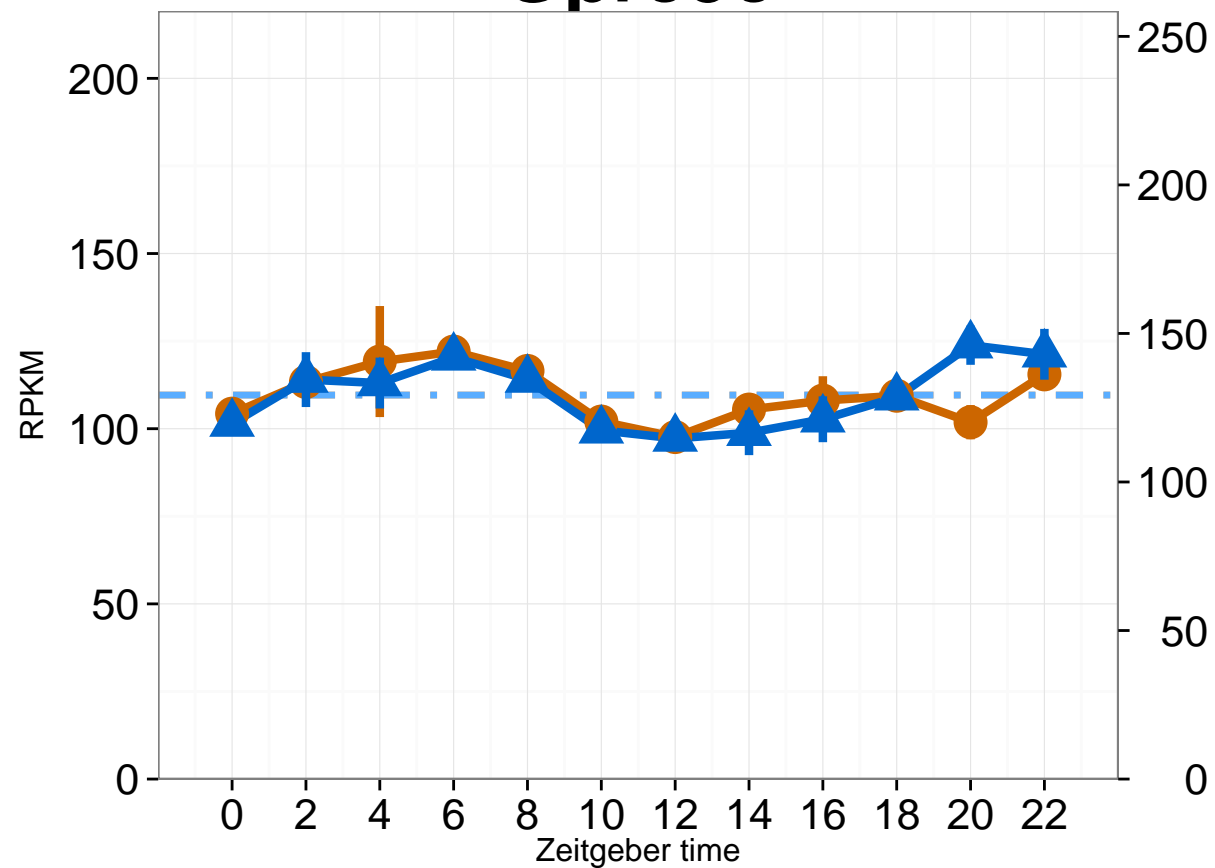

# Gprc5c

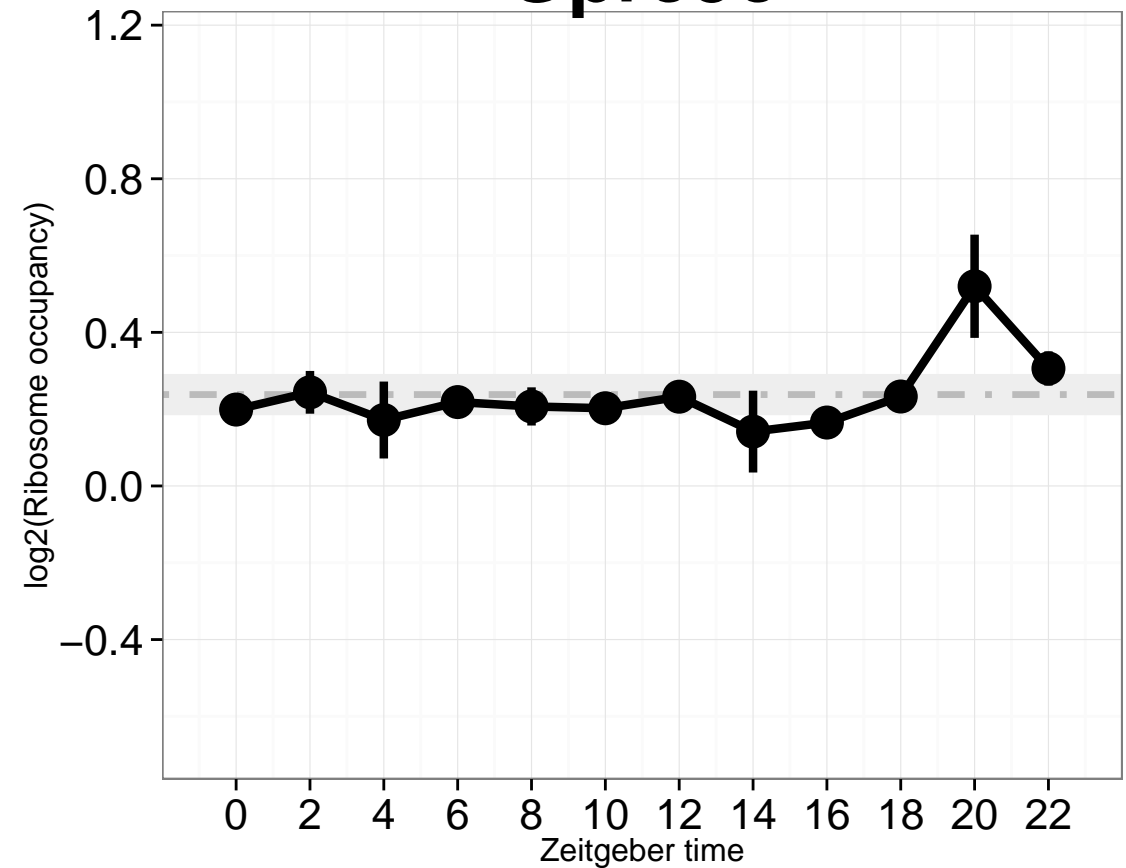

Supplement: Supplementary file 9867 [file 1]

# Chaf1a

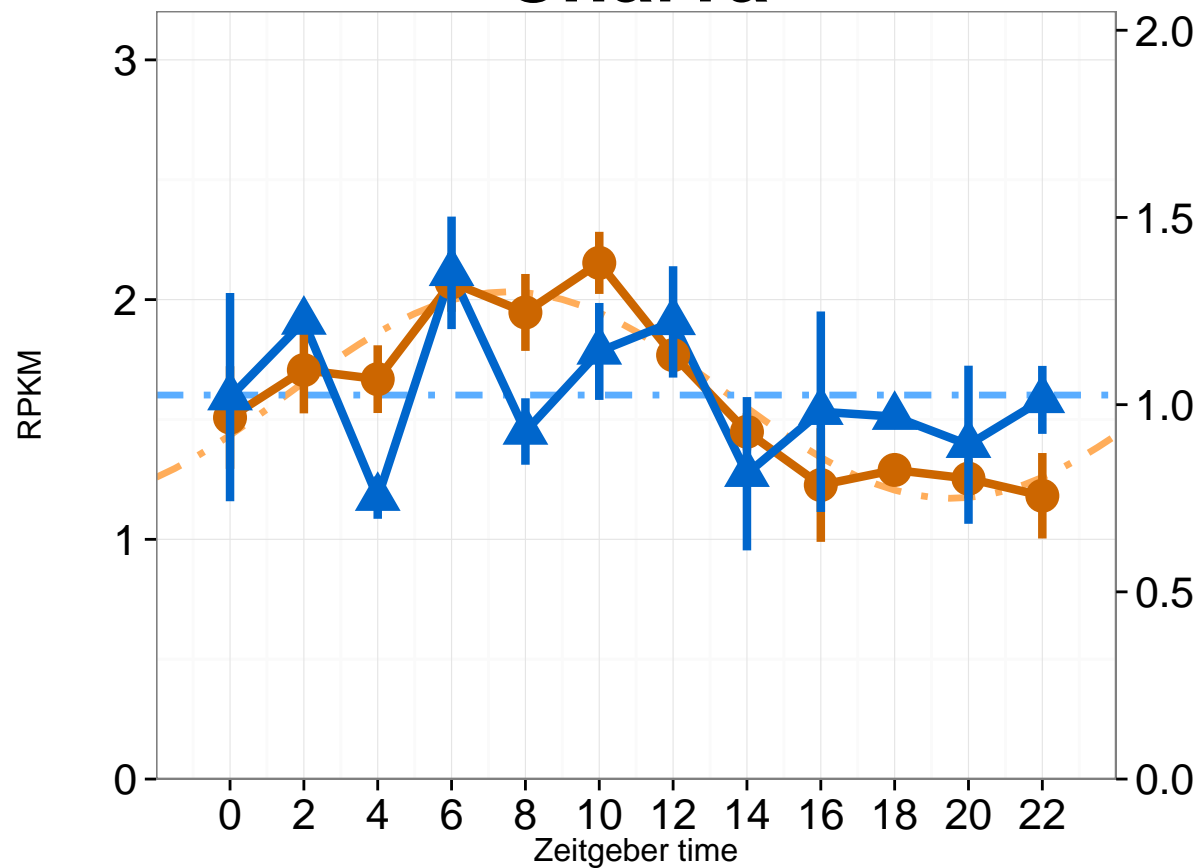

# Chaf1a

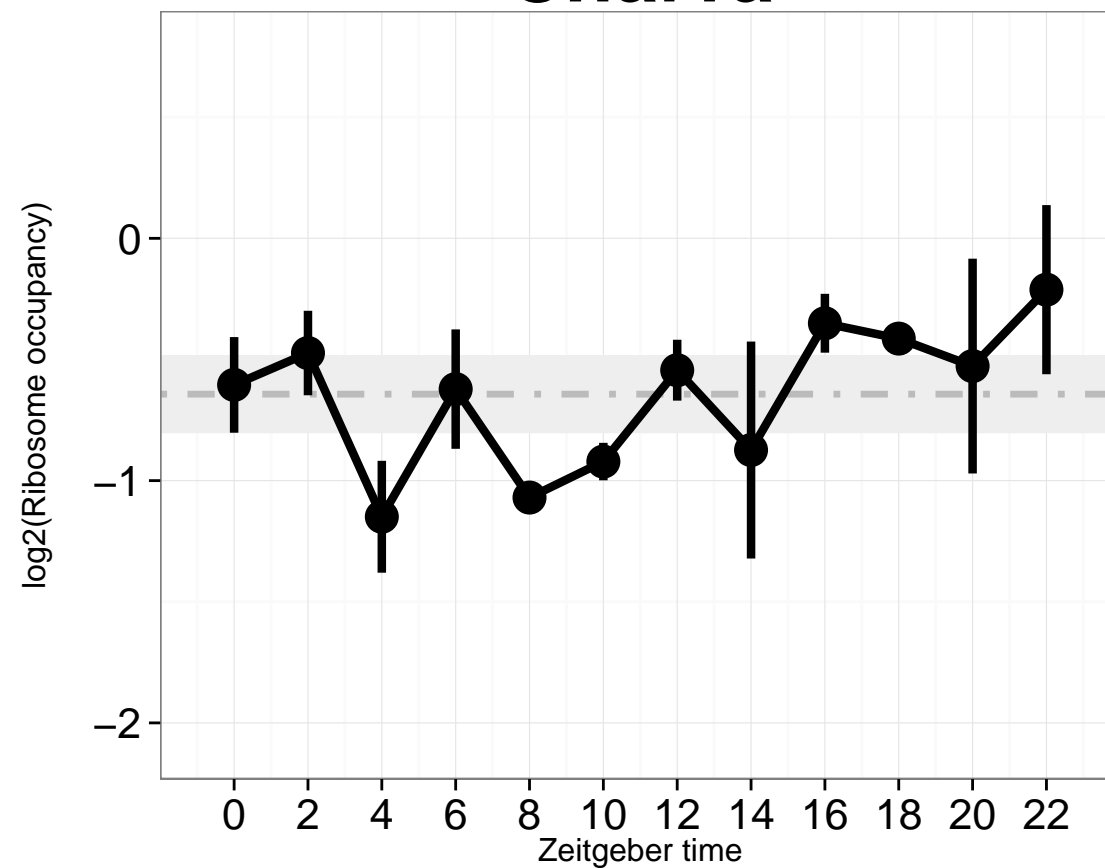

Supplement: Supplementary file 9868 [file 1]

# Thada

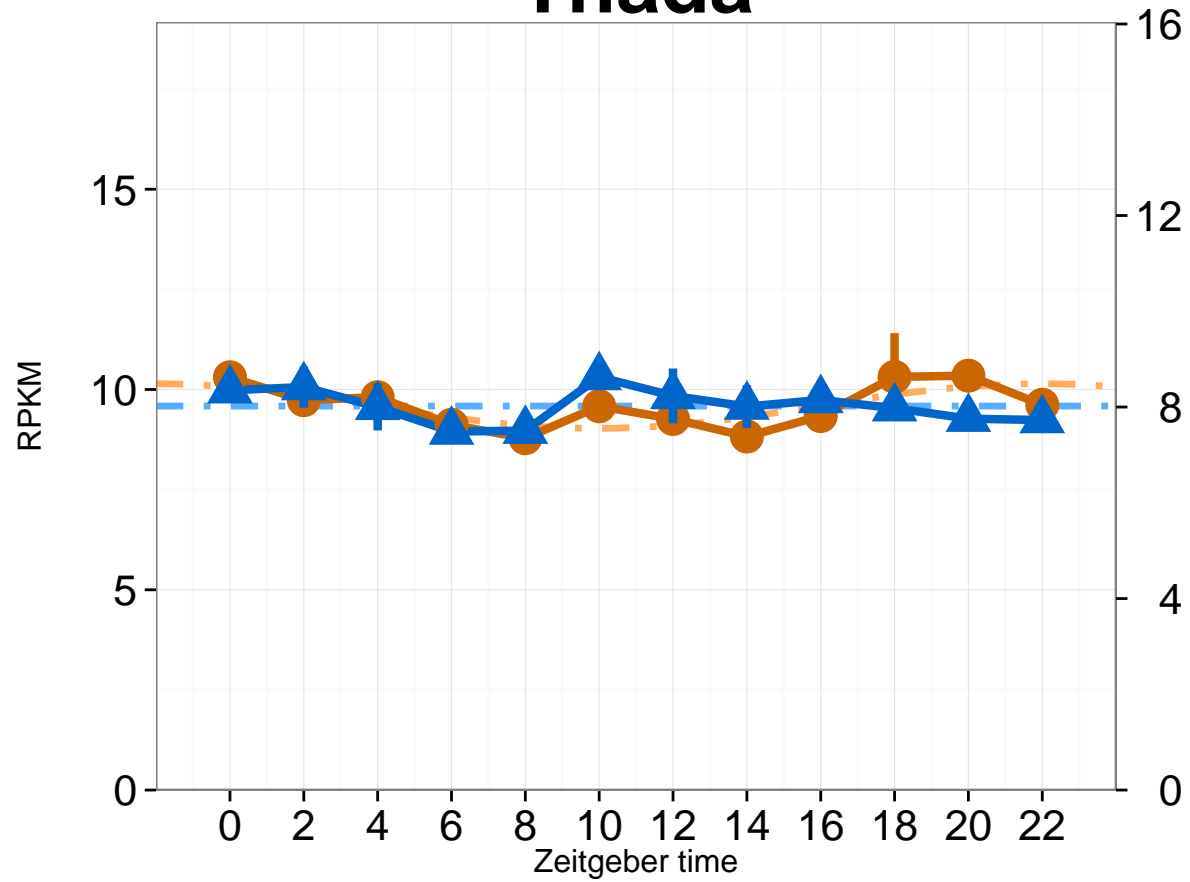

# Thada

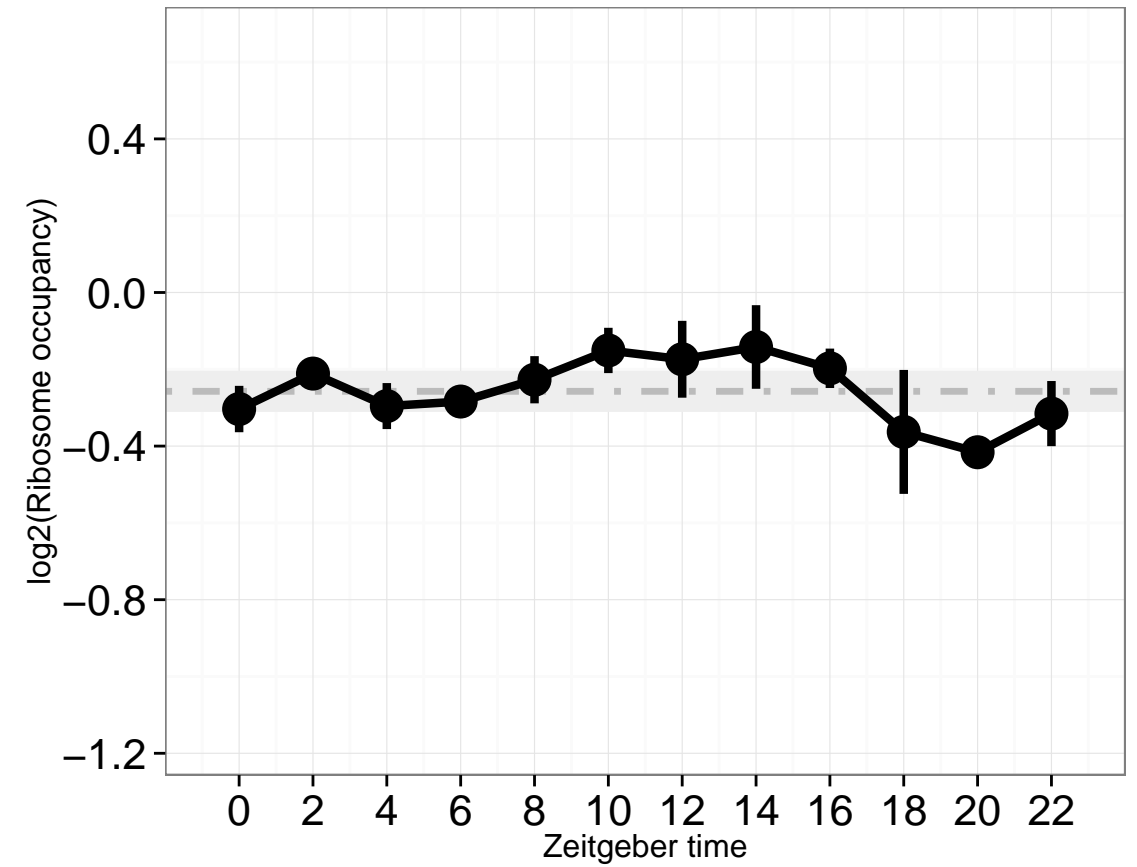

Supplement: Supplementary file 9869 [file 1]

## Phf15

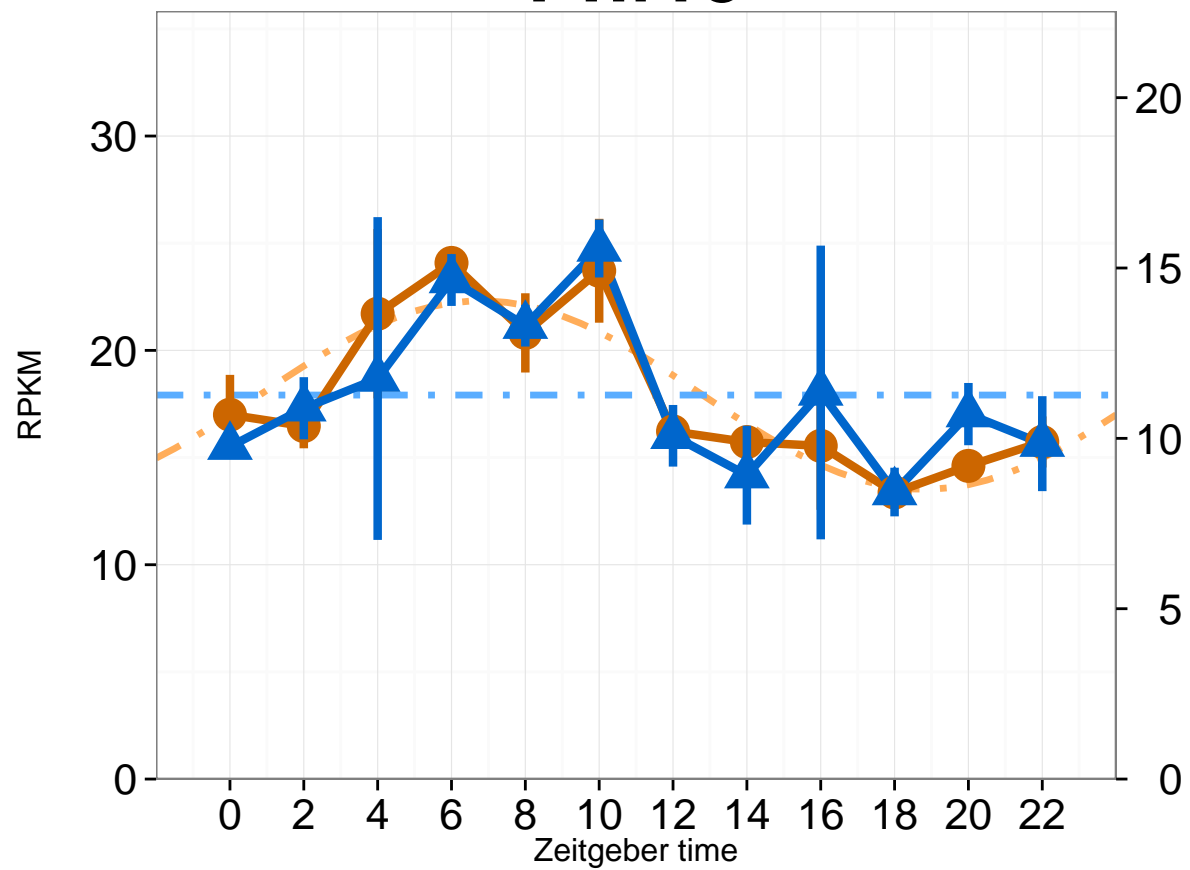

## Phf15

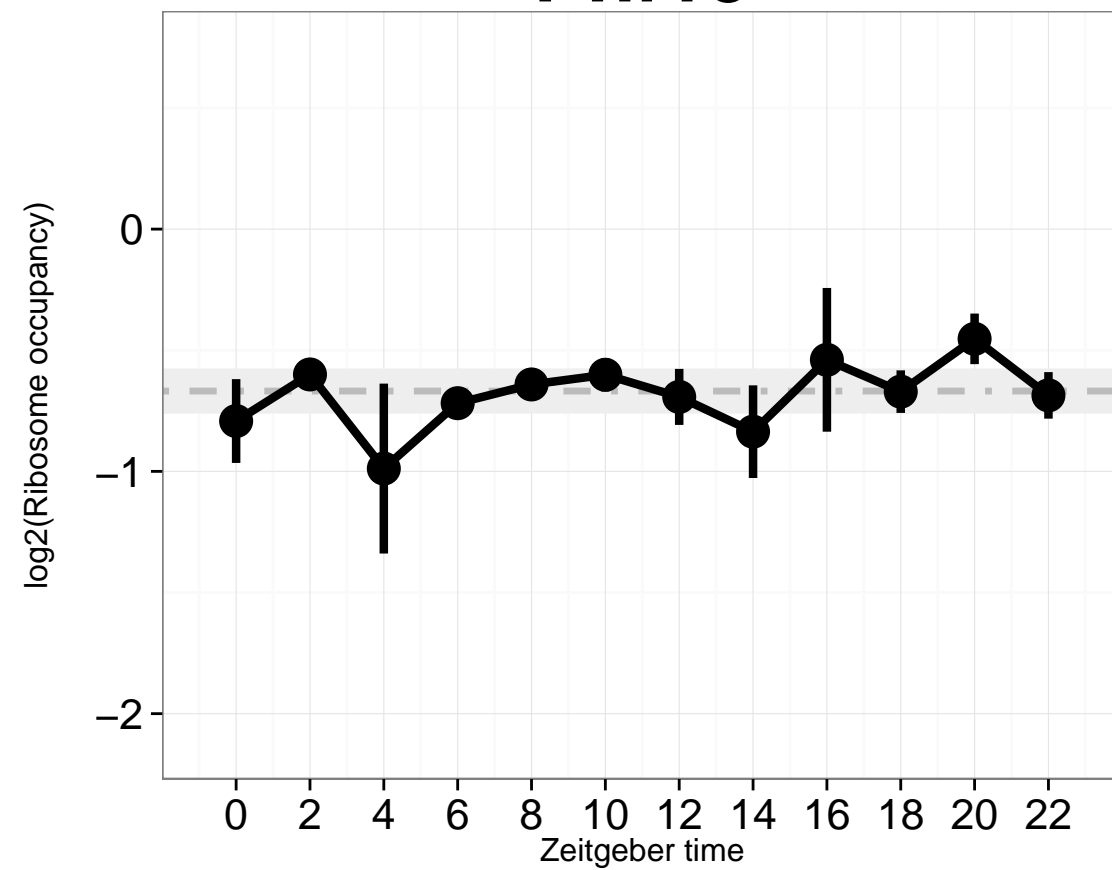

Supplement: Supplementary file 9870 [file 1]

## Smyd3

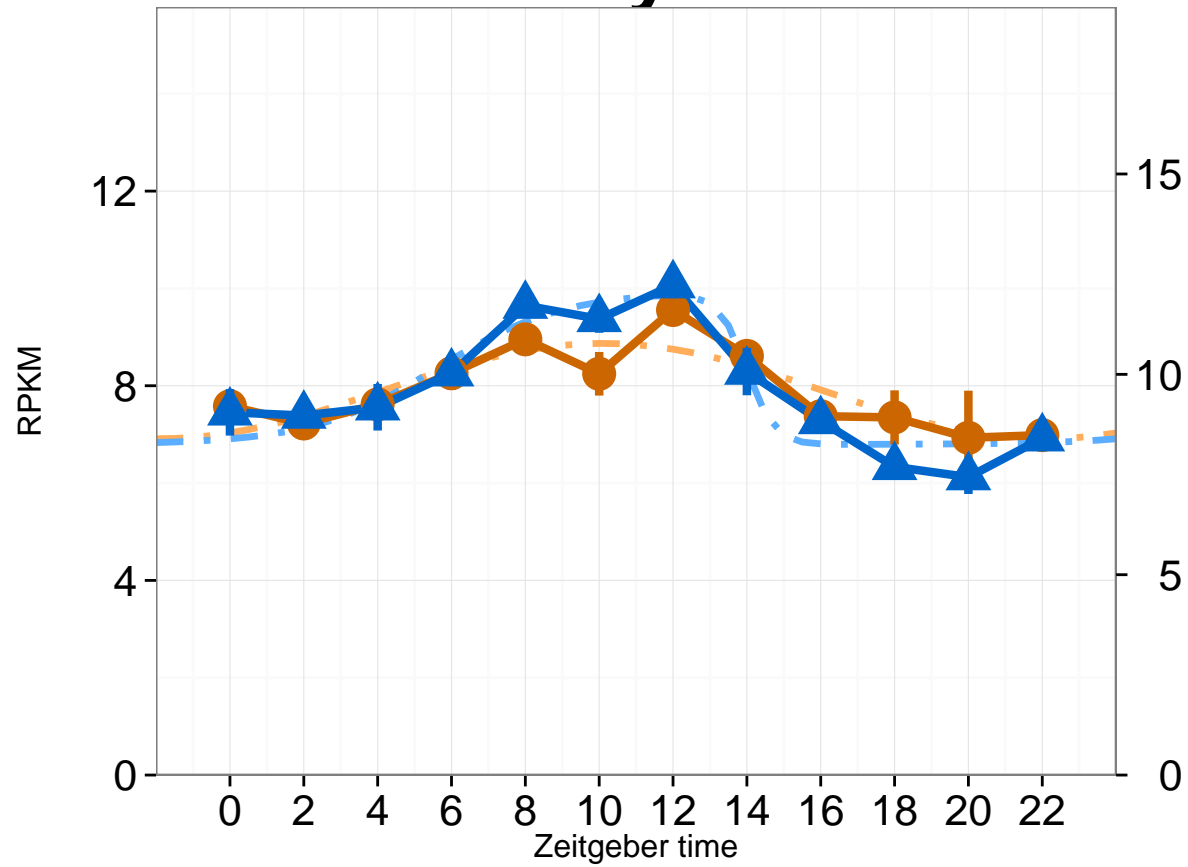

## Smyd3

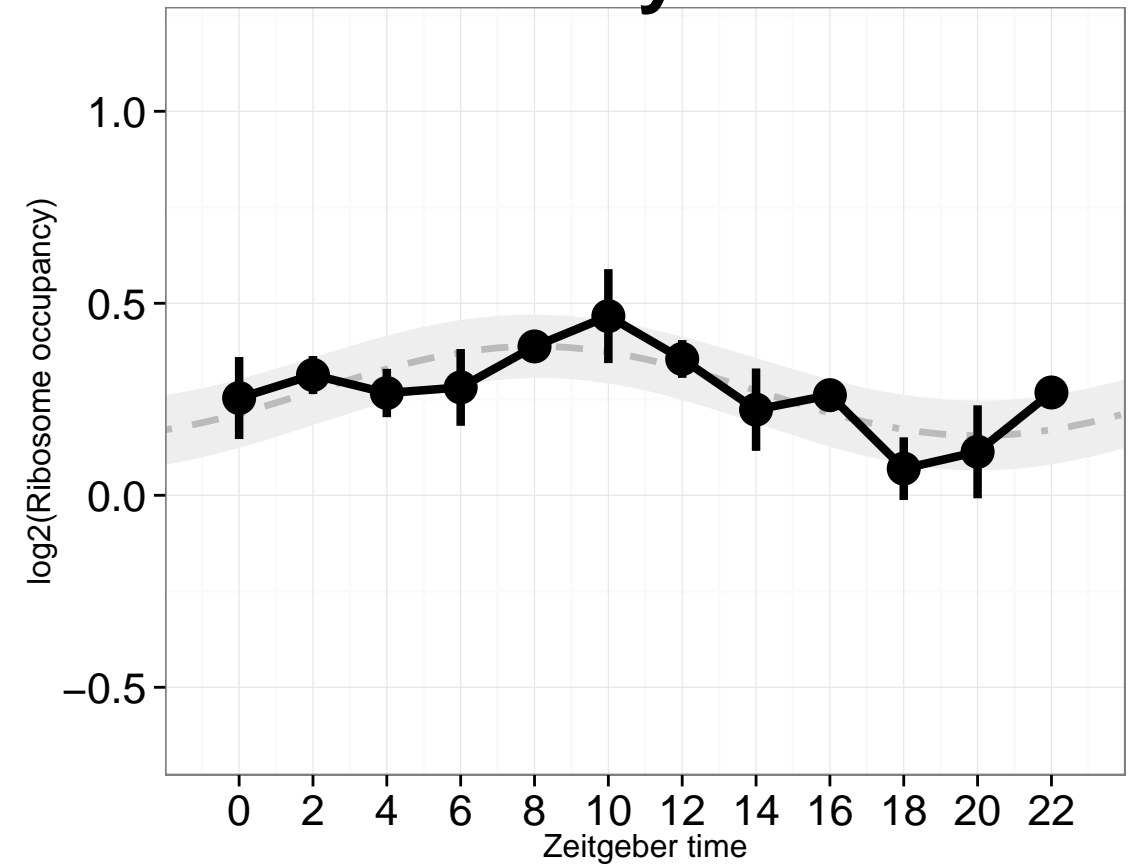

Supplement: Supplementary file 9871 [file 1]

## Mbd1

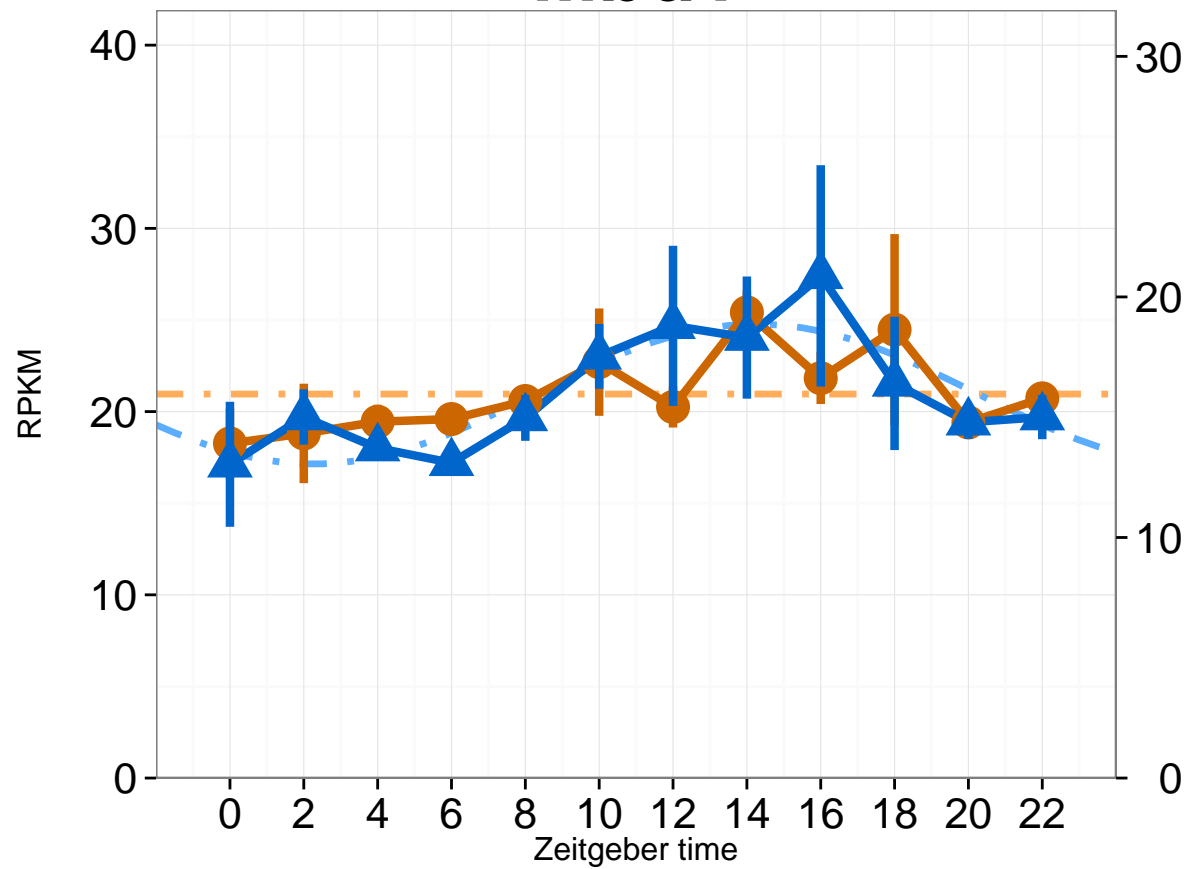

## Mbd1

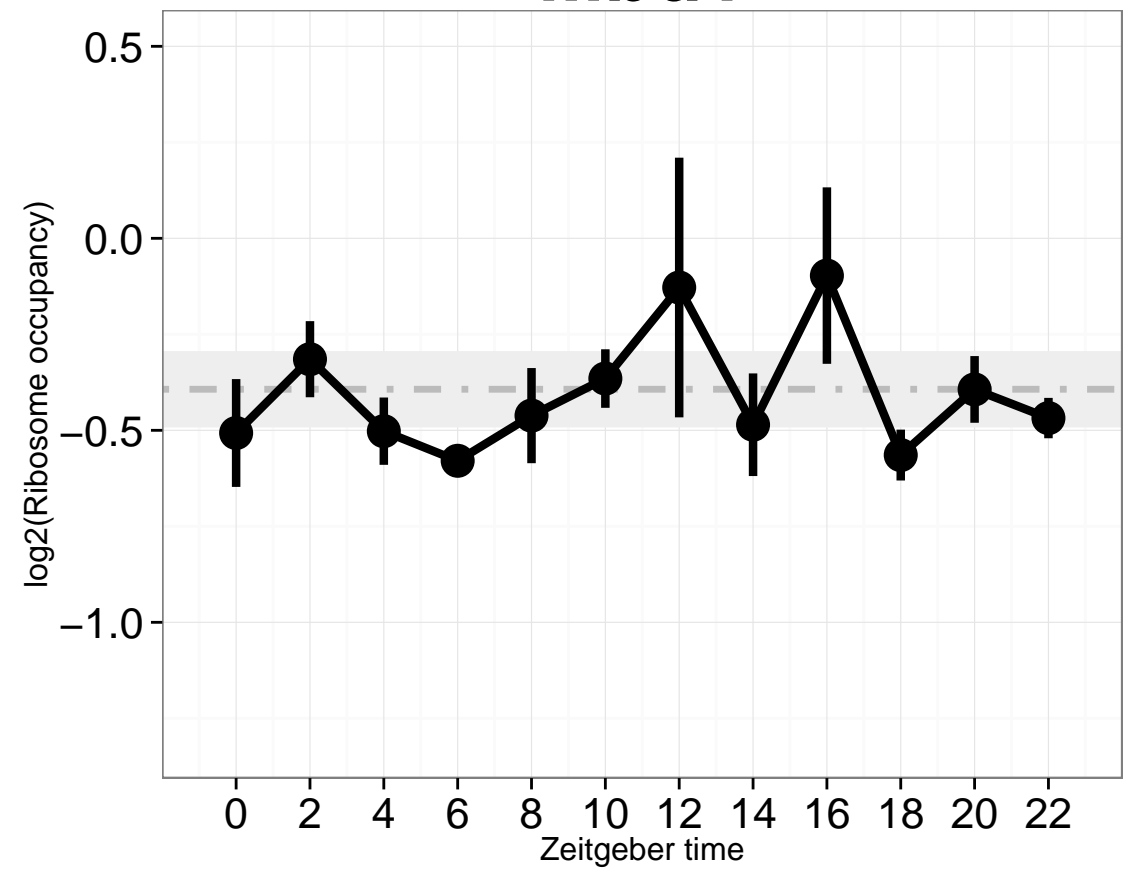

Supplement: Supplementary file 9872 [file 1]

# Cct4

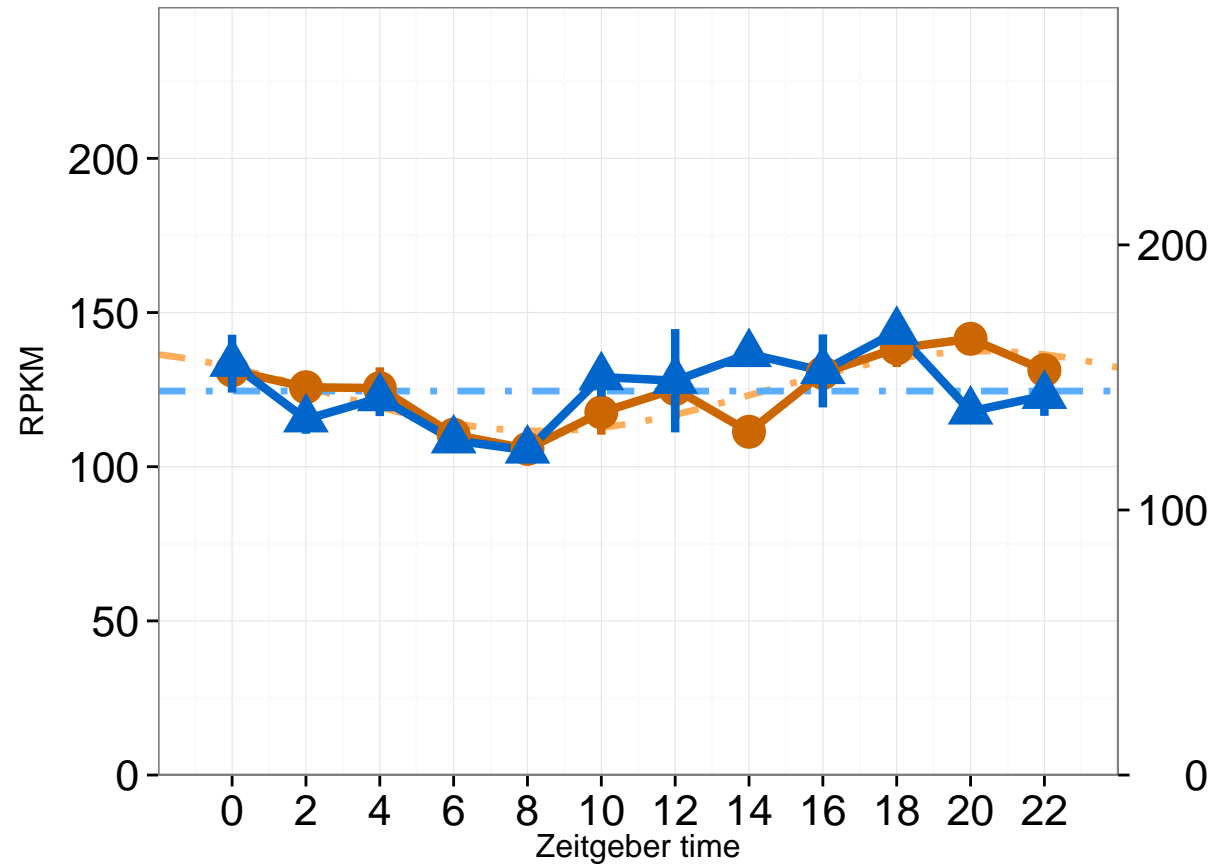

# Cct4

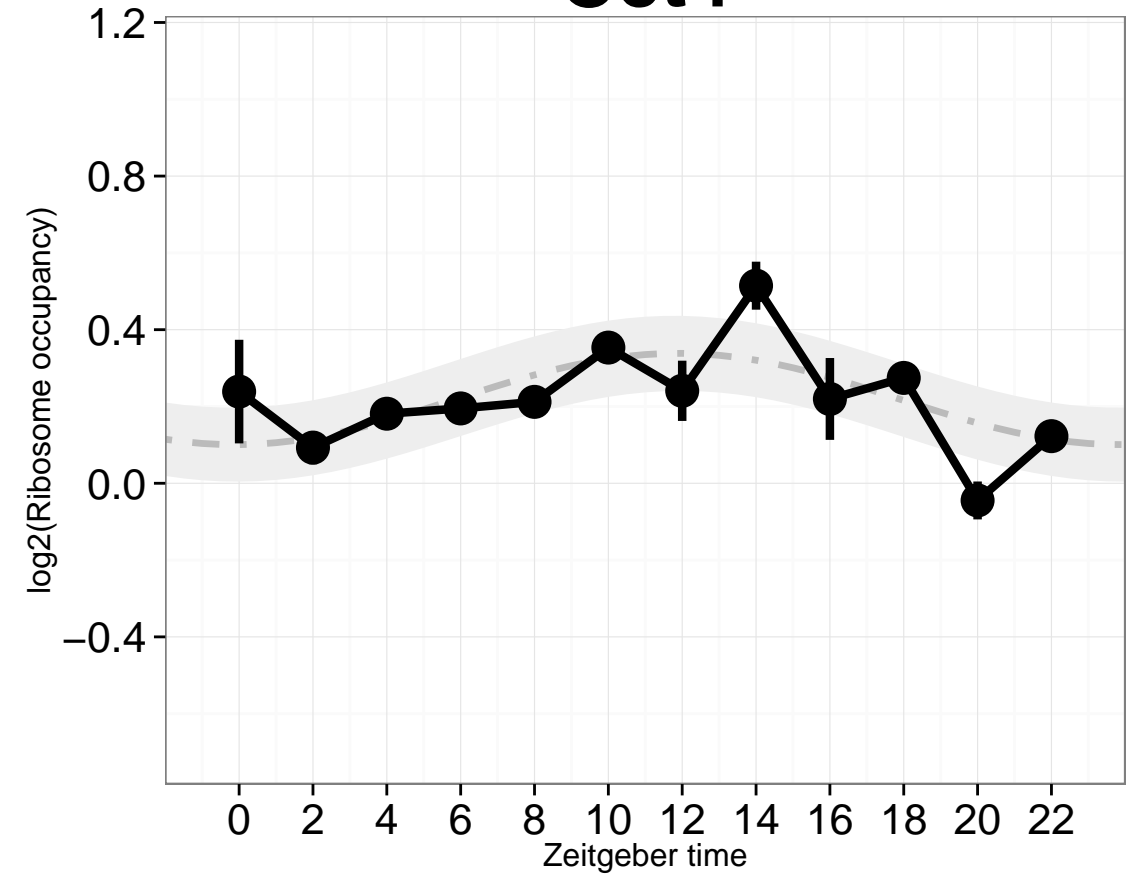

Supplement: Supplementary file 9873 [file 1]

# Ppp1r7

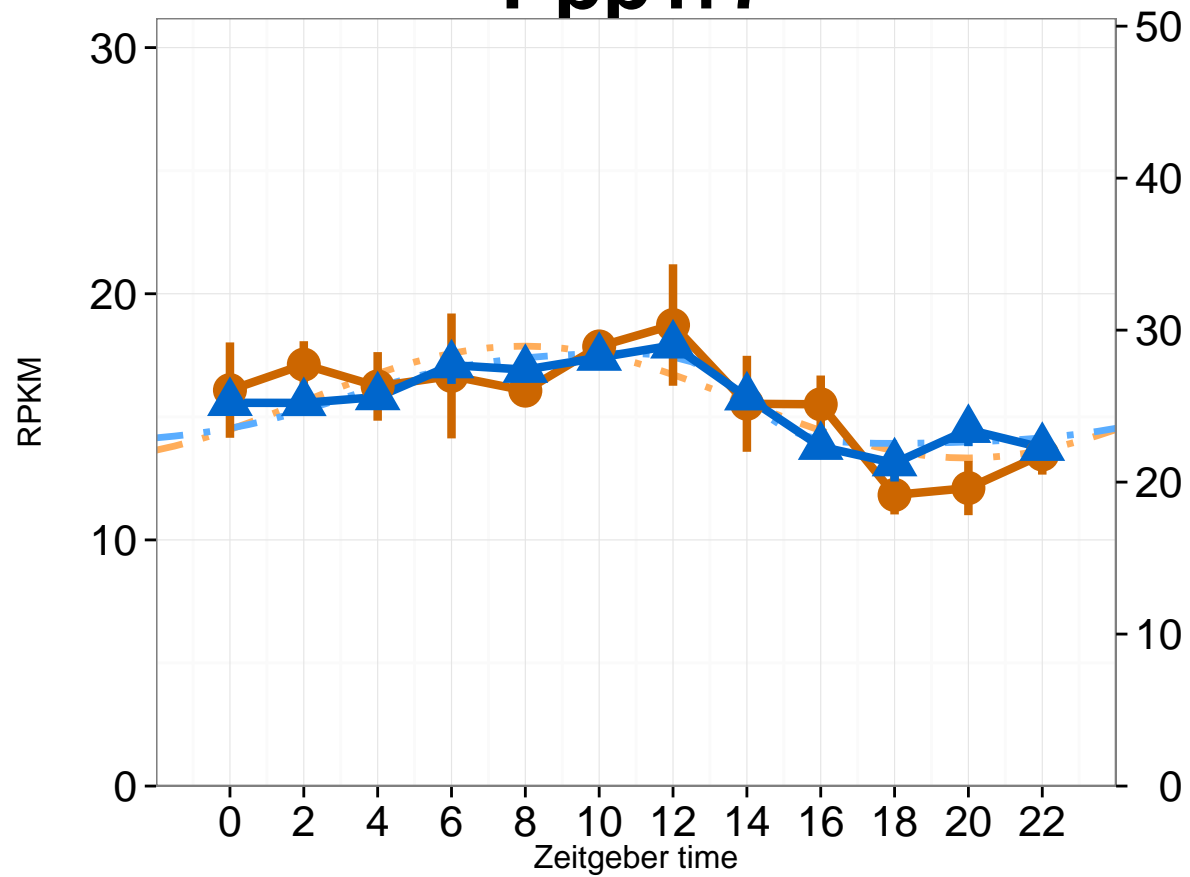

# Ppp1r7

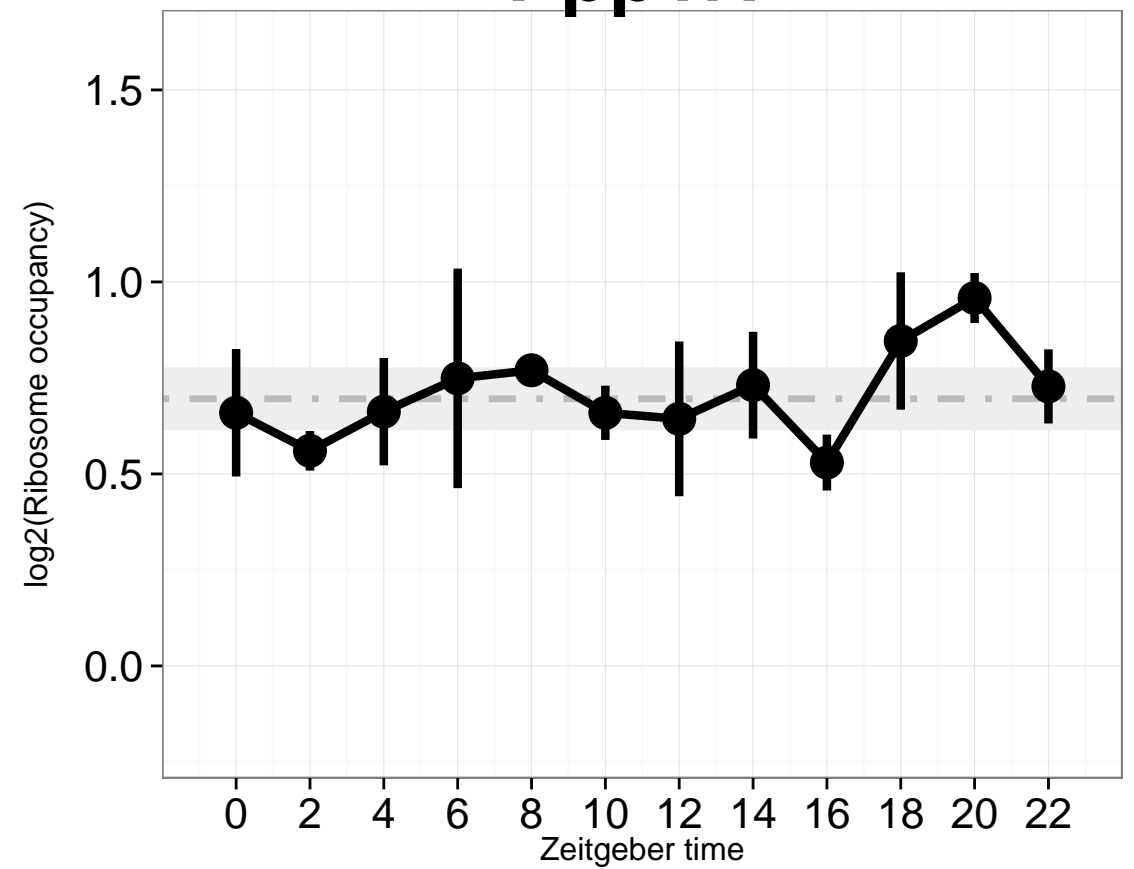

Supplement: Supplementary file 9874 [file 1]

## Baiap2

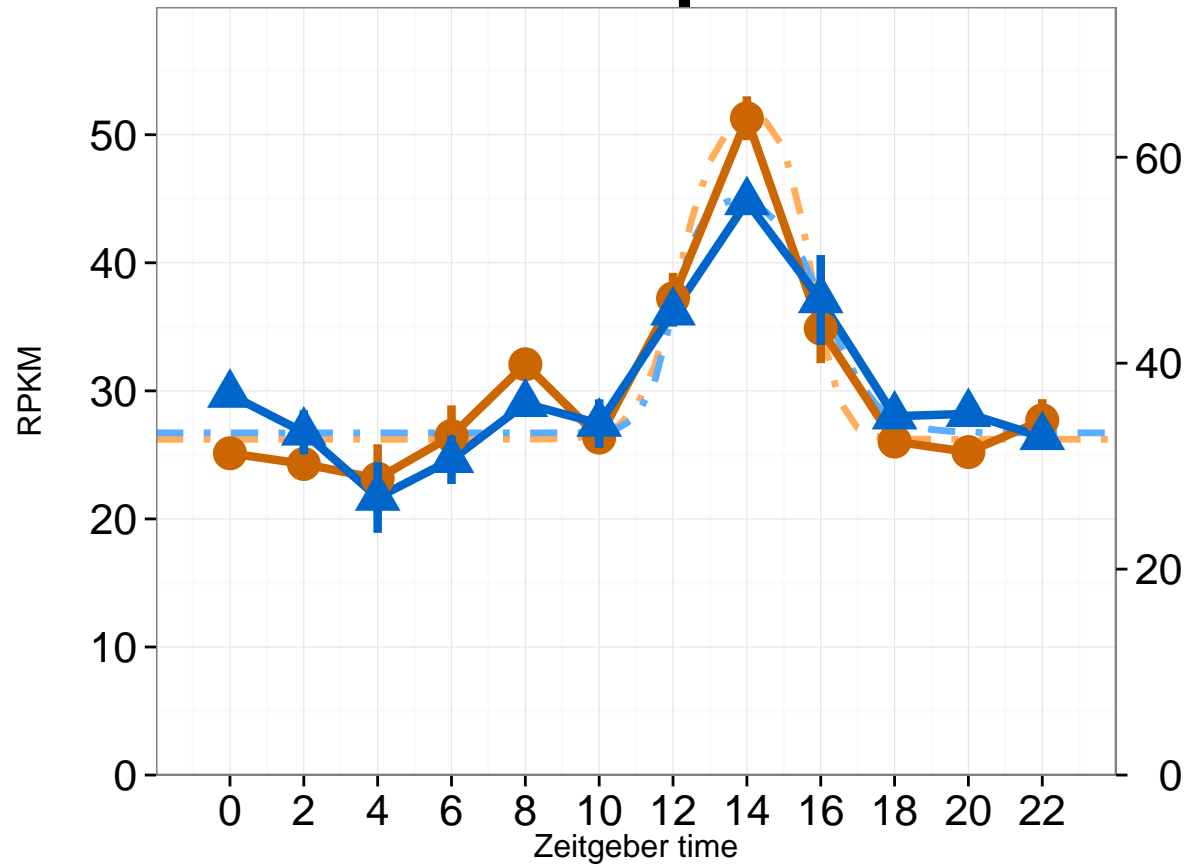

## Baiap2

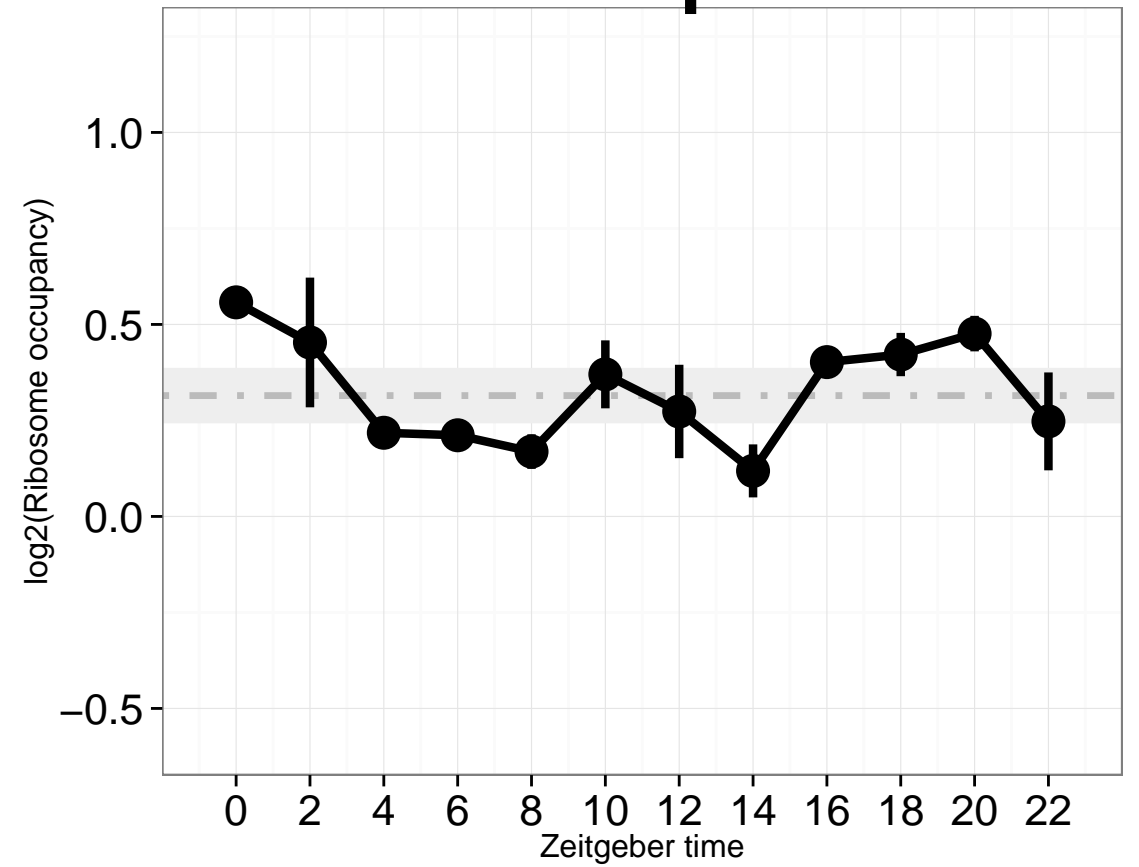

Supplement: Supplementary file 9875 [file 1]

# D230025D16Rik

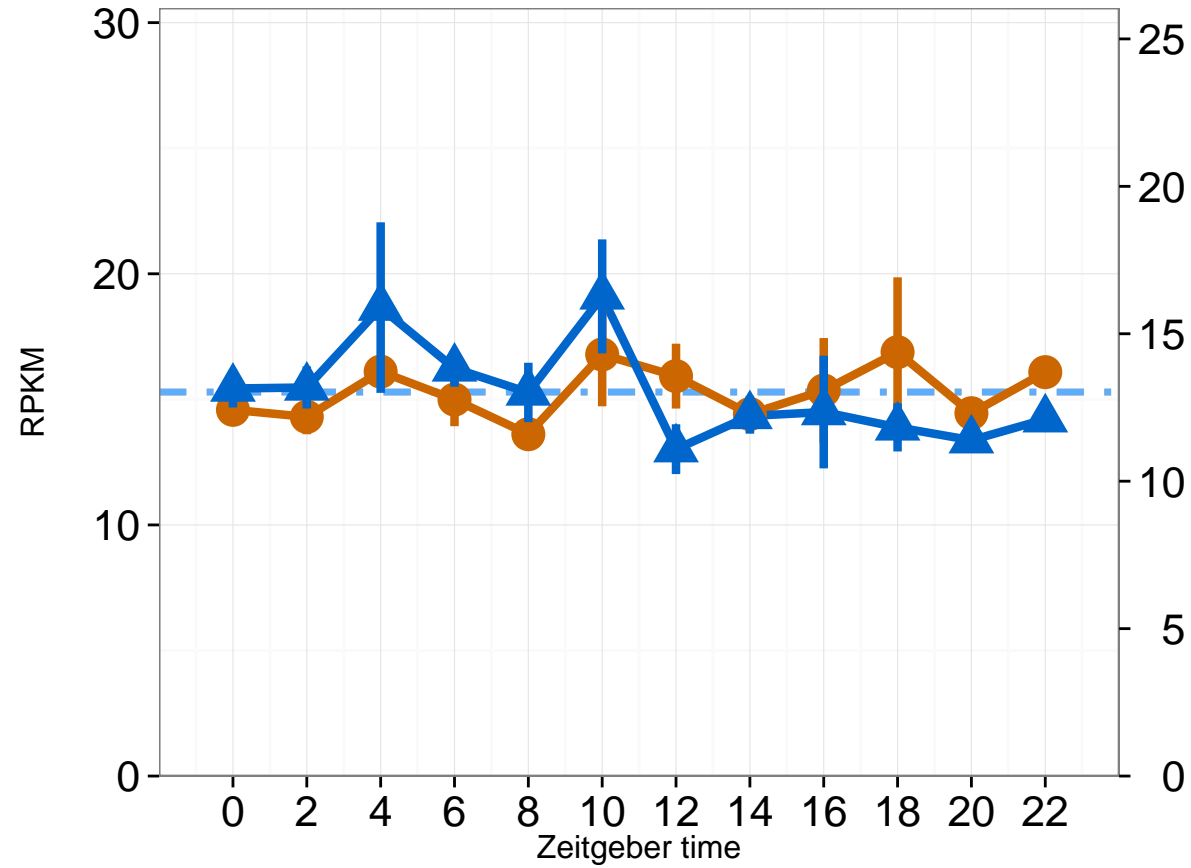

# D230025D16Rik

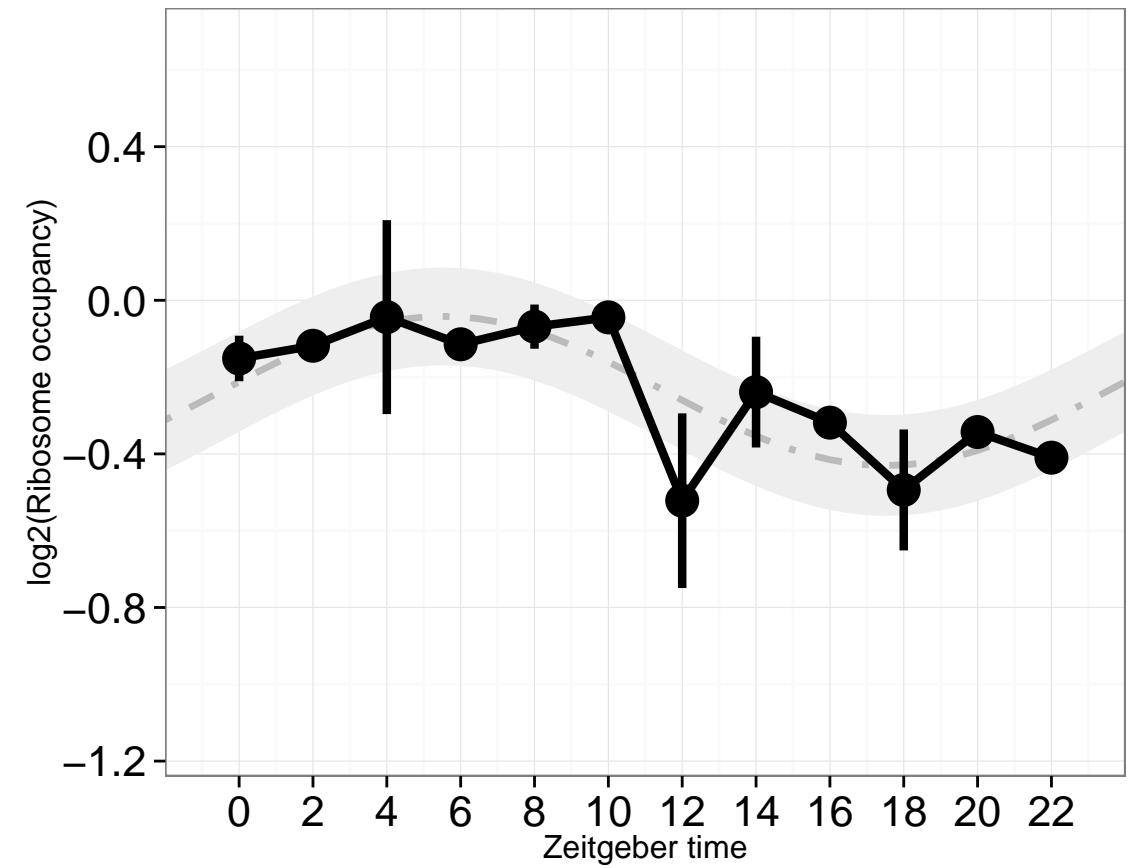

Supplement: Supplementary file 9876 [file 1]

# Rbm10

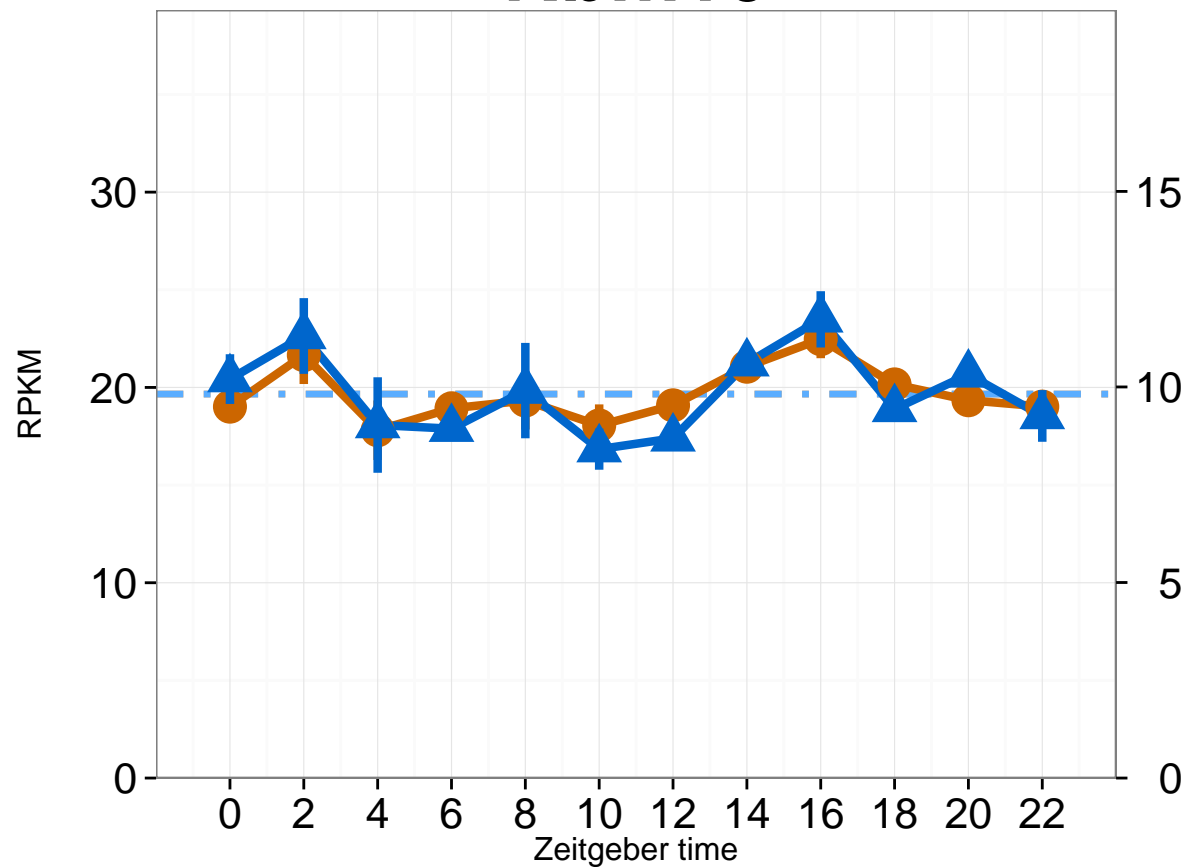

# Rbm10

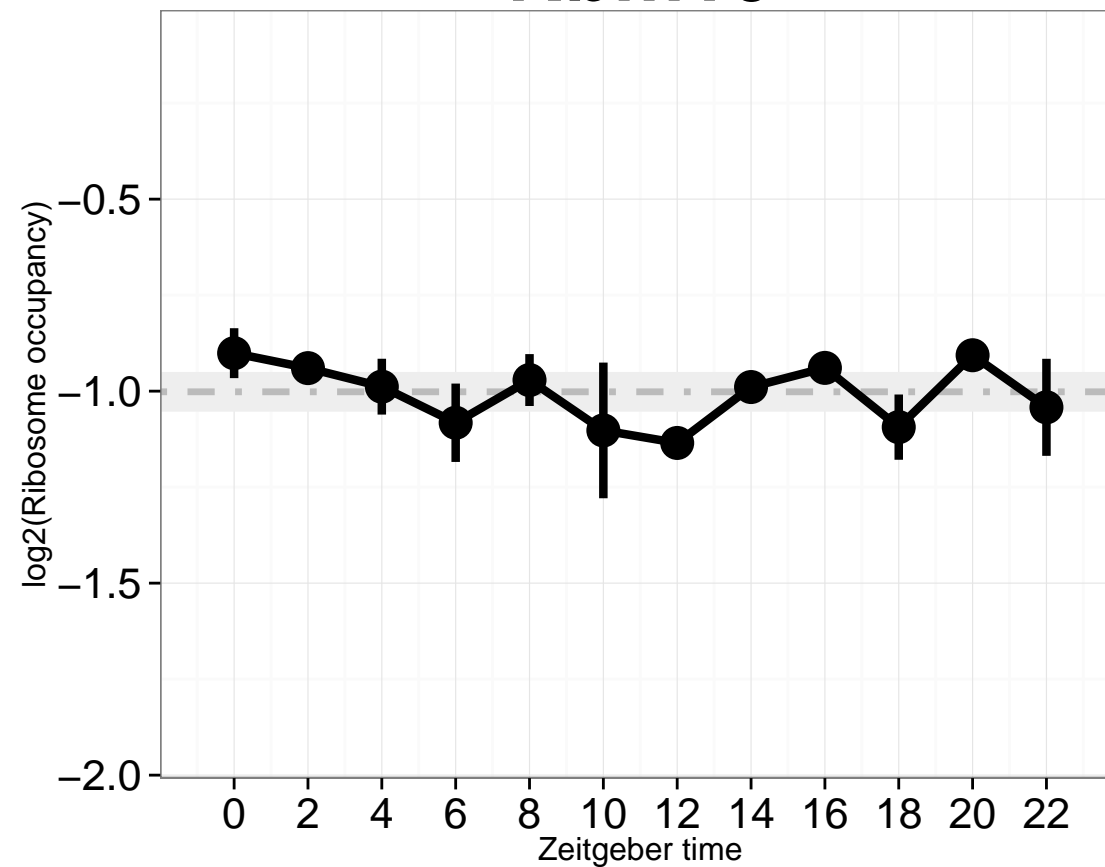

Supplement: Supplementary file 9877 [file 1]

## Esr1

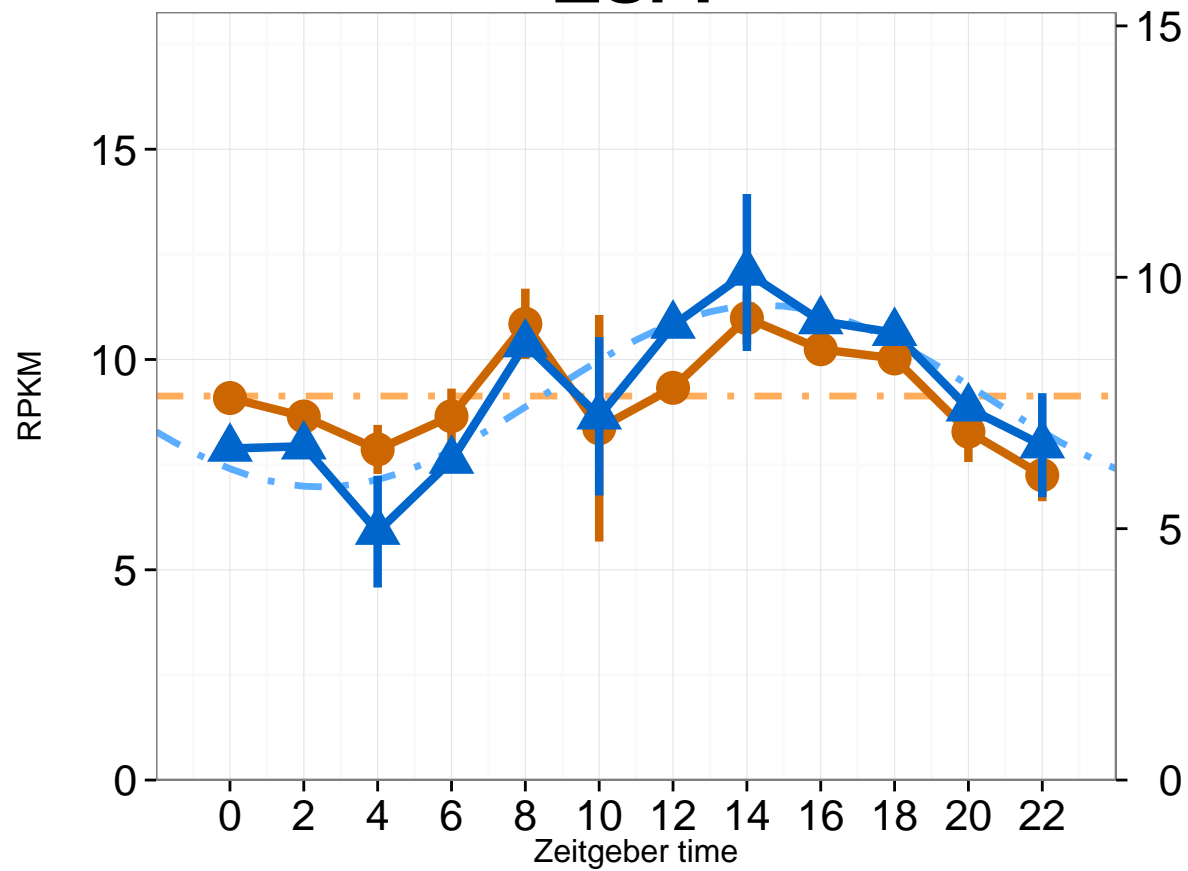

## Esr1

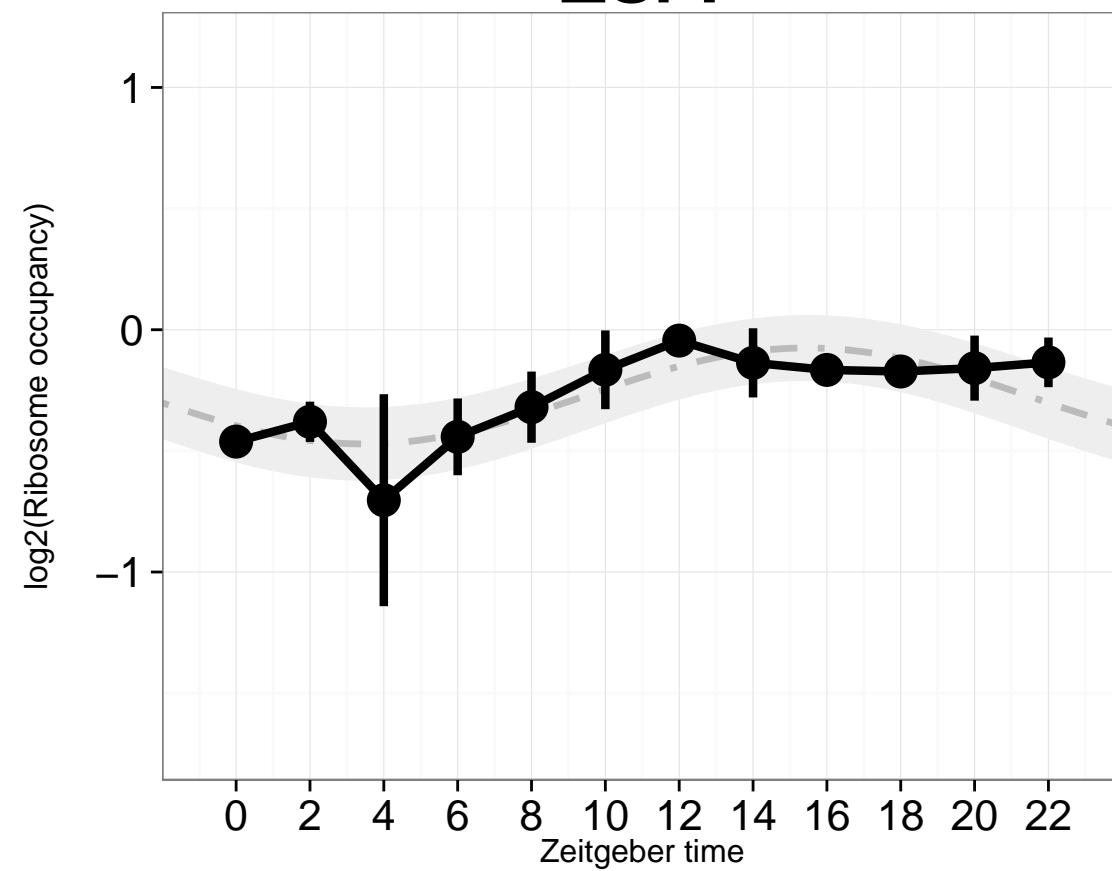

Supplement: Supplementary file 9878 [file 1]

## Camkmt

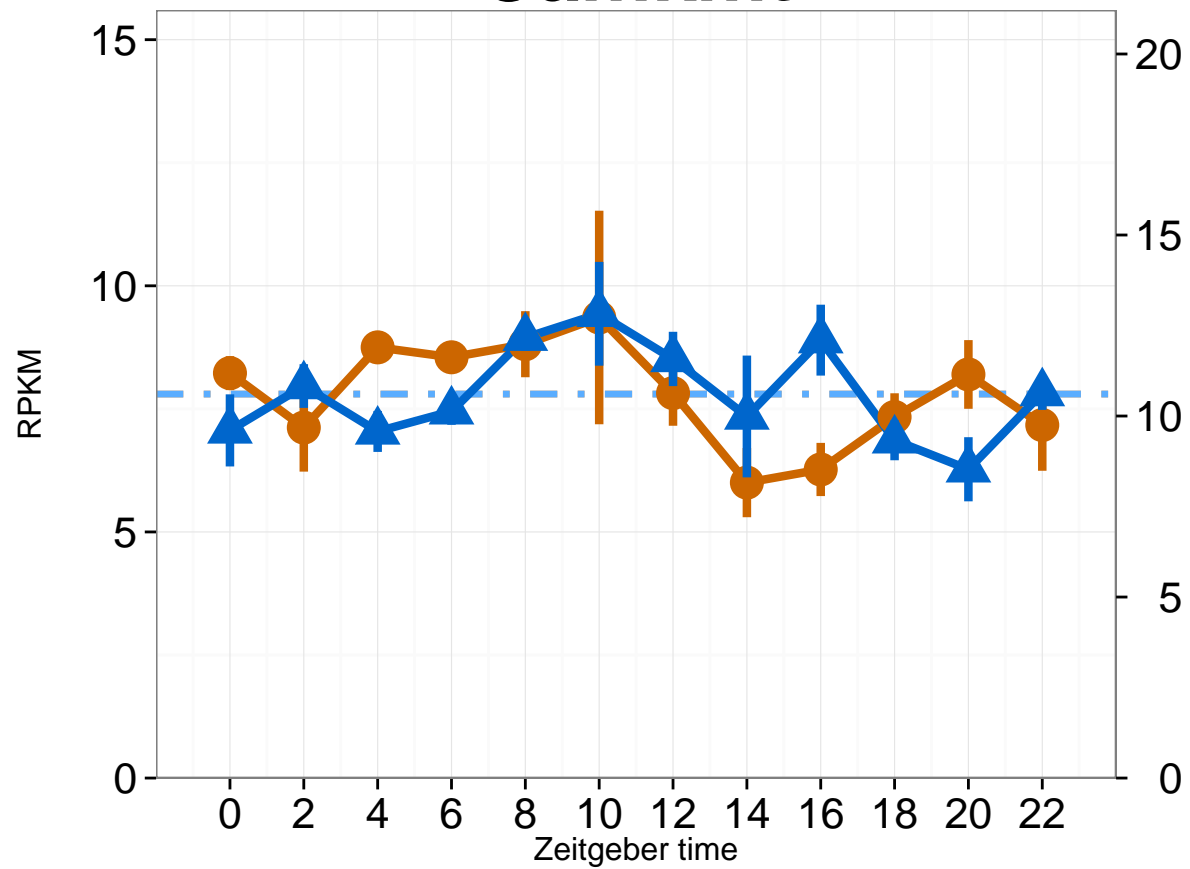

## Camkmt

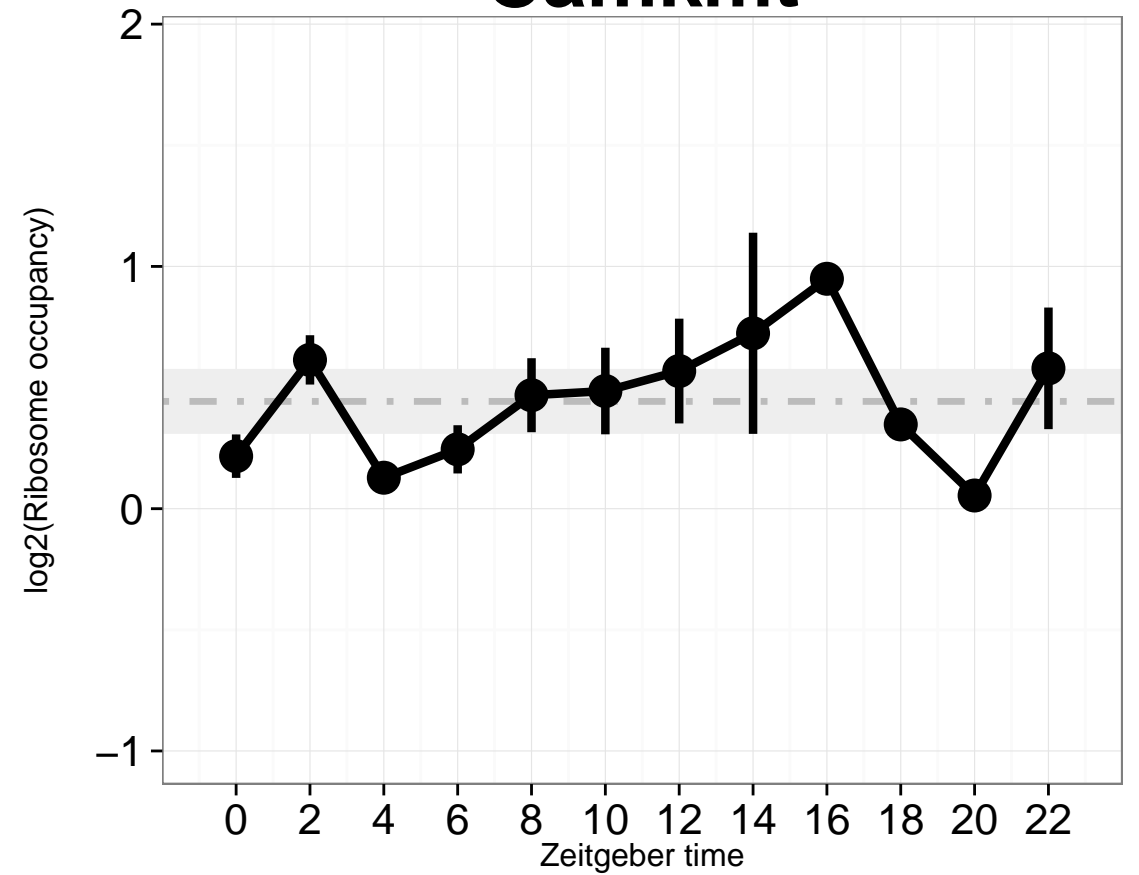

Supplement: Supplementary file 9879 [file 1]

# Smad6

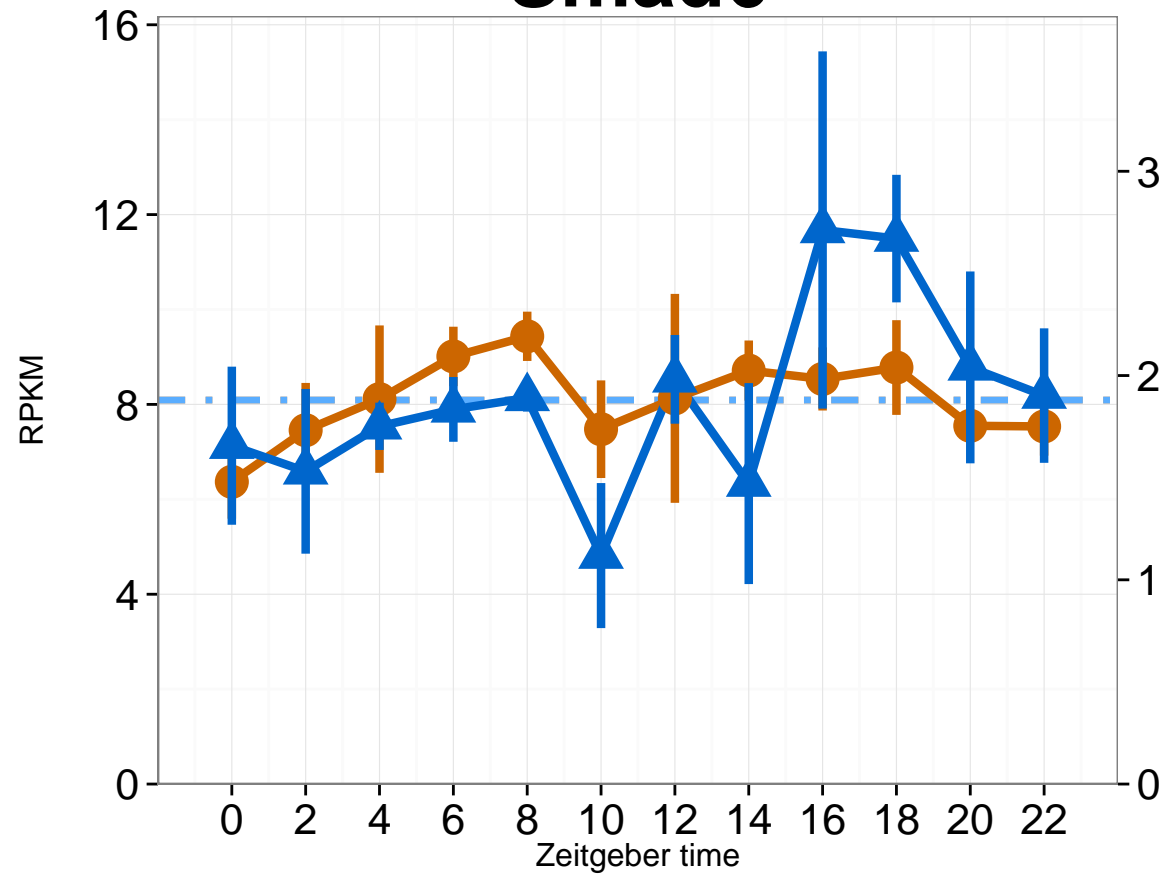

# Smad6

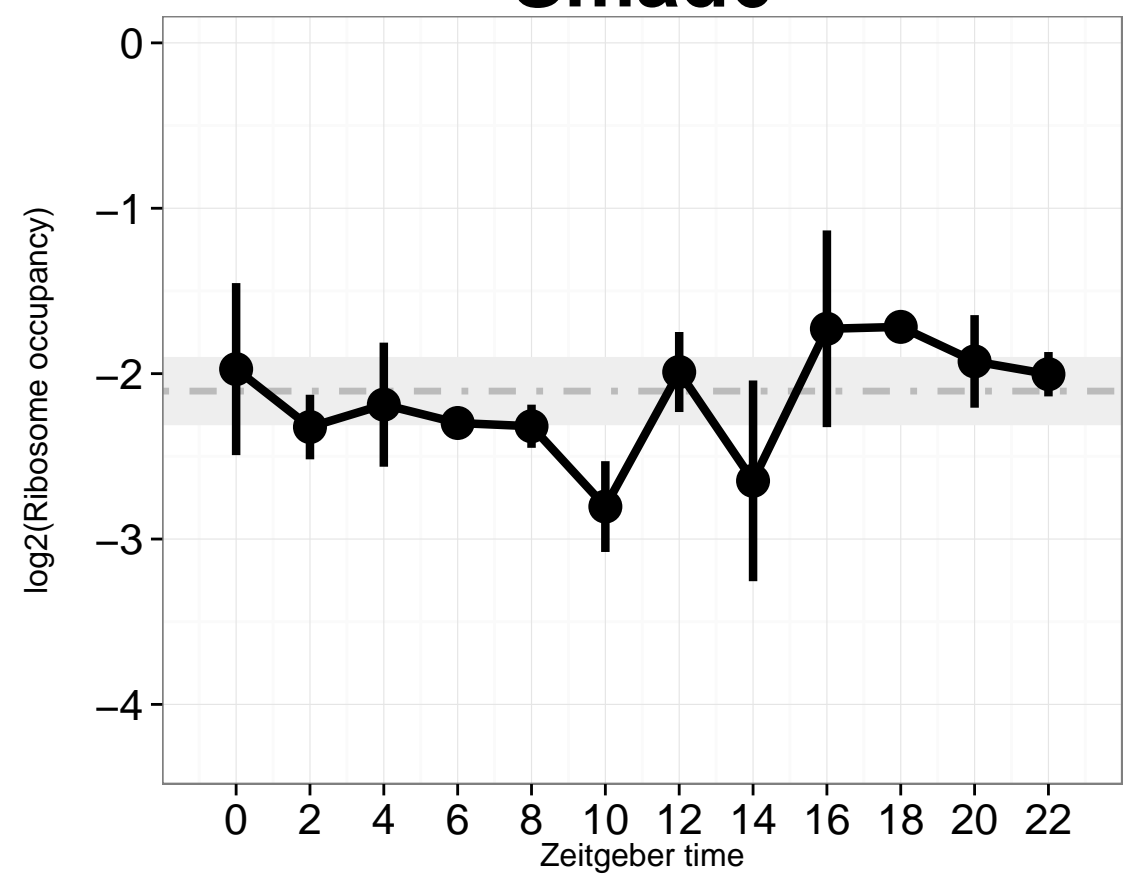

Supplement: Supplementary file 9880 [file 1]

## Ccm2

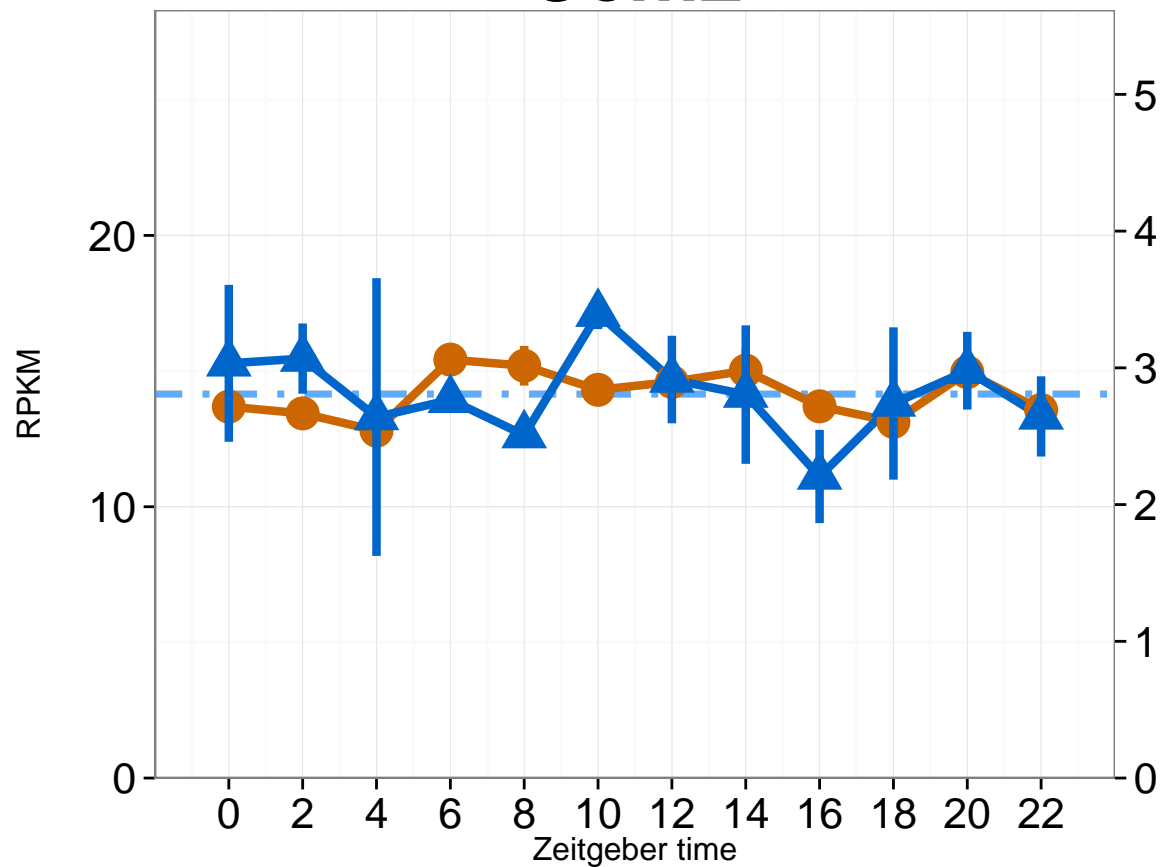

## Ccm2

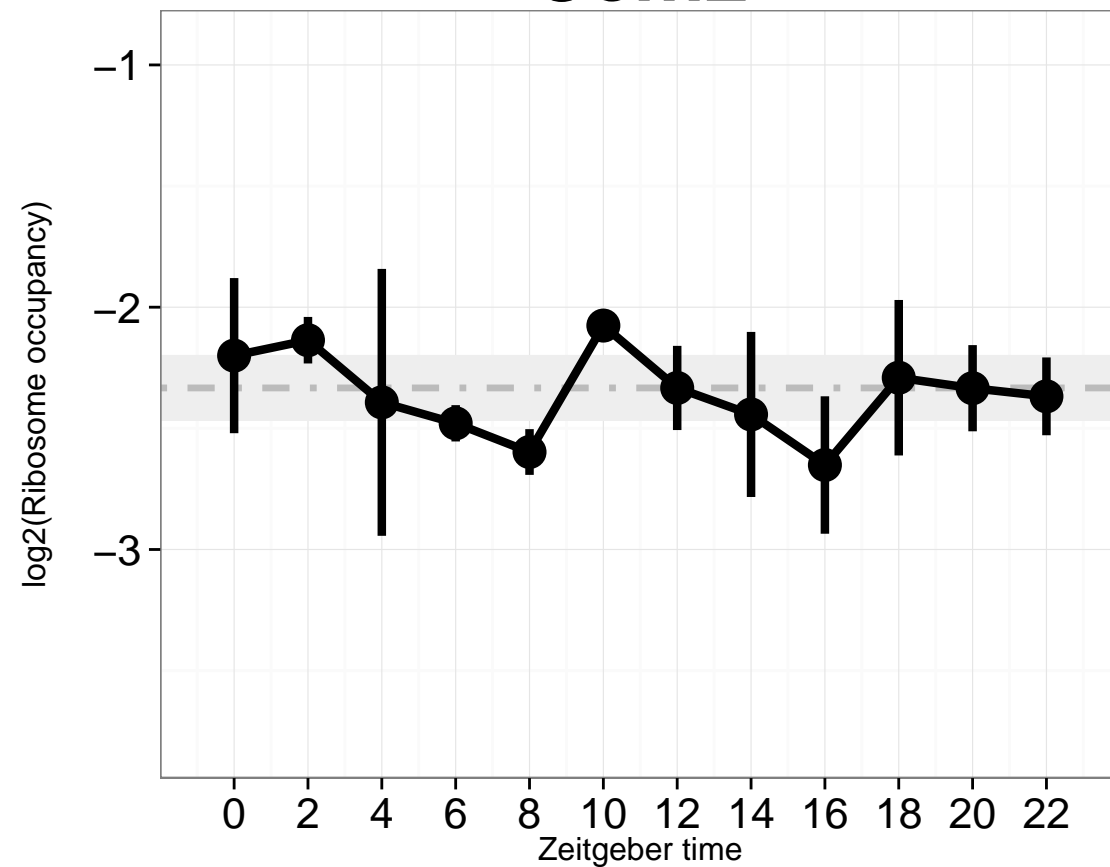

Supplement: Supplementary file 9881 [file 1]

## Emp3

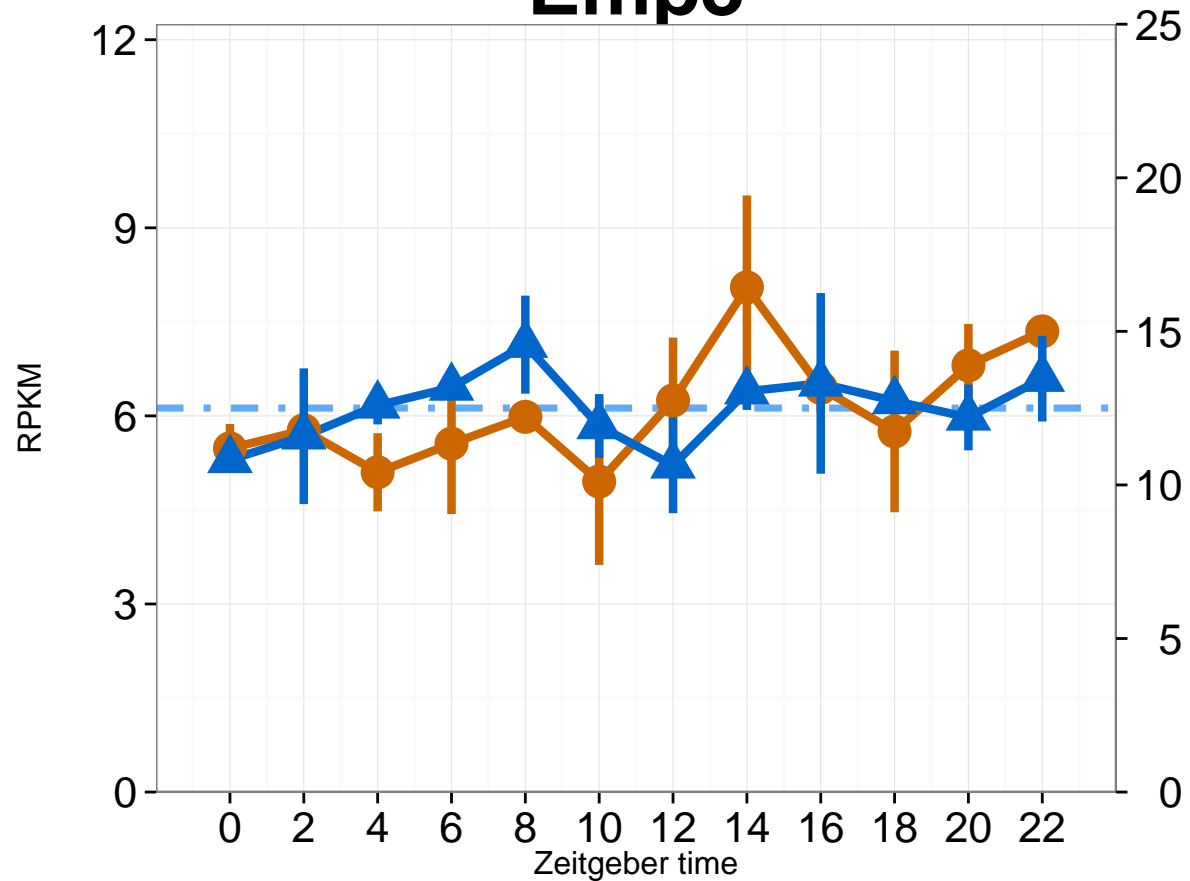

## Emp3

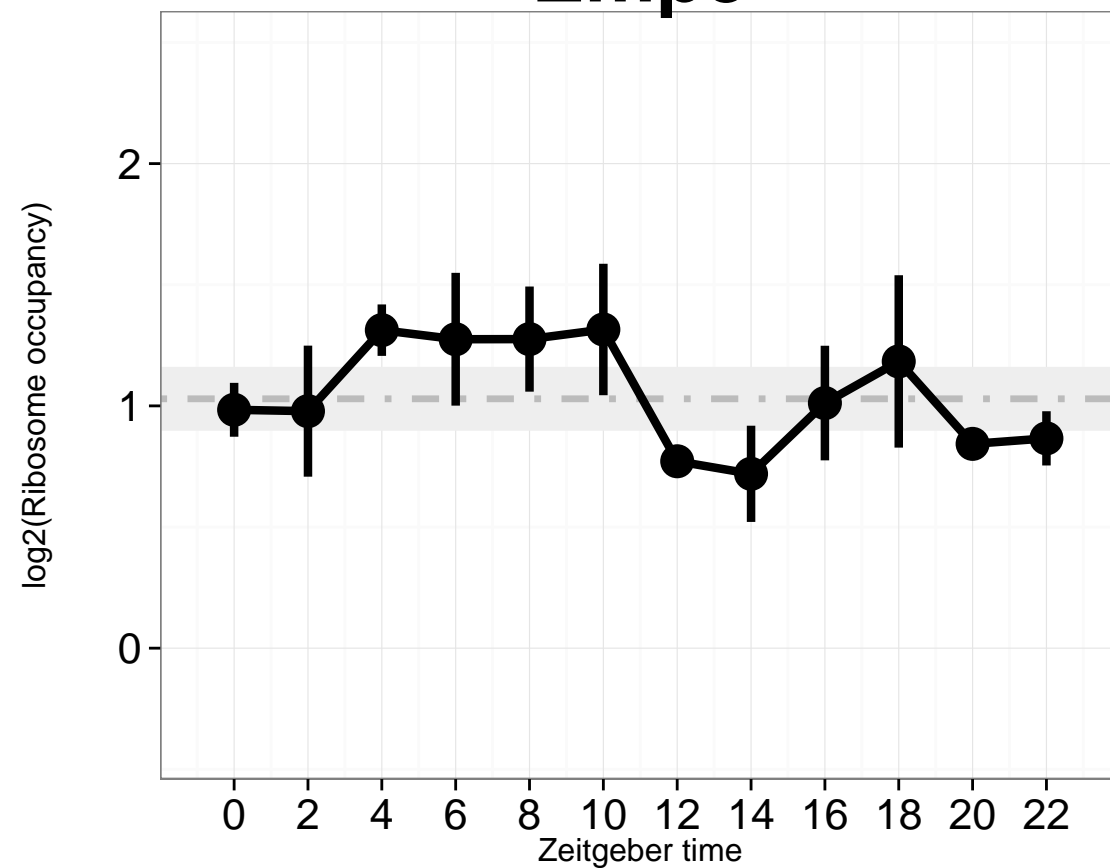

Supplement: Supplementary file 9882 [file 1]

## Csf1r

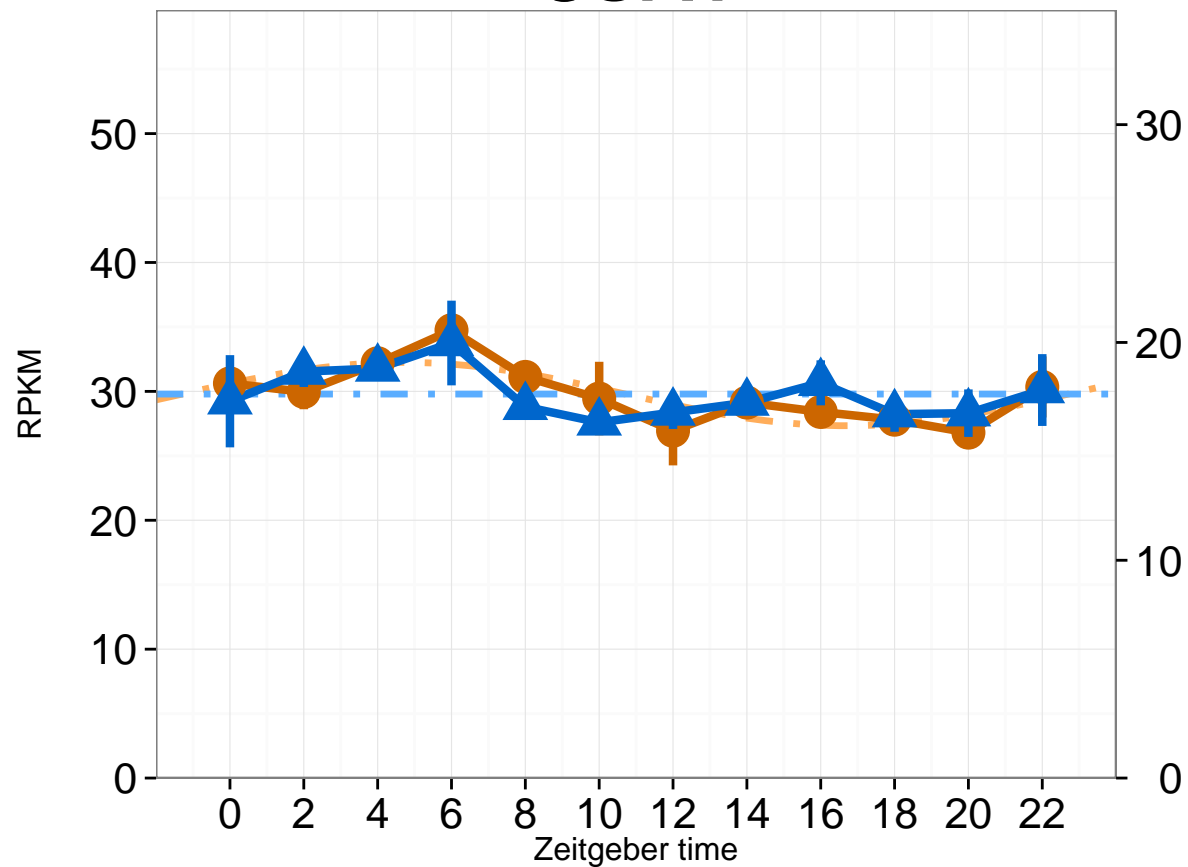

## Csf1r

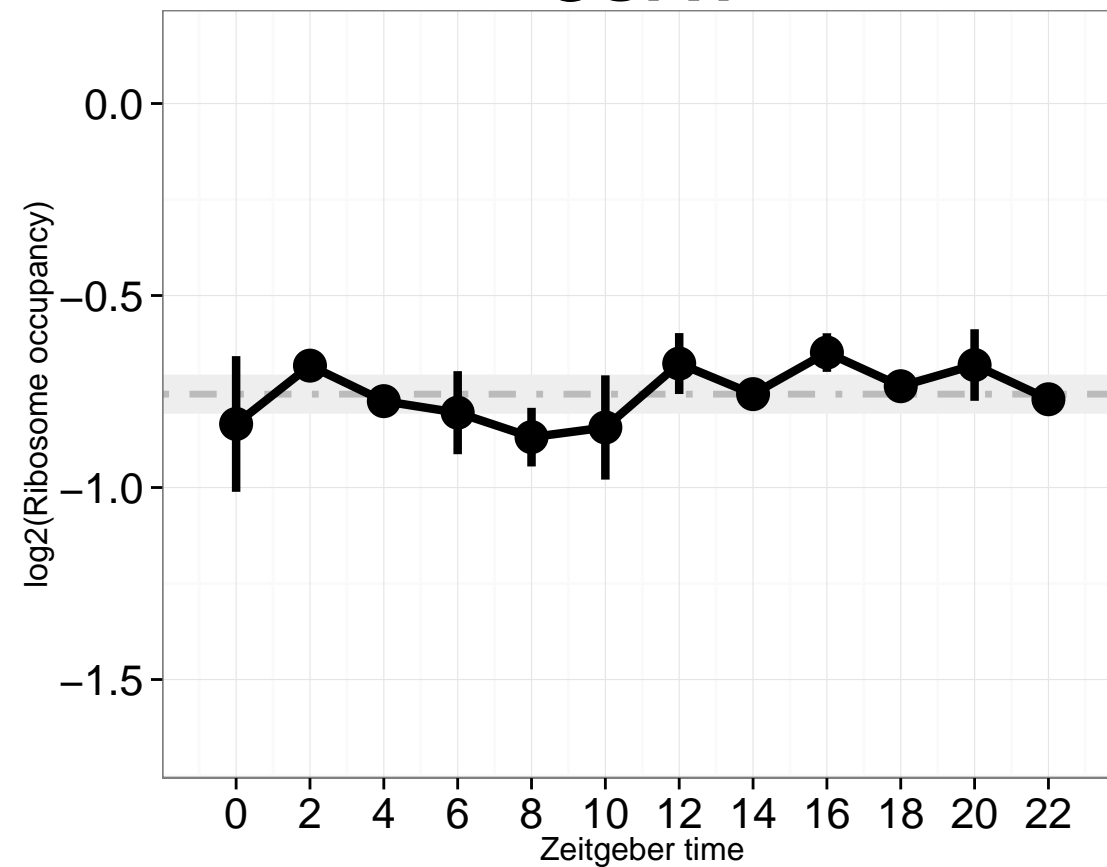

Supplement: Supplementary file 9883 [file 1]

**Rbm4 TR**

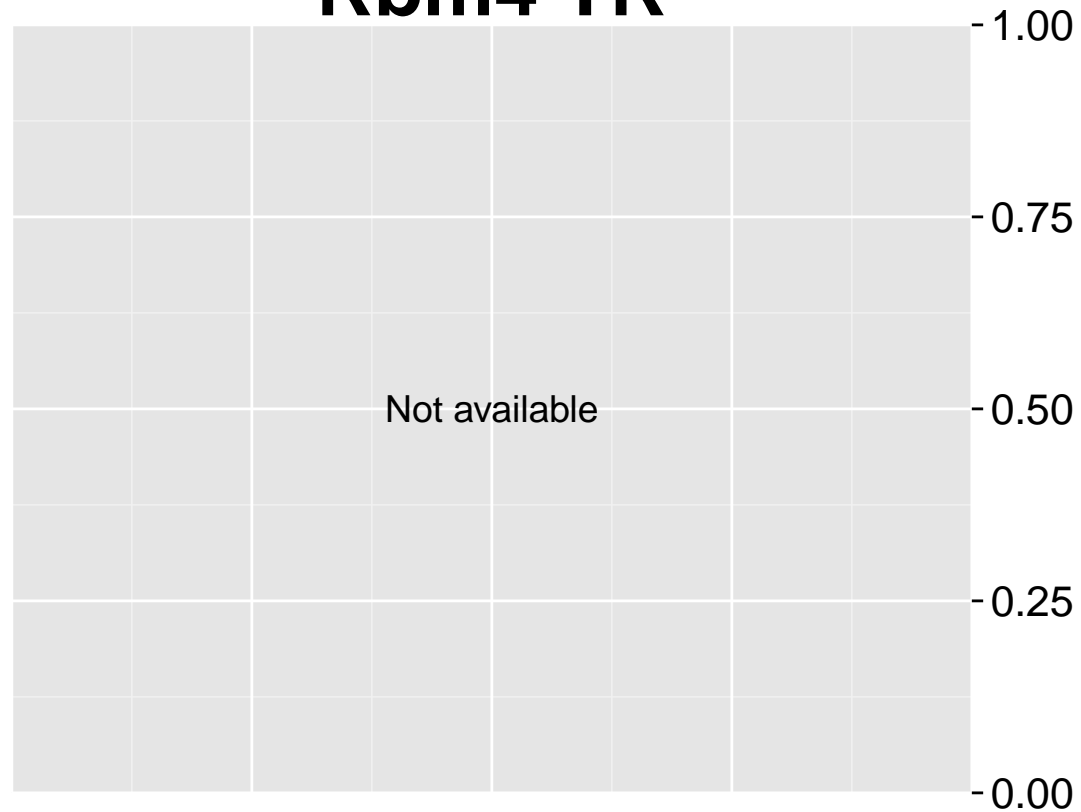

**Rbm4 log2(Ribosome occupancy**

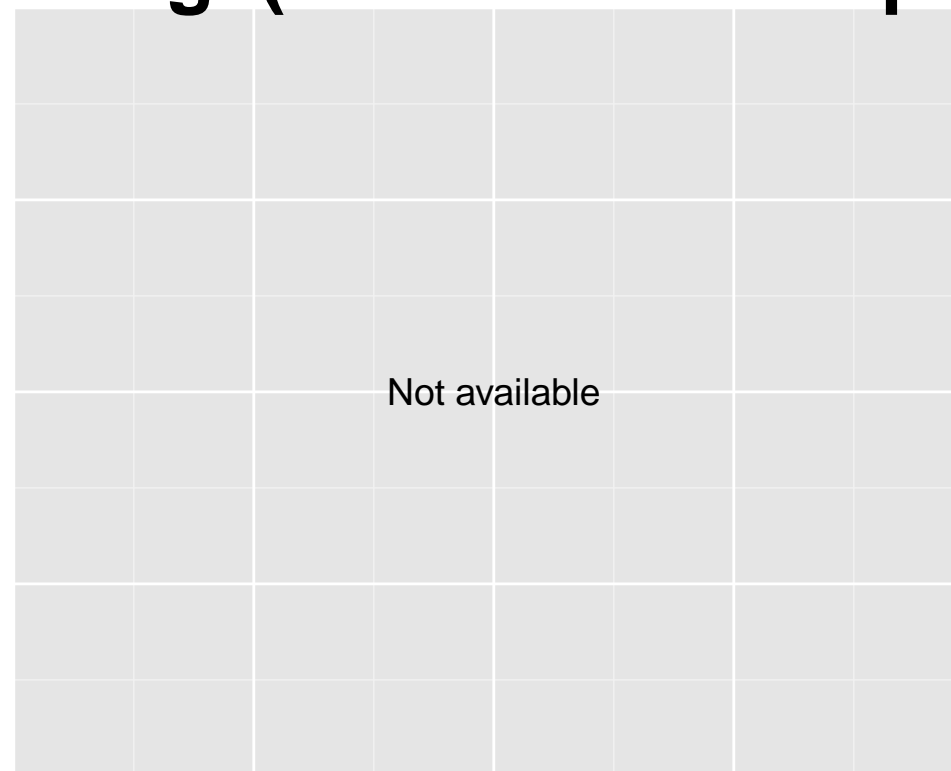

Supplement: Supplementary file 9884 [file 1]

# Dmxl1

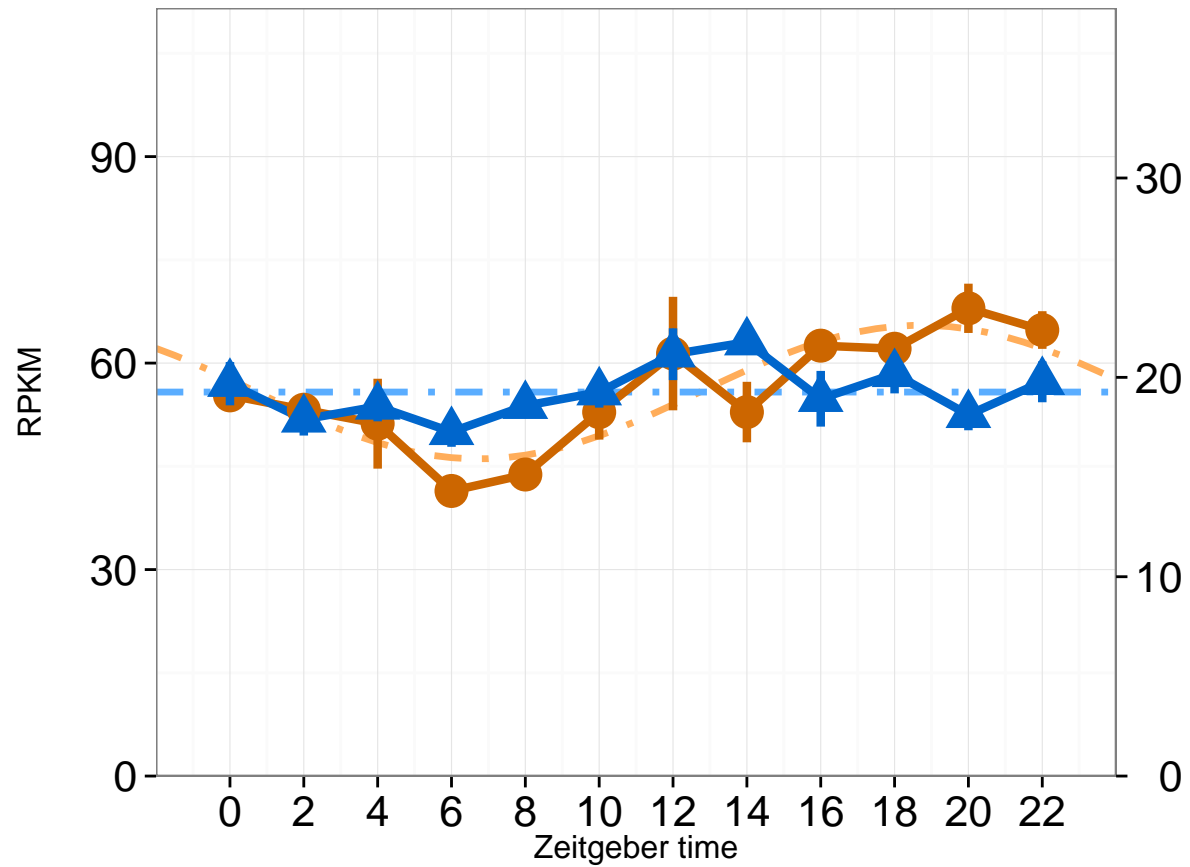

# Dmxl1

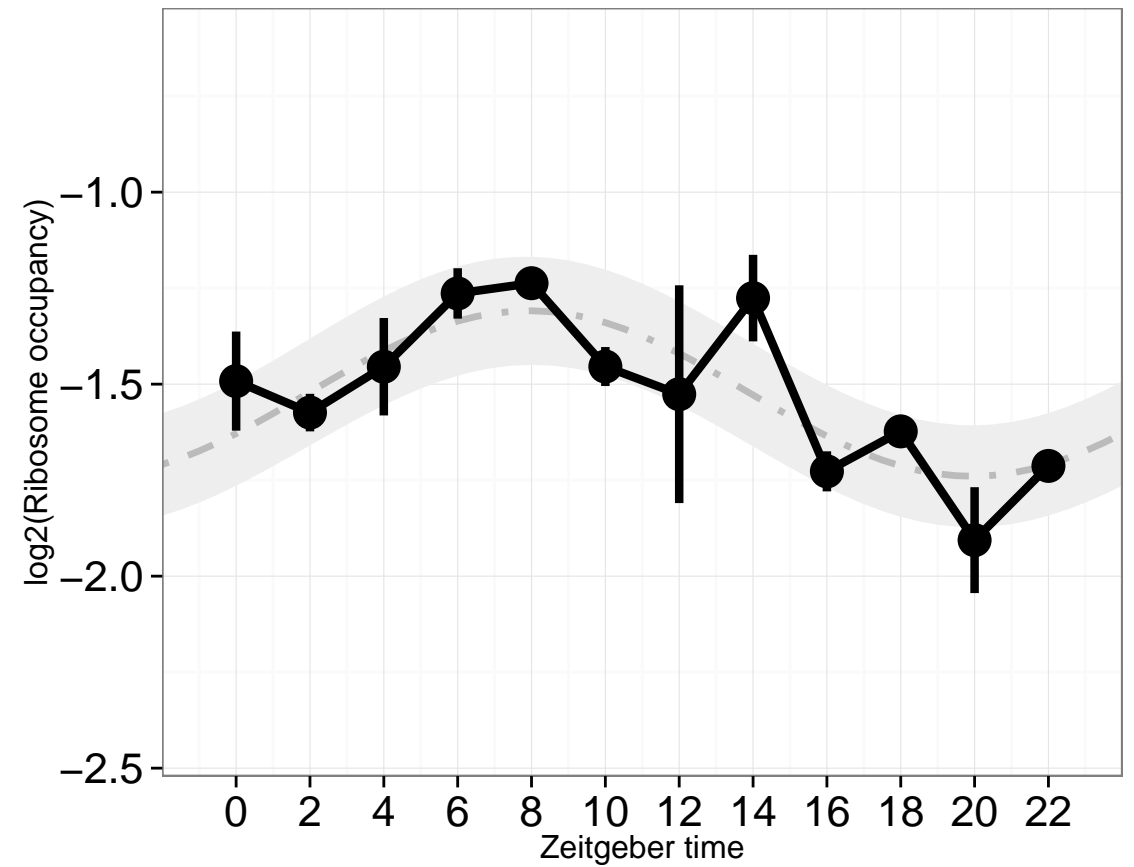

Supplement: Supplementary file 9885 [file 1]

## Ccdc23

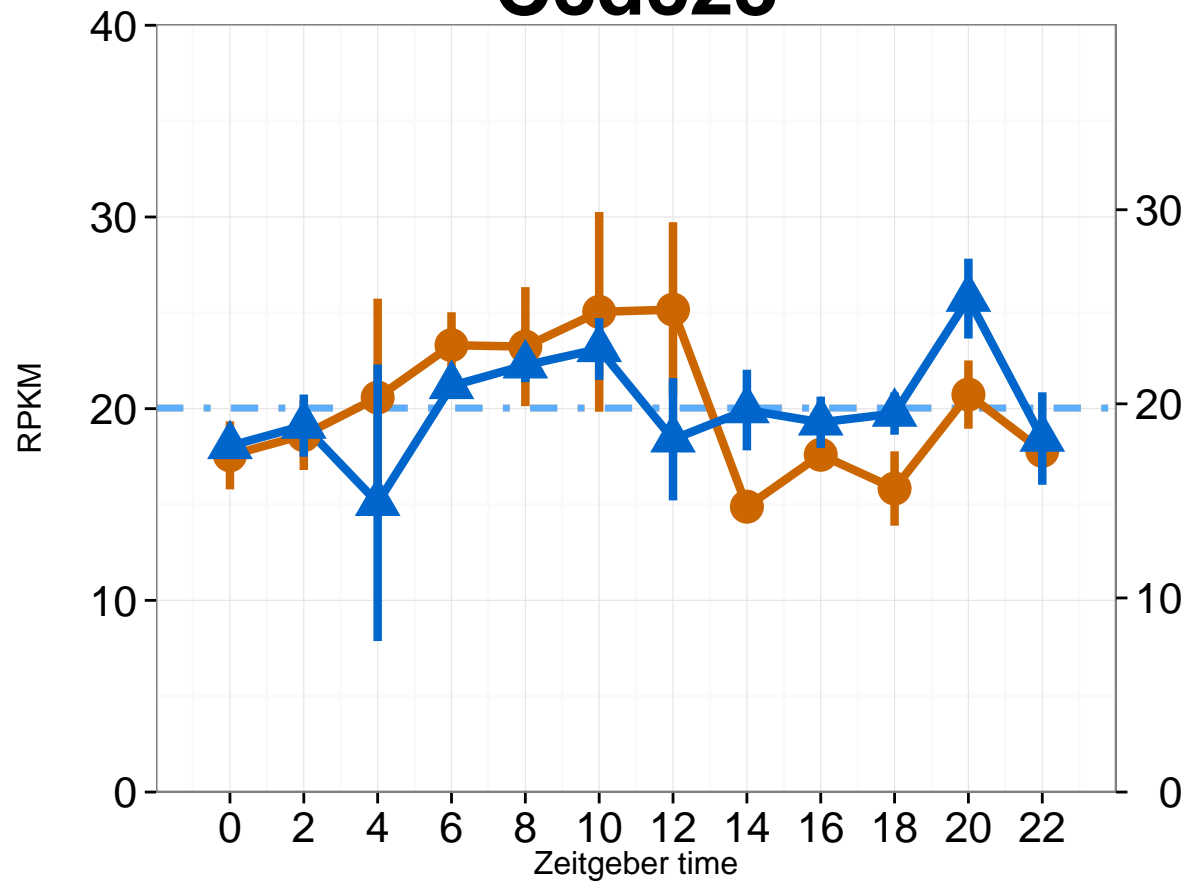

## Ccdc23

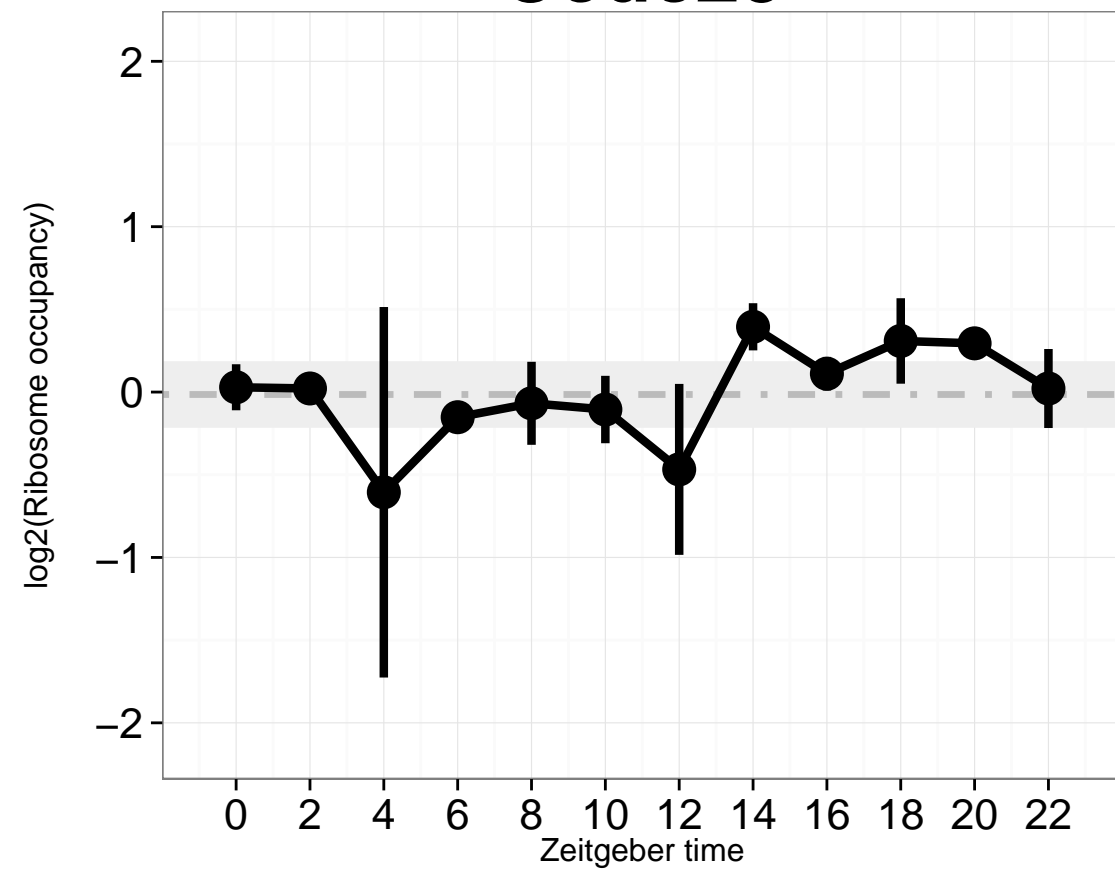

Supplement: Supplementary file 9886 [file 1]

# Rbm17

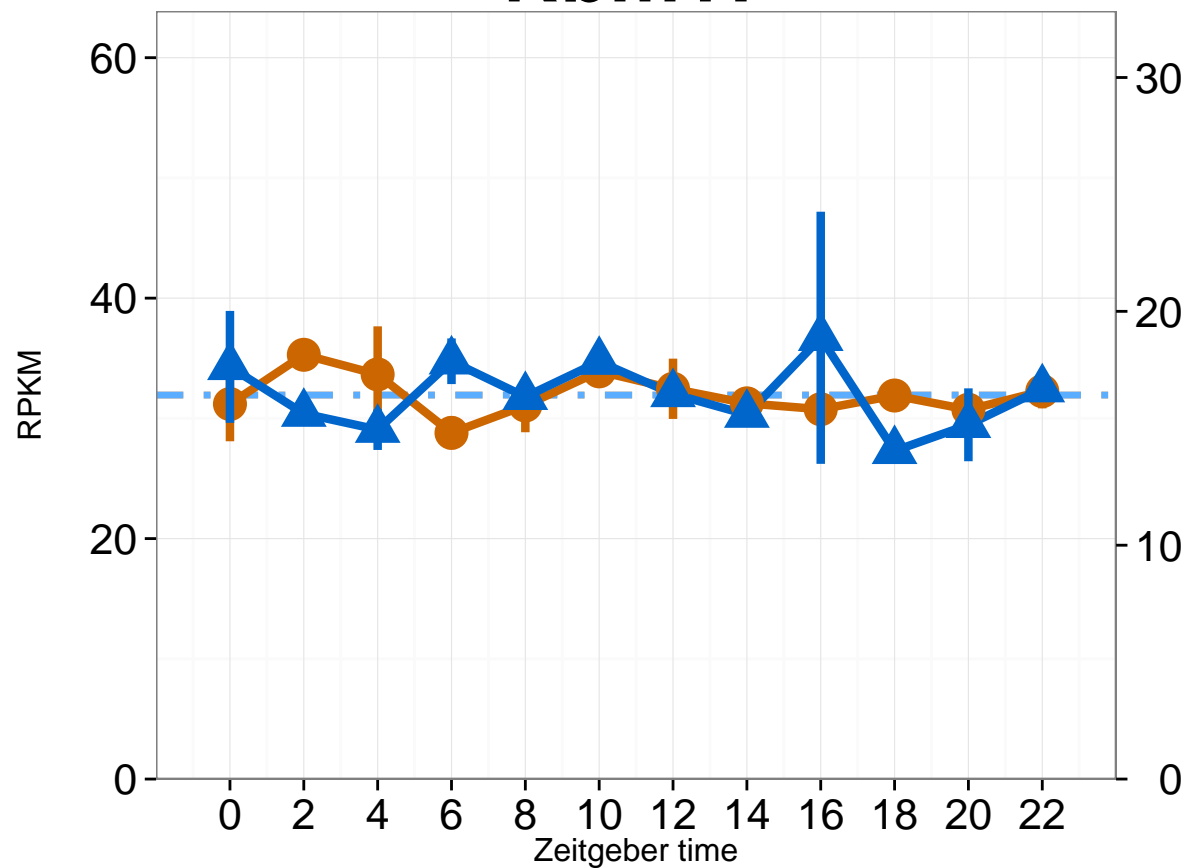

# Rbm17

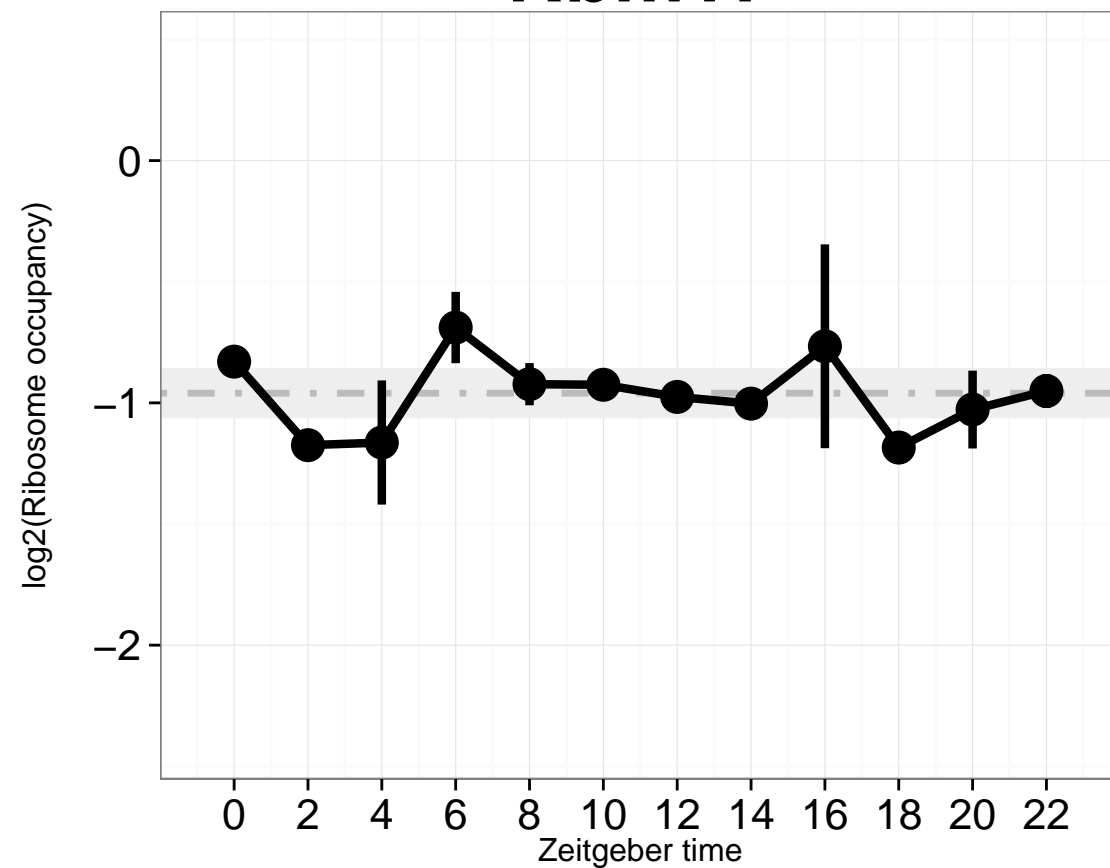

Supplement: Supplementary file 9887 [file 1]

## Fzd3

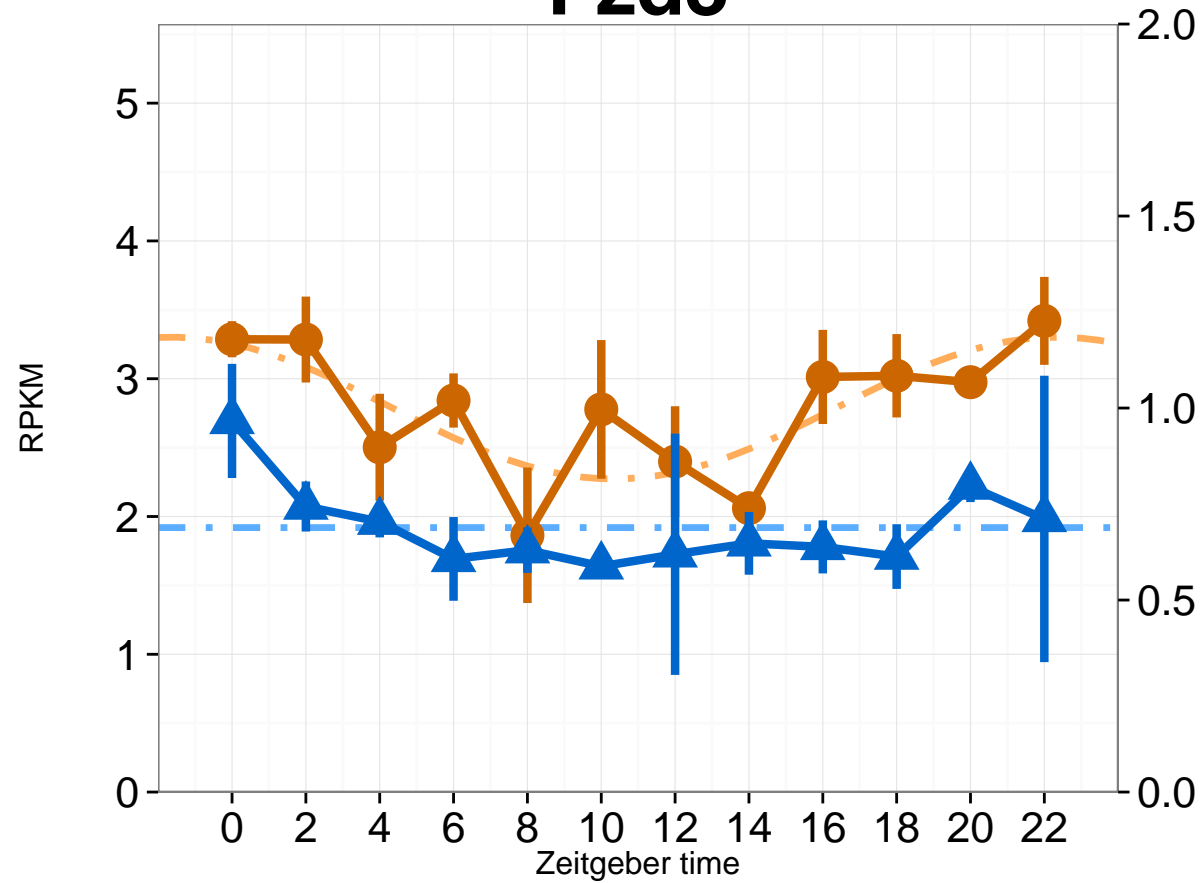

## Fzd3

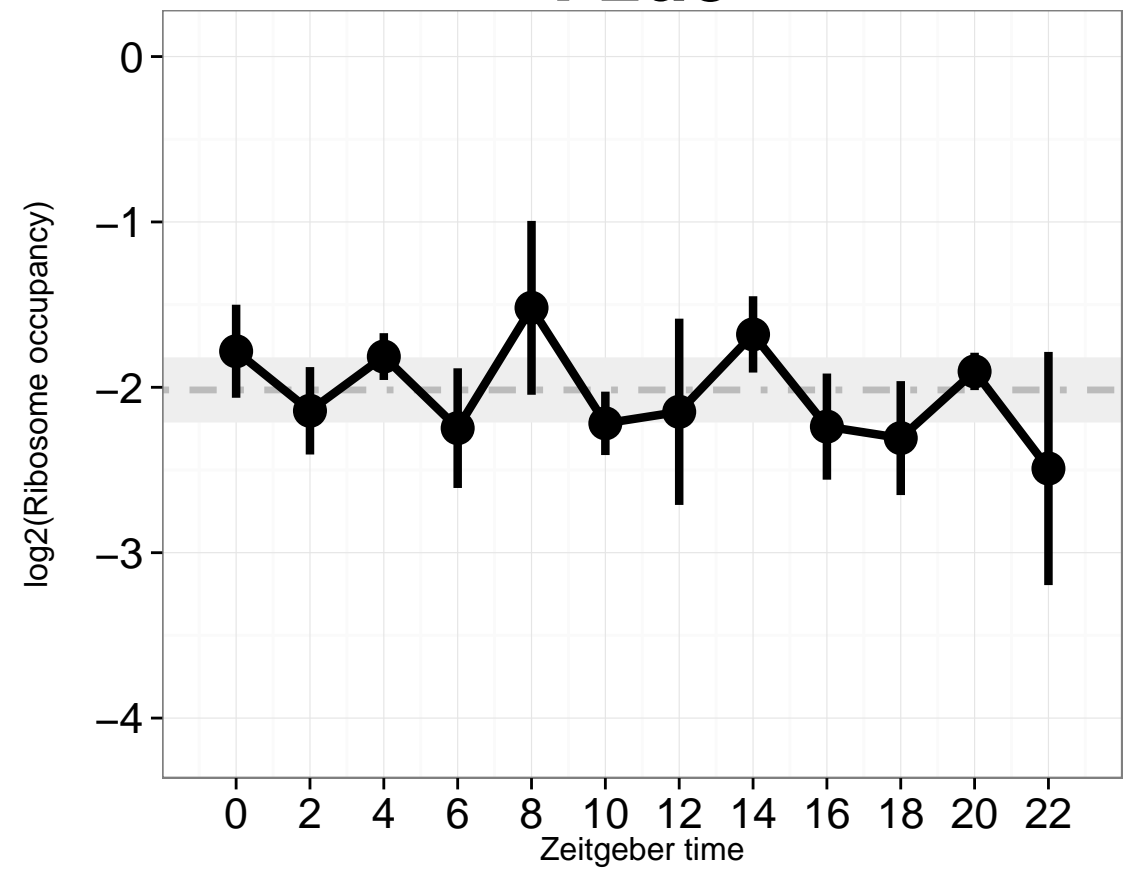

Supplement: Supplementary file 9888 [file 1]

# Micu1

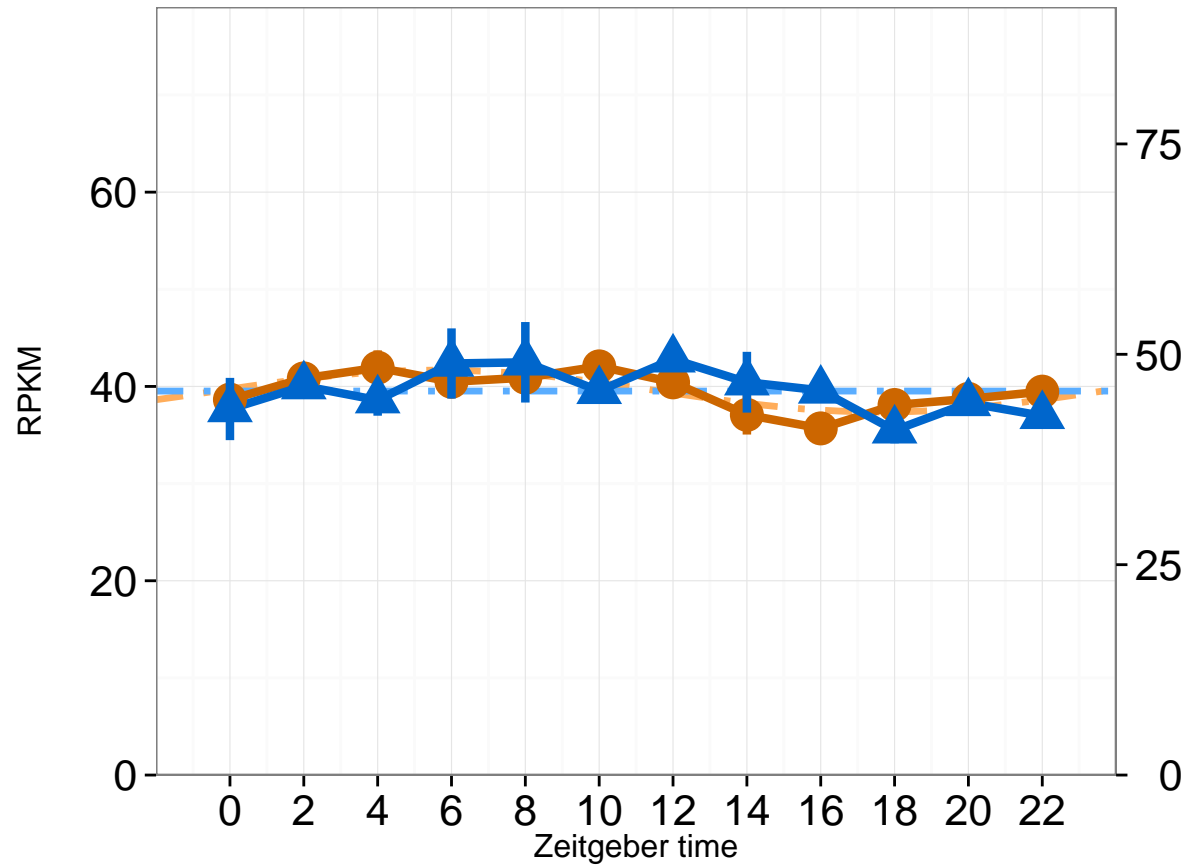

# Micu1

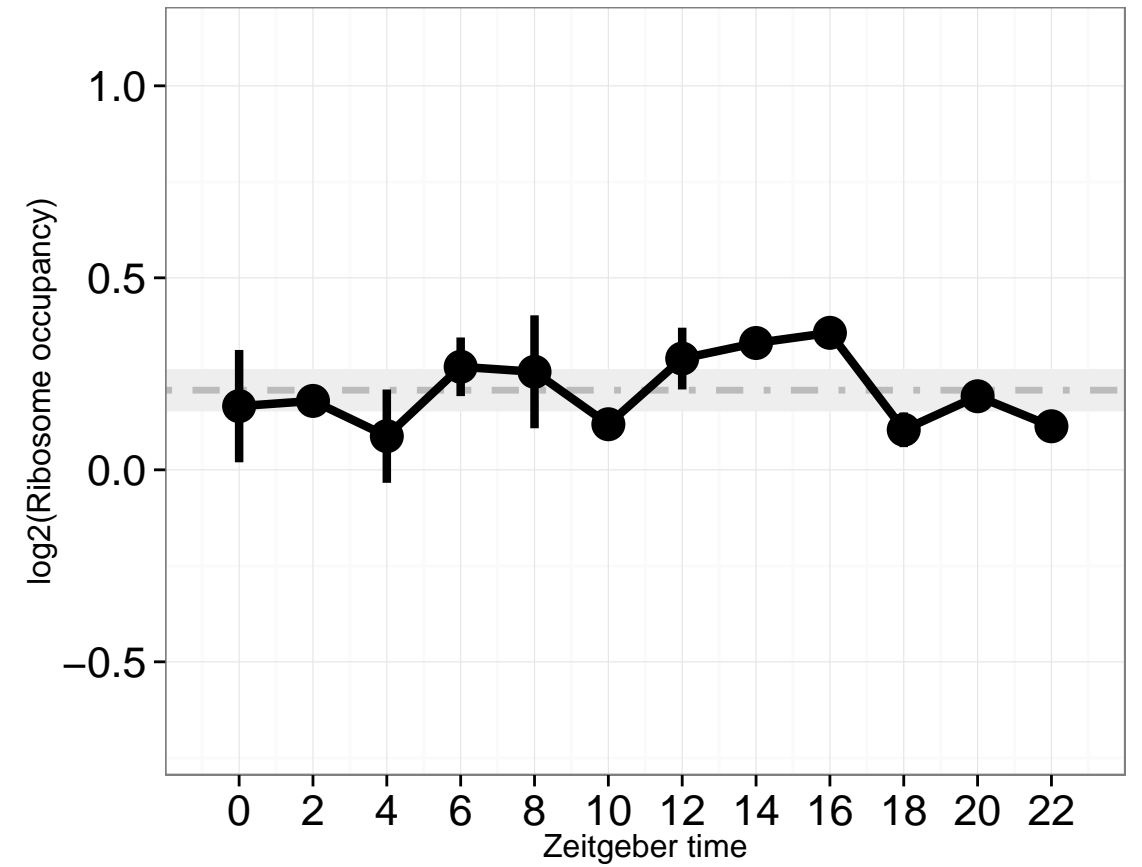

Supplement: Supplementary file 9889 [file 1]

## Mxra8

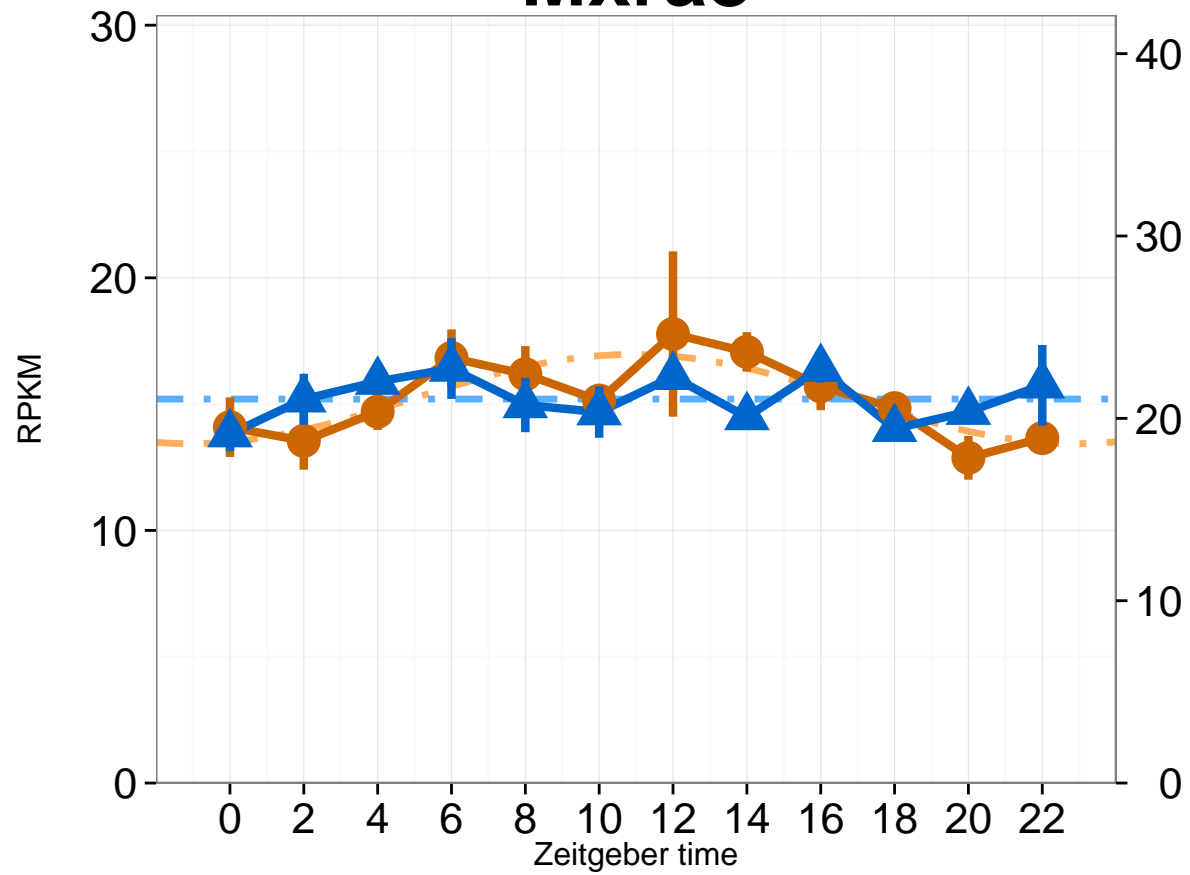

## Mxra8

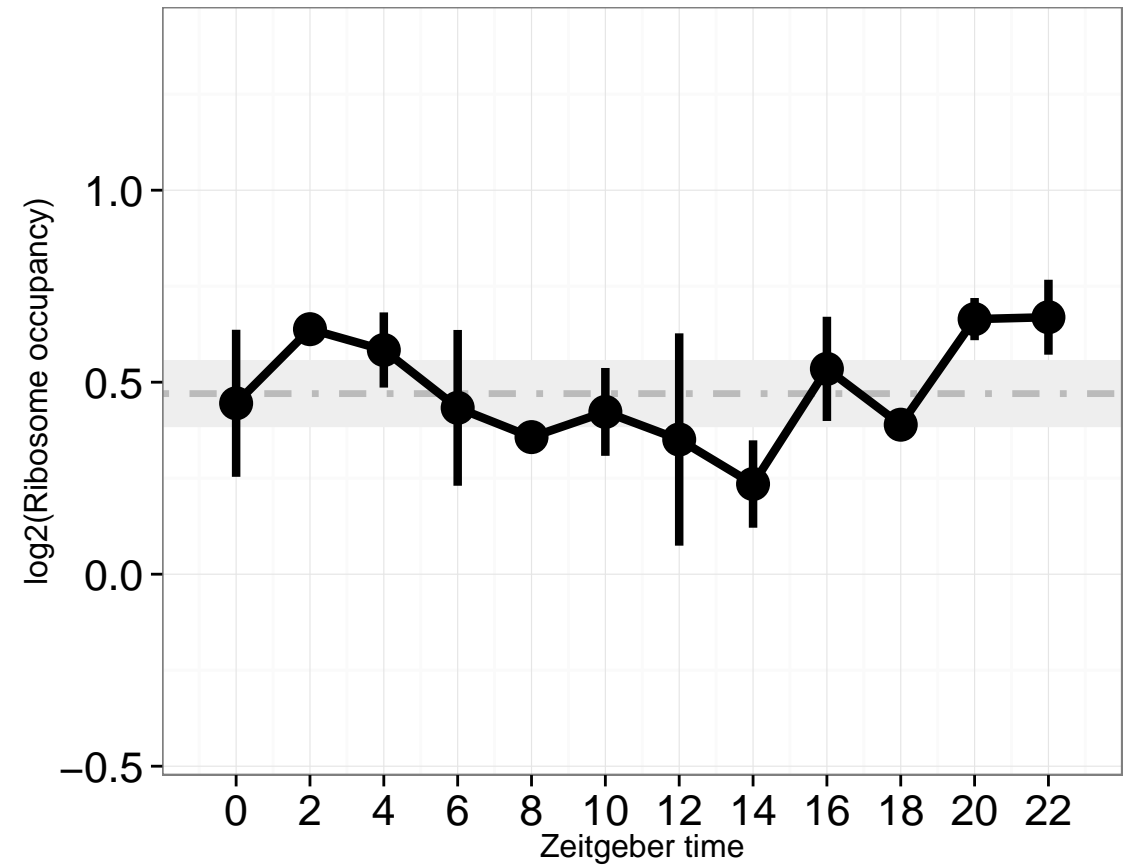

Supplement: Supplementary file 9890 [file 1]

## Spsb3

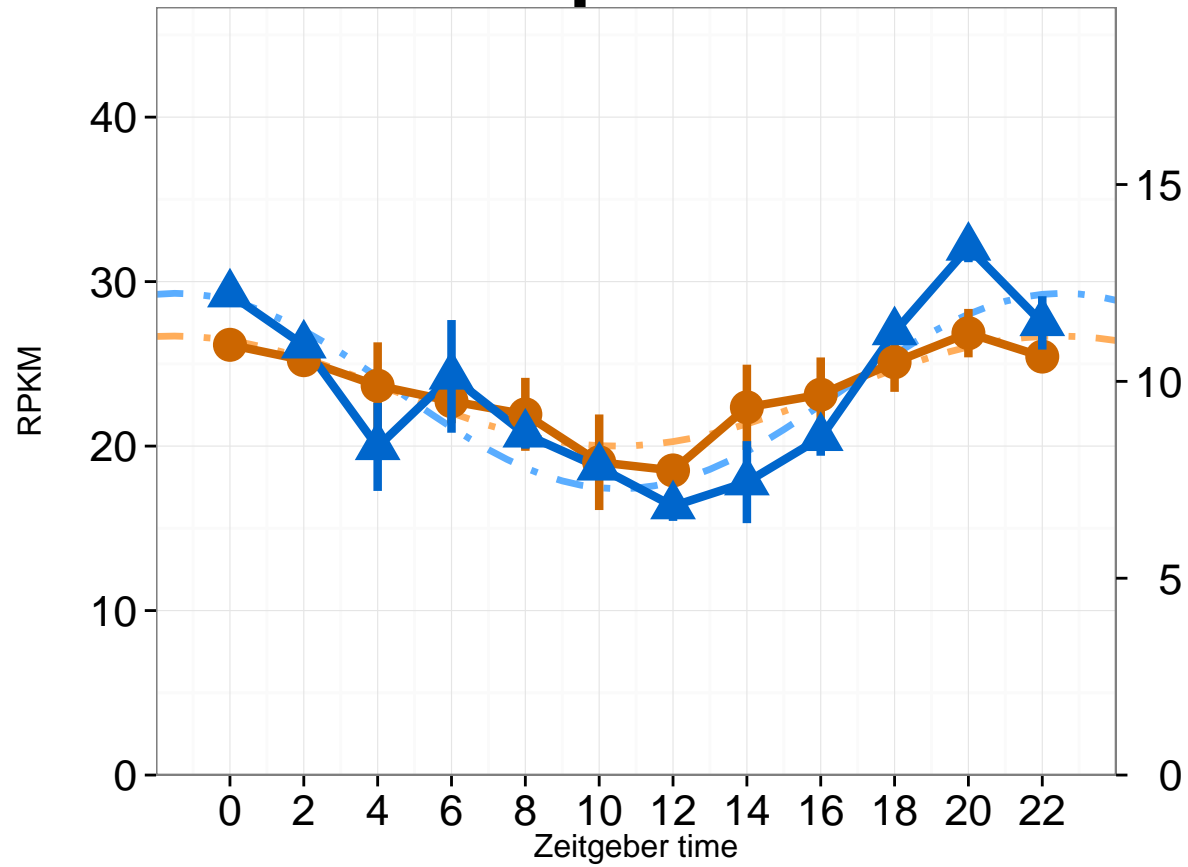

## Spsb3

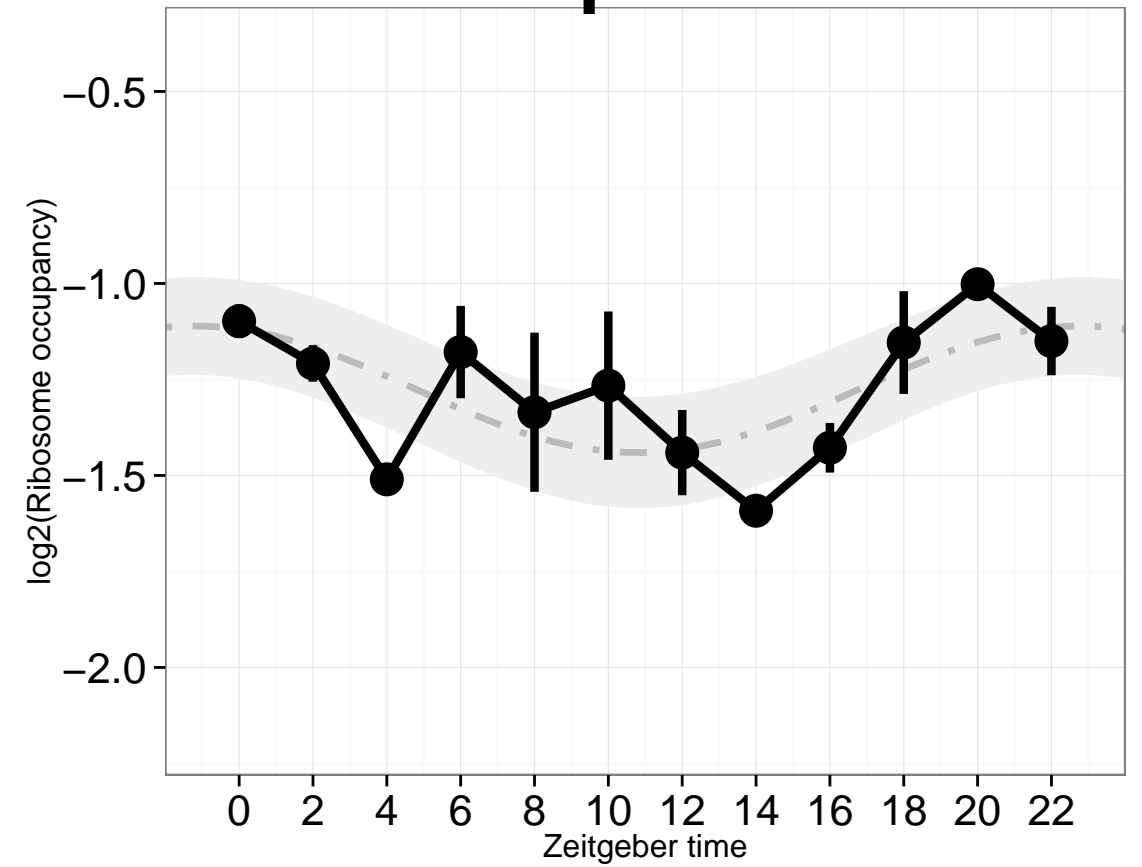

Supplement: Supplementary file 9891 [file 1]

# Mta1

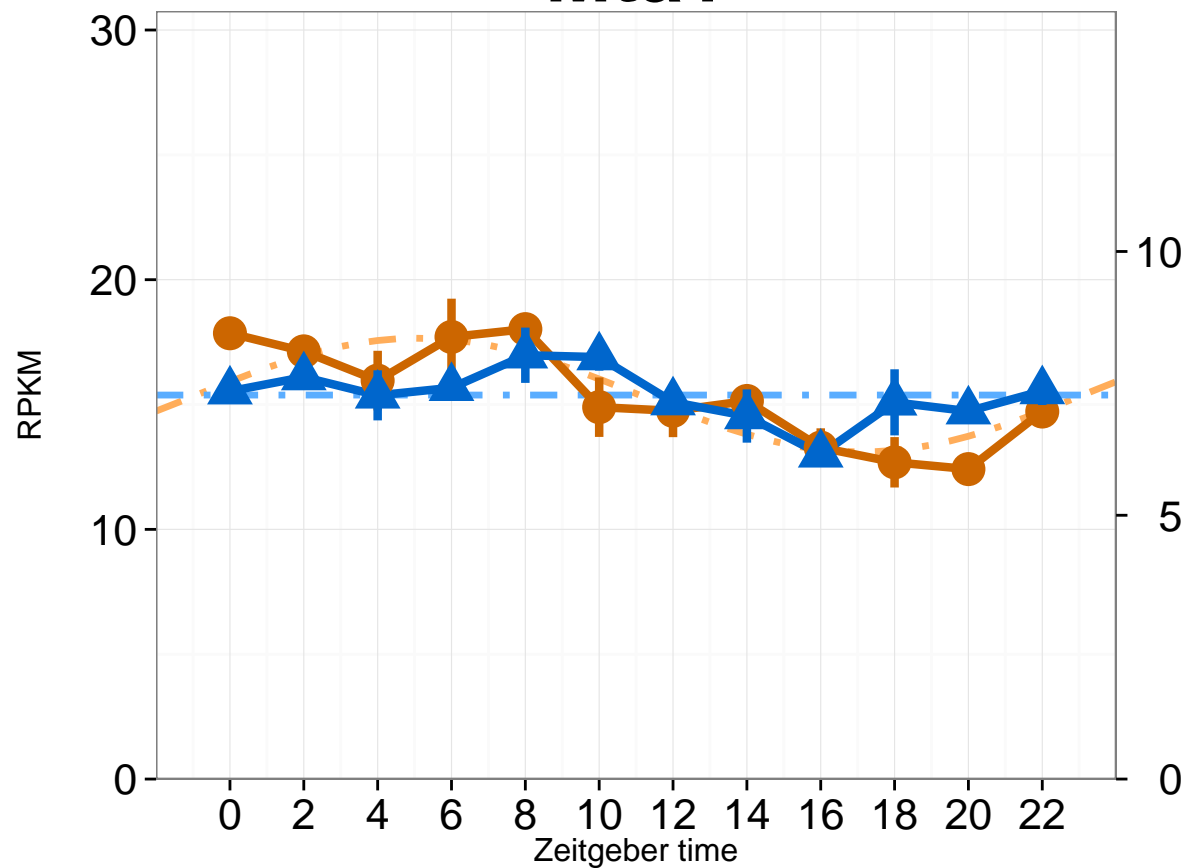

# Mta1

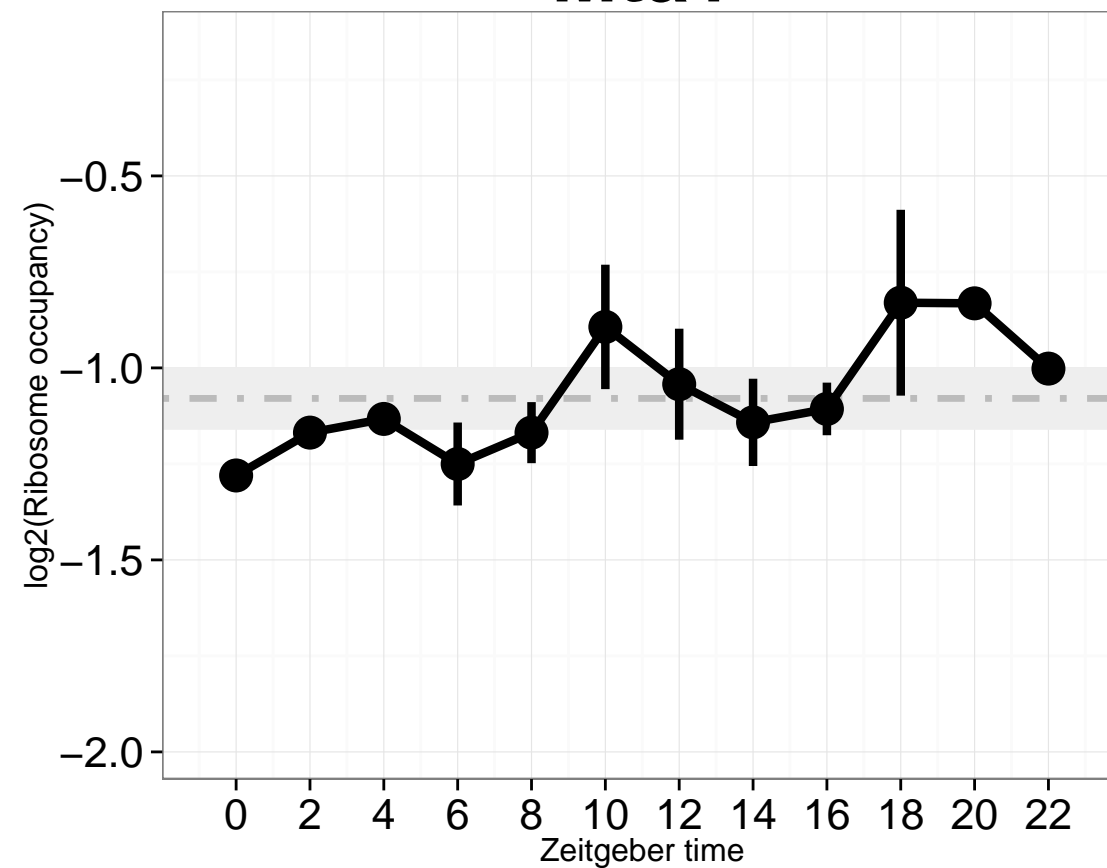

Supplement: Supplementary file 9892 [file 1]

## Cfl2

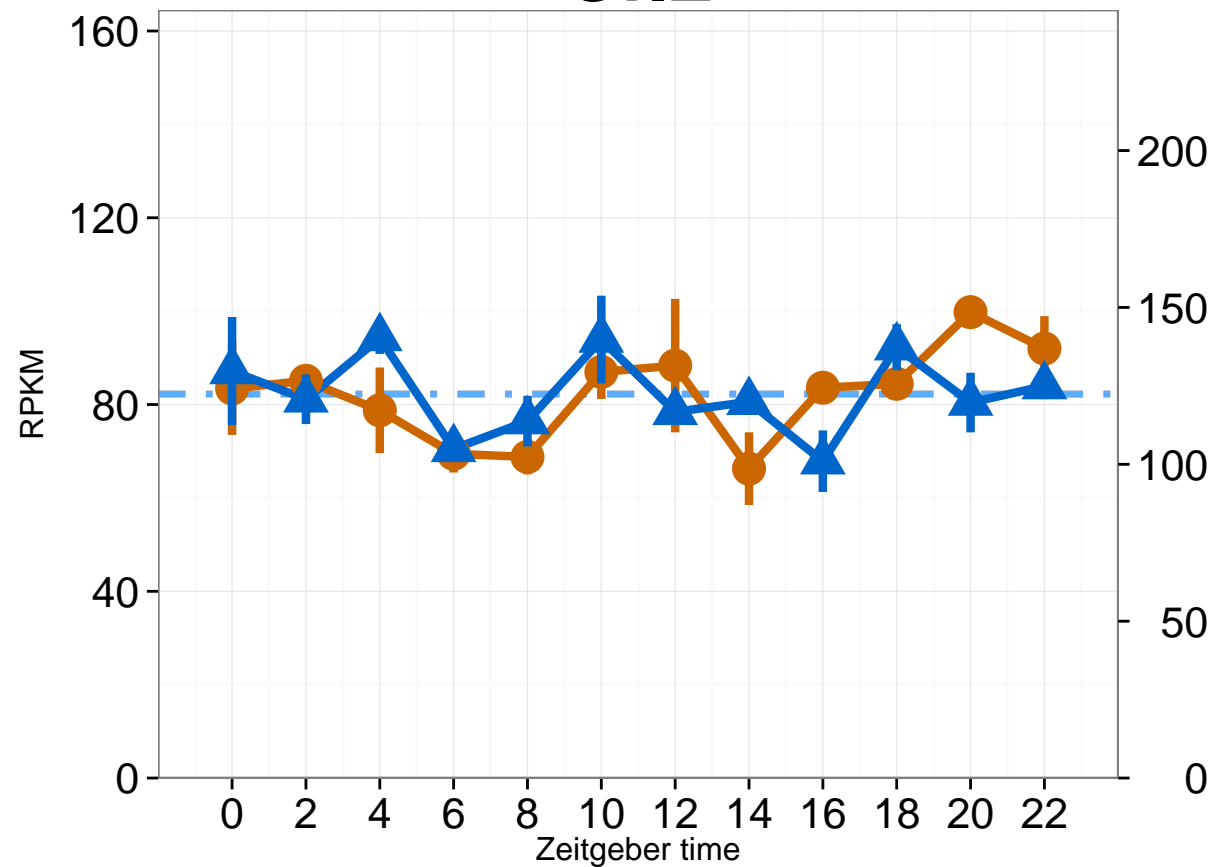

## Cfl2

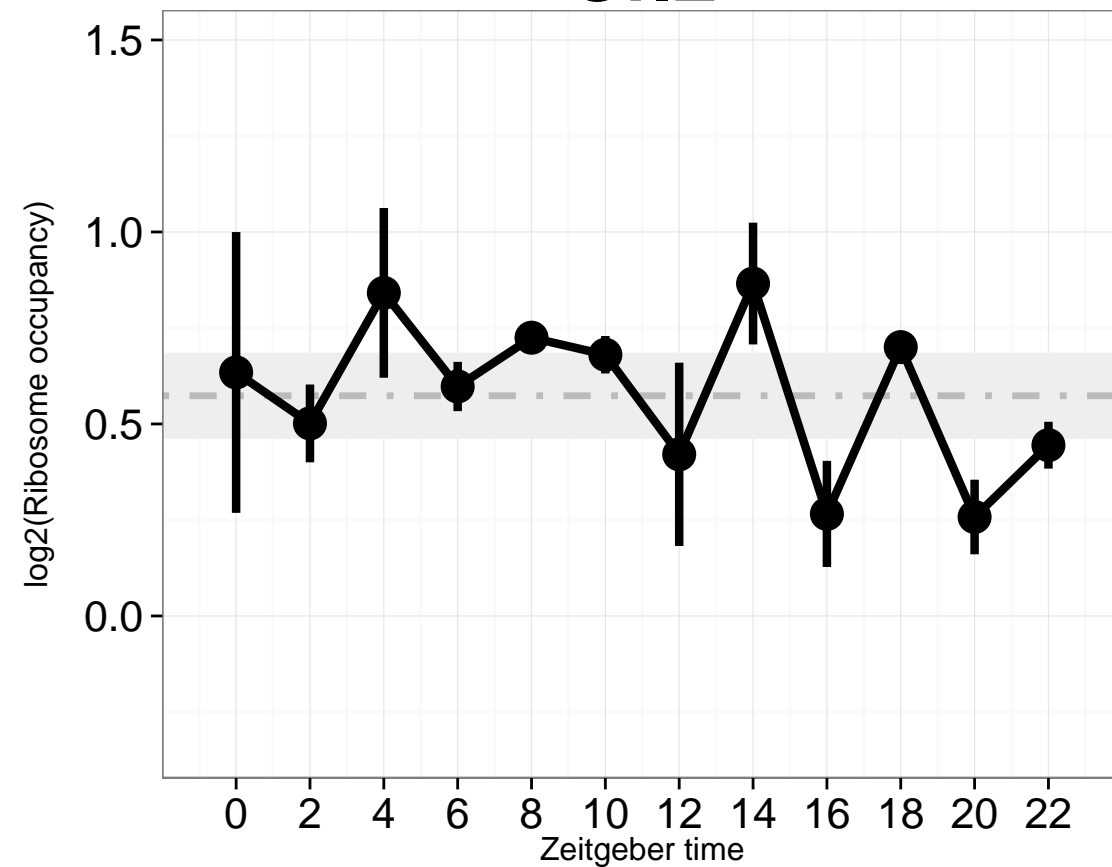

Supplement: Supplementary file 9893 [file 1]

## Rpl6

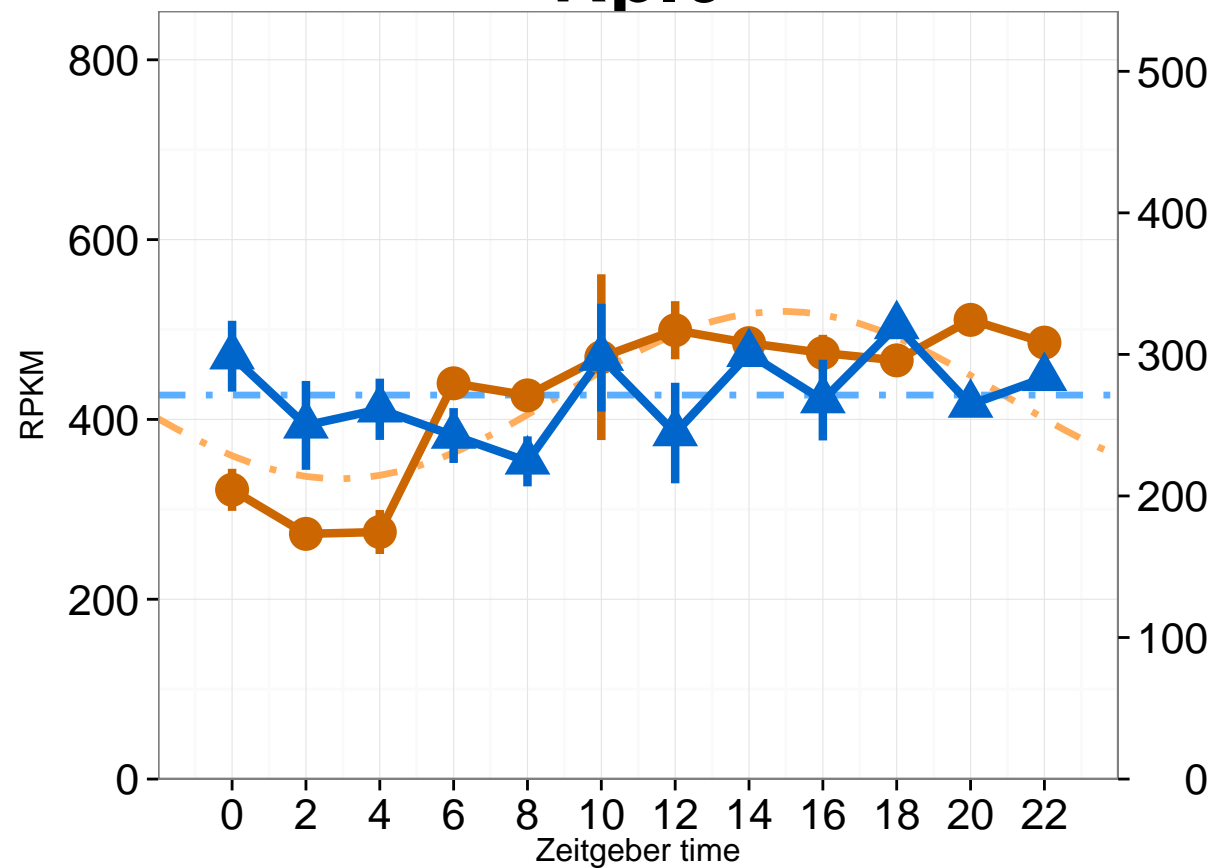

## Rpl6

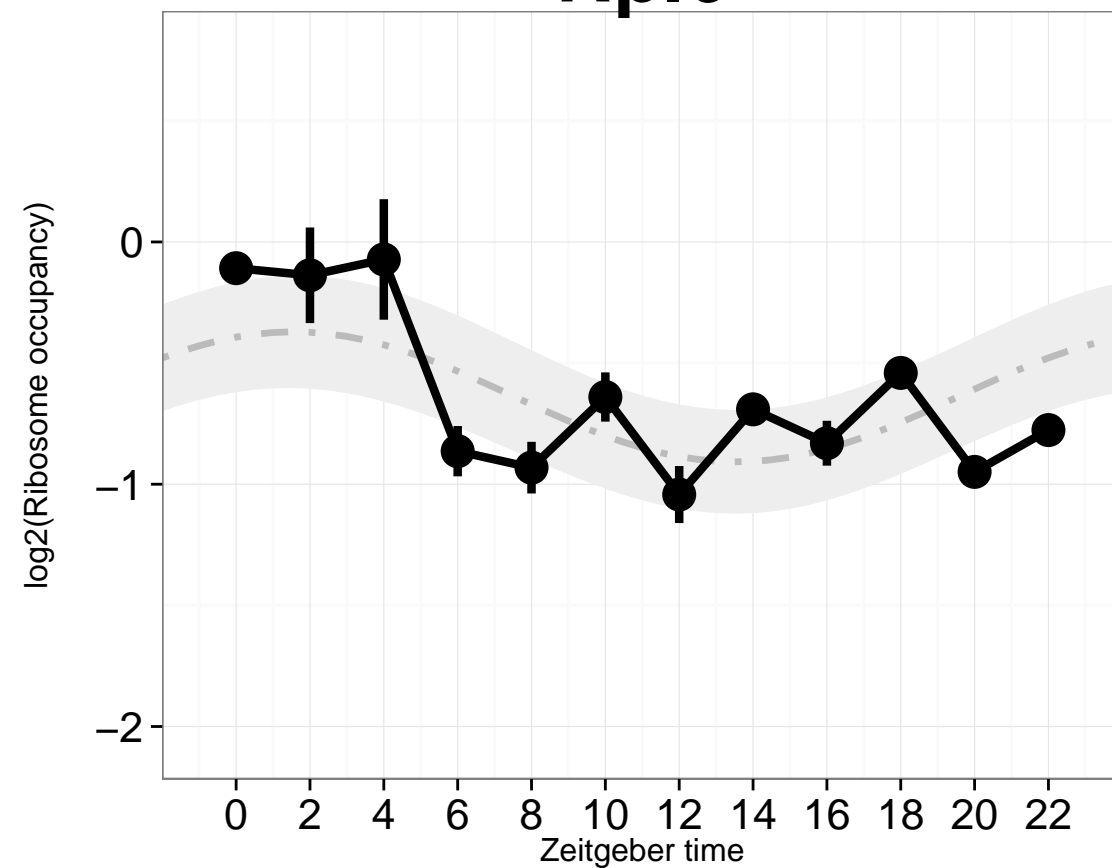

Supplement: Supplementary file 9894 [file 1]

# Rasal1

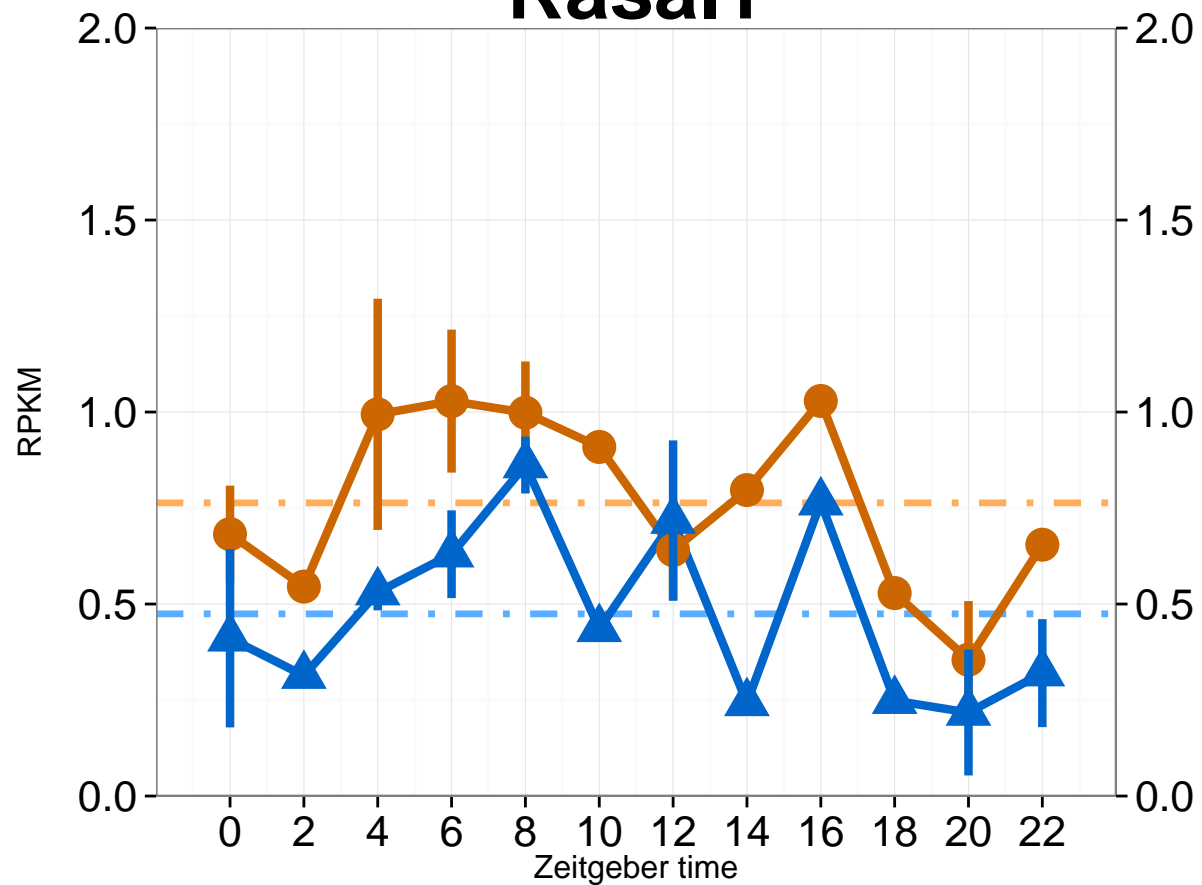

# Rasal1

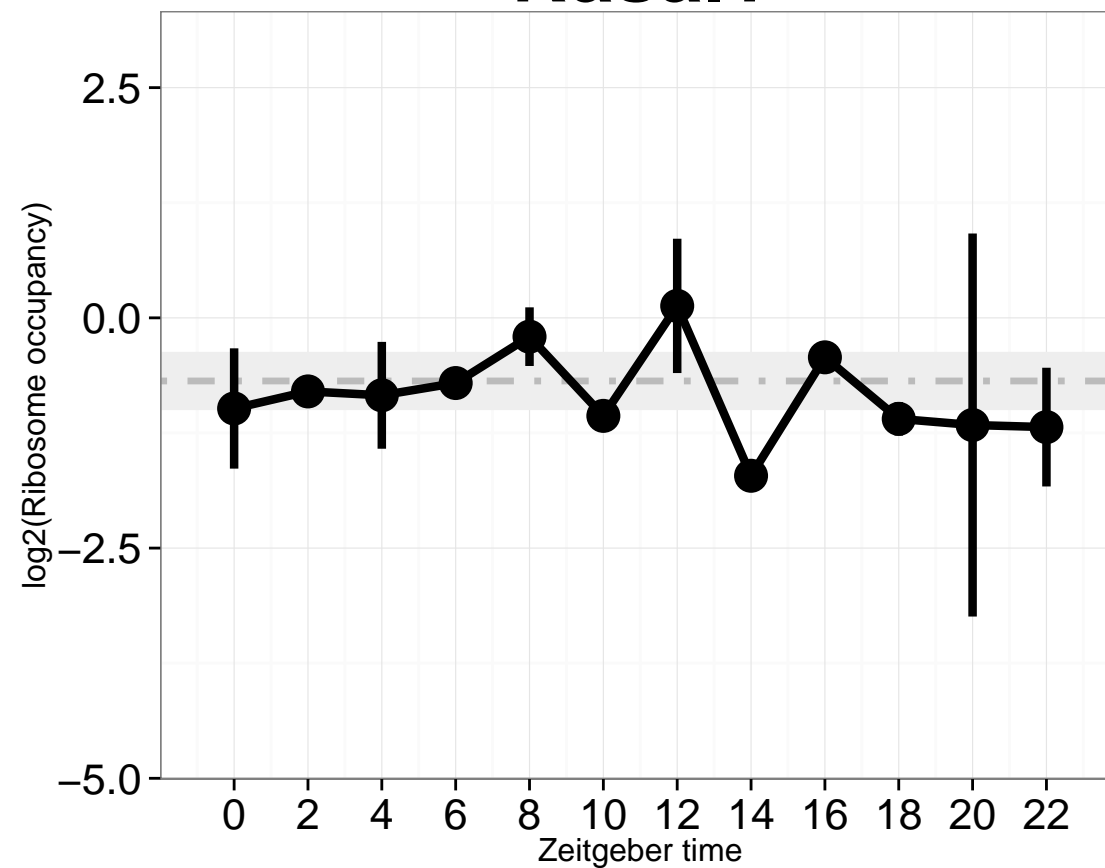

Supplement: Supplementary file 9895 [file 1]

## Ubxn10

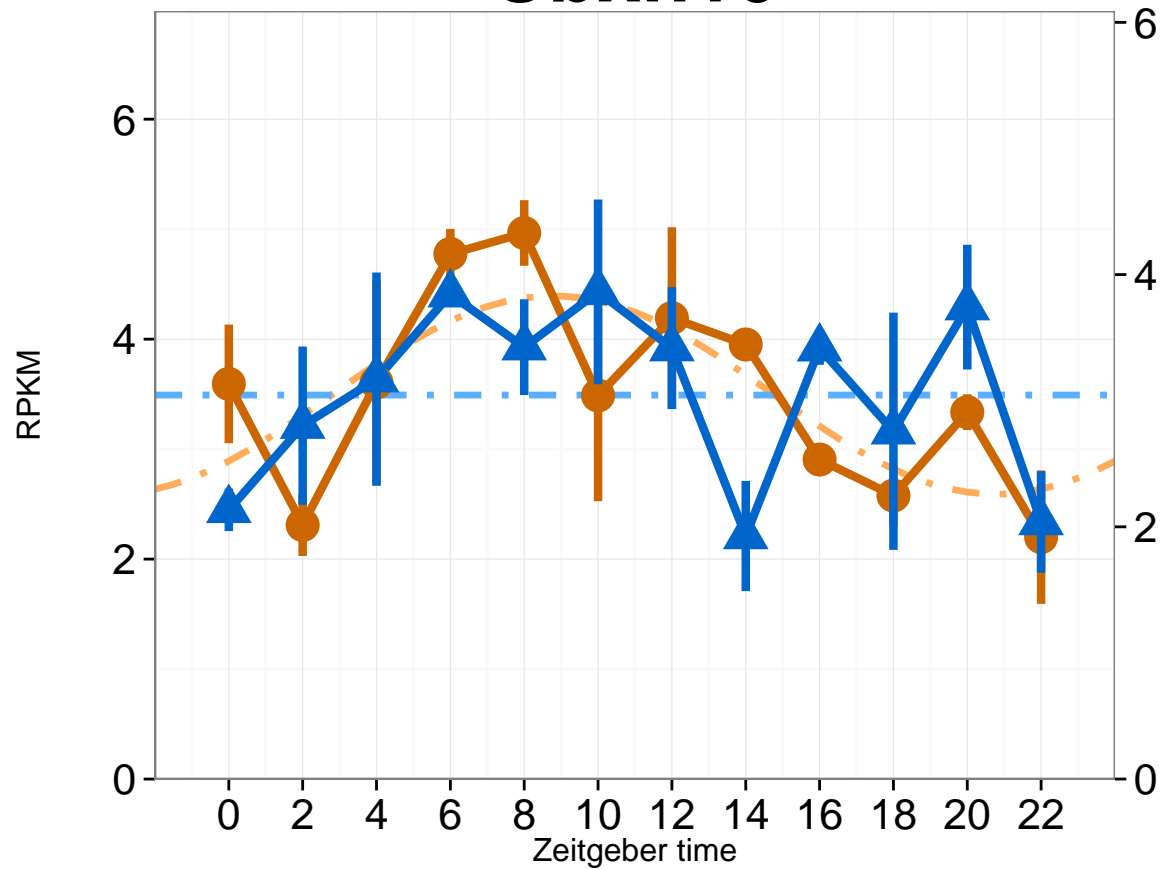

## Ubxn10

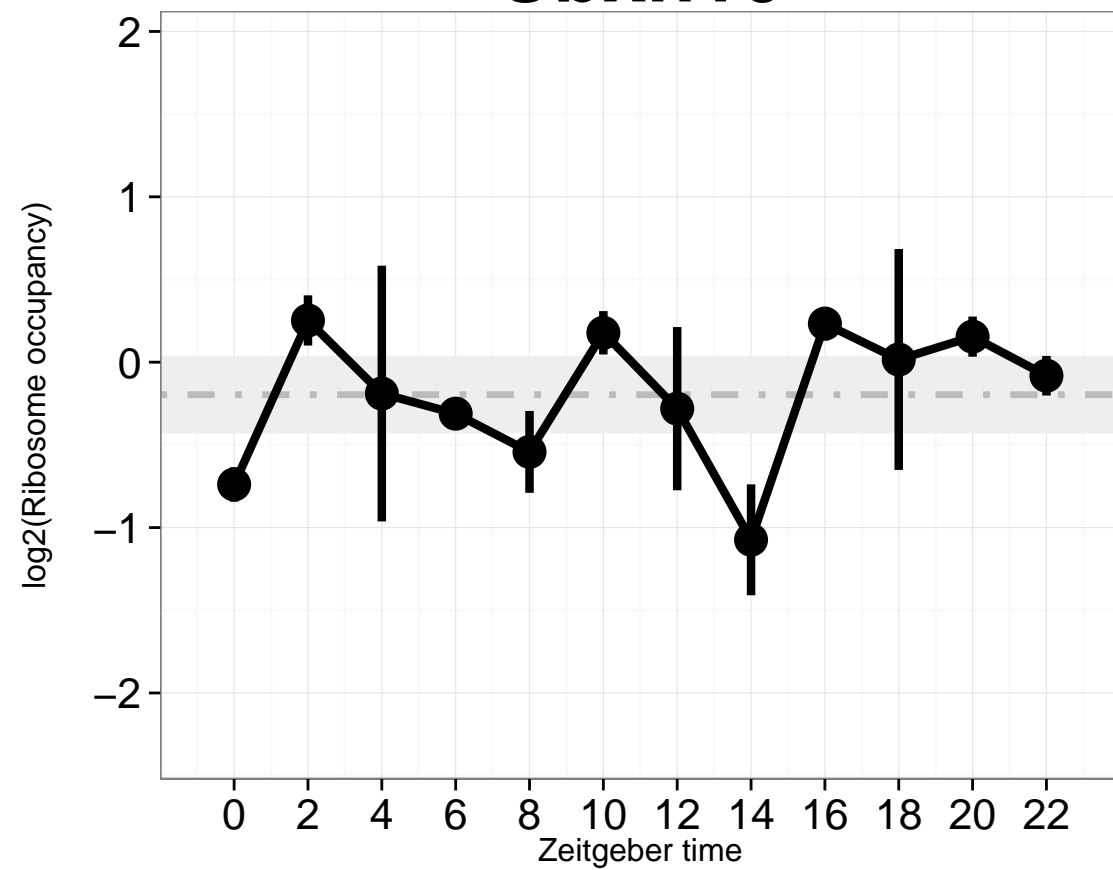

Supplement: Supplementary file 9896 [file 1]

# Igfbp7

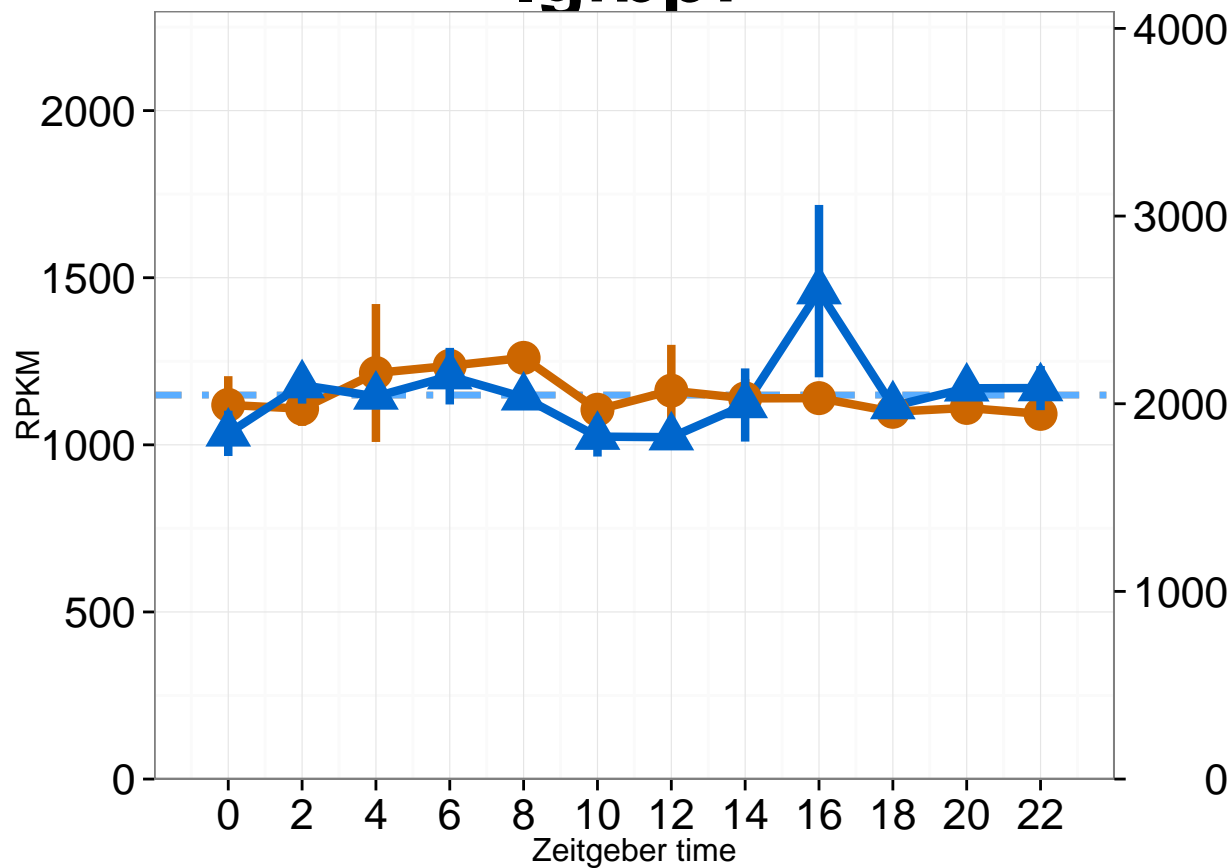

# Igfbp7

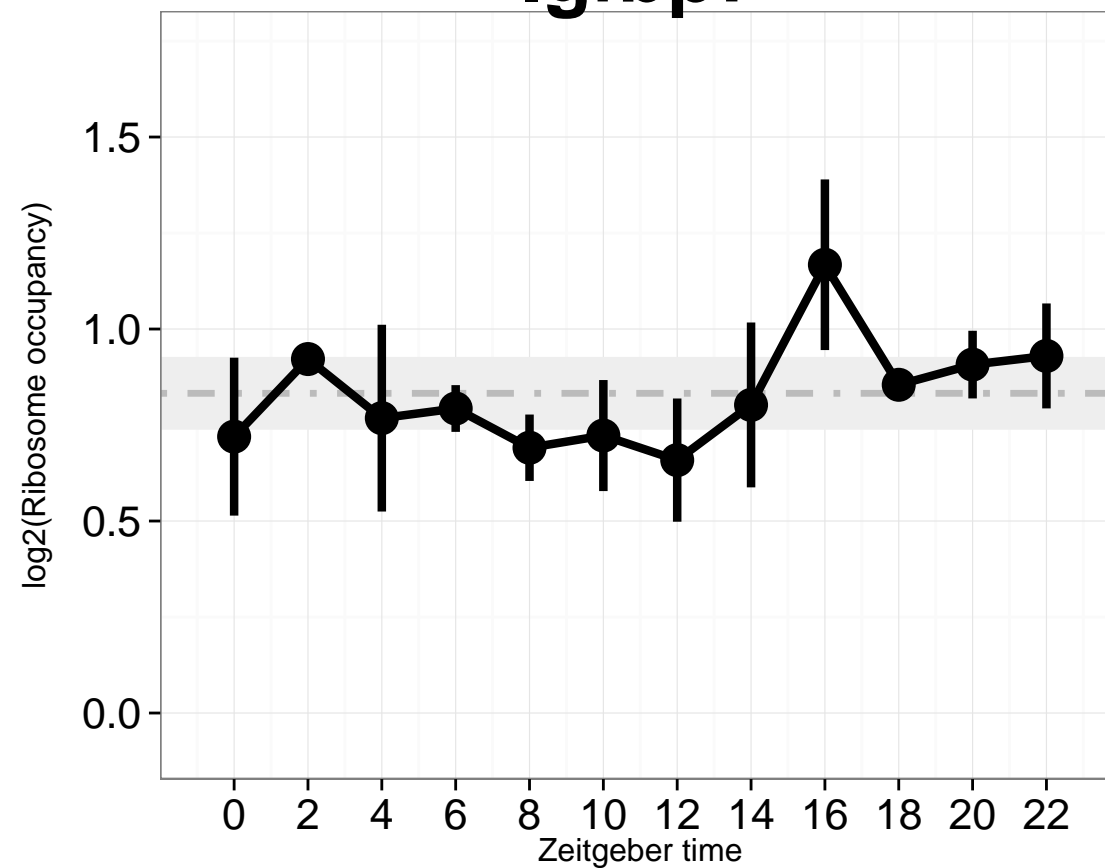

Supplement: Supplementary file 9897 [file 1]

# Luc7l3

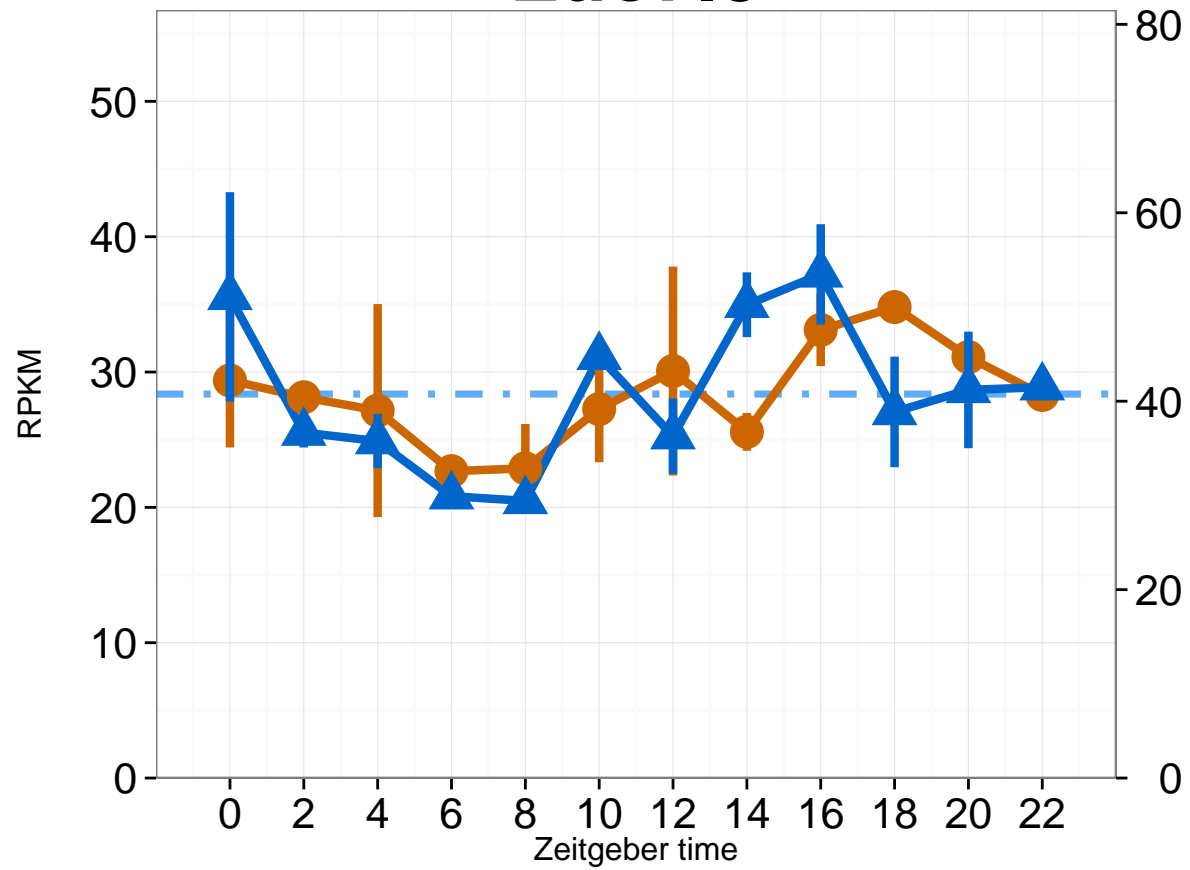

# Luc7l3

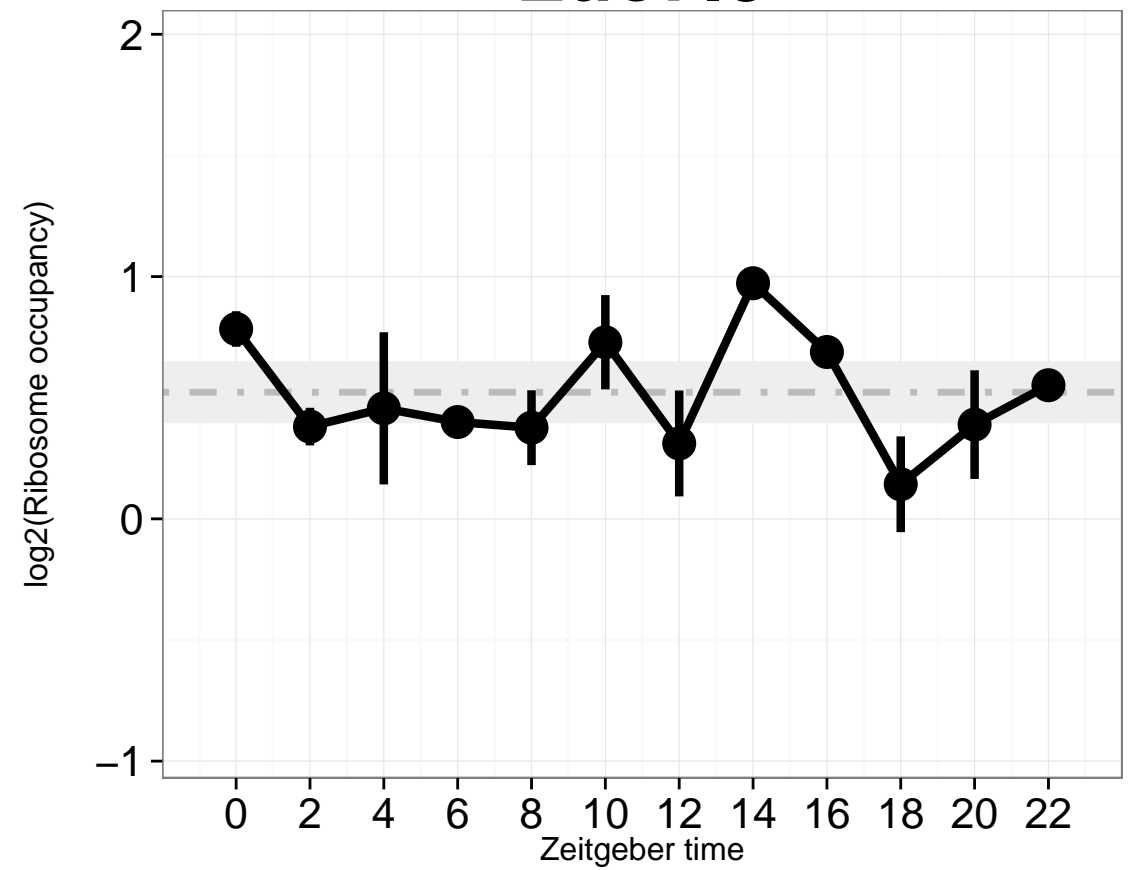

Supplement: Supplementary file 9898 [file 1]

## Ubn1

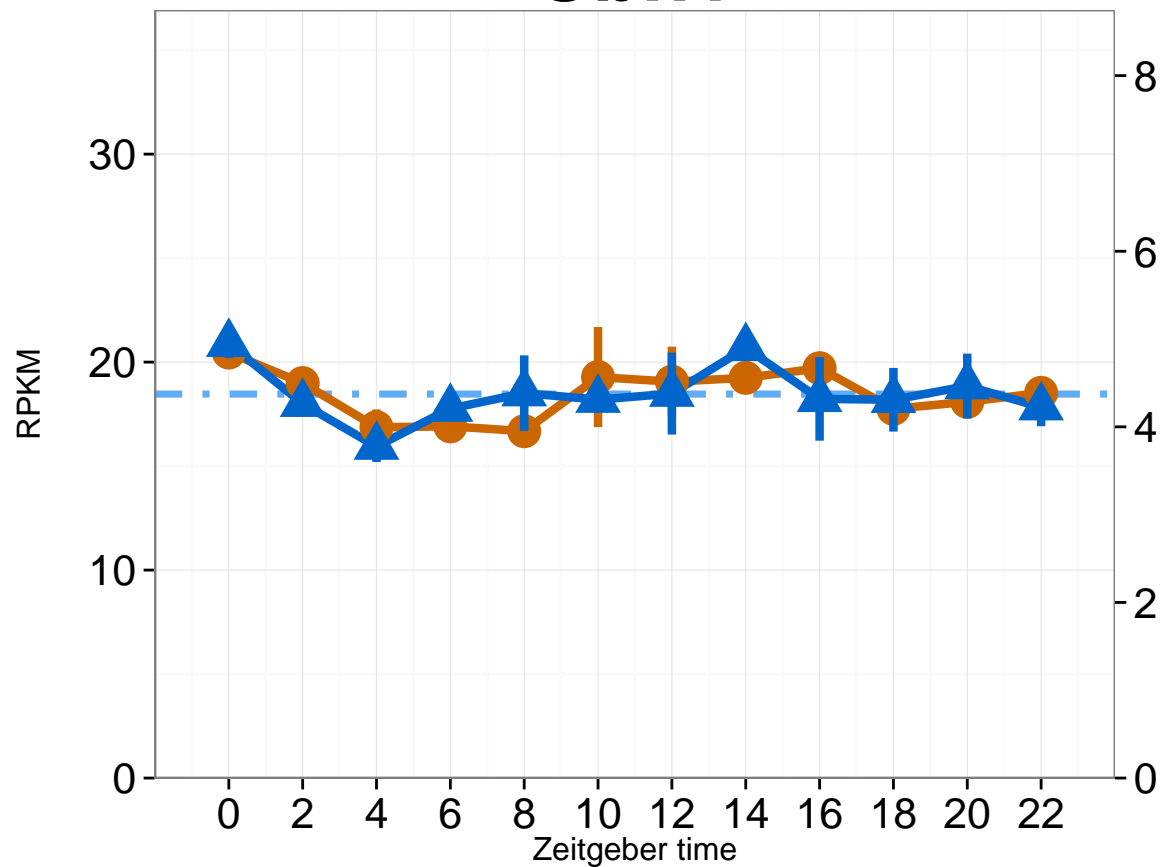

## Ubn1

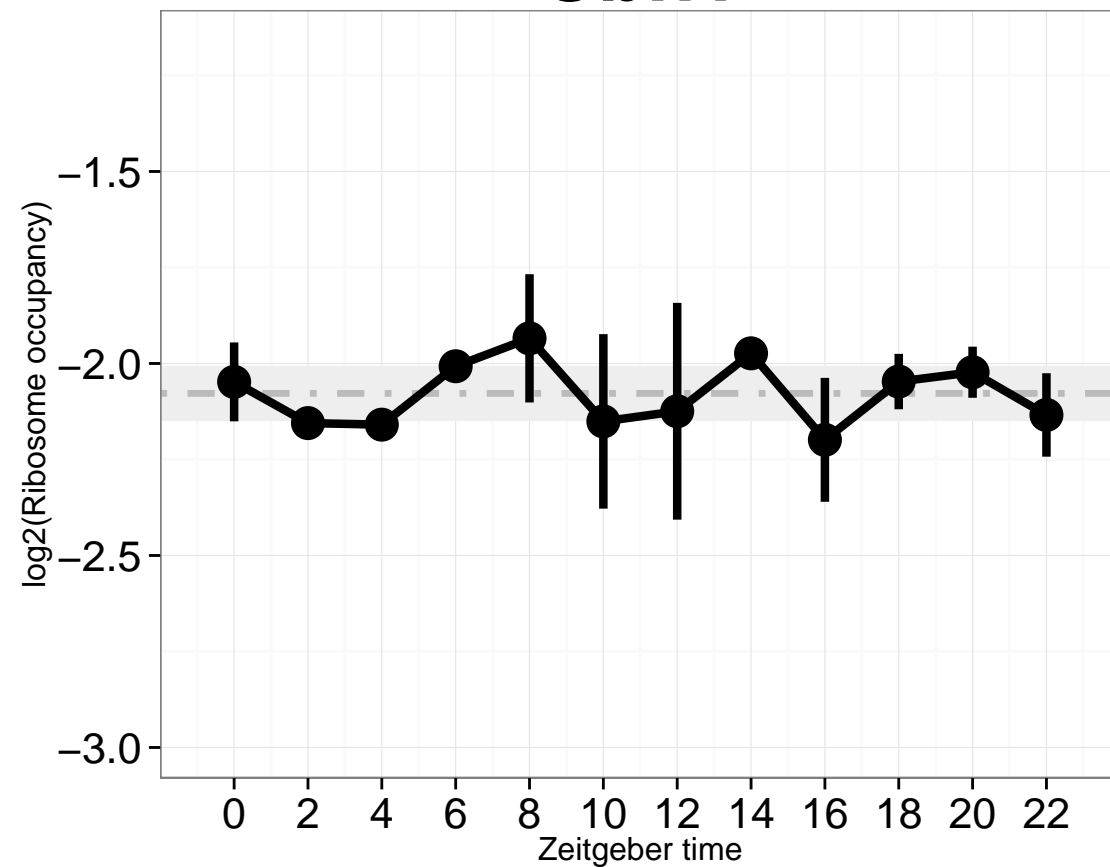

Supplement: Supplementary file 9899 [file 1]

## Slc27a1

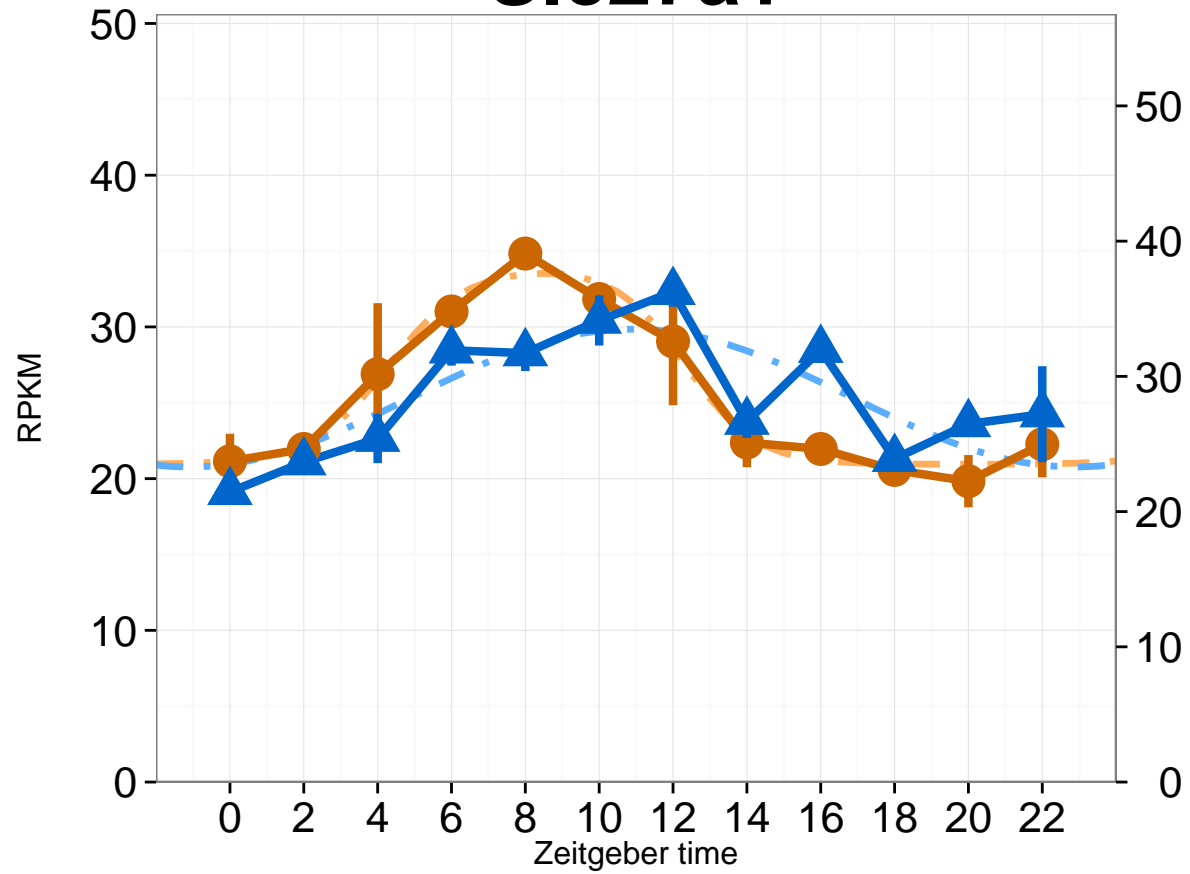

## Slc27a1

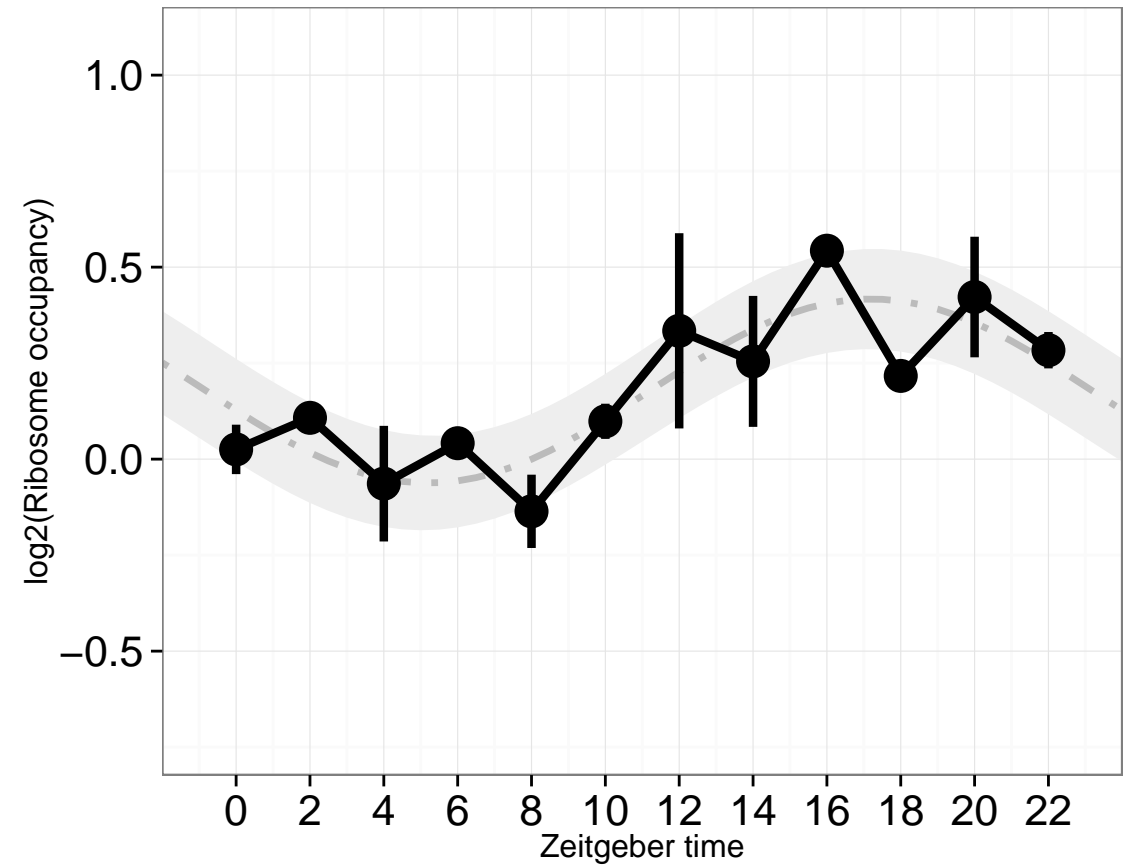

Supplement: Supplementary file 9900 [file 1]

# Ndufa5

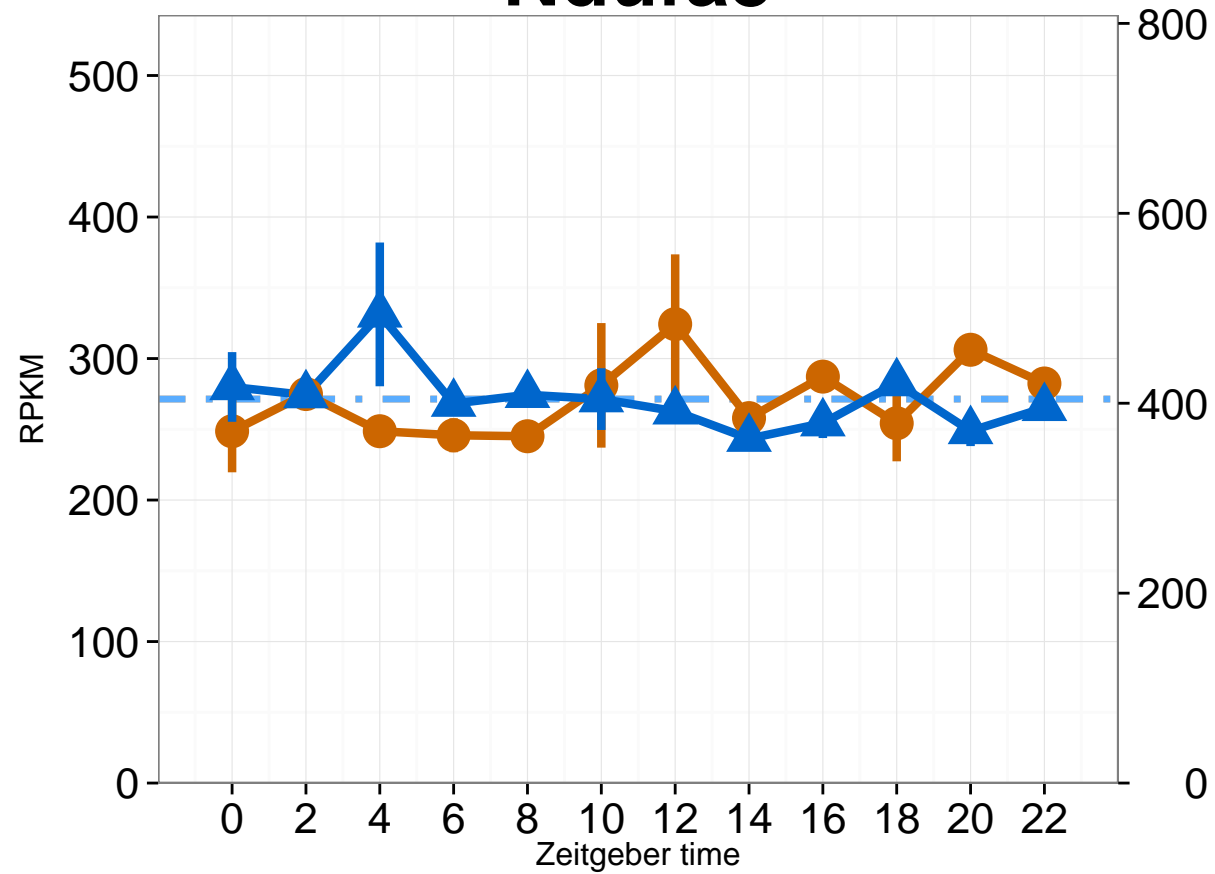

# Ndufa5

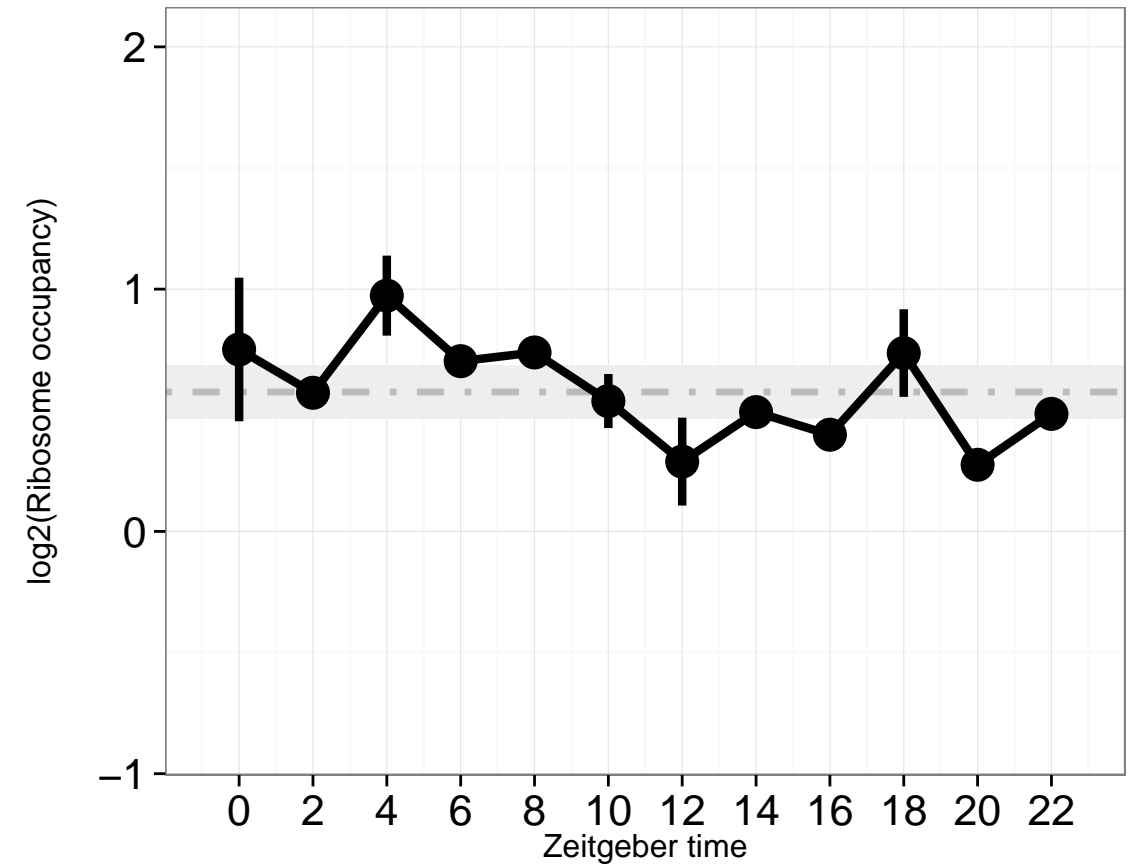

Supplement: Supplementary file 9901 [file 1]

# Efcab4a

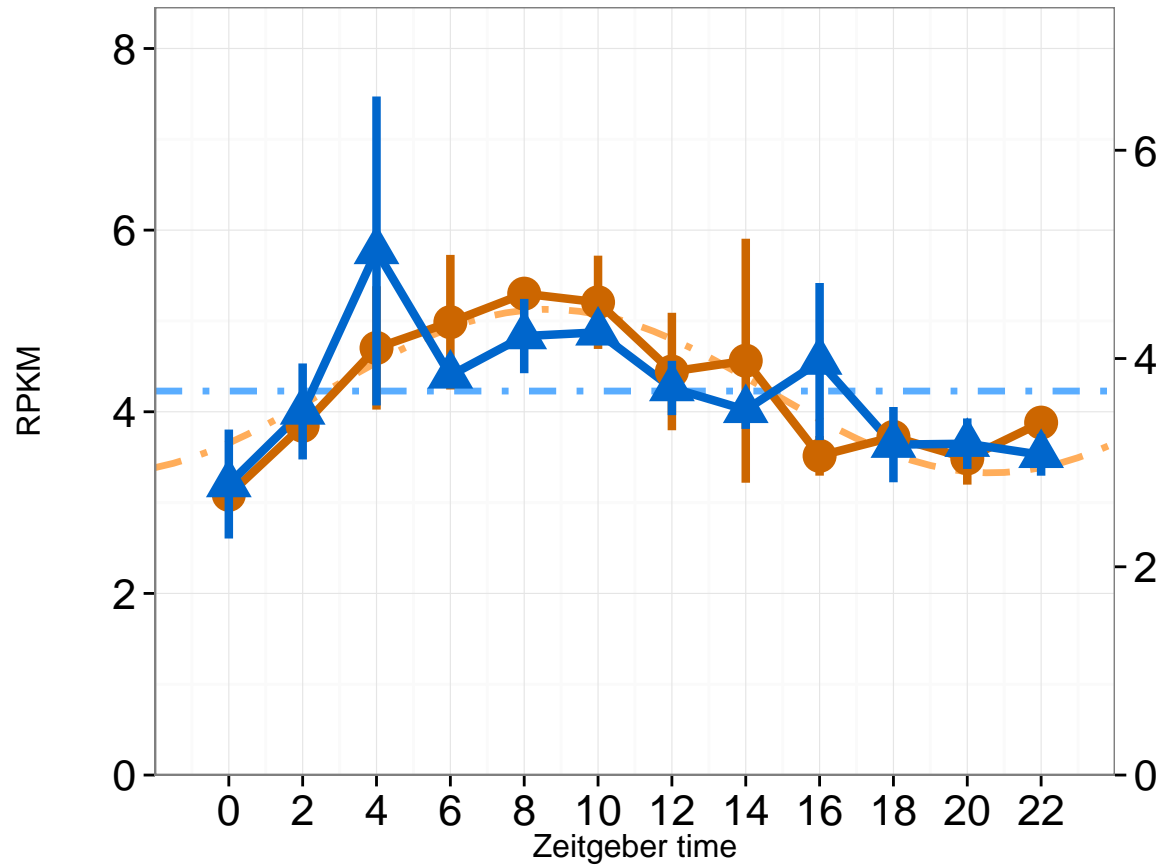

# Efcab4a

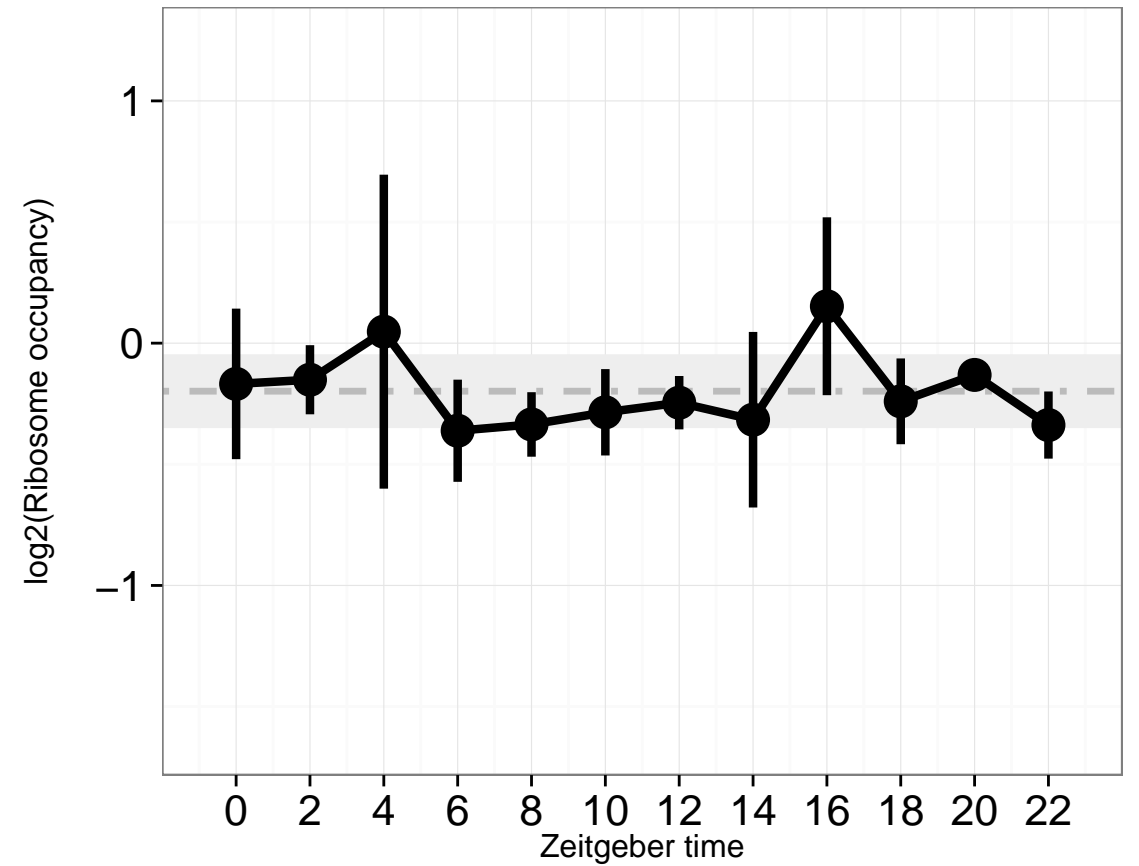

Supplement: Supplementary file 9902 [file 1]

## Fbxo38

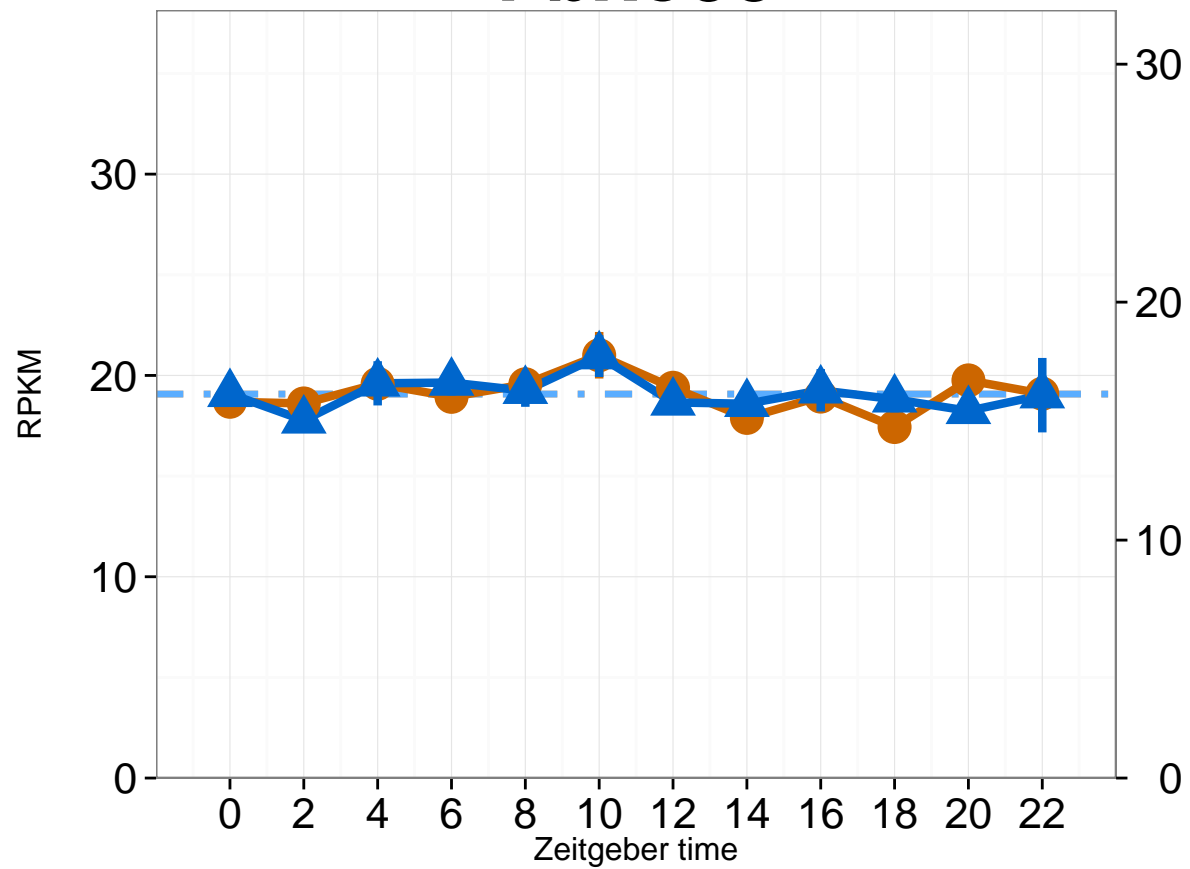

## Fbxo38

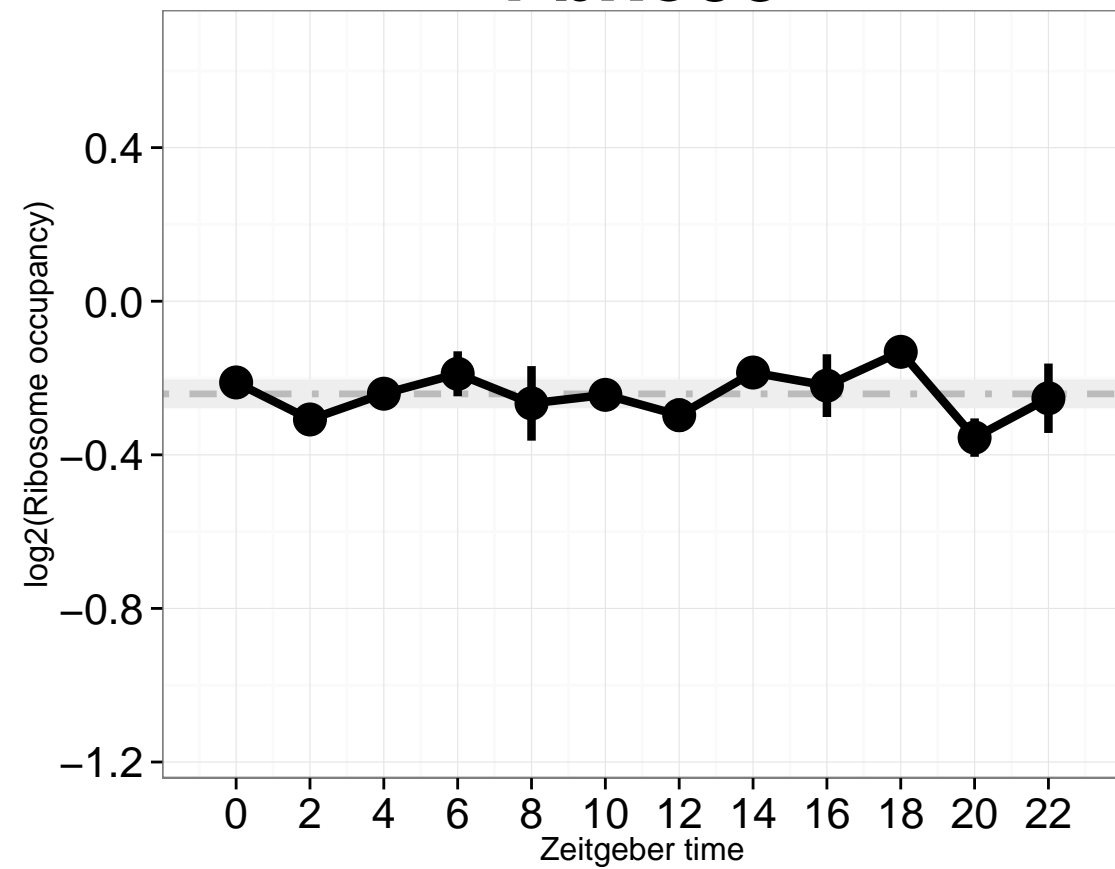

Supplement: Supplementary file 9903 [file 1]

## Npc2

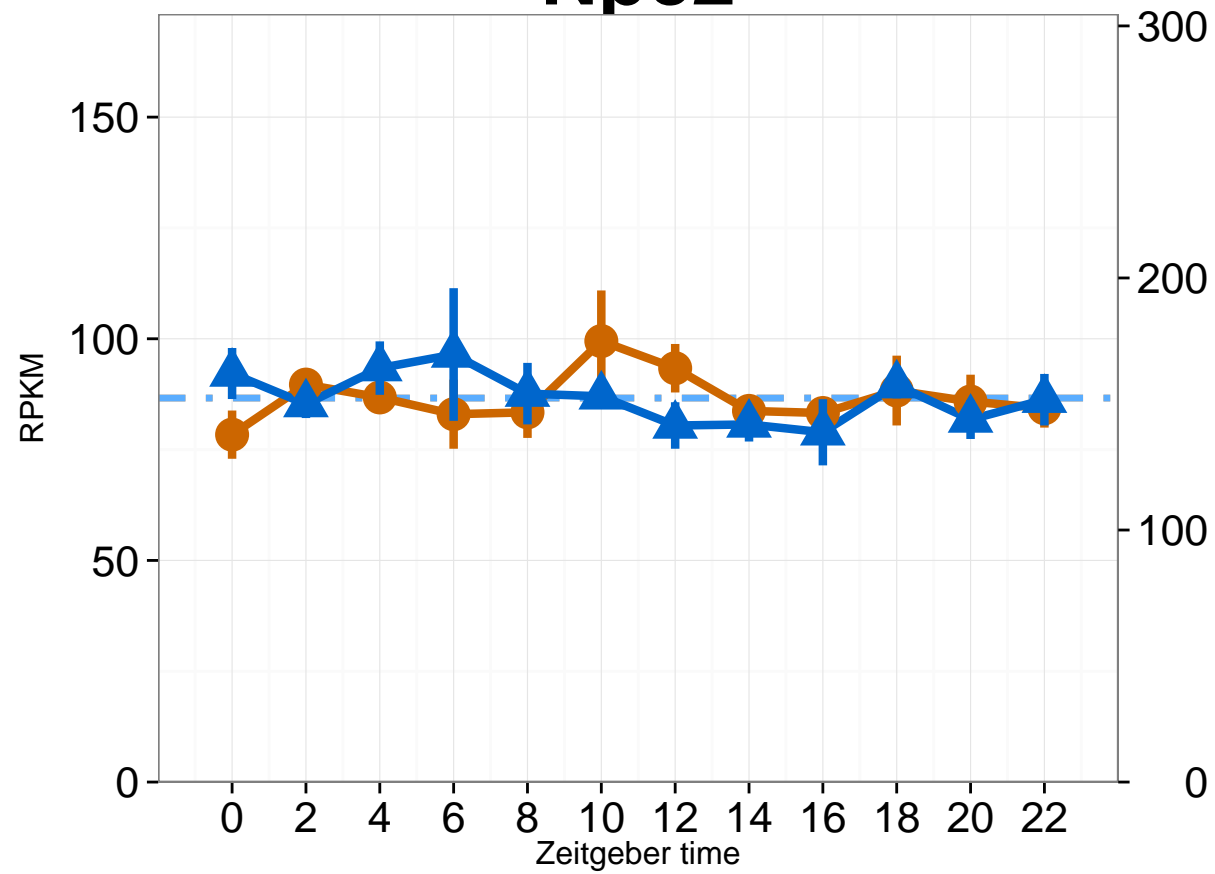

## Npc2

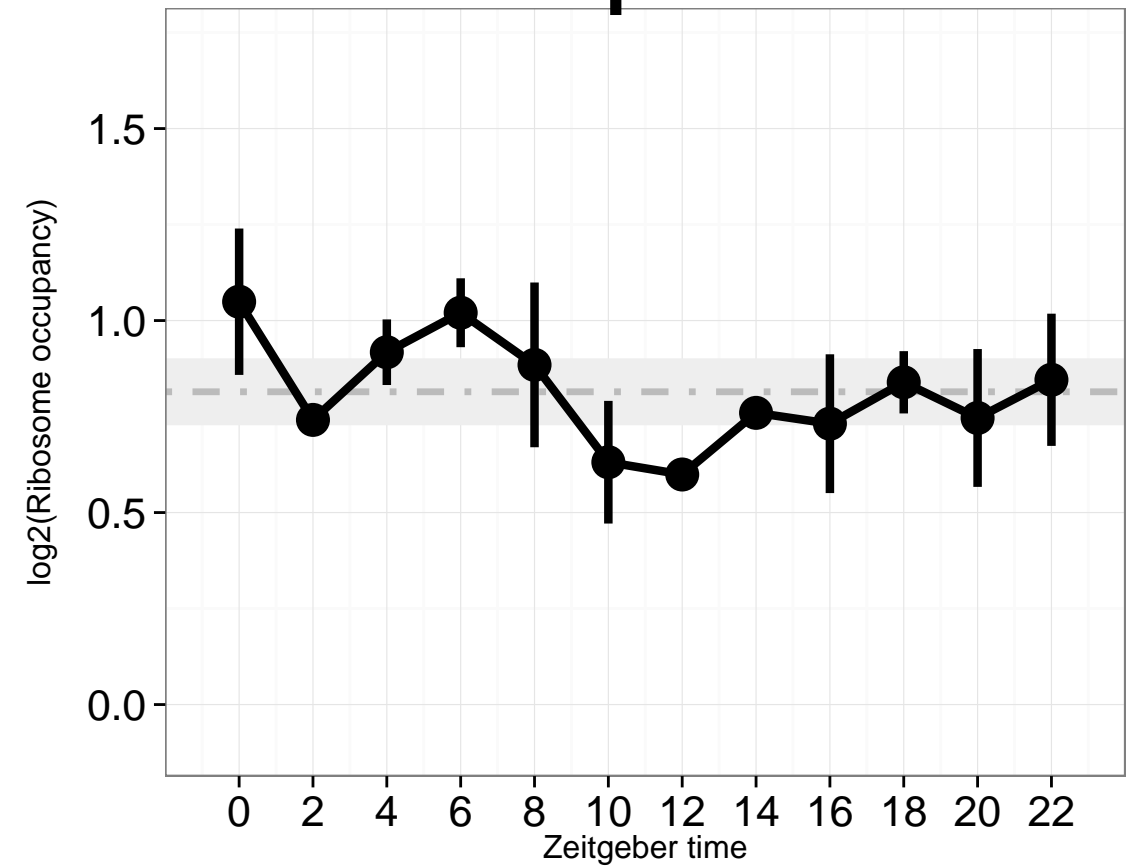

Supplement: Supplementary file 9904 [file 1]

**Ulp1 TR**

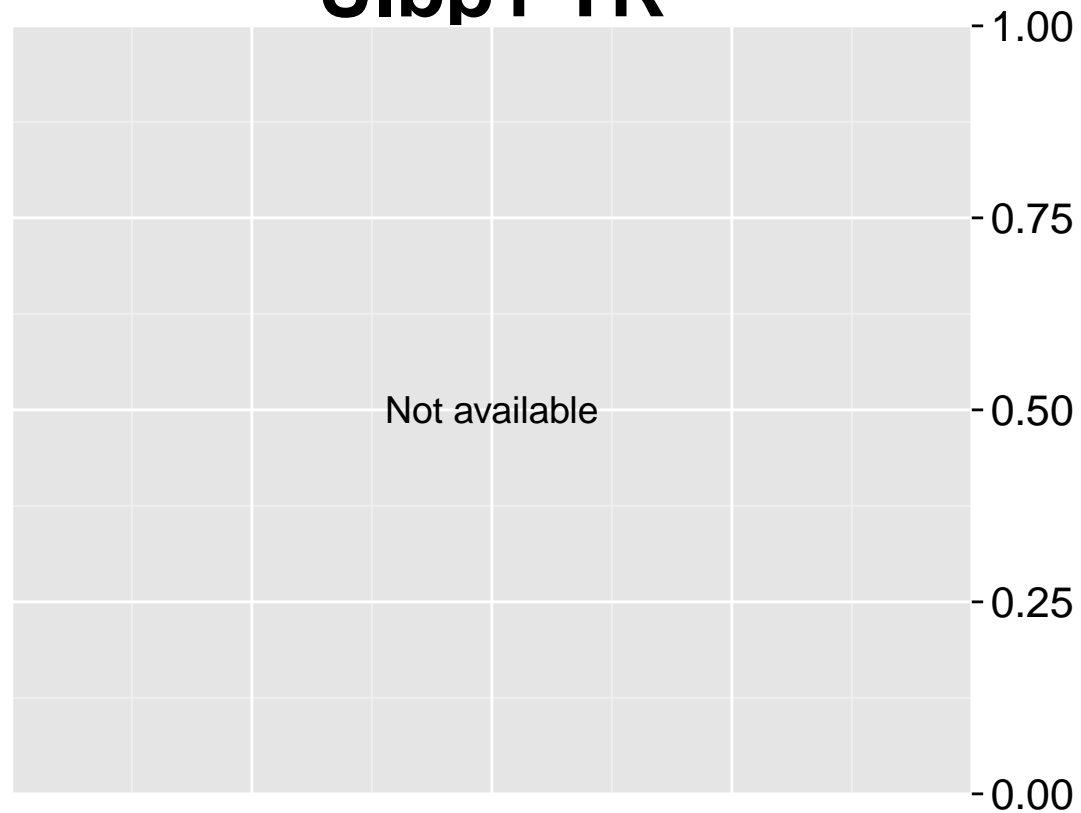

**Ulp1 log2(Ribosome occupancy**

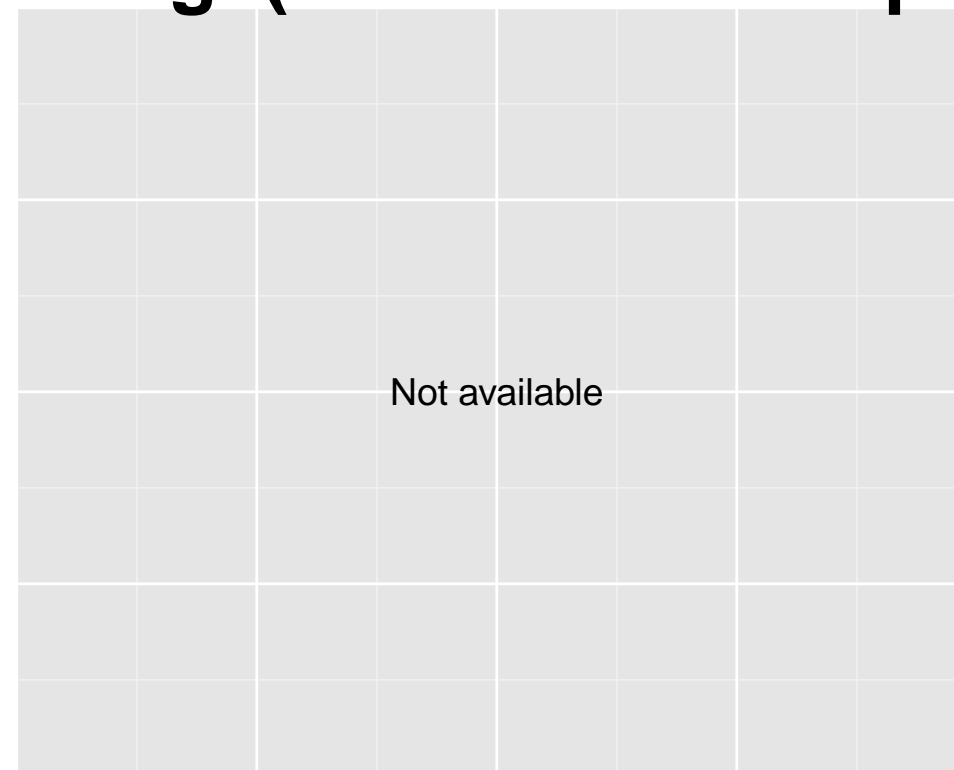

Supplement: Supplementary file 9905 [file 1]

## Tgif1

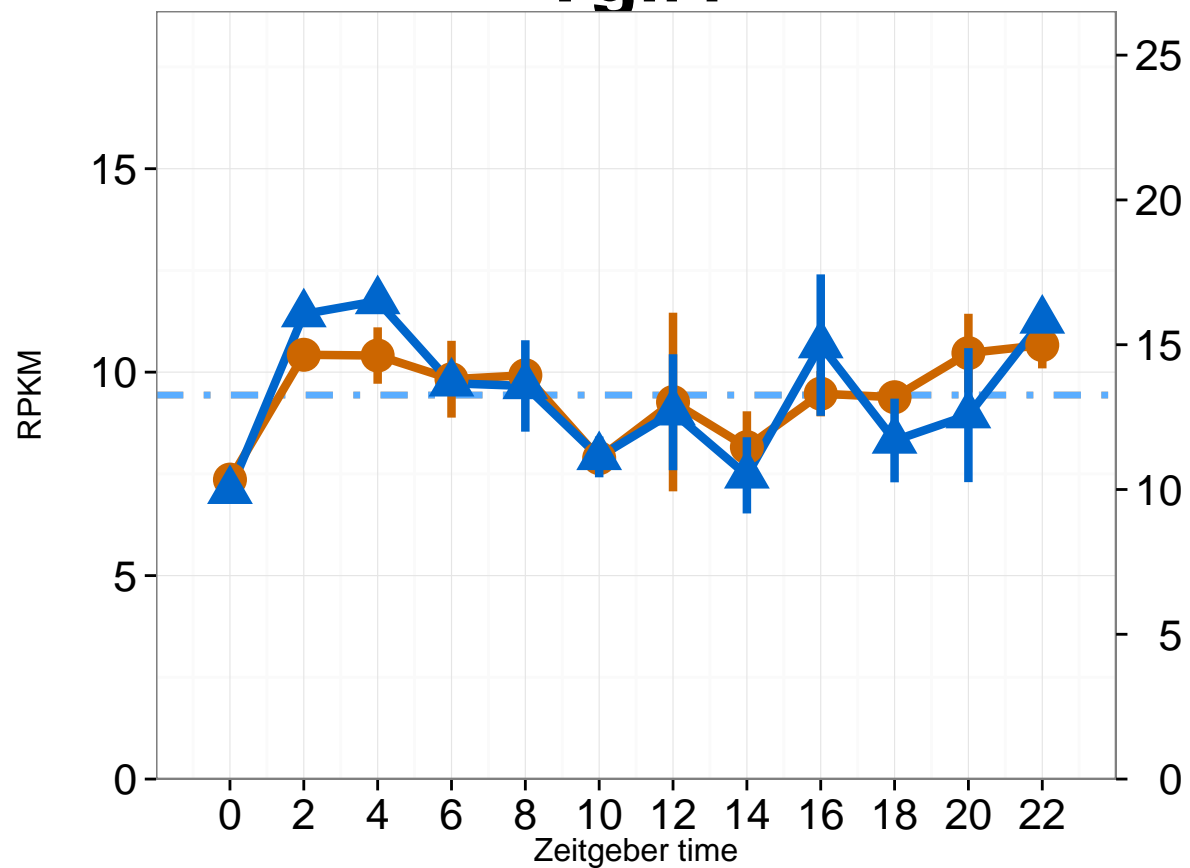

## Tgif1

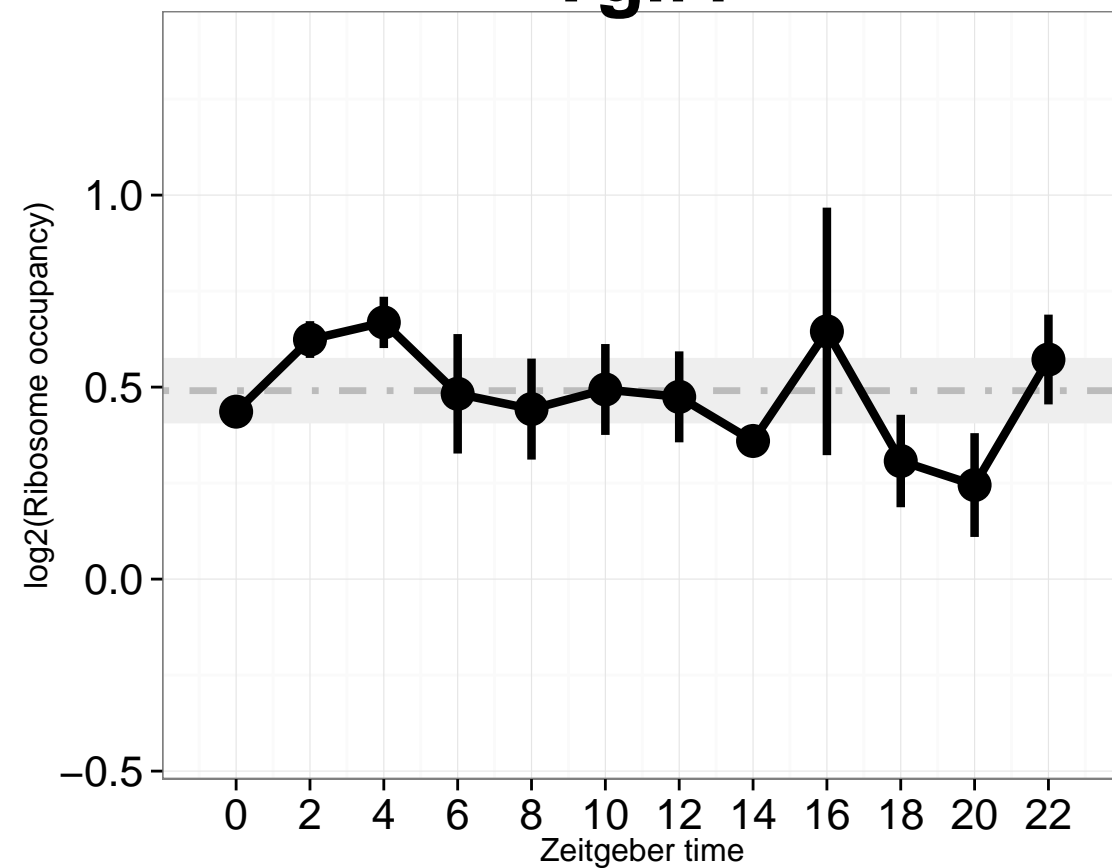

Supplement: Supplementary file 9906 [file 1]

## Slc2a9

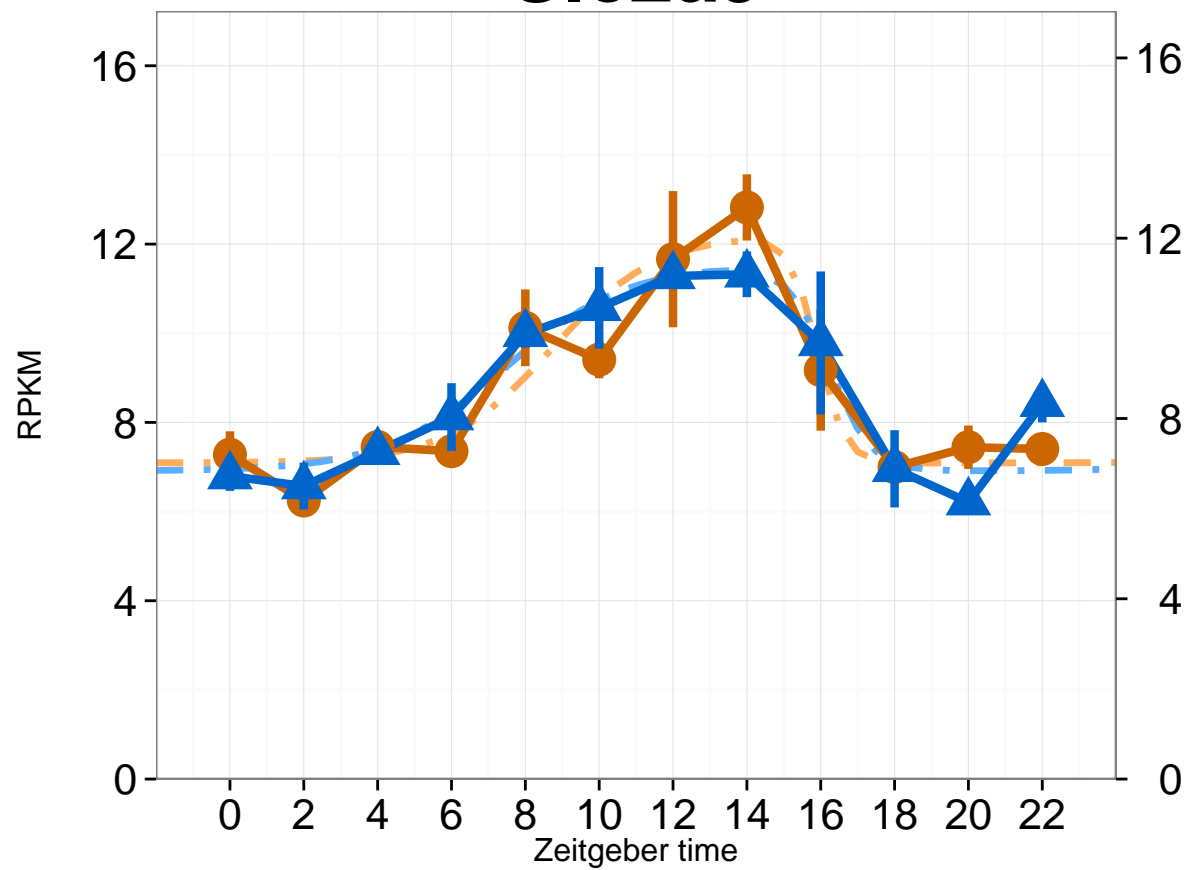

## Slc2a9

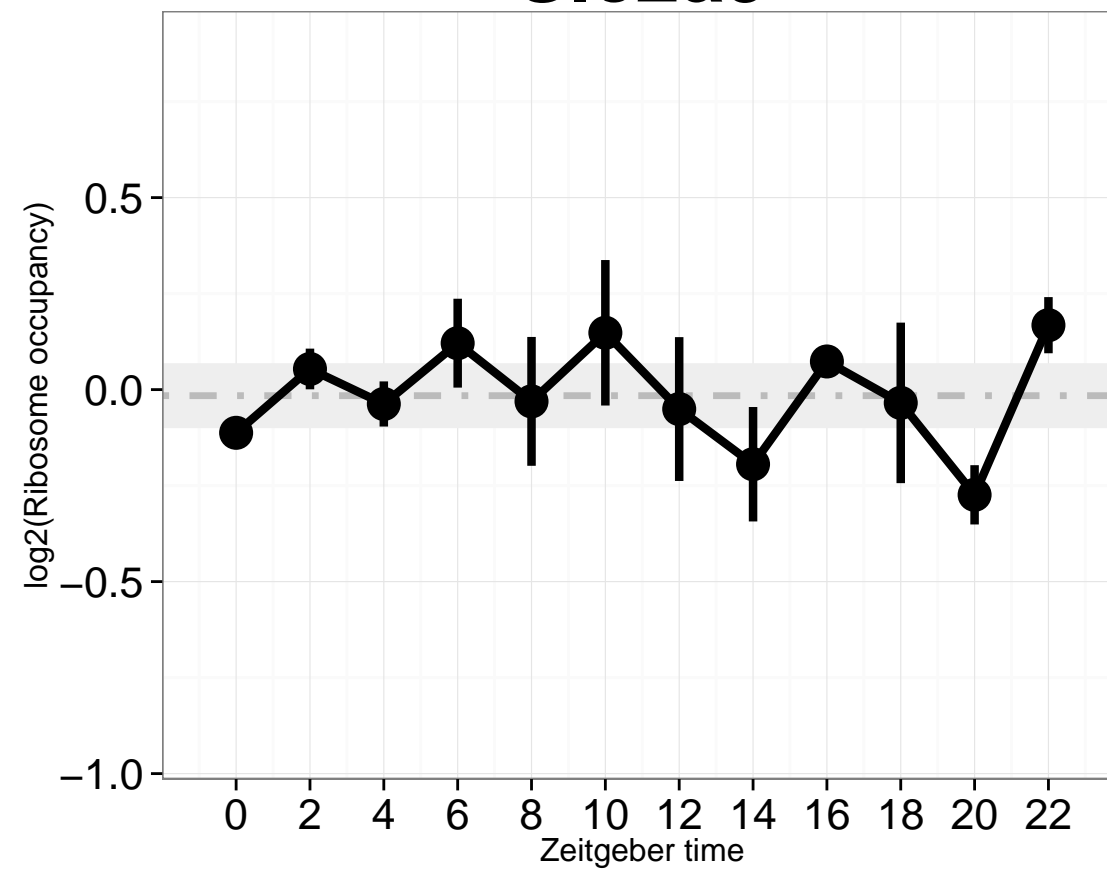

Supplement: Supplementary file 9907 [file 1]

## Aff2

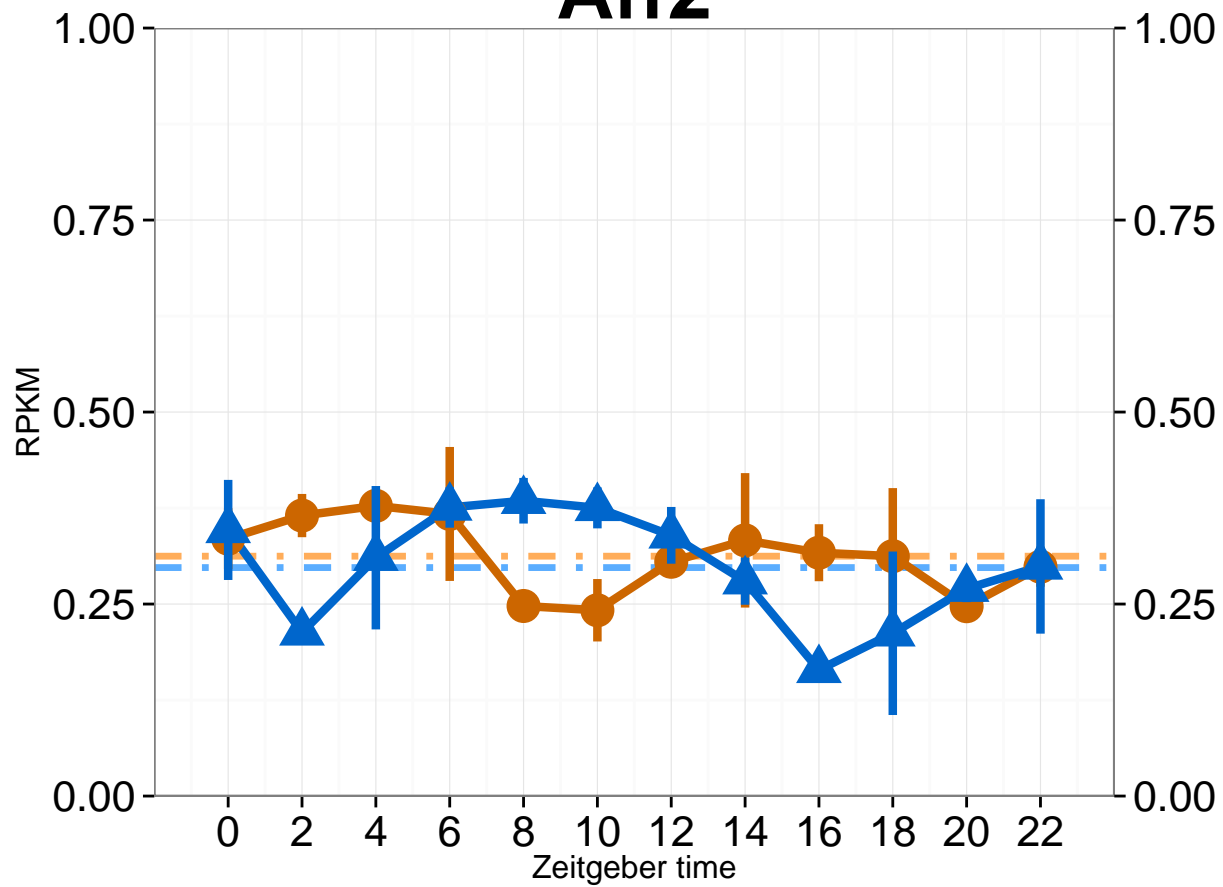

## Aff2

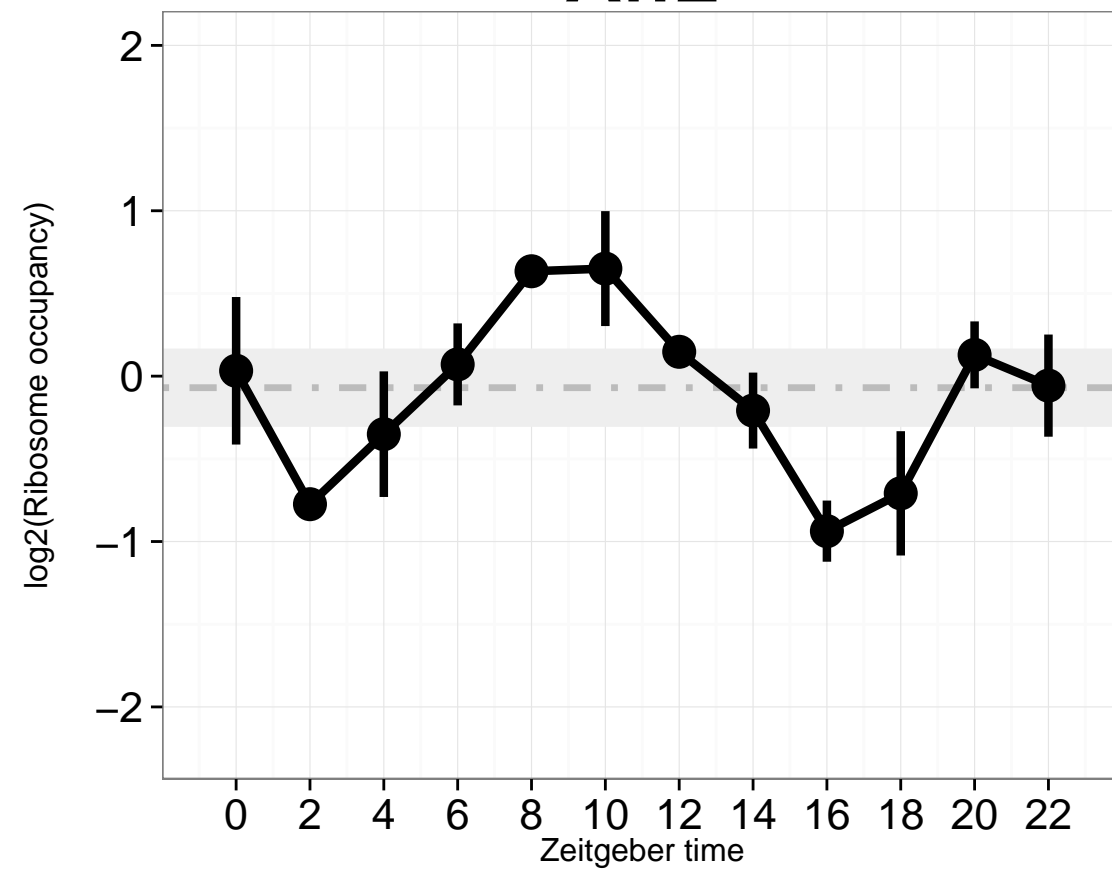

Supplement: Supplementary file 9908 [file 1]

## Slc34a1

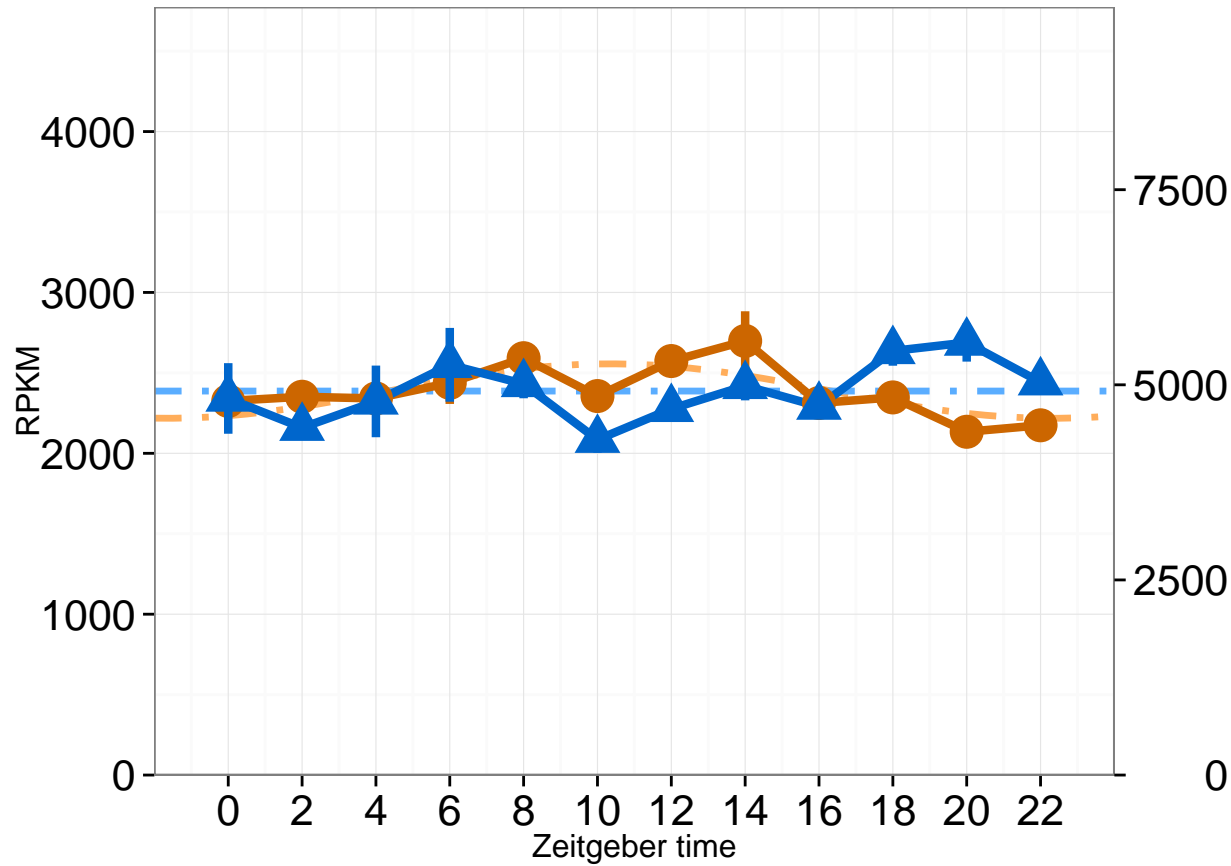

## Slc34a1

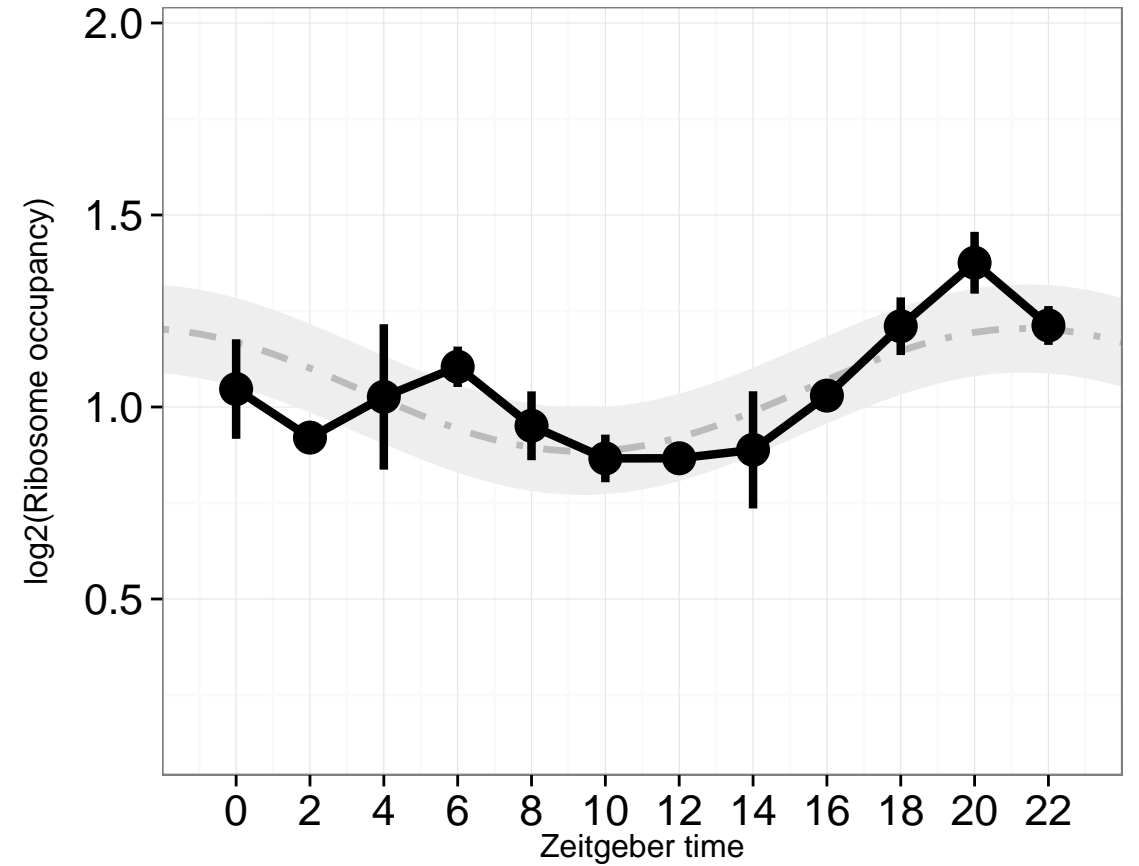

Supplement: Supplementary file 9909 [file 1]

## Mycbpap

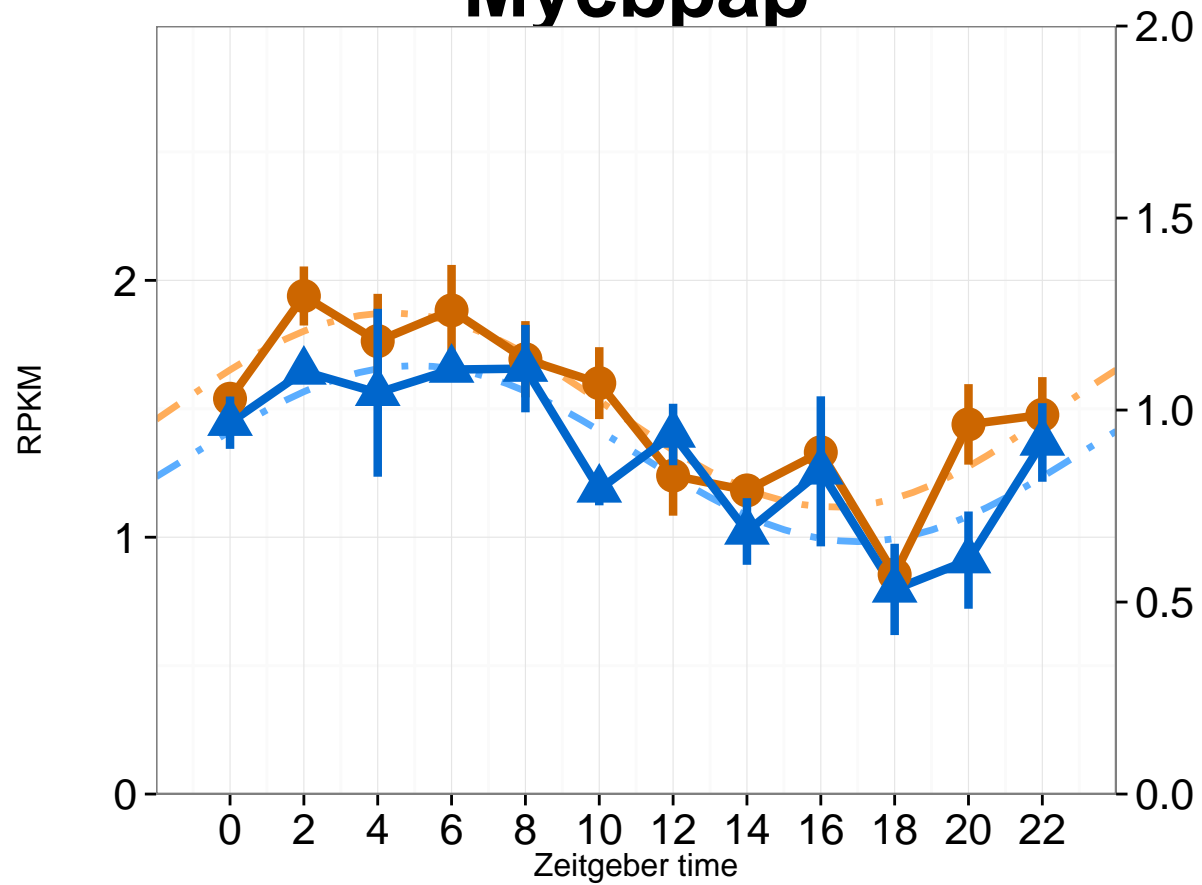

## Mycbpap

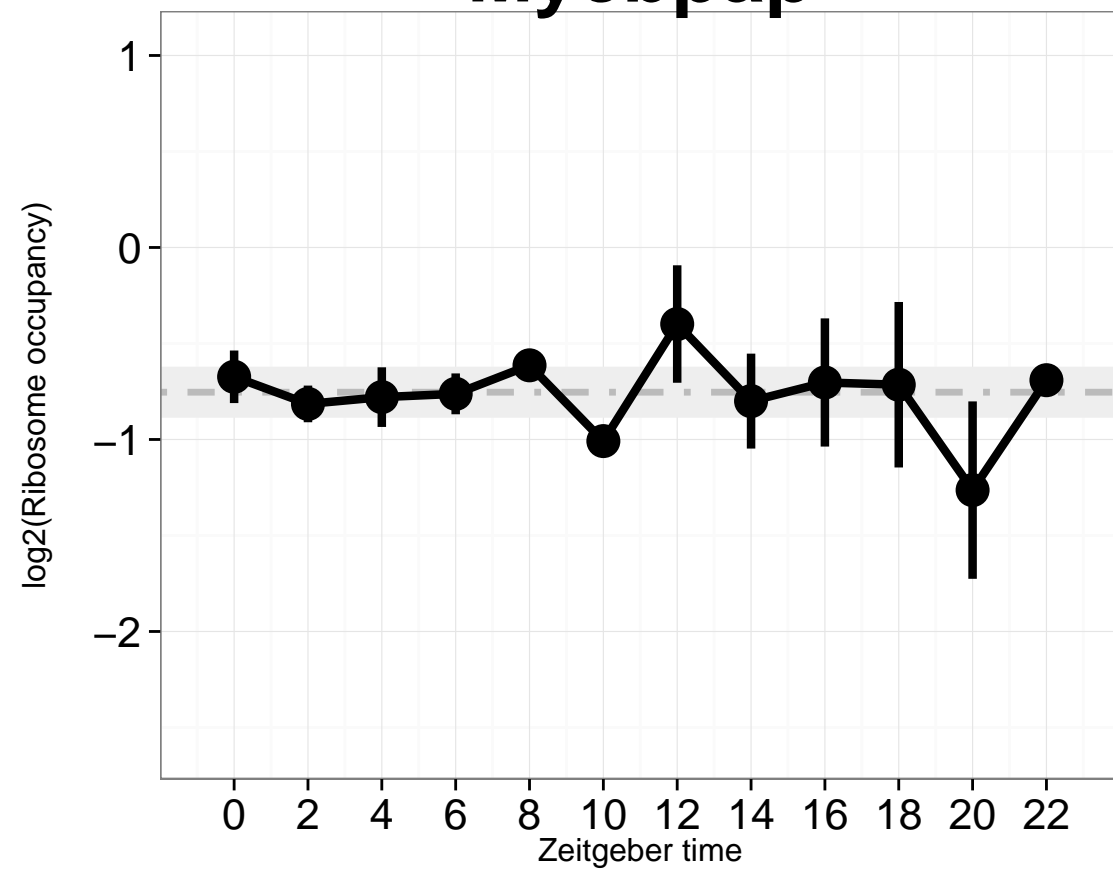

Supplement: Supplementary file 9910 [file 1]

## Mcm6

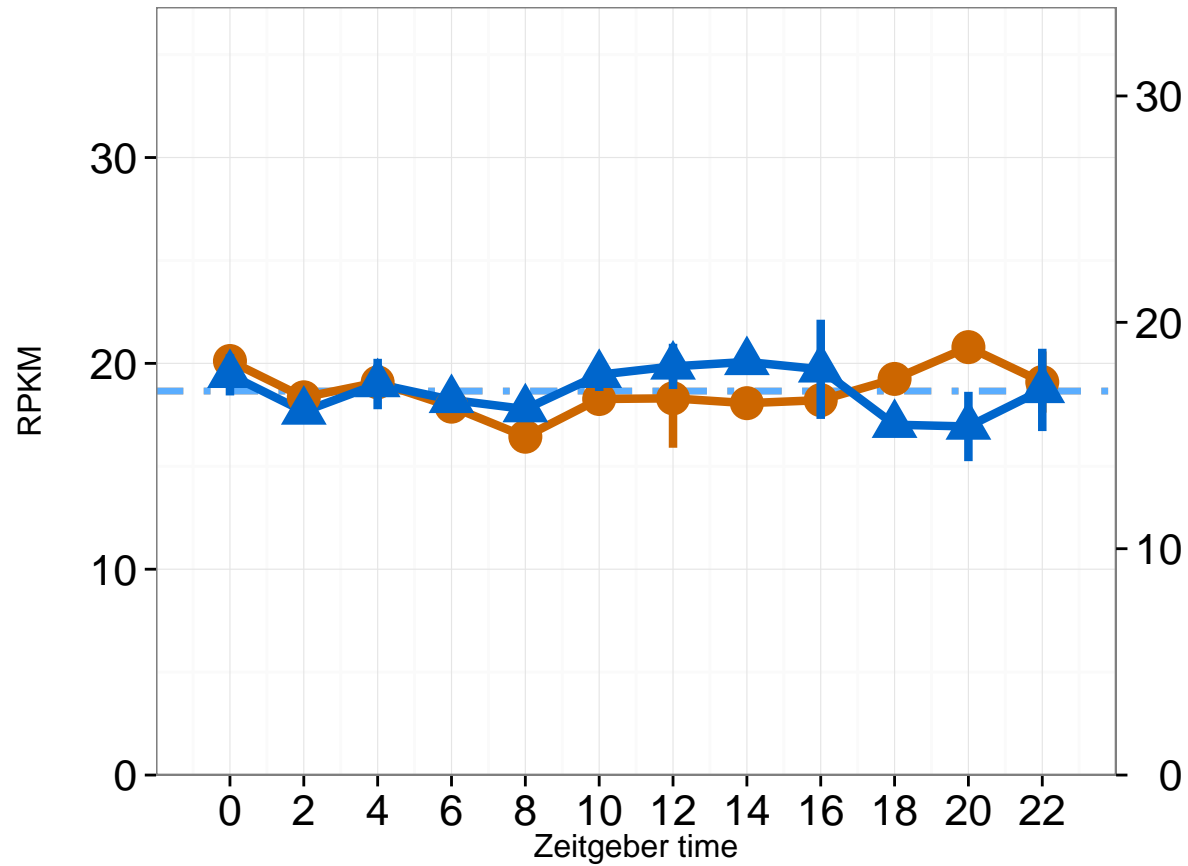

## Mcm6

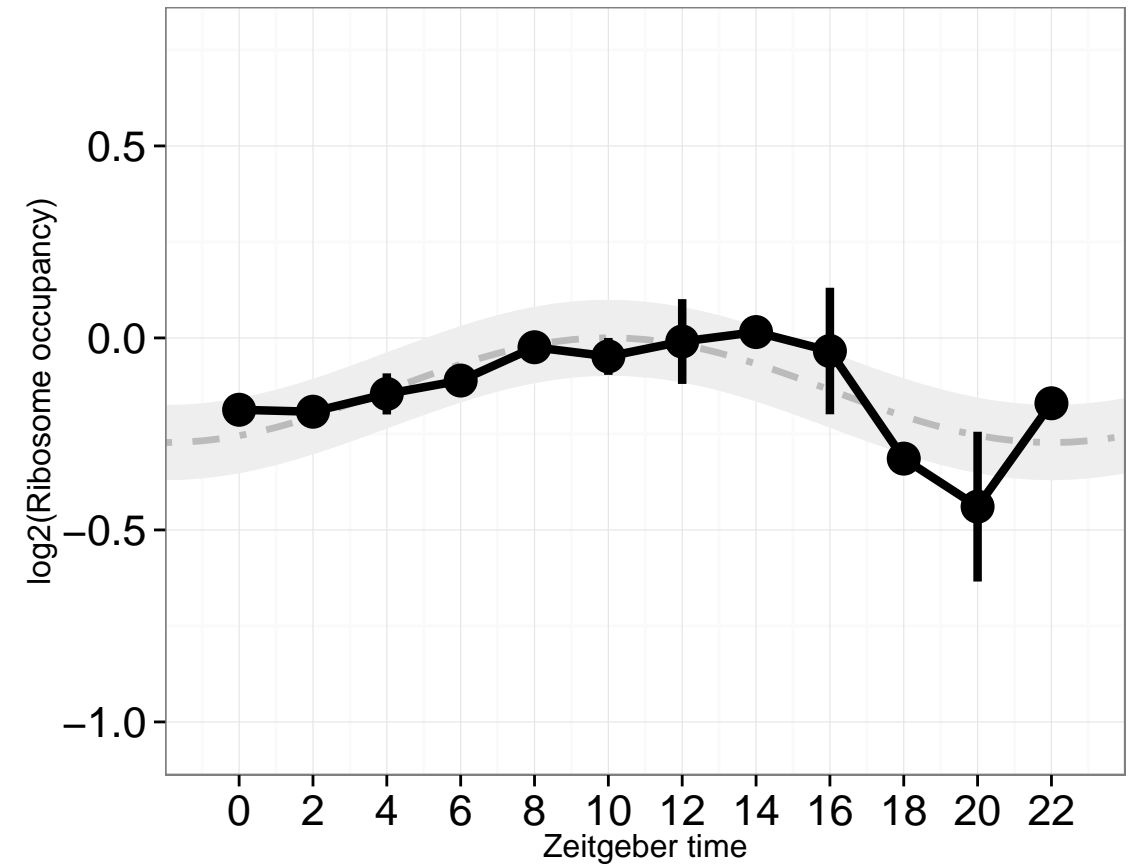

Supplement: Supplementary file 9911 [file 1]

# Clec1a

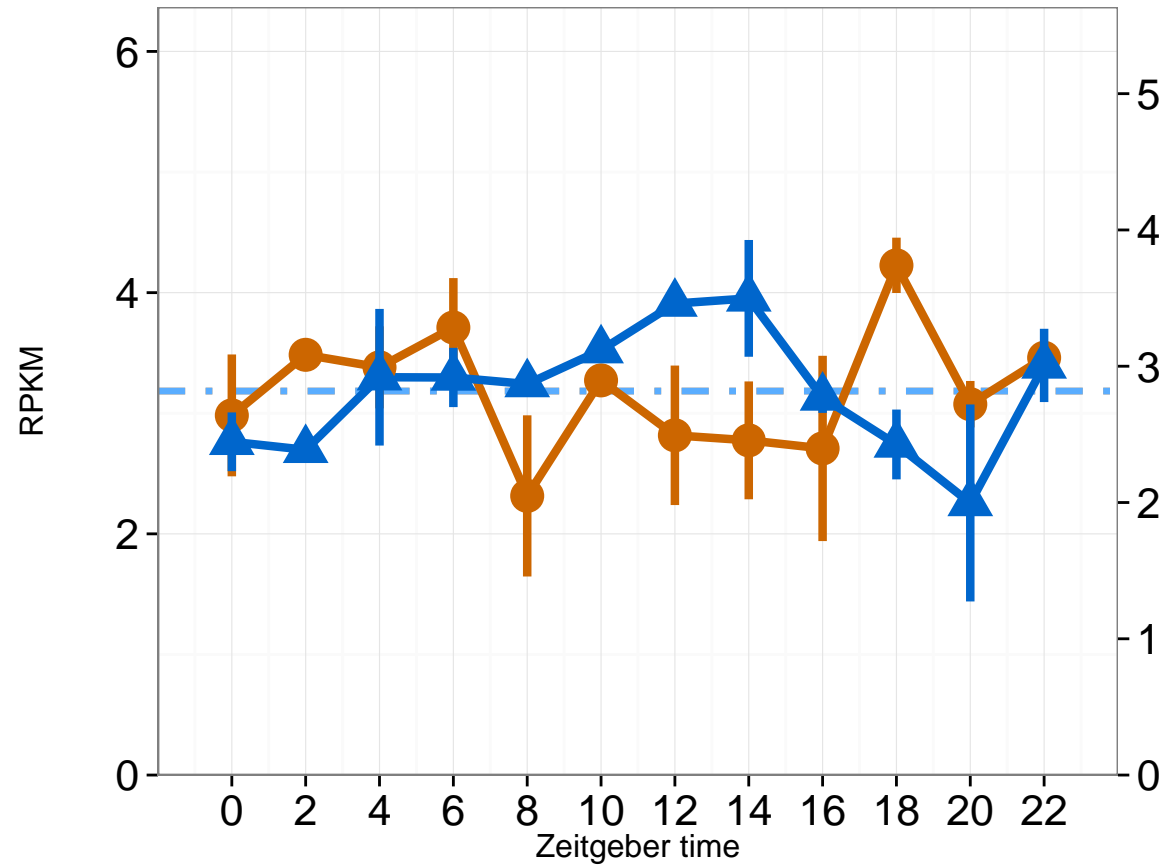

# Clec1a

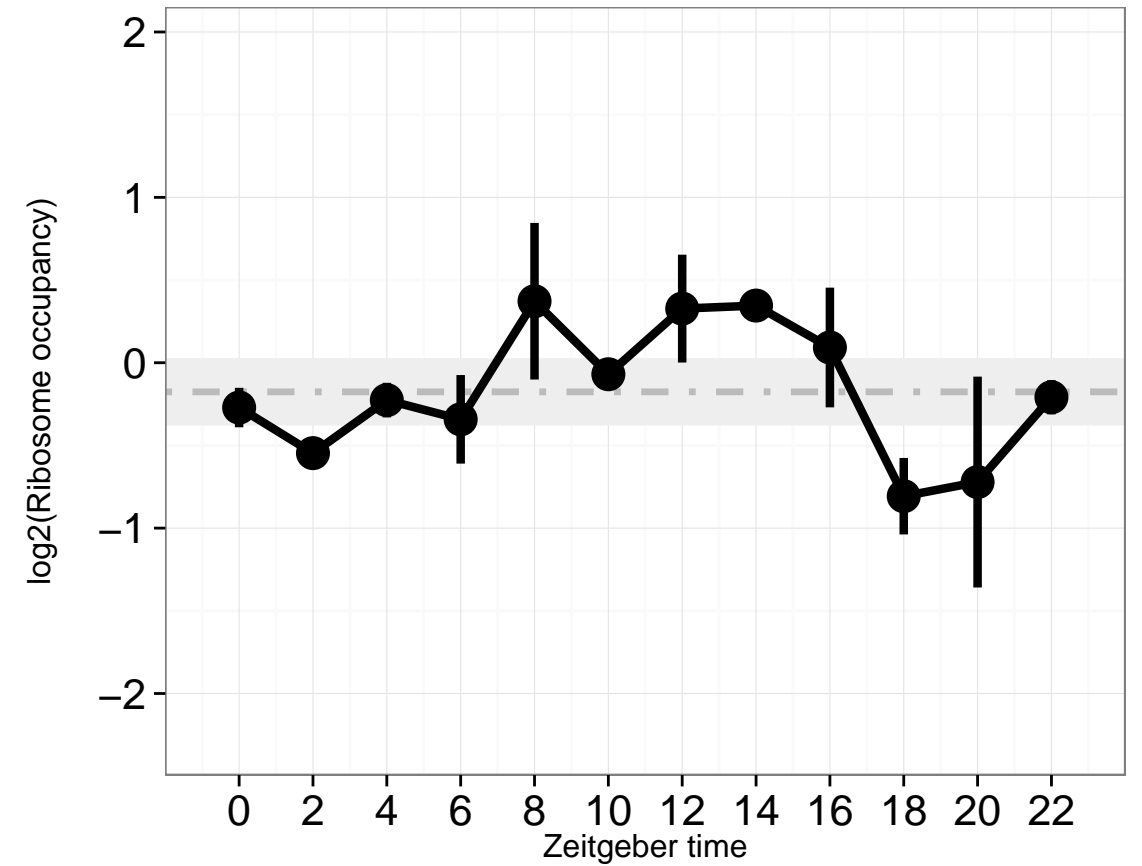

Supplement: Supplementary file 9912 [file 1]

# Zfp408

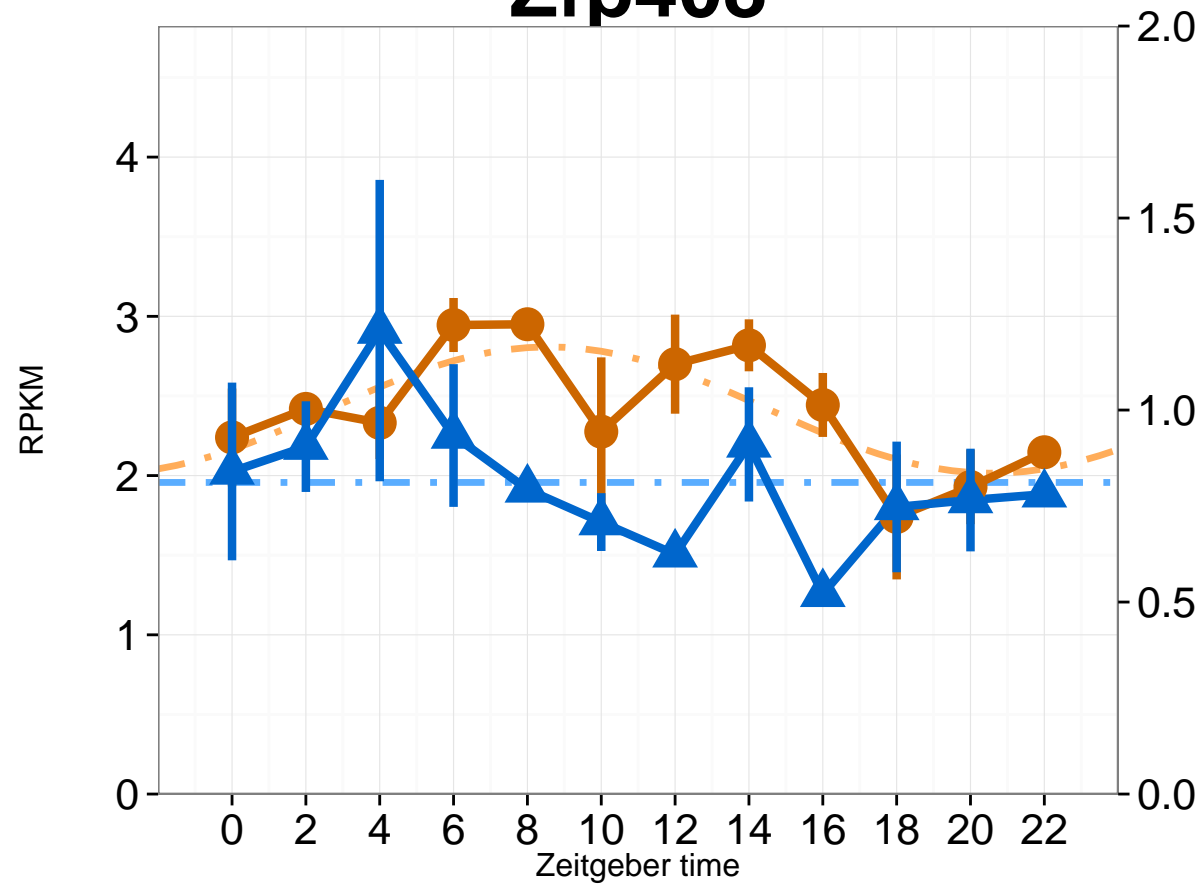

# Zfp408

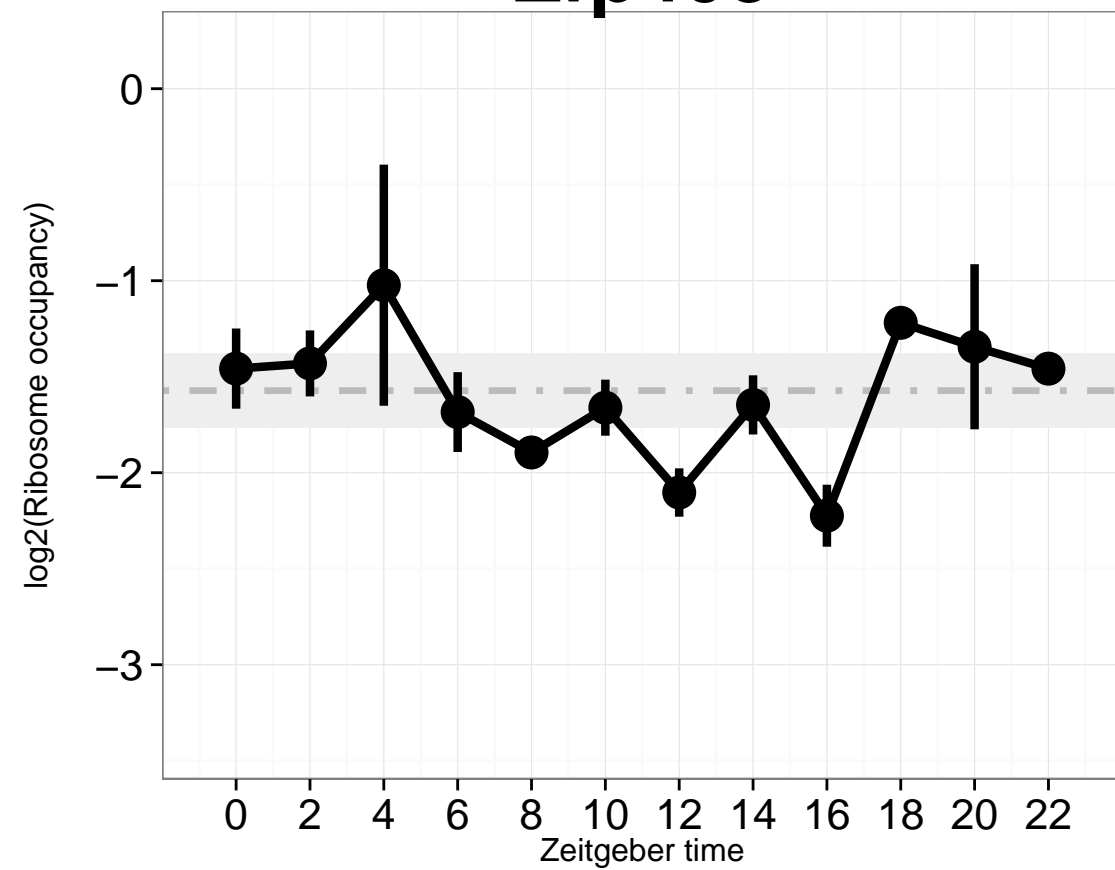

Supplement: Supplementary file 9913 [file 1]

# Adcy3

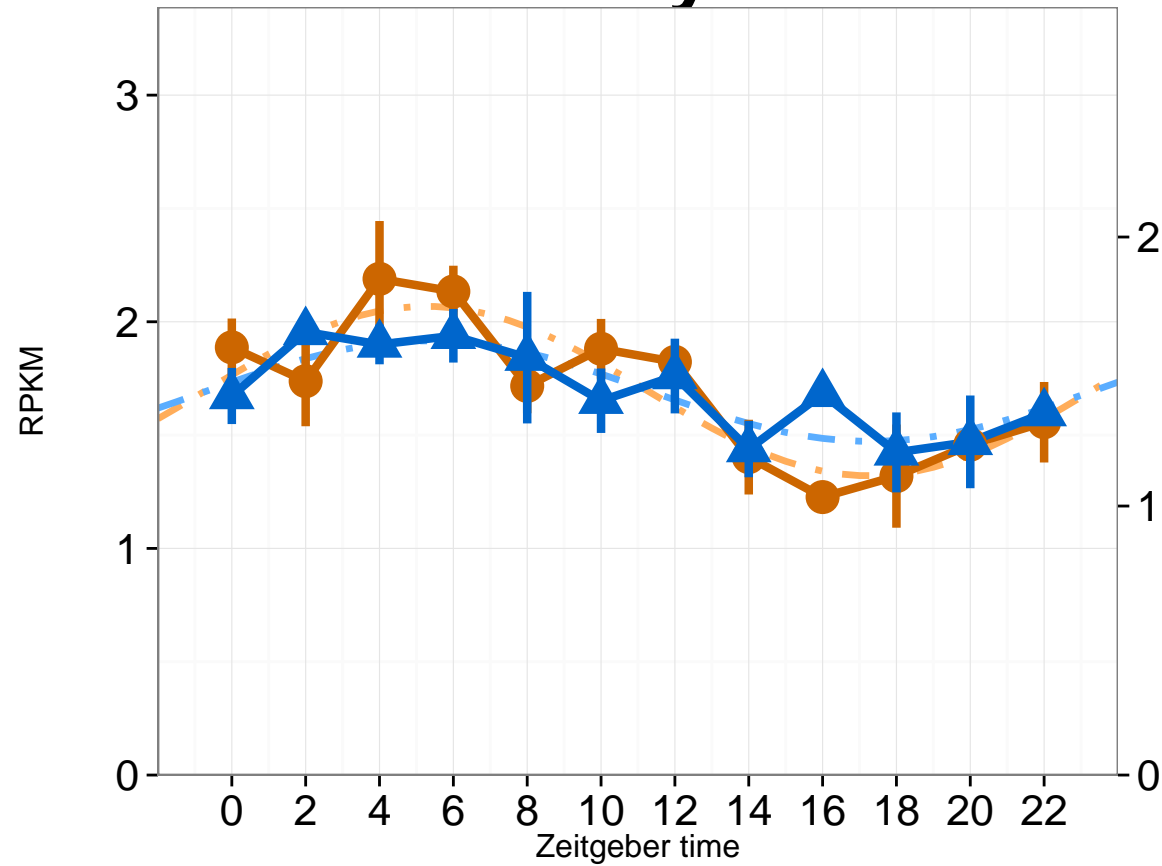

# Adcy3

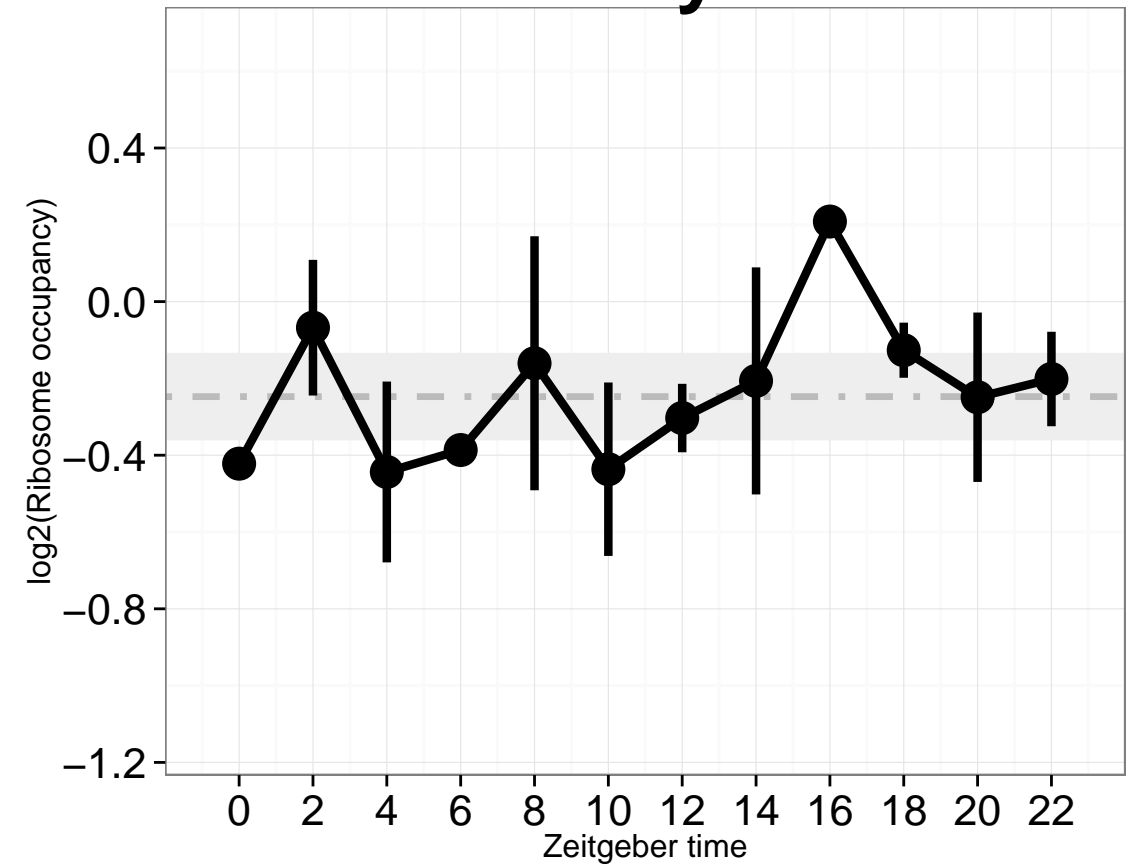

Supplement: Supplementary file 9914 [file 1]

## Sowahc

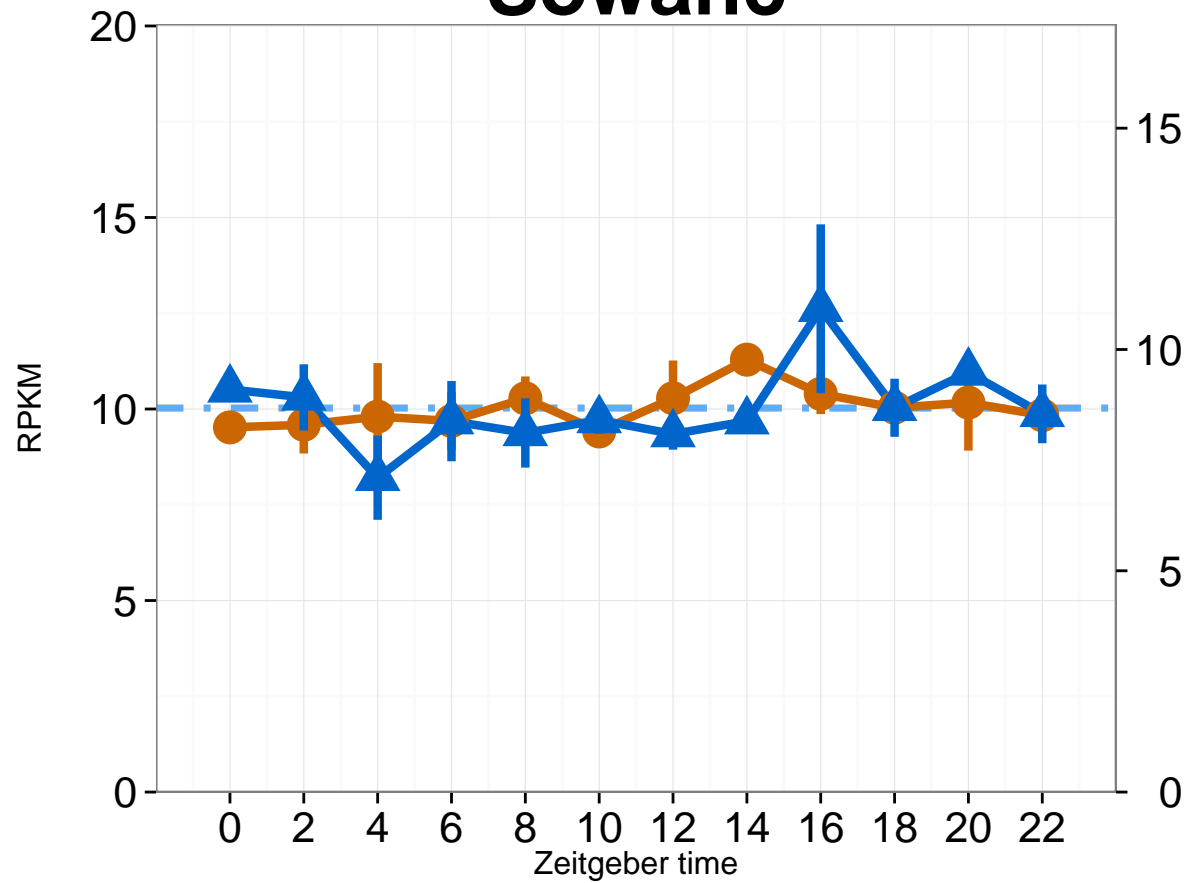

## Sowahc

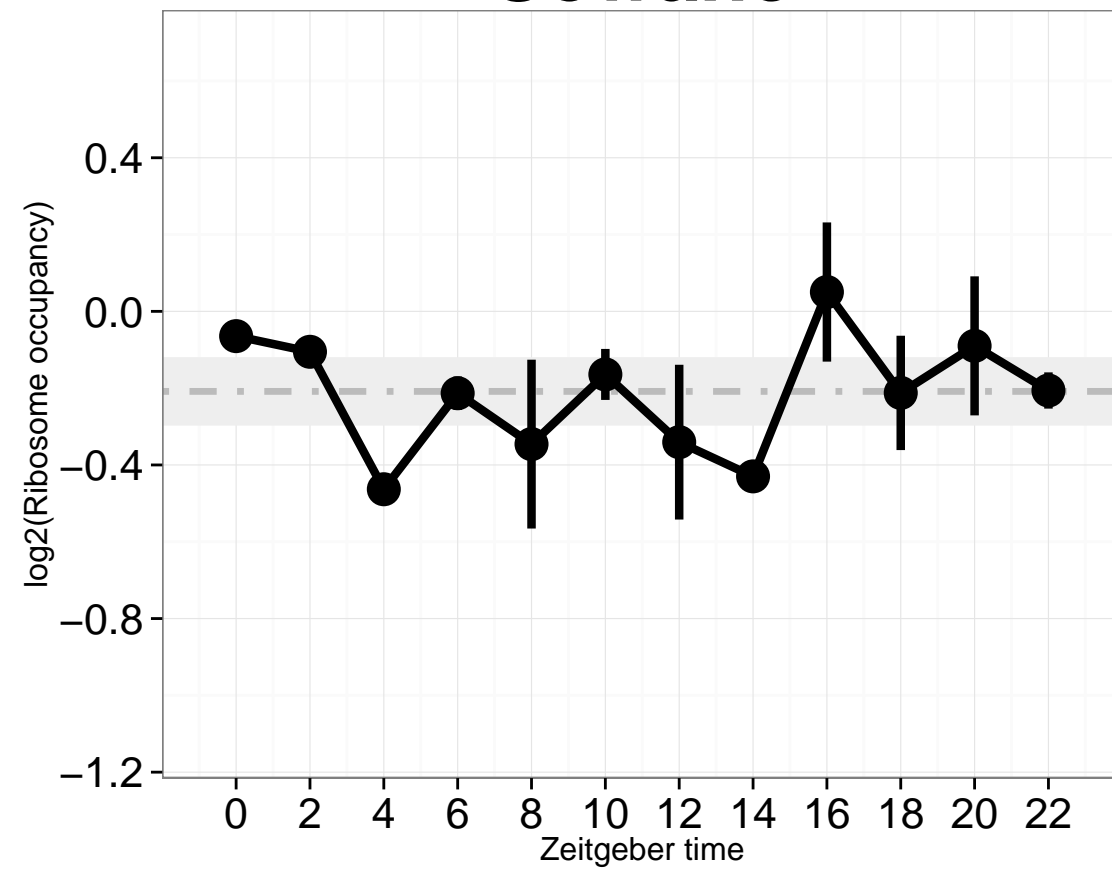

Supplement: Supplementary file 9915 [file 1]

**Pcdhb21 TR**

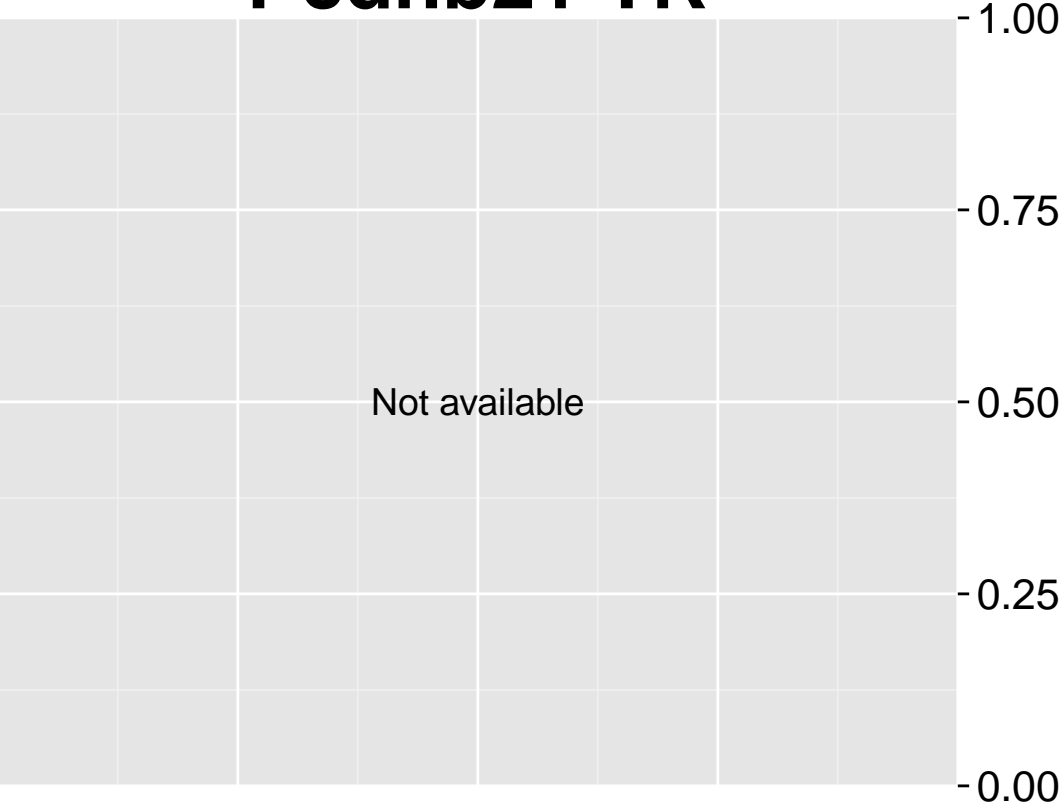

**Pcdhb21 log2(Ribosome occupanc**

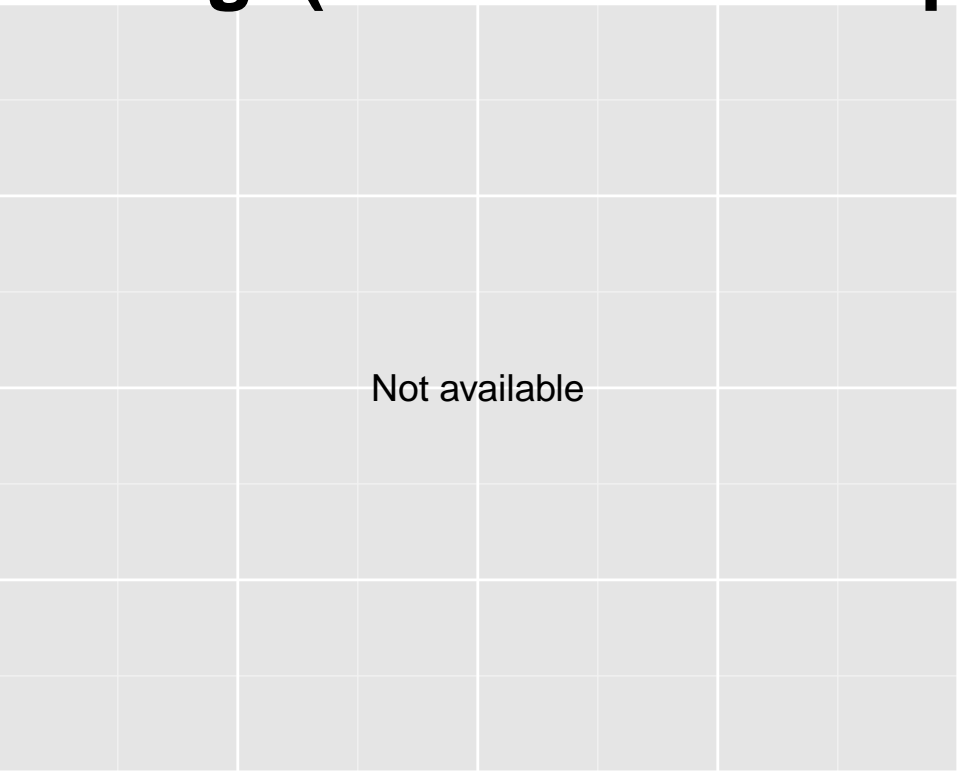

Supplement: Supplementary file 9916 [file 1]

## Ptpn6

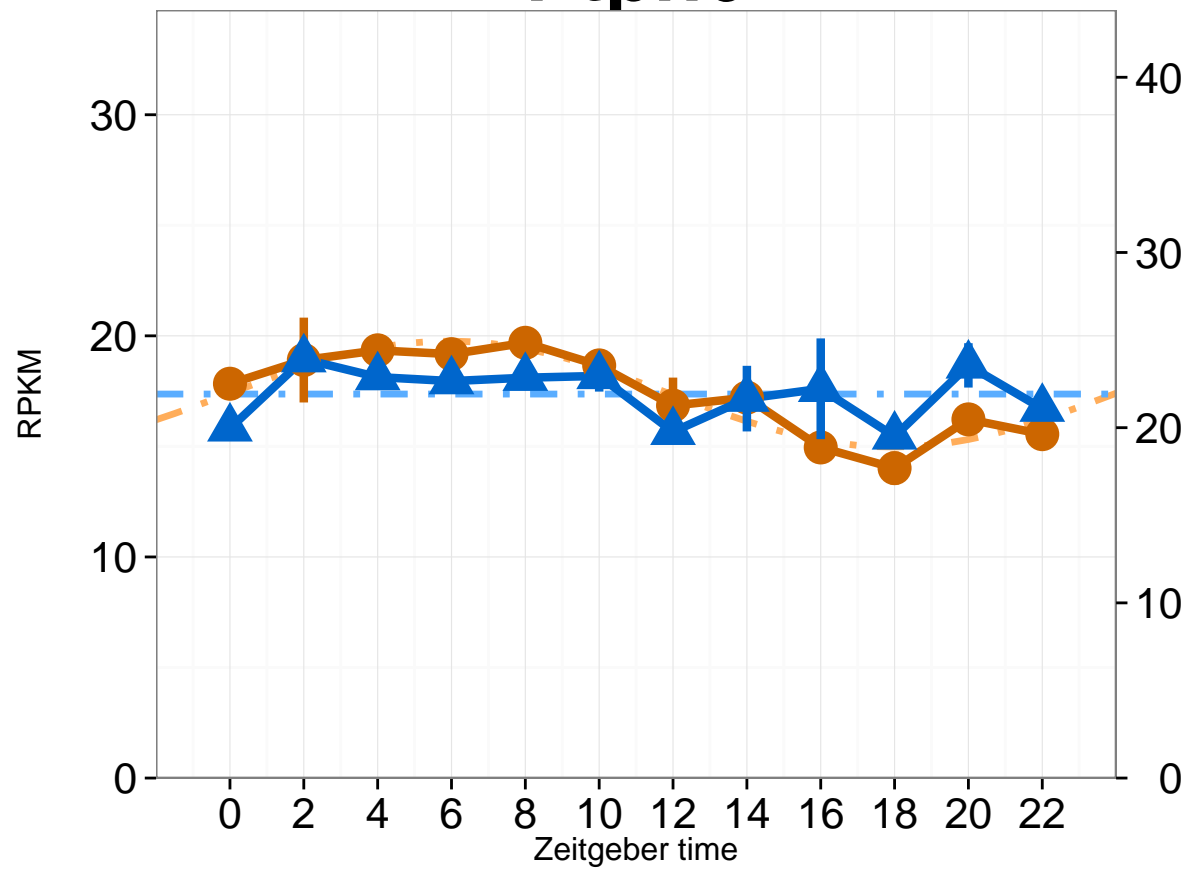

## Ptpn6

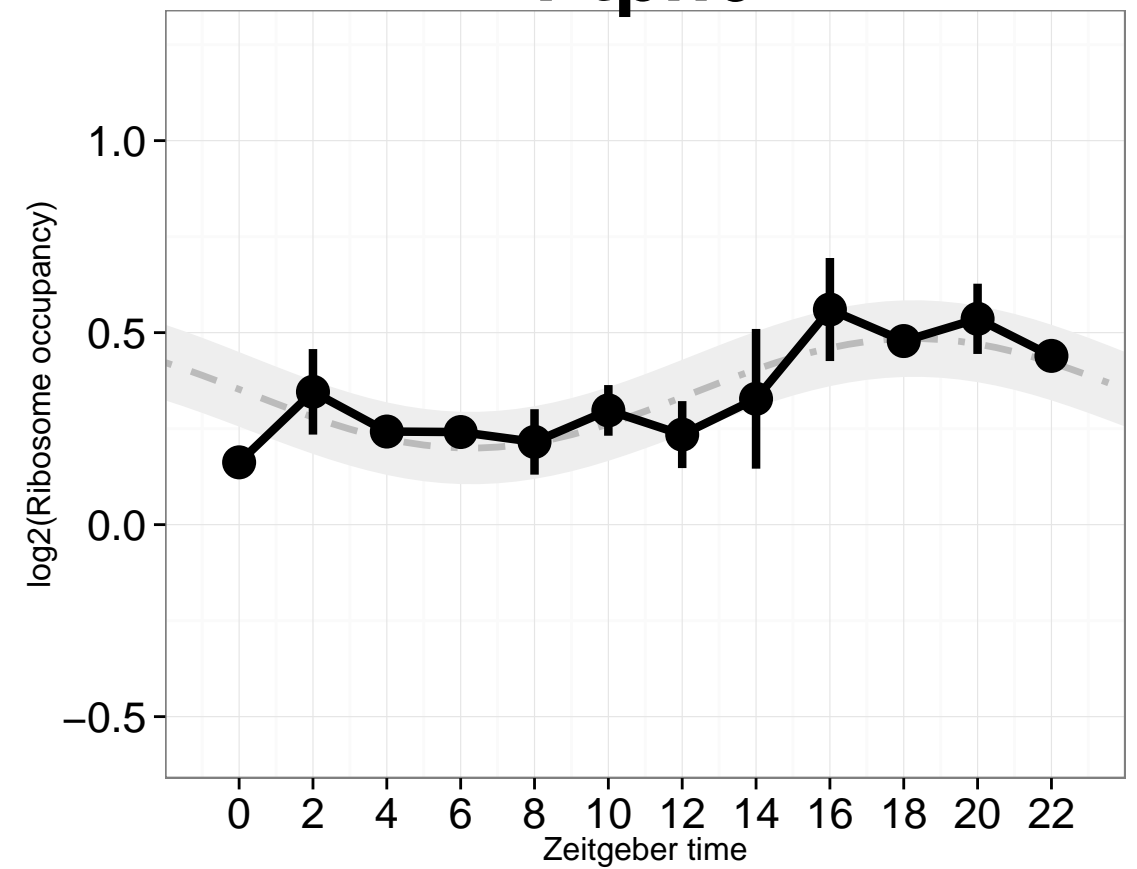

Supplement: Supplementary file 9917 [file 1]

## Prkcd

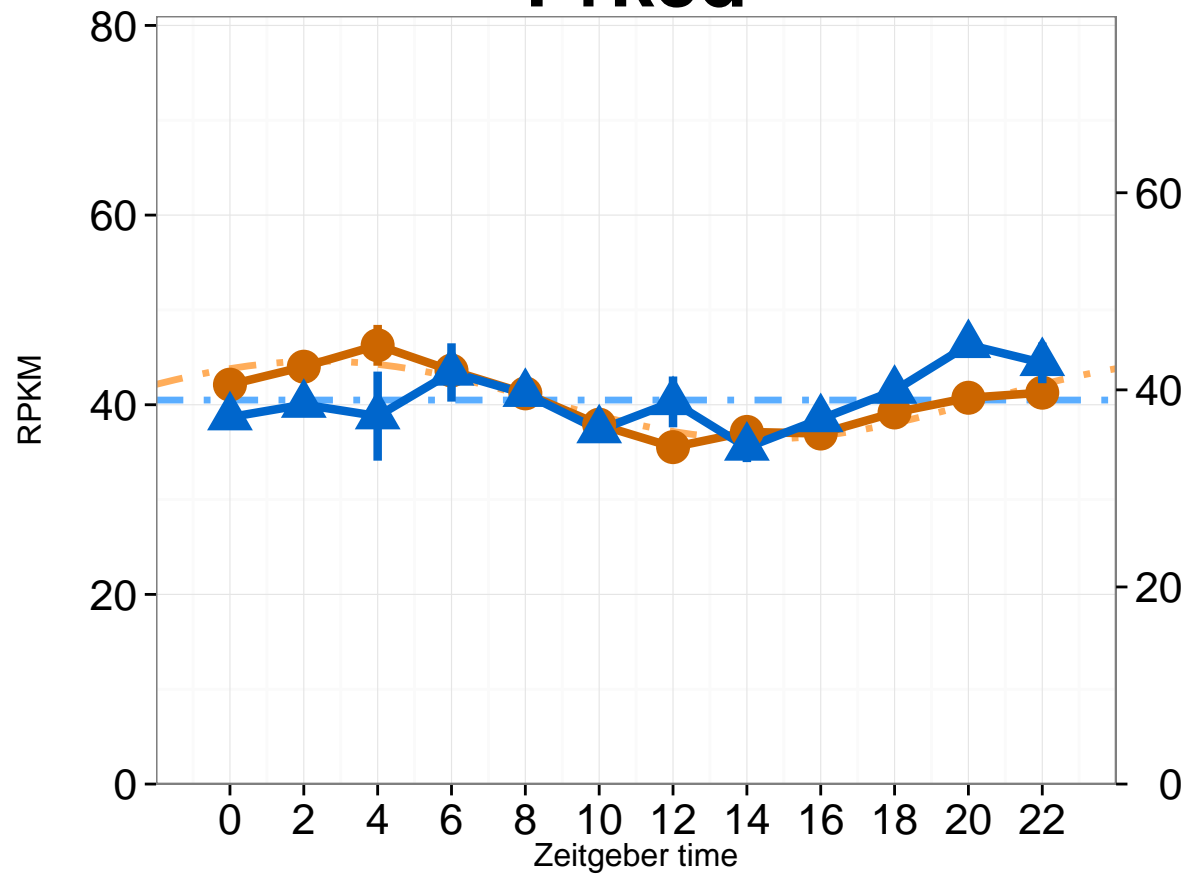

## Prkcd

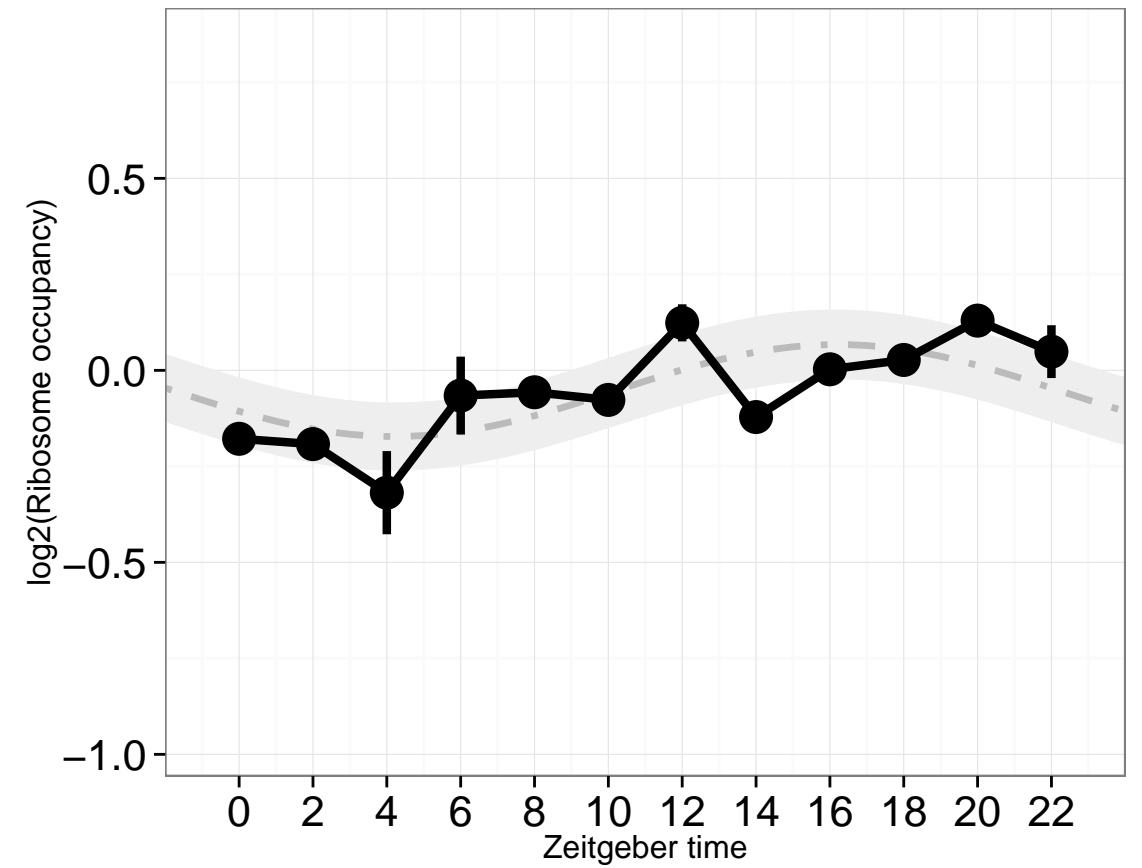

Supplement: Supplementary file 9918 [file 1]

## Ccdc34

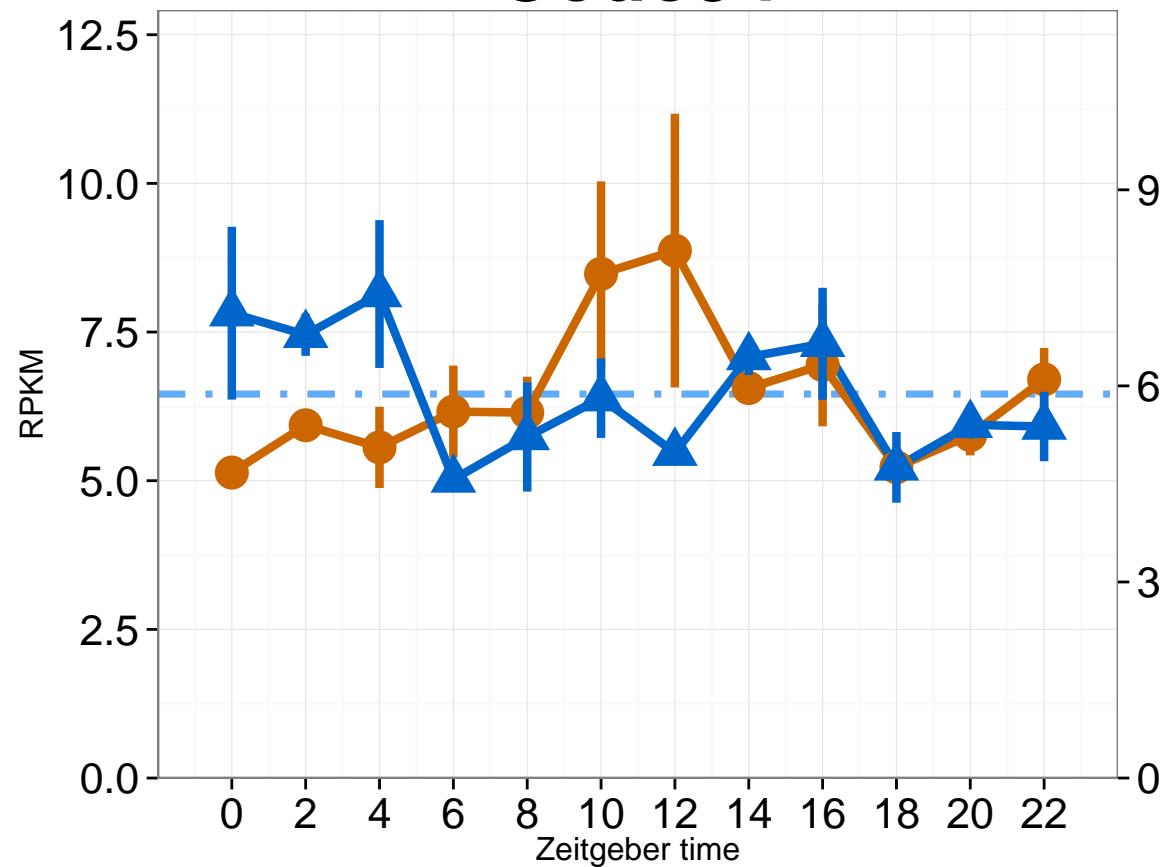

## Ccdc34

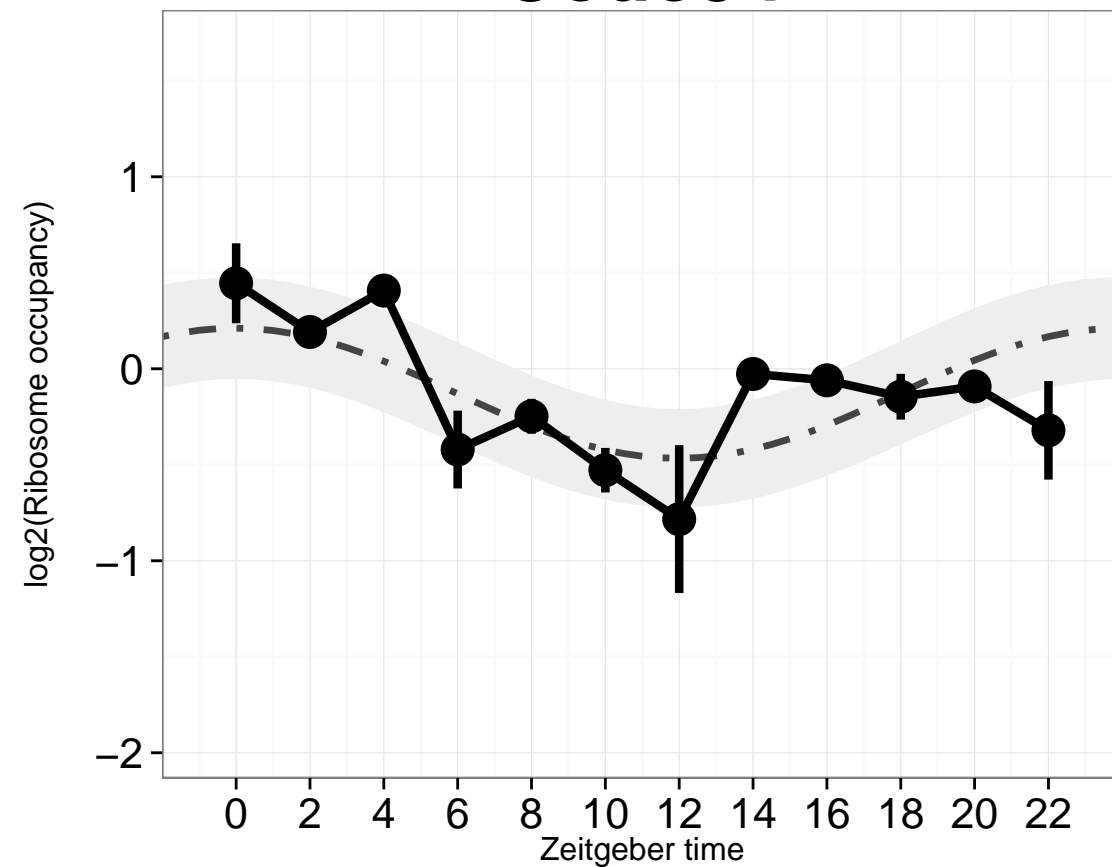

Supplement: Supplementary file 9919 [file 1]

## Aspg

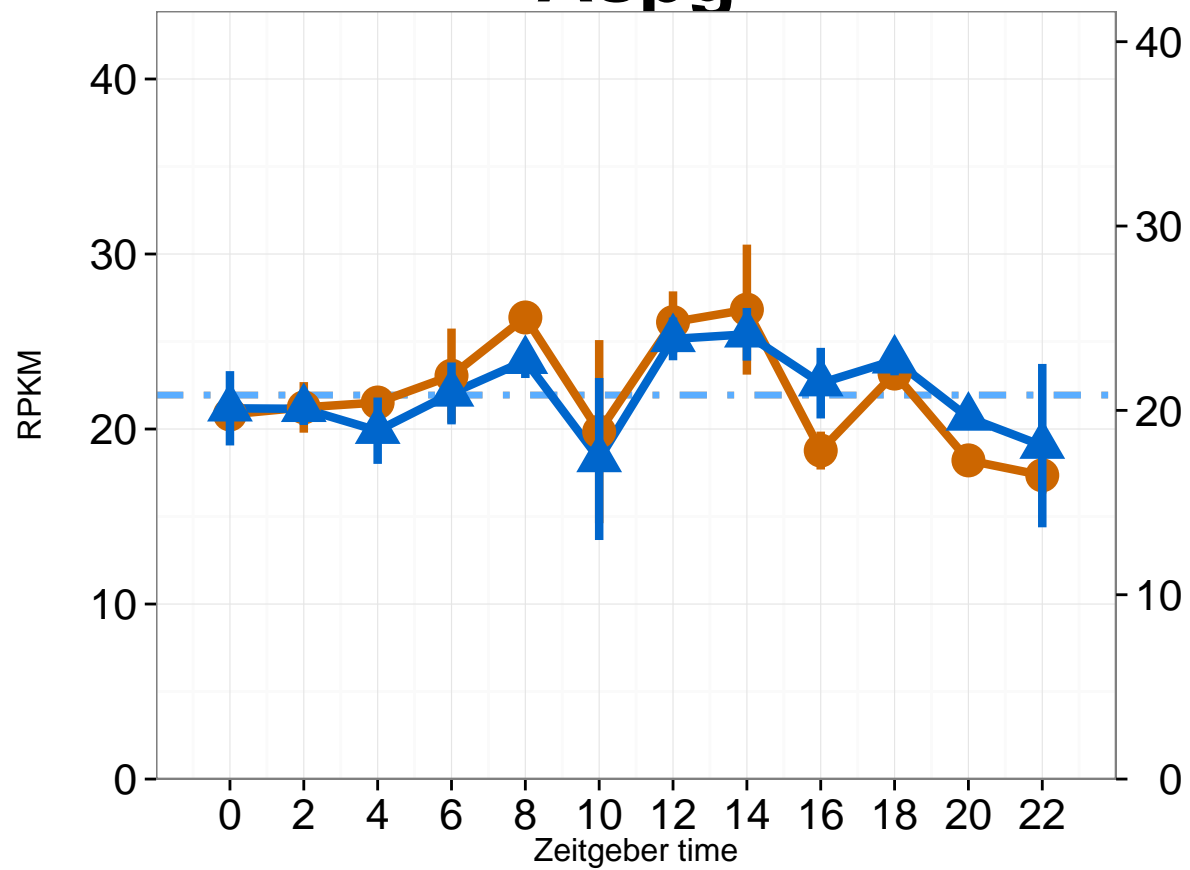

## Aspg

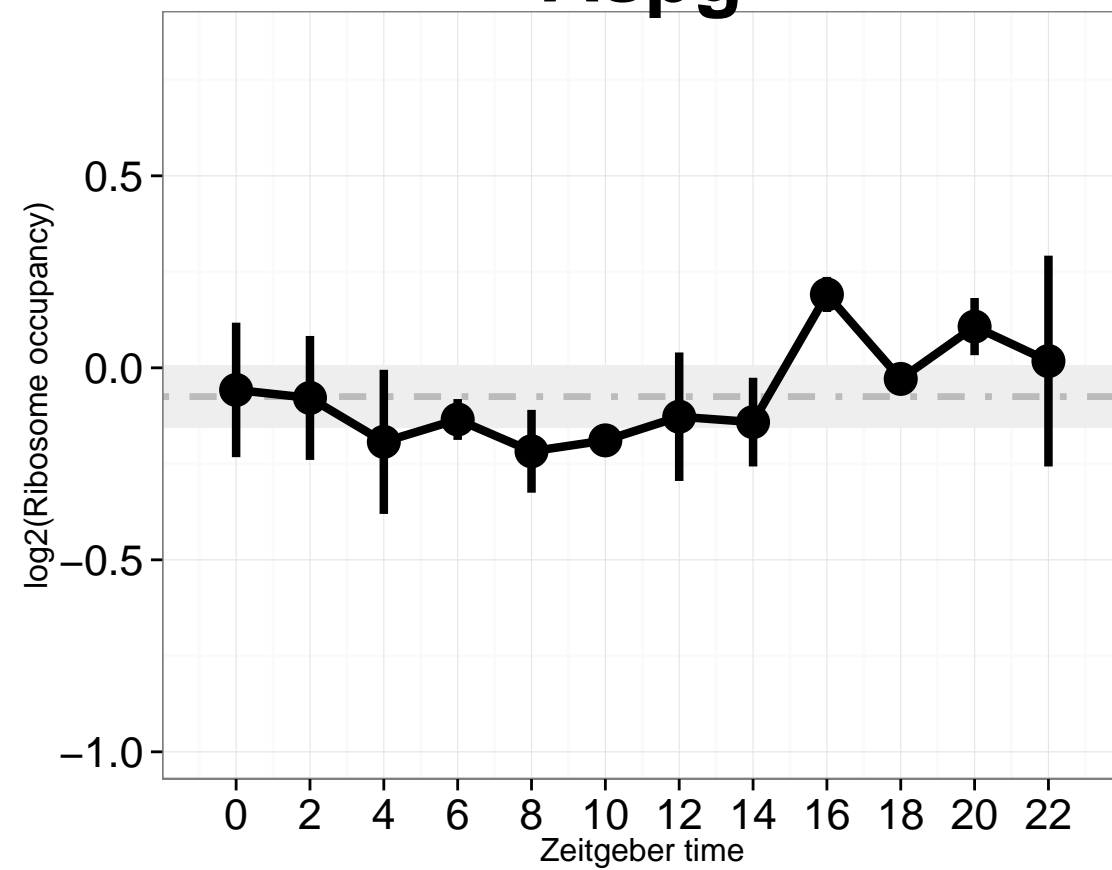

Supplement: Supplementary file 9920 [file 1]

# Sh2d4a

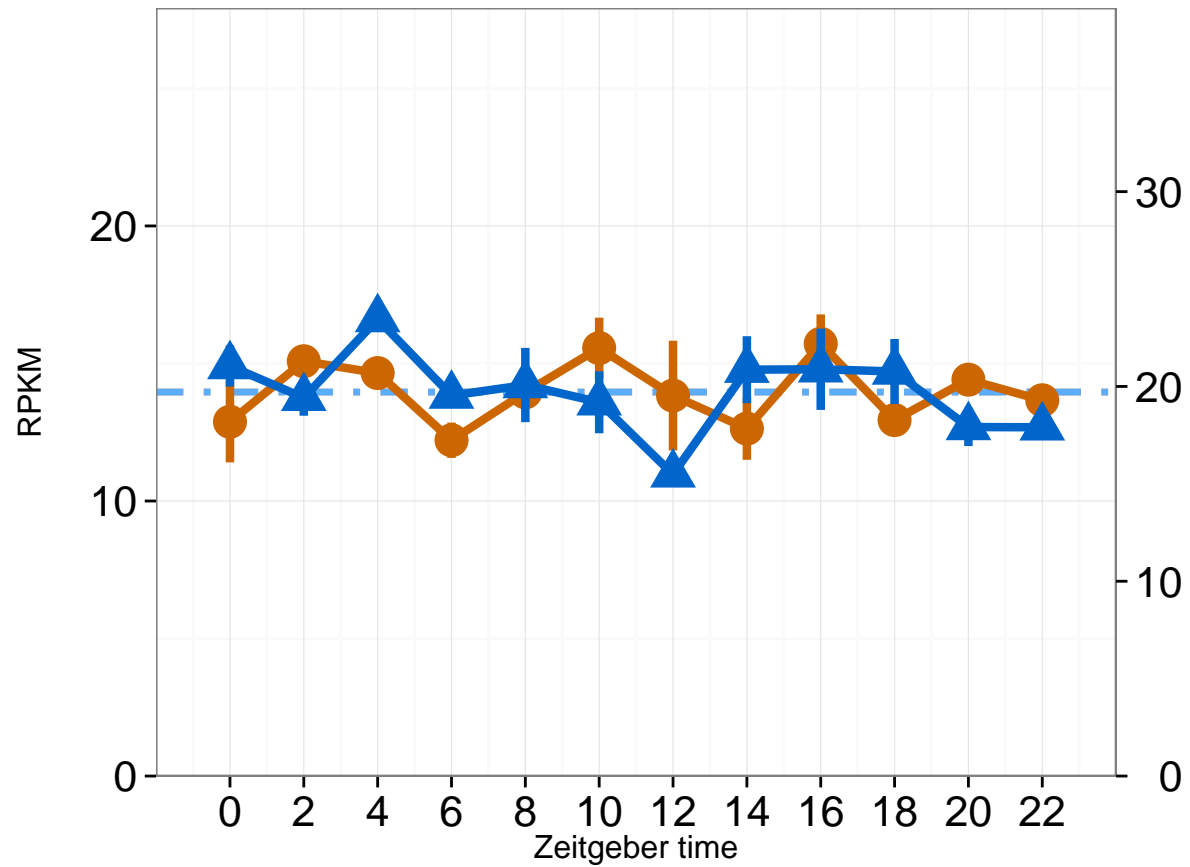

# Sh2d4a

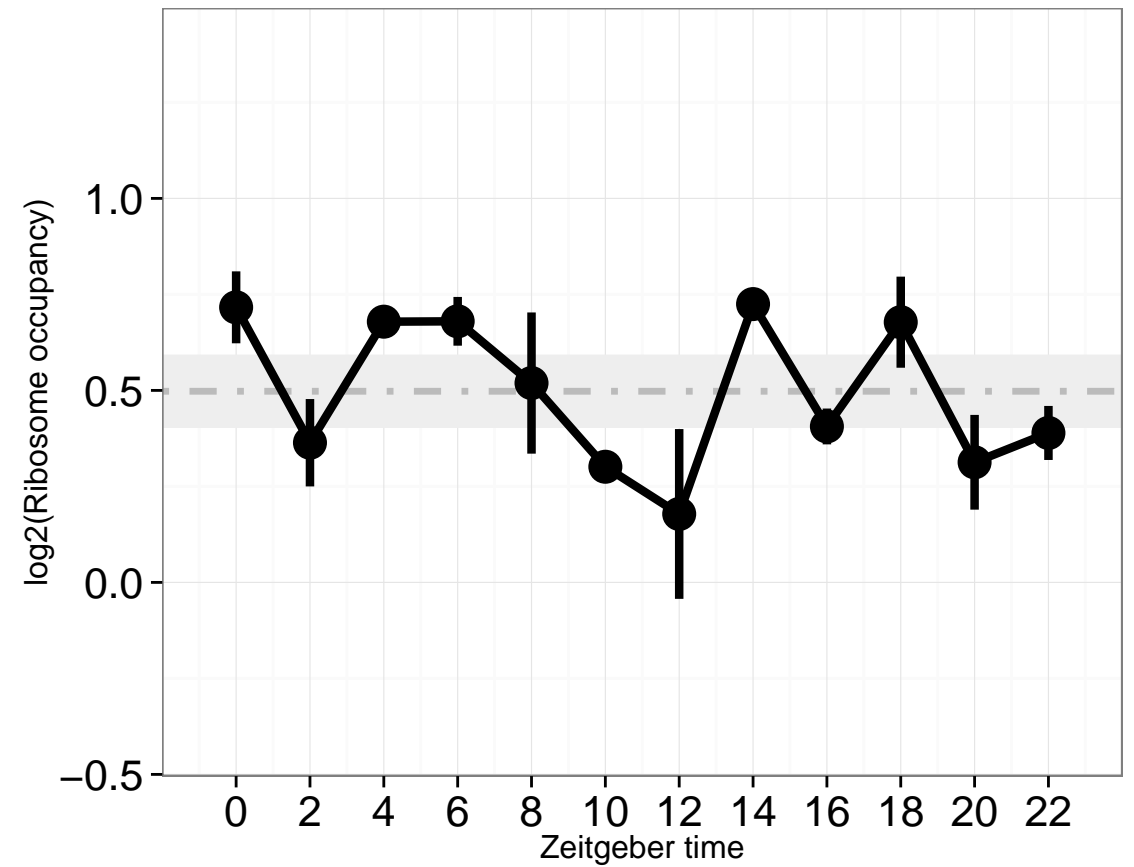

Supplement: Supplementary file 9921 [file 1]

# Pcbd1

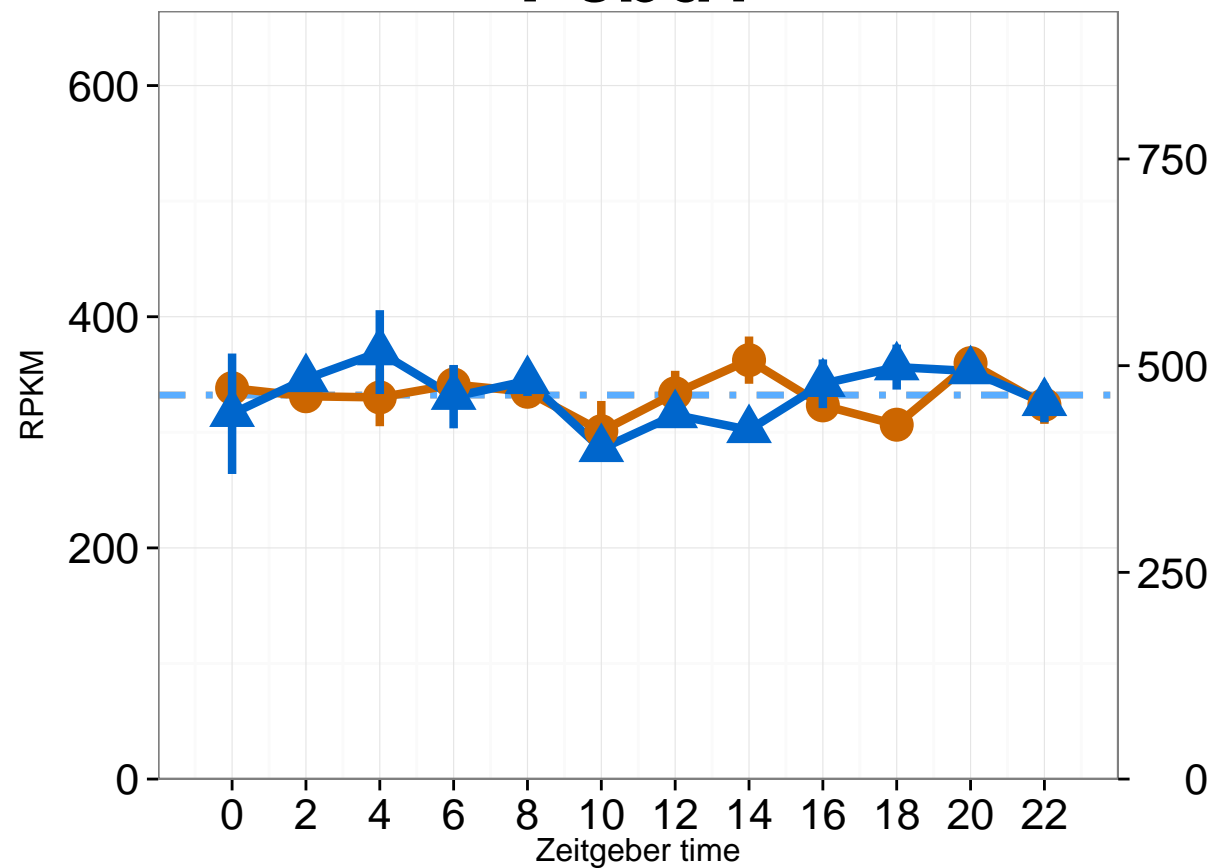

# Pcbd1

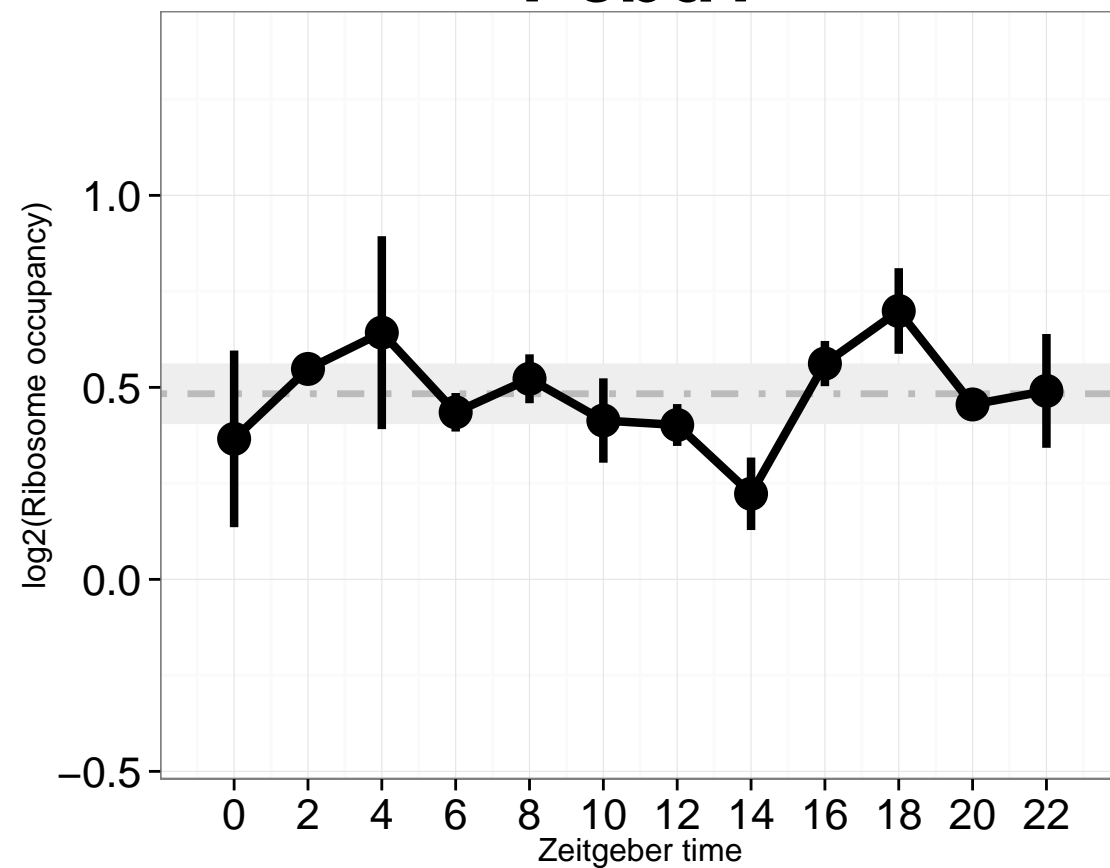

Supplement: Supplementary file 9922 [file 1]

## Vegfb

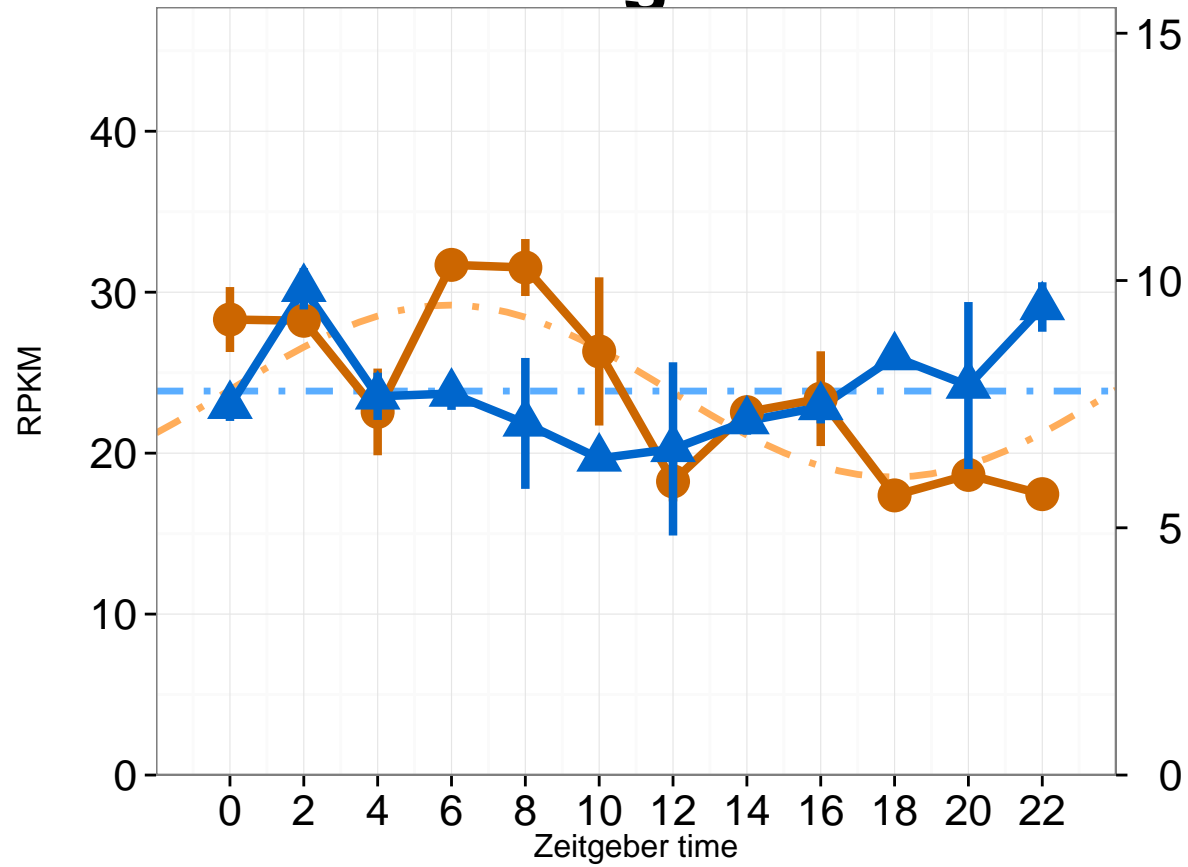

## Vegfb

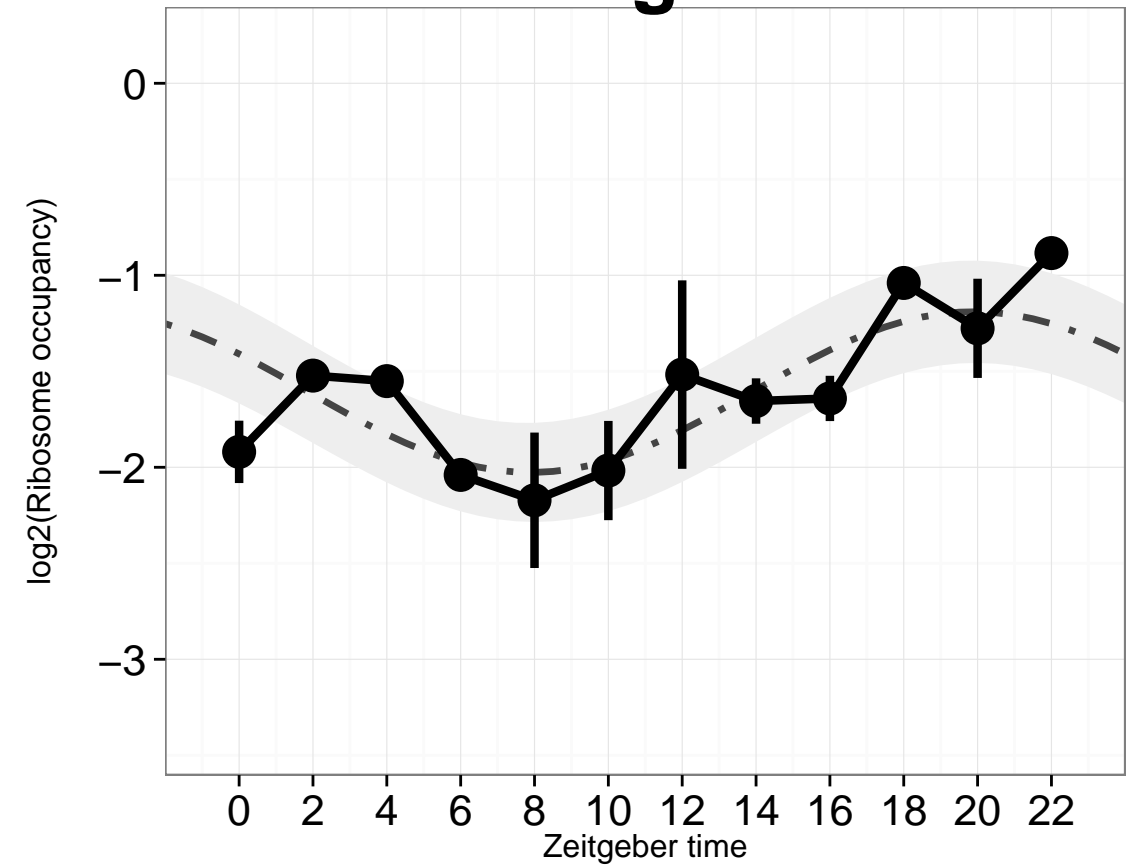

Supplement: Supplementary file 9923 [file 1]

# Lmod3

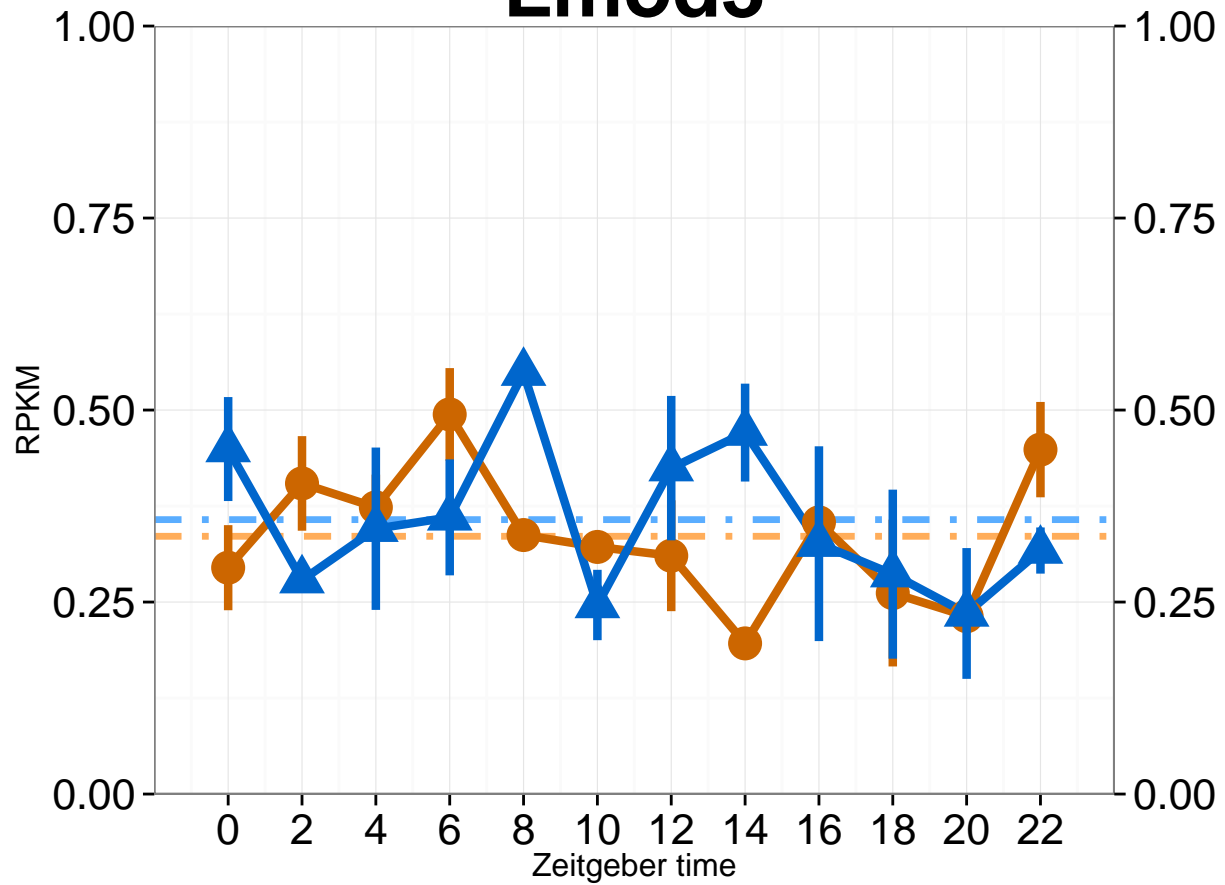

# Lmod3

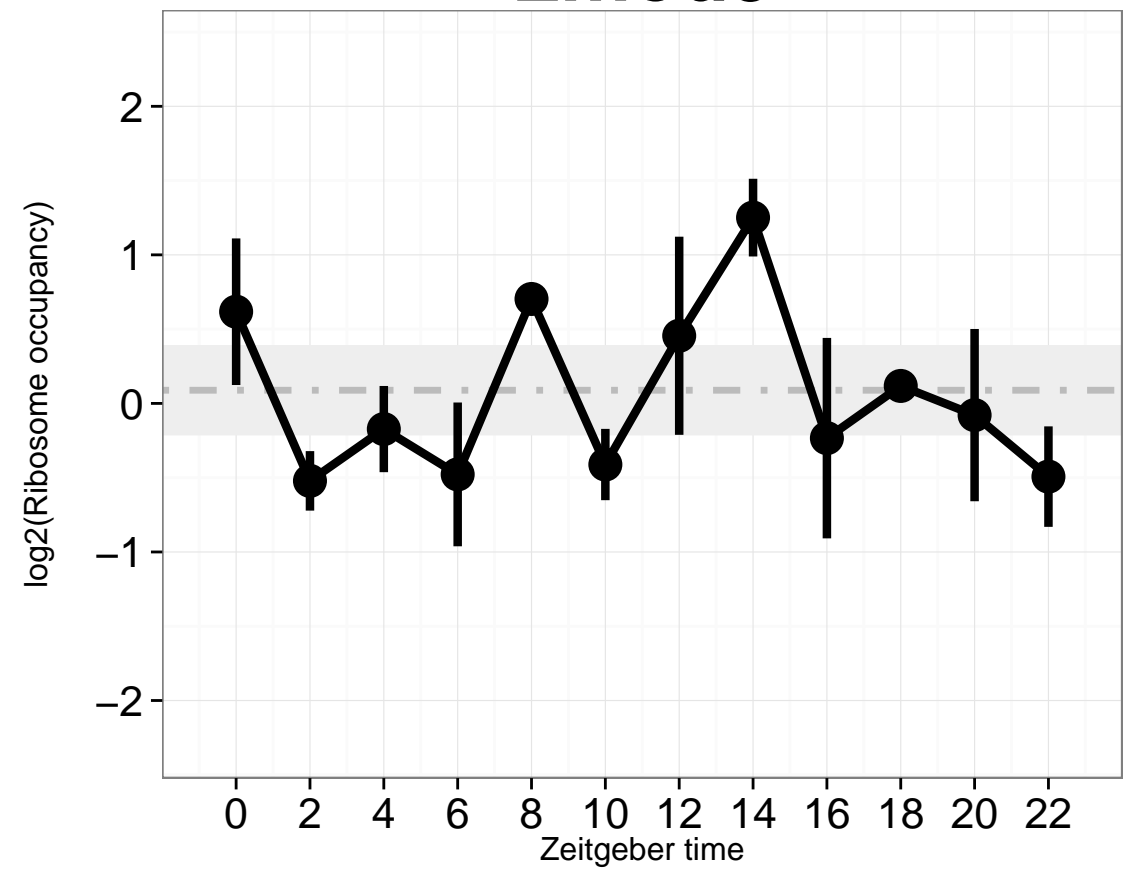

Supplement: Supplementary file 9924 [file 1]

# Bace2

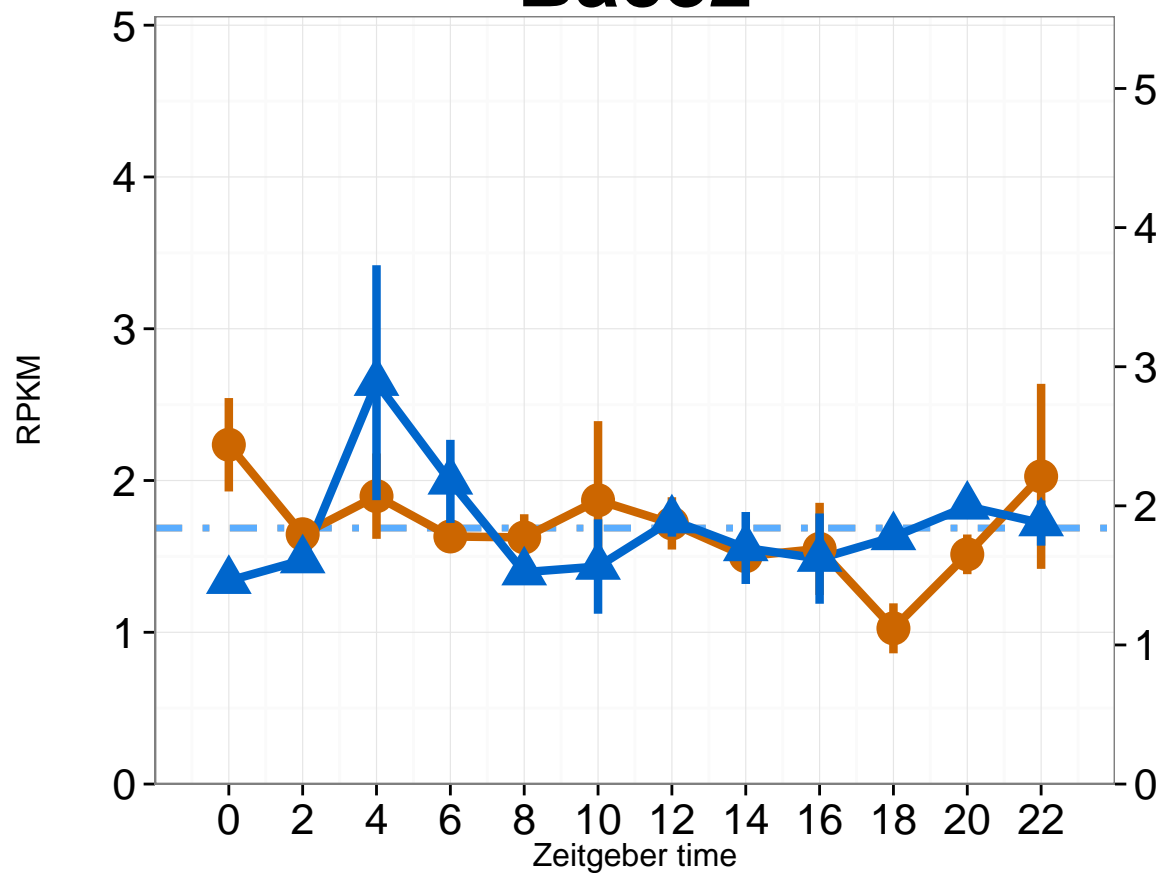

# Bace2

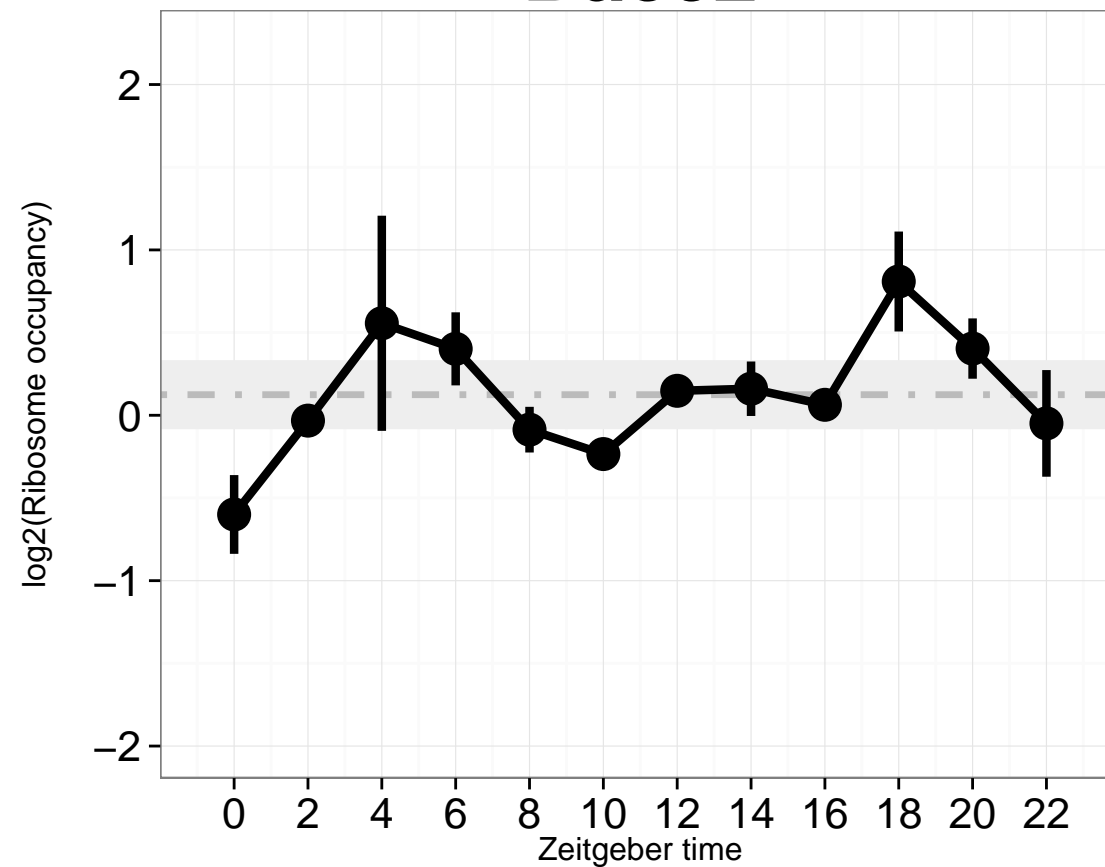

Supplement: Supplementary file 9925 [file 1]

# Atp6v0c

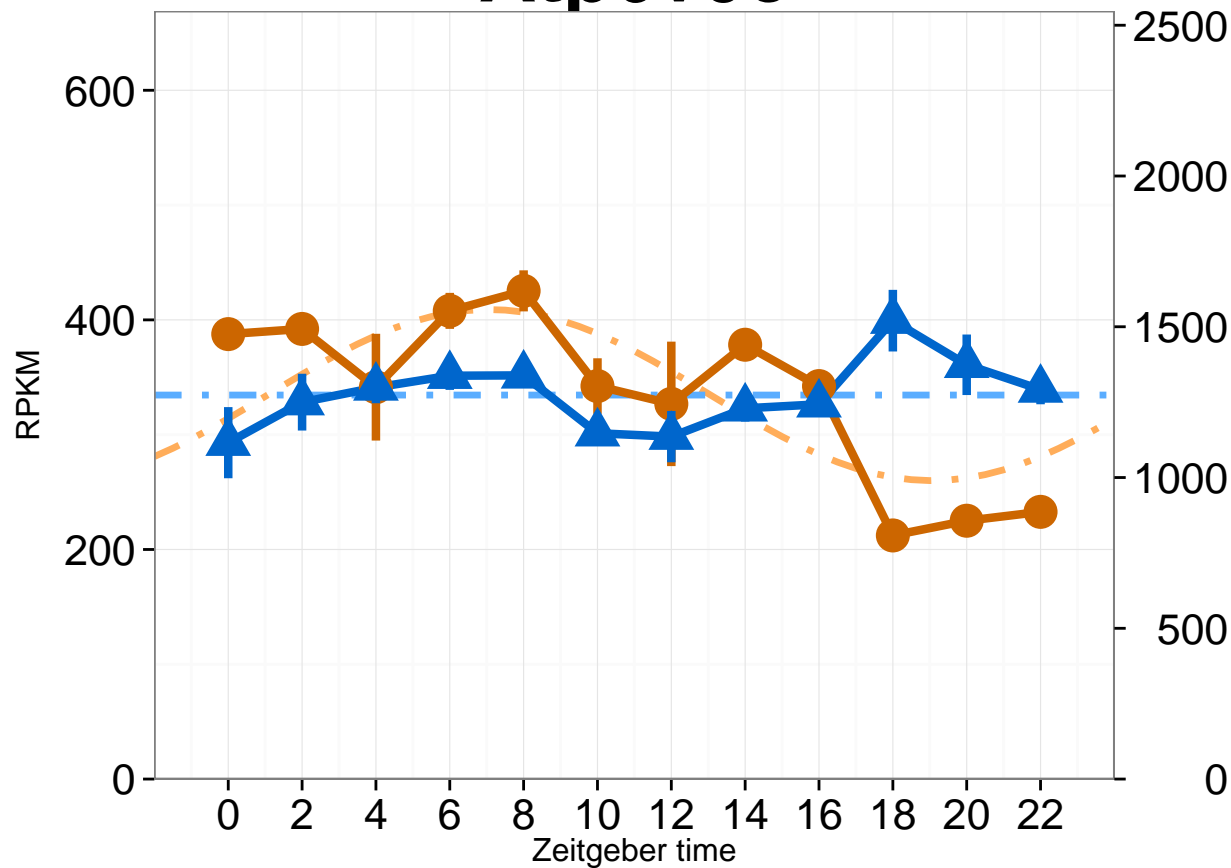

# Atp6v0c

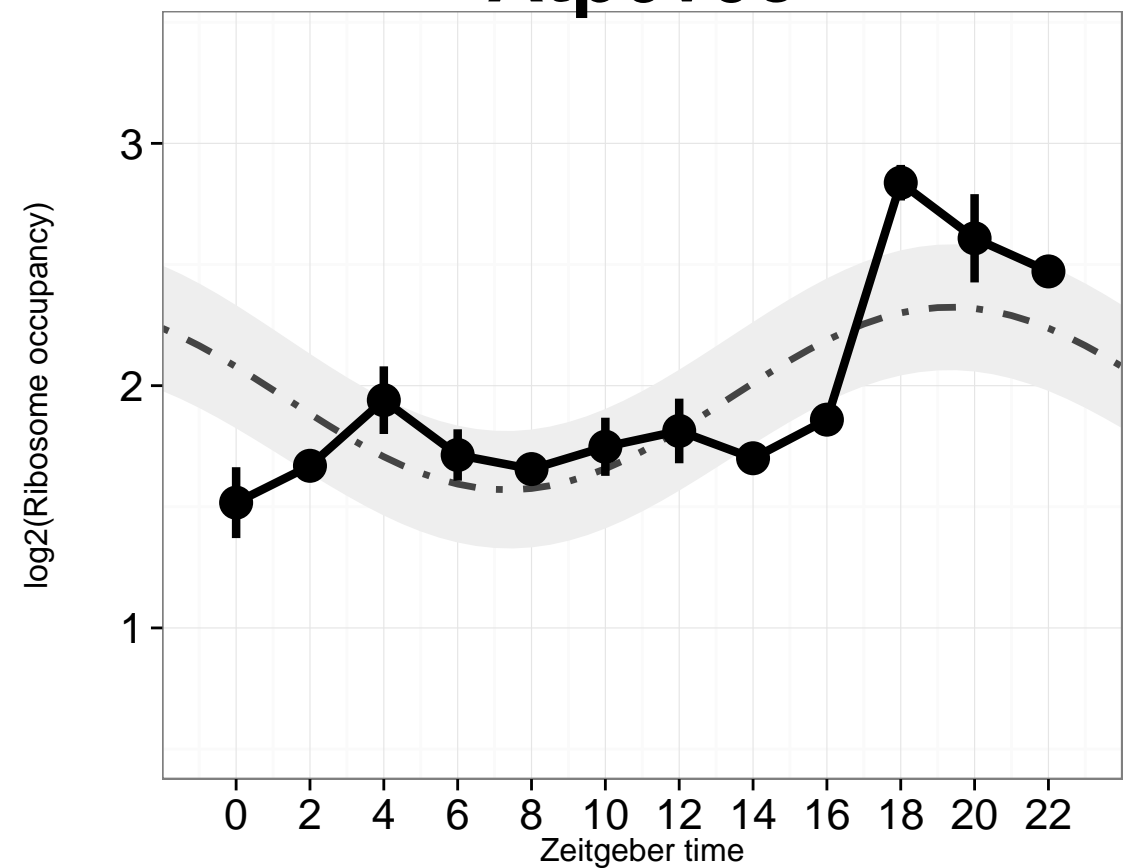

Supplement: Supplementary file 9926 [file 1]

# Gpank1

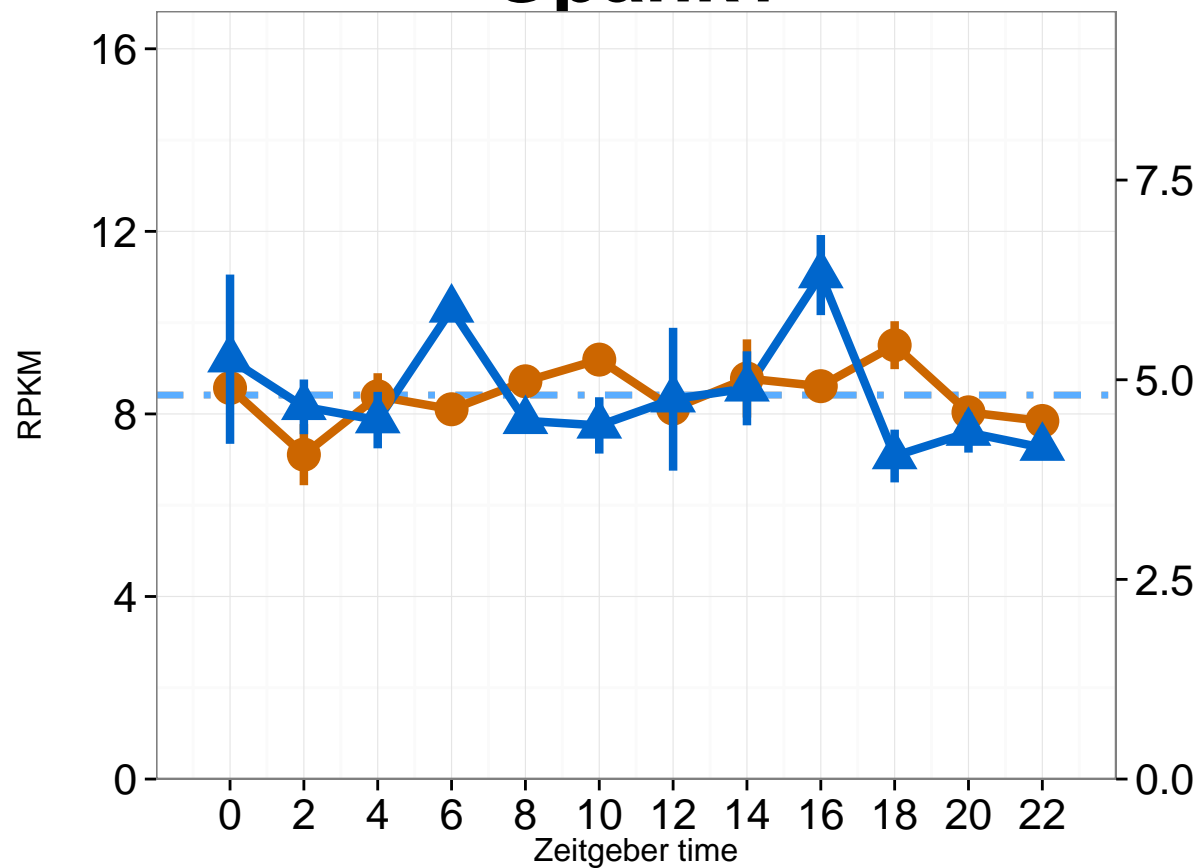

# Gpank1

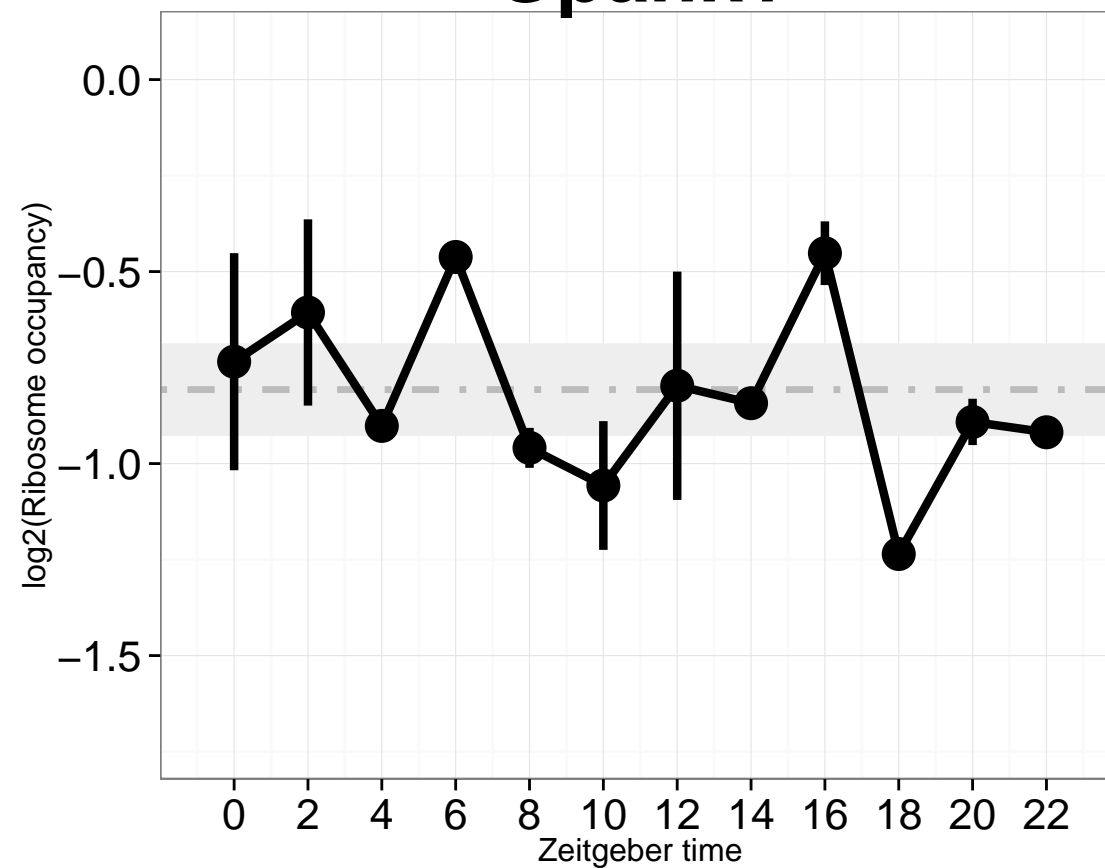

Supplement: Supplementary file 9927 [file 1]

# Bnc2

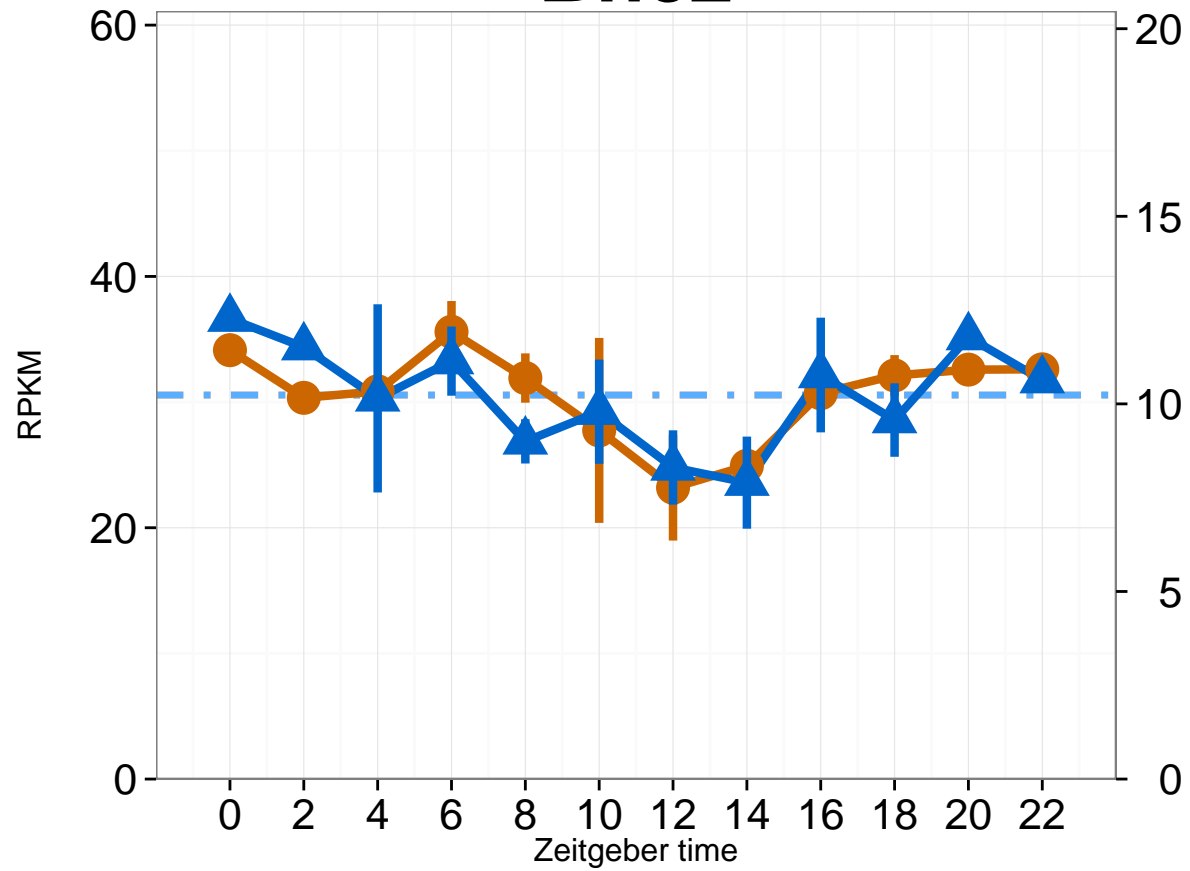

# Bnc2

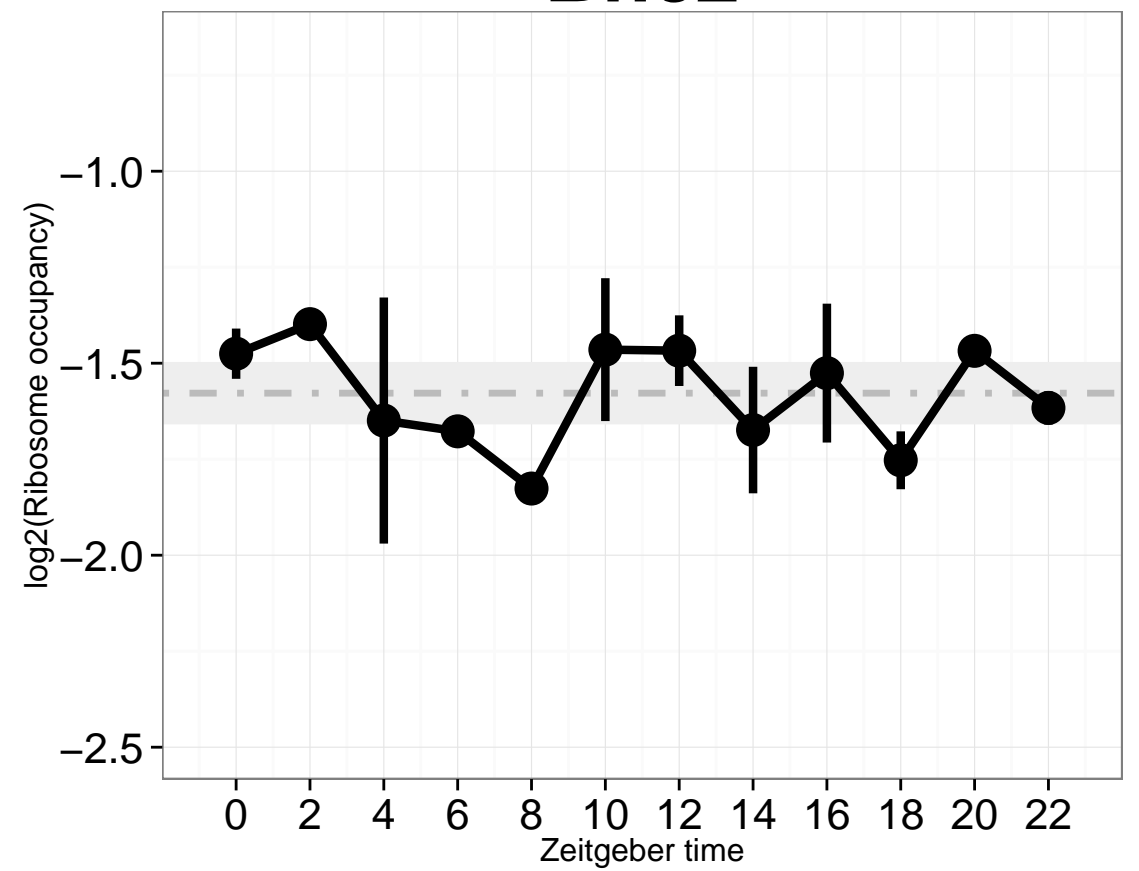

Supplement: Supplementary file 9928 [file 1]

# Atp9b

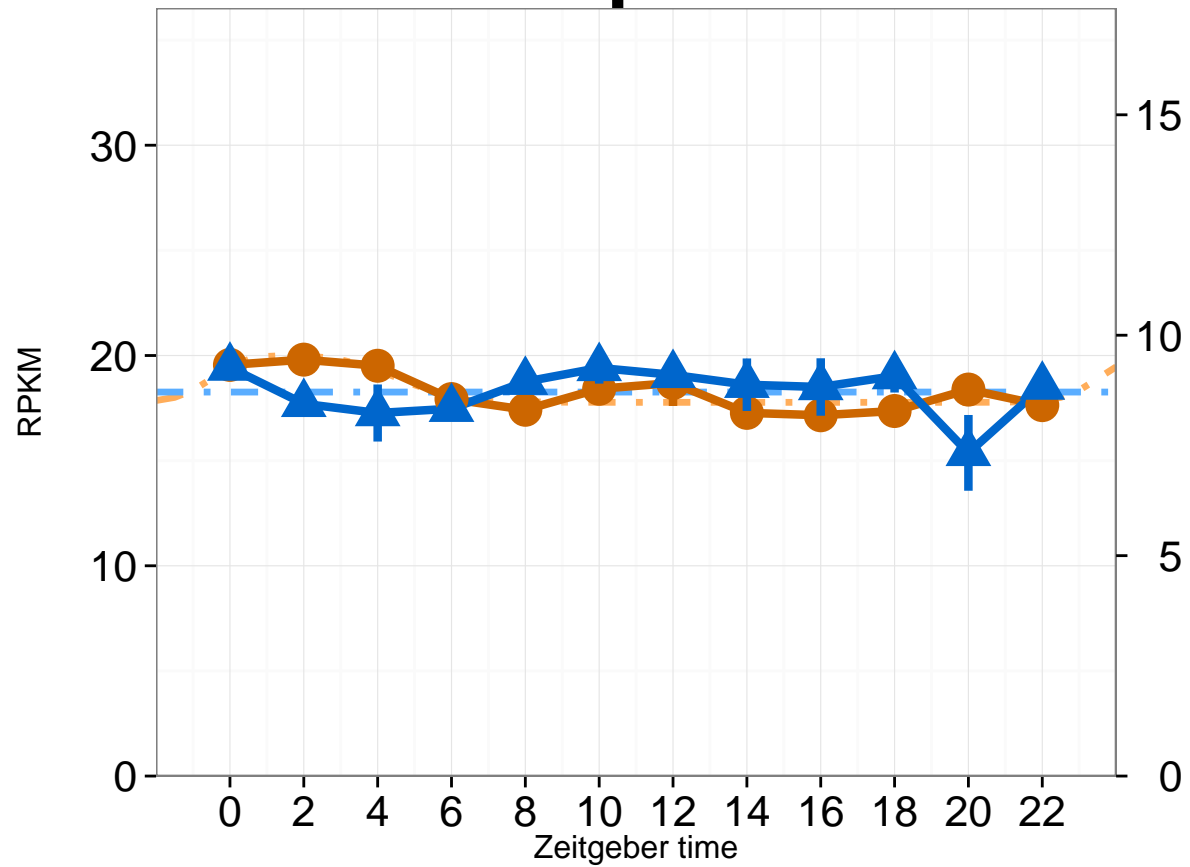

# Atp9b

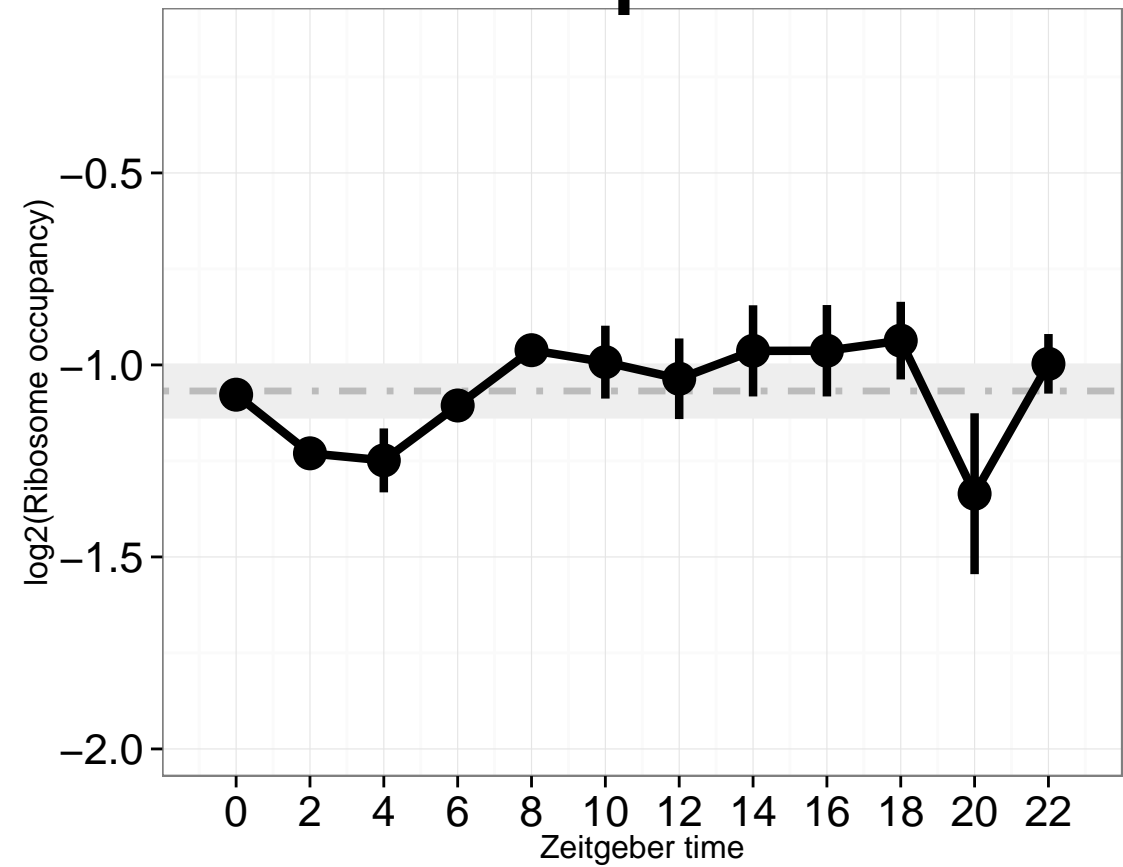

Supplement: Supplementary file 9929 [file 1]

## Smarcd3

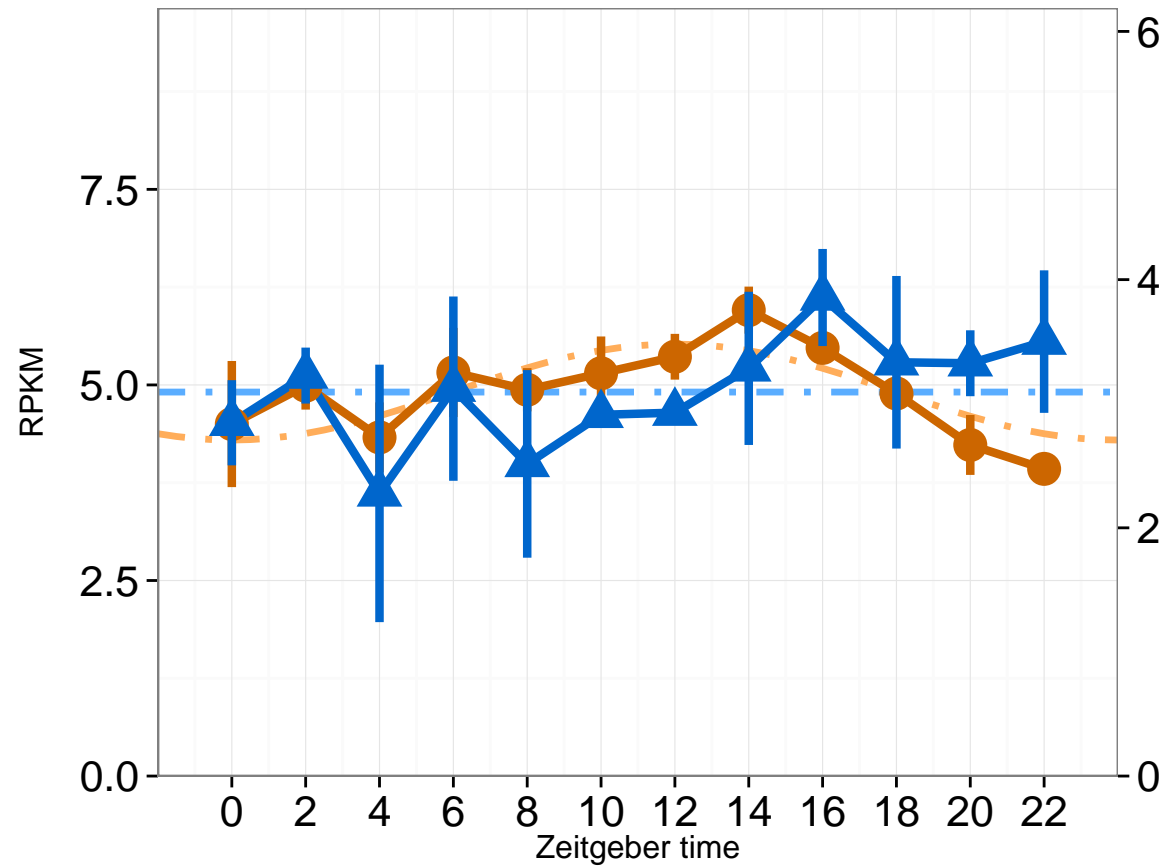

## Smarcd3

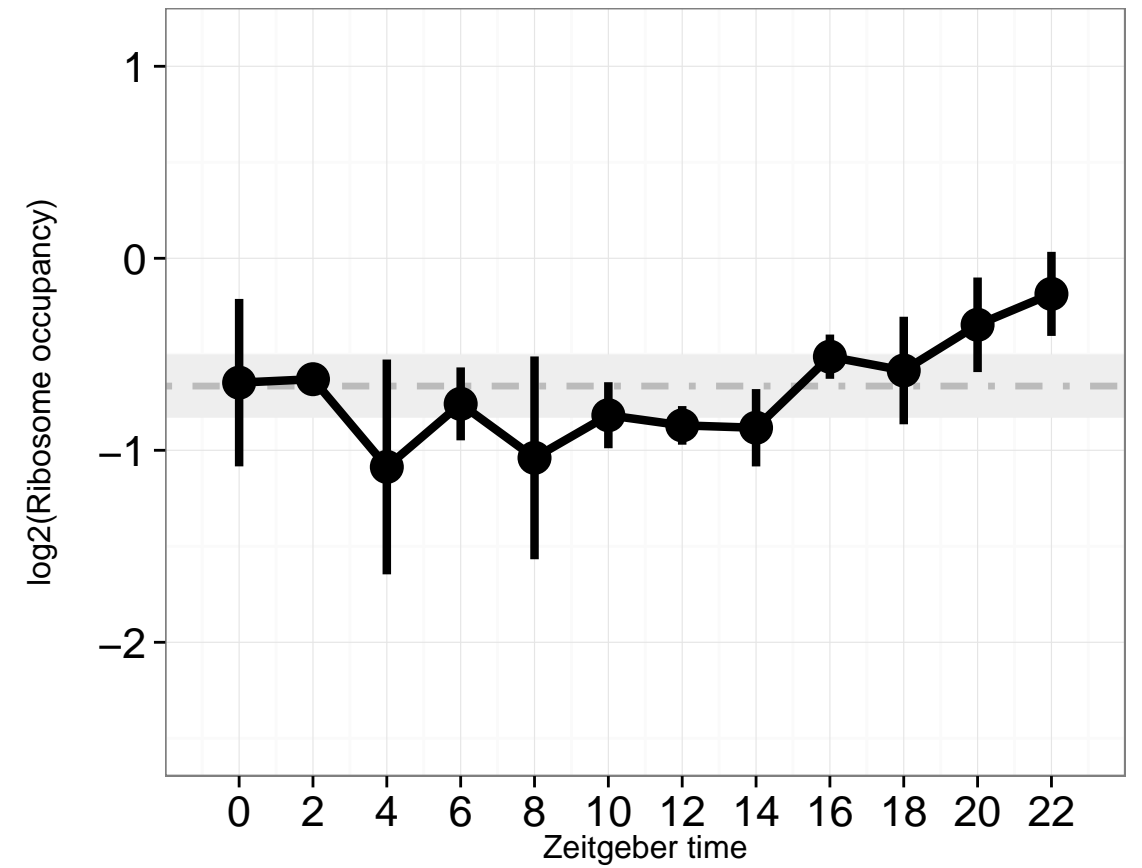

Supplement: Supplementary file 9930 [file 1]

# Dusp10

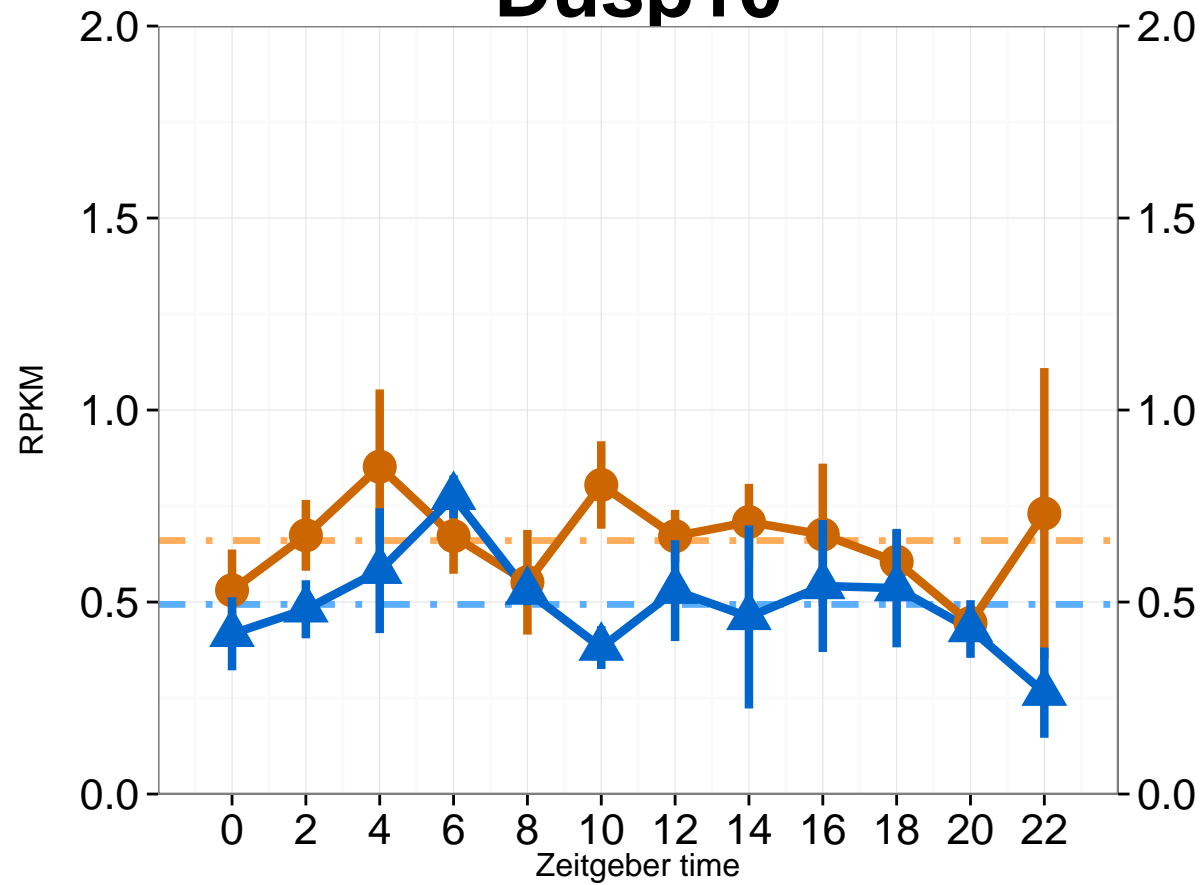

# Dusp10

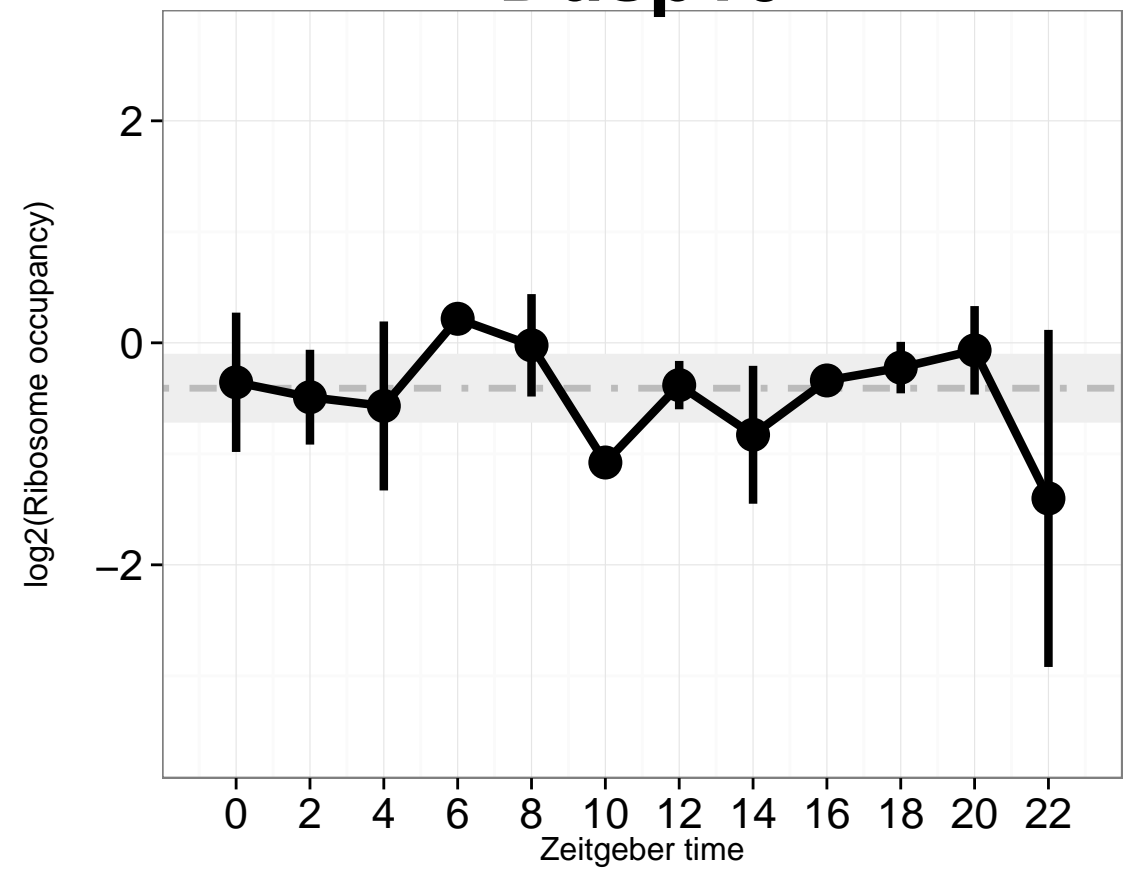

Supplement: Supplementary file 9931 [file 1]

## Sdc2

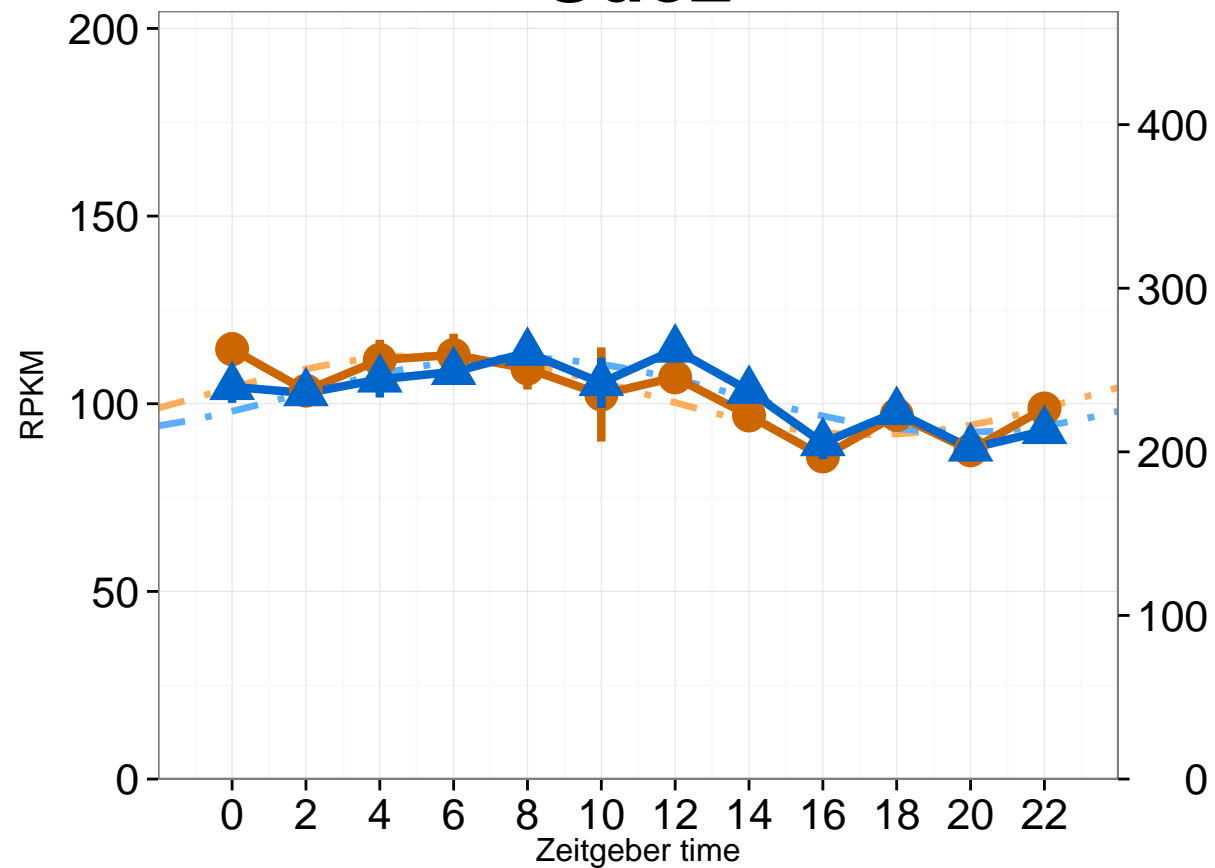

## Sdc2

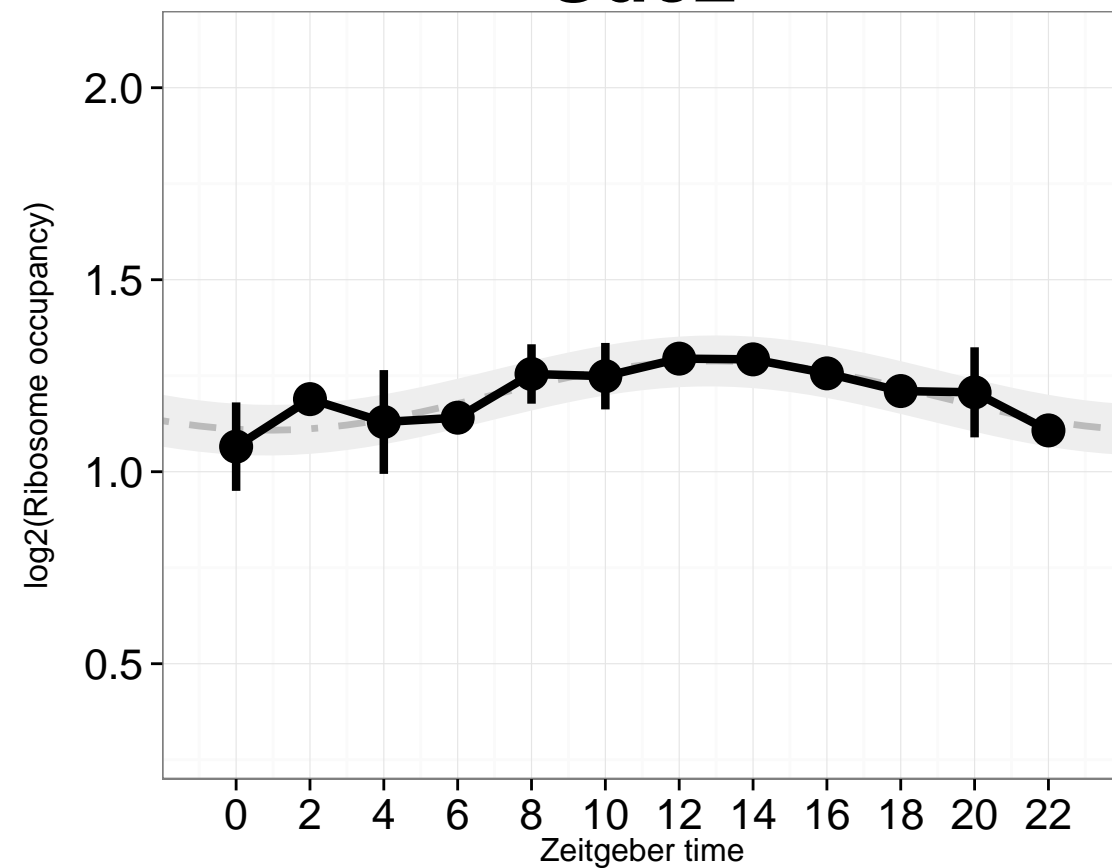

Supplement: Supplementary file 9932 [file 1]

# Setd1b

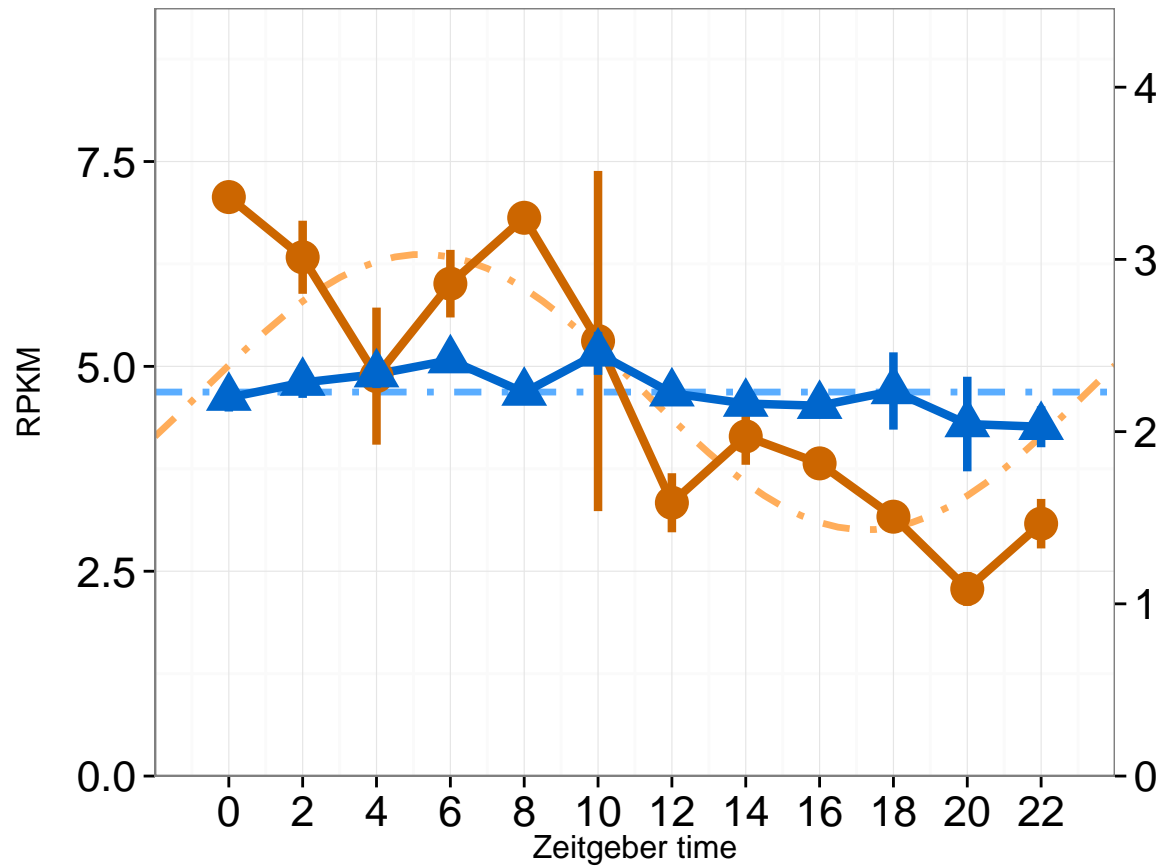

# Setd1b

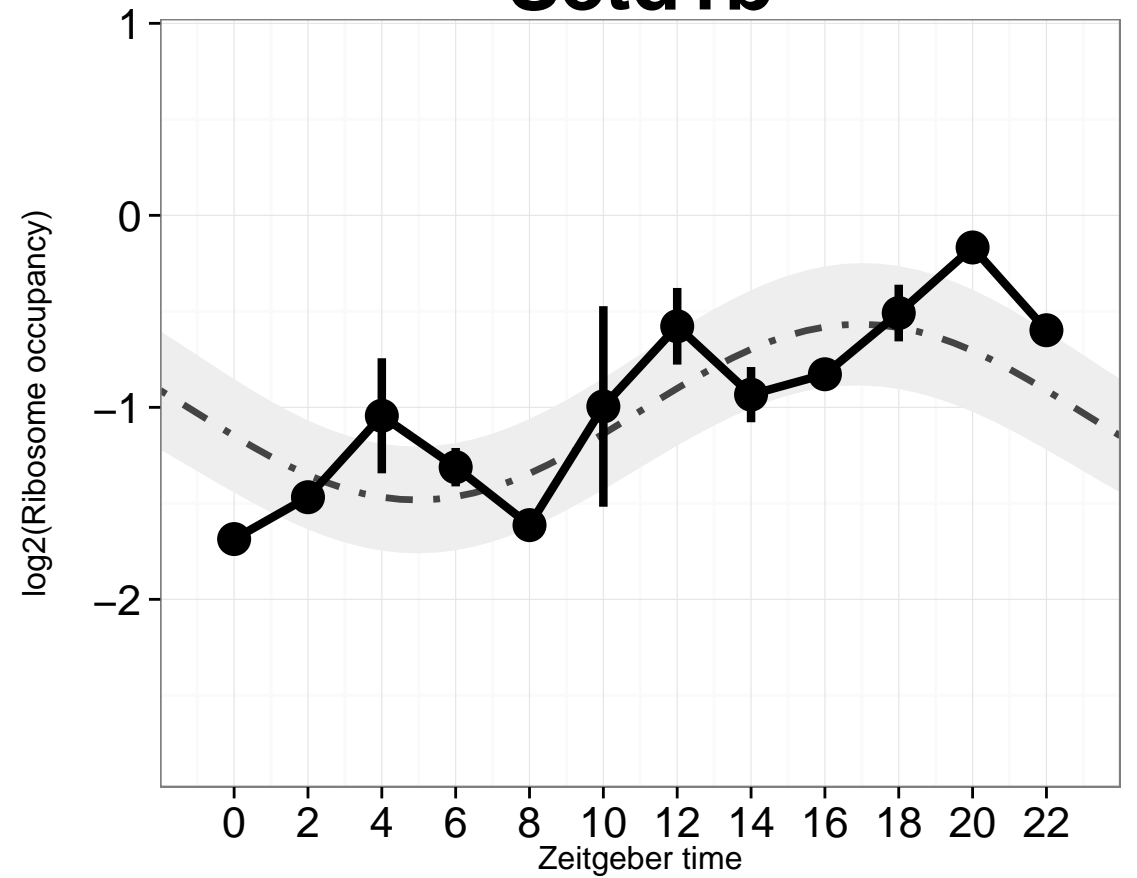

Supplement: Supplementary file 9933 [file 1]

# Zfp583

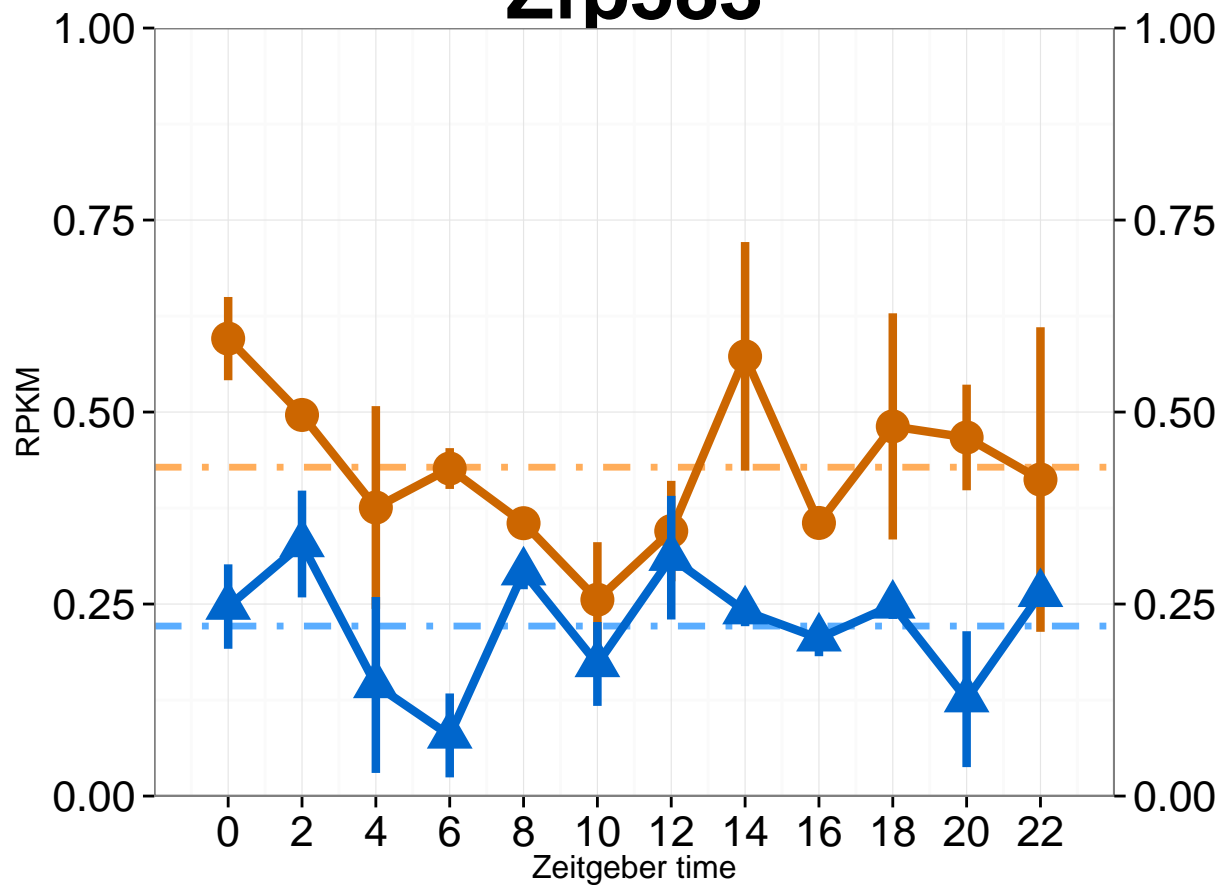

# Zfp583

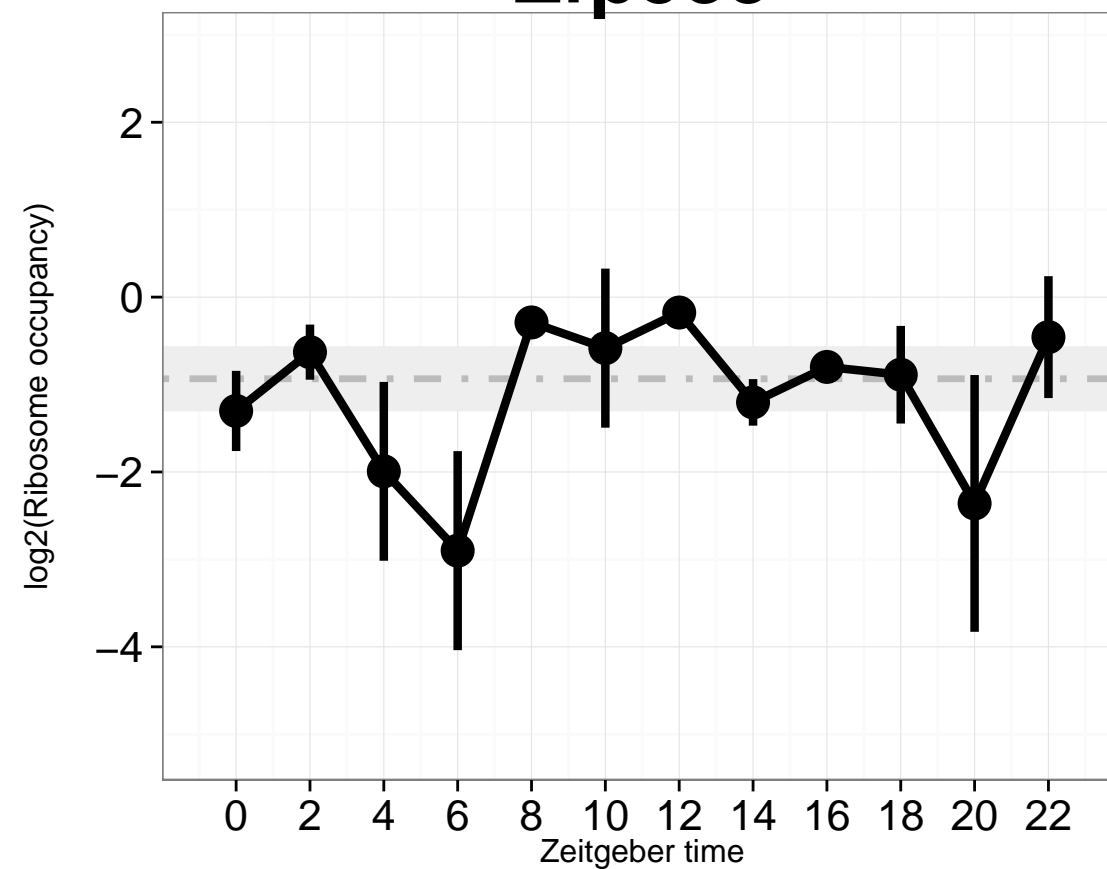

Supplement: Supplementary file 9934 [file 1]

## Porcn

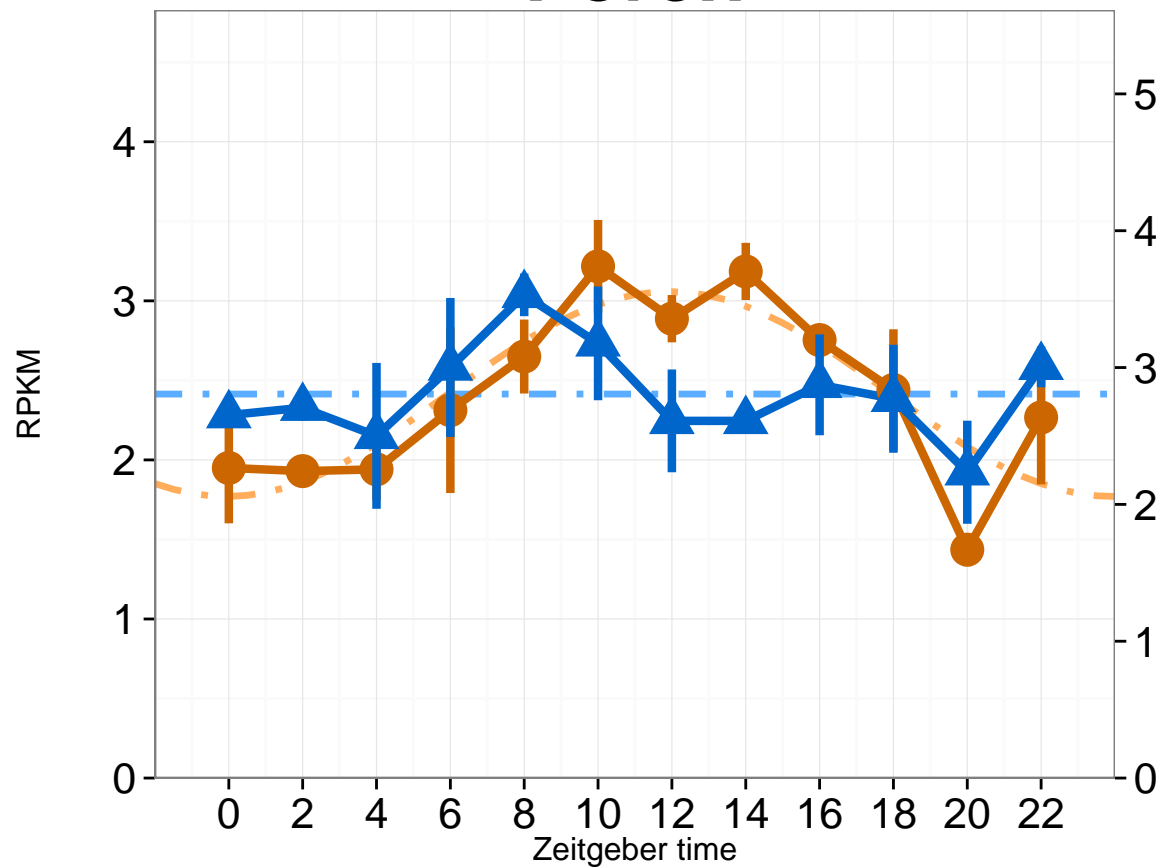

## Porcn

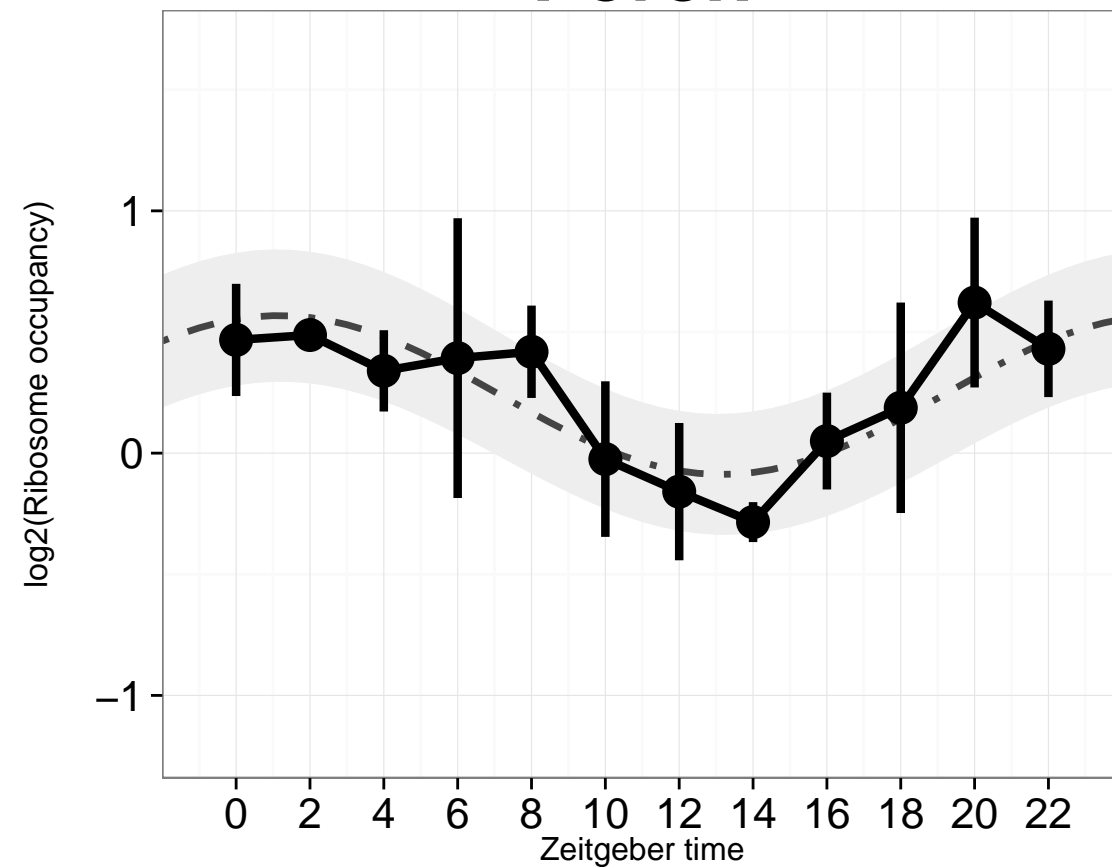

Supplement: Supplementary file 9935 [file 1]

## Phf8

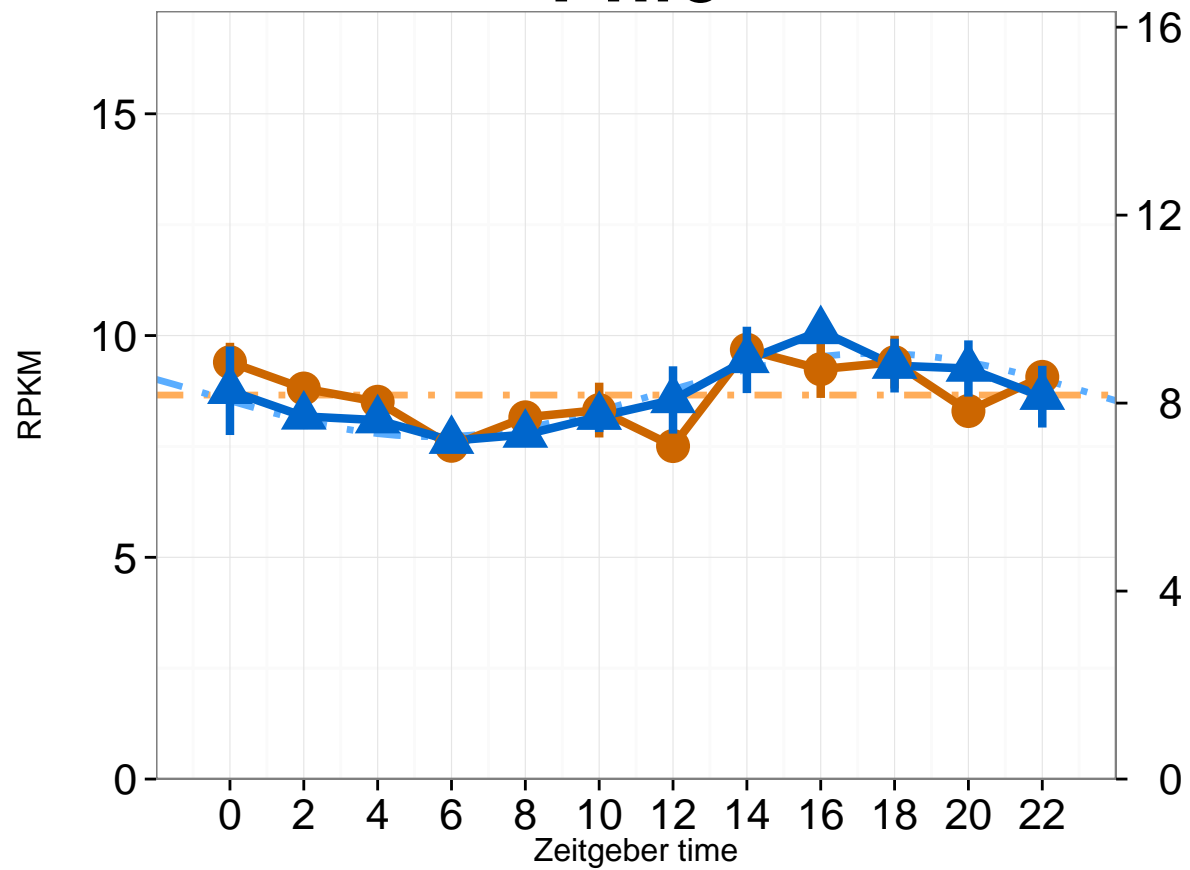

## Phf8

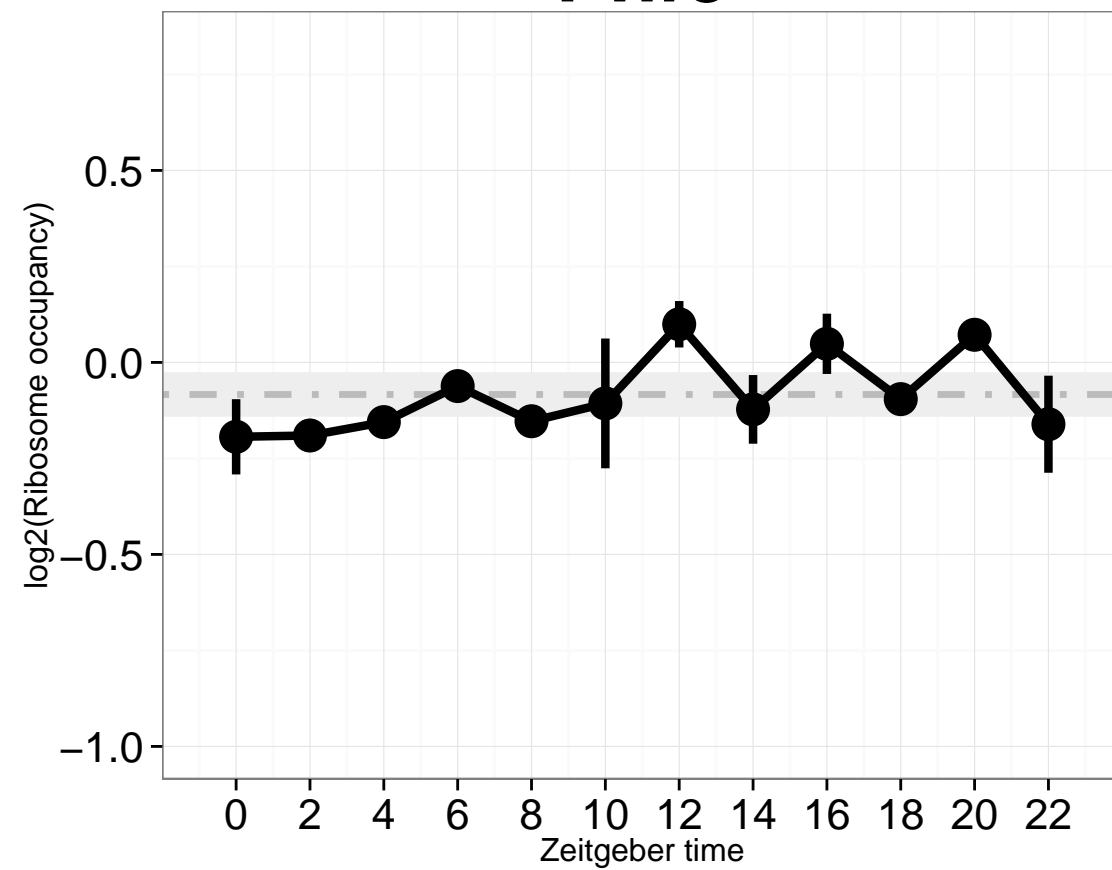

Supplement: Supplementary file 9936 [file 1]
