# Supplementary material (part 100 of 133)
Source: publisher figshare collection journal article supplement (https://springernature.figshare.com/articles/dataset/_/4903193)

## Alox5ap

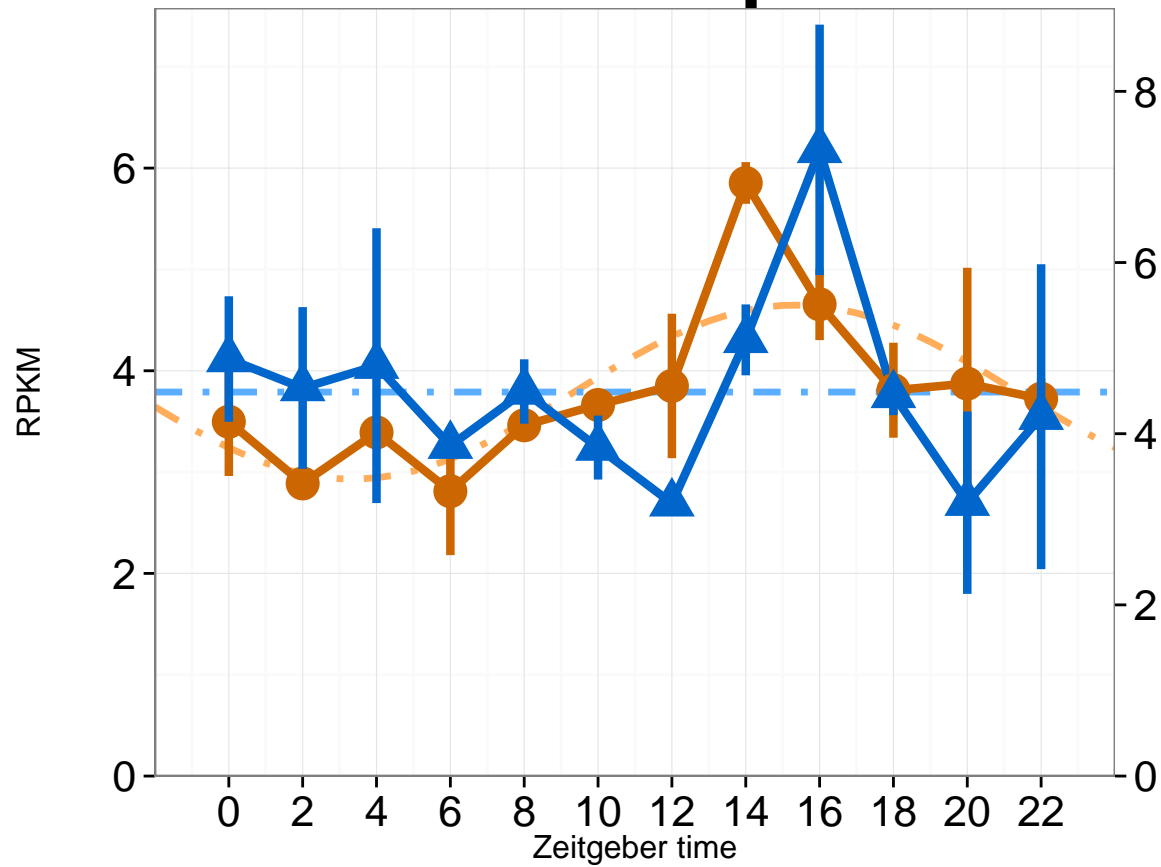

## Alox5ap

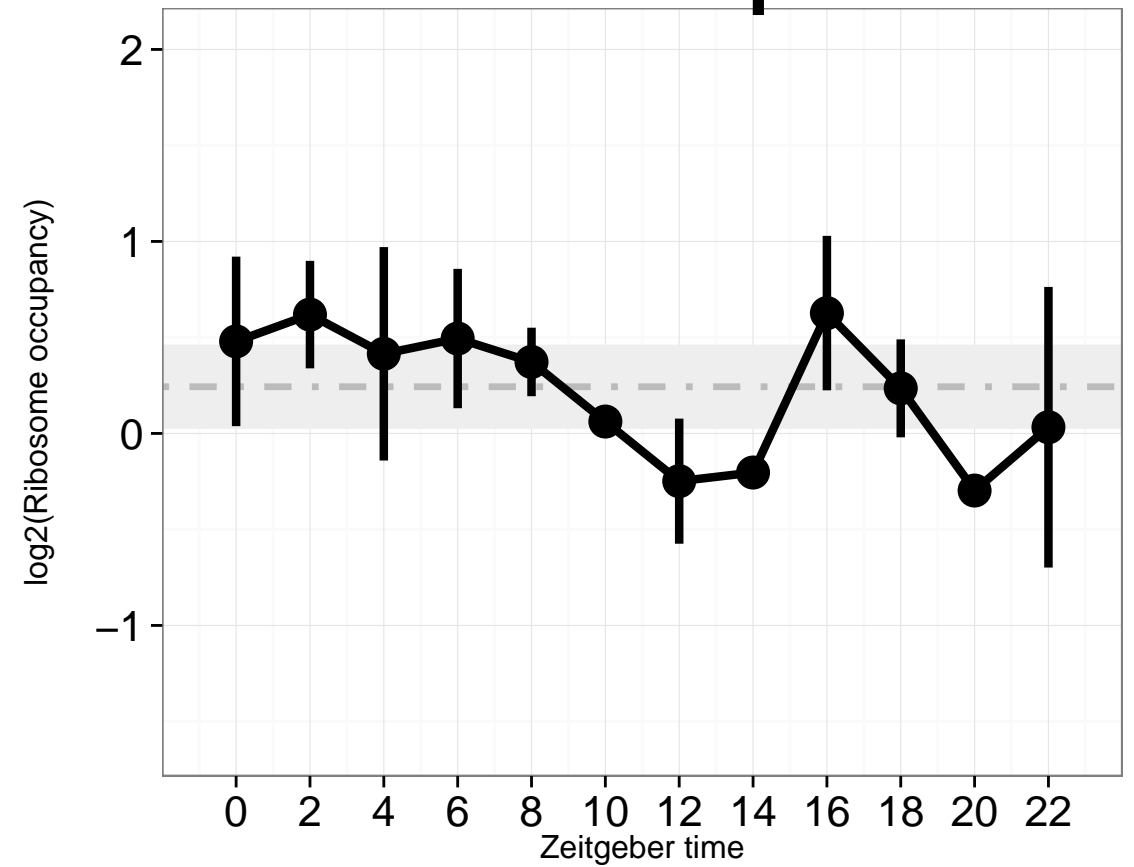

Supplement: Supplementary file 9937 [file 1]

# Bag2

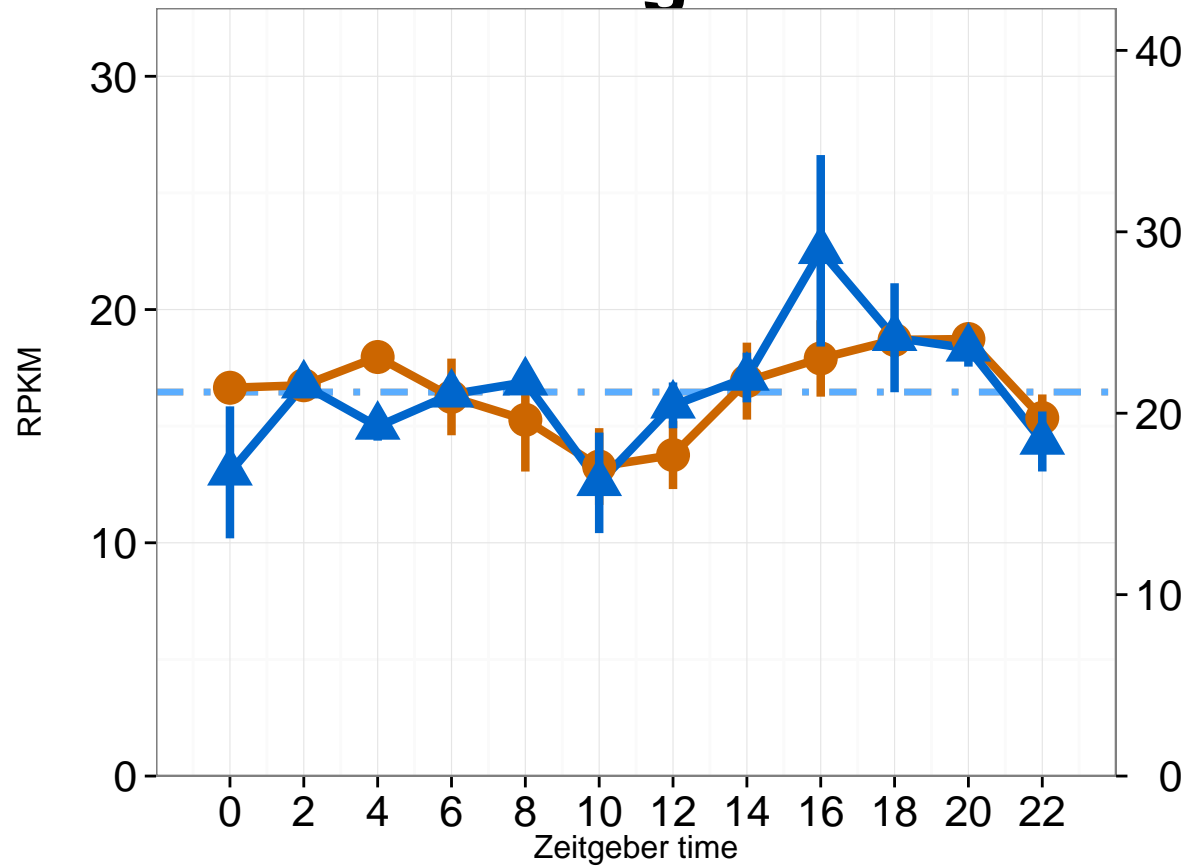

# Bag2

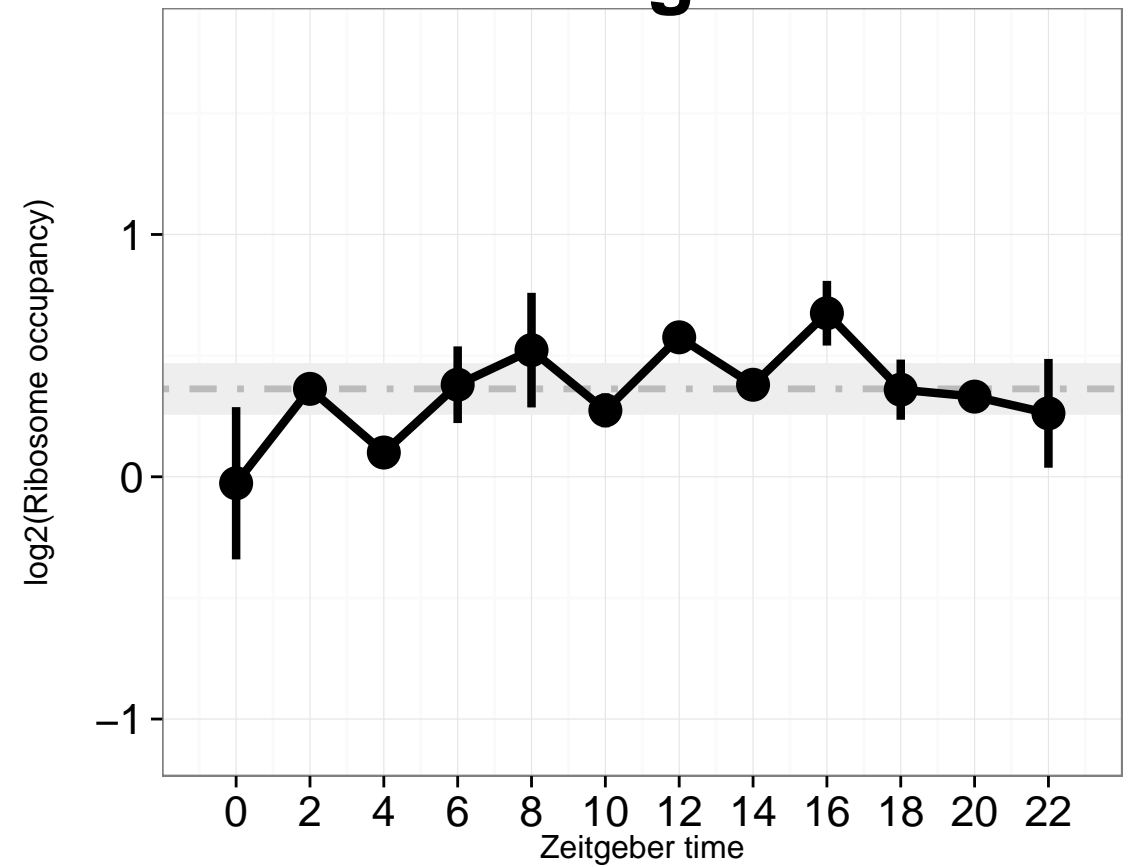

Supplement: Supplementary file 9938 [file 1]

**Bad**

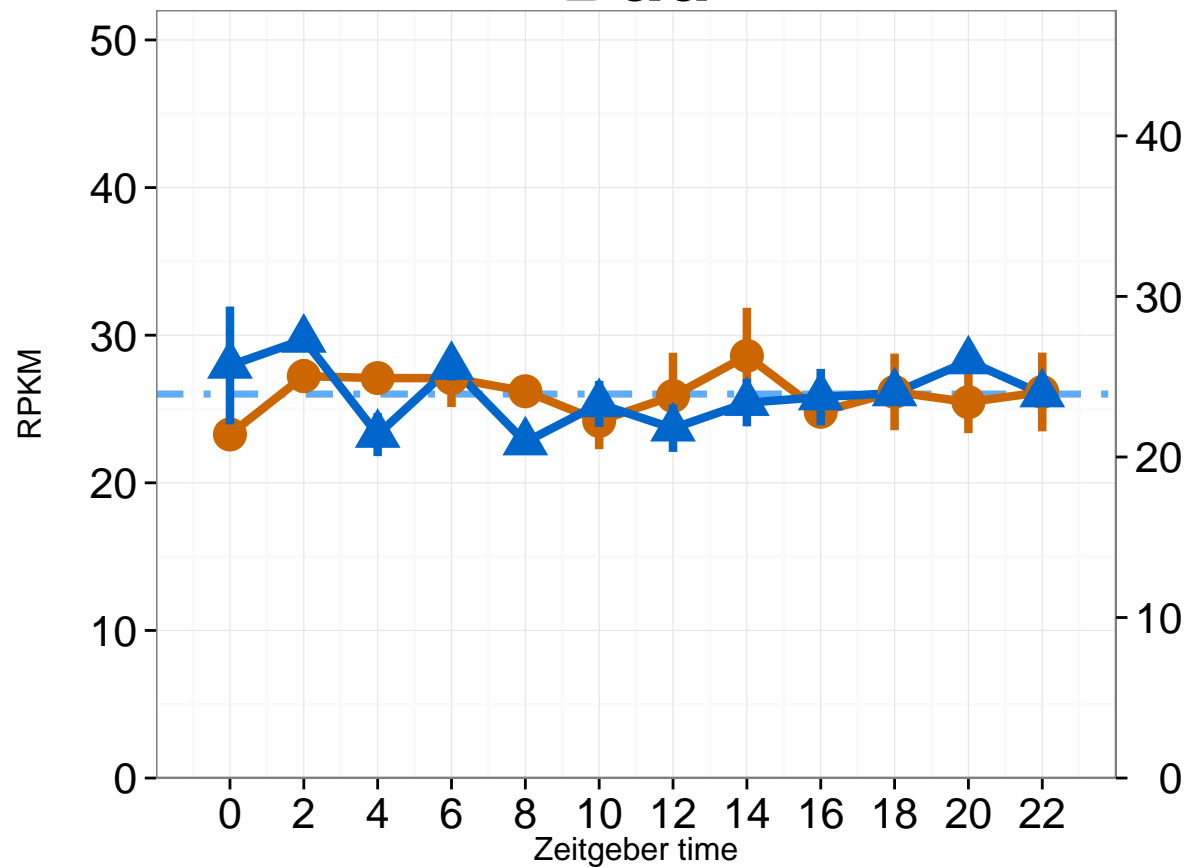

**Bad**

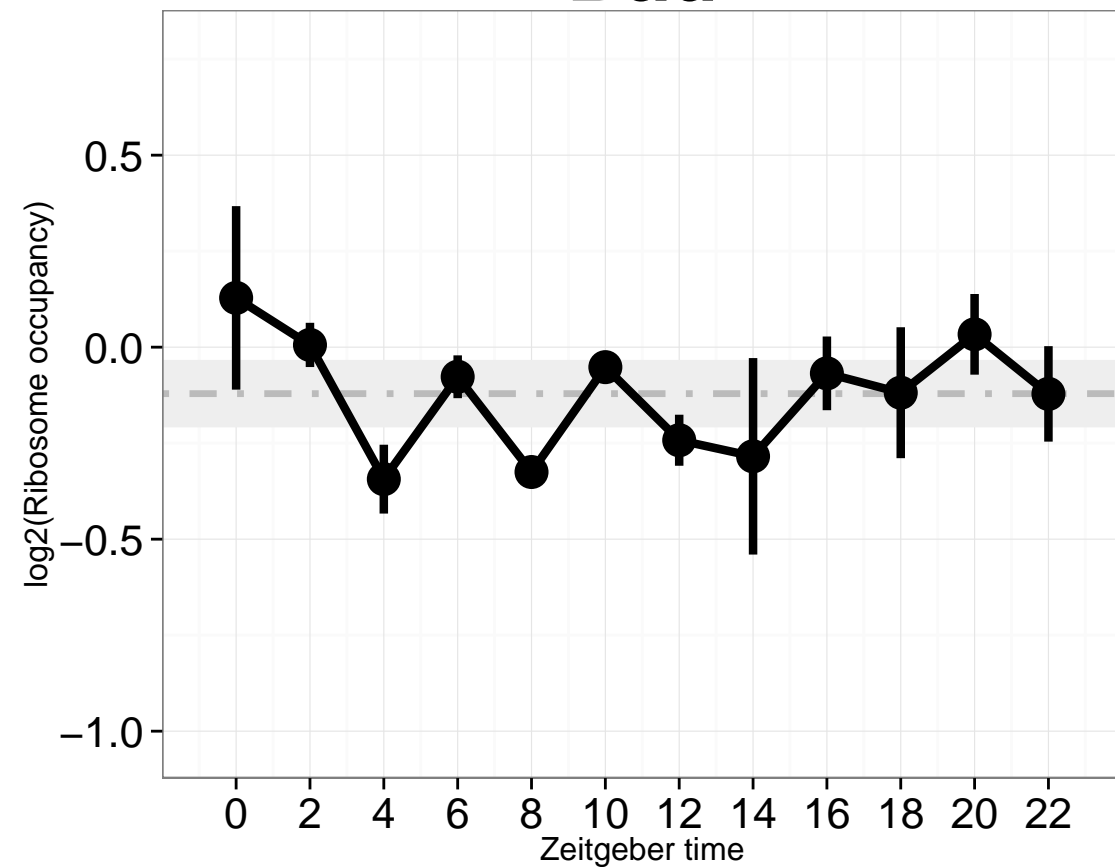

Supplement: Supplementary file 9939 [file 1]

## Ttc14

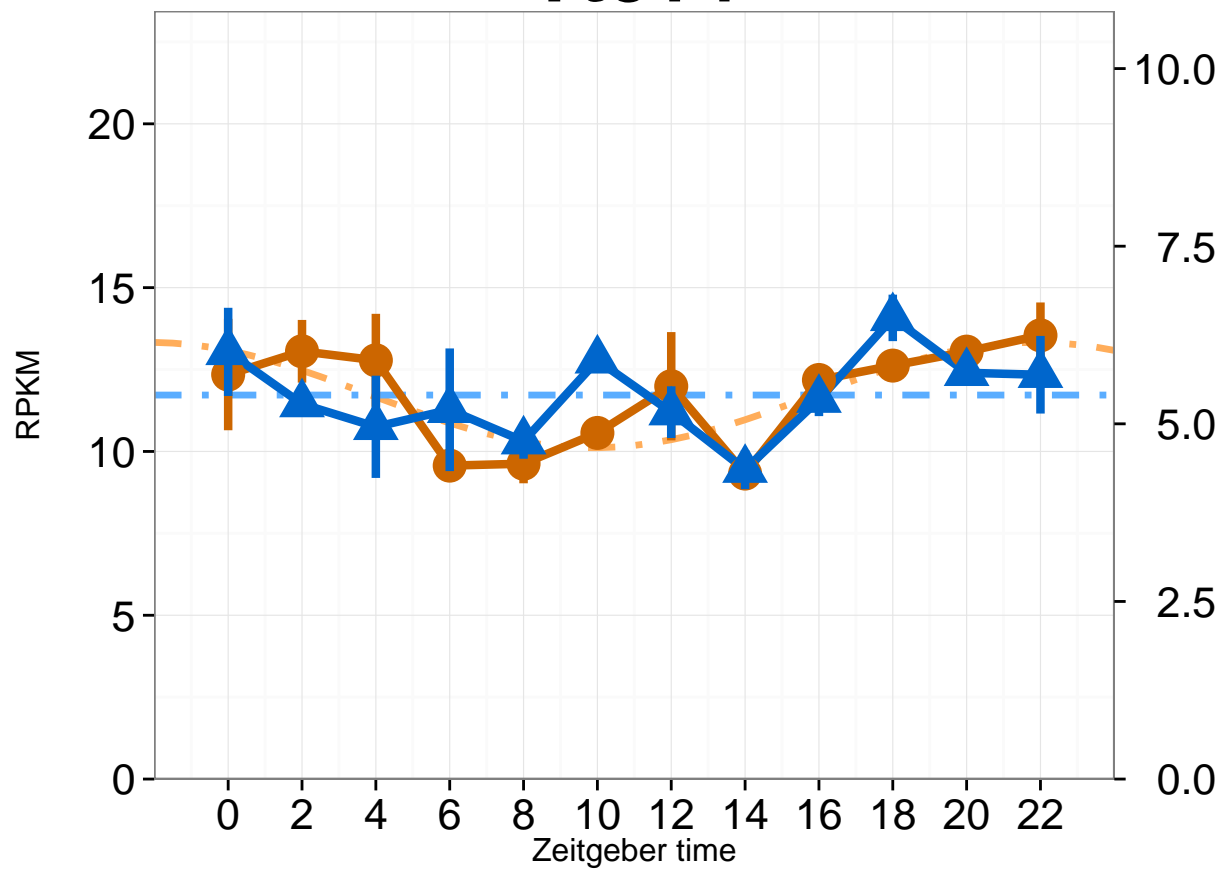

## Ttc14

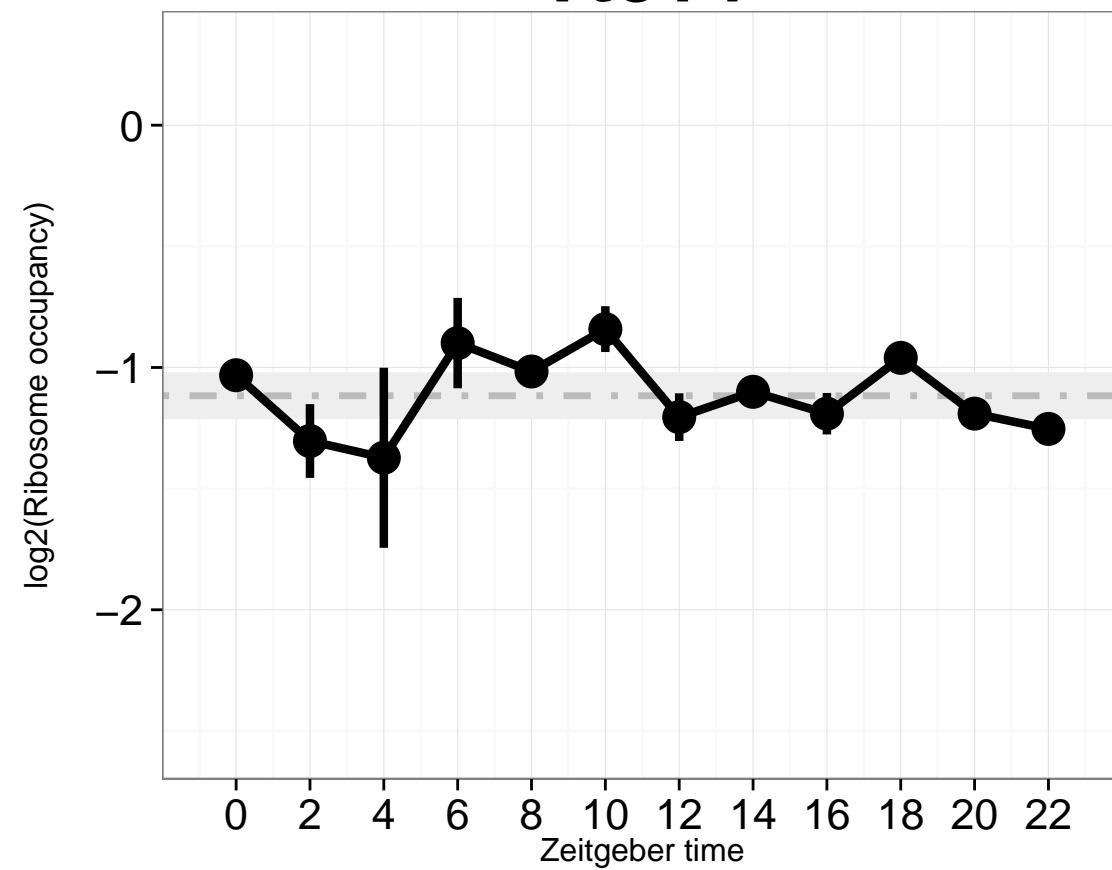

Supplement: Supplementary file 9940 [file 1]

# Fam103a1

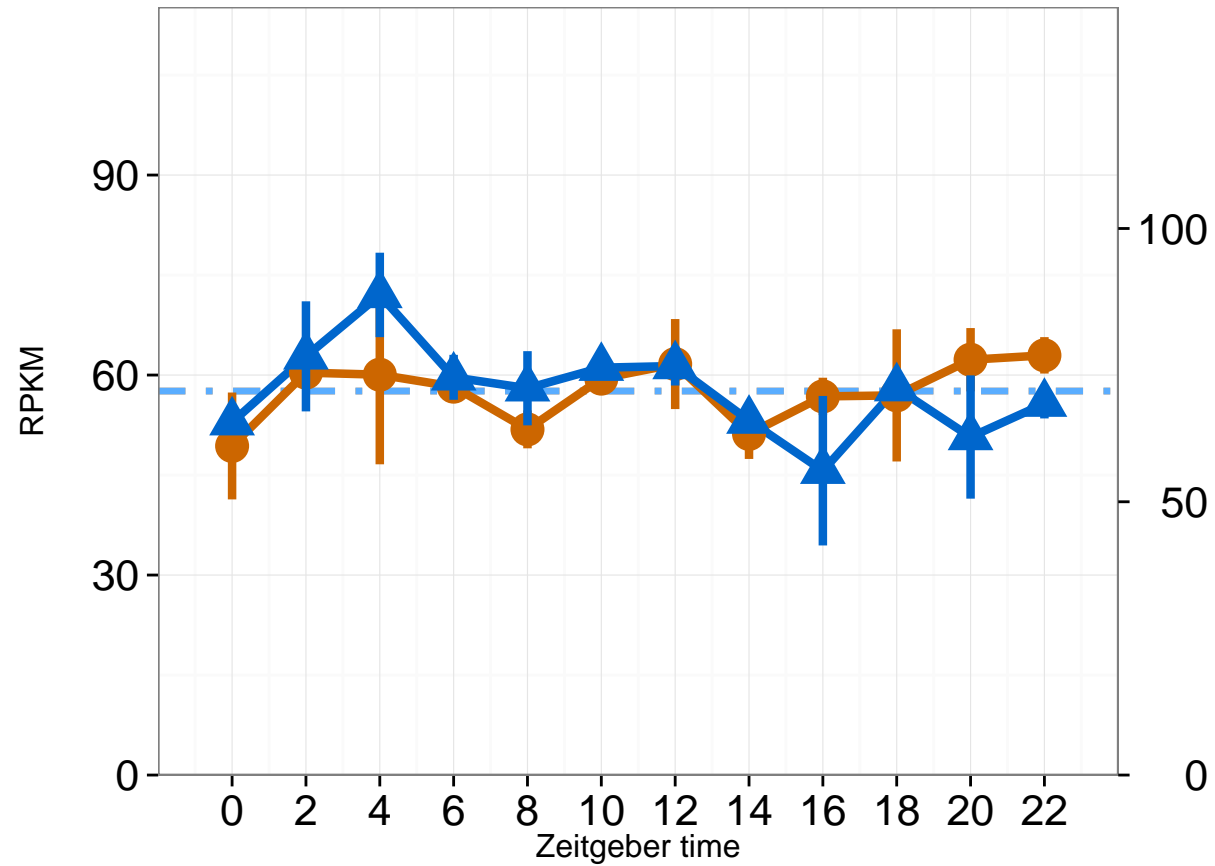

# Fam103a1

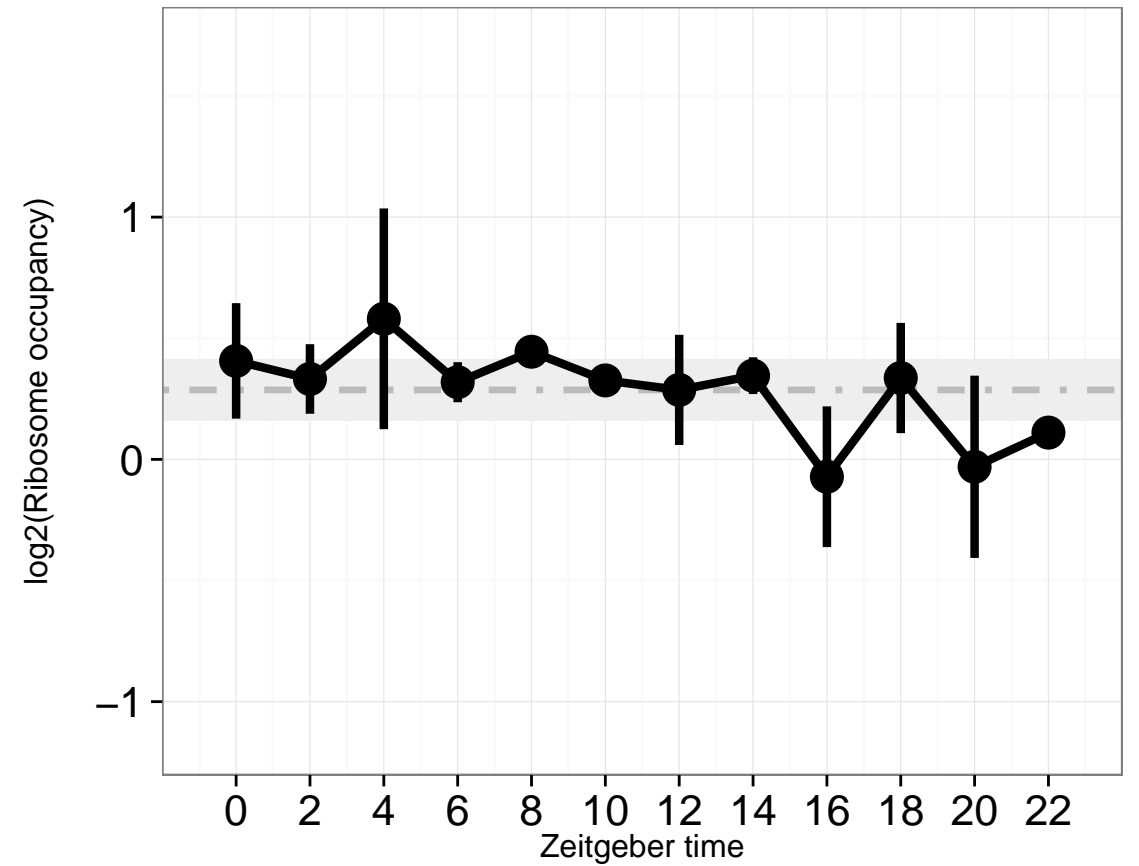

Supplement: Supplementary file 9941 [file 1]

# Col27a1

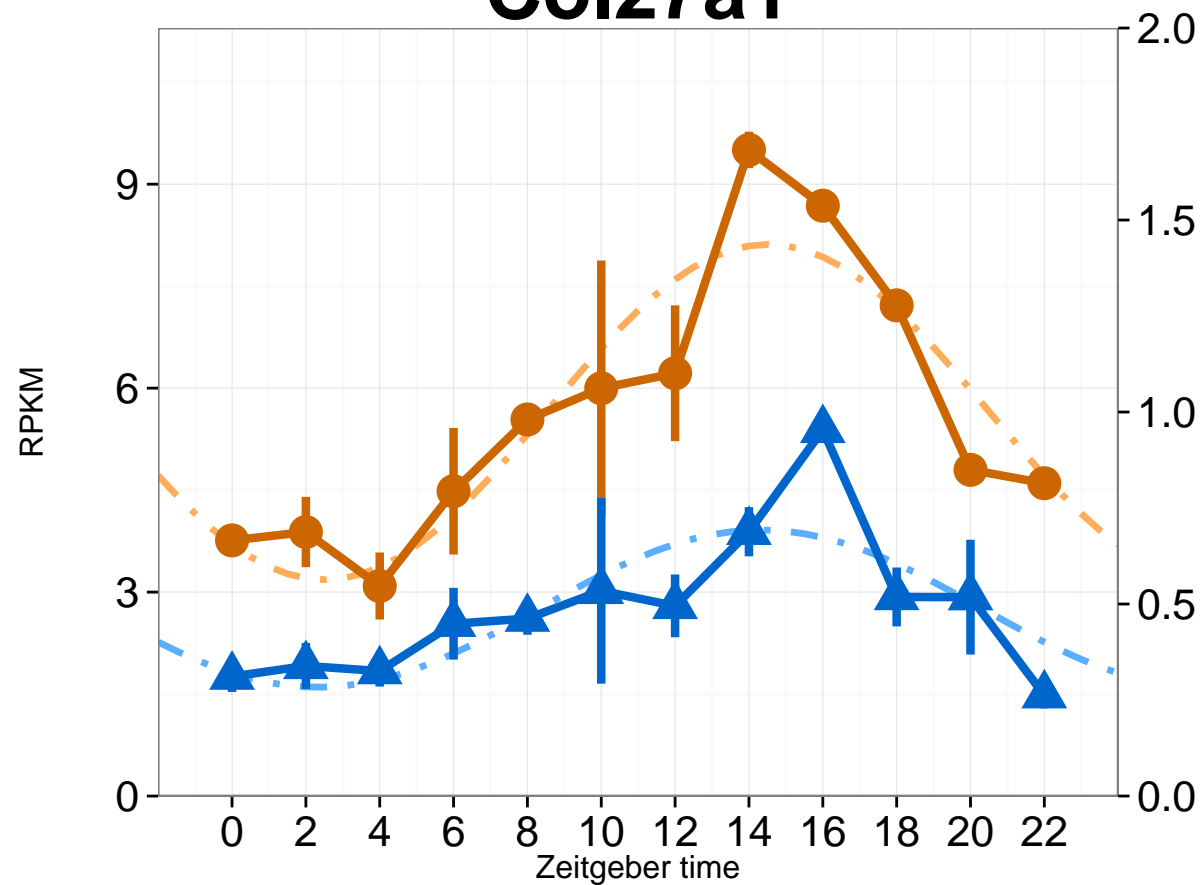

# Col27a1

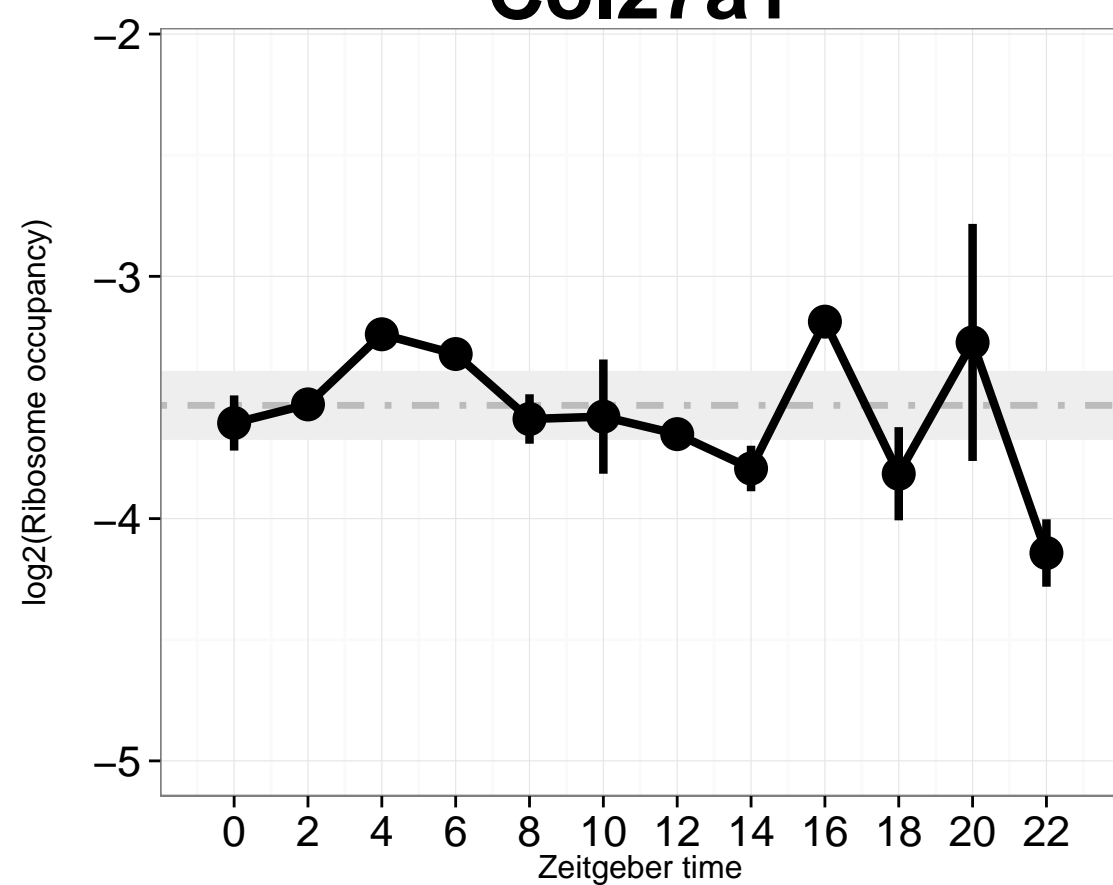

Supplement: Supplementary file 9942 [file 1]

# Ints8

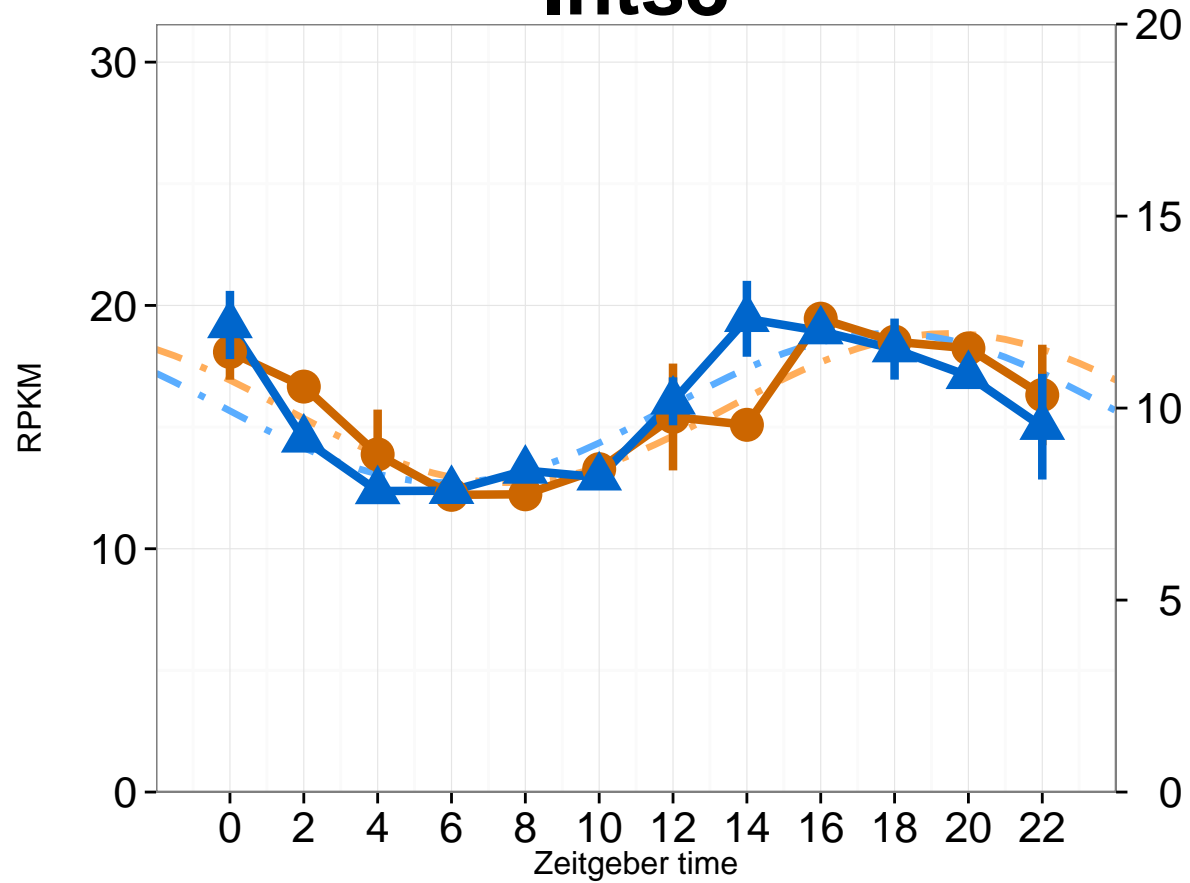

# Ints8

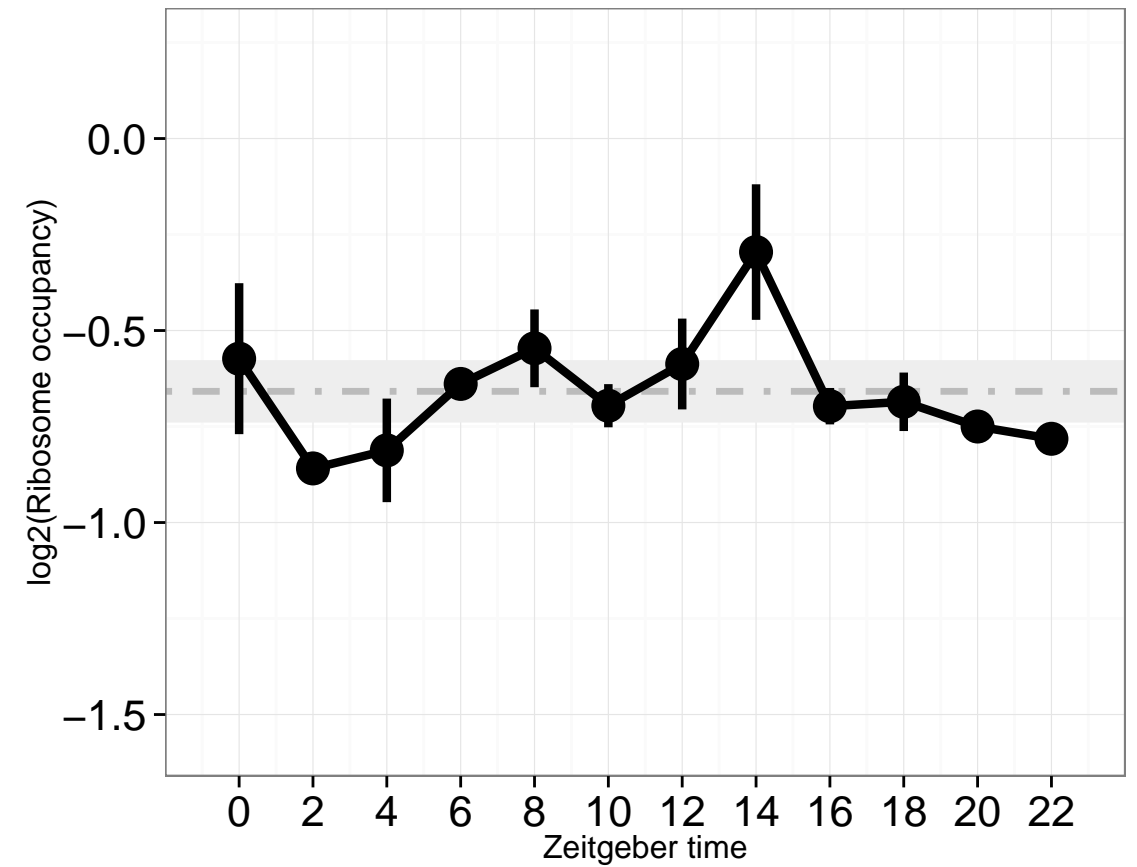

Supplement: Supplementary file 9943 [file 1]

## Cisd2

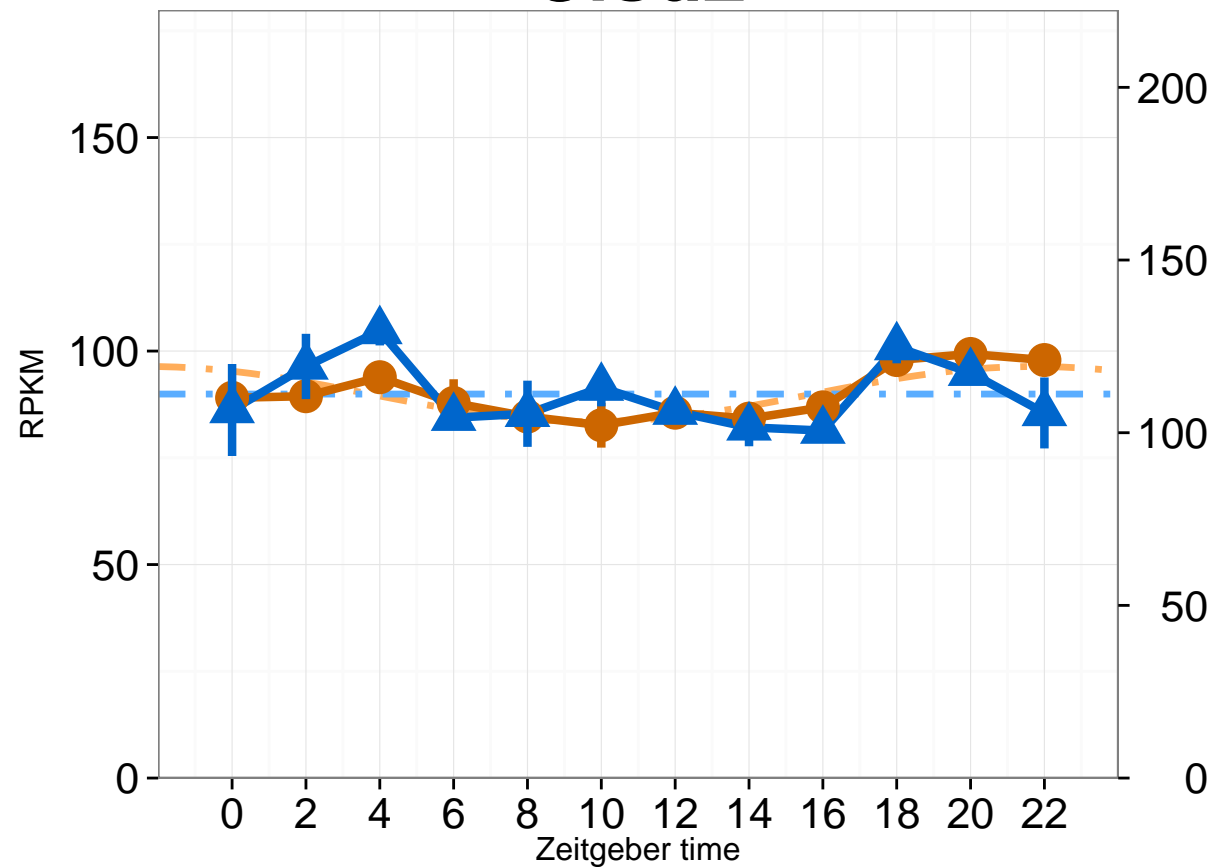

## Cisd2

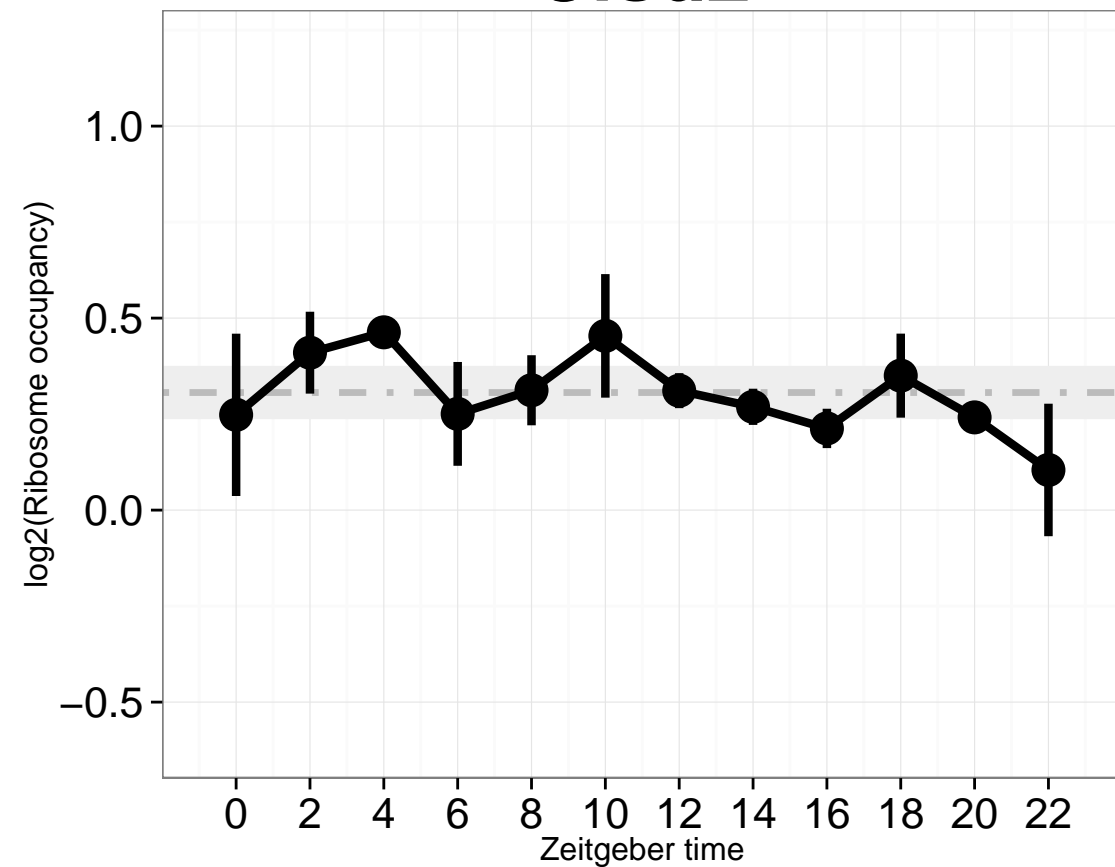

Supplement: Supplementary file 9944 [file 1]

# Usp9x

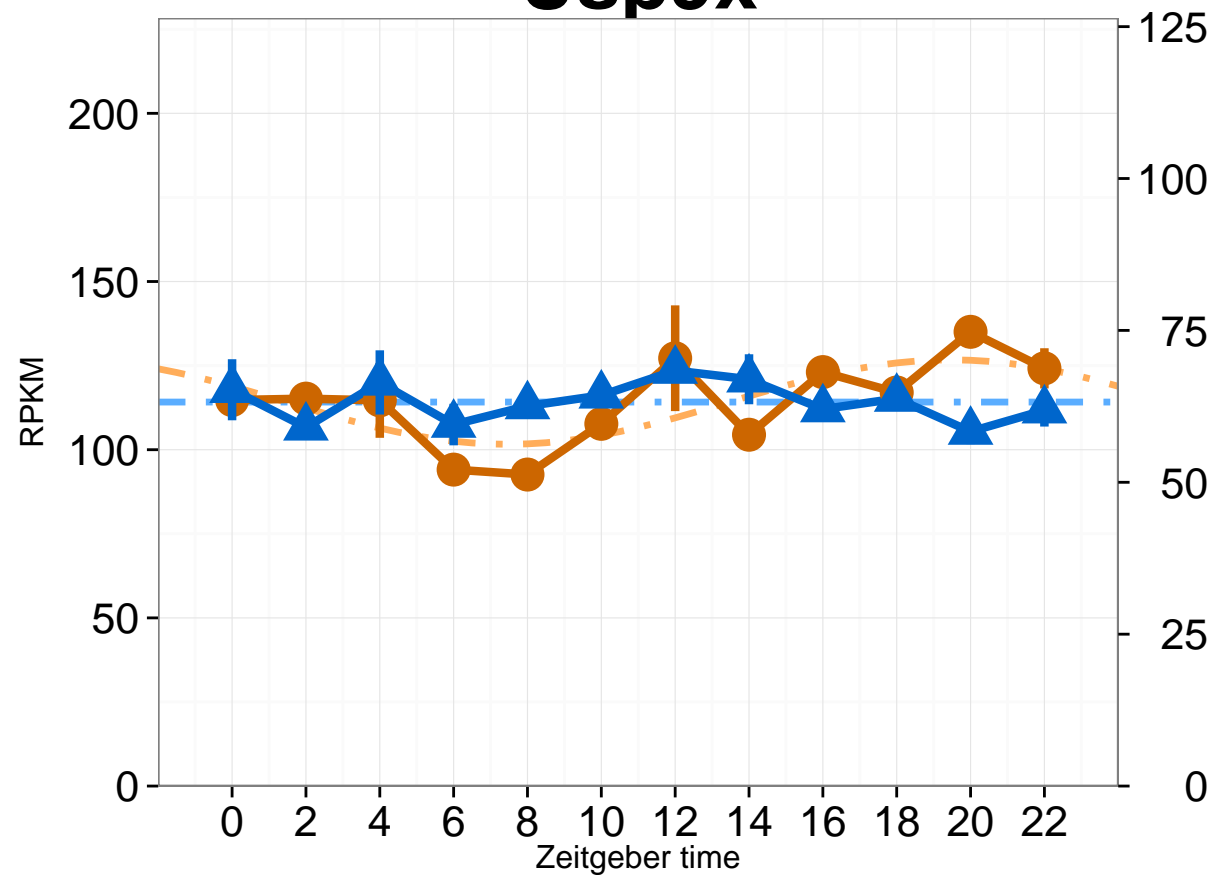

# Usp9x

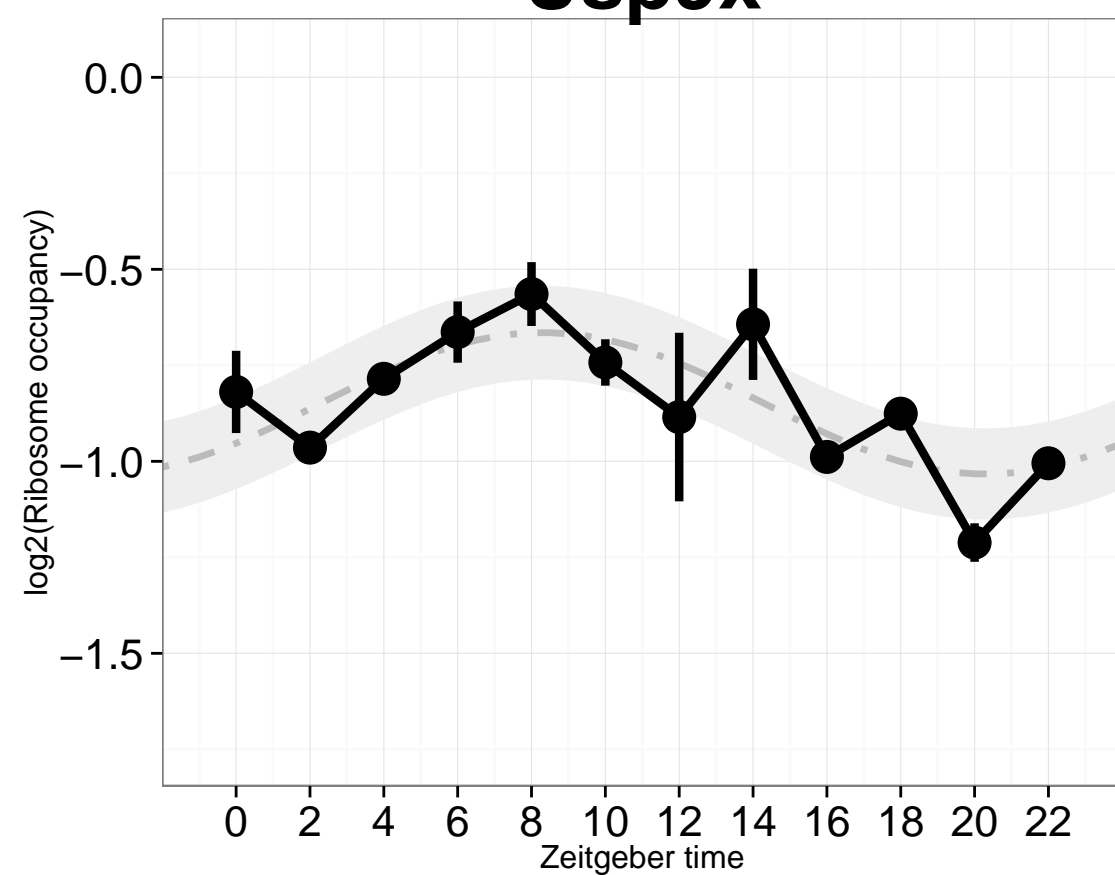

Supplement: Supplementary file 9945 [file 1]

## Arsq

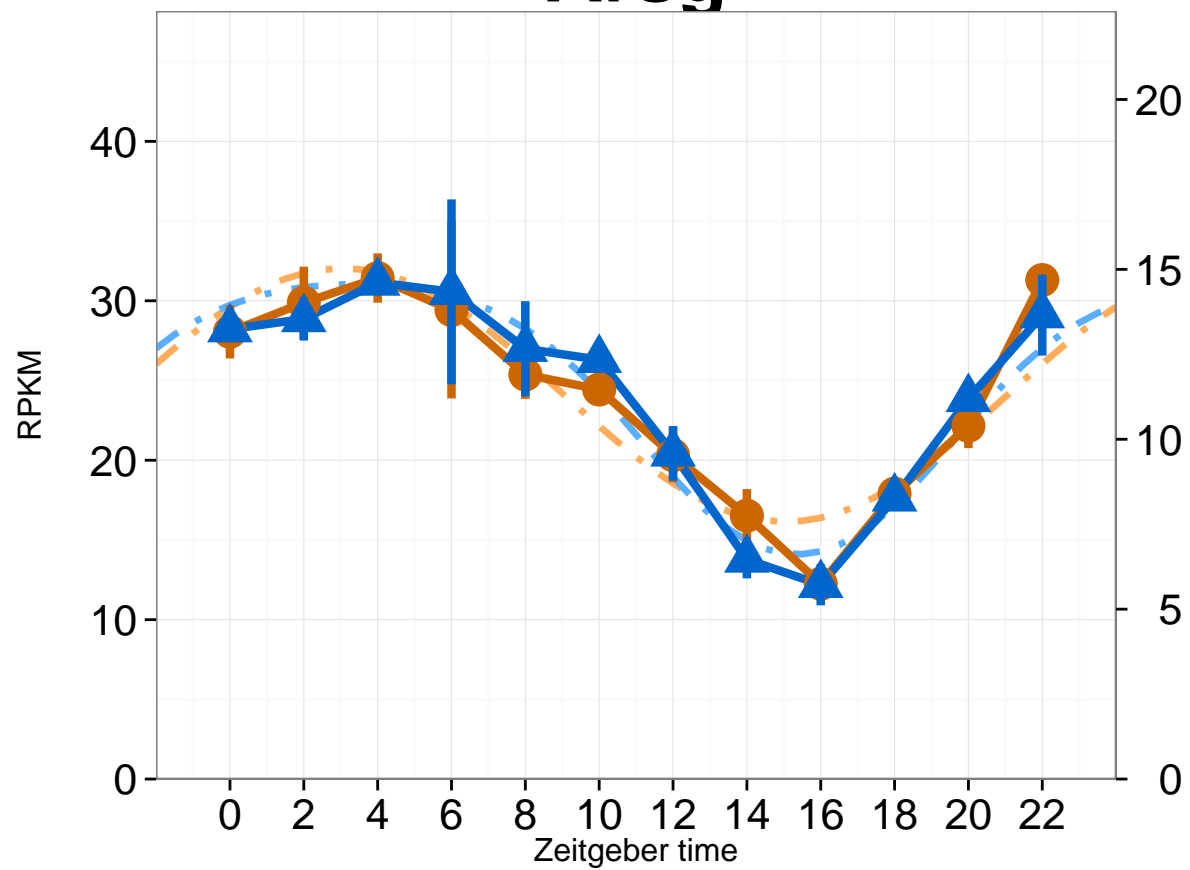

## Arsq

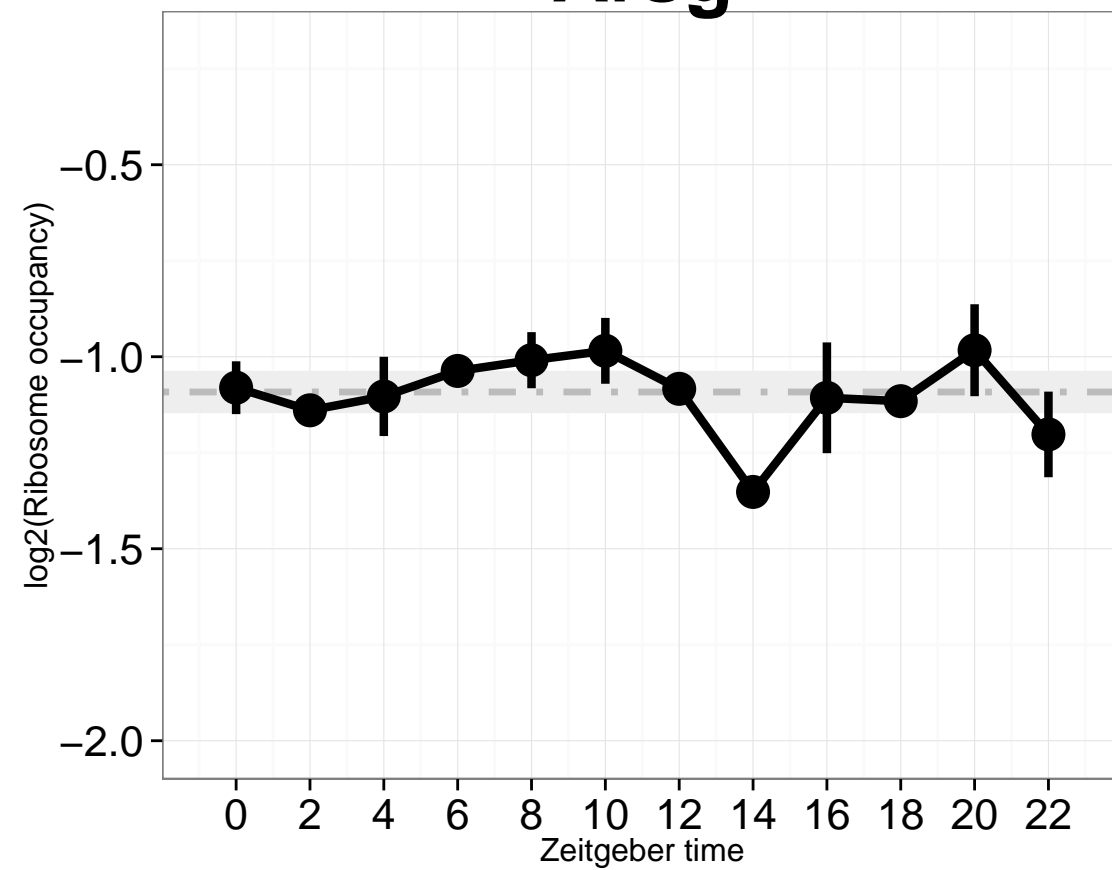

Supplement: Supplementary file 9946 [file 1]

## Ddx47

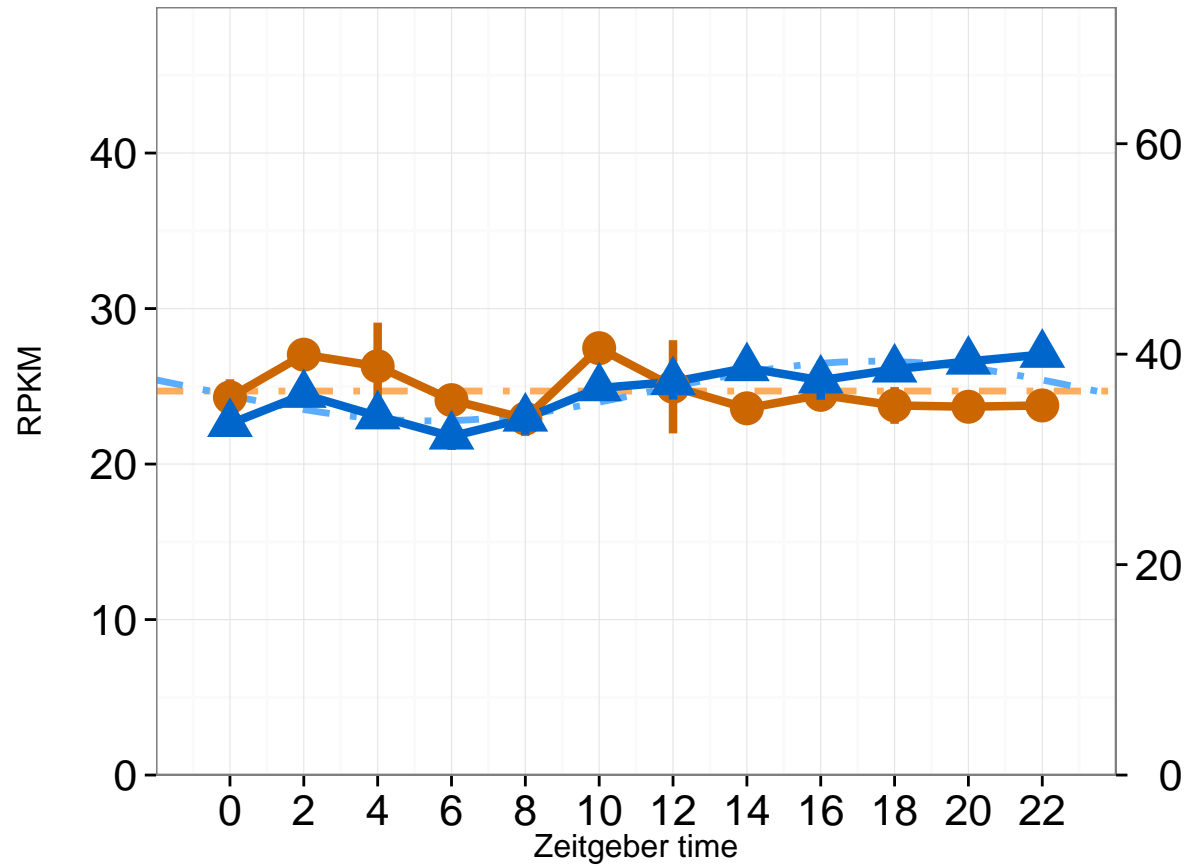

## Ddx47

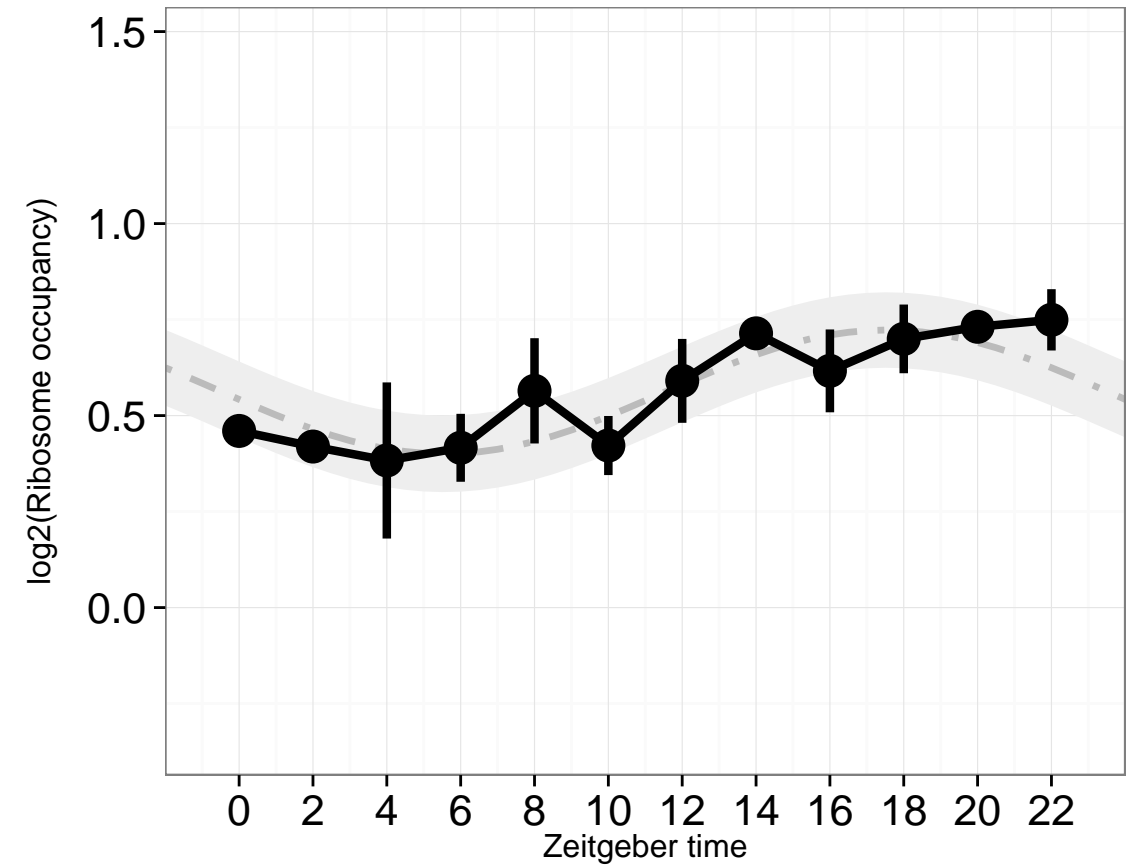

Supplement: Supplementary file 9947 [file 1]

## Bod1l

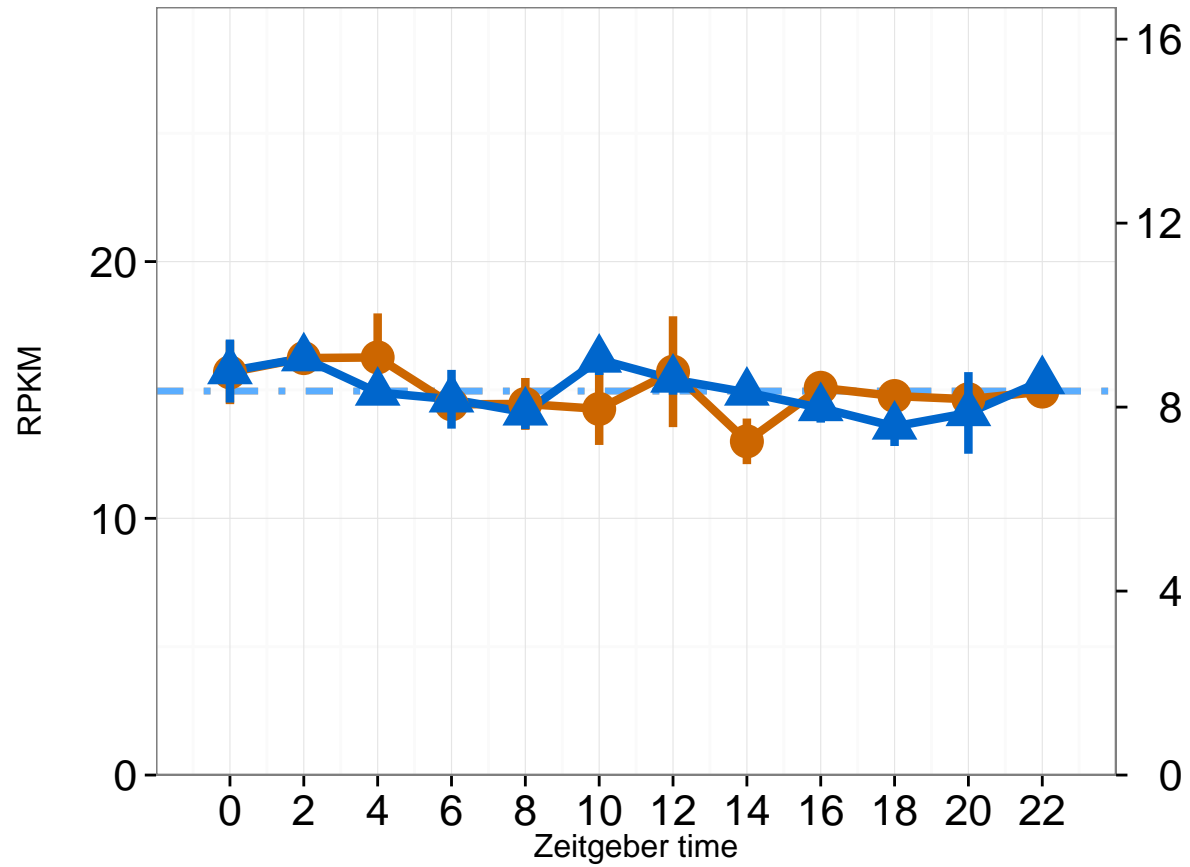

## Bod1l

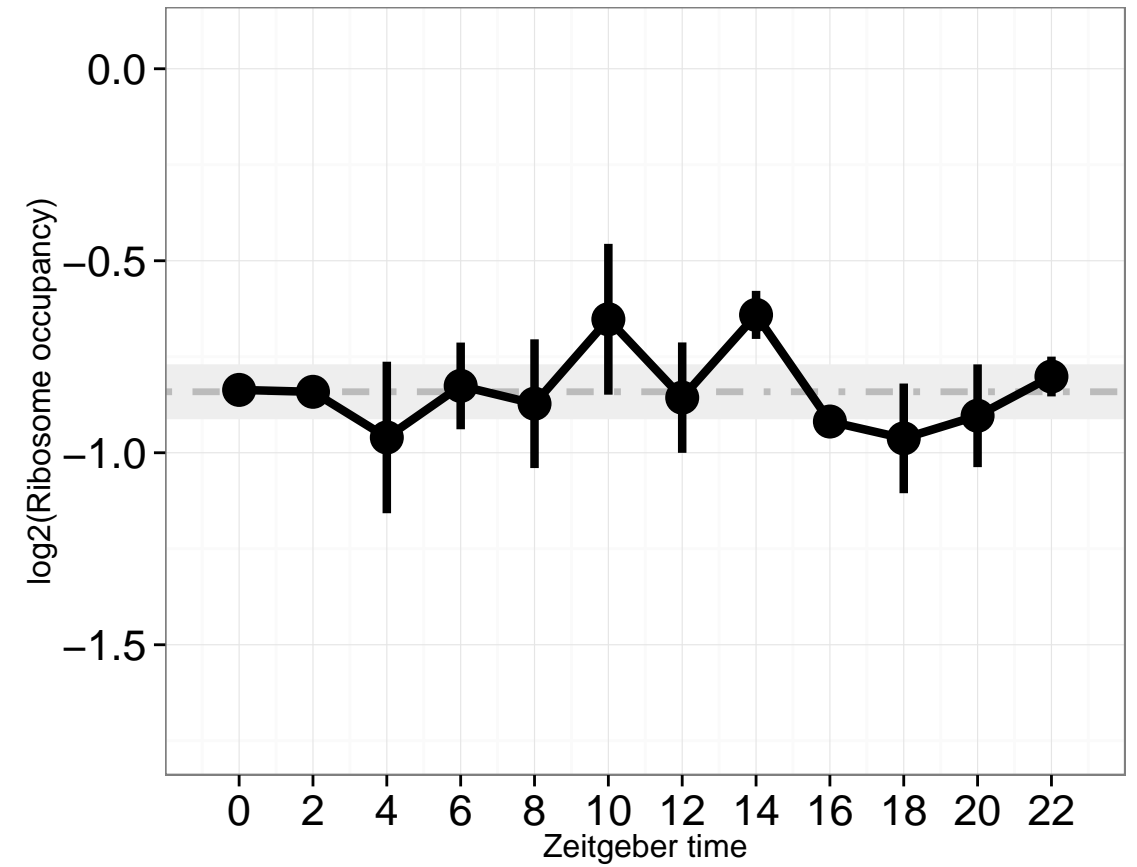

Supplement: Supplementary file 9948 [file 1]

## 2700050L05Rik

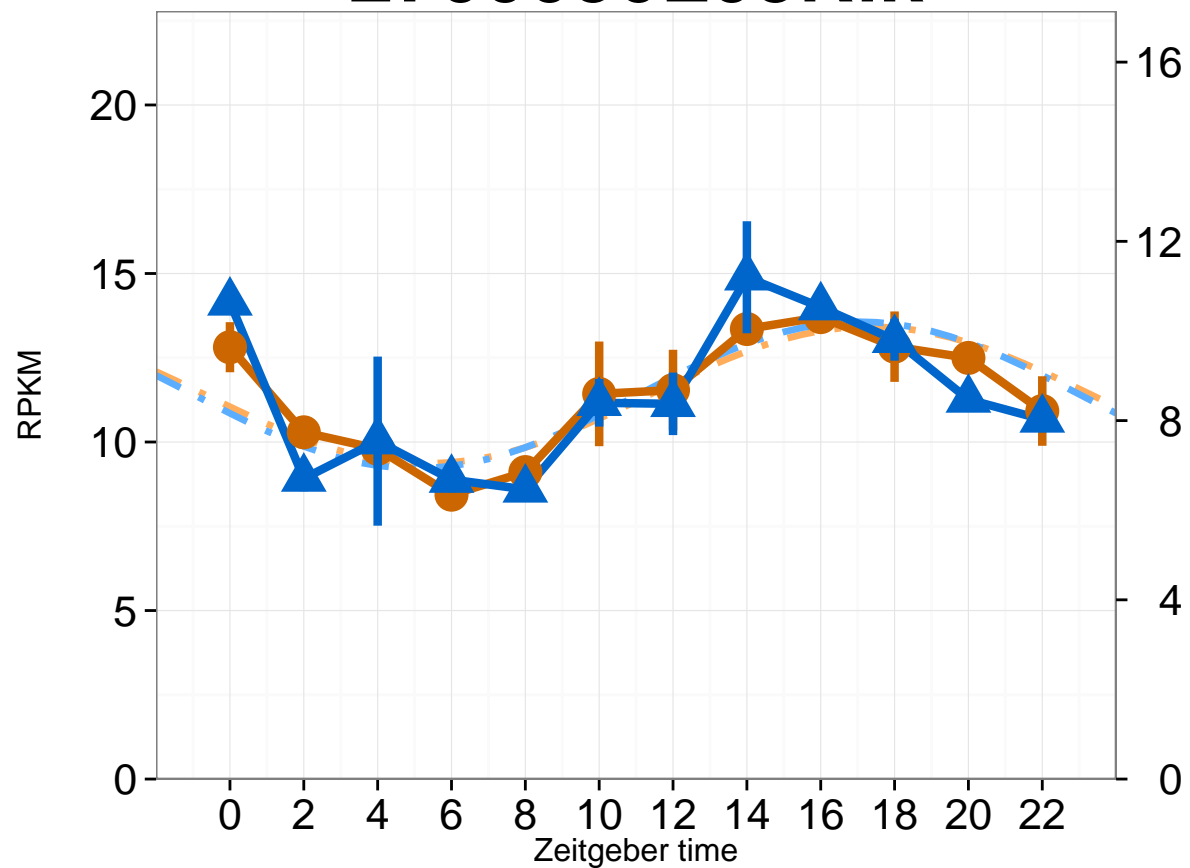

## 2700050L05Rik

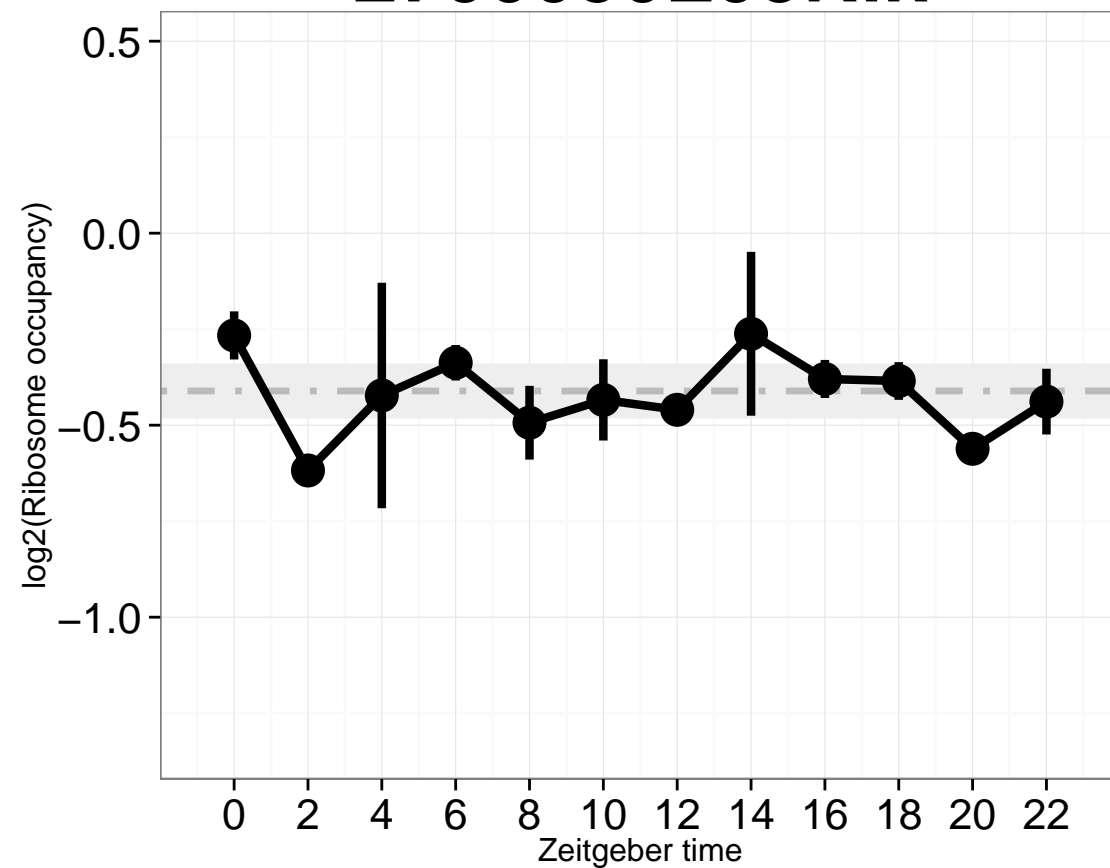

Supplement: Supplementary file 9949 [file 1]

## Clcnkb

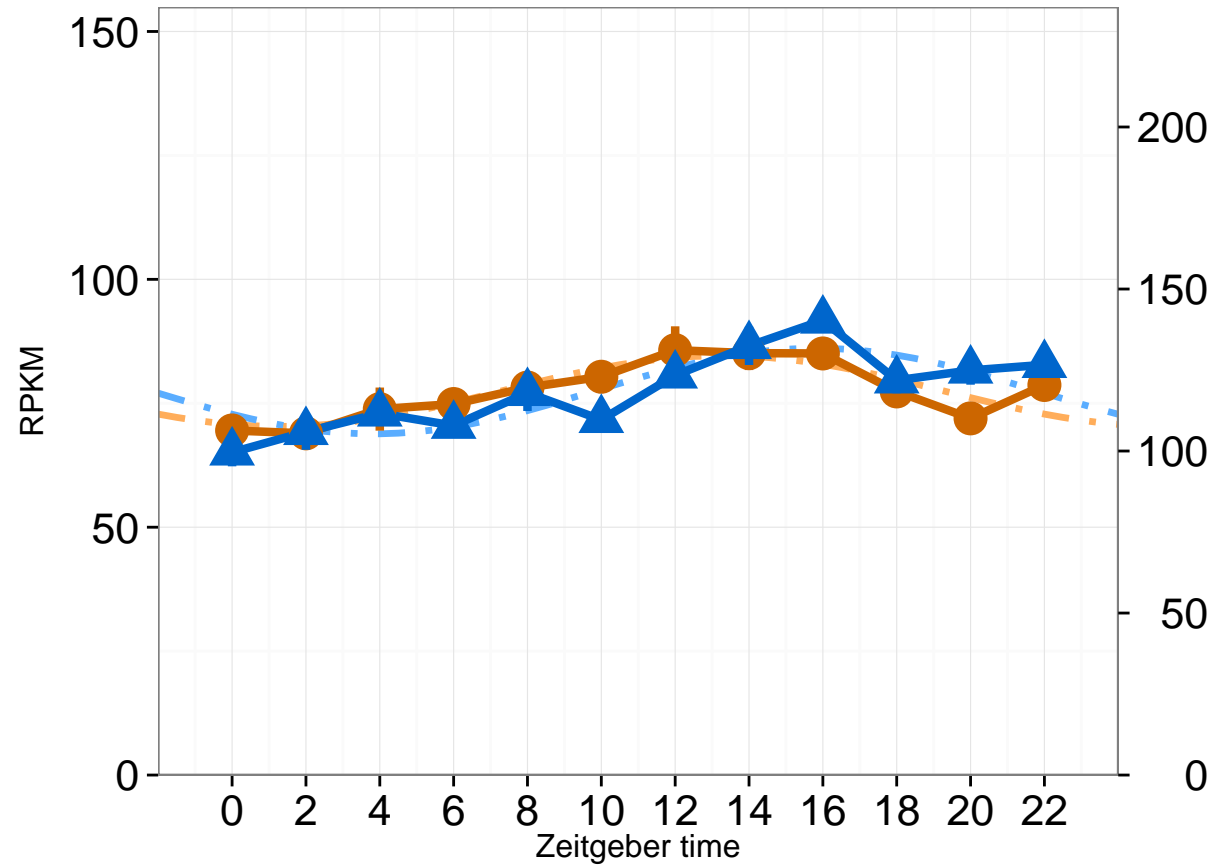

## Clcnkb

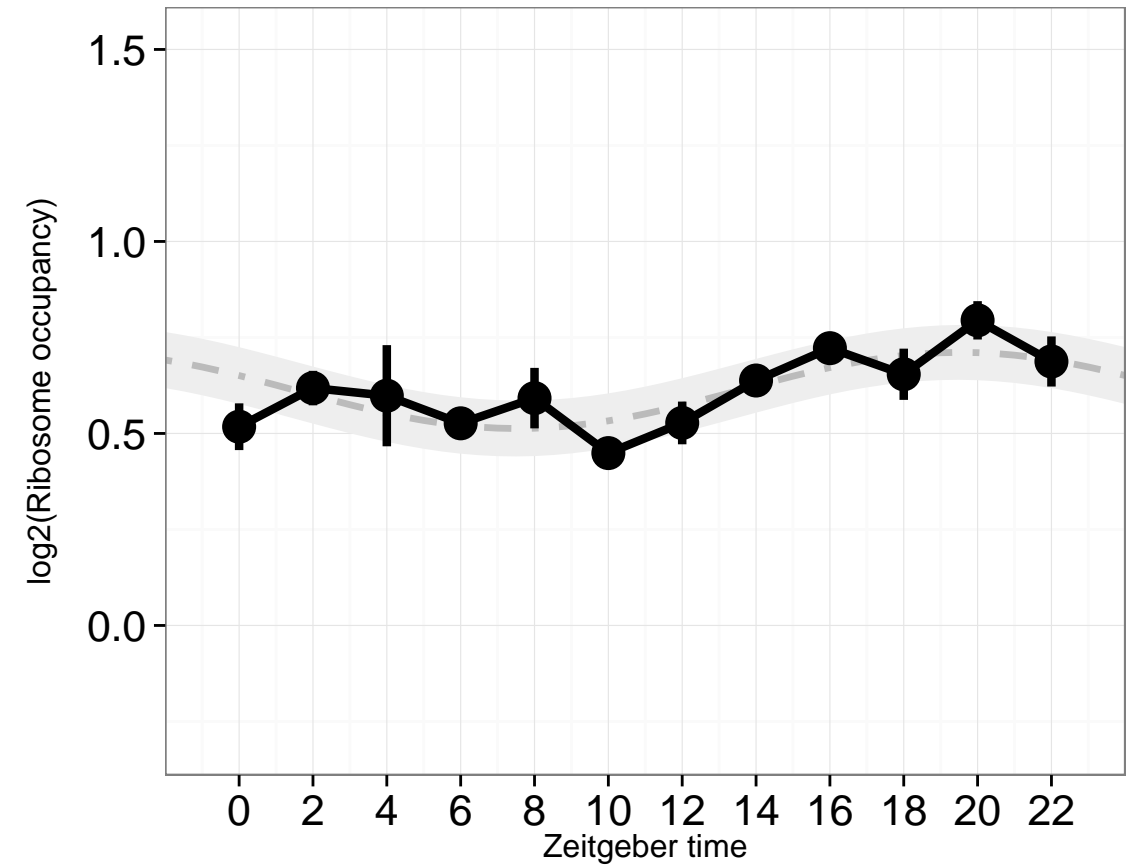

Supplement: Supplementary file 9950 [file 1]

# Zfc3h1

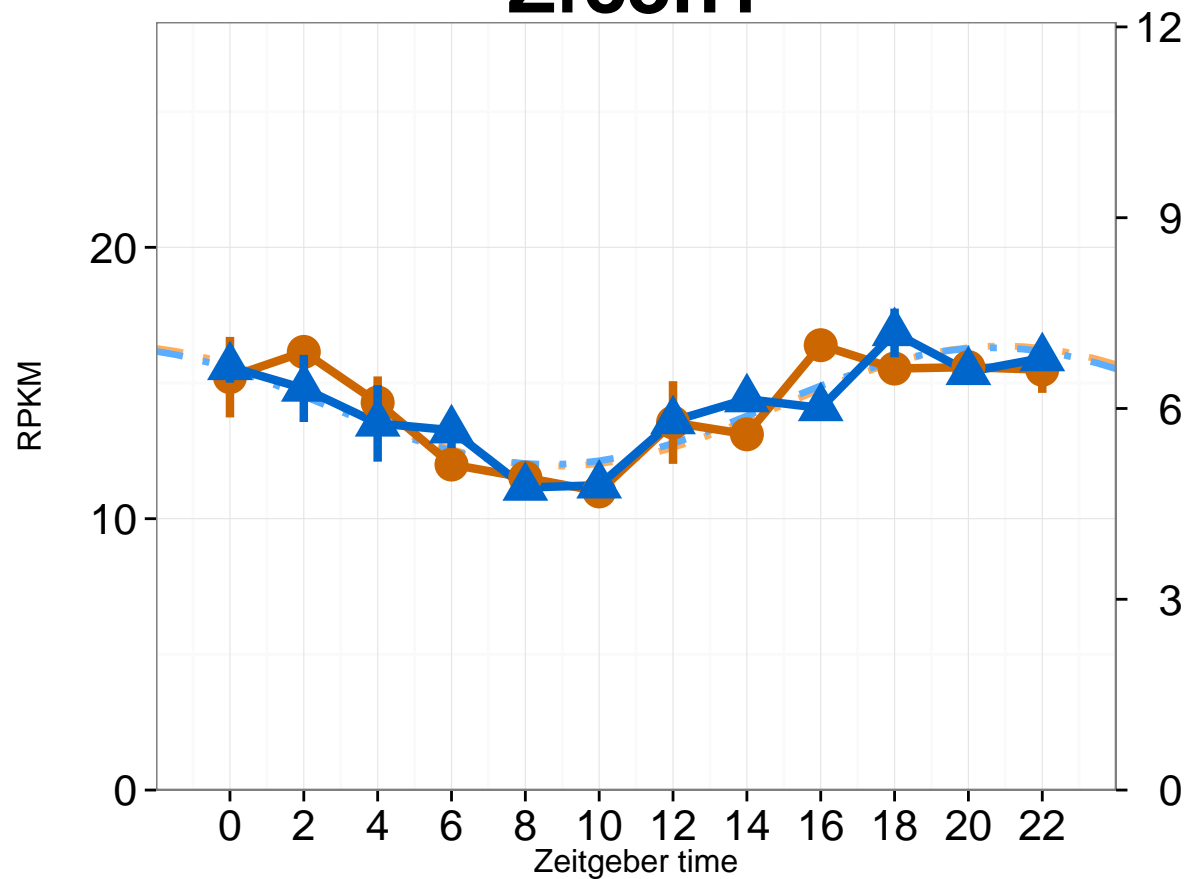

# Zfc3h1

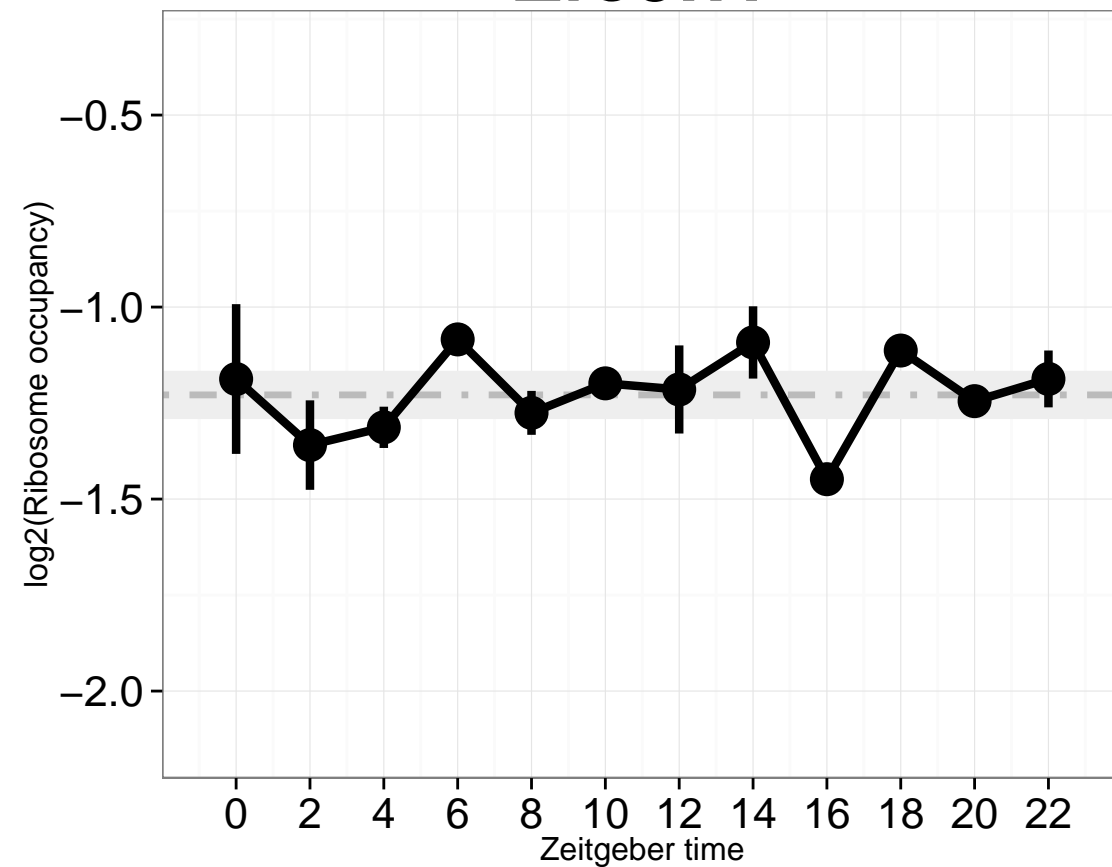

Supplement: Supplementary file 9951 [file 1]

# Eef1b2

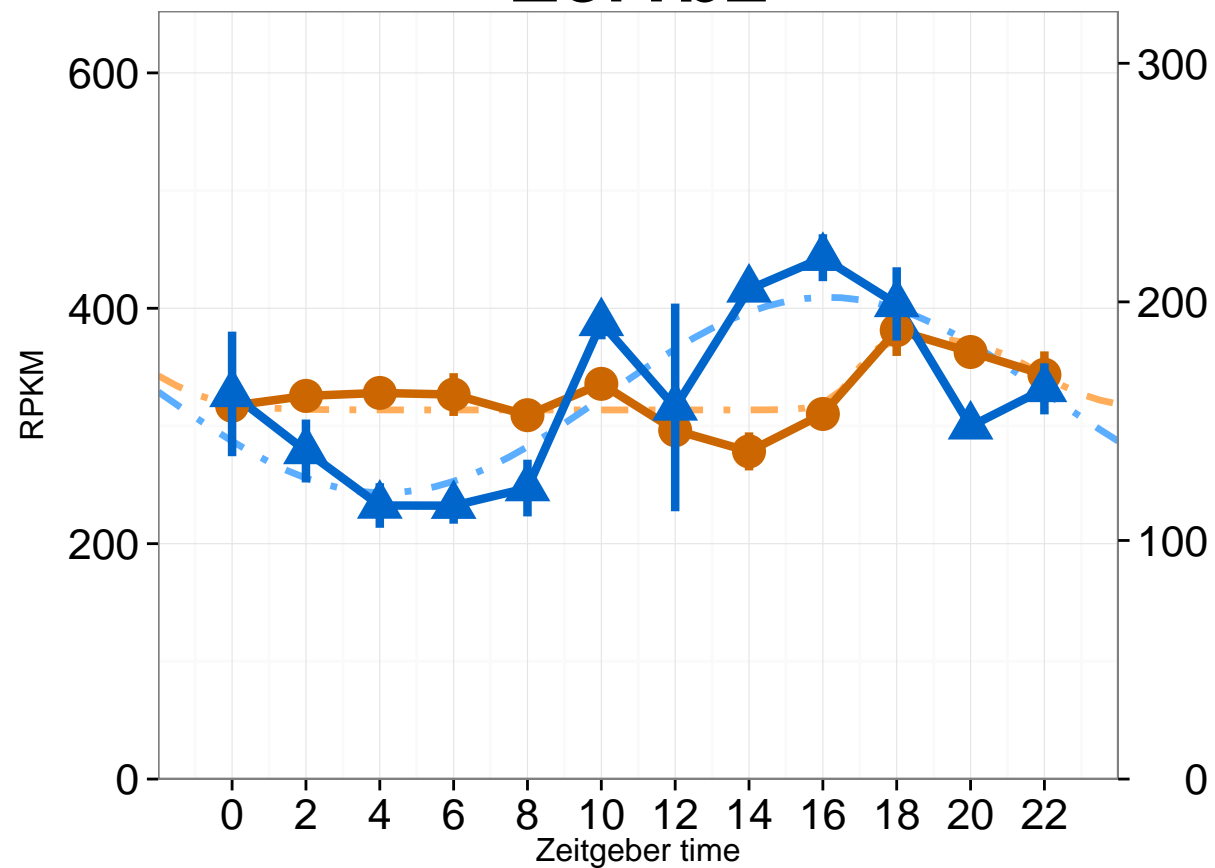

# Eef1b2

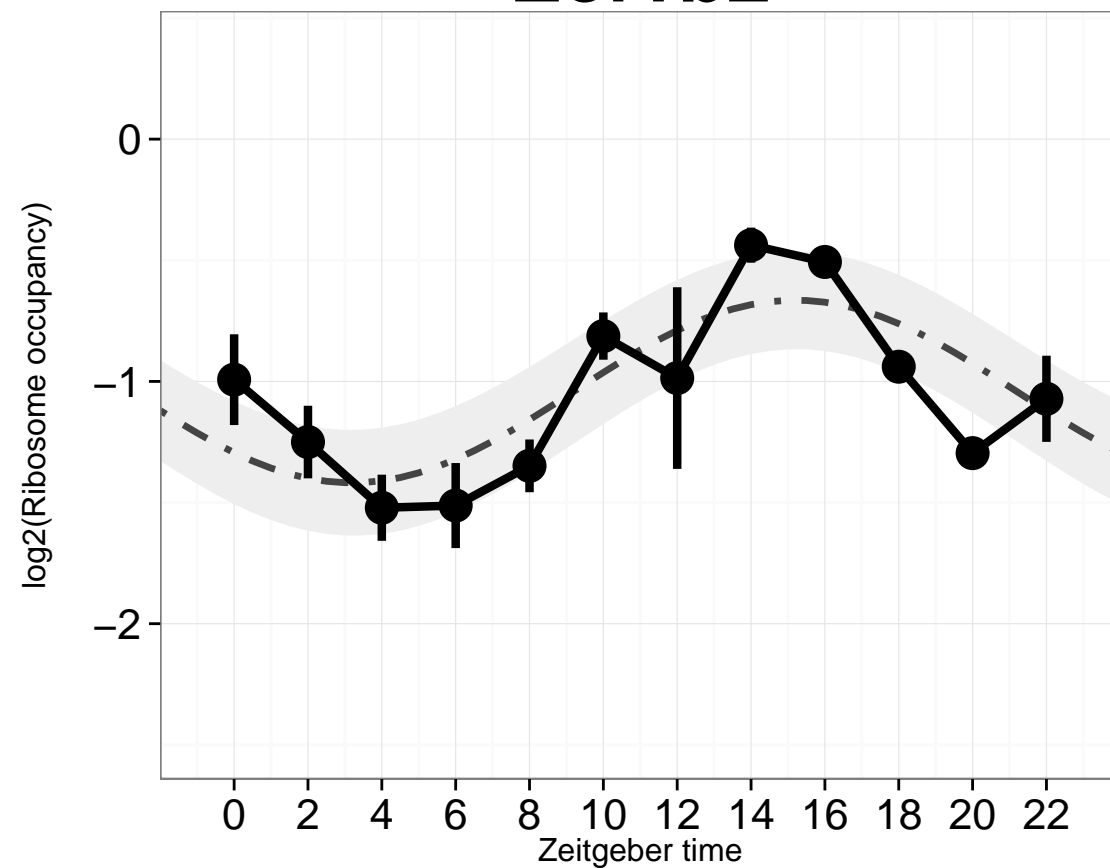

Supplement: Supplementary file 9952 [file 1]

## Tmem97

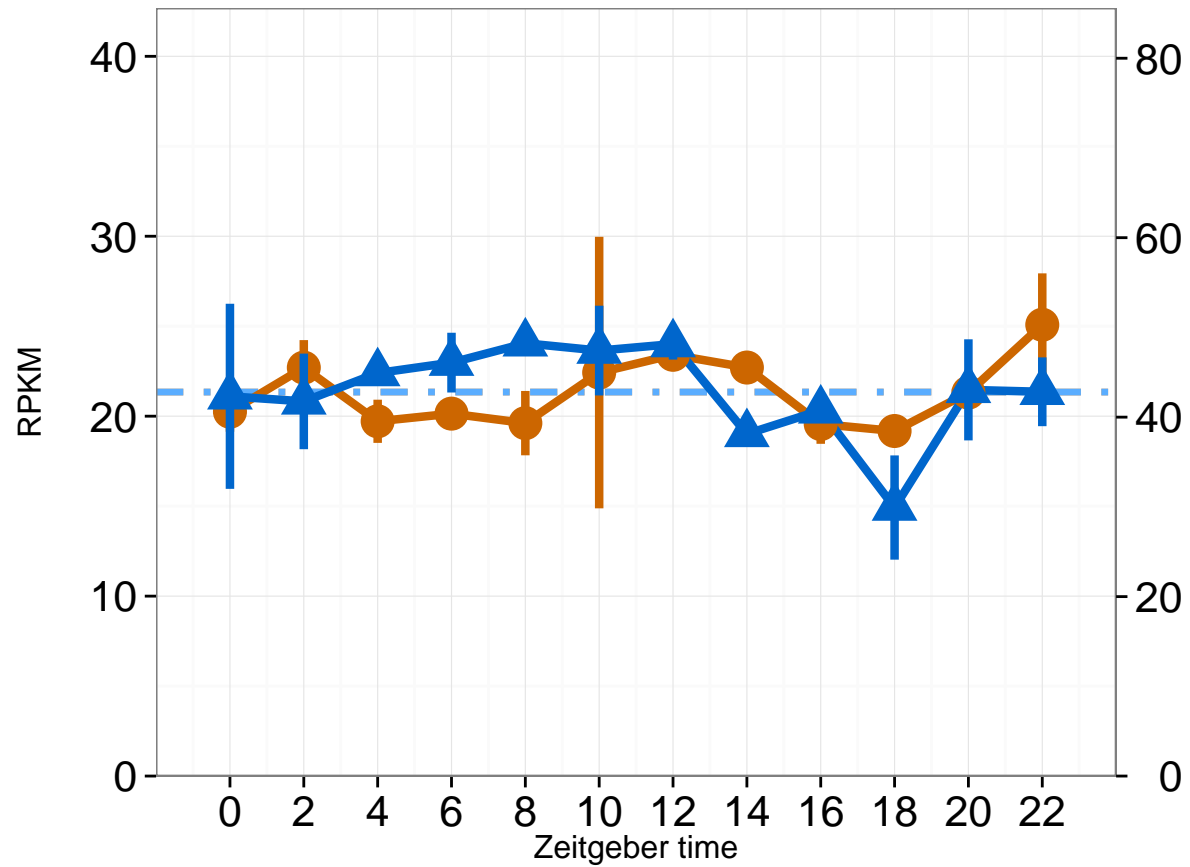

## Tmem97

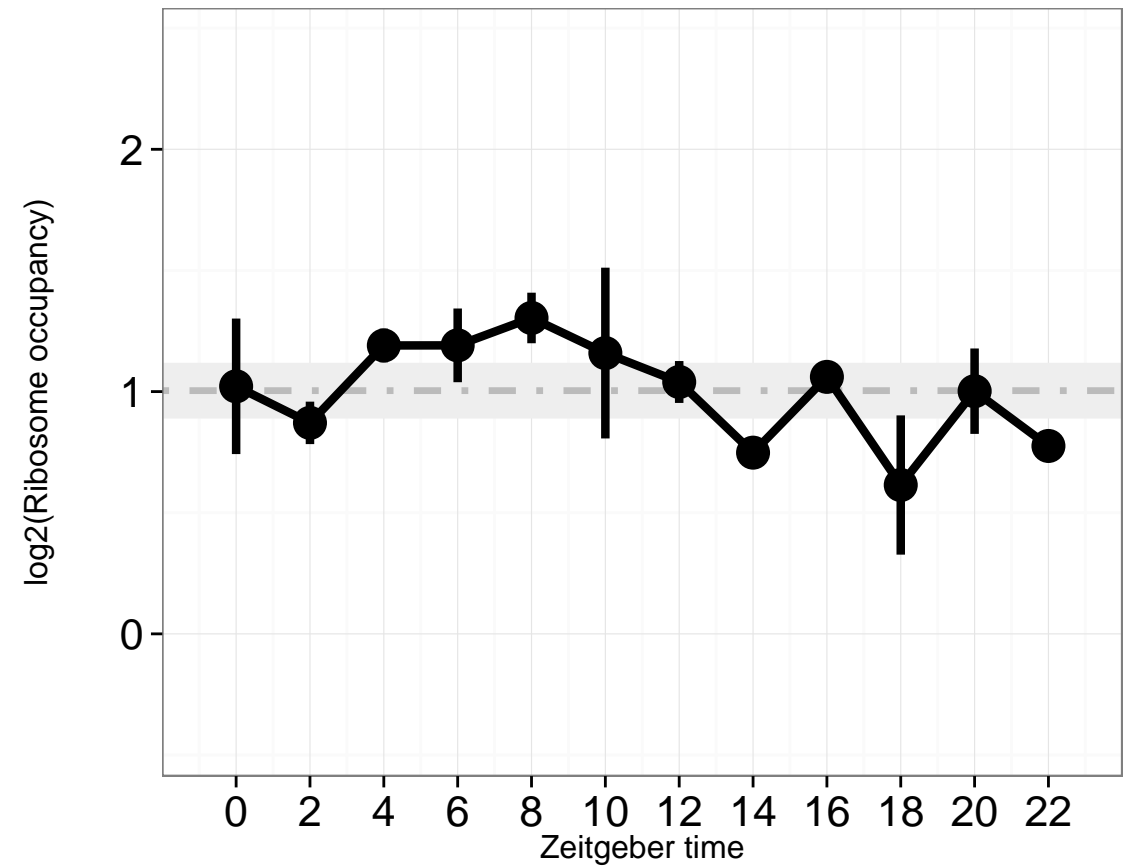

Supplement: Supplementary file 9953 [file 1]

## Cep97

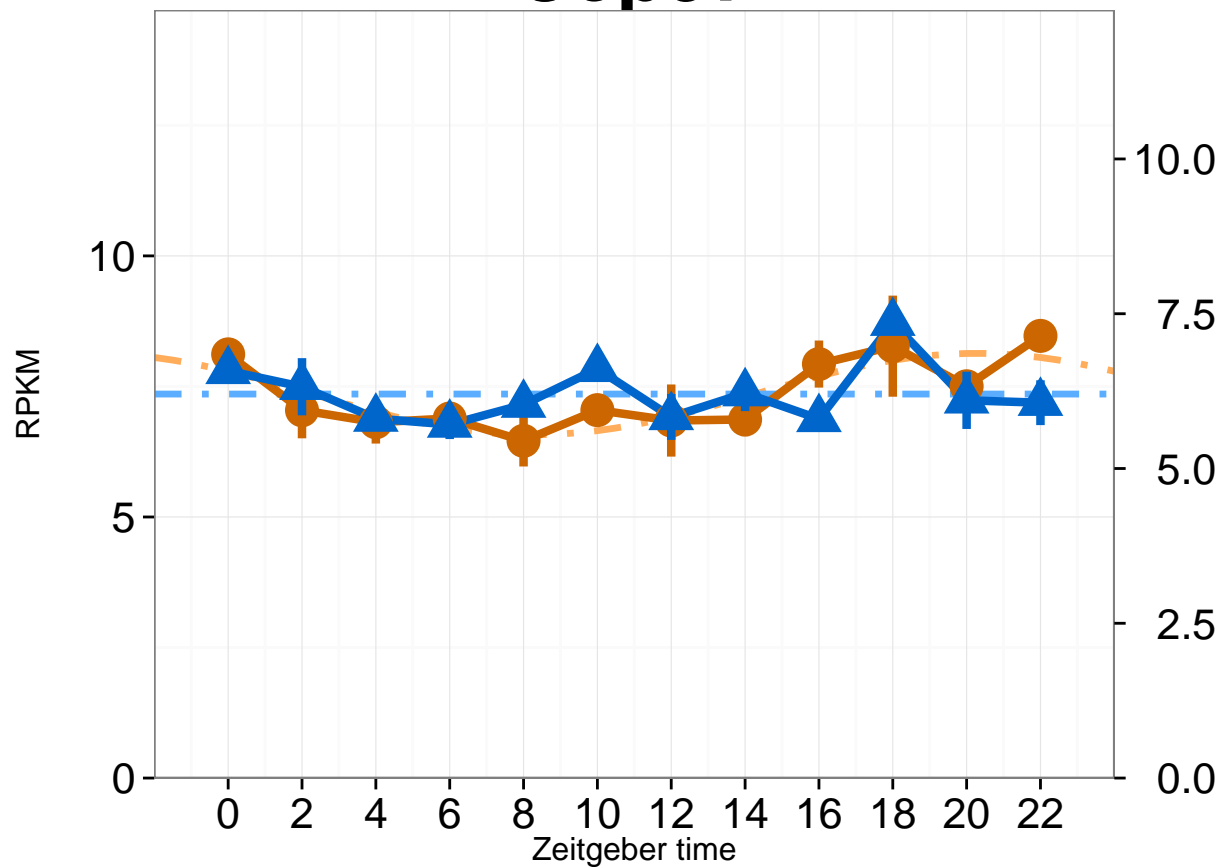

## Cep97

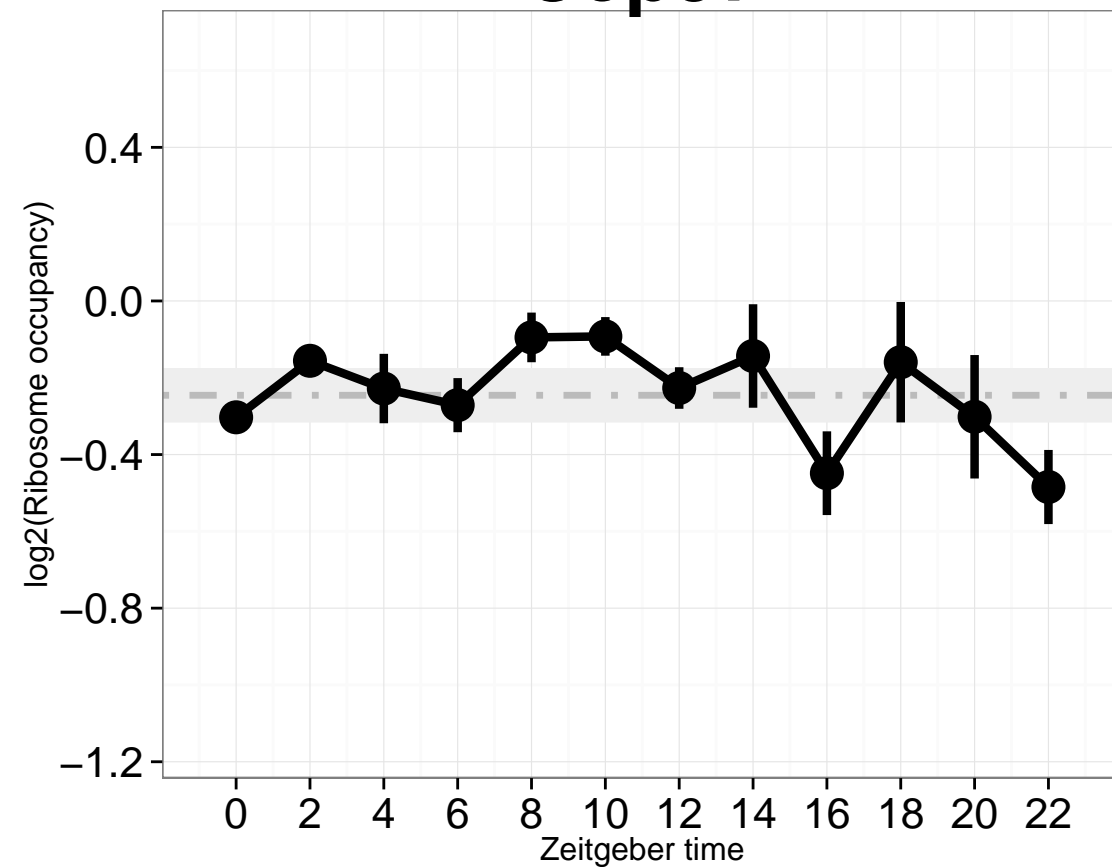

Supplement: Supplementary file 9954 [file 1]

# Mst1r

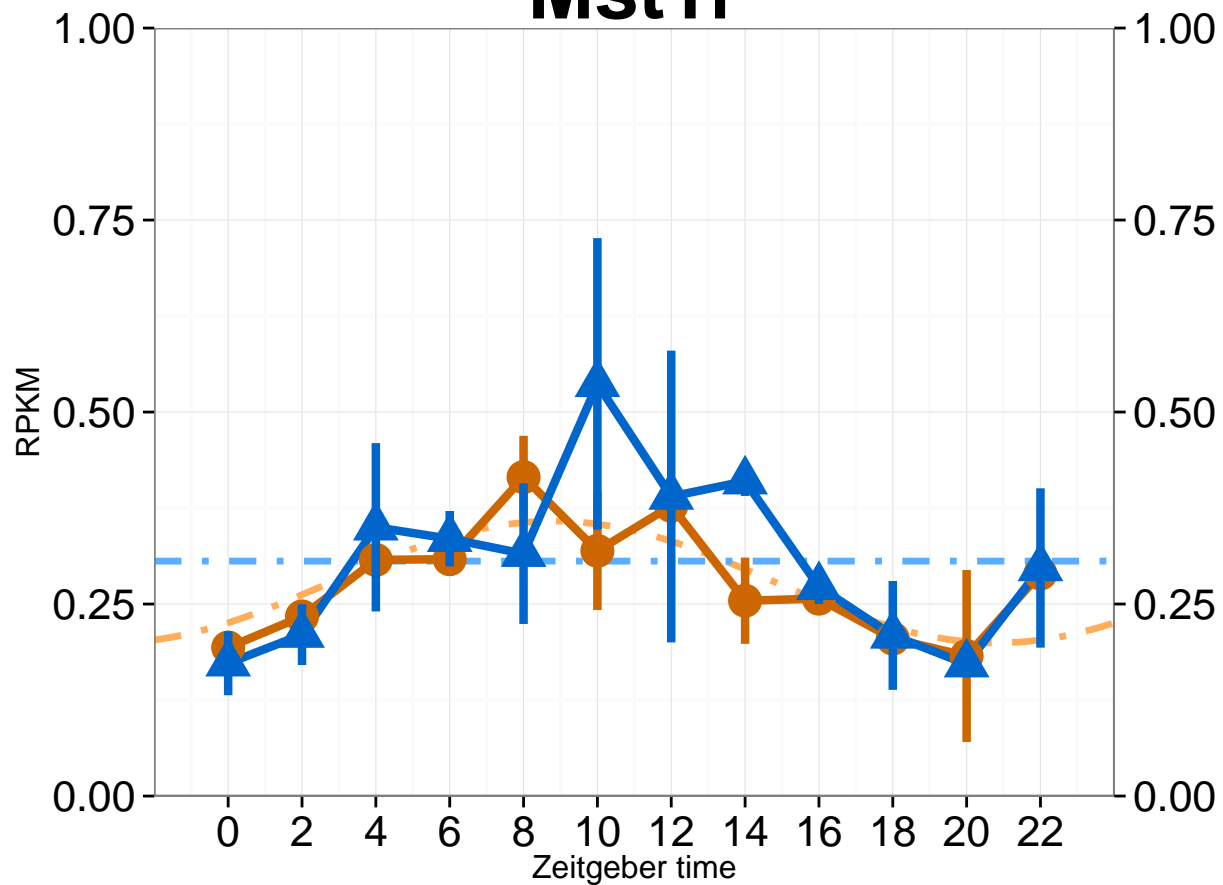

# Mst1r

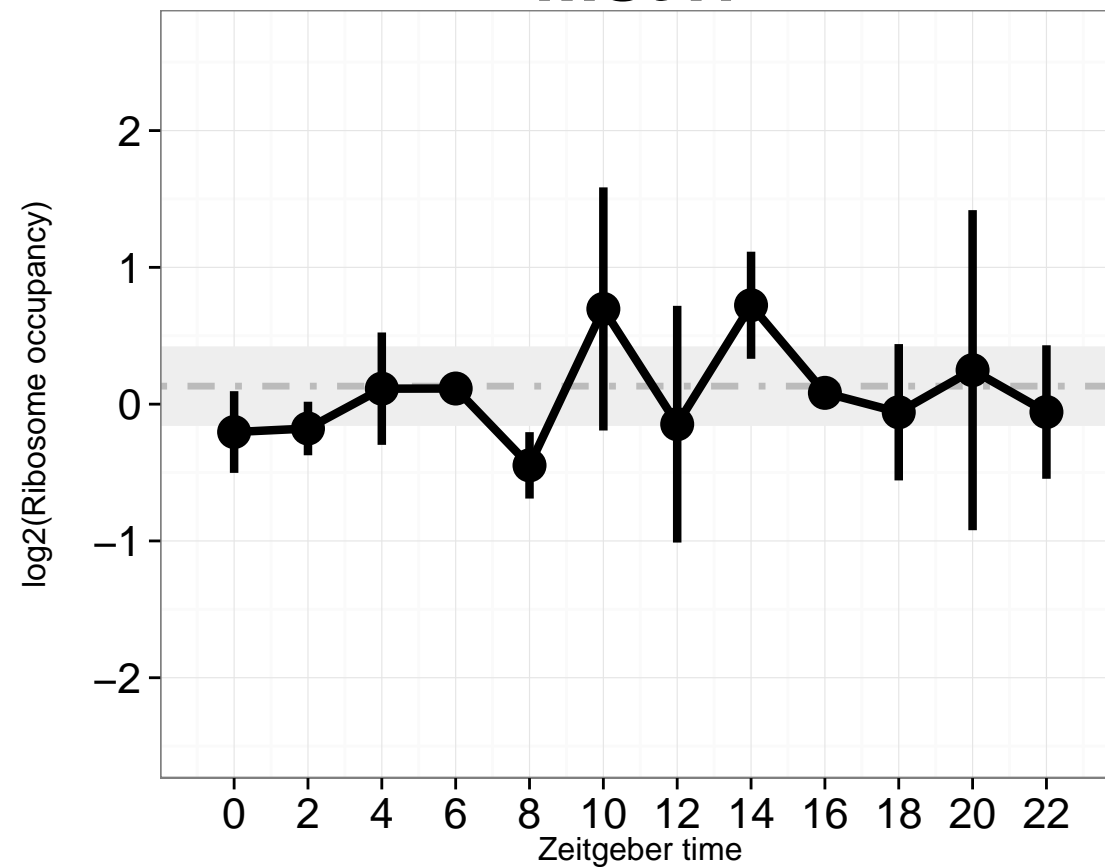

Supplement: Supplementary file 9955 [file 1]

## Leprel4

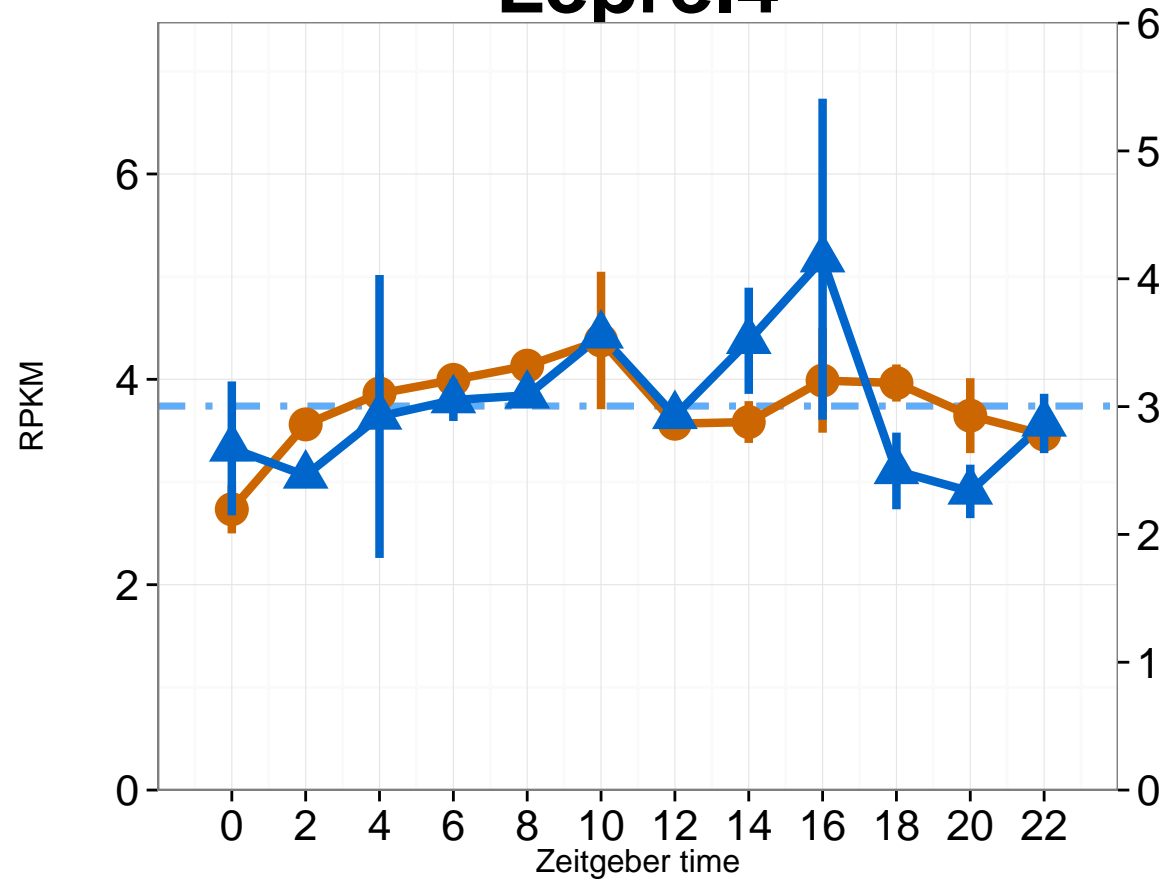

## Leprel4

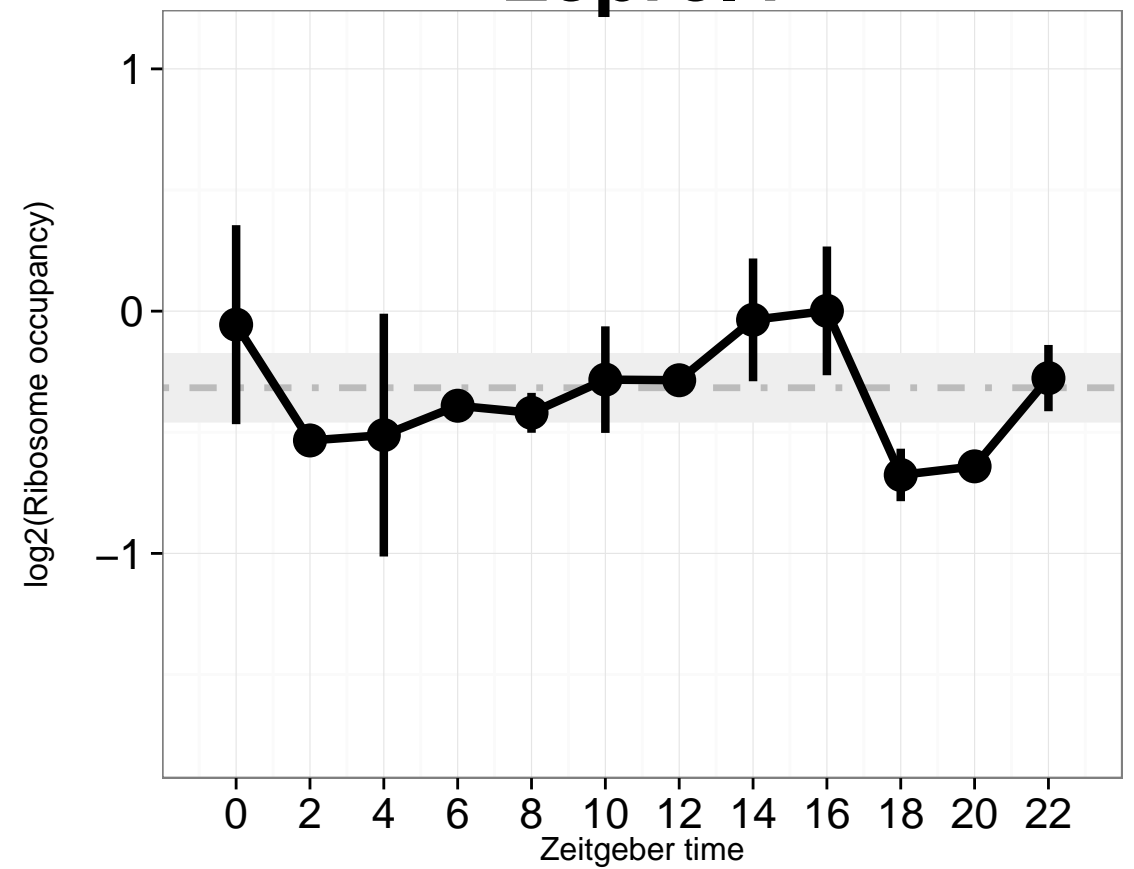

Supplement: Supplementary file 9956 [file 1]

## Mthfd1l

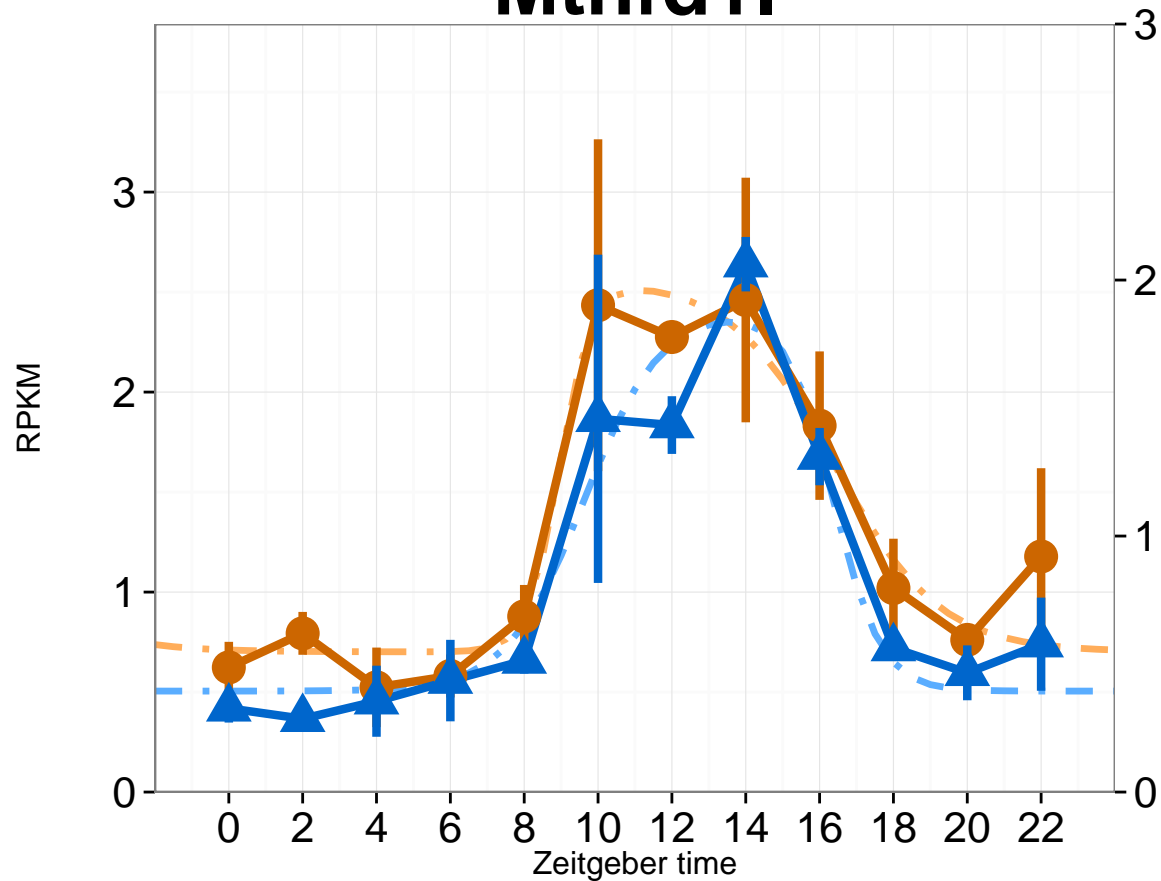

## Mthfd1l

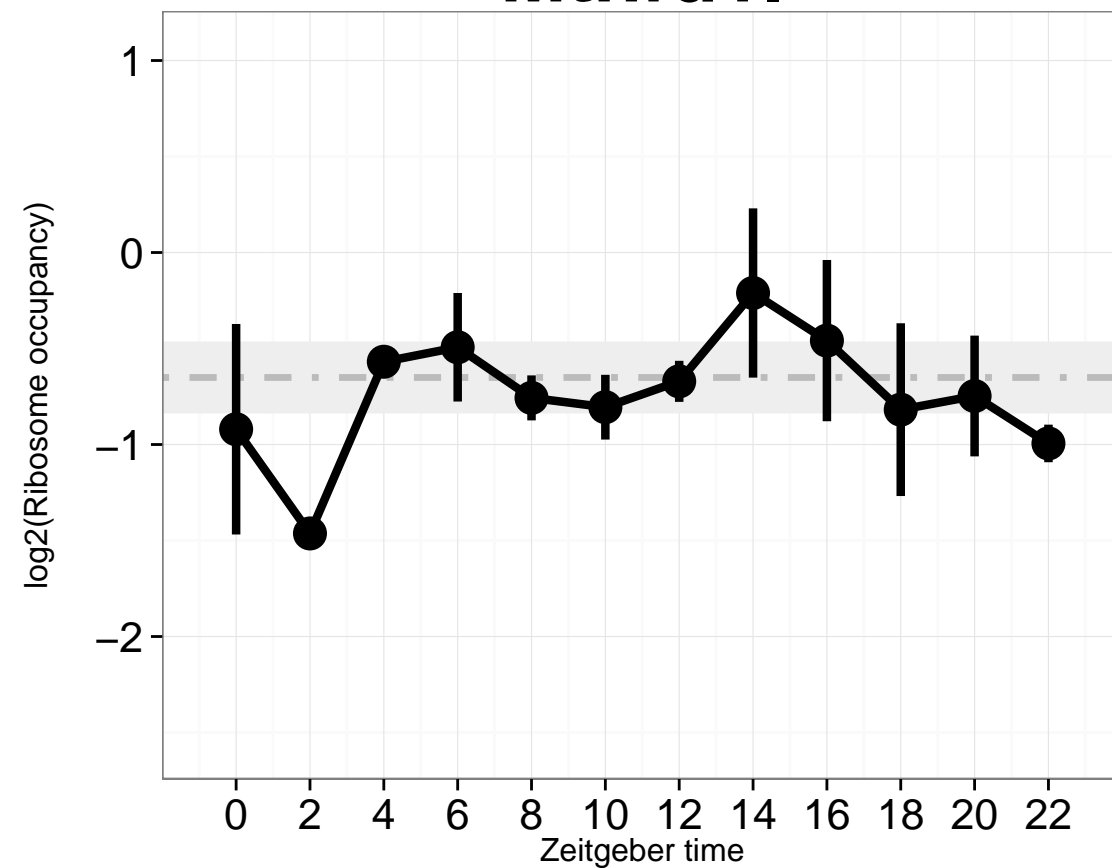

Supplement: Supplementary file 9957 [file 1]

# Dopey1

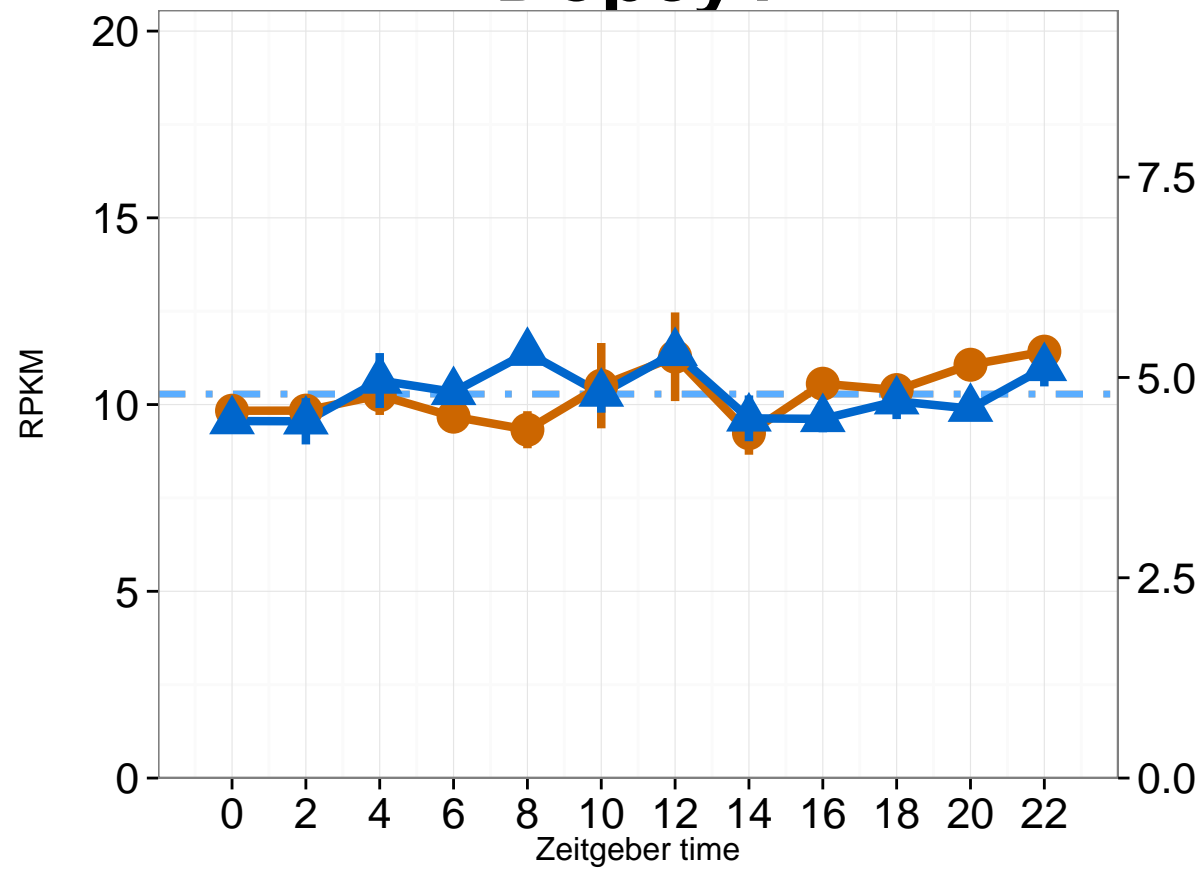

# Dopey1

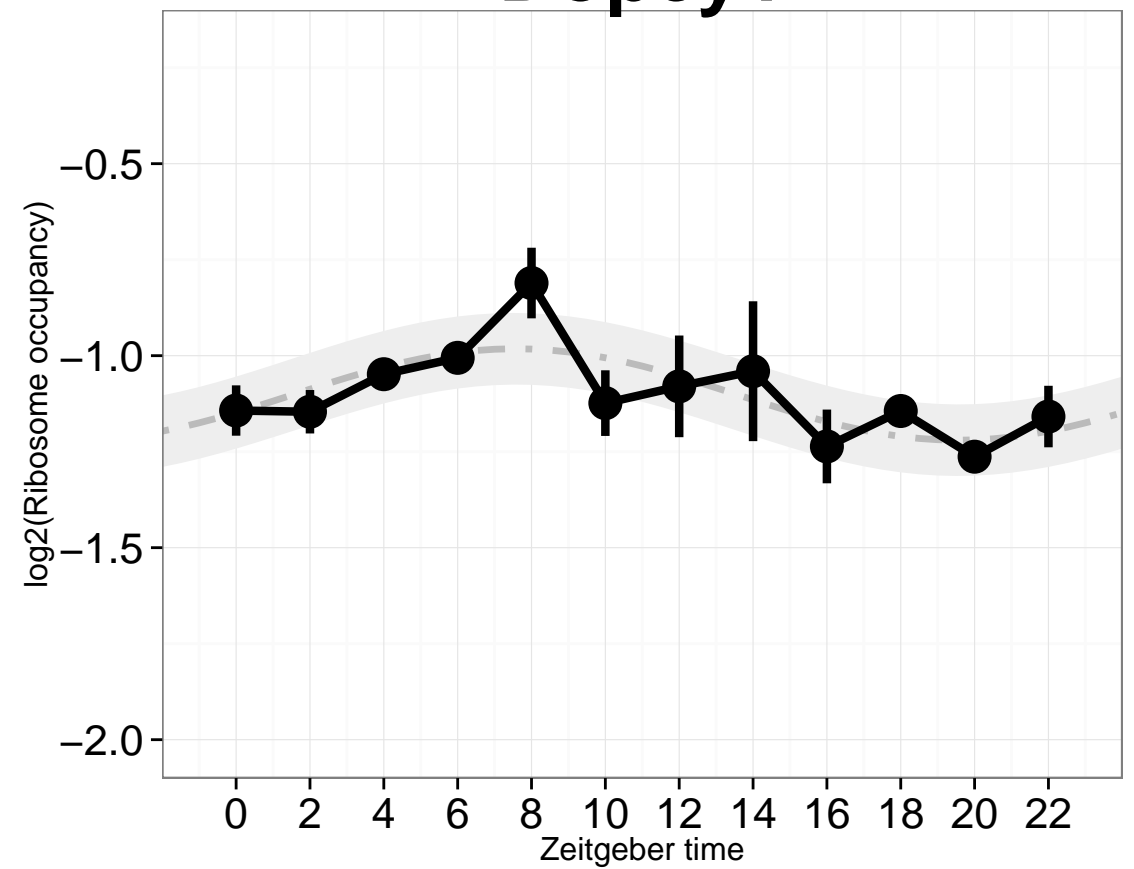

Supplement: Supplementary file 9958 [file 1]

## Pnpla8

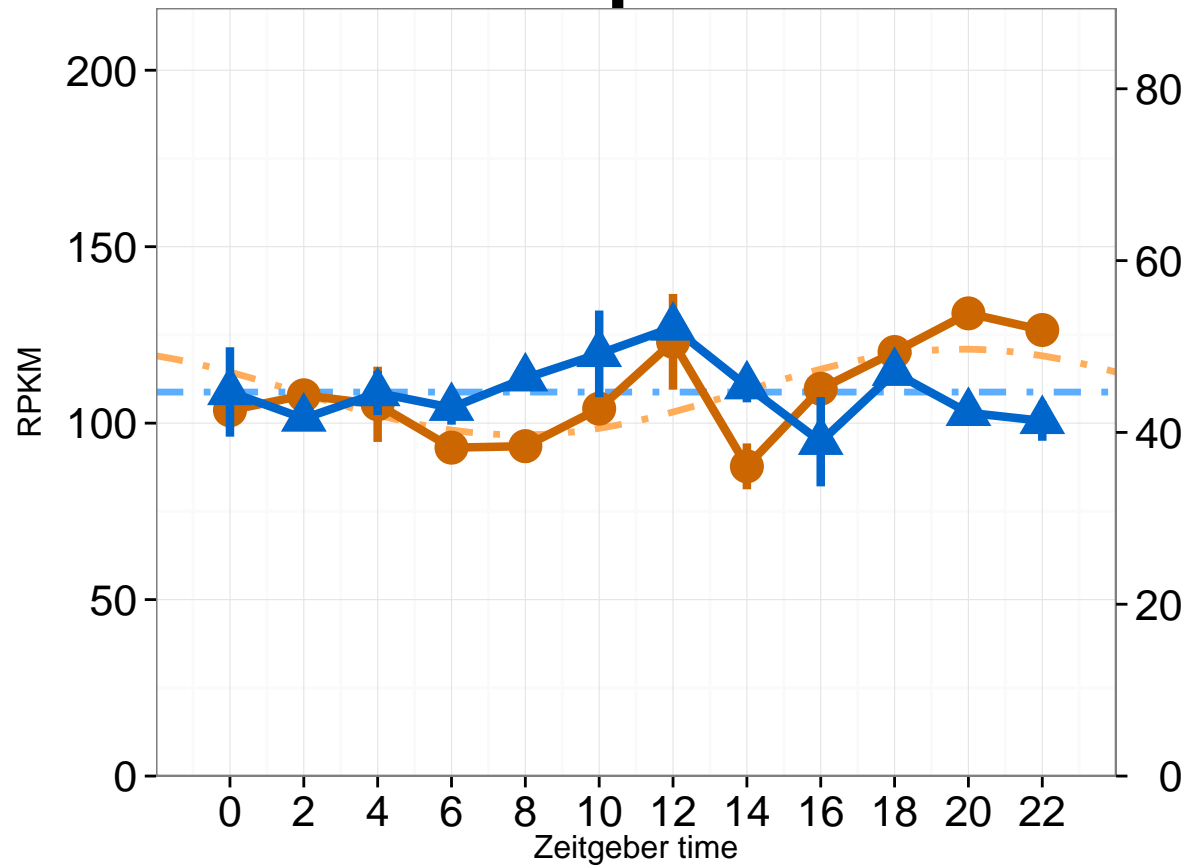

## Pnpla8

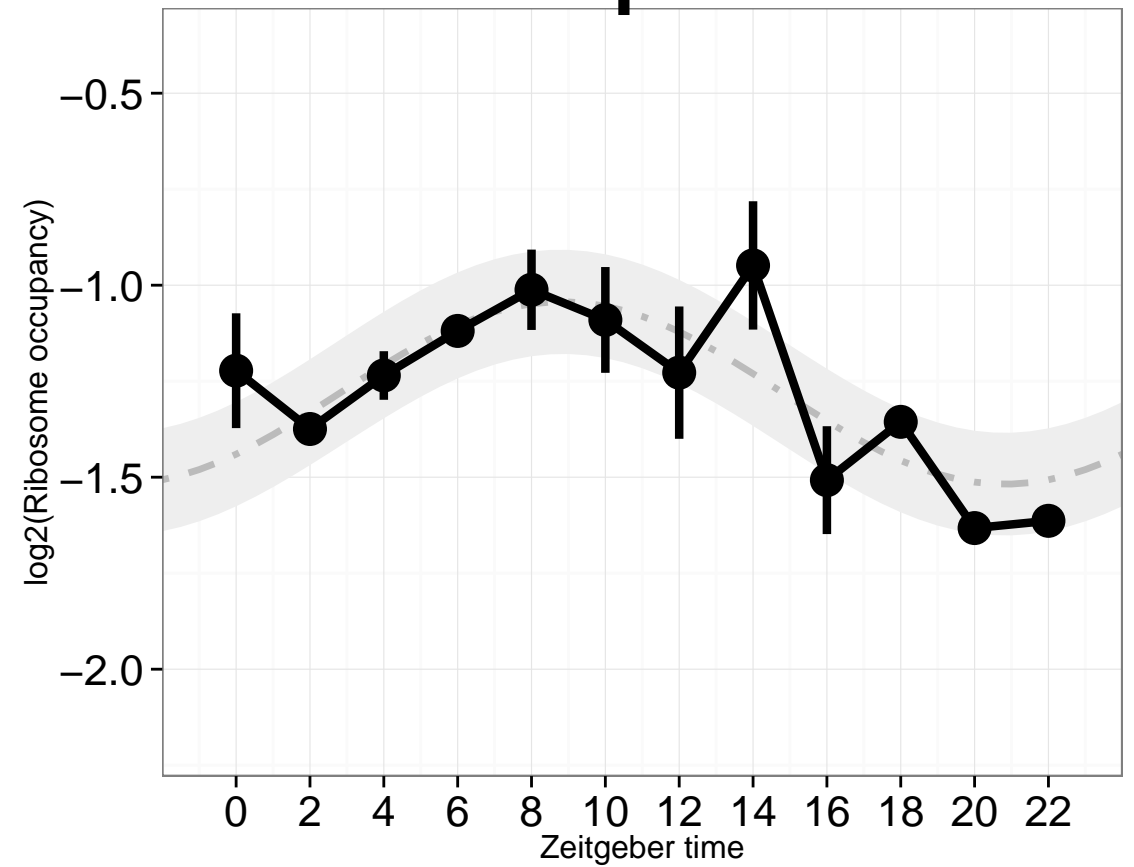

Supplement: Supplementary file 9959 [file 1]

## Nat8

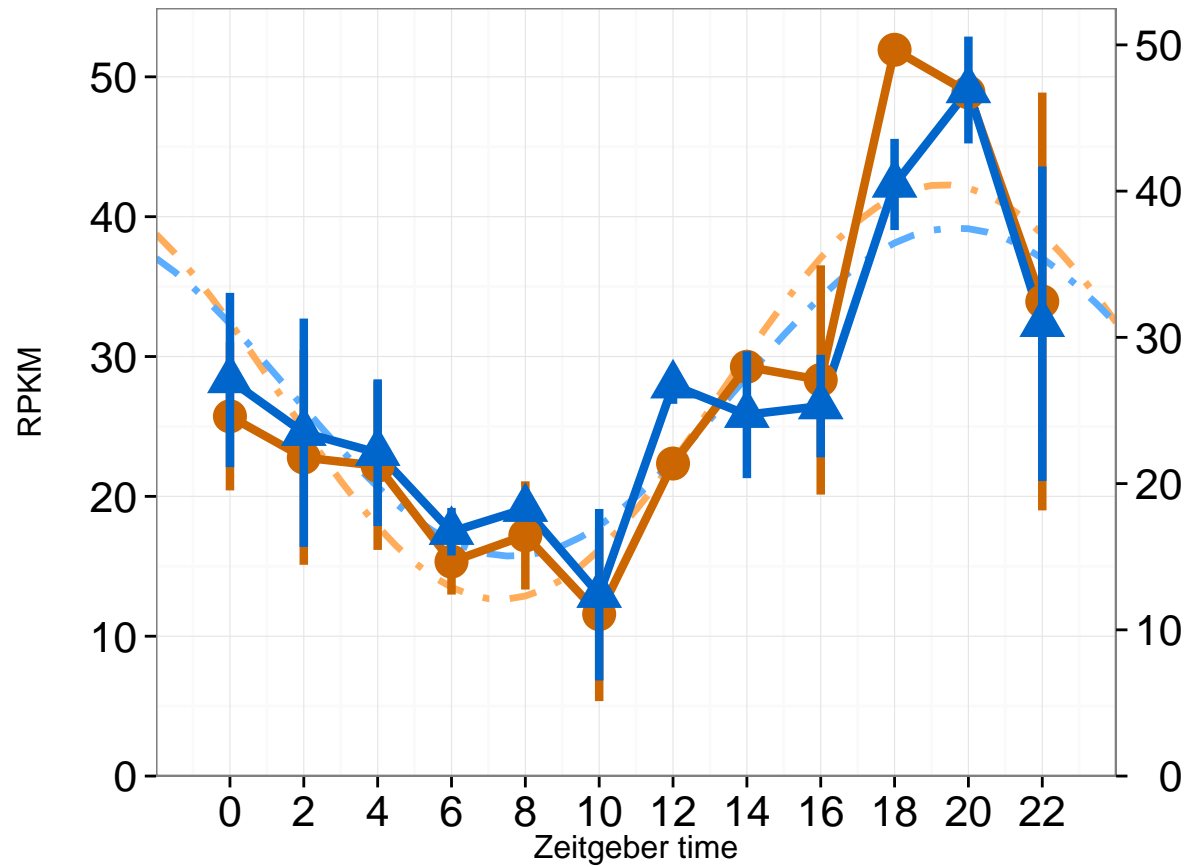

## Nat8

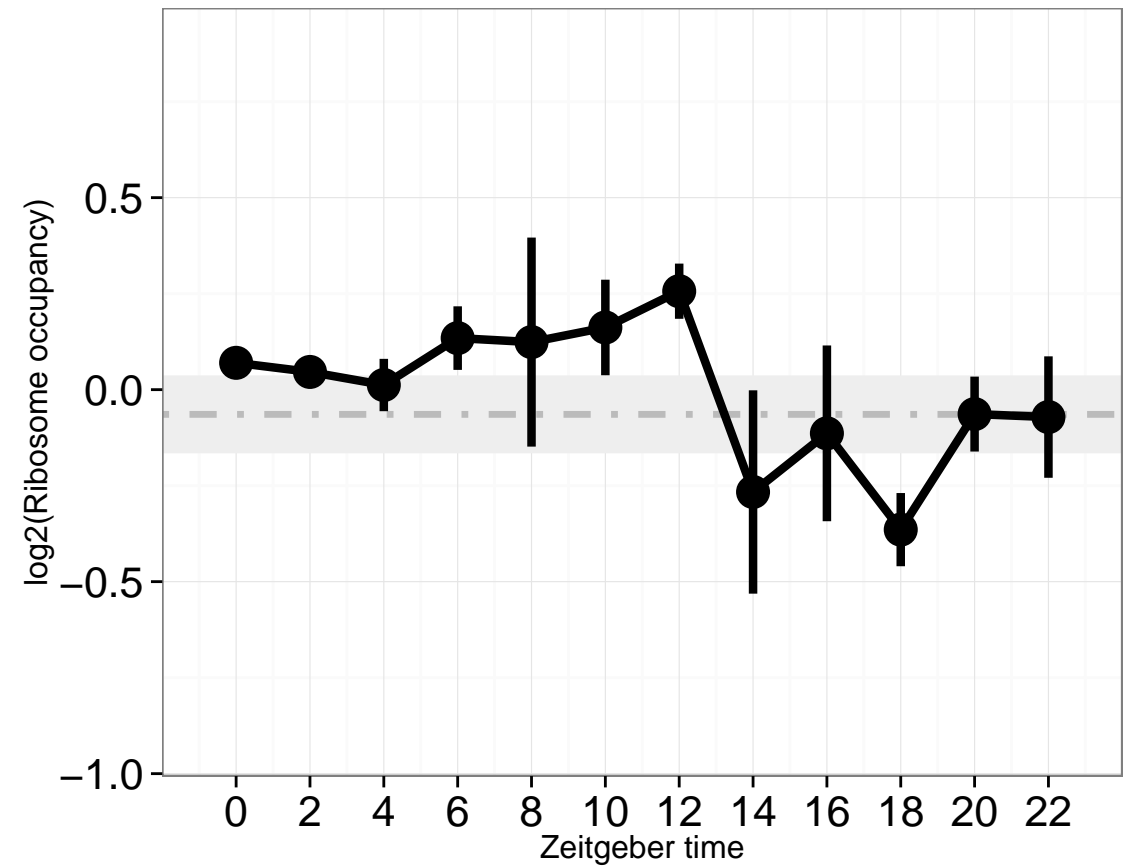

Supplement: Supplementary file 9960 [file 1]

# Hadhb

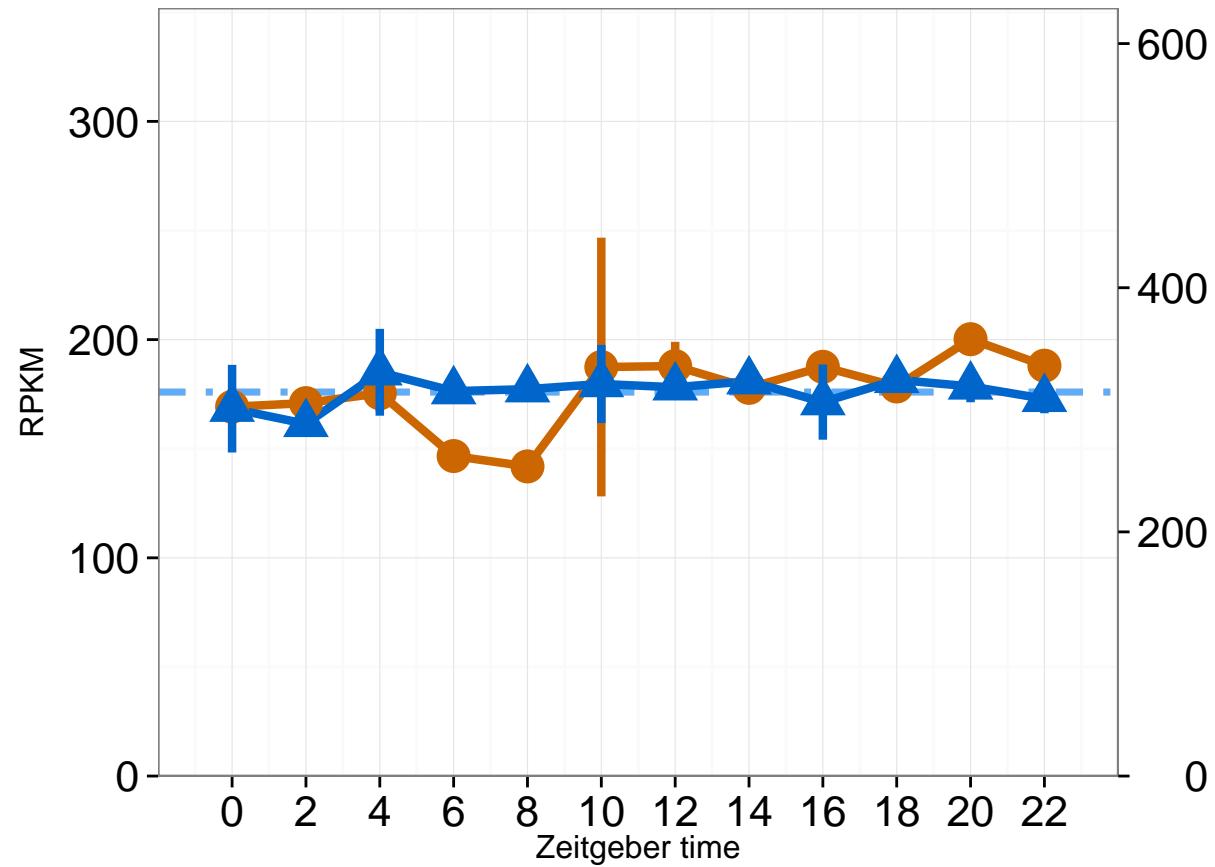

# Hadhb

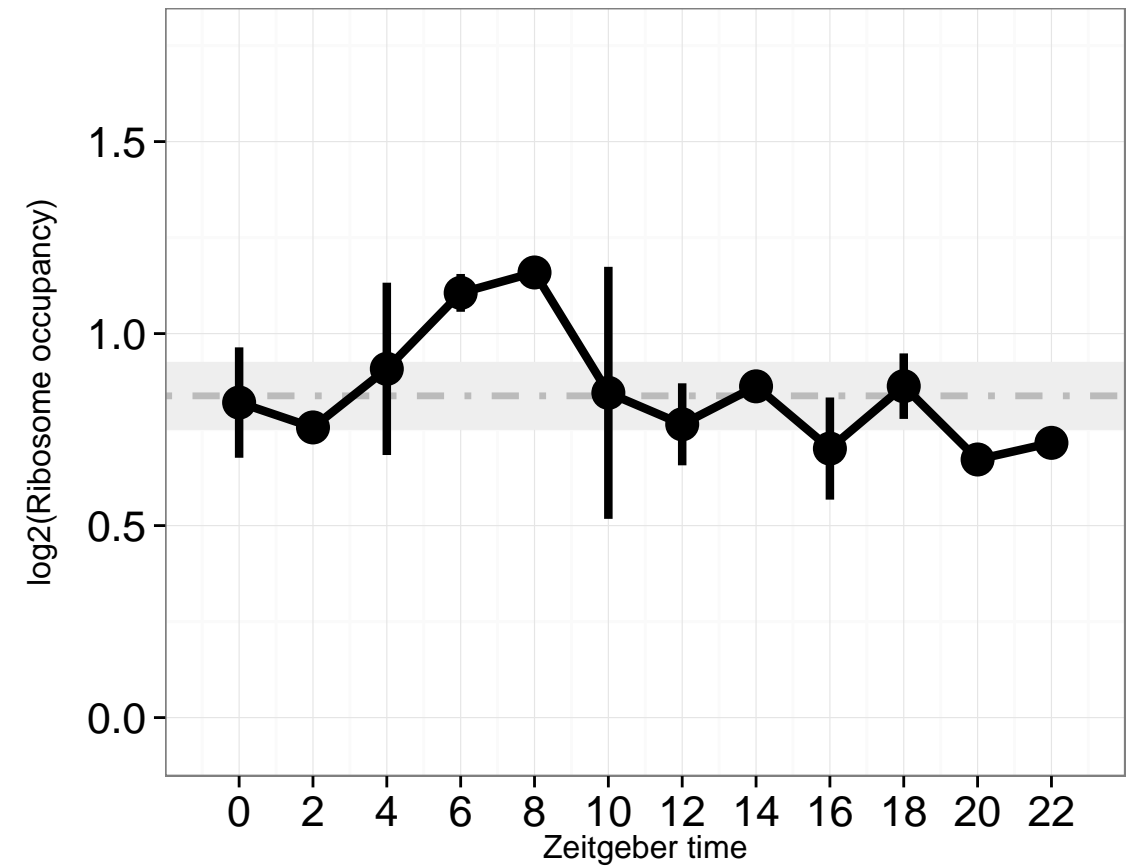

Supplement: Supplementary file 9961 [file 1]

## Slc6a17

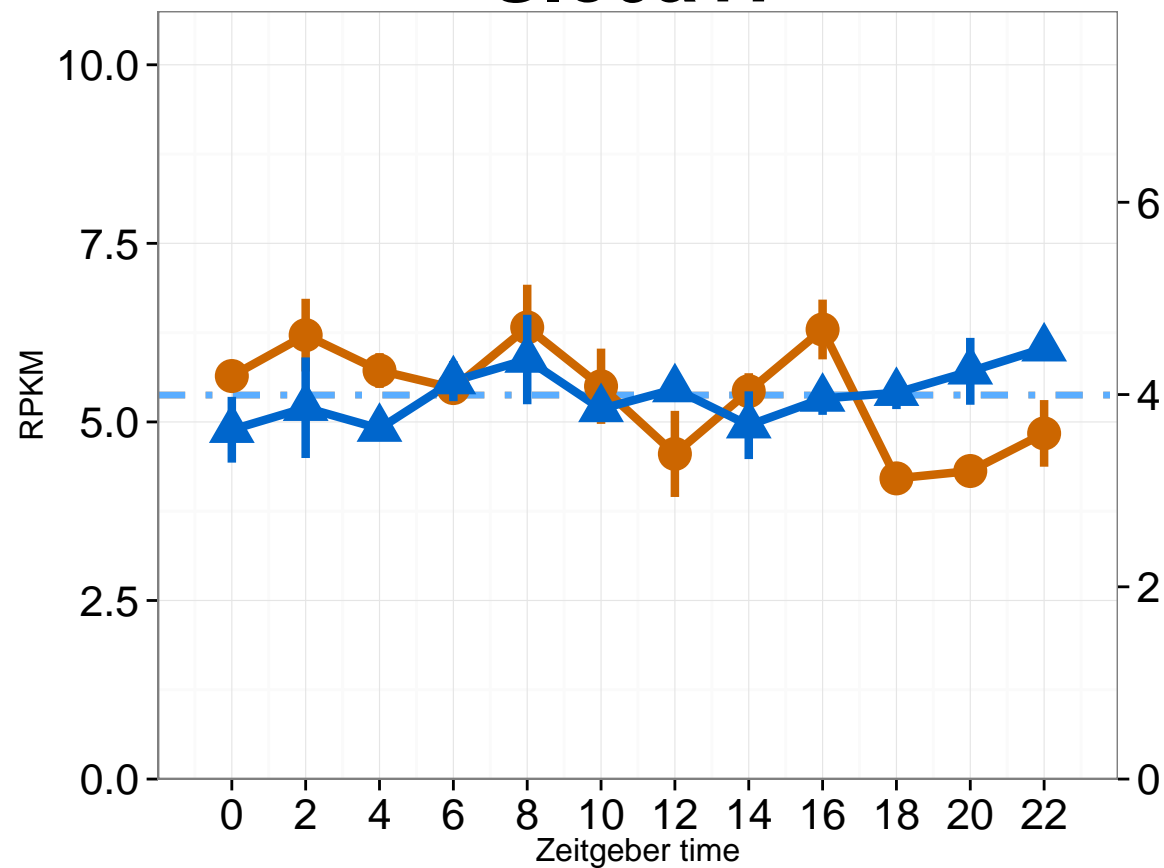

## Slc6a17

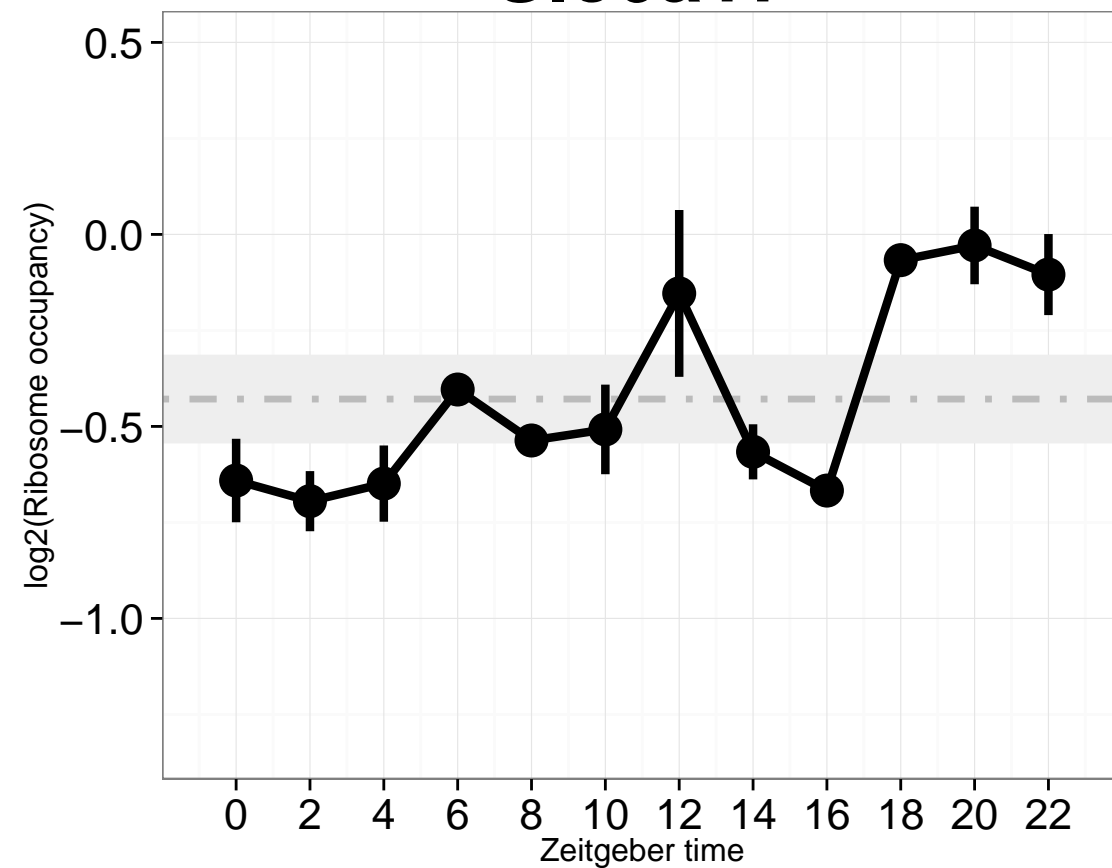

Supplement: Supplementary file 9962 [file 1]

# Armc5

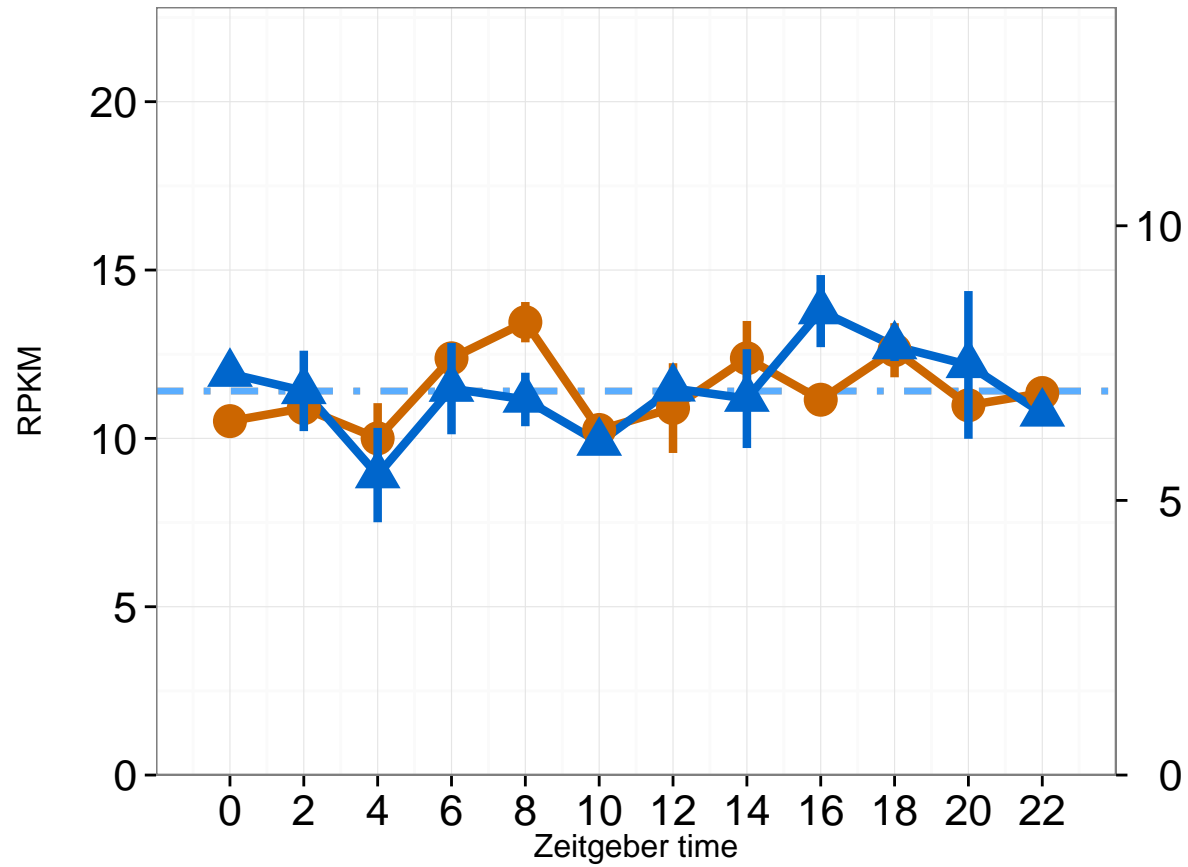

# Armc5

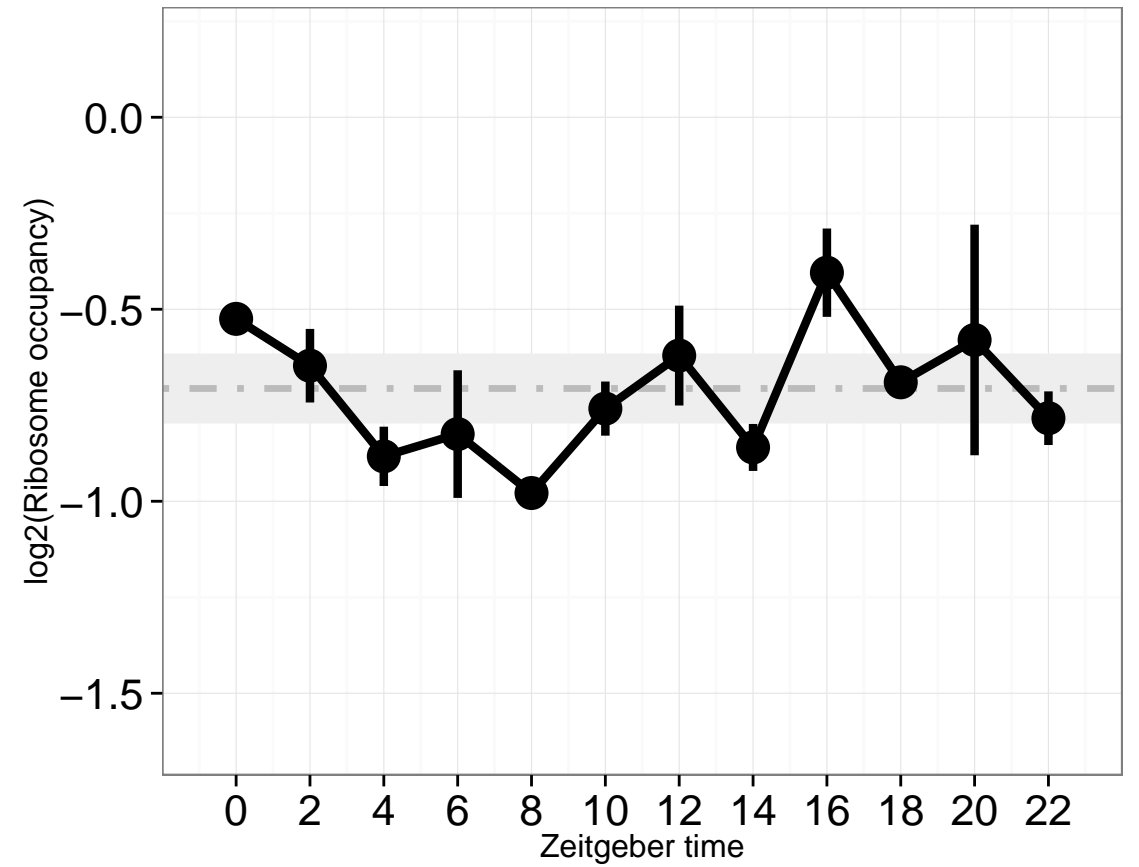

Supplement: Supplementary file 9963 [file 1]

## Ets2

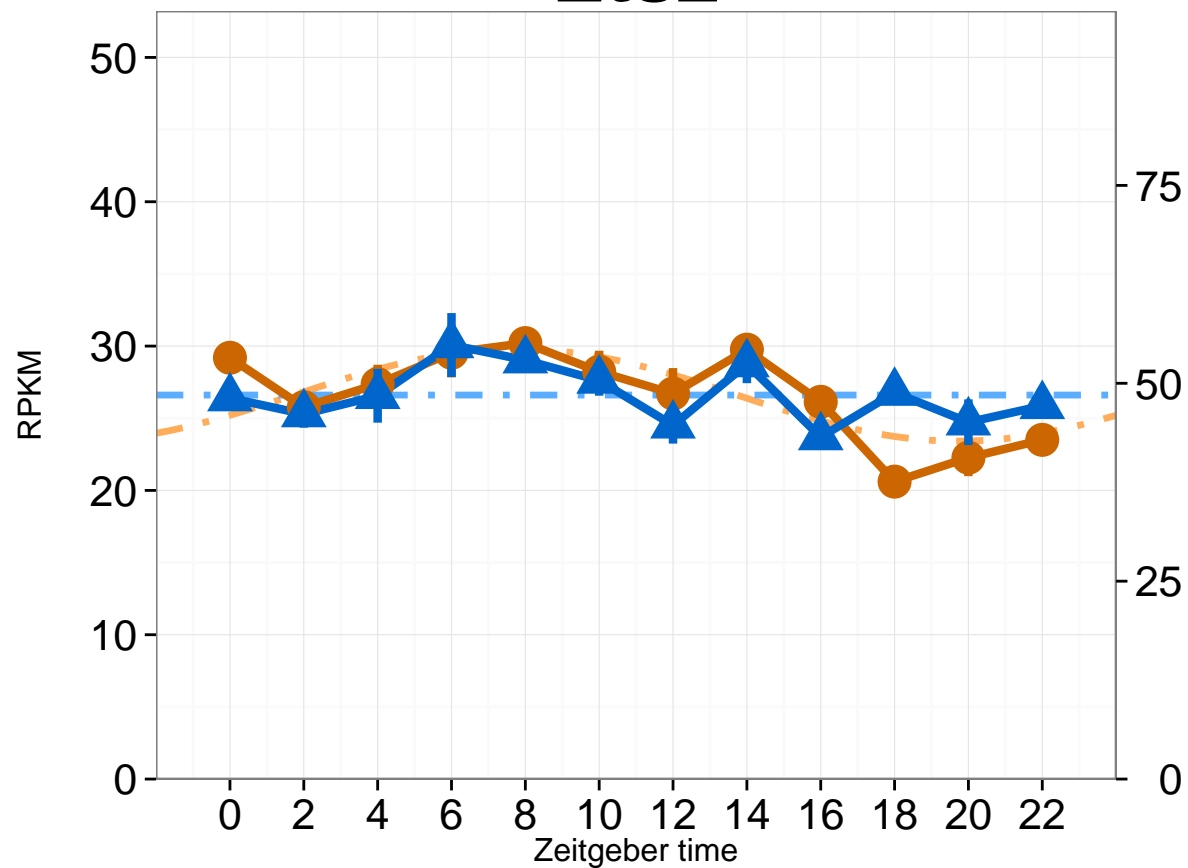

## Ets2

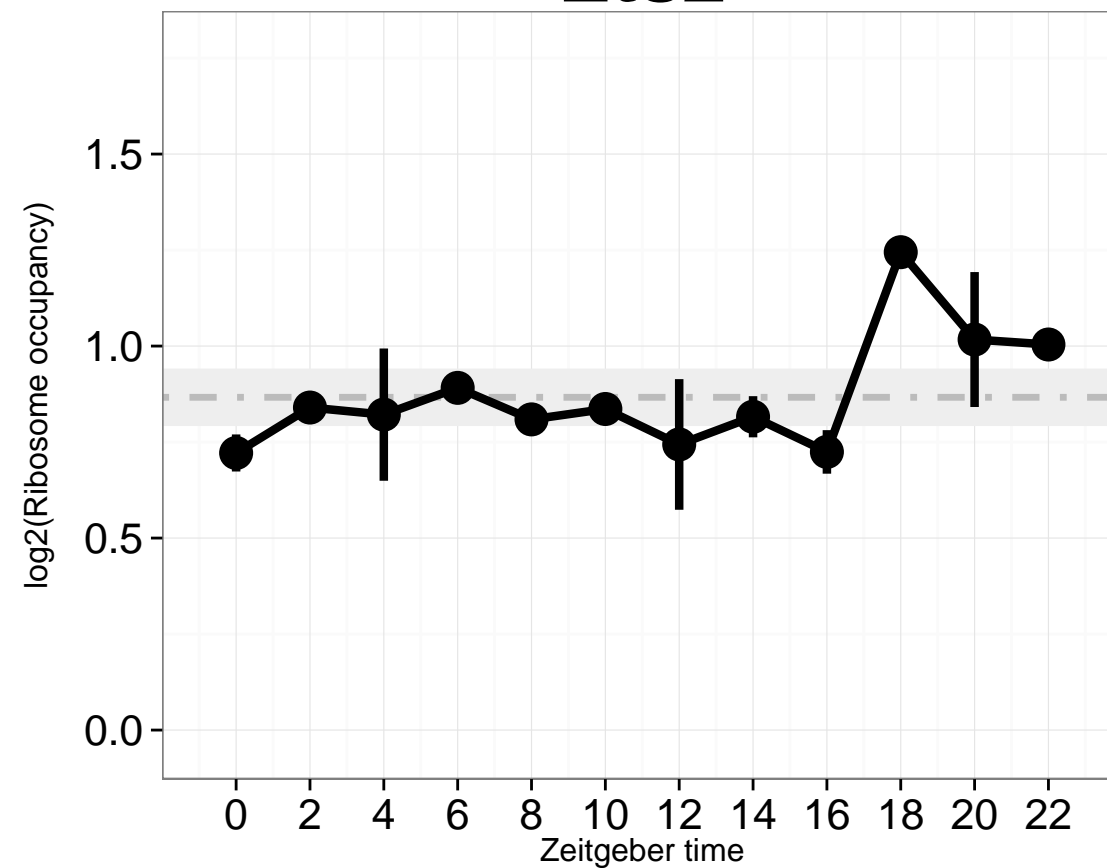

Supplement: Supplementary file 9964 [file 1]

## Zfp599

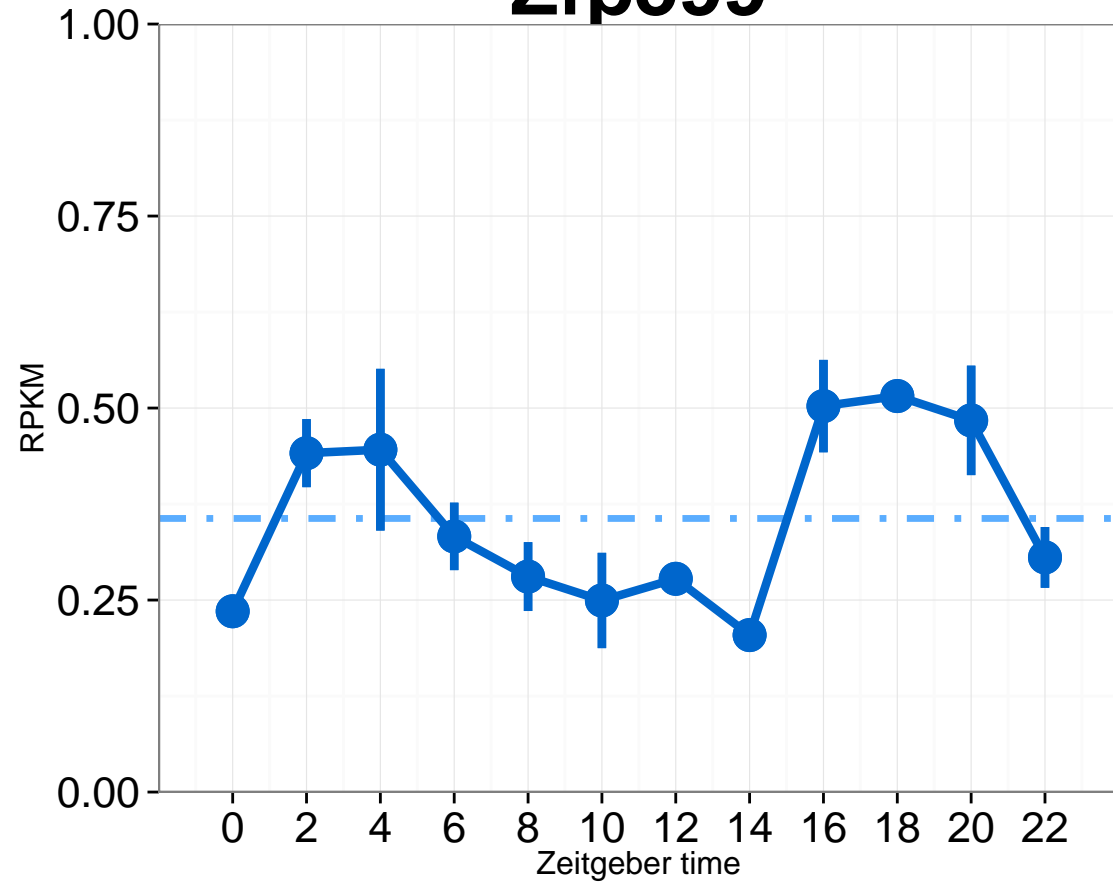

## Zfp599 log2(Ribosome occupancy

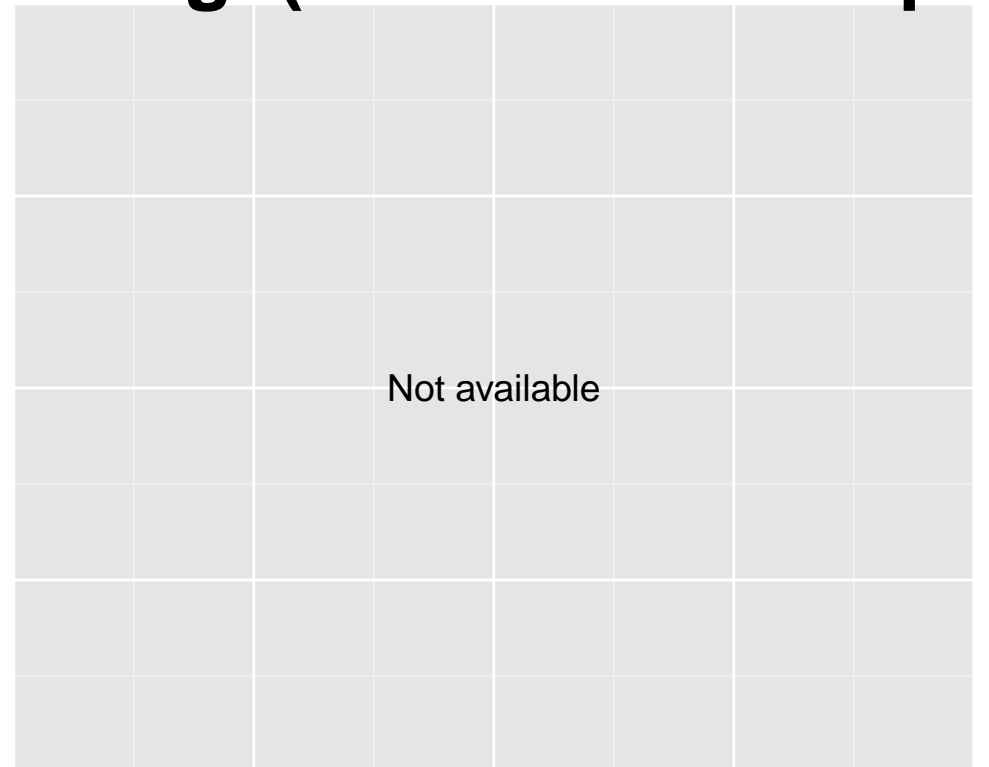

Supplement: Supplementary file 9965 [file 1]

## Lasp1

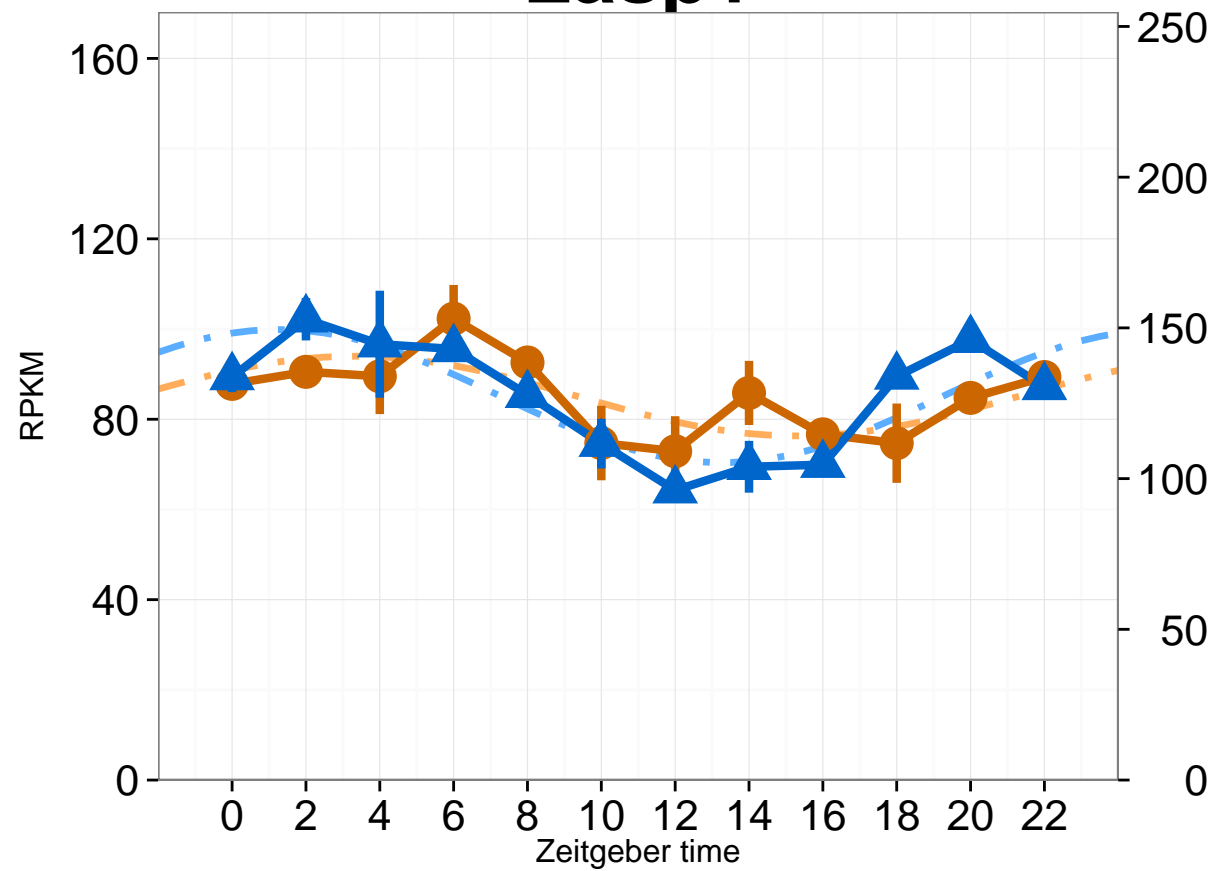

## Lasp1

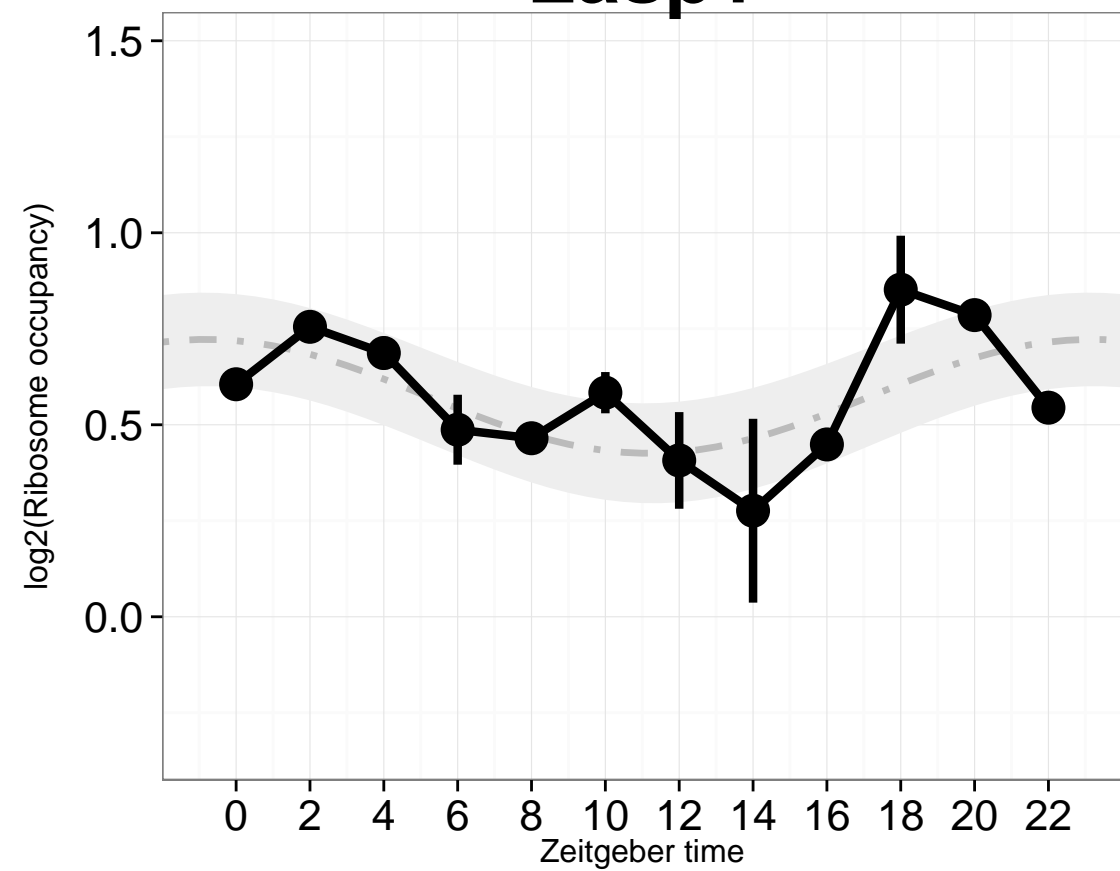

Supplement: Supplementary file 9966 [file 1]

# Klk1b9

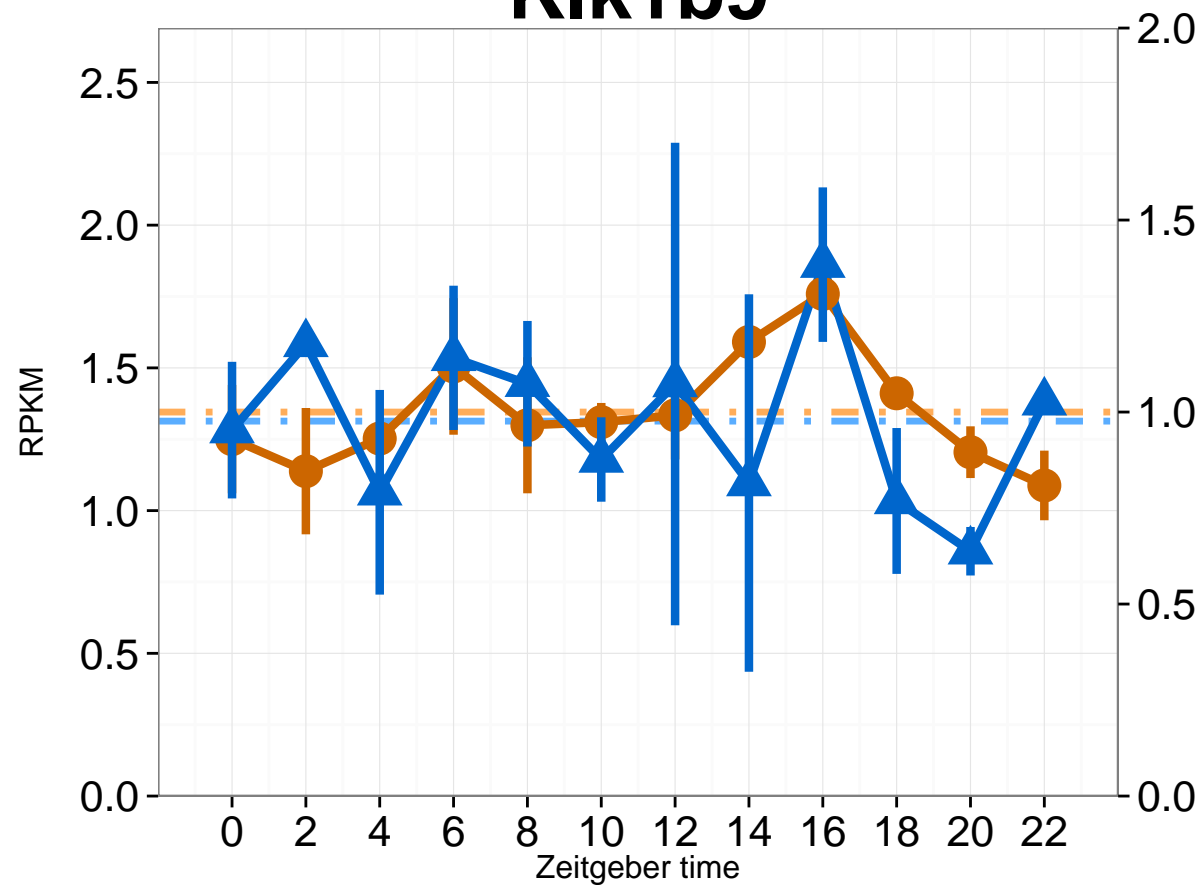

# Klk1b9

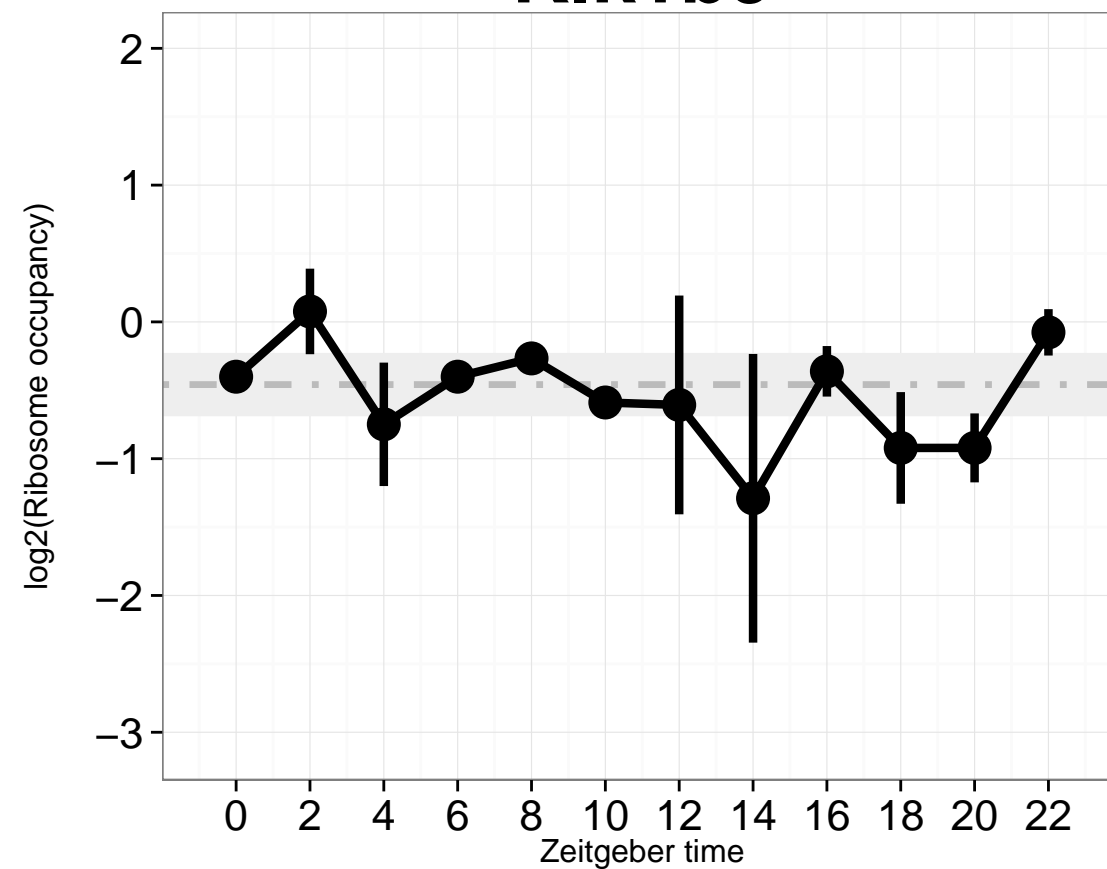

Supplement: Supplementary file 9967 [file 1]

## Ccl6

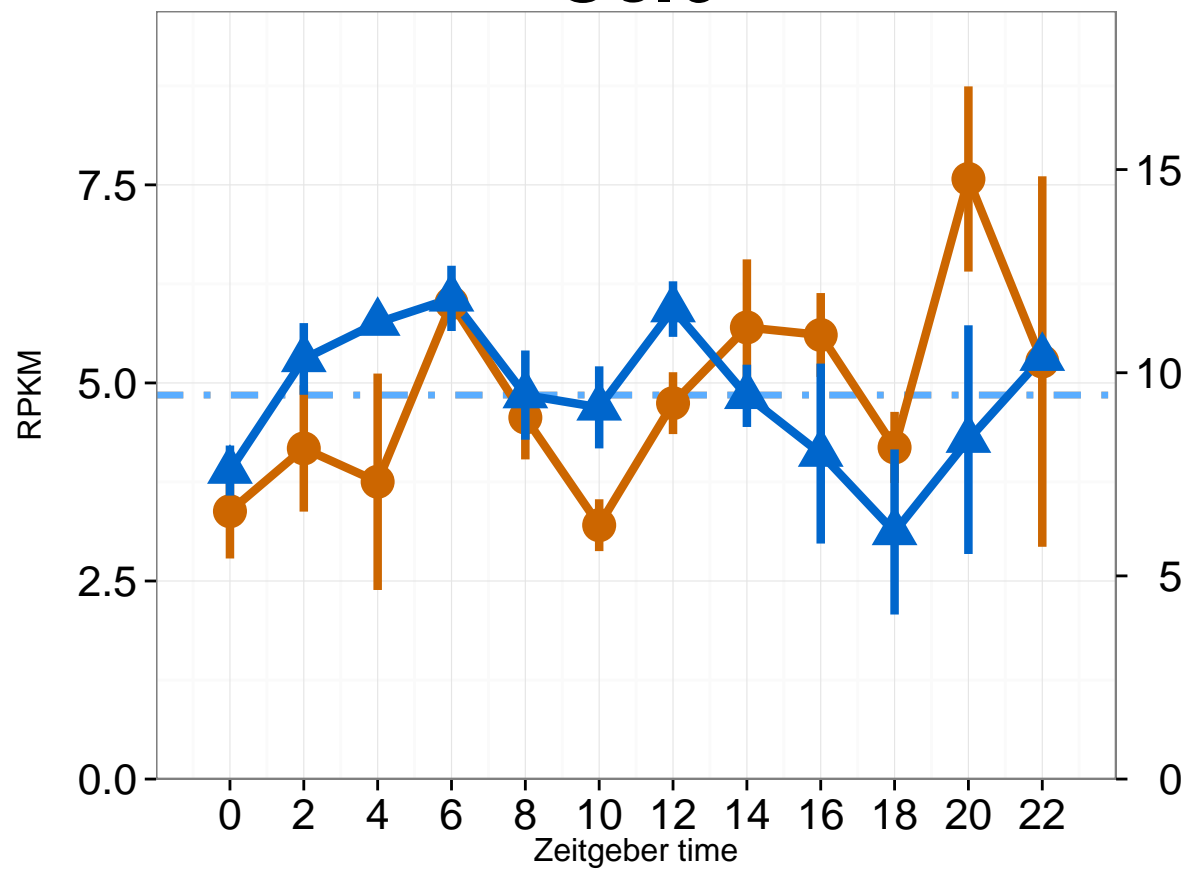

## Ccl6

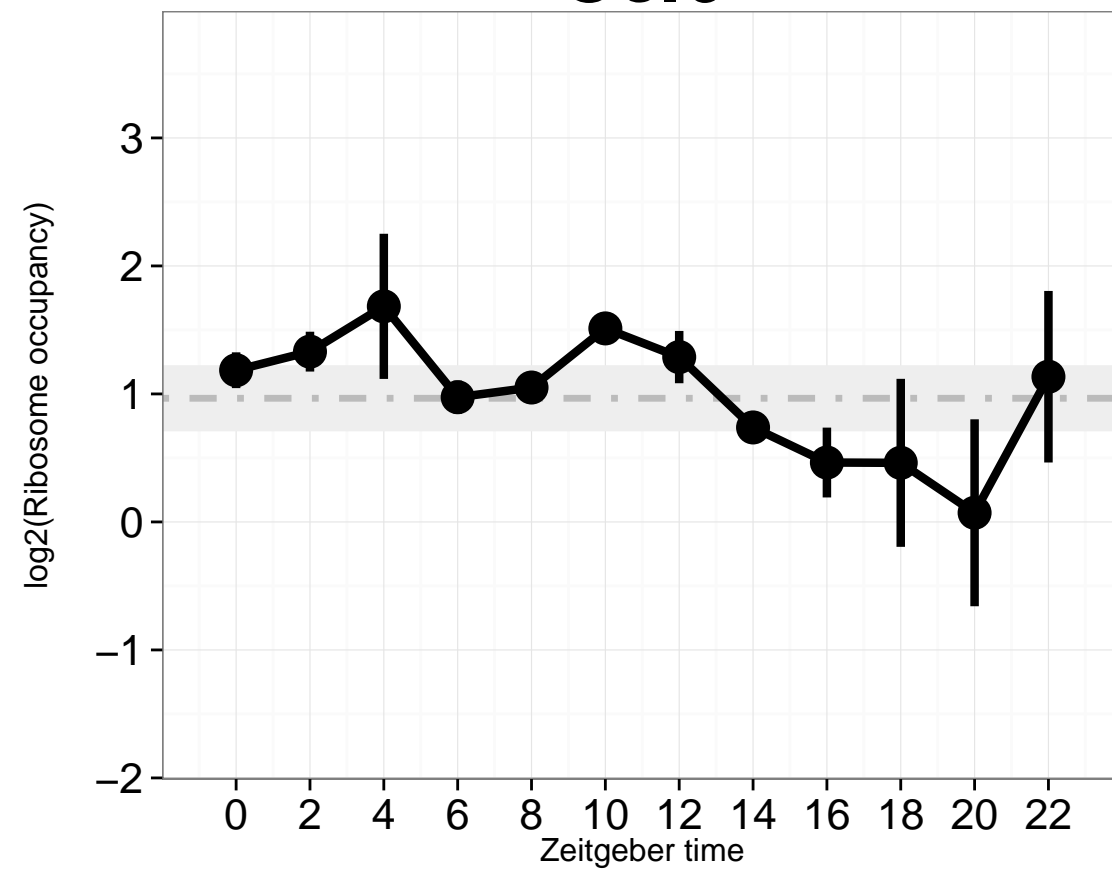

Supplement: Supplementary file 9968 [file 1]

# Rab39b

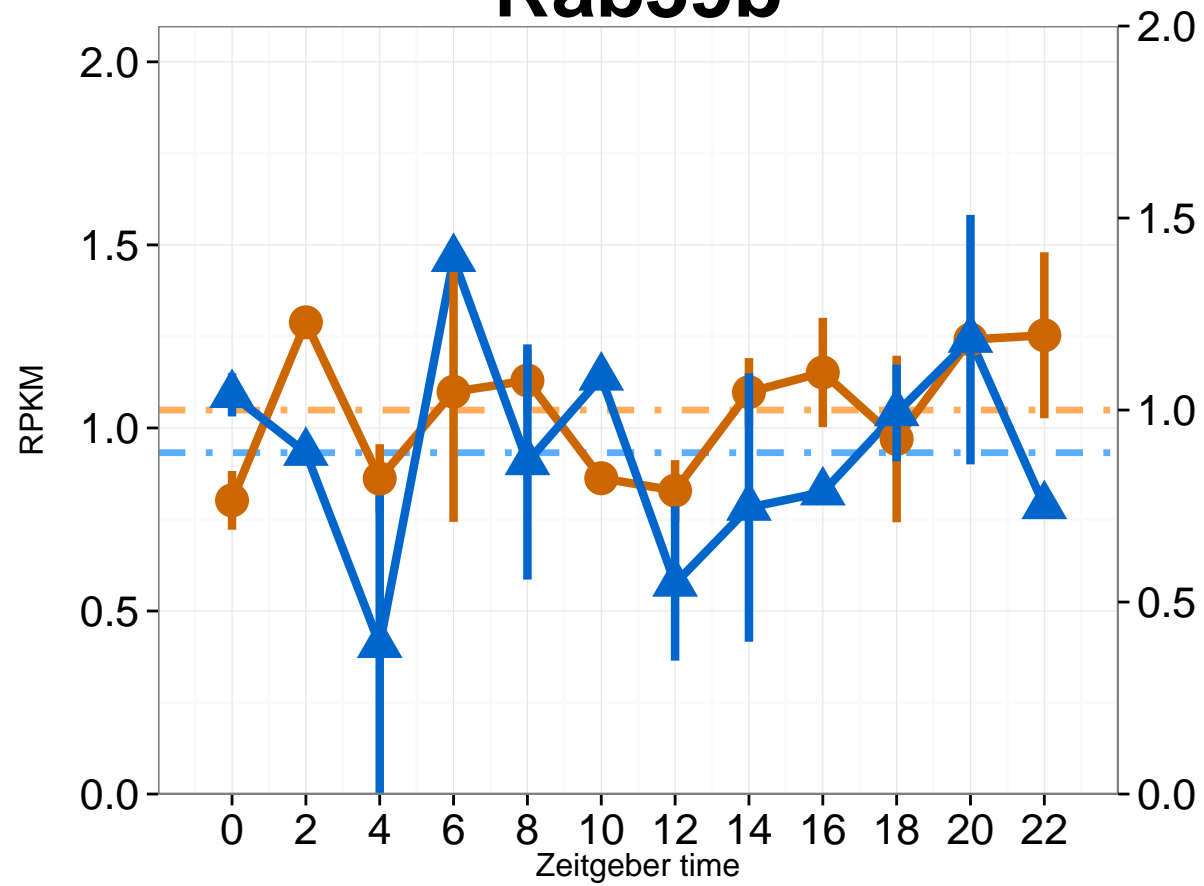

# Rab39b

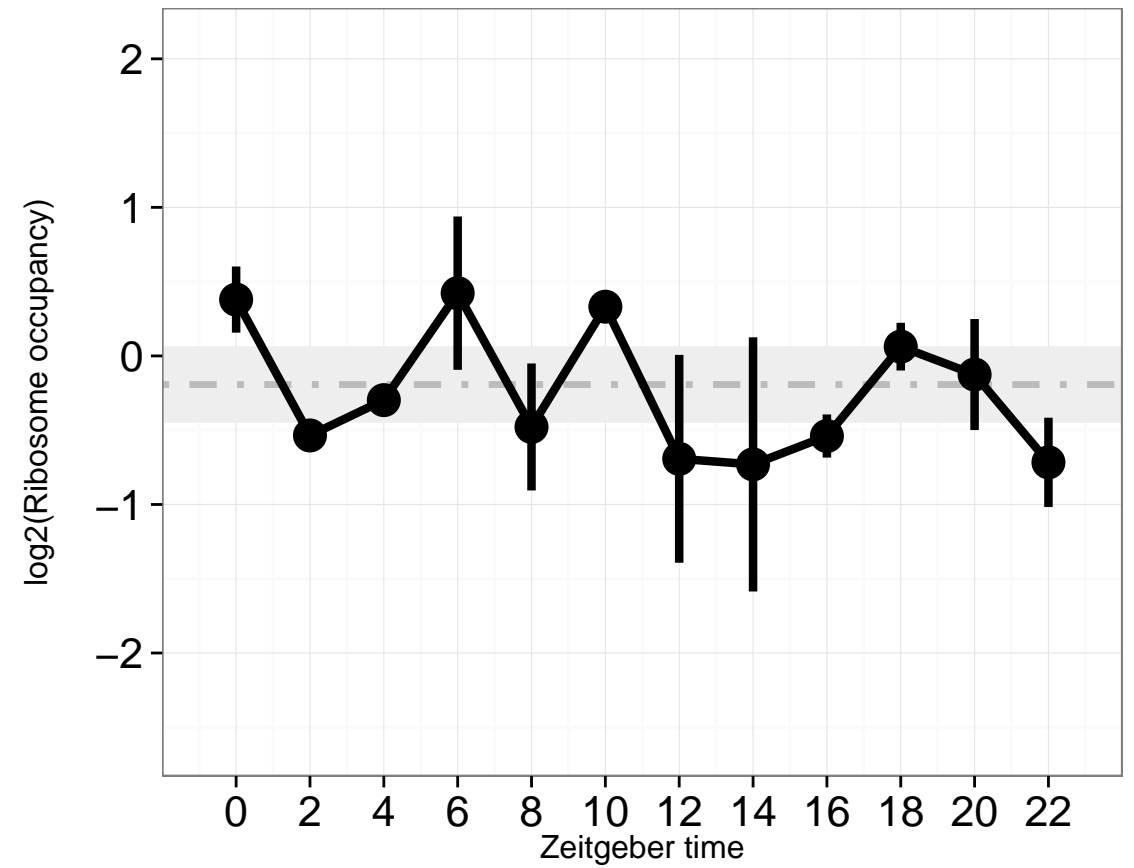

Supplement: Supplementary file 9969 [file 1]

**Ptn**

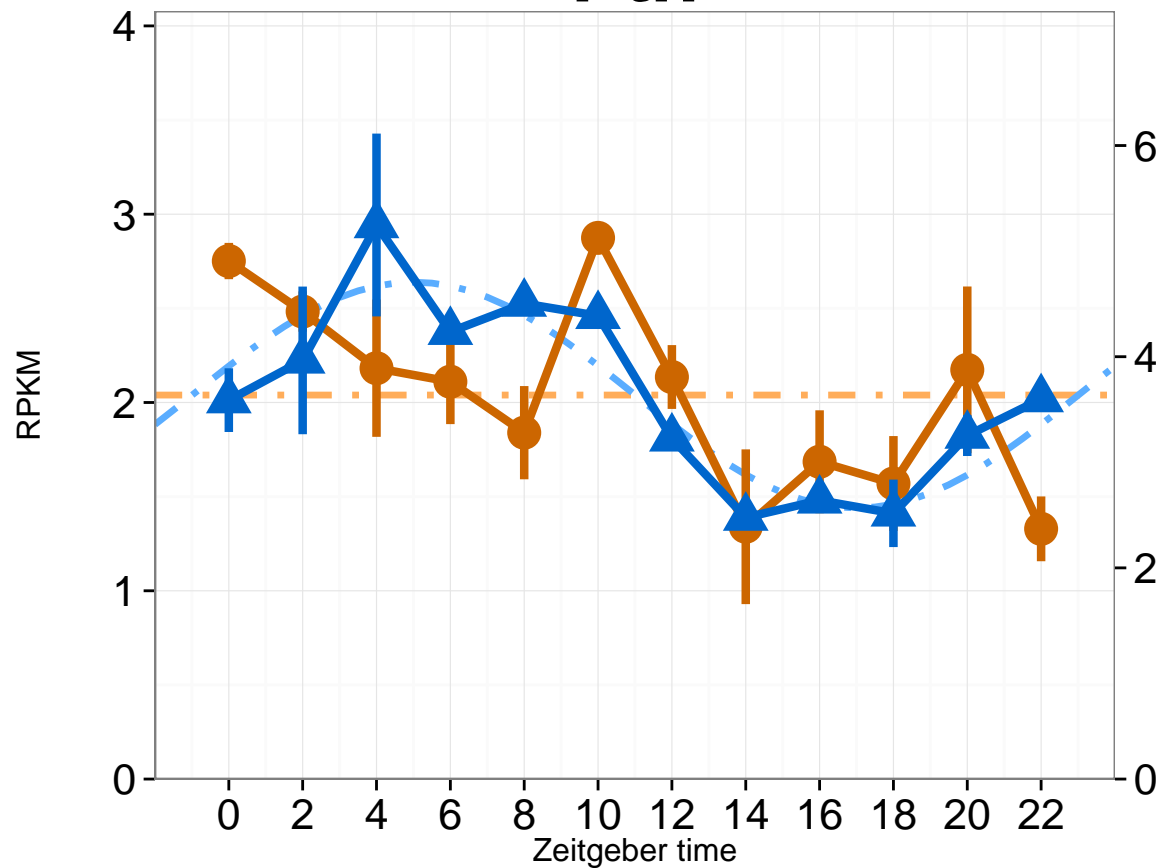

**Ptn**

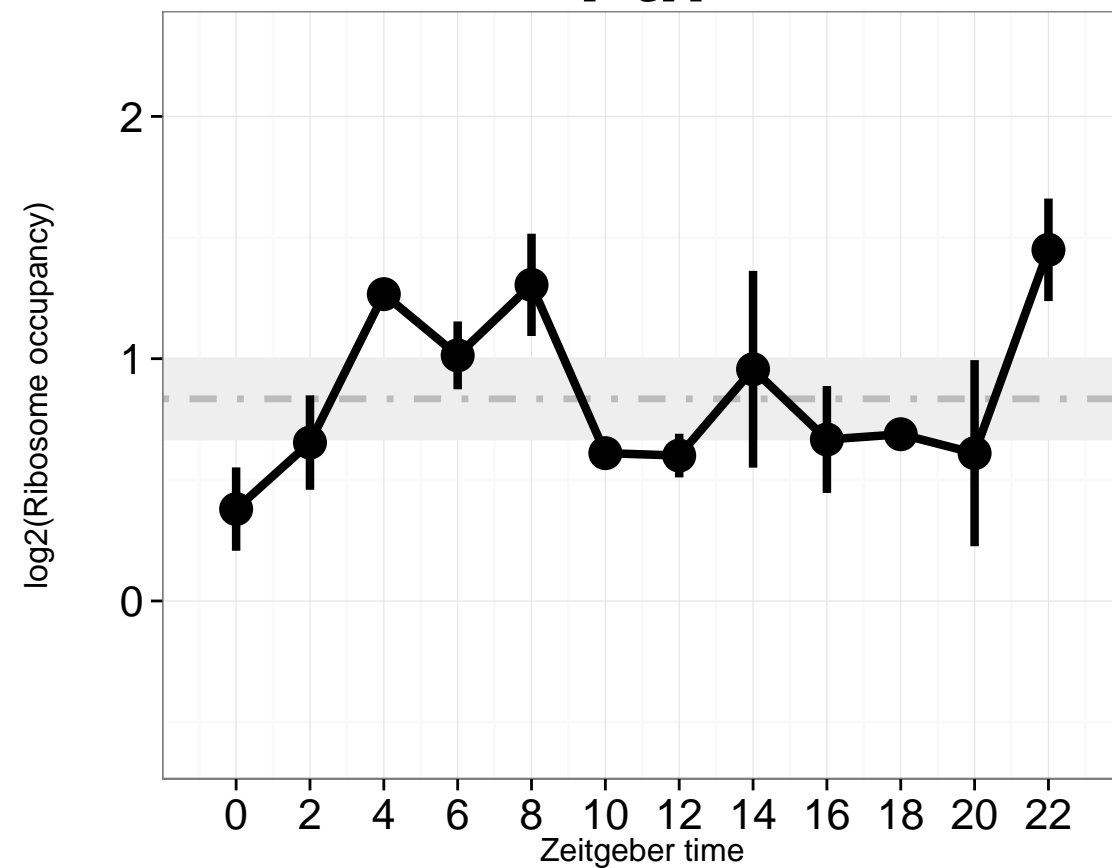

Supplement: Supplementary file 9970 [file 1]

## Stx18

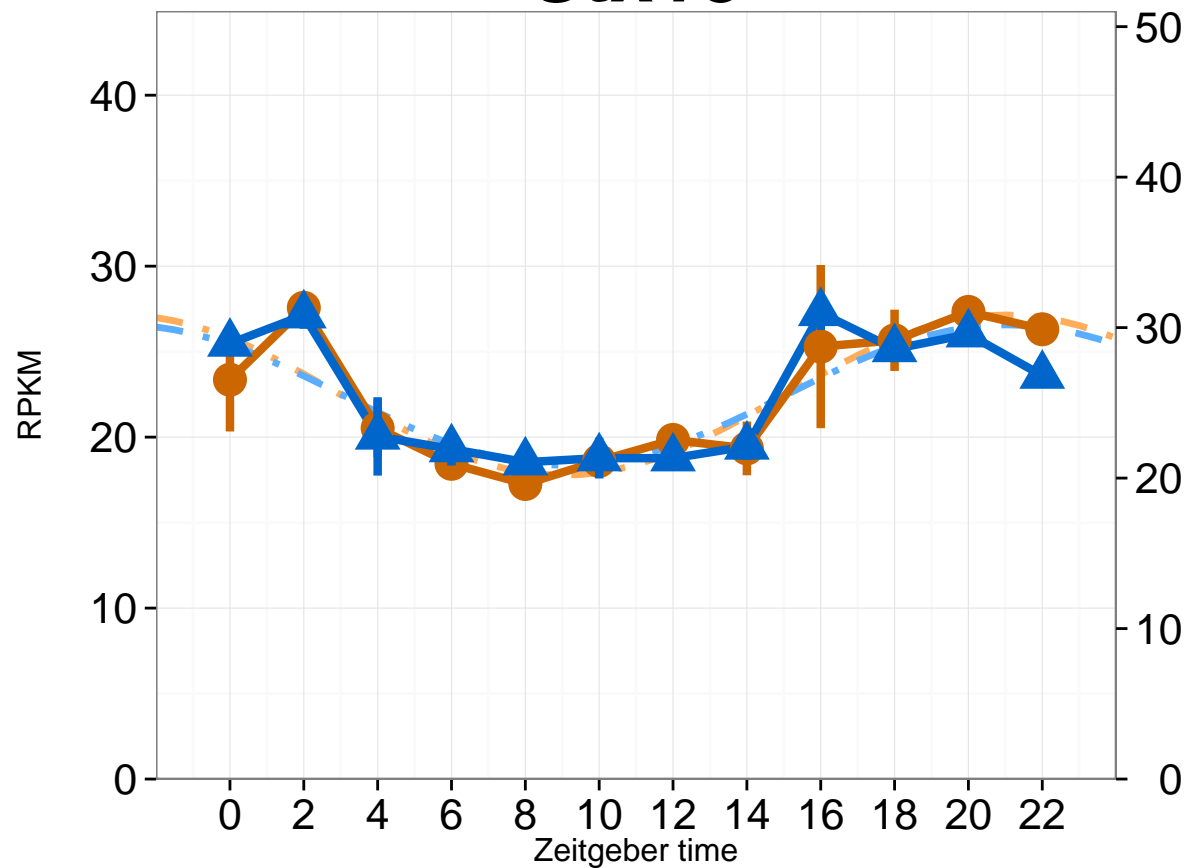

## Stx18

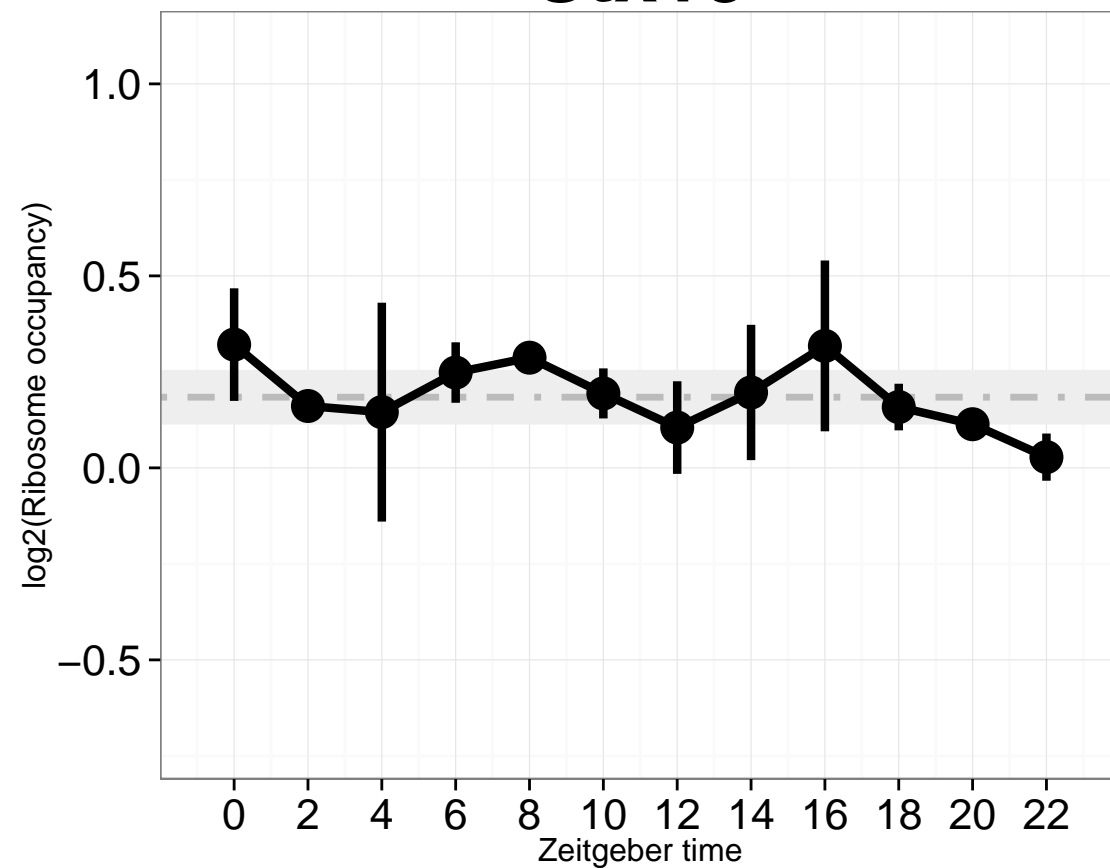

Supplement: Supplementary file 9971 [file 1]

# Vav1

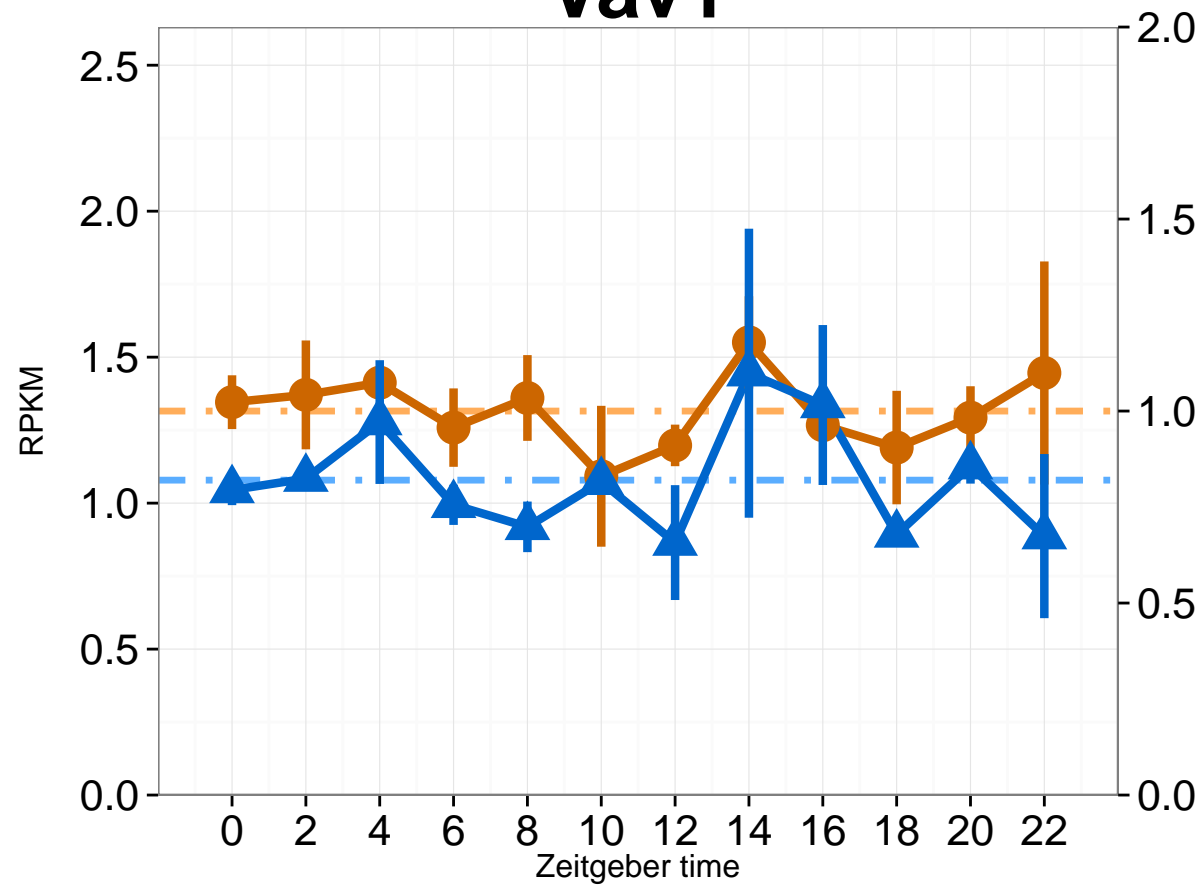

# Vav1

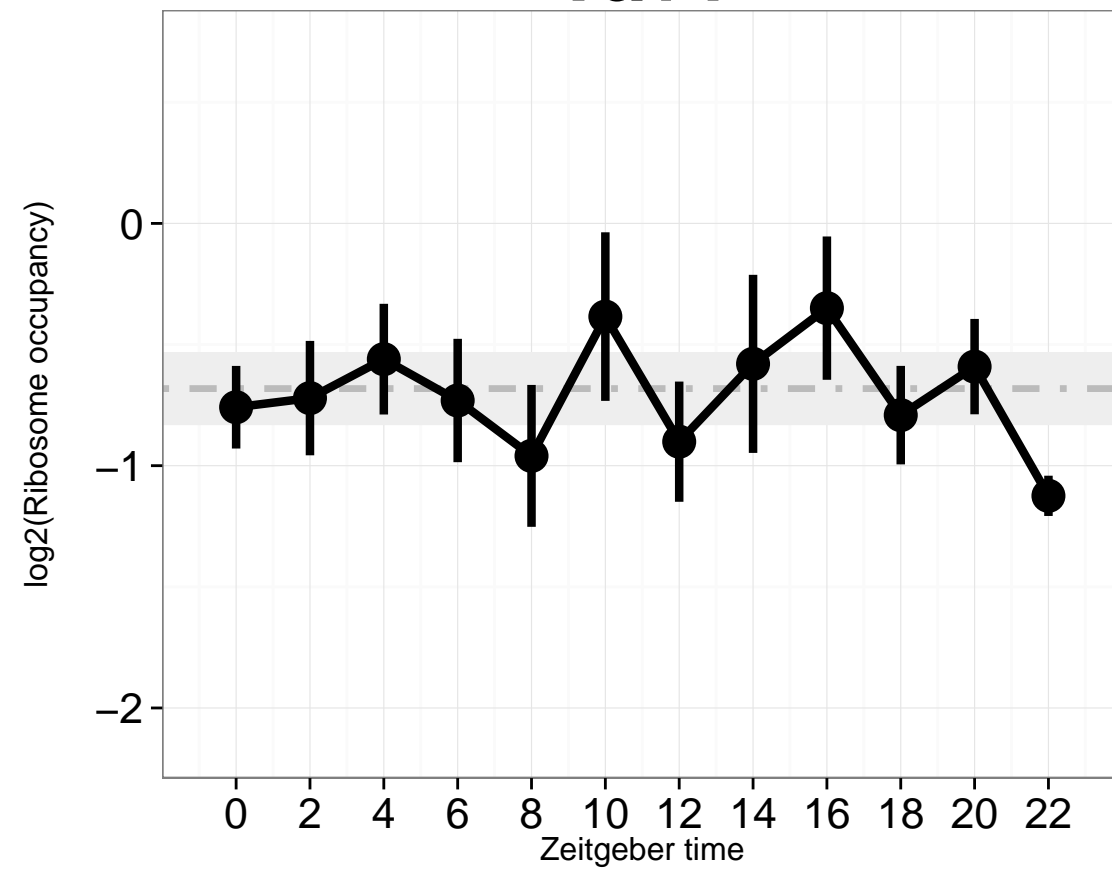

Supplement: Supplementary file 9972 [file 1]

## Fbxw8

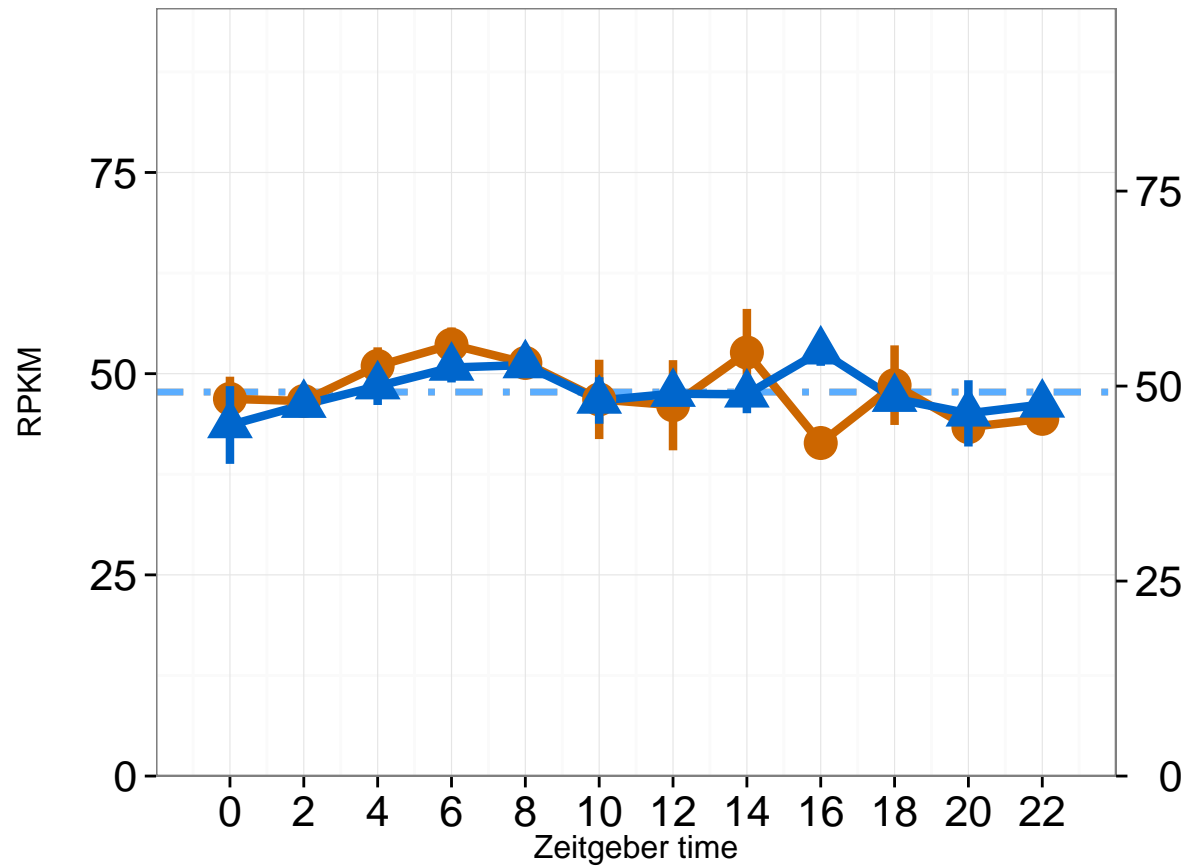

## Fbxw8

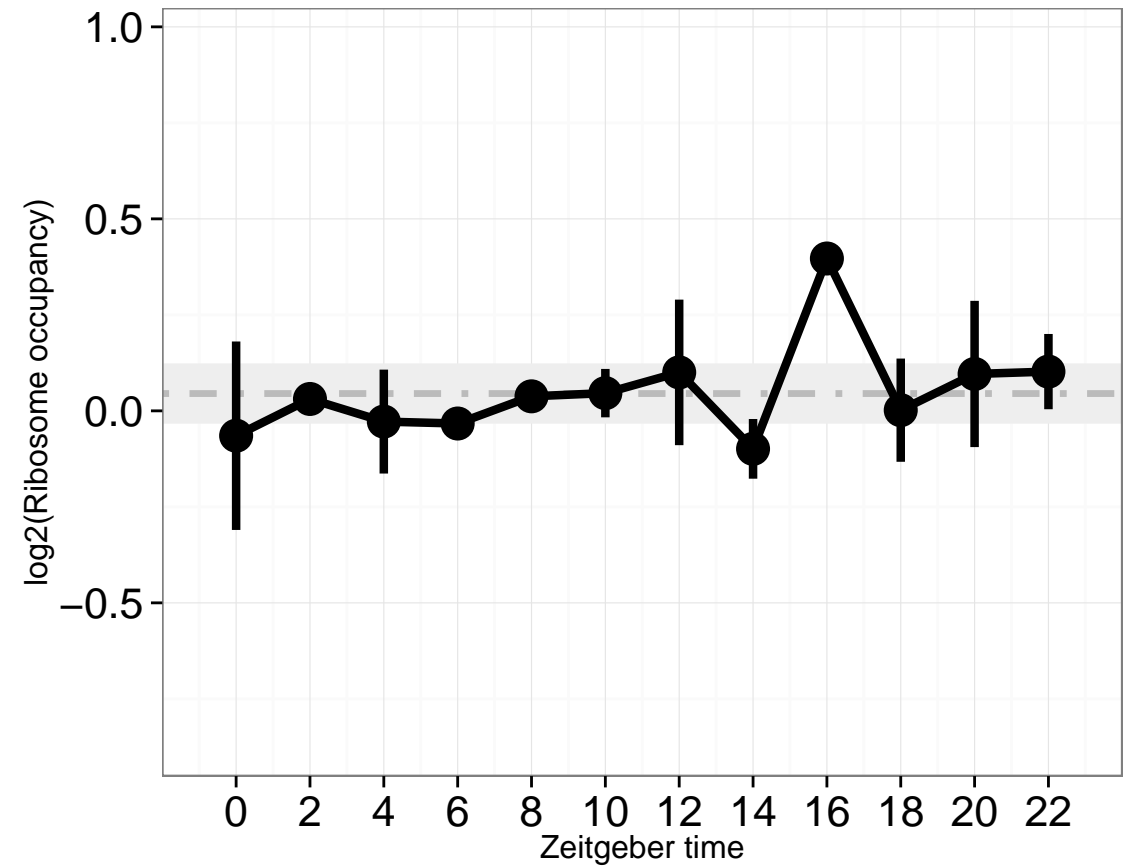

Supplement: Supplementary file 9973 [file 1]

## Usp6nl

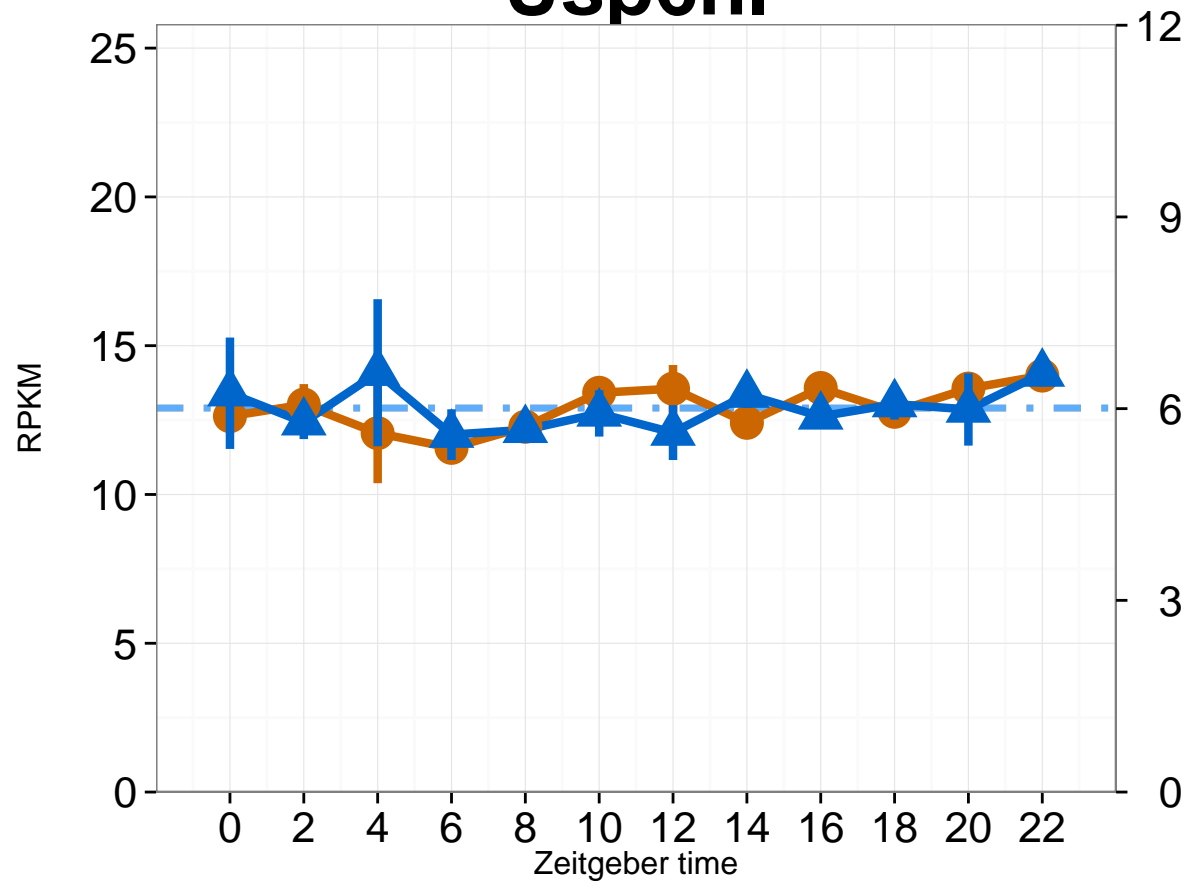

## Usp6nl

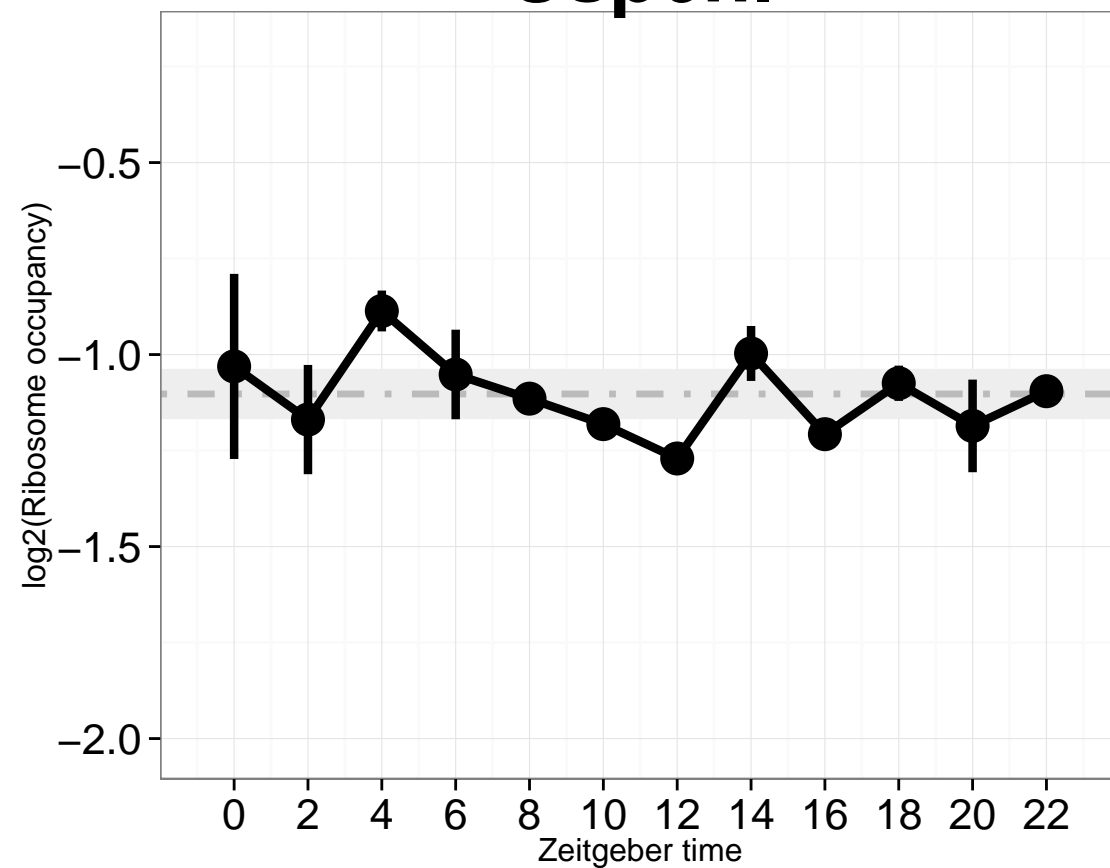

Supplement: Supplementary file 9974 [file 1]

## Acadm

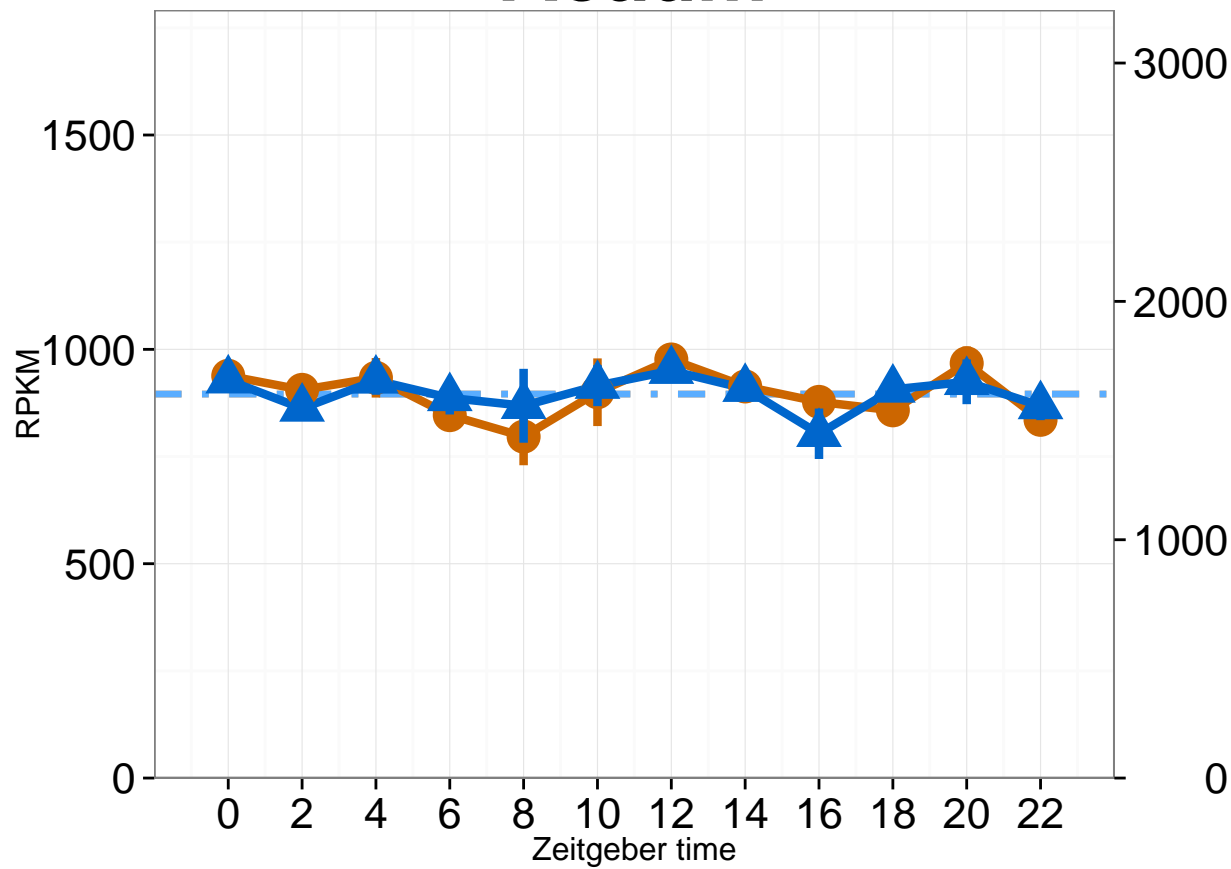

## Acadm

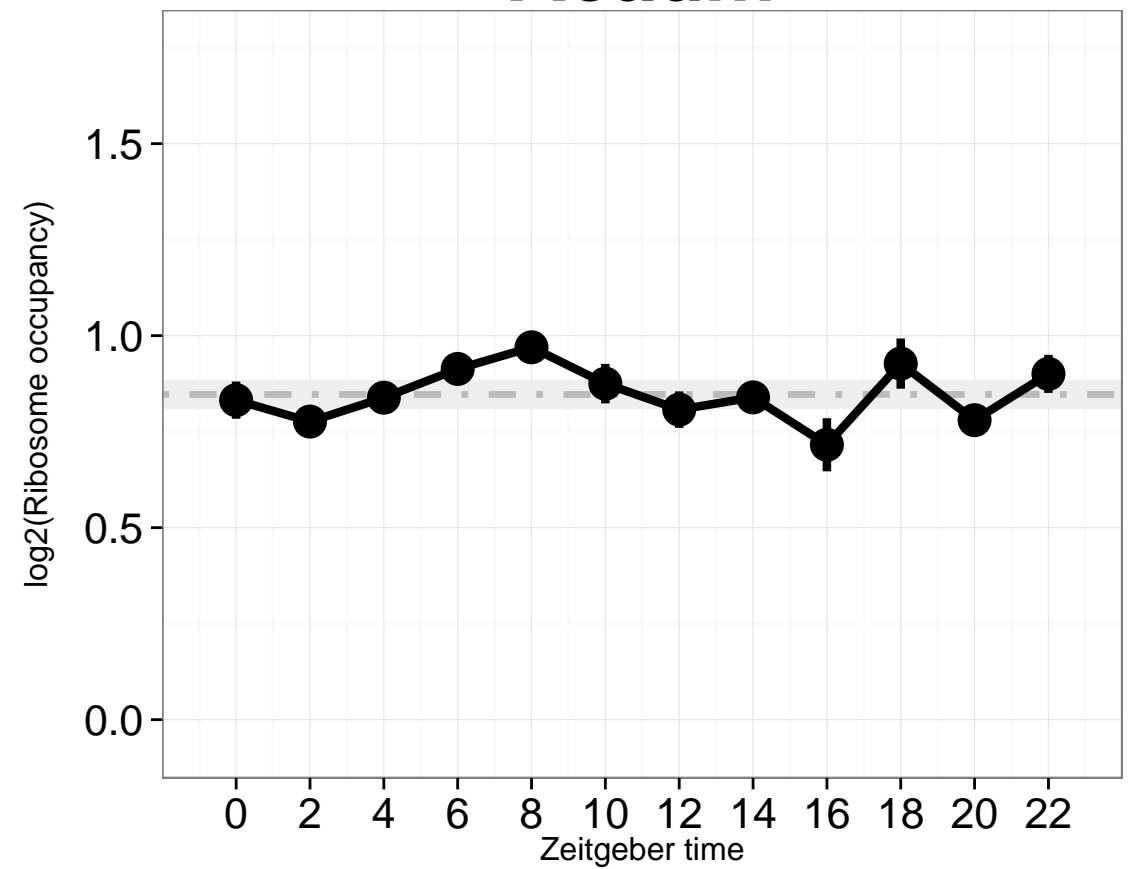

Supplement: Supplementary file 9975 [file 1]

## Gabbr2

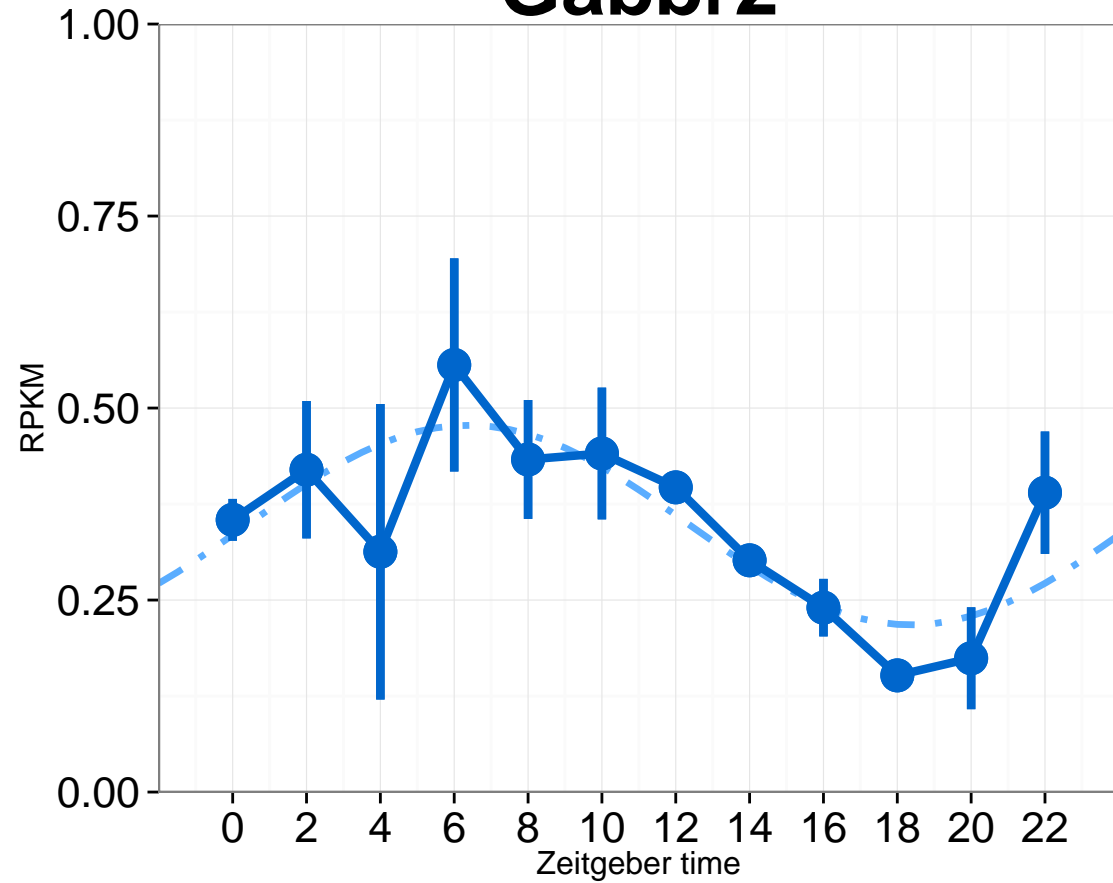

## Gabbr2 log2(Ribosome occupancy)

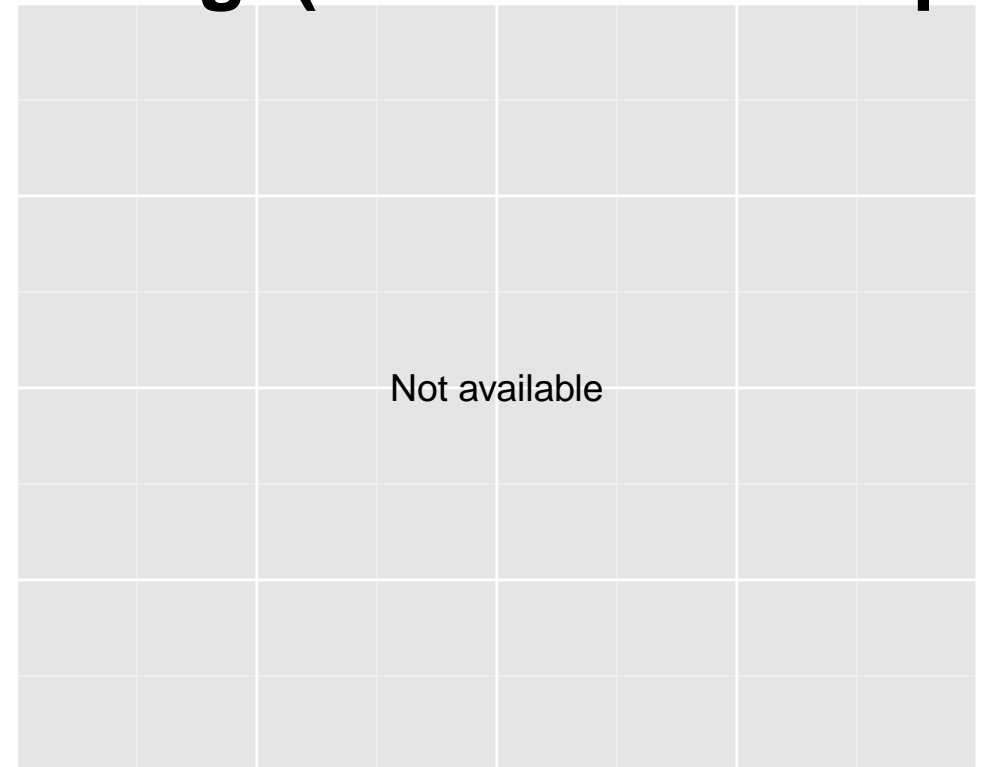

Supplement: Supplementary file 9976 [file 1]

# Gpd1

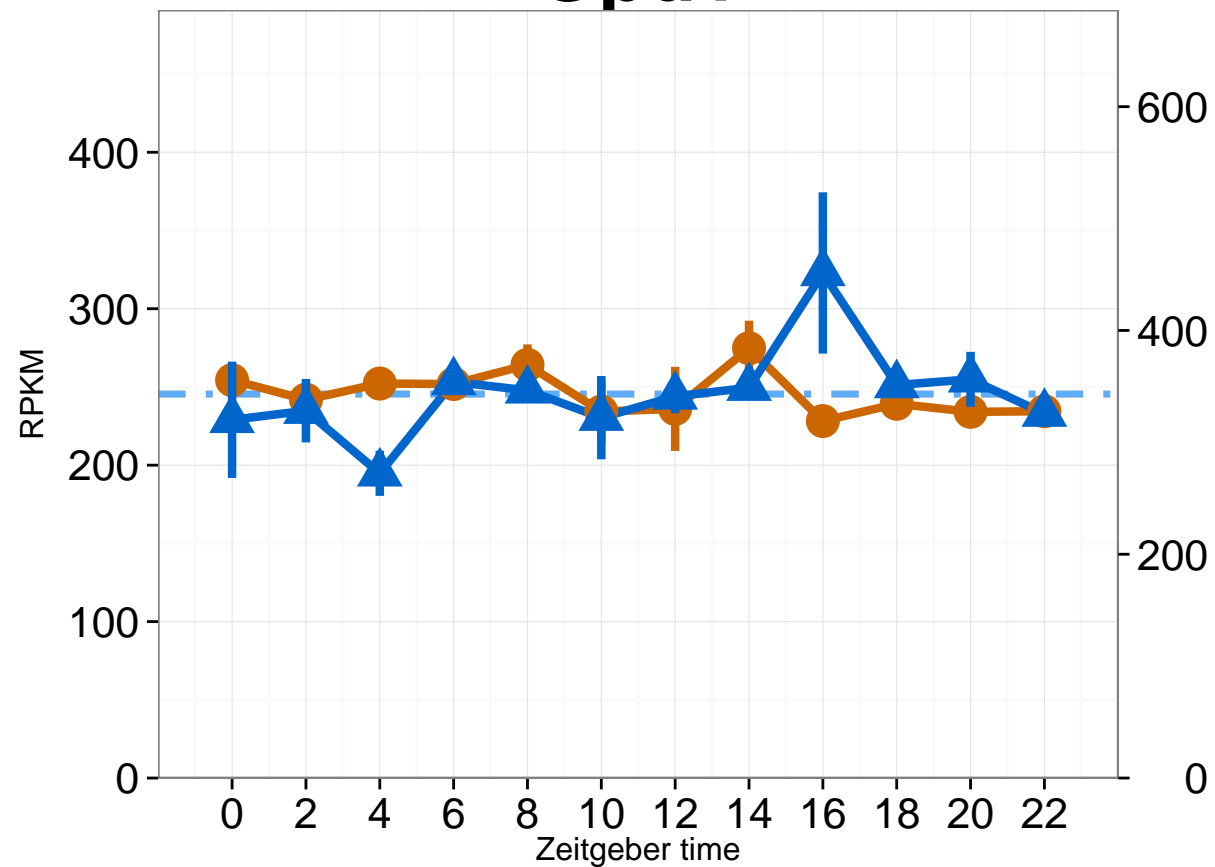

# Gpd1

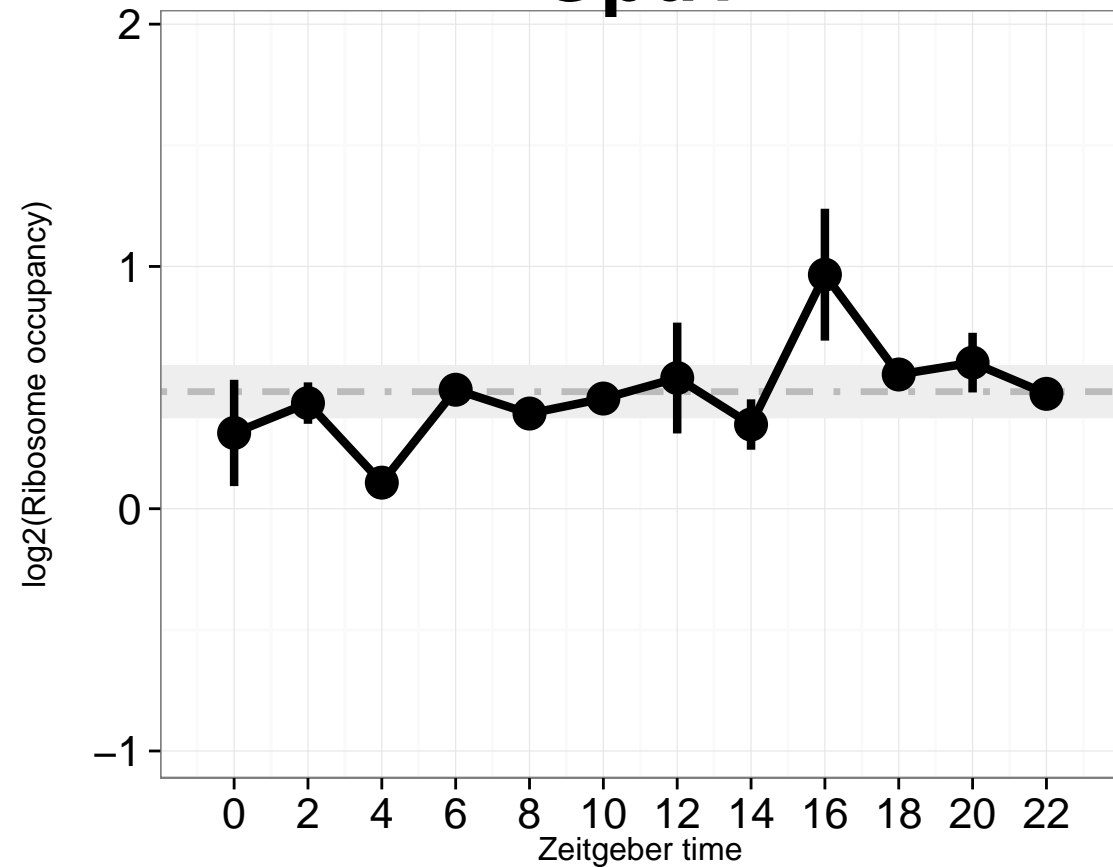

Supplement: Supplementary file 9977 [file 1]

# Tdrp

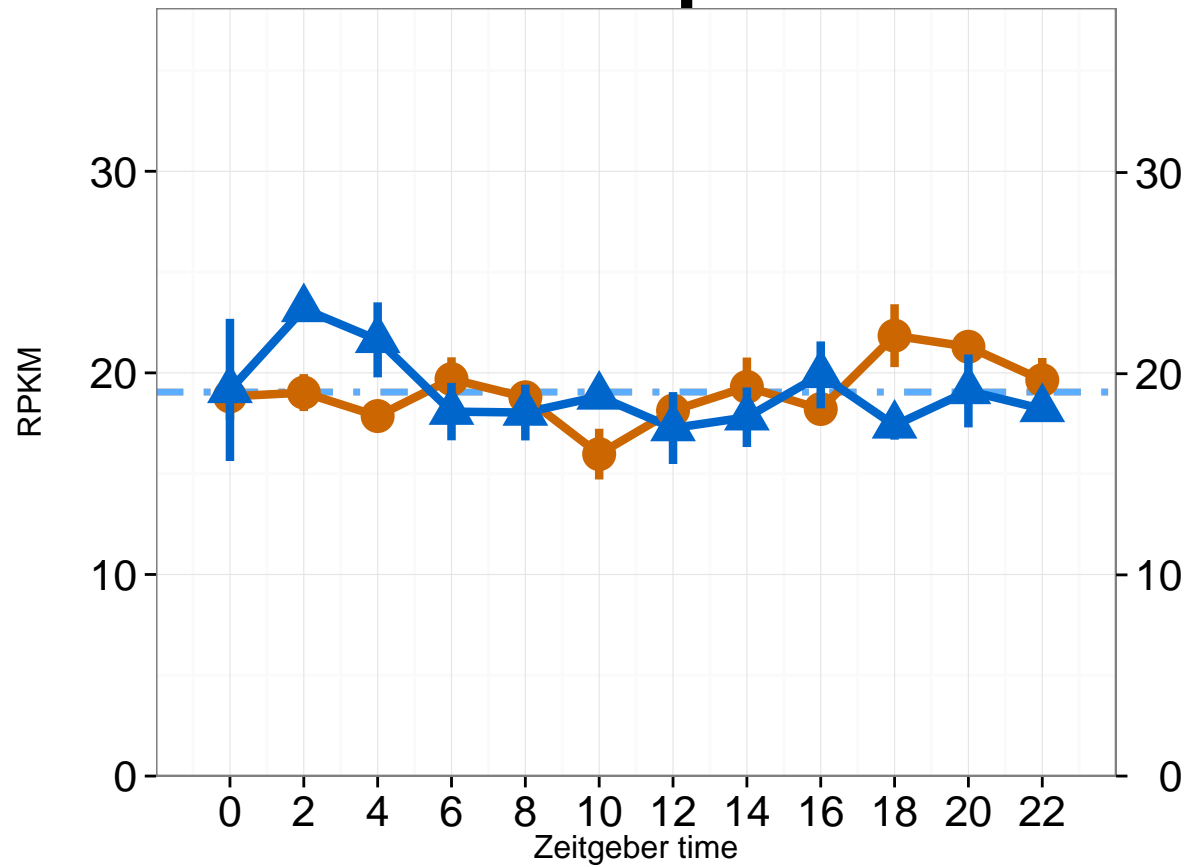

# Tdrp

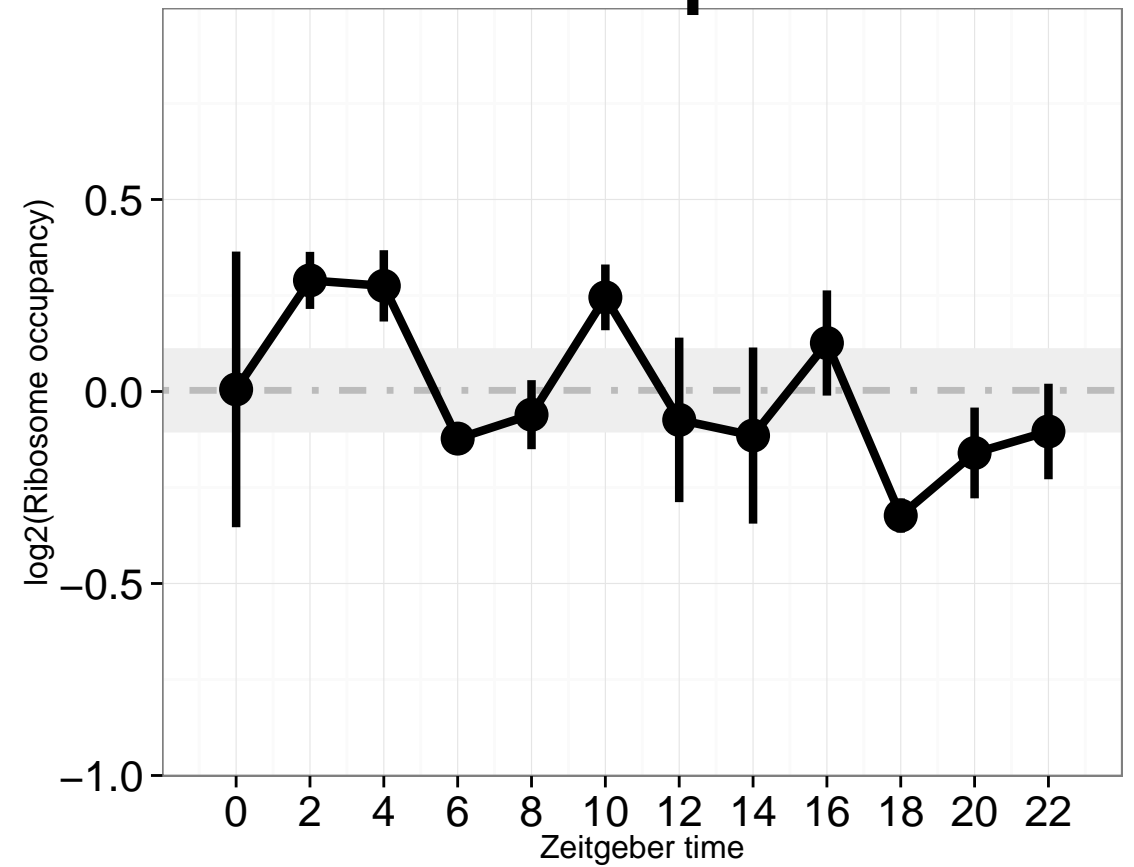

Supplement: Supplementary file 9978 [file 1]

# Armxc2

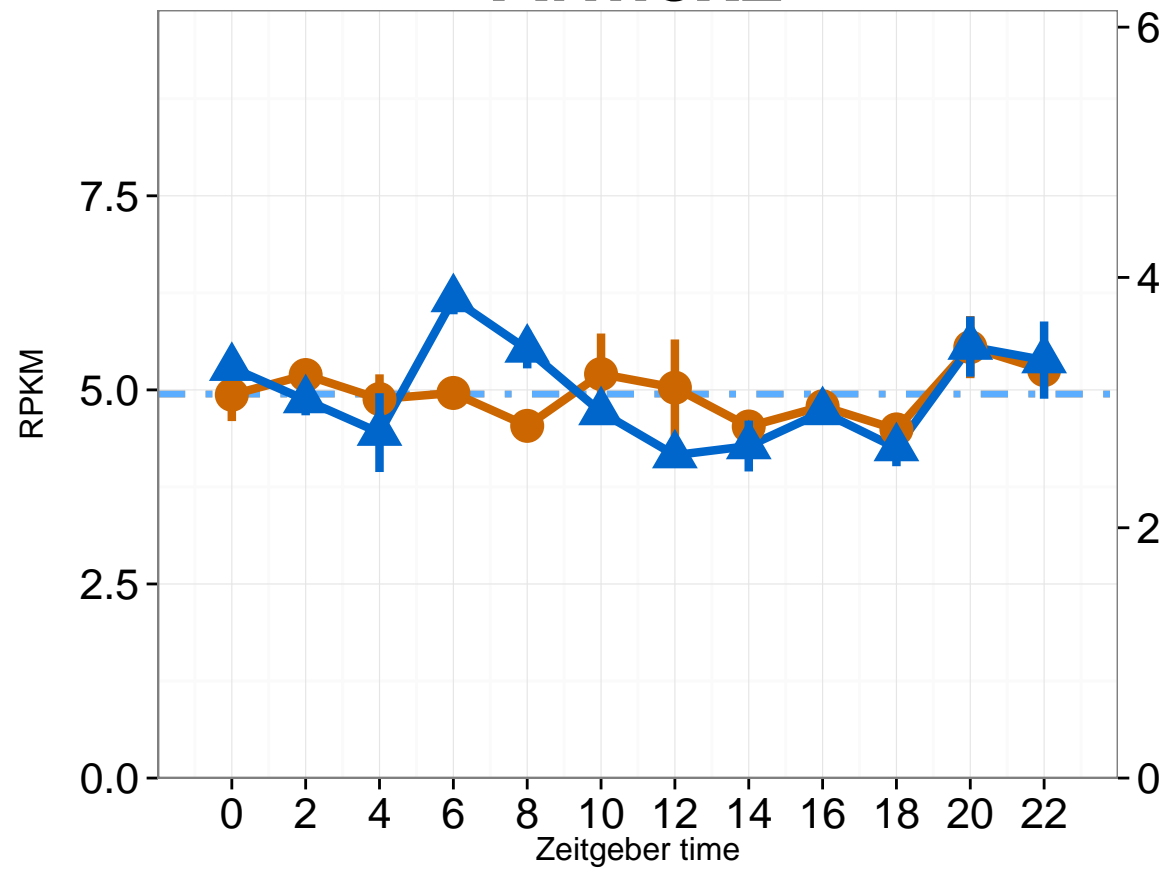

# Armxc2

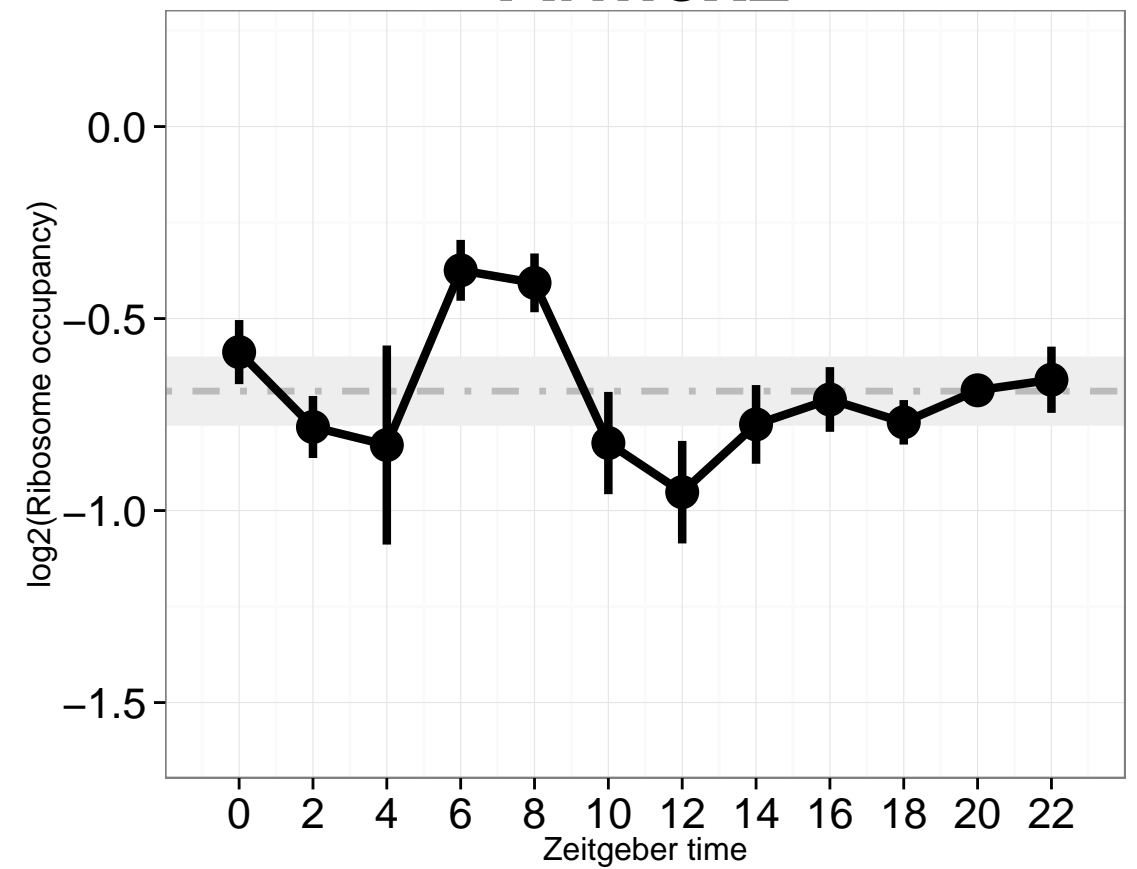

Supplement: Supplementary file 9979 [file 1]

## Agpat2

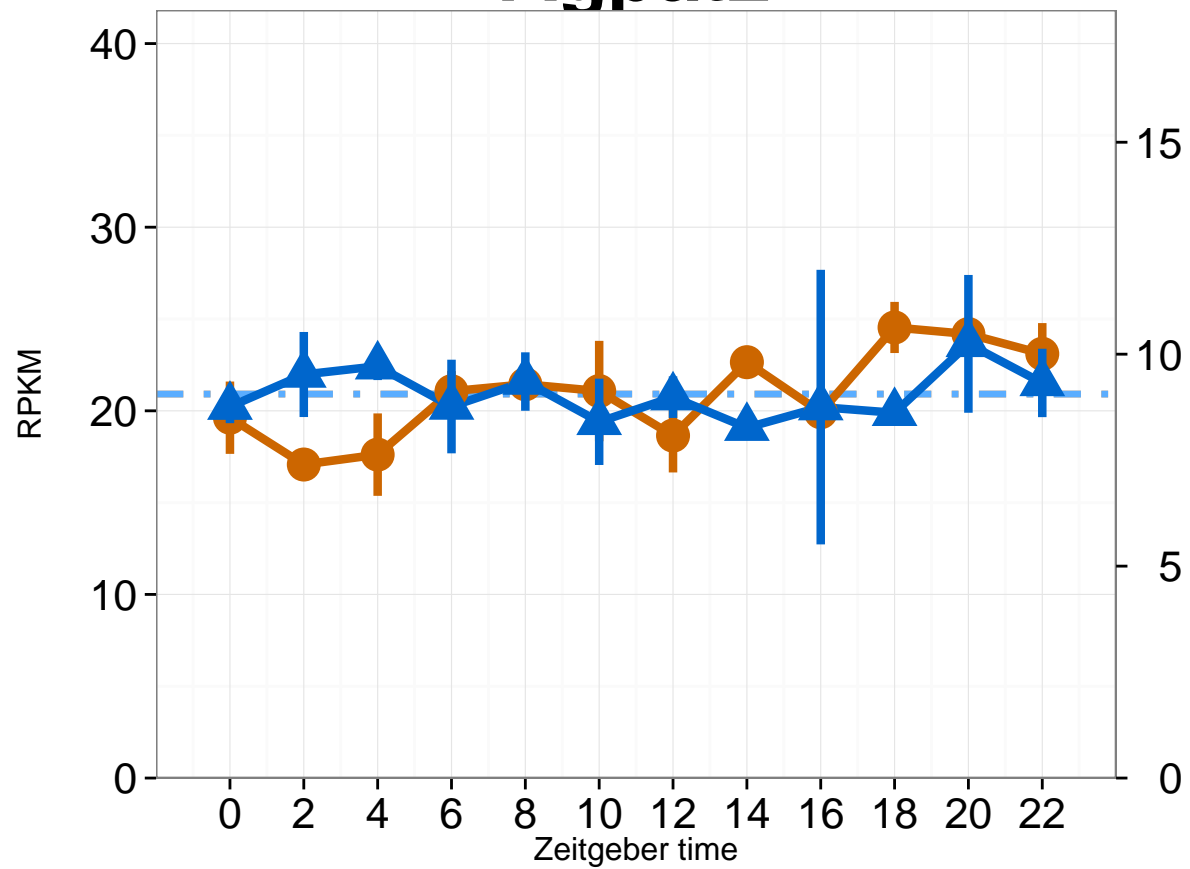

## Agpat2

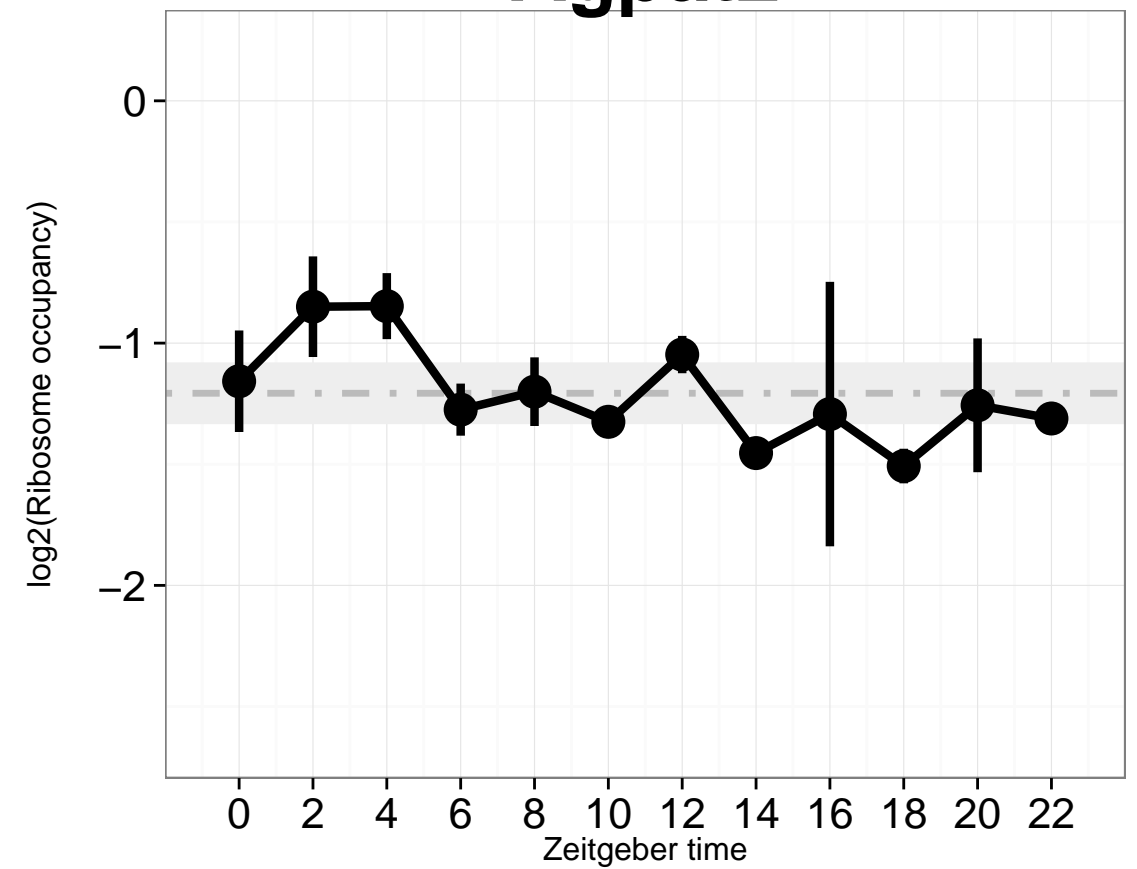

Supplement: Supplementary file 9980 [file 1]

## Wdr35

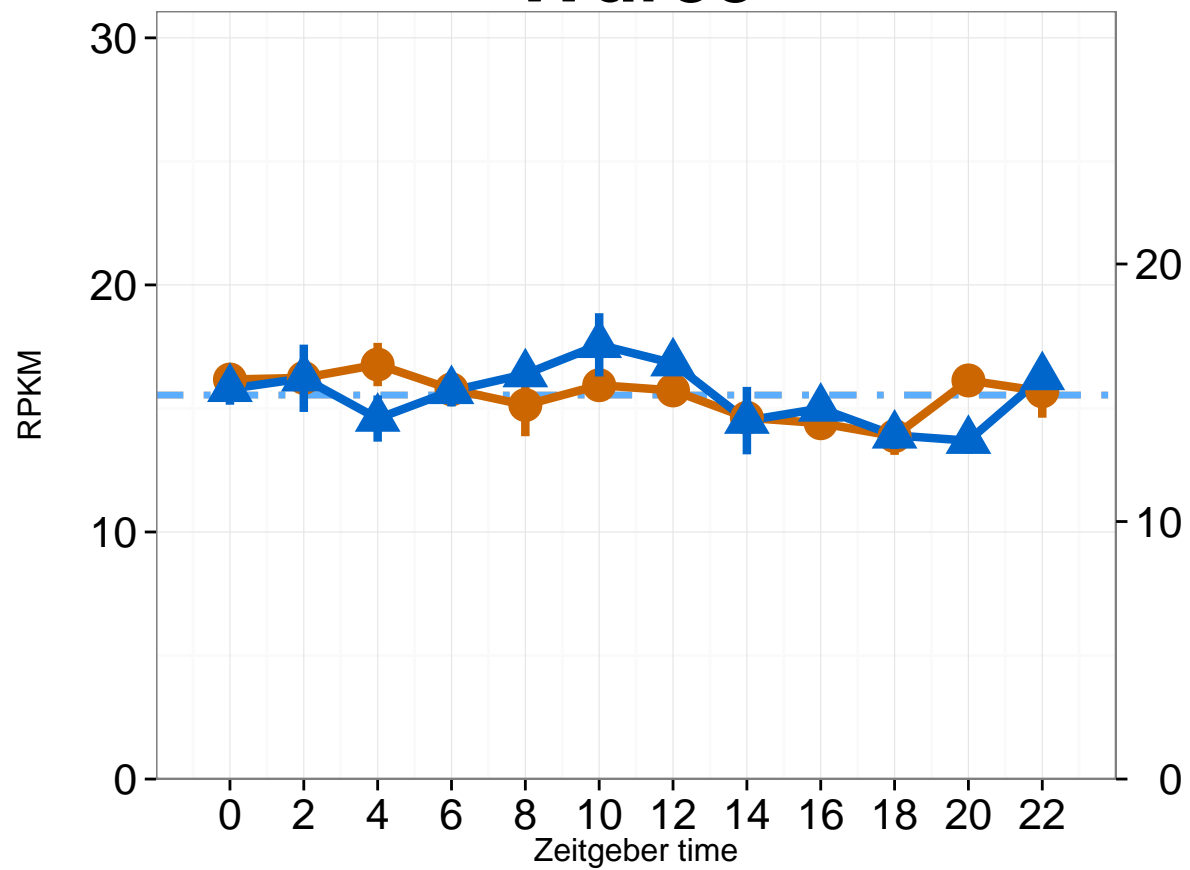

## Wdr35

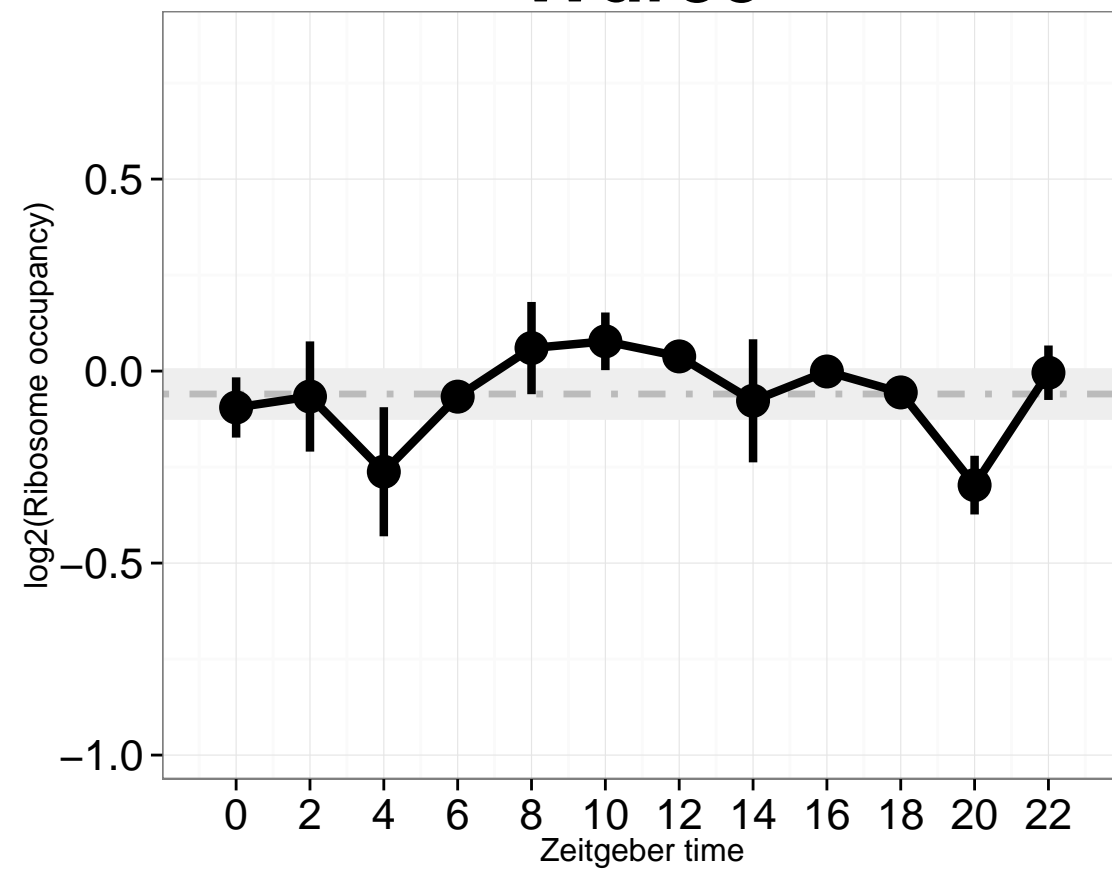

Supplement: Supplementary file 9981 [file 1]

# Aldh1a3

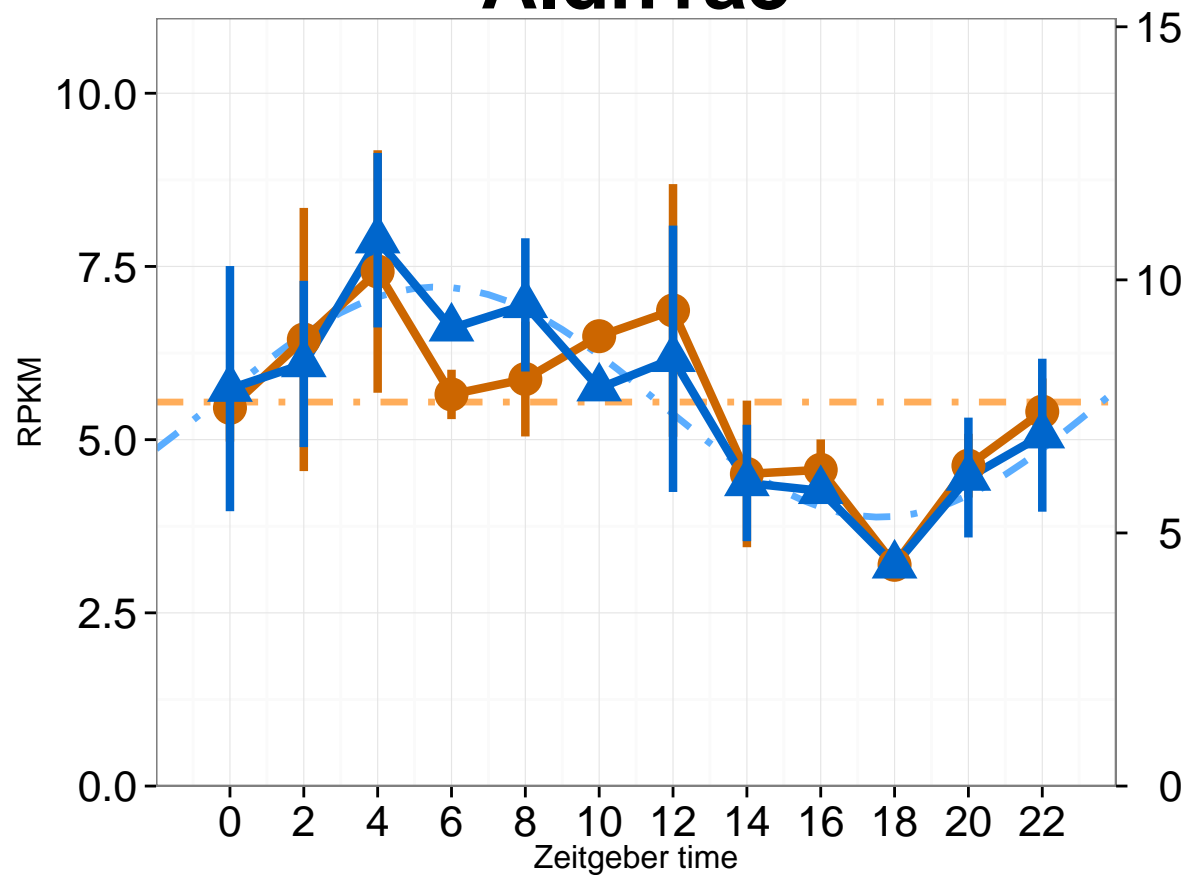

# Aldh1a3

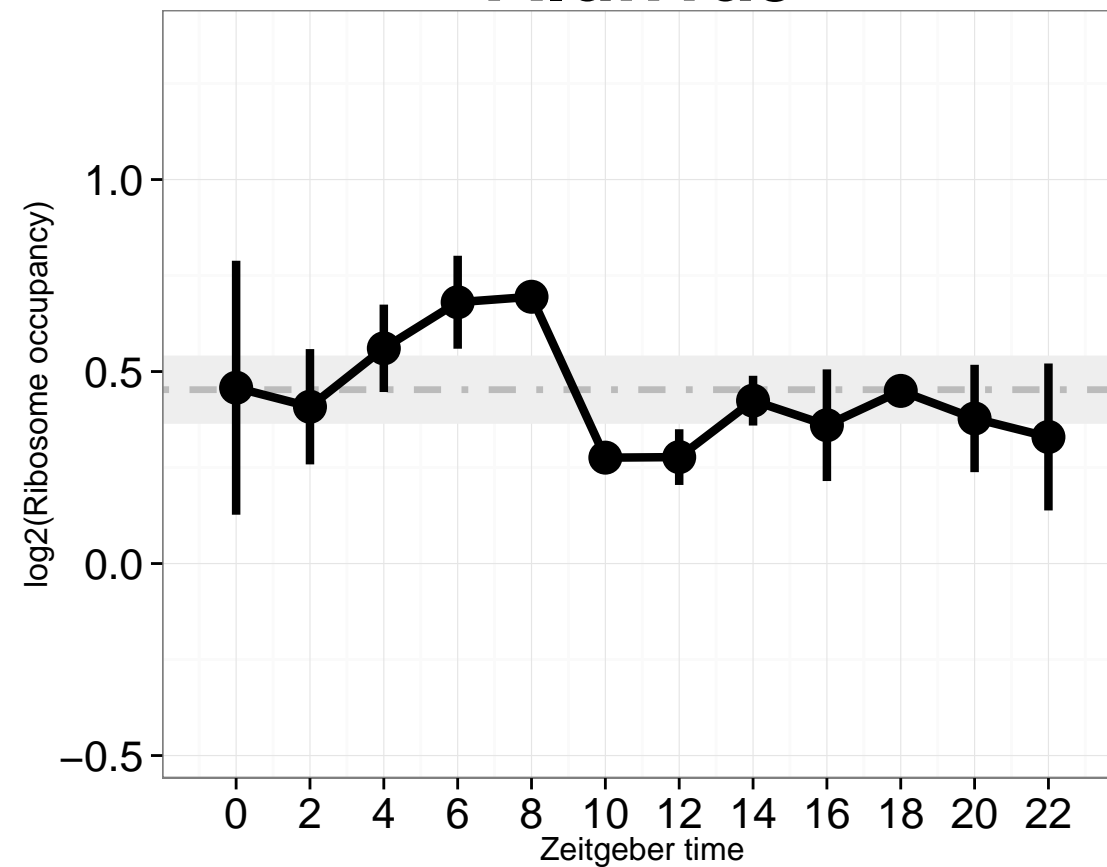

Supplement: Supplementary file 9982 [file 1]

## Tfr2

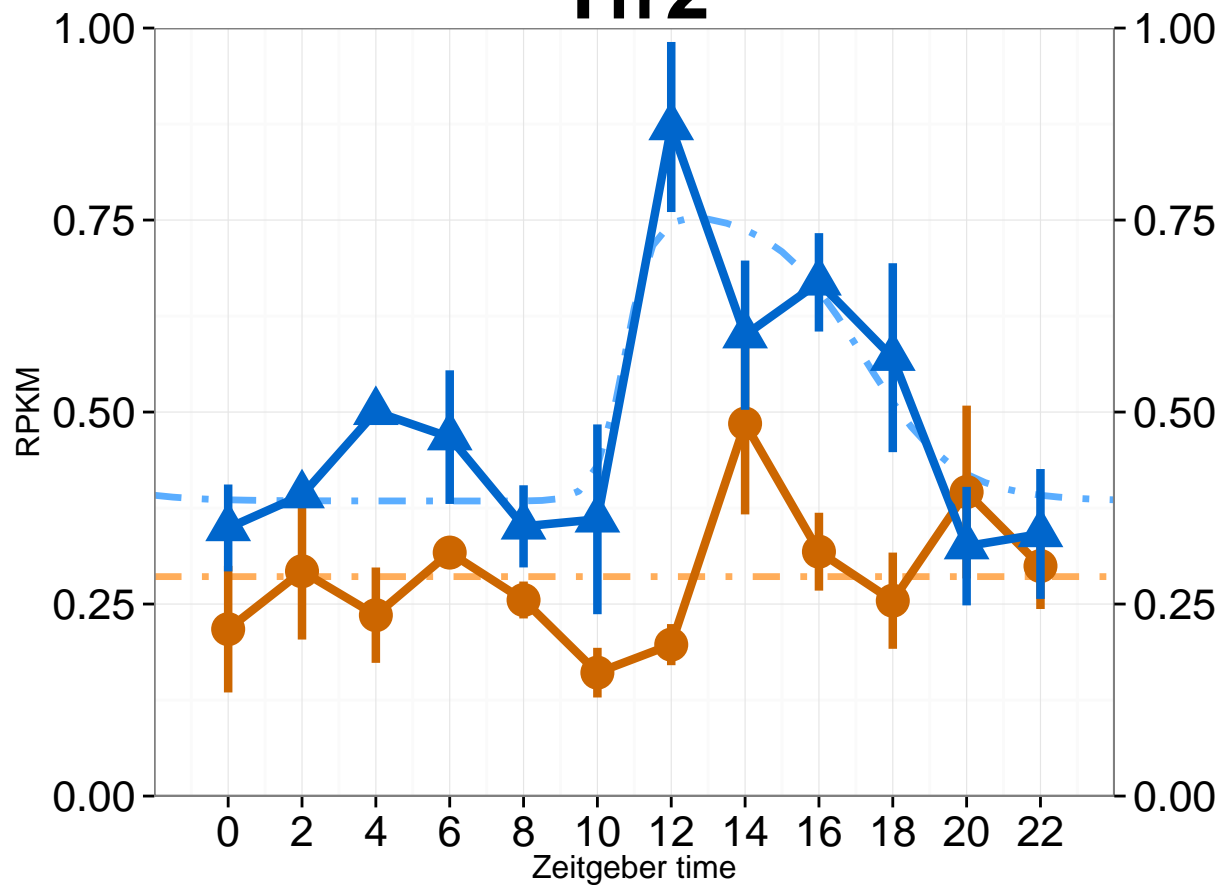

## Tfr2

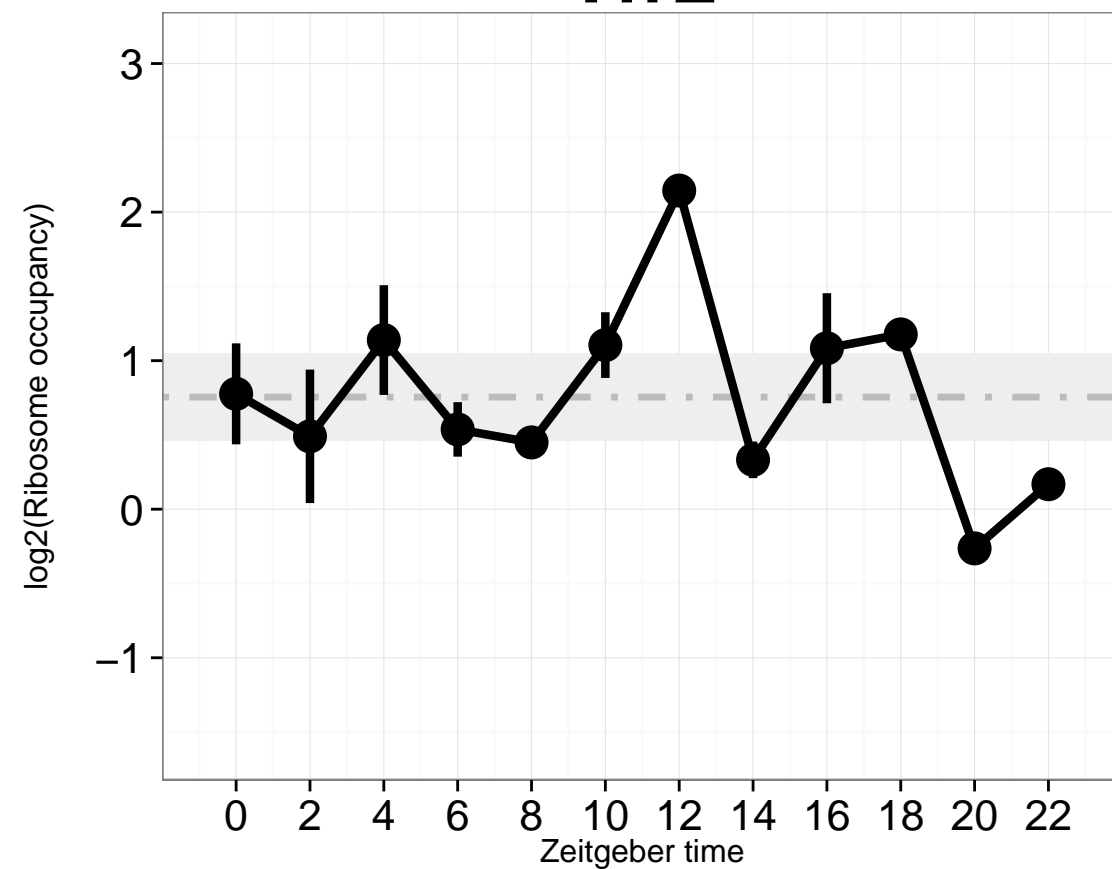

Supplement: Supplementary file 9983 [file 1]

## Dab2

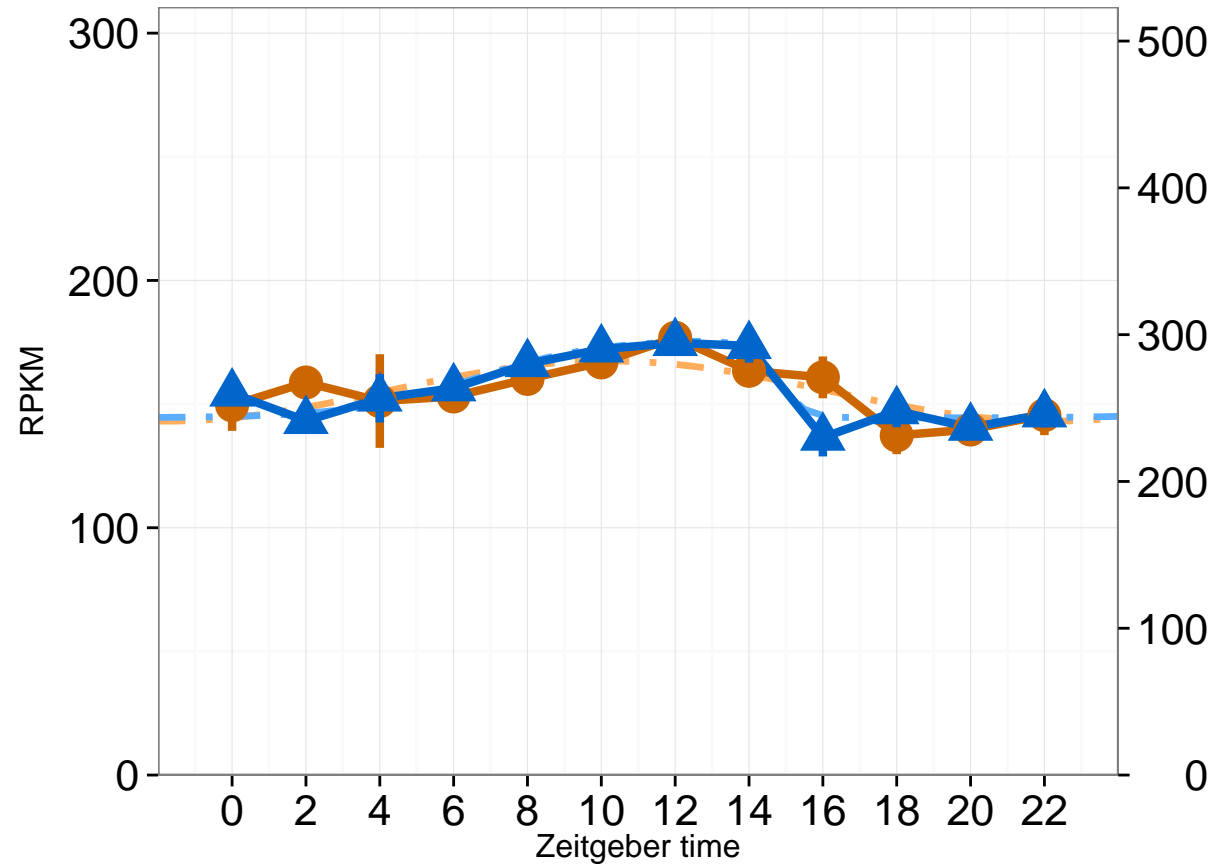

## Dab2

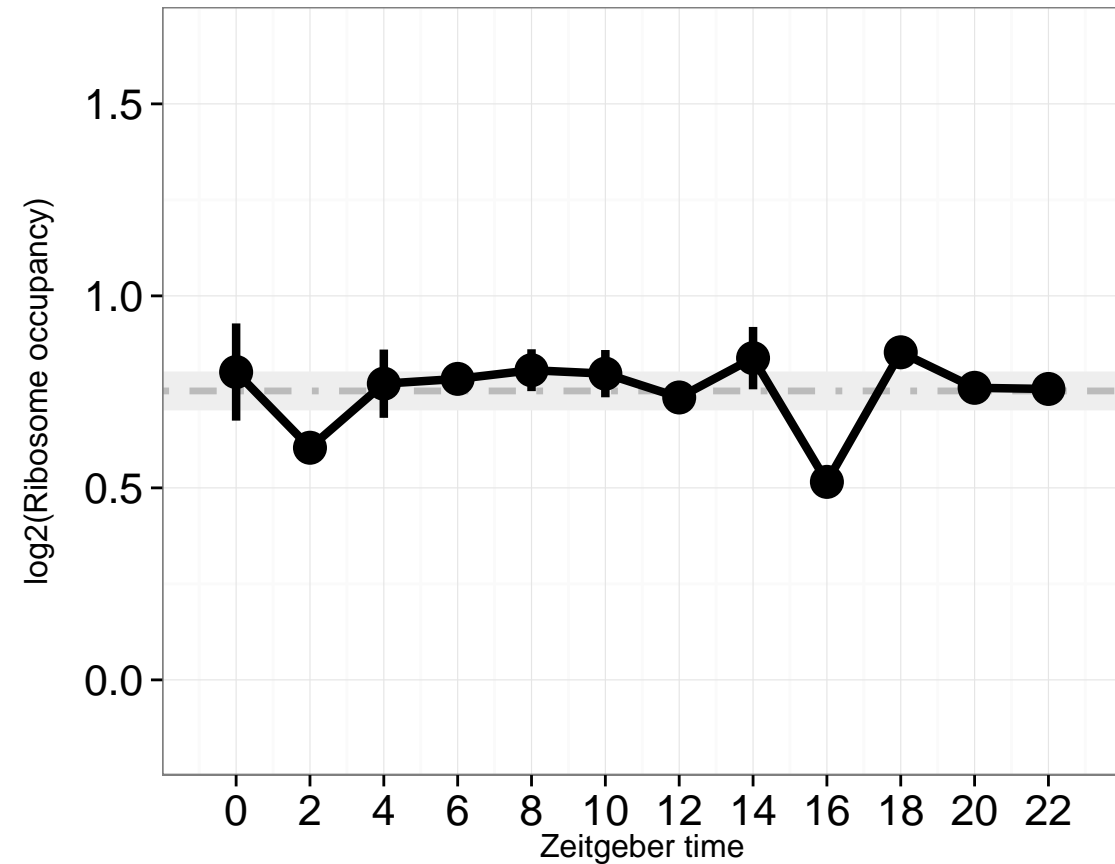

Supplement: Supplementary file 9984 [file 1]

# Pttg1ip

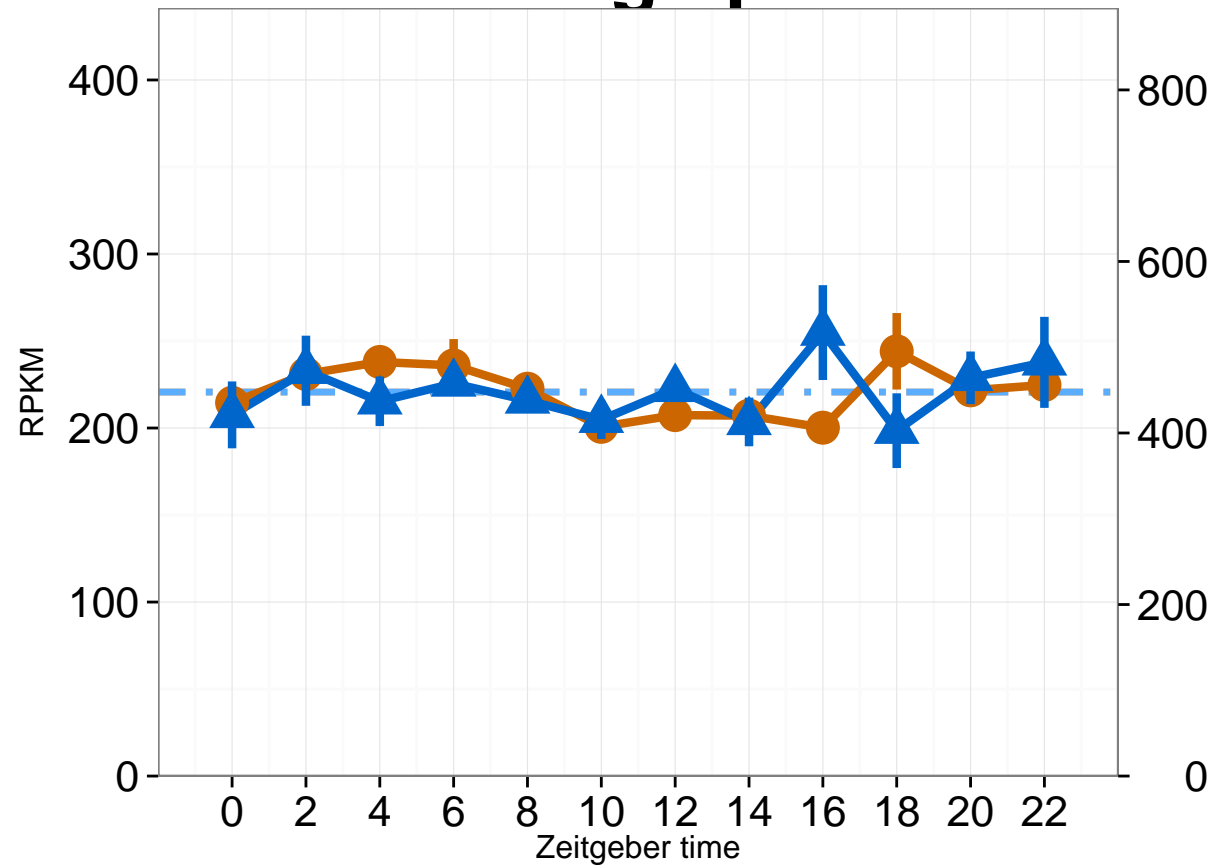

# Pttg1ip

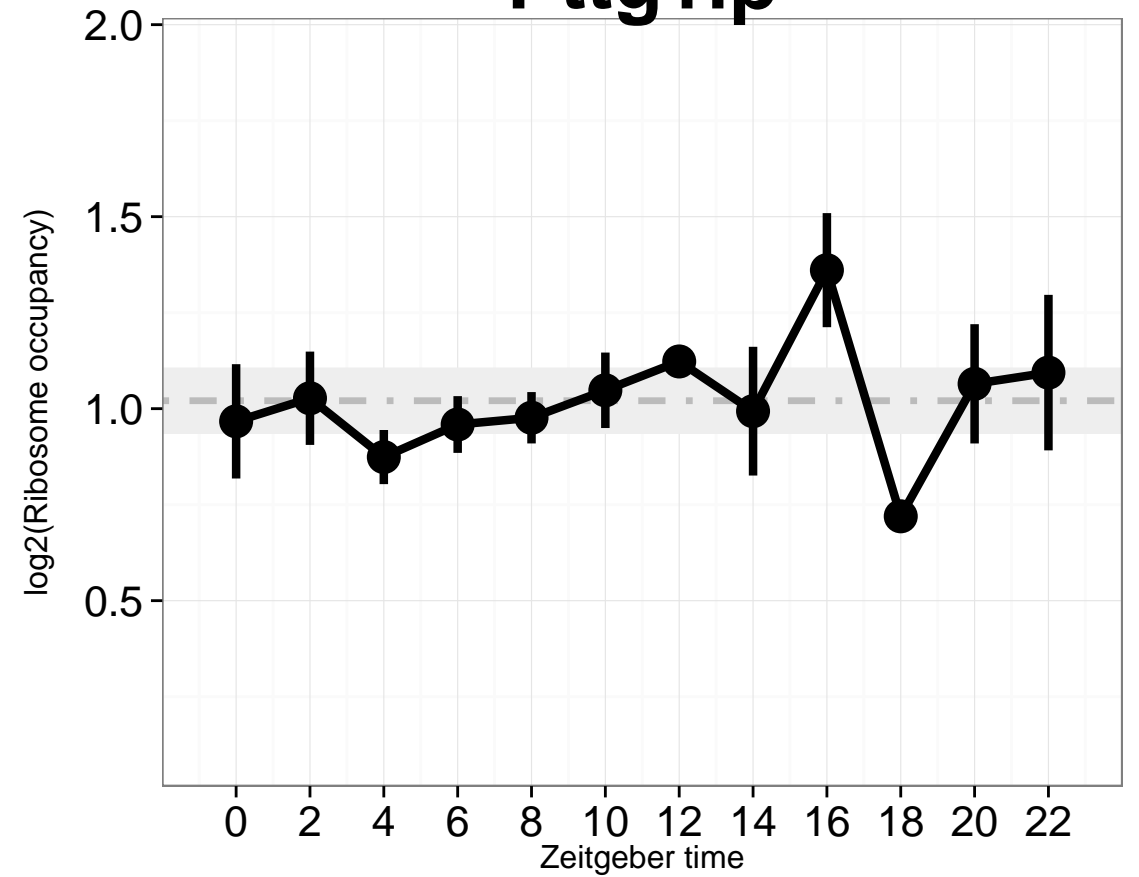

Supplement: Supplementary file 9985 [file 1]

## 2900026A02Rik

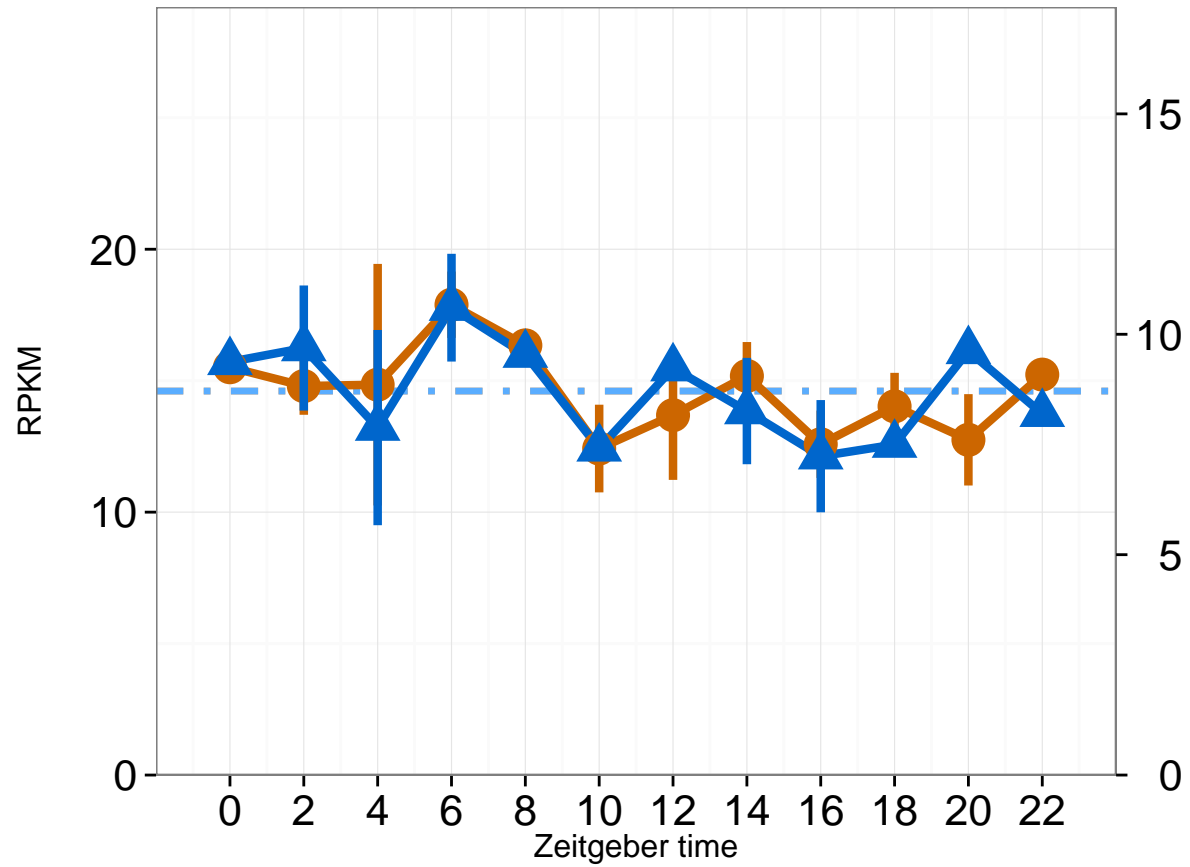

## 2900026A02Rik

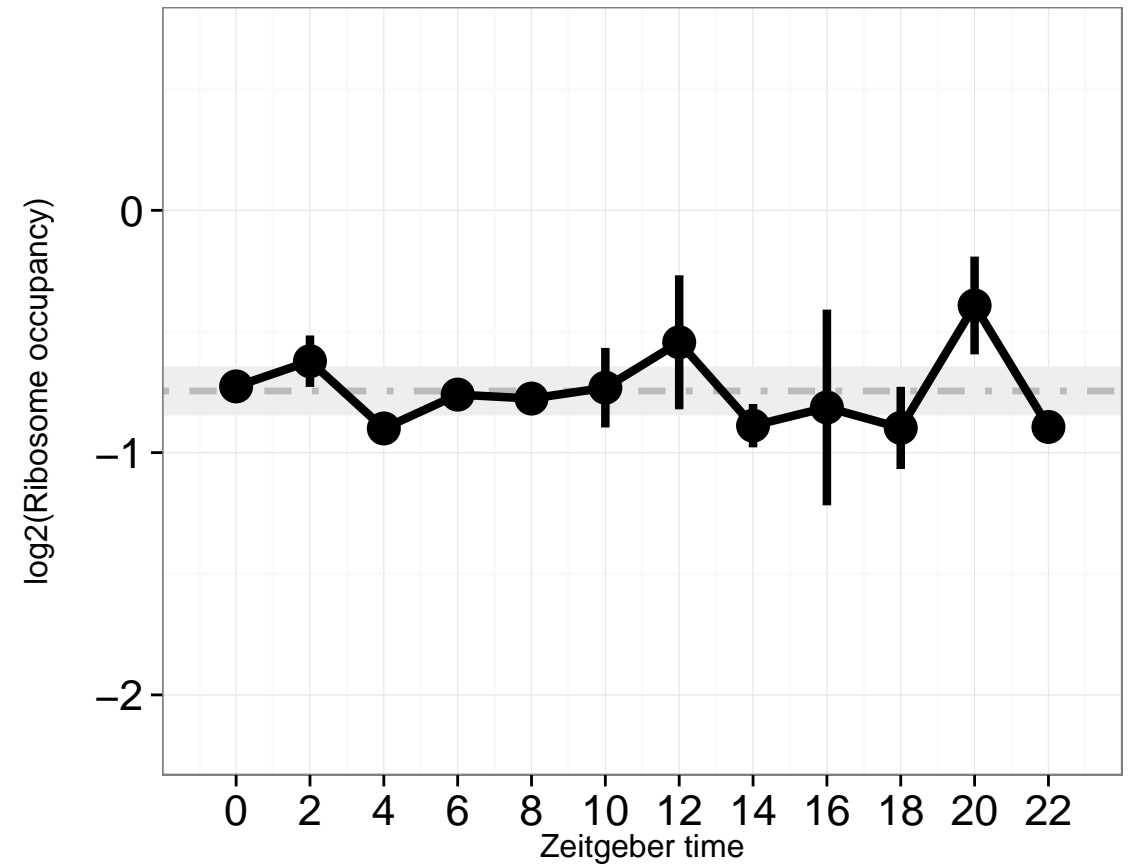

Supplement: Supplementary file 9986 [file 1]

## Gstt3

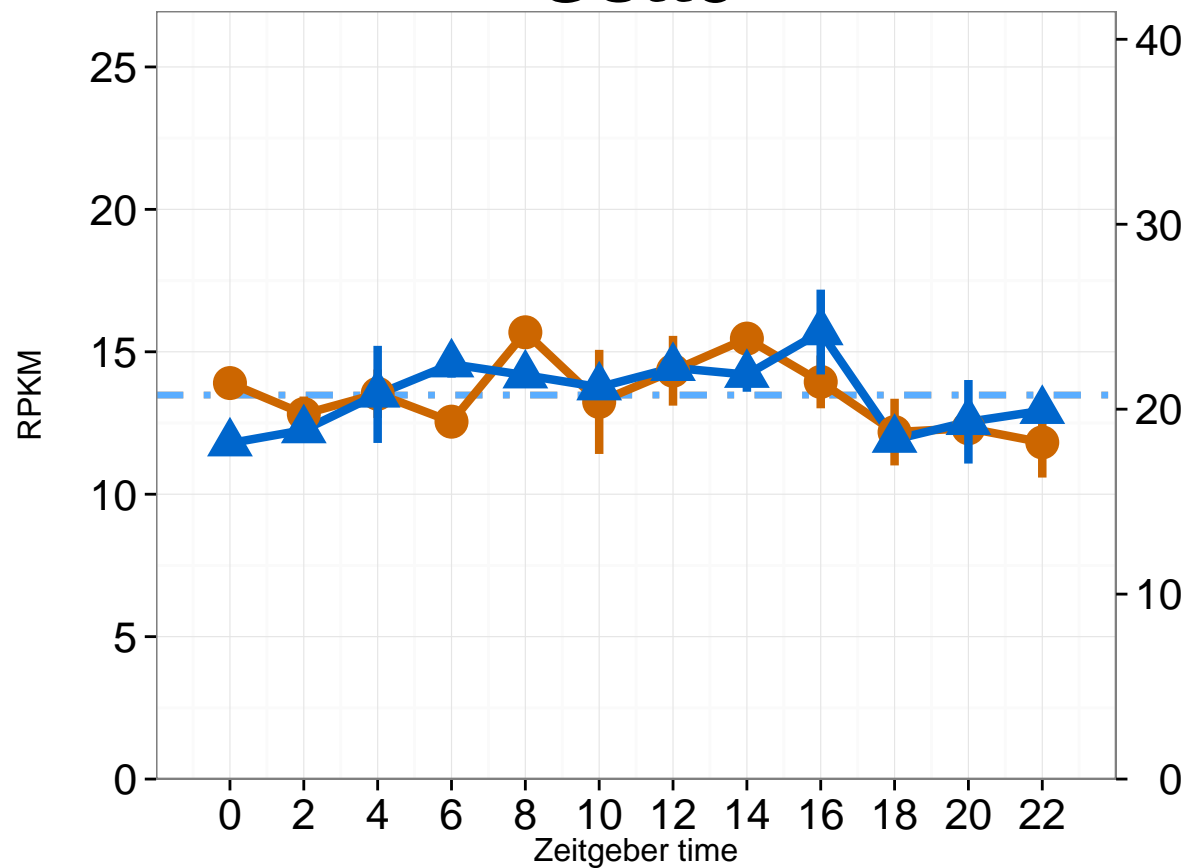

## Gstt3

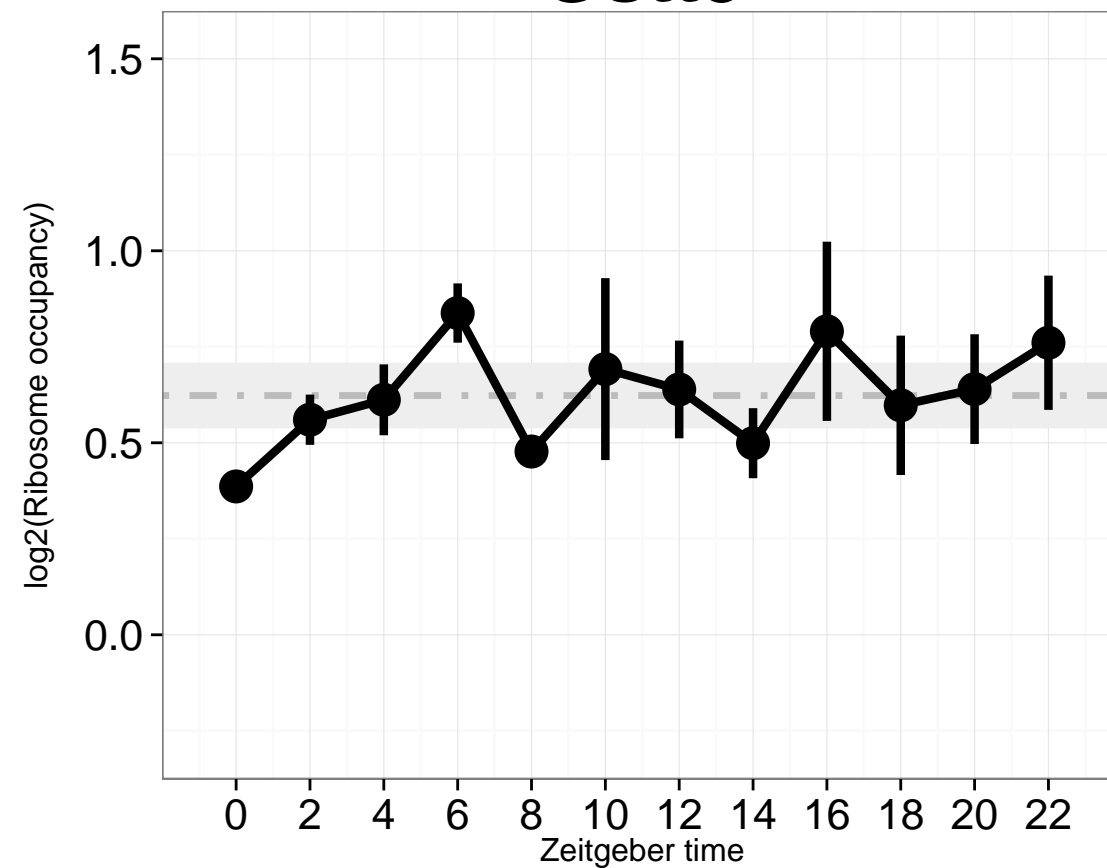

Supplement: Supplementary file 9987 [file 1]

# 4933434E20Rik

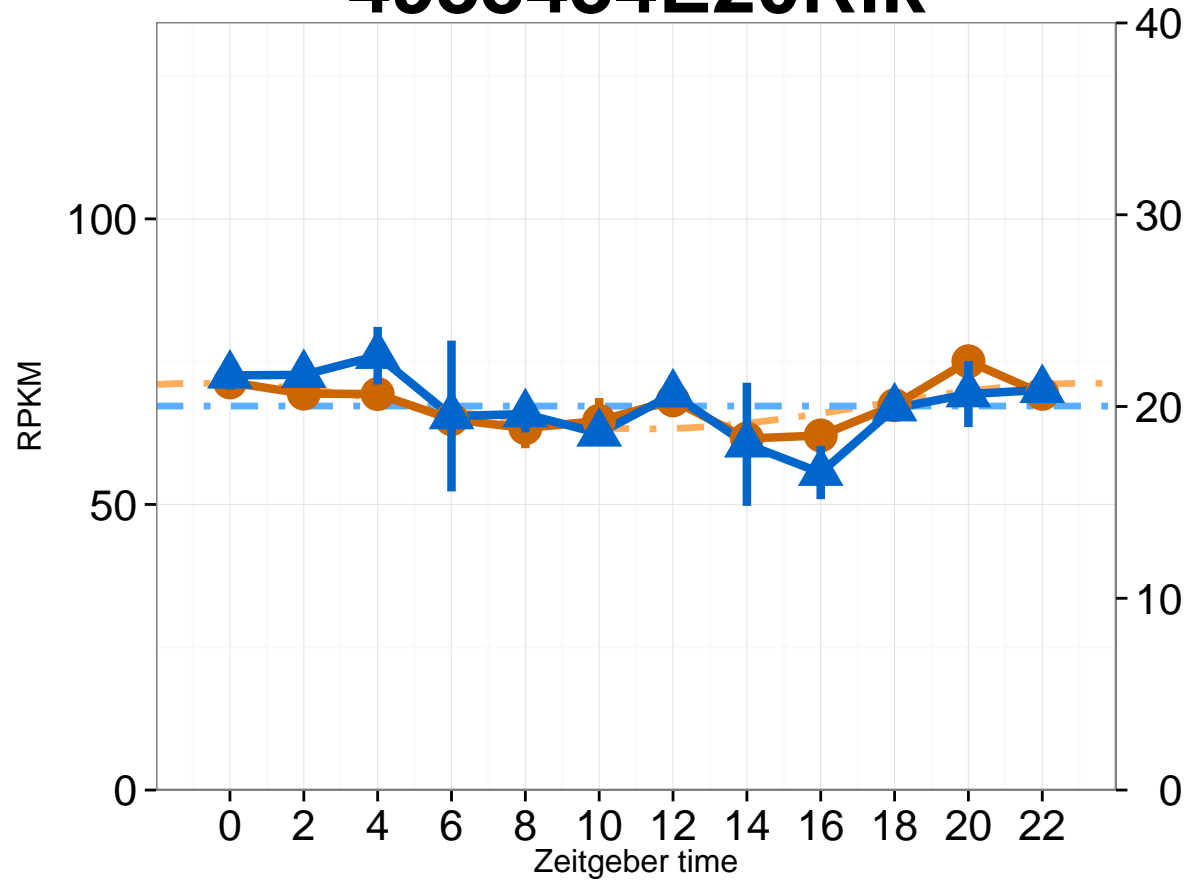

# 4933434E20Rik

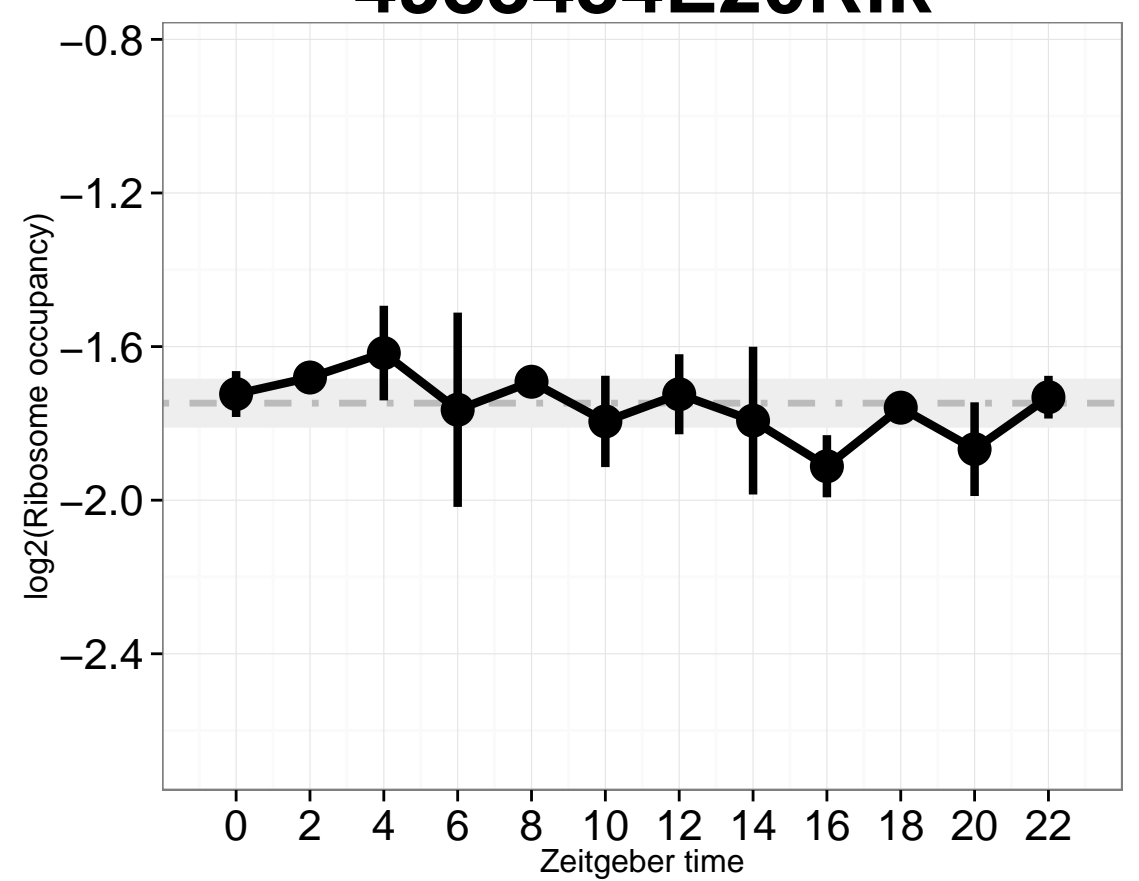

Supplement: Supplementary file 9988 [file 1]

## Pbx3

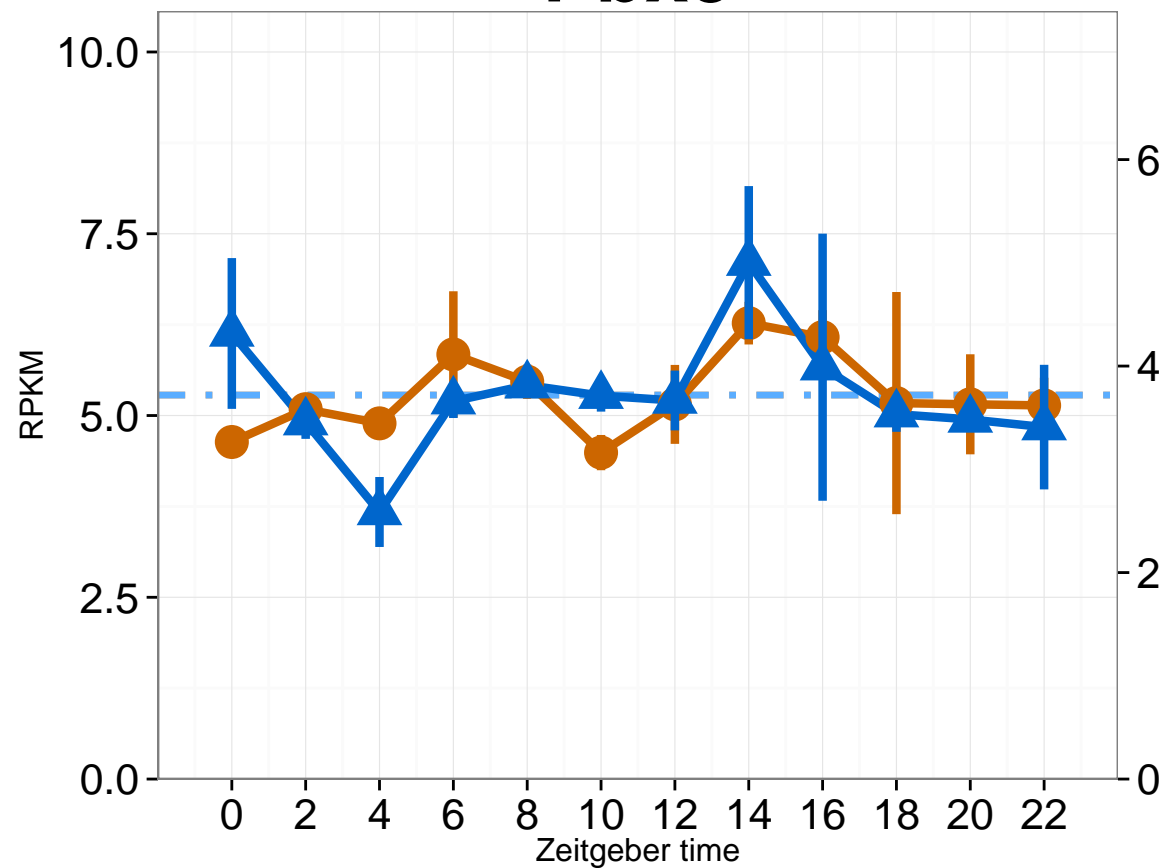

## Pbx3

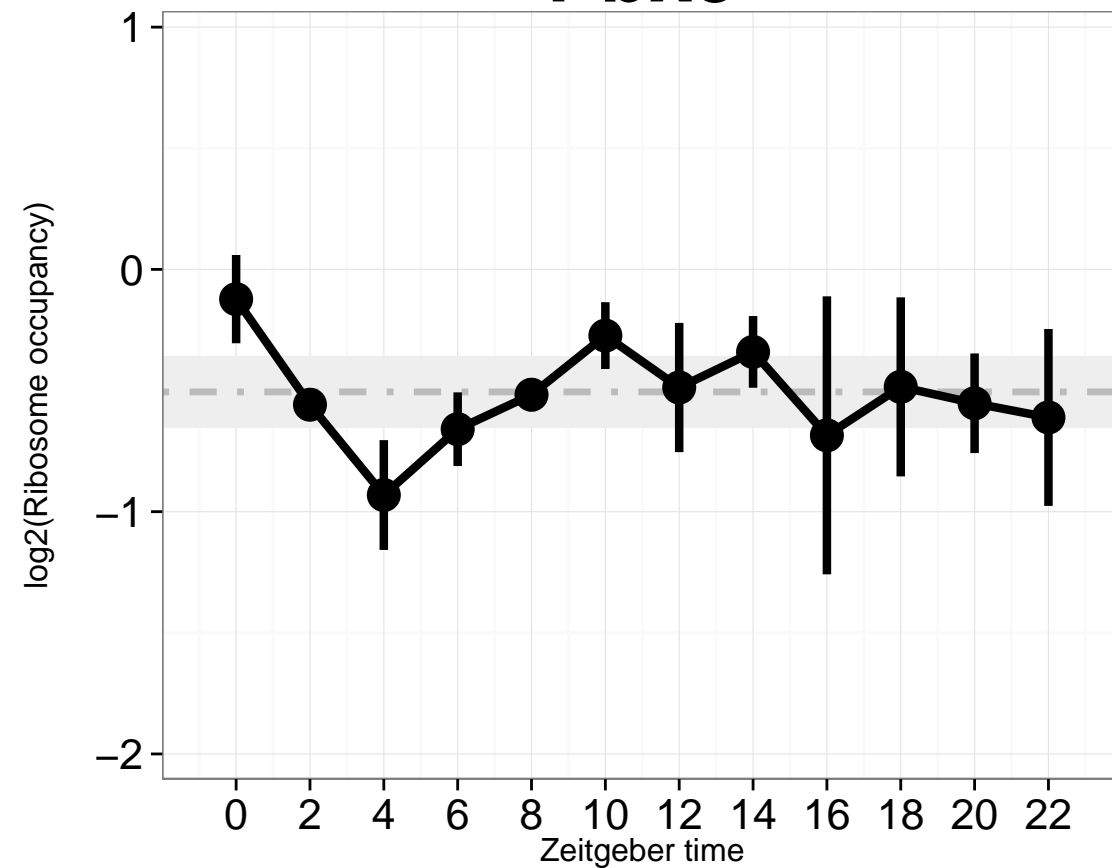

Supplement: Supplementary file 9989 [file 1]

## Derl3

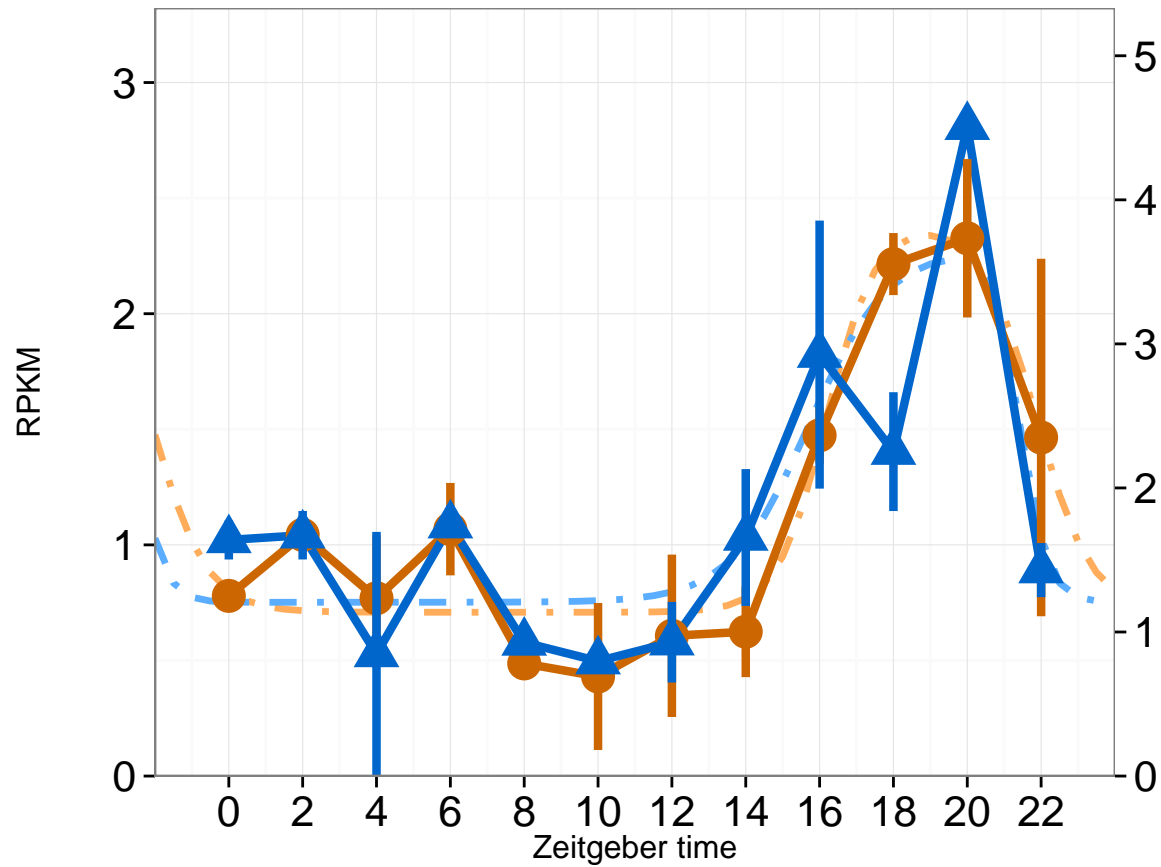

## Derl3

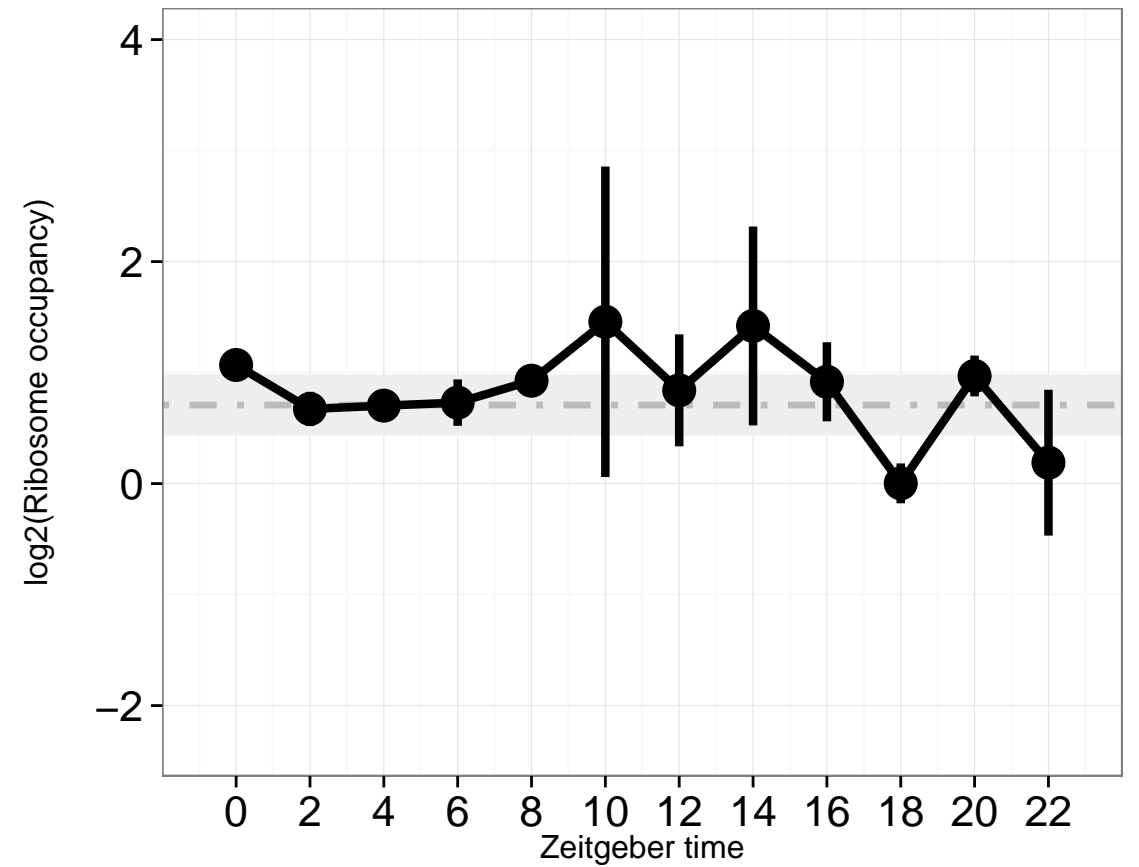

Supplement: Supplementary file 9990 [file 1]

## Polr2l

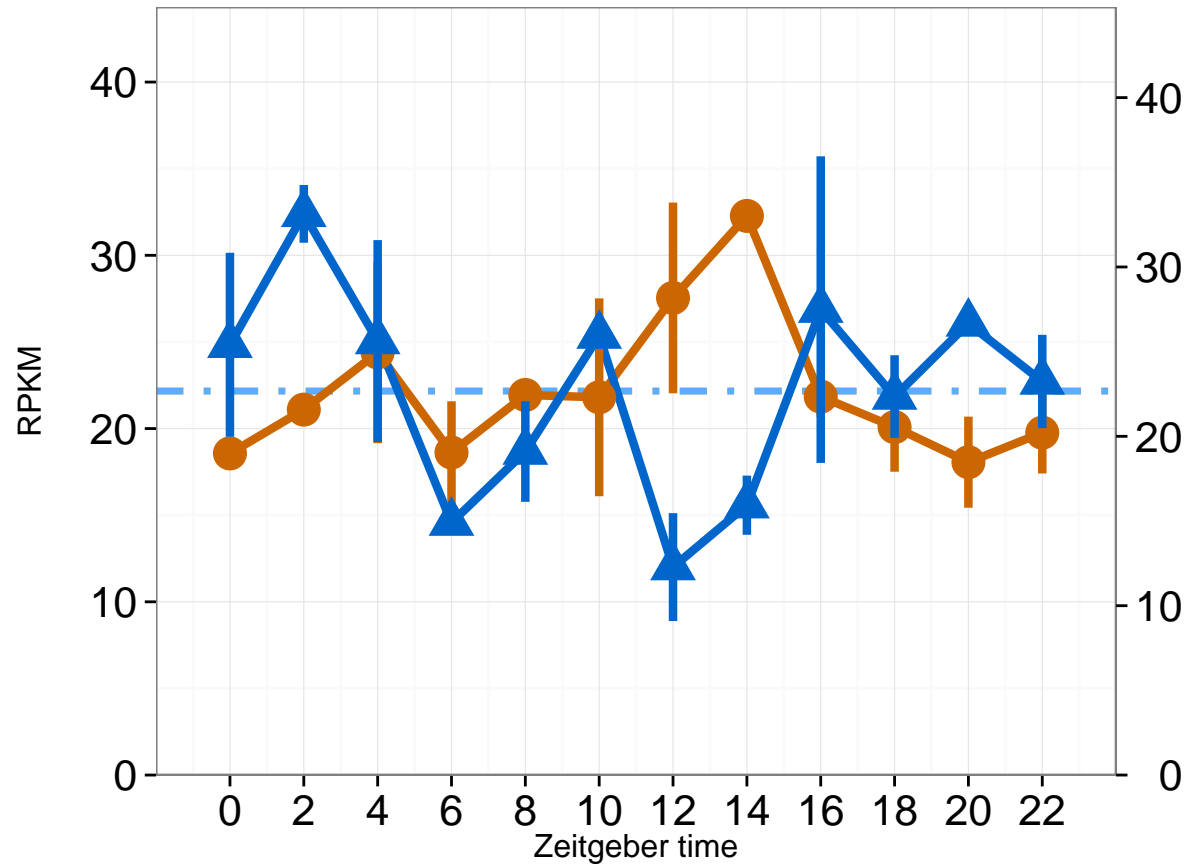

## Polr2l

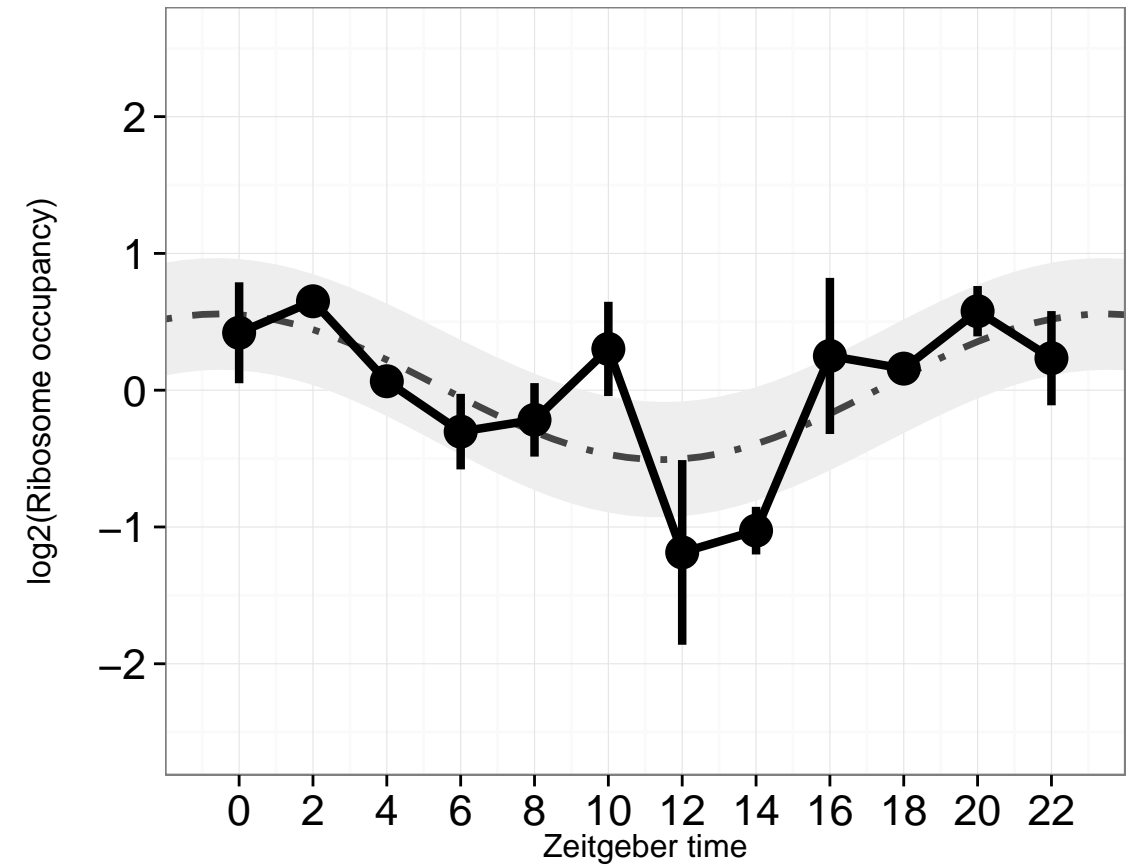

Supplement: Supplementary file 9991 [file 1]

## Azin1

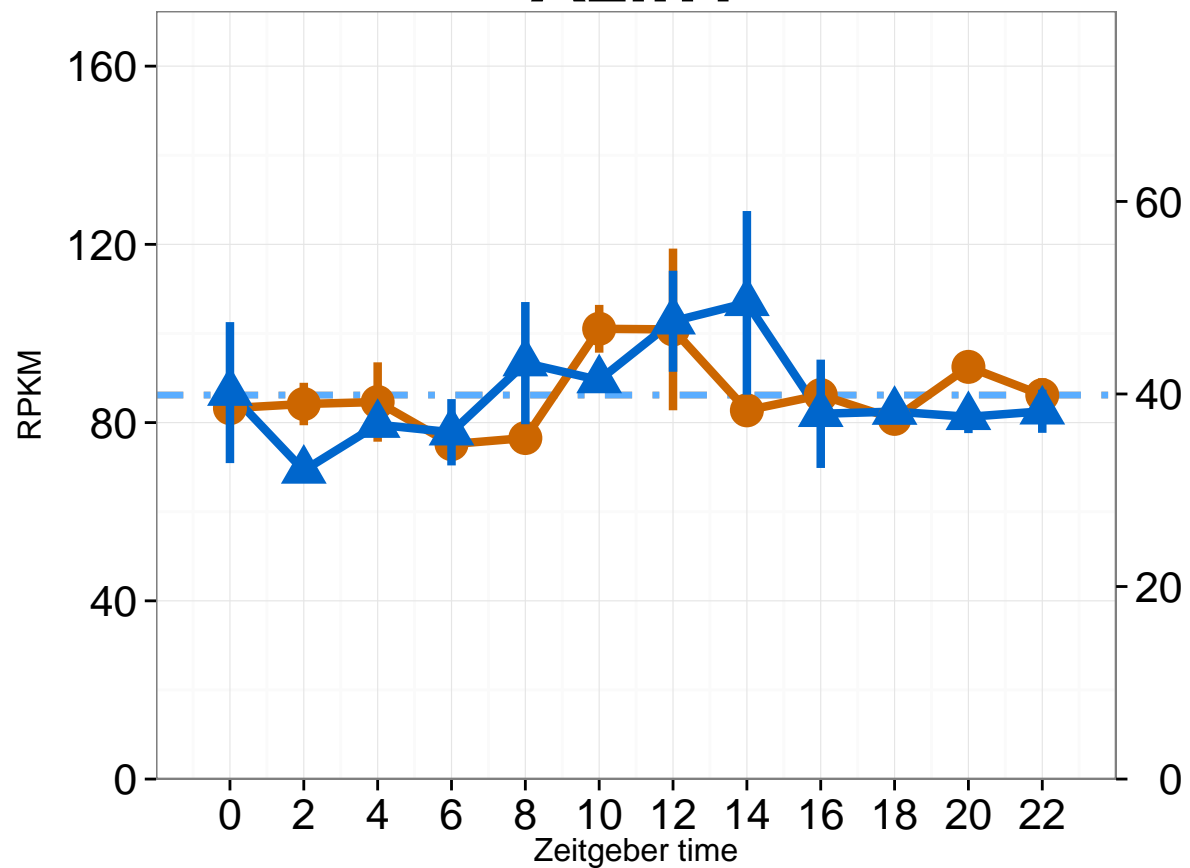

## Azin1

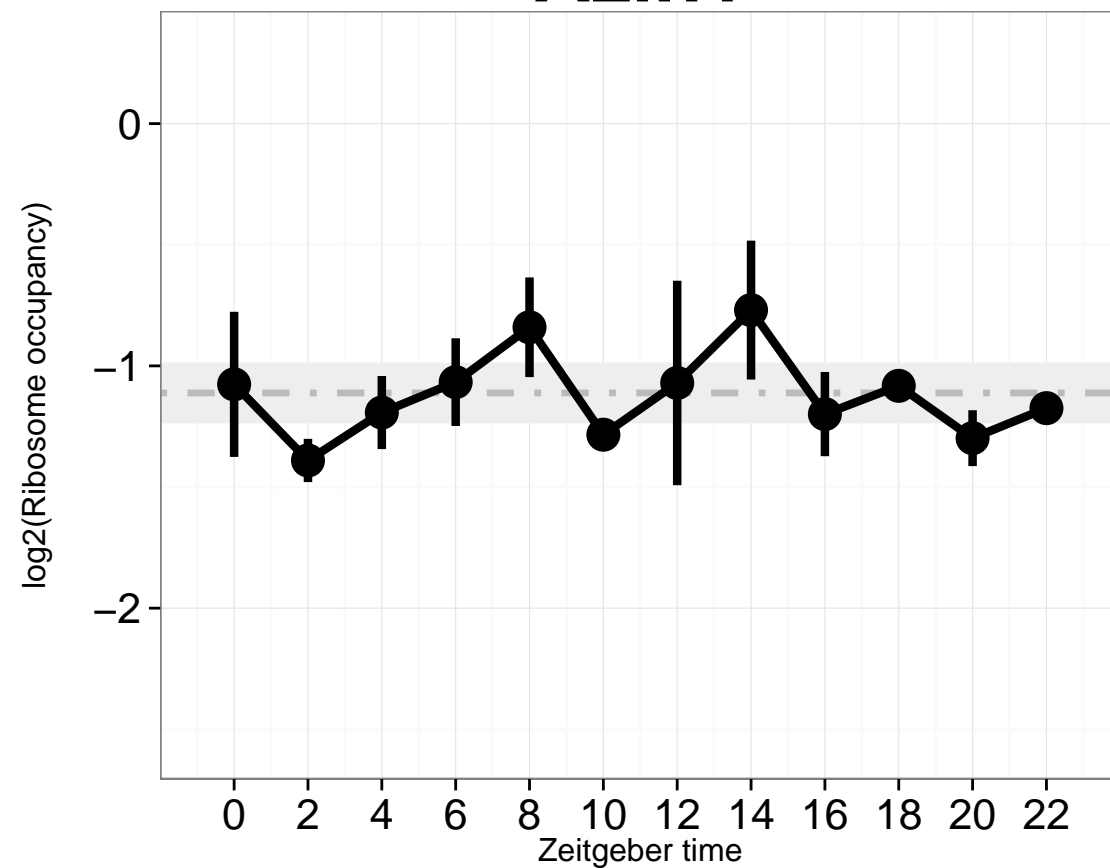

Supplement: Supplementary file 9992 [file 1]

## Gna11

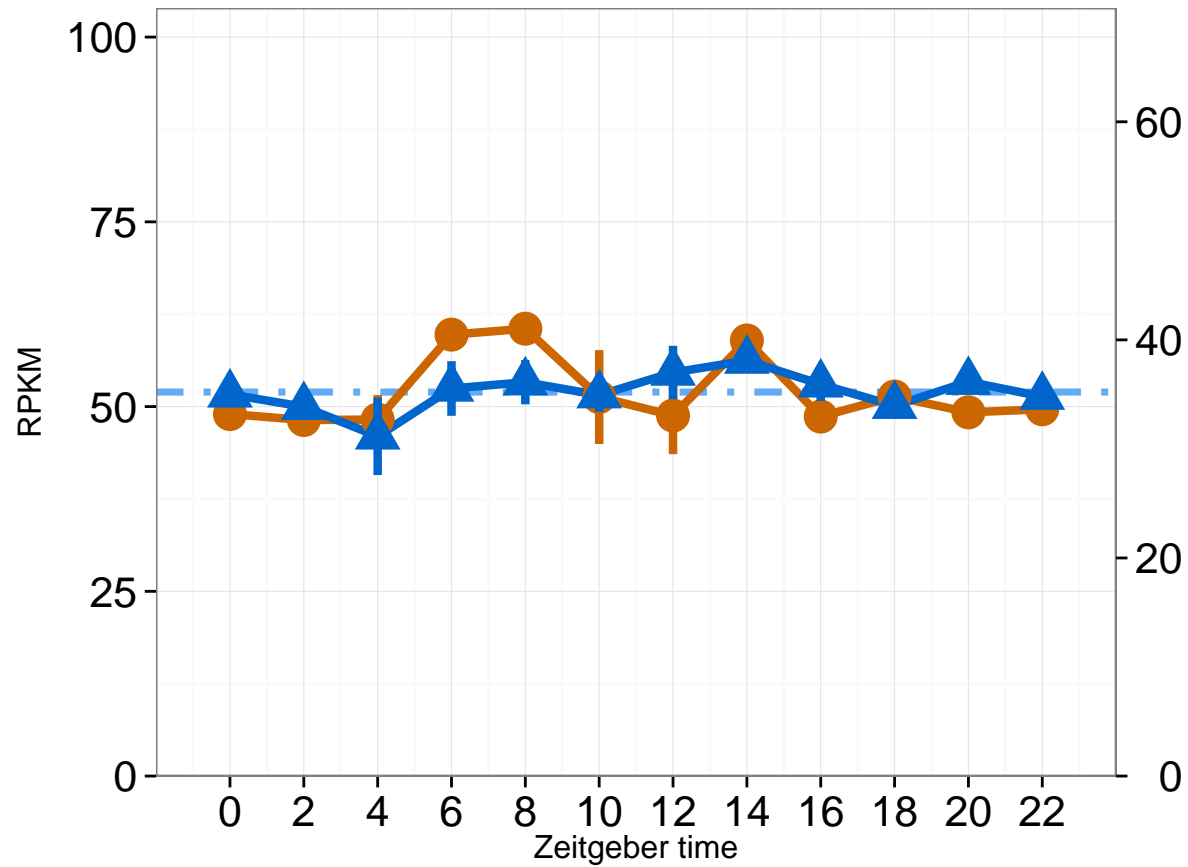

## Gna11

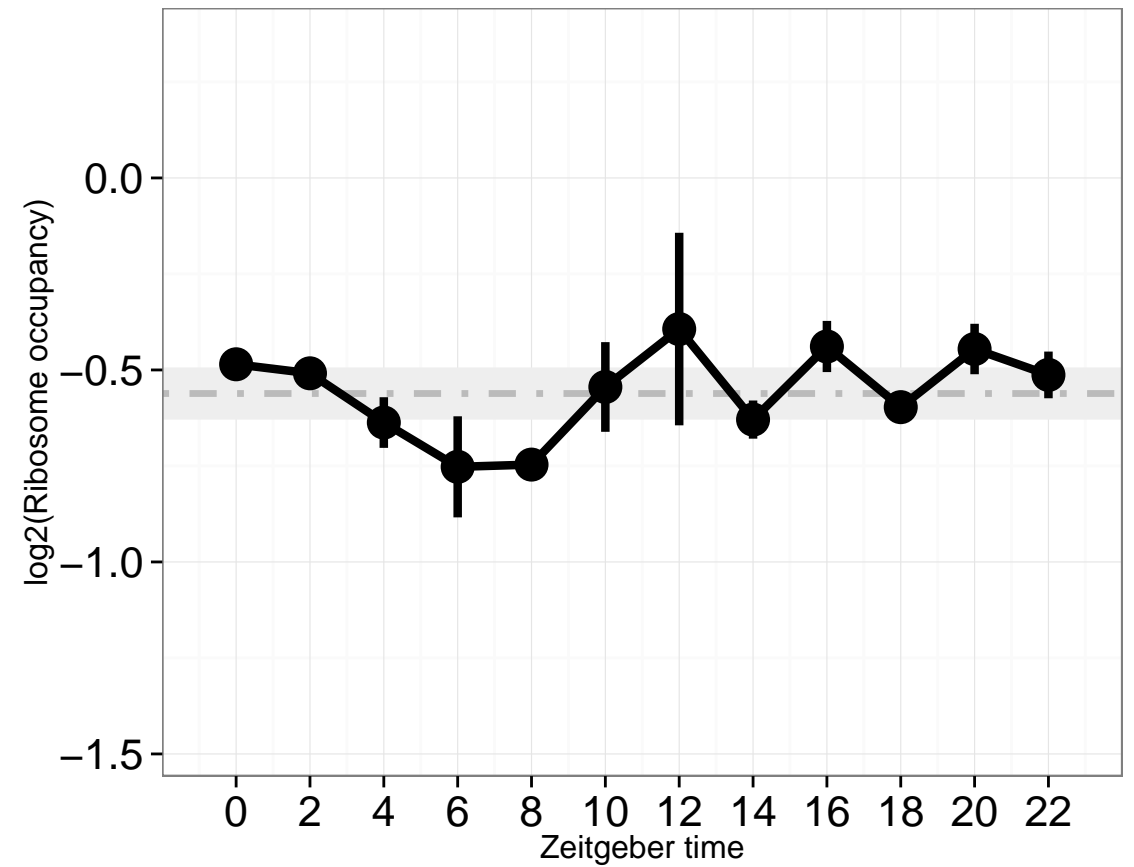

Supplement: Supplementary file 9993 [file 1]

# Tmcc2

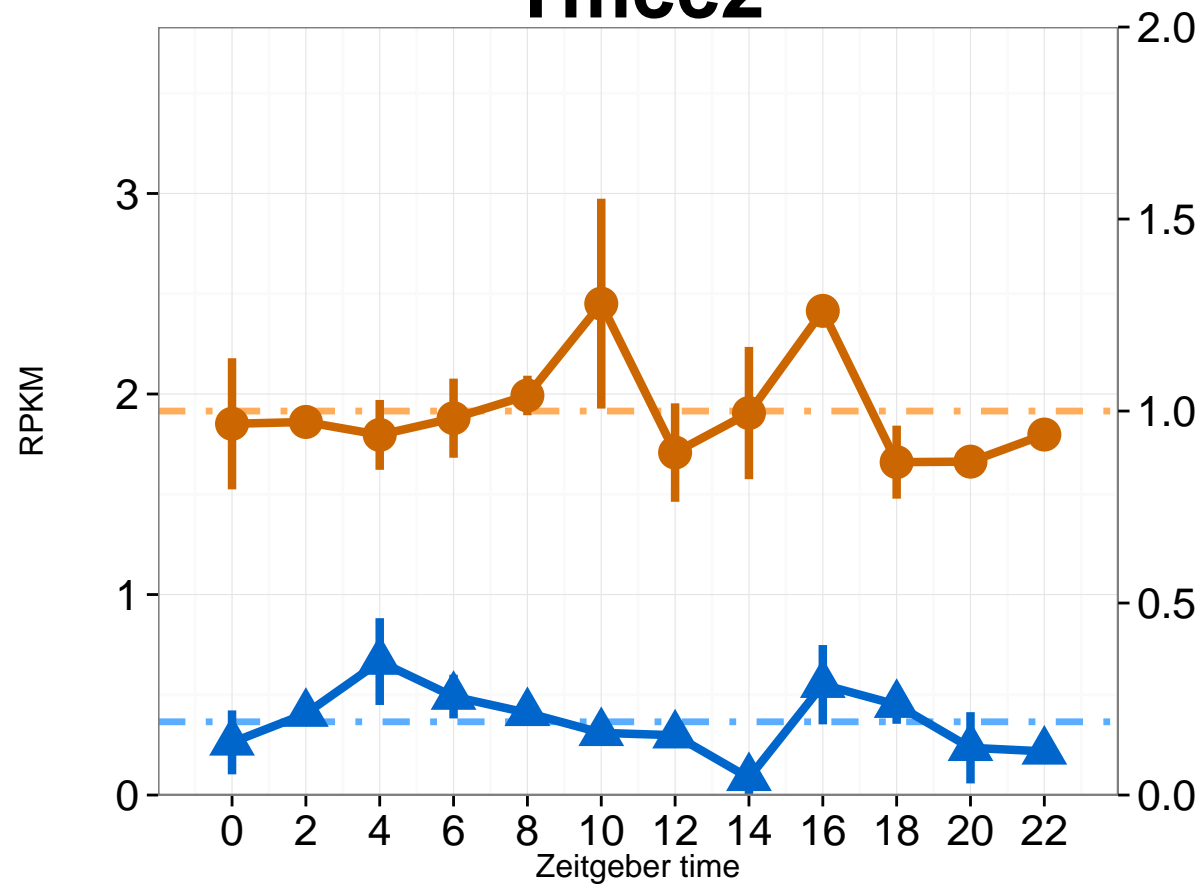

# Tmcc2

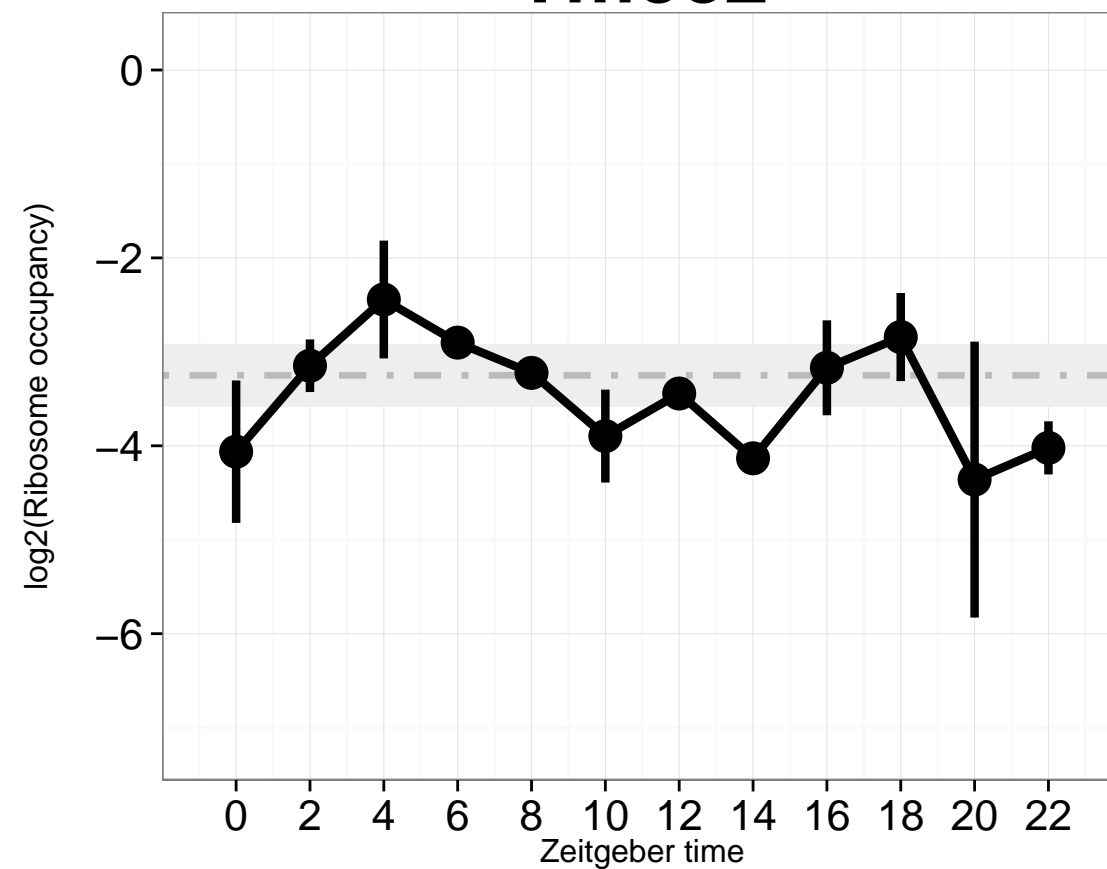

Supplement: Supplementary file 9994 [file 1]

## Ppcs

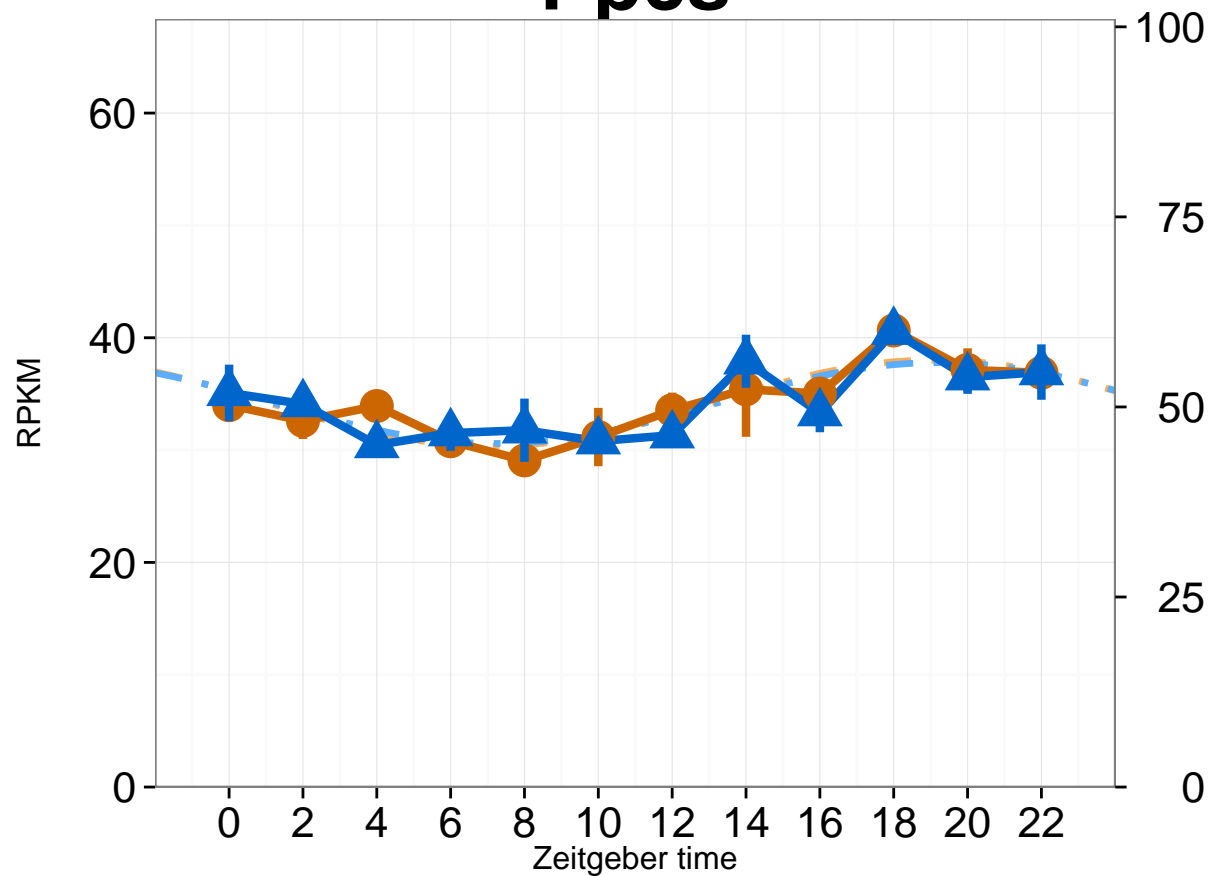

## Ppcs

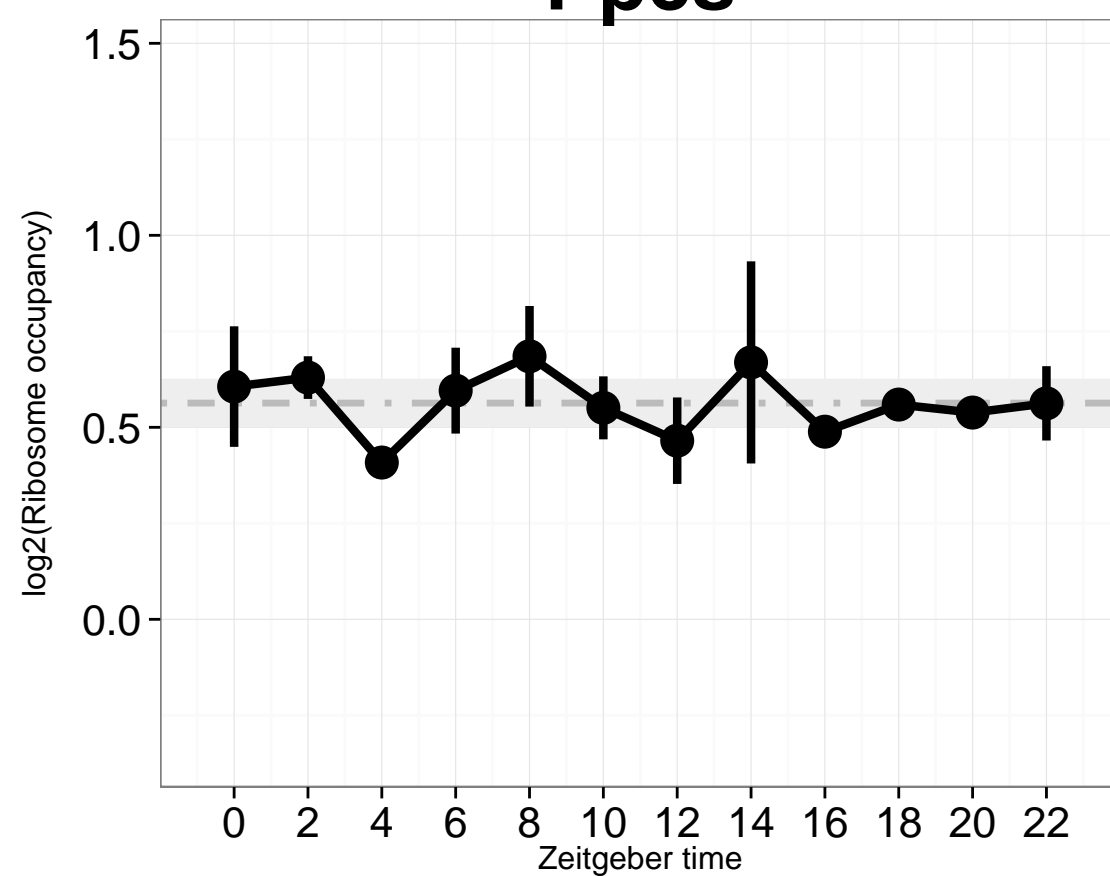

Supplement: Supplementary file 9995 [file 1]

## Mtss1l

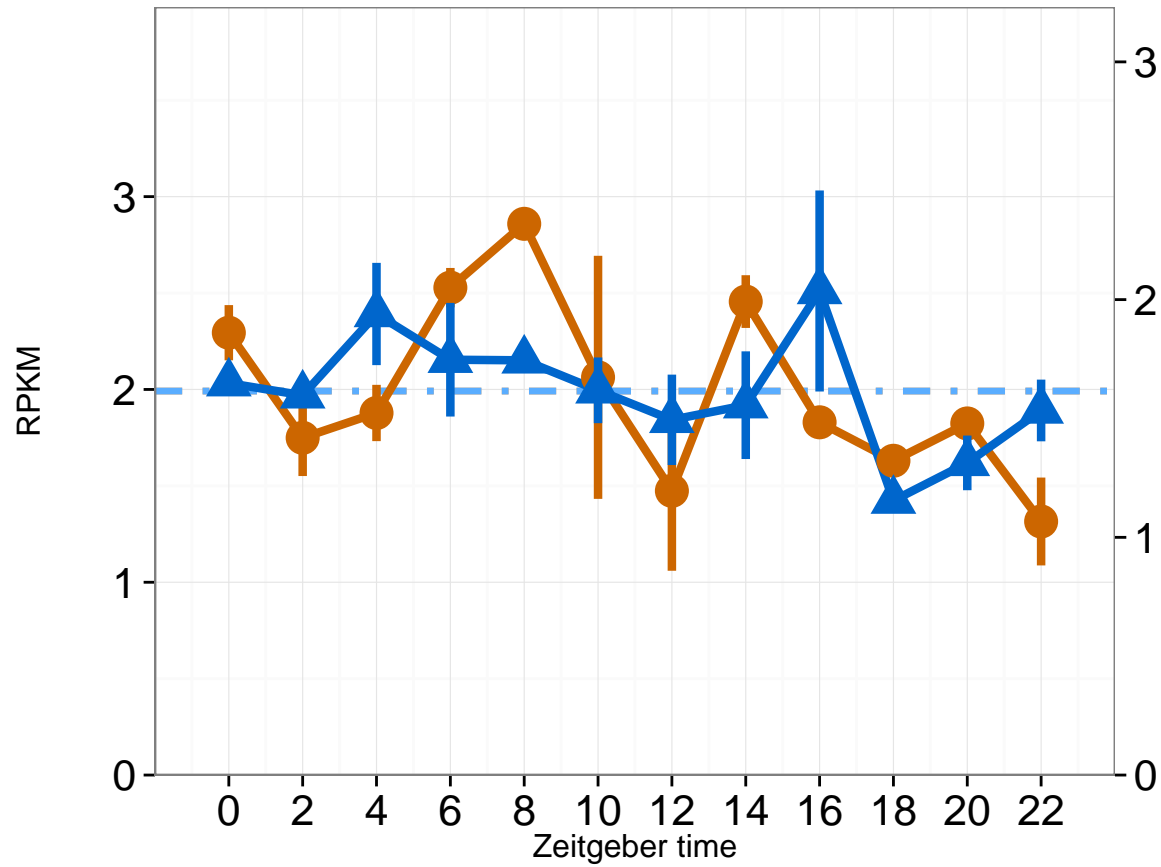

## Mtss1l

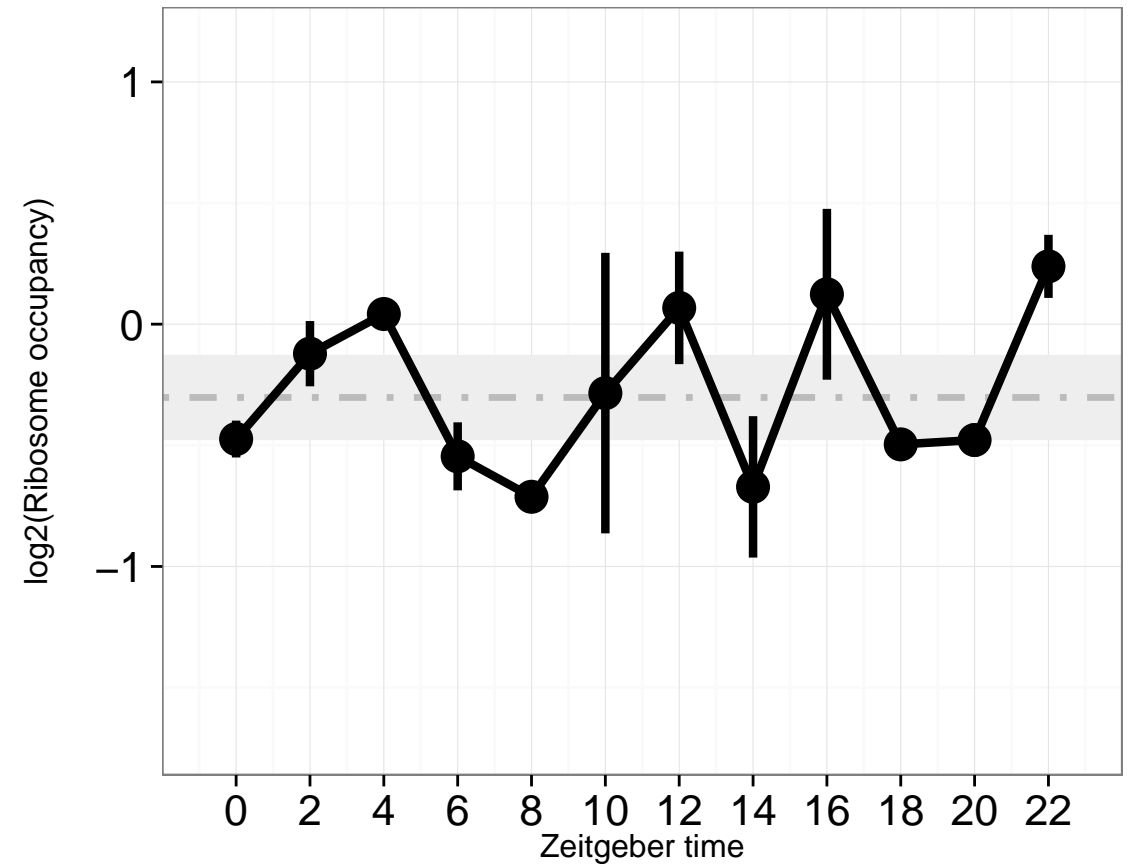

Supplement: Supplementary file 9996 [file 1]

## Meaf6

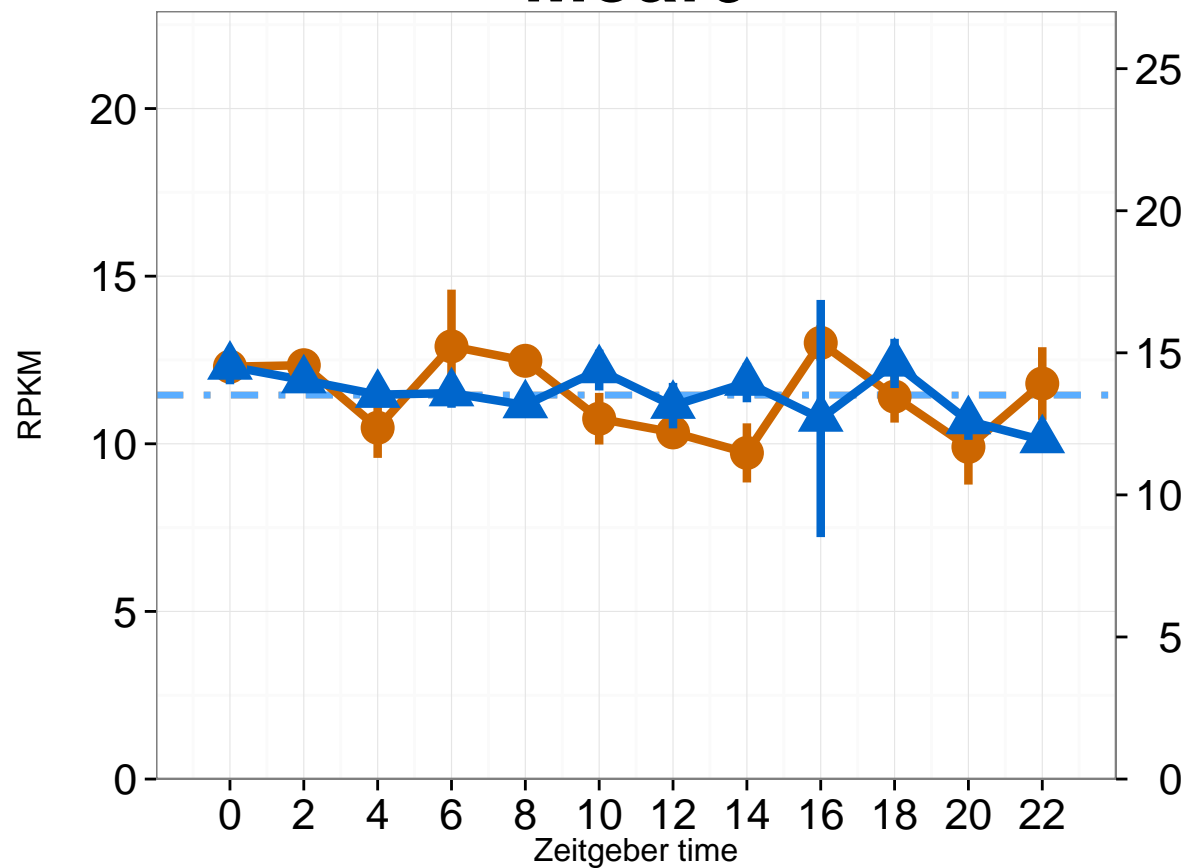

## Meaf6

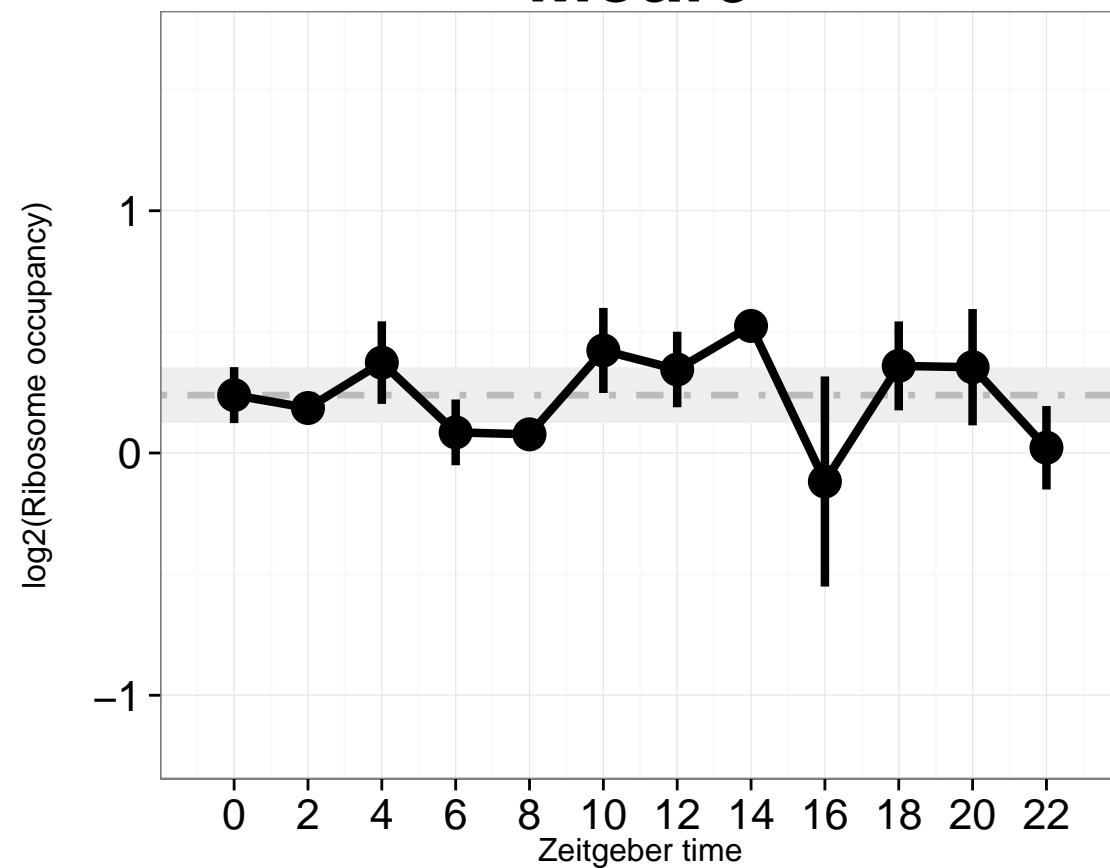

Supplement: Supplementary file 9997 [file 1]

## Ogdhl

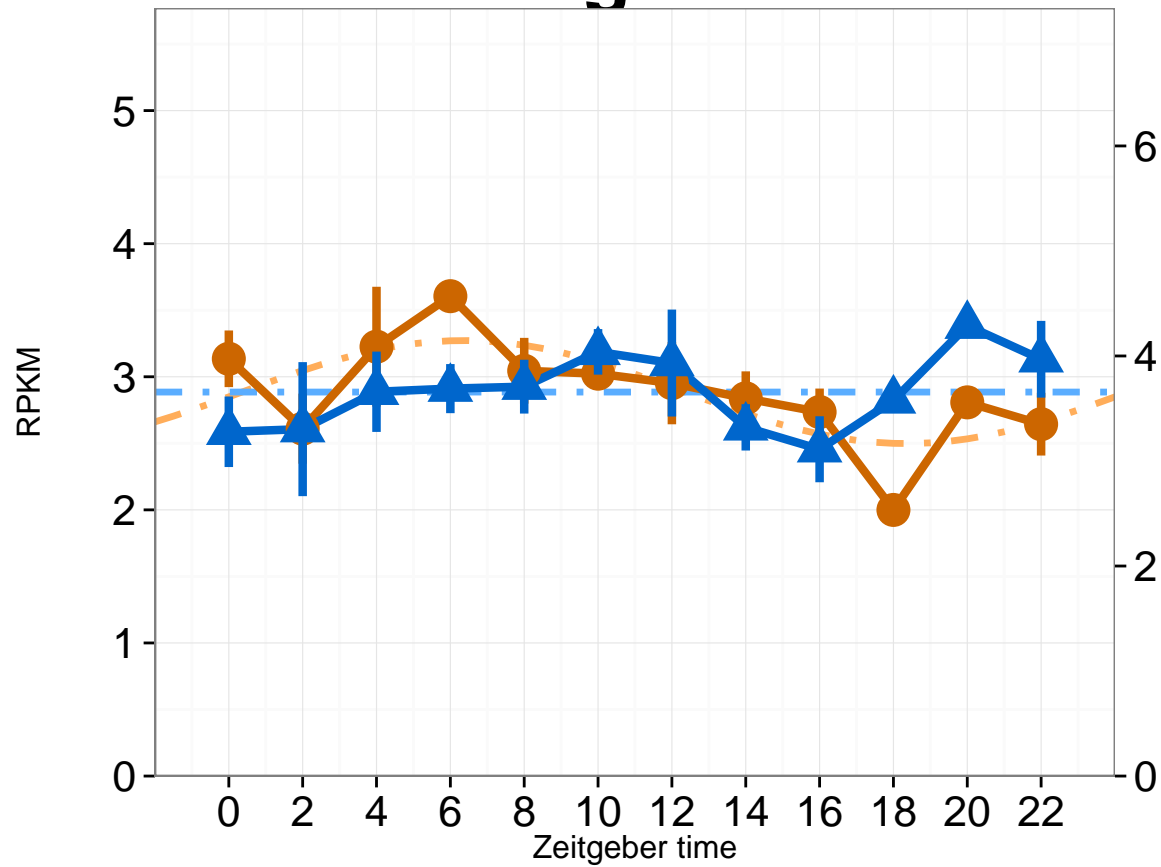

## Ogdhl

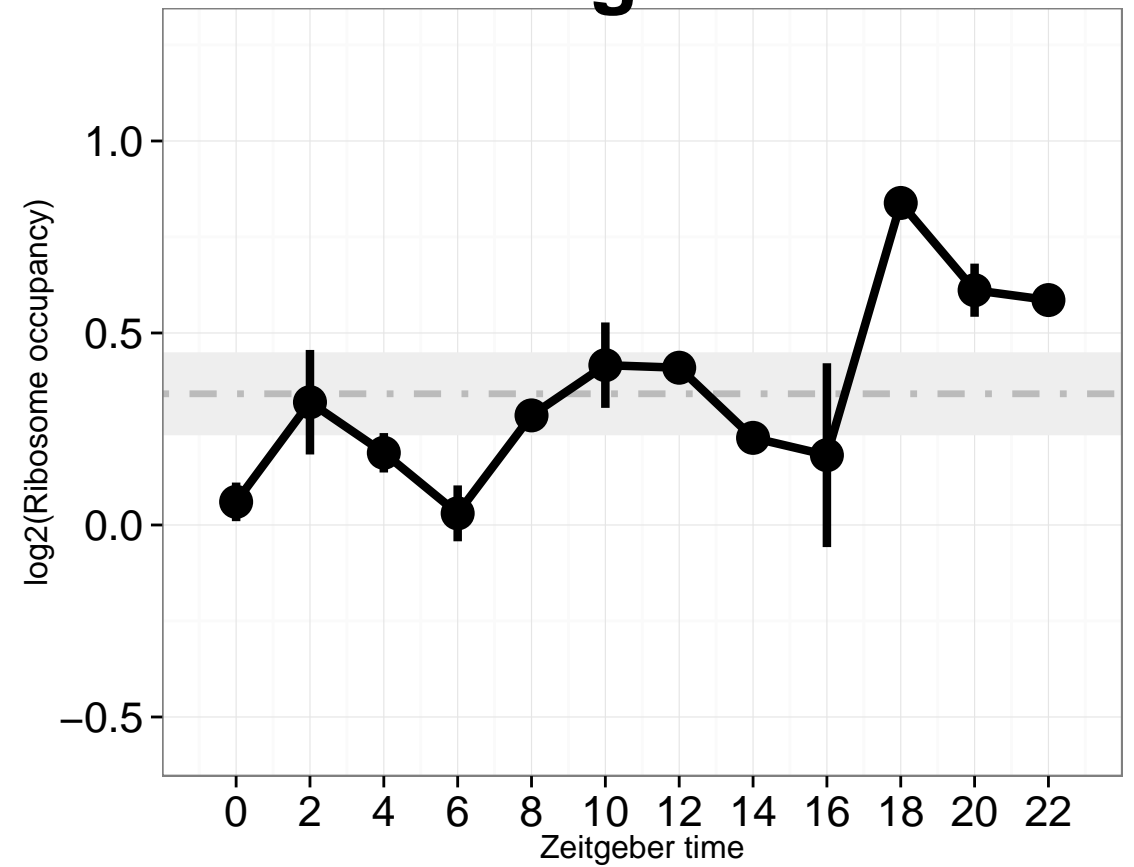

Supplement: Supplementary file 9998 [file 1]

# Hist1h4i

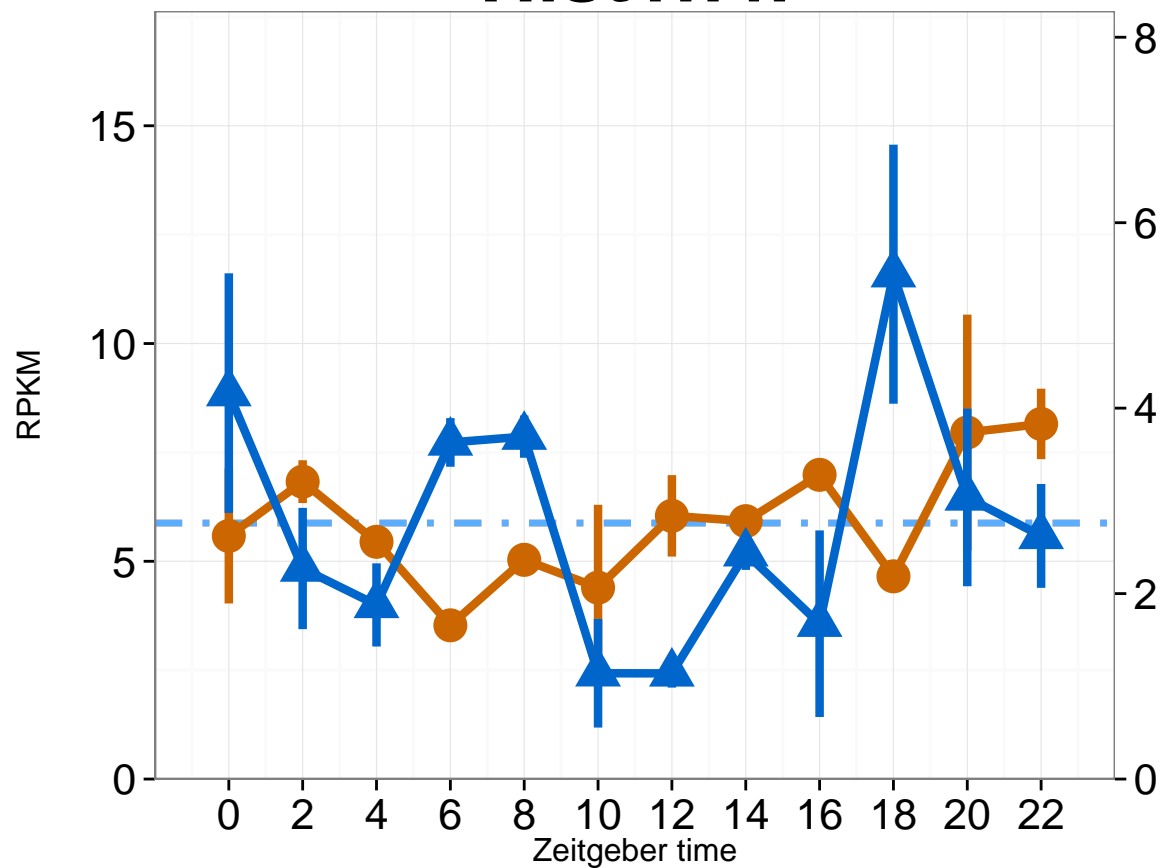

# Hist1h4i

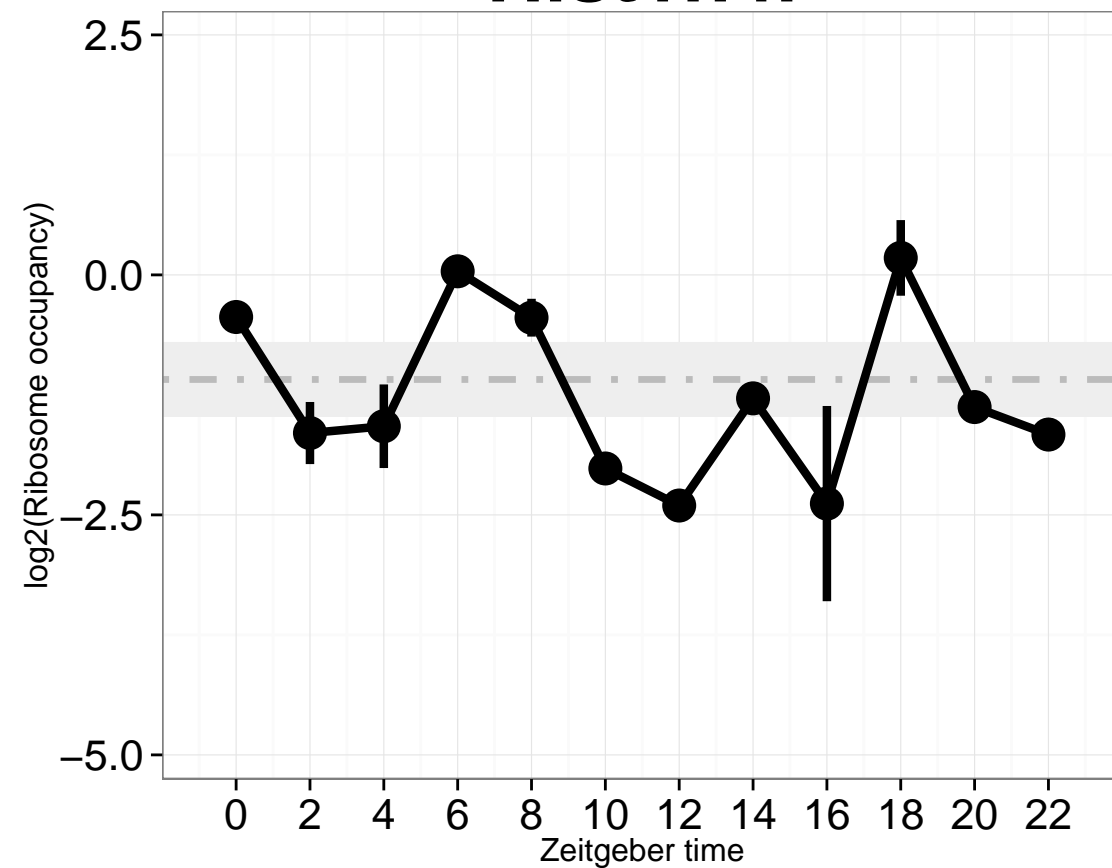

Supplement: Supplementary file 9999 [file 1]

## Mrc1

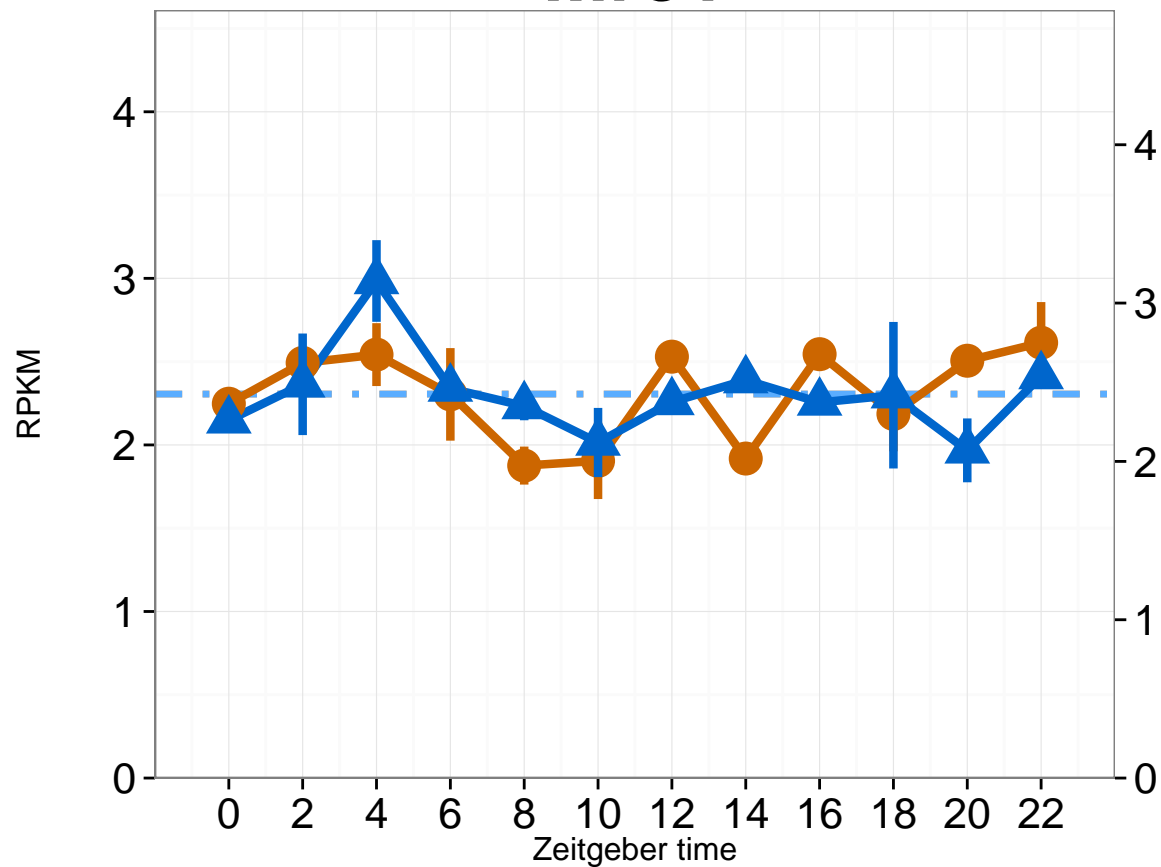

## Mrc1

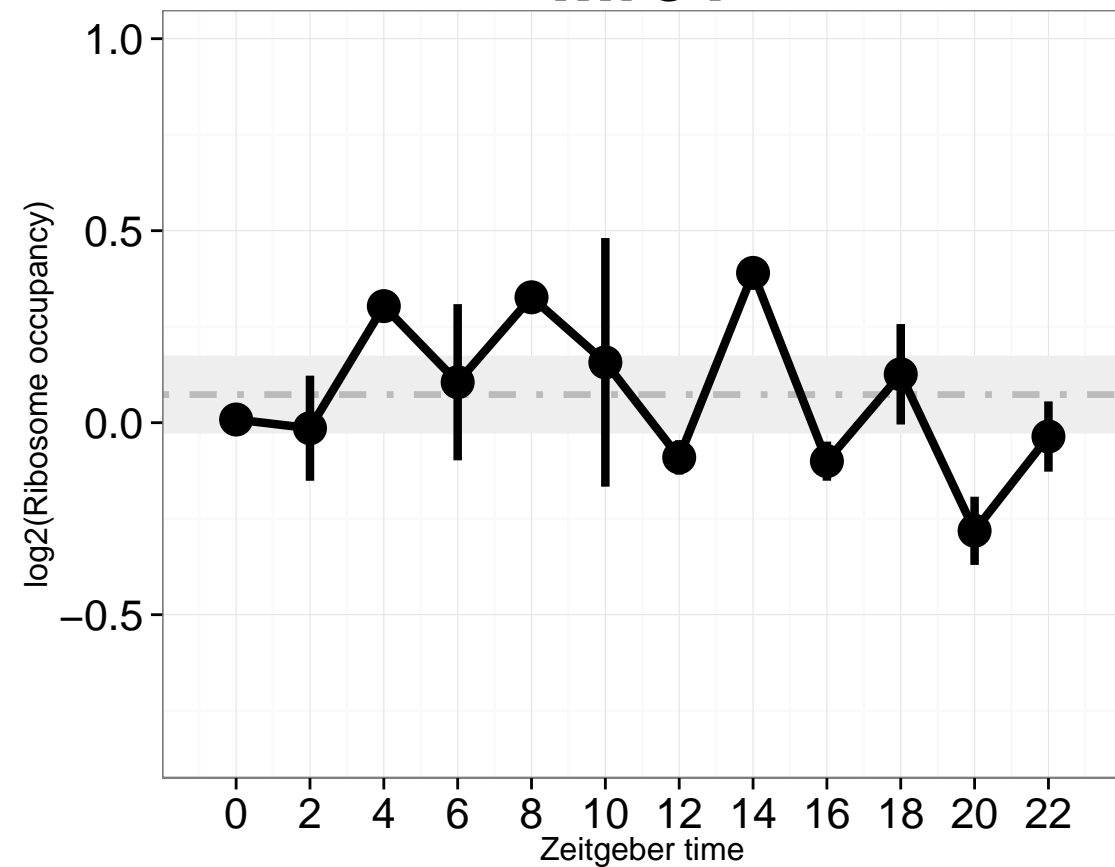

Supplement: Supplementary file 10000 [file 1]

# Zfp935

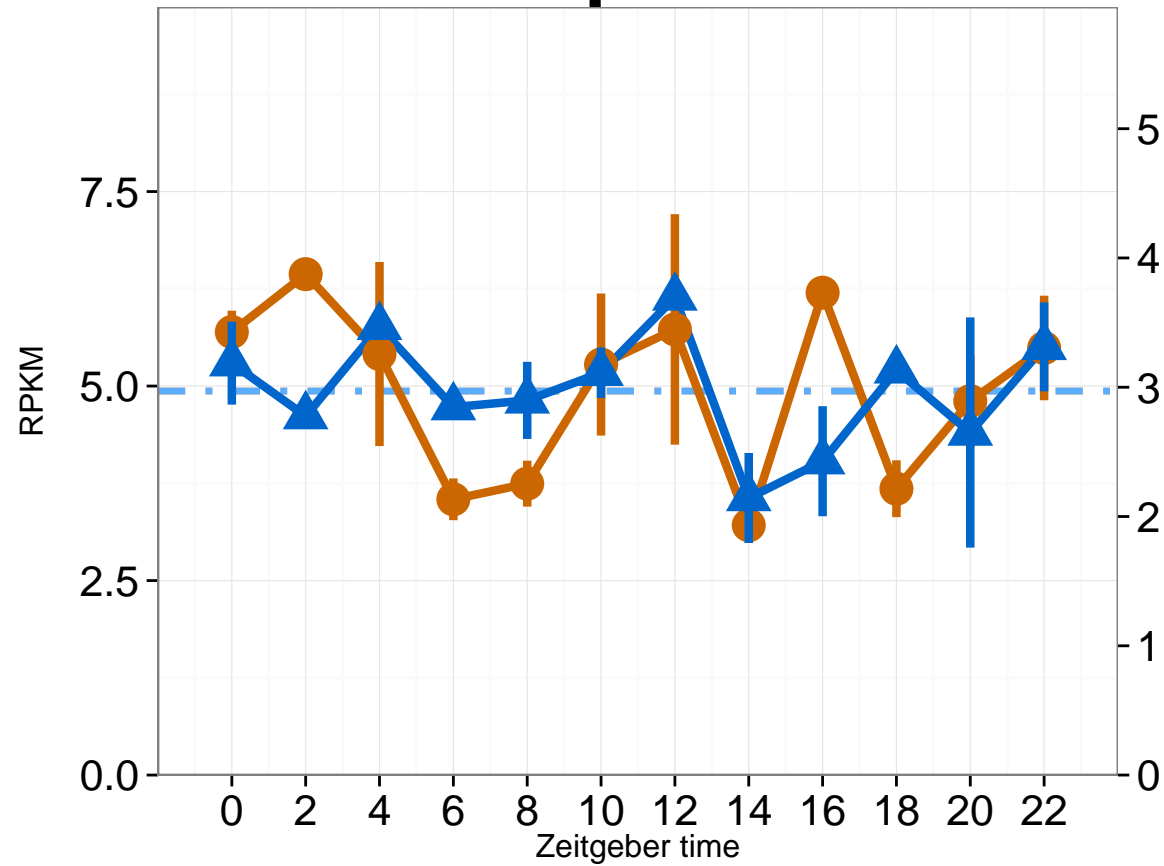

# Zfp935

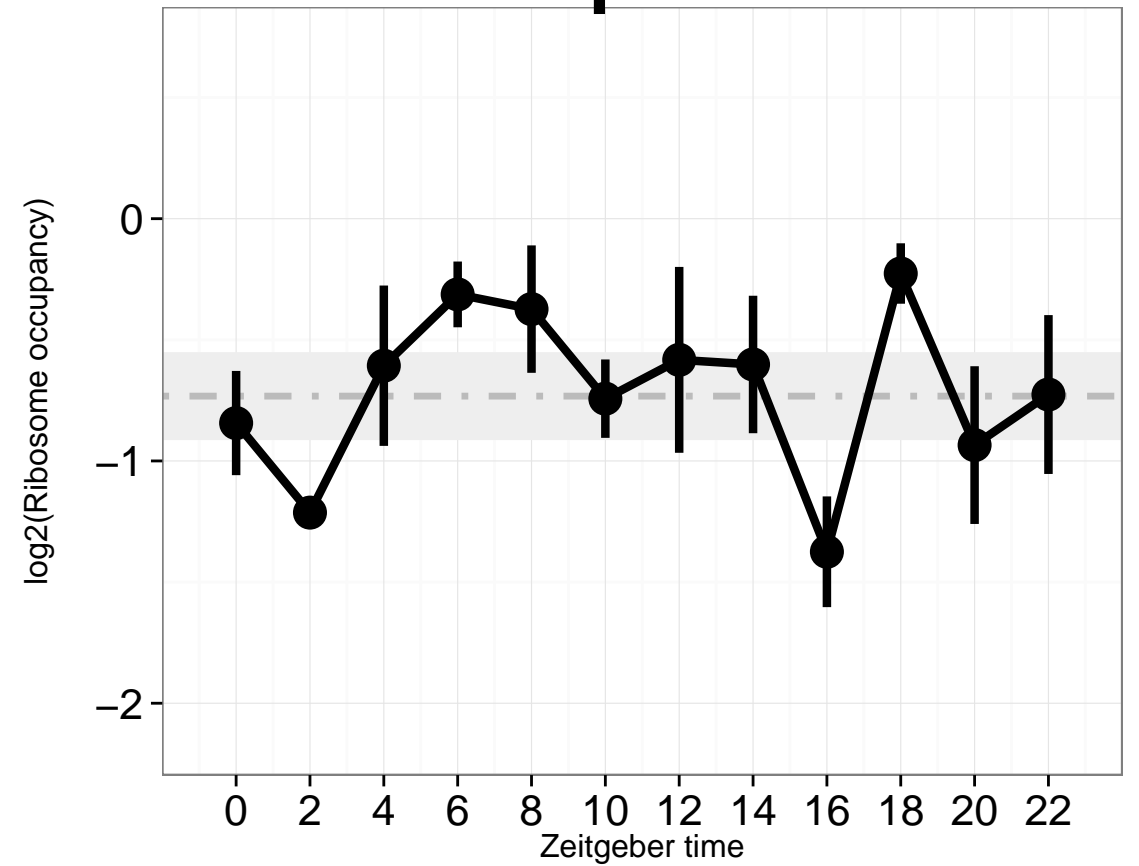

Supplement: Supplementary file 10001 [file 1]

# Camkk1

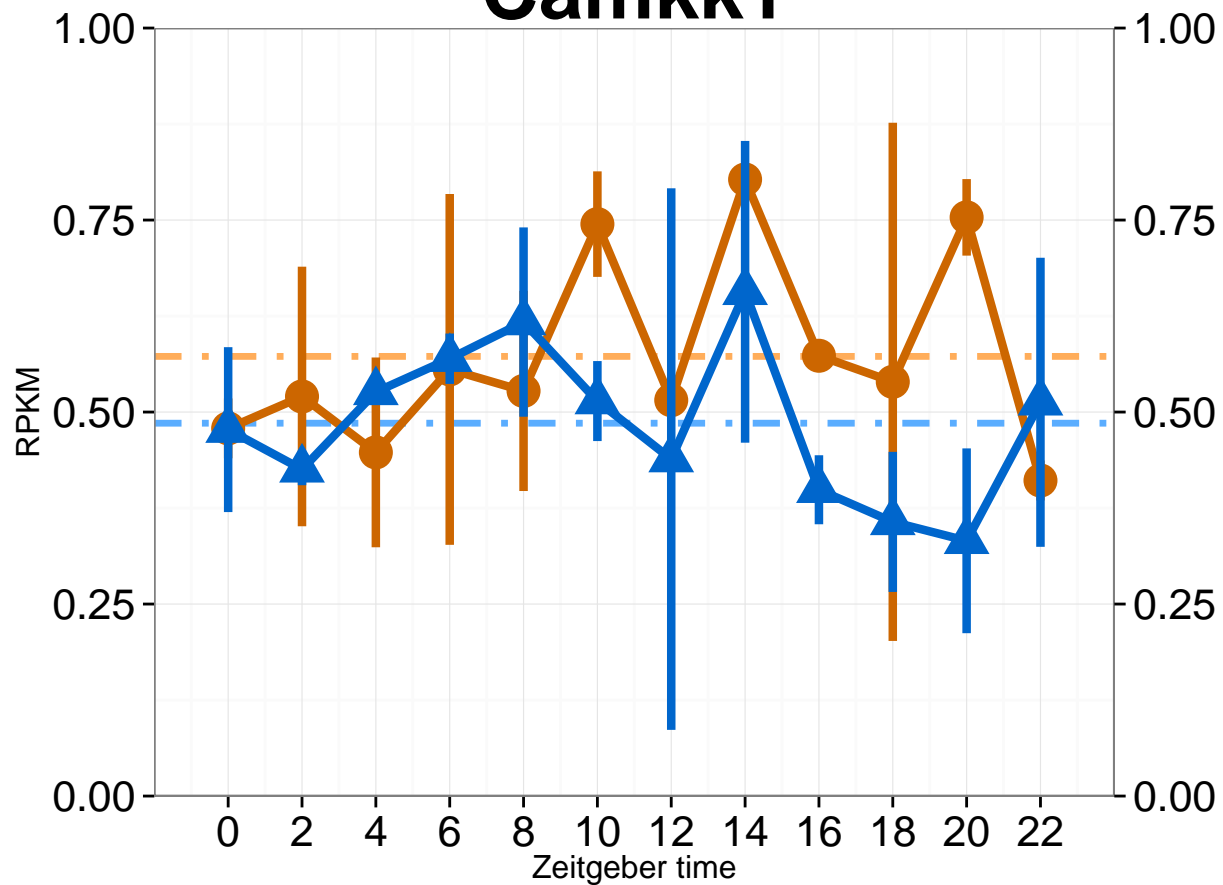

# Camkk1

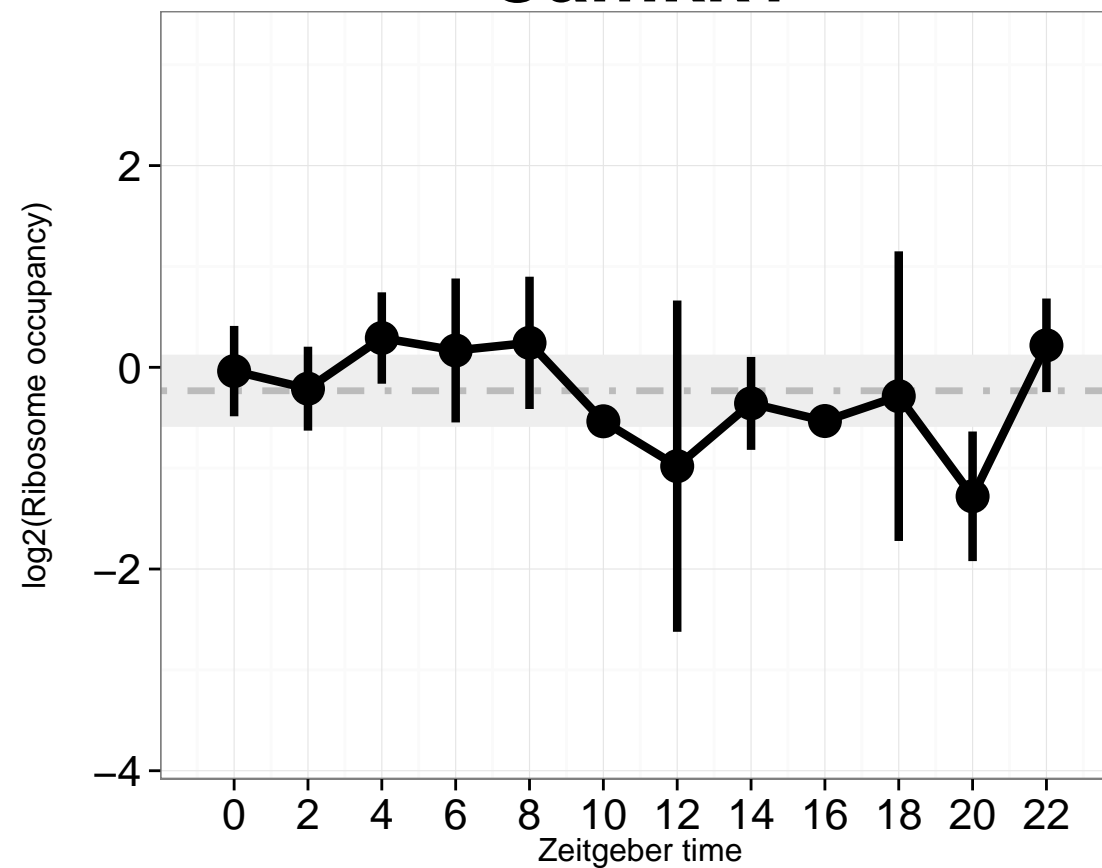

Supplement: Supplementary file 10002 [file 1]

## lars2

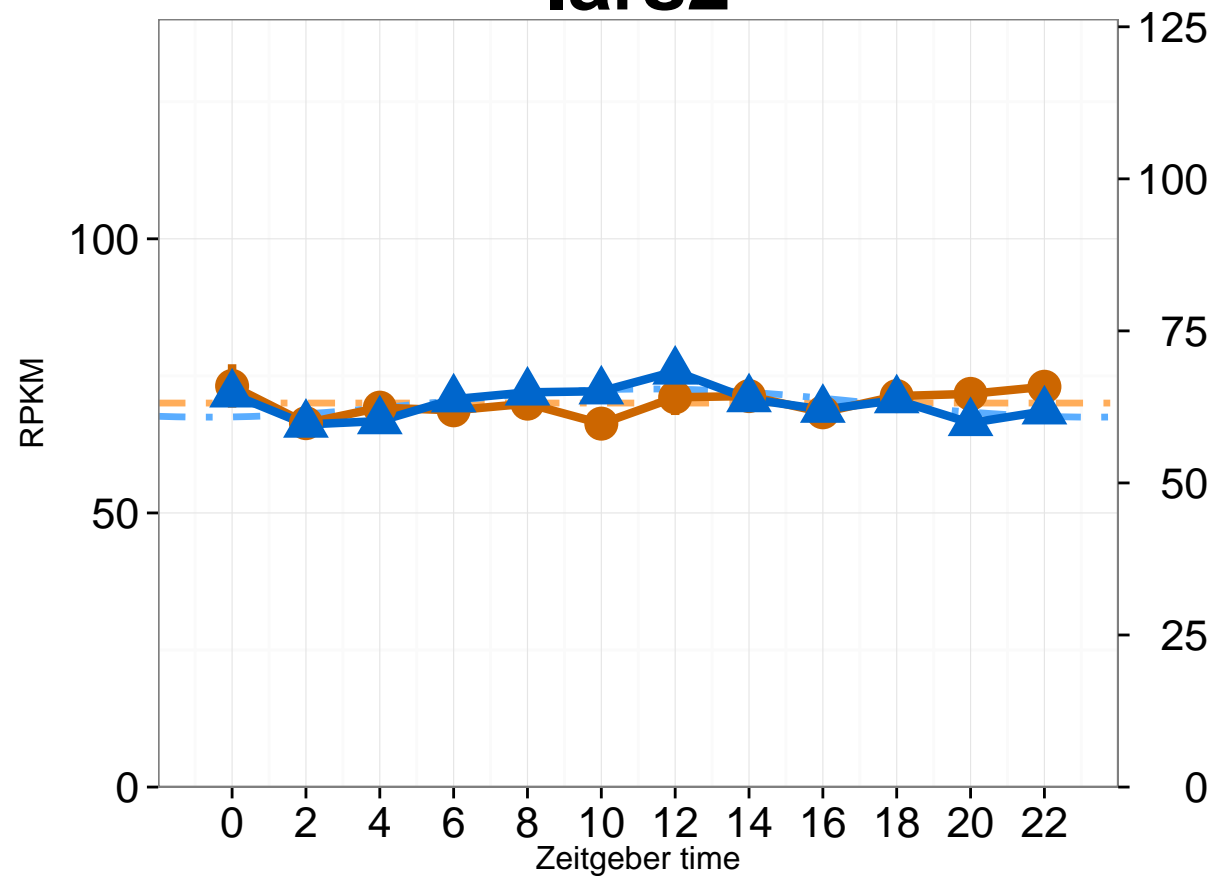

## lars2

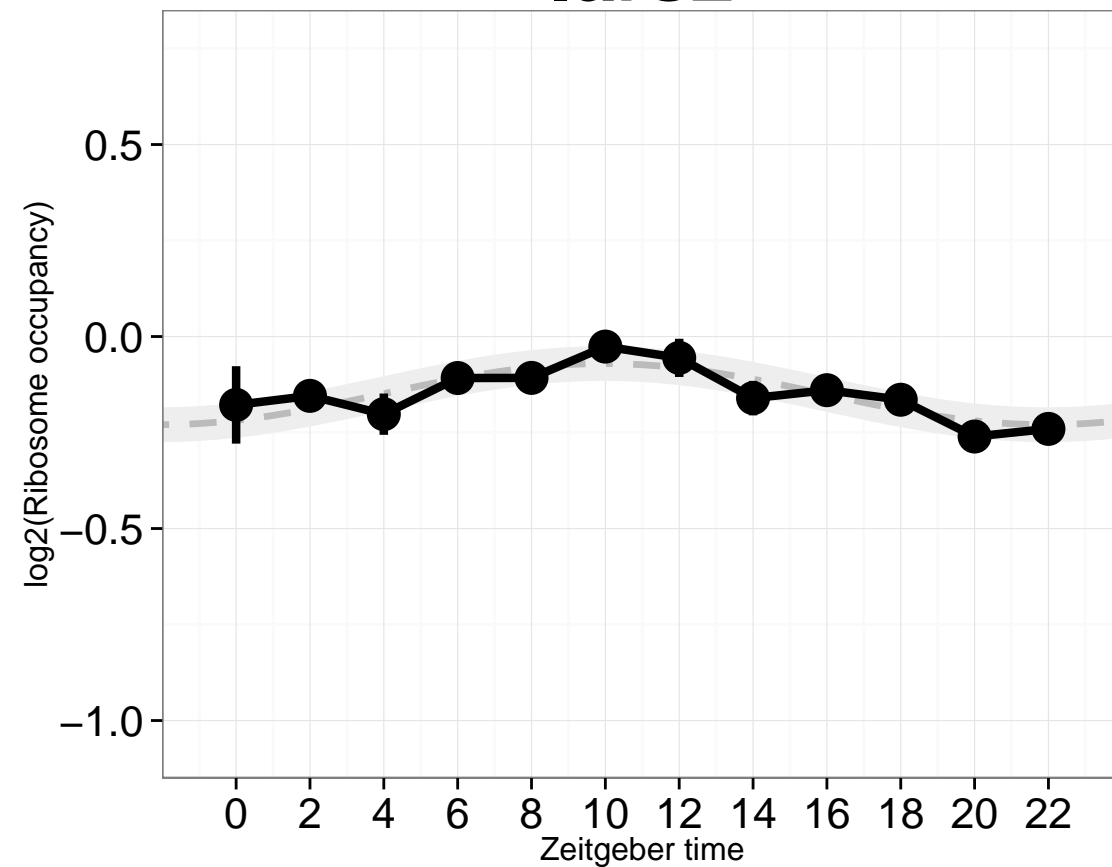

Supplement: Supplementary file 10003 [file 1]

# Angptl1

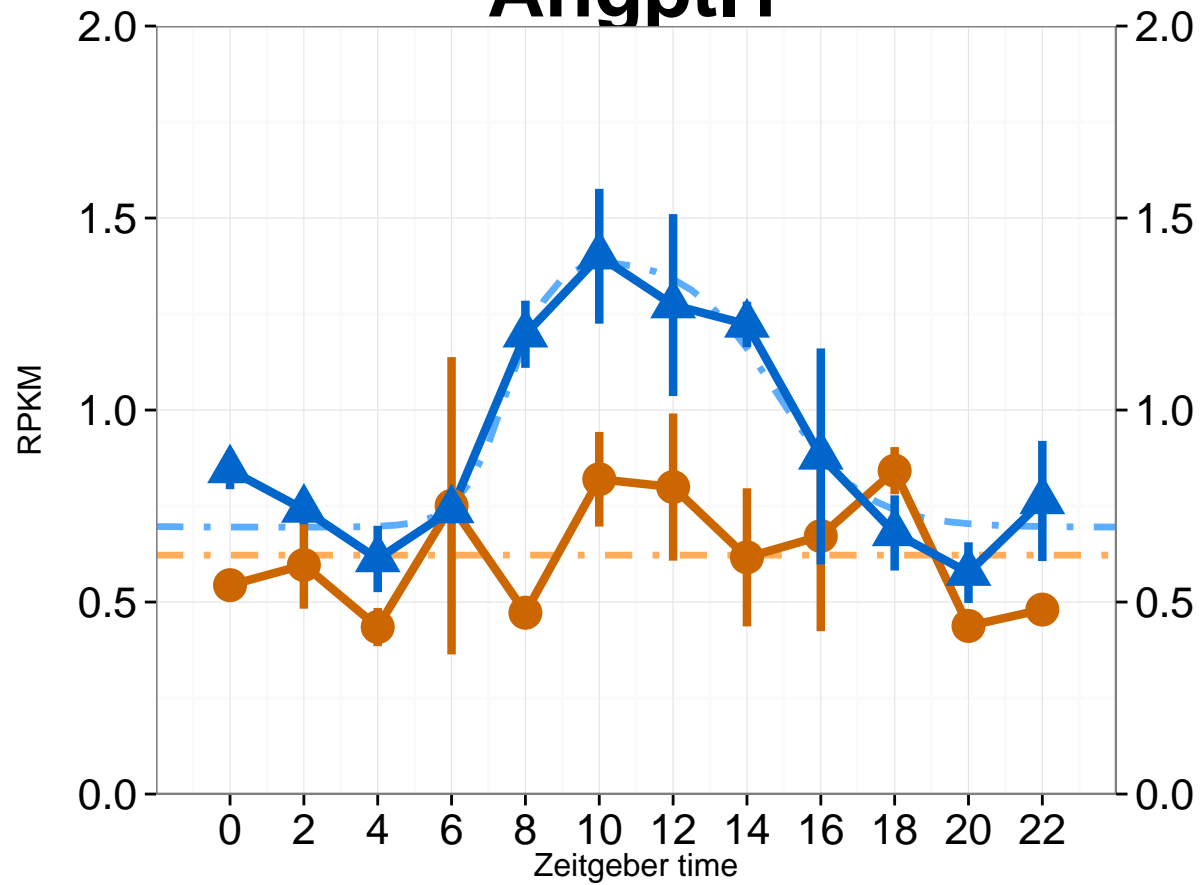

# Angptl1

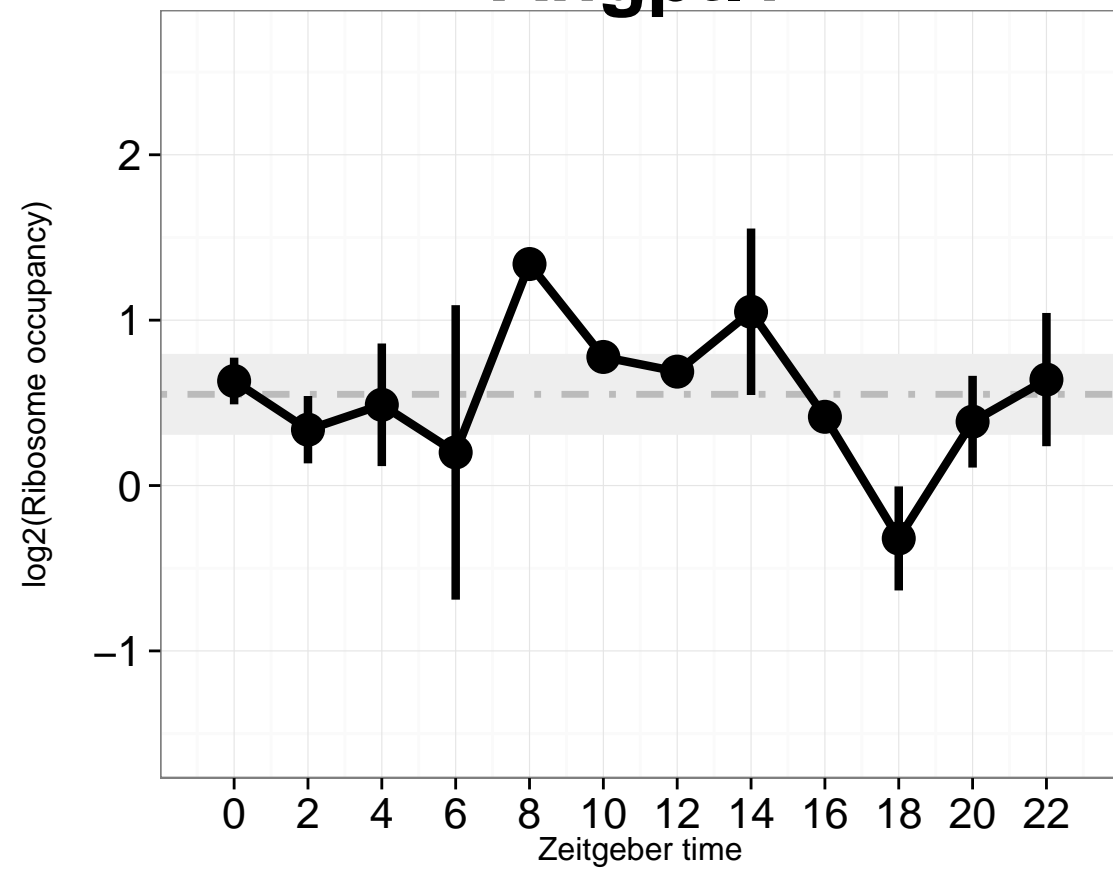

Supplement: Supplementary file 10004 [file 1]

# Rsad2

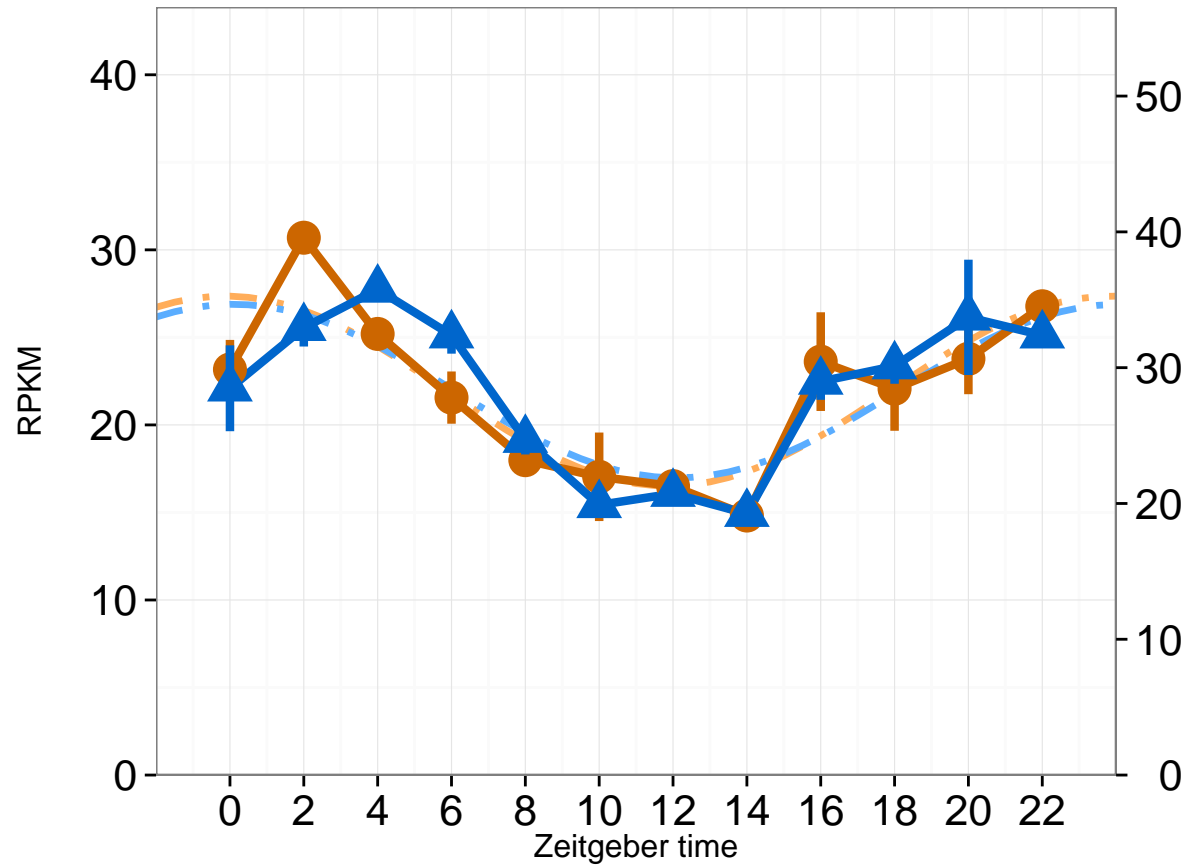

# Rsad2

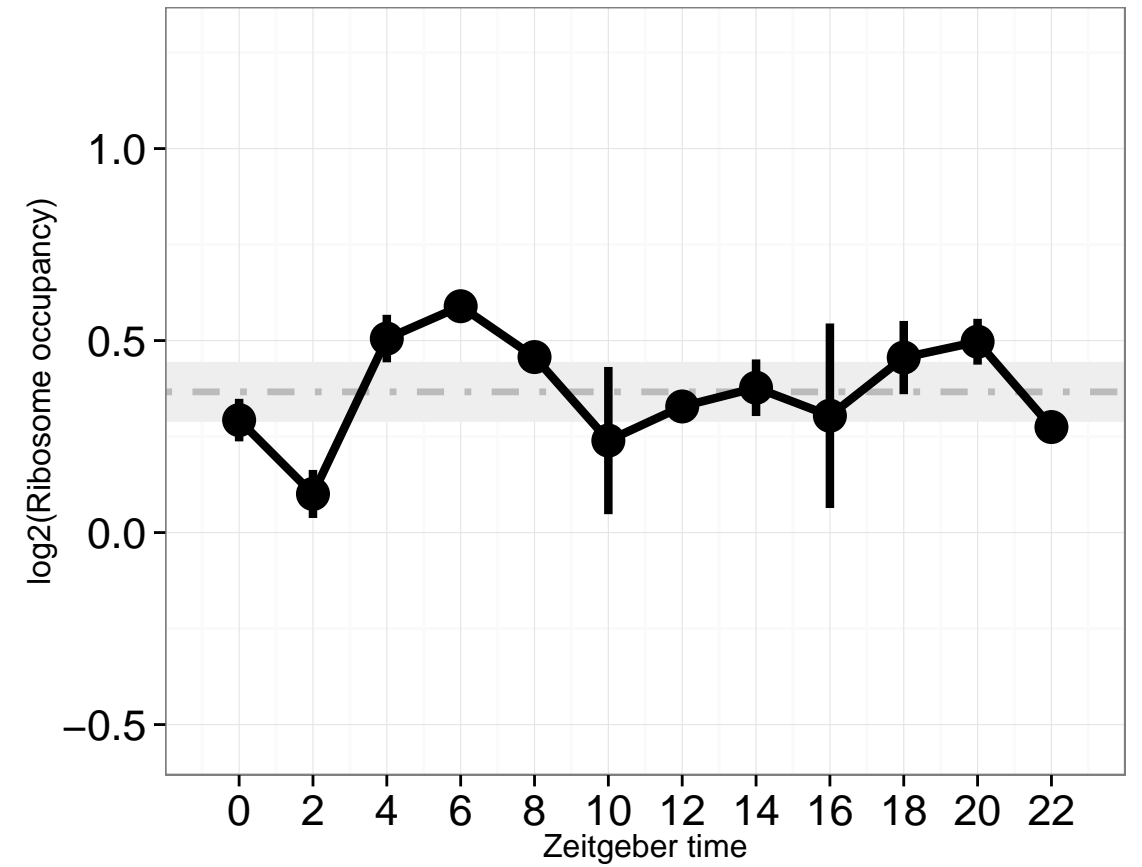

Supplement: Supplementary file 10005 [file 1]

## Cdk20

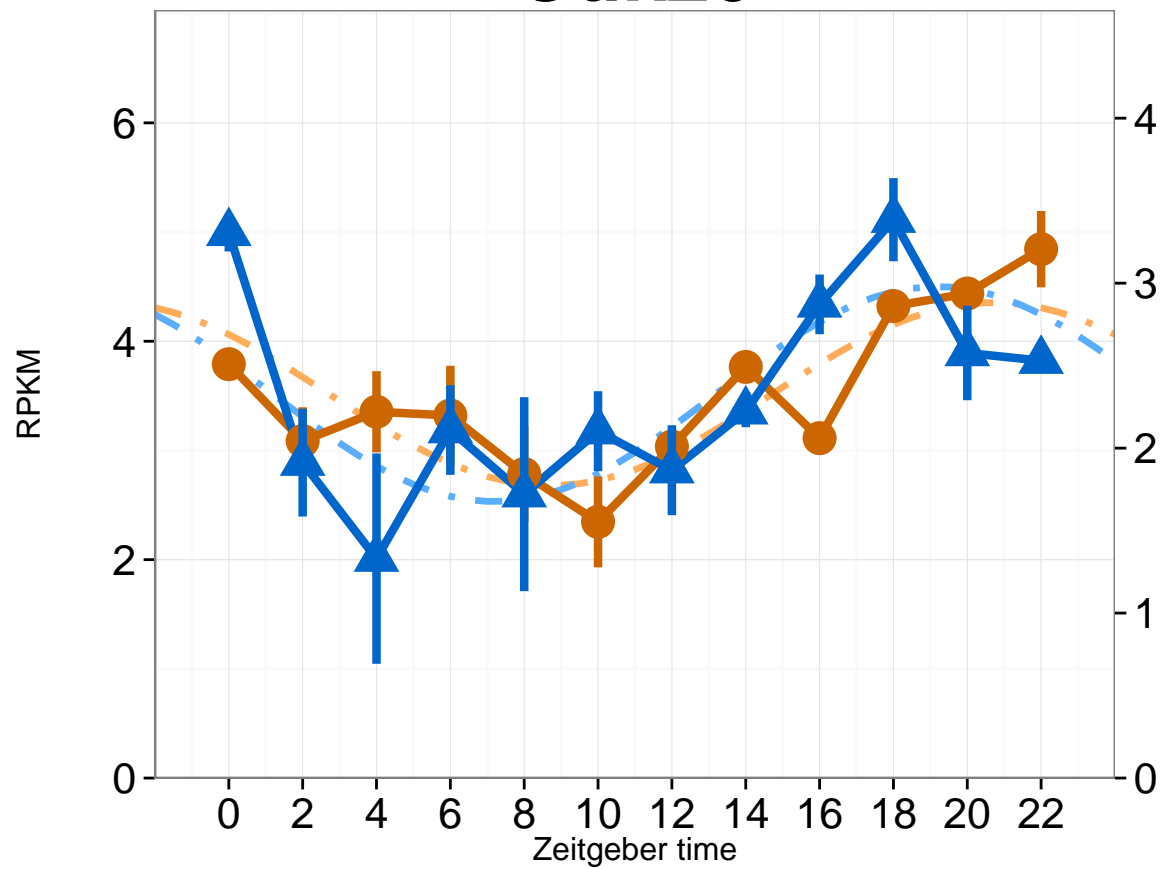

## Cdk20

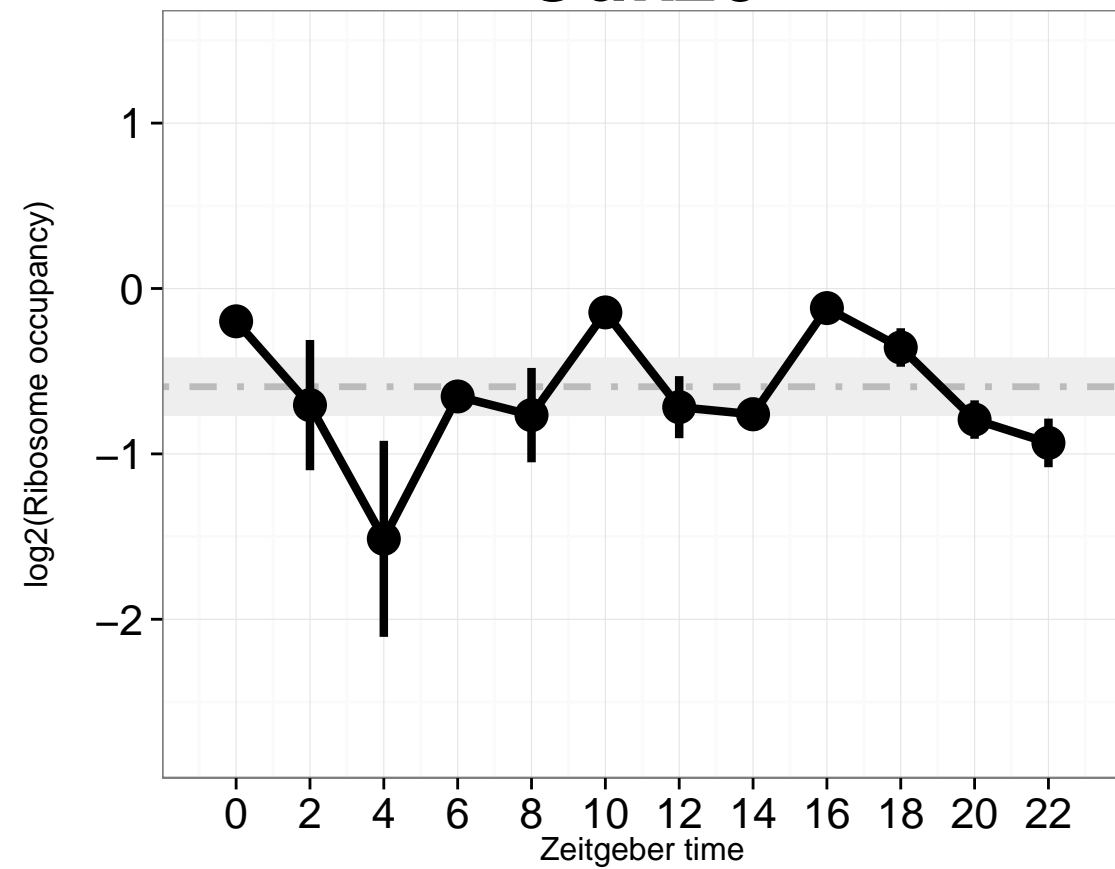

Supplement: Supplementary file 10006 [file 1]

## Pf4

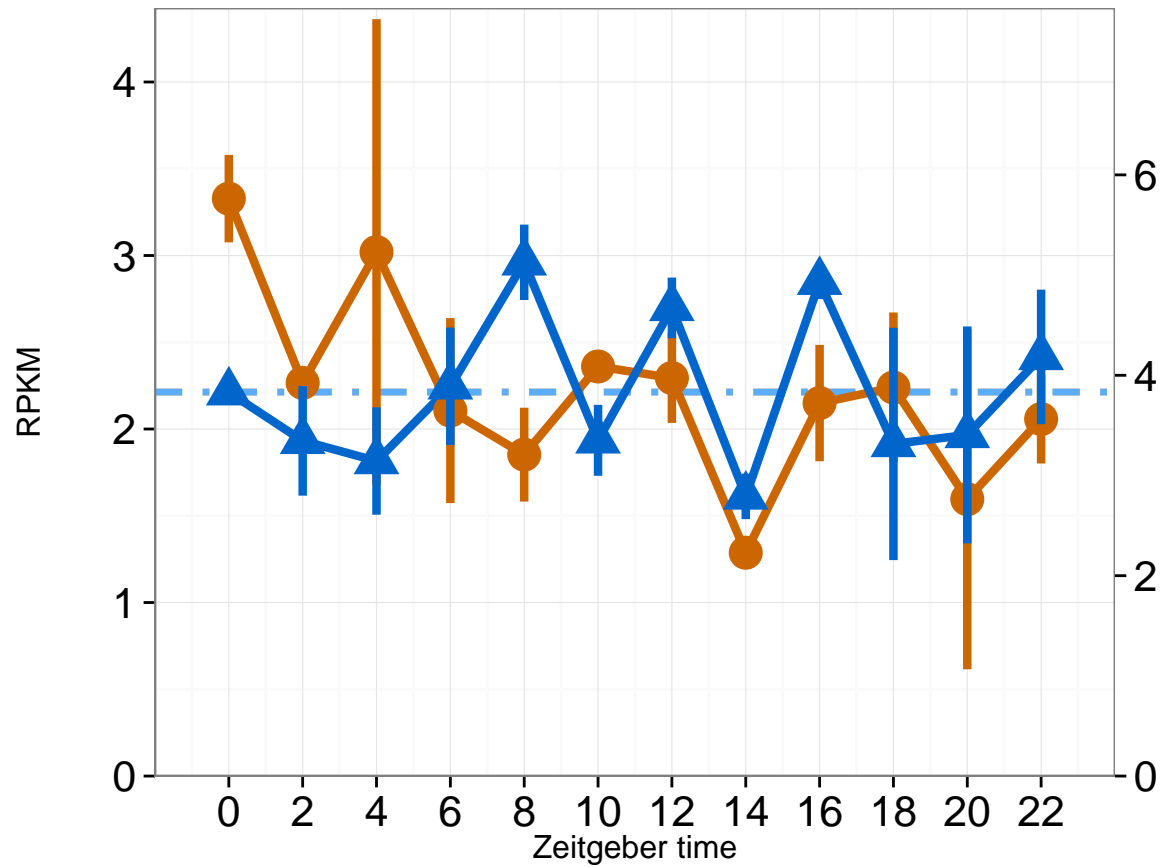

## Pf4

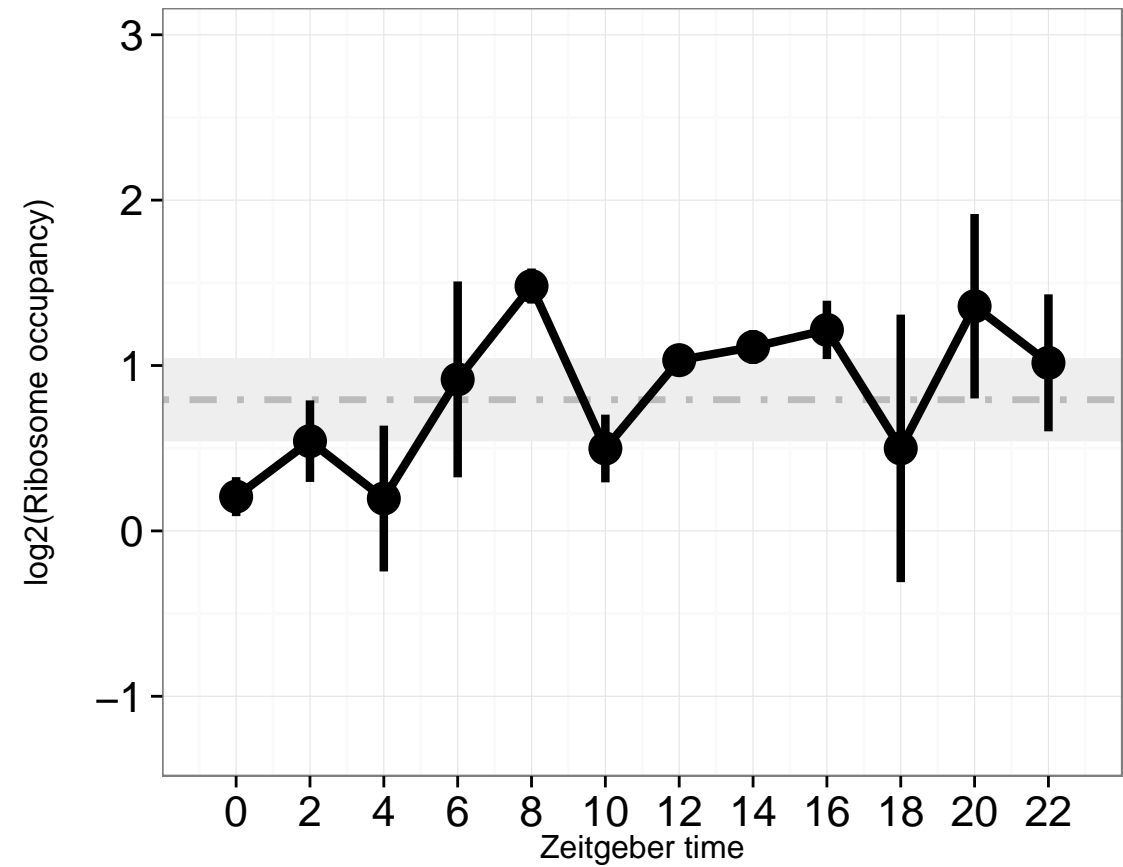

Supplement: Supplementary file 10007 [file 1]

# Tbc1d22a

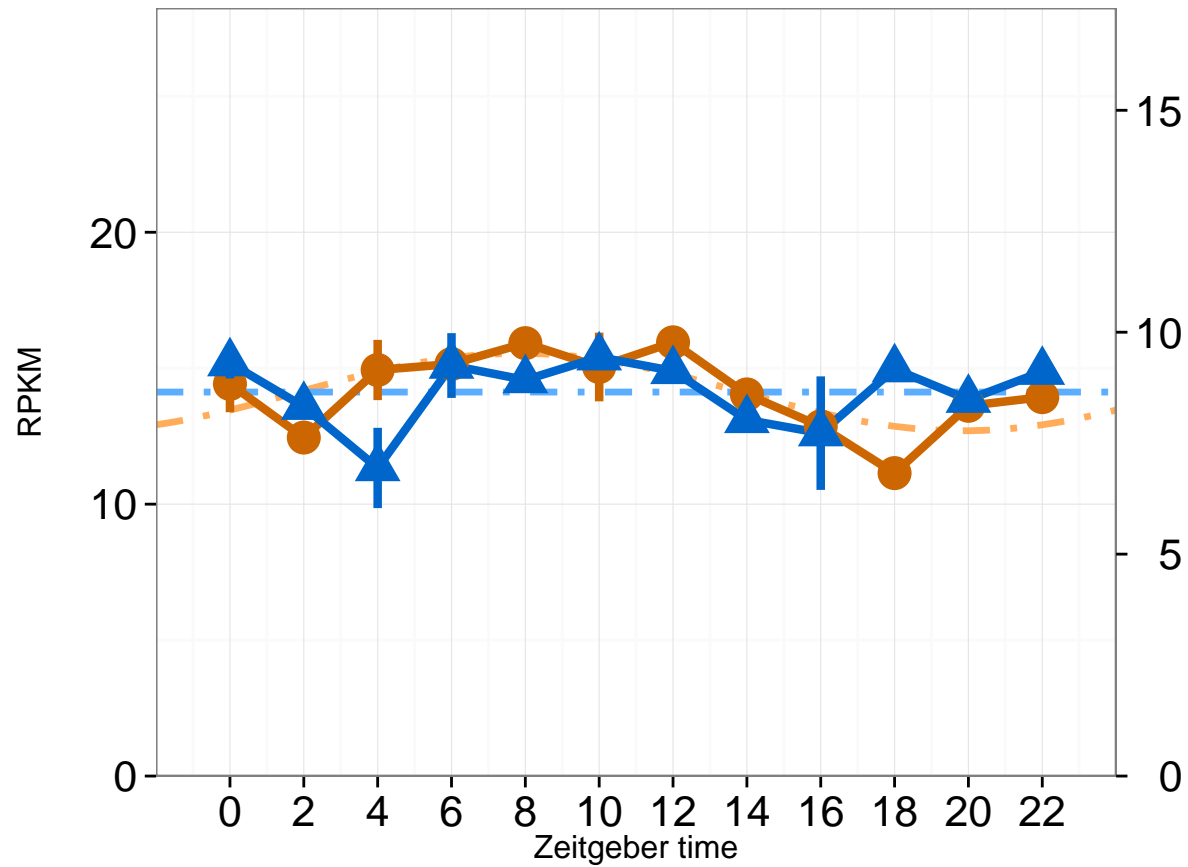

# Tbc1d22a

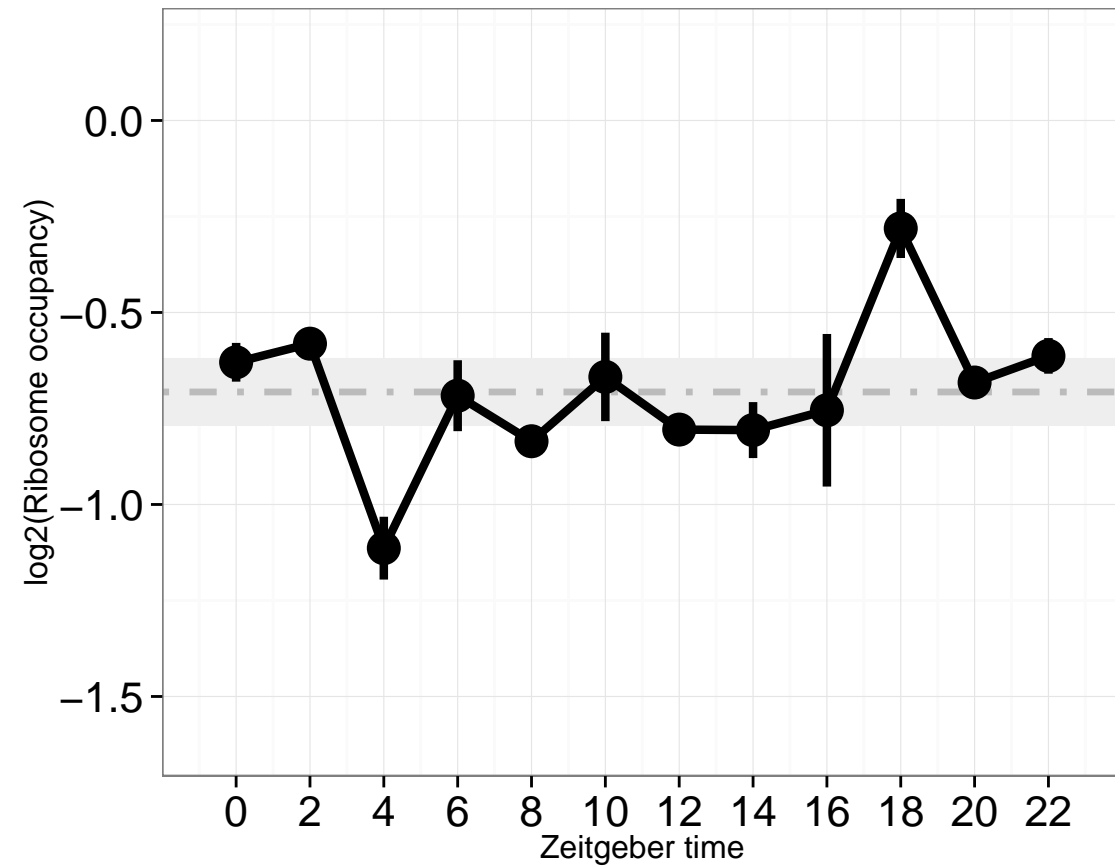

Supplement: Supplementary file 10008 [file 1]

# Kif18a

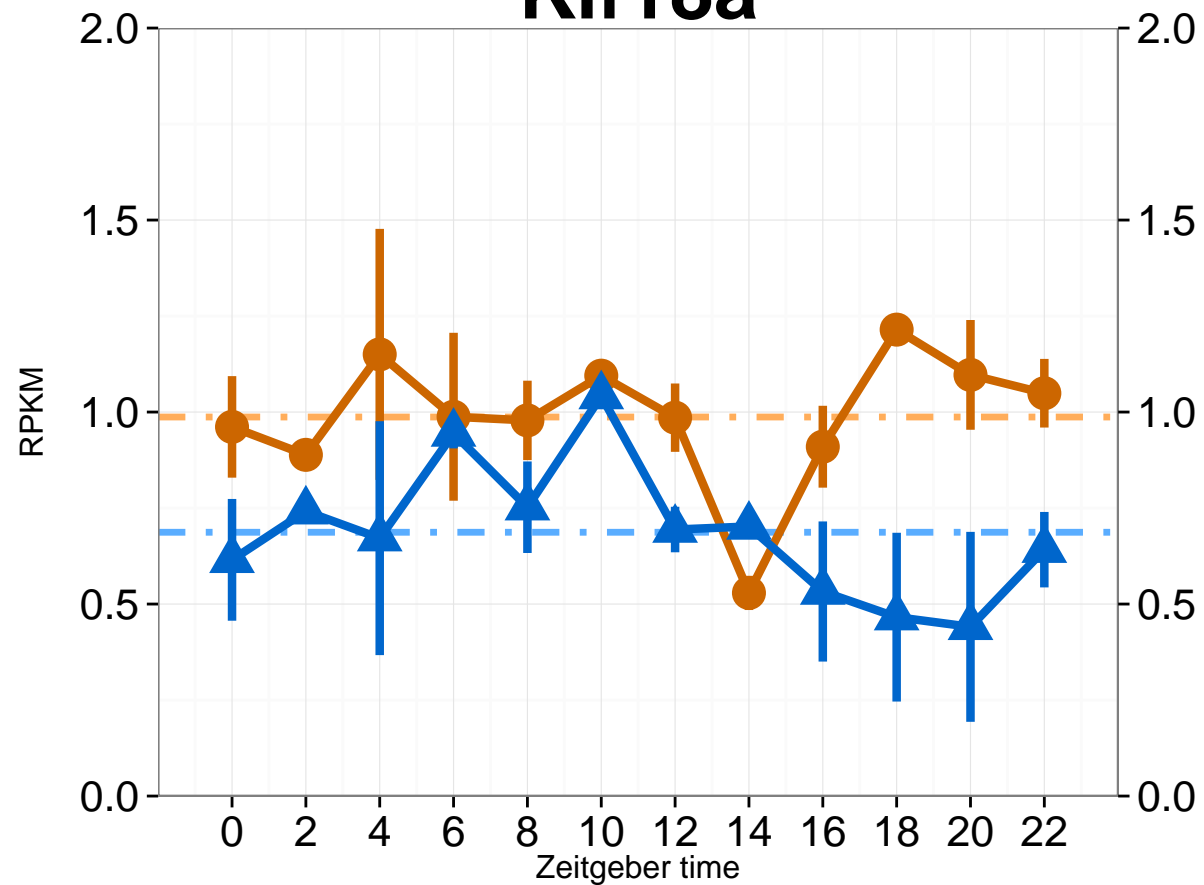

# Kif18a

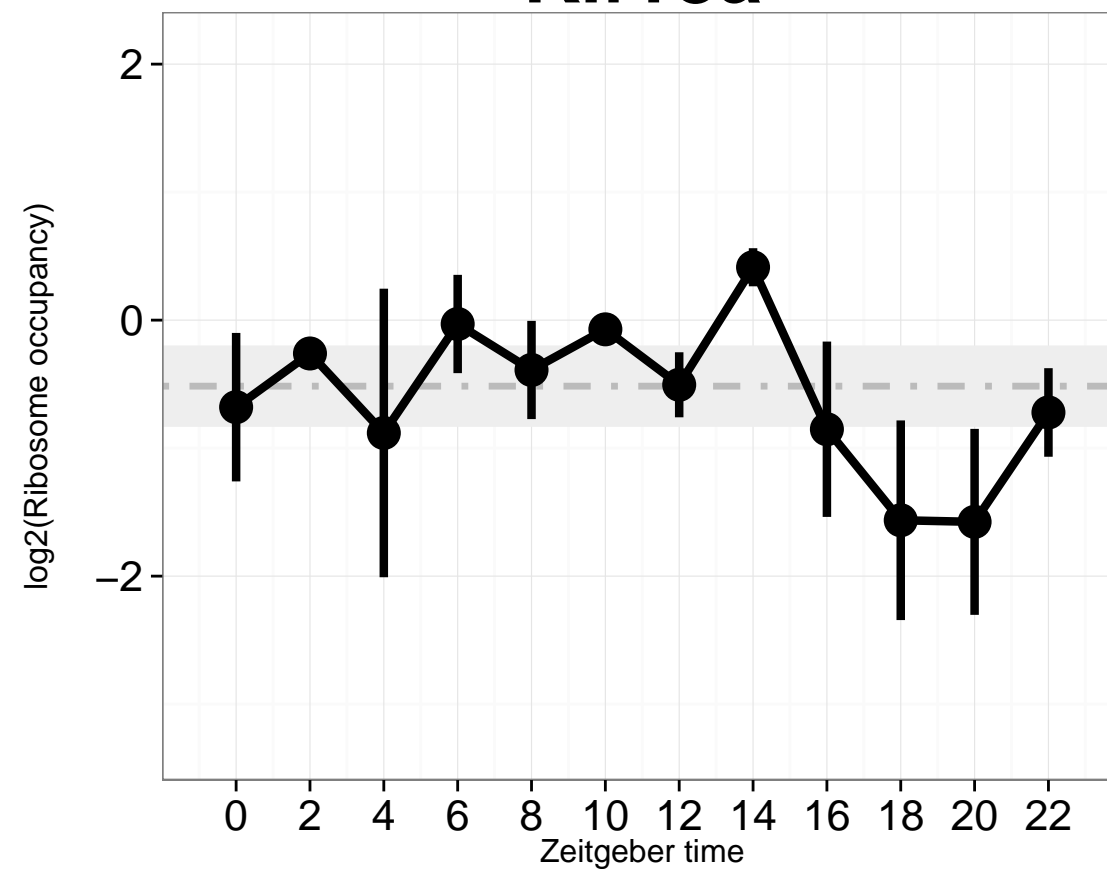

Supplement: Supplementary file 10009 [file 1]

# Atp6ap1

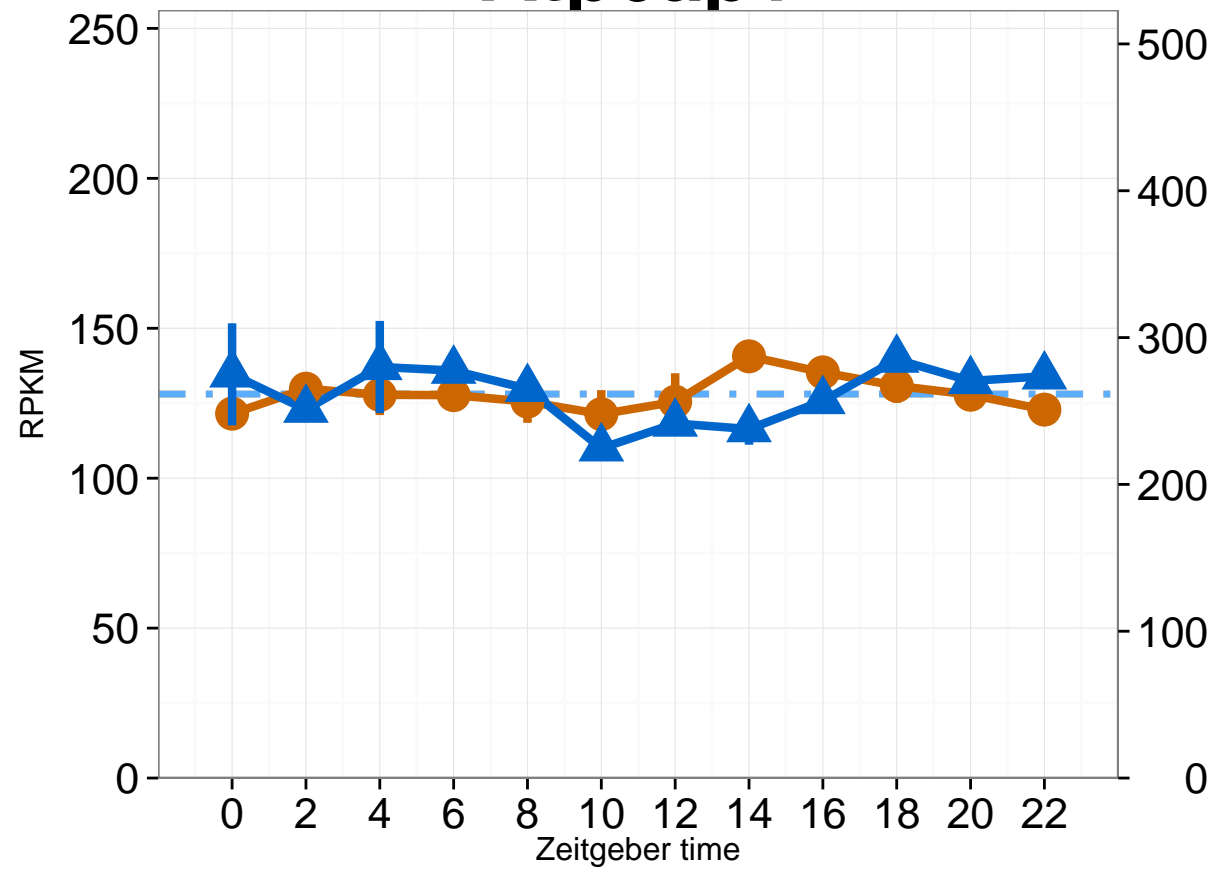

# Atp6ap1

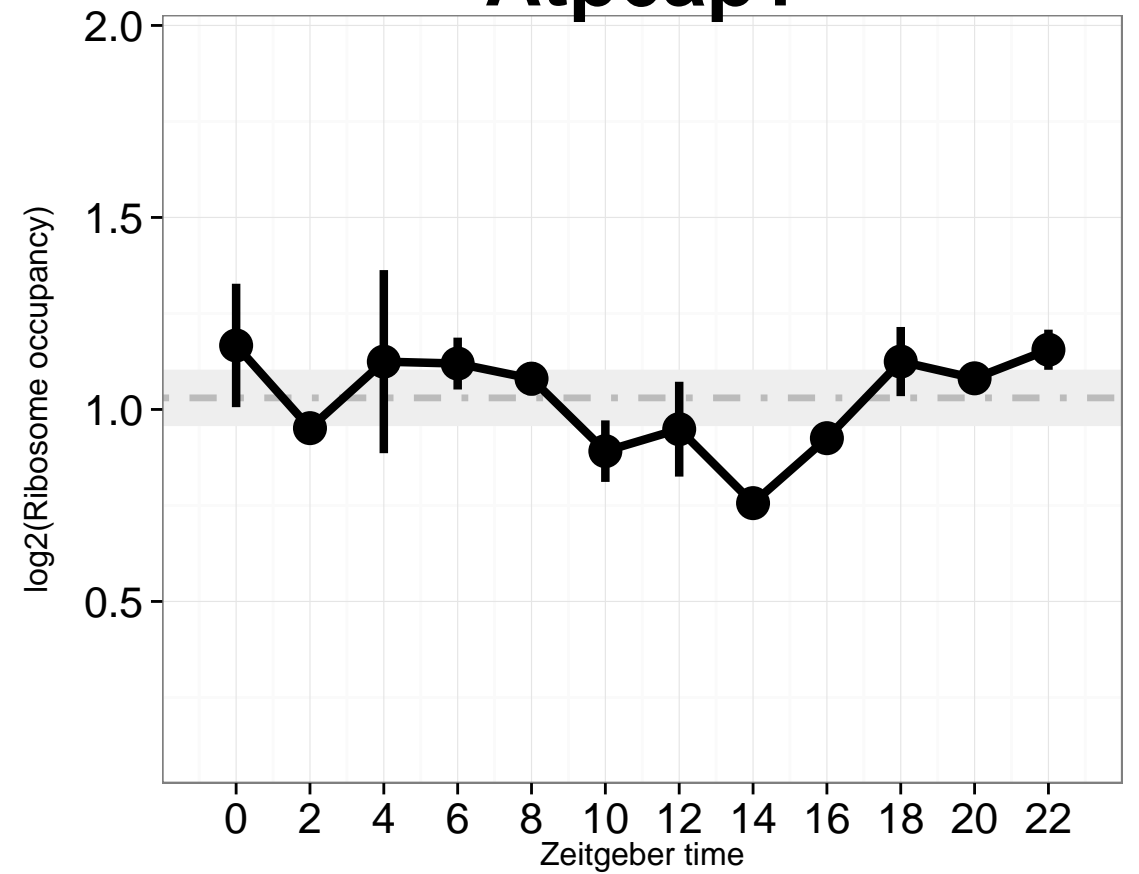

Supplement: Supplementary file 10010 [file 1]

## Antxr2

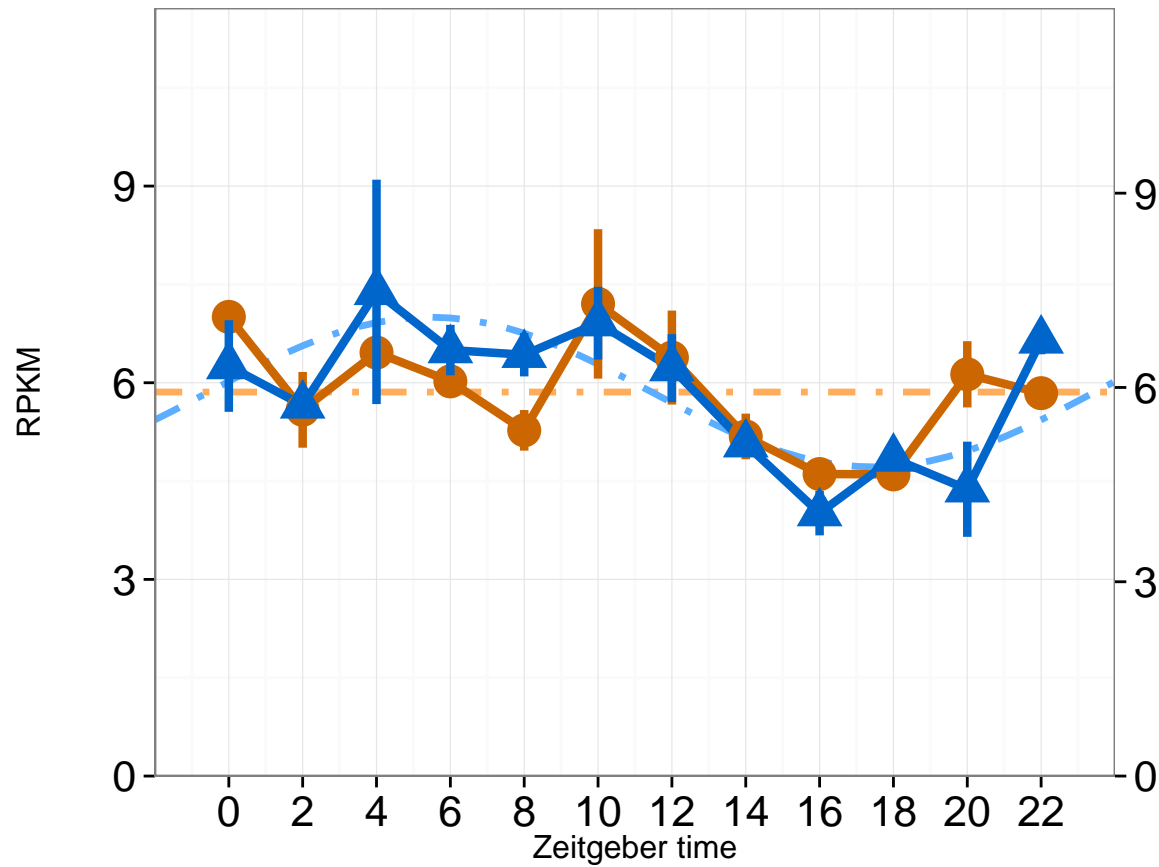

## Antxr2

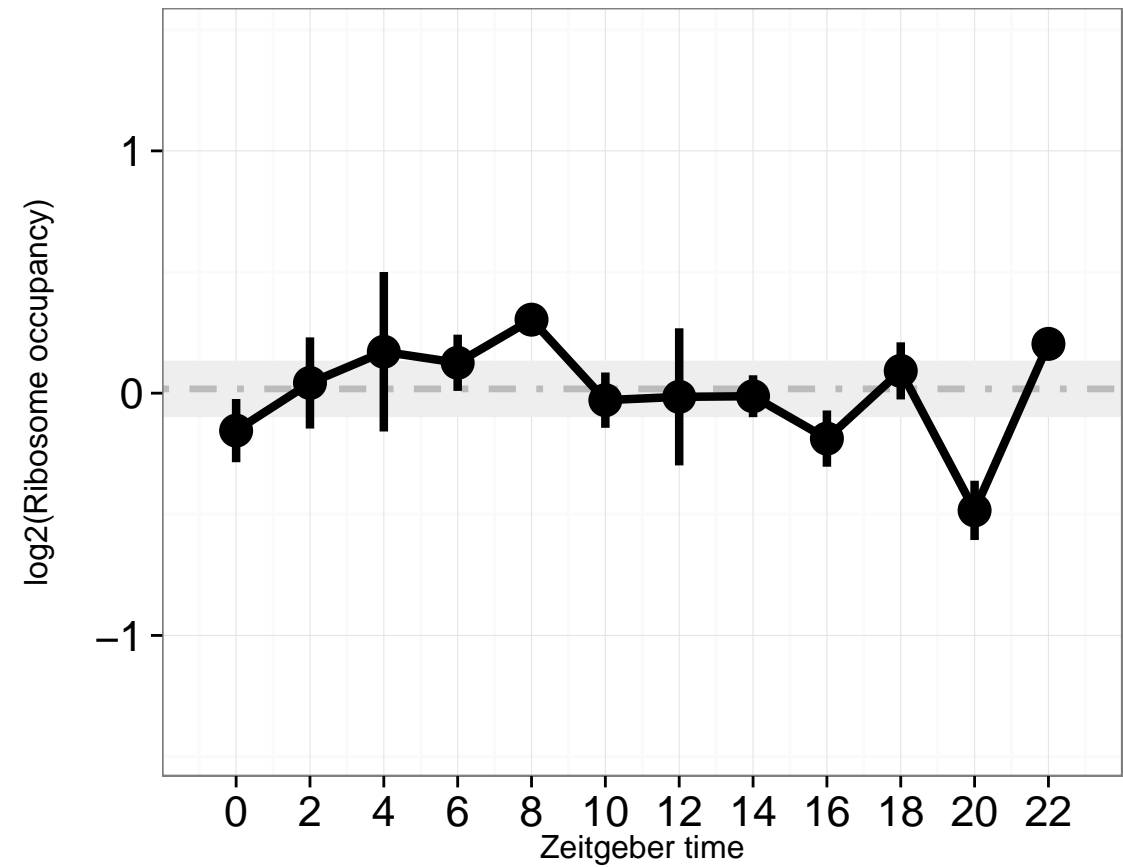

Supplement: Supplementary file 10011 [file 1]

## Tnfaip1

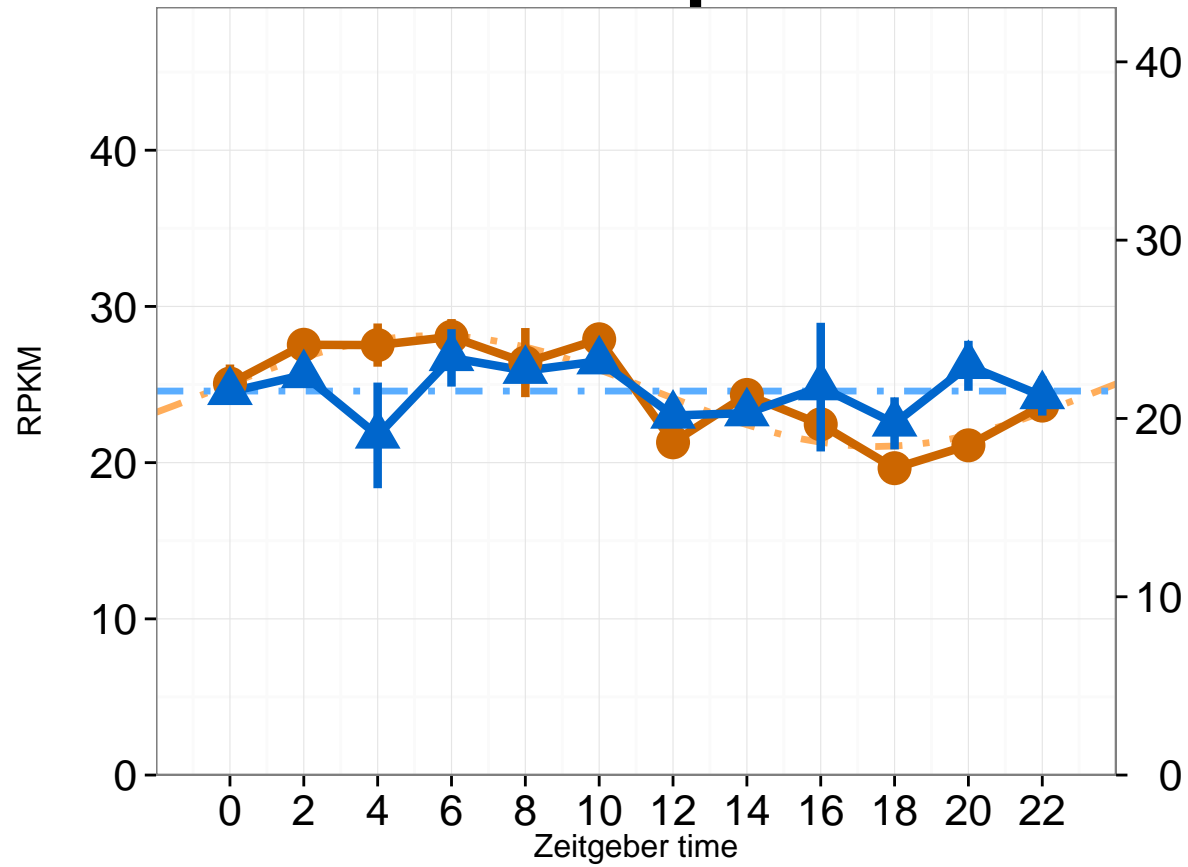

## Tnfaip1

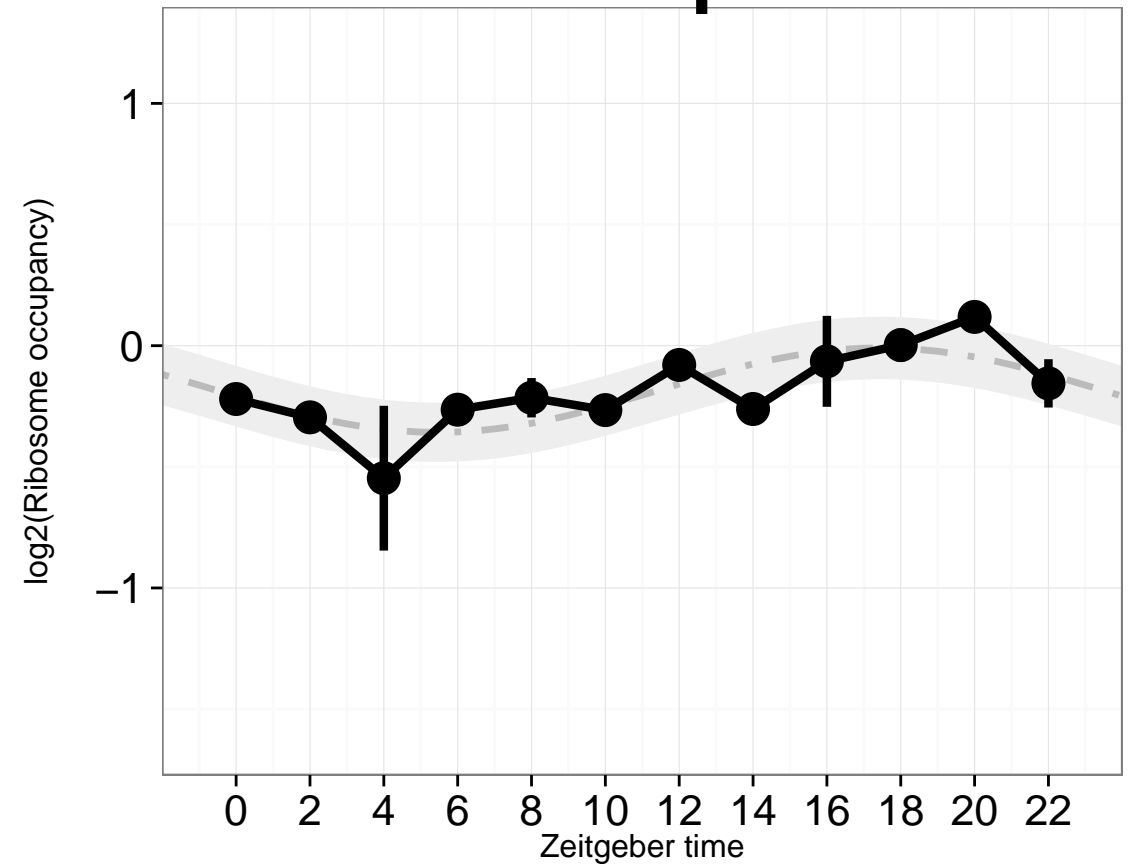

Supplement: Supplementary file 10012 [file 1]

# Tubb4a

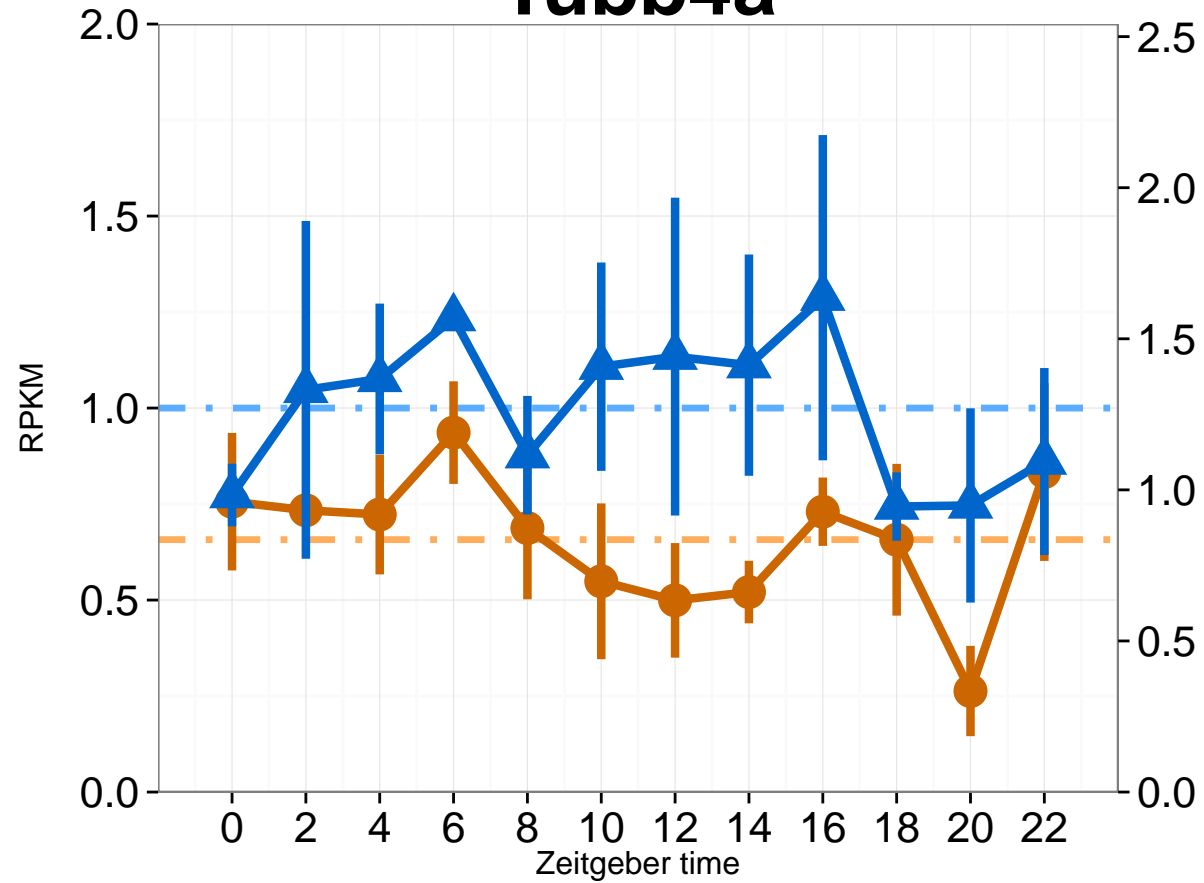

# Tubb4a

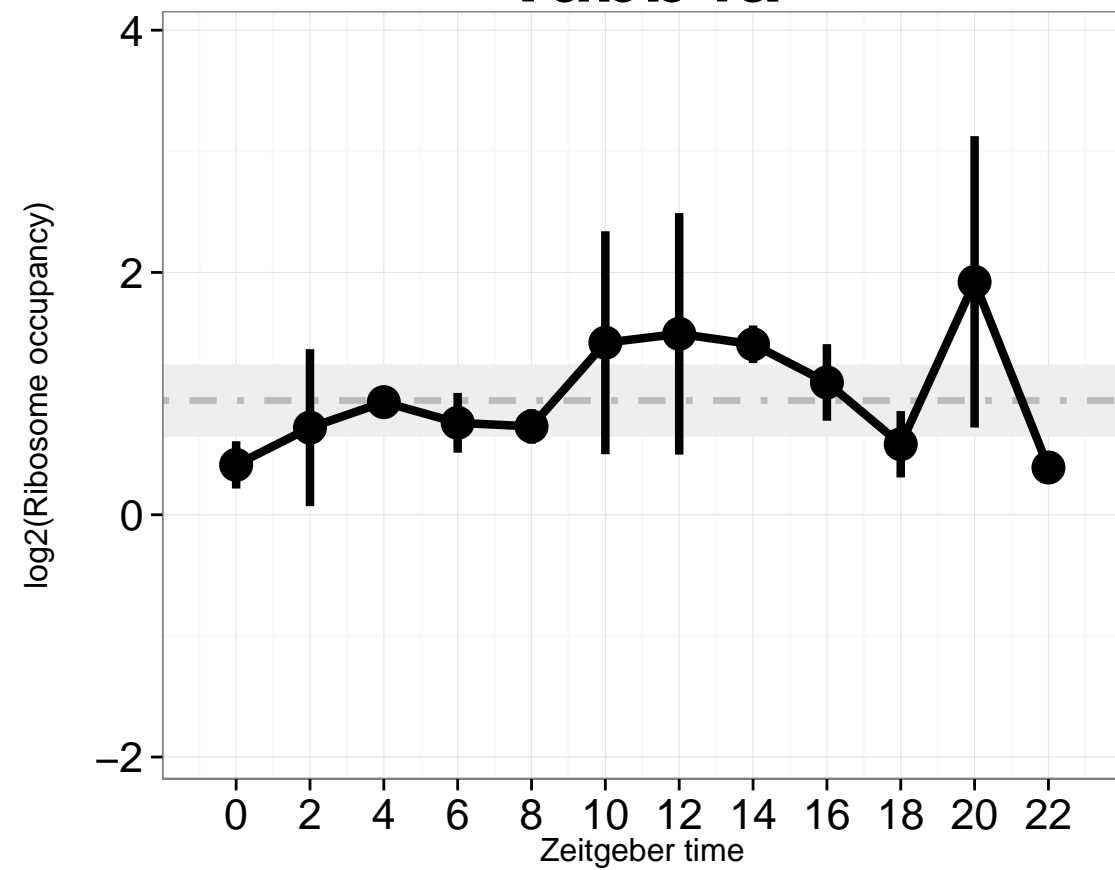

Supplement: Supplementary file 10013 [file 1]

## Aasdh

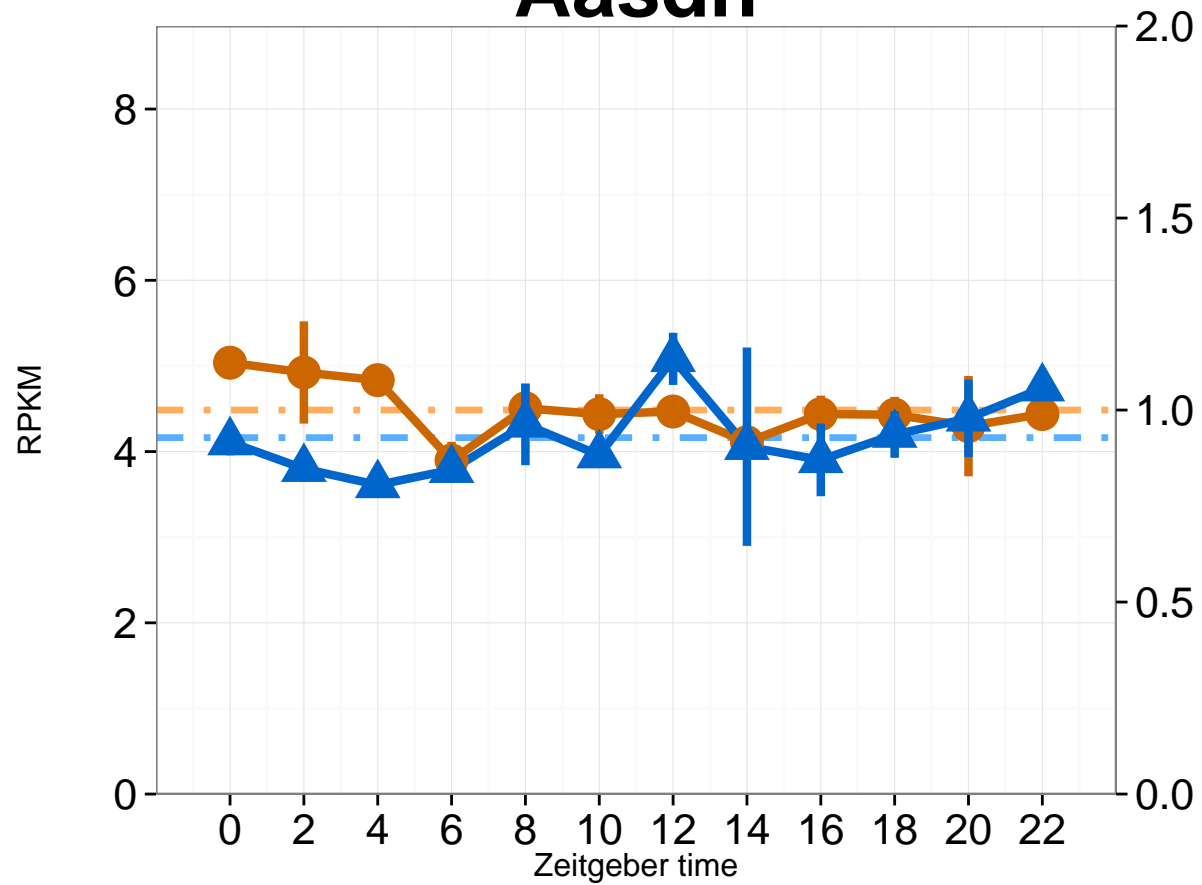

## Aasdh

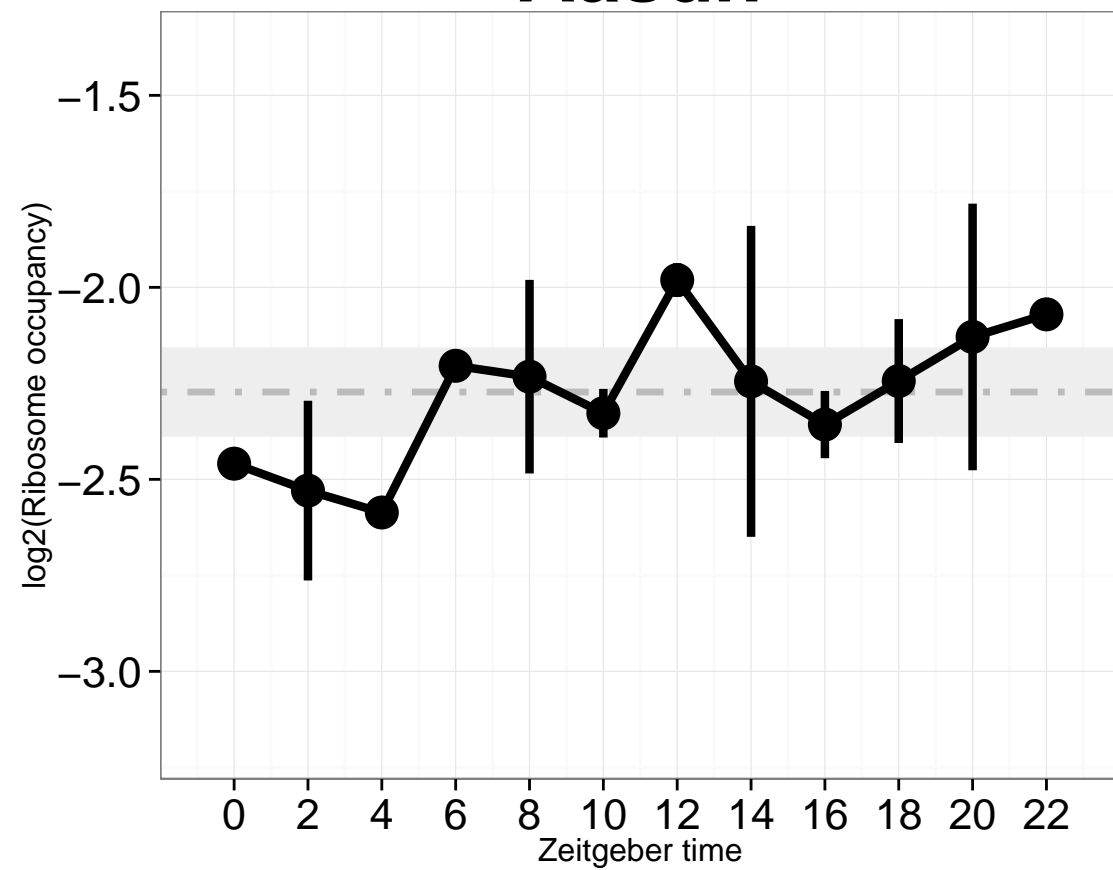

Supplement: Supplementary file 10014 [file 1]

## Stk25

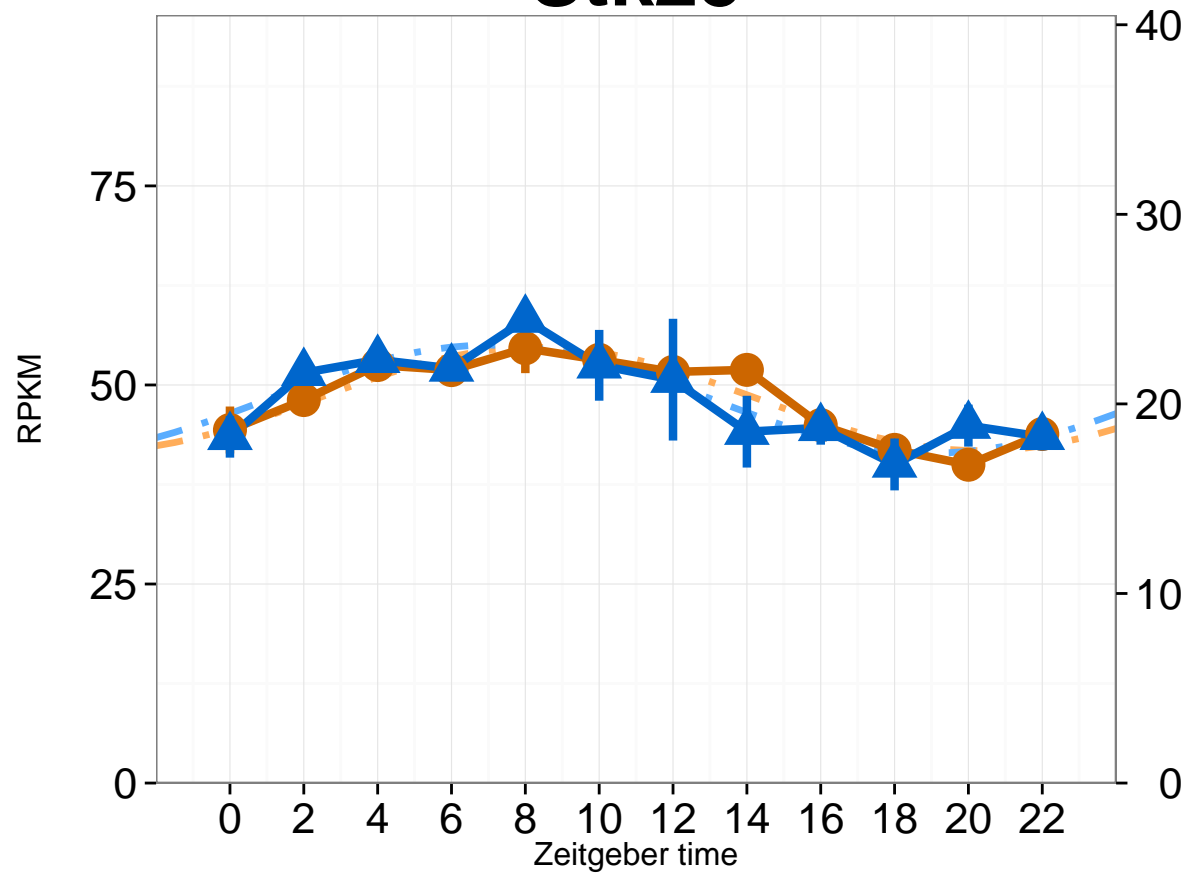

## Stk25

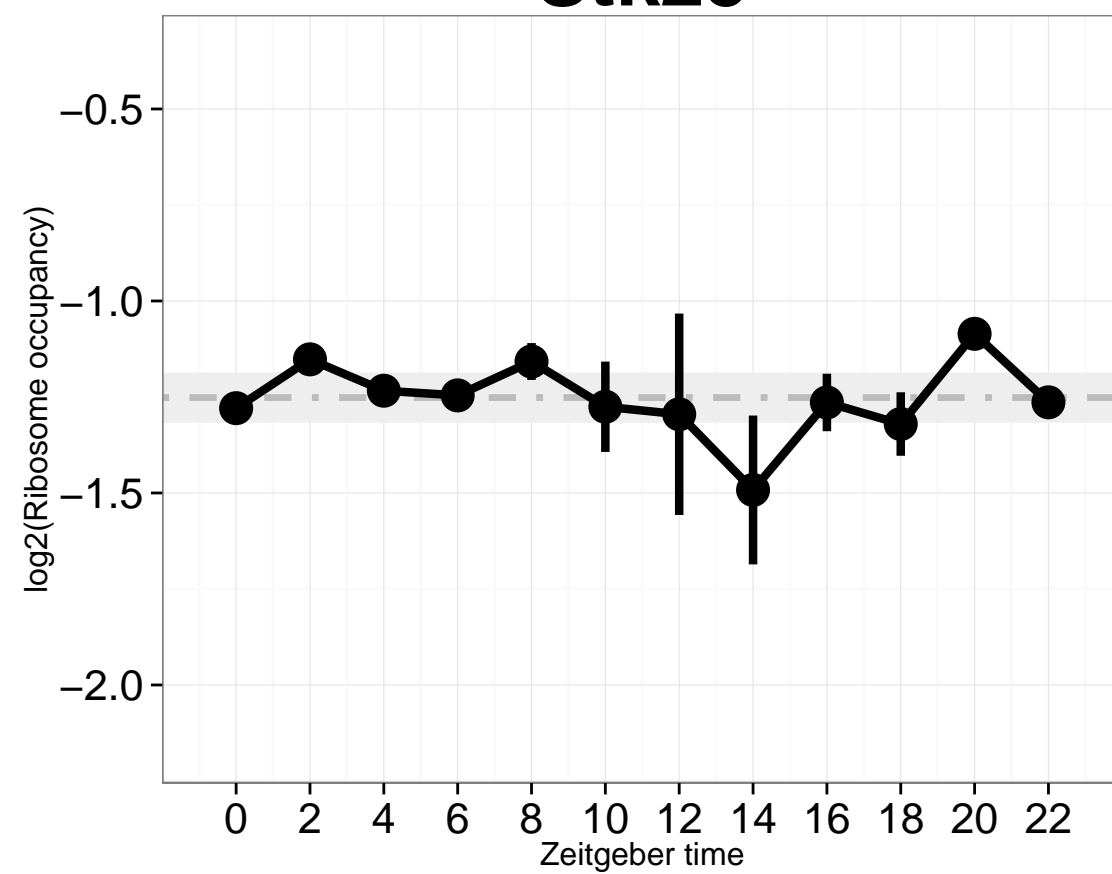

Supplement: Supplementary file 10015 [file 1]

## Gm16039

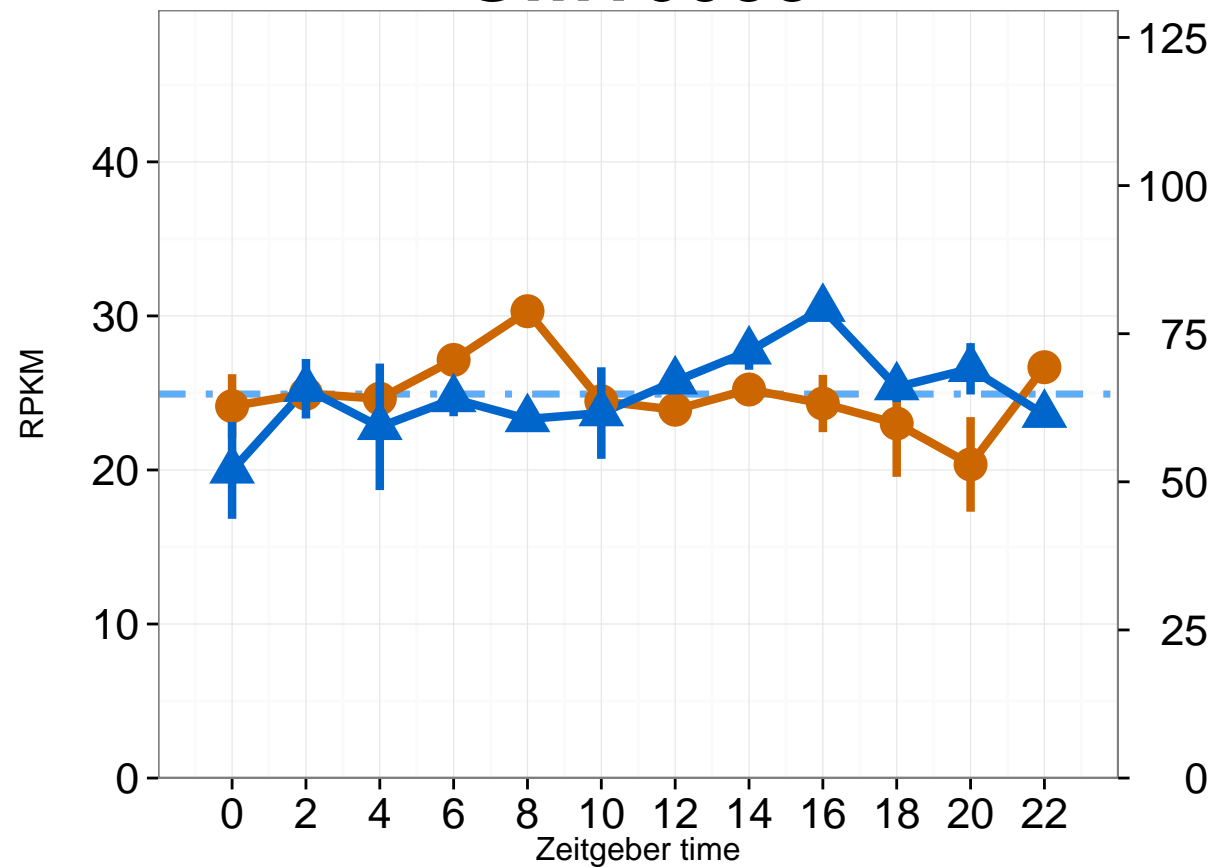

## Gm16039

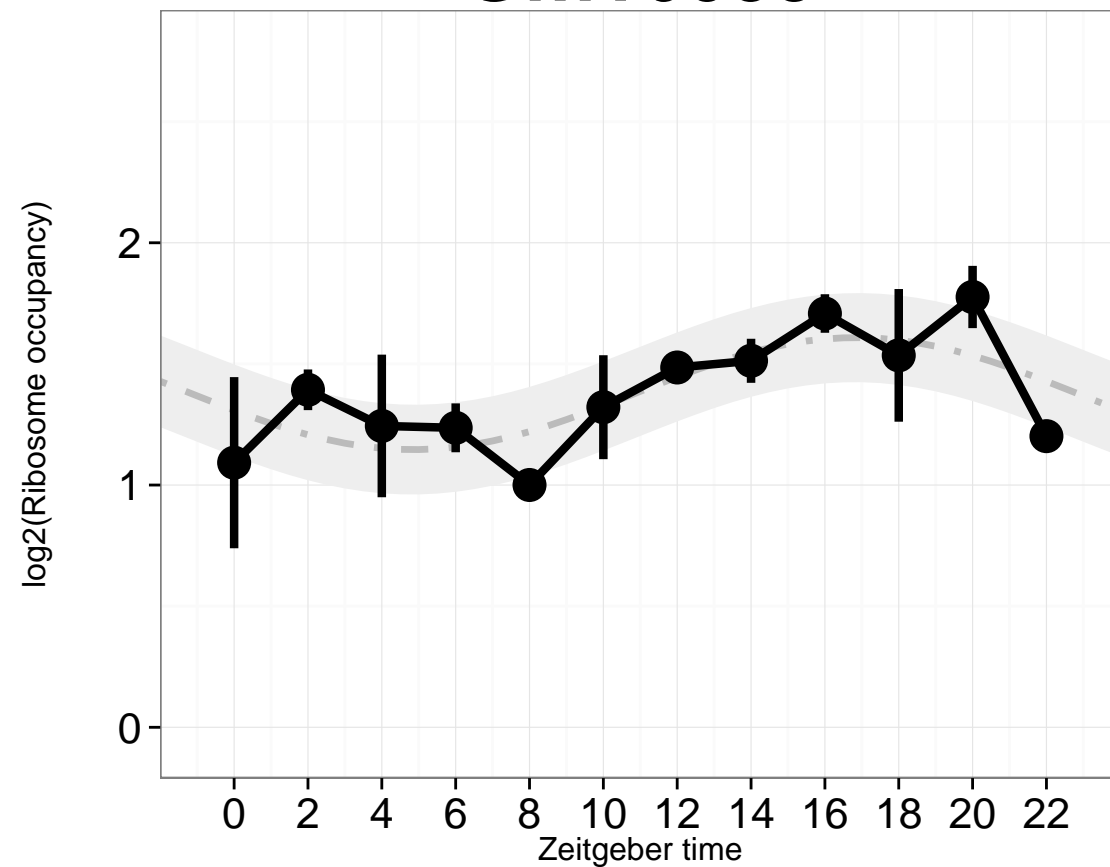

Supplement: Supplementary file 10016 [file 1]

## Prickle3

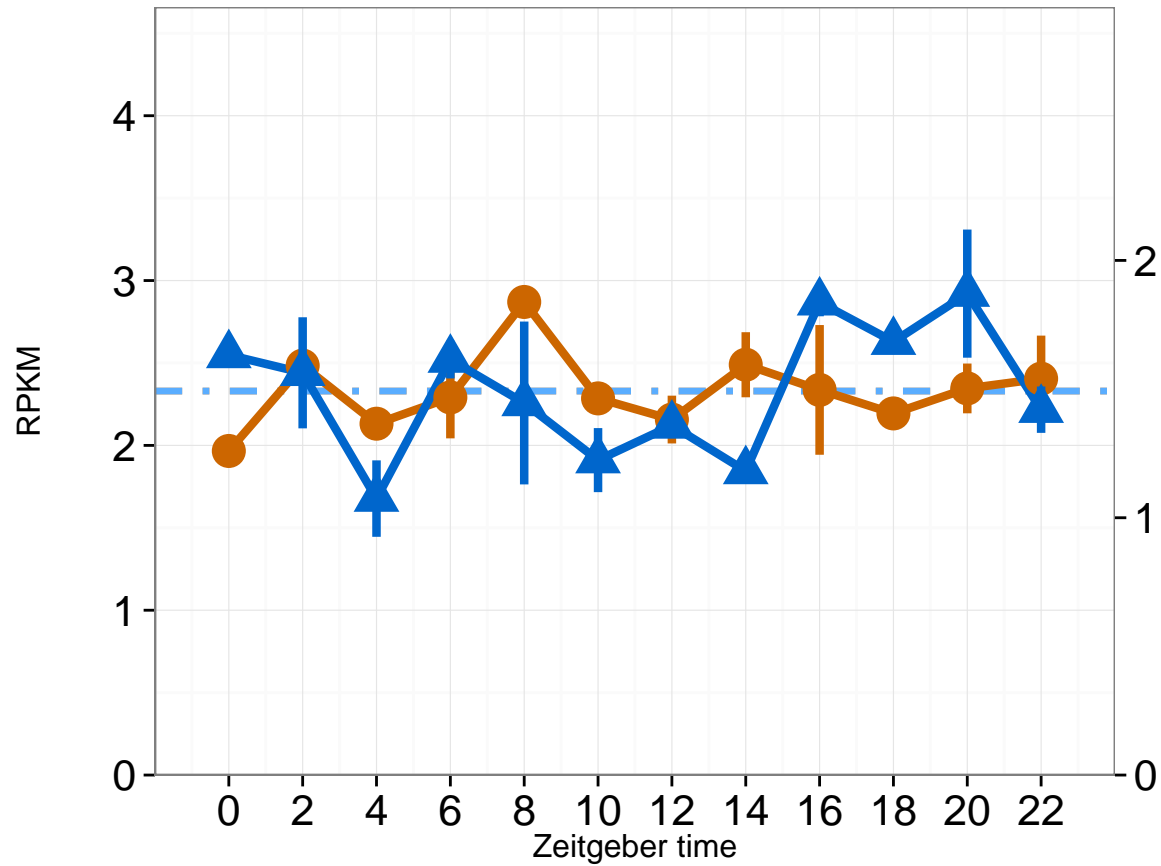

## Prickle3

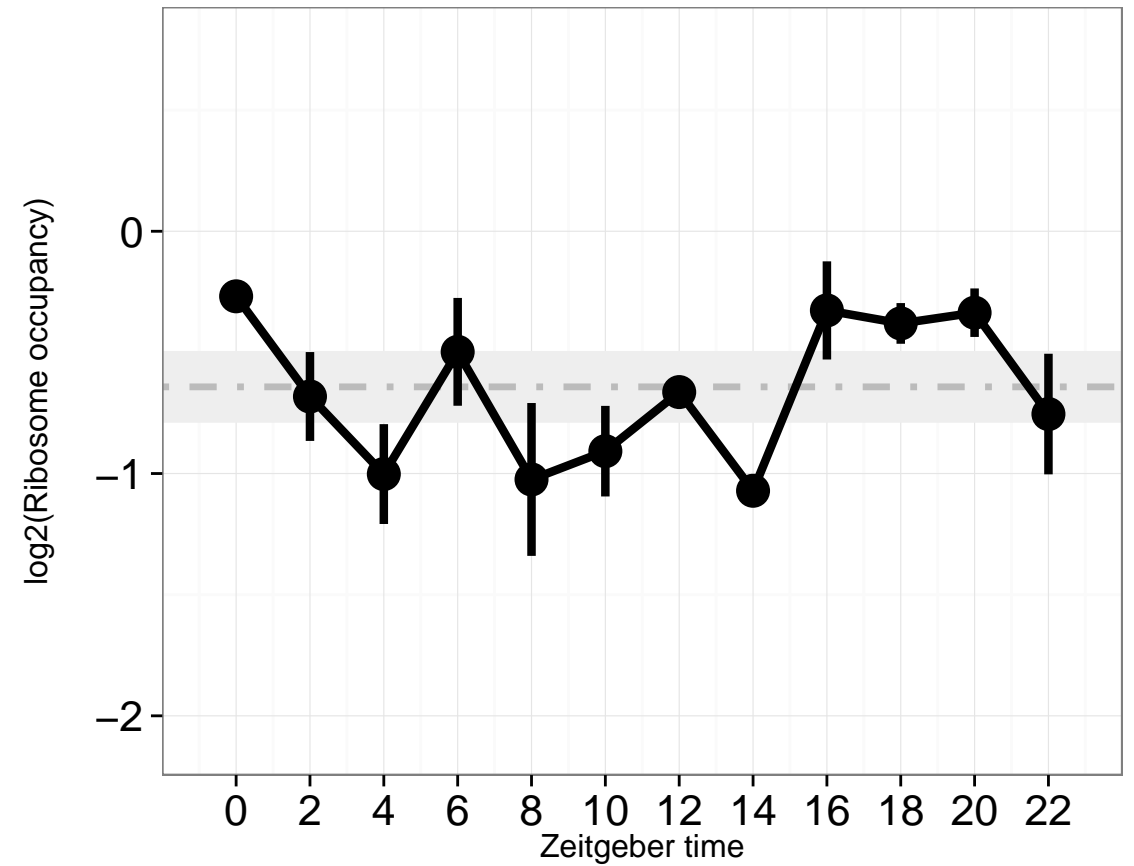

Supplement: Supplementary file 10017 [file 1]

## Stx12

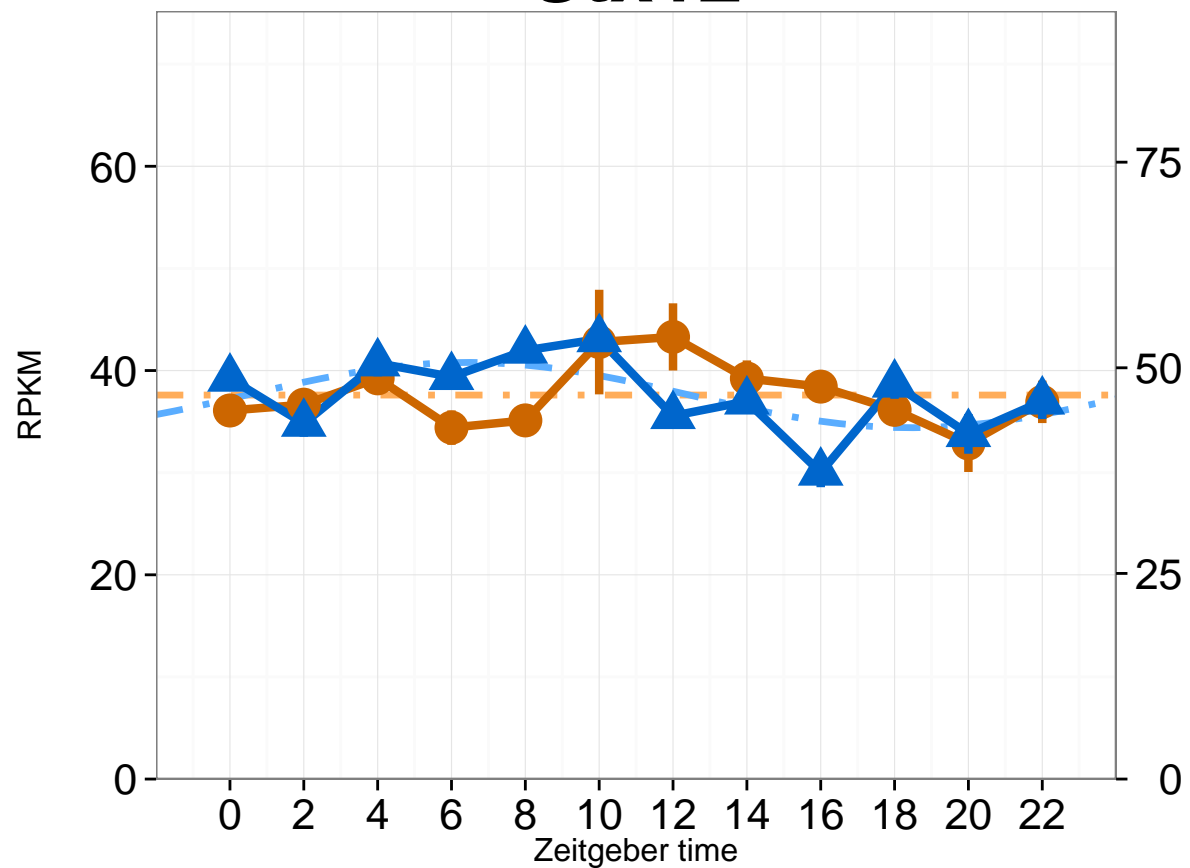

## Stx12

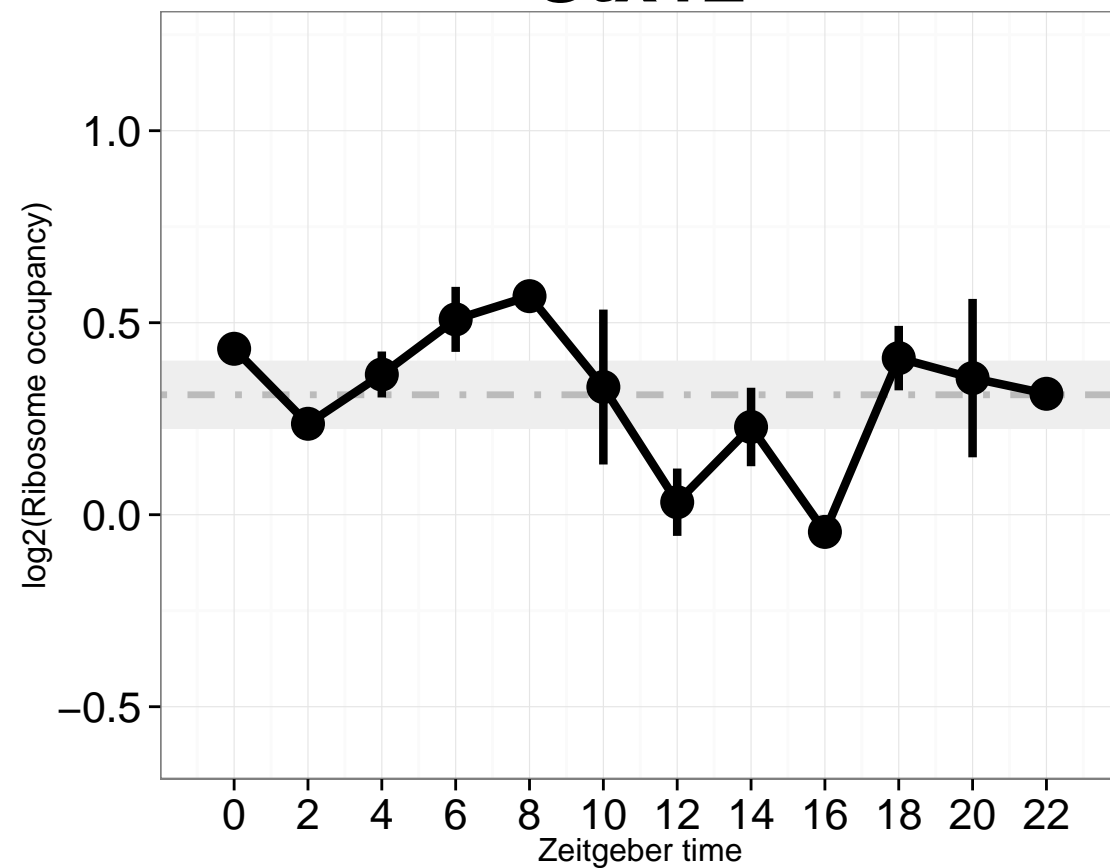

Supplement: Supplementary file 10018 [file 1]

## Aldh4a1

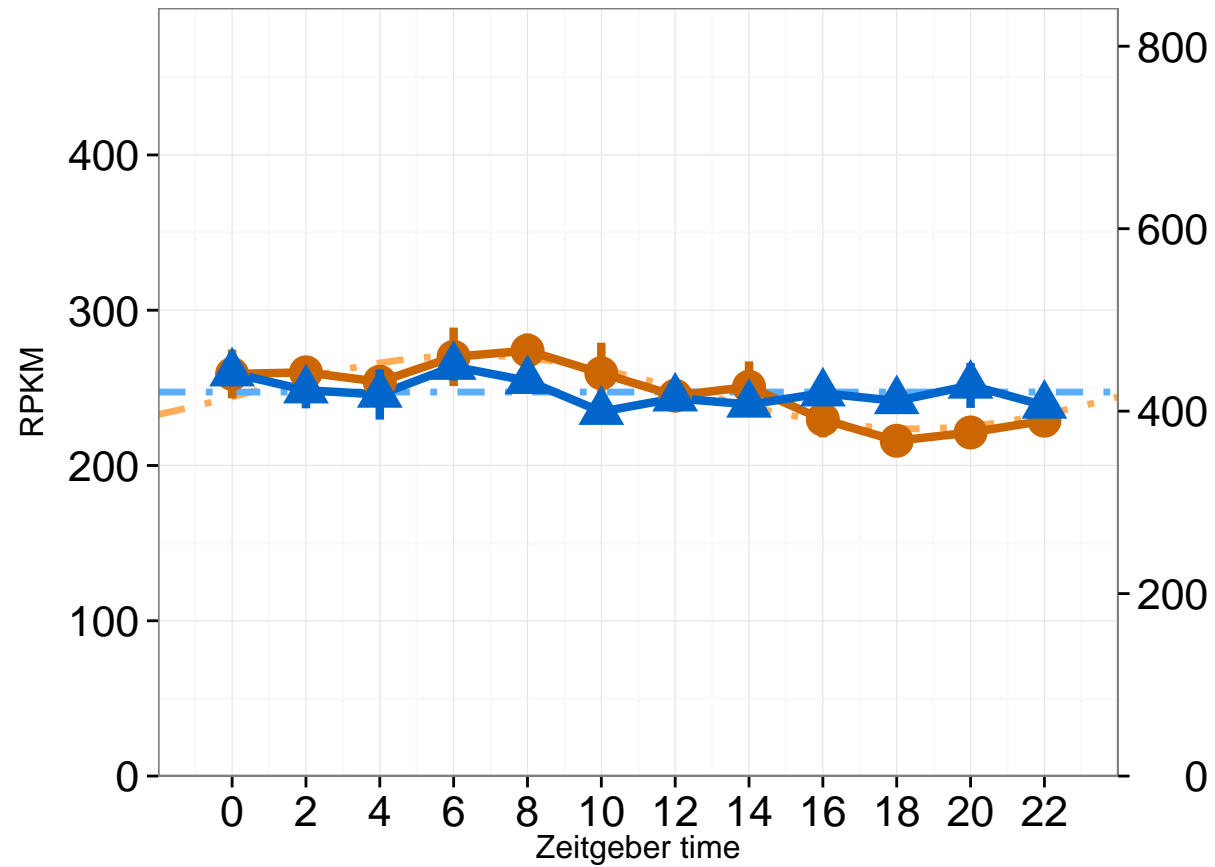

## Aldh4a1

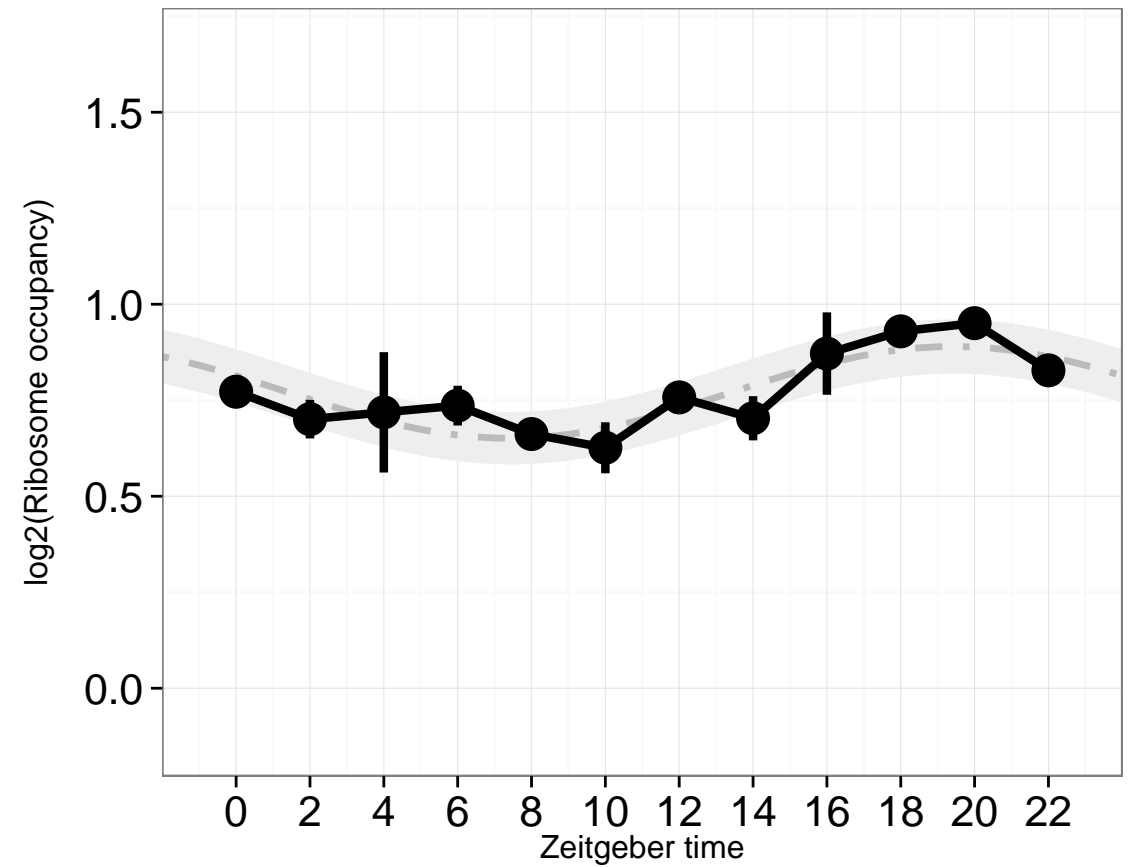

Supplement: Supplementary file 10019 [file 1]

# Rrp8

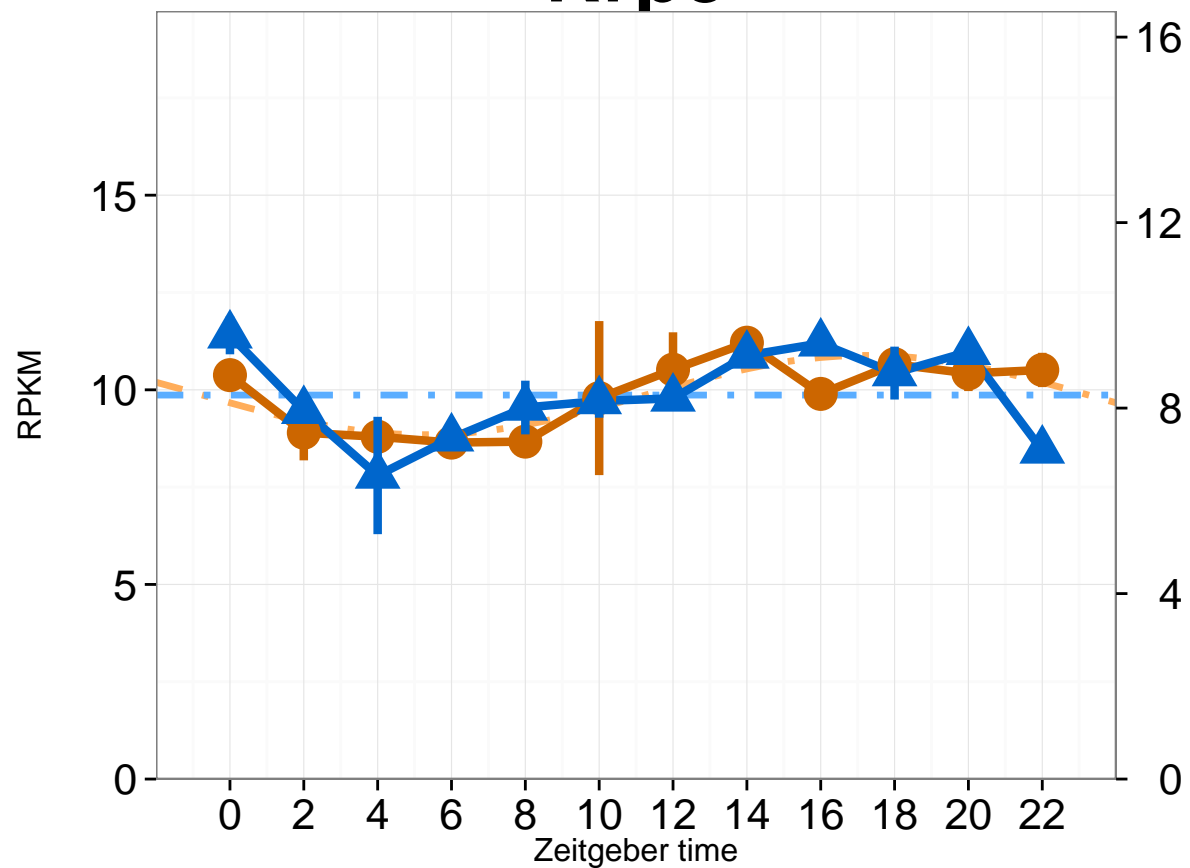

# Rrp8

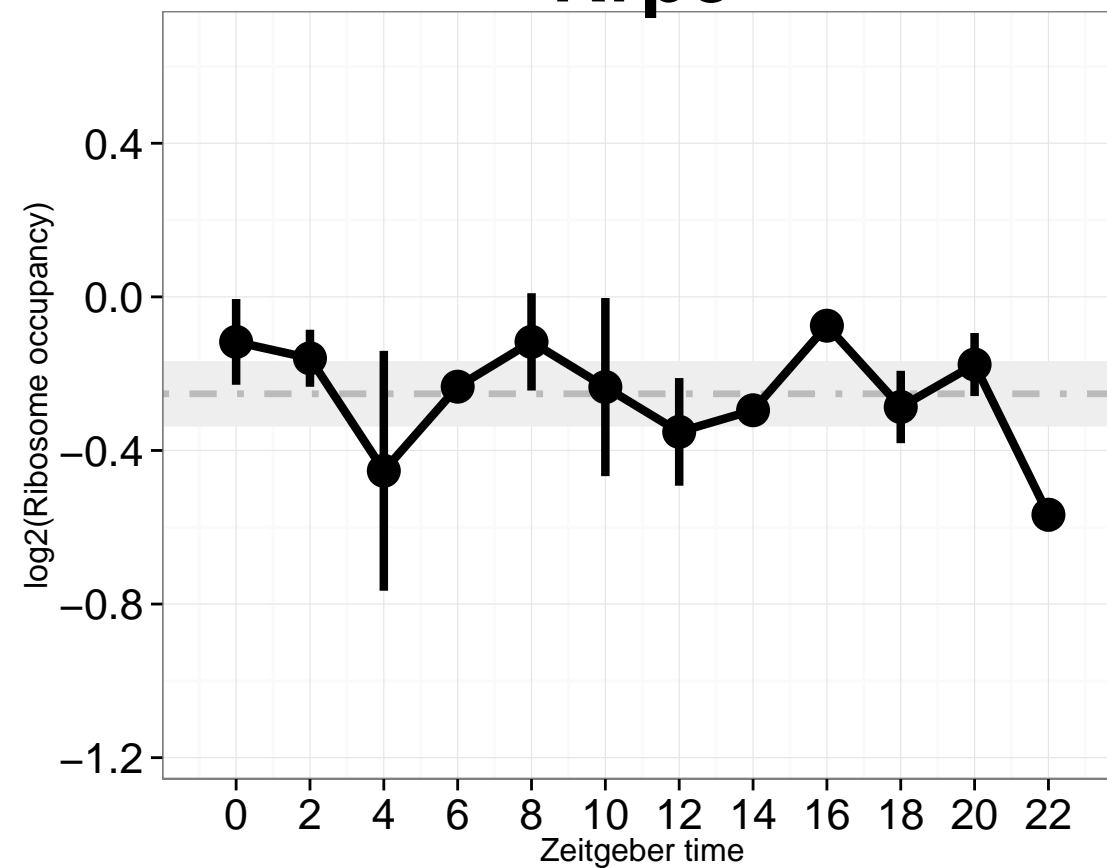

Supplement: Supplementary file 10020 [file 1]

## Psap

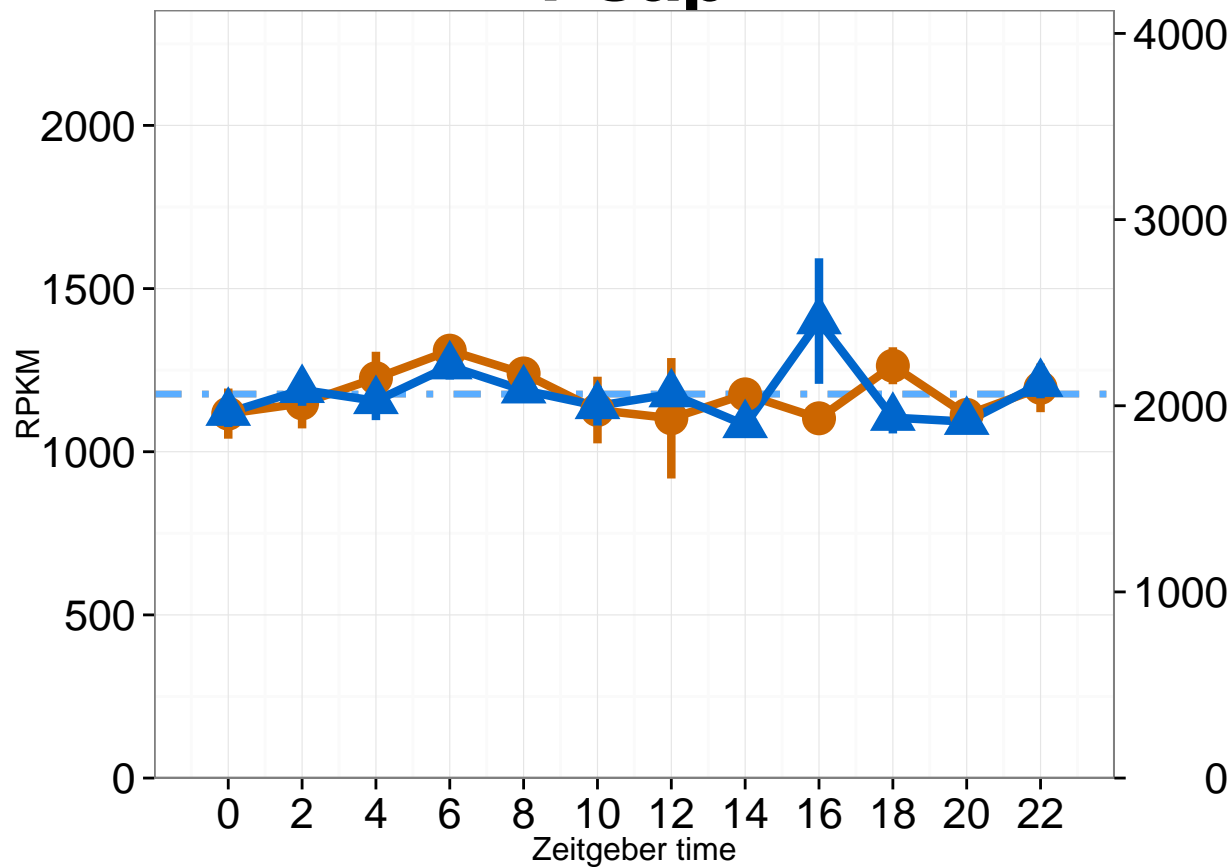

## Psap

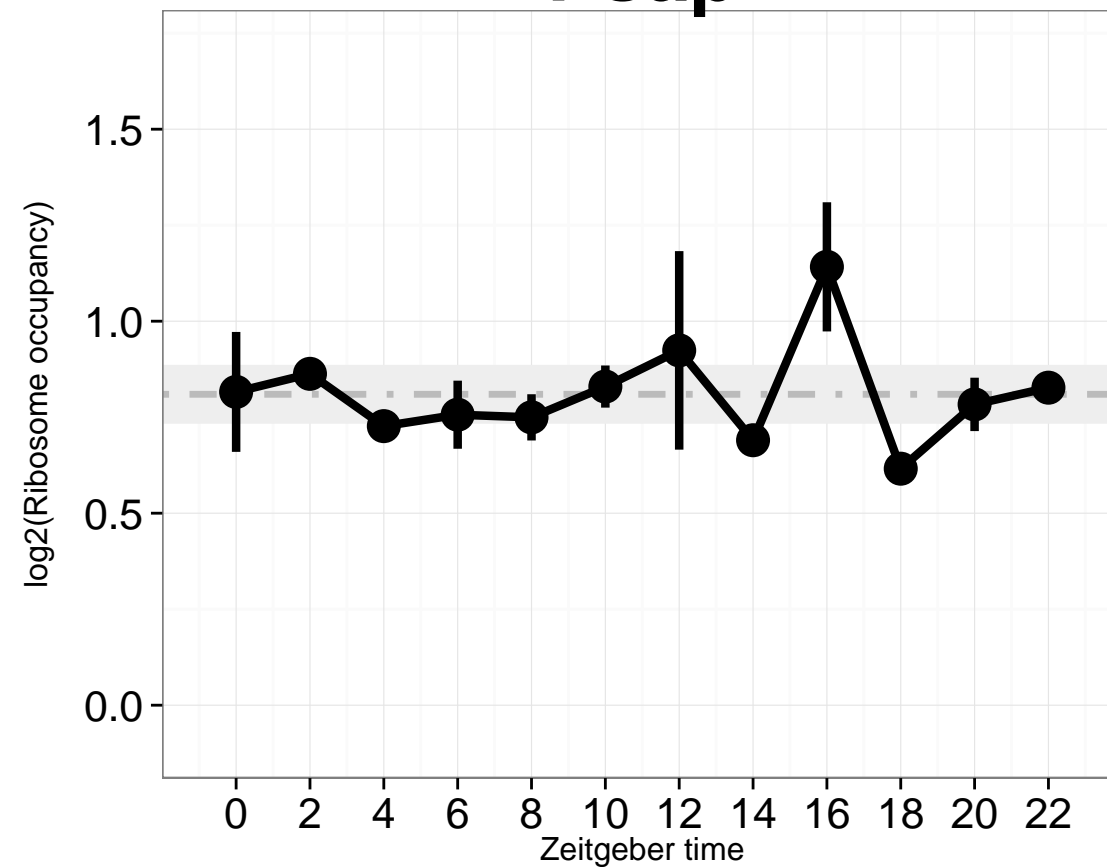

Supplement: Supplementary file 10021 [file 1]

## Lnpep

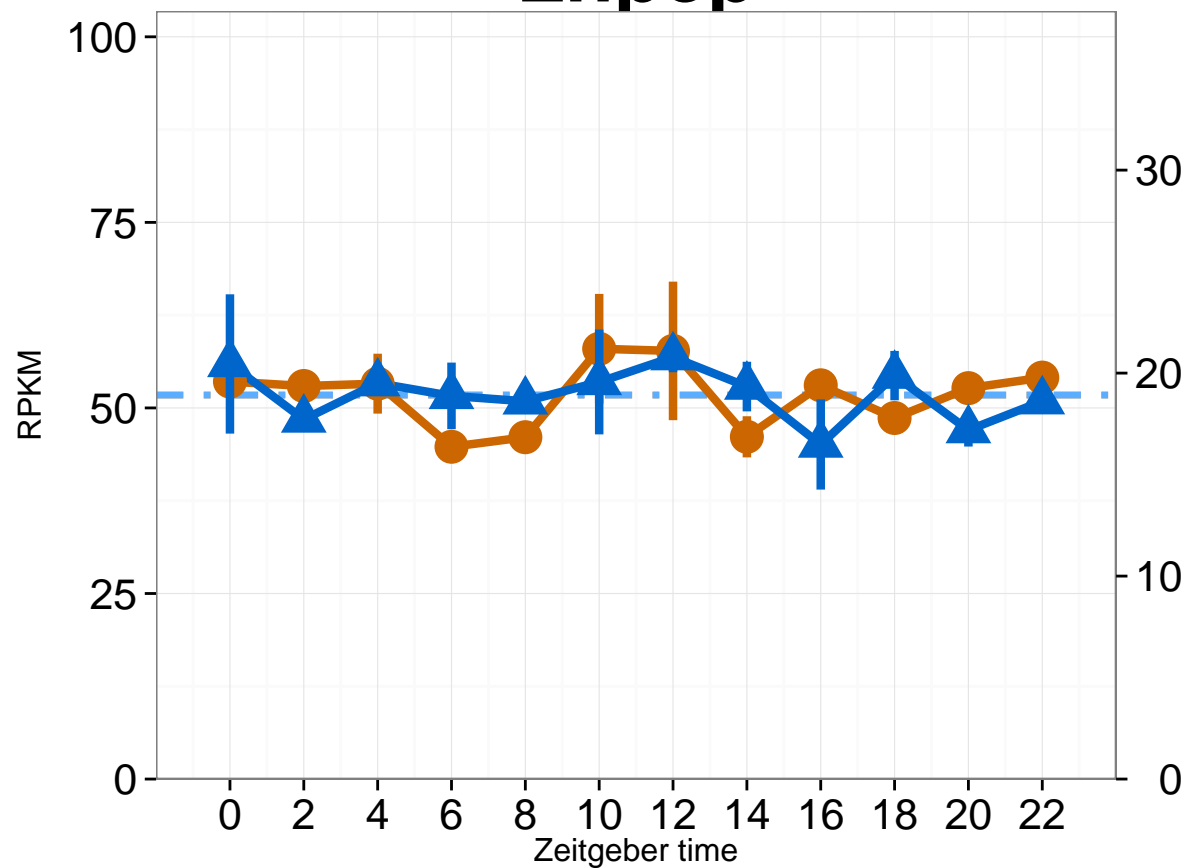

## Lnpep

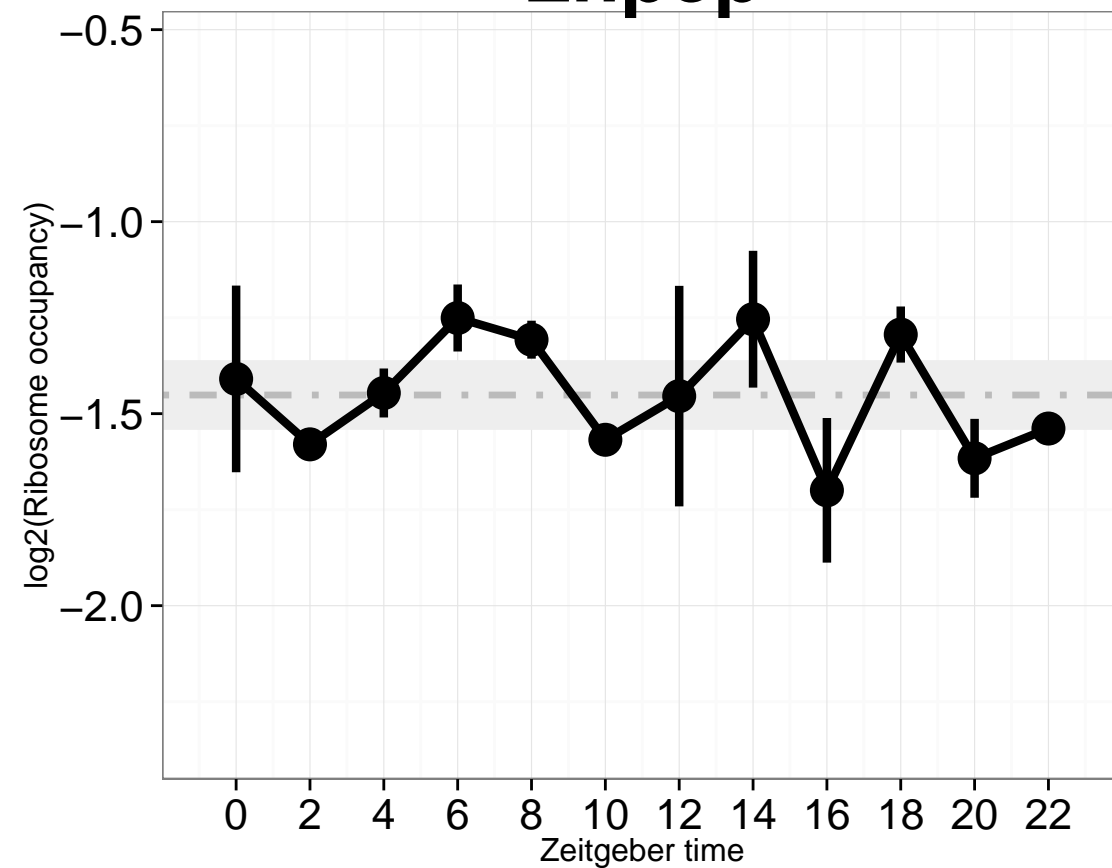

Supplement: Supplementary file 10022 [file 1]

# Poll

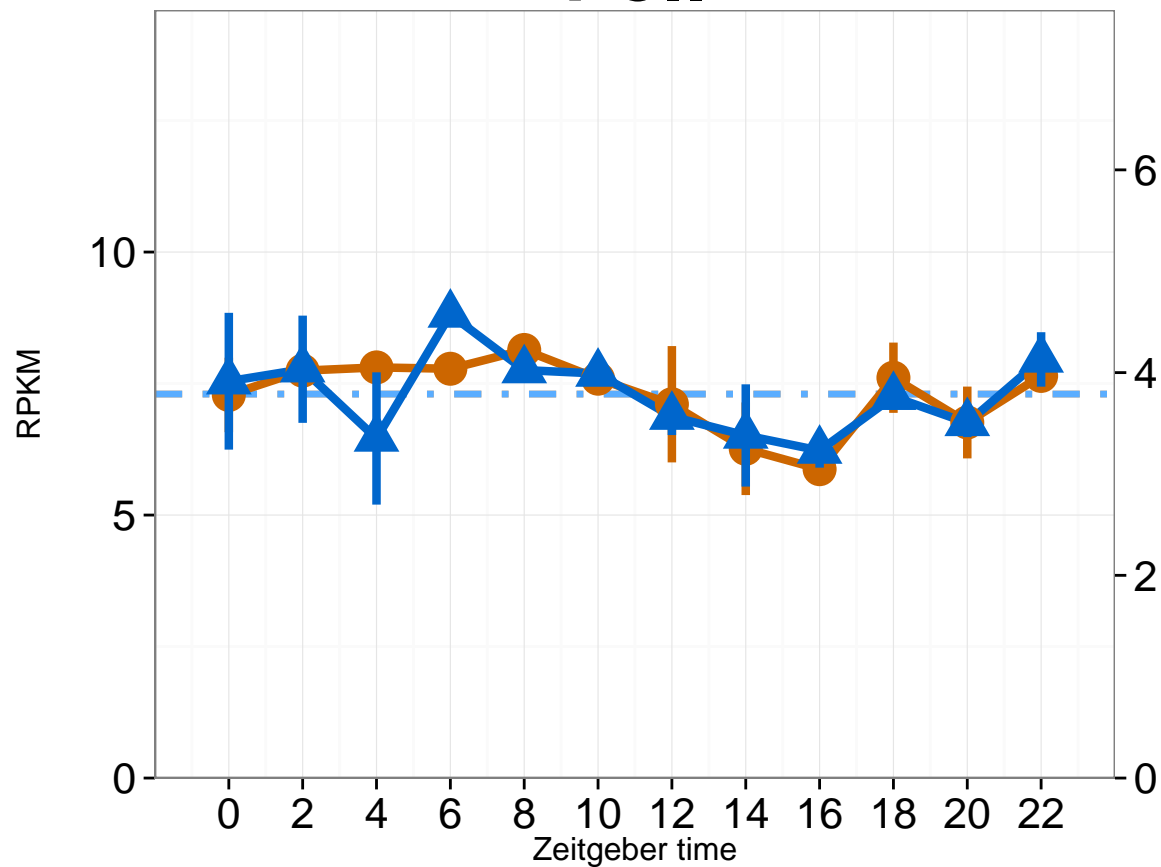

# Poll

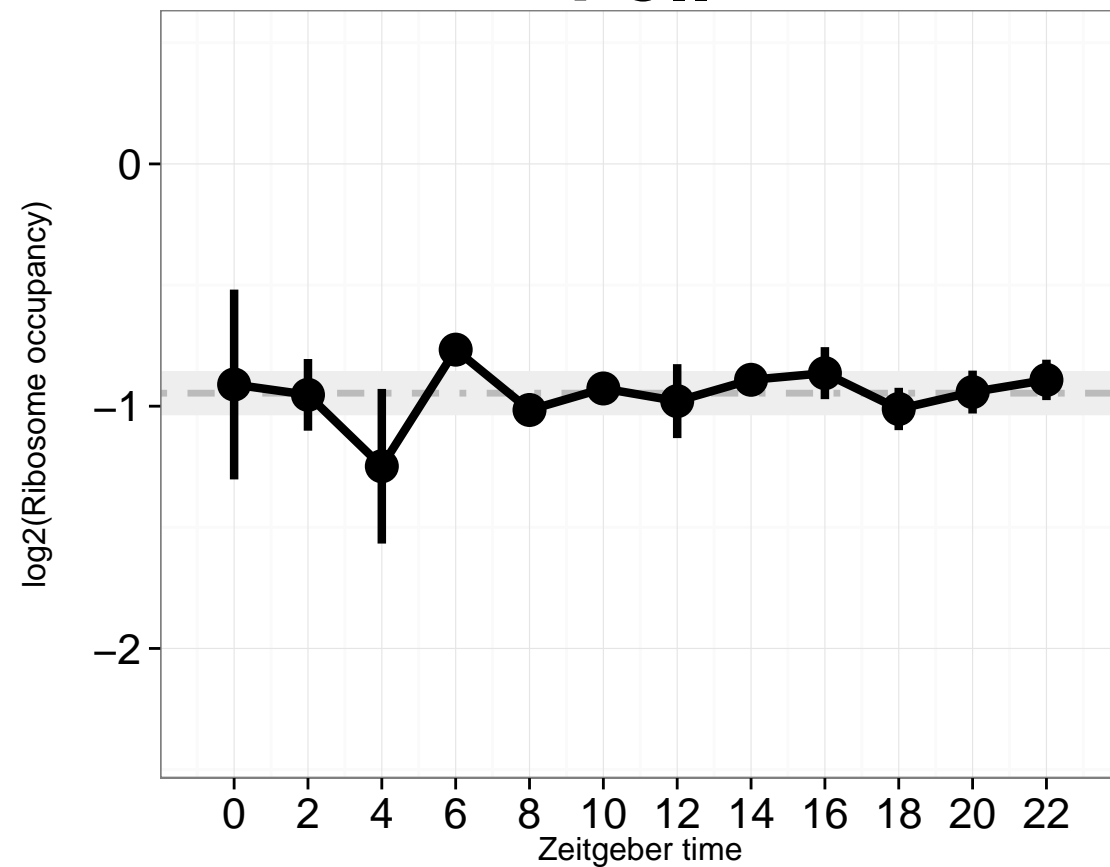

Supplement: Supplementary file 10023 [file 1]

## Wee1

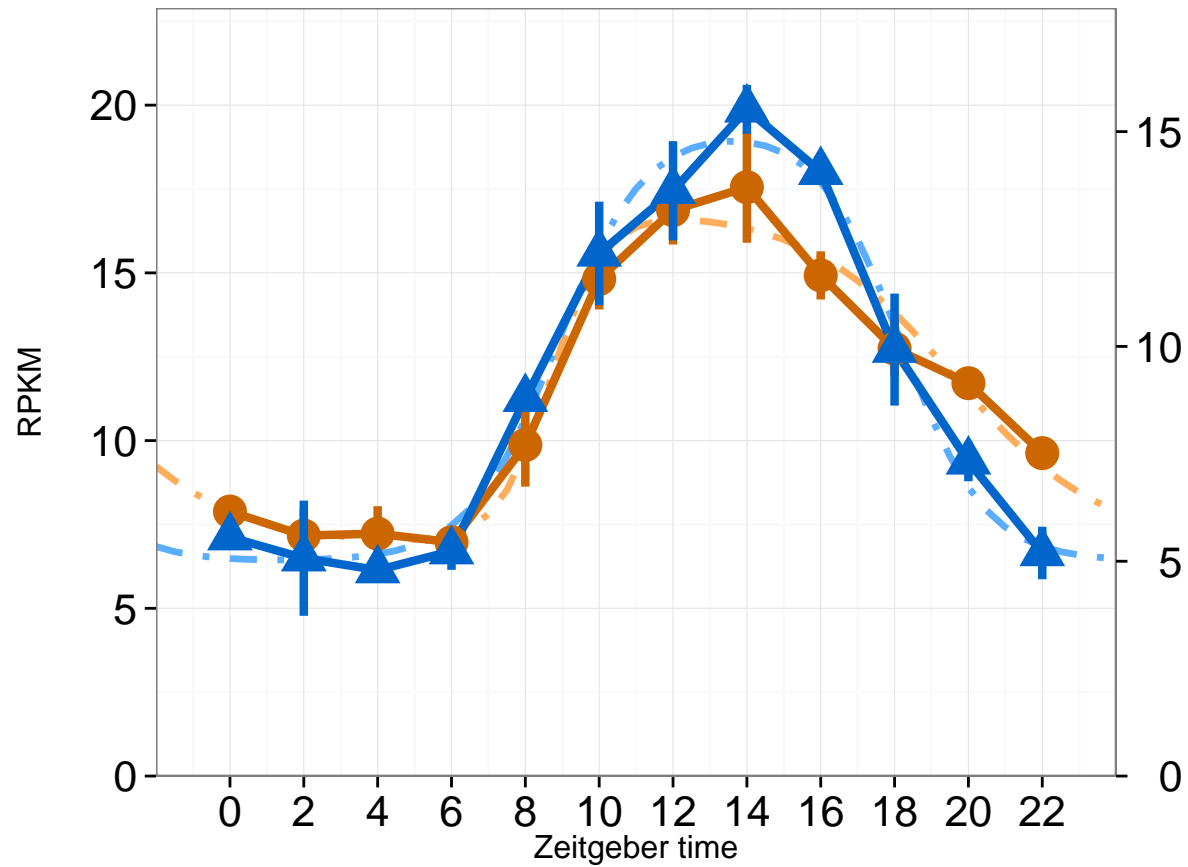

## Wee1

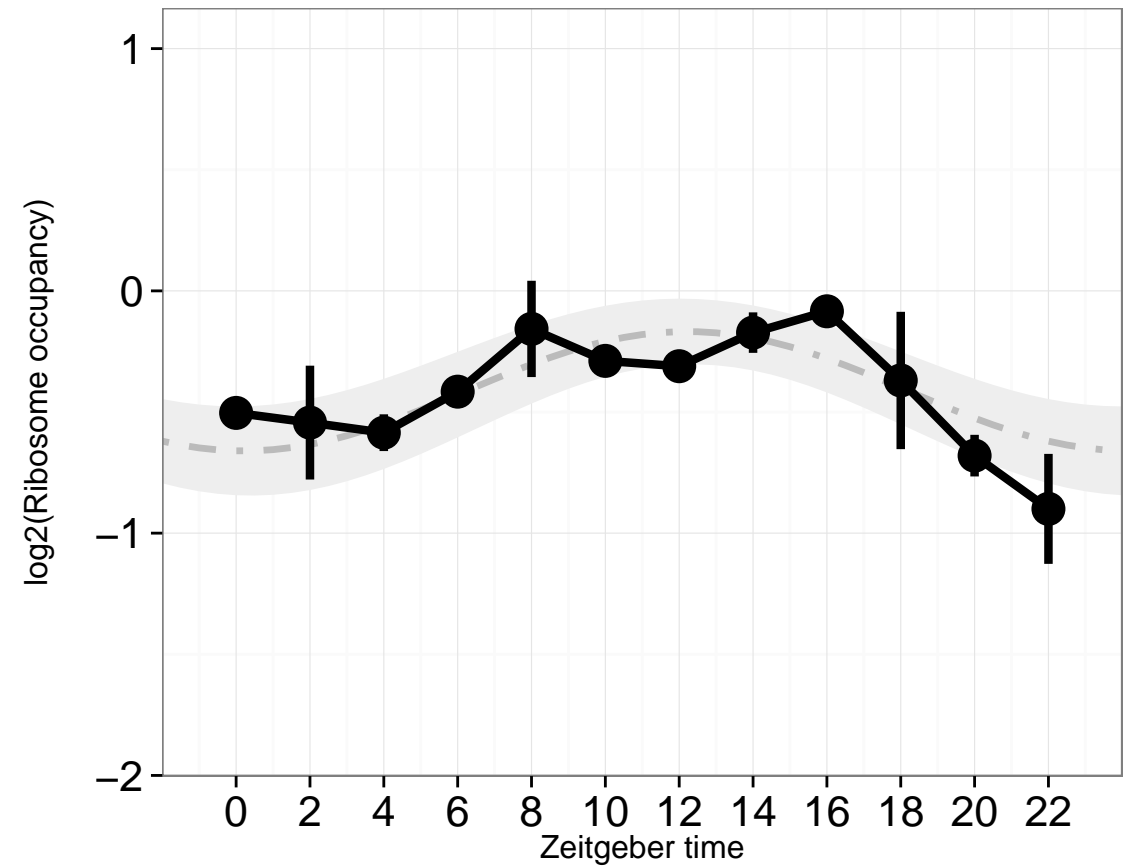

Supplement: Supplementary file 10024 [file 1]

## Pdss2

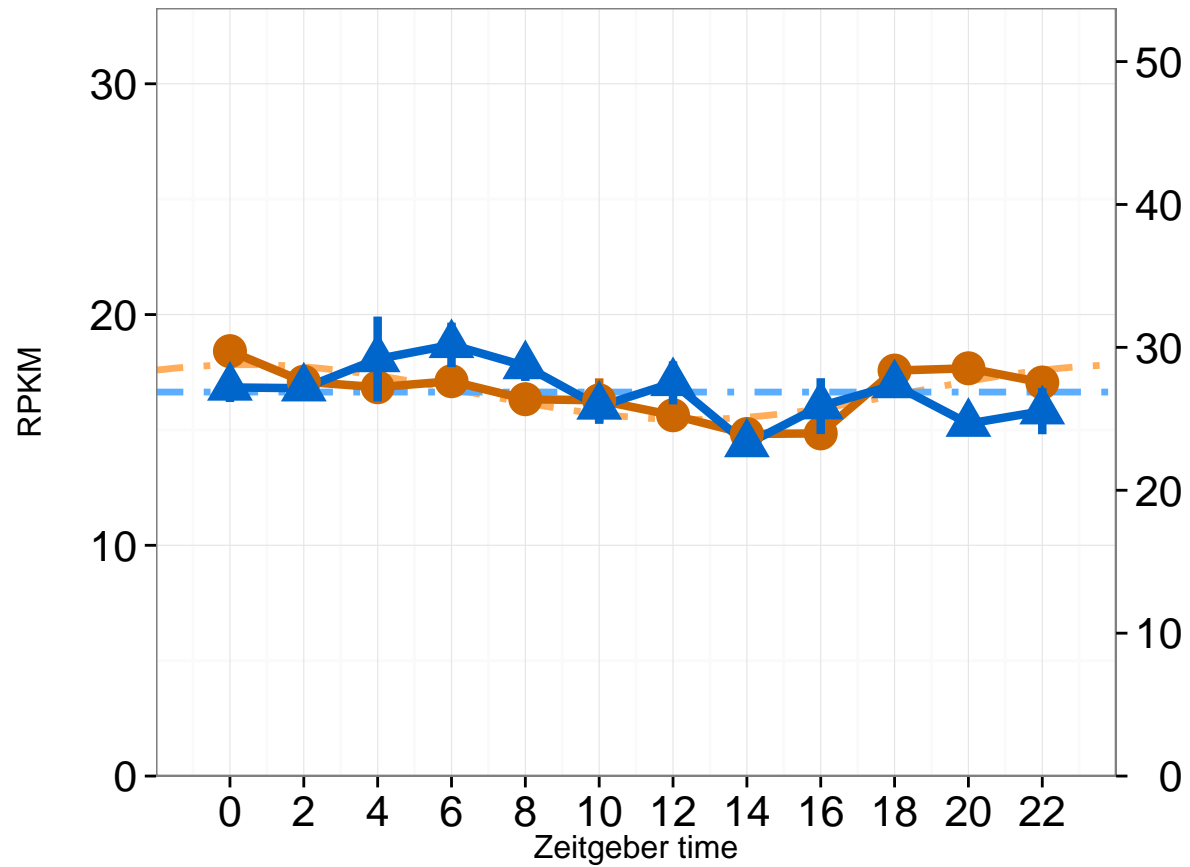

## Pdss2

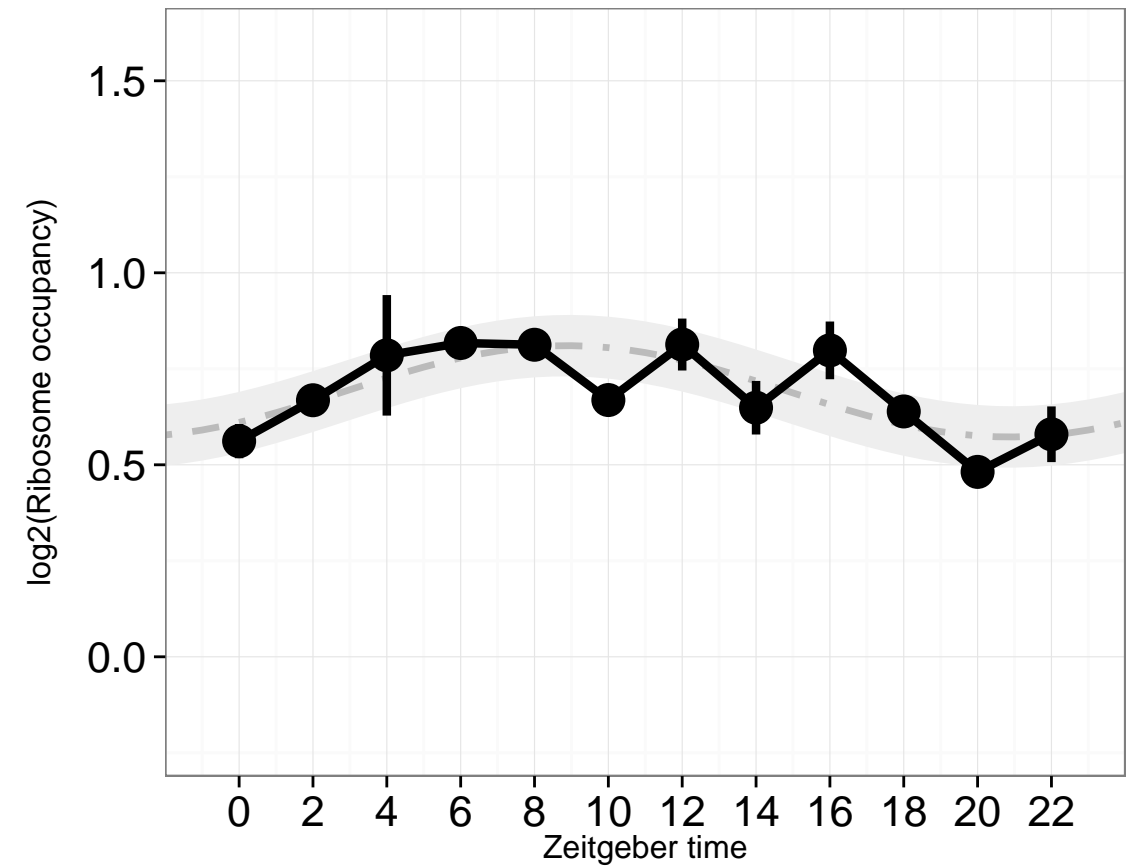

Supplement: Supplementary file 10025 [file 1]

# Sytl3

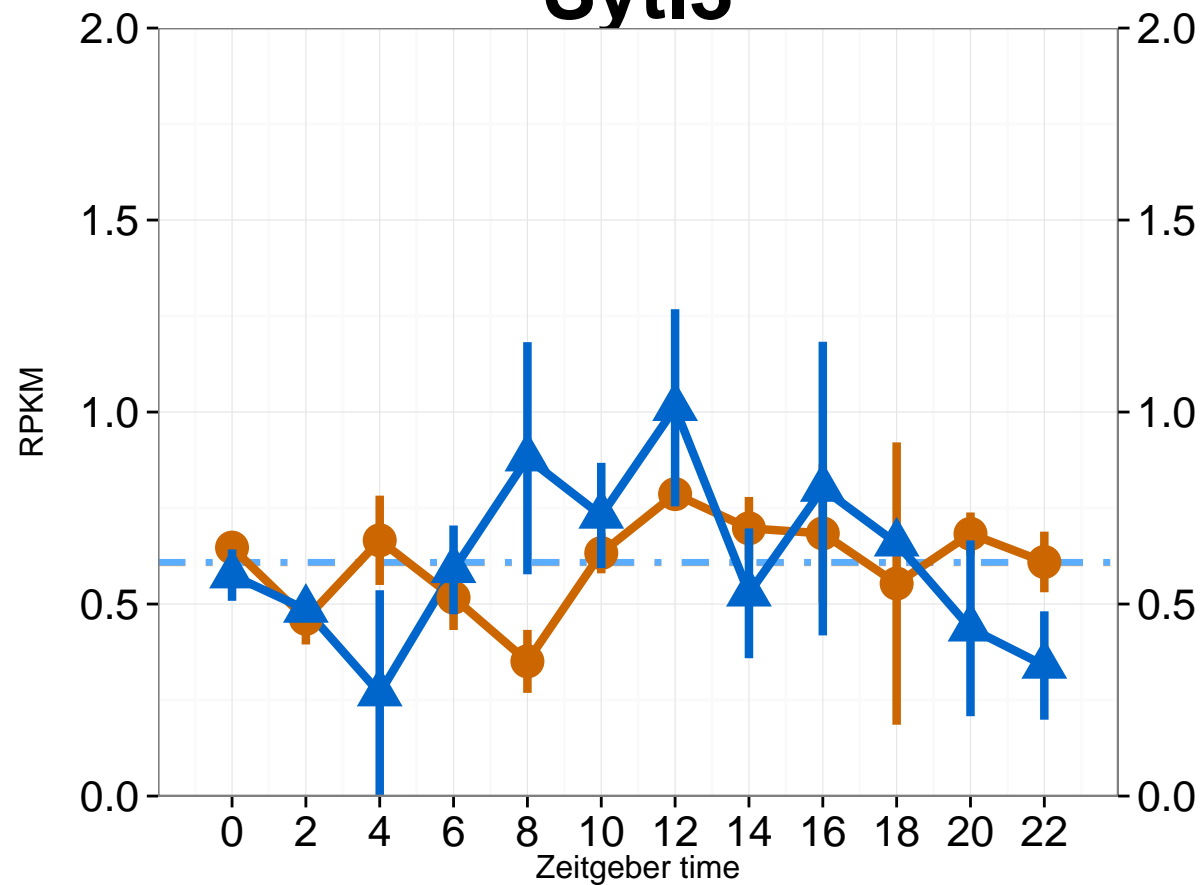

# Sytl3

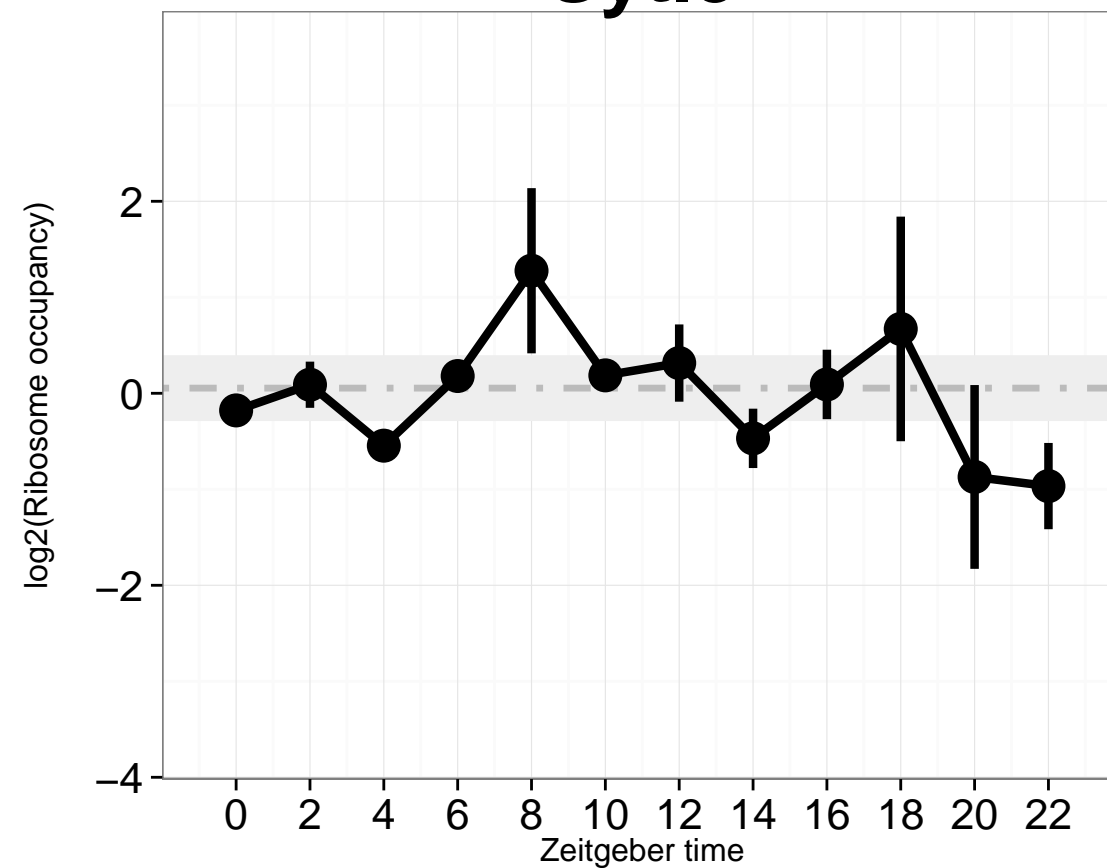

Supplement: Supplementary file 10026 [file 1]

# Ncf4

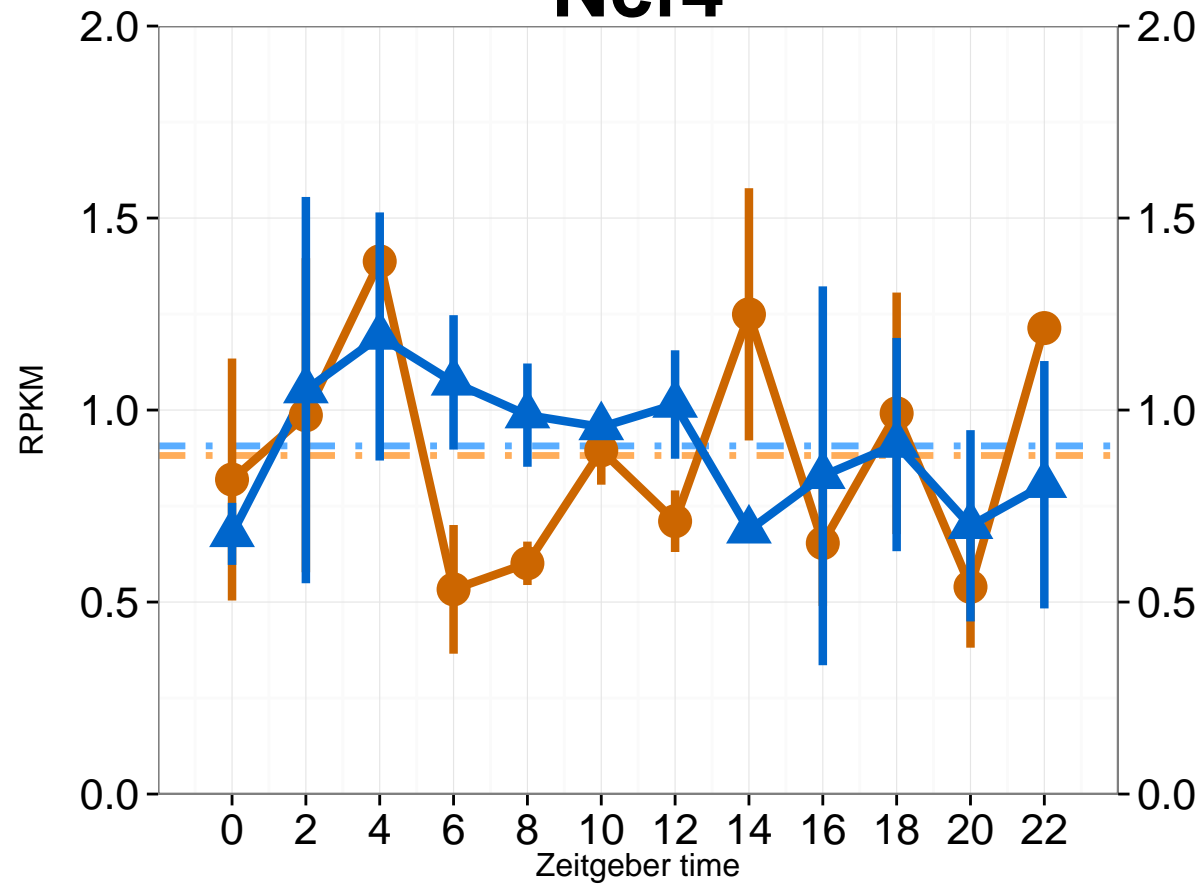

# Ncf4

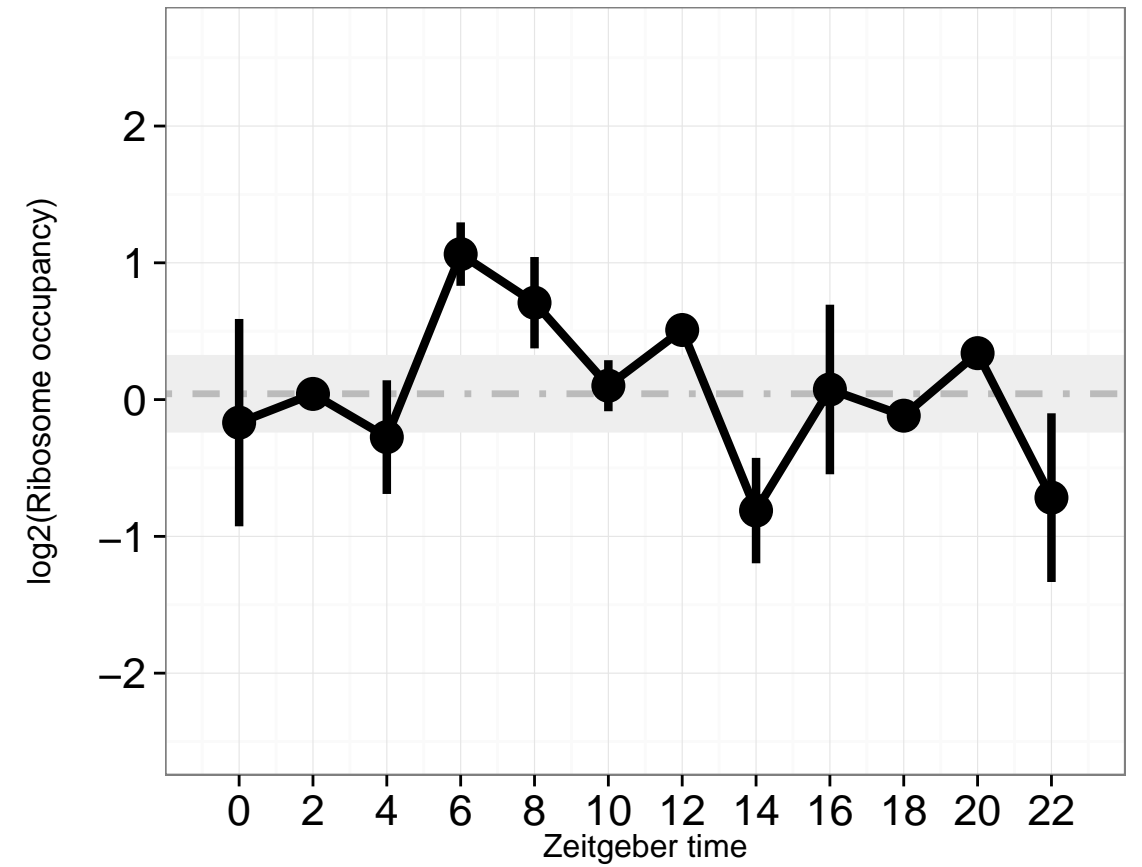

Supplement: Supplementary file 10027 [file 1]

# Frmpd1

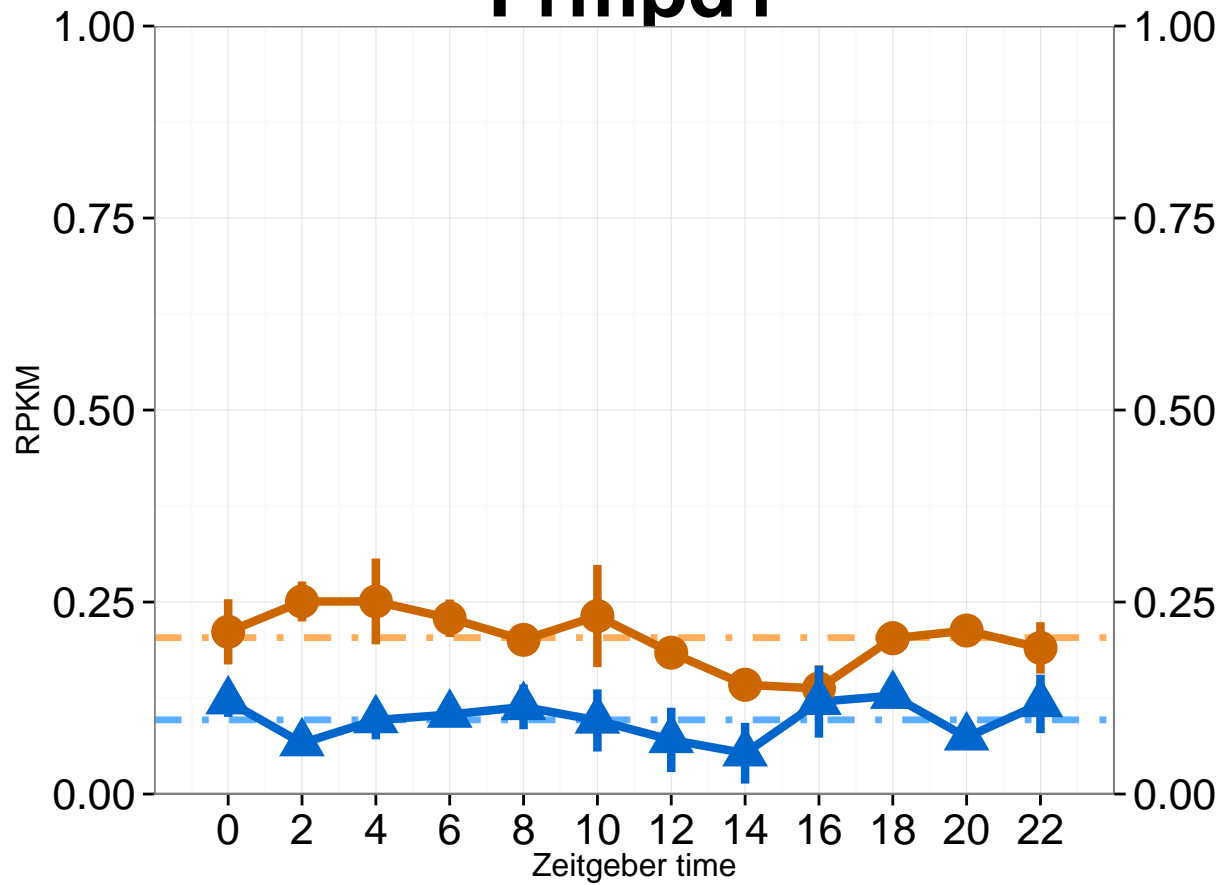

# Frmpd1

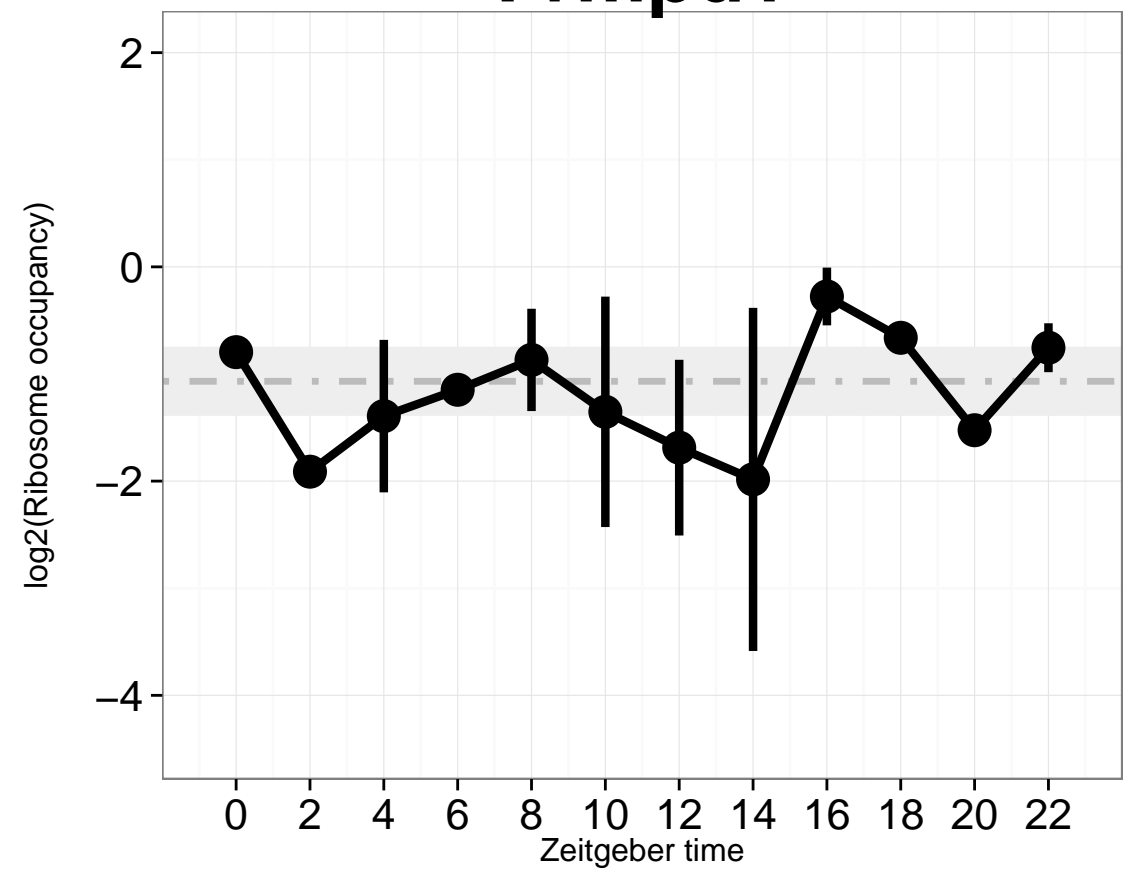

Supplement: Supplementary file 10028 [file 1]

## Rcsd1

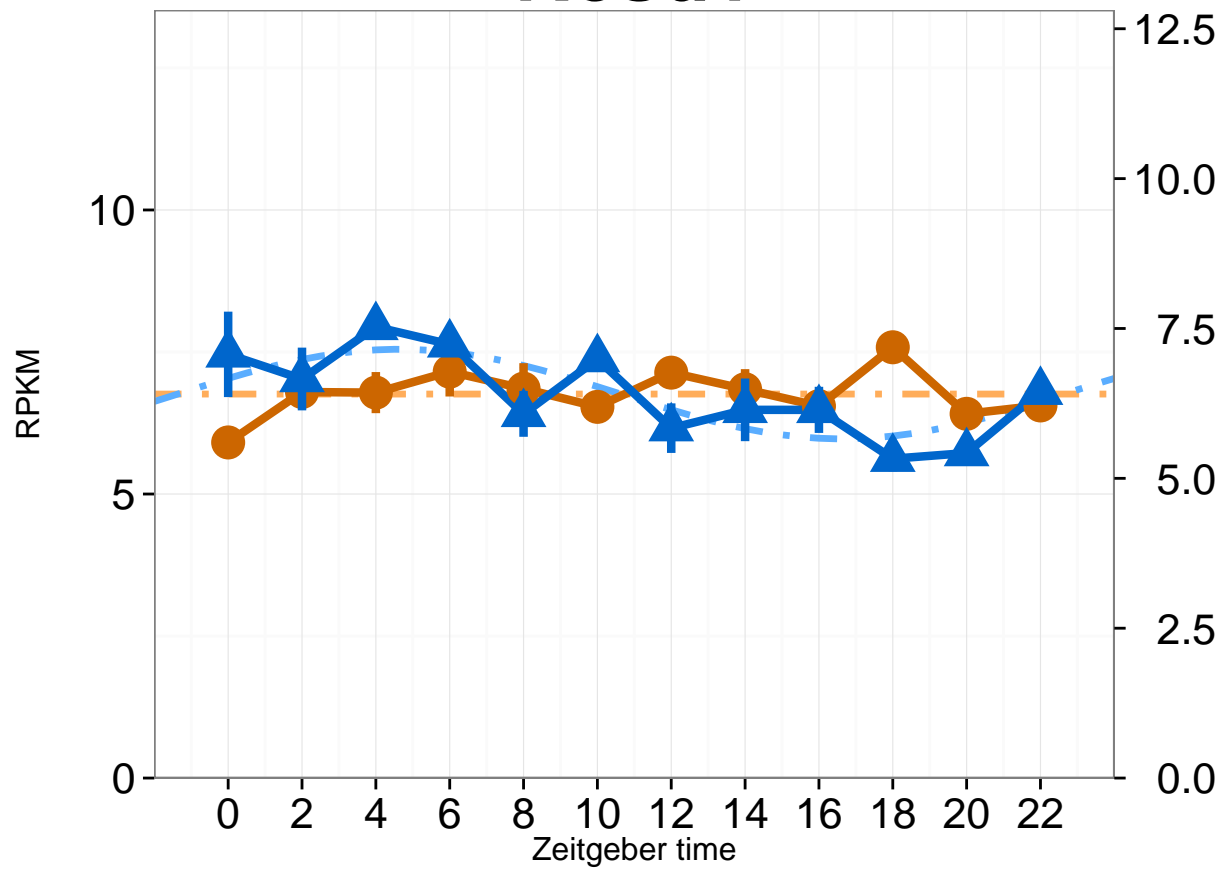

## Rcsd1

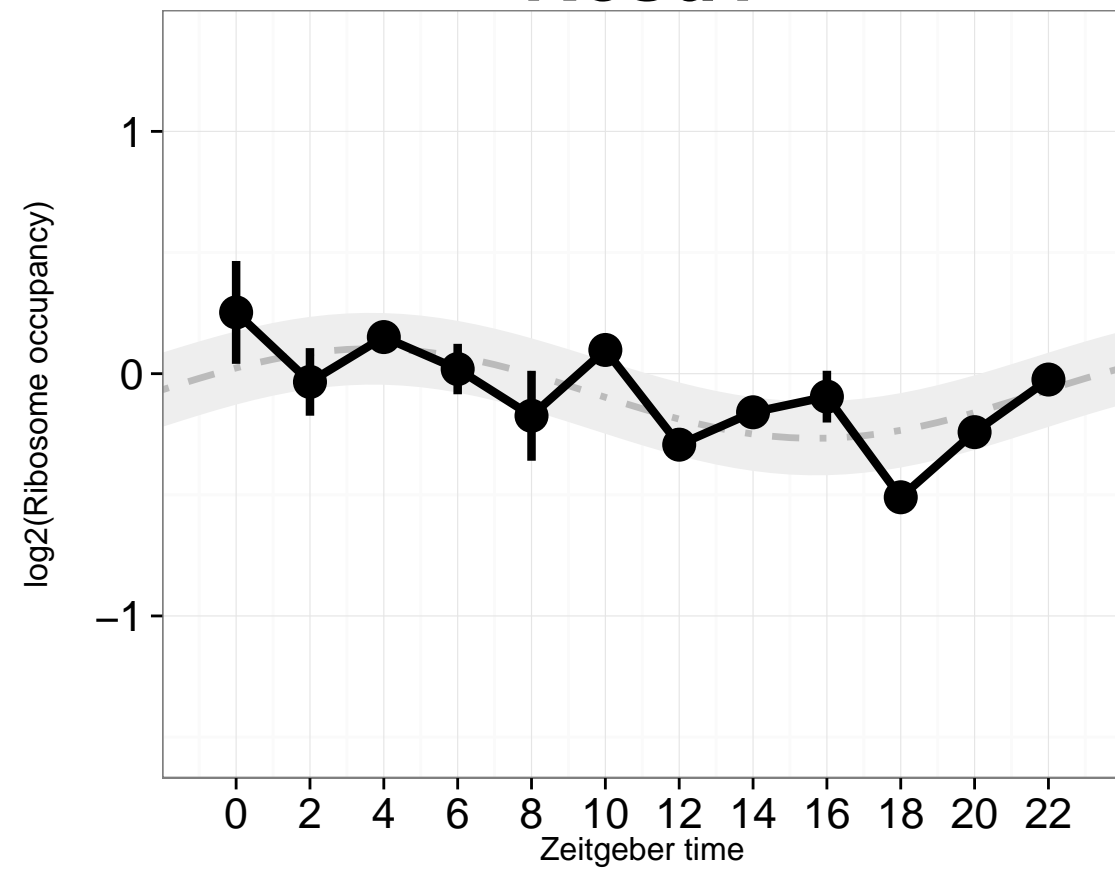

Supplement: Supplementary file 10029 [file 1]

## Adck3

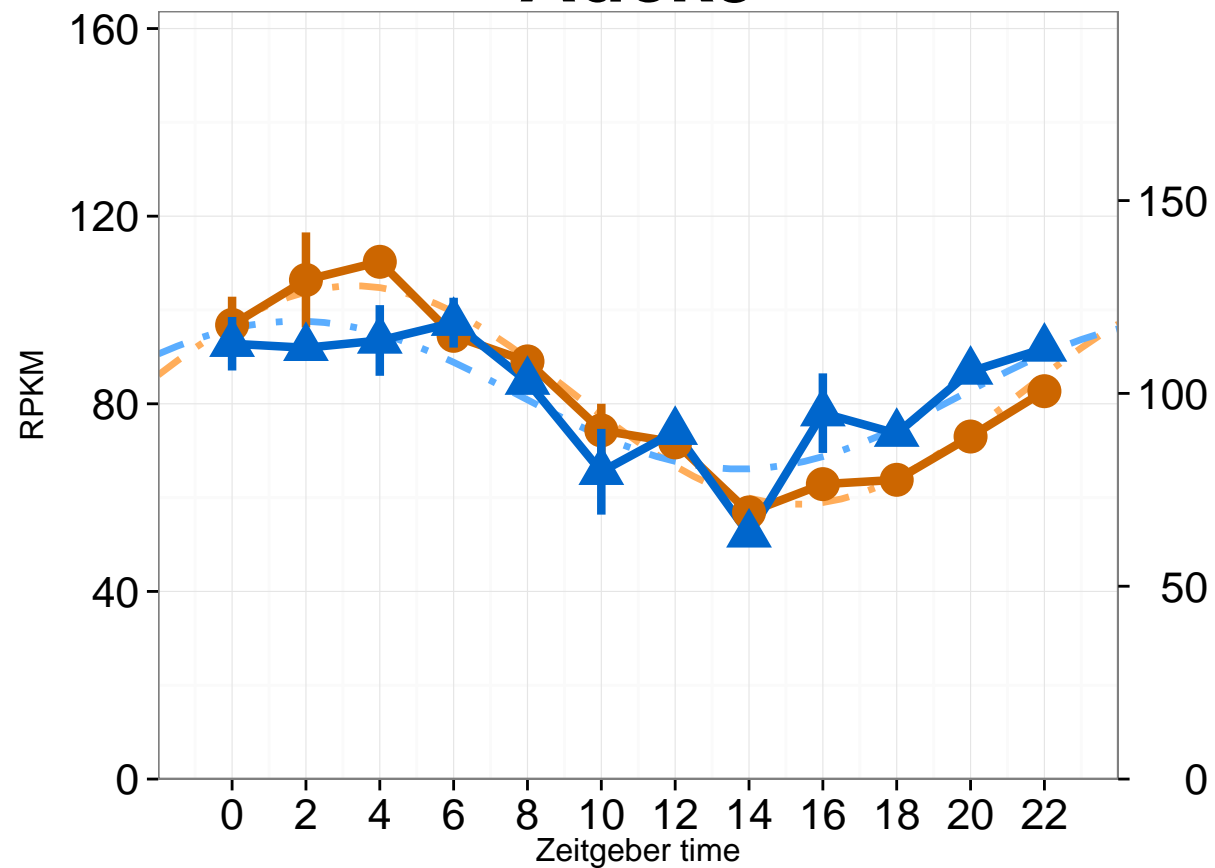

## Adck3

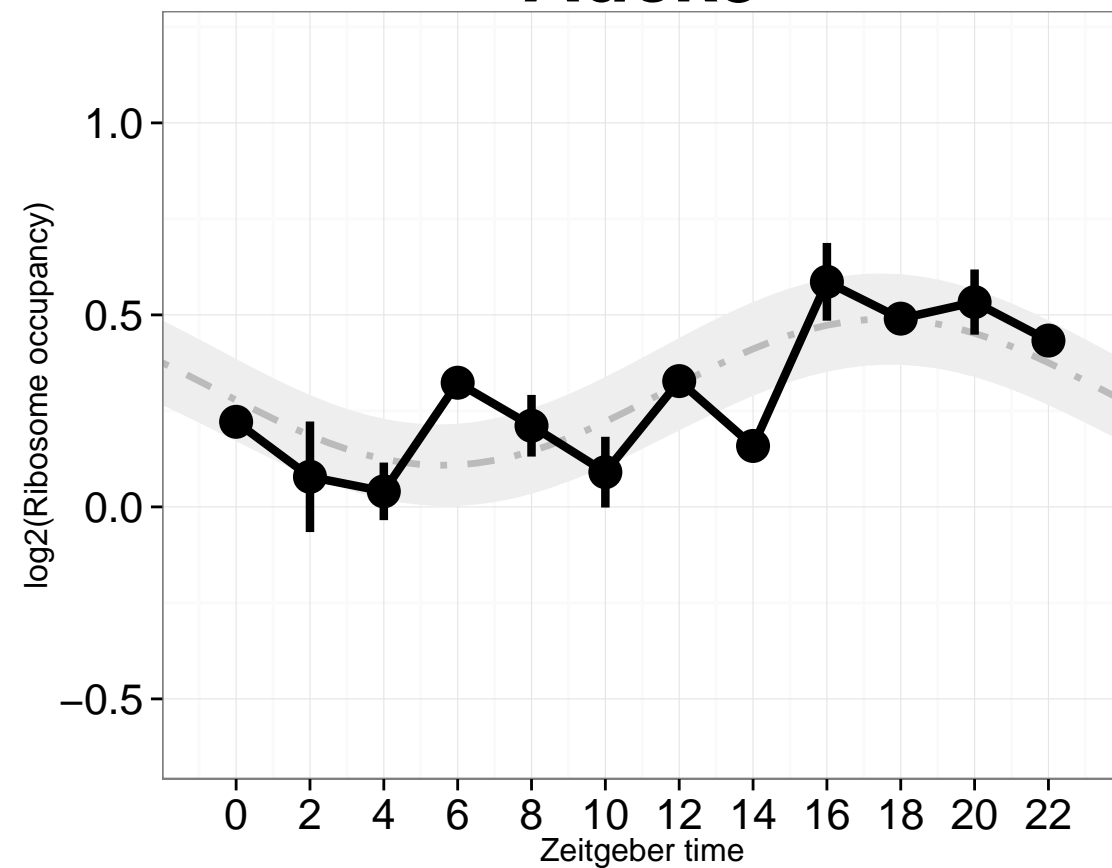

Supplement: Supplementary file 10030 [file 1]

## Cr2

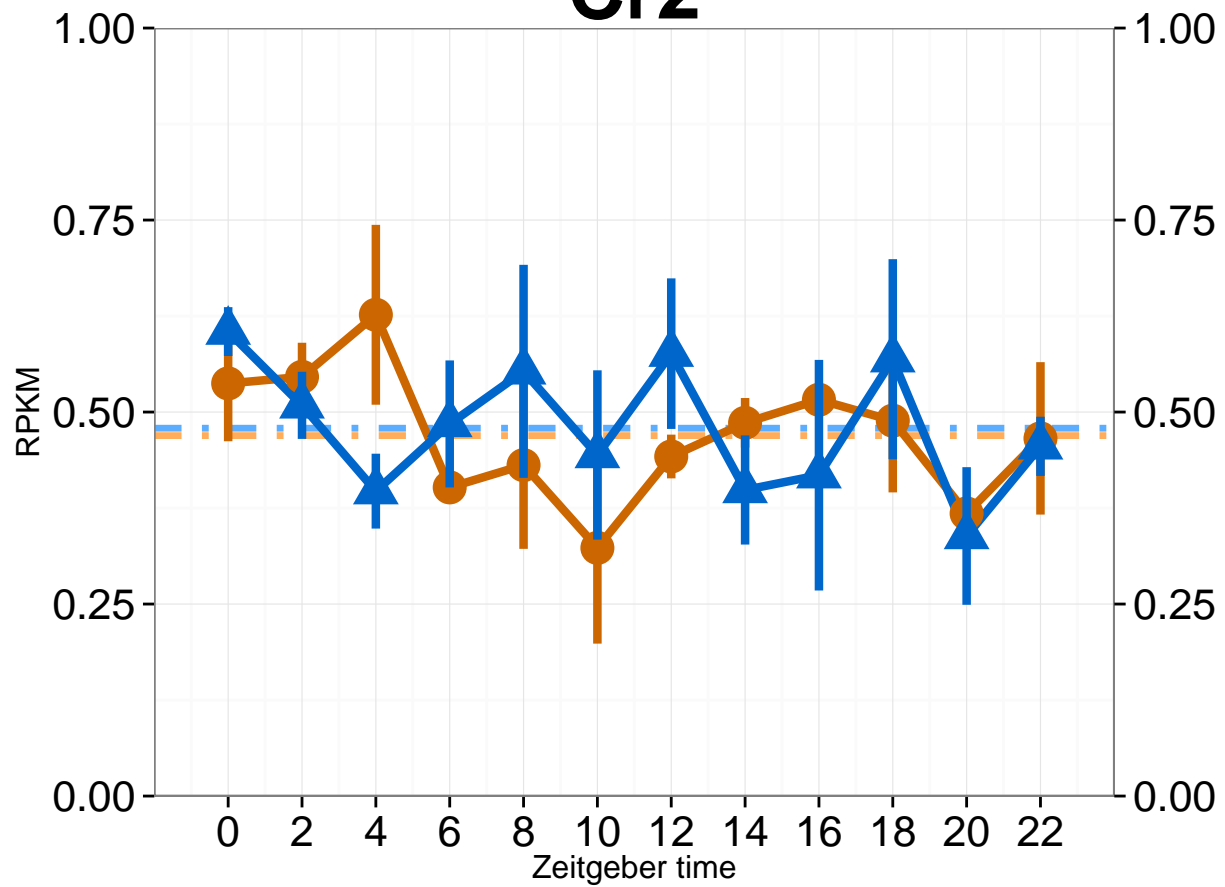

## Cr2

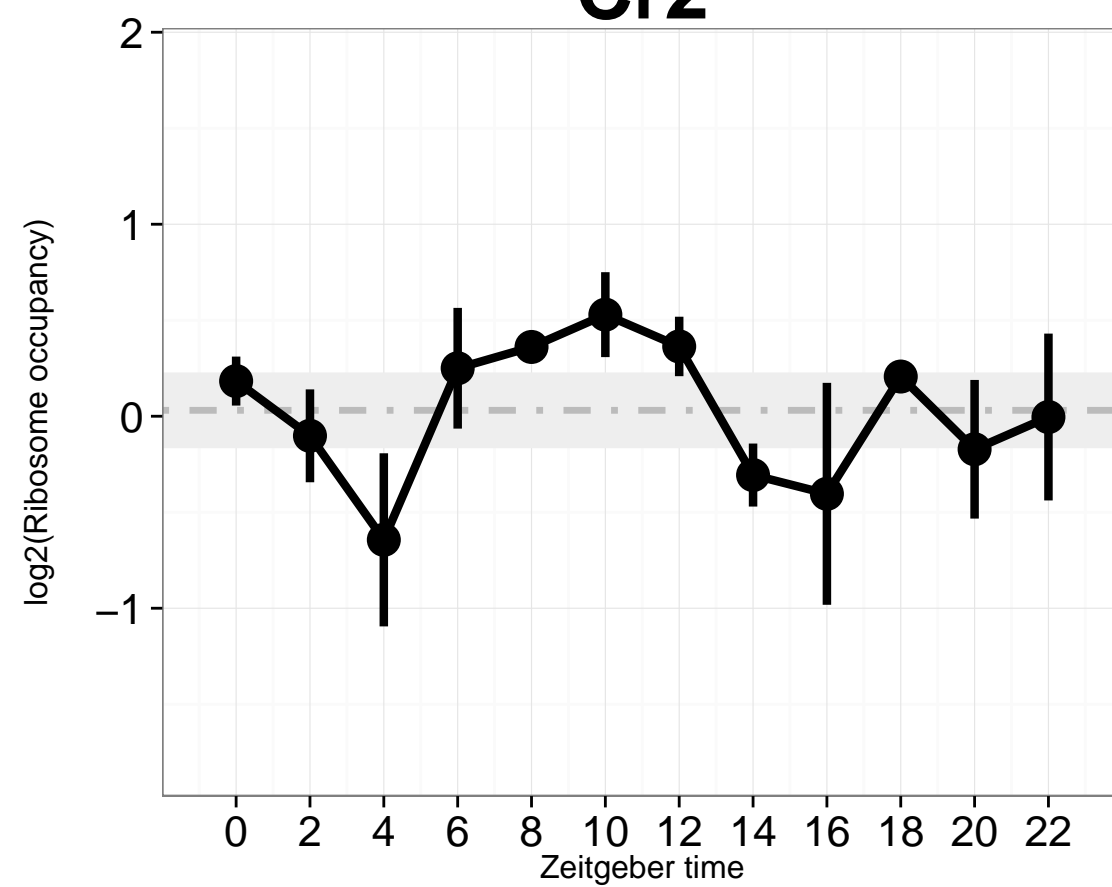

Supplement: Supplementary file 10031 [file 1]

## Taf3

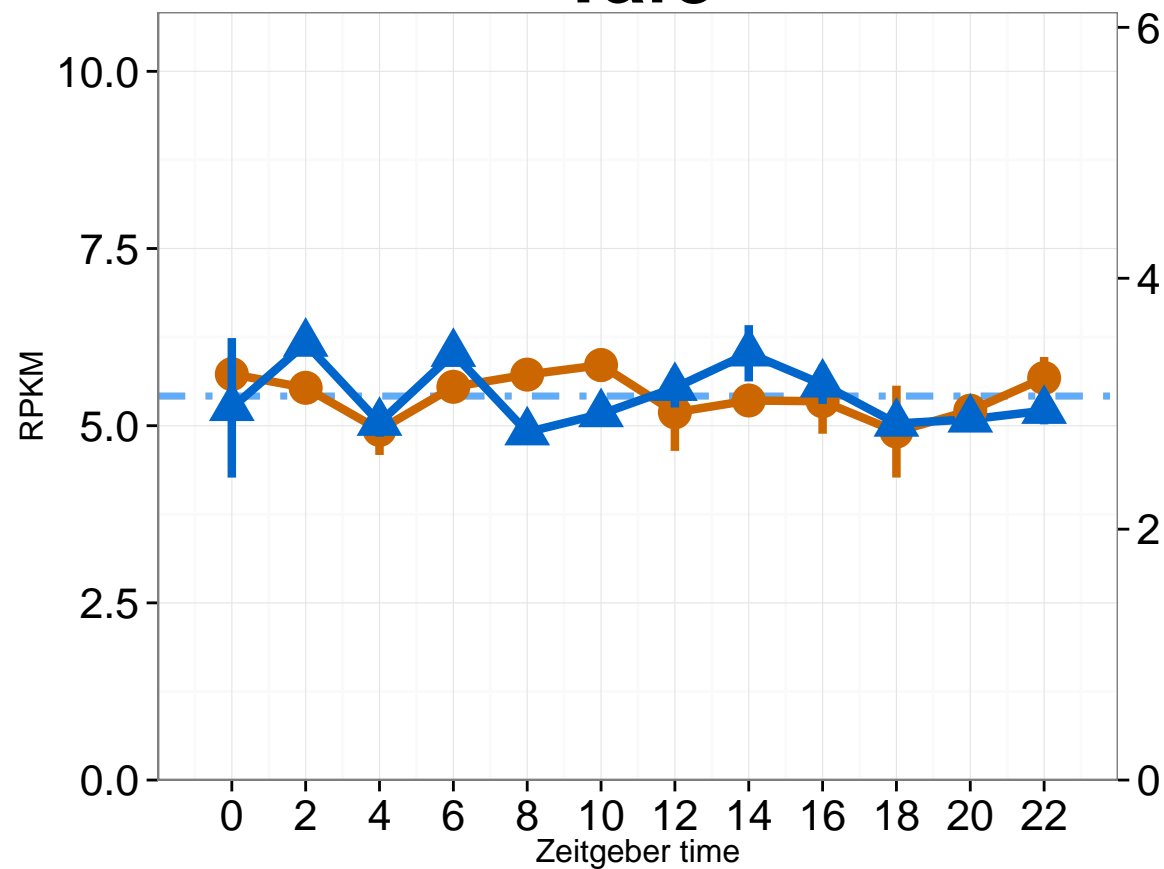

## Taf3

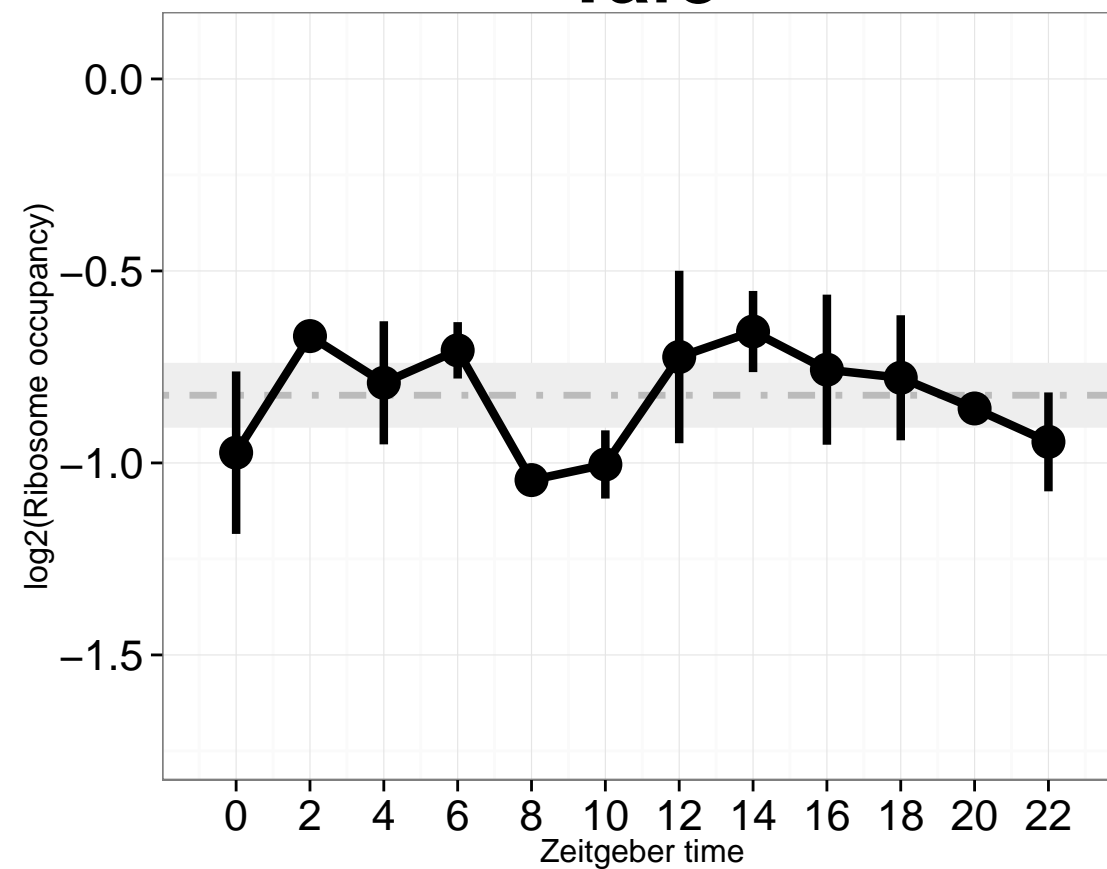

Supplement: Supplementary file 10033 [file 1]

# Fkbp11

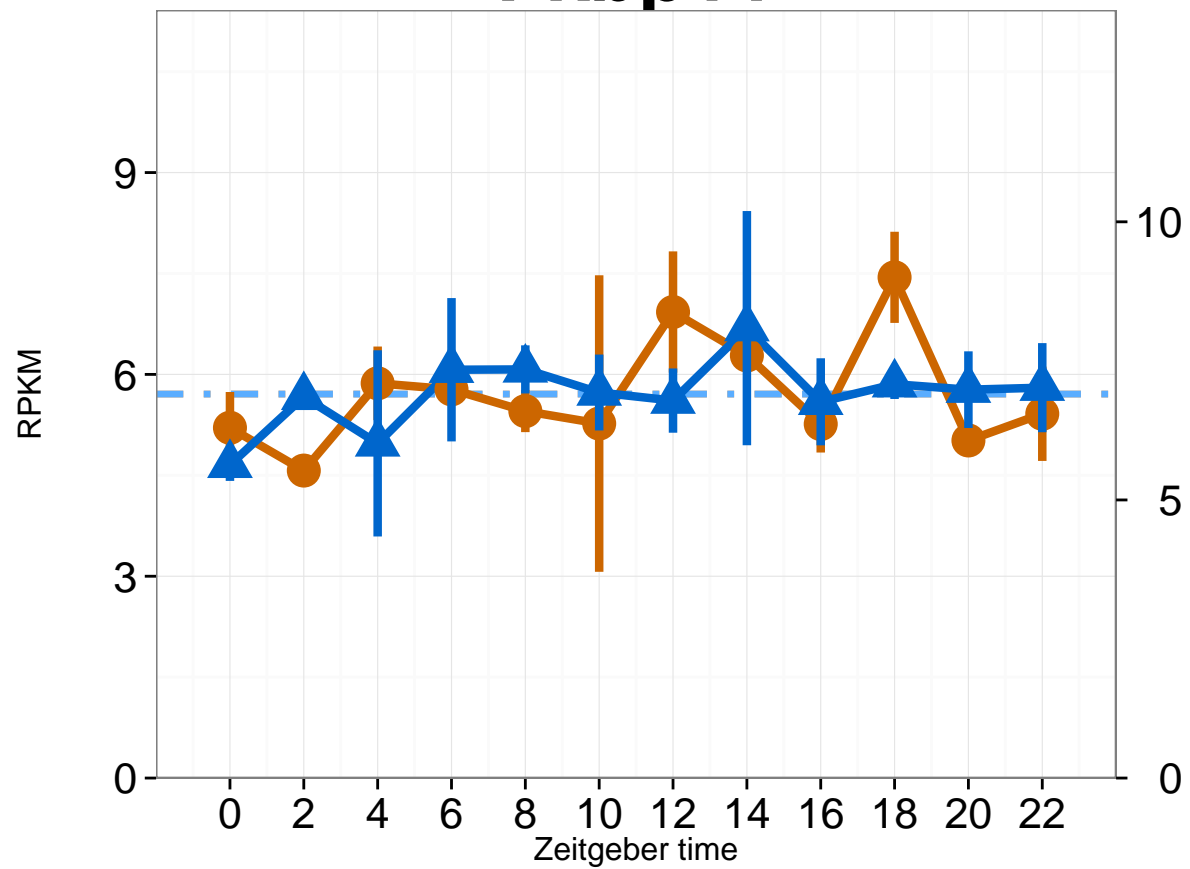

# Fkbp11

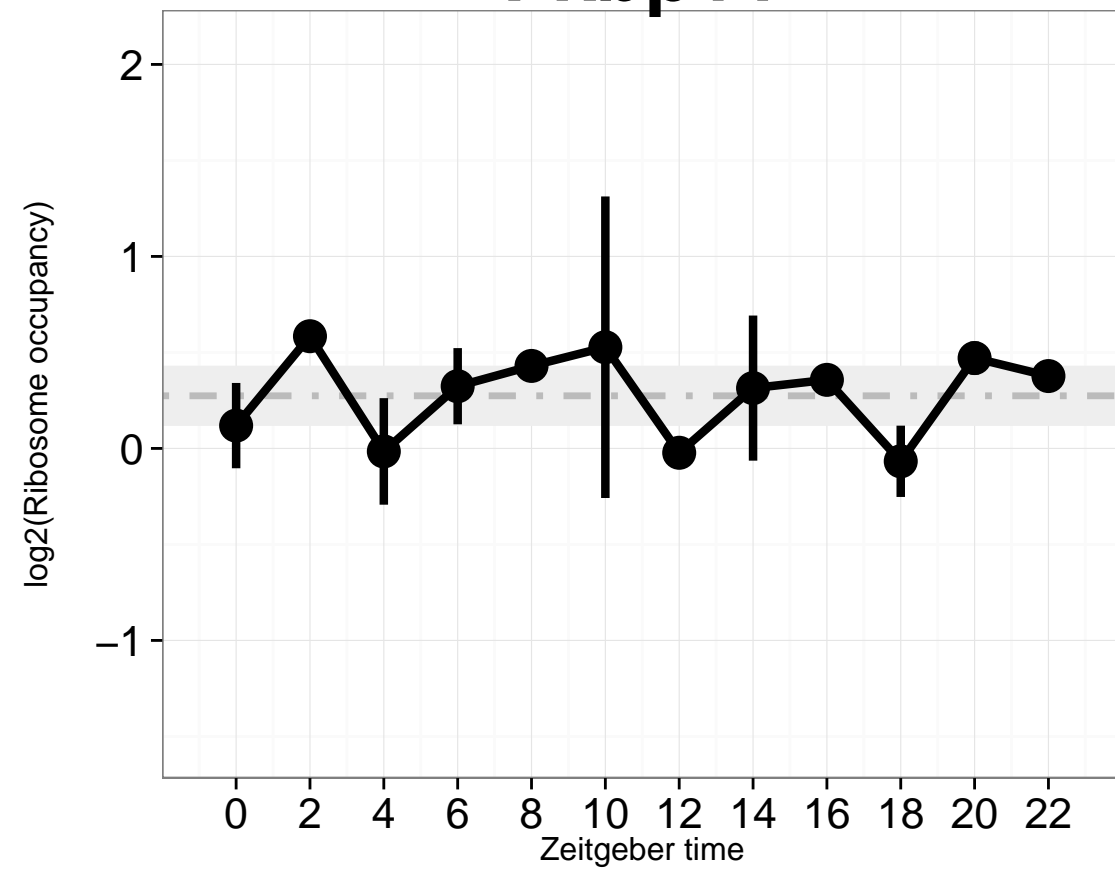

Supplement: Supplementary file 10034 [file 1]

# Evi2b

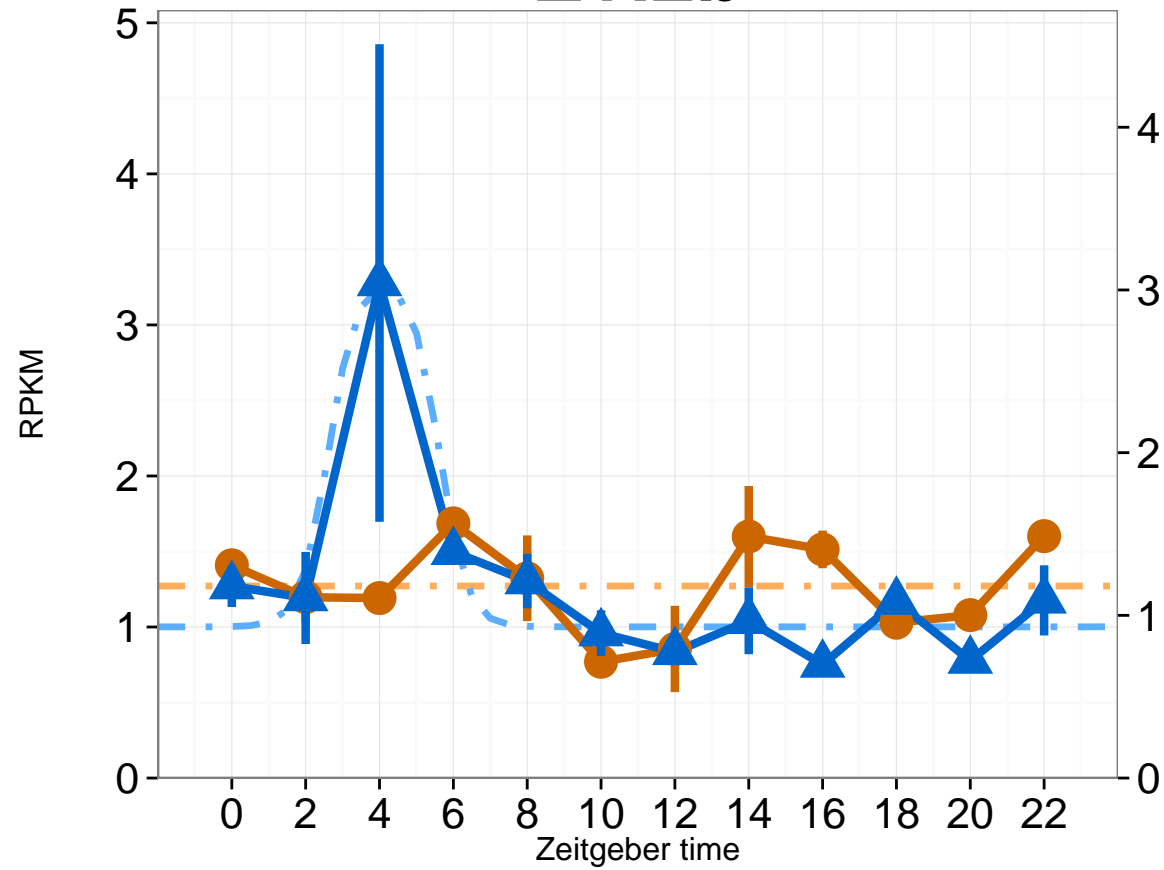

# Evi2b

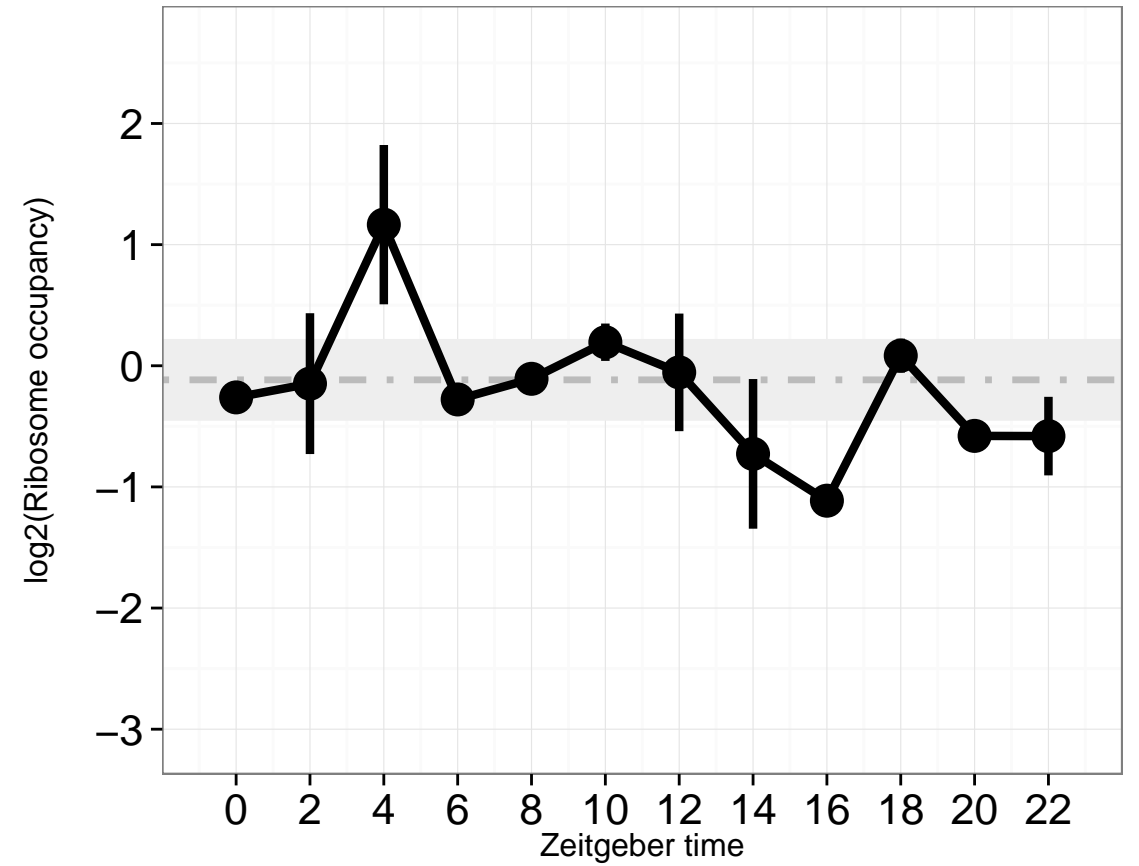

Supplement: Supplementary file 10035 [file 1]

## Ociad2

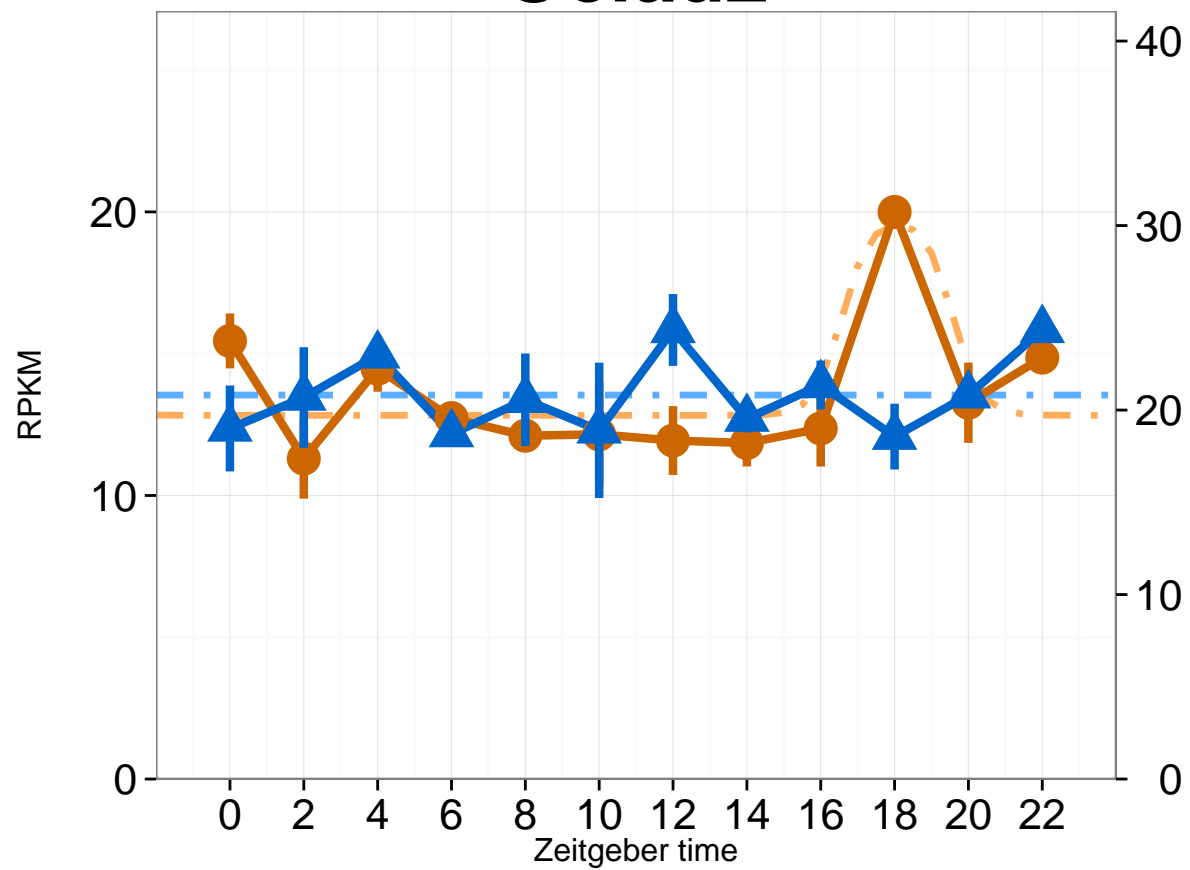

## Ociad2

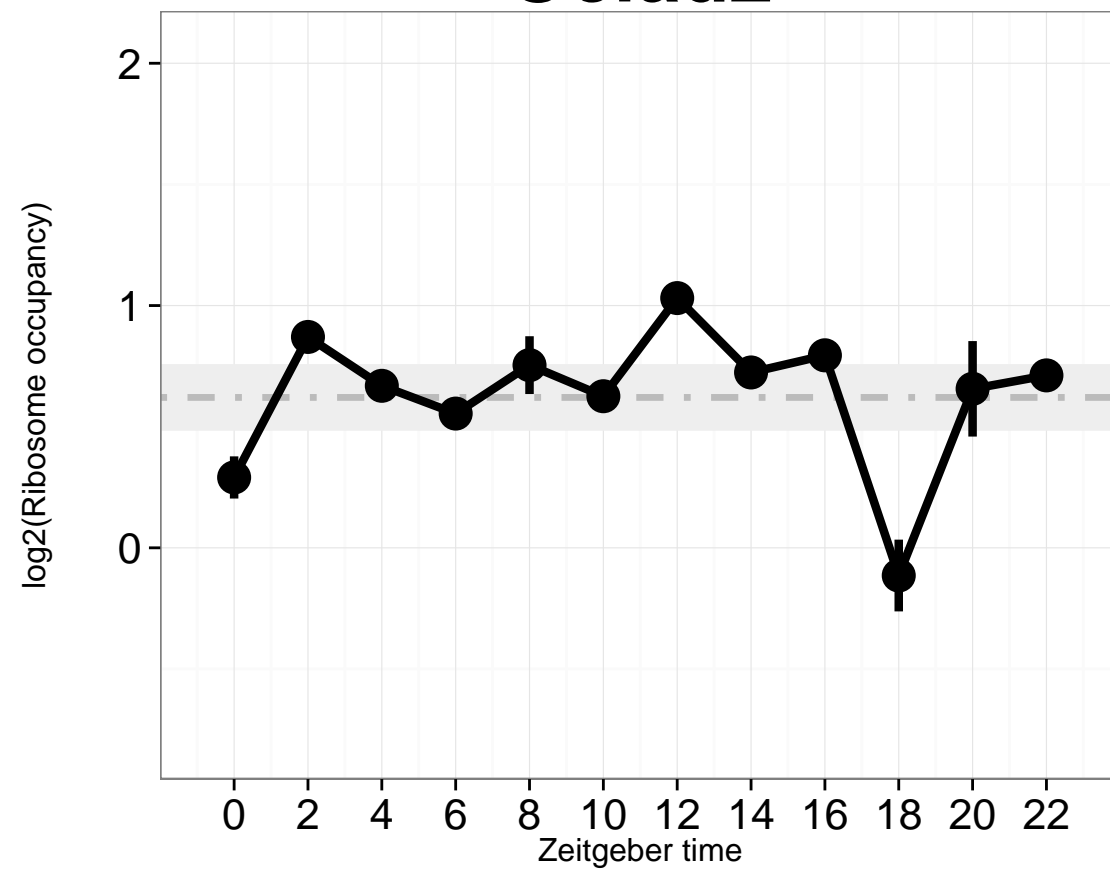

Supplement: Supplementary file 10036 [file 1]

# Dmtf1

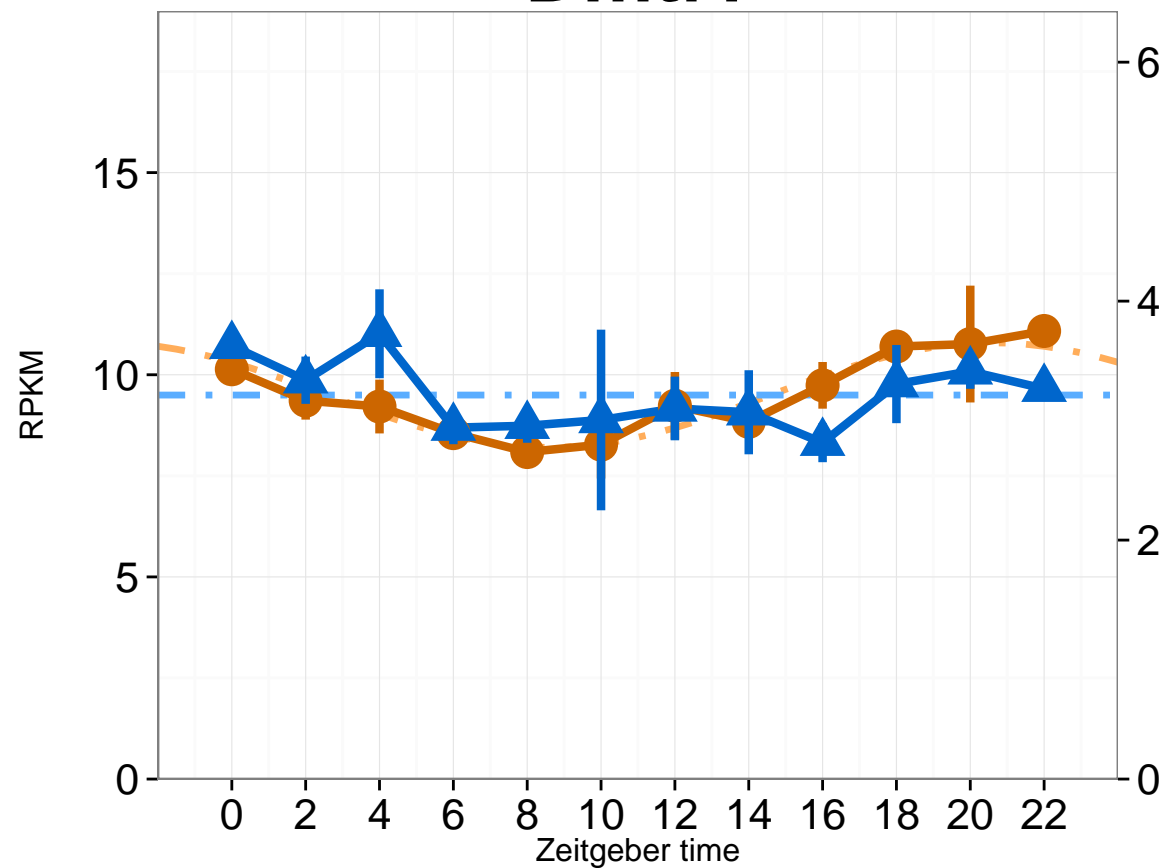

# Dmtf1

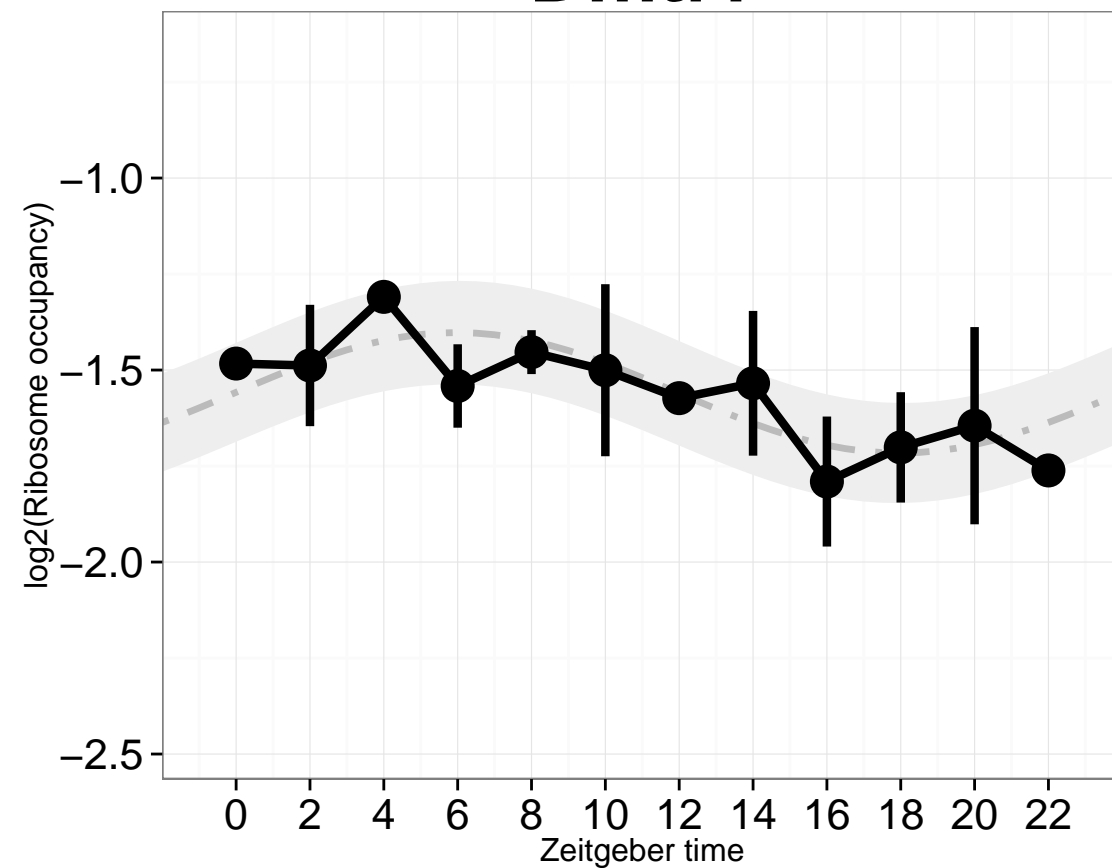

Supplement: Supplementary file 10037 [file 1]
