# Supplementary material (part 101 of 133)
Source: publisher figshare collection journal article supplement (https://springernature.figshare.com/articles/dataset/_/4903193)

# Plod3

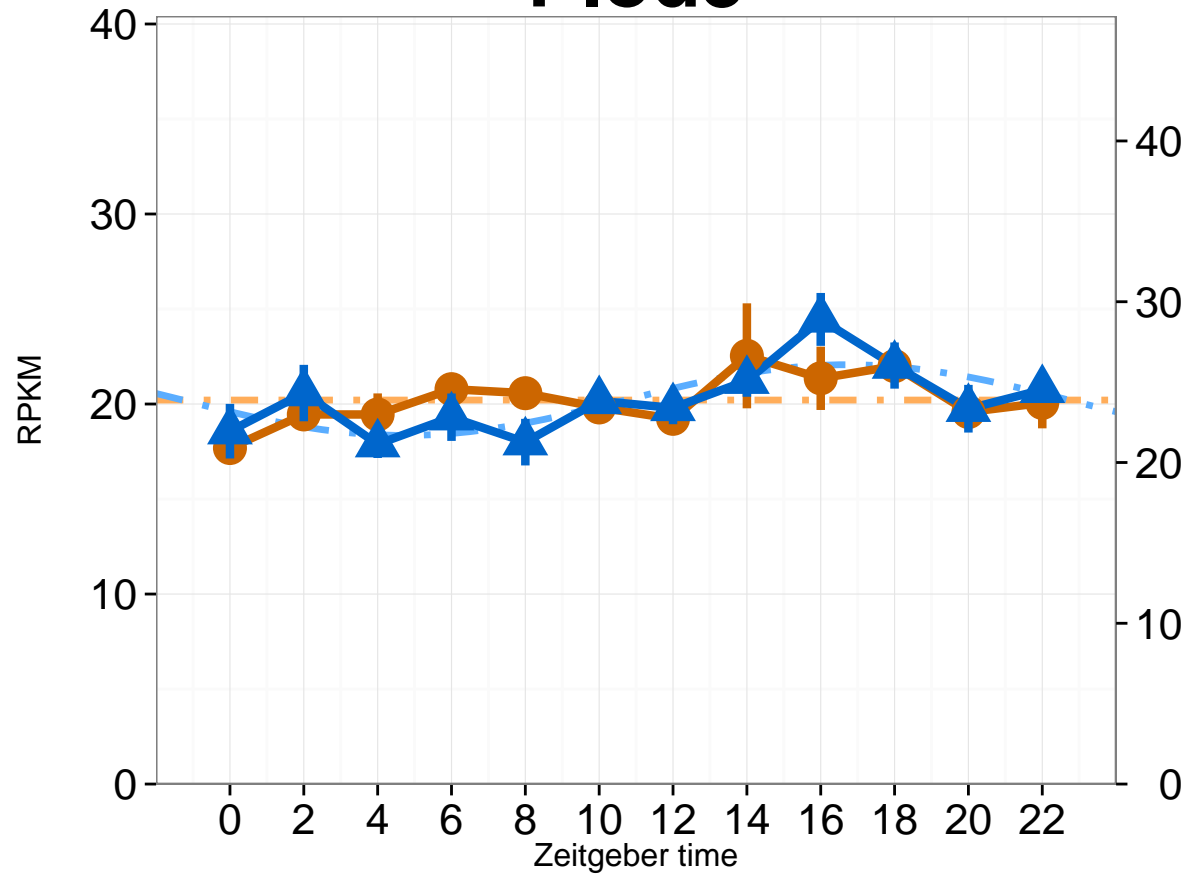

# Plod3

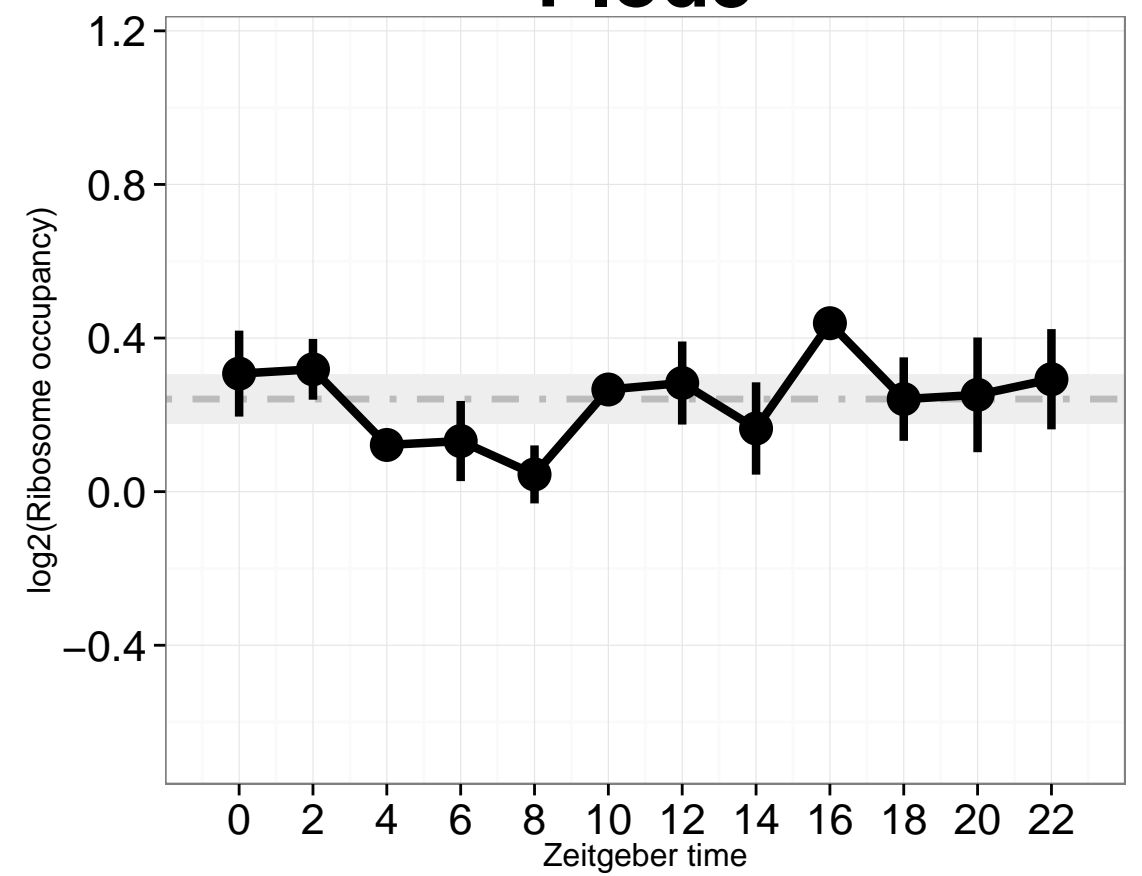

Supplement: Supplementary file 10038 [file 1]

## Tnrc6b

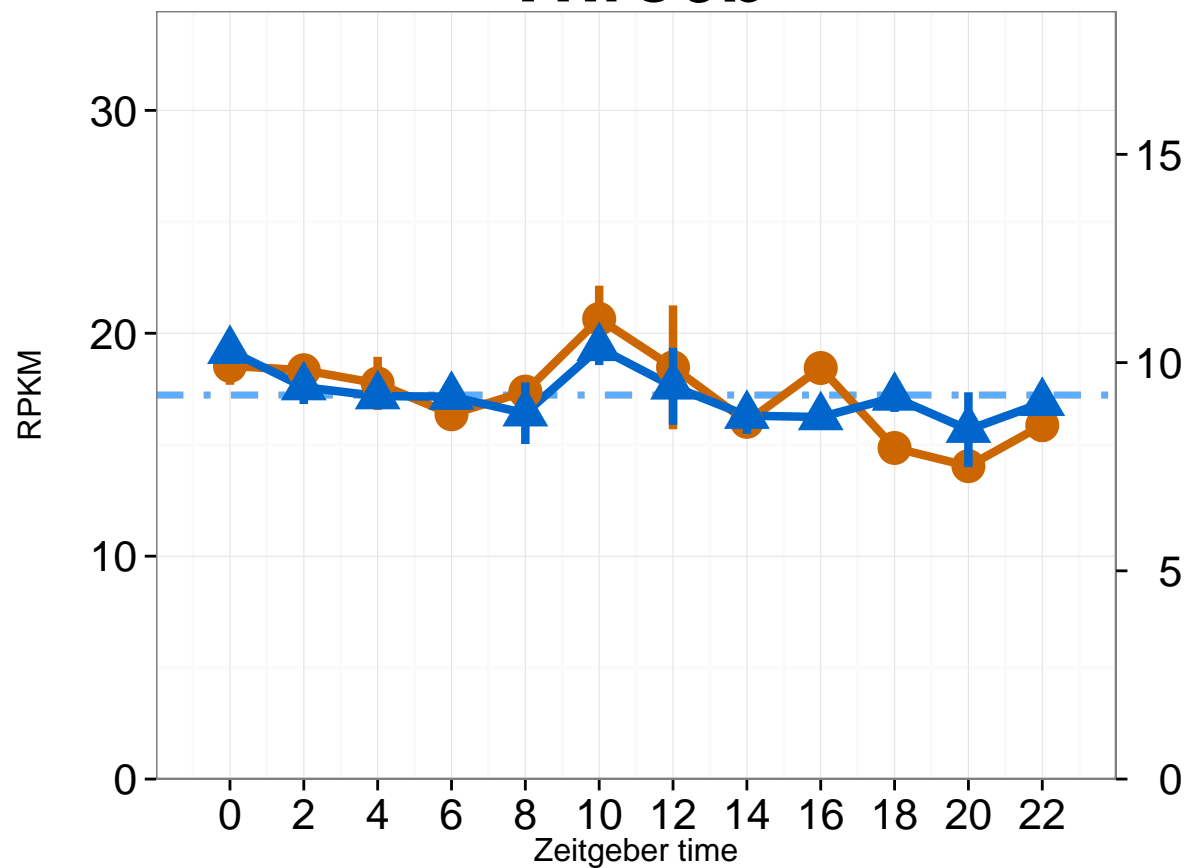

## Tnrc6b

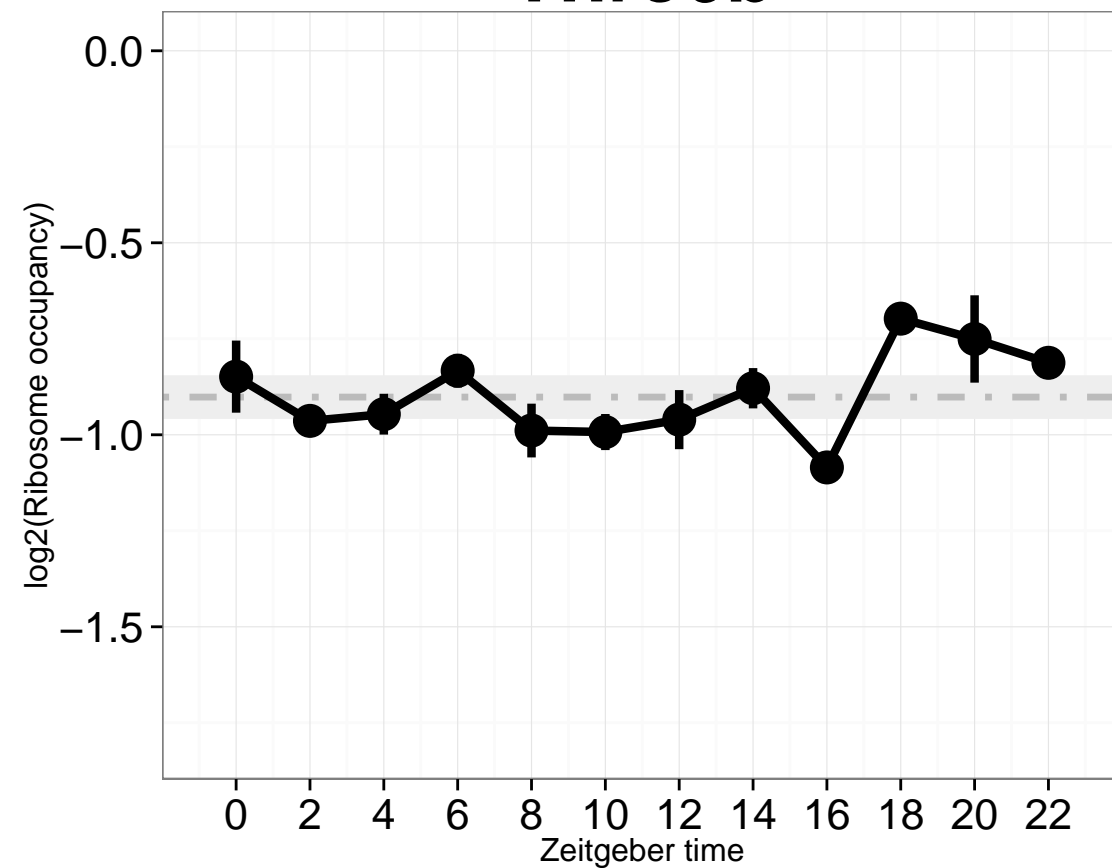

Supplement: Supplementary file 10039 [file 1]

## Zbtb40

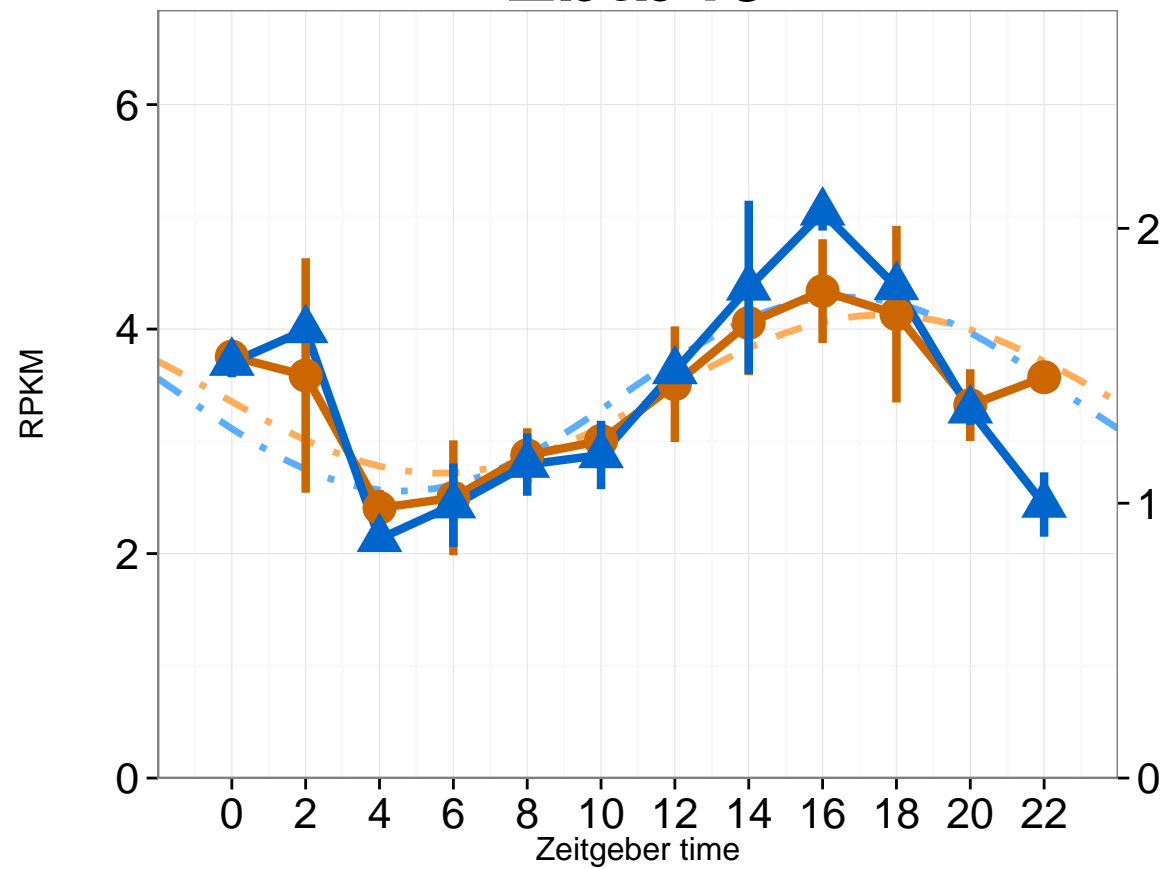

## Zbtb40

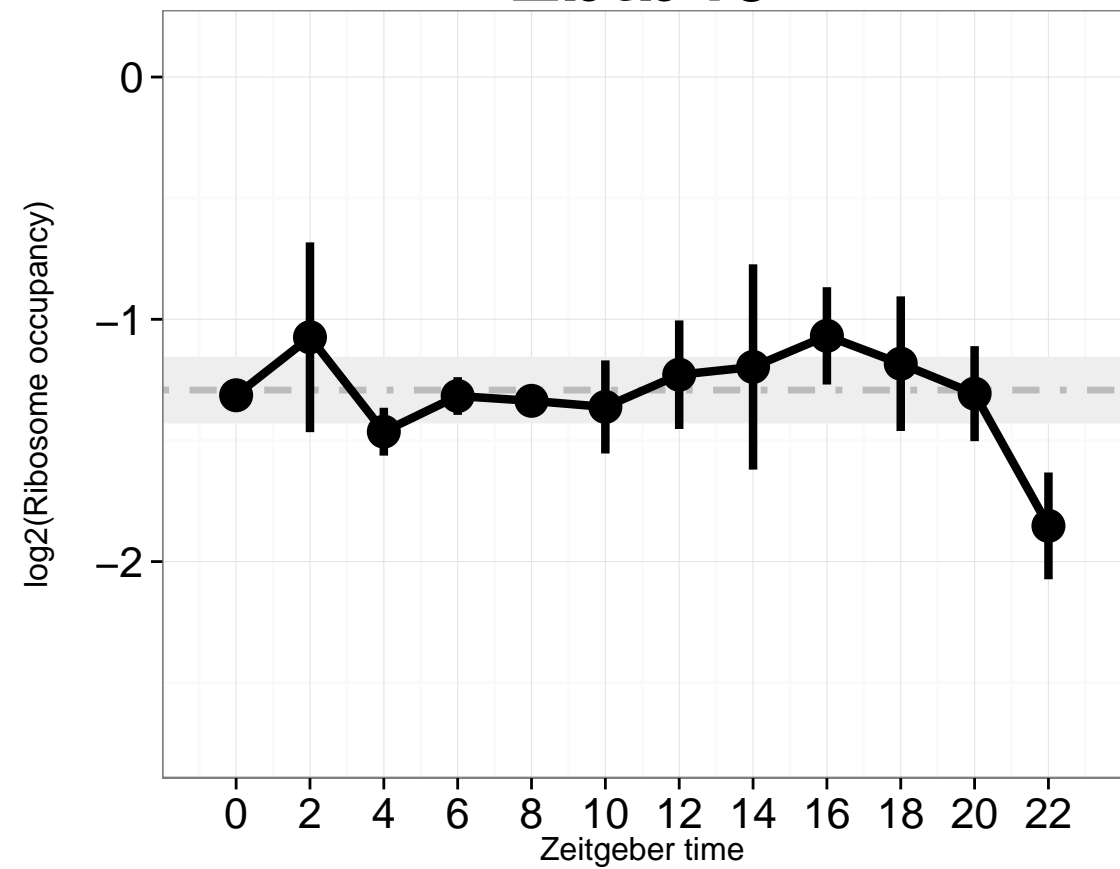

Supplement: Supplementary file 10040 [file 1]

## Gng5

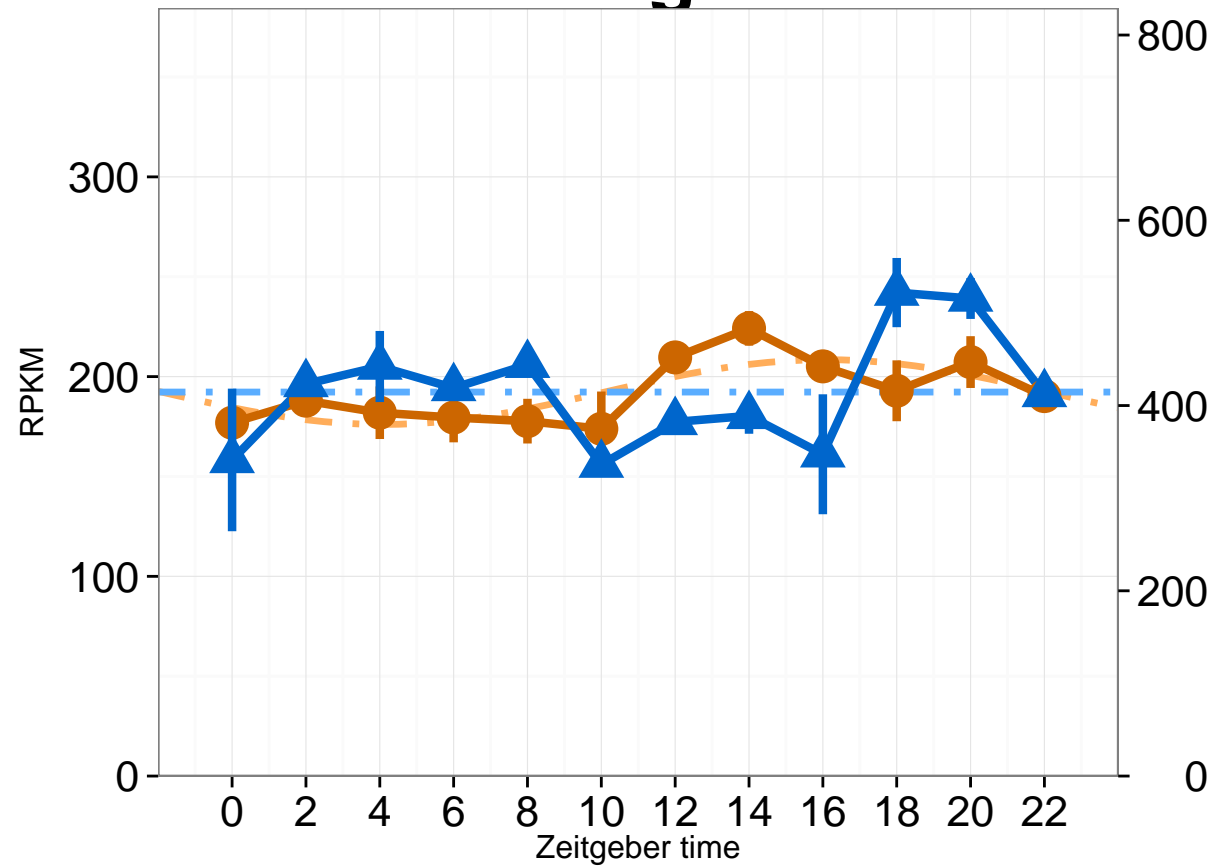

## Gng5

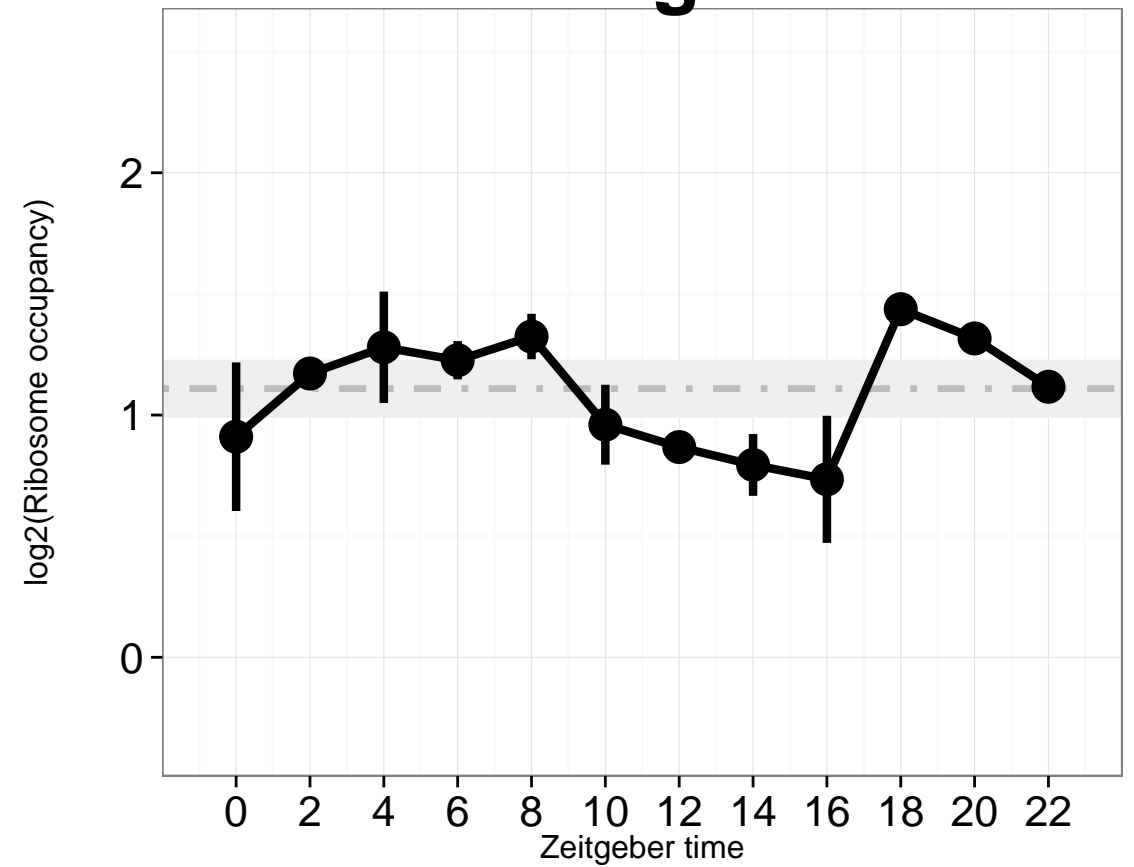

Supplement: Supplementary file 10041 [file 1]

# Efcab7

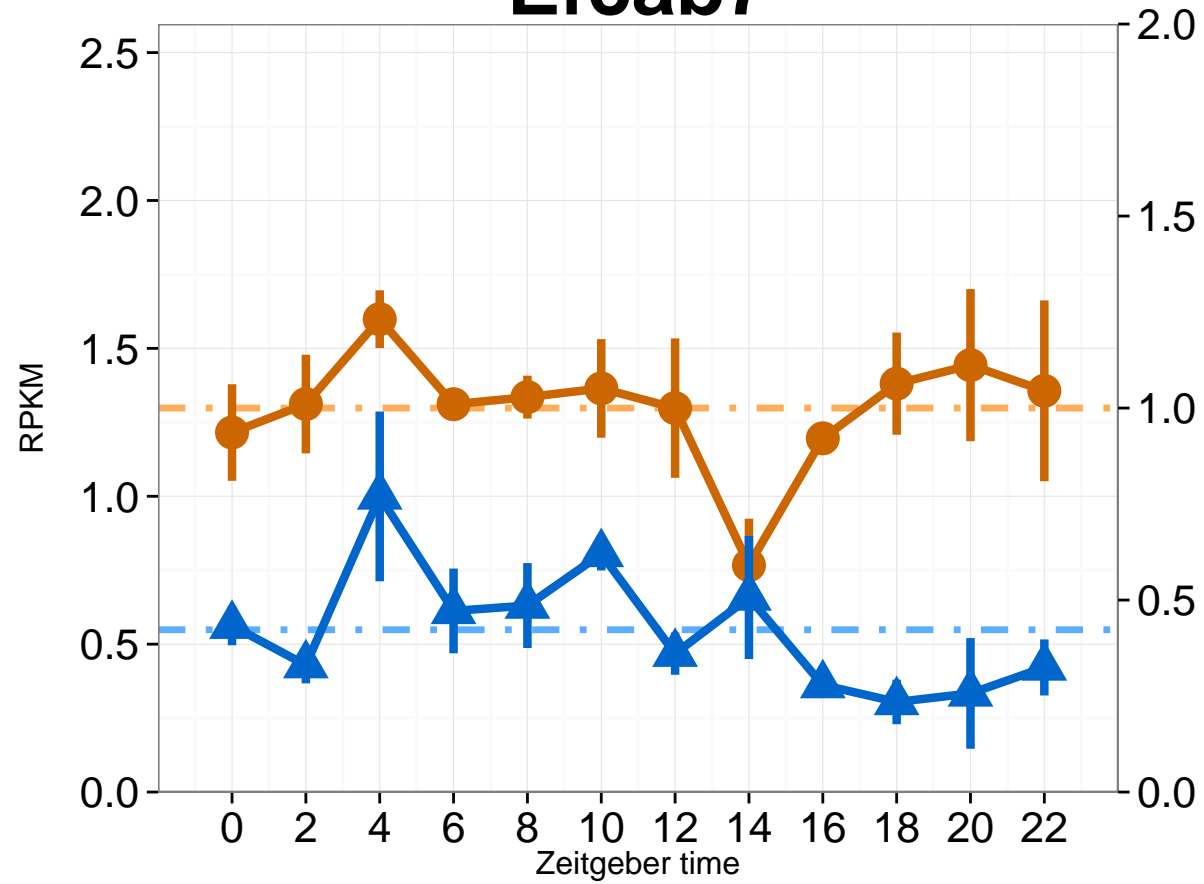

# Efcab7

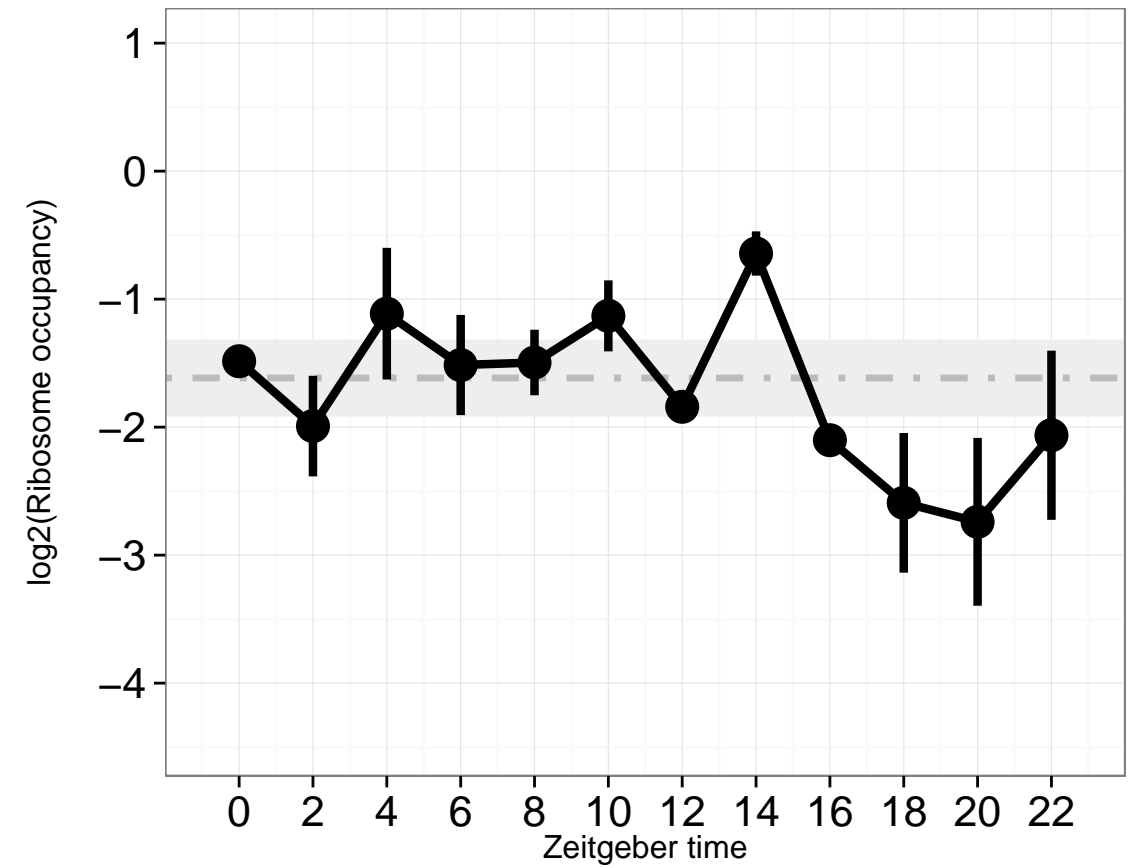

Supplement: Supplementary file 10042 [file 1]

# Akr1c19

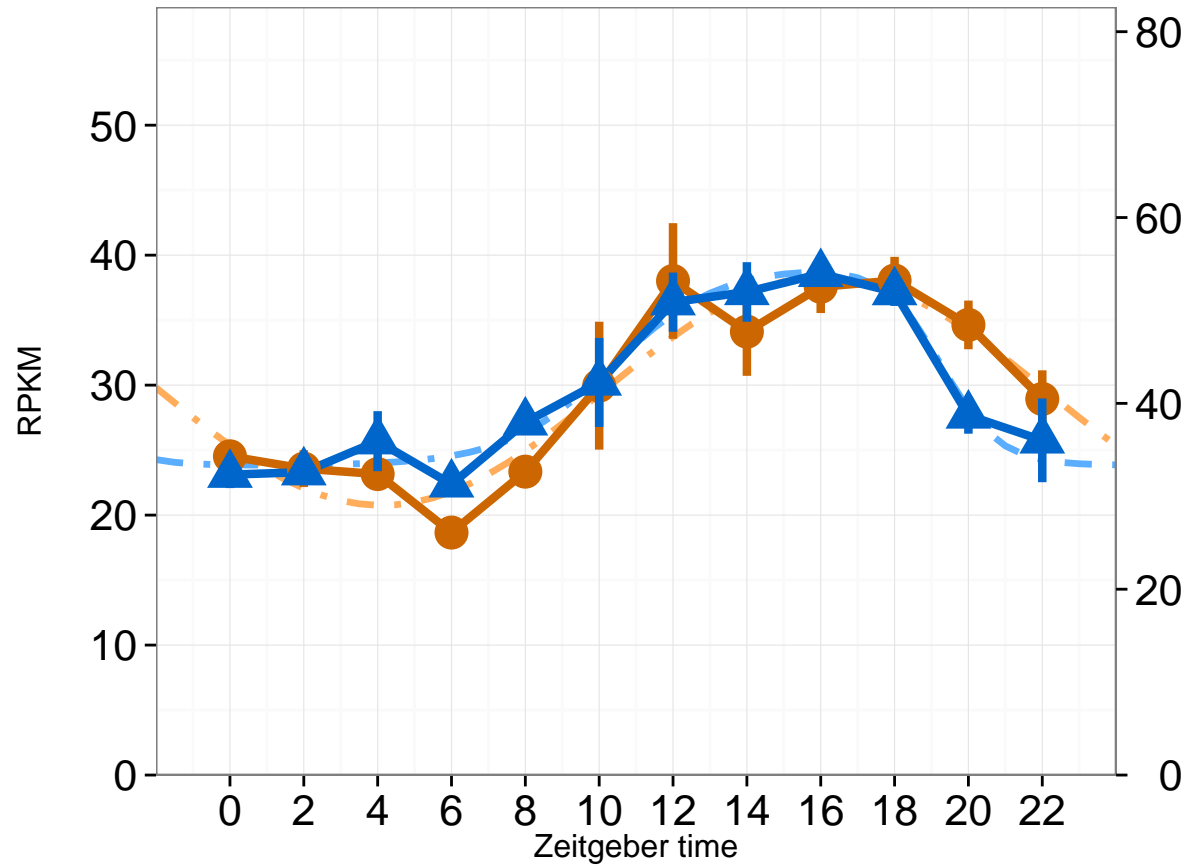

# Akr1c19

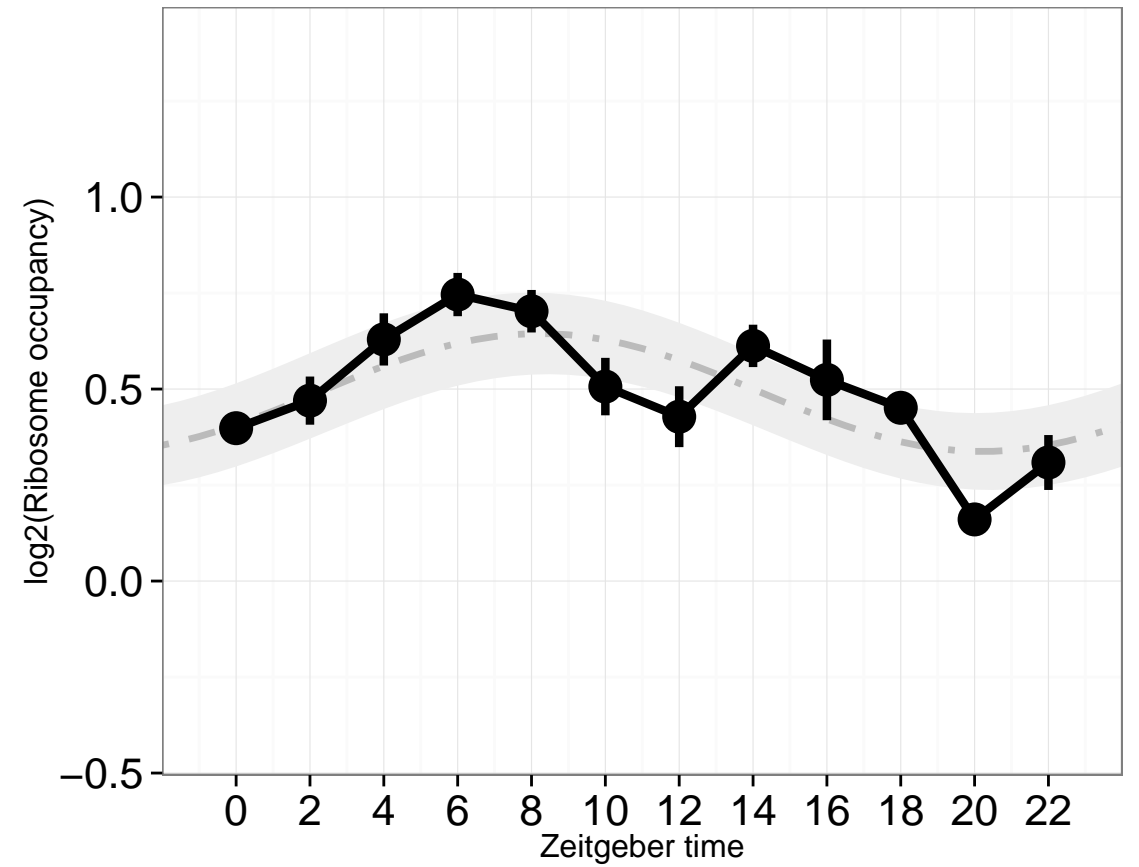

Supplement: Supplementary file 10043 [file 1]

# Bace1

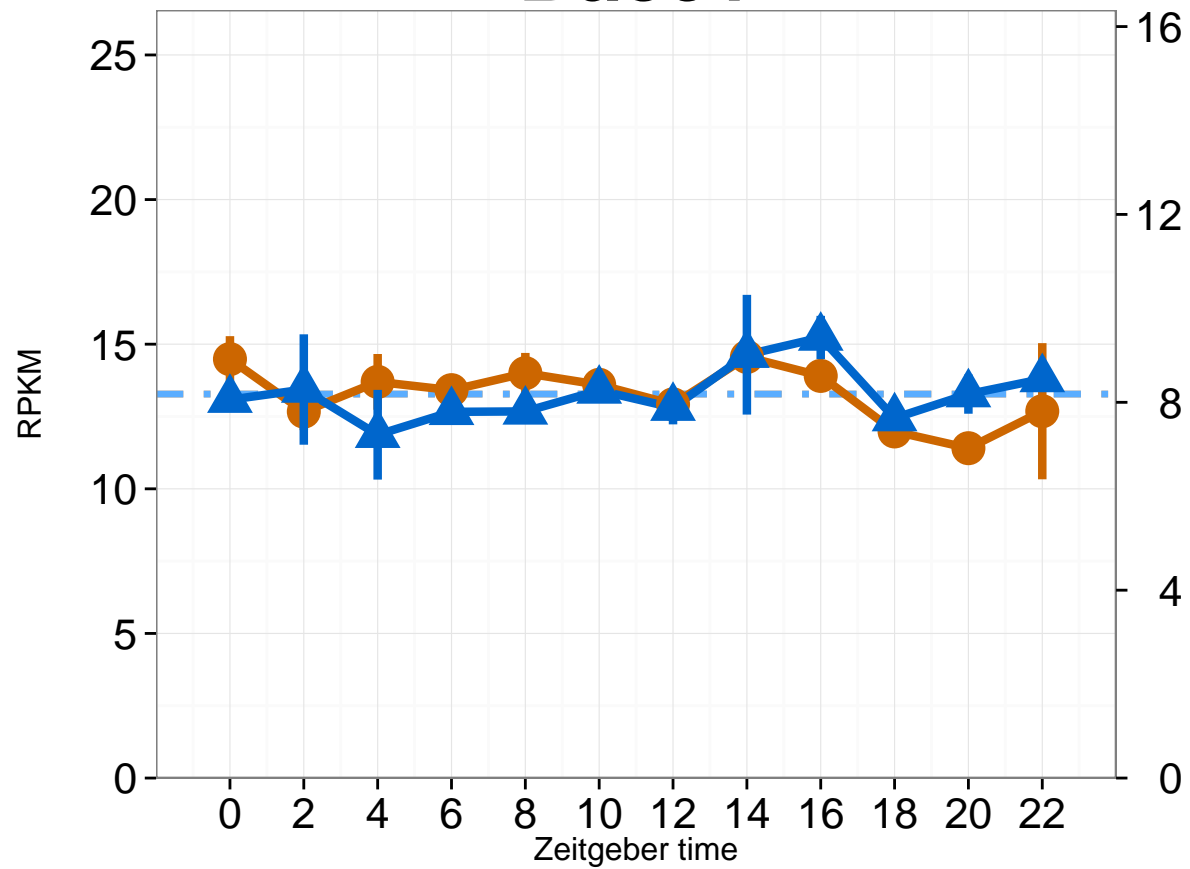

# Bace1

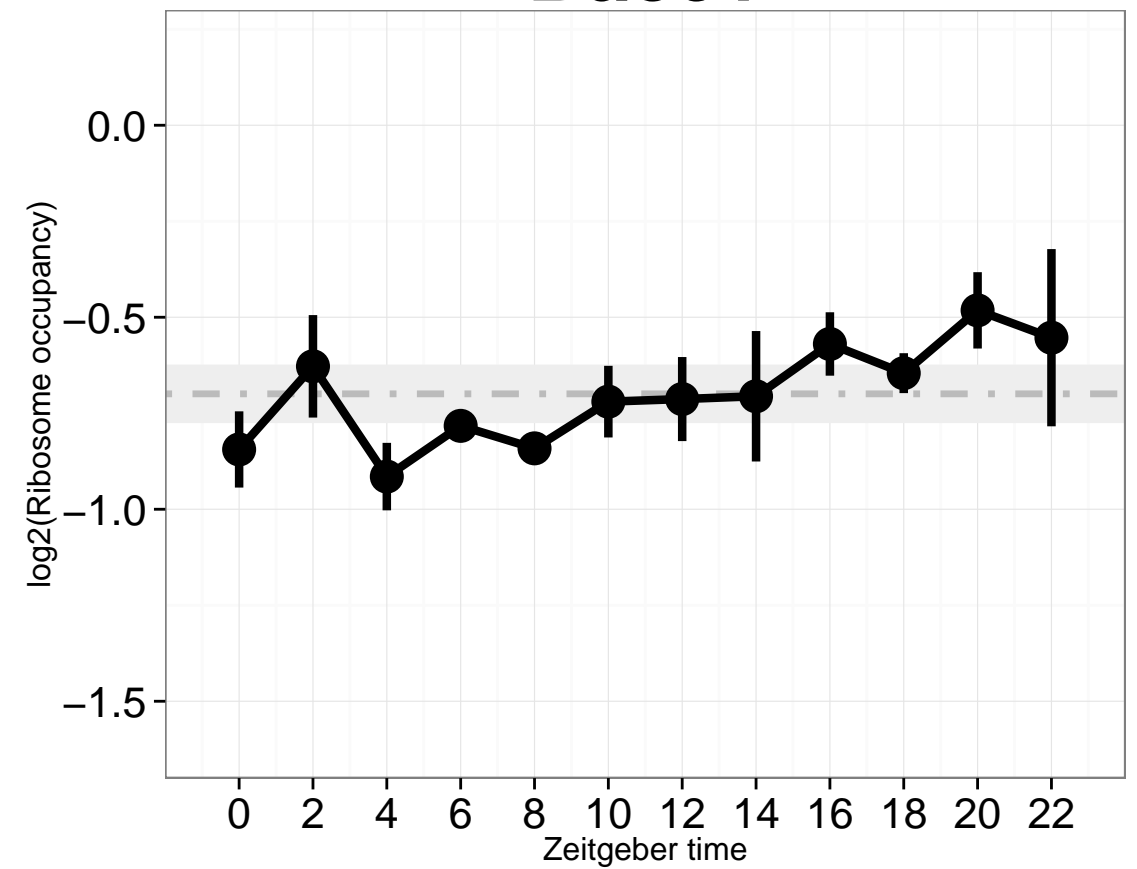

Supplement: Supplementary file 10044 [file 1]

# Dhcr24

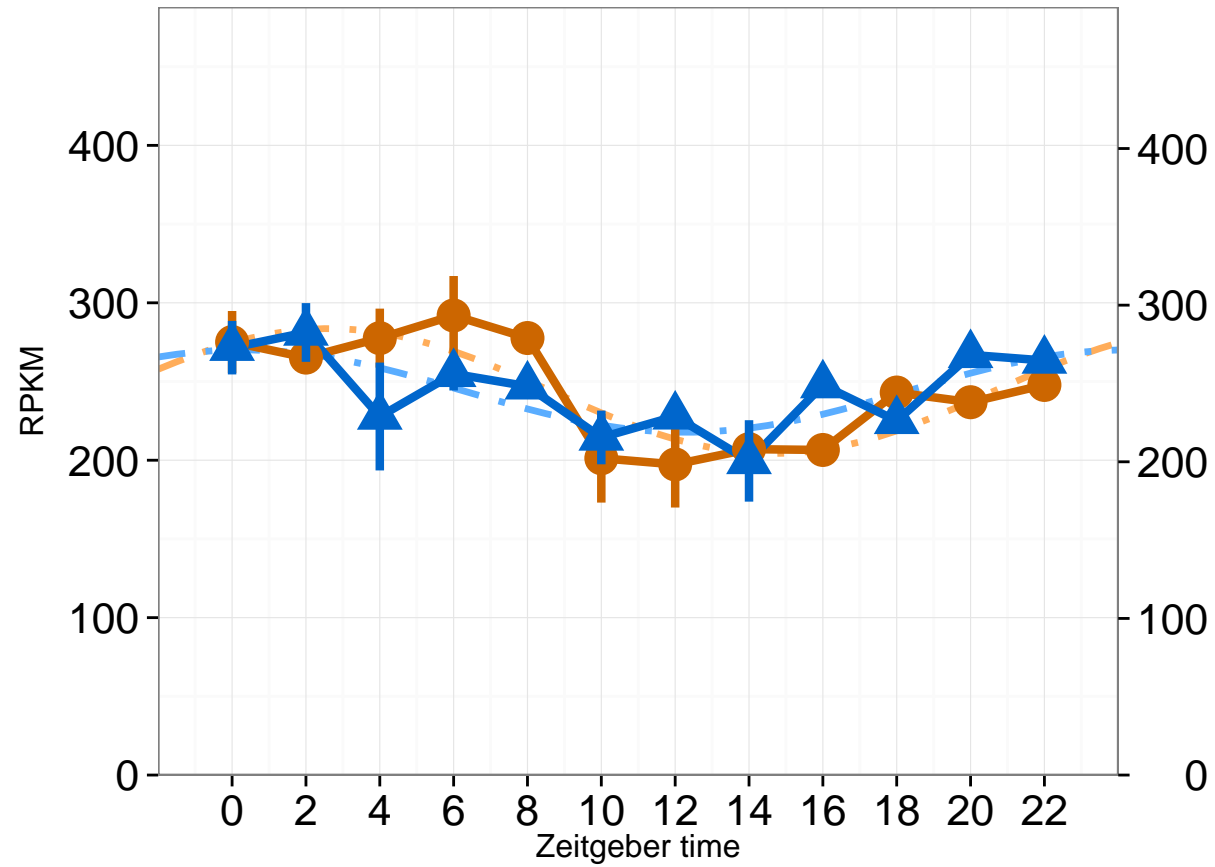

# Dhcr24

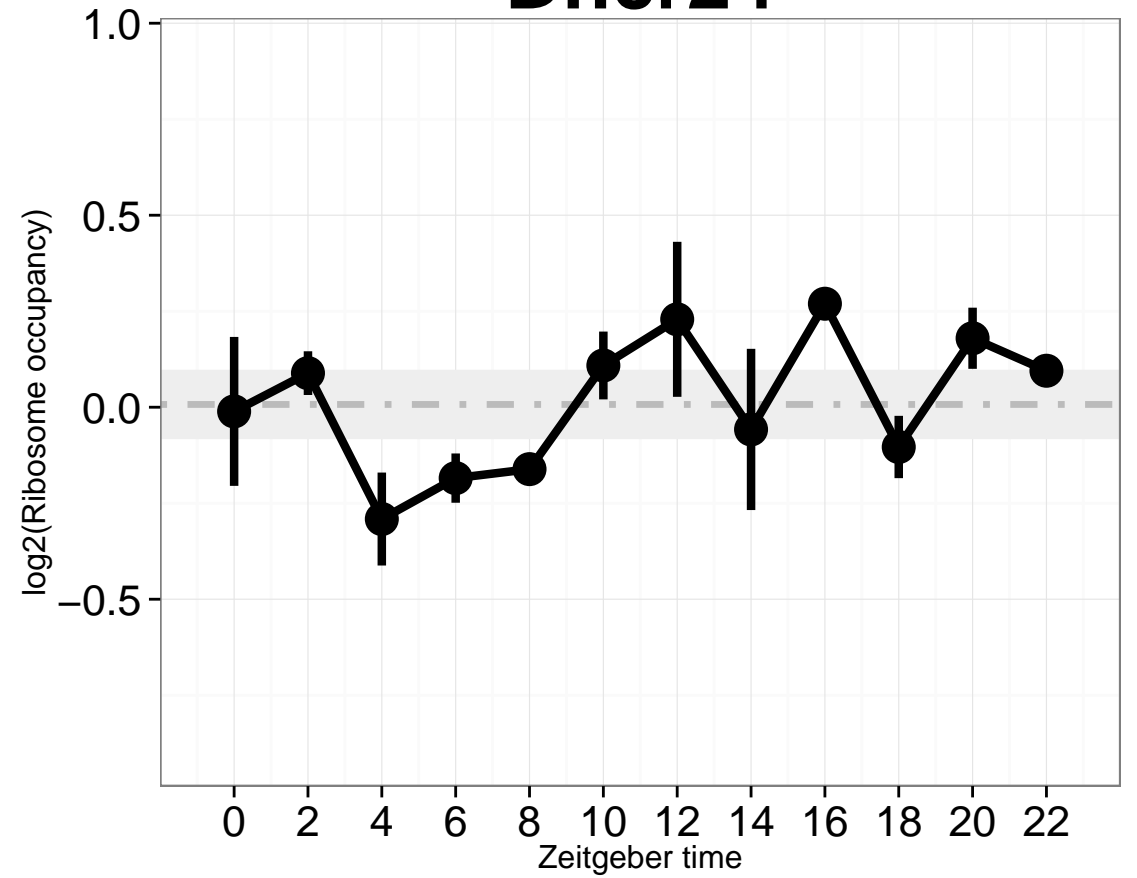

Supplement: Supplementary file 10045 [file 1]

# Upp1

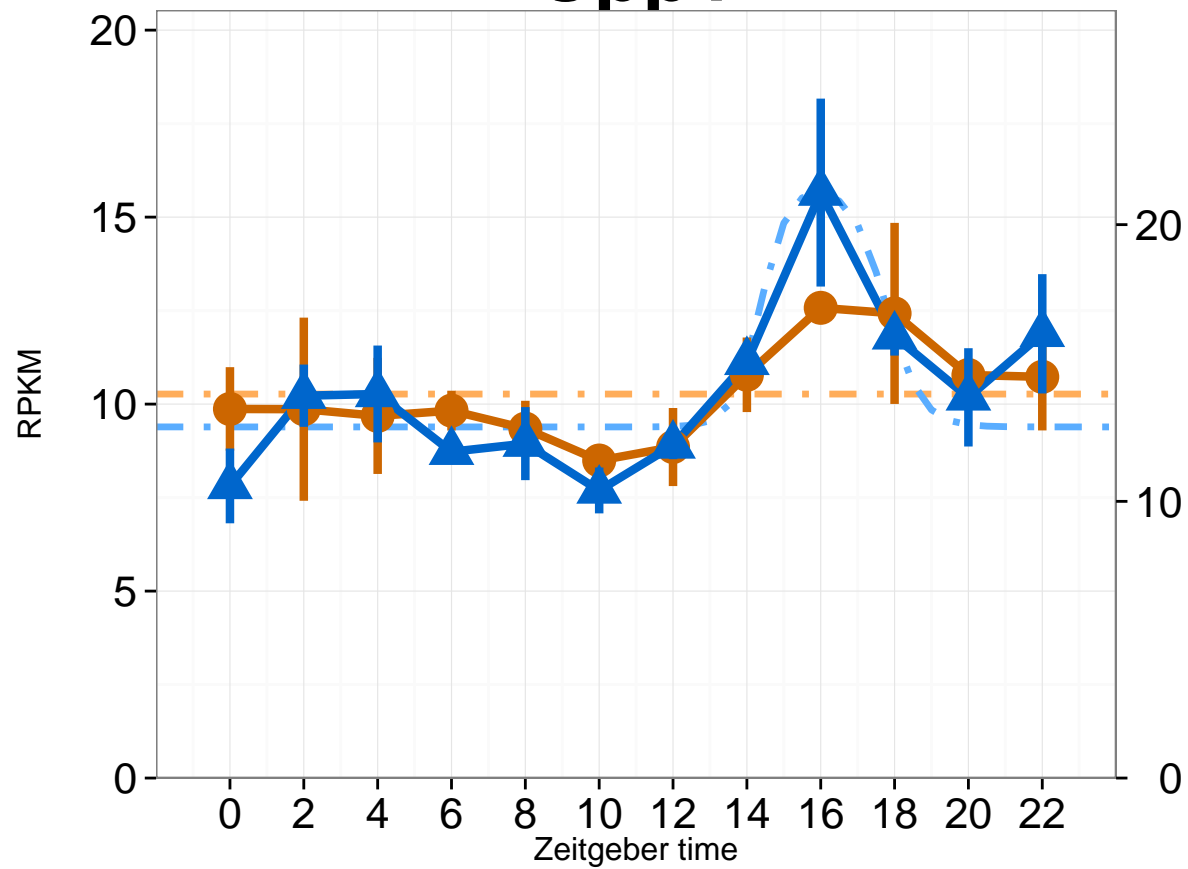

# Upp1

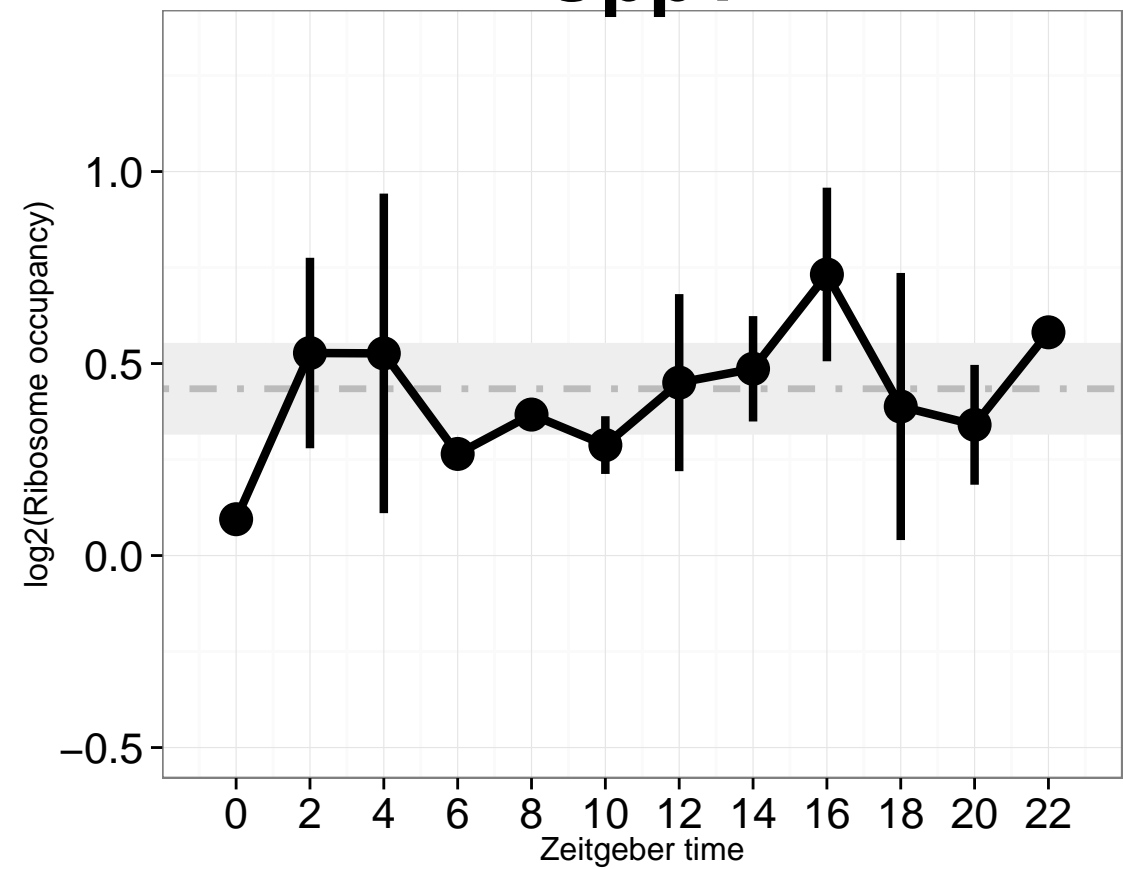

Supplement: Supplementary file 10046 [file 1]

# Stxbp3a

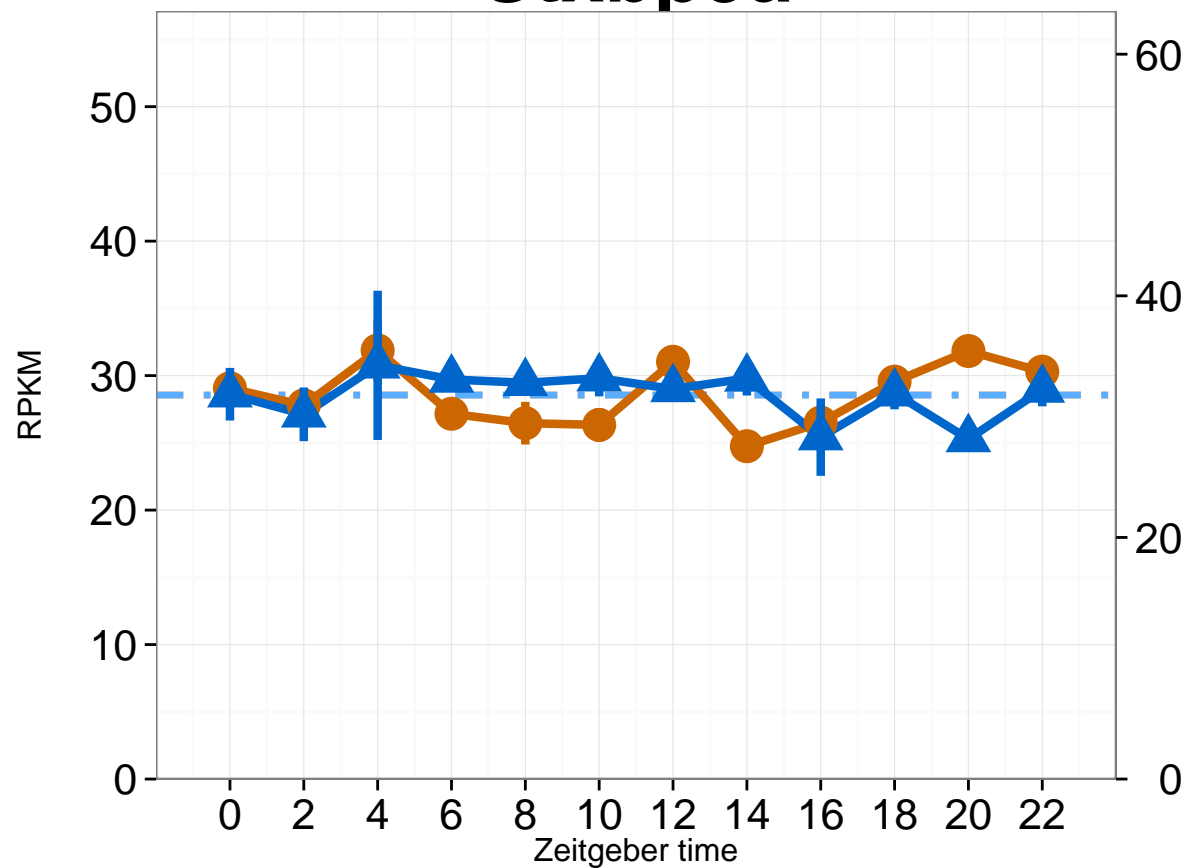

# Stxbp3a

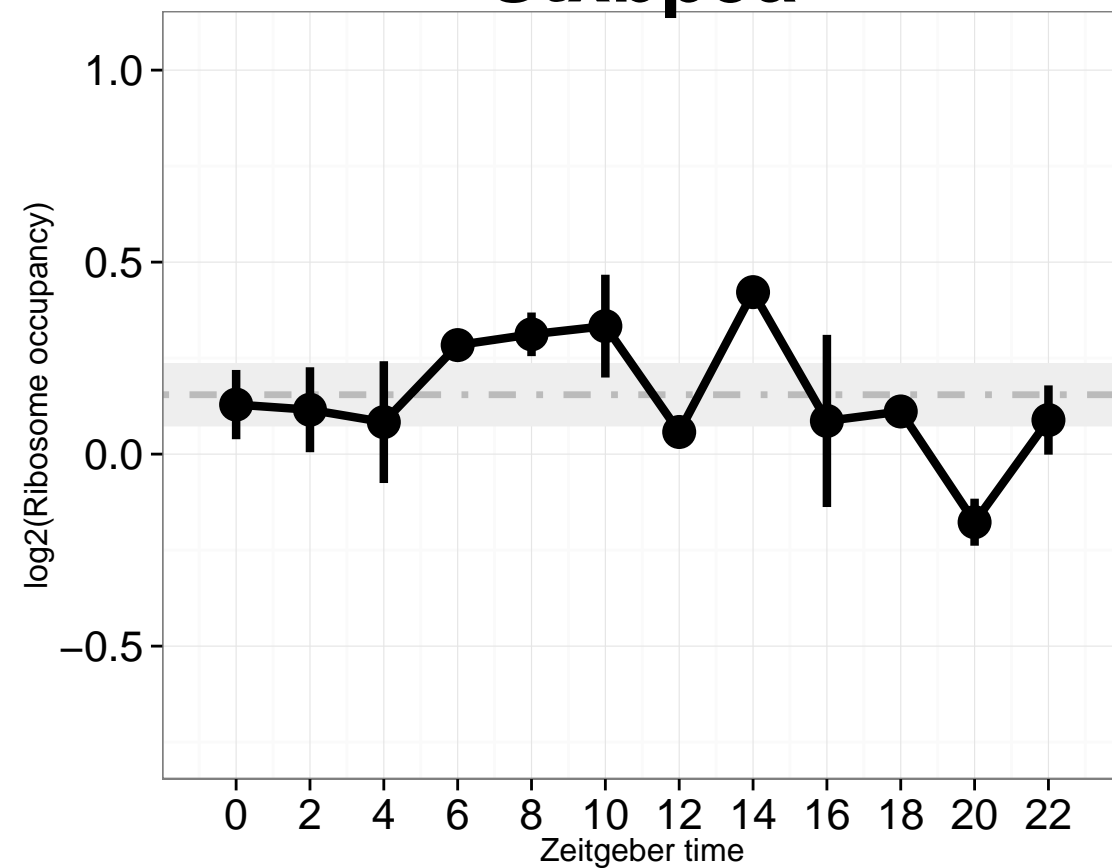

Supplement: Supplementary file 10047 [file 1]

# D030056L22Rik

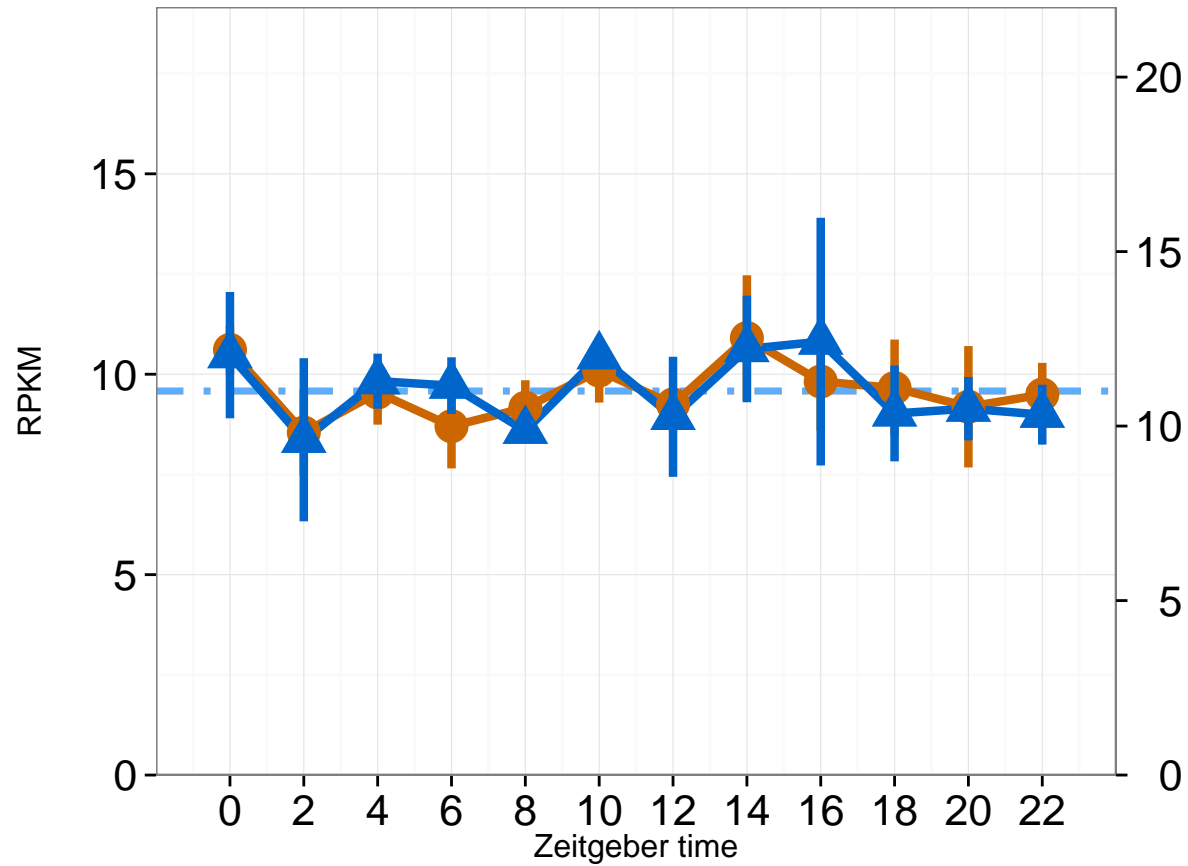

# D030056L22Rik

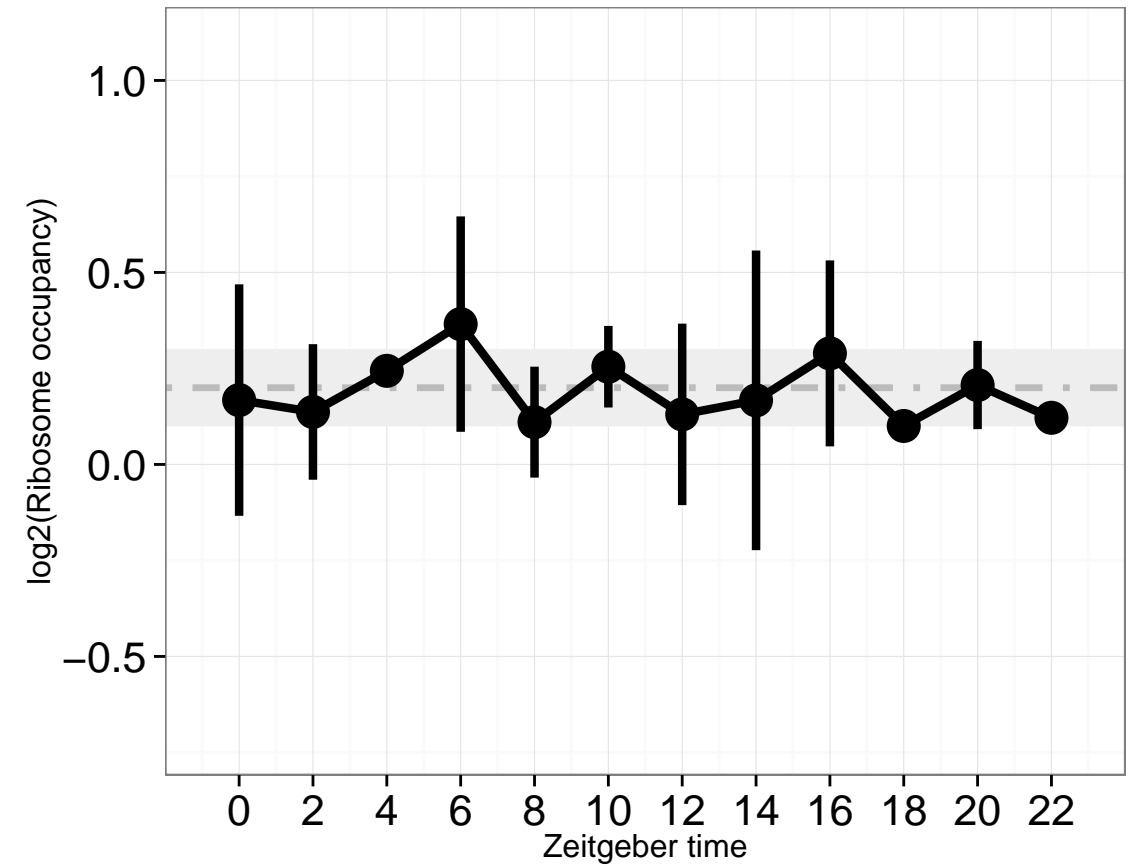

Supplement: Supplementary file 10048 [file 1]

## Aqp7

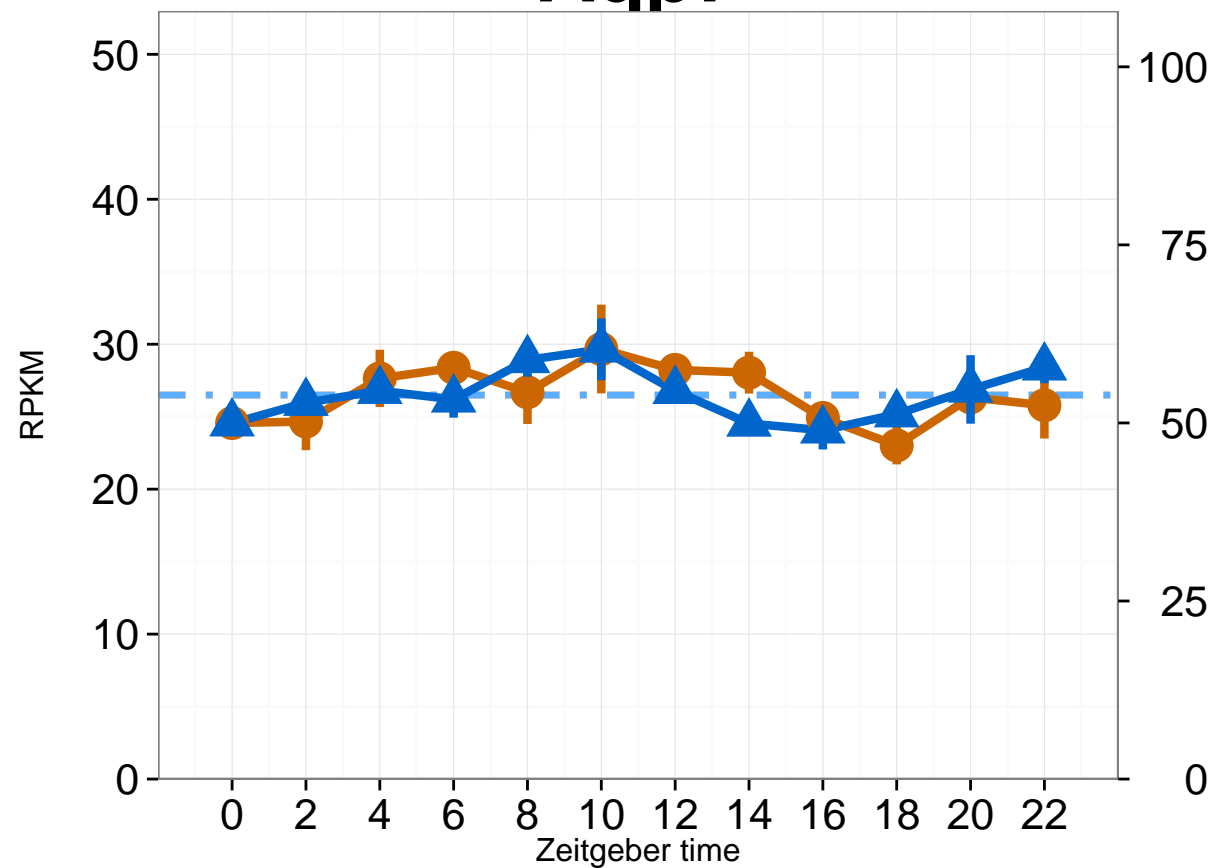

## Aqp7

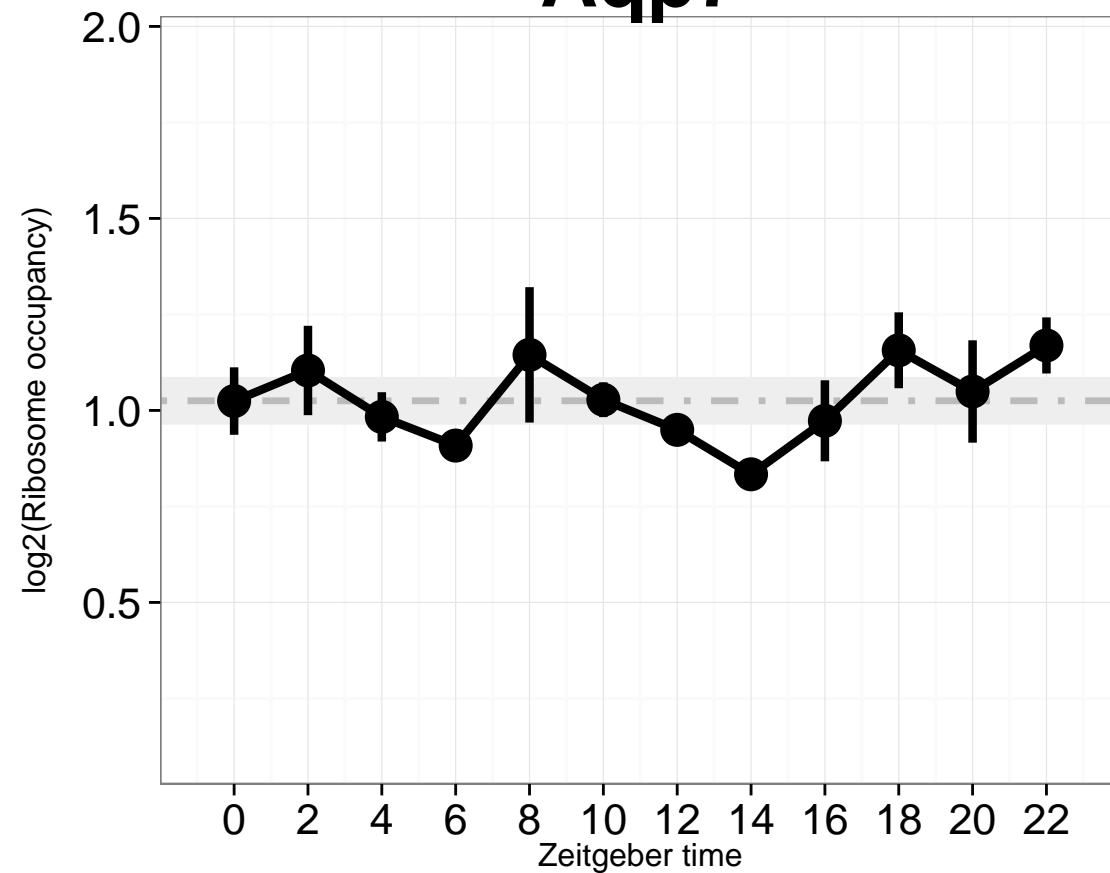

Supplement: Supplementary file 10049 [file 1]

# Pth1r

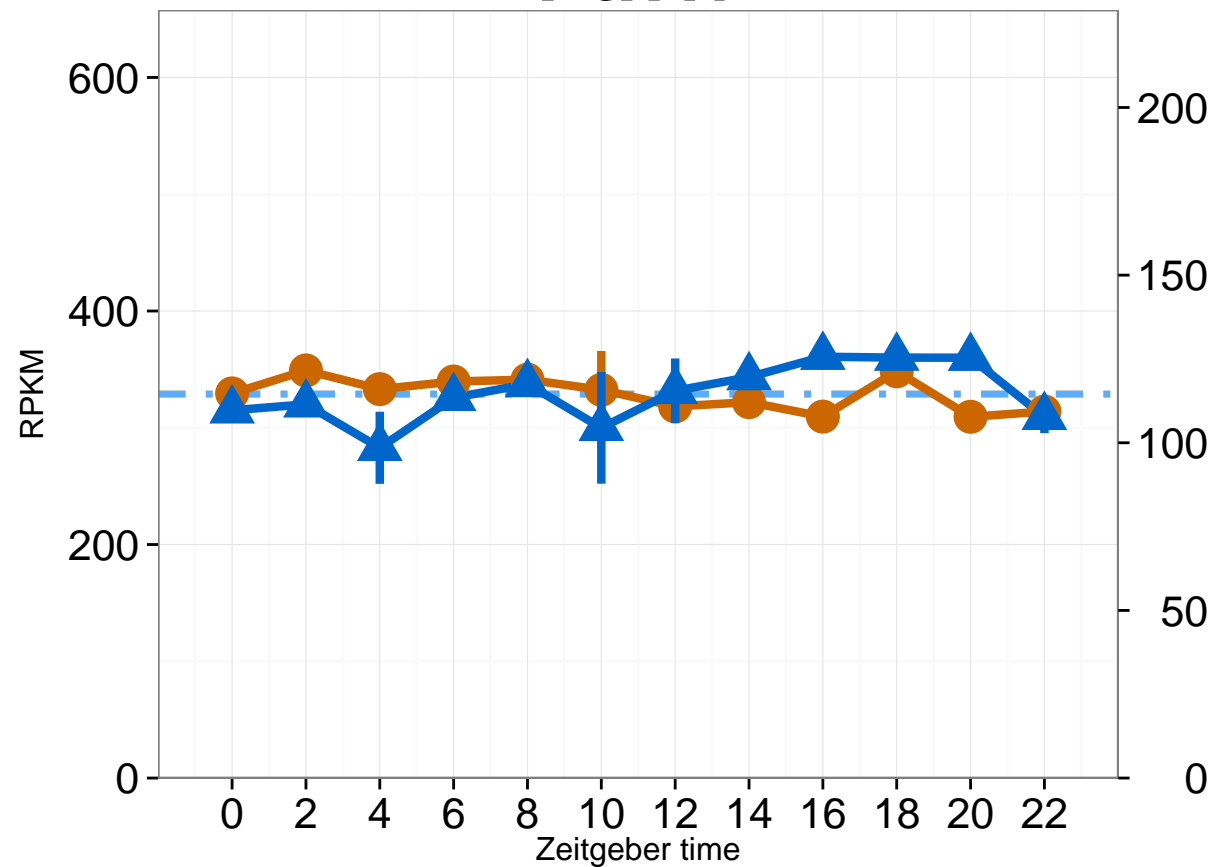

# Pth1r

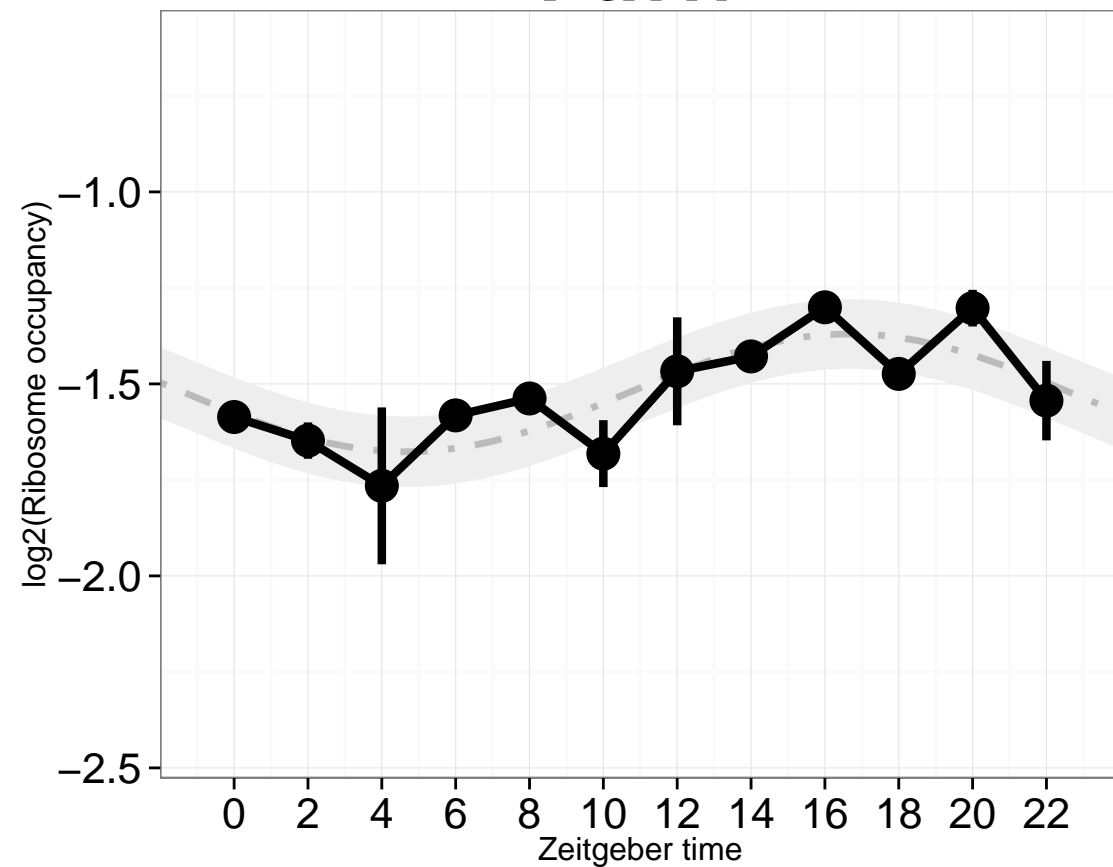

Supplement: Supplementary file 10050 [file 1]

# Cd59a

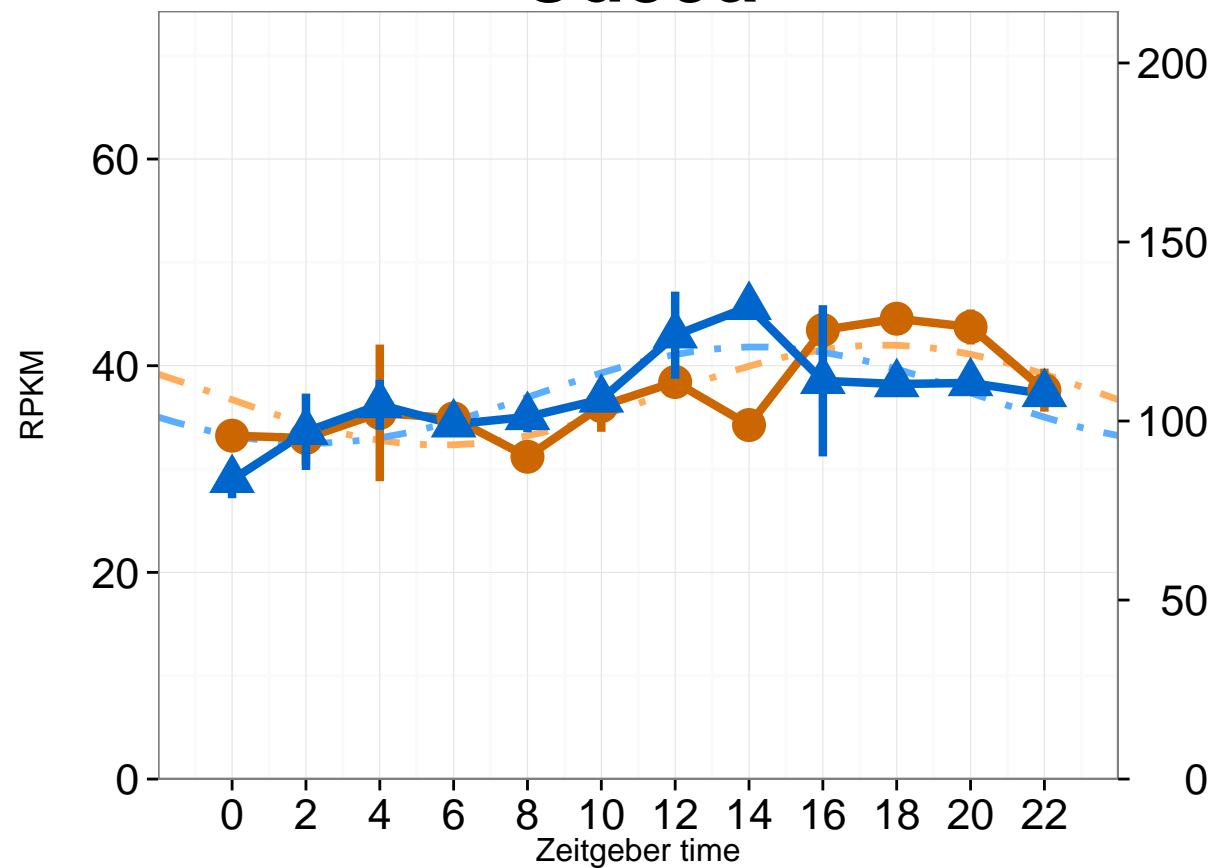

# Cd59a

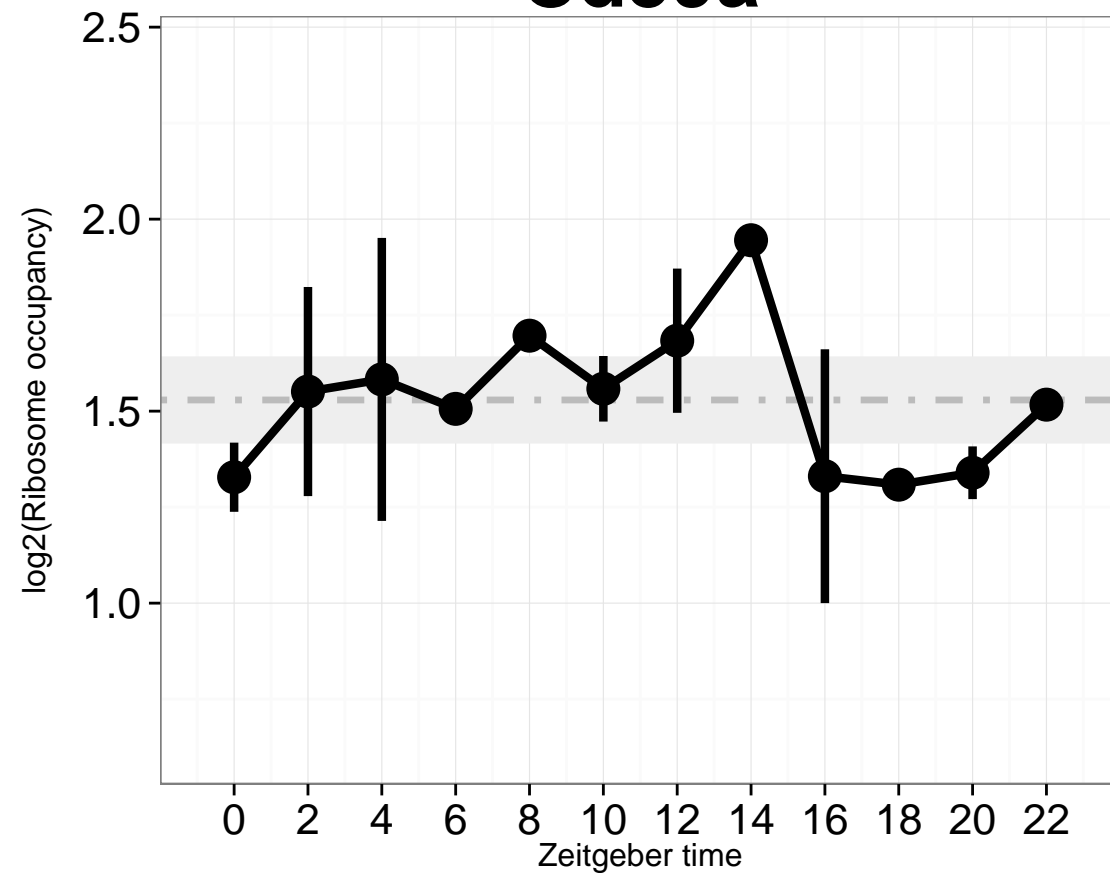

Supplement: Supplementary file 10051 [file 1]

## Gnai1

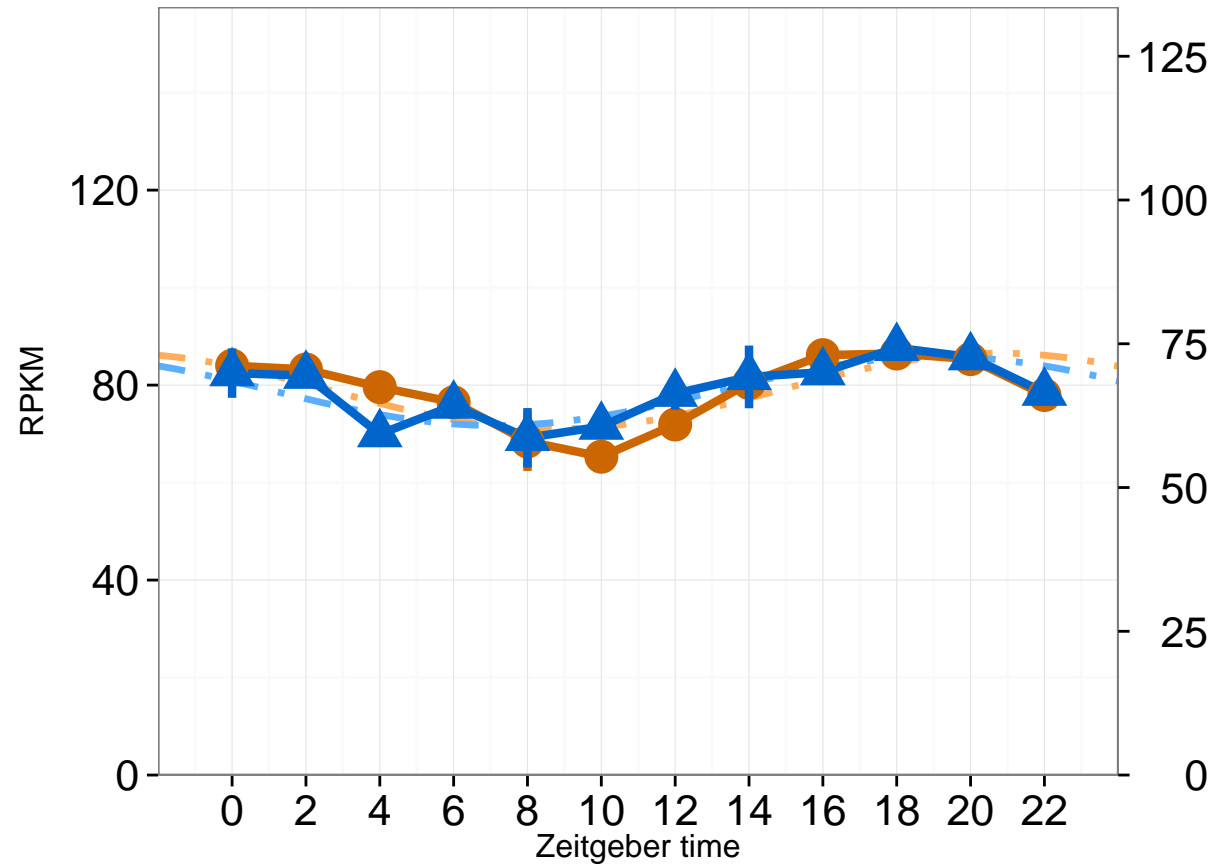

## Gnai1

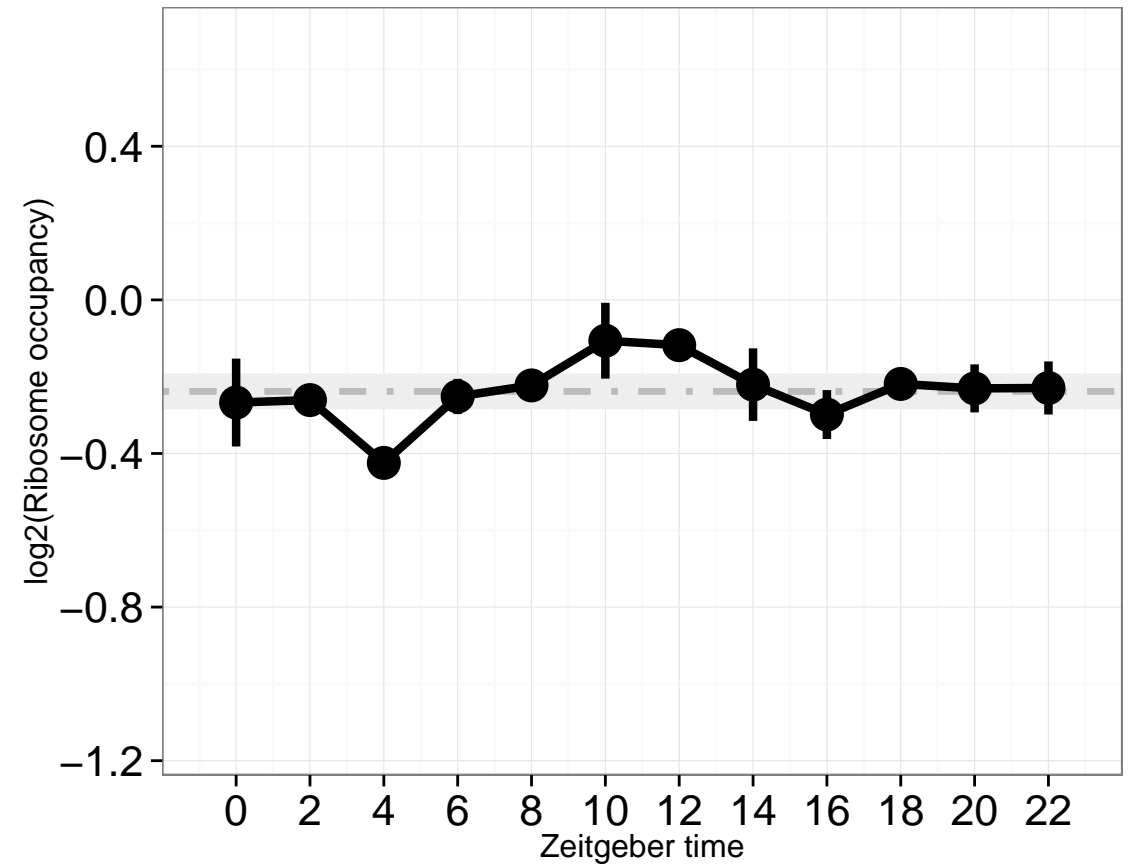

Supplement: Supplementary file 10052 [file 1]

# Slitrk1

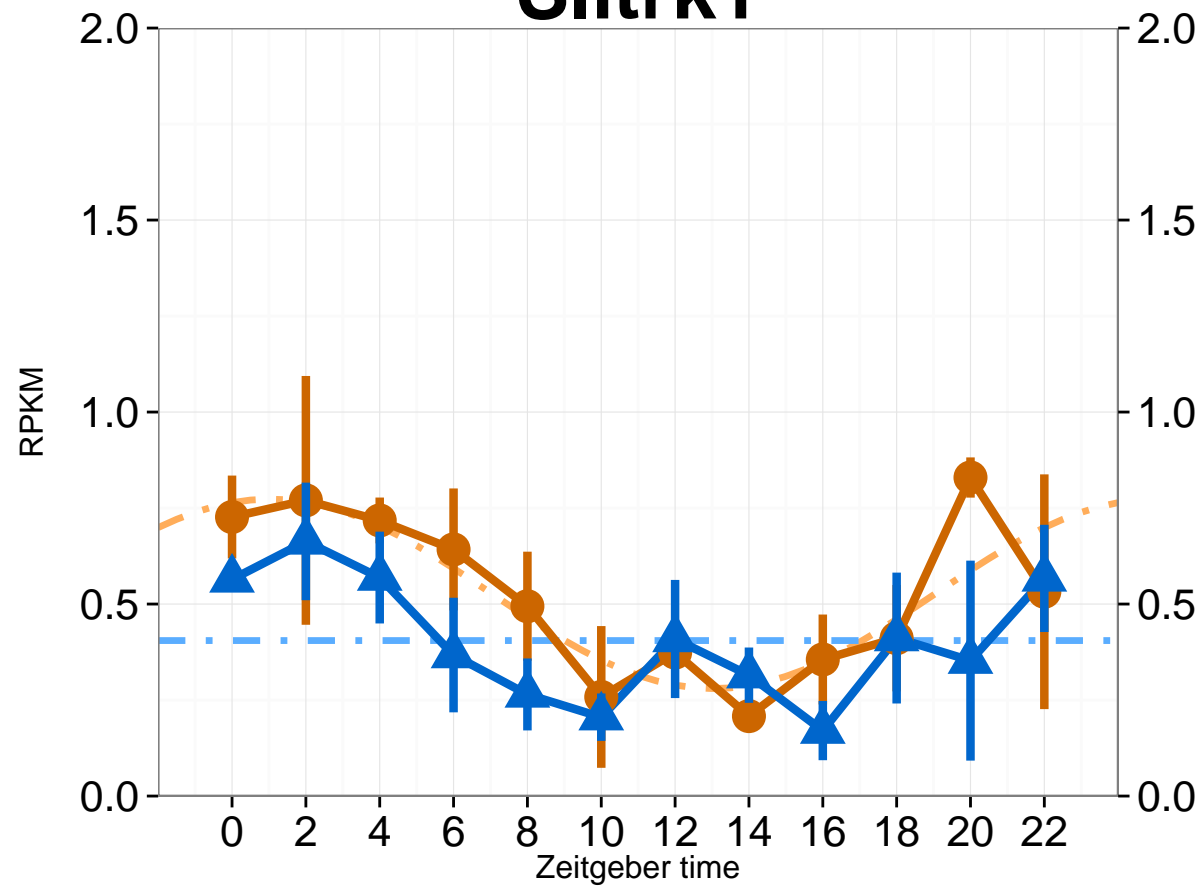

# Slitrk1

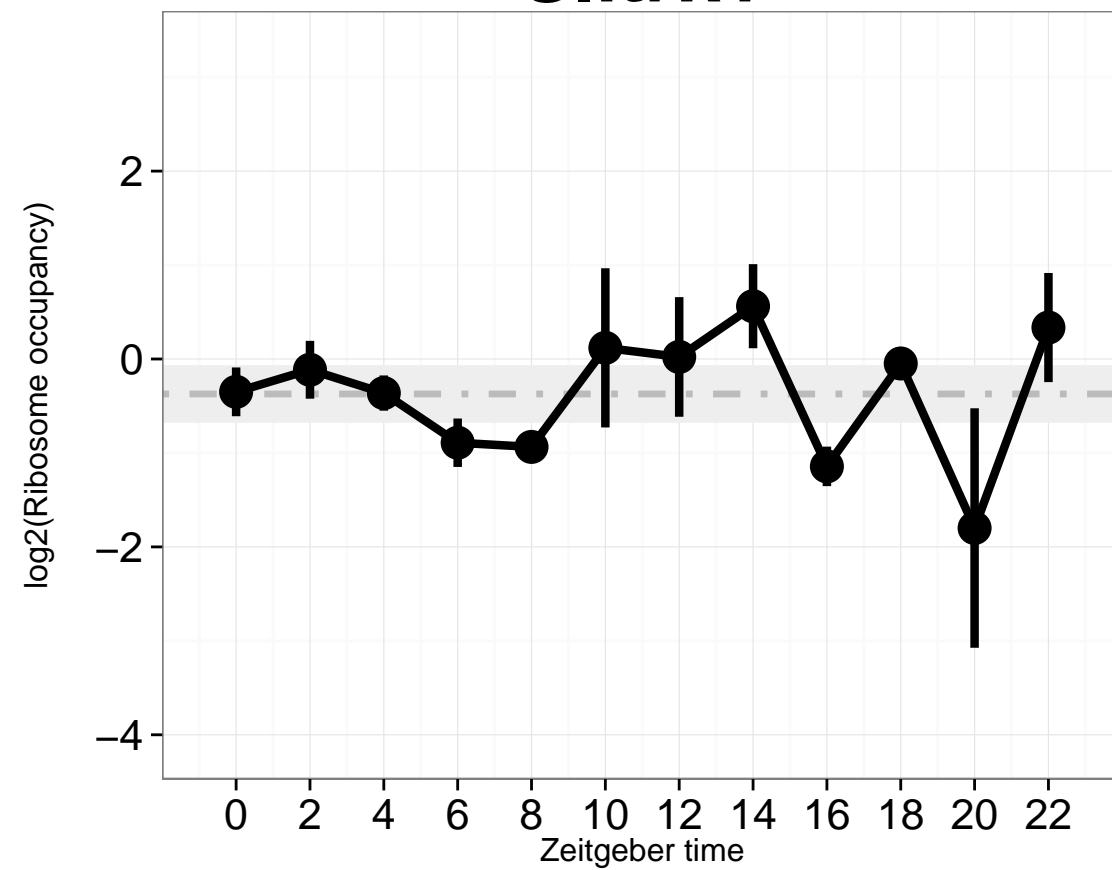

Supplement: Supplementary file 10053 [file 1]

## Ggt1

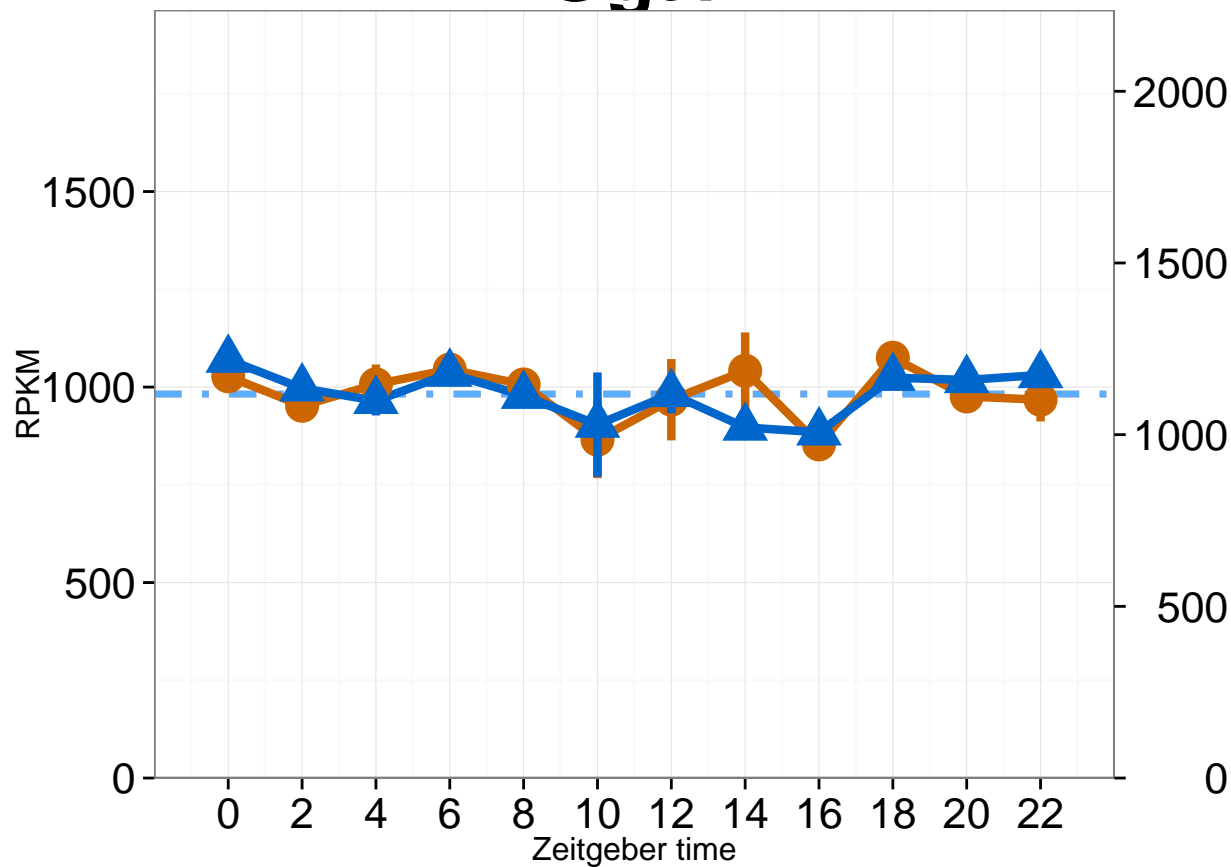

## Ggt1

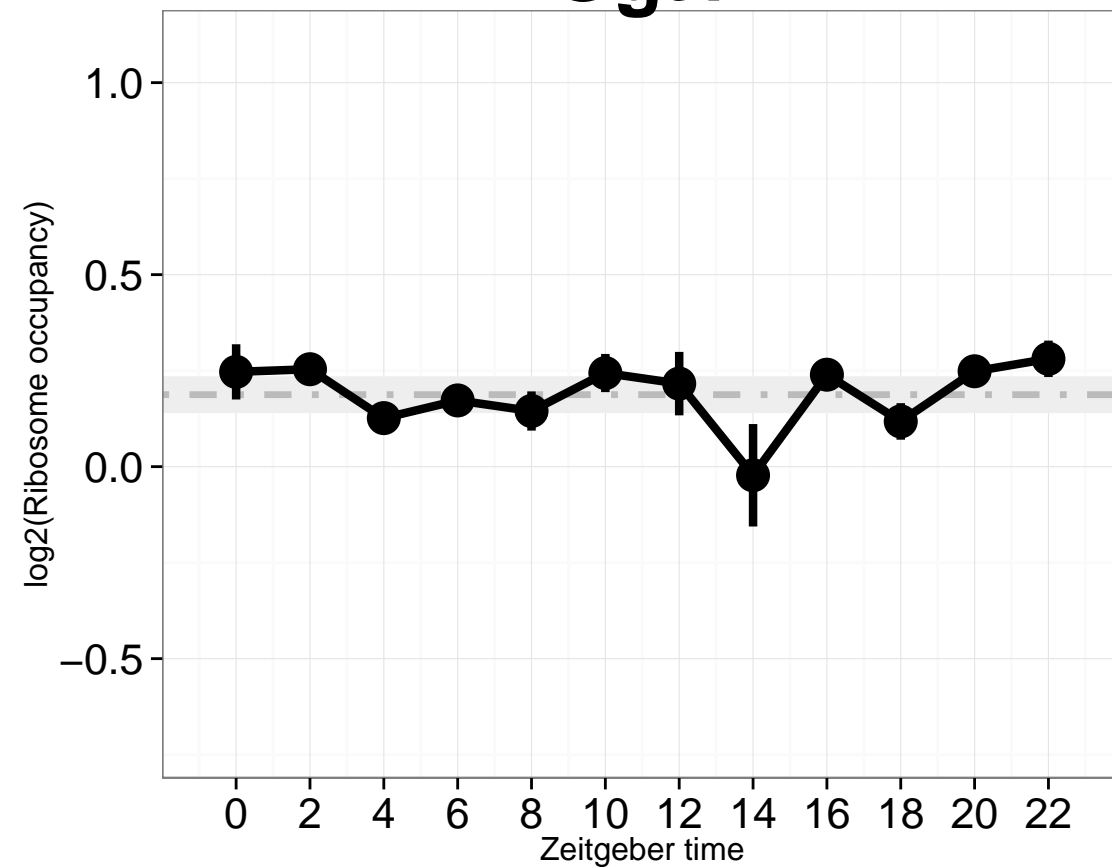

Supplement: Supplementary file 10054 [file 1]

## Rab13

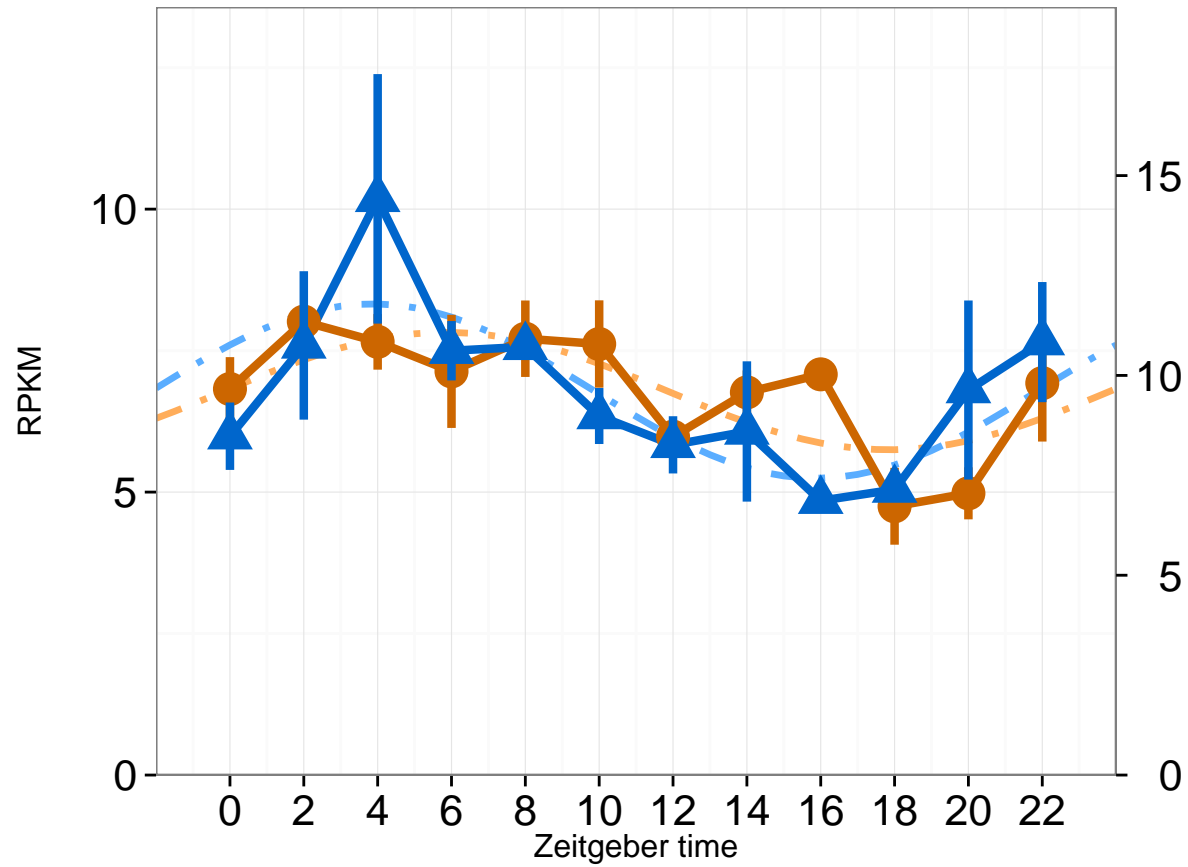

## Rab13

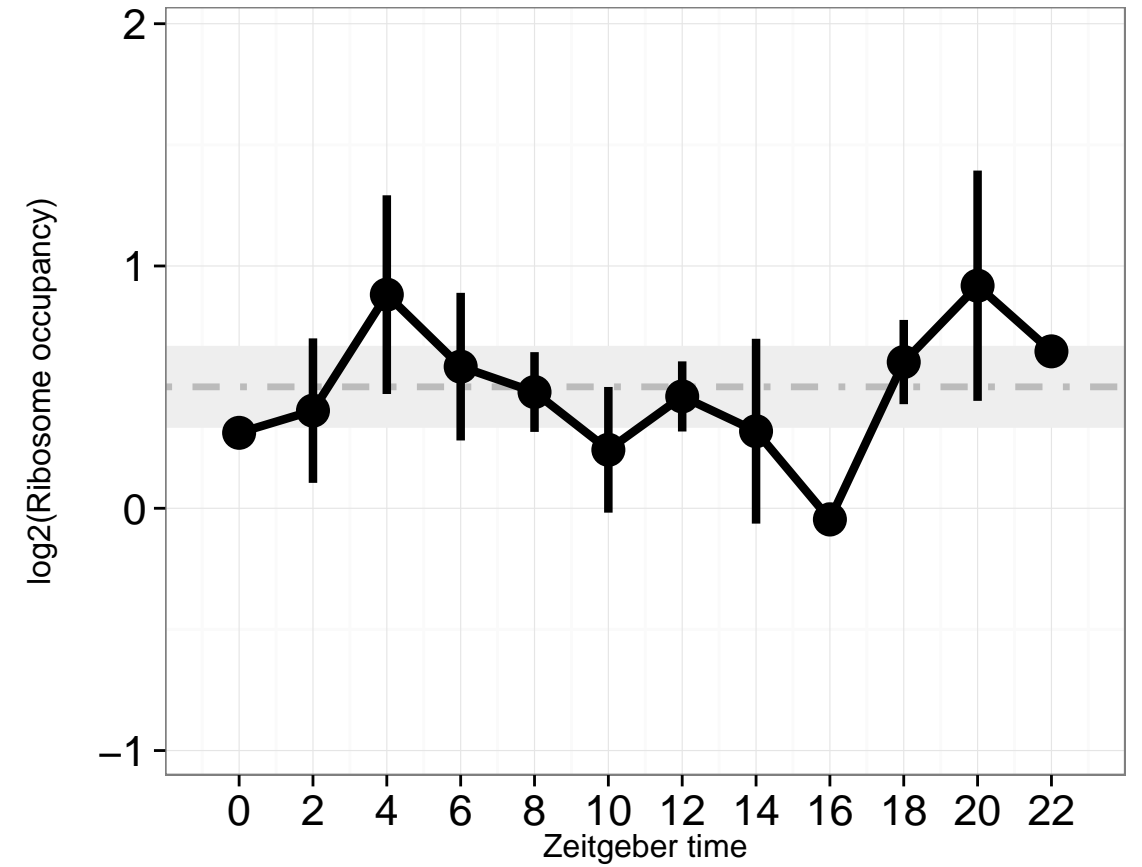

Supplement: Supplementary file 10055 [file 1]

## Rapgef3

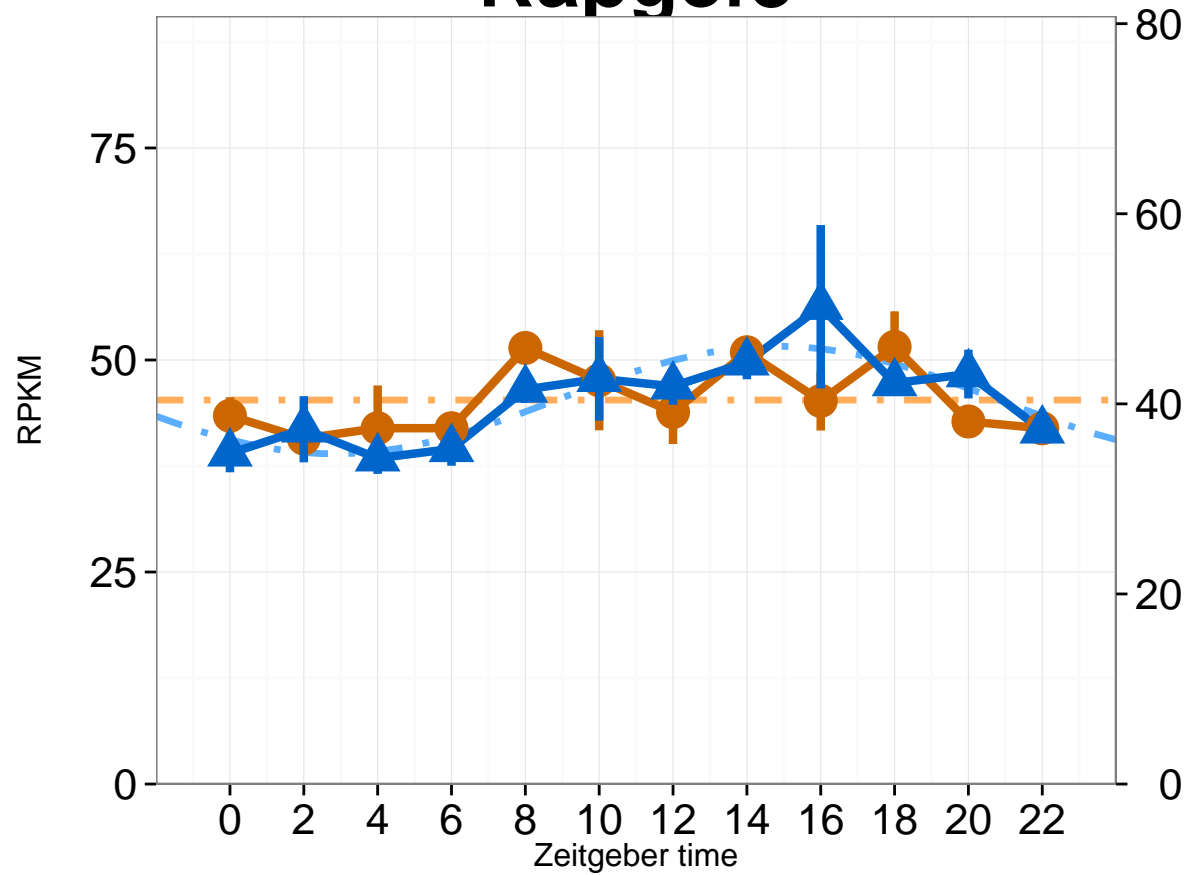

## Rapgef3

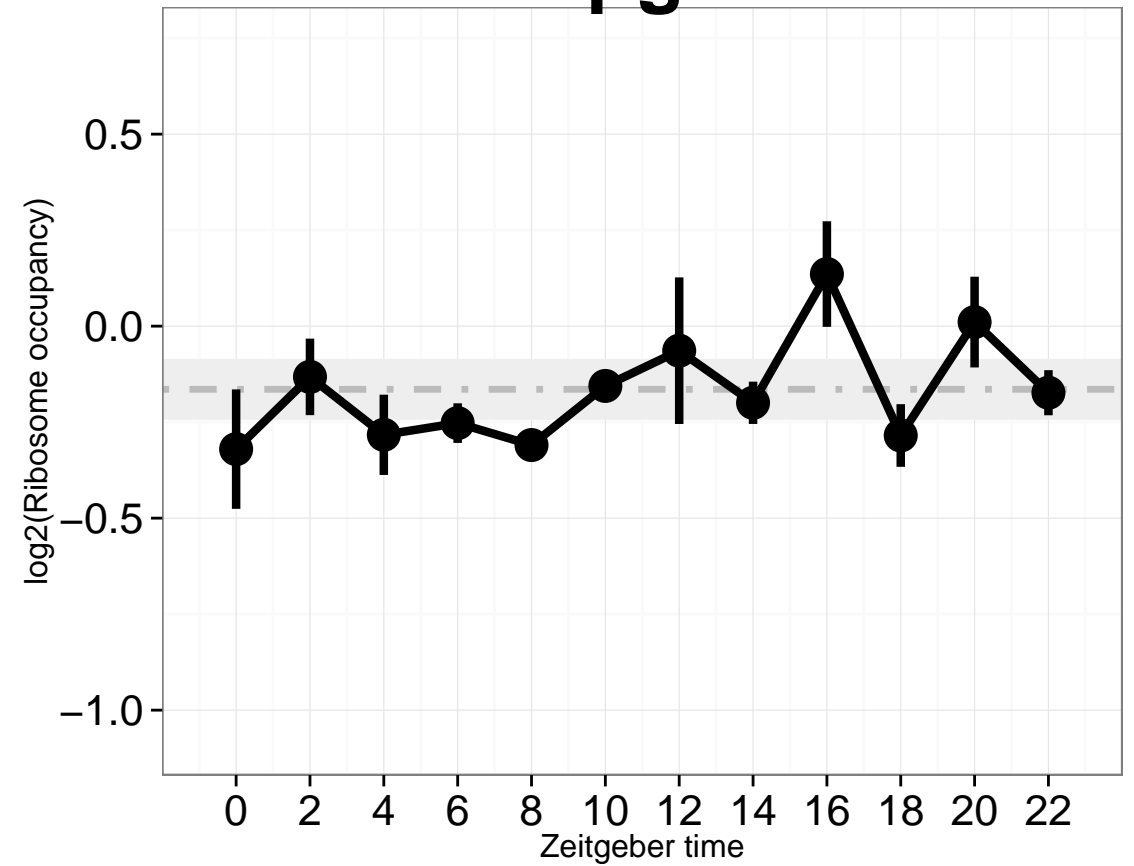

Supplement: Supplementary file 10056 [file 1]

## Echdc3

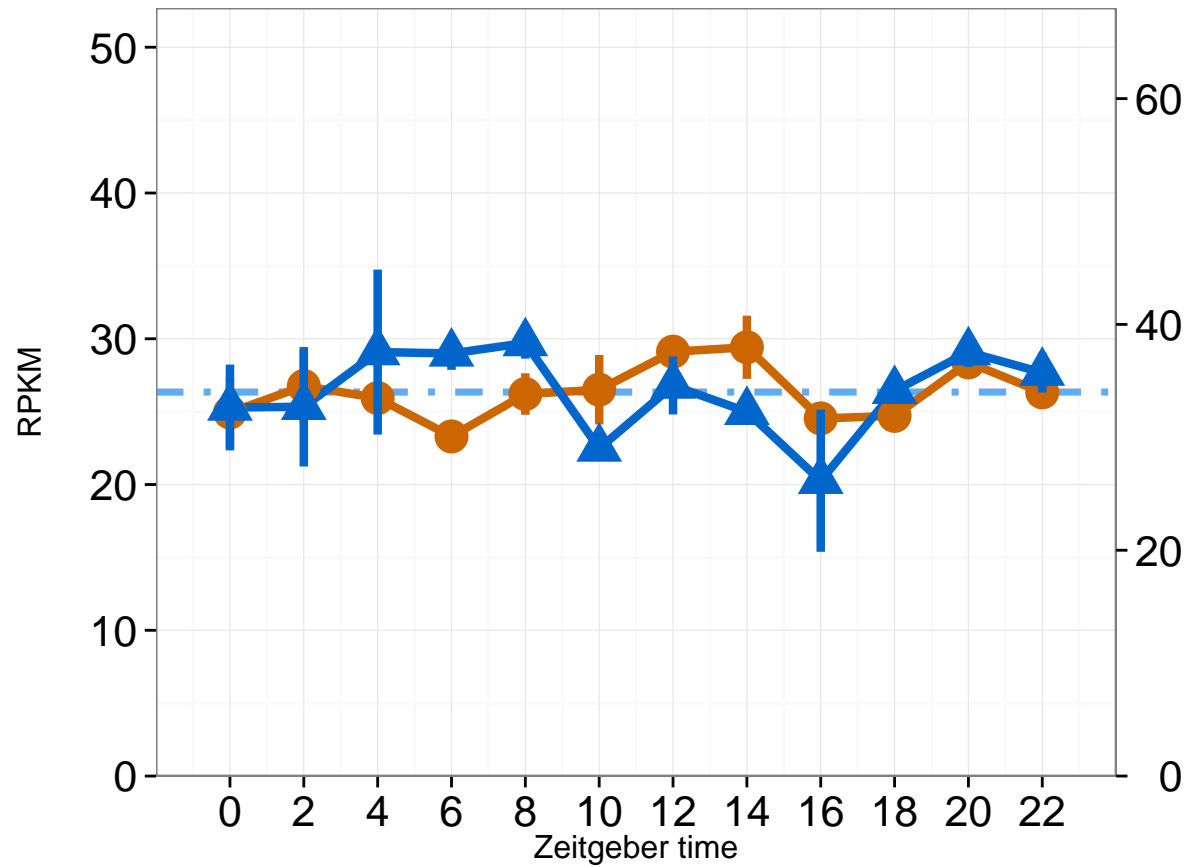

## Echdc3

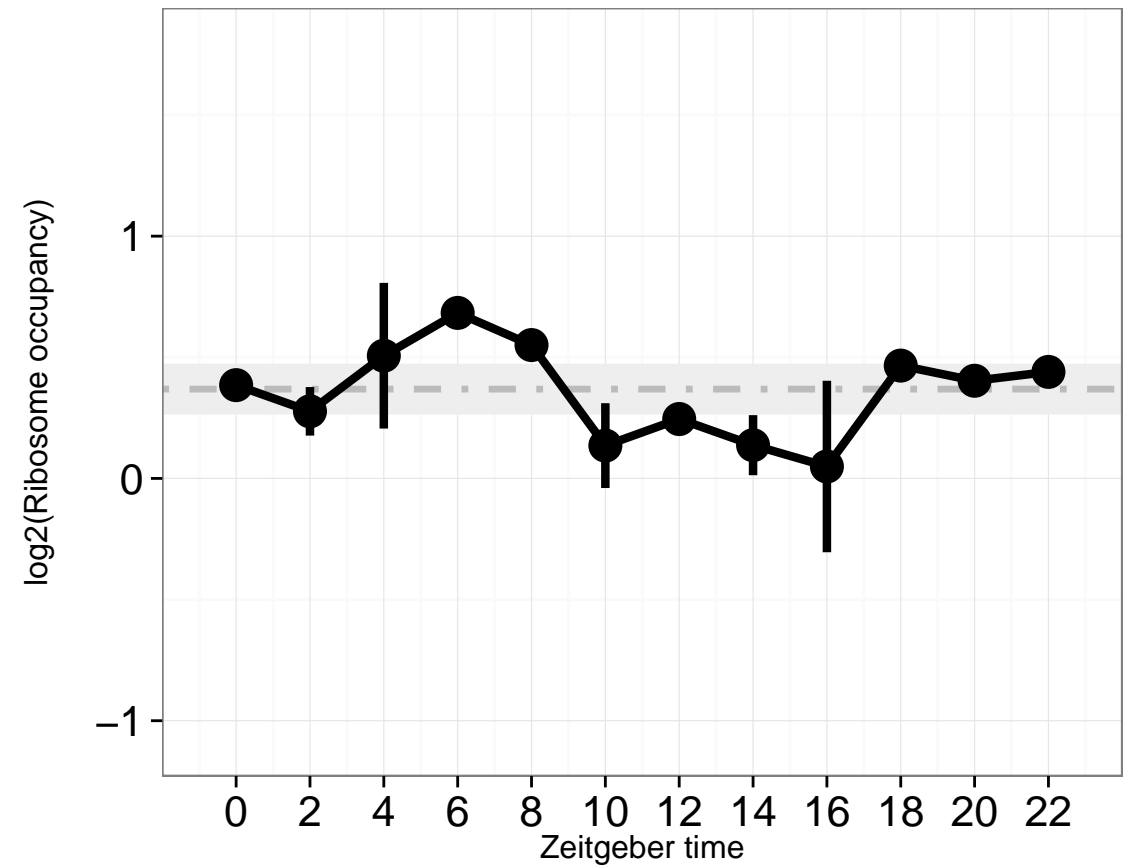

Supplement: Supplementary file 10057 [file 1]

## Lyf1

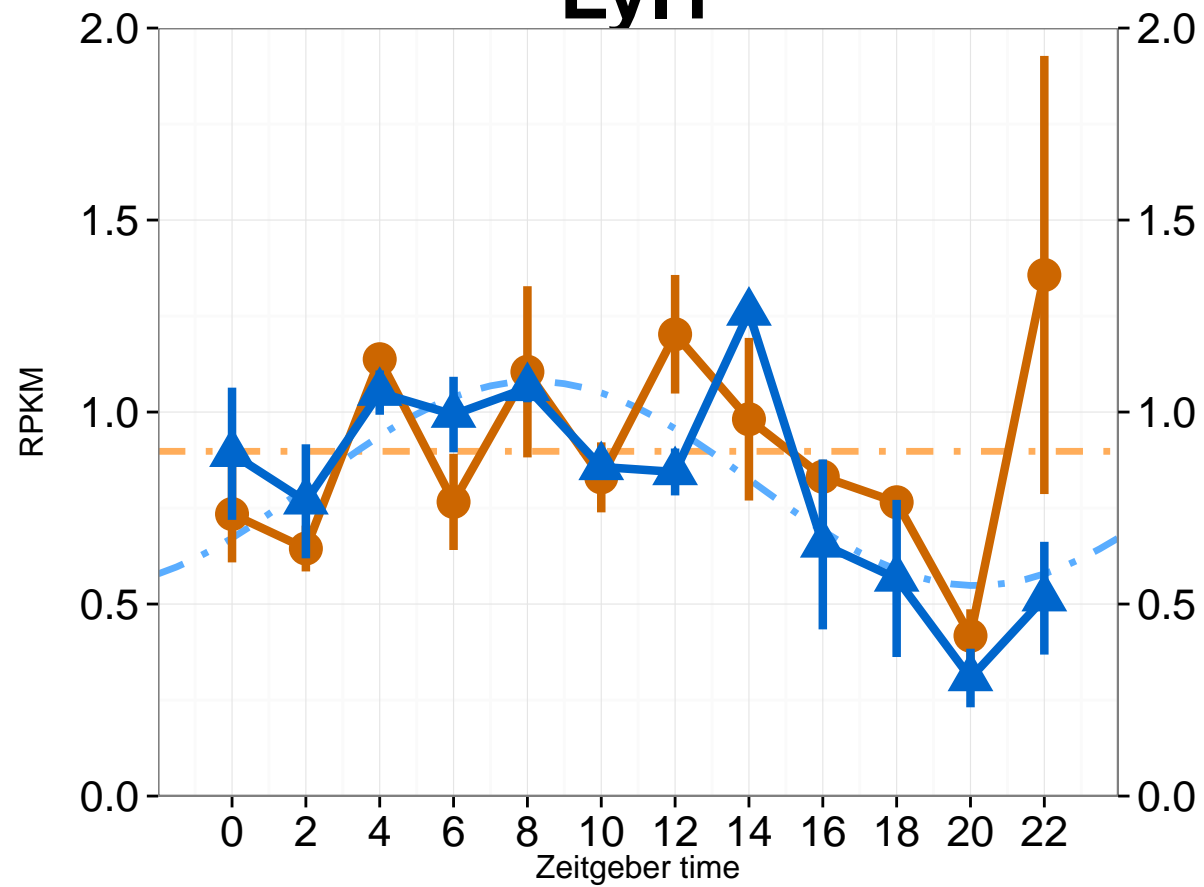

## Lyf1

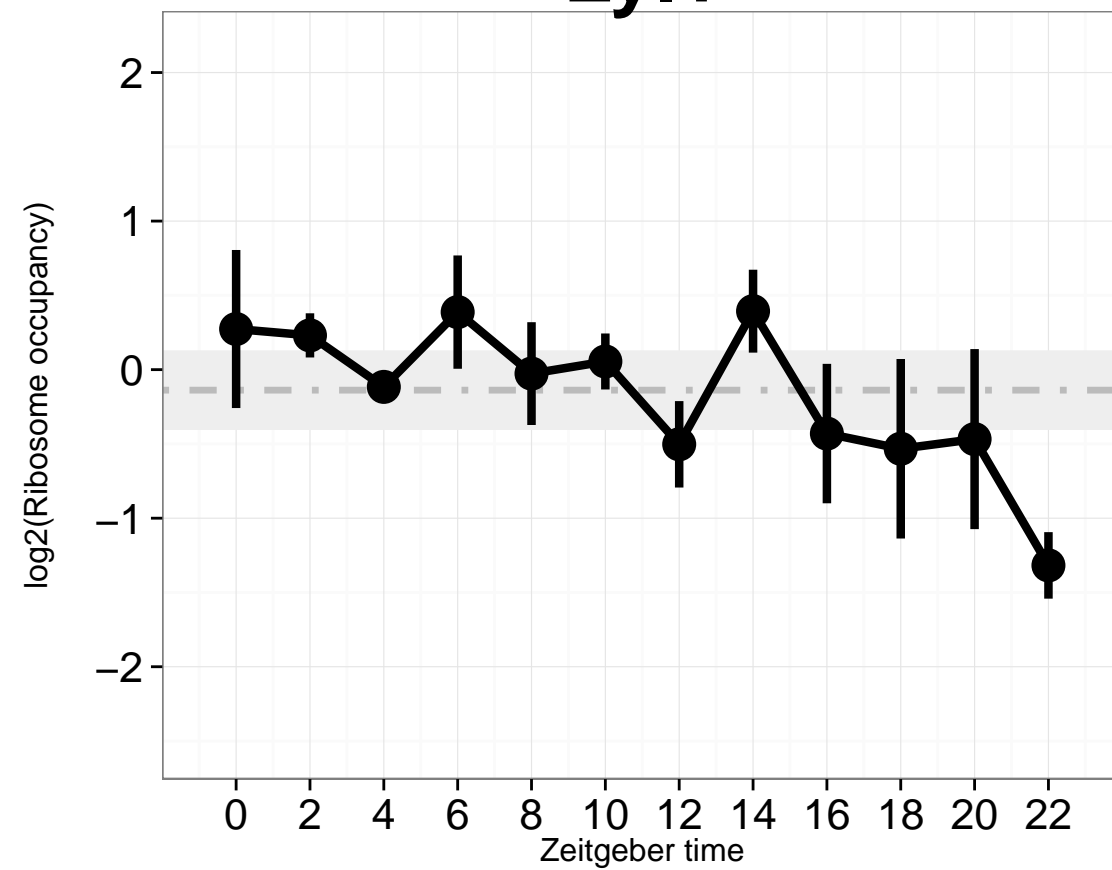

Supplement: Supplementary file 10058 [file 1]

# Poli

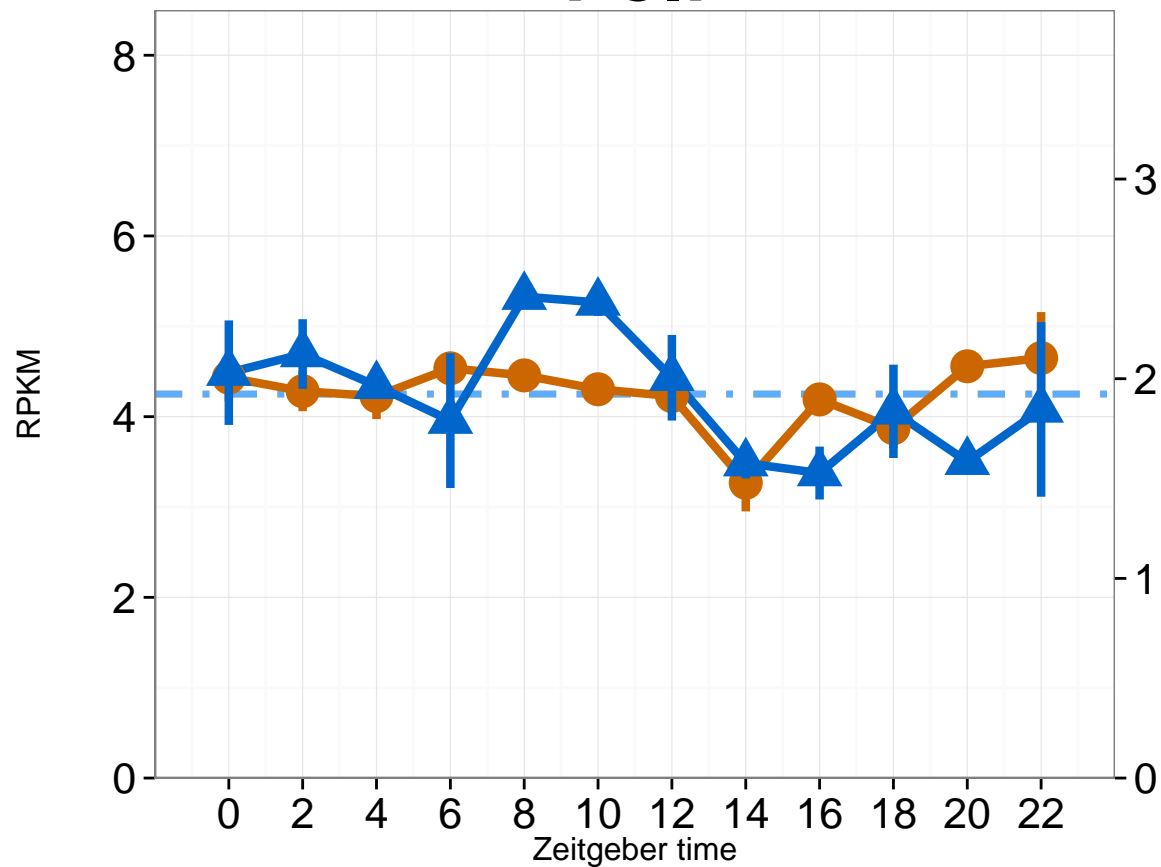

# Poli

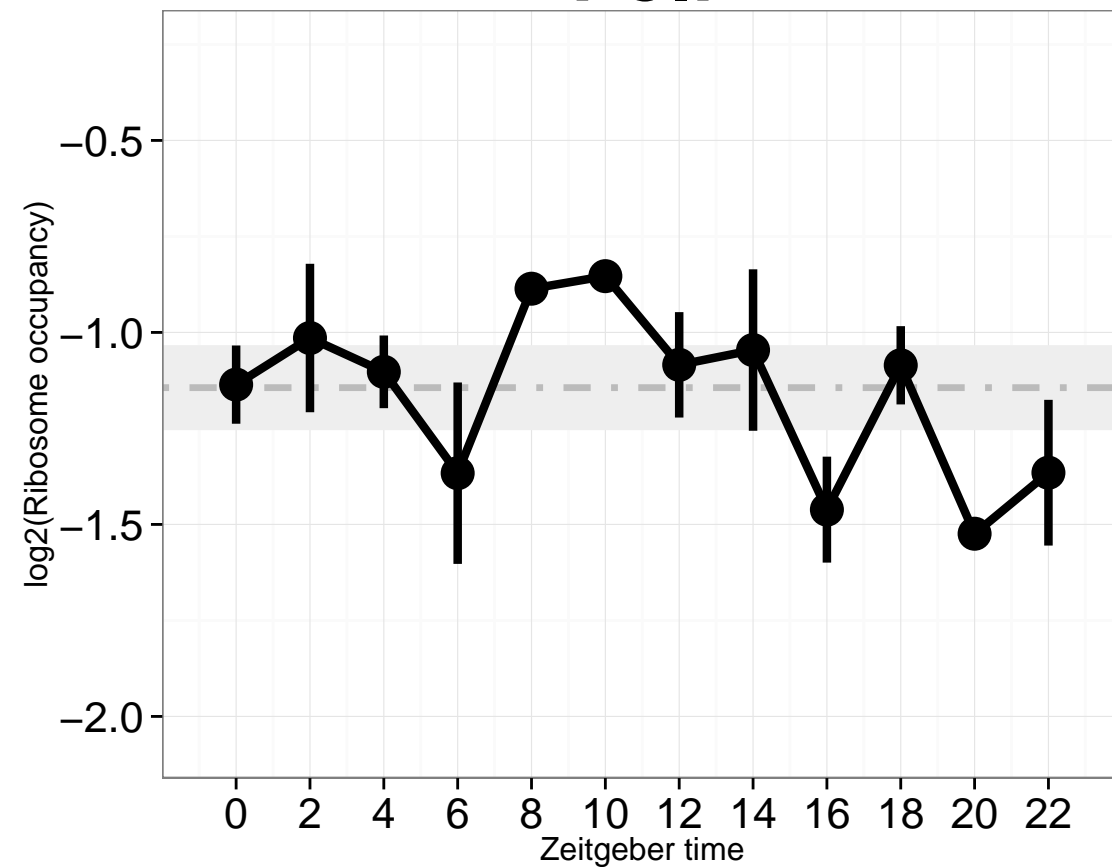

Supplement: Supplementary file 10059 [file 1]

## Calm3

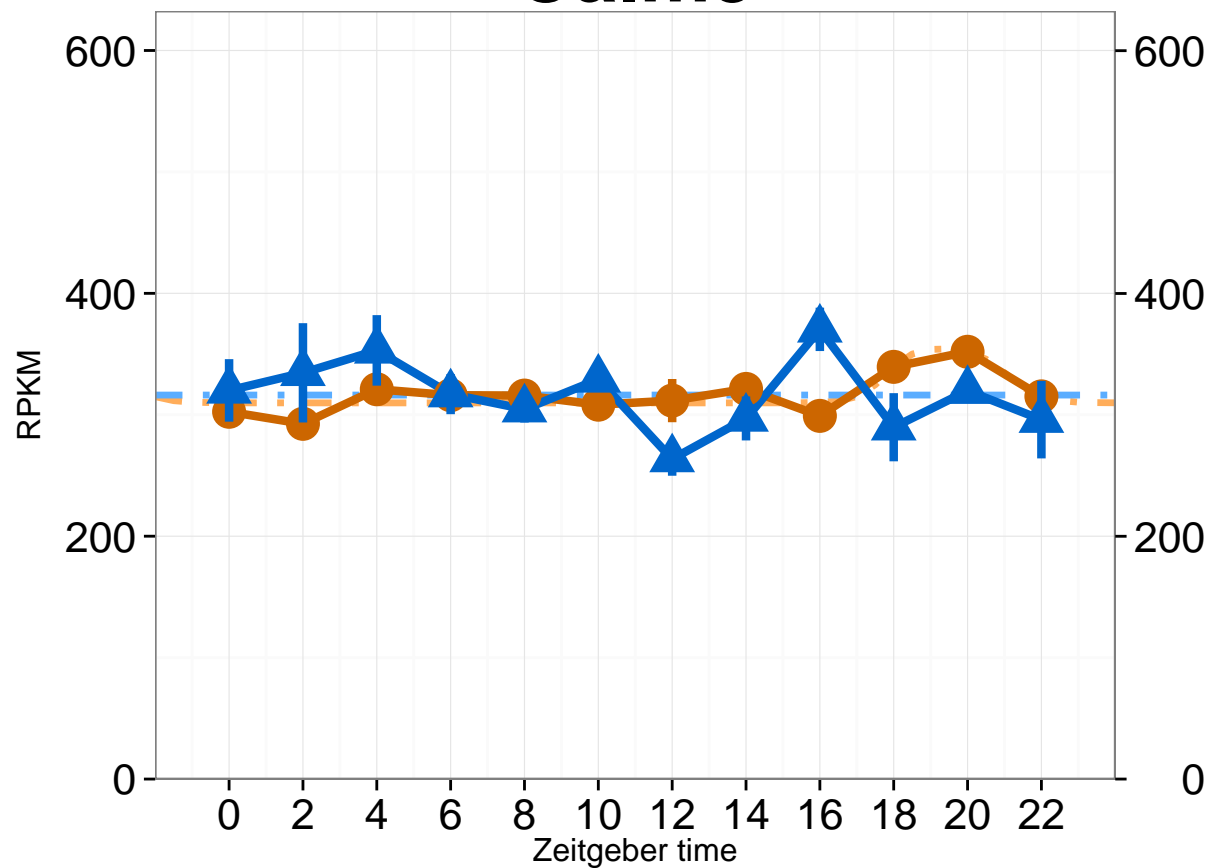

## Calm3

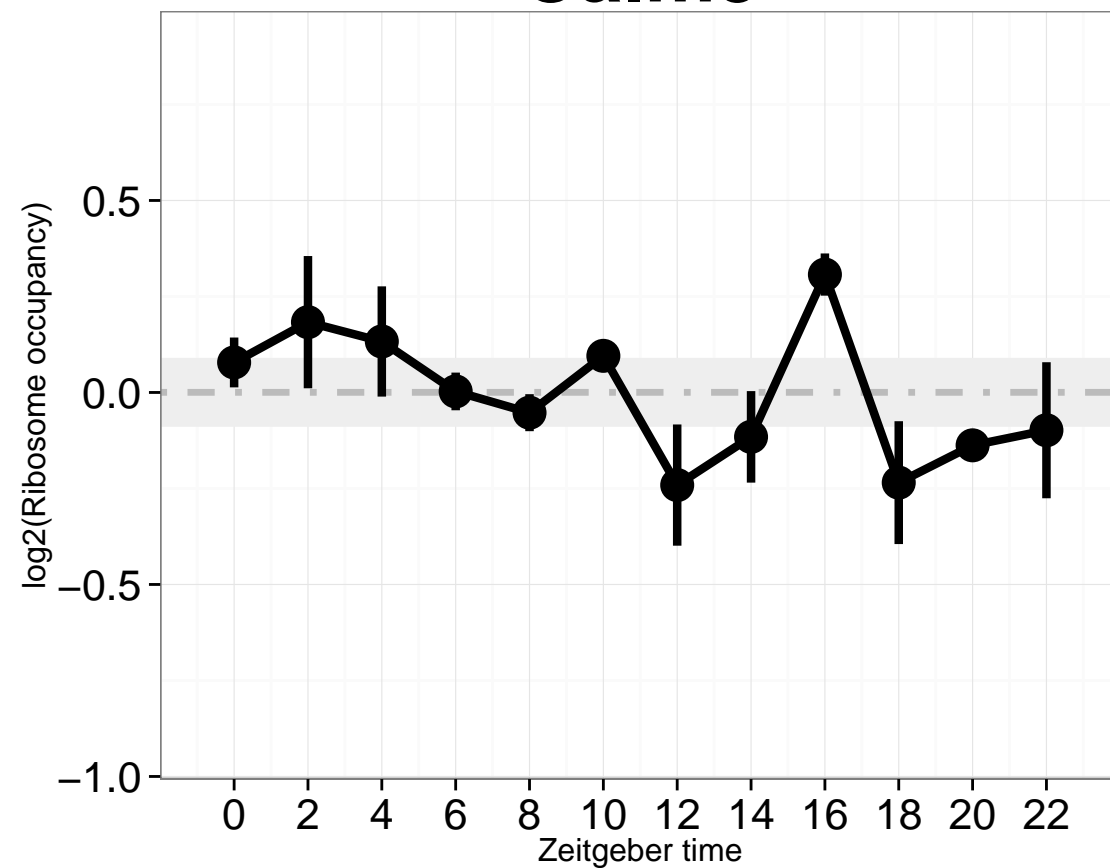

Supplement: Supplementary file 10060 [file 1]

## Fbxl14

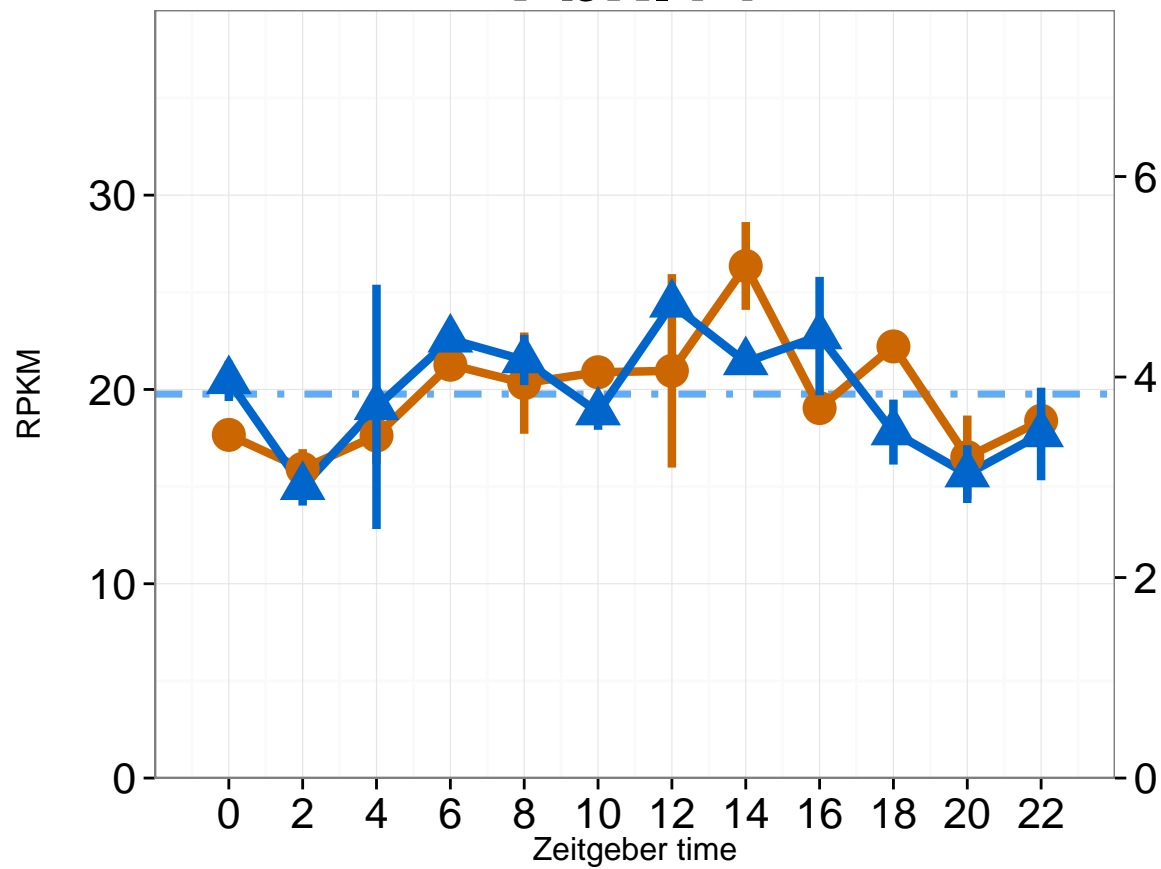

## Fbxl14

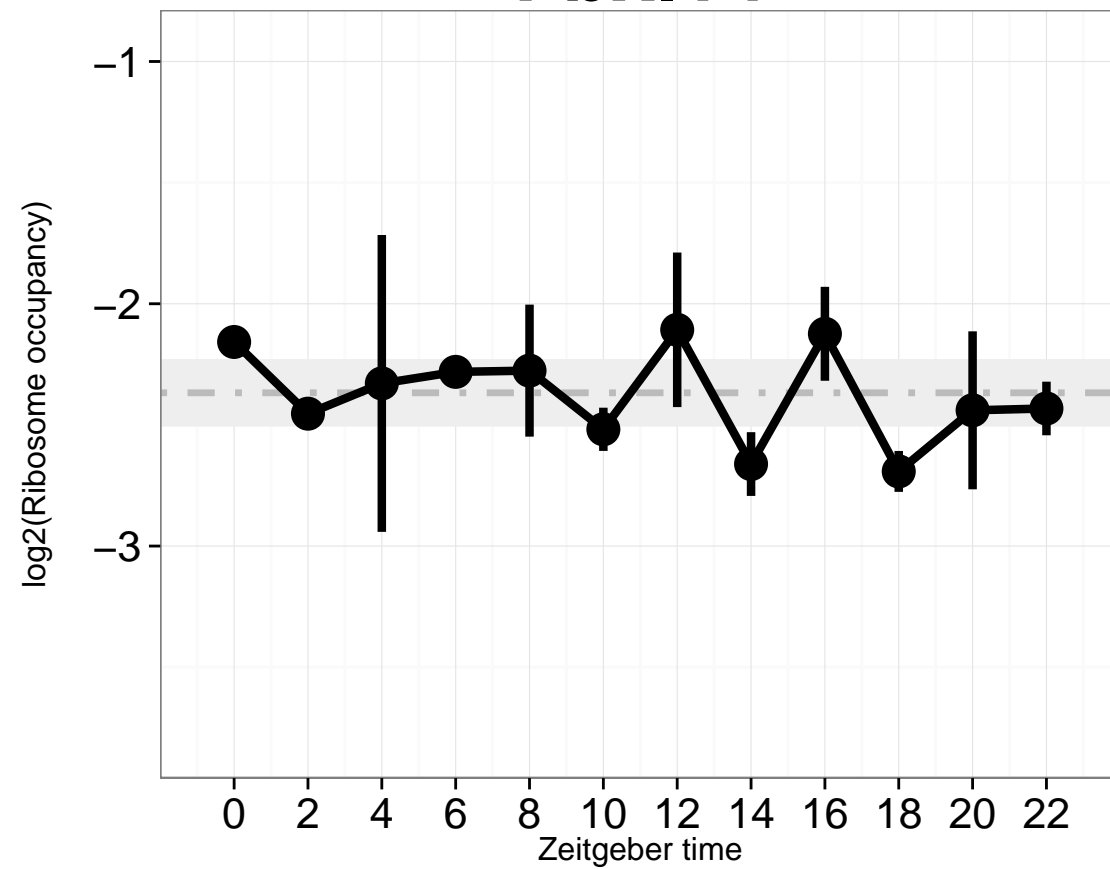

Supplement: Supplementary file 10061 [file 1]

# Sppl3

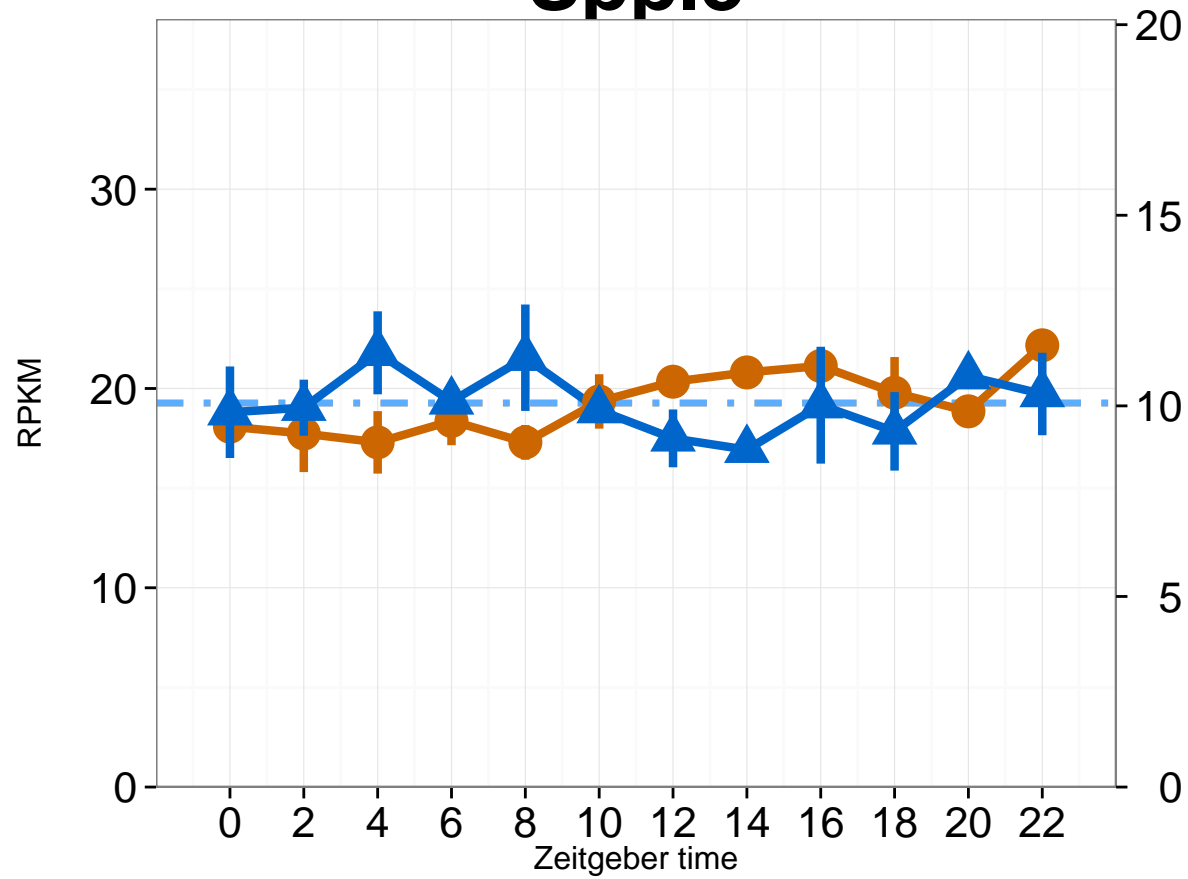

# Sppl3

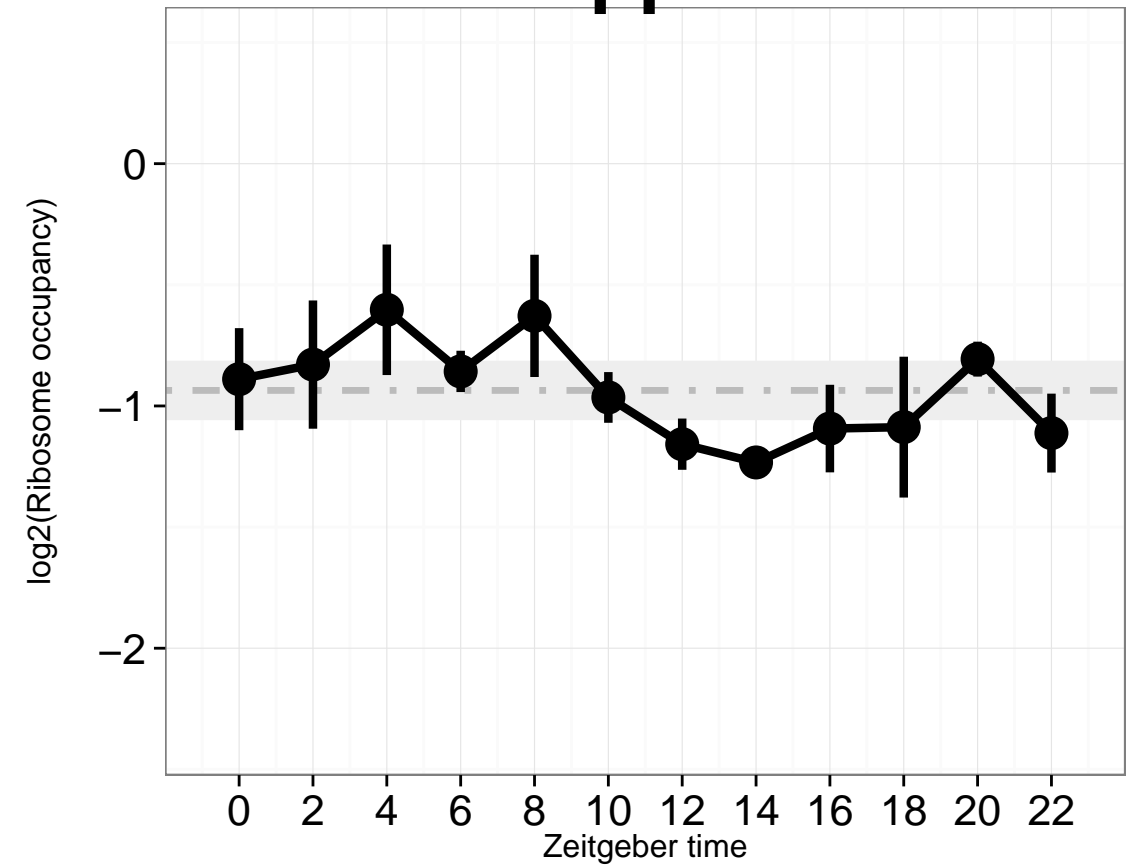

Supplement: Supplementary file 10062 [file 1]

## Vav2

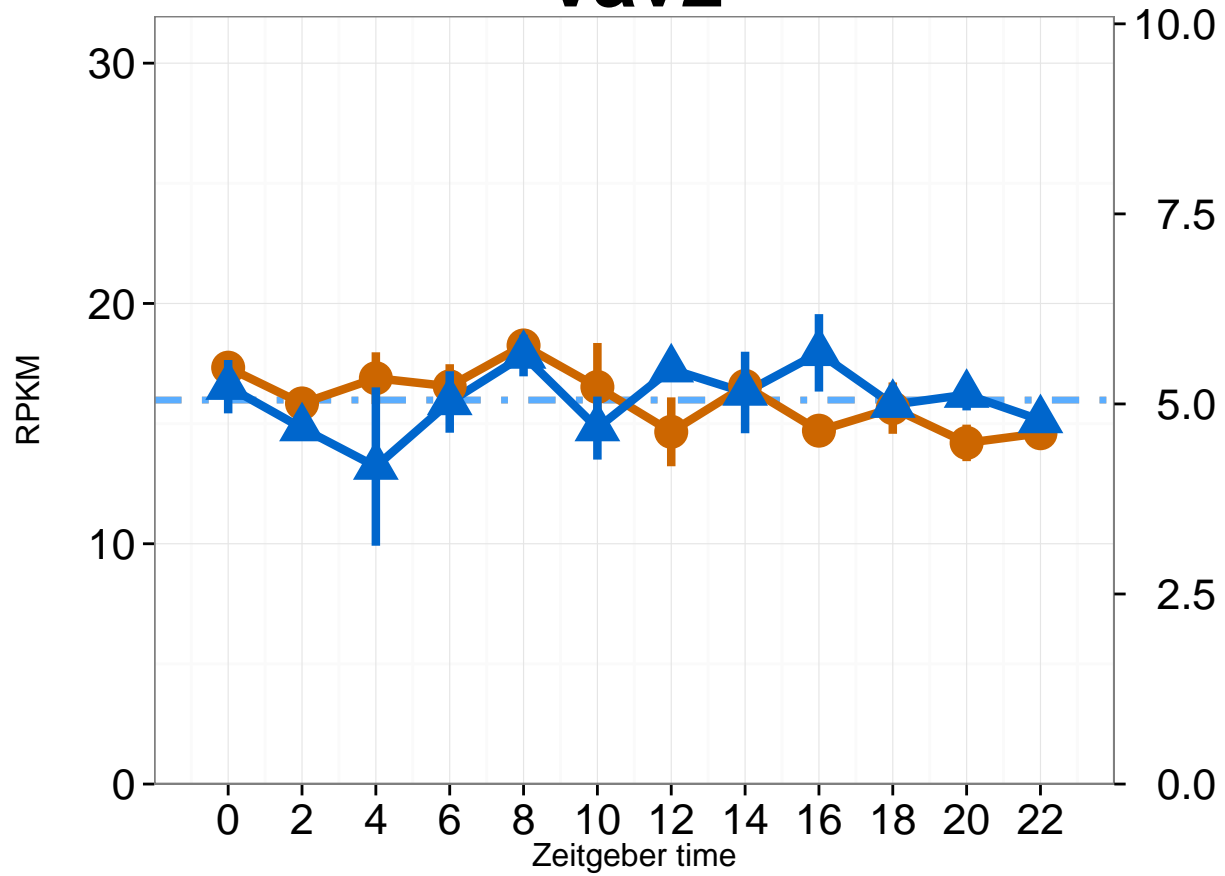

## Vav2

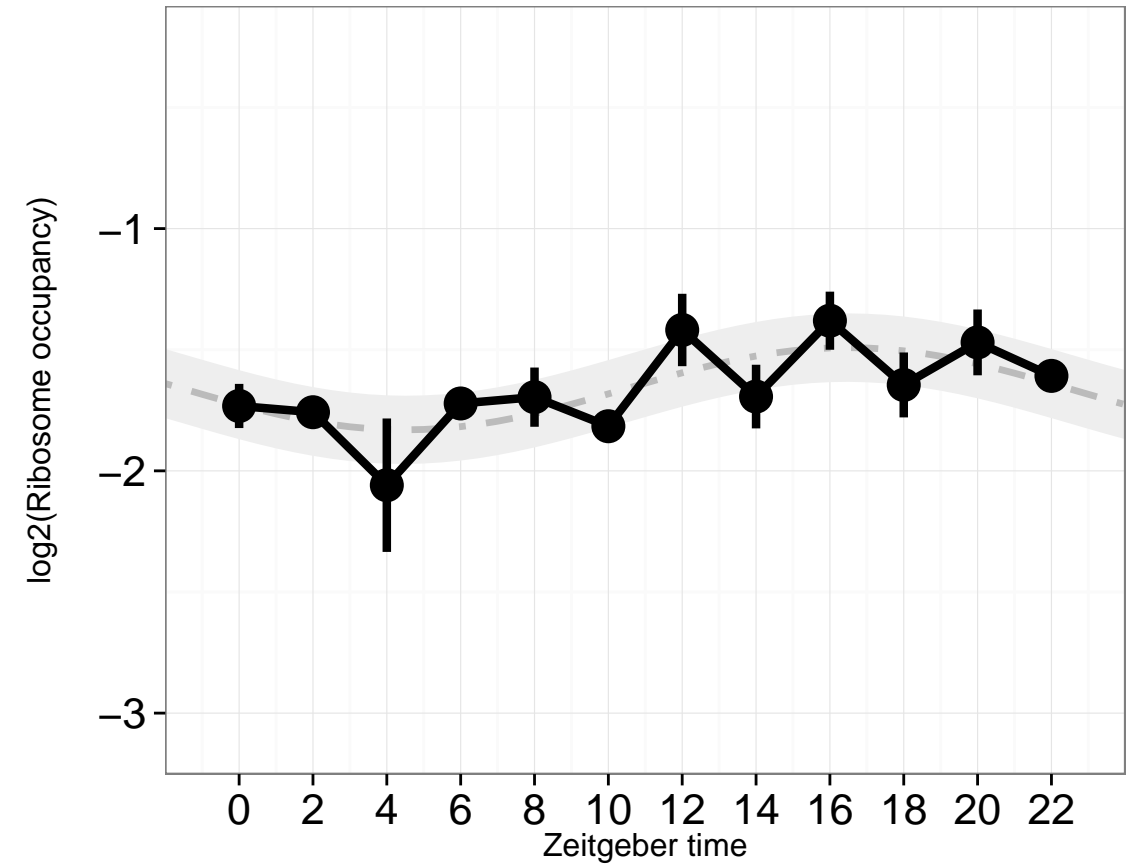

Supplement: Supplementary file 10063 [file 1]

## Gpr157

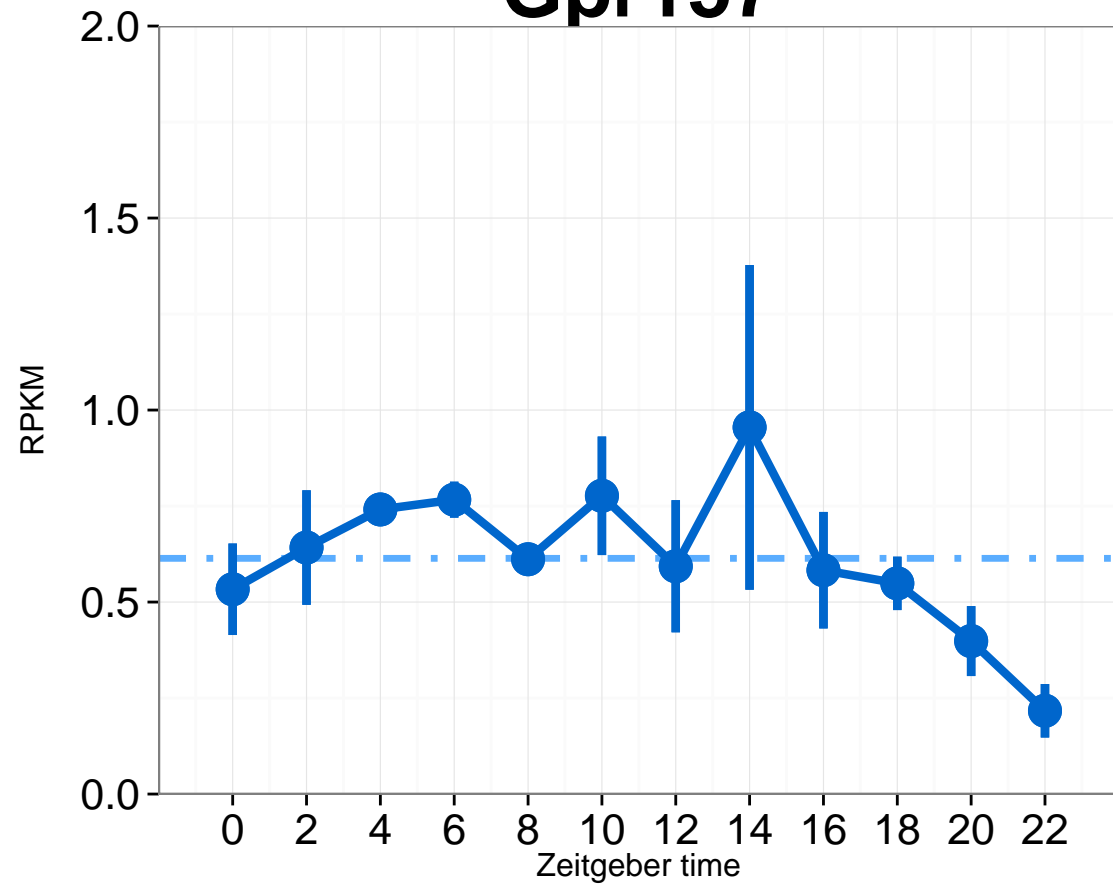

## Gpr157 log2(Ribosome occupancy

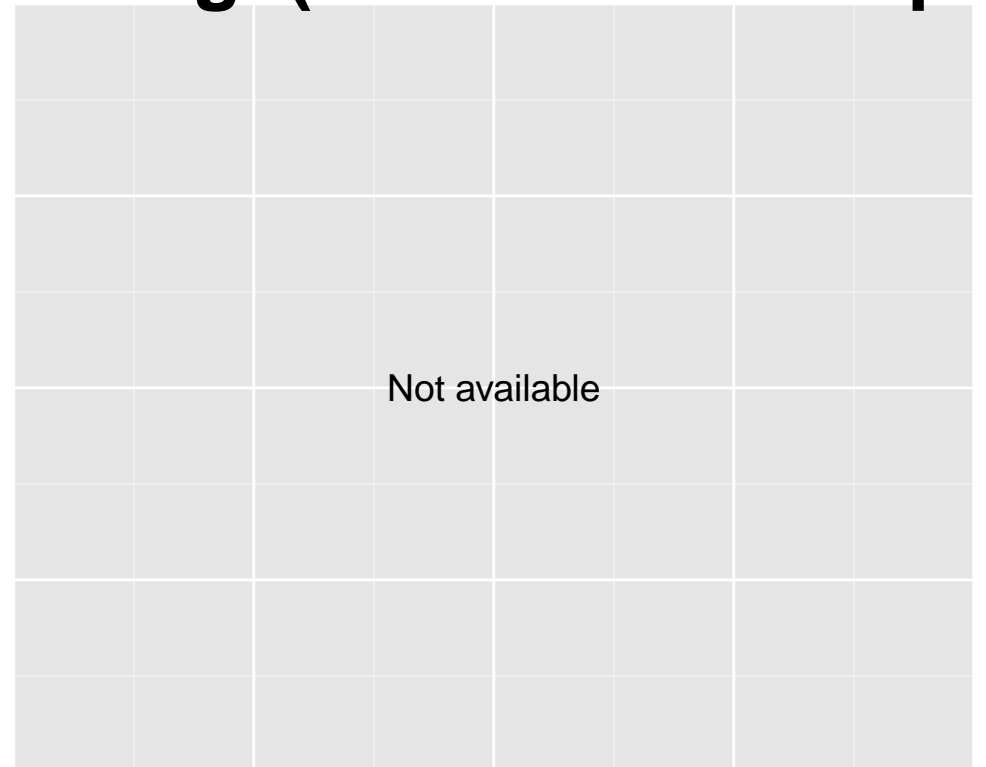

Supplement: Supplementary file 10064 [file 1]

## Foxn2

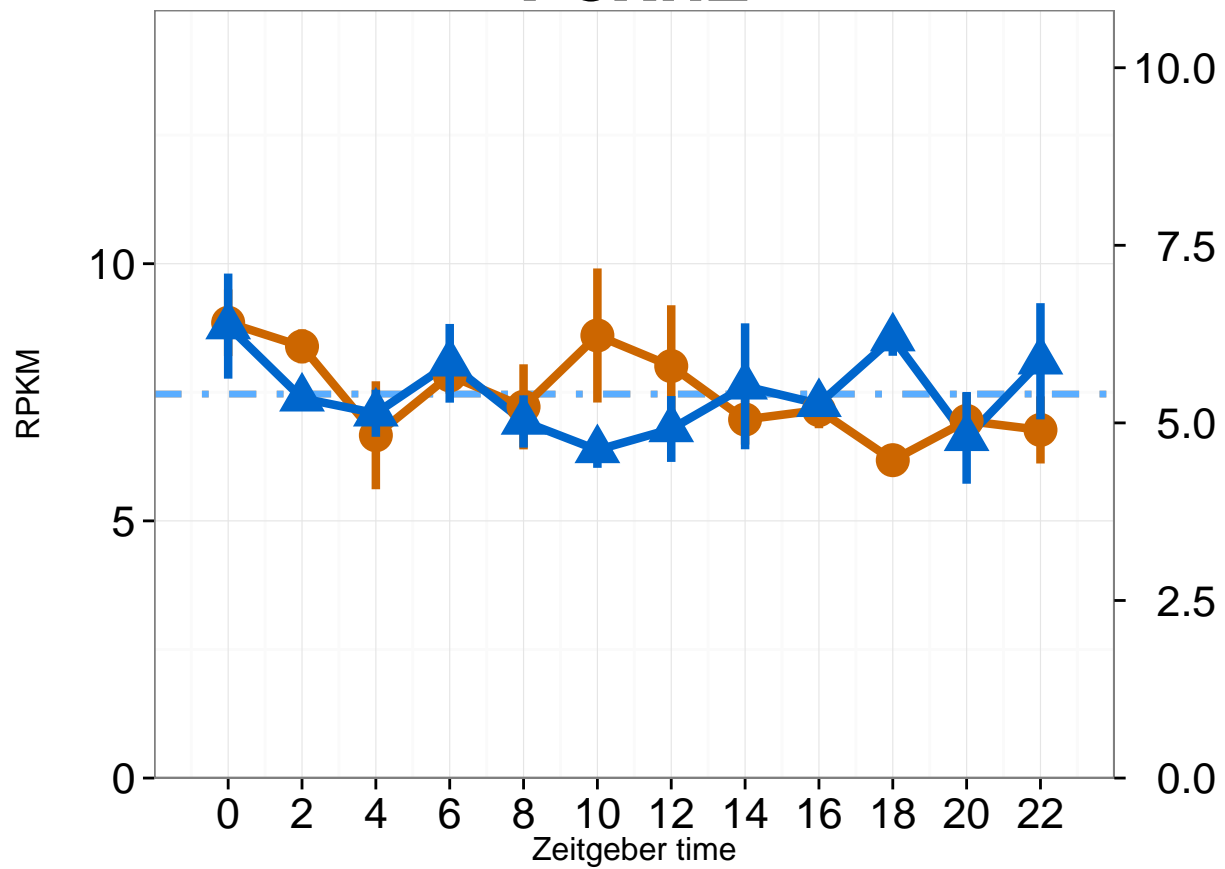

## Foxn2

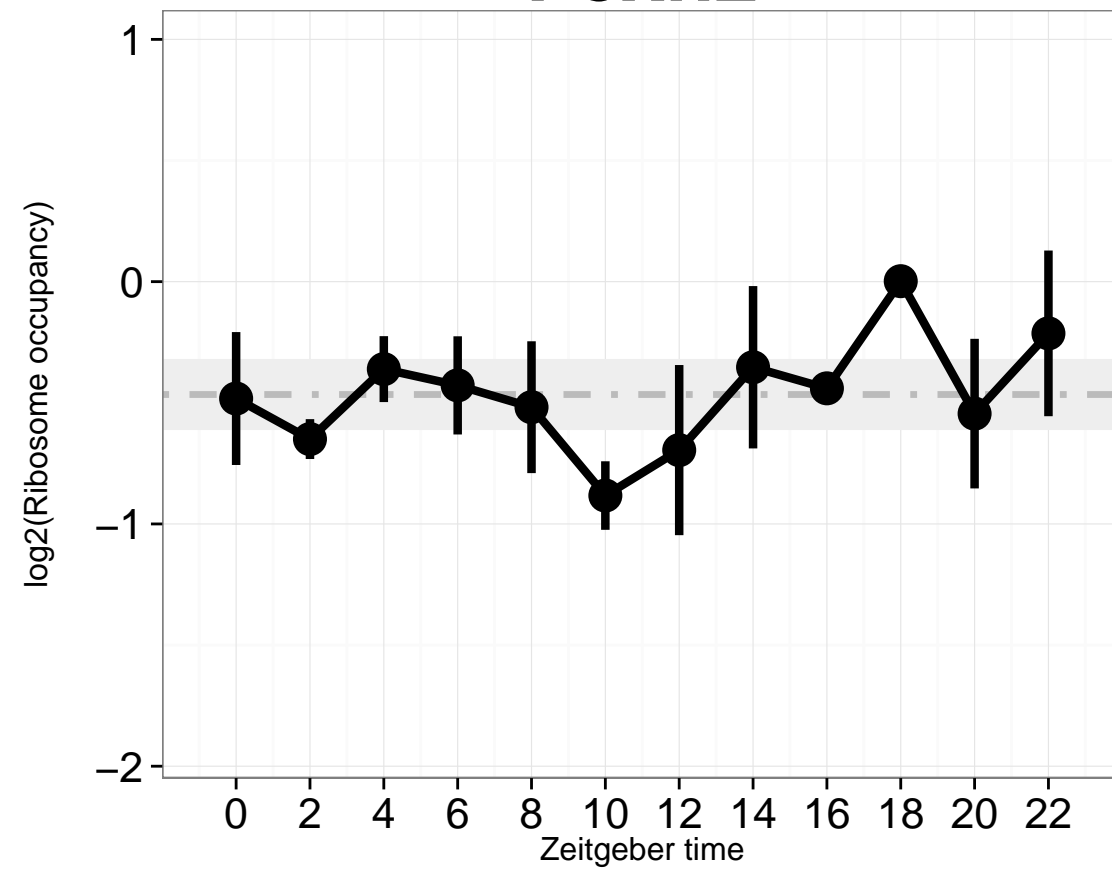

Supplement: Supplementary file 10065 [file 1]

# Nckap5l

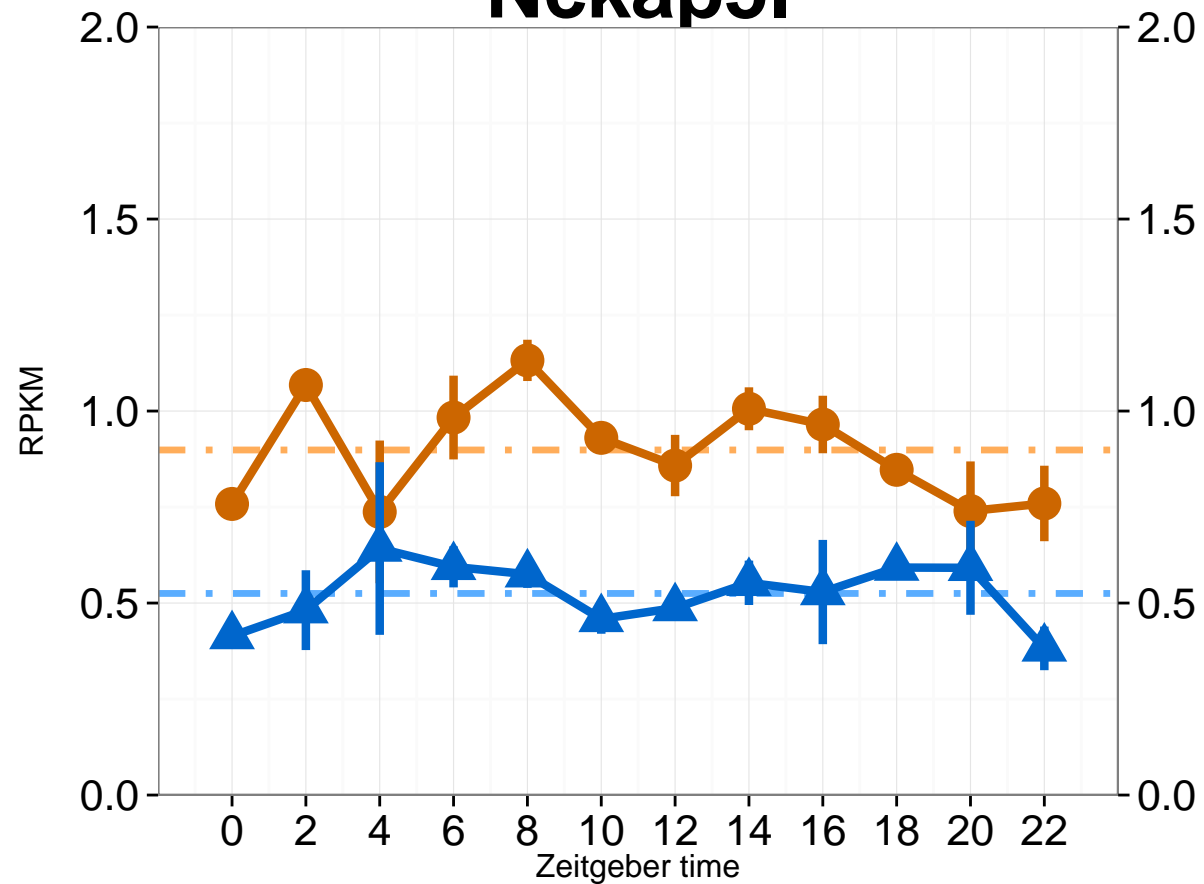

# Nckap5l

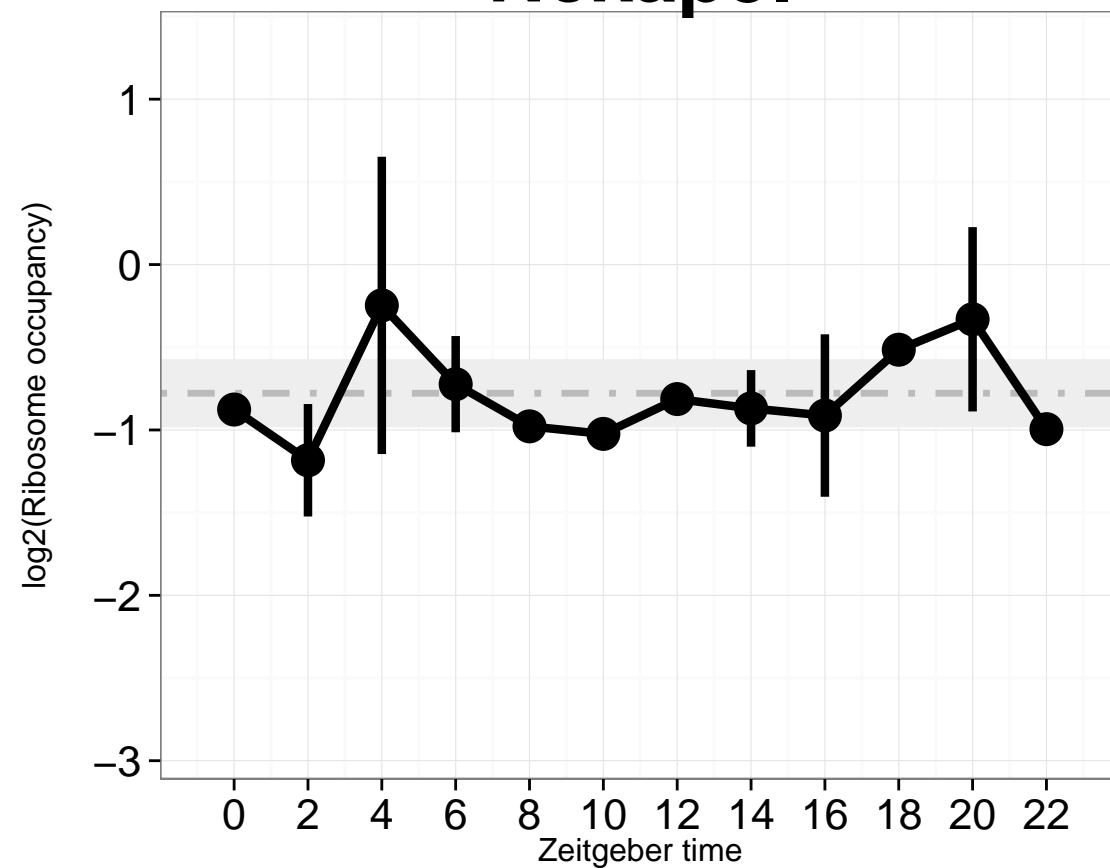

Supplement: Supplementary file 10066 [file 1]

## Kif5a

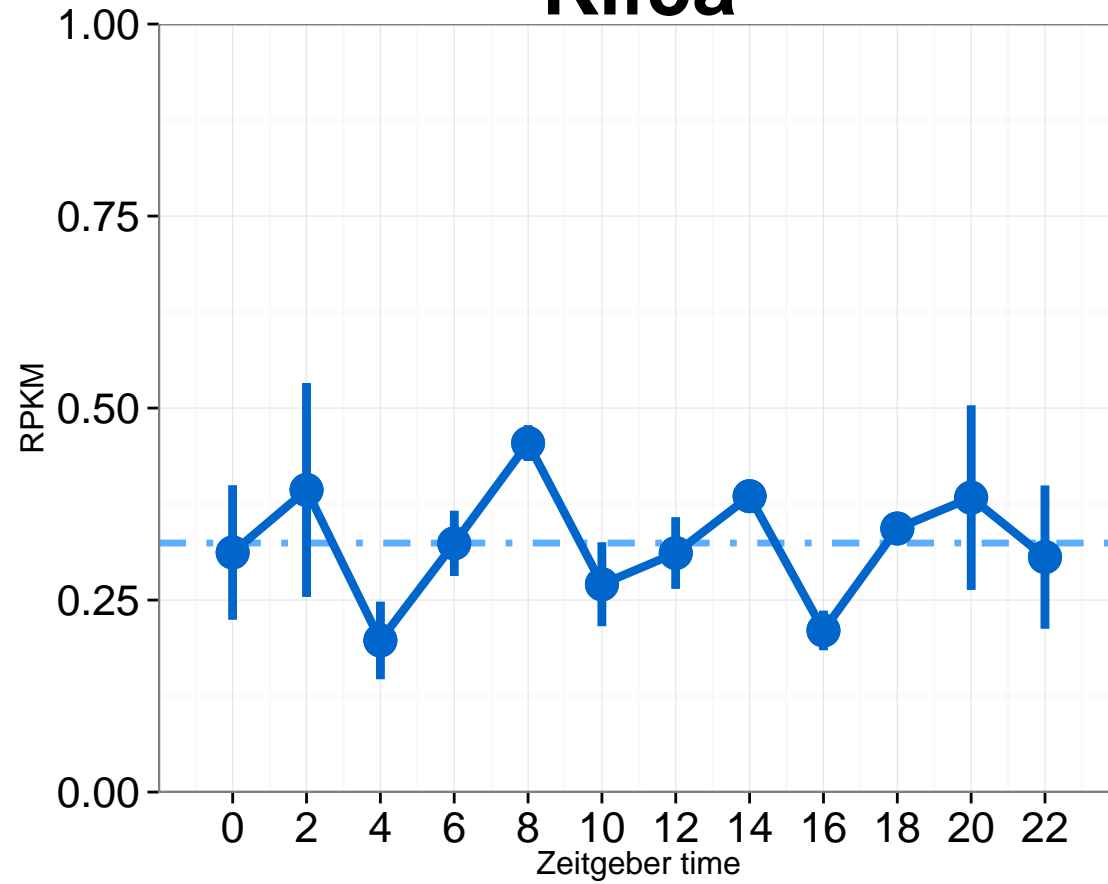

## Kif5a log2(Ribosome occupancy)

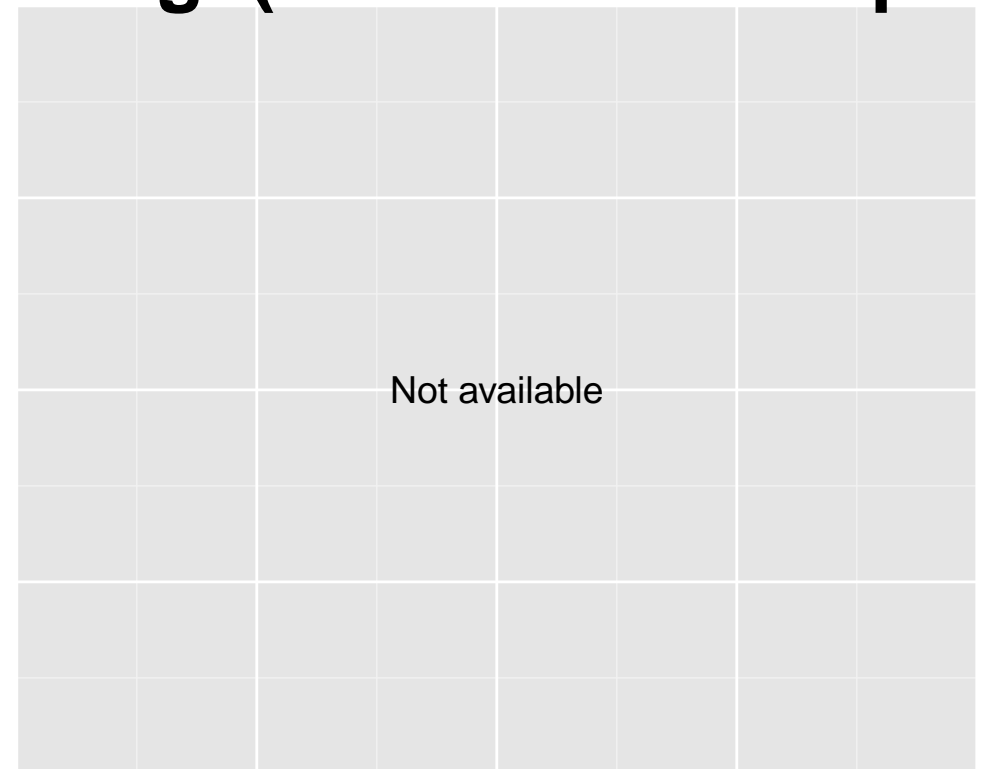

Supplement: Supplementary file 10067 [file 1]

## Pdzd2

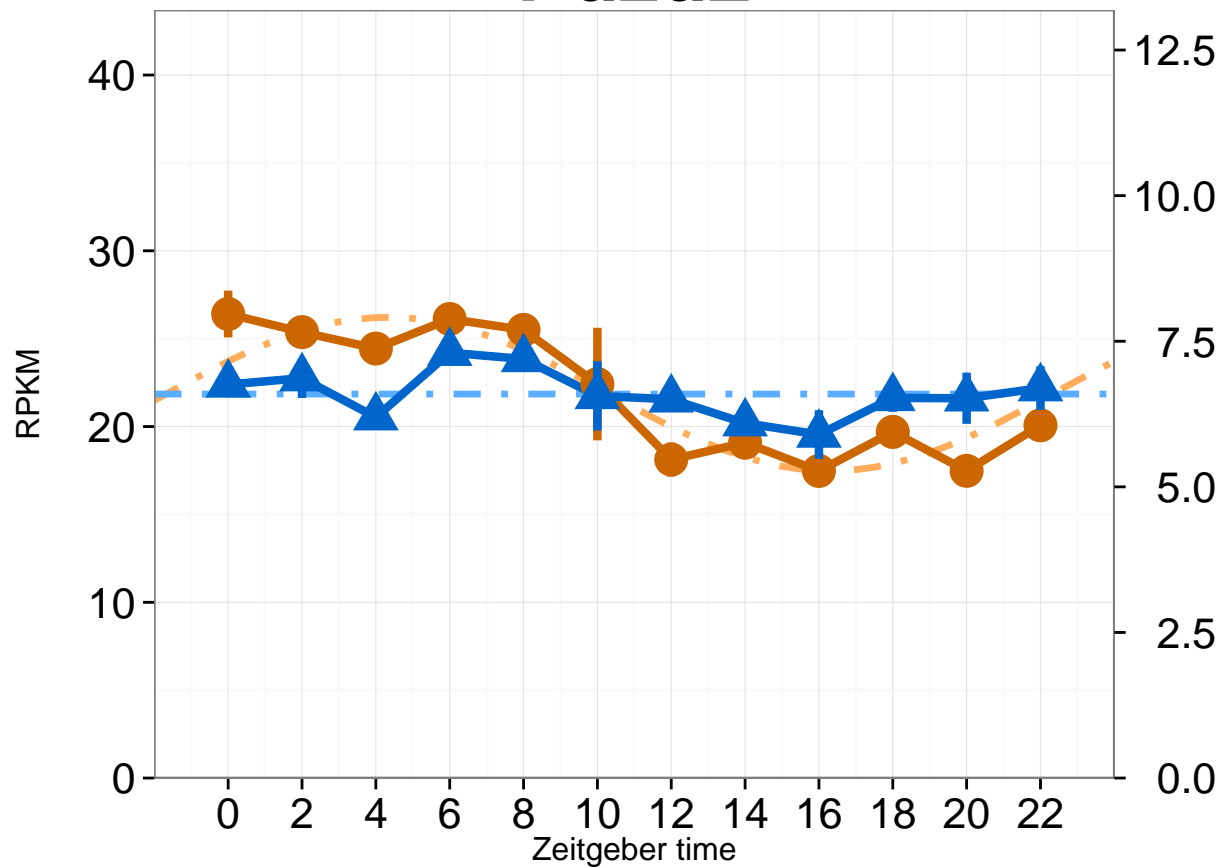

## Pdzd2

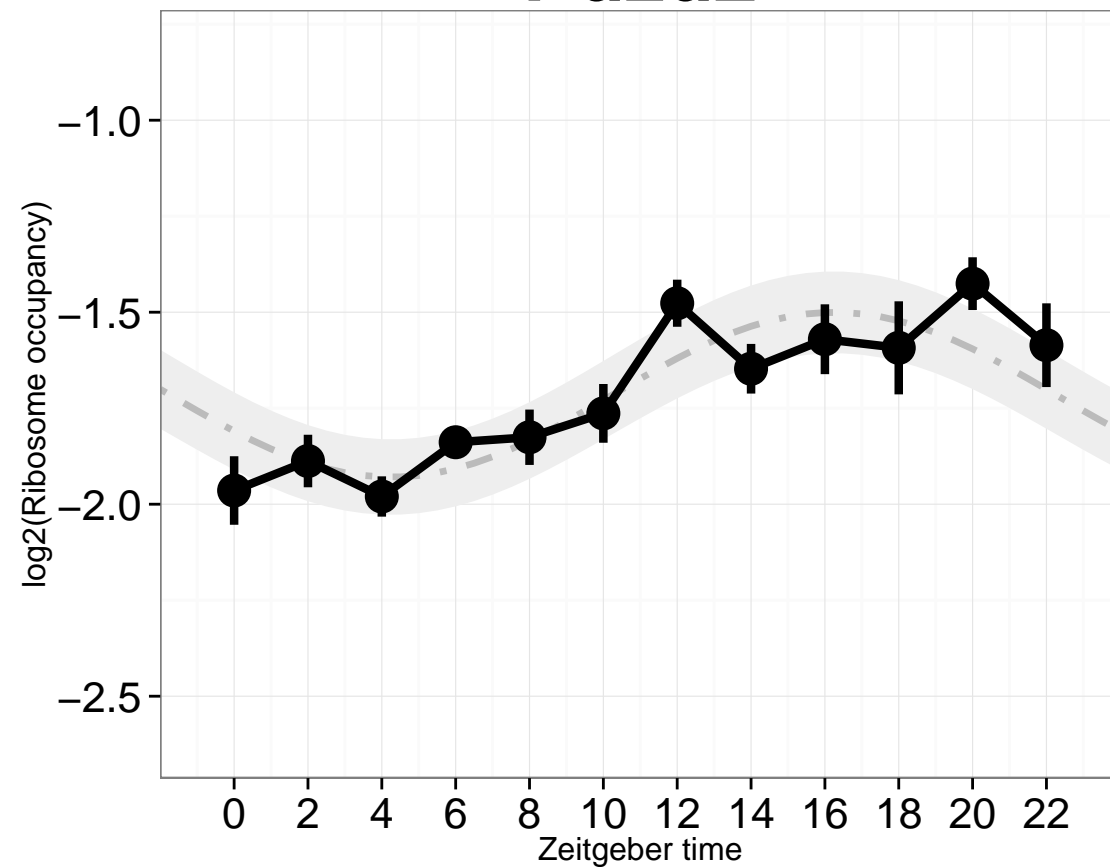

Supplement: Supplementary file 10068 [file 1]

# Taok2

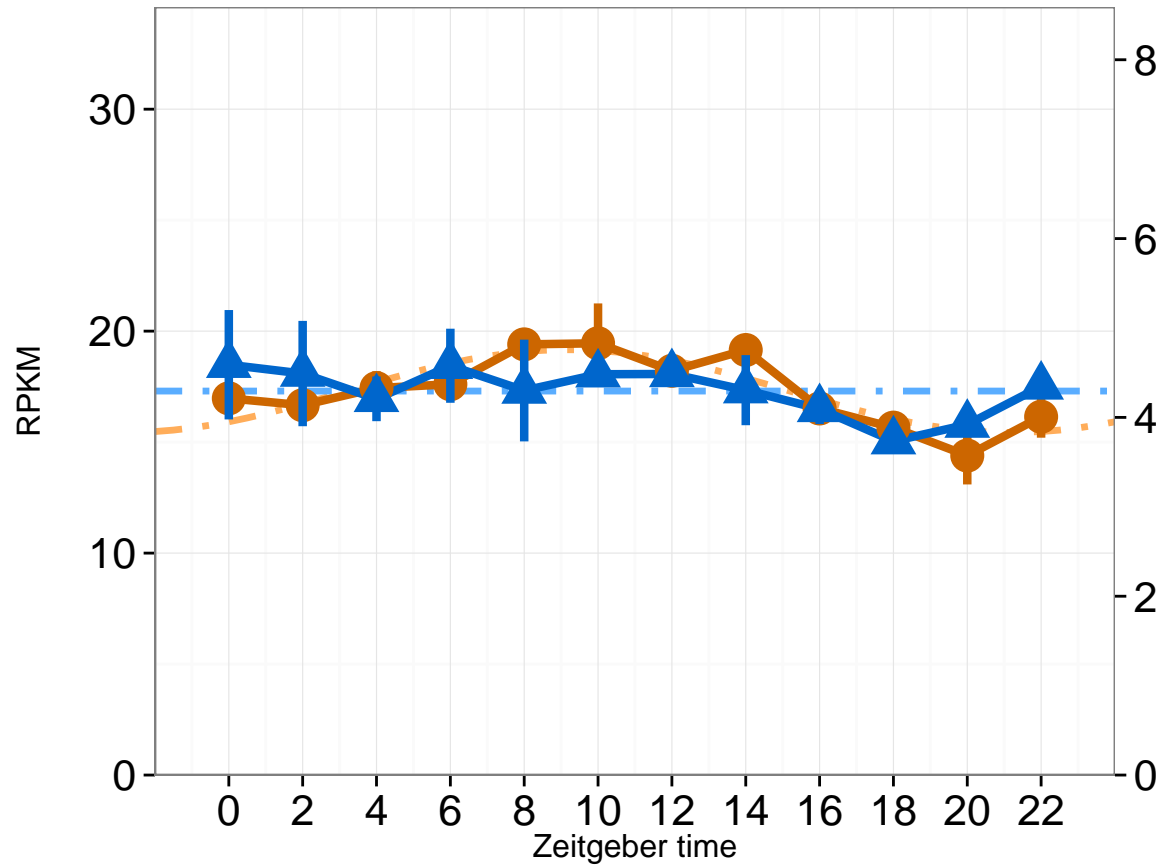

# Taok2

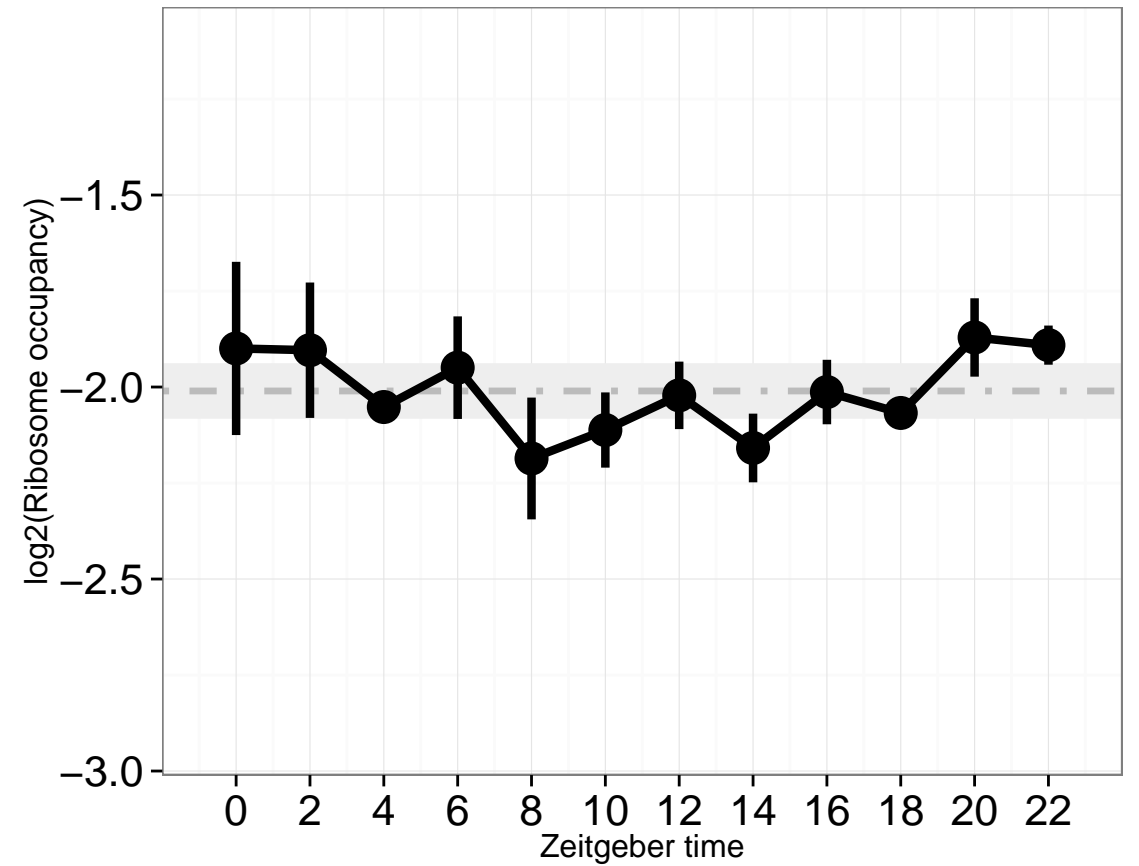

Supplement: Supplementary file 10069 [file 1]

## Tardbp

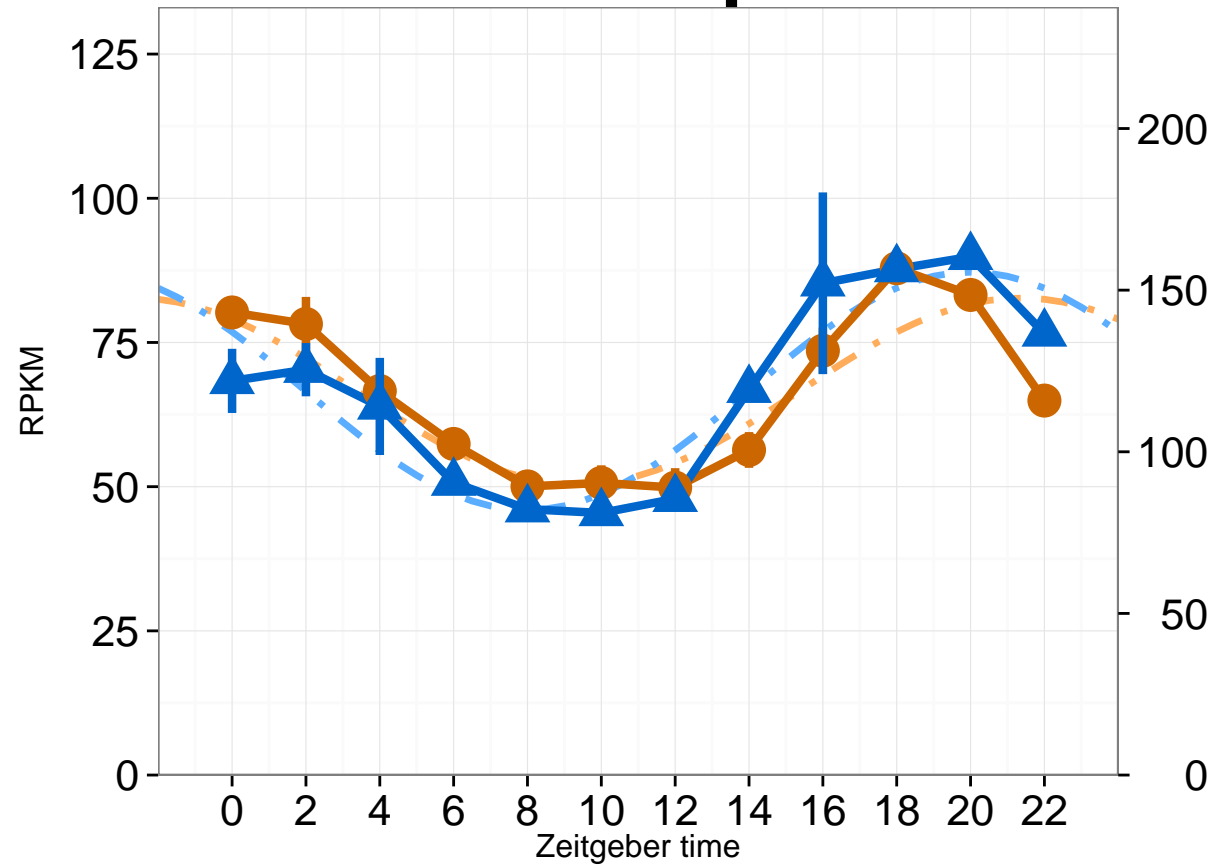

## Tardbp

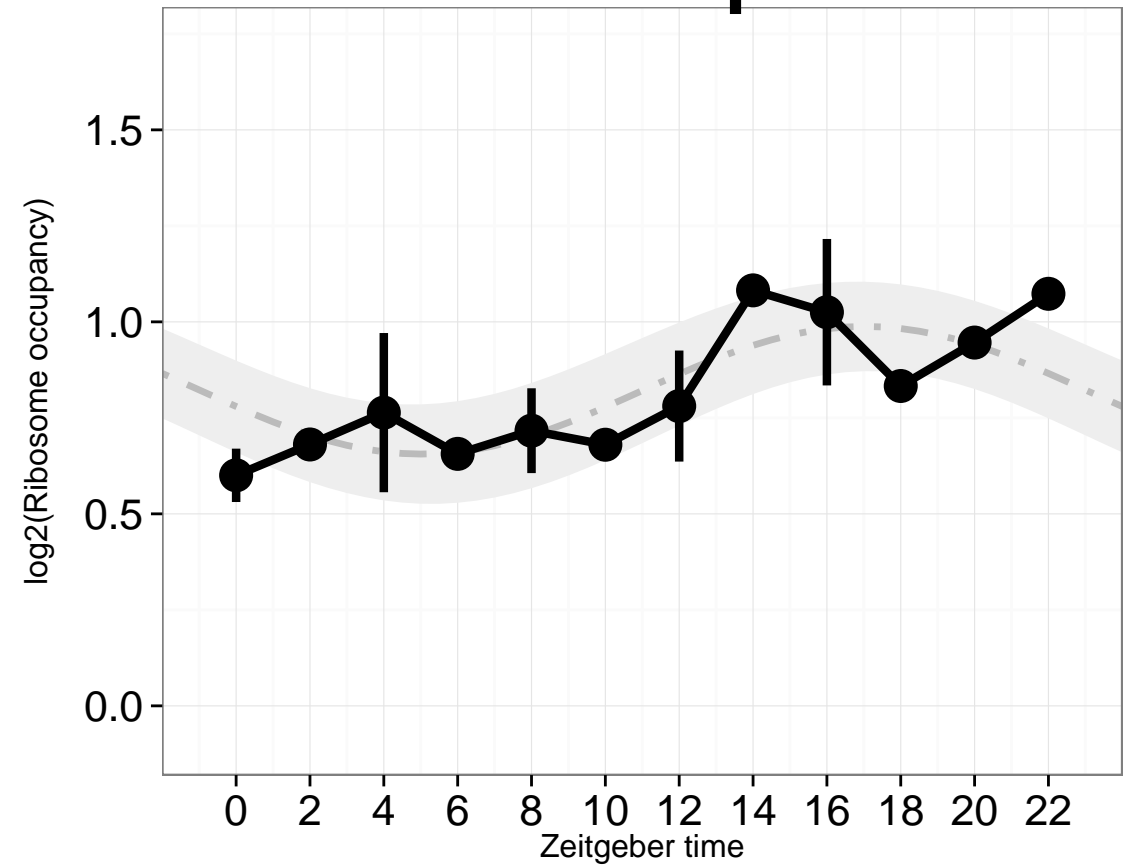

Supplement: Supplementary file 10070 [file 1]

## Abi3

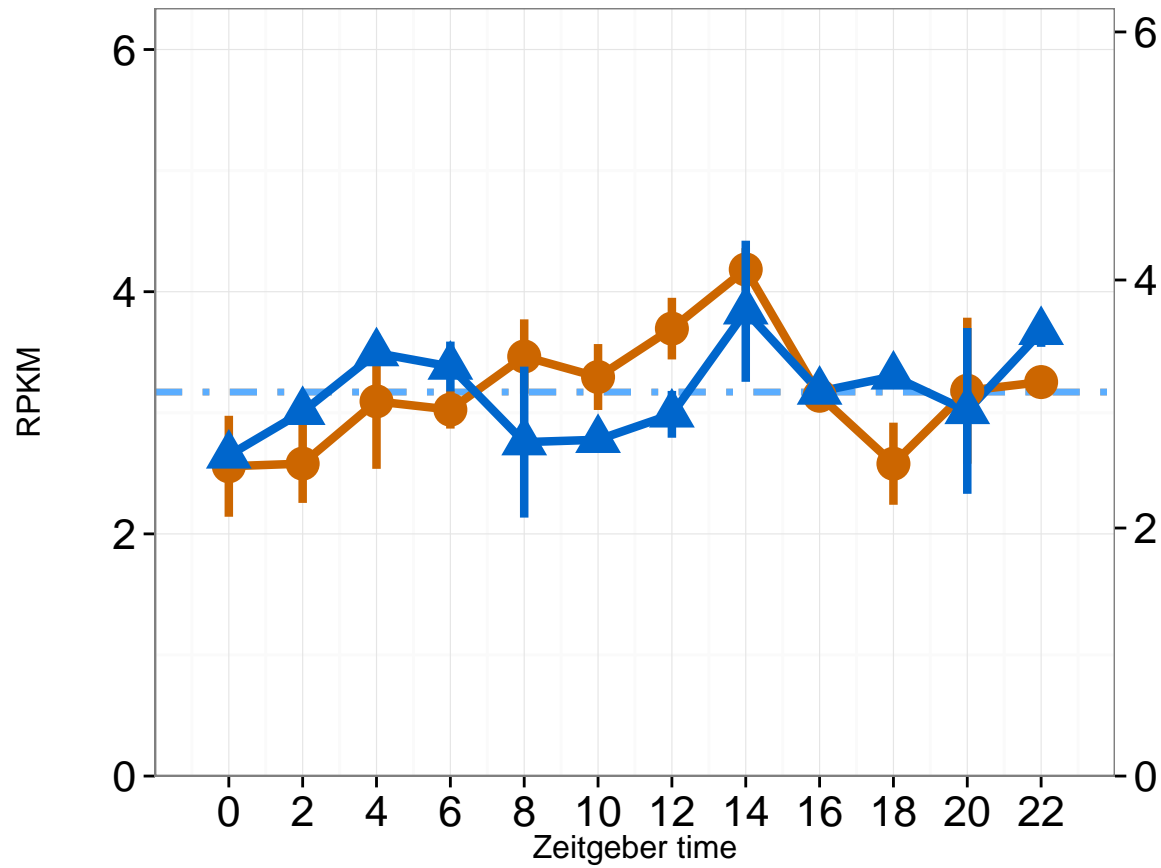

## Abi3

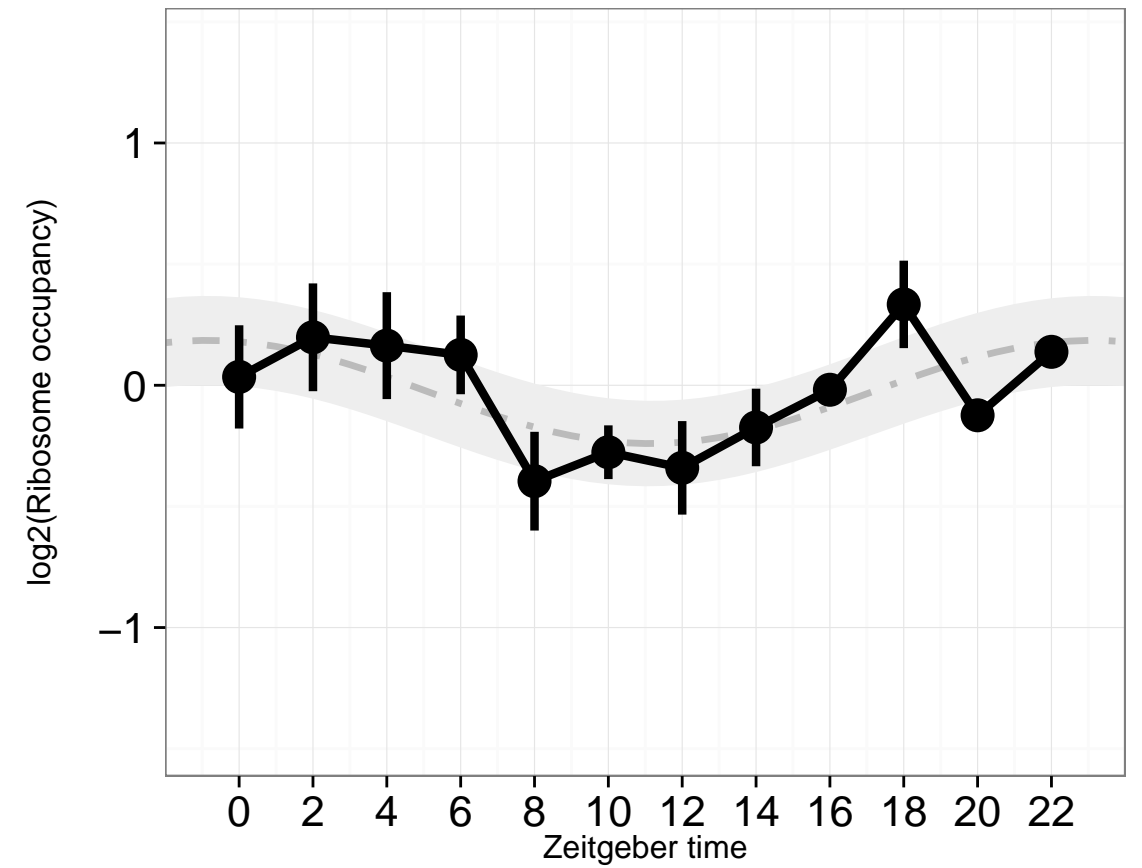

Supplement: Supplementary file 10071 [file 1]

# Lsm6

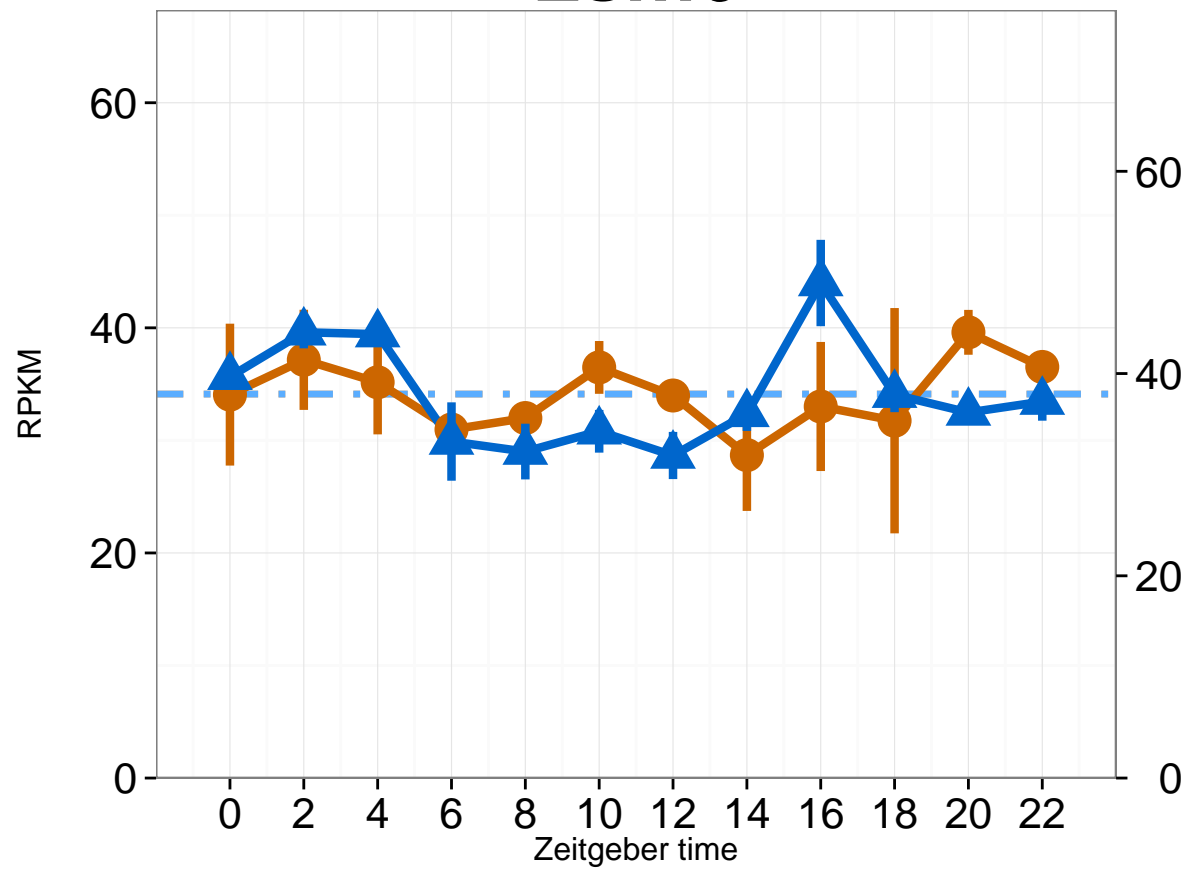

# Lsm6

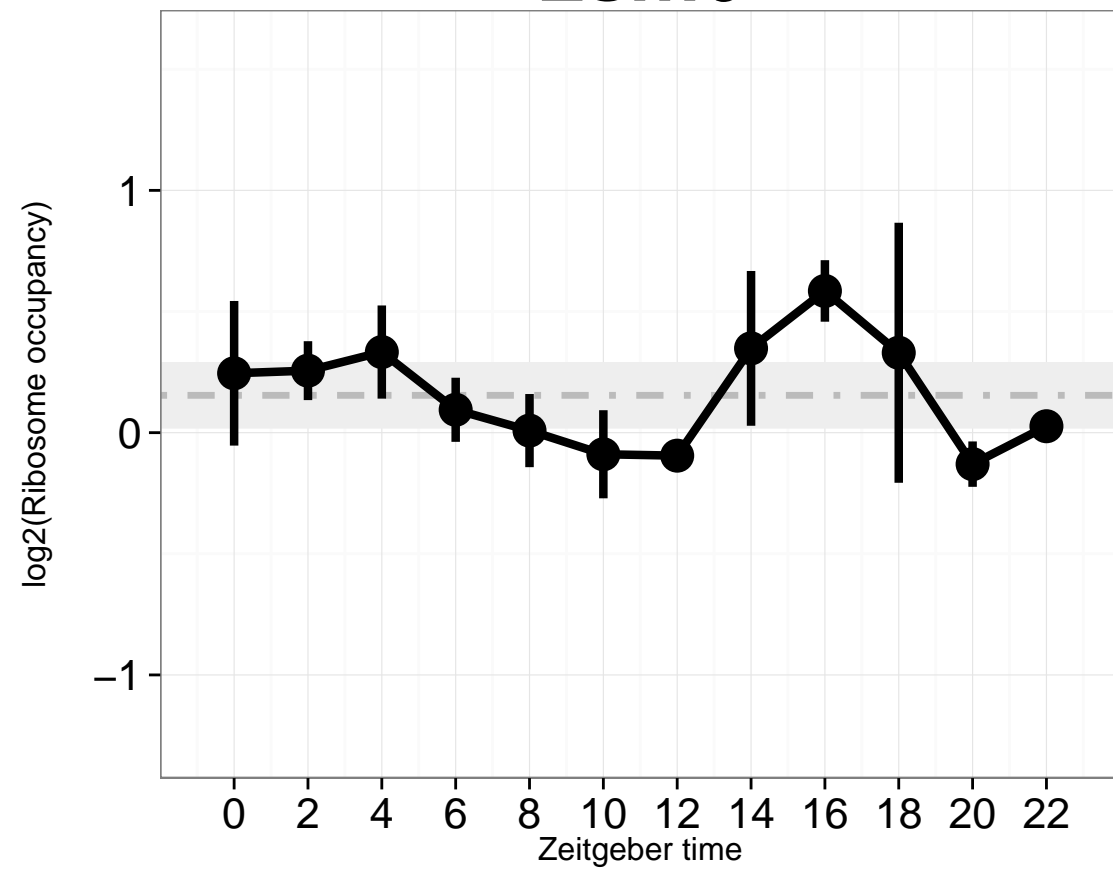

Supplement: Supplementary file 10072 [file 1]

## Nox4

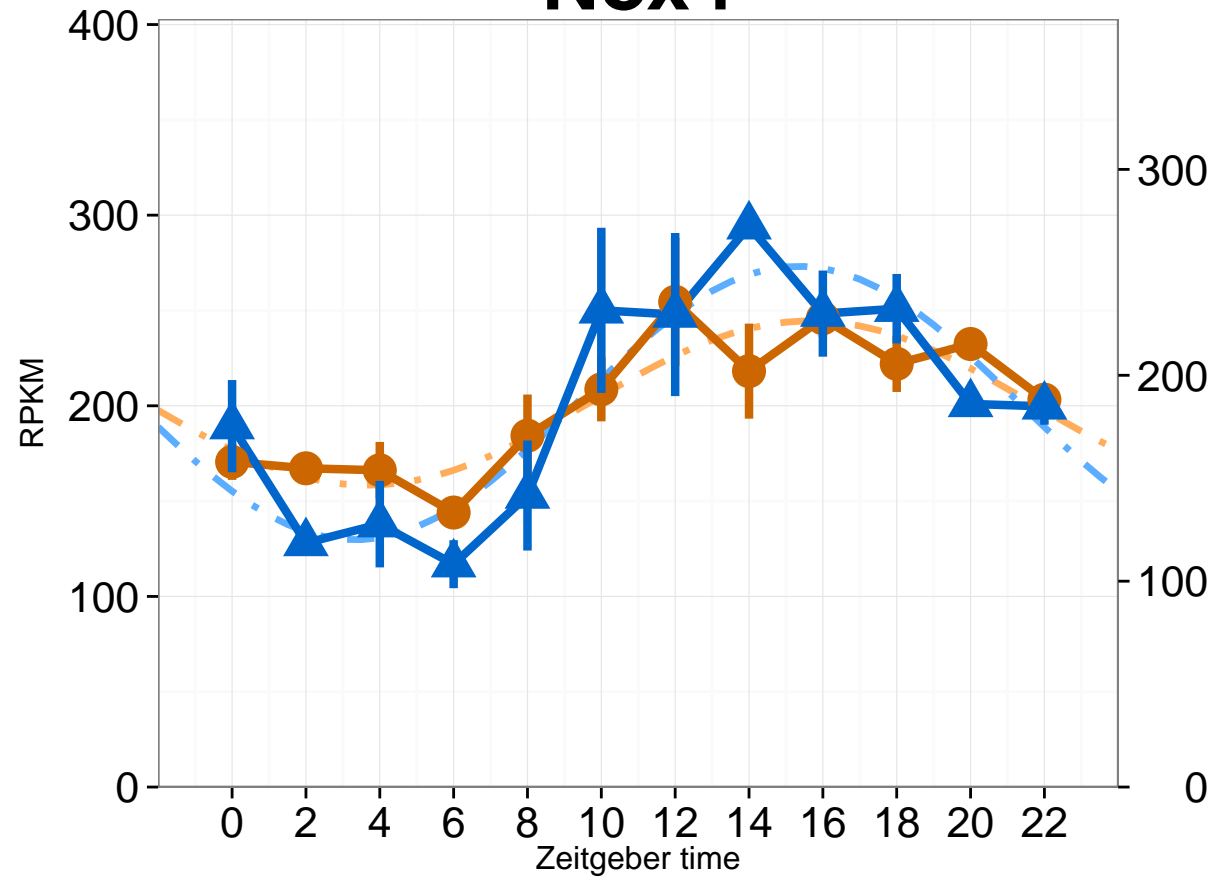

## Nox4

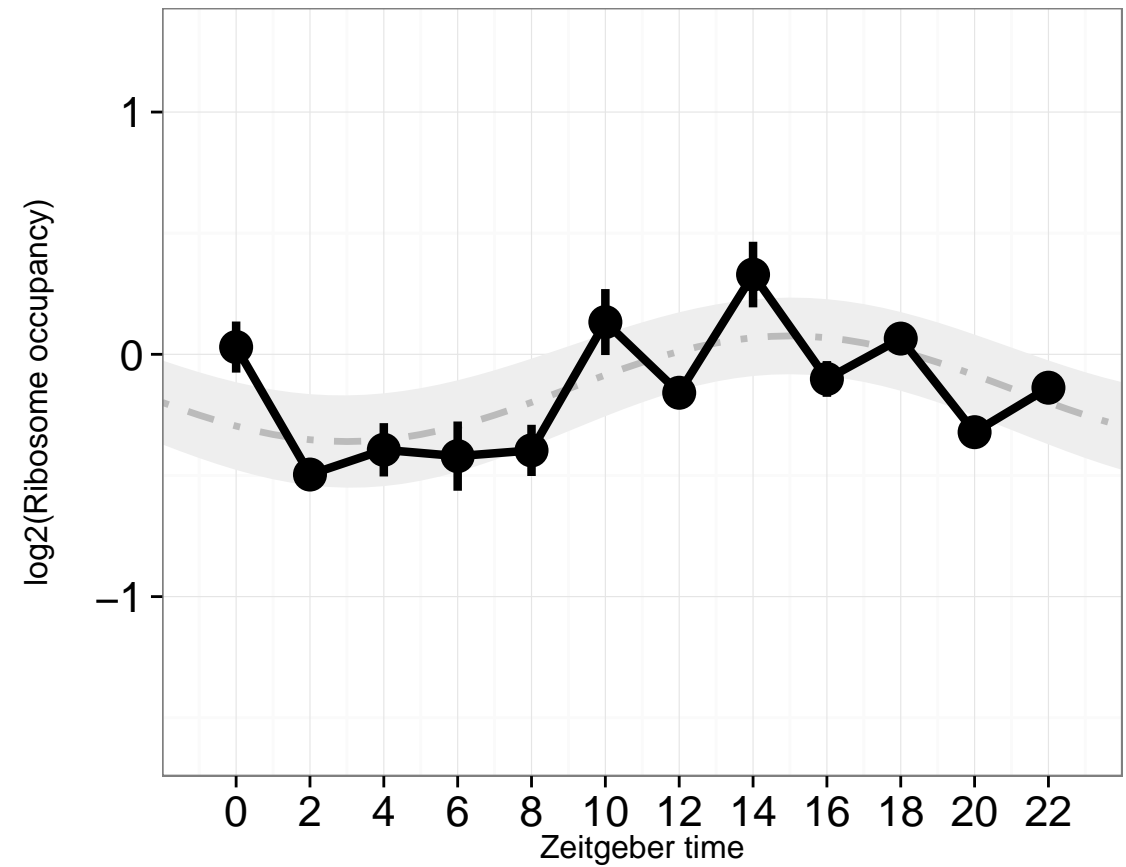

Supplement: Supplementary file 10073 [file 1]

## Cwc22

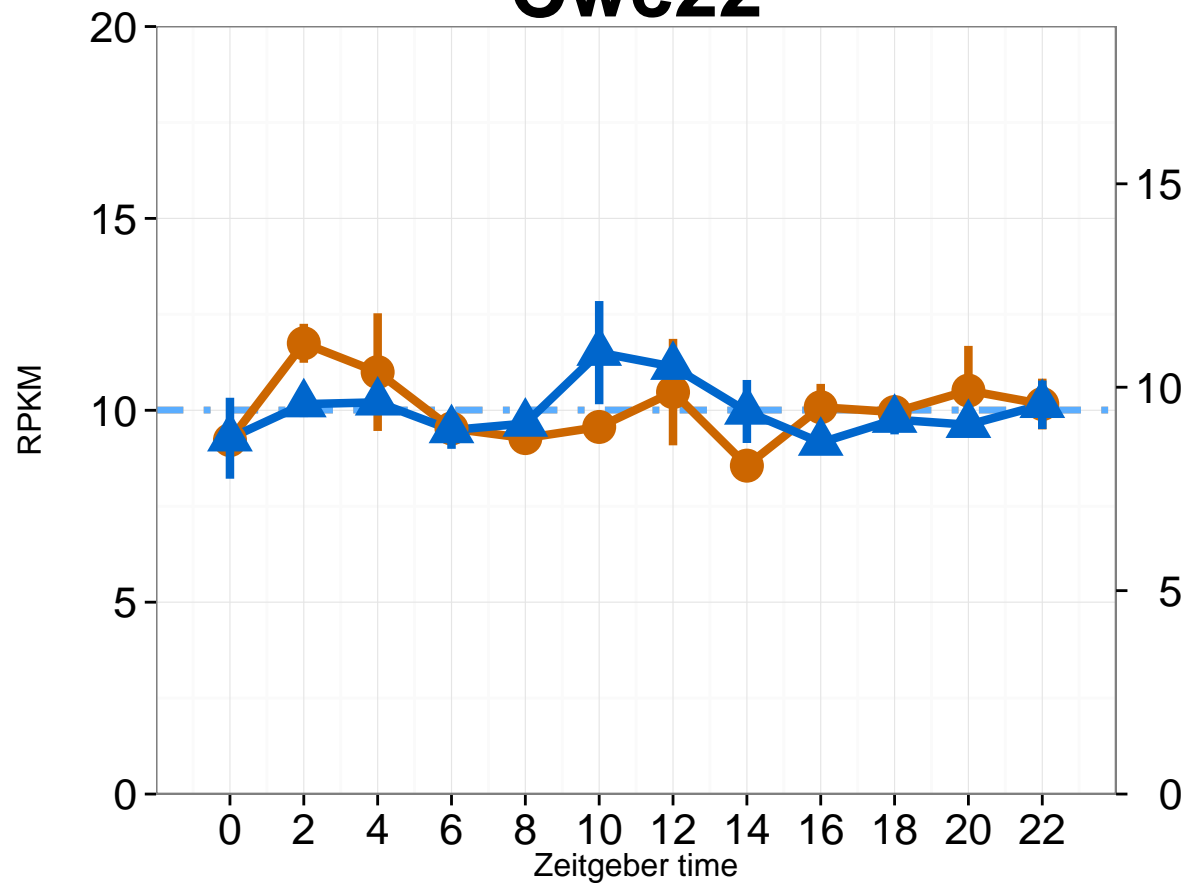

## Cwc22

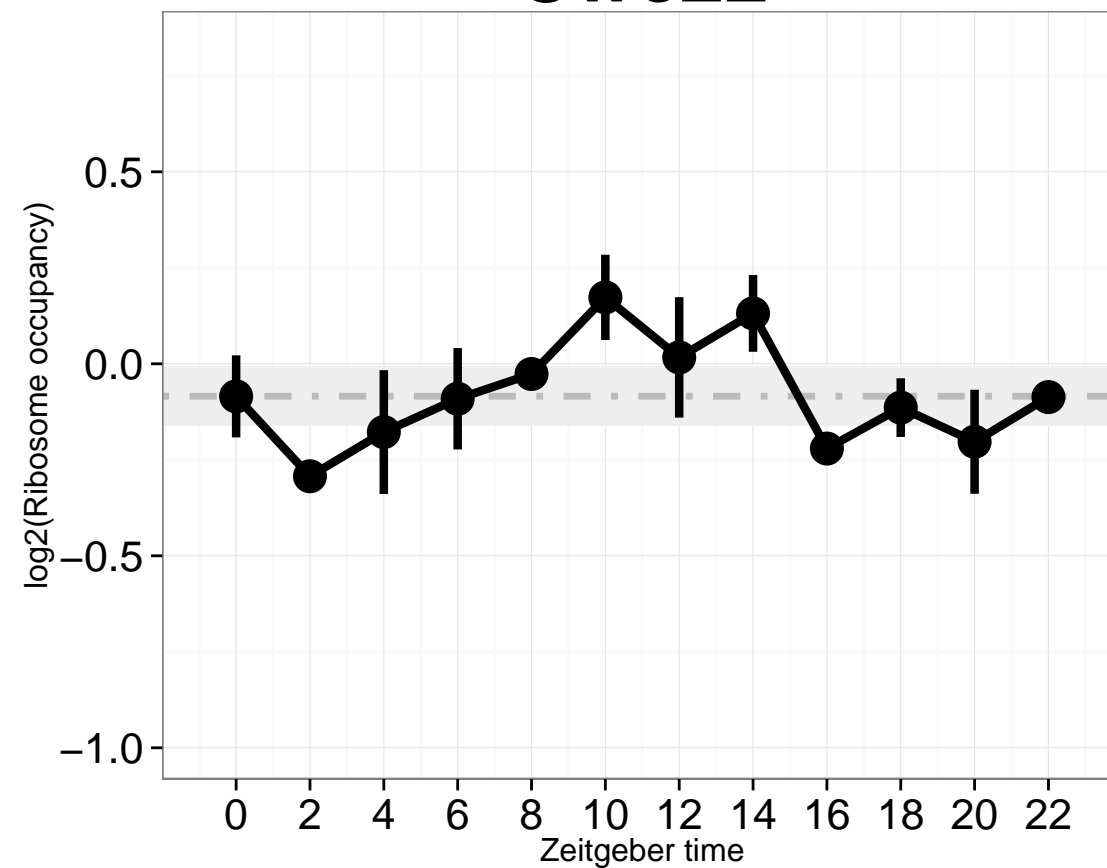

Supplement: Supplementary file 10074 [file 1]

# Bloc1s4

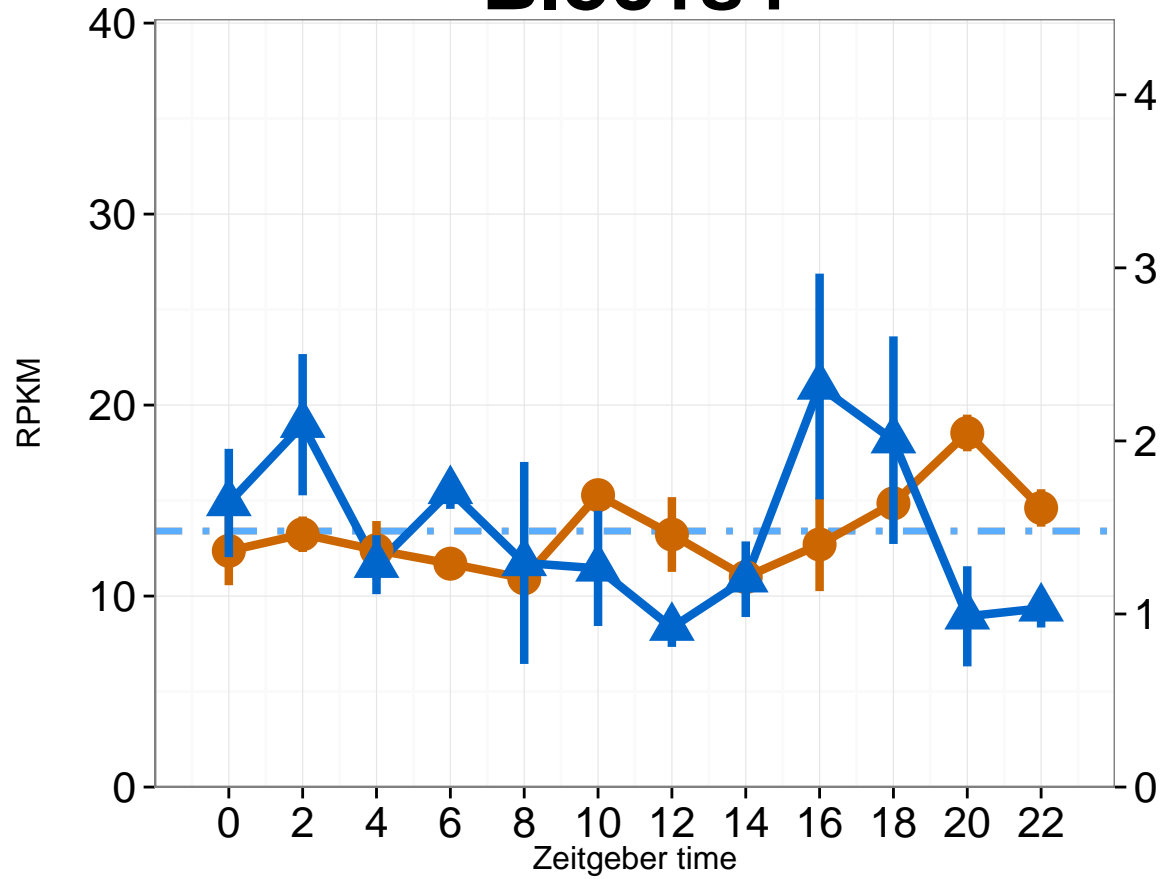

# Bloc1s4

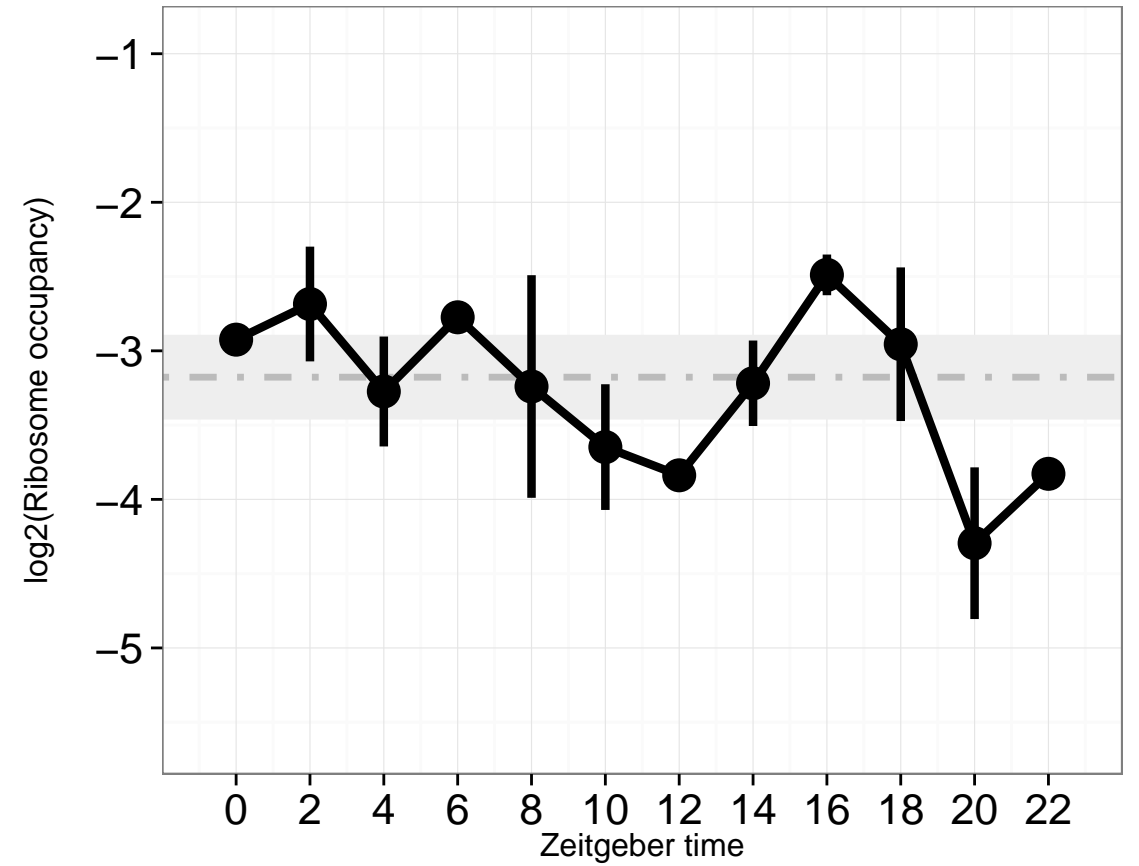

Supplement: Supplementary file 10075 [file 1]

# Fgfbp1

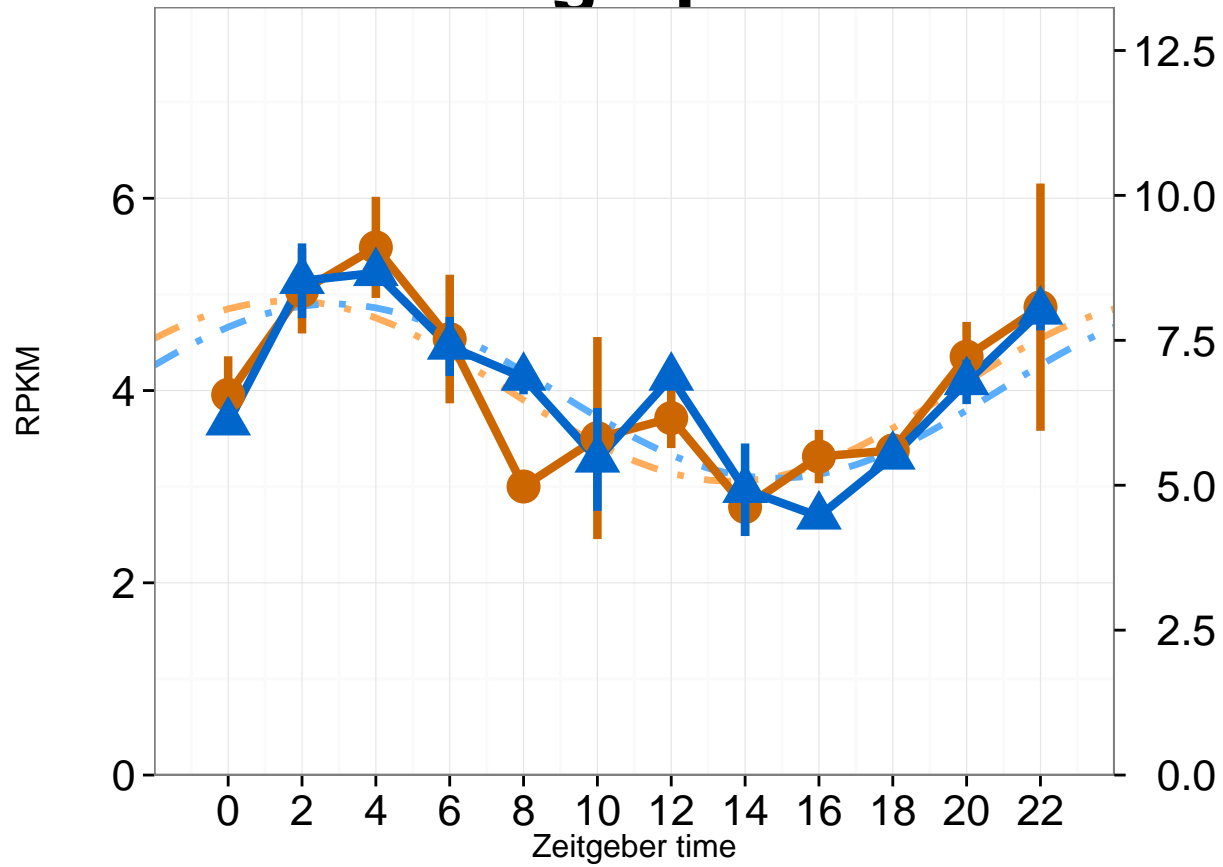

# Fgfbp1

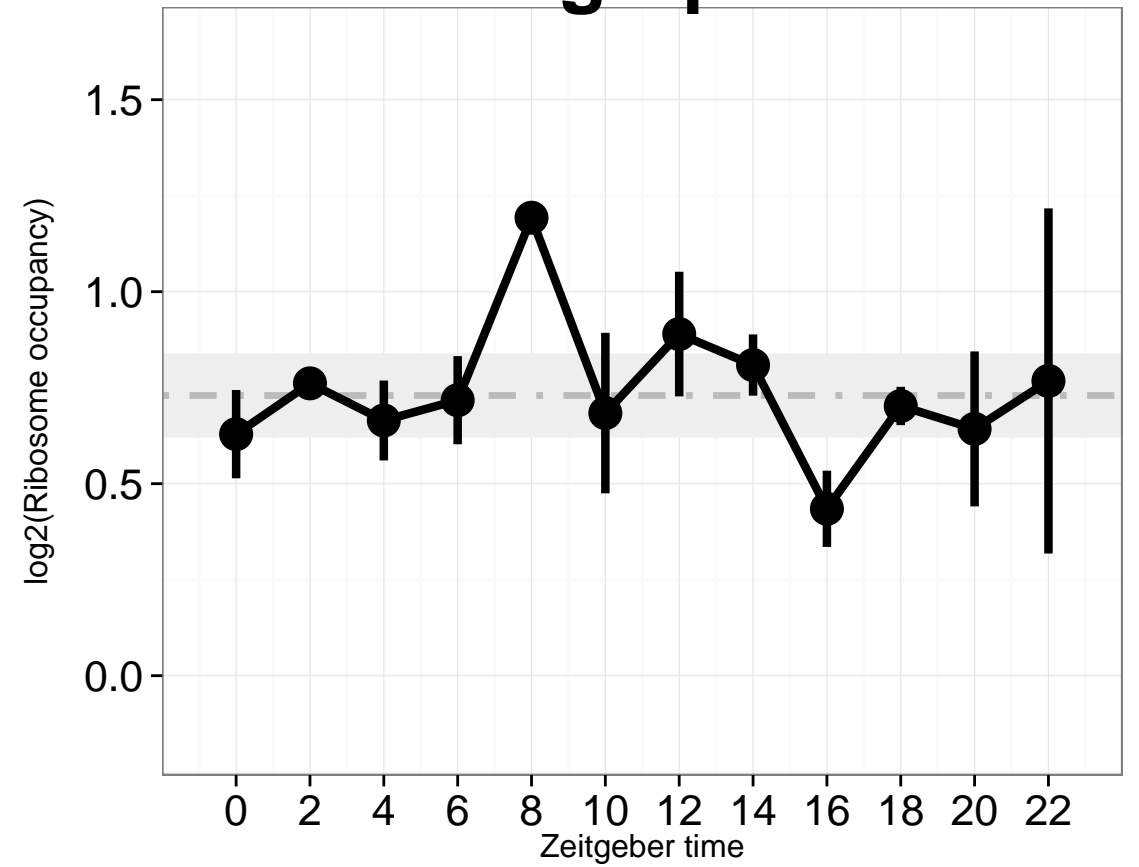

Supplement: Supplementary file 10076 [file 1]

## Gm5113

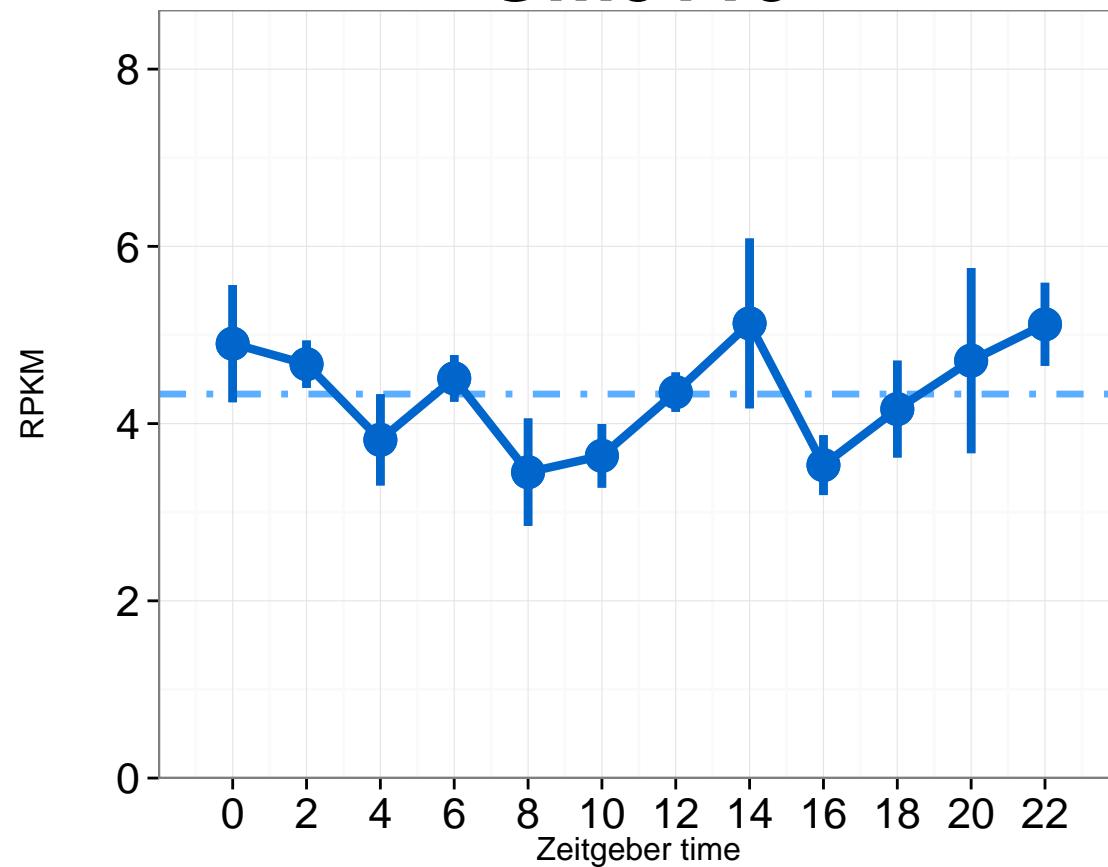

## Gm5113 log2(Ribosome occupanc

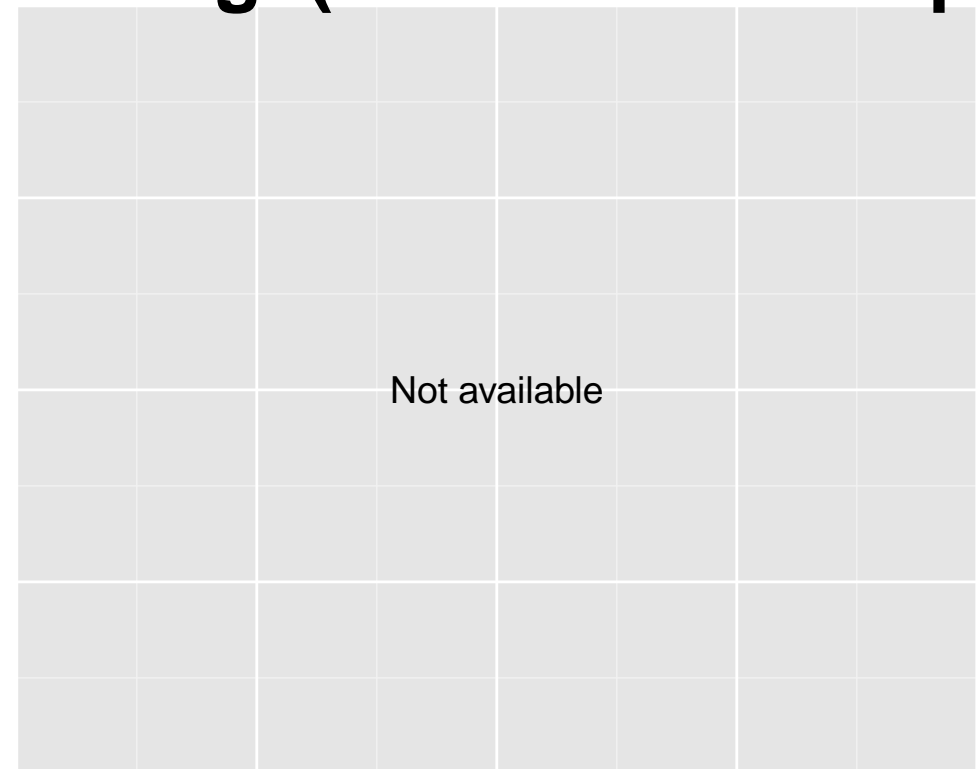

Supplement: Supplementary file 10077 [file 1]

## Ascc2

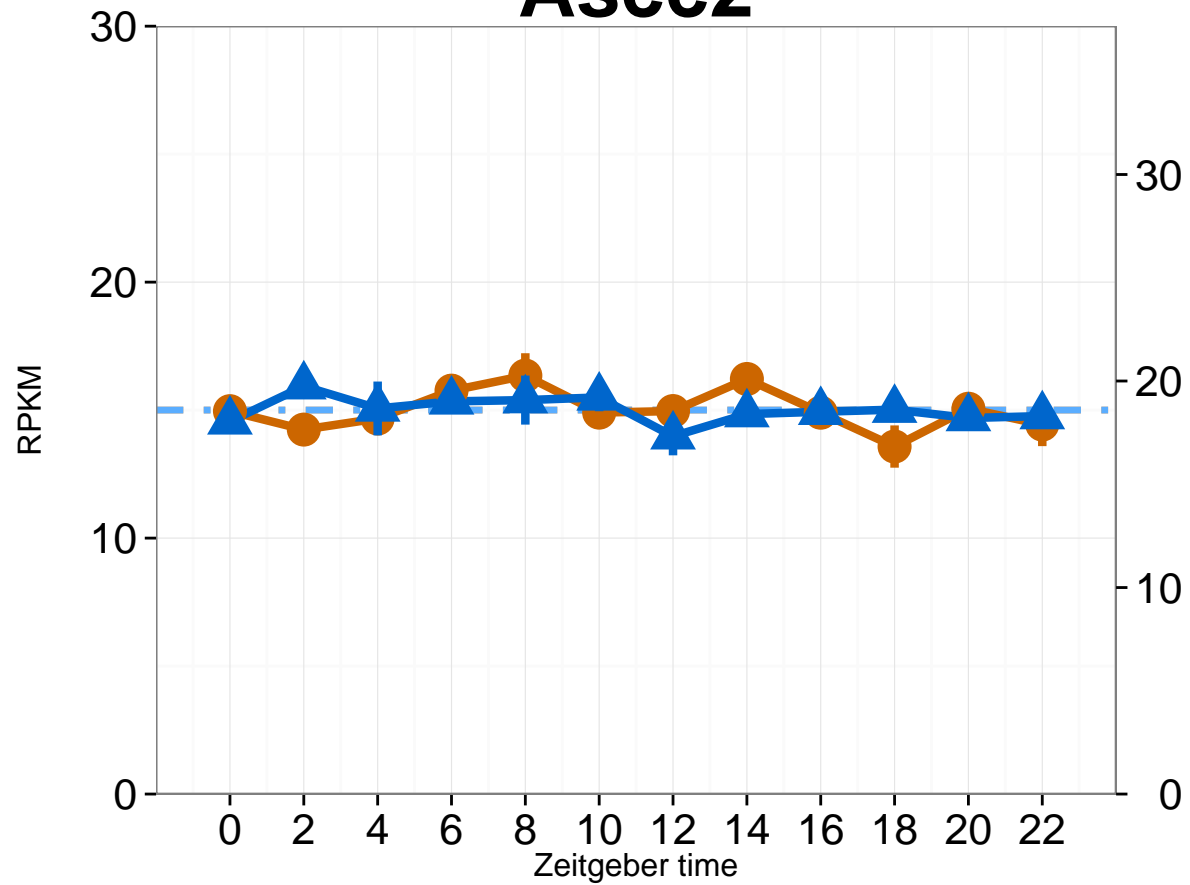

## Ascc2

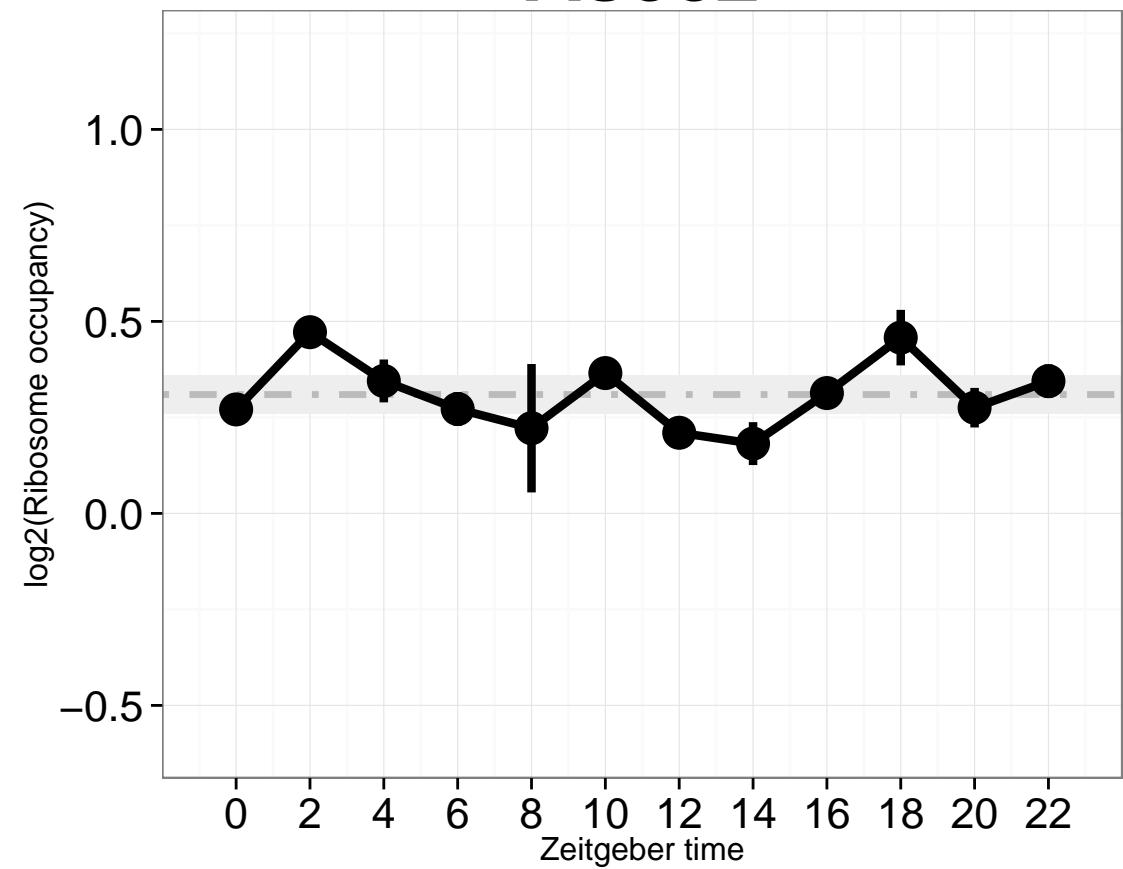

Supplement: Supplementary file 10078 [file 1]

## Ero1l

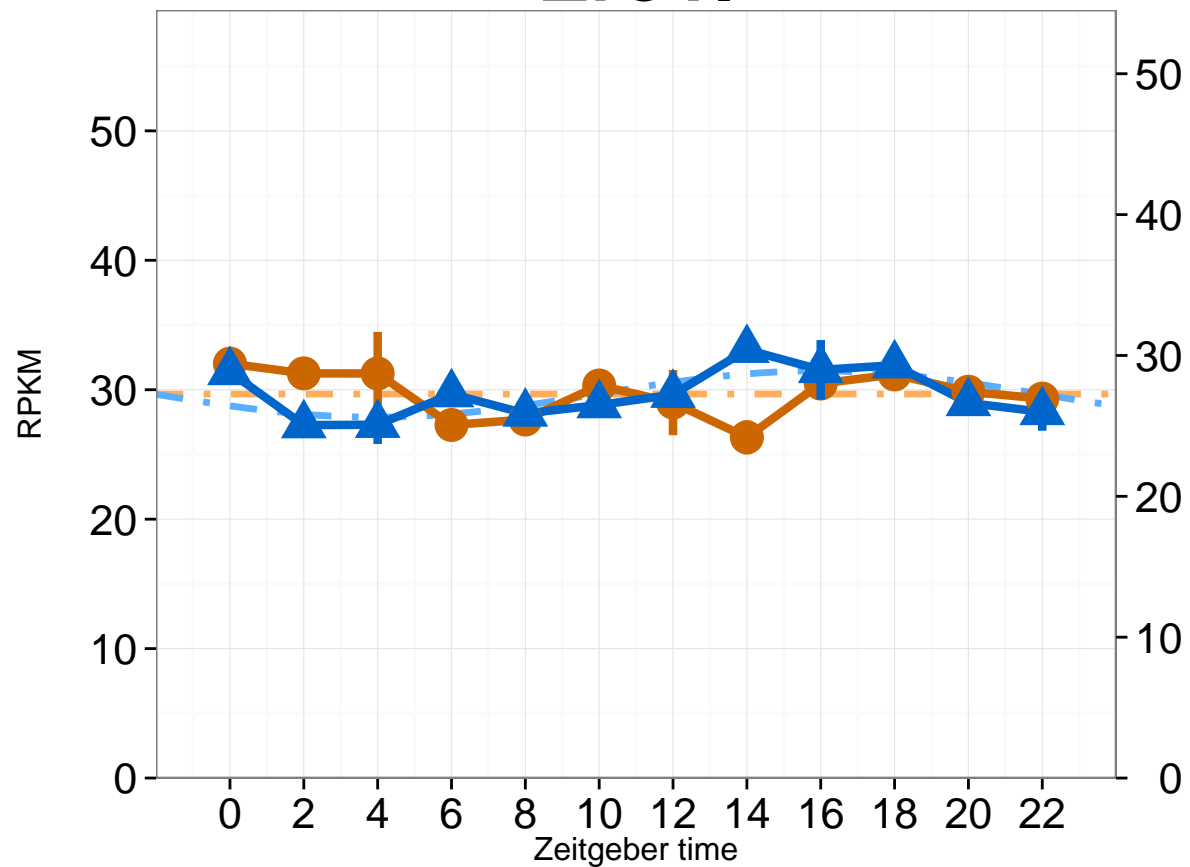

## Ero1l

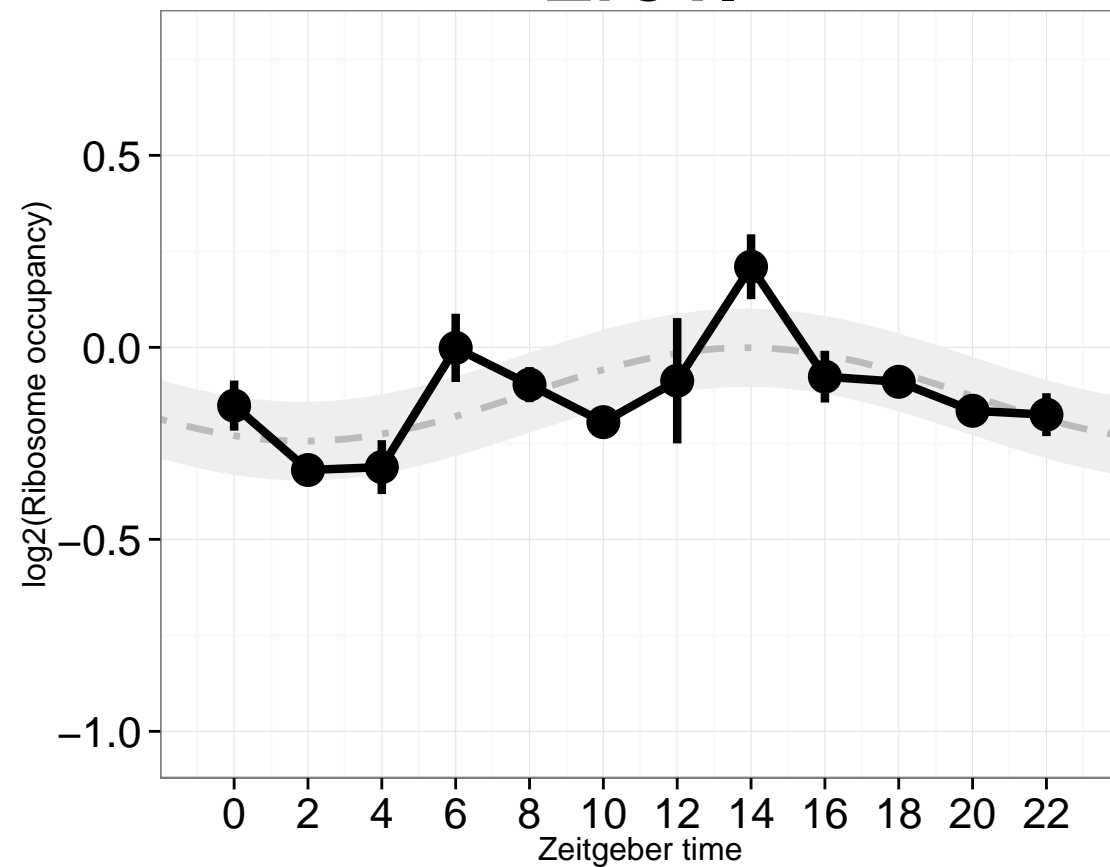

Supplement: Supplementary file 10079 [file 1]

## Ip6k1

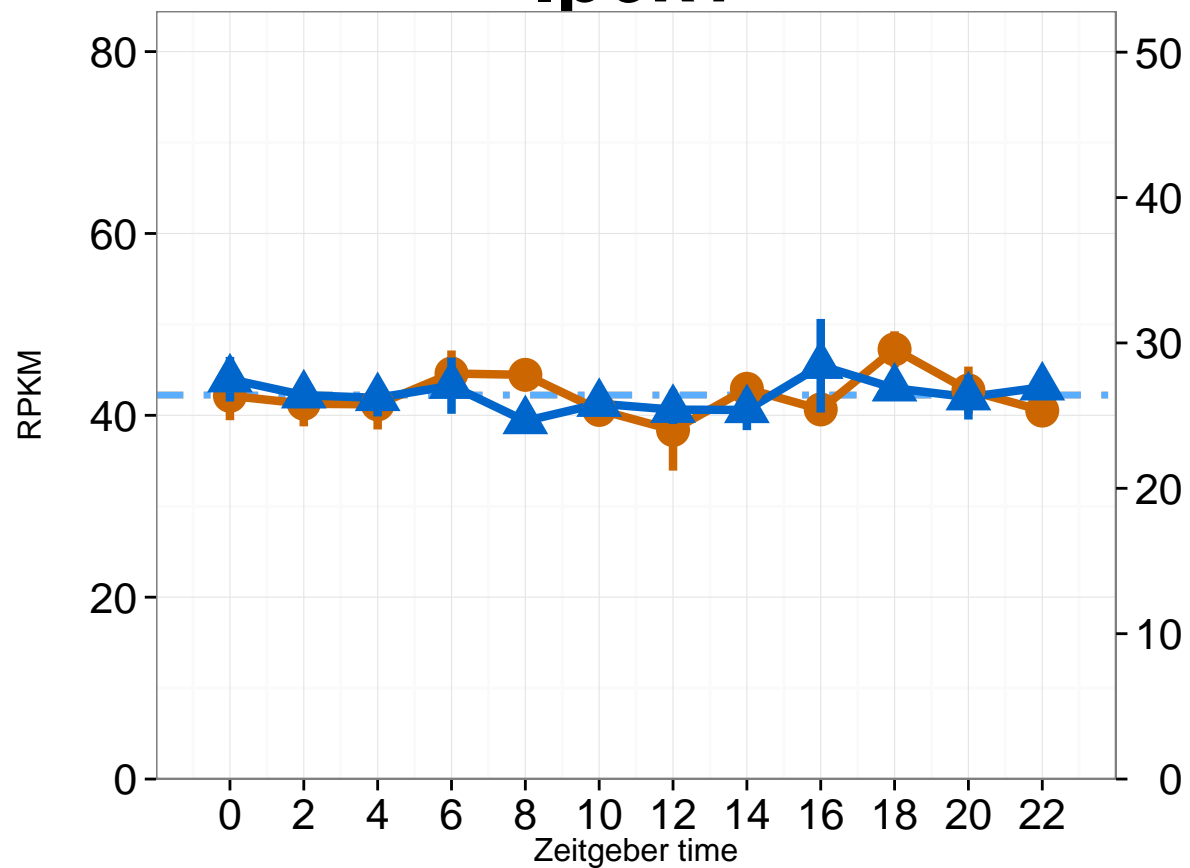

## Ip6k1

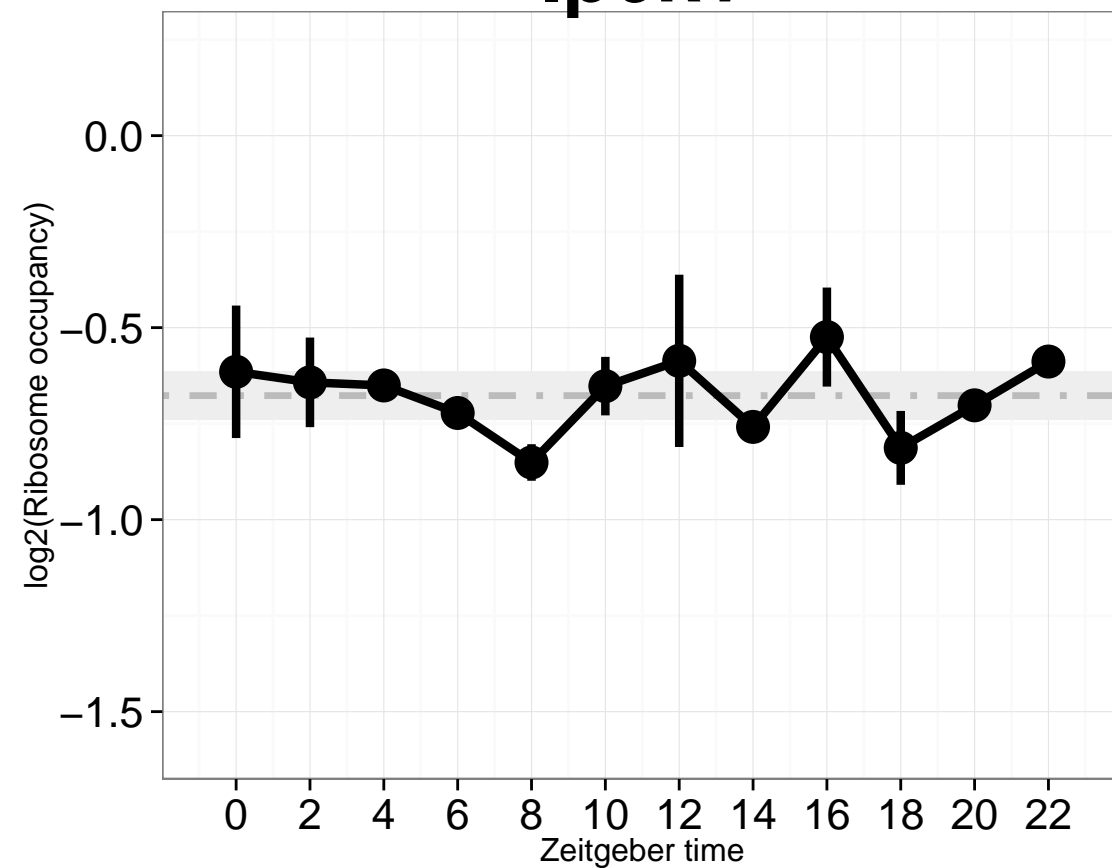

Supplement: Supplementary file 10080 [file 1]

## Tle3

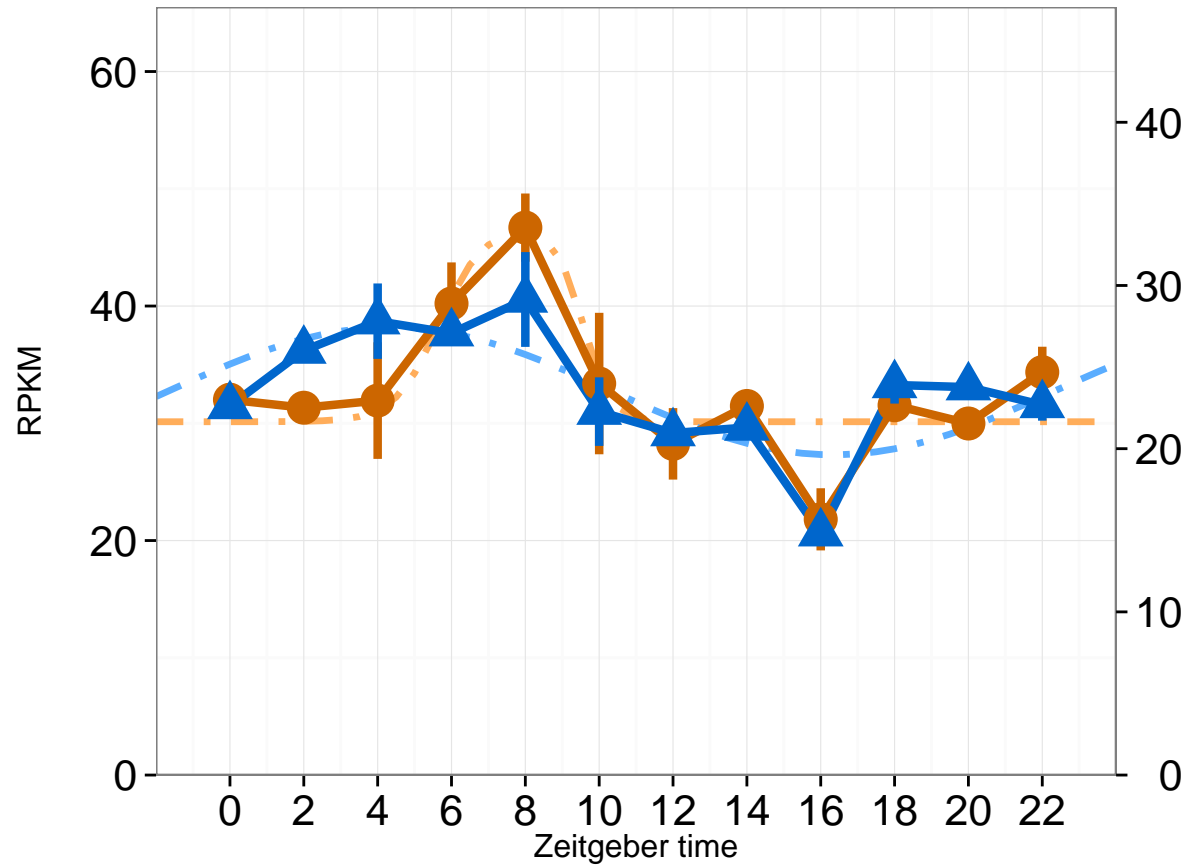

## Tle3

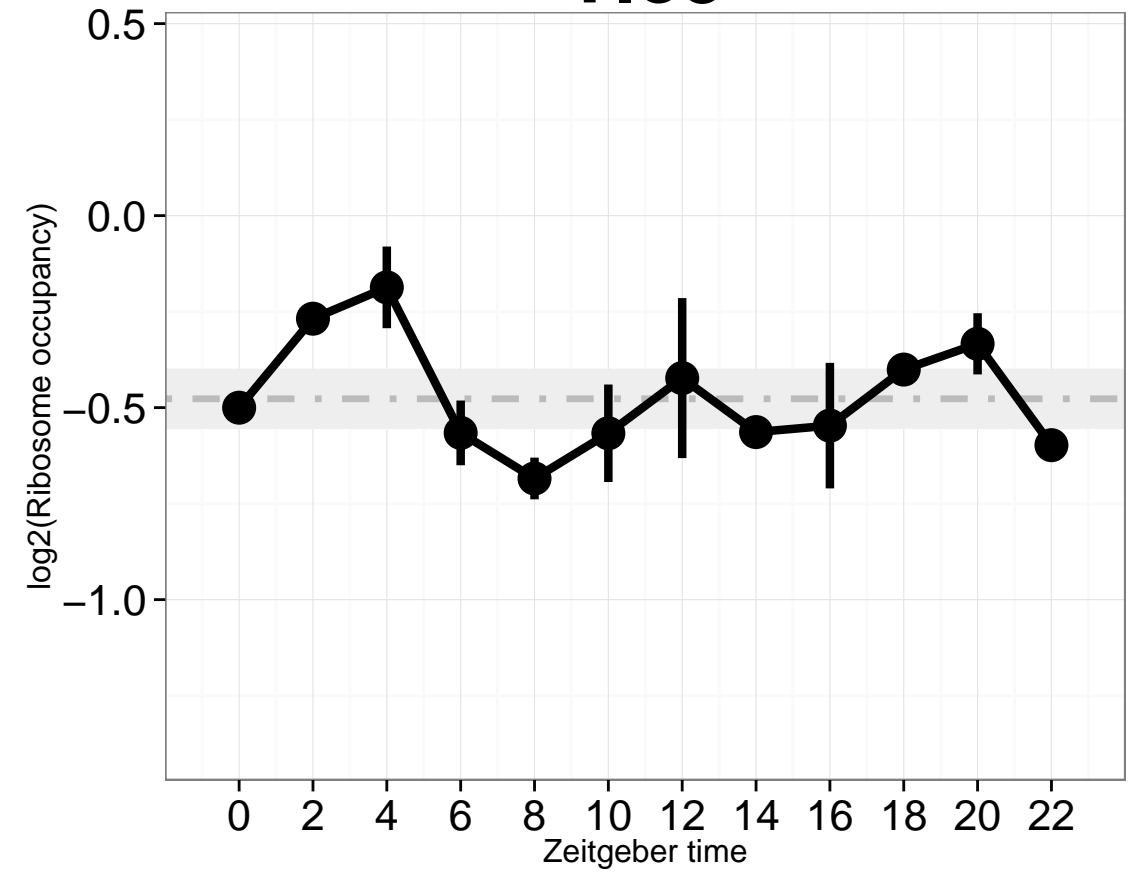

Supplement: Supplementary file 10081 [file 1]

## Crkl

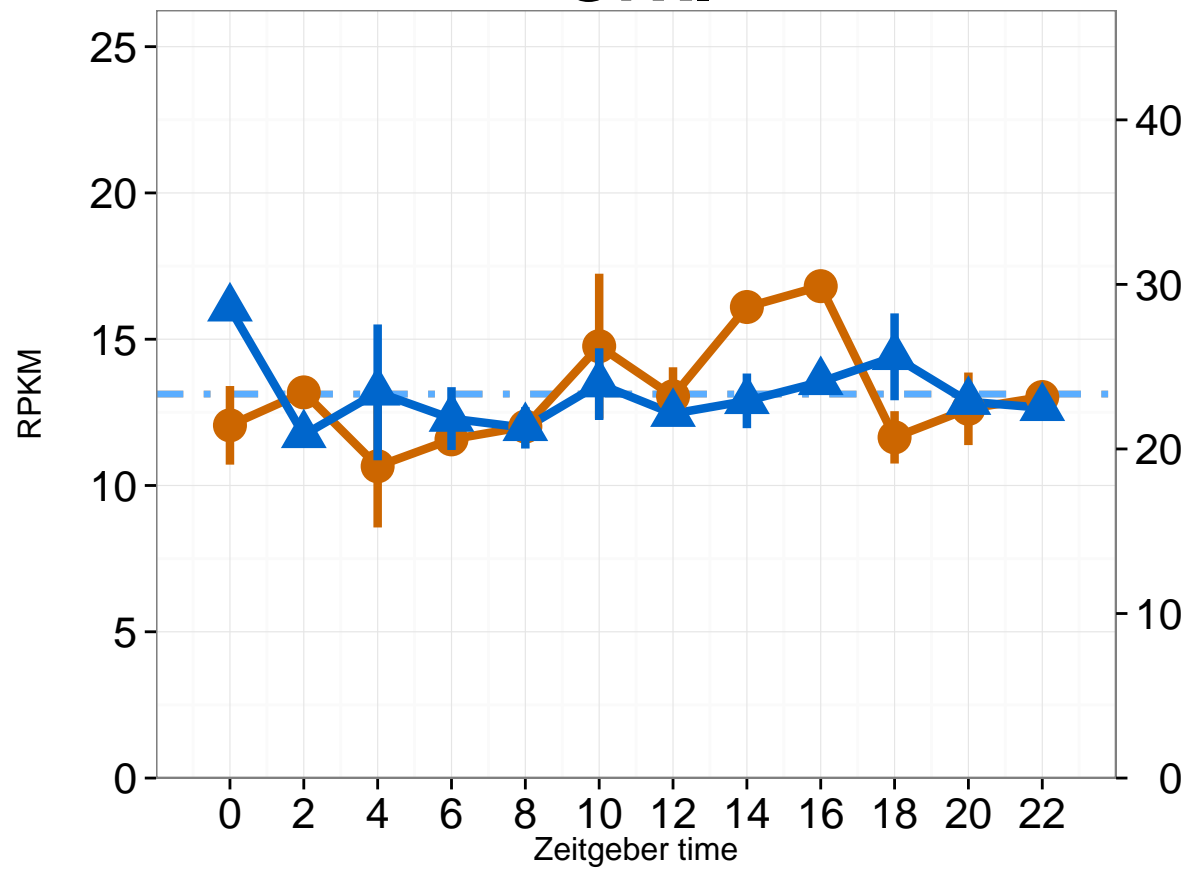

## Crkl

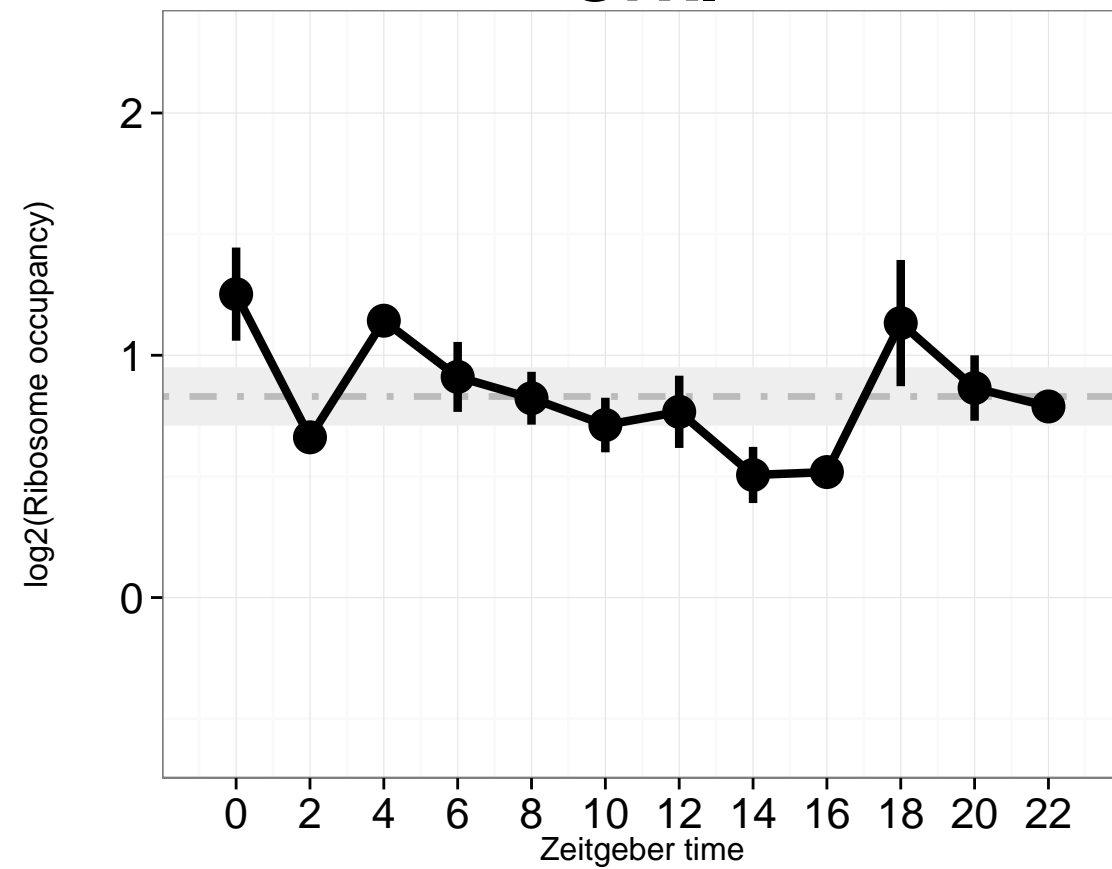

Supplement: Supplementary file 10082 [file 1]

## Uso1

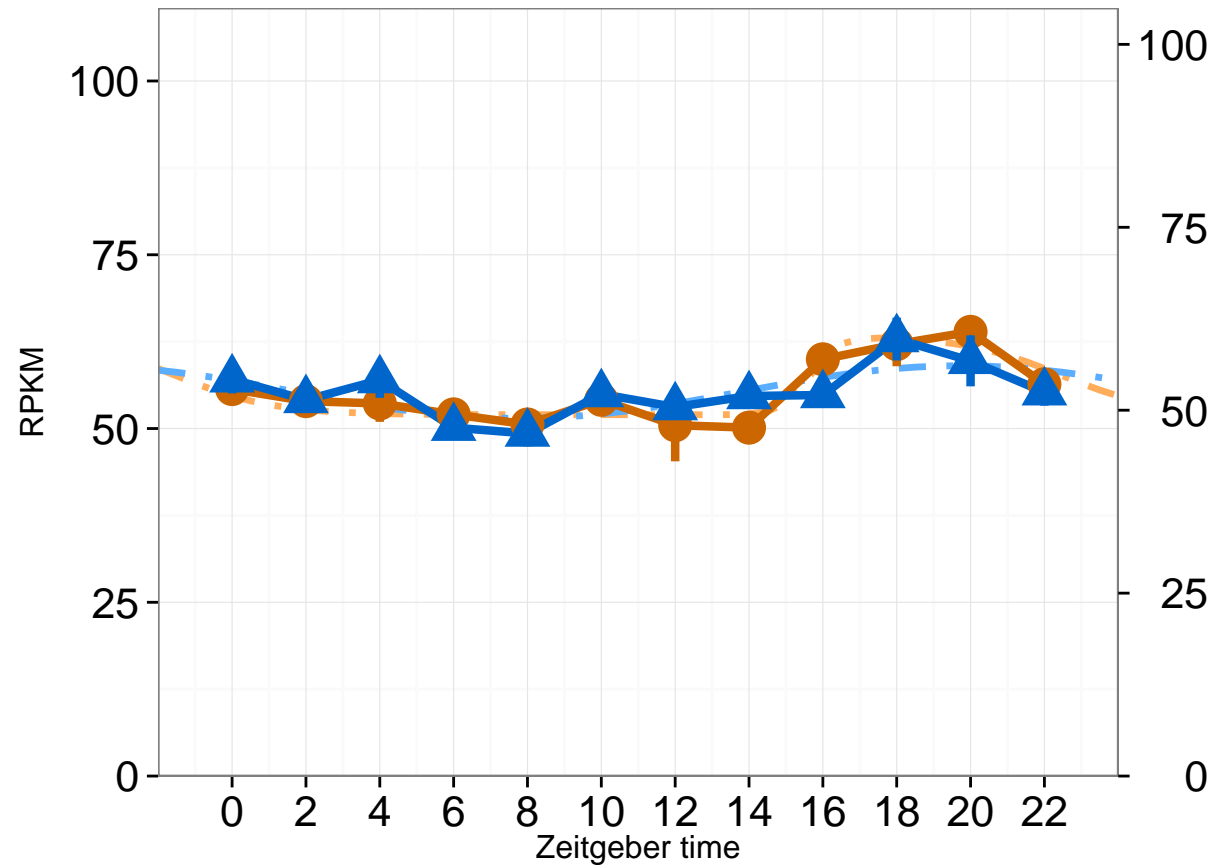

## Uso1

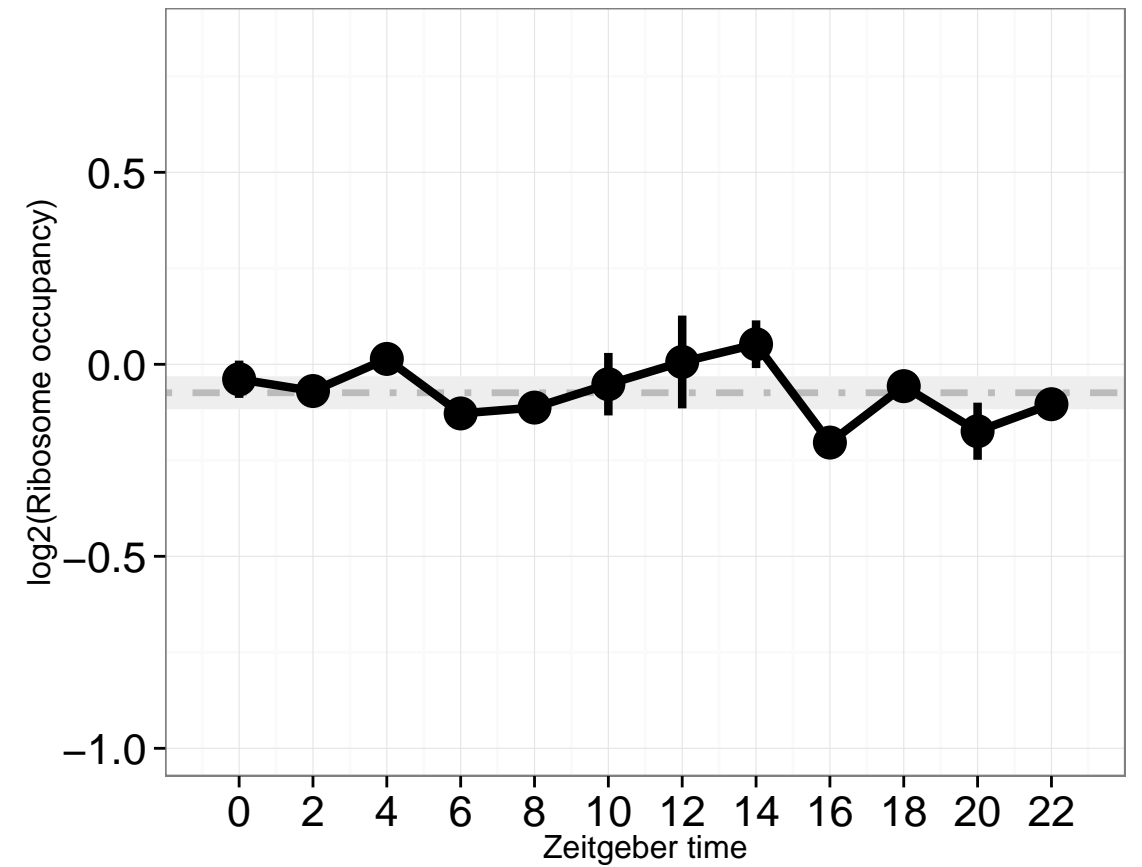

Supplement: Supplementary file 10083 [file 1]

# Mroh1

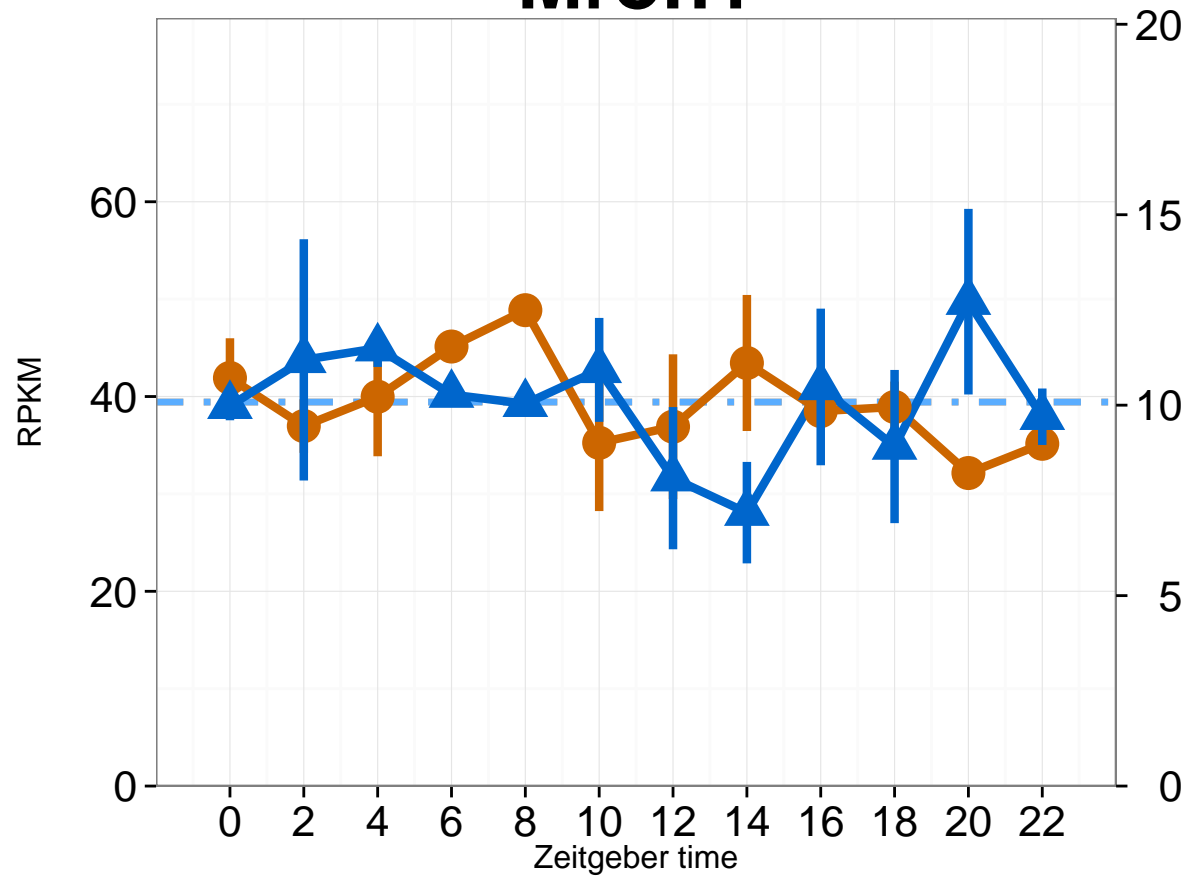

# Mroh1

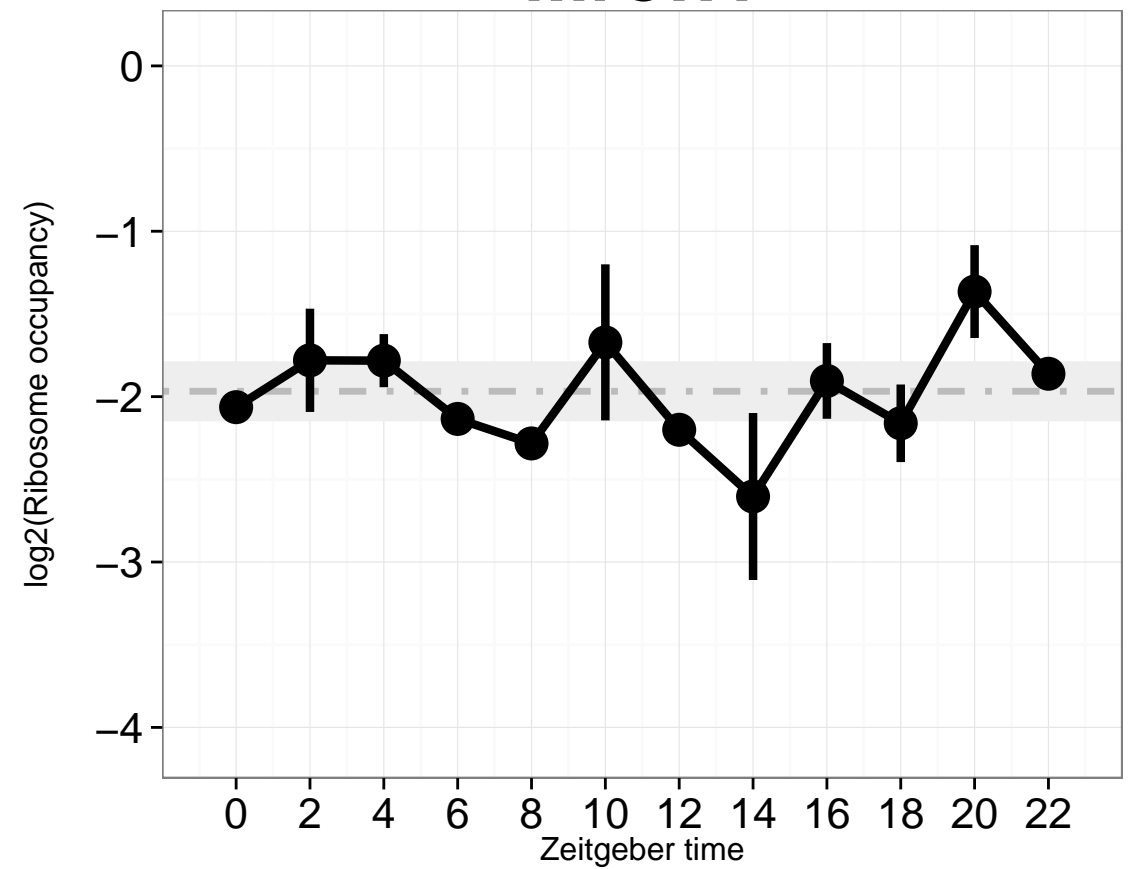

Supplement: Supplementary file 10084 [file 1]

## Enho

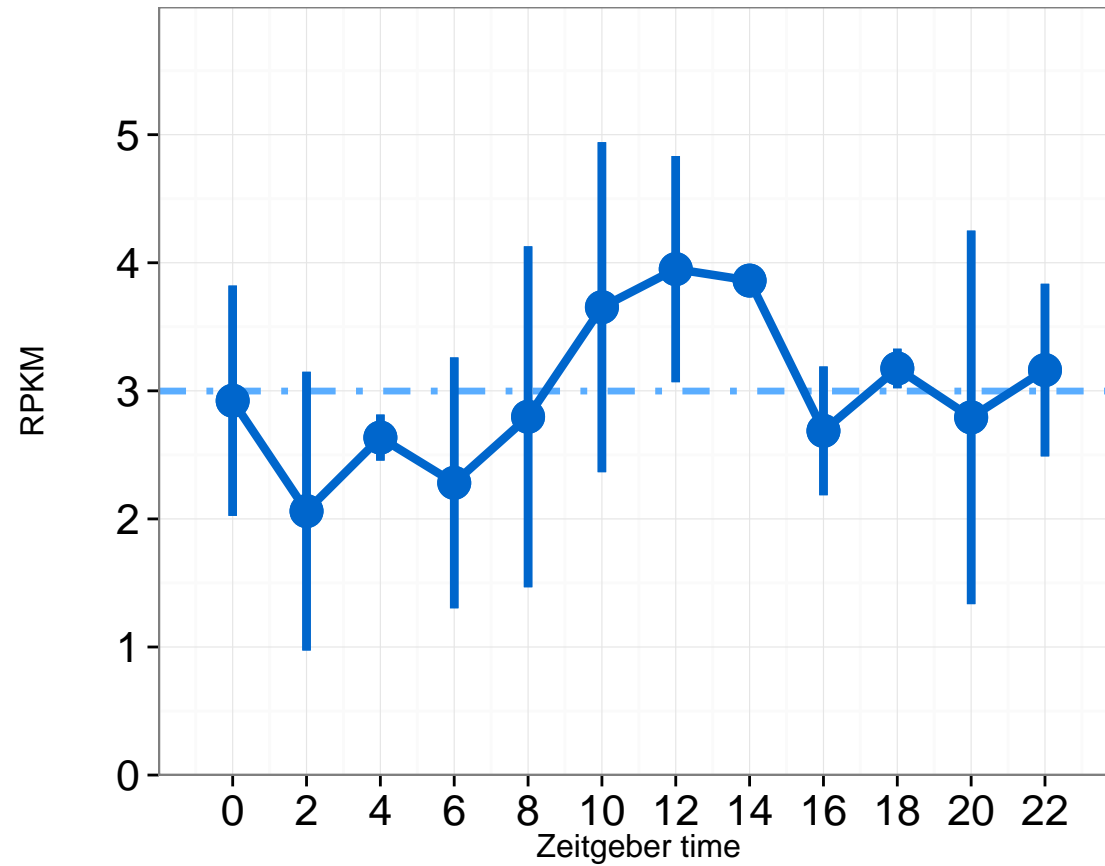

## Enho log2(Ribosome occupancy)

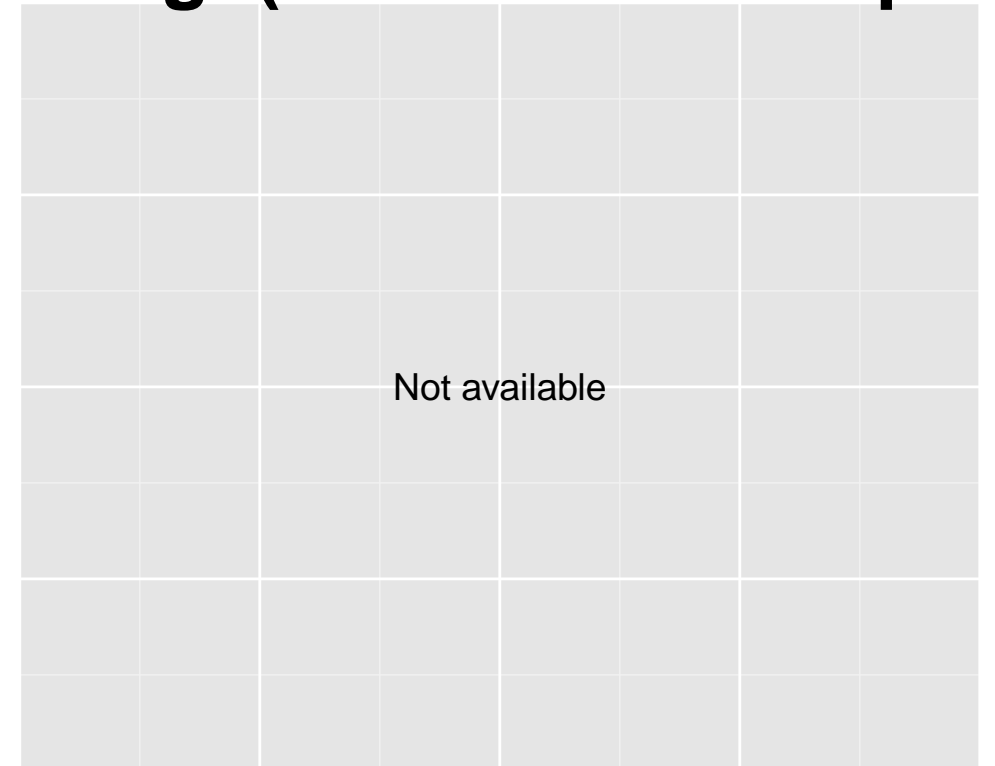

Supplement: Supplementary file 10085 [file 1]

# Atg4d

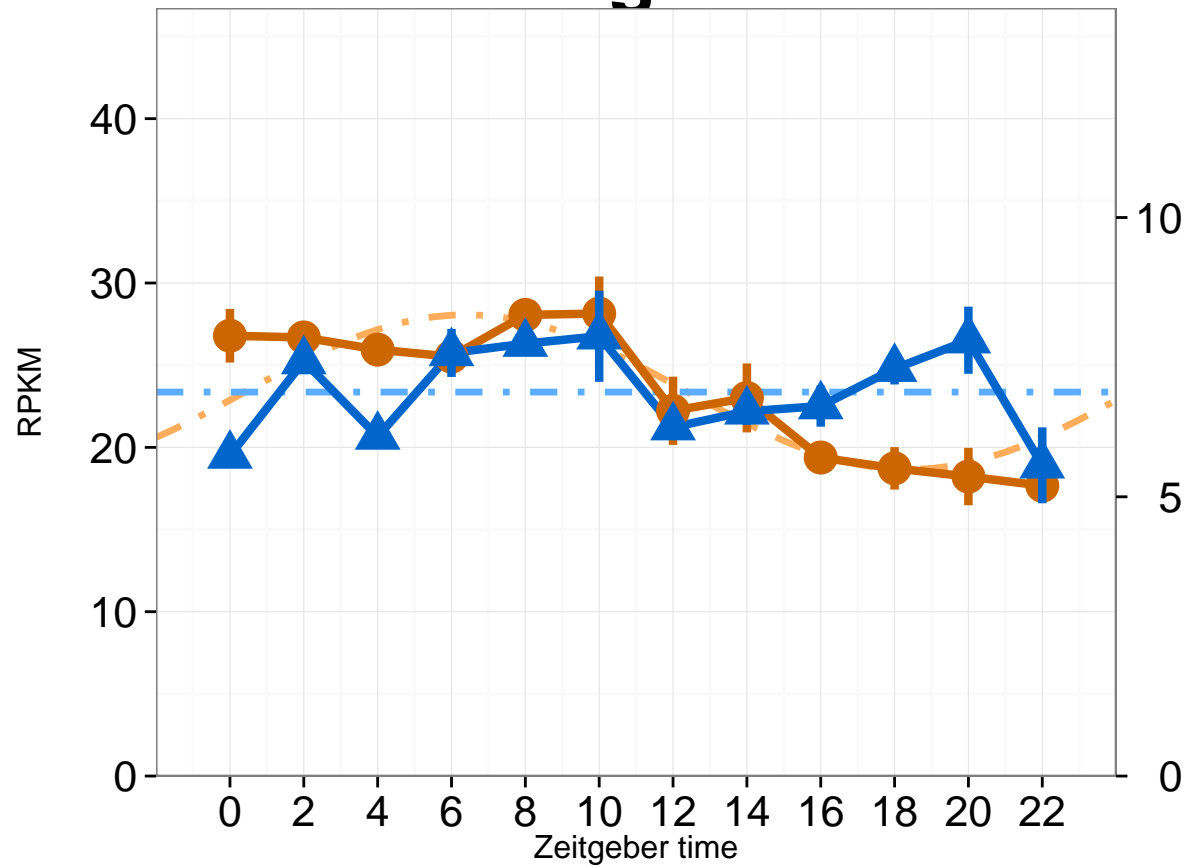

# Atg4d

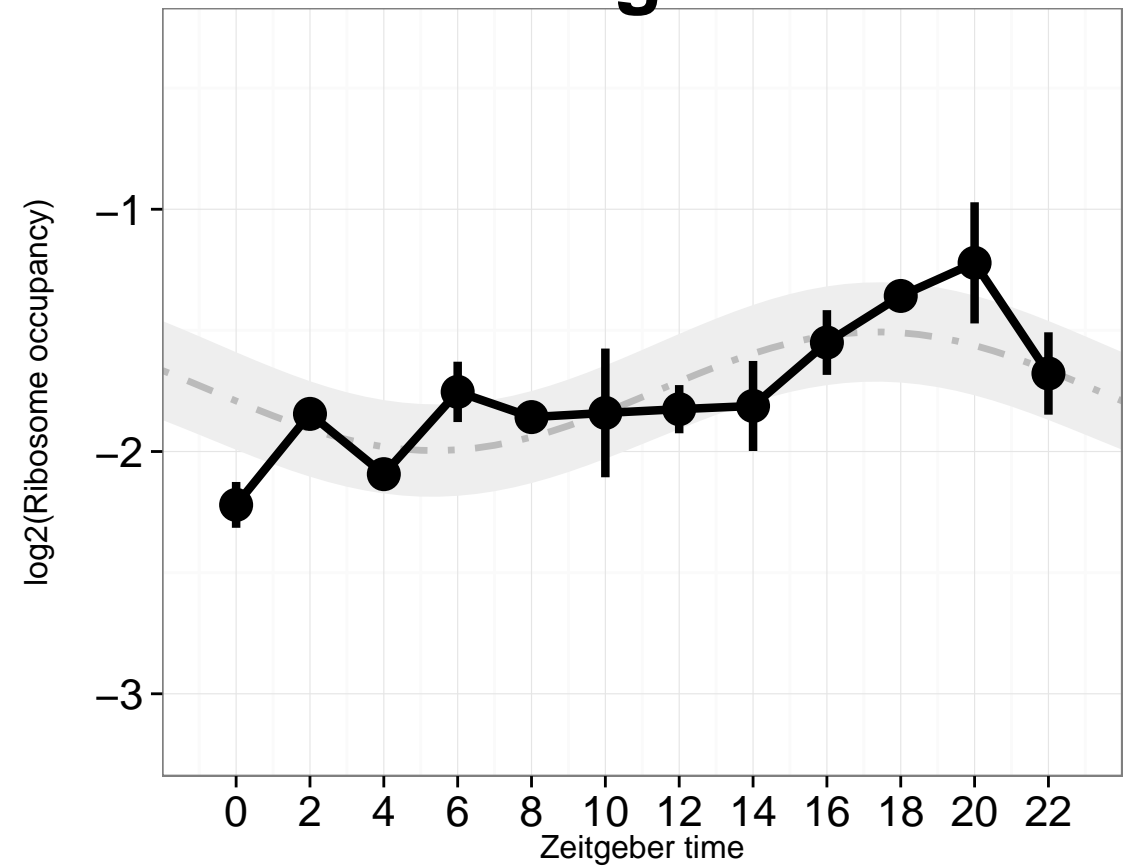

Supplement: Supplementary file 10086 [file 1]

# Fam81a

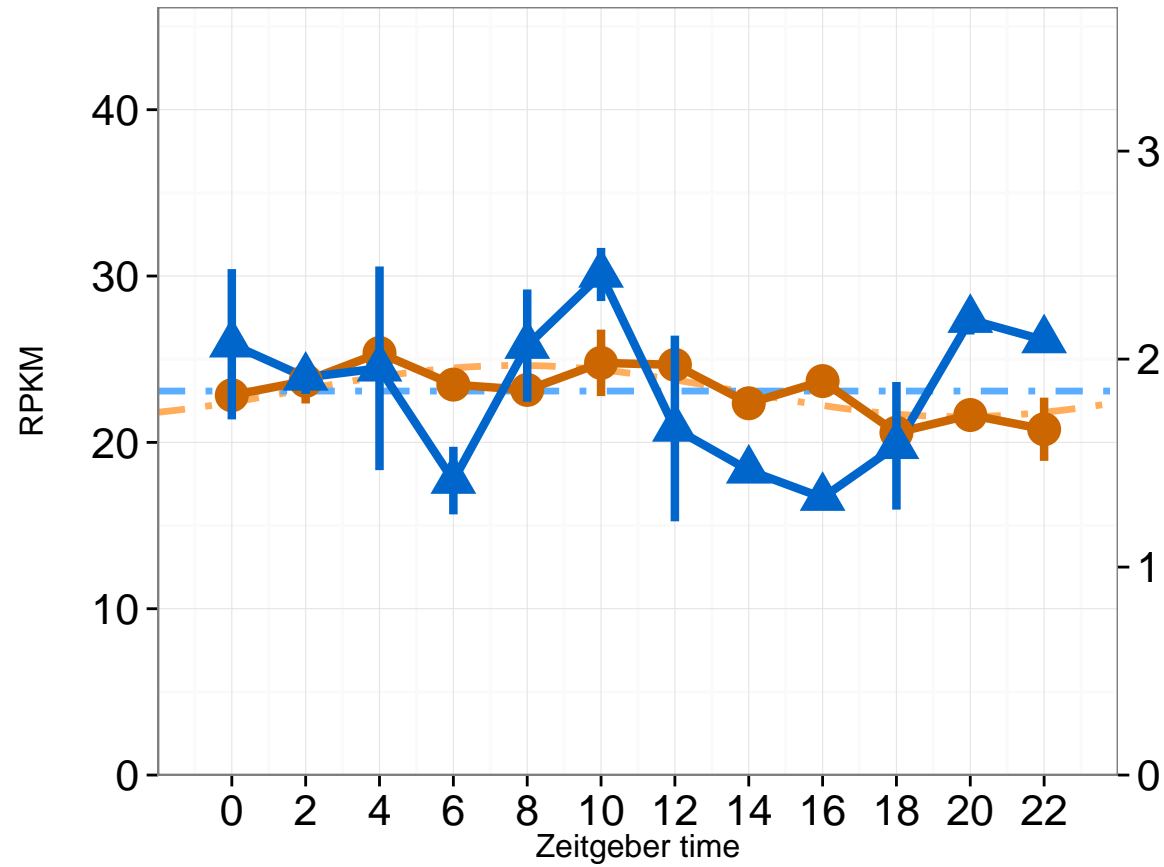

# Fam81a

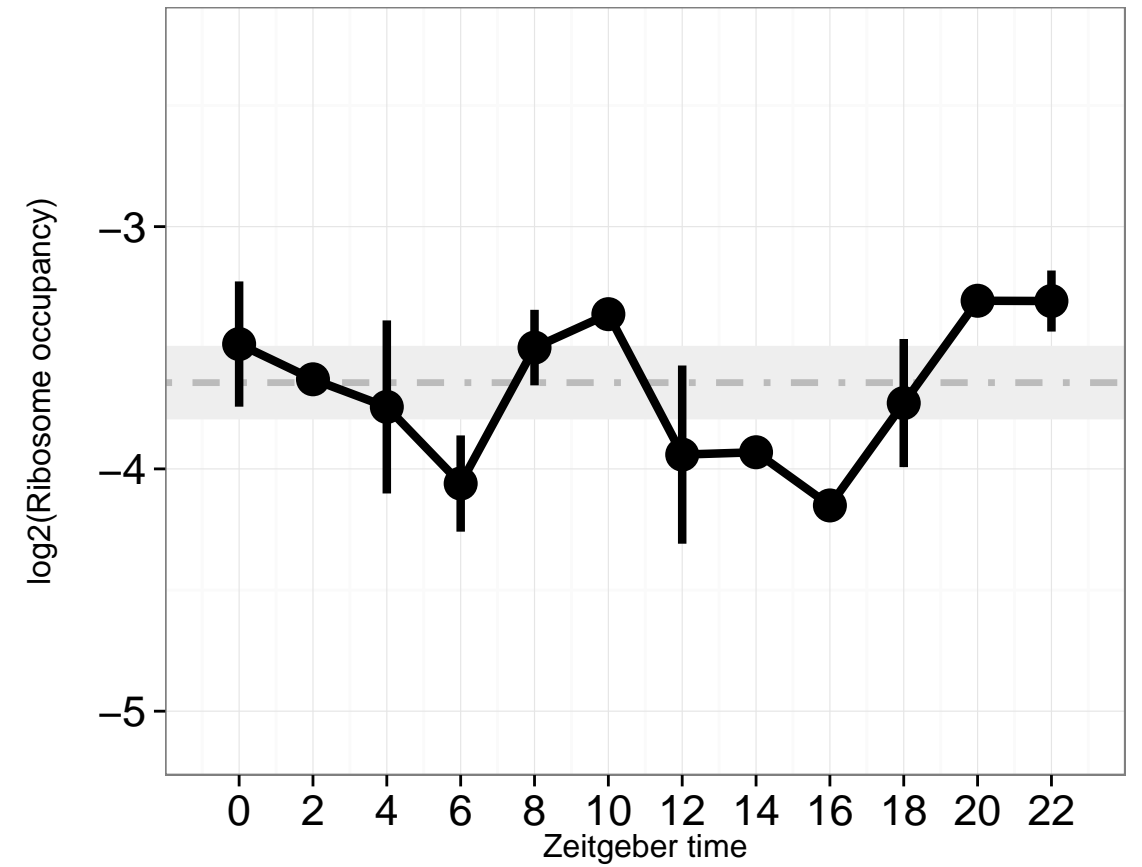

Supplement: Supplementary file 10087 [file 1]

## Notch1

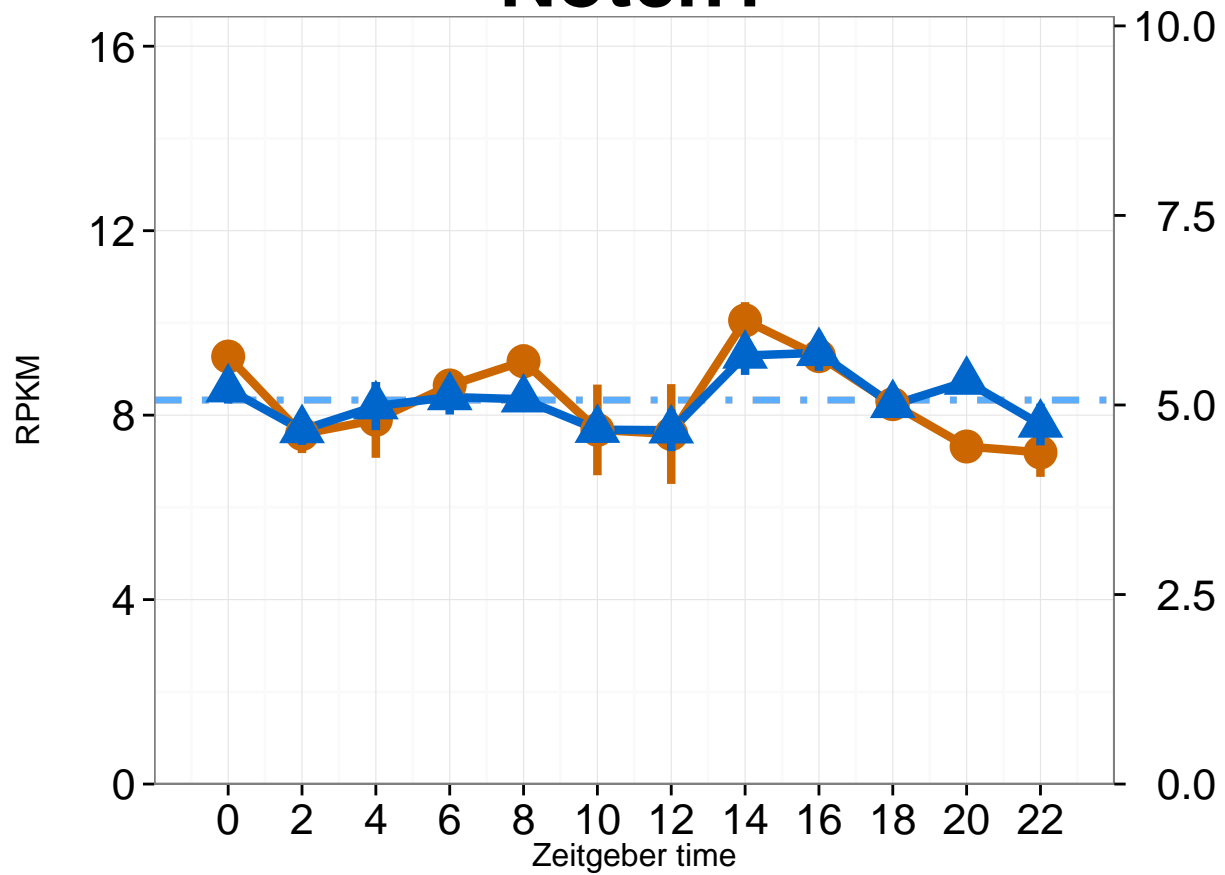

## Notch1

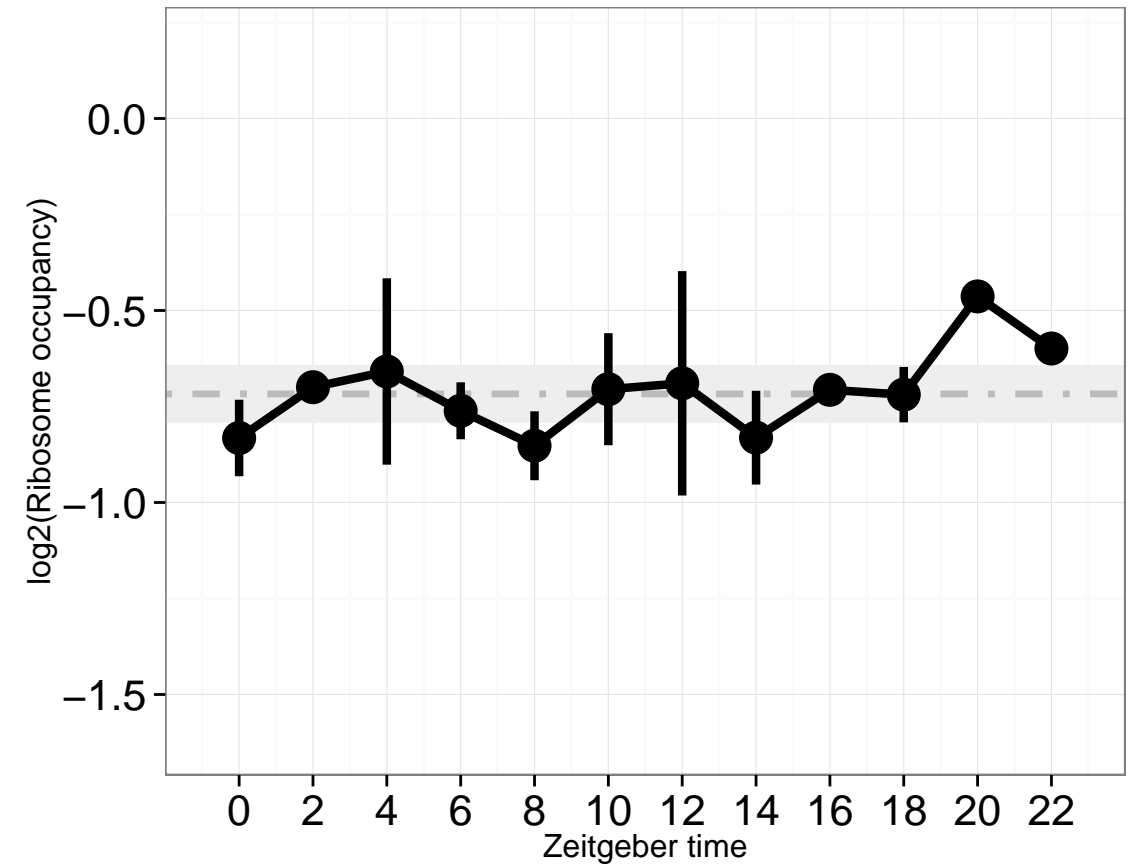

Supplement: Supplementary file 10088 [file 1]

## Sox13

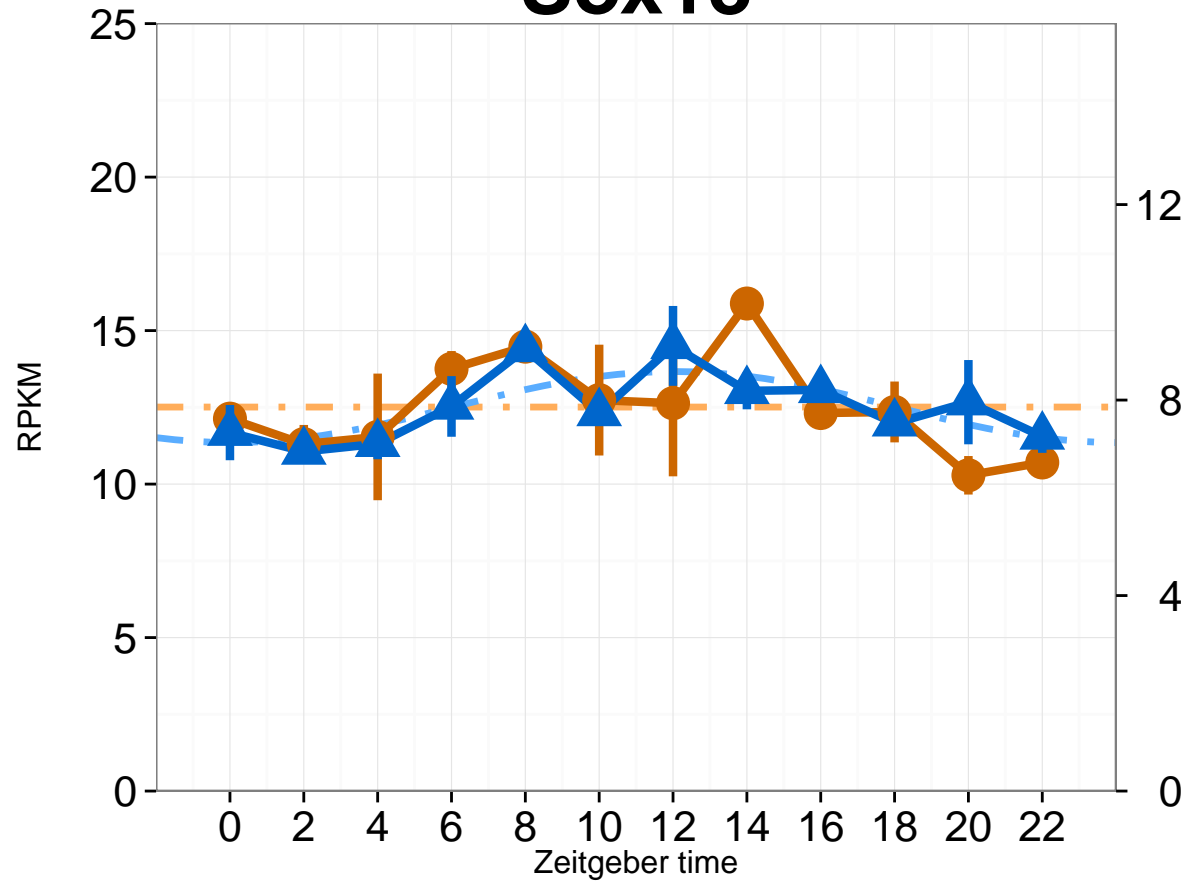

## Sox13

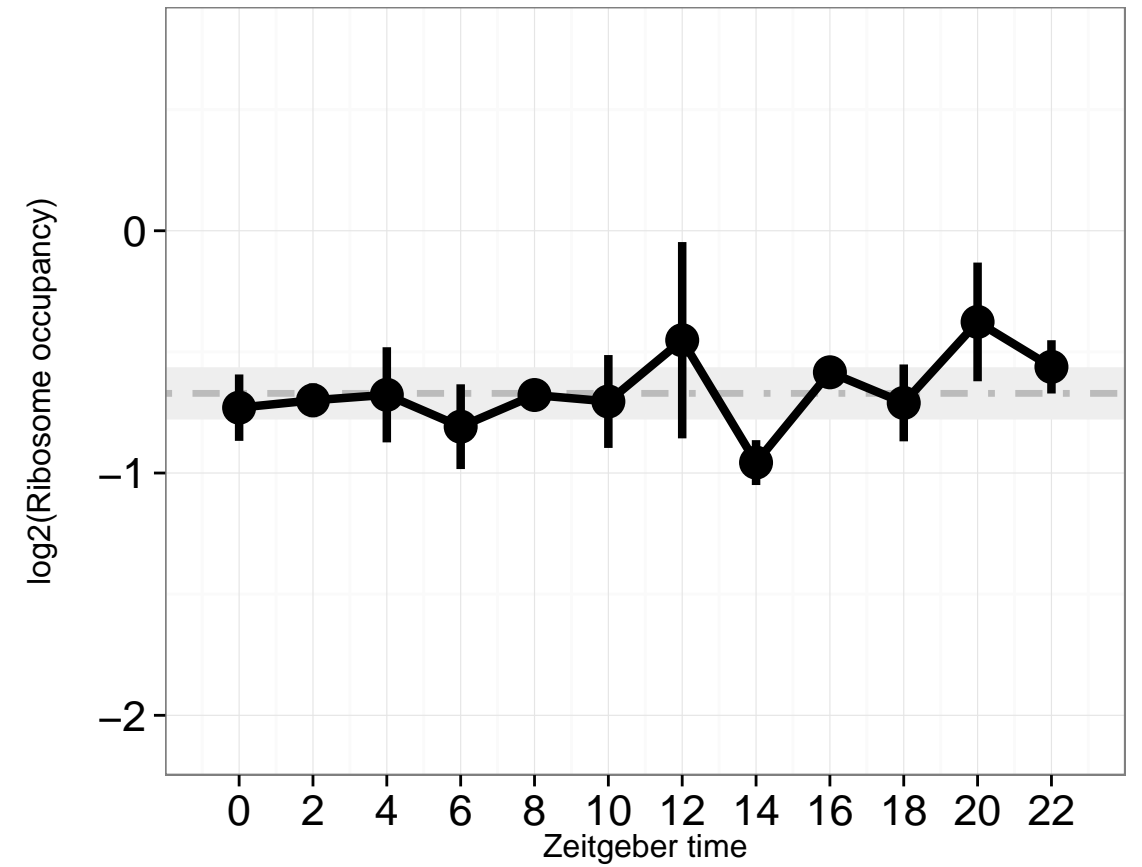

Supplement: Supplementary file 10089 [file 1]

# Yae1d1

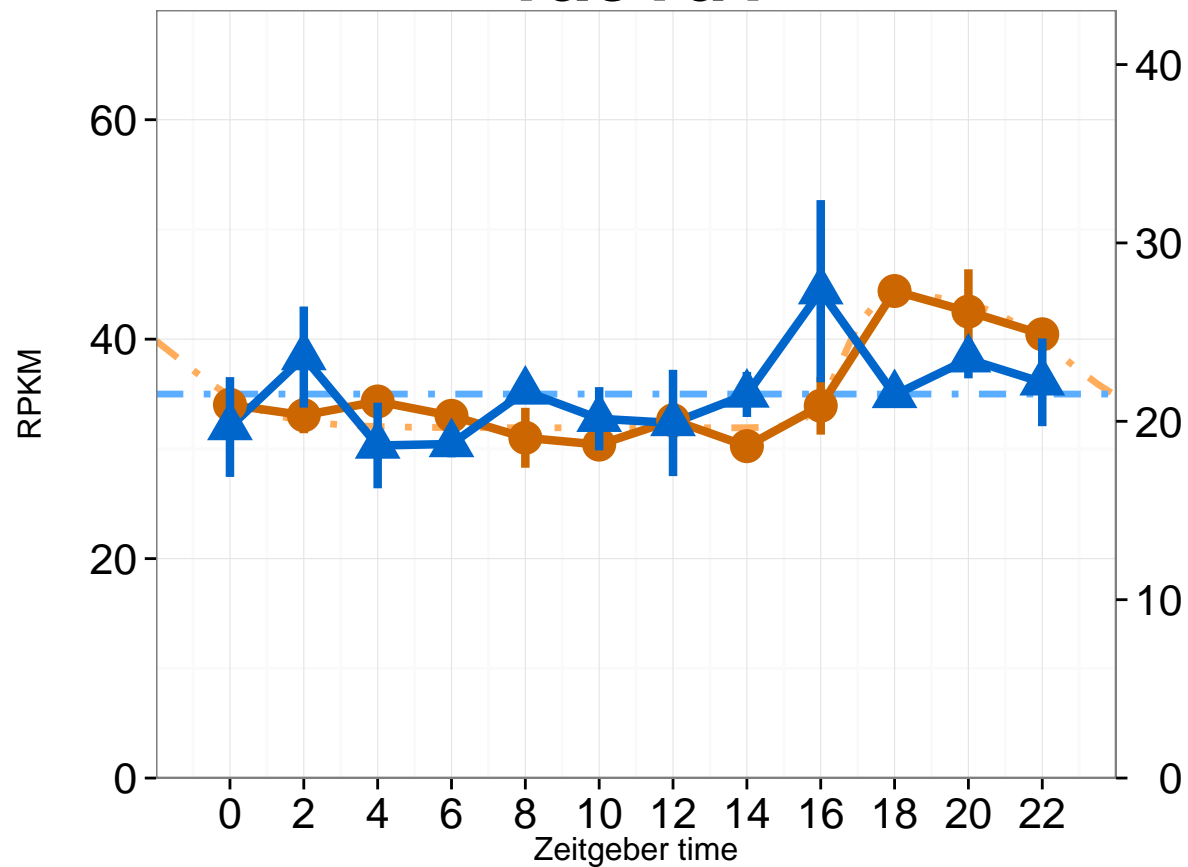

# Yae1d1

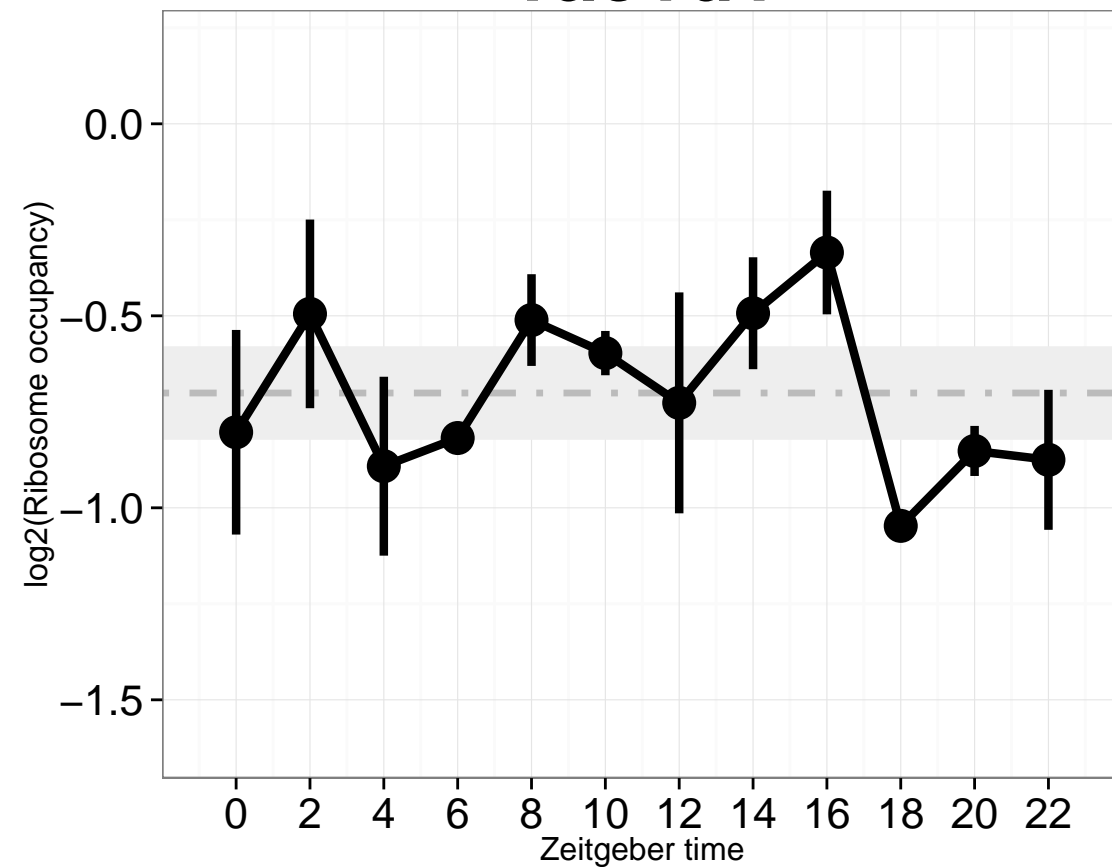

Supplement: Supplementary file 10090 [file 1]

# Tbc1d20

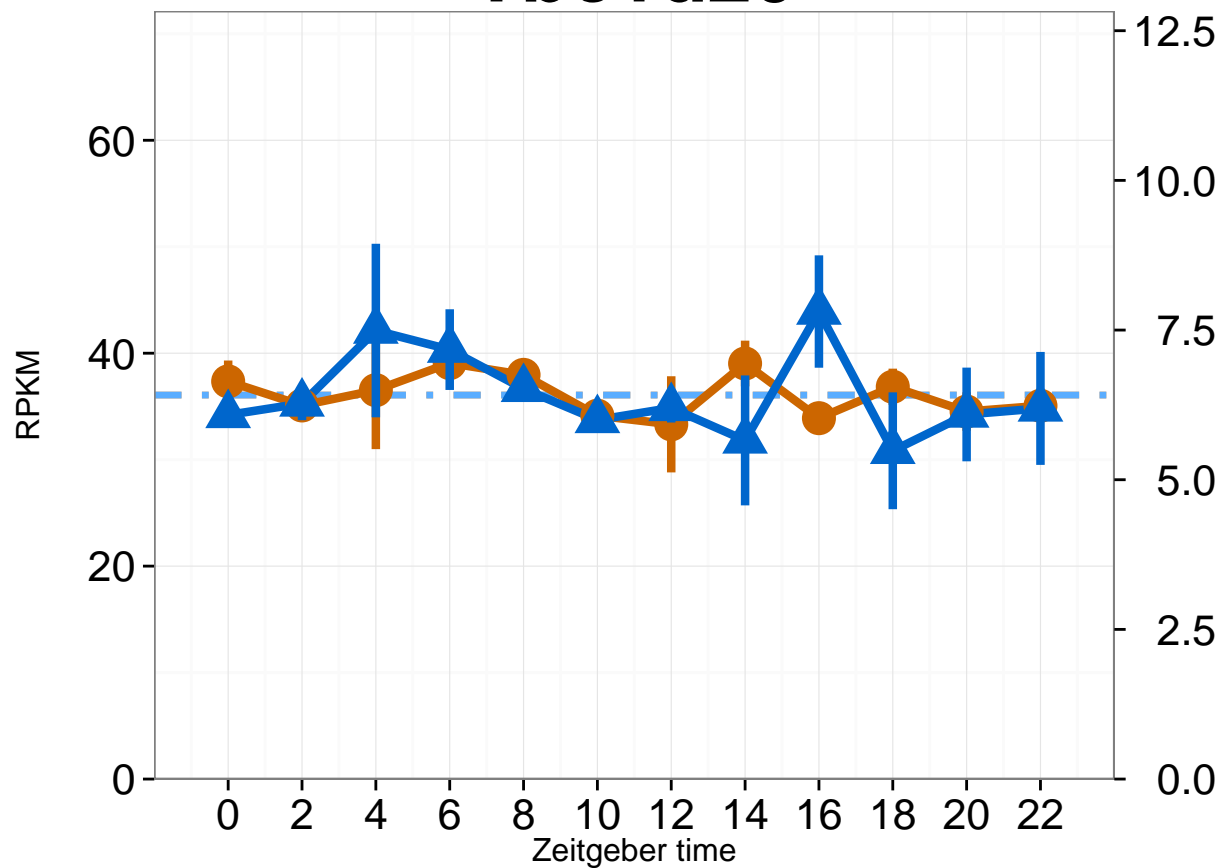

# Tbc1d20

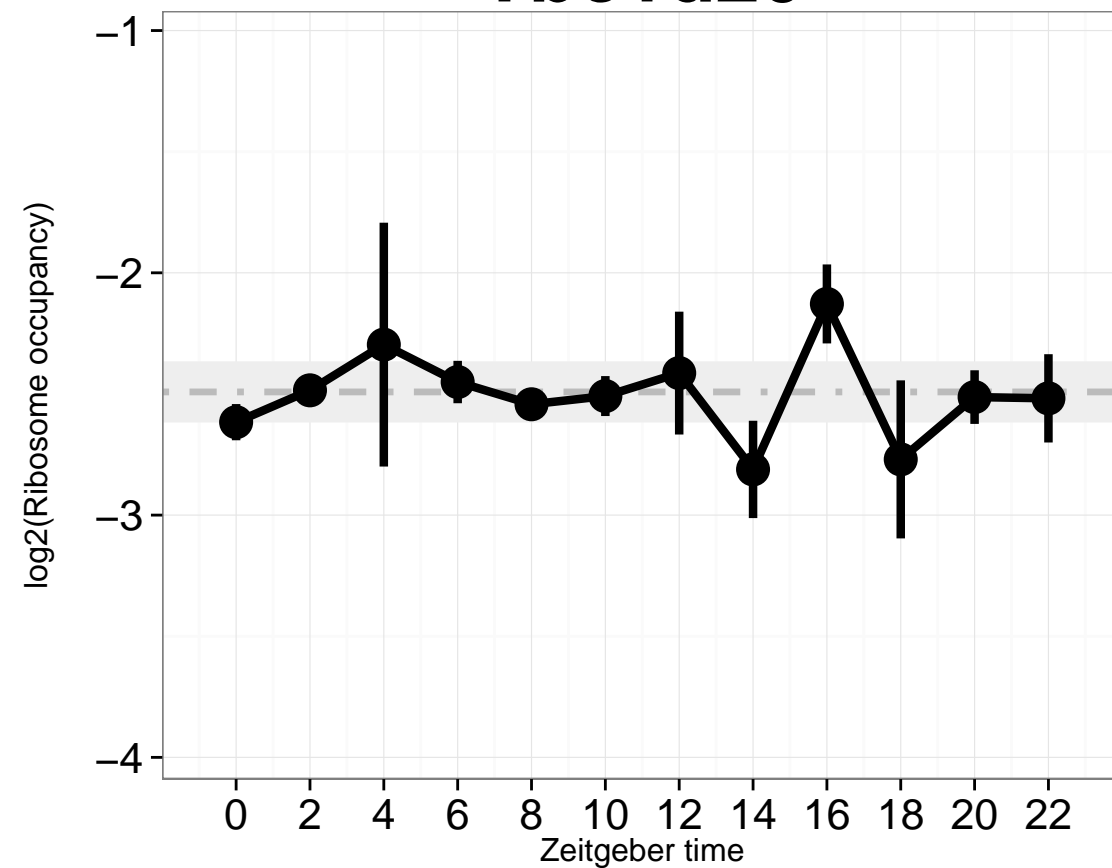

Supplement: Supplementary file 10091 [file 1]

## Slc35b4

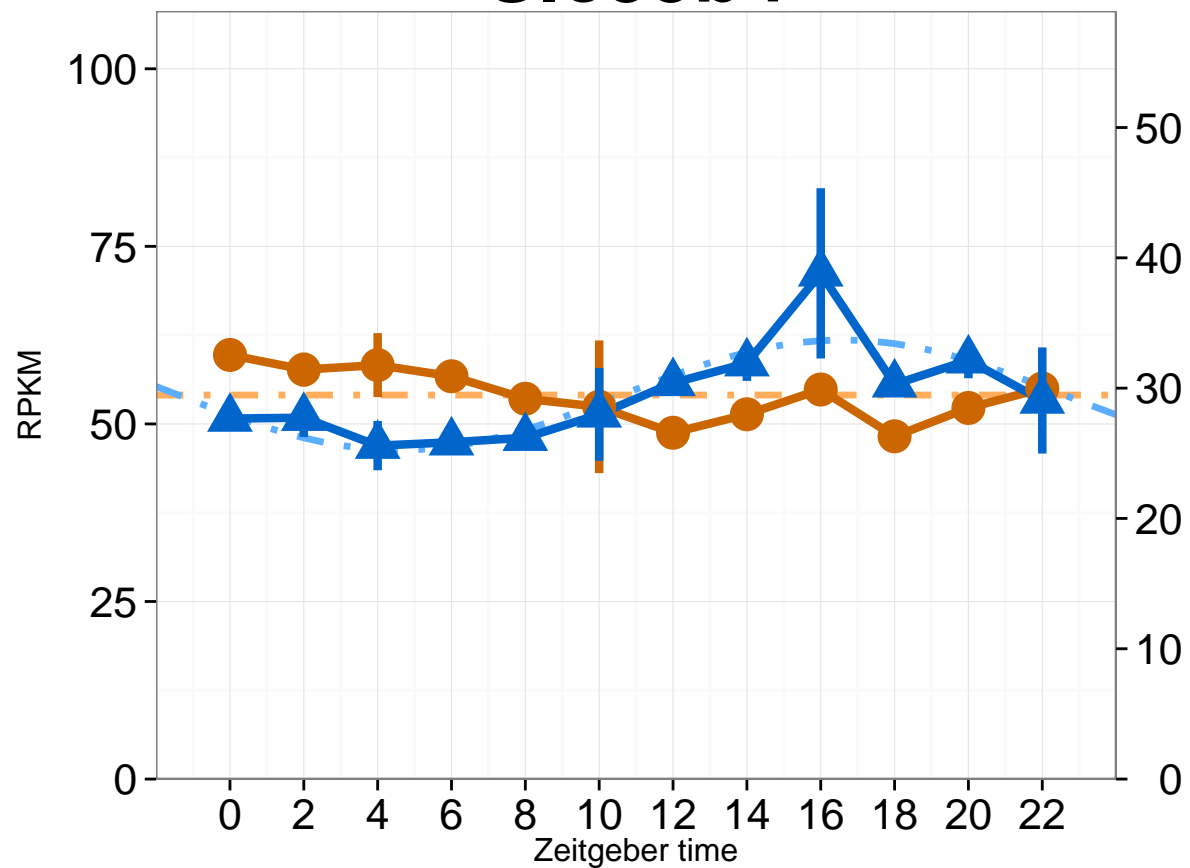

## Slc35b4

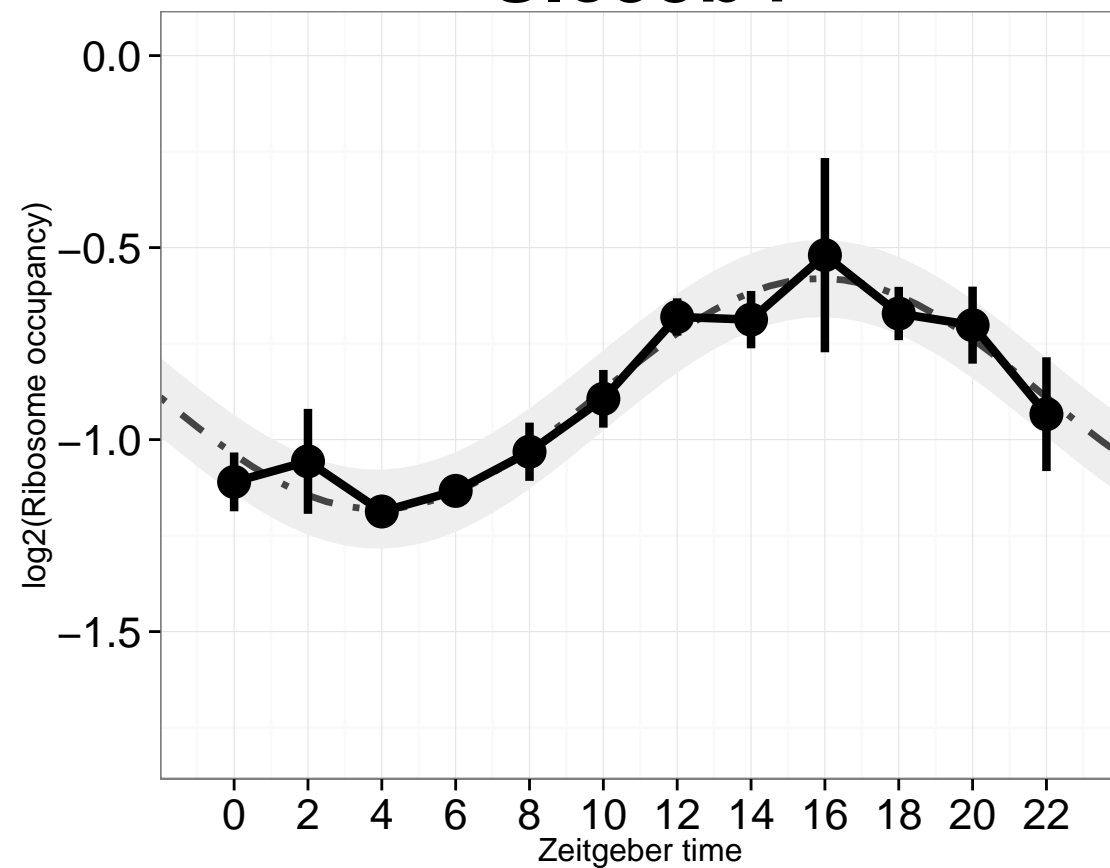

Supplement: Supplementary file 10092 [file 1]

## Letm1

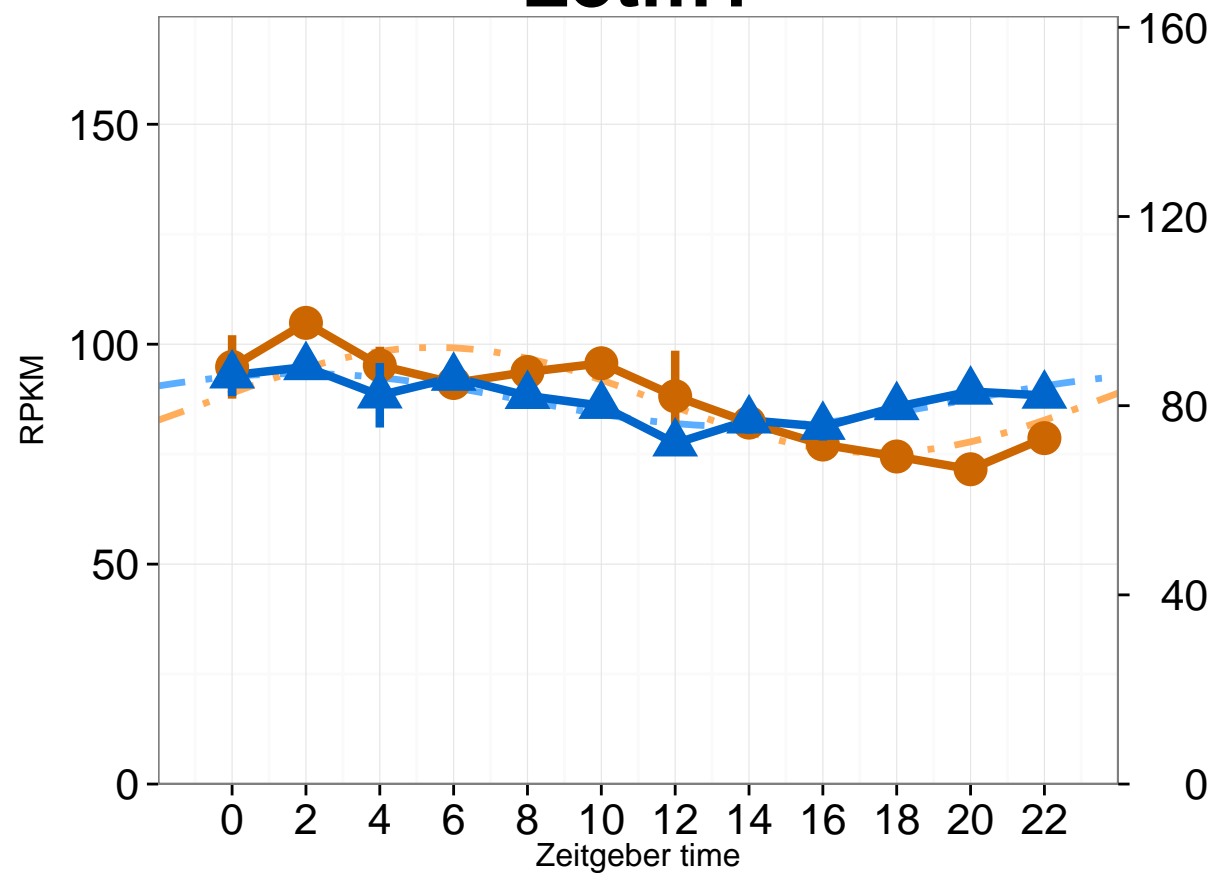

## Letm1

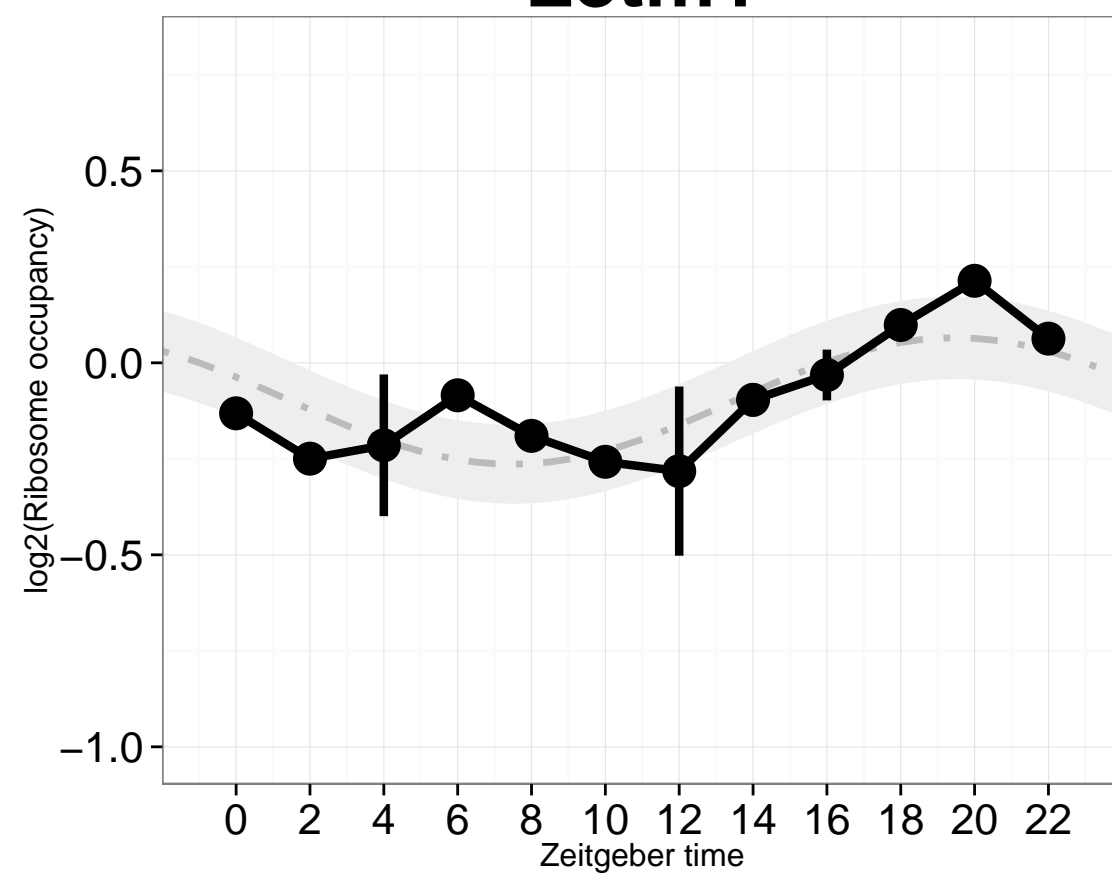

Supplement: Supplementary file 10093 [file 1]

# Rps3

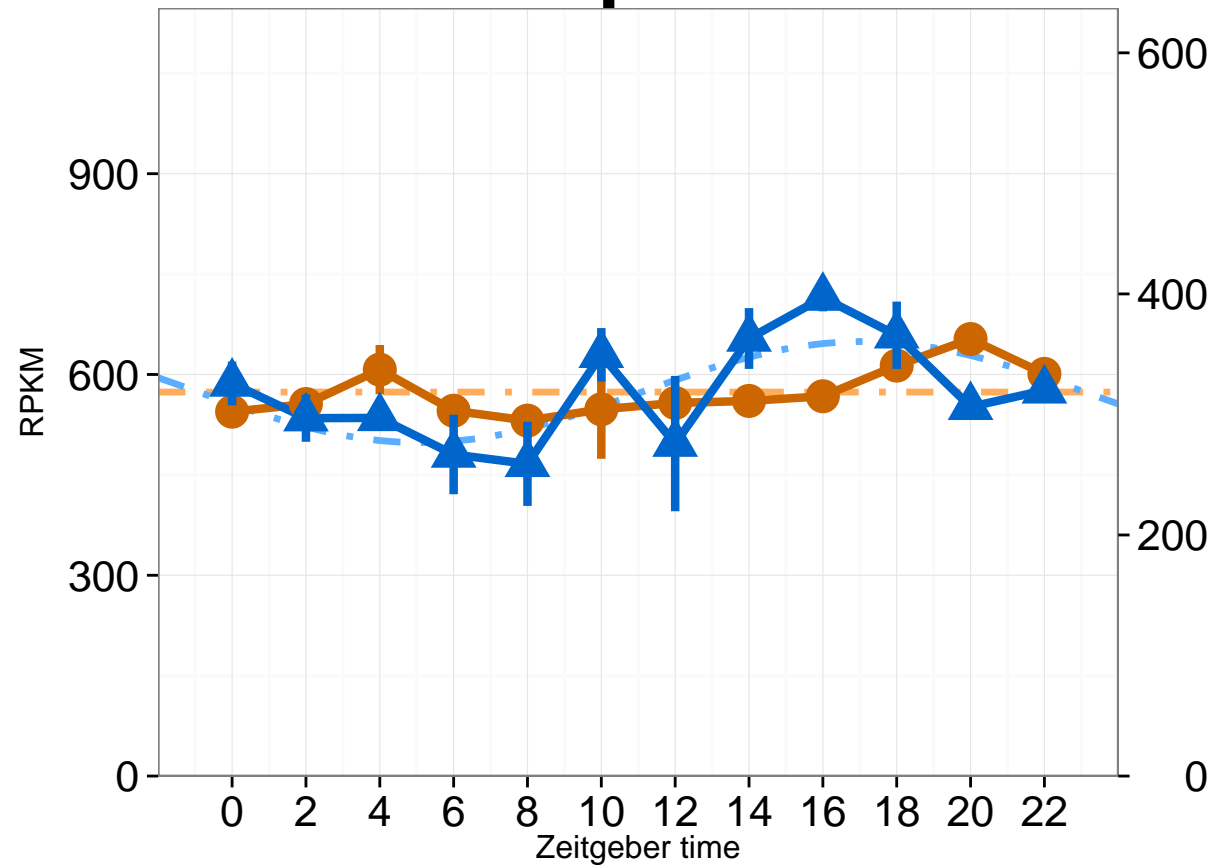

# Rps3

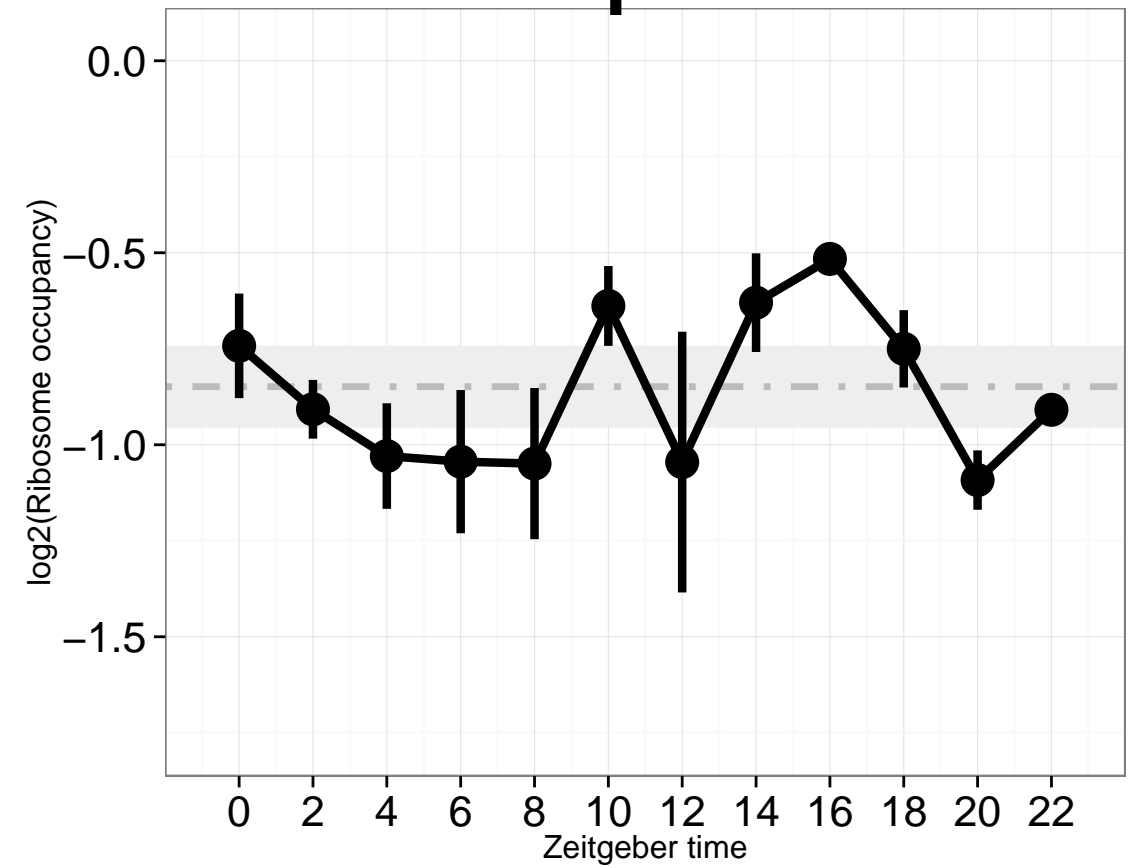

Supplement: Supplementary file 10094 [file 1]

# Rcan3

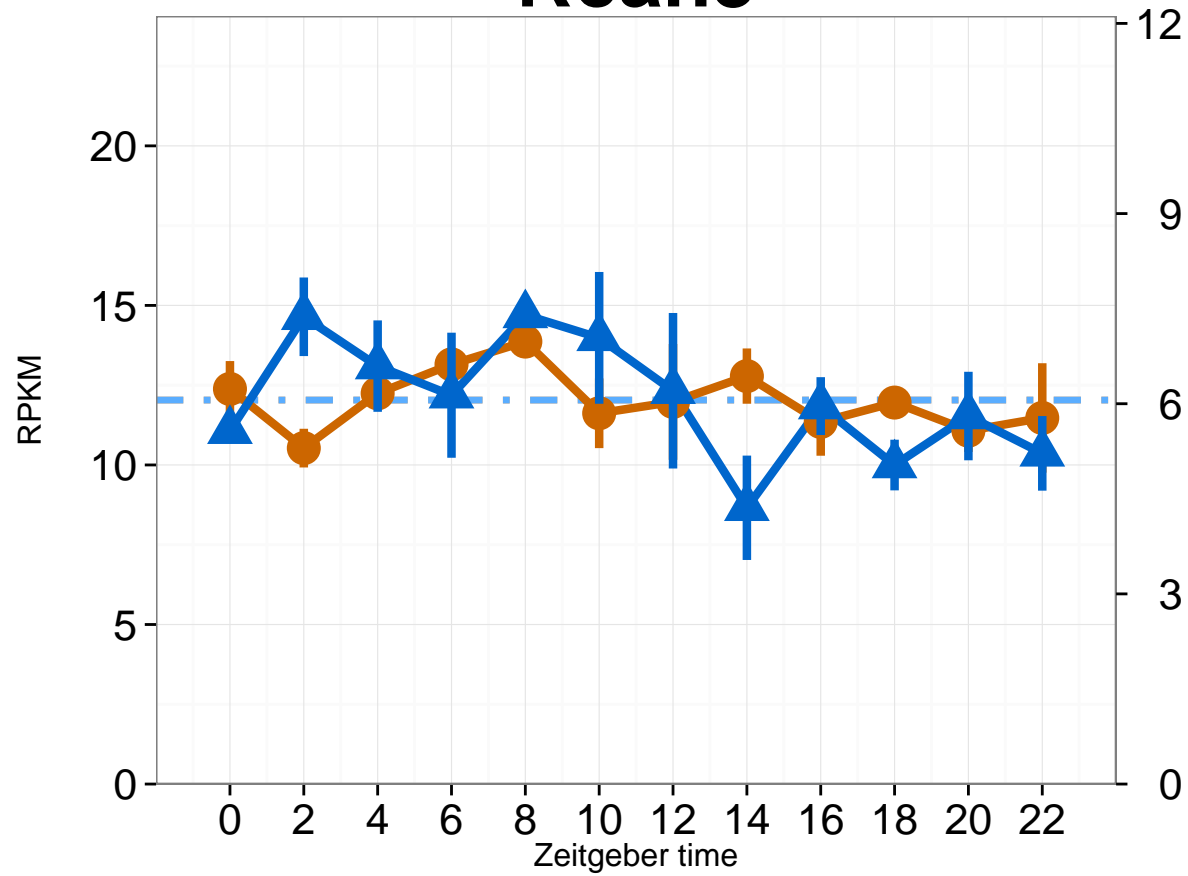

# Rcan3

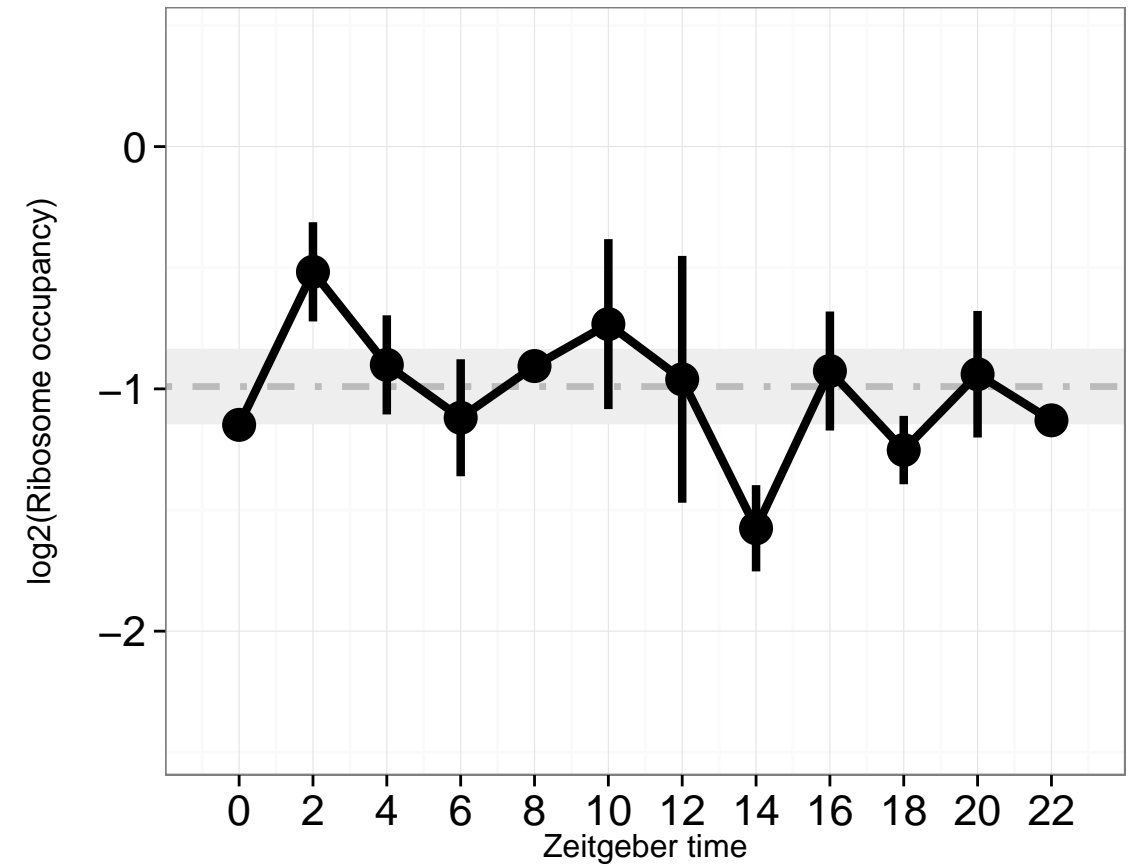

Supplement: Supplementary file 10095 [file 1]

## Cttnbp2

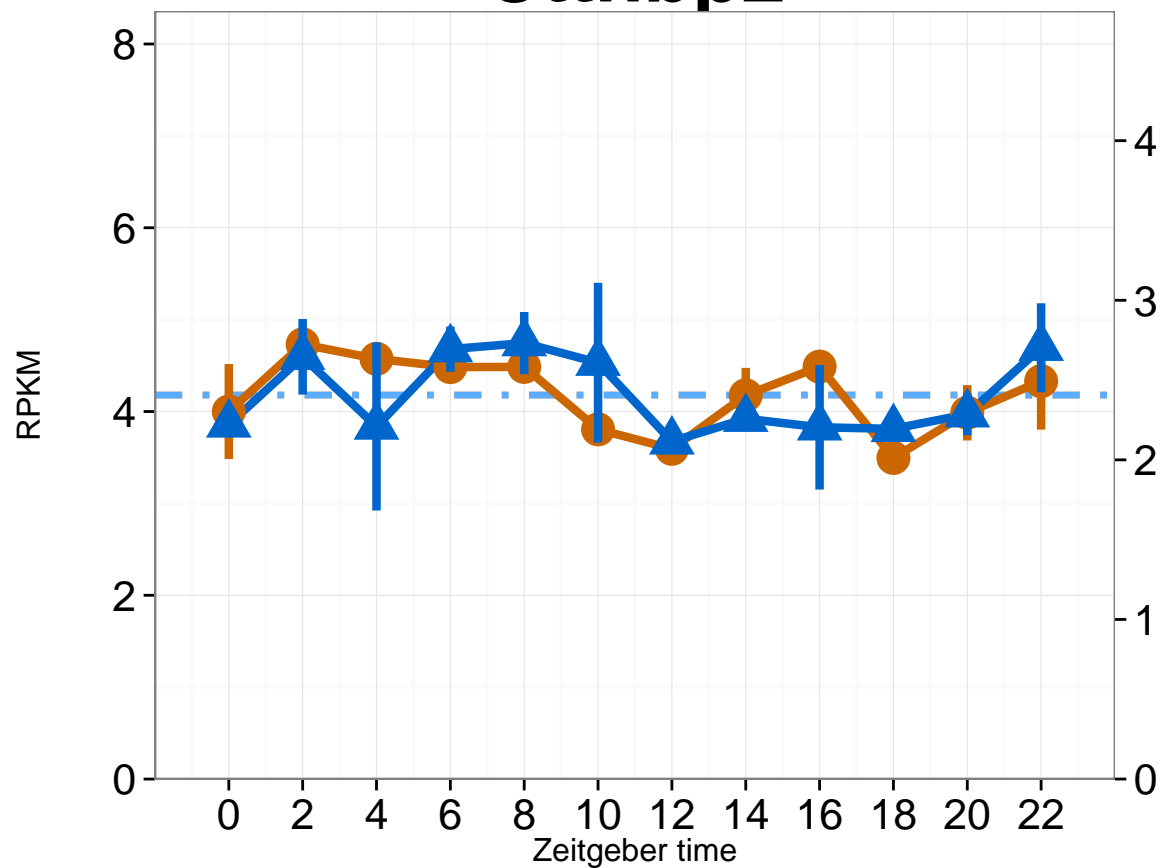

## Cttnbp2

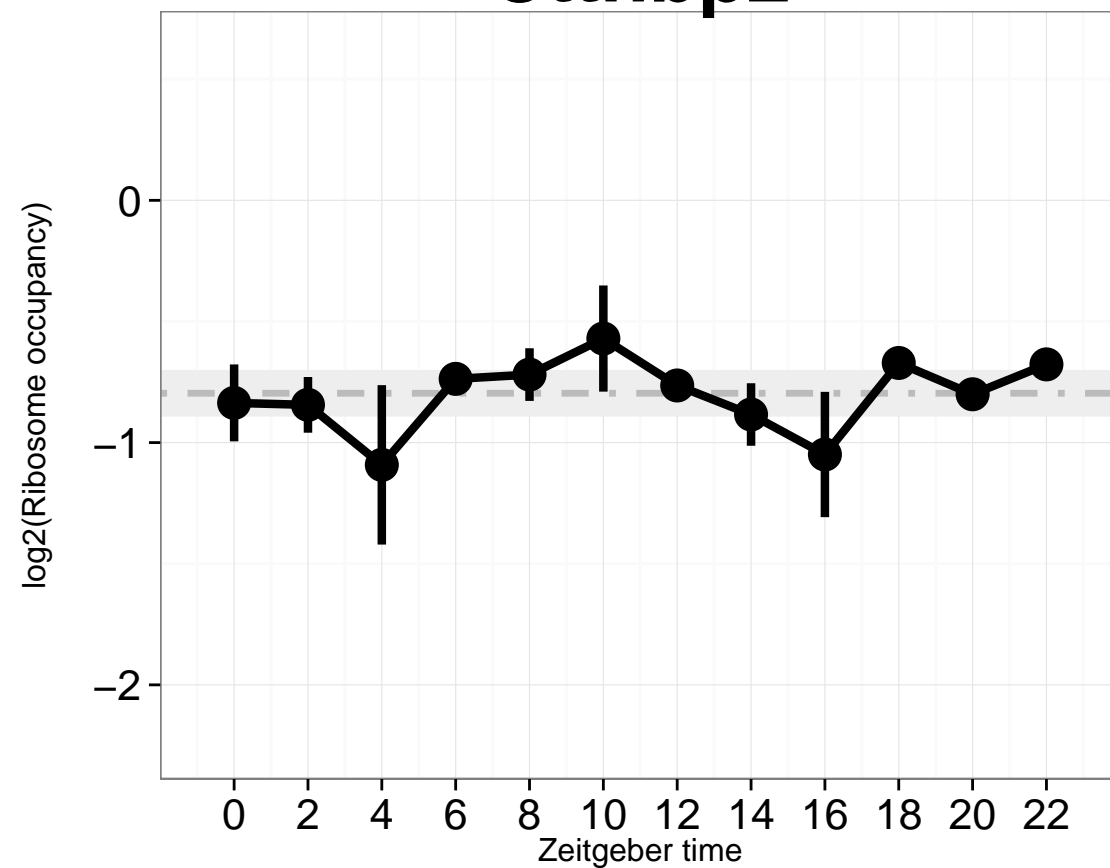

Supplement: Supplementary file 10096 [file 1]

# Fam184a

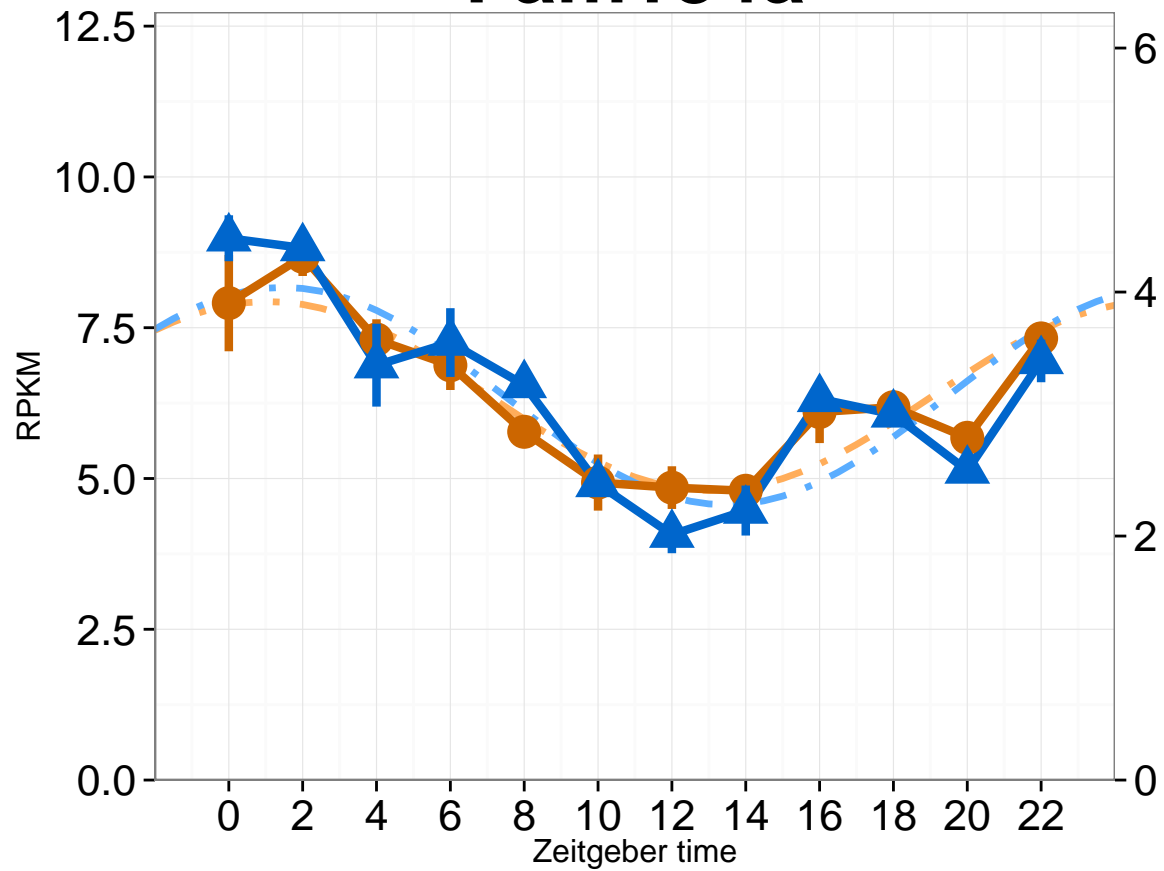

# Fam184a

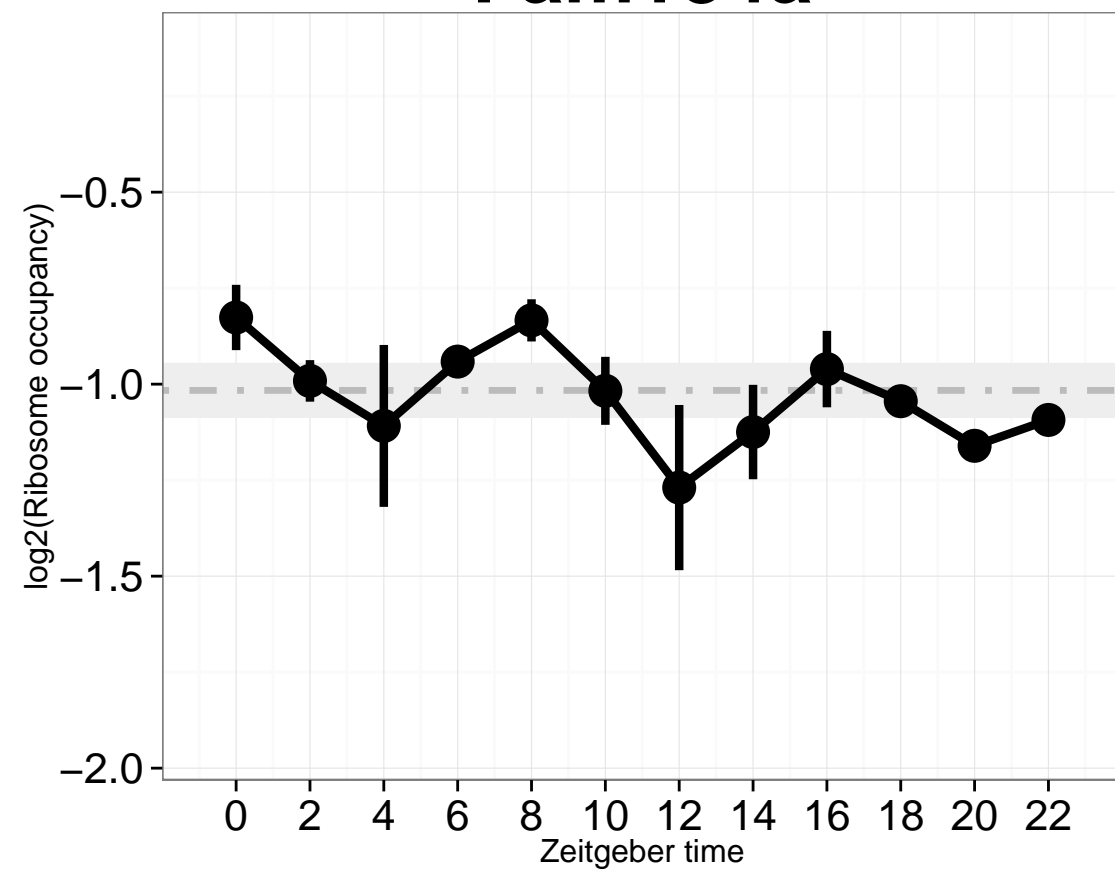

Supplement: Supplementary file 10097 [file 1]

# Ccdc57

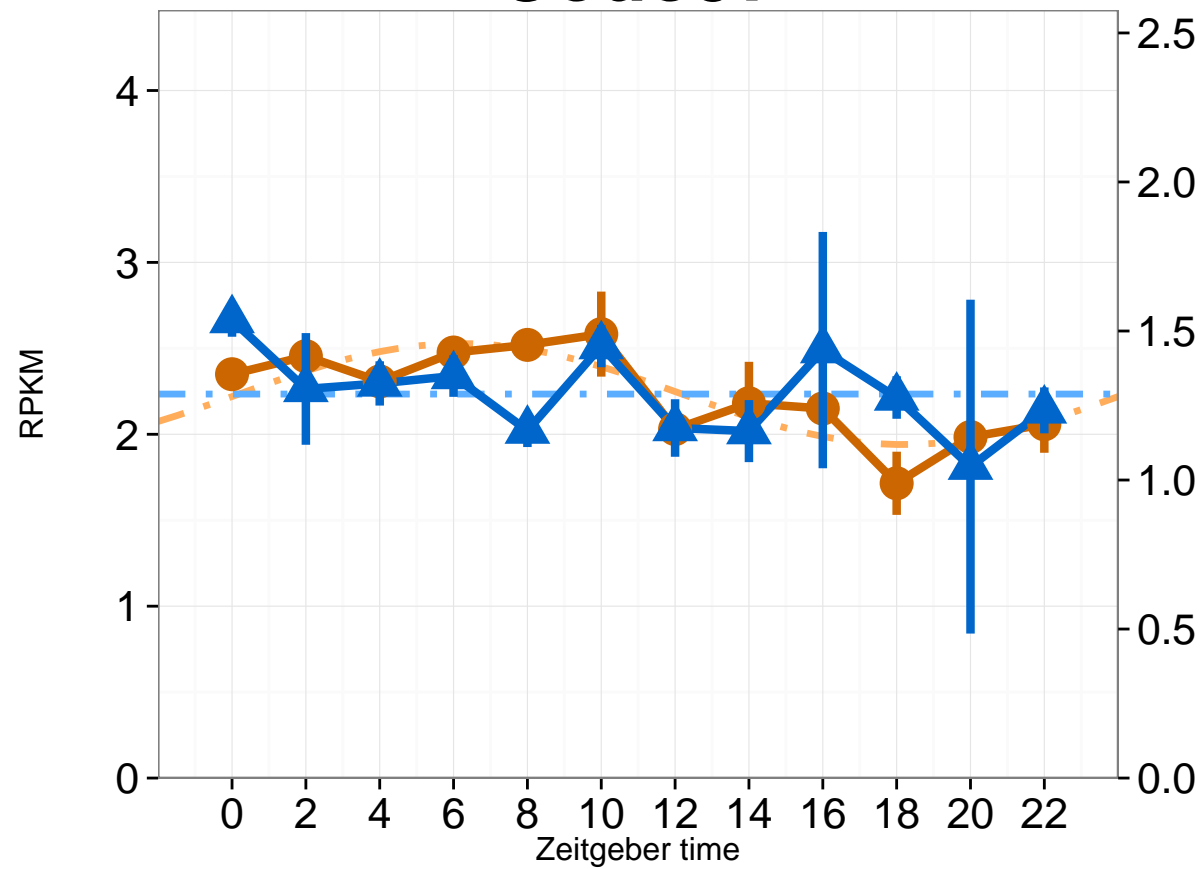

# Ccdc57

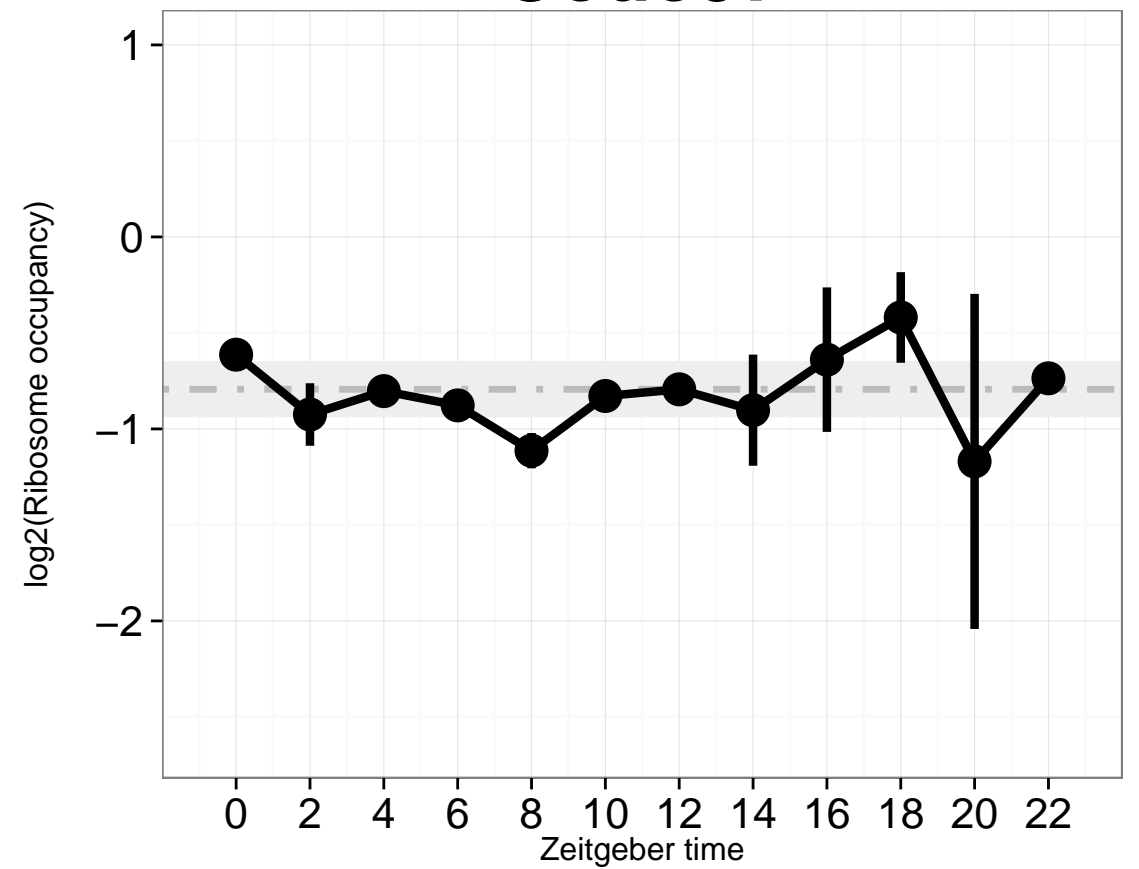

Supplement: Supplementary file 10098 [file 1]

# Cx3cr1

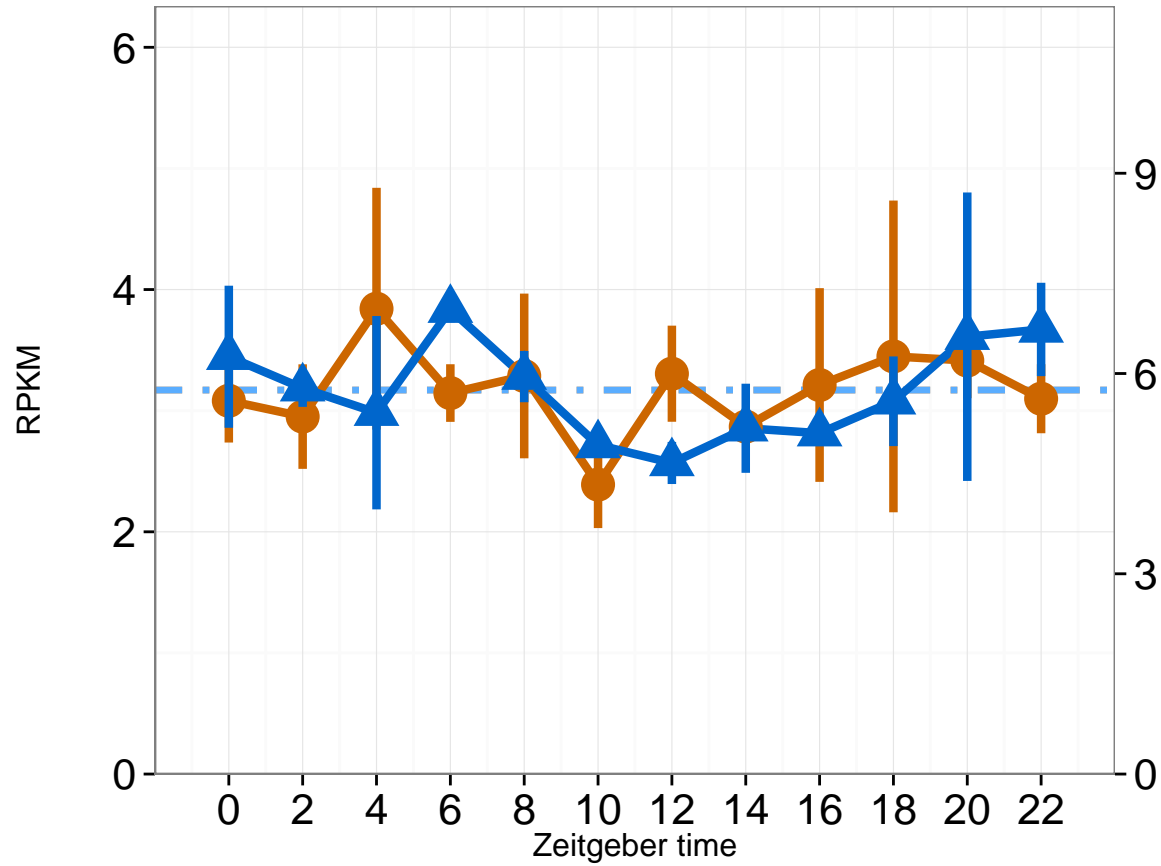

# Cx3cr1

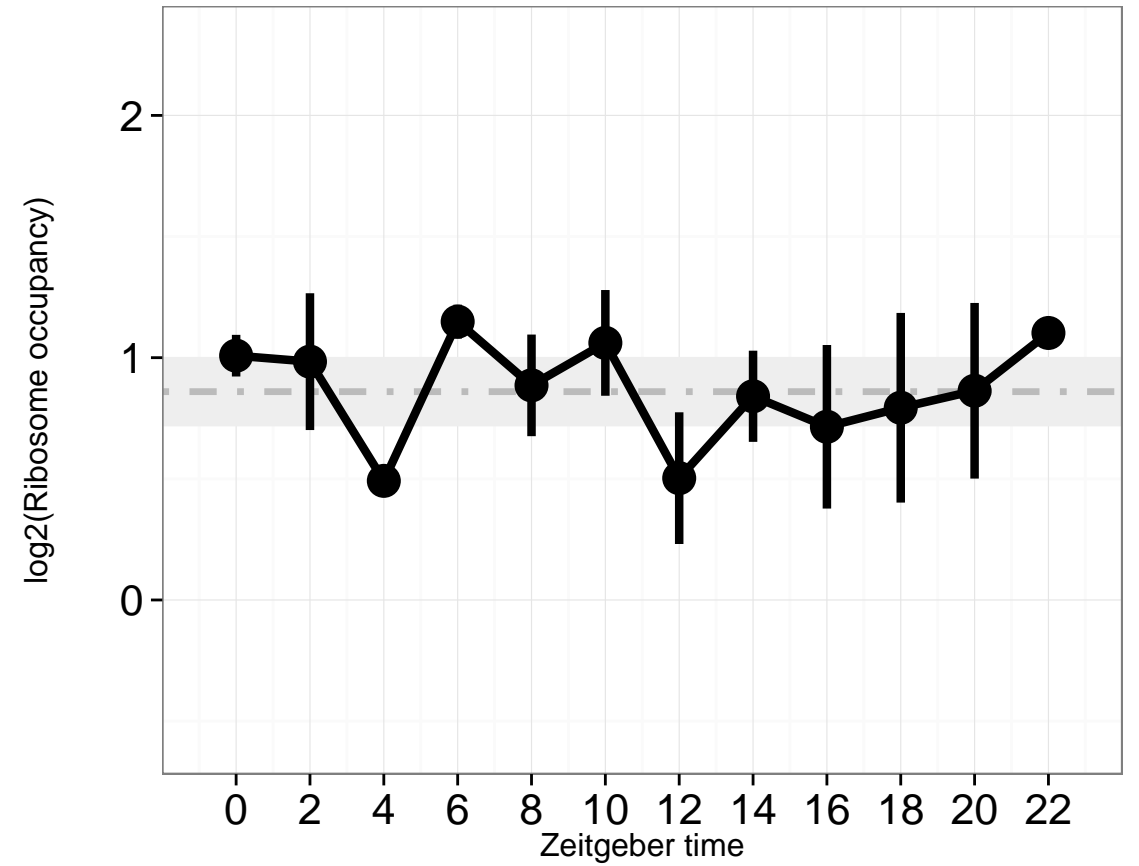

Supplement: Supplementary file 10099 [file 1]

# Slc7a6

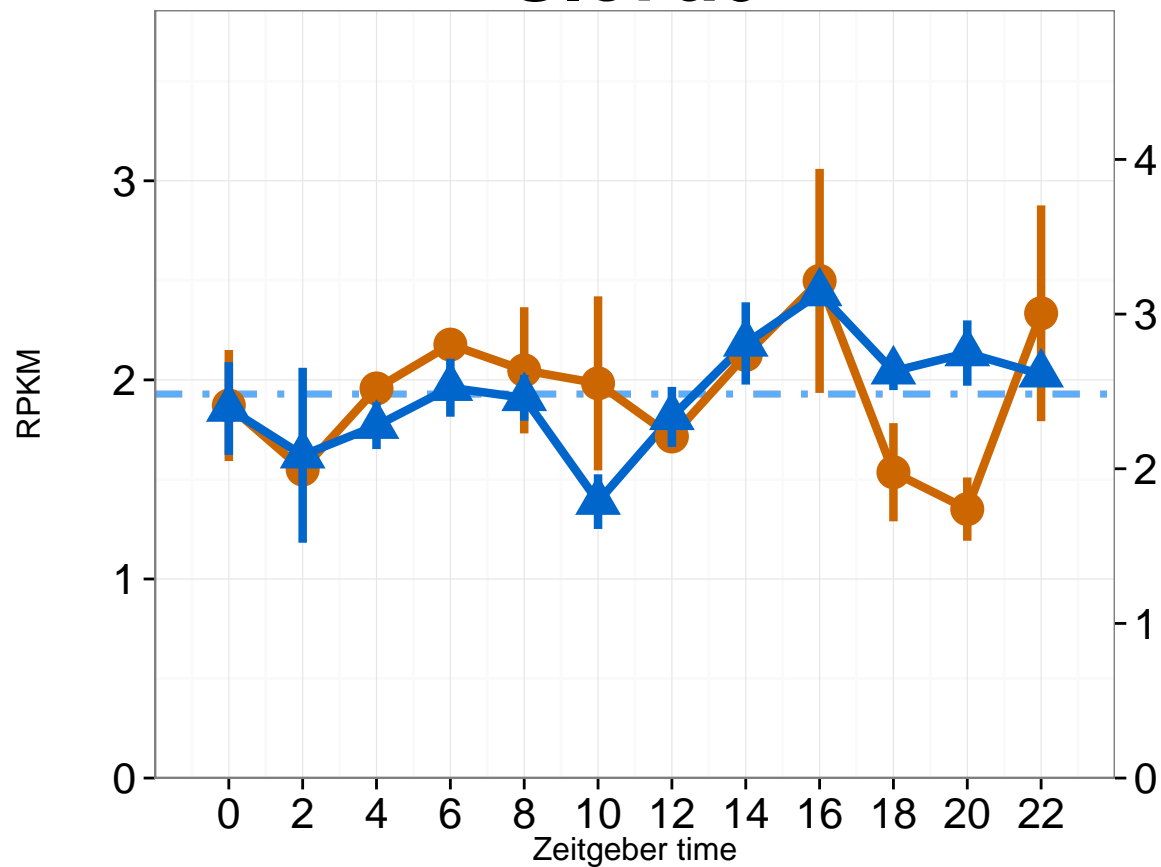

# Slc7a6

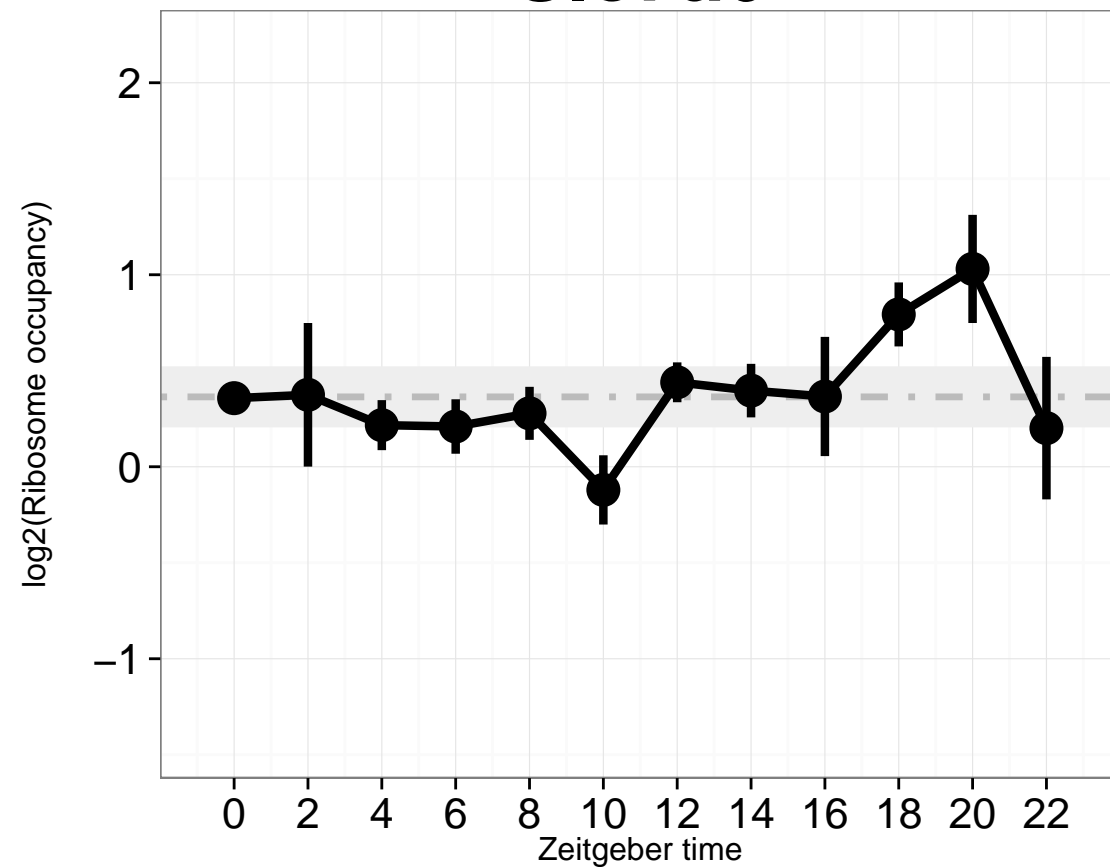

Supplement: Supplementary file 10100 [file 1]

## Muc20

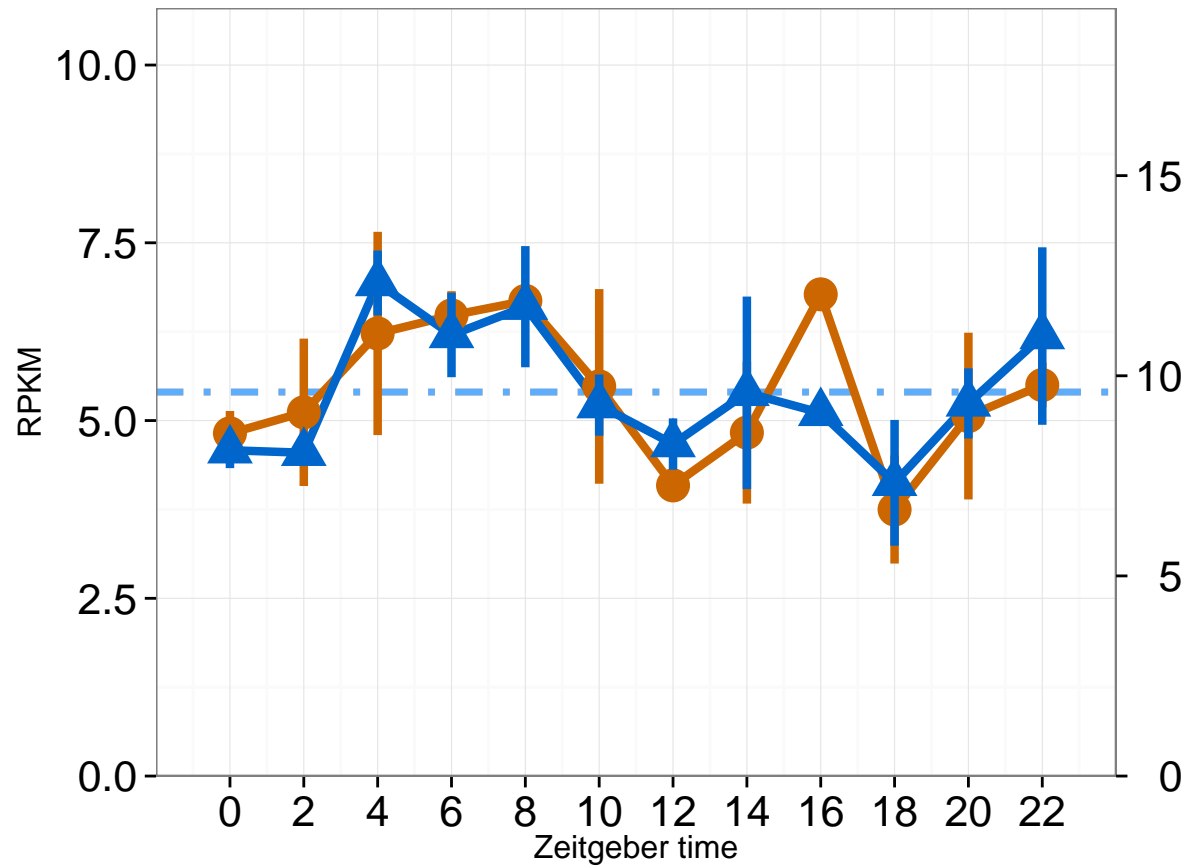

## Muc20

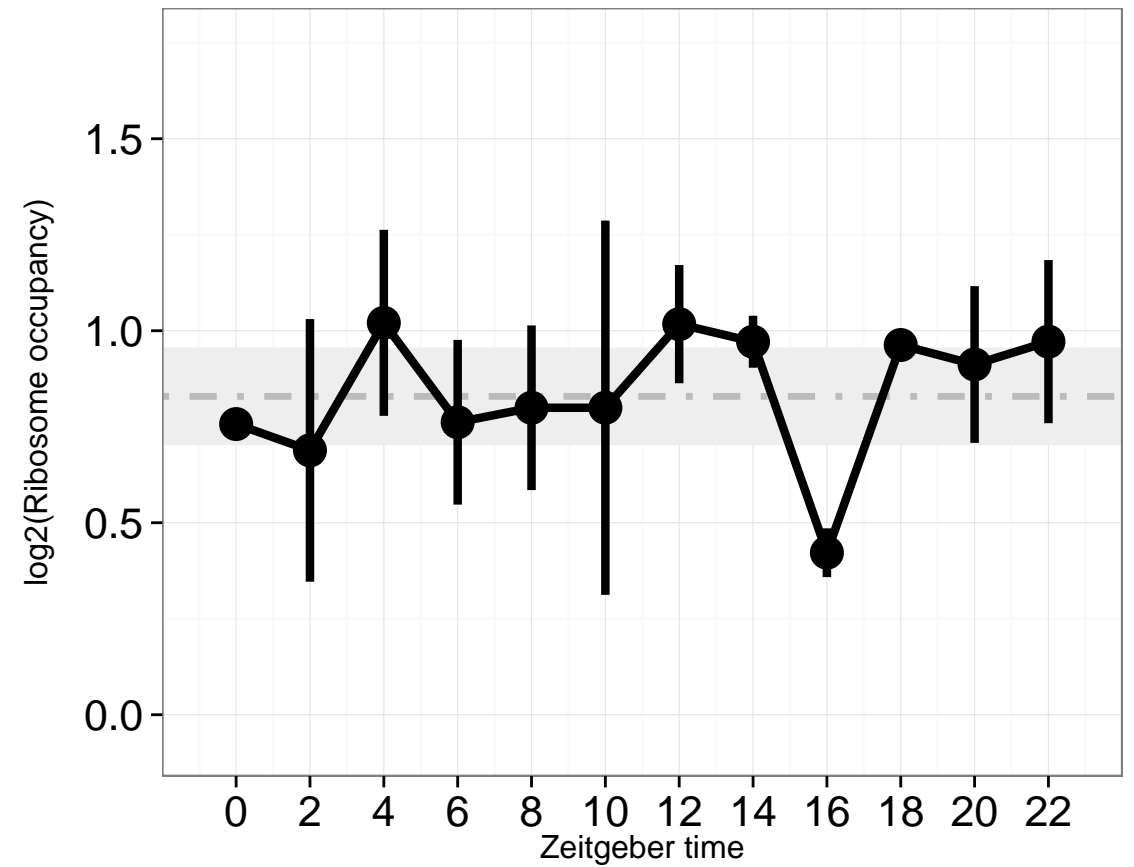

Supplement: Supplementary file 10101 [file 1]

**Hist1h2af TR**

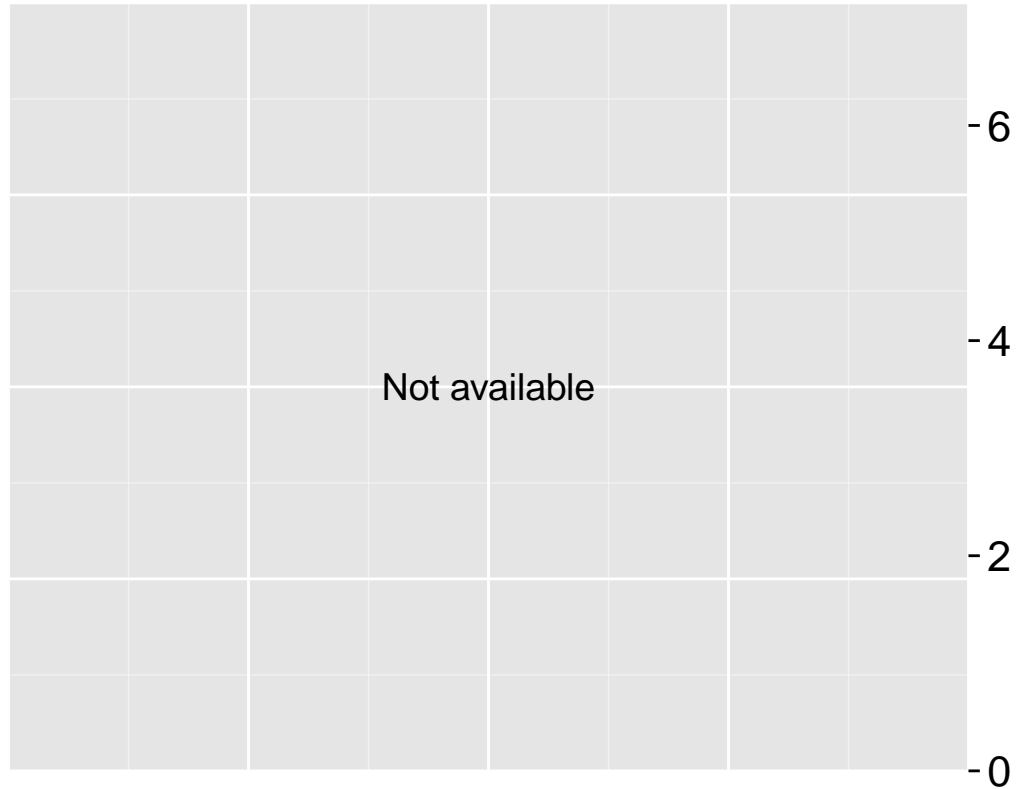

**Hist1h2af log2(Ribosome occupancy)**

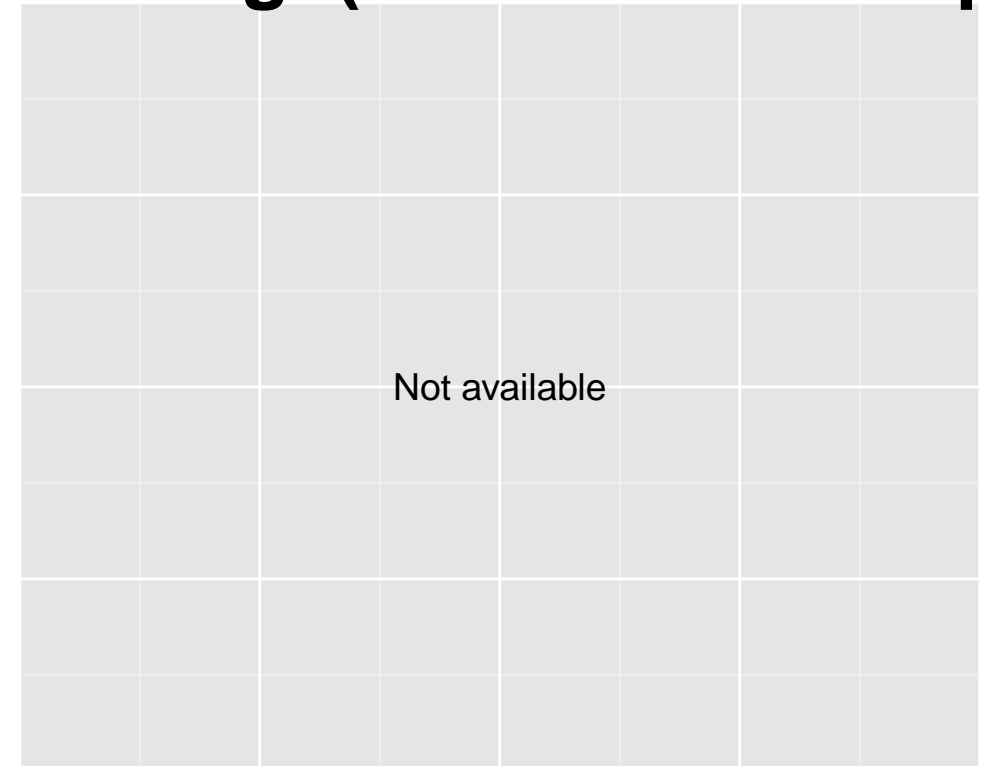

Supplement: Supplementary file 10102 [file 1]

# Pced1a

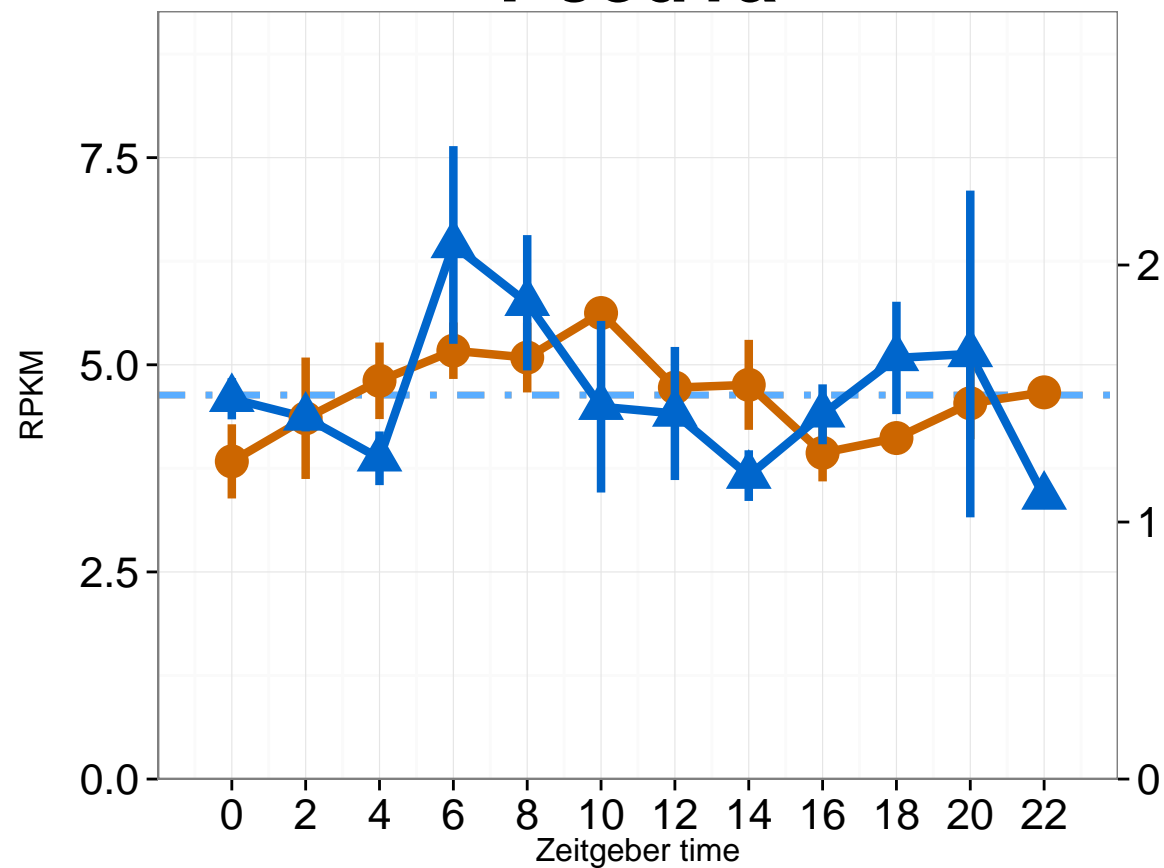

# Pced1a

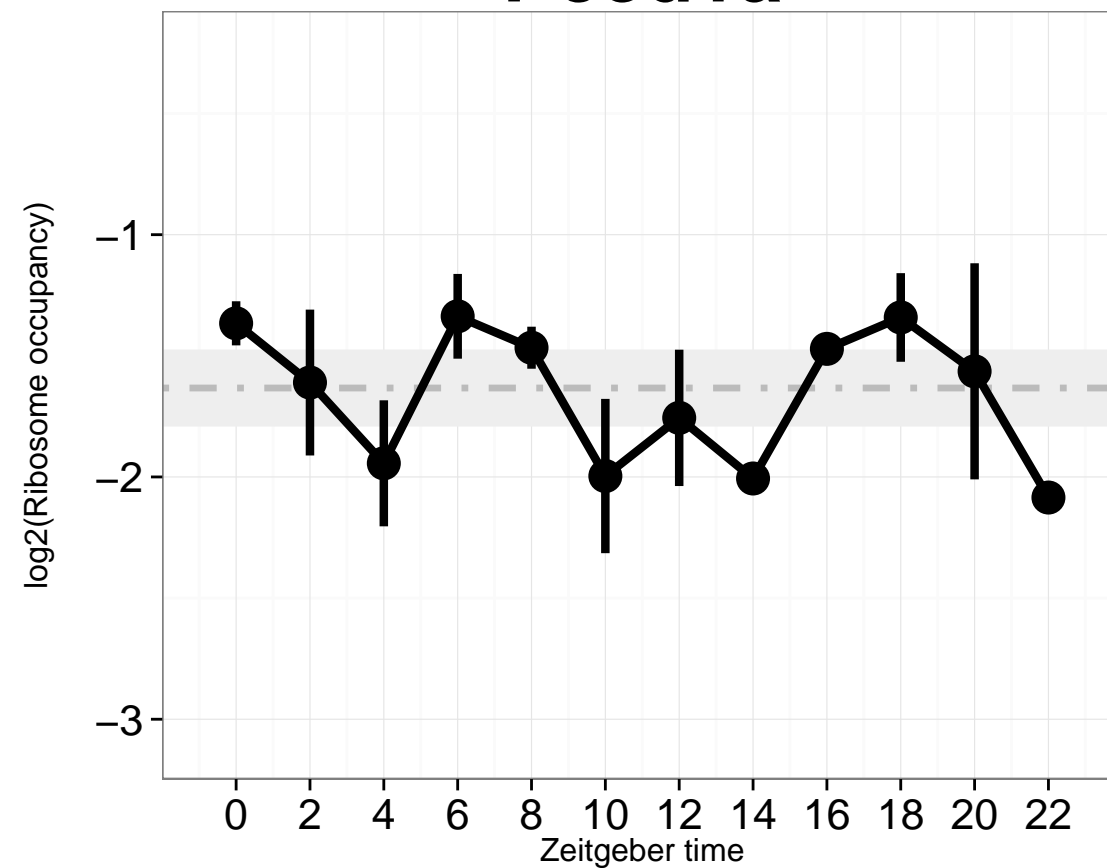

Supplement: Supplementary file 10103 [file 1]

## Ptcd2

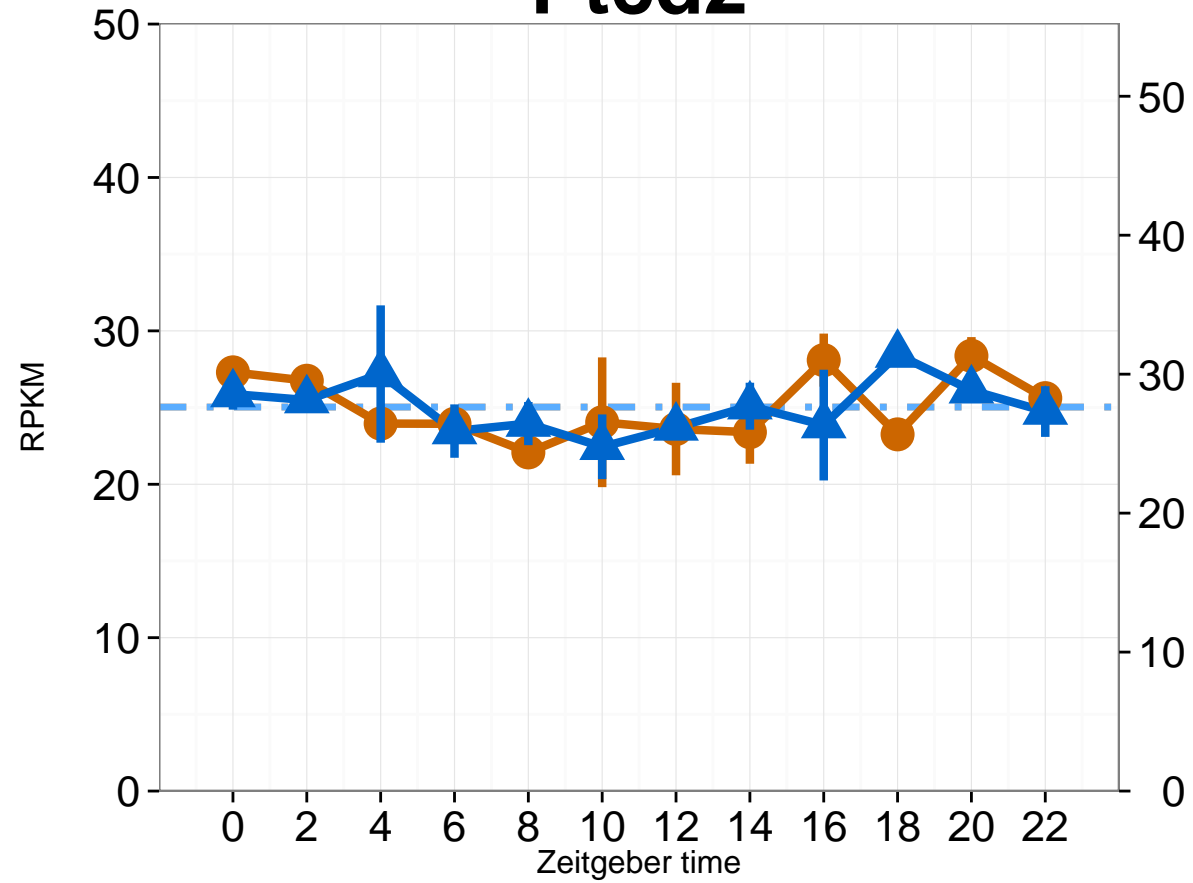

## Ptcd2

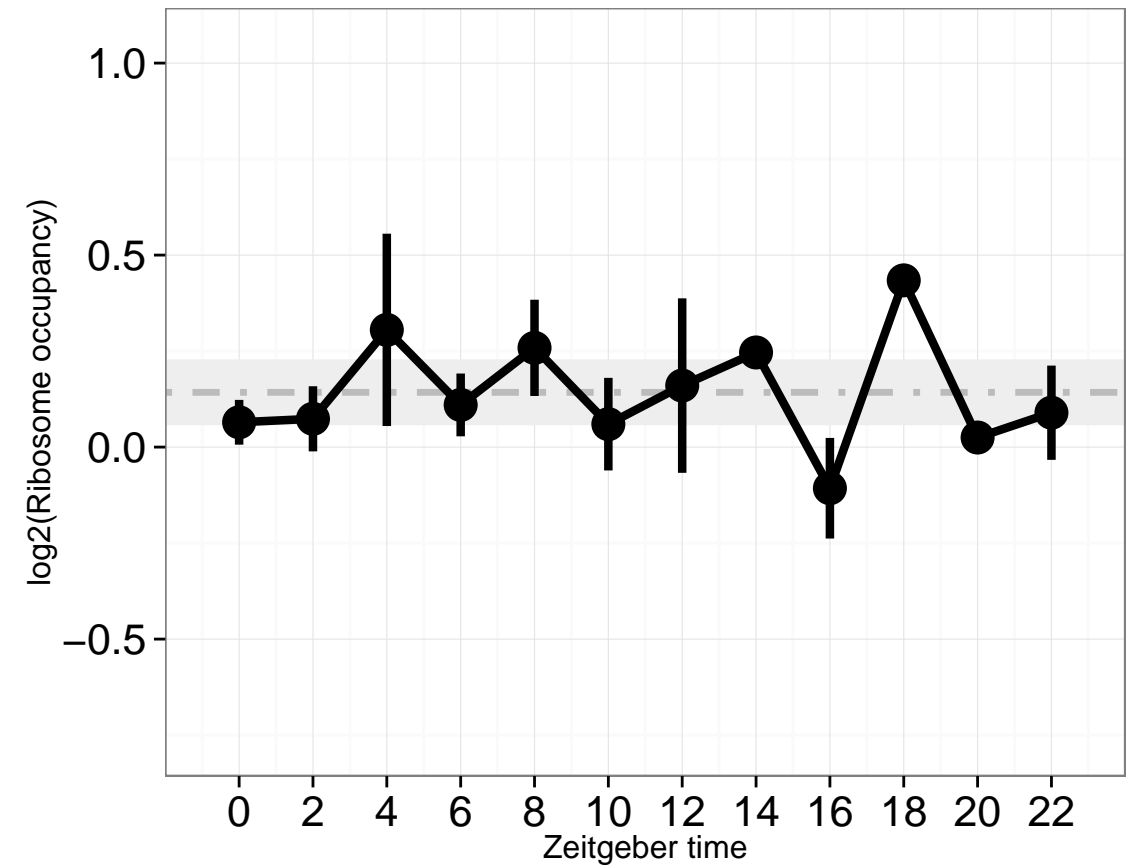

Supplement: Supplementary file 10104 [file 1]

## Kif24

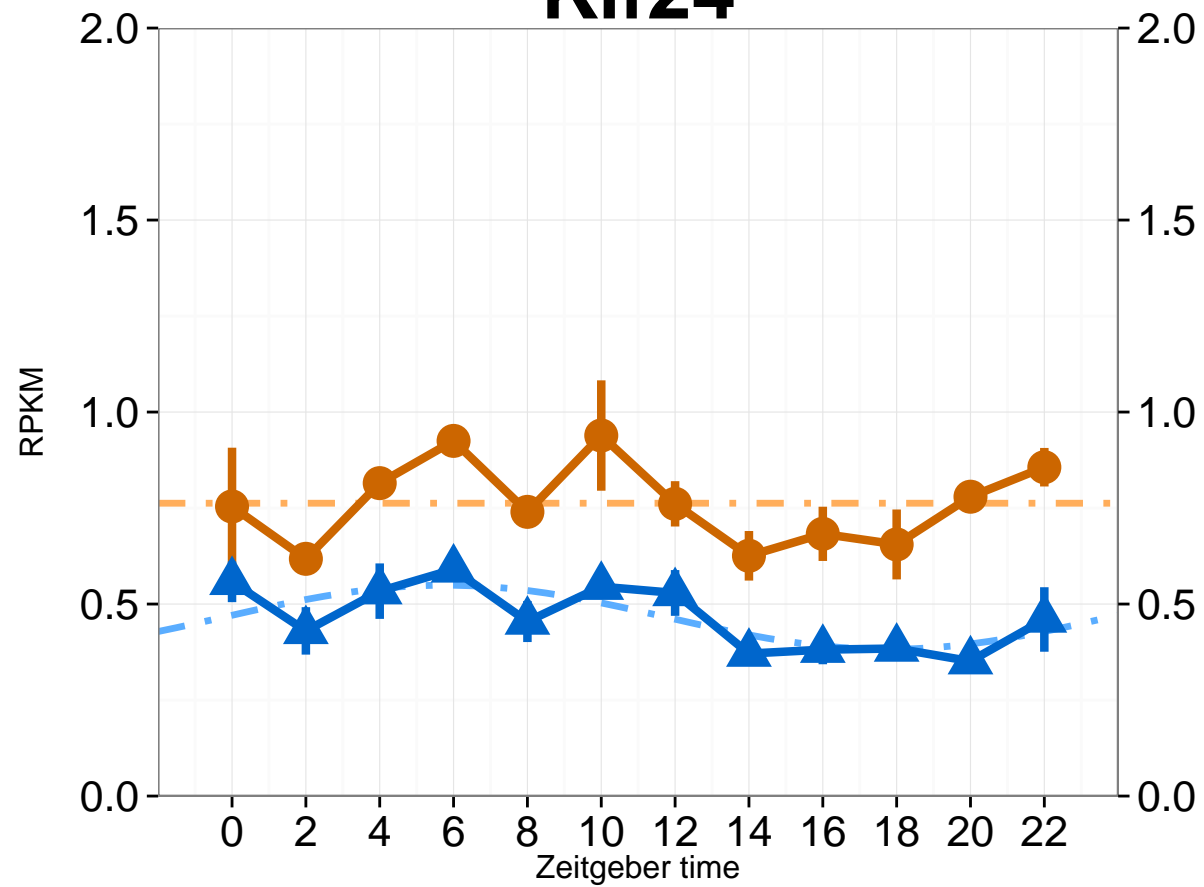

## Kif24

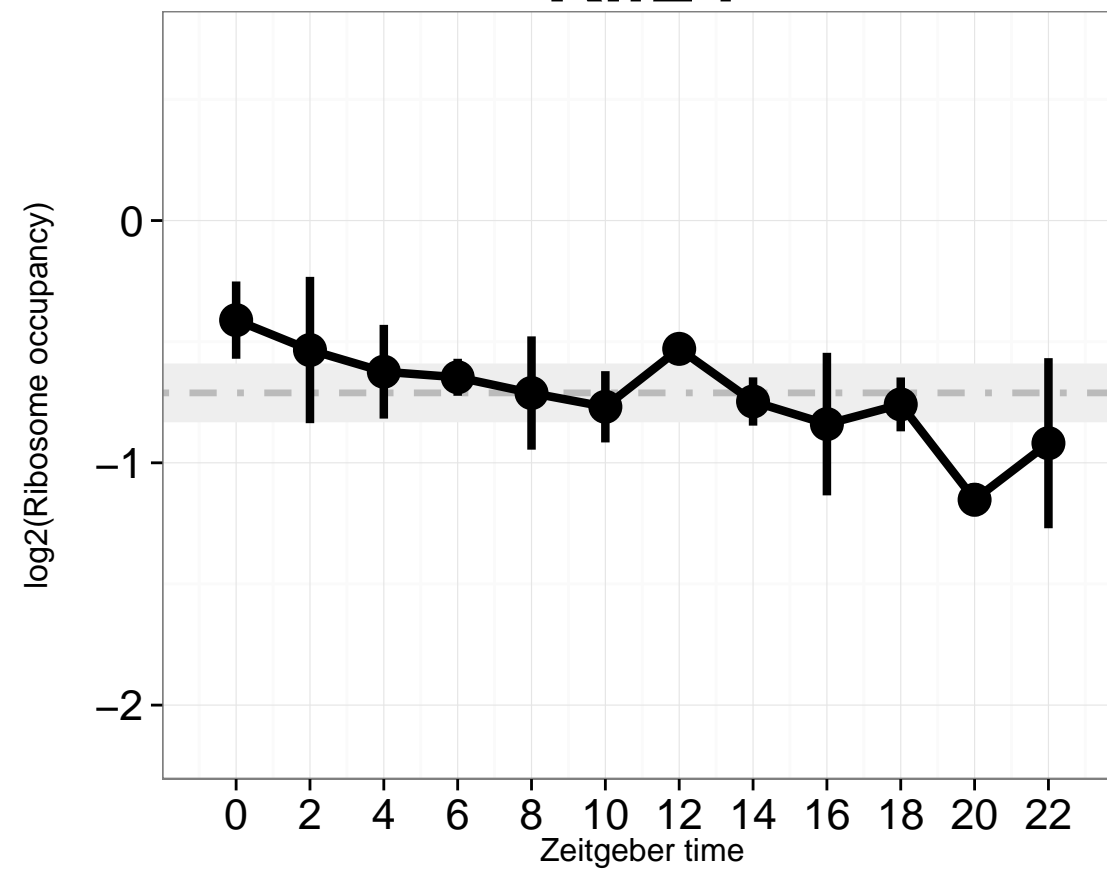

Supplement: Supplementary file 10105 [file 1]

## Bcas2

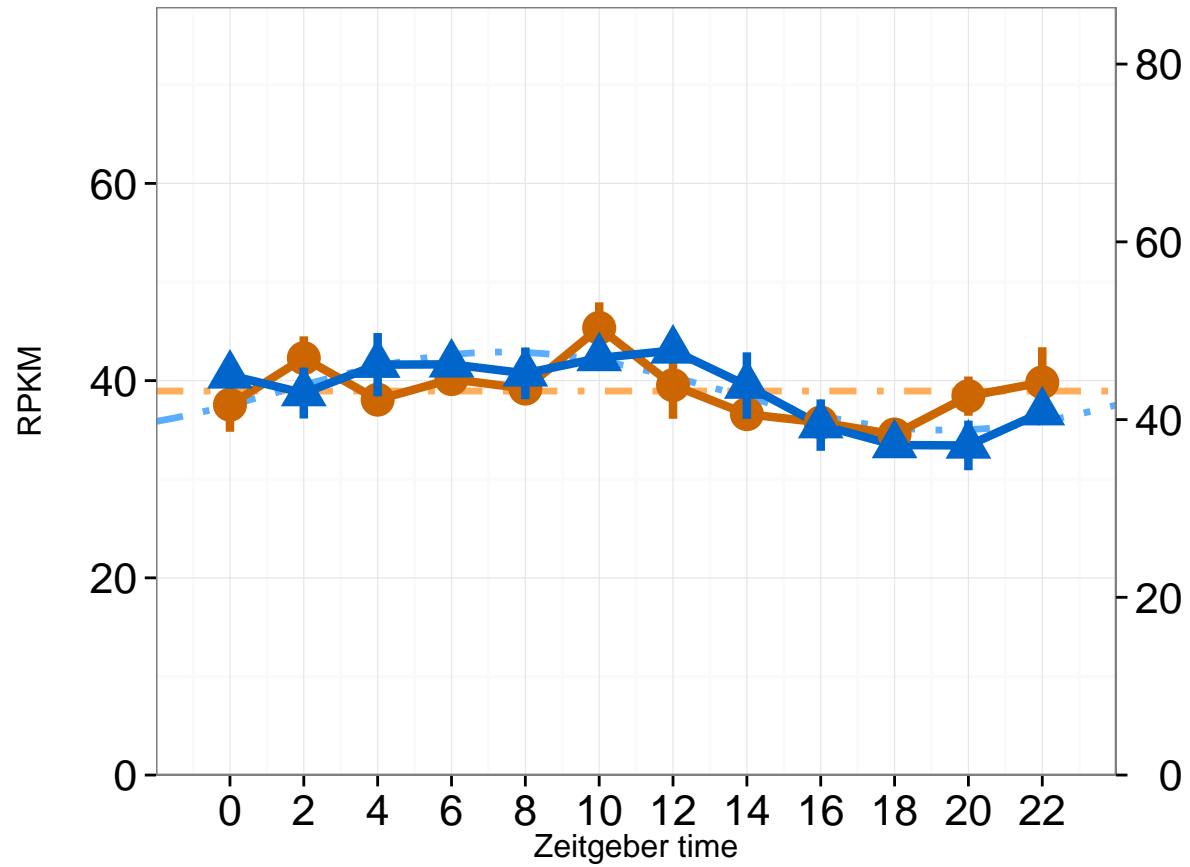

## Bcas2

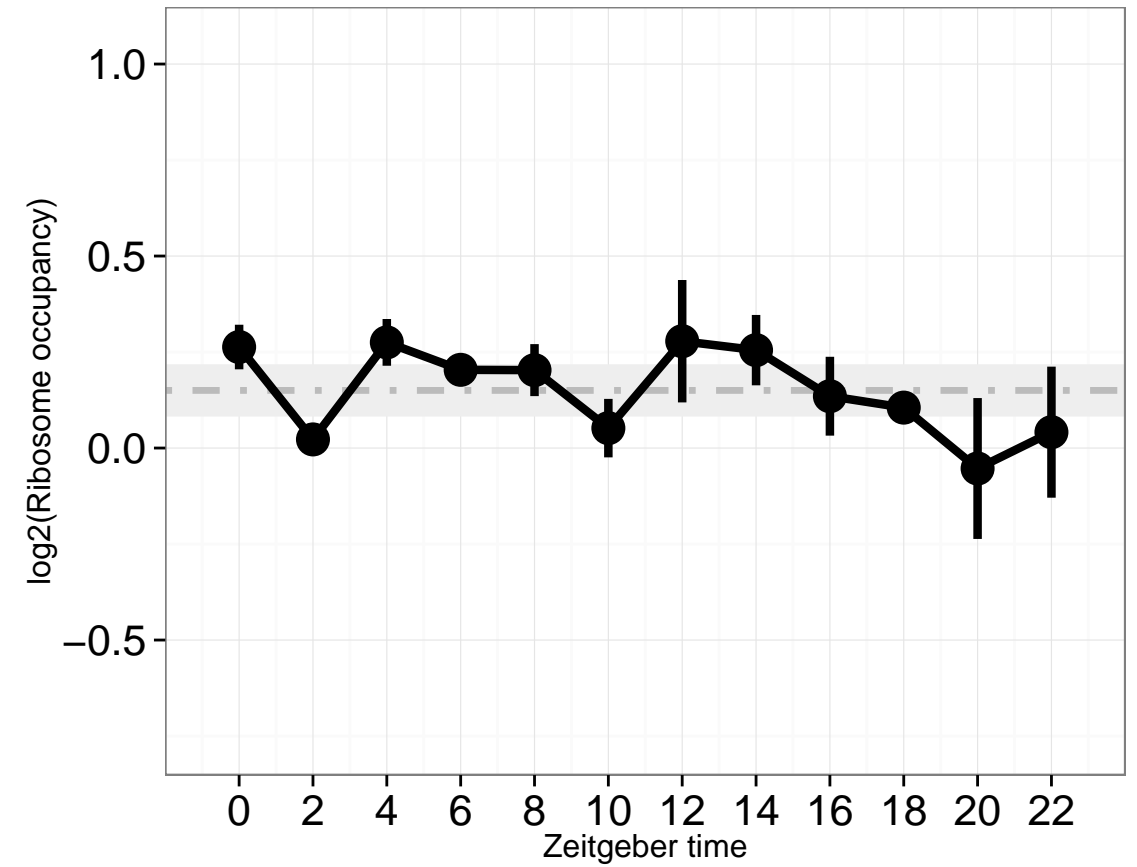

Supplement: Supplementary file 10106 [file 1]

## Egfr

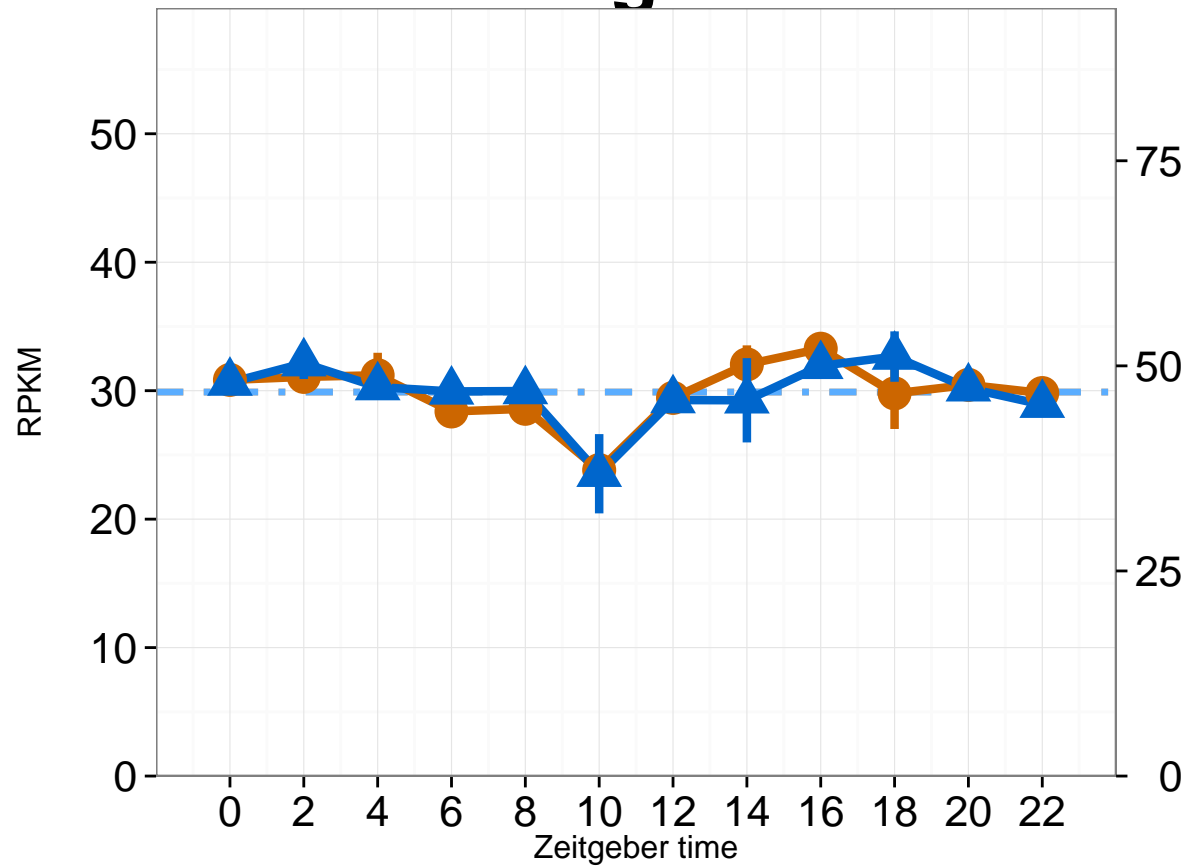

## Egfr

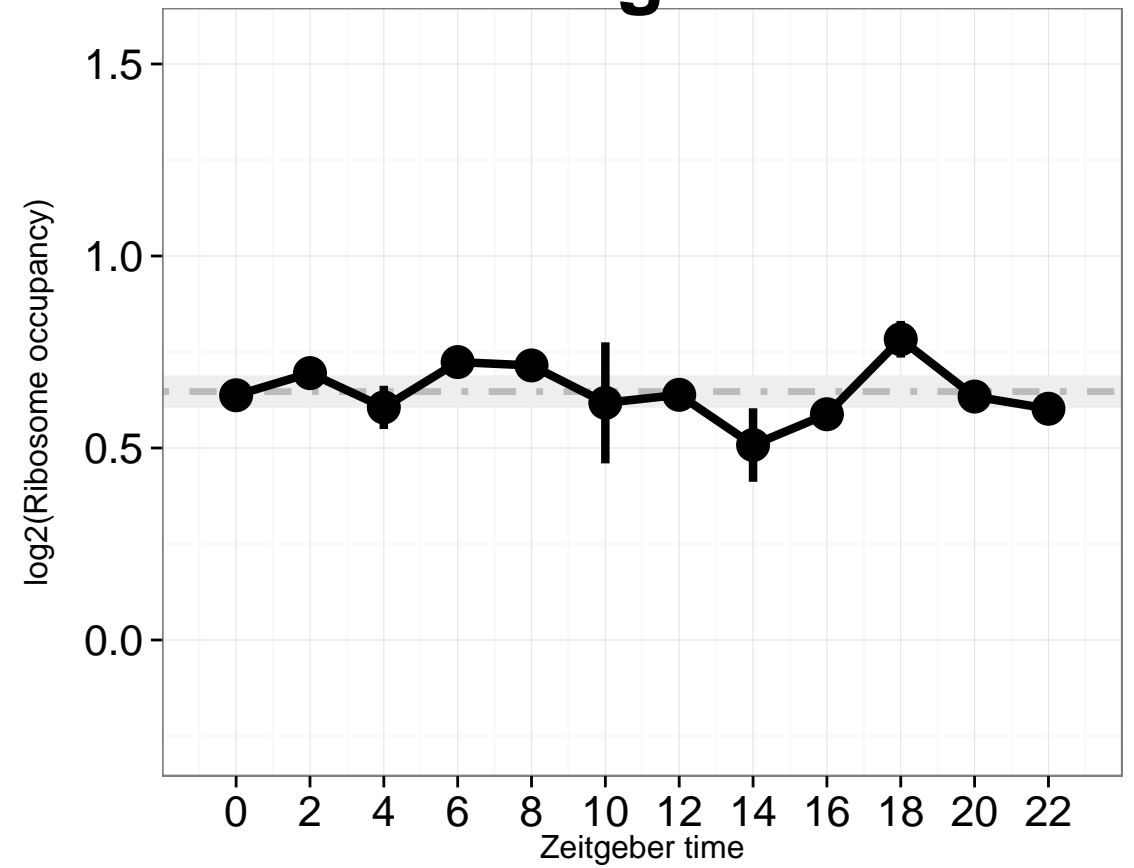

Supplement: Supplementary file 10107 [file 1]

## Smc1a

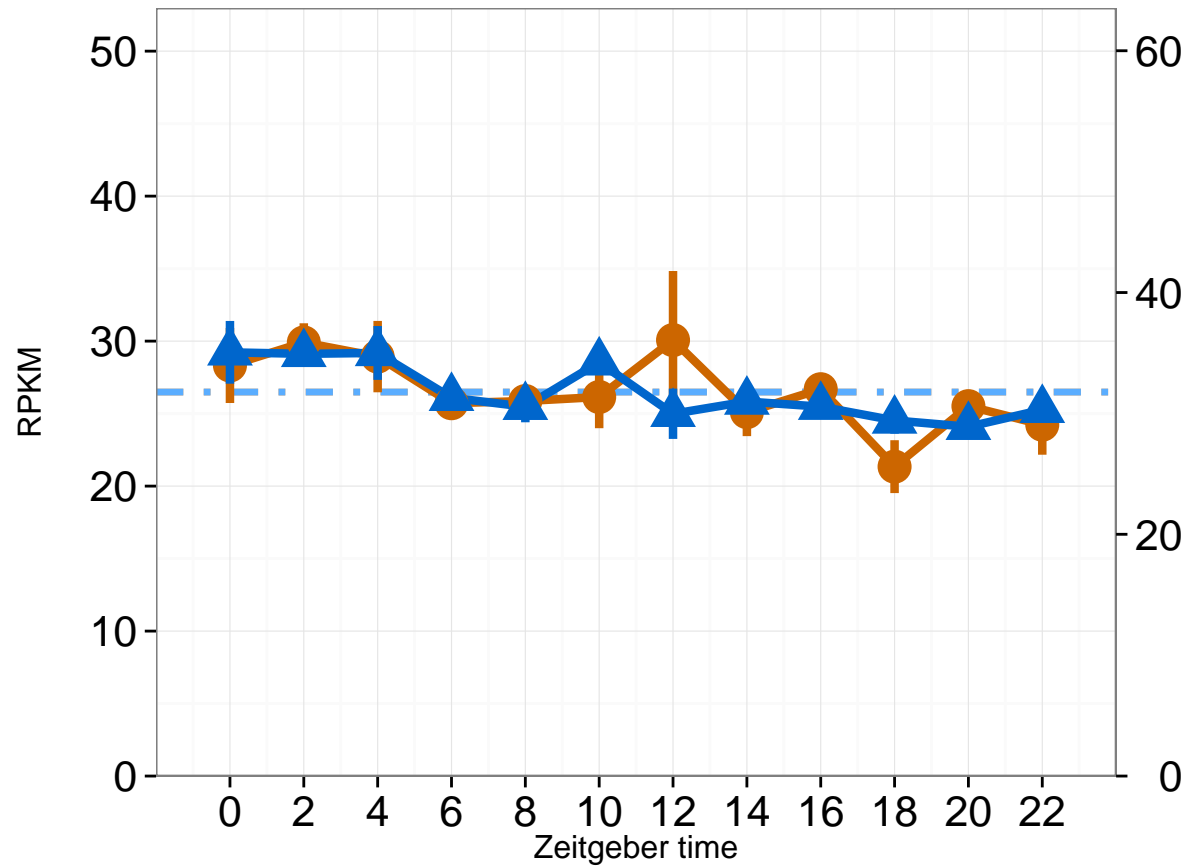

## Smc1a

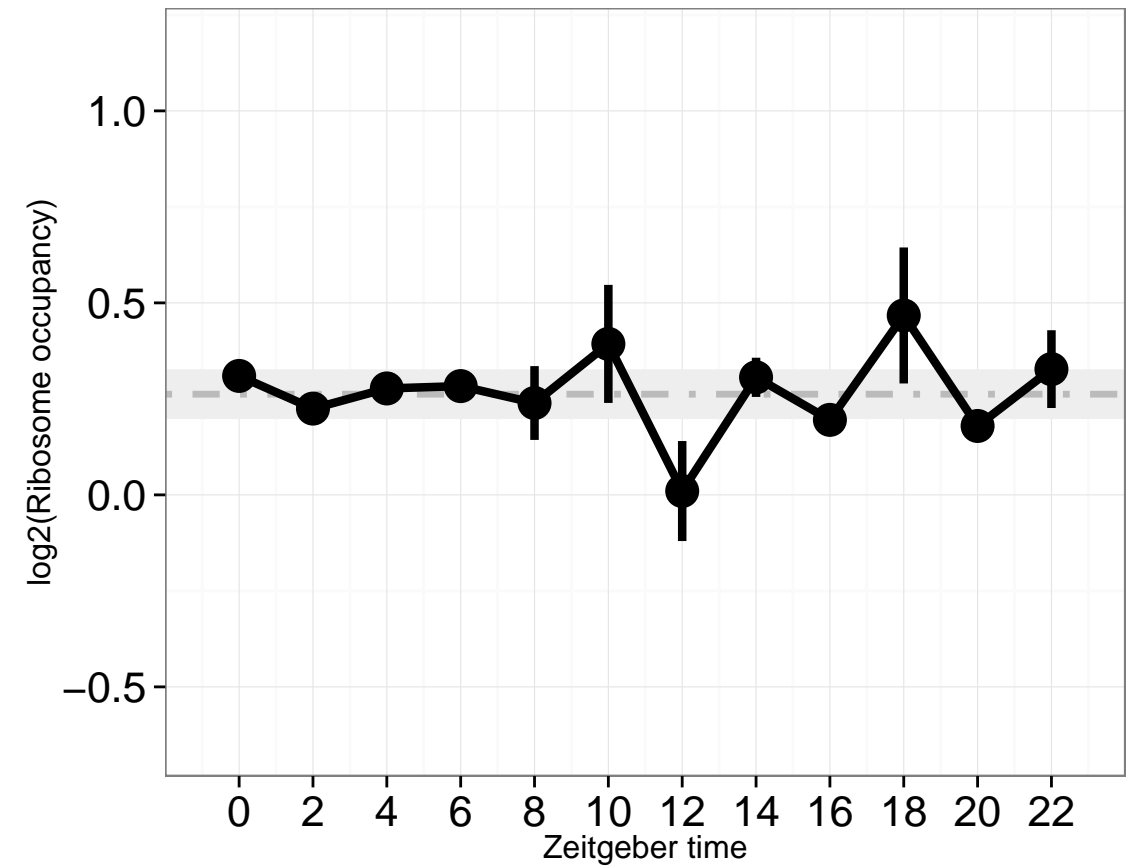

Supplement: Supplementary file 10108 [file 1]

## Lfng

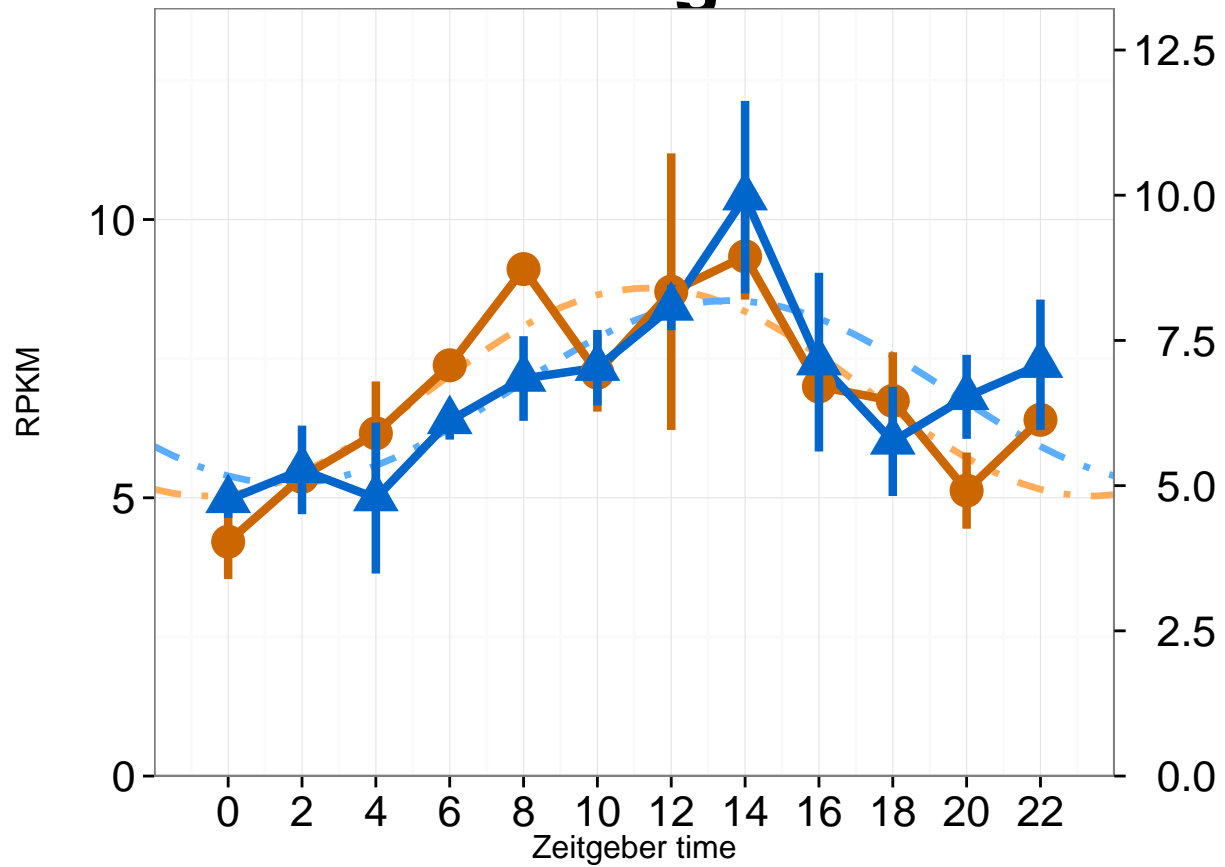

## Lfng

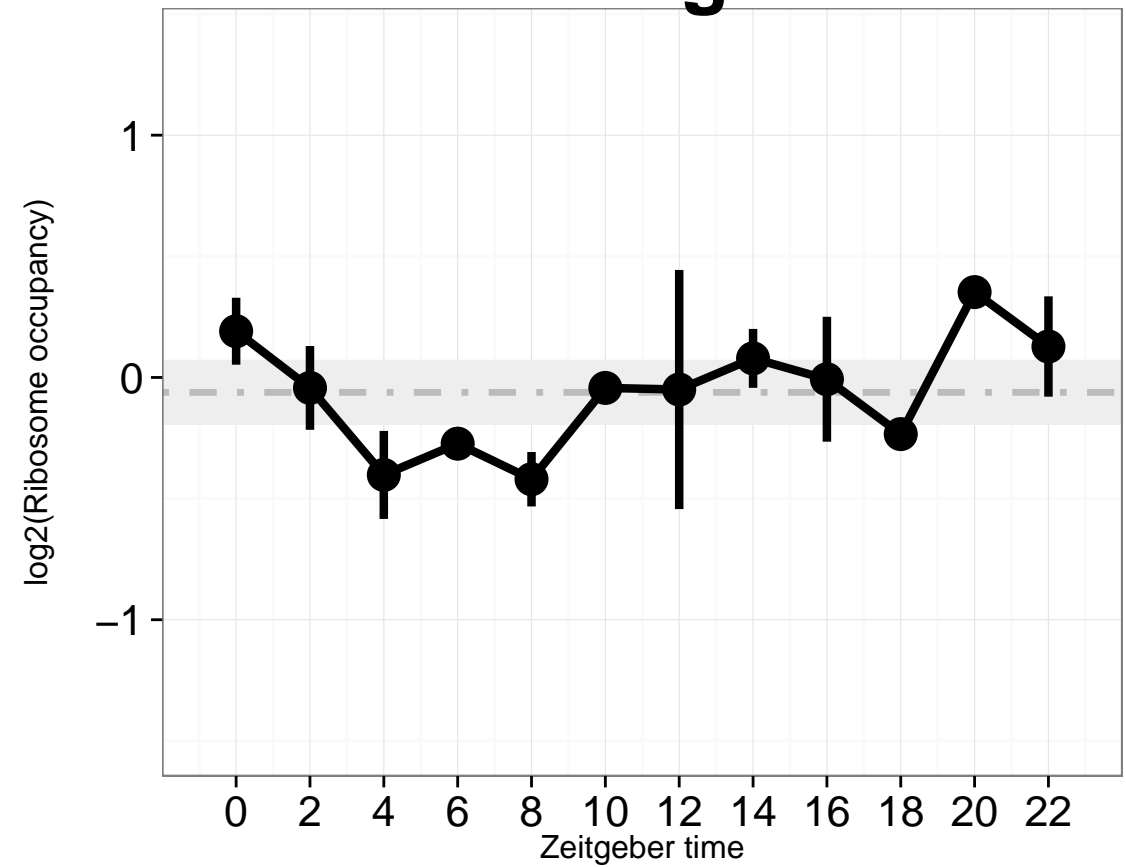

Supplement: Supplementary file 10109 [file 1]

# Zfp202

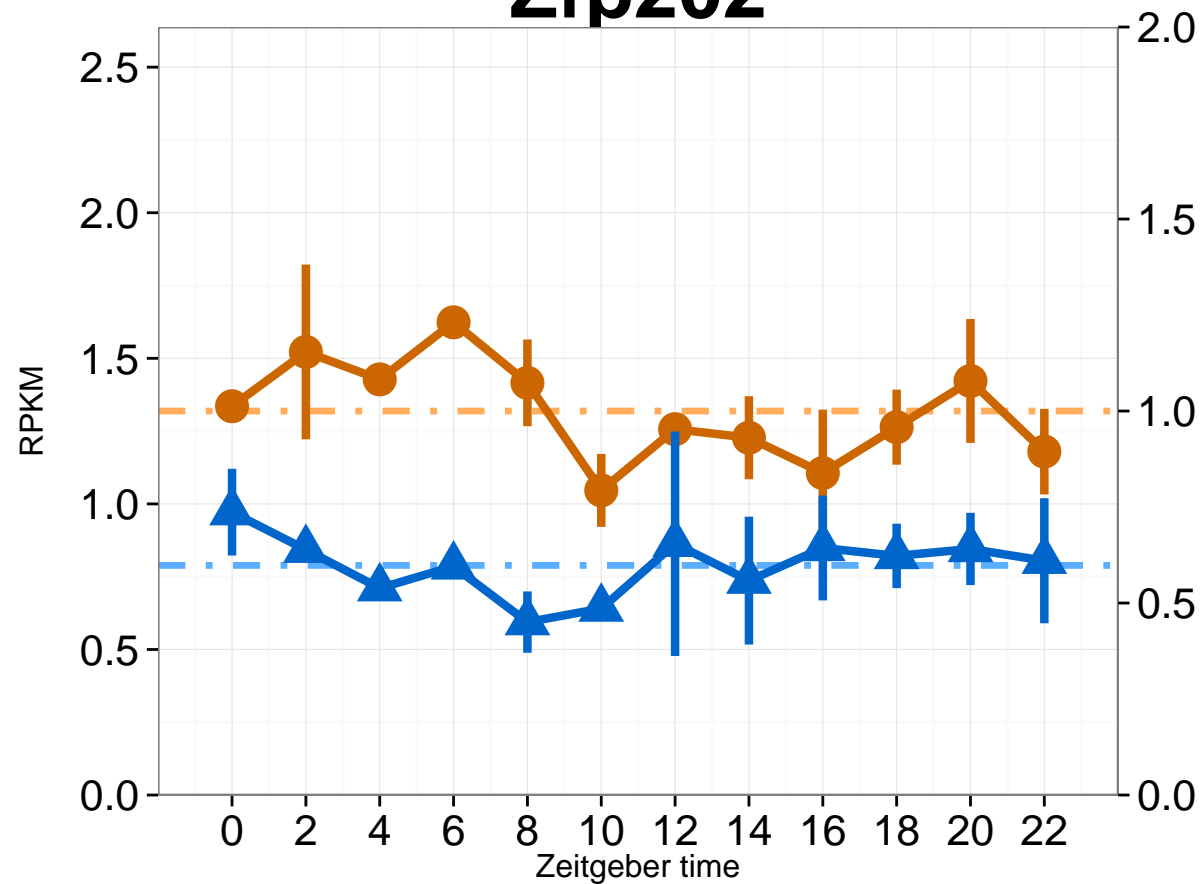

# Zfp202

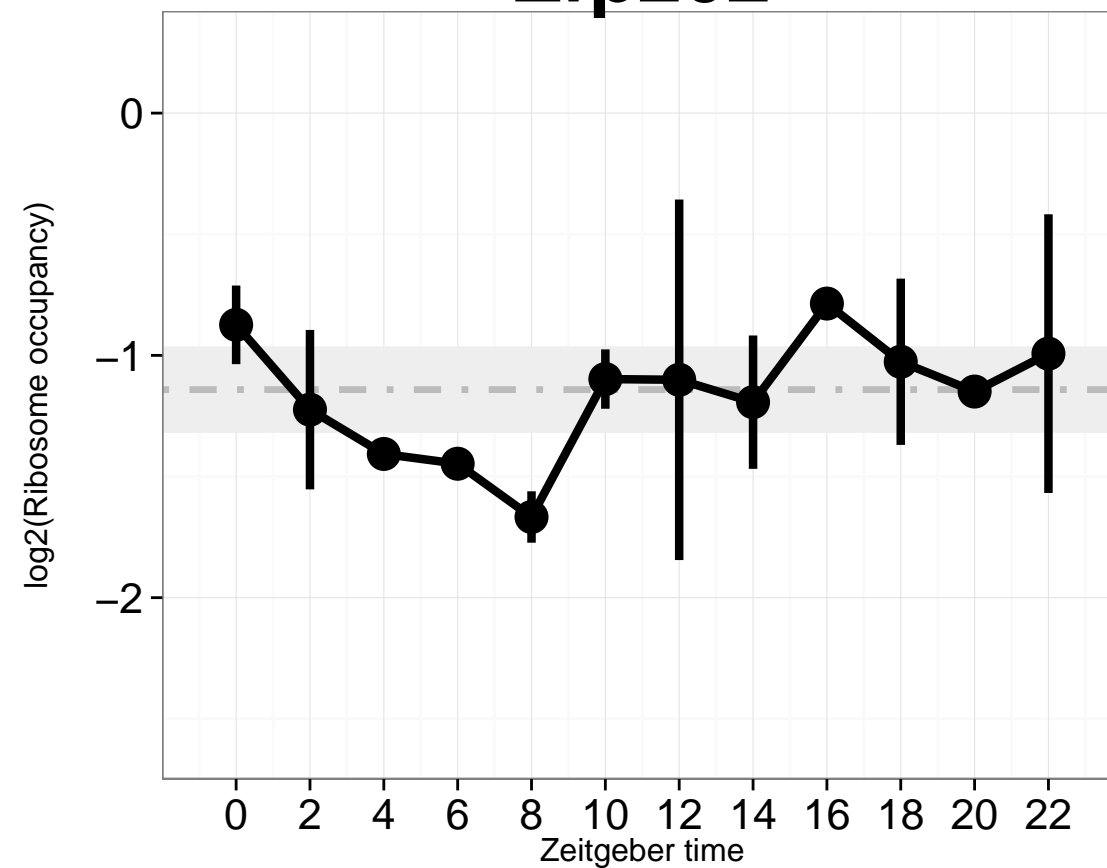

Supplement: Supplementary file 10110 [file 1]

## Rel1

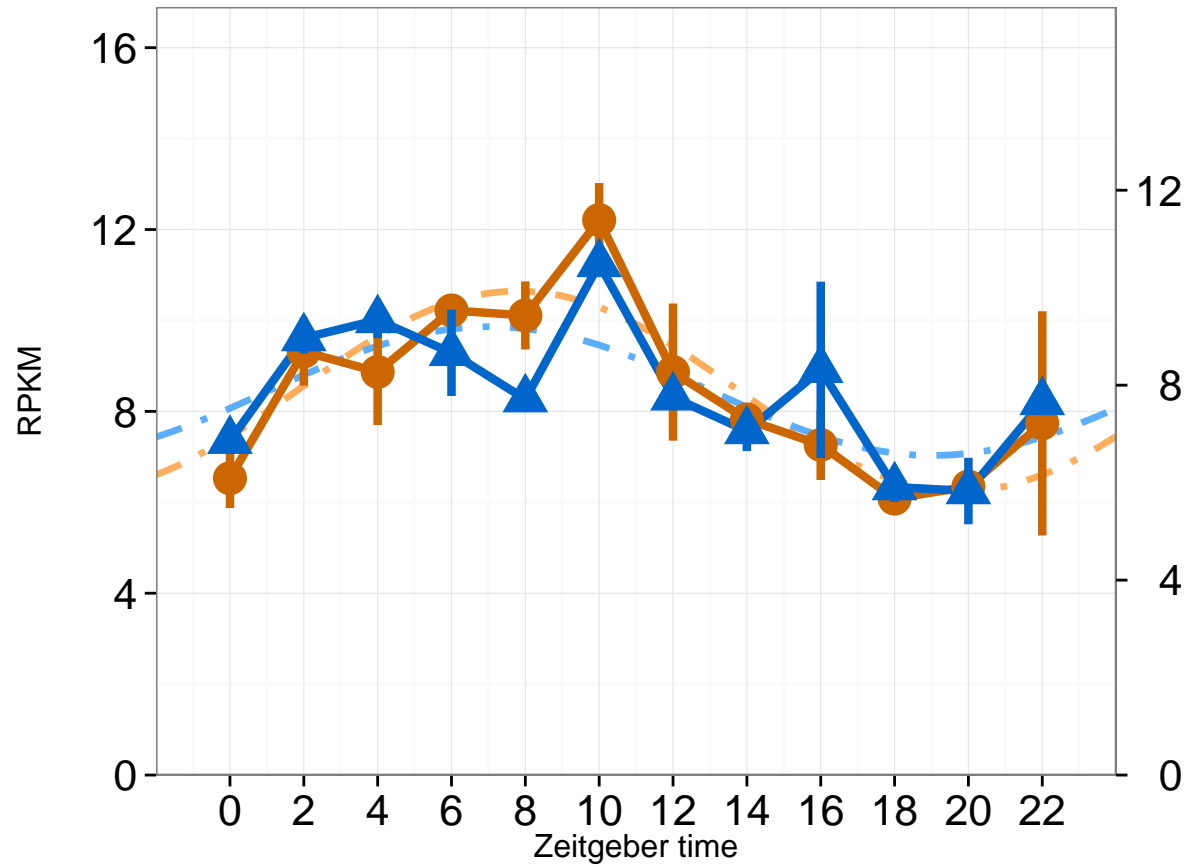

## Rel1

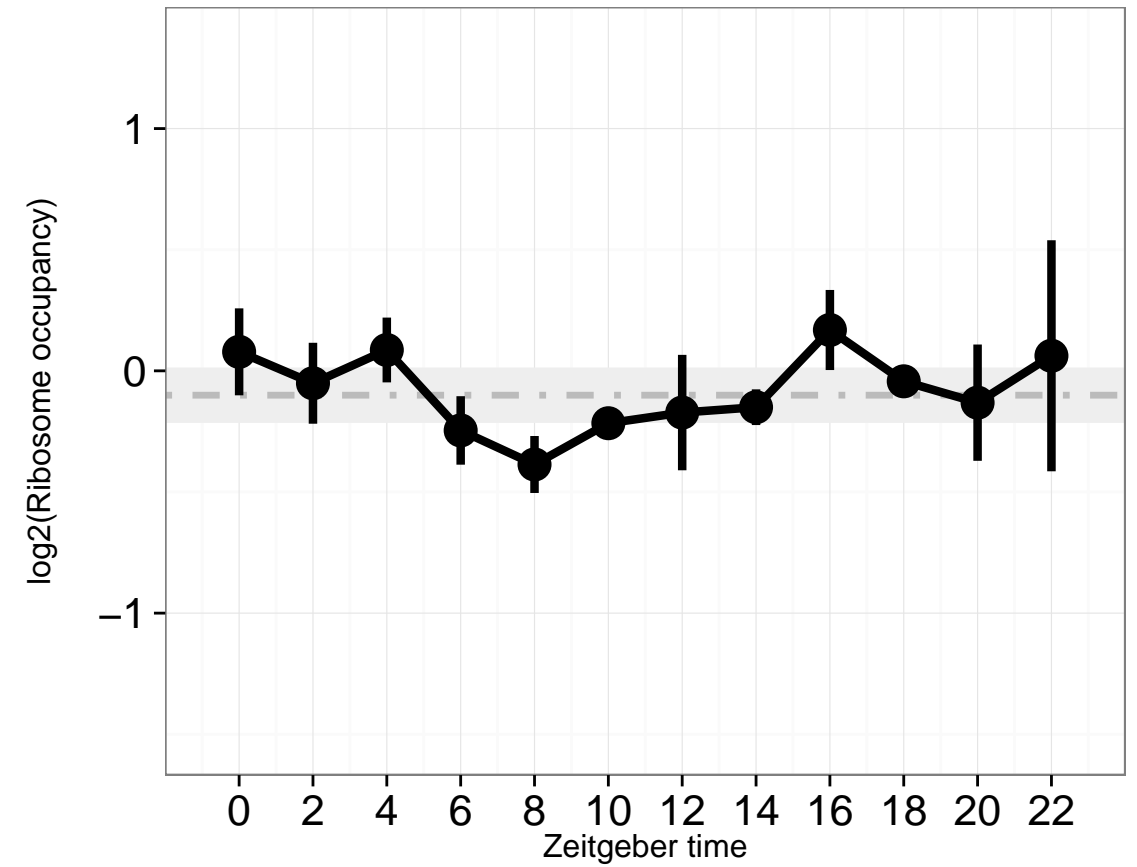

Supplement: Supplementary file 10111 [file 1]

# Stard10

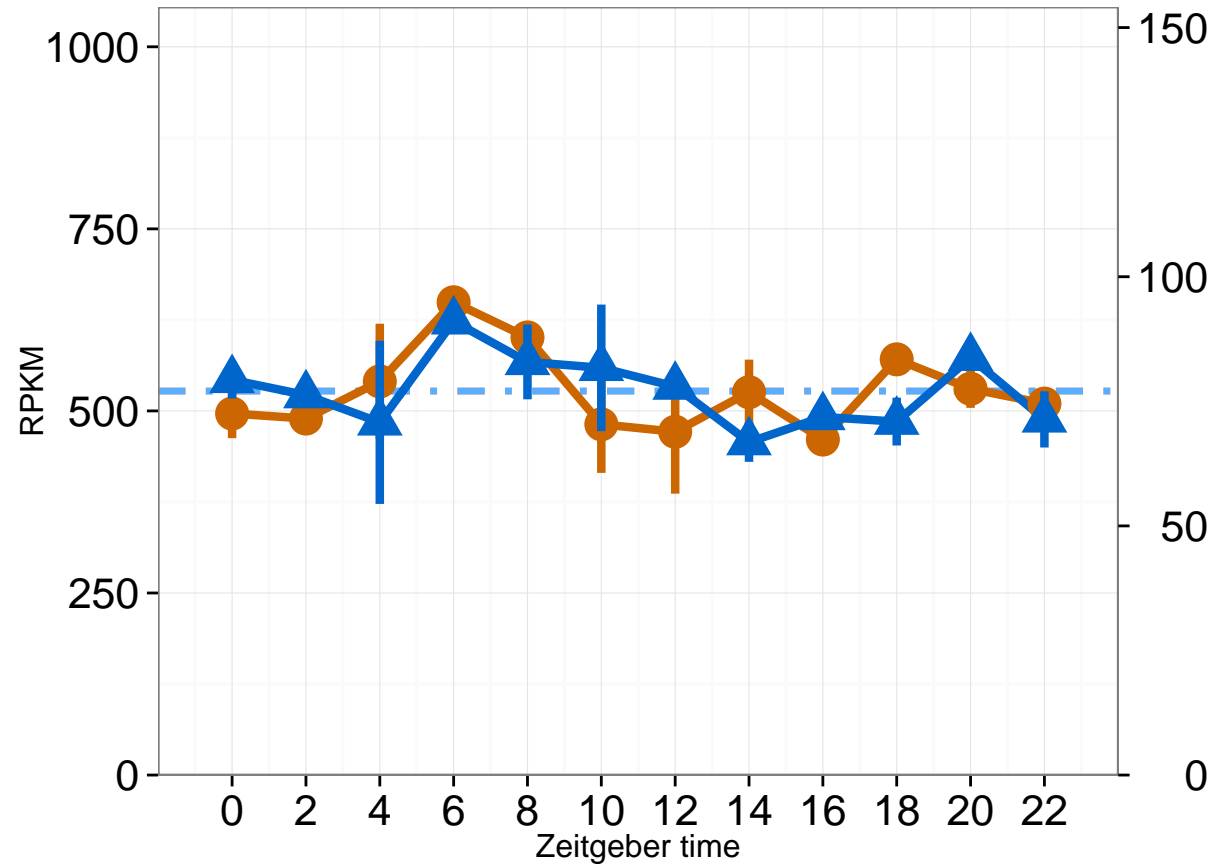

# Stard10

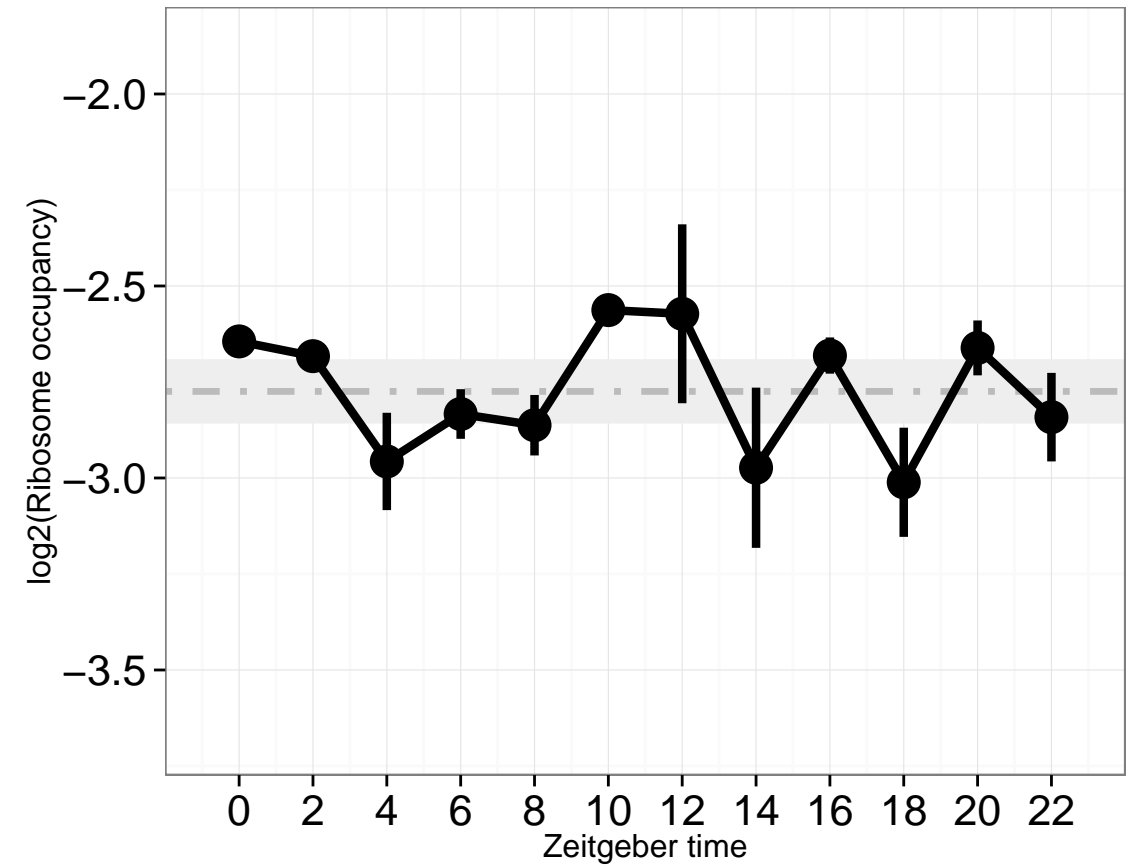

Supplement: Supplementary file 10112 [file 1]

## Cdk1

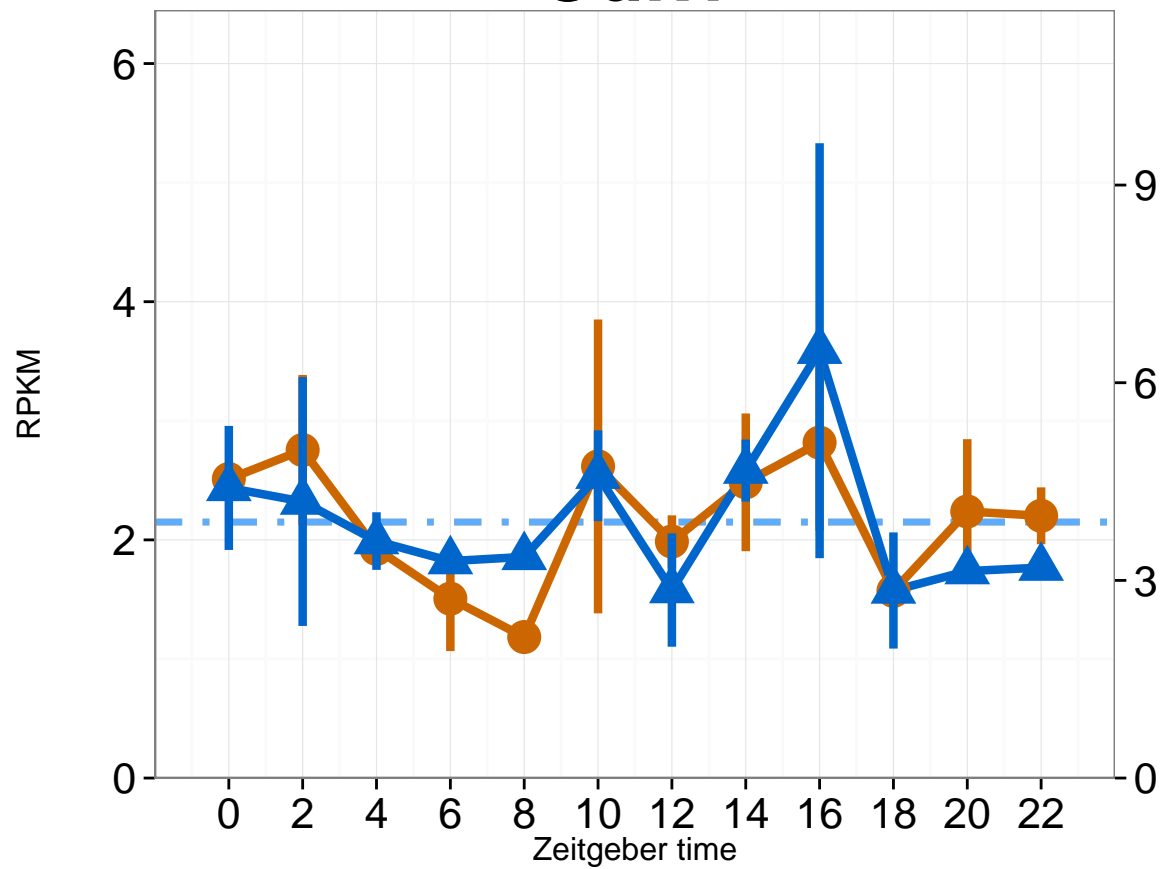

## Cdk1

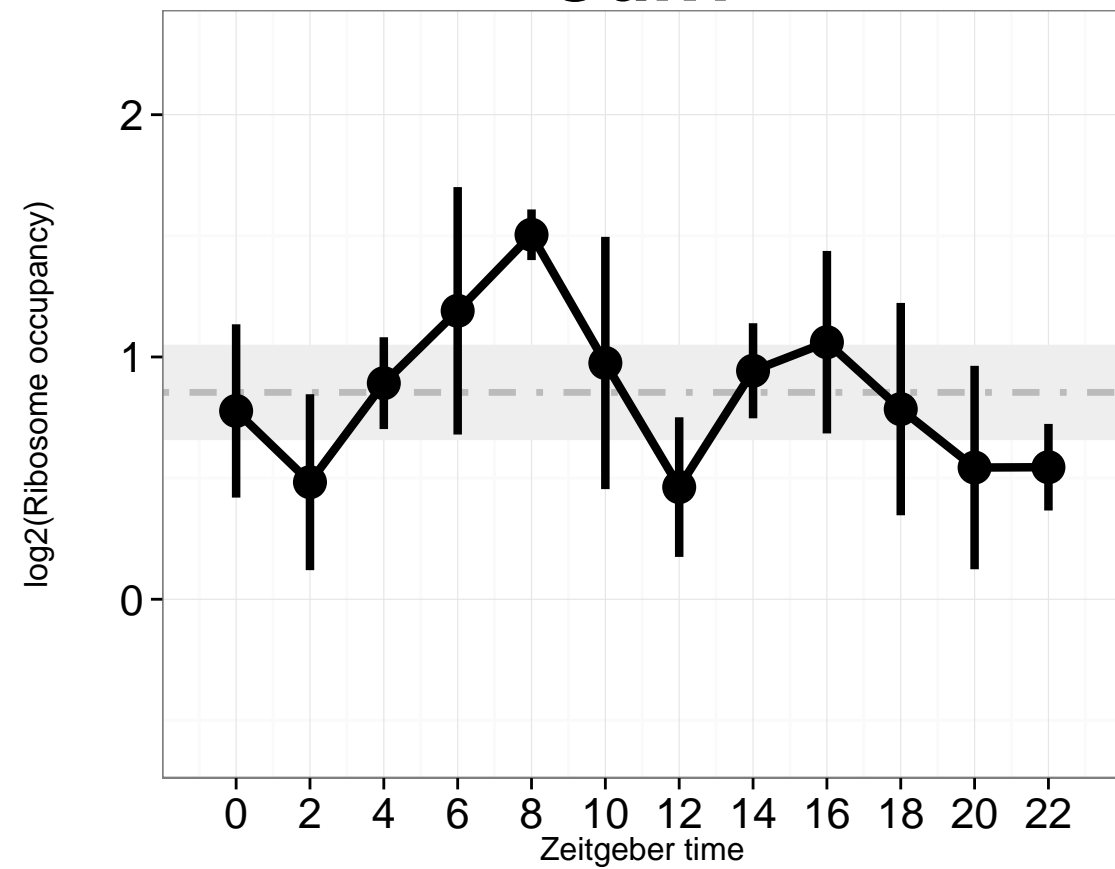

Supplement: Supplementary file 10113 [file 1]

# Atp6v1b1

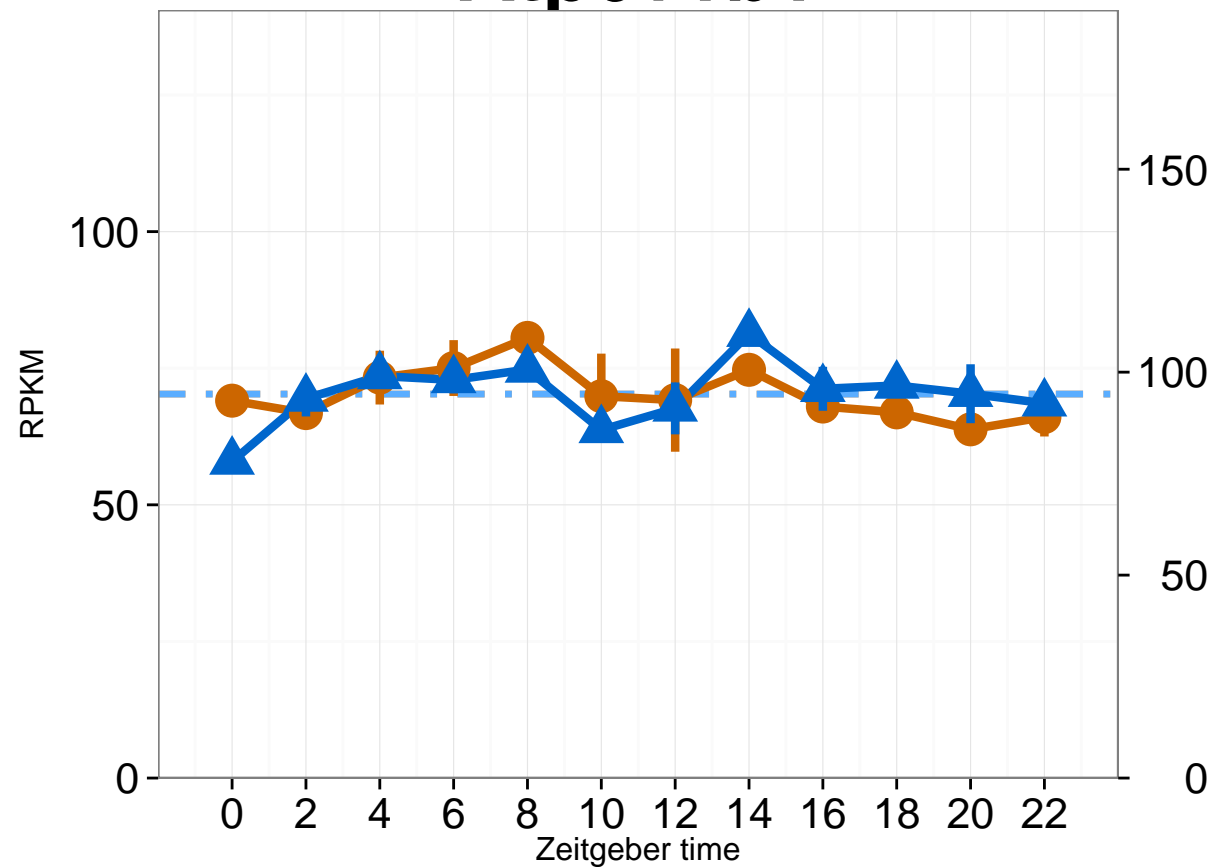

# Atp6v1b1

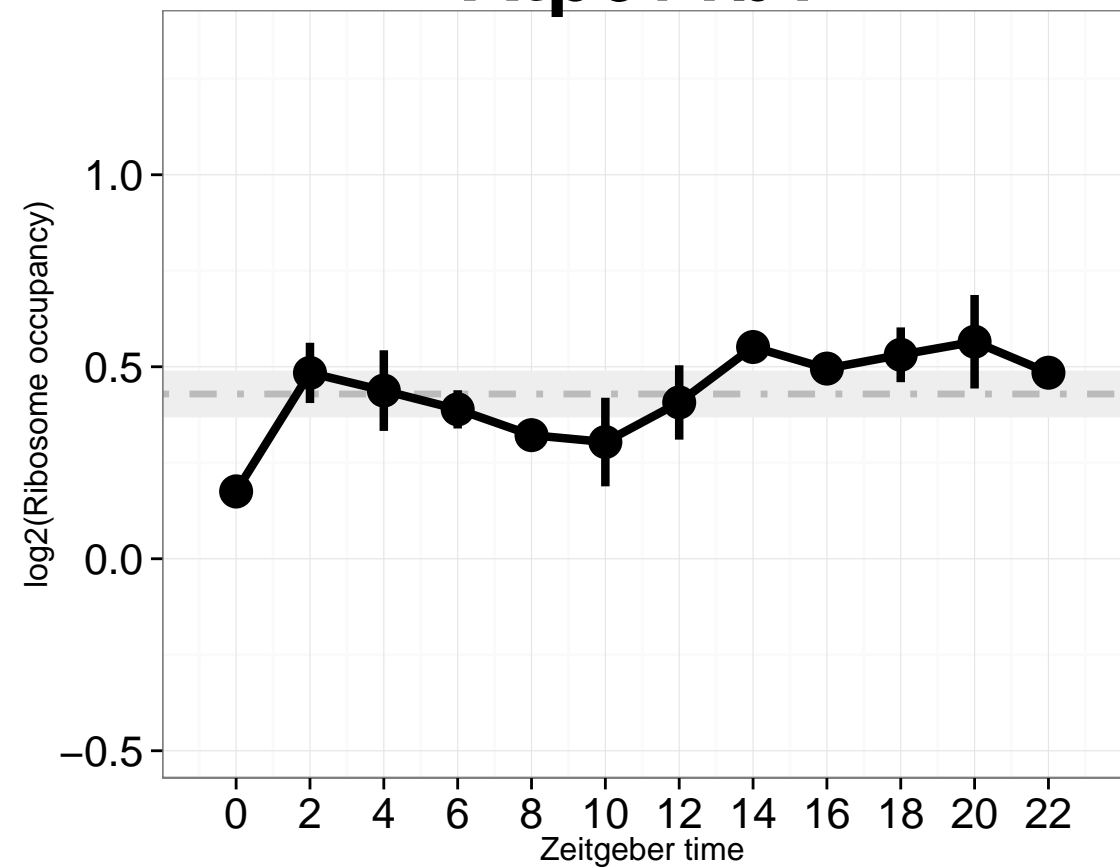

Supplement: Supplementary file 10114 [file 1]

# Timp2

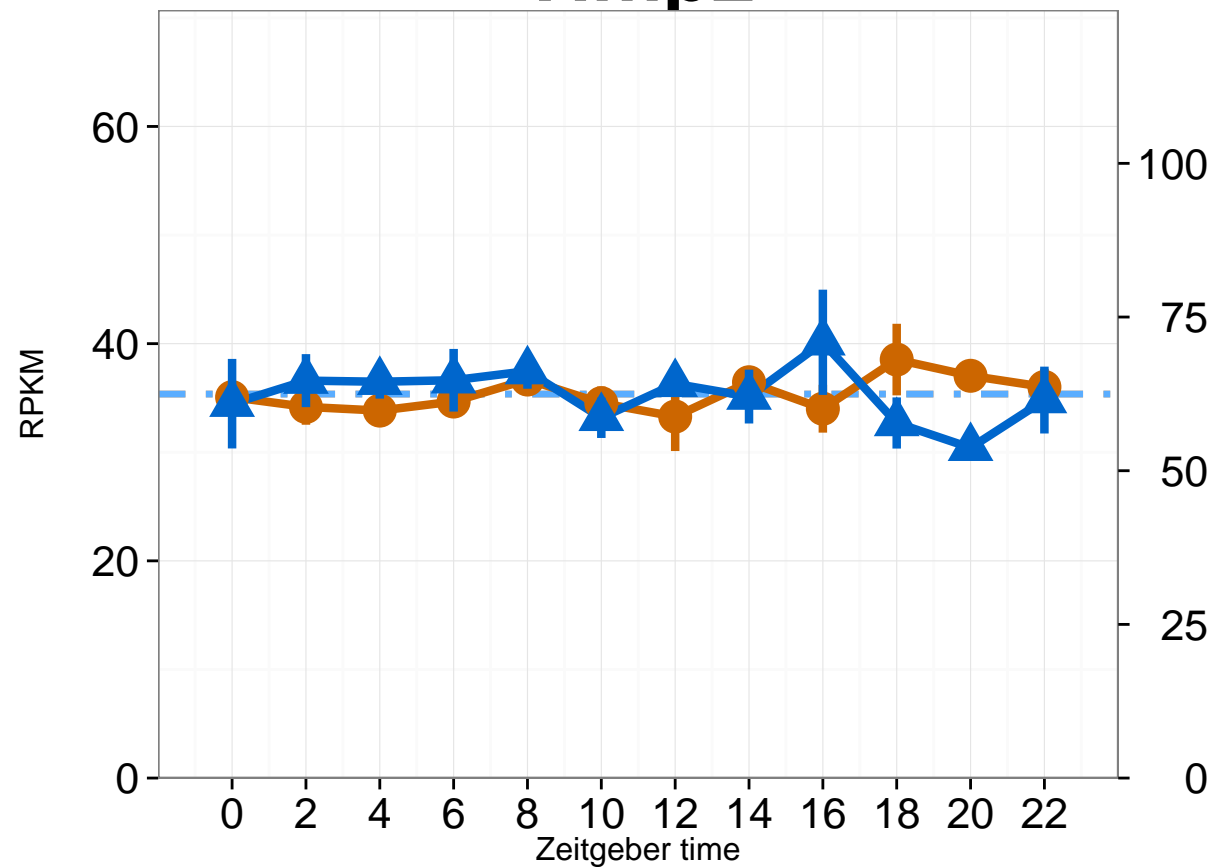

# Timp2

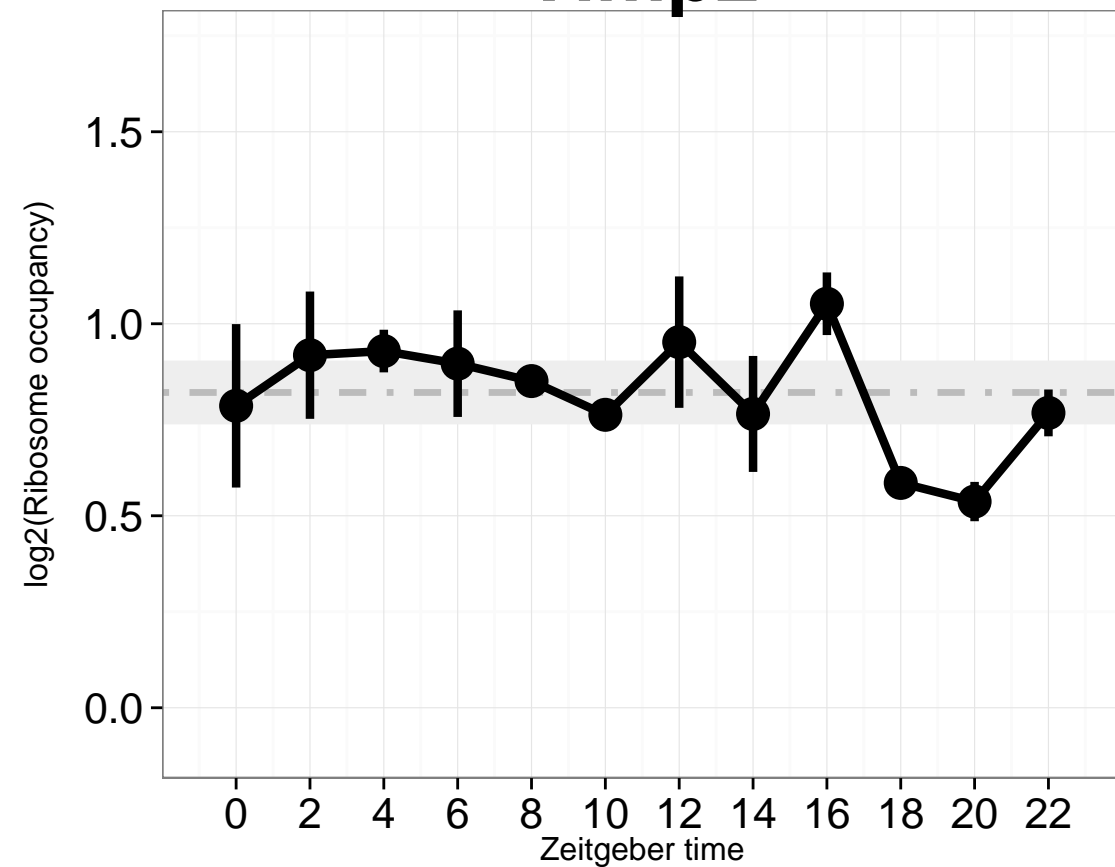

Supplement: Supplementary file 10115 [file 1]

## Lipg

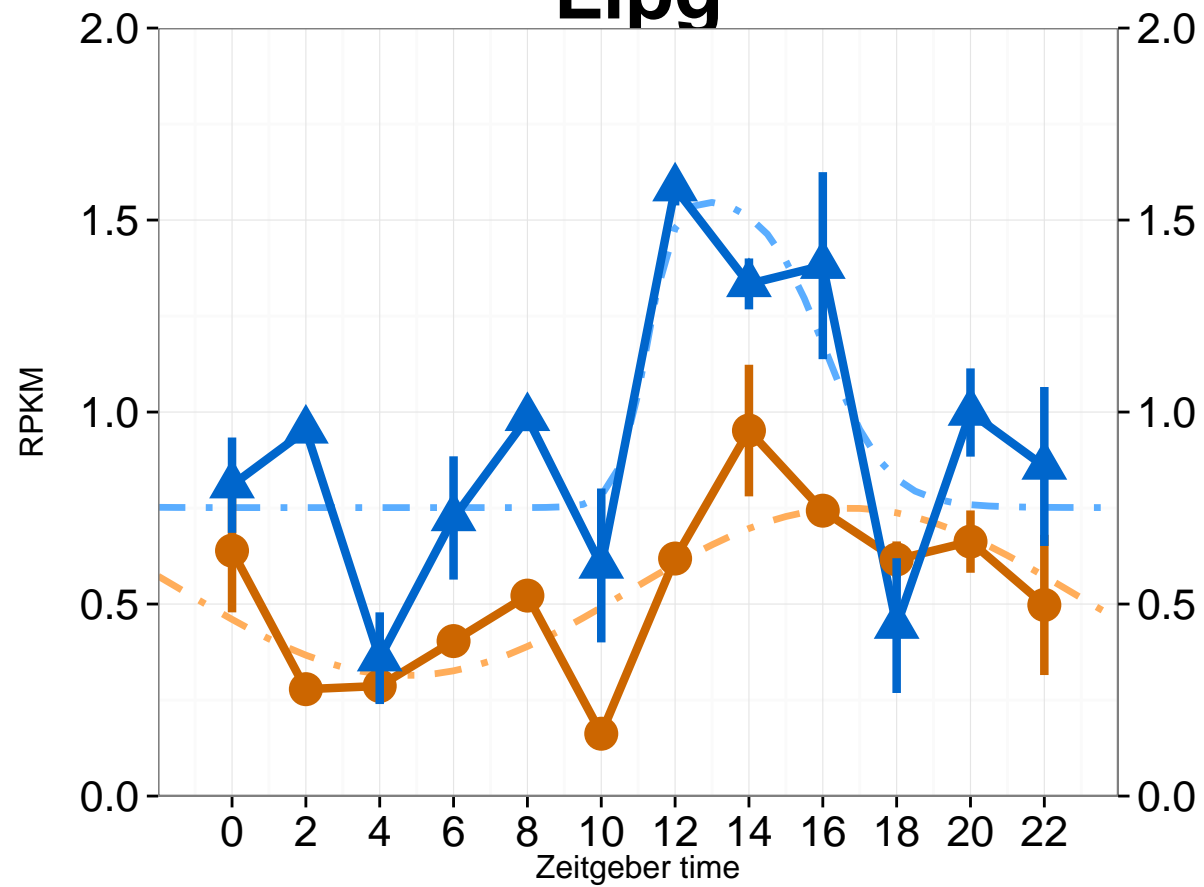

## Lipg

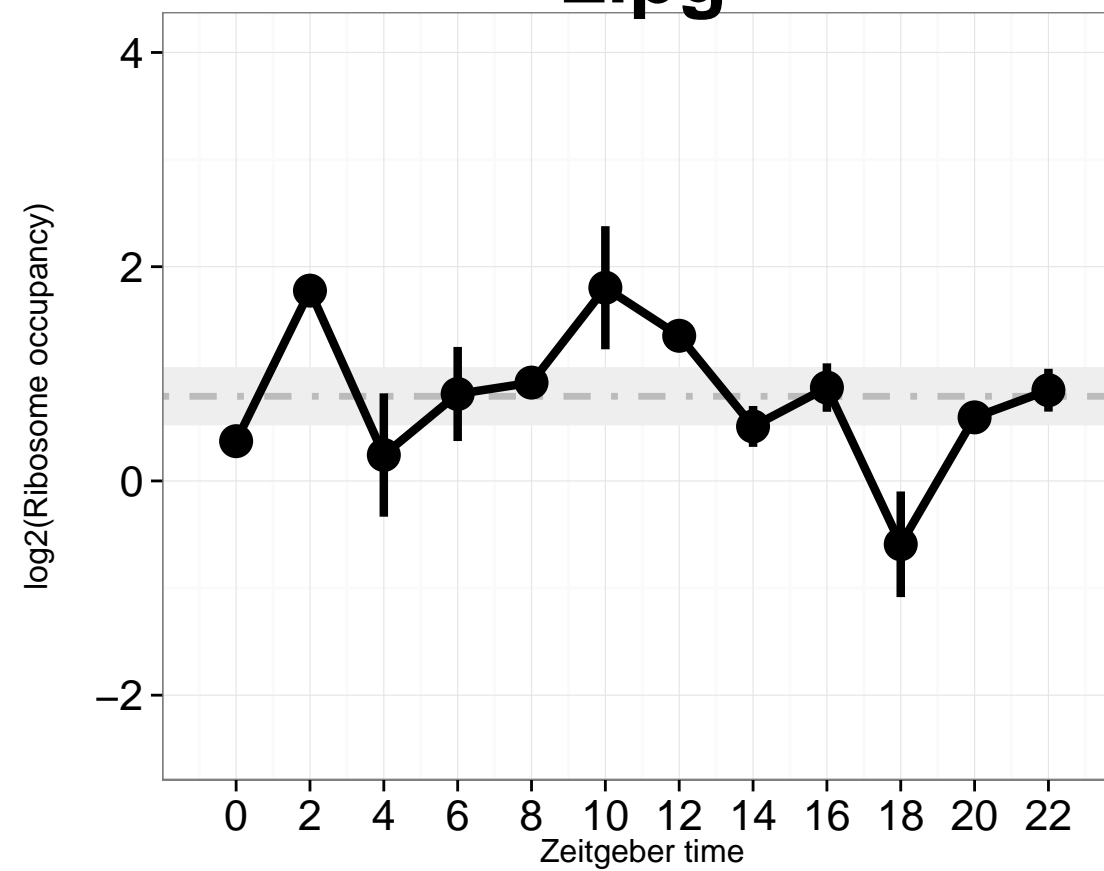

Supplement: Supplementary file 10116 [file 1]

## Dnmbp

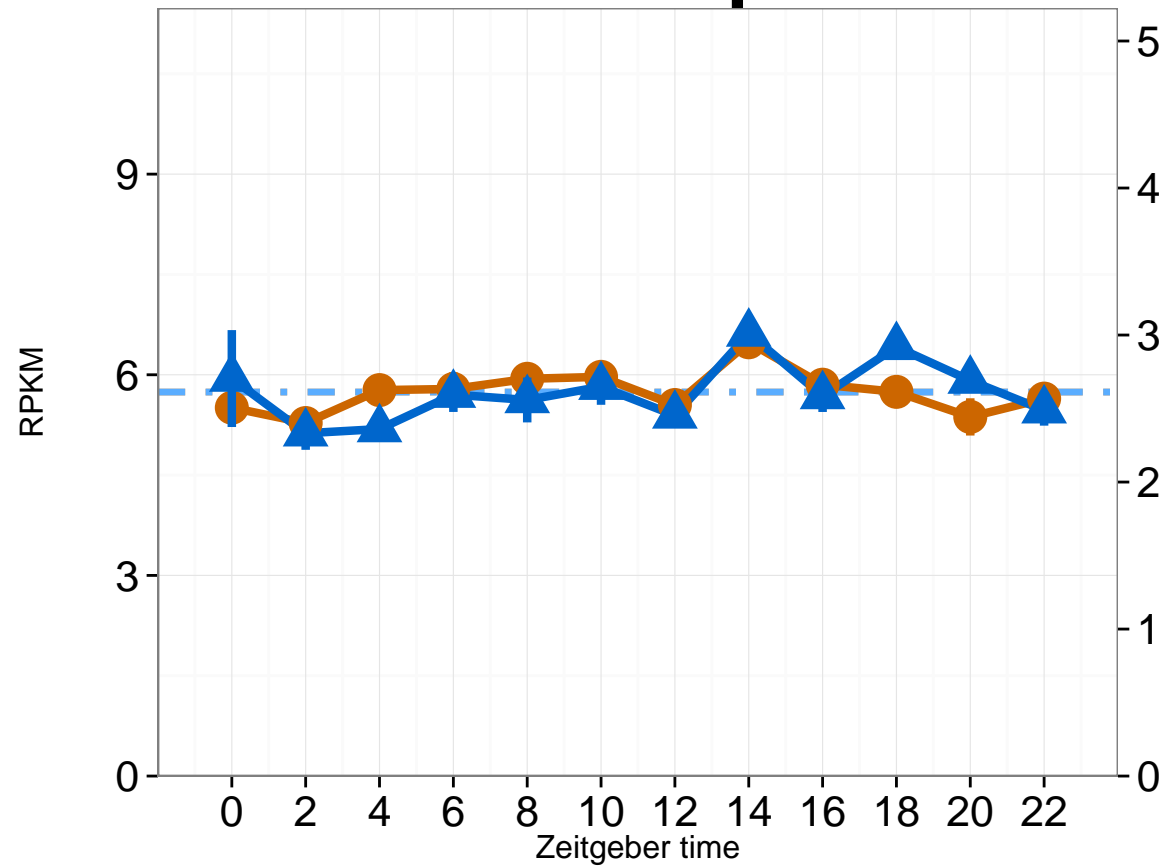

## Dnmbp

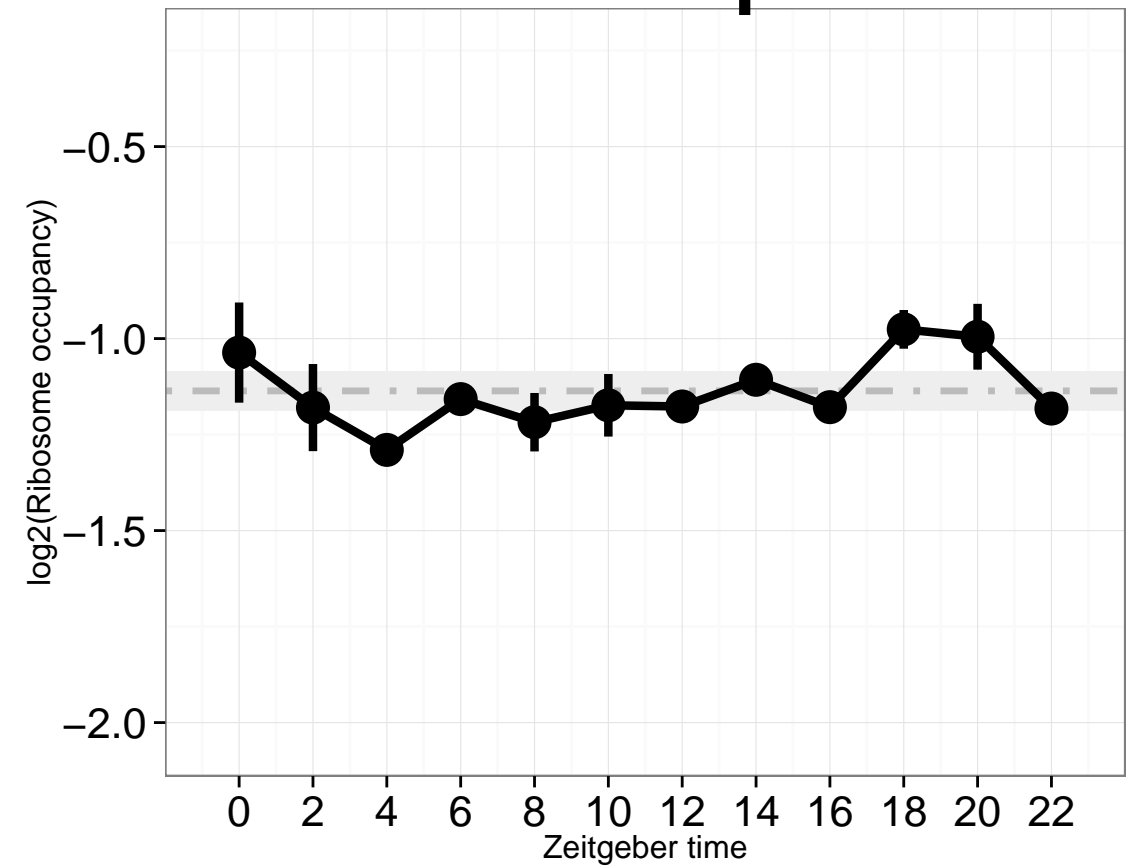

Supplement: Supplementary file 10117 [file 1]

# Cox7b

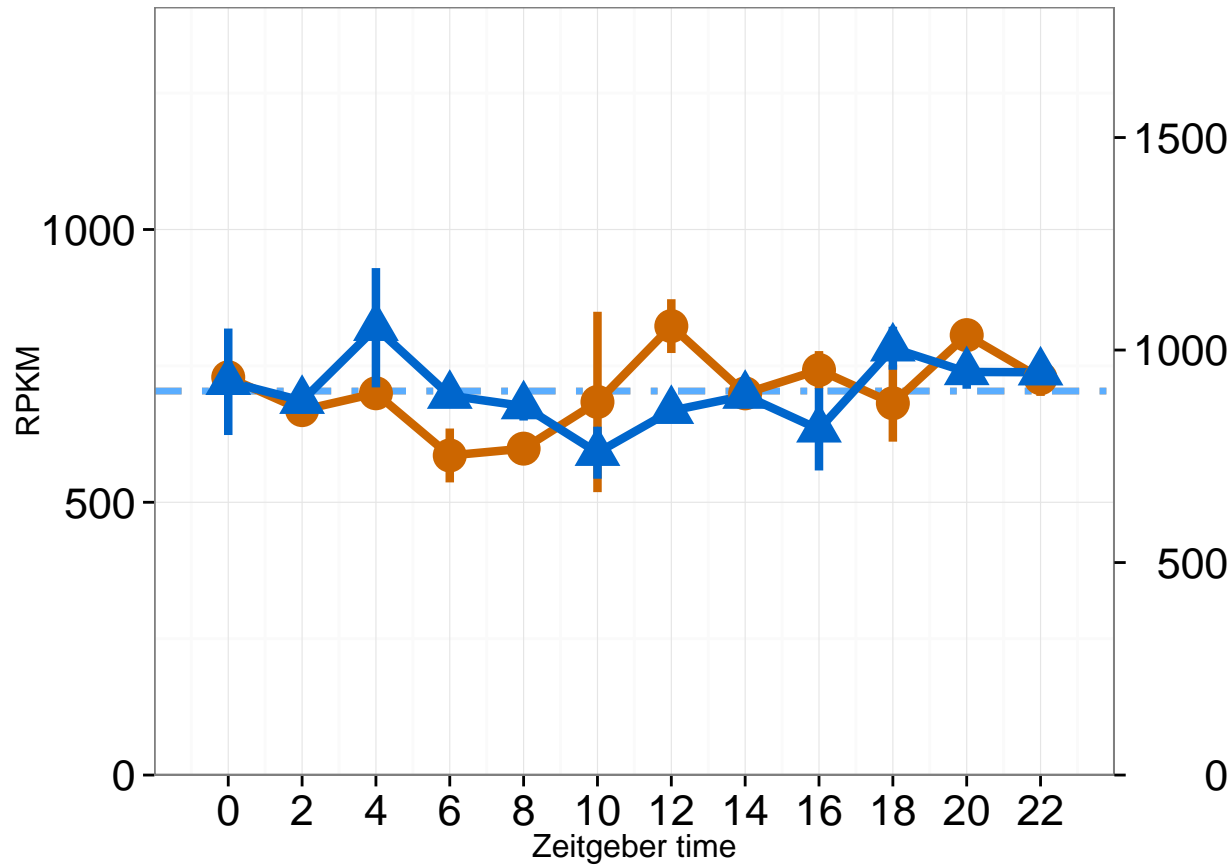

# Cox7b

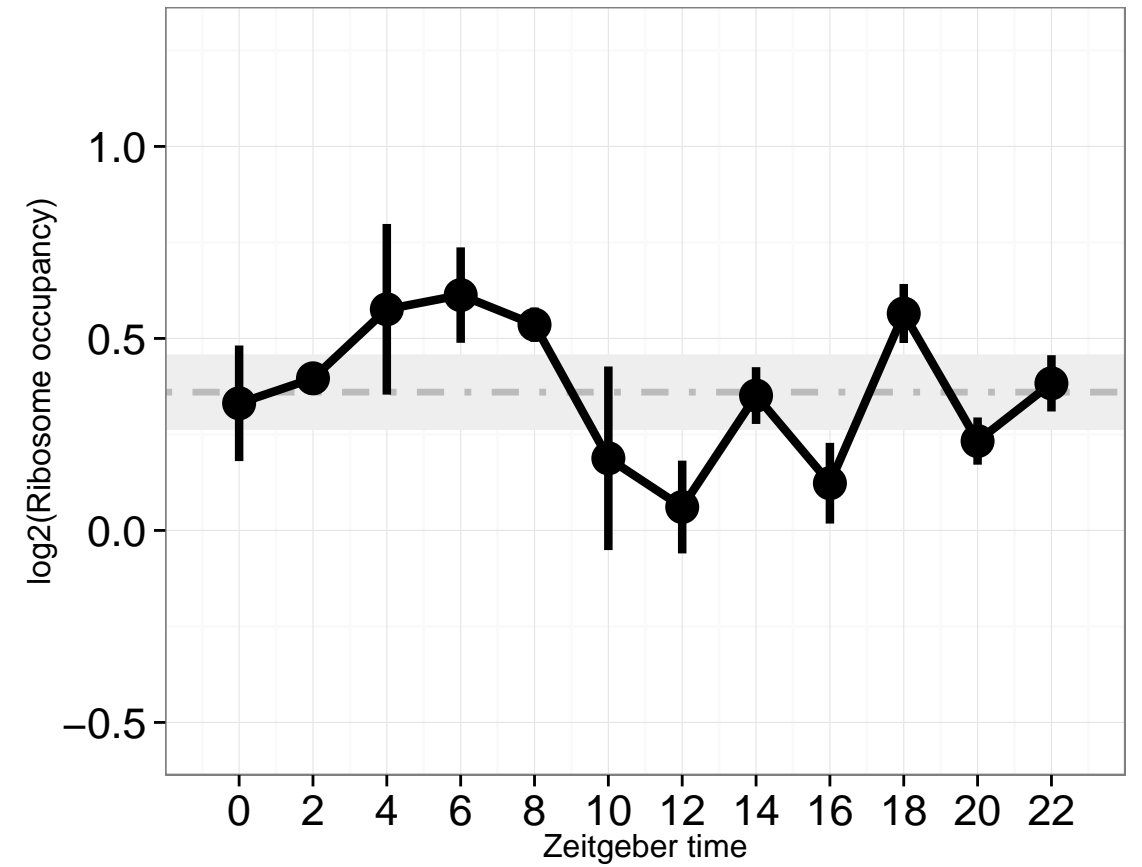

Supplement: Supplementary file 10118 [file 1]

# Trip10

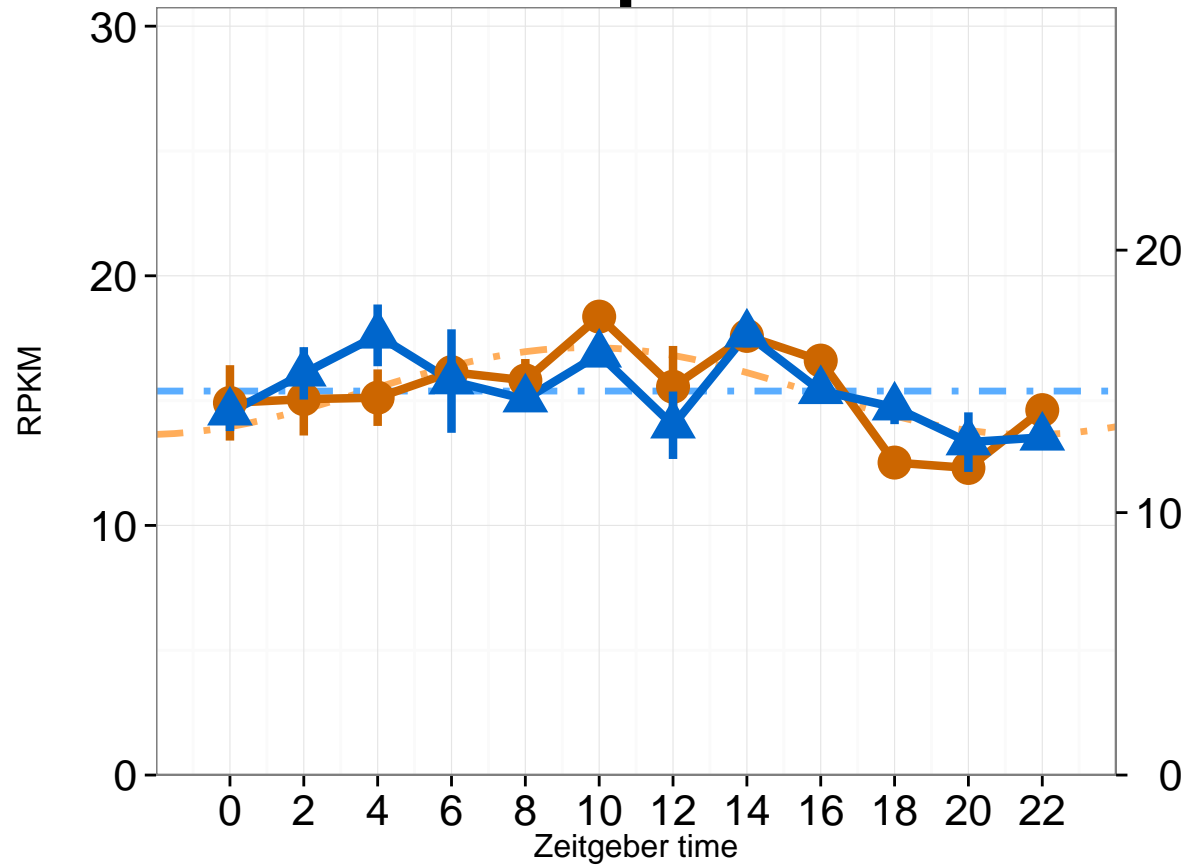

# Trip10

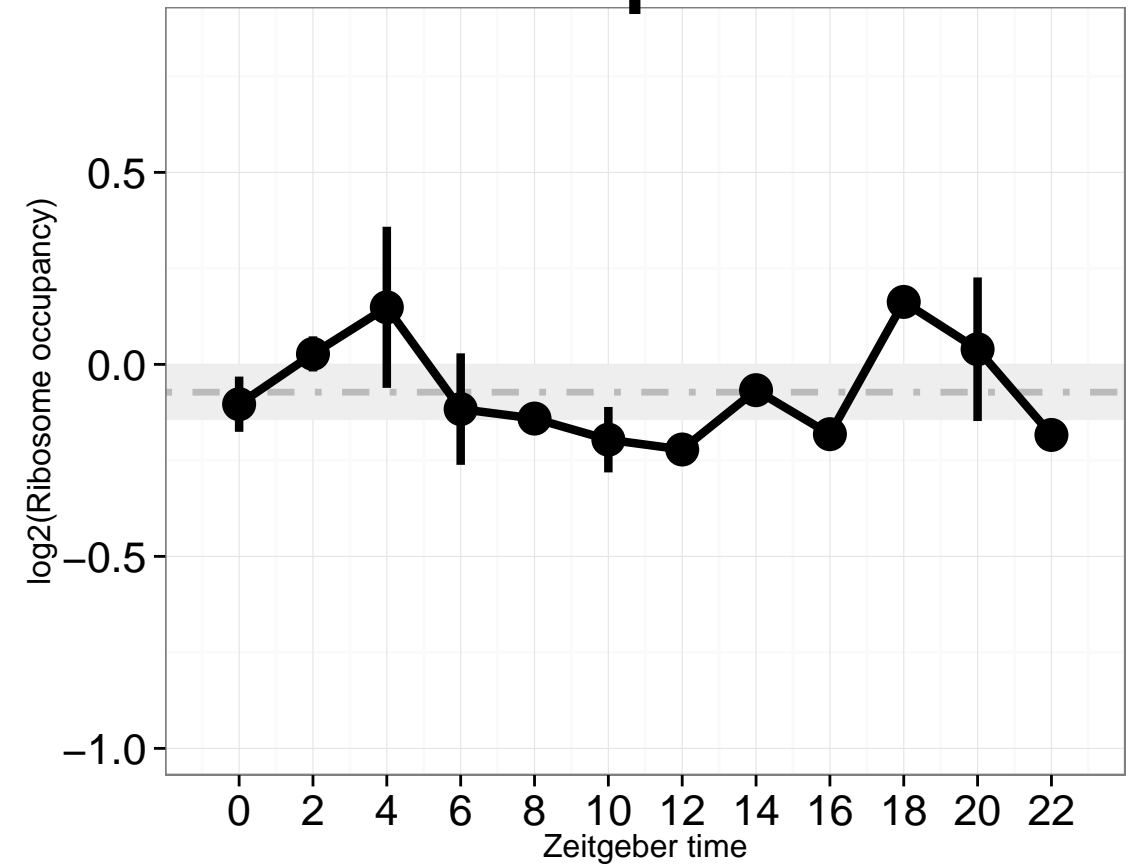

Supplement: Supplementary file 10119 [file 1]

# Rcl1

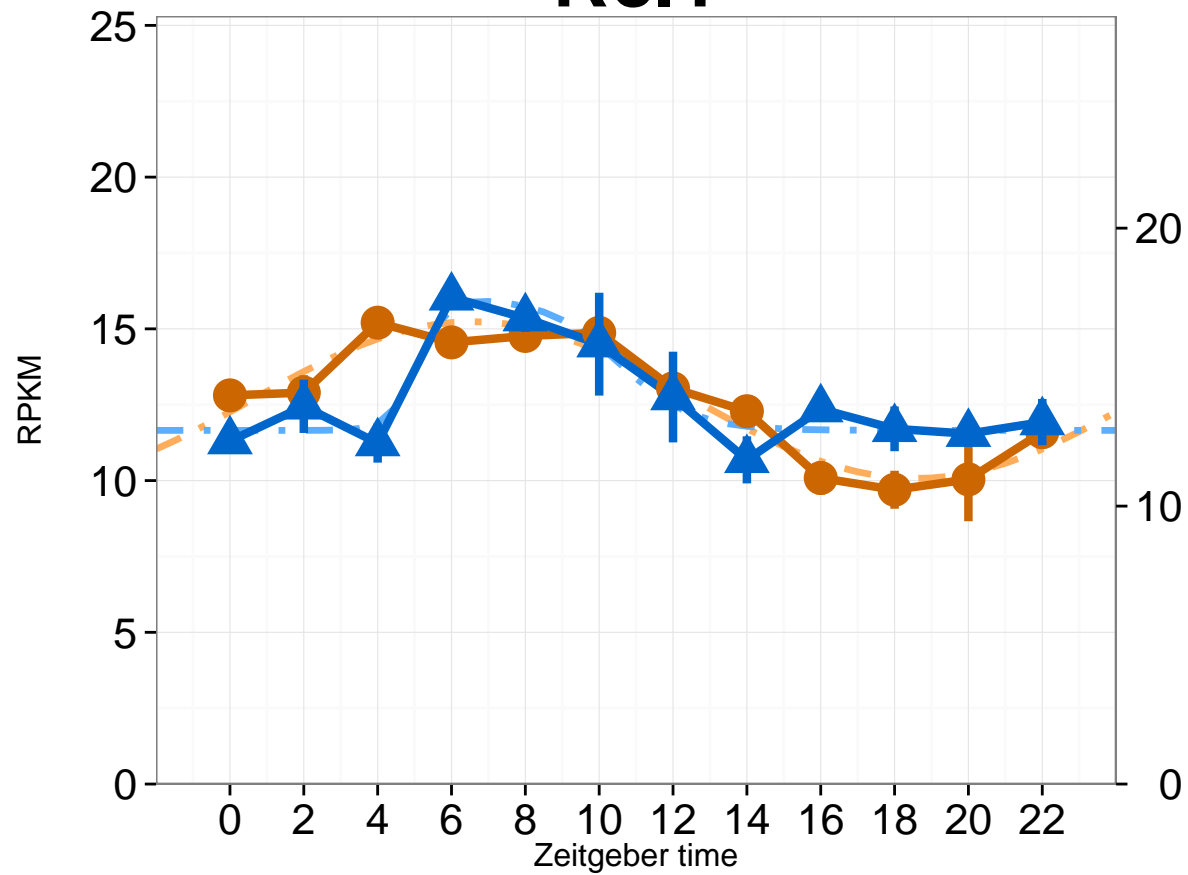

# Rcl1

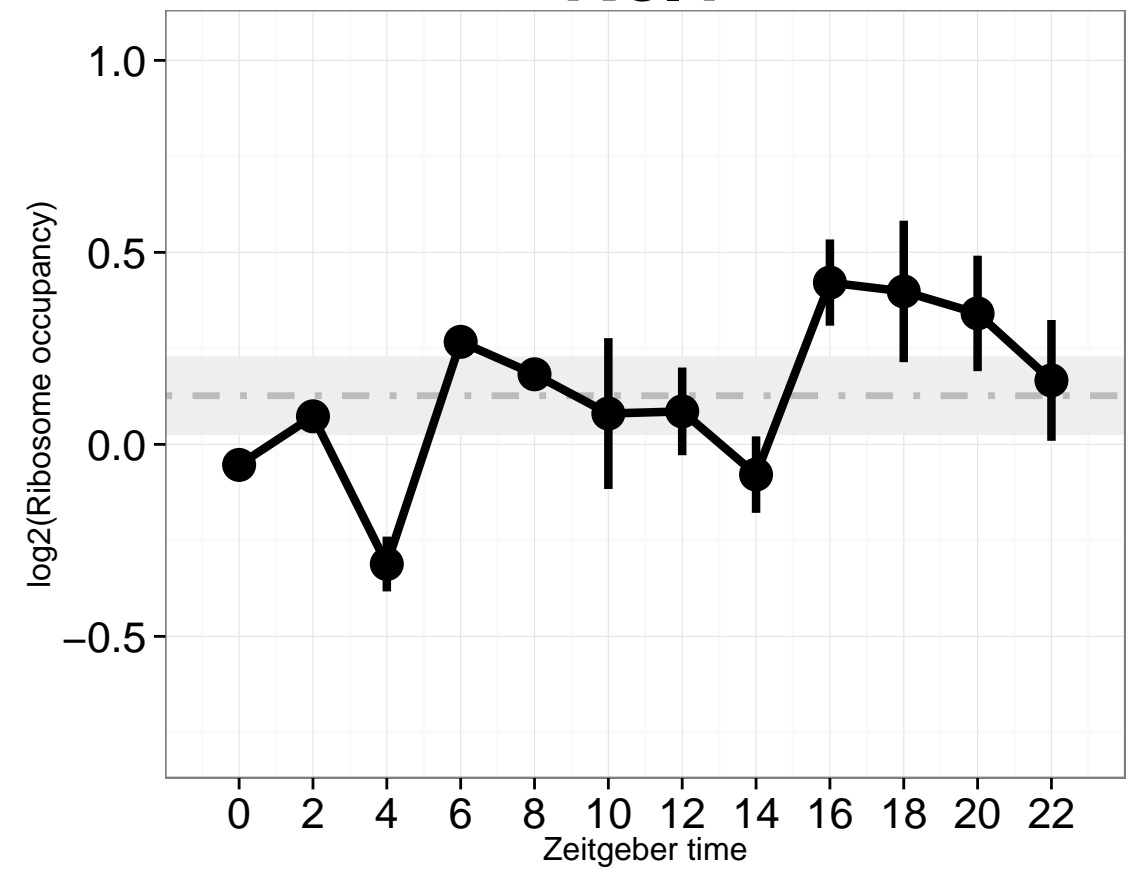

Supplement: Supplementary file 10120 [file 1]

# Cog8

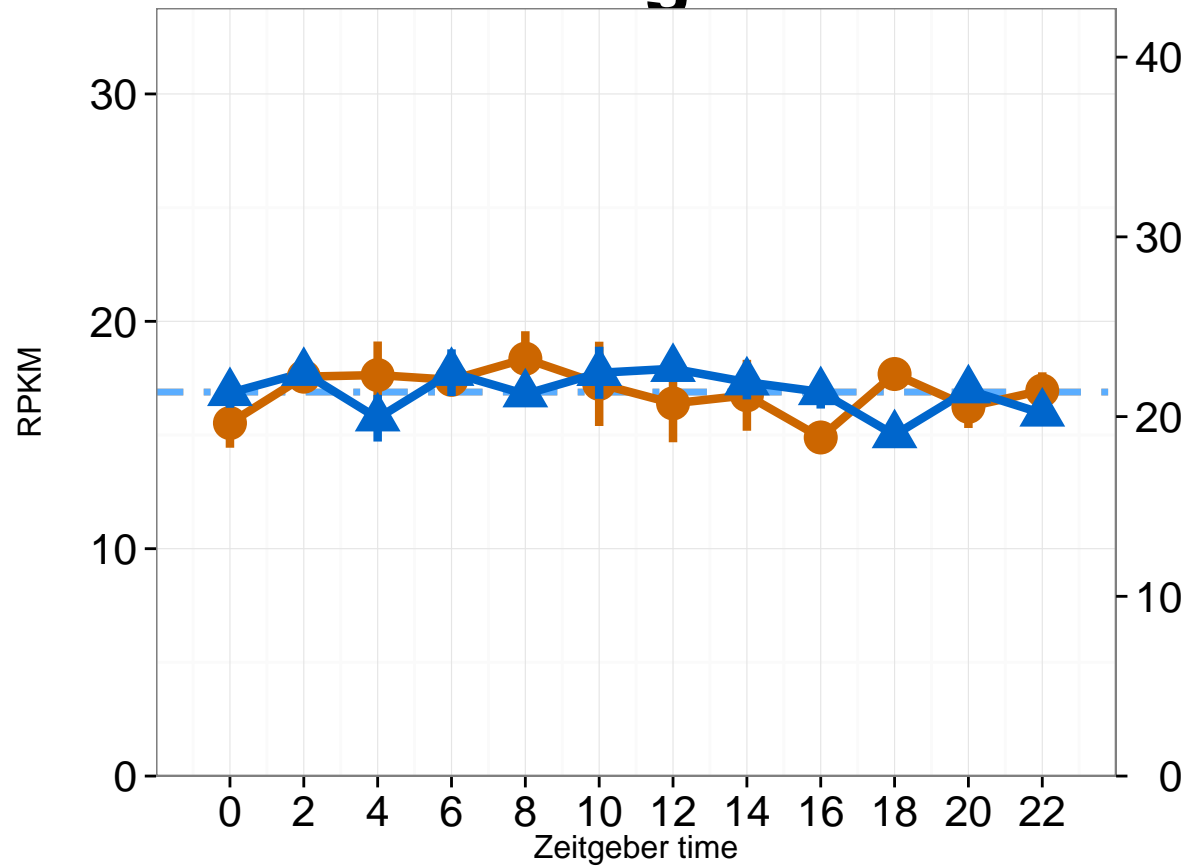

# Cog8

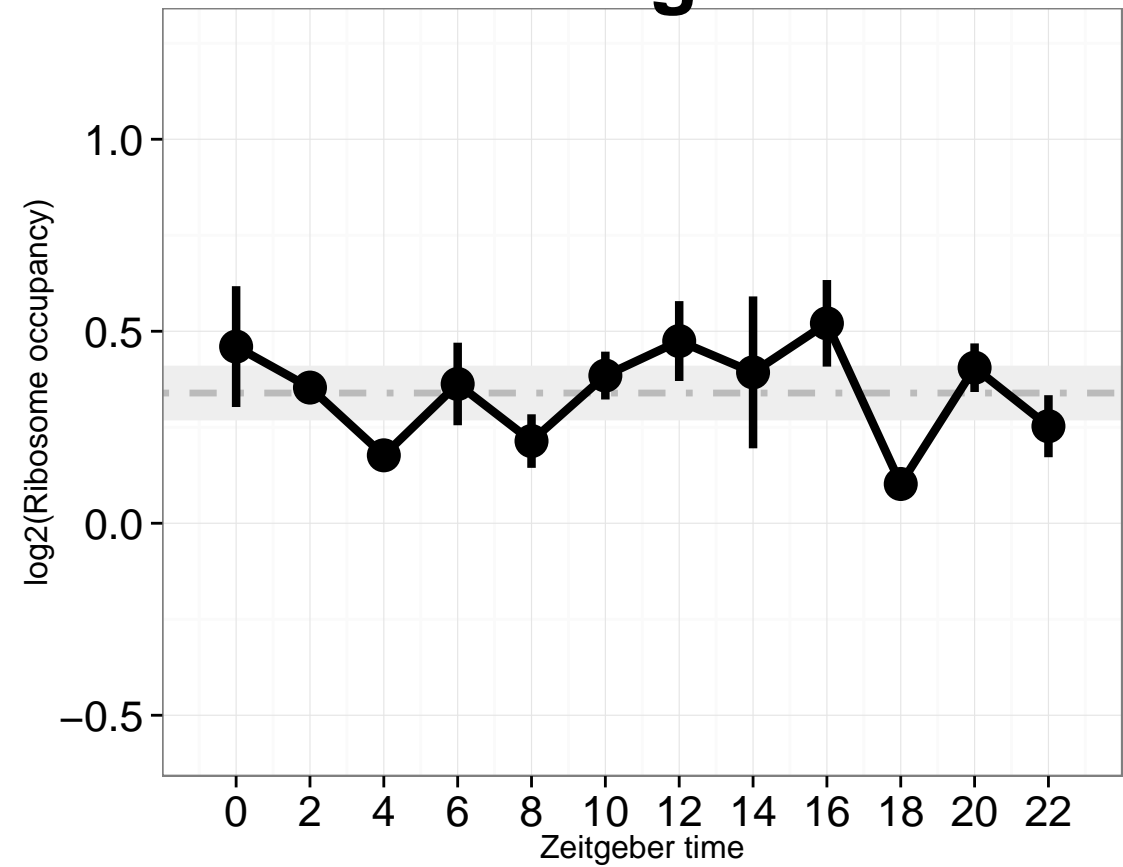

Supplement: Supplementary file 10121 [file 1]

# Mtcp1

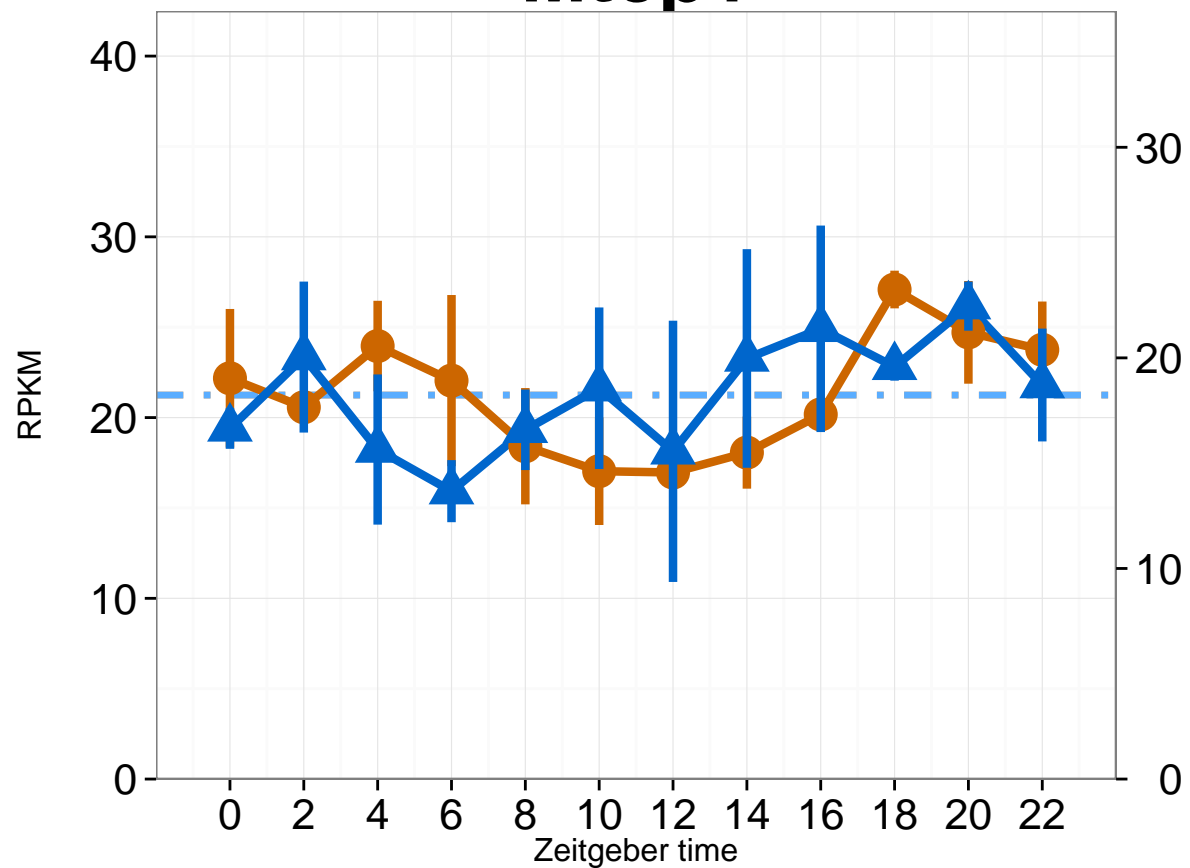

# Mtcp1

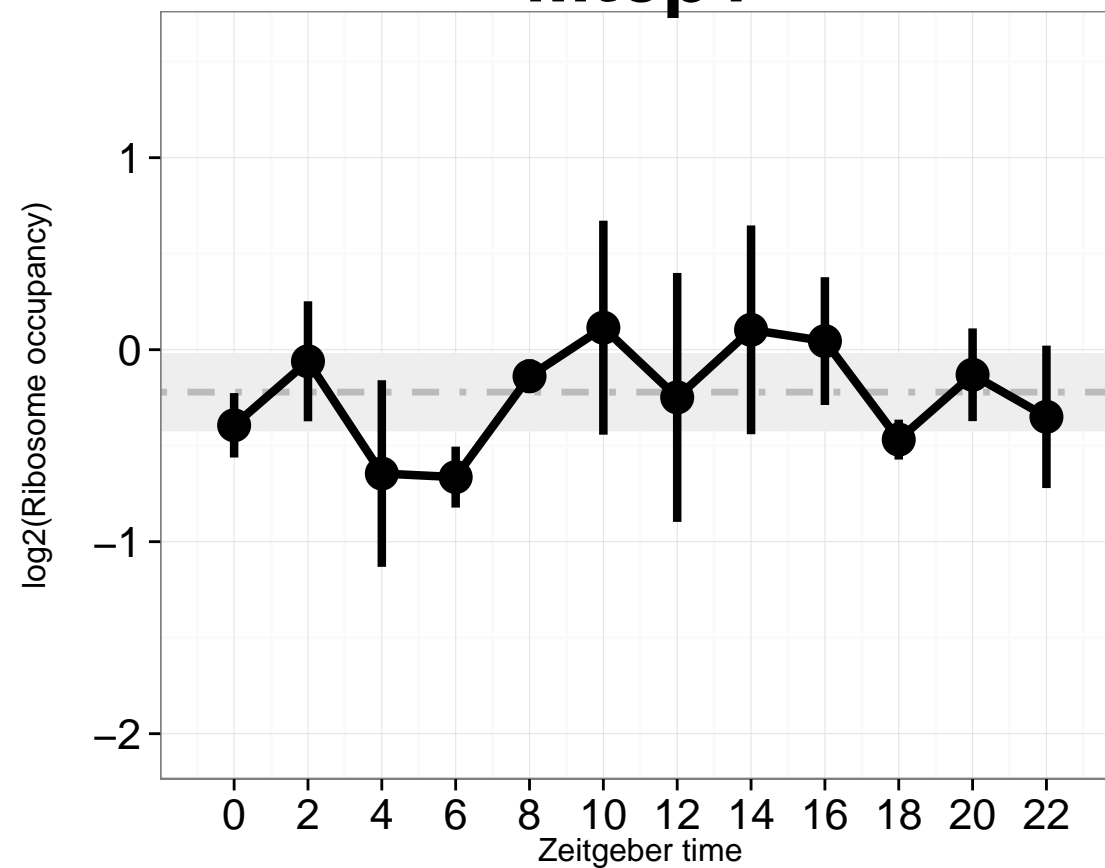

Supplement: Supplementary file 10122 [file 1]

## Ttf2

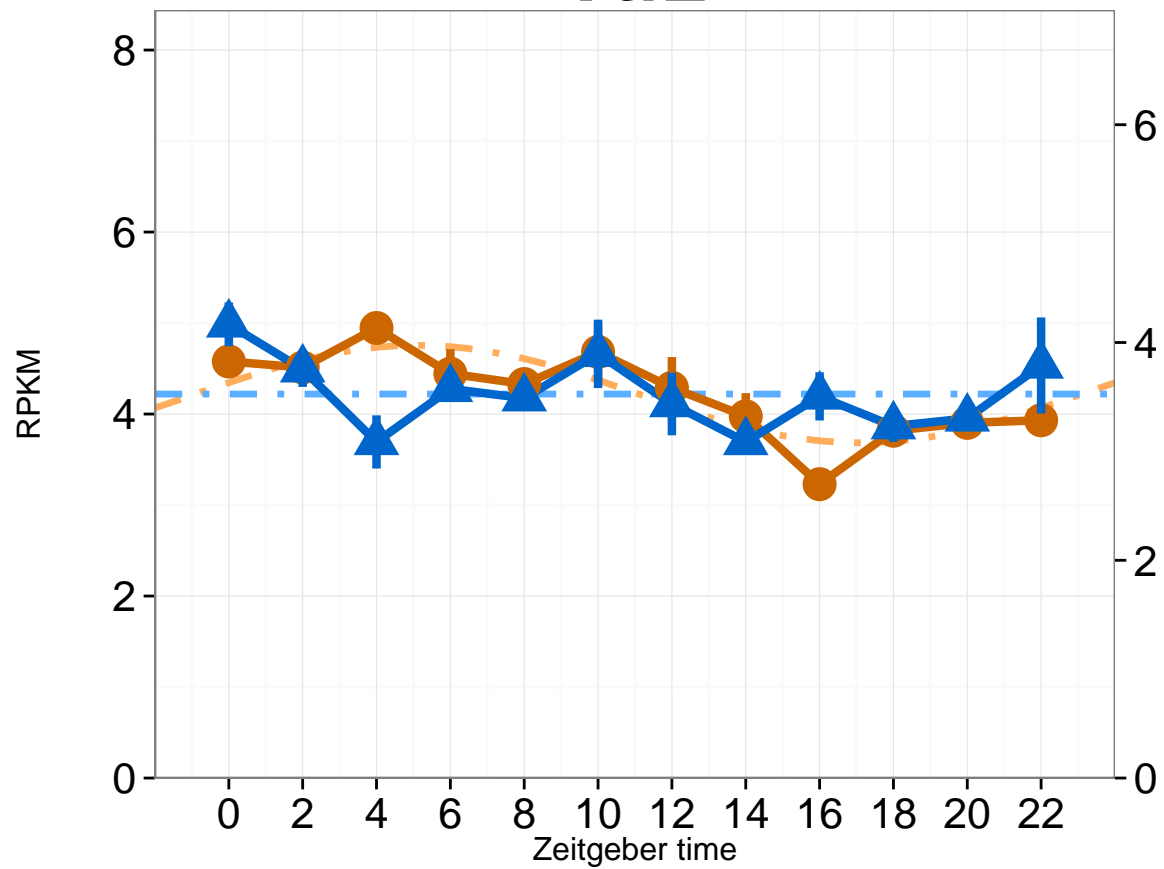

## Ttf2

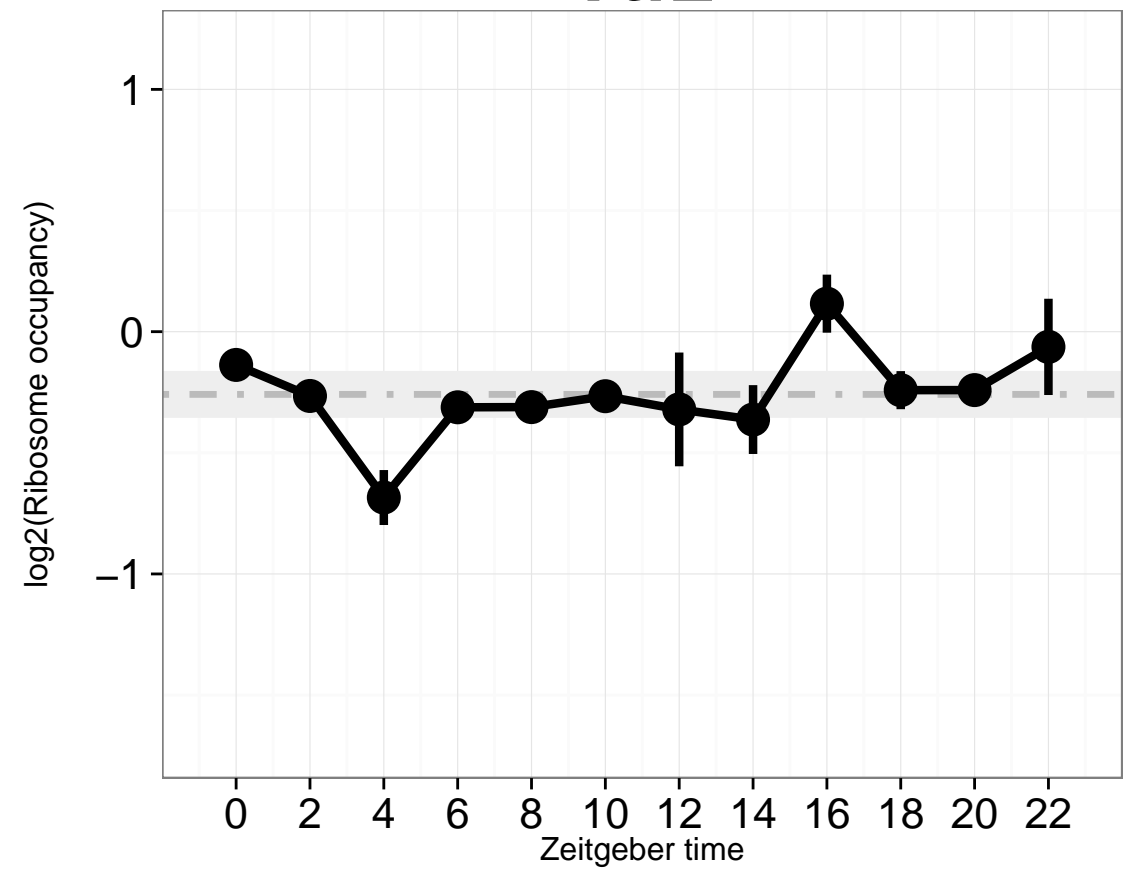

Supplement: Supplementary file 10123 [file 1]

# Stab1

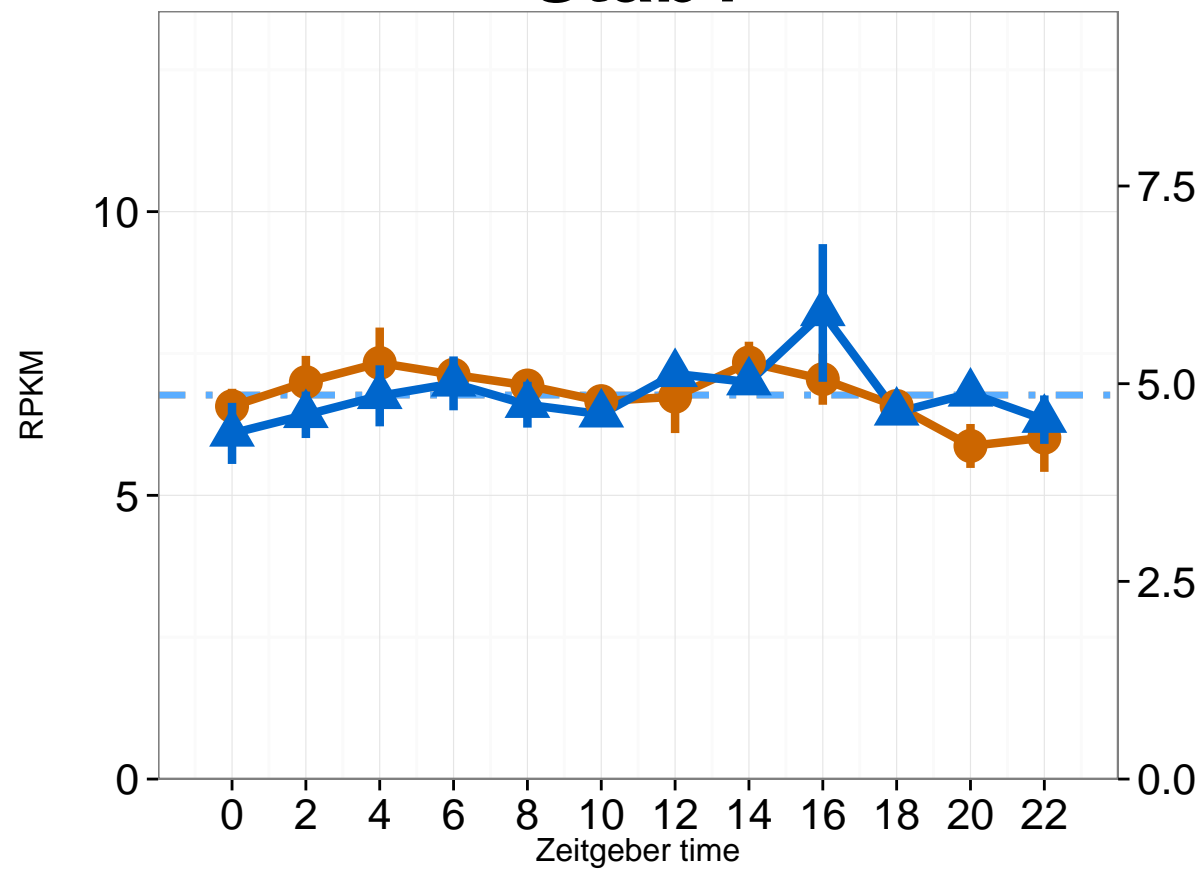

# Stab1

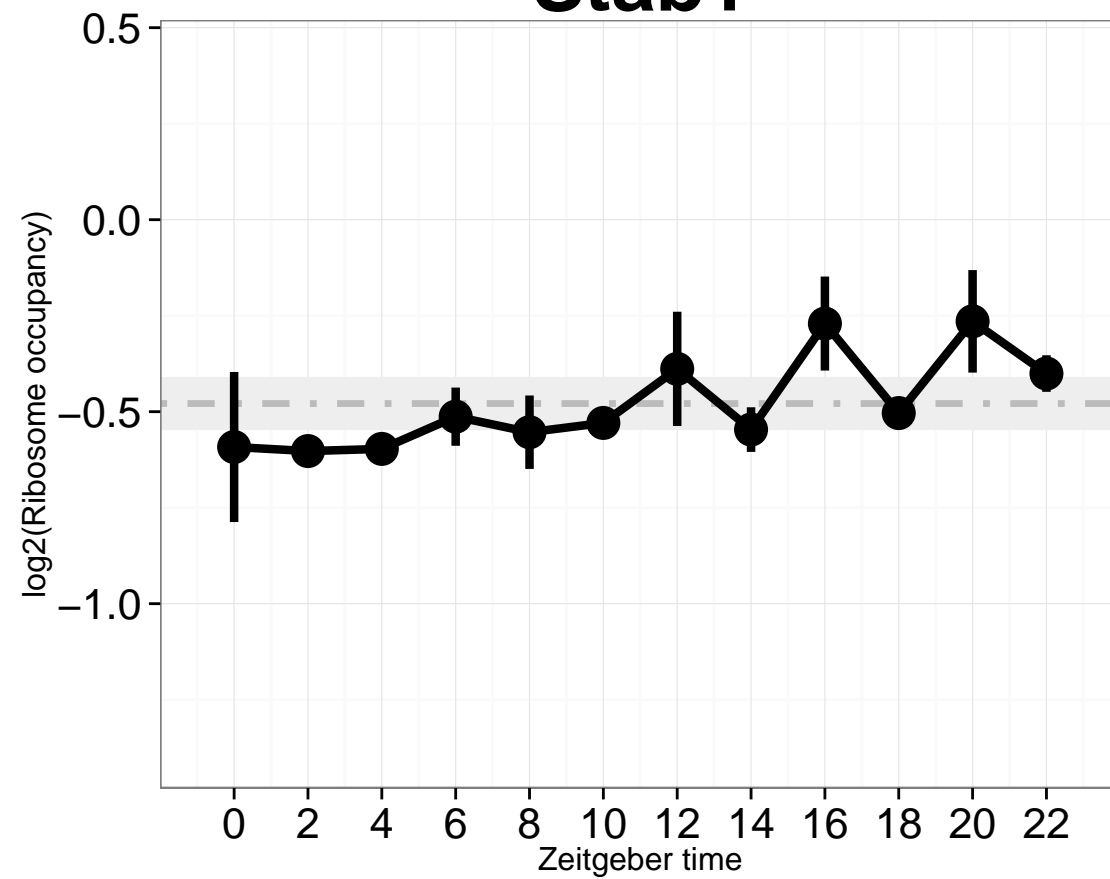

Supplement: Supplementary file 10124 [file 1]

# Slc38a6

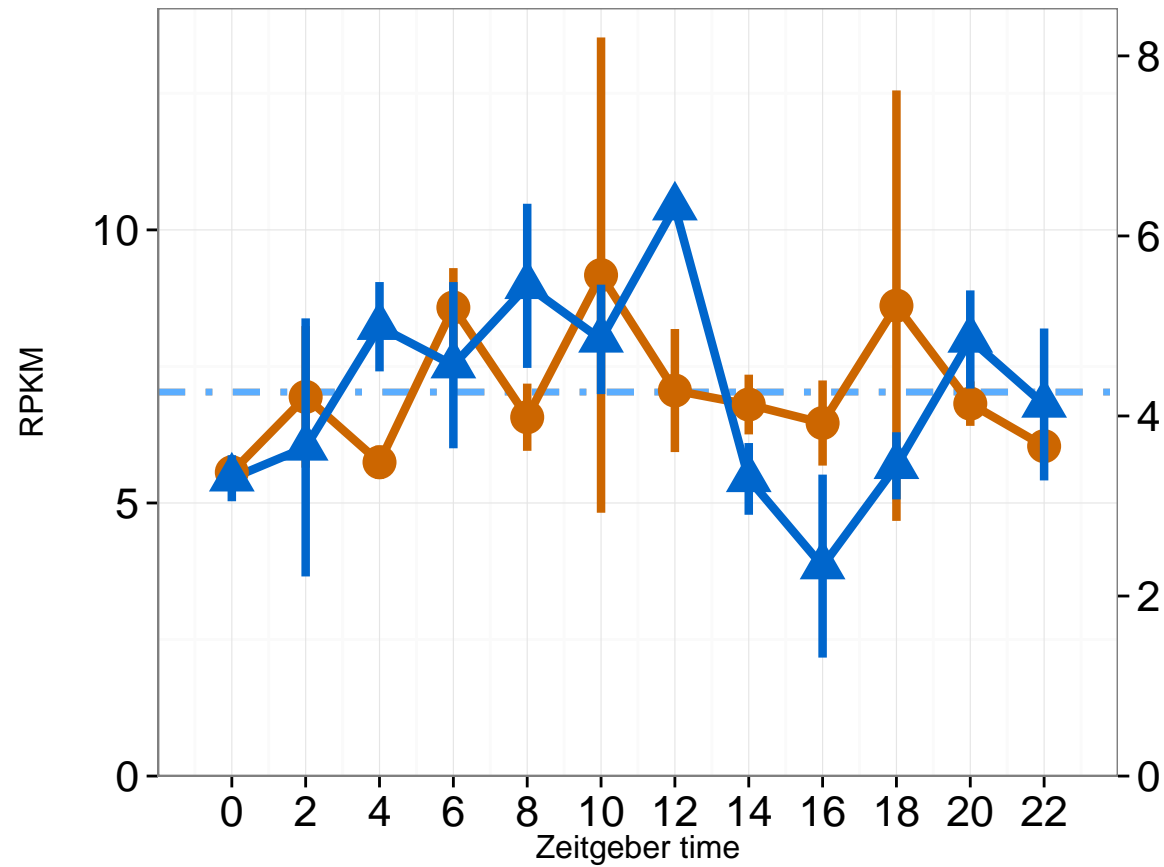

# Slc38a6

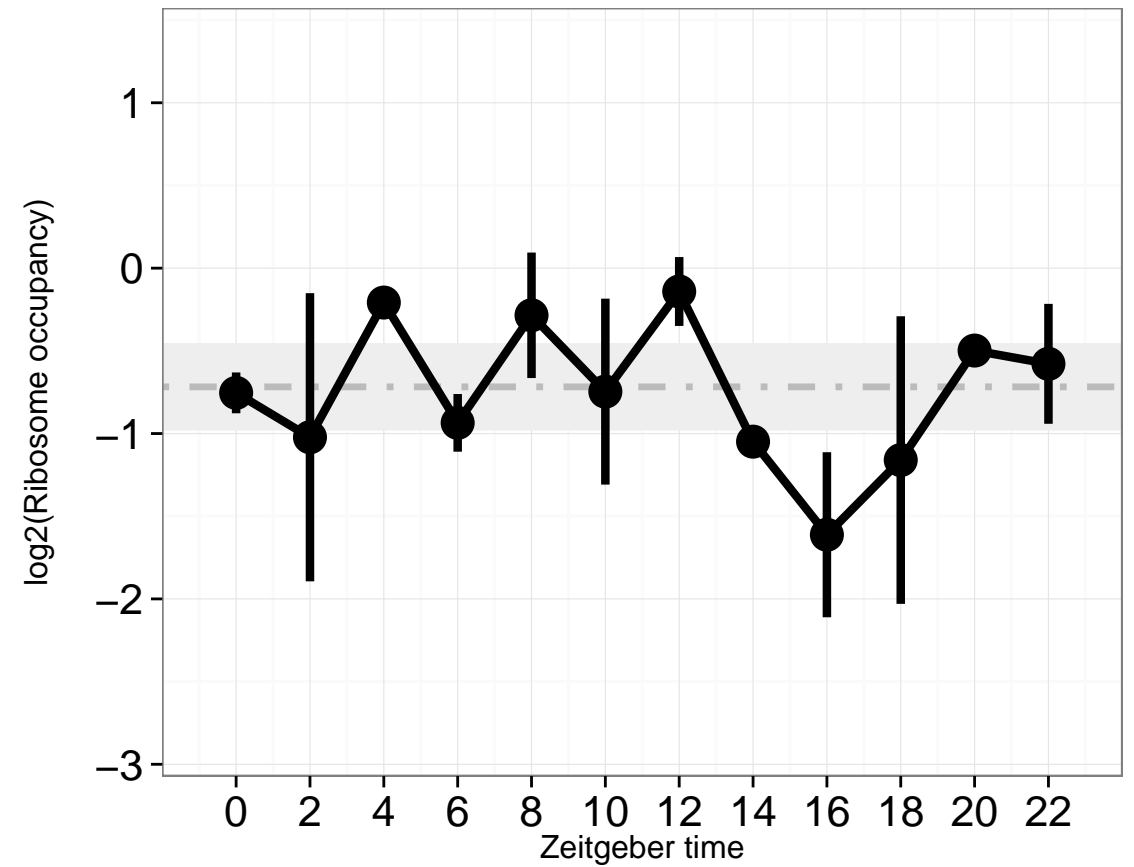

Supplement: Supplementary file 10125 [file 1]

# Kif1a

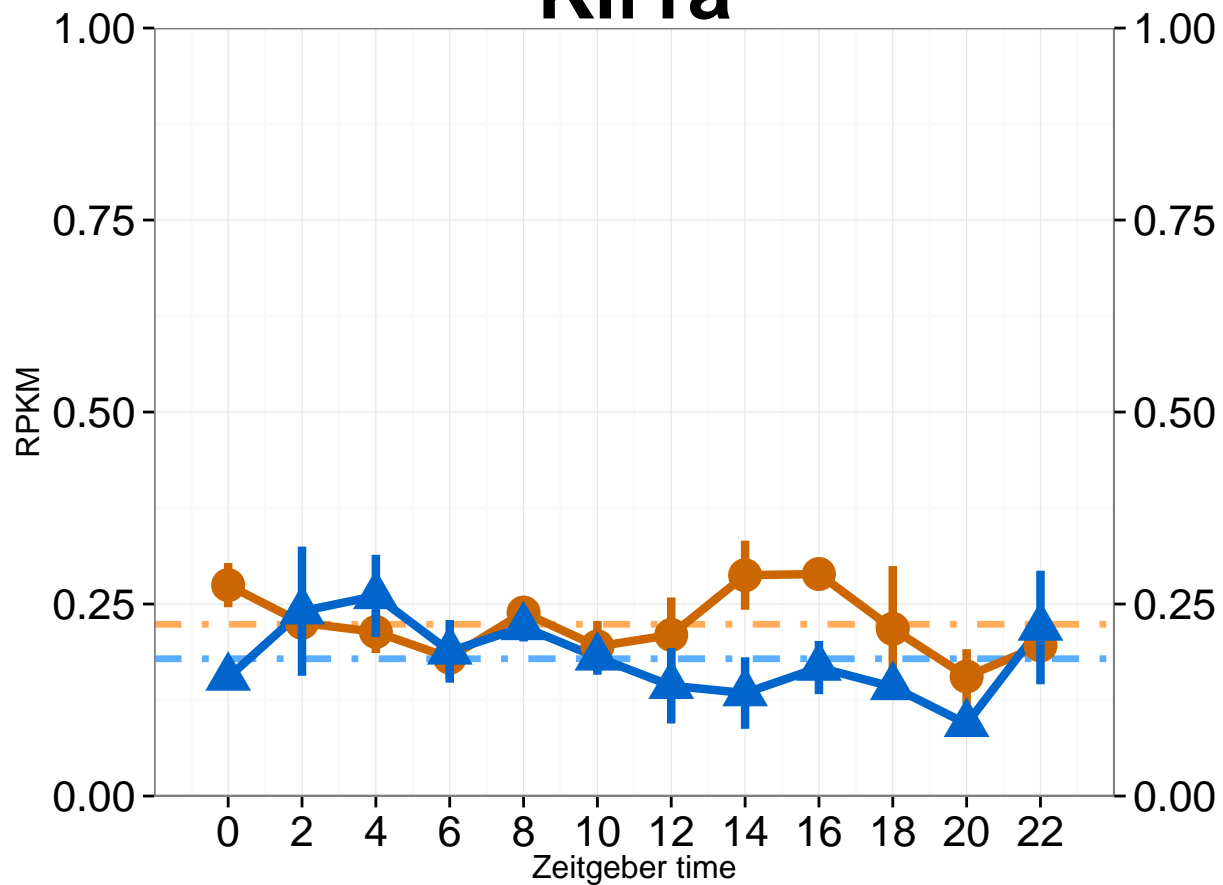

# Kif1a

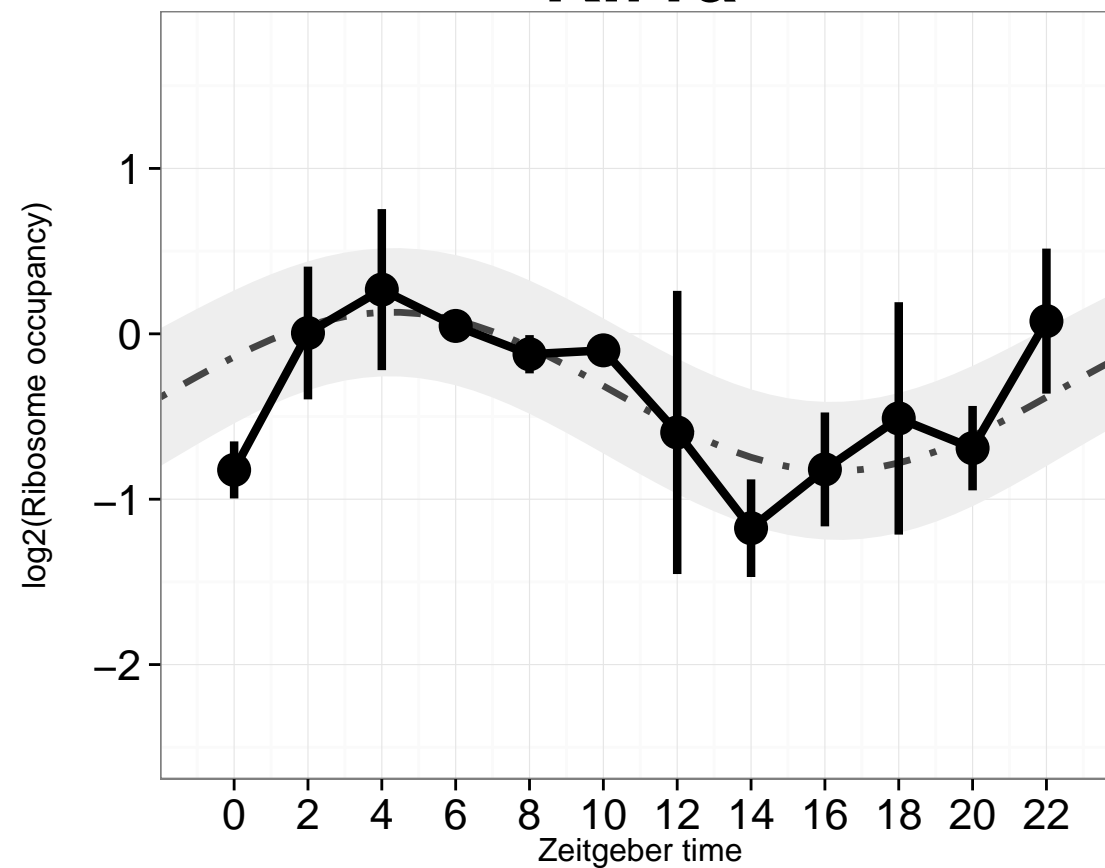

Supplement: Supplementary file 10126 [file 1]

# Cog1

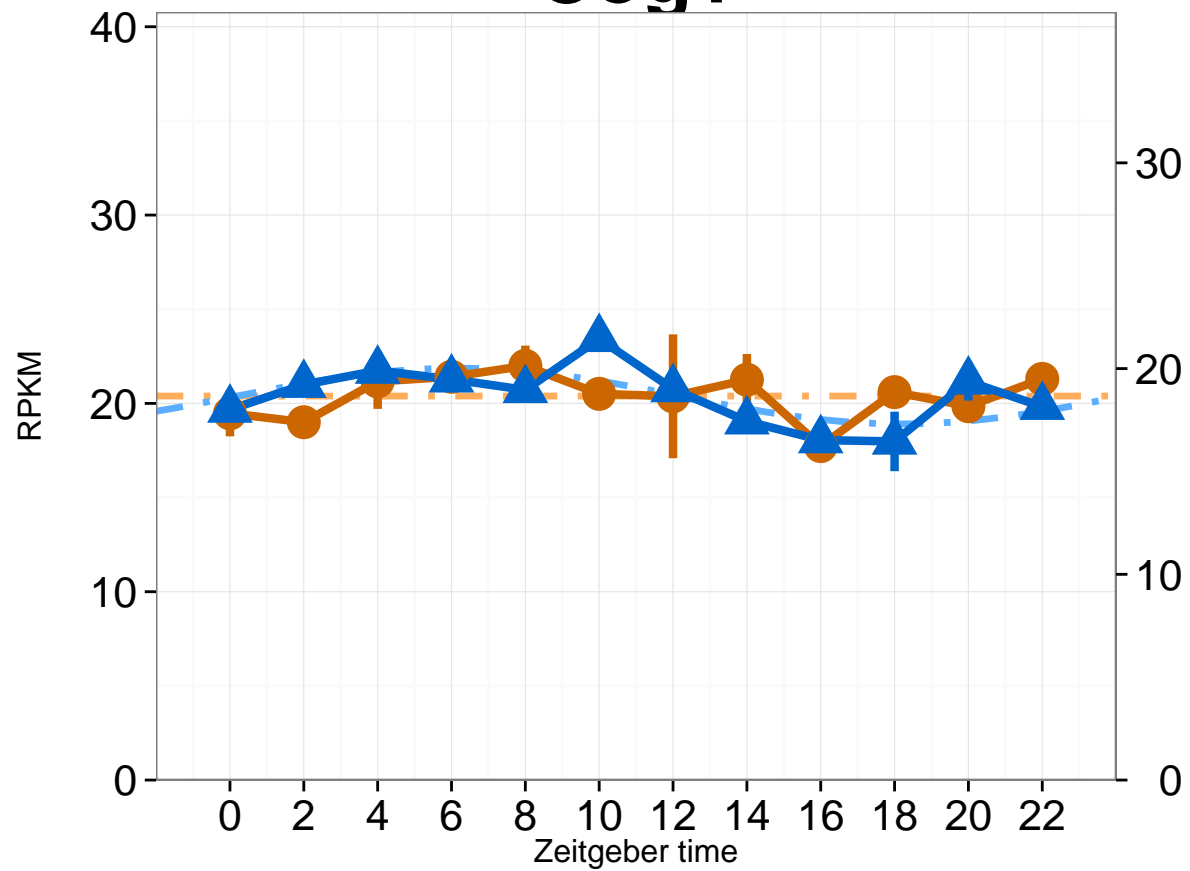

# Cog1

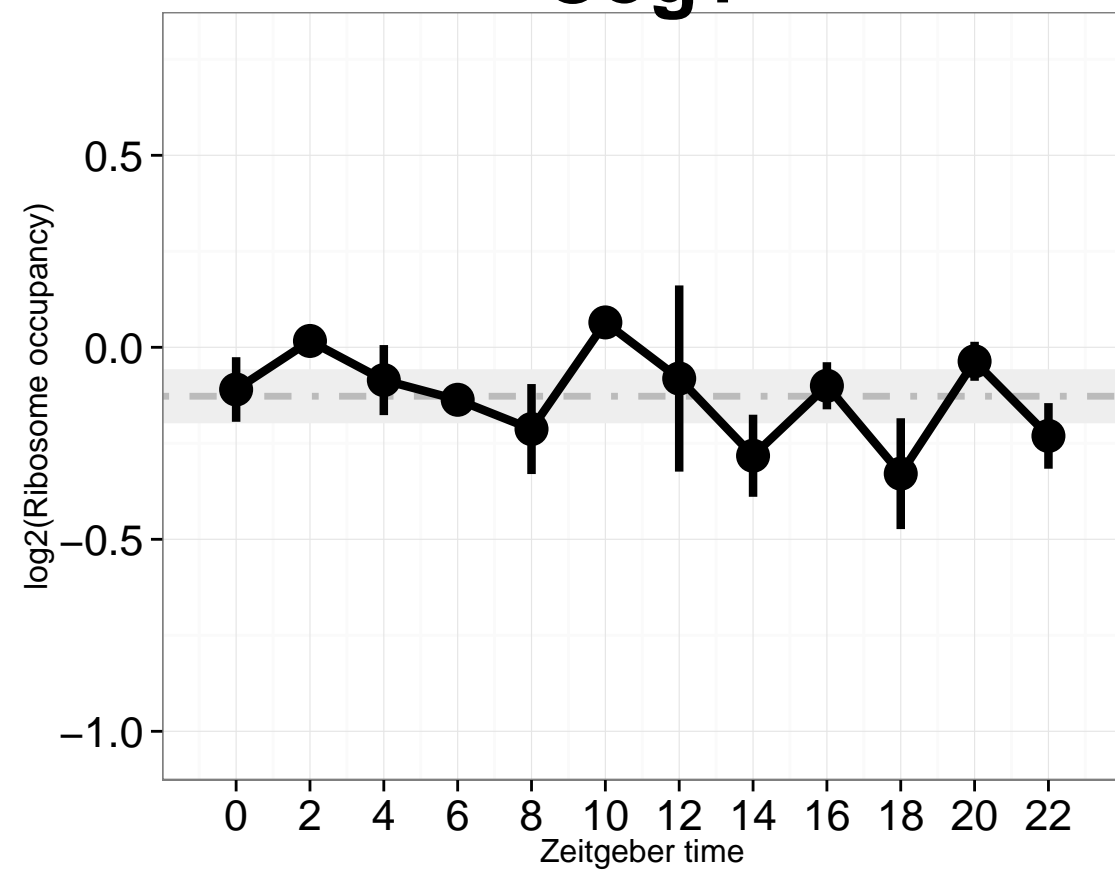

Supplement: Supplementary file 10127 [file 1]

## Kbtbd4

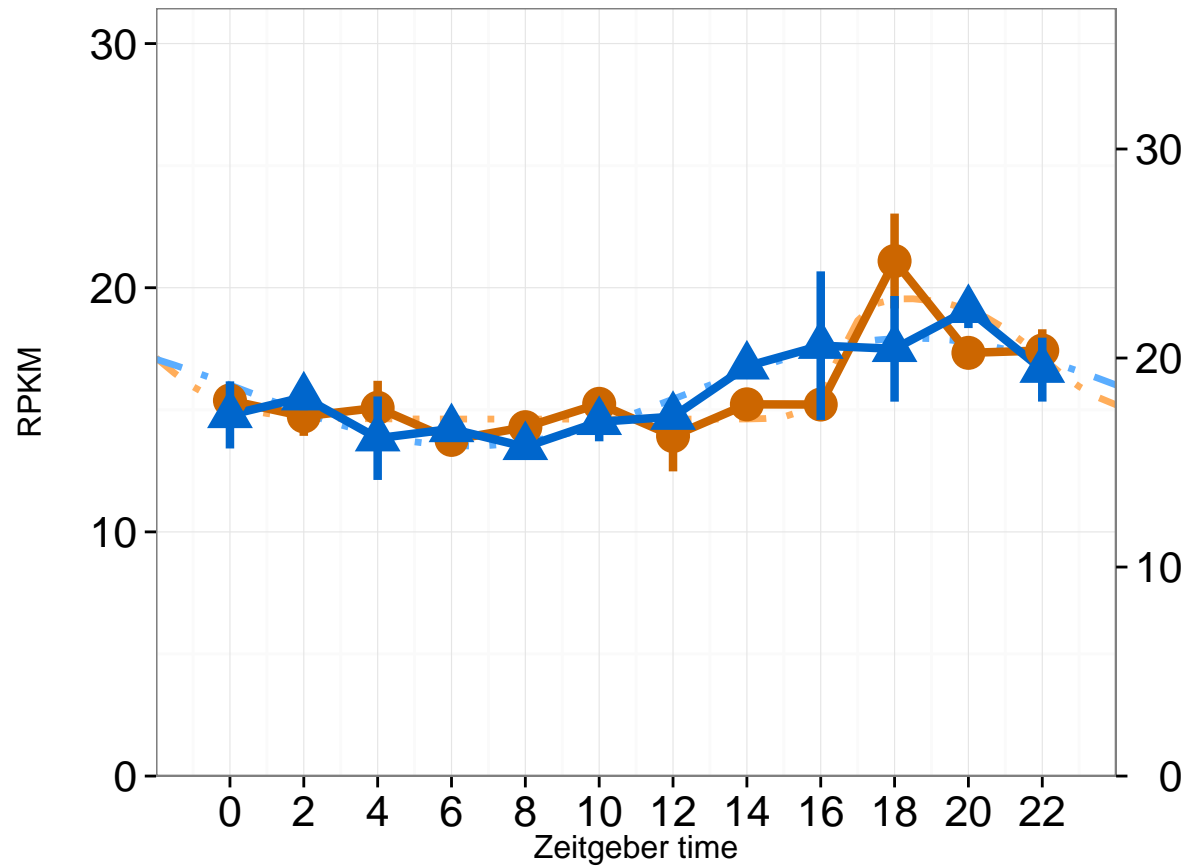

## Kbtbd4

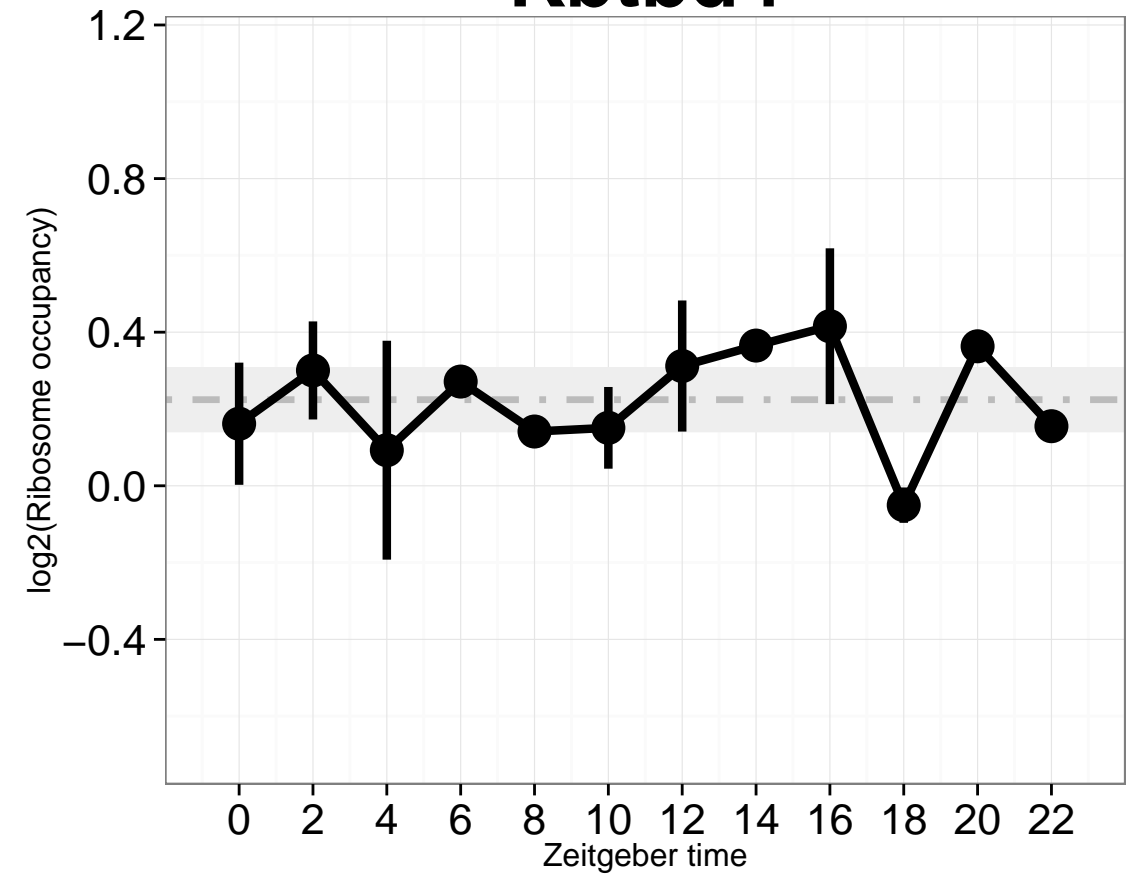

Supplement: Supplementary file 10128 [file 1]

# Lysmd1

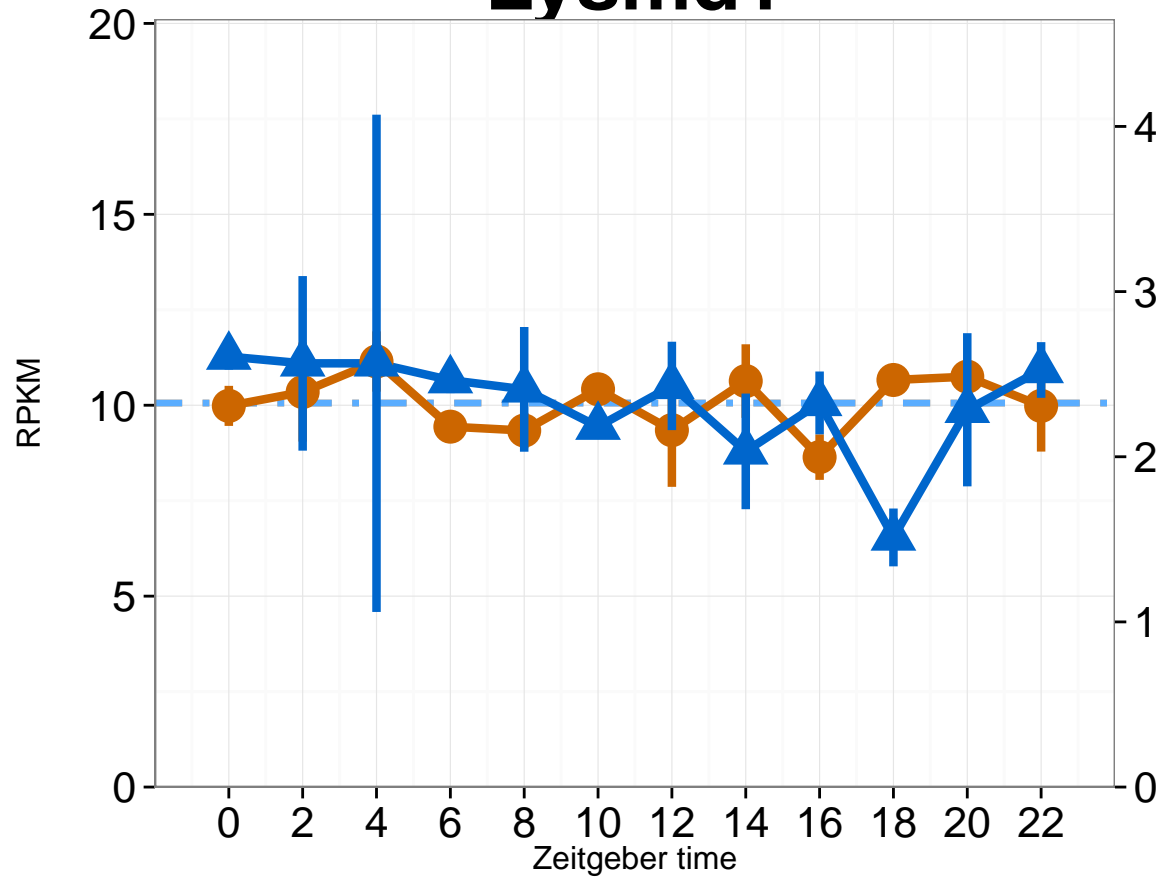

# Lysmd1

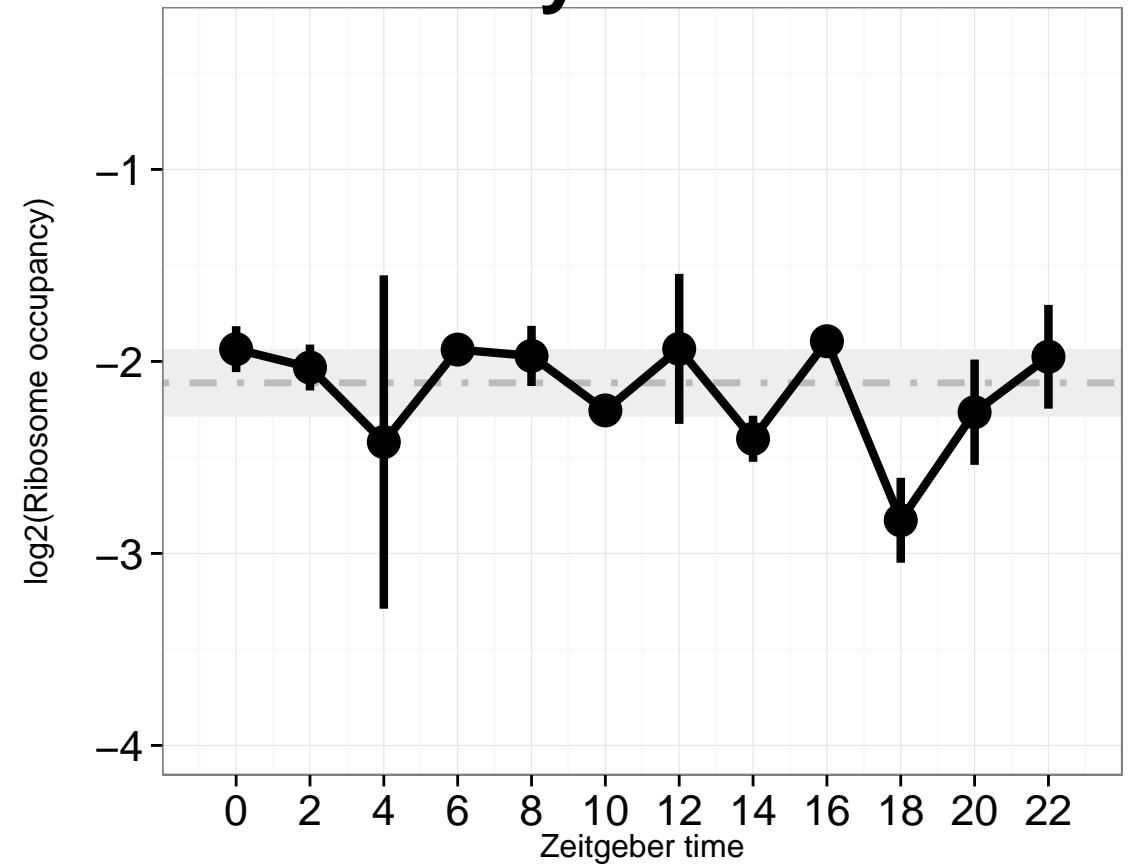

Supplement: Supplementary file 10129 [file 1]

# Tspan13

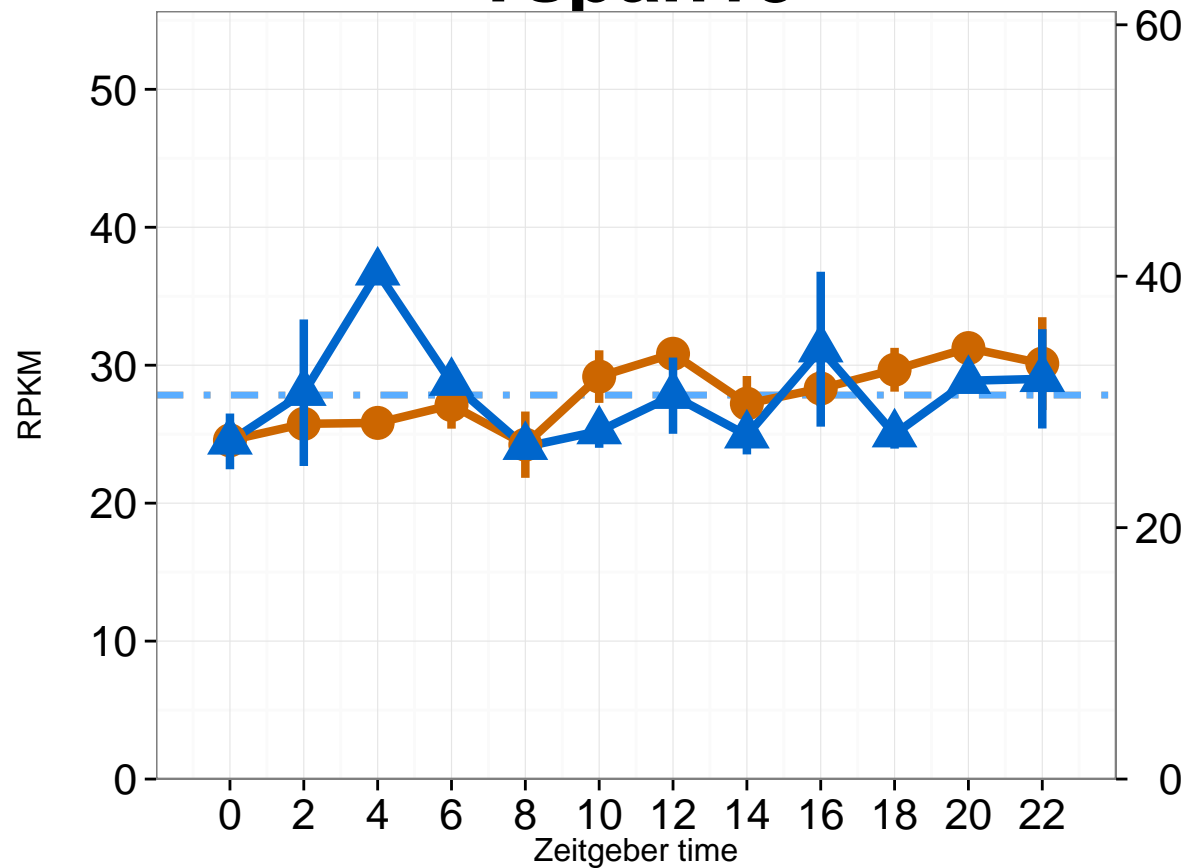

# Tspan13

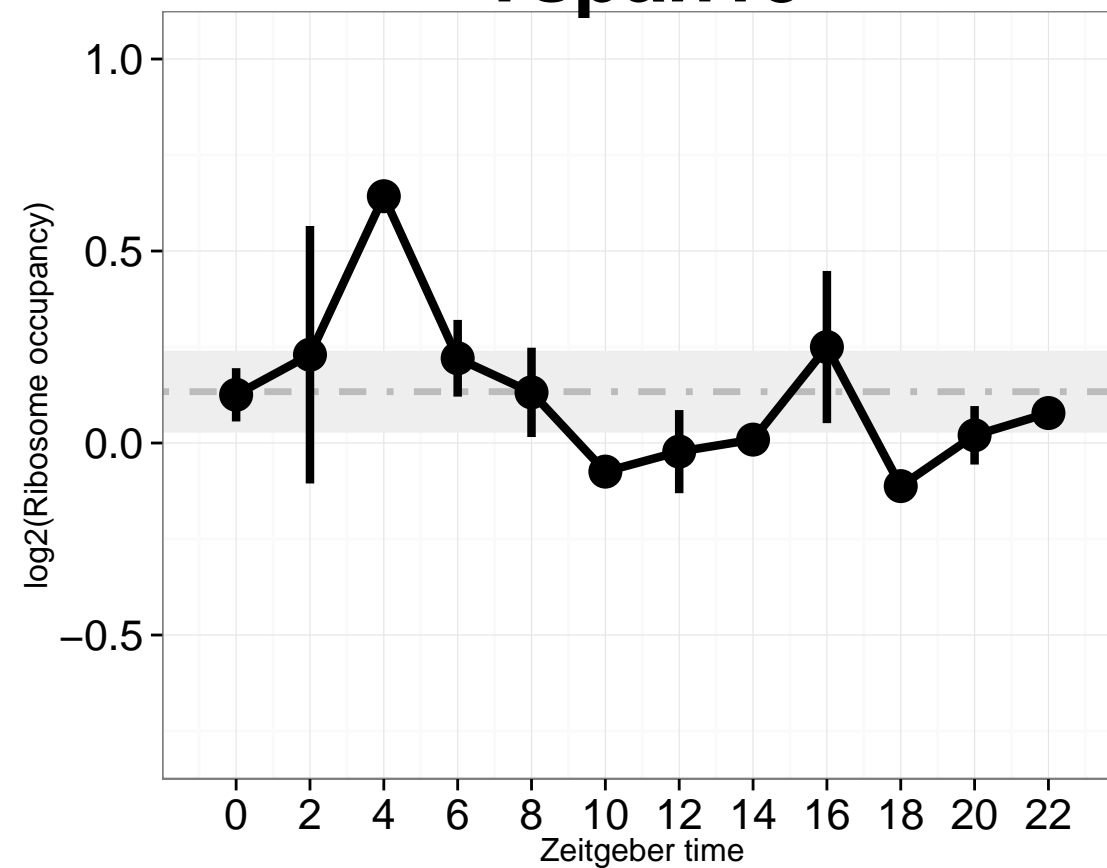

Supplement: Supplementary file 10130 [file 1]

# Cxcr6

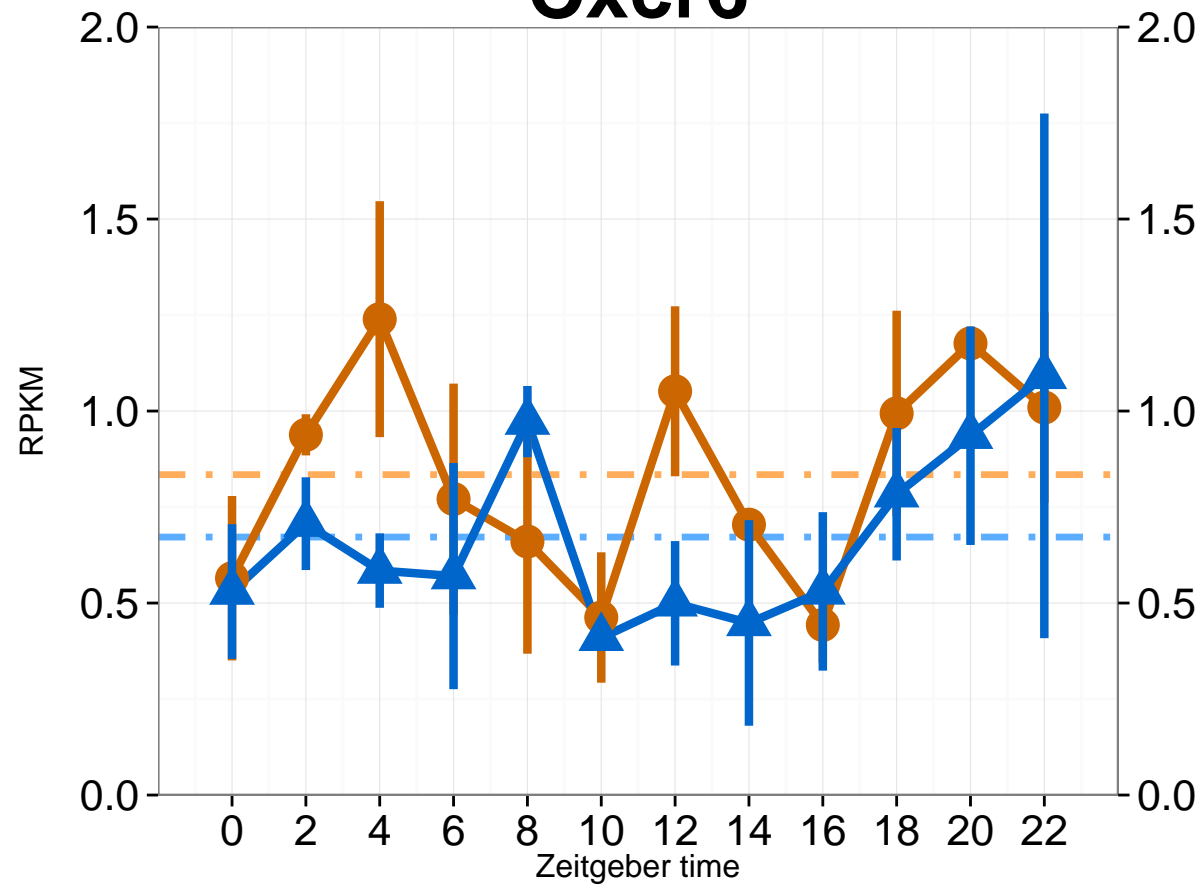

# Cxcr6

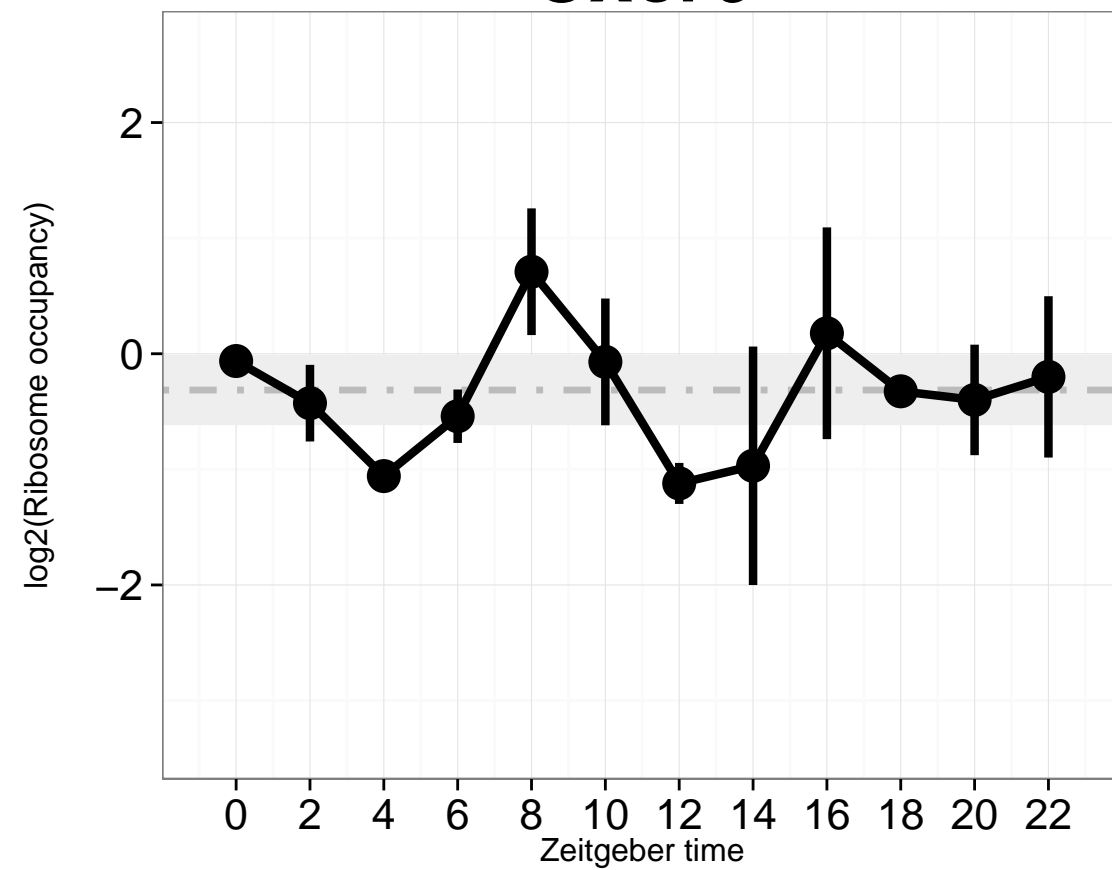

Supplement: Supplementary file 10131 [file 1]

## Phf2

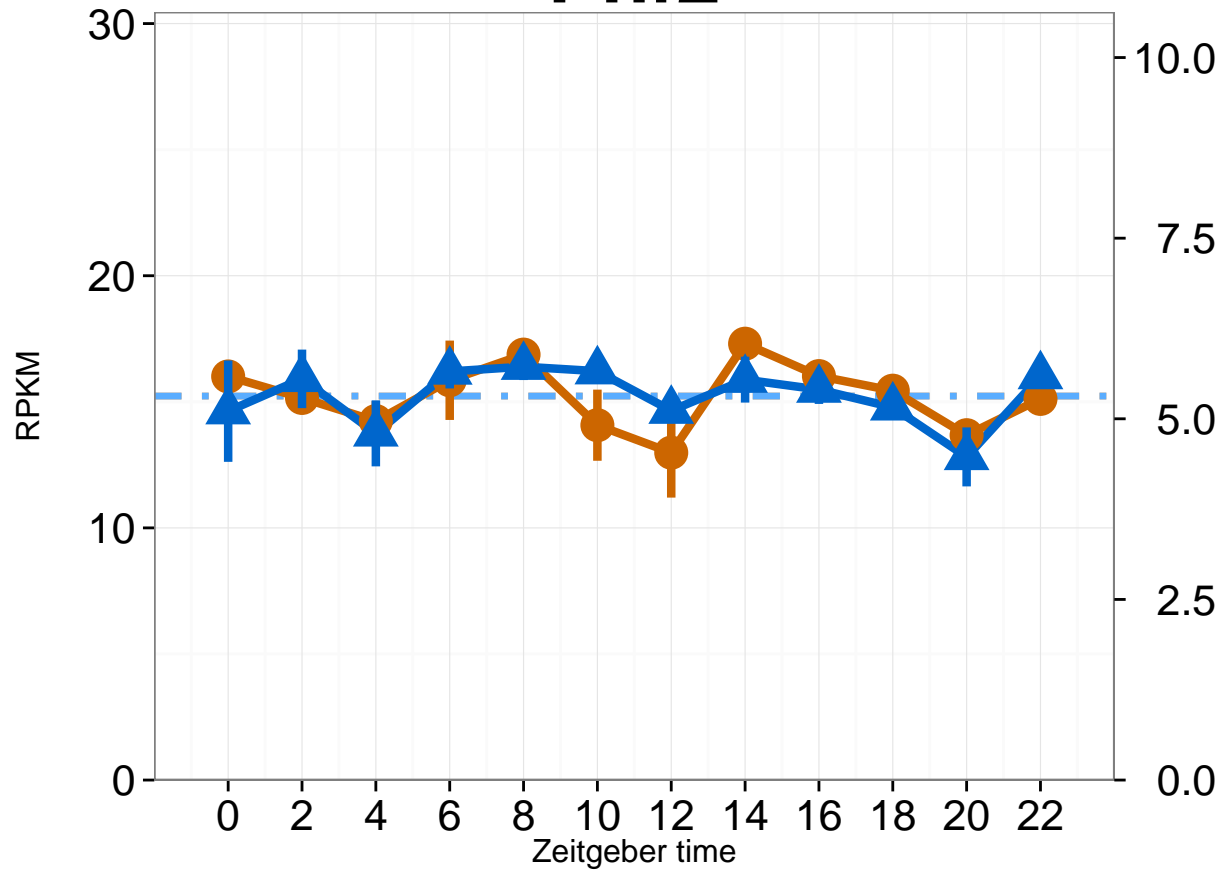

## Phf2

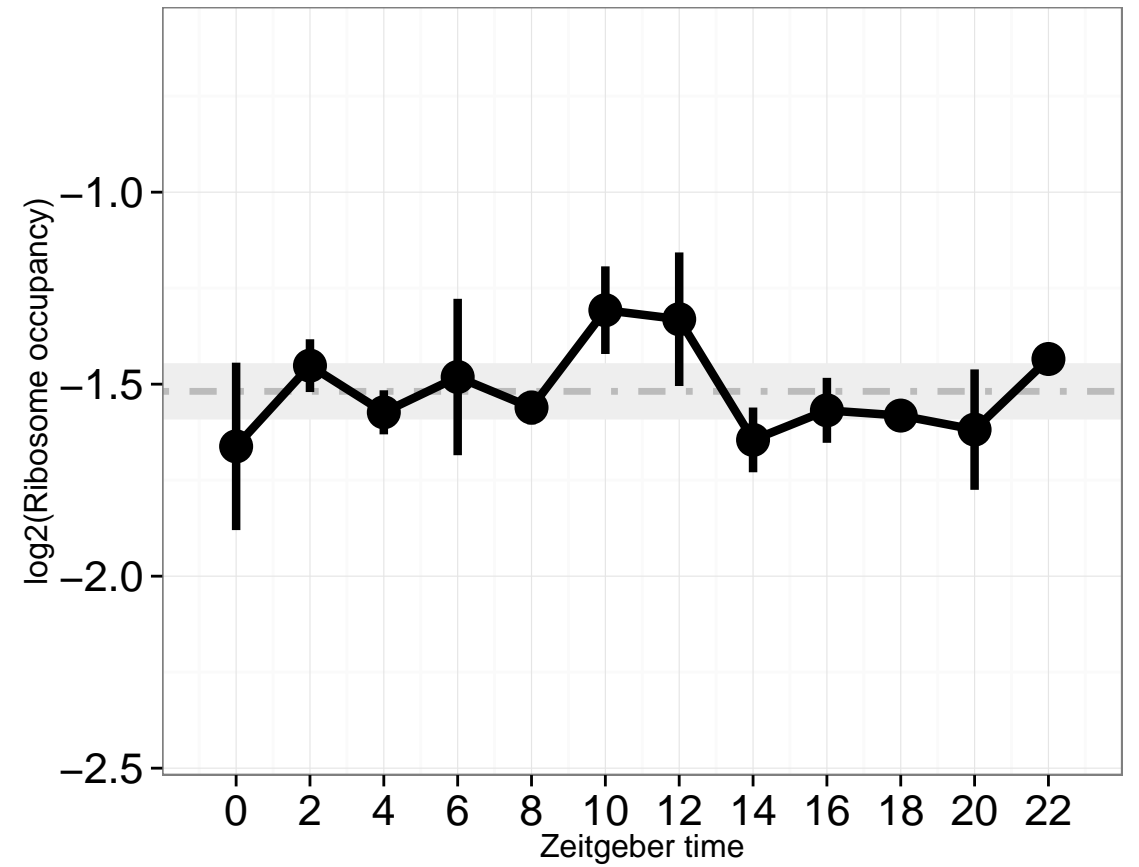

Supplement: Supplementary file 10132 [file 1]

# Samd4b

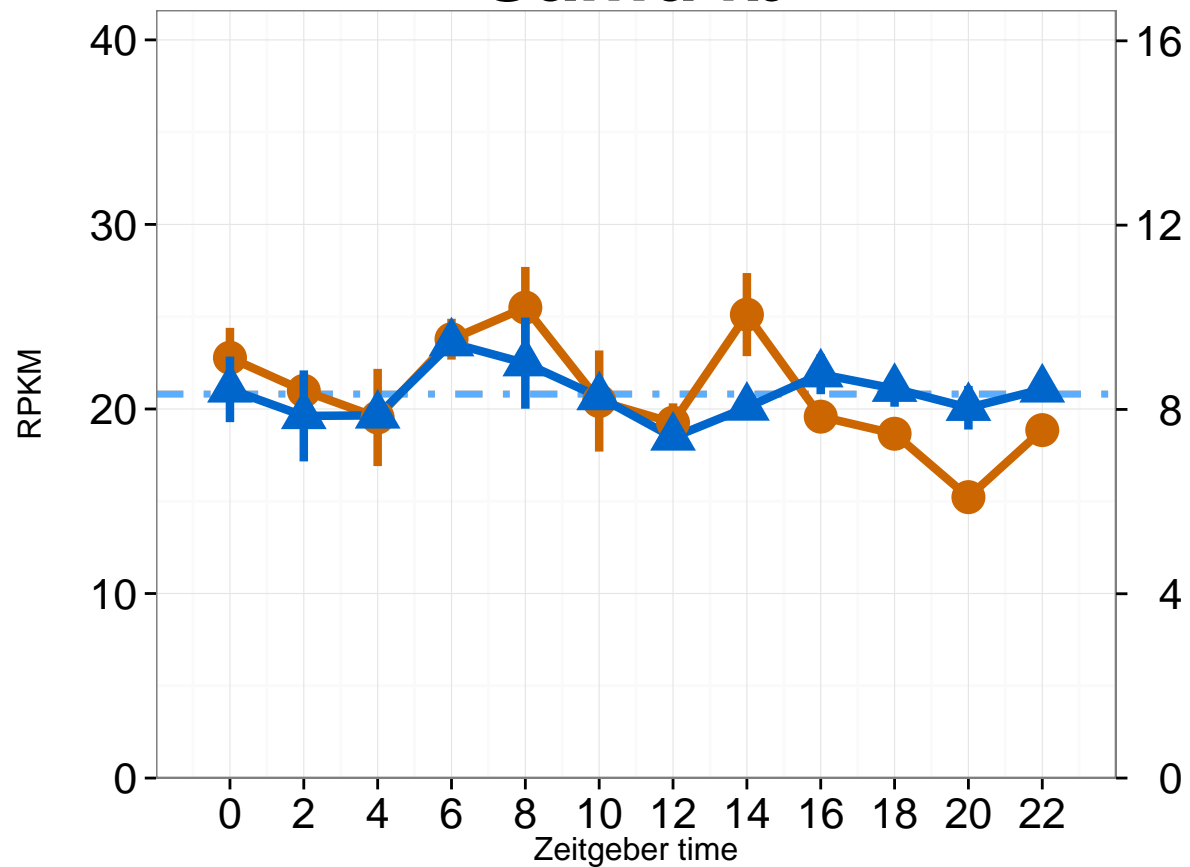

# Samd4b

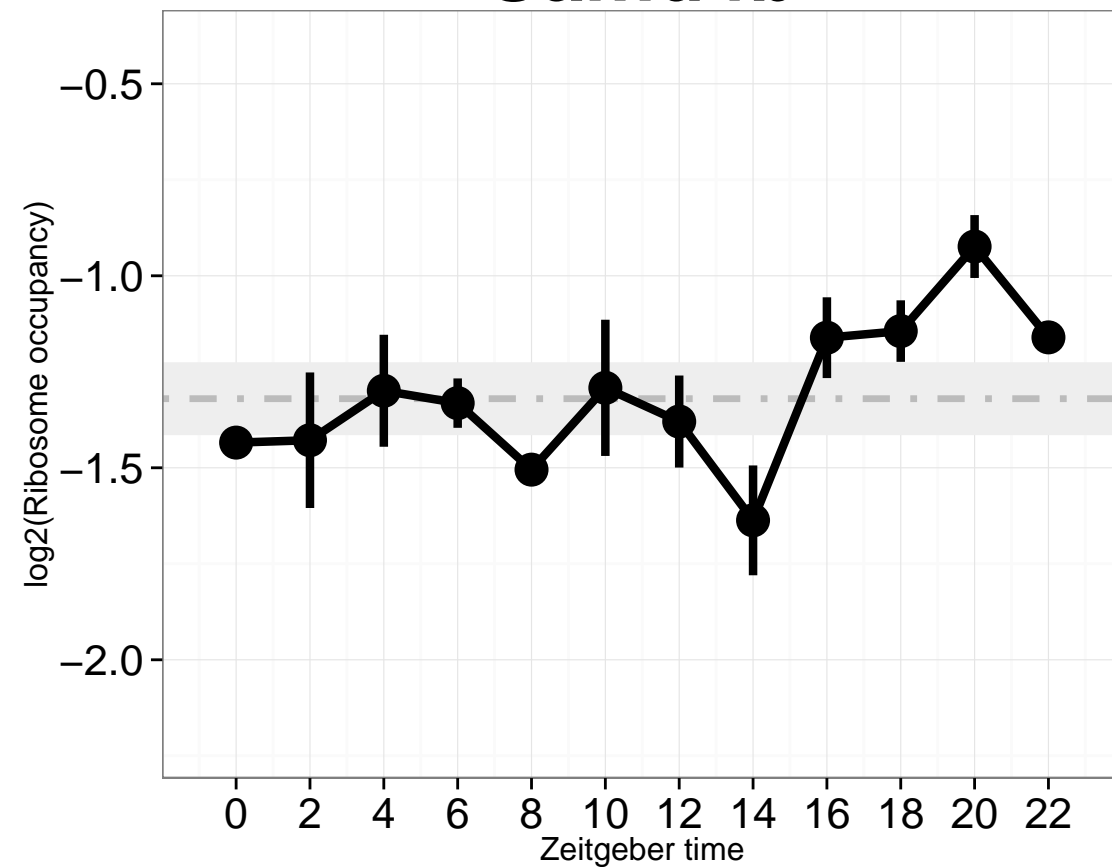

Supplement: Supplementary file 10133 [file 1]

# Cyb5b

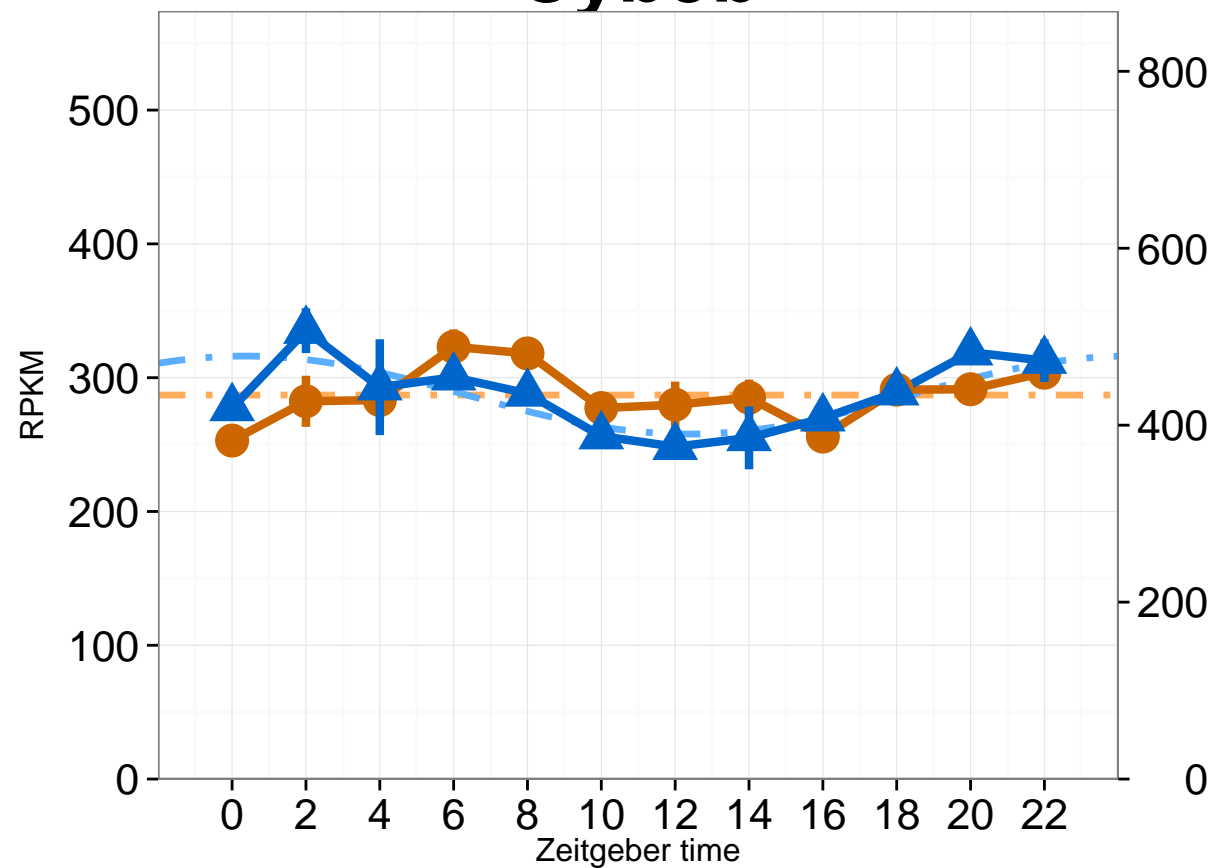

# Cyb5b

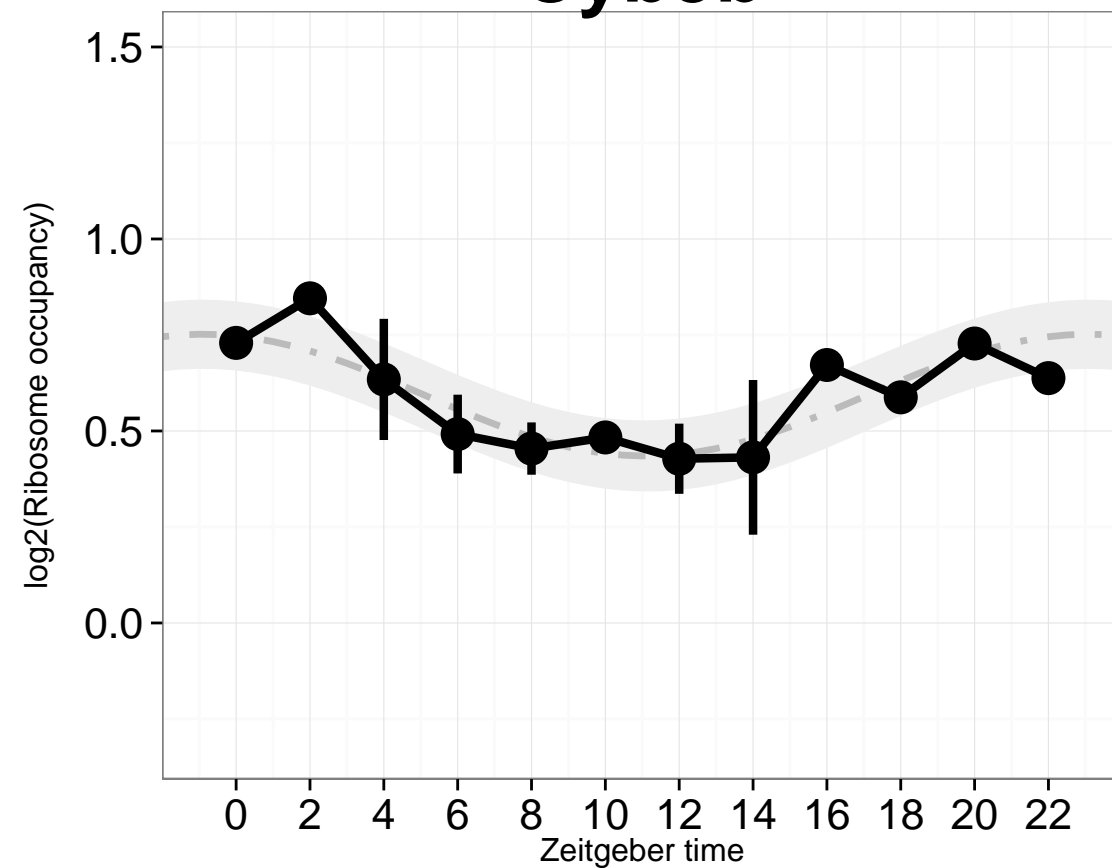

Supplement: Supplementary file 10134 [file 1]

## Nsa2

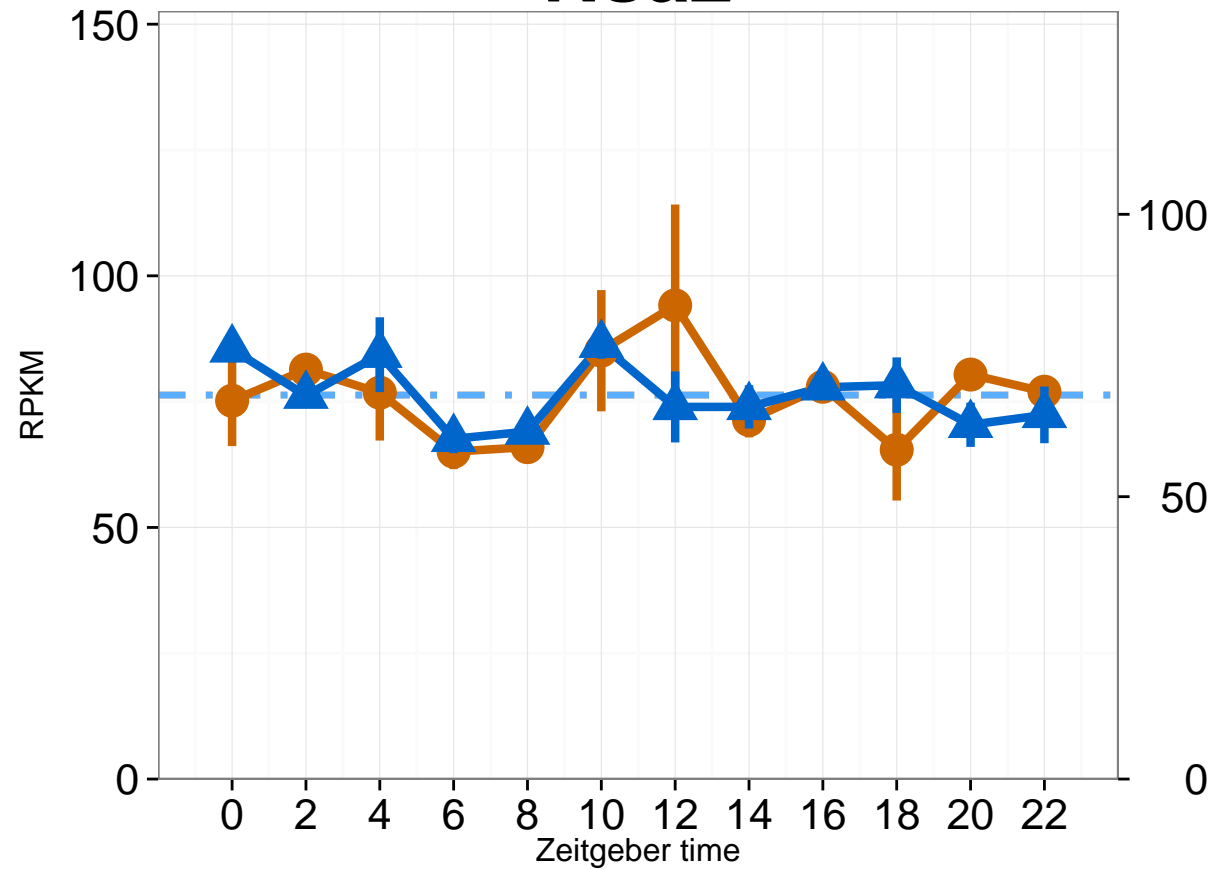

## Nsa2

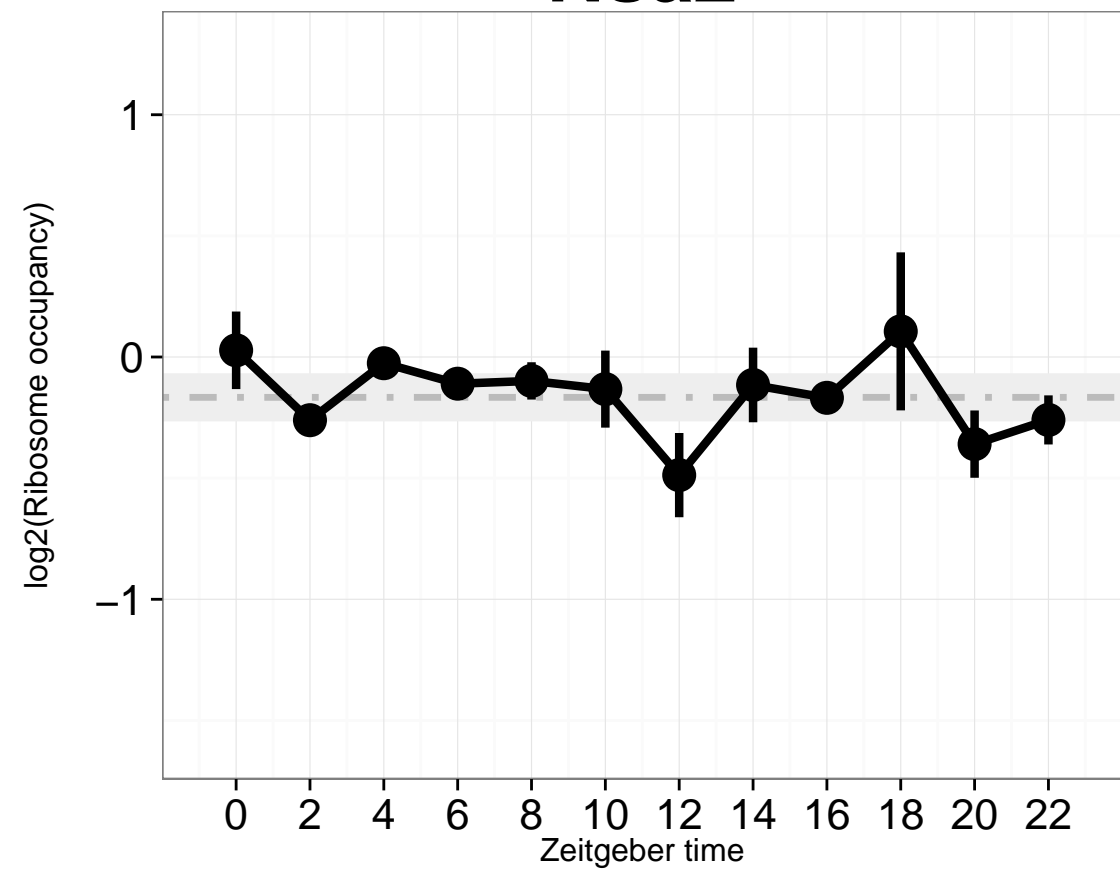

Supplement: Supplementary file 10135 [file 1]

# Serpinb8

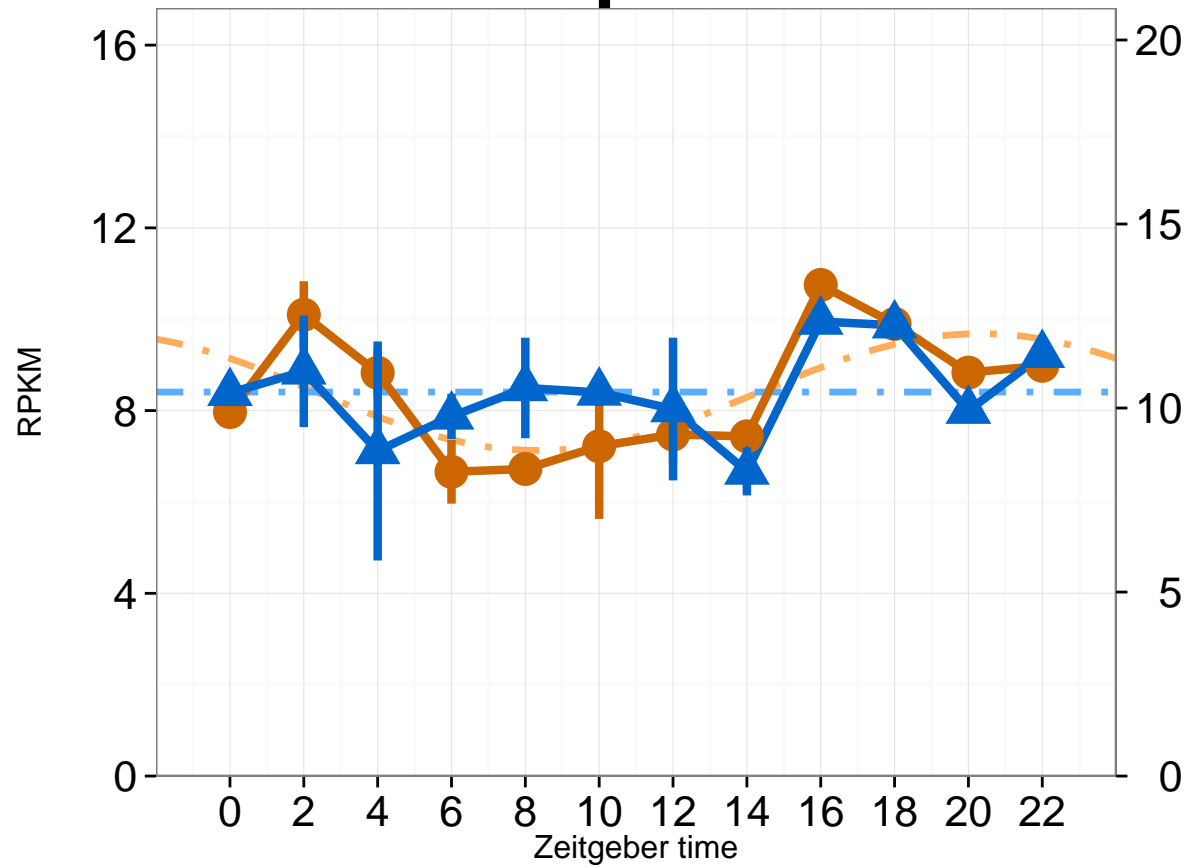

# Serpinb8

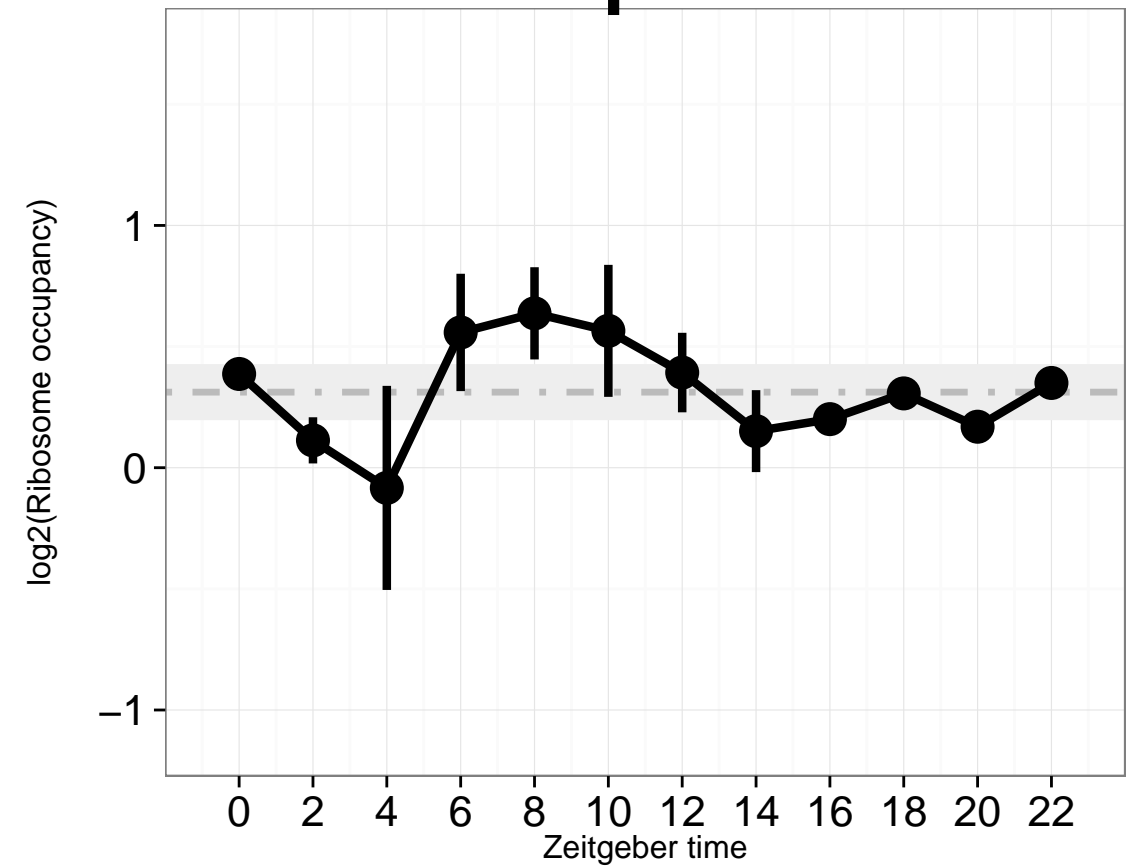

Supplement: Supplementary file 10136 [file 1]

# Mapk8ip3

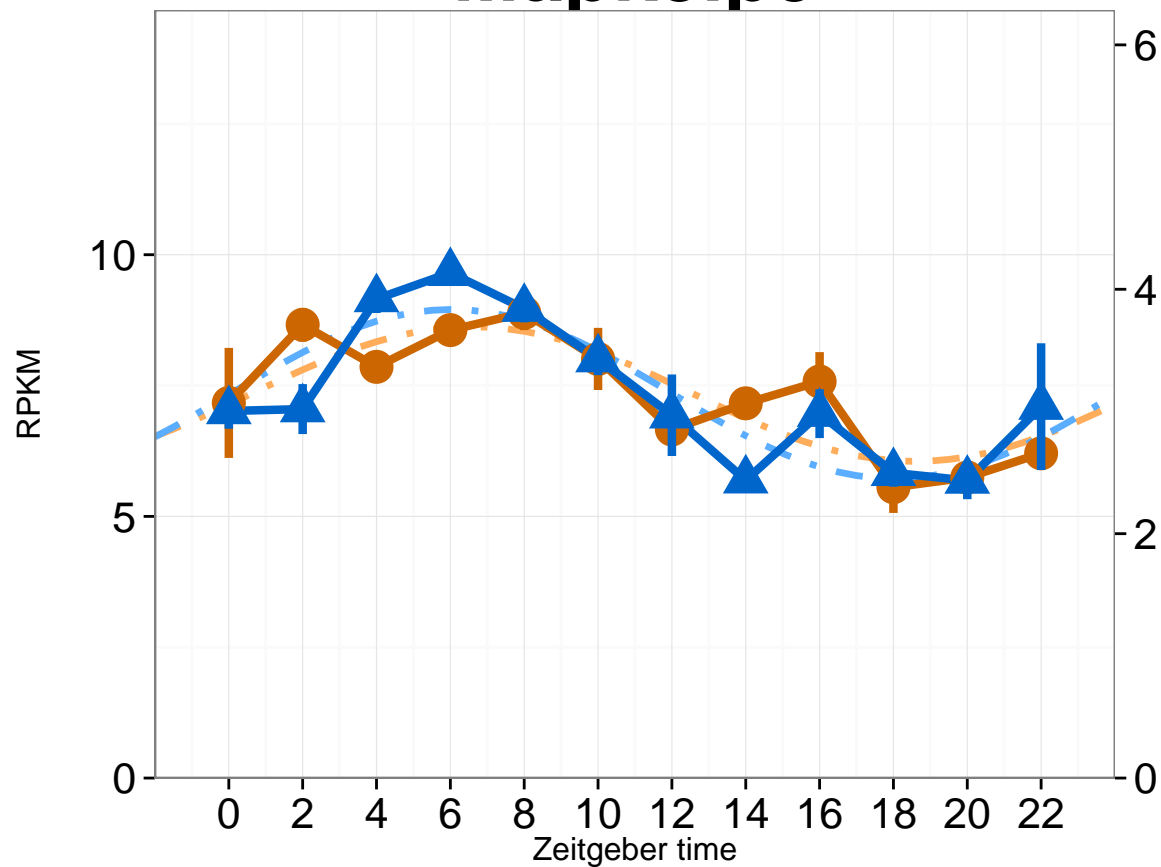

# Mapk8ip3

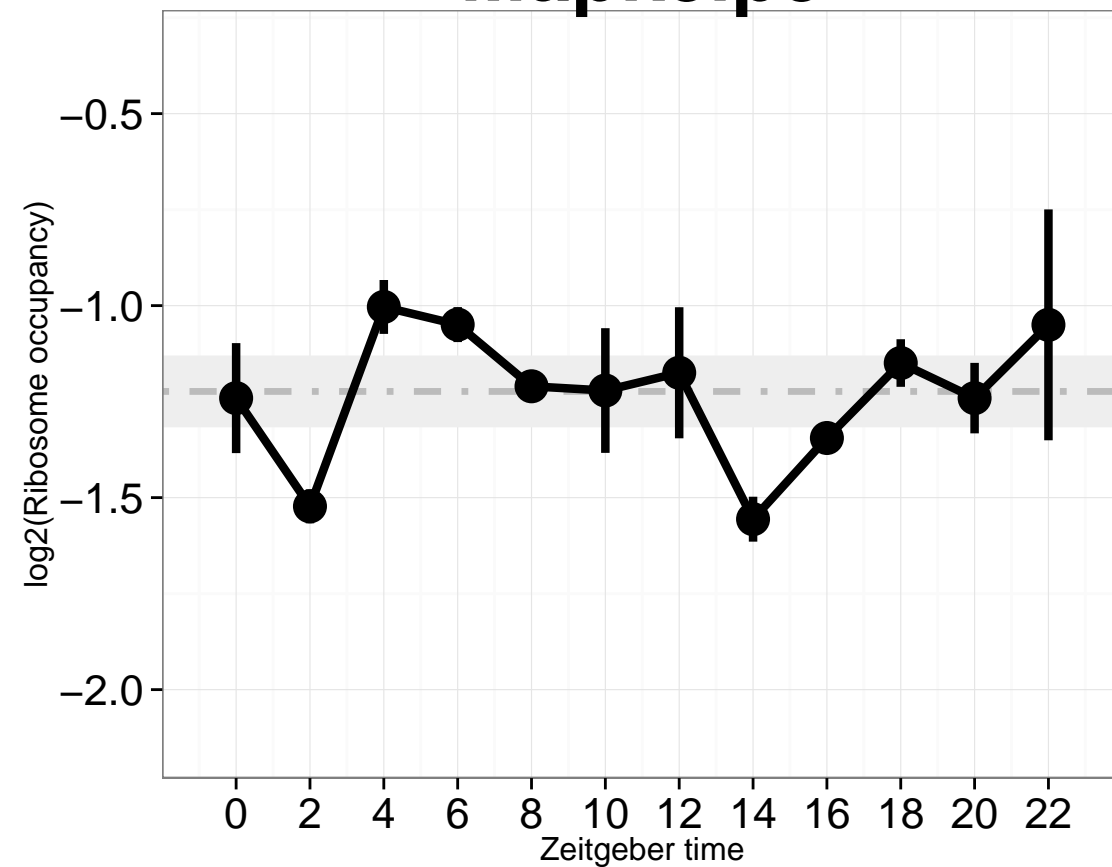

Supplement: Supplementary file 10137 [file 1]
