# Supplementary material (part 102 of 133)
Source: publisher figshare collection journal article supplement (https://springernature.figshare.com/articles/dataset/_/4903193)

# Prdm1

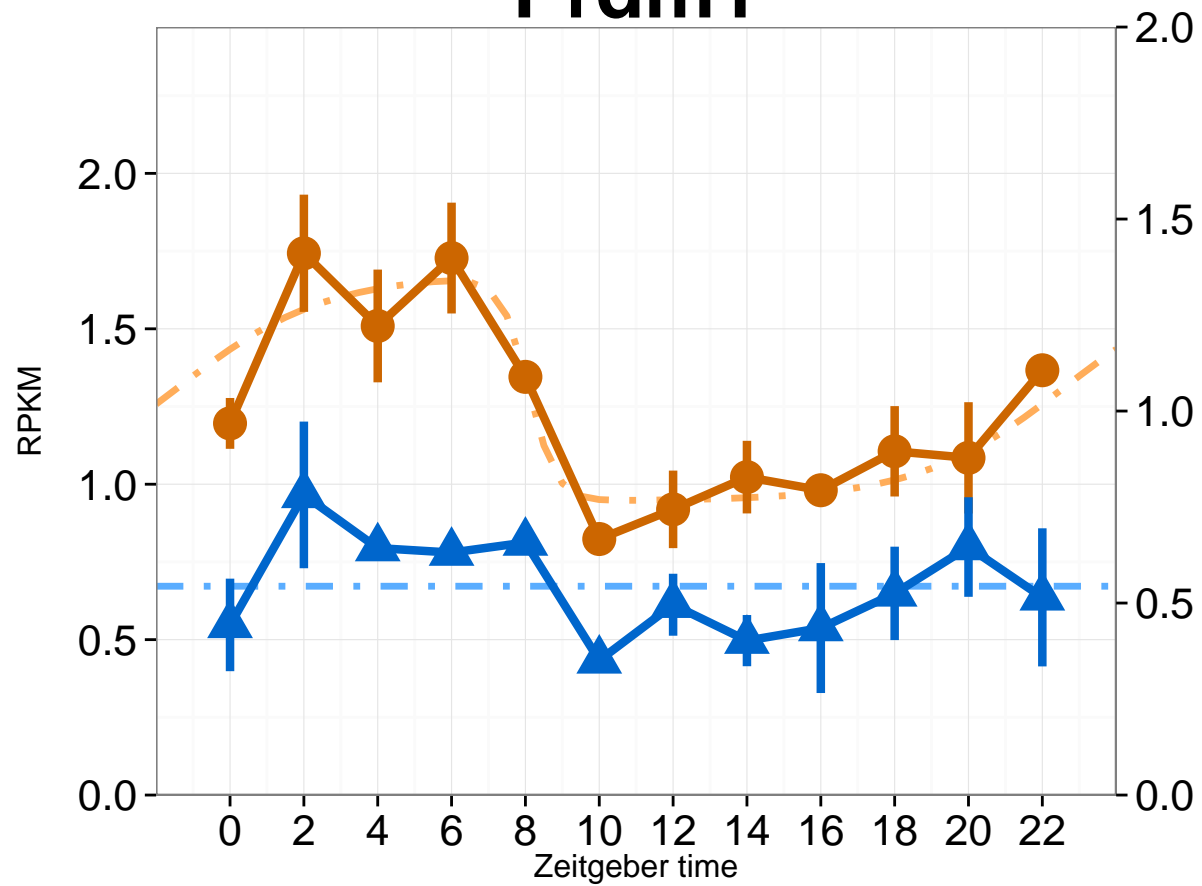

# Prdm1

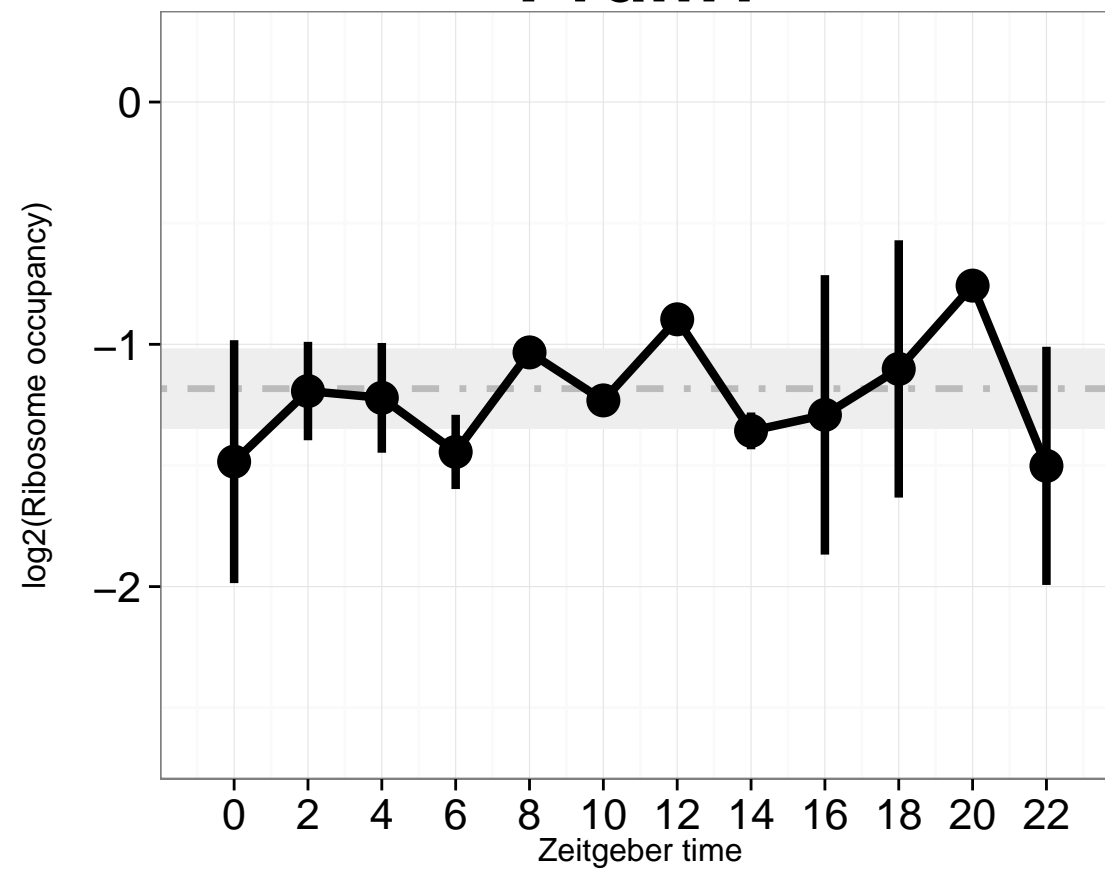

Supplement: Supplementary file 10138 [file 1]

## Lipa

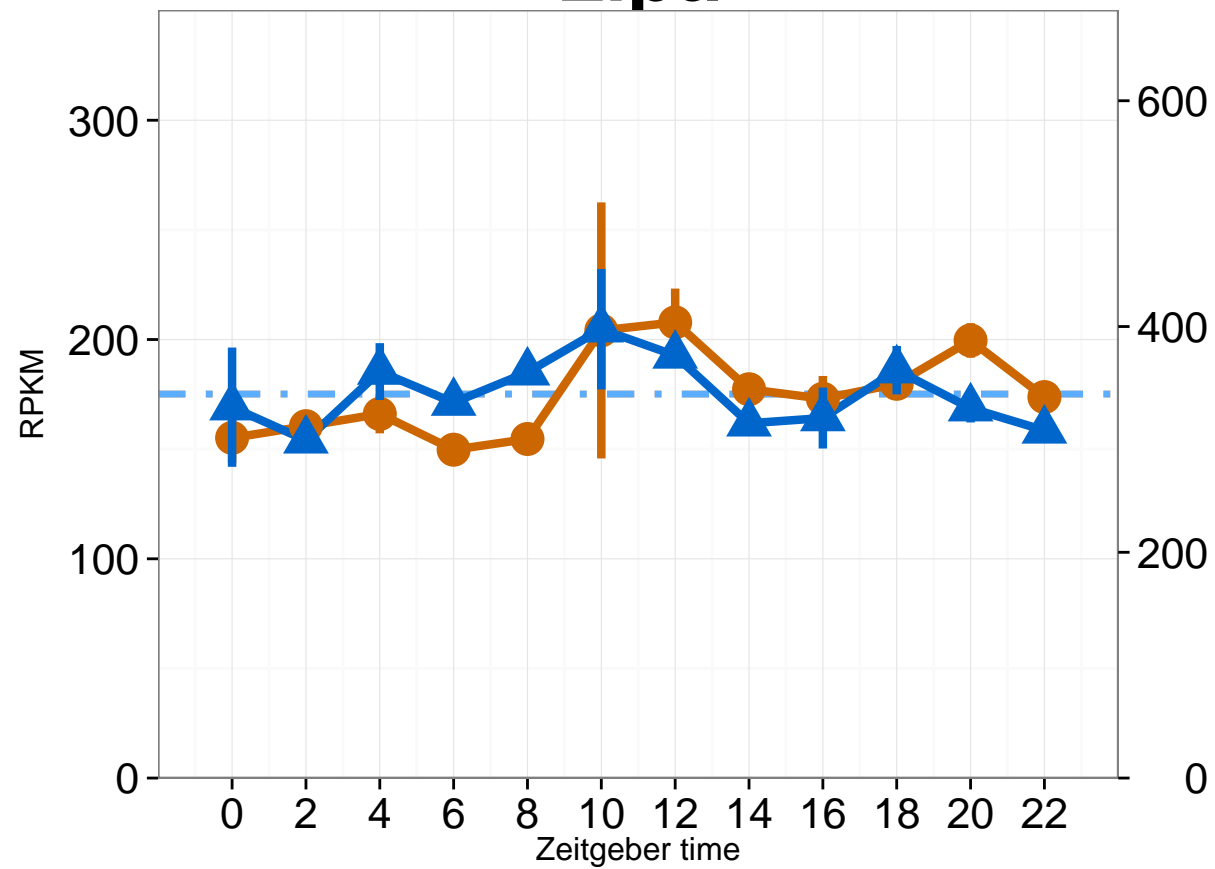

## Lipa

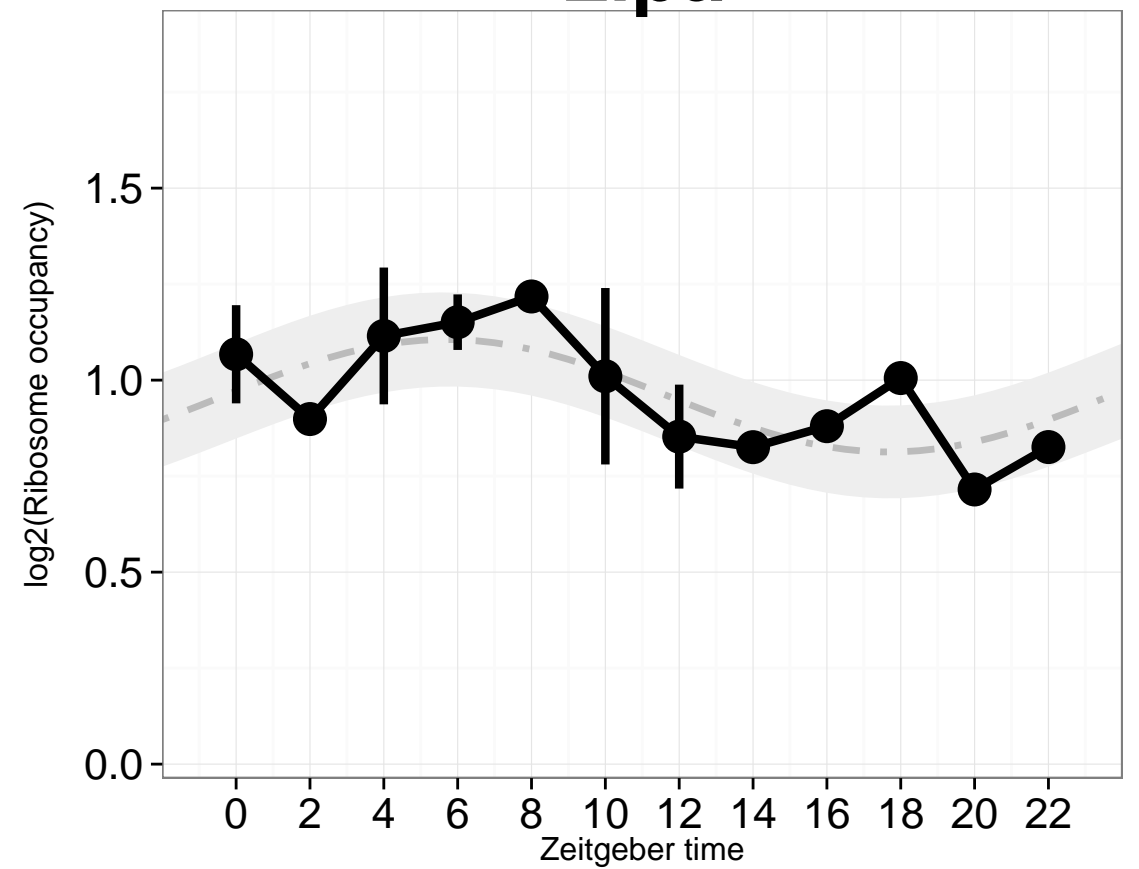

Supplement: Supplementary file 10139 [file 1]

# Dcdc2a

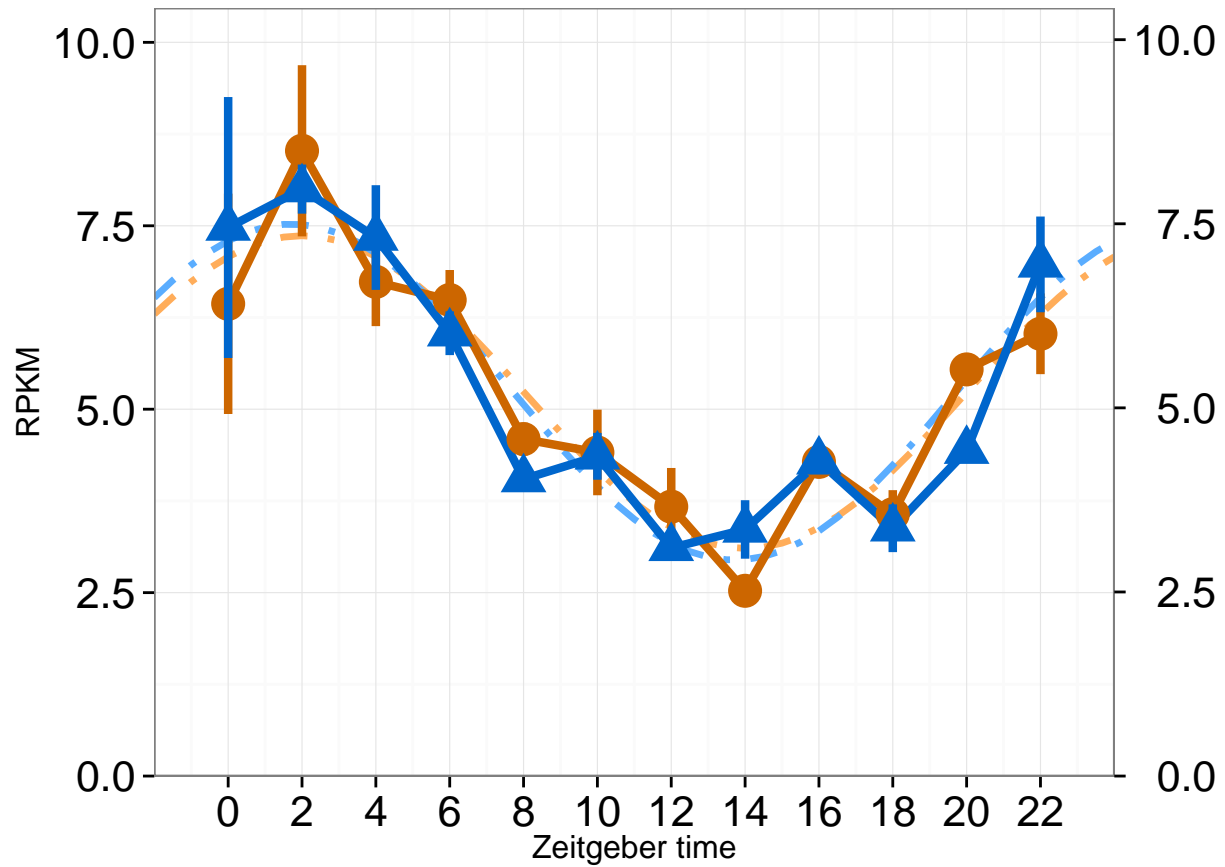

# Dcdc2a

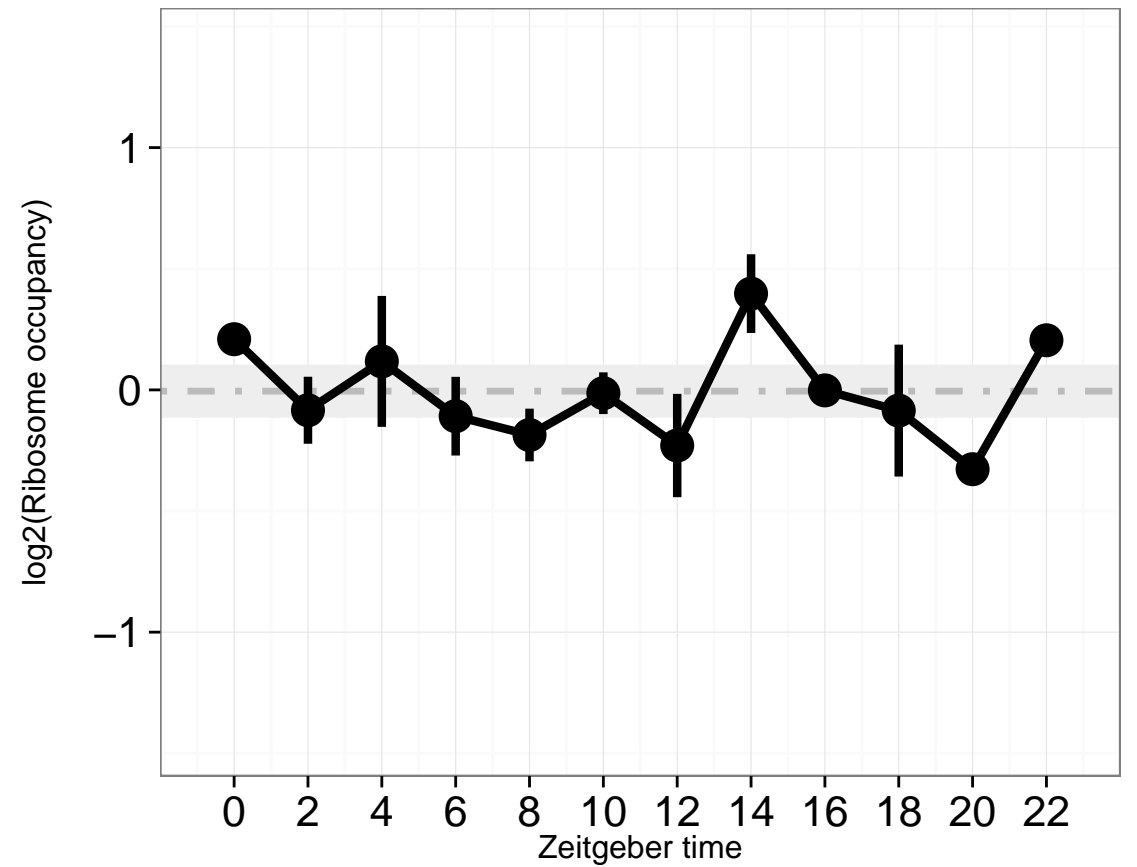

Supplement: Supplementary file 10140 [file 1]

# Unc5a

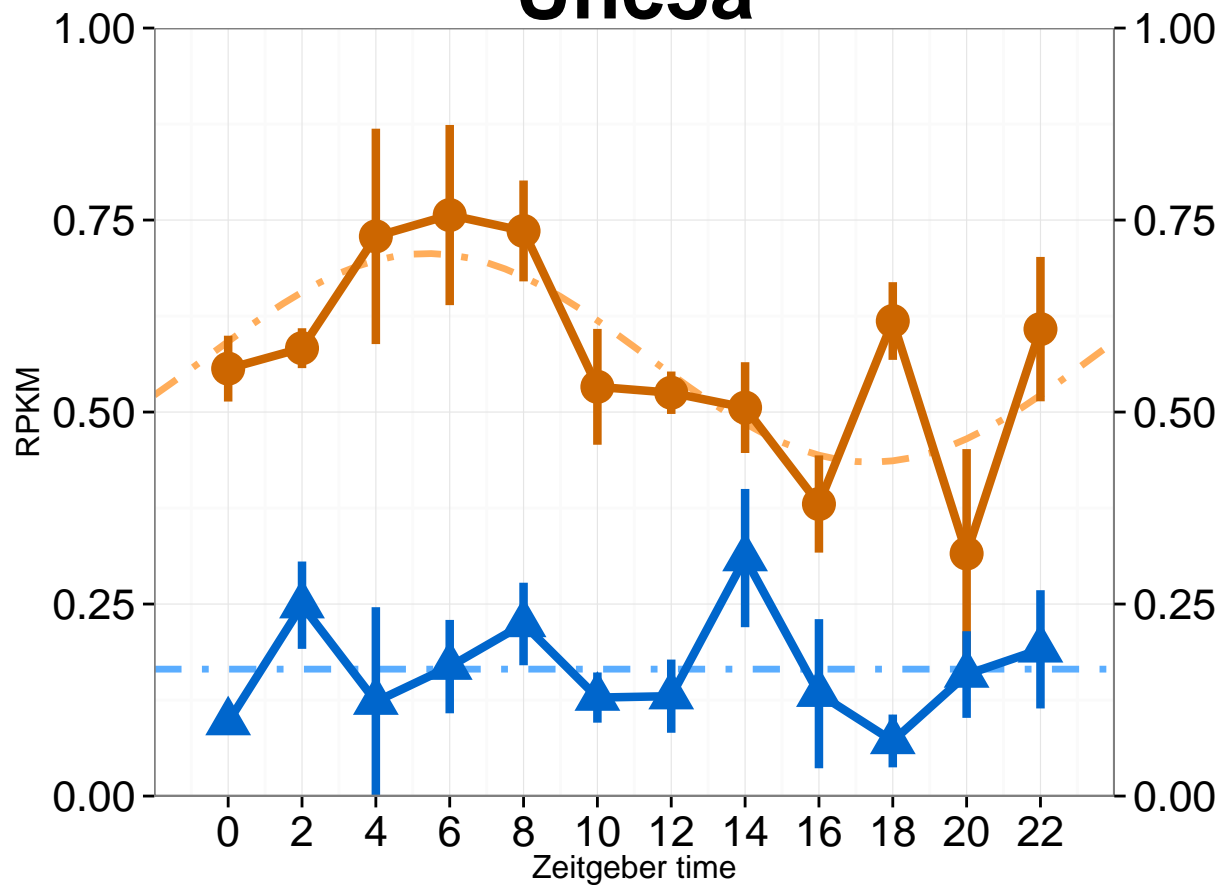

# Unc5a

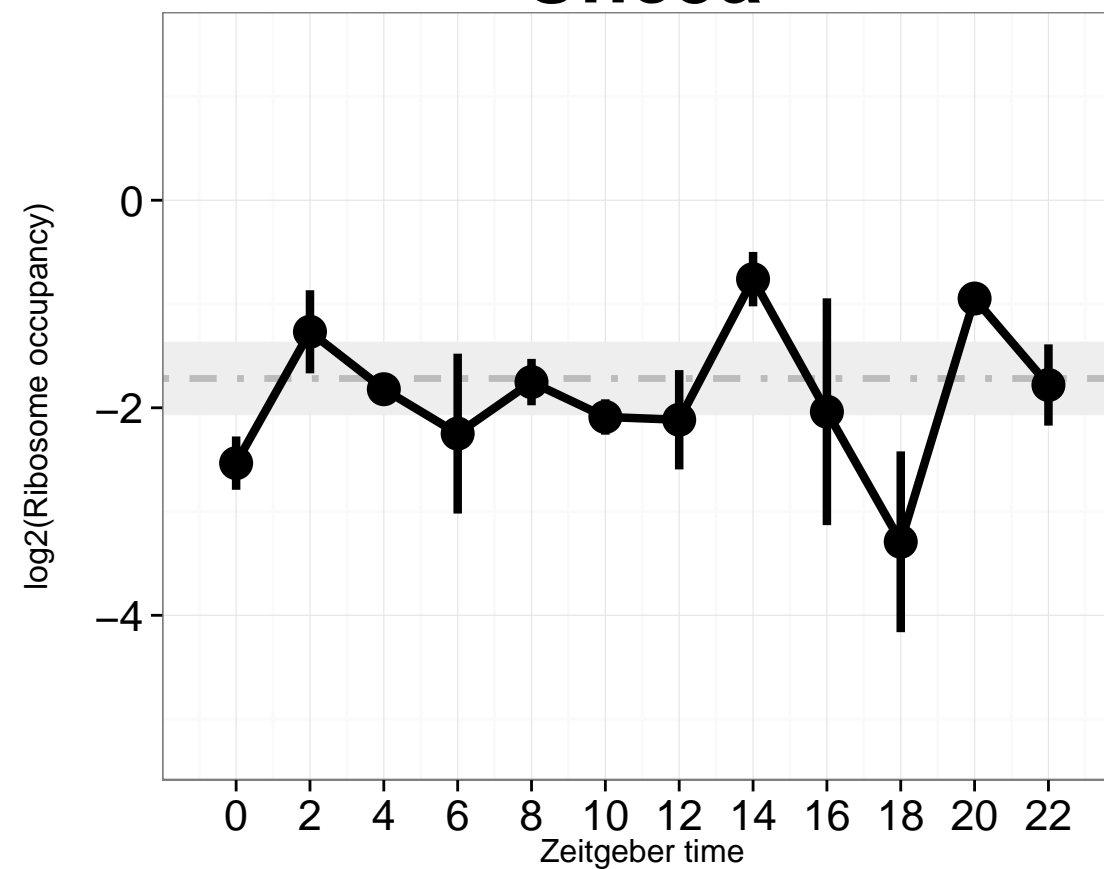

Supplement: Supplementary file 10141 [file 1]

## 2810408A11Rik

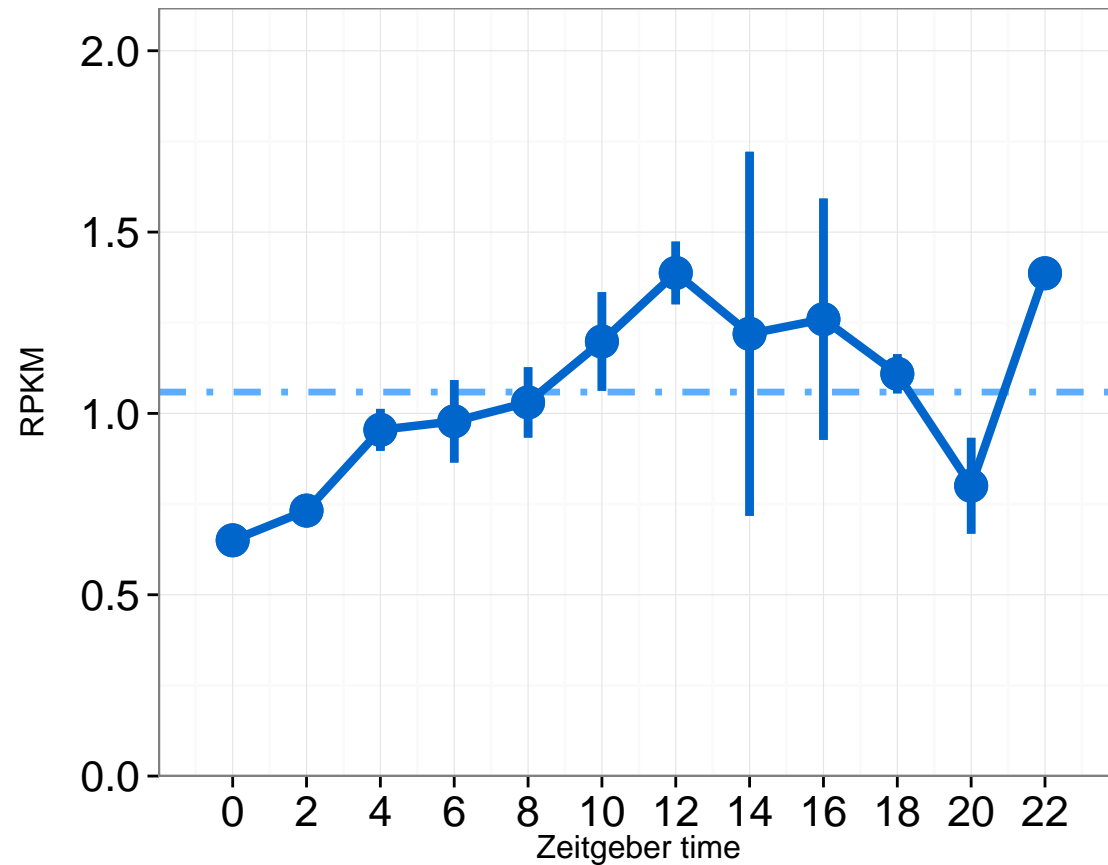

## 2810408A11Rik log2(Ribosome occup

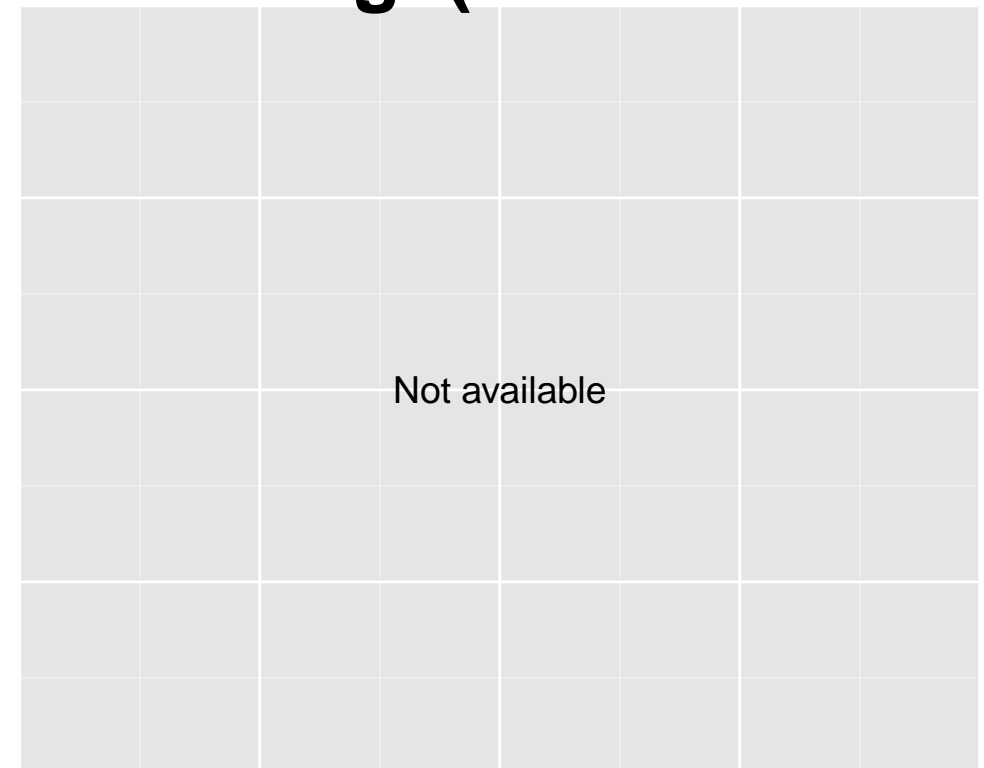

Supplement: Supplementary file 10142 [file 1]

## Nubp1

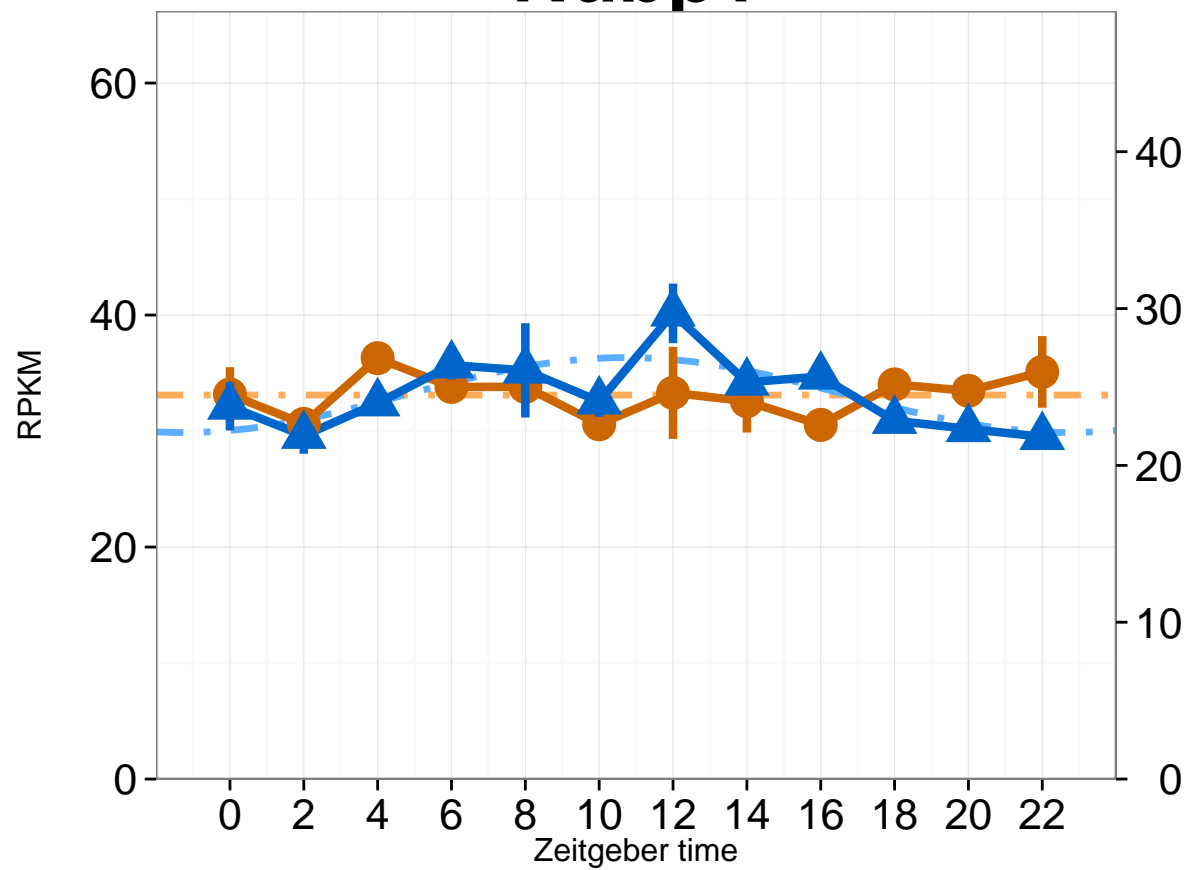

## Nubp1

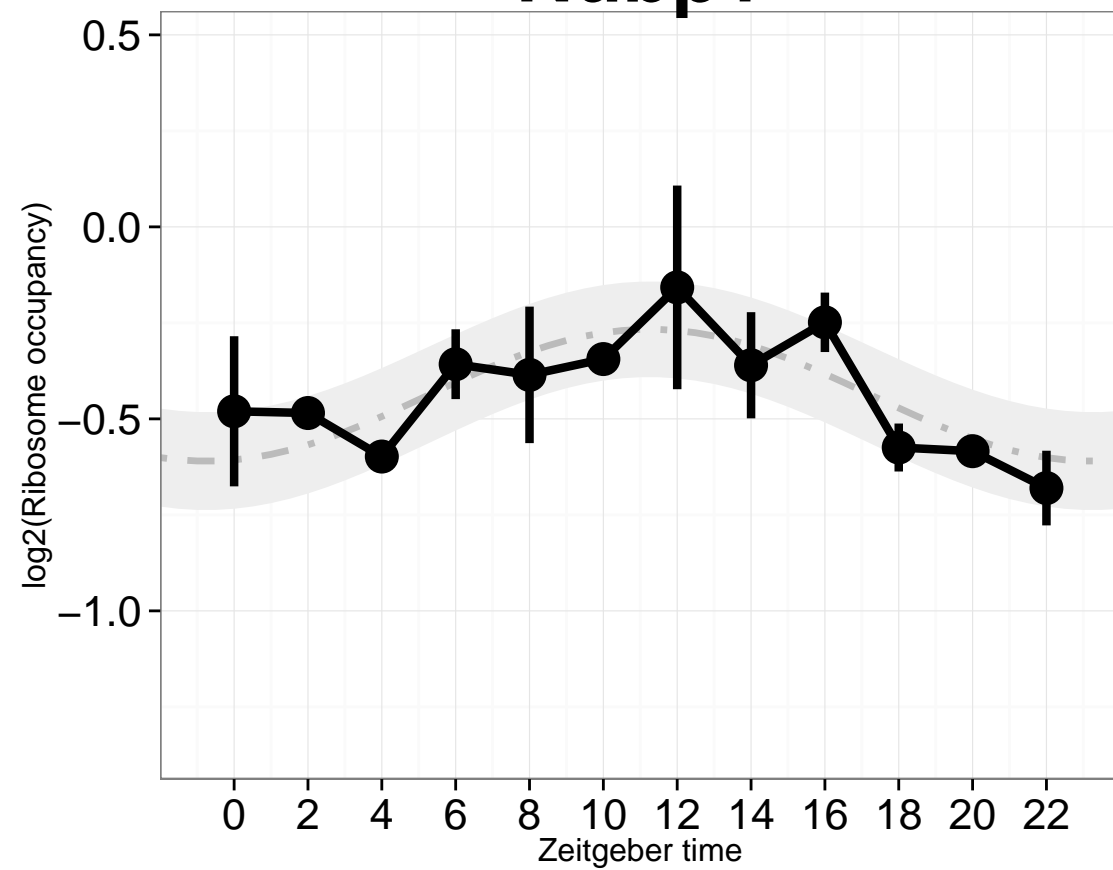

Supplement: Supplementary file 10143 [file 1]

# Ap3m1

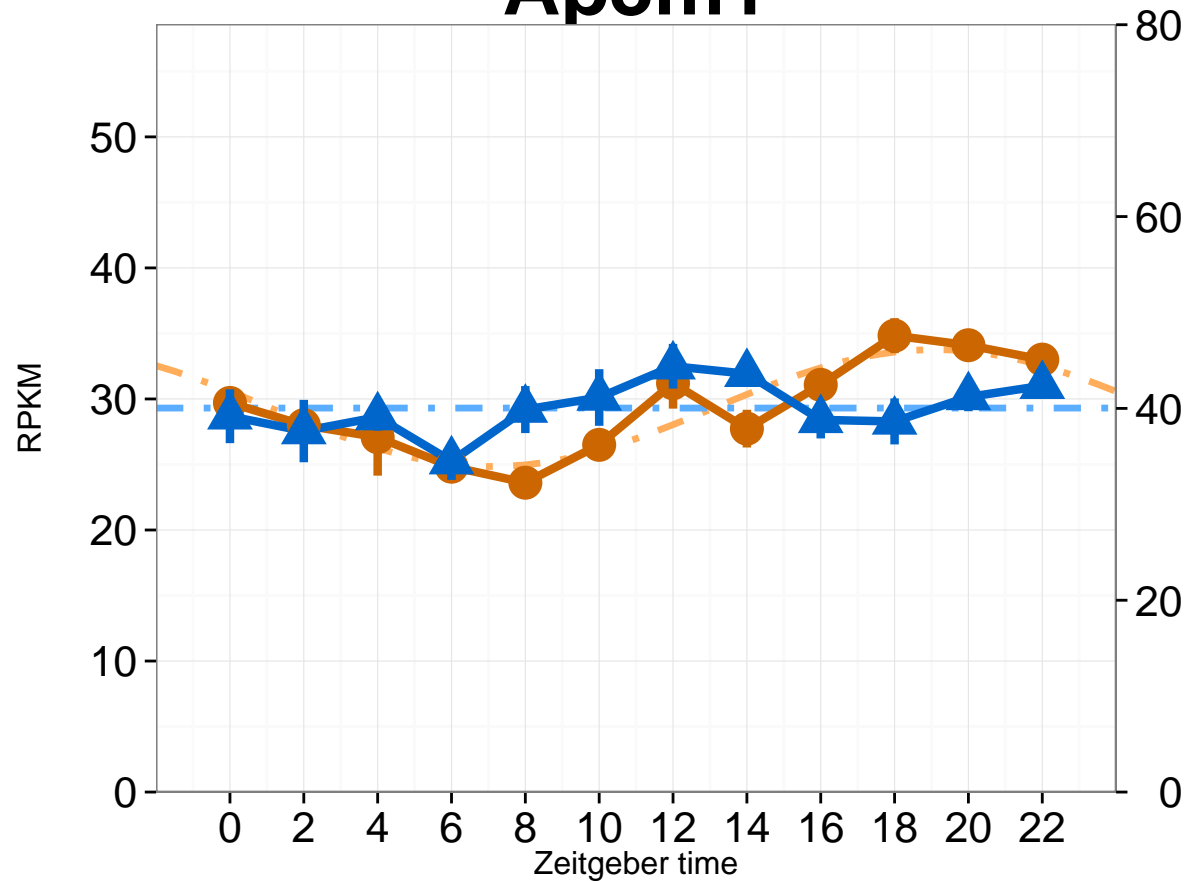

# Ap3m1

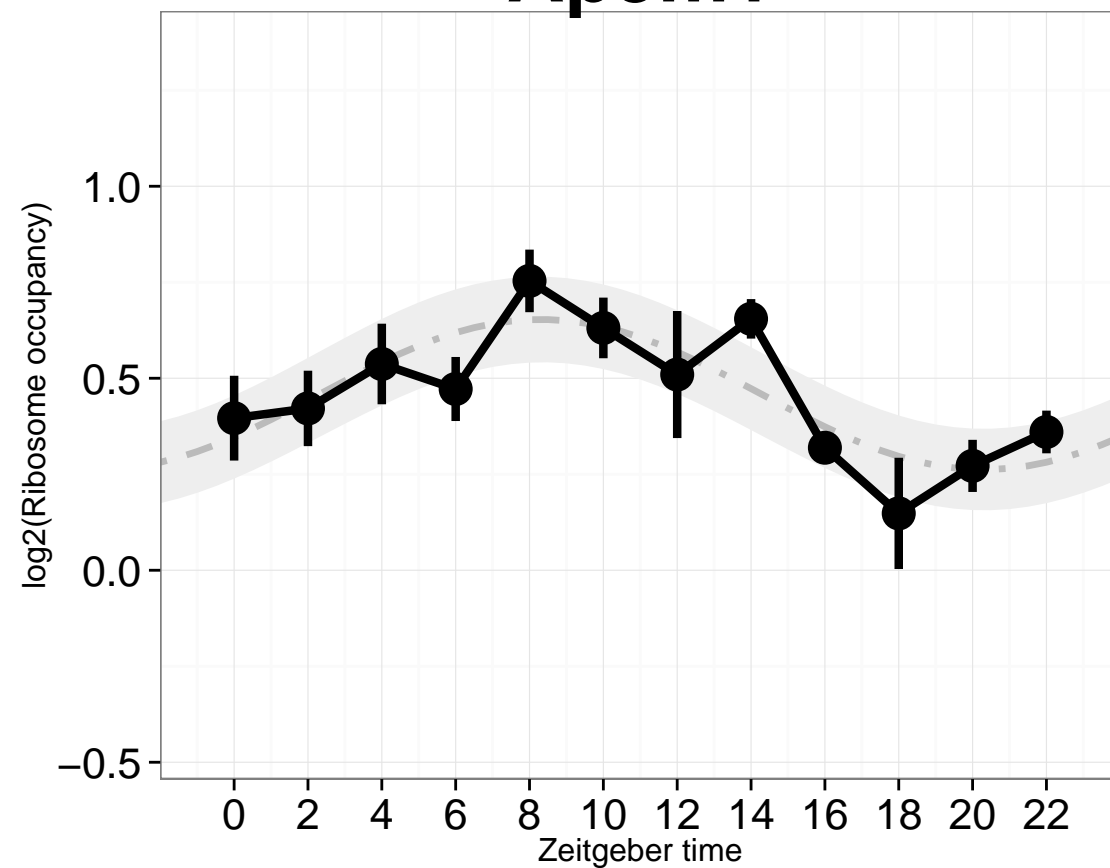

Supplement: Supplementary file 10144 [file 1]

## Maea

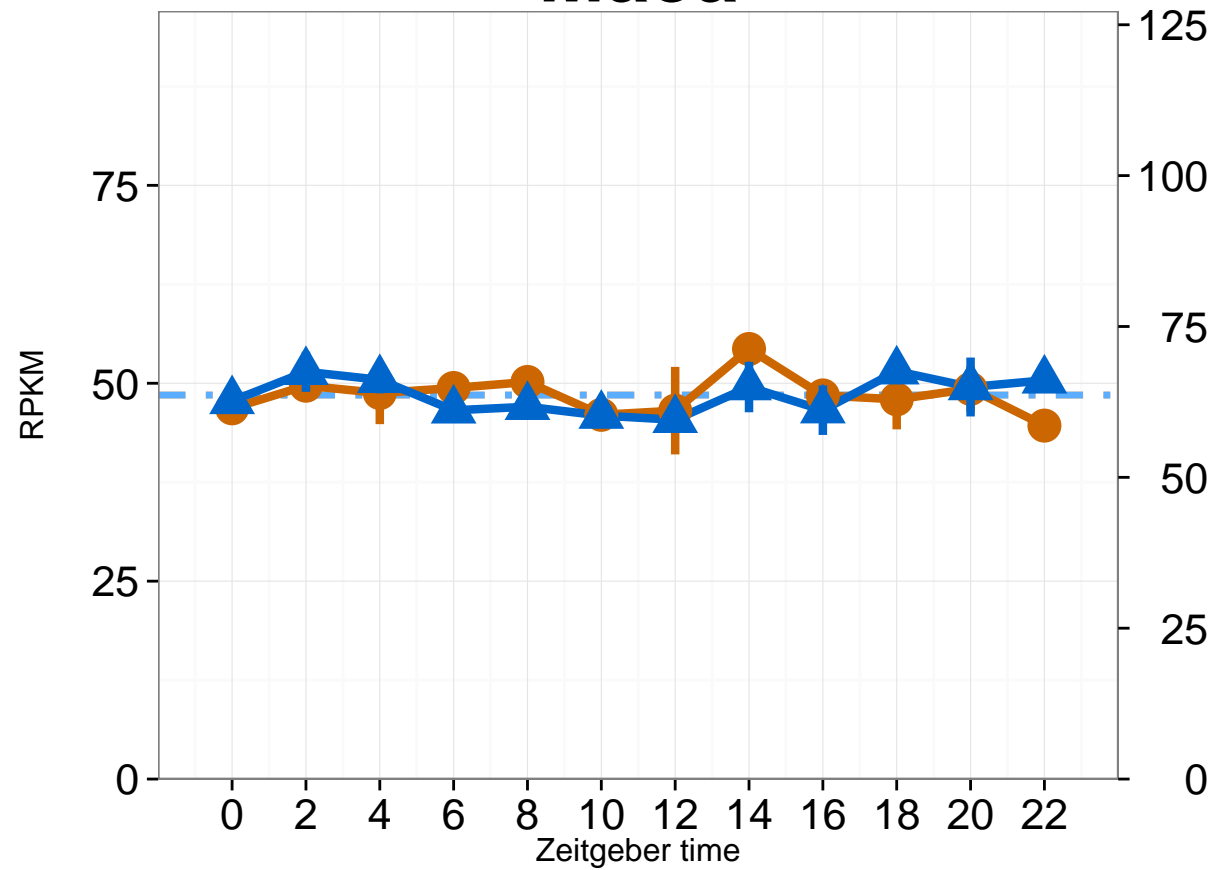

## Maea

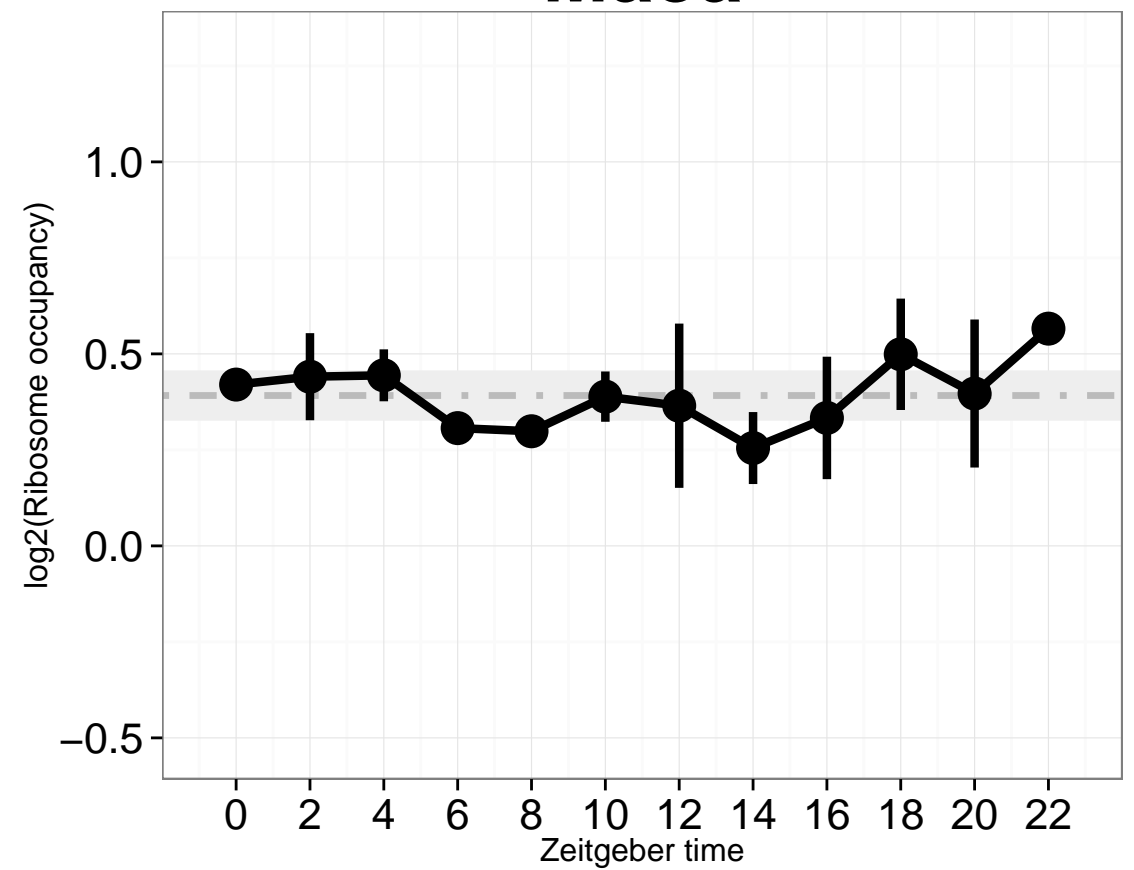

Supplement: Supplementary file 10145 [file 1]

## Taf1

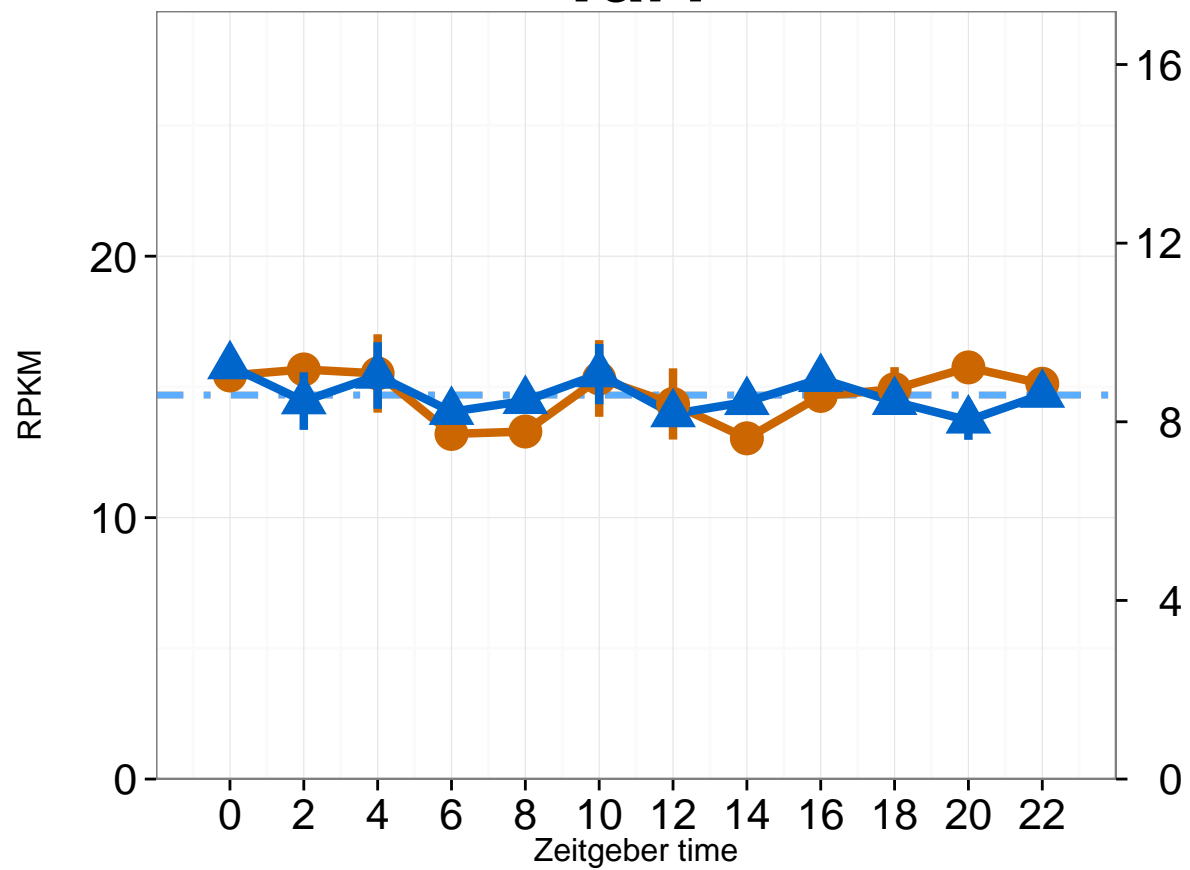

## Taf1

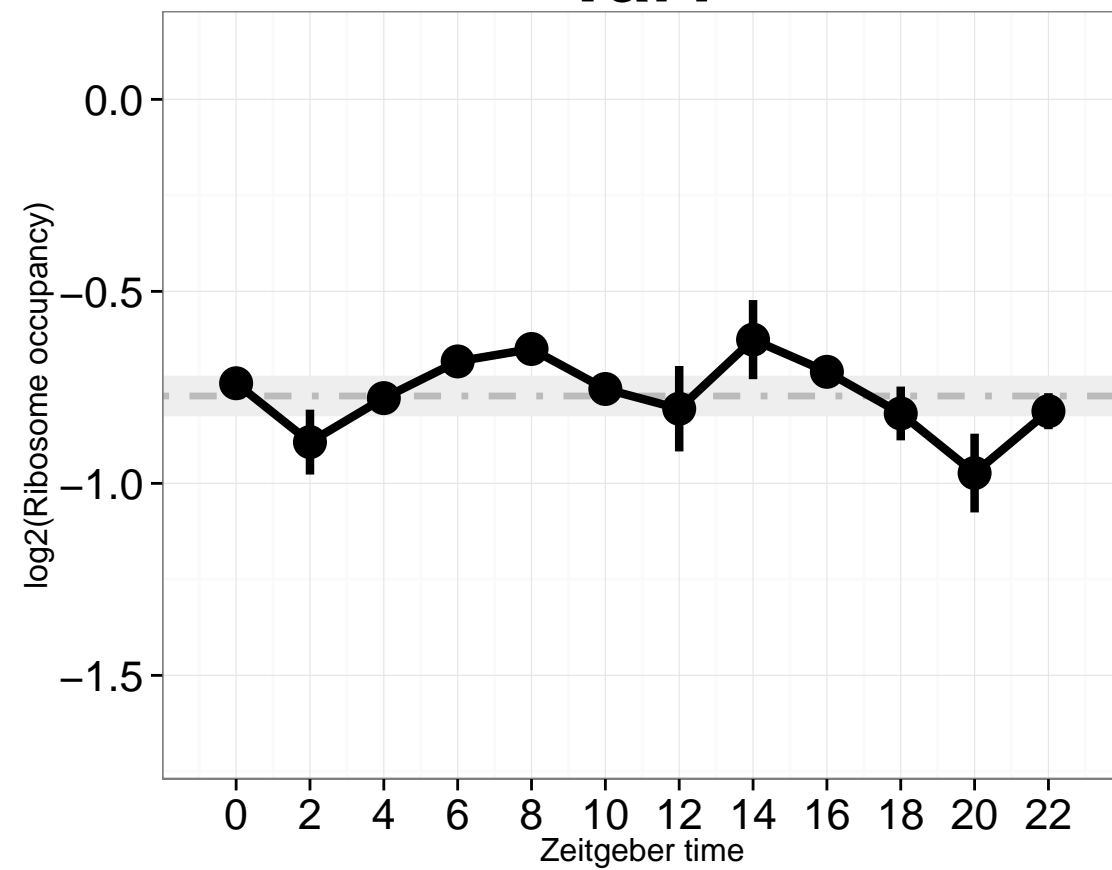

Supplement: Supplementary file 10146 [file 1]

**Ephx3 TR**

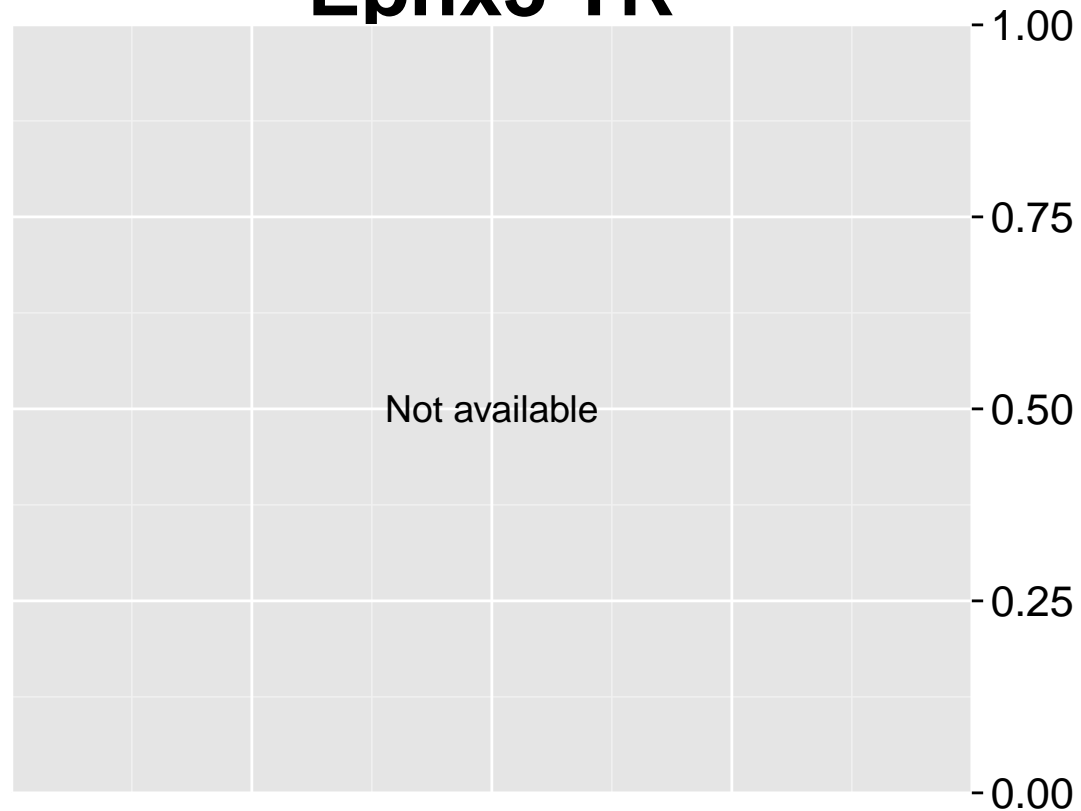

**Ephx3 log2(Ribosome occupancy**

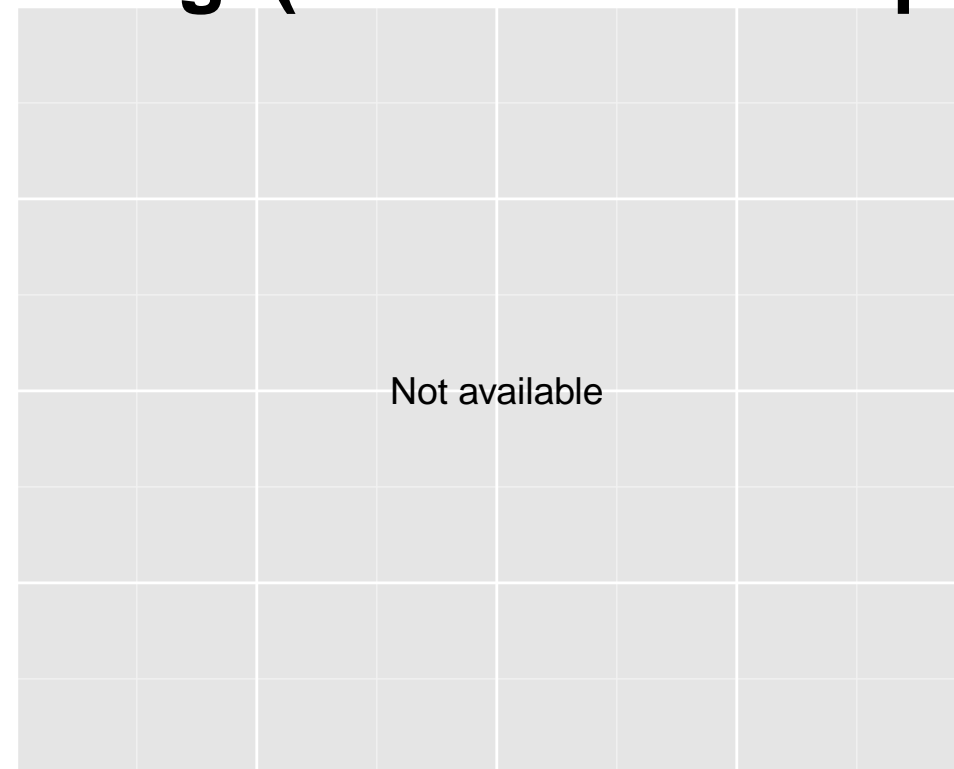

Supplement: Supplementary file 10147 [file 1]

## Insr

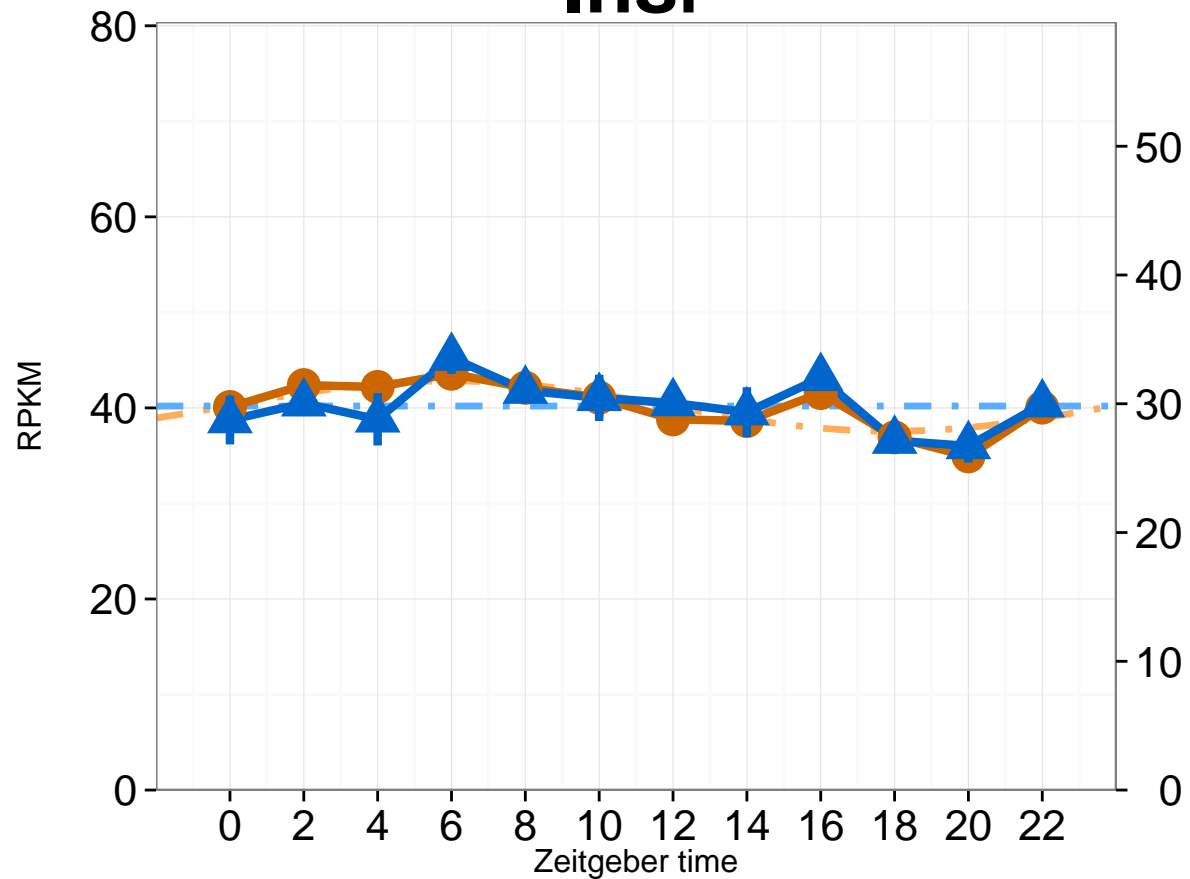

## Insr

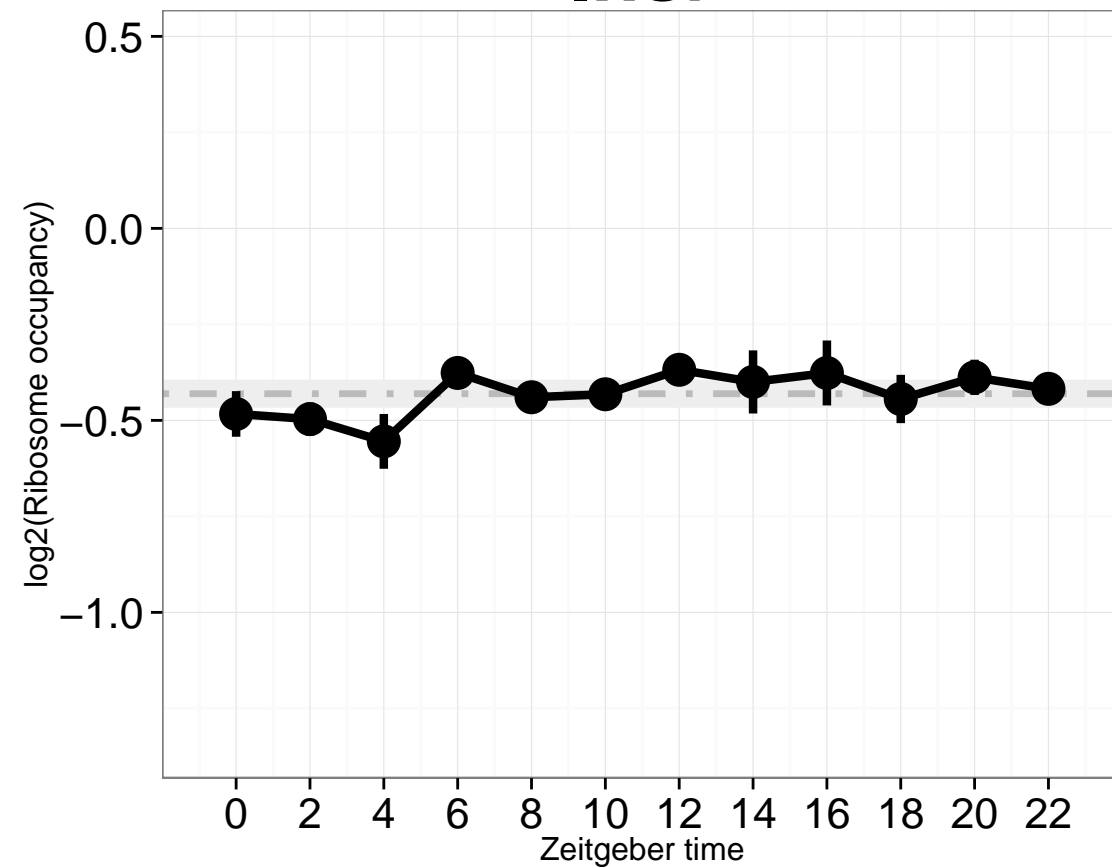

Supplement: Supplementary file 10148 [file 1]

## Gm129

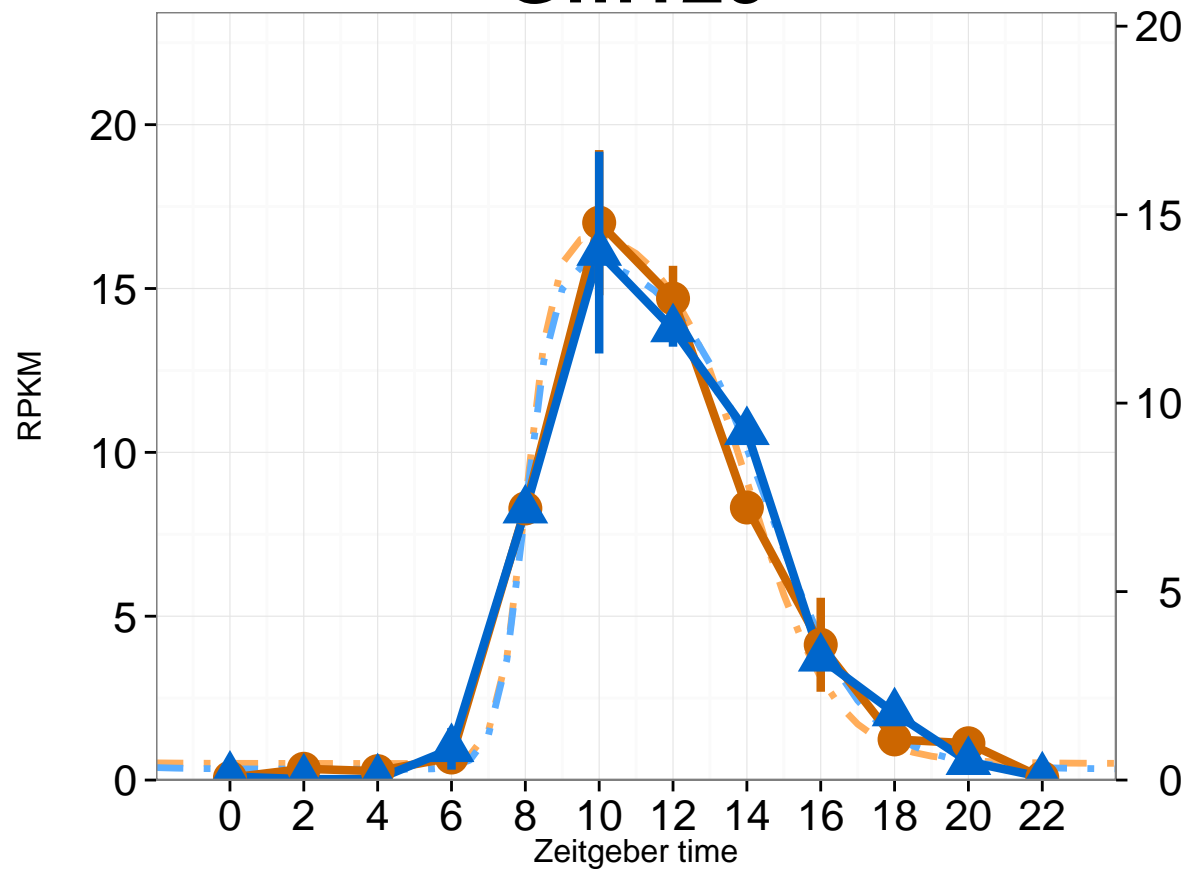

## Gm129

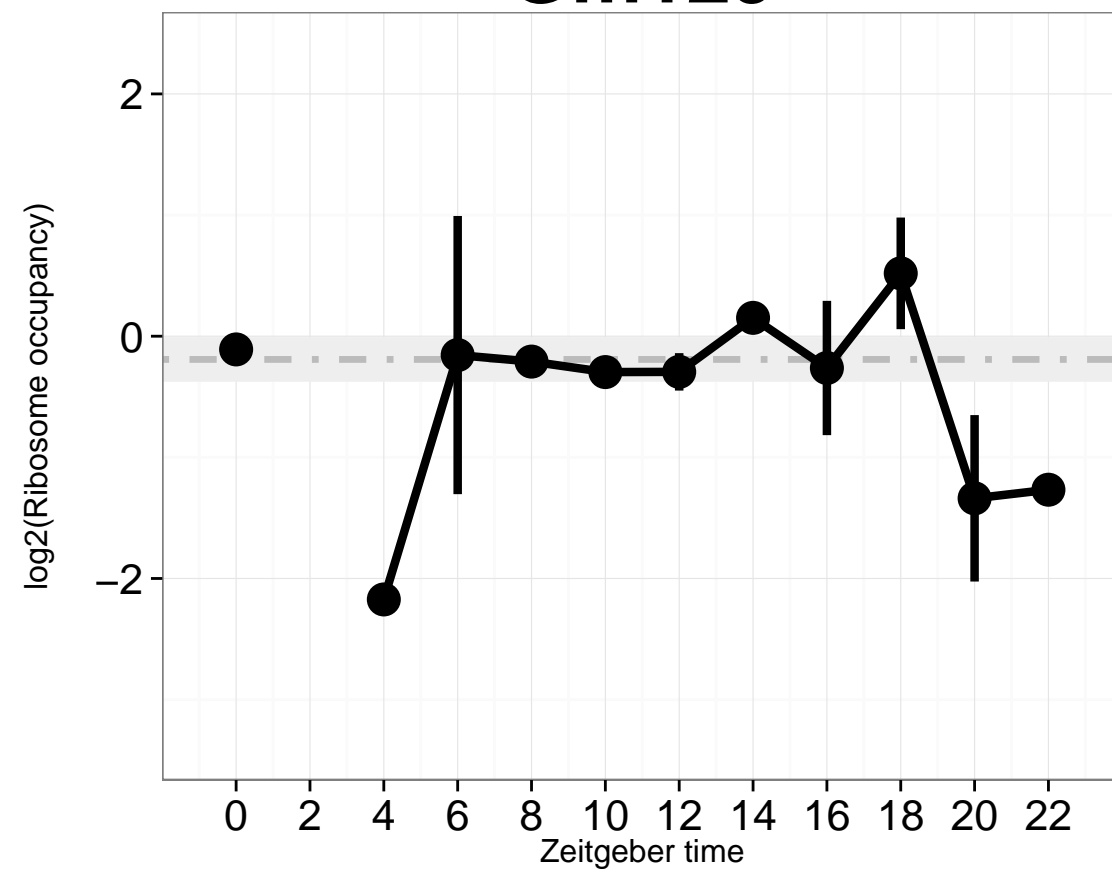

Supplement: Supplementary file 10149 [file 1]

# Fam76b

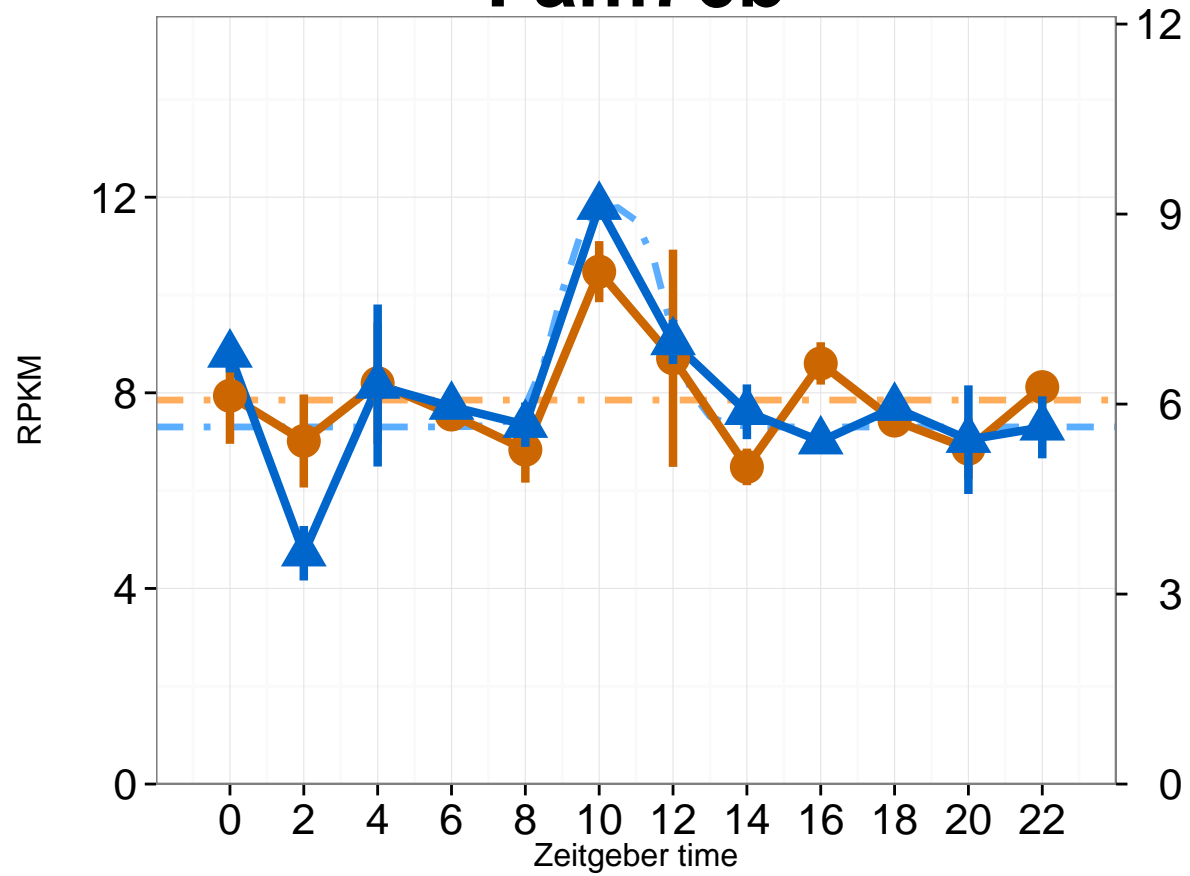

# Fam76b

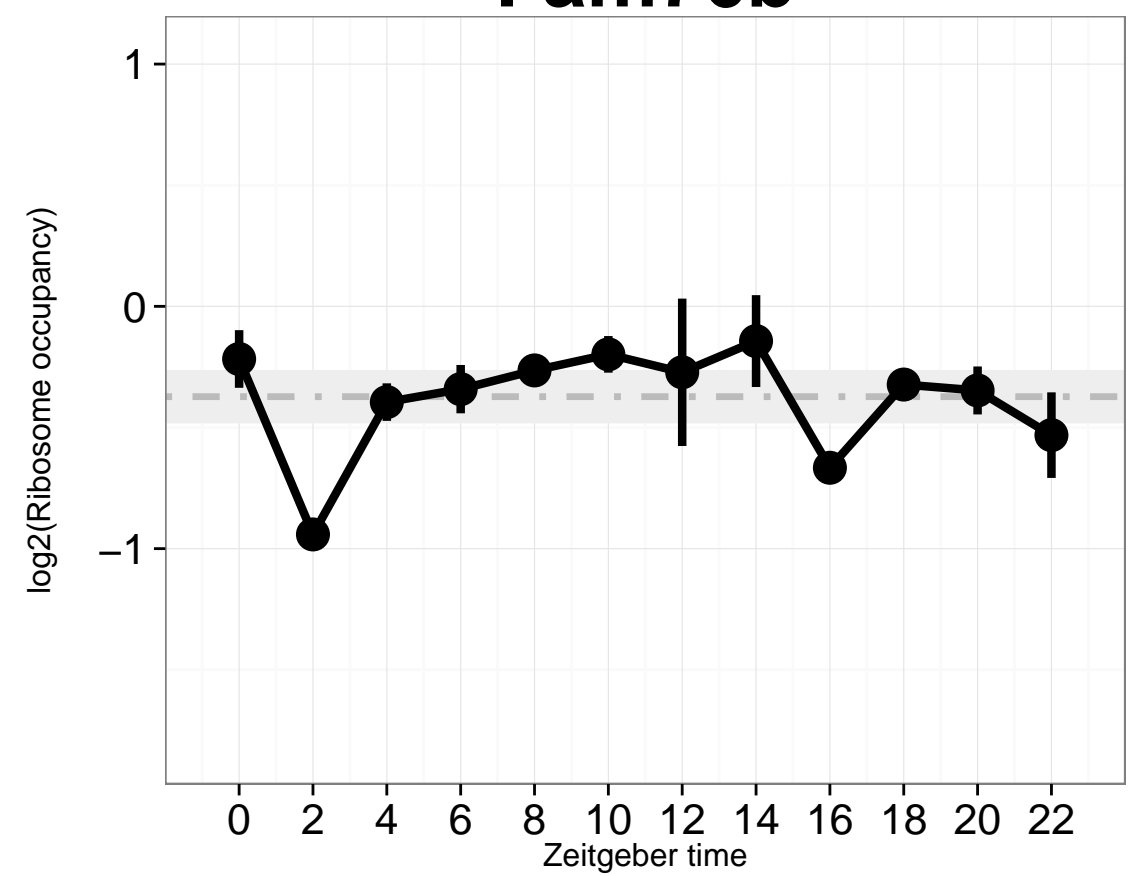

Supplement: Supplementary file 10150 [file 1]

**Gm5424 TR**

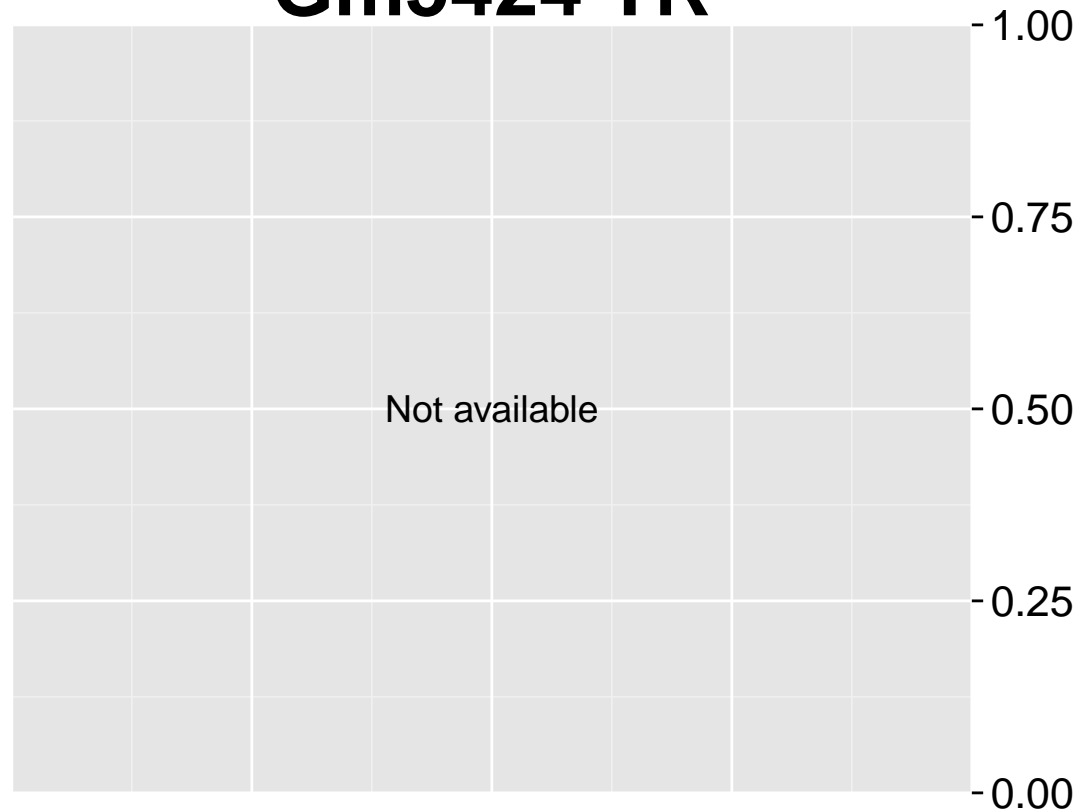

**Gm5424 log2(Ribosome occupanc**

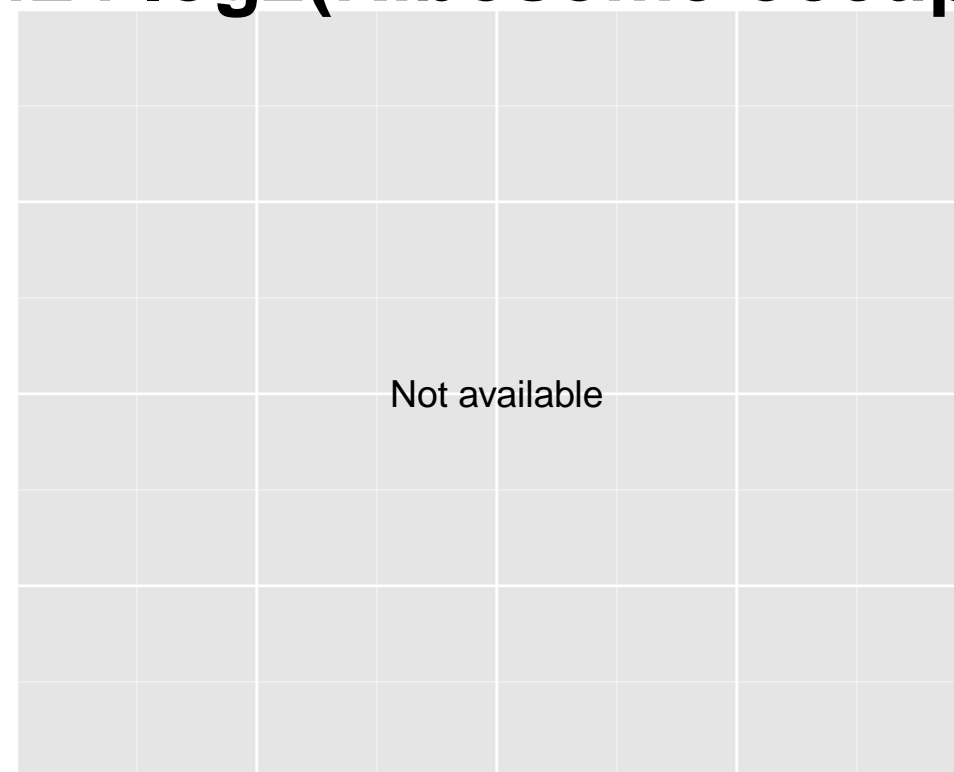

Supplement: Supplementary file 10151 [file 1]

# Cacnb1

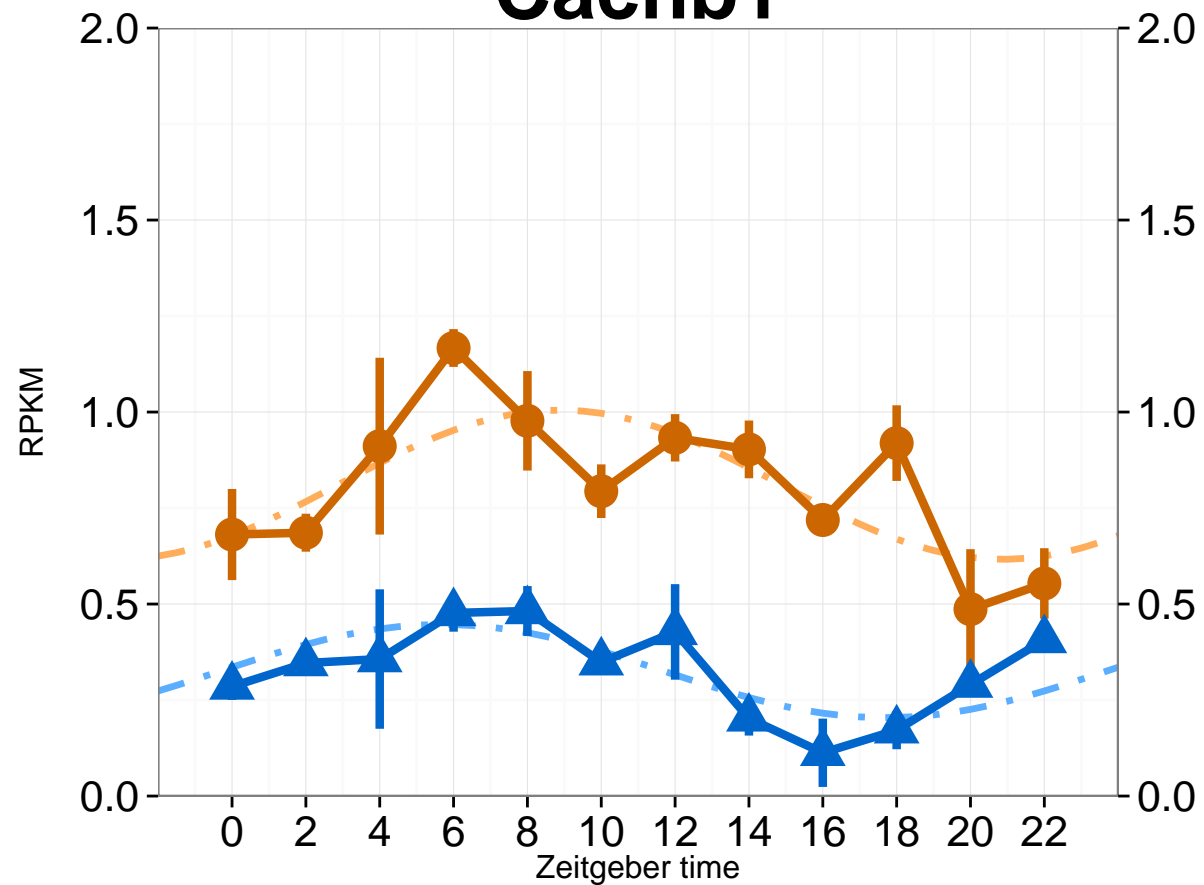

# Cacnb1

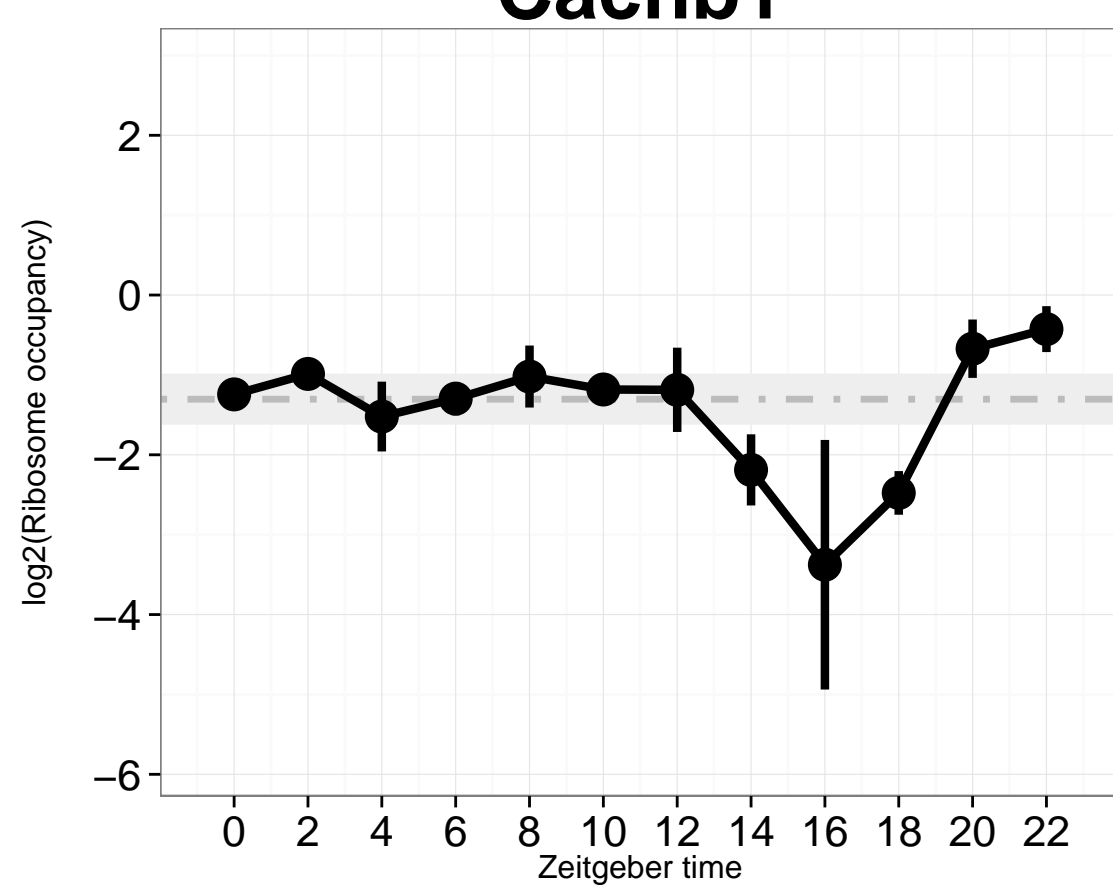

Supplement: Supplementary file 10152 [file 1]

# Morf4l1

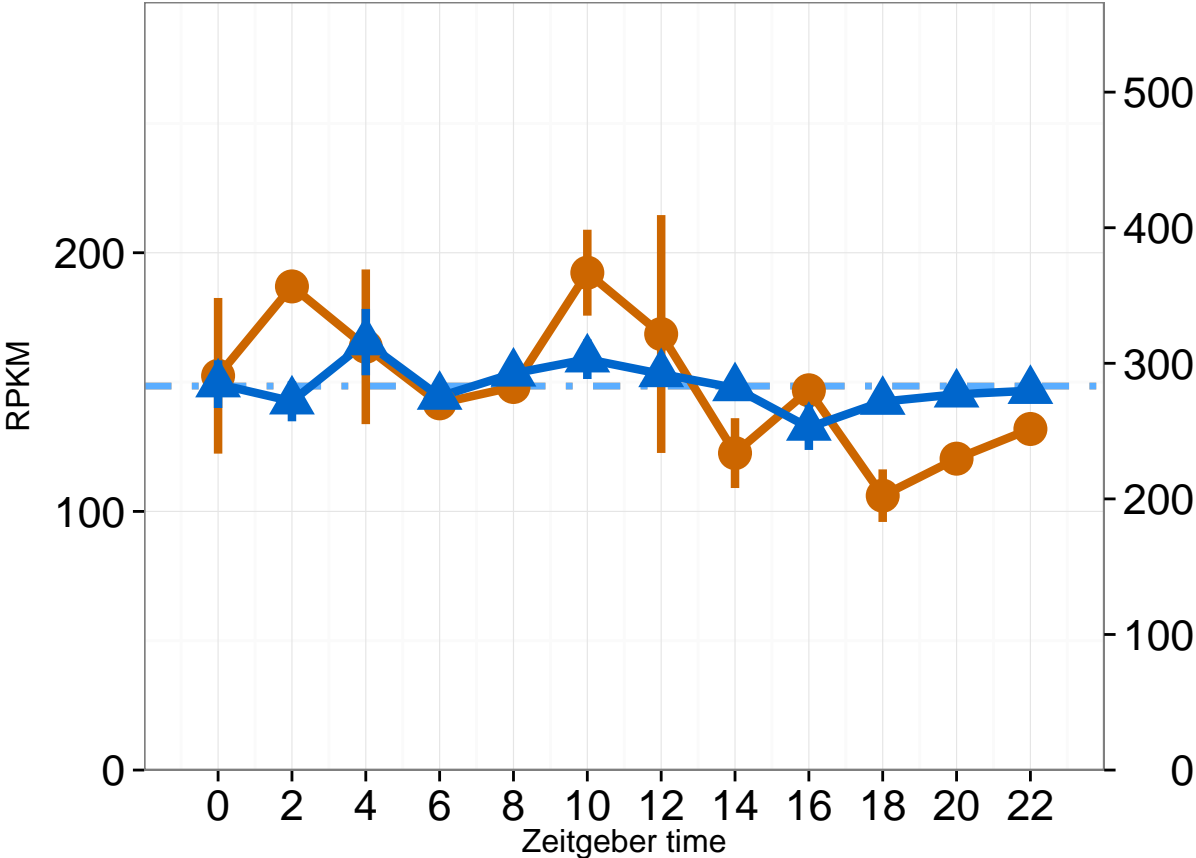

# Morf4l1

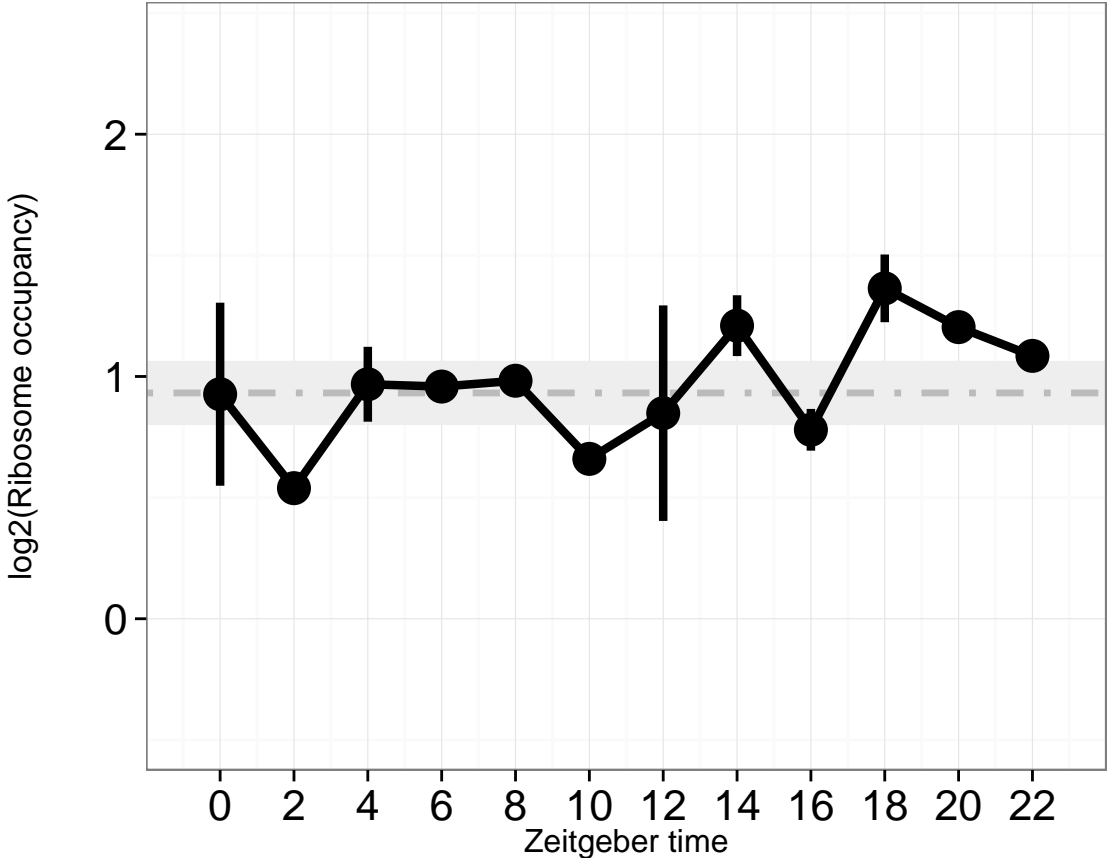

Supplement: Supplementary file 10153 [file 1]

## Arl4a

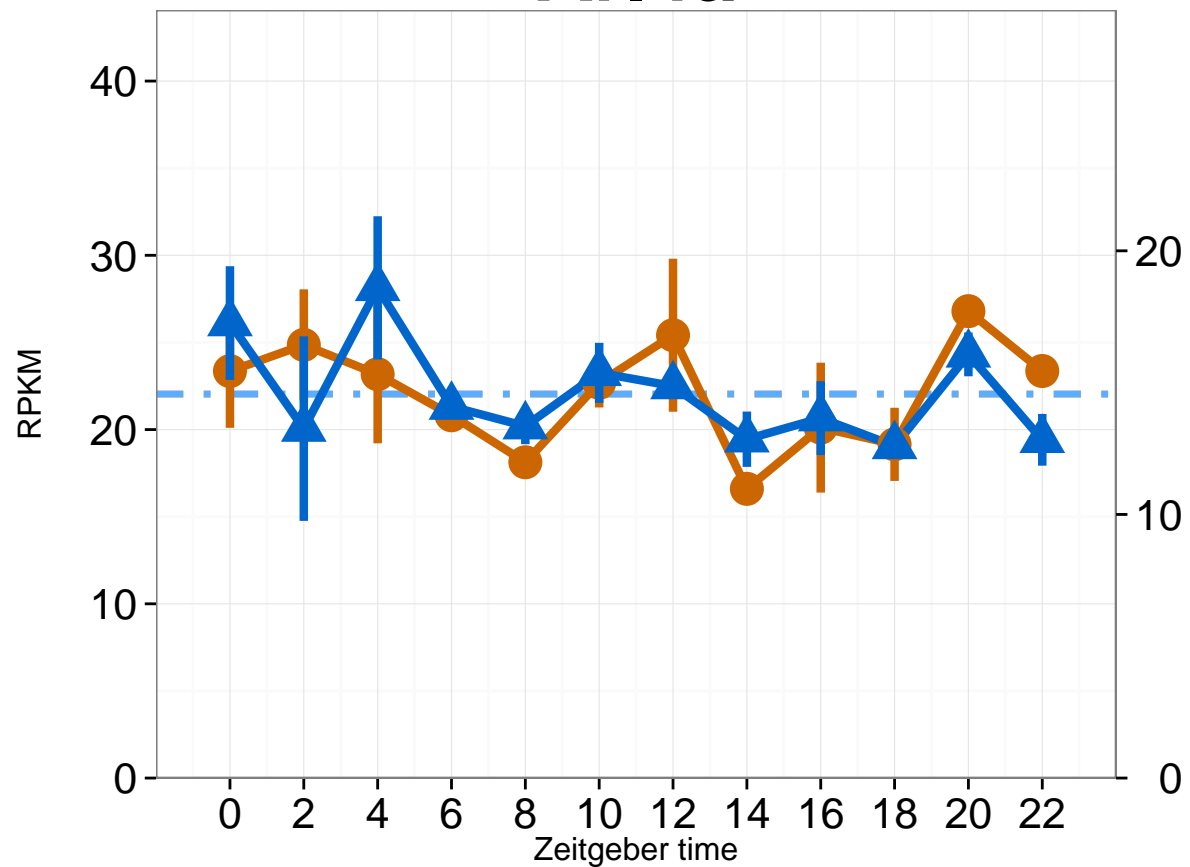

## Arl4a

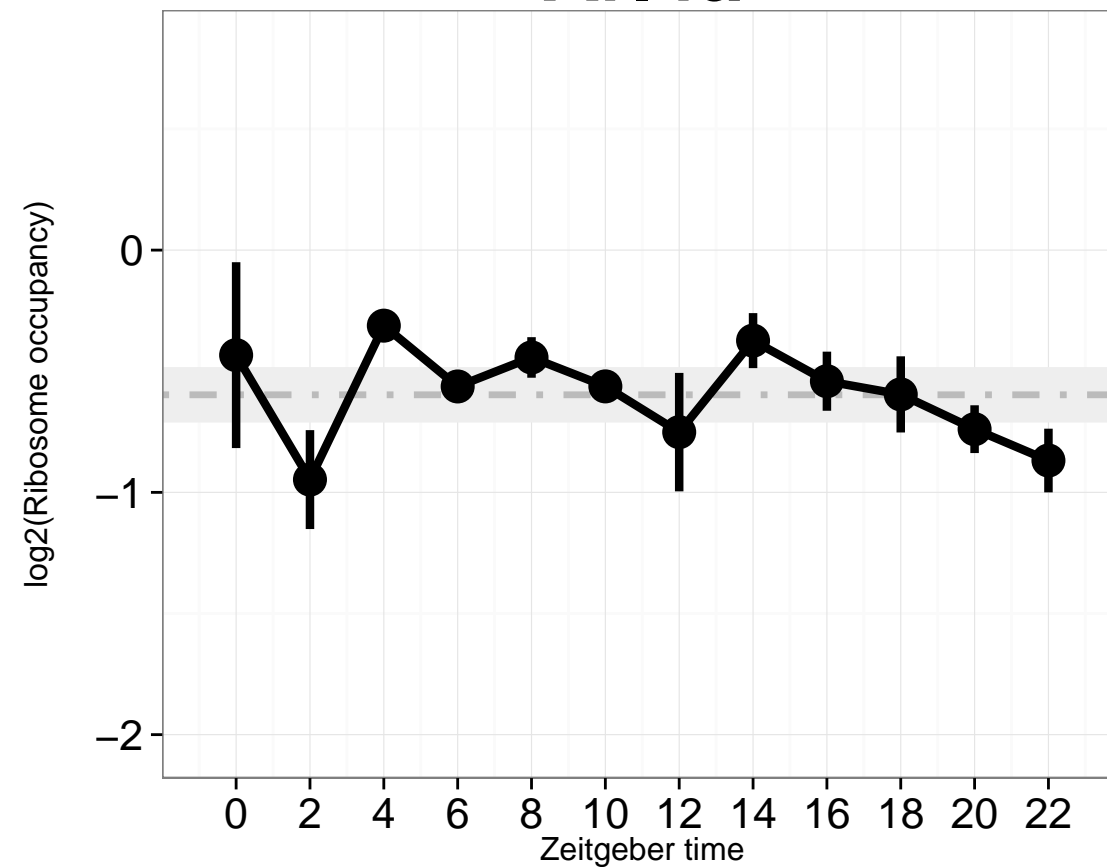

Supplement: Supplementary file 10154 [file 1]

**Zcchc12 TR**

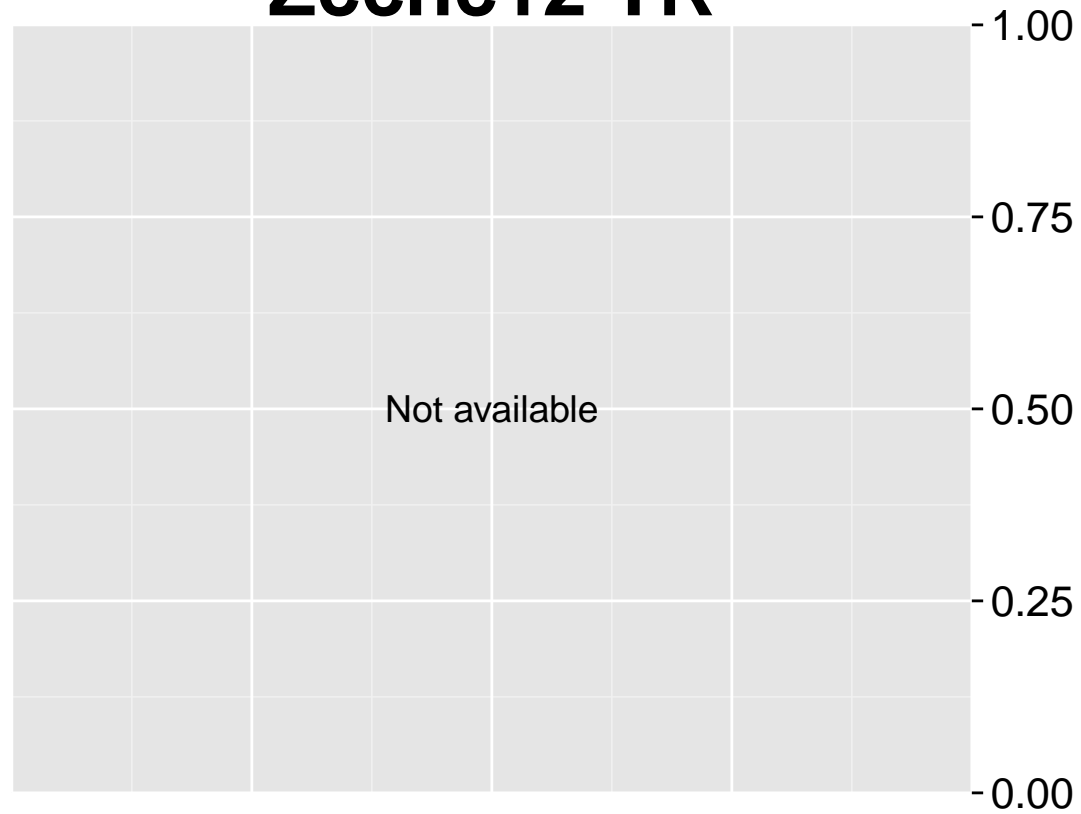

**Zcchc12 log2(Ribosome occupanc**

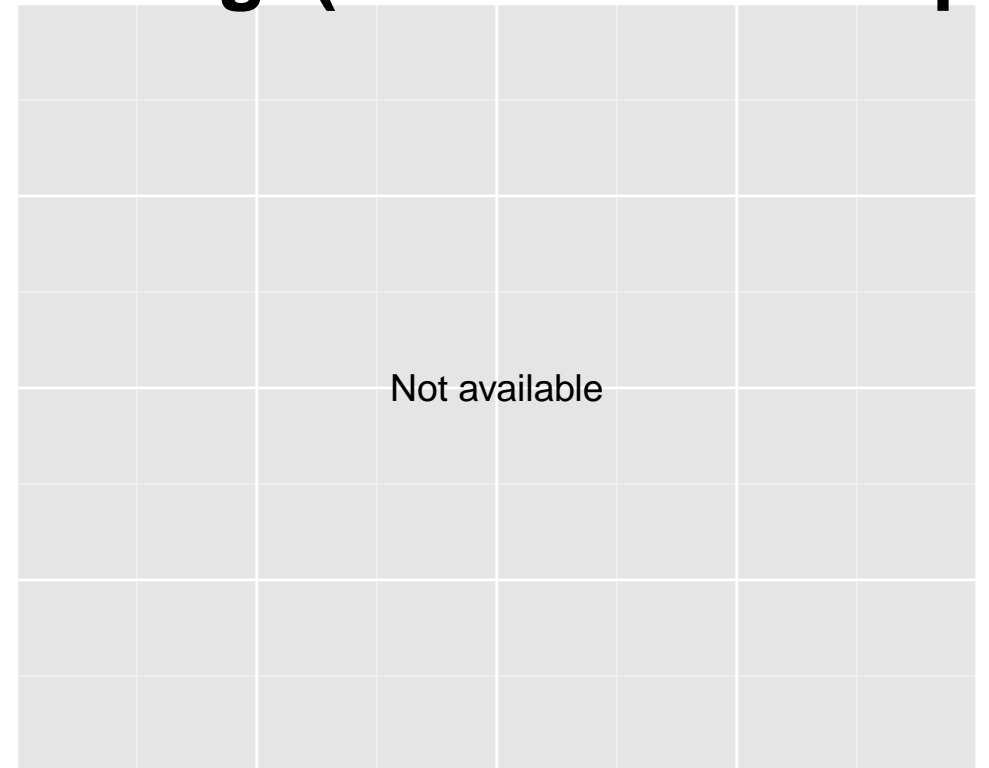

Supplement: Supplementary file 10155 [file 1]

## 2210404O09Rik

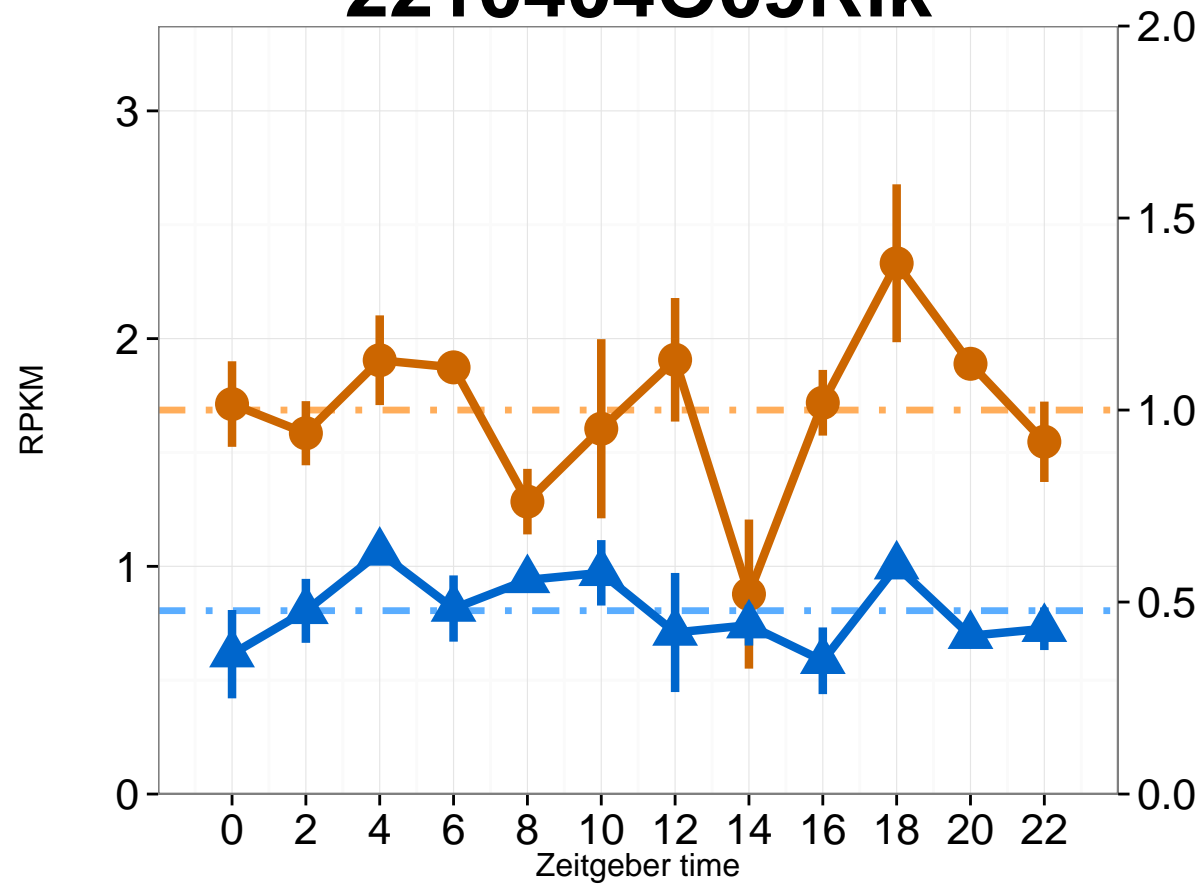

## 2210404O09Rik

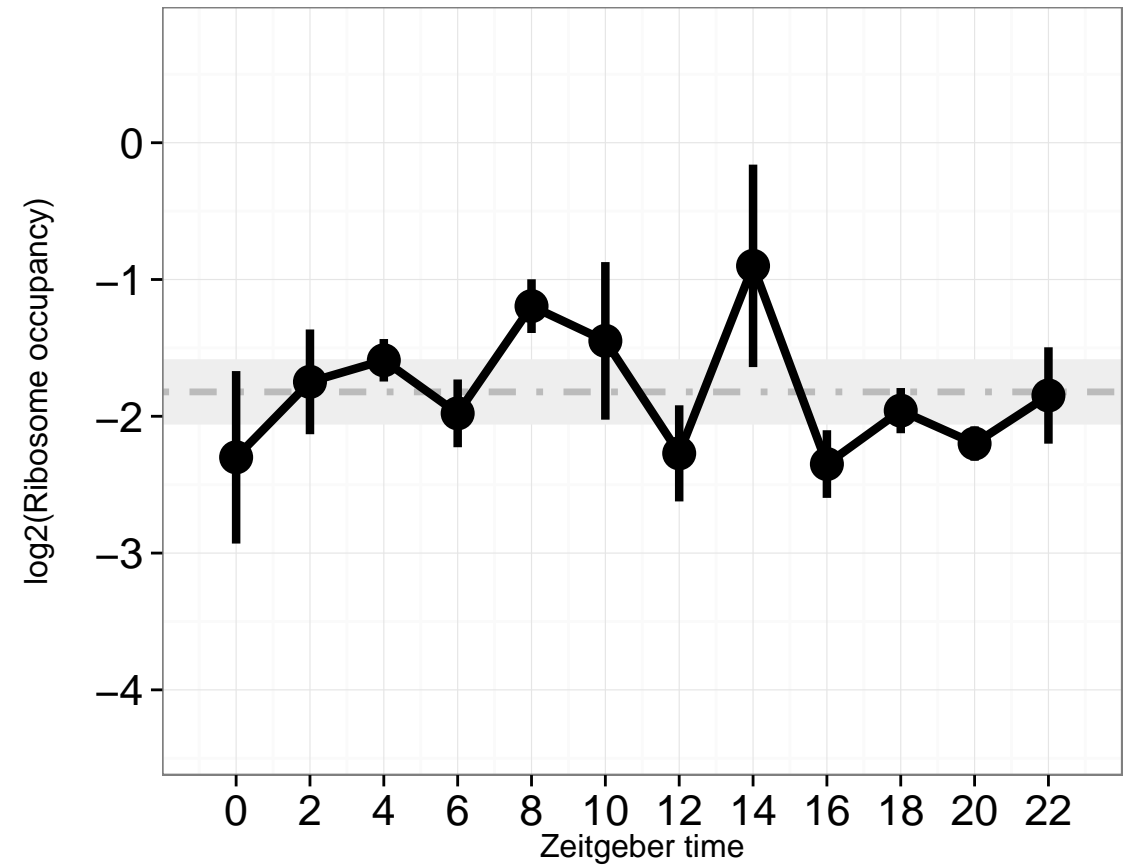

Supplement: Supplementary file 10156 [file 1]

# Man1a

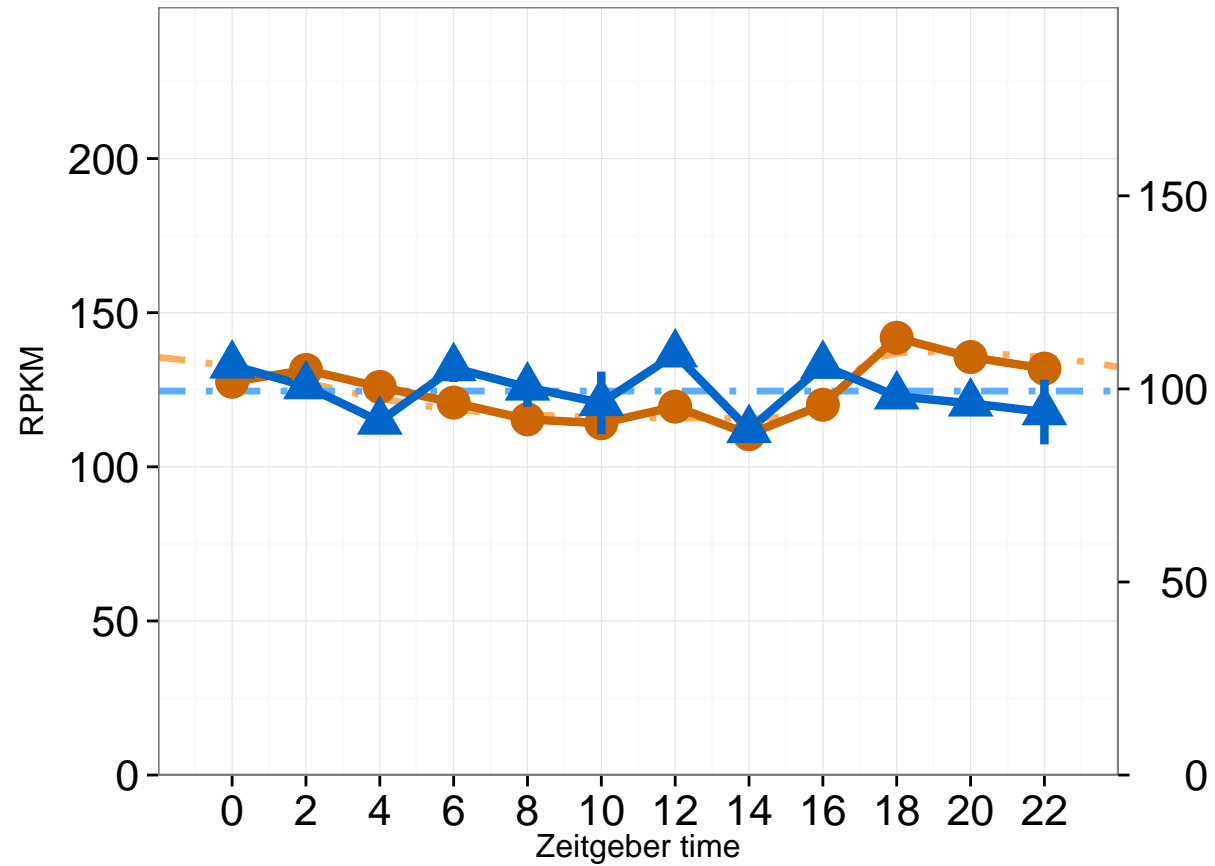

# Man1a

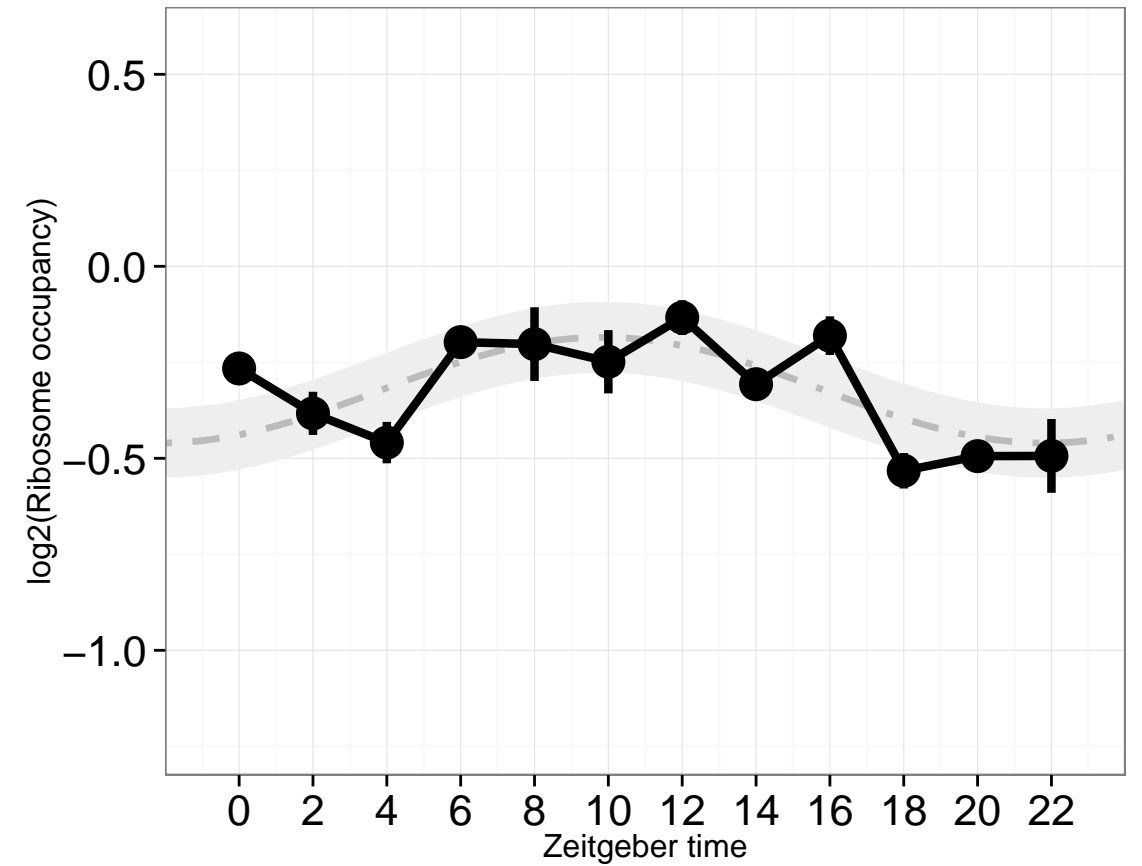

Supplement: Supplementary file 10157 [file 1]

**Tmem79**

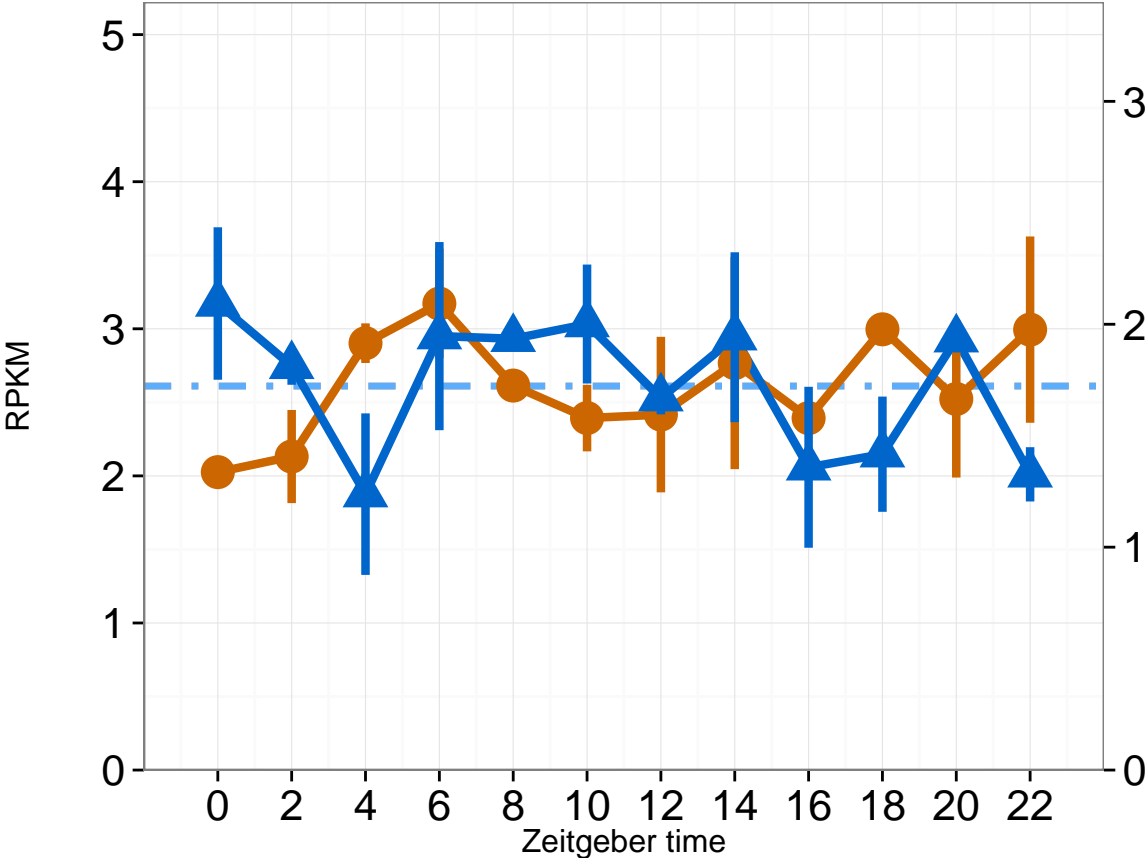

**Tmem79**

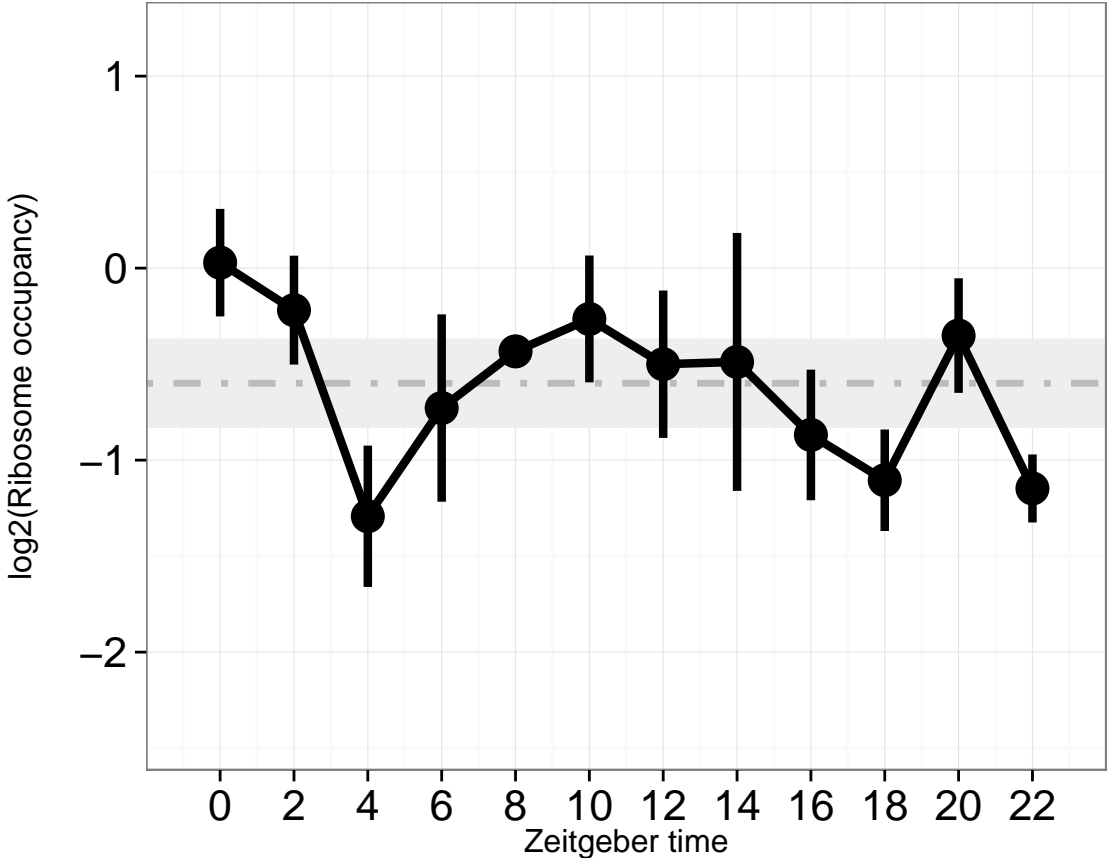

Supplement: Supplementary file 10158 [file 1]

## Pole2

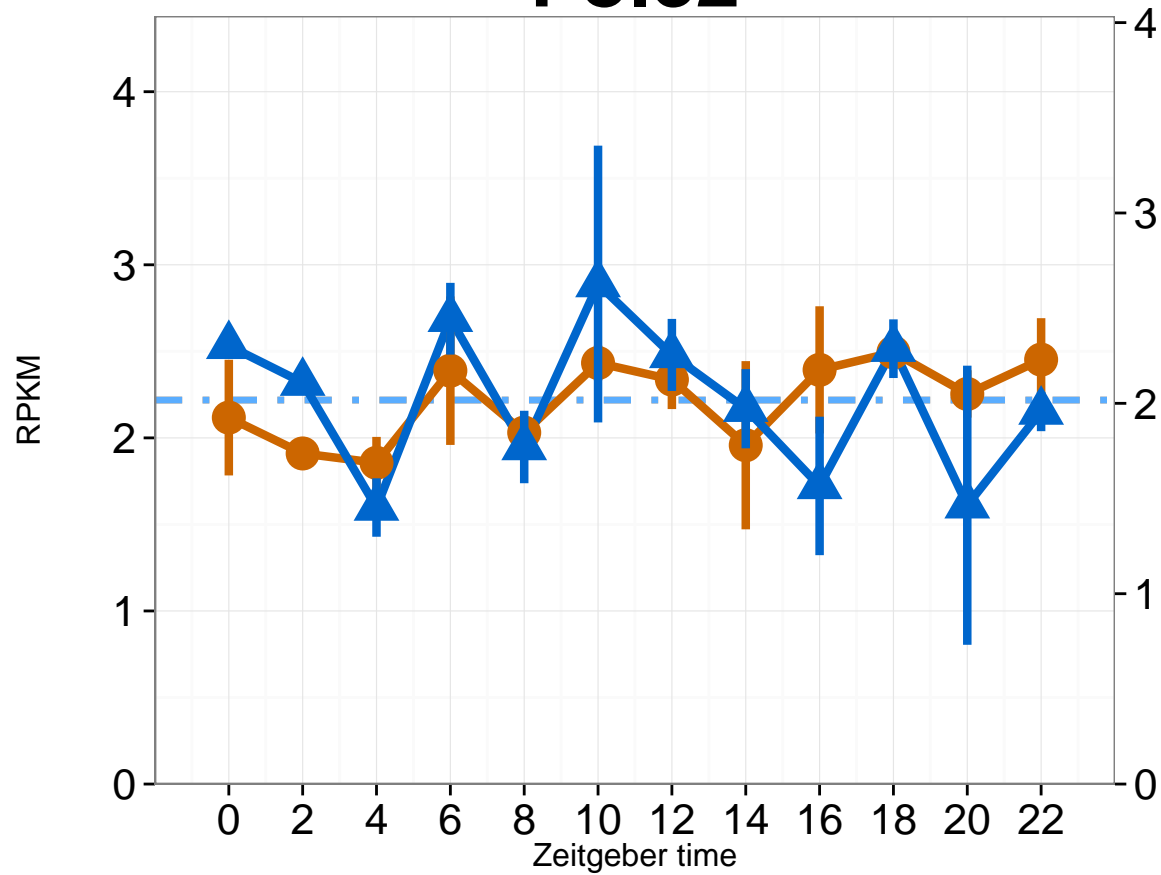

## Pole2

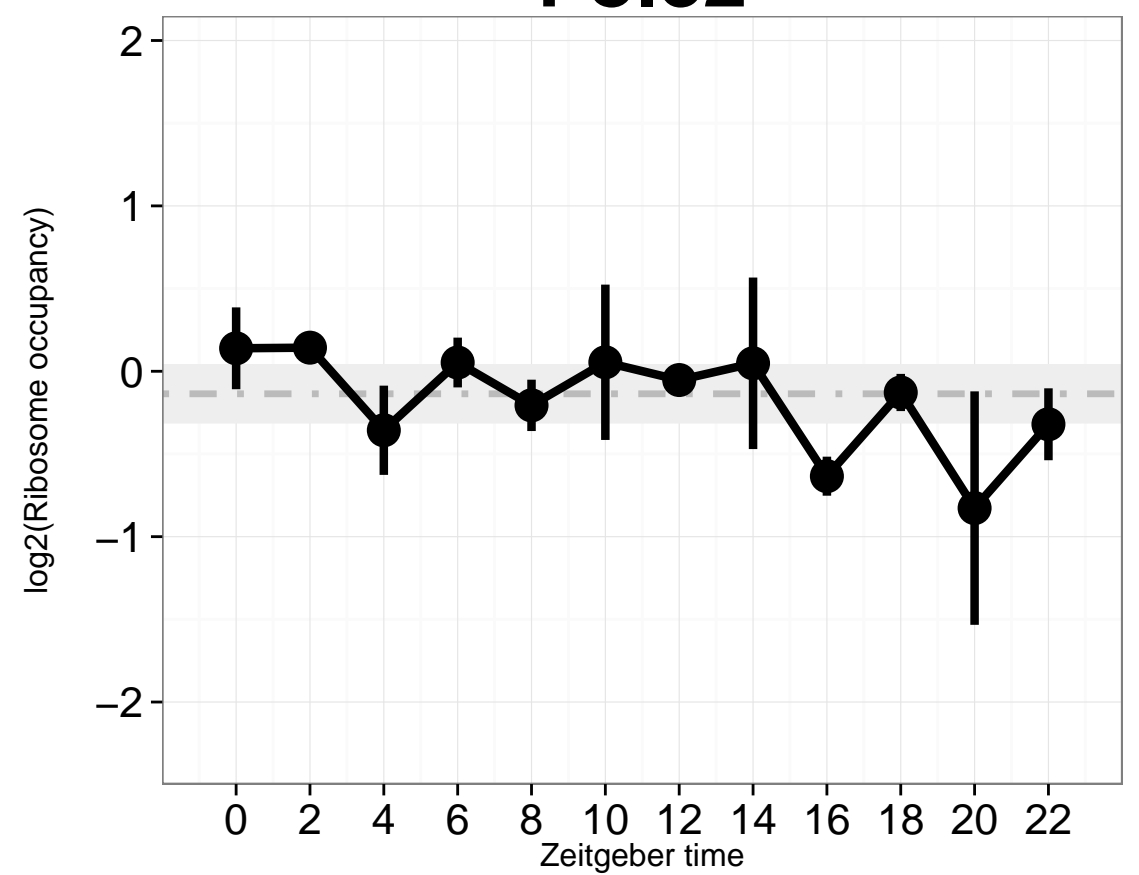

Supplement: Supplementary file 10159 [file 1]

## Plxna4

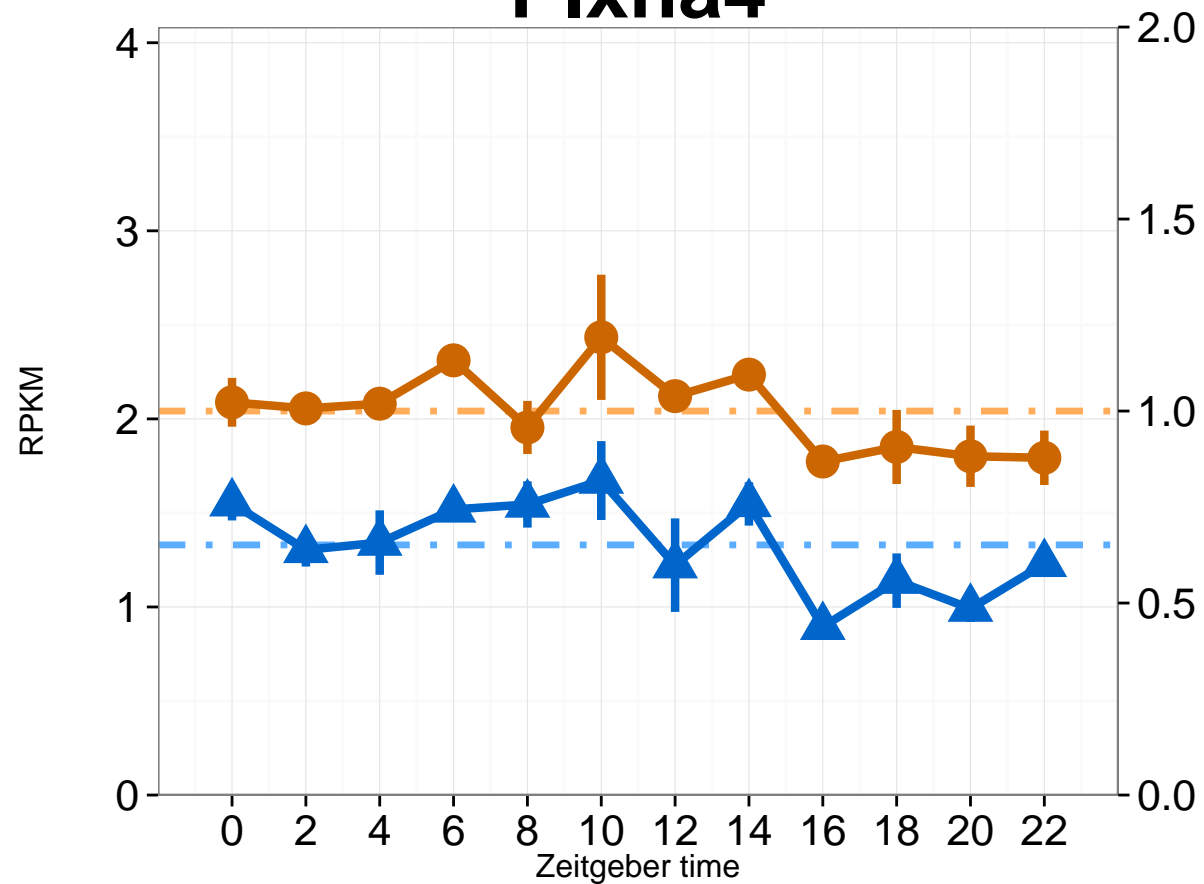

## Plxna4

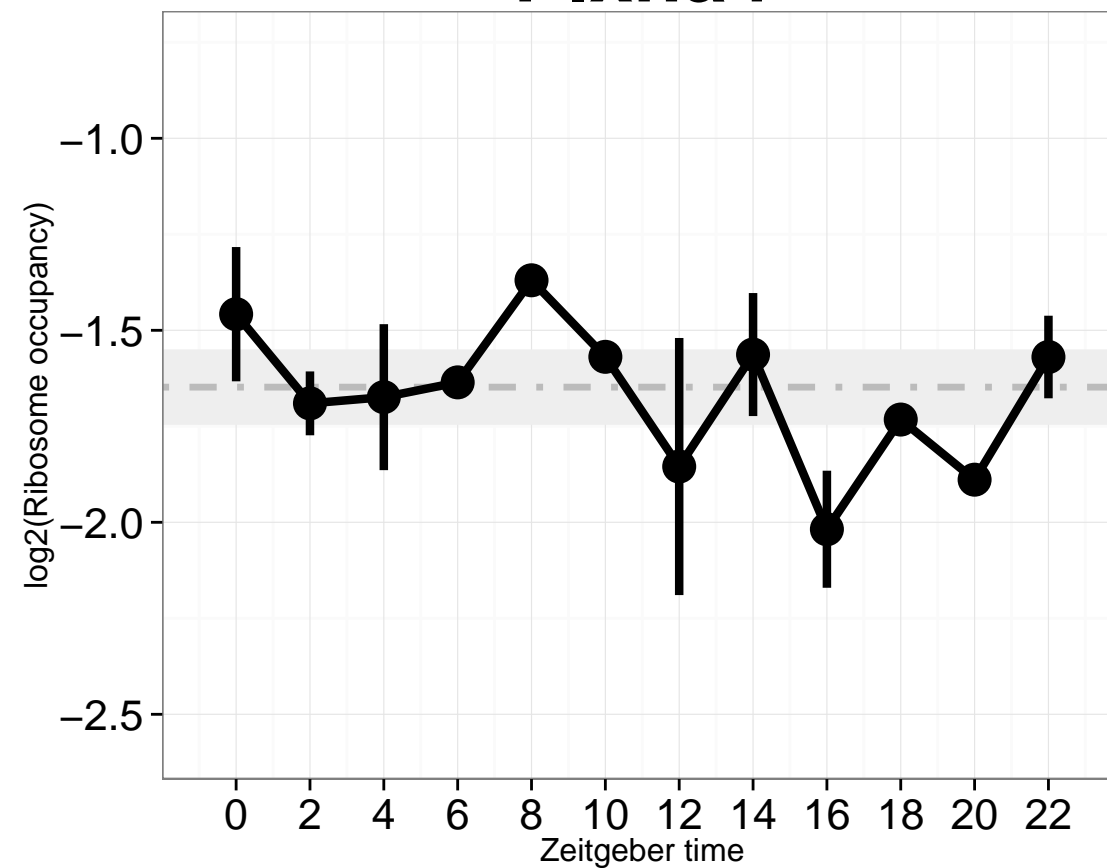

Supplement: Supplementary file 10160 [file 1]

## Asun

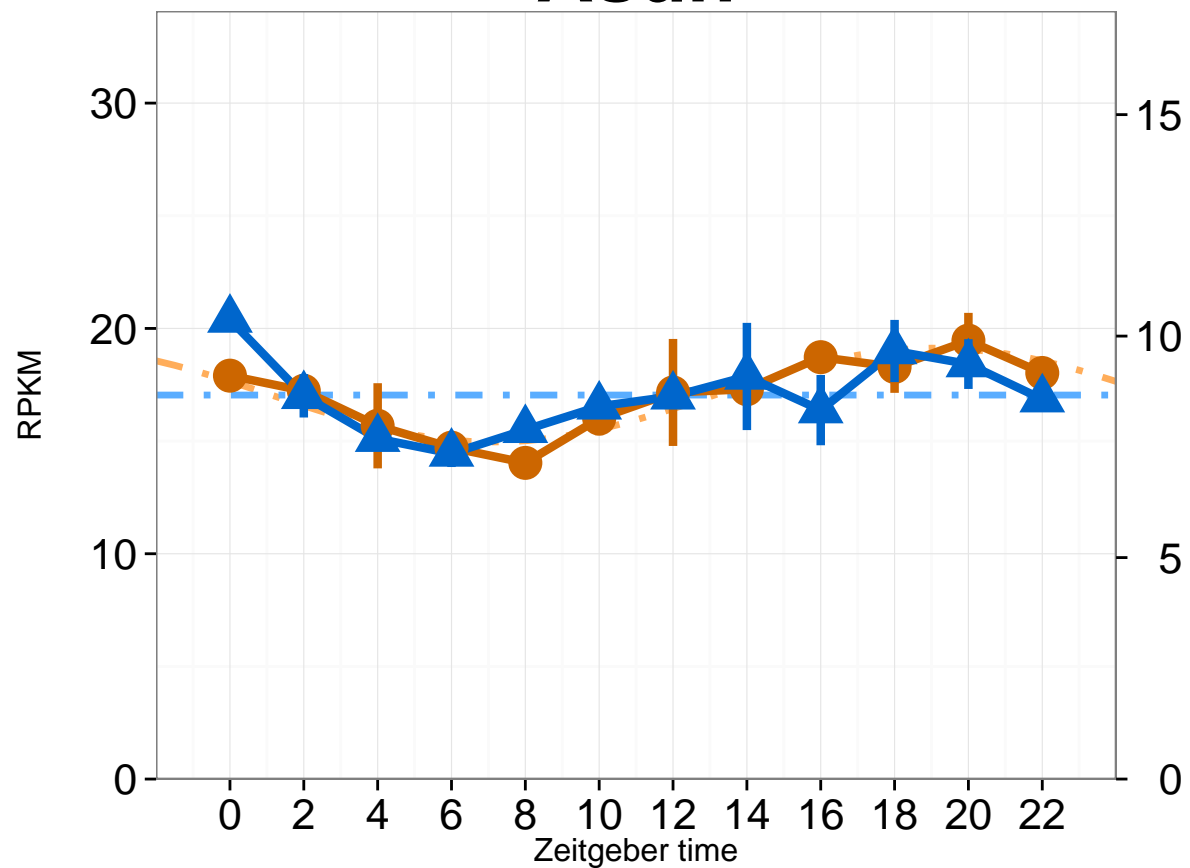

## Asun

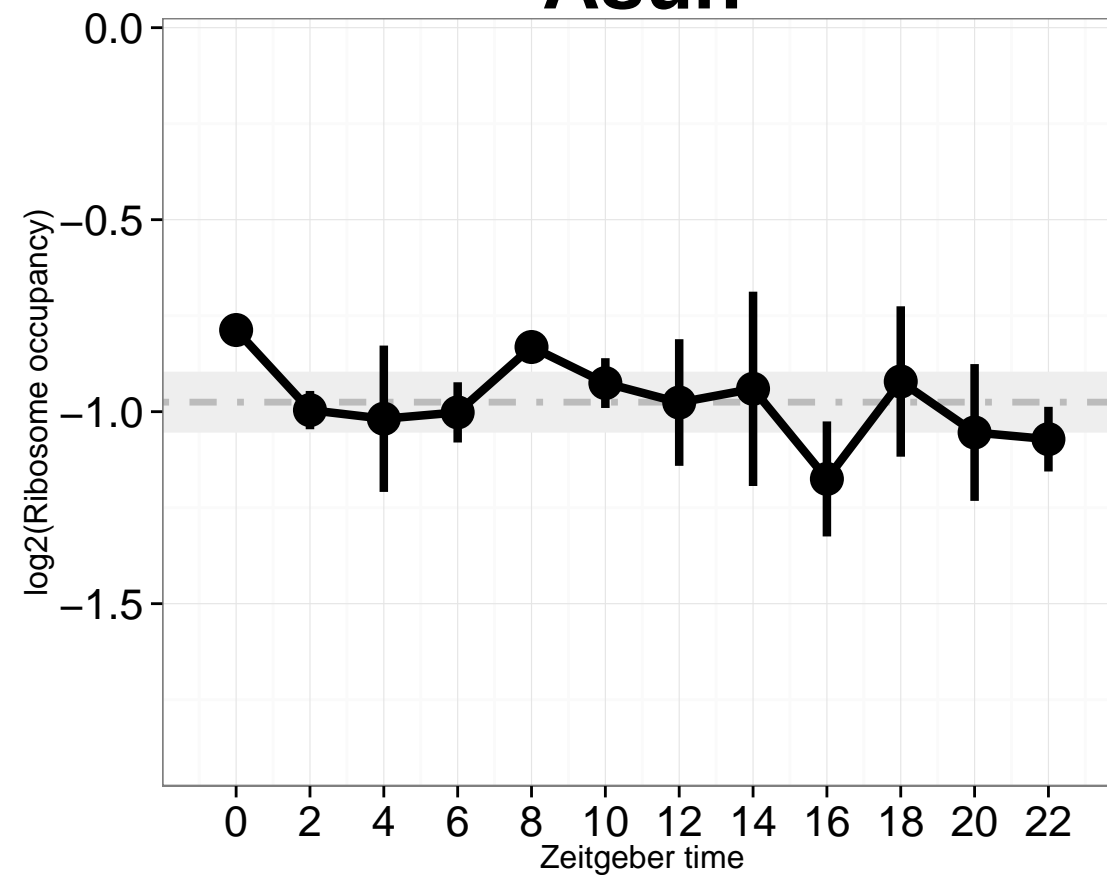

Supplement: Supplementary file 10161 [file 1]

## Rab6b

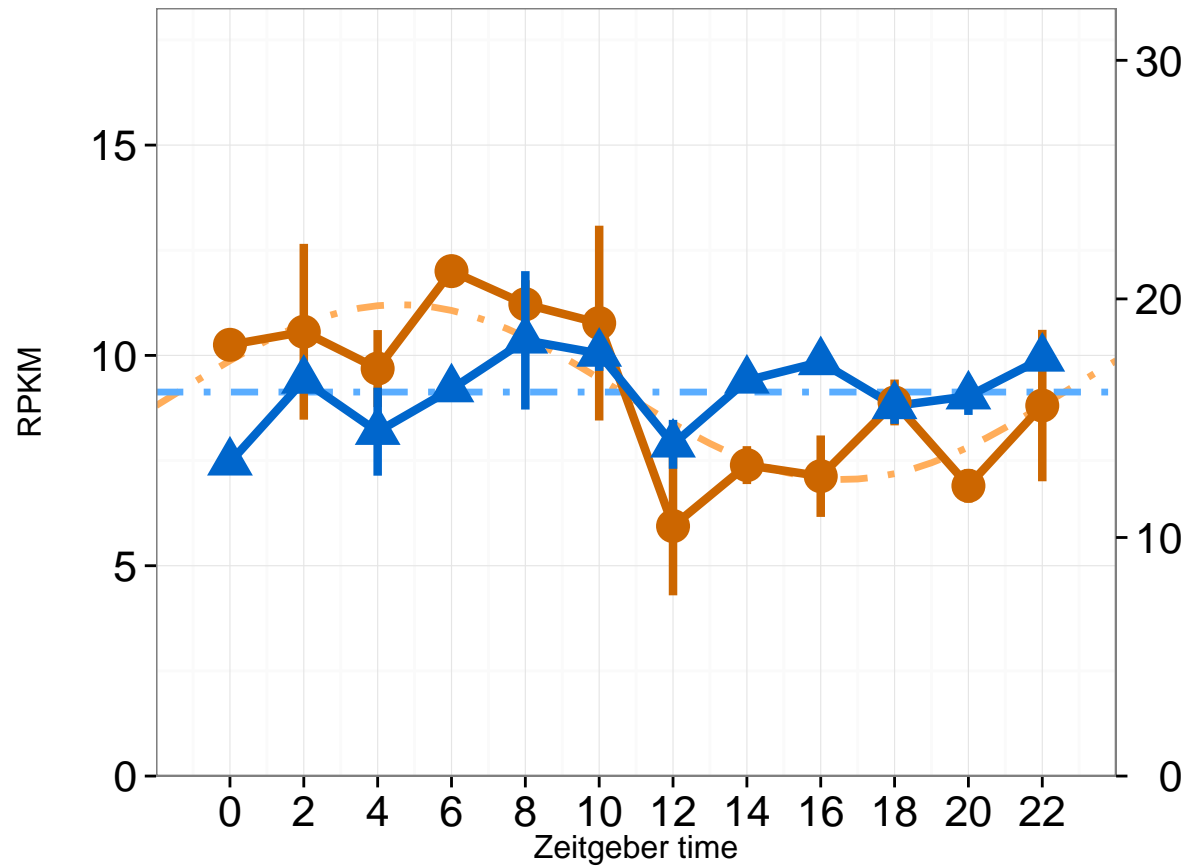

## Rab6b

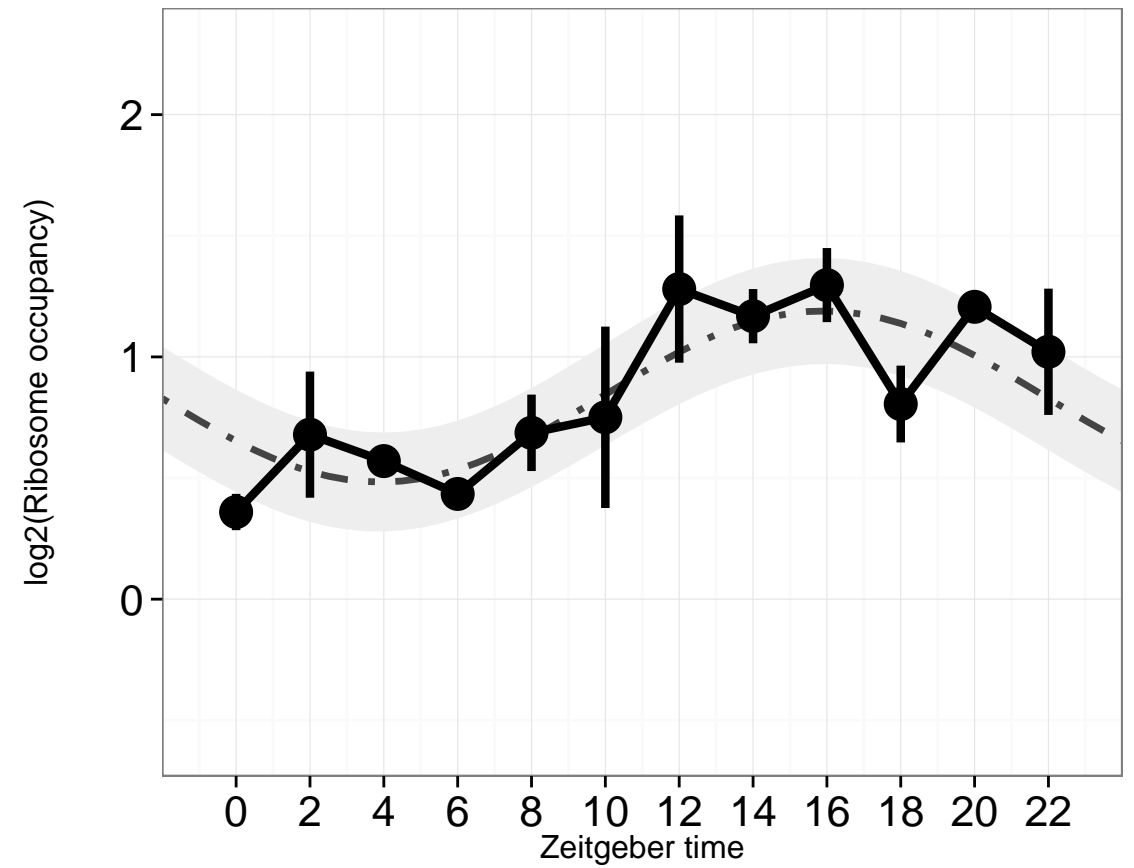

Supplement: Supplementary file 10162 [file 1]

## Rapsn

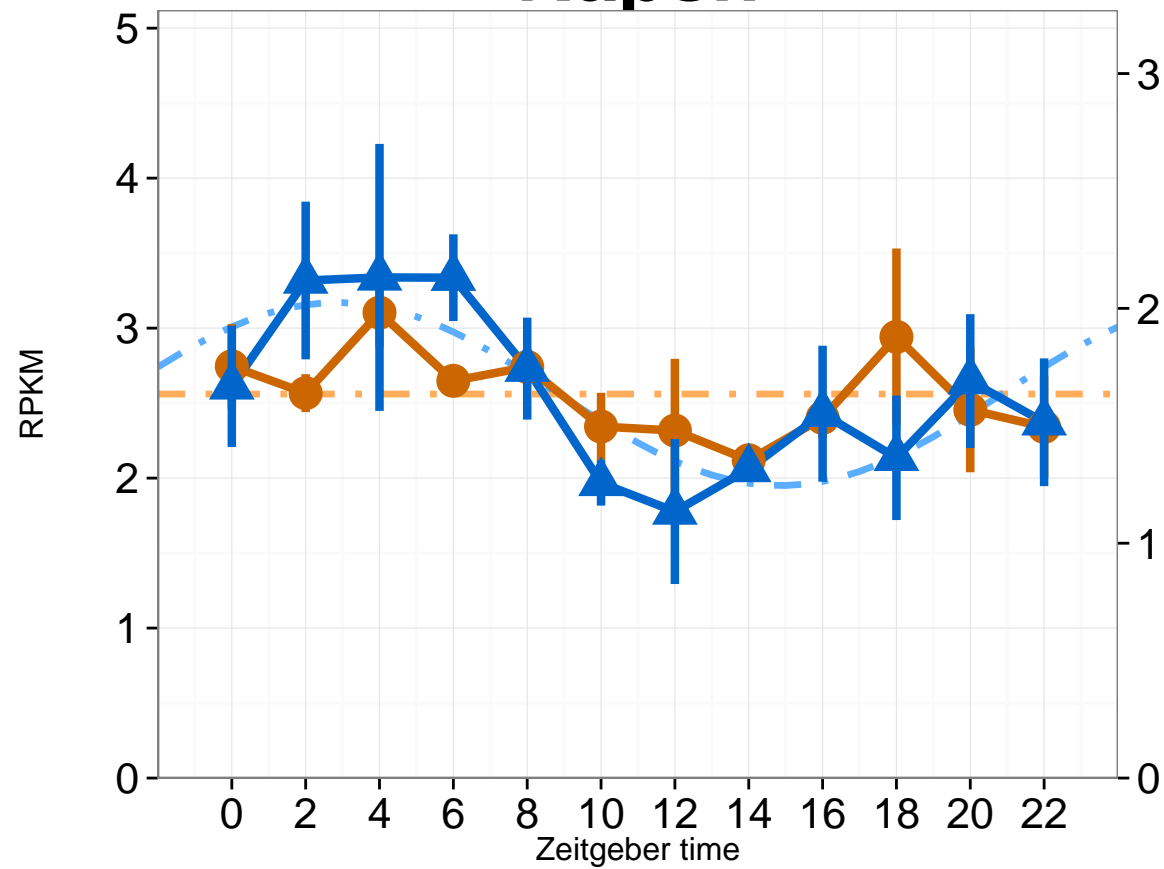

## Rapsn

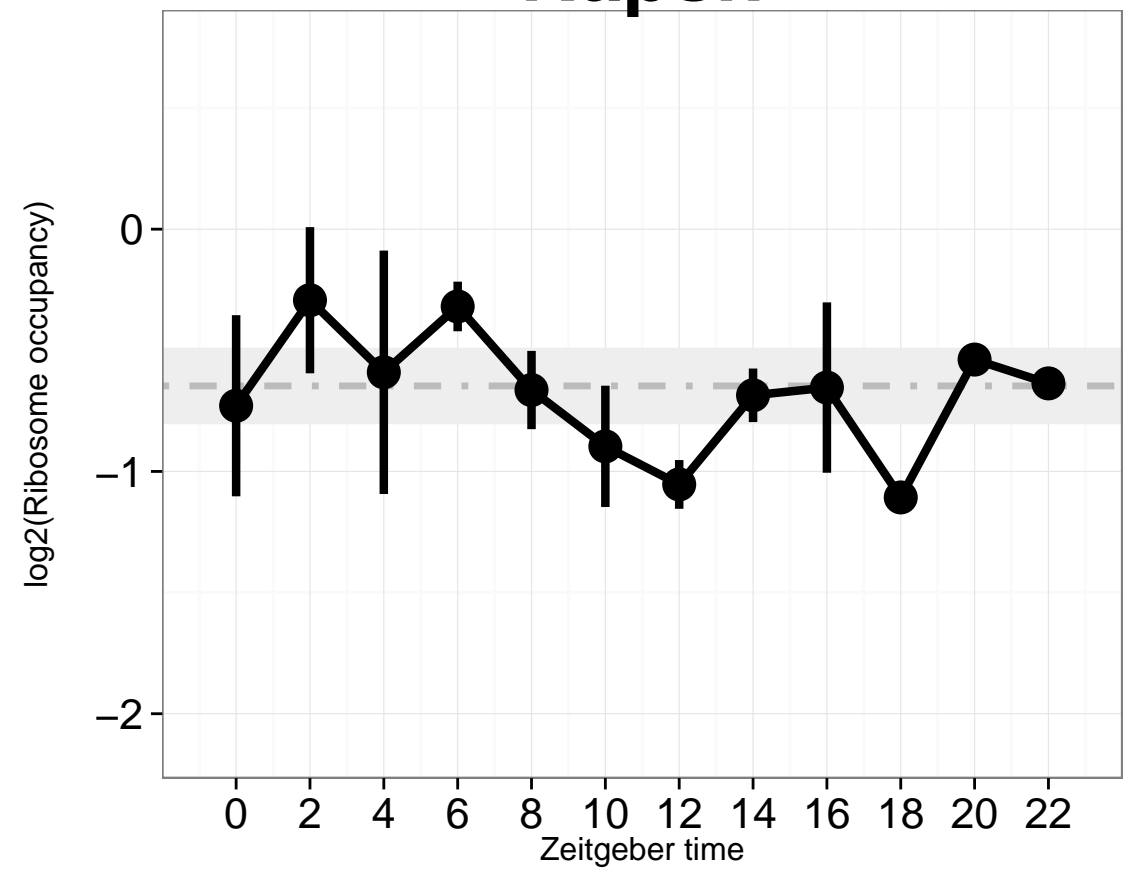

Supplement: Supplementary file 10163 [file 1]

# HacI1

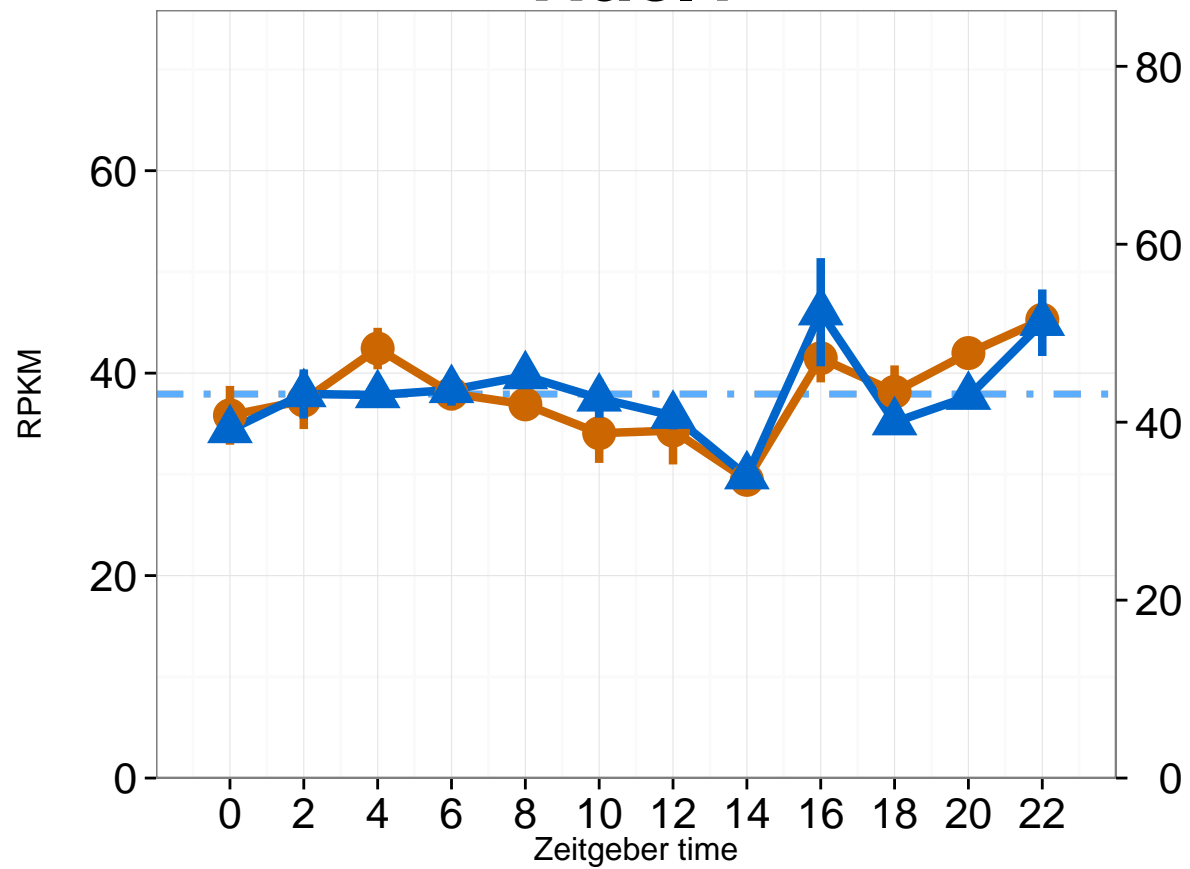

# HacI1

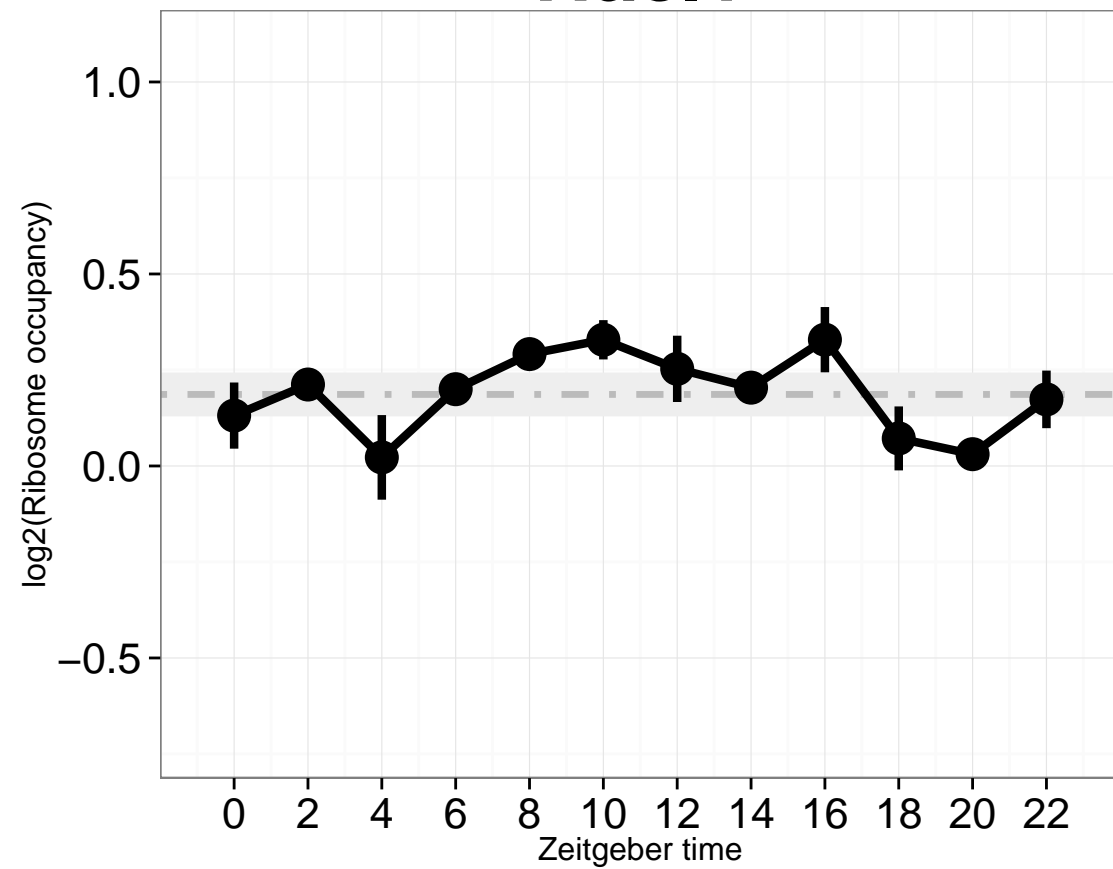

Supplement: Supplementary file 10164 [file 1]

## Slc16a1

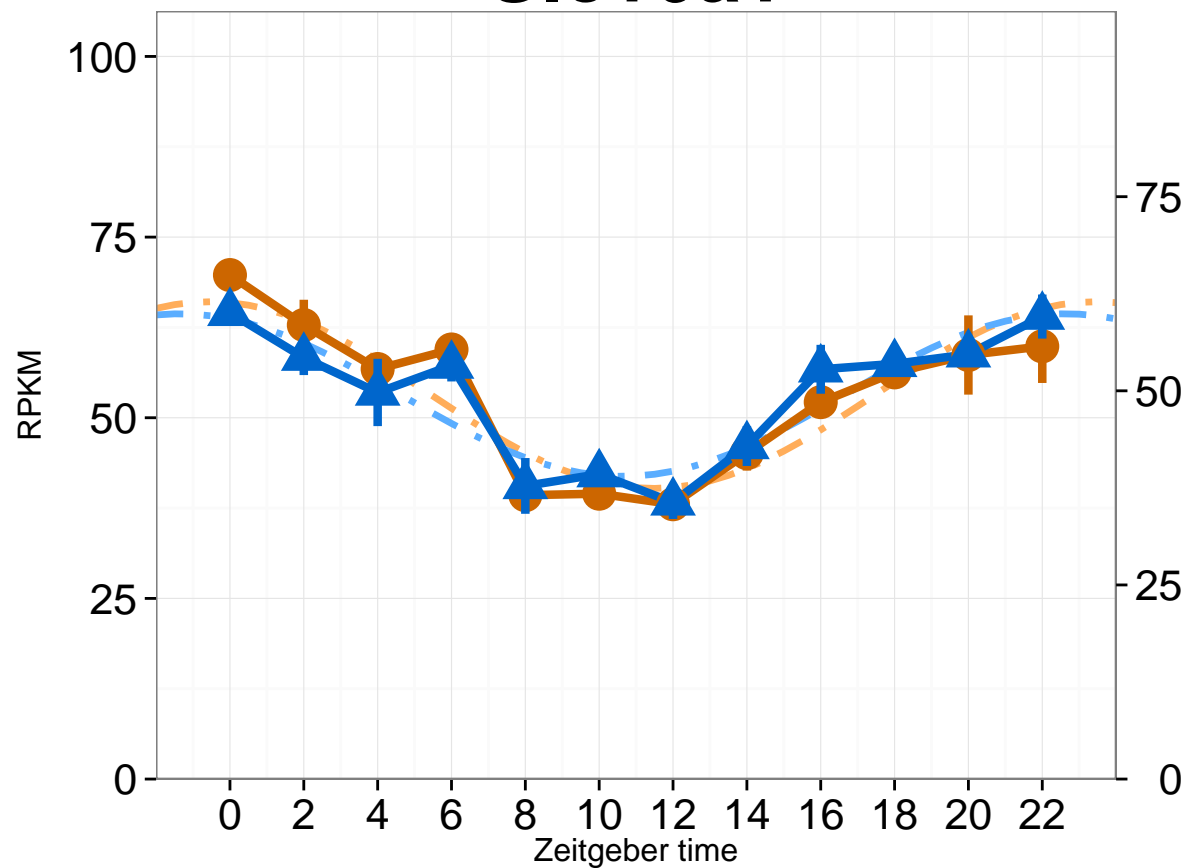

## Slc16a1

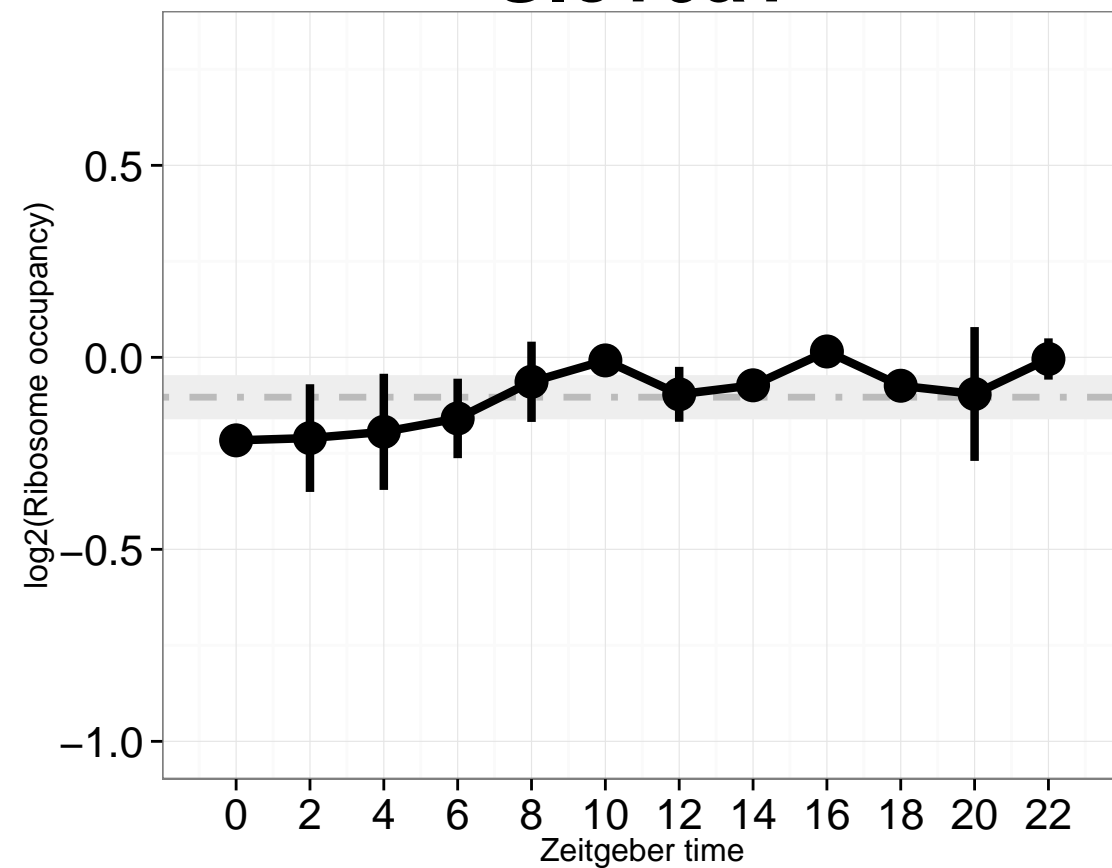

Supplement: Supplementary file 10165 [file 1]

## Loxl4

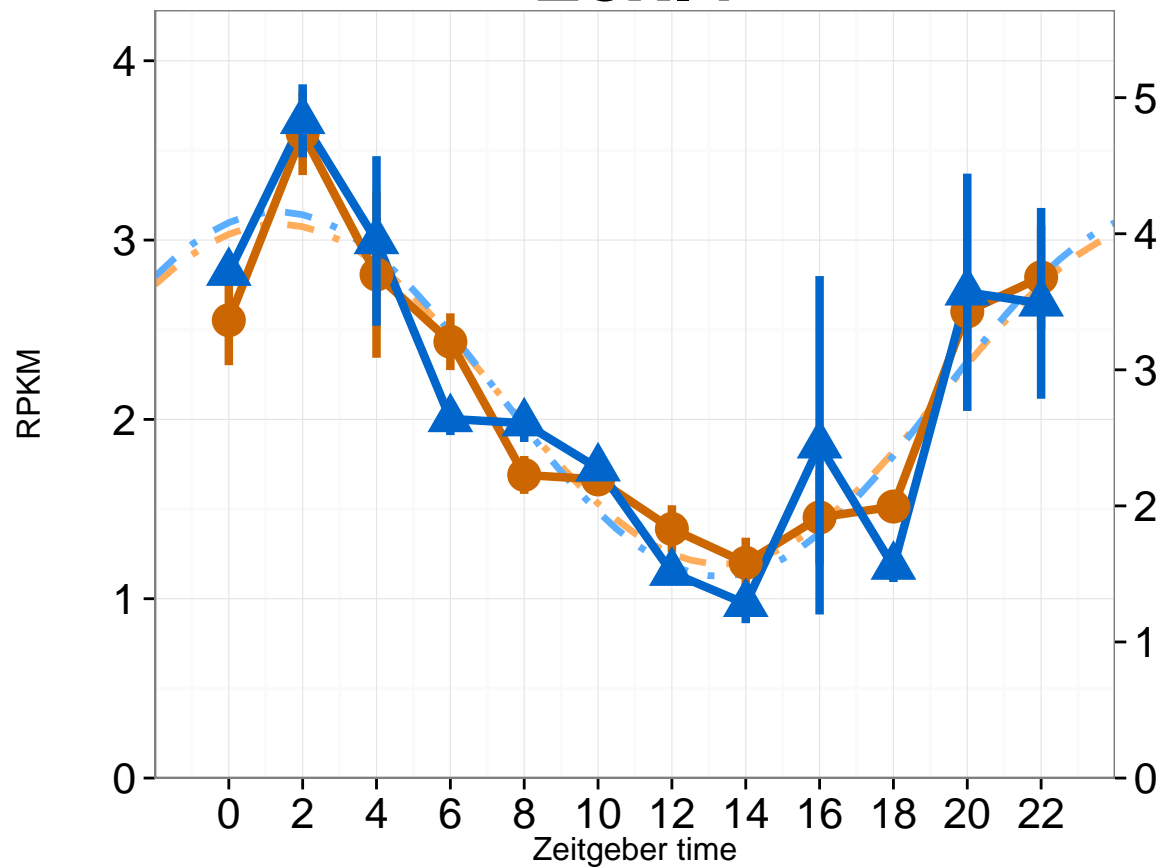

## Loxl4

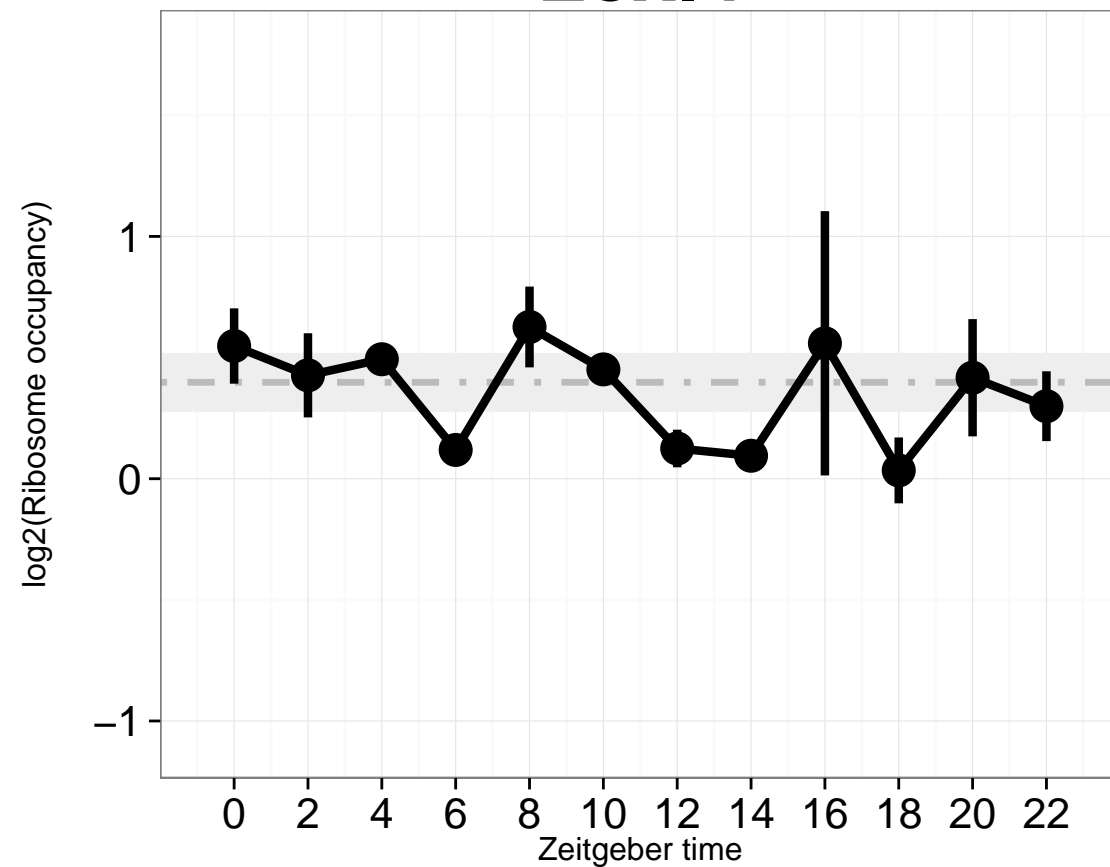

Supplement: Supplementary file 10166 [file 1]

## Plekha5

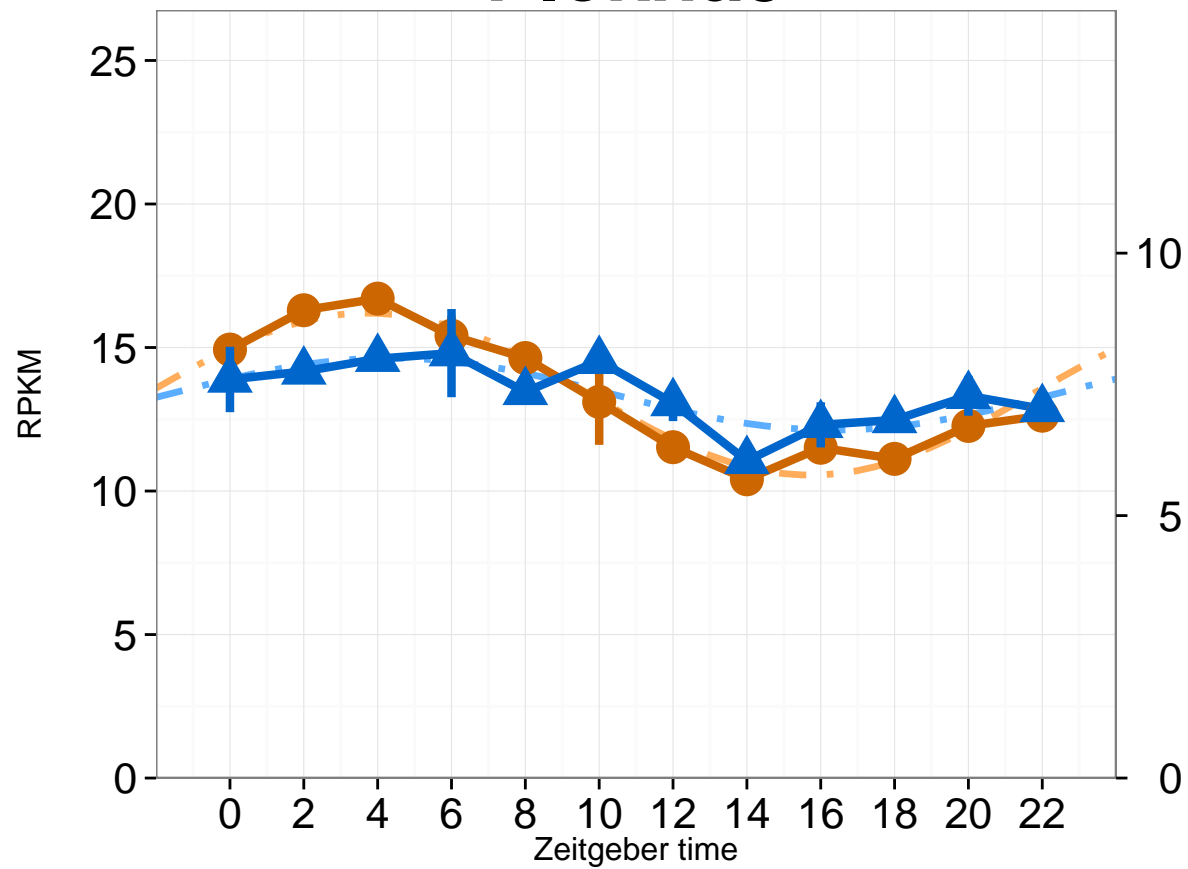

## Plekha5

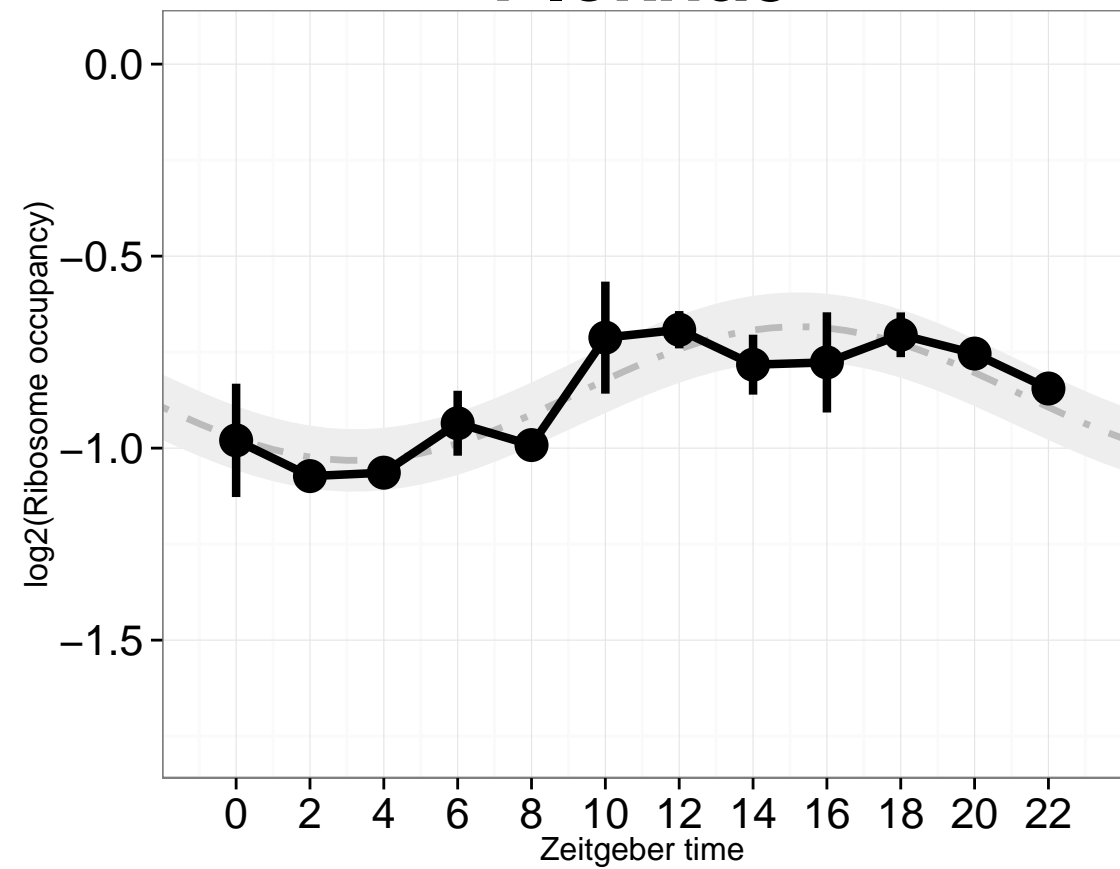

Supplement: Supplementary file 10167 [file 1]

## Gspt1

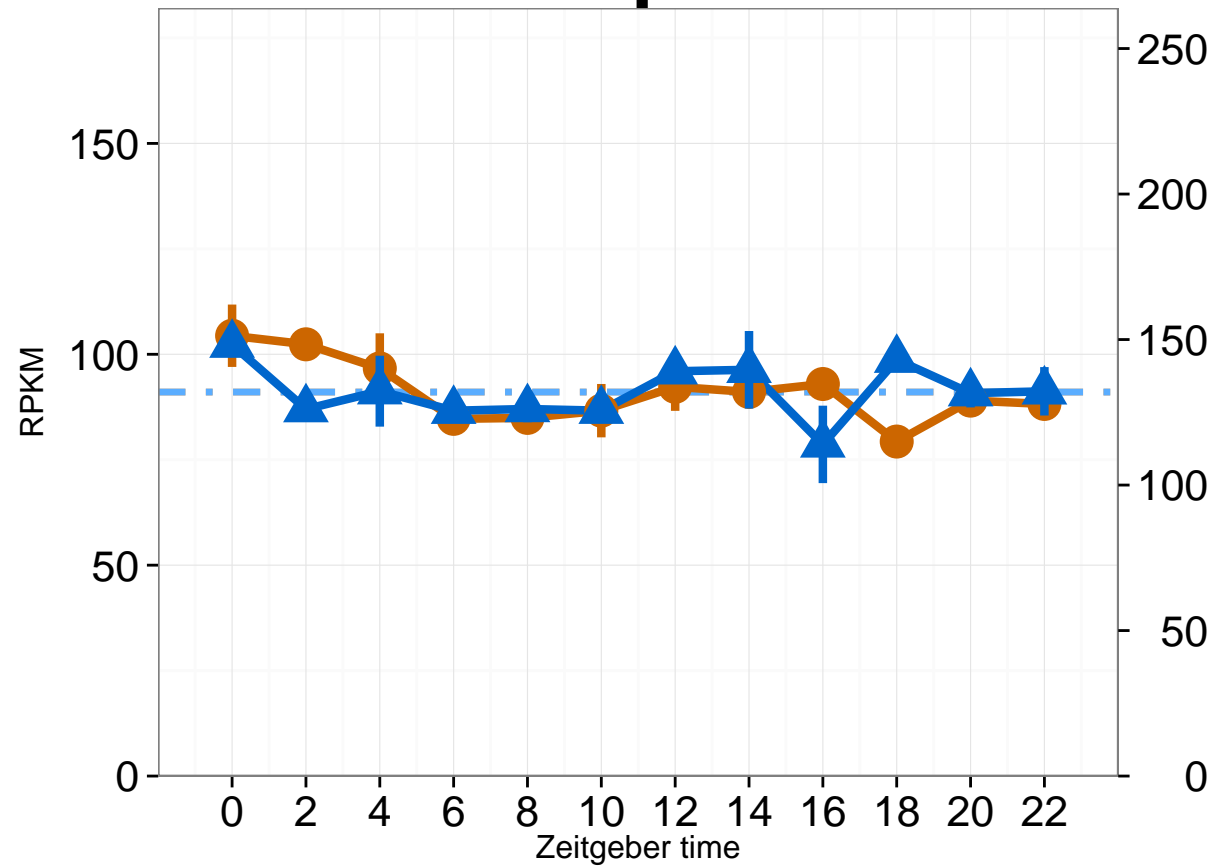

## Gspt1

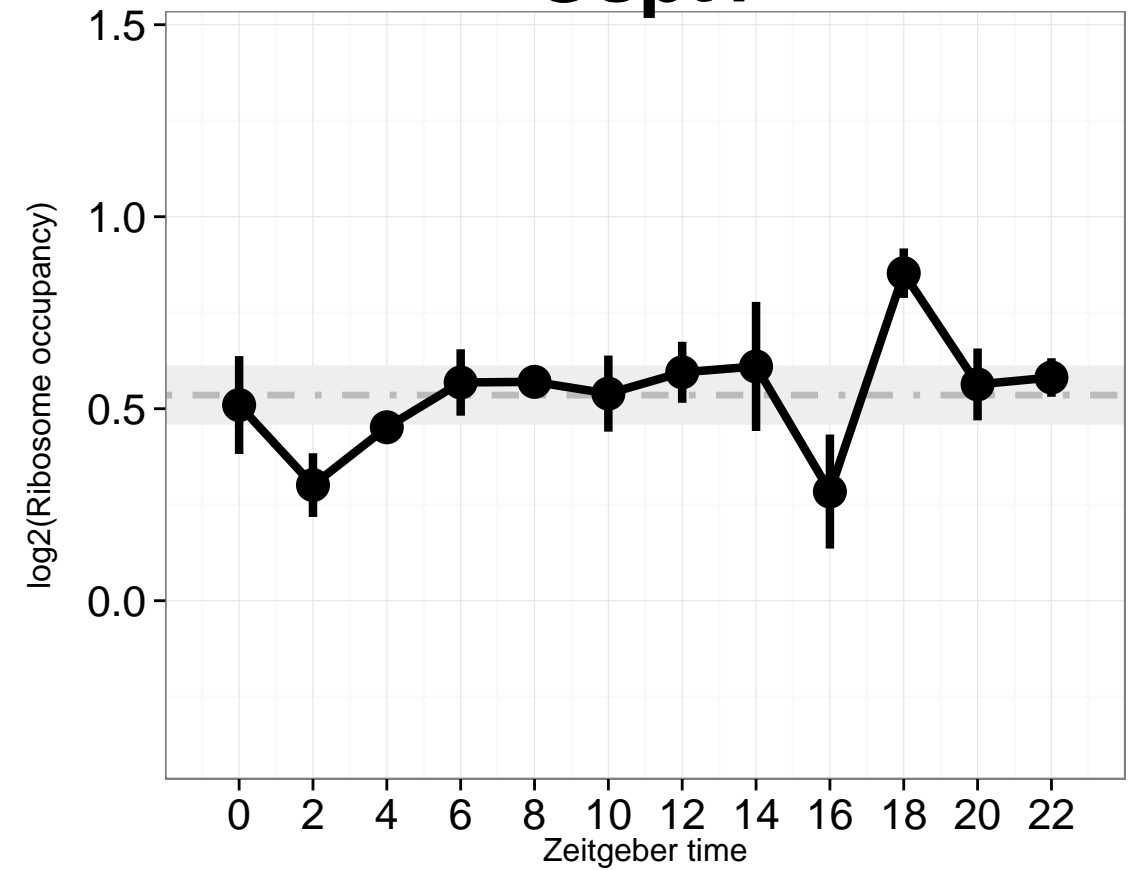

Supplement: Supplementary file 10168 [file 1]

## 2310022B05Rik

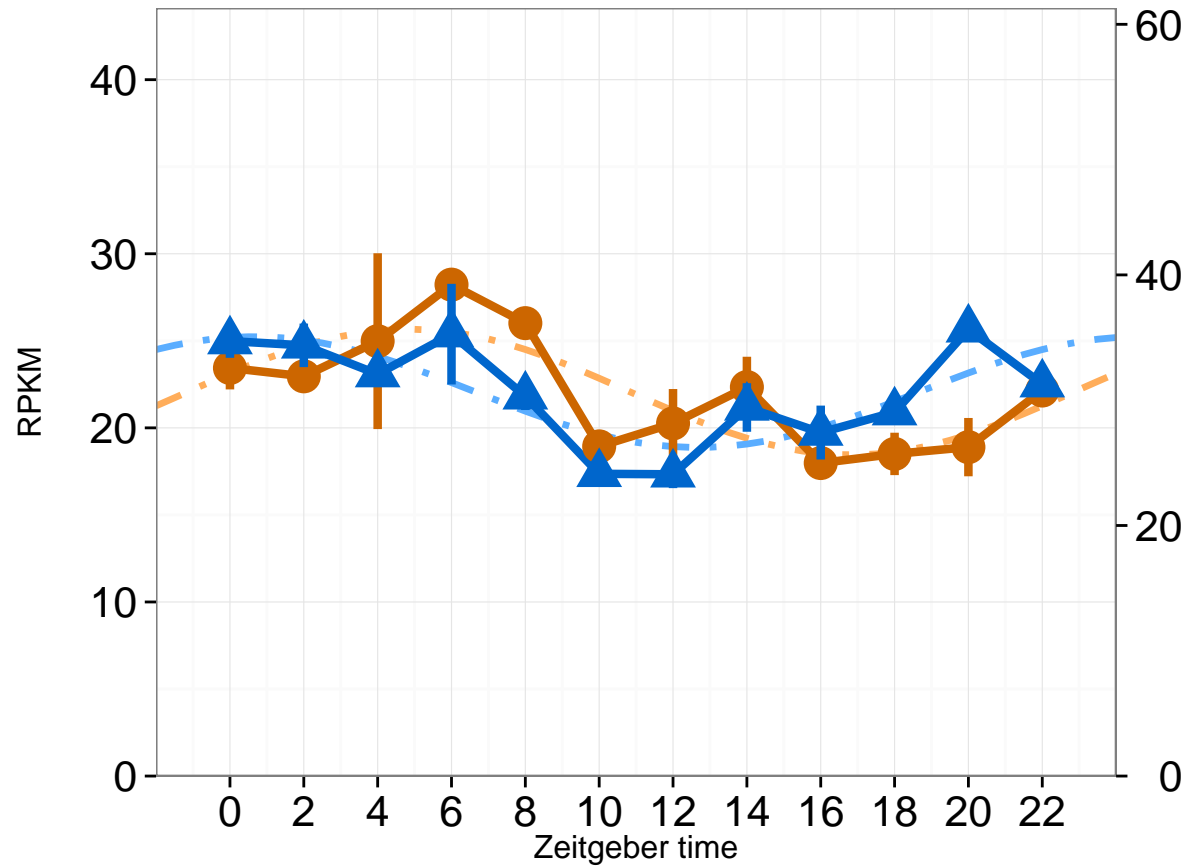

## 2310022B05Rik

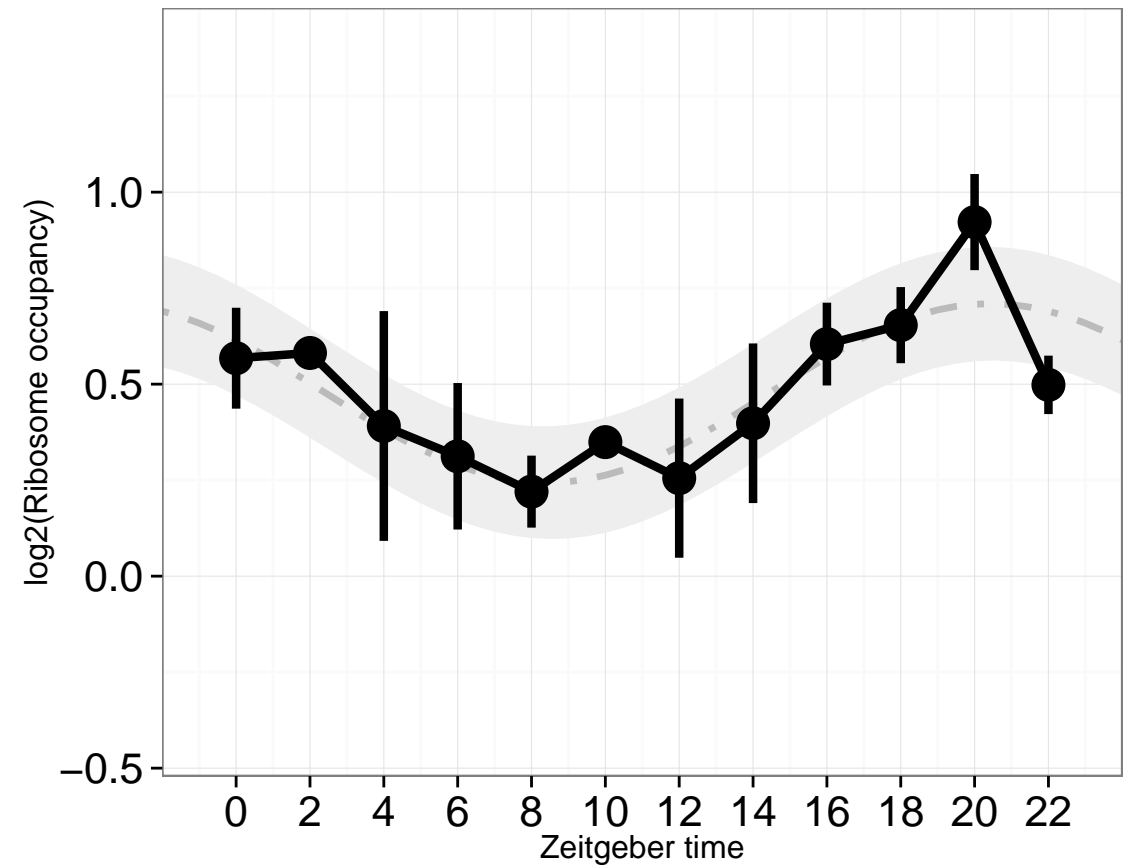

Supplement: Supplementary file 10169 [file 1]

# Arhgef25

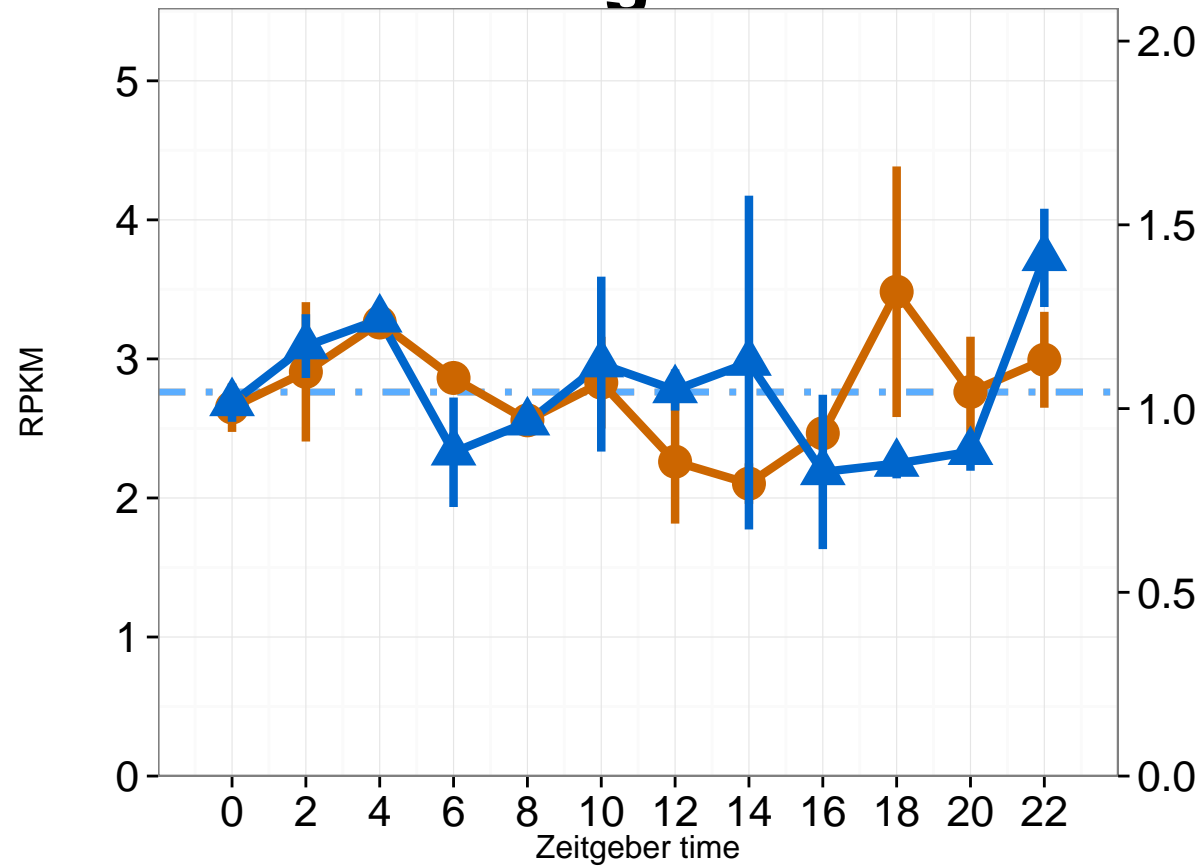

# Arhgef25

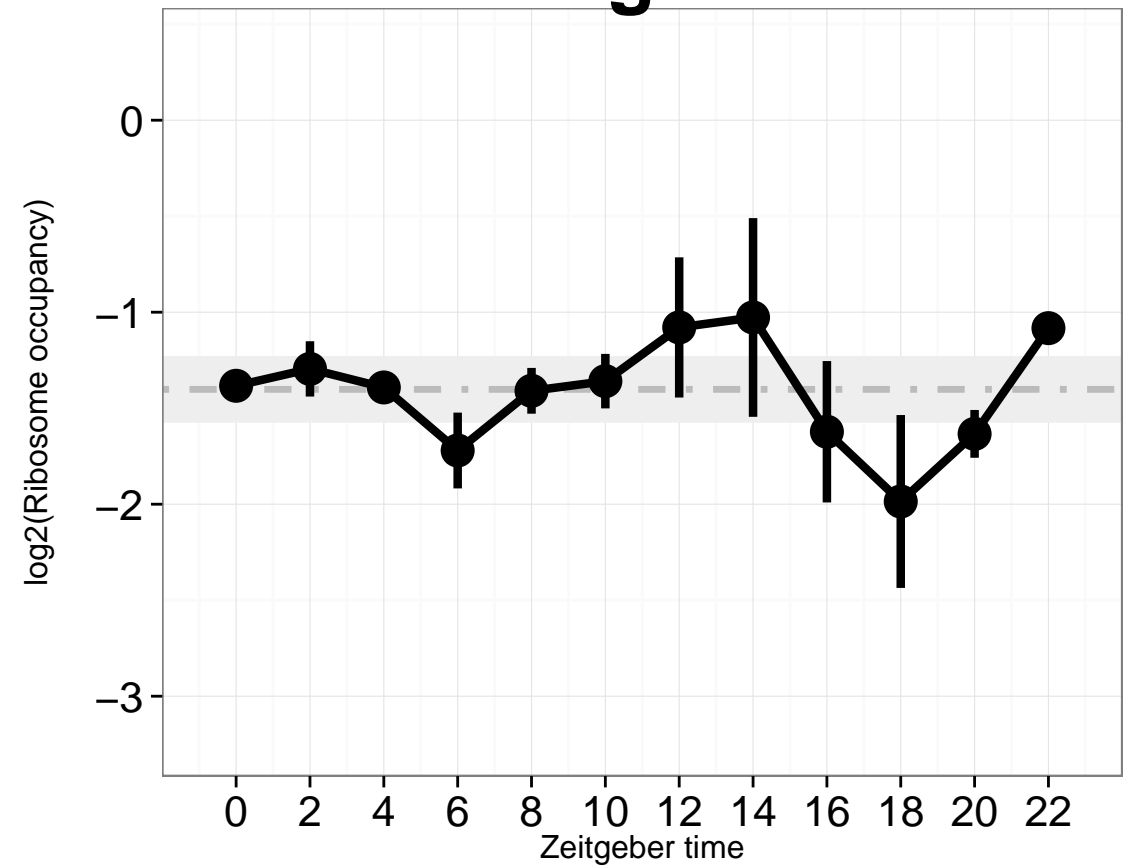

Supplement: Supplementary file 10170 [file 1]

## Bbs4

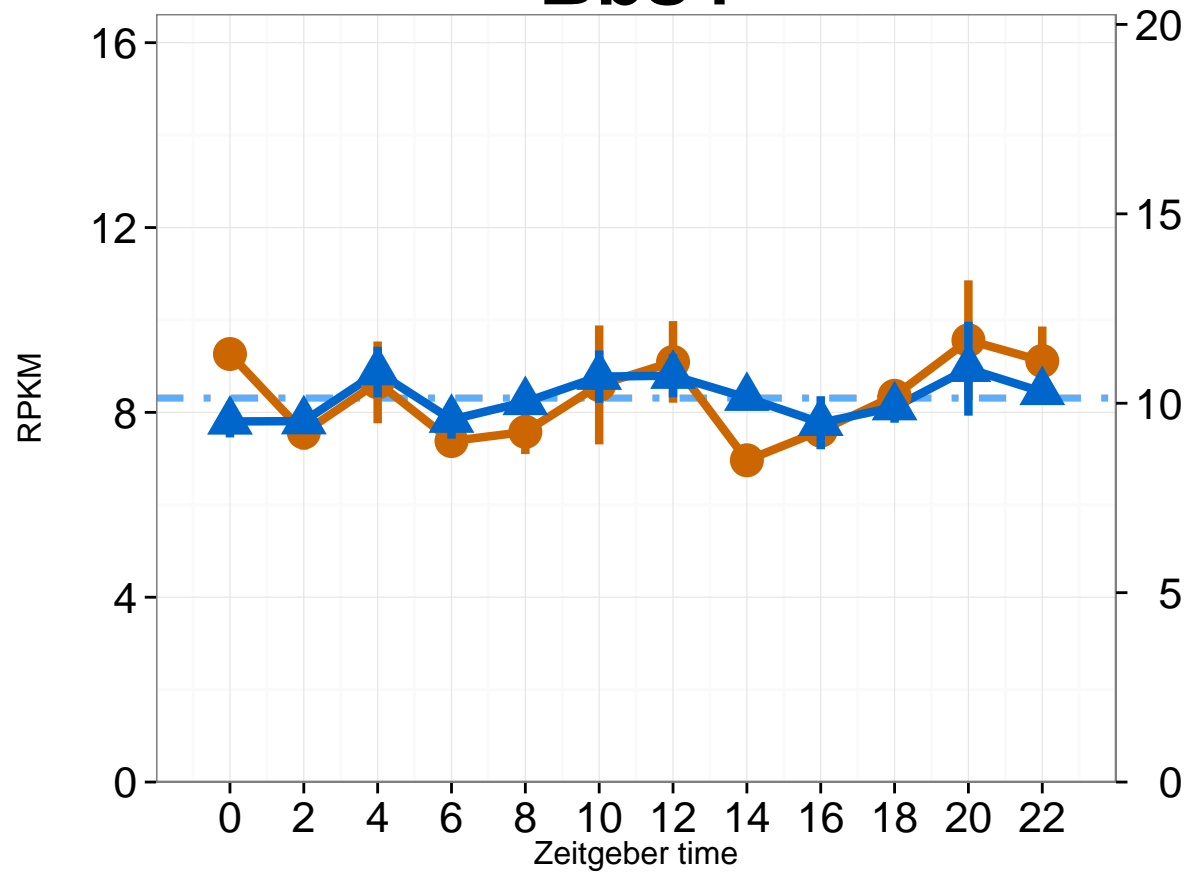

## Bbs4

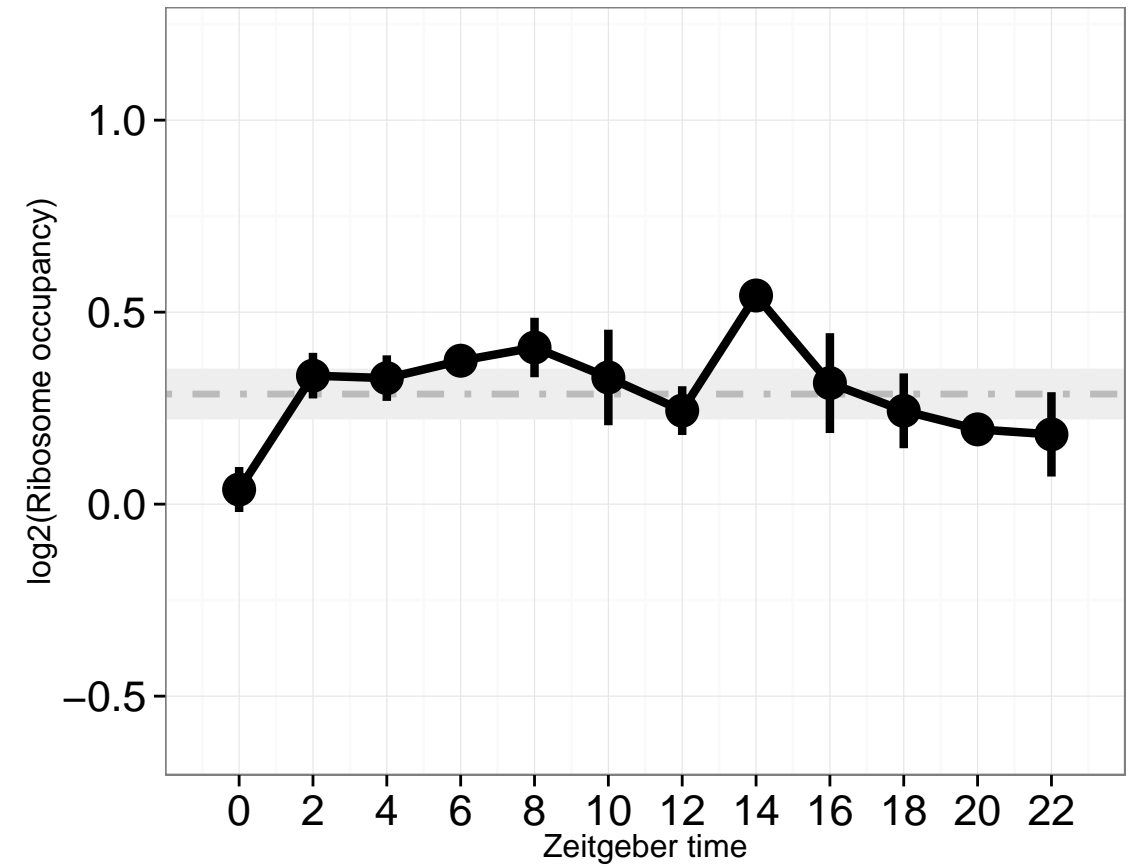

Supplement: Supplementary file 10171 [file 1]

# Npy1r

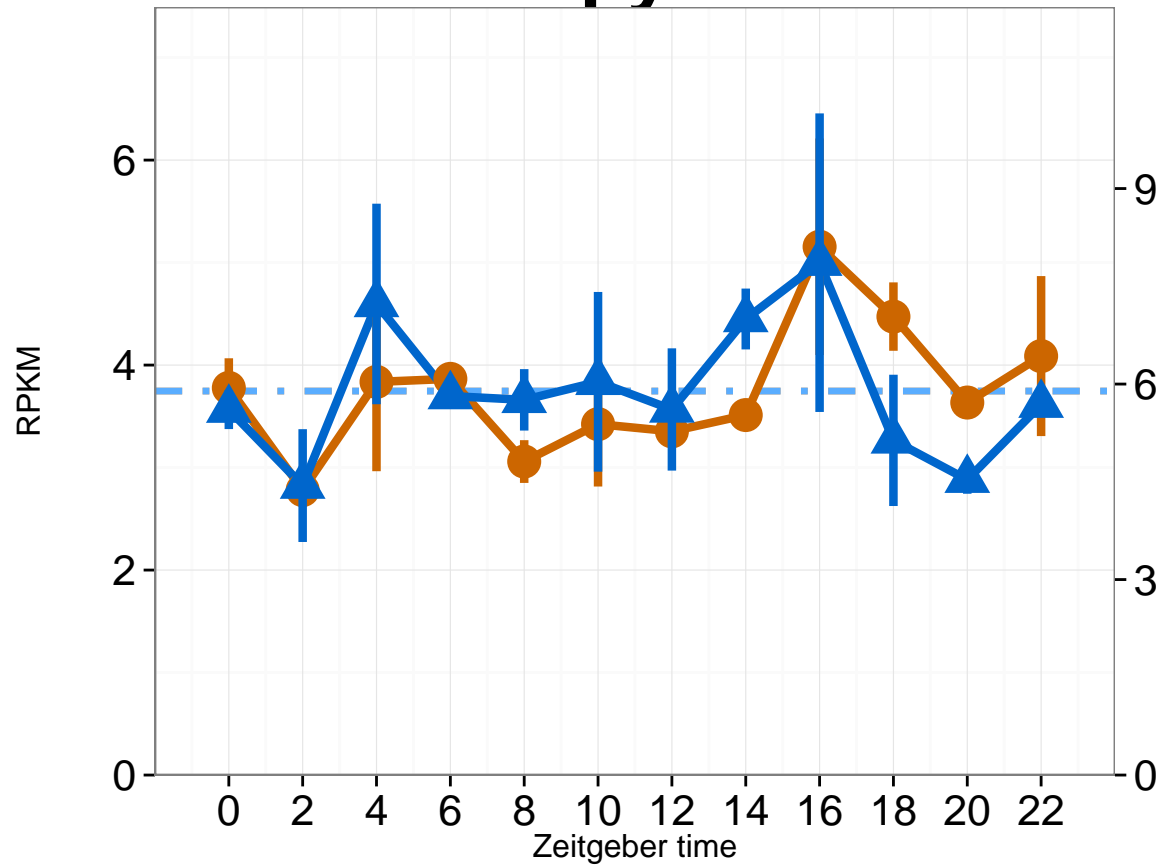

# Npy1r

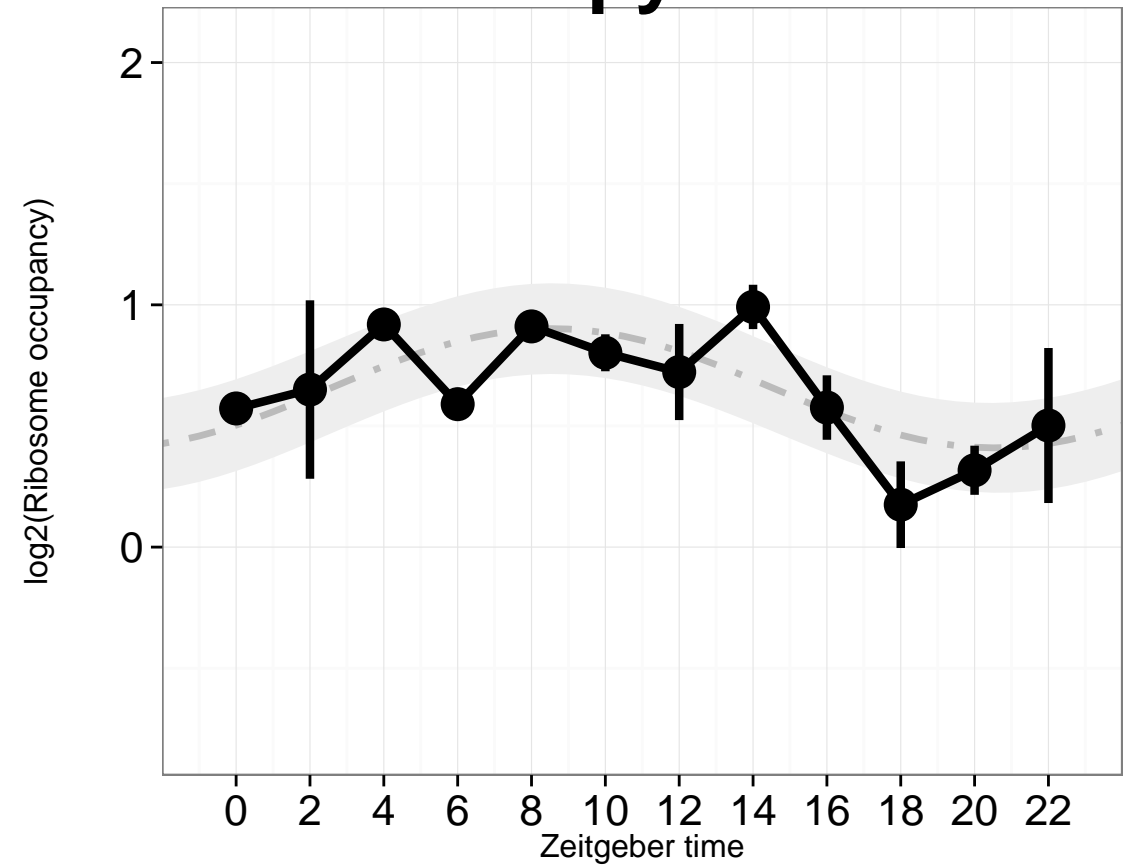

Supplement: Supplementary file 10172 [file 1]

# Mkrn3

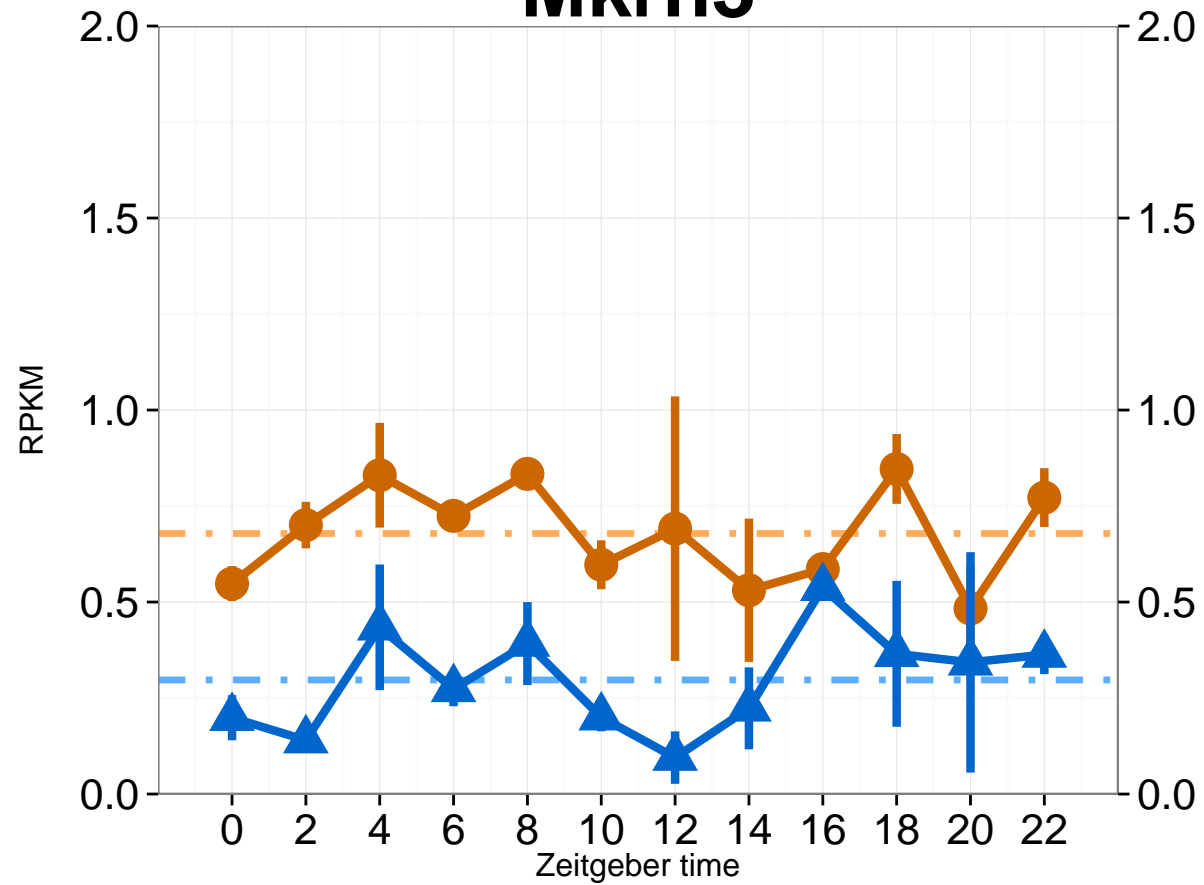

# Mkrn3

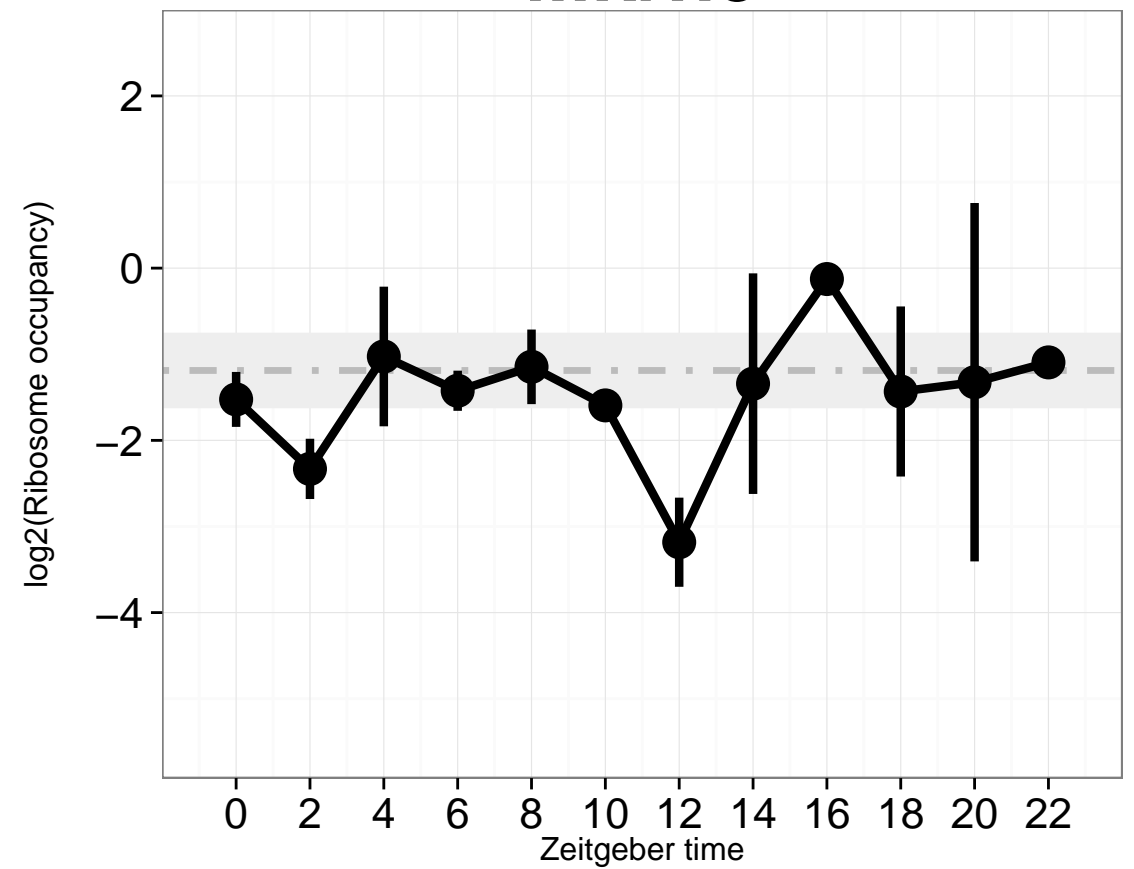

Supplement: Supplementary file 10173 [file 1]

# Nmrk1

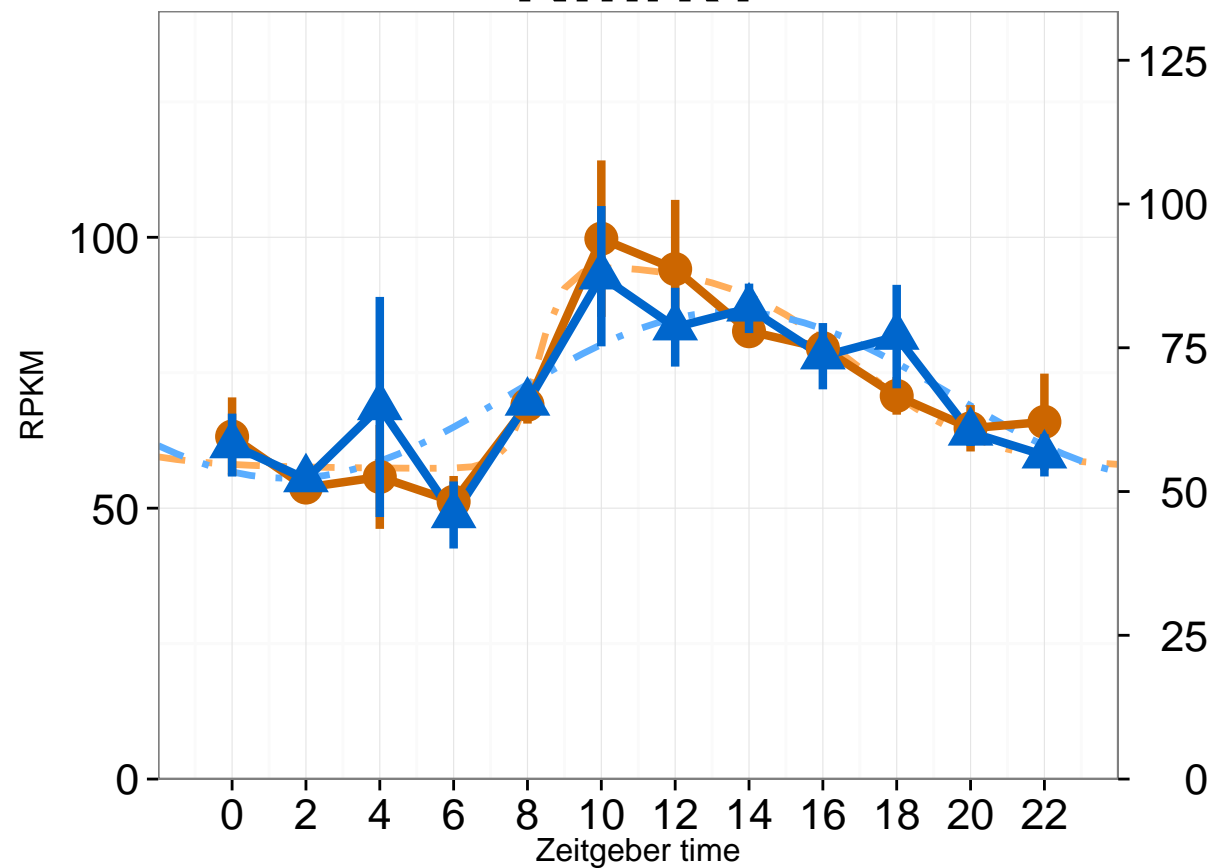

# Nmrk1

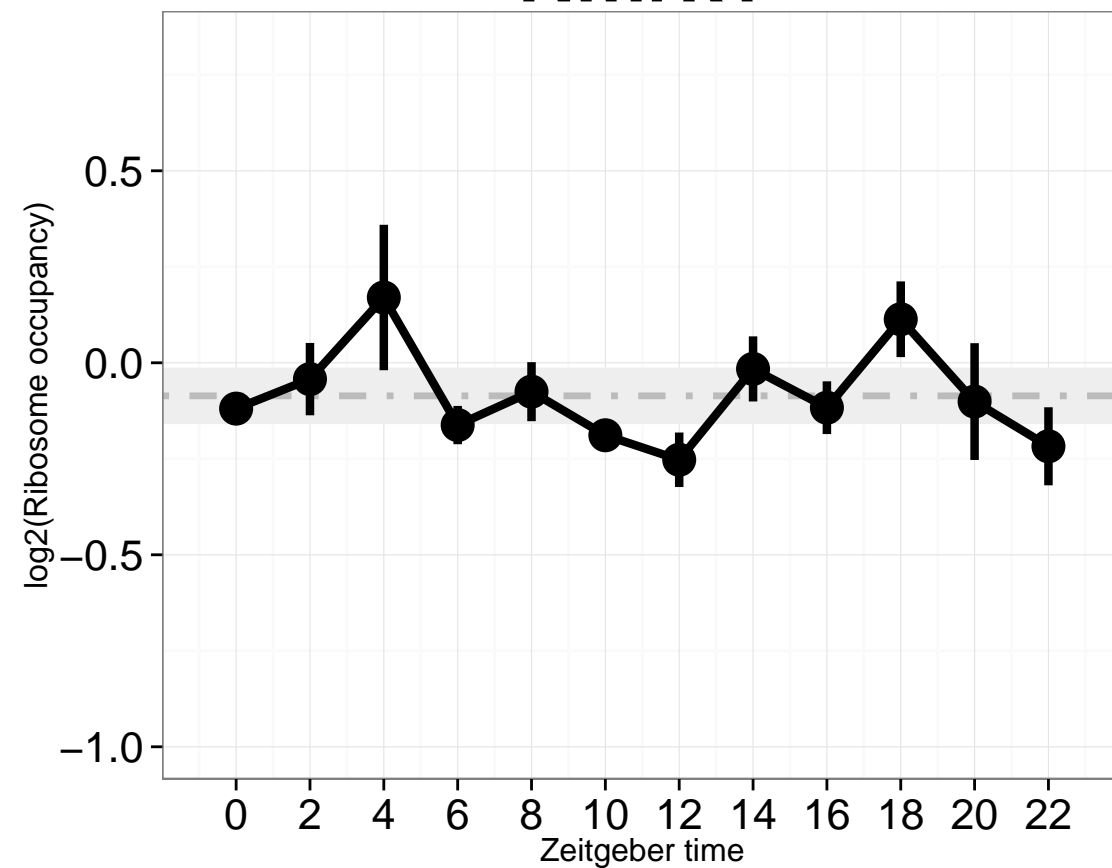

Supplement: Supplementary file 10174 [file 1]

## Mpzl2

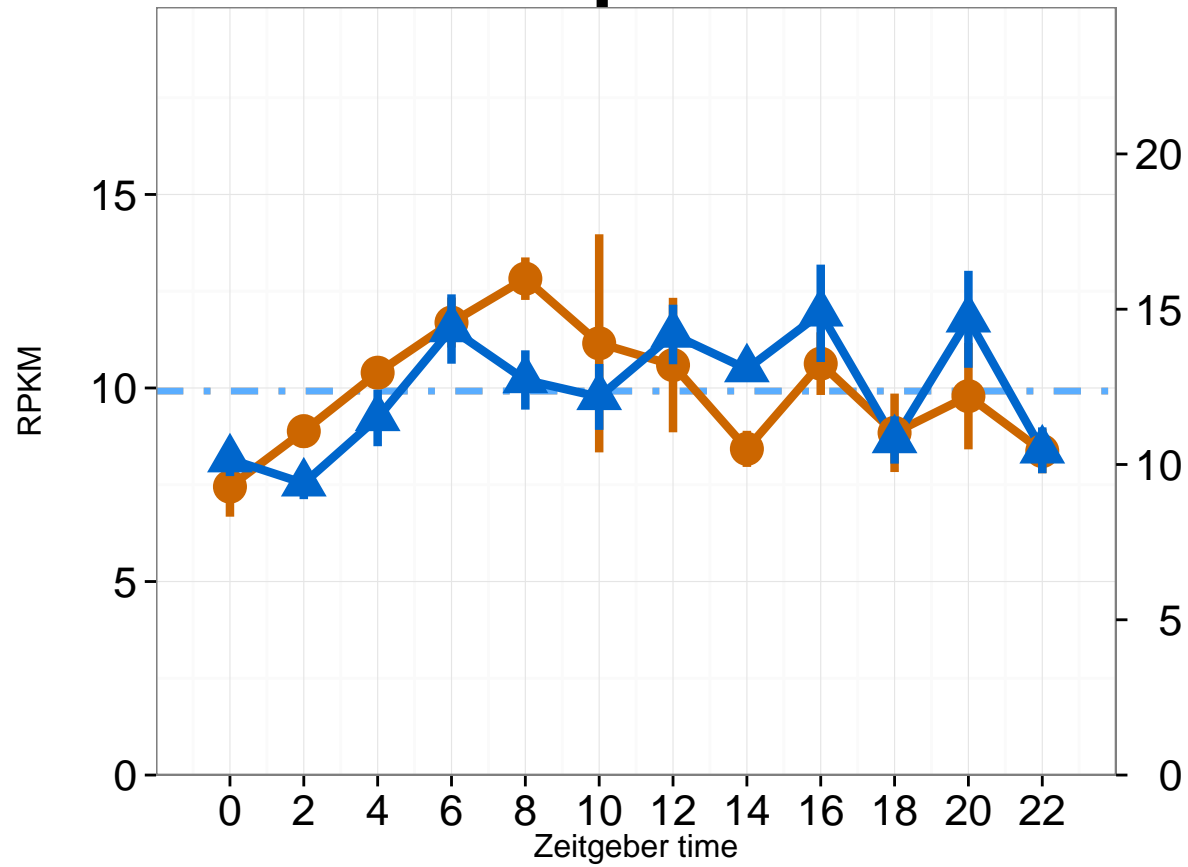

## Mpzl2

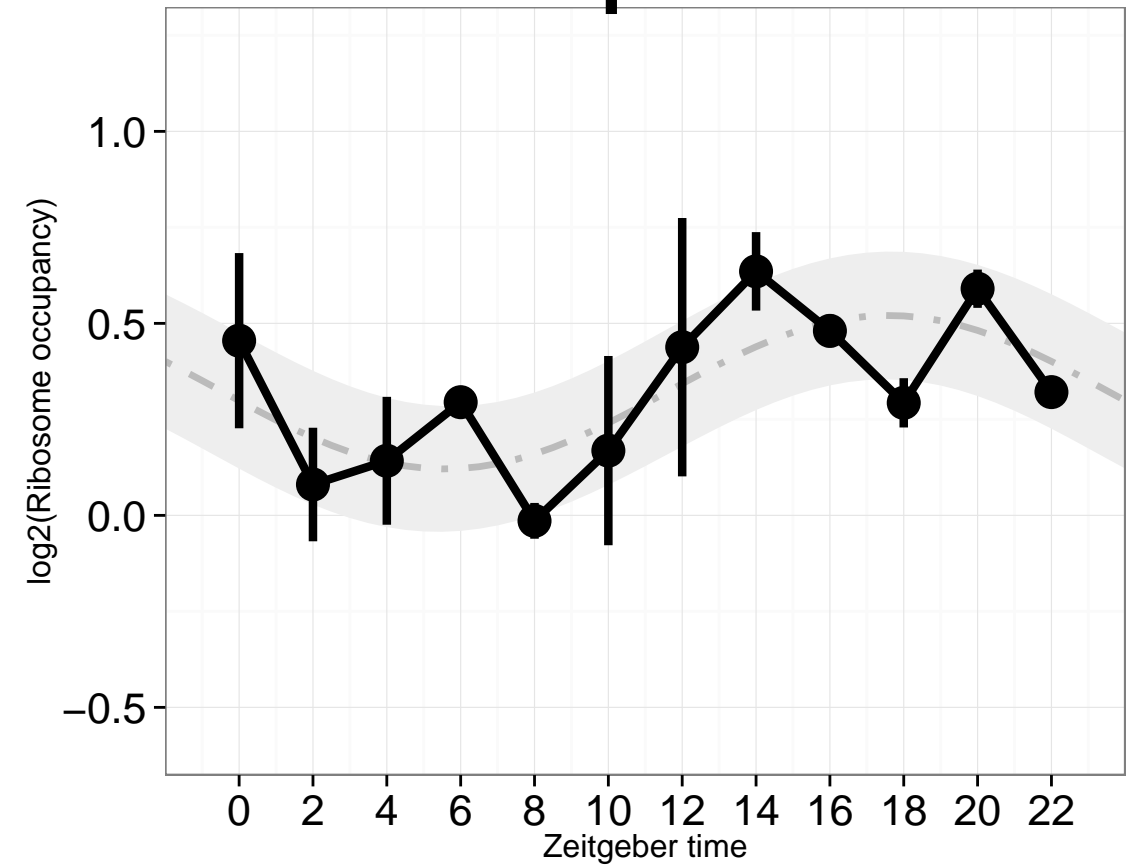

Supplement: Supplementary file 10176 [file 1]

## Fnbp1

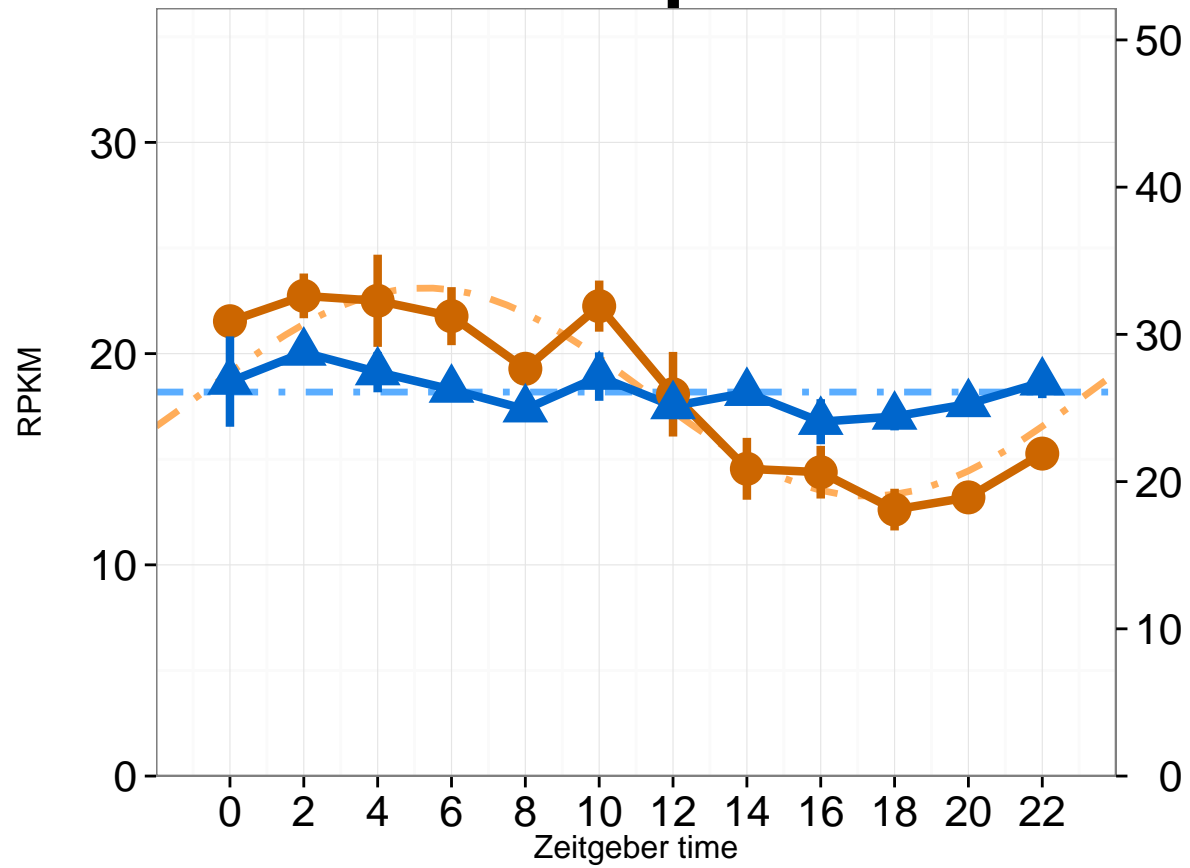

## Fnbp1

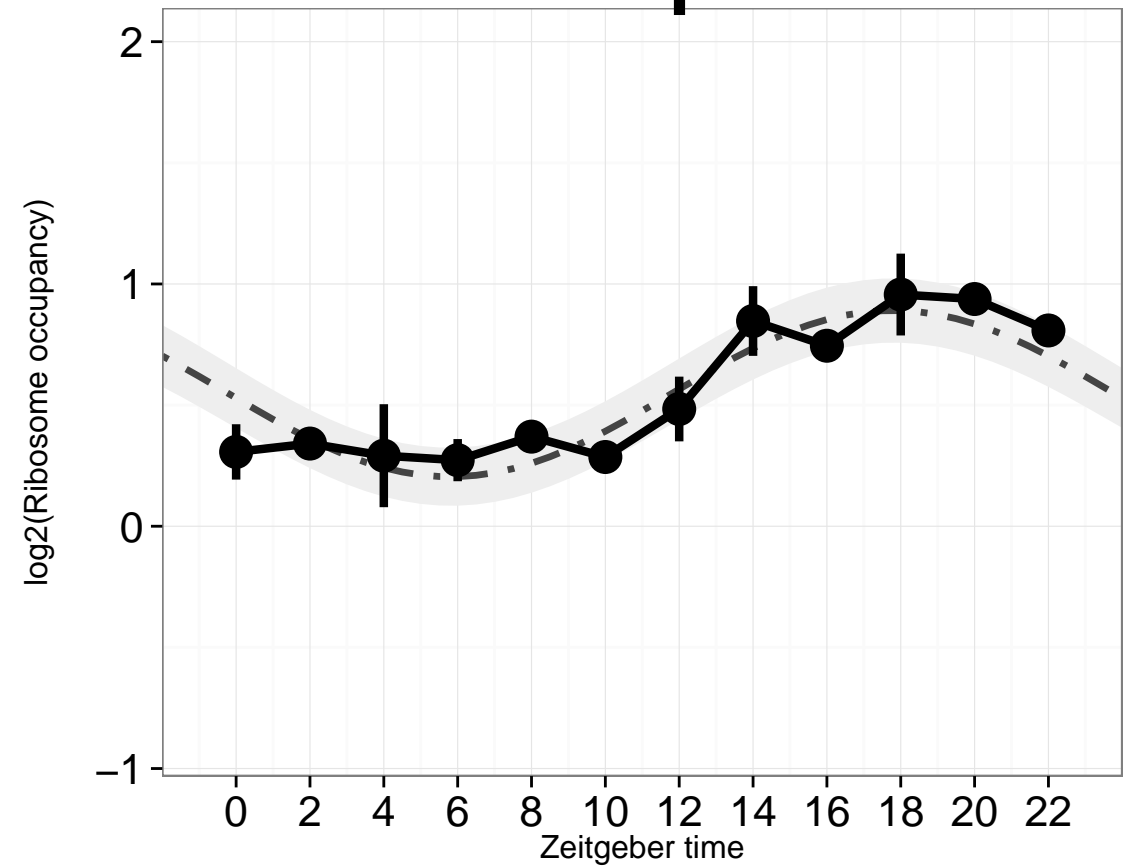

Supplement: Supplementary file 10177 [file 1]

# Pigk

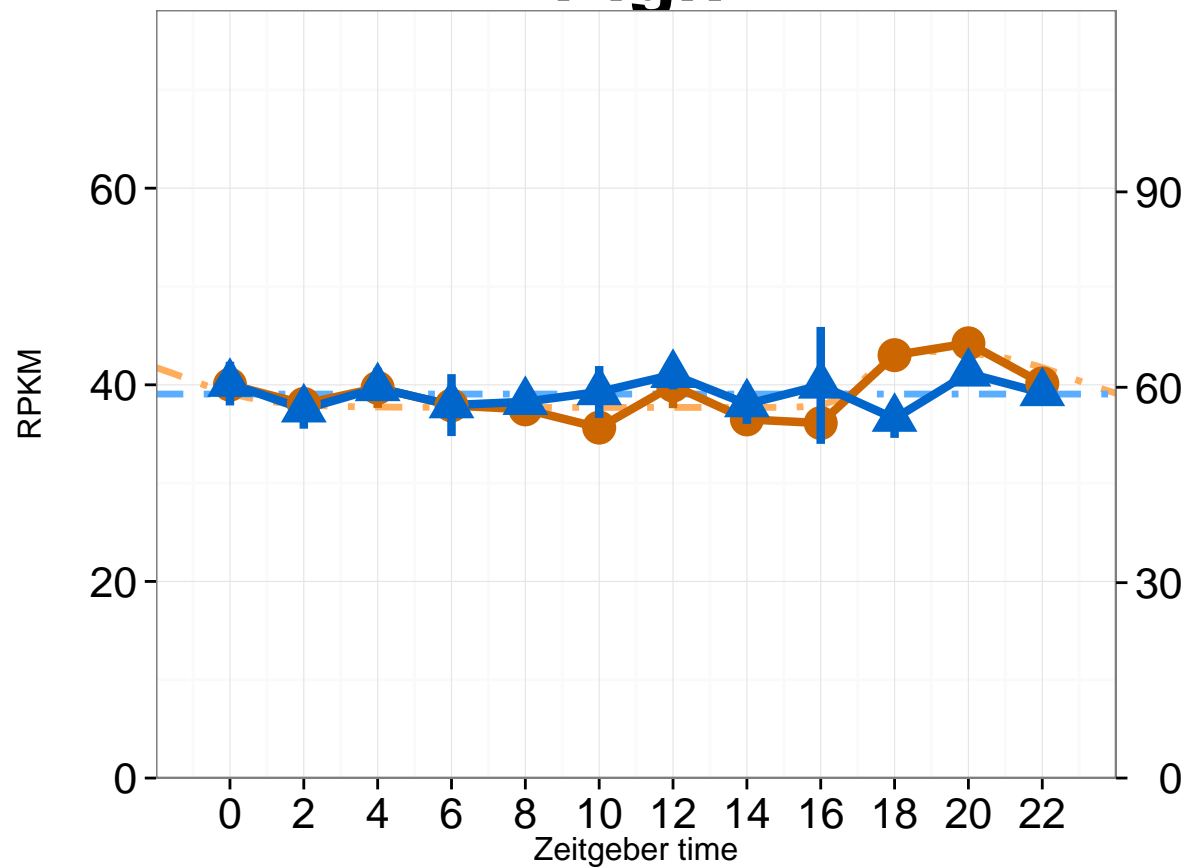

# Pigk

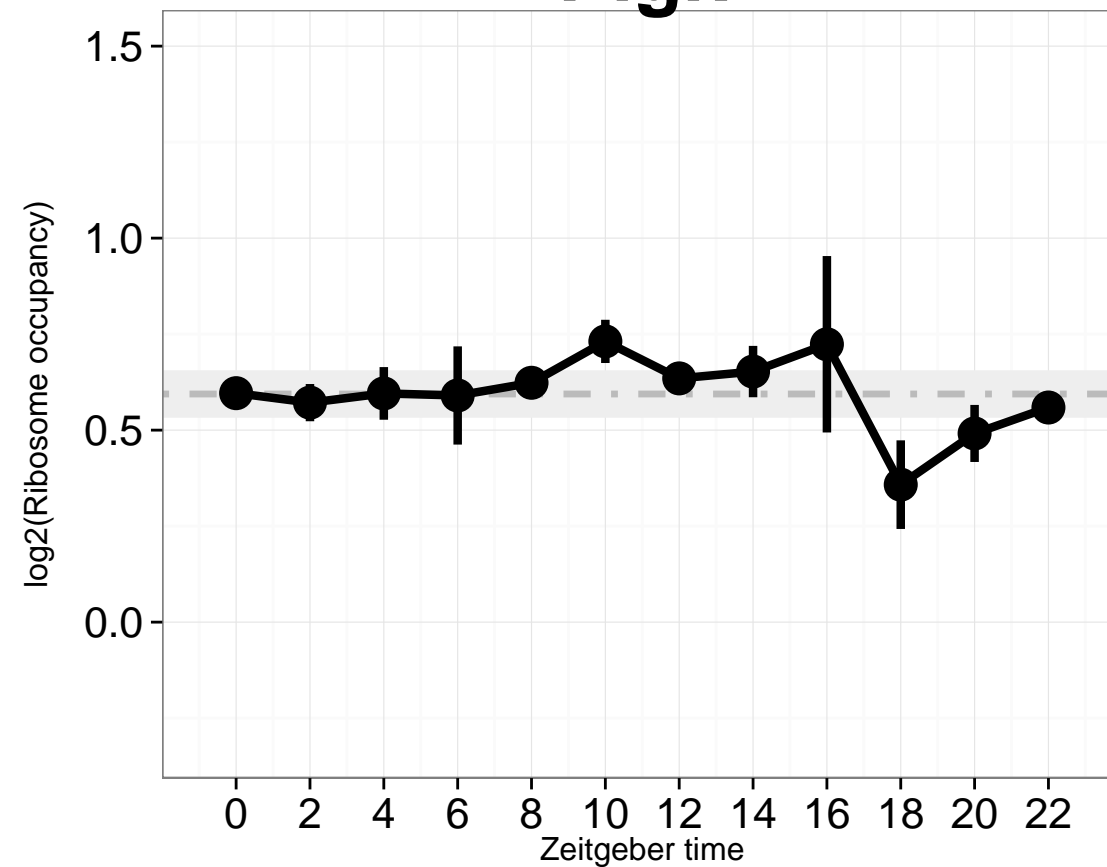

Supplement: Supplementary file 10178 [file 1]

## Atmin

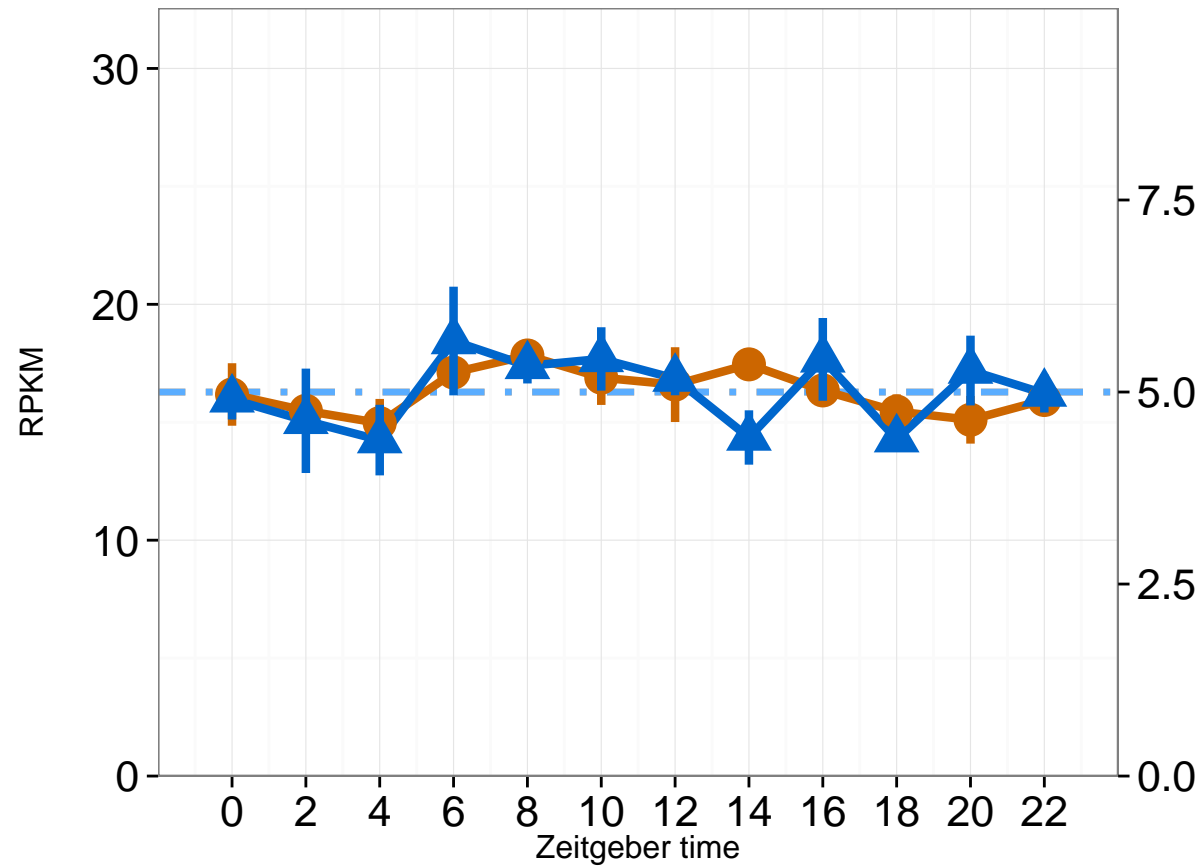

## Atmin

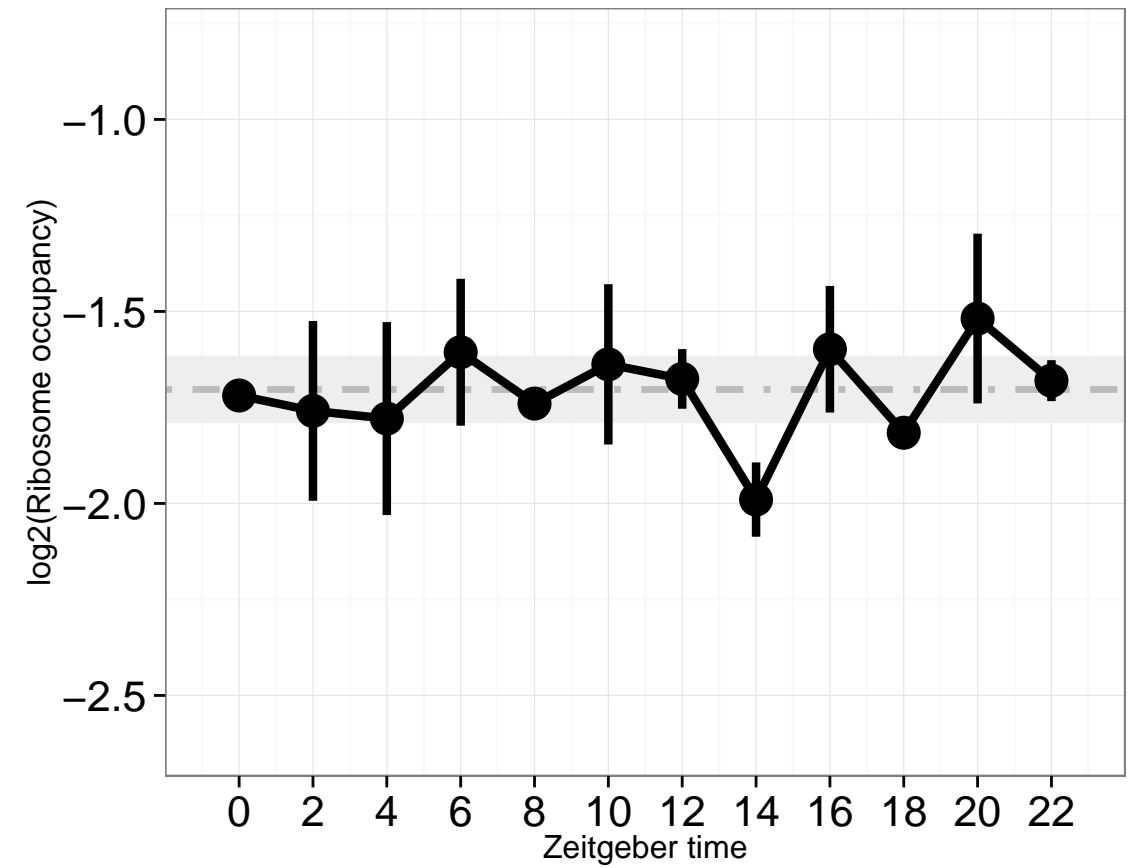

Supplement: Supplementary file 10179 [file 1]

## Hexa

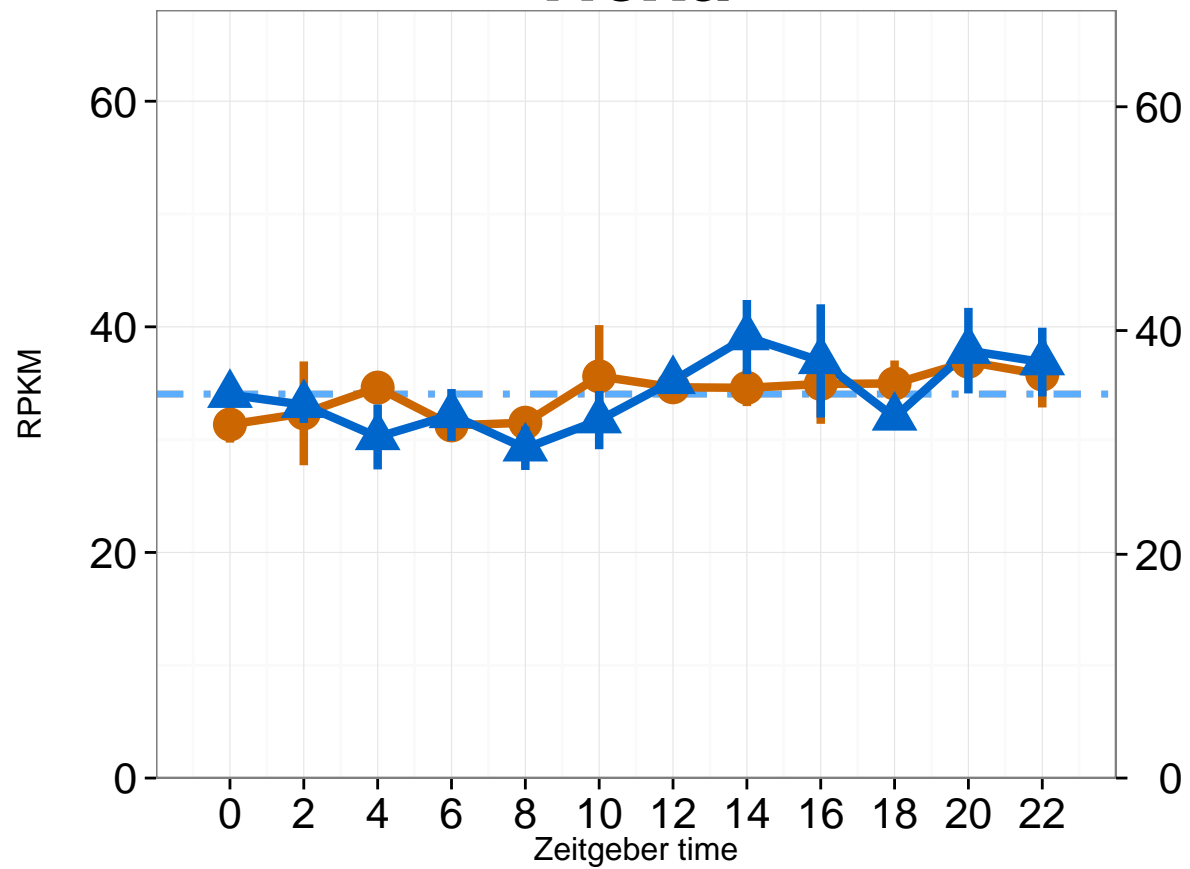

## Hexa

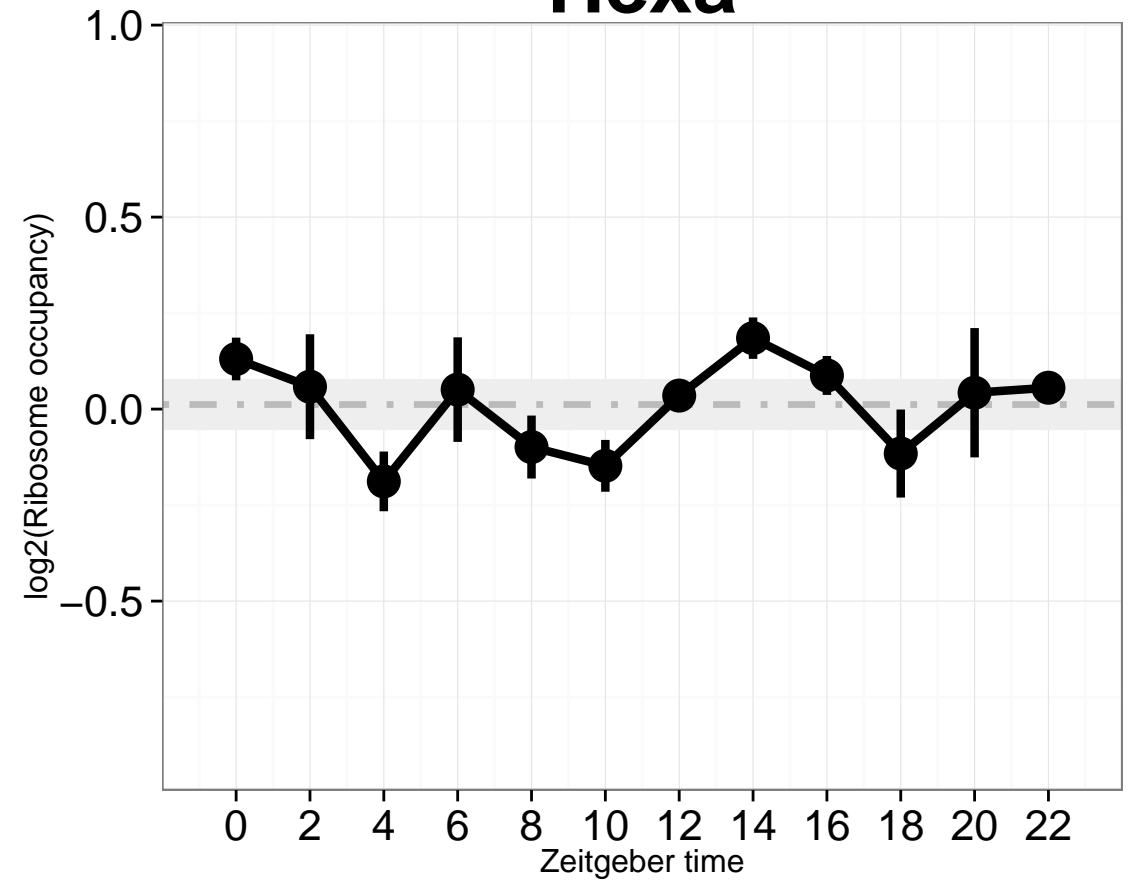

Supplement: Supplementary file 10180 [file 1]

## Gars

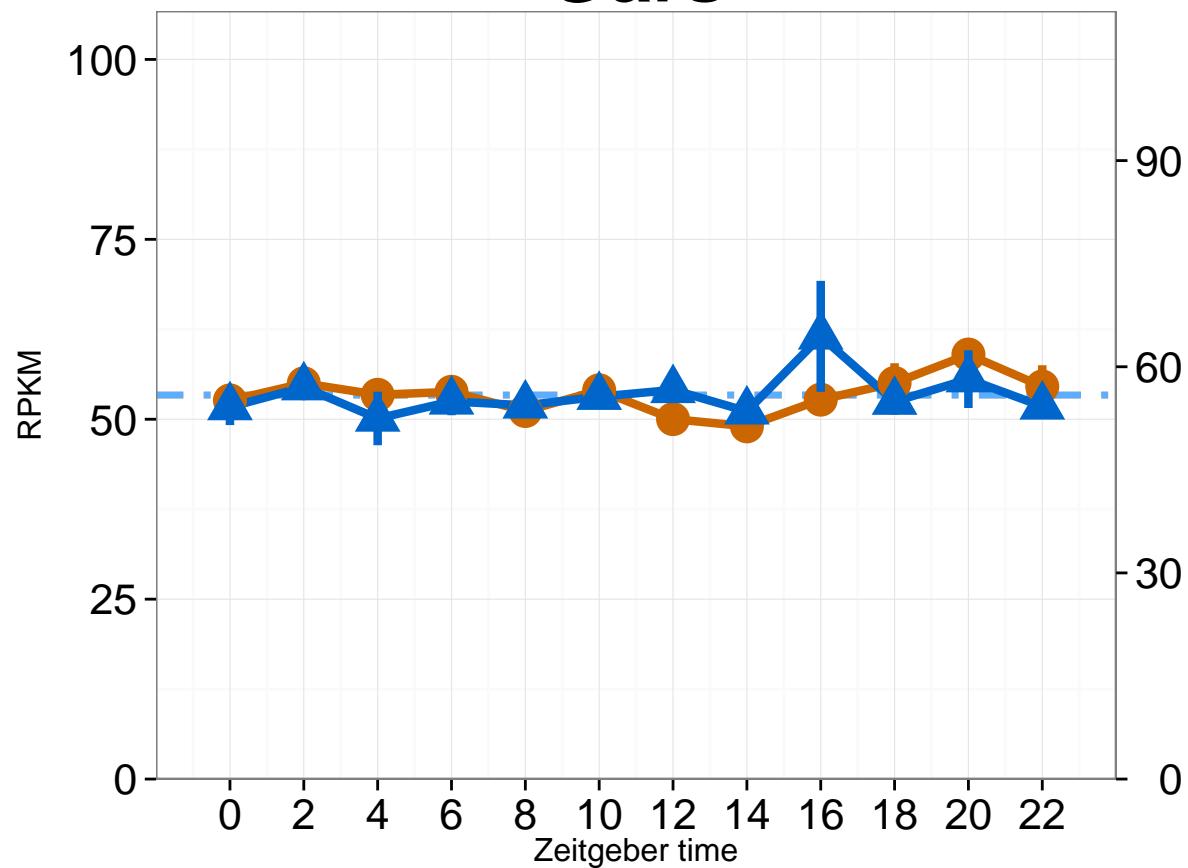

## Gars

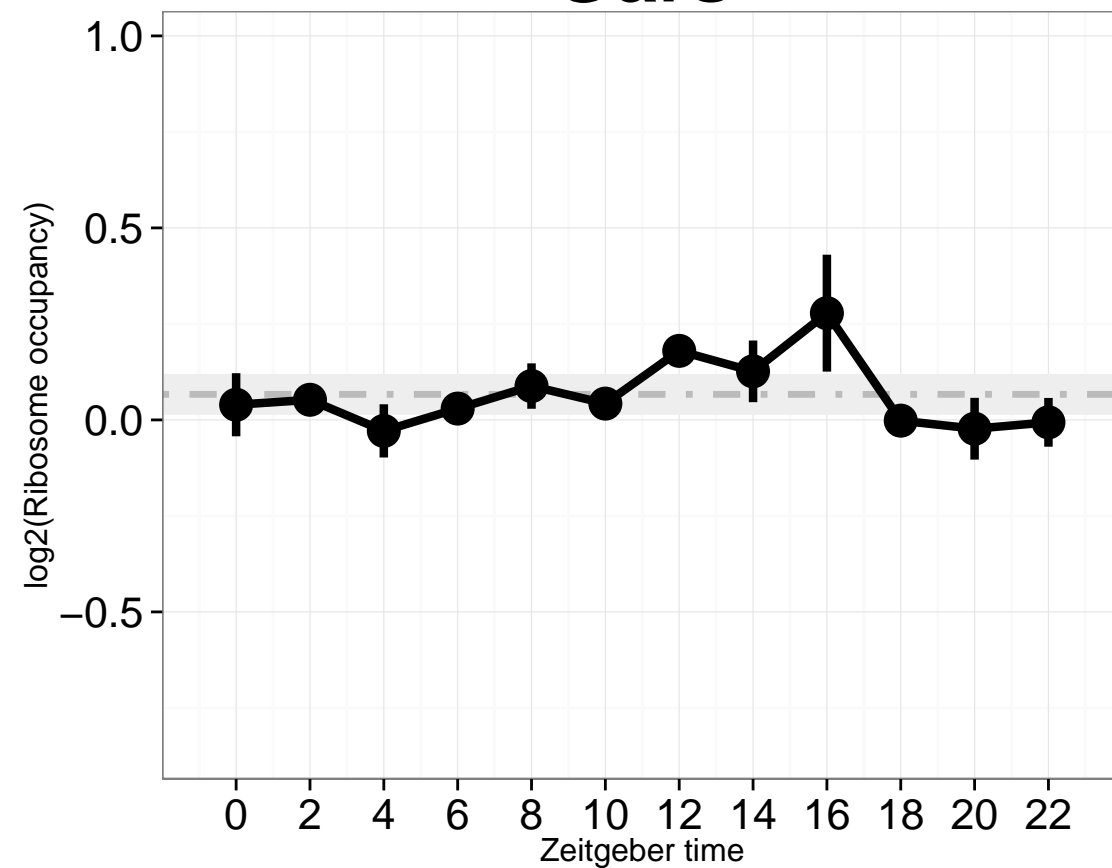

Supplement: Supplementary file 10181 [file 1]

## Gzma TR

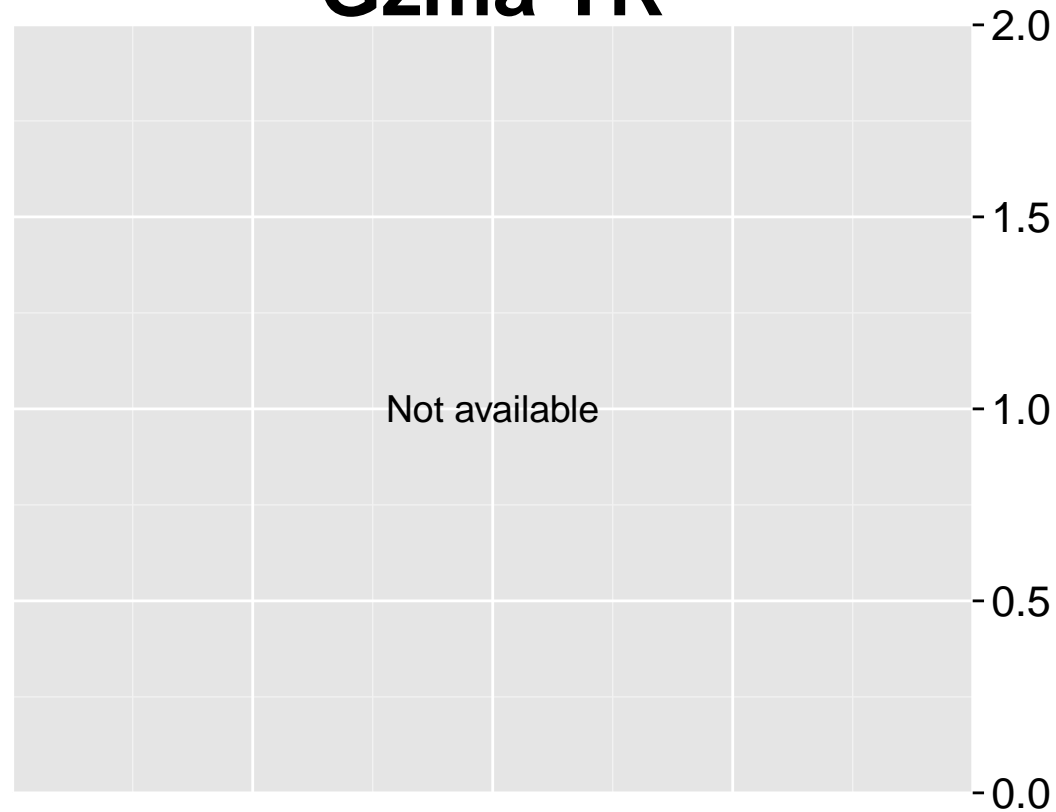

## Gzma log2(Ribosome occupancy)

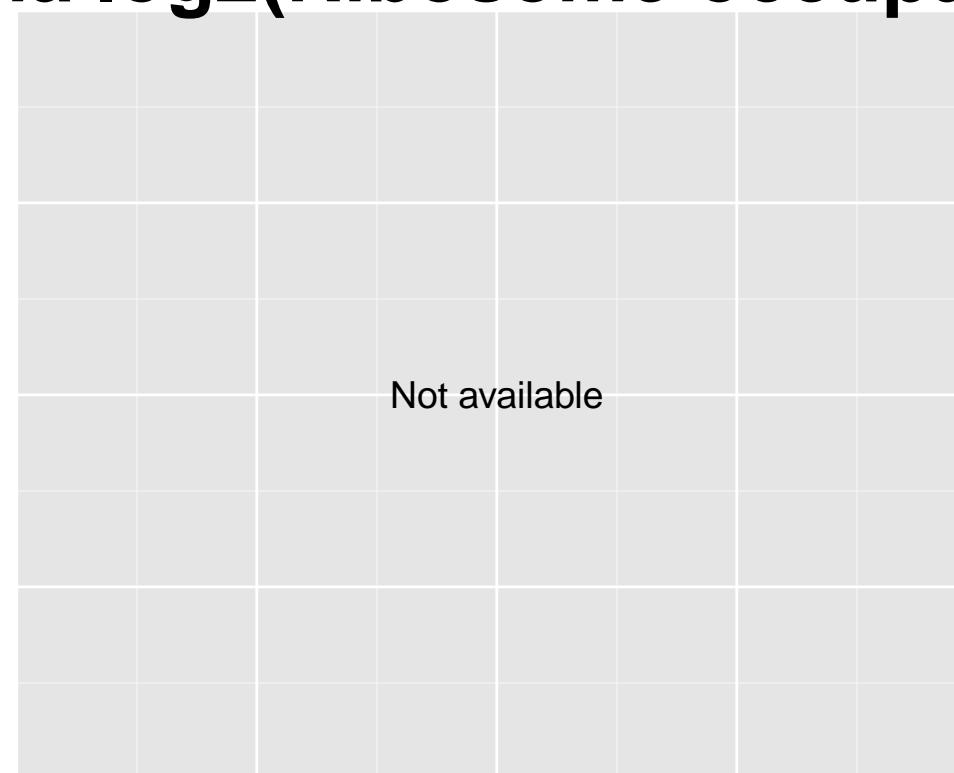

Supplement: Supplementary file 10182 [file 1]

# BC034090

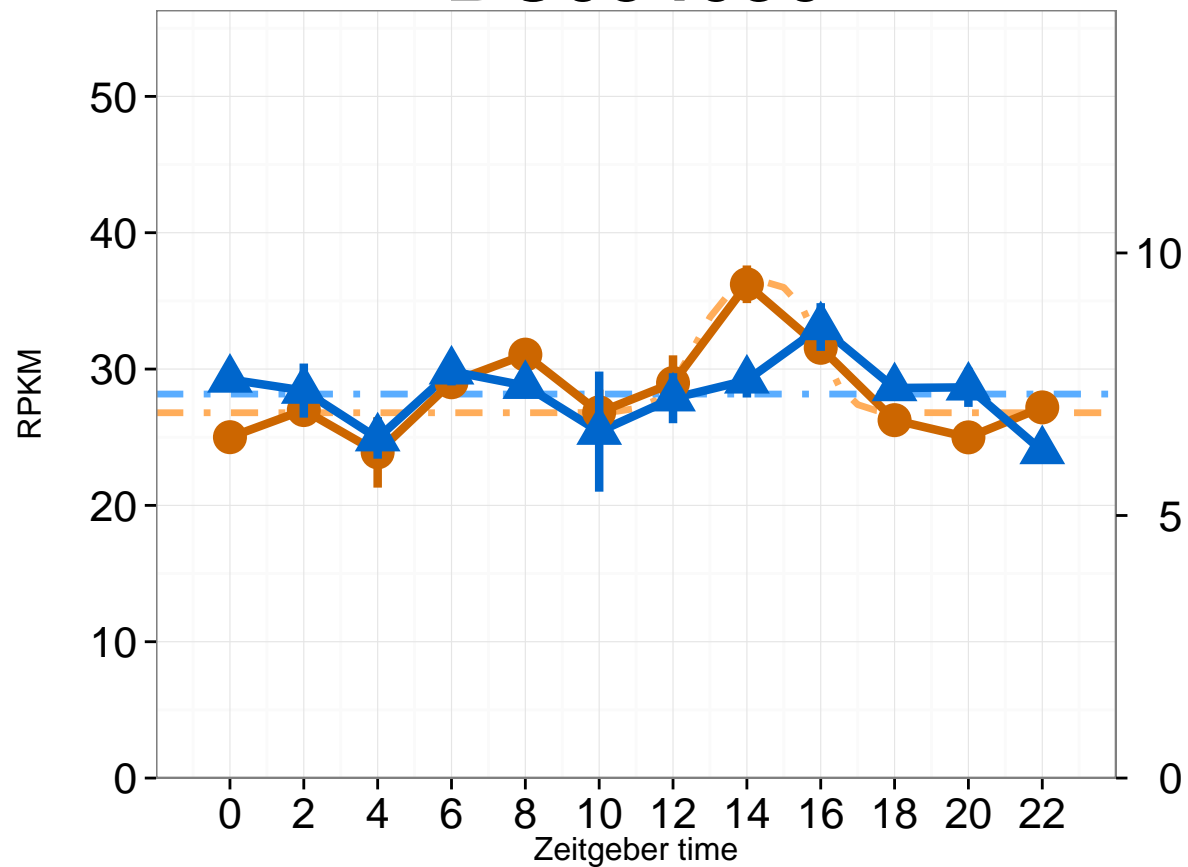

# BC034090

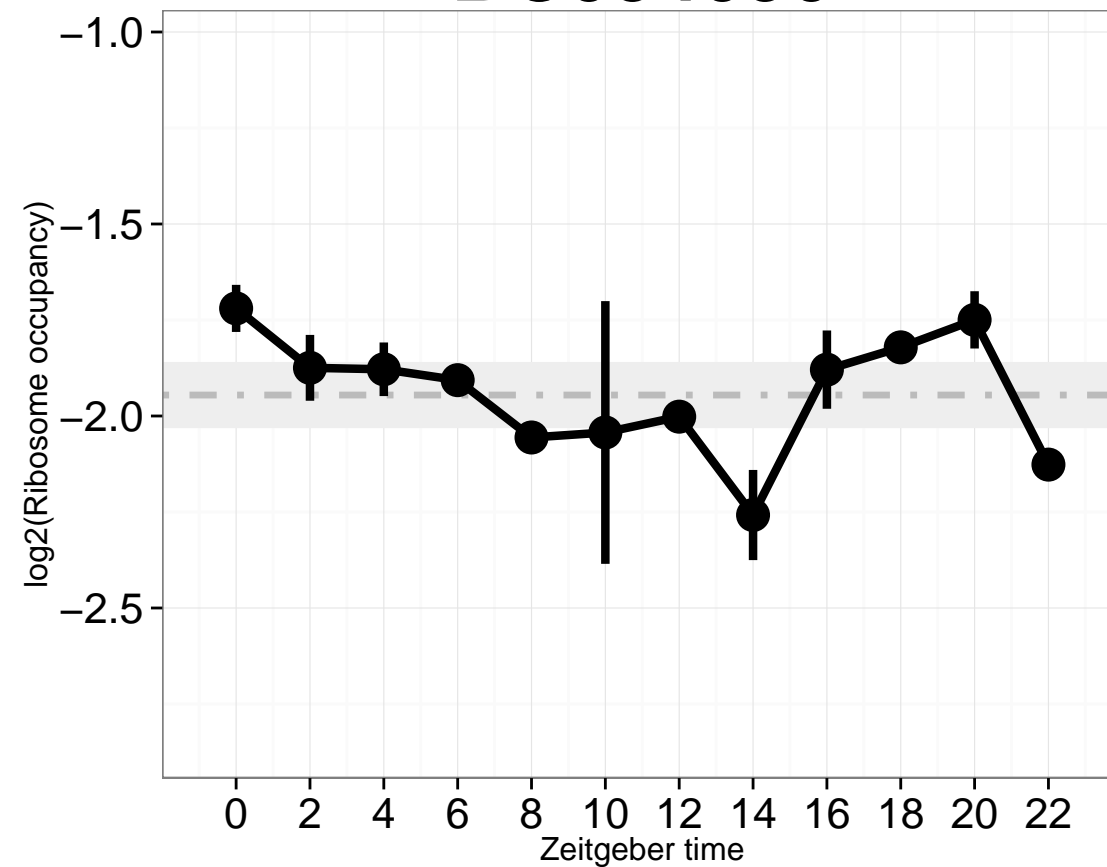

Supplement: Supplementary file 10183 [file 1]

## Kif3b

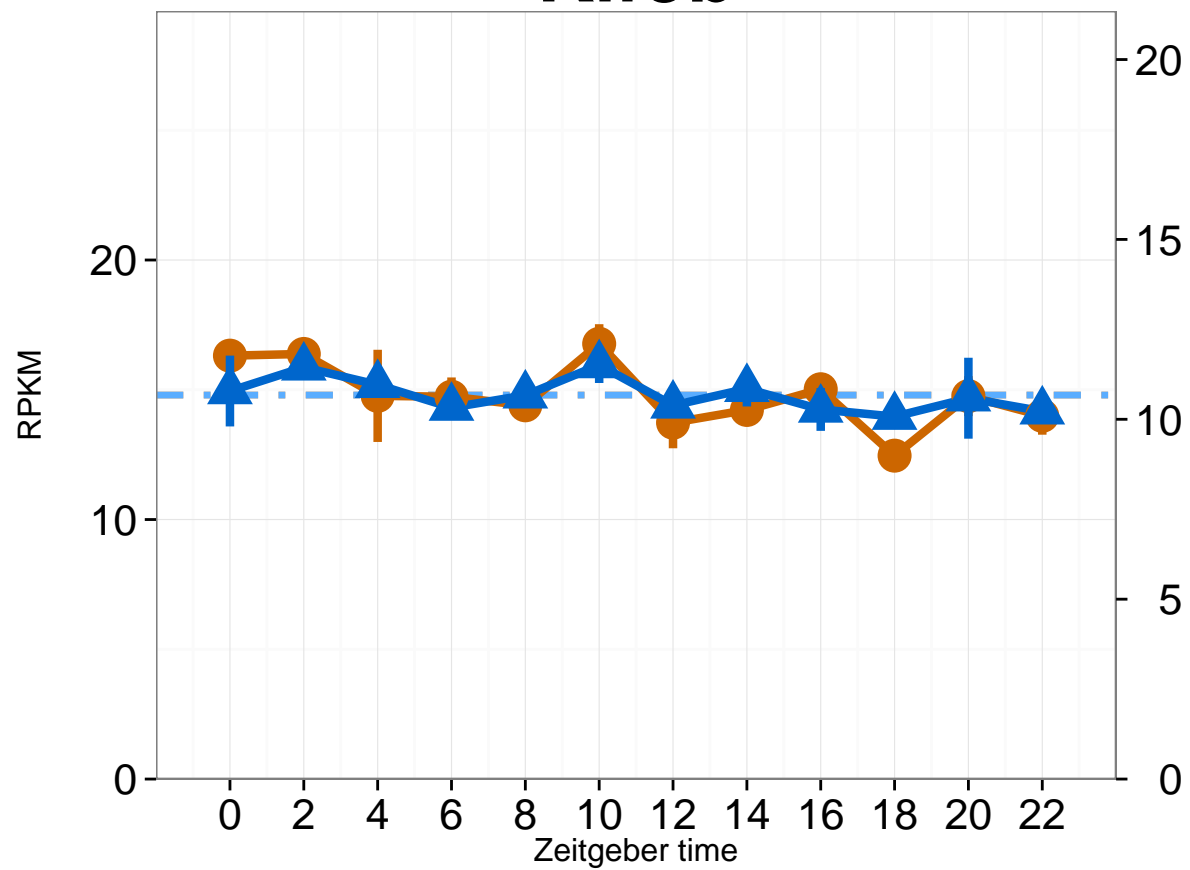

## Kif3b

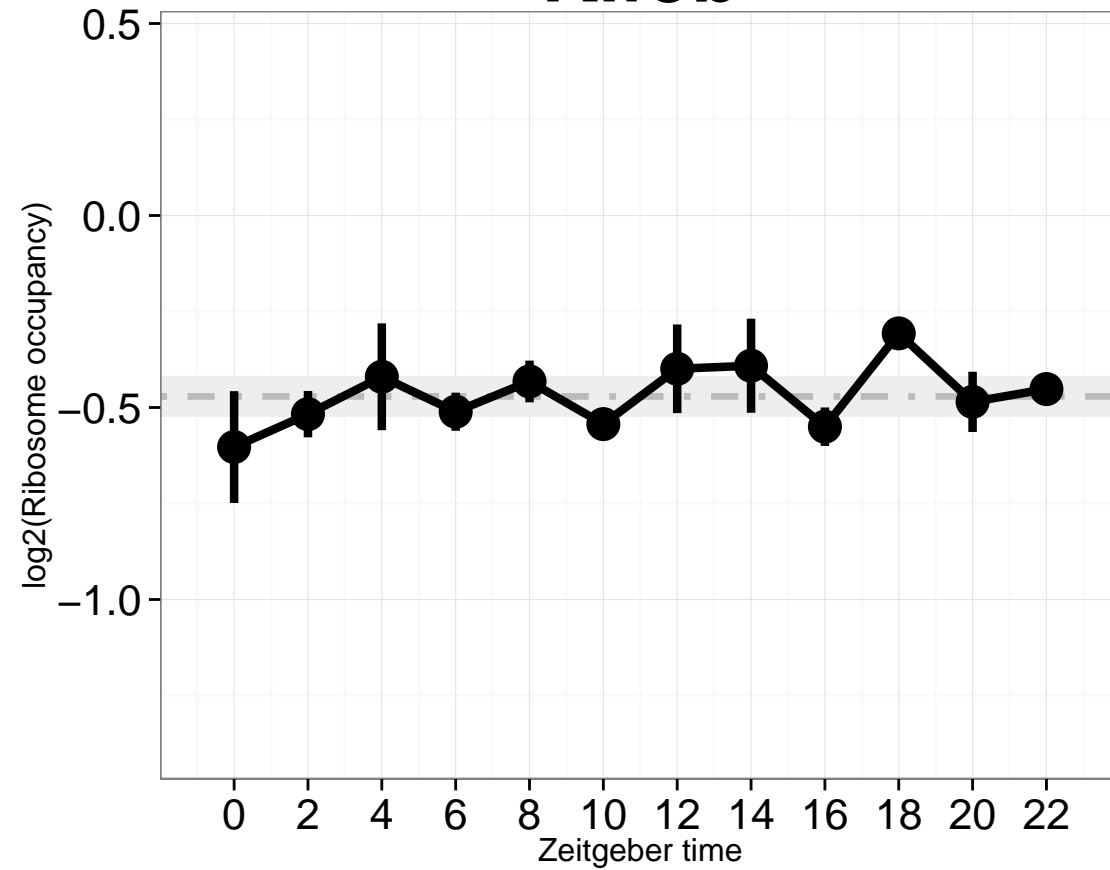

Supplement: Supplementary file 10184 [file 1]

## Inpp1

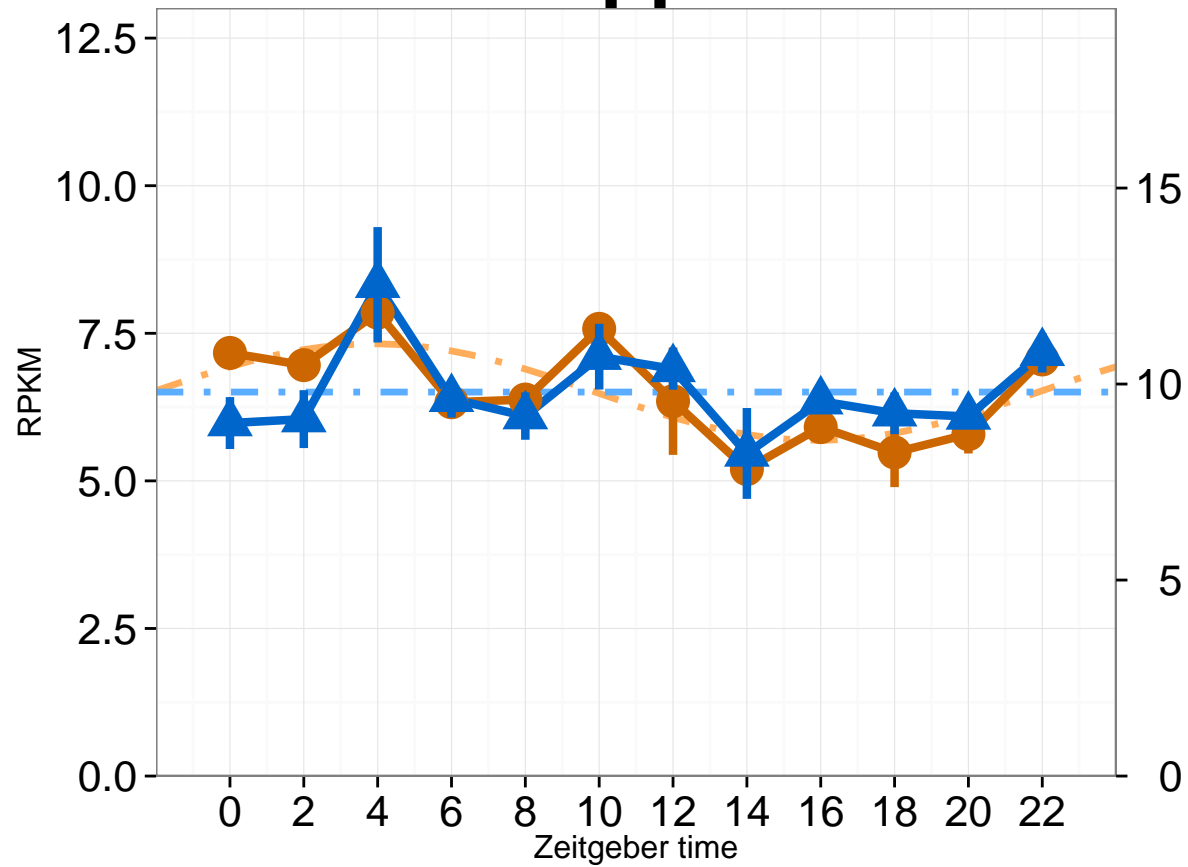

## Inpp1

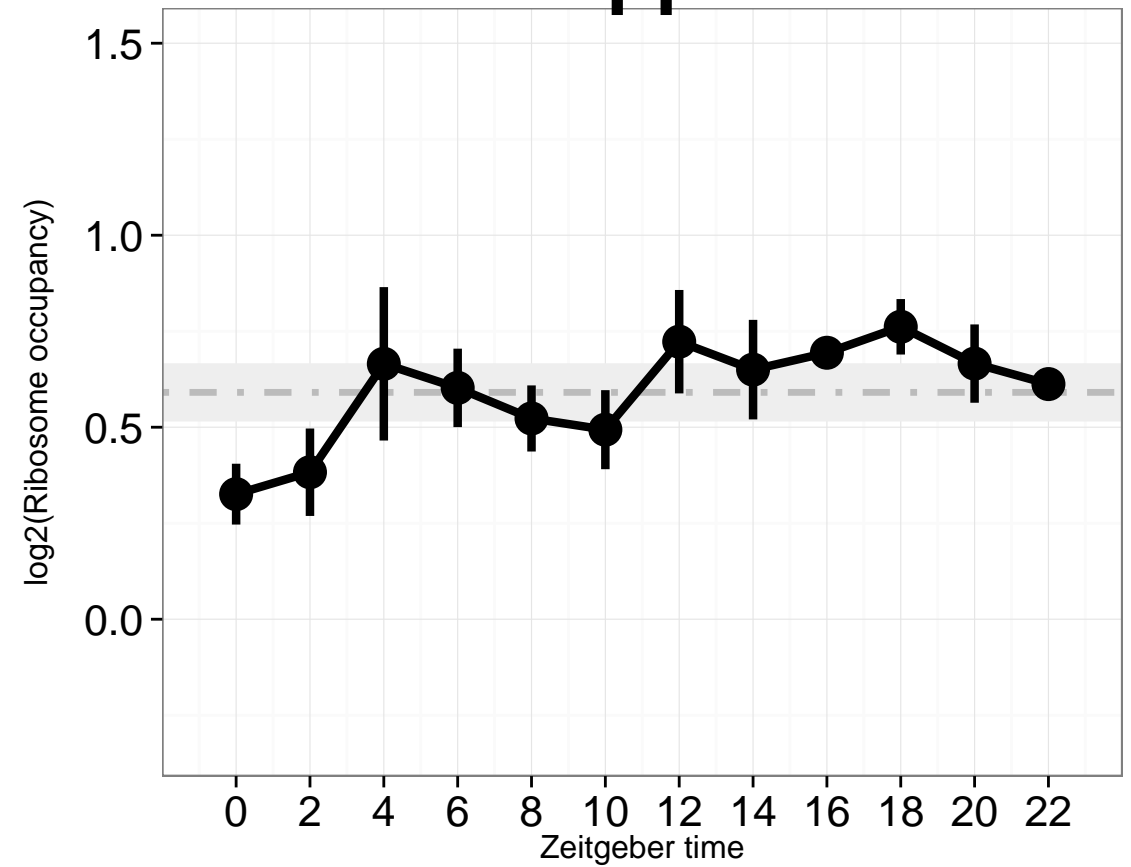

Supplement: Supplementary file 10185 [file 1]

## Ipo4

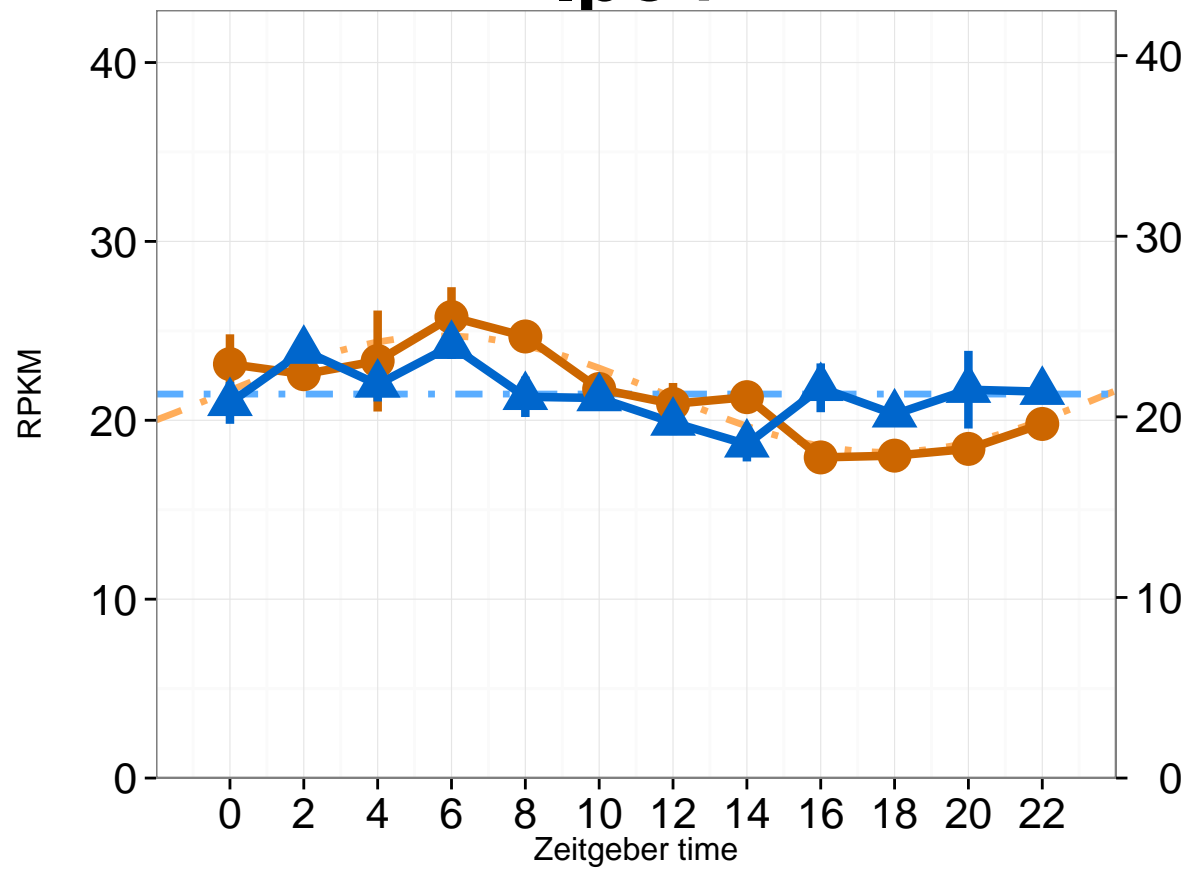

## Ipo4

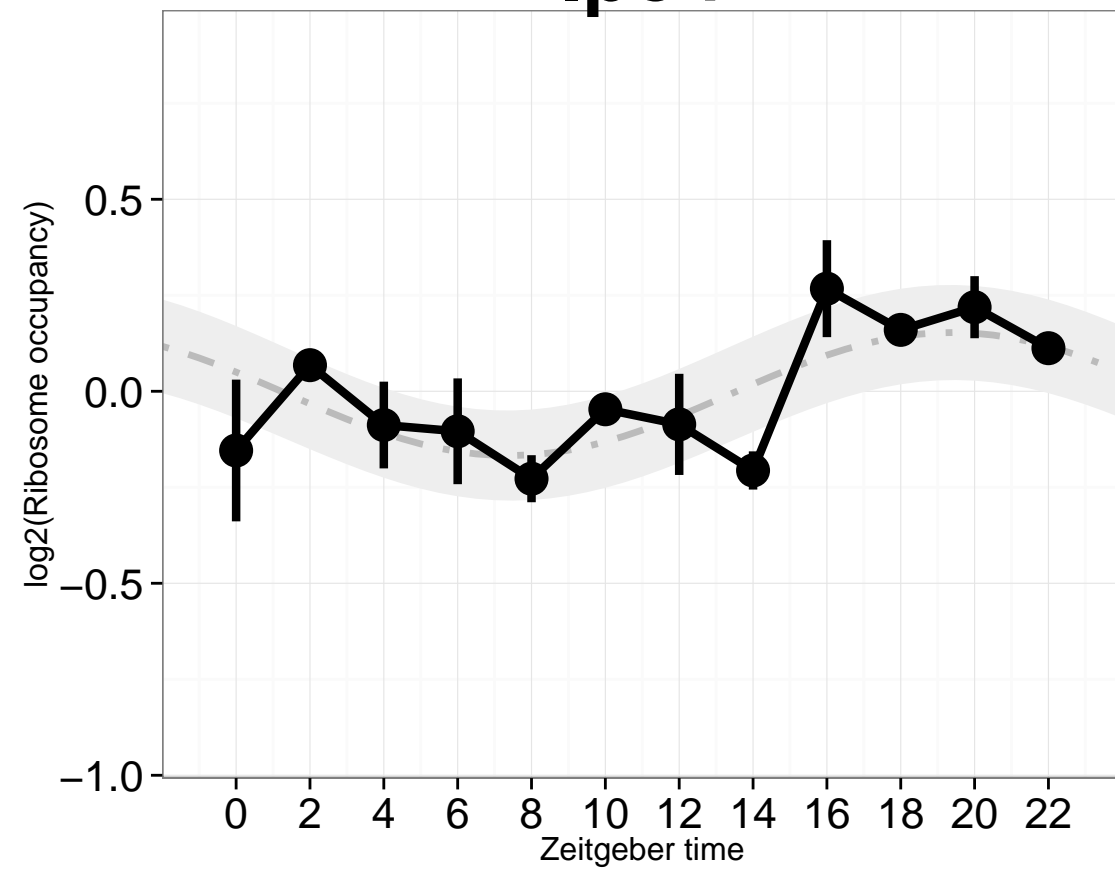

Supplement: Supplementary file 10186 [file 1]

## Ankrd10

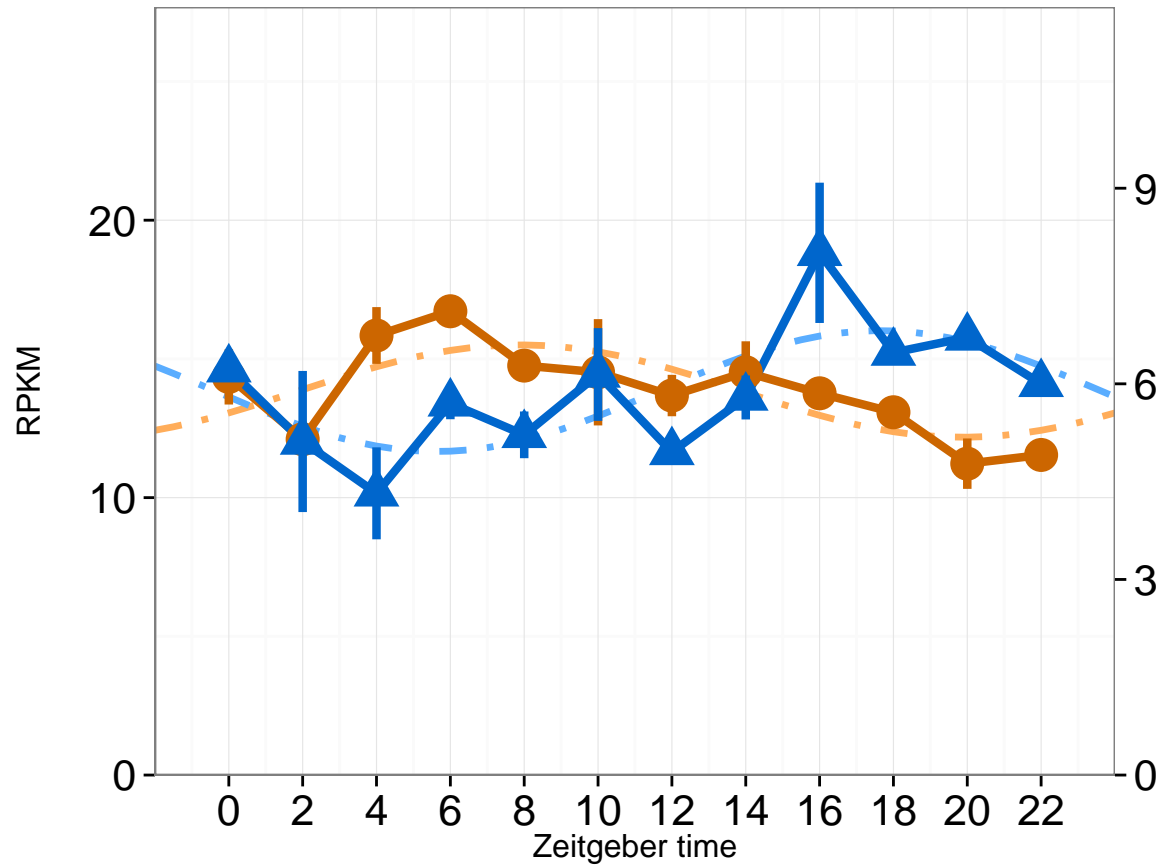

## Ankrd10

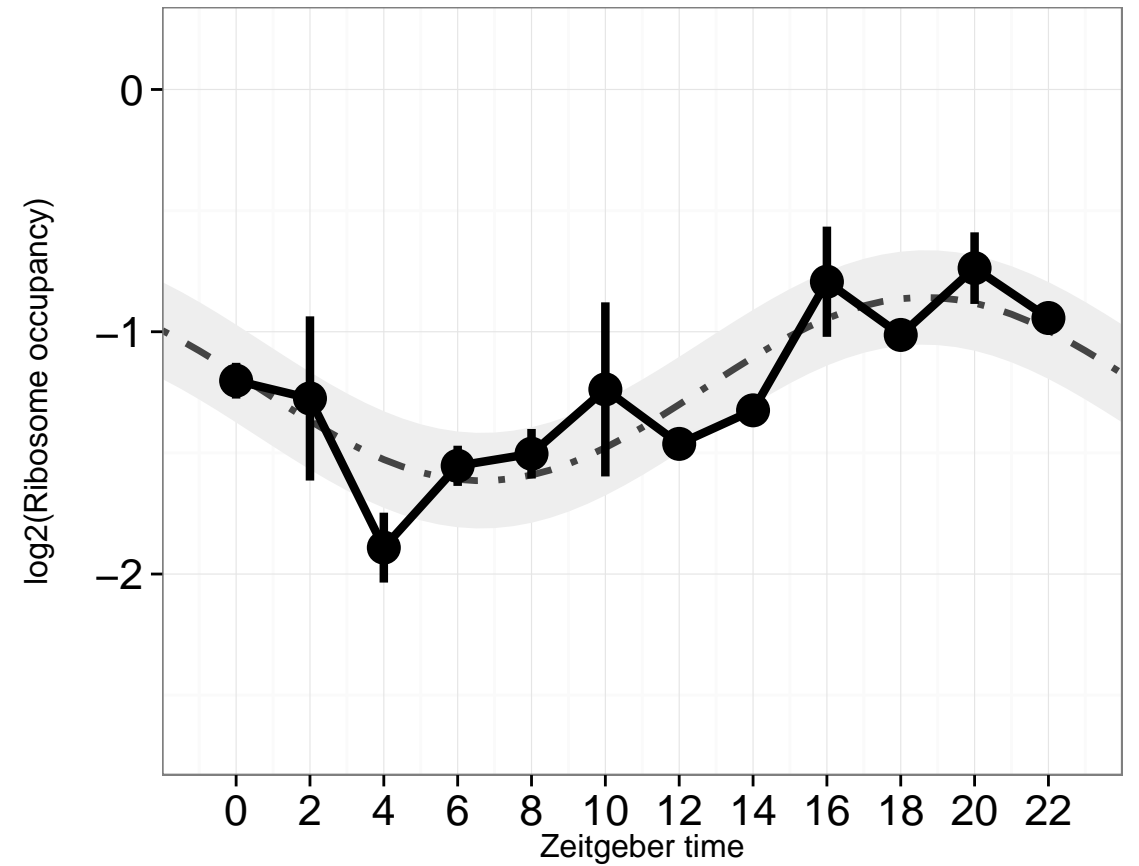

Supplement: Supplementary file 10187 [file 1]

## Nup160

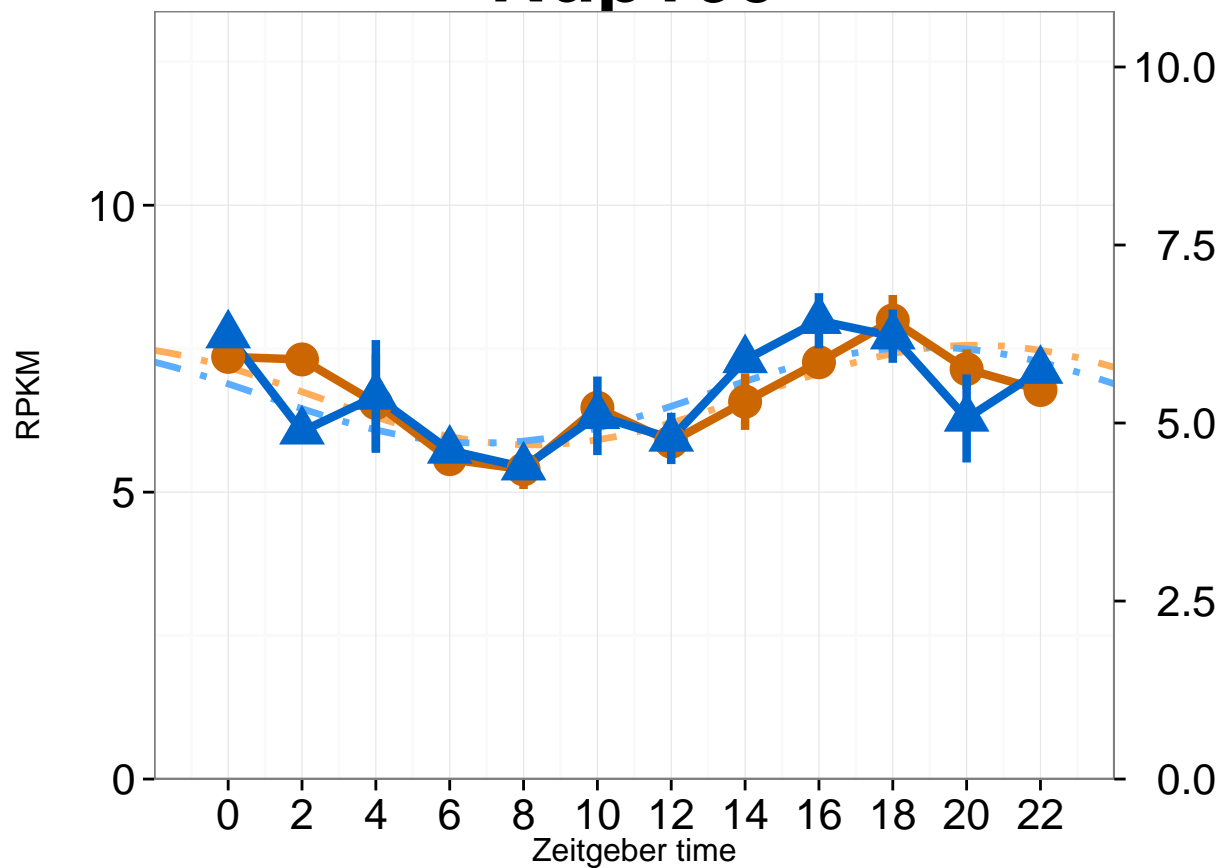

## Nup160

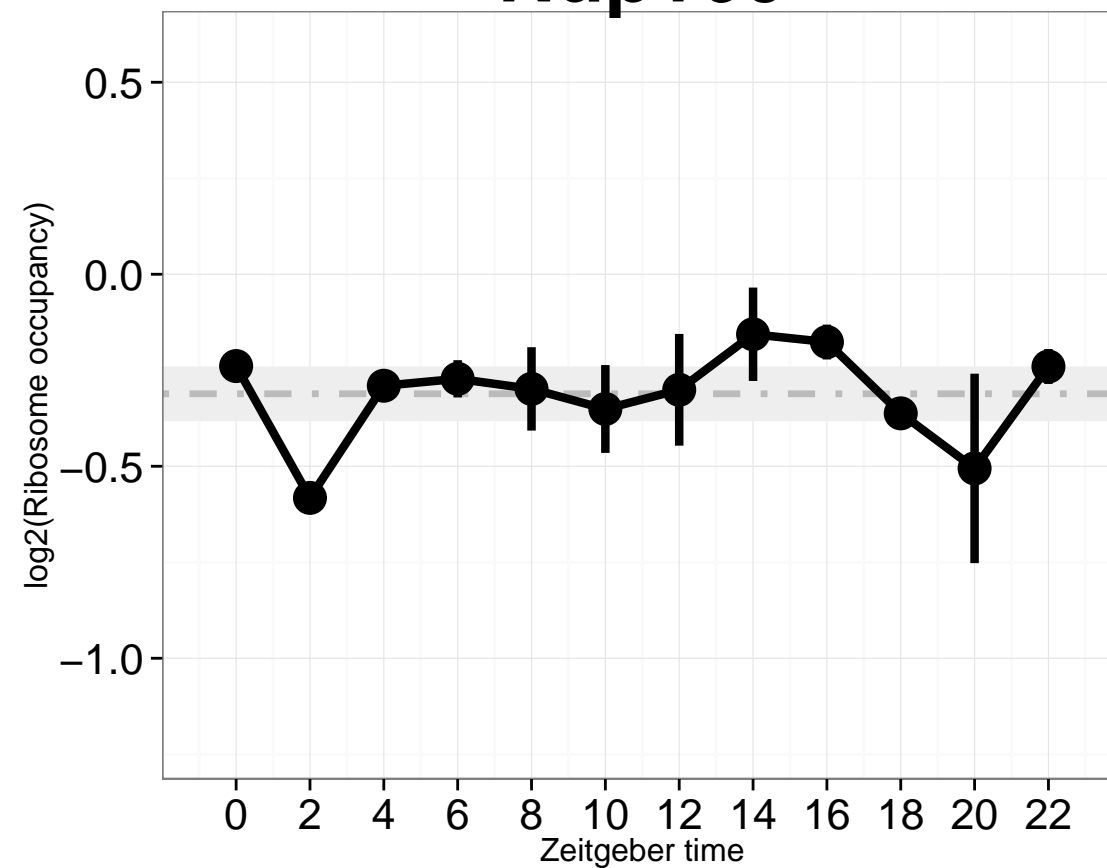

Supplement: Supplementary file 10188 [file 1]

## Acvr1b

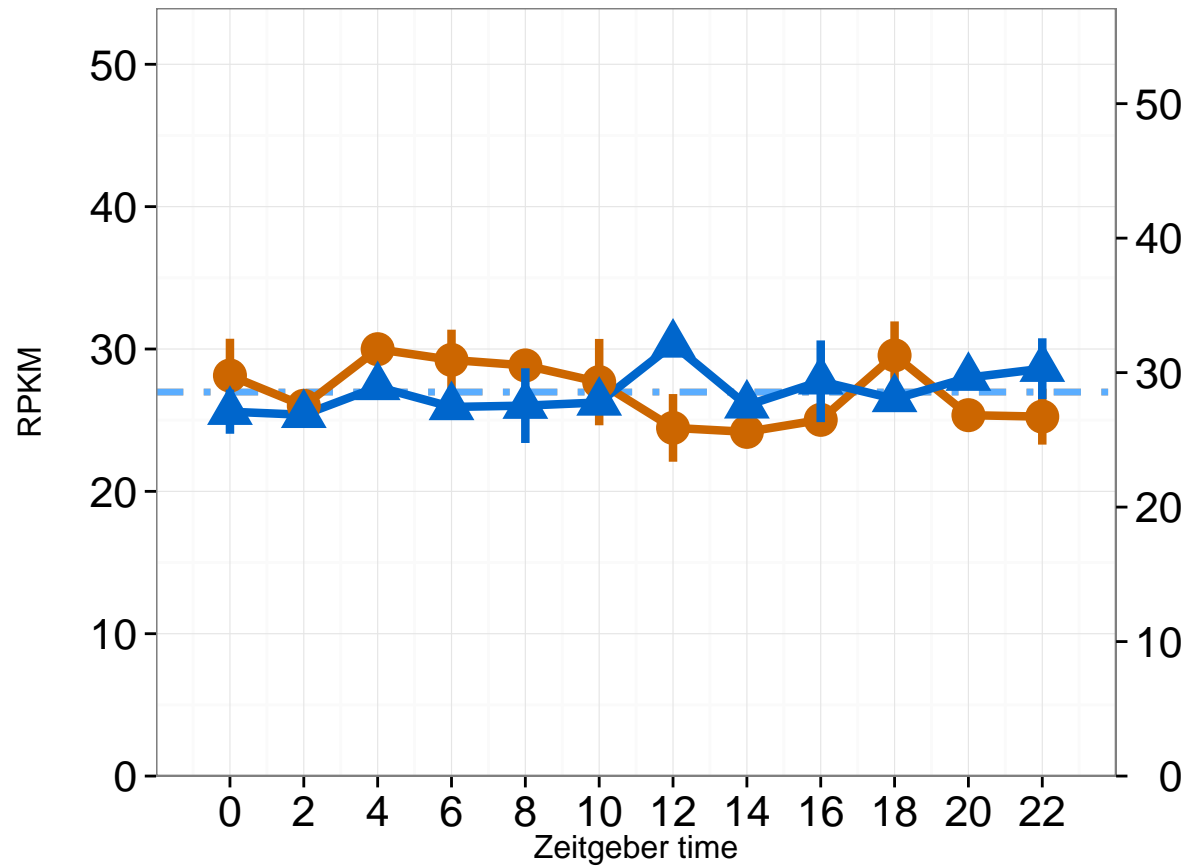

## Acvr1b

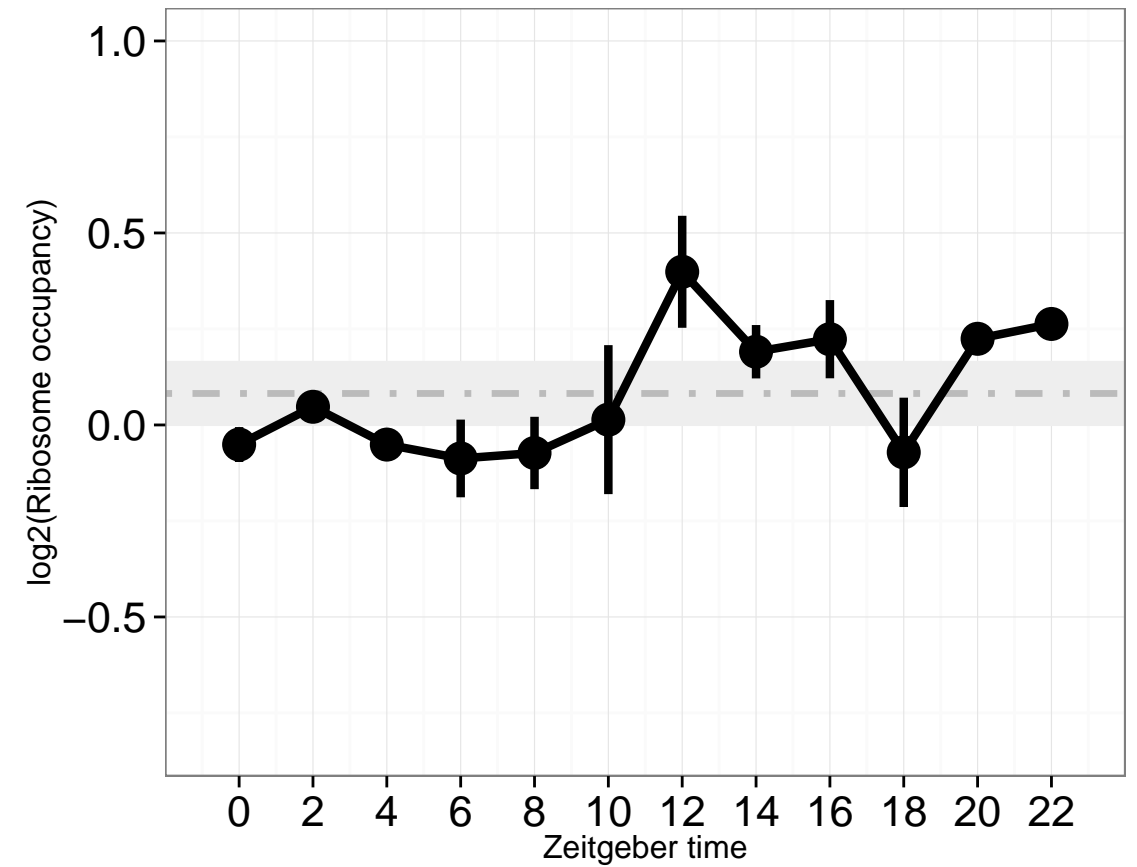

Supplement: Supplementary file 10189 [file 1]

## Zer1

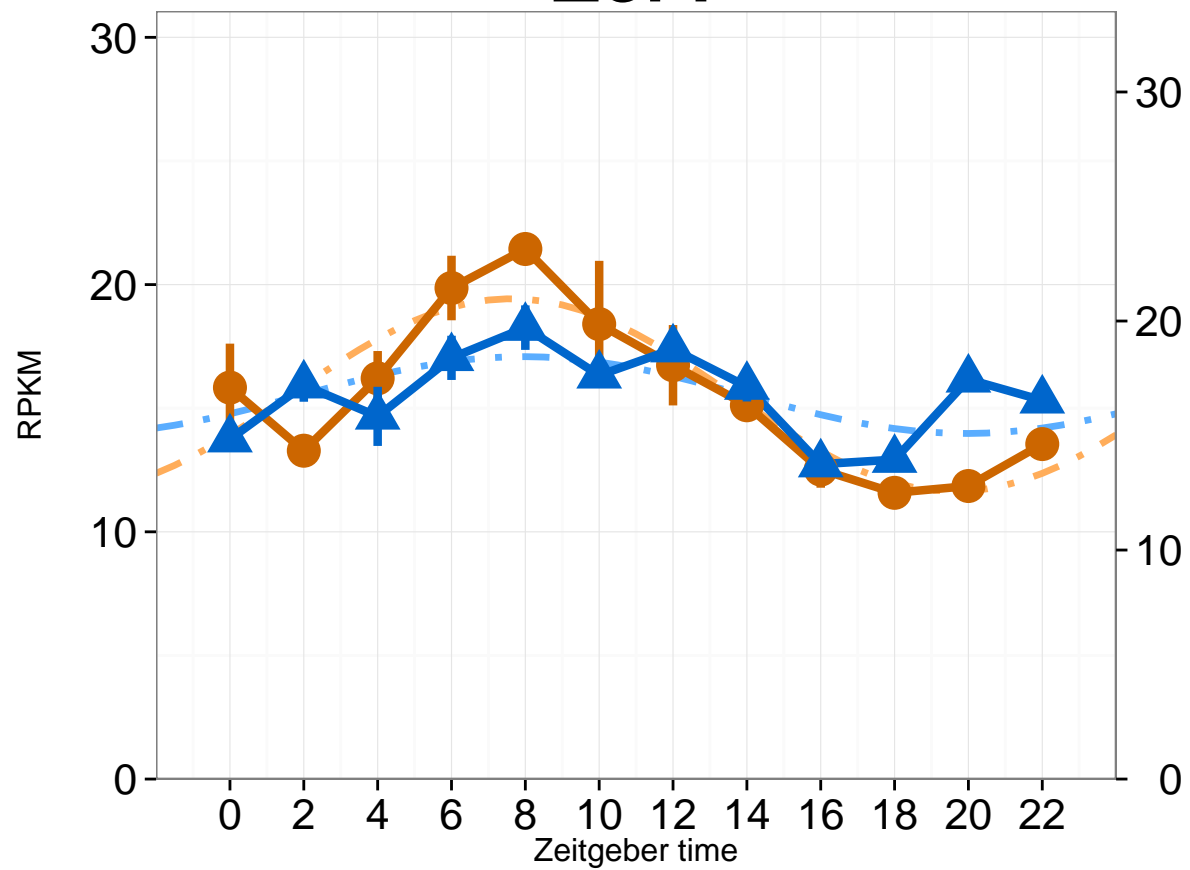

## Zer1

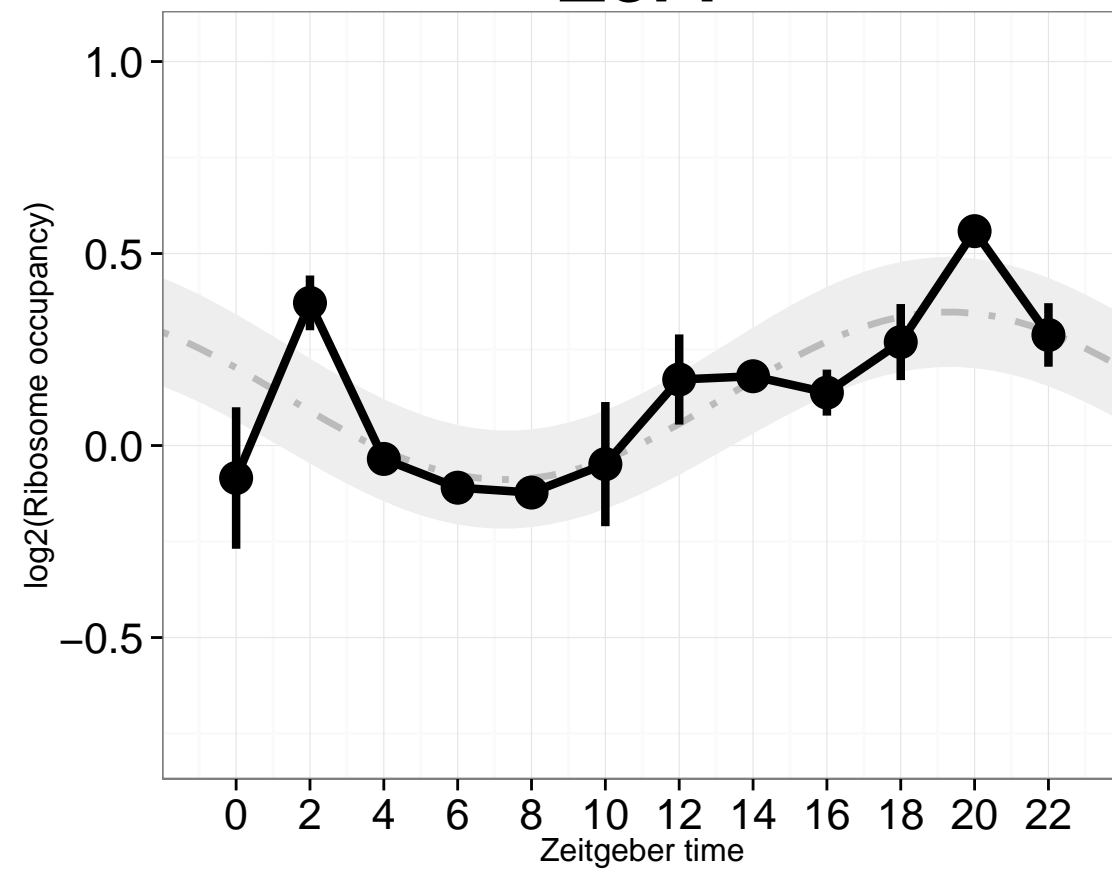

Supplement: Supplementary file 10190 [file 1]

## Sec23ip

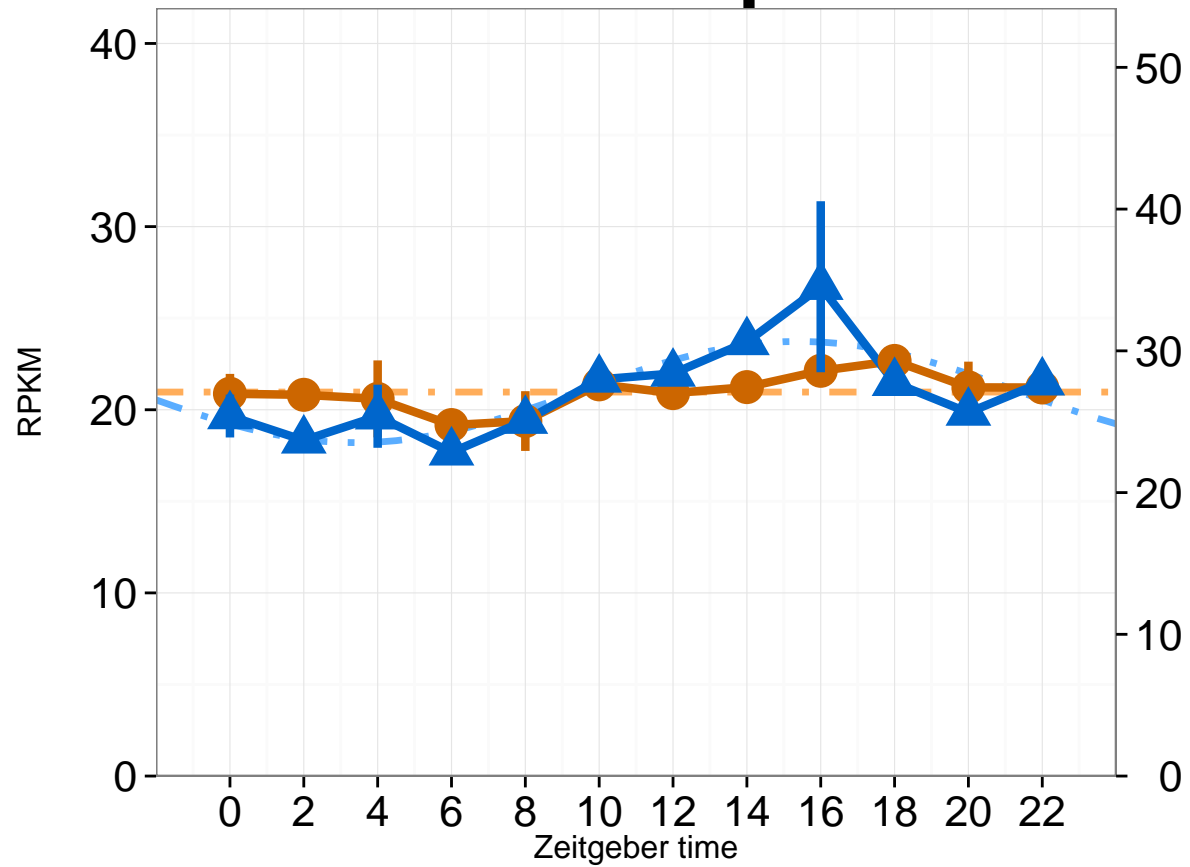

## Sec23ip

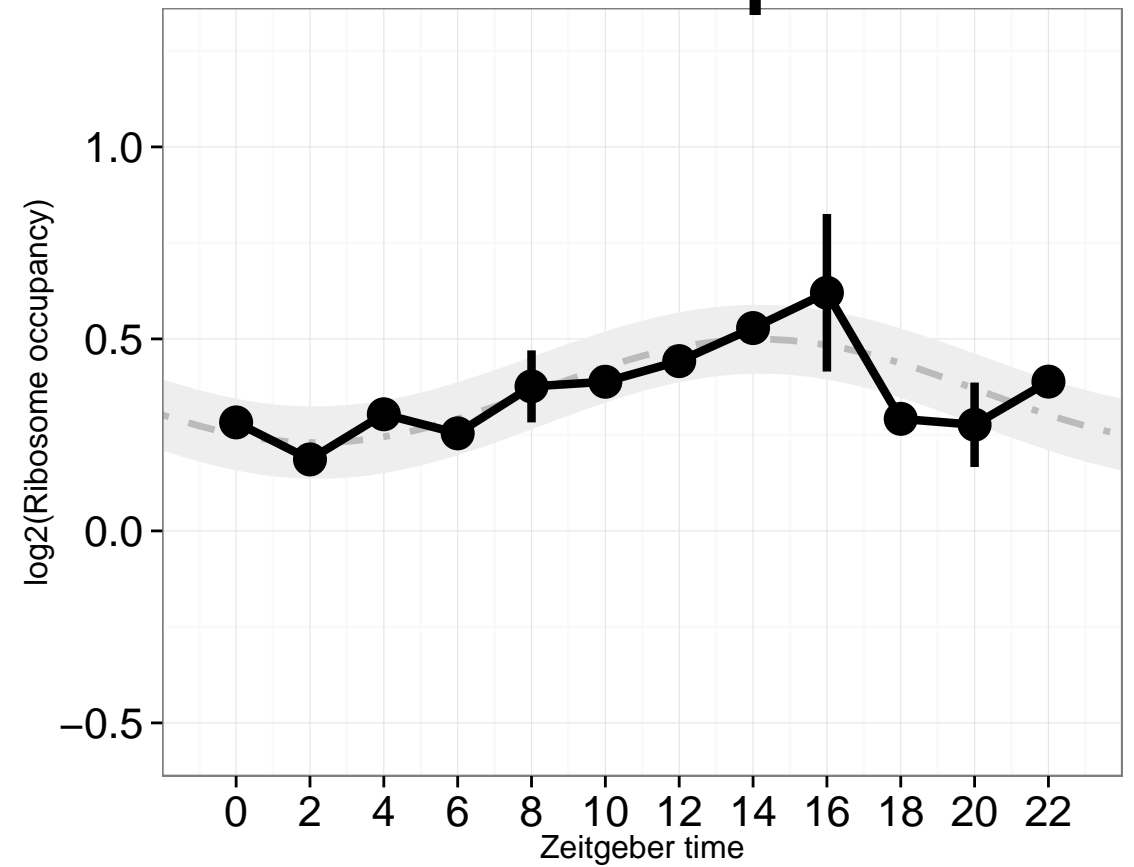

Supplement: Supplementary file 10191 [file 1]

# Aqp1

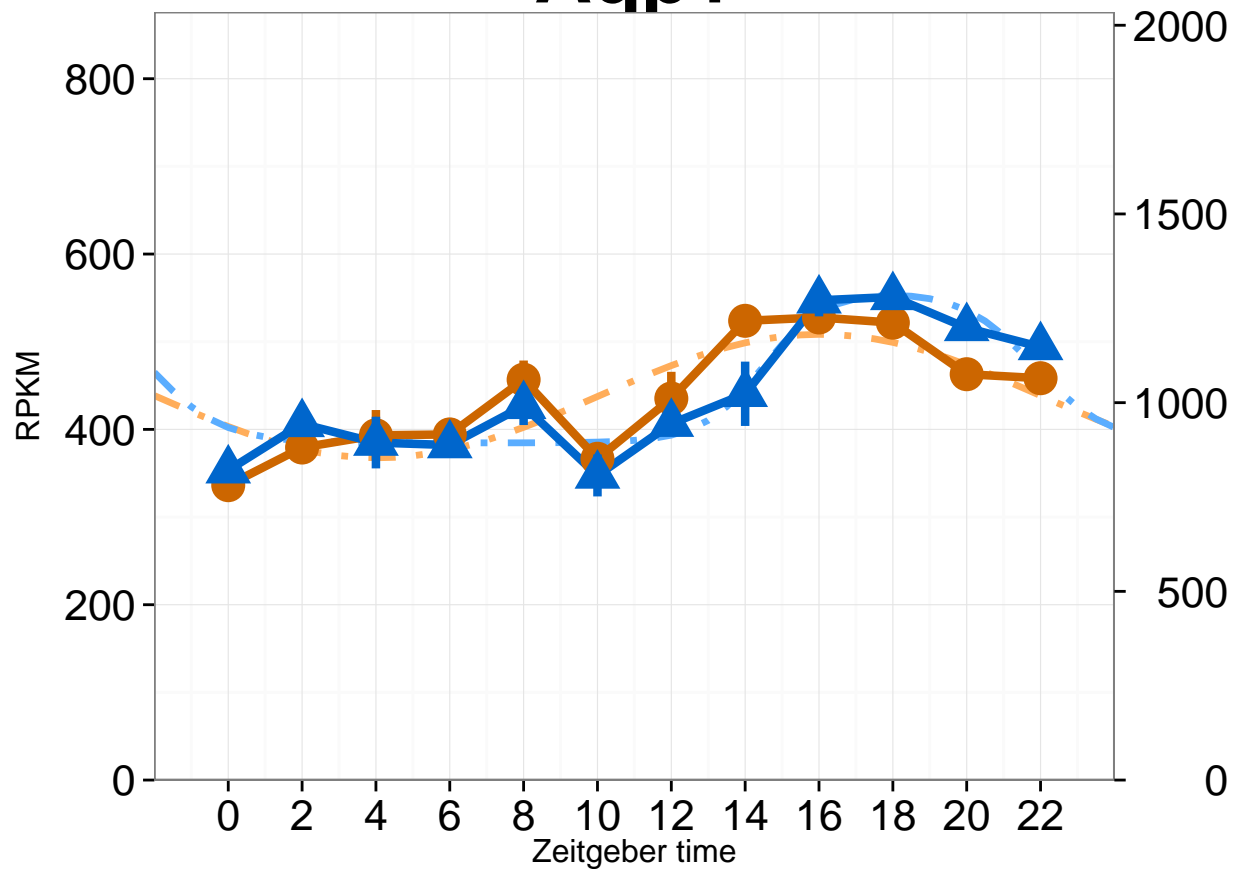

# Aqp1

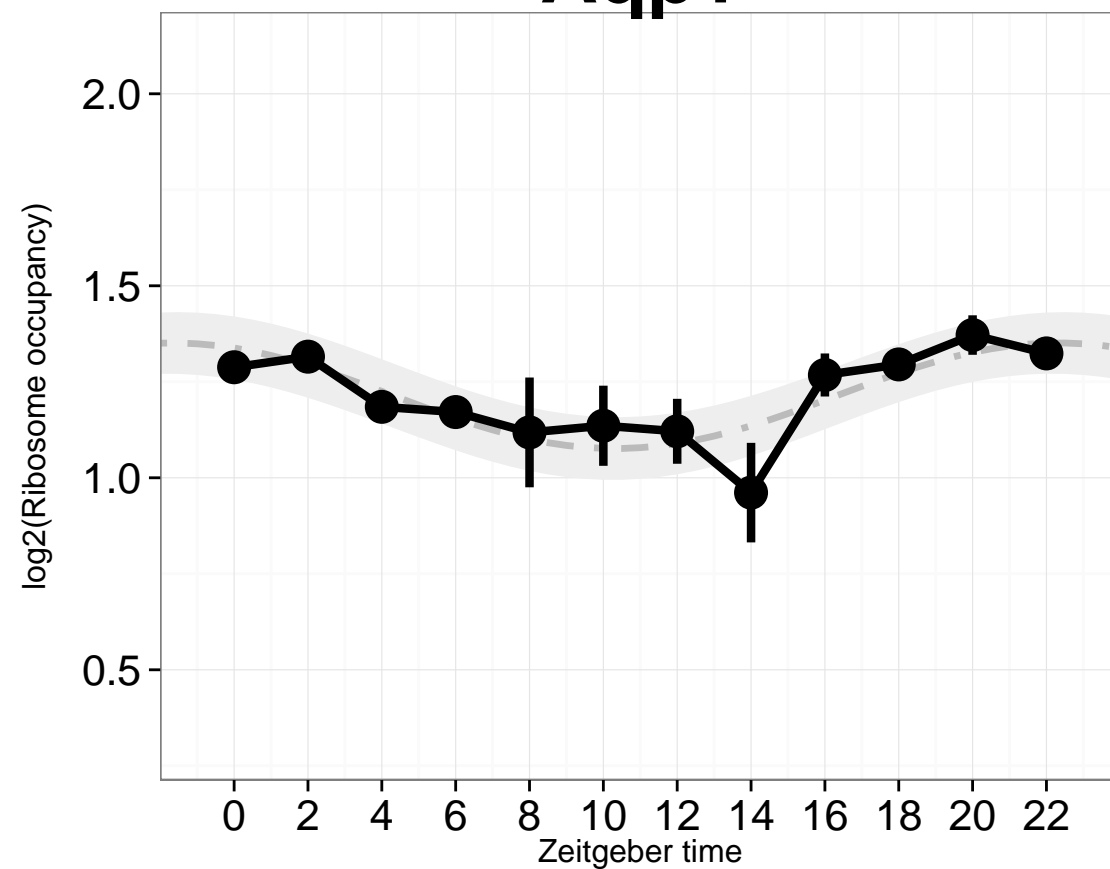

Supplement: Supplementary file 10192 [file 1]

## Perp

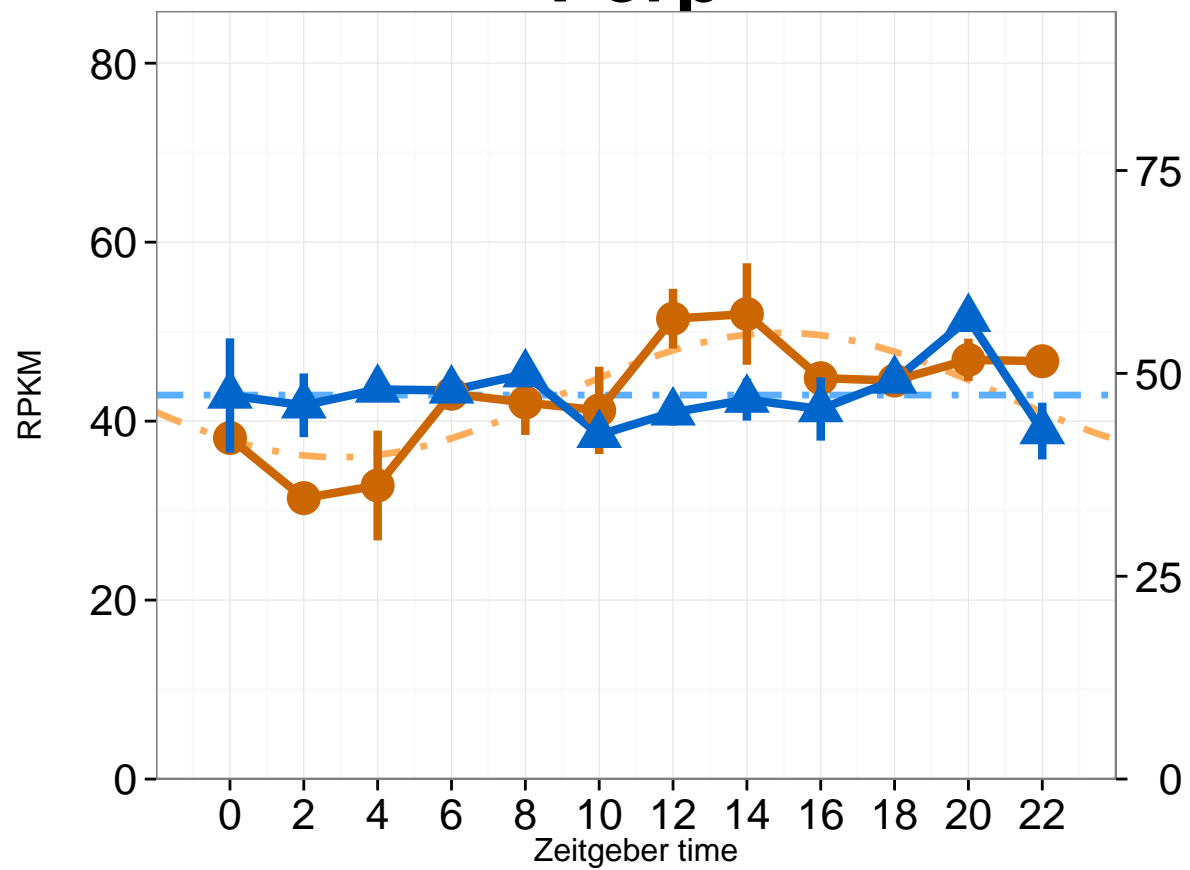

## Perp

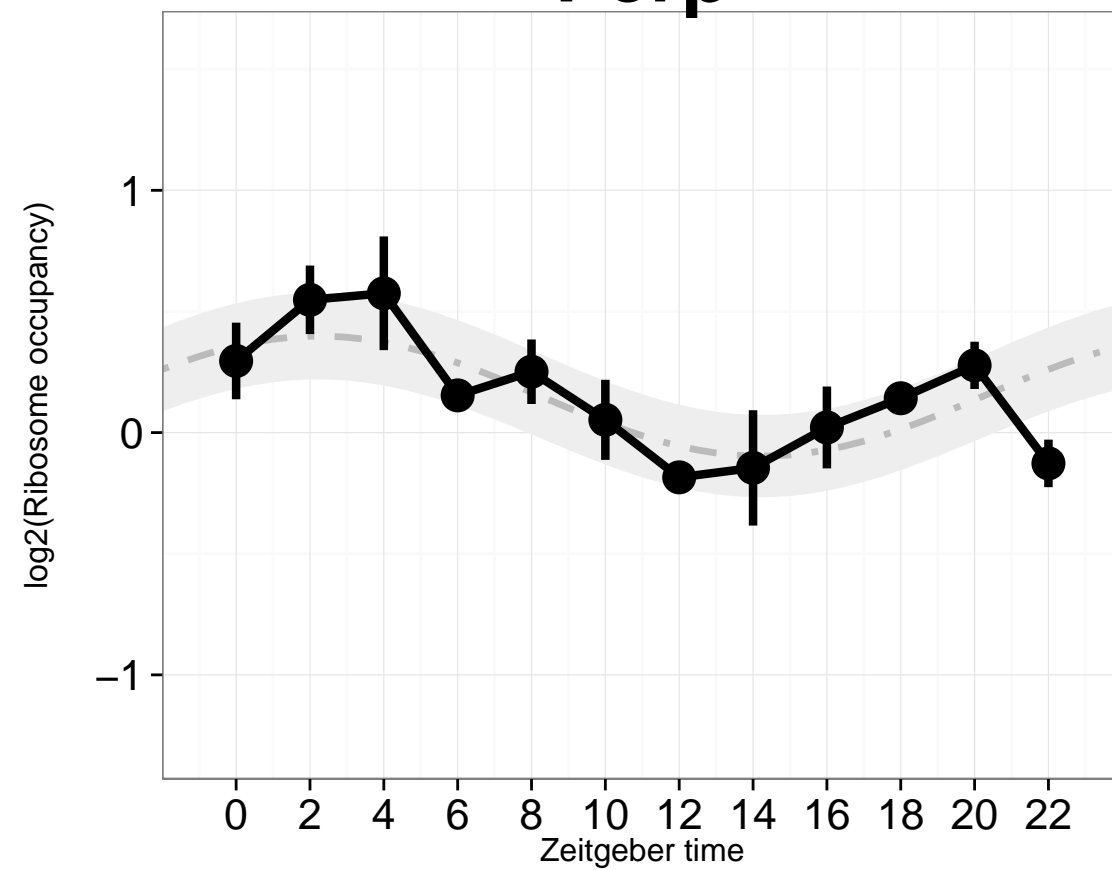

Supplement: Supplementary file 10193 [file 1]

# Asl

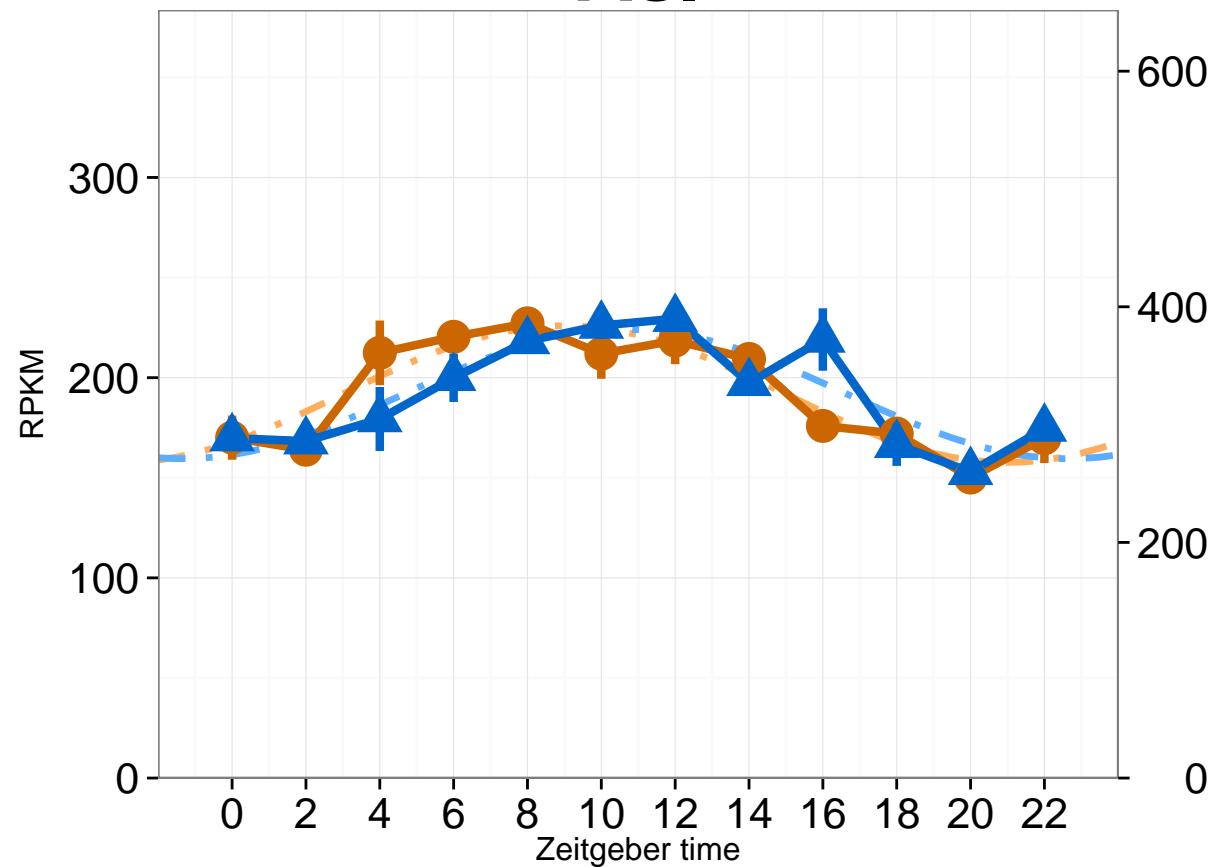

# Asl

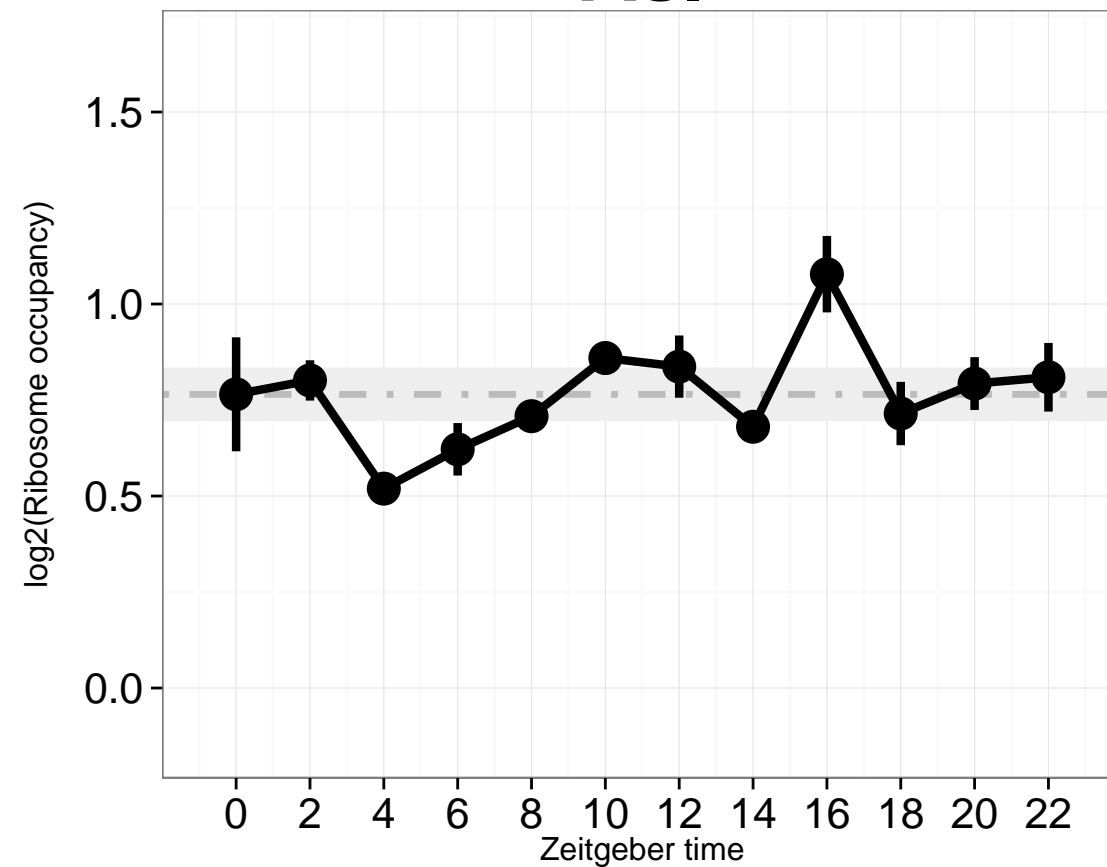

Supplement: Supplementary file 10194 [file 1]

## Rcbtb2

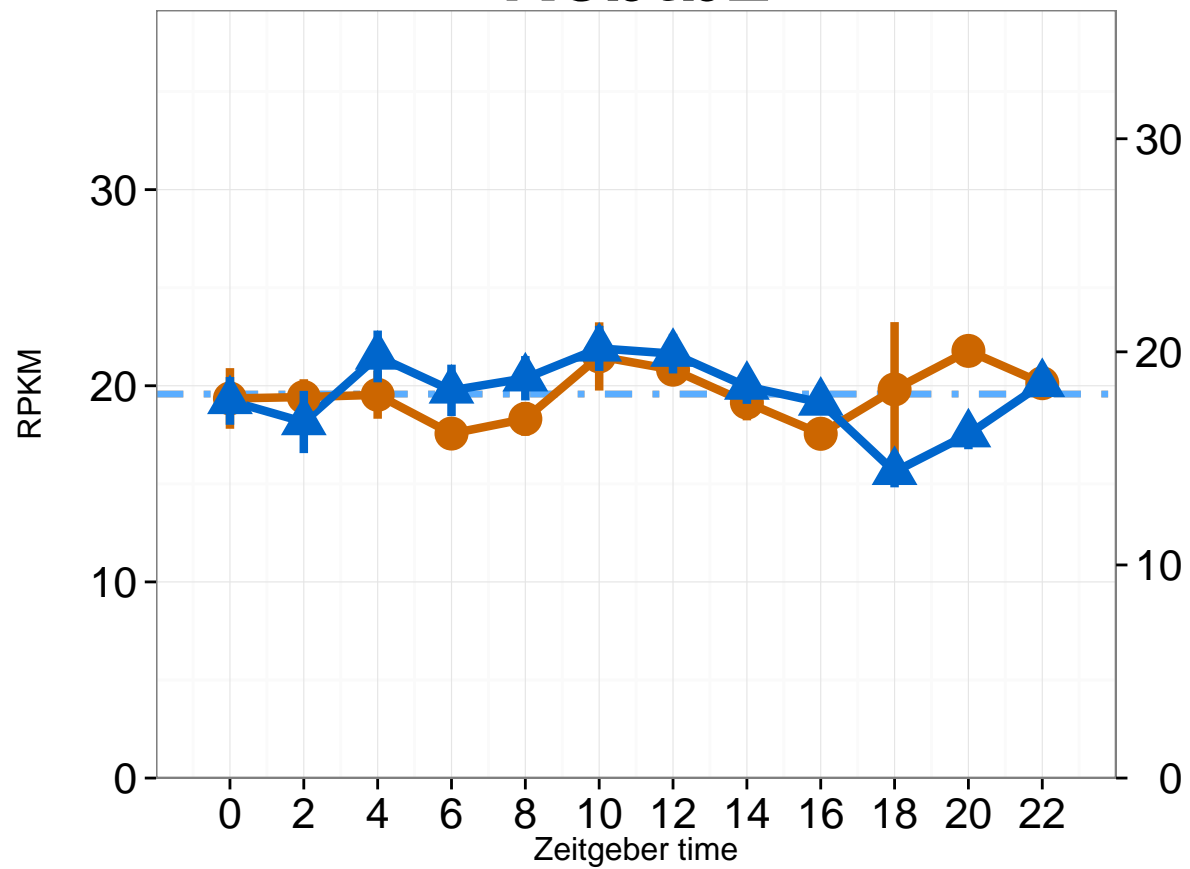

## Rcbtb2

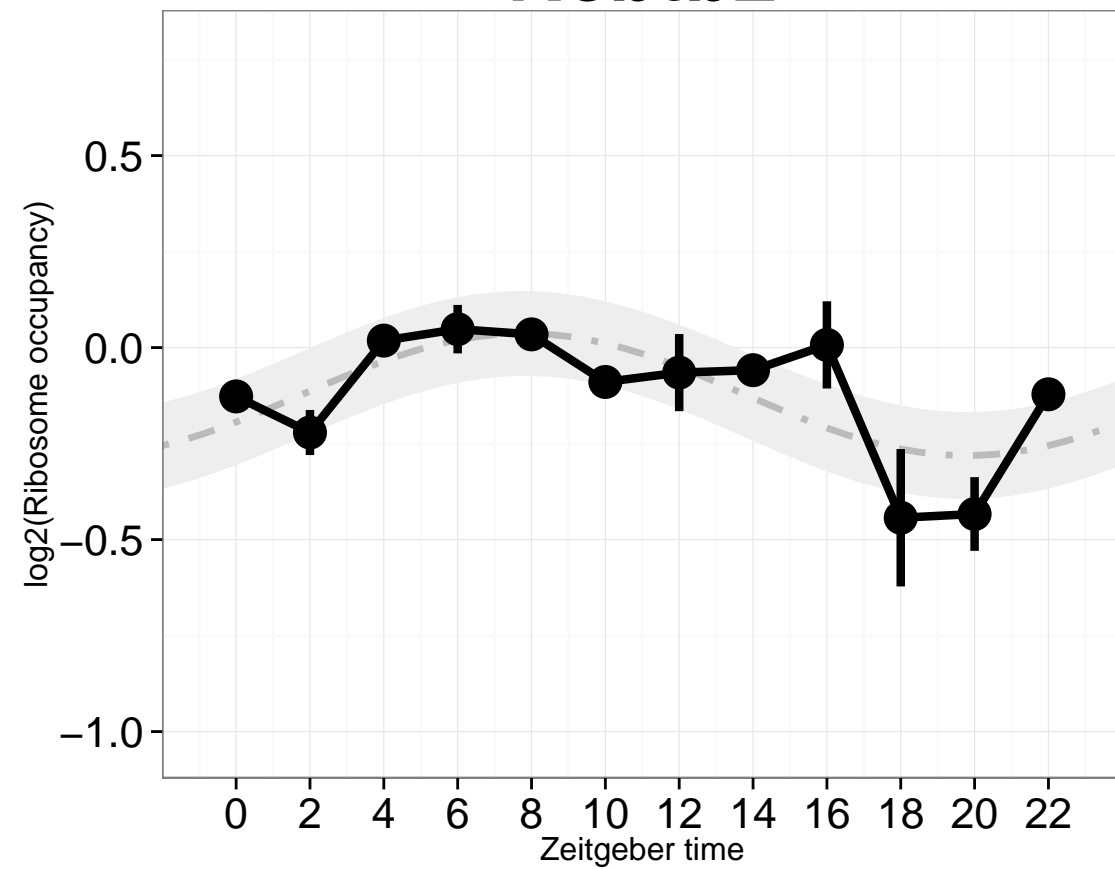

Supplement: Supplementary file 10195 [file 1]

## Bbs9

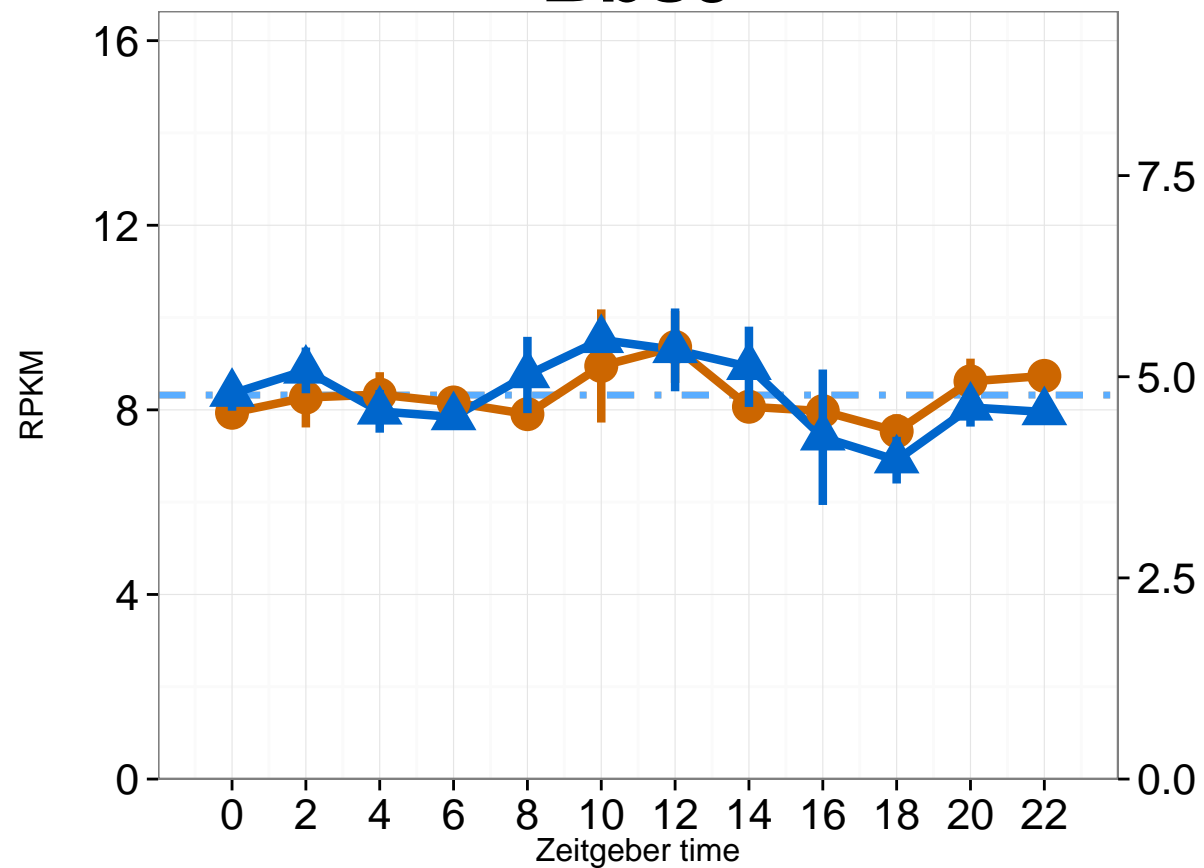

## Bbs9

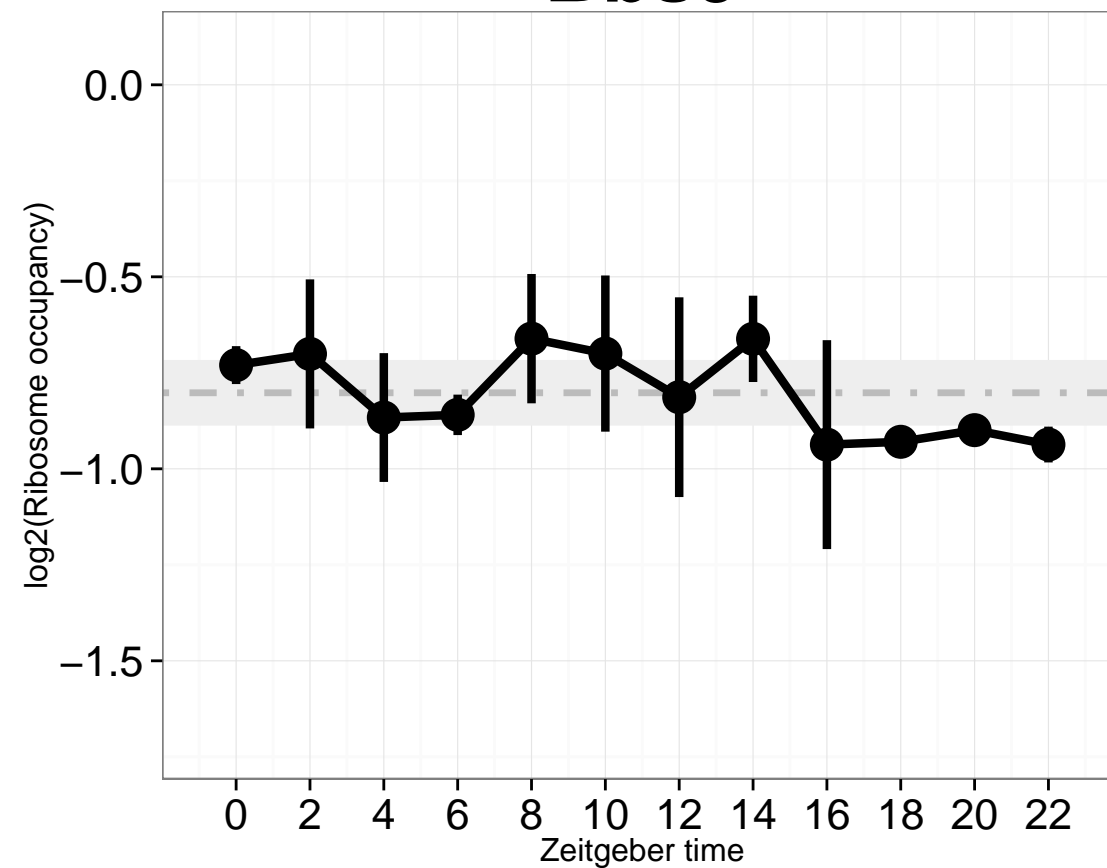

Supplement: Supplementary file 10196 [file 1]

## Sorcs2

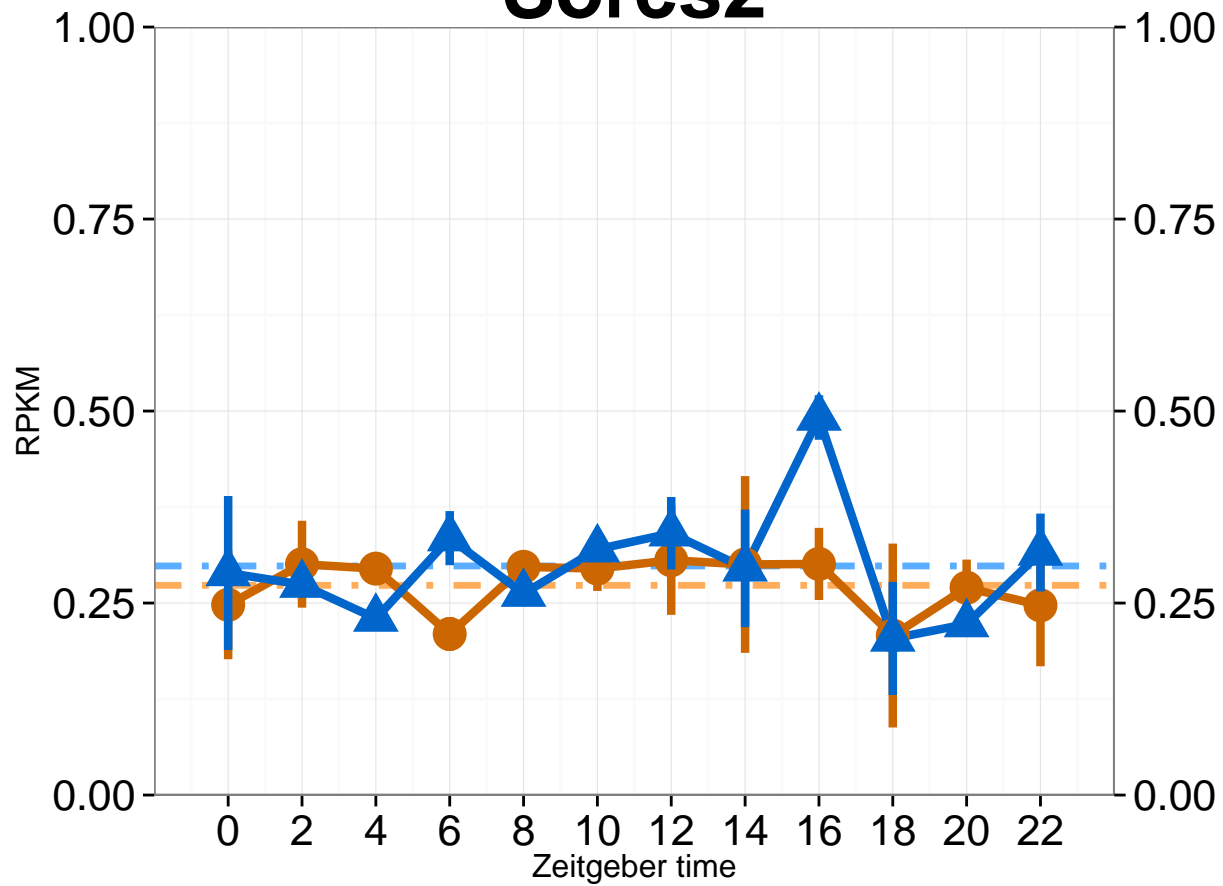

## Sorcs2

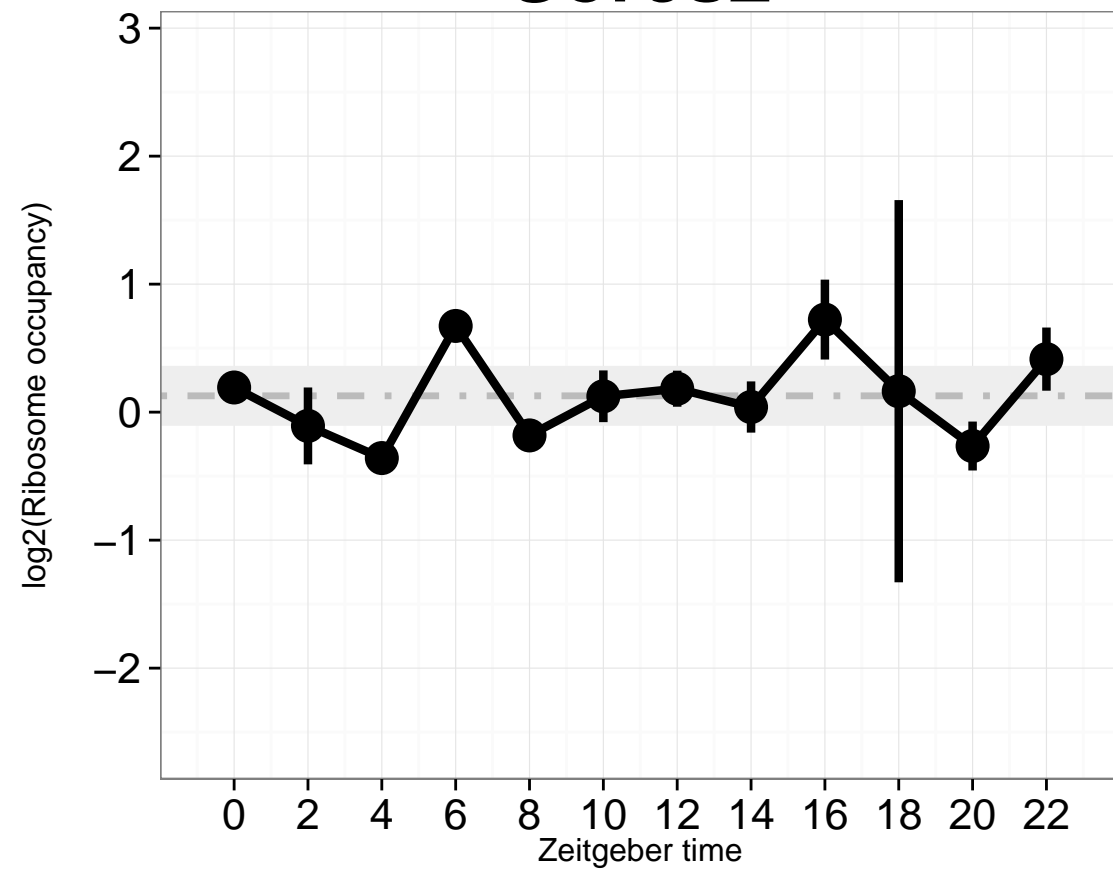

Supplement: Supplementary file 10197 [file 1]

# Upk3b

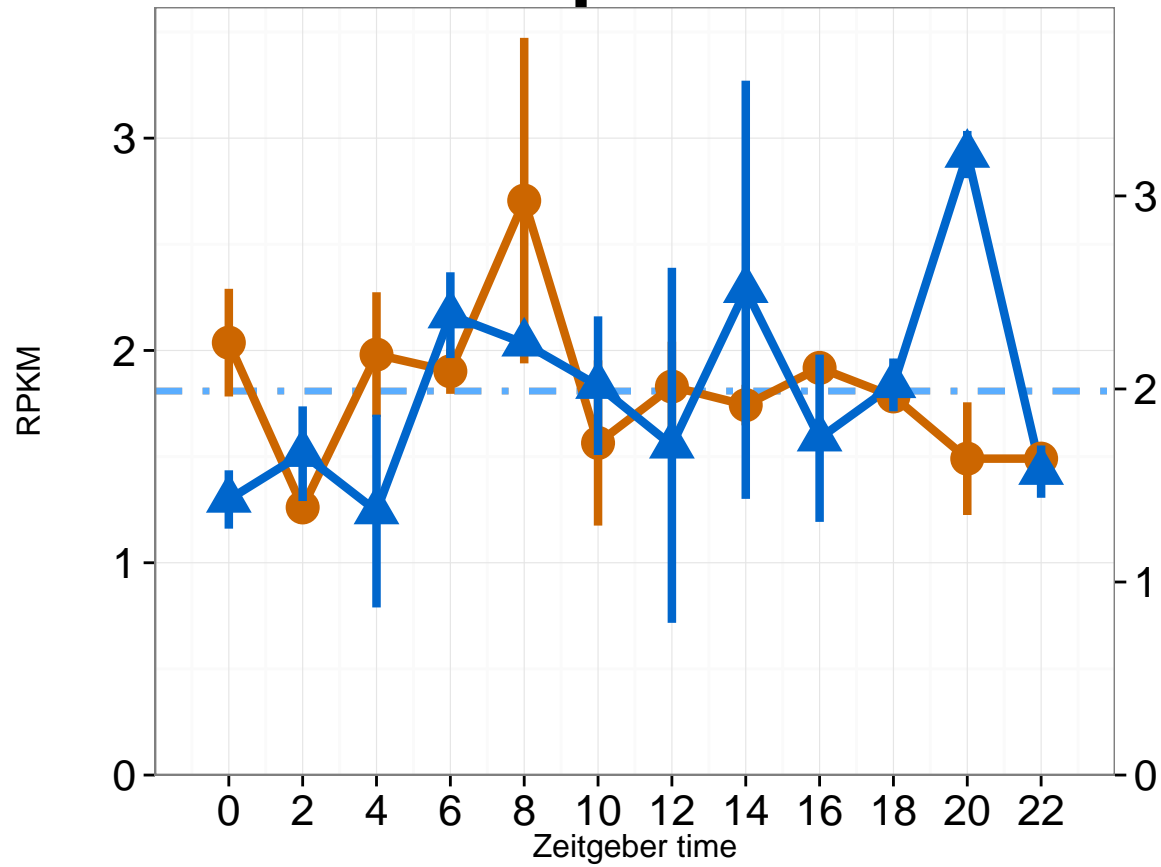

# Upk3b

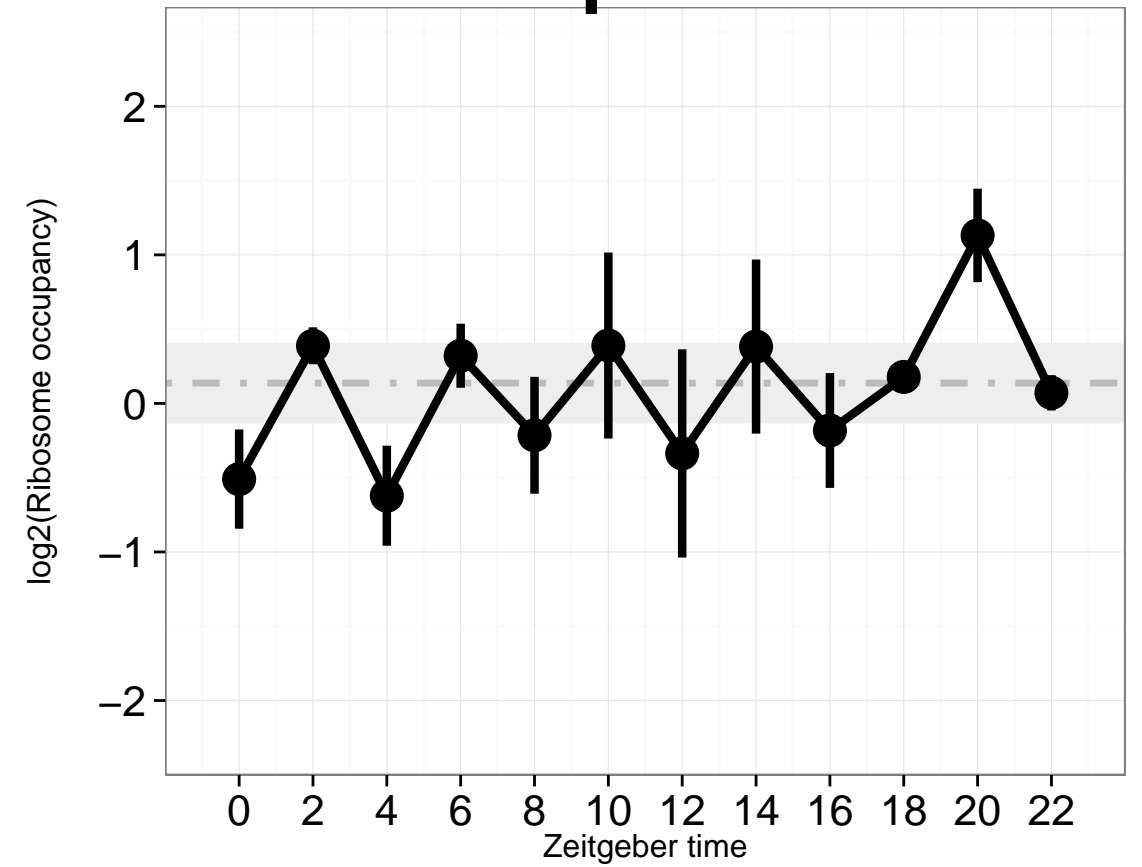

Supplement: Supplementary file 10198 [file 1]

# Arhgap15

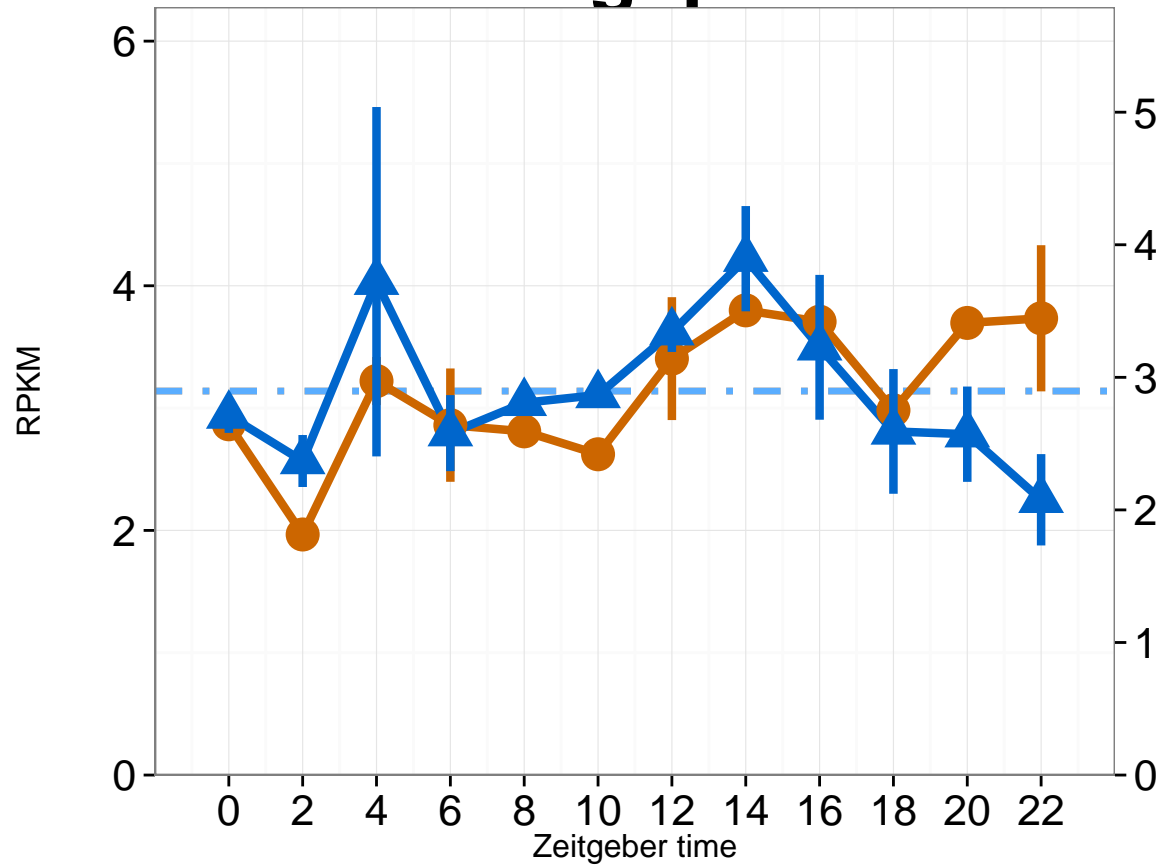

# Arhgap15

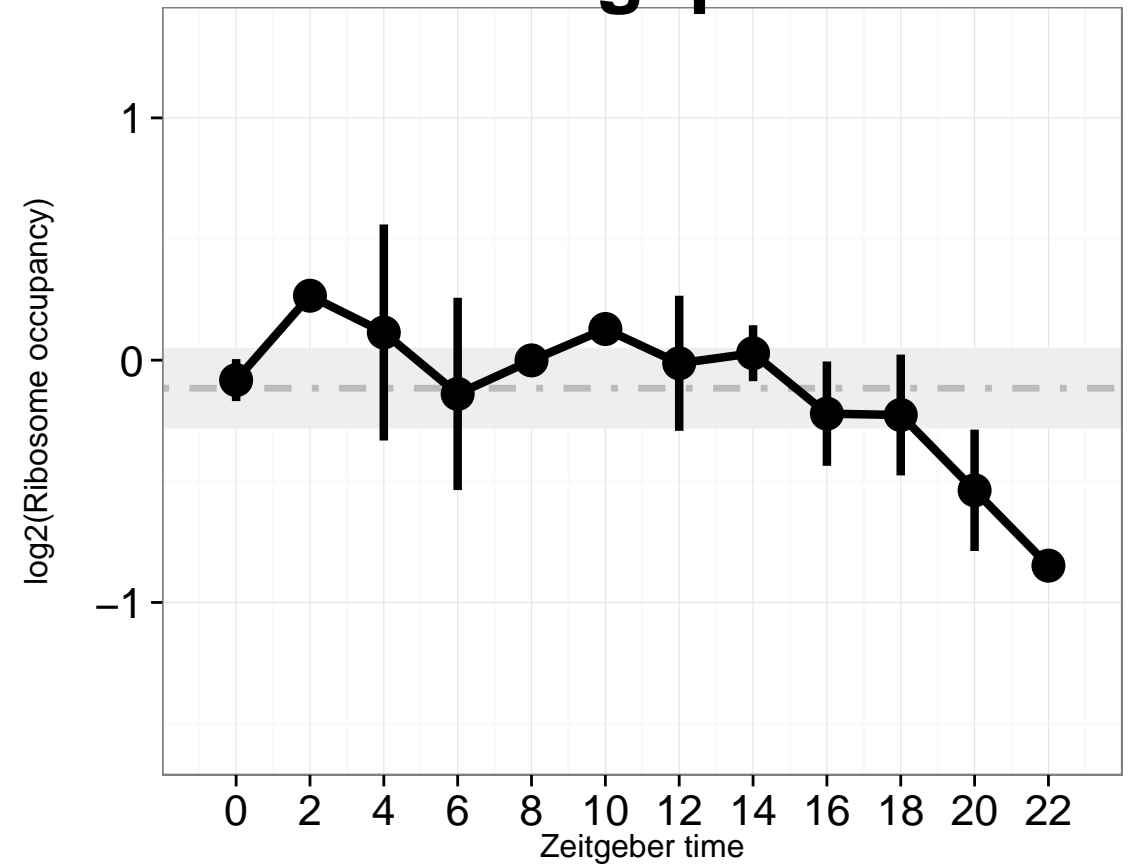

Supplement: Supplementary file 10199 [file 1]

# Fam71e1

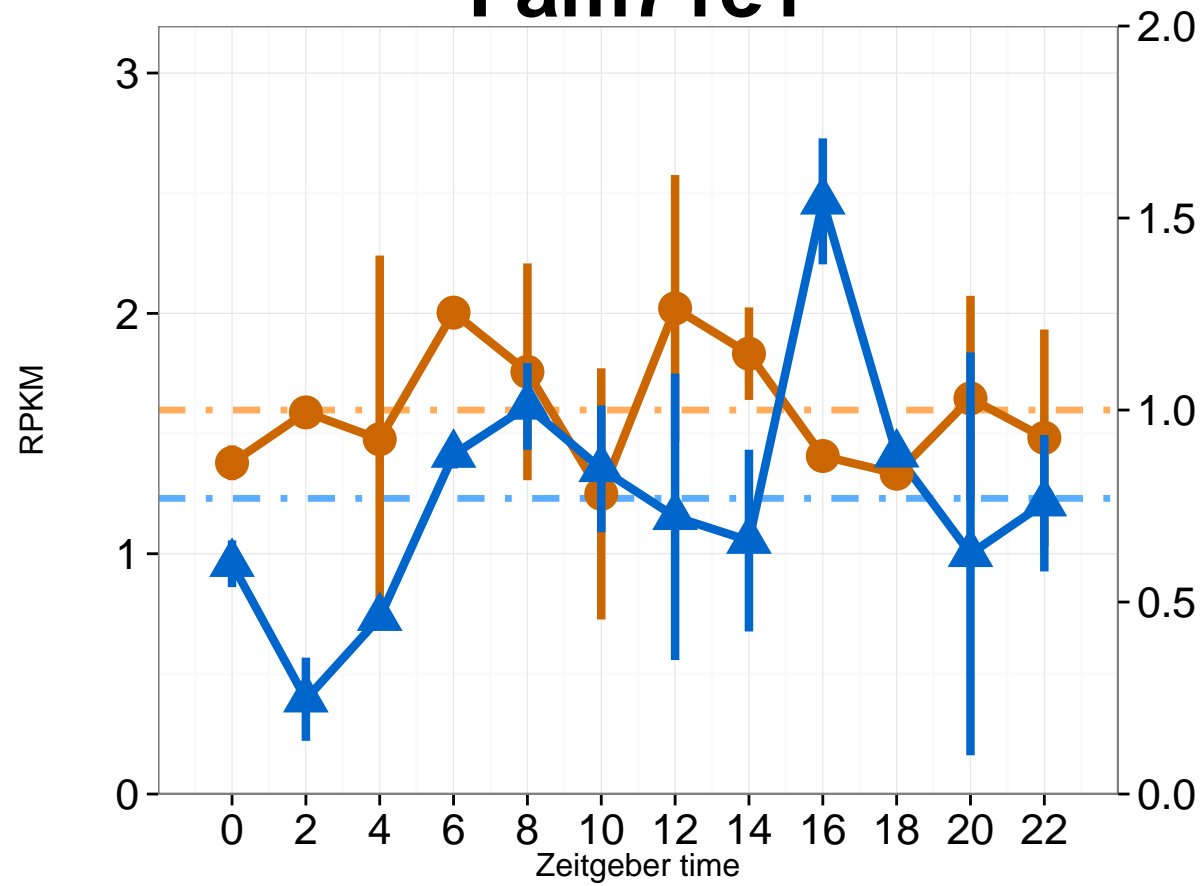

# Fam71e1

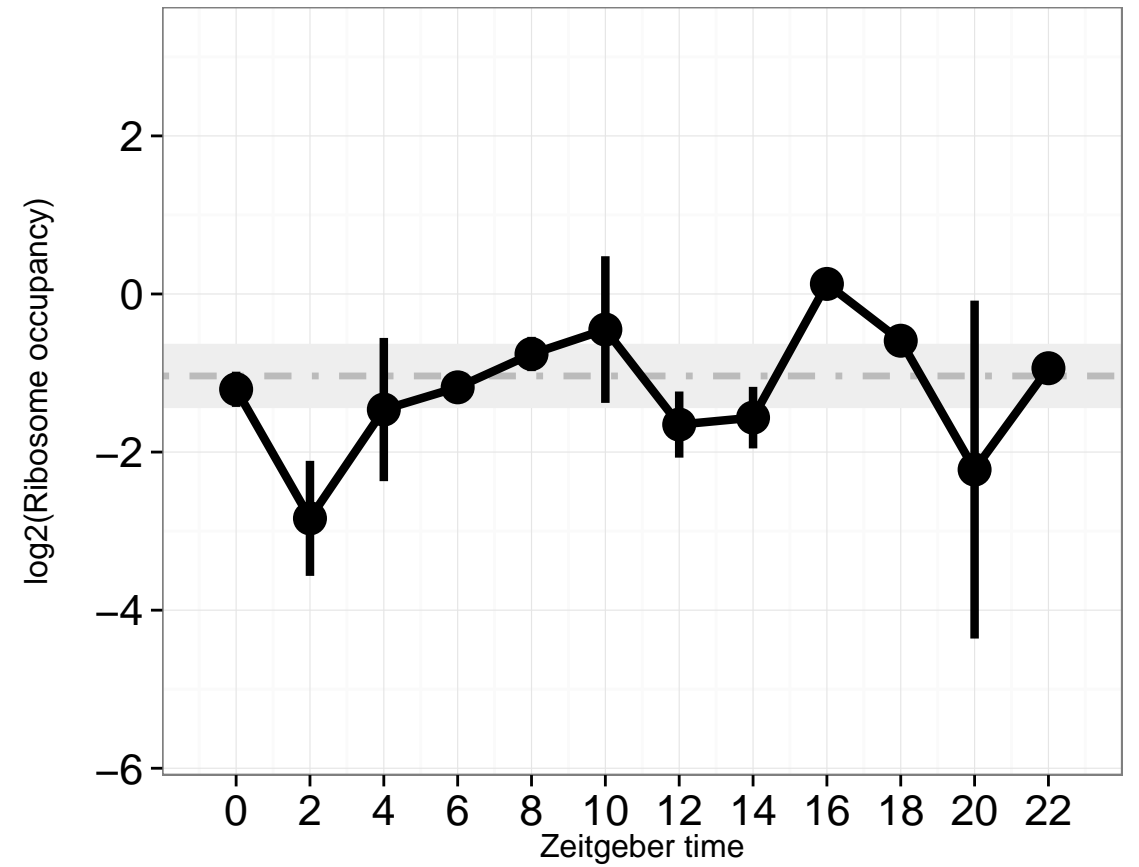

Supplement: Supplementary file 10200 [file 1]

## Dock8

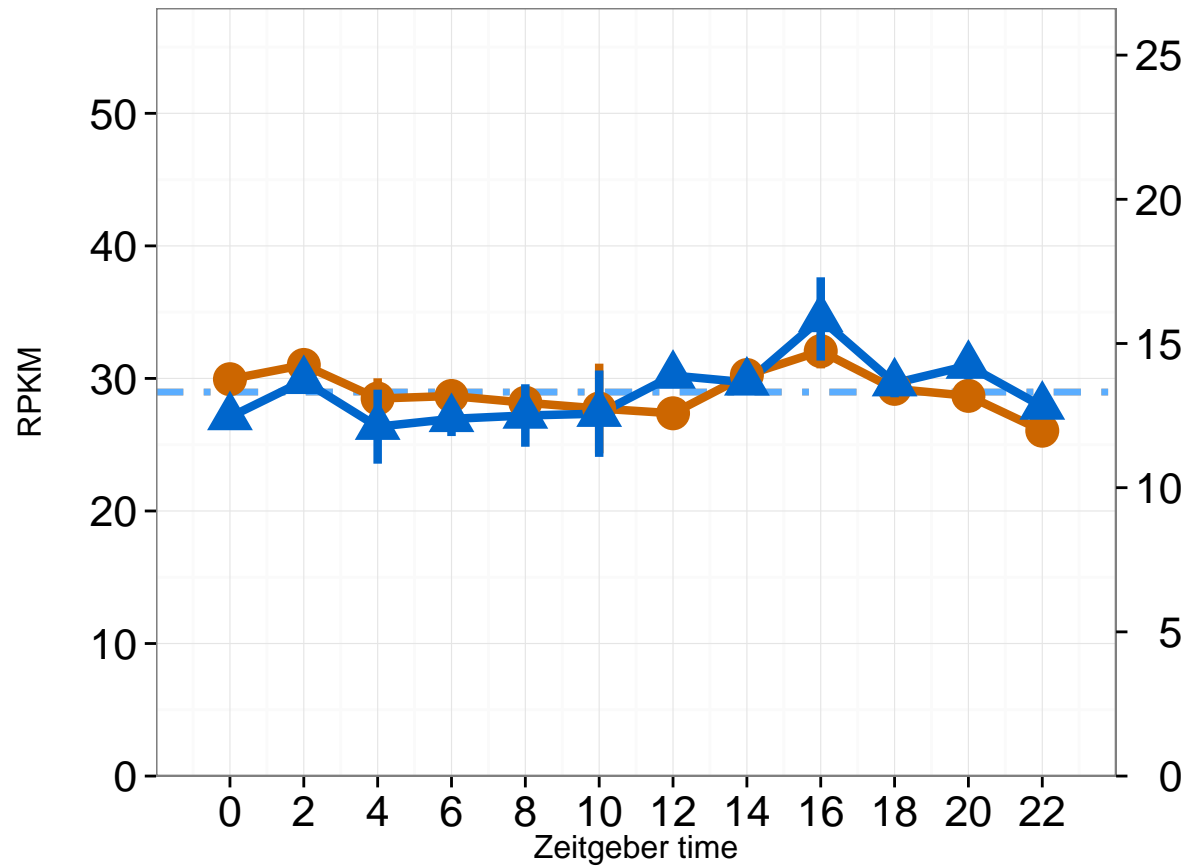

## Dock8

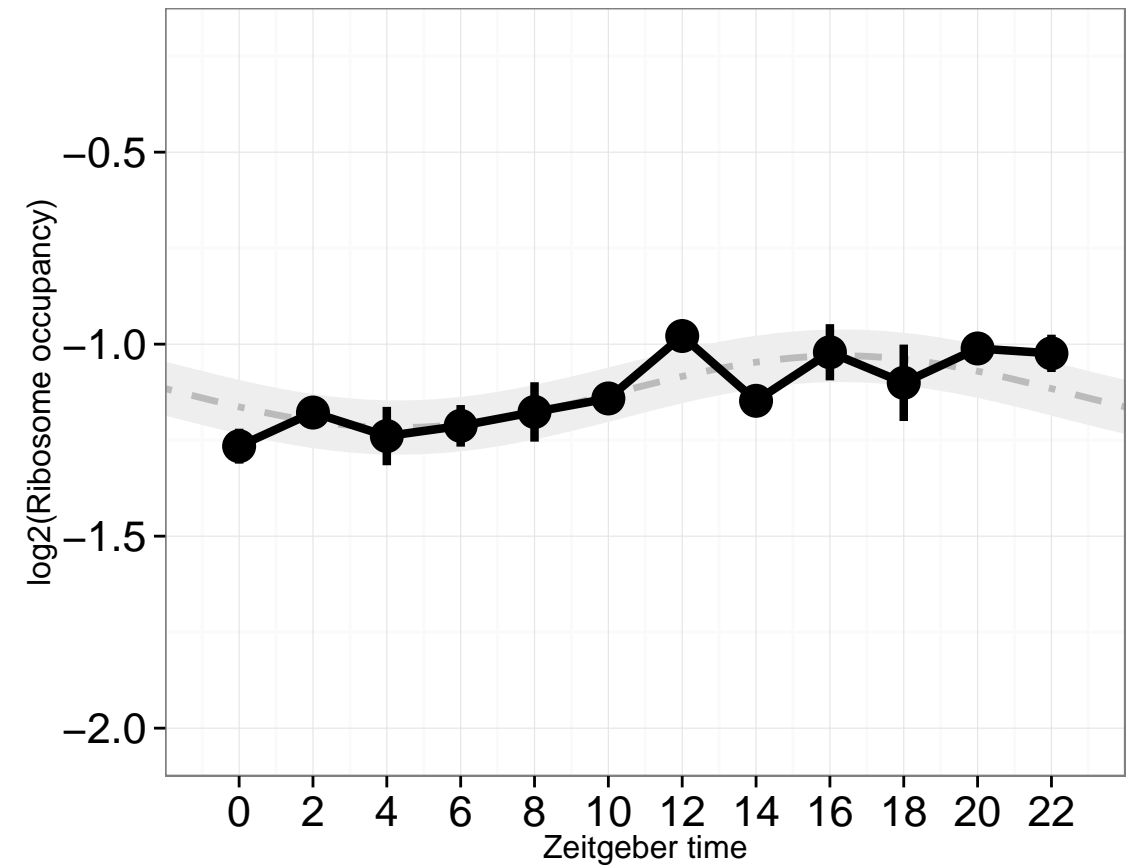

Supplement: Supplementary file 10201 [file 1]

# Trp53i13

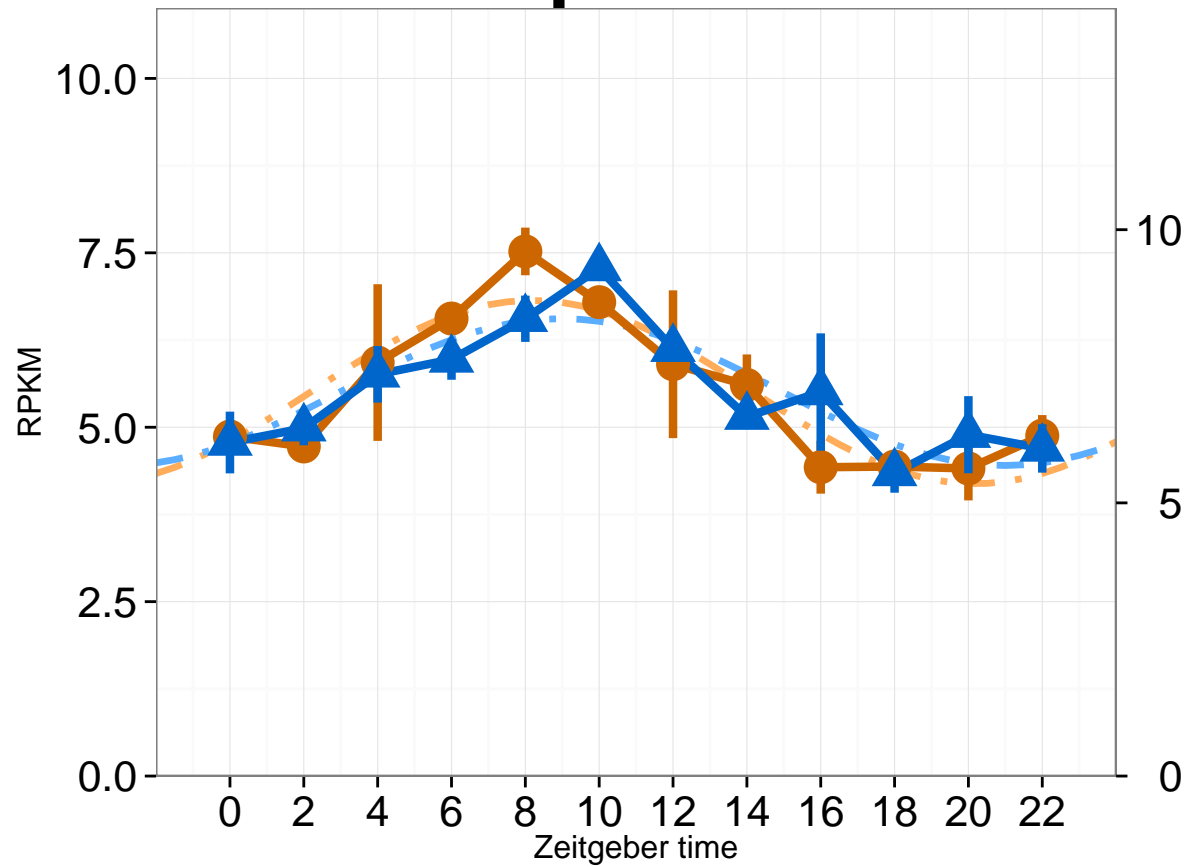

# Trp53i13

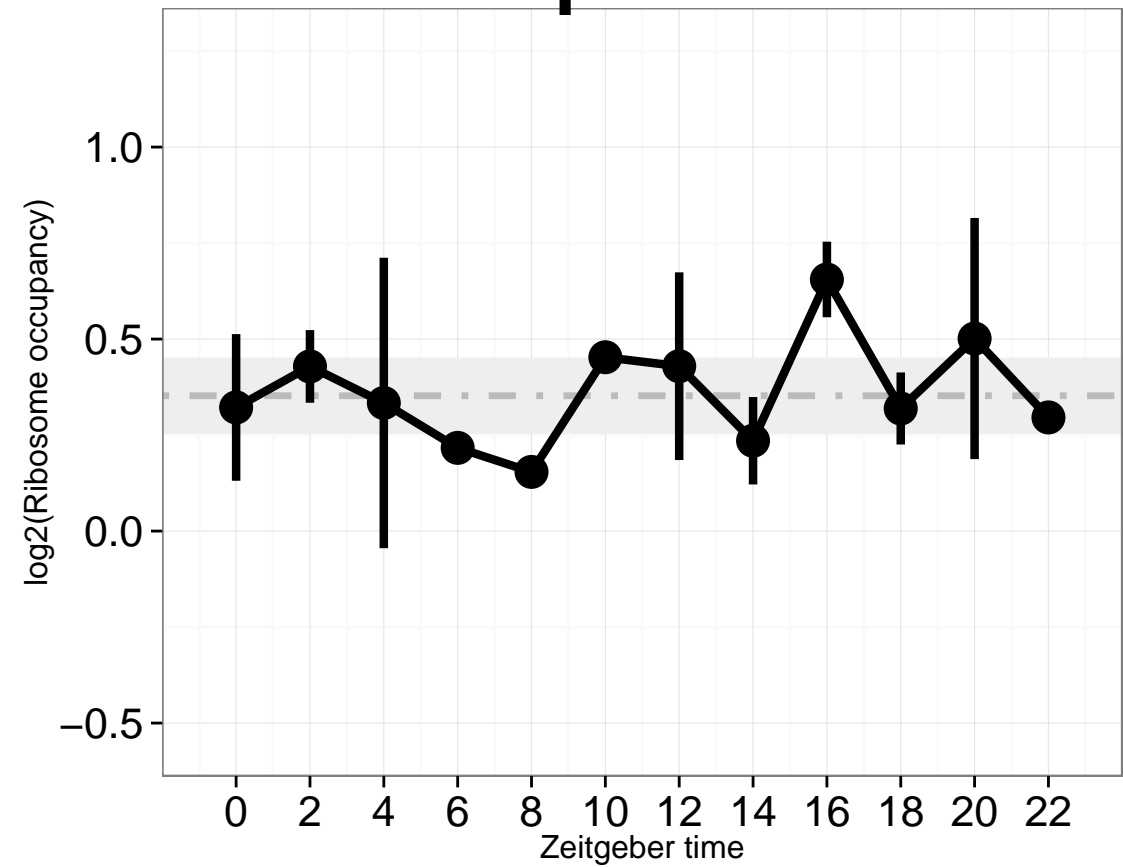

Supplement: Supplementary file 10202 [file 1]

## Trafd1

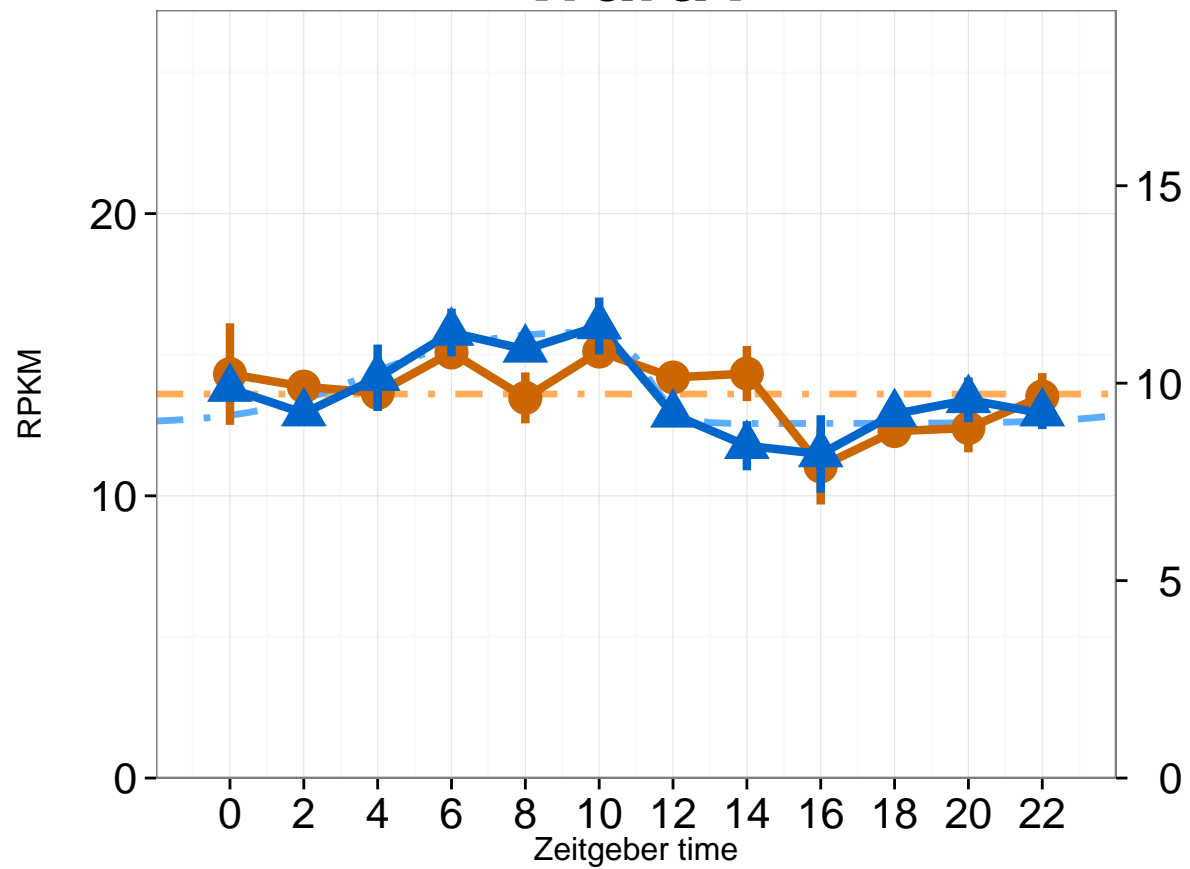

## Trafd1

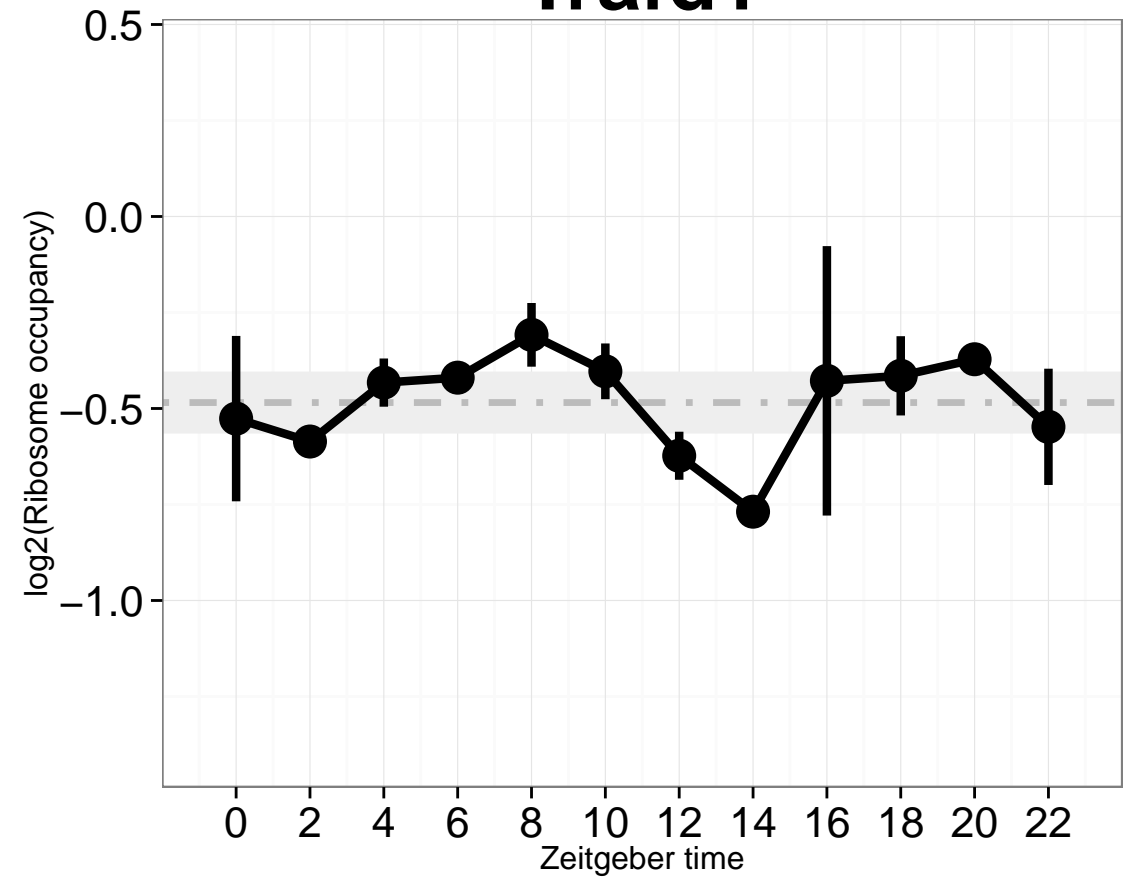

Supplement: Supplementary file 10203 [file 1]

# Coro6

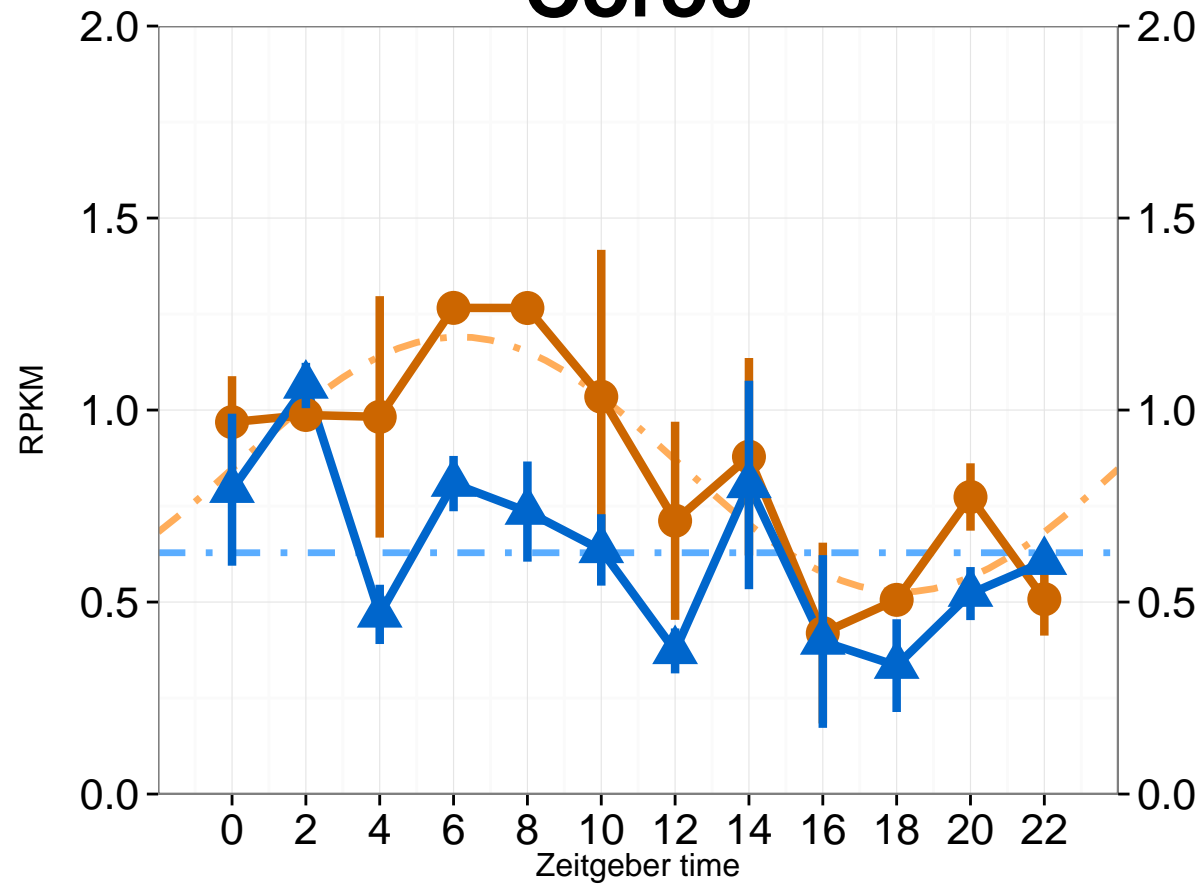

# Coro6

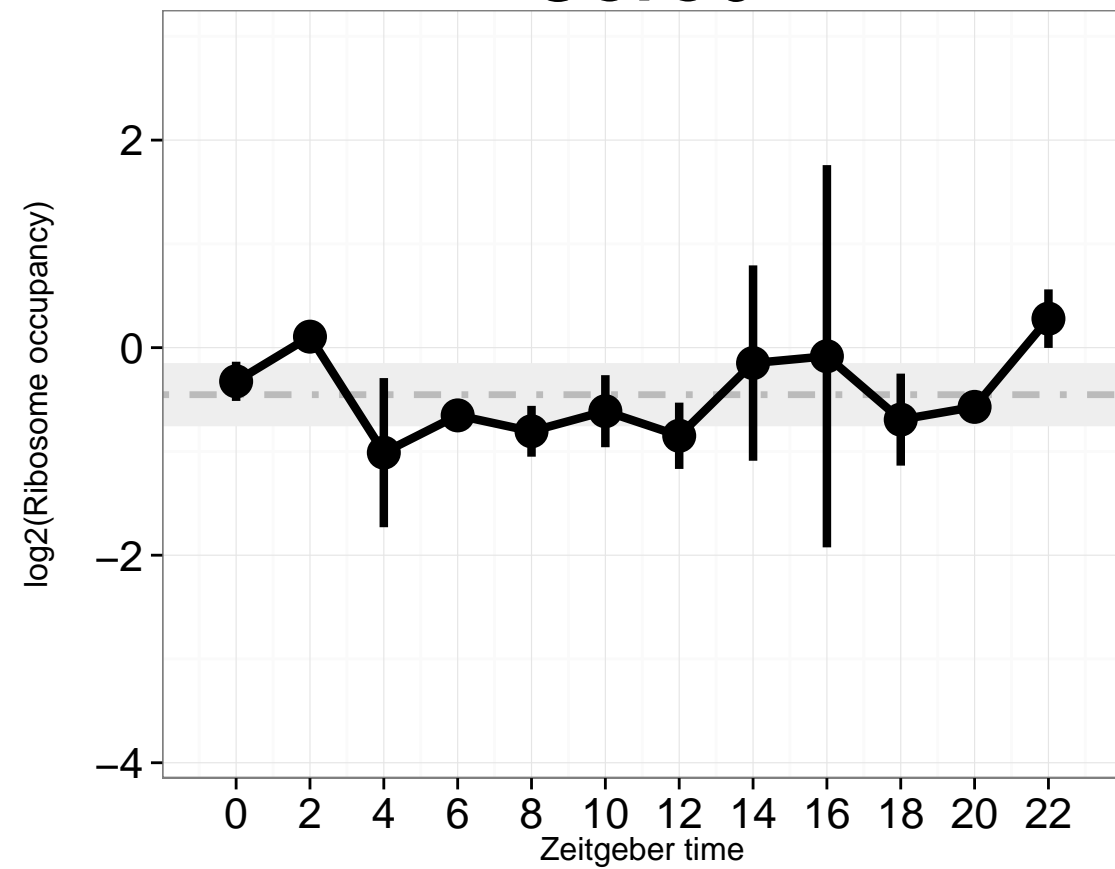

Supplement: Supplementary file 10204 [file 1]

# Mettl16

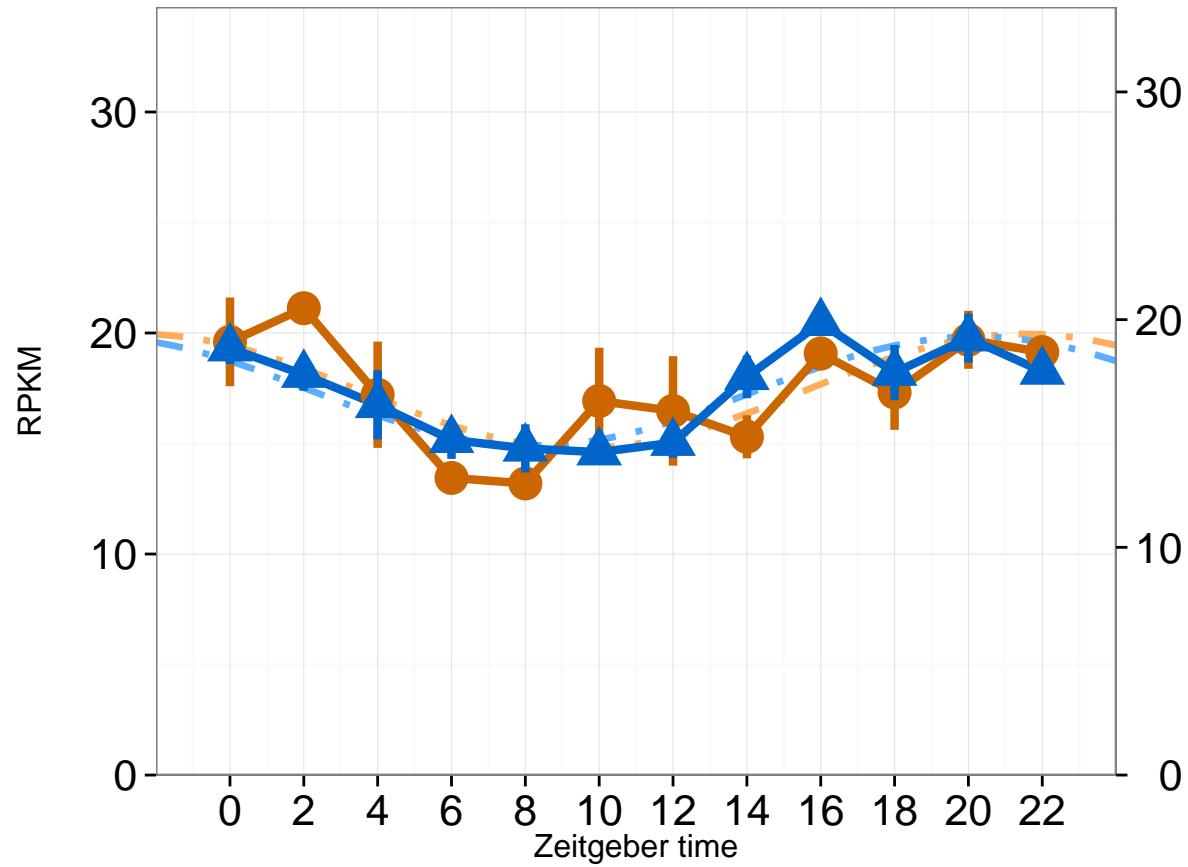

# Mettl16

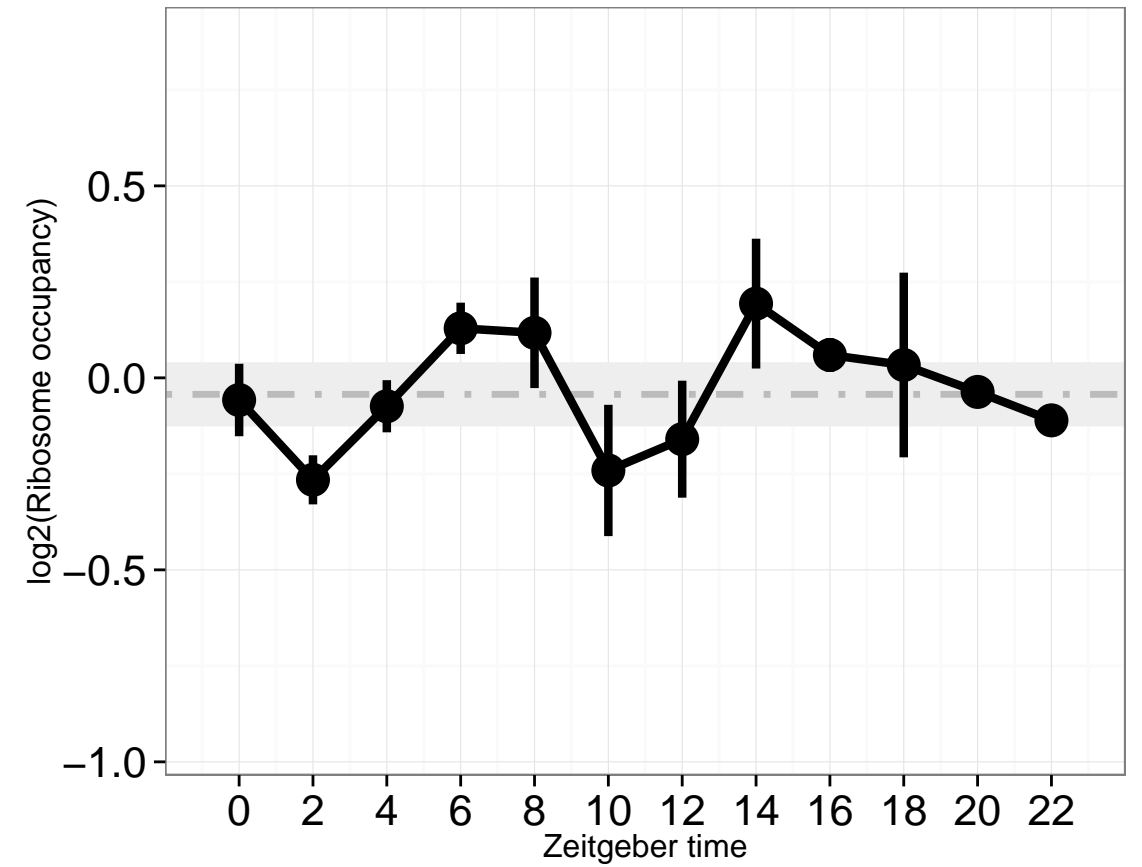

Supplement: Supplementary file 10205 [file 1]

# Cnot8

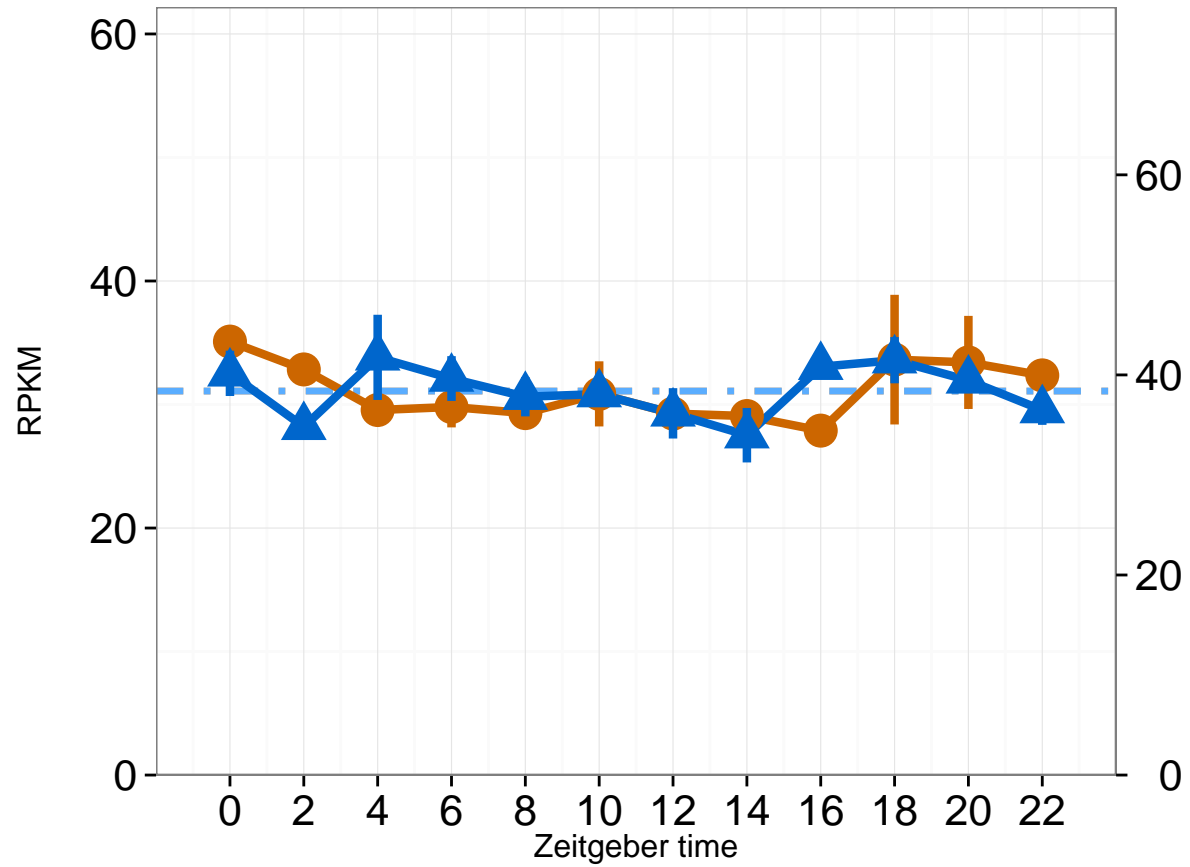

# Cnot8

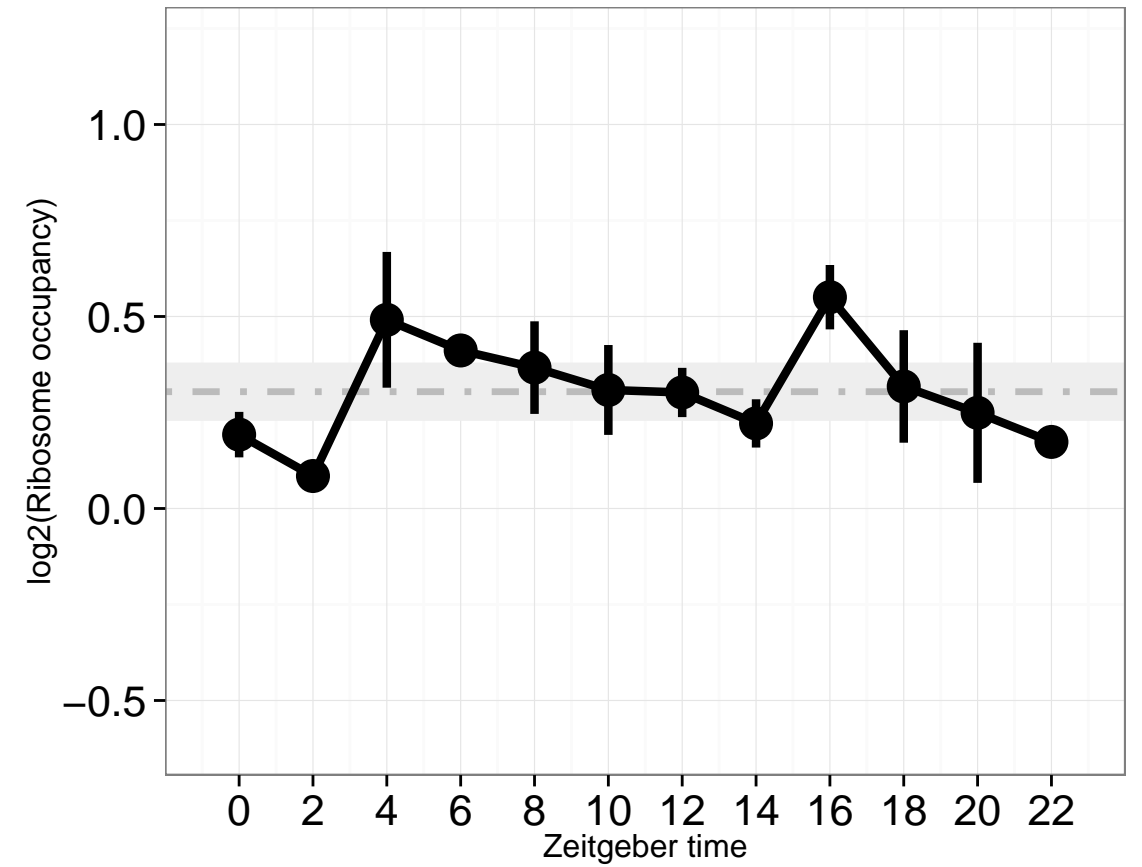

Supplement: Supplementary file 10206 [file 1]

## Rfx1

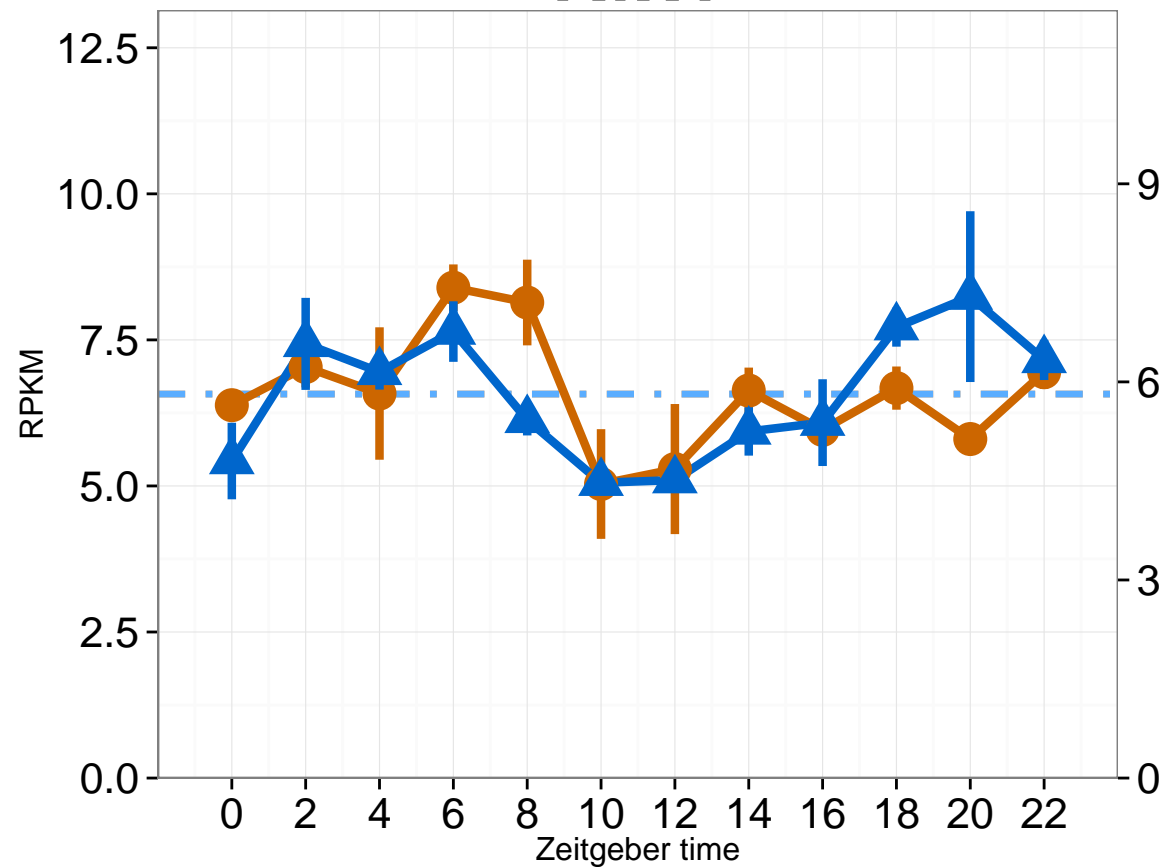

## Rfx1

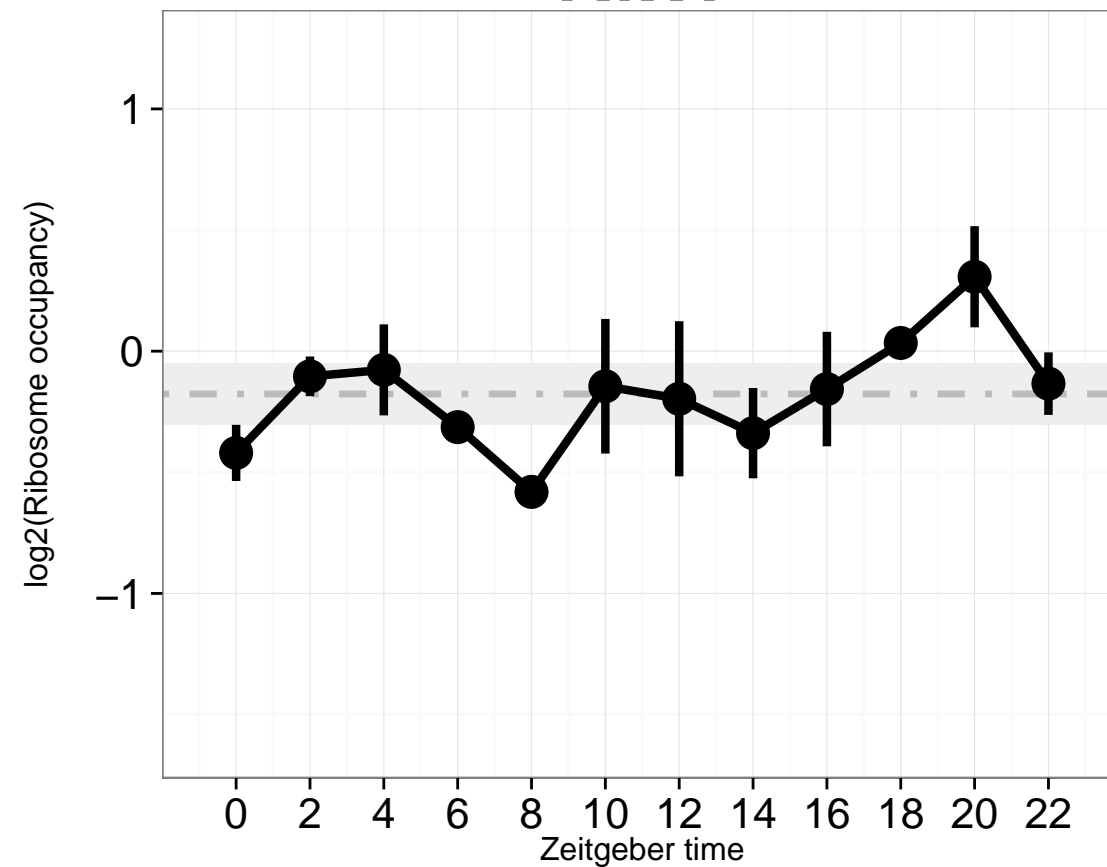

Supplement: Supplementary file 10207 [file 1]

## Cmtm8

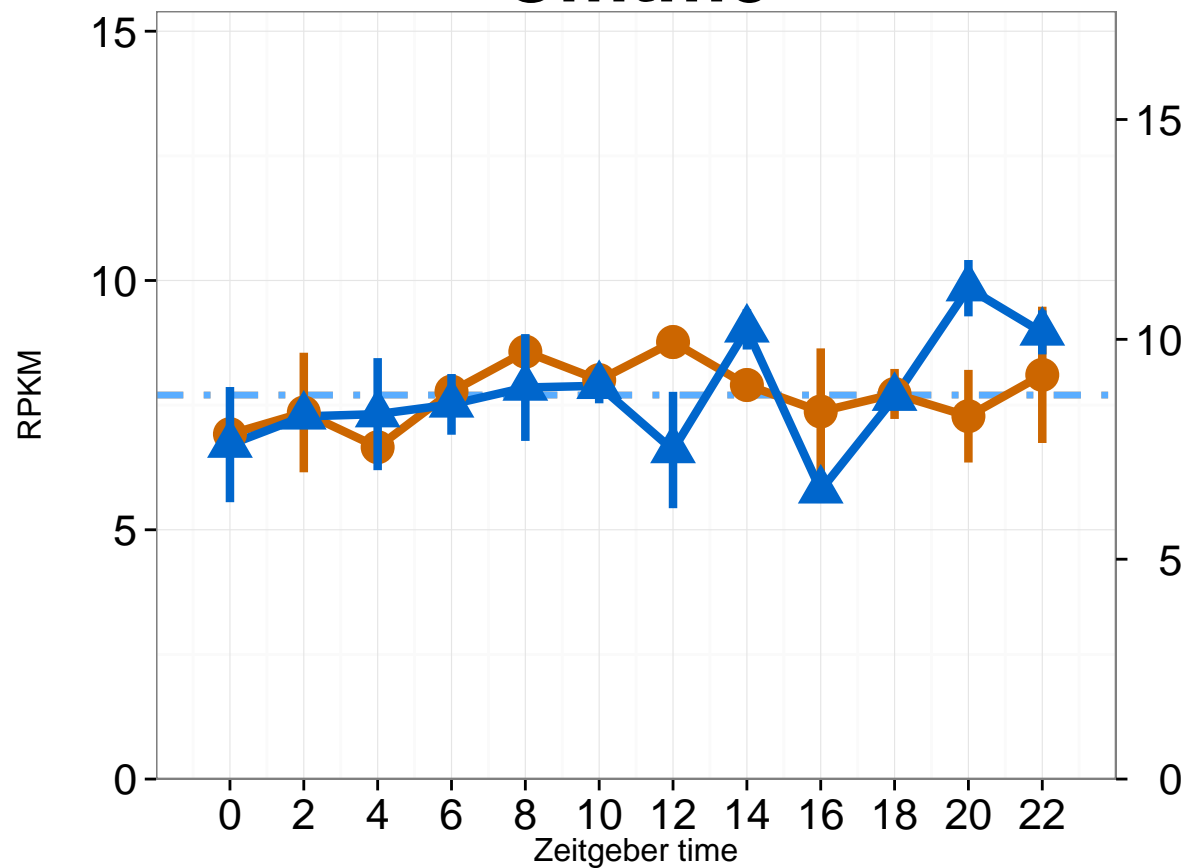

## Cmtm8

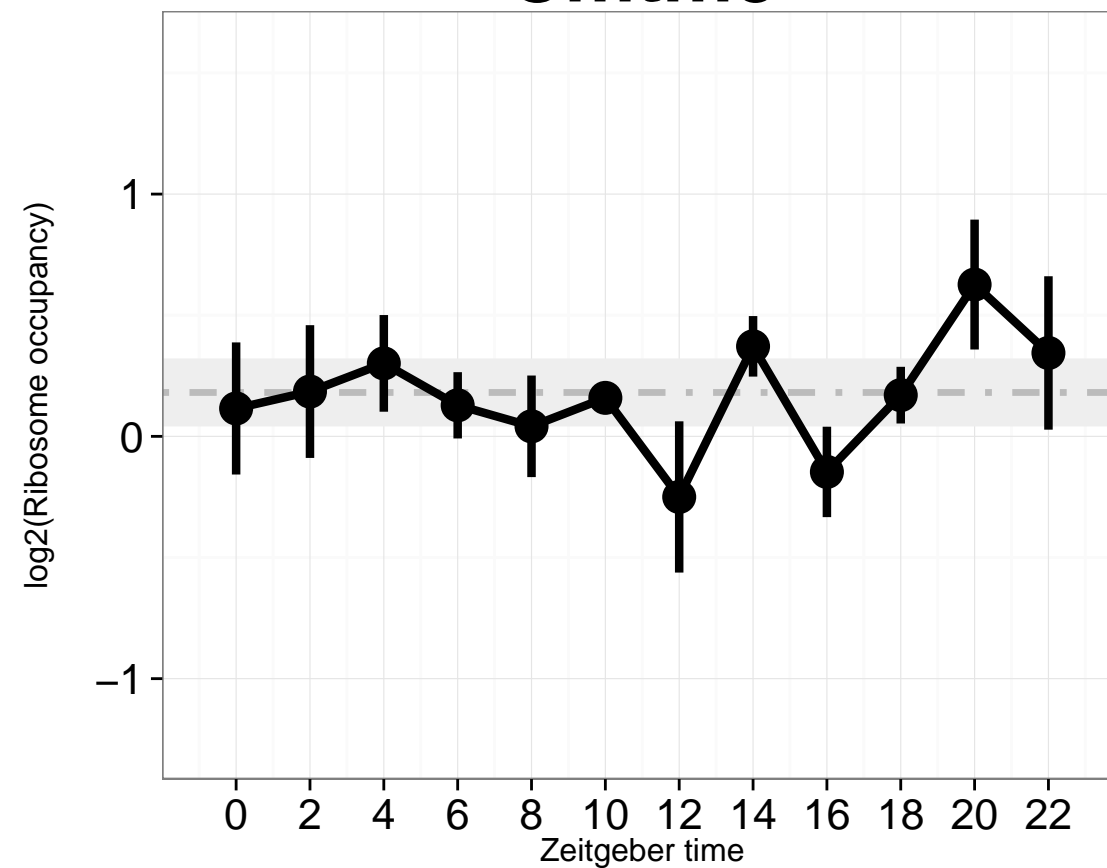

Supplement: Supplementary file 10208 [file 1]

## Cobl

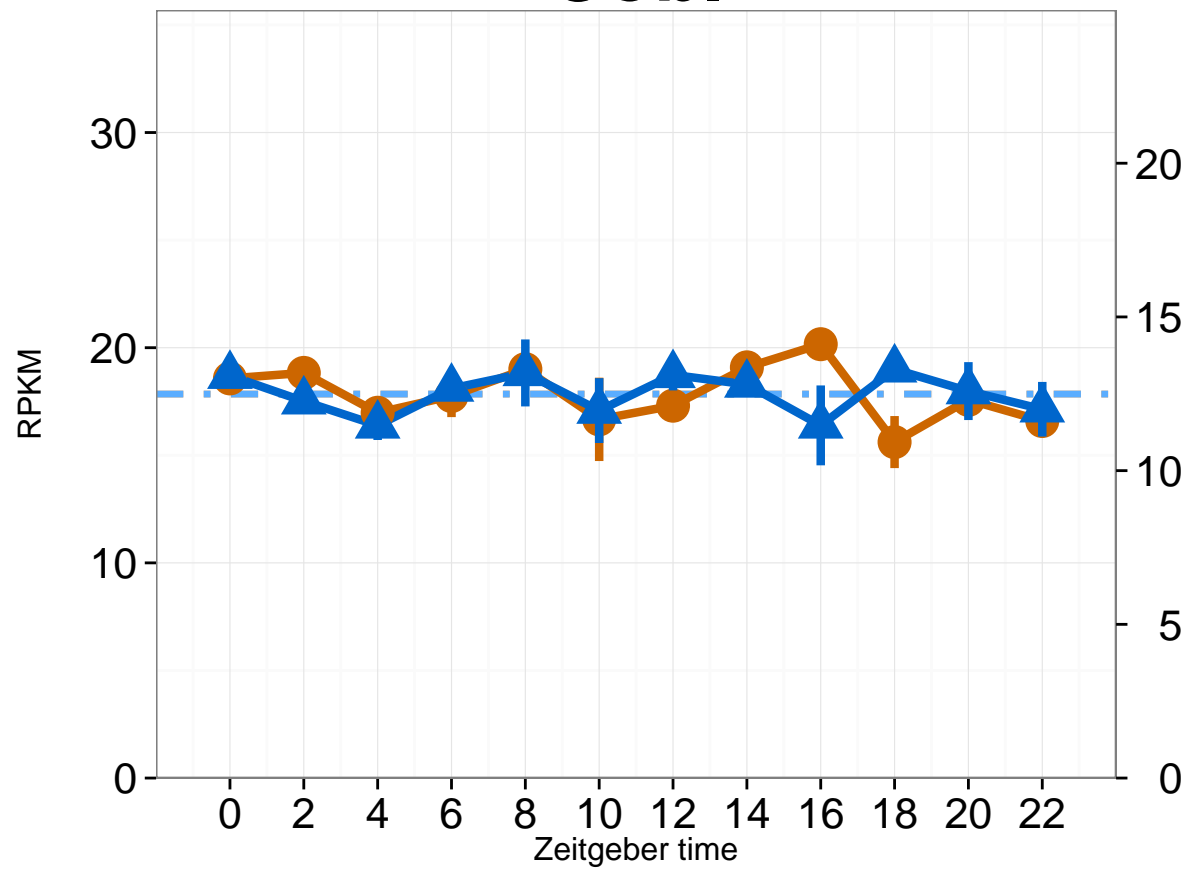

## Cobl

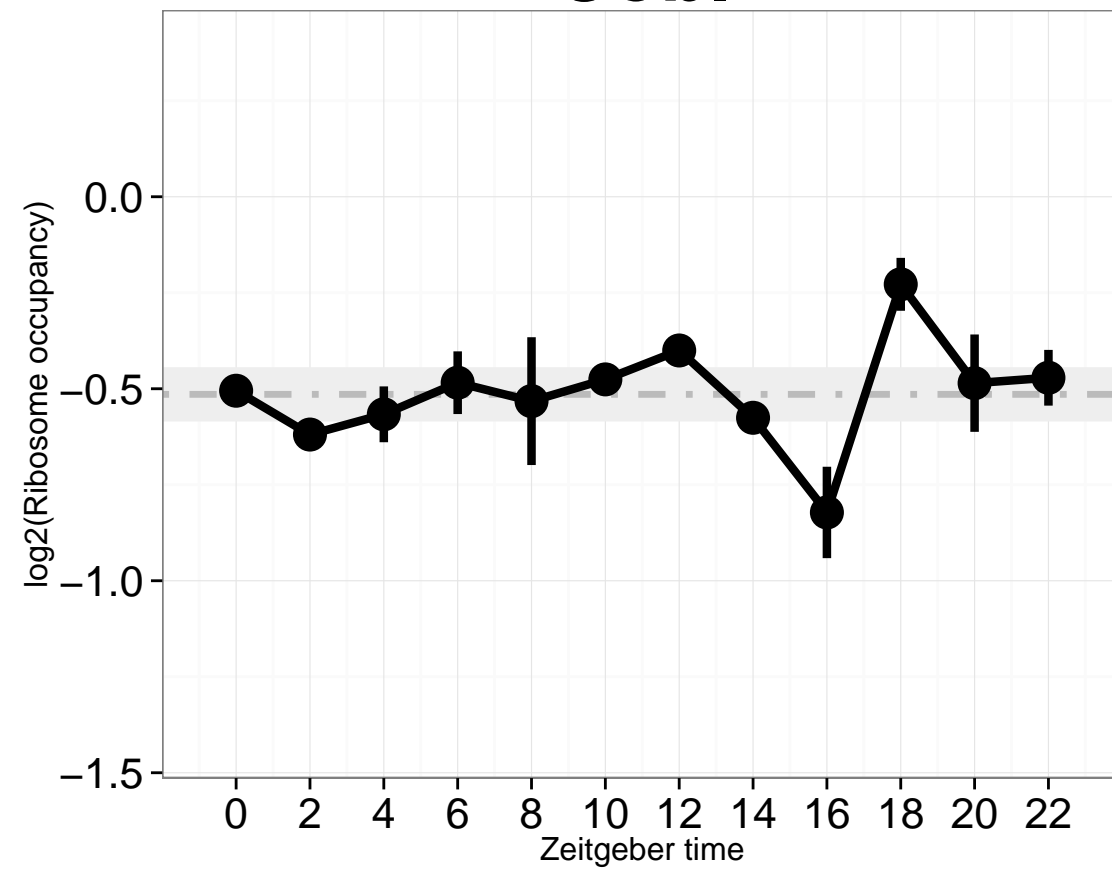

Supplement: Supplementary file 10209 [file 1]

## Gcn1l1

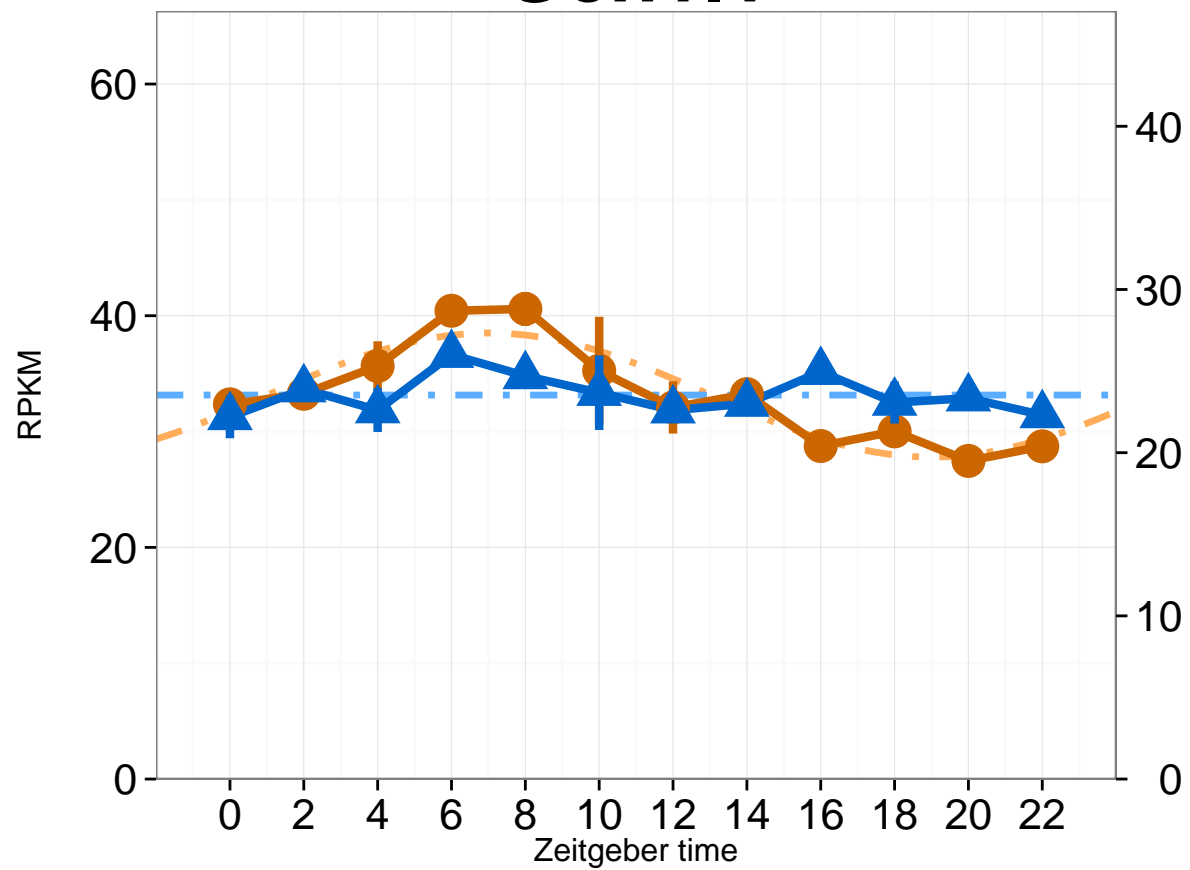

## Gcn1l1

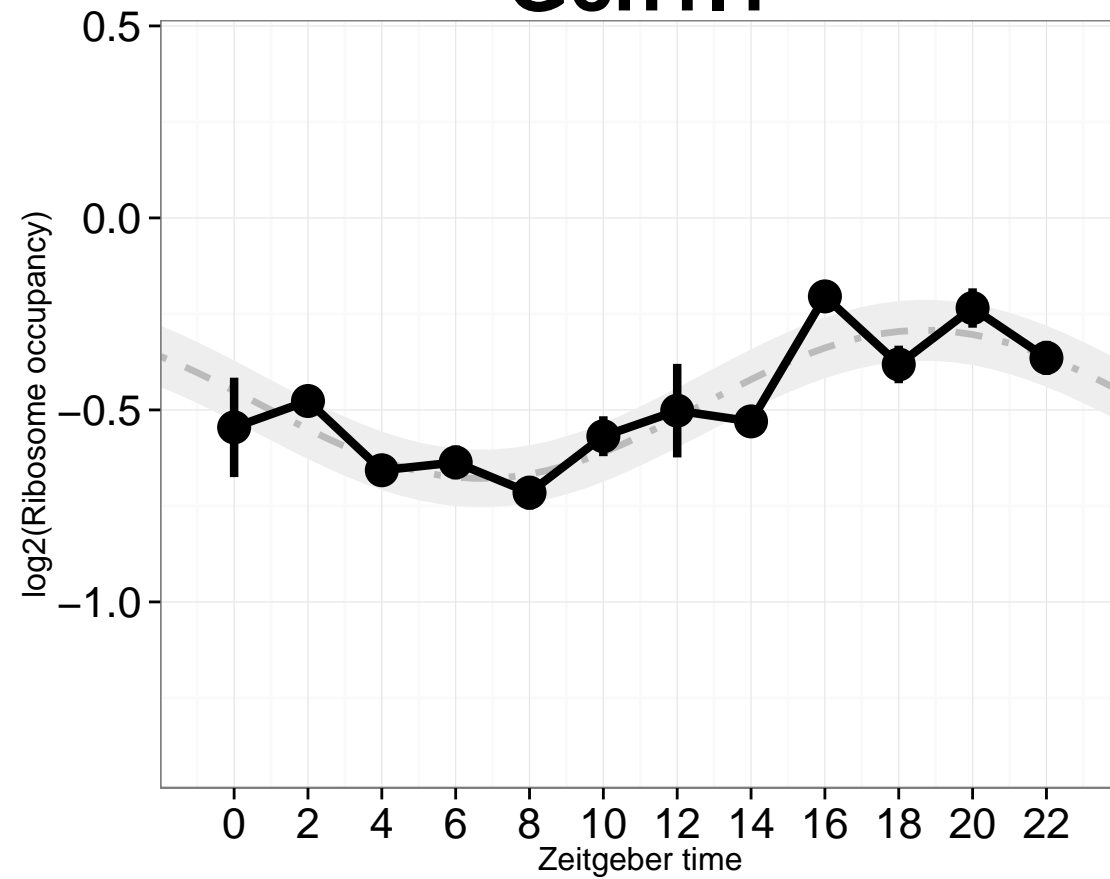

Supplement: Supplementary file 10210 [file 1]

## Dcakd

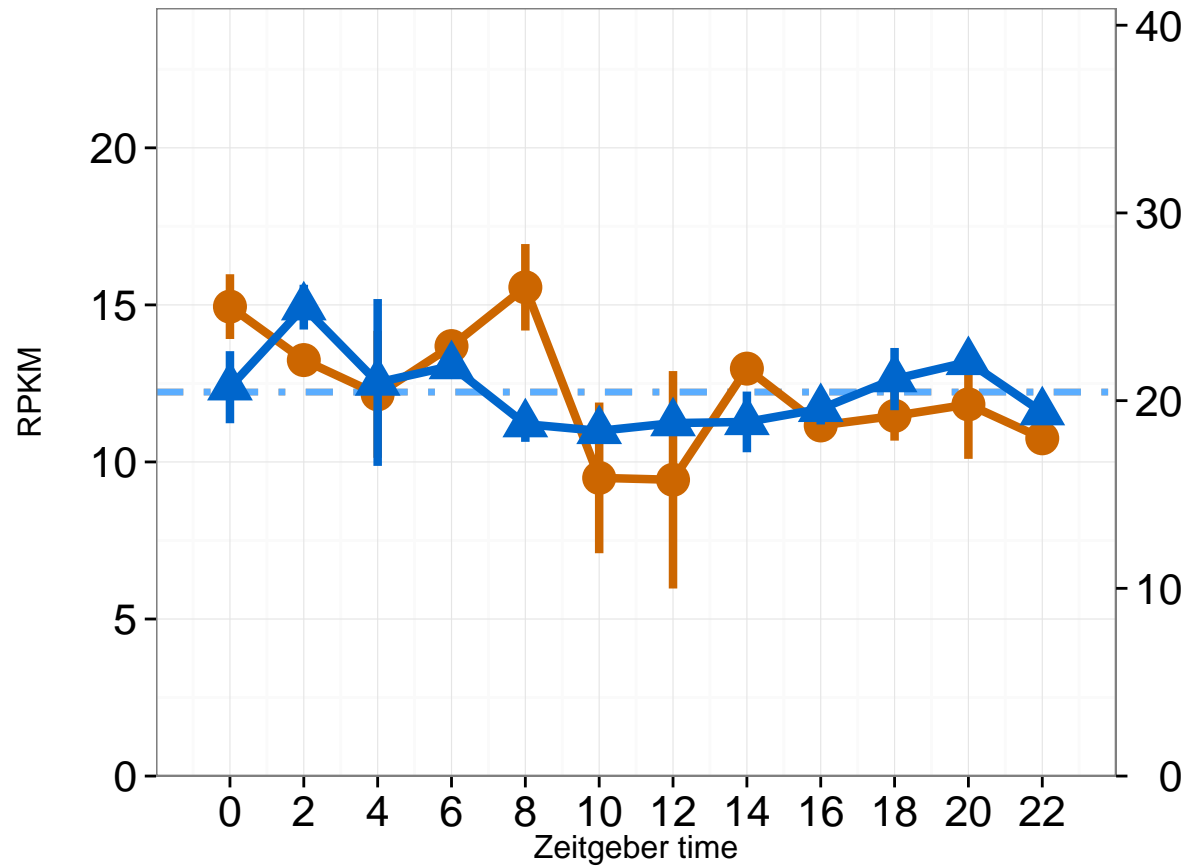

## Dcakd

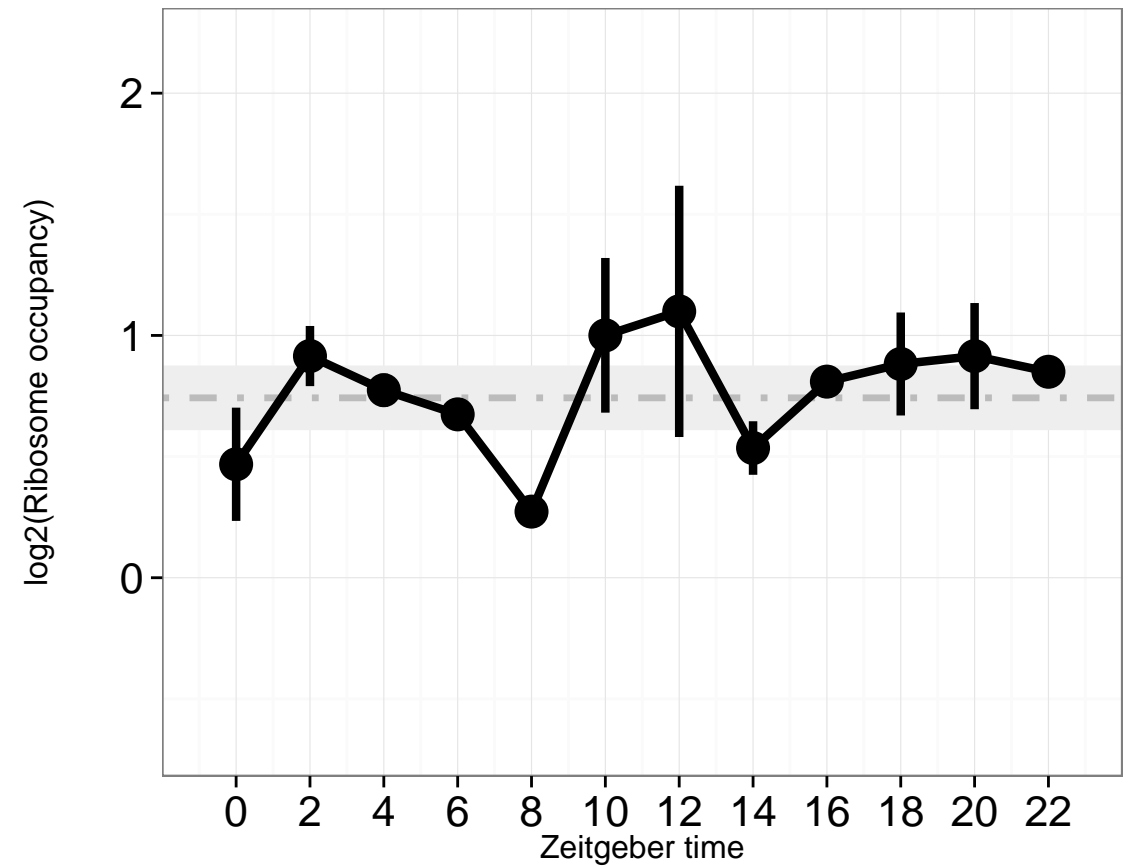

Supplement: Supplementary file 10211 [file 1]

# Hoxa5

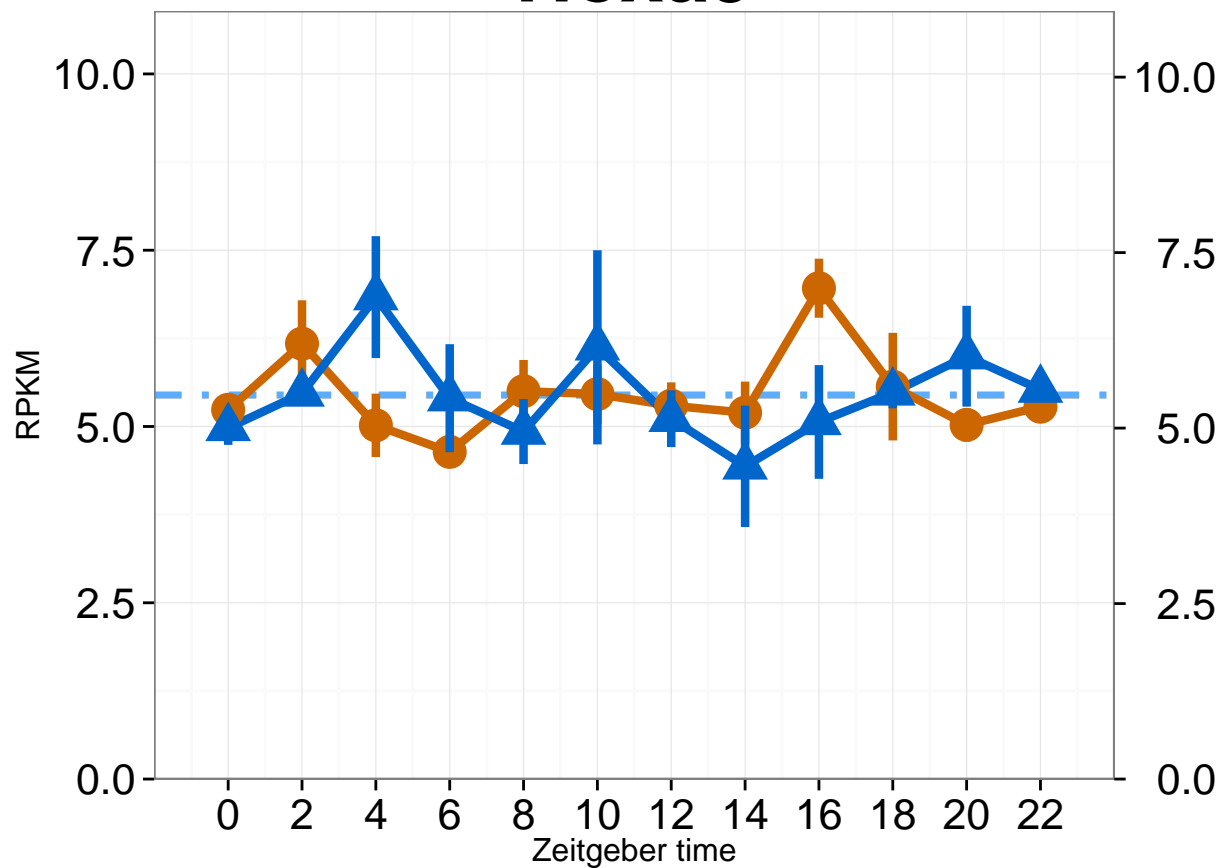

# Hoxa5

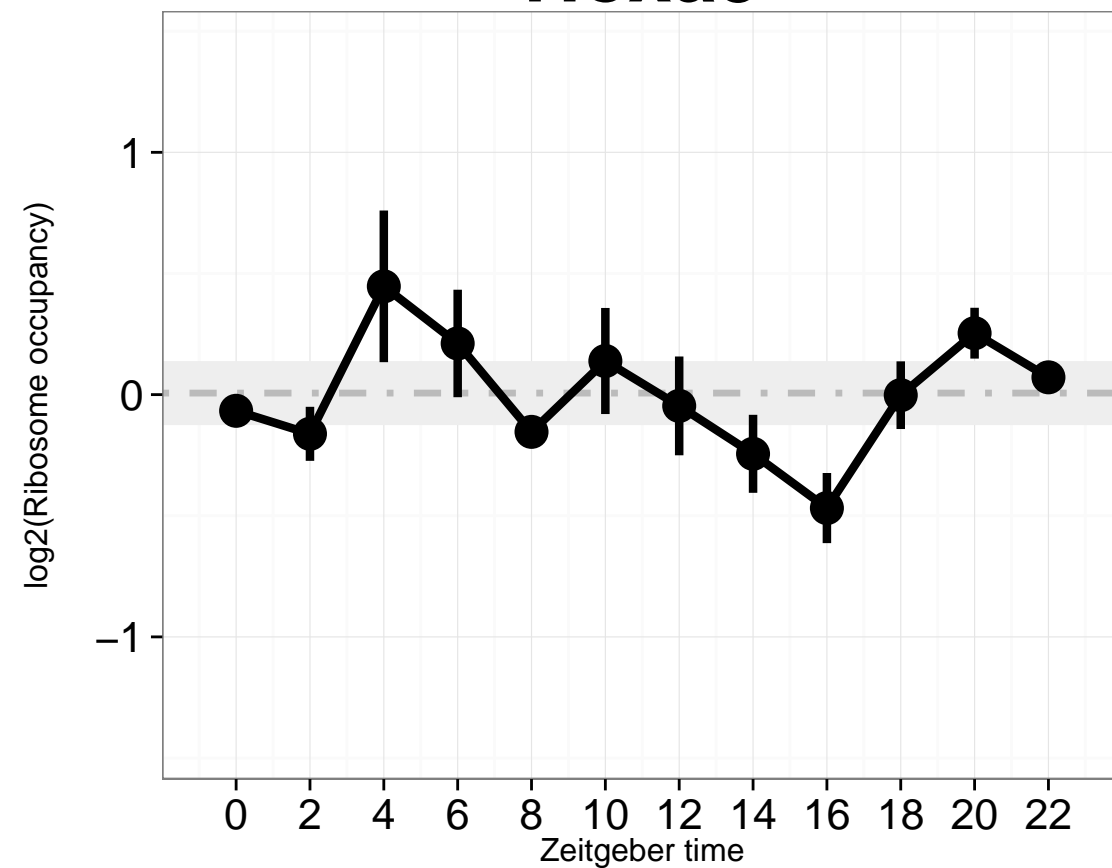

Supplement: Supplementary file 10212 [file 1]

## Bcorl1

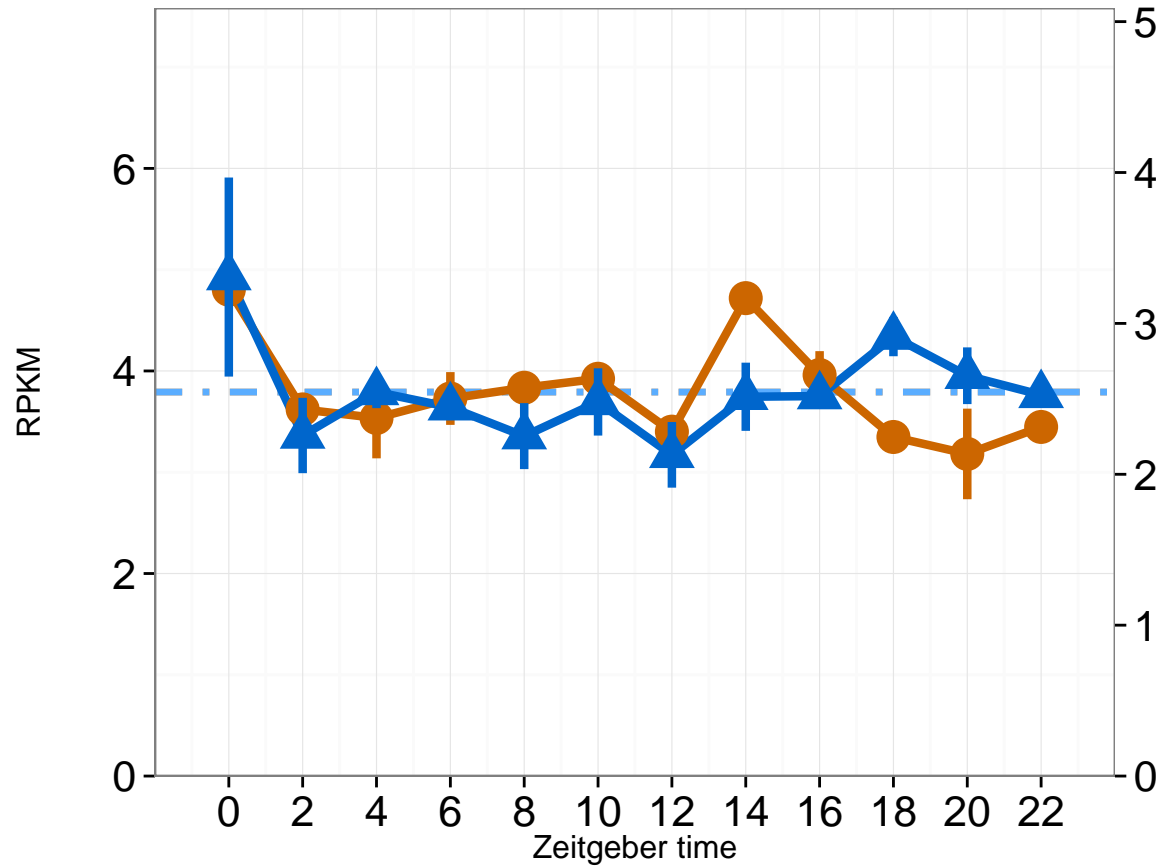

## Bcorl1

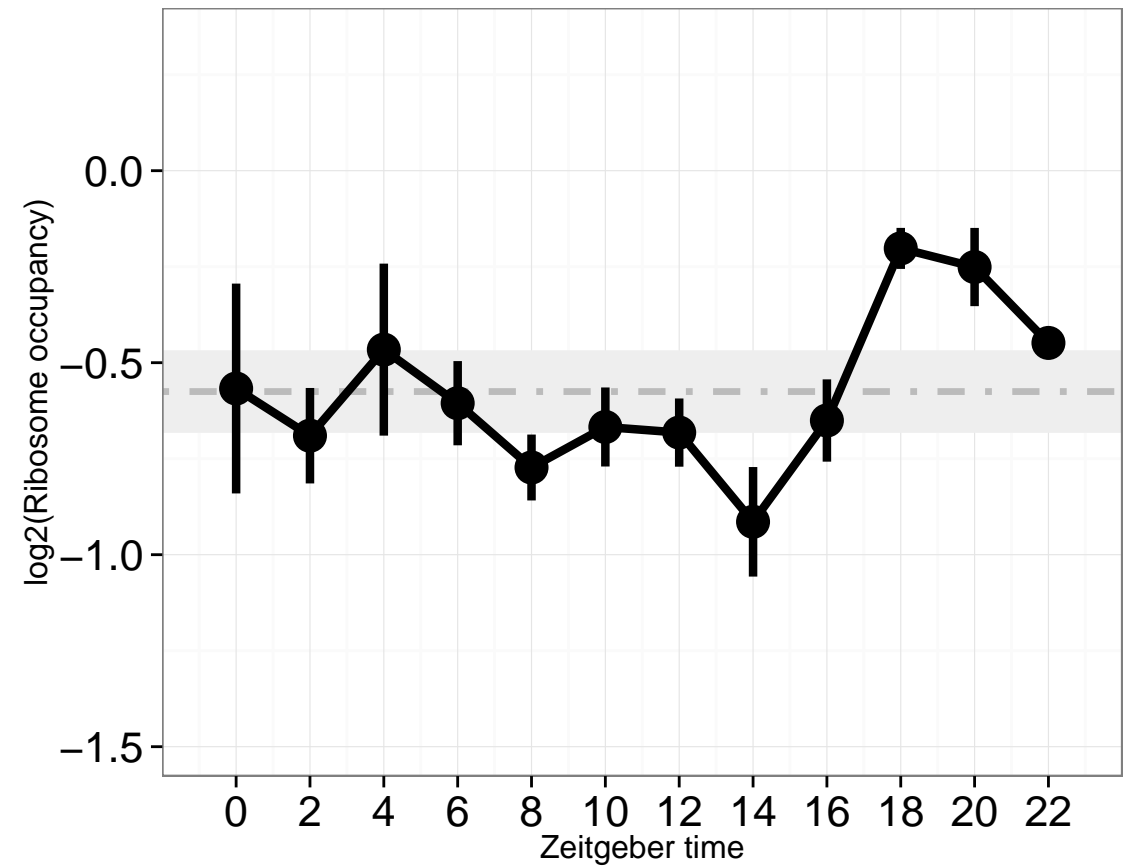

Supplement: Supplementary file 10213 [file 1]

## Sdhaf2

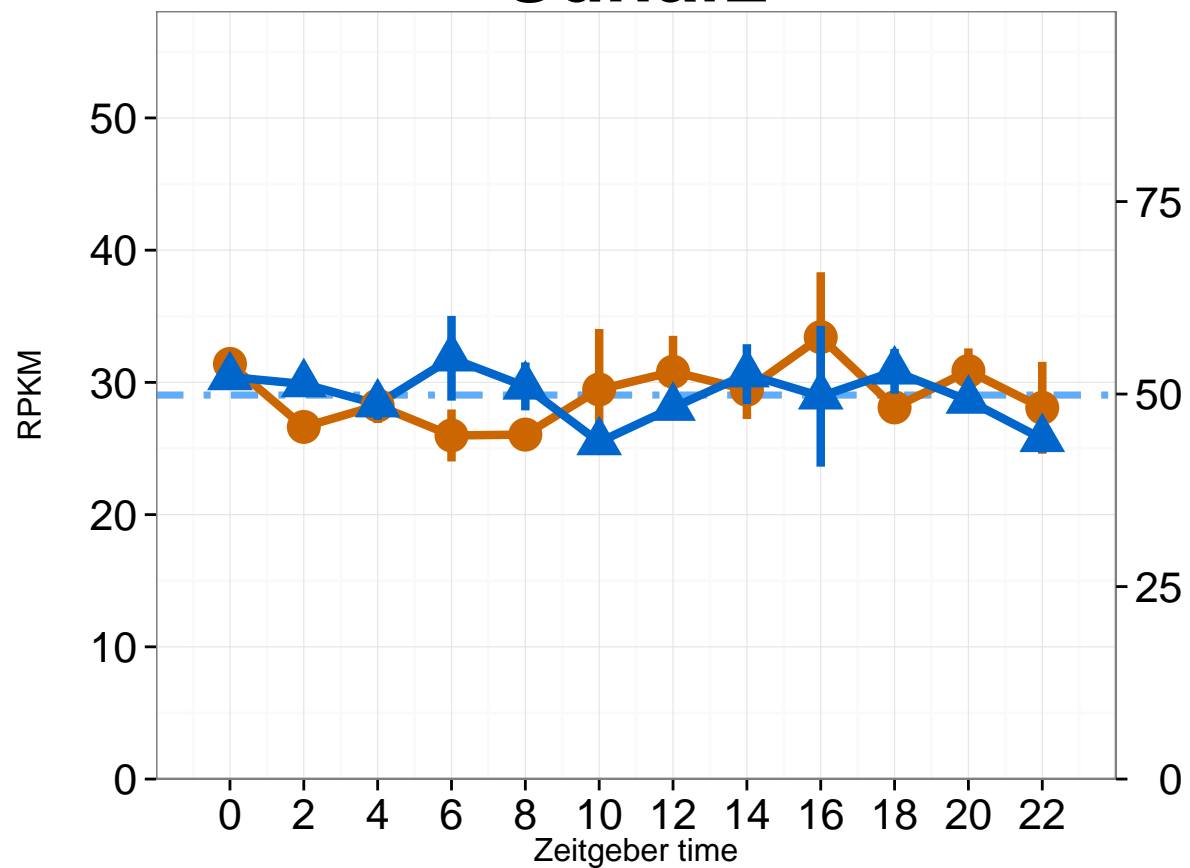

## Sdhaf2

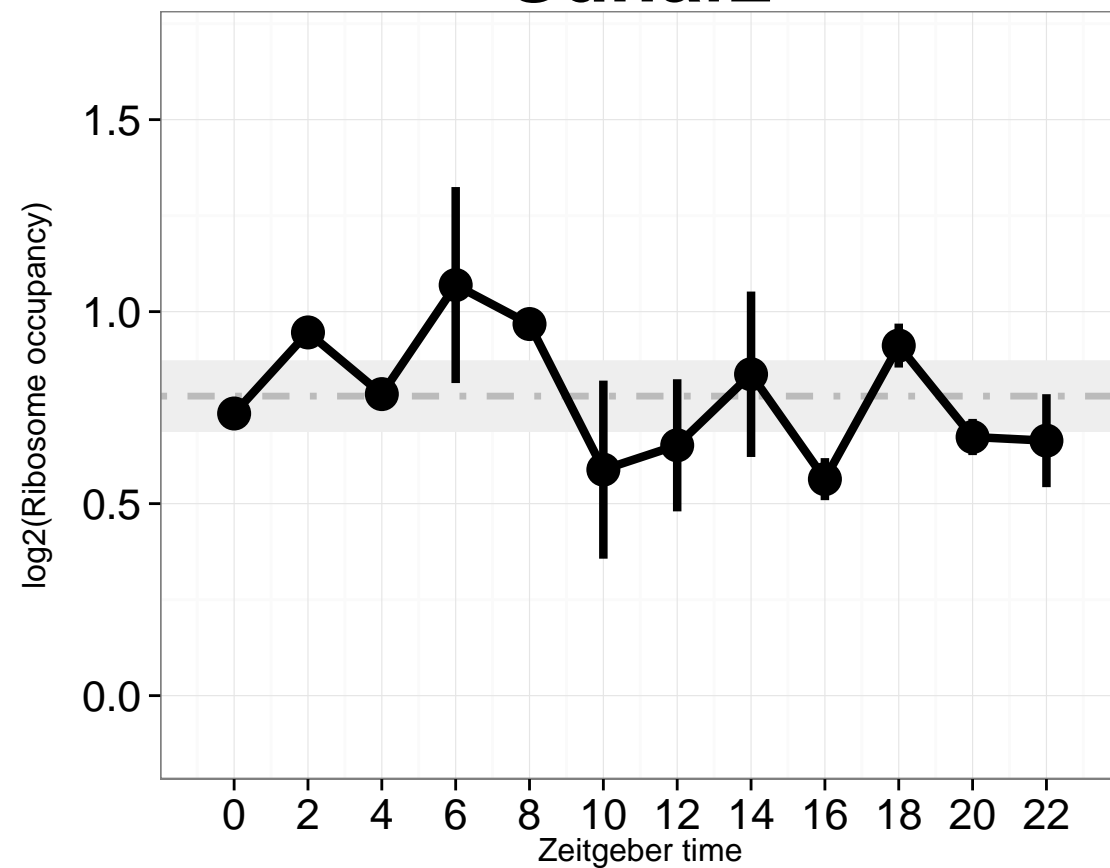

Supplement: Supplementary file 10214 [file 1]

# Dgke

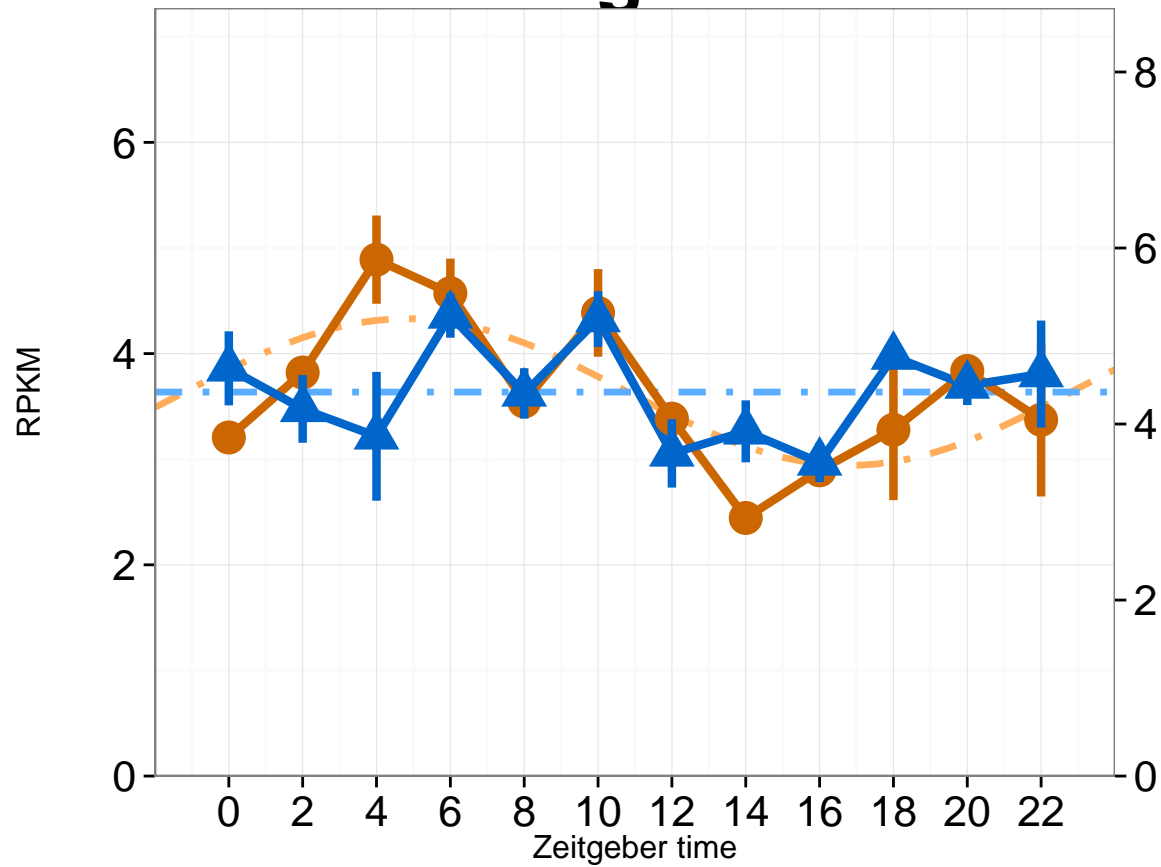

# Dgke

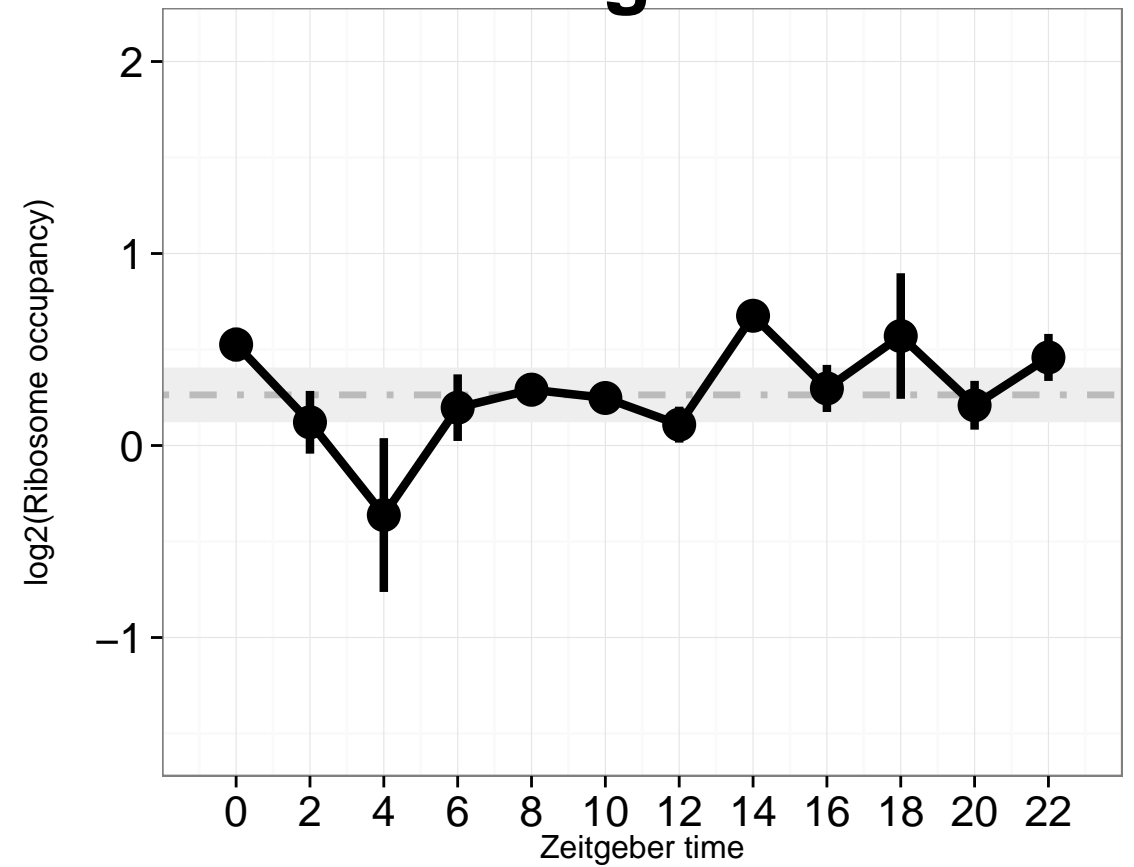

Supplement: Supplementary file 10215 [file 1]

## 2310033P09Rik

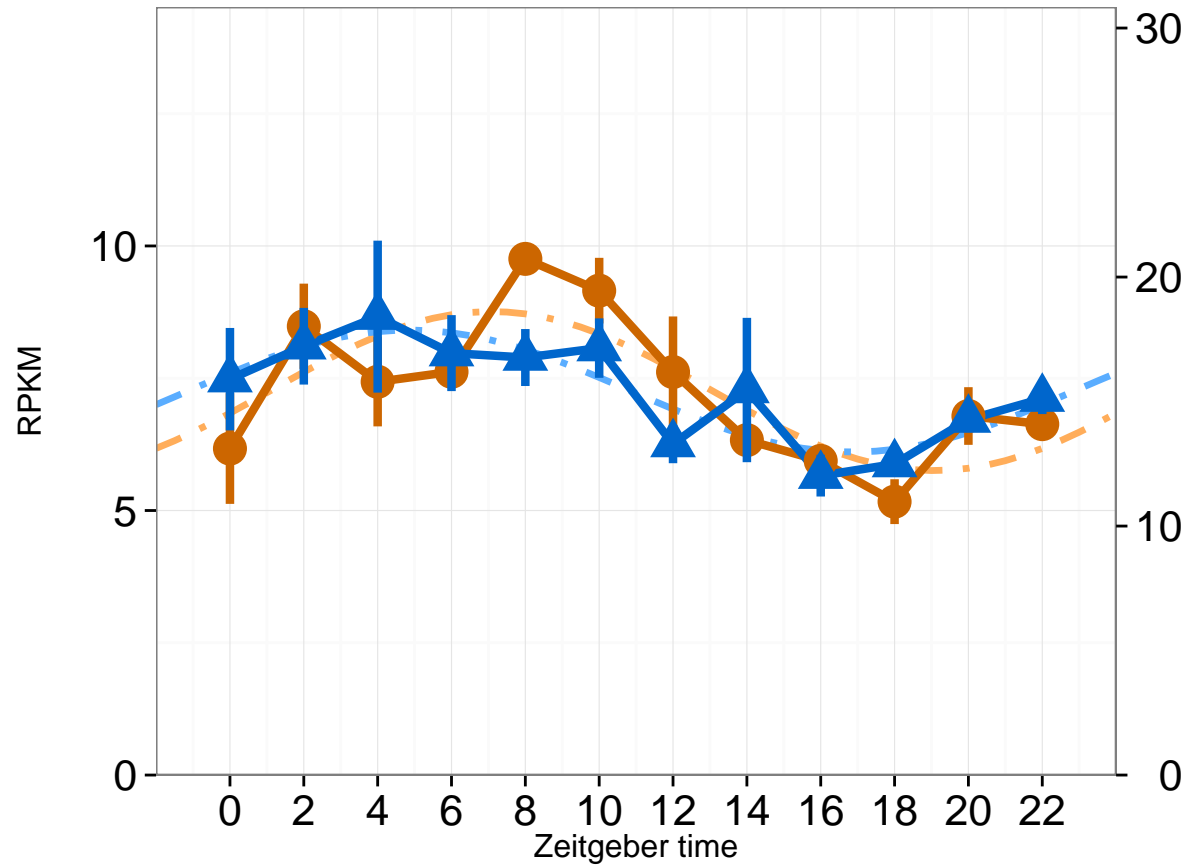

## 2310033P09Rik

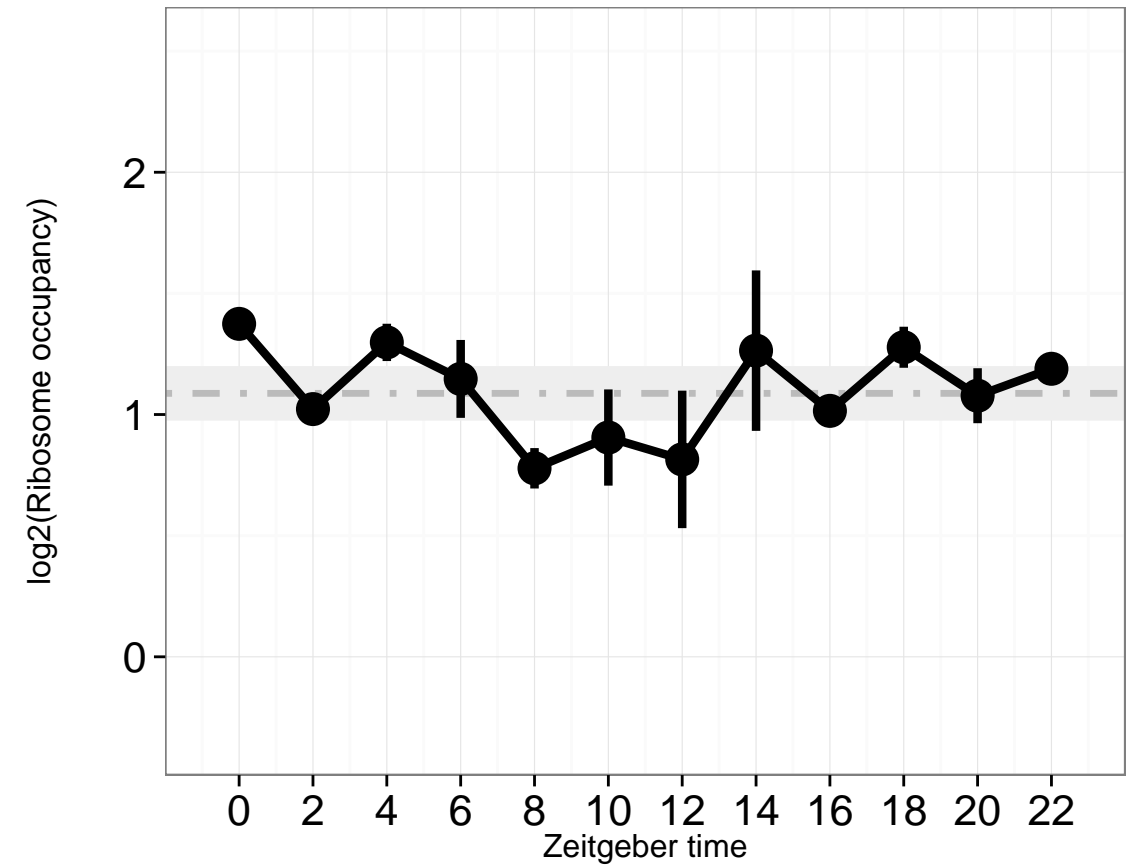

Supplement: Supplementary file 10216 [file 1]

## Afm

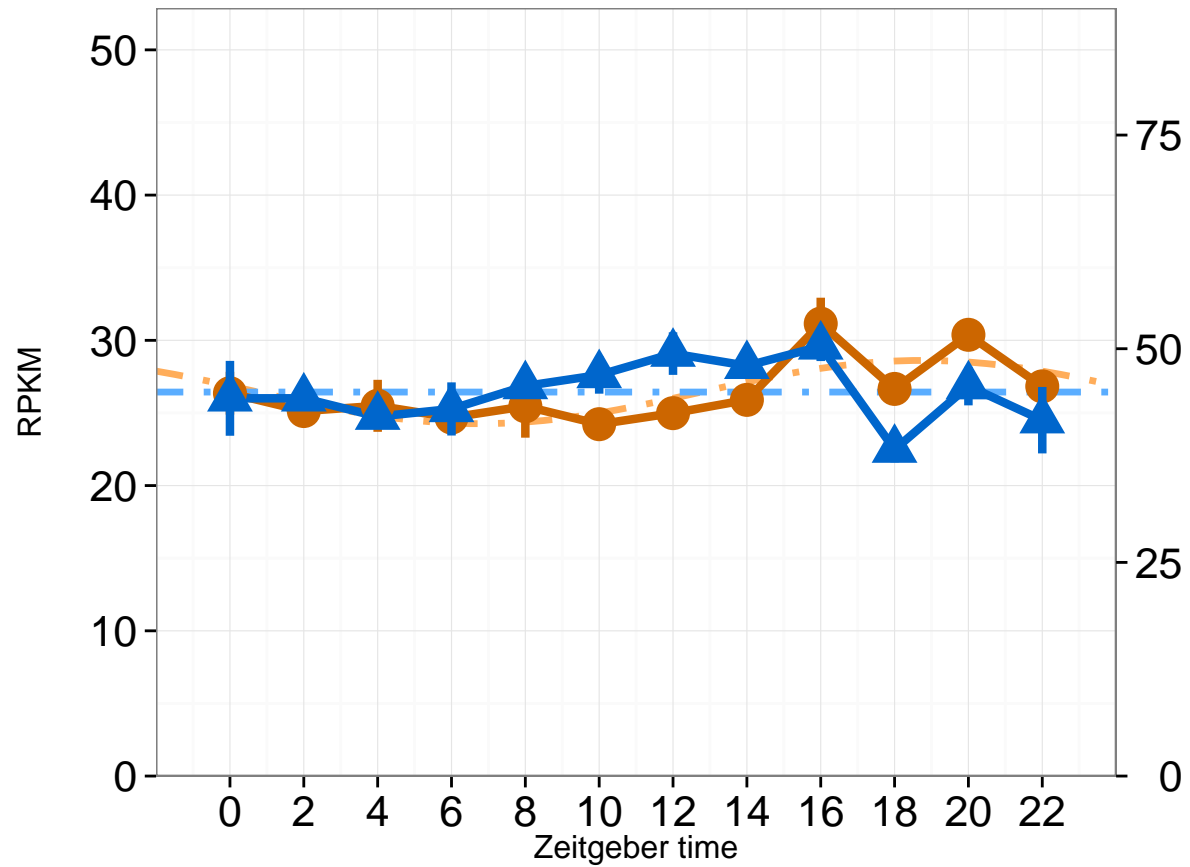

## Afm

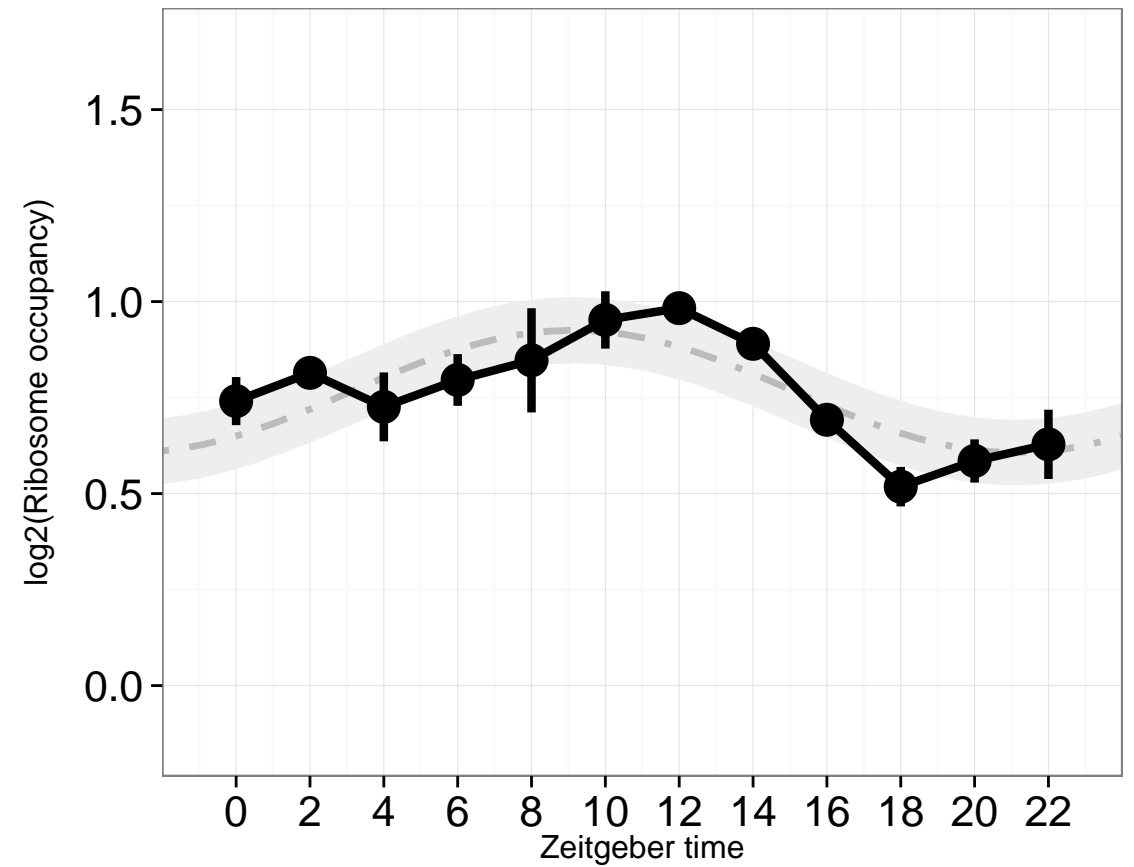

Supplement: Supplementary file 10217 [file 1]

## Cttn

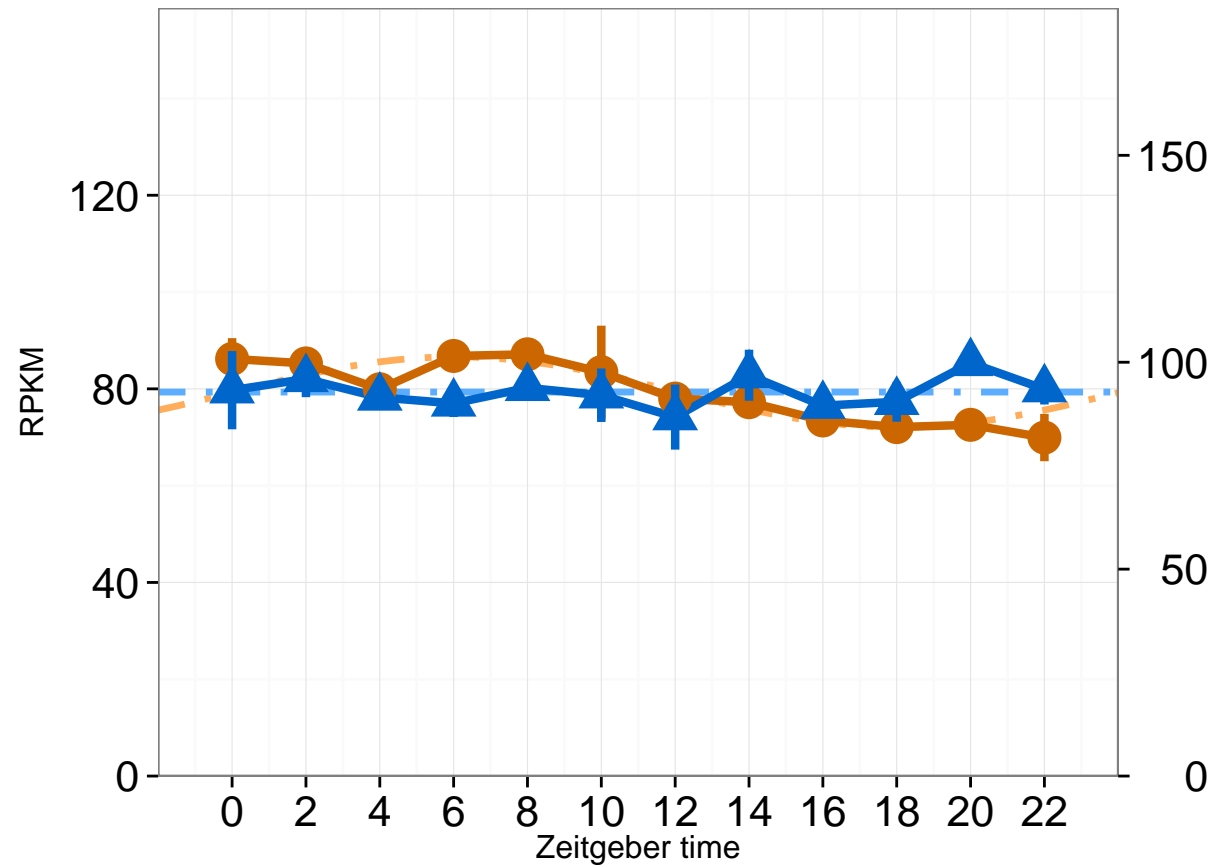

## Cttn

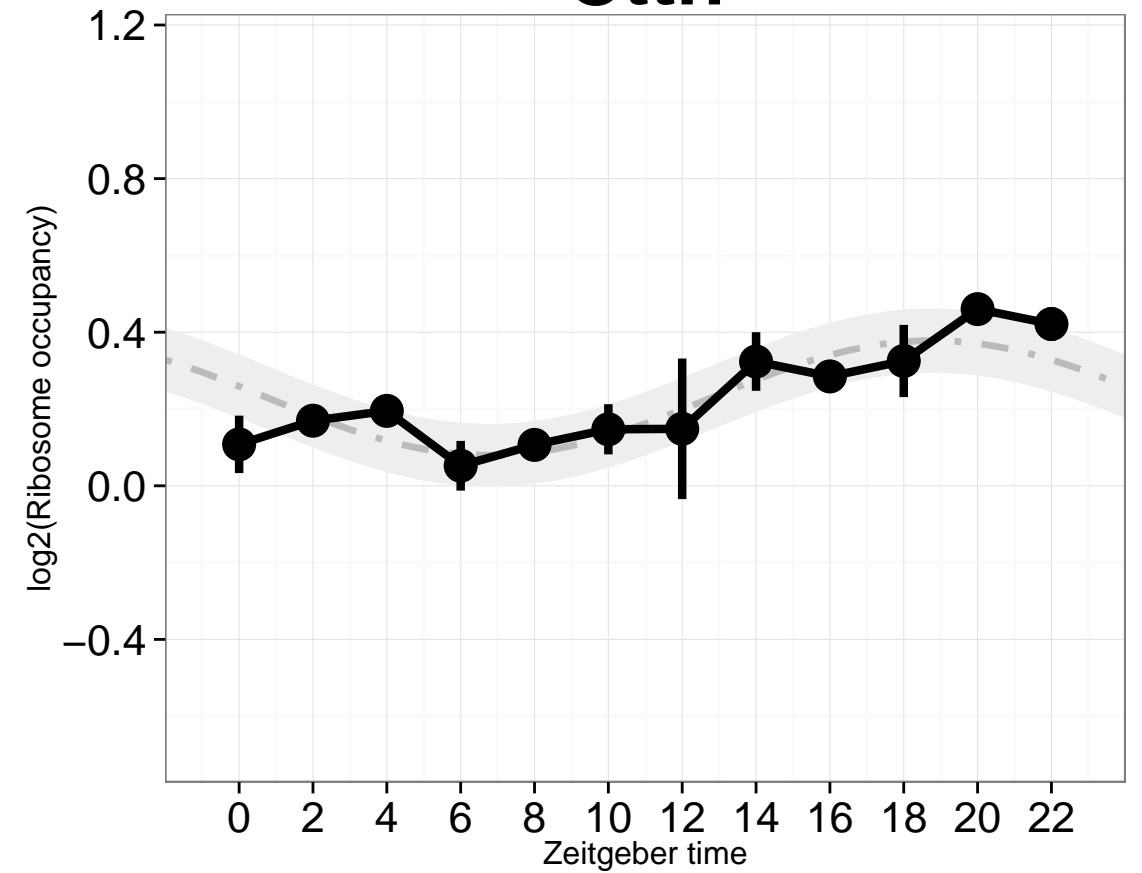

Supplement: Supplementary file 10218 [file 1]

## Bnip3

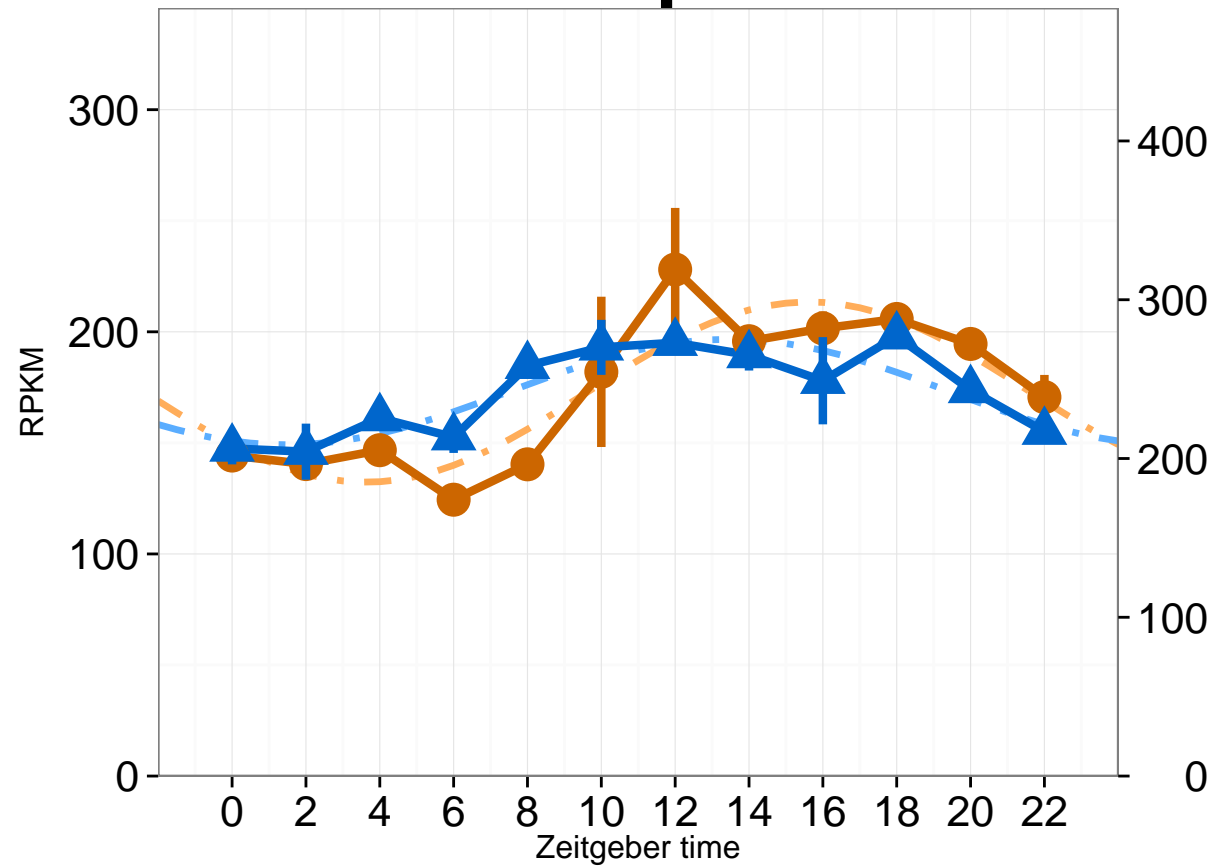

## Bnip3

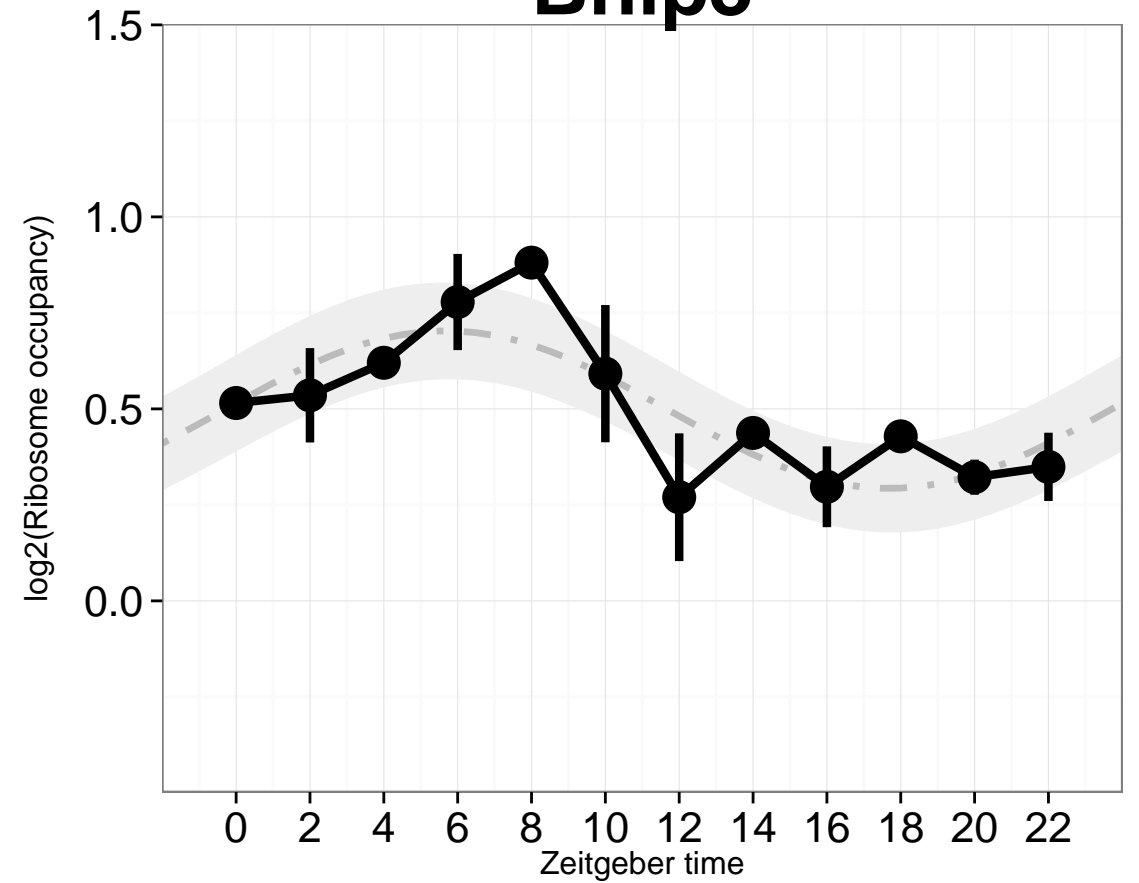

Supplement: Supplementary file 10219 [file 1]

# Aqp8

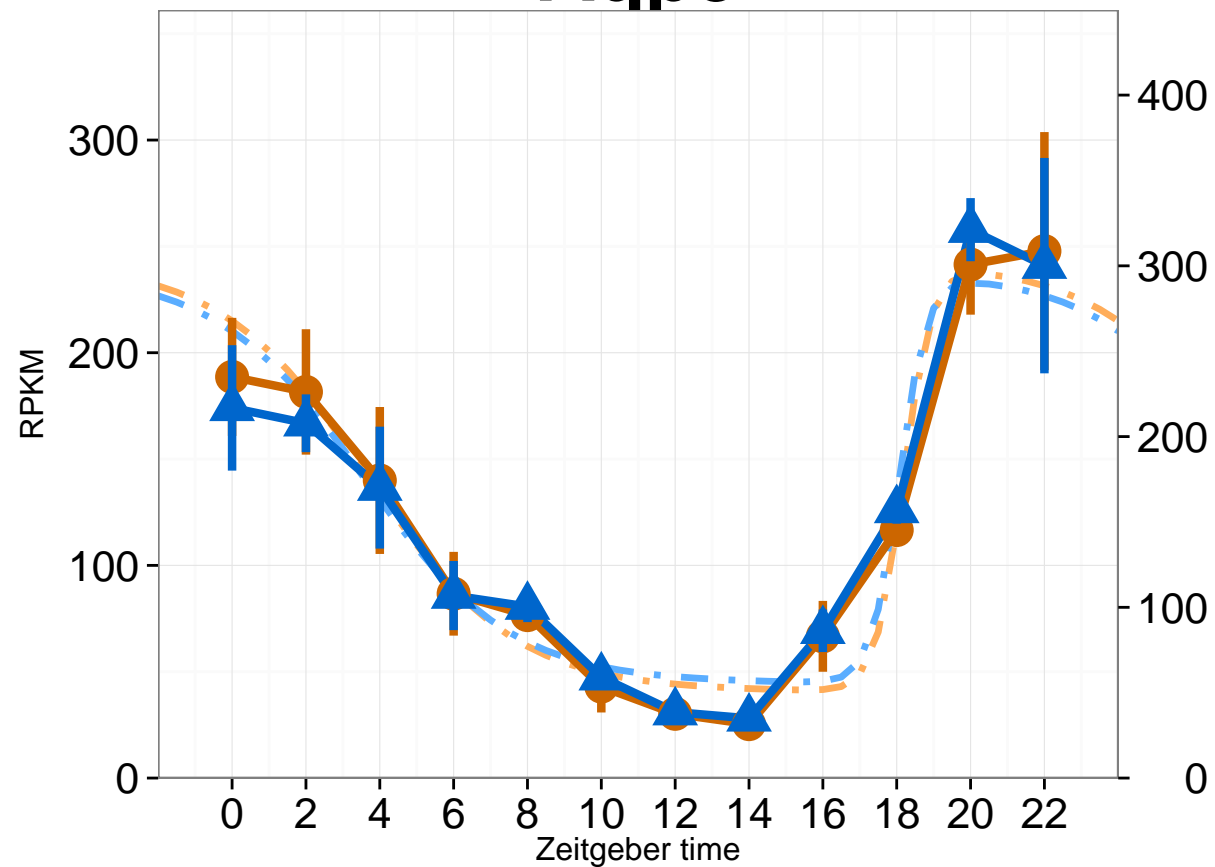

# Aqp8

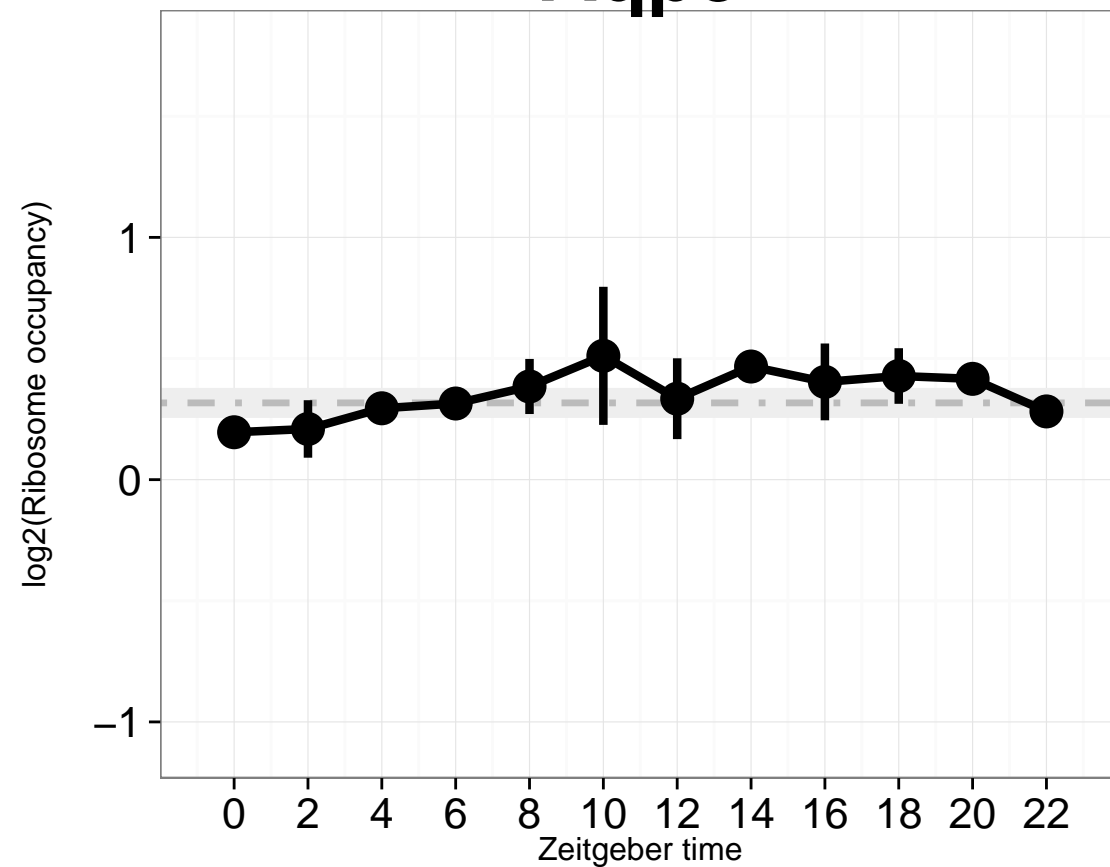

Supplement: Supplementary file 10220 [file 1]

# Dnajc17

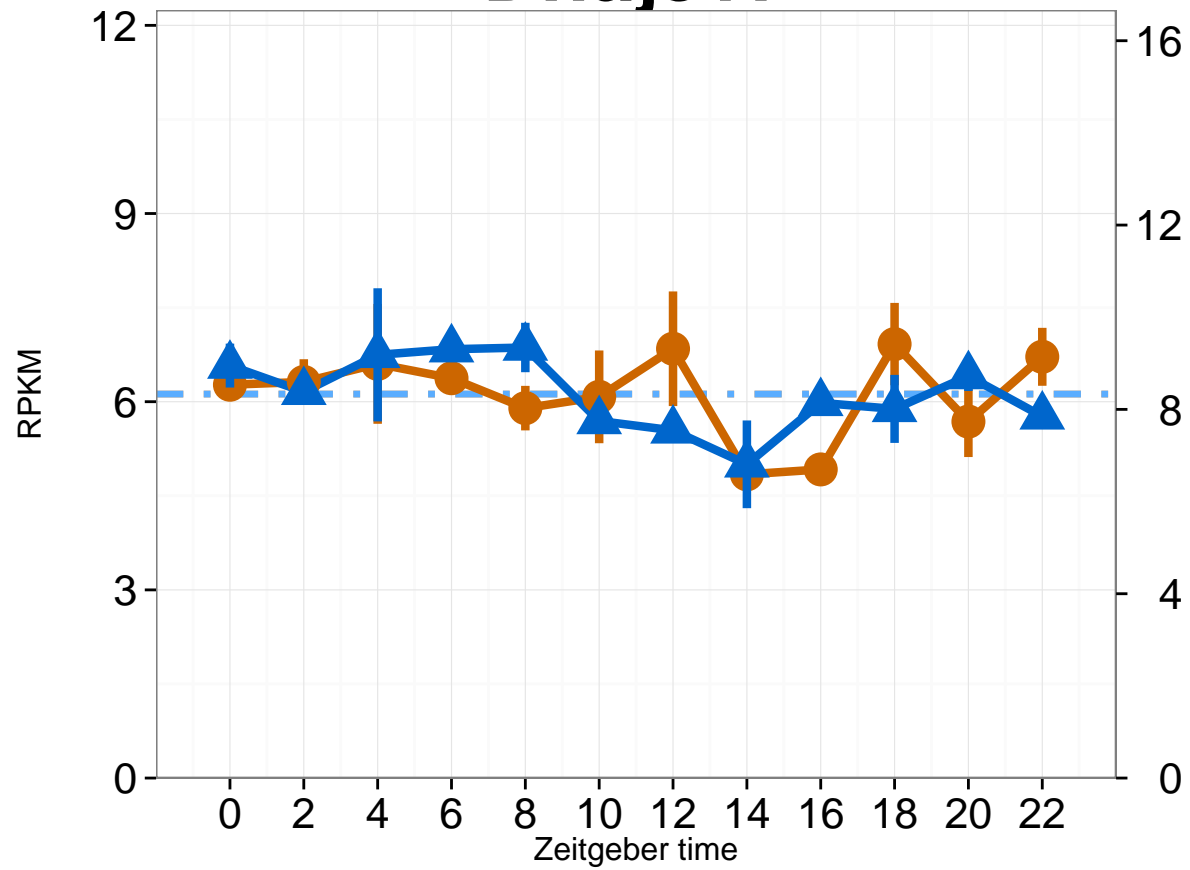

# Dnajc17

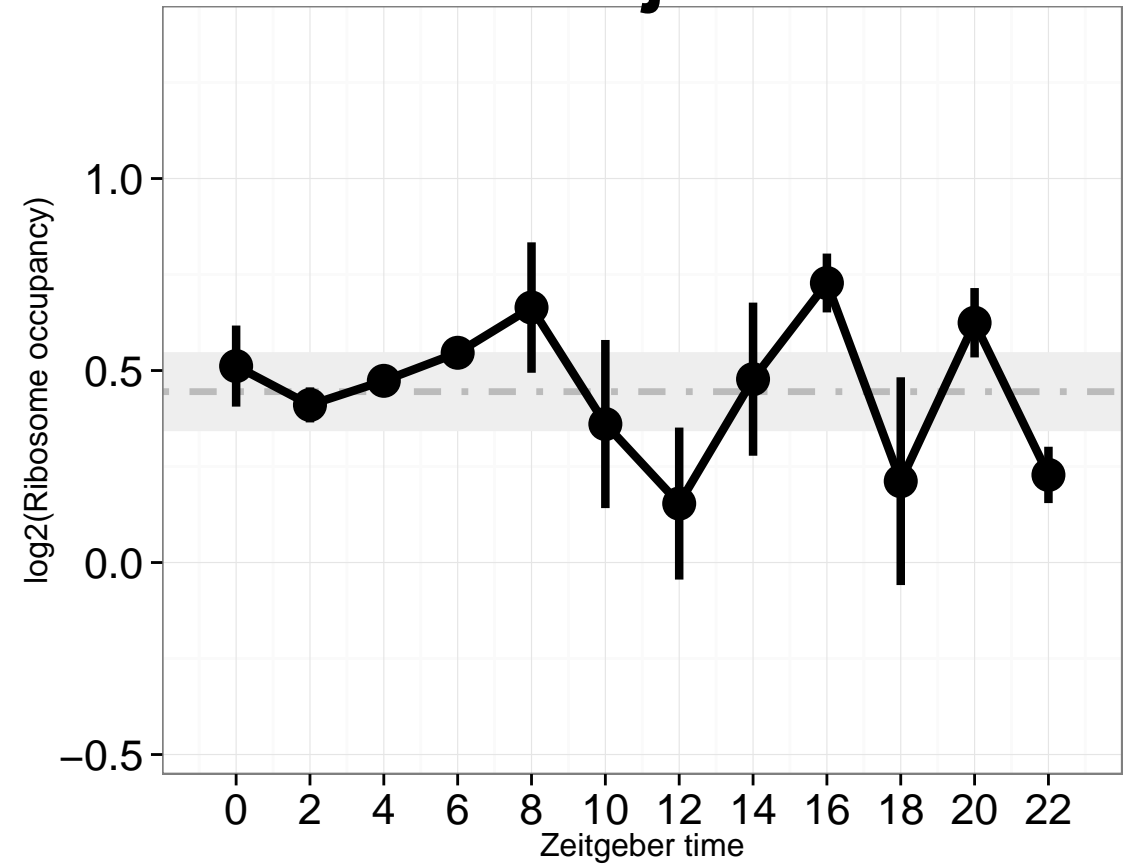

Supplement: Supplementary file 10221 [file 1]

# Adcy5

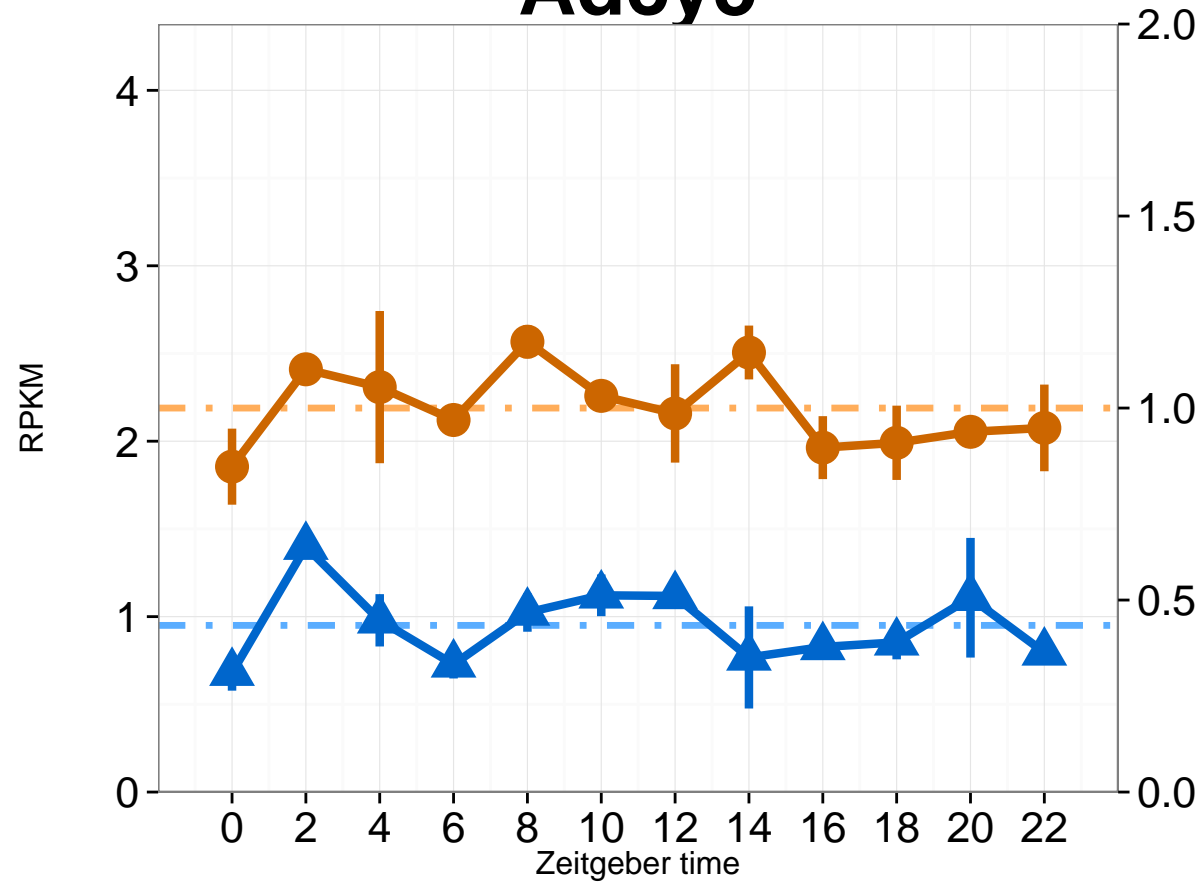

# Adcy5

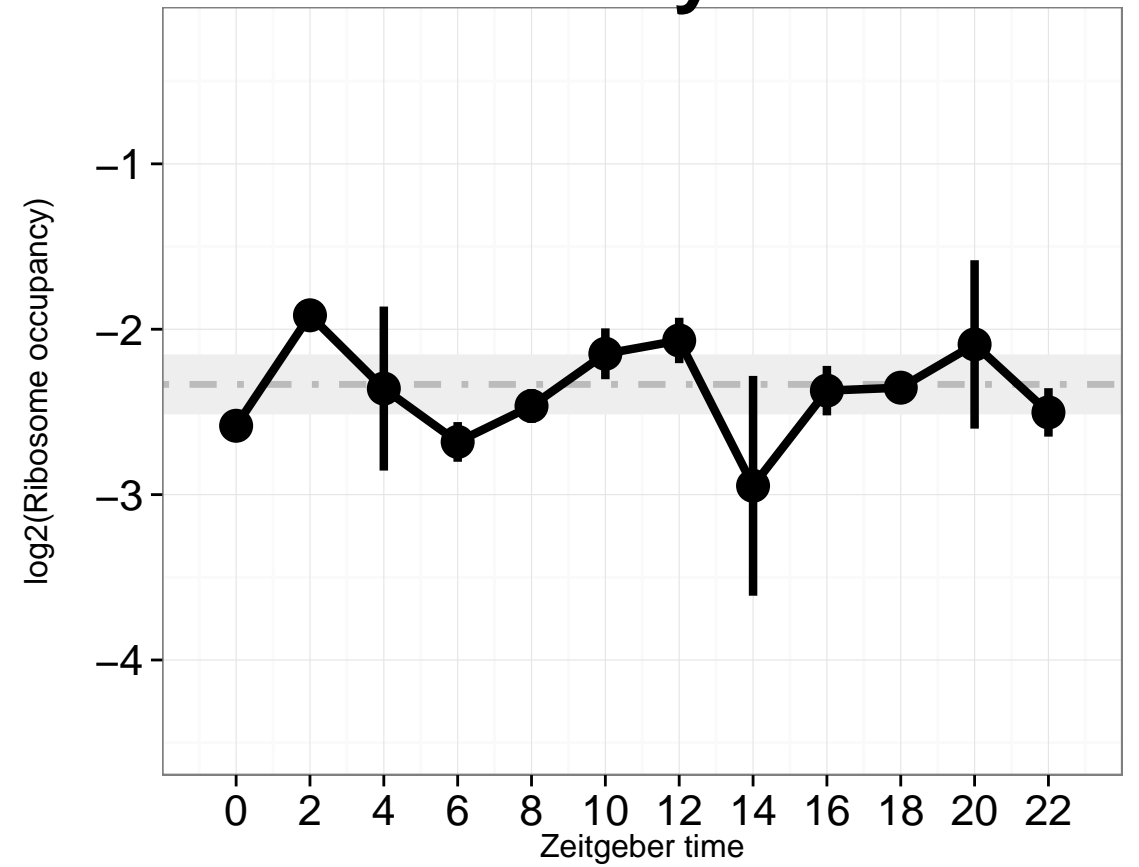

Supplement: Supplementary file 10222 [file 1]

# Stat6

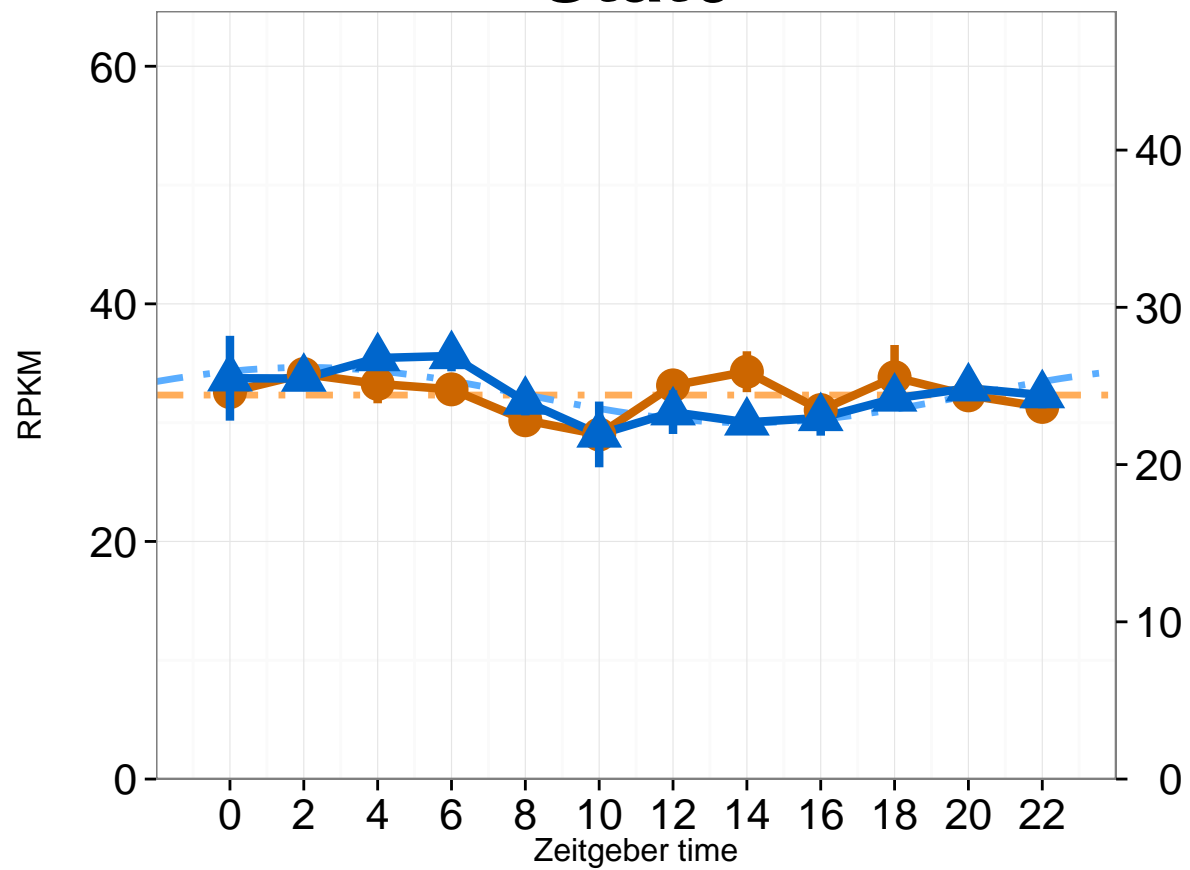

# Stat6

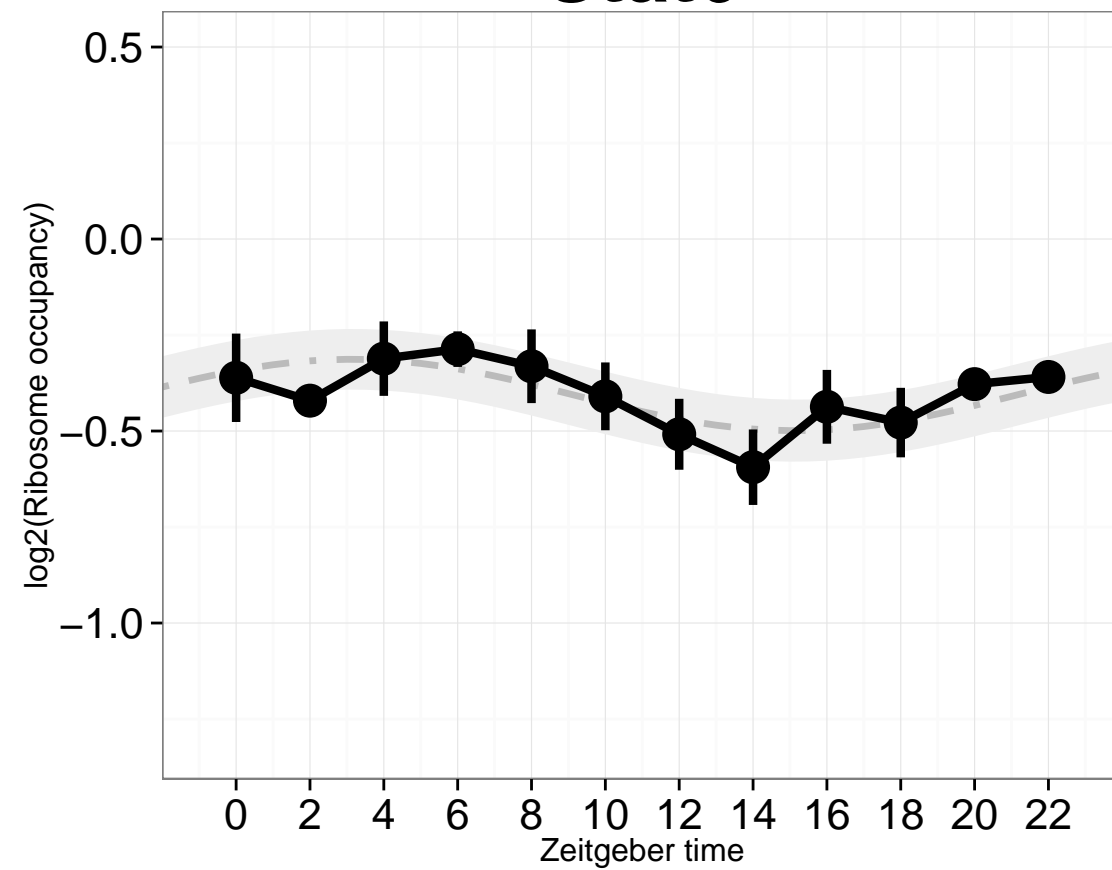

Supplement: Supplementary file 10223 [file 1]

## Nosip

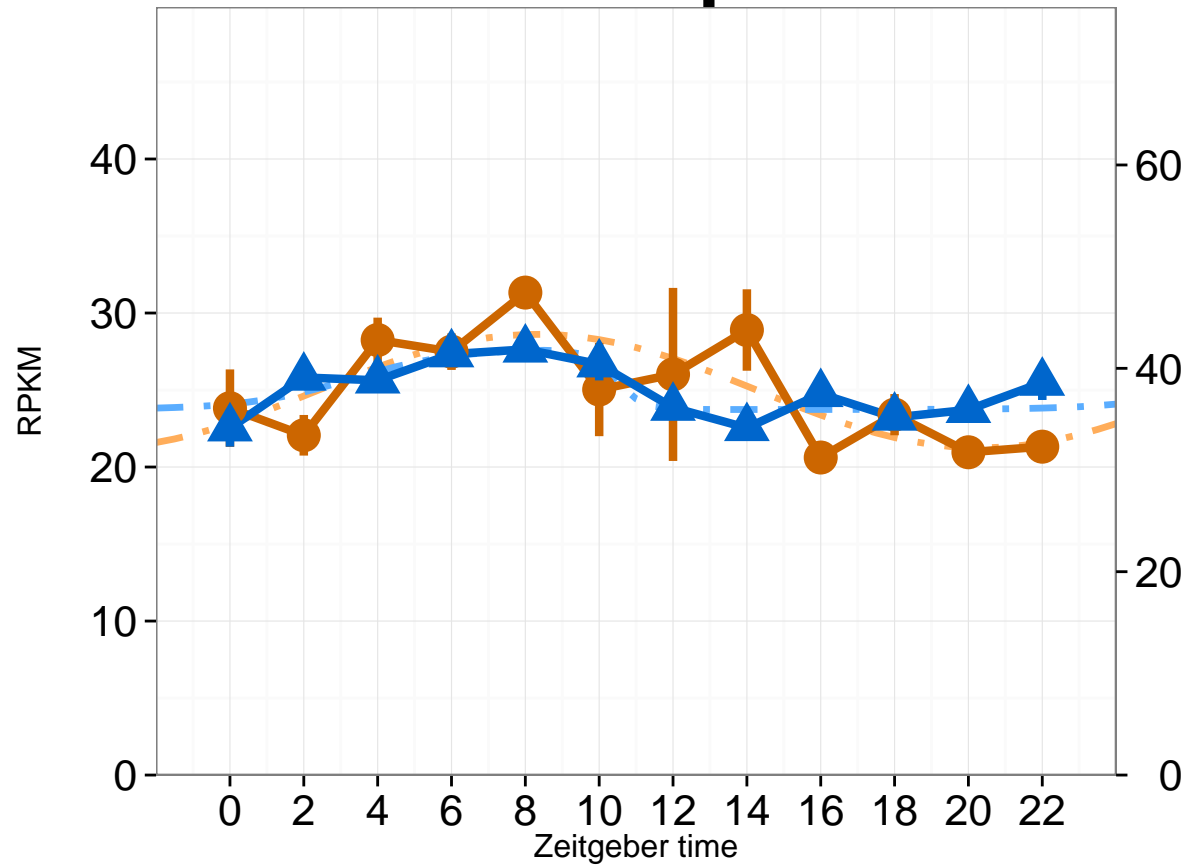

## Nosip

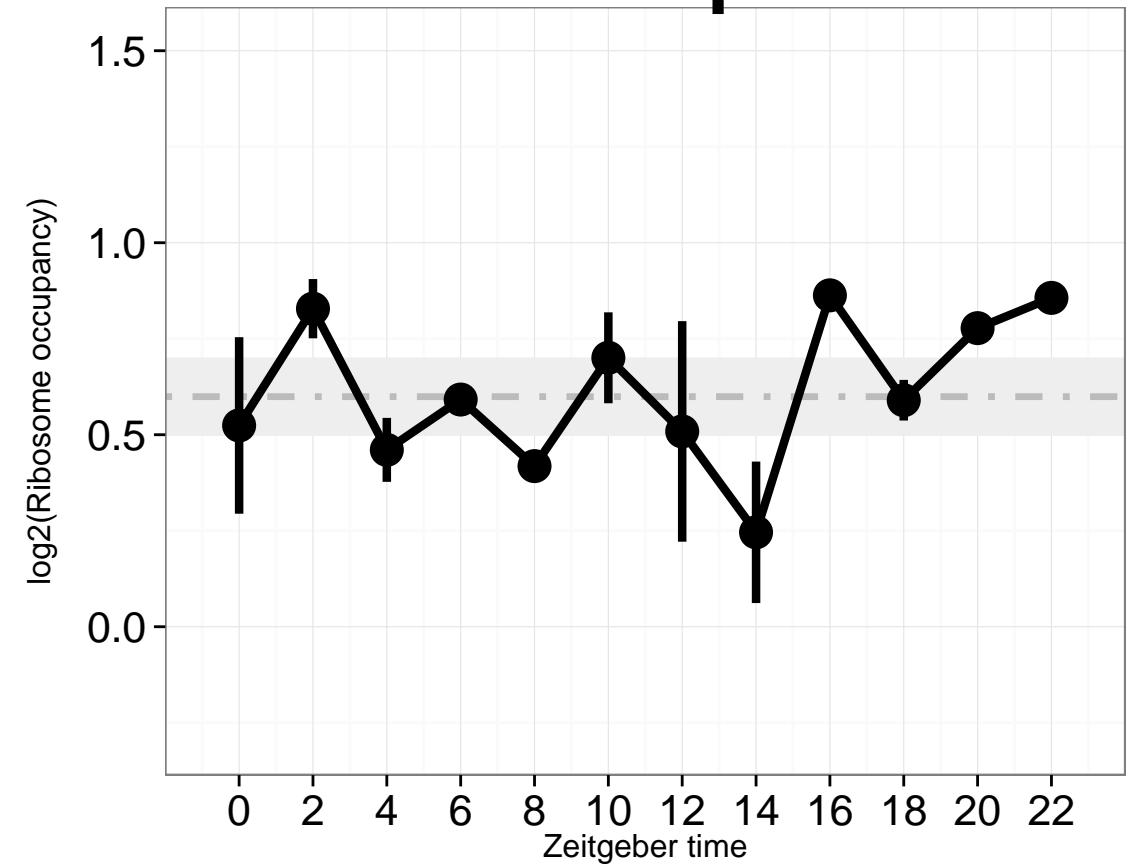

Supplement: Supplementary file 10224 [file 1]

## Gmip

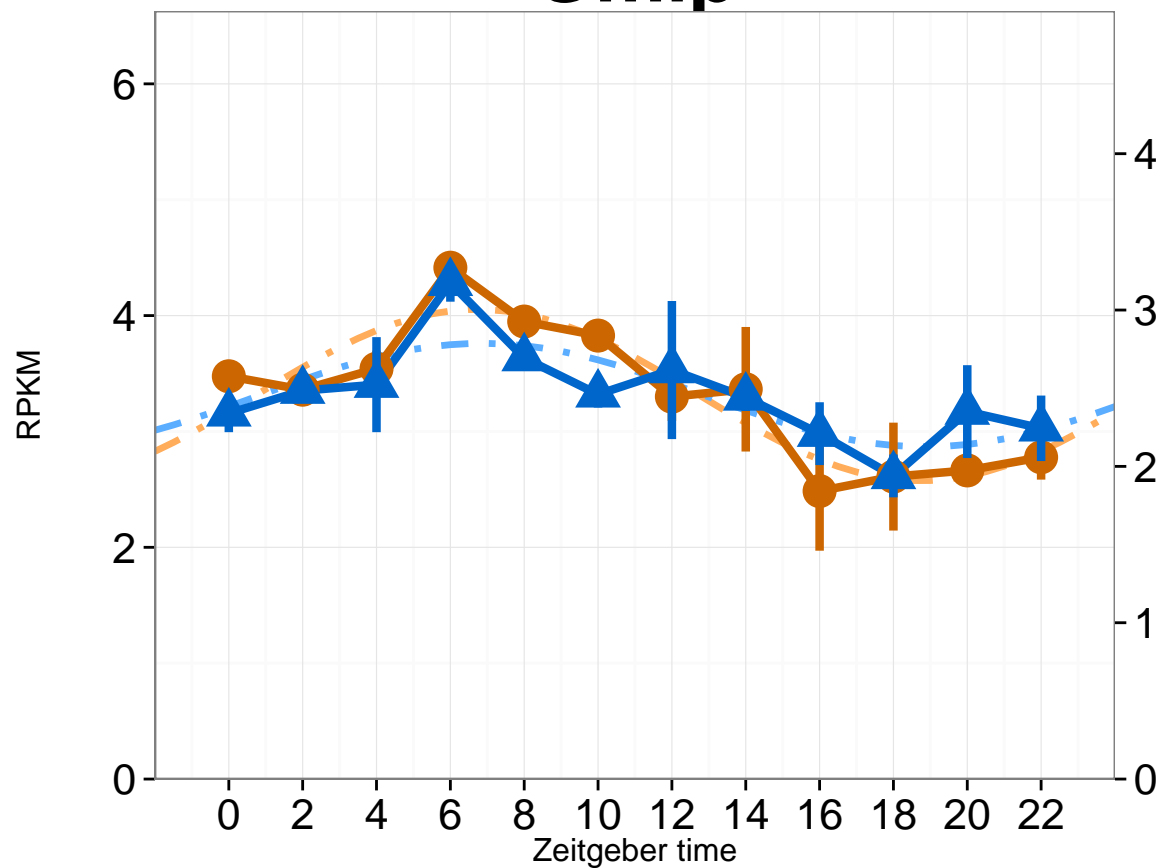

## Gmip

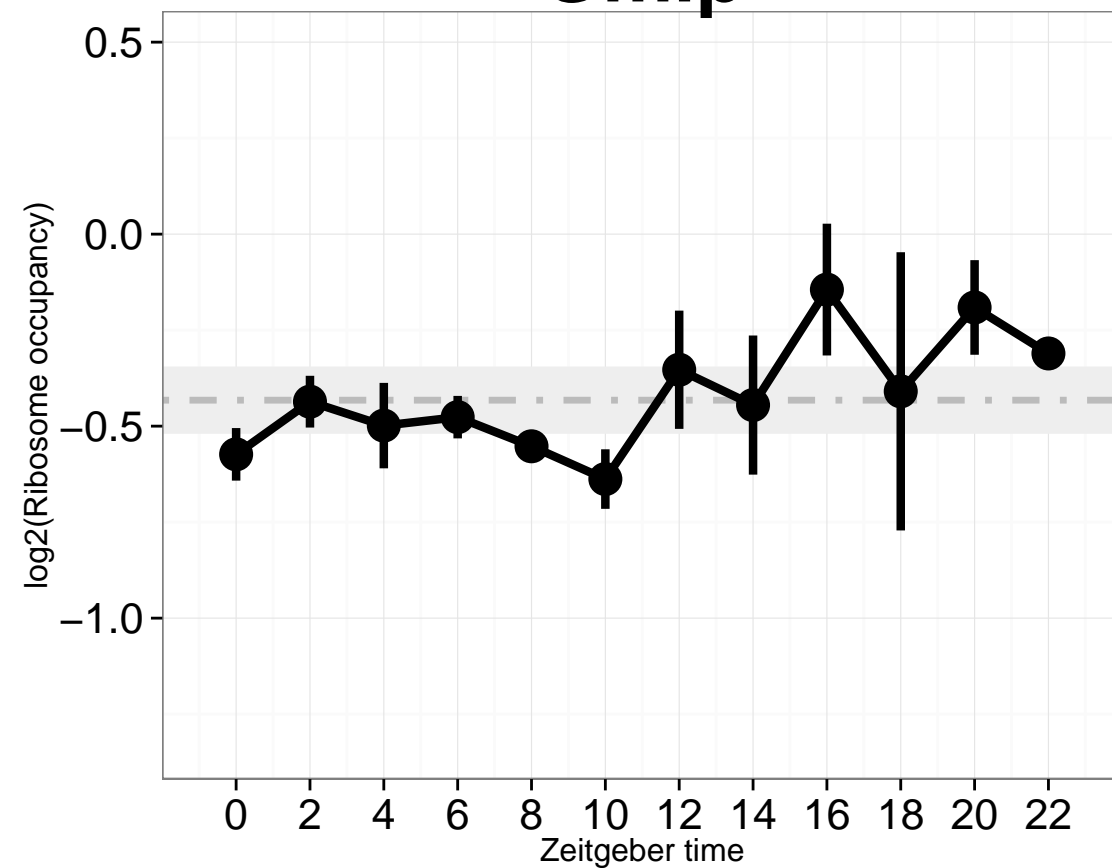

Supplement: Supplementary file 10225 [file 1]

# S100g

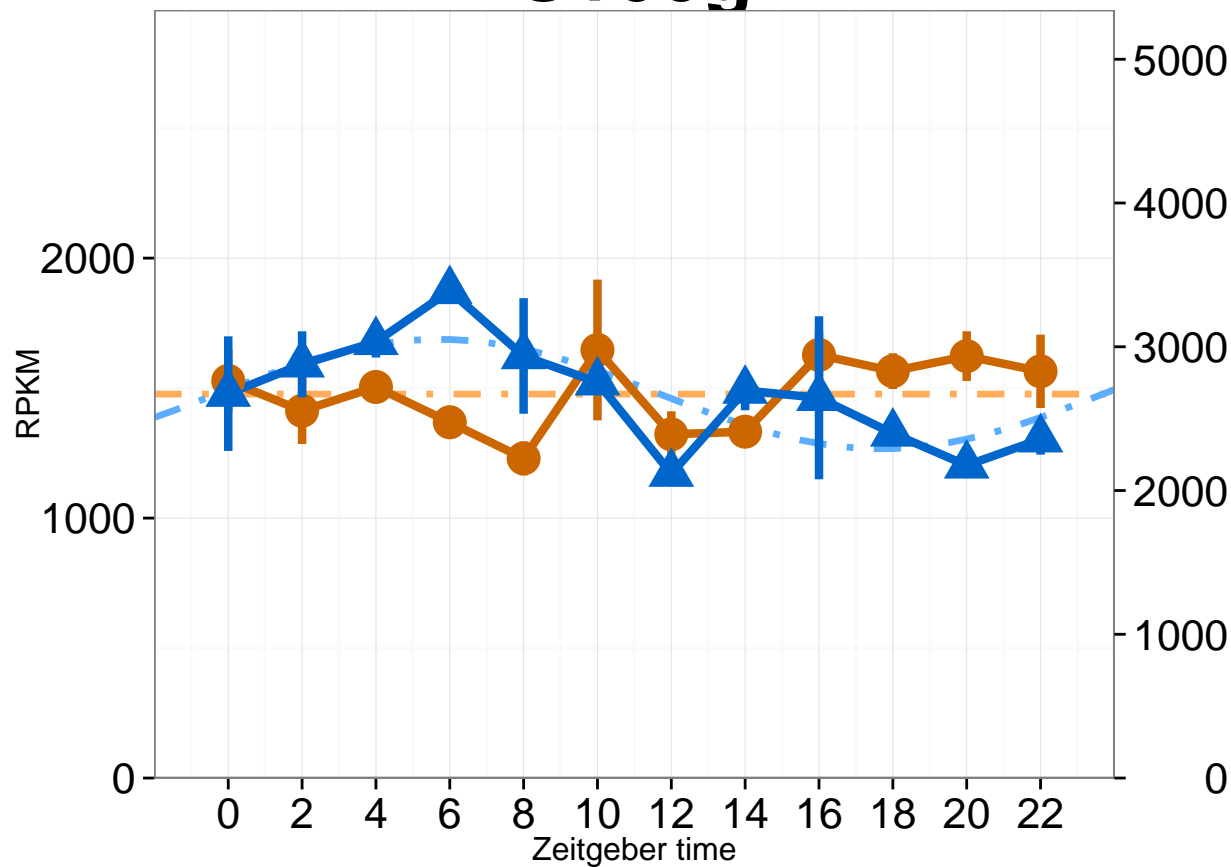

# S100g

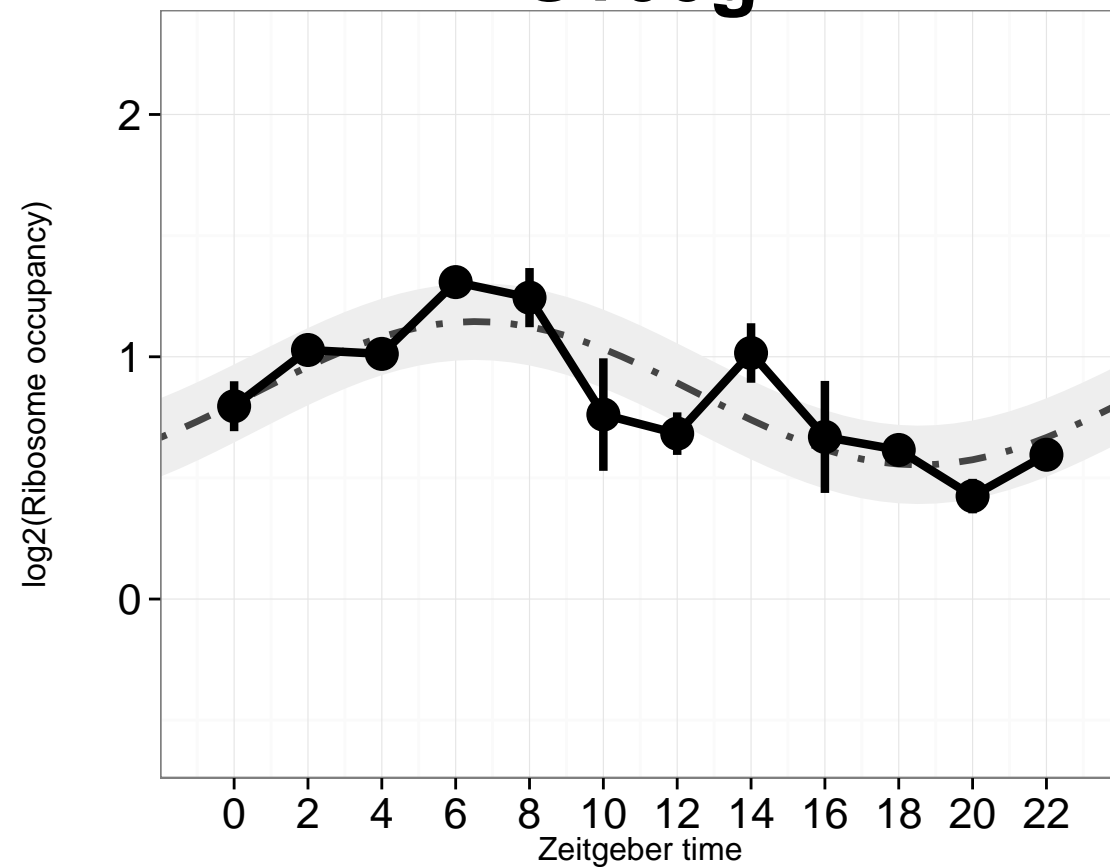

Supplement: Supplementary file 10226 [file 1]

## Aldh2

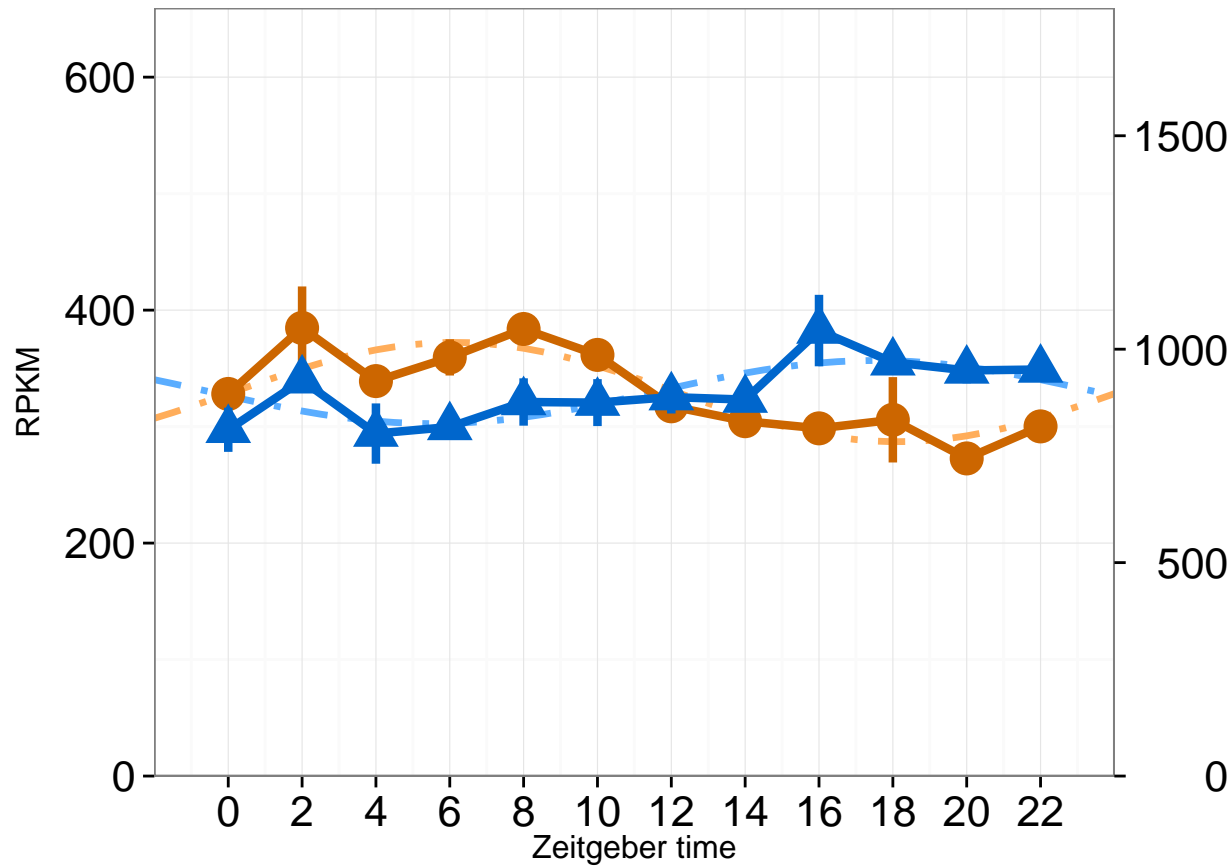

## Aldh2

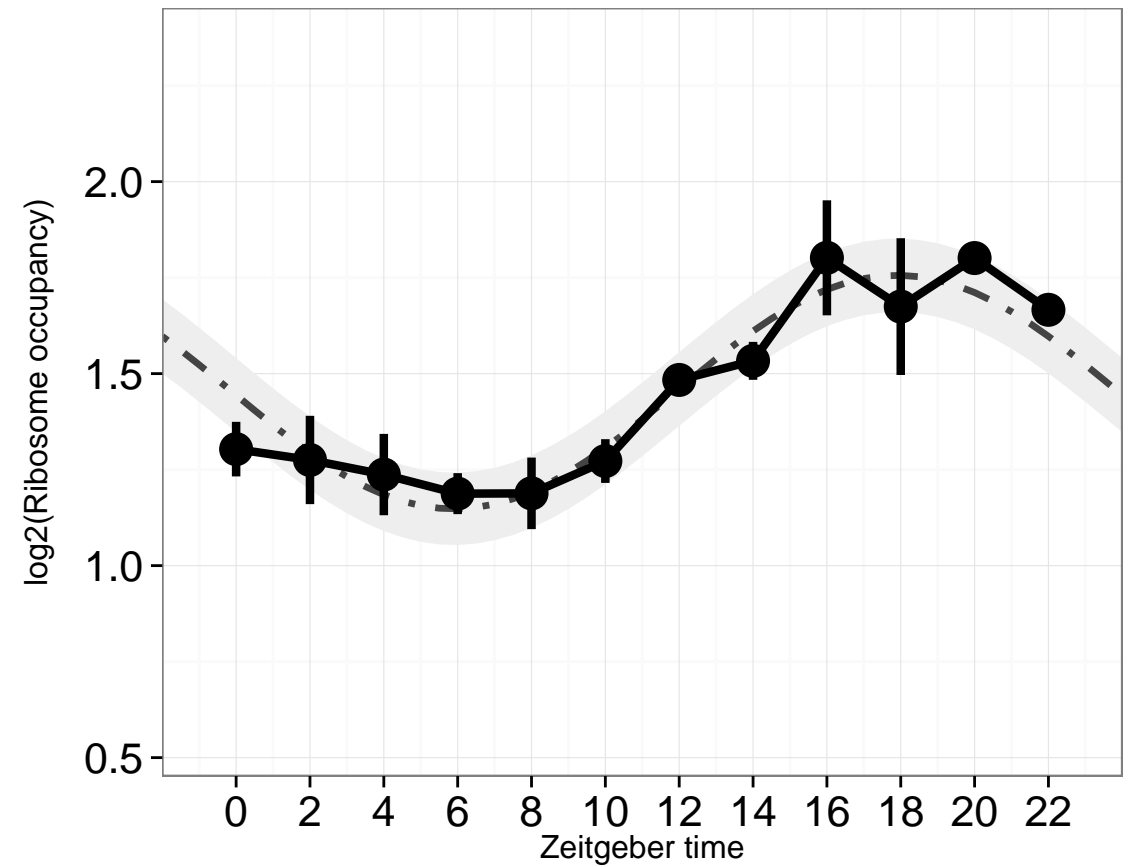

Supplement: Supplementary file 10227 [file 1]

## Cdc123

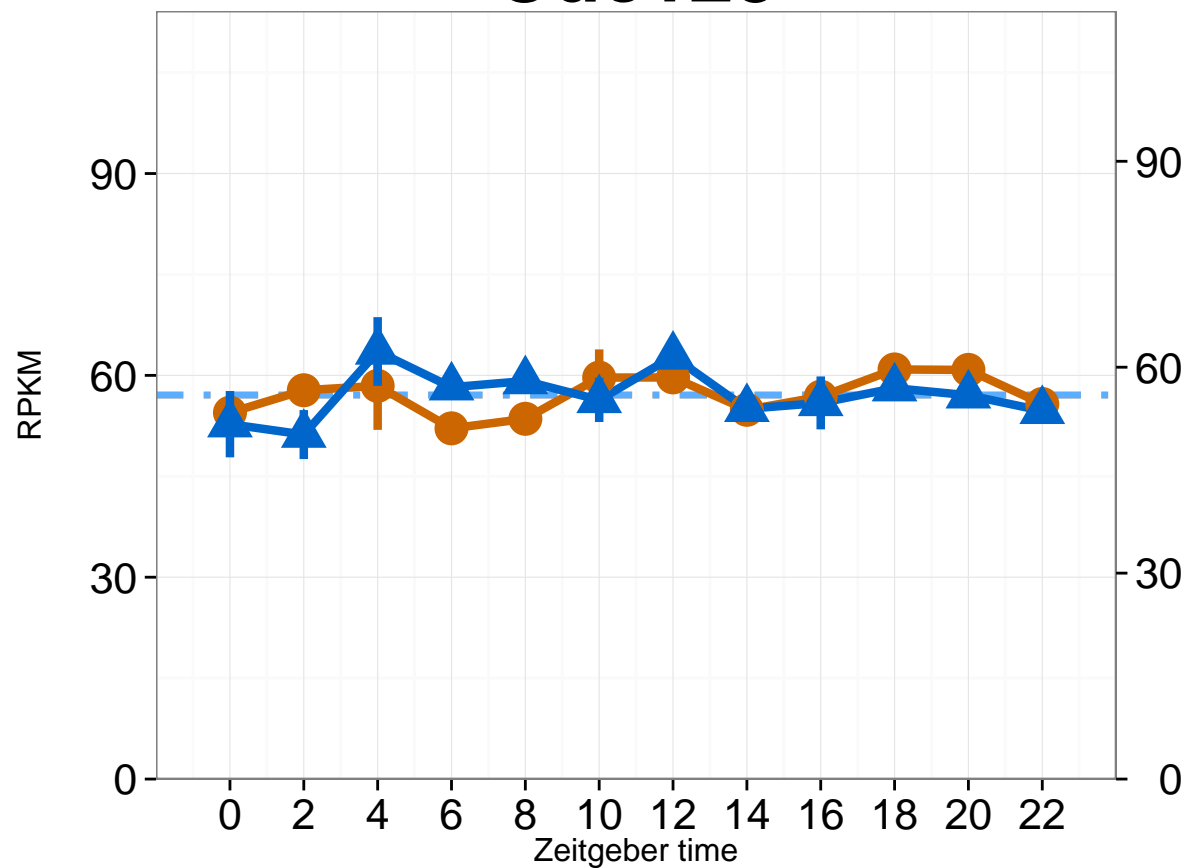

## Cdc123

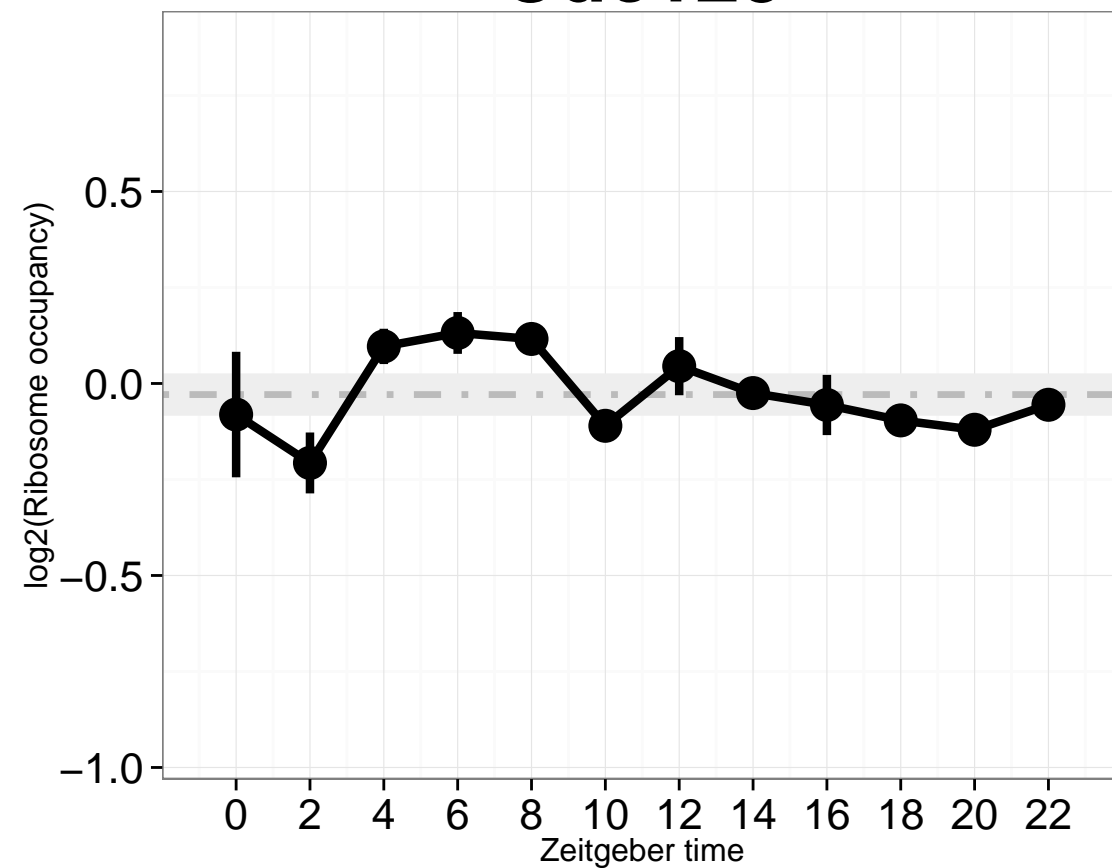

Supplement: Supplementary file 10228 [file 1]

# Zc3h12c

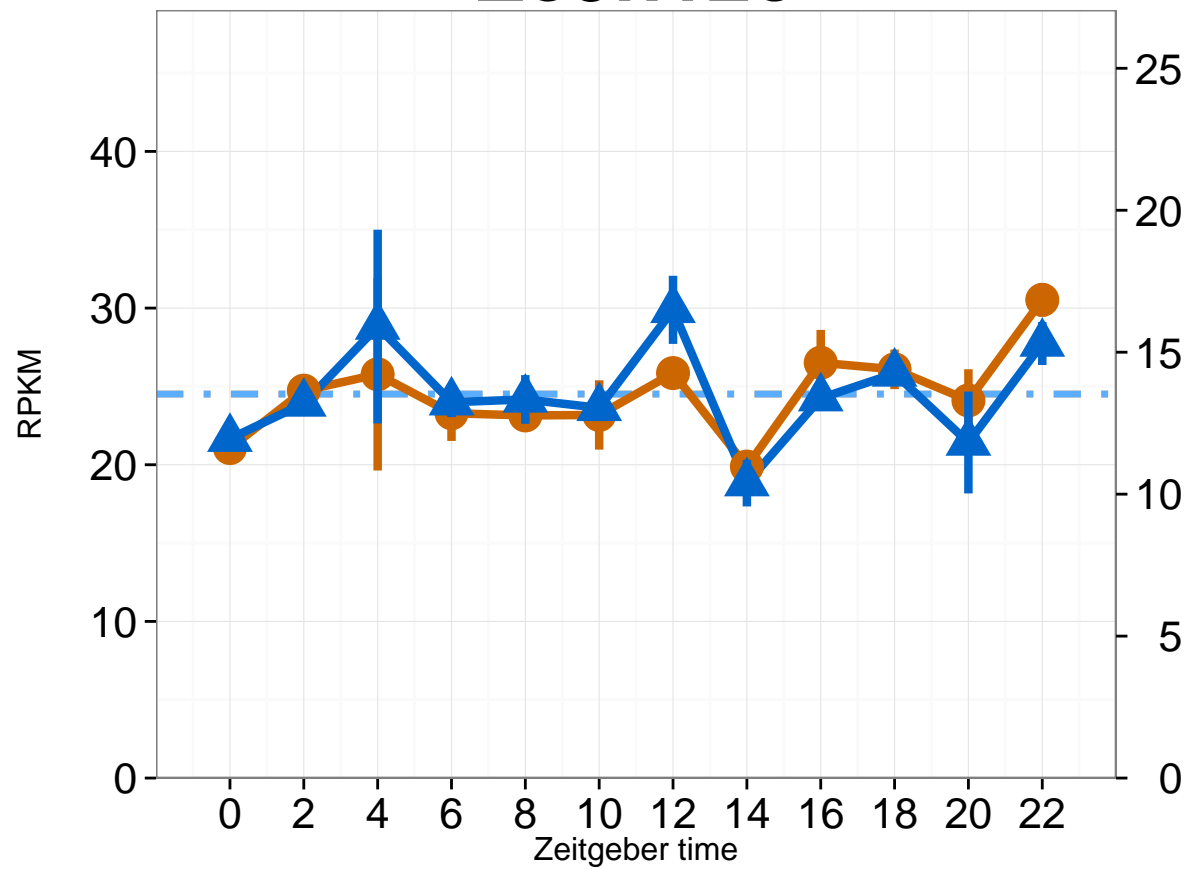

# Zc3h12c

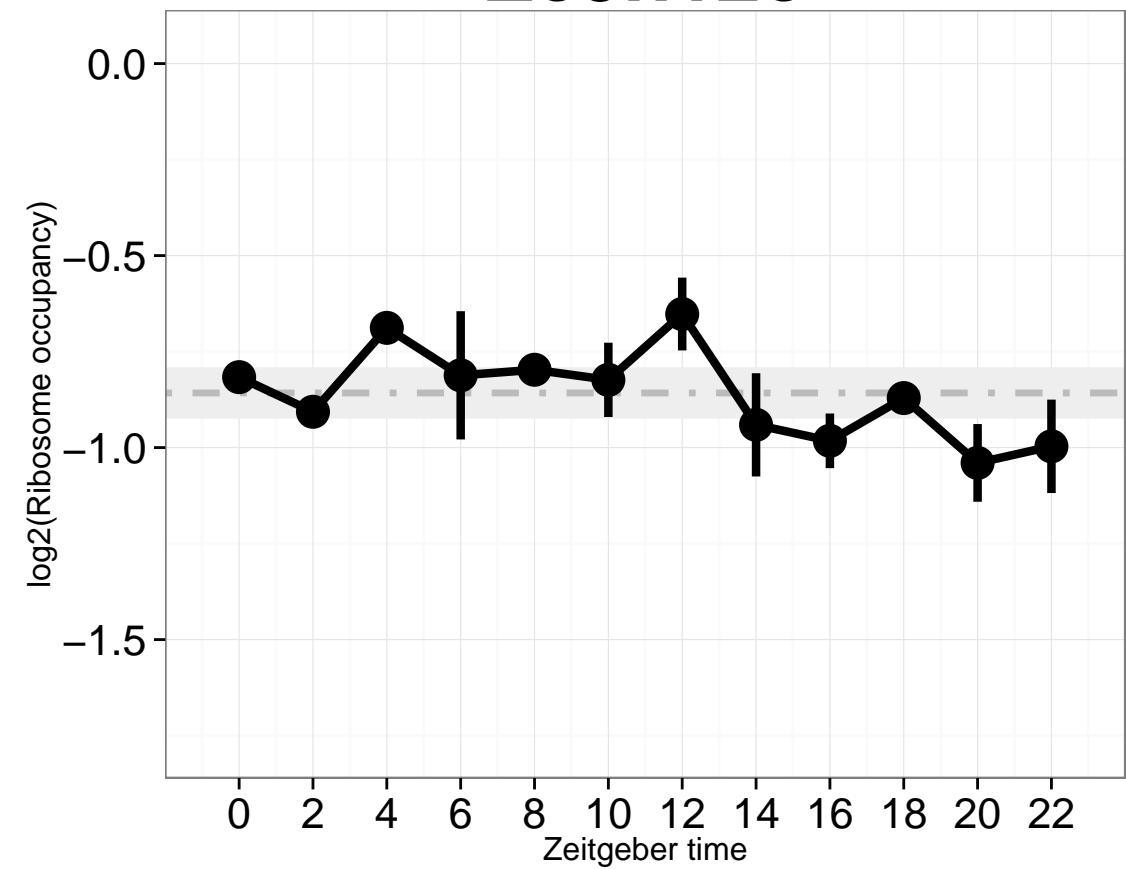

Supplement: Supplementary file 10229 [file 1]

## Cck

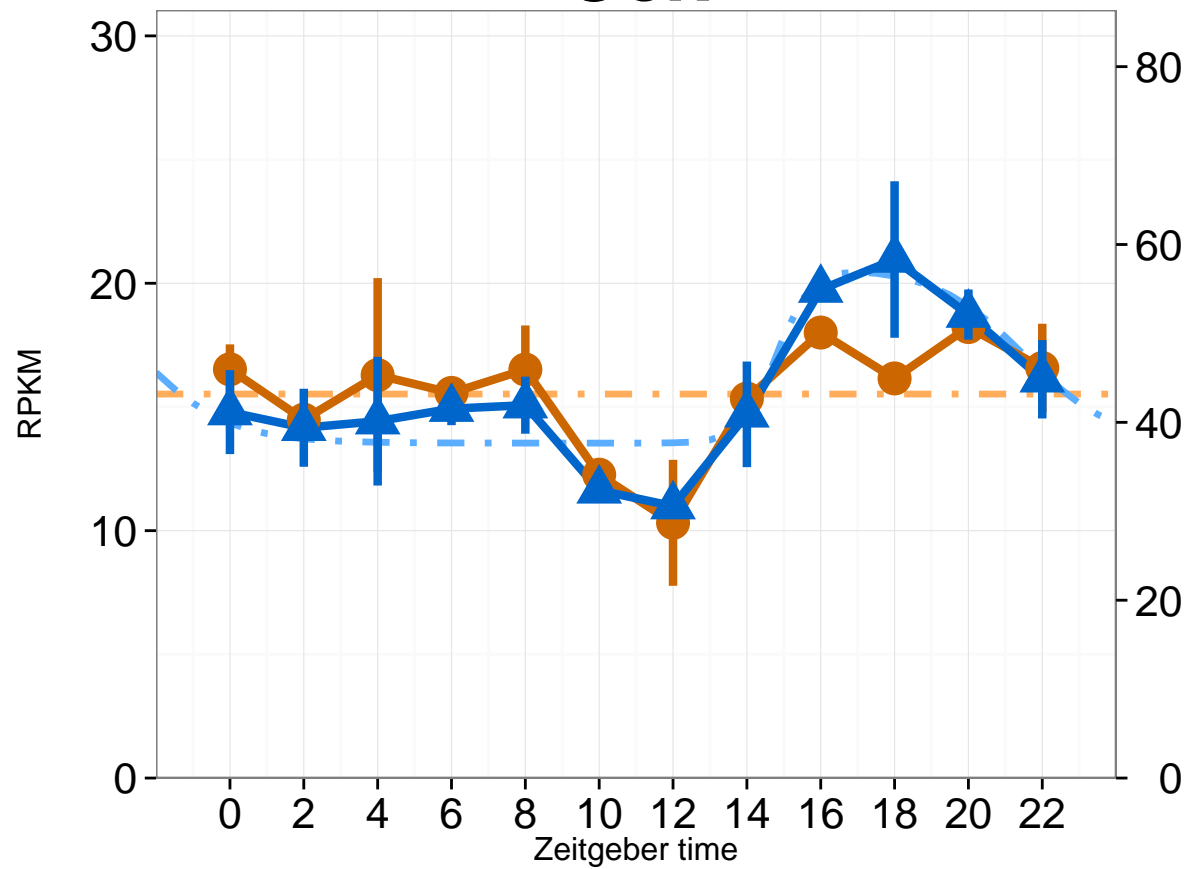

## Cck

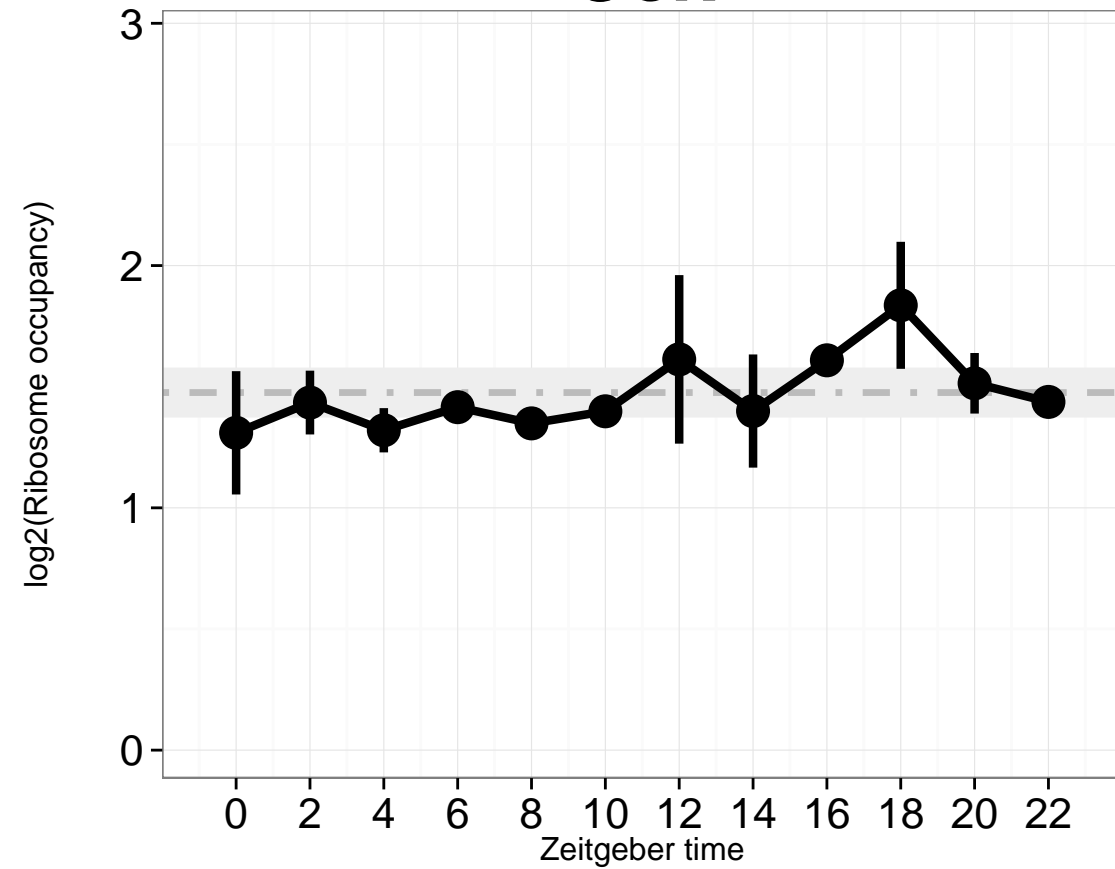

Supplement: Supplementary file 10230 [file 1]

## Zadh2

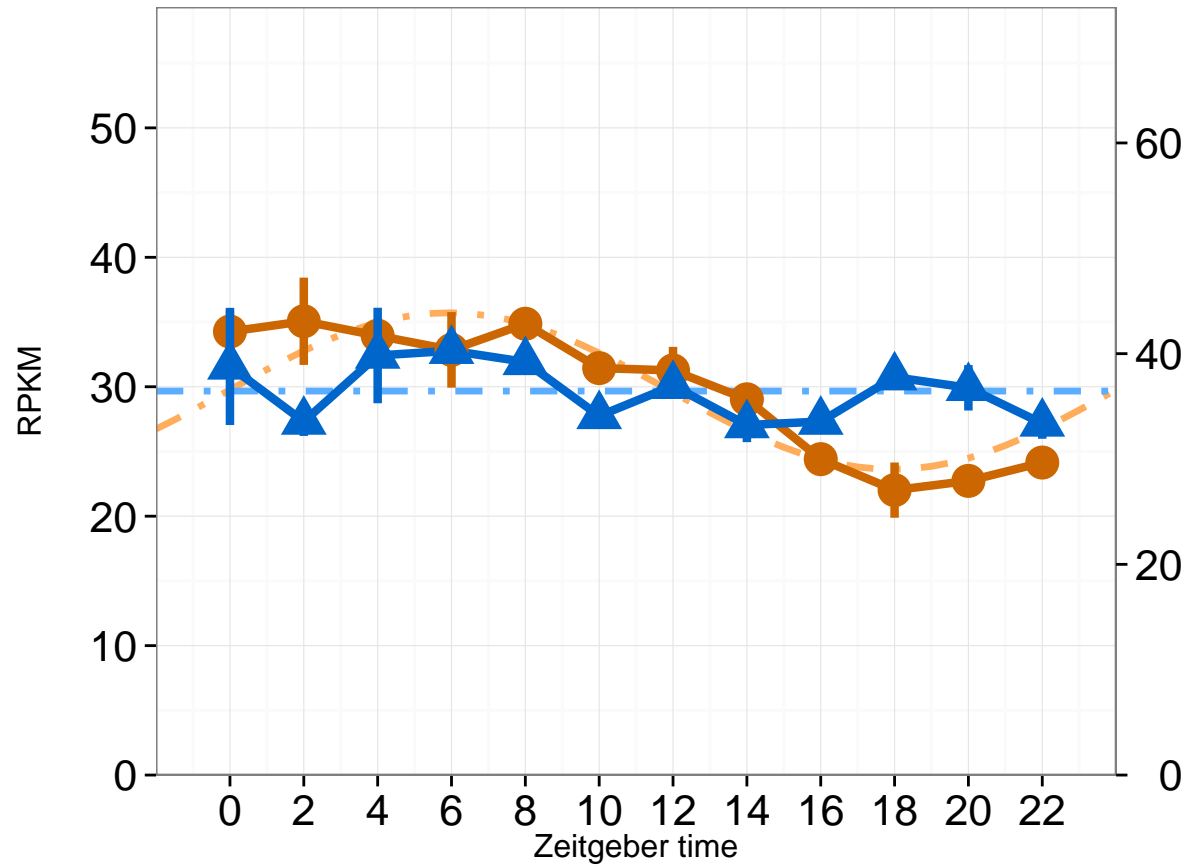

## Zadh2

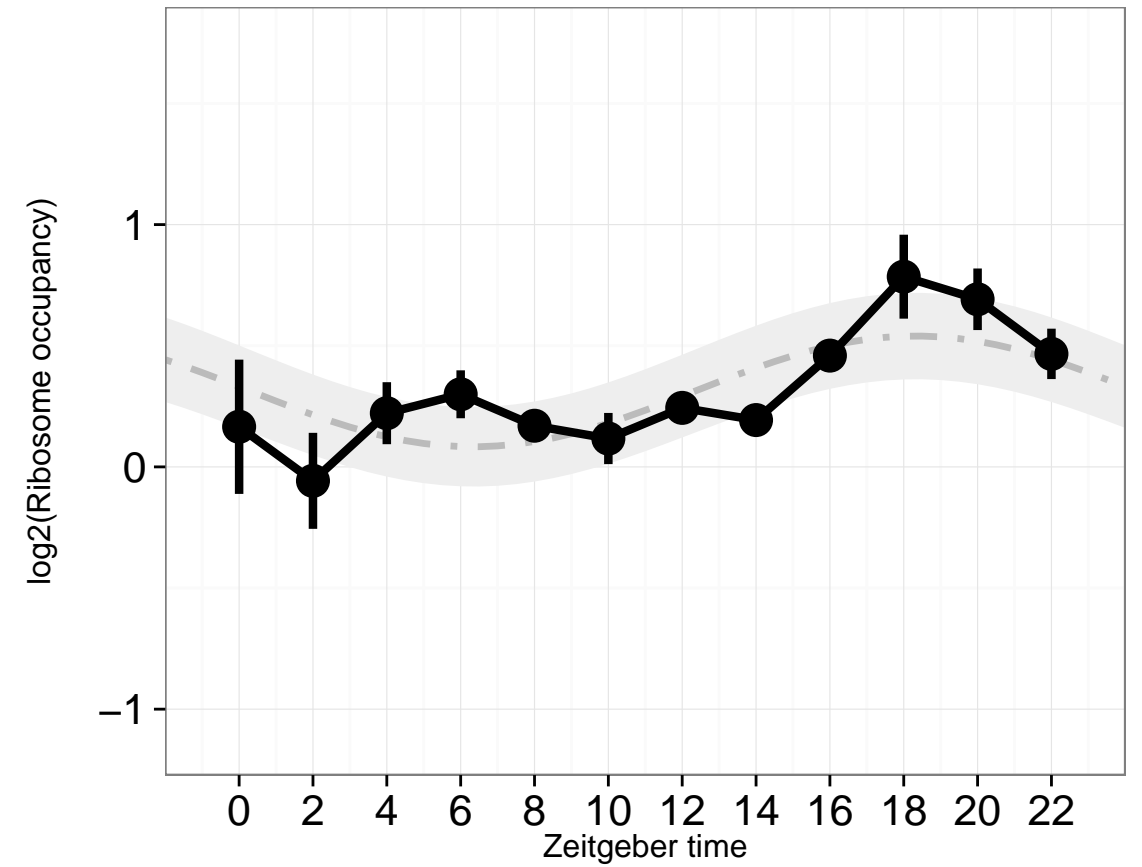

Supplement: Supplementary file 10231 [file 1]

# Tspan33

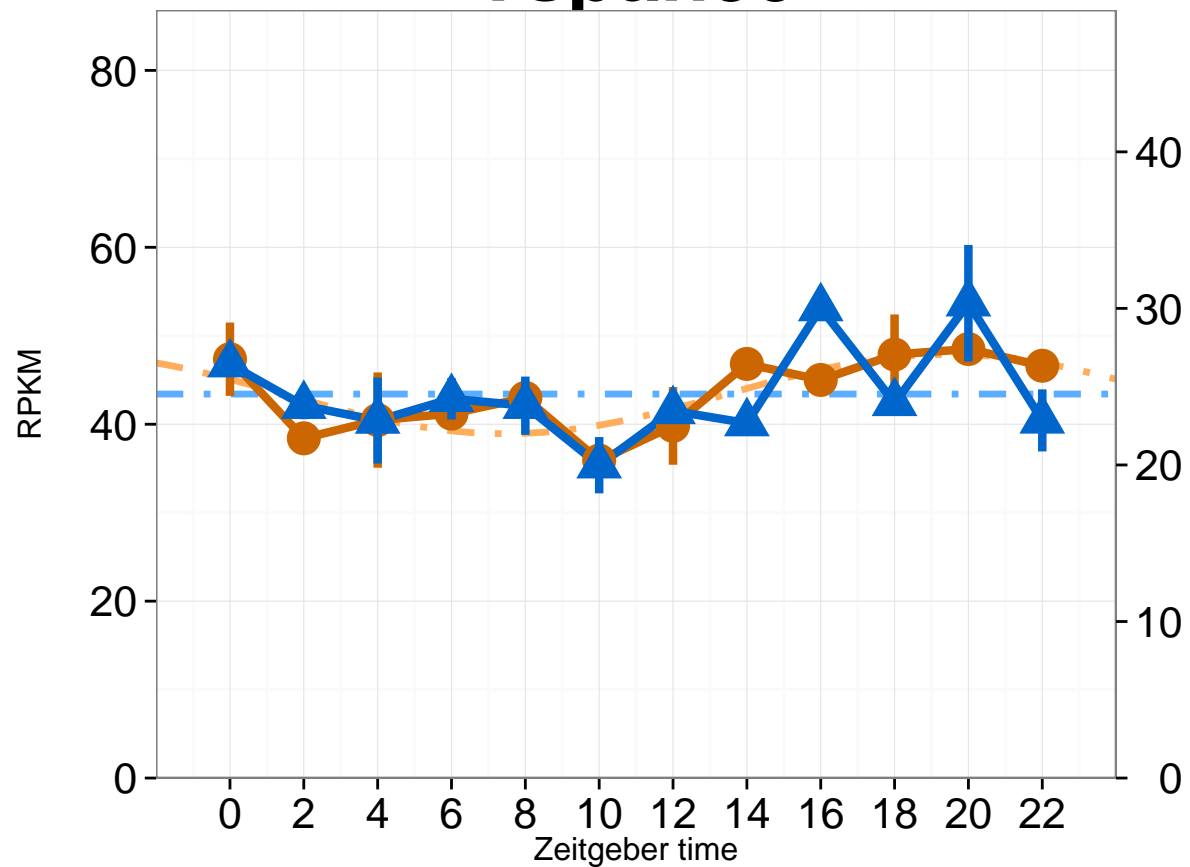

# Tspan33

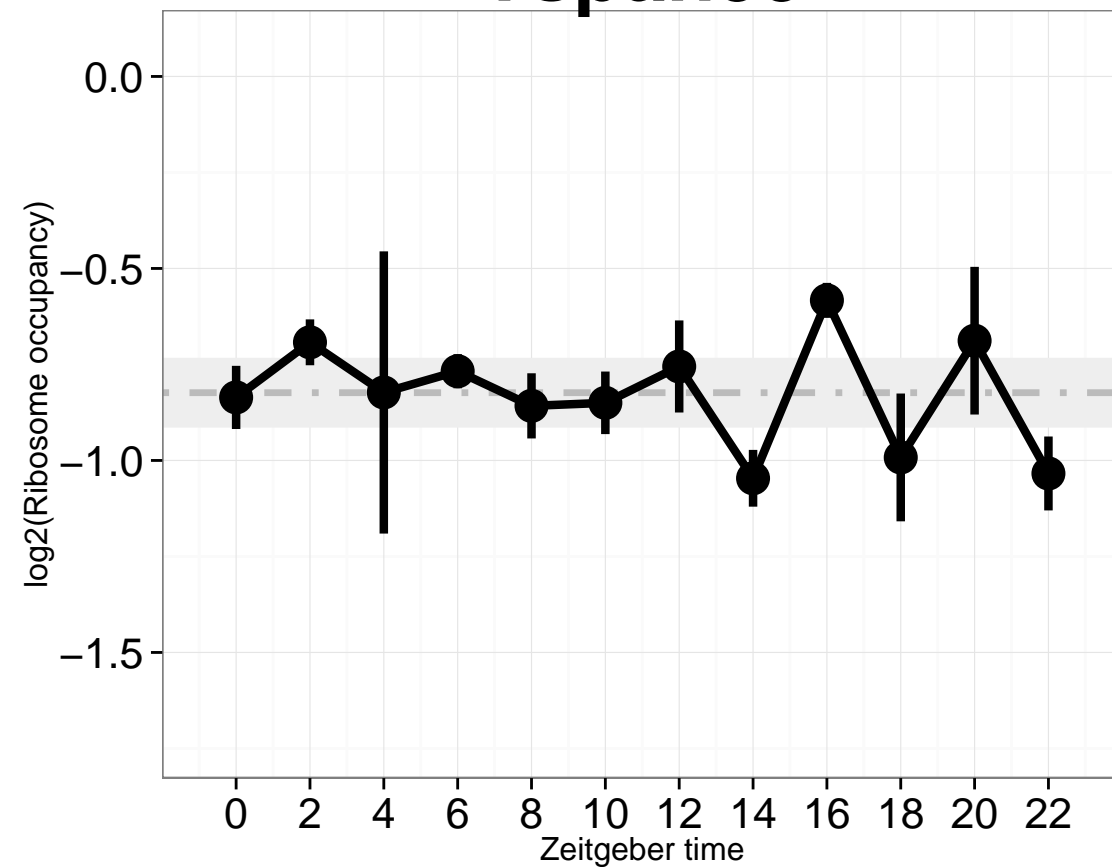

Supplement: Supplementary file 10232 [file 1]

# Zc3h8

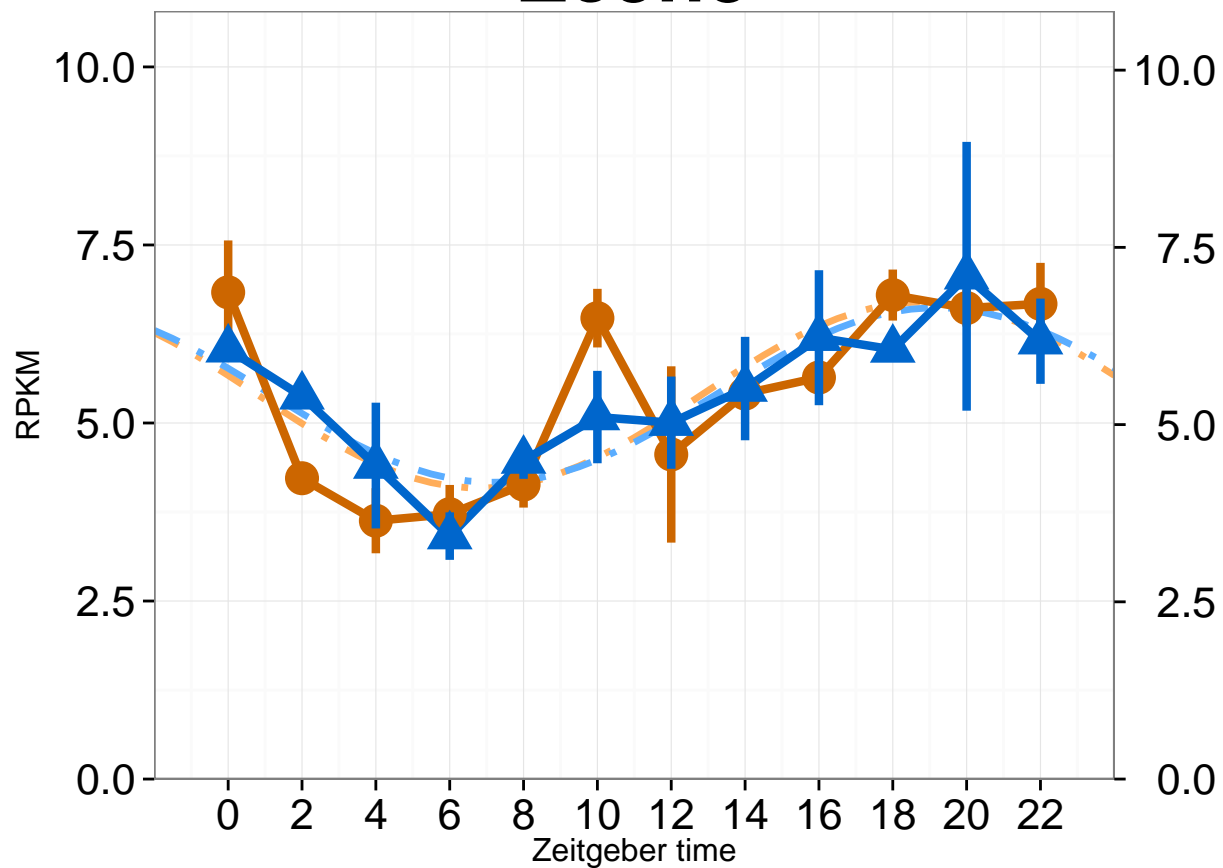

# Zc3h8

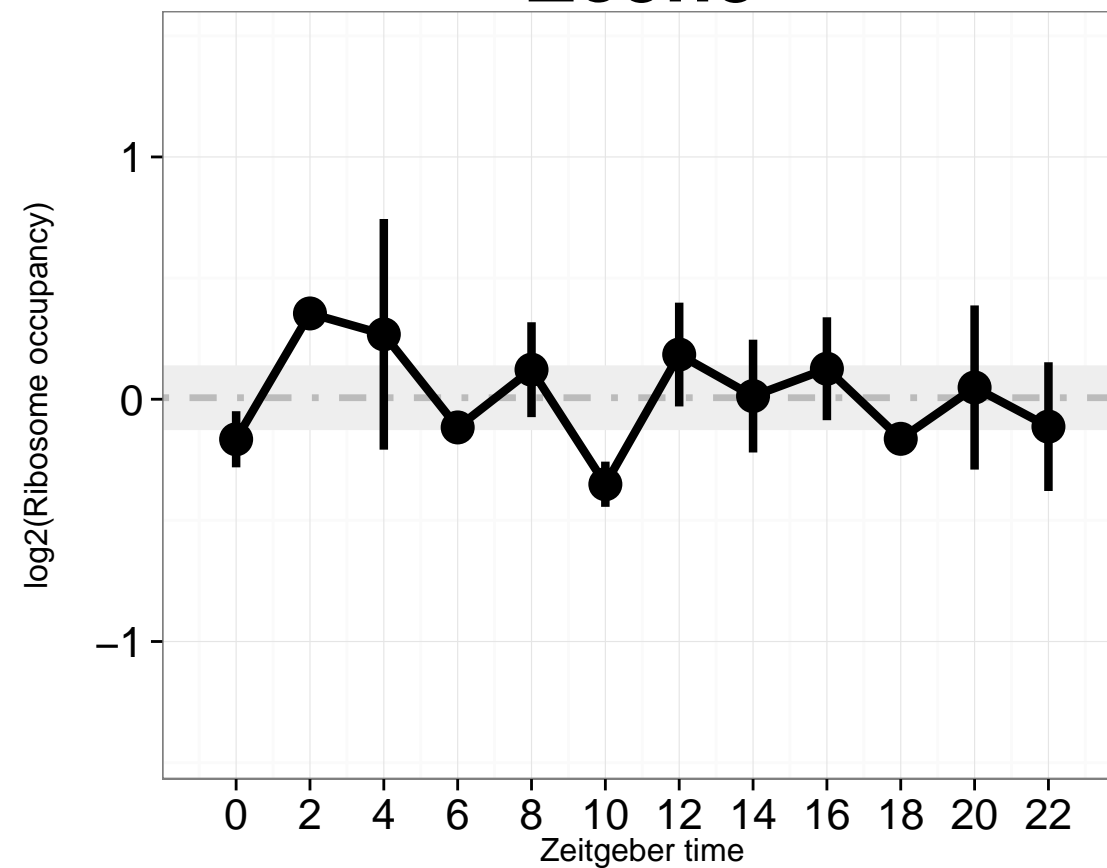

Supplement: Supplementary file 10233 [file 1]

## Nubp2

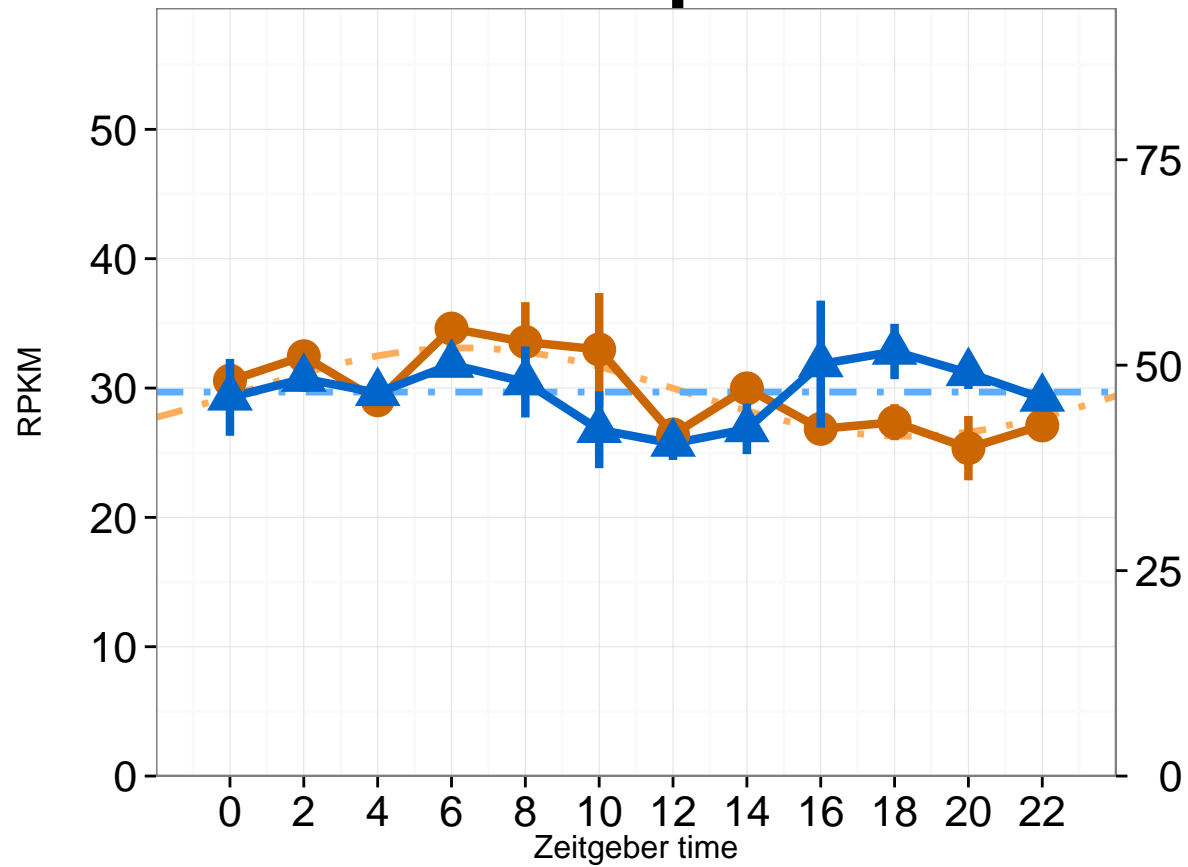

## Nubp2

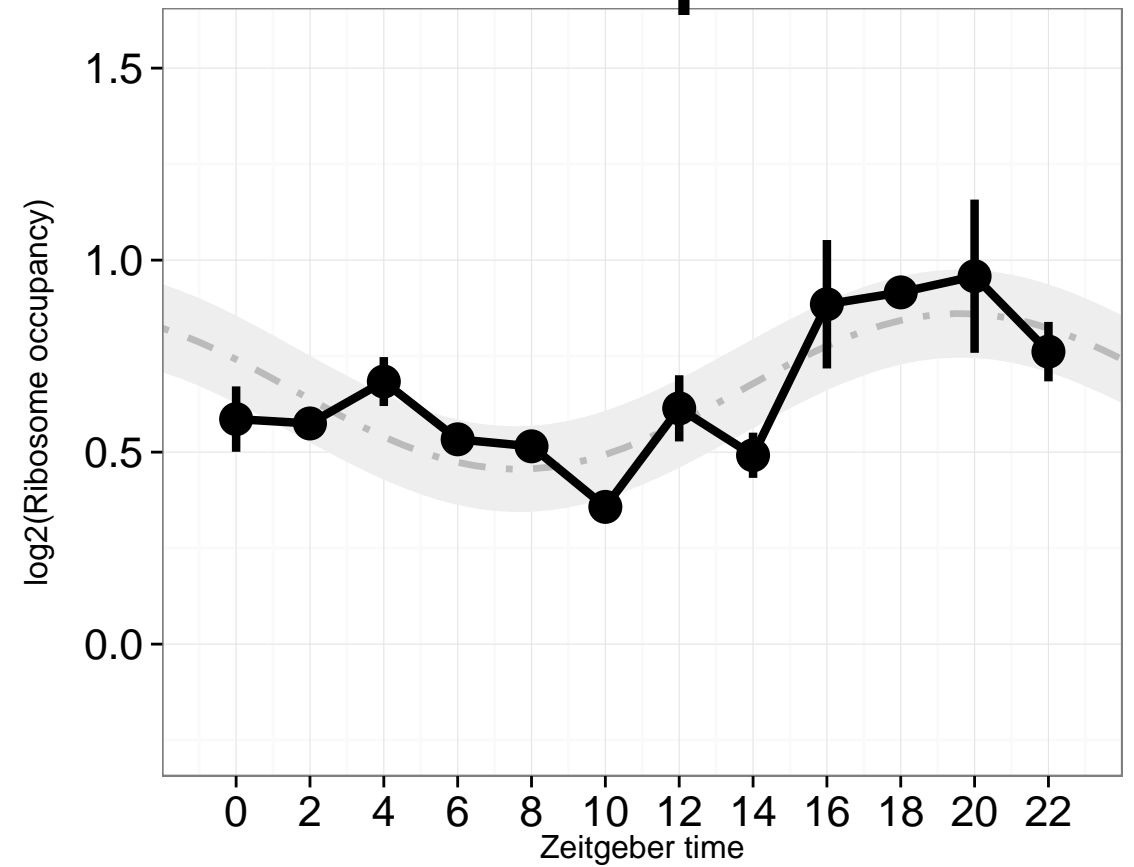

Supplement: Supplementary file 10234 [file 1]

# Rps25

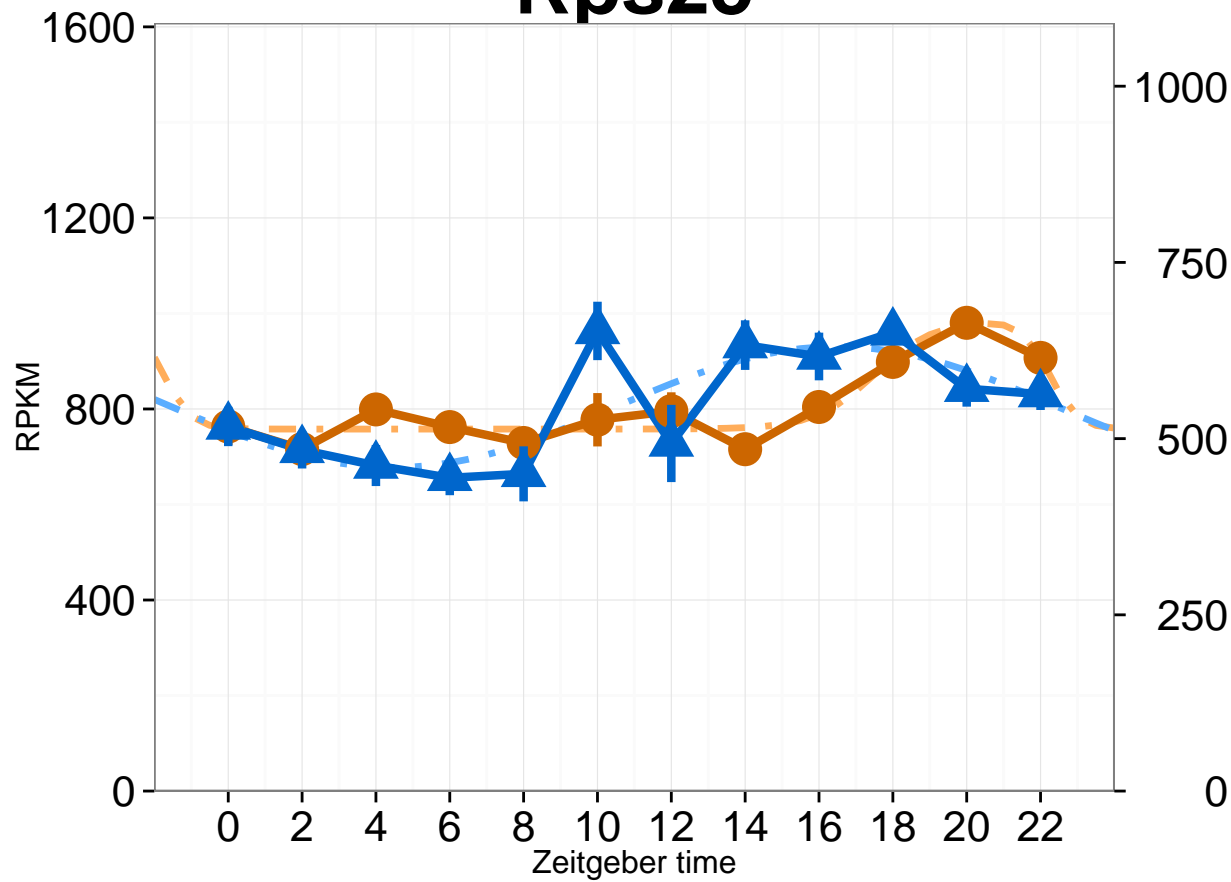

# Rps25

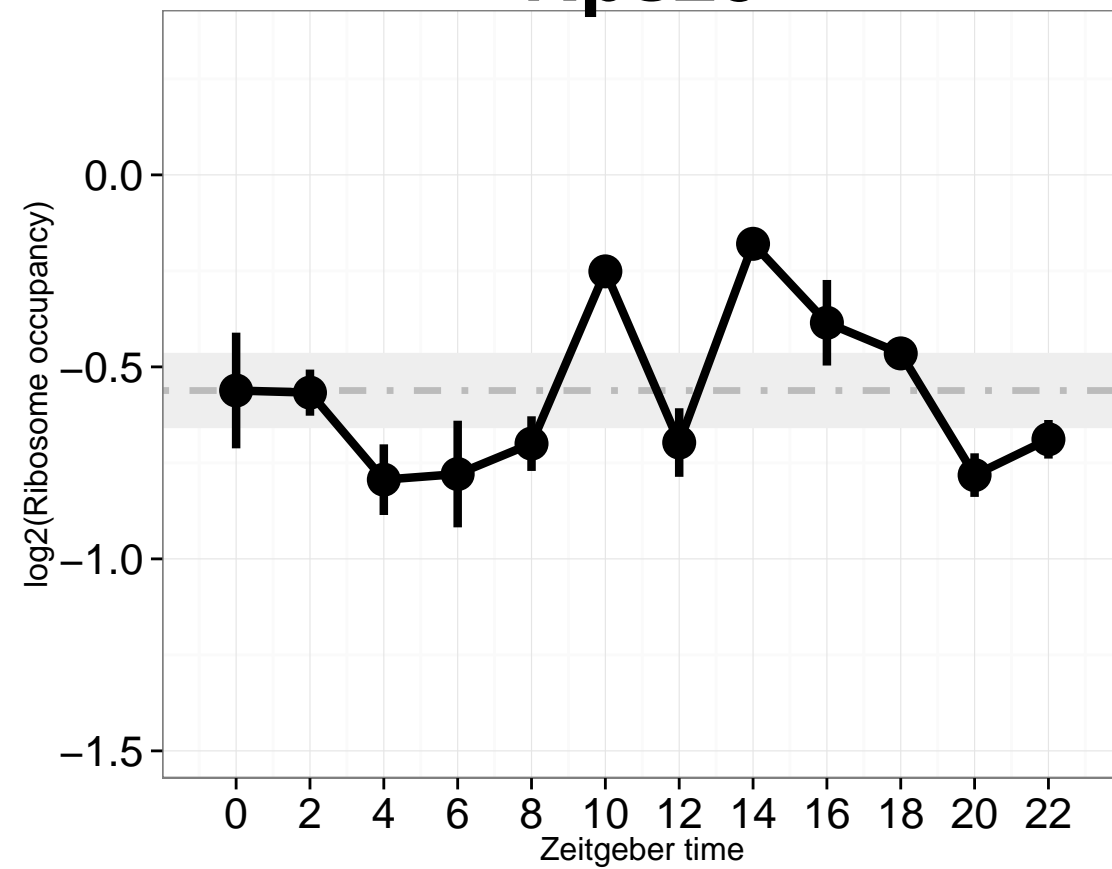

Supplement: Supplementary file 10235 [file 1]

# Fads1

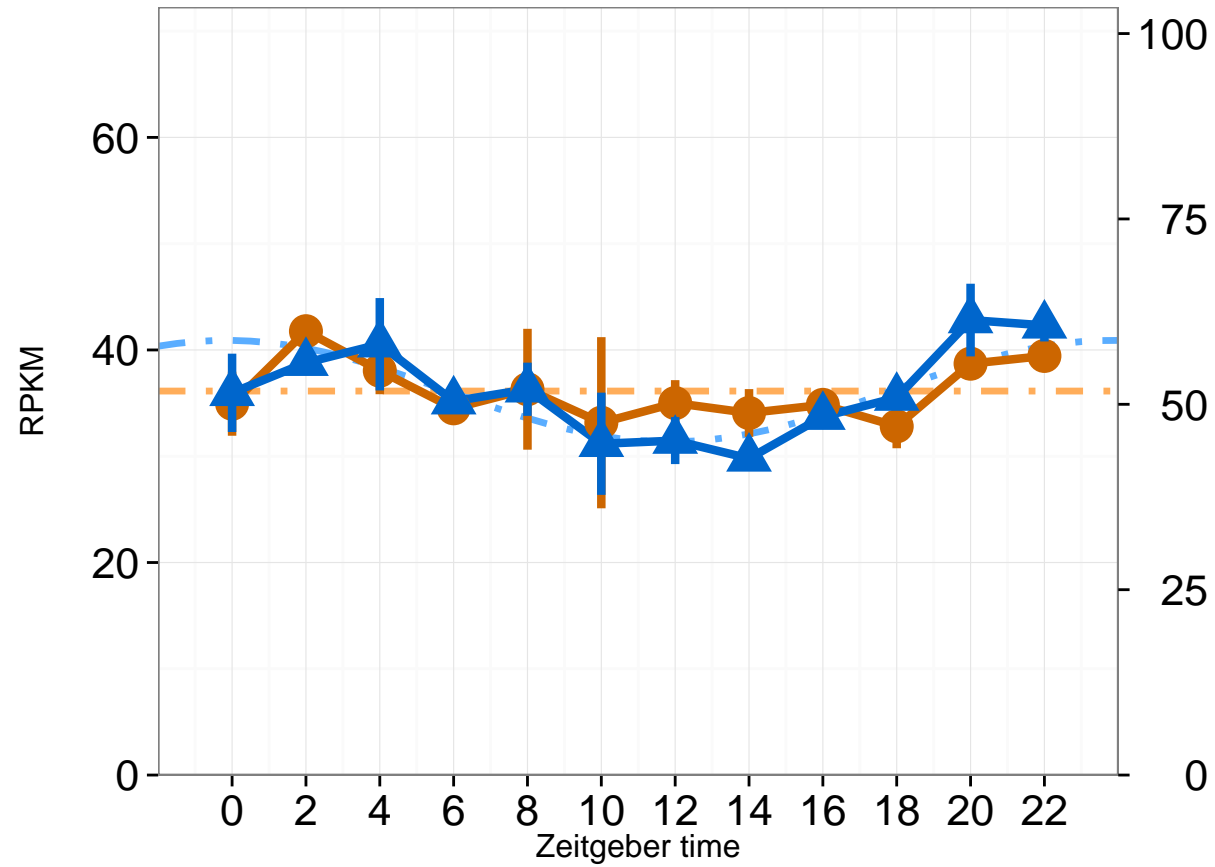

# Fads1

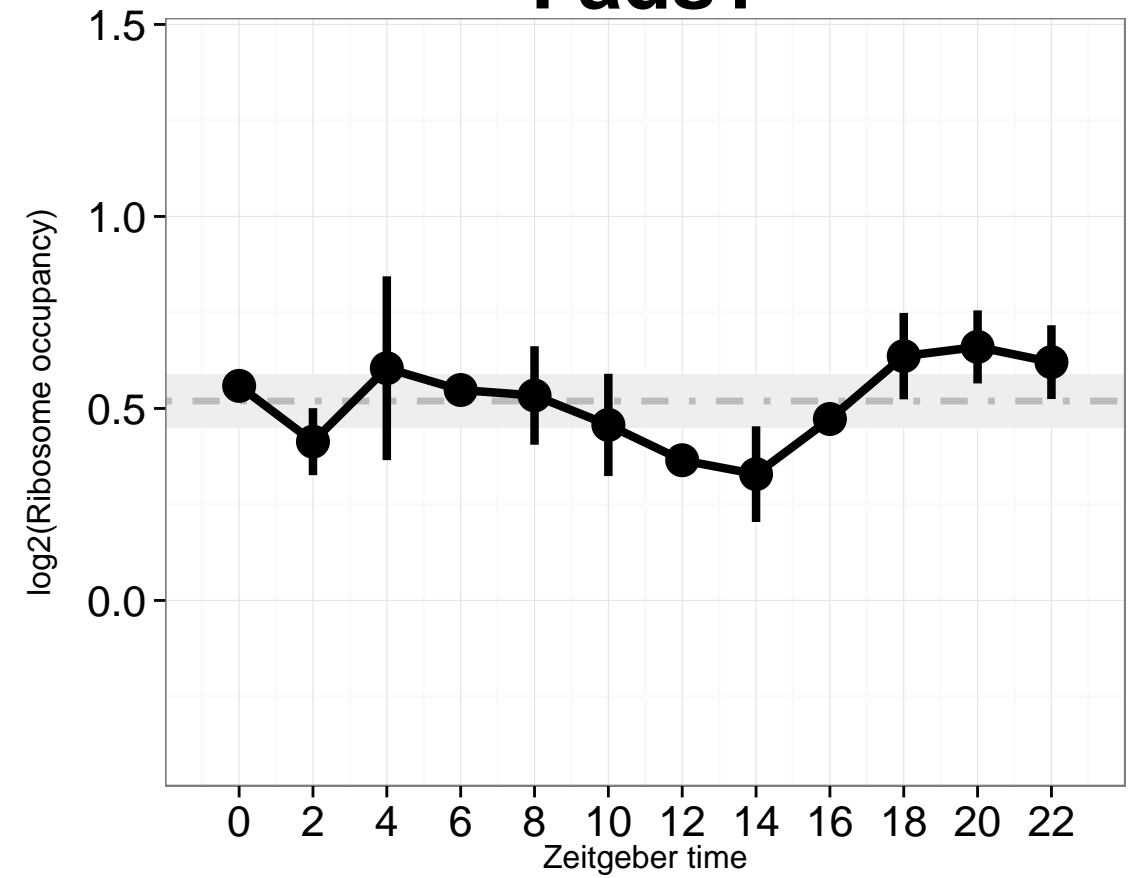

Supplement: Supplementary file 10236 [file 1]

# Stap2

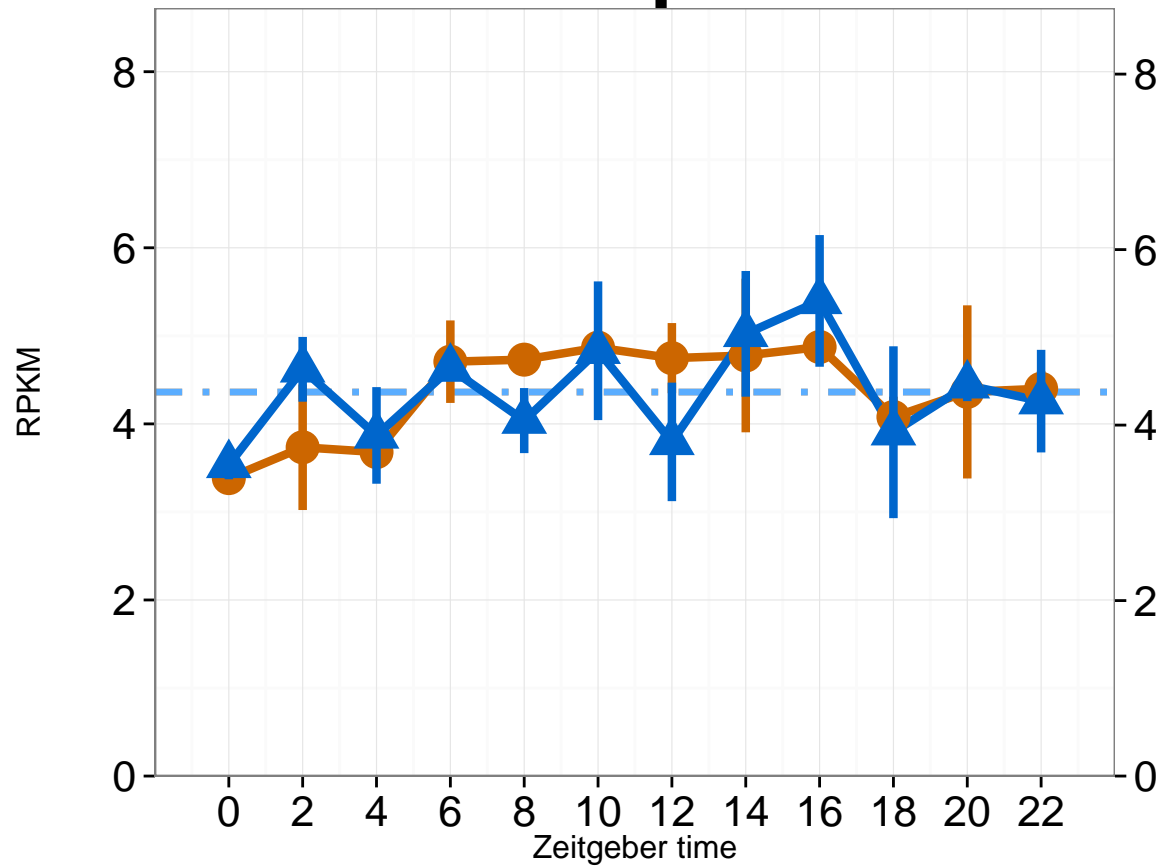

# Stap2

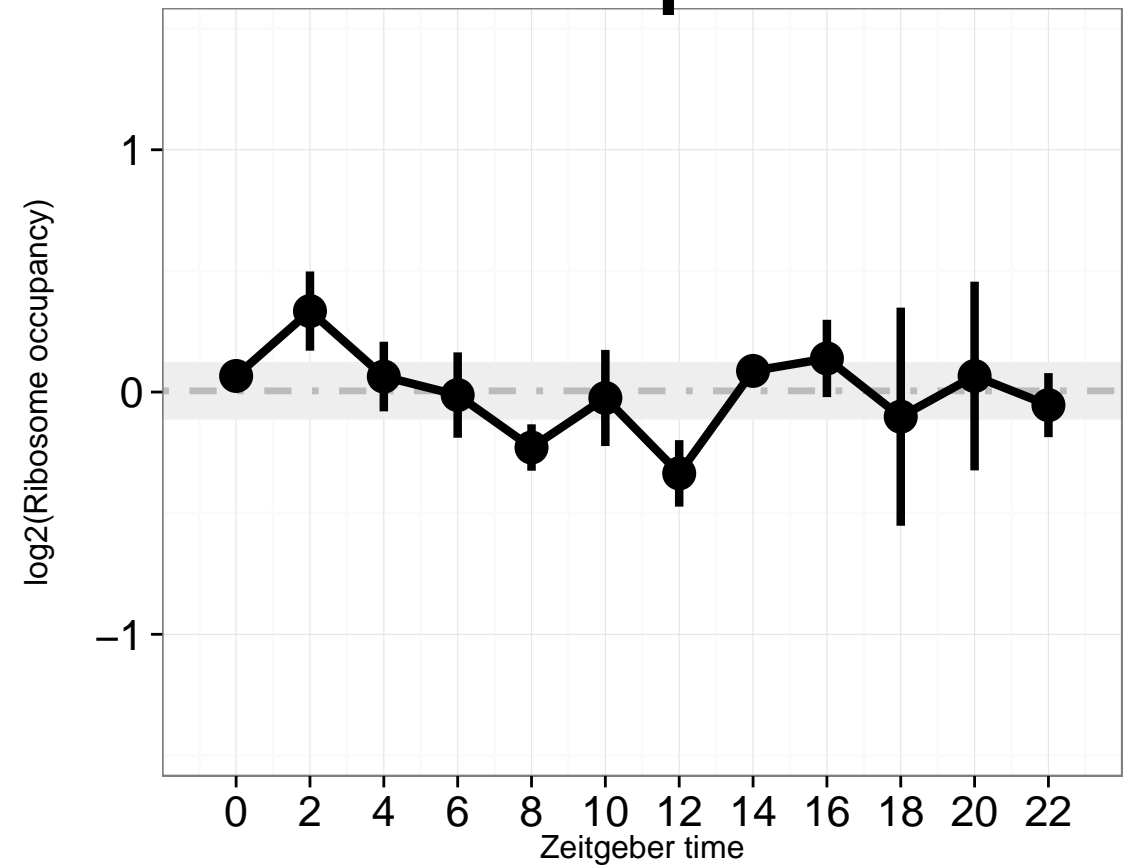

Supplement: Supplementary file 10237 [file 1]

# Lsm5

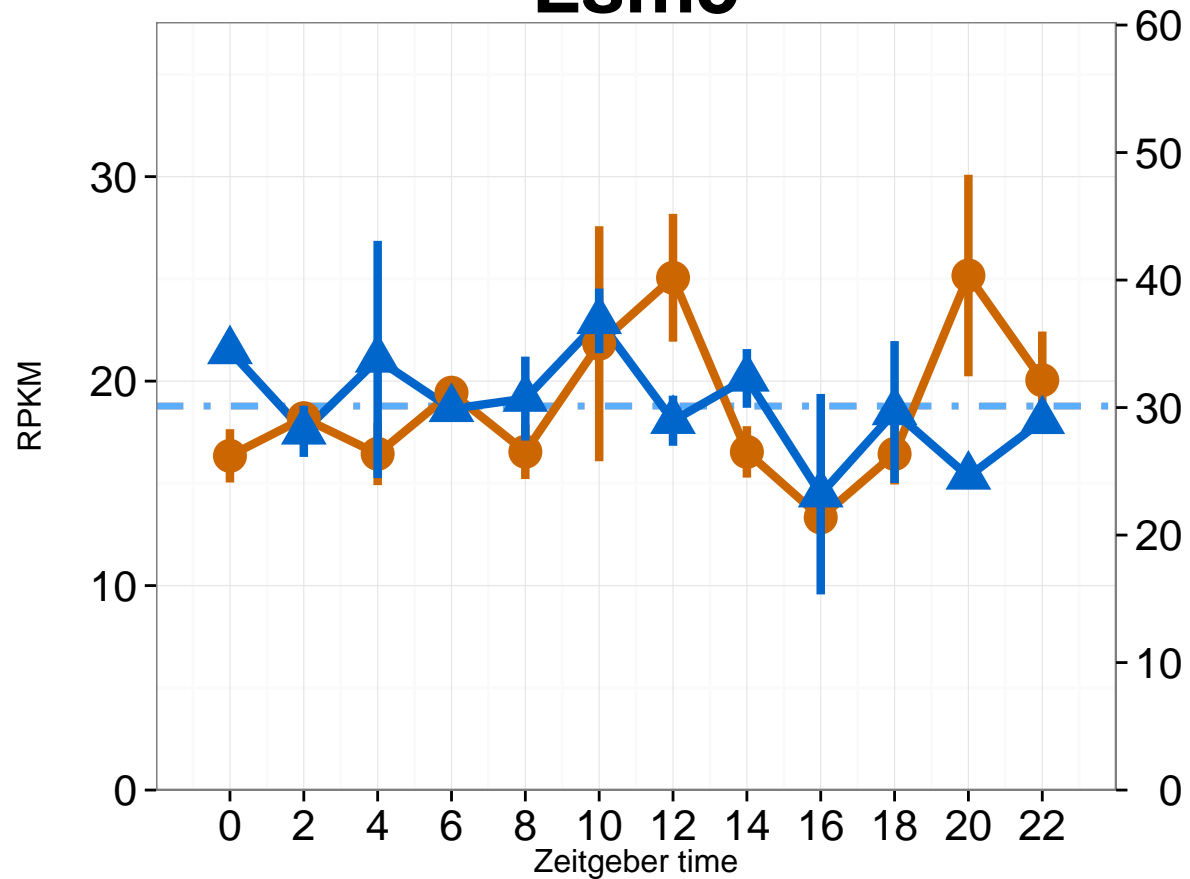

# Lsm5

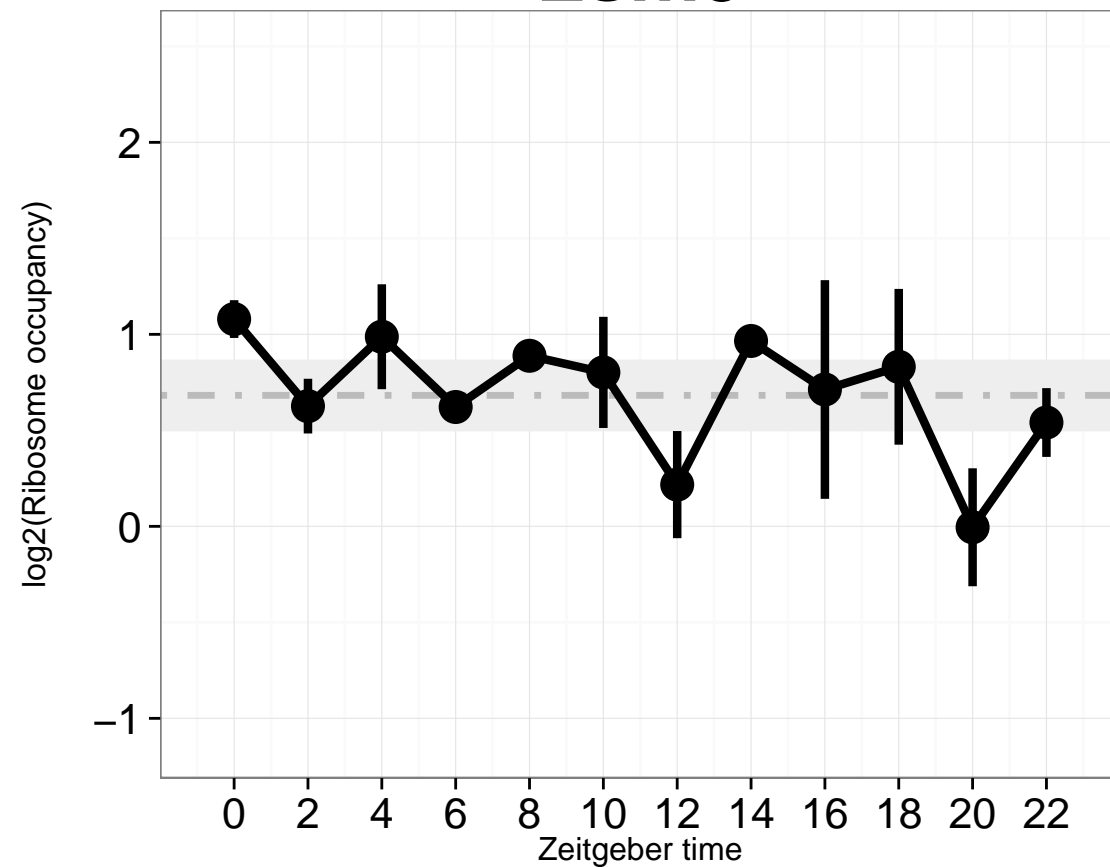

Supplement: Supplementary file 10238 [file 1]
