# Supplementary material (part 103 of 133)
Source: publisher figshare collection journal article supplement (https://springernature.figshare.com/articles/dataset/_/4903193)

## Tfec

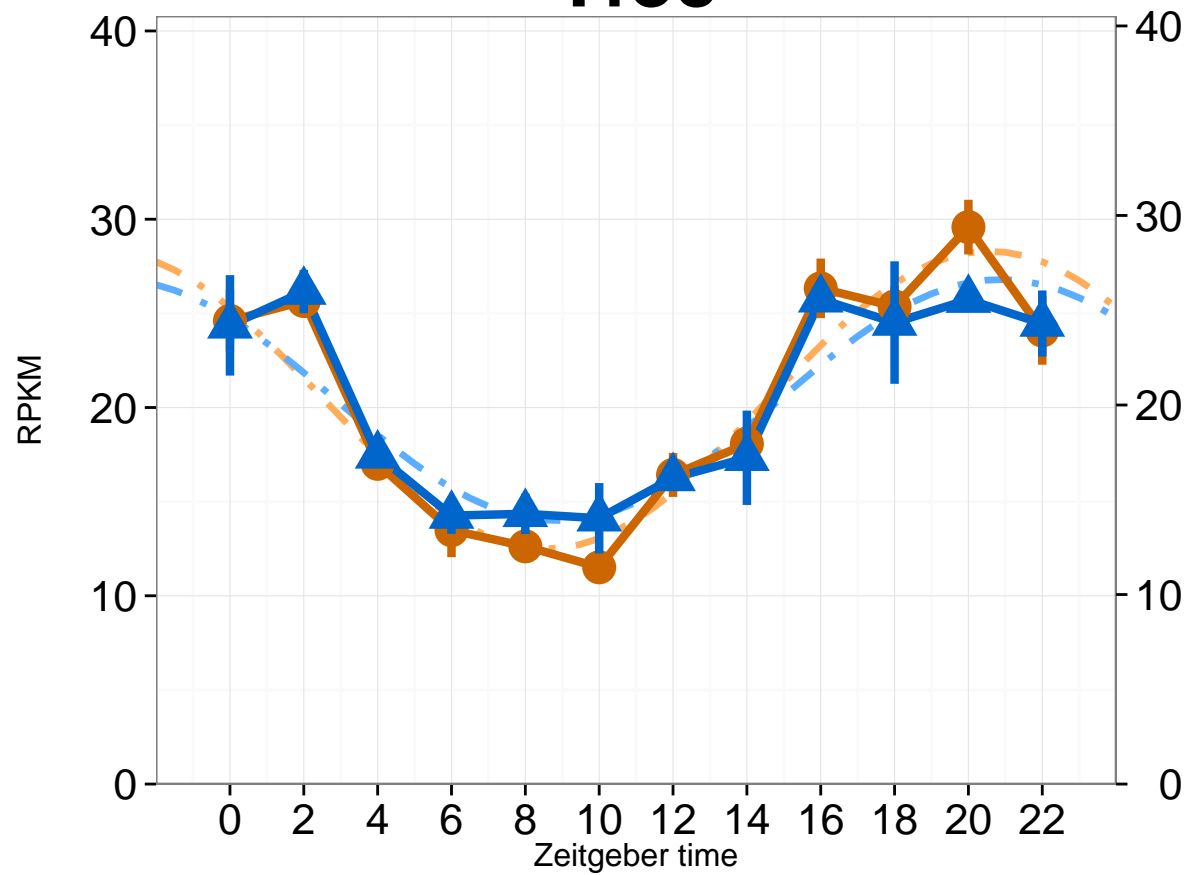

## Tfec

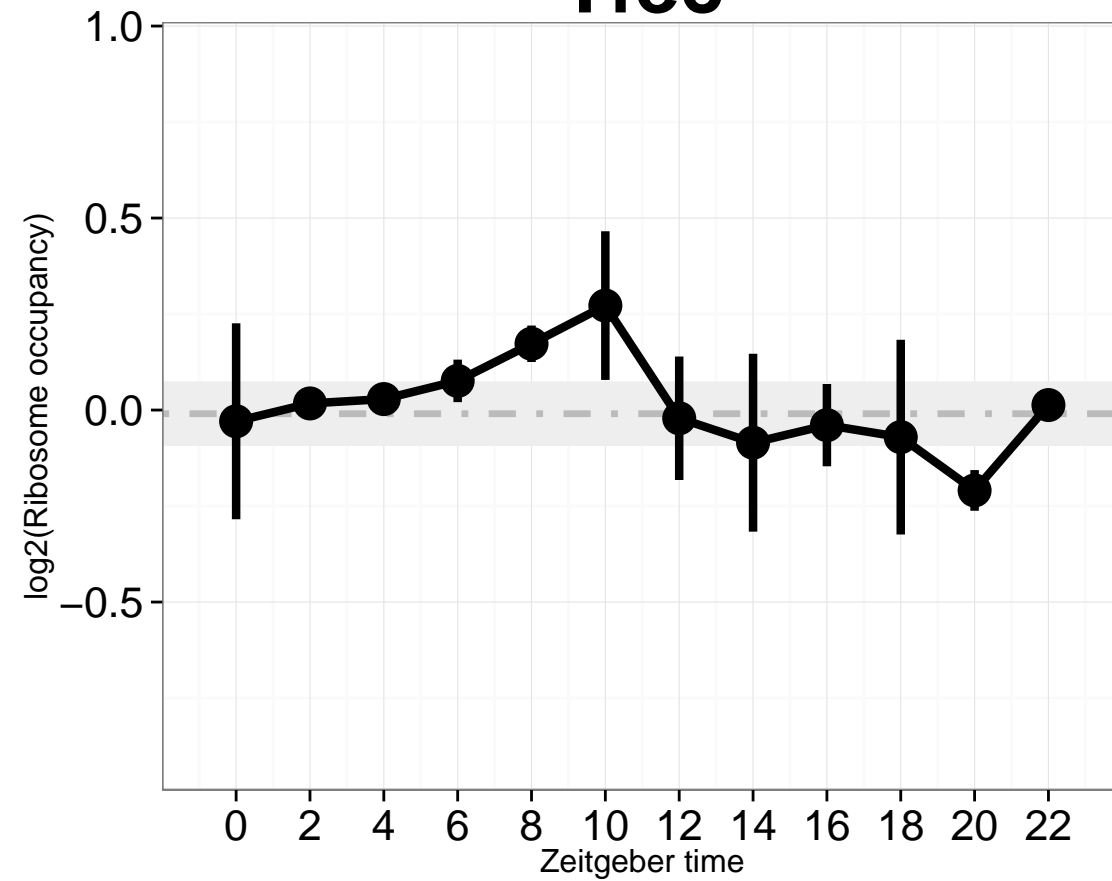

Supplement: Supplementary file 10239 [file 1]

# Cmtm3

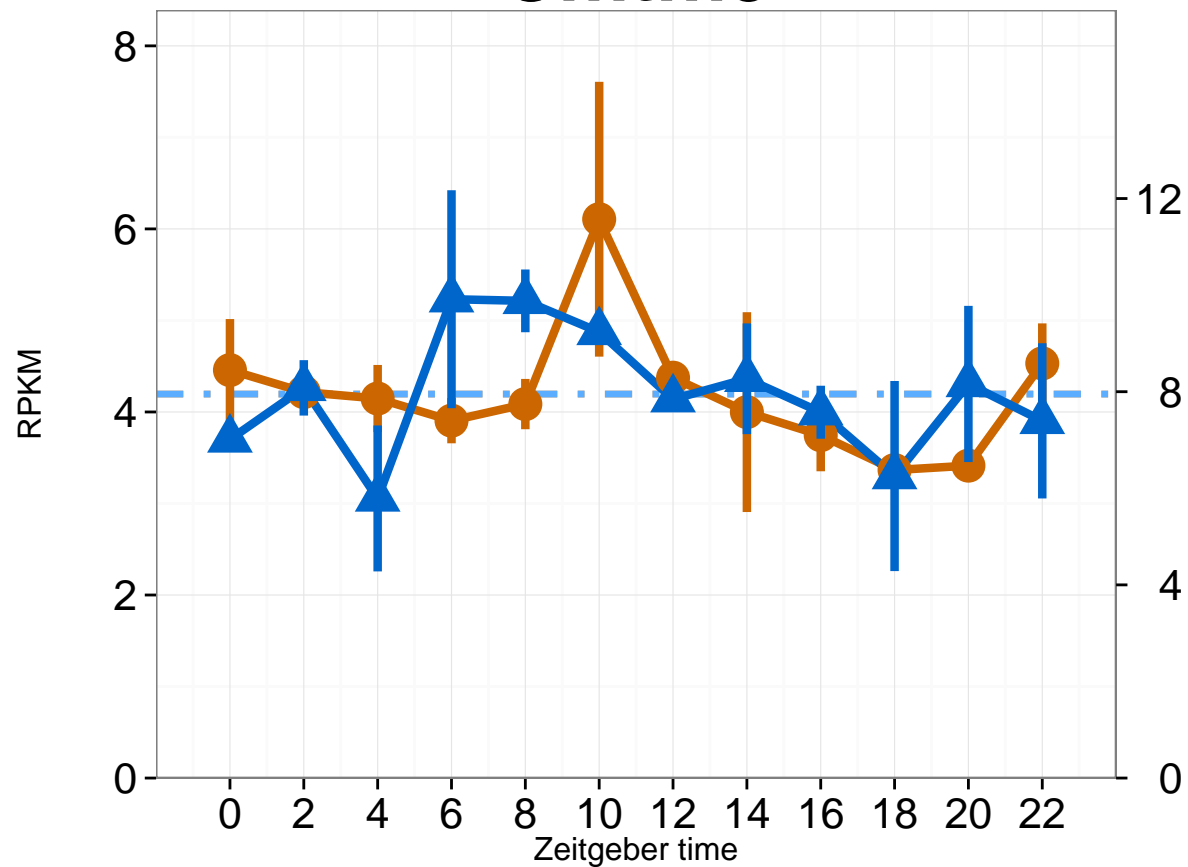

# Cmtm3

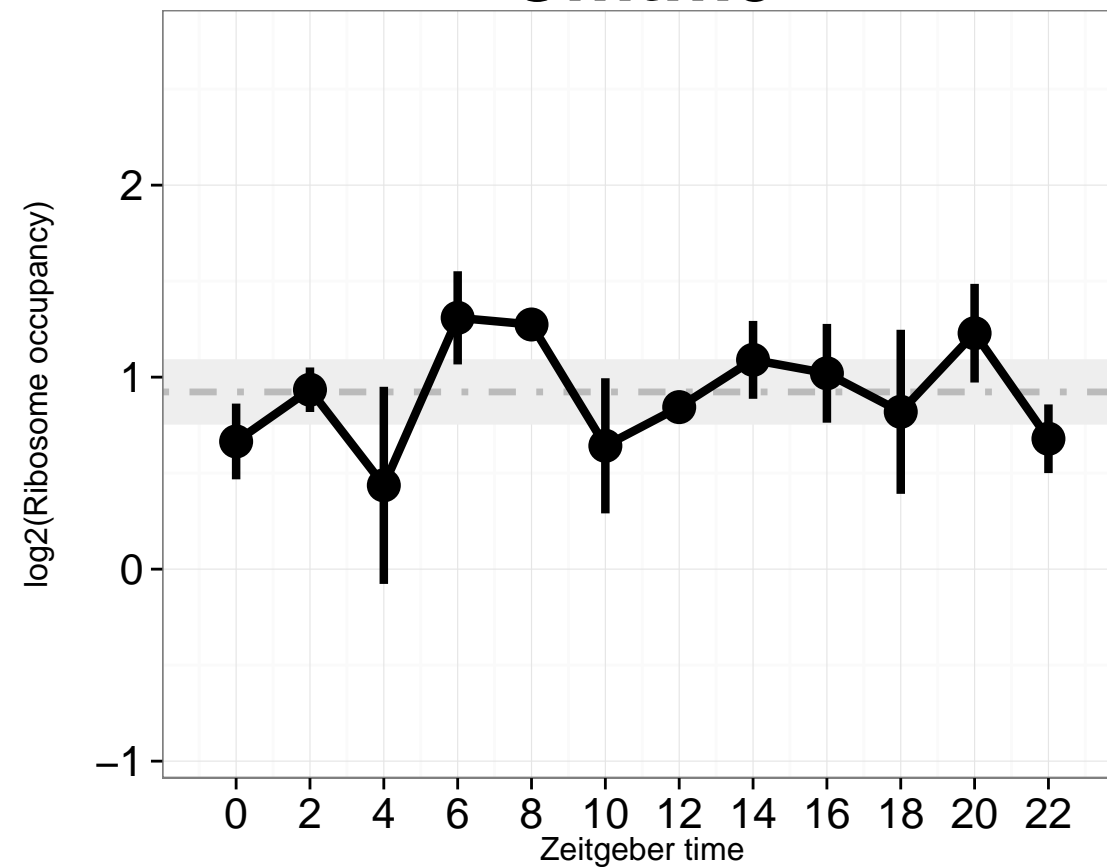

Supplement: Supplementary file 10240 [file 1]

# Igsf9

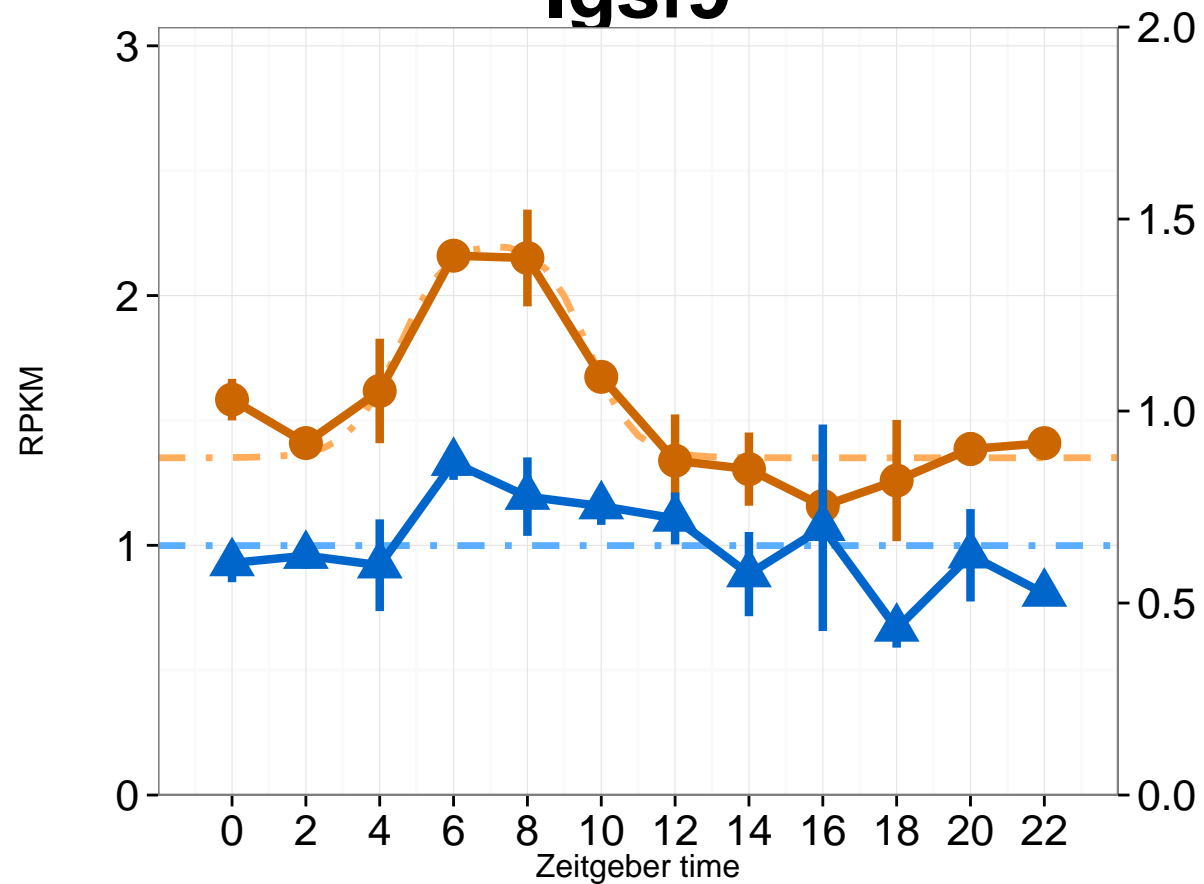

# Igsf9

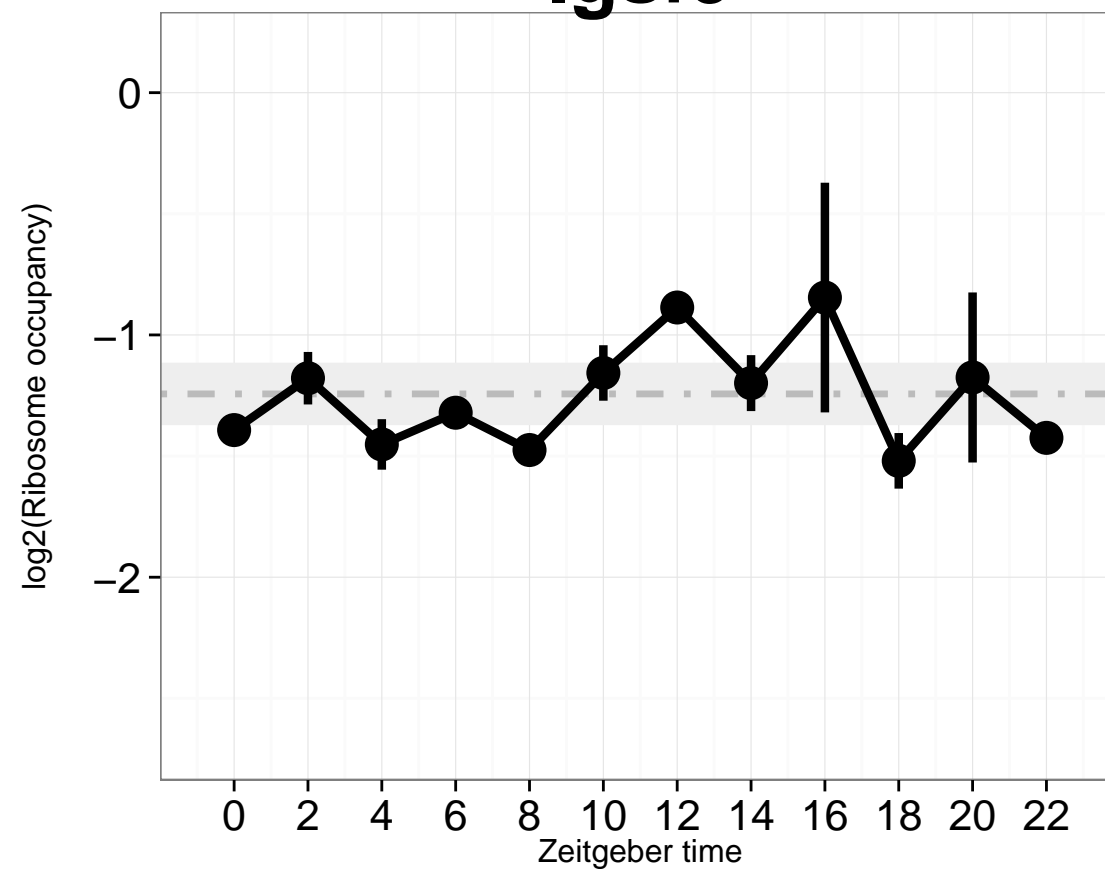

Supplement: Supplementary file 10241 [file 1]

## Arhgef17

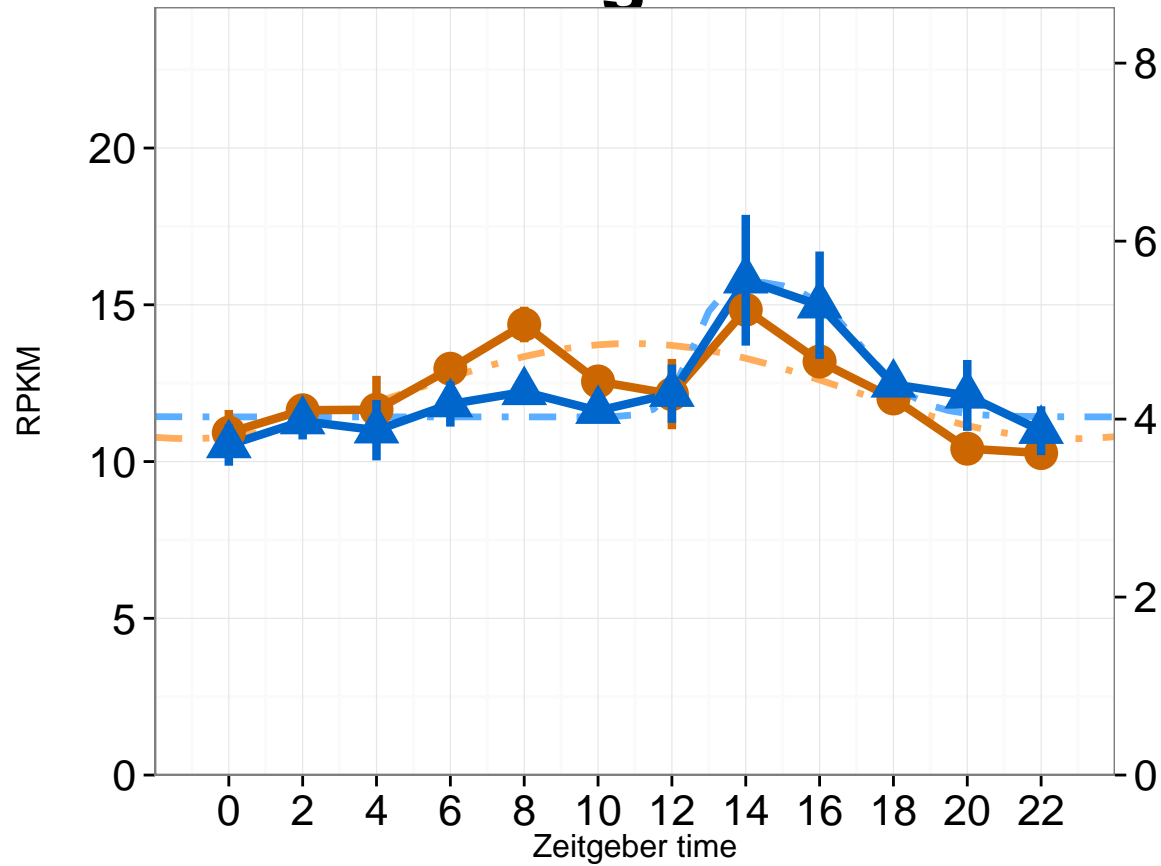

## Arhgef17

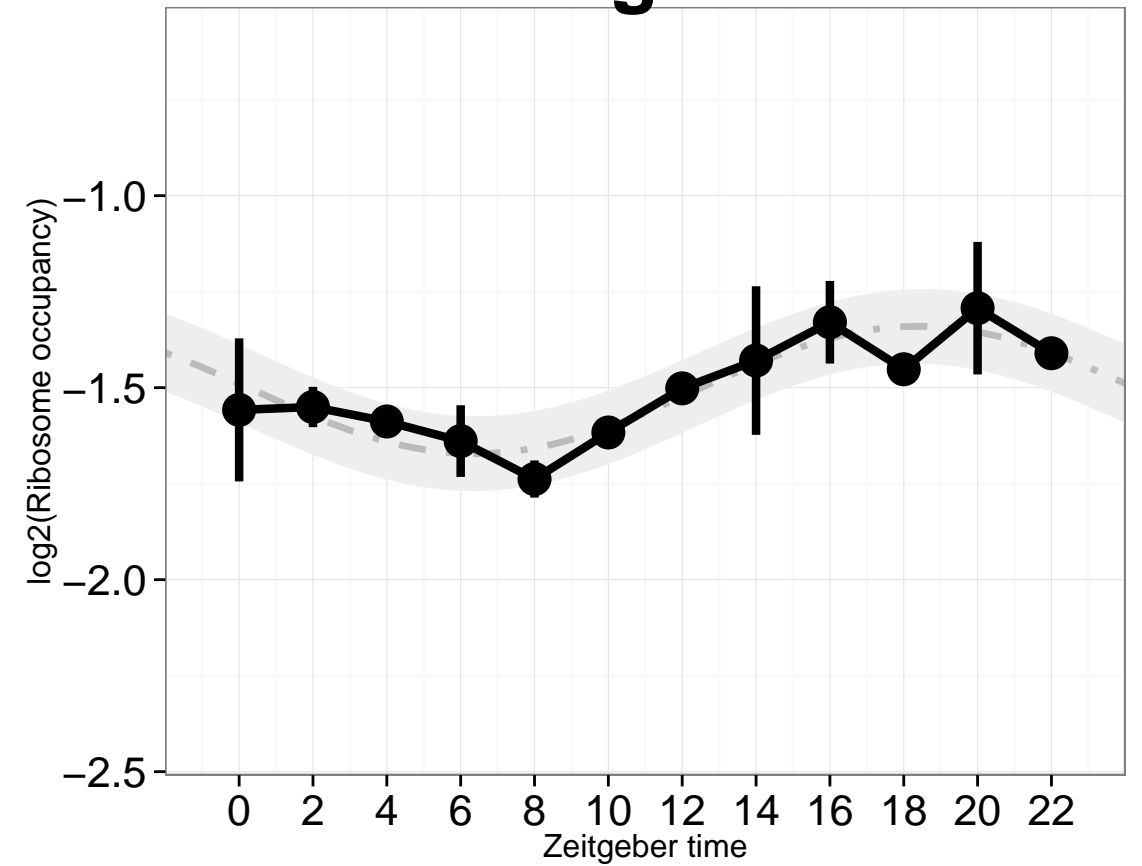

Supplement: Supplementary file 10242 [file 1]

# Lca5

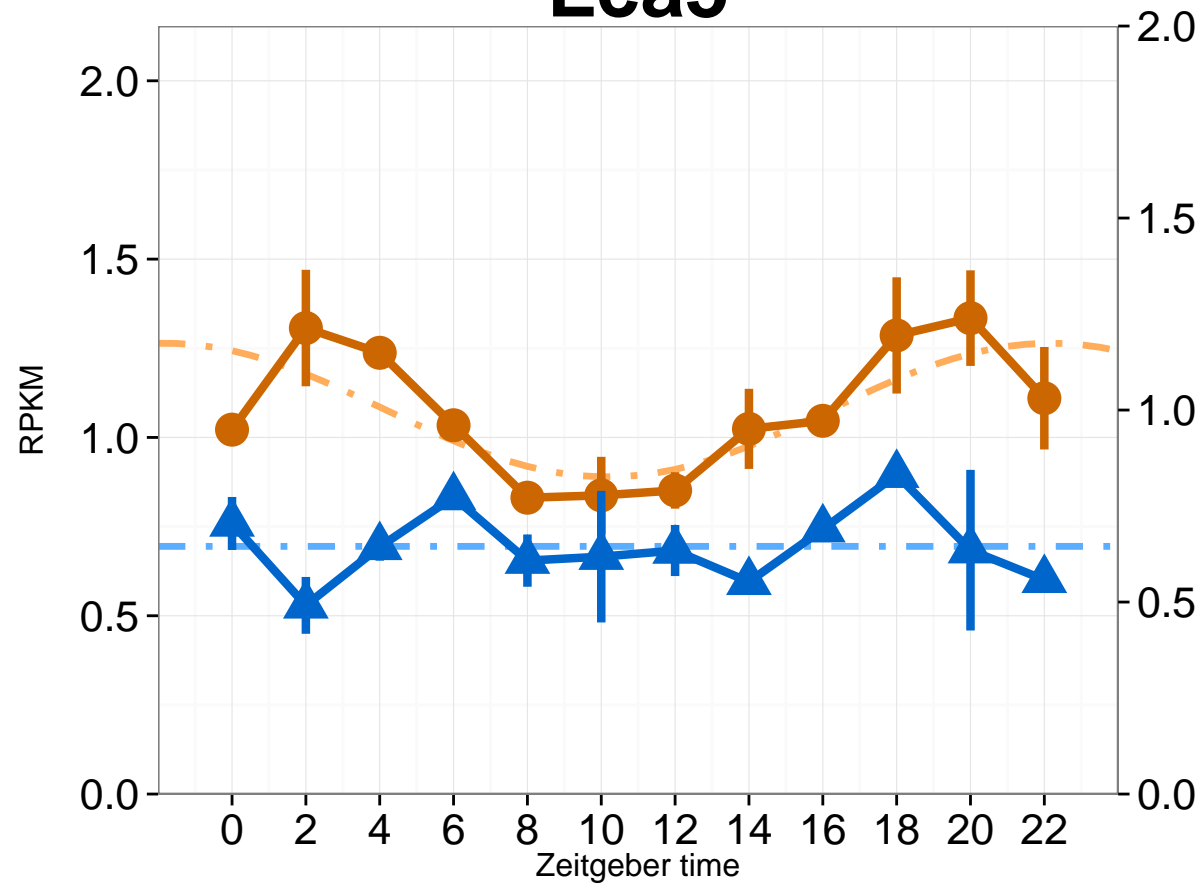

# Lca5

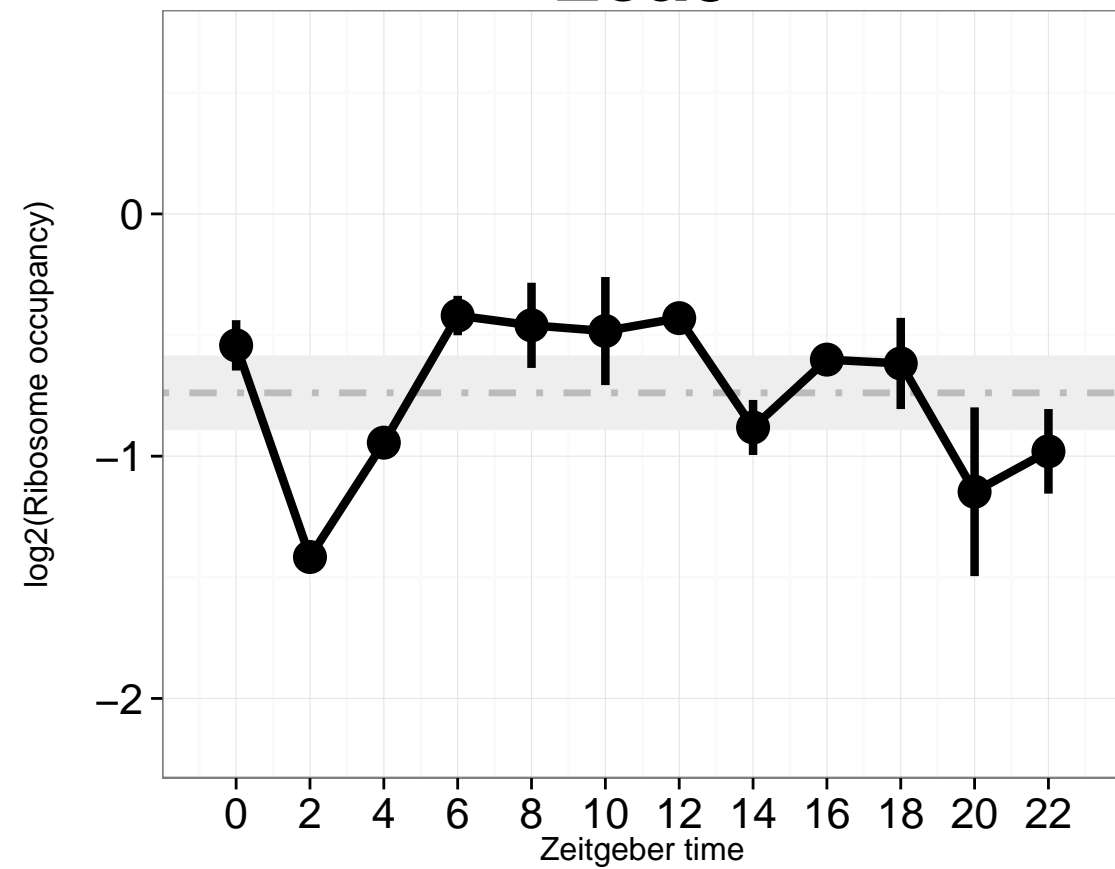

Supplement: Supplementary file 10243 [file 1]

# F5

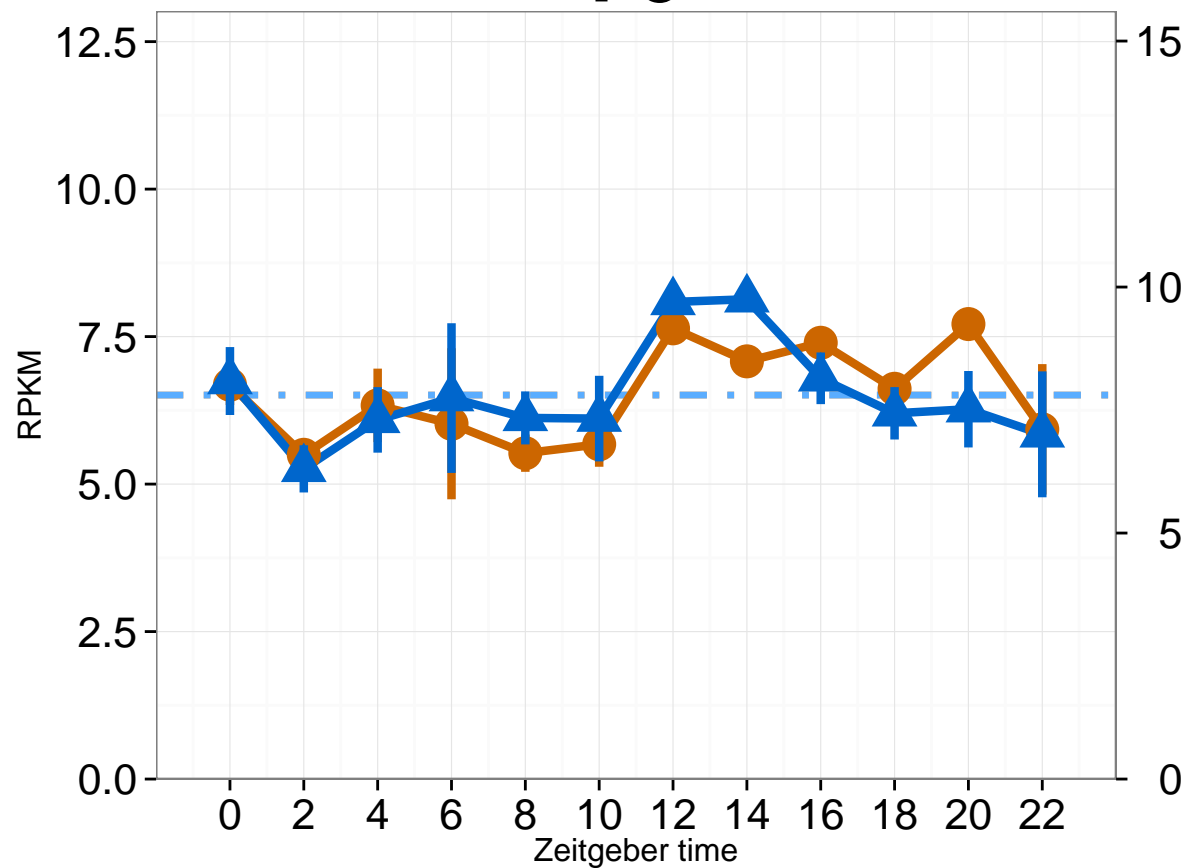

# F5

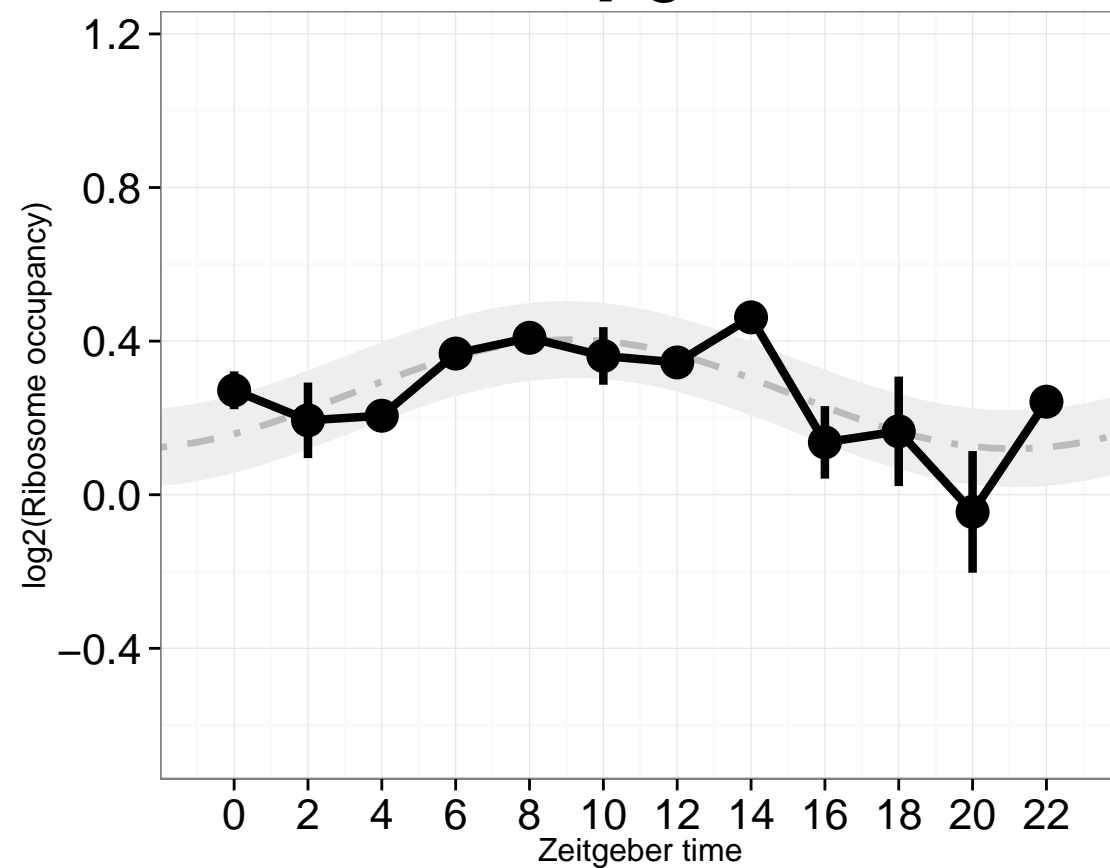

Supplement: Supplementary file 10244 [file 1]

## Mtch2

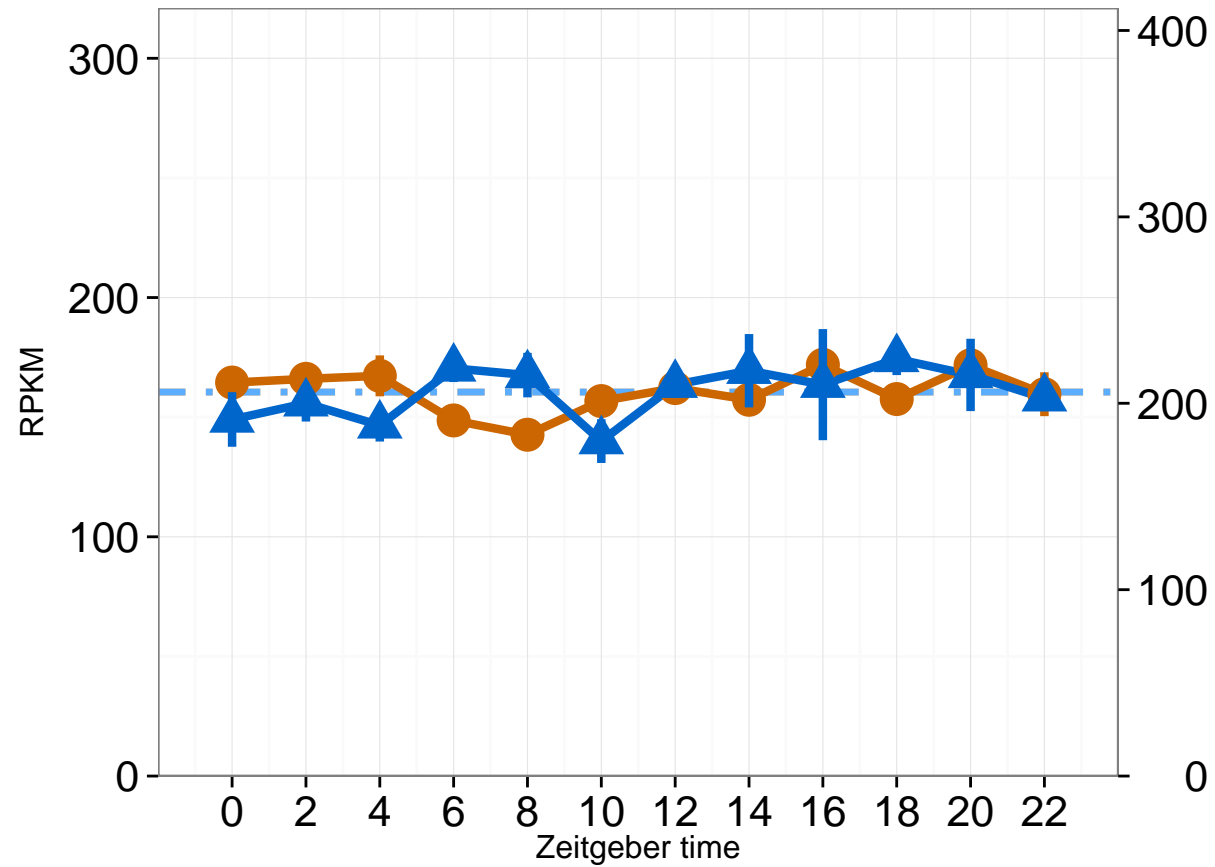

## Mtch2

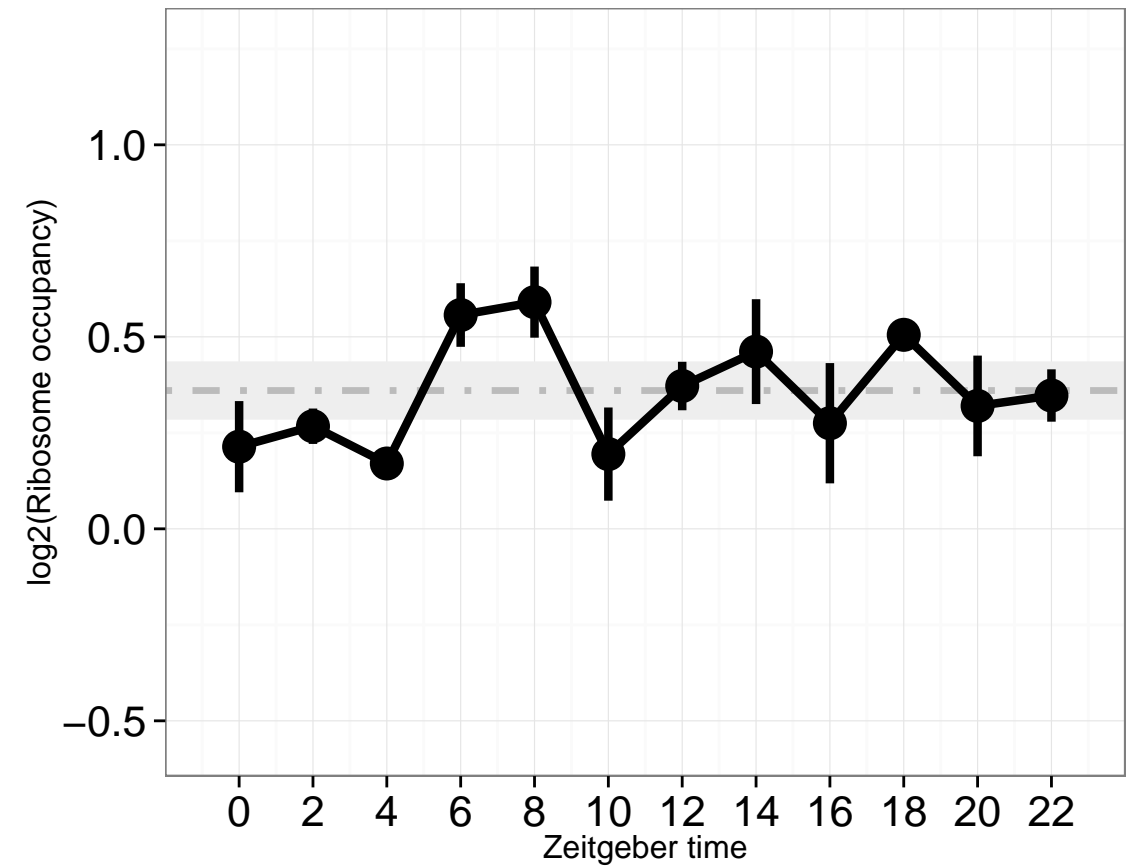

Supplement: Supplementary file 10245 [file 1]

# Hesx1

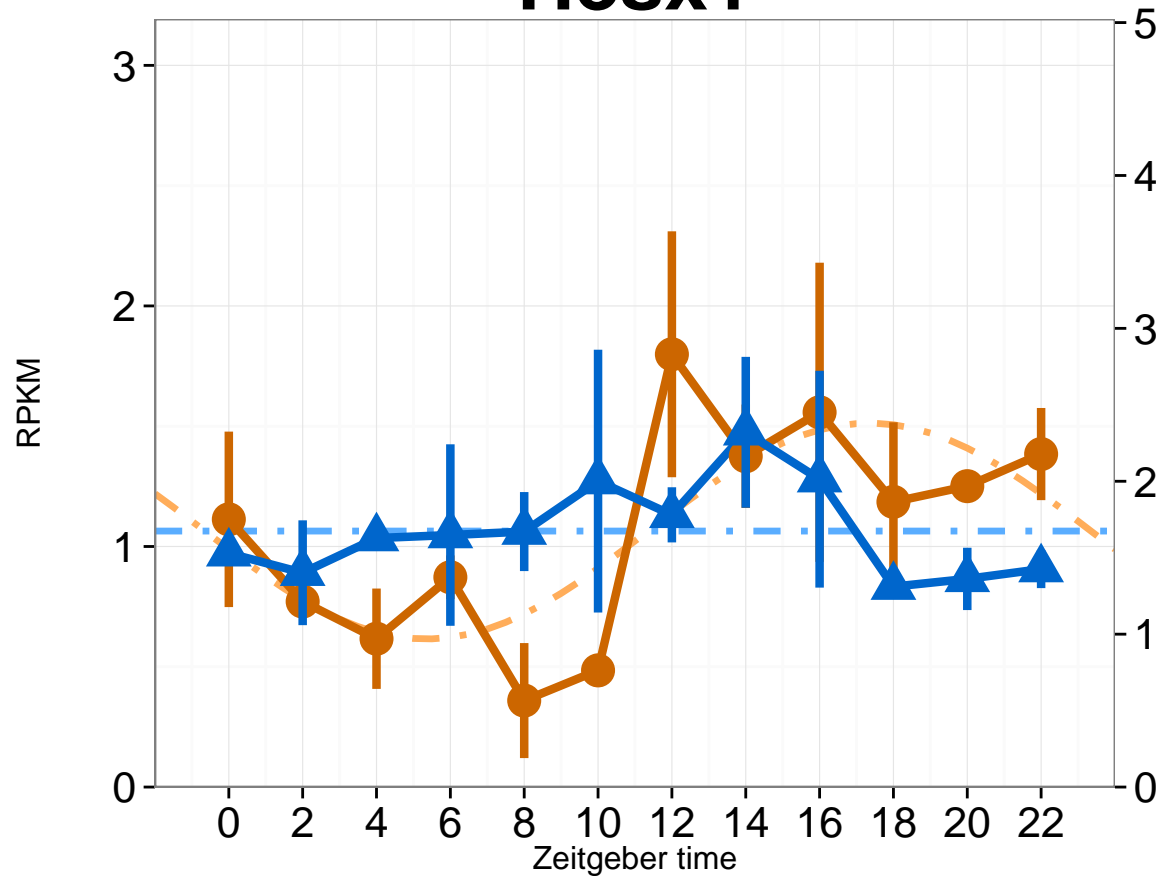

# Hesx1

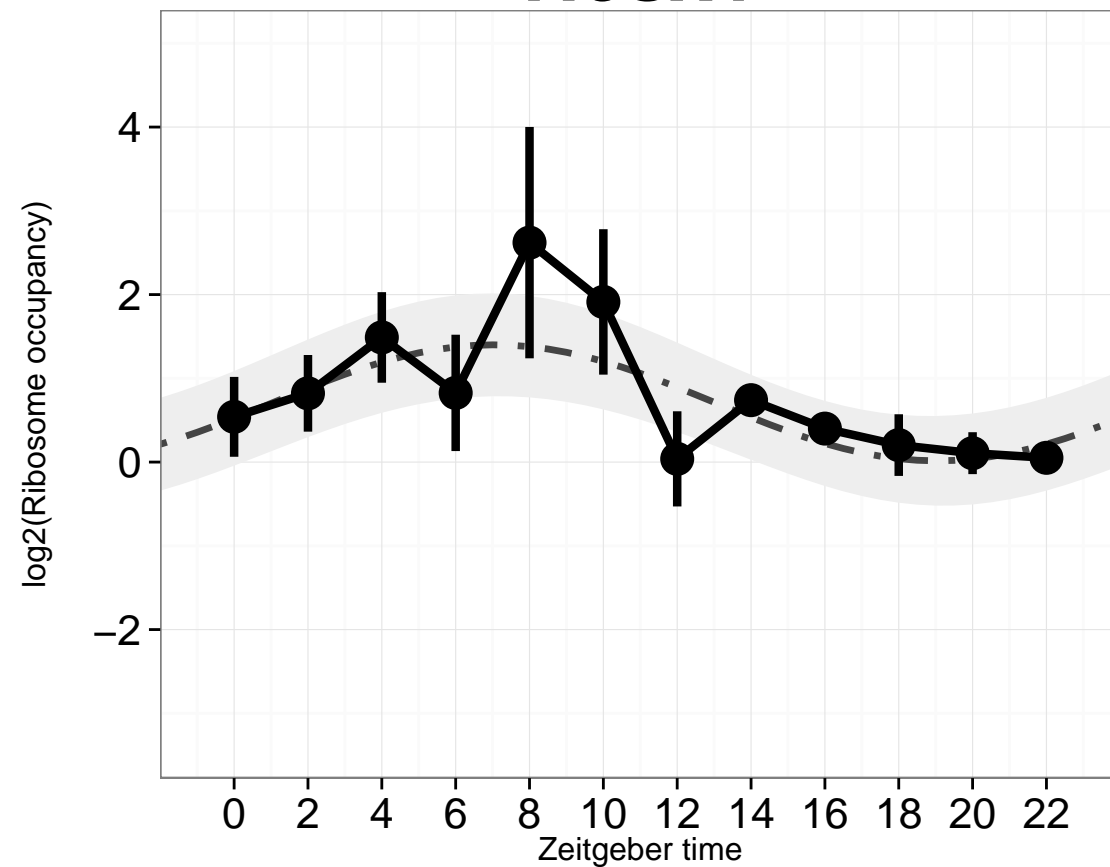

Supplement: Supplementary file 10246 [file 1]

# Clip4

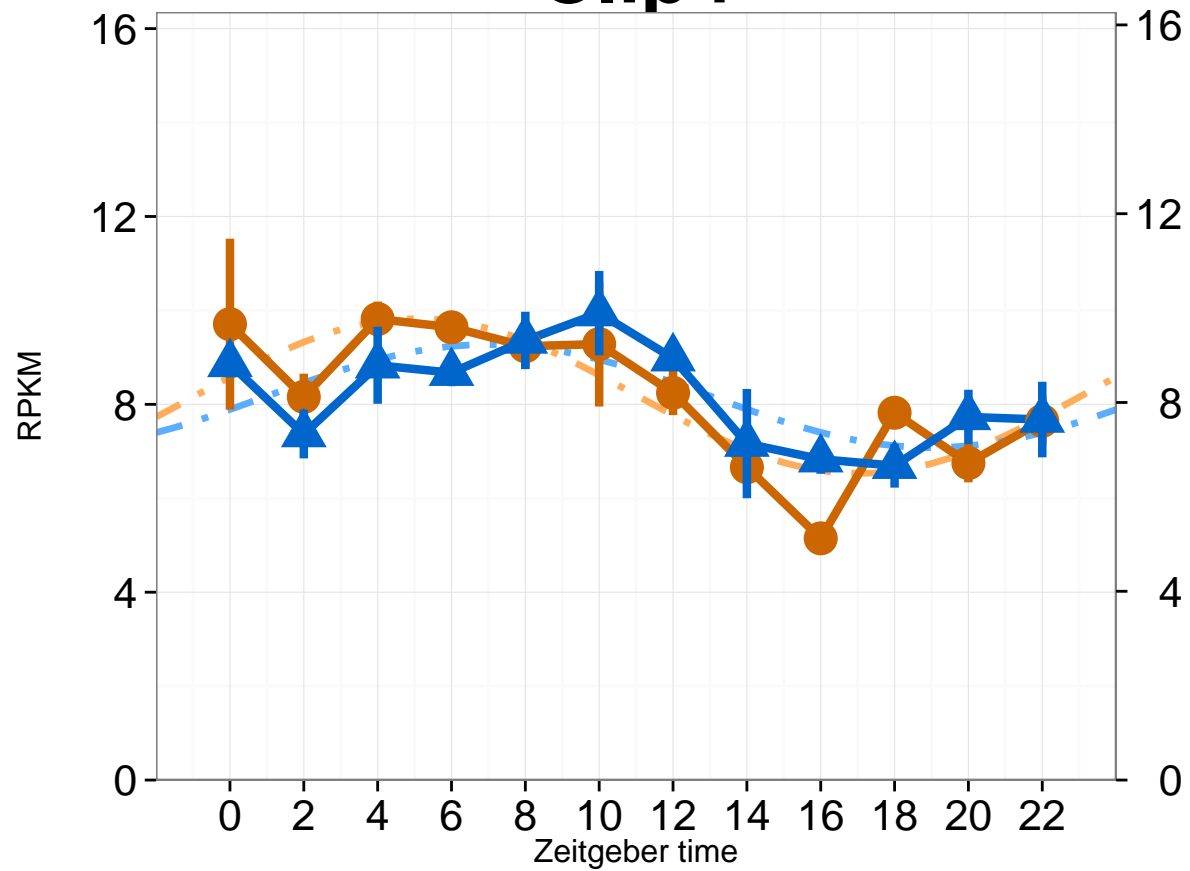

# Clip4

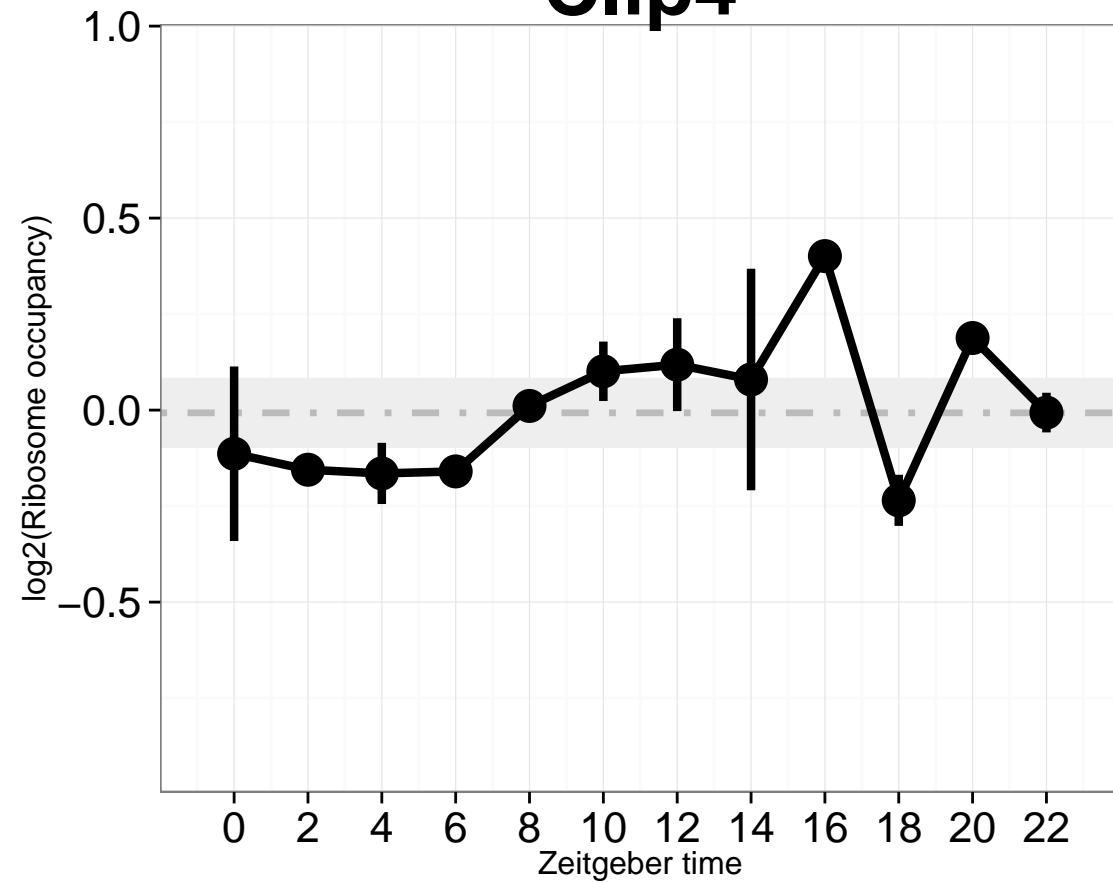

Supplement: Supplementary file 10247 [file 1]

## Ormdl3

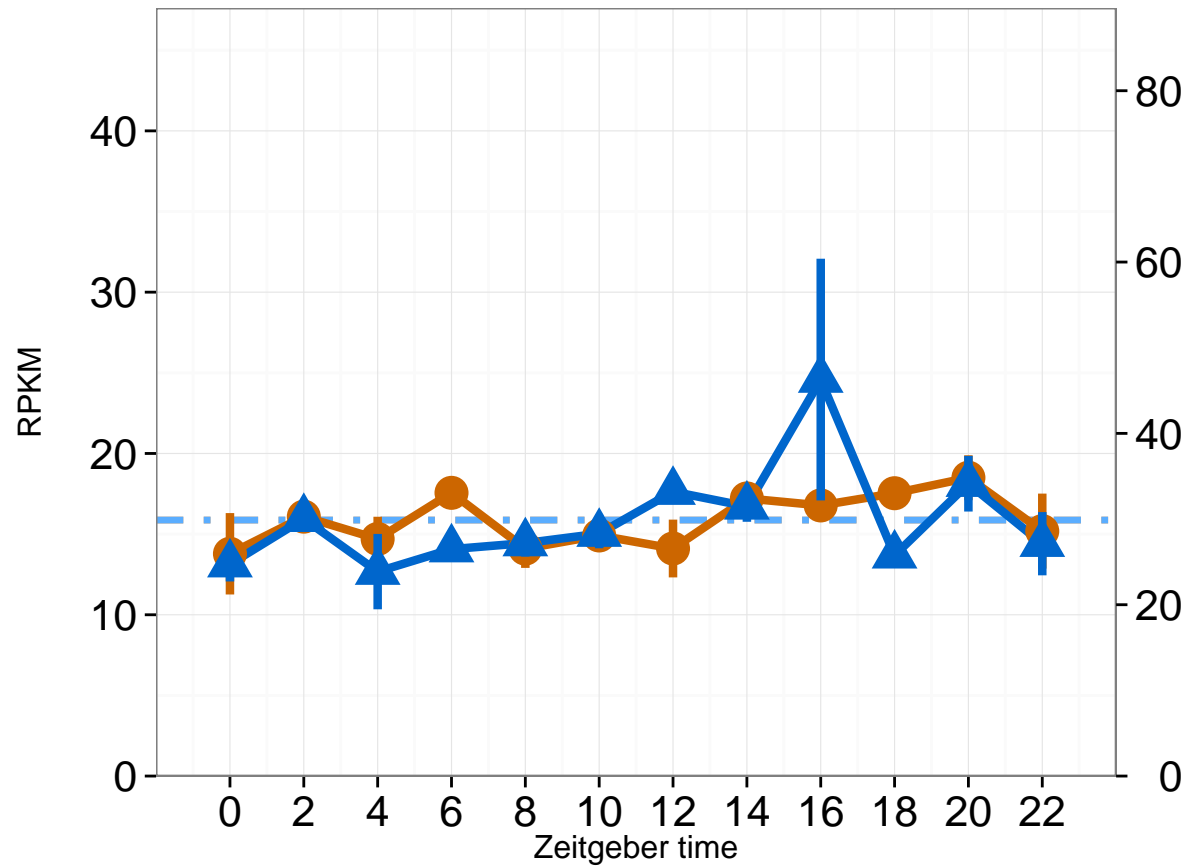

## Ormdl3

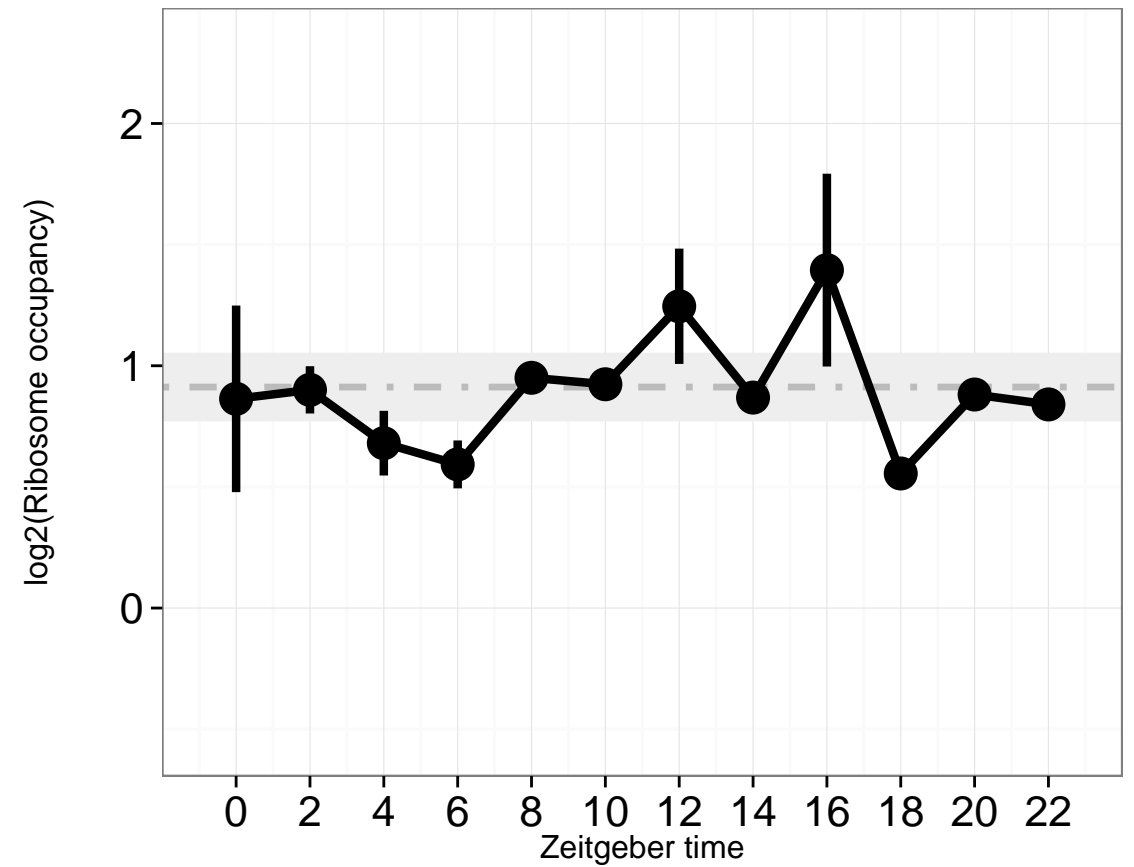

Supplement: Supplementary file 10248 [file 1]

# Adcy4

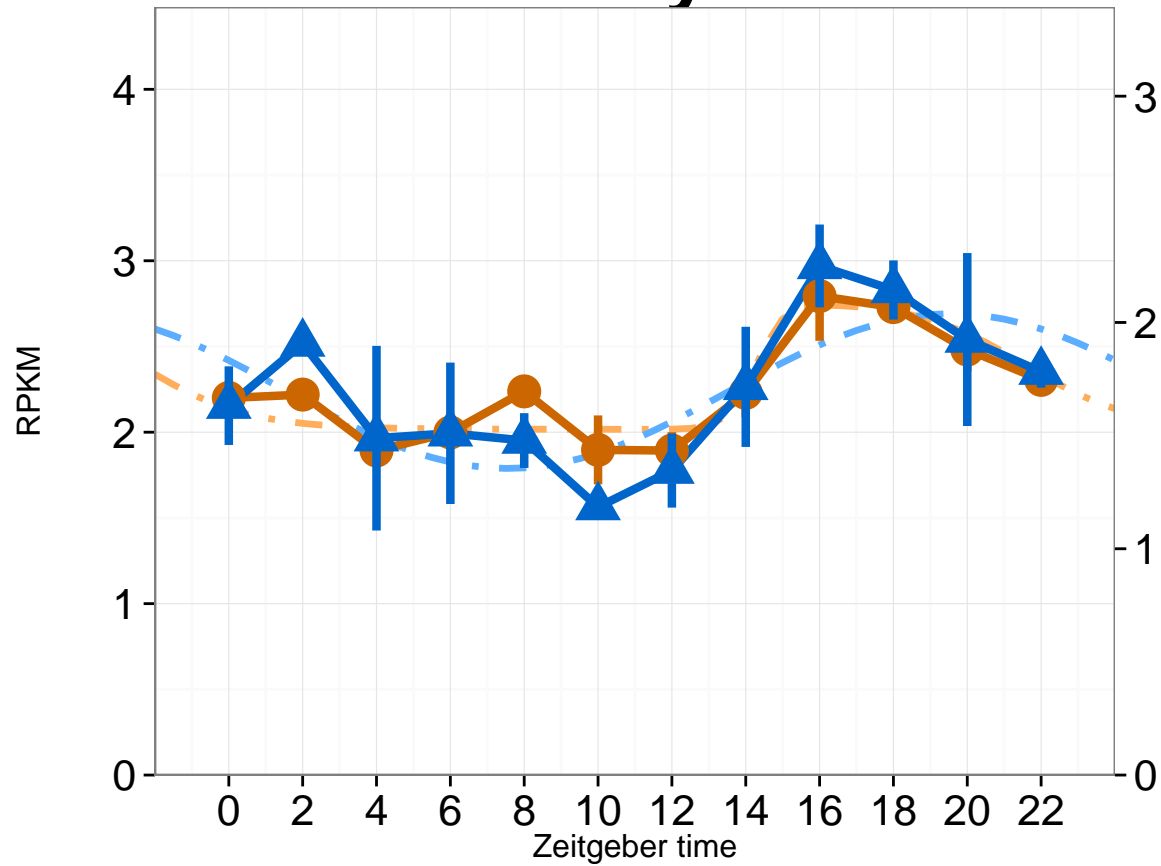

# Adcy4

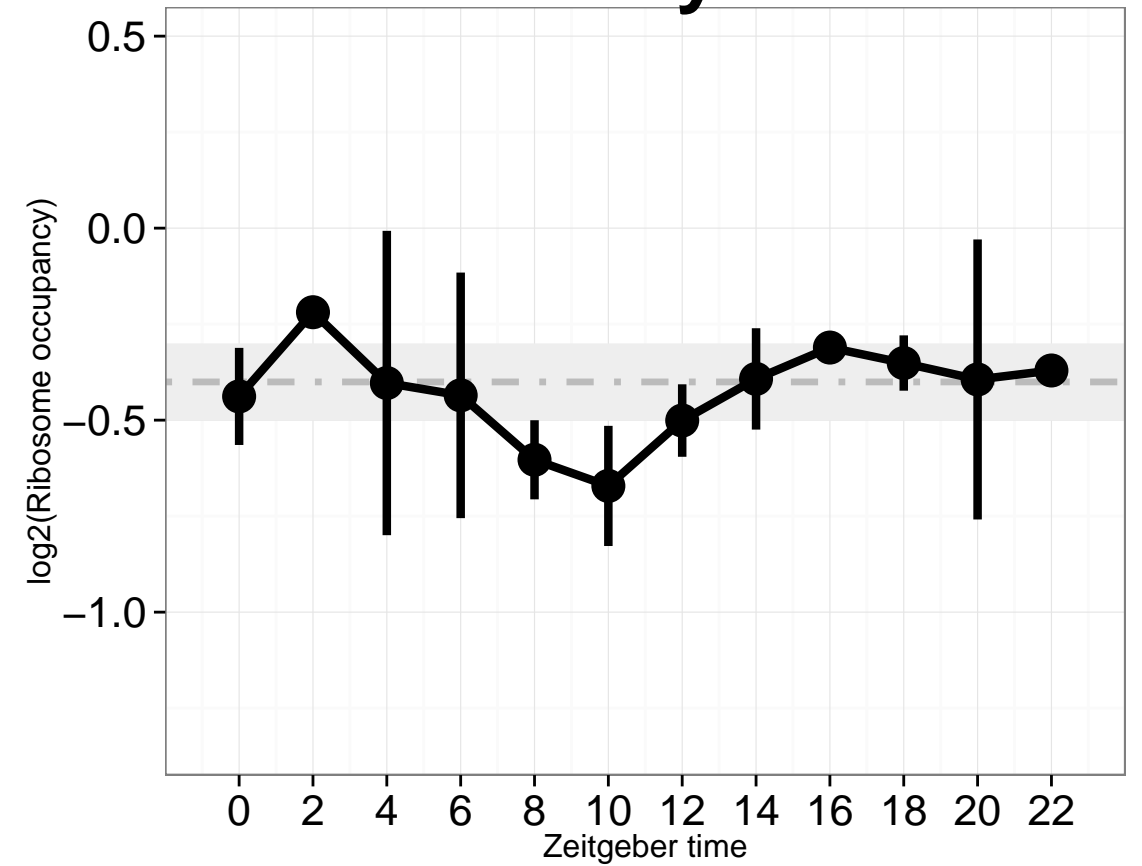

Supplement: Supplementary file 10249 [file 1]

## Lmbr1

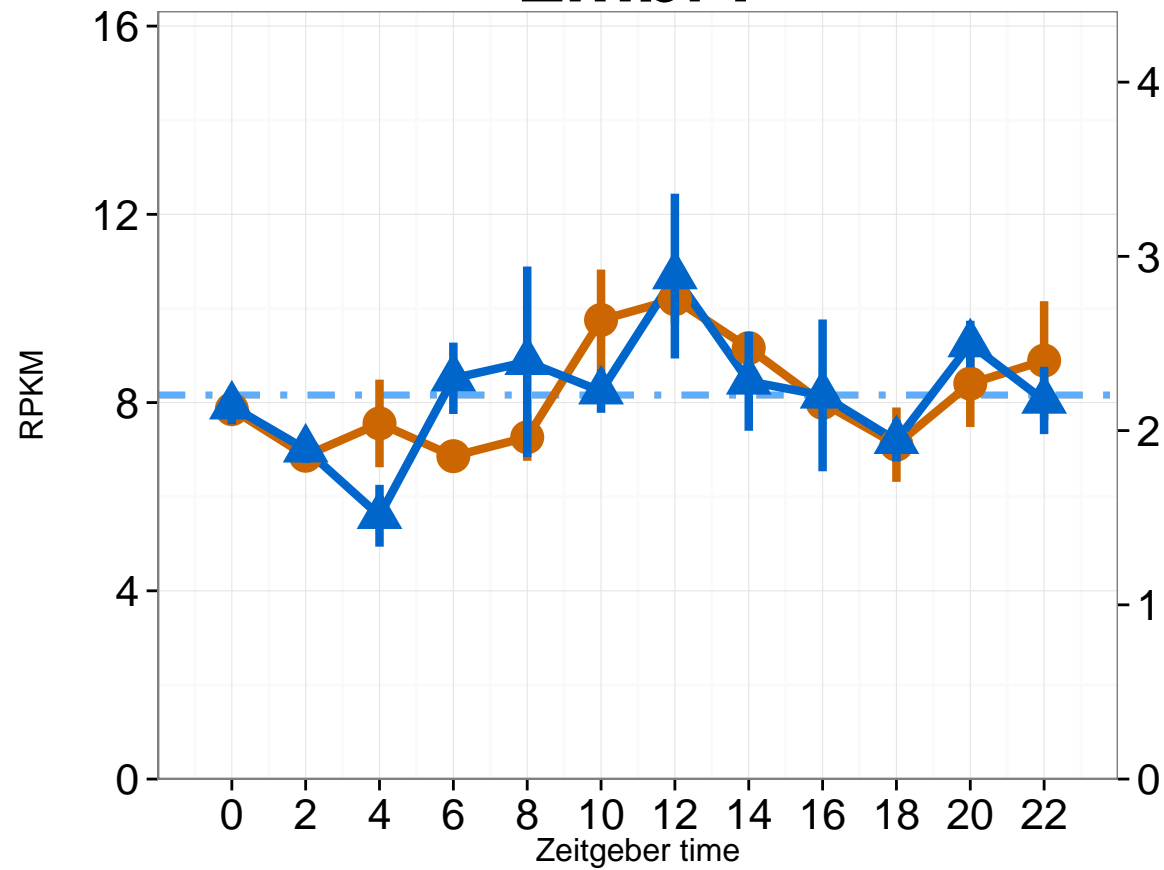

## Lmbr1

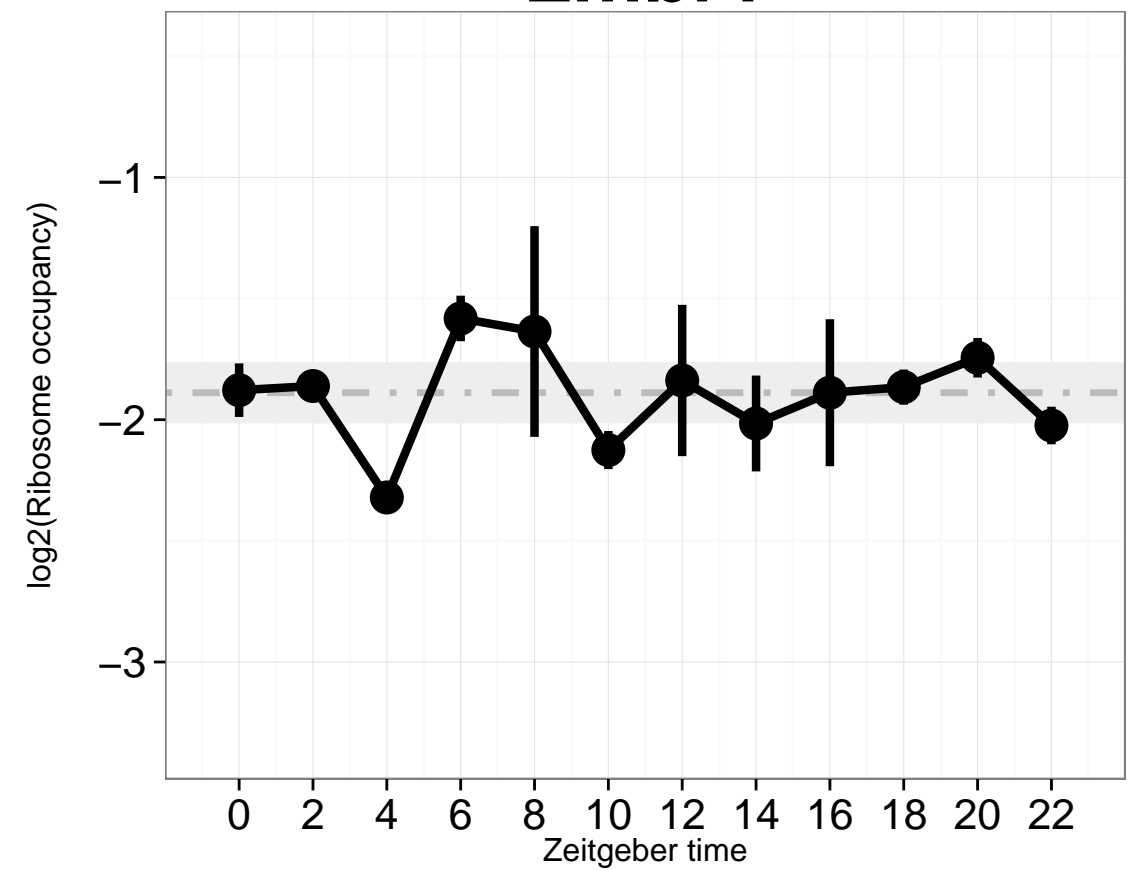

Supplement: Supplementary file 10250 [file 1]

# Ccdc85b

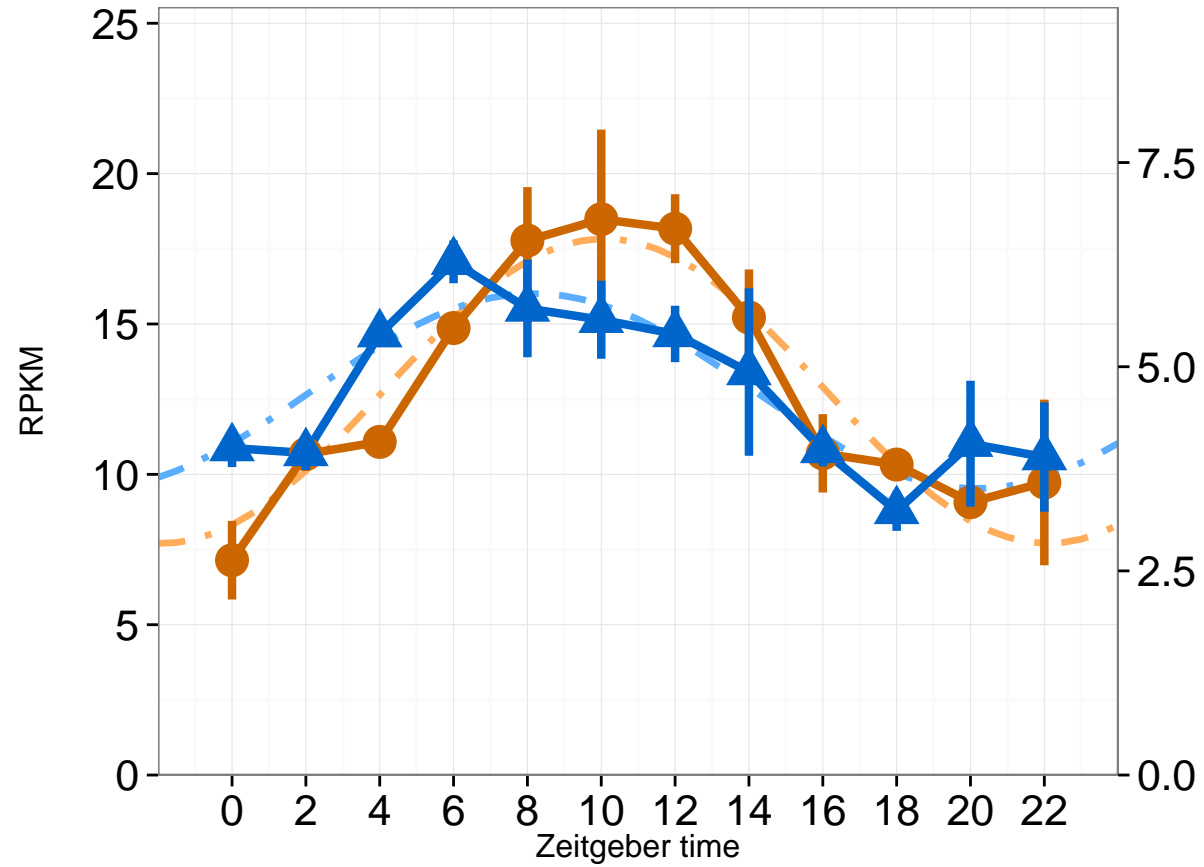

# Ccdc85b

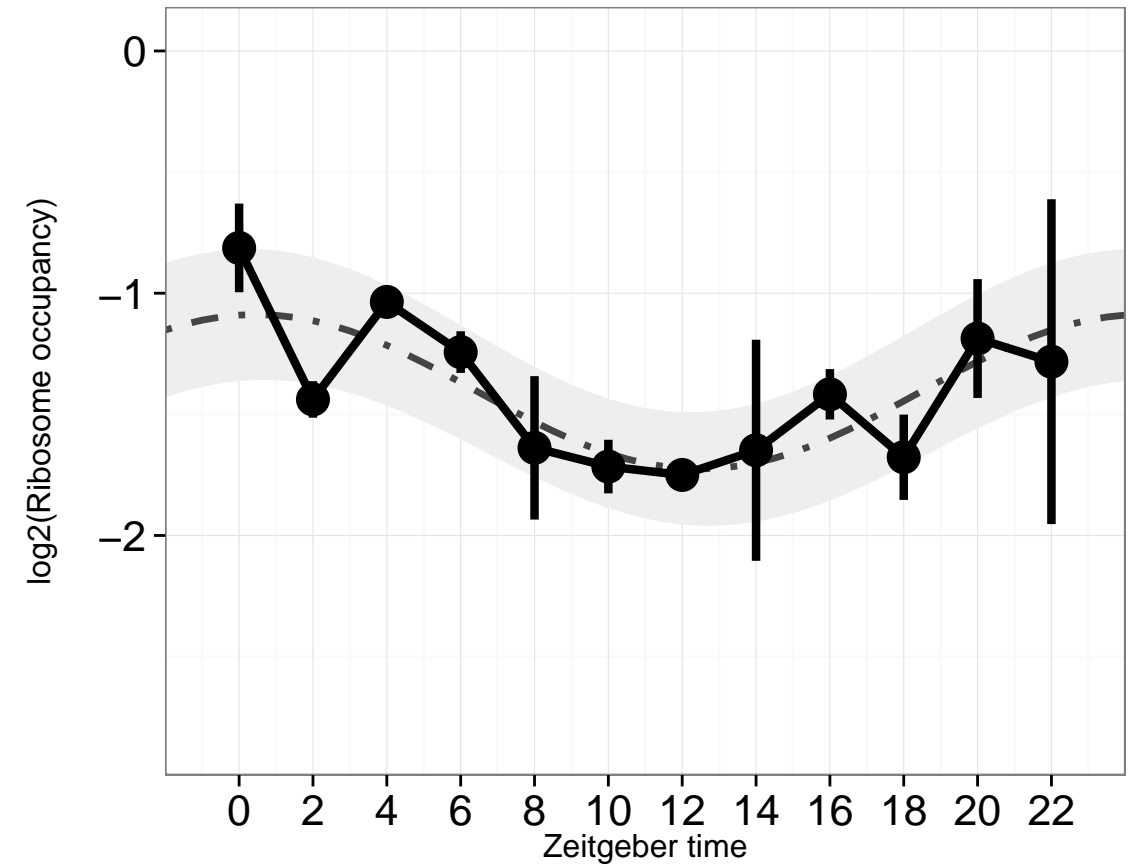

Supplement: Supplementary file 10251 [file 1]

## Hes6

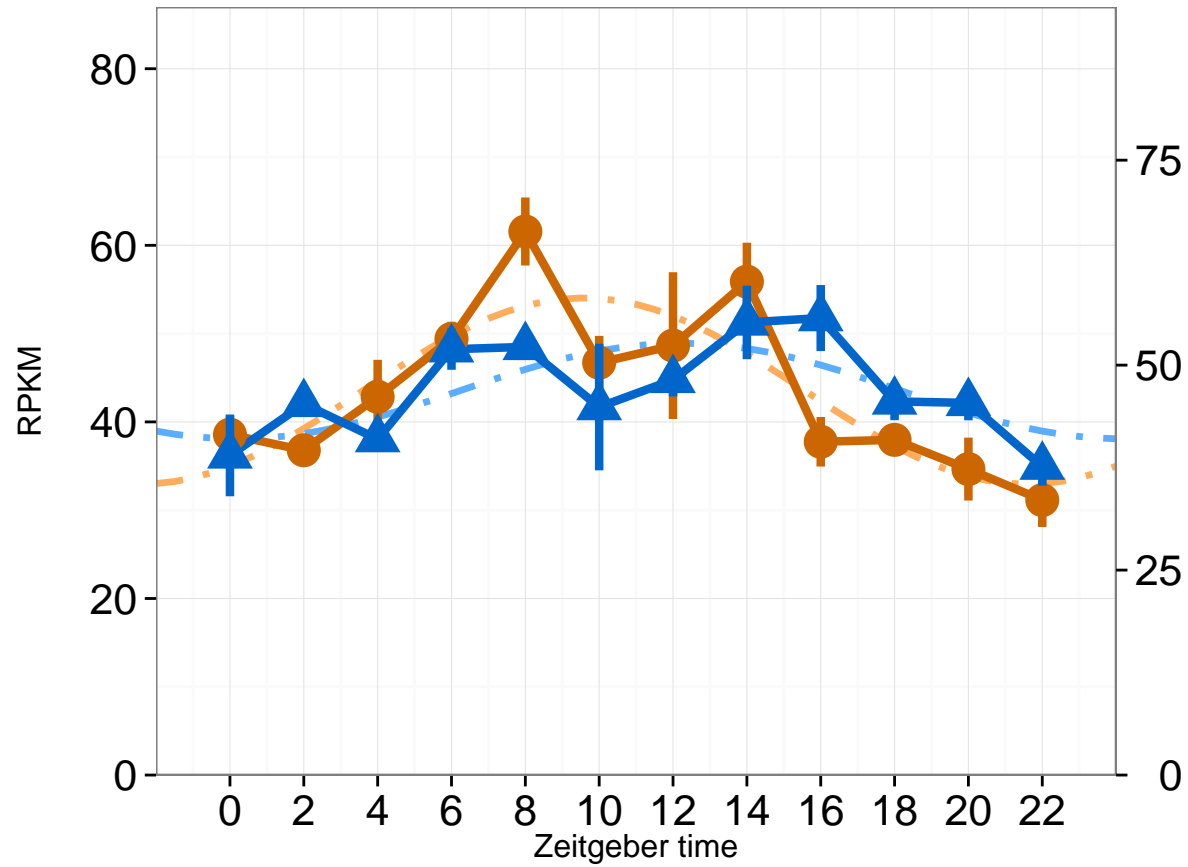

## Hes6

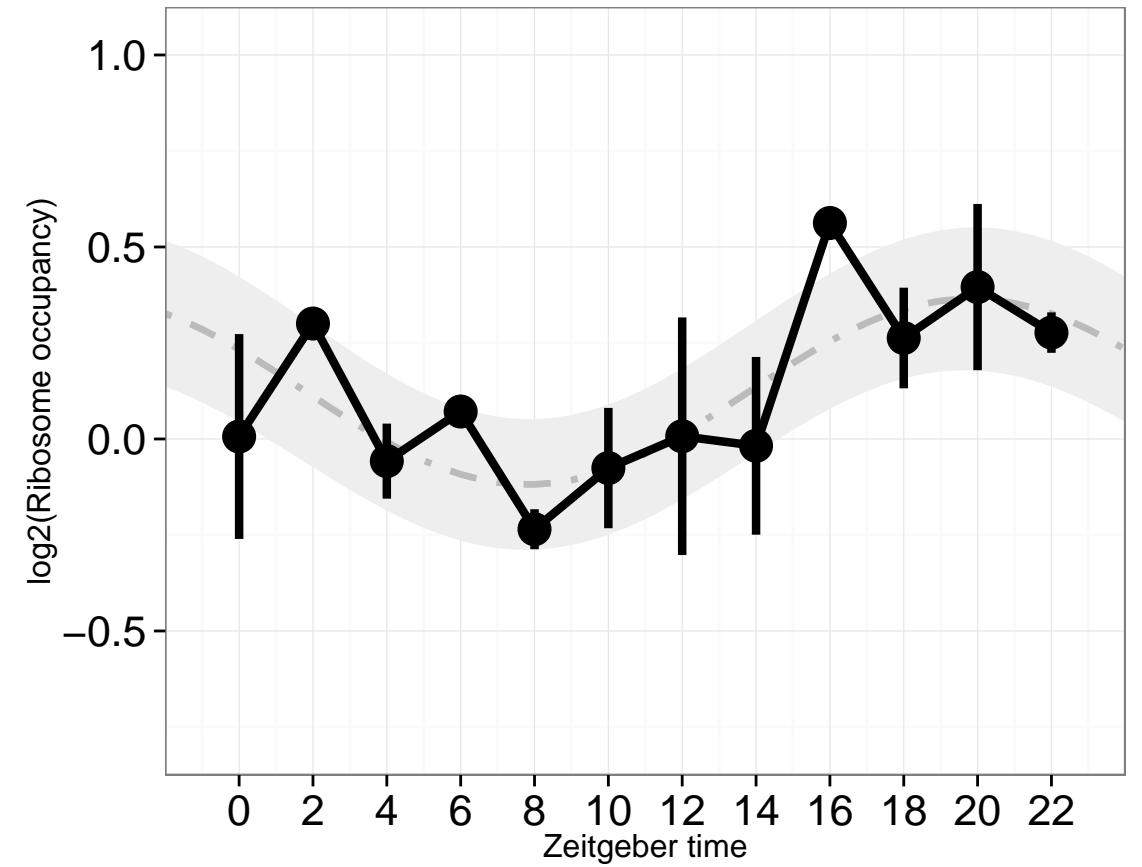

Supplement: Supplementary file 10252 [file 1]

# P4ha1

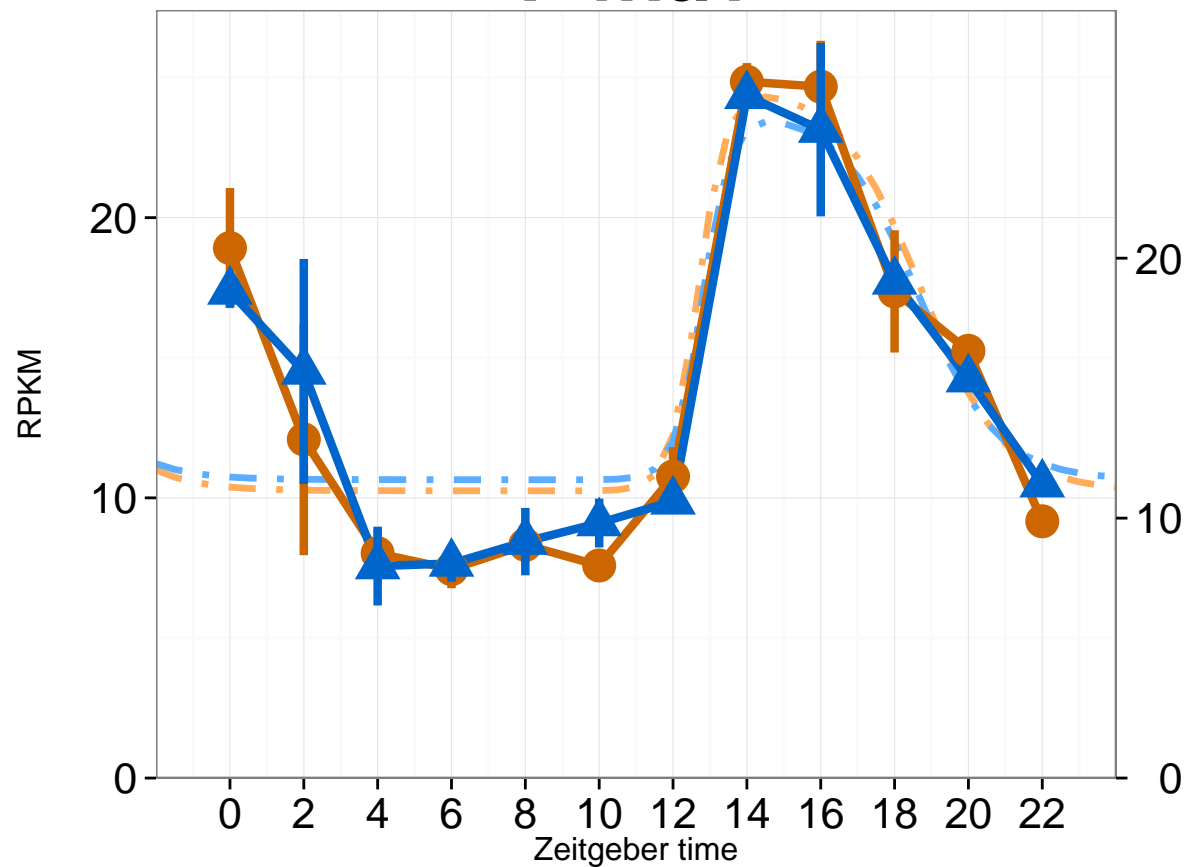

# P4ha1

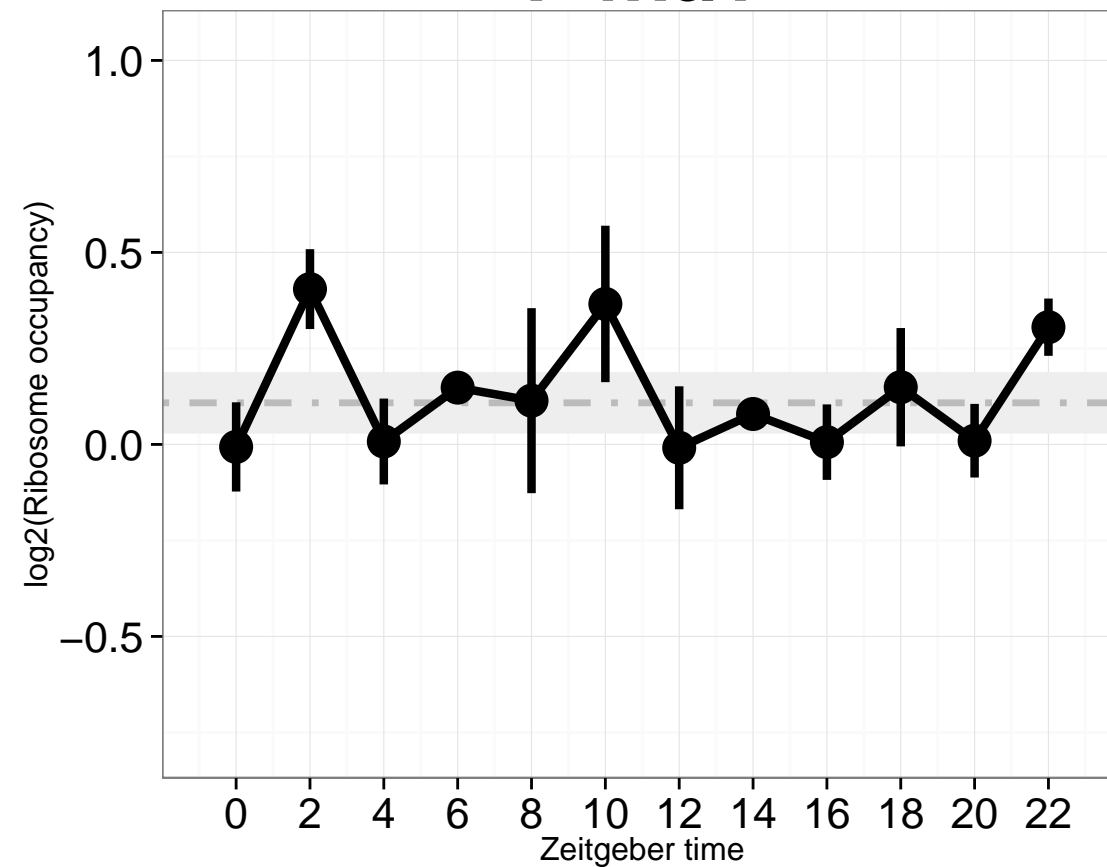

Supplement: Supplementary file 10253 [file 1]

# Slc25a22

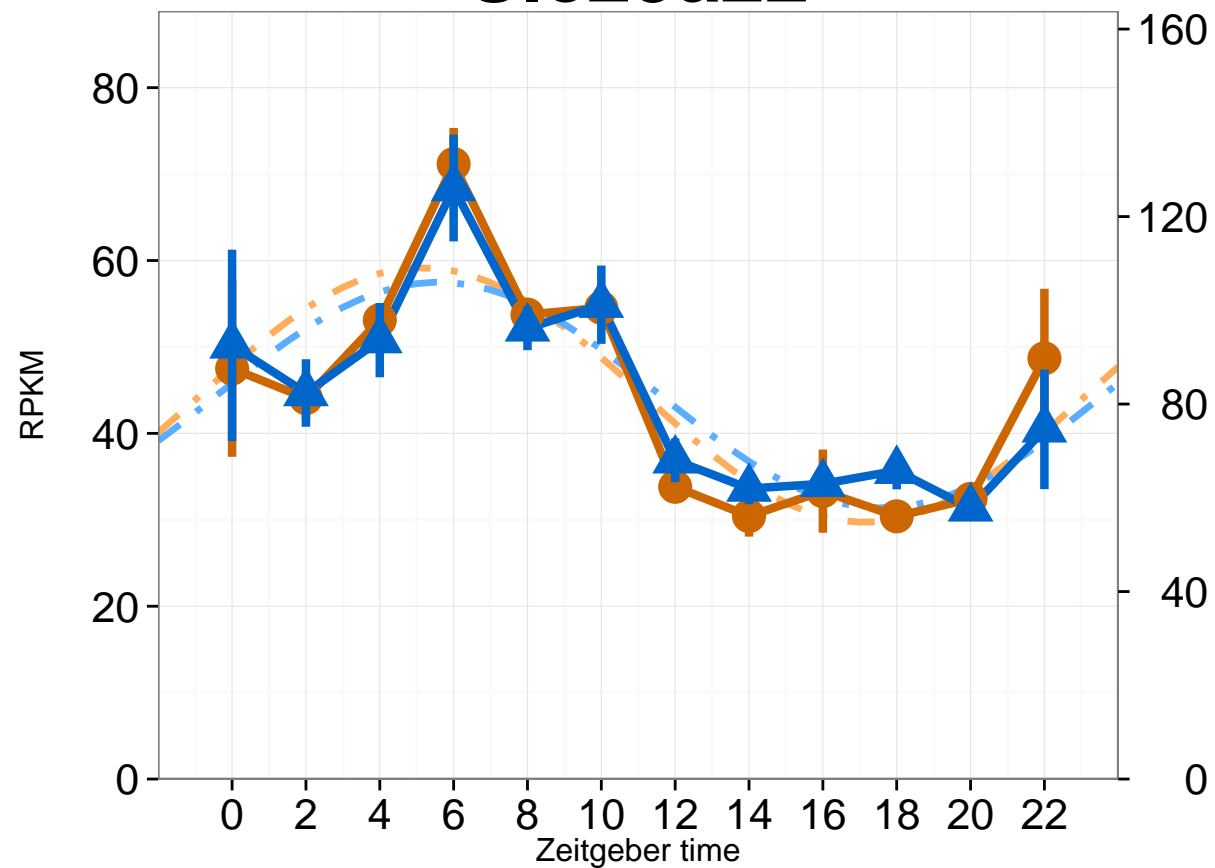

# Slc25a22

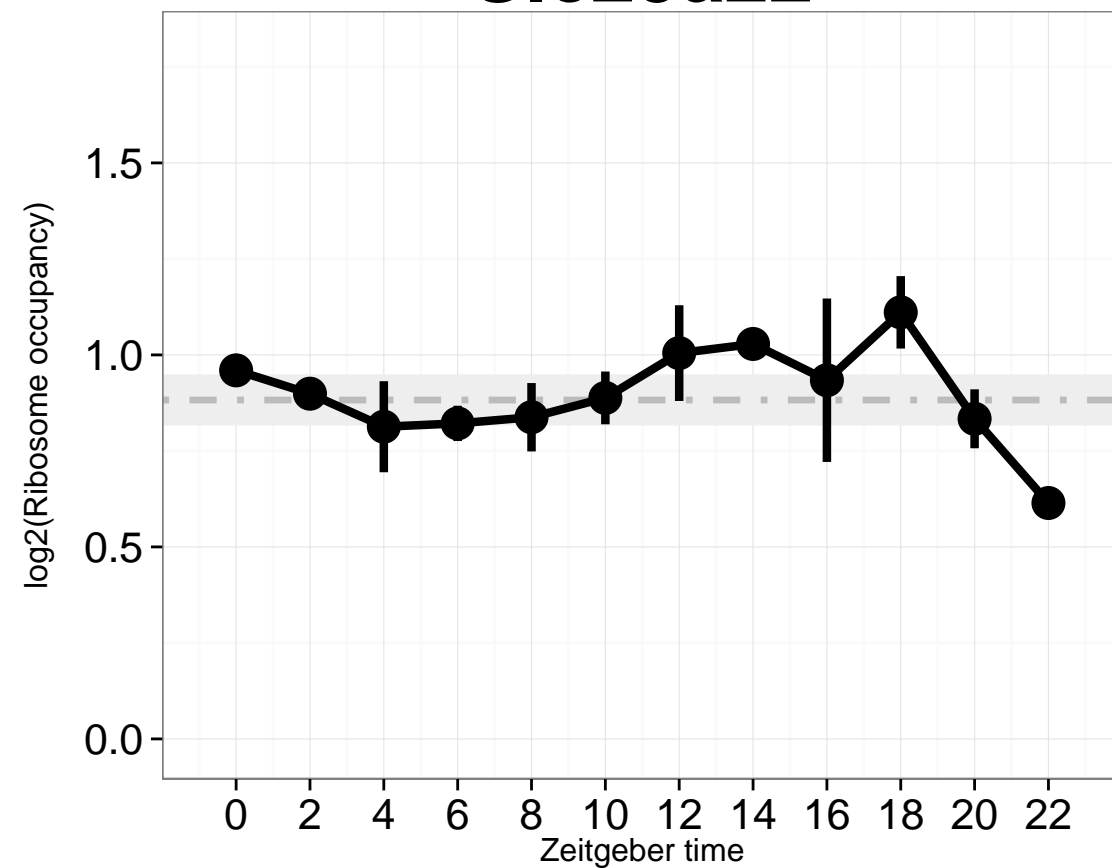

Supplement: Supplementary file 10254 [file 1]

## Lnp

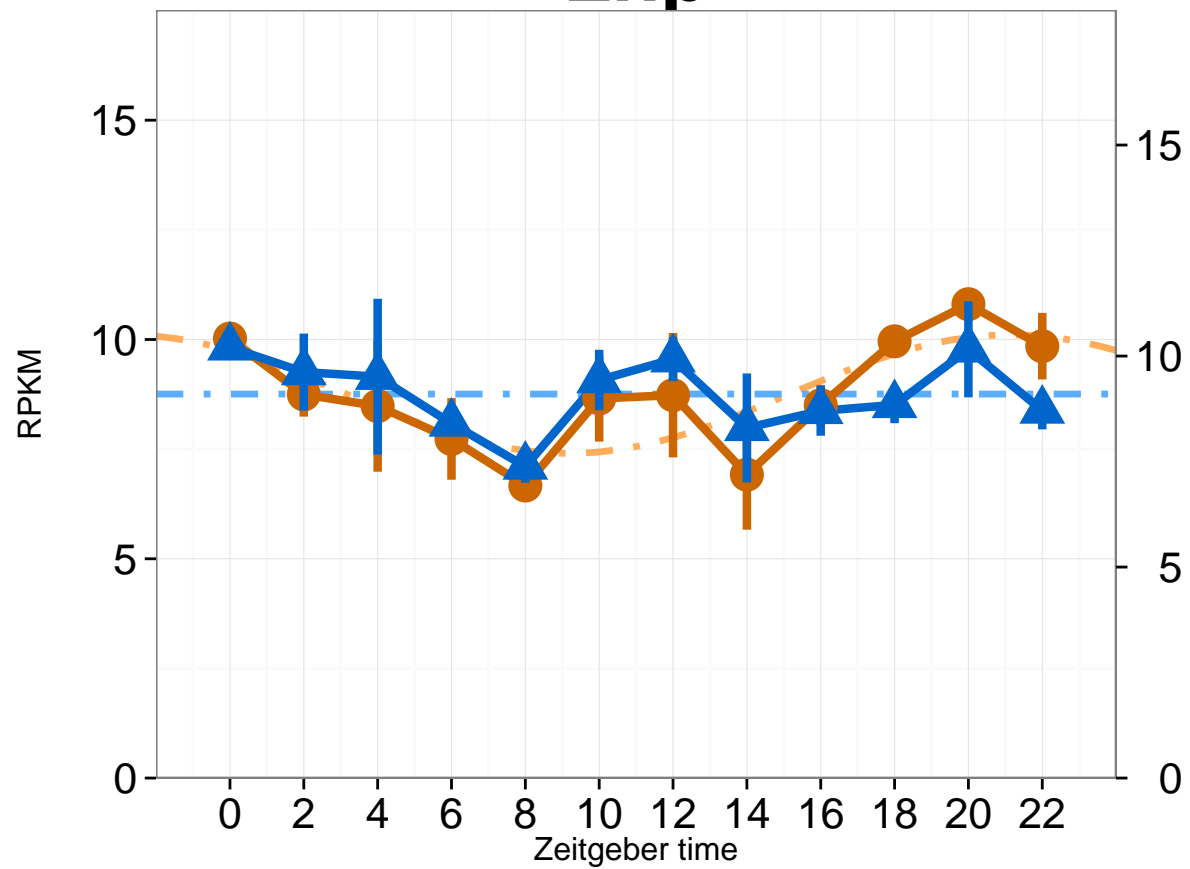

## Lnp

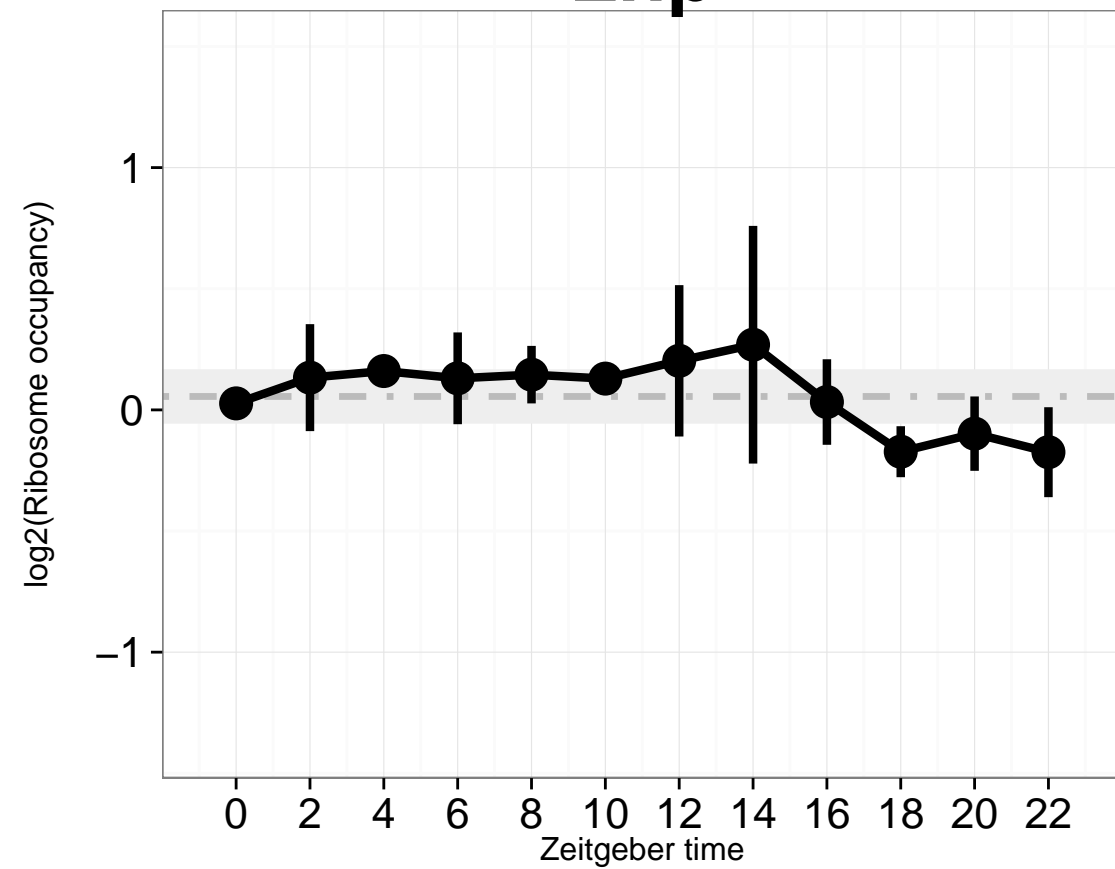

Supplement: Supplementary file 10255 [file 1]

## H2afz

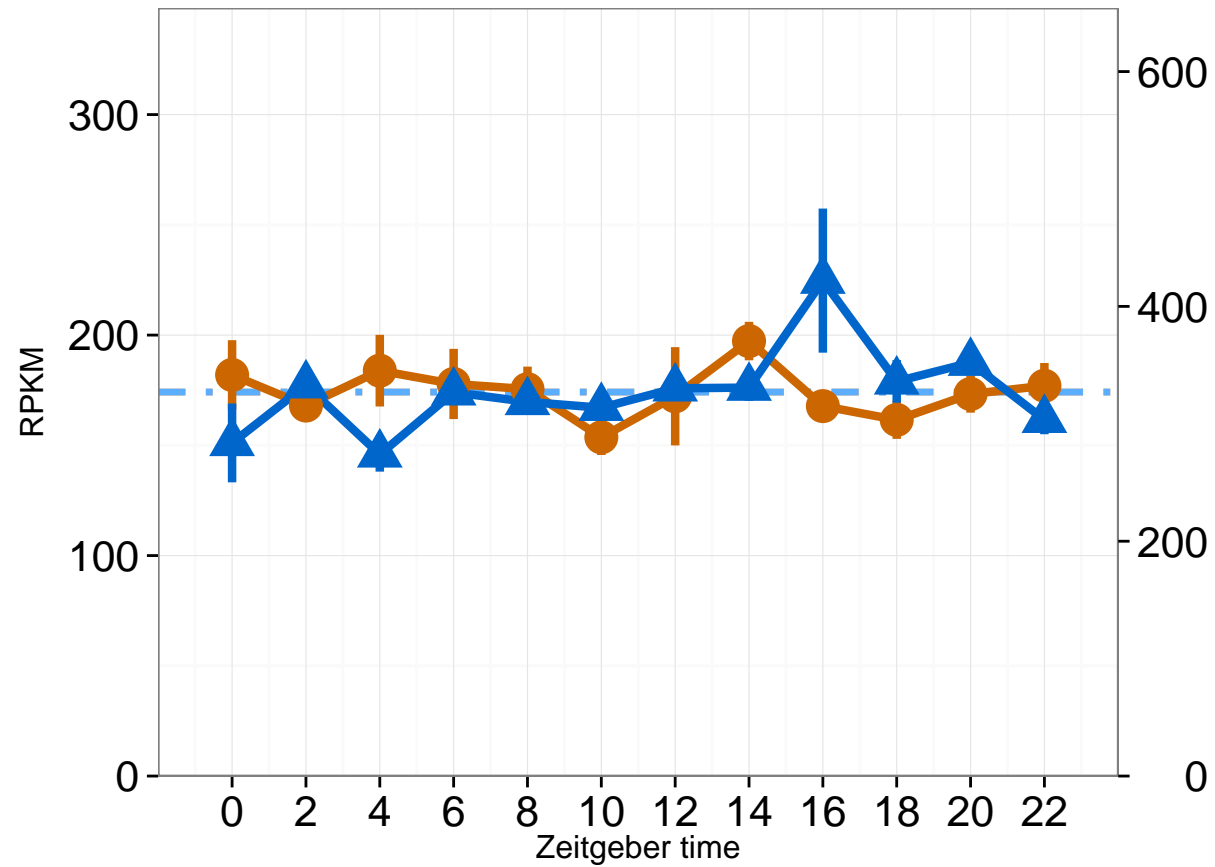

## H2afz

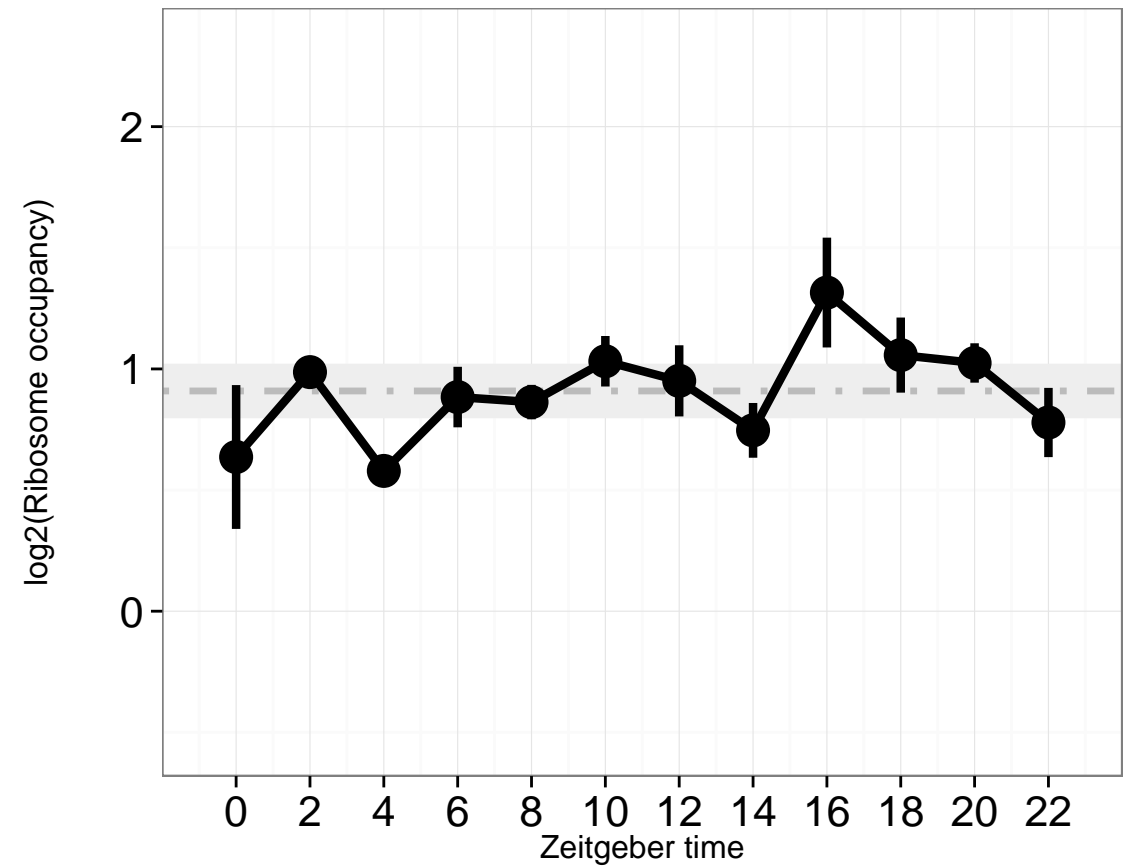

Supplement: Supplementary file 10256 [file 1]

# Mpp5

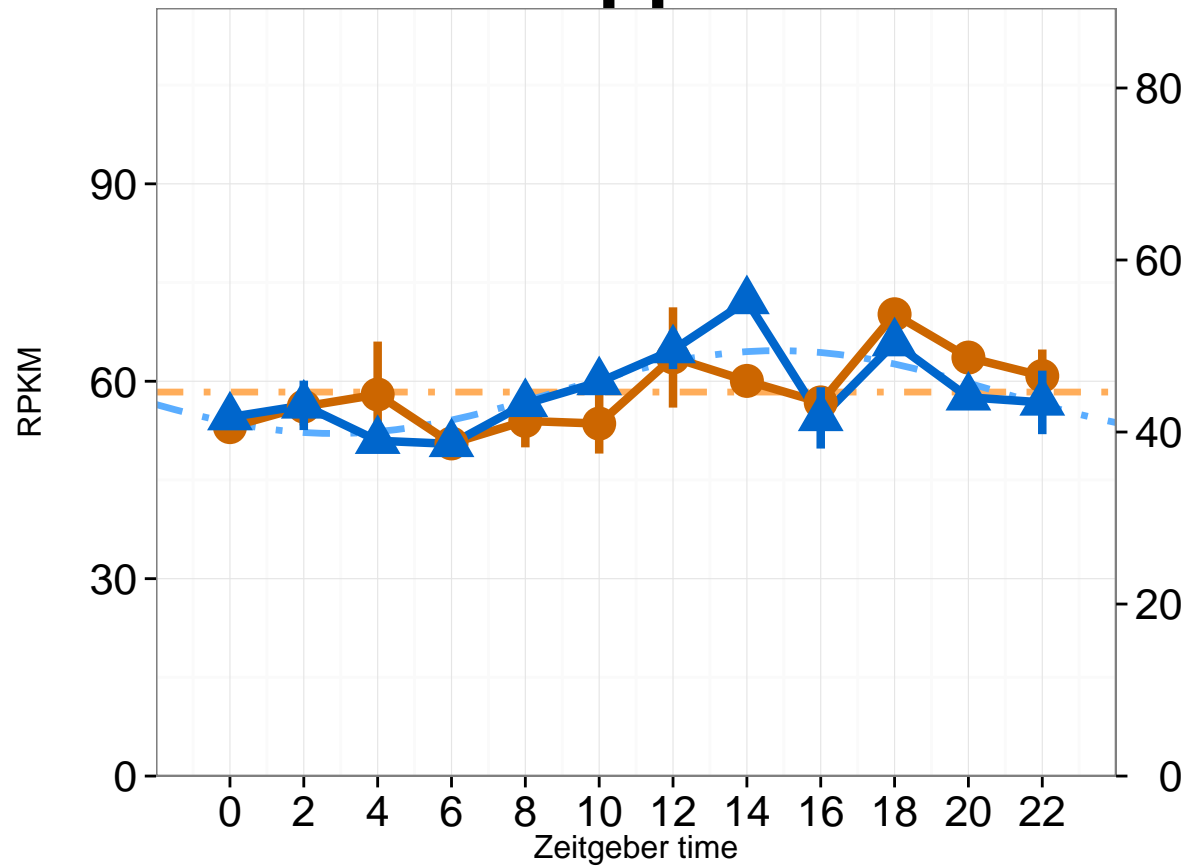

# Mpp5

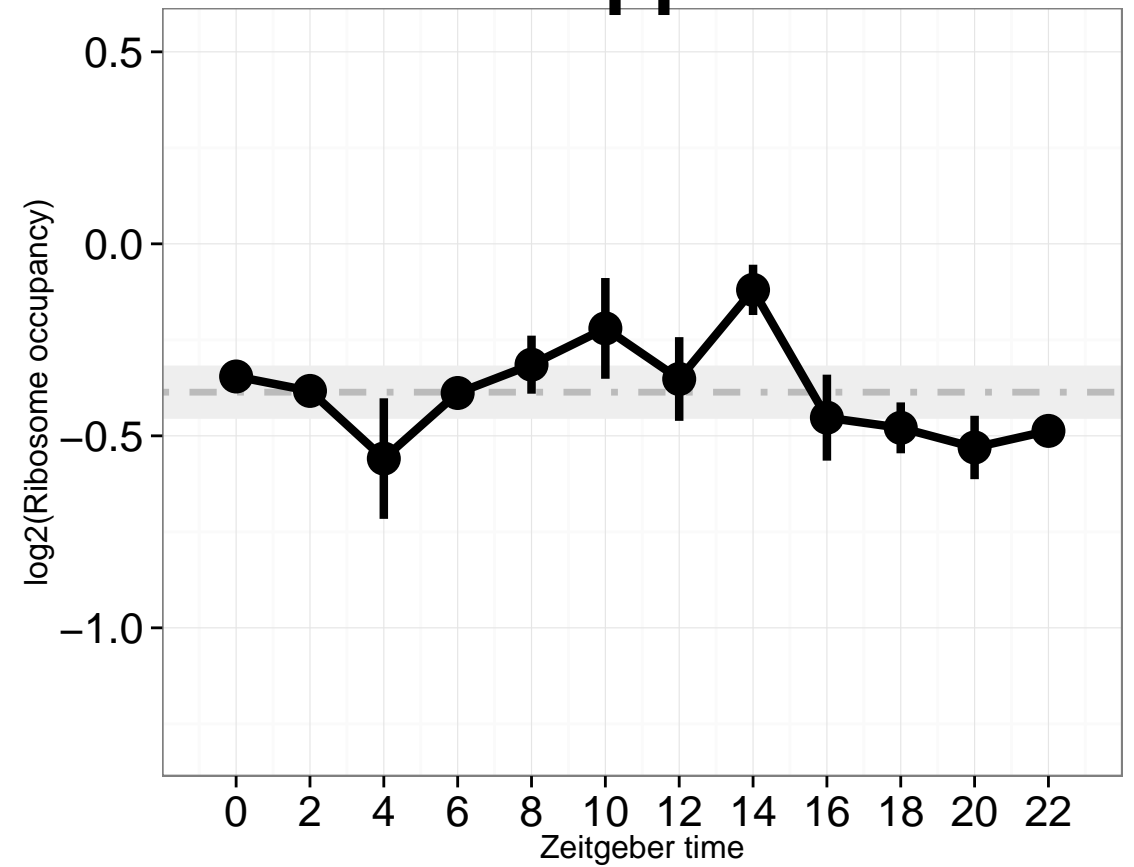

Supplement: Supplementary file 10257 [file 1]

# 3830406C13Rik

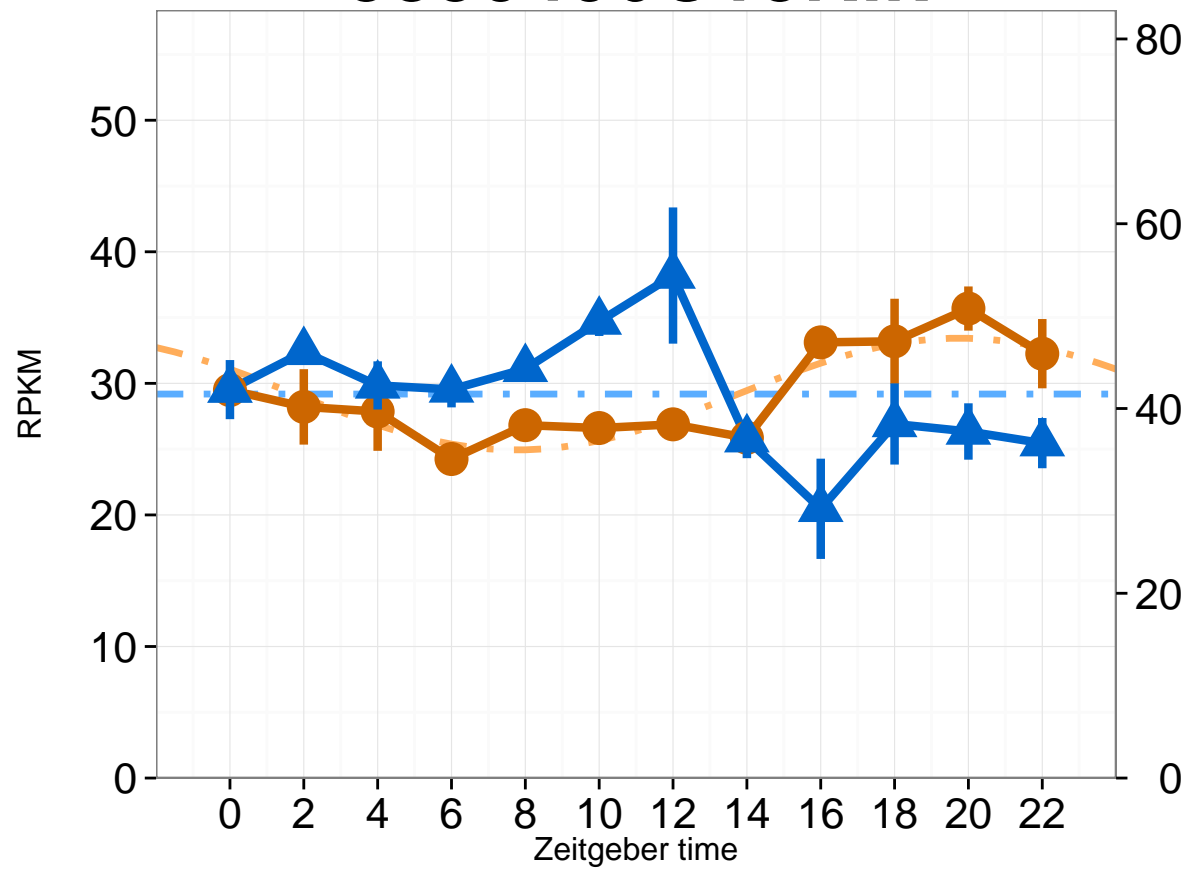

# 3830406C13Rik

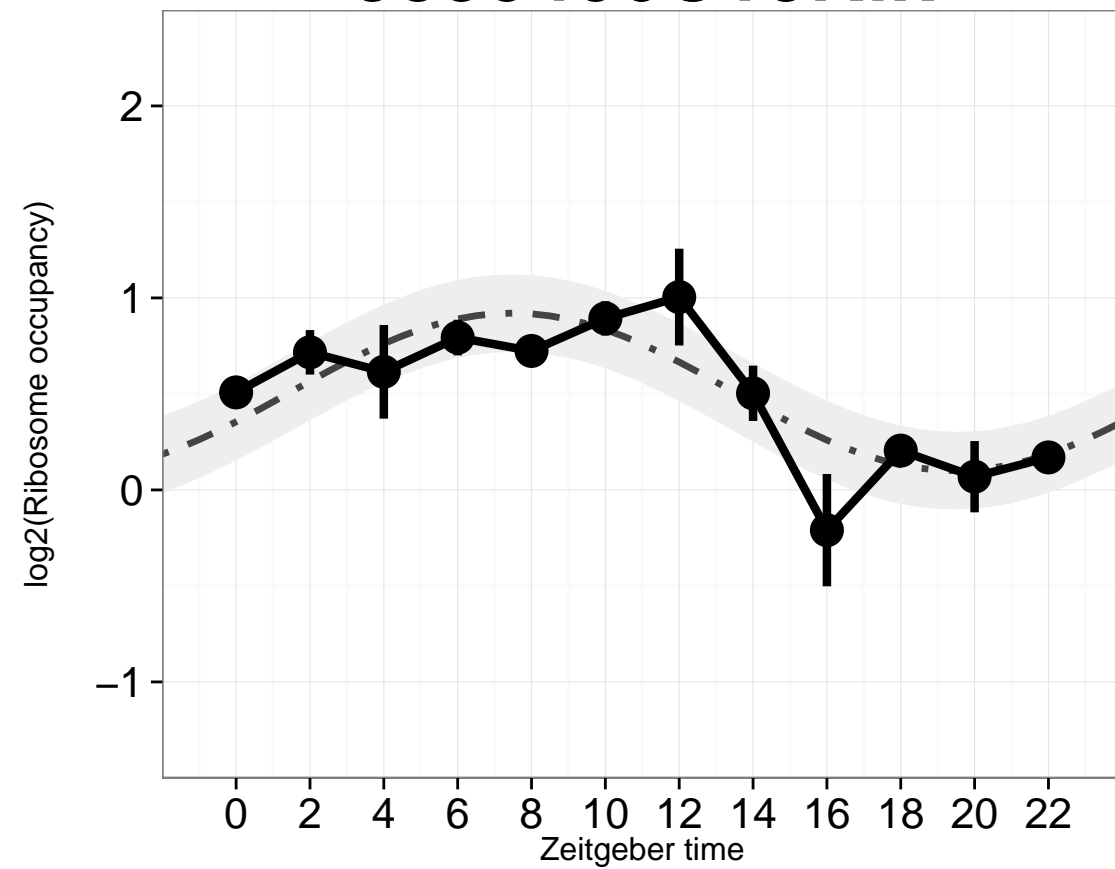

Supplement: Supplementary file 10258 [file 1]

# Hoxa11

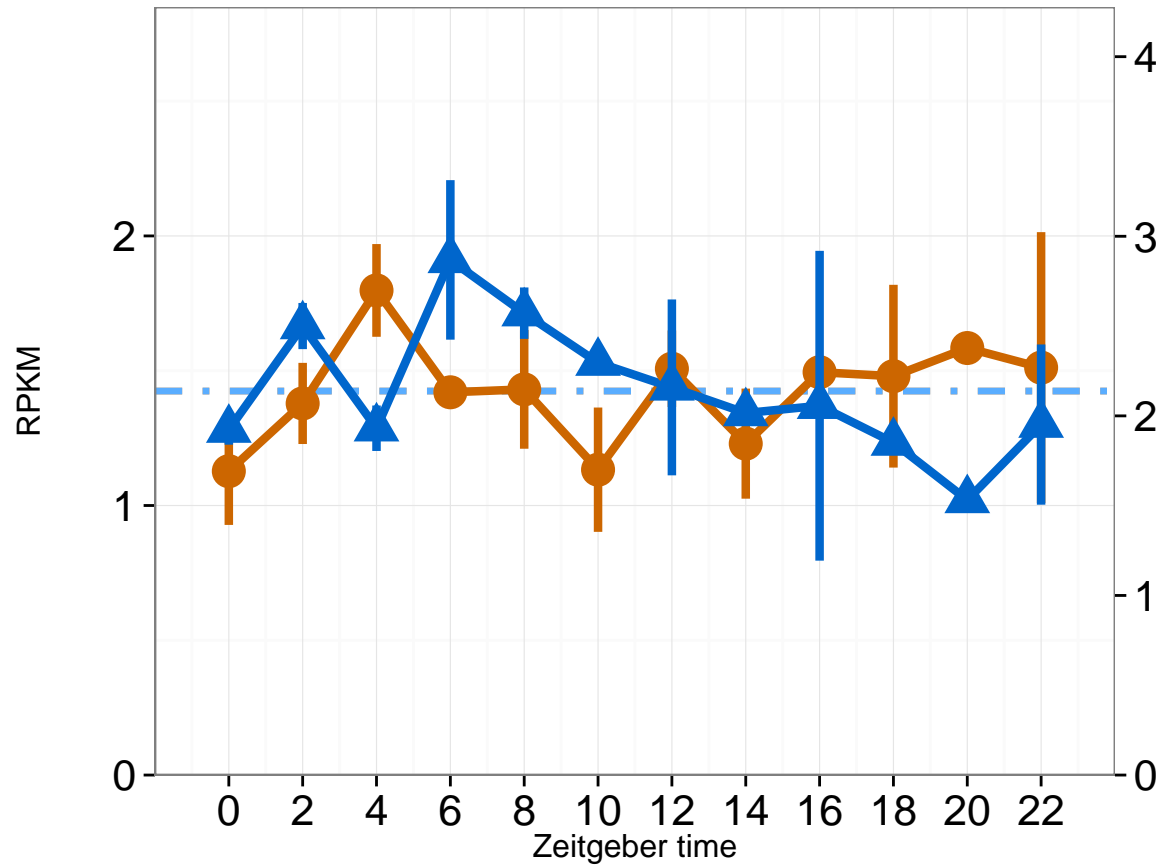

# Hoxa11

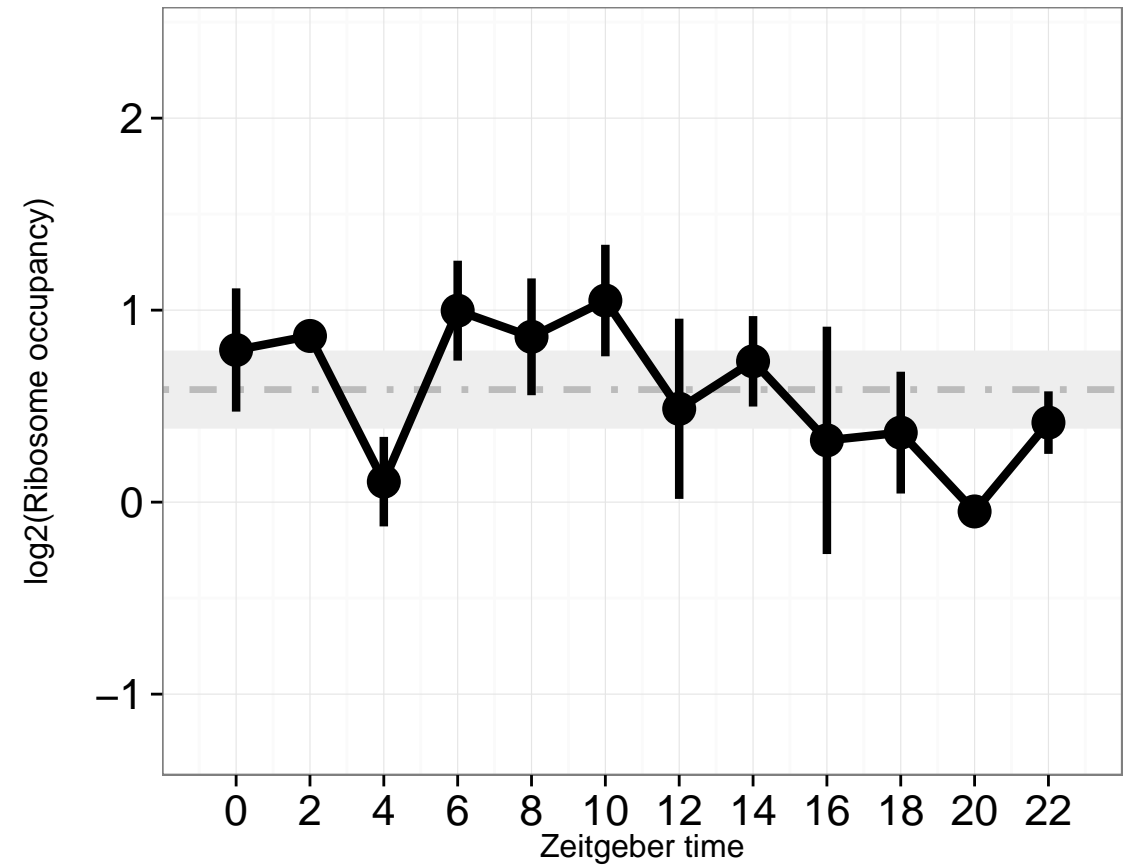

Supplement: Supplementary file 10259 [file 1]

## Nphp1

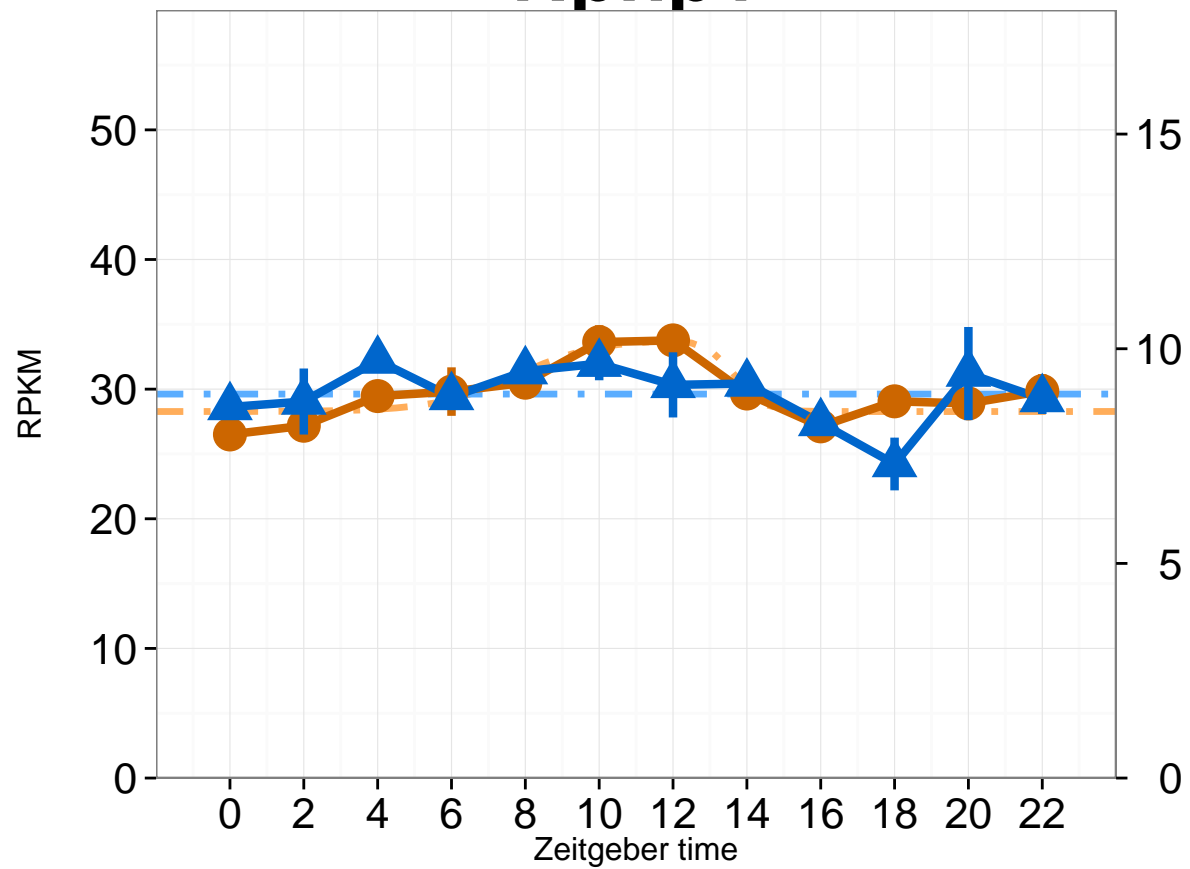

## Nphp1

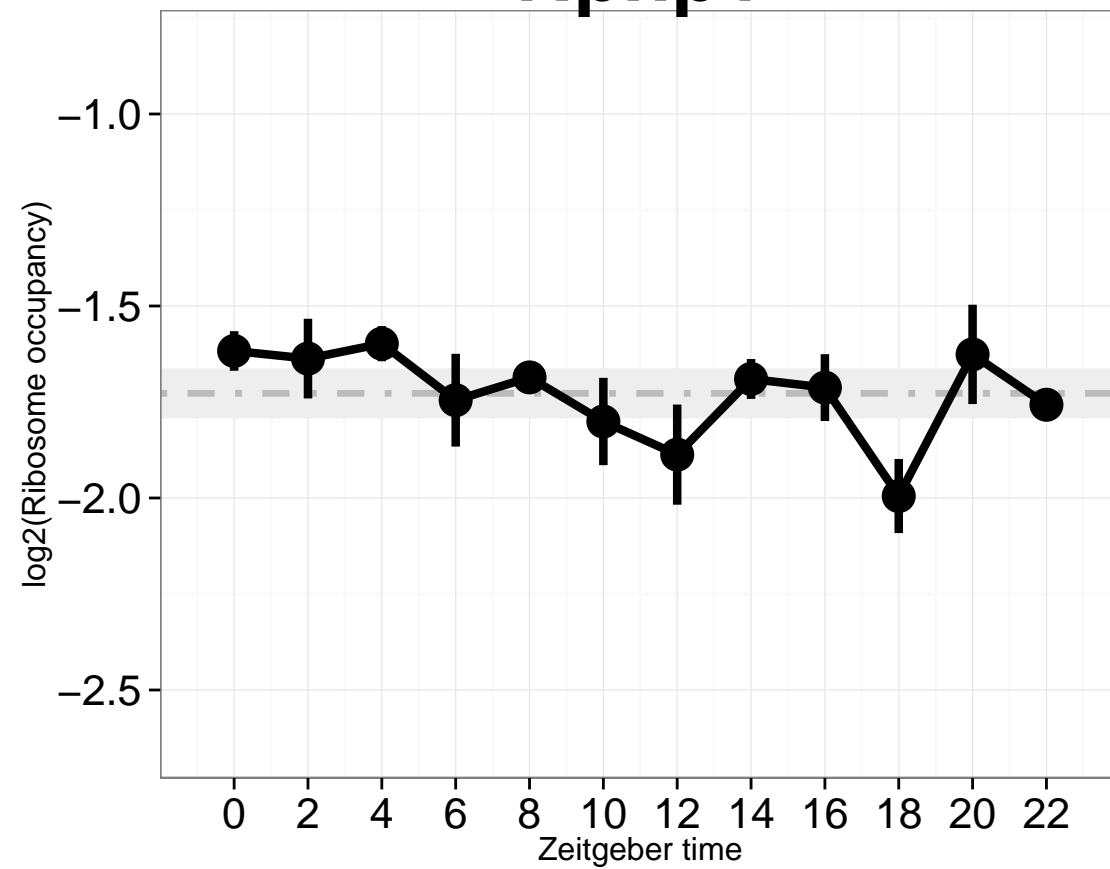

Supplement: Supplementary file 10260 [file 1]

# Ankrd13c

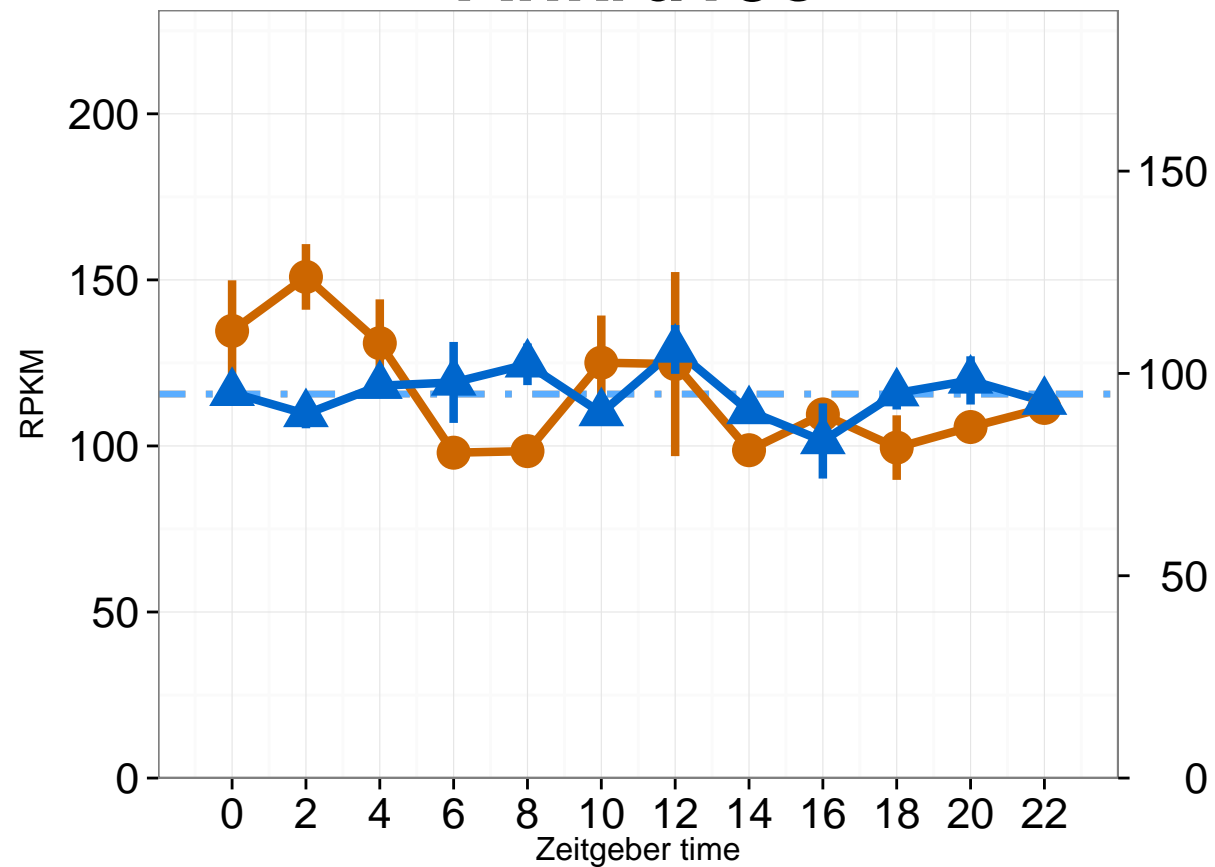

# Ankrd13c

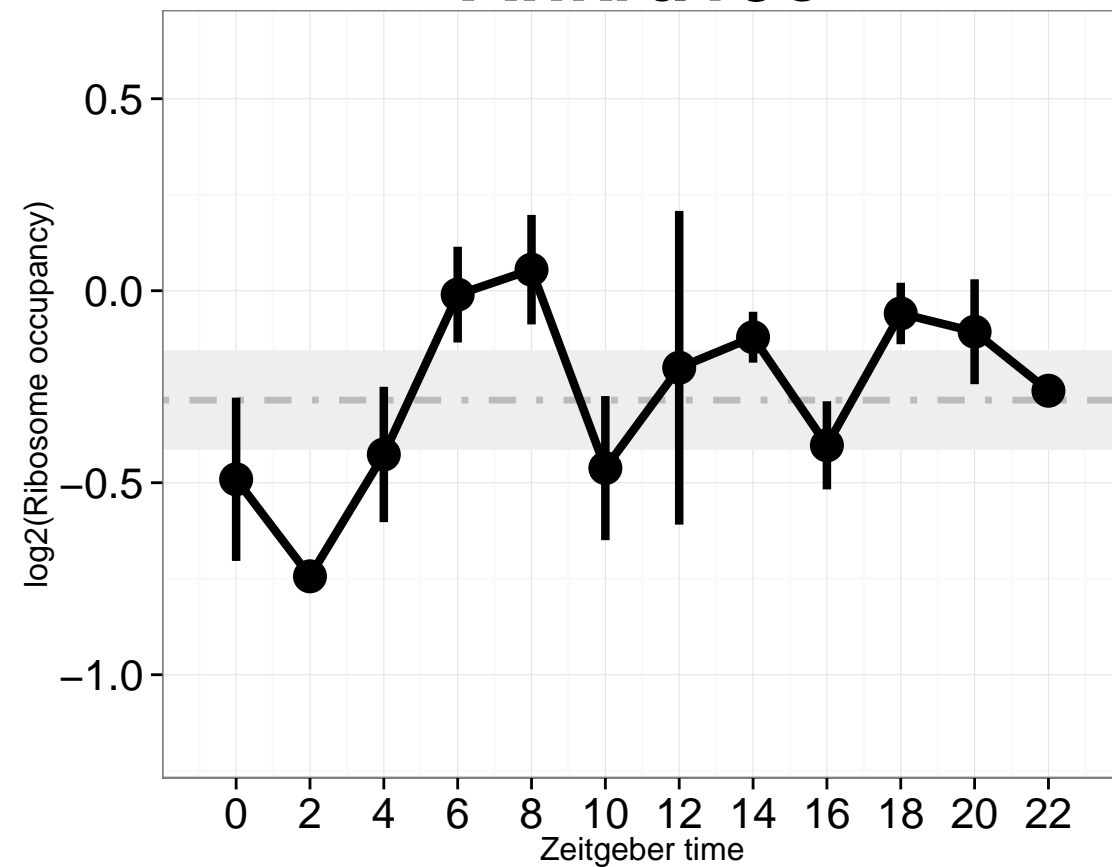

Supplement: Supplementary file 10261 [file 1]

# Cox7a2

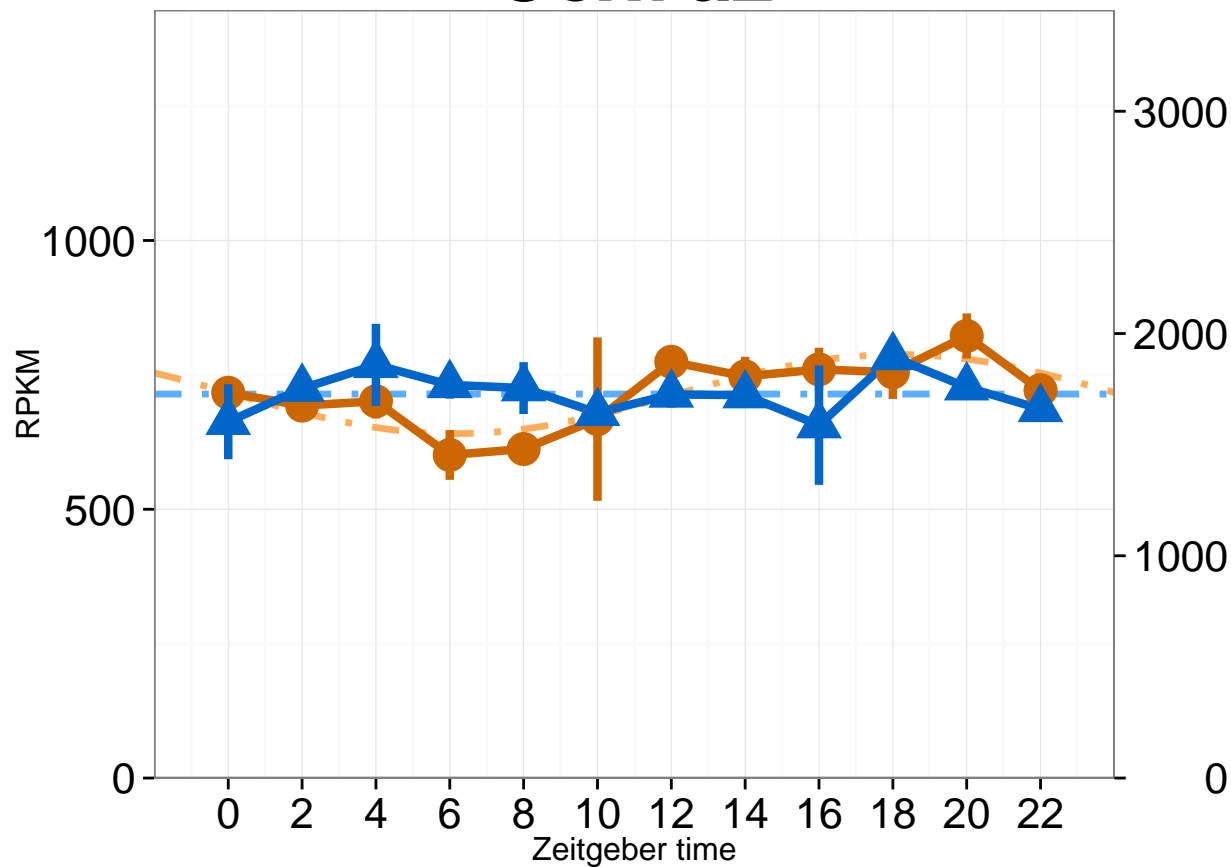

# Cox7a2

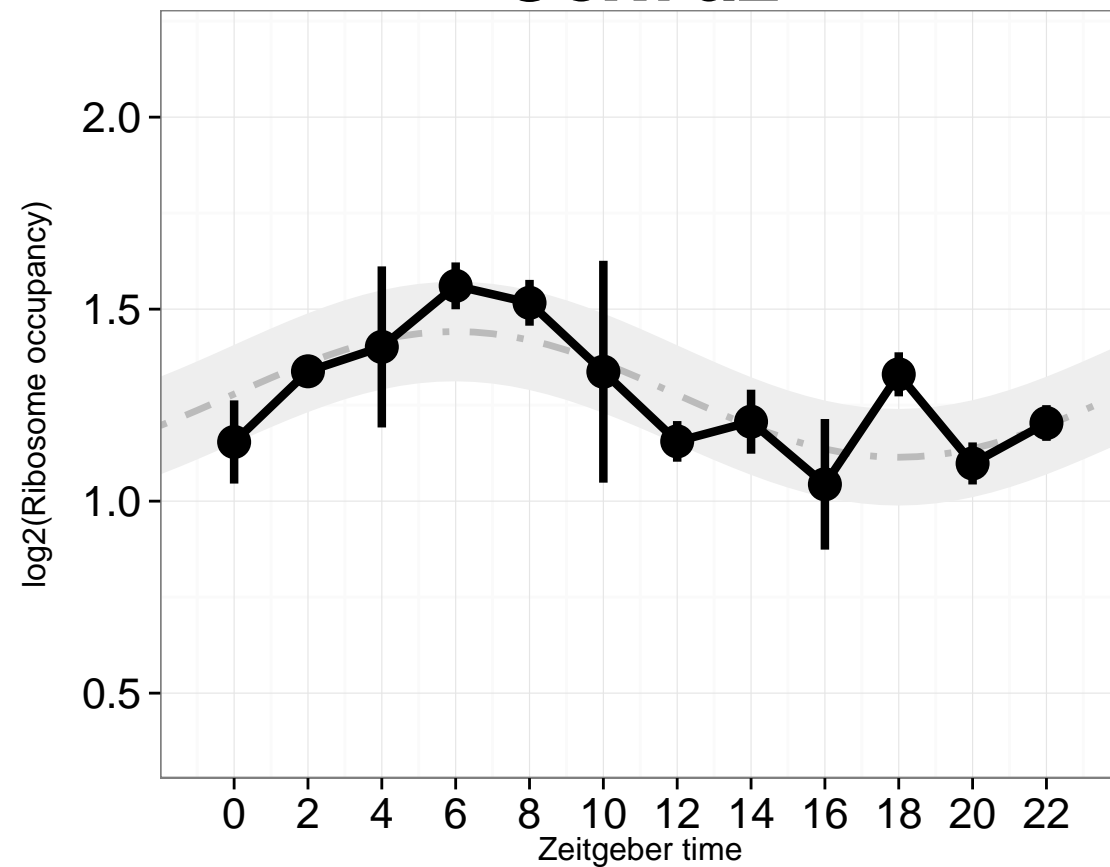

Supplement: Supplementary file 10262 [file 1]

# Mrpl50

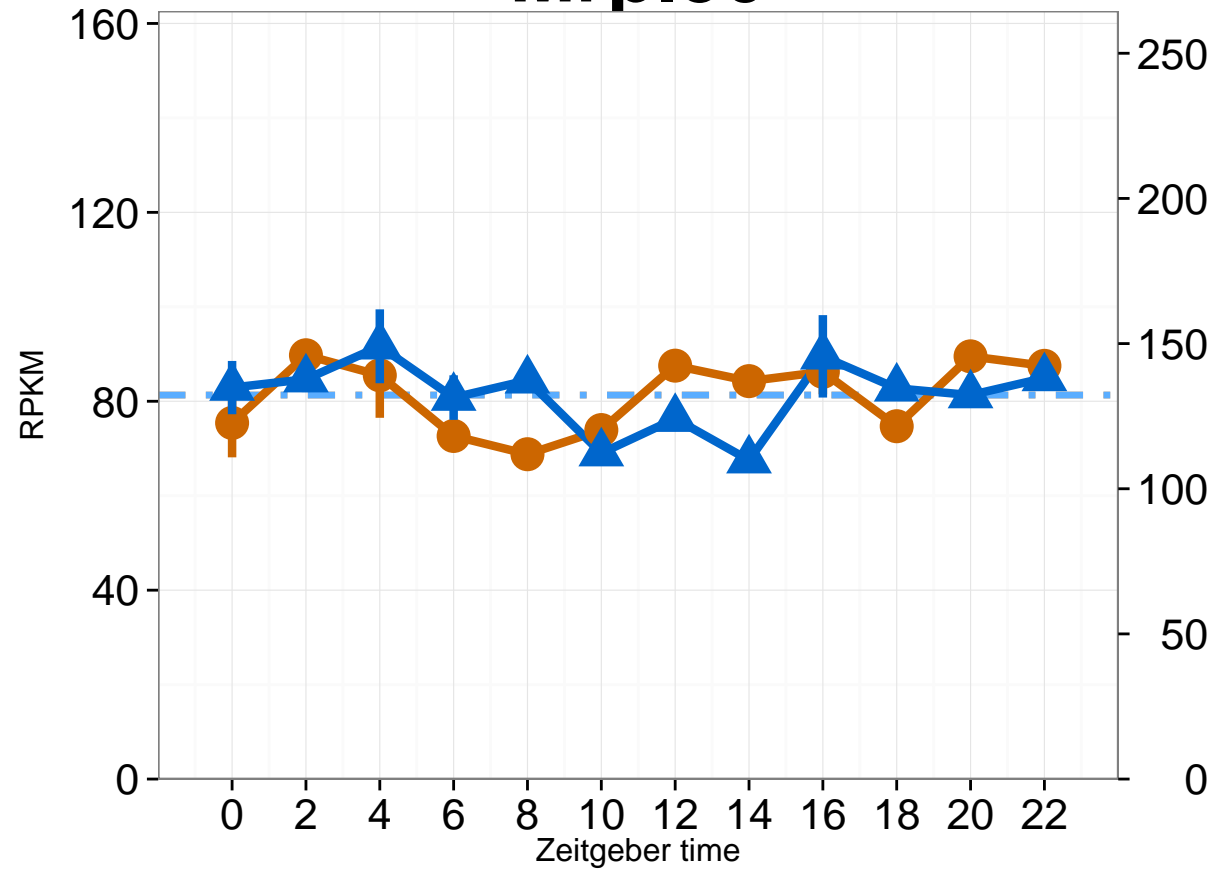

# Mrpl50

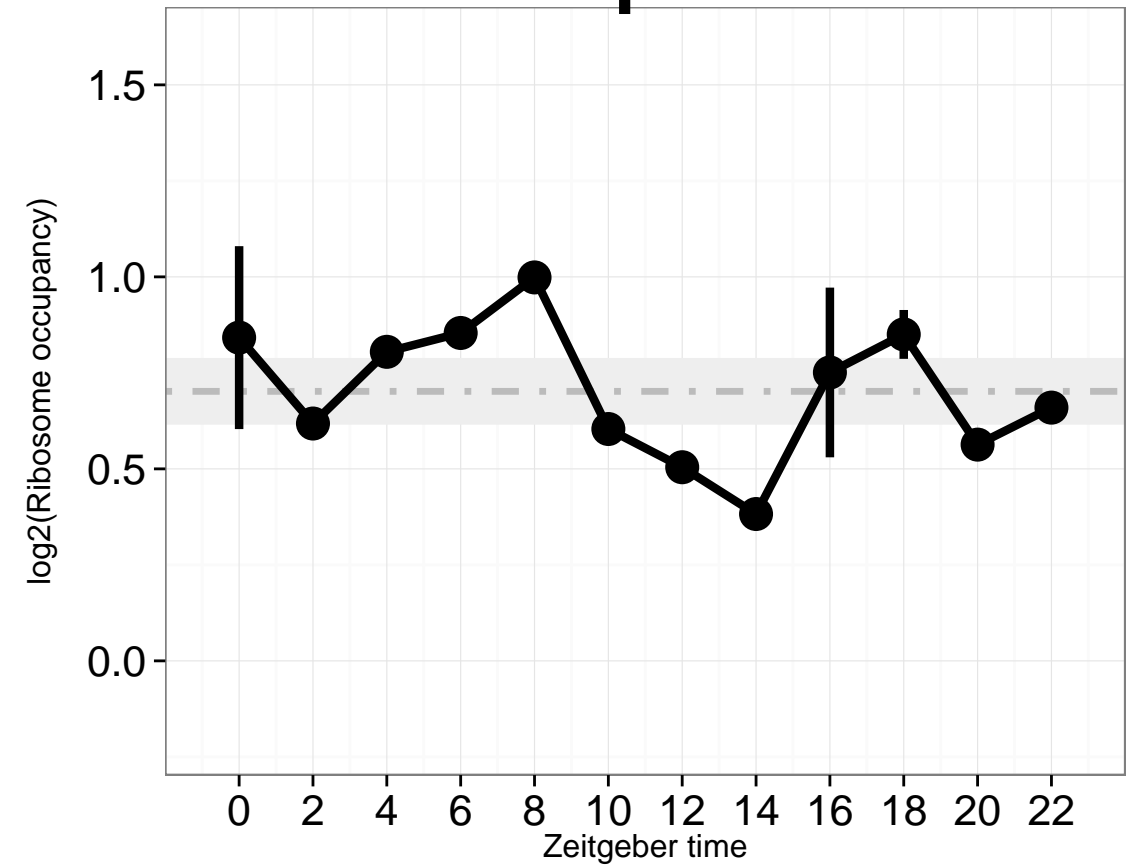

Supplement: Supplementary file 10263 [file 1]

# Gm21962

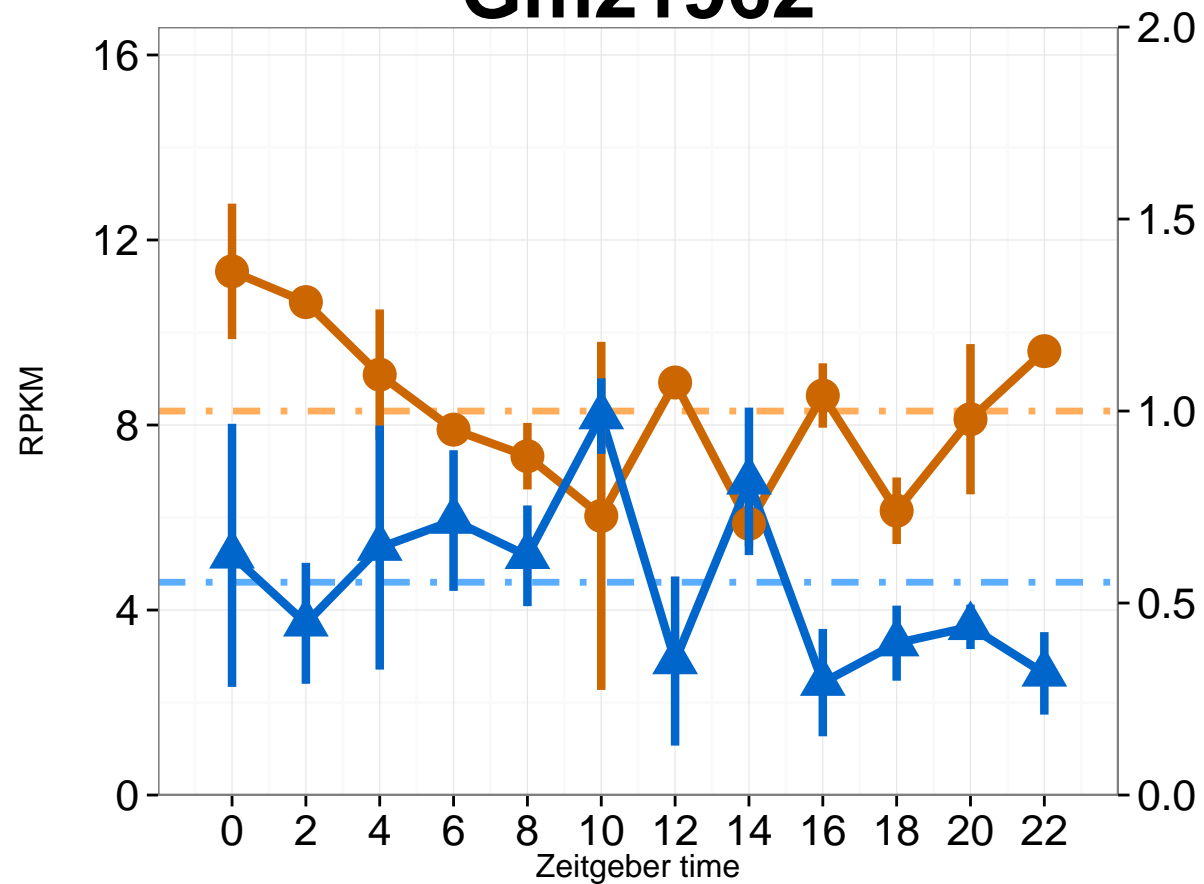

# Gm21962

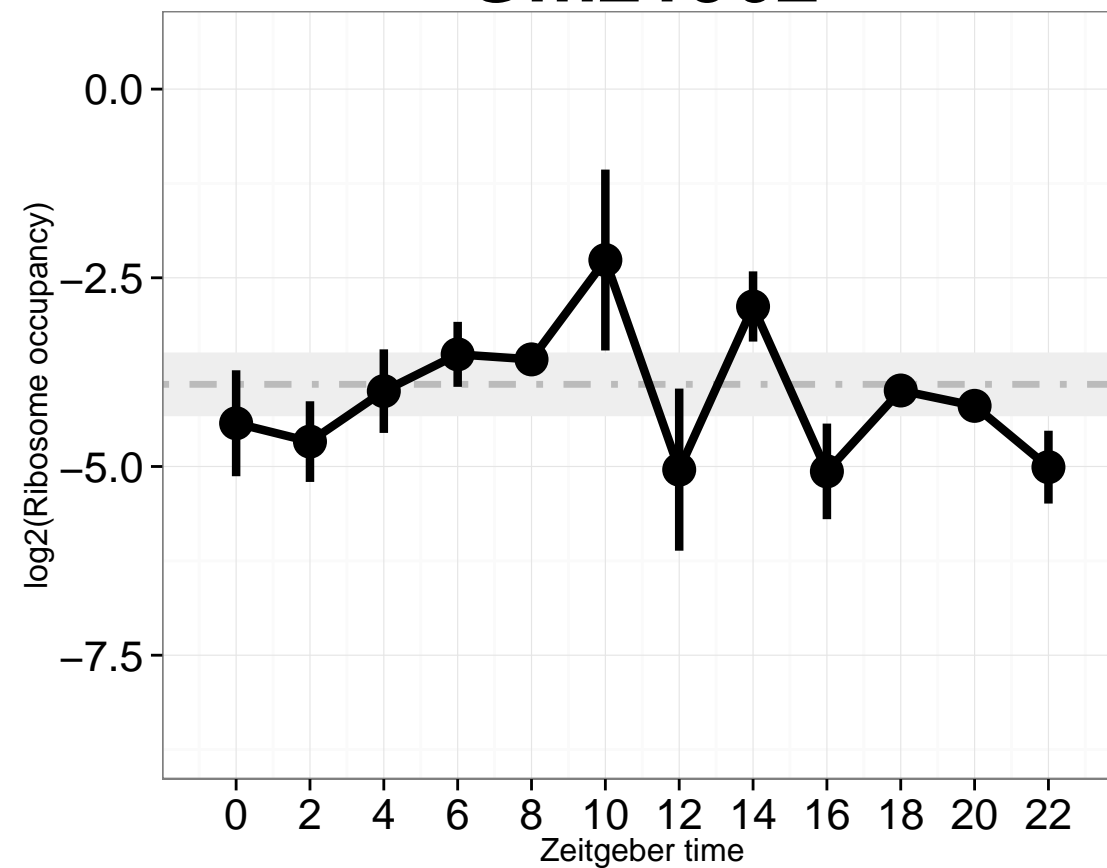

Supplement: Supplementary file 10264 [file 1]

## Abca2

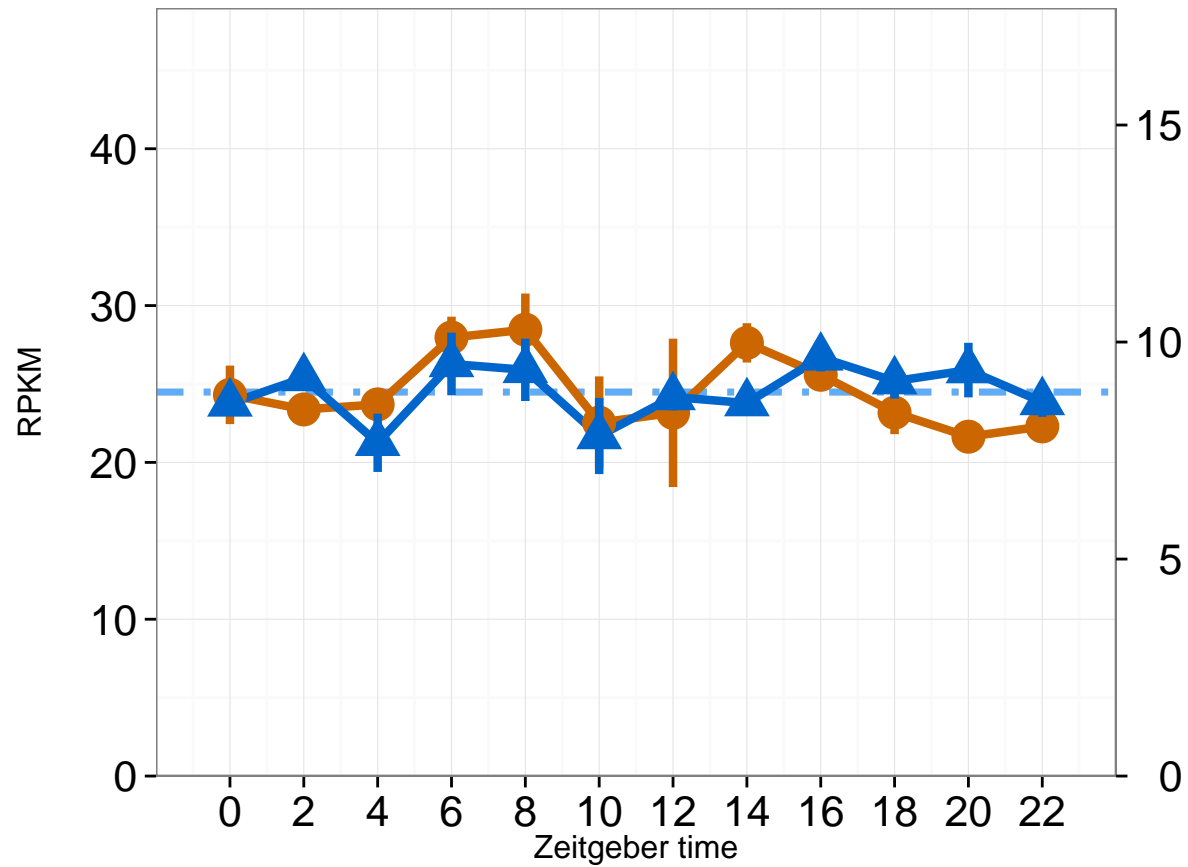

## Abca2

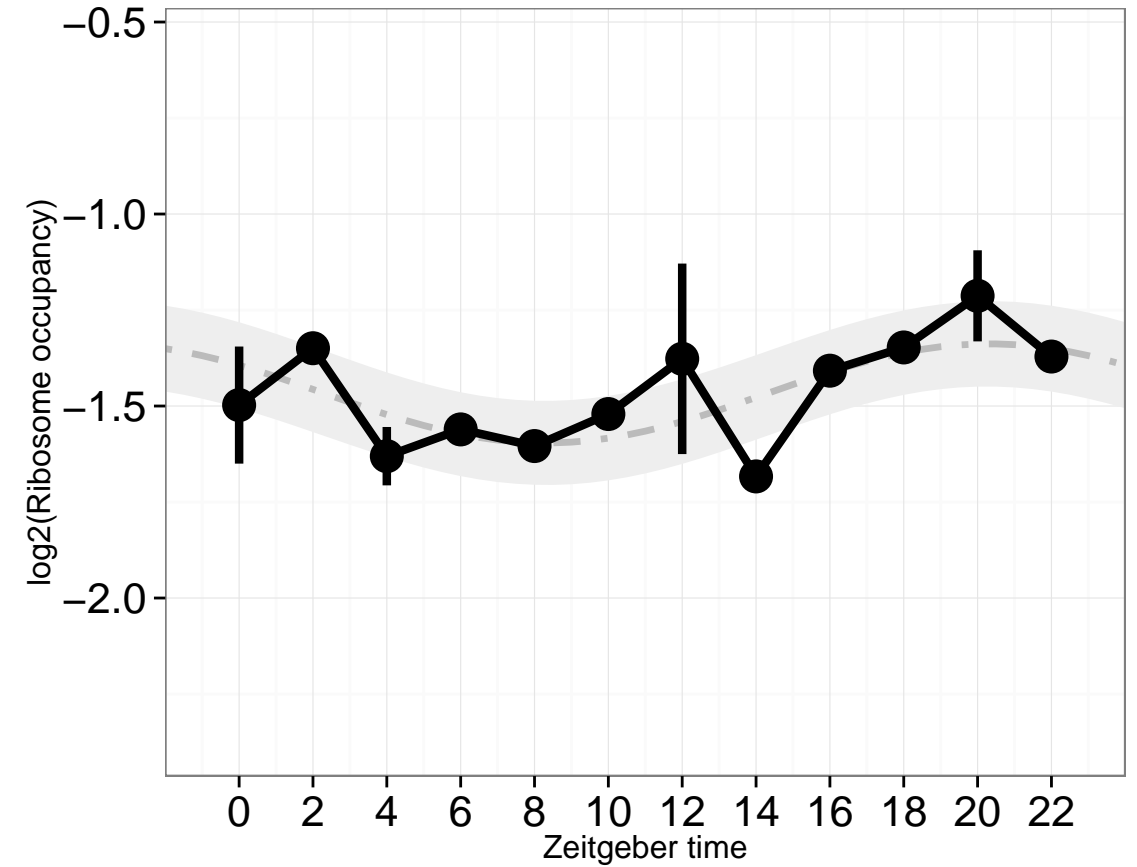

Supplement: Supplementary file 10265 [file 1]

# Psmg1

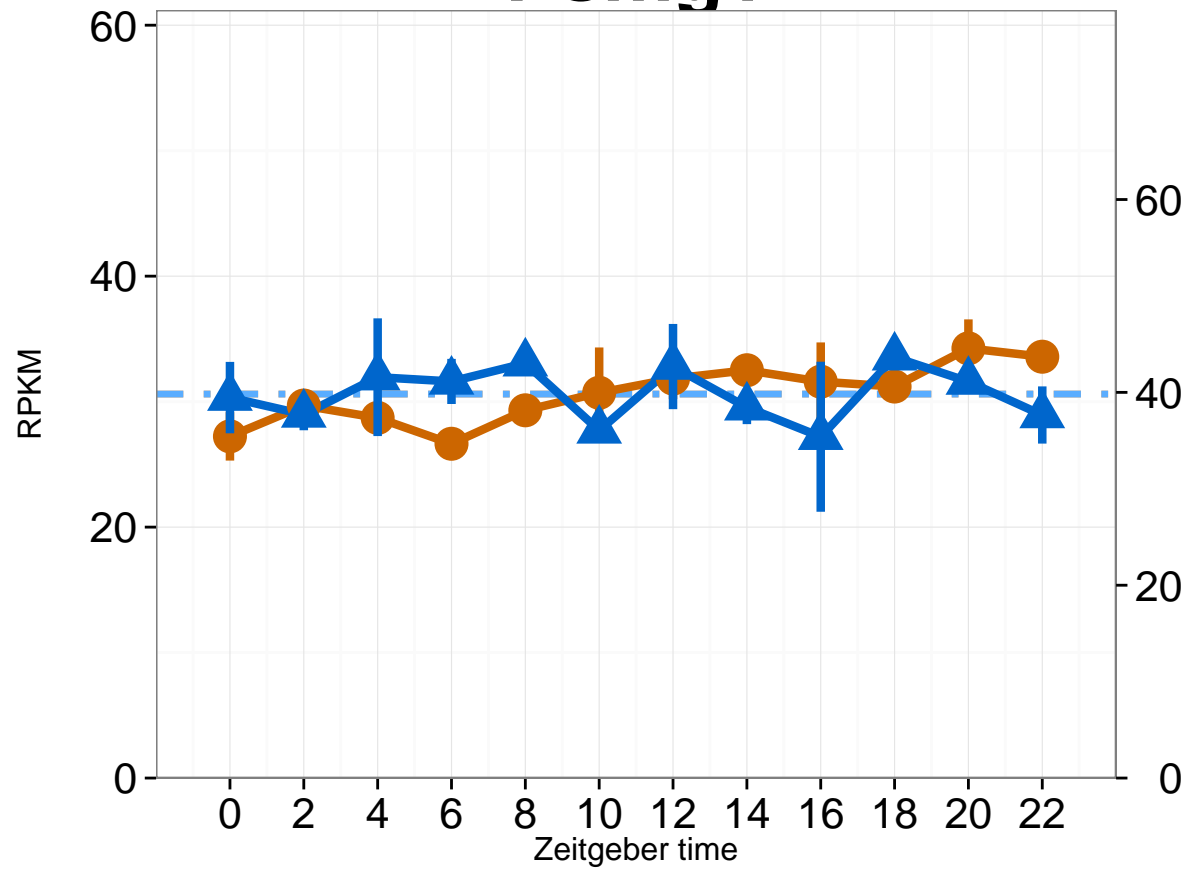

# Psmg1

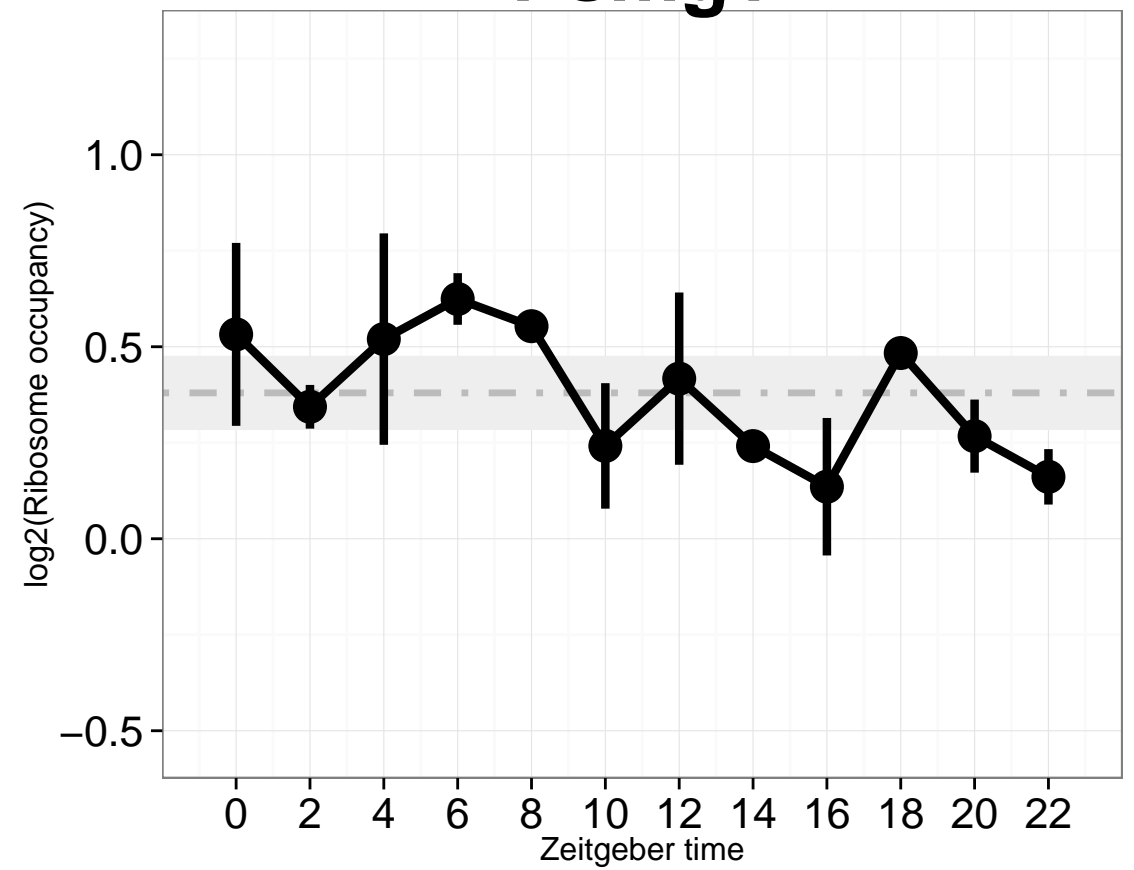

Supplement: Supplementary file 10266 [file 1]

# Strbp

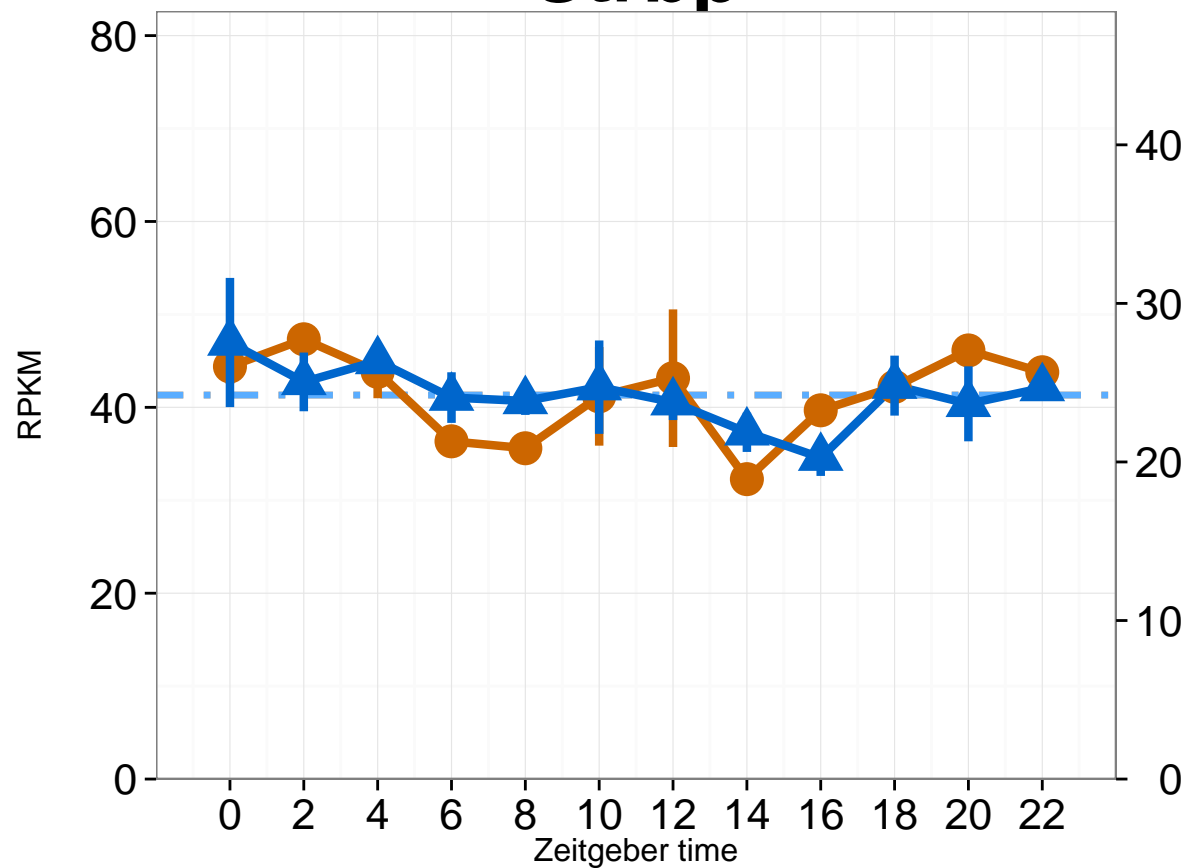

# Strbp

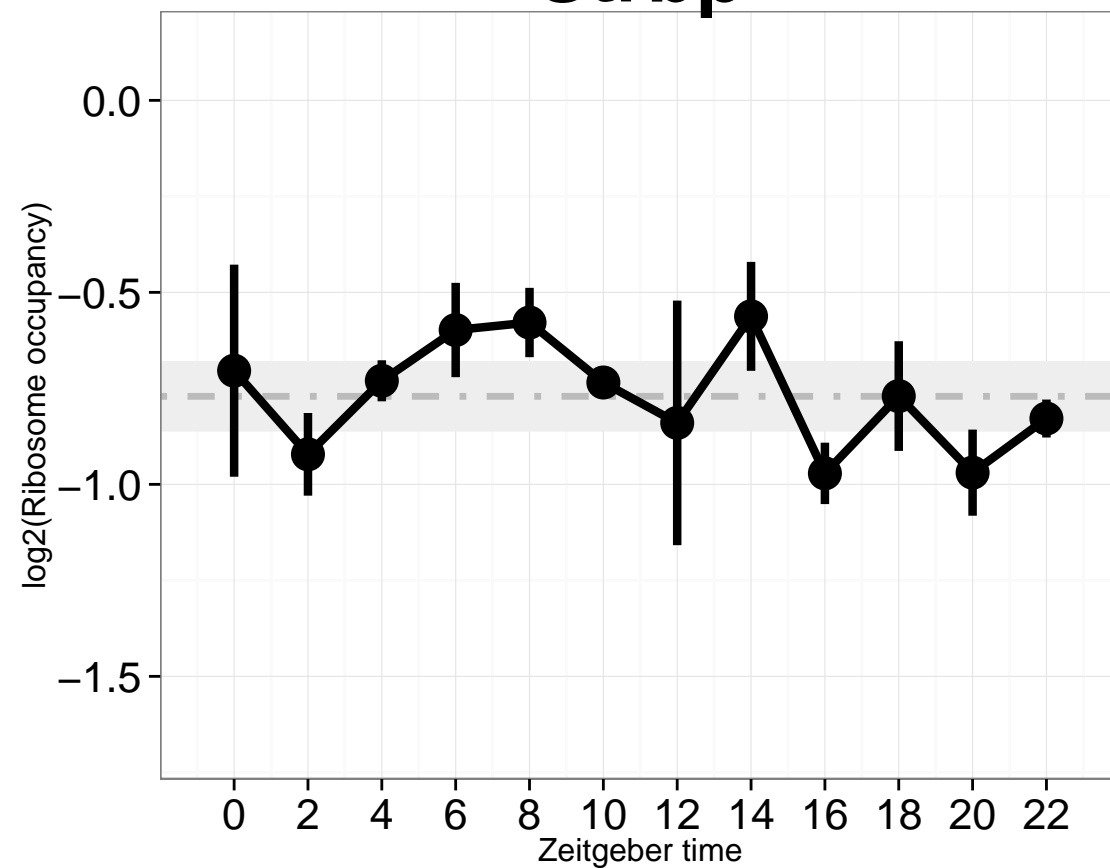

Supplement: Supplementary file 10267 [file 1]

# Med30

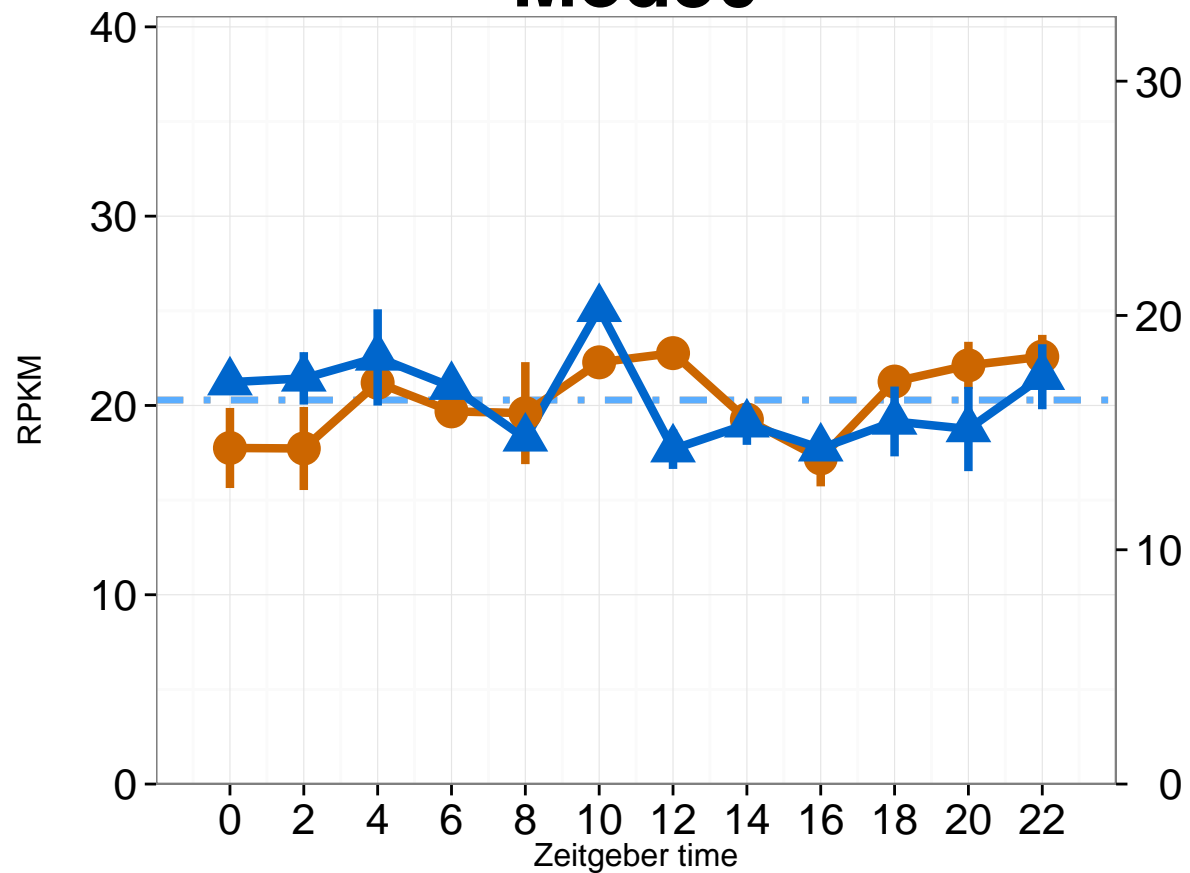

# Med30

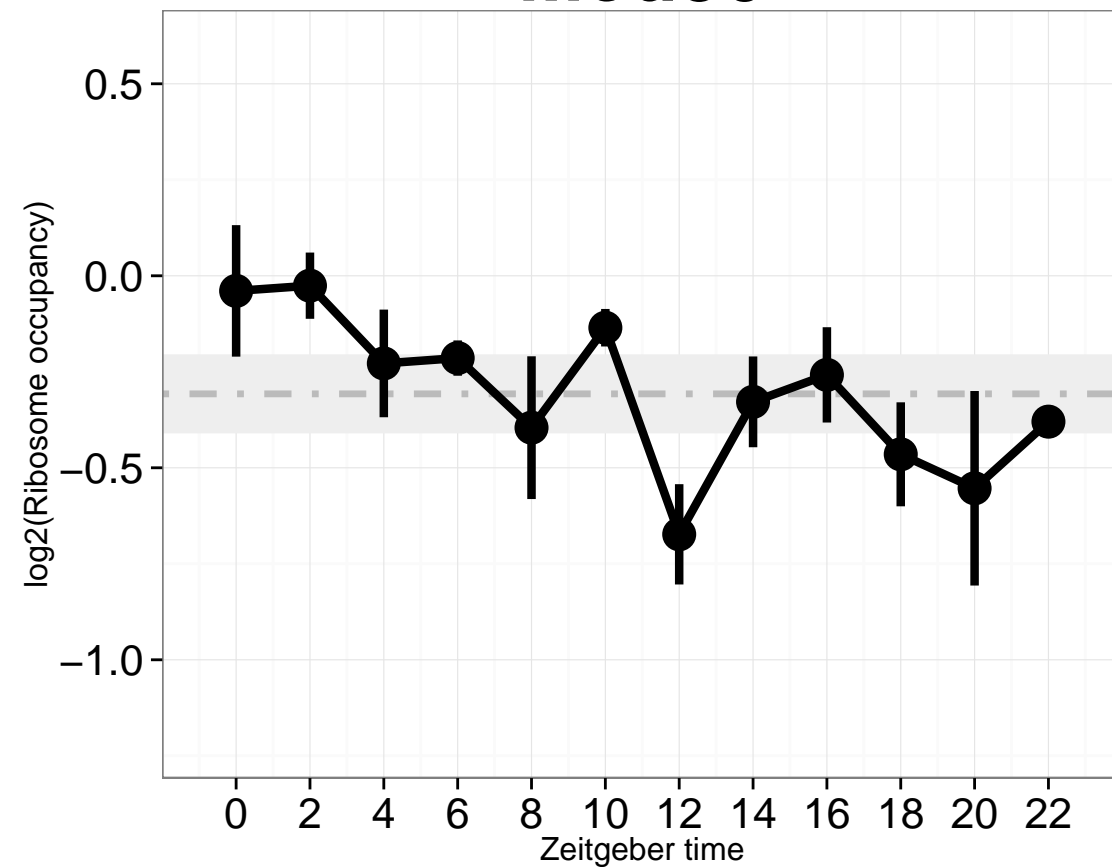

Supplement: Supplementary file 10268 [file 1]

# Mob1a

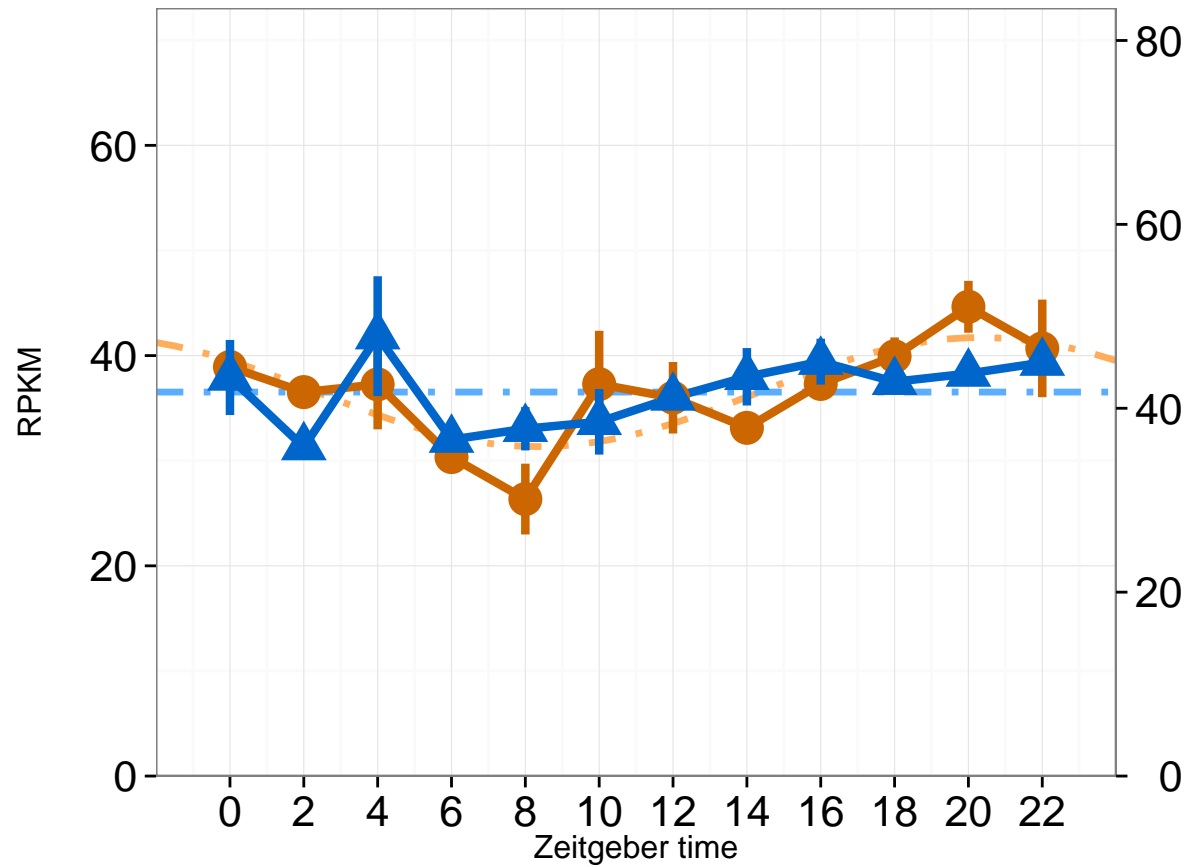

# Mob1a

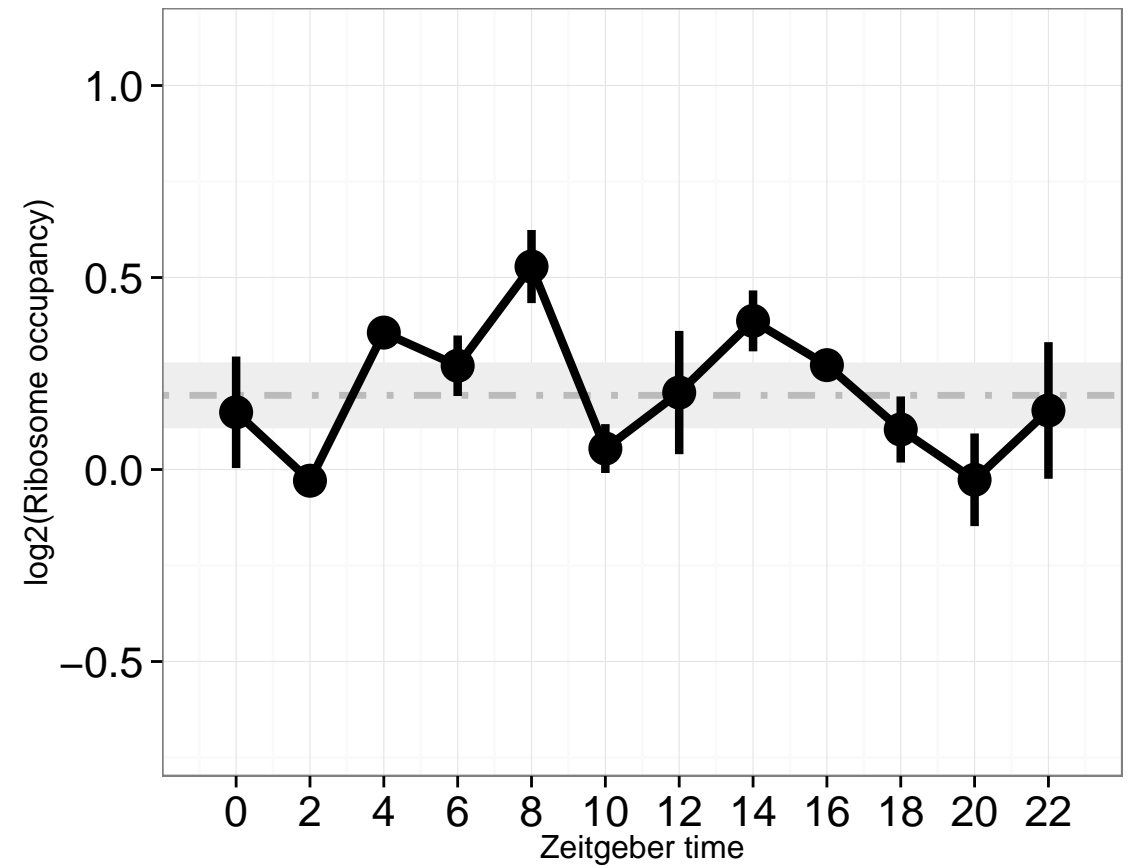

Supplement: Supplementary file 10269 [file 1]

## Usp20

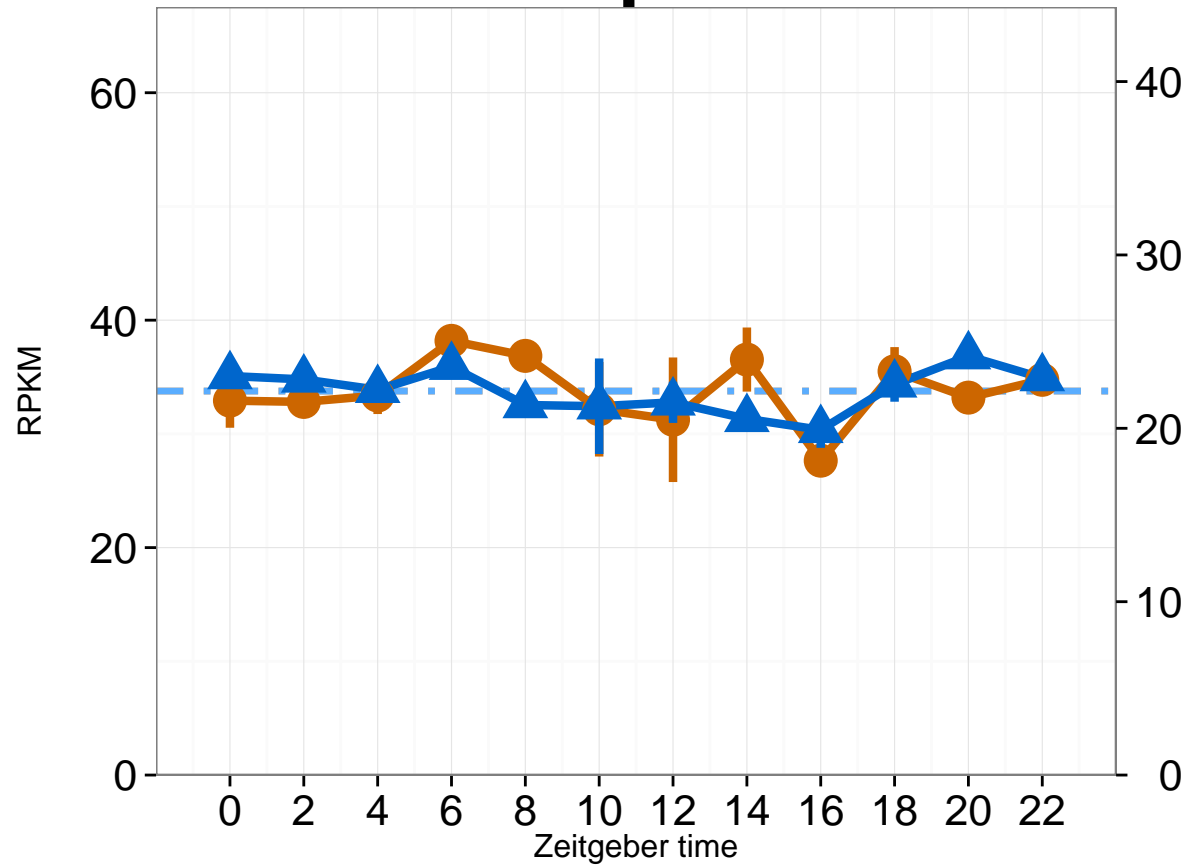

## Usp20

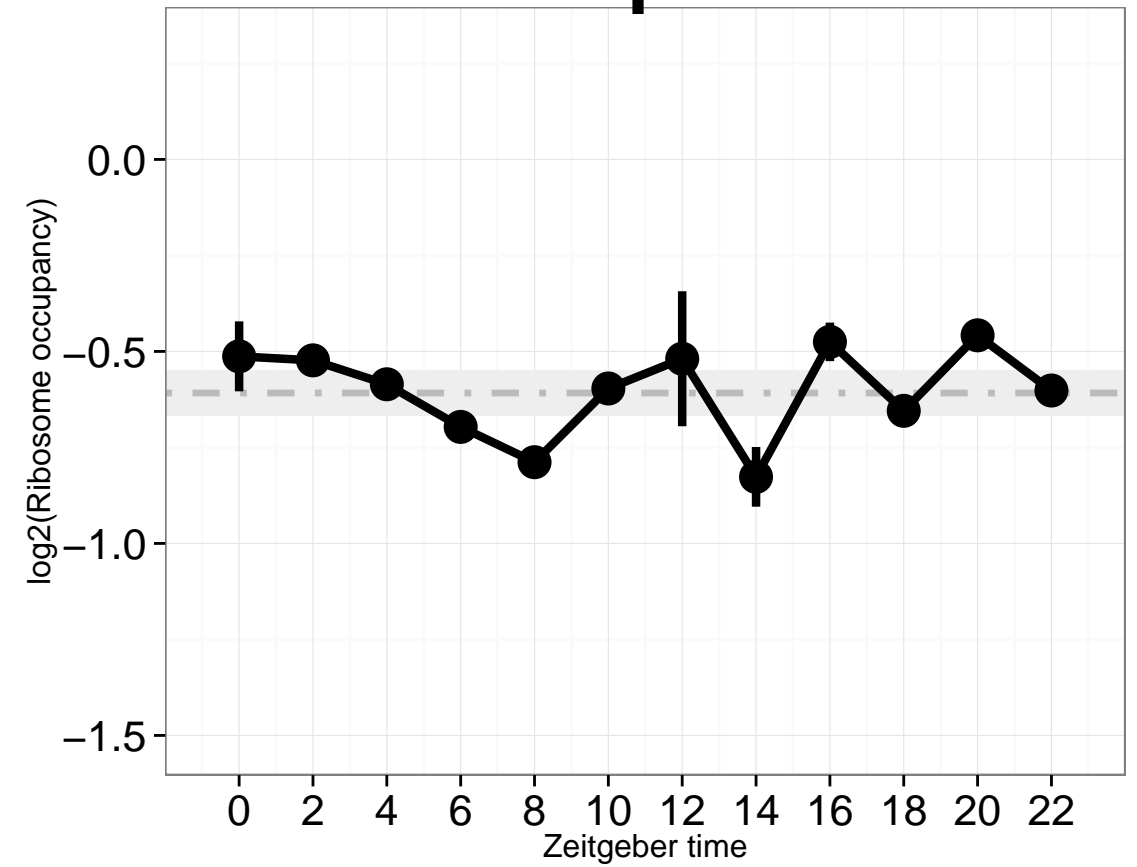

Supplement: Supplementary file 10270 [file 1]

## Pak6

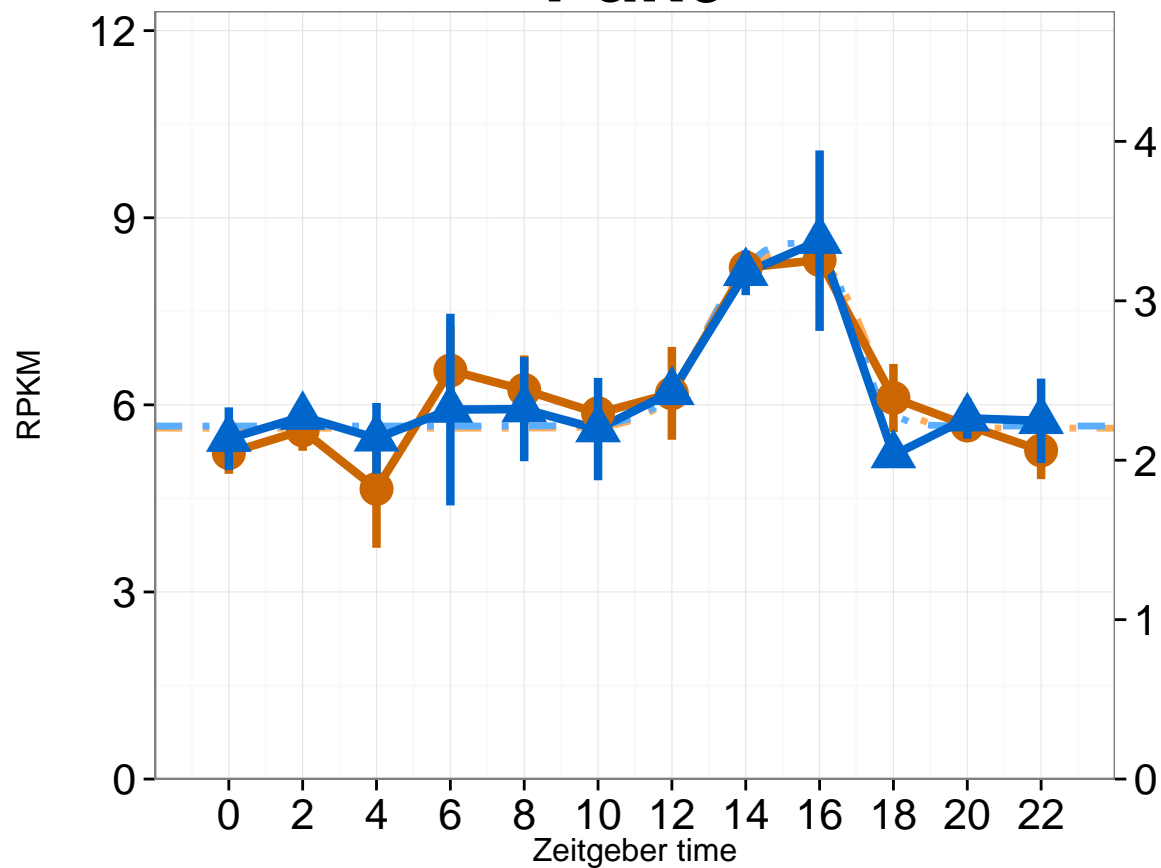

## Pak6

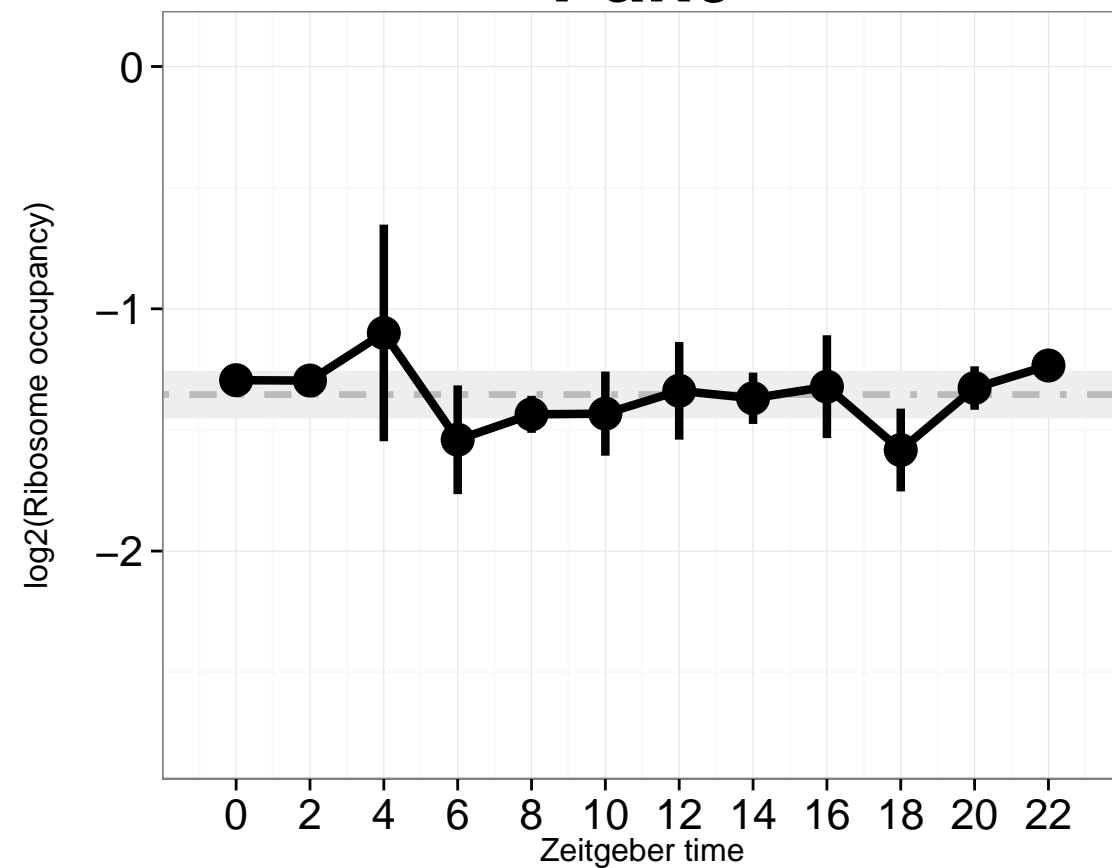

Supplement: Supplementary file 10271 [file 1]

## Idi1

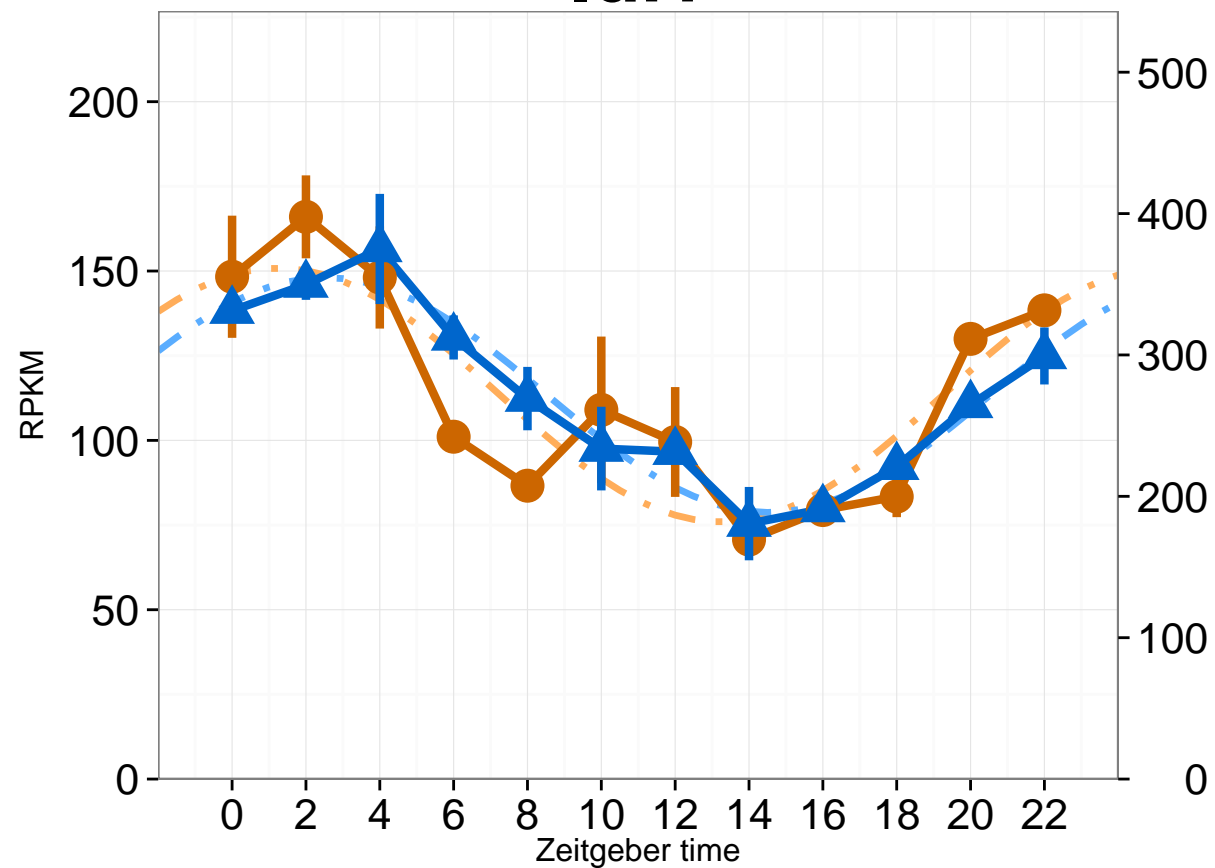

## Idi1

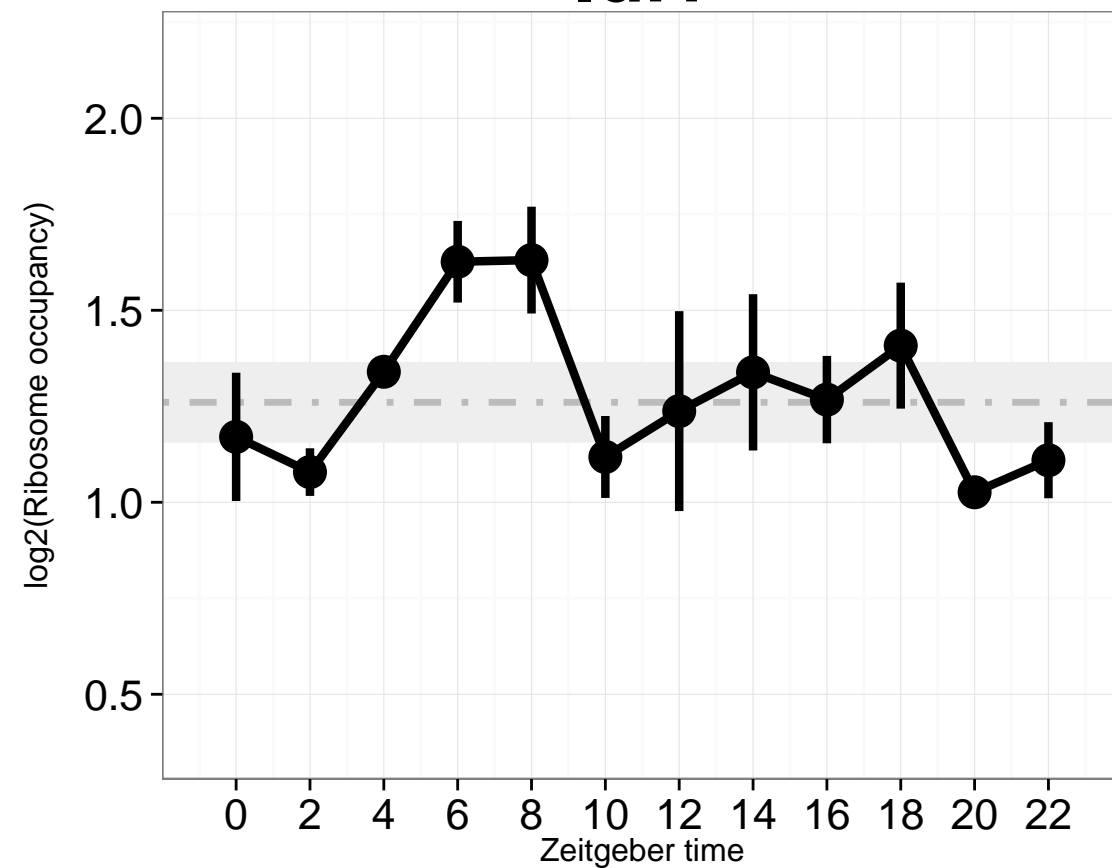

Supplement: Supplementary file 10272 [file 1]

## Sirt3

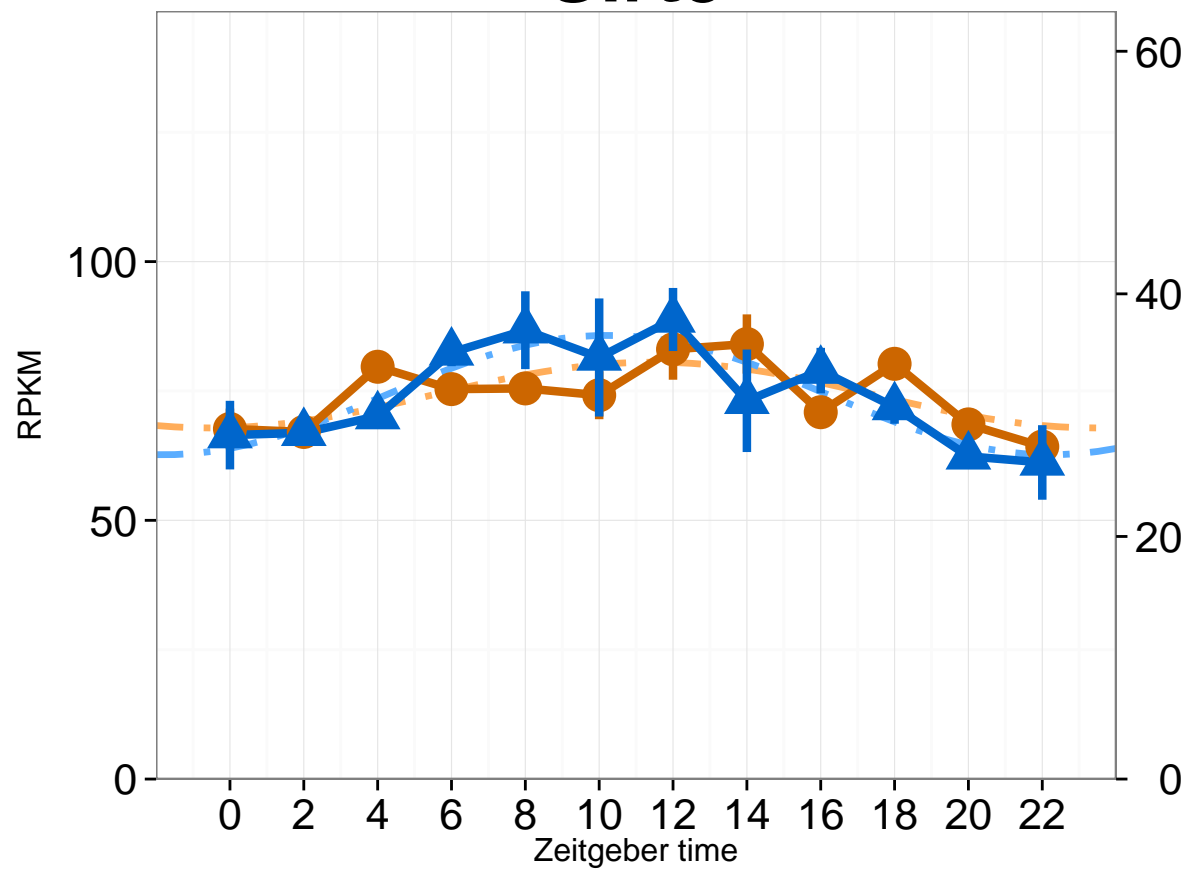

## Sirt3

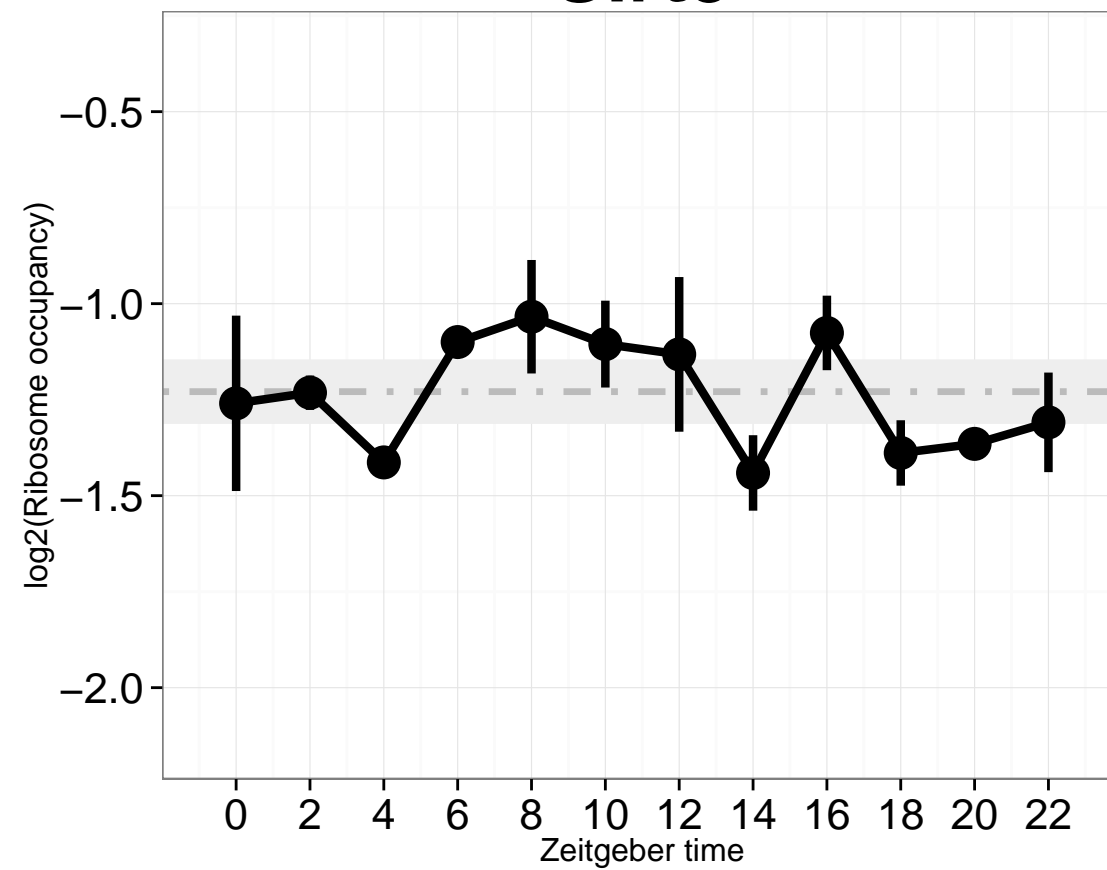

Supplement: Supplementary file 10273 [file 1]

## Tmbim4

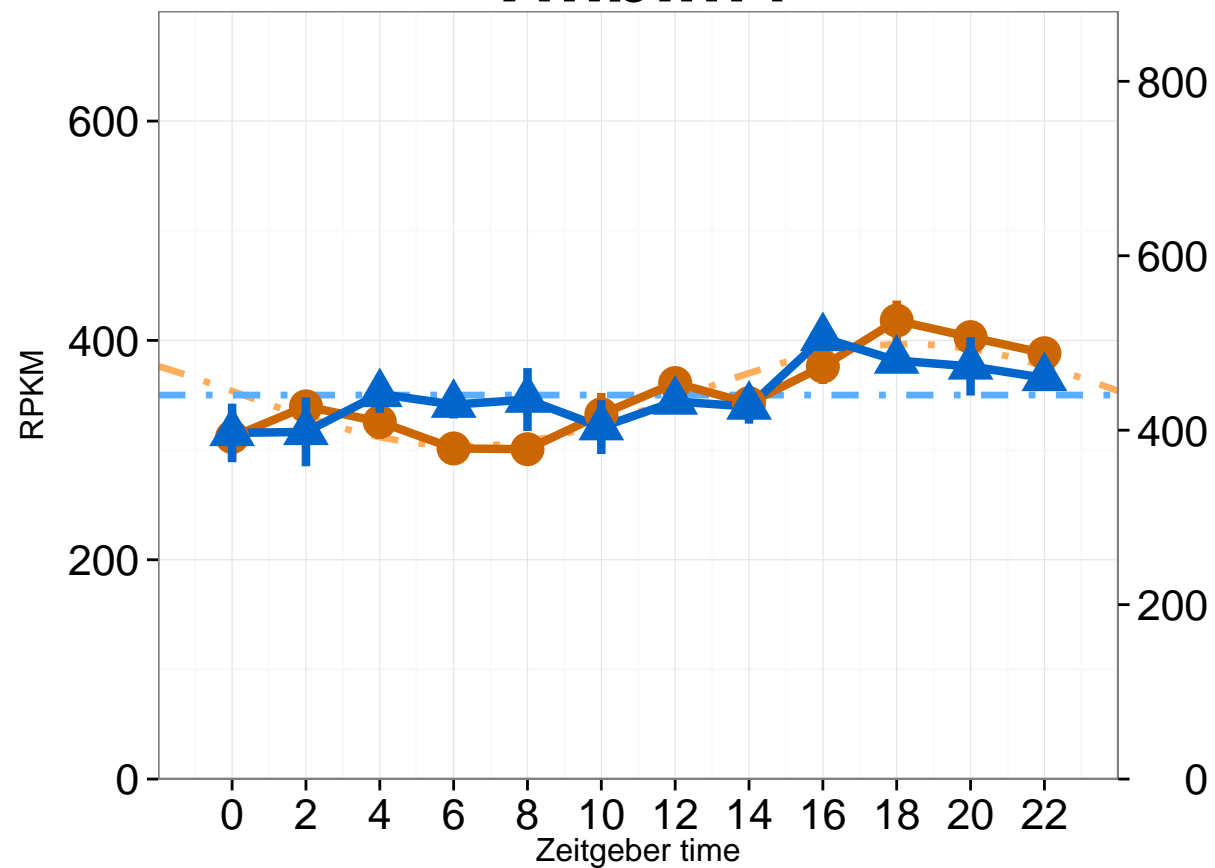

## Tmbim4

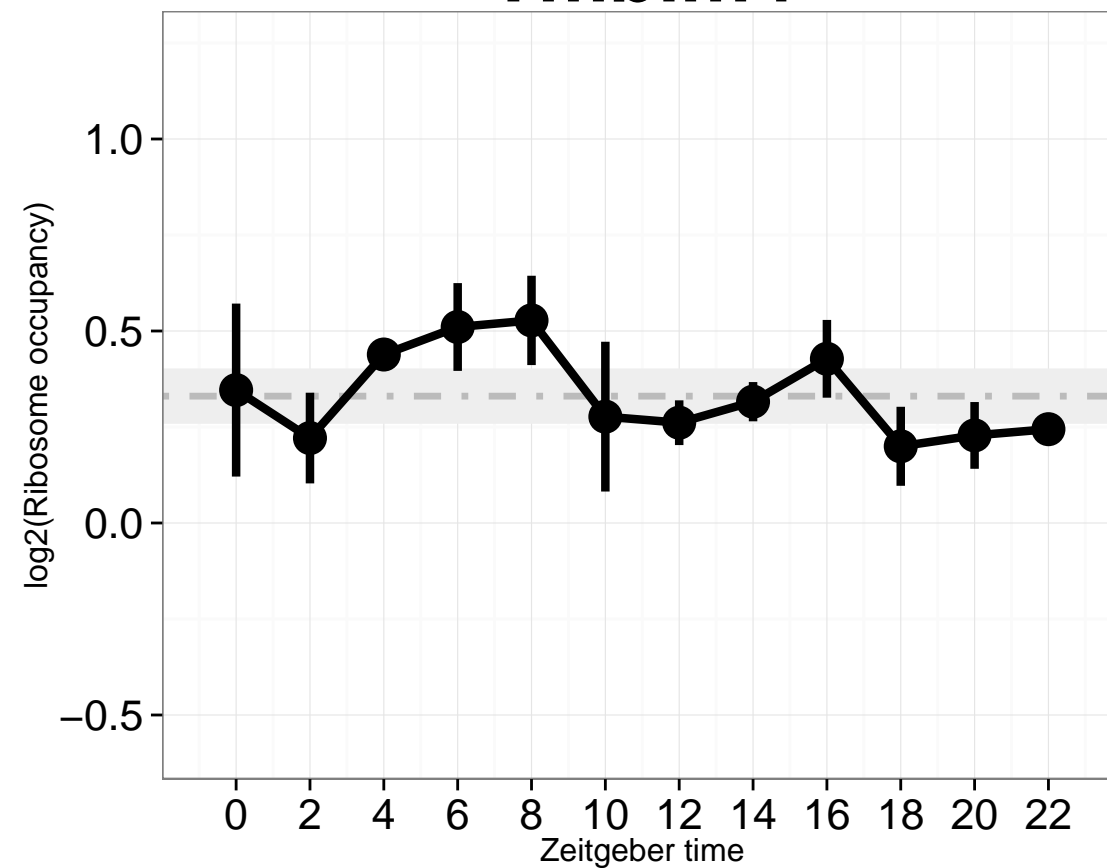

Supplement: Supplementary file 10274 [file 1]

# Limd1

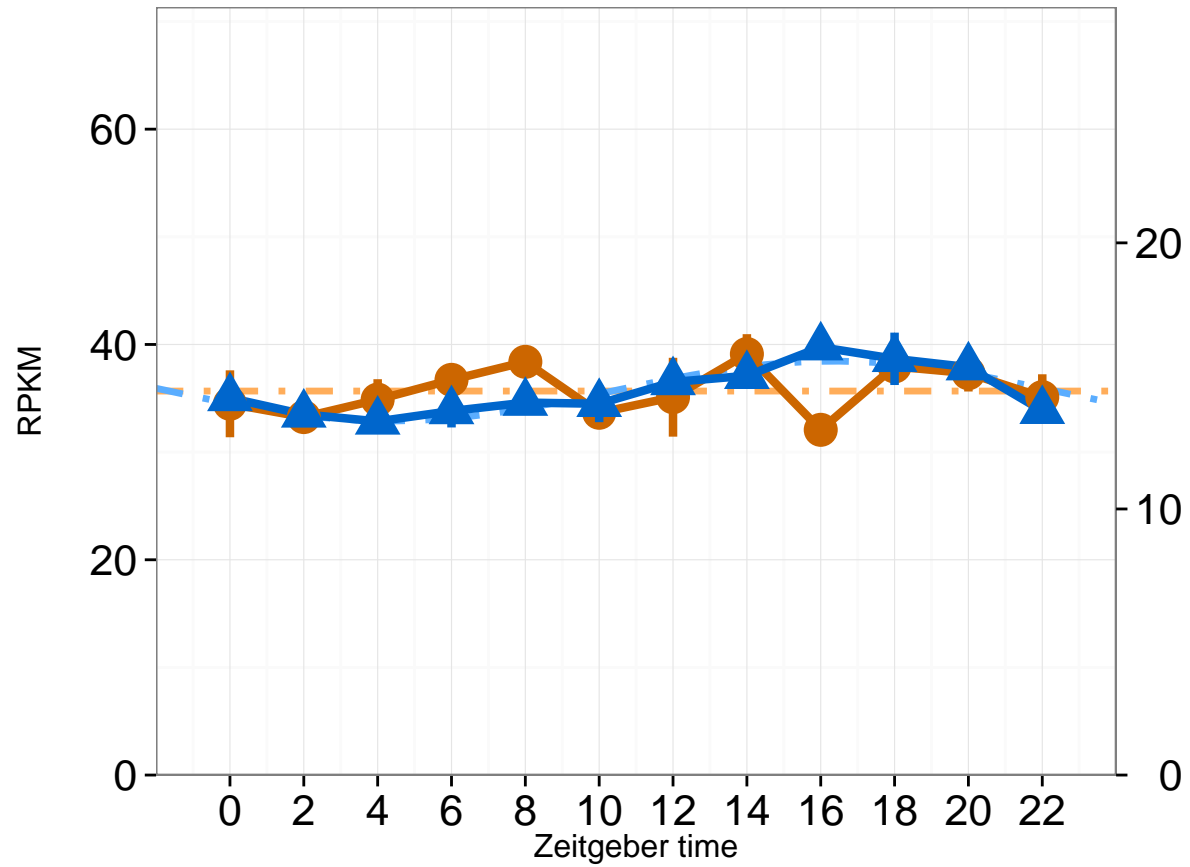

# Limd1

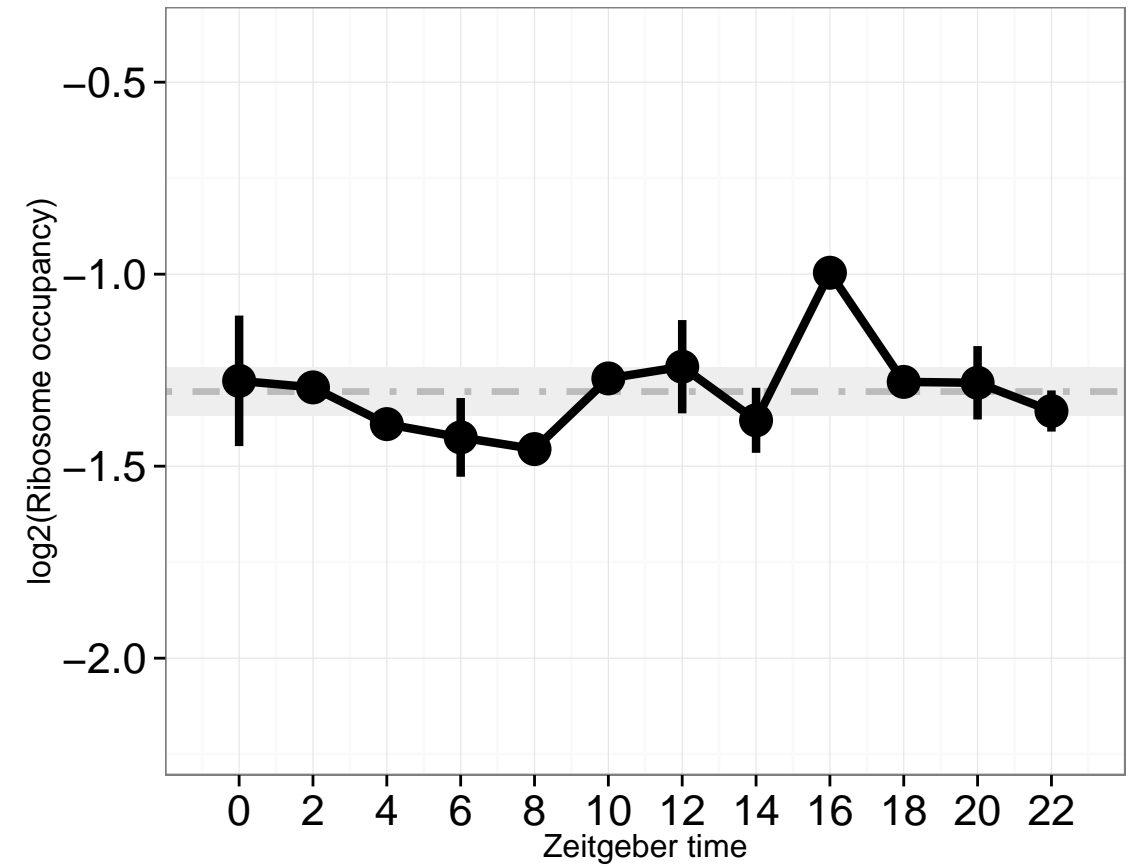

Supplement: Supplementary file 10275 [file 1]

## Eif2ak3

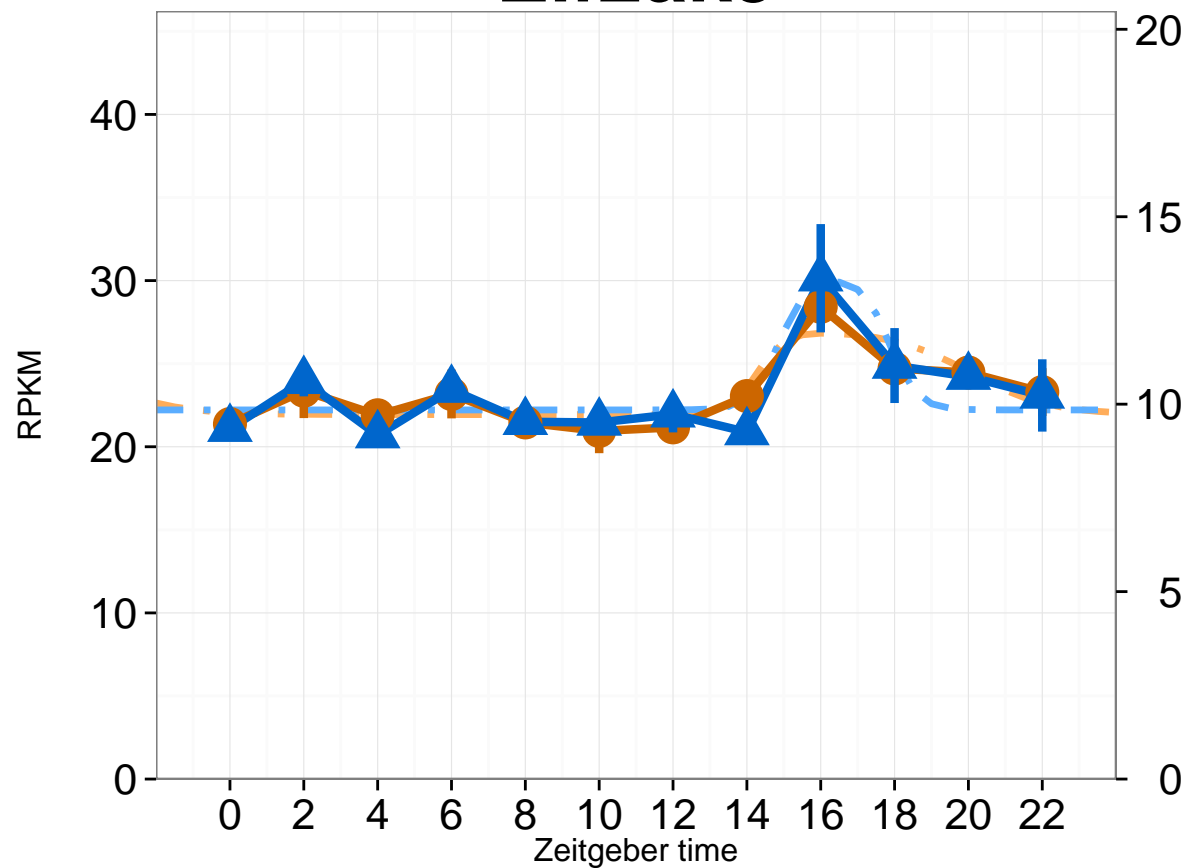

## Eif2ak3

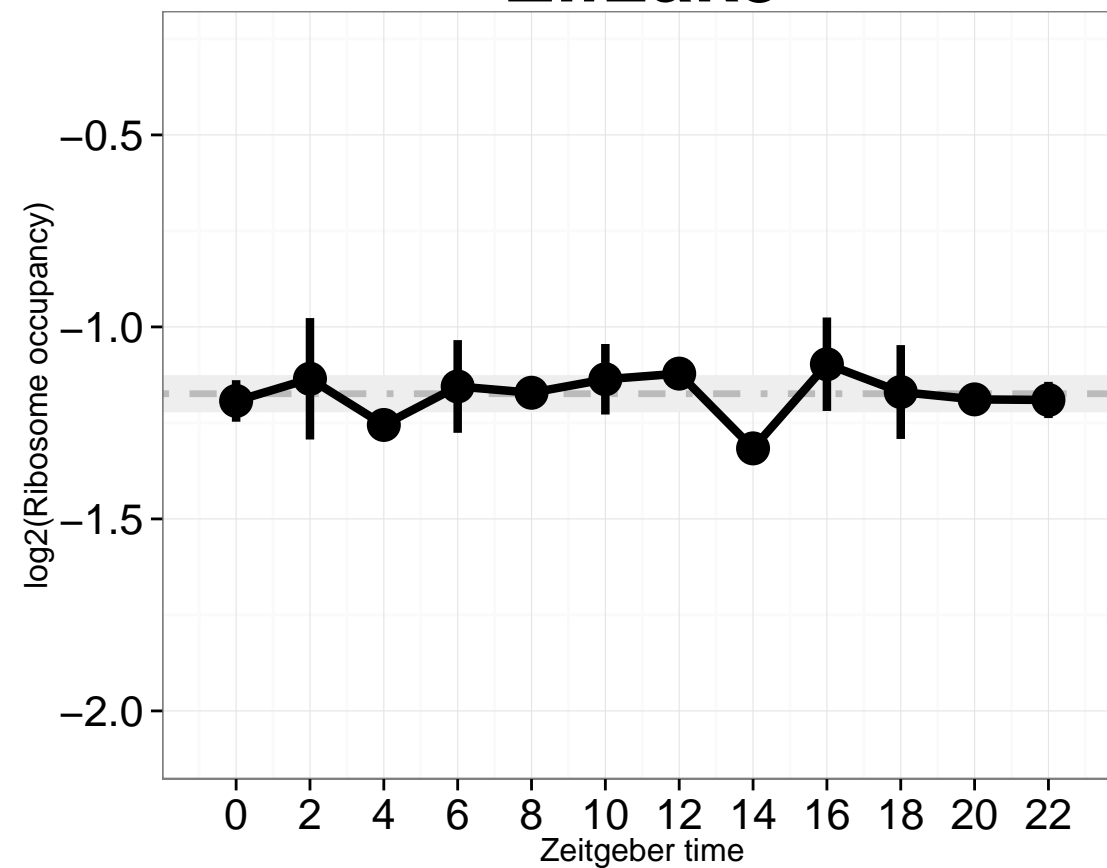

Supplement: Supplementary file 10276 [file 1]

**Angptl6**

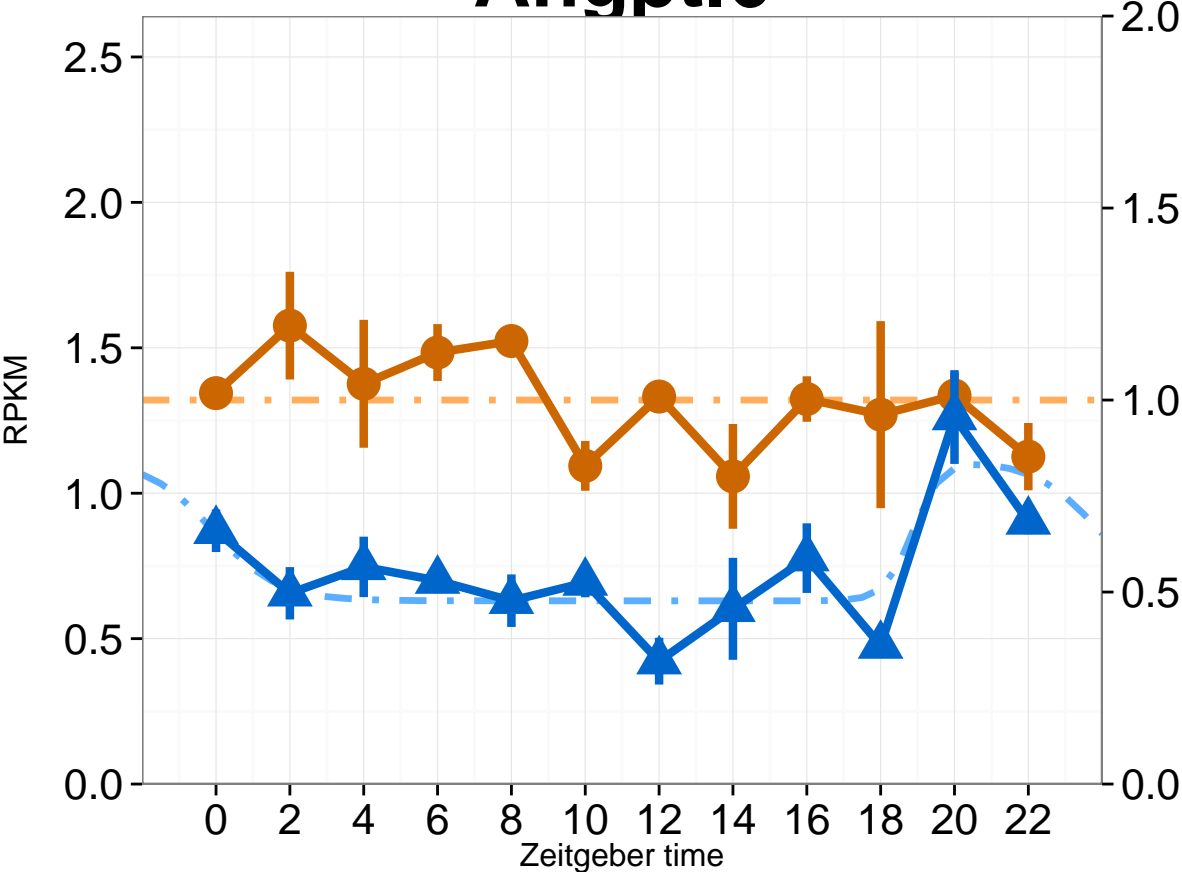

**Angptl6**

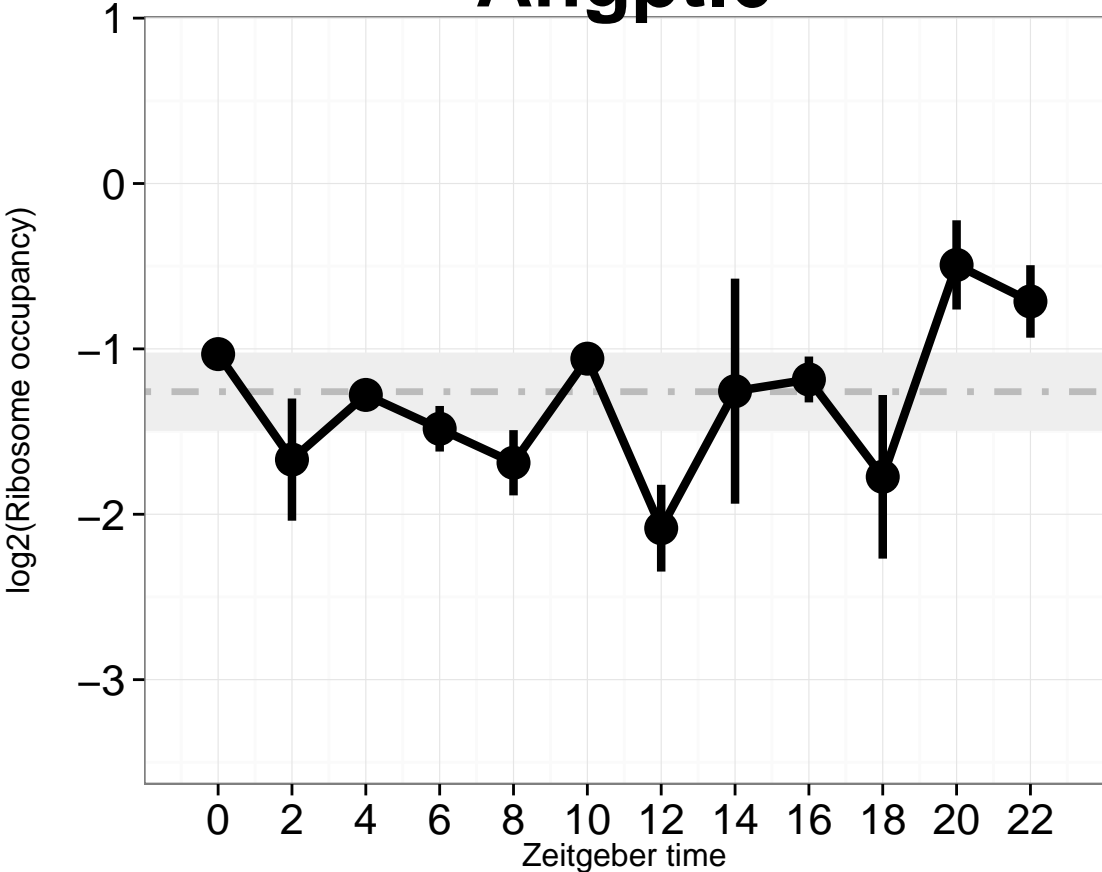

Supplement: Supplementary file 10277 [file 1]

# Srpk1

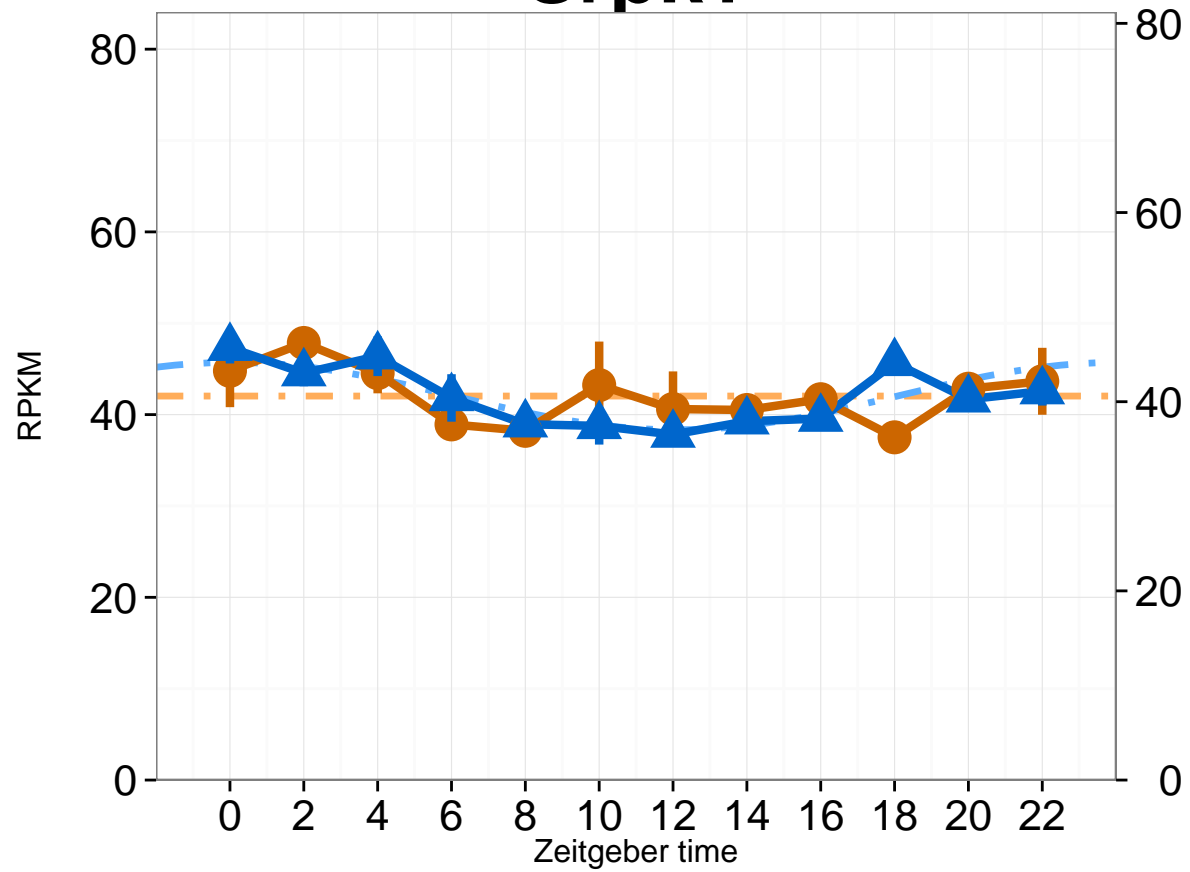

# Srpk1

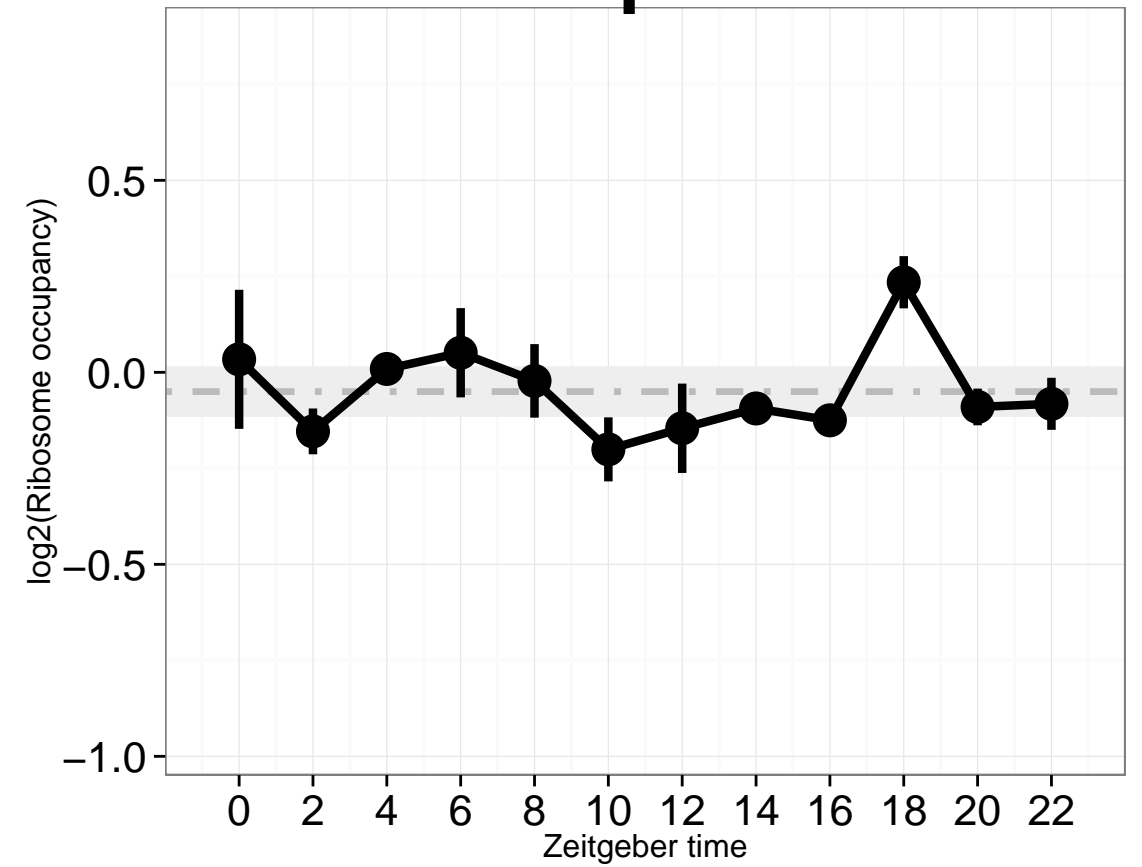

Supplement: Supplementary file 10278 [file 1]

## Mcam

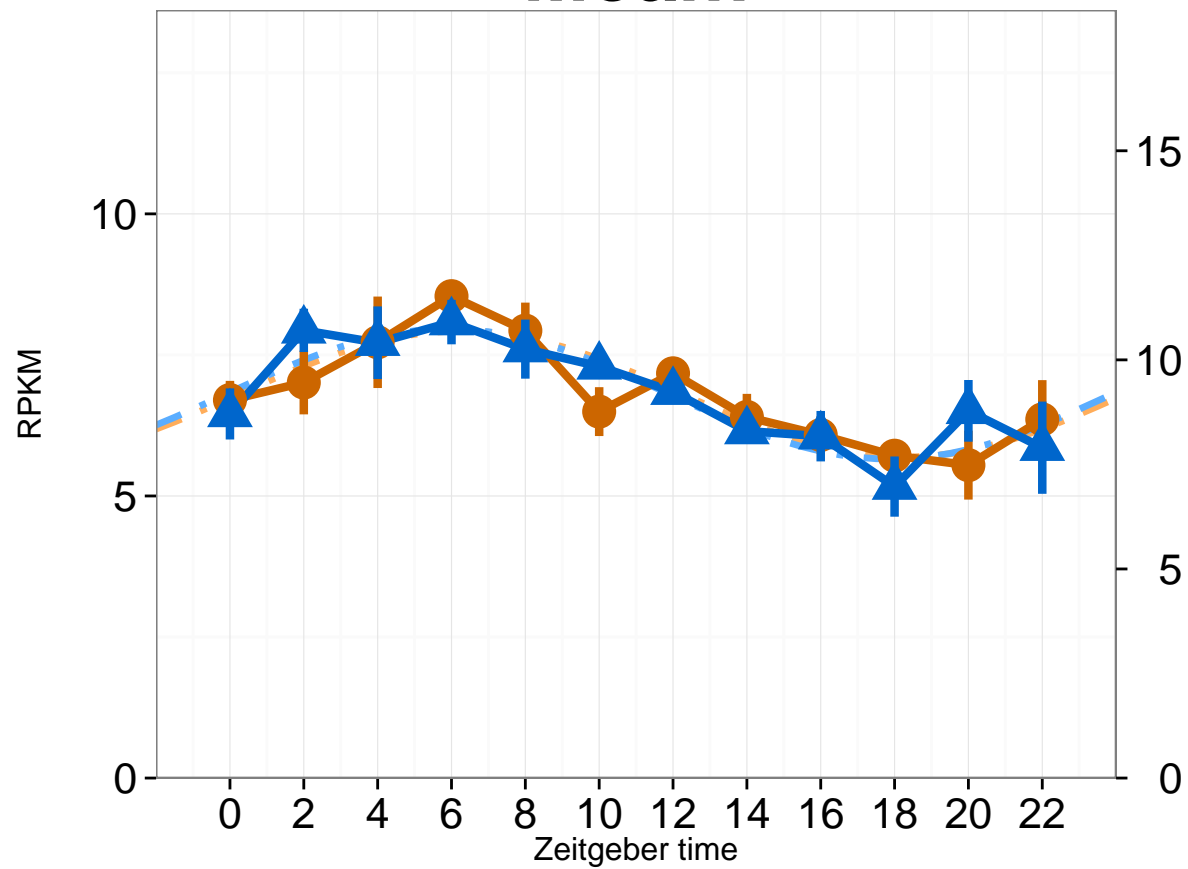

## Mcam

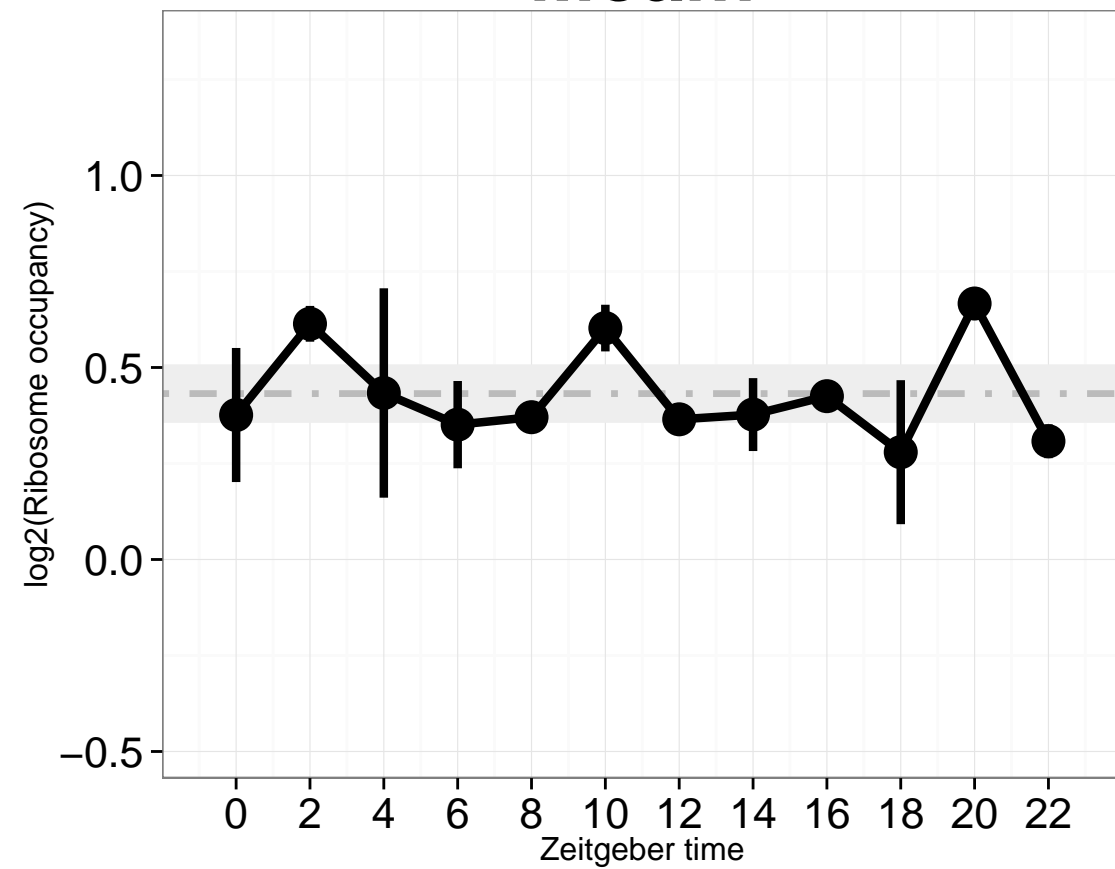

Supplement: Supplementary file 10279 [file 1]

# Ssrp1

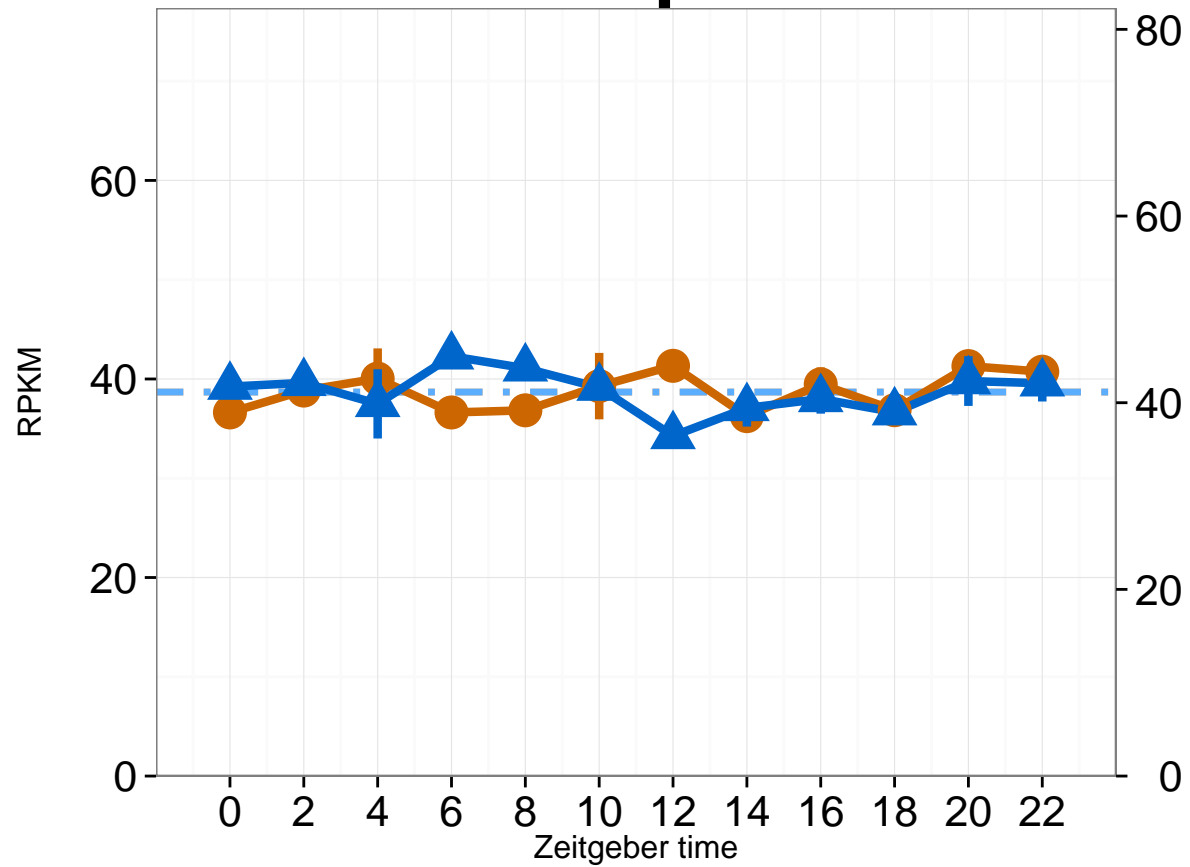

# Ssrp1

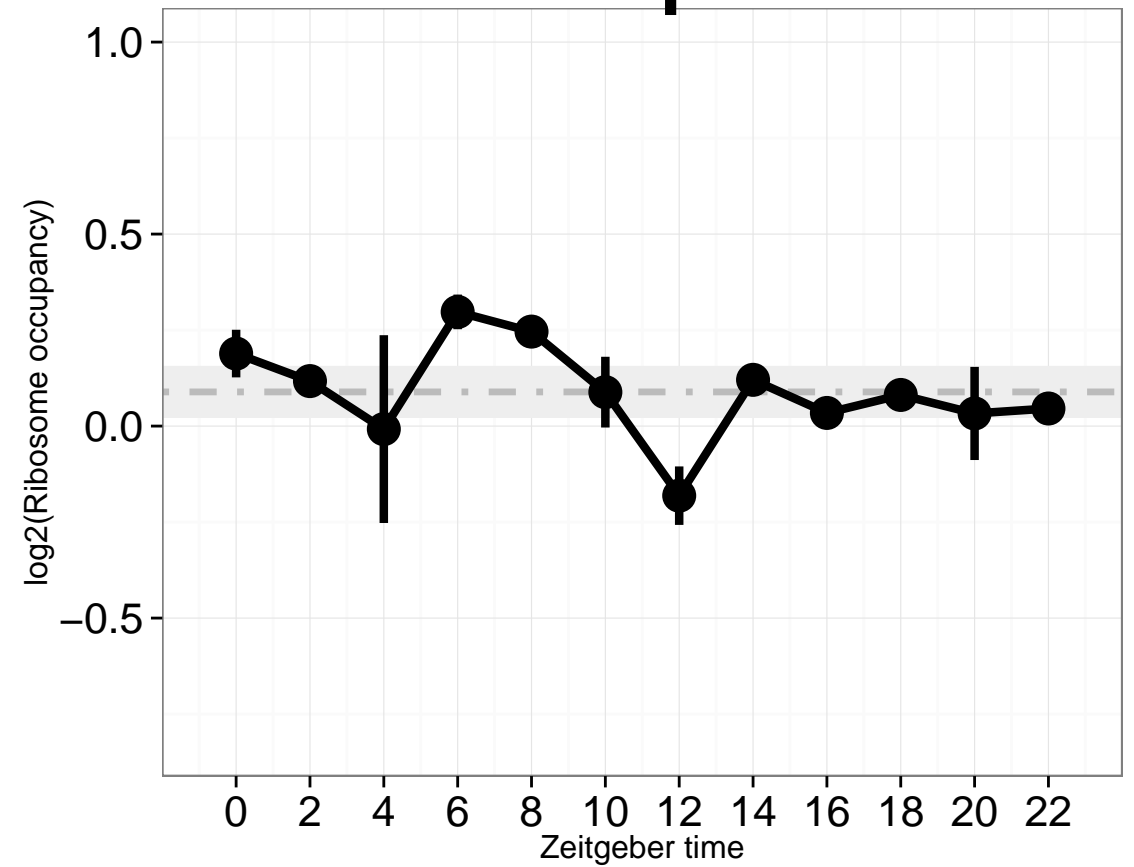

Supplement: Supplementary file 10280 [file 1]

## Nfkbib

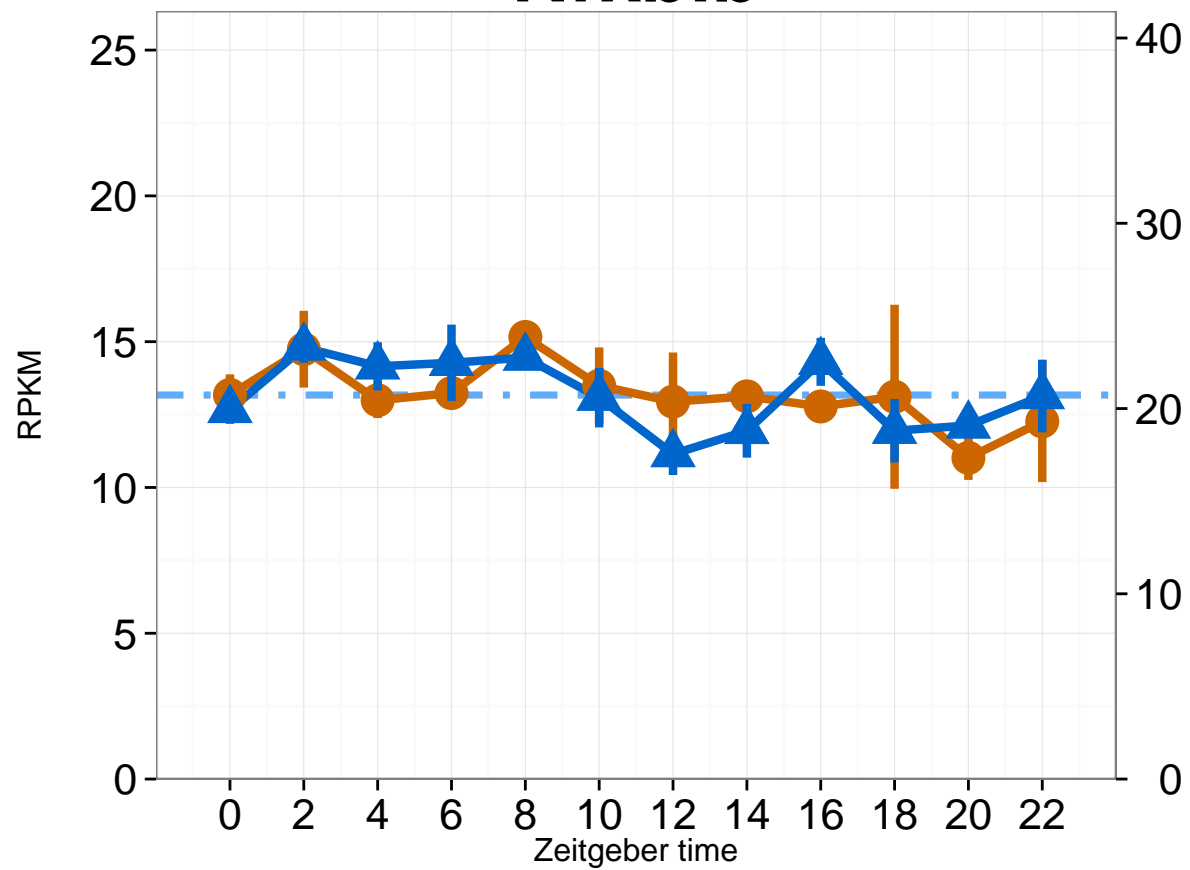

## Nfkbib

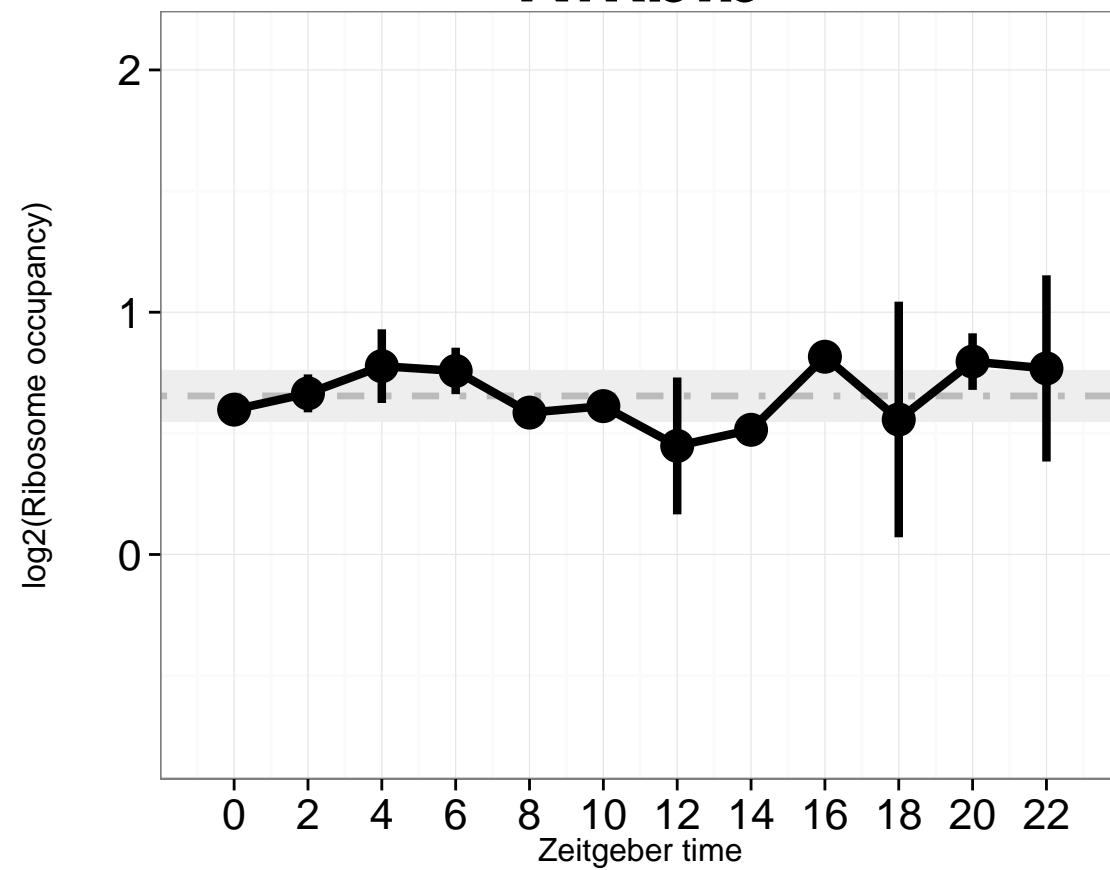

Supplement: Supplementary file 10281 [file 1]

## Rhoa

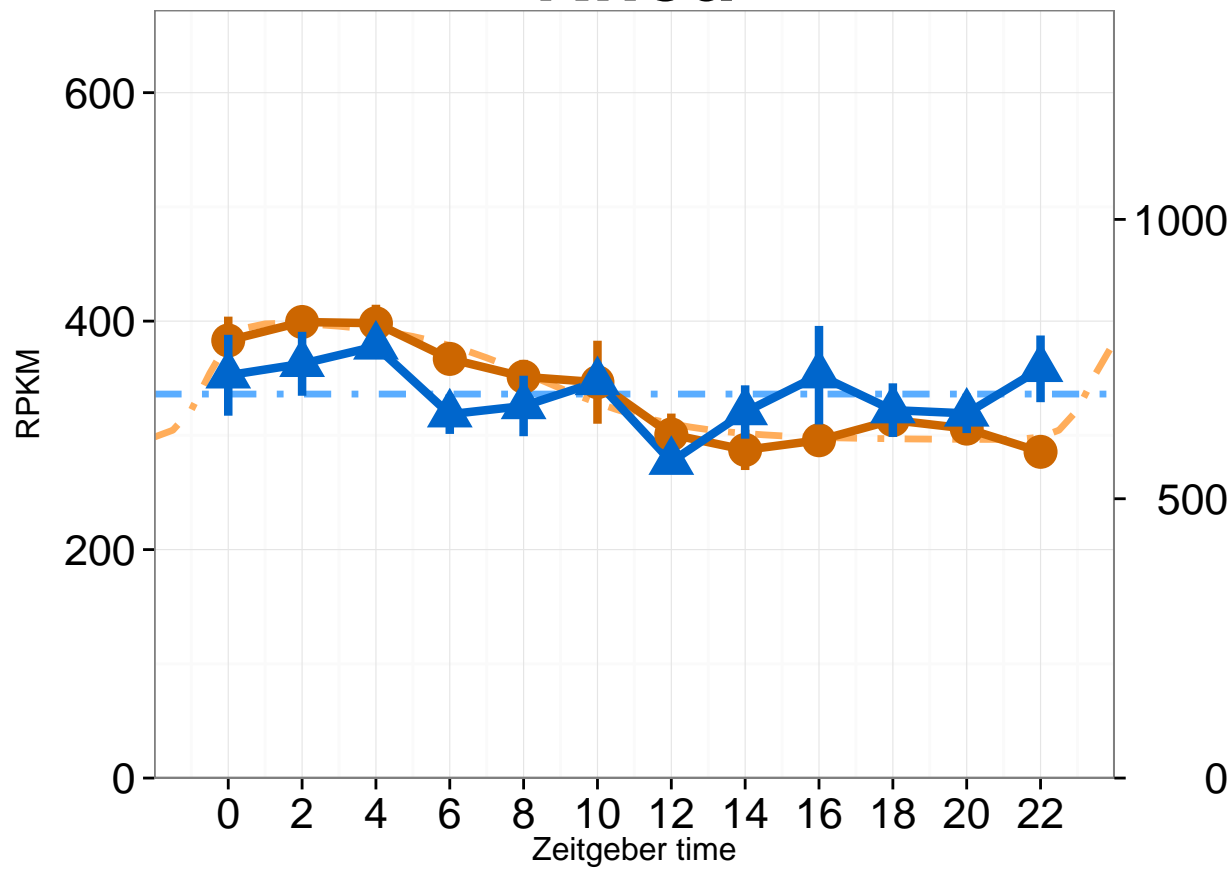

## Rhoa

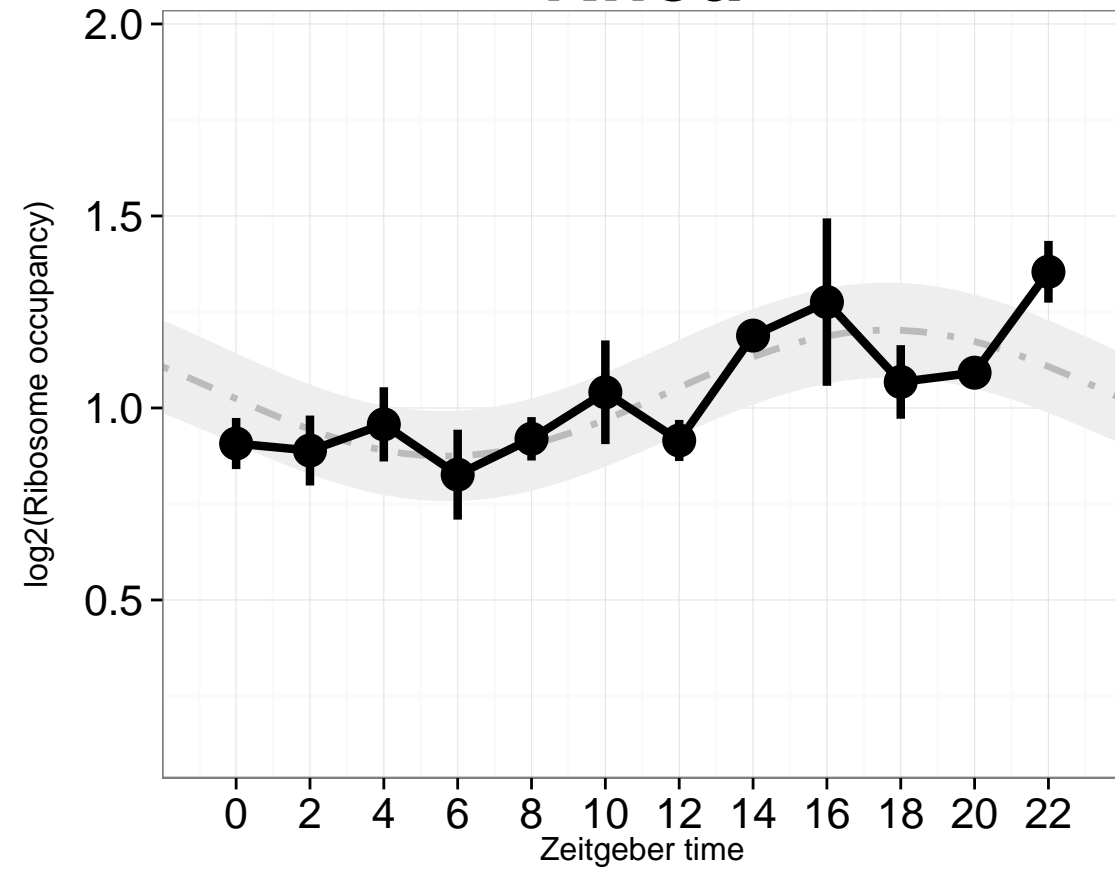

Supplement: Supplementary file 10282 [file 1]

# Stk32a

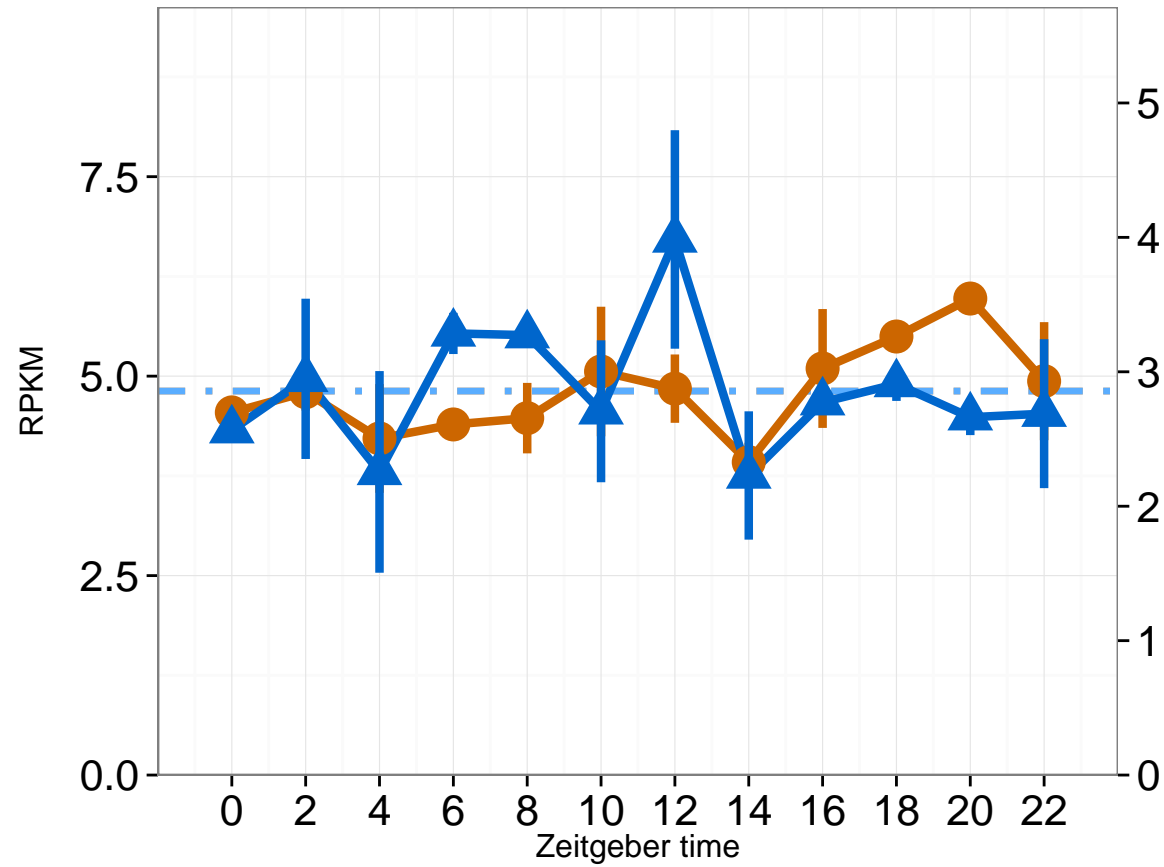

# Stk32a

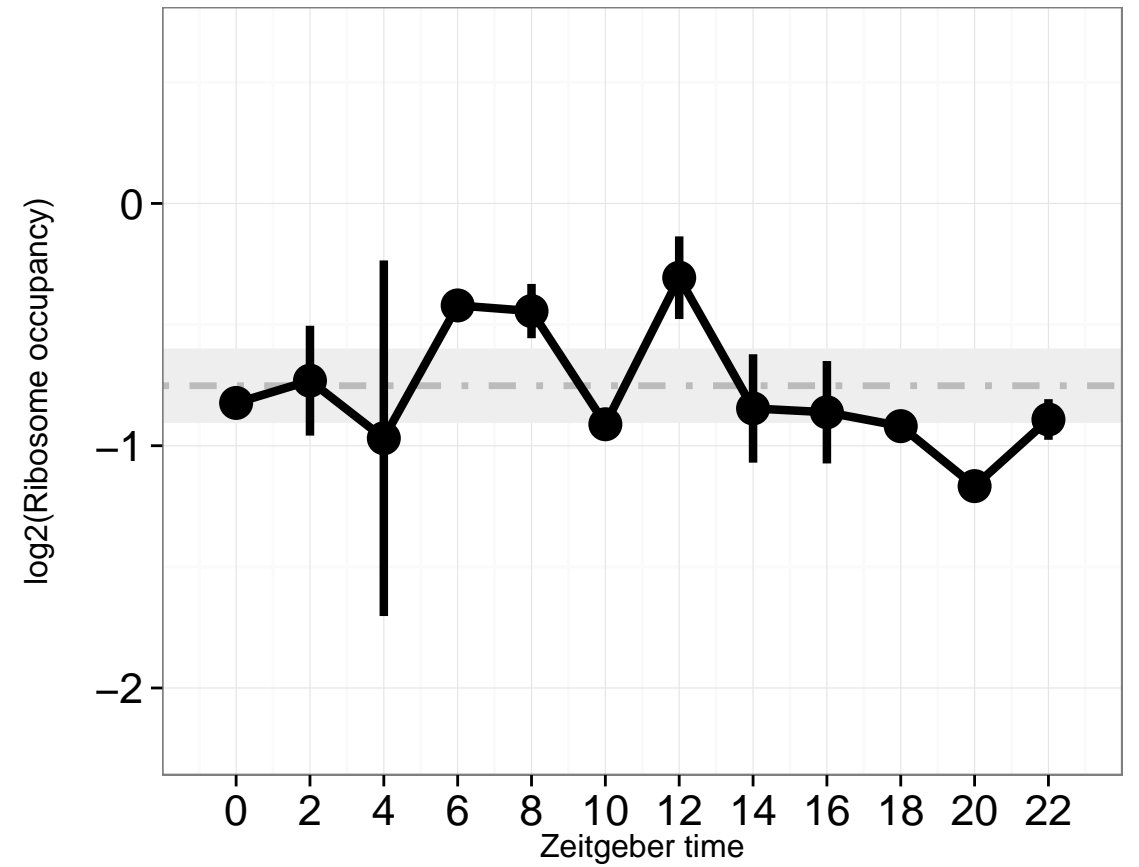

Supplement: Supplementary file 10283 [file 1]

# Gramd1a

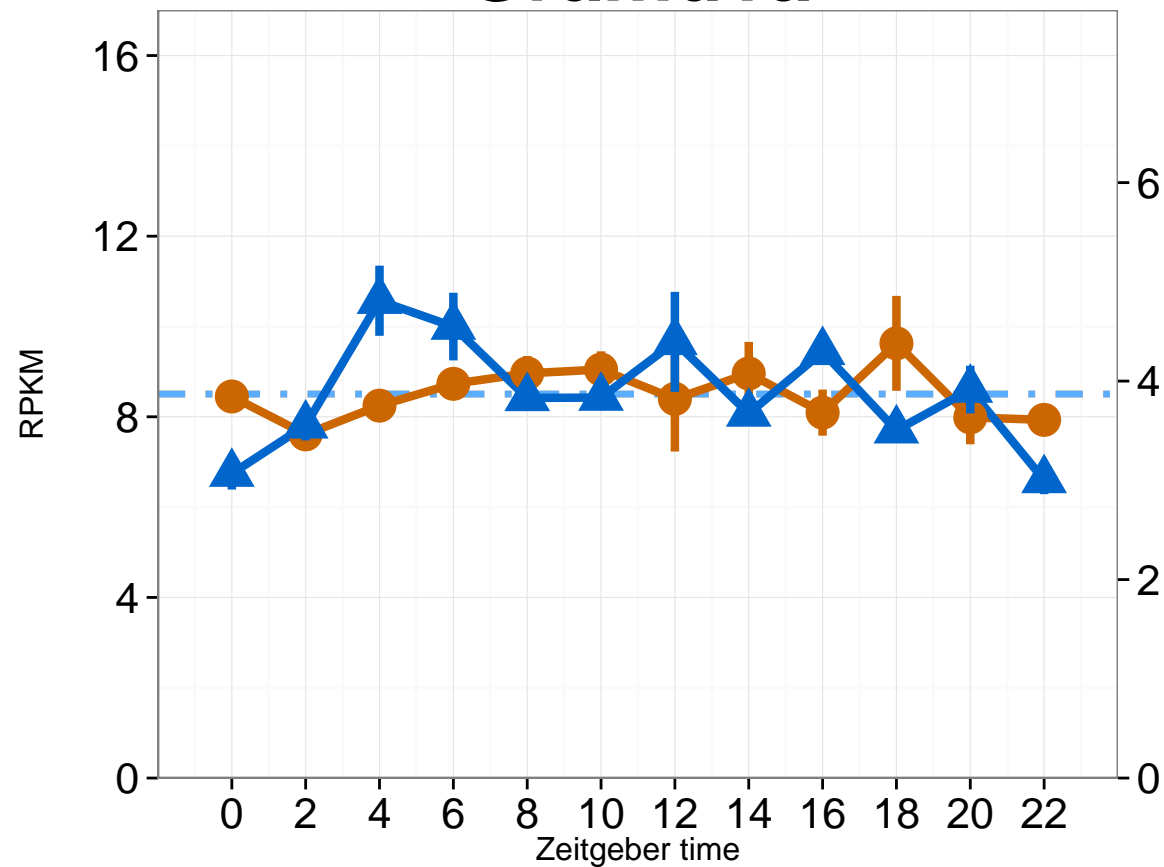

# Gramd1a

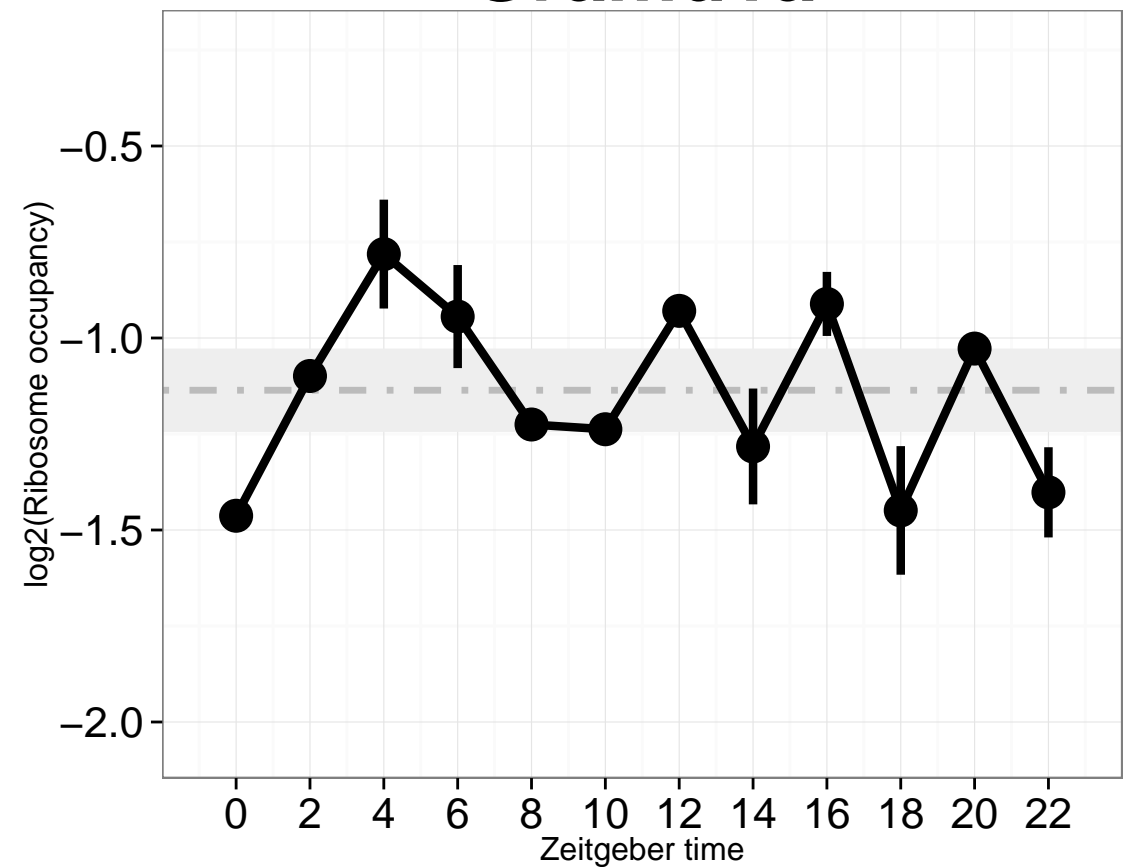

Supplement: Supplementary file 10284 [file 1]

# Upk3a

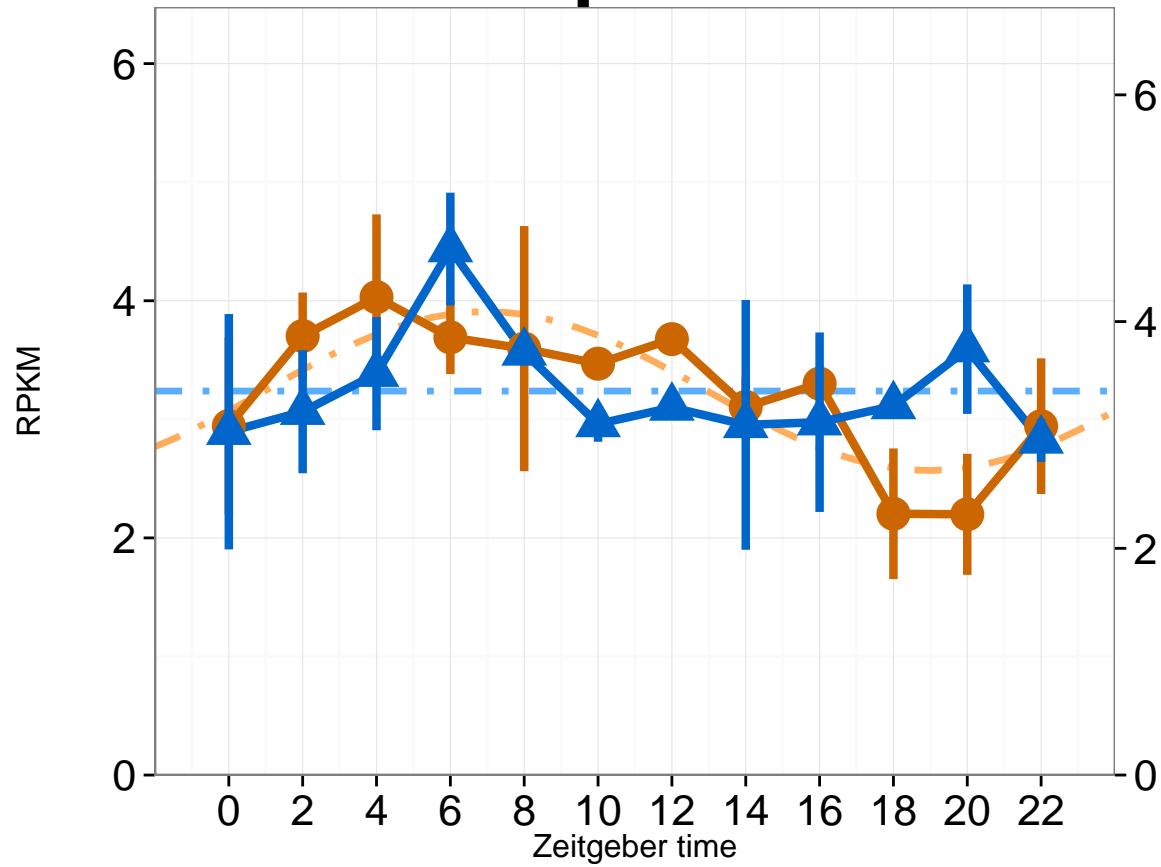

# Upk3a

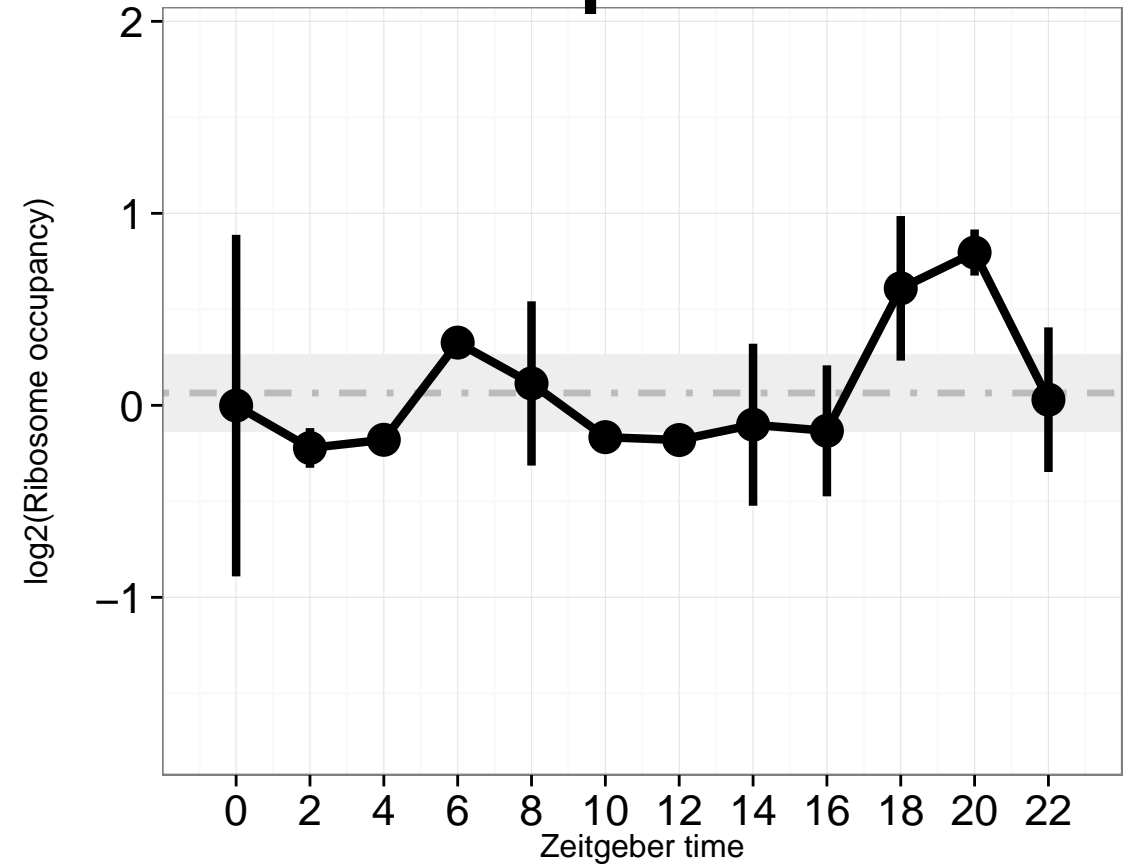

Supplement: Supplementary file 10285 [file 1]

## Dstyk

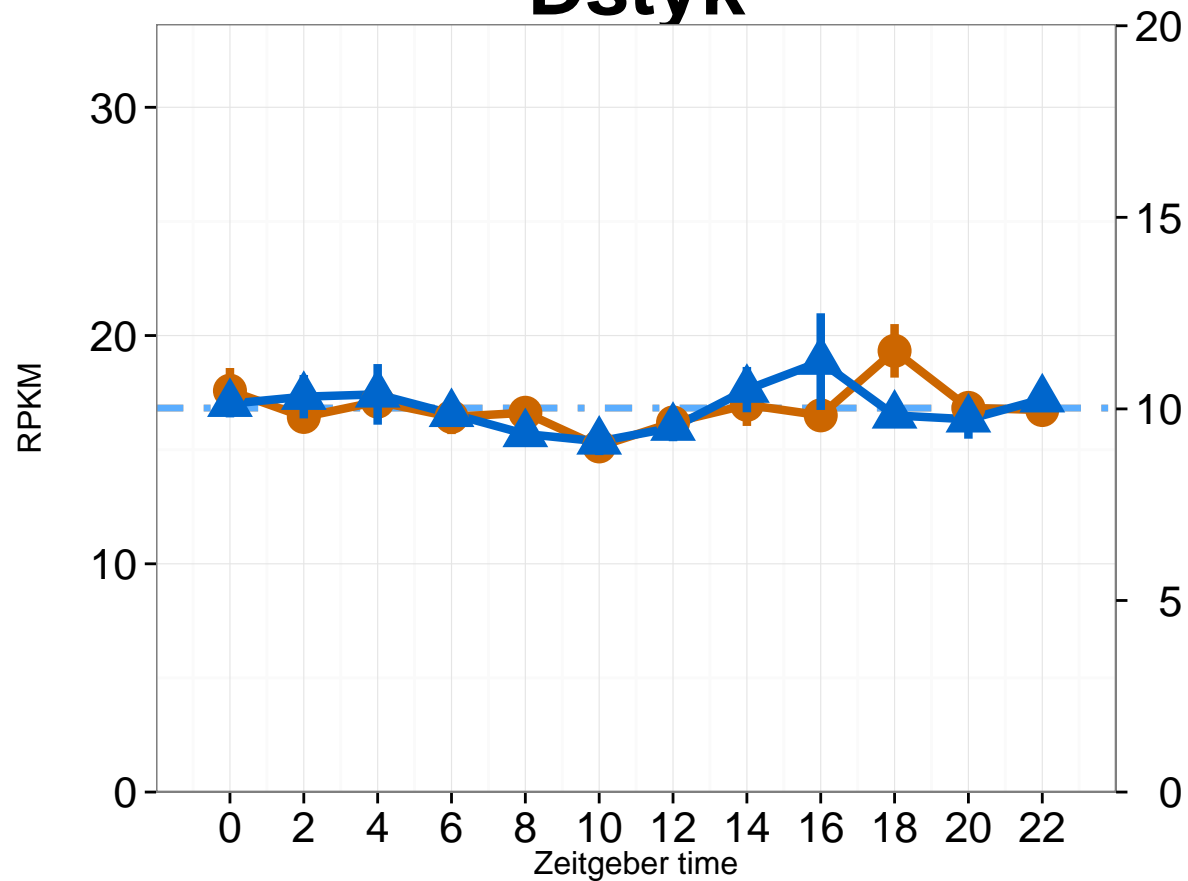

## Dstyk

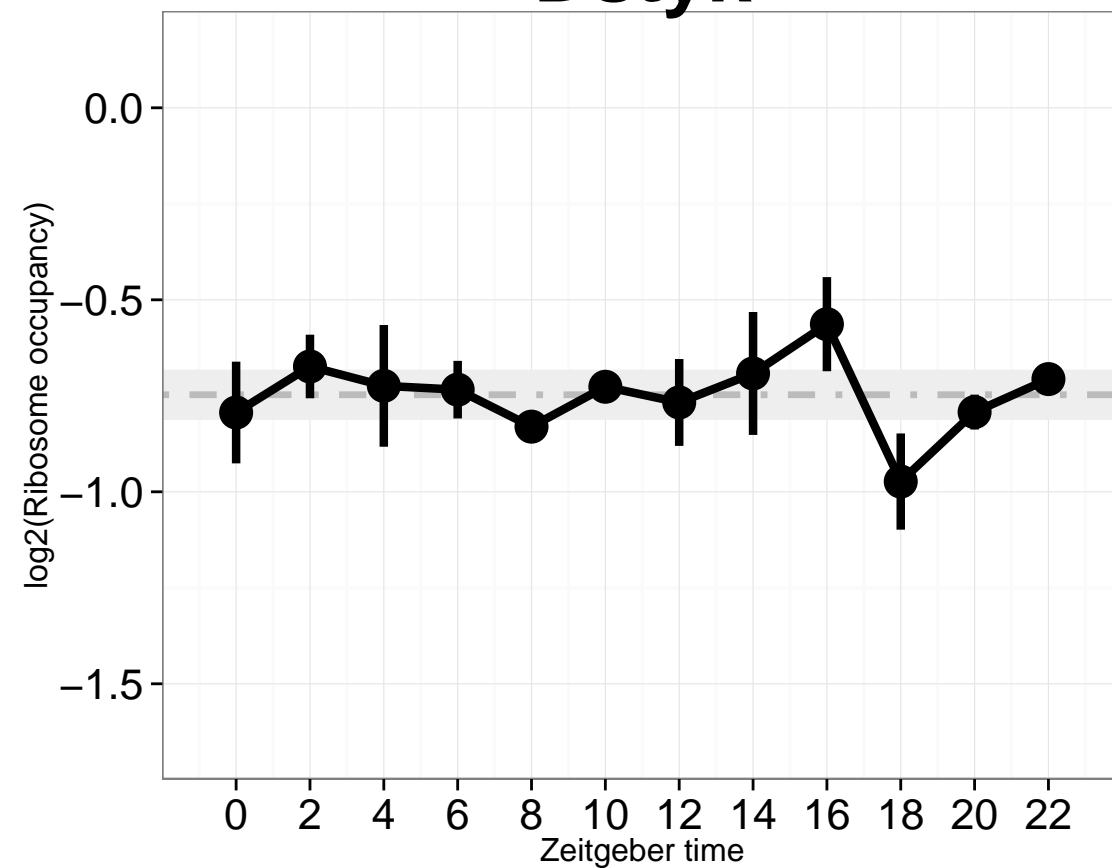

Supplement: Supplementary file 10286 [file 1]

# Fam83b

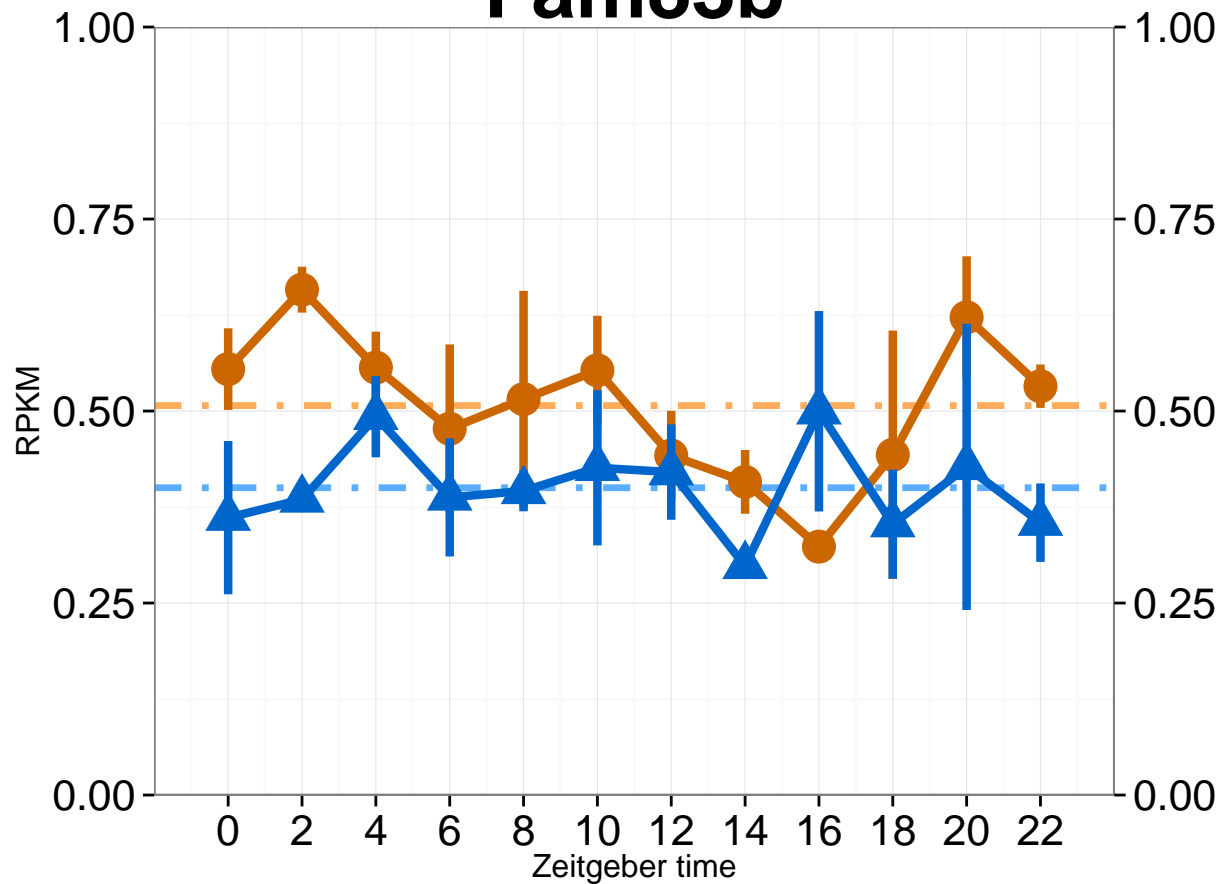

# Fam83b

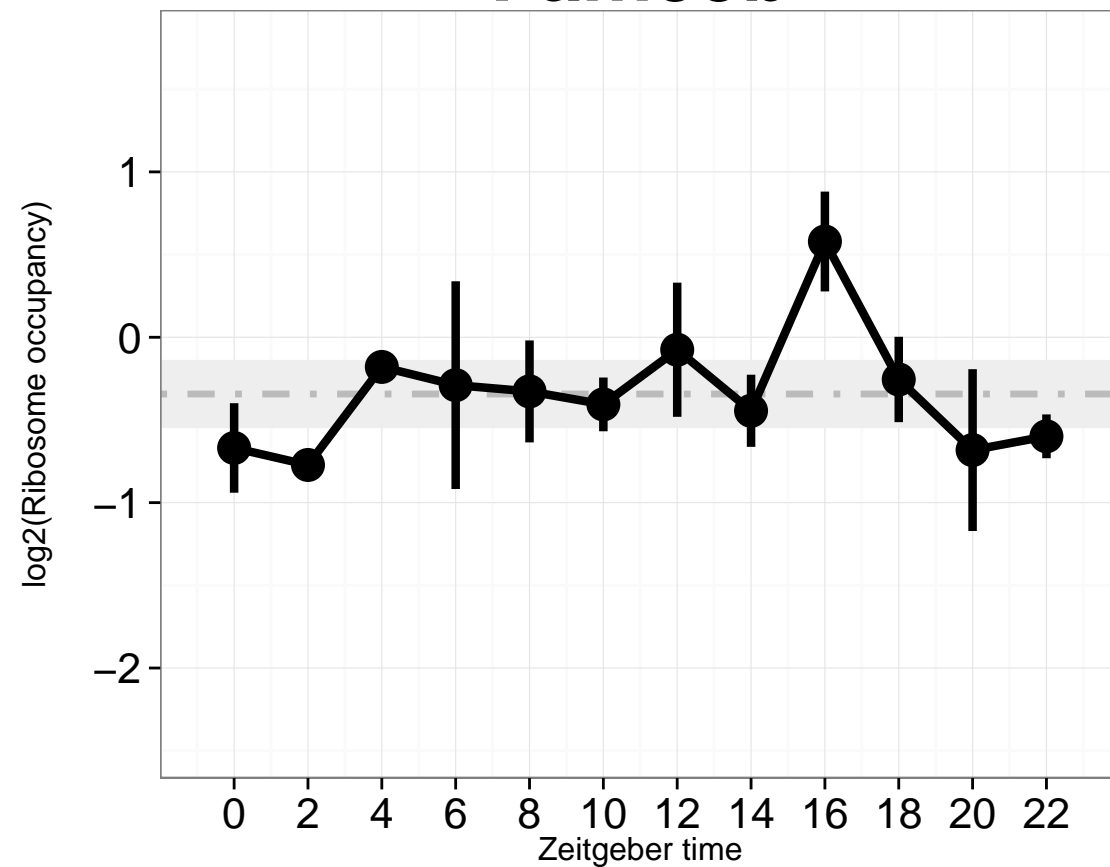

Supplement: Supplementary file 10287 [file 1]

# Fahd2a

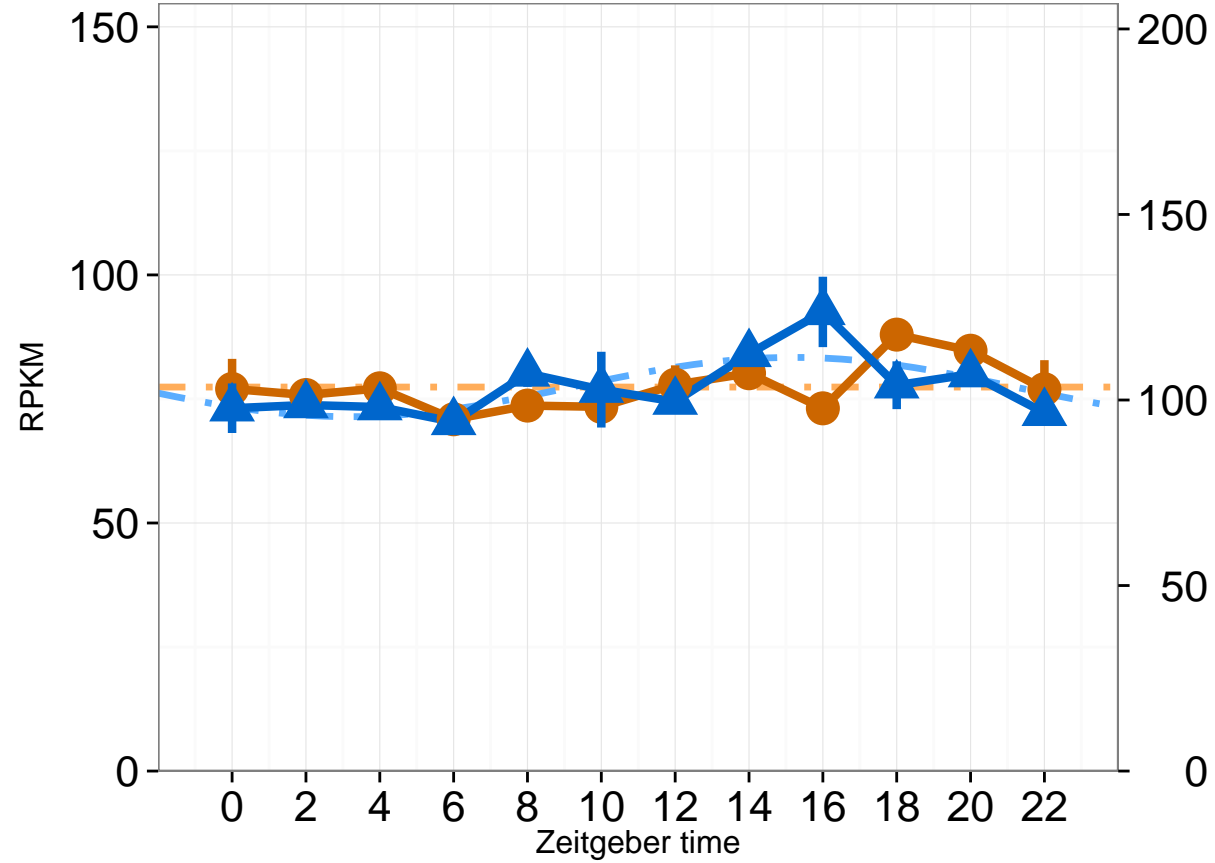

# Fahd2a

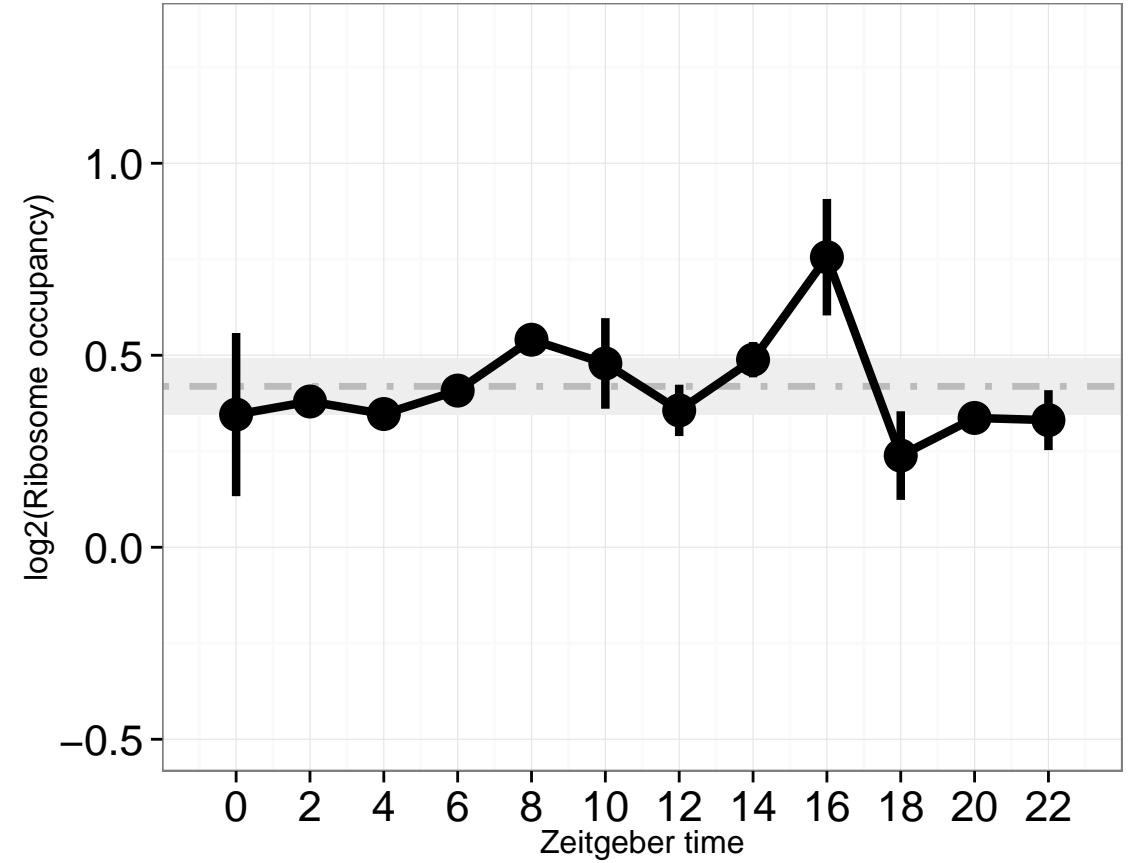

Supplement: Supplementary file 10288 [file 1]

## Endog

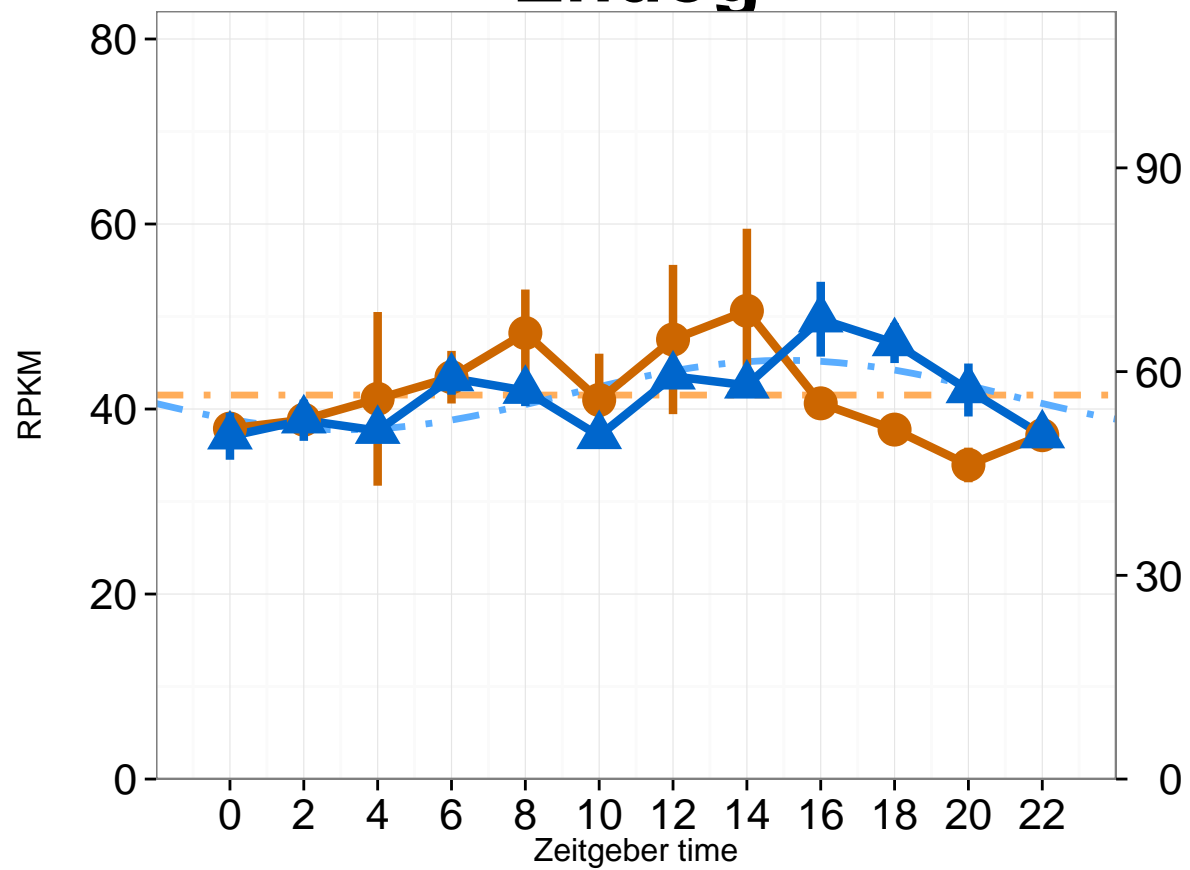

## Endog

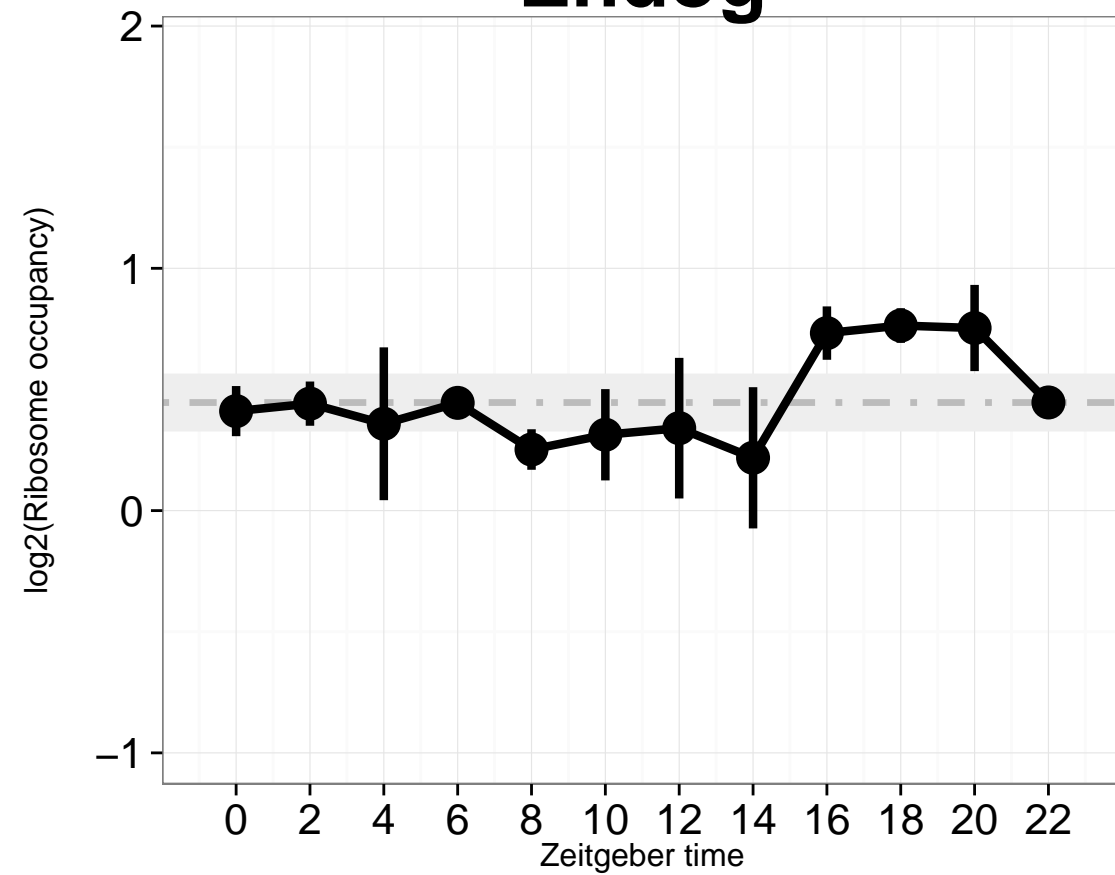

Supplement: Supplementary file 10289 [file 1]

## Get4

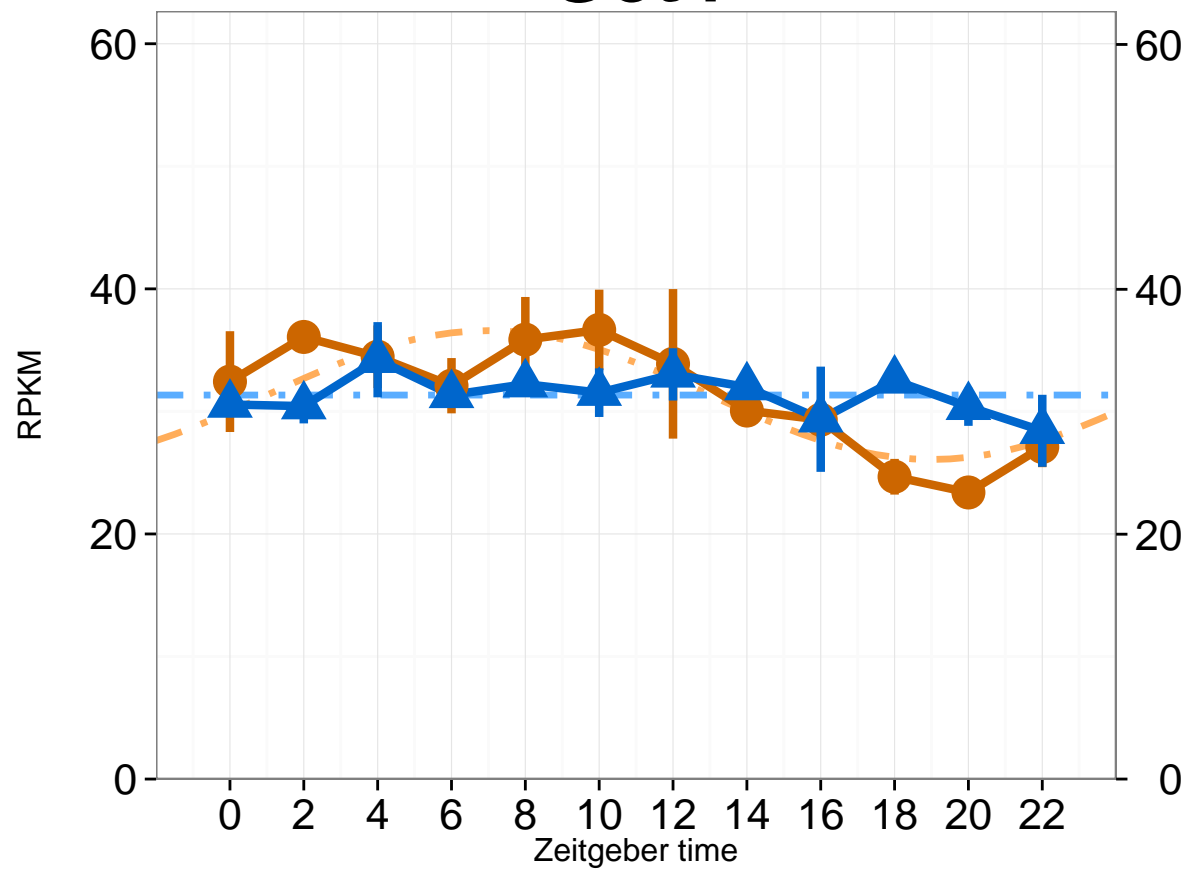

## Get4

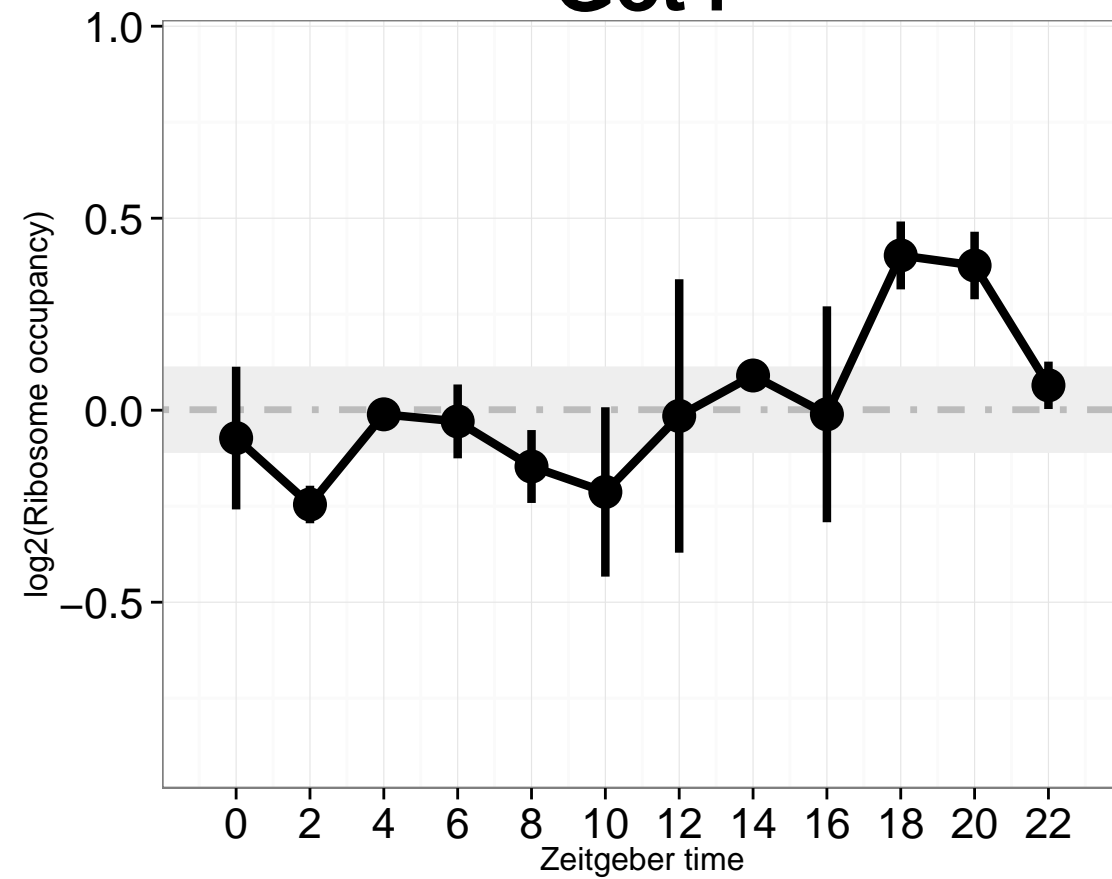

Supplement: Supplementary file 10290 [file 1]

## Rilp

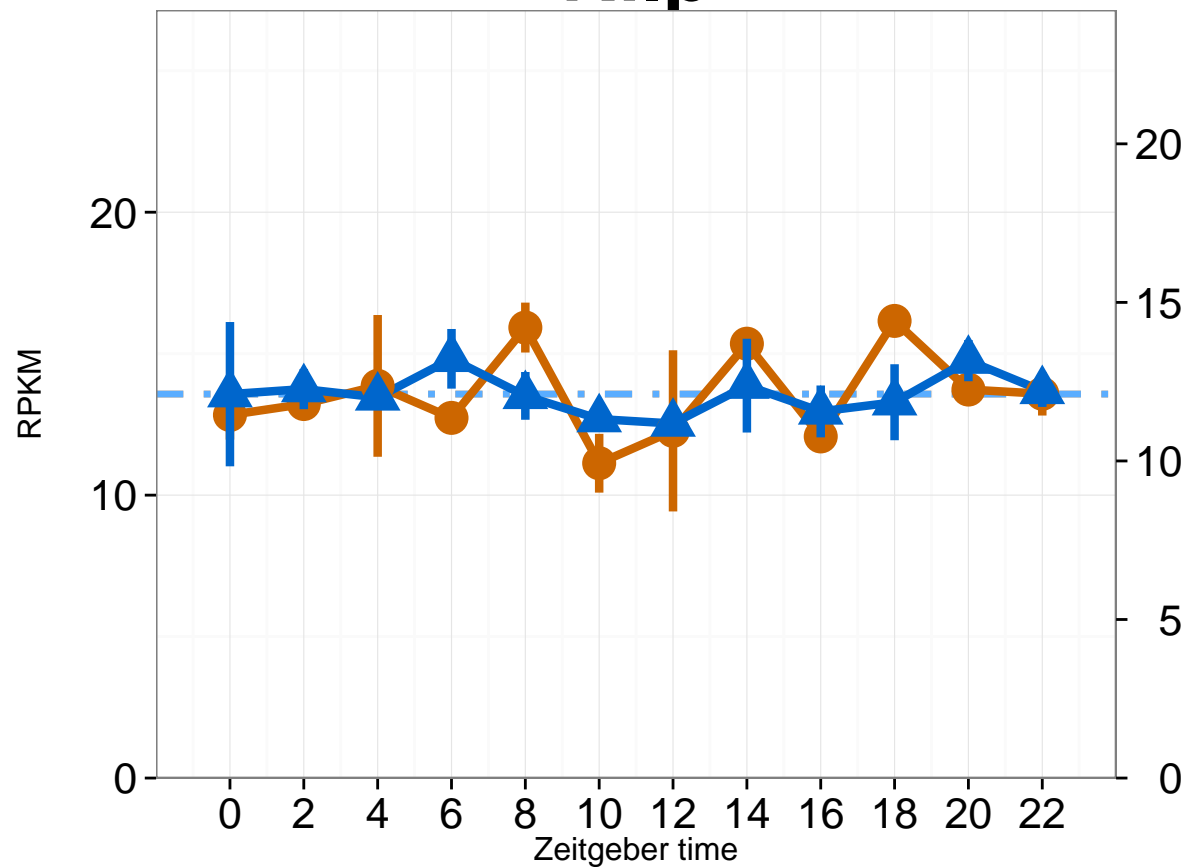

## Rilp

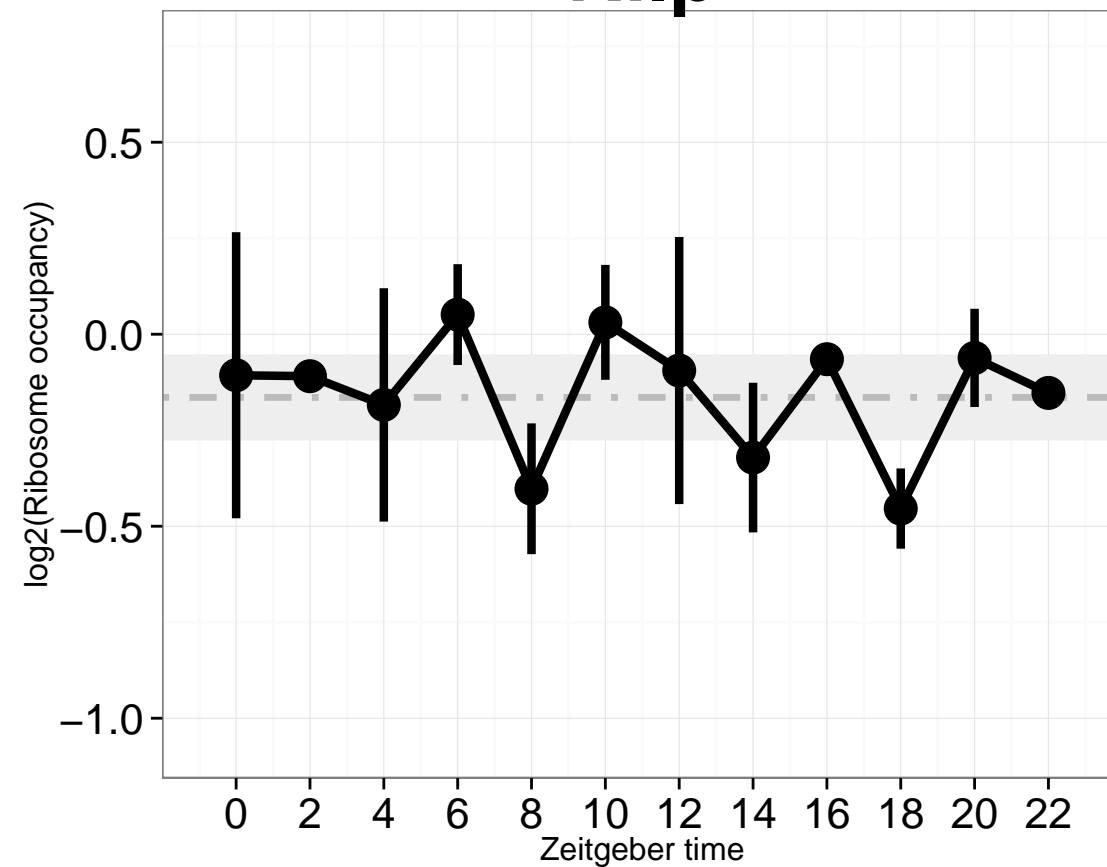

Supplement: Supplementary file 10291 [file 1]

# Pag1

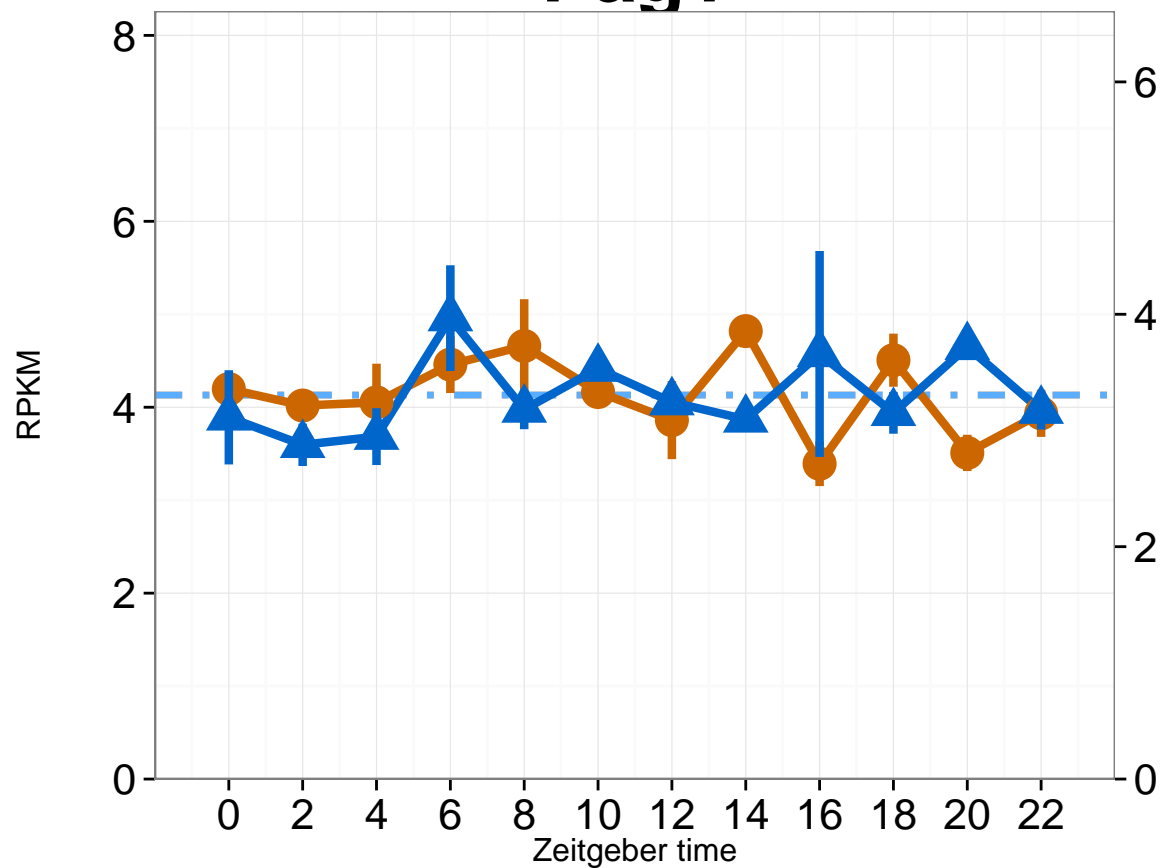

# Pag1

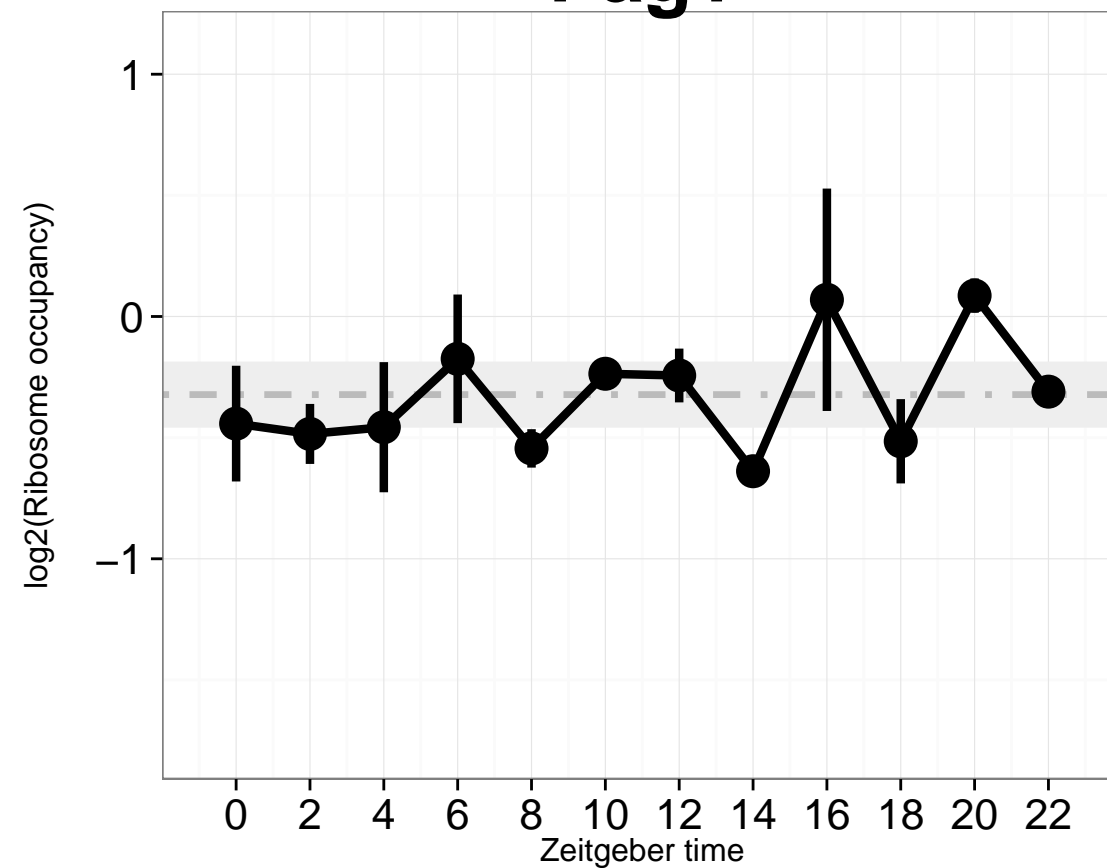

Supplement: Supplementary file 10292 [file 1]

## Smt12

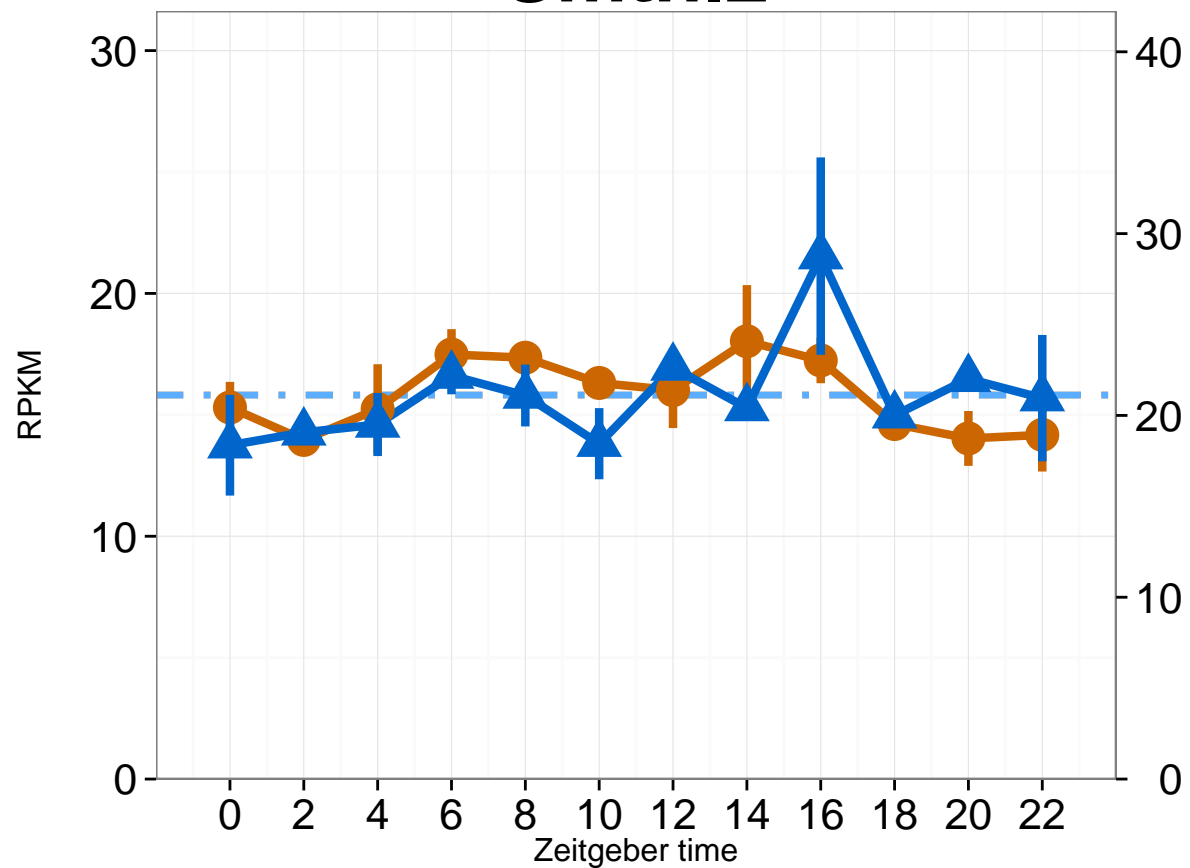

## Smt12

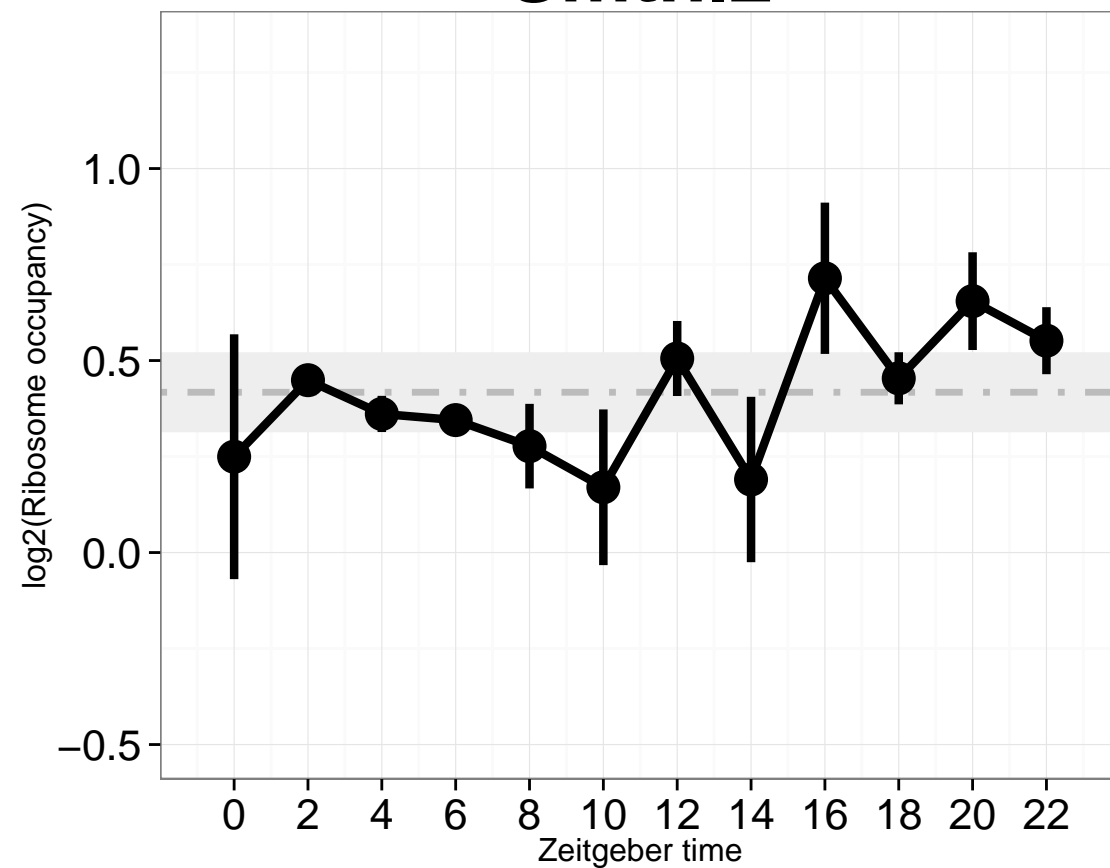

Supplement: Supplementary file 10293 [file 1]

## Hint2

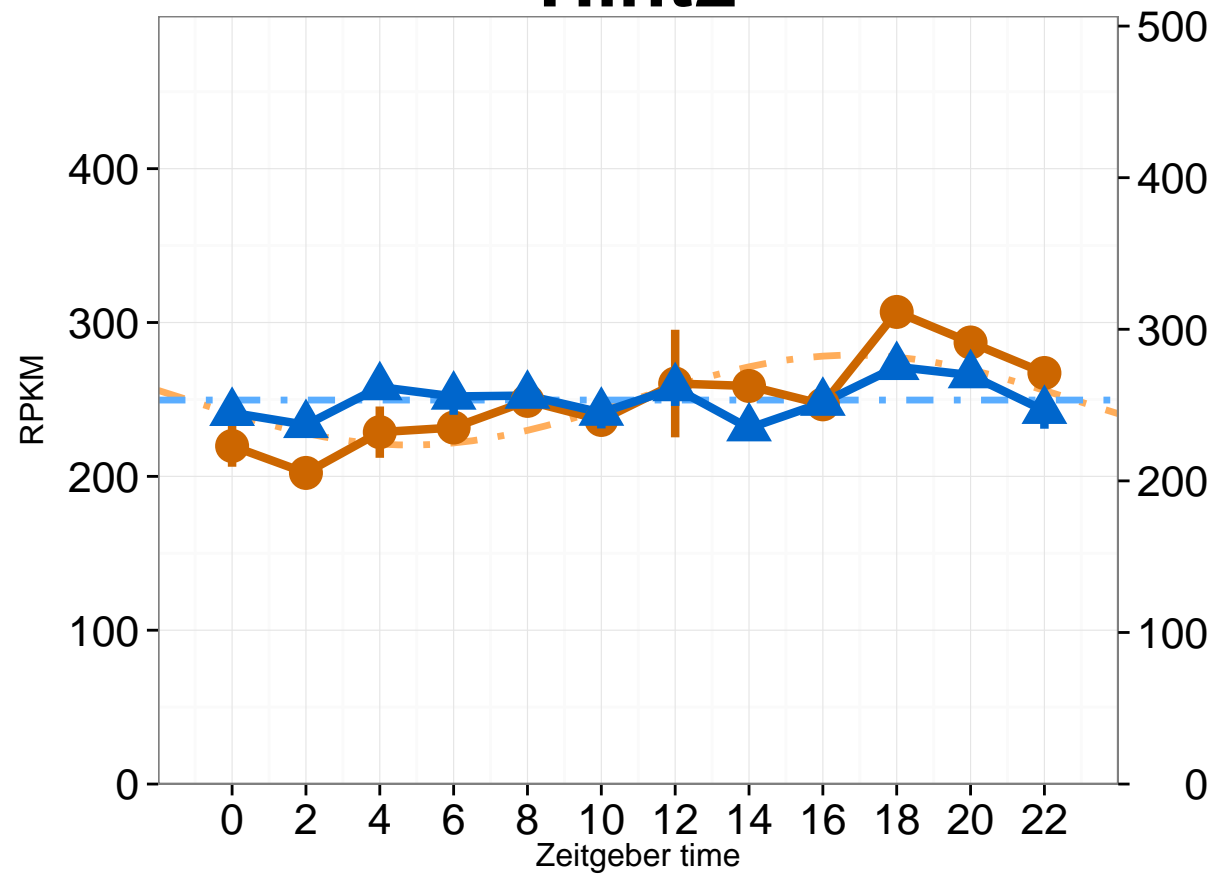

## Hint2

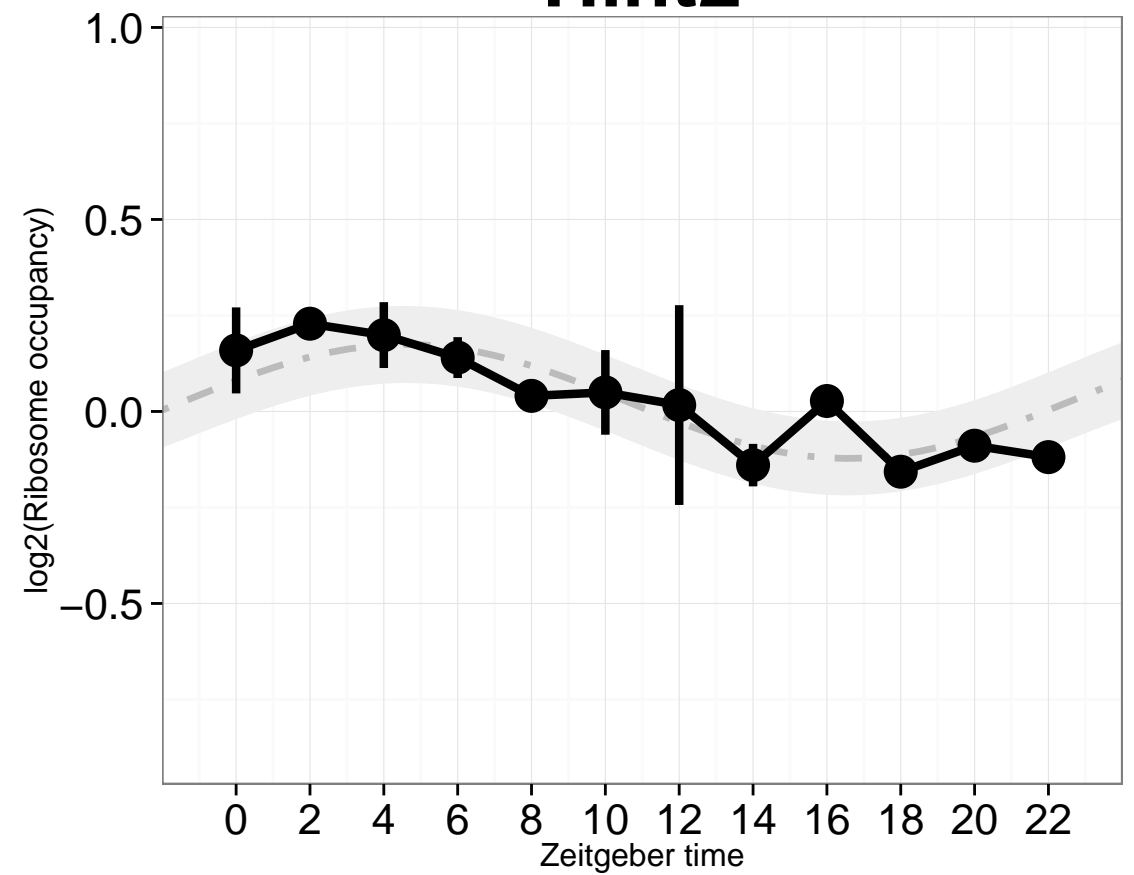

Supplement: Supplementary file 10294 [file 1]

# Fam189a2

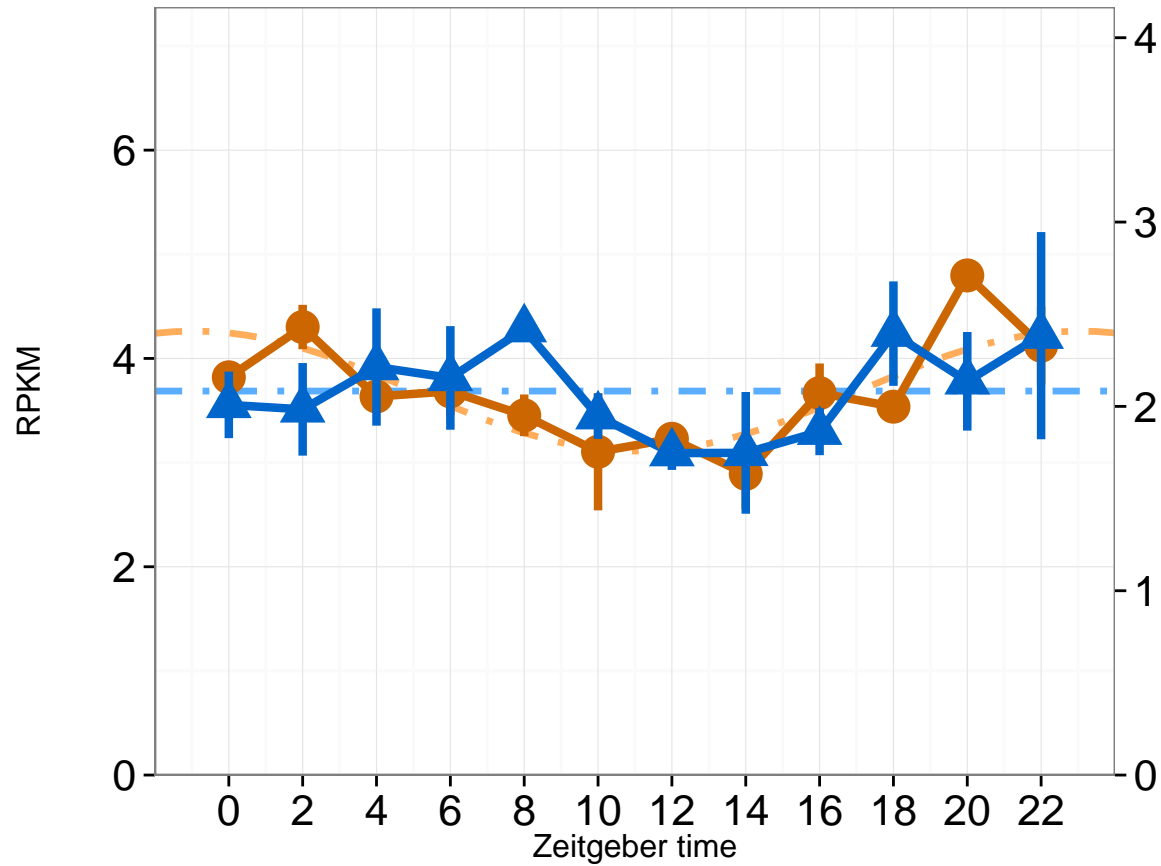

# Fam189a2

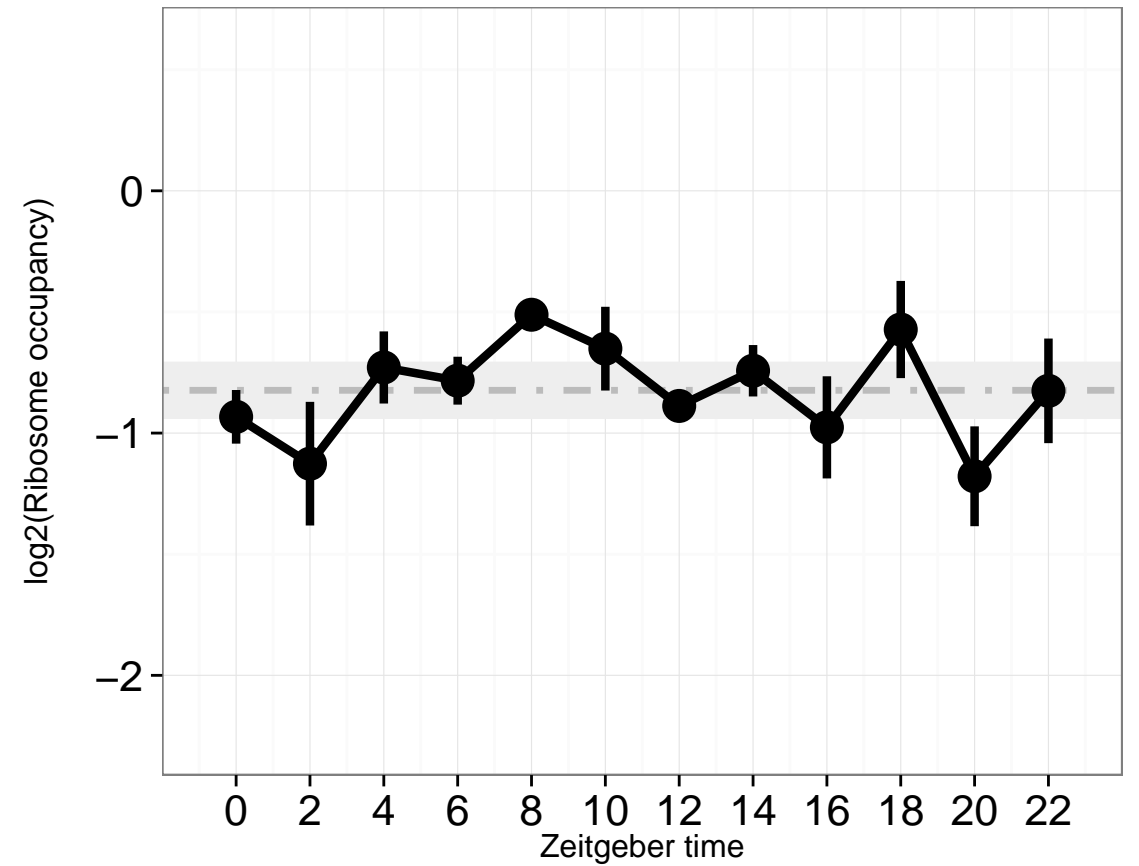

Supplement: Supplementary file 10295 [file 1]

## Fmnl3

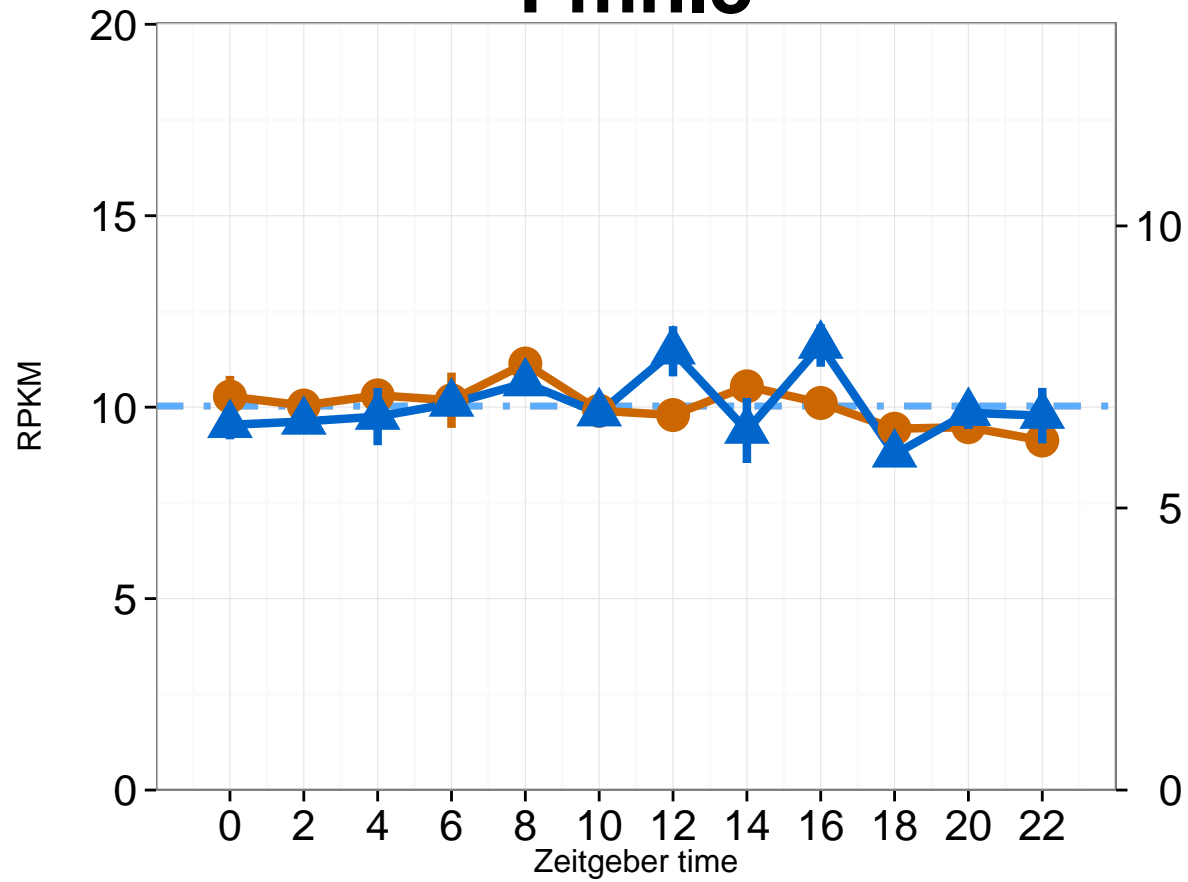

## Fmnl3

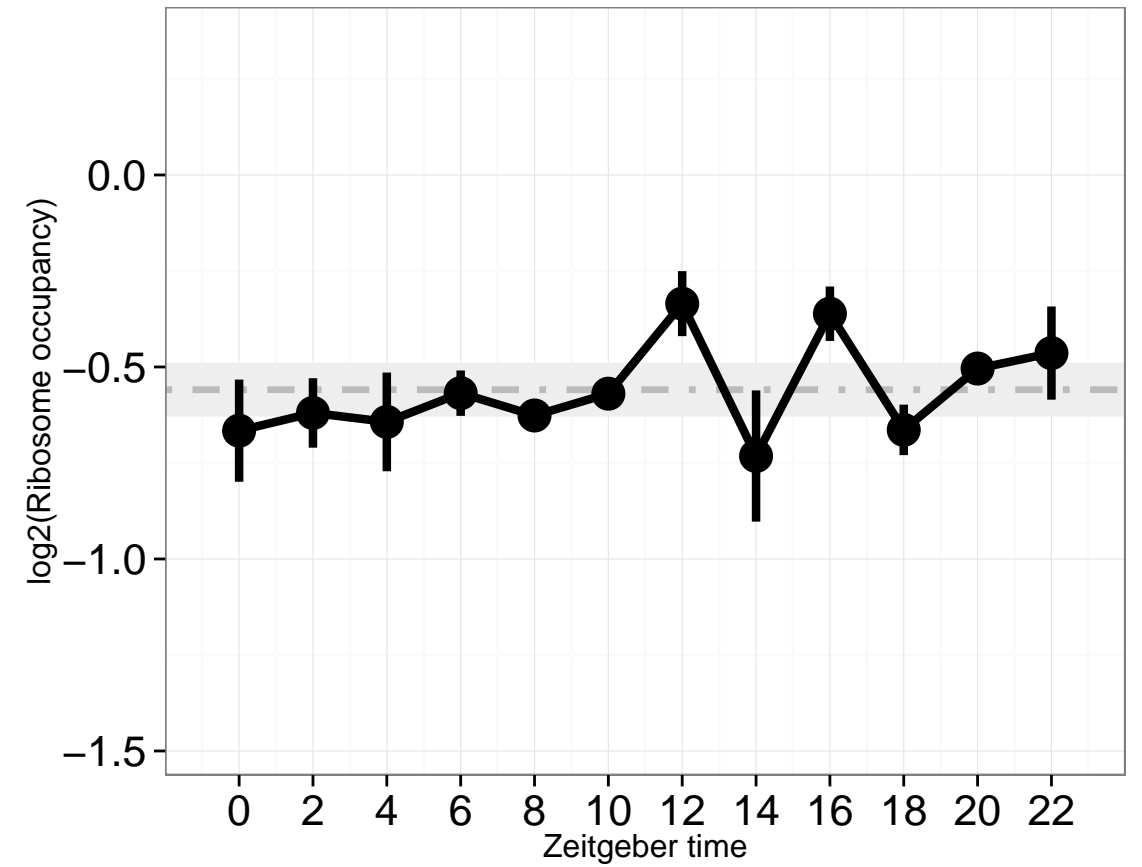

Supplement: Supplementary file 10296 [file 1]

## Rpgrip1l

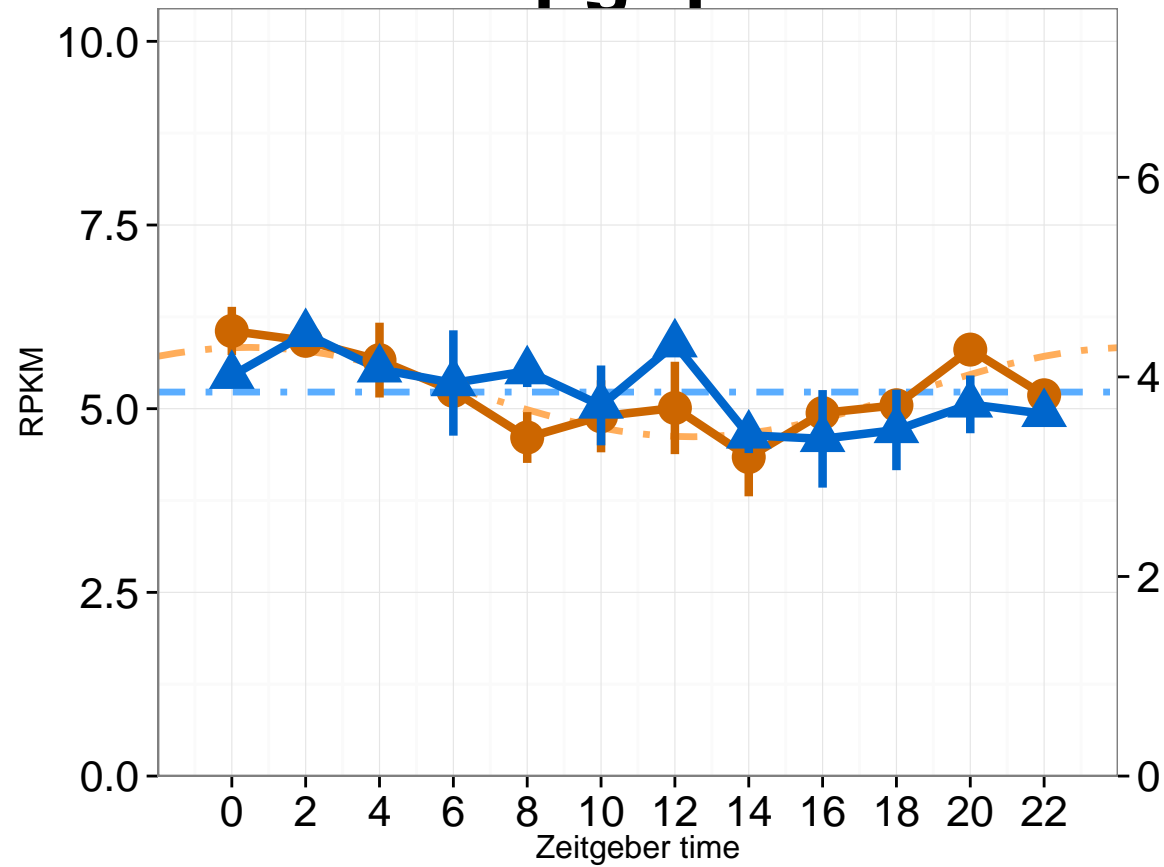

## Rpgrip1l

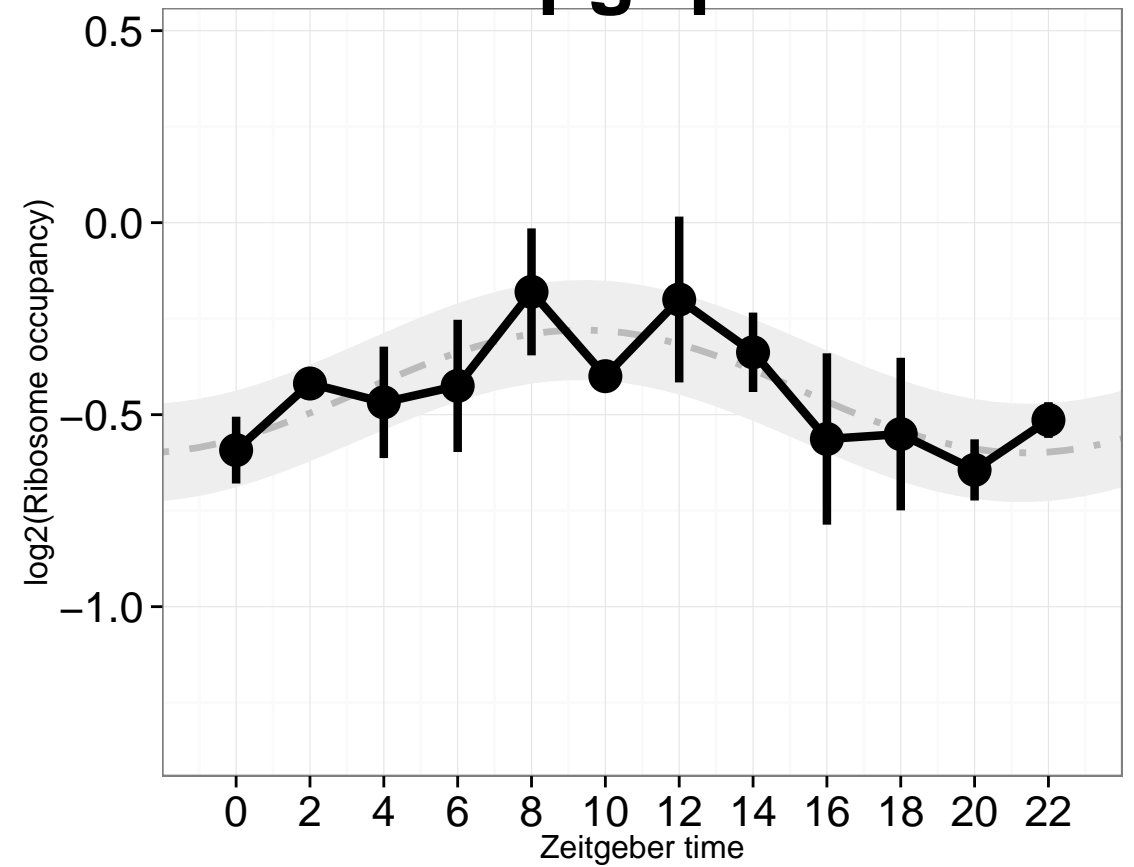

Supplement: Supplementary file 10297 [file 1]

# Smpd13a

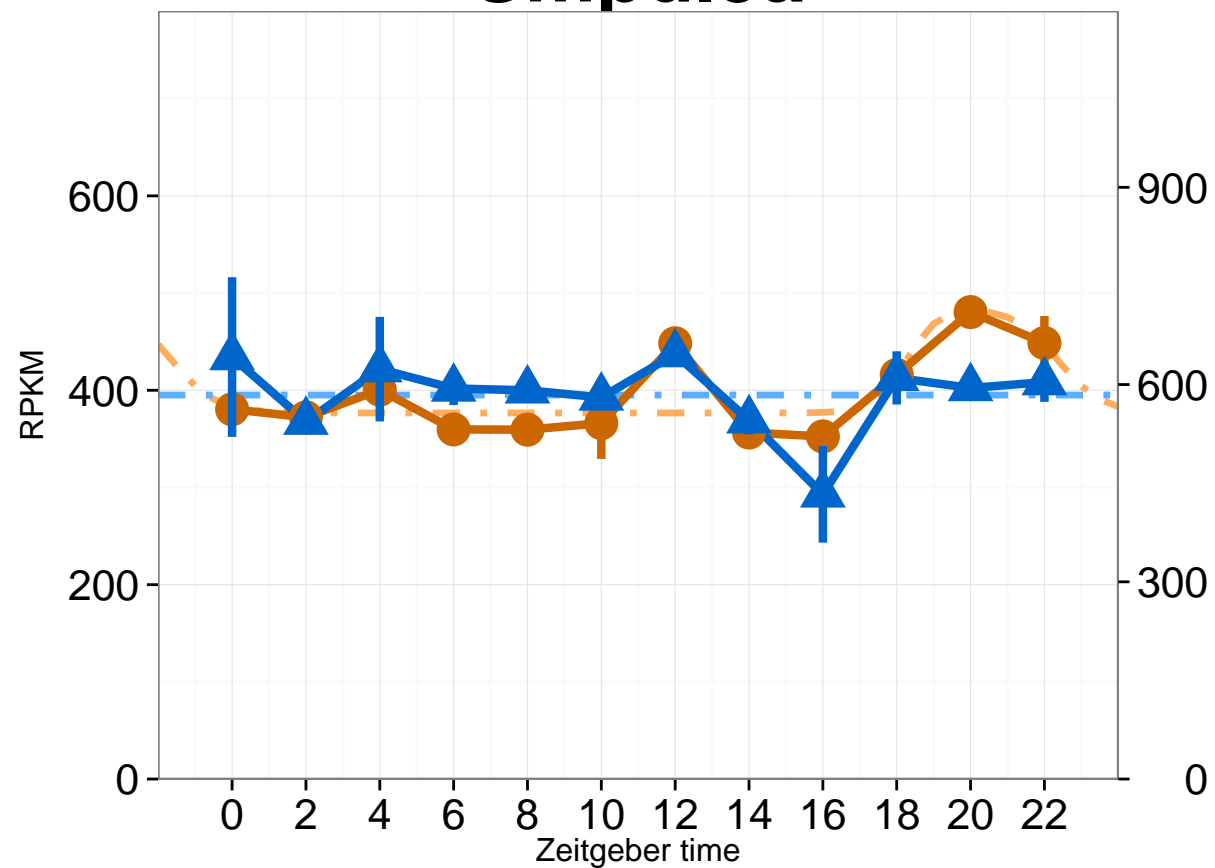

# Smpd13a

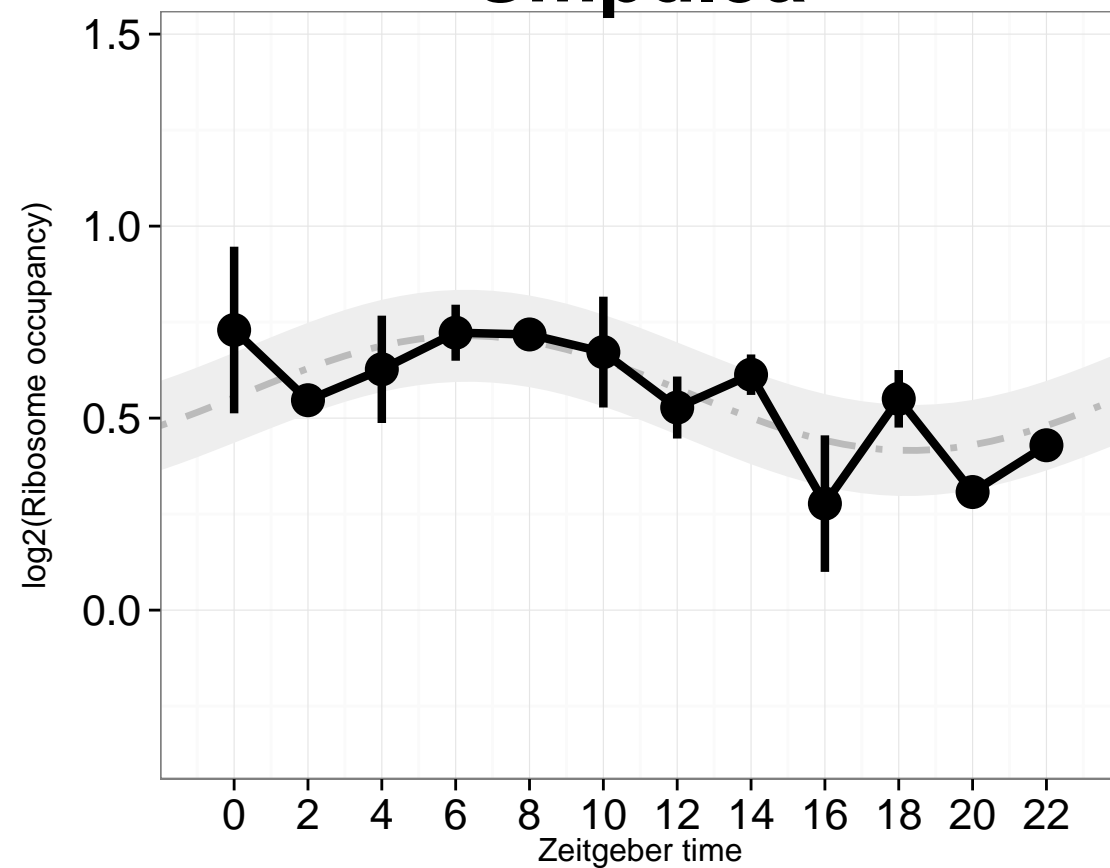

Supplement: Supplementary file 10298 [file 1]

# Spta1

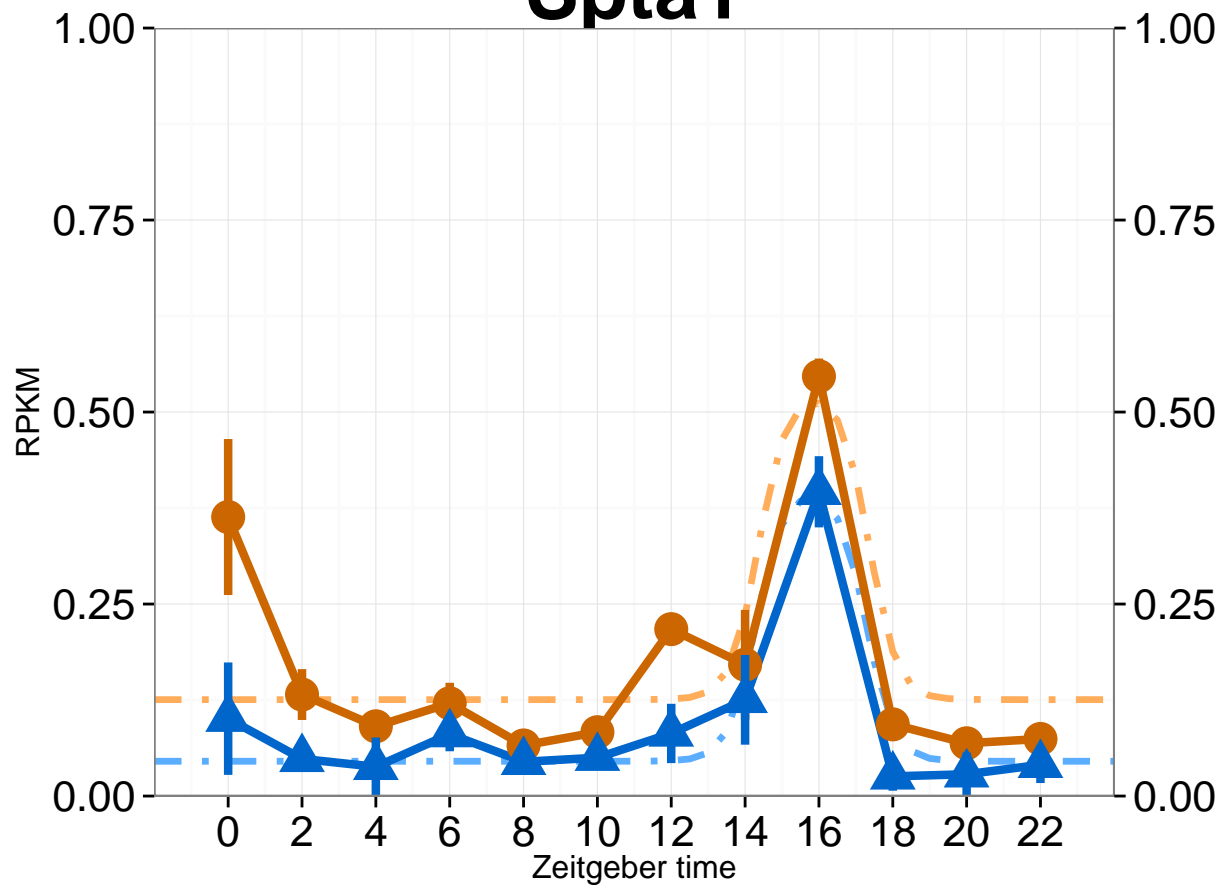

# Spta1

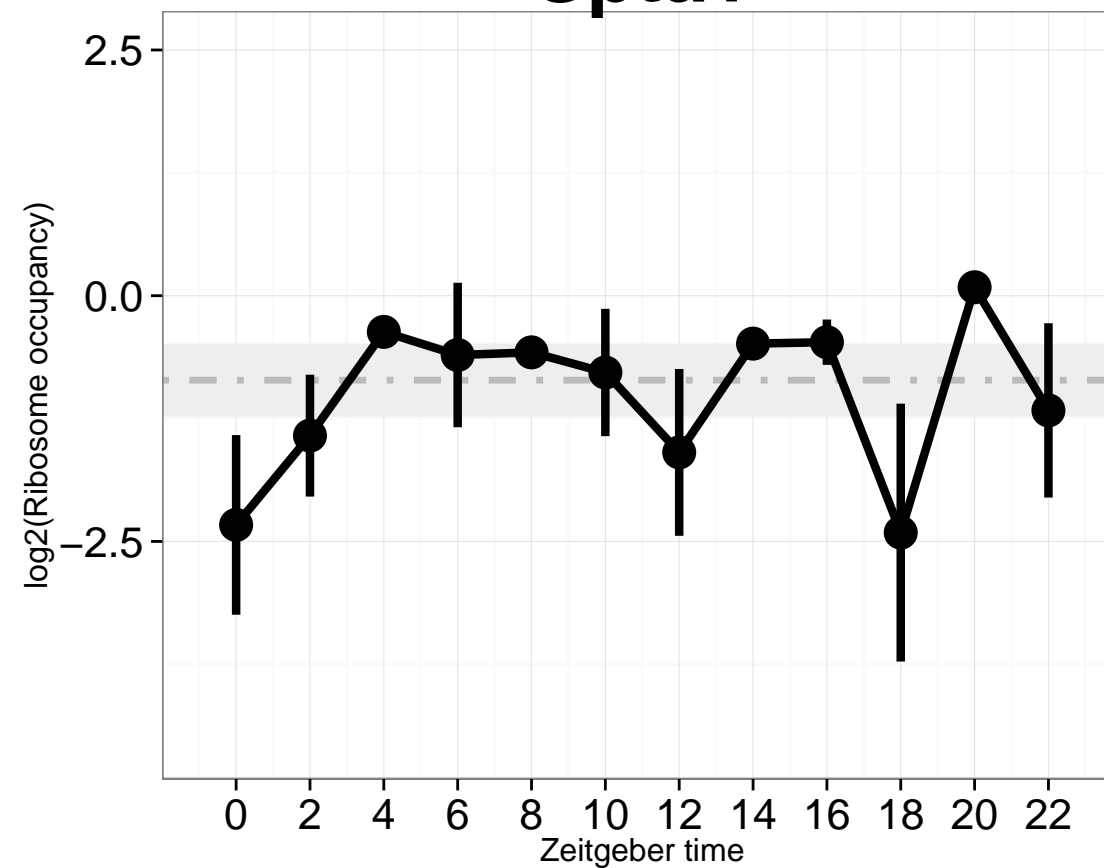

Supplement: Supplementary file 10299 [file 1]

## Slc38a4

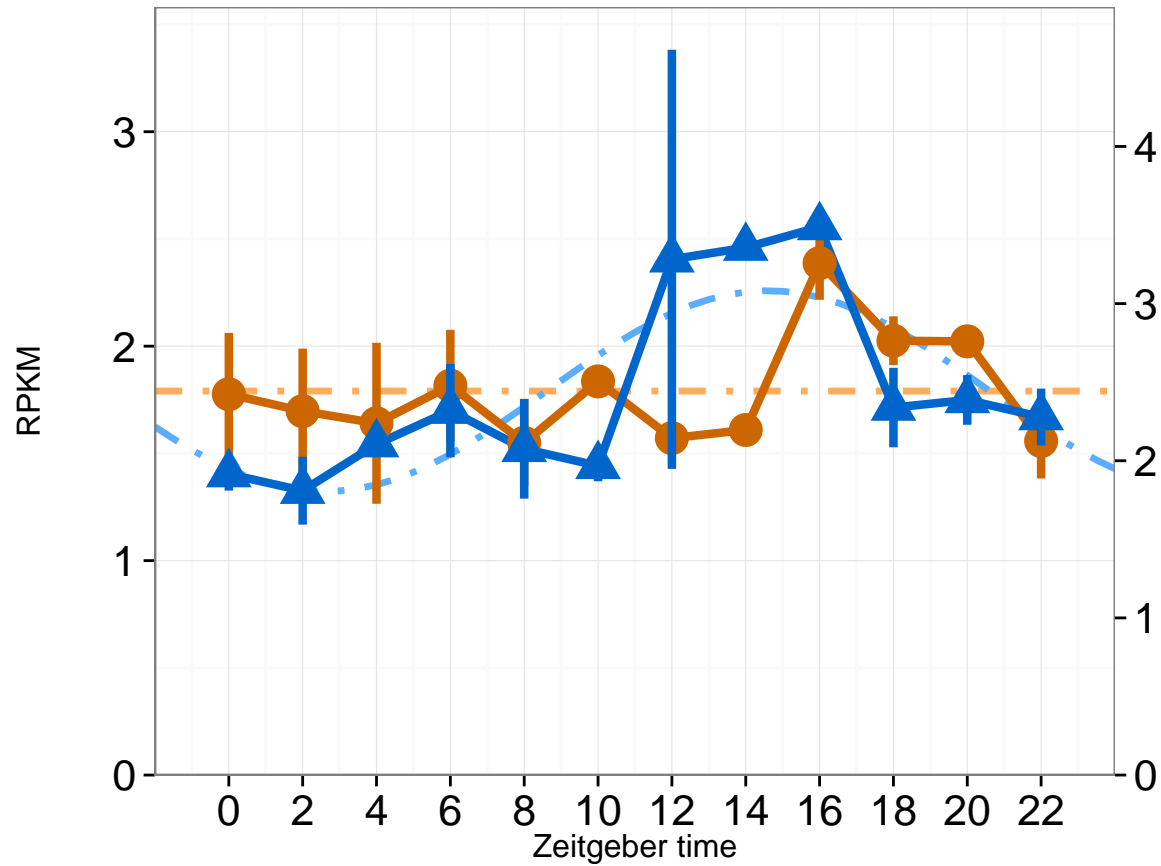

## Slc38a4

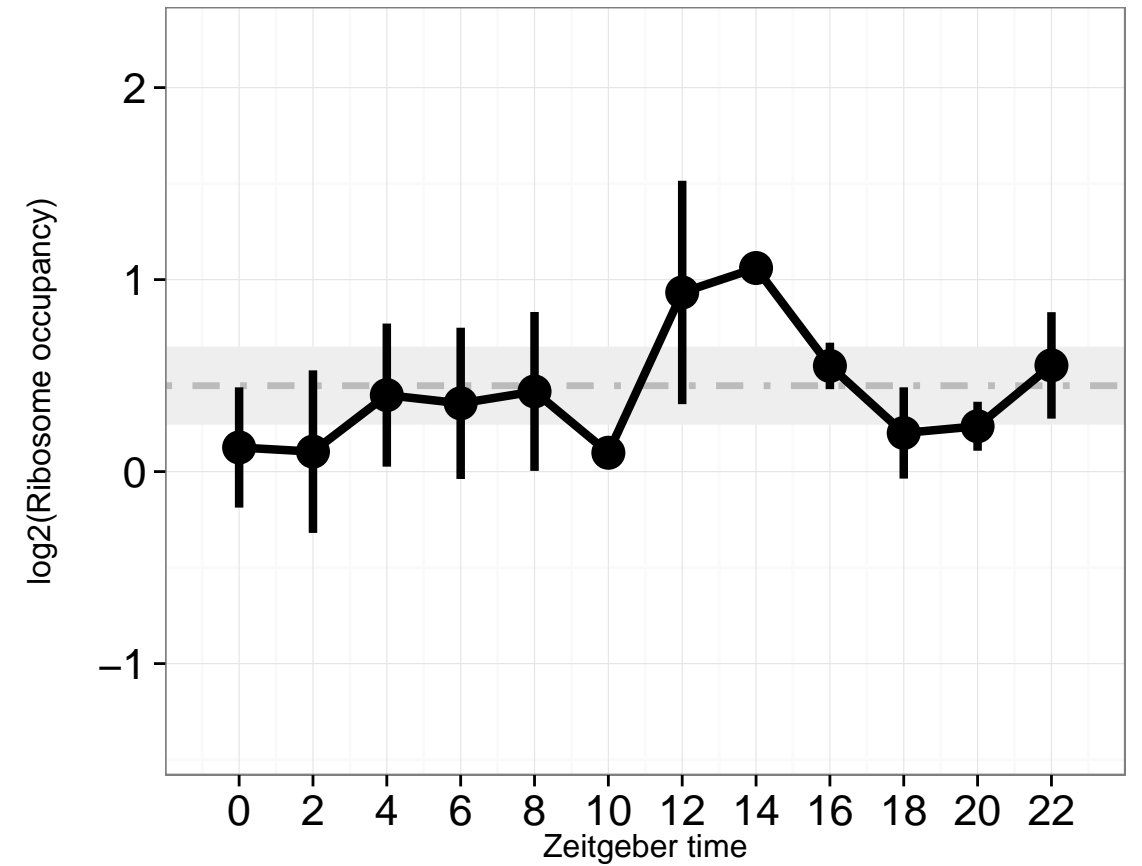

Supplement: Supplementary file 10300 [file 1]

# Gm9922

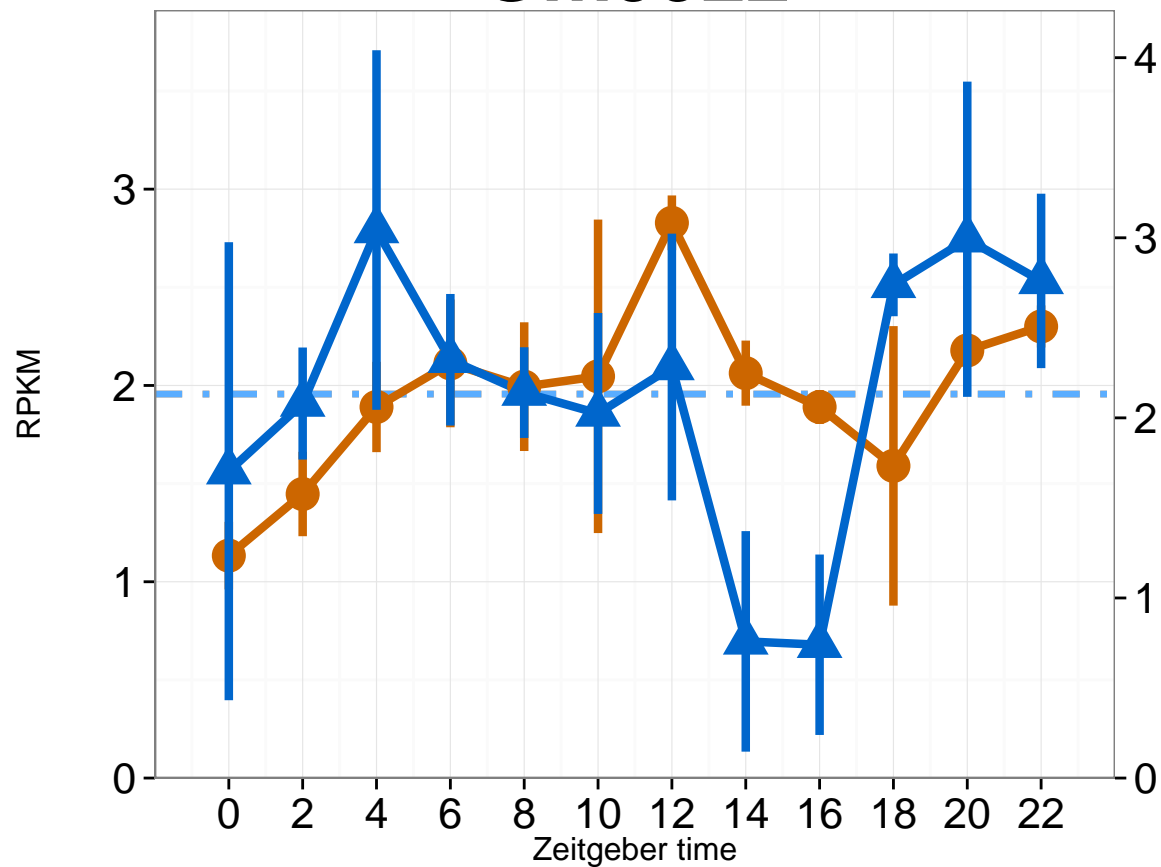

# Gm9922

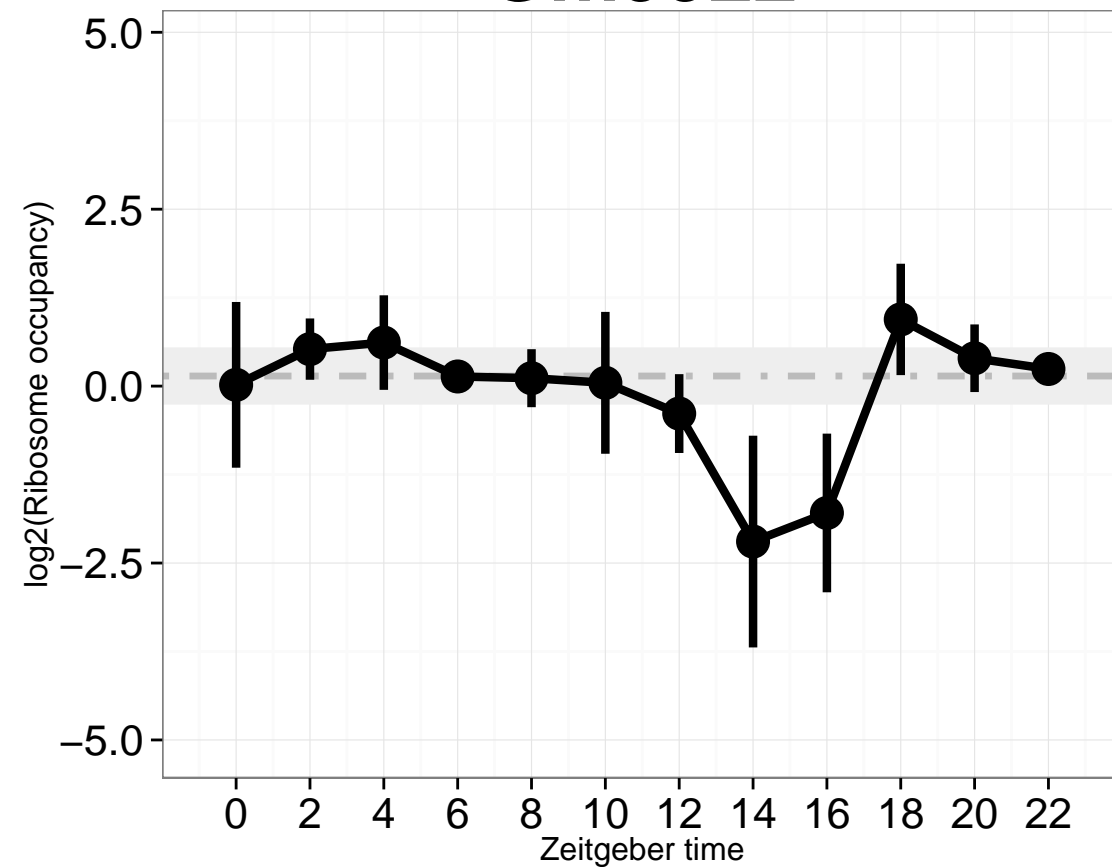

Supplement: Supplementary file 10301 [file 1]

## Rnf4

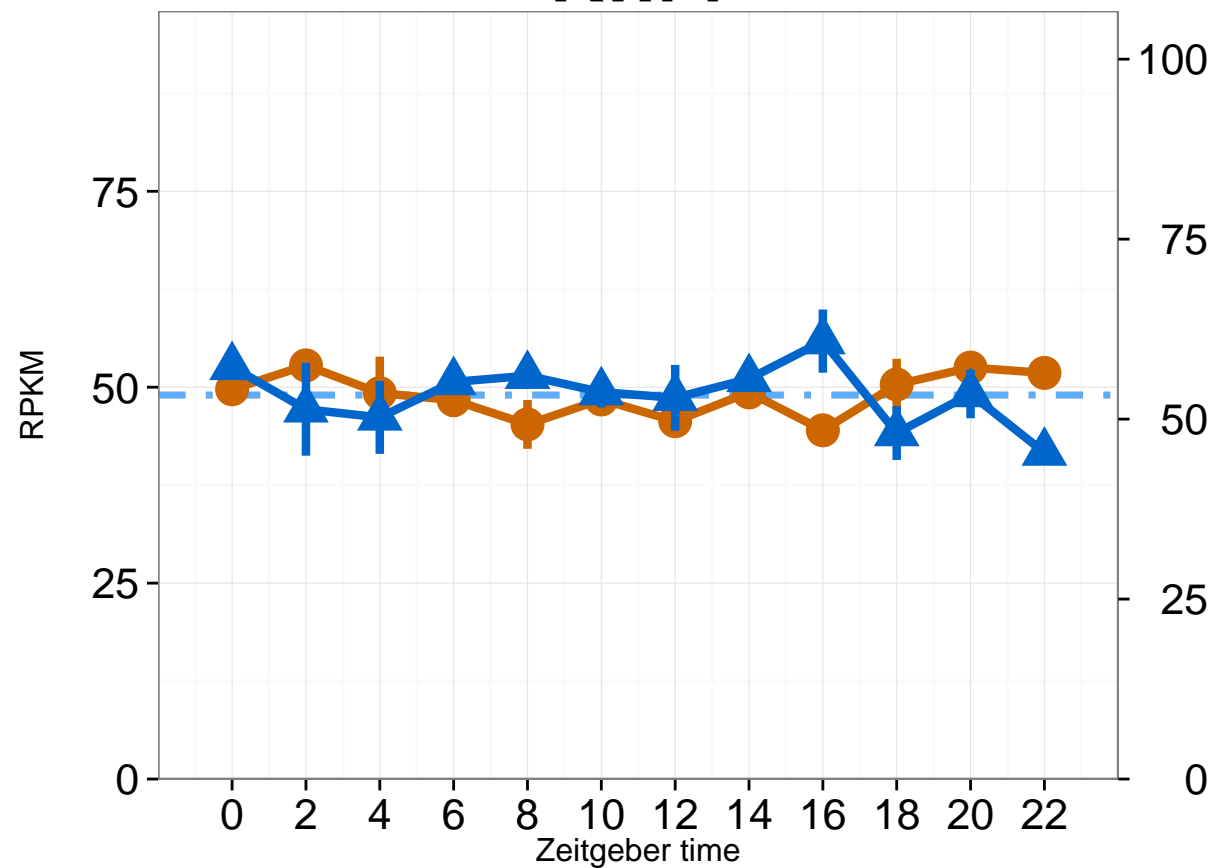

## Rnf4

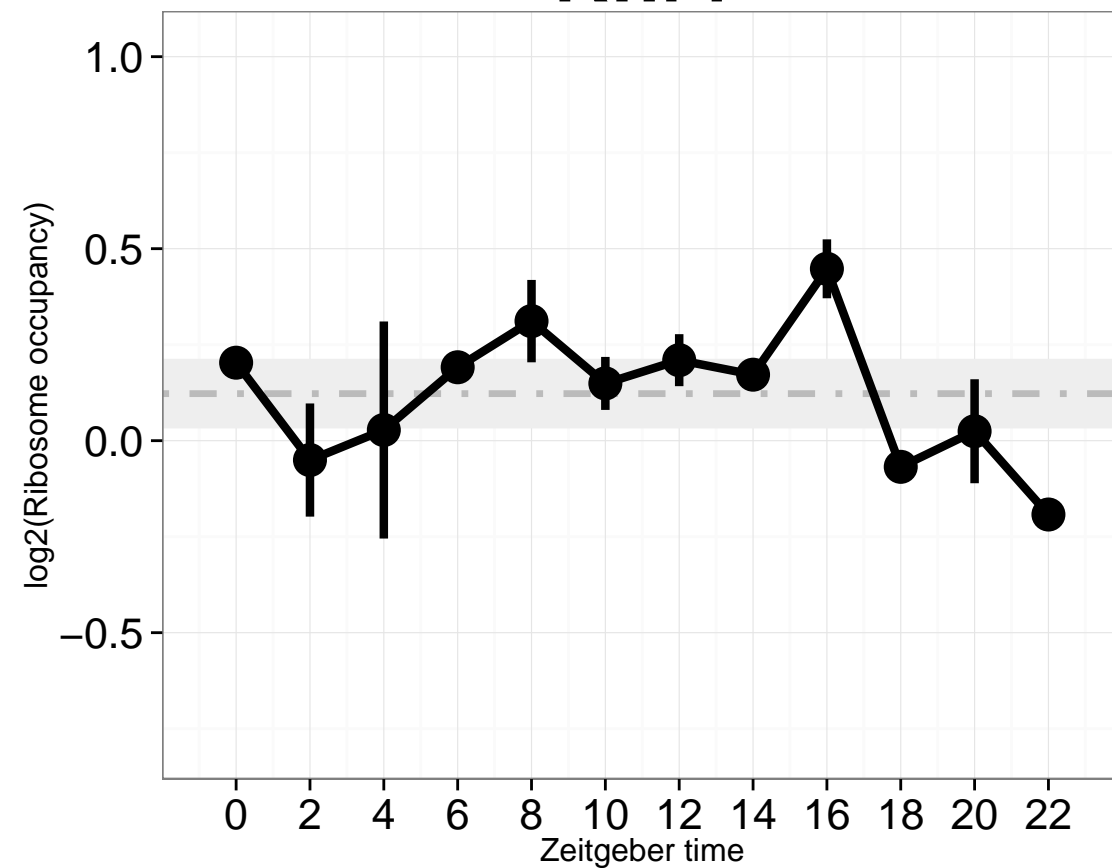

Supplement: Supplementary file 10302 [file 1]

# Qprt

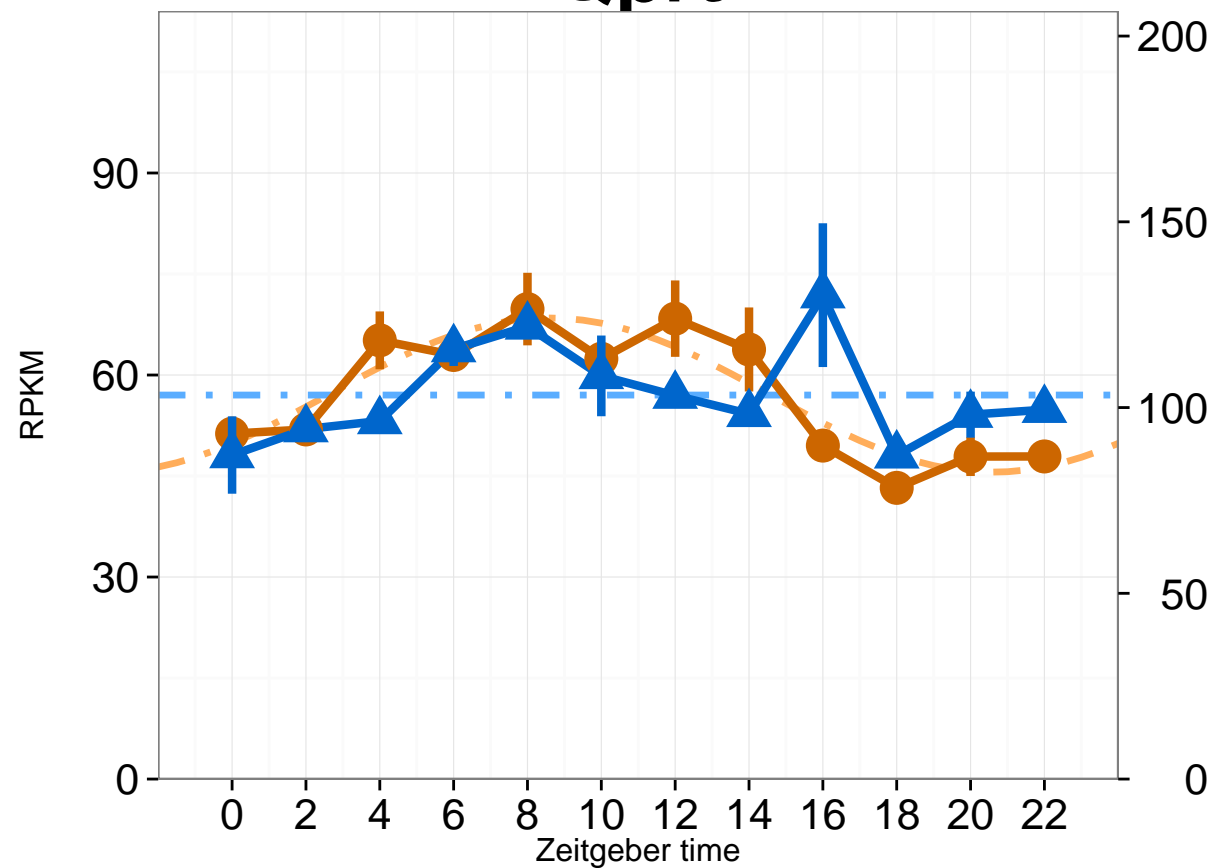

# Qprt

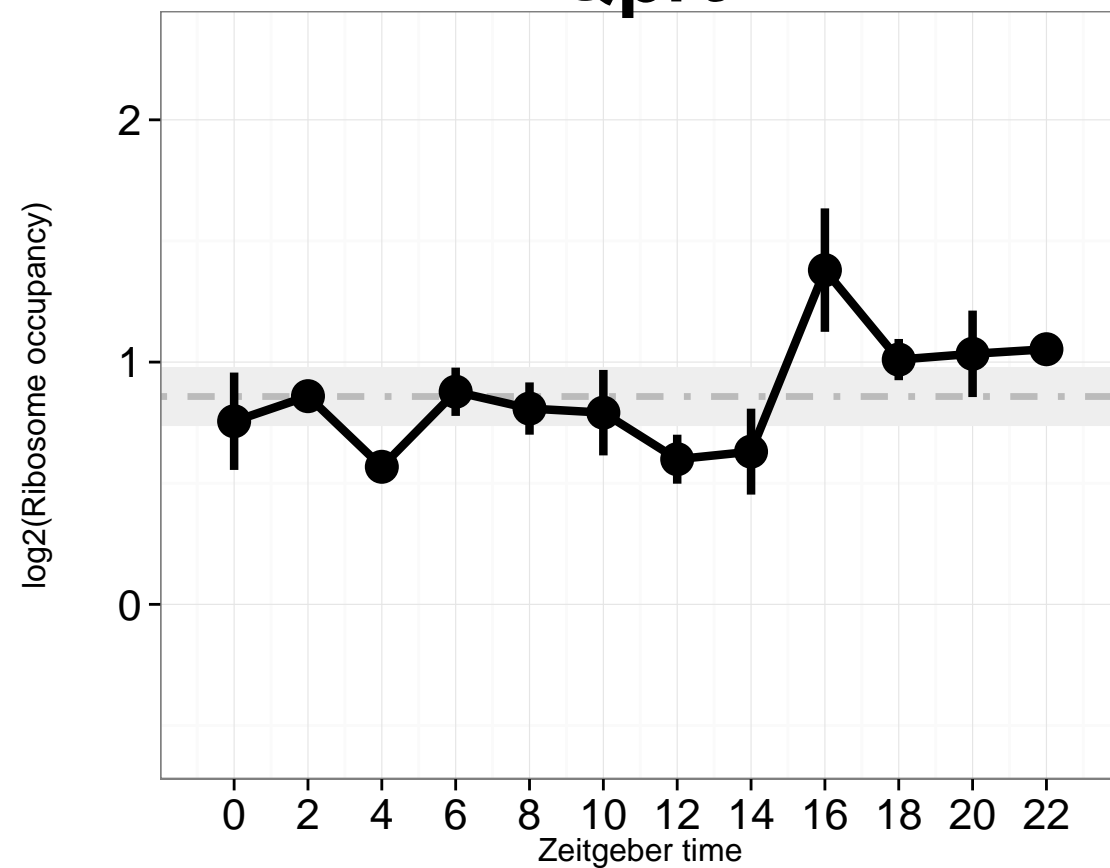

Supplement: Supplementary file 10303 [file 1]

# S1pr1

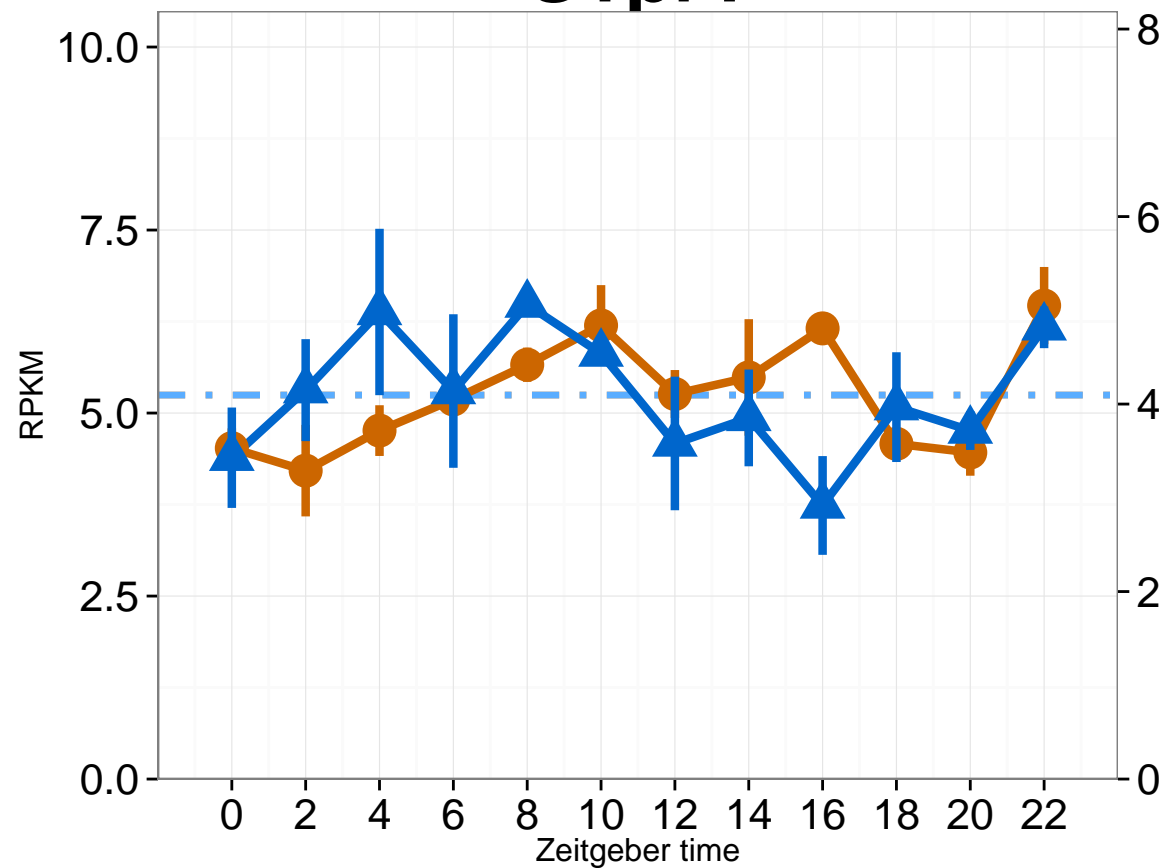

# S1pr1

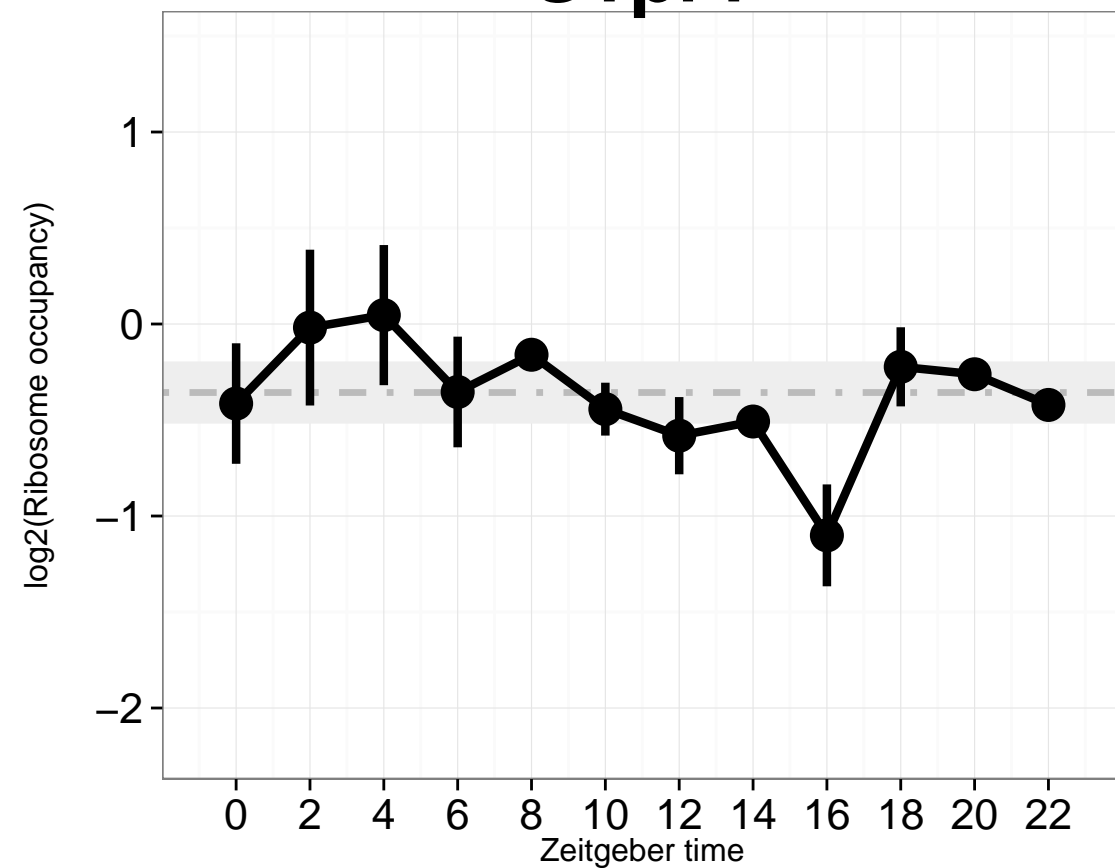

Supplement: Supplementary file 10304 [file 1]

# Tmem70

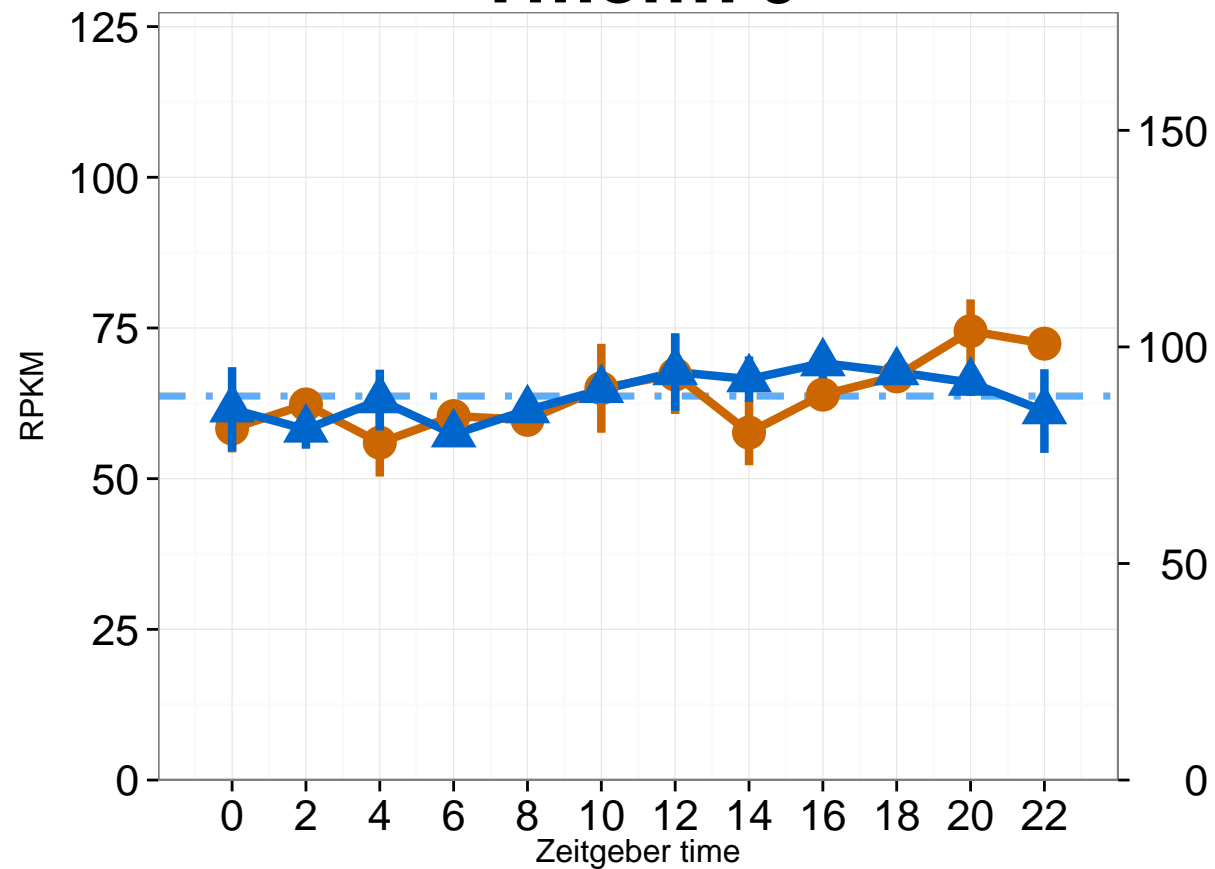

# Tmem70

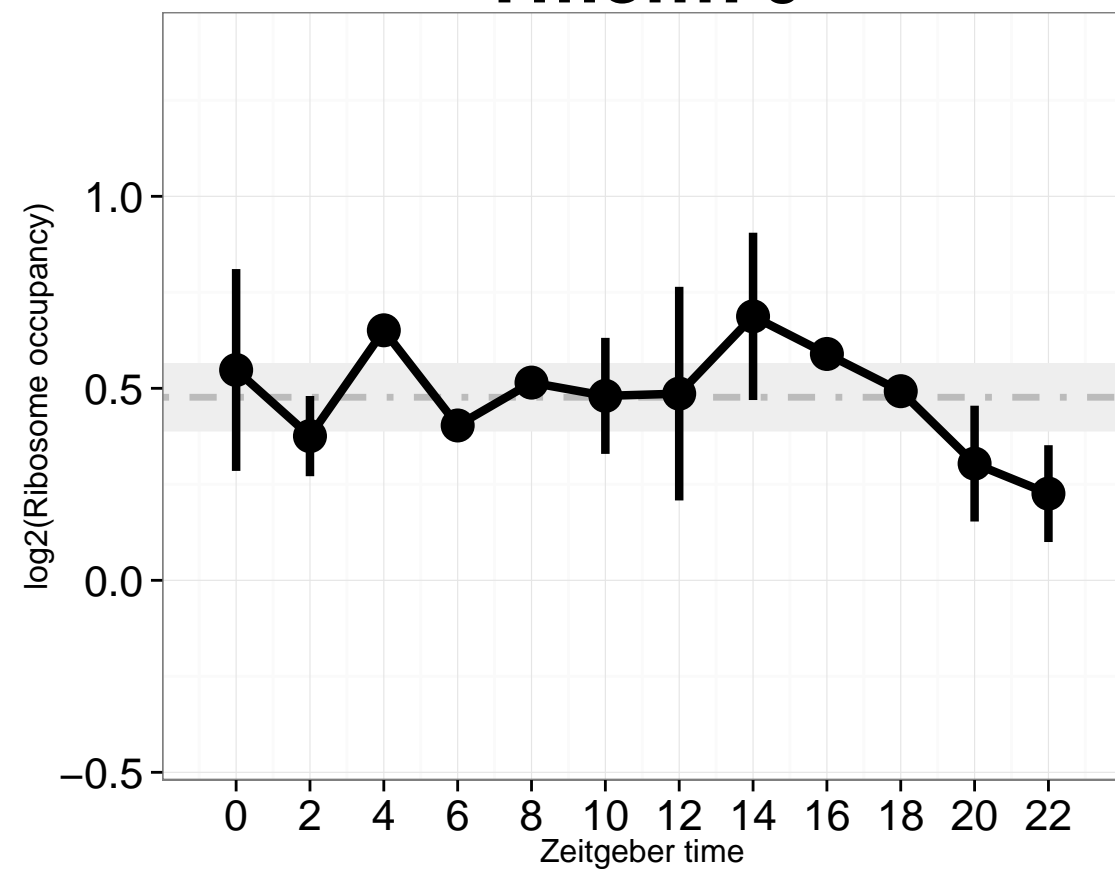

Supplement: Supplementary file 10305 [file 1]

# Marveld1

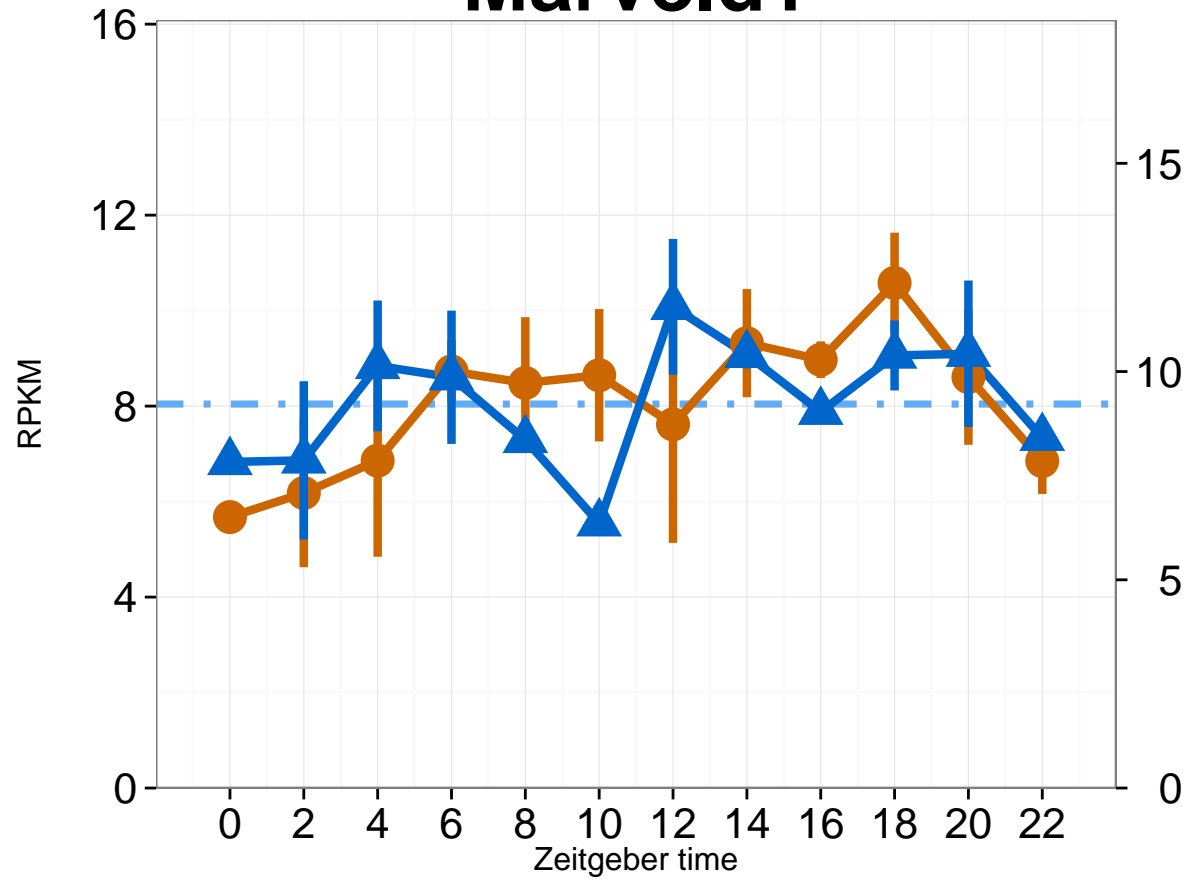

# Marveld1

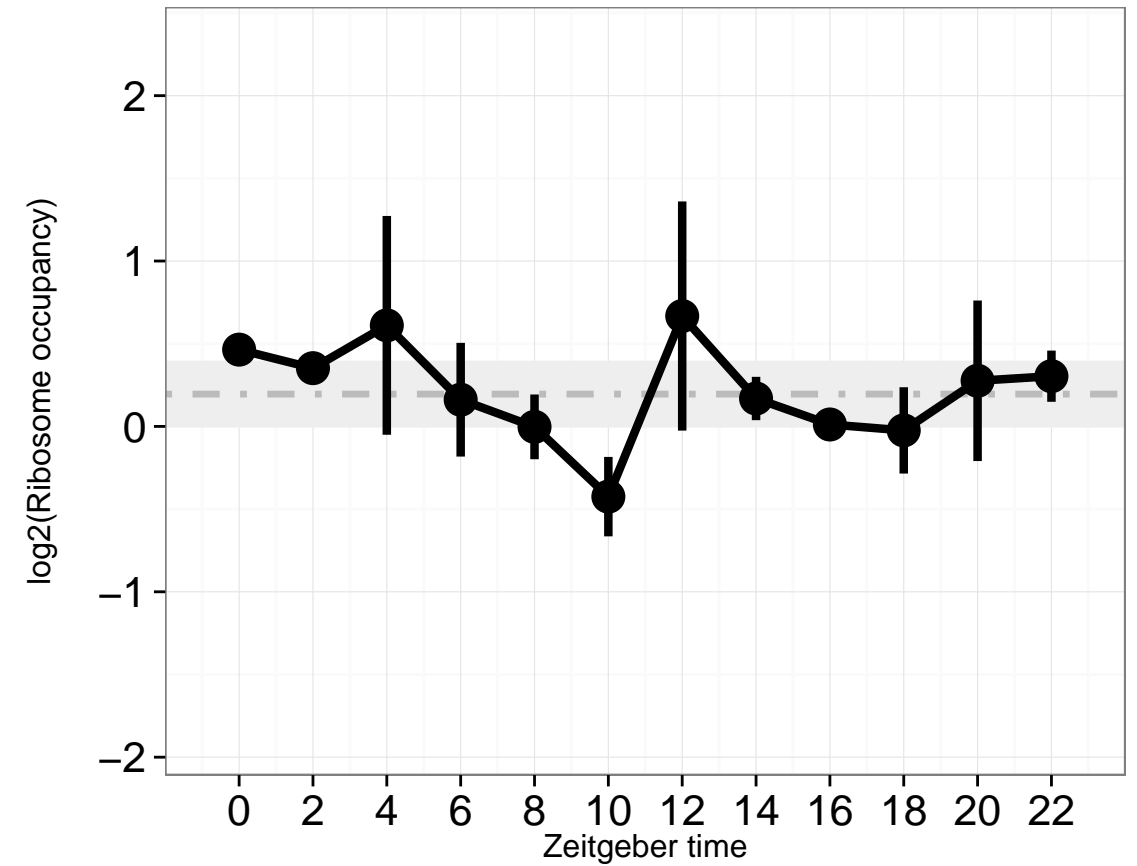

Supplement: Supplementary file 10306 [file 1]

# Cep41

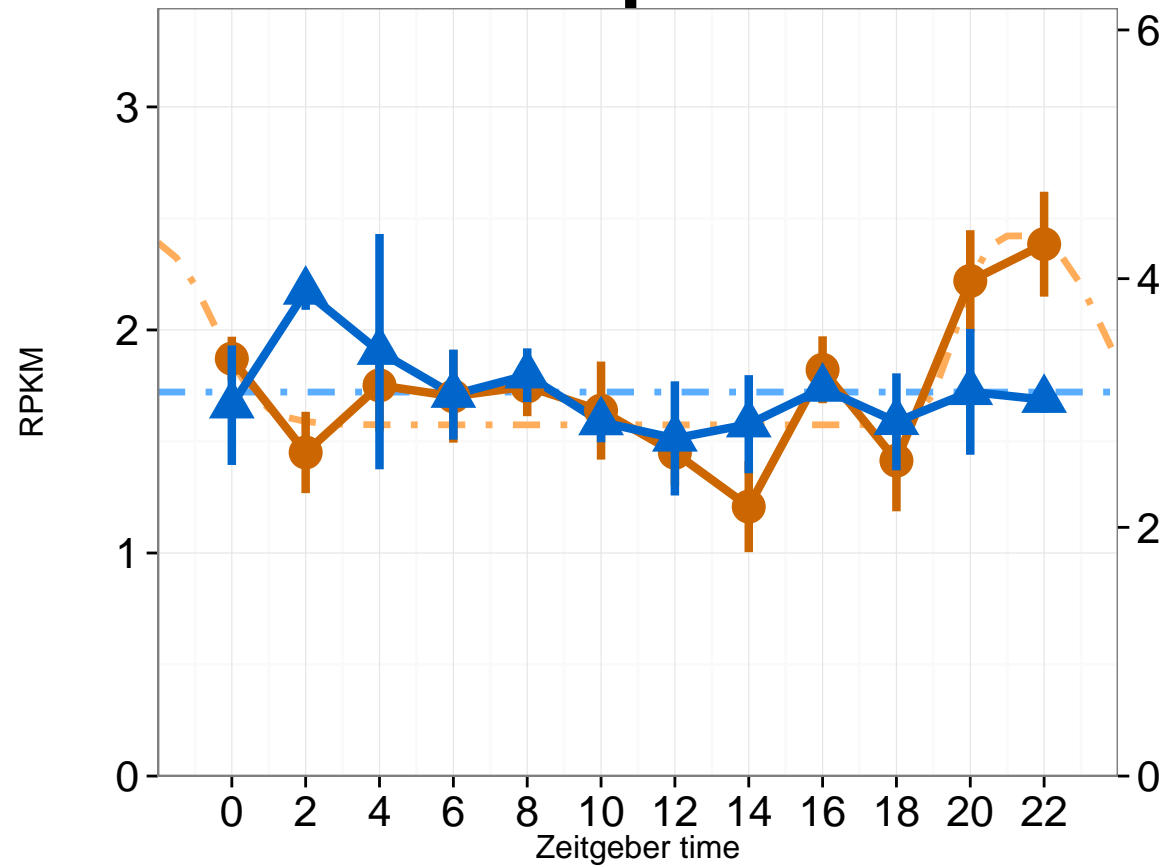

# Cep41

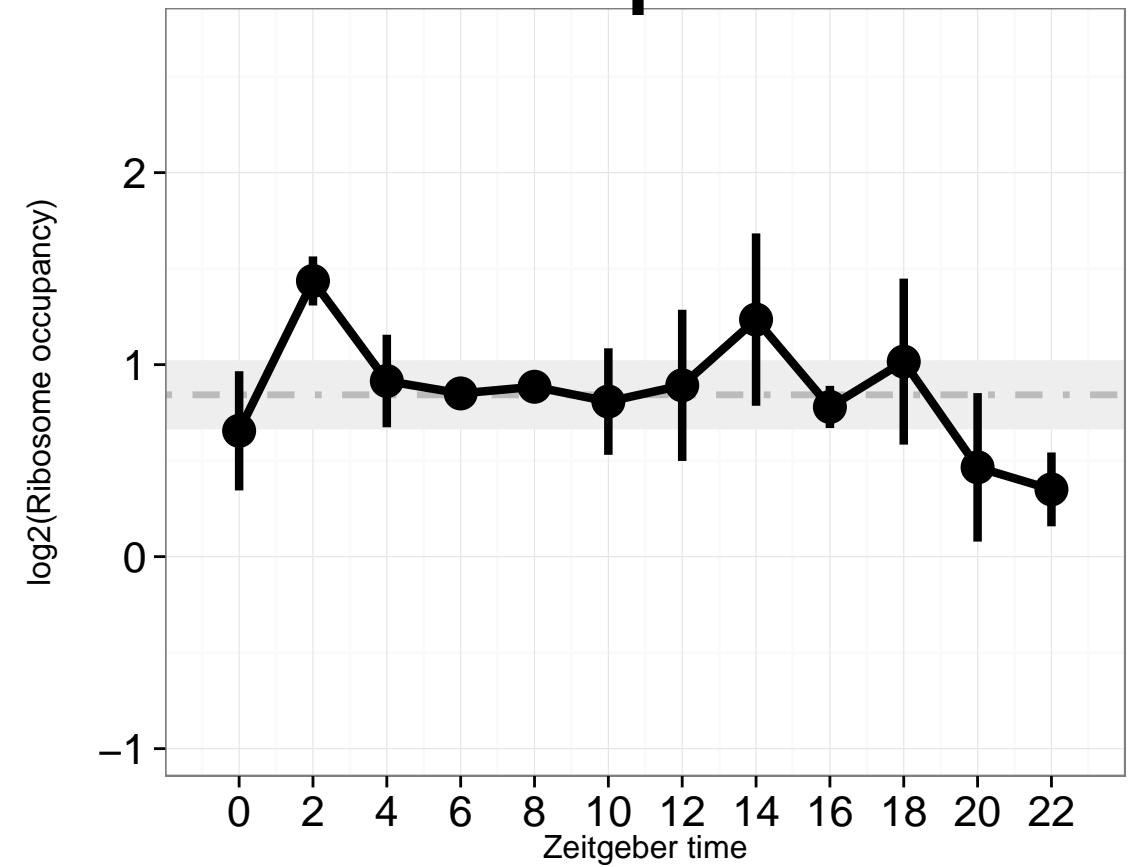

Supplement: Supplementary file 10307 [file 1]

# Ralgapa1

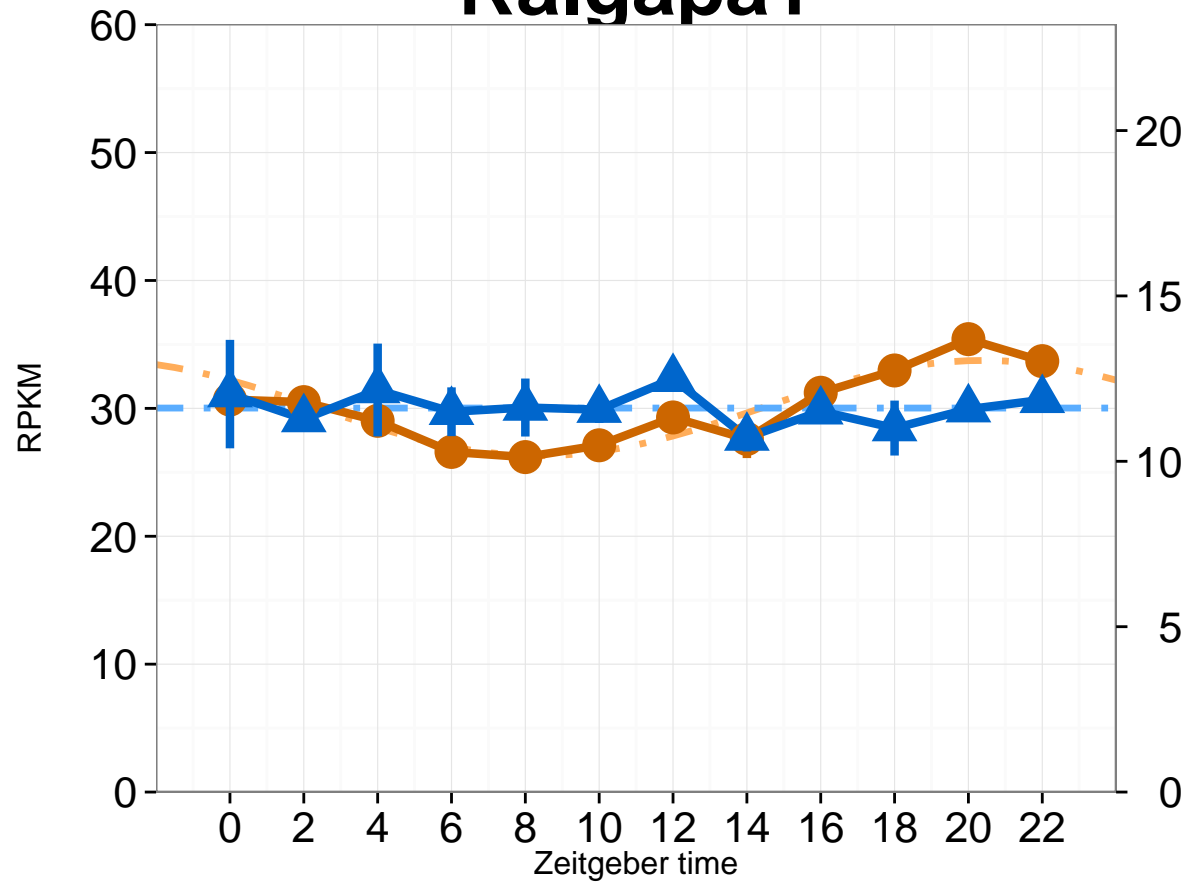

# Ralgapa1

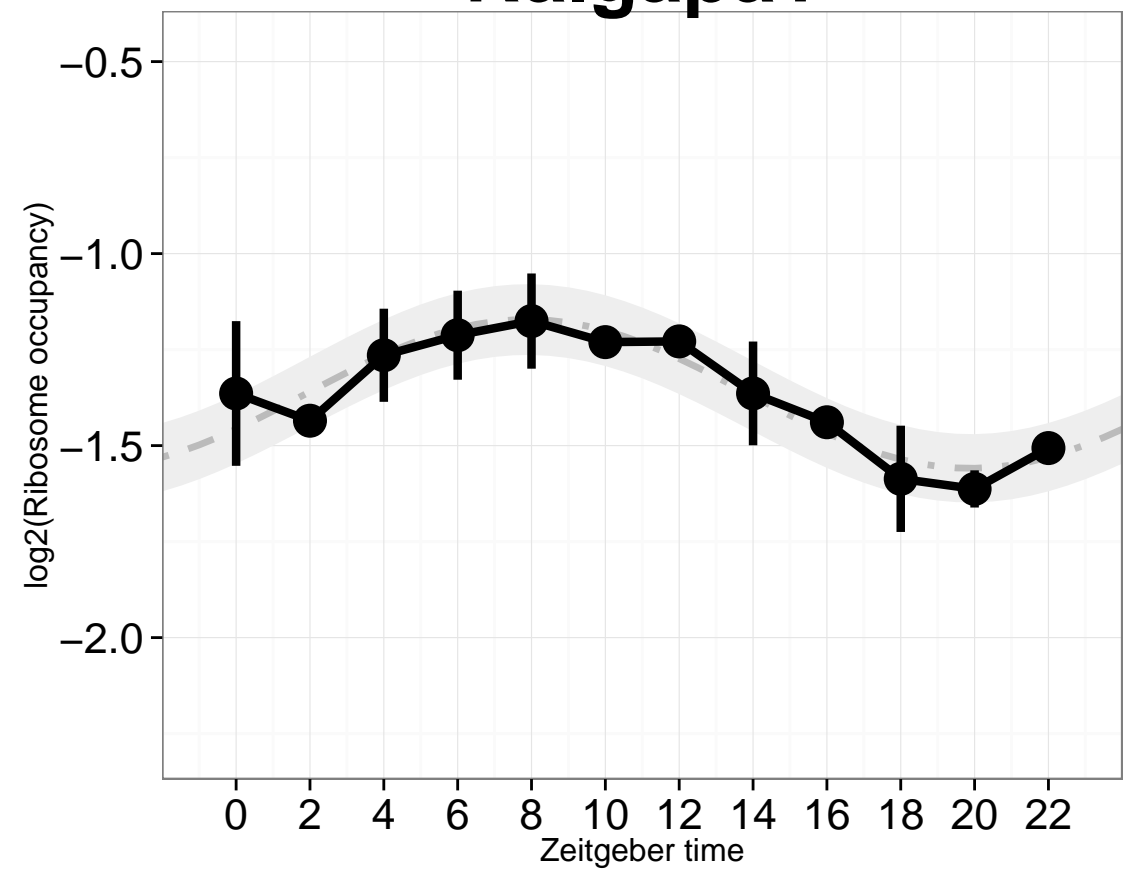

Supplement: Supplementary file 10308 [file 1]

## Nars

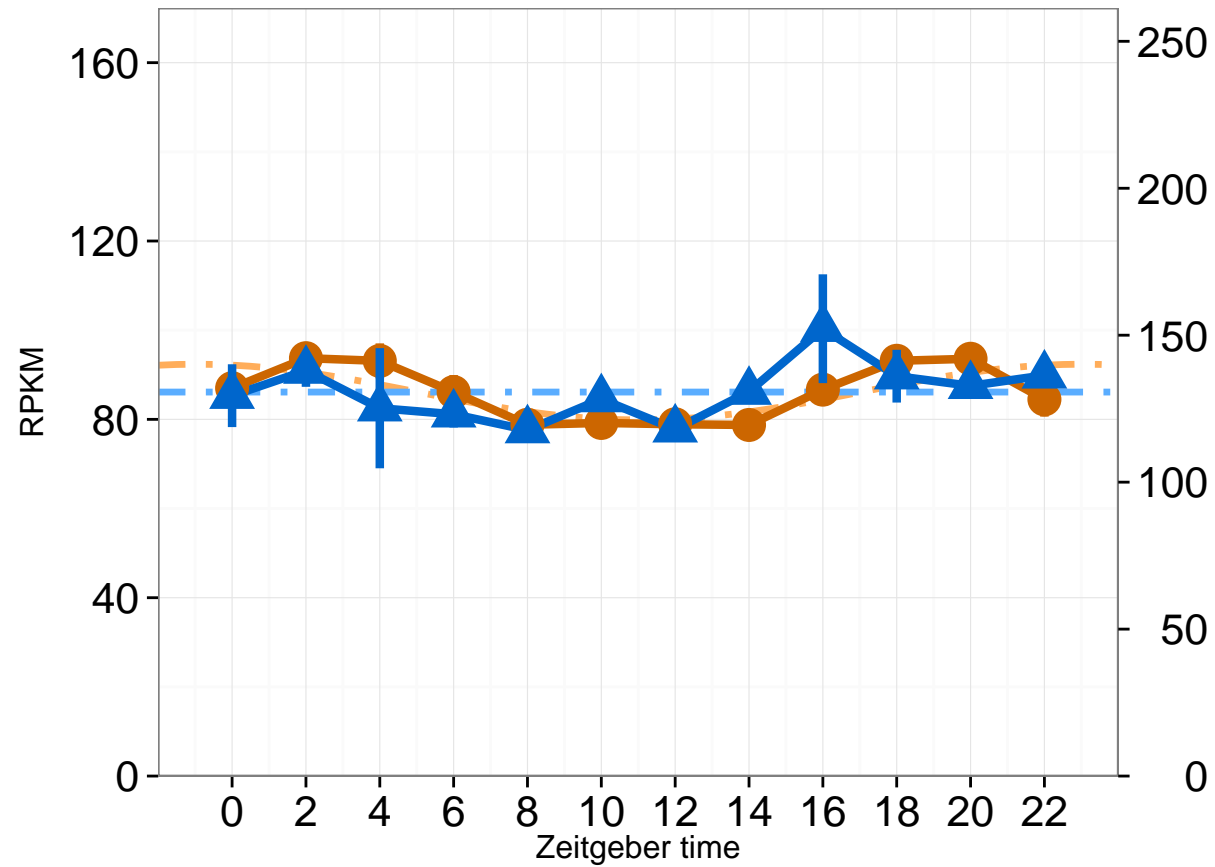

## Nars

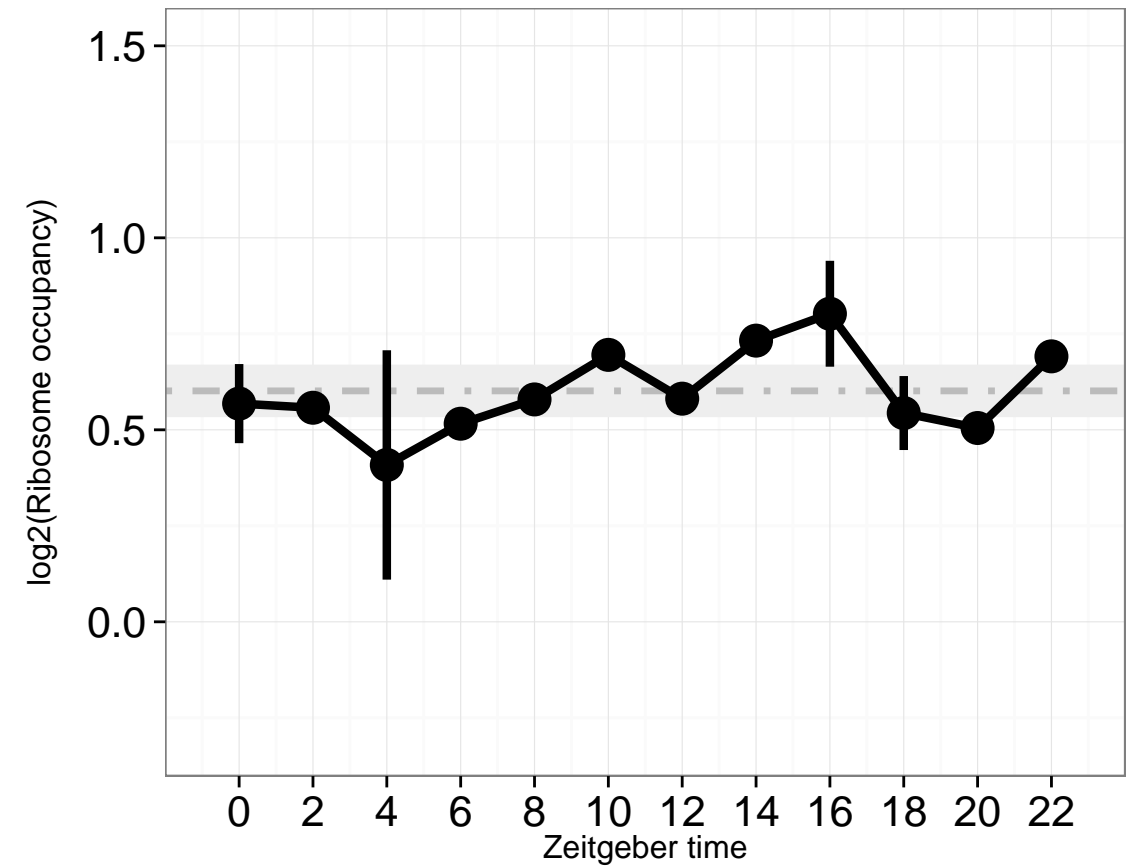

Supplement: Supplementary file 10309 [file 1]

## Prr13

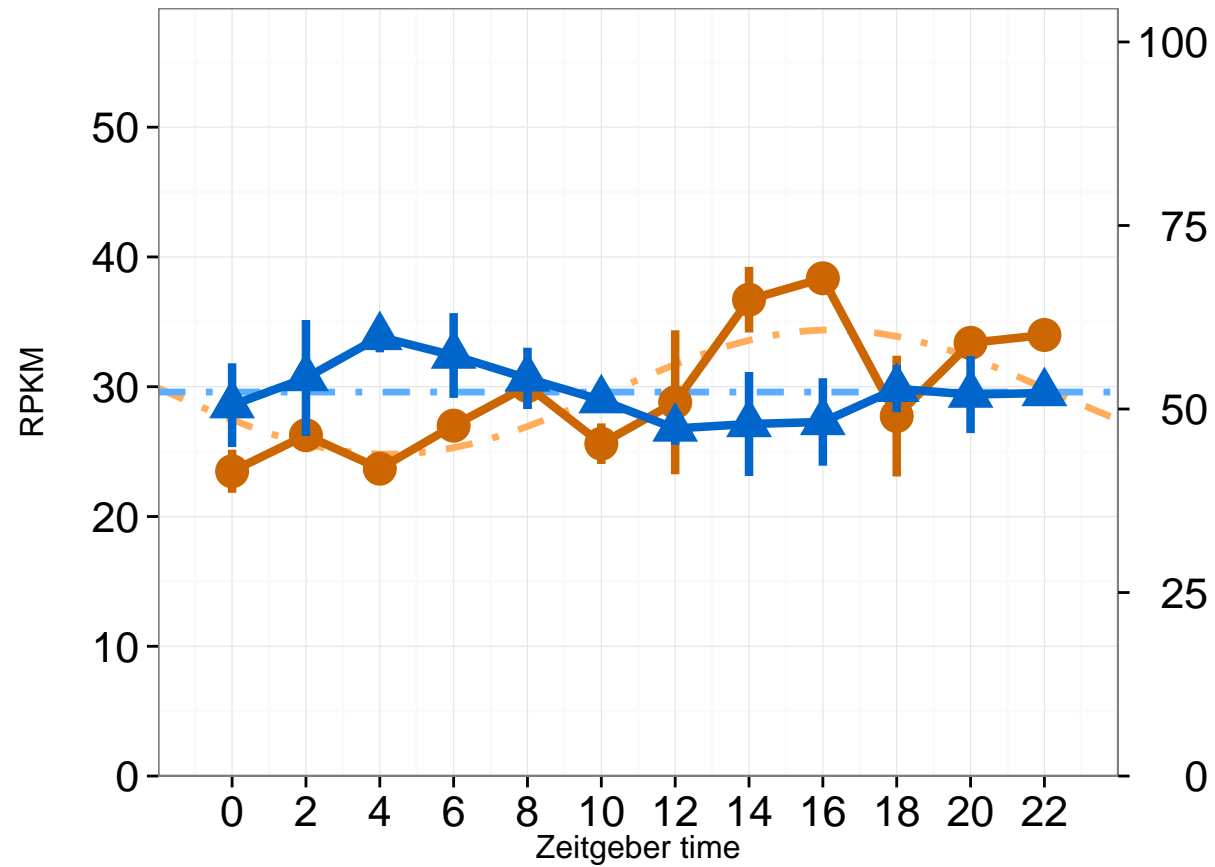

## Prr13

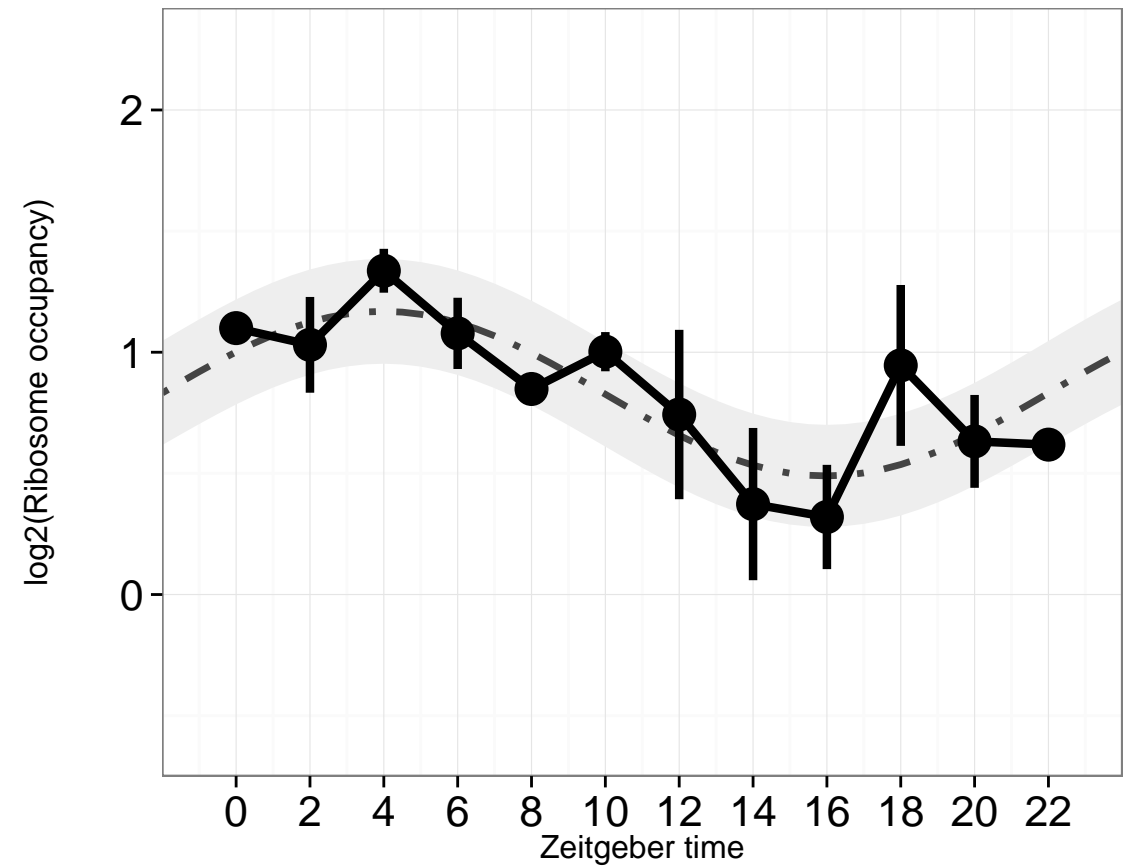

Supplement: Supplementary file 10310 [file 1]

**Traip TR**

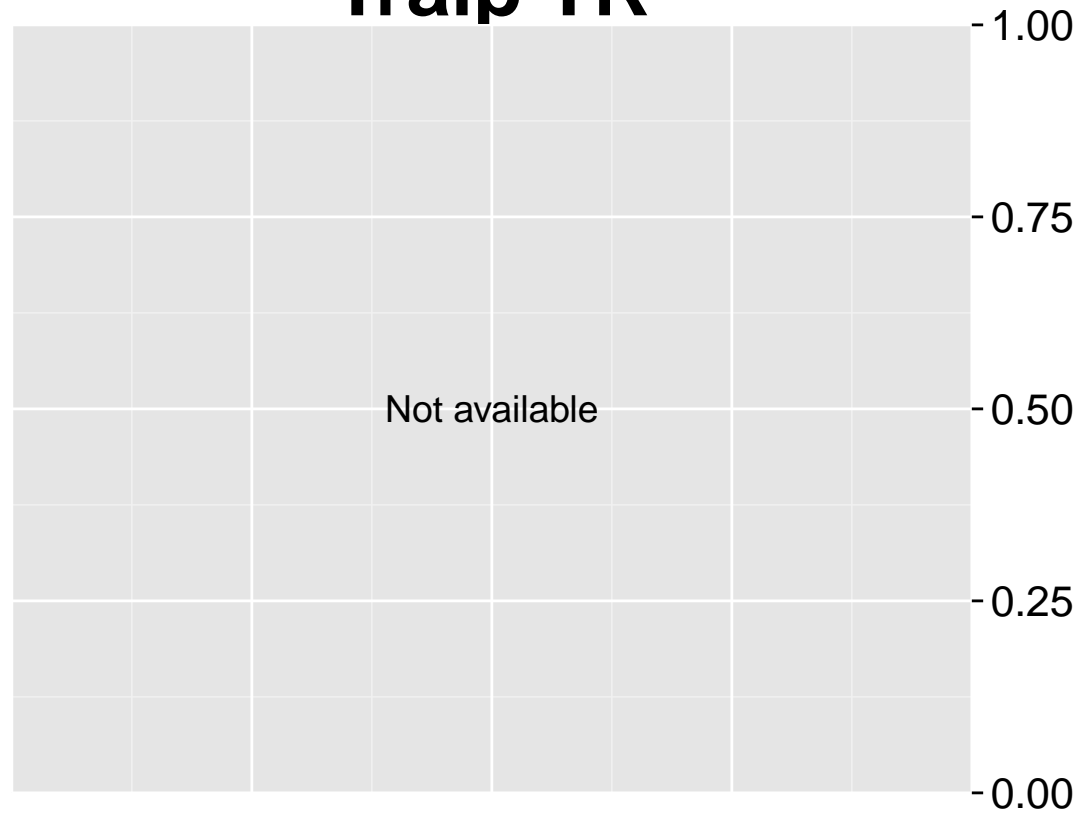

**Traip log2(Ribosome occupancy)**

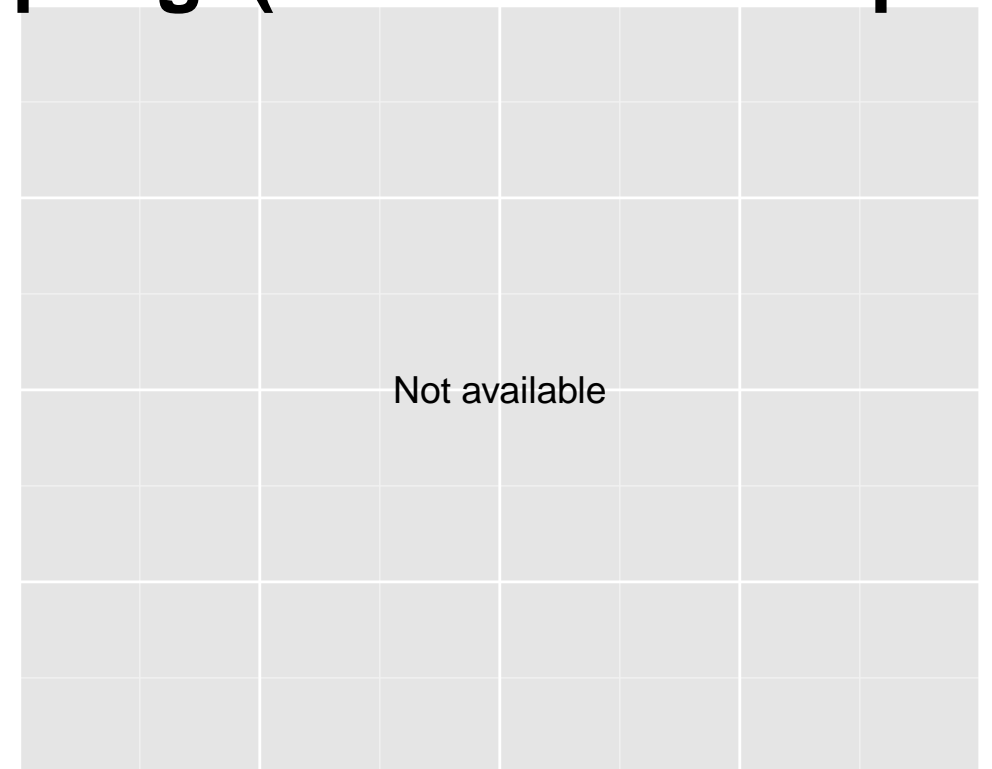

Supplement: Supplementary file 10311 [file 1]

## Snx31

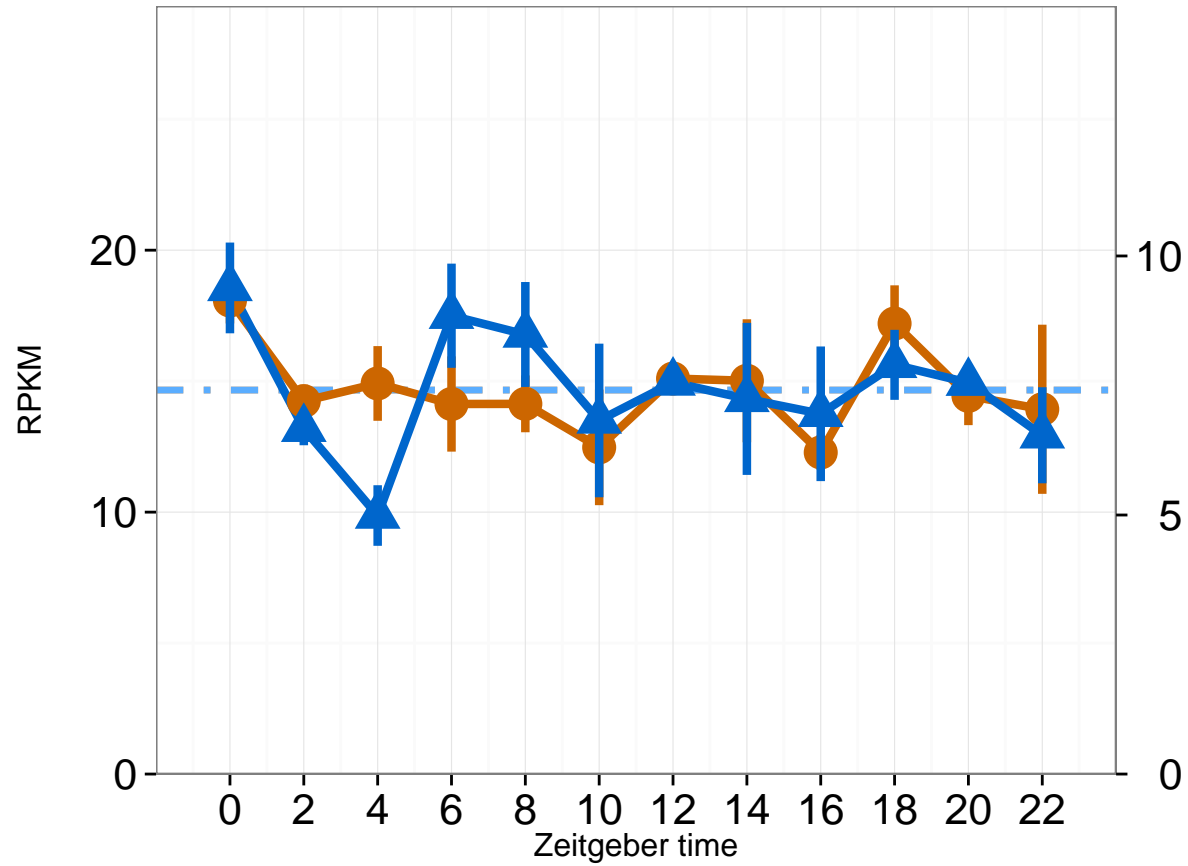

## Snx31

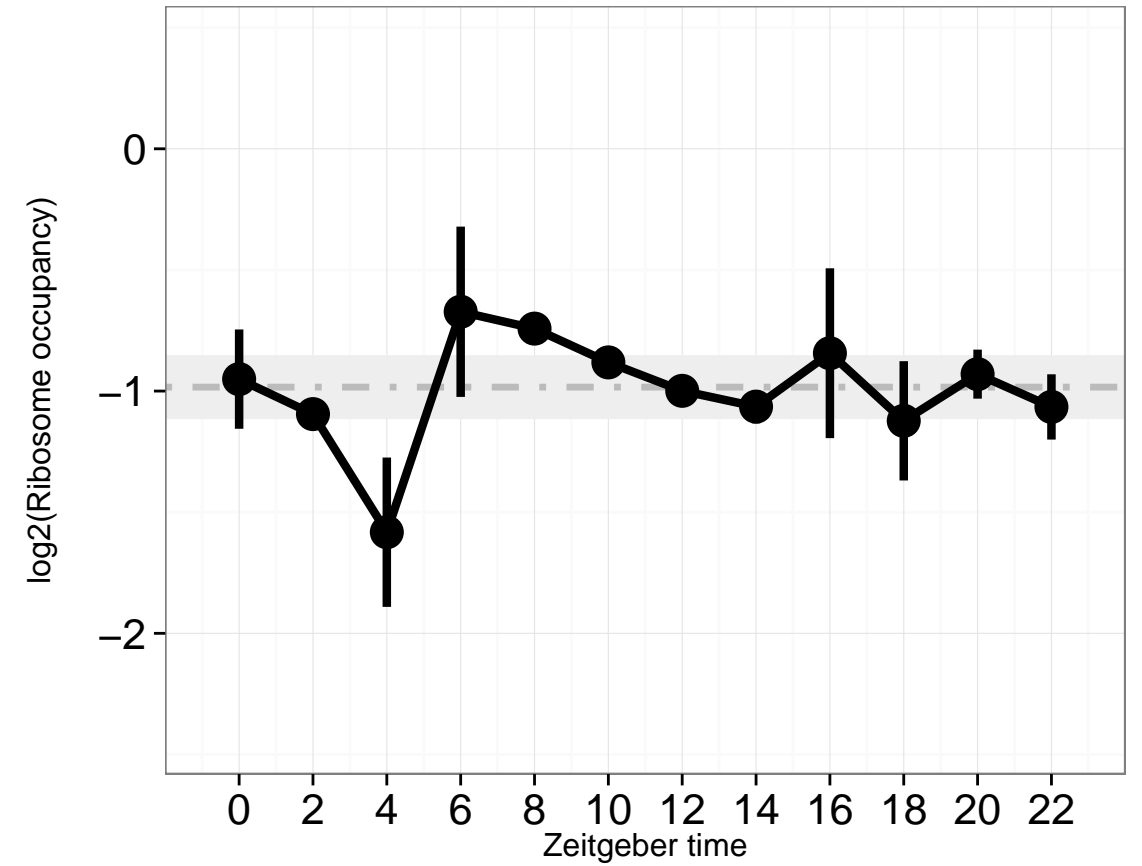

Supplement: Supplementary file 10312 [file 1]

# Ugt2b5

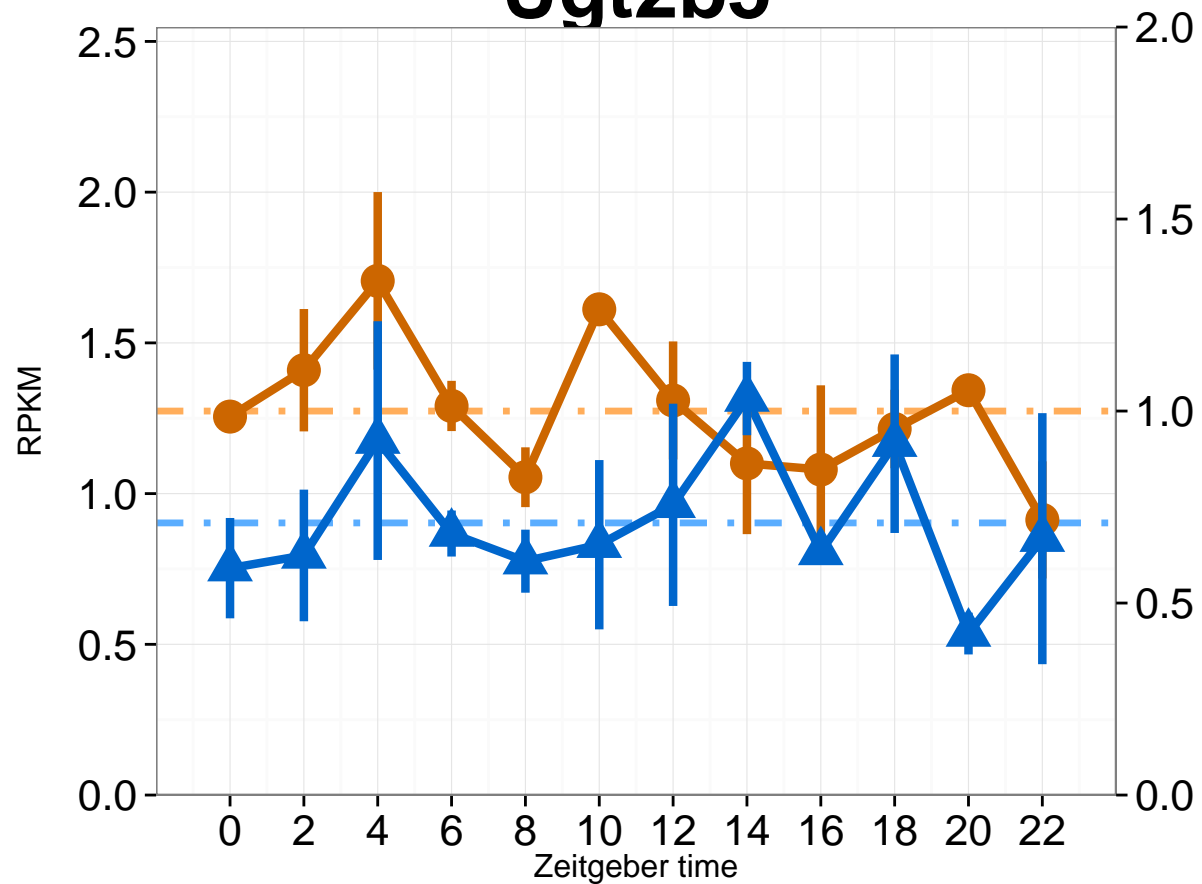

# Ugt2b5

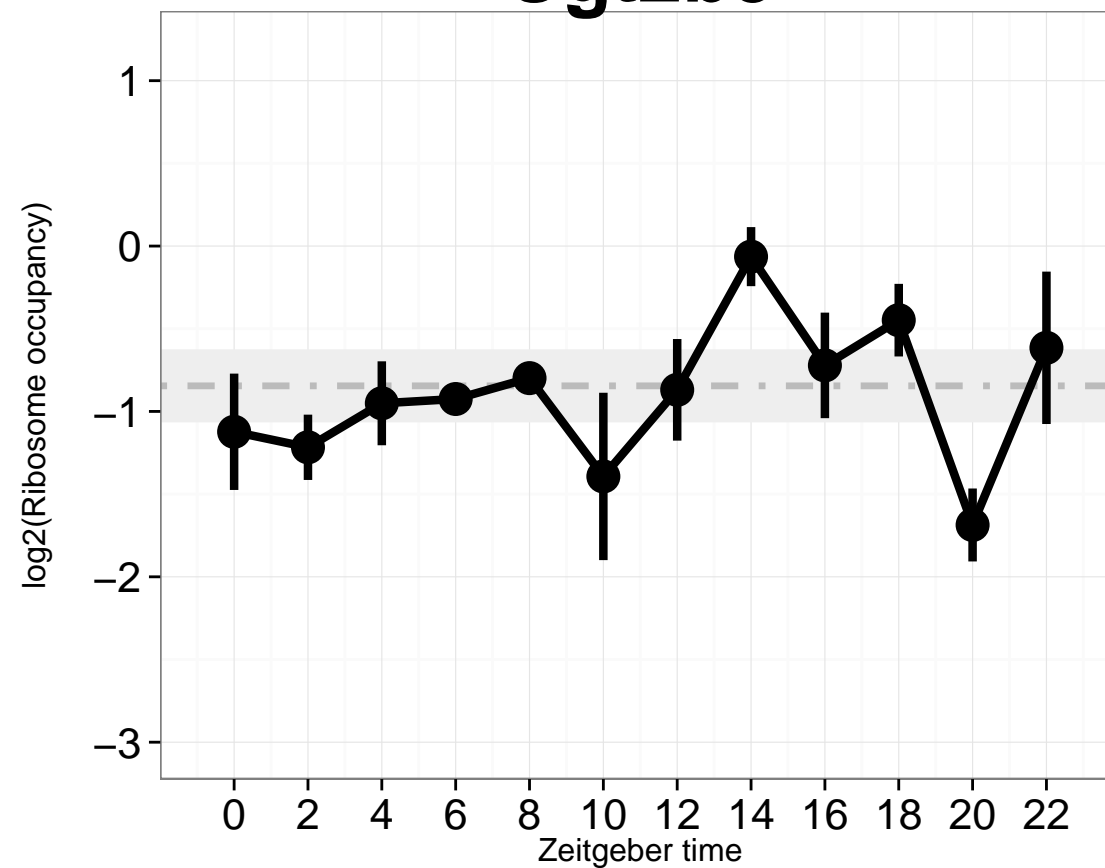

Supplement: Supplementary file 10313 [file 1]

# Cep57l1

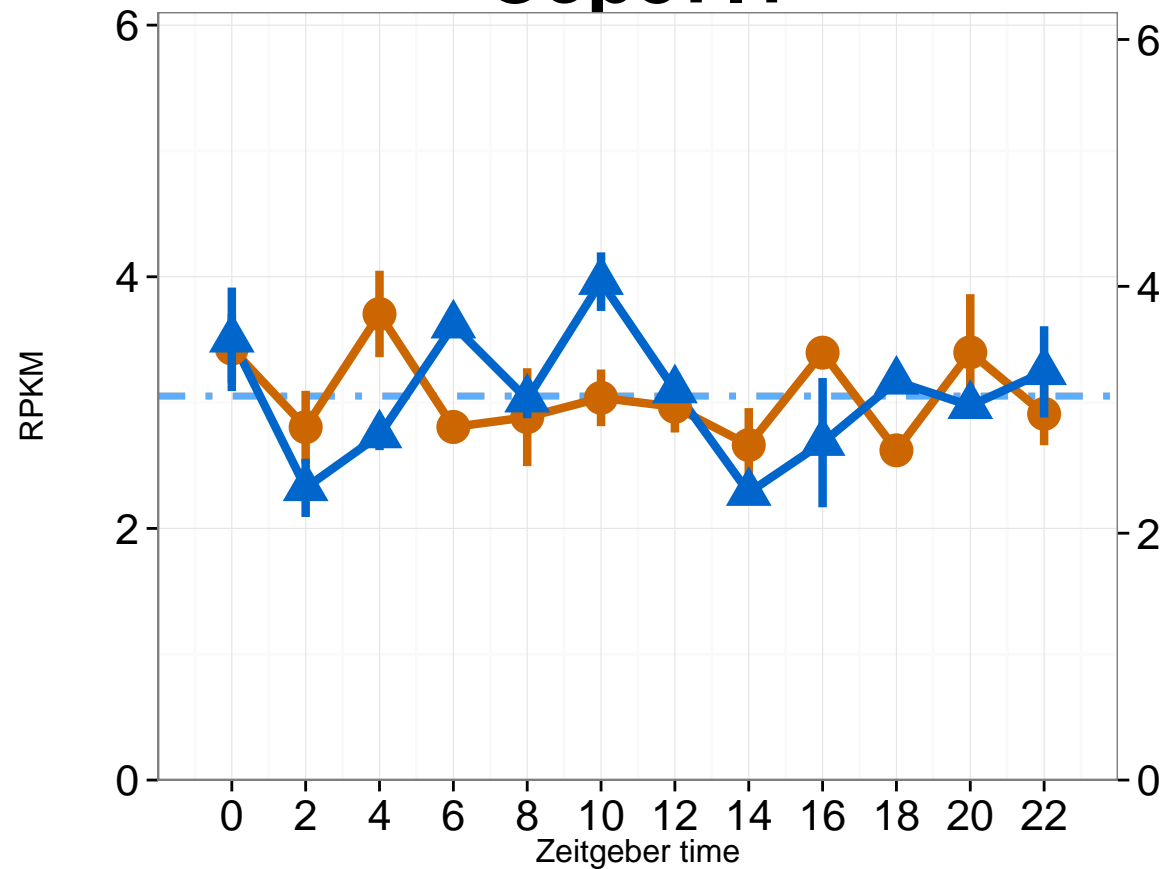

# Cep57l1

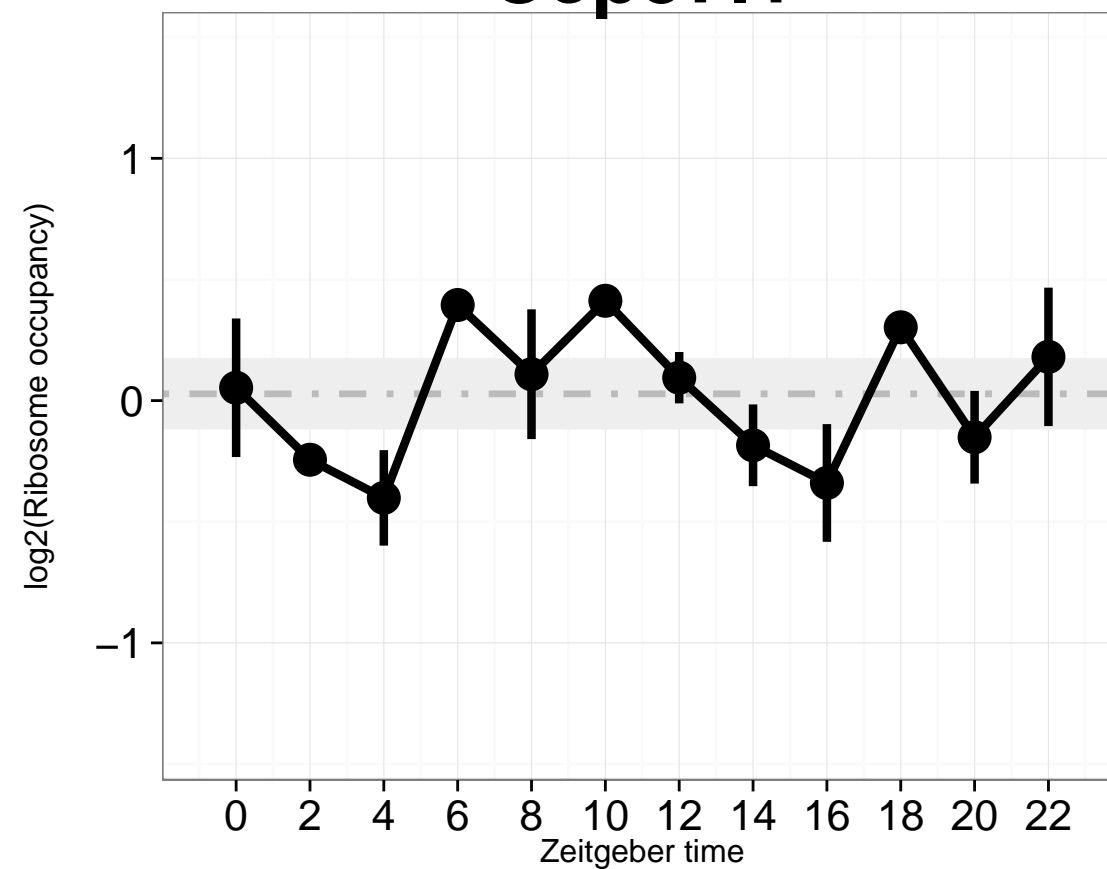

Supplement: Supplementary file 10314 [file 1]

## Dysf

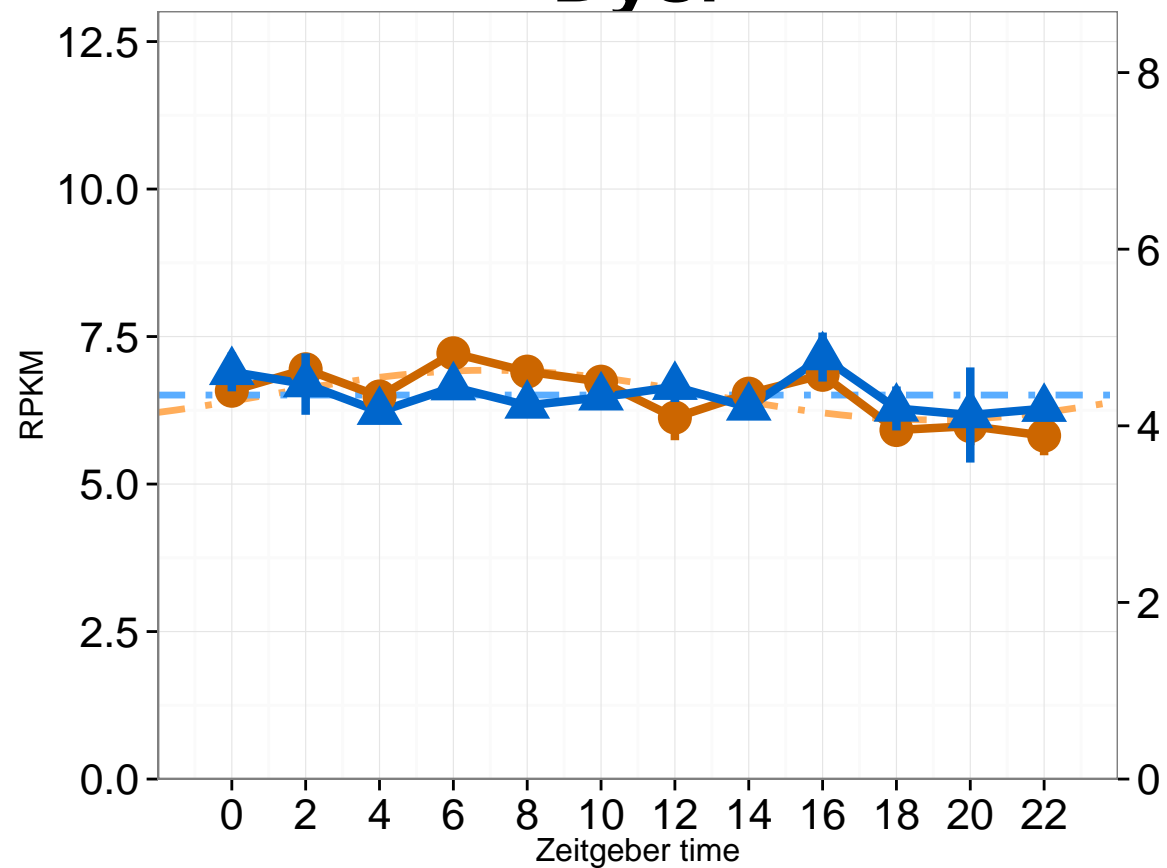

## Dysf

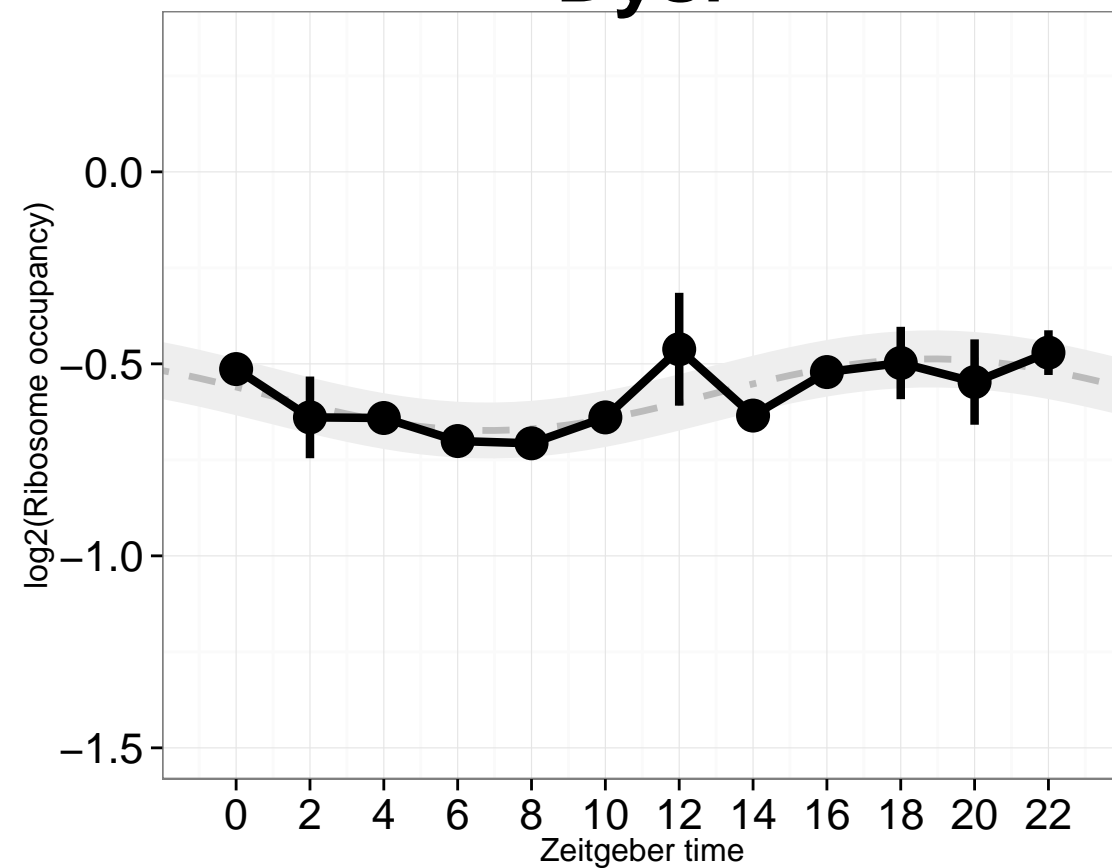

Supplement: Supplementary file 10315 [file 1]

# Zfp36l1

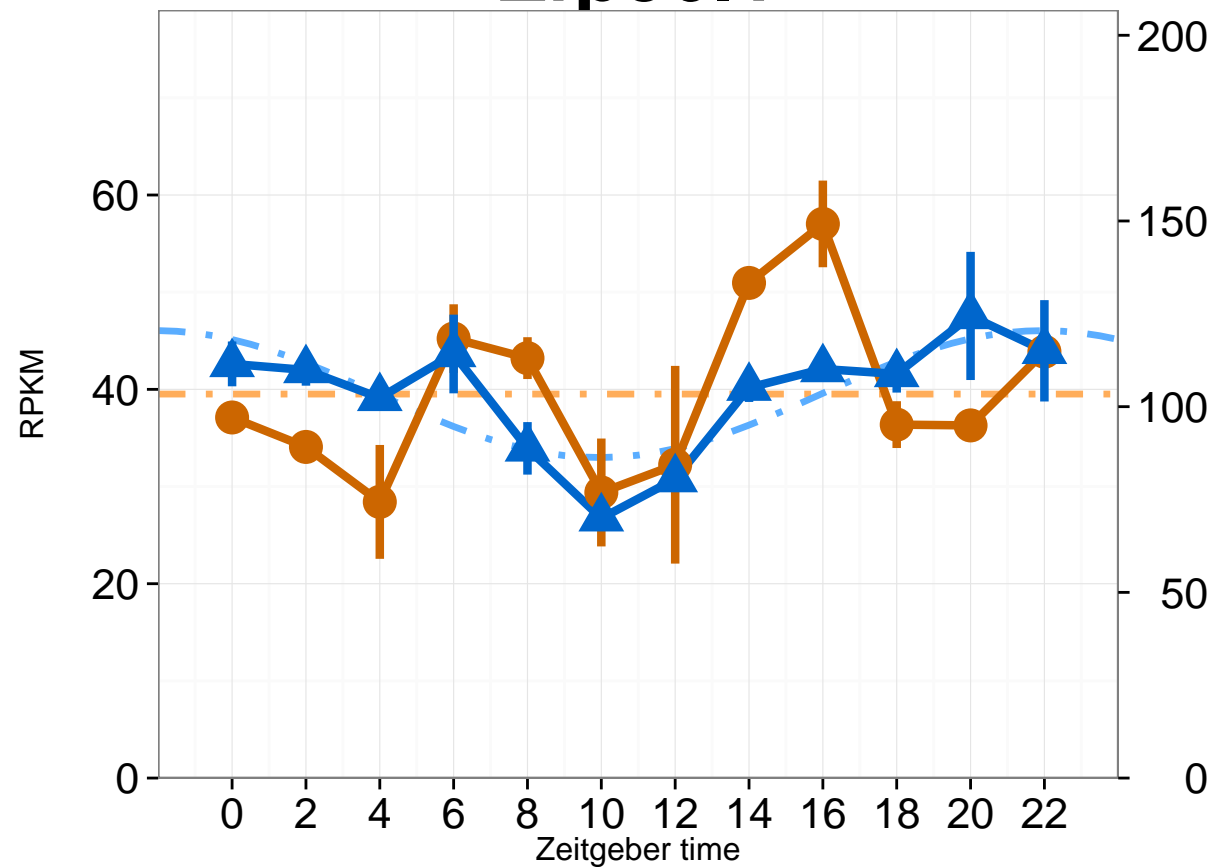

# Zfp36l1

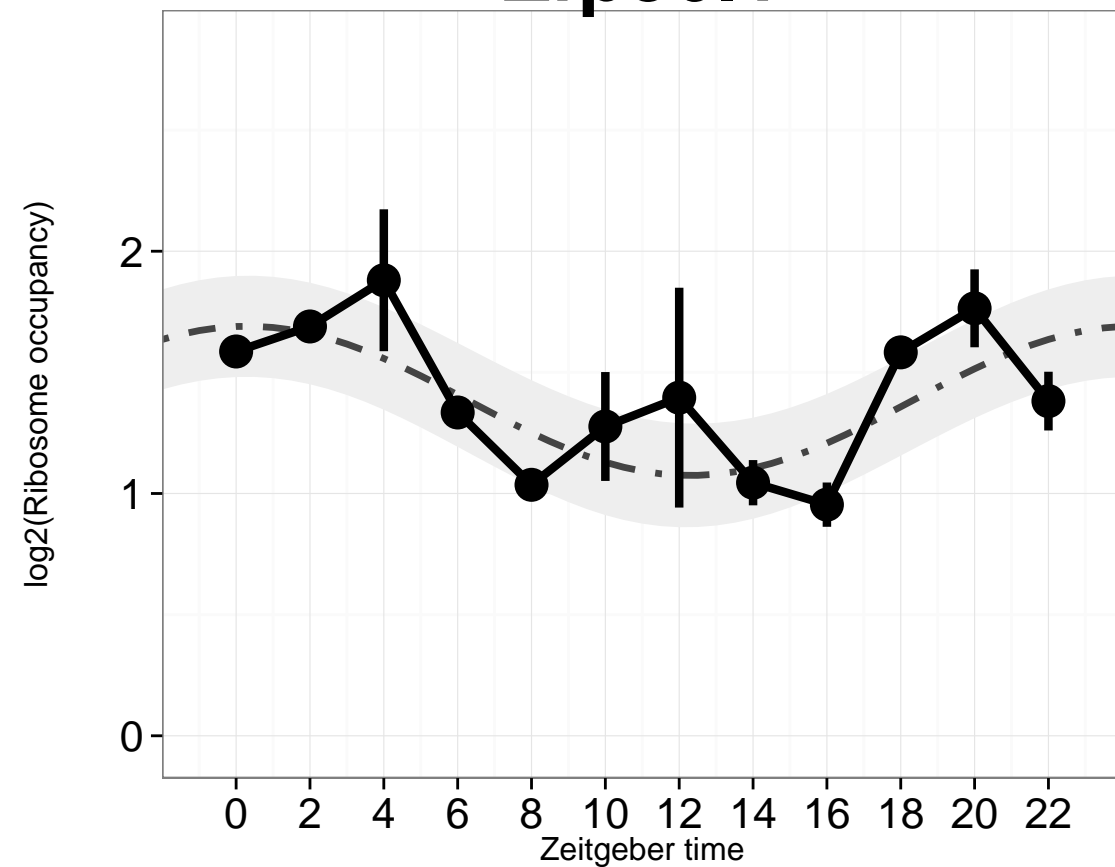

Supplement: Supplementary file 10316 [file 1]

## Palmd

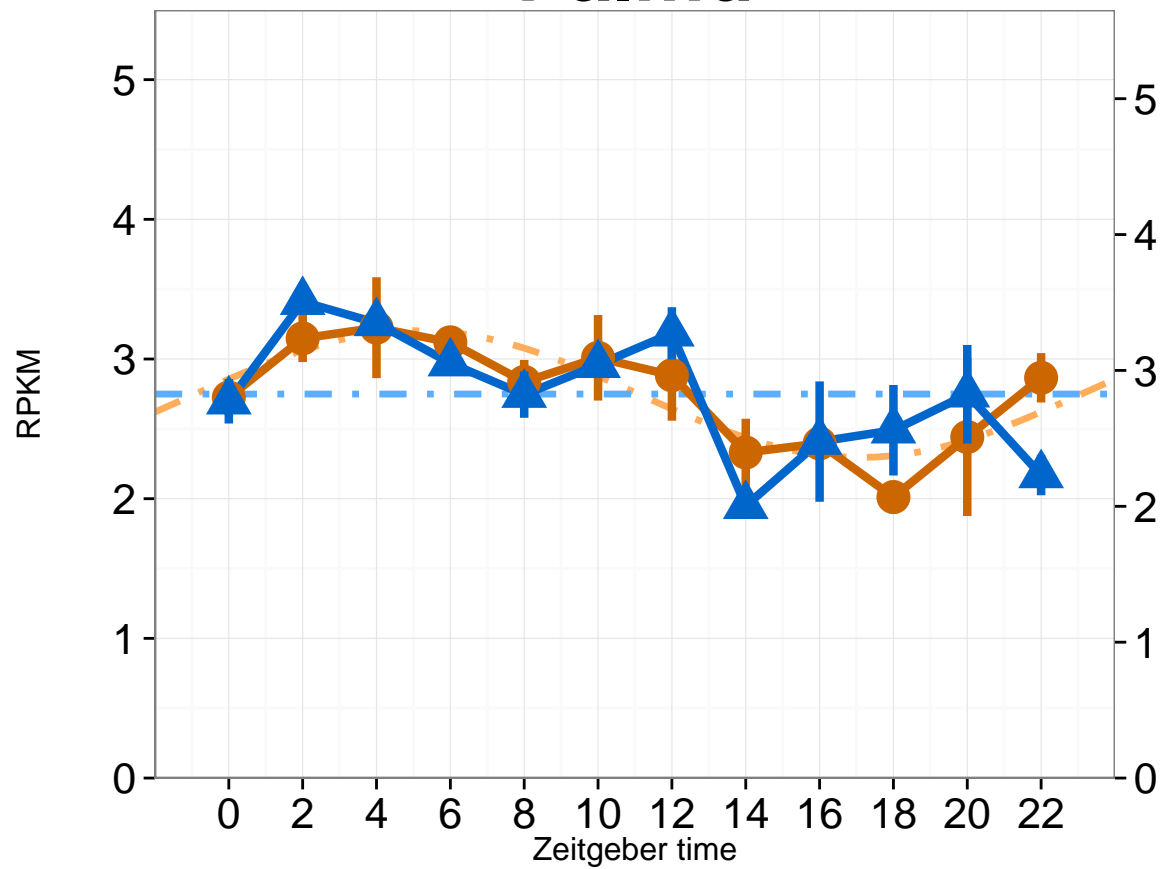

## Palmd

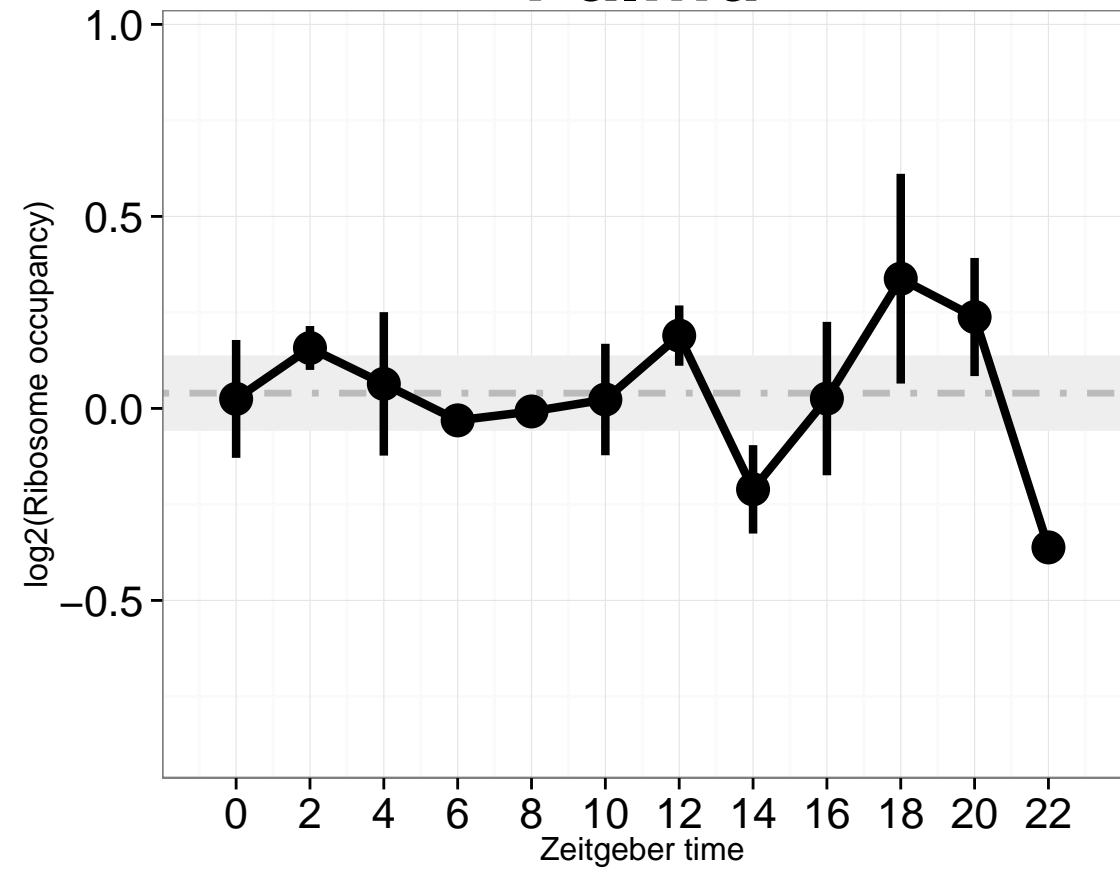

Supplement: Supplementary file 10317 [file 1]

## Wasf3

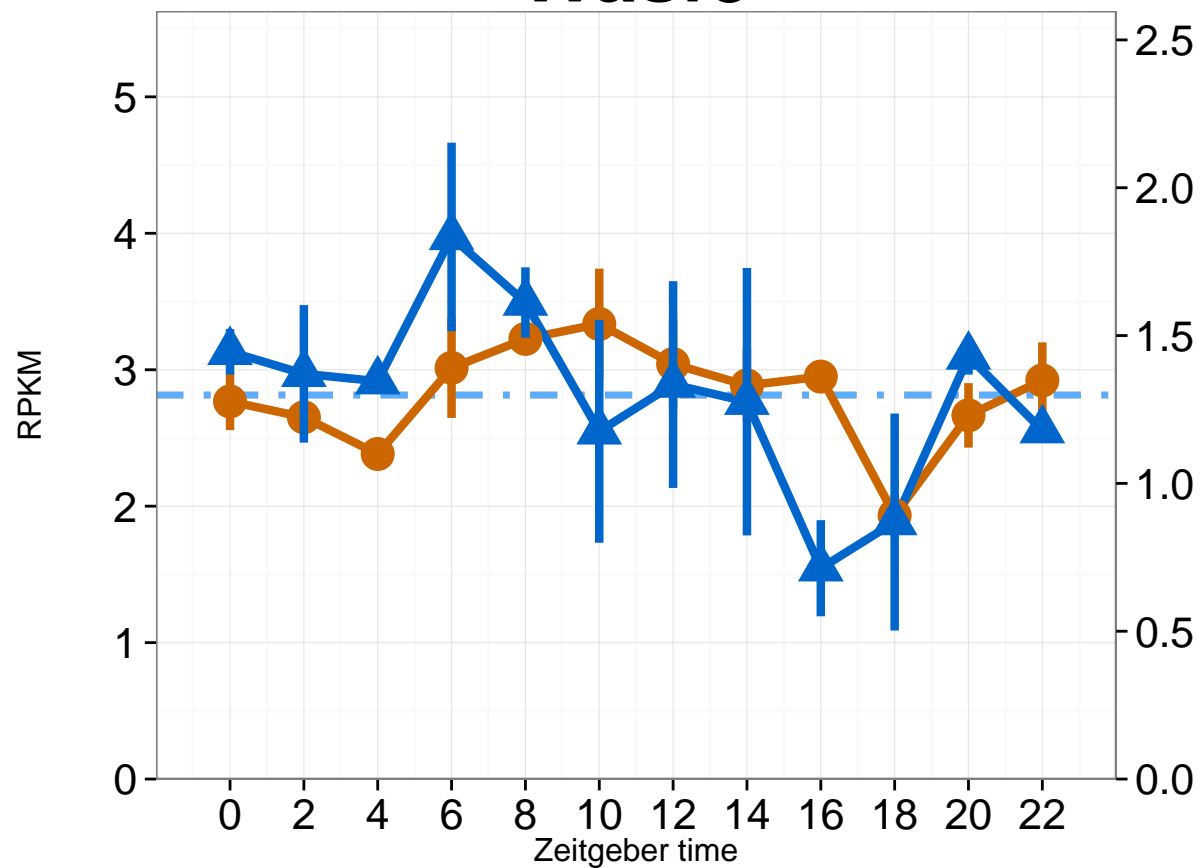

## Wasf3

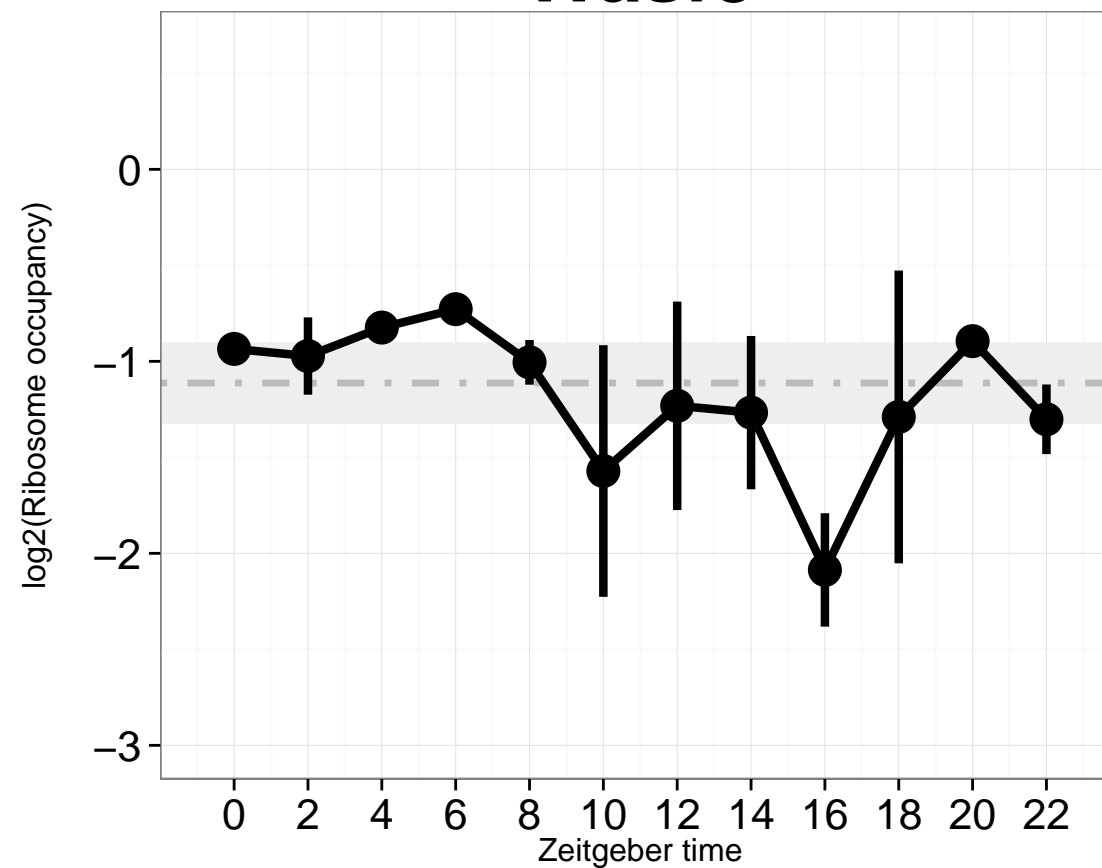

Supplement: Supplementary file 10318 [file 1]

## Alad

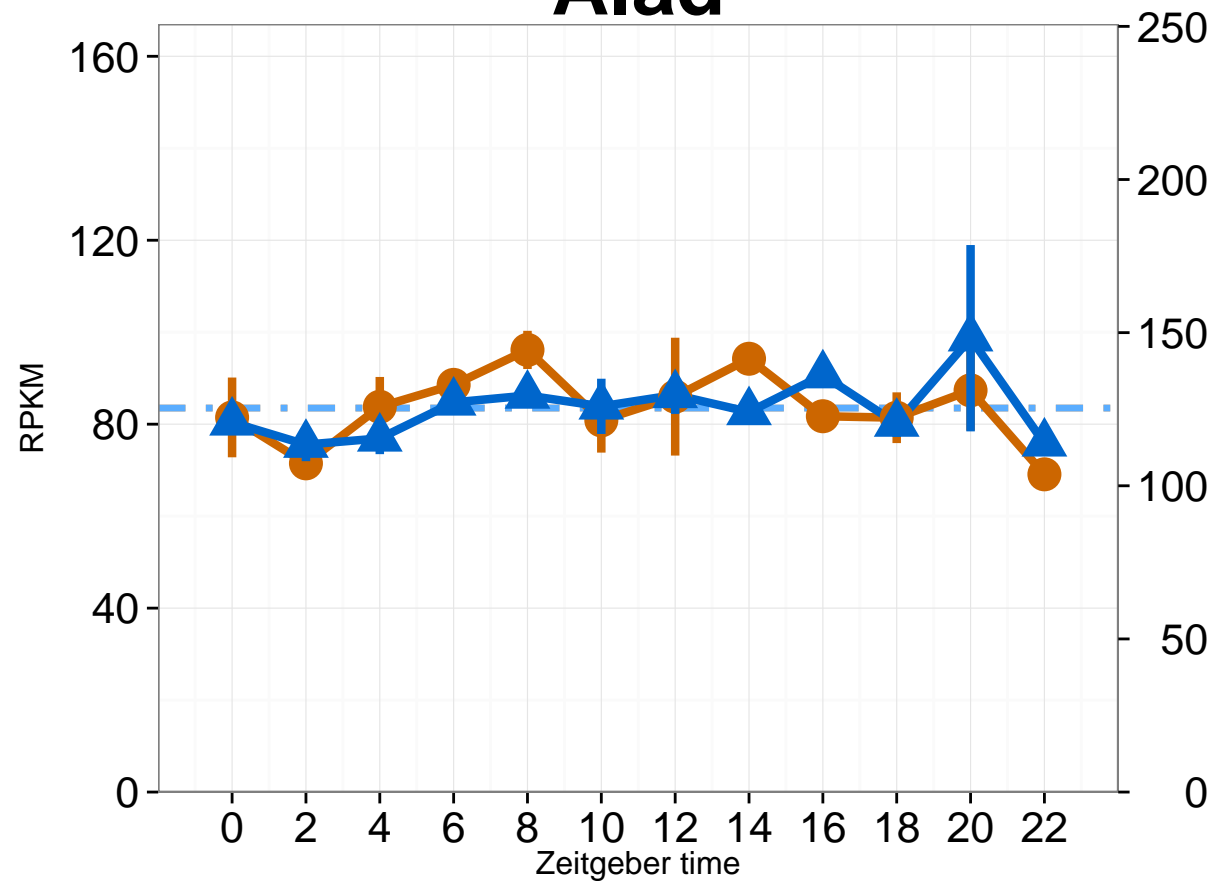

## Alad

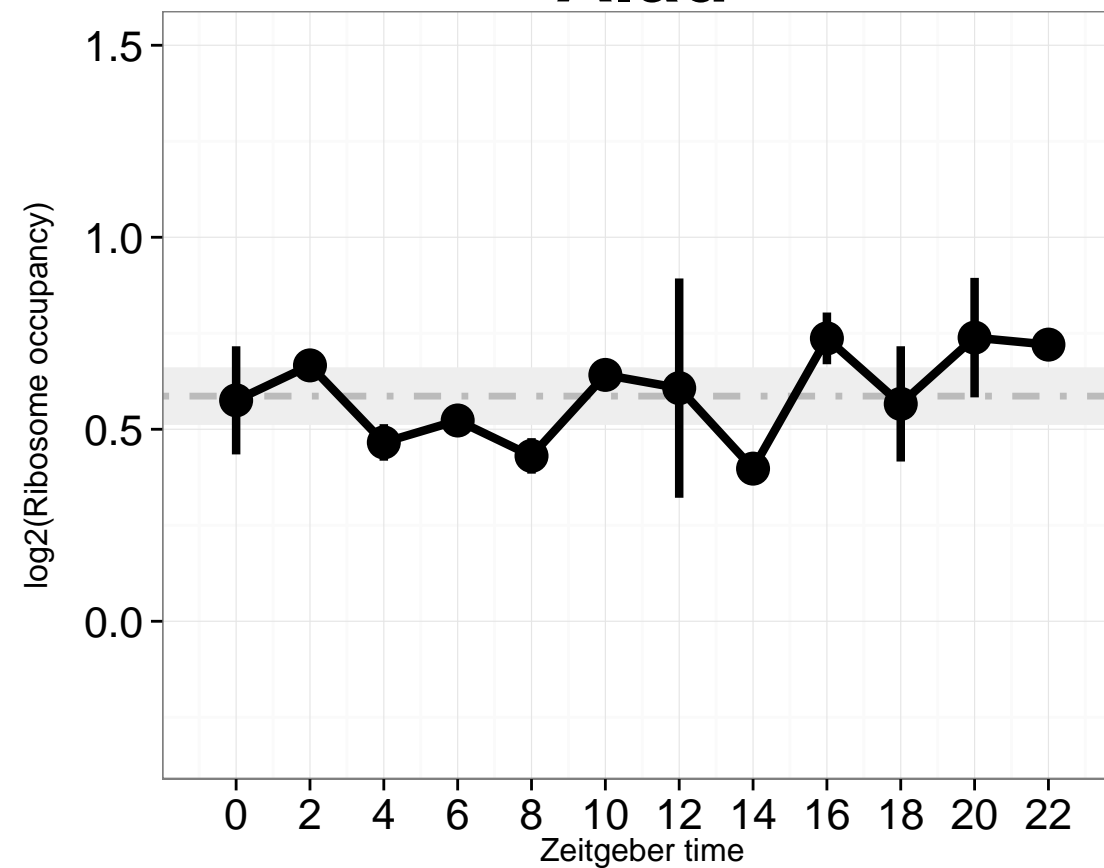

Supplement: Supplementary file 10319 [file 1]

# Mug1

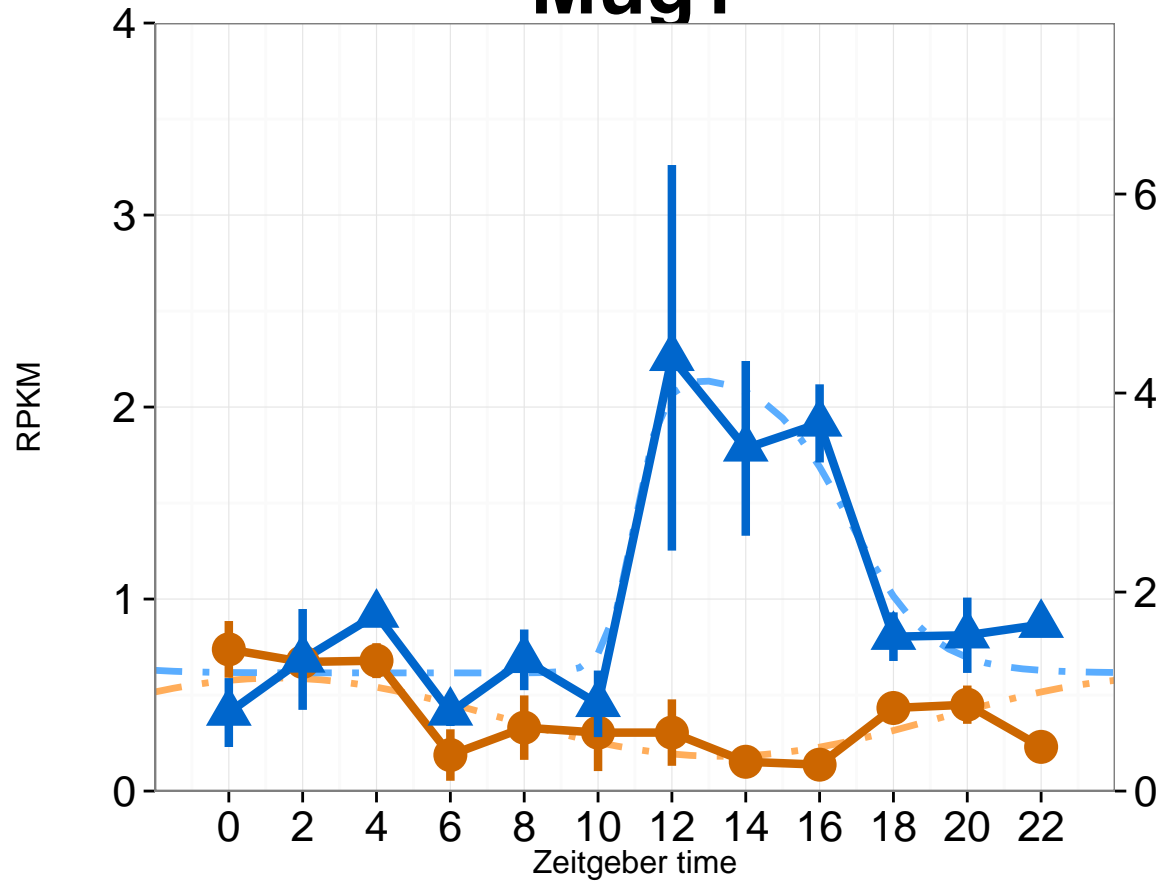

# Mug1

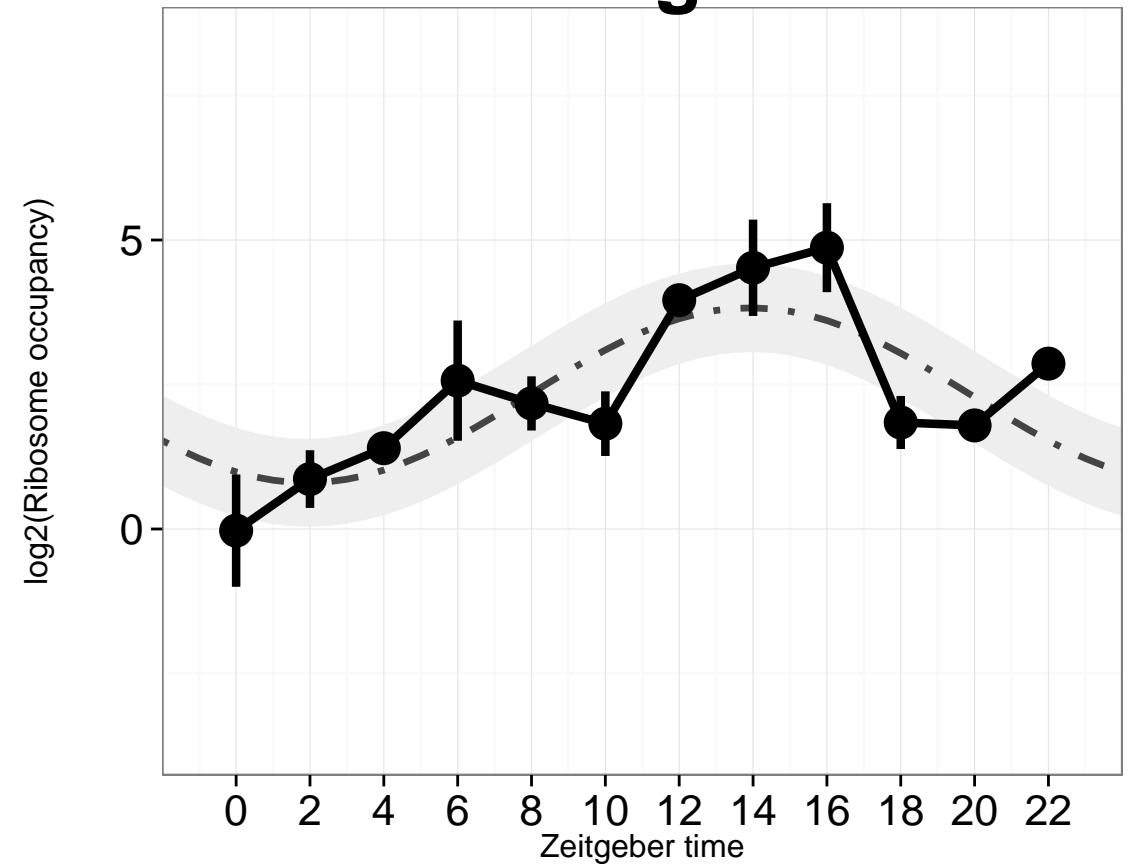

Supplement: Supplementary file 10320 [file 1]

# Zbtb7b

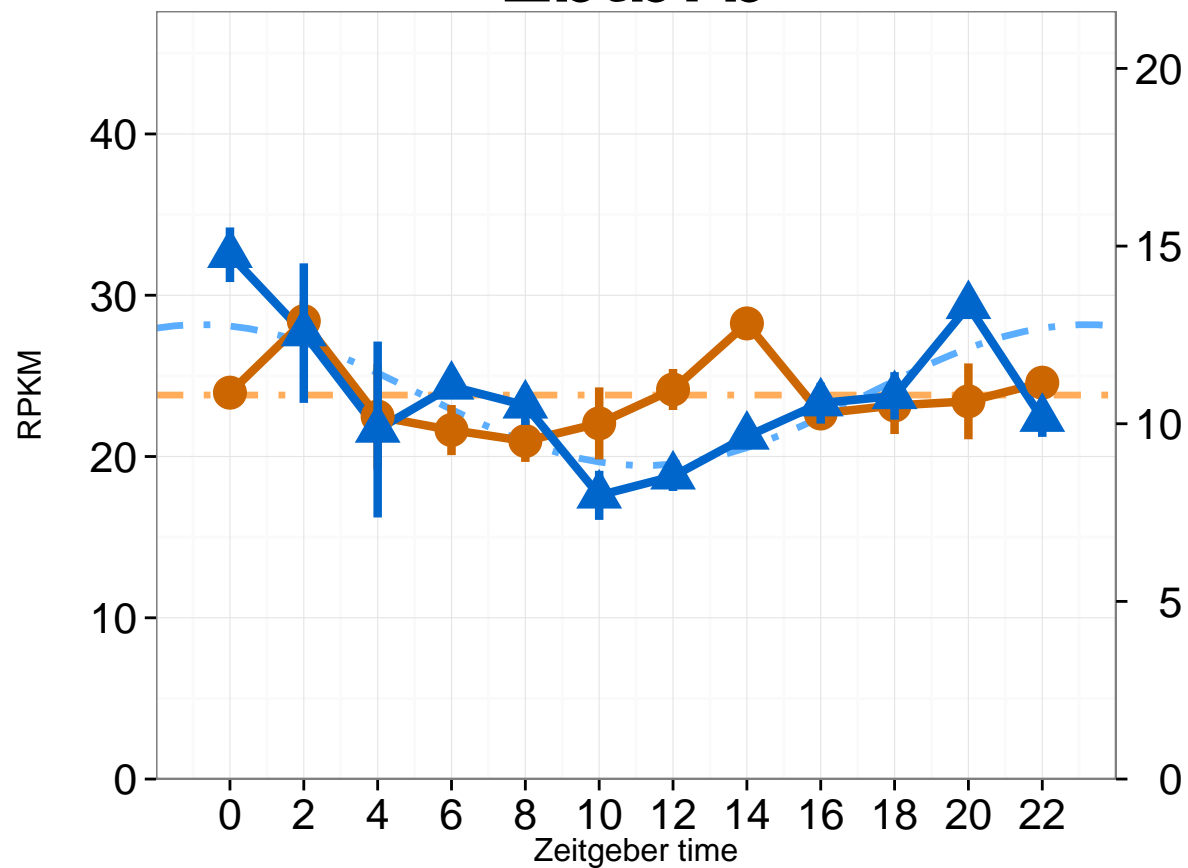

# Zbtb7b

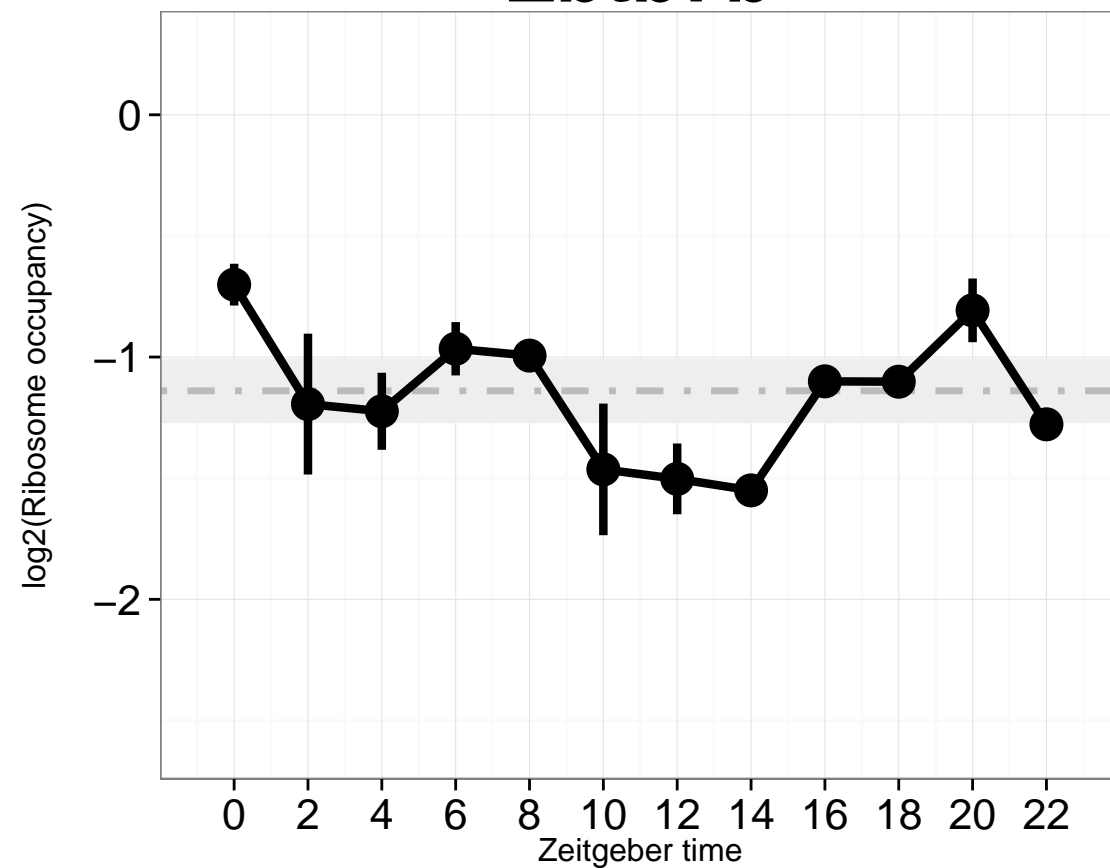

Supplement: Supplementary file 10321 [file 1]

## Smap1

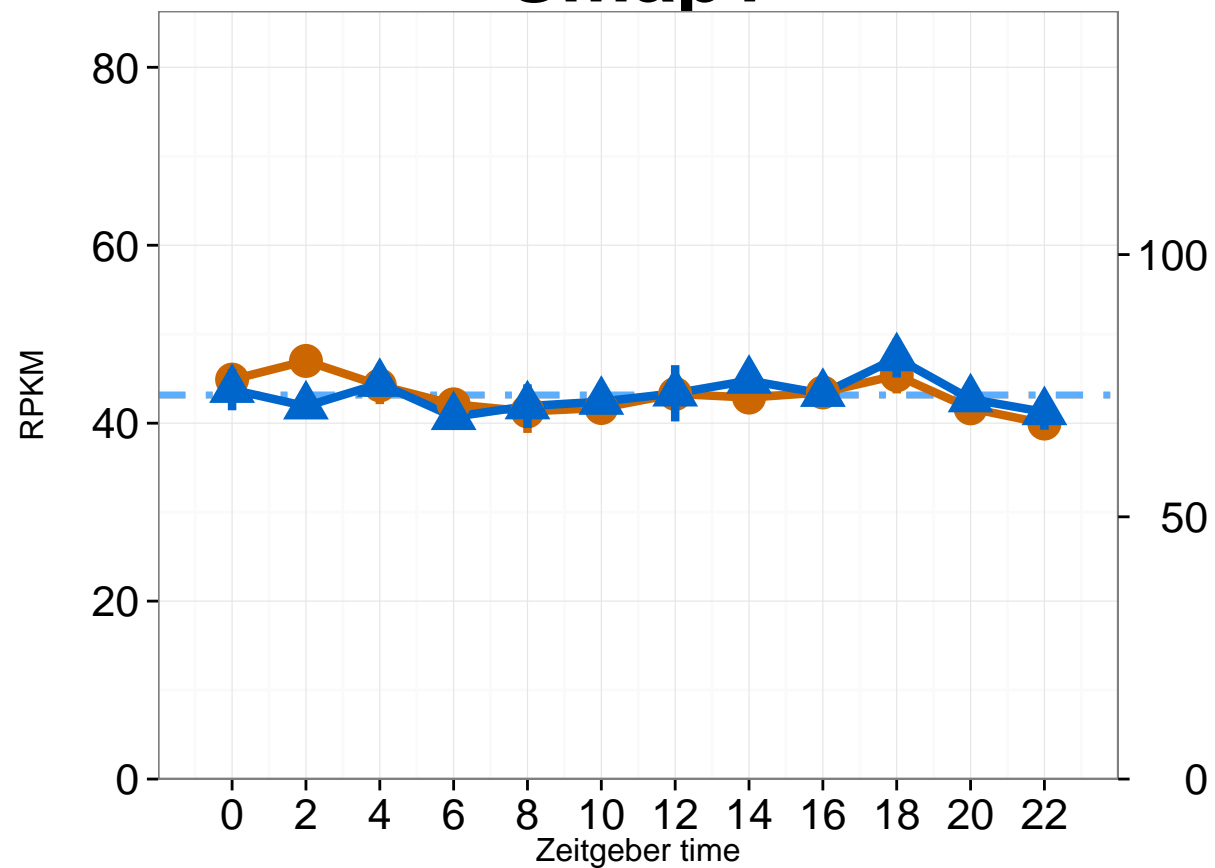

## Smap1

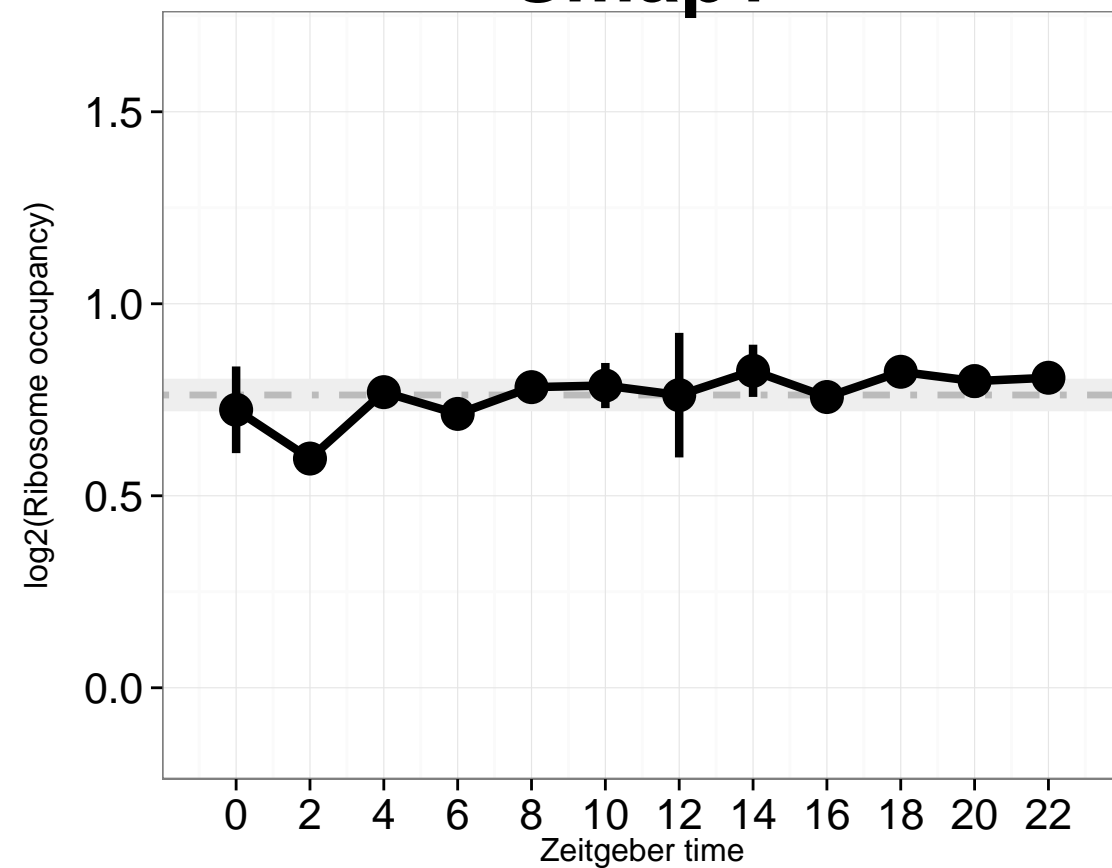

Supplement: Supplementary file 10322 [file 1]

**Rarres1 TR**

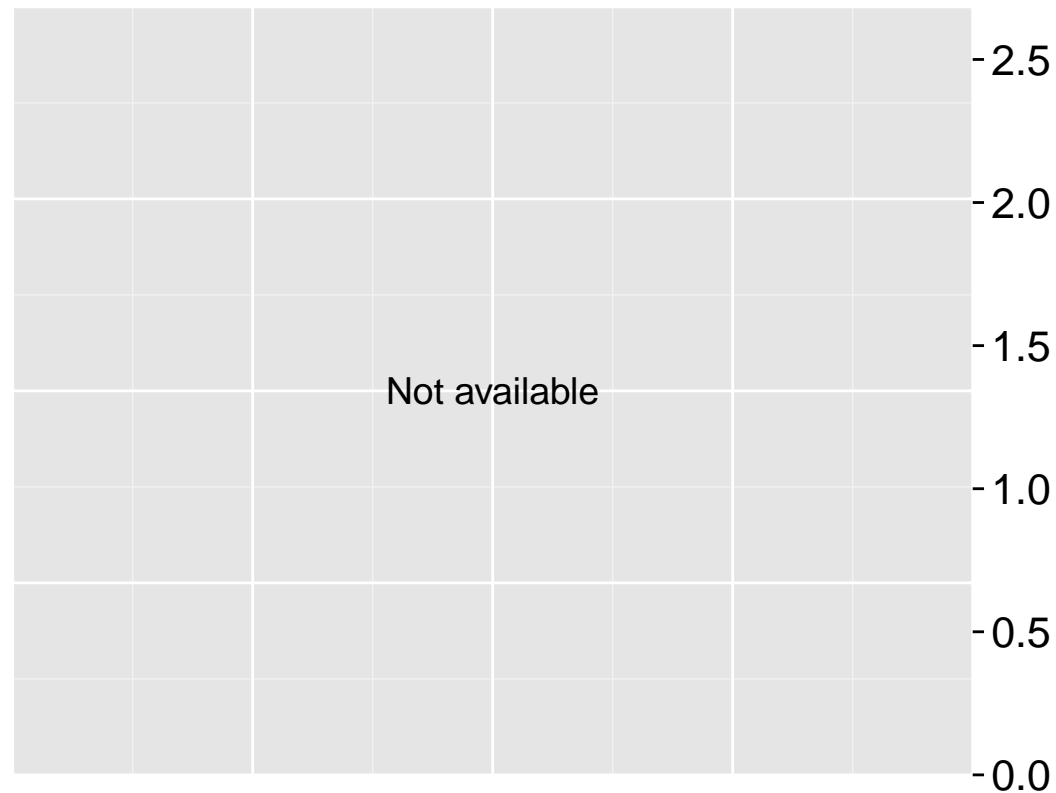

**Rarres1 log2(Ribosome occupancy**

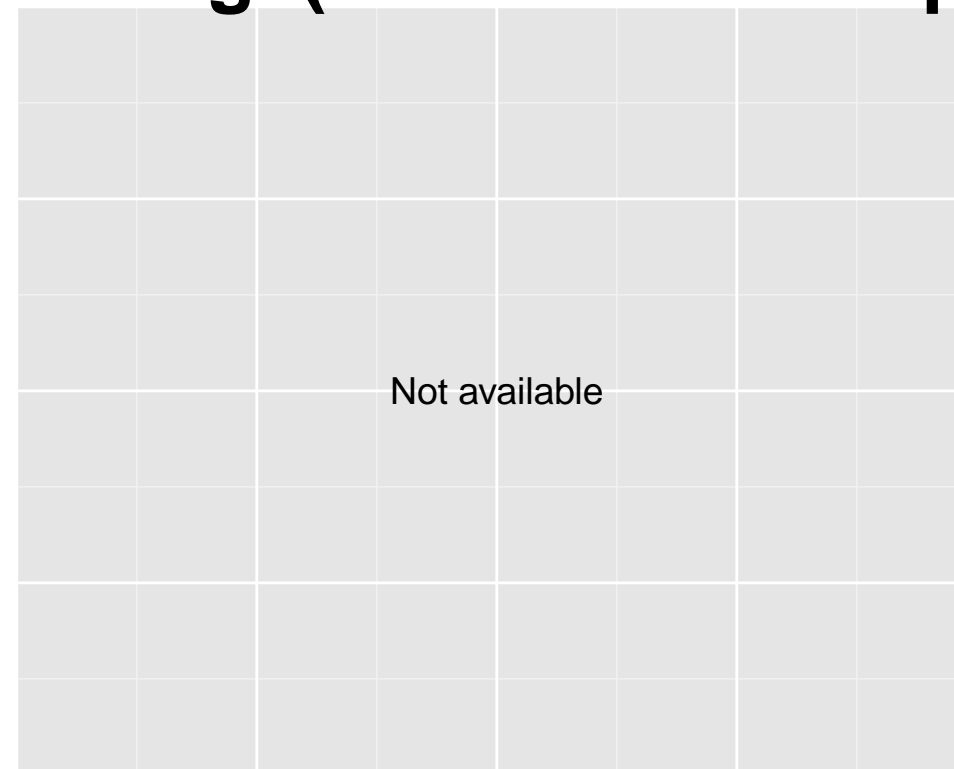

Supplement: Supplementary file 10323 [file 1]

## Evc2

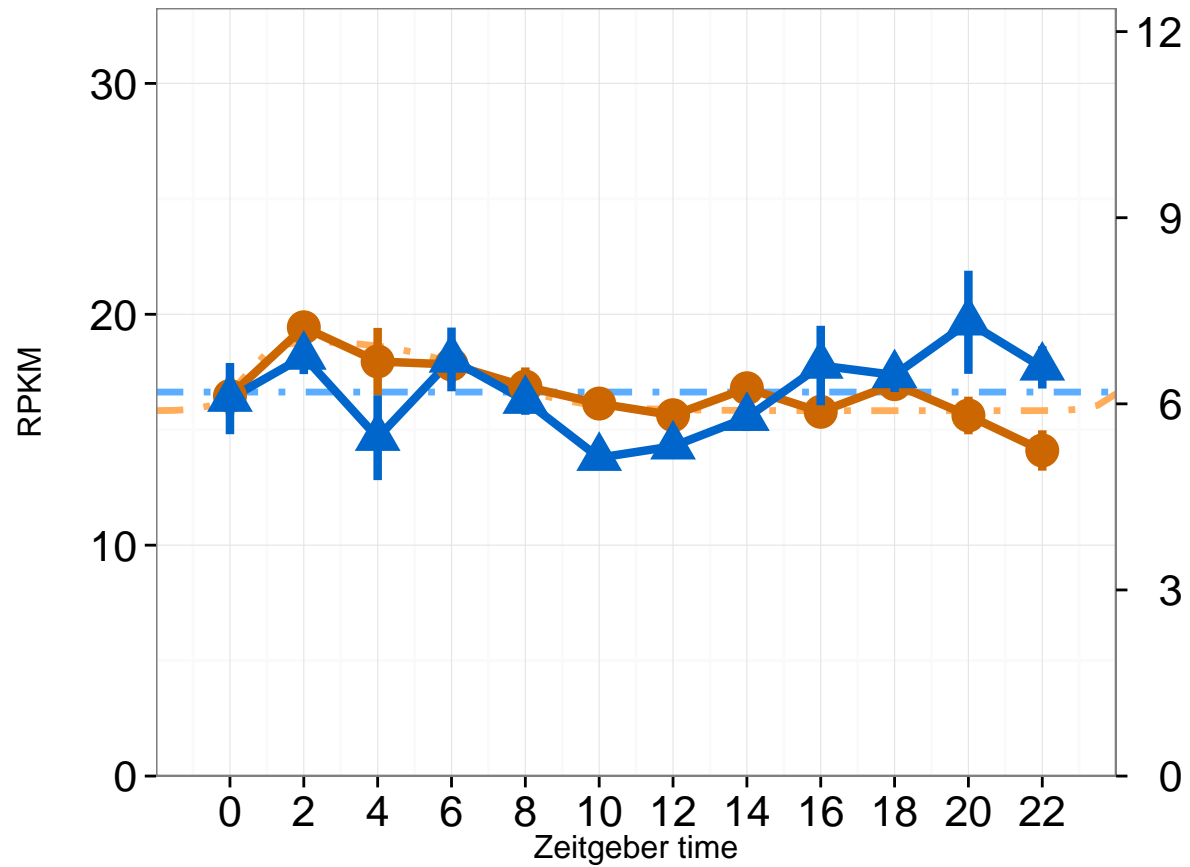

## Evc2

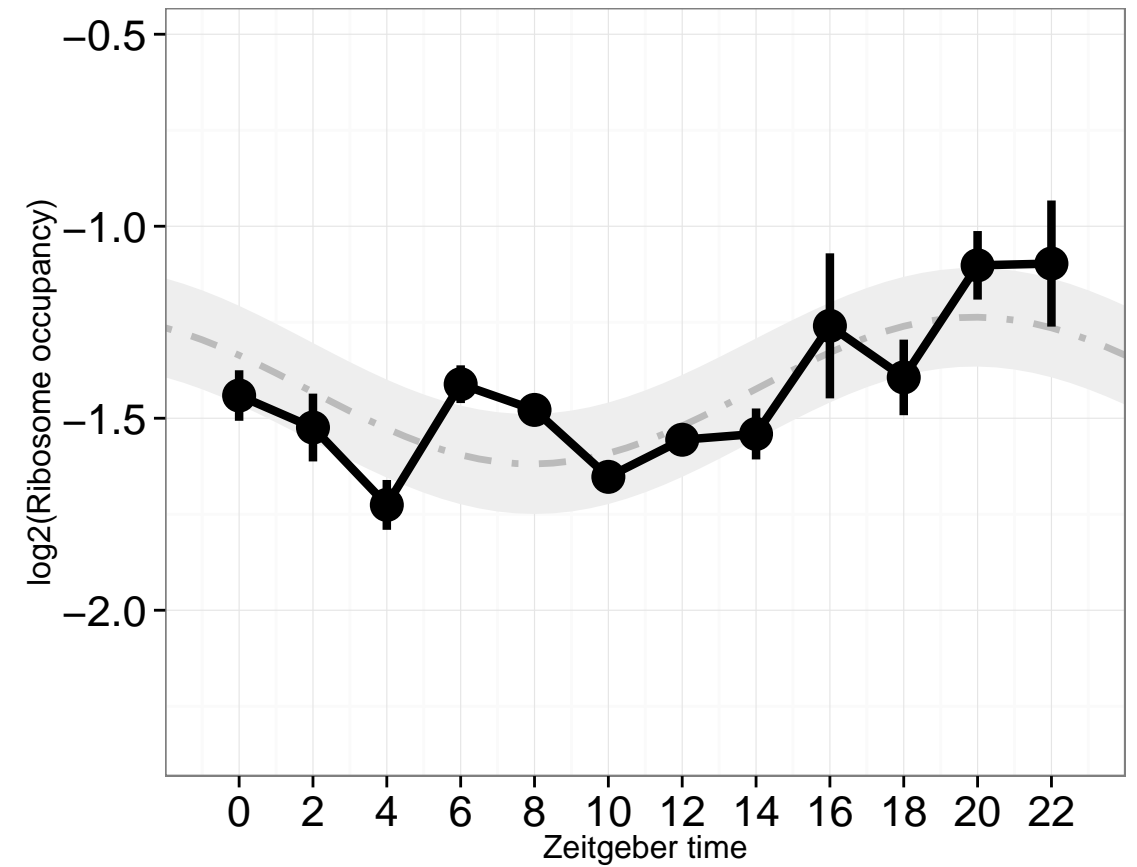

Supplement: Supplementary file 10324 [file 1]

## Calml4

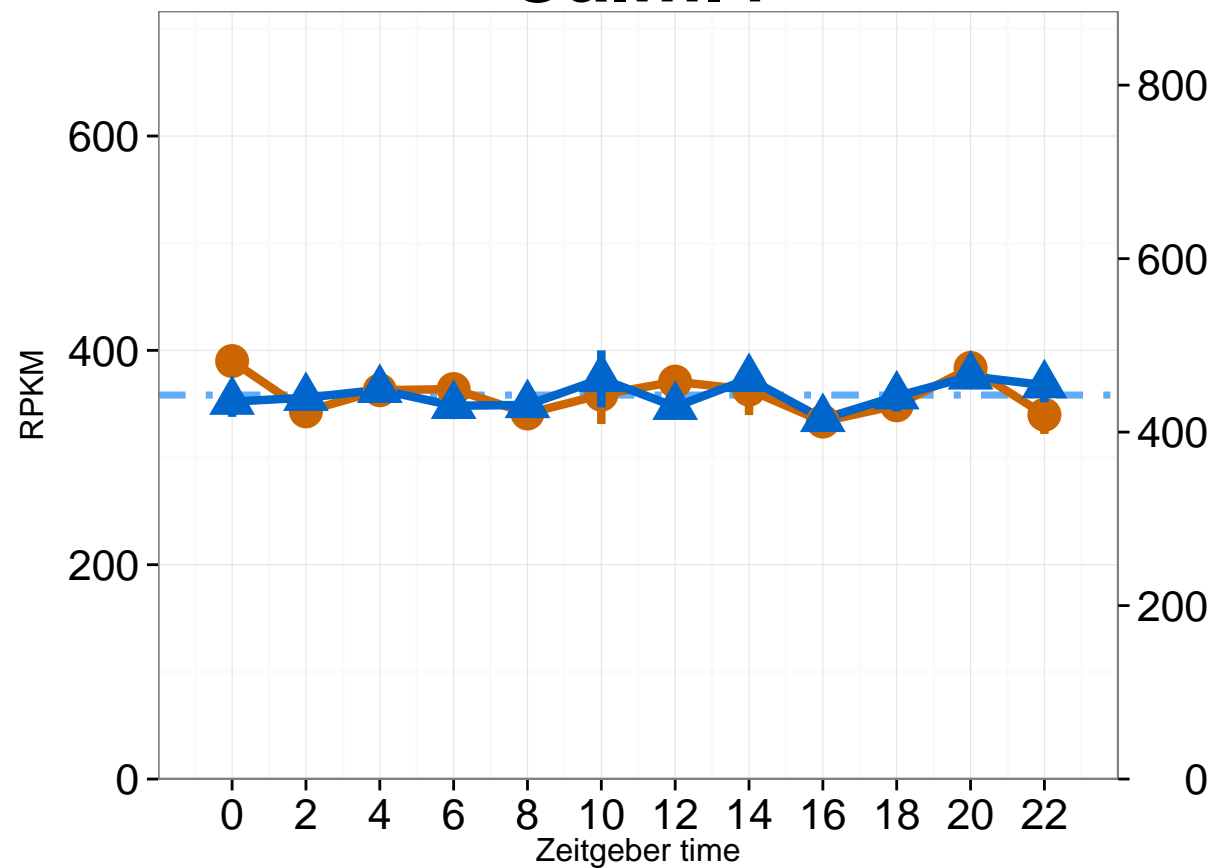

## Calml4

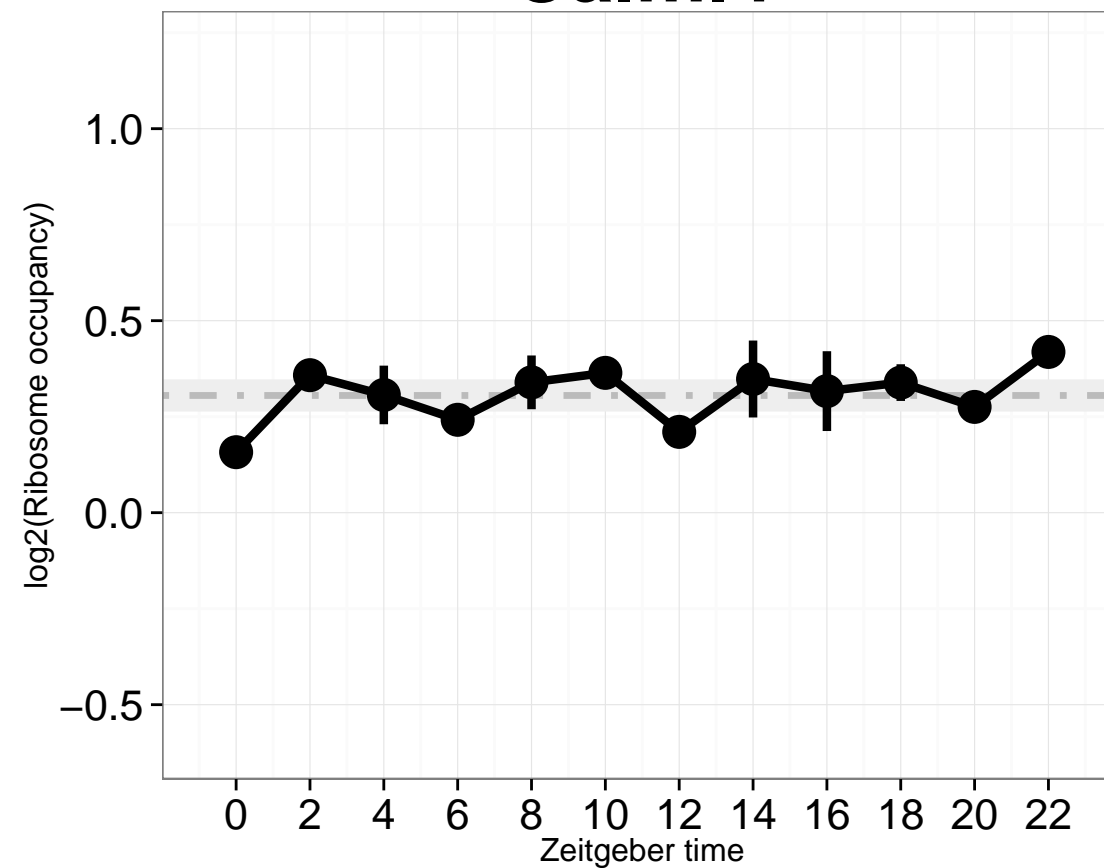

Supplement: Supplementary file 10325 [file 1]

# Zfp937

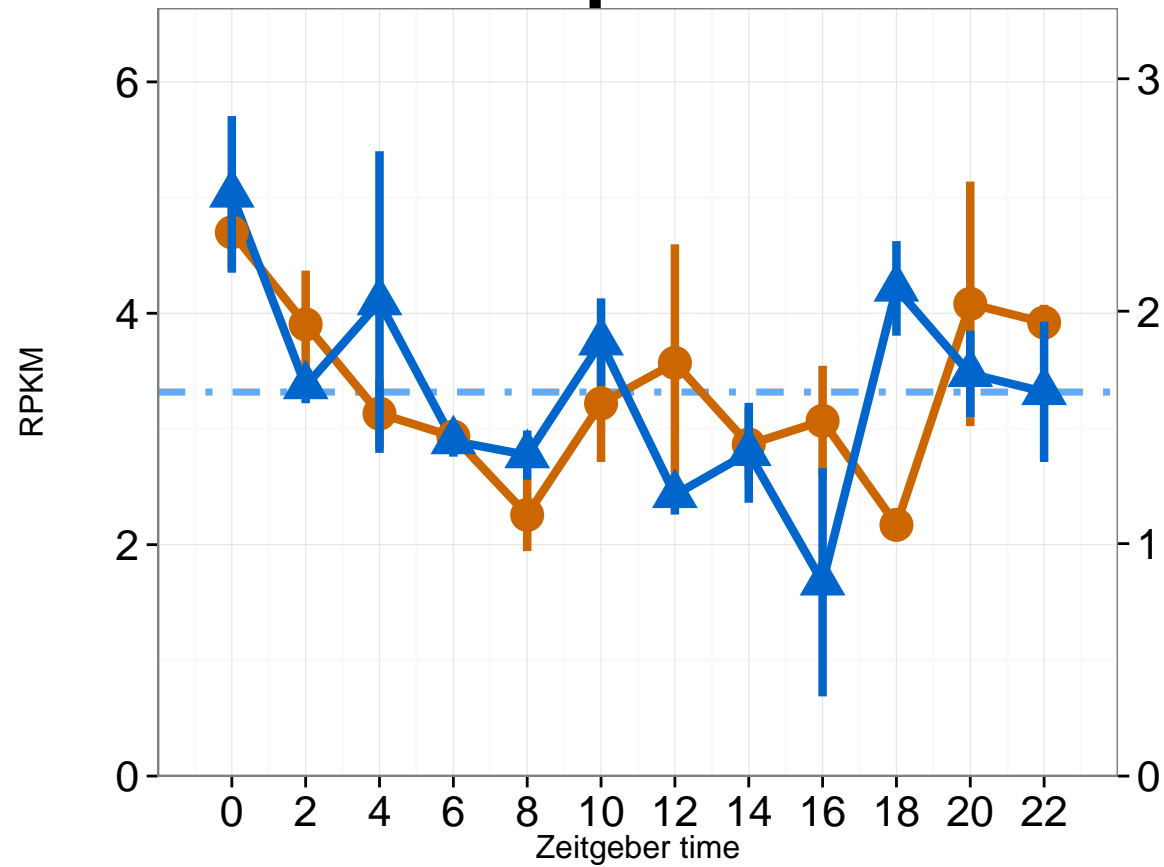

# Zfp937

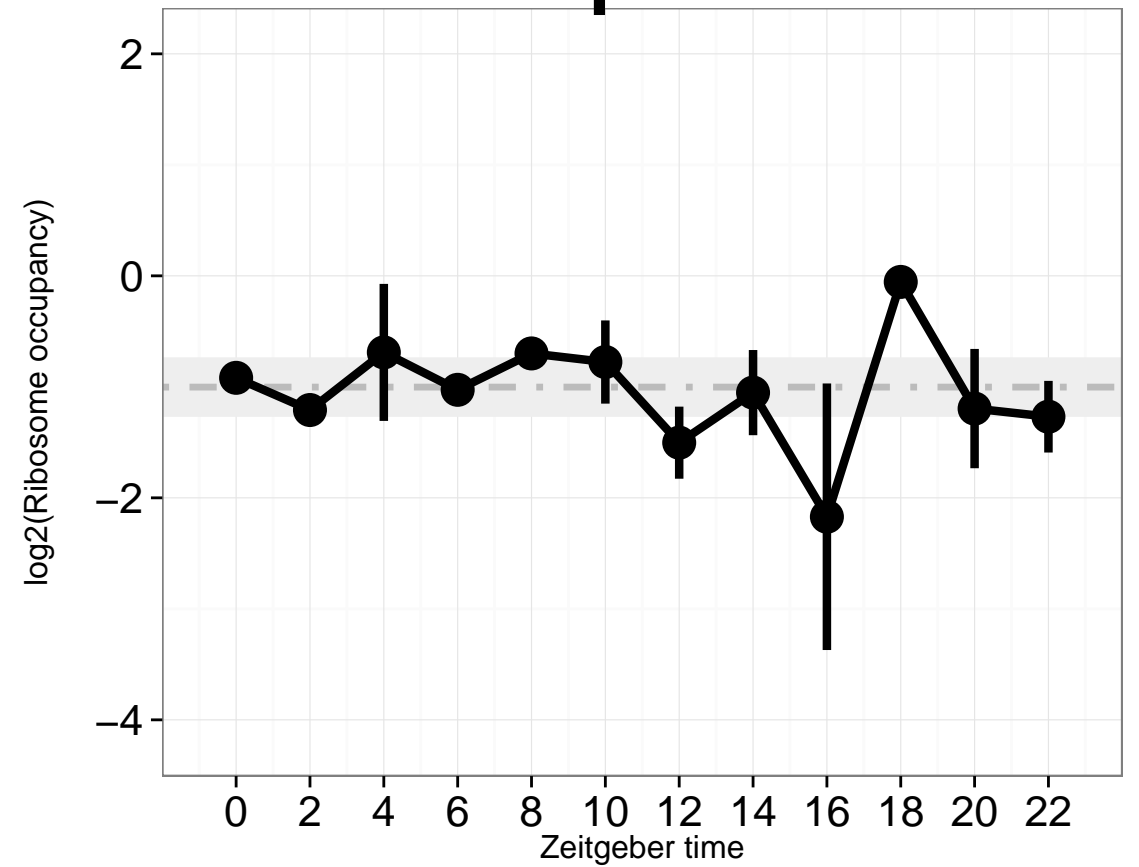

Supplement: Supplementary file 10326 [file 1]

## Irak2

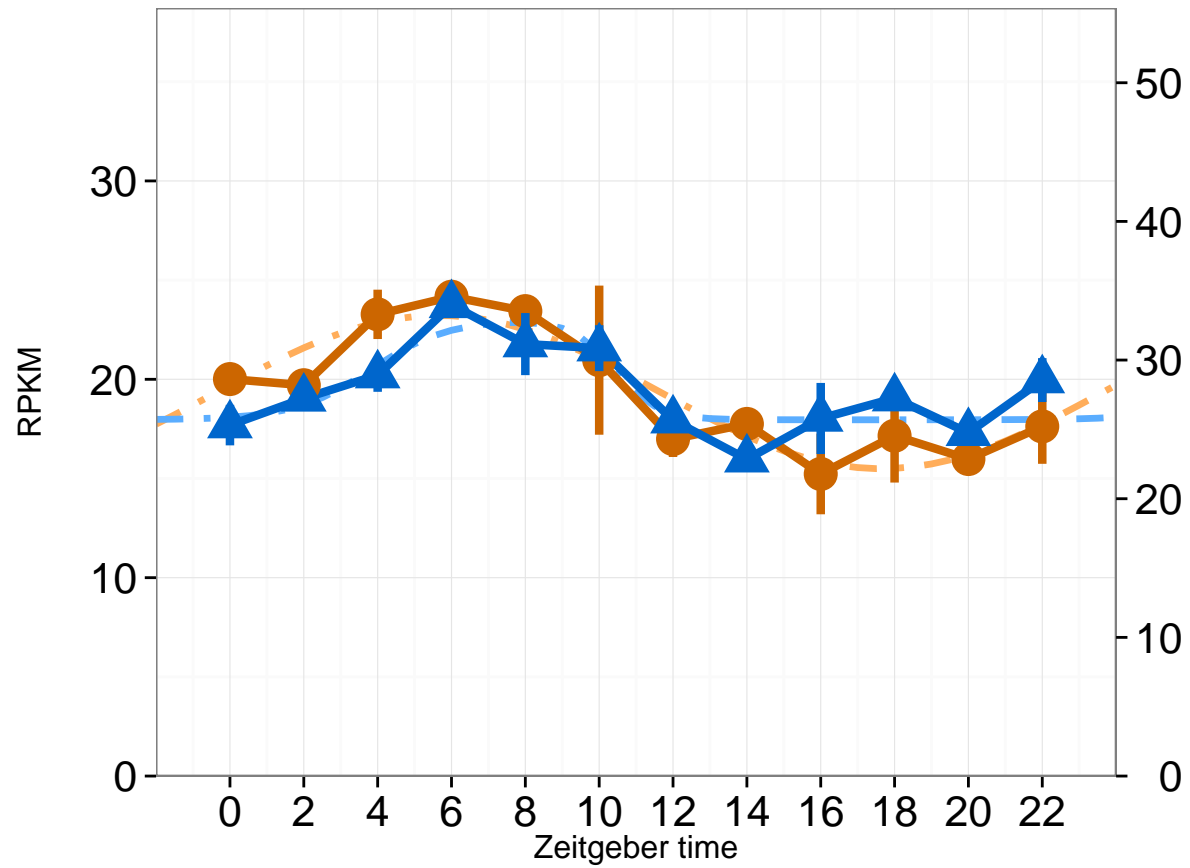

## Irak2

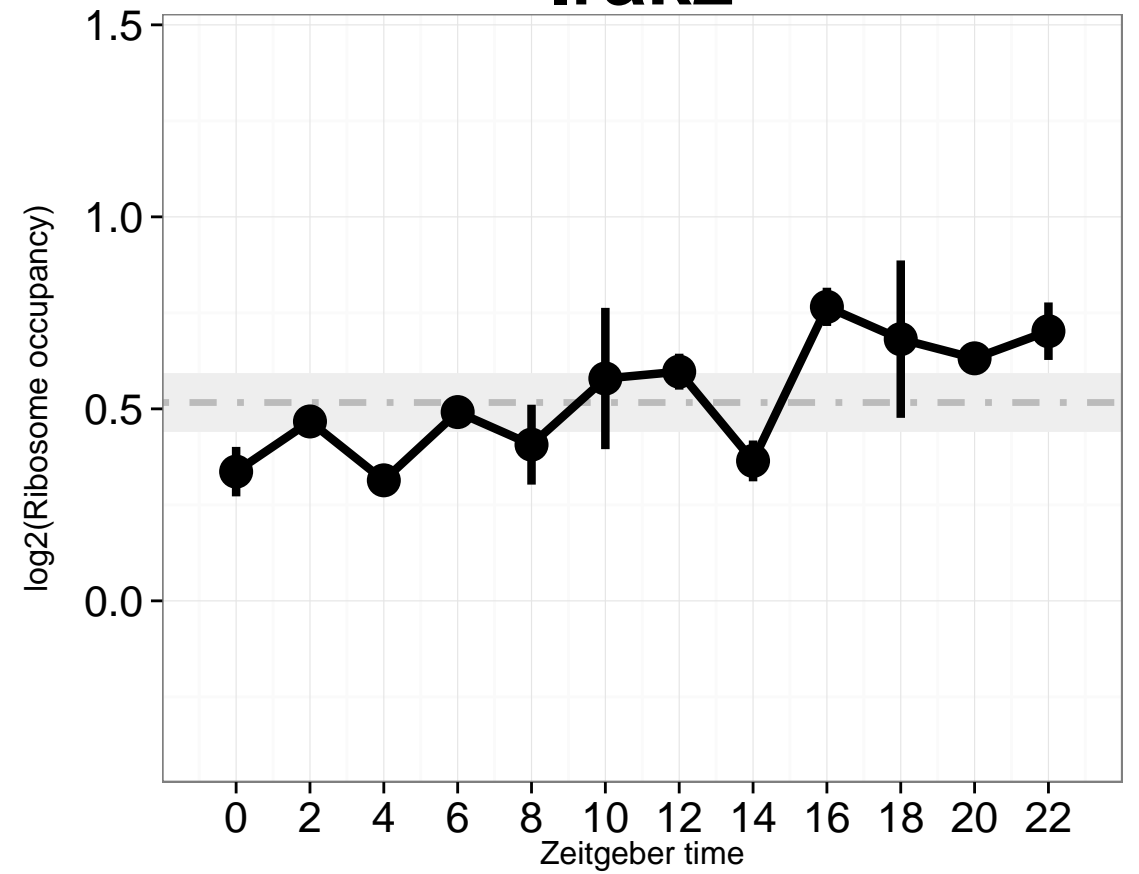

Supplement: Supplementary file 10327 [file 1]

# Cdpf1

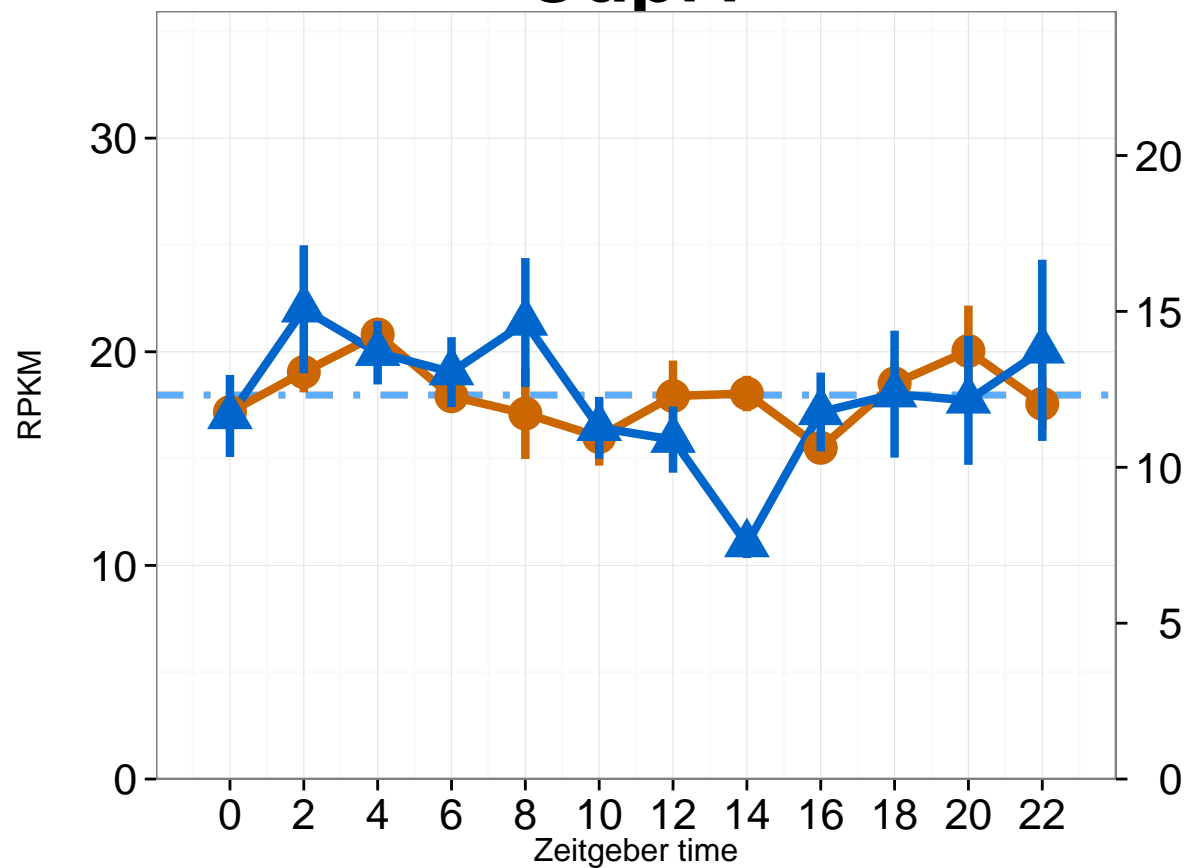

# Cdpf1

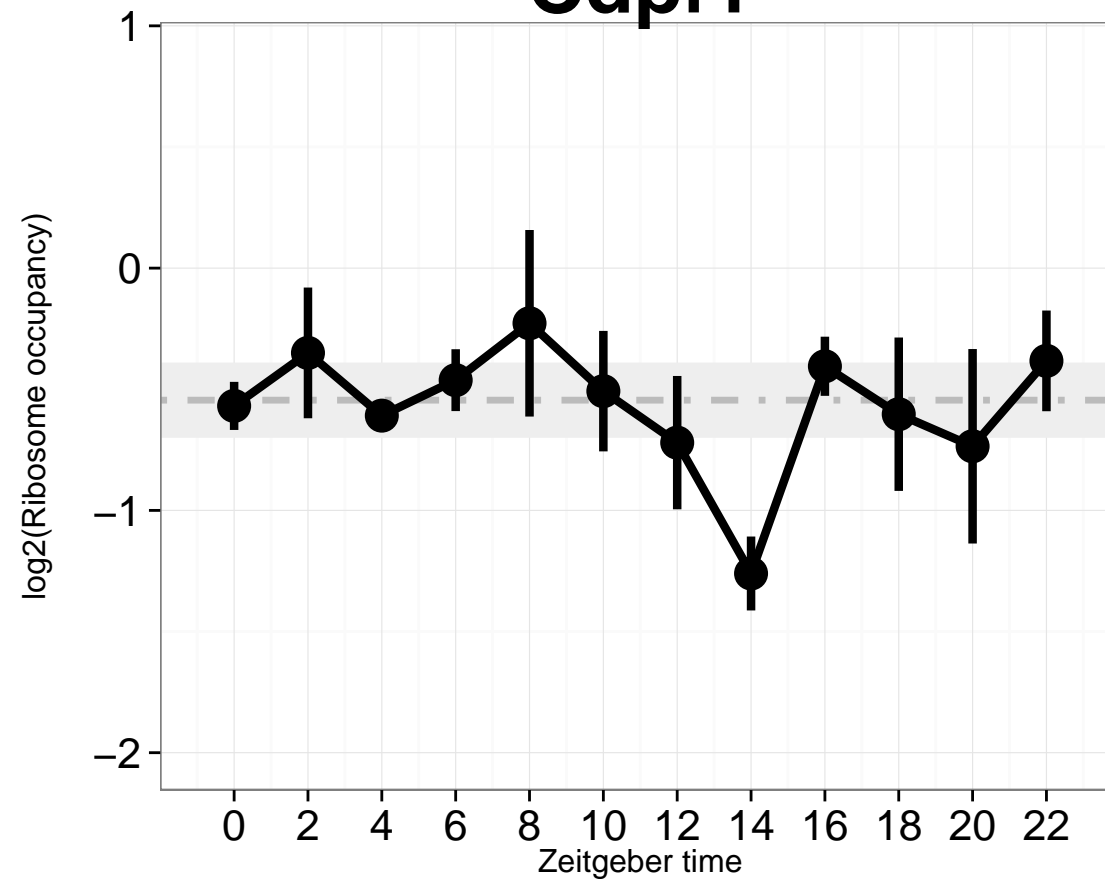

Supplement: Supplementary file 10328 [file 1]

# Tnfrsf21

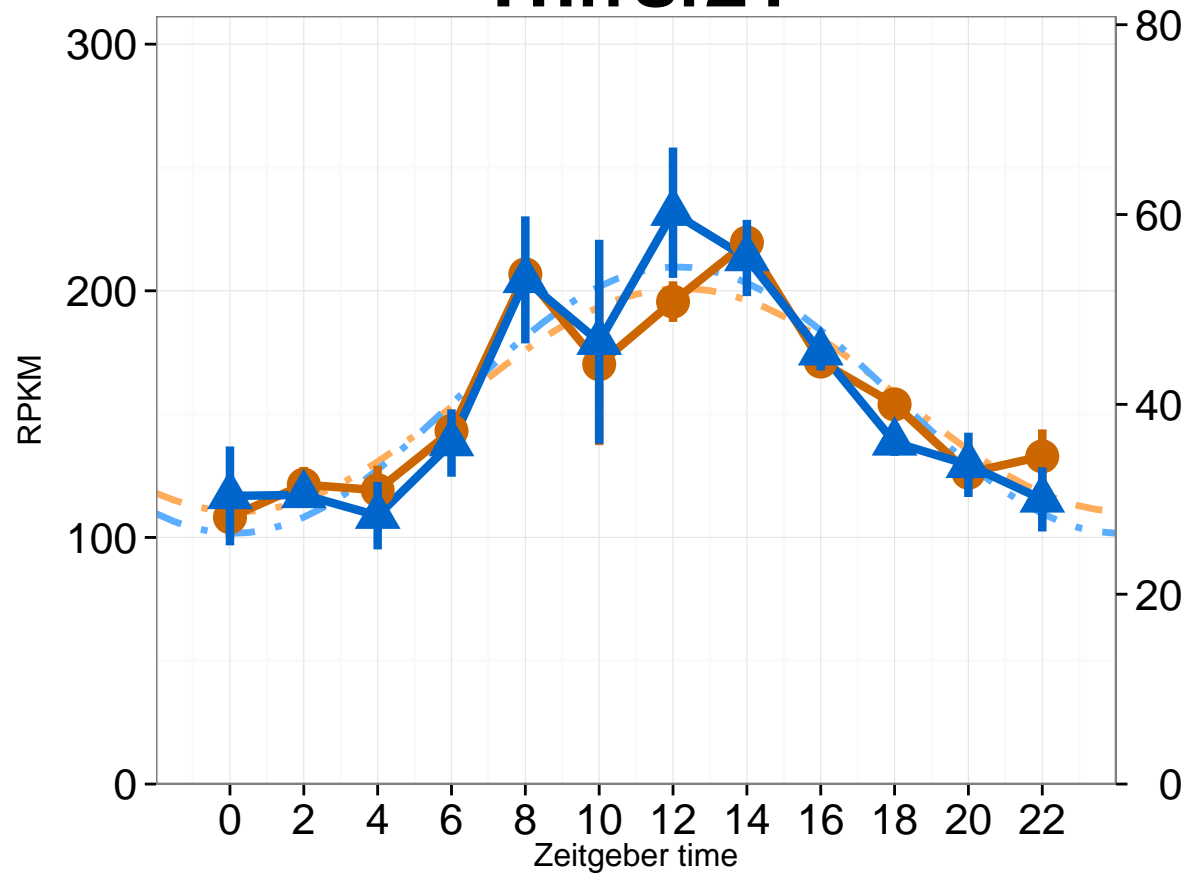

# Tnfrsf21

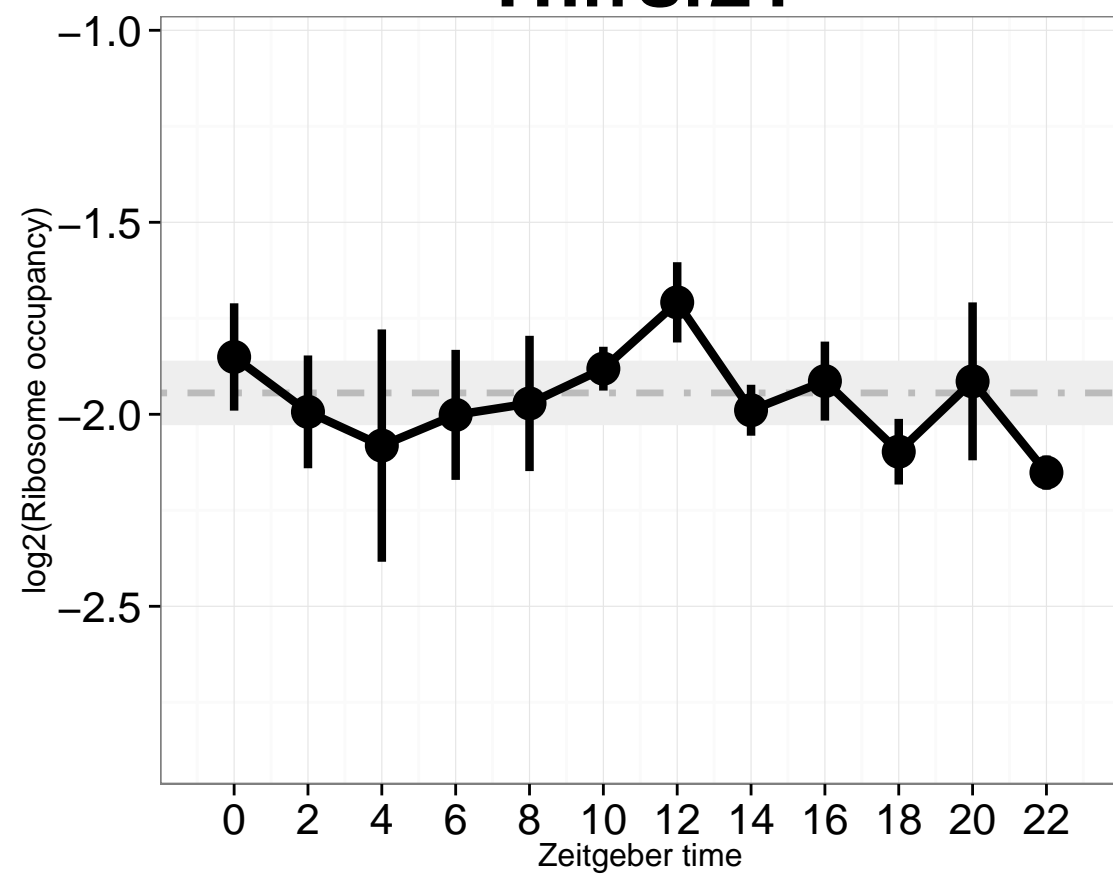

Supplement: Supplementary file 10329 [file 1]

## Sox18

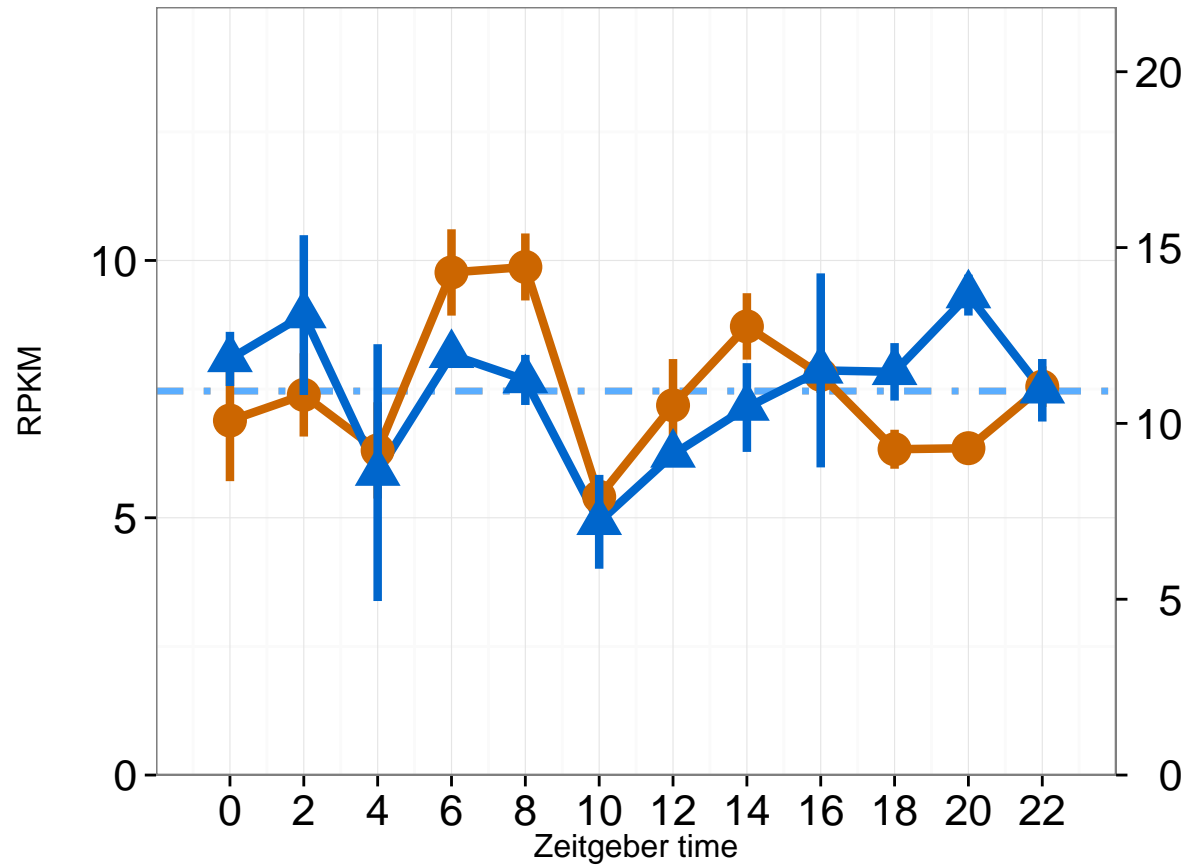

## Sox18

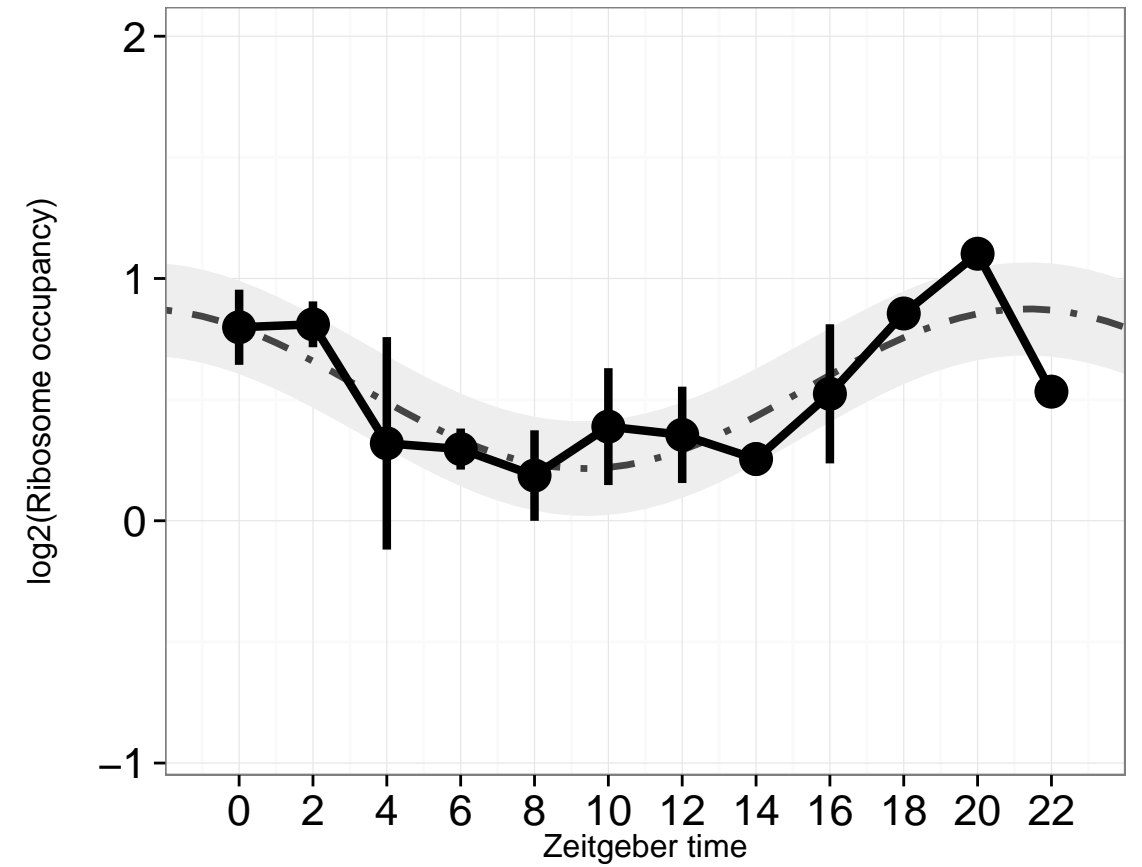

Supplement: Supplementary file 10330 [file 1]

# Tmem50b

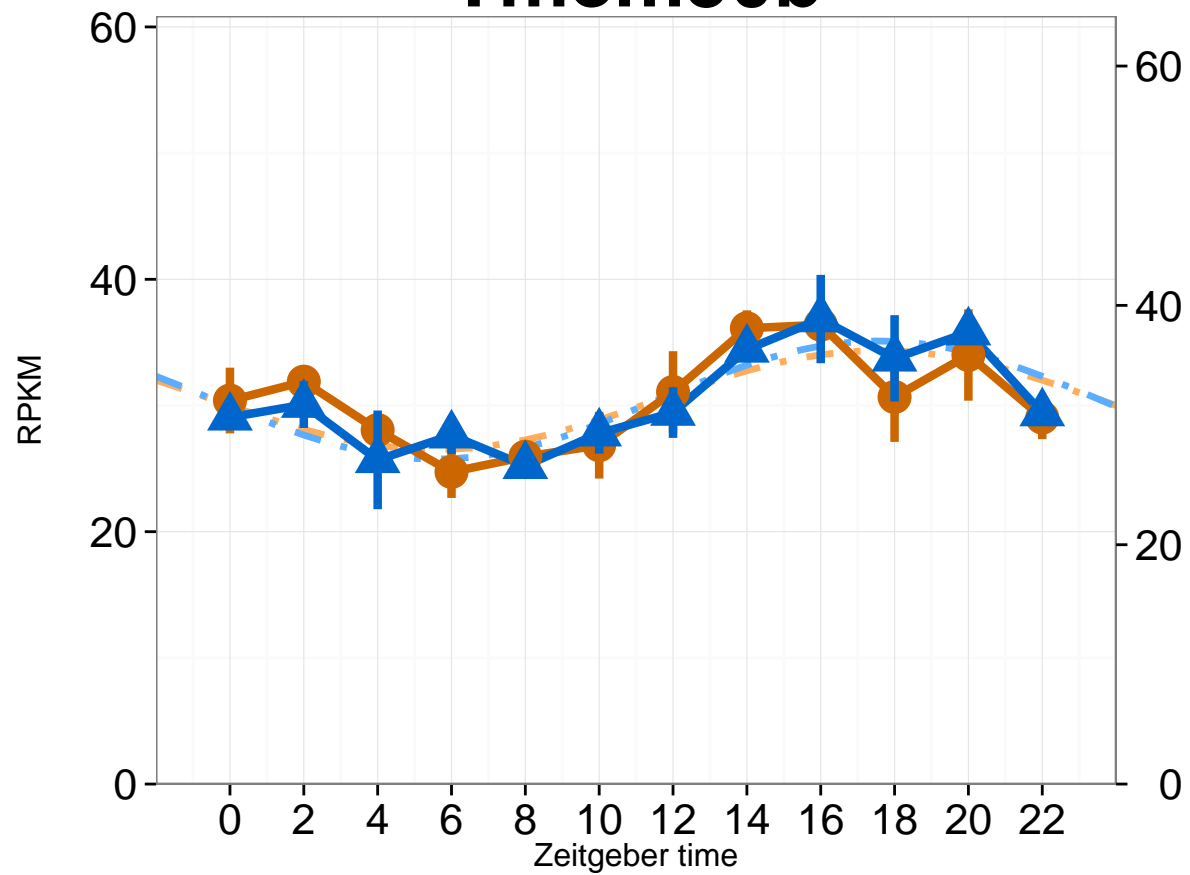

# Tmem50b

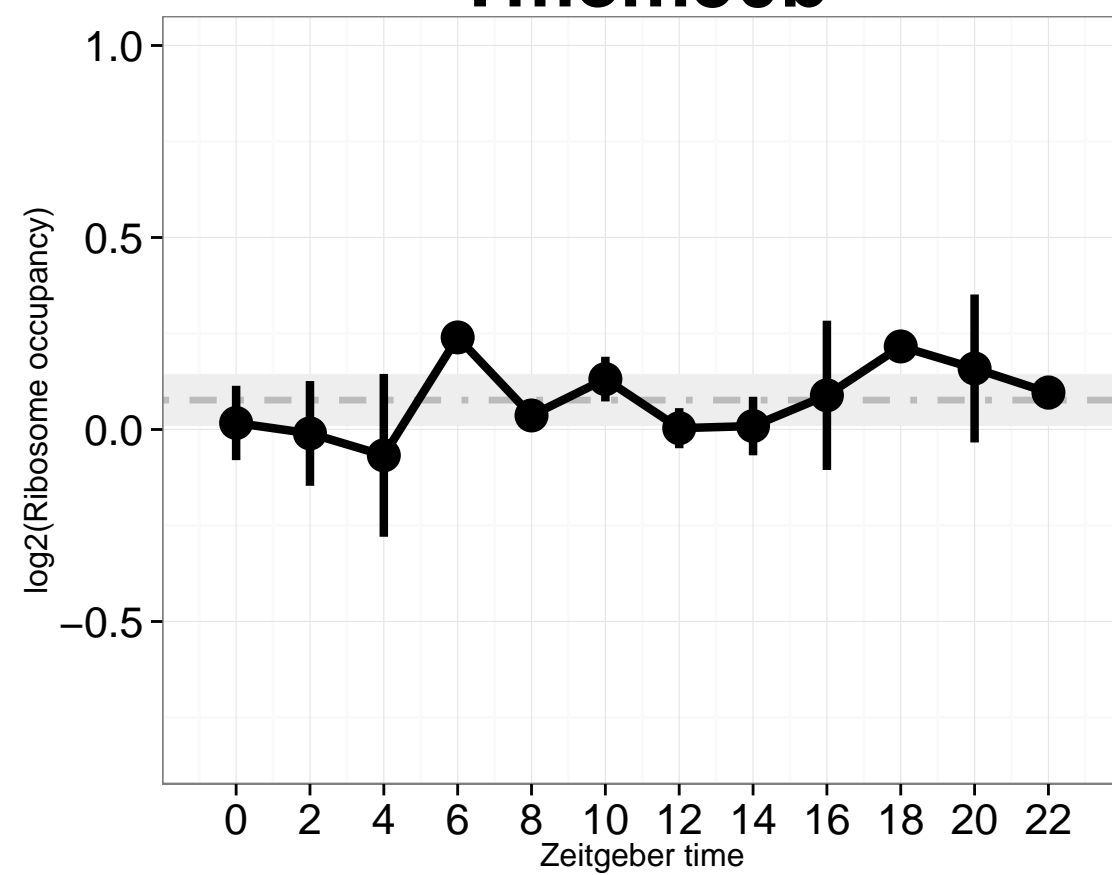

Supplement: Supplementary file 10331 [file 1]

**4632434I11Rik**

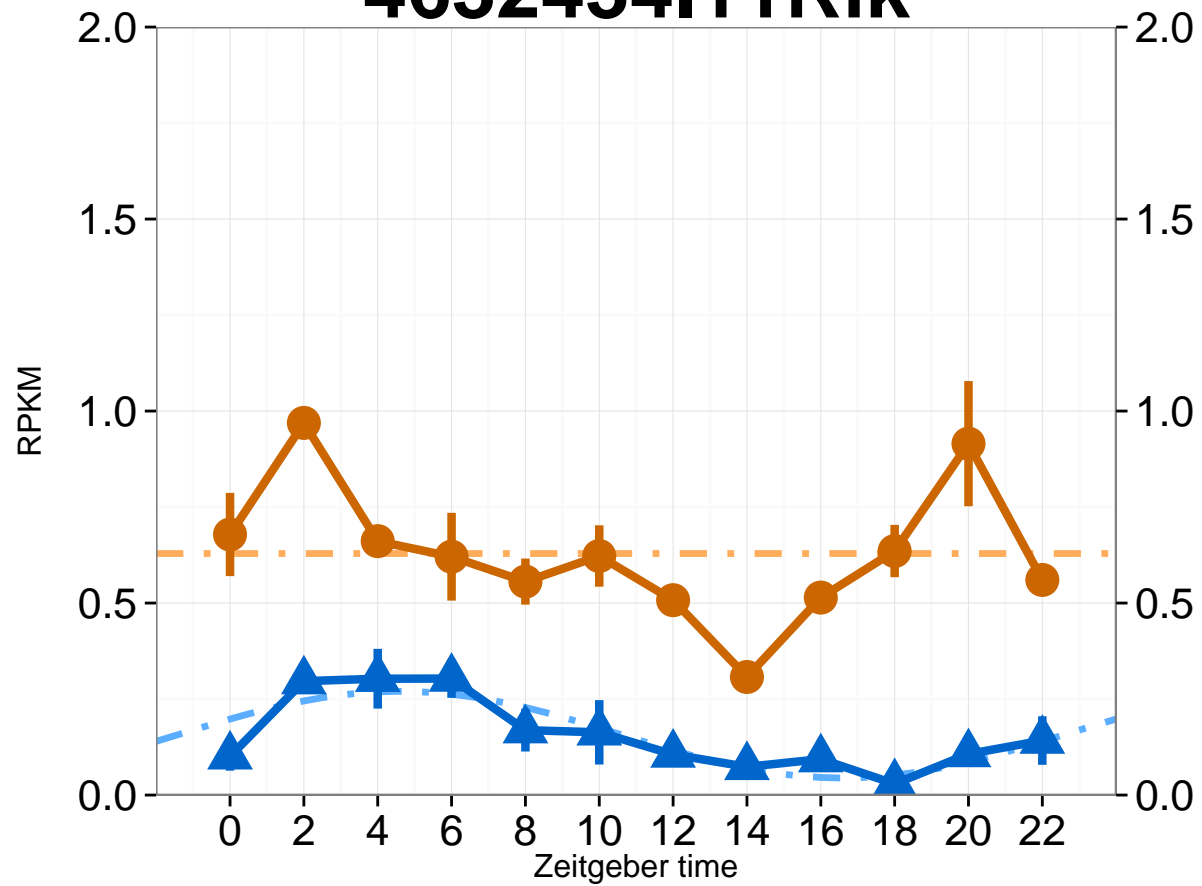

**4632434I11Rik**

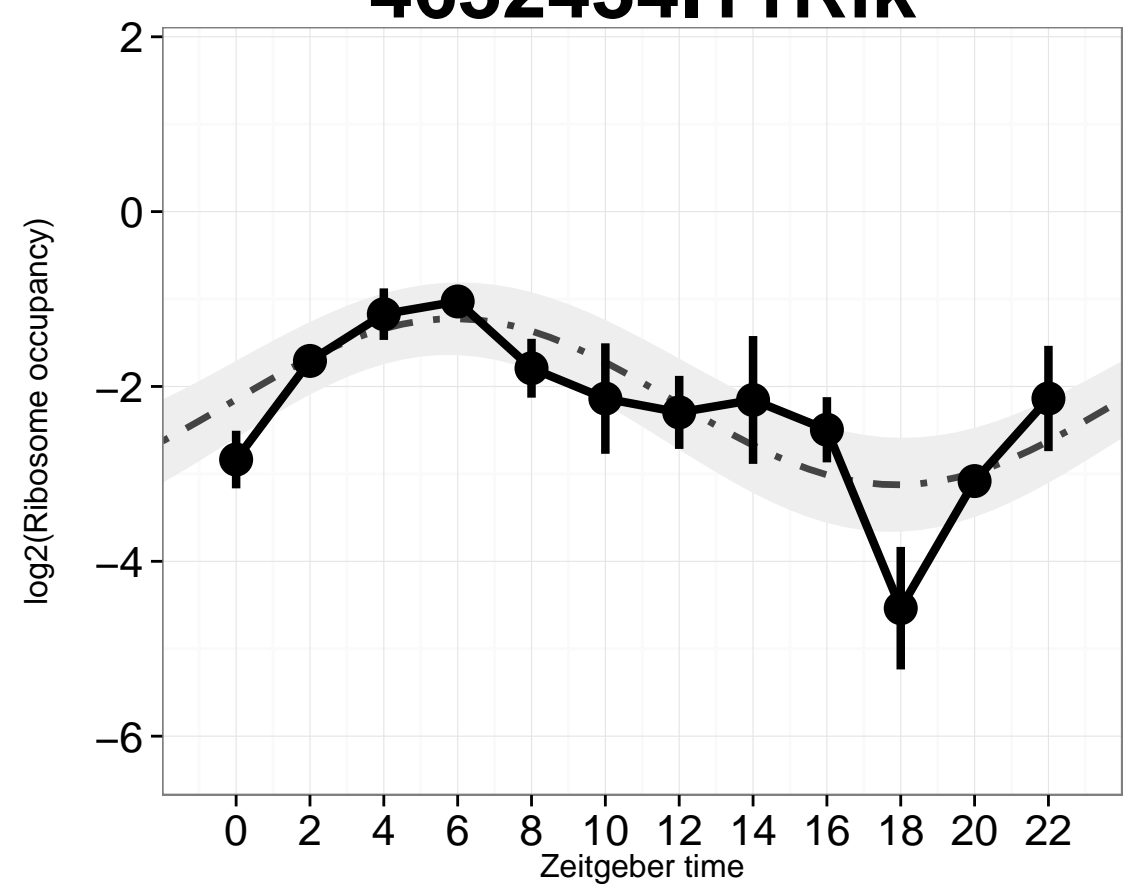

Supplement: Supplementary file 10332 [file 1]

## Eef1d

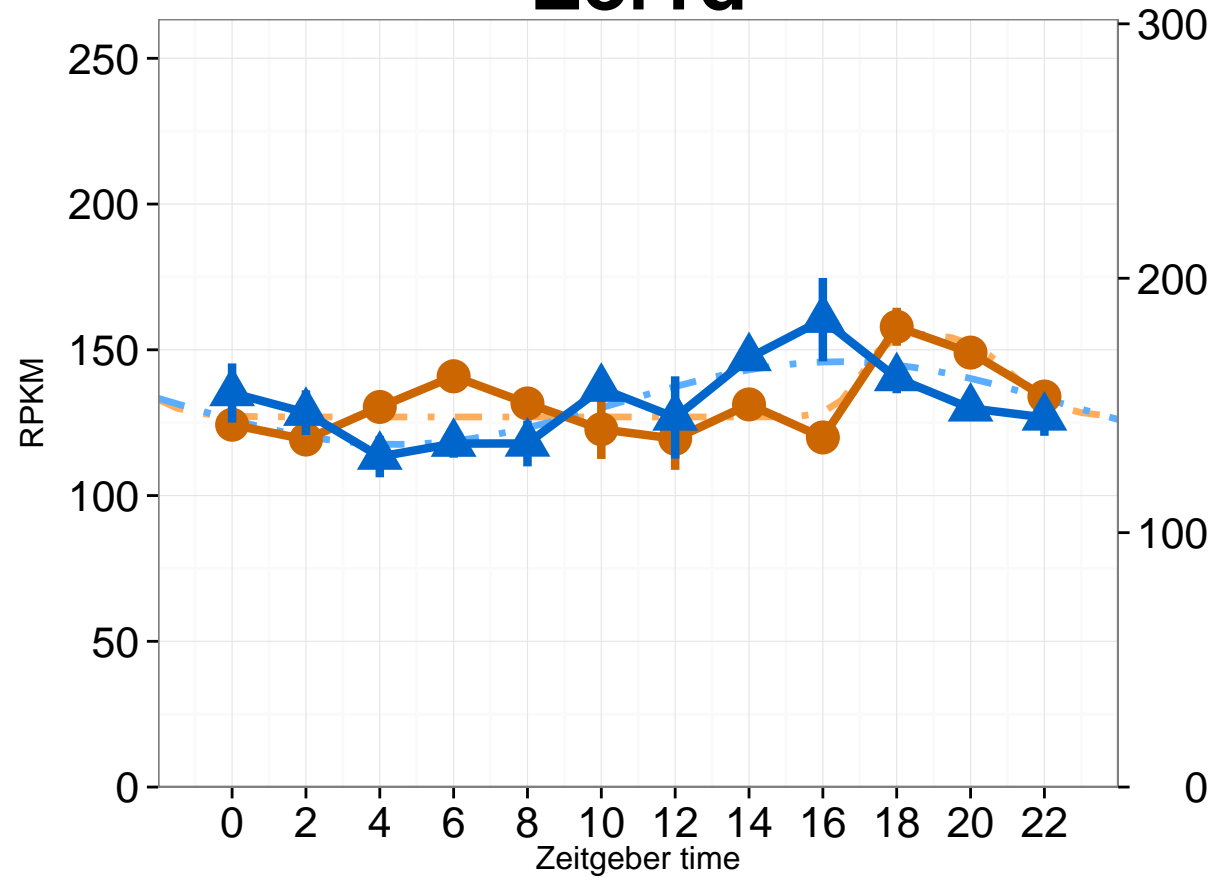

## Eef1d

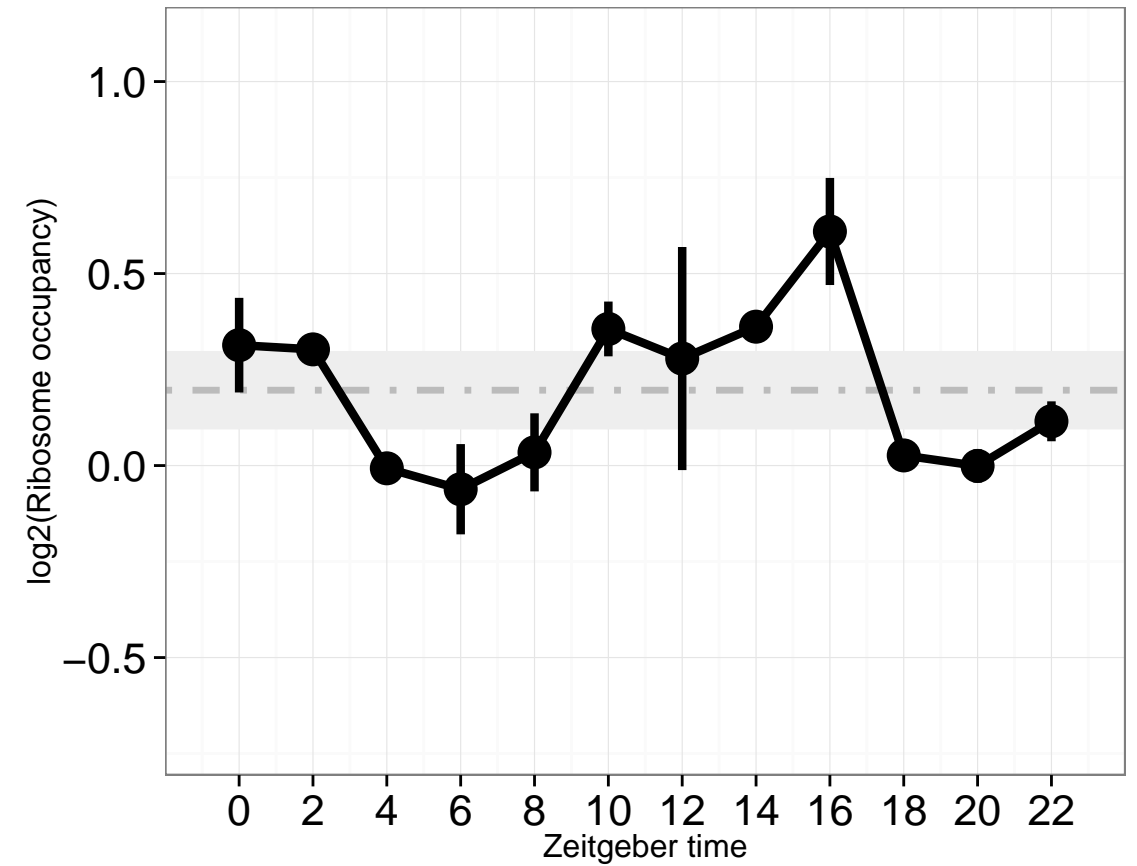

Supplement: Supplementary file 10333 [file 1]

# Mab21l3

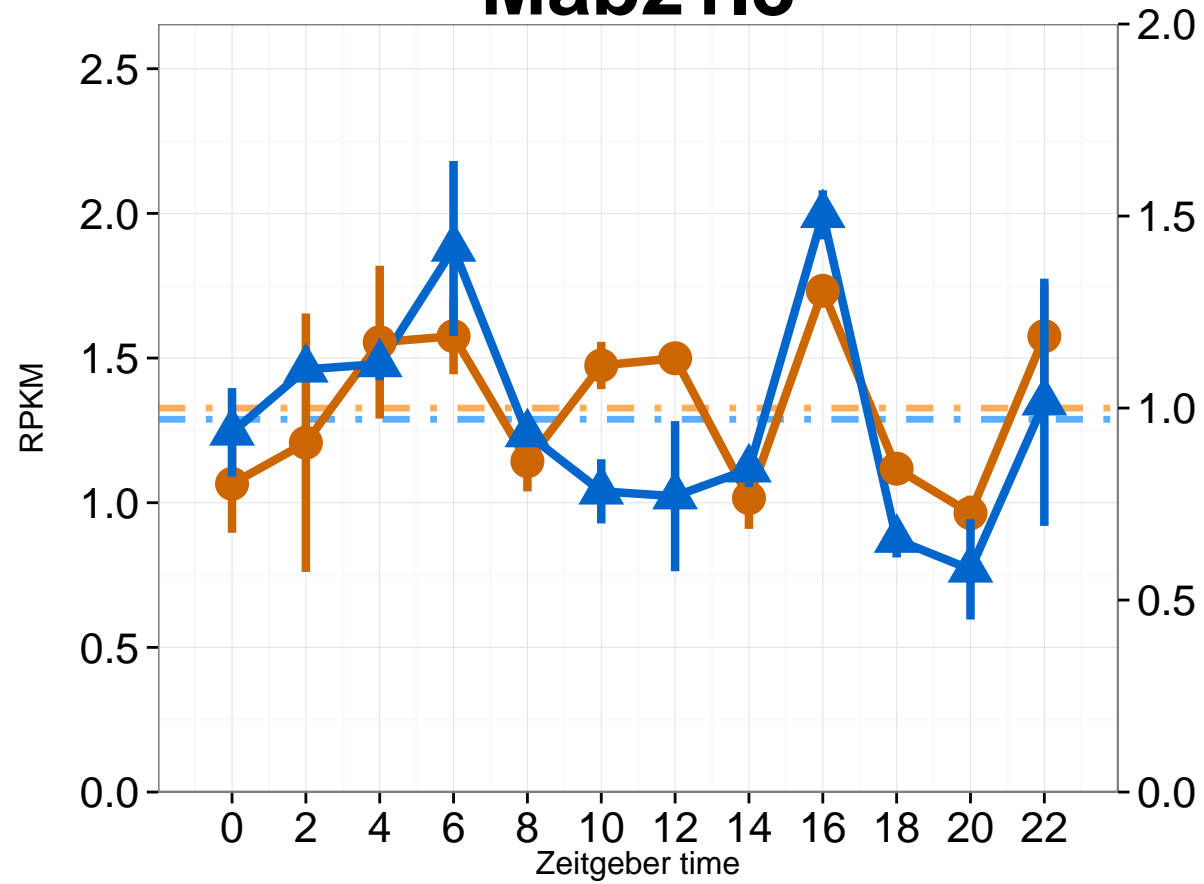

# Mab21l3

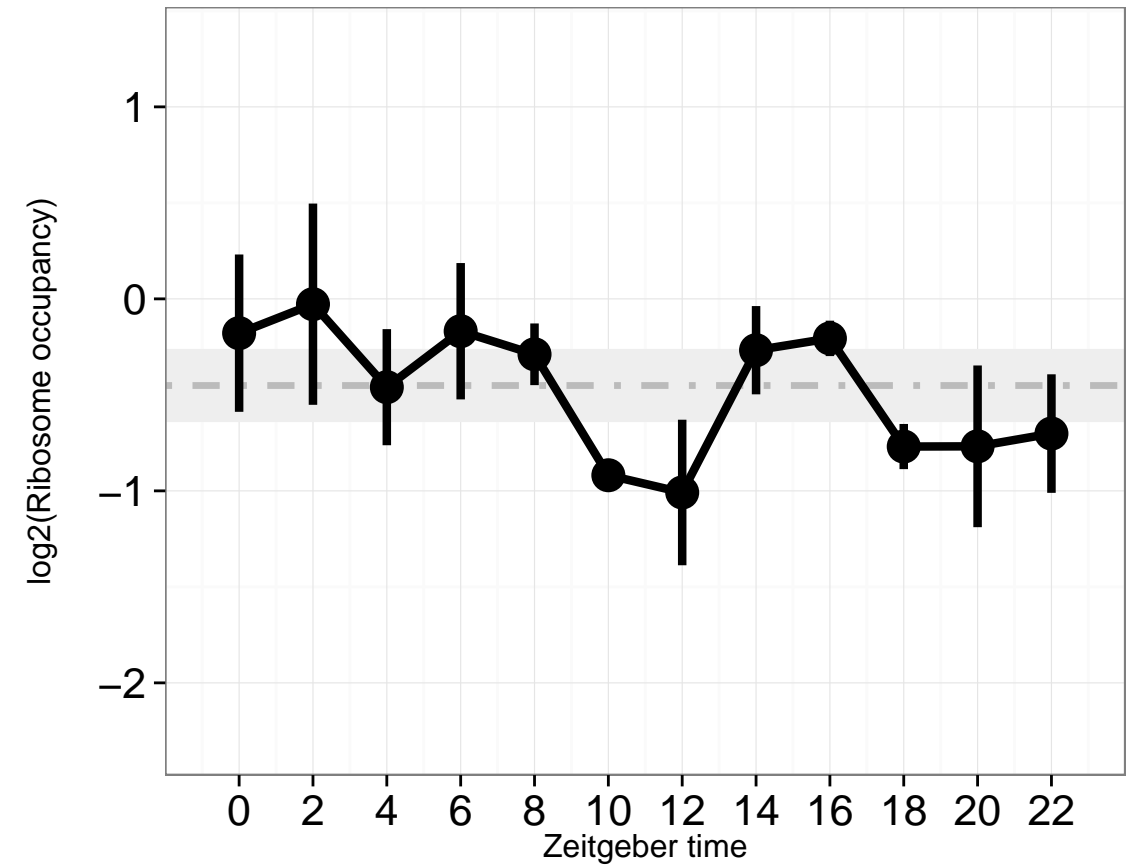

Supplement: Supplementary file 10334 [file 1]

# Mrpl33

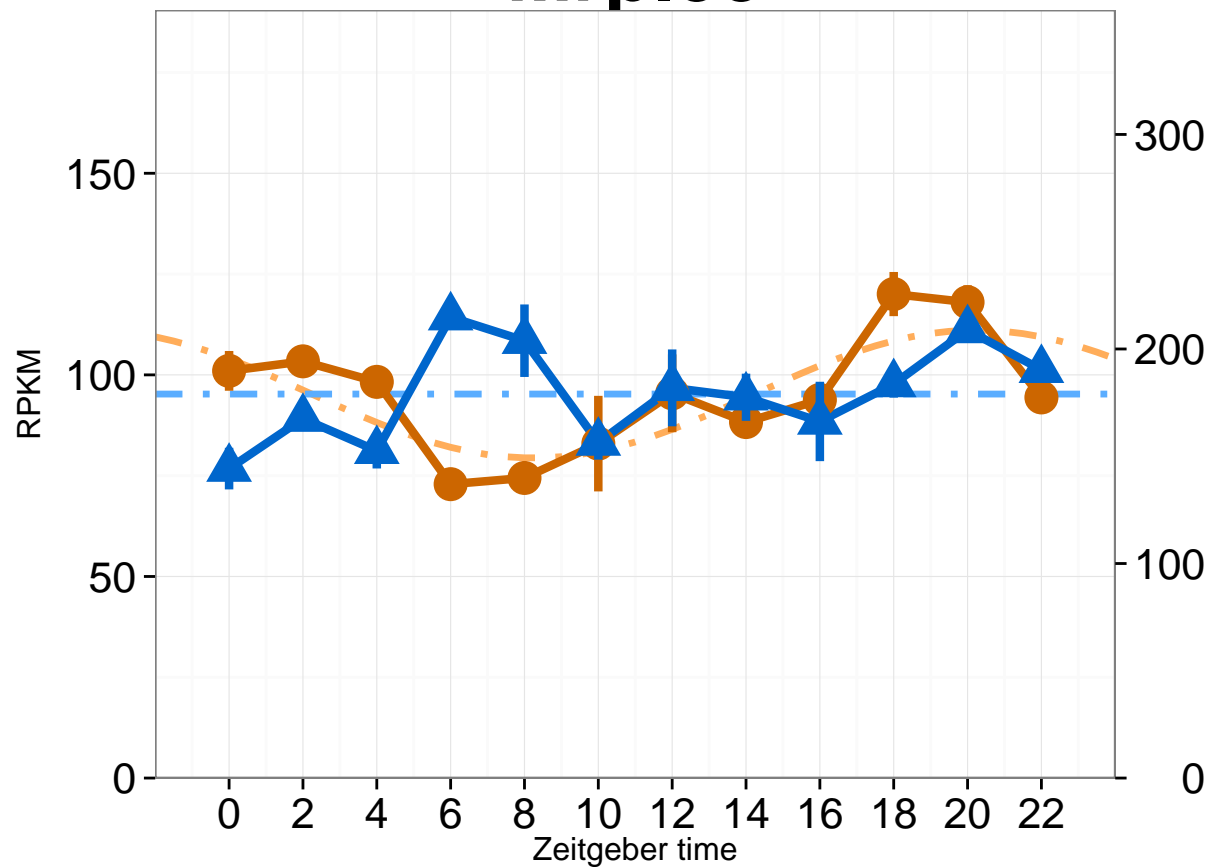

# Mrpl33

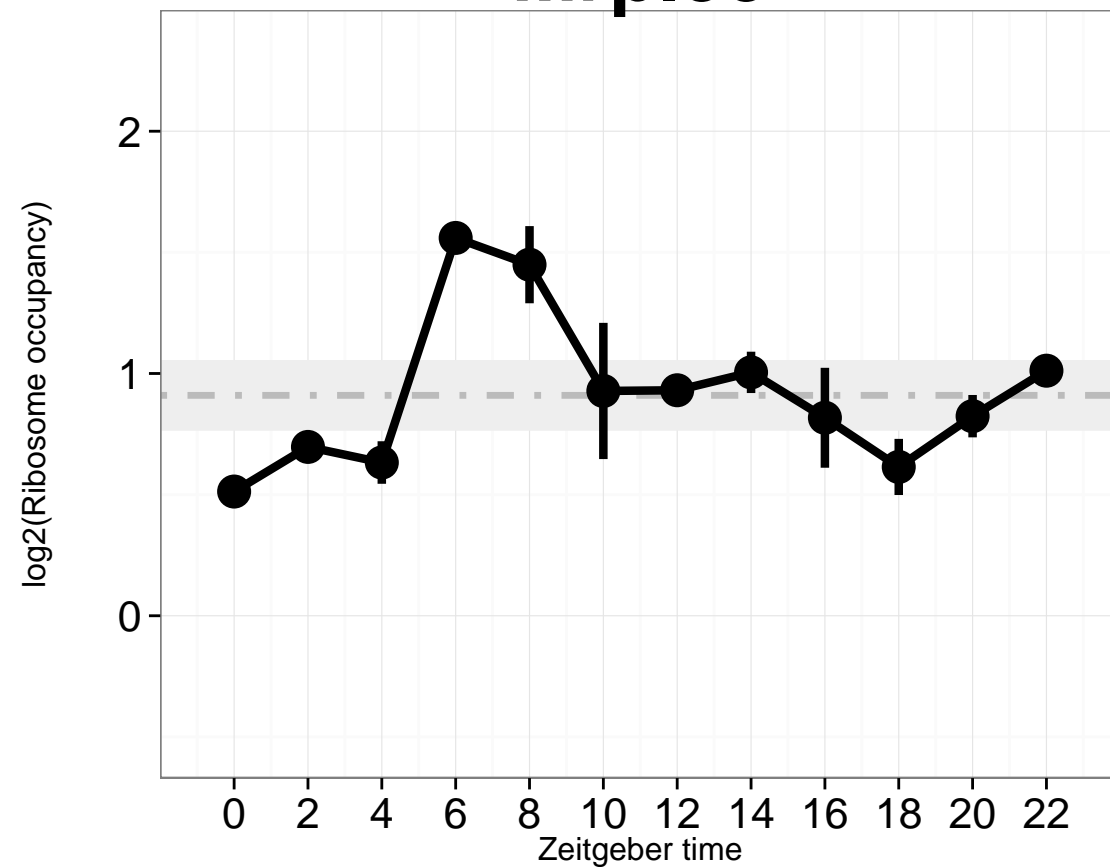

Supplement: Supplementary file 10335 [file 1]

## Paox

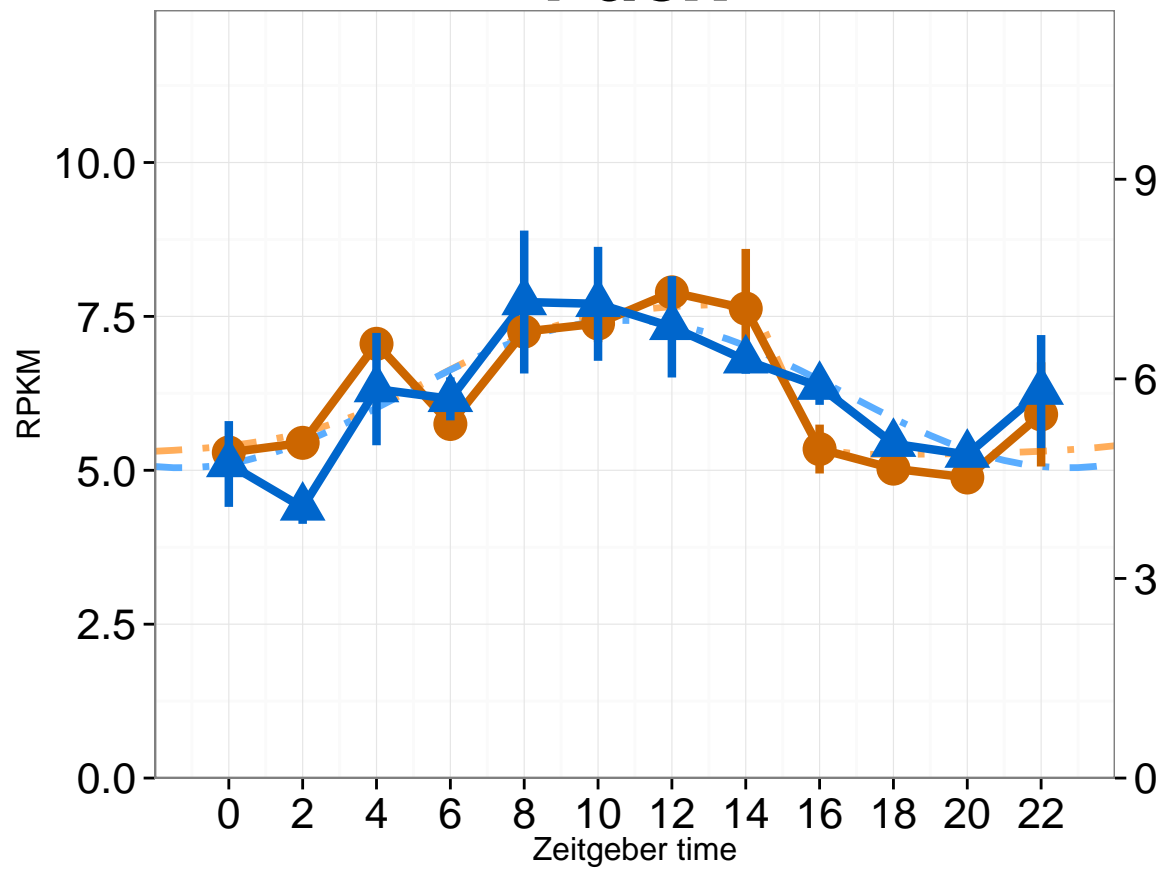

## Paox

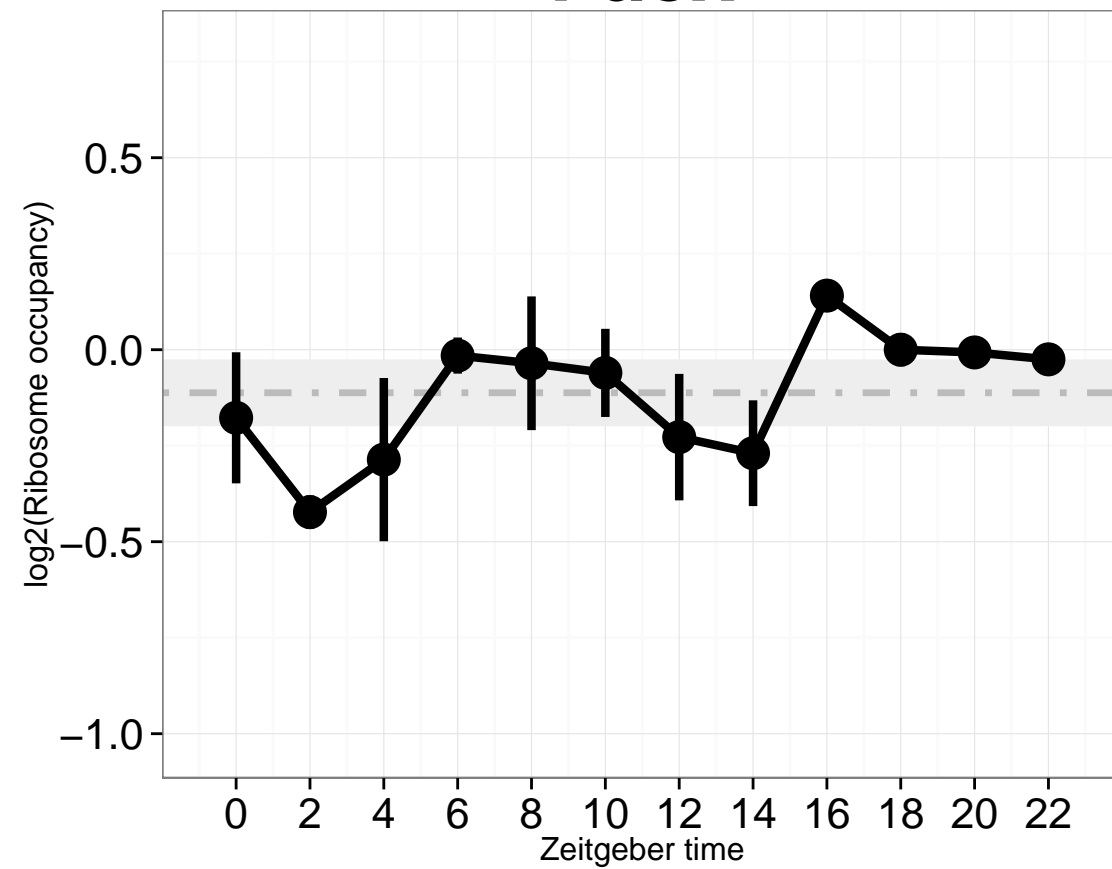

Supplement: Supplementary file 10336 [file 1]

## Mterfd2

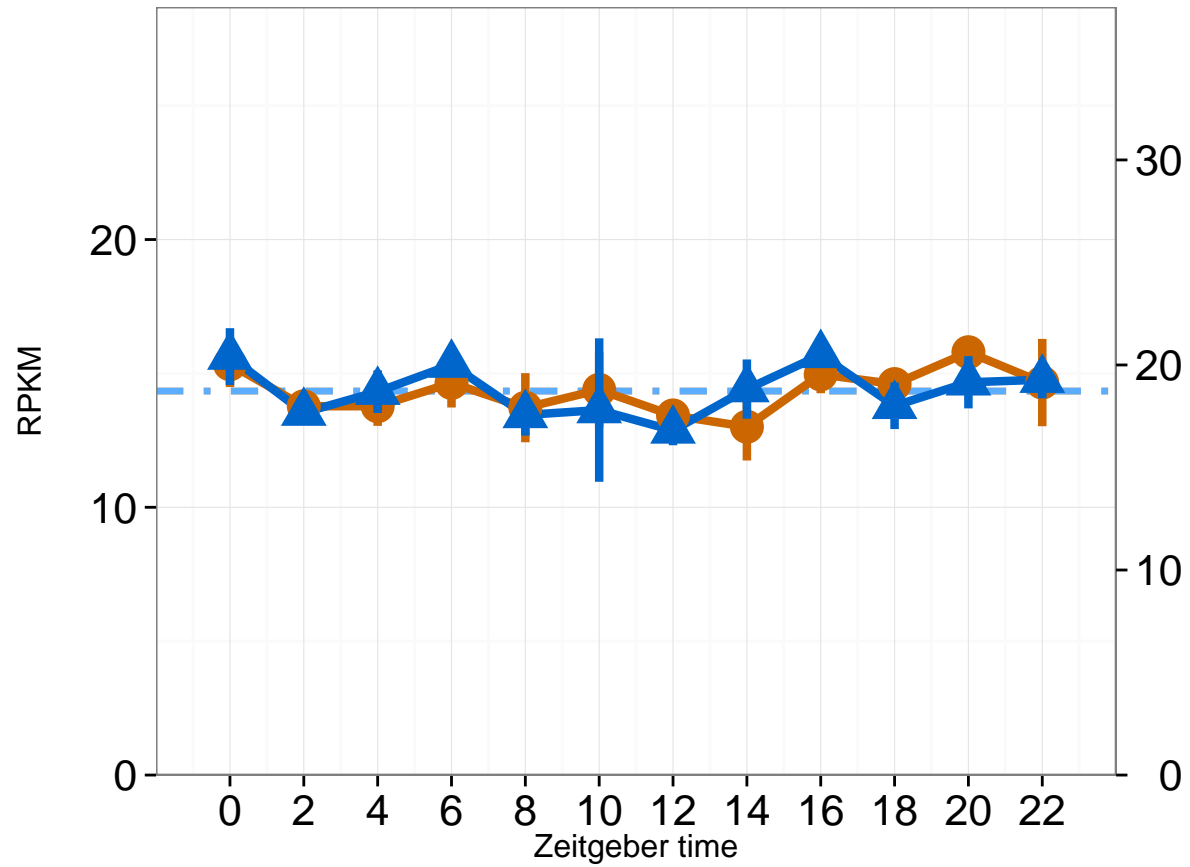

## Mterfd2

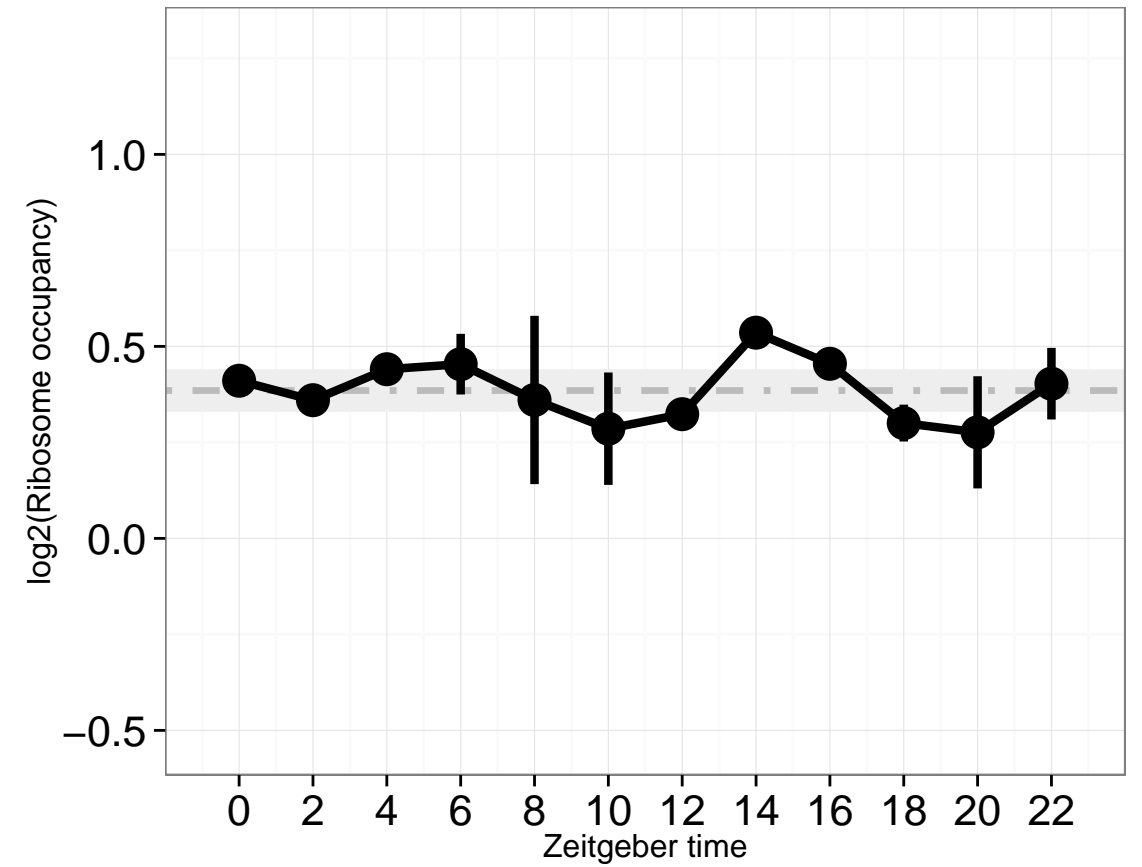

Supplement: Supplementary file 10337 [file 1]

# Fancf

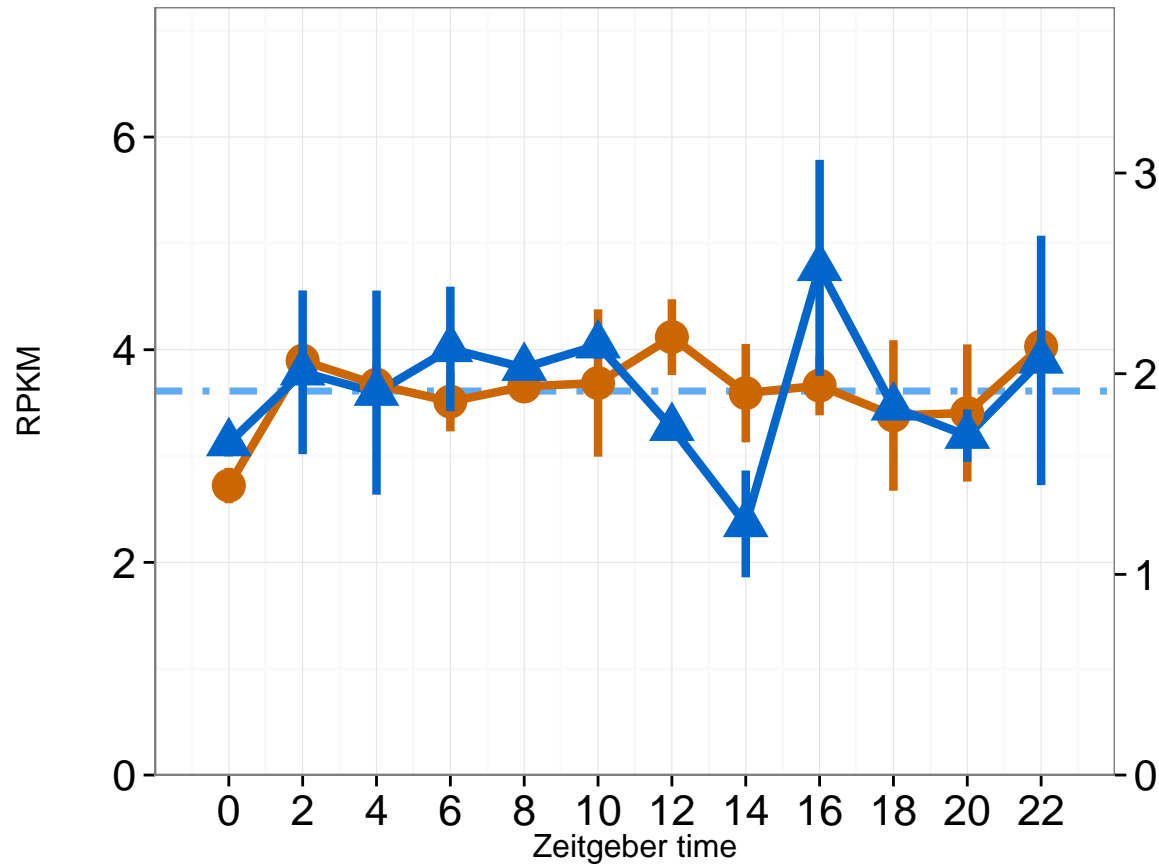

# Fancf

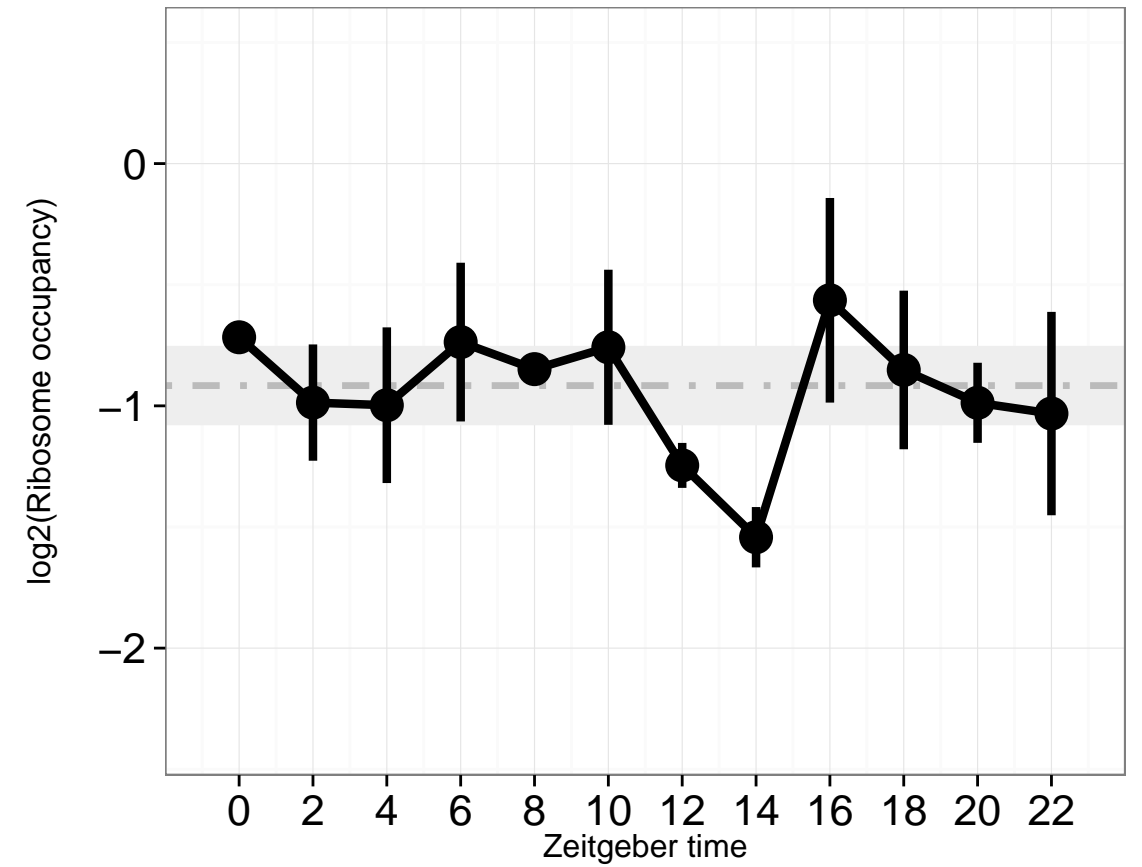

Supplement: Supplementary file 10338 [file 1]
