# Supplementary material (part 104 of 133)
Source: publisher figshare collection journal article supplement (https://springernature.figshare.com/articles/dataset/_/4903193)

# Atf7ip2

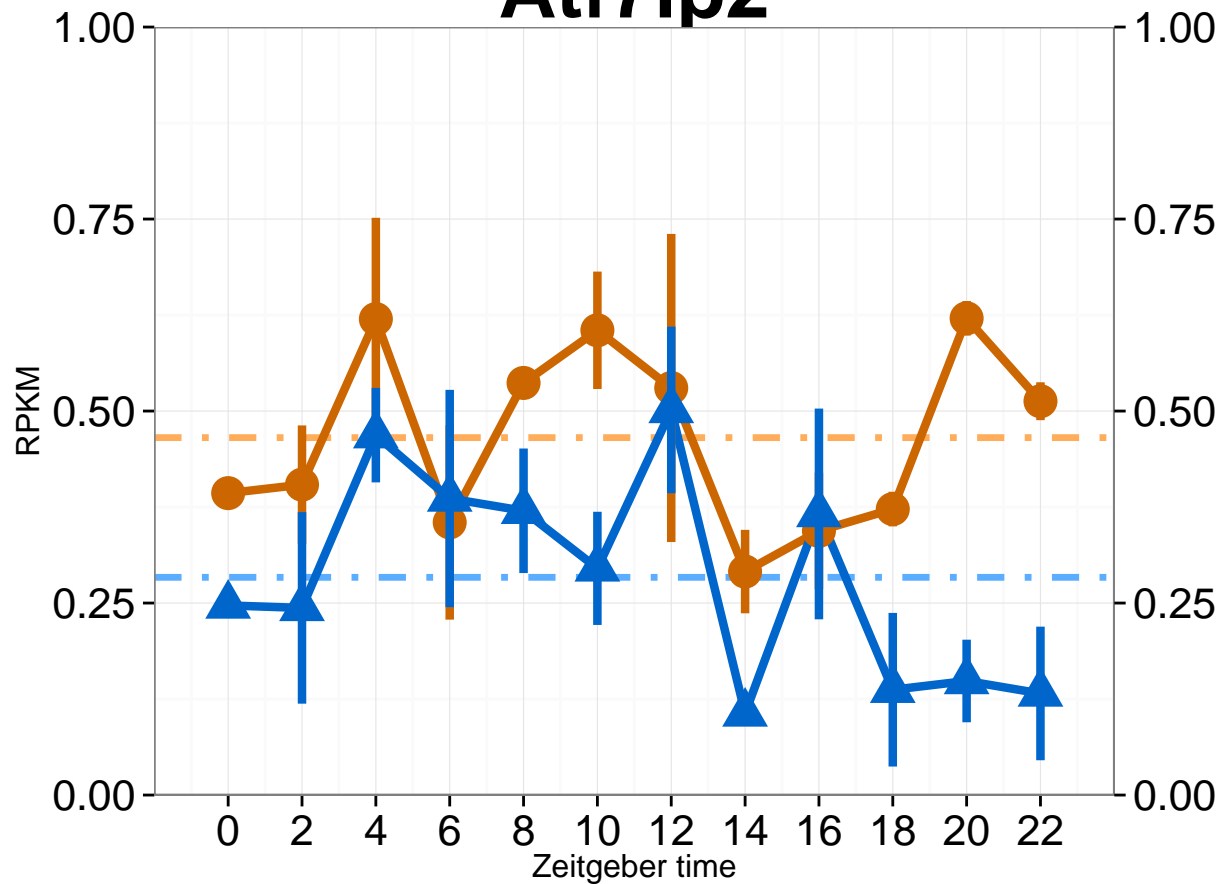

# Atf7ip2

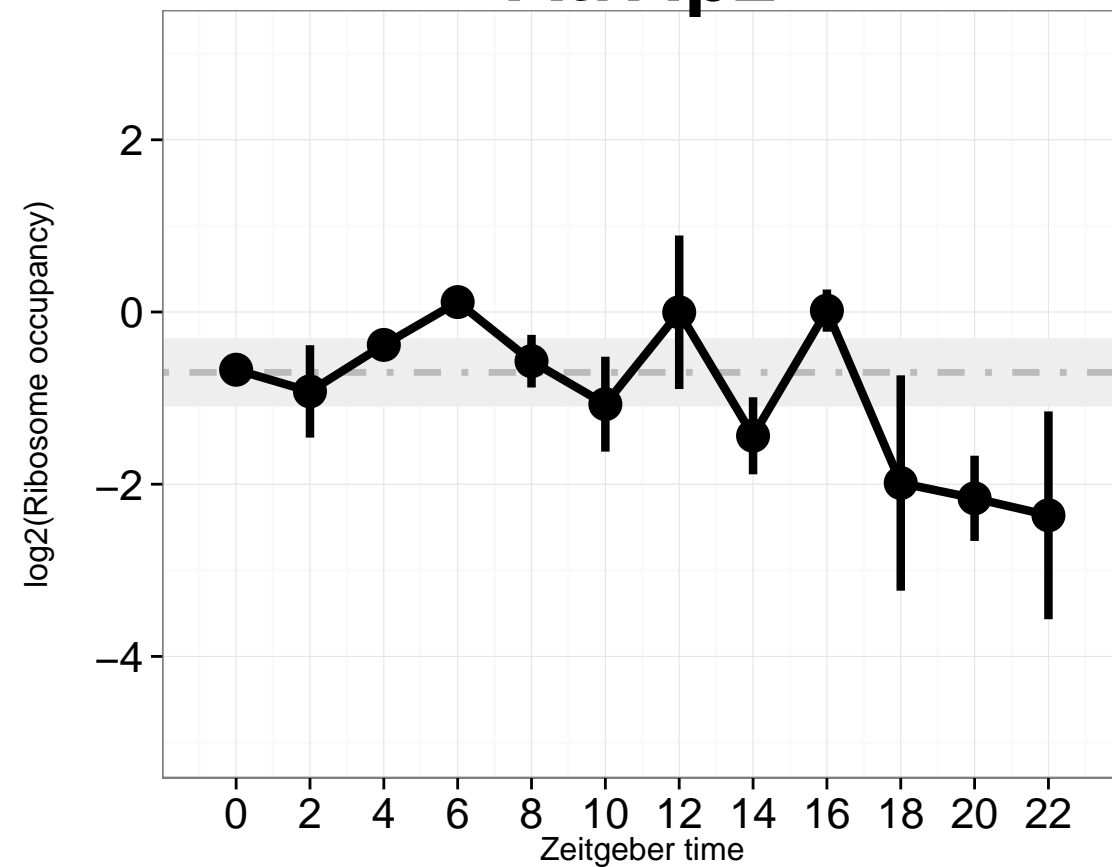

Supplement: Supplementary file 10339 [file 1]

## Lats2

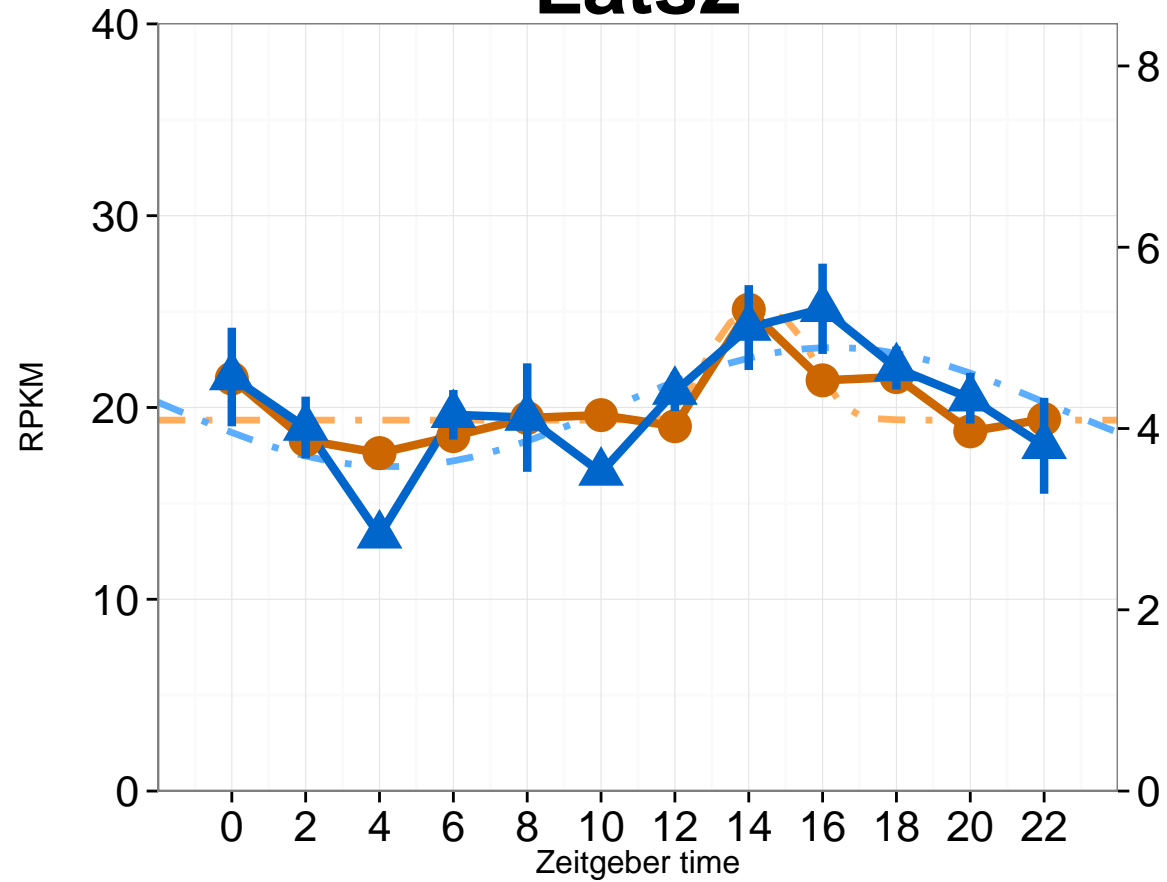

## Lats2

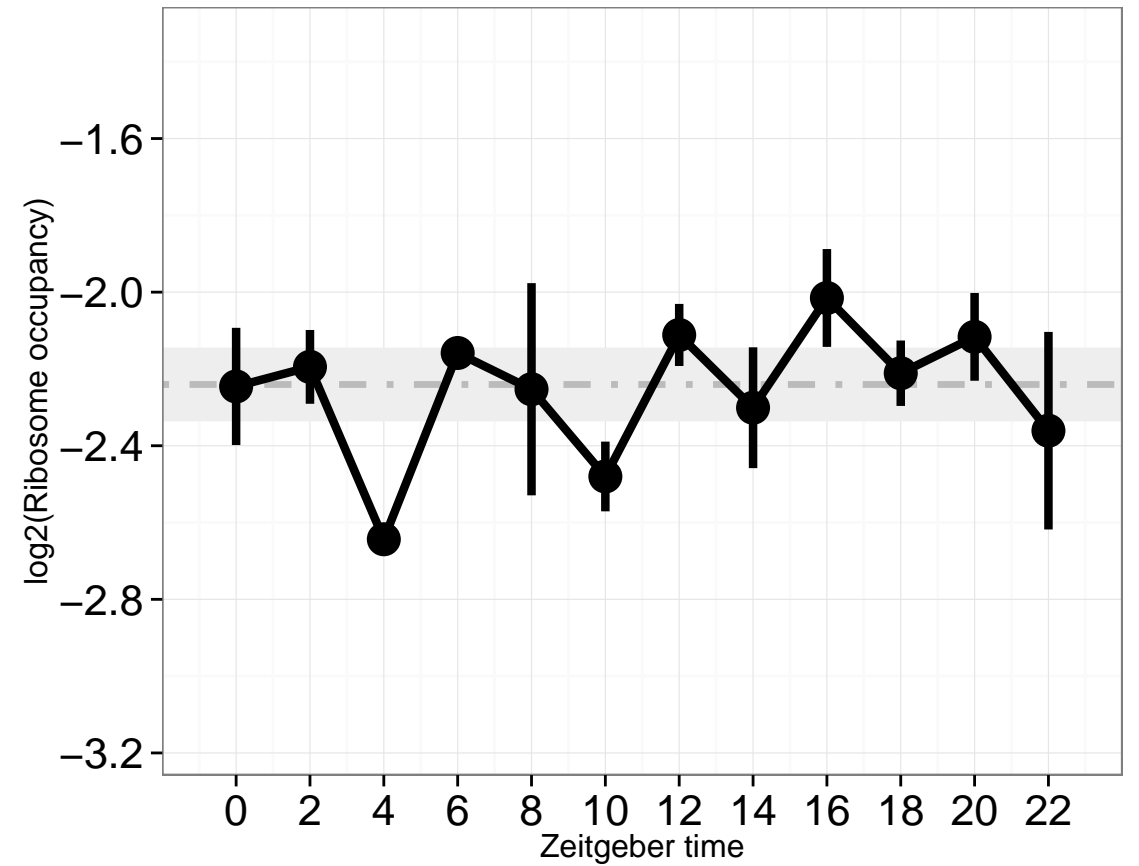

Supplement: Supplementary file 10340 [file 1]

# Slc35g2

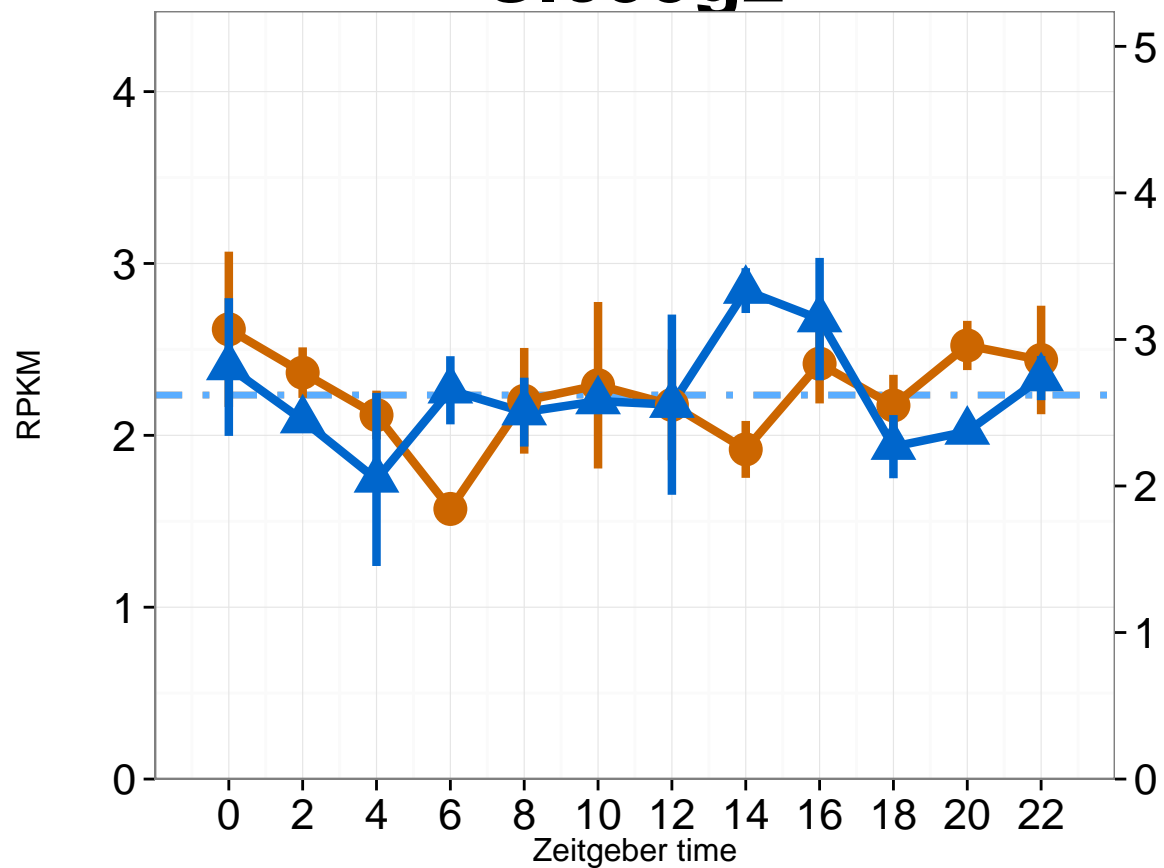

# Slc35g2

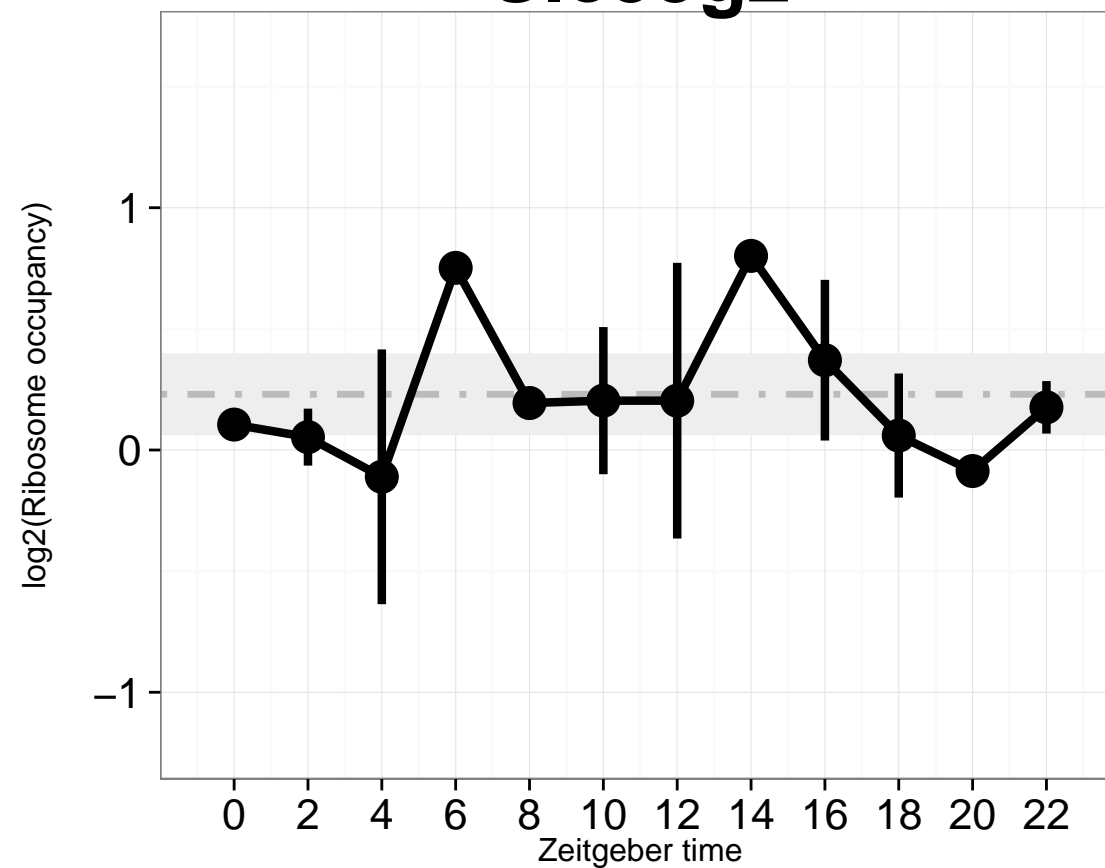

Supplement: Supplementary file 10341 [file 1]

# Adrb1

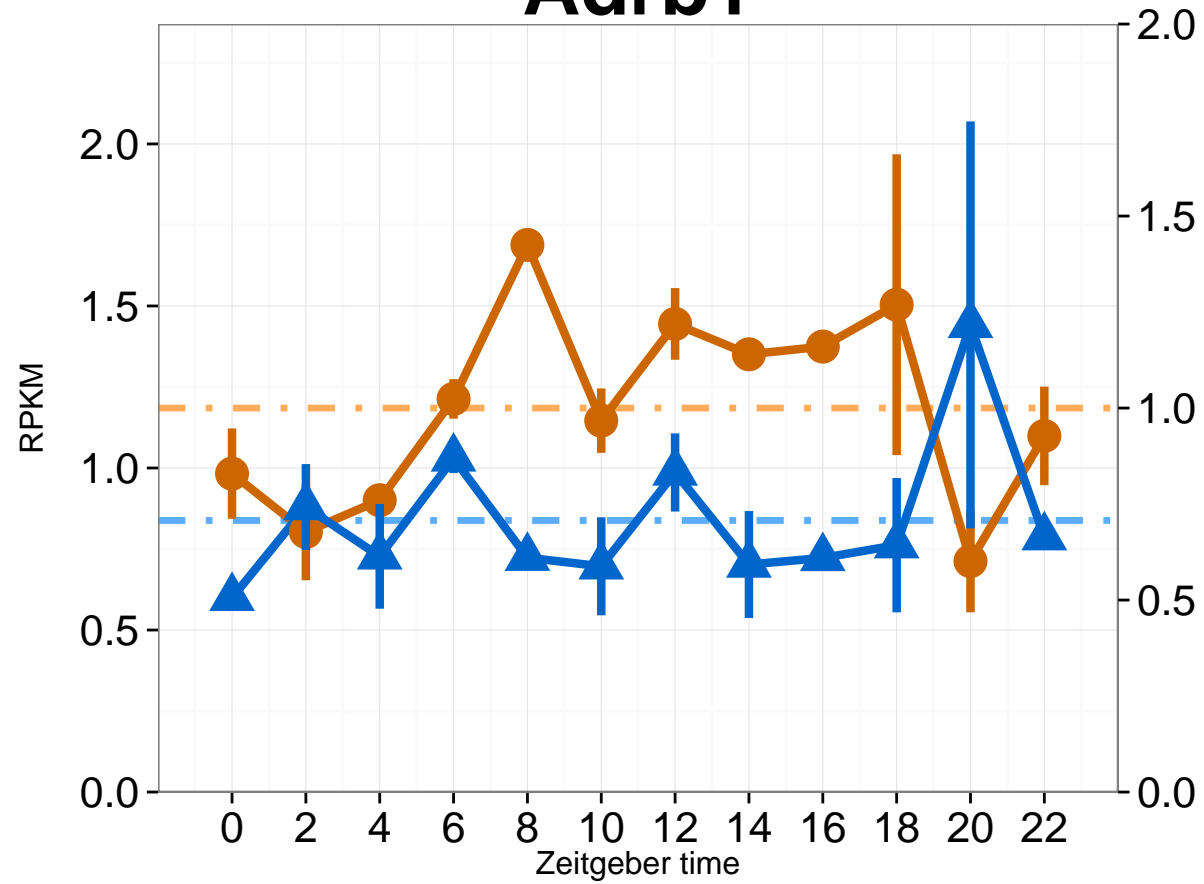

# Adrb1

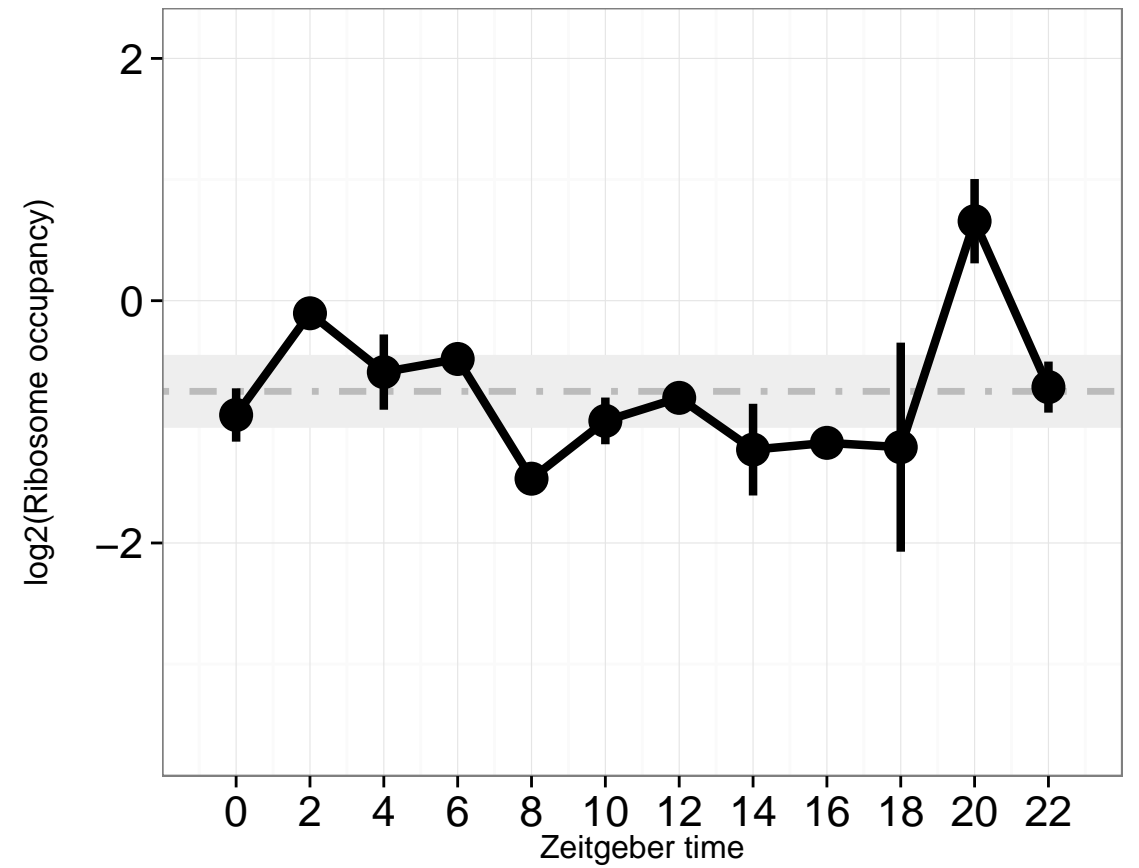

Supplement: Supplementary file 10342 [file 1]

# Ap3s2

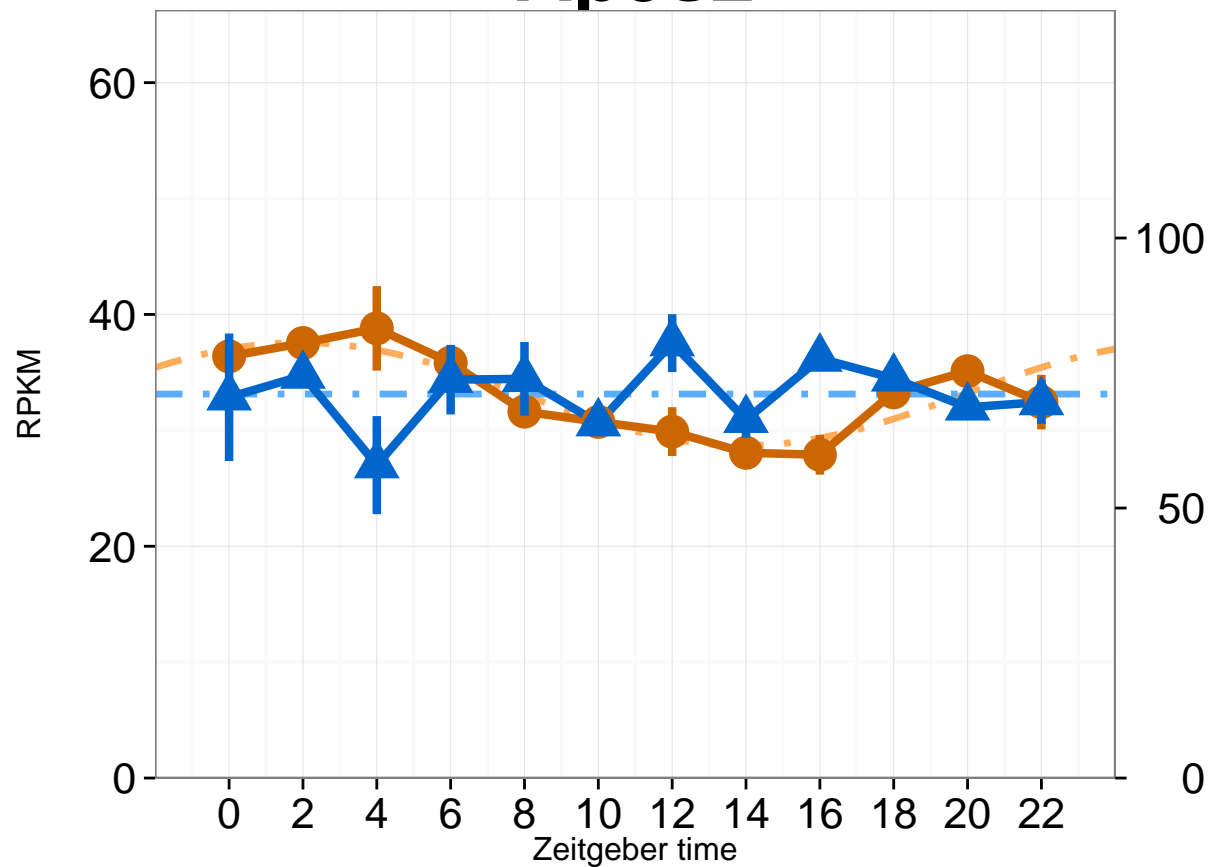

# Ap3s2

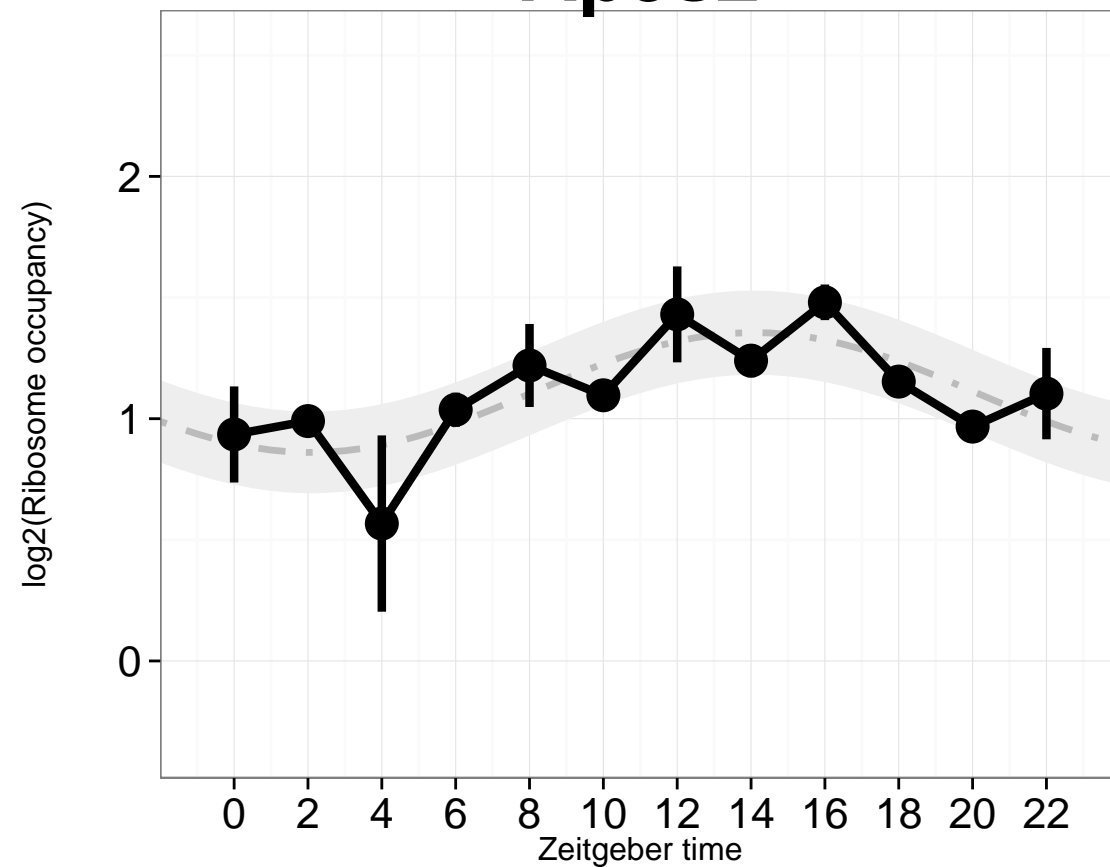

Supplement: Supplementary file 10343 [file 1]

## Postn

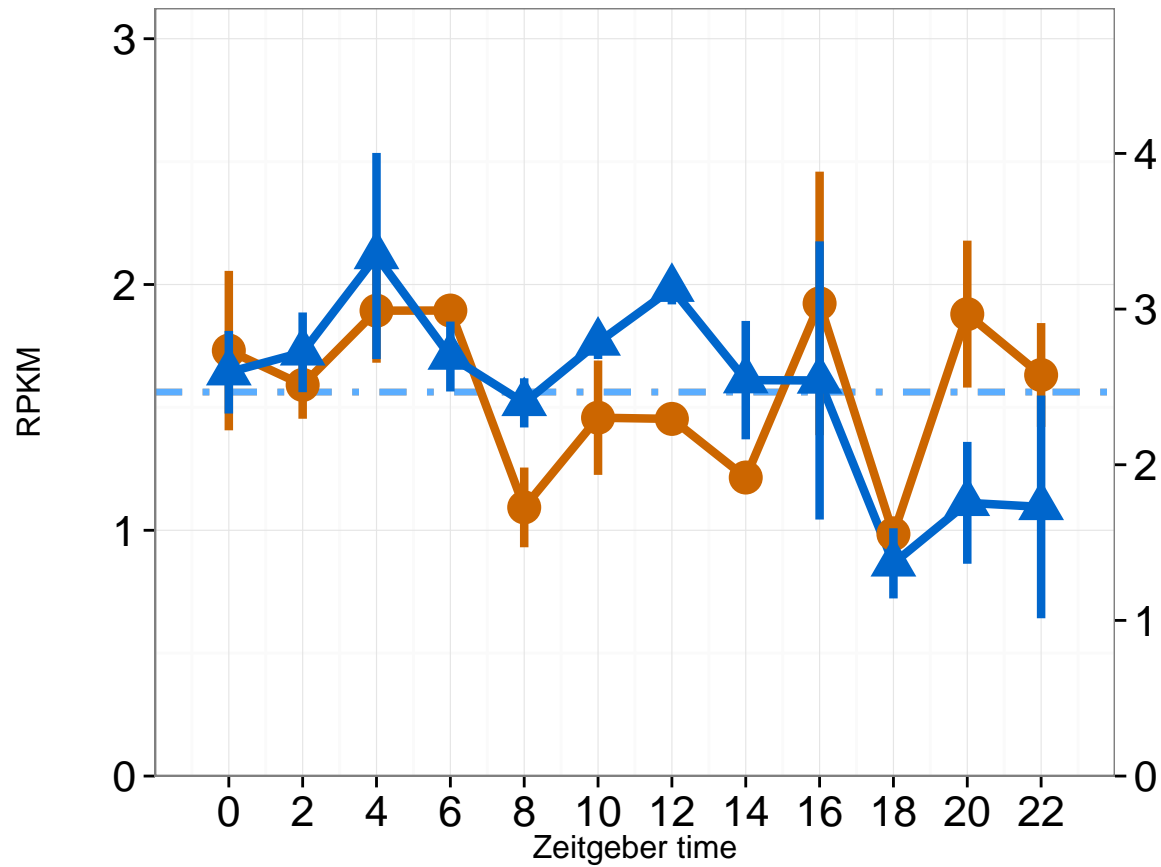

## Postn

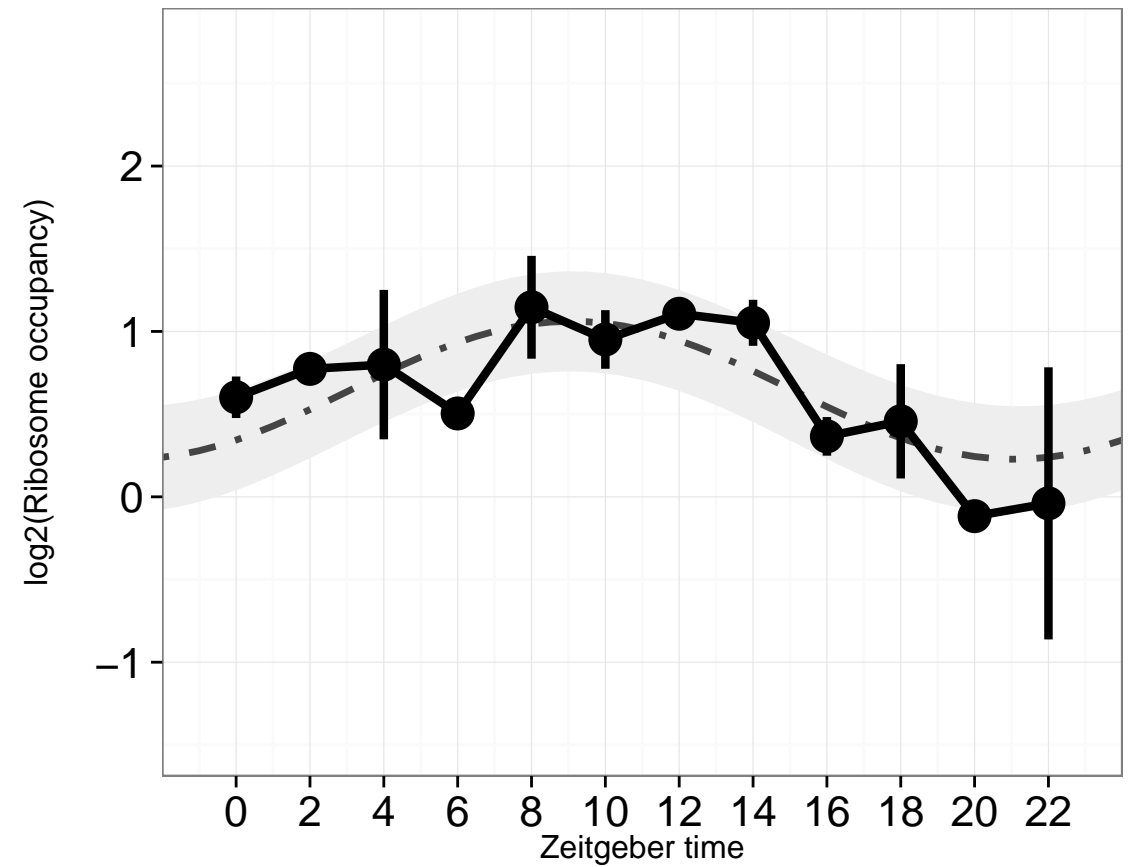

Supplement: Supplementary file 10344 [file 1]

# Ak7

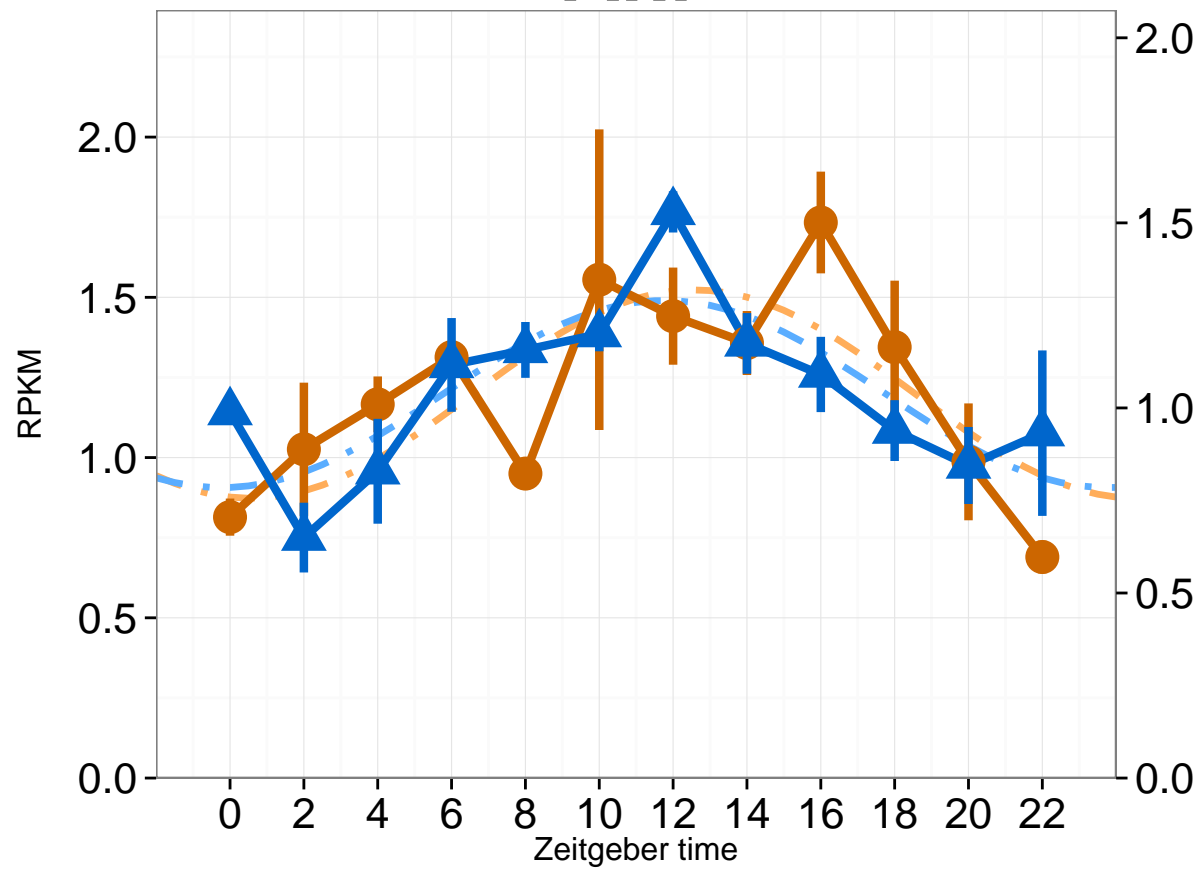

# Ak7

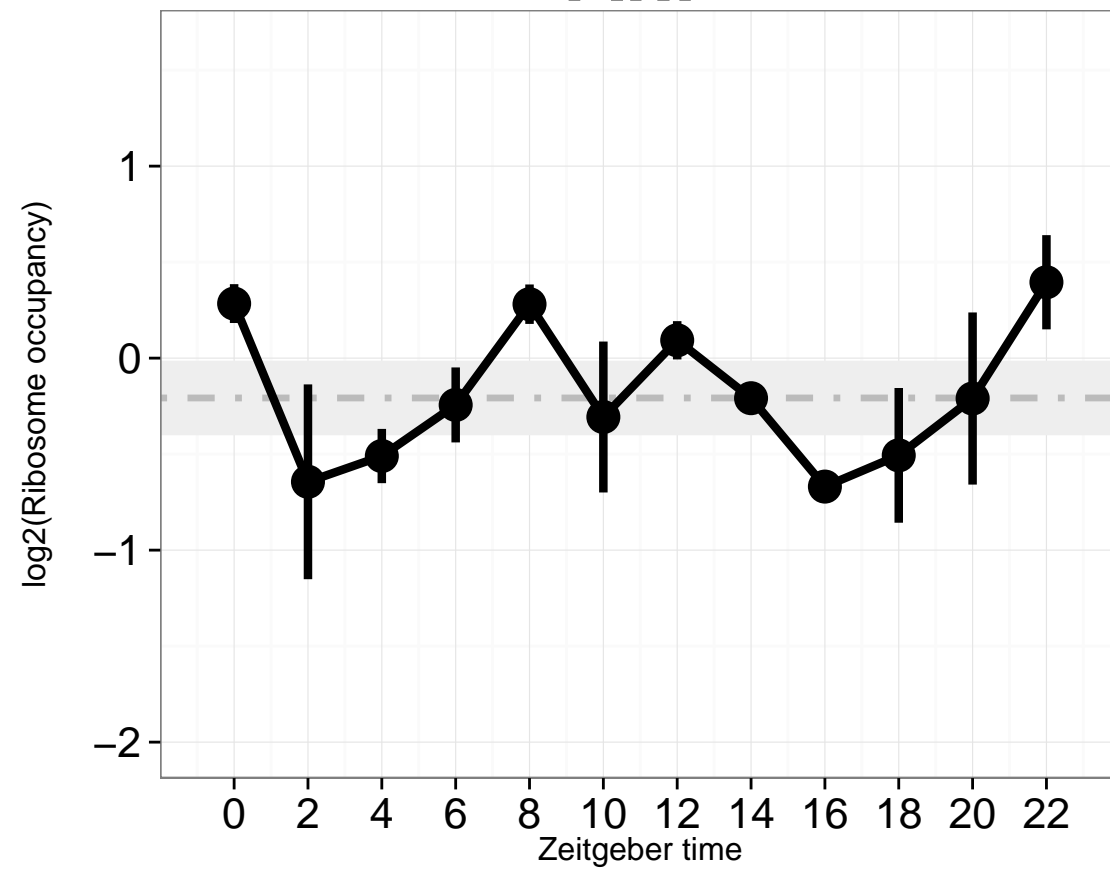

Supplement: Supplementary file 10345 [file 1]

**Ccdc89 TR**

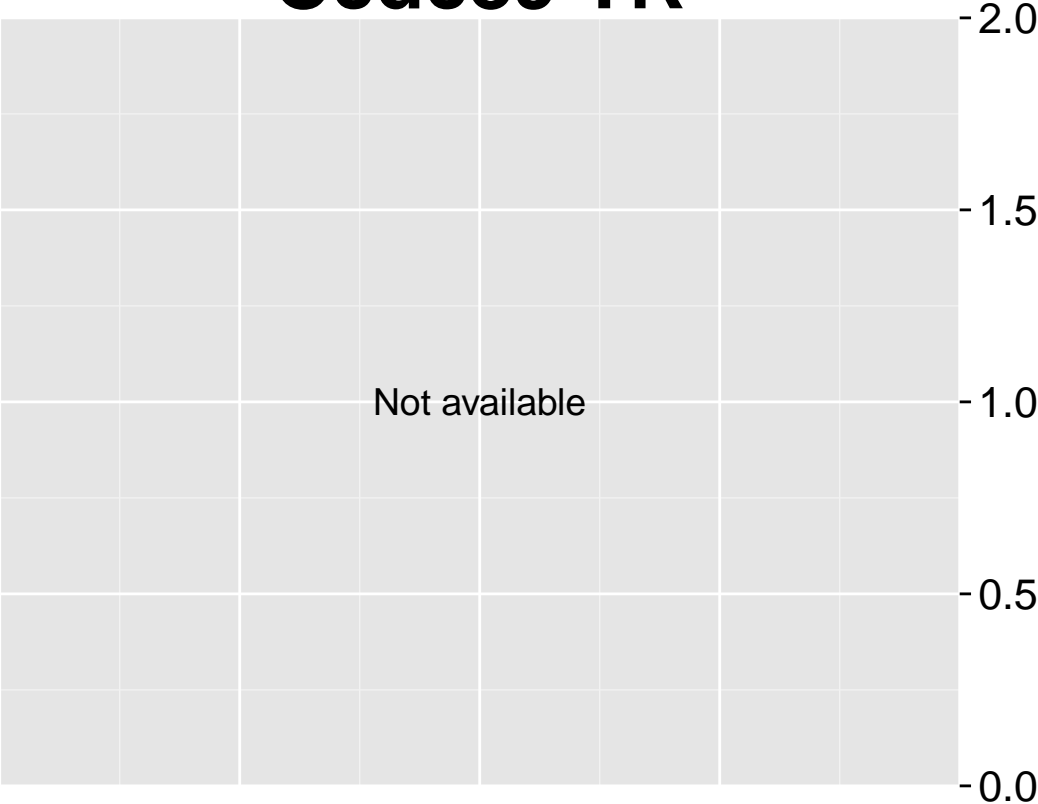

**Ccdc89 log2(Ribosome occupancy**

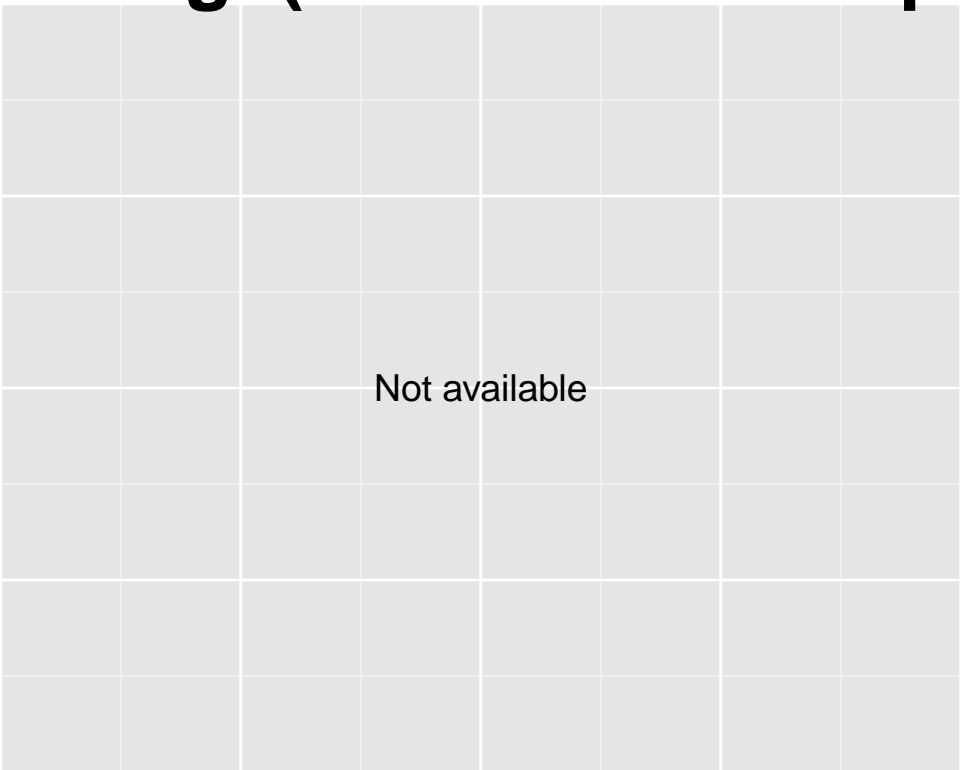

Supplement: Supplementary file 10346 [file 1]

# Rhno1

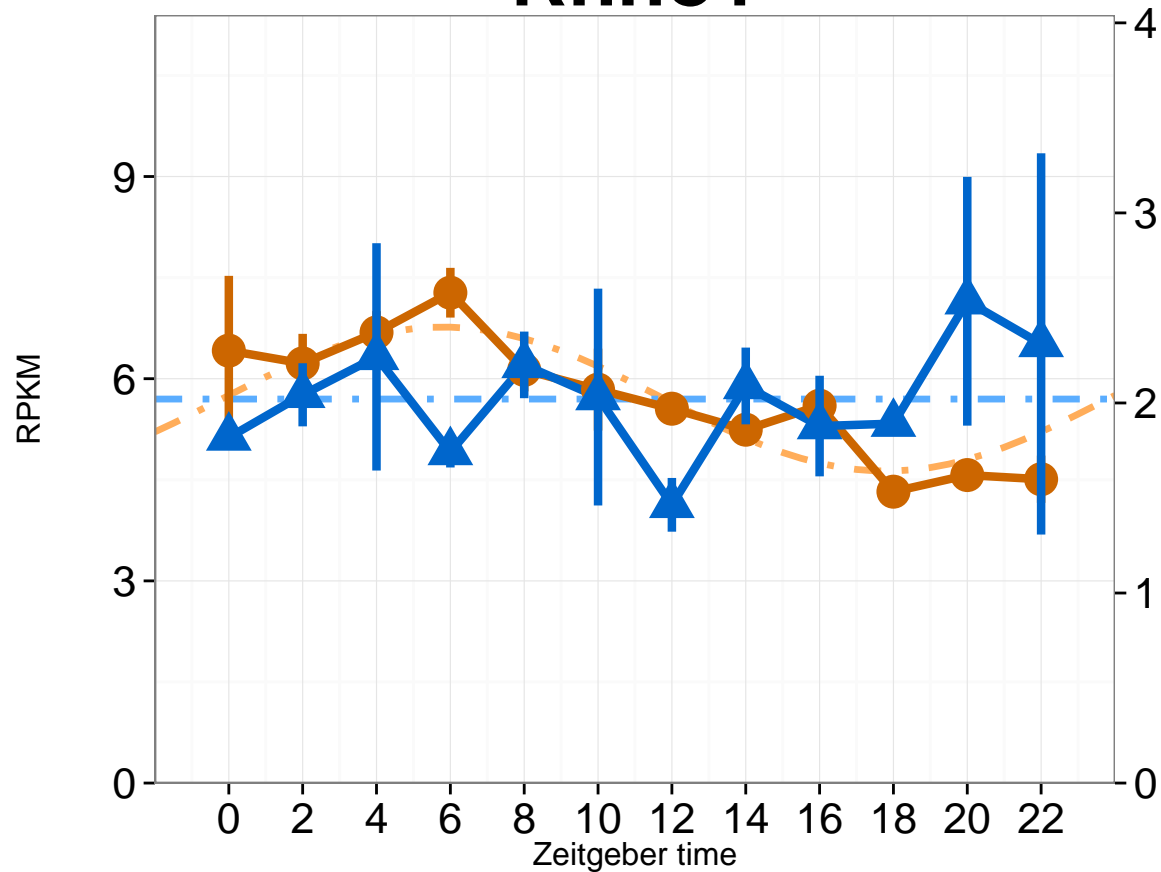

# Rhno1

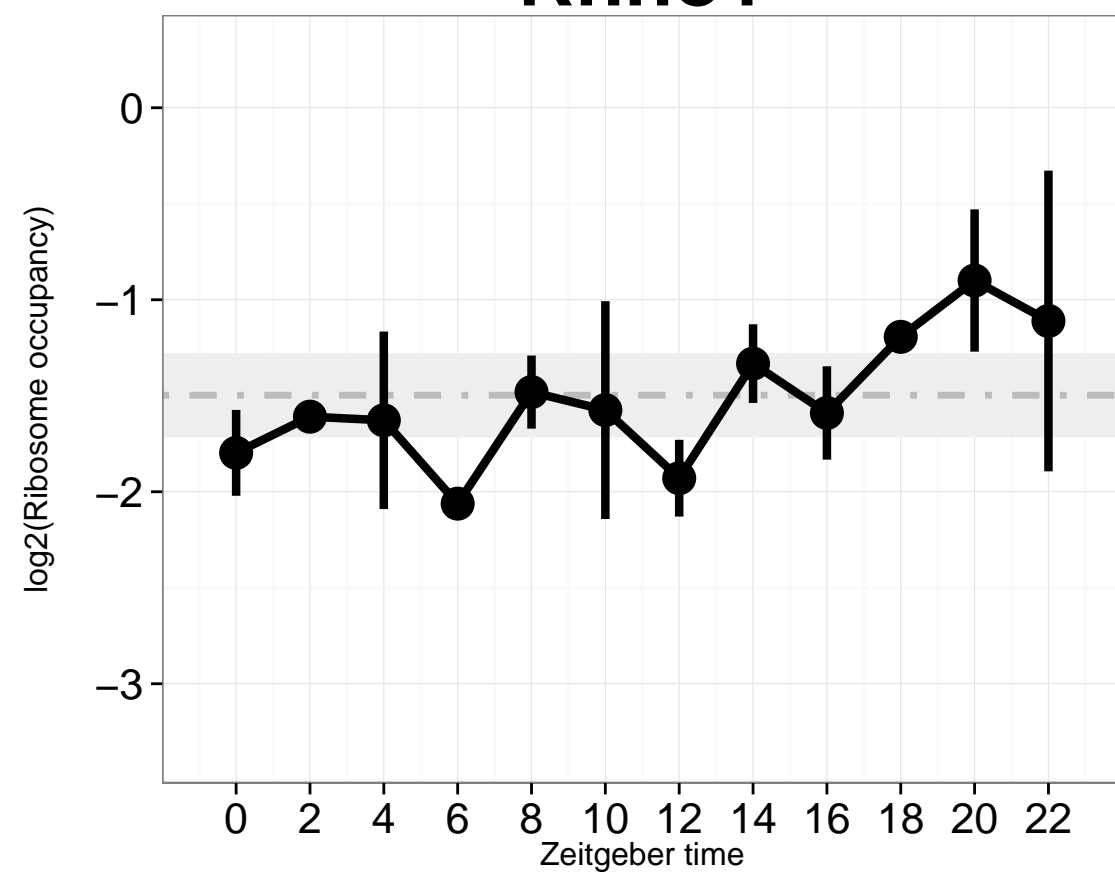

Supplement: Supplementary file 10347 [file 1]

## Snrpe

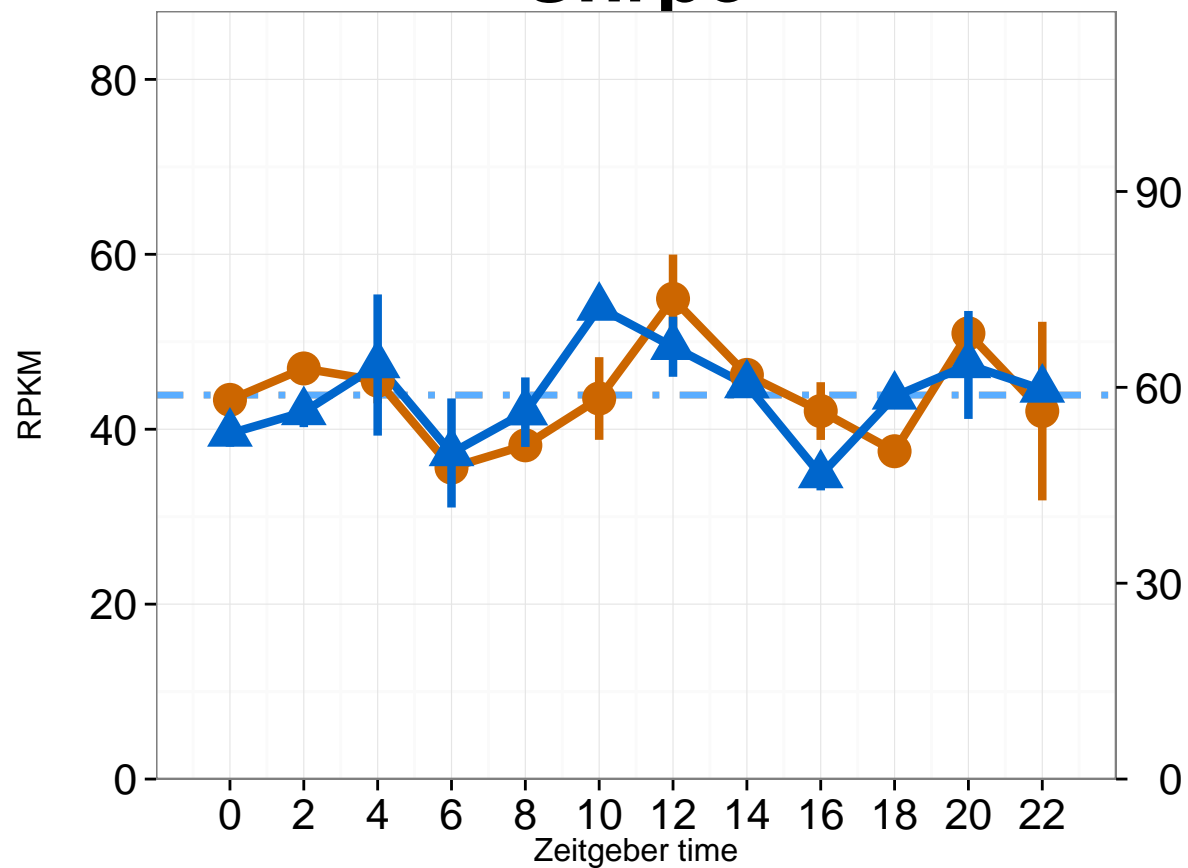

## Snrpe

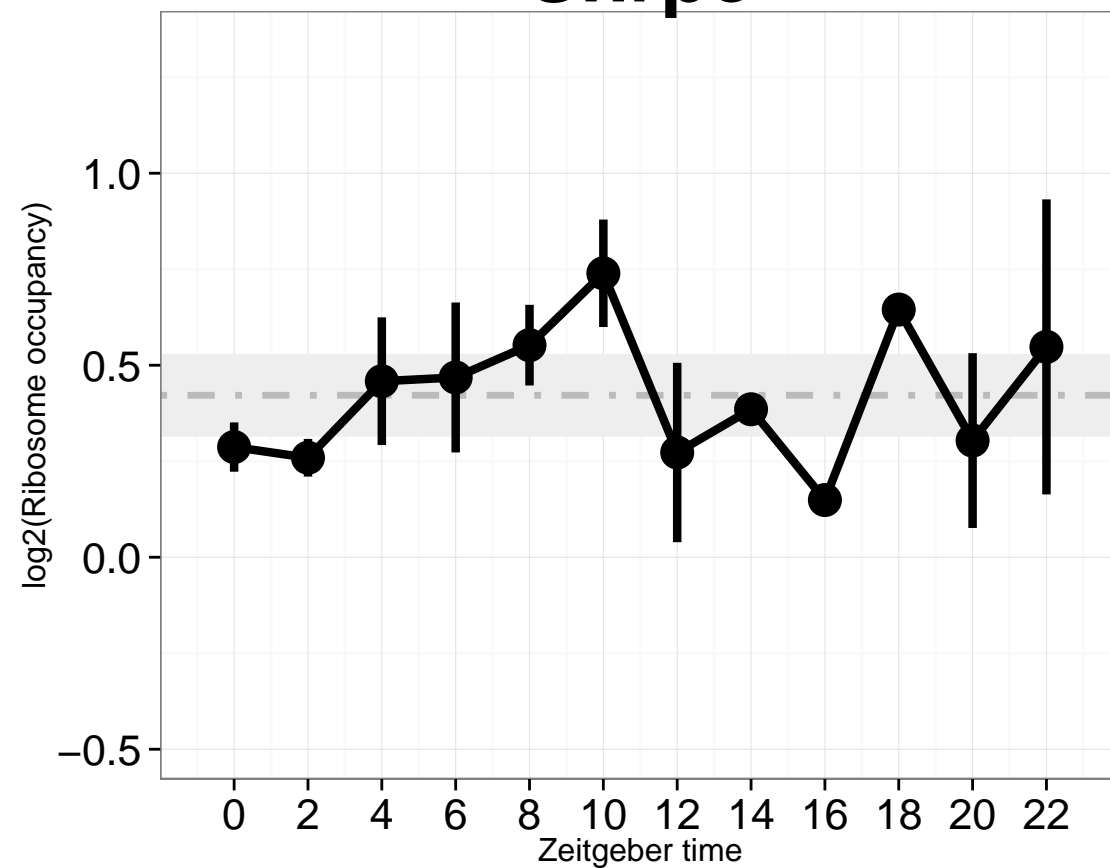

Supplement: Supplementary file 10348 [file 1]

## Gatsl3

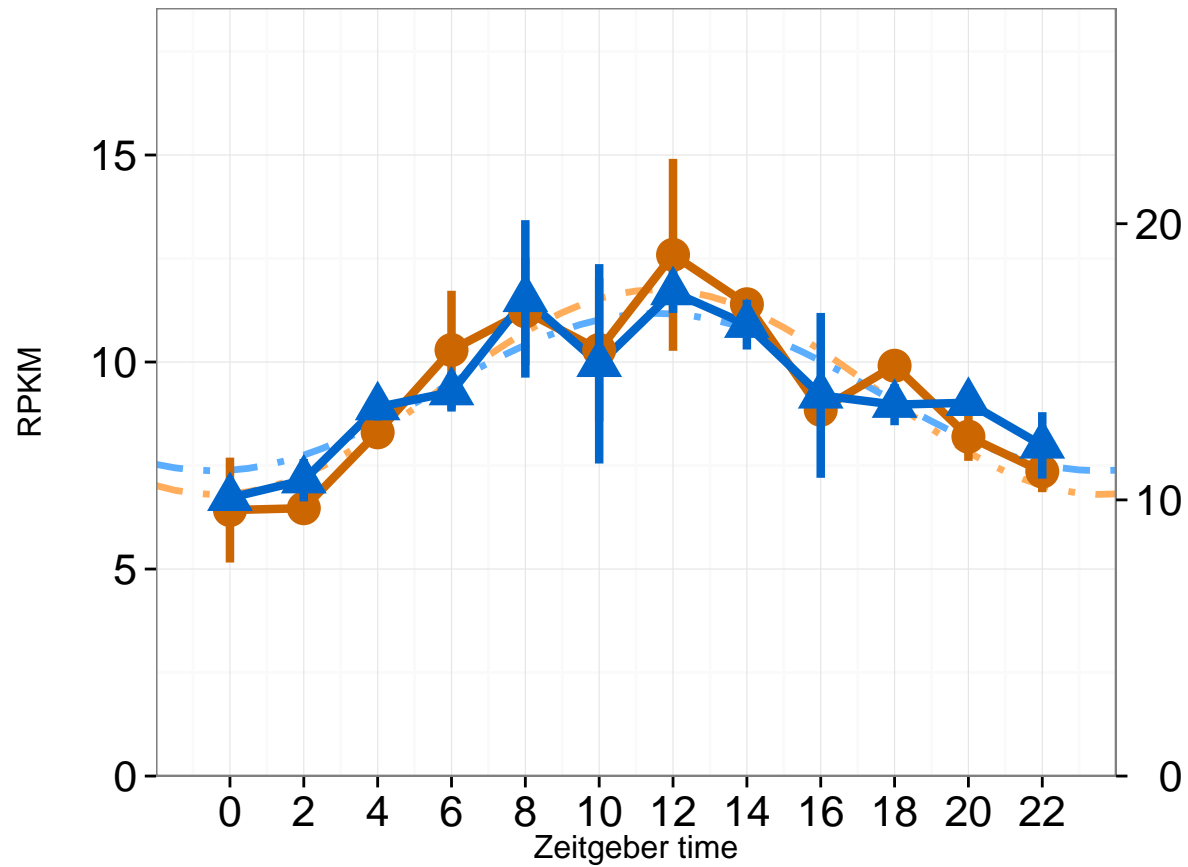

## Gatsl3

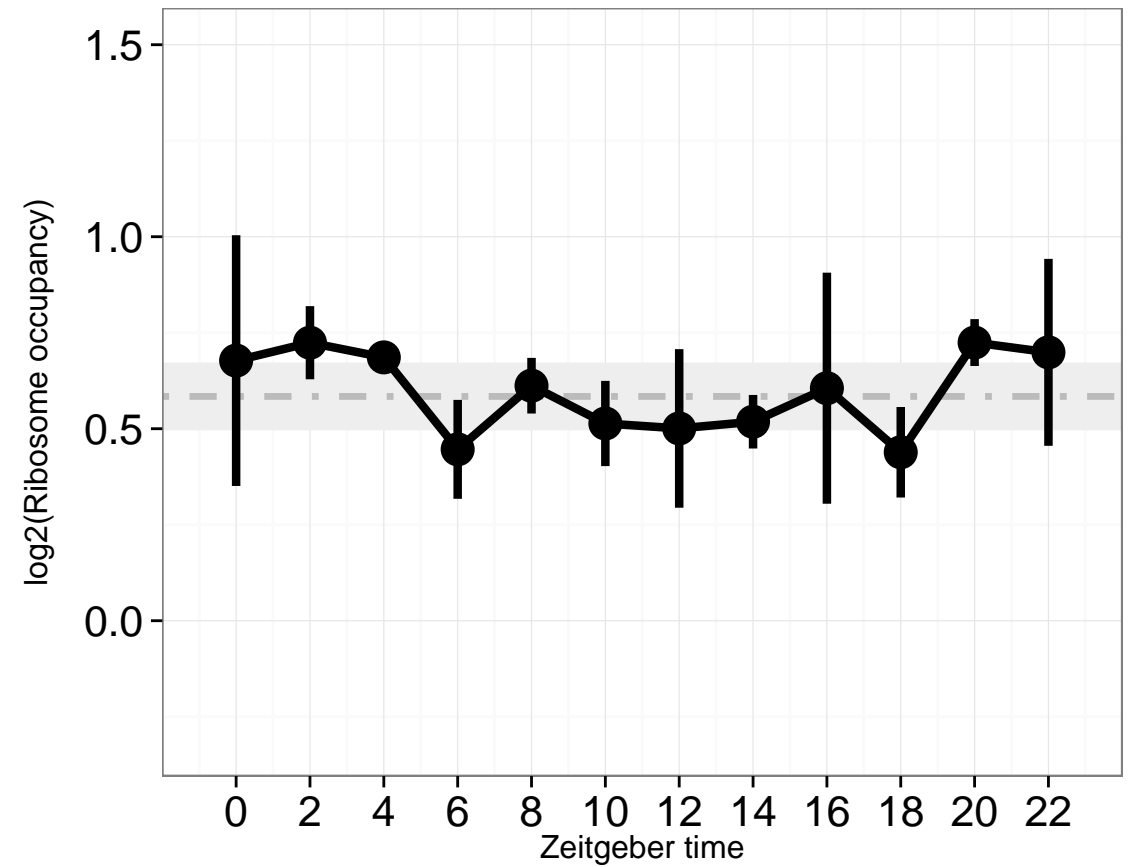

Supplement: Supplementary file 10349 [file 1]

## A930004D18Rik

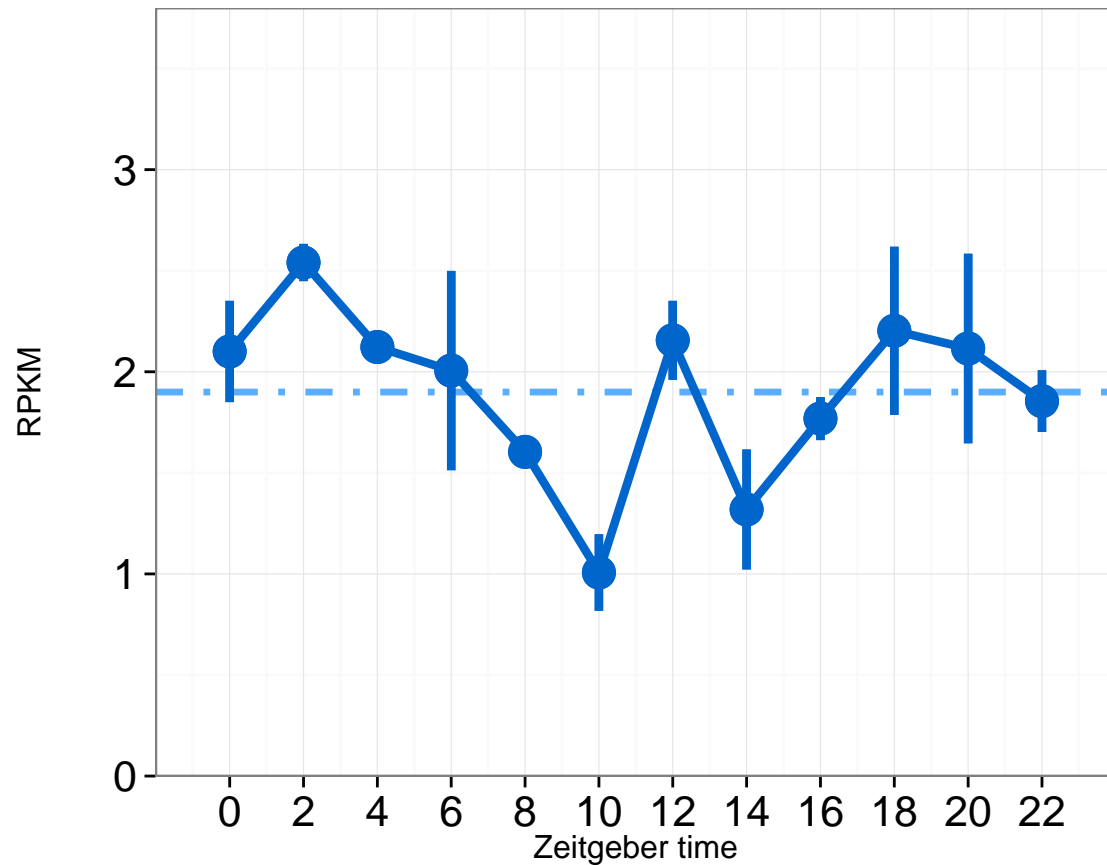

## A930004D18Rik log2(Ribosome occup

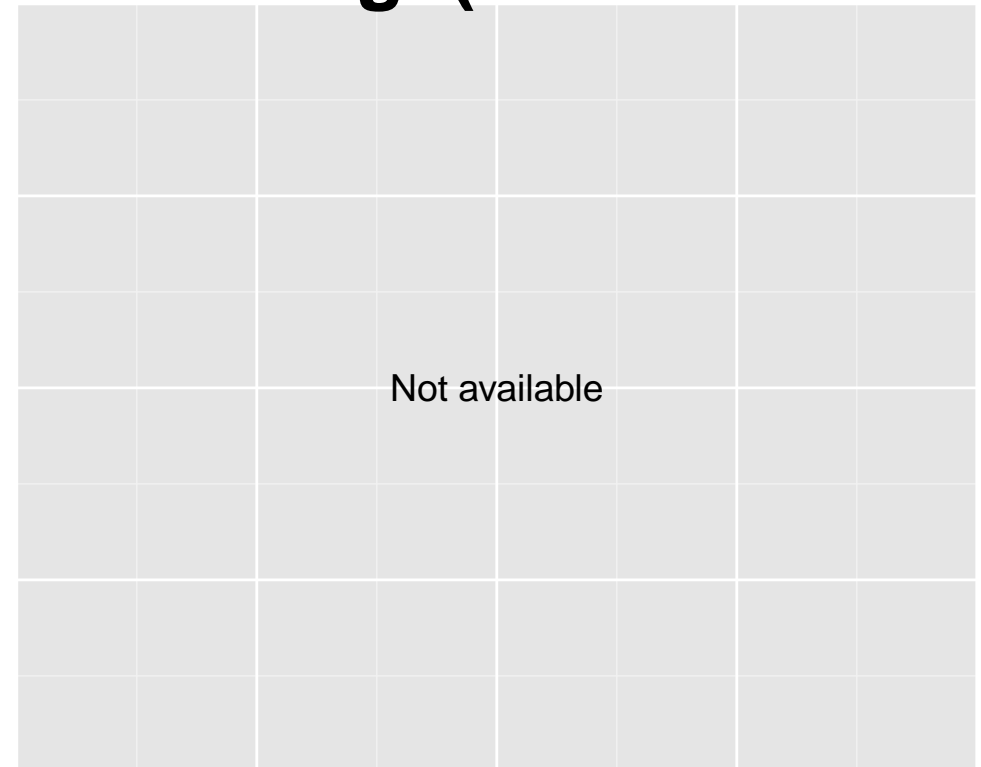

Supplement: Supplementary file 10350 [file 1]

## lqcg

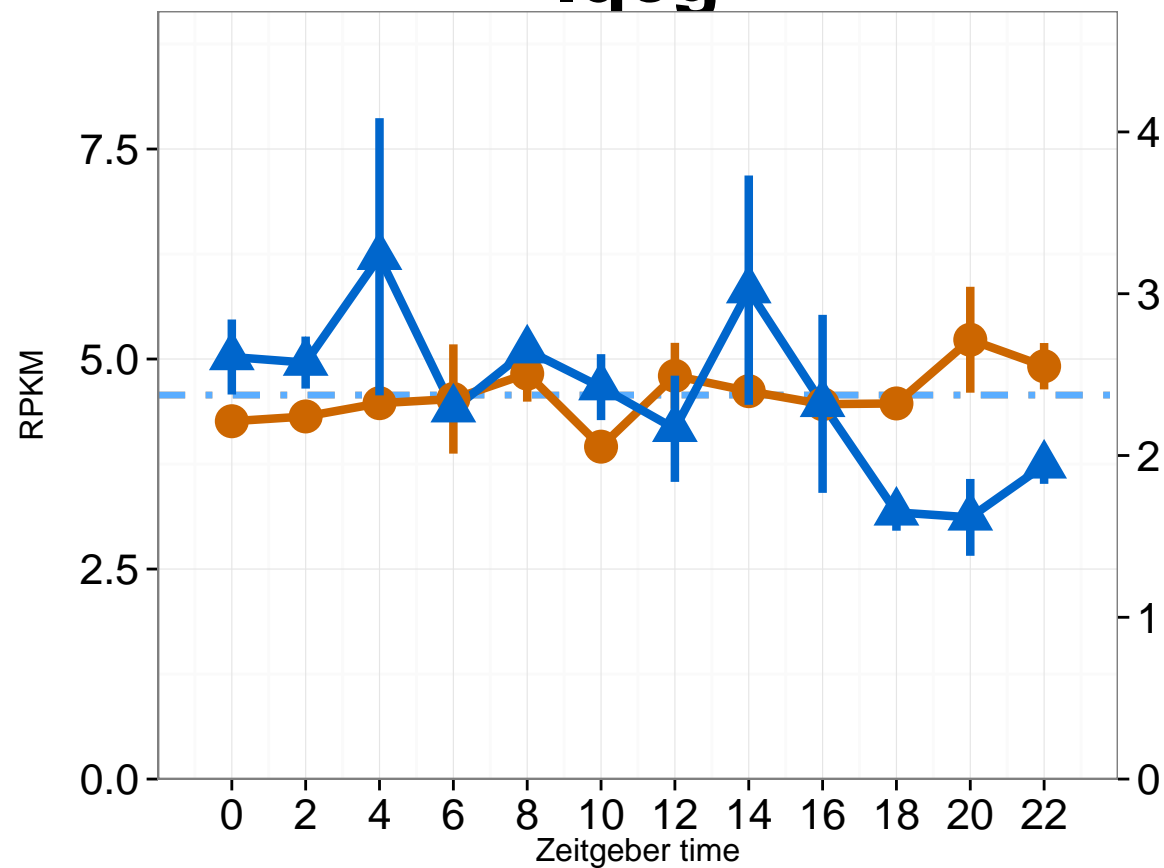

## lqcg

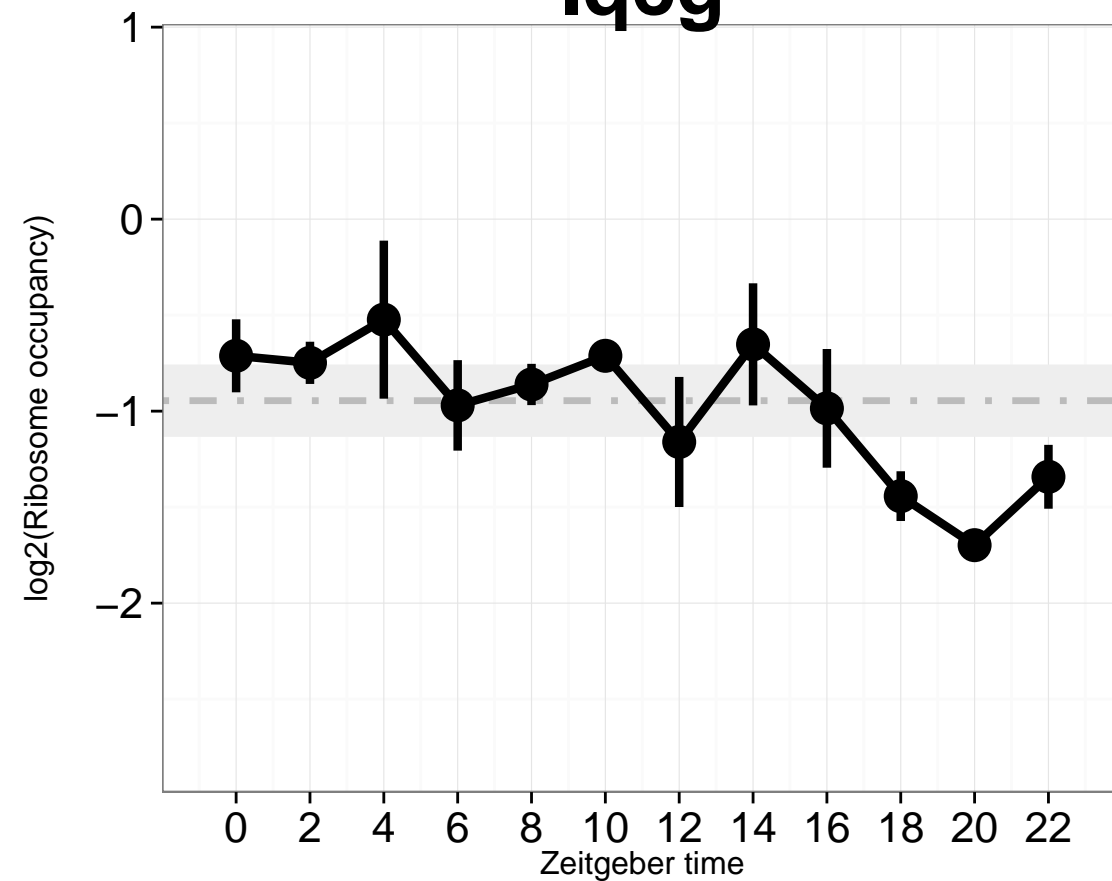

Supplement: Supplementary file 10351 [file 1]

# Akap8

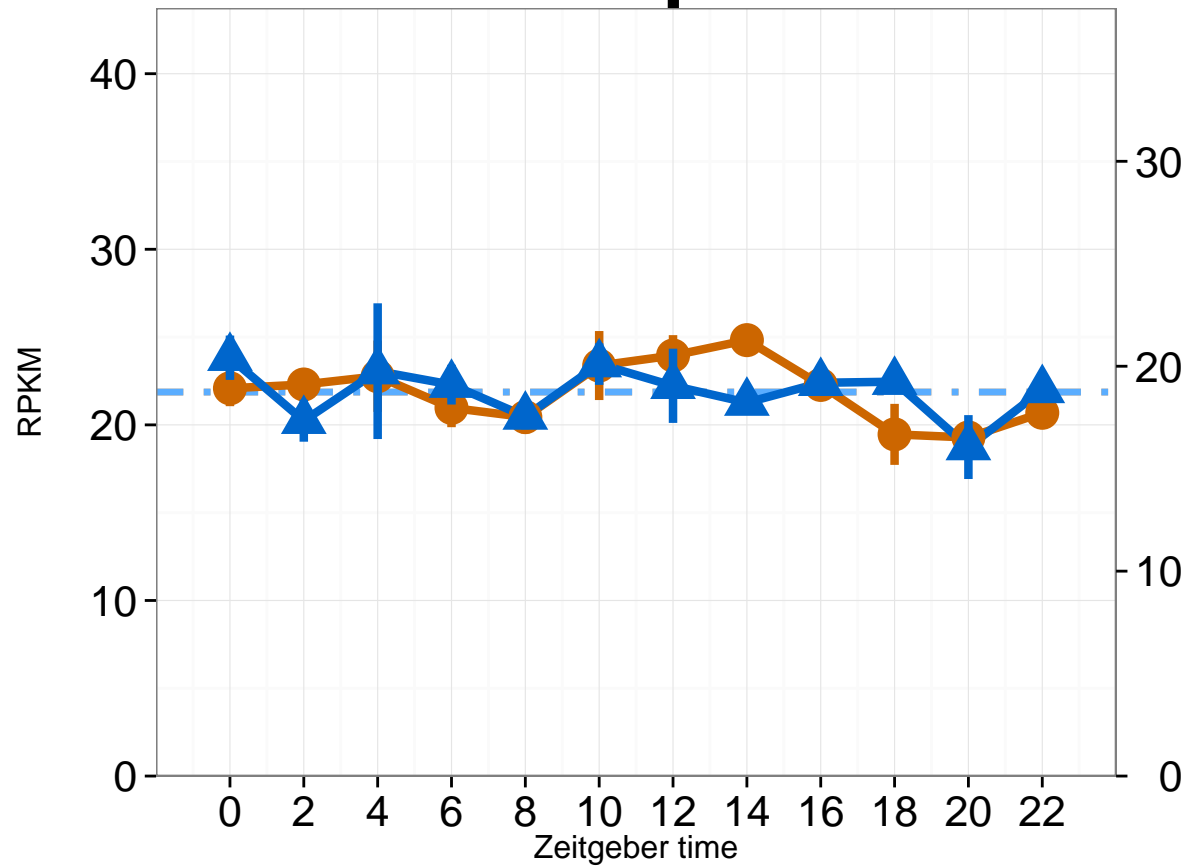

# Akap8

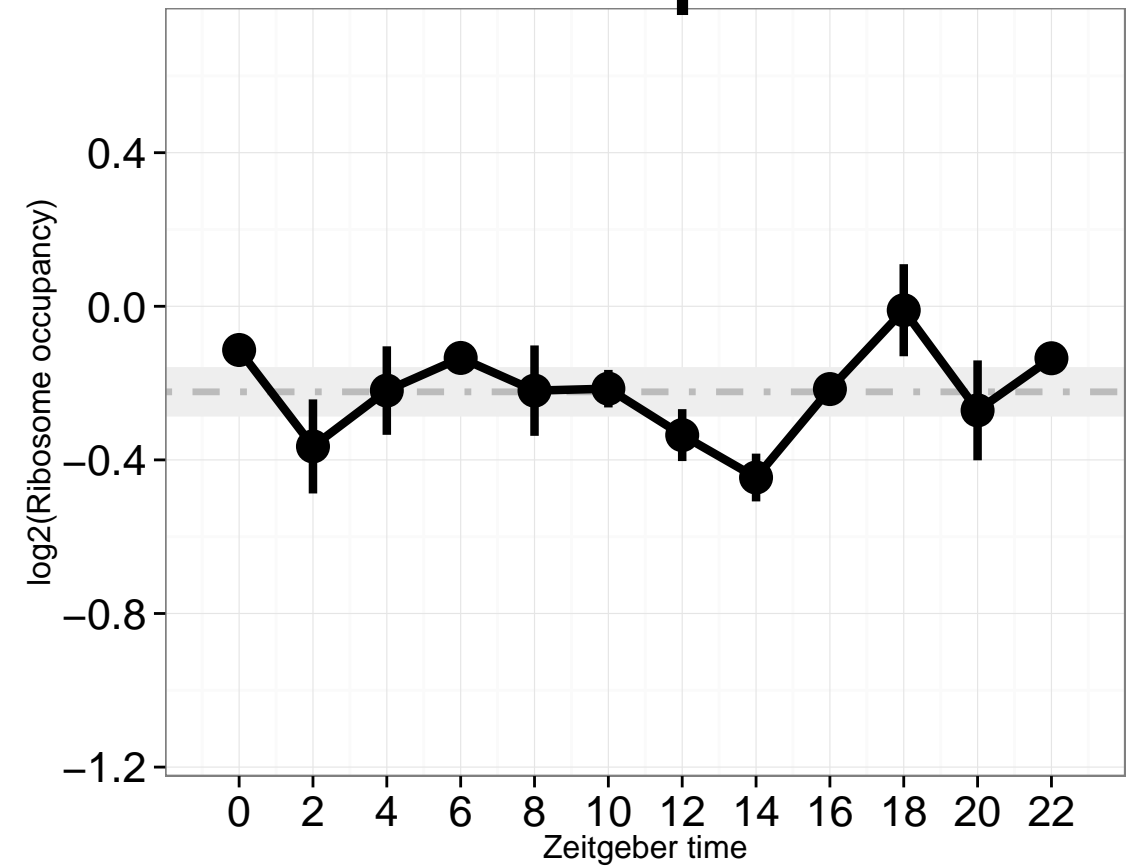

Supplement: Supplementary file 10352 [file 1]

## PIk2

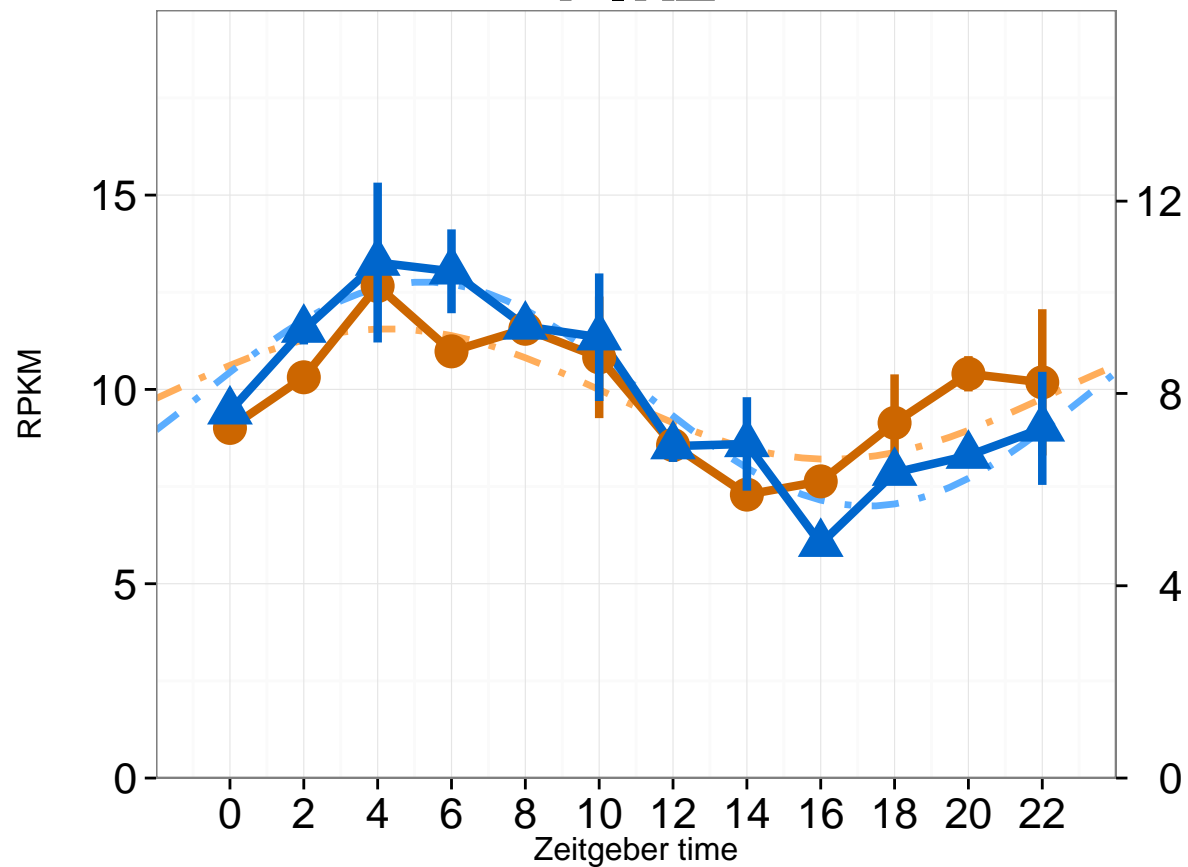

## PIk2

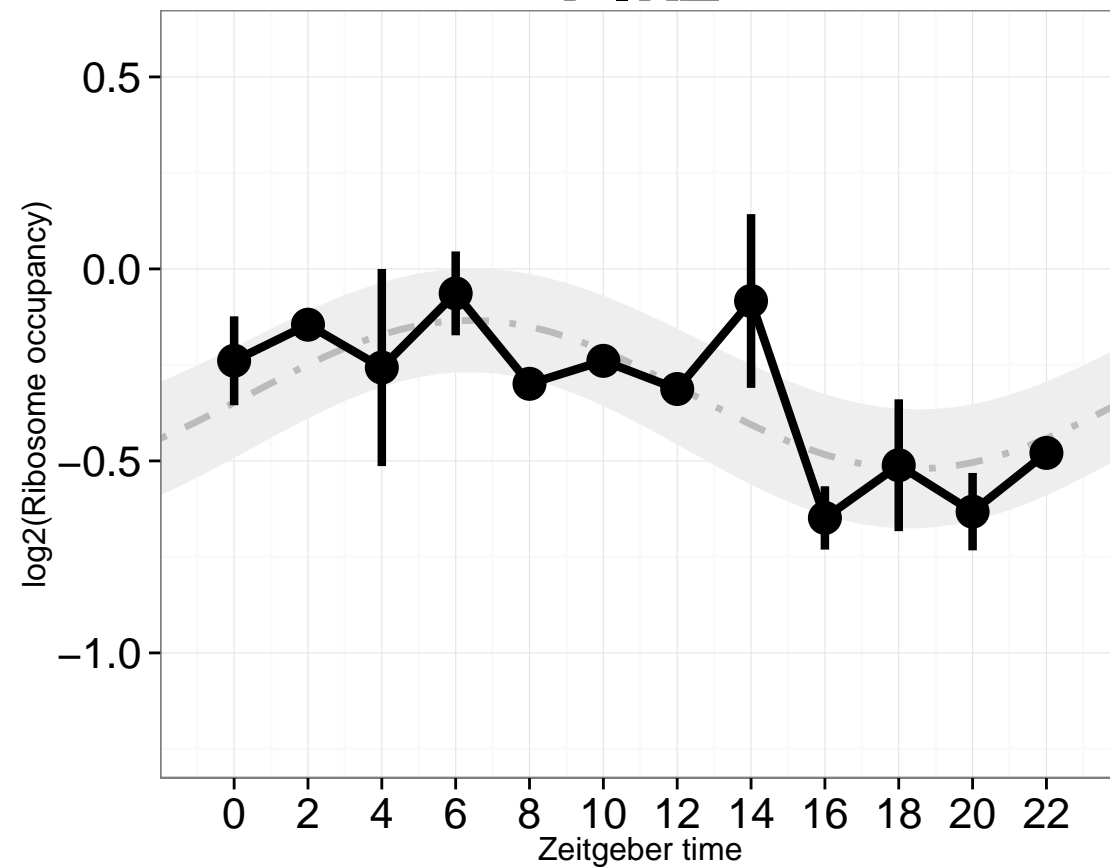

Supplement: Supplementary file 10353 [file 1]

# D2Wsu81e

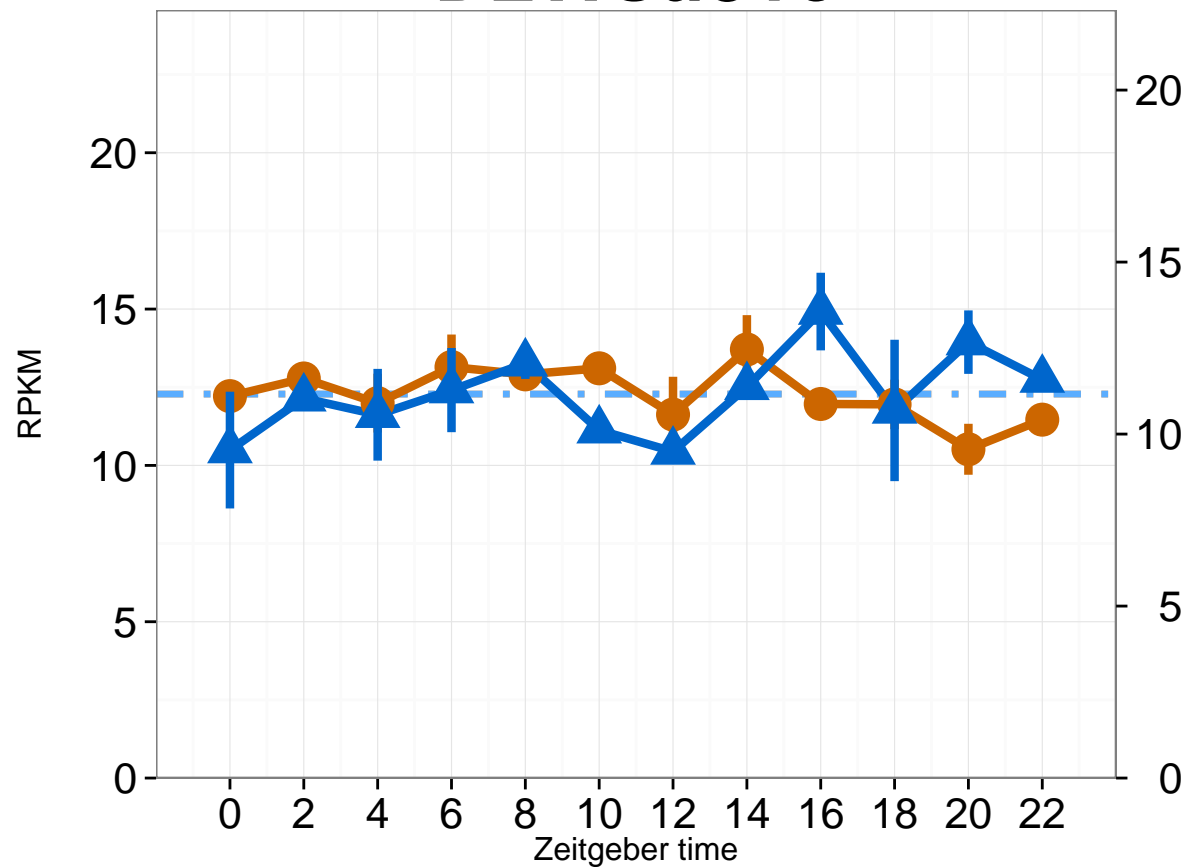

# D2Wsu81e

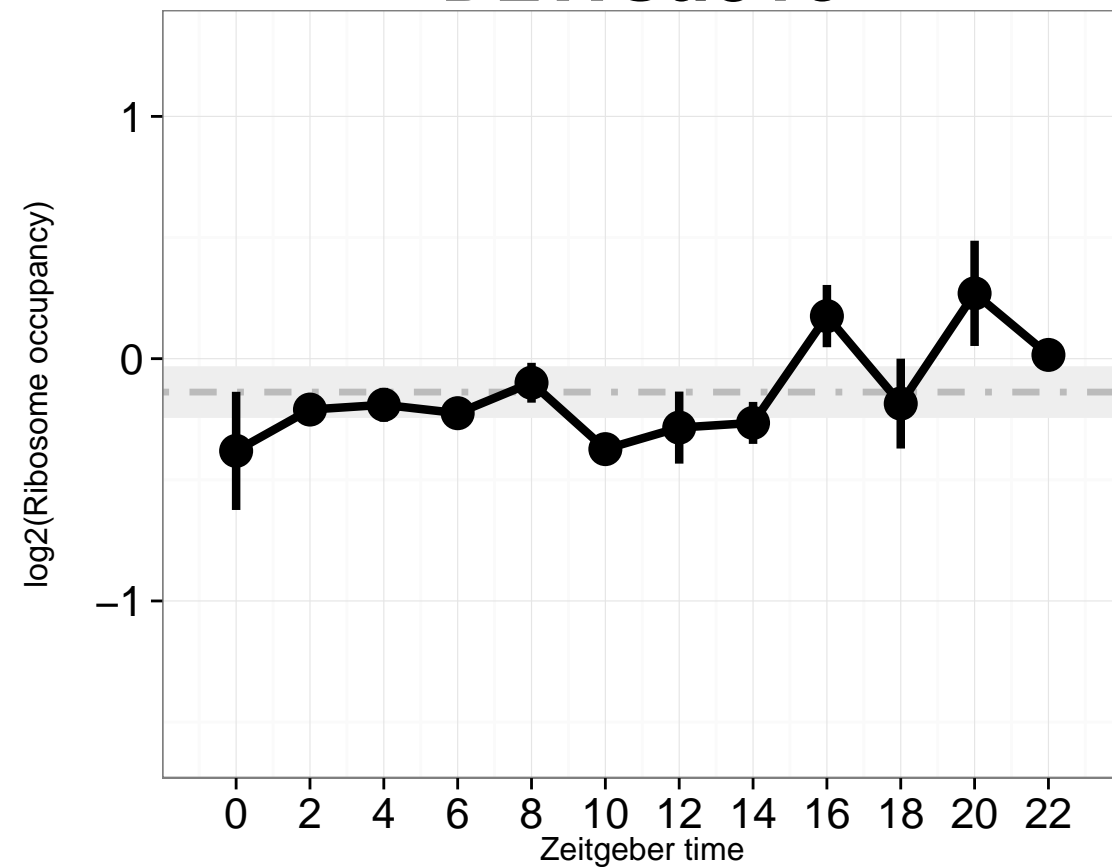

Supplement: Supplementary file 10354 [file 1]

**Ldb3 TR**

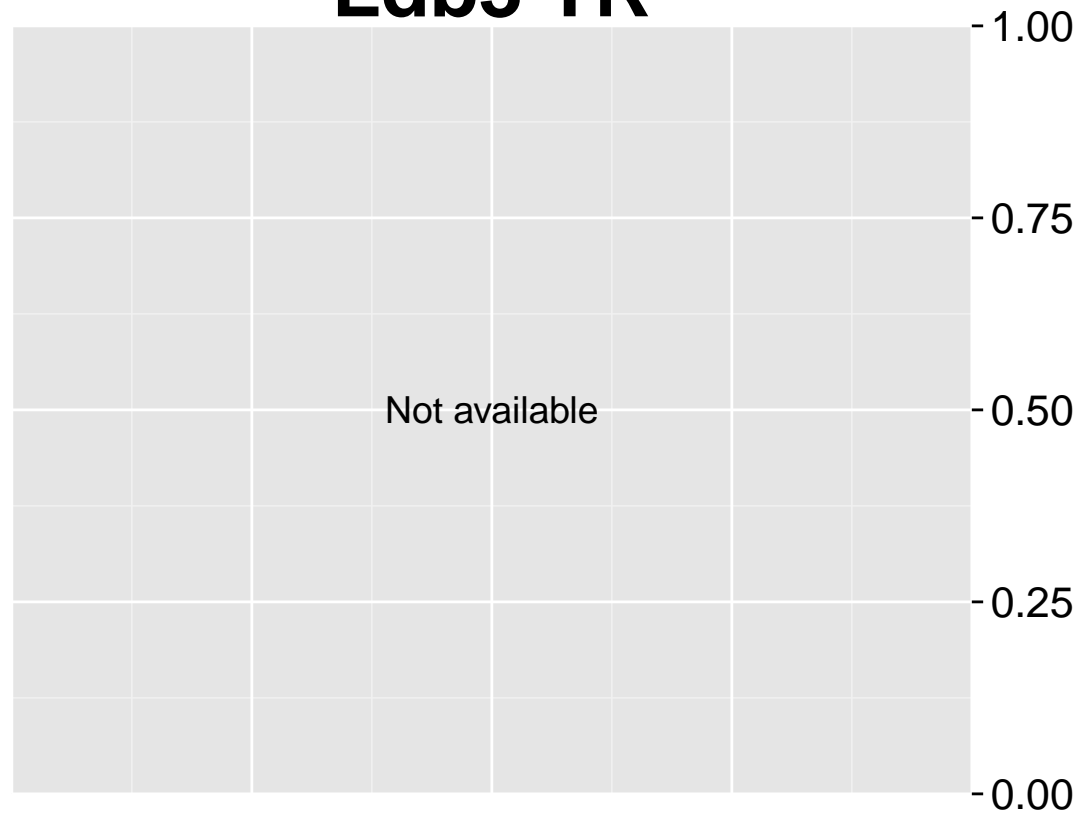

**Ldb3 log2(Ribosome occupancy)**

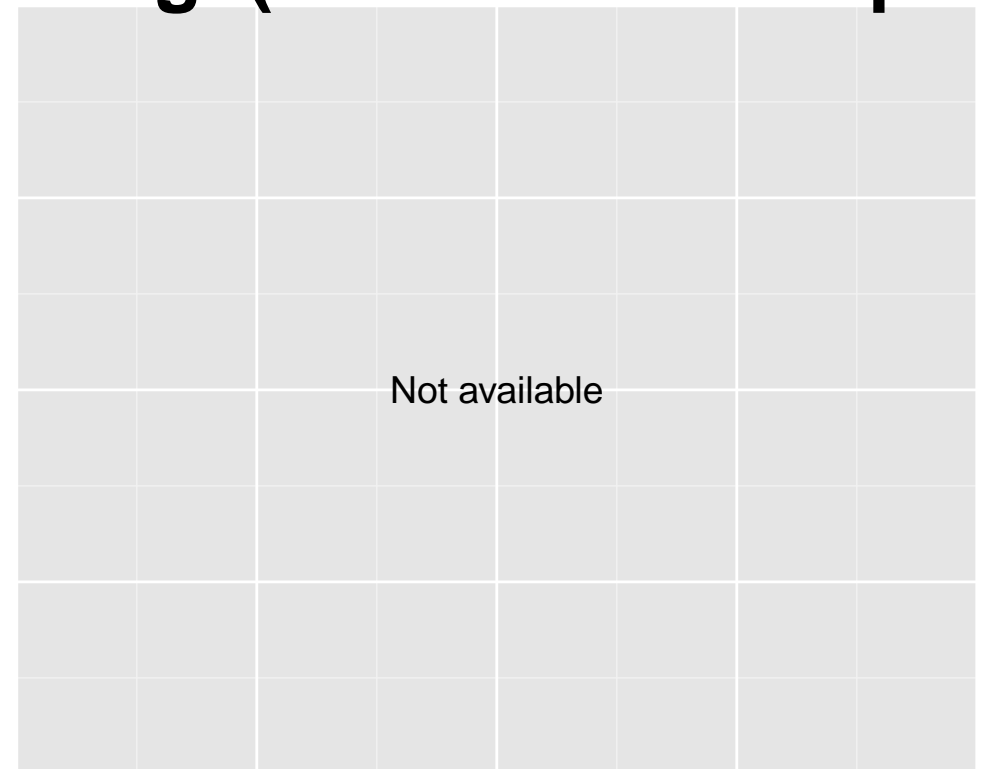

Supplement: Supplementary file 10355 [file 1]

## Magohb

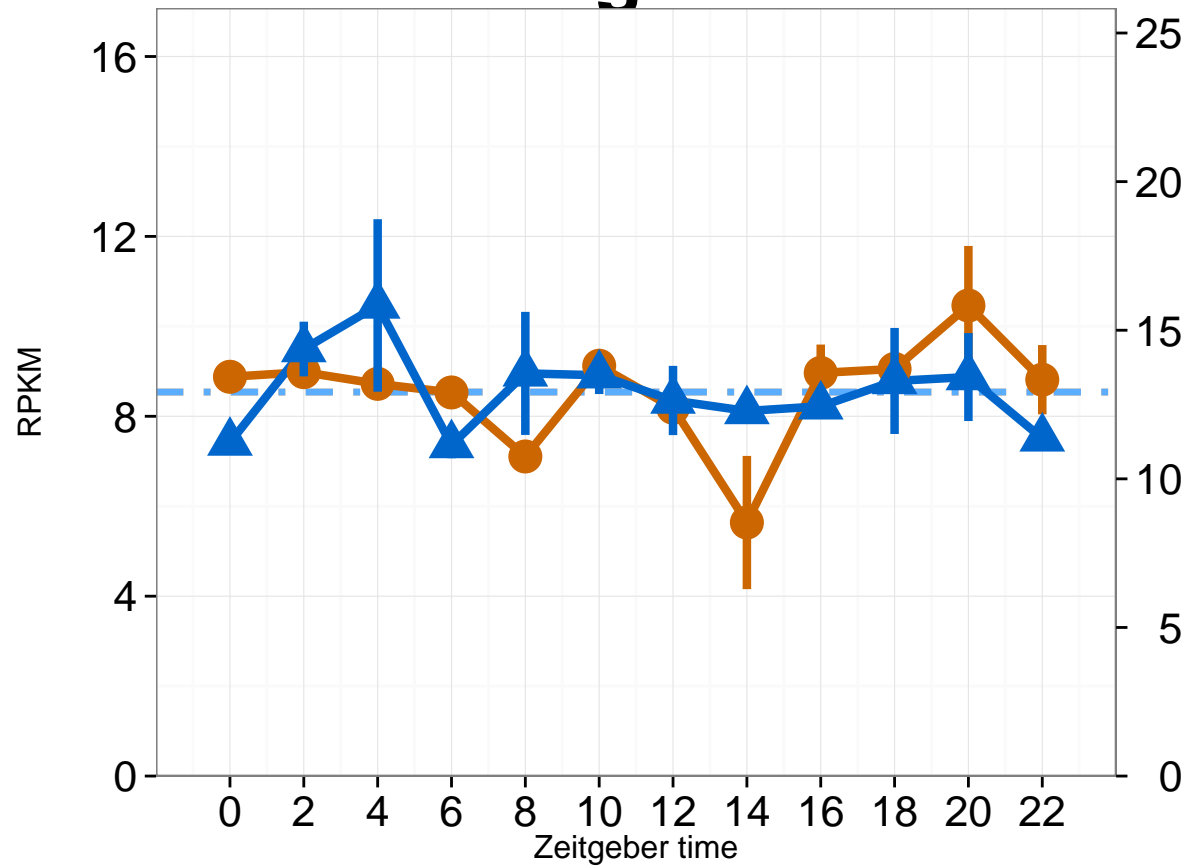

## Magohb

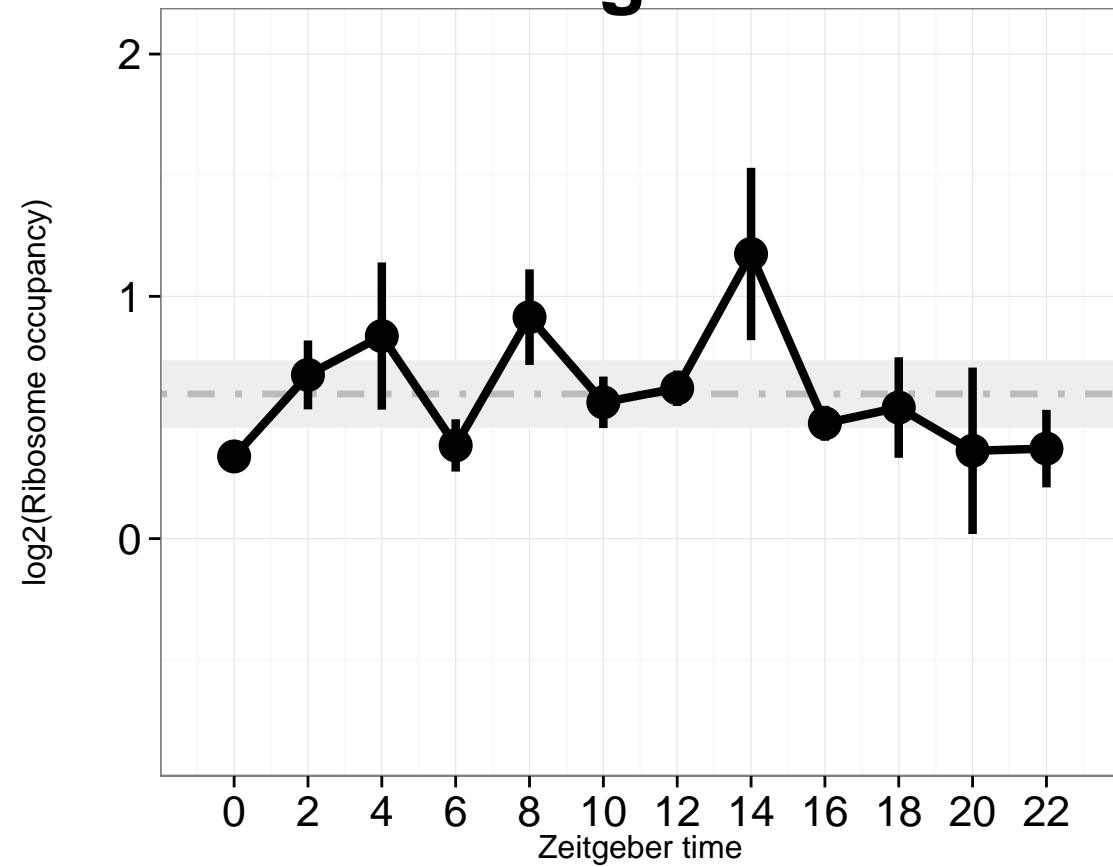

Supplement: Supplementary file 10356 [file 1]

## CntIn

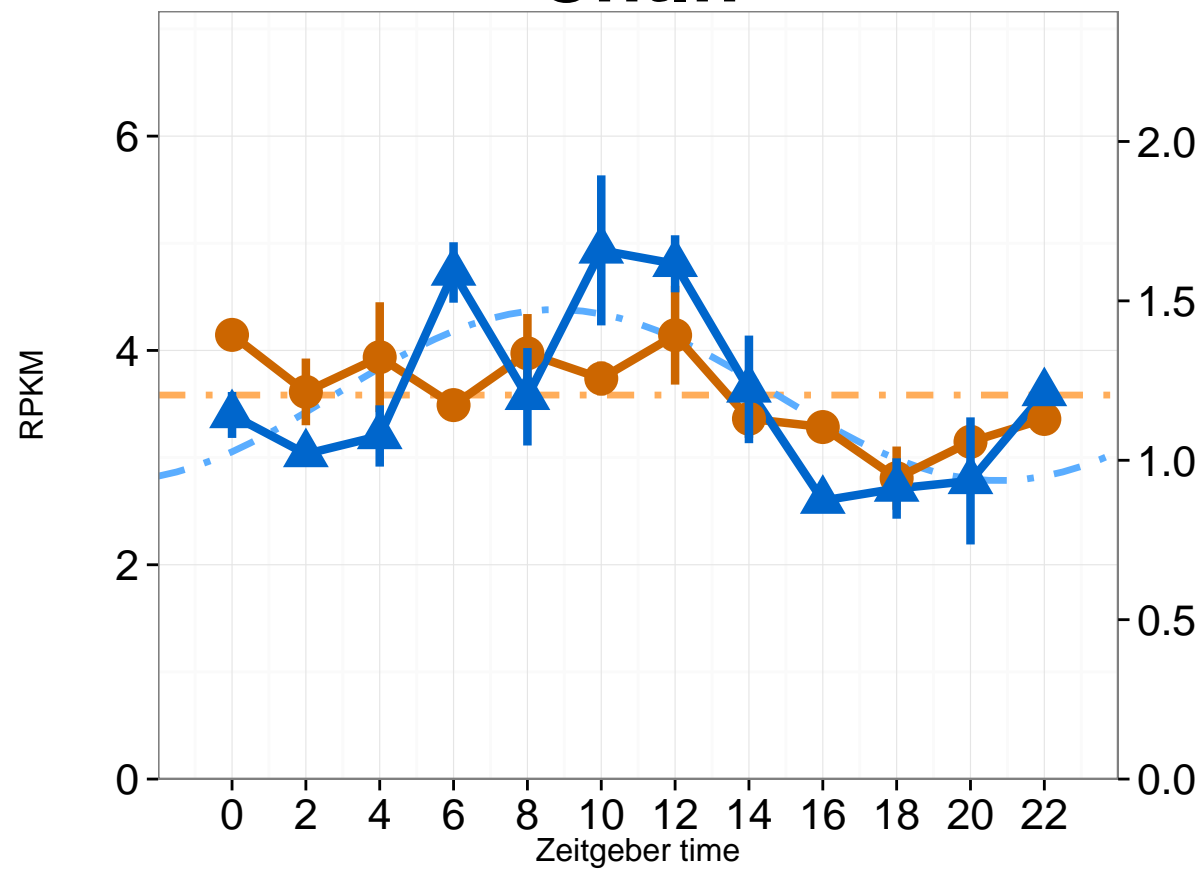

## CntIn

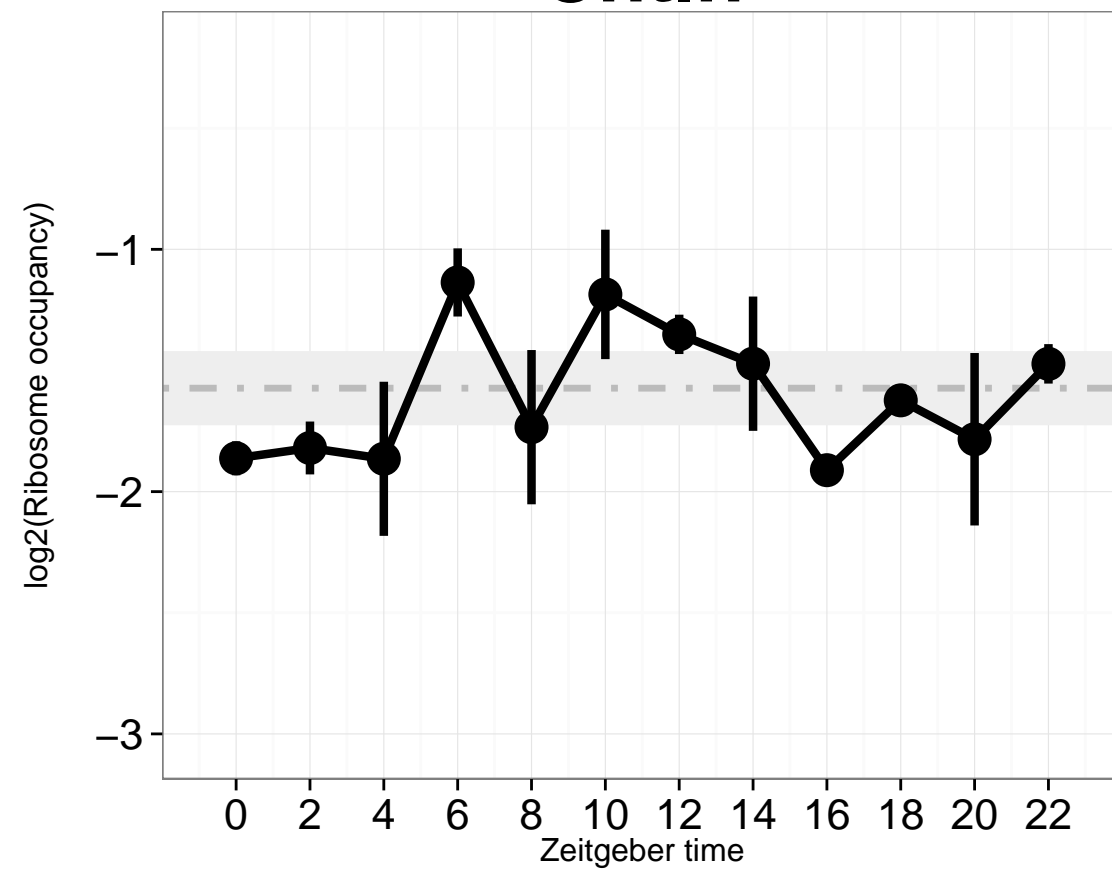

Supplement: Supplementary file 10357 [file 1]

## Coprs

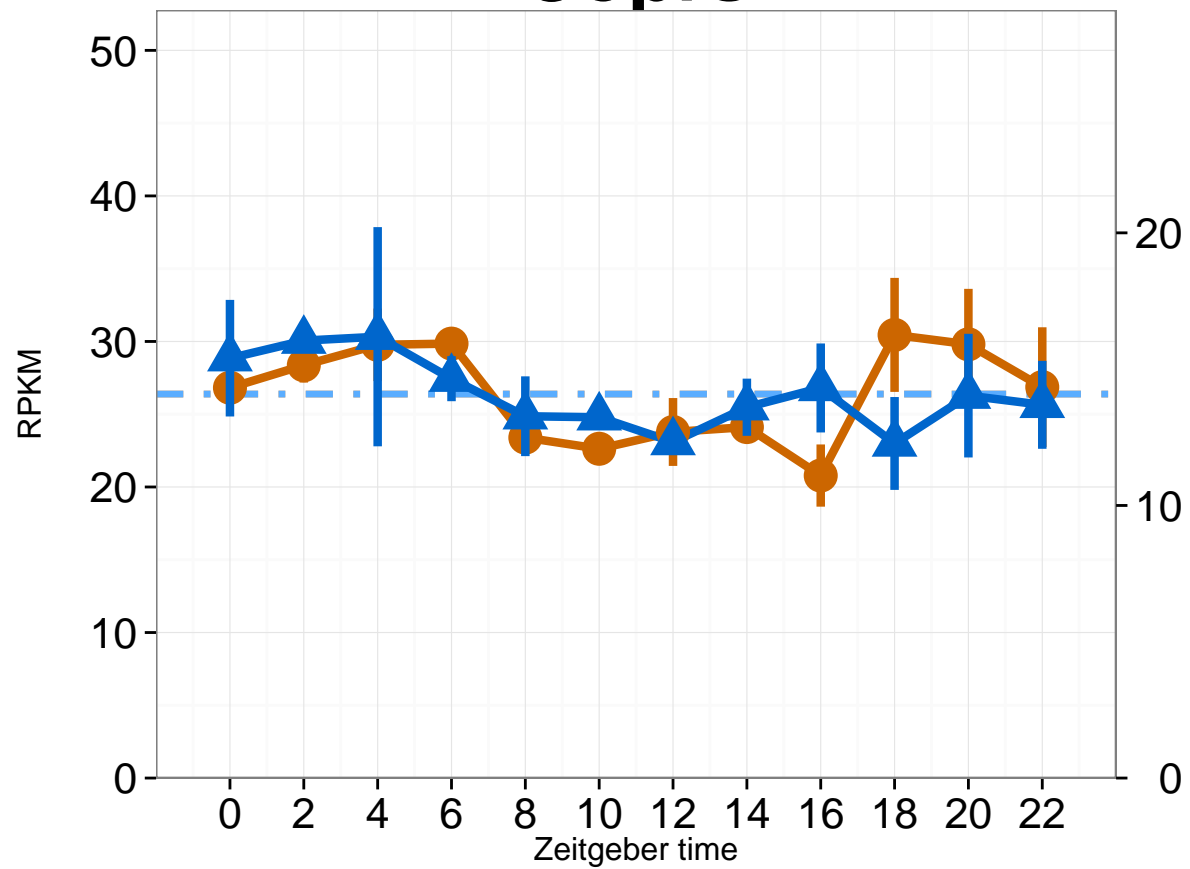

## Coprs

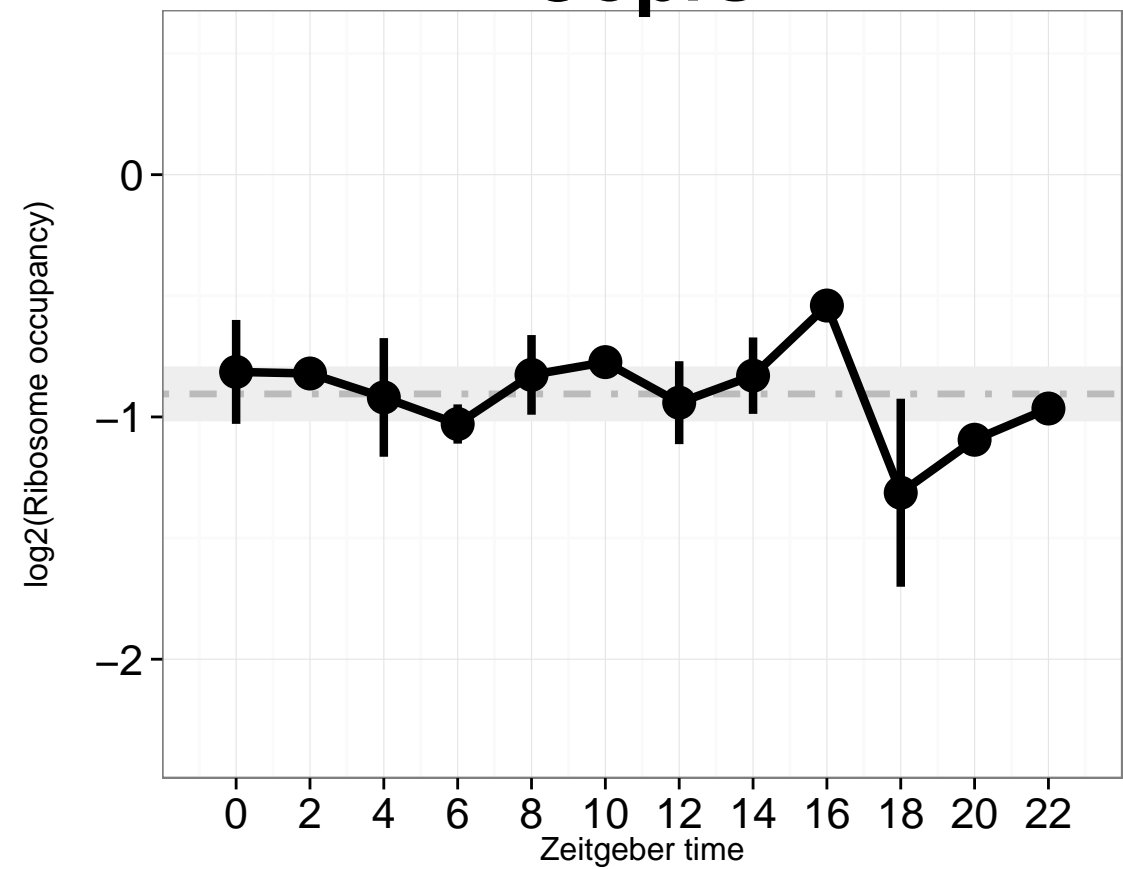

Supplement: Supplementary file 10358 [file 1]

## Kdm4a

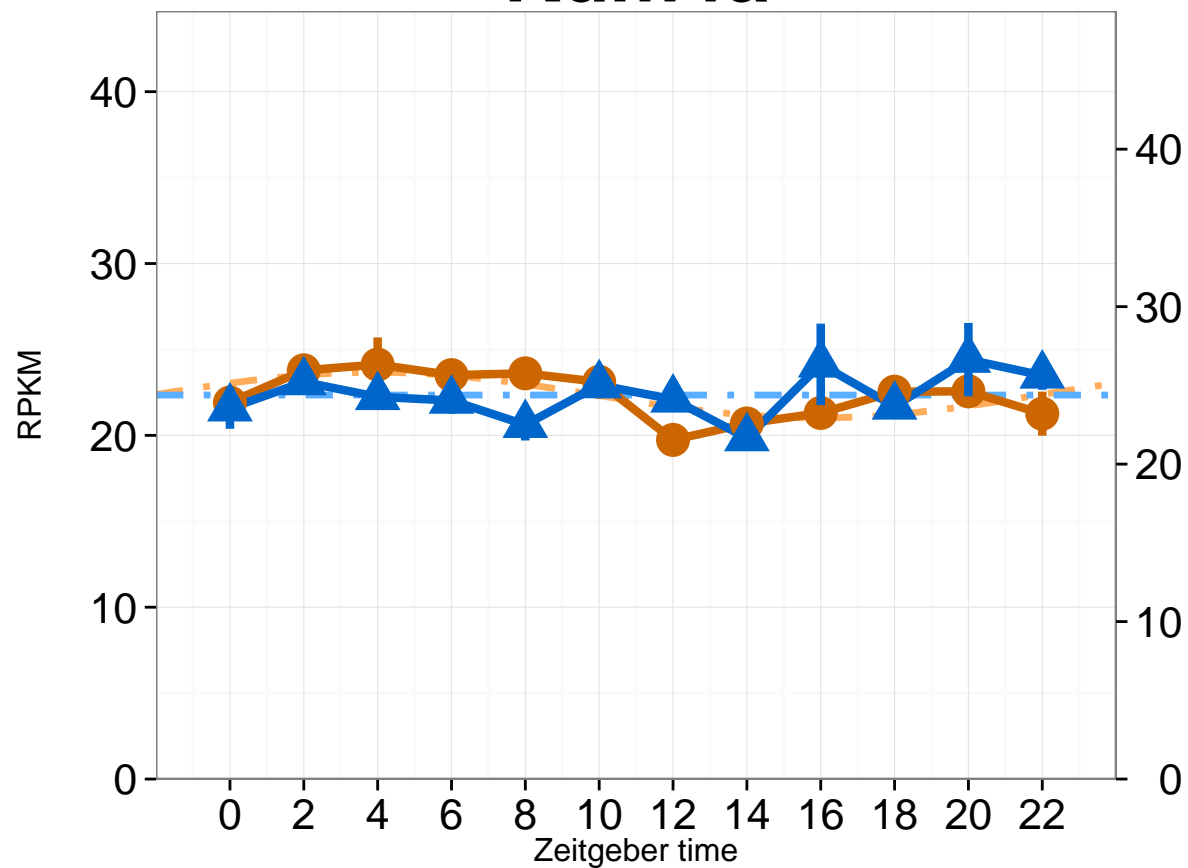

## Kdm4a

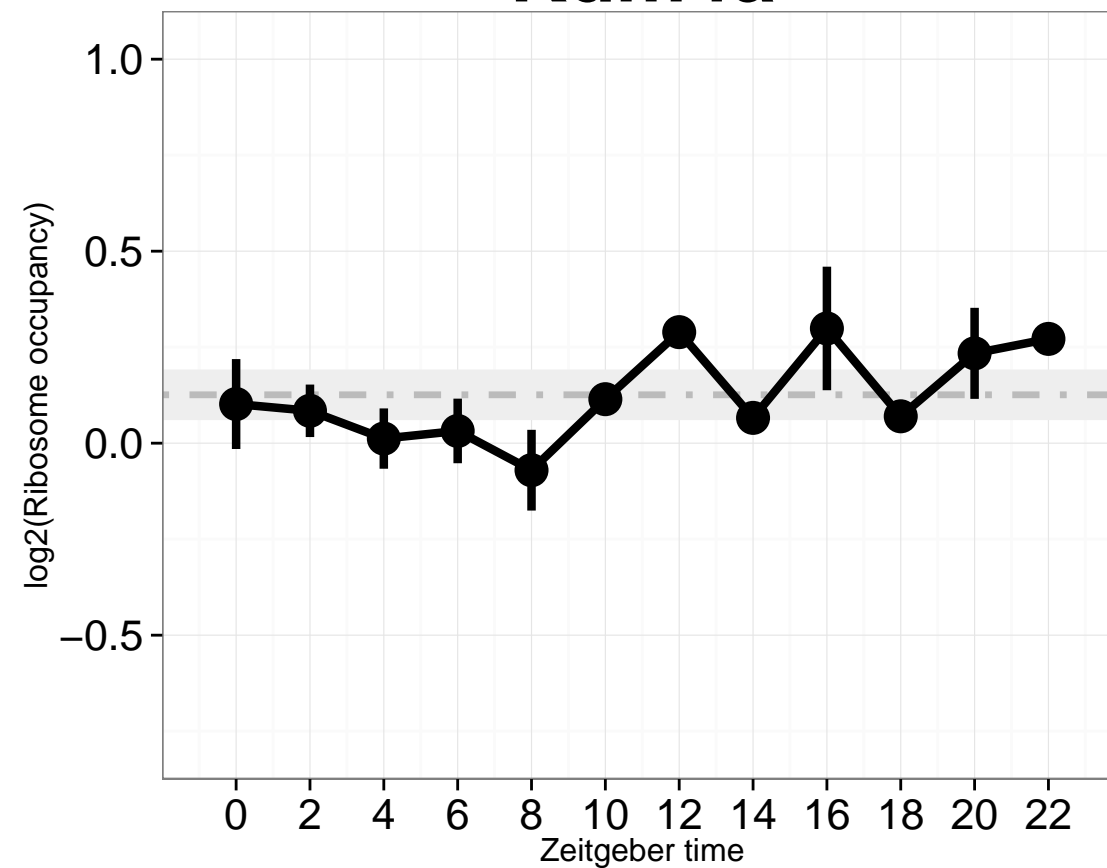

Supplement: Supplementary file 10359 [file 1]

## Tk2

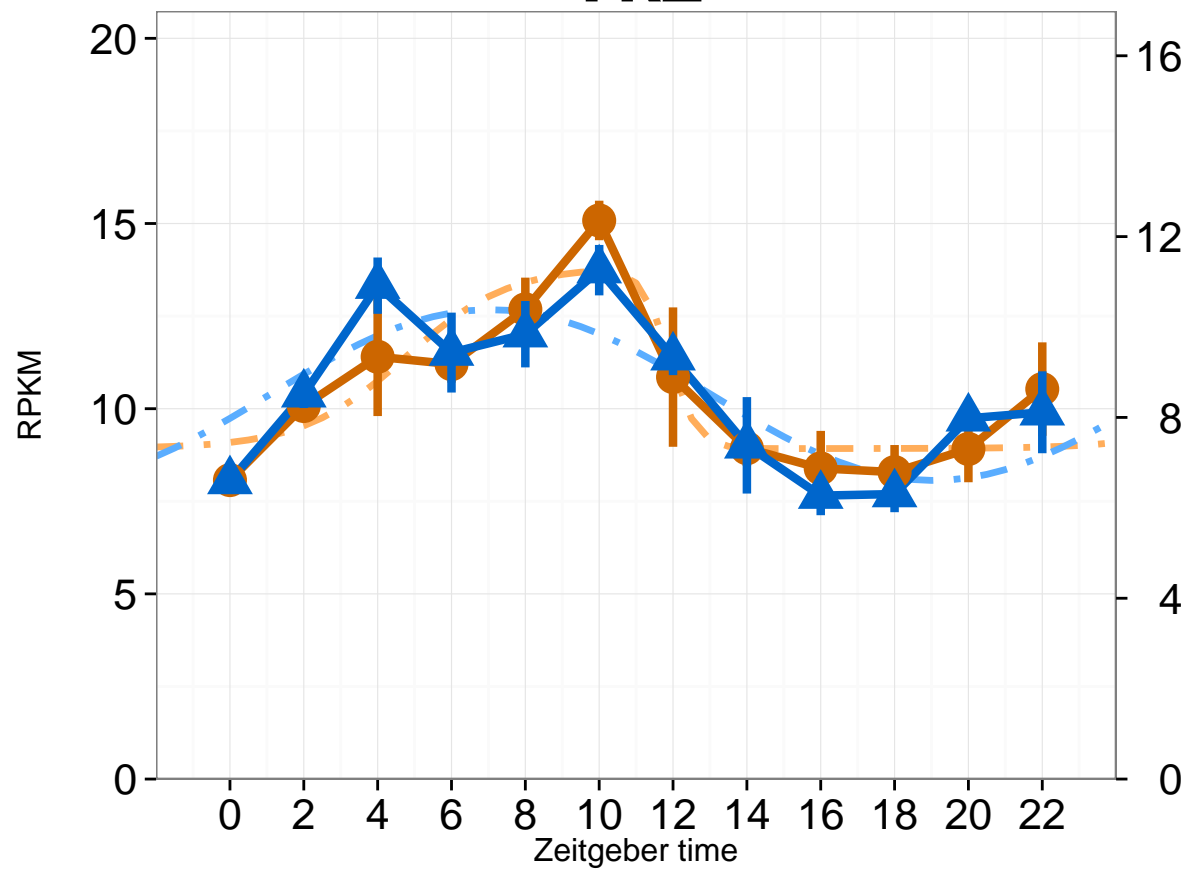

## Tk2

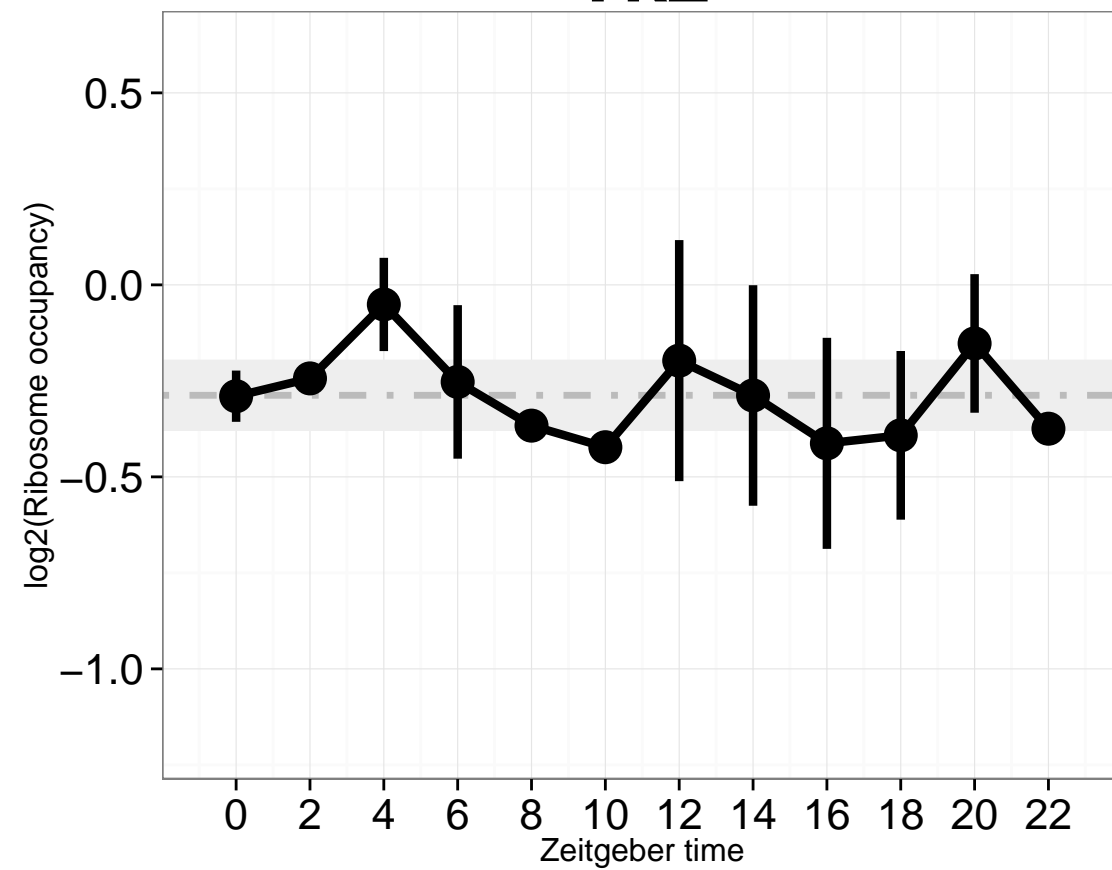

Supplement: Supplementary file 10360 [file 1]

## Ln<sub>x</sub>2

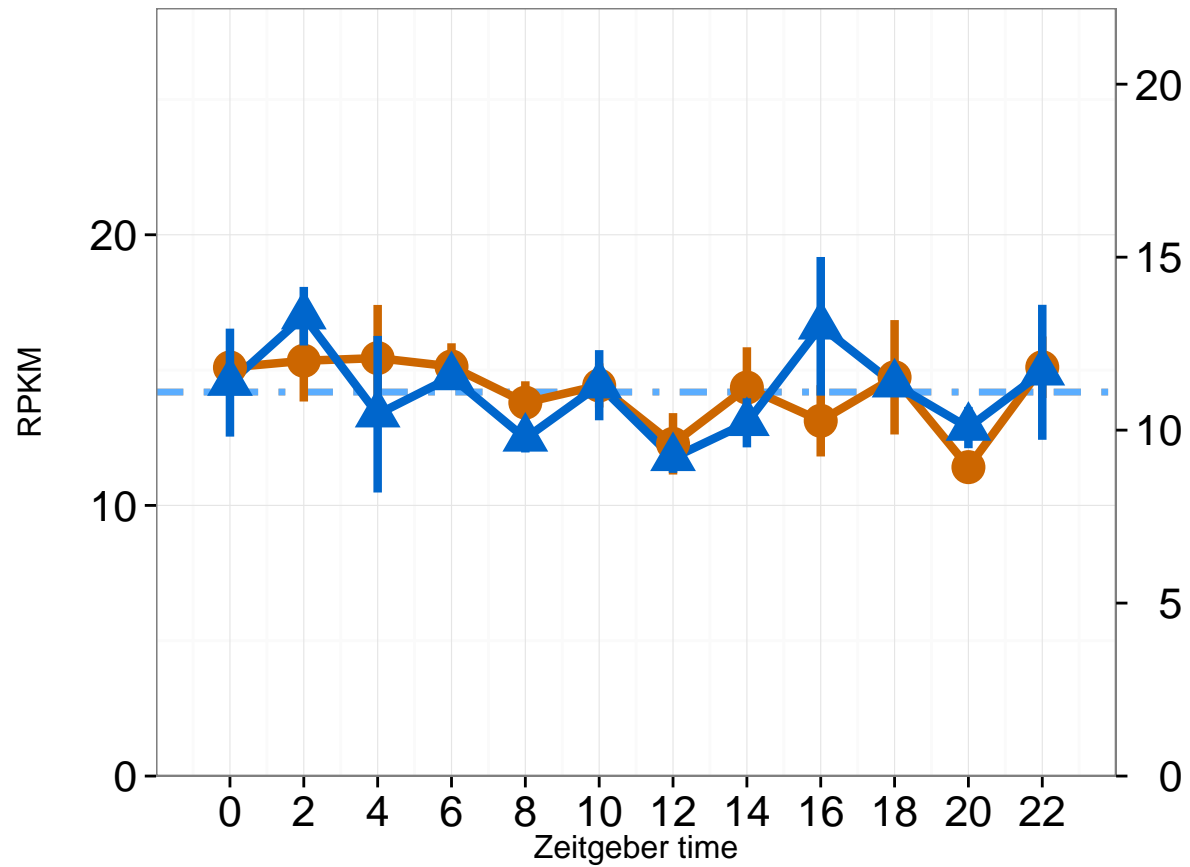

## Ln<sub>x</sub>2

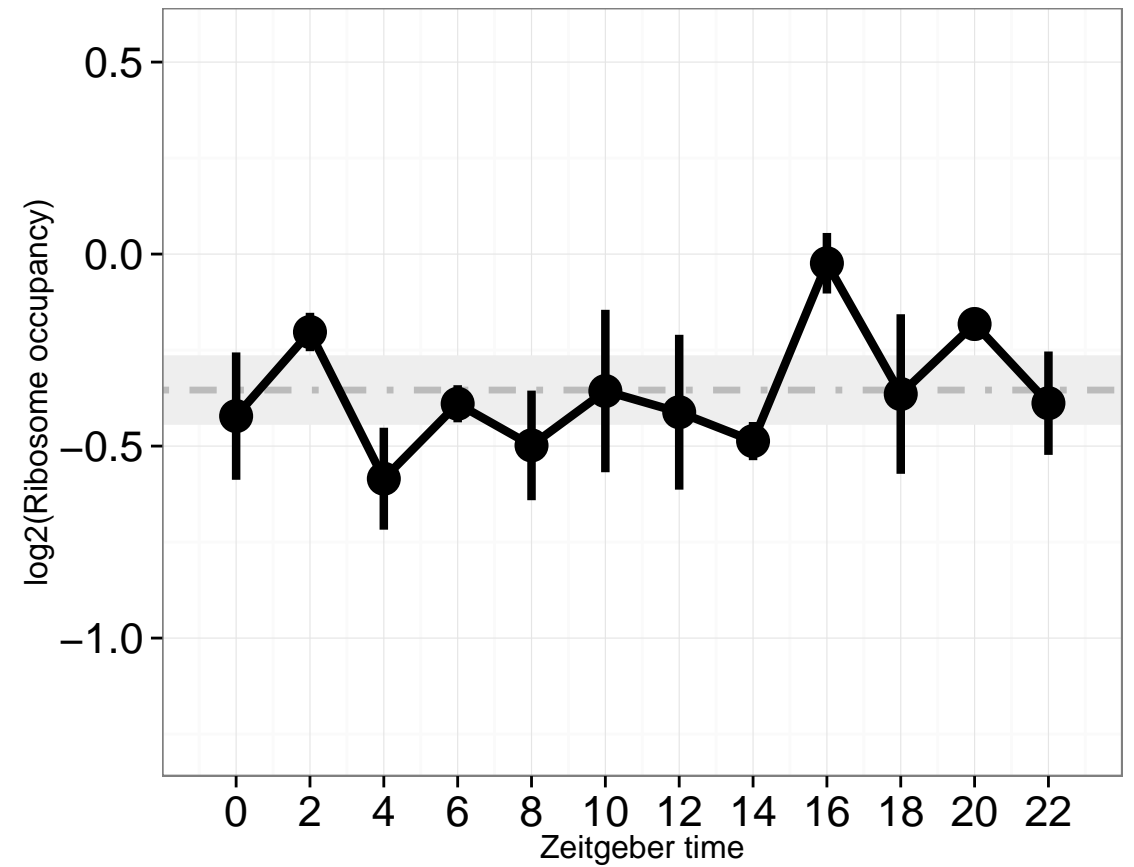

Supplement: Supplementary file 10362 [file 1]

## Vars2

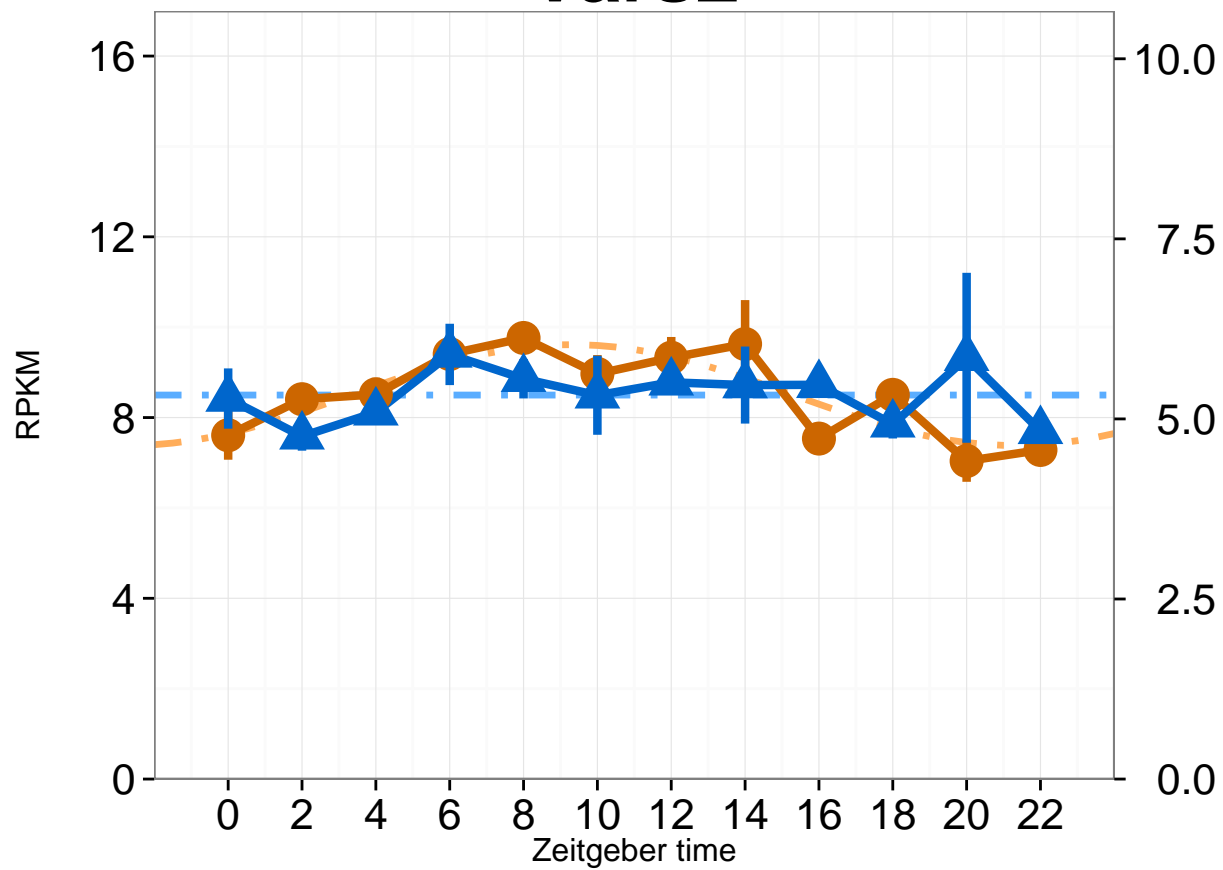

## Vars2

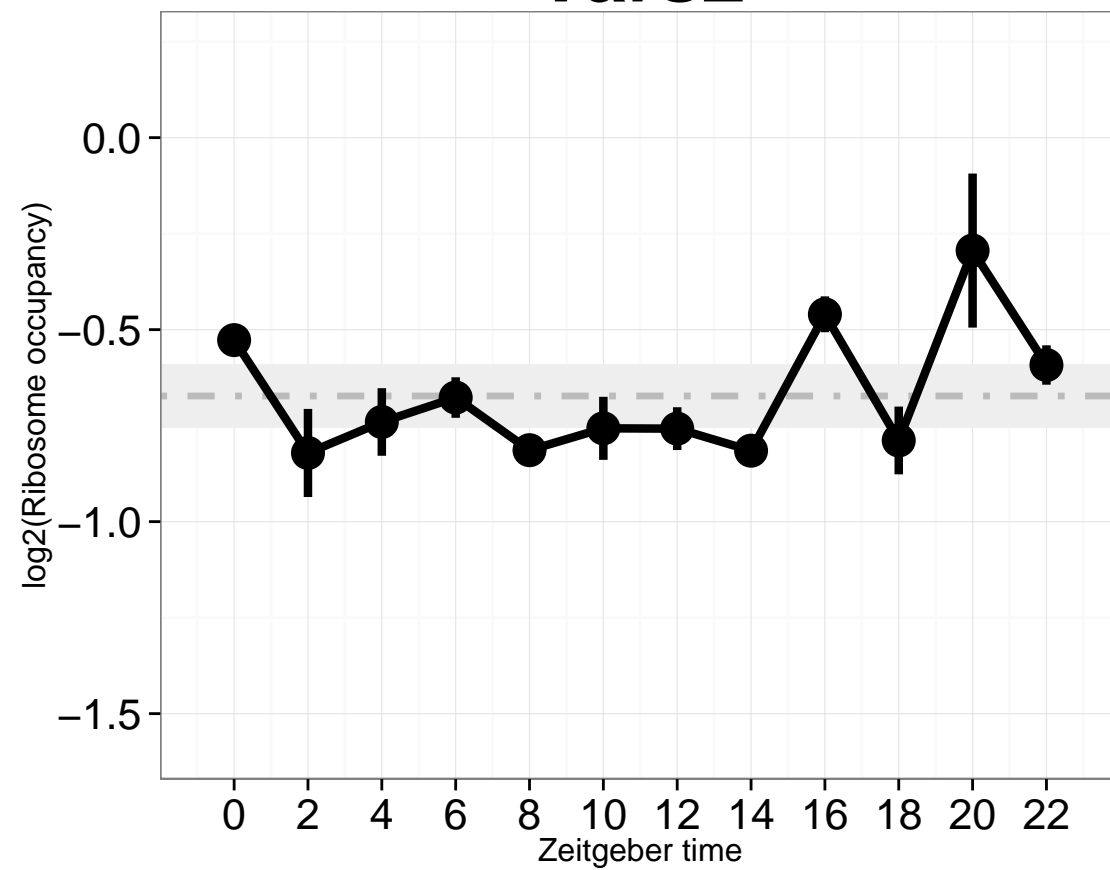

Supplement: Supplementary file 10363 [file 1]

# Adam12

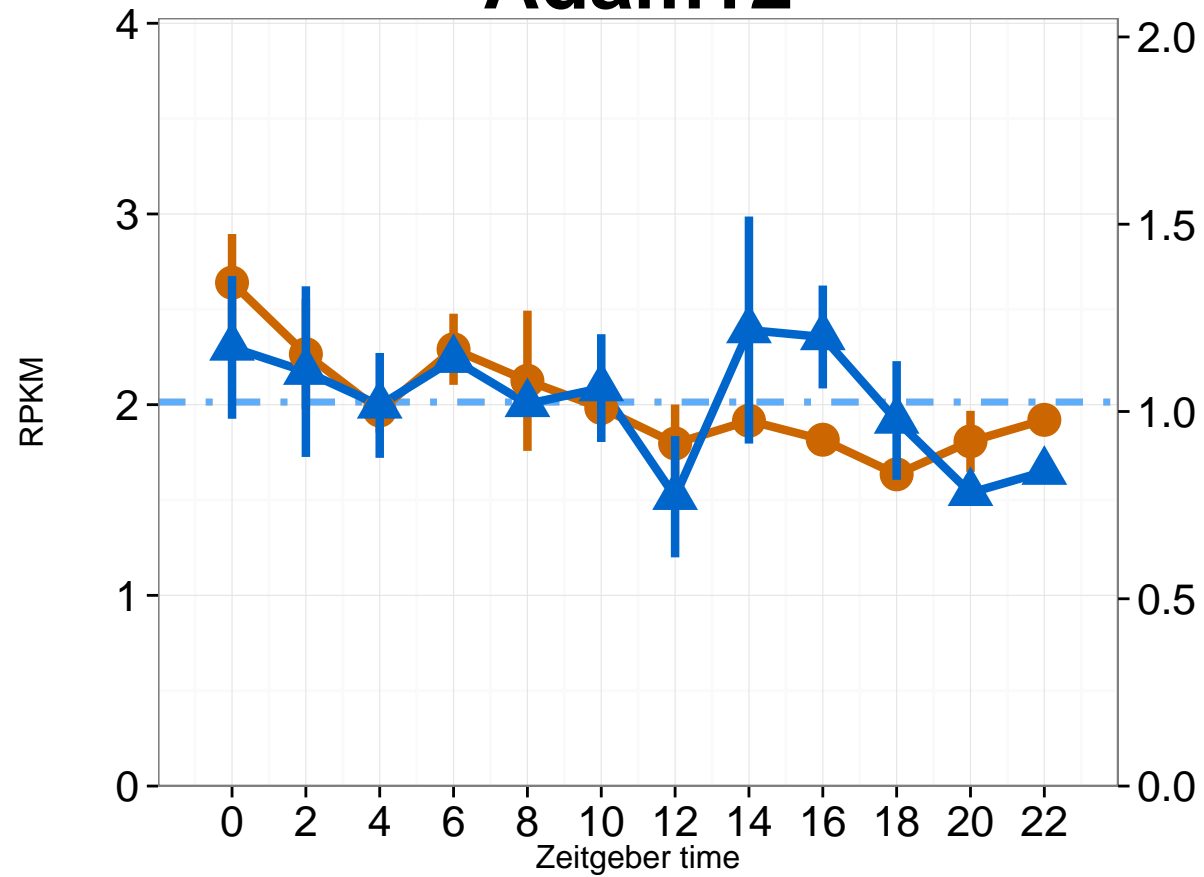

# Adam12

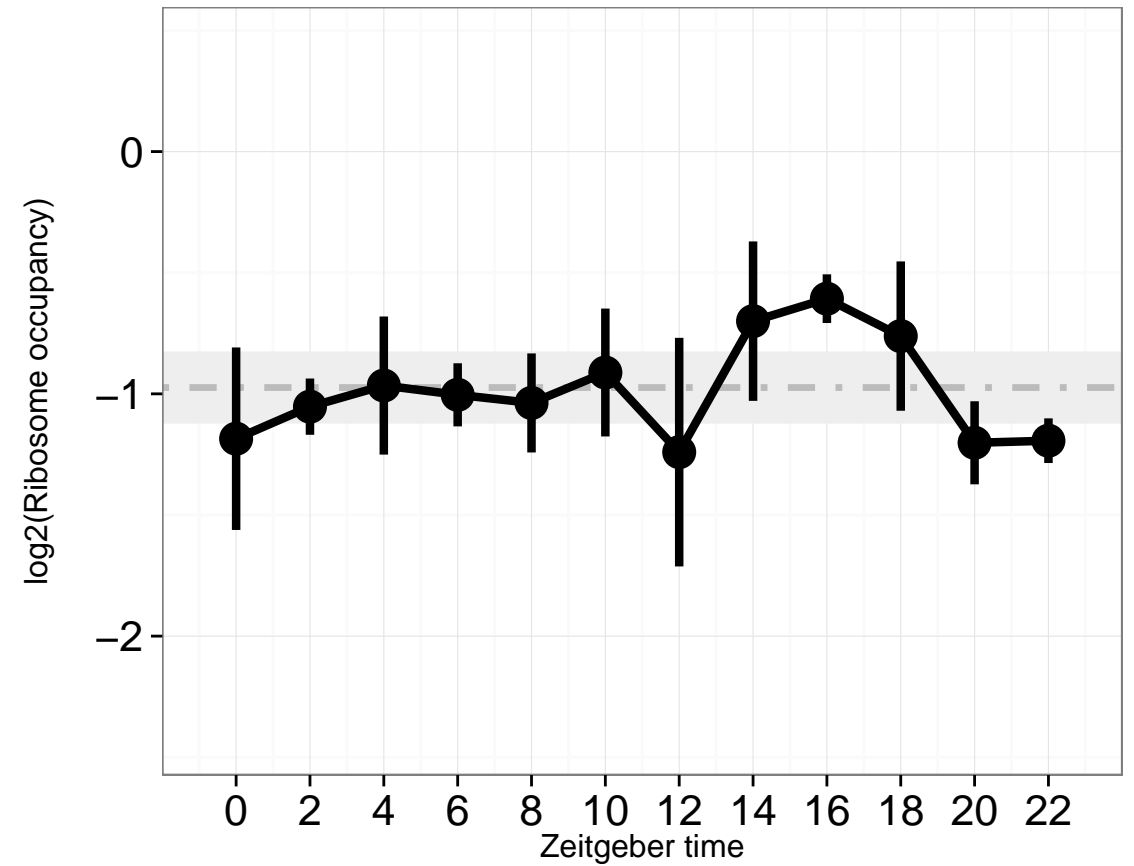

Supplement: Supplementary file 10364 [file 1]

## Abcc5

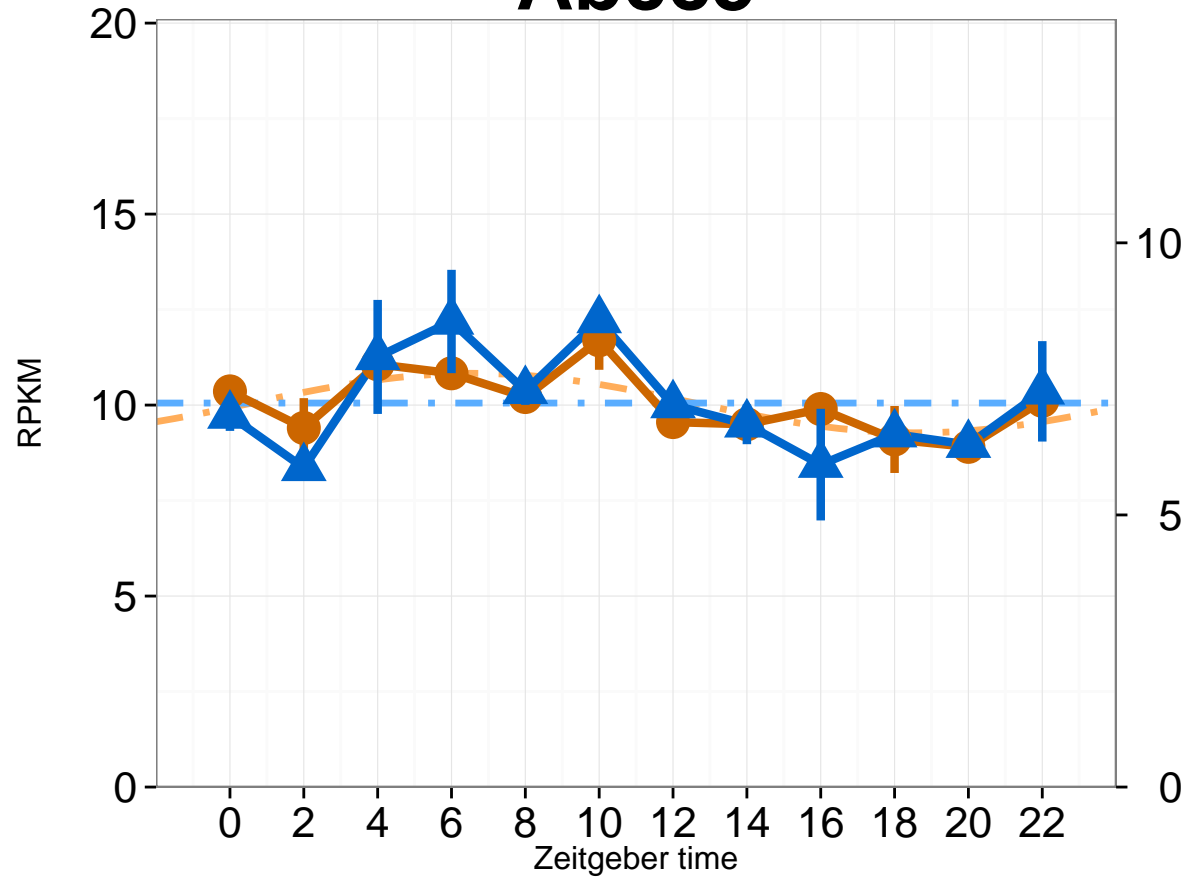

## Abcc5

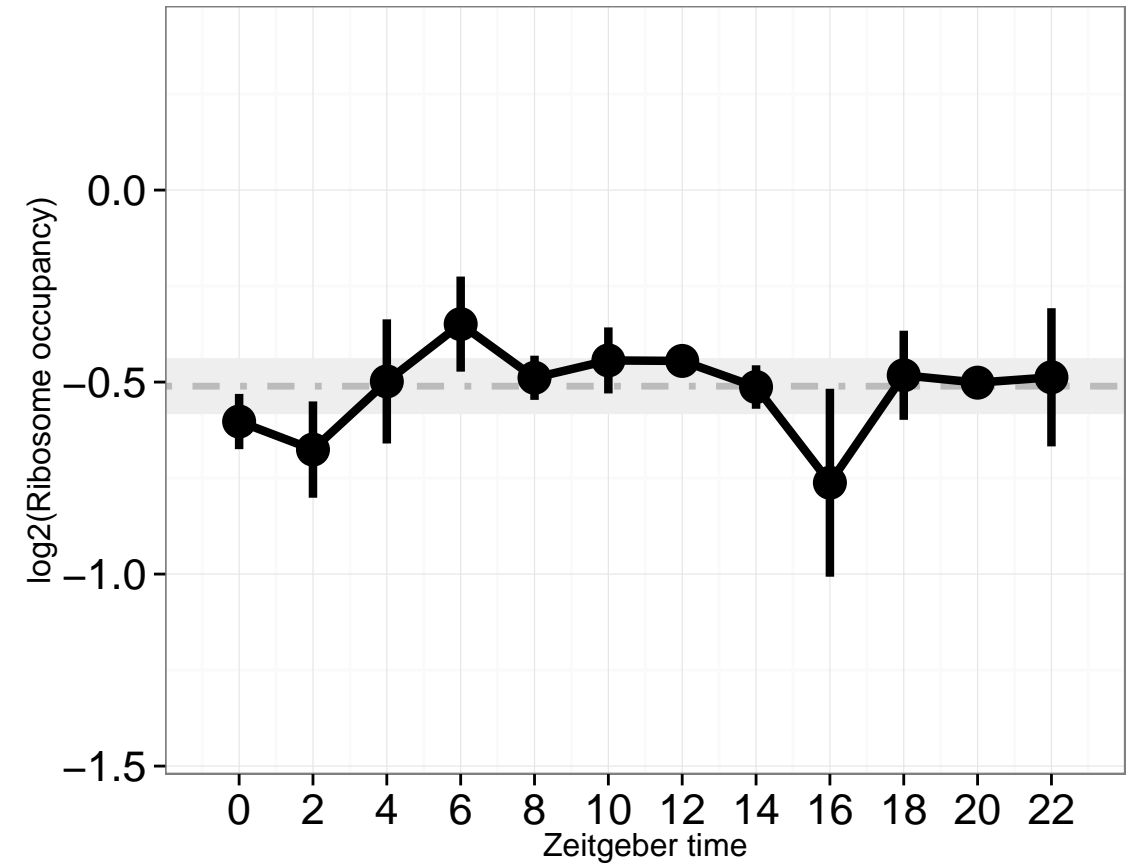

Supplement: Supplementary file 10365 [file 1]

# Pick1

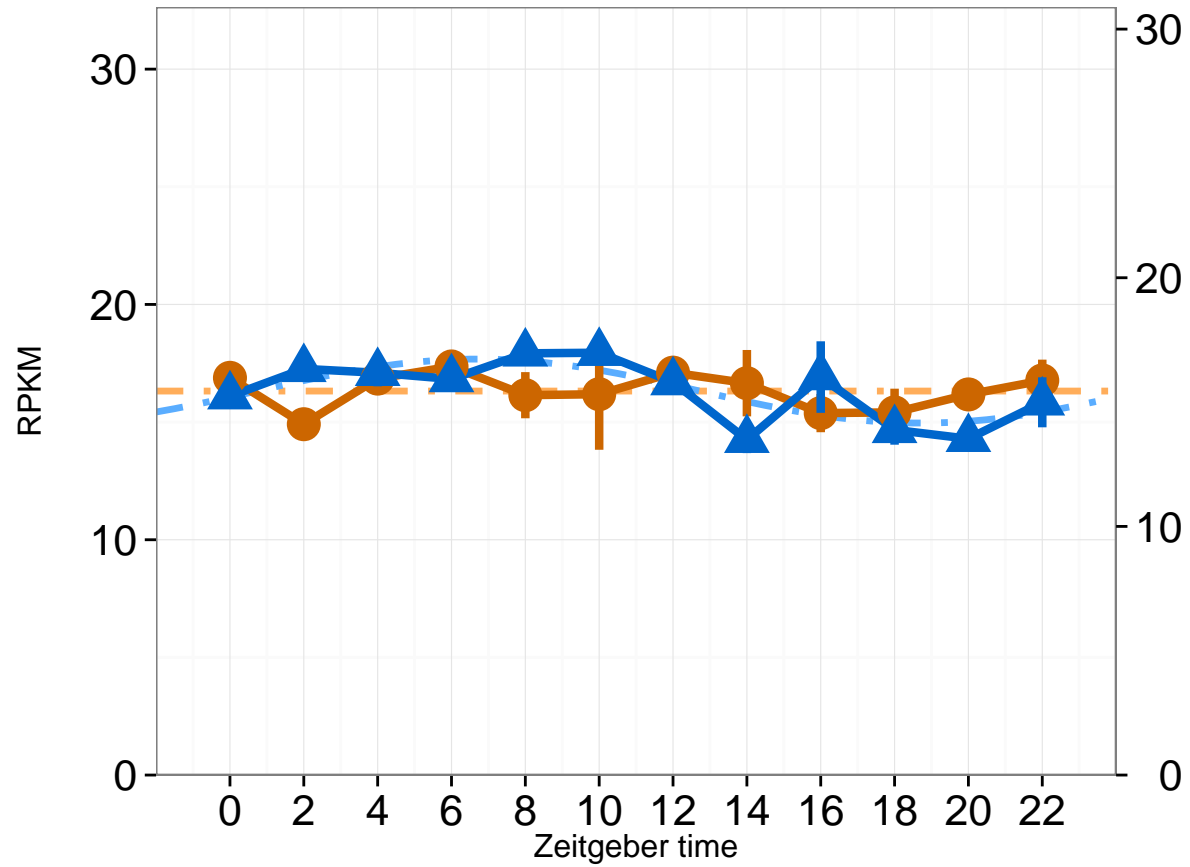

# Pick1

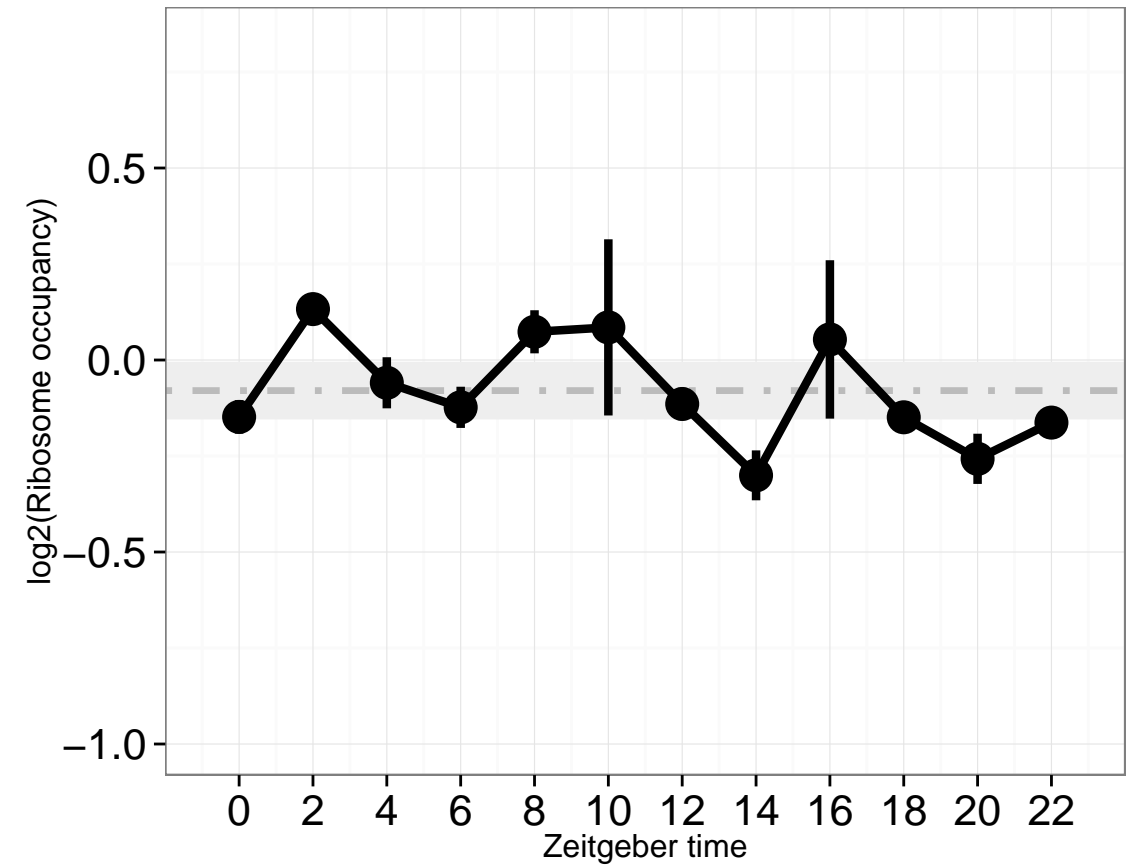

Supplement: Supplementary file 10366 [file 1]

## Znfx1

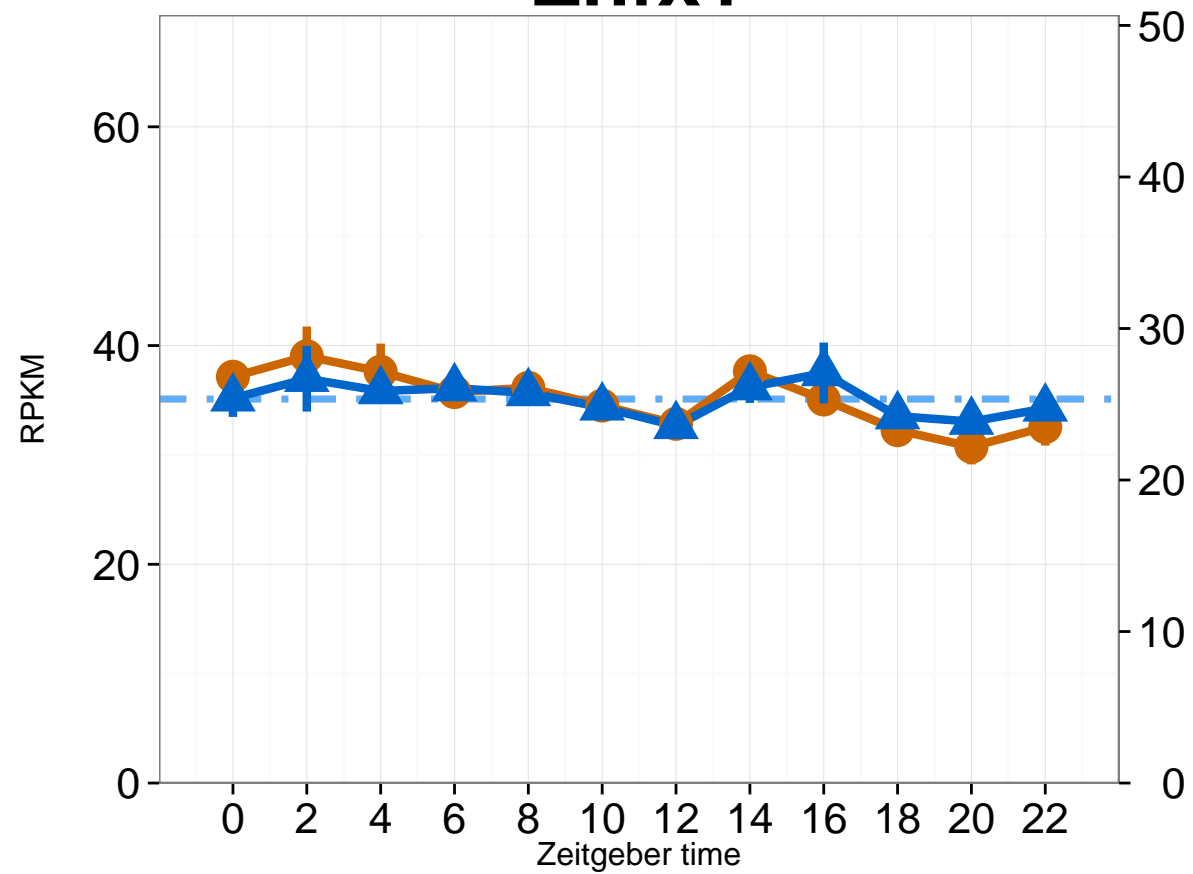

## Znfx1

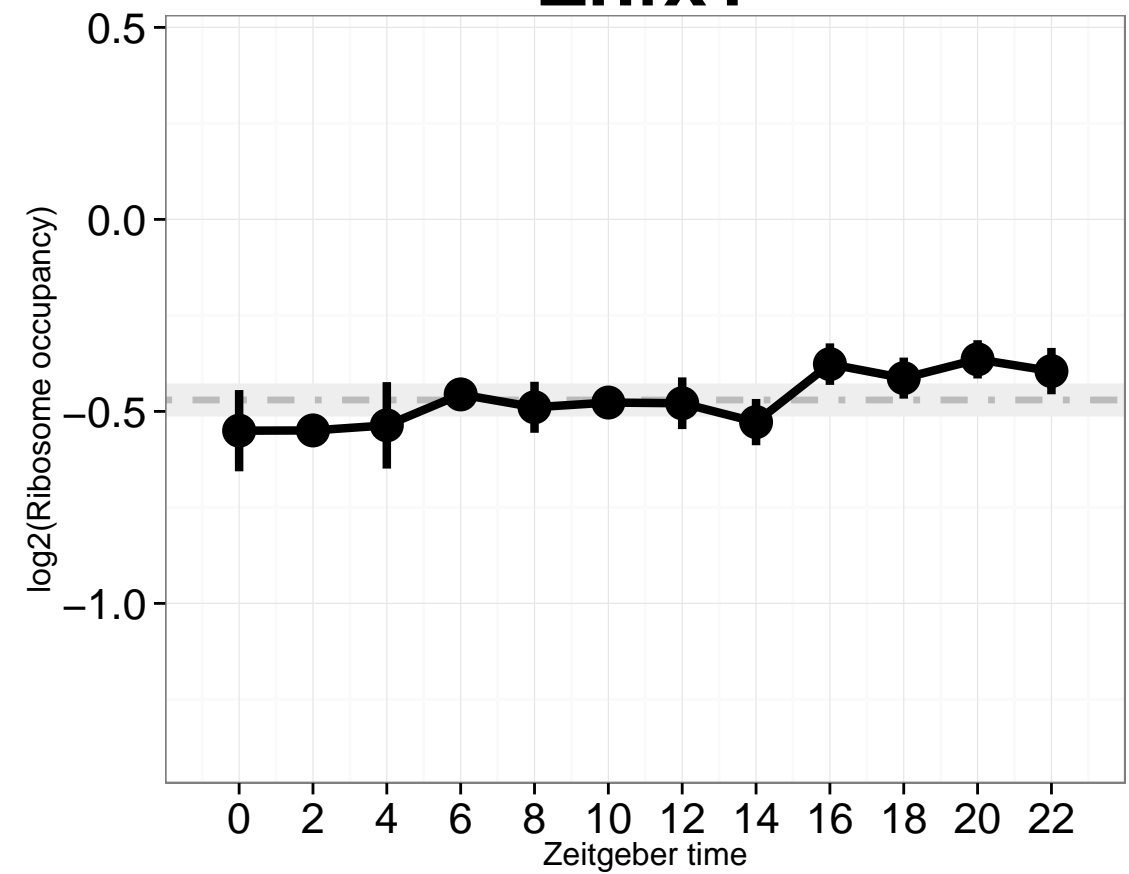

Supplement: Supplementary file 10367 [file 1]

## Bckdk

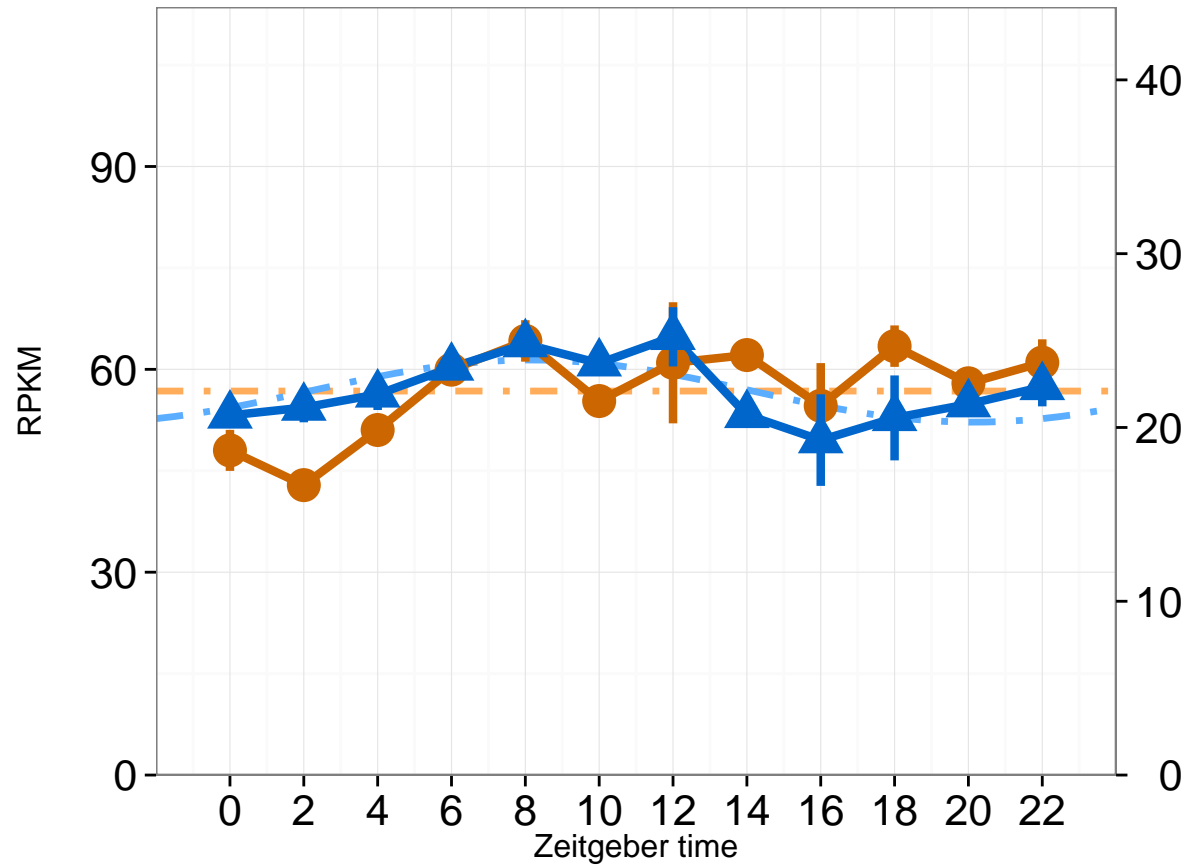

## Bckdk

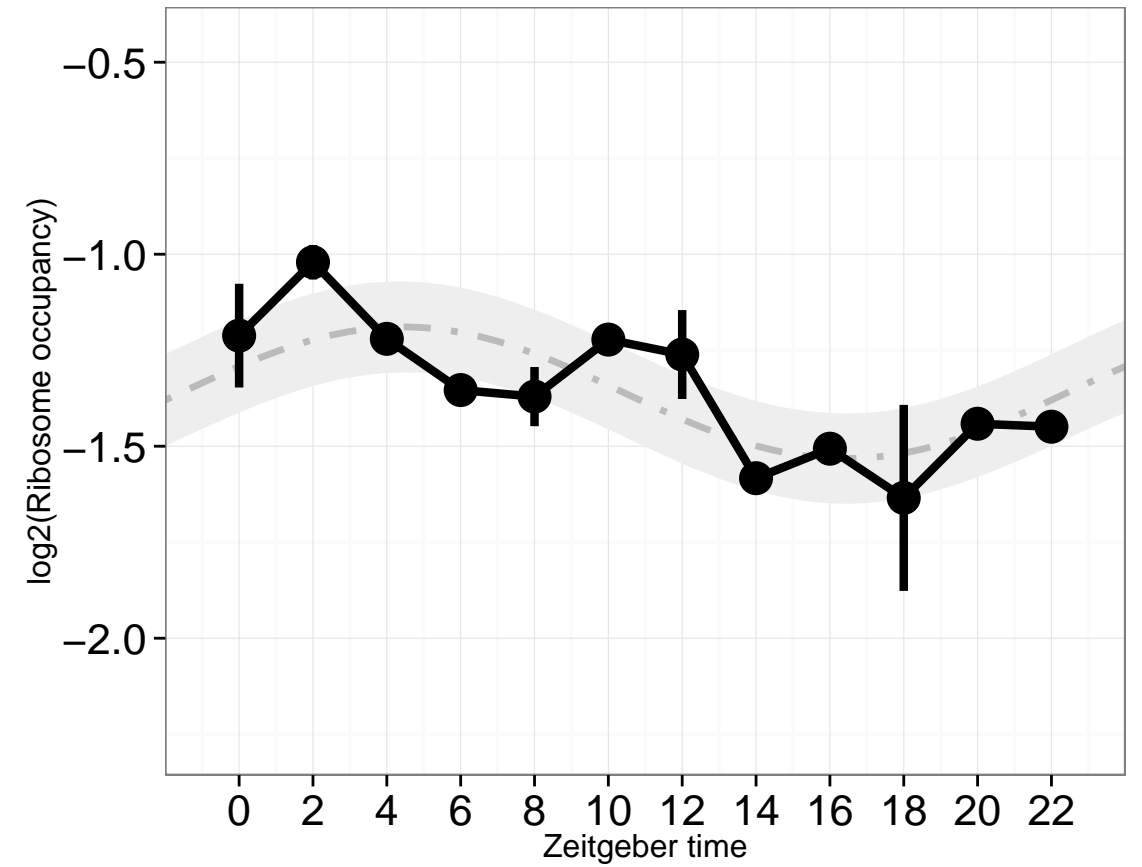

Supplement: Supplementary file 10368 [file 1]

# Ptpru

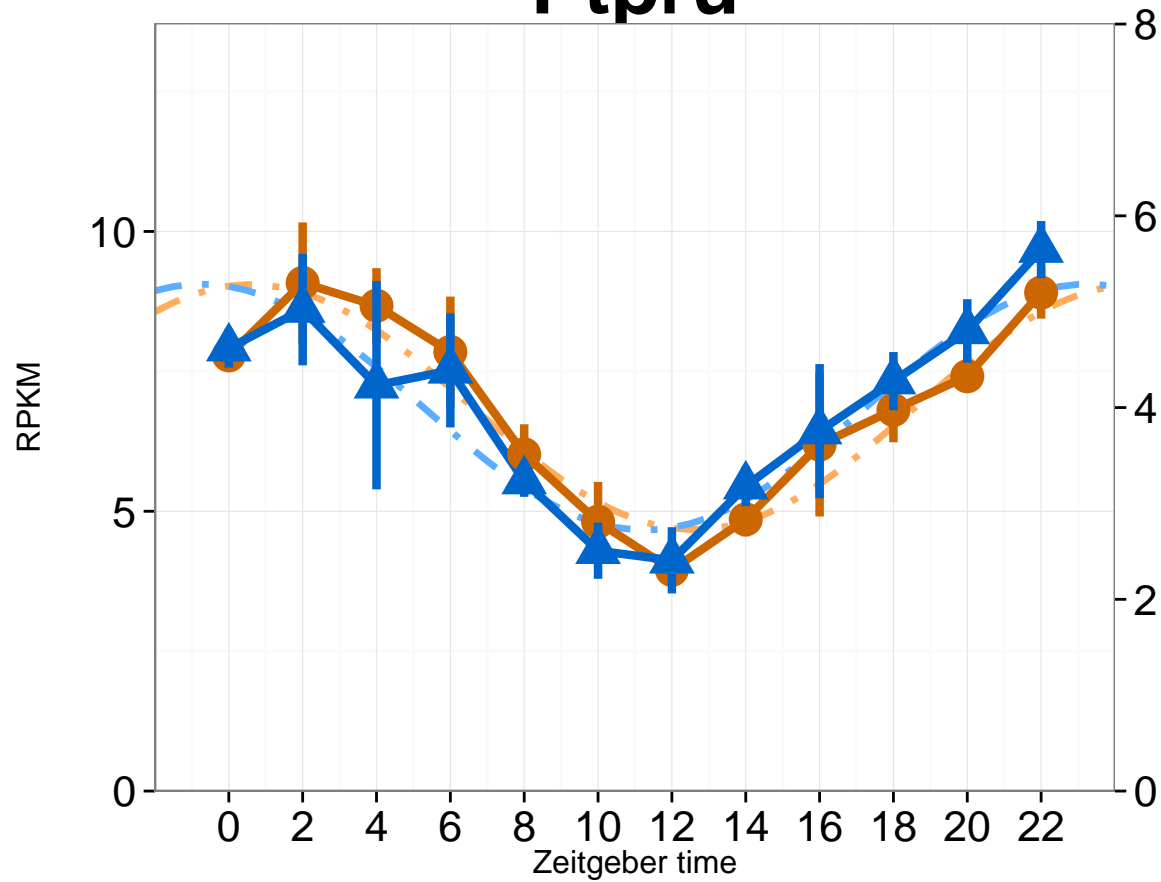

# Ptpru

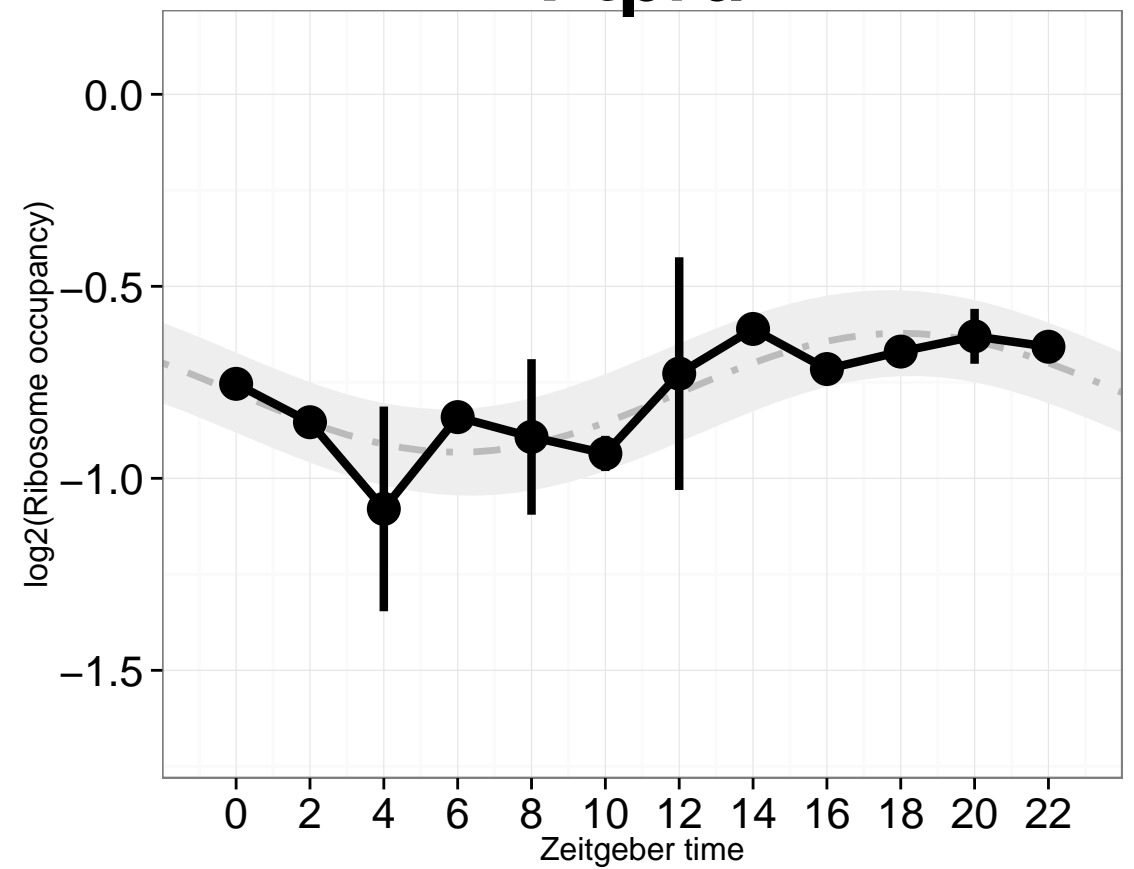

Supplement: Supplementary file 10369 [file 1]

# Tnfsf12

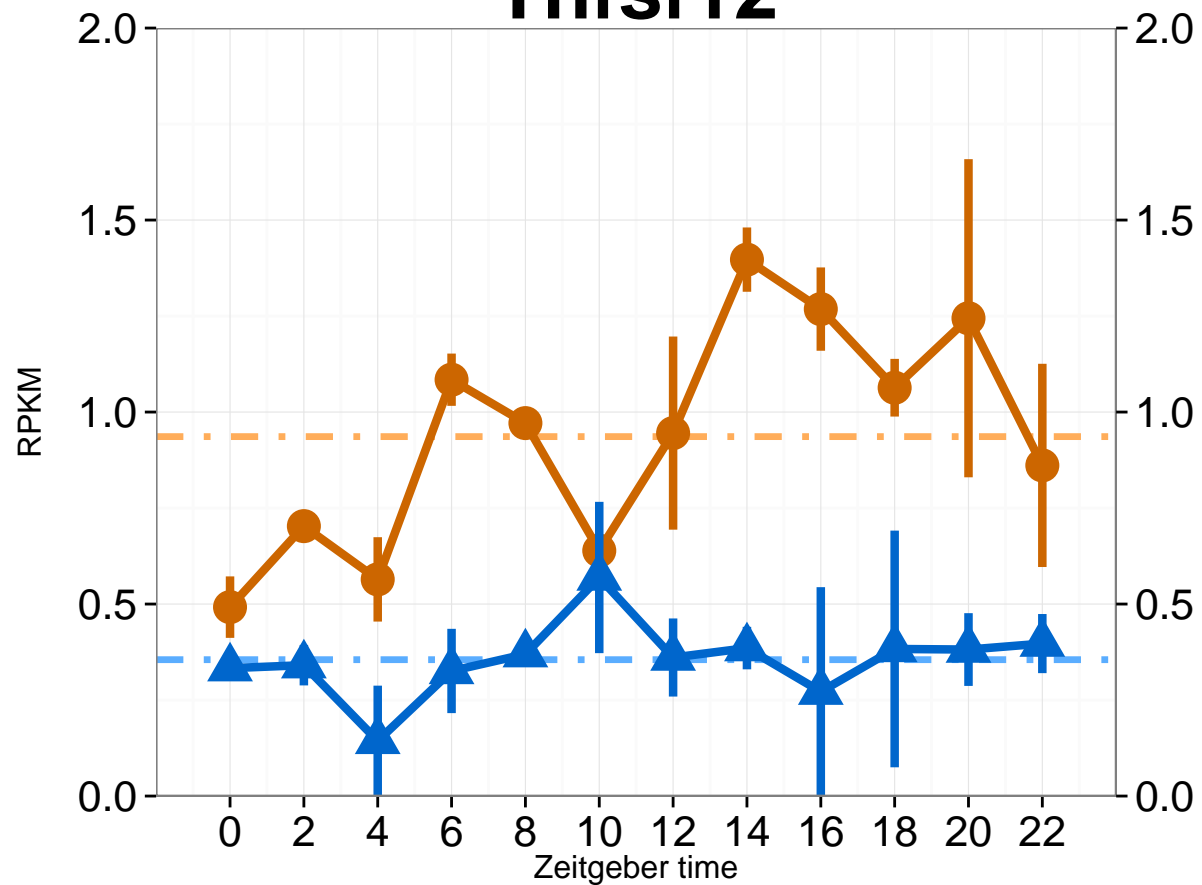

# Tnfsf12

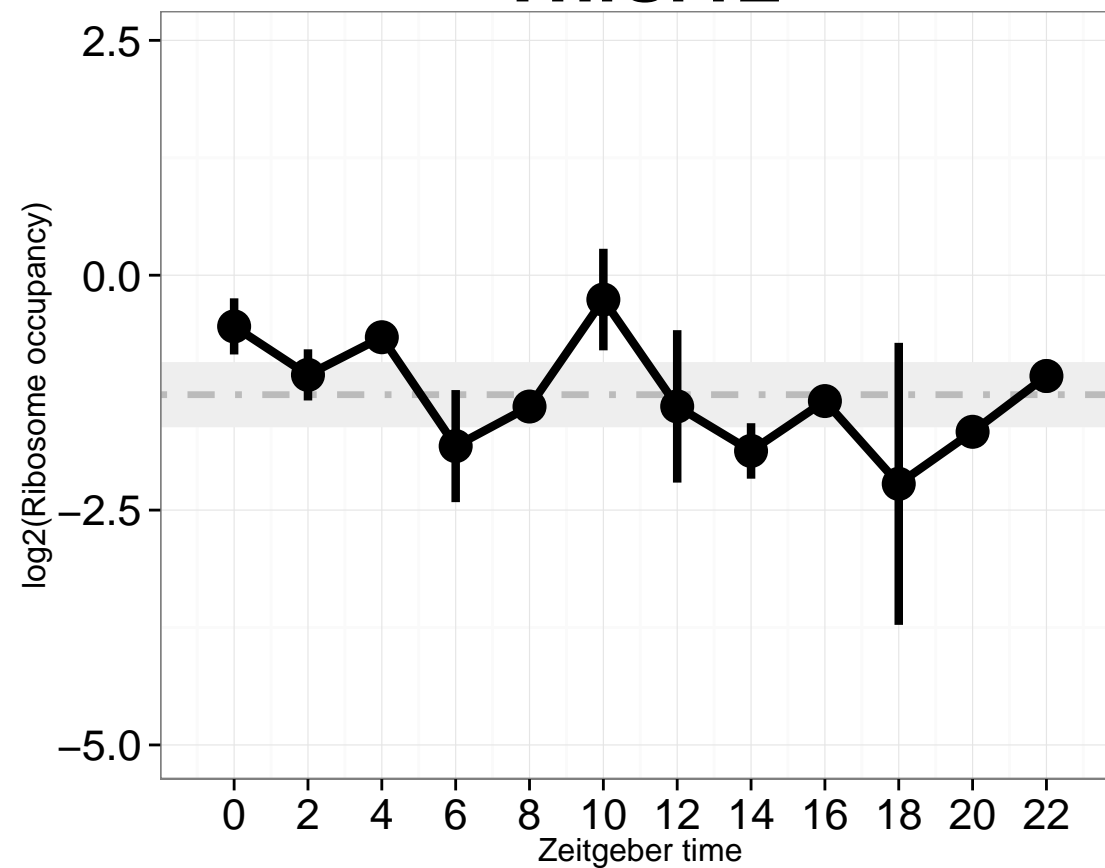

Supplement: Supplementary file 10370 [file 1]

# St13

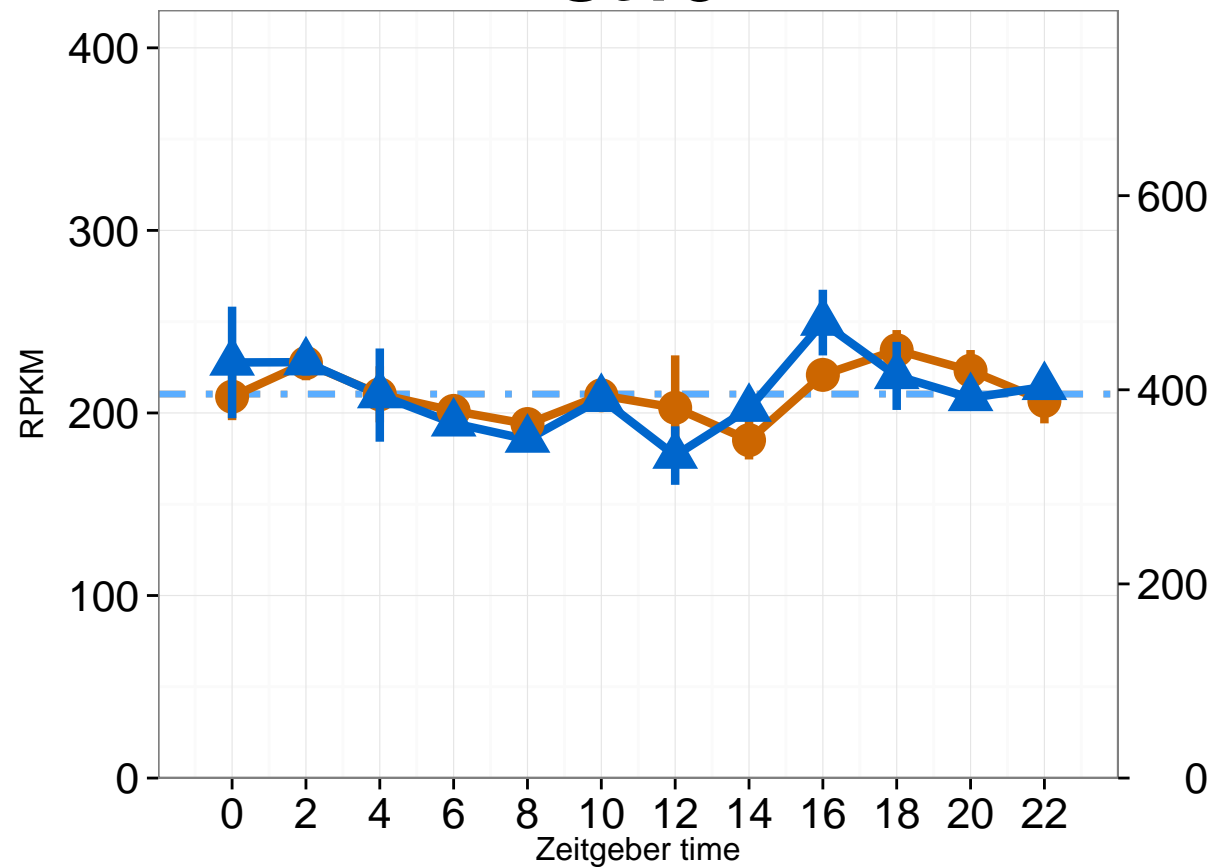

# St13

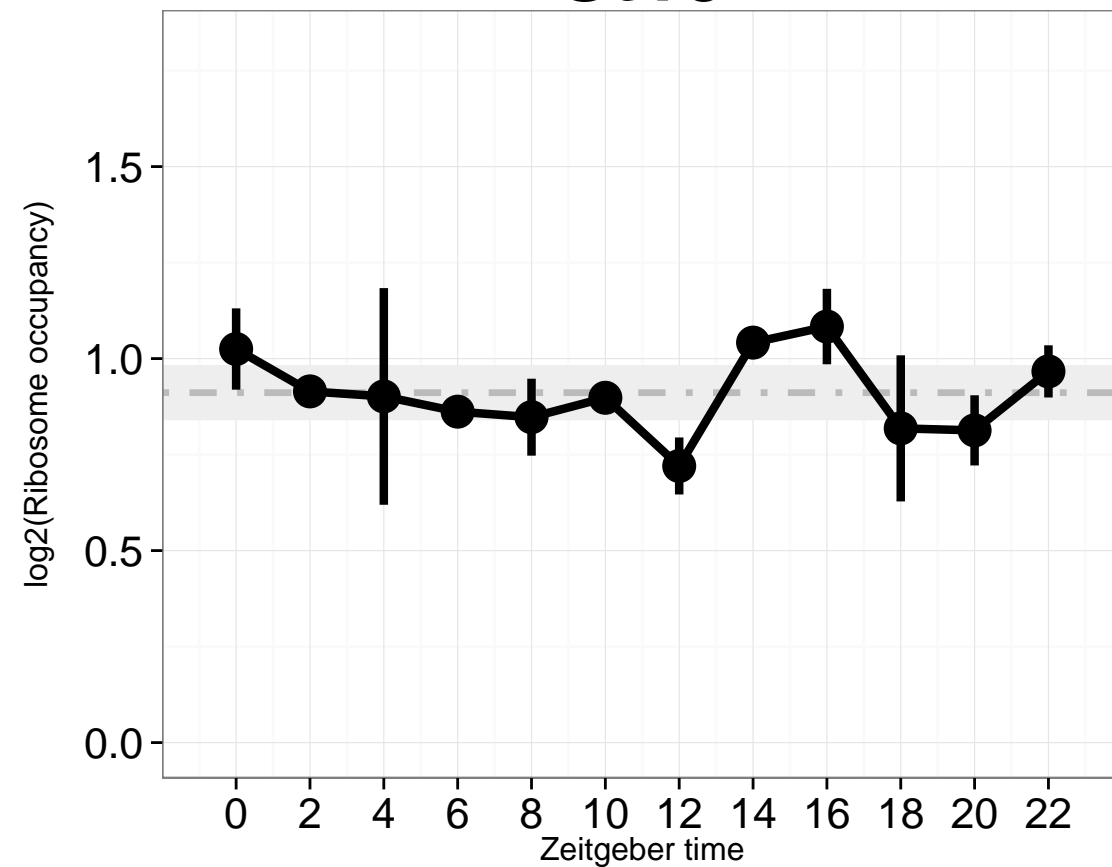

Supplement: Supplementary file 10371 [file 1]

# Slc15a4

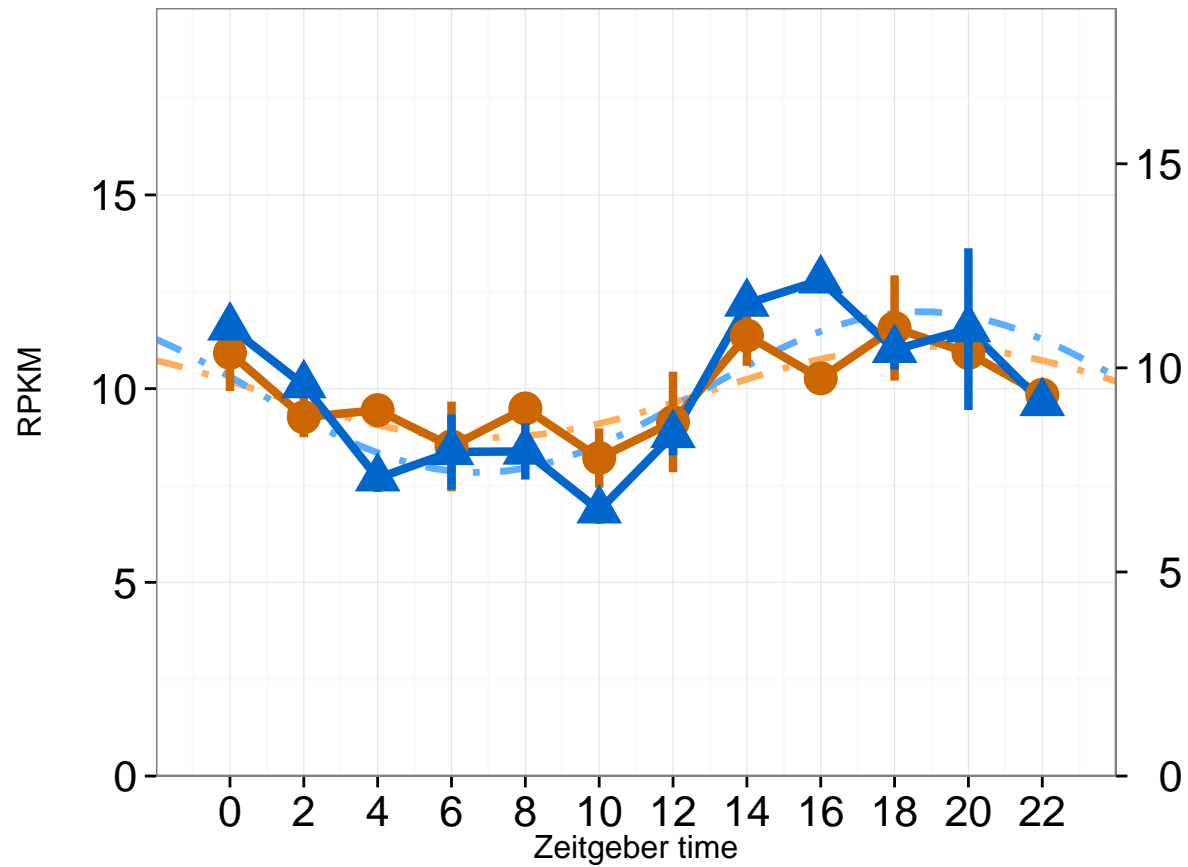

# Slc15a4

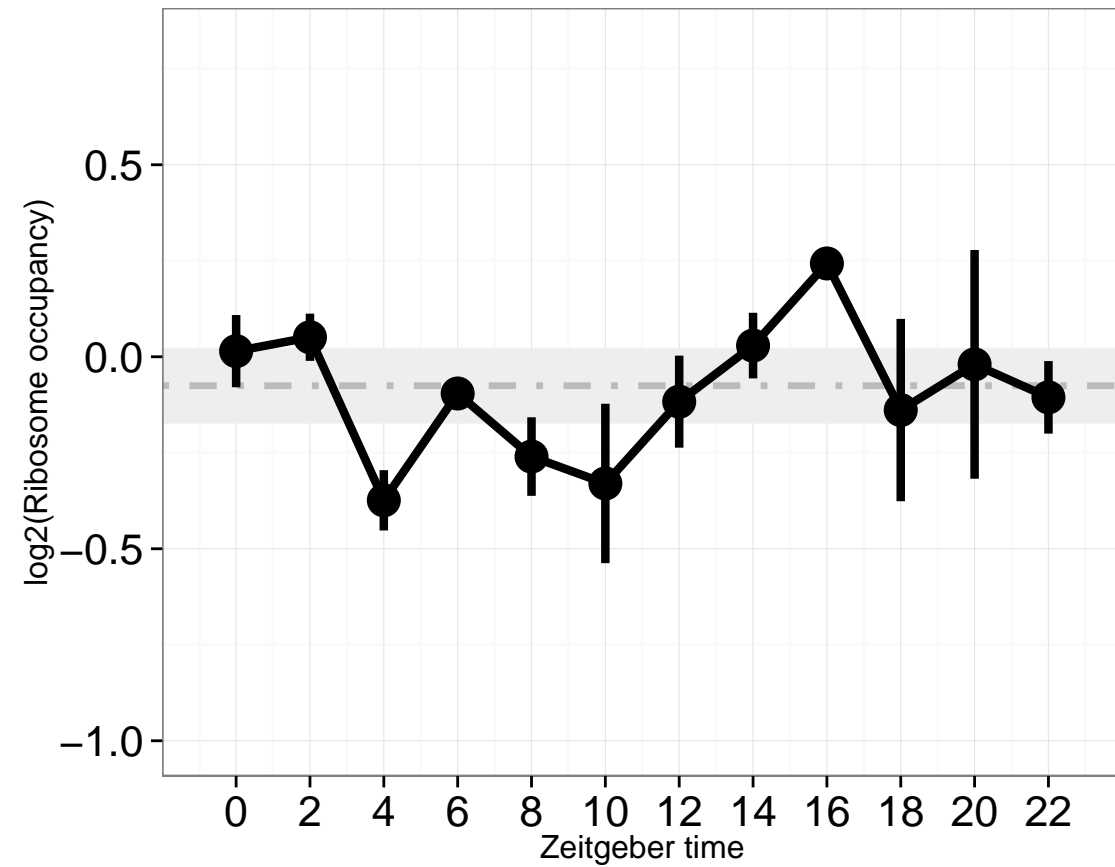

Supplement: Supplementary file 10372 [file 1]

## Alx1

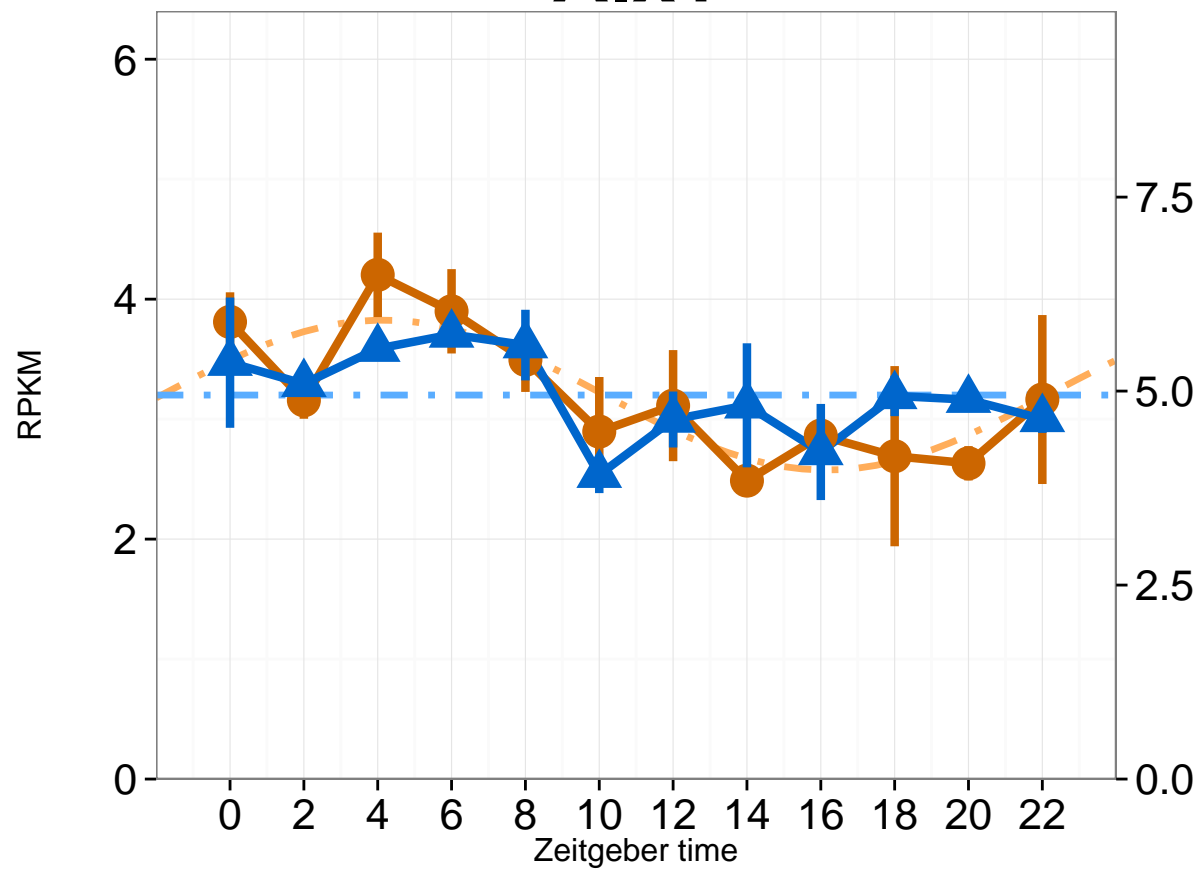

## Alx1

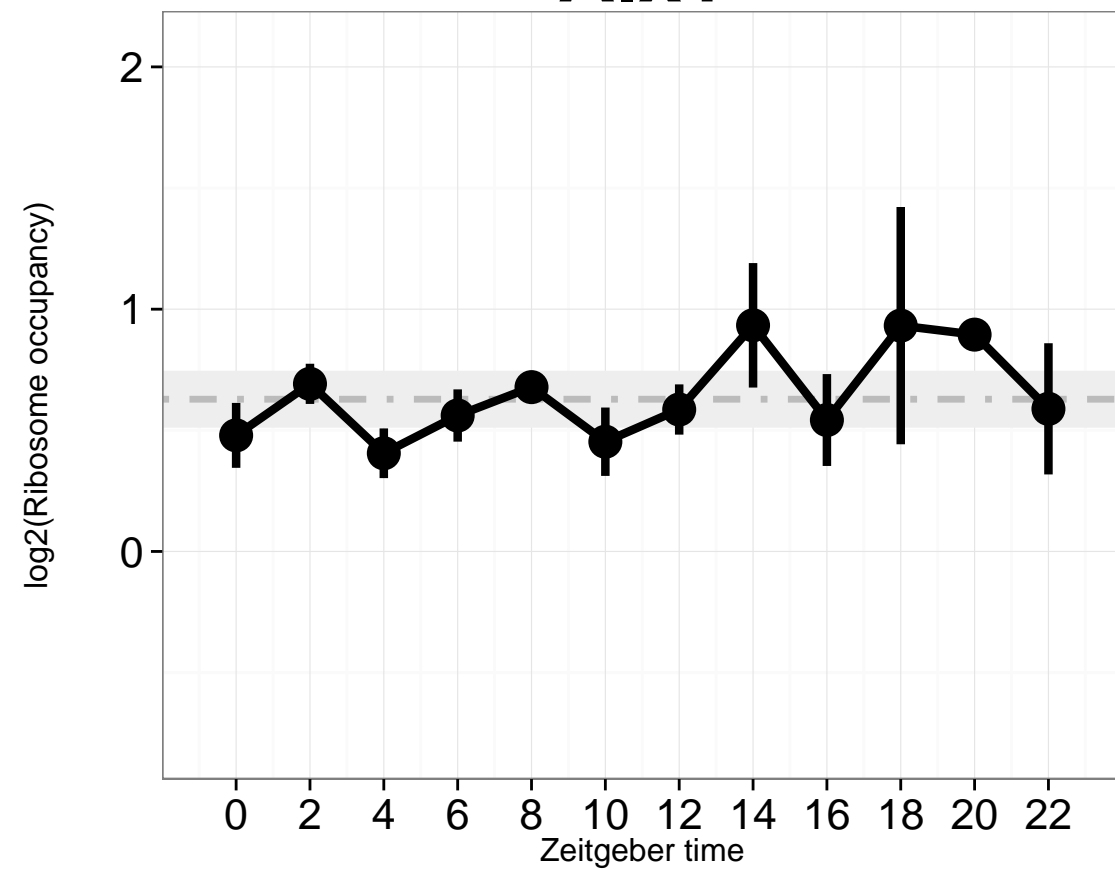

Supplement: Supplementary file 10373 [file 1]

# Irf2bpl

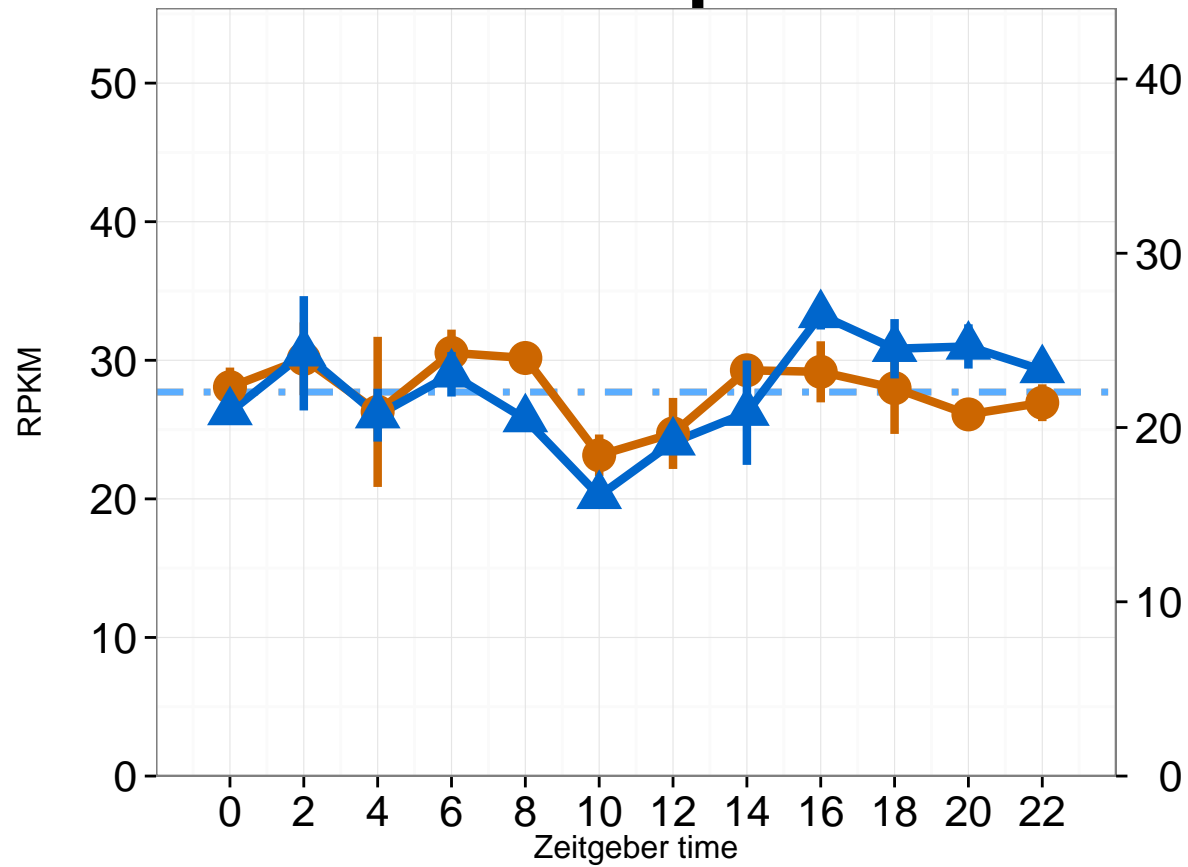

# Irf2bpl

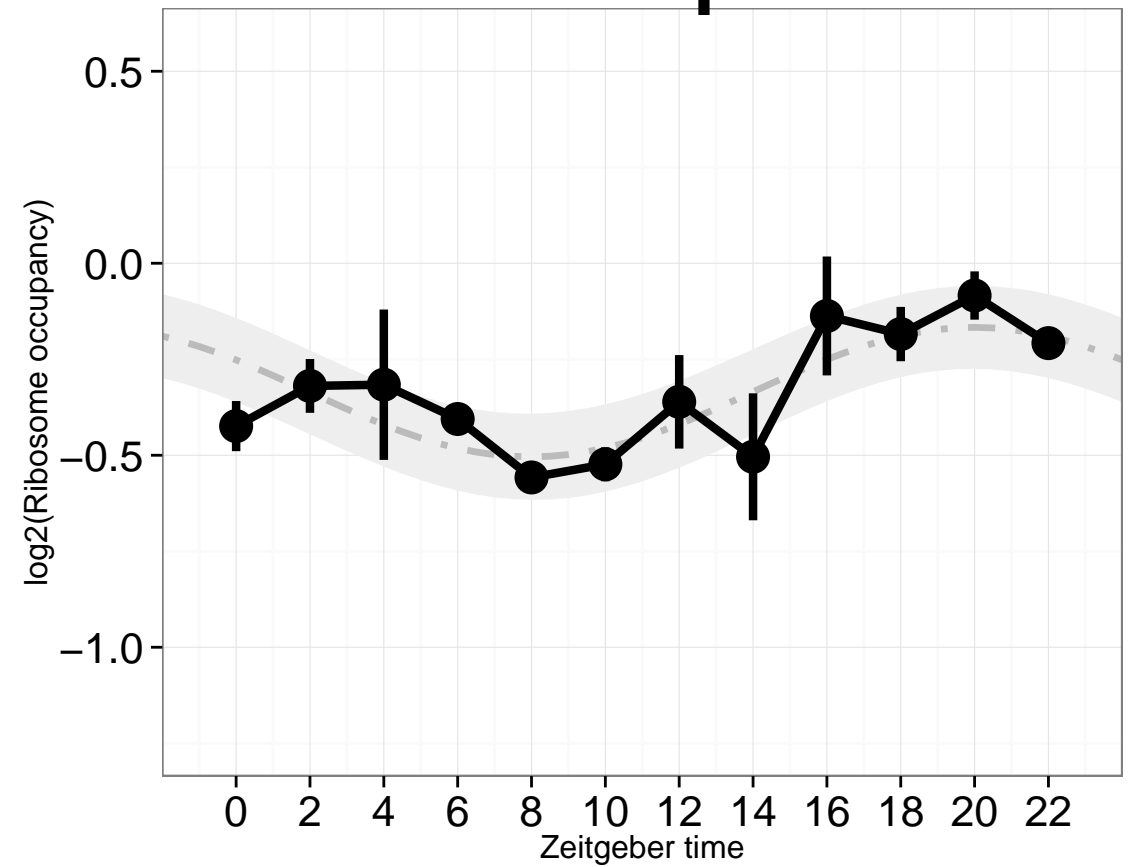

Supplement: Supplementary file 10374 [file 1]

## Jph2

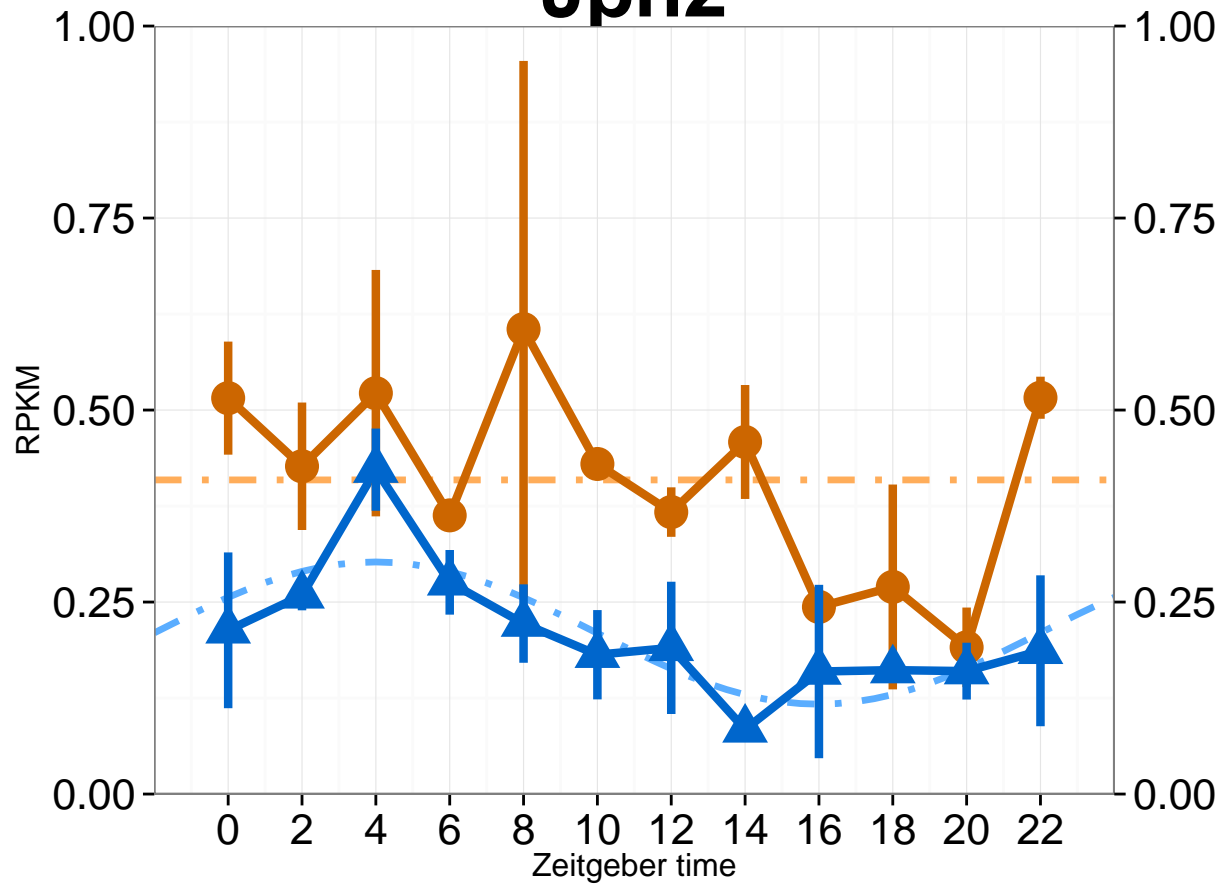

## Jph2

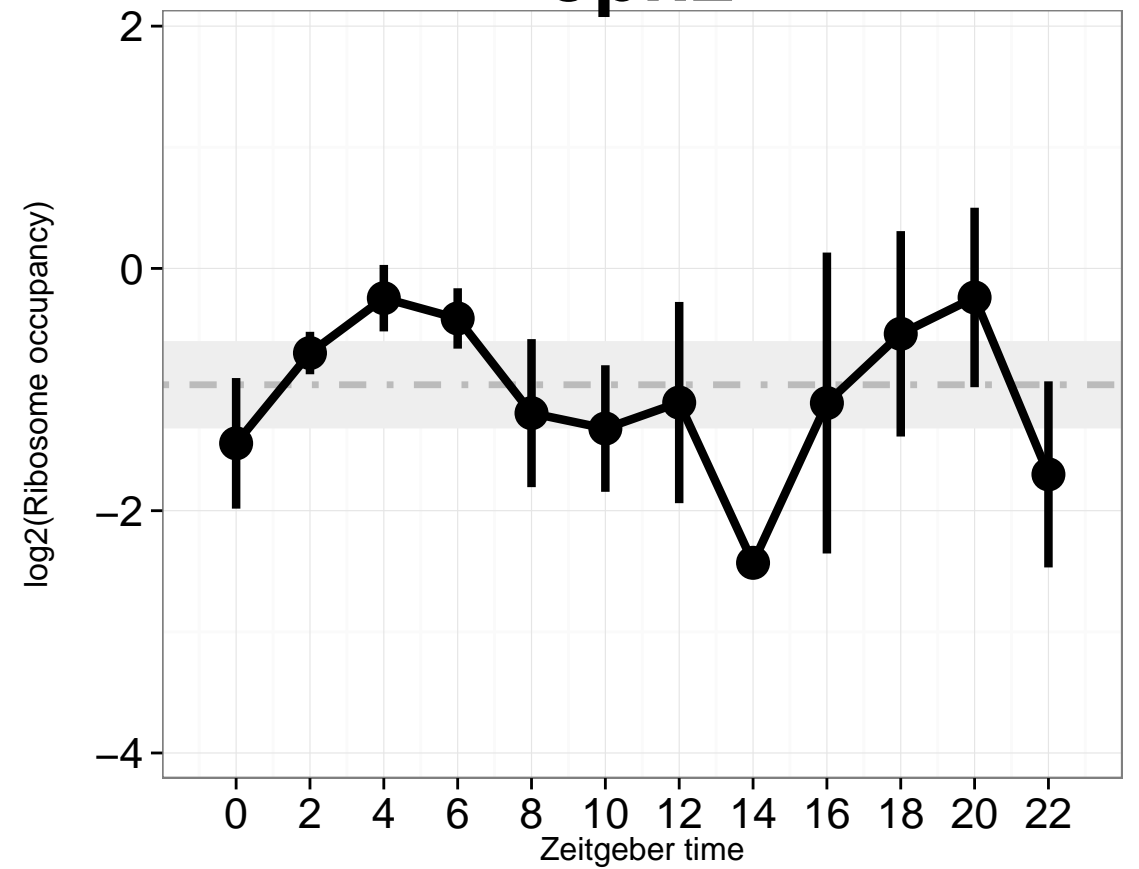

Supplement: Supplementary file 10375 [file 1]

# Zbtb17

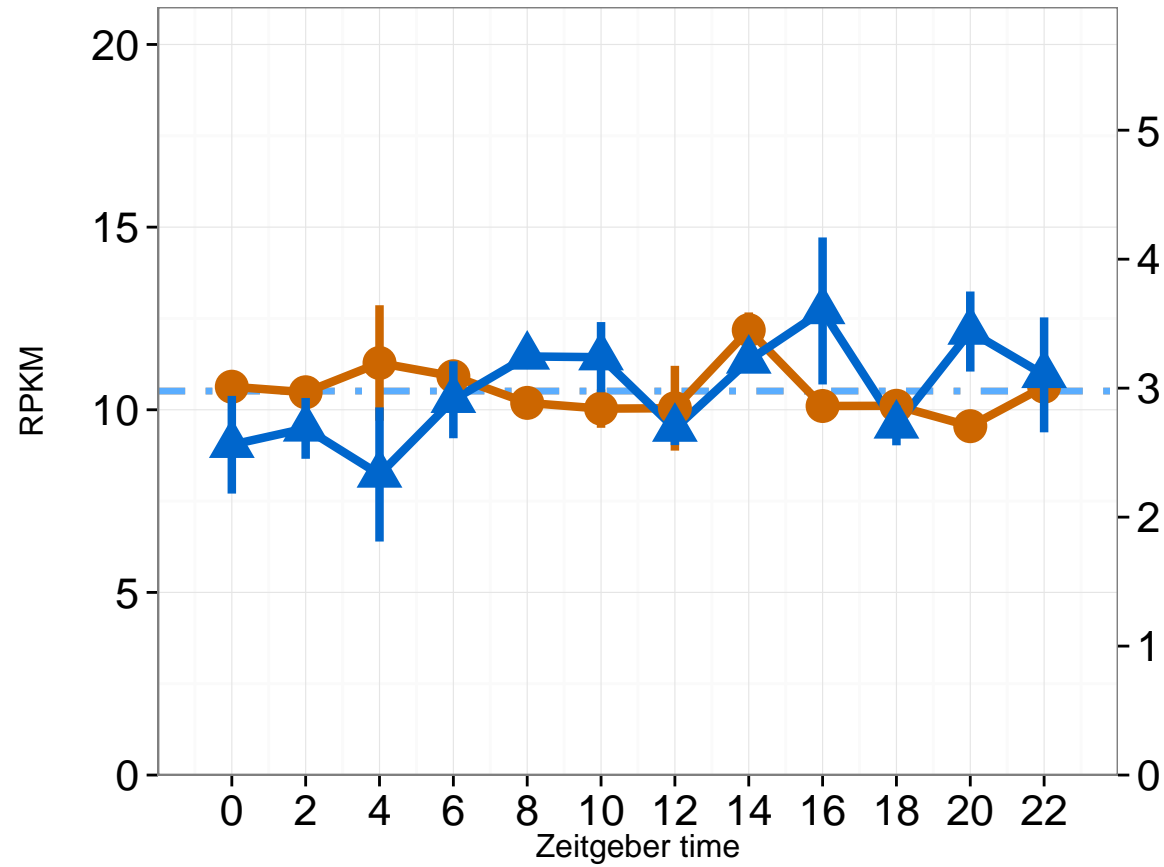

# Zbtb17

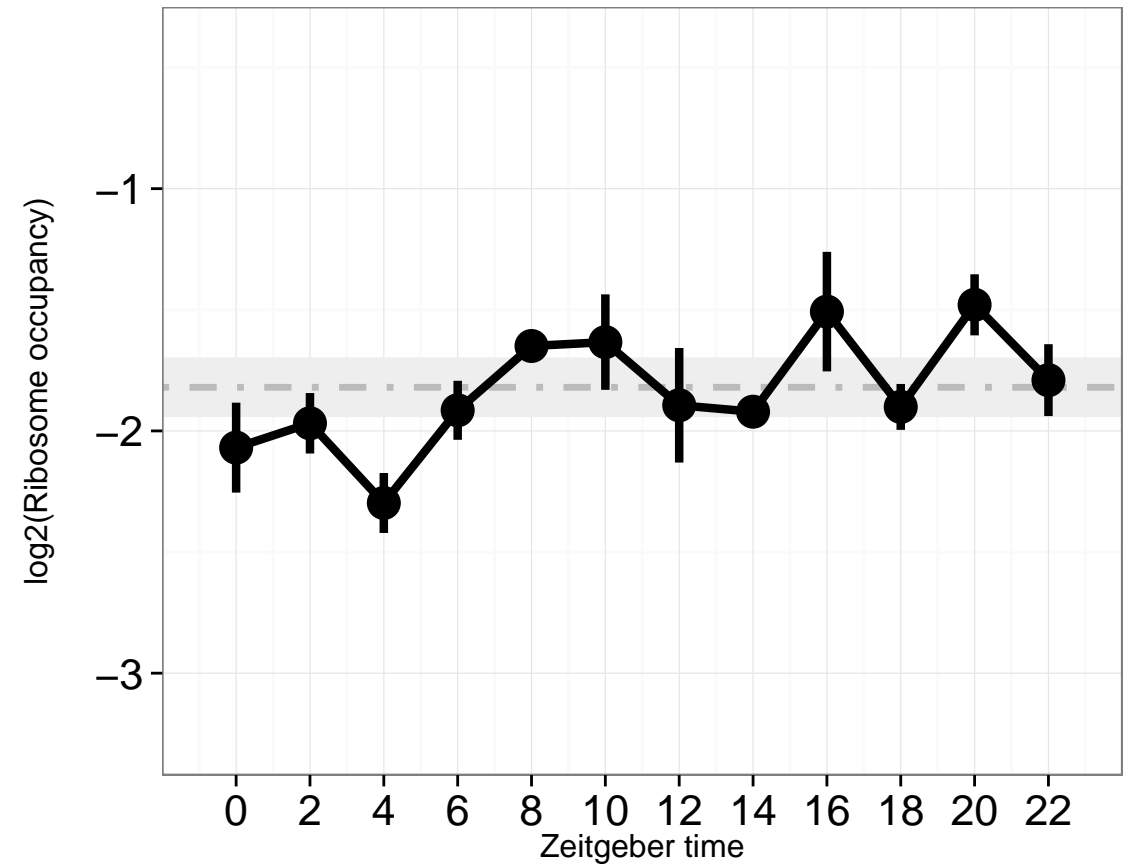

Supplement: Supplementary file 10376 [file 1]

## Pkn2

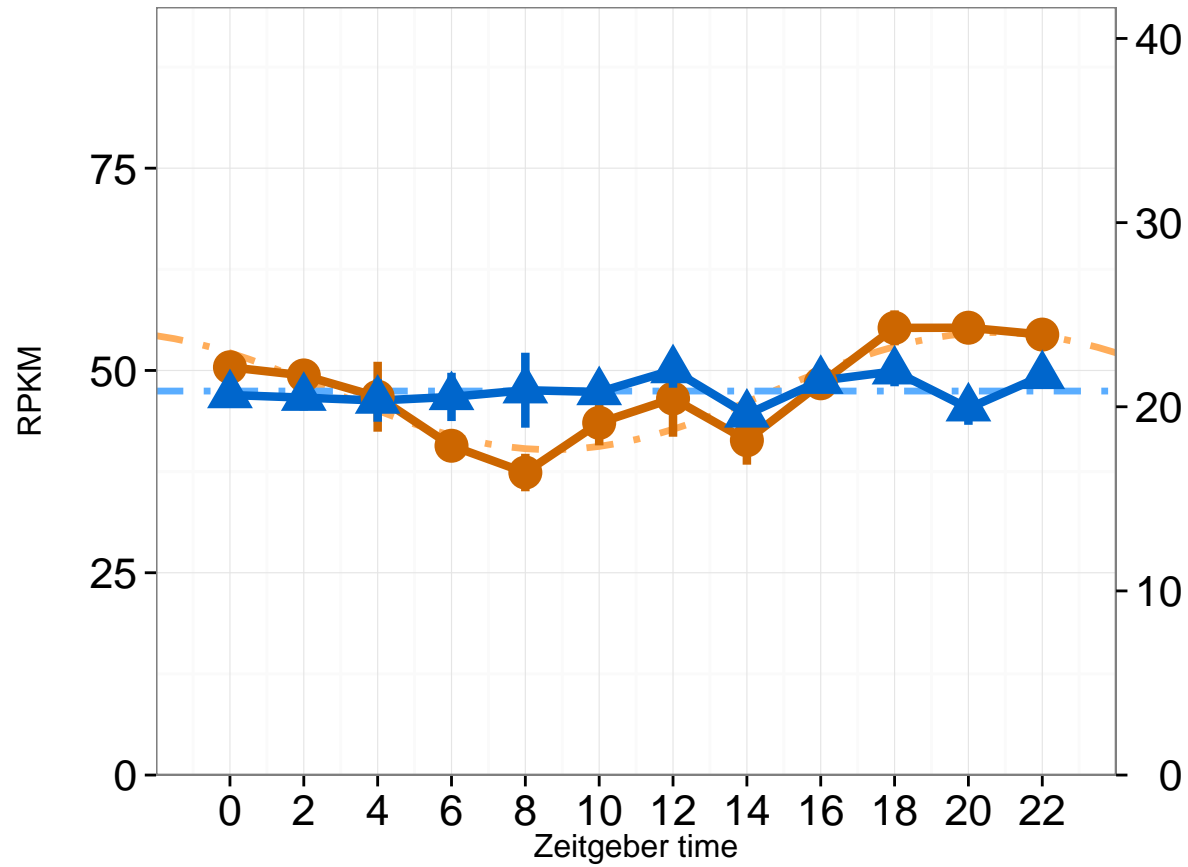

## Pkn2

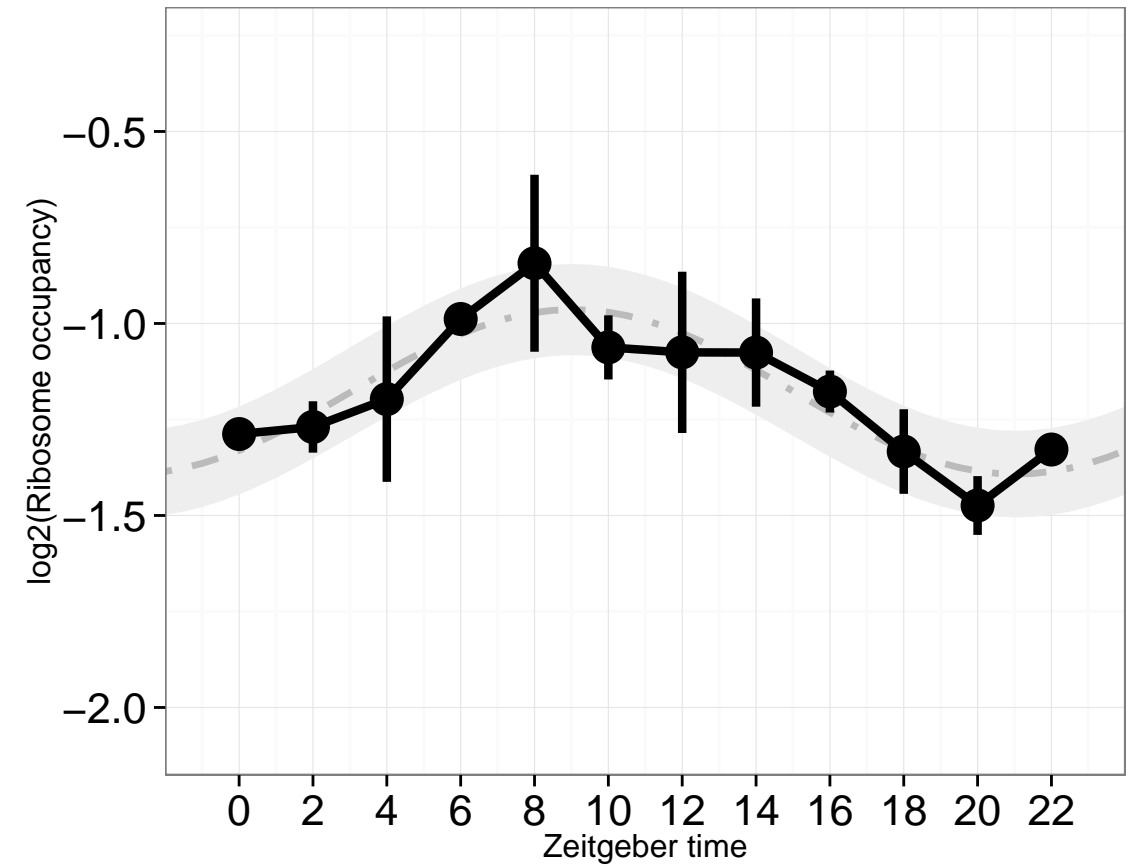

Supplement: Supplementary file 10377 [file 1]

# Rbm11

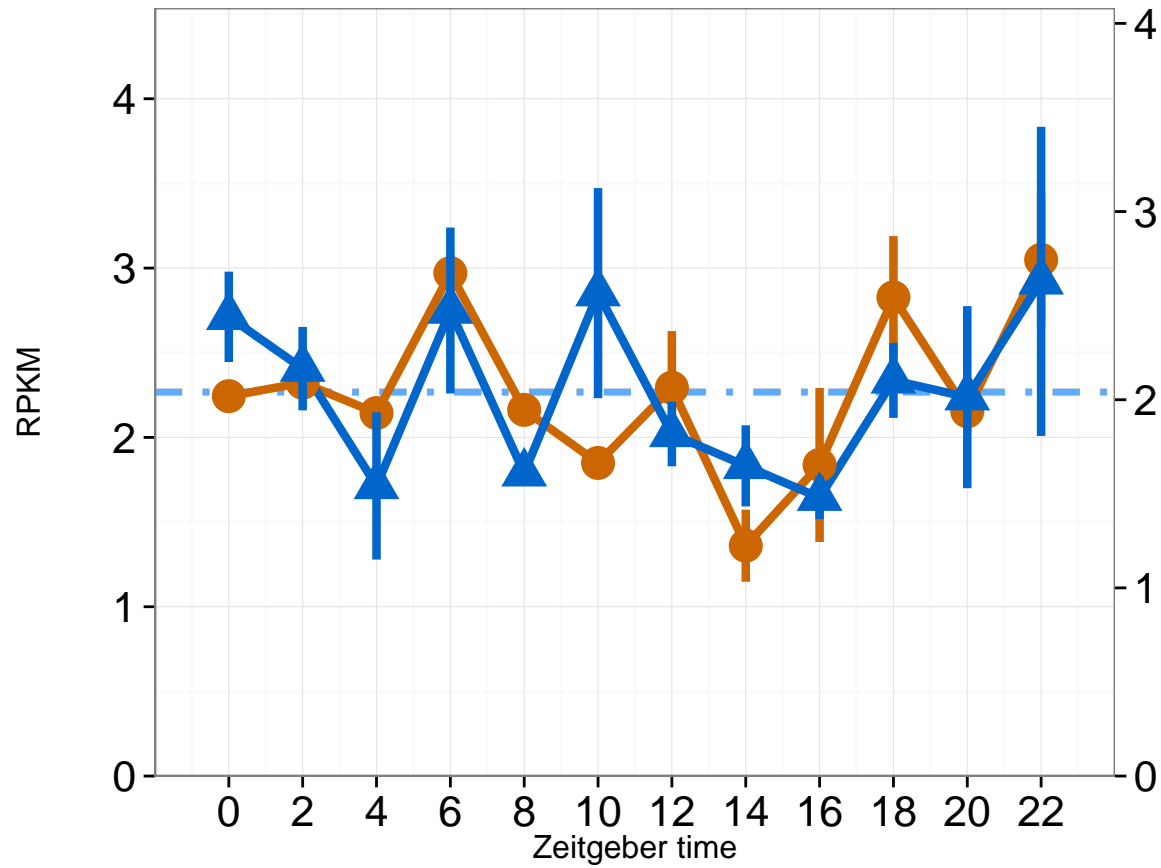

# Rbm11

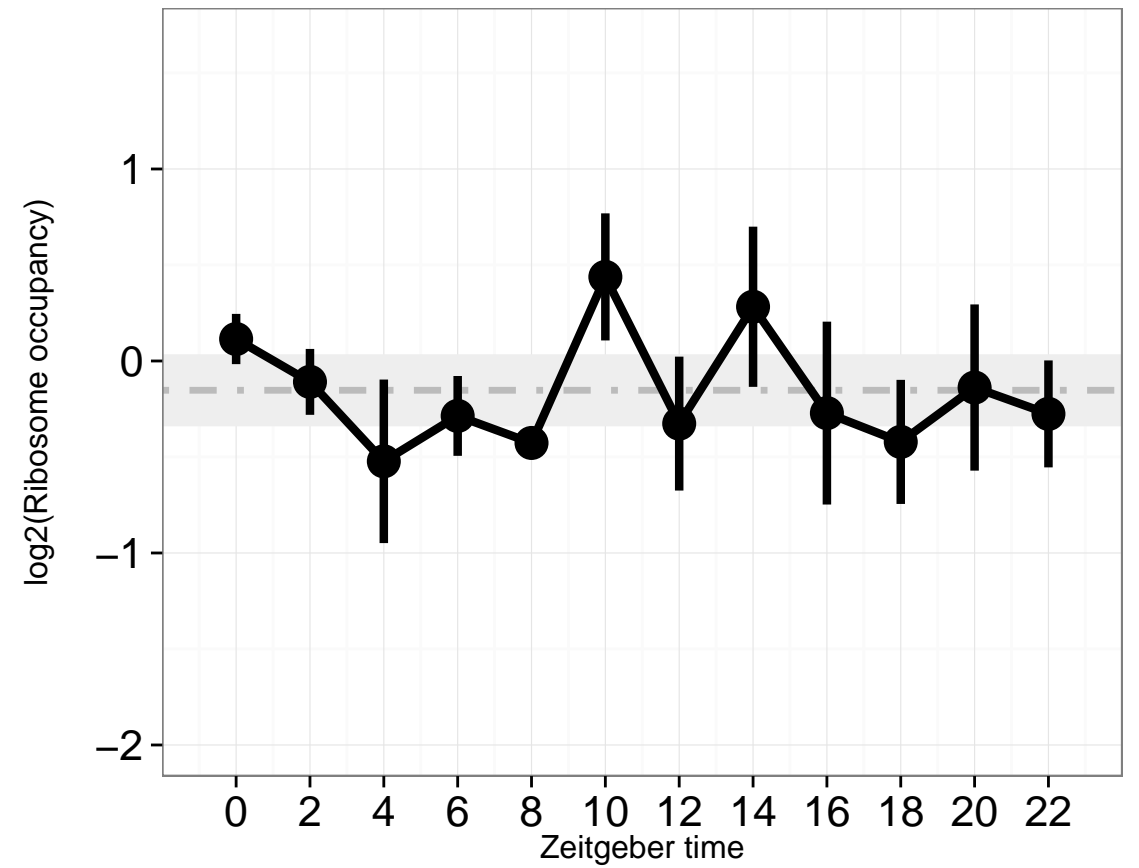

Supplement: Supplementary file 10378 [file 1]

# mt-Co1

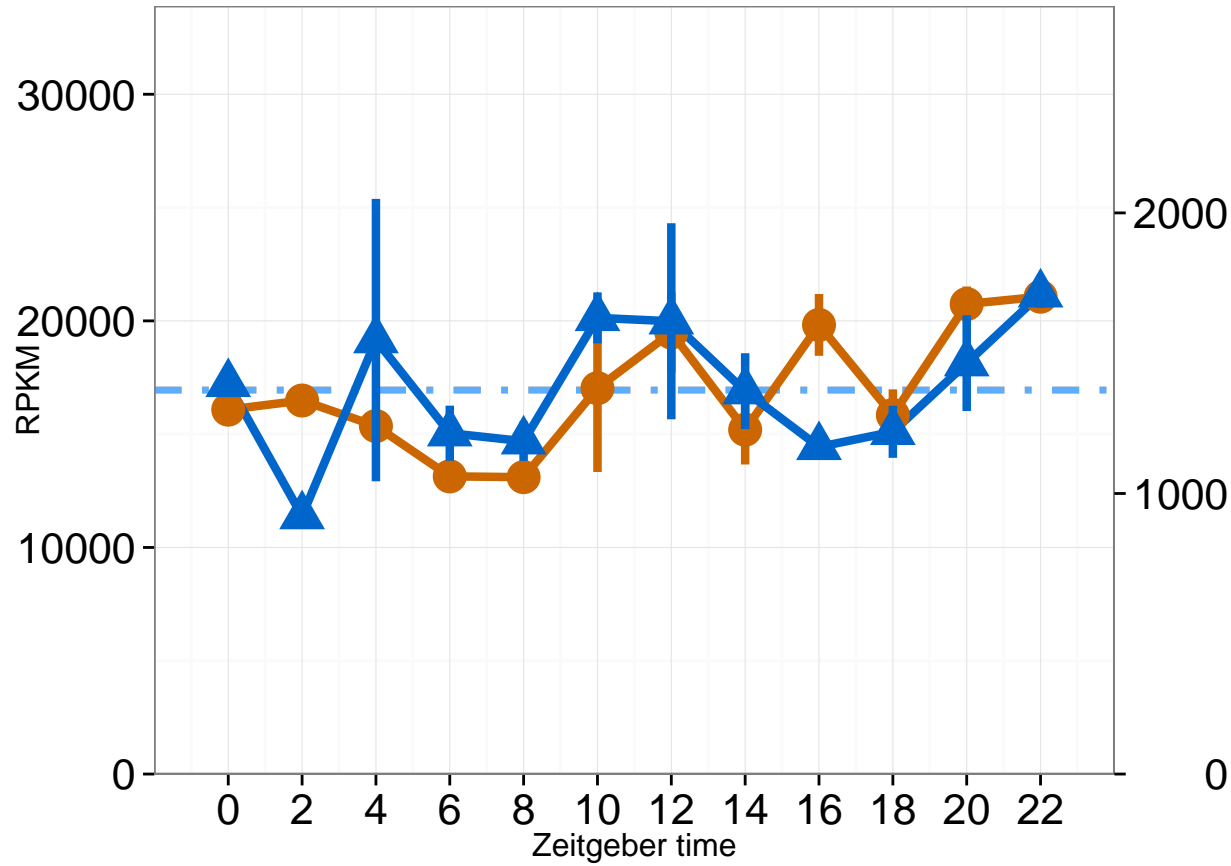

# mt-Co1

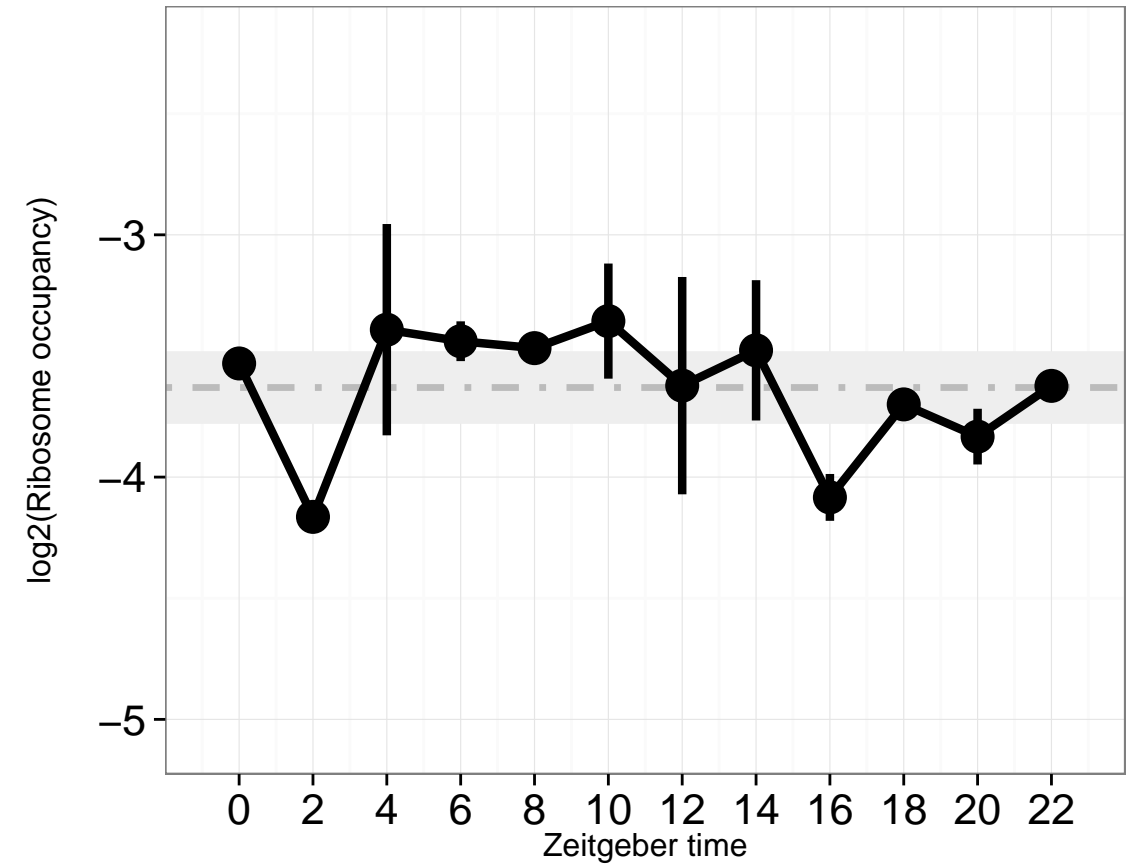

Supplement: Supplementary file 10379 [file 1]

# Pnpt1

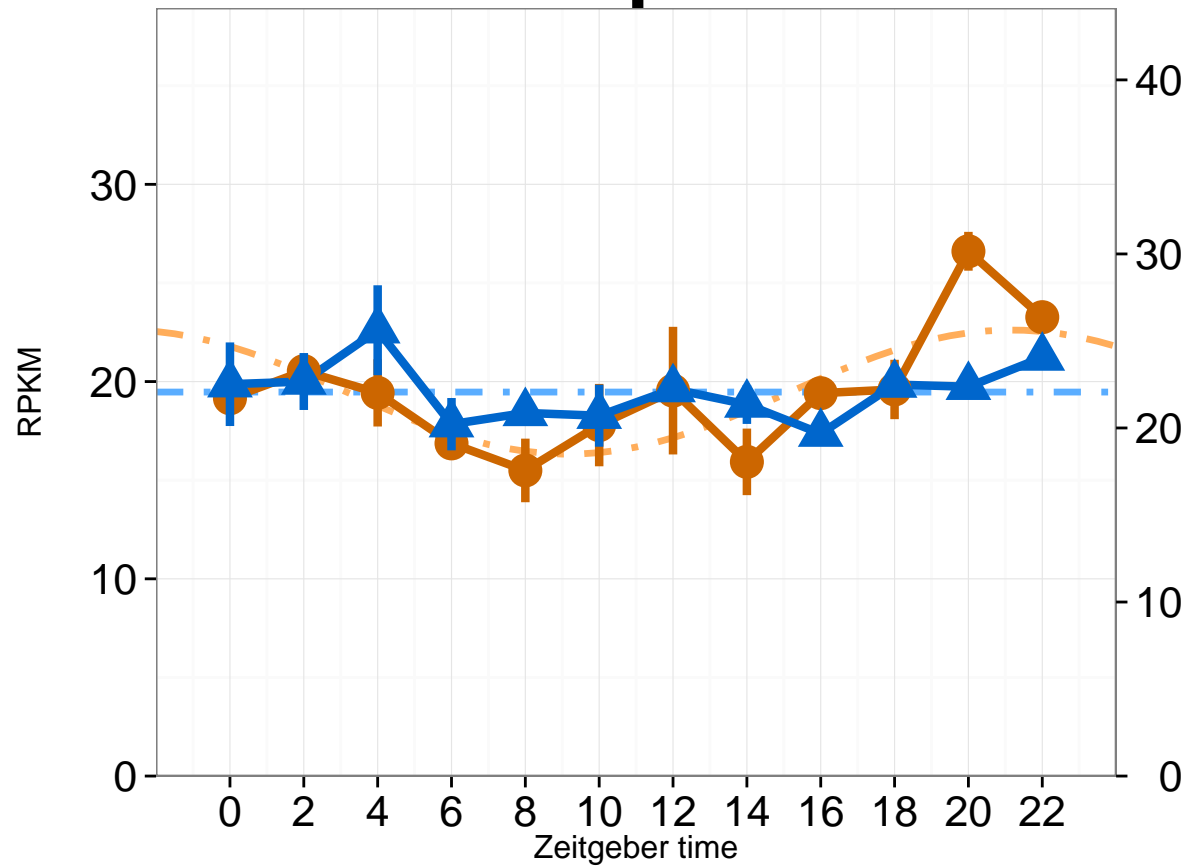

# Pnpt1

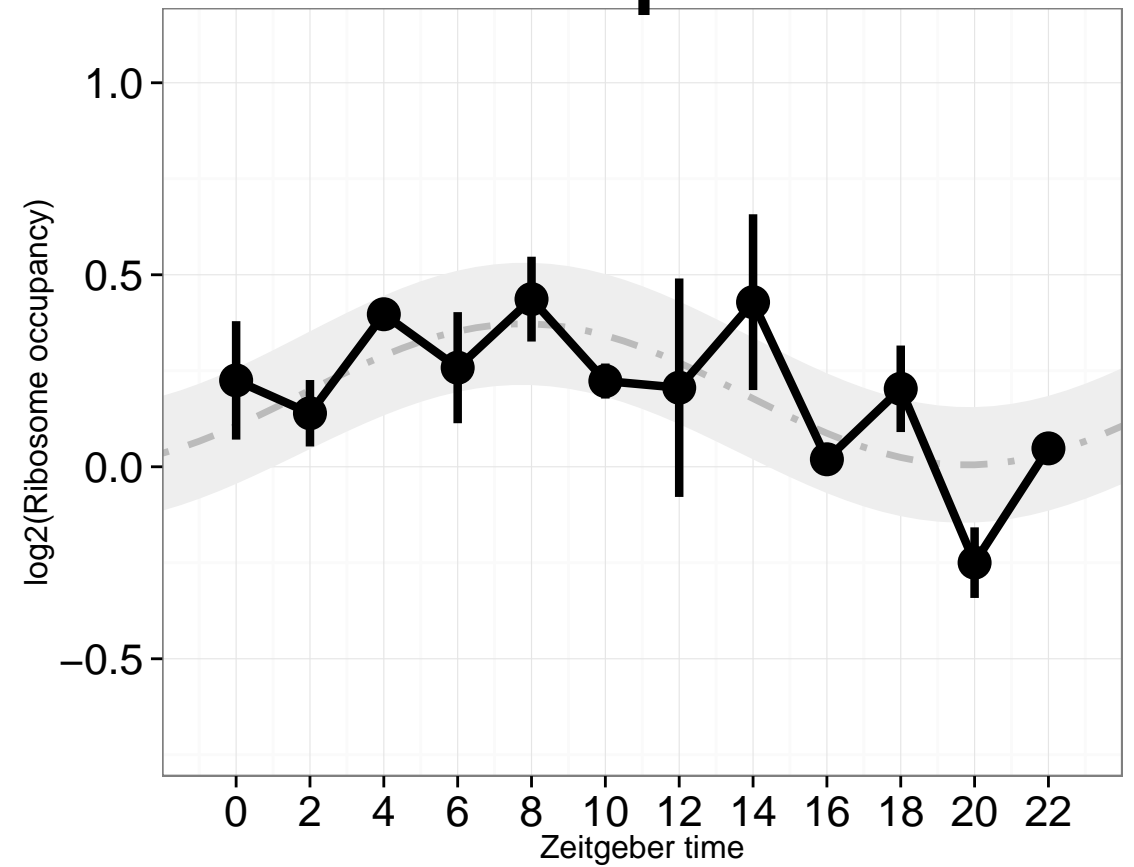

Supplement: Supplementary file 10380 [file 1]

## Srsf7

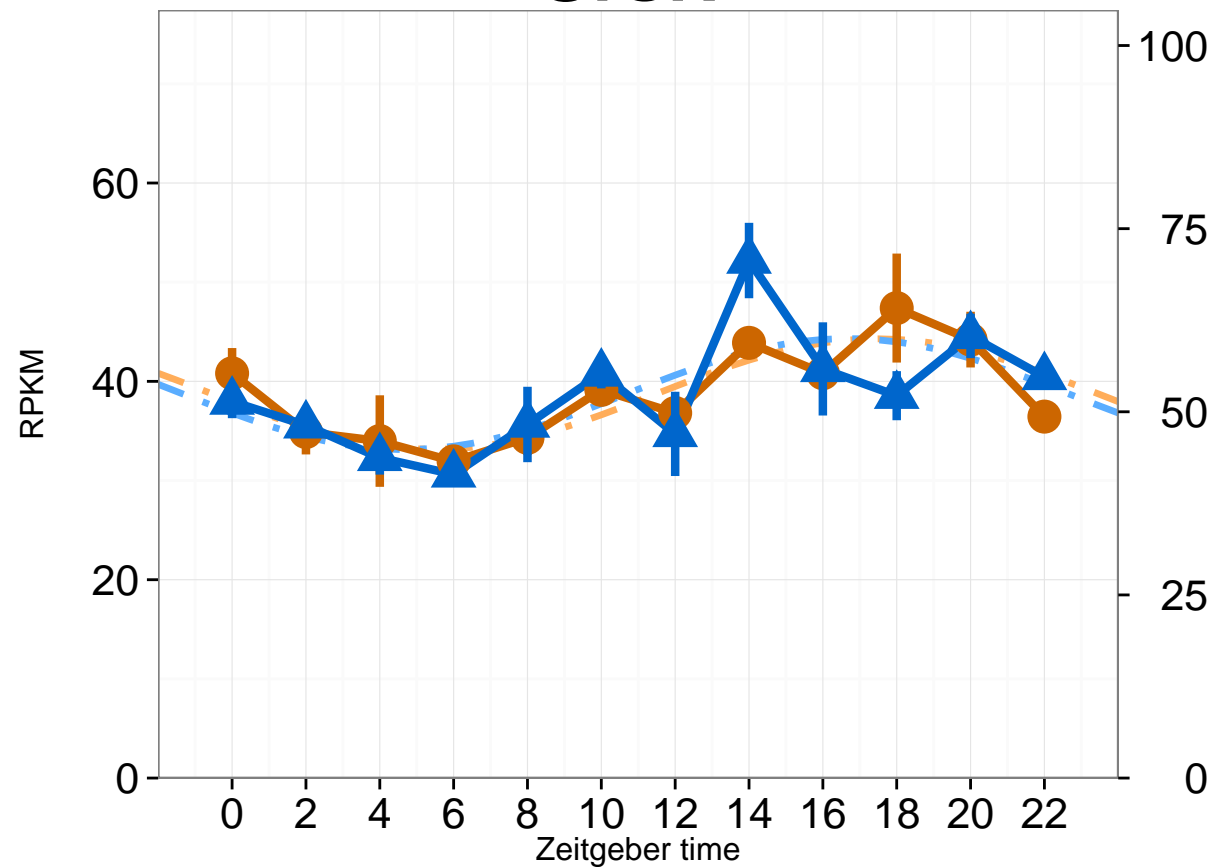

## Srsf7

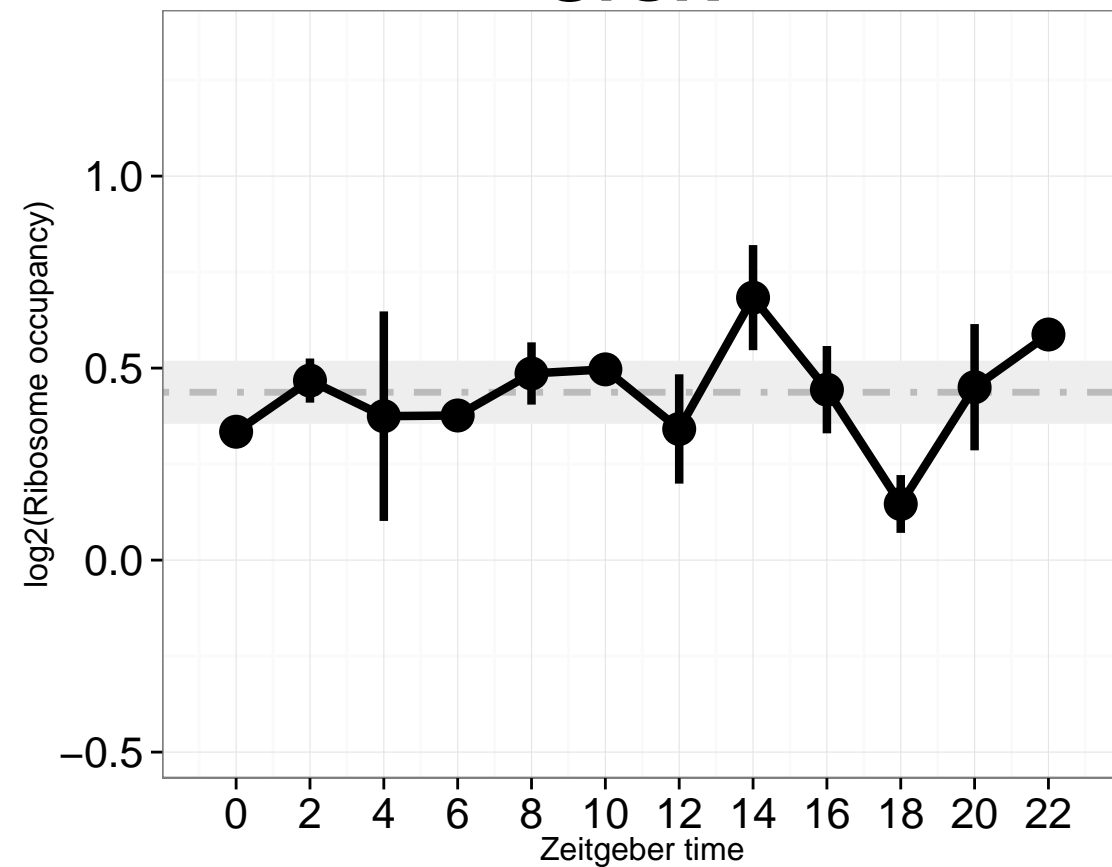

Supplement: Supplementary file 10381 [file 1]

1700128F08Rik

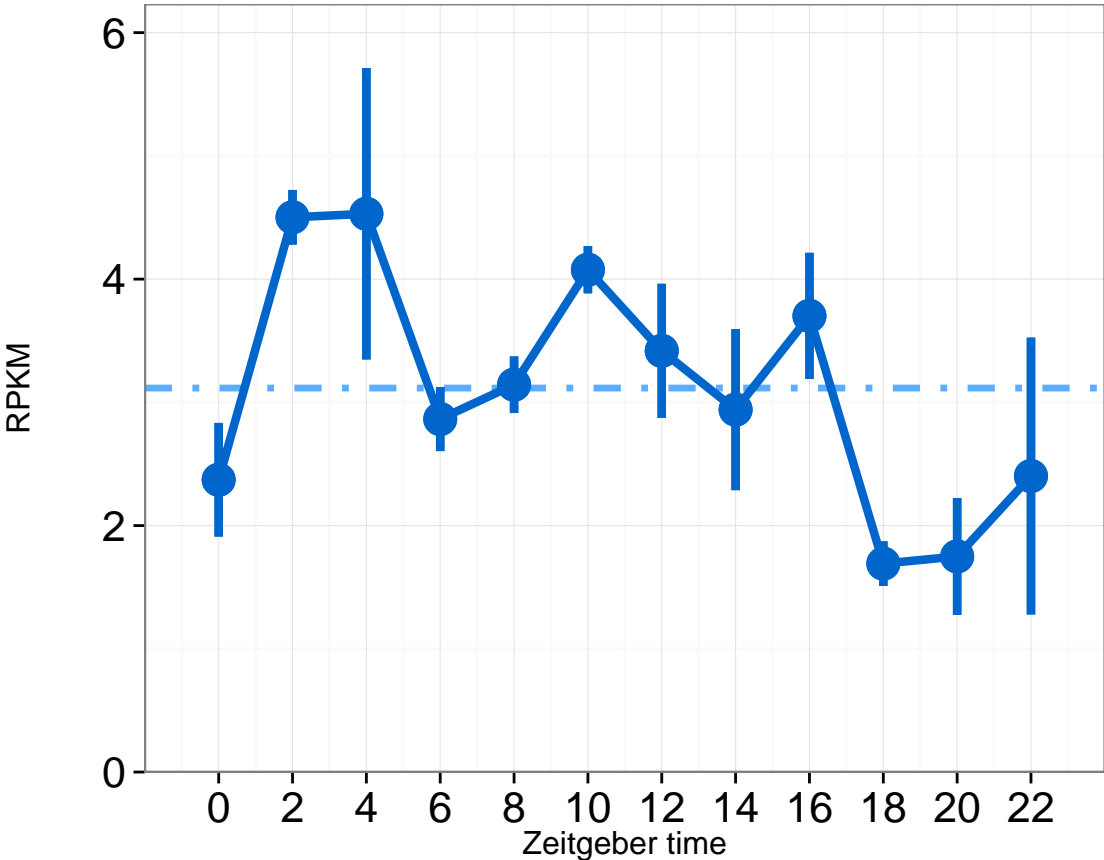

1700128F08Rik log2(Ribosome occupancy)

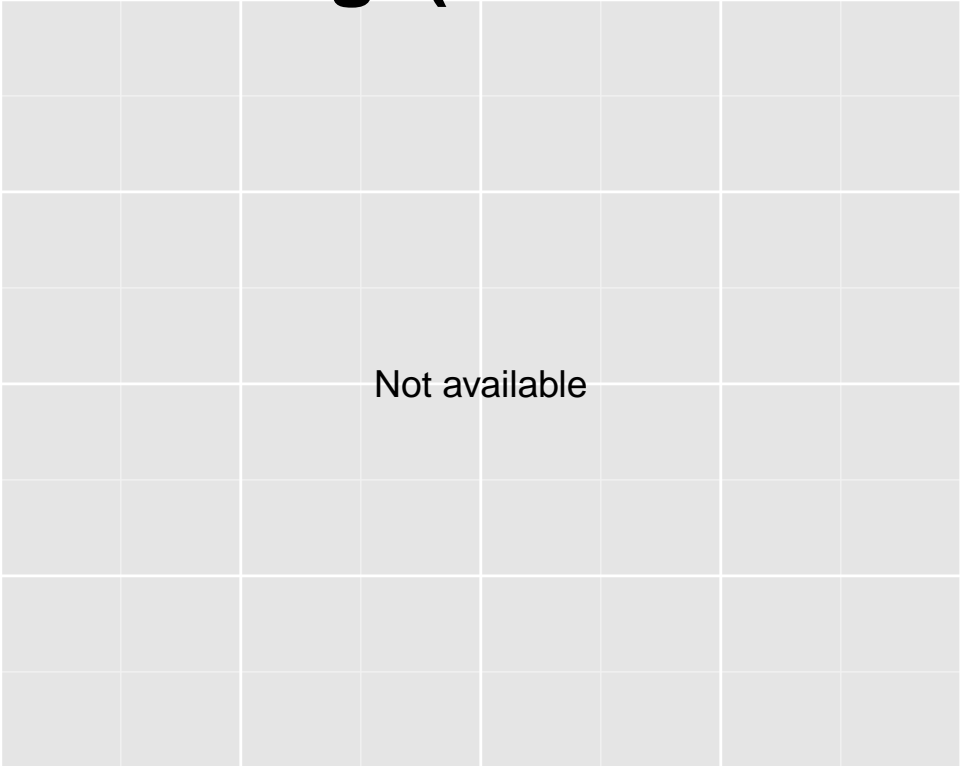

Supplement: Supplementary file 10382 [file 1]

## Nkiras2

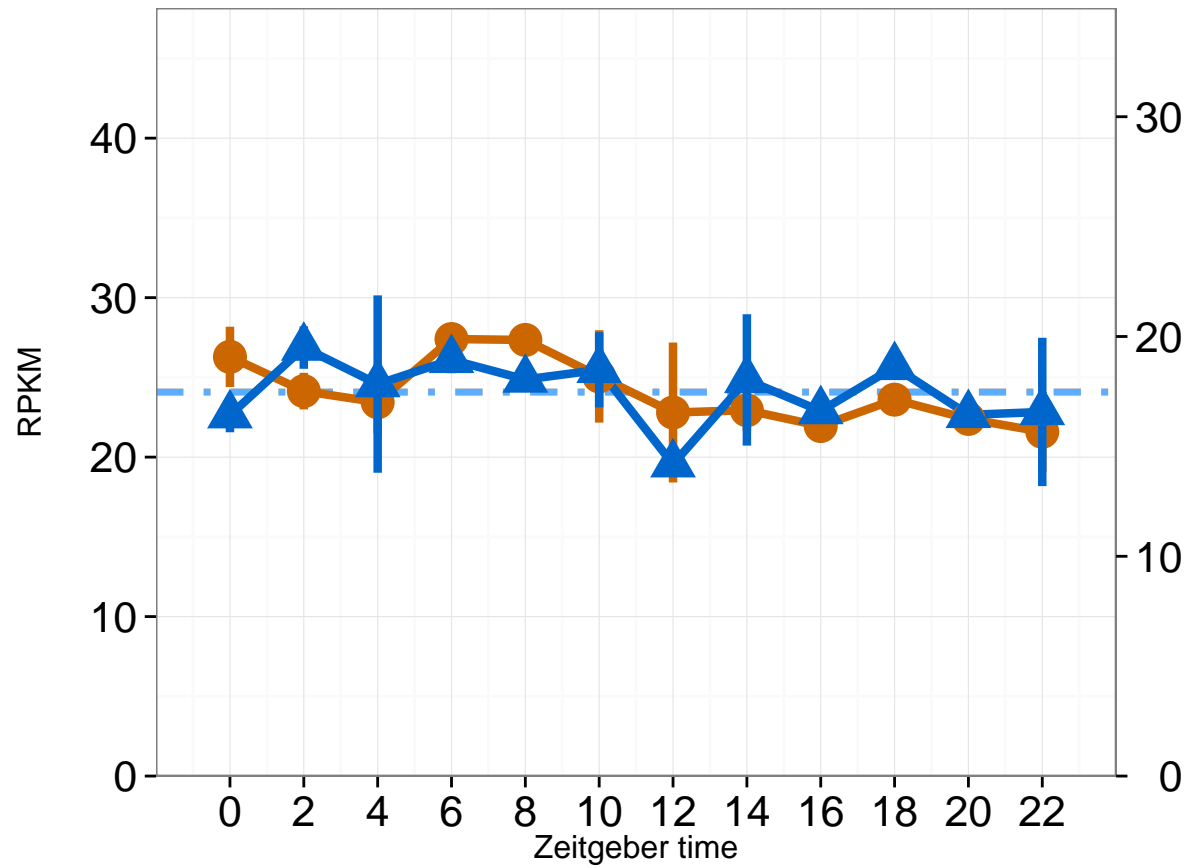

## Nkiras2

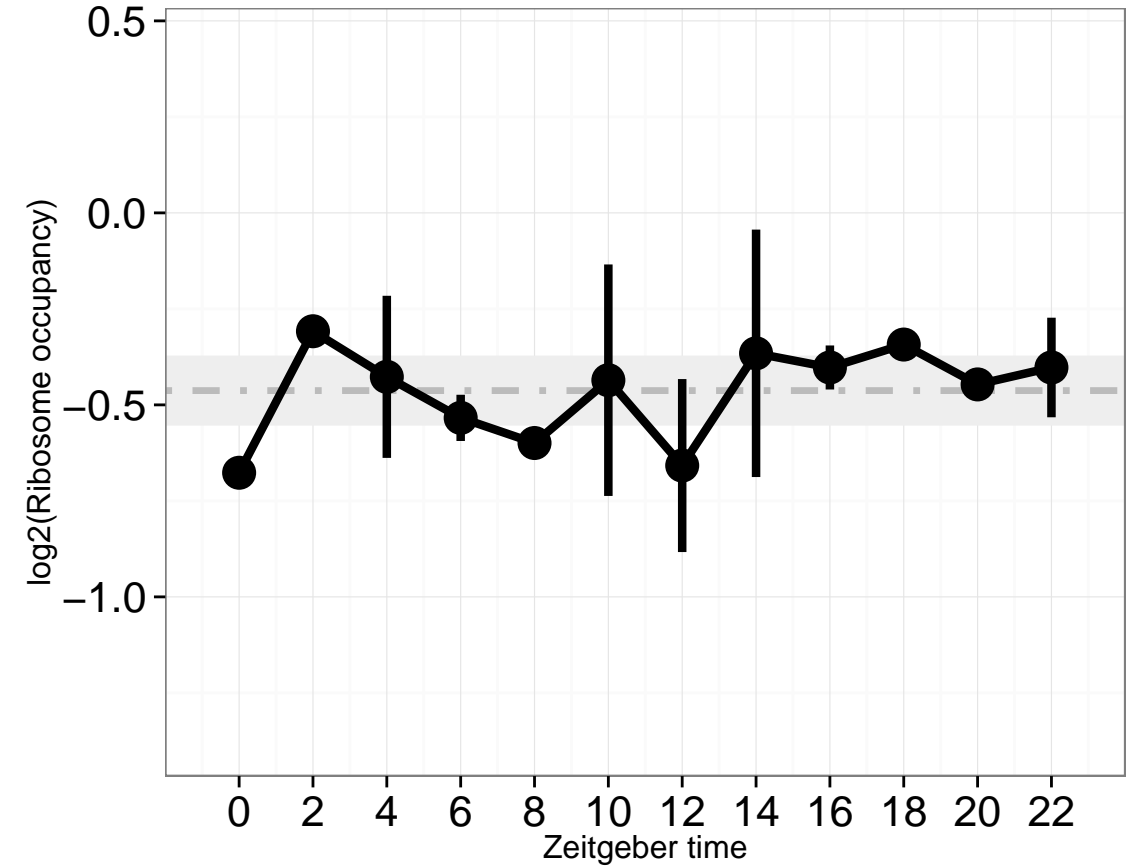

Supplement: Supplementary file 10383 [file 1]

## Ndufb9

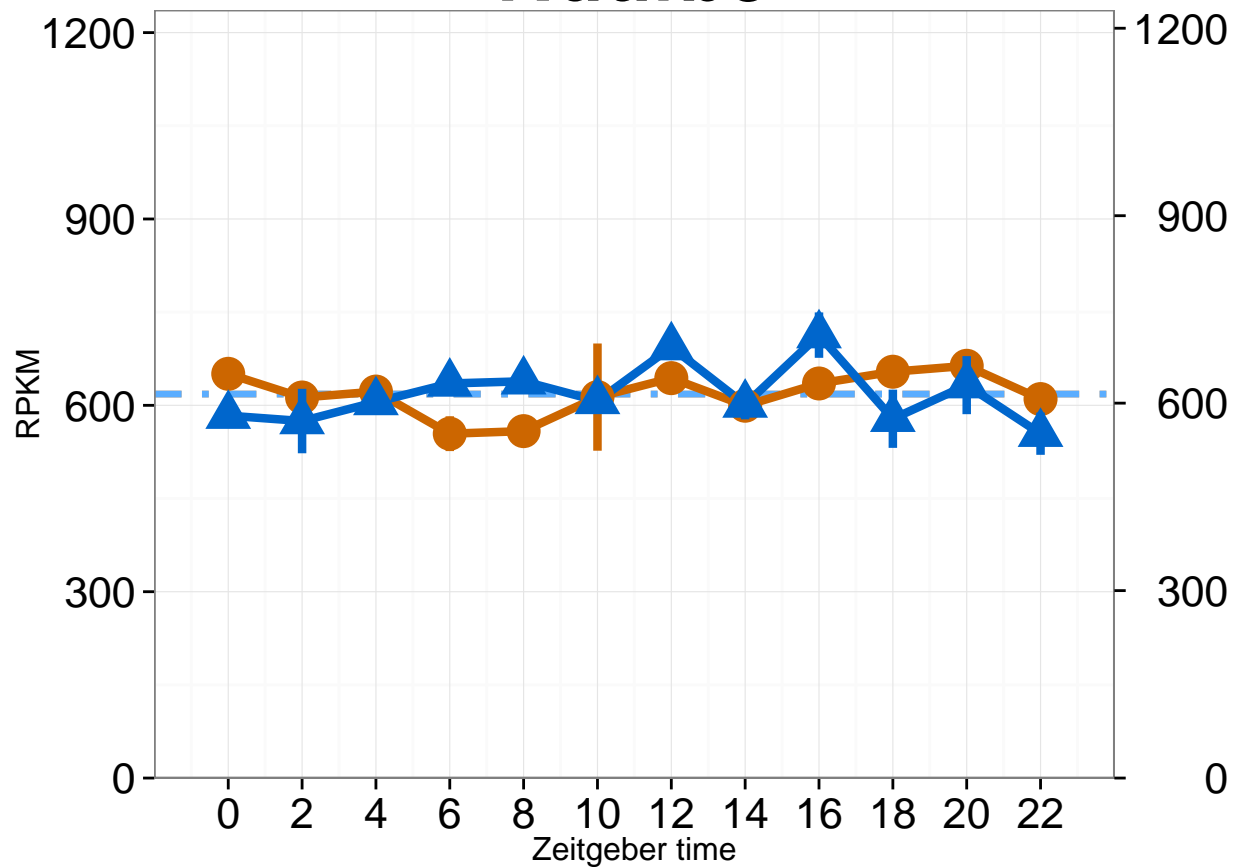

## Ndufb9

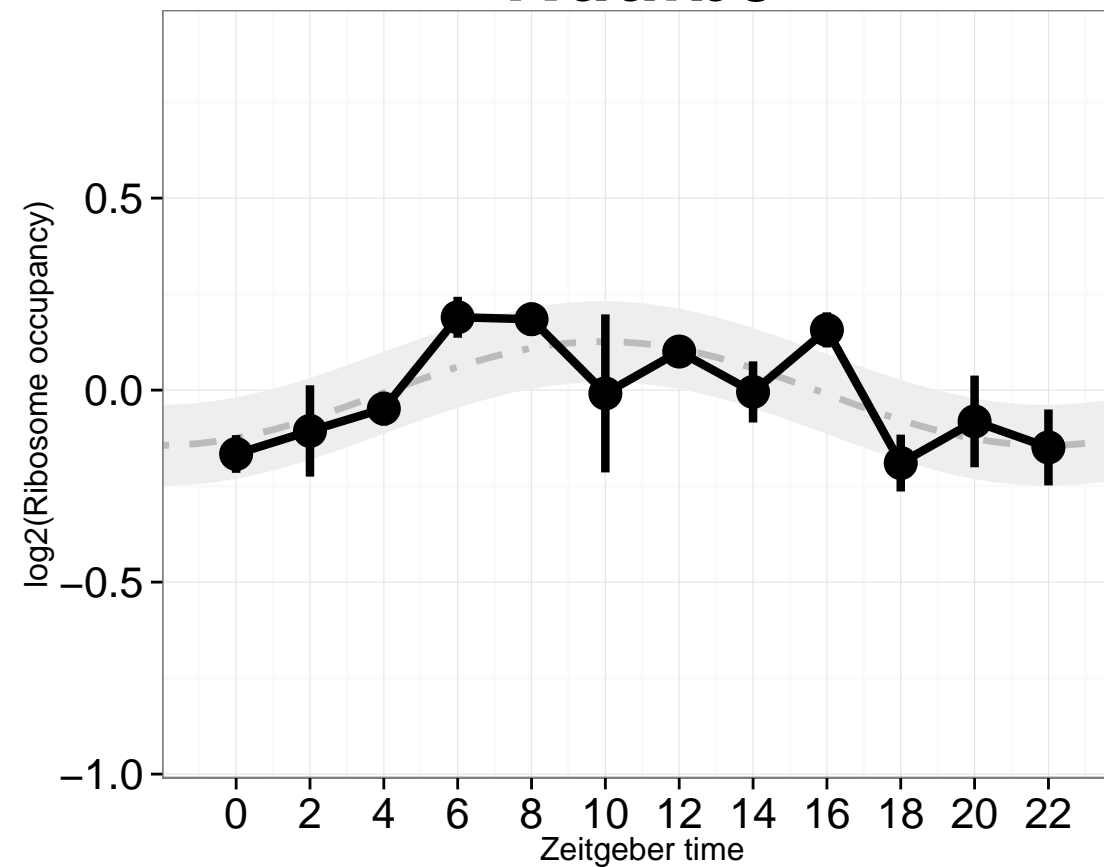

Supplement: Supplementary file 10384 [file 1]

## Rwdd1

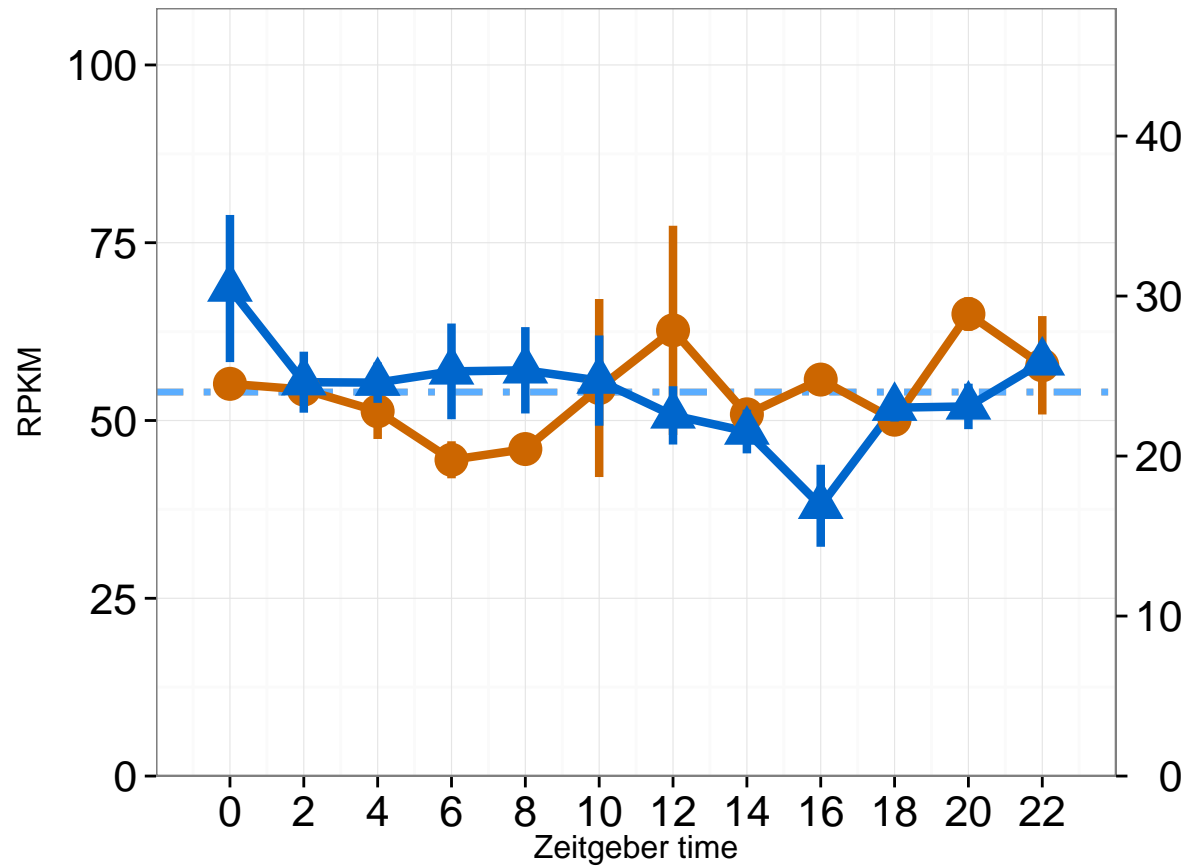

## Rwdd1

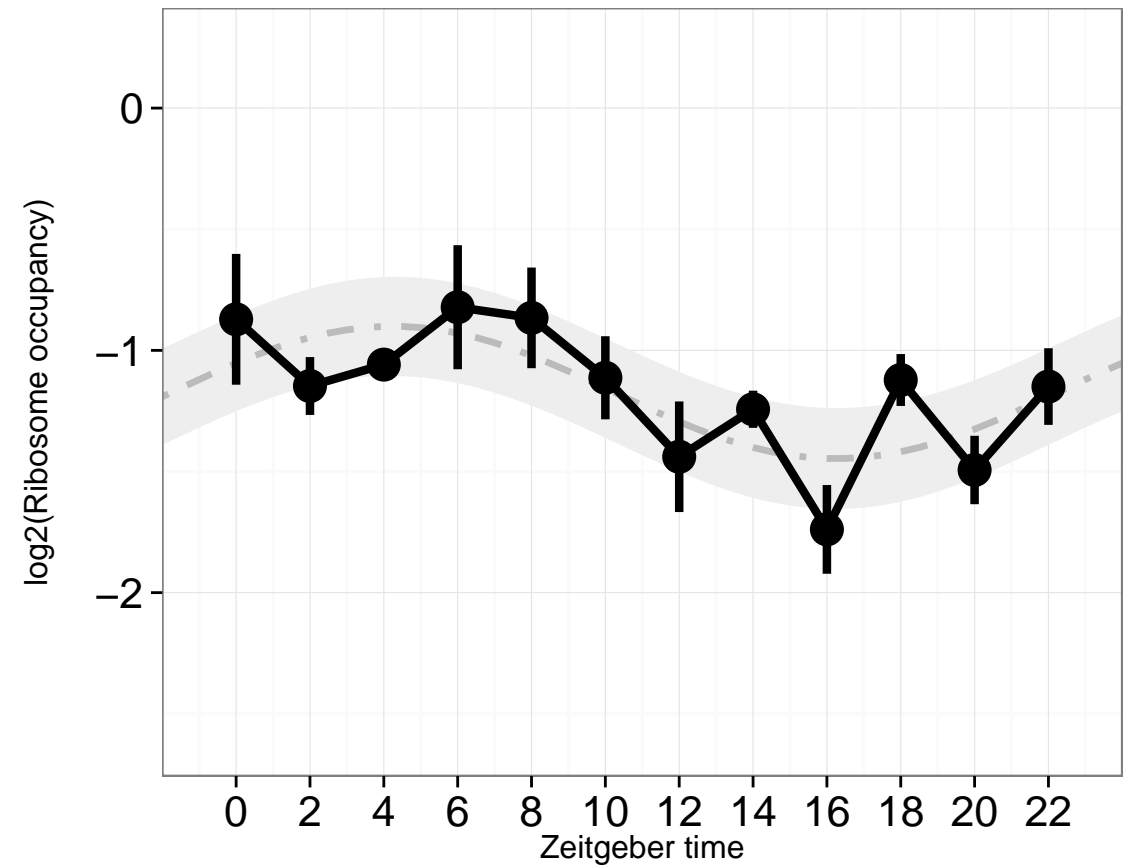

Supplement: Supplementary file 10385 [file 1]

# Ptpn13

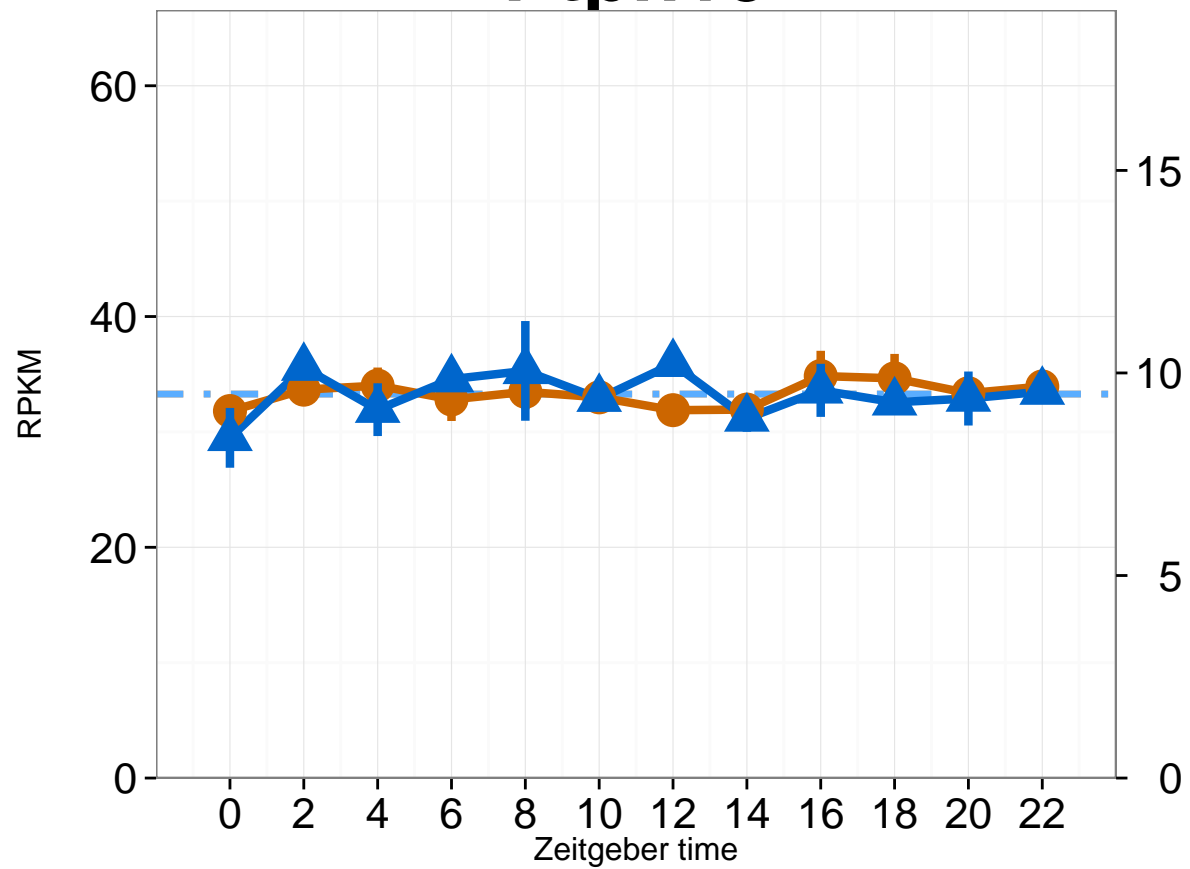

# Ptpn13

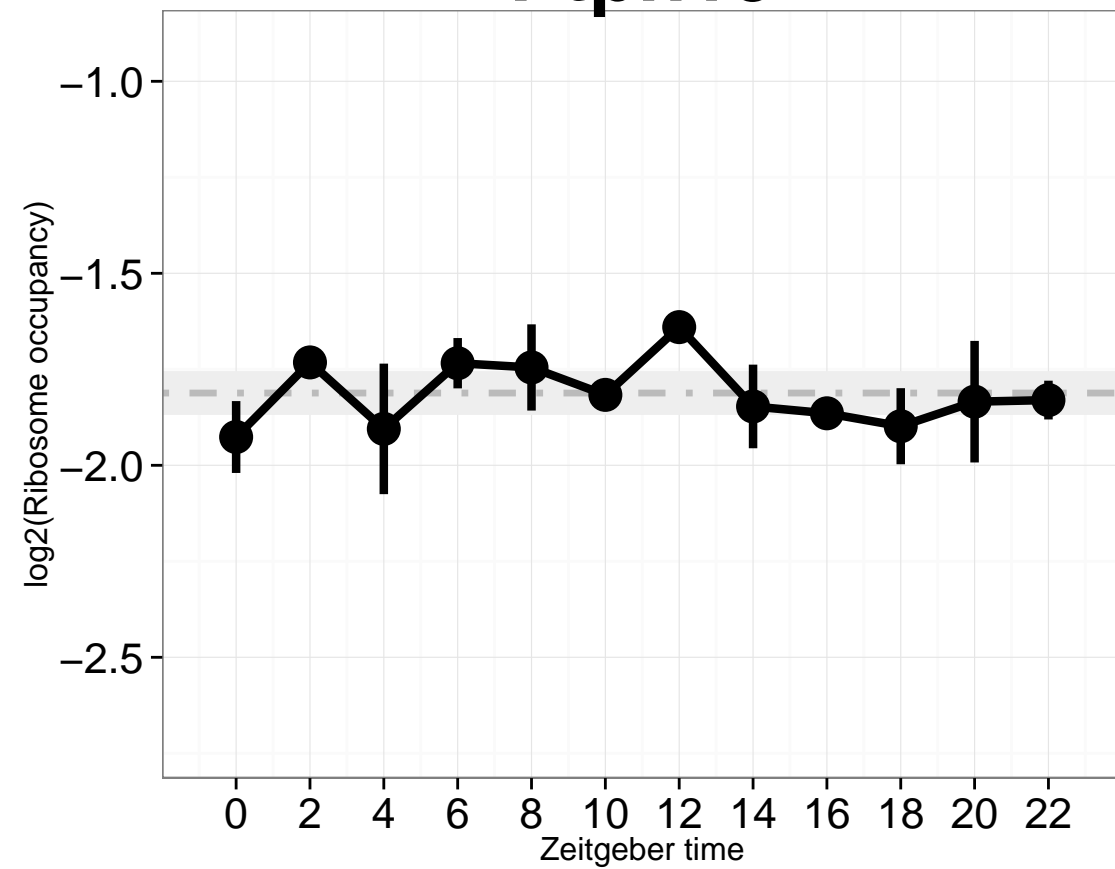

Supplement: Supplementary file 10386 [file 1]

# B3gnt3

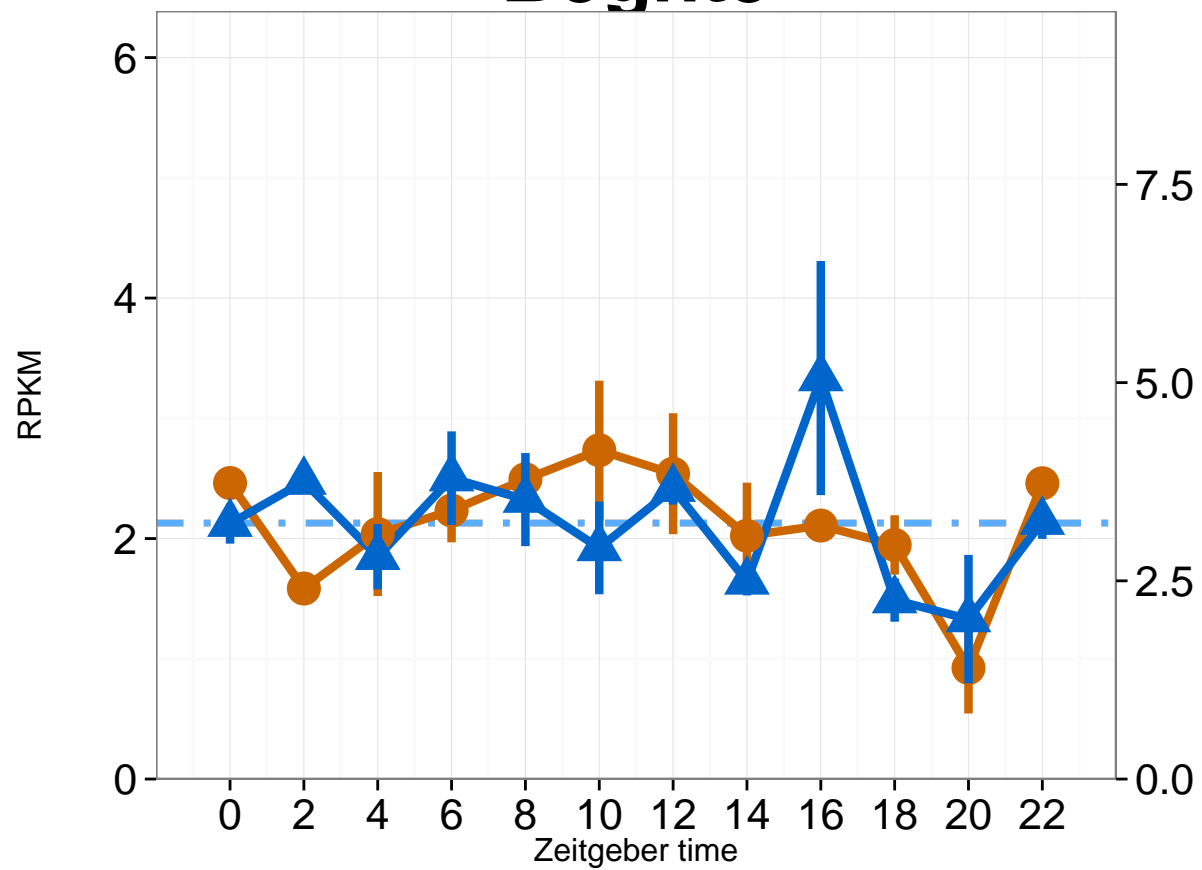

# B3gnt3

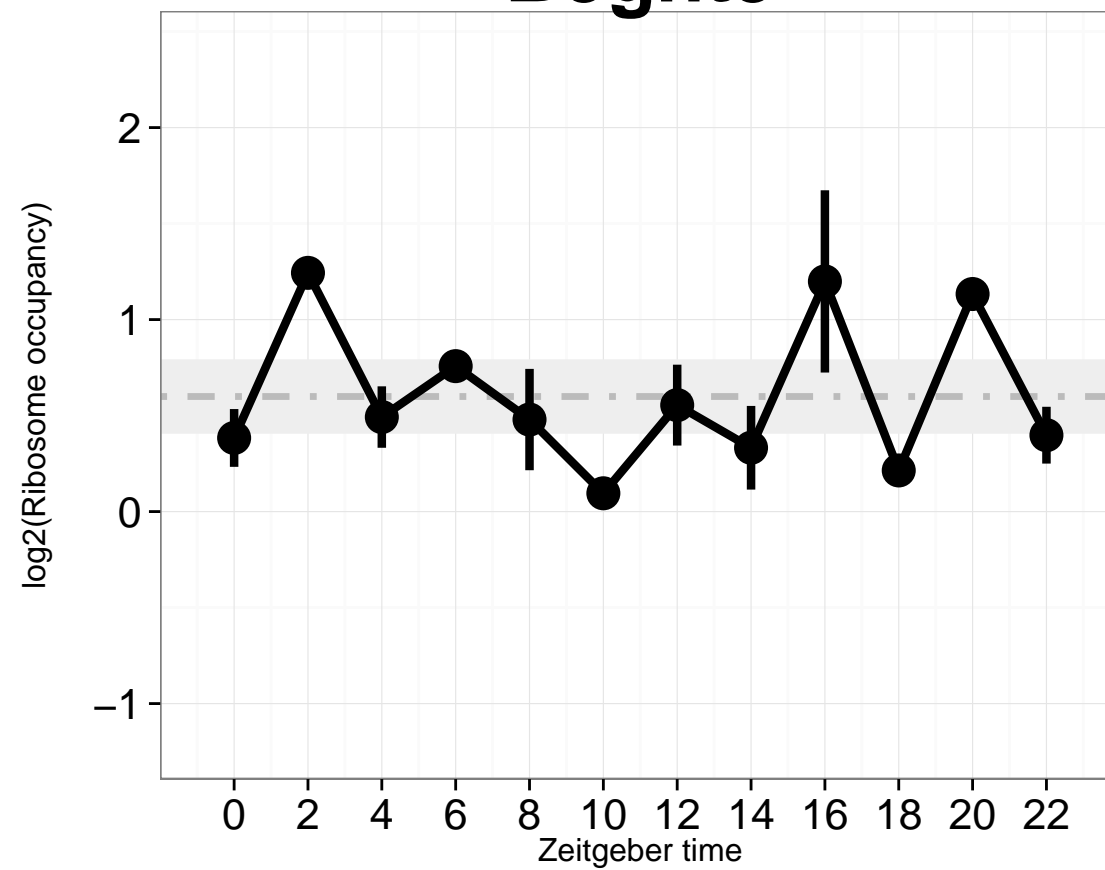

Supplement: Supplementary file 10387 [file 1]

# Atp11b

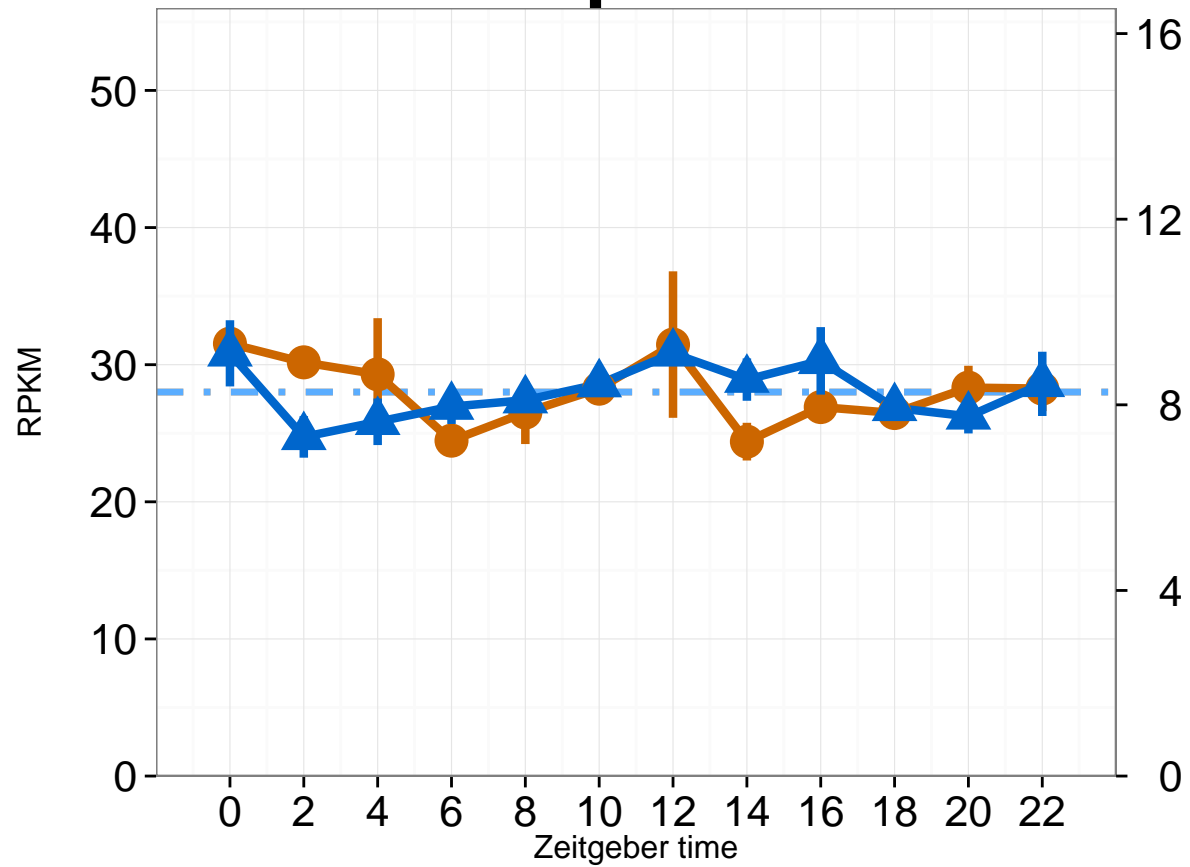

# Atp11b

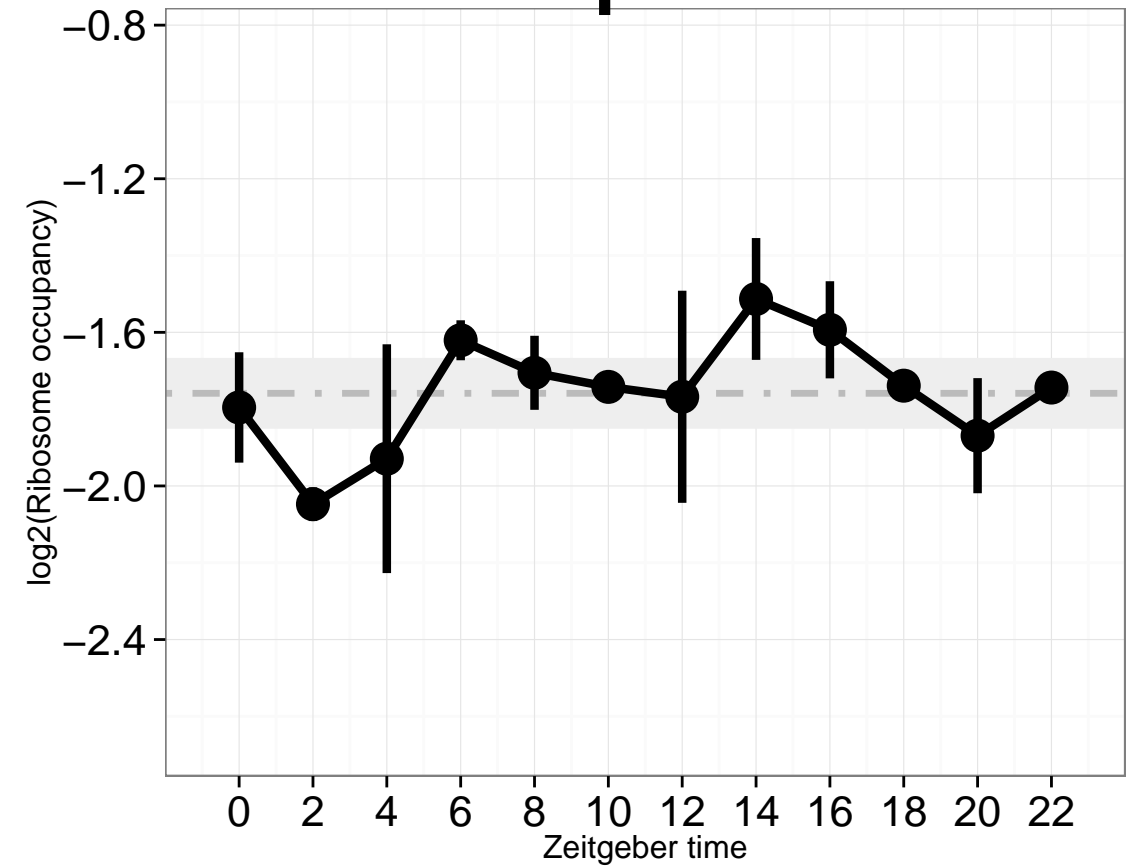

Supplement: Supplementary file 10388 [file 1]

## Ccdc30

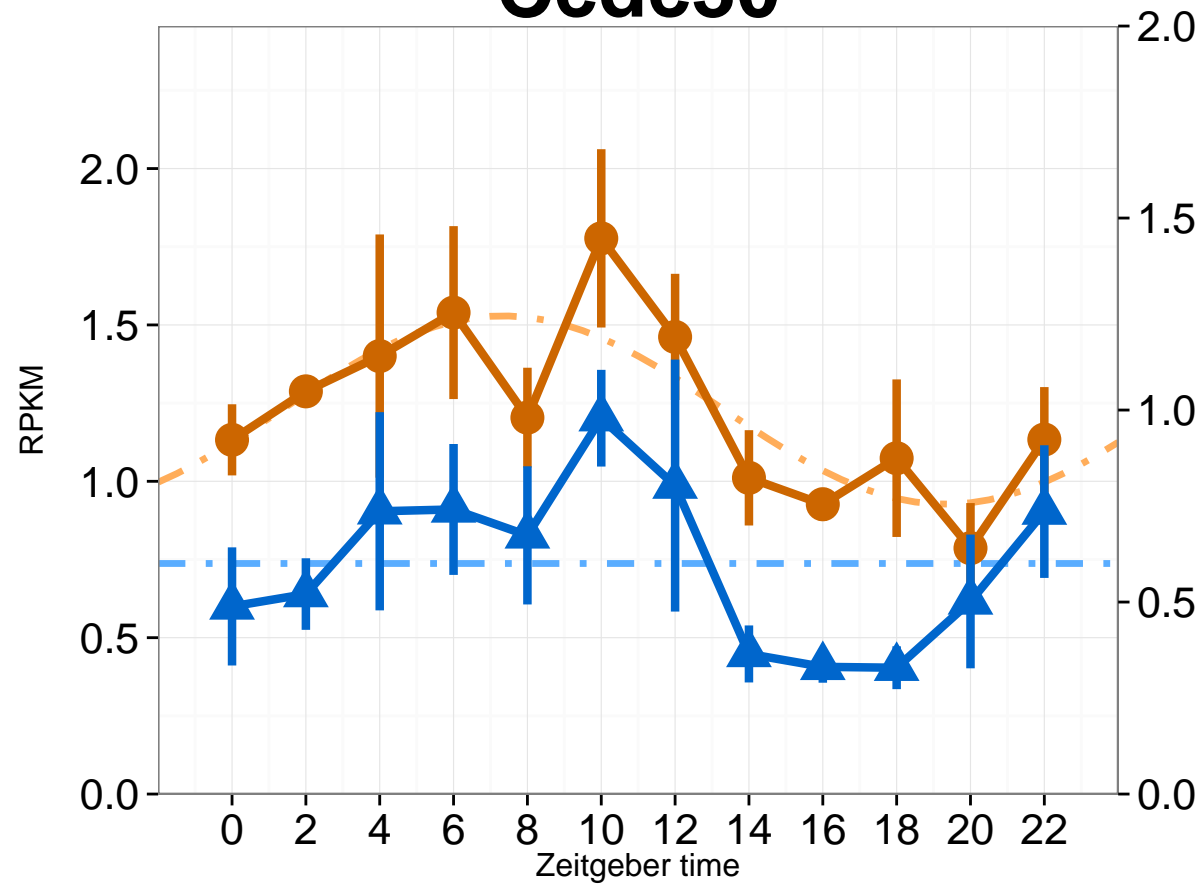

## Ccdc30

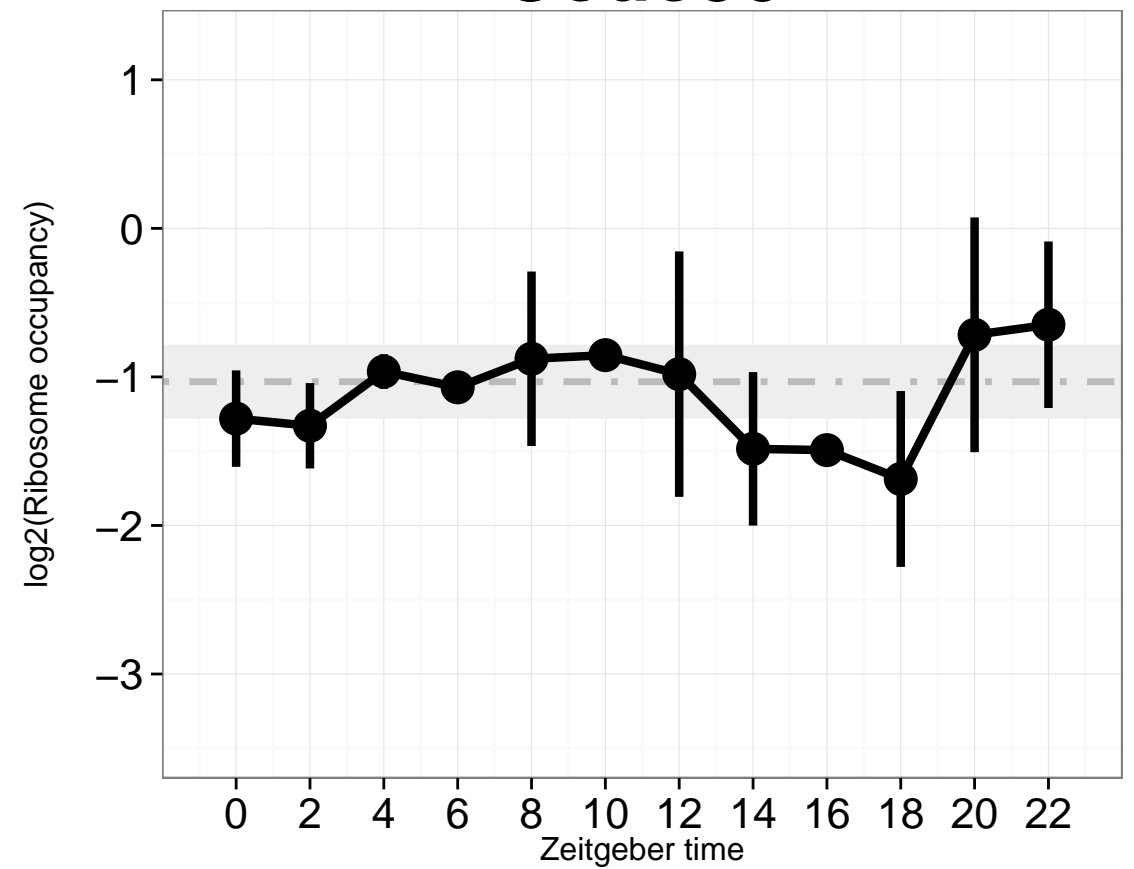

Supplement: Supplementary file 10389 [file 1]

# Pq1c2

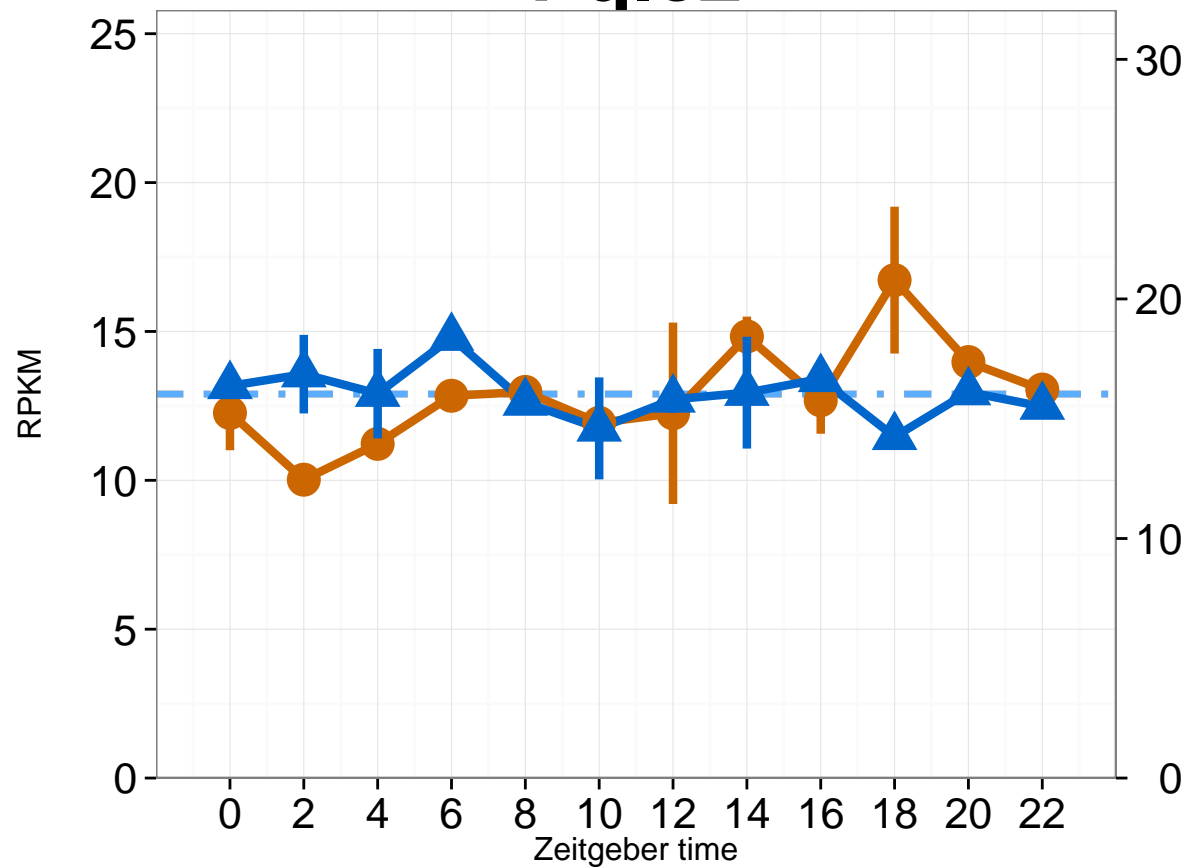

# Pq1c2

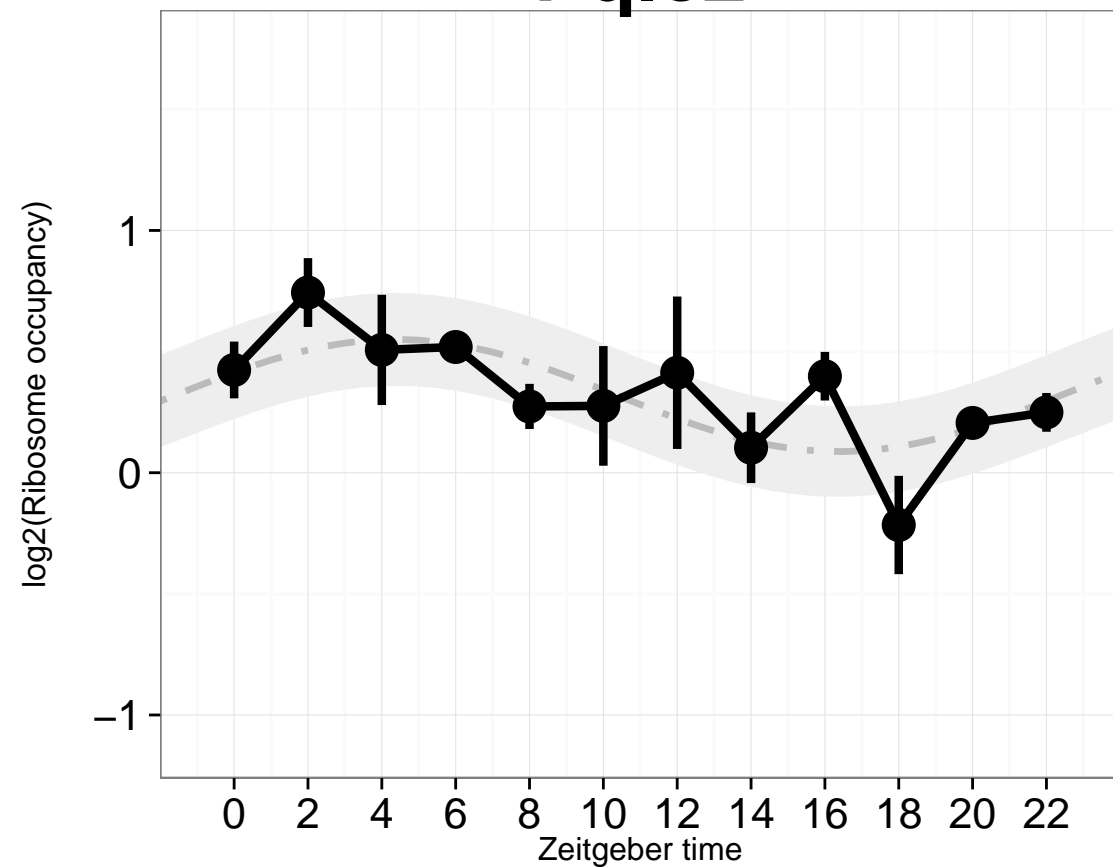

Supplement: Supplementary file 10390 [file 1]

## Stk40

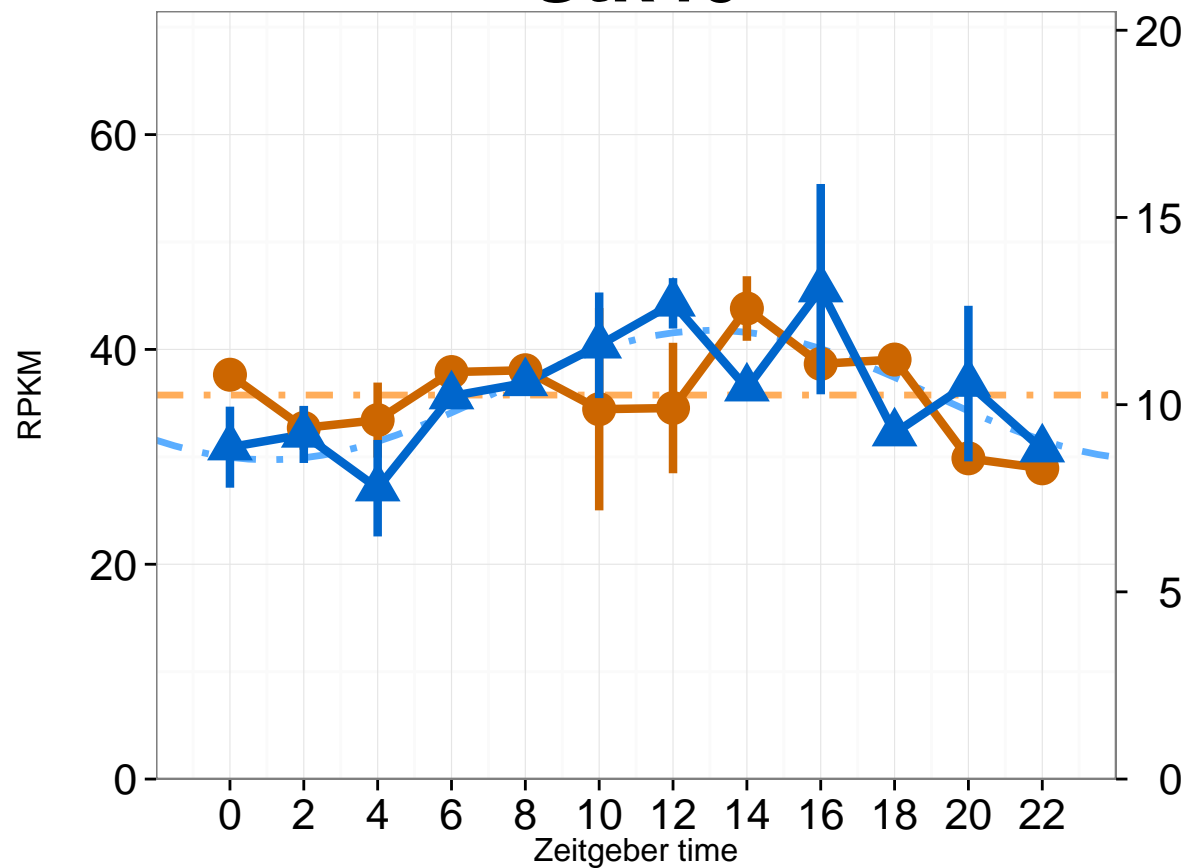

## Stk40

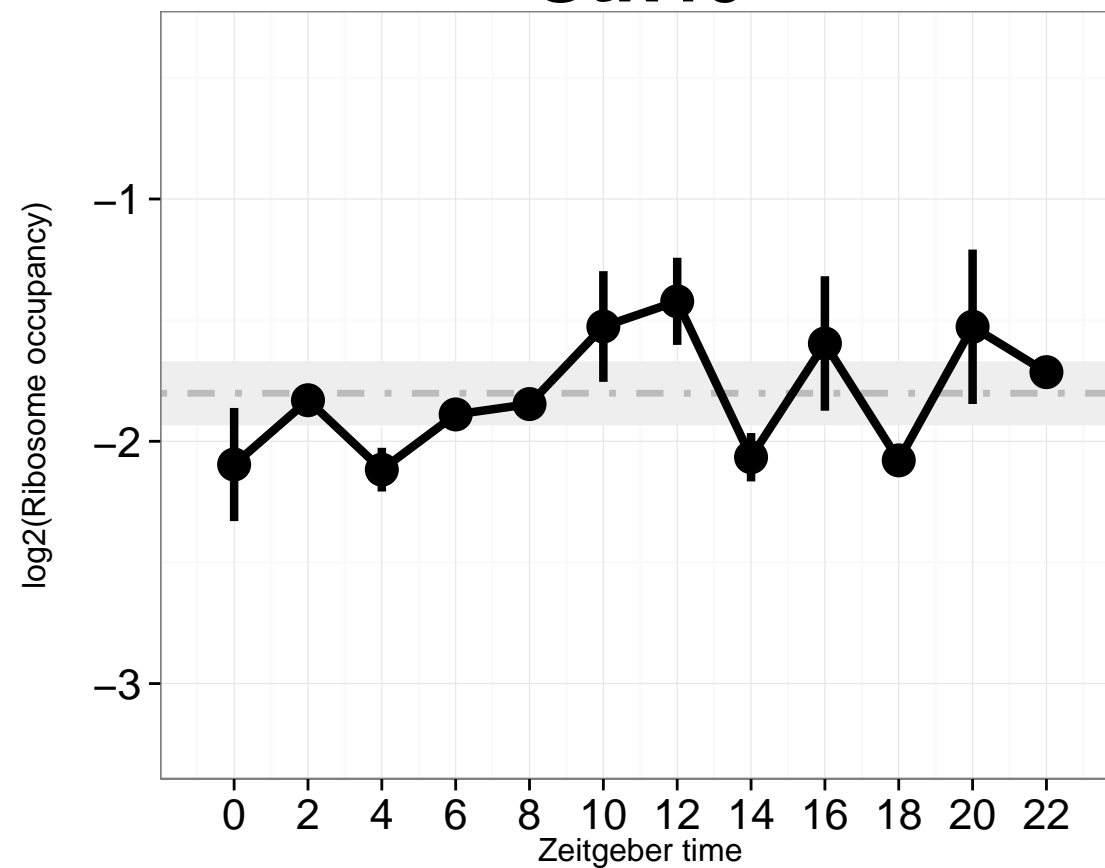

Supplement: Supplementary file 10391 [file 1]

## Fuca2

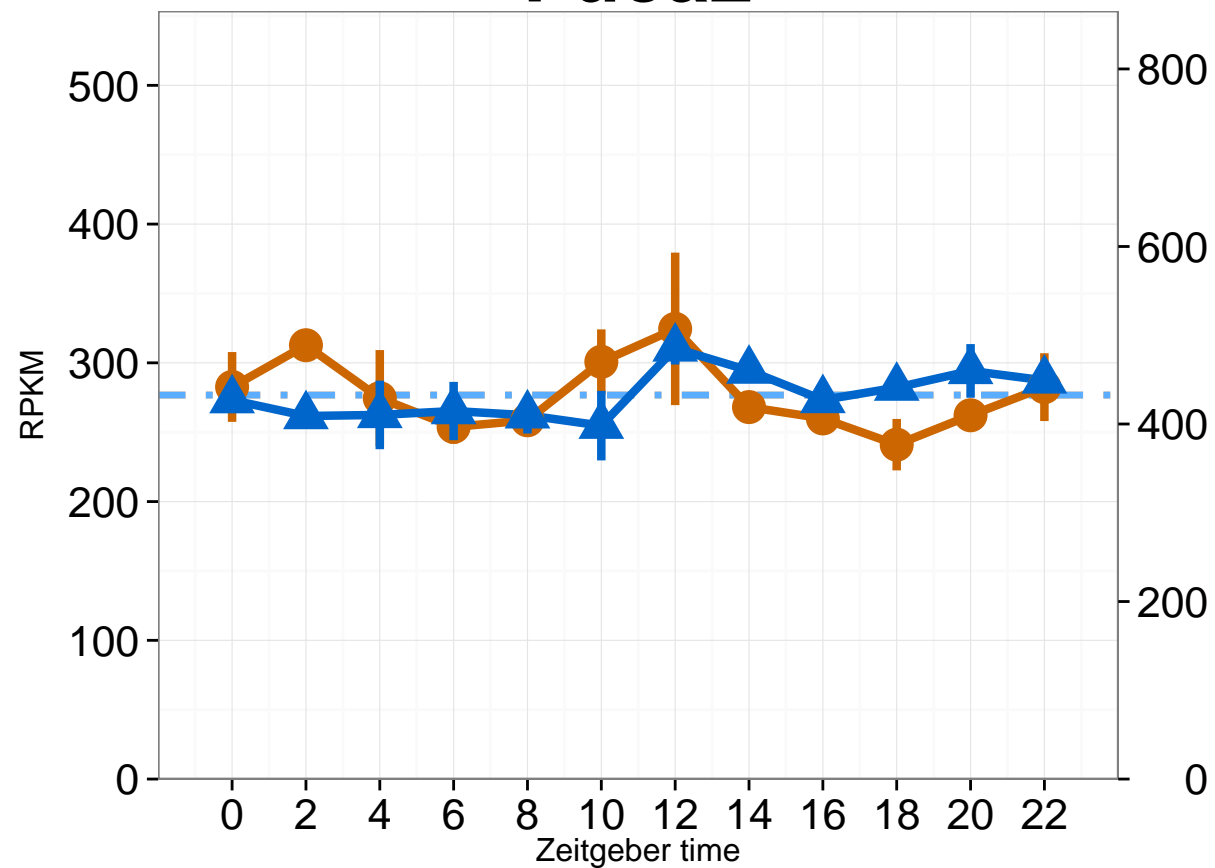

## Fuca2

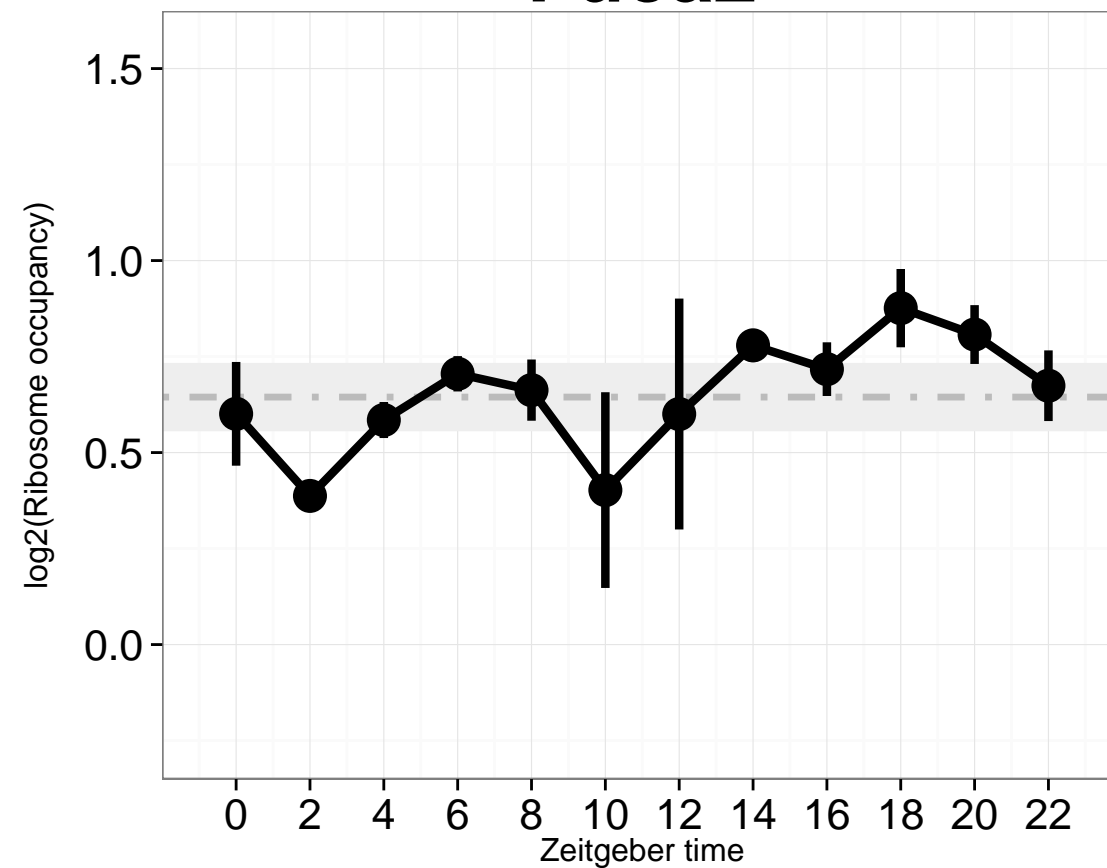

Supplement: Supplementary file 10392 [file 1]

## Ctps

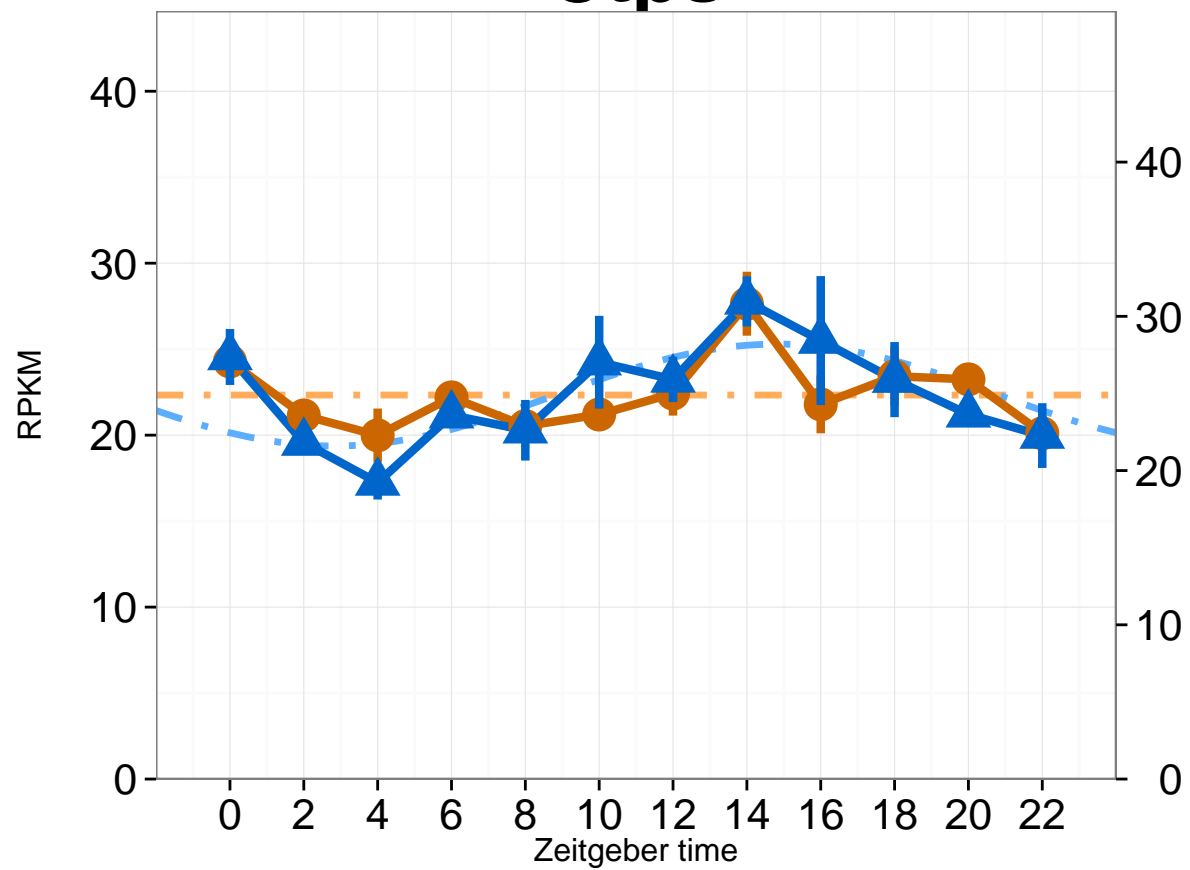

## Ctps

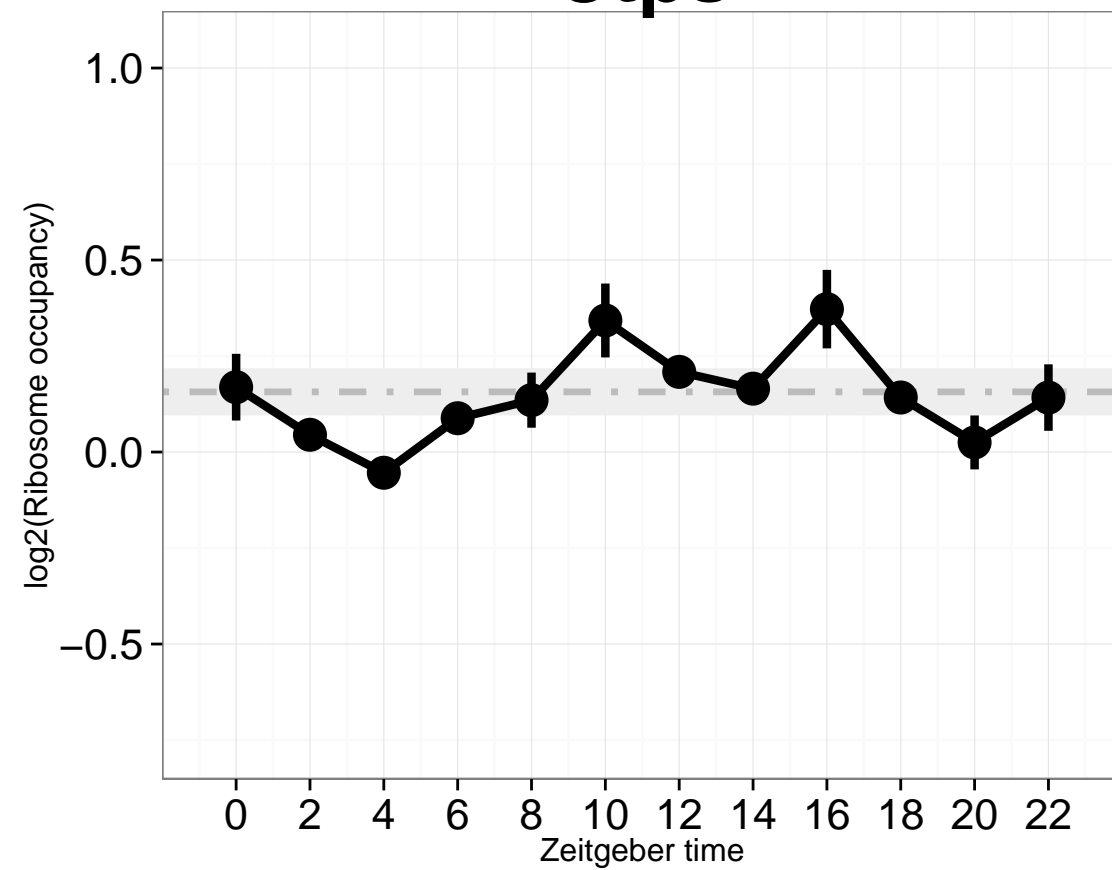

Supplement: Supplementary file 10393 [file 1]

# Desi1

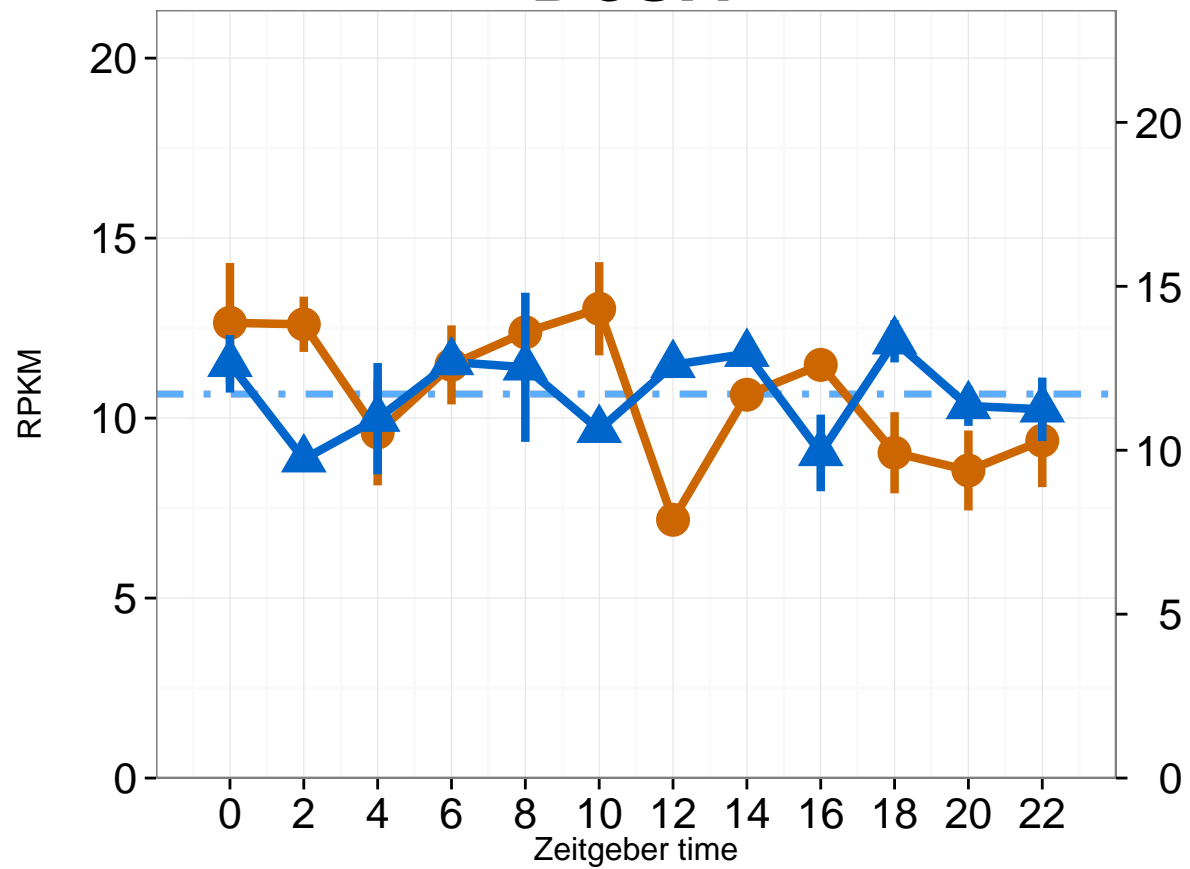

# Desi1

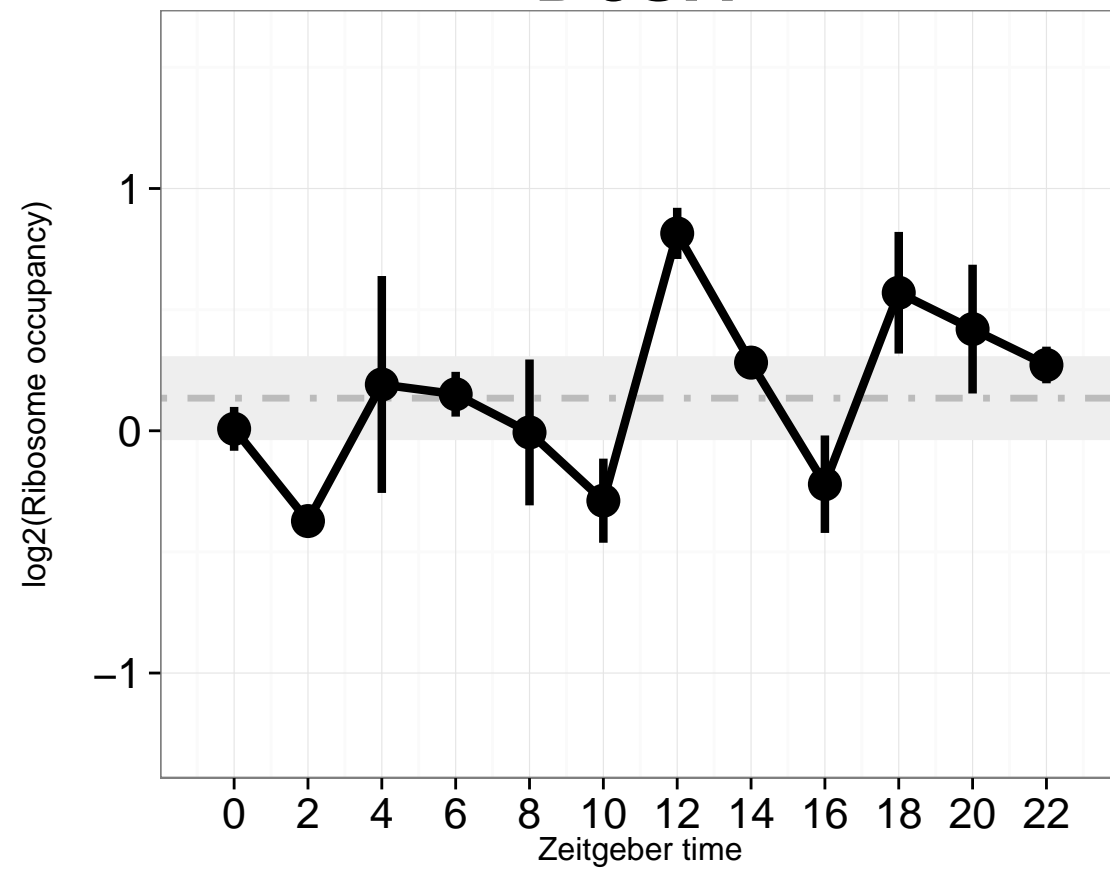

Supplement: Supplementary file 10394 [file 1]

## Sart1

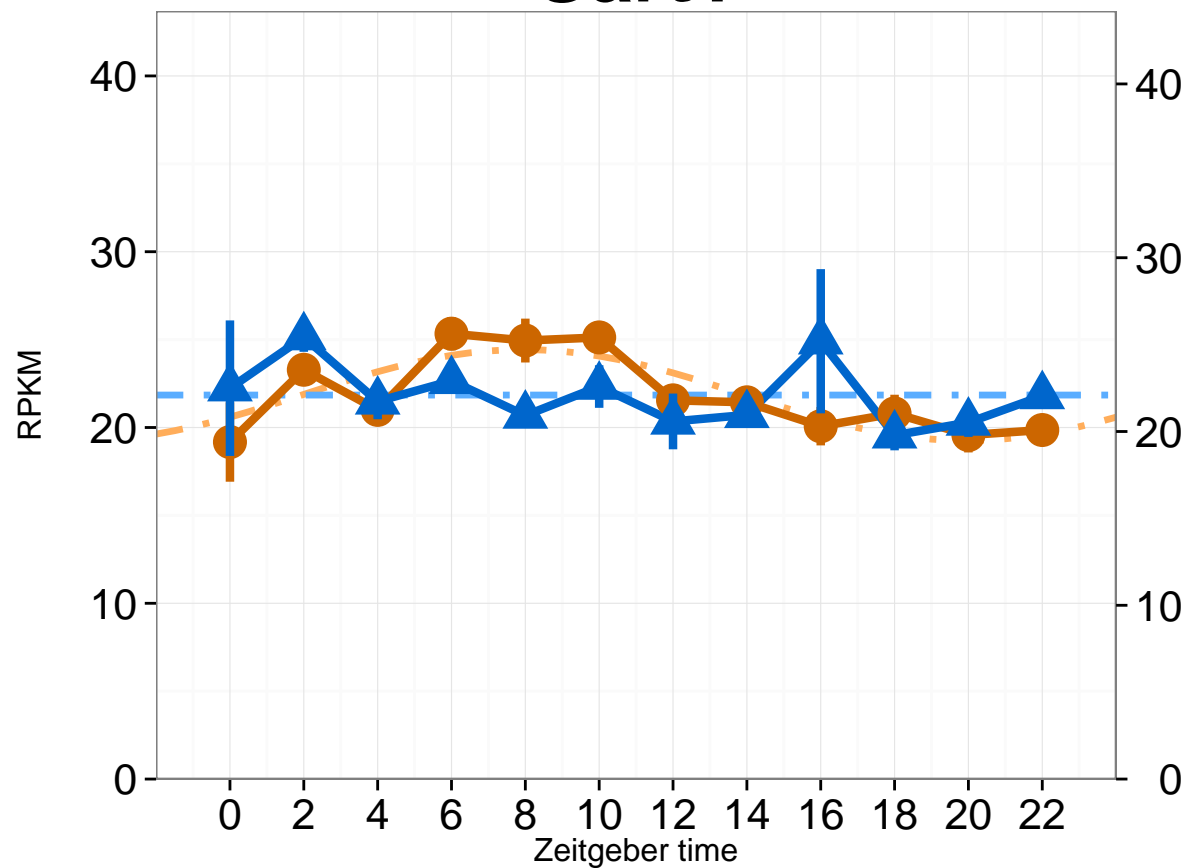

## Sart1

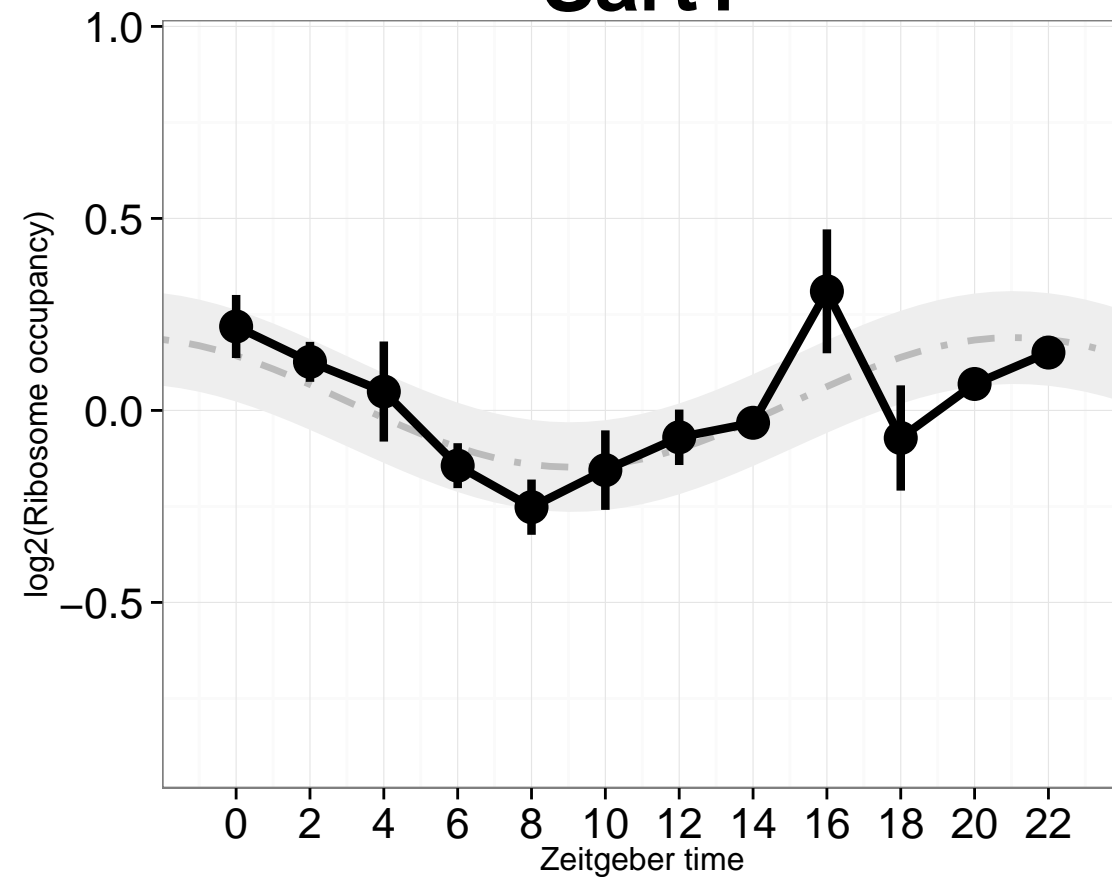

Supplement: Supplementary file 10395 [file 1]

## Myo15b

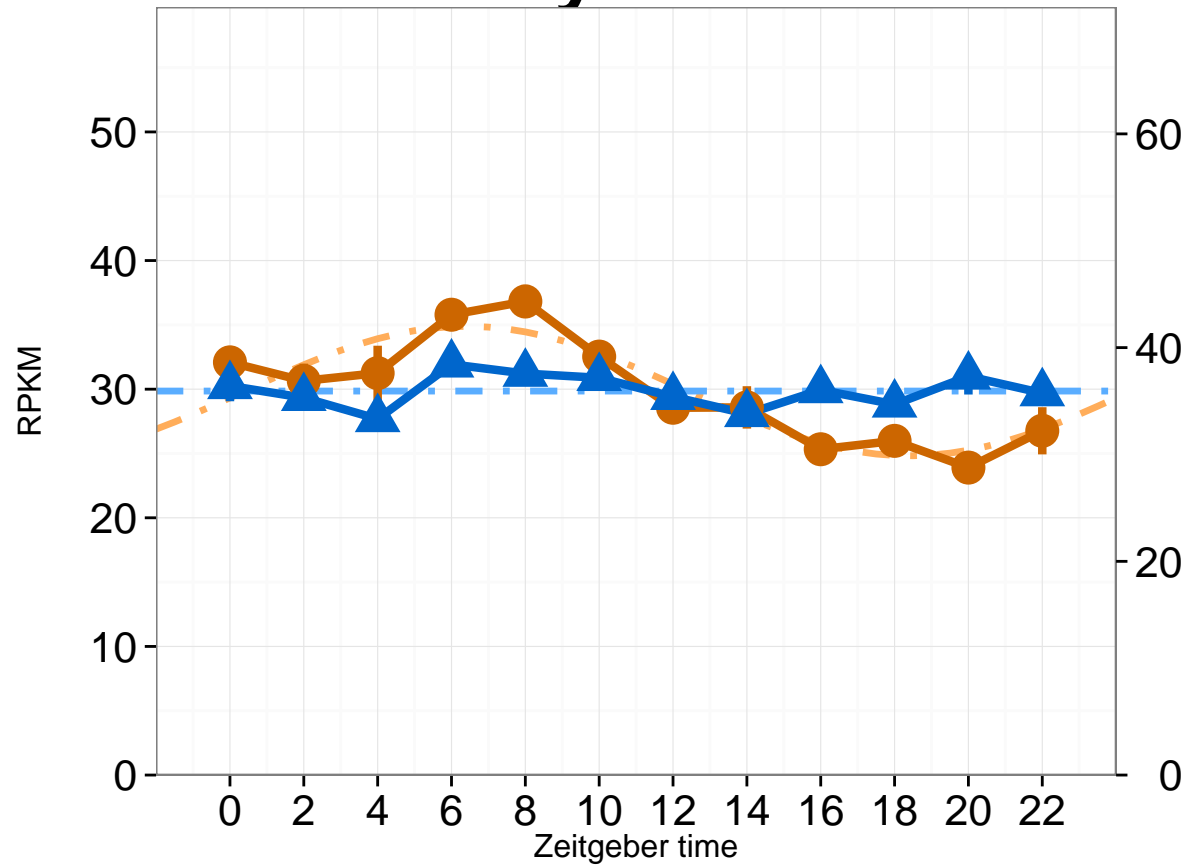

## Myo15b

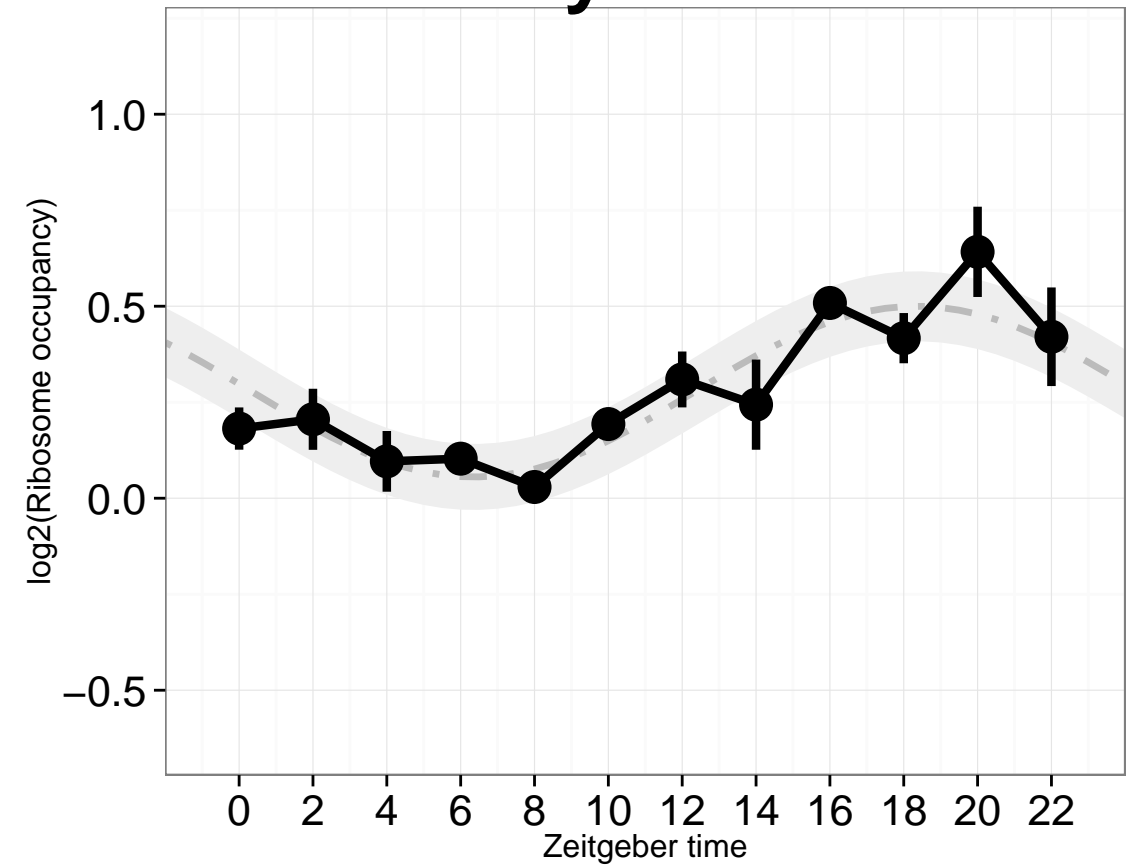

Supplement: Supplementary file 10396 [file 1]

## Zmpste24

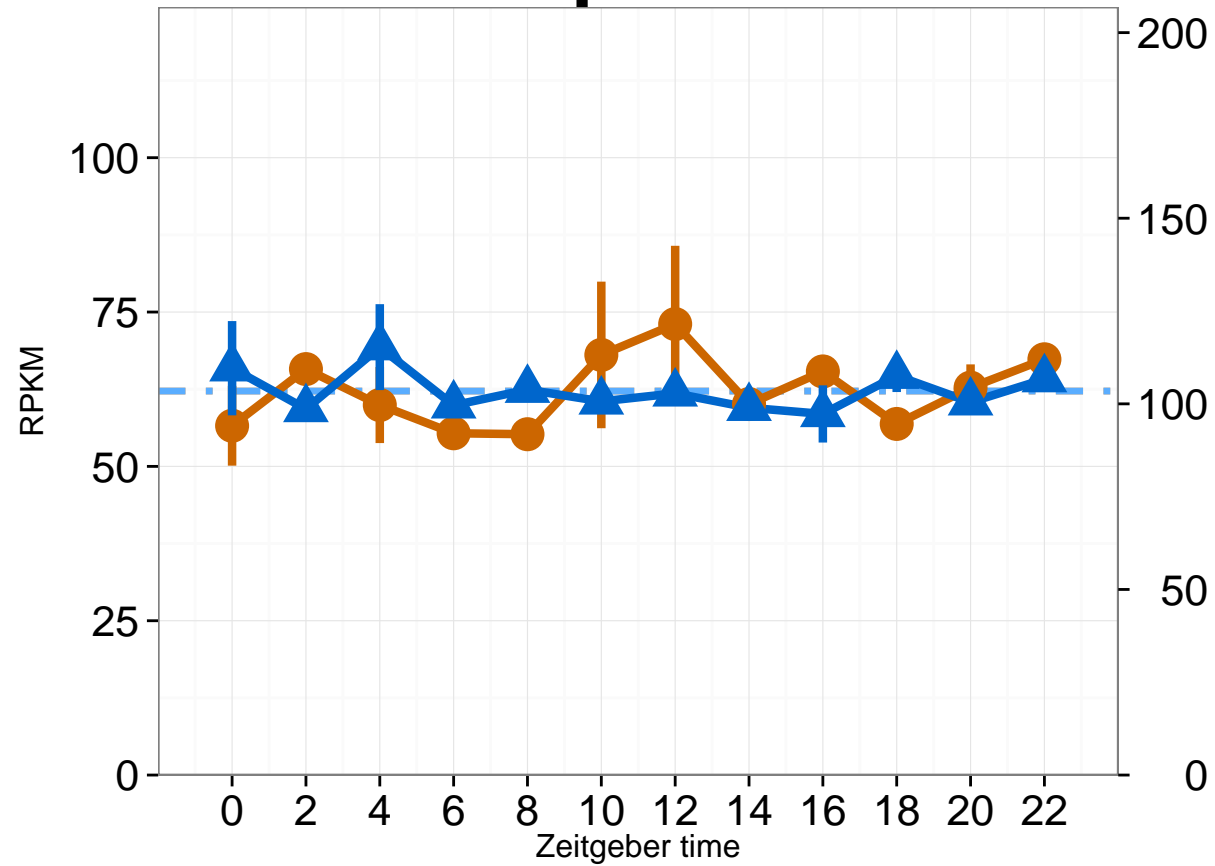

## Zmpste24

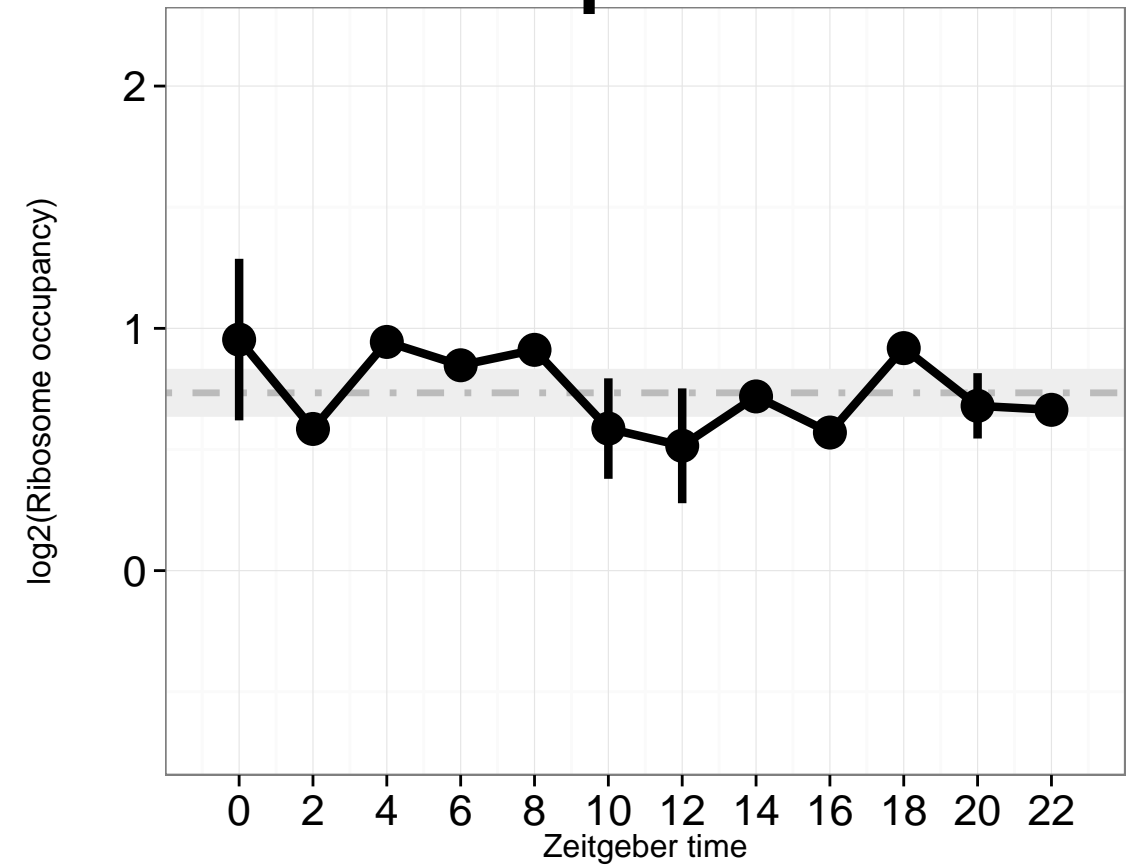

Supplement: Supplementary file 10397 [file 1]

## Wrn

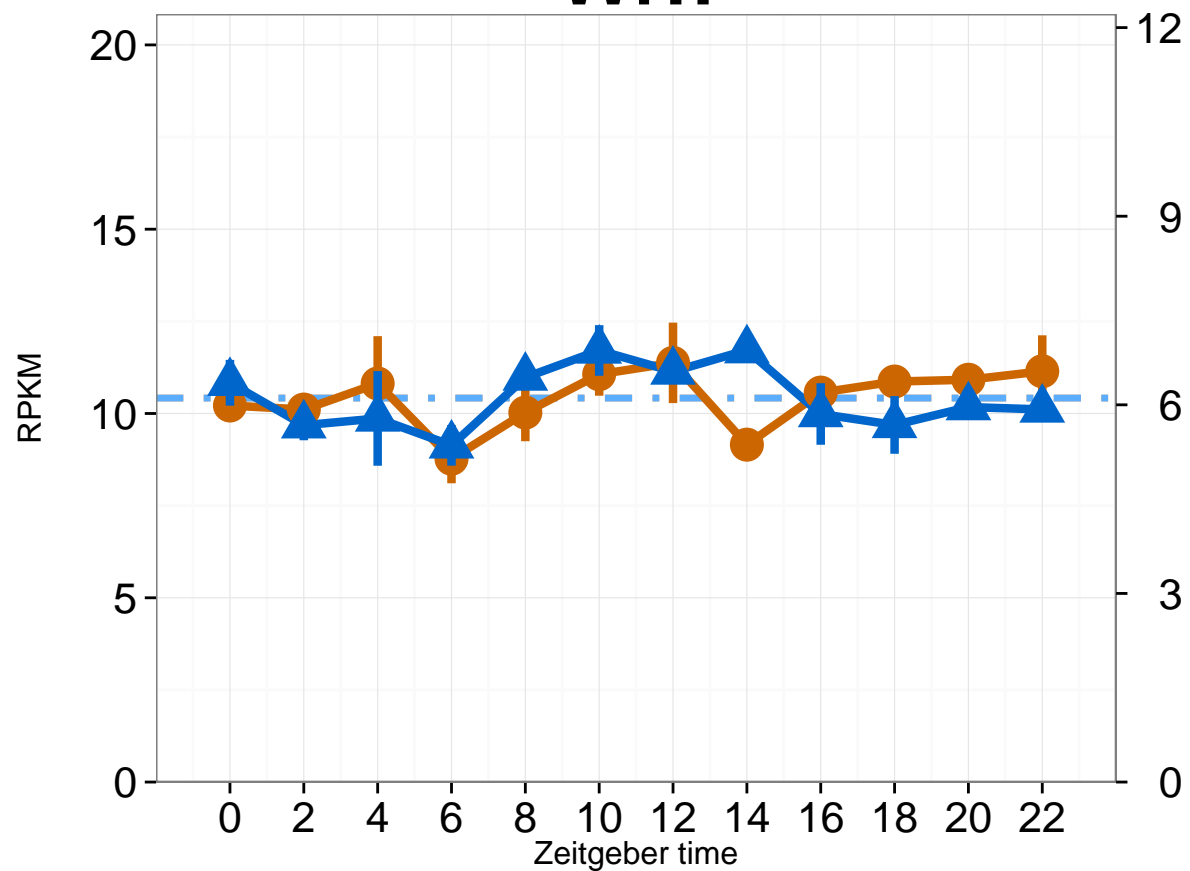

## Wrn

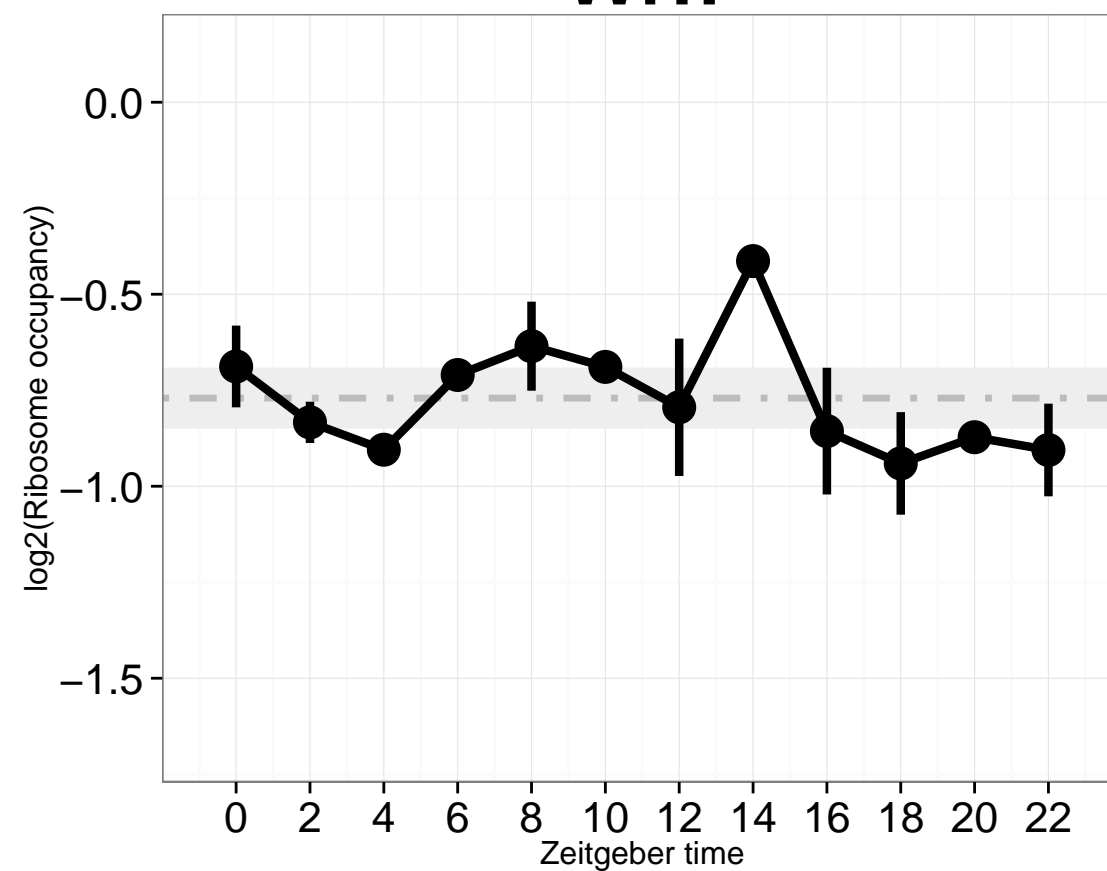

Supplement: Supplementary file 10398 [file 1]

## Themis2

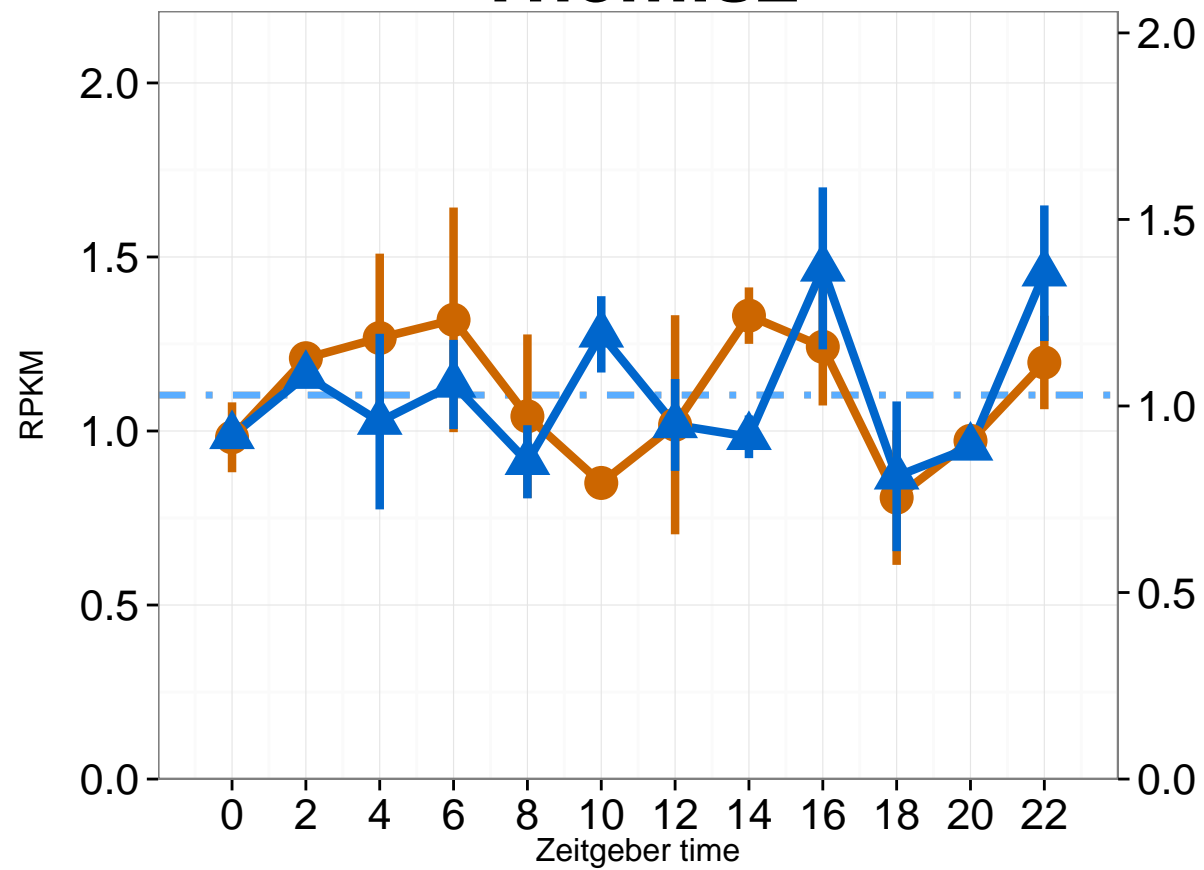

## Themis2

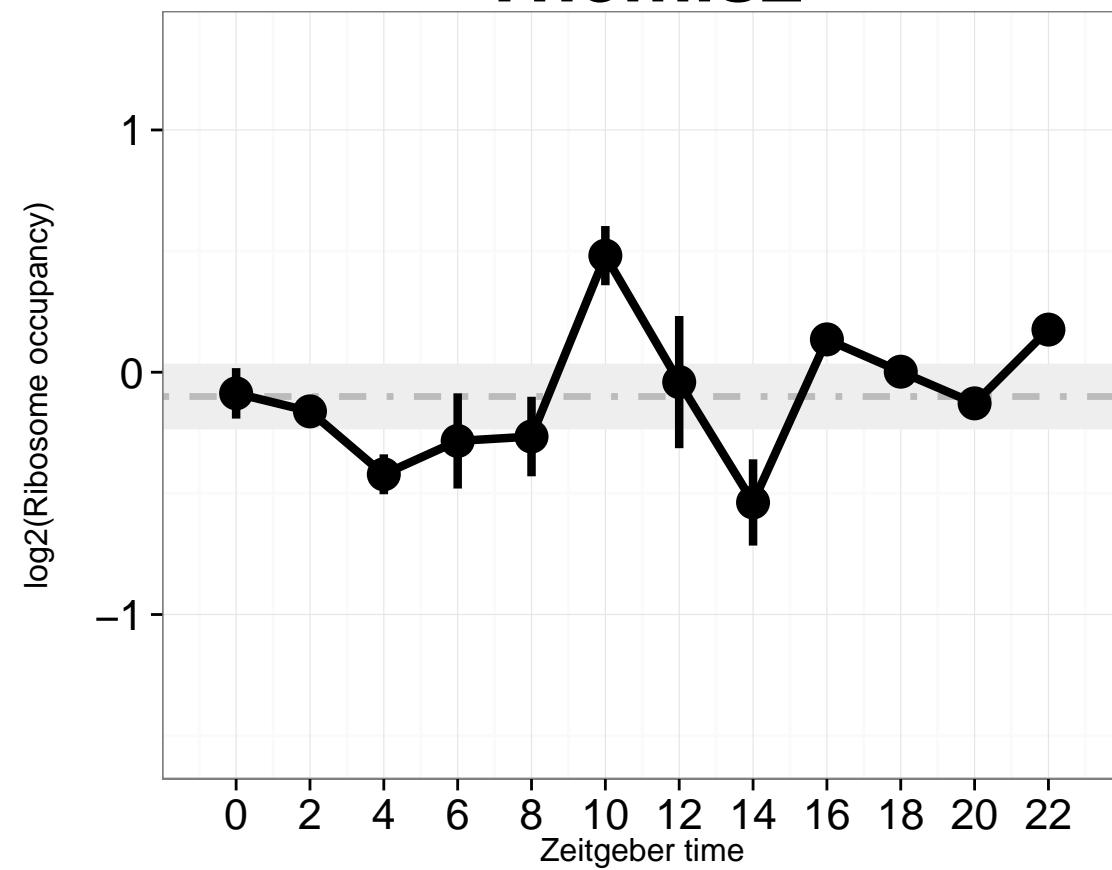

Supplement: Supplementary file 10399 [file 1]

# Usp16

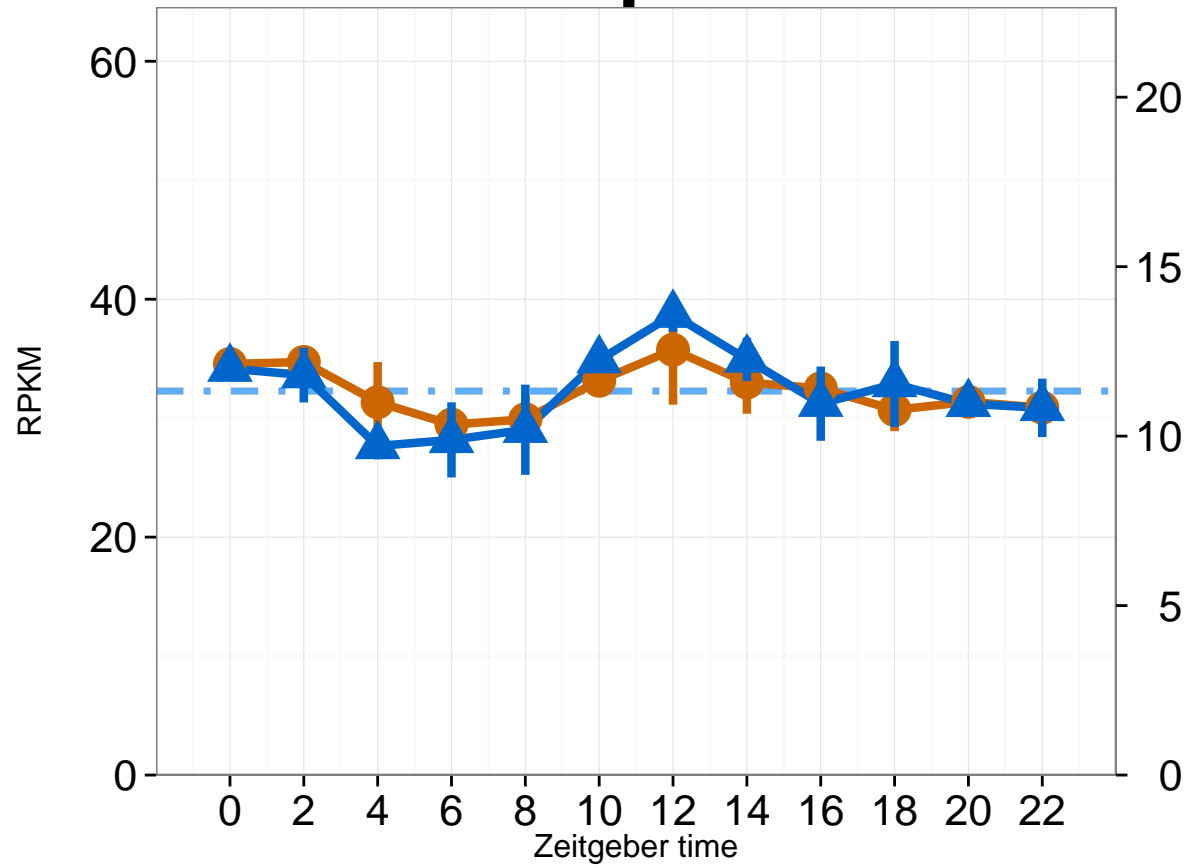

# Usp16

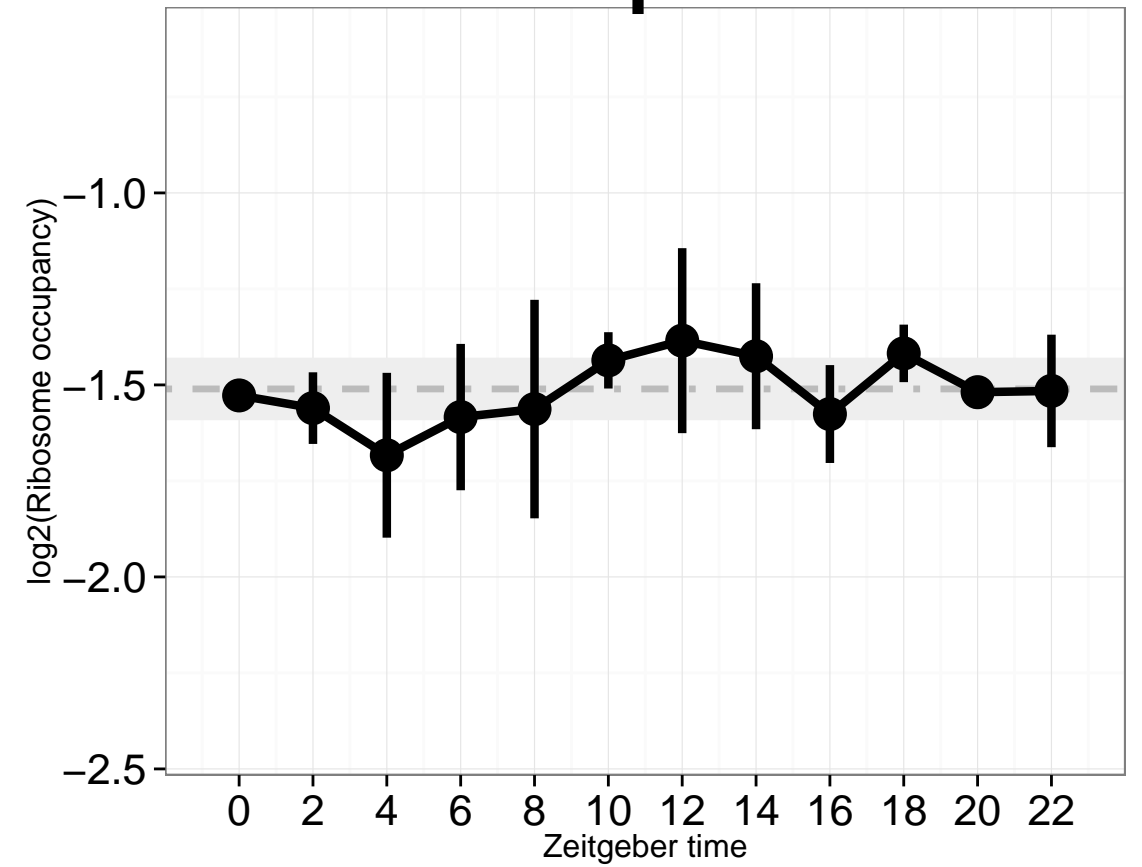

Supplement: Supplementary file 10400 [file 1]

# Angel1

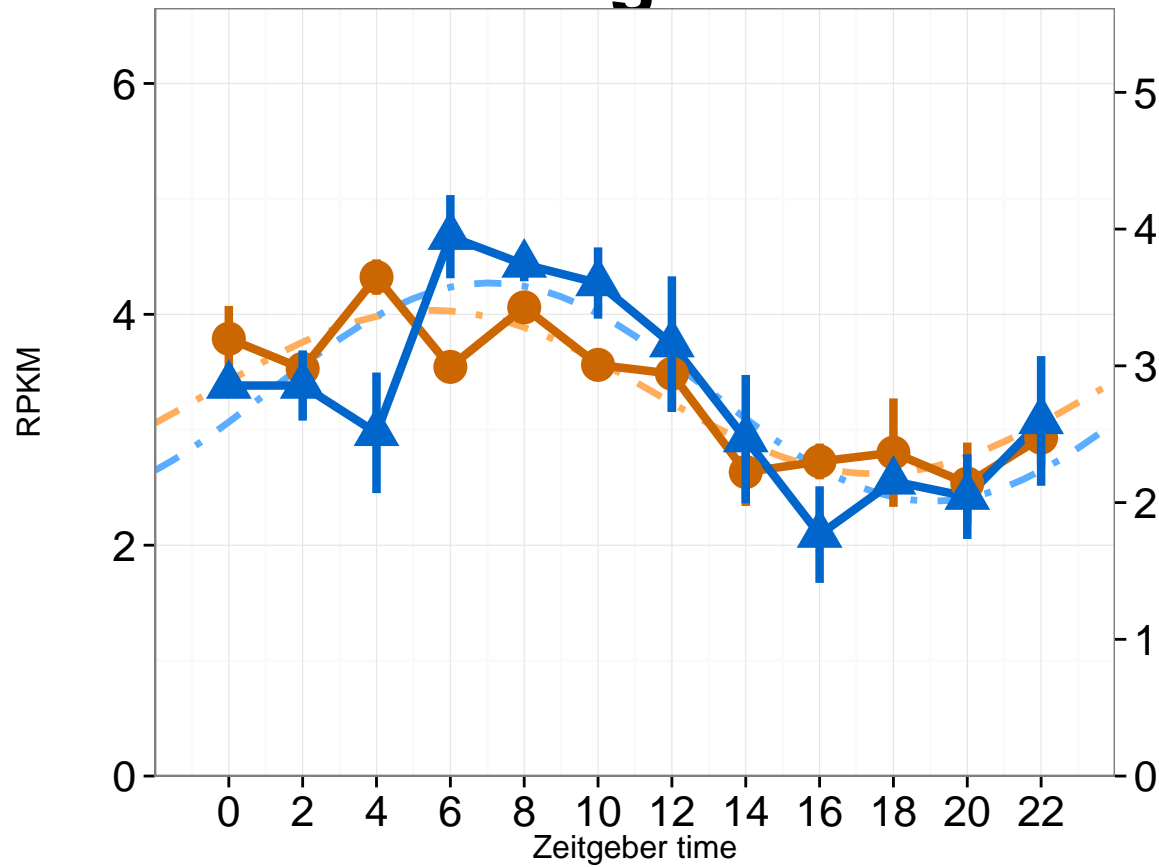

# Angel1

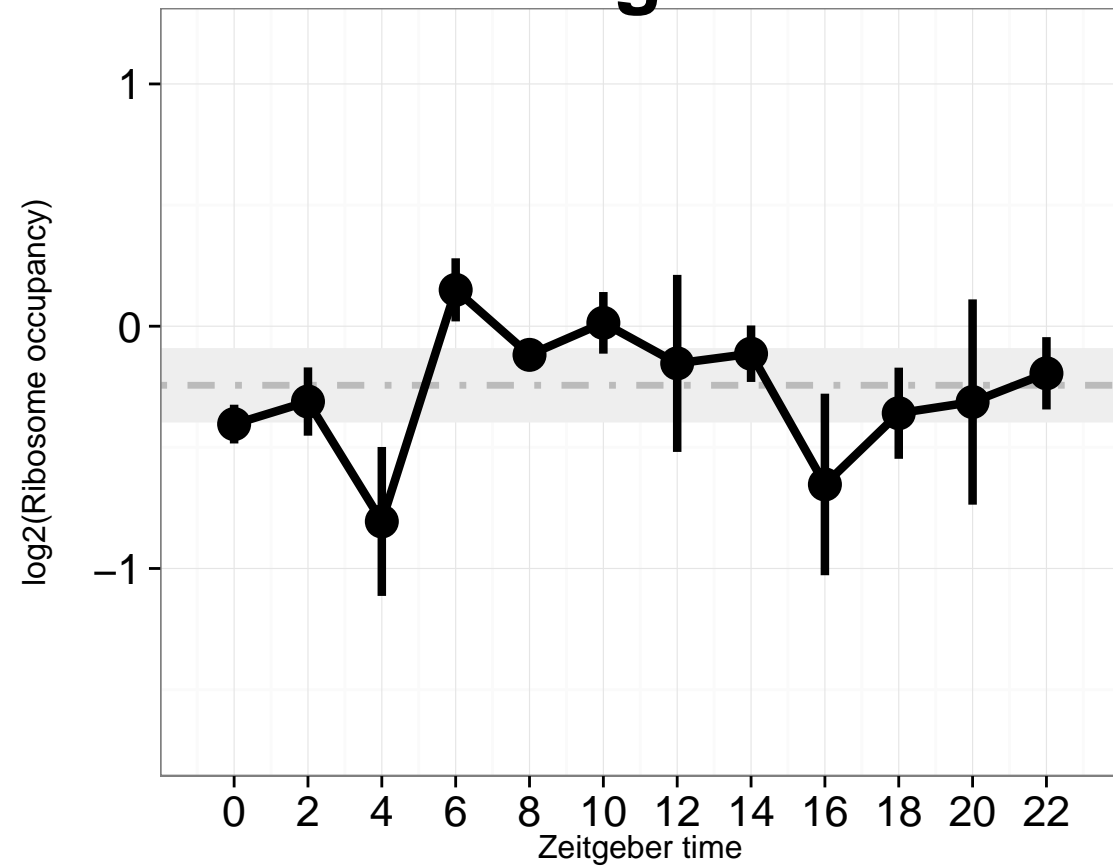

Supplement: Supplementary file 10401 [file 1]

# Zdhhc14

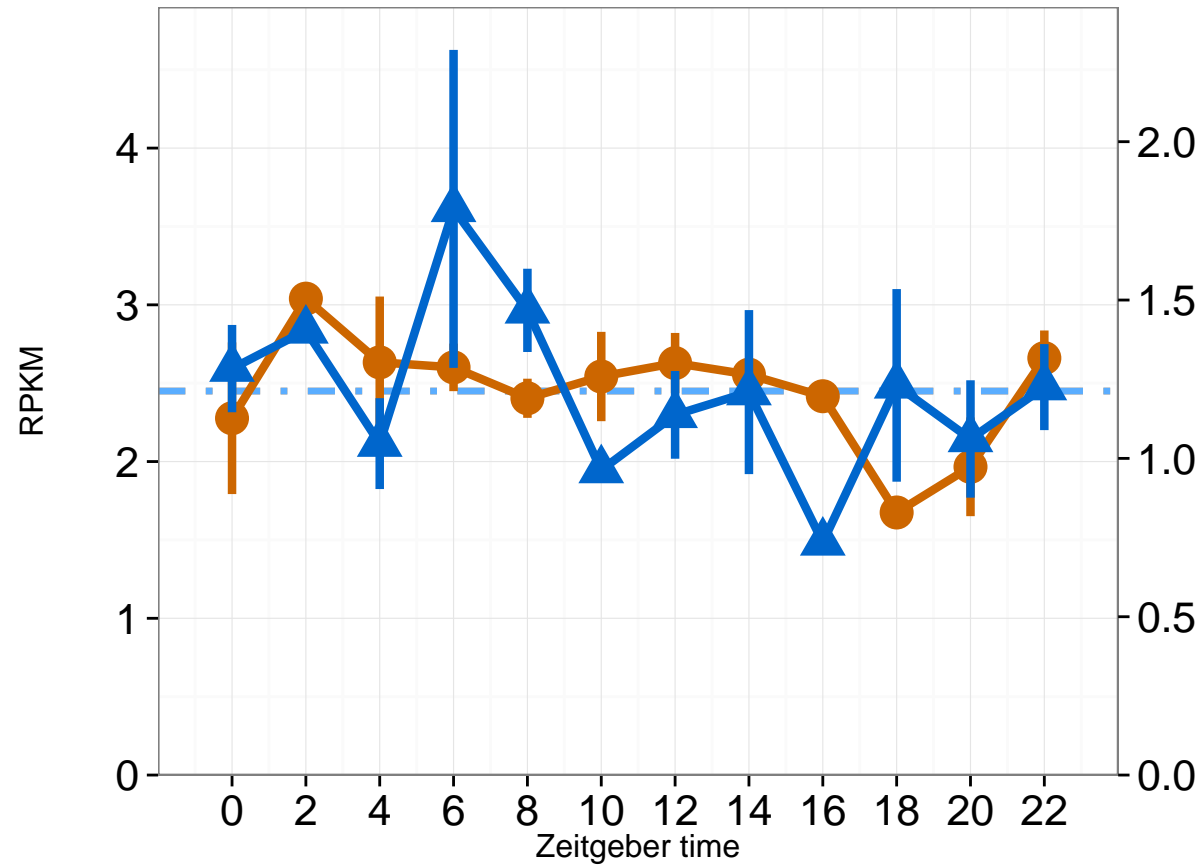

# Zdhhc14

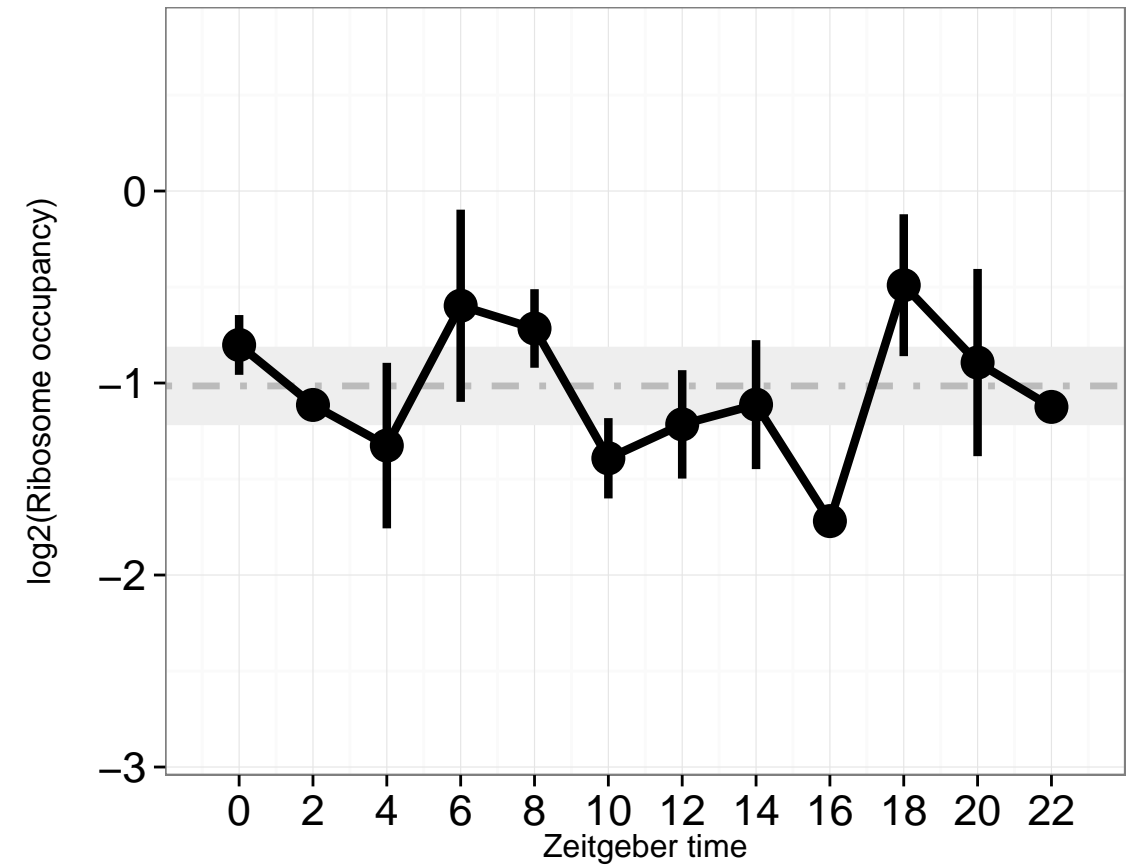

Supplement: Supplementary file 10402 [file 1]

## Rab43

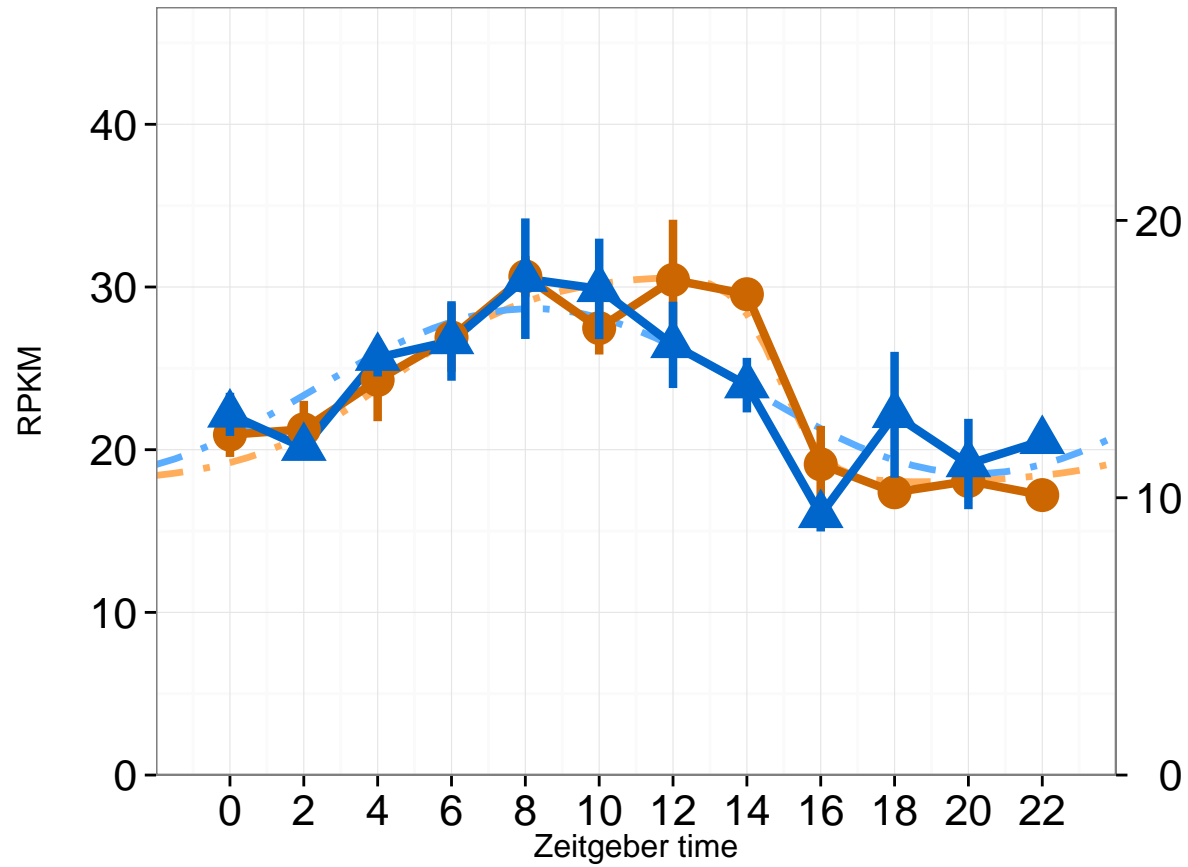

## Rab43

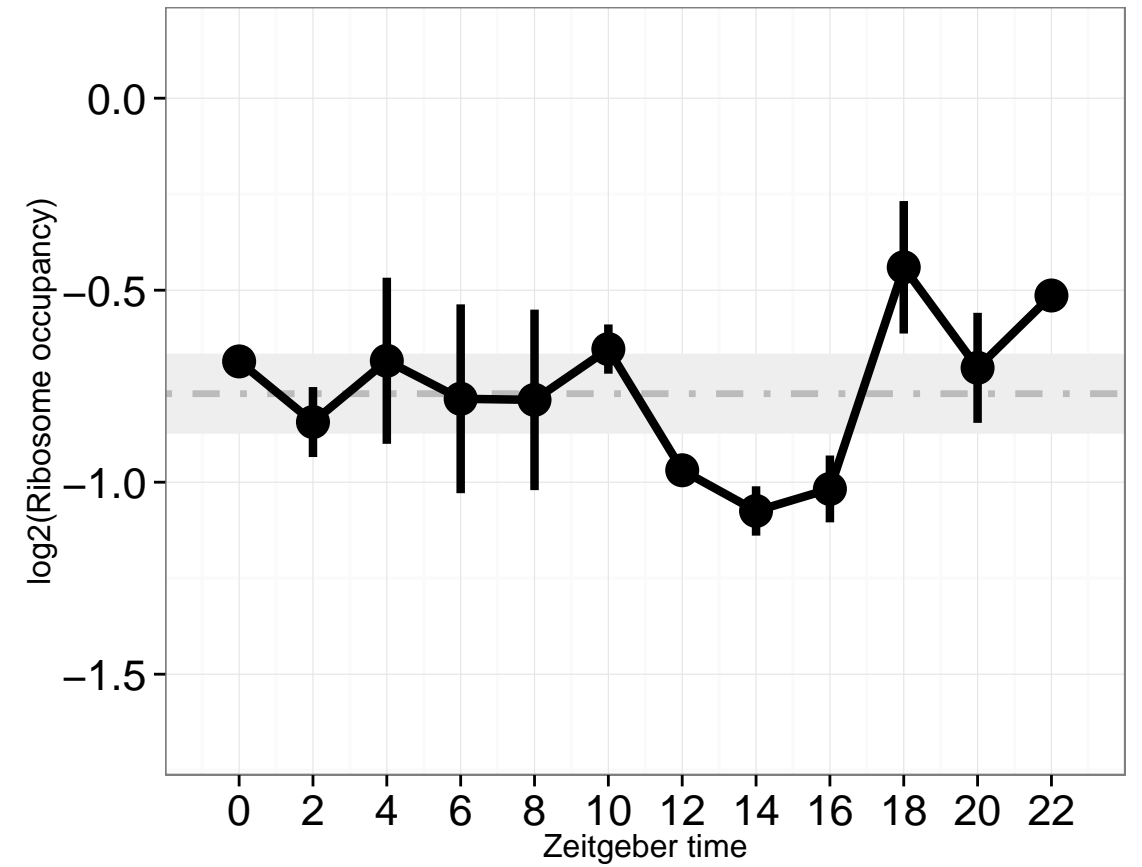

Supplement: Supplementary file 10403 [file 1]

## Rassf3

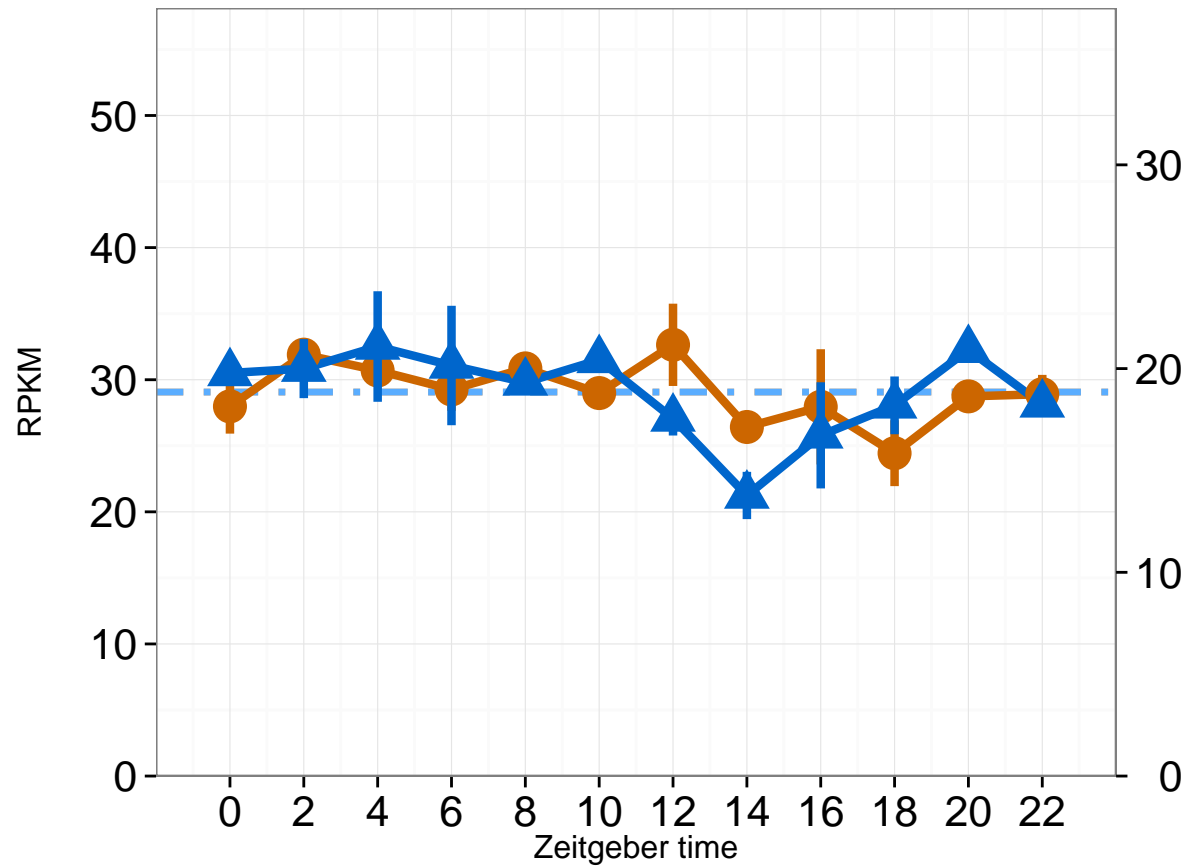

## Rassf3

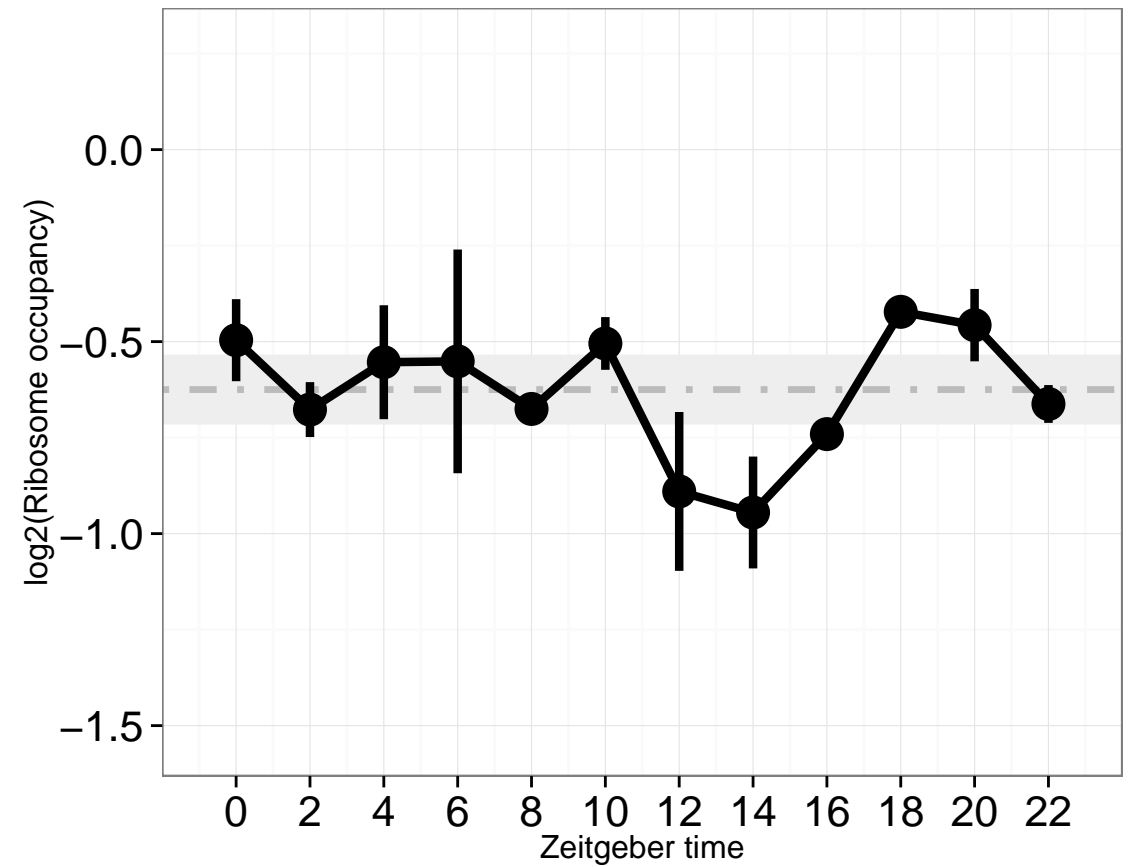

Supplement: Supplementary file 10404 [file 1]

## Lmnb2

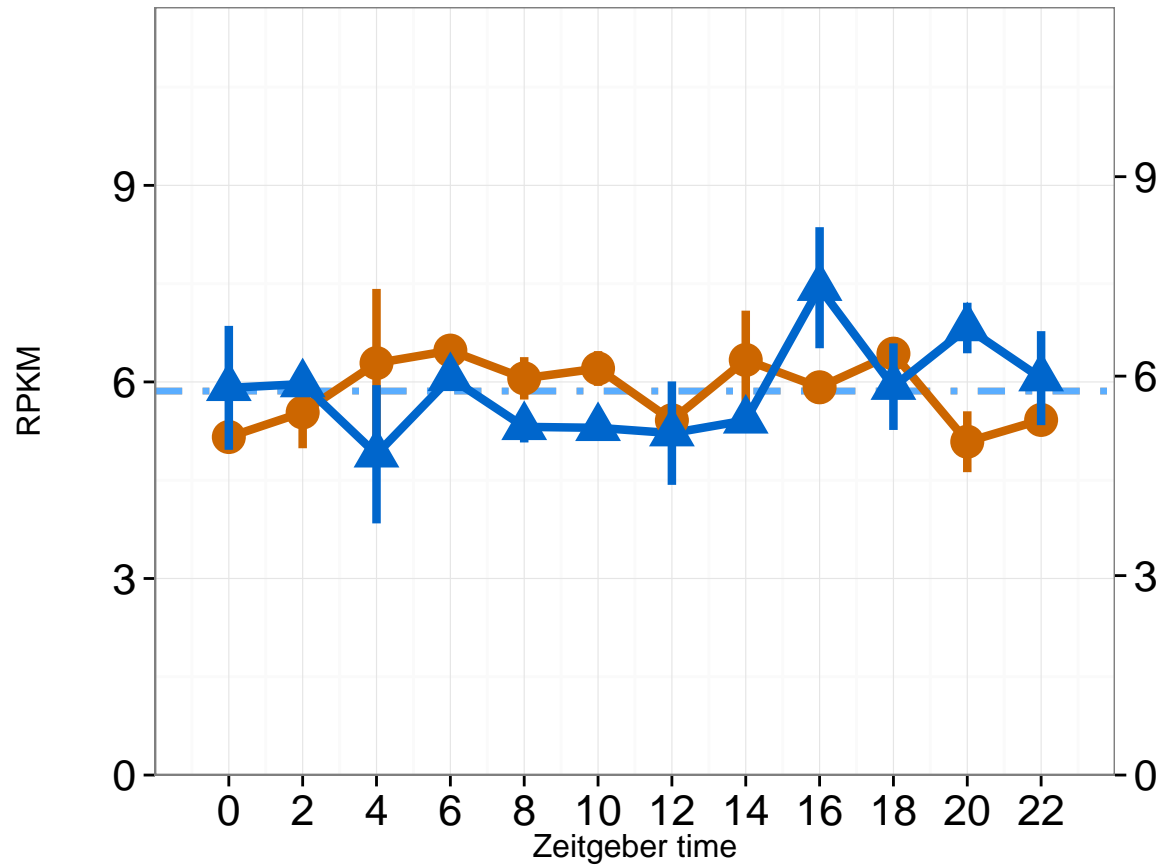

## Lmnb2

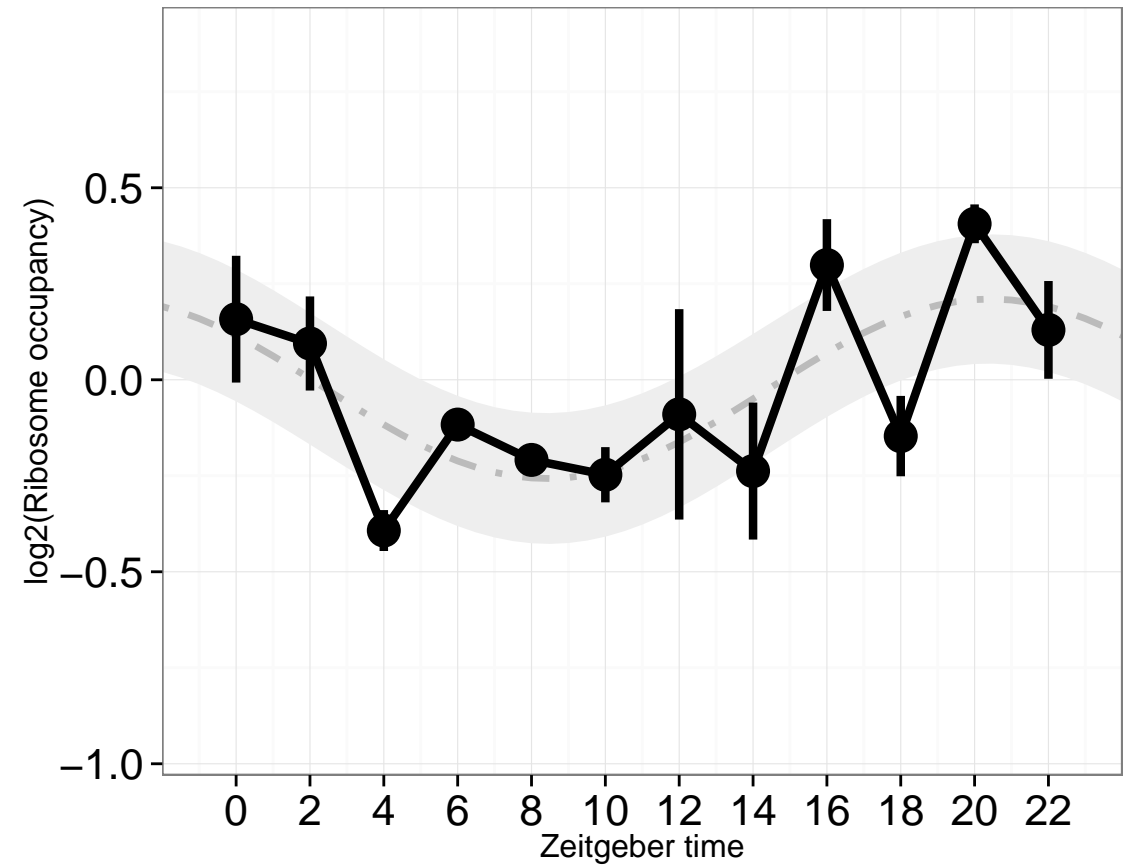

Supplement: Supplementary file 10405 [file 1]

## Ppp1r15b

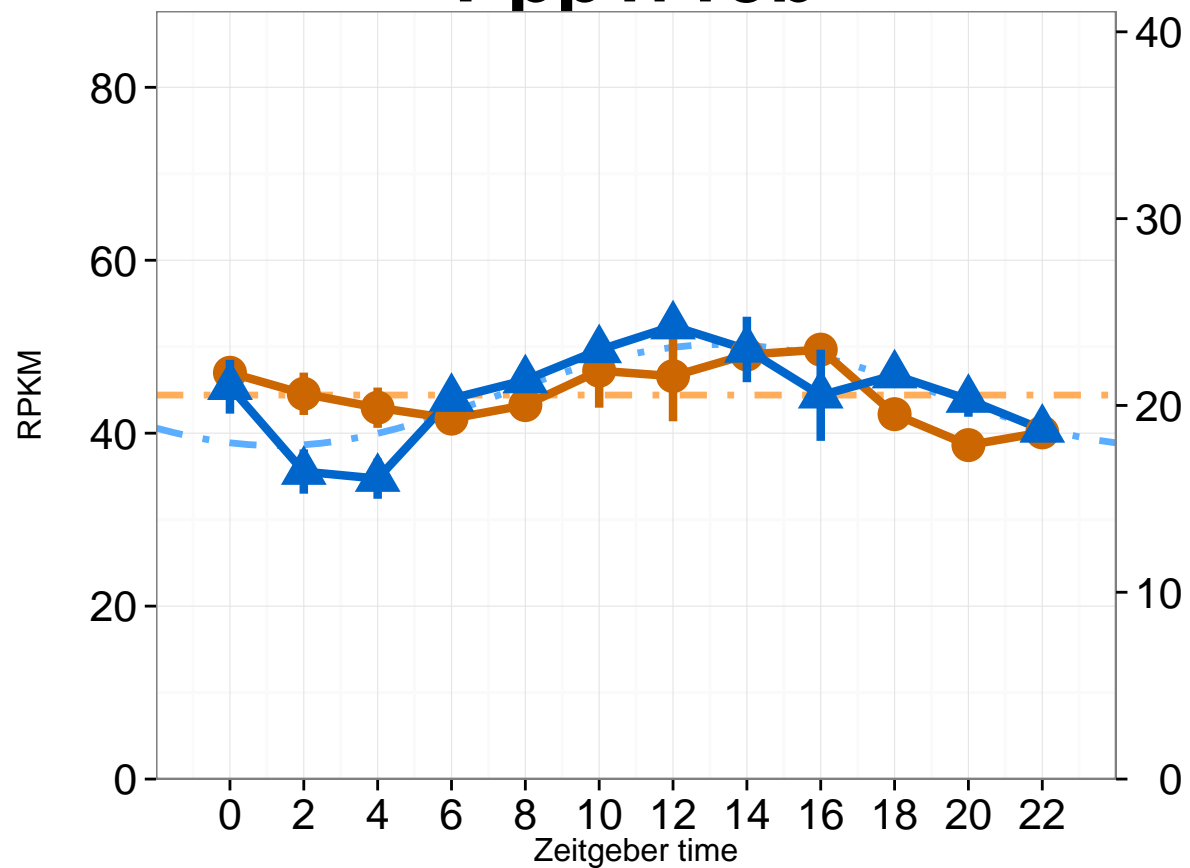

## Ppp1r15b

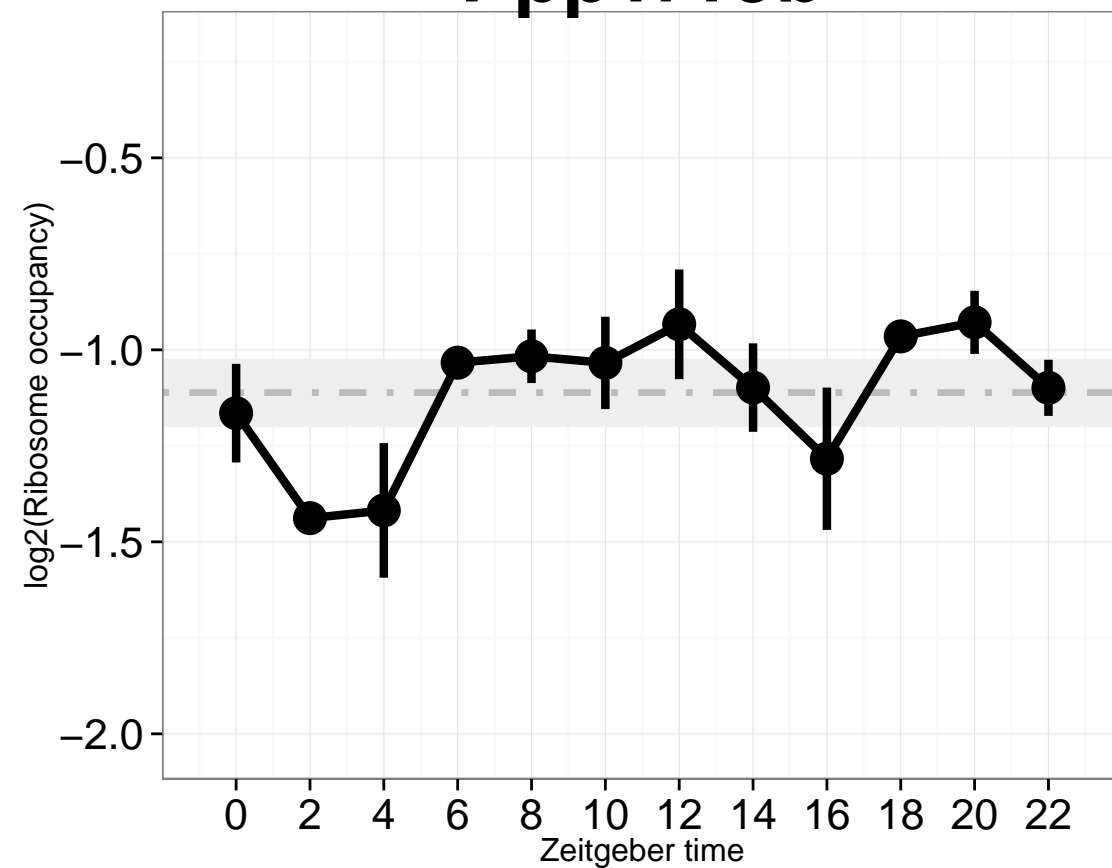

Supplement: Supplementary file 10406 [file 1]

# Gpr19

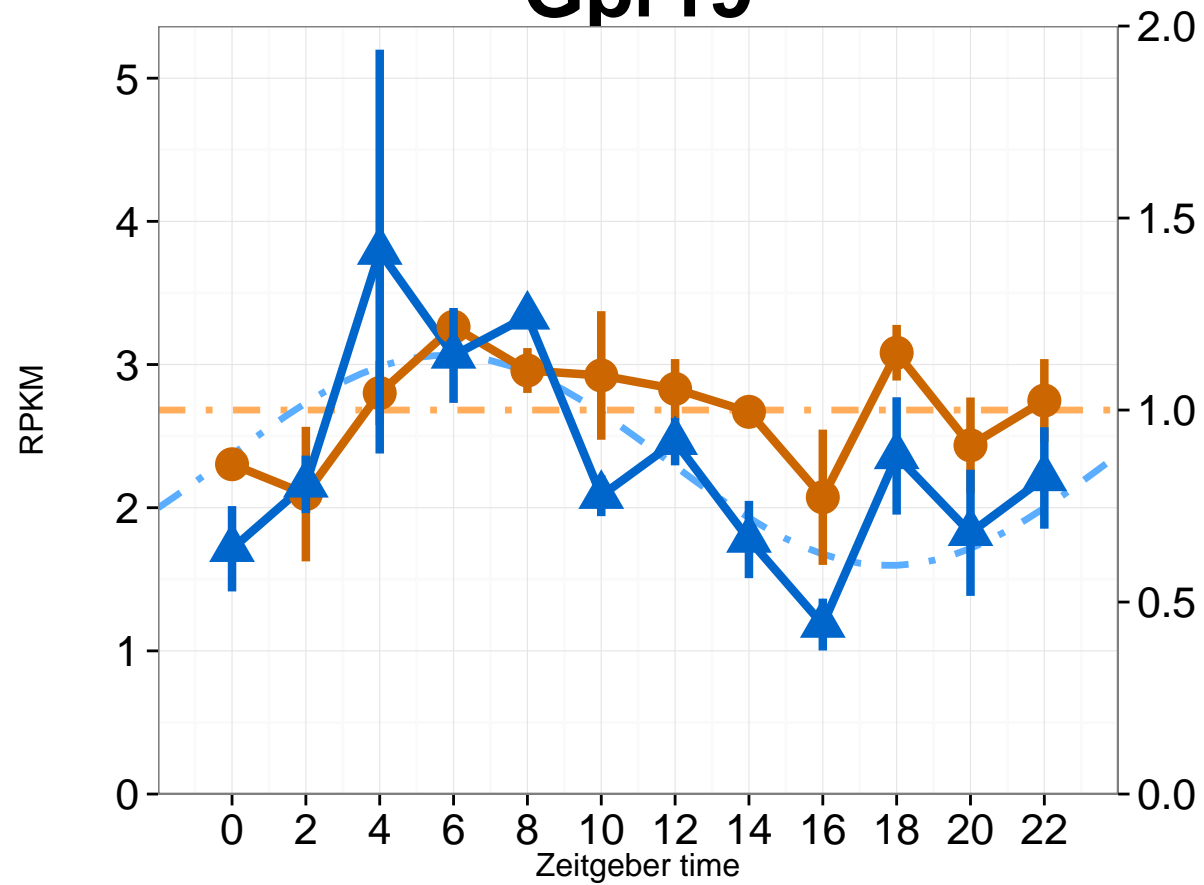

# Gpr19

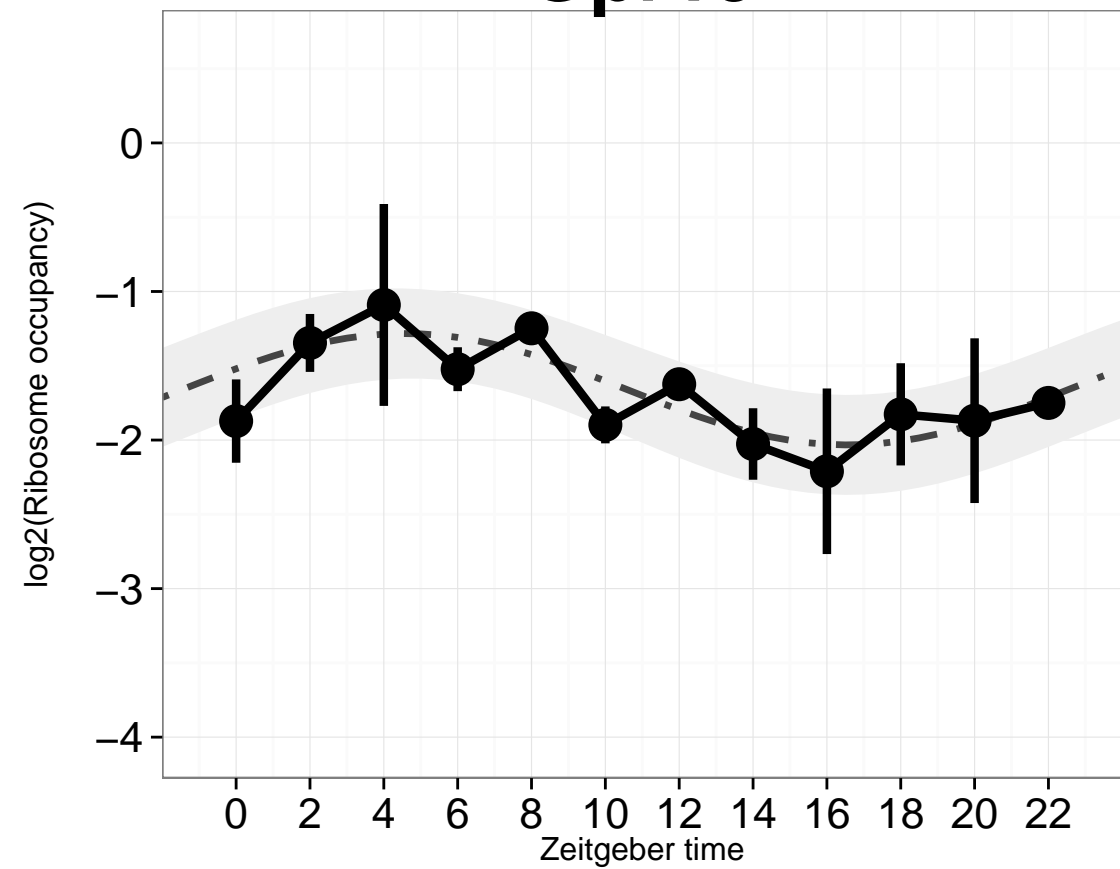

Supplement: Supplementary file 10407 [file 1]

## Aspn

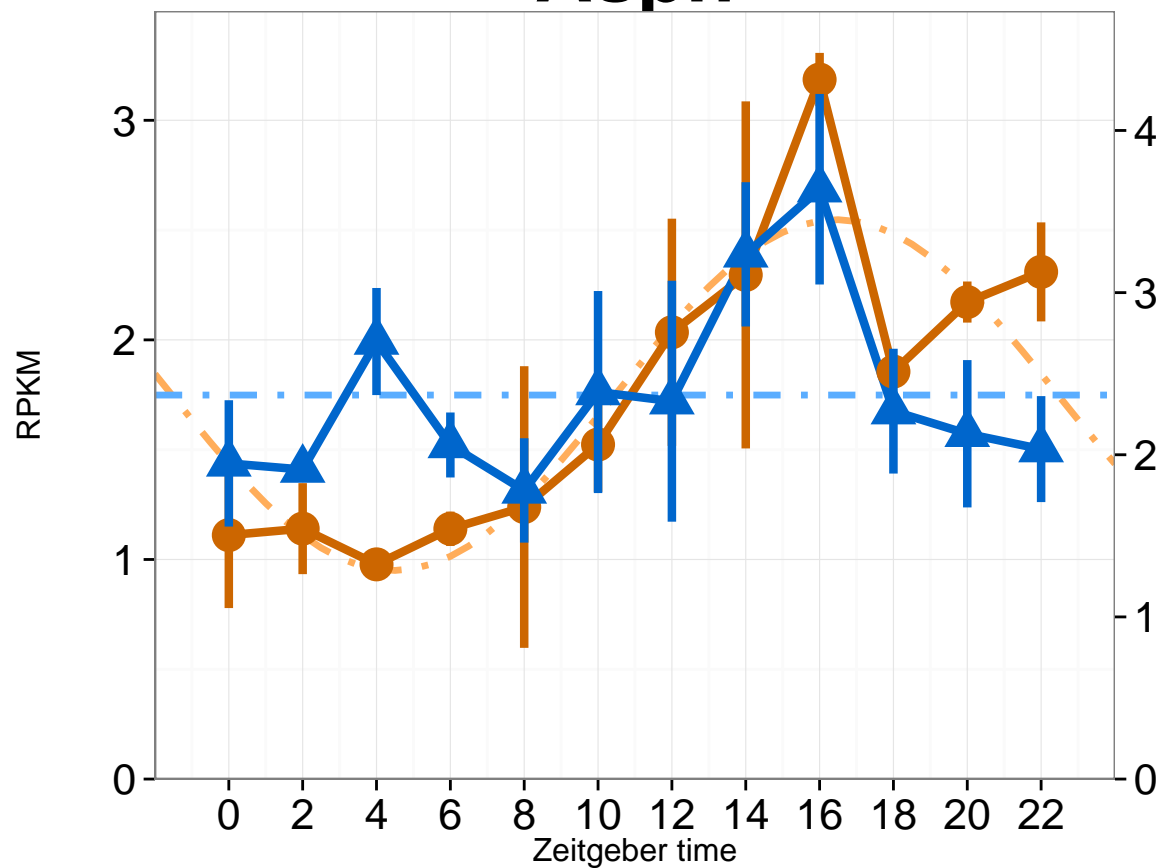

## Aspn

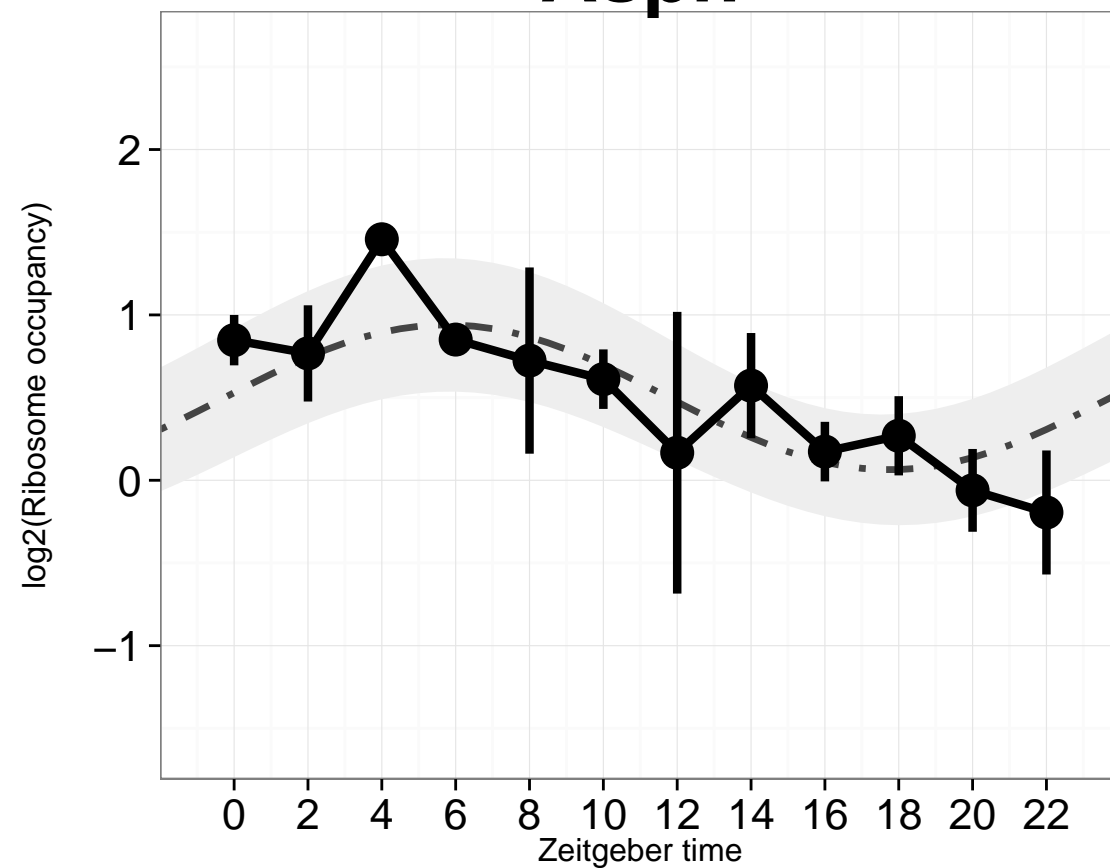

Supplement: Supplementary file 10408 [file 1]

## Rbm34

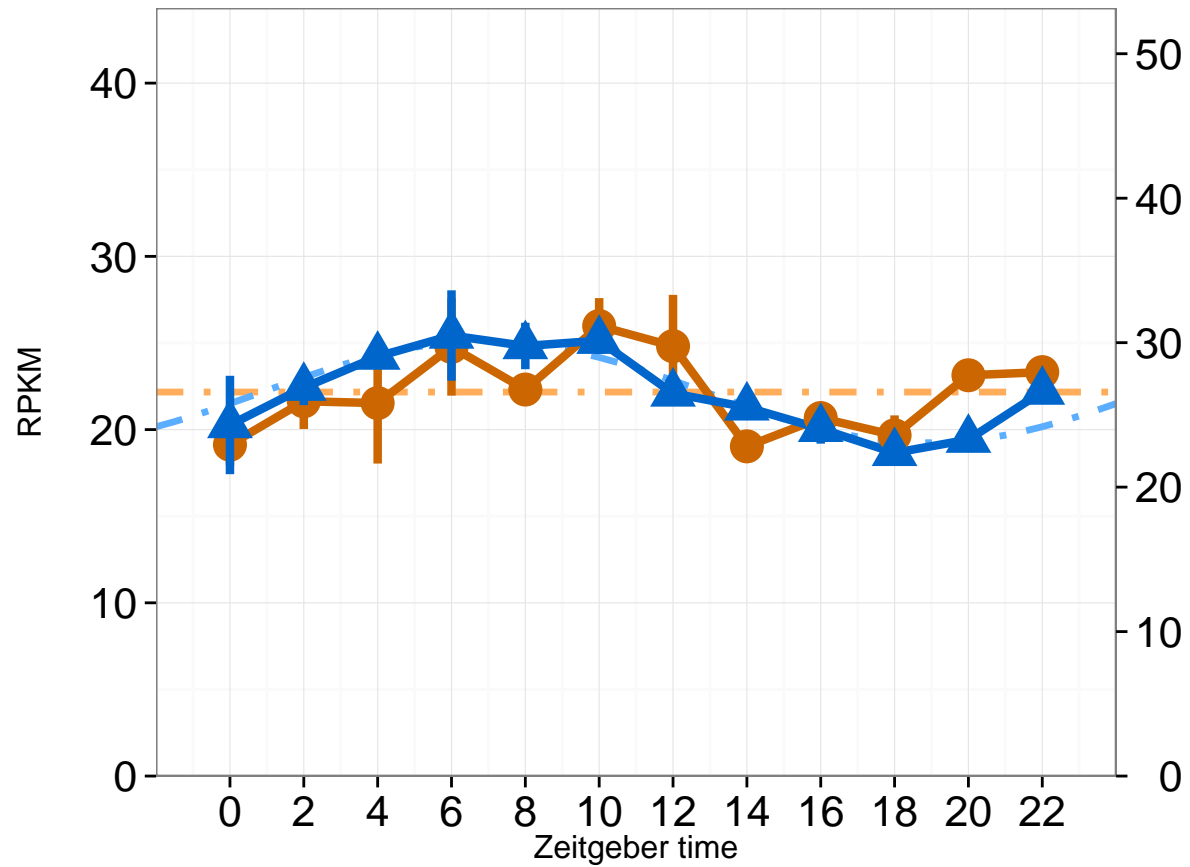

## Rbm34

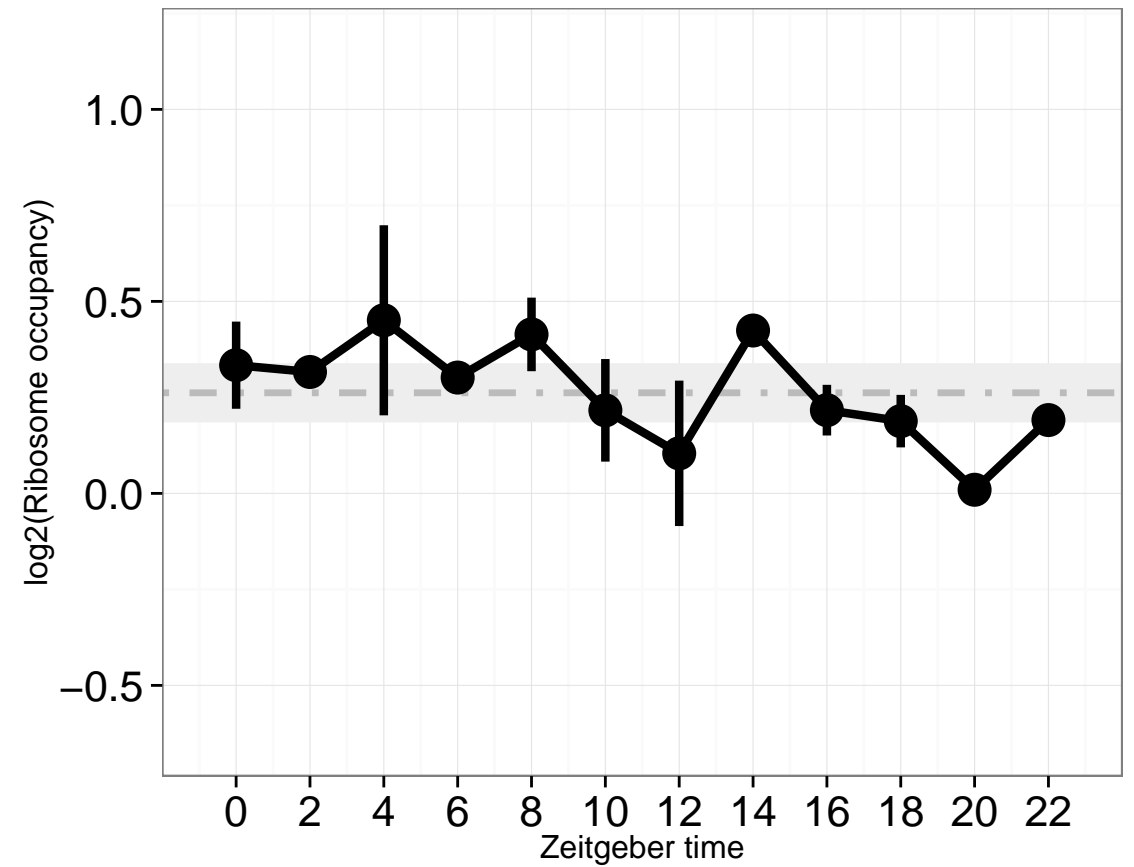

Supplement: Supplementary file 10409 [file 1]

# Mbtps1

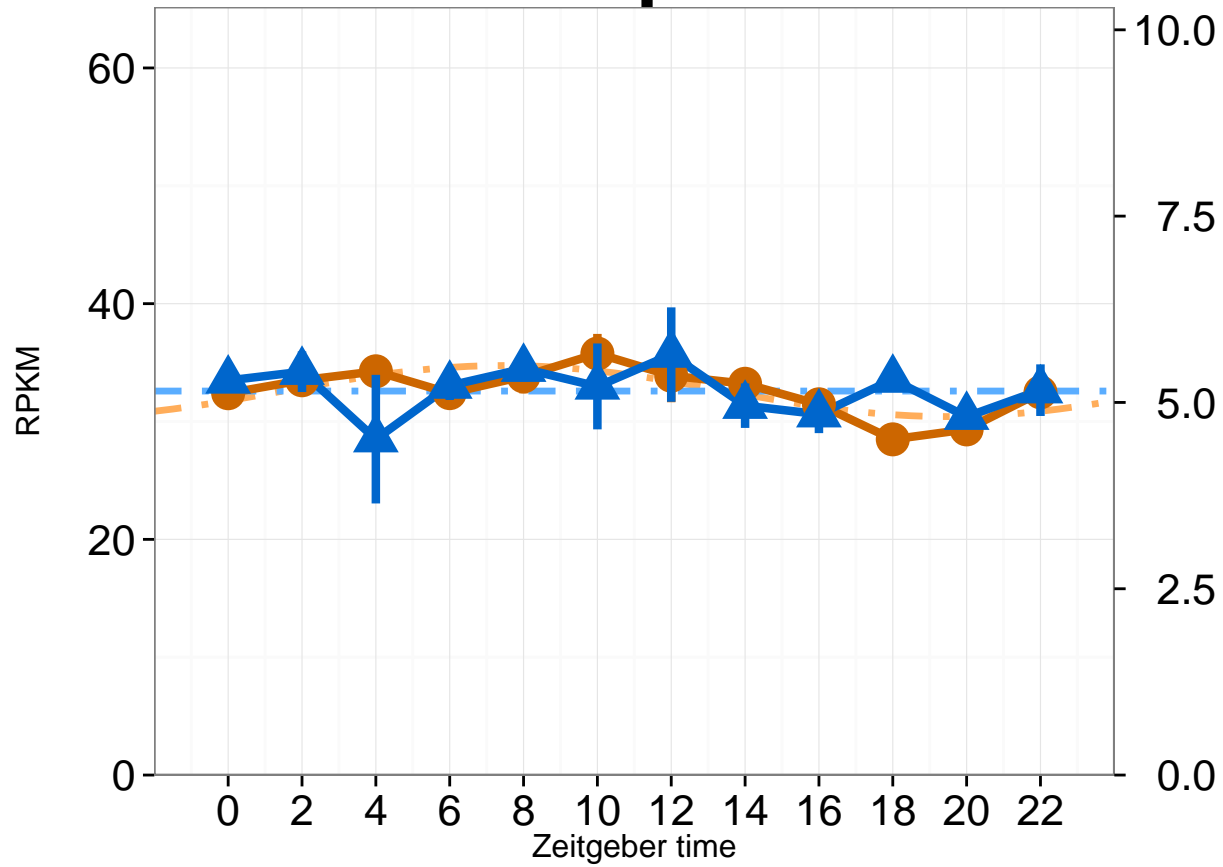

# Mbtps1

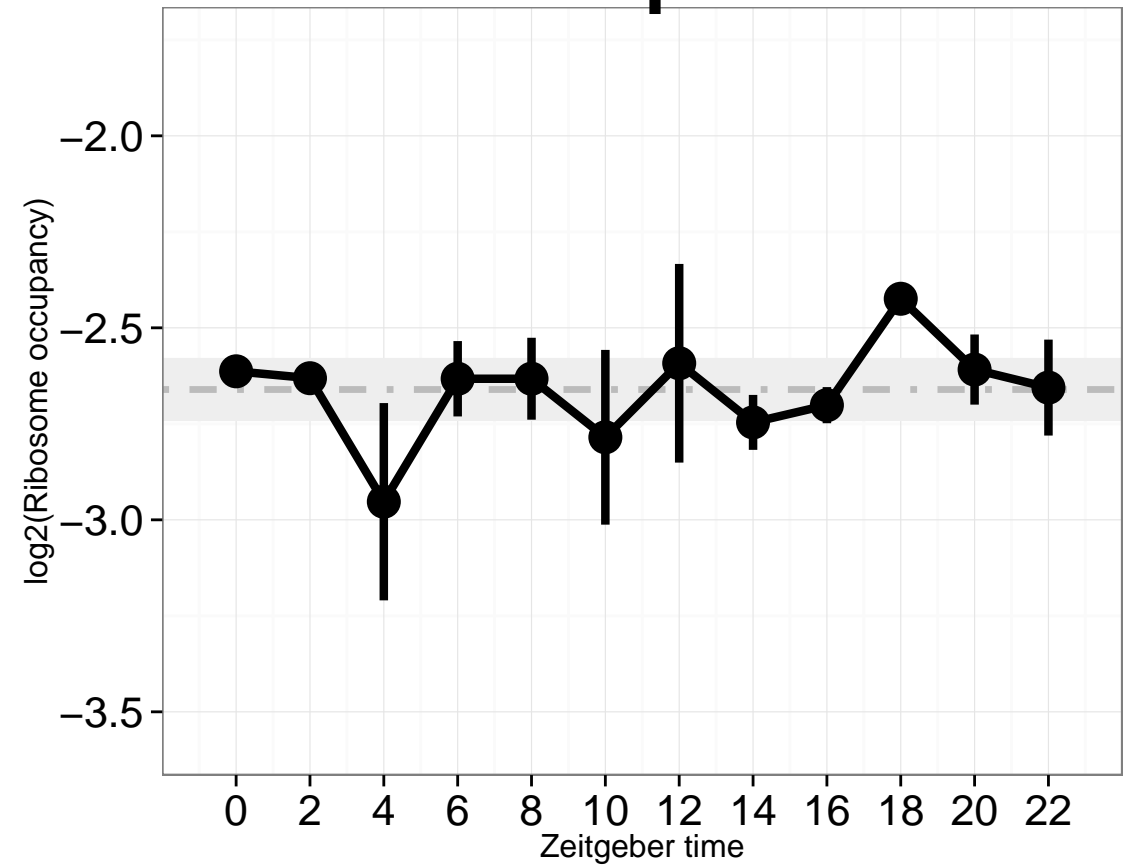

Supplement: Supplementary file 10410 [file 1]

# Slco4c1

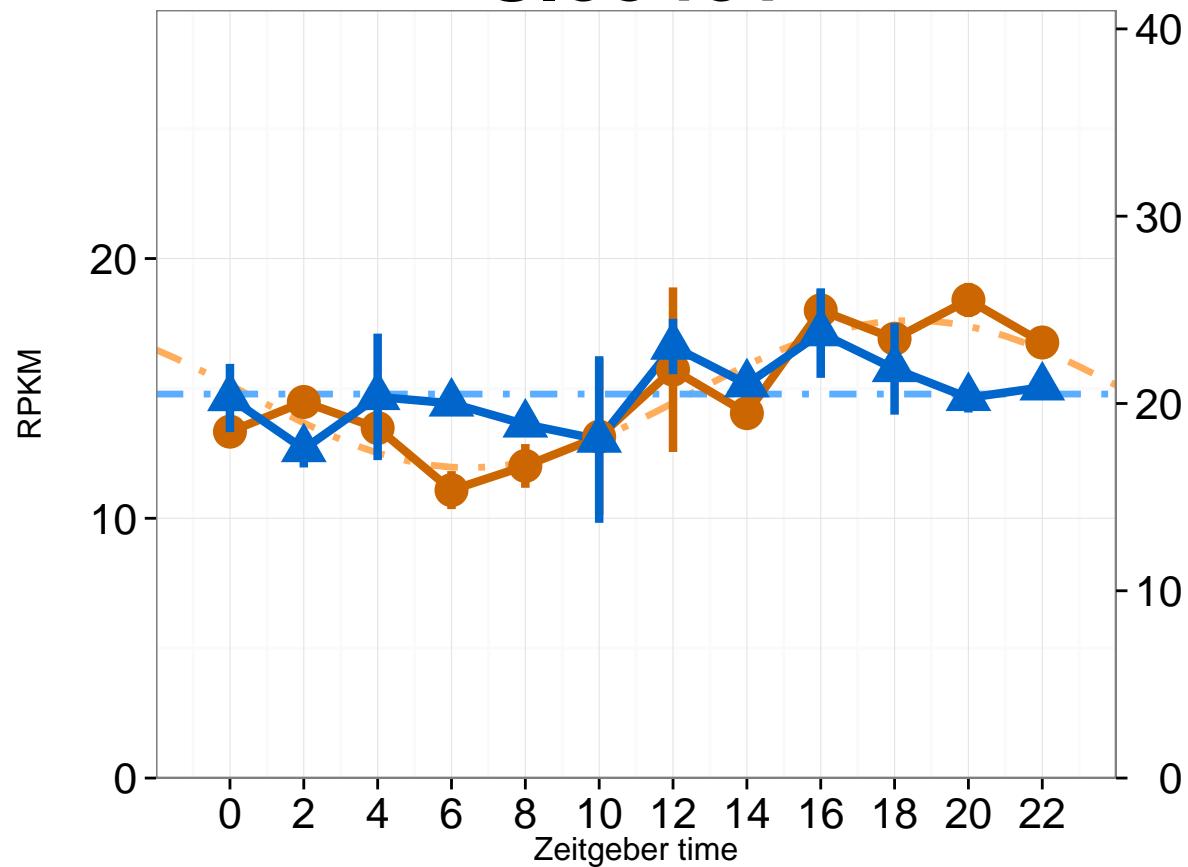

# Slco4c1

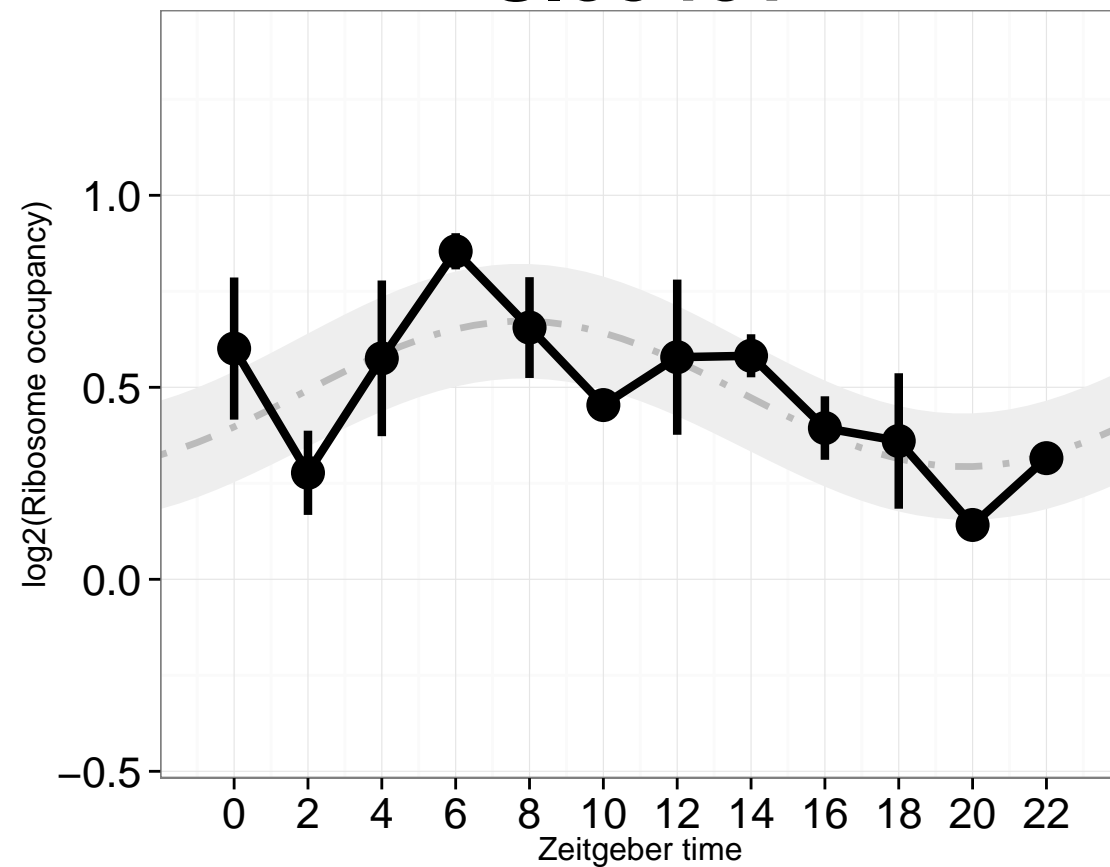

Supplement: Supplementary file 10411 [file 1]

# Hpcal4

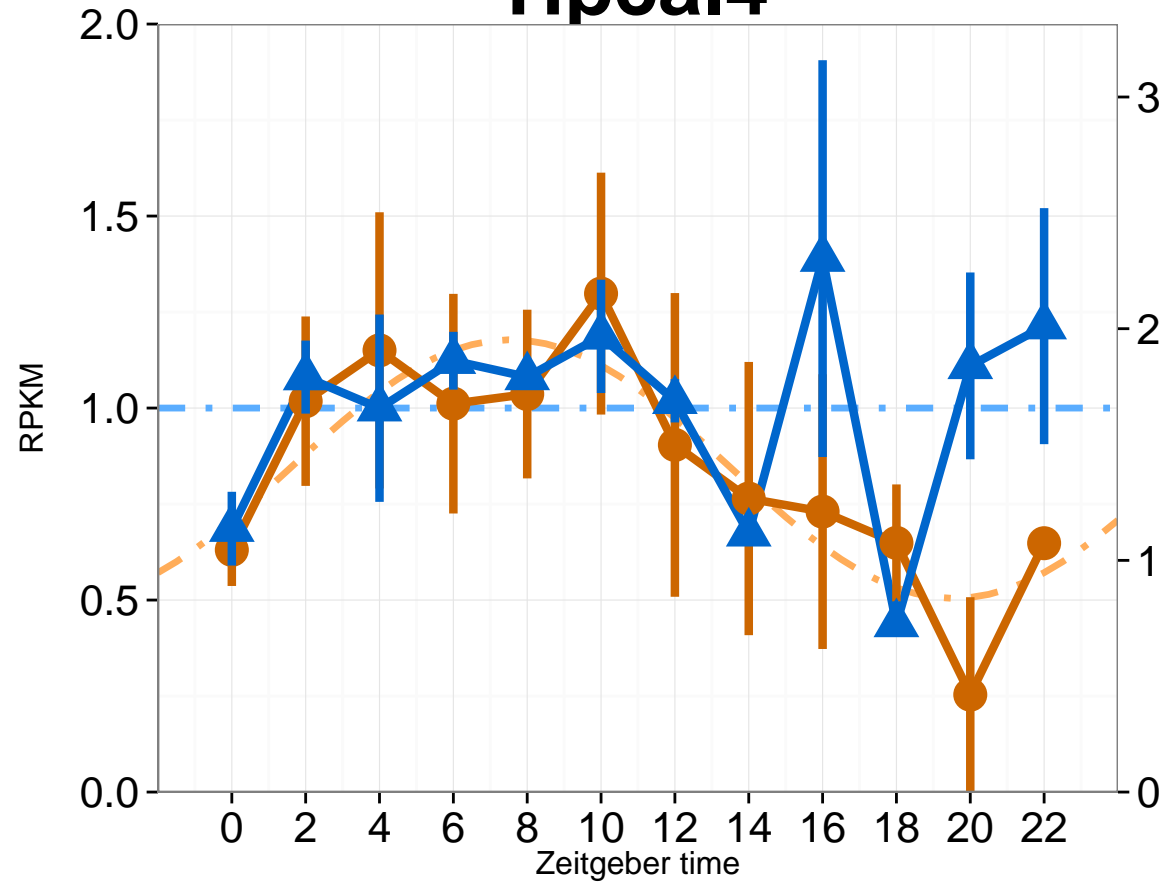

# Hpcal4

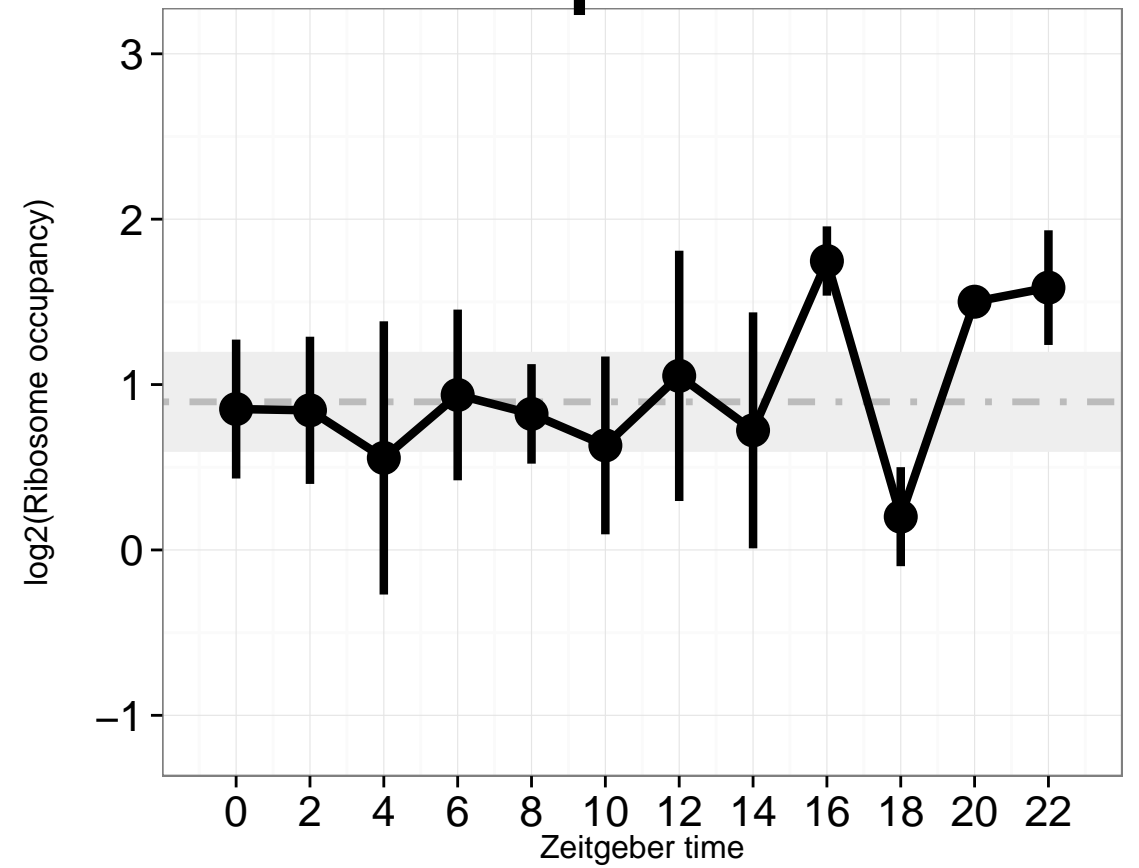

Supplement: Supplementary file 10412 [file 1]

## Tank

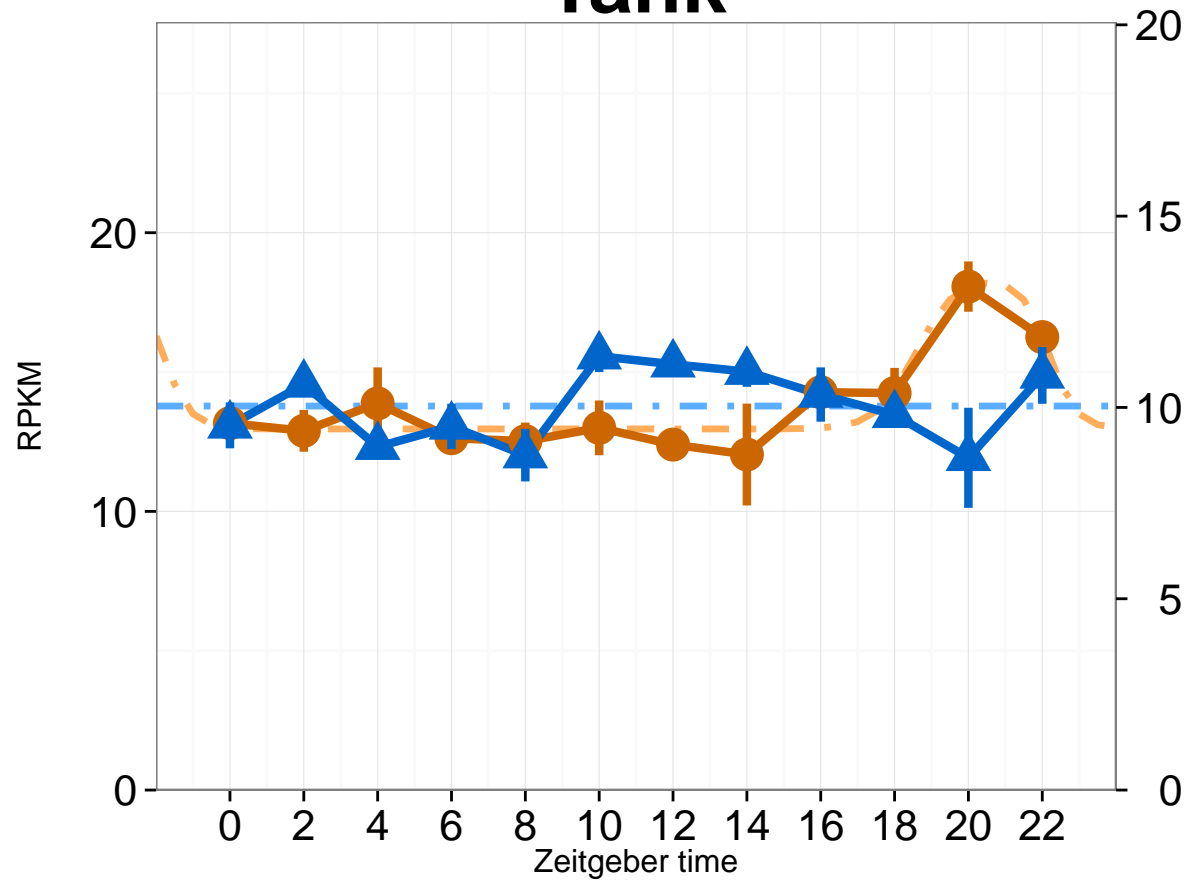

## Tank

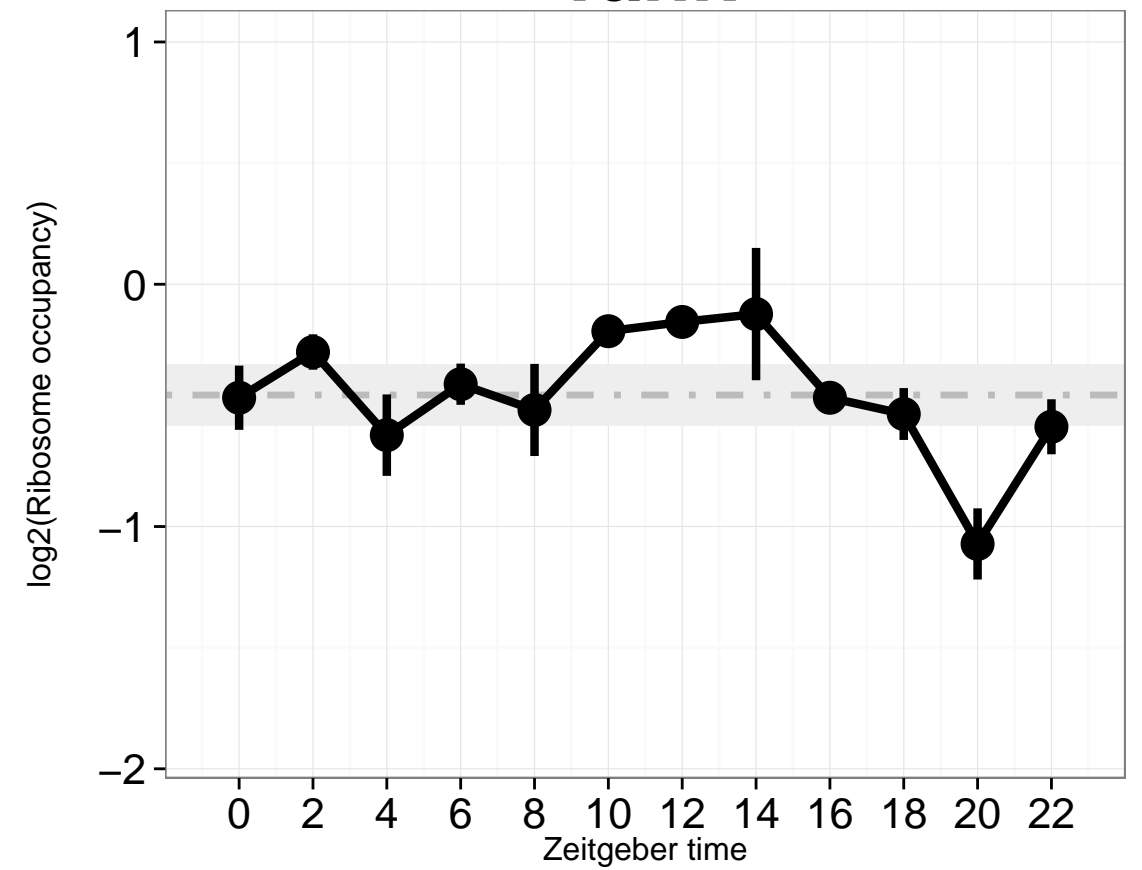

Supplement: Supplementary file 10413 [file 1]

# Lgals3bp

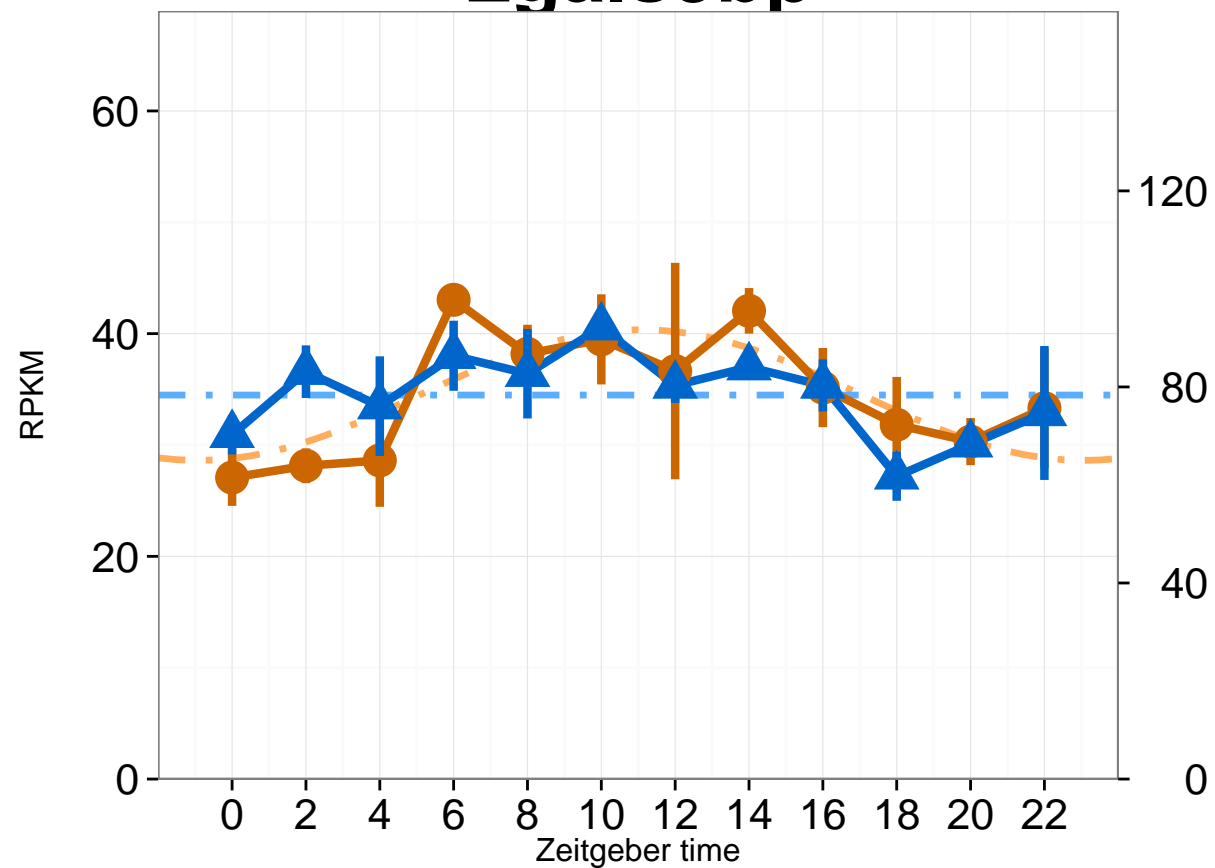

# Lgals3bp

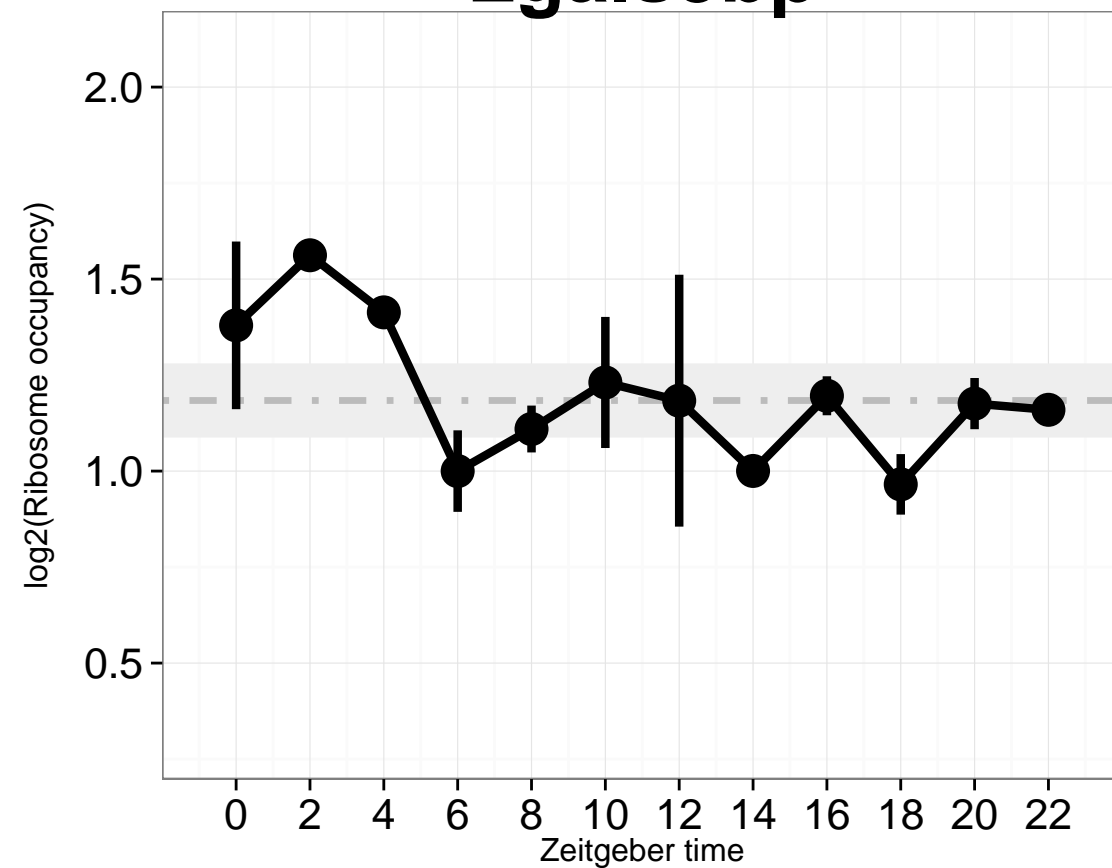

Supplement: Supplementary file 10414 [file 1]

# Pgap3

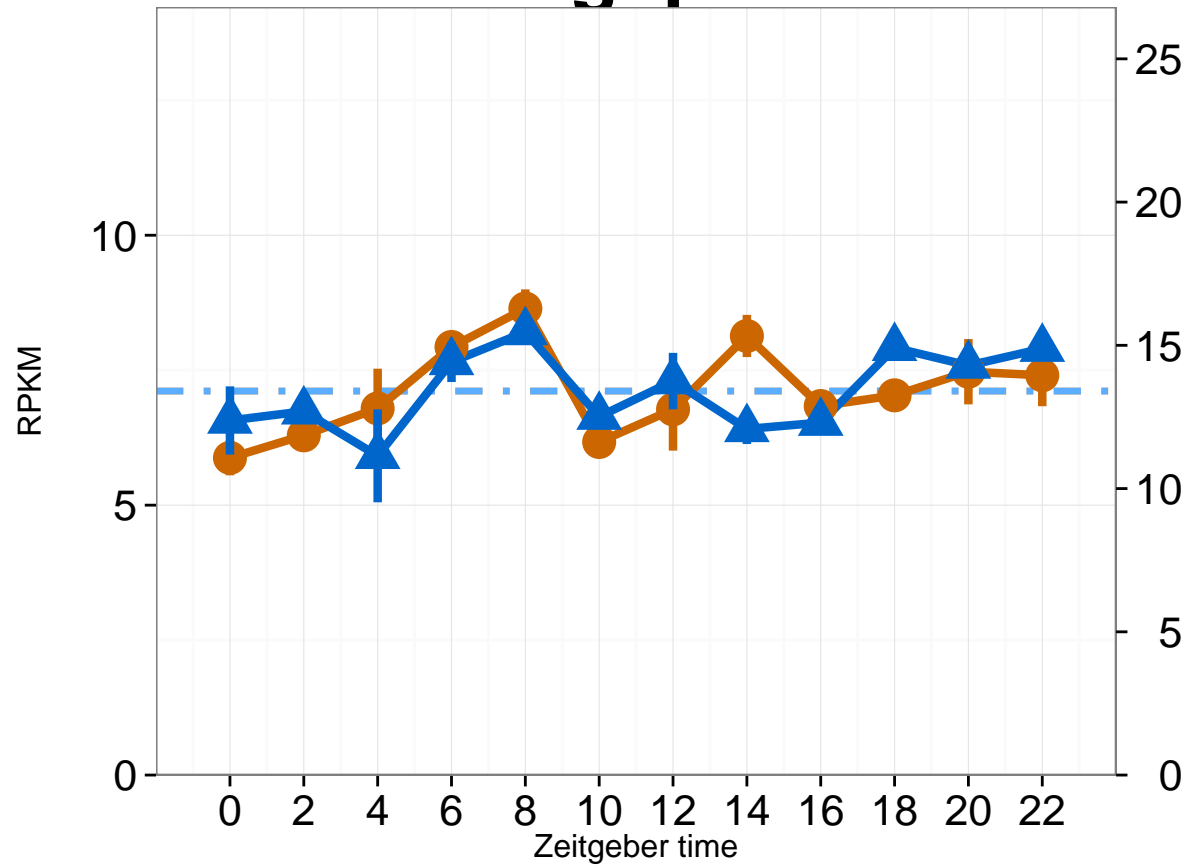

# Pgap3

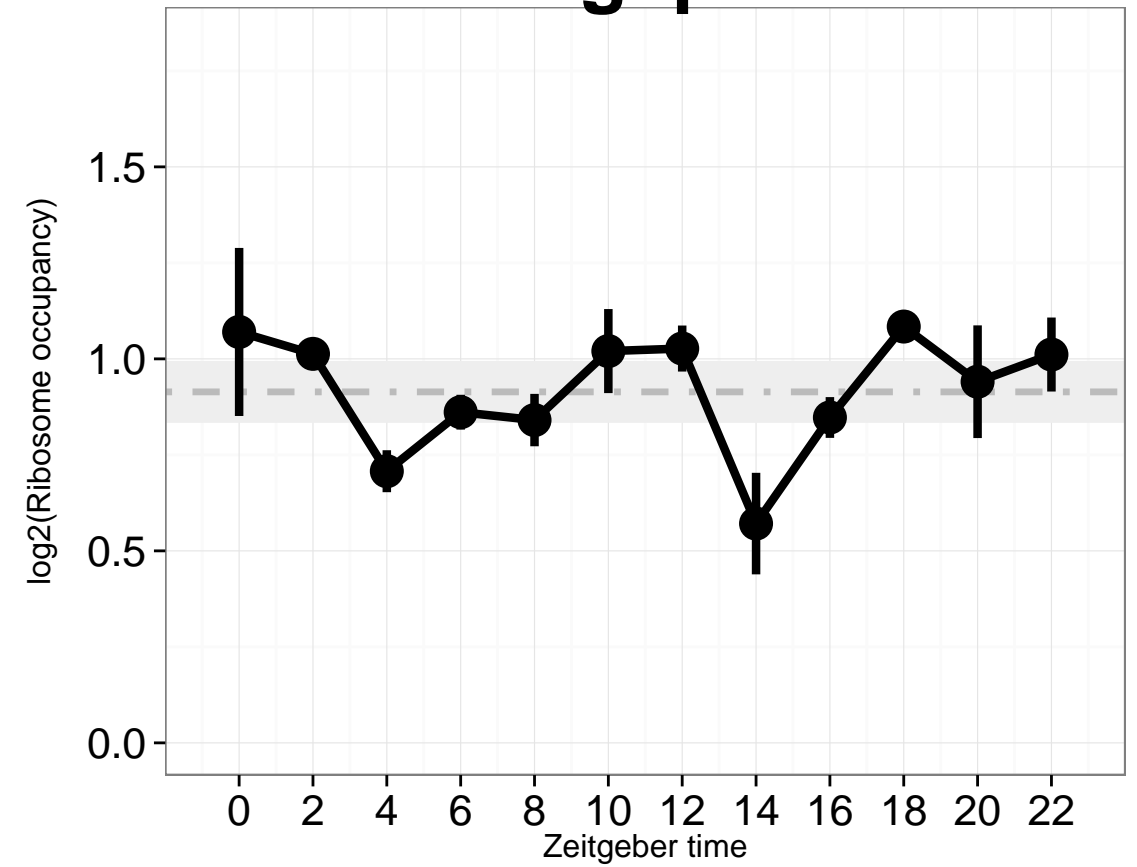

Supplement: Supplementary file 10415 [file 1]

## Lsm3

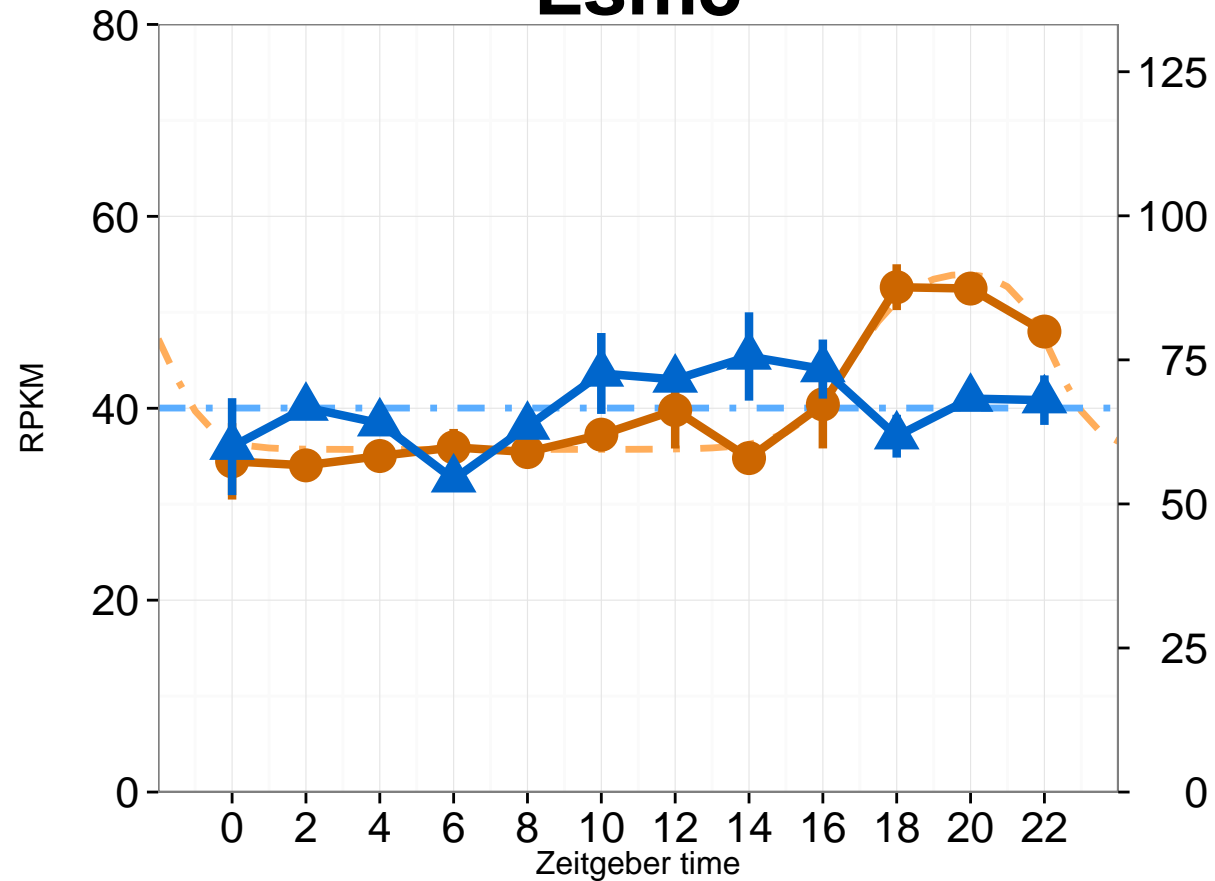

## Lsm3

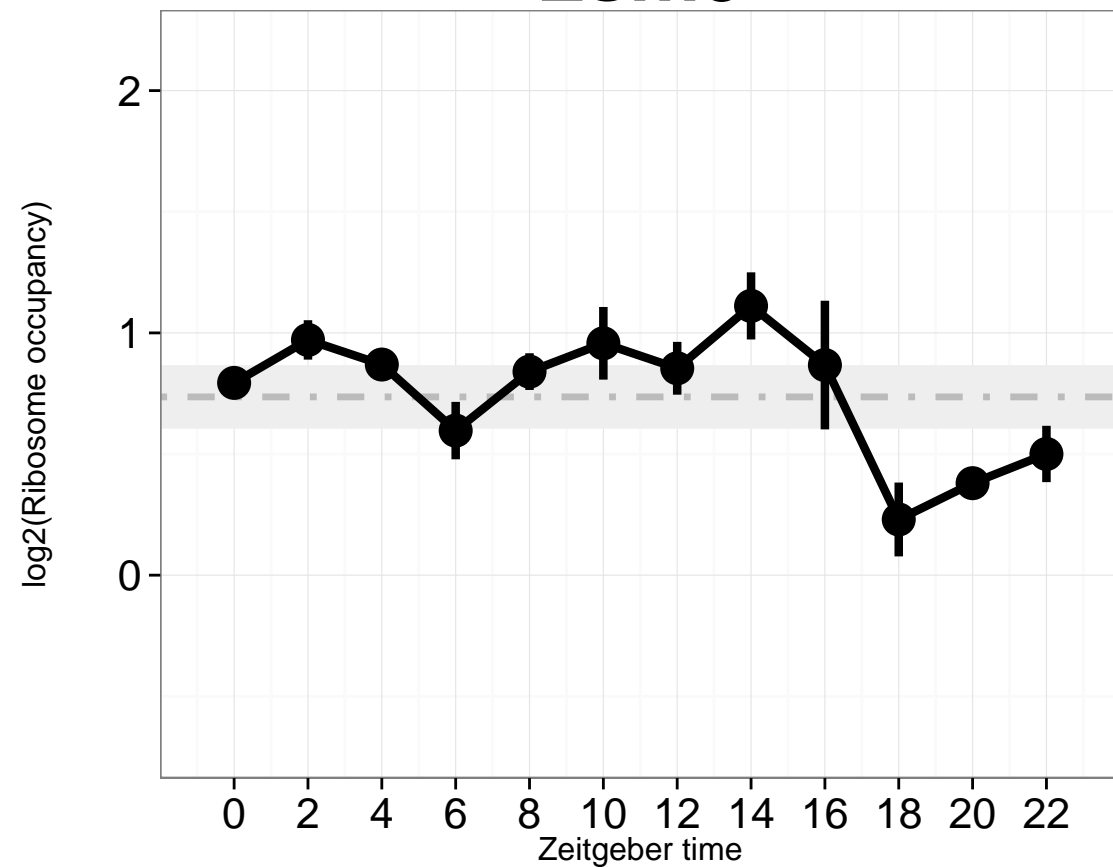

Supplement: Supplementary file 10416 [file 1]

# Hoxd8

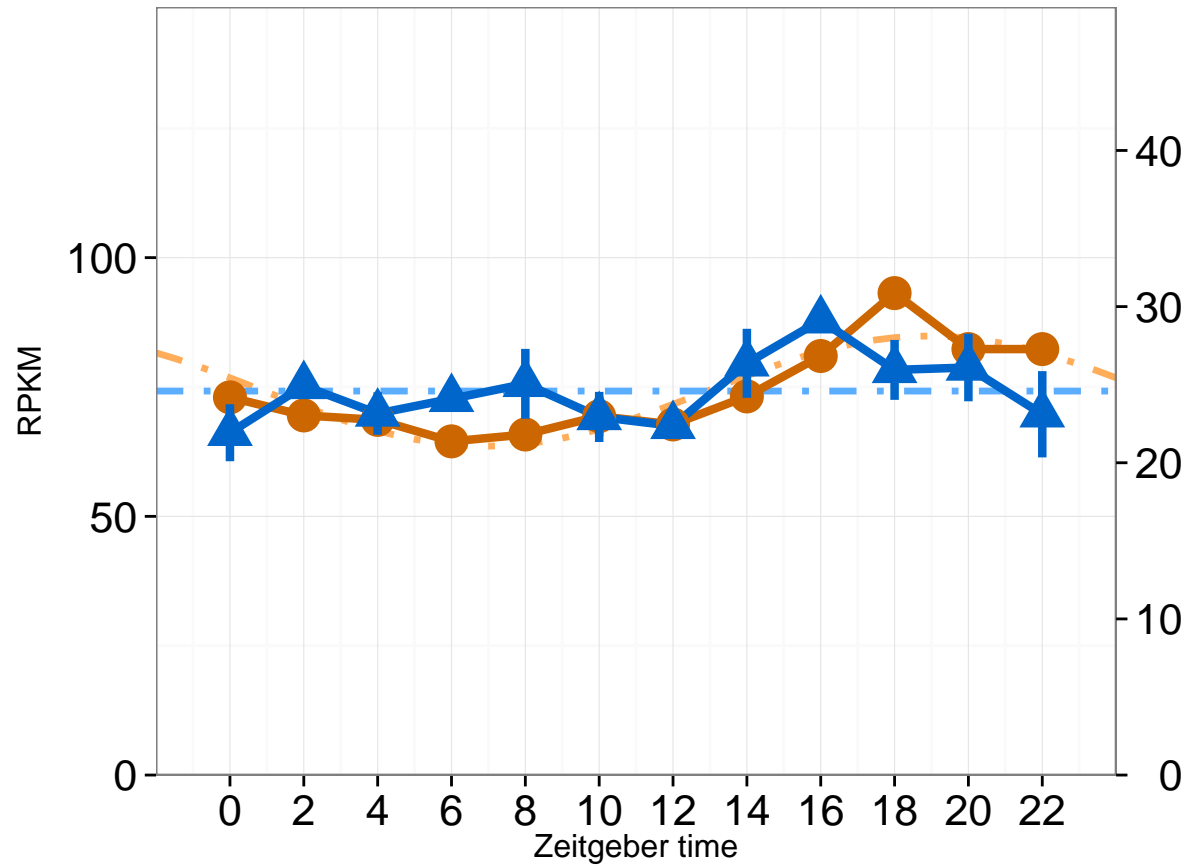

# Hoxd8

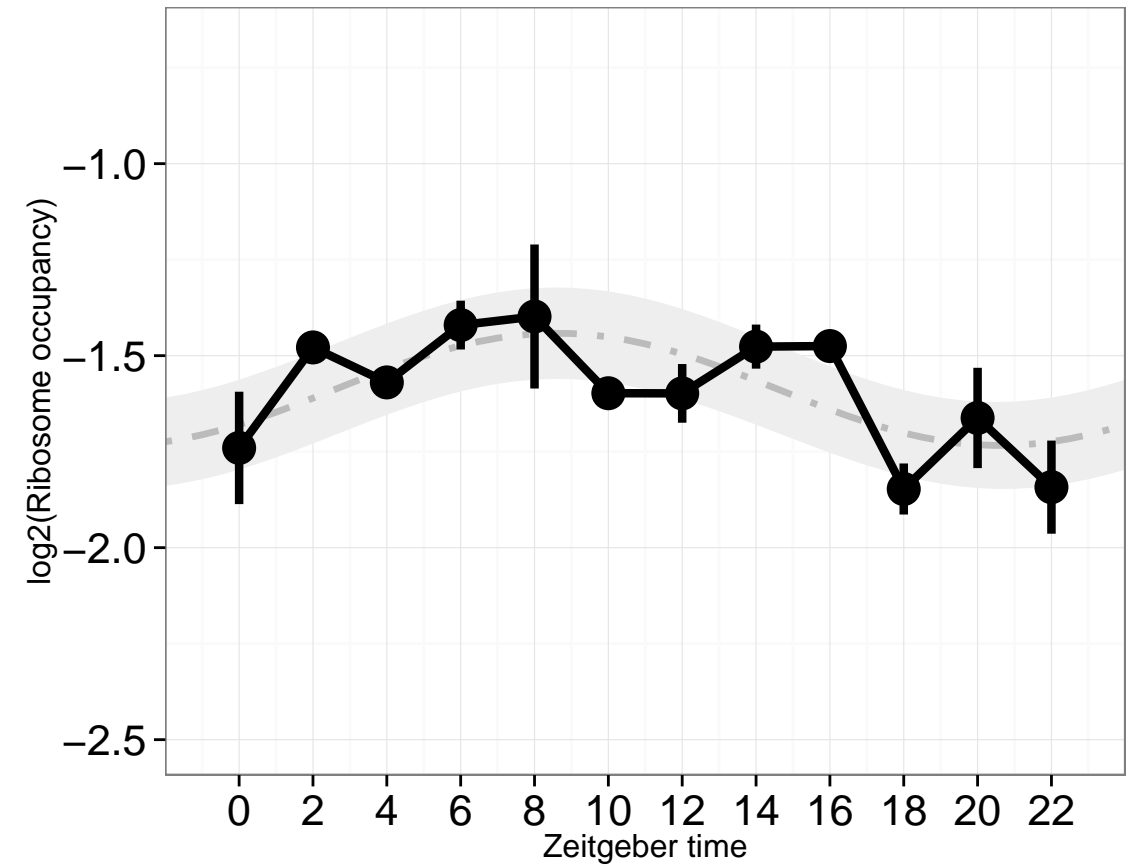

Supplement: Supplementary file 10417 [file 1]

# Bet1

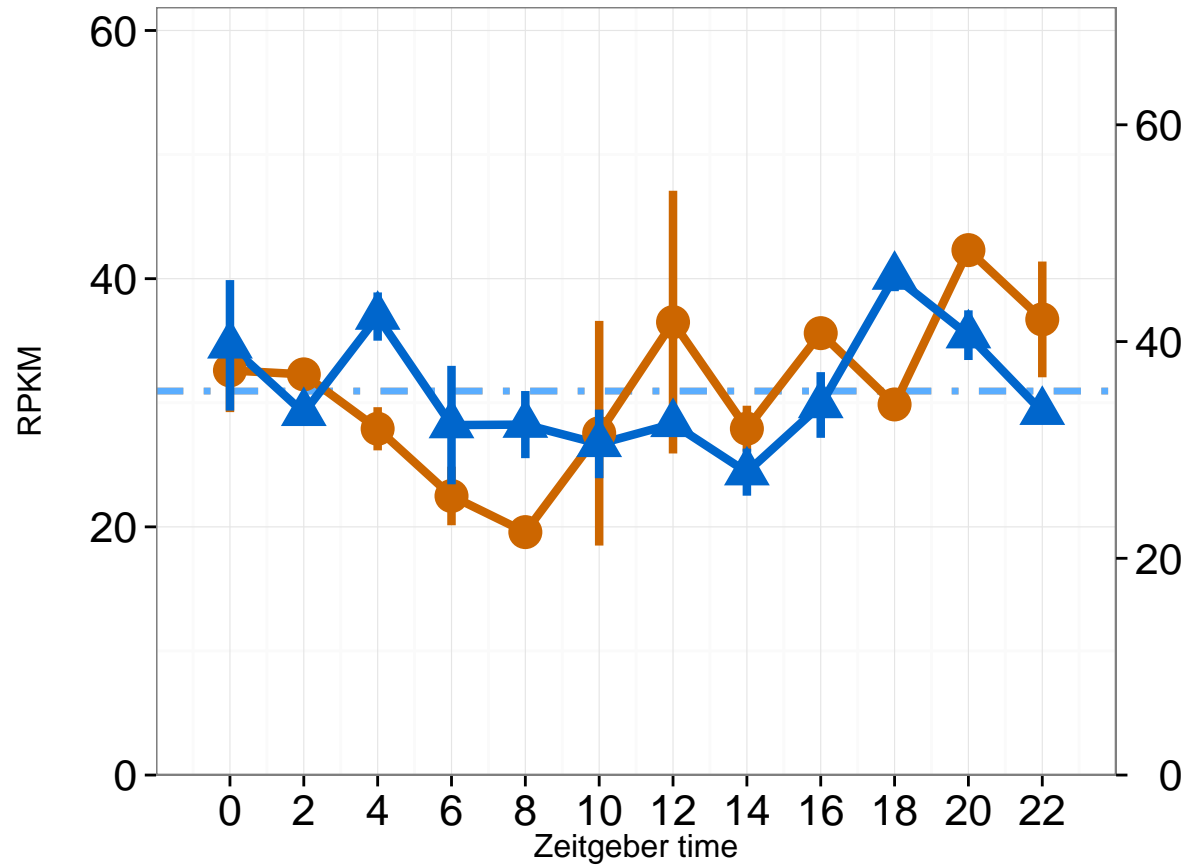

# Bet1

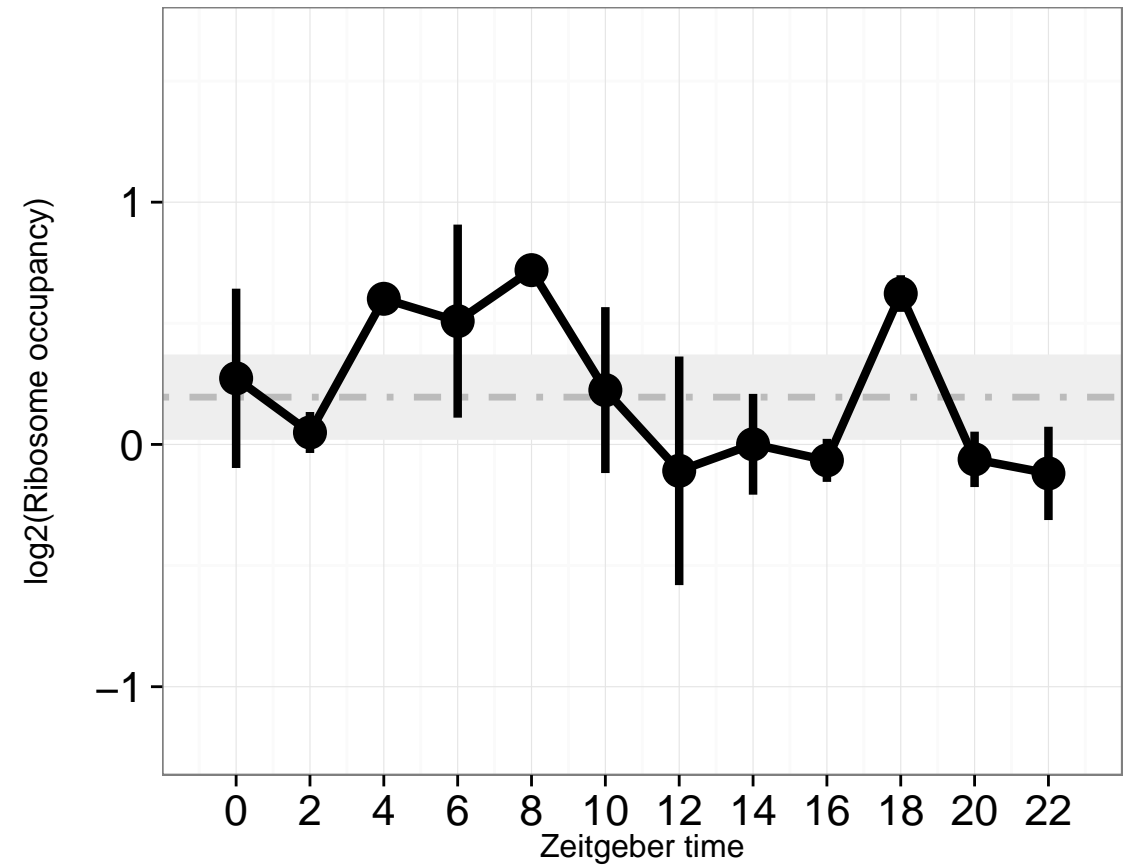

Supplement: Supplementary file 10418 [file 1]

## 2700062C07Rik

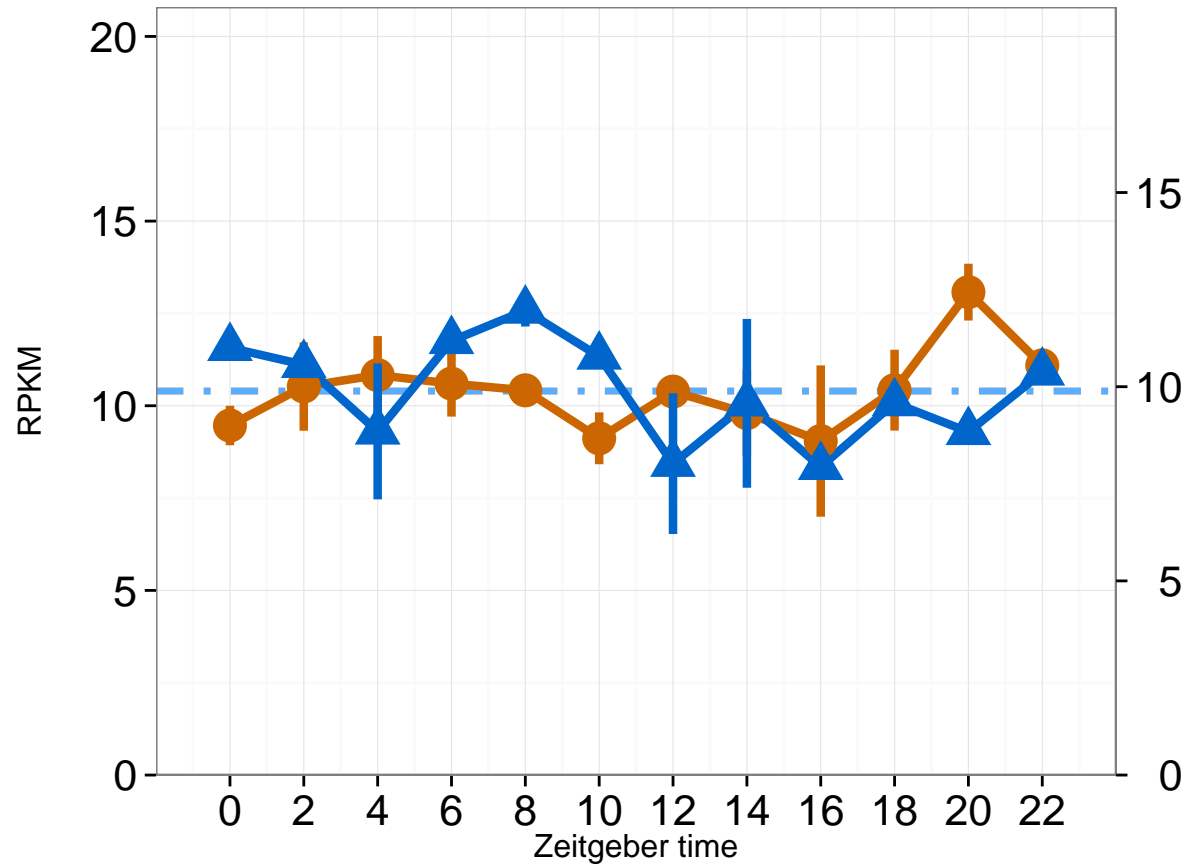

## 2700062C07Rik

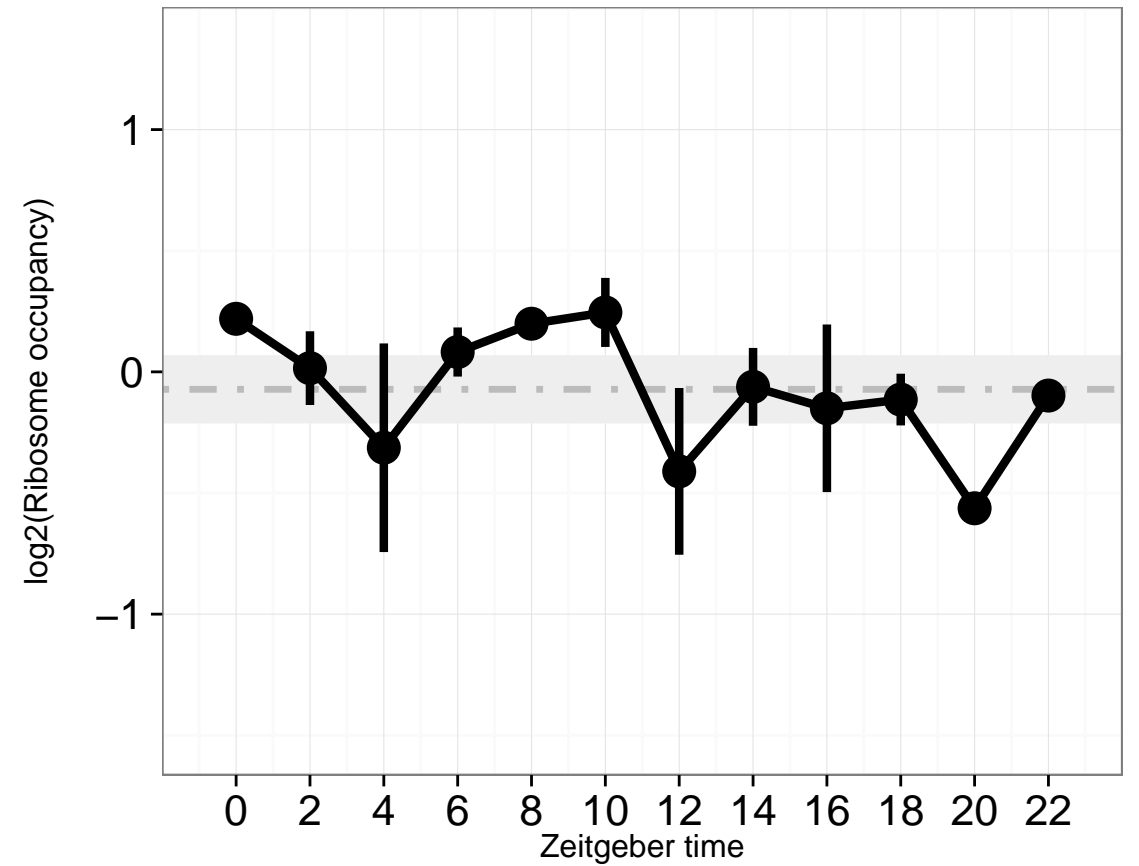

Supplement: Supplementary file 10419 [file 1]

## Asb3

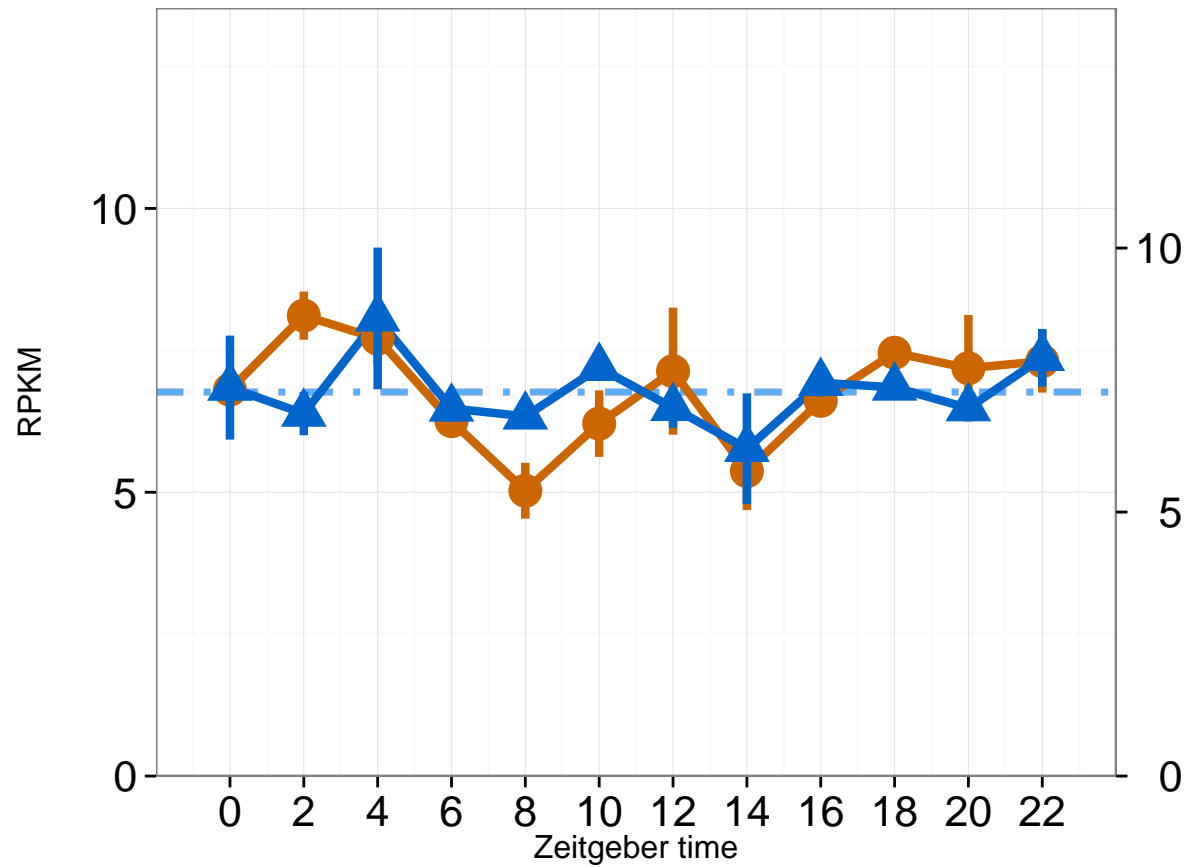

## Asb3

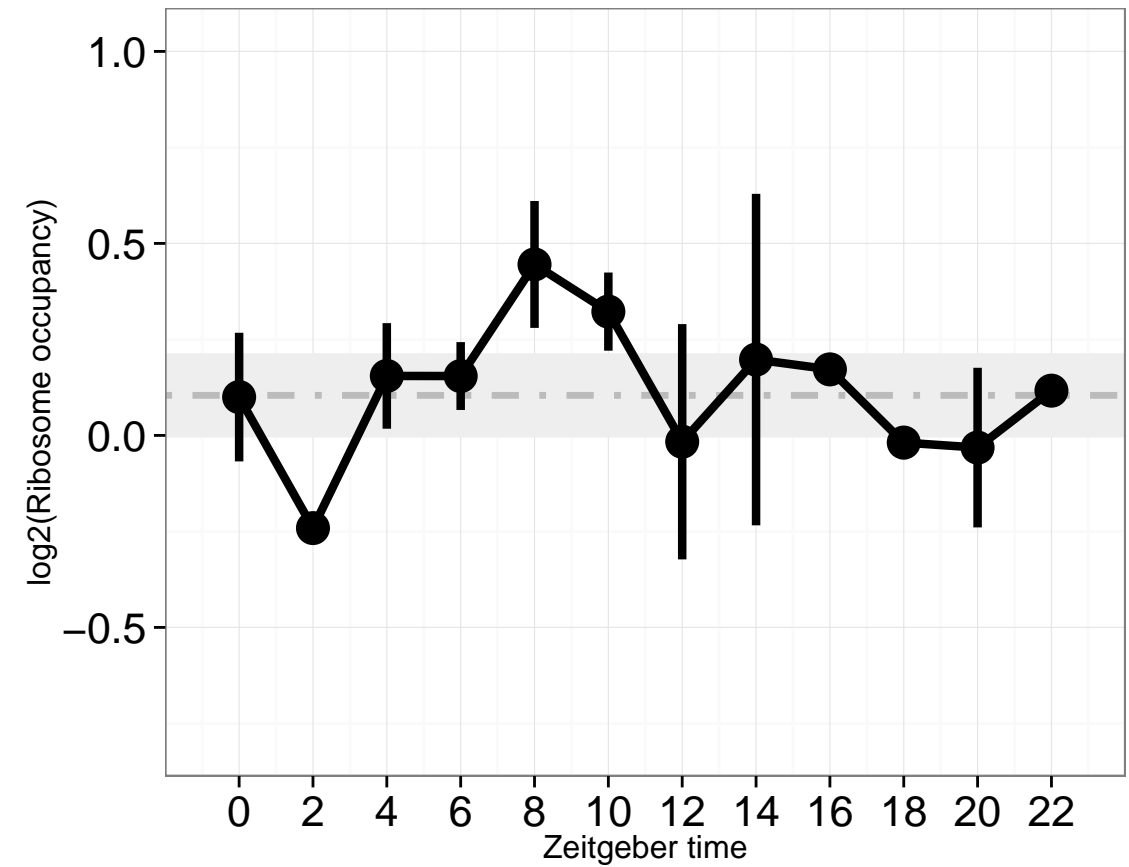

Supplement: Supplementary file 10420 [file 1]

# Alyref

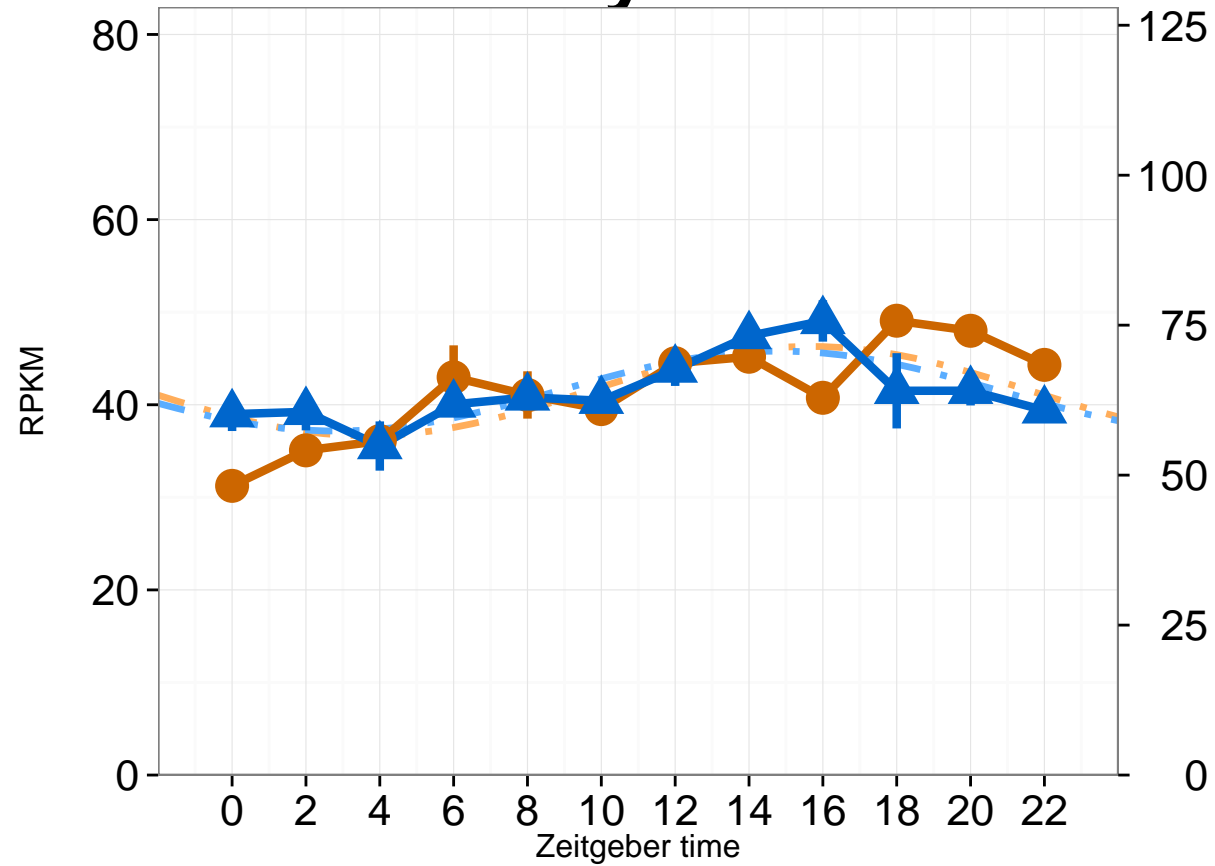

# Alyref

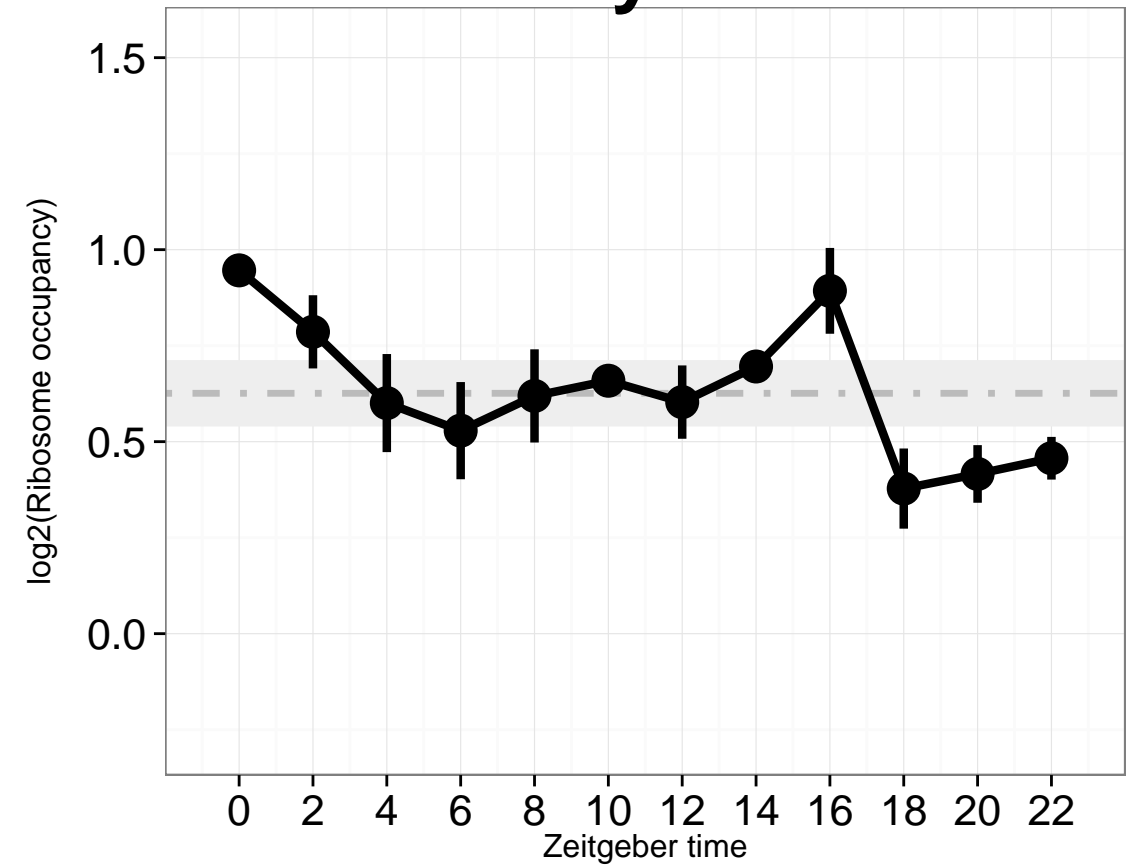

Supplement: Supplementary file 10421 [file 1]

# Coq10b

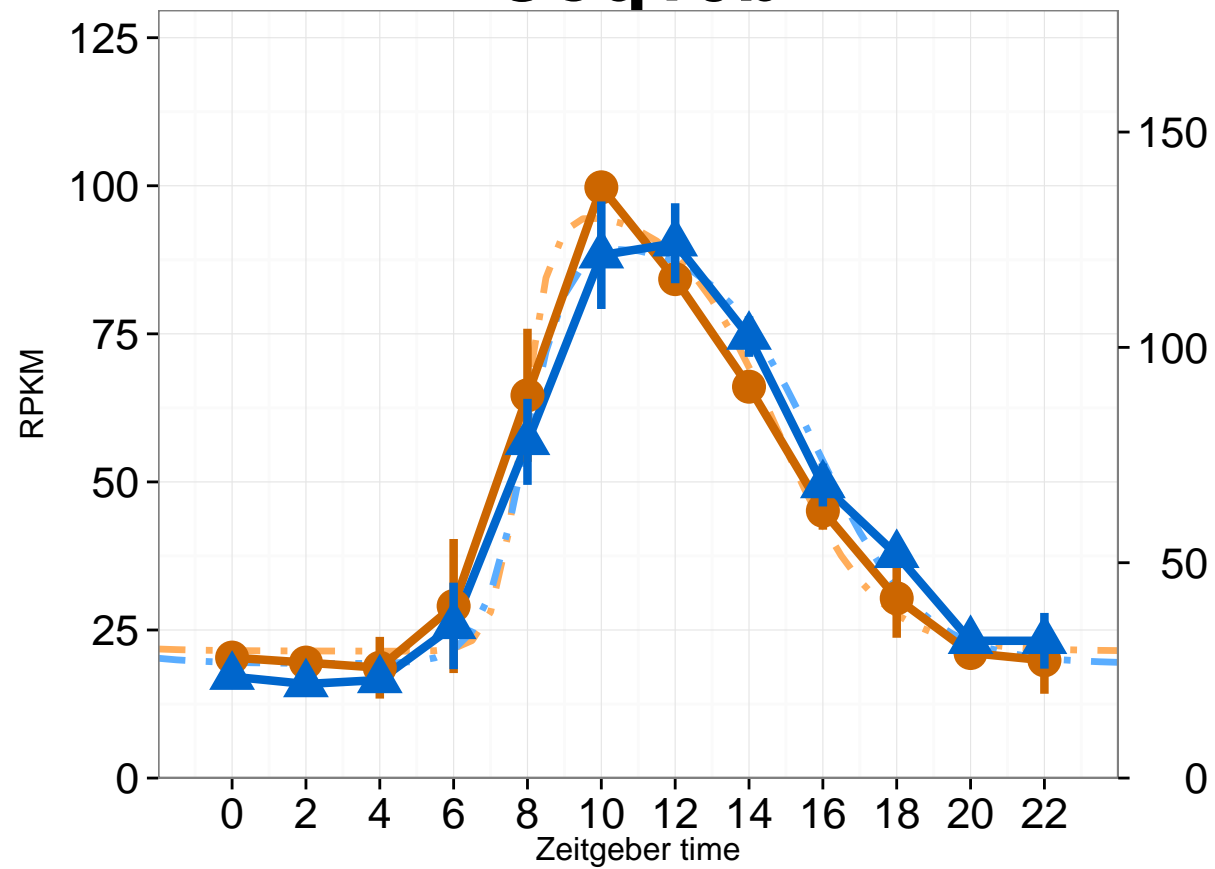

# Coq10b

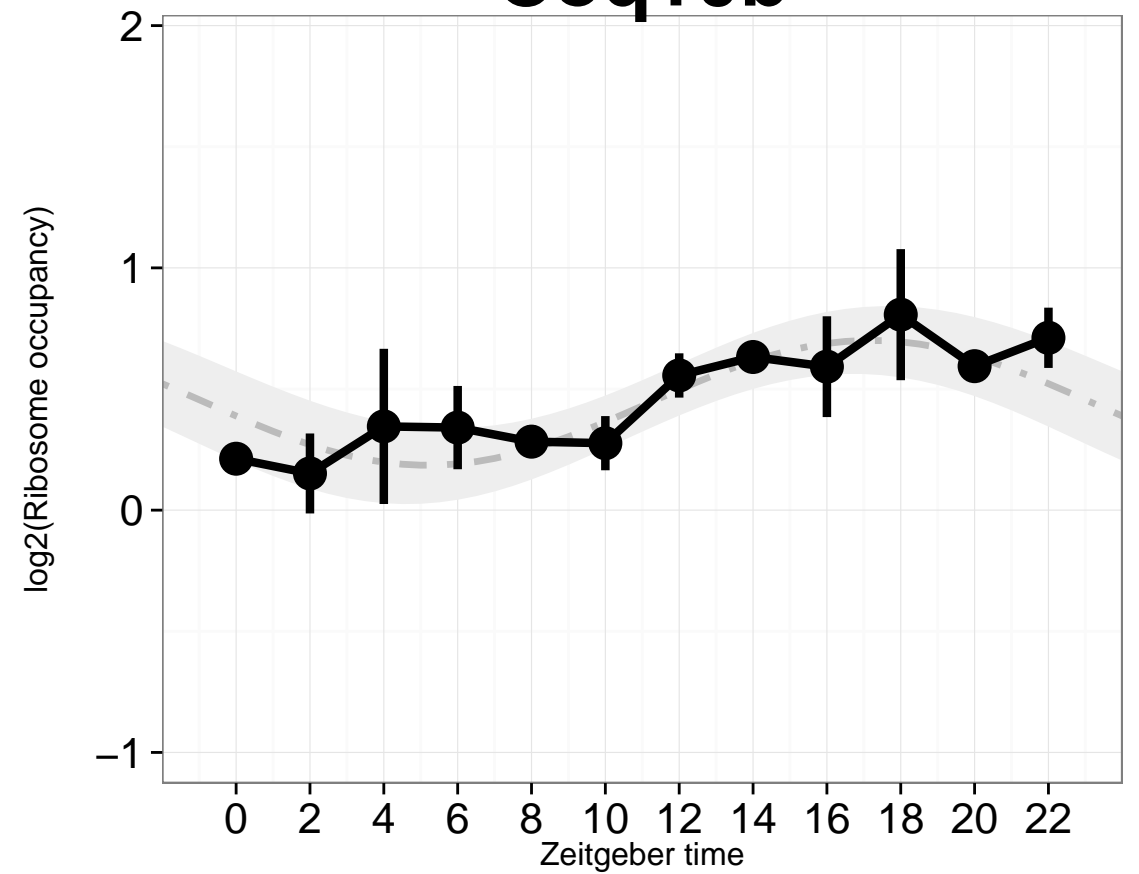

Supplement: Supplementary file 10422 [file 1]

## Pycard

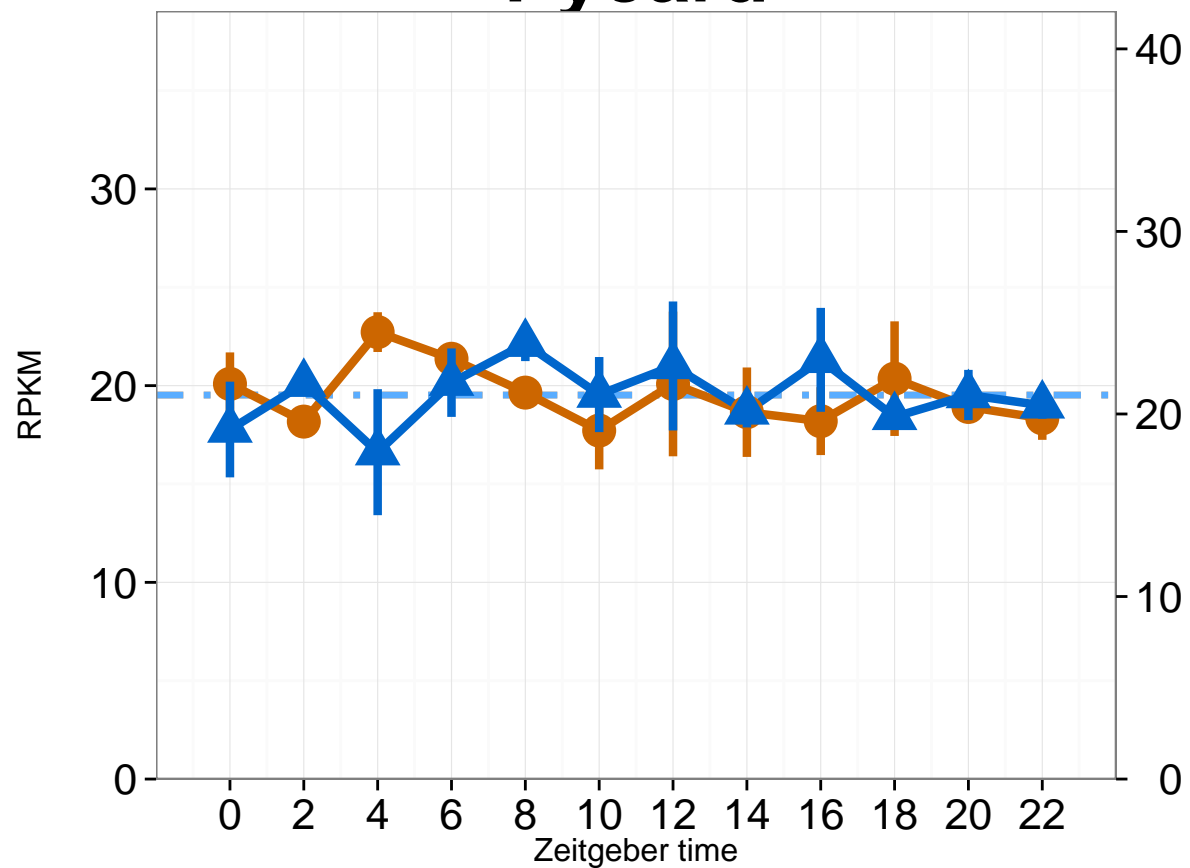

## Pycard

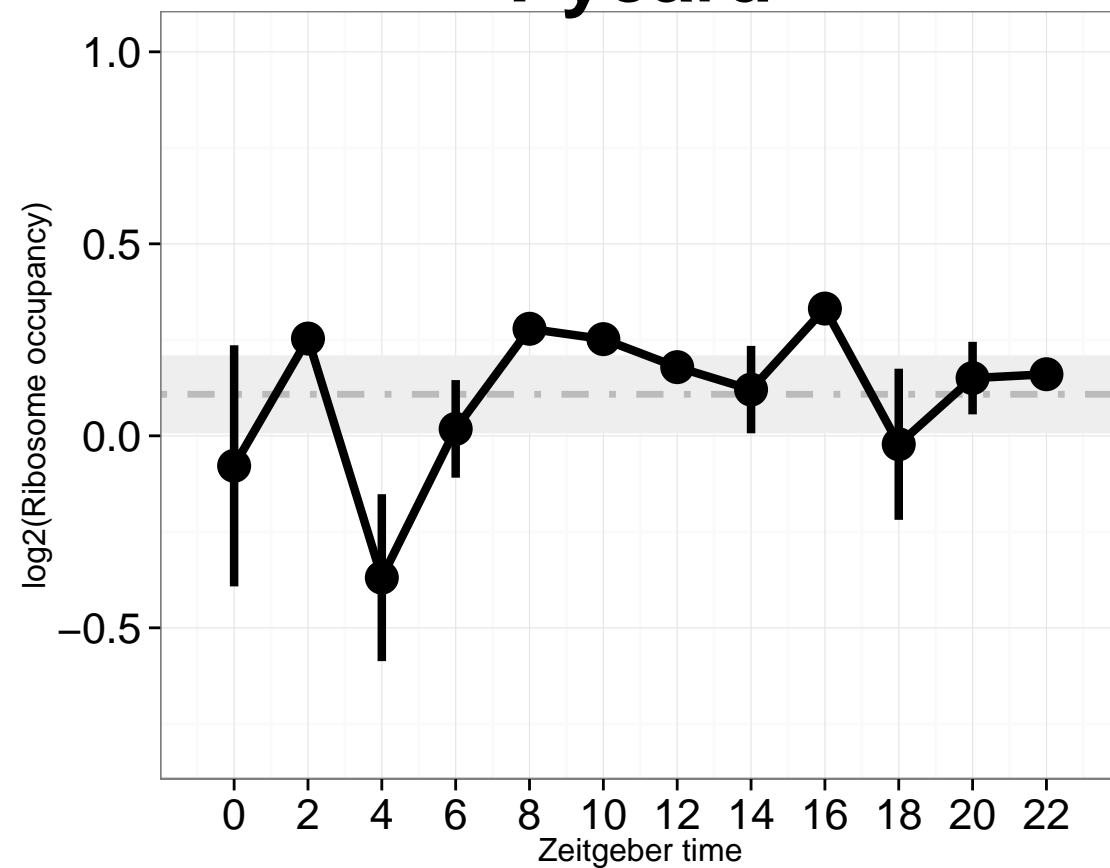

Supplement: Supplementary file 10423 [file 1]

# Clca1

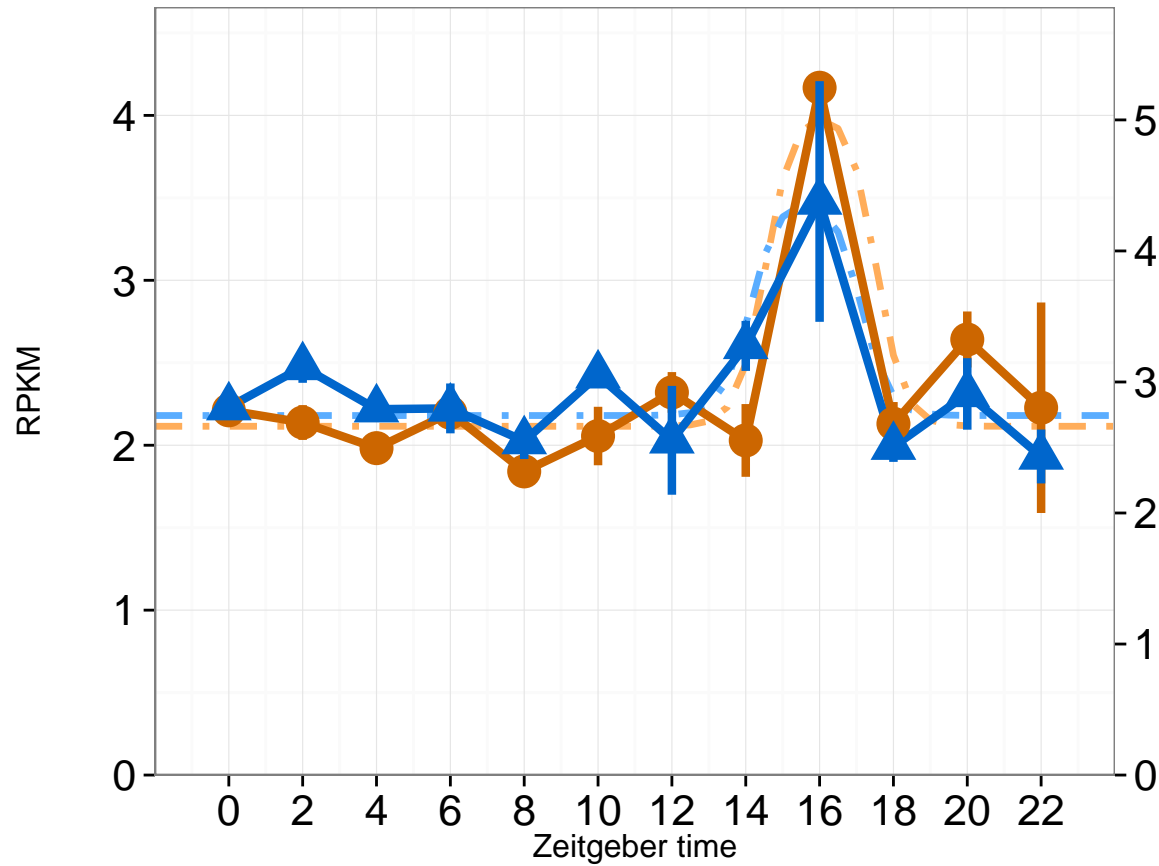

# Clca1

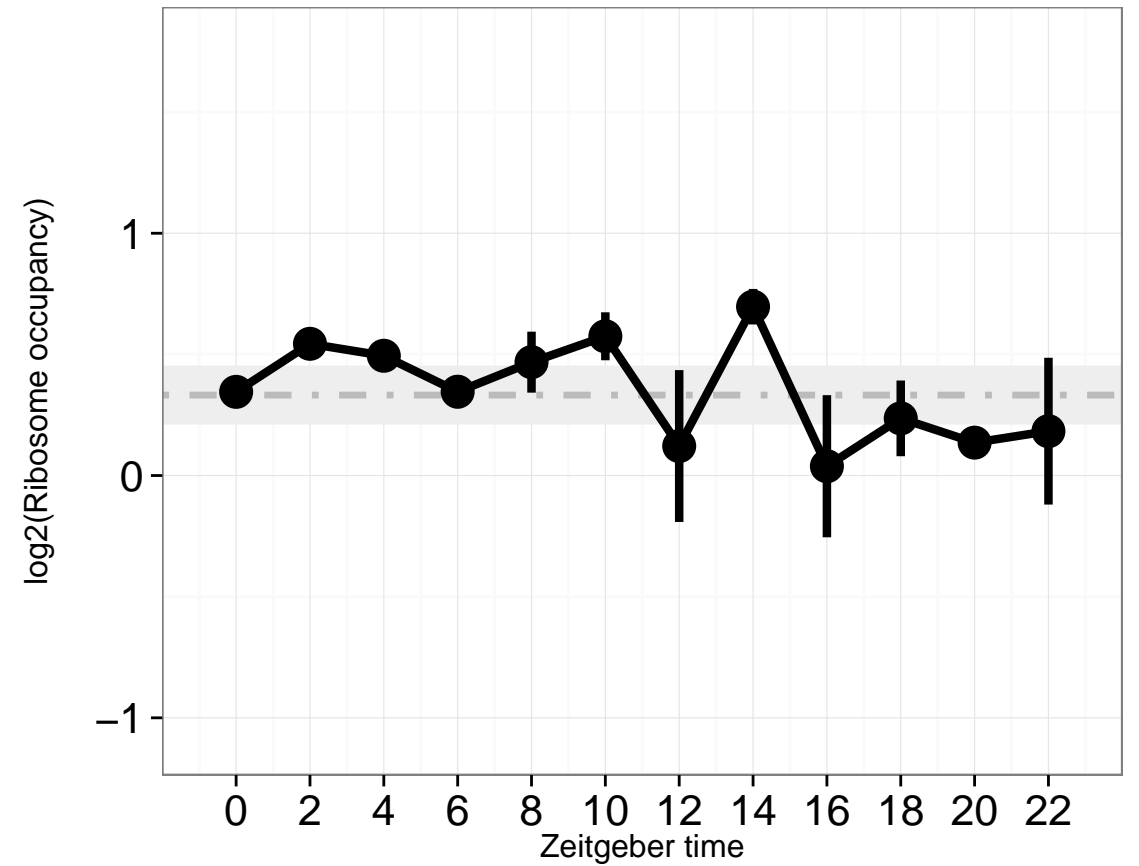

Supplement: Supplementary file 10424 [file 1]

## Psme3

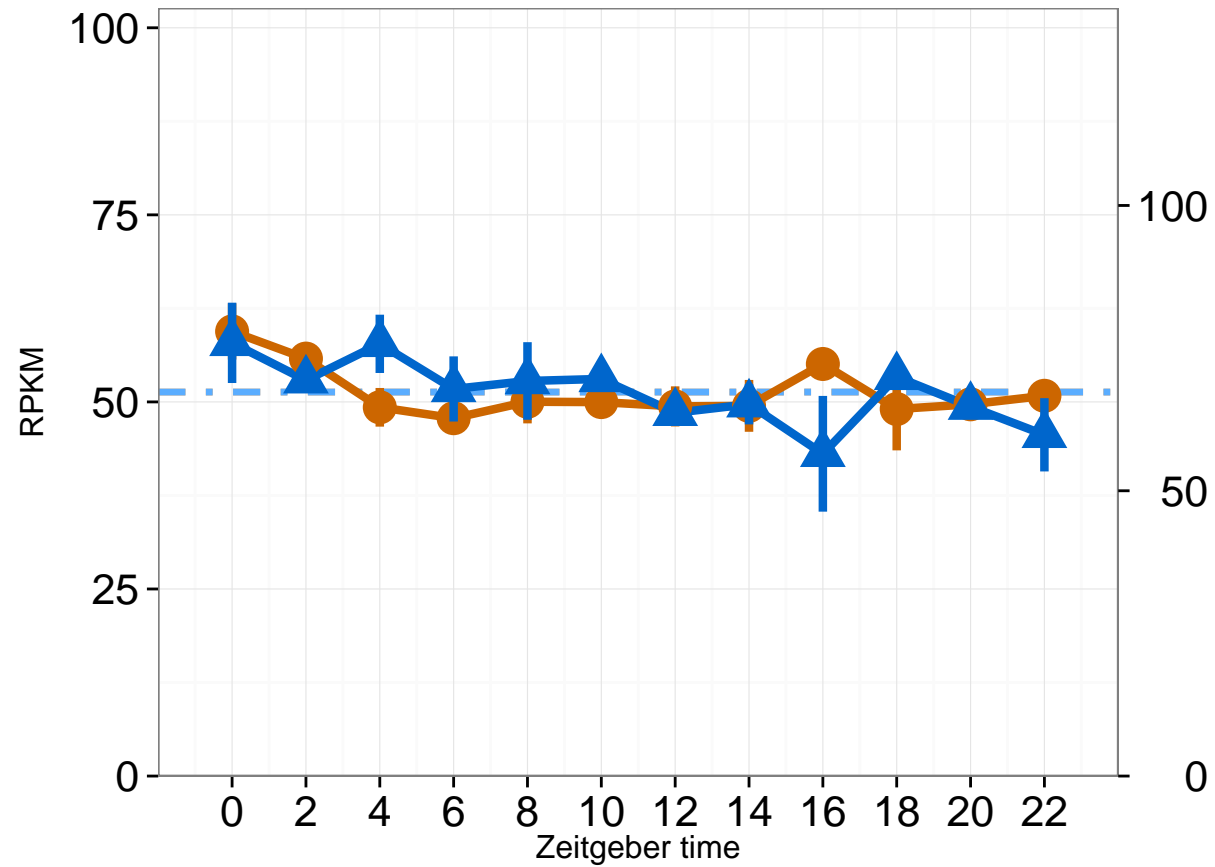

## Psme3

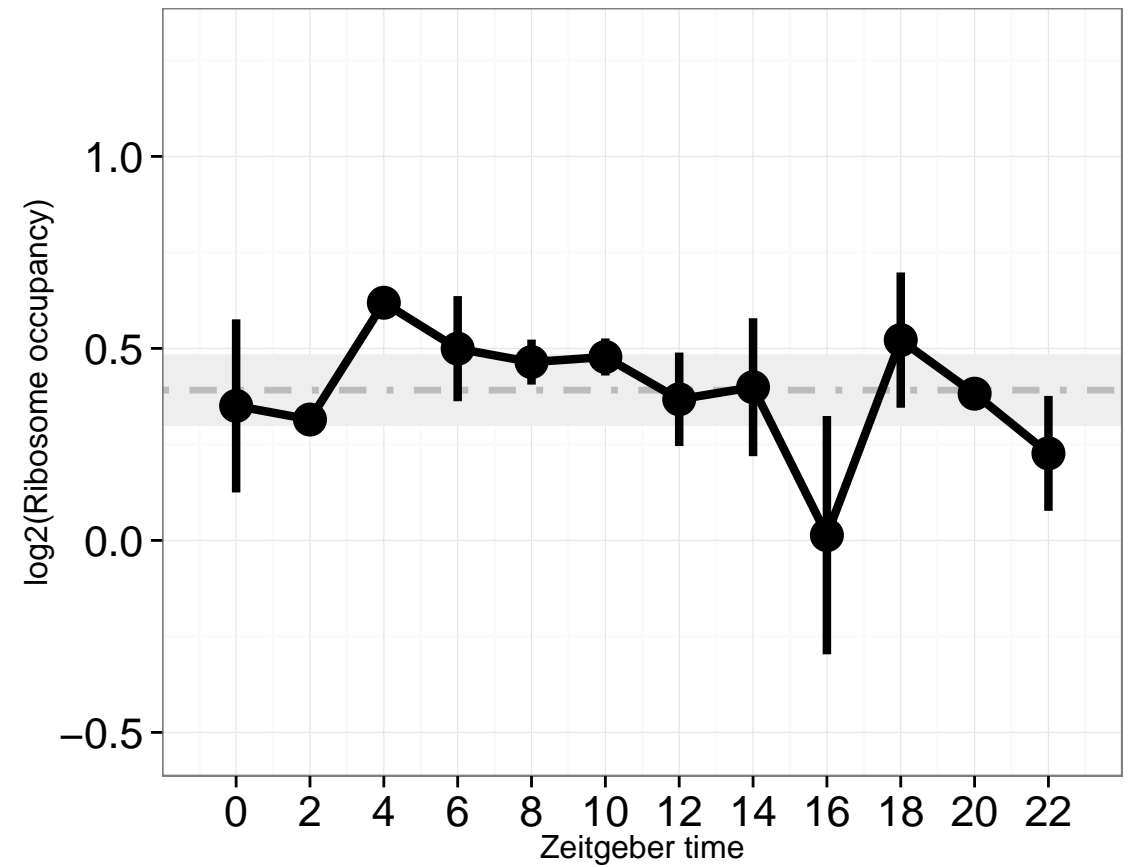

Supplement: Supplementary file 10425 [file 1]

## Cd46

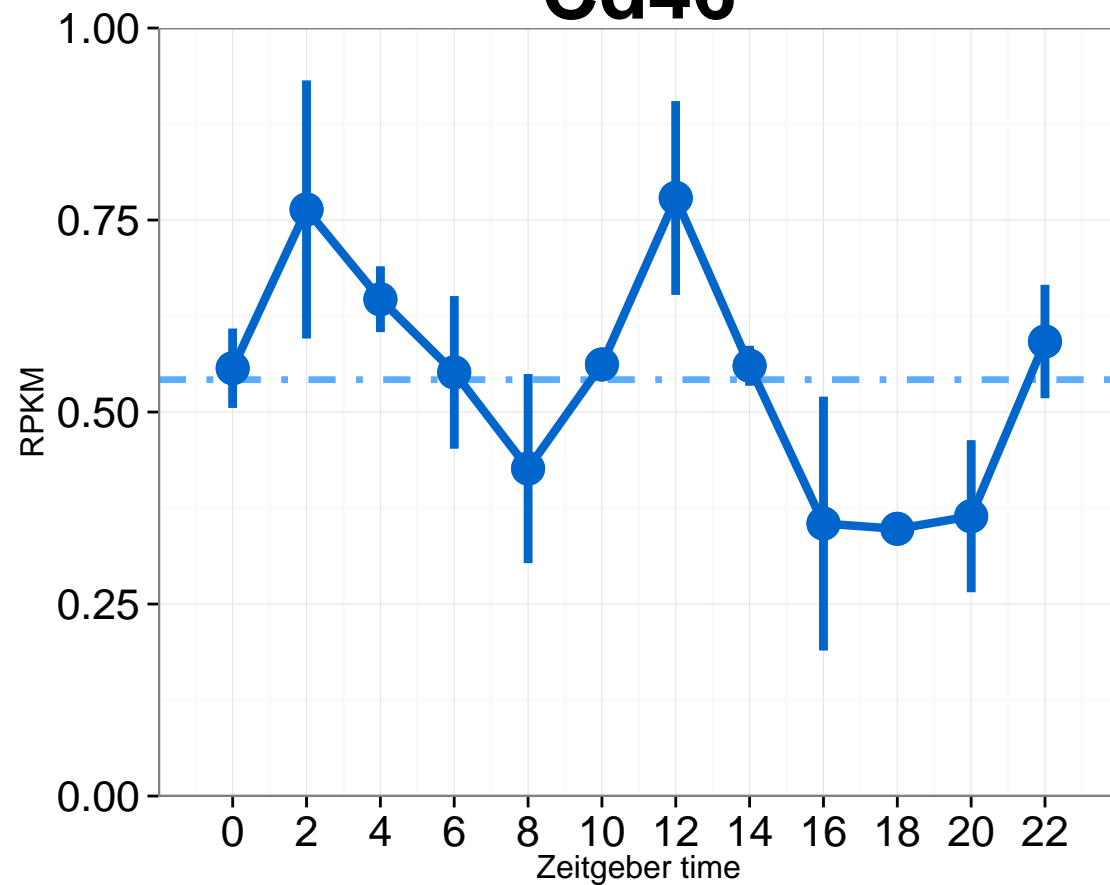

## Cd46 log2(Ribosome occupancy)

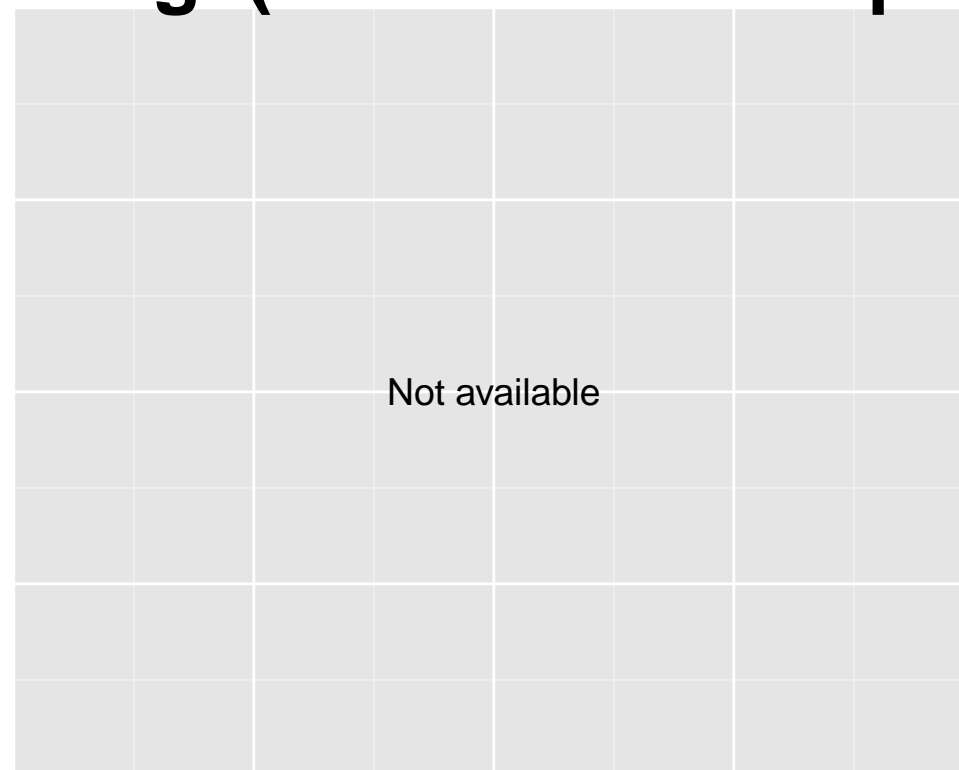

Supplement: Supplementary file 10426 [file 1]

## Lhfp

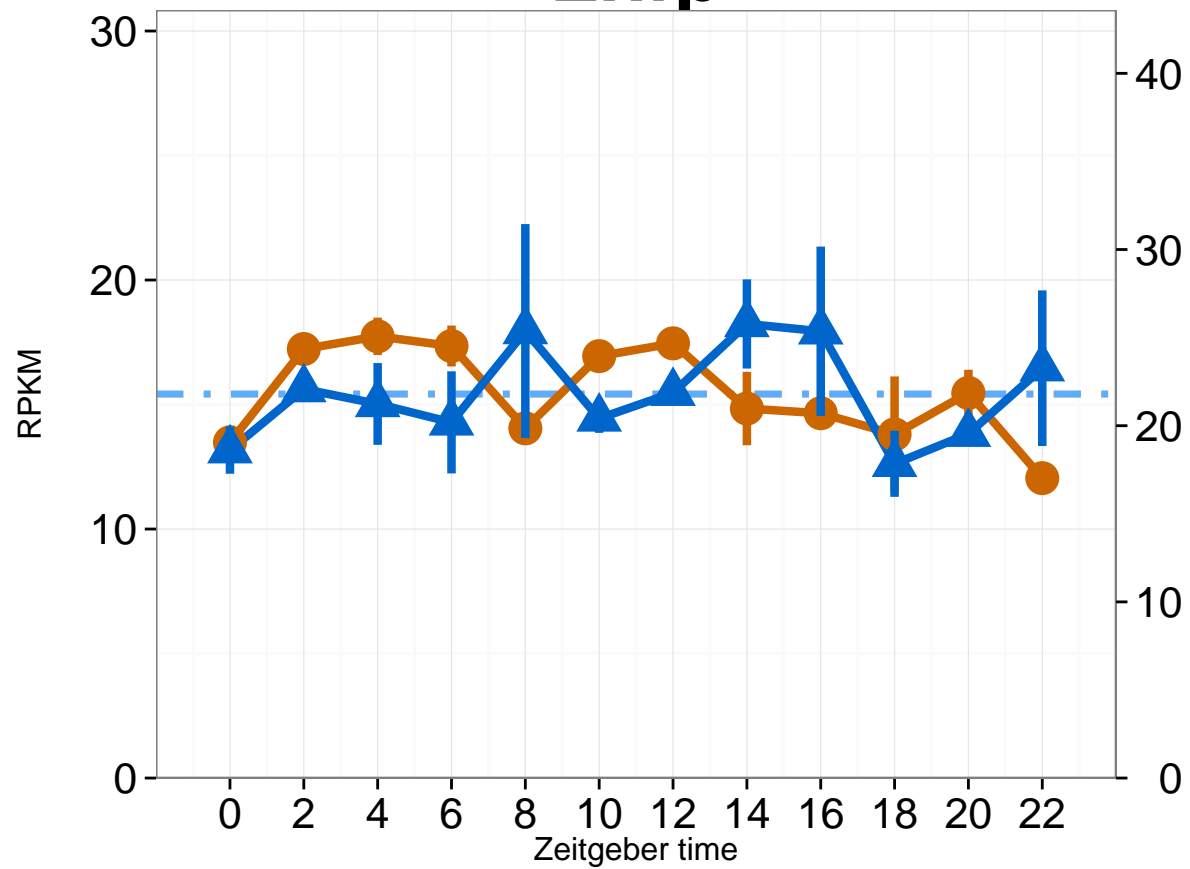

## Lhfp

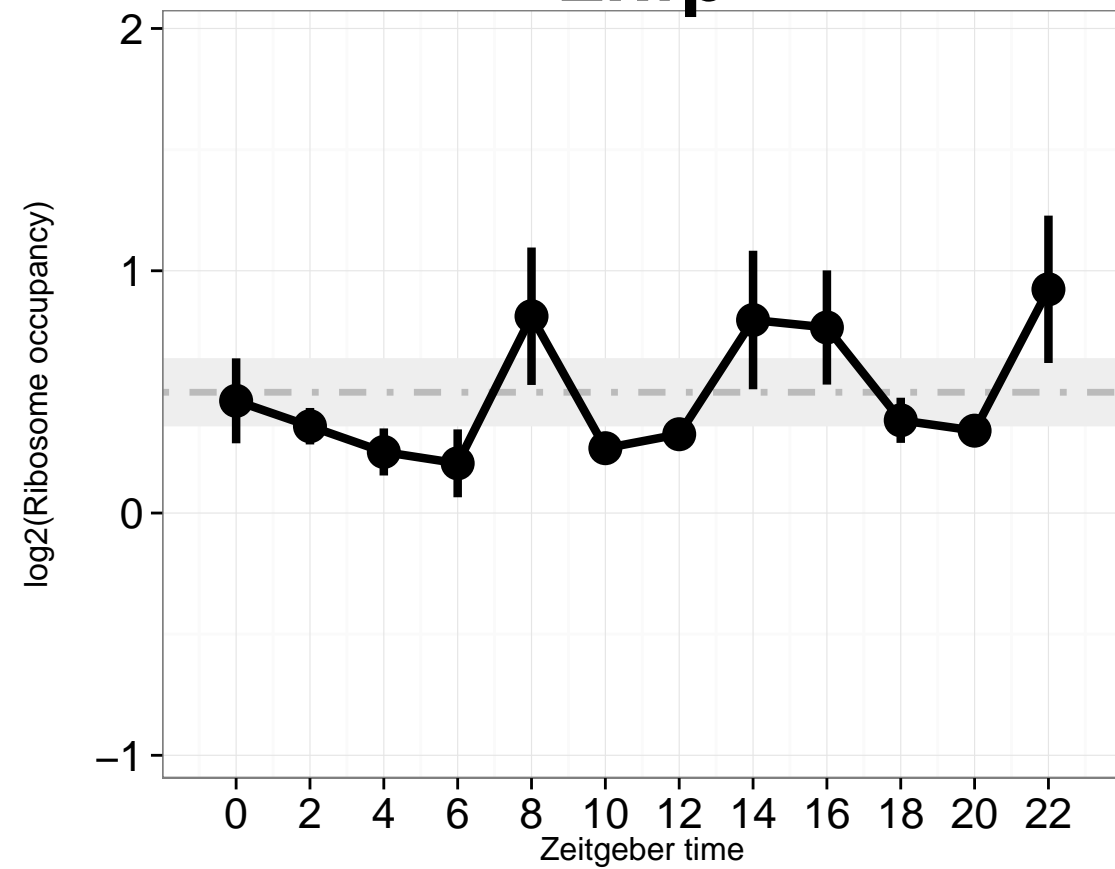

Supplement: Supplementary file 10427 [file 1]

## Eif4e2

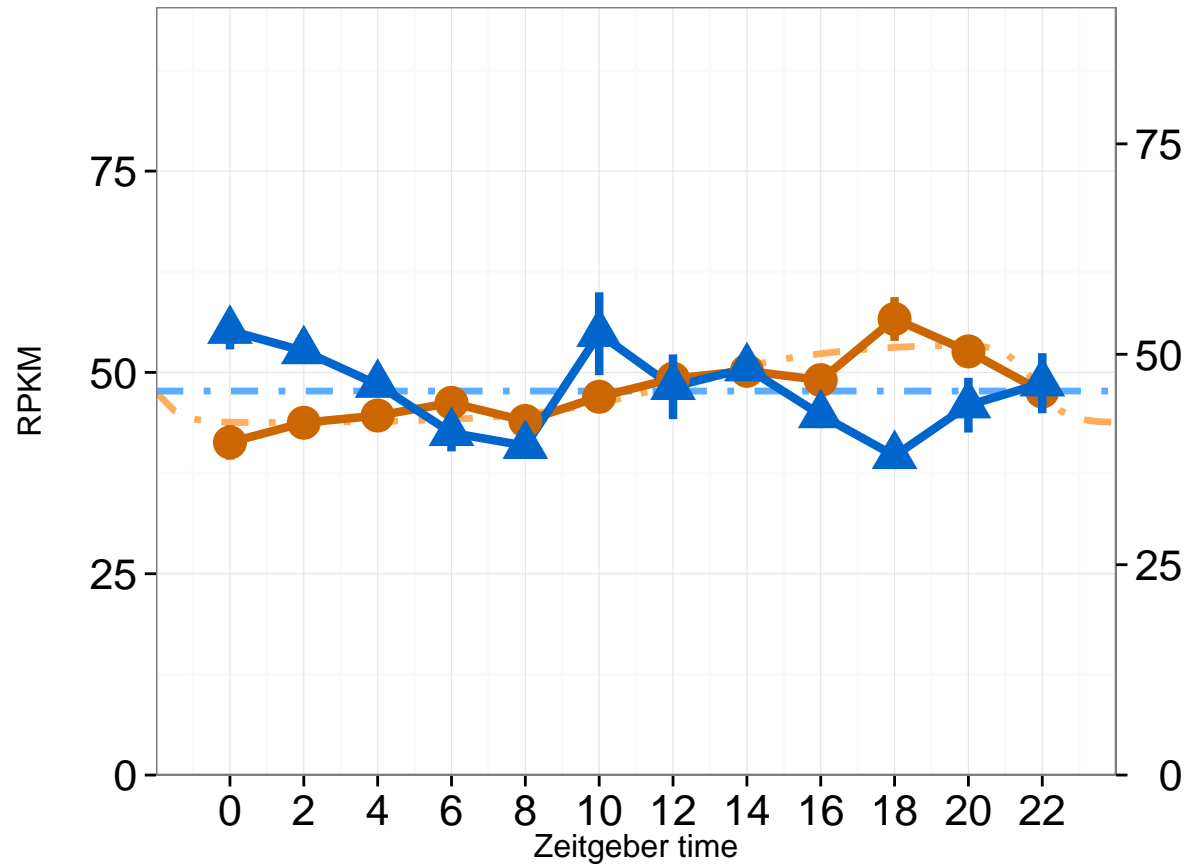

## Eif4e2

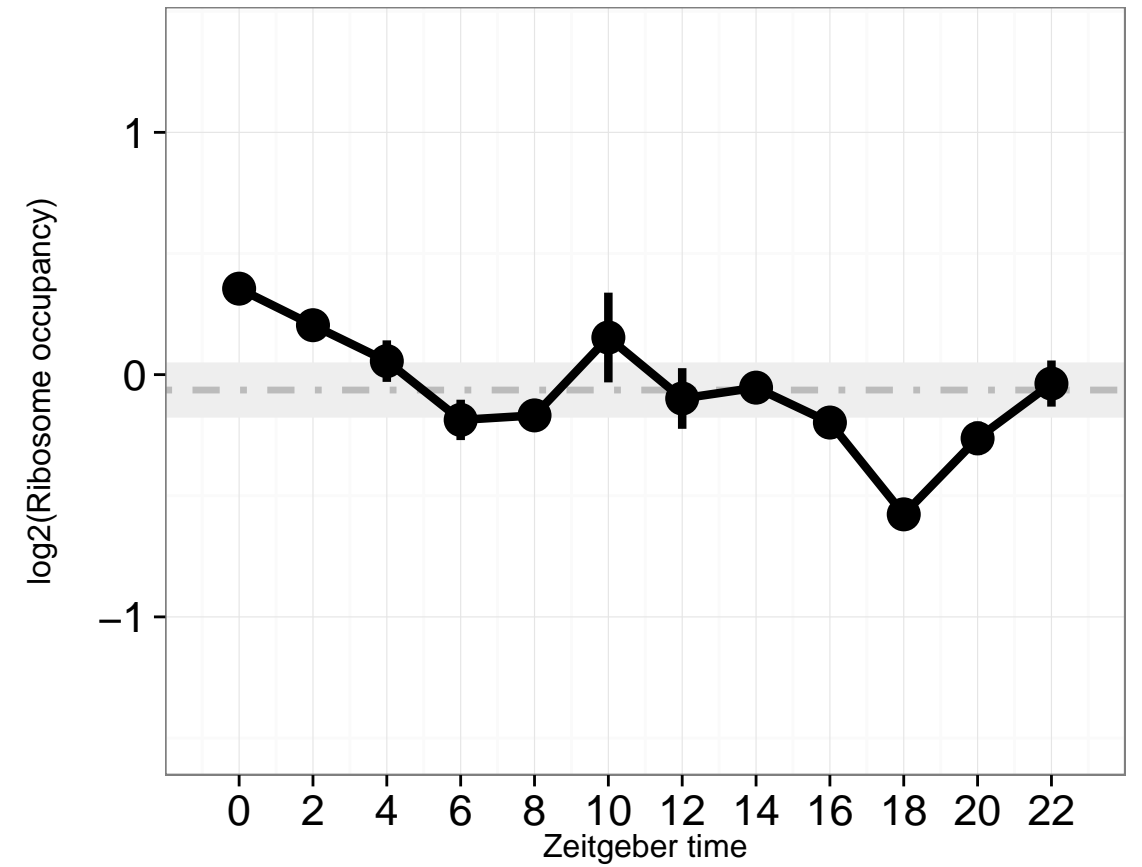

Supplement: Supplementary file 10428 [file 1]

## Adck2

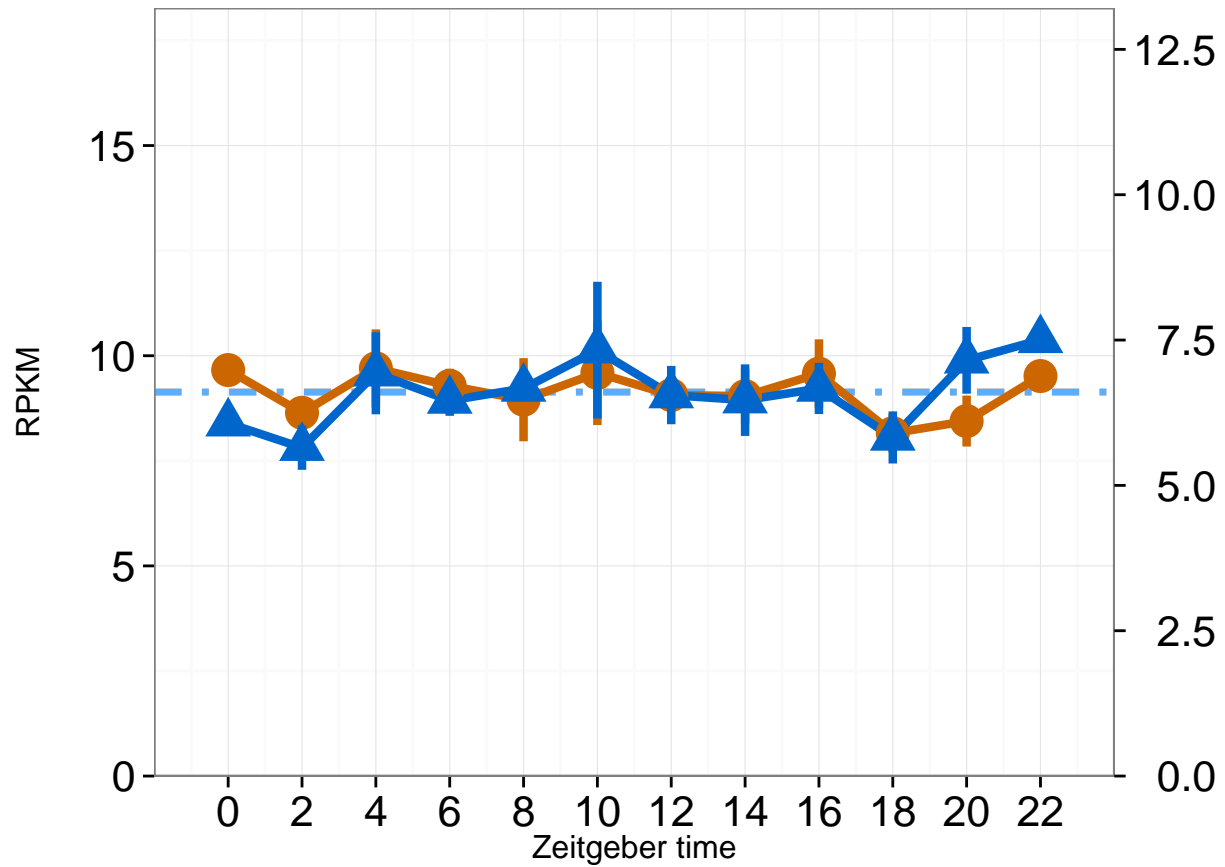

## Adck2

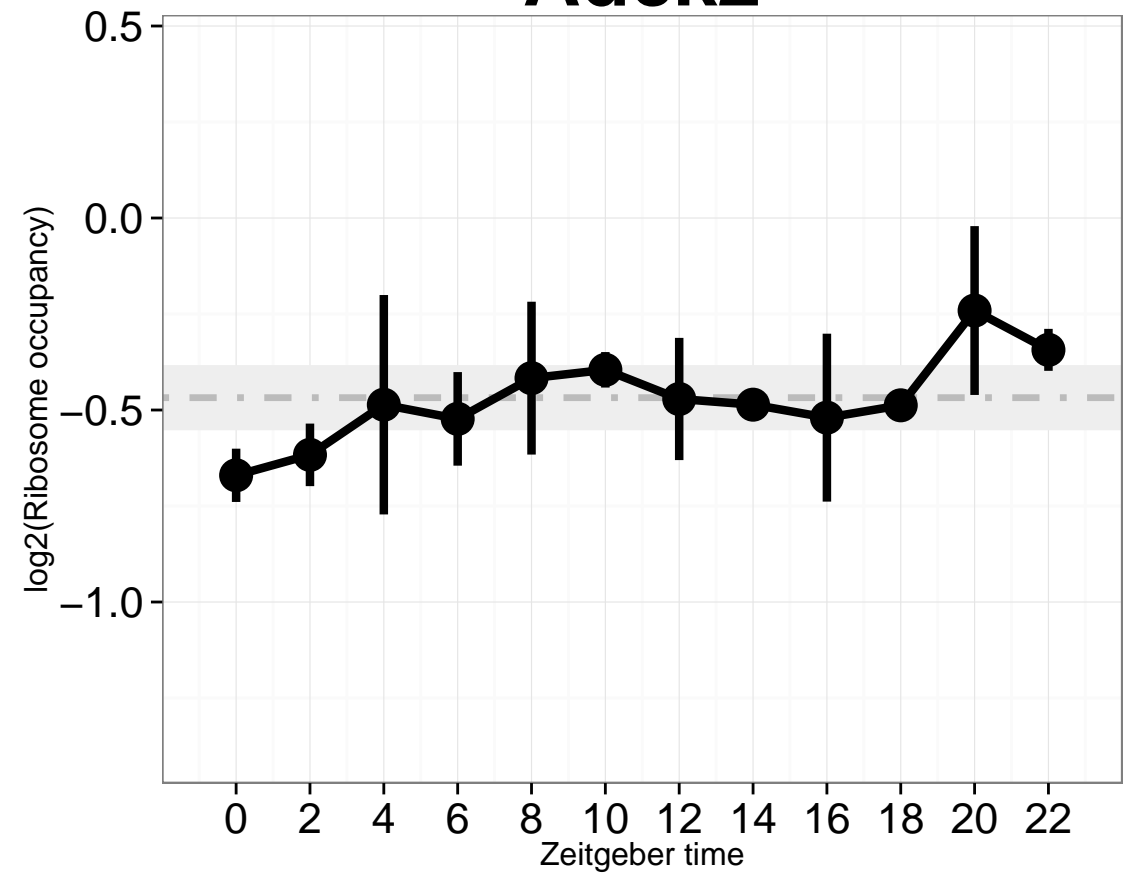

Supplement: Supplementary file 10429 [file 1]

## Hprt

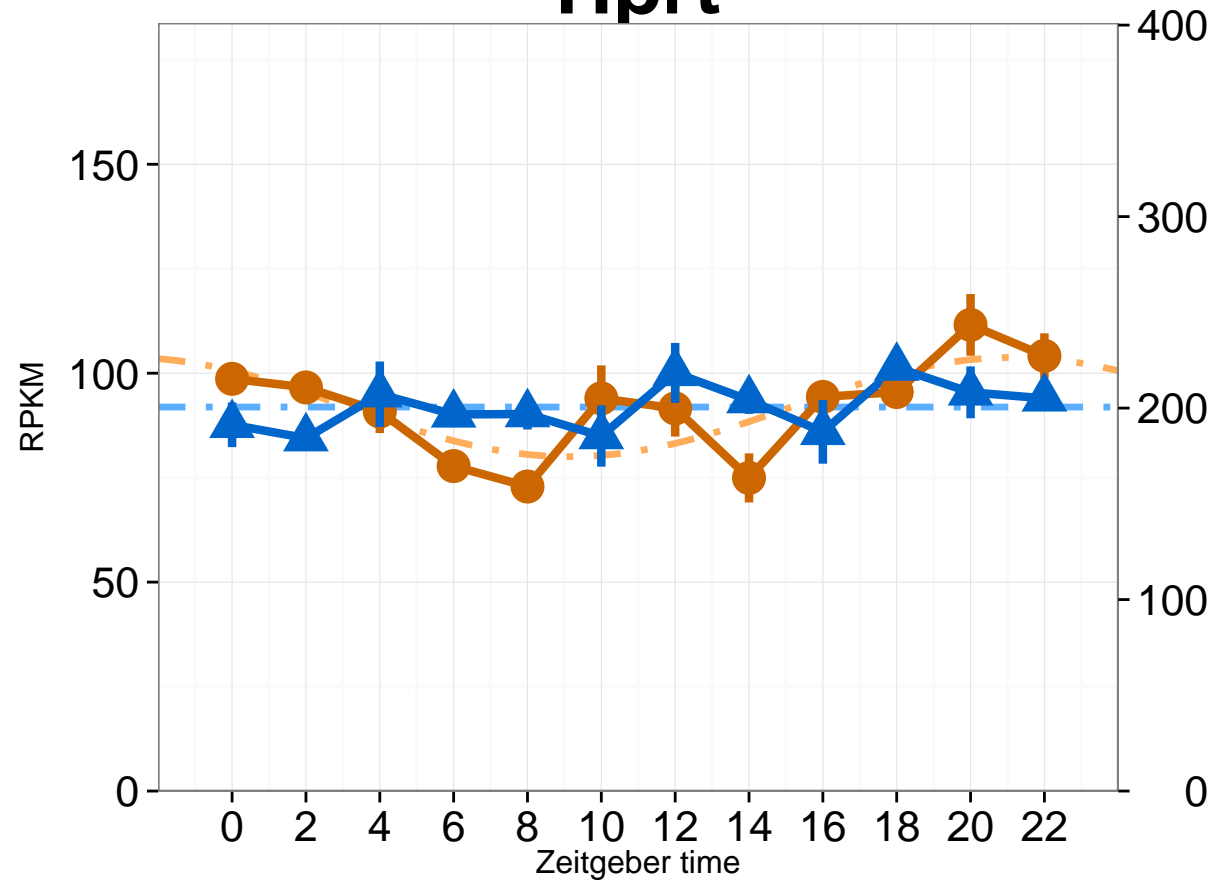

## Hprt

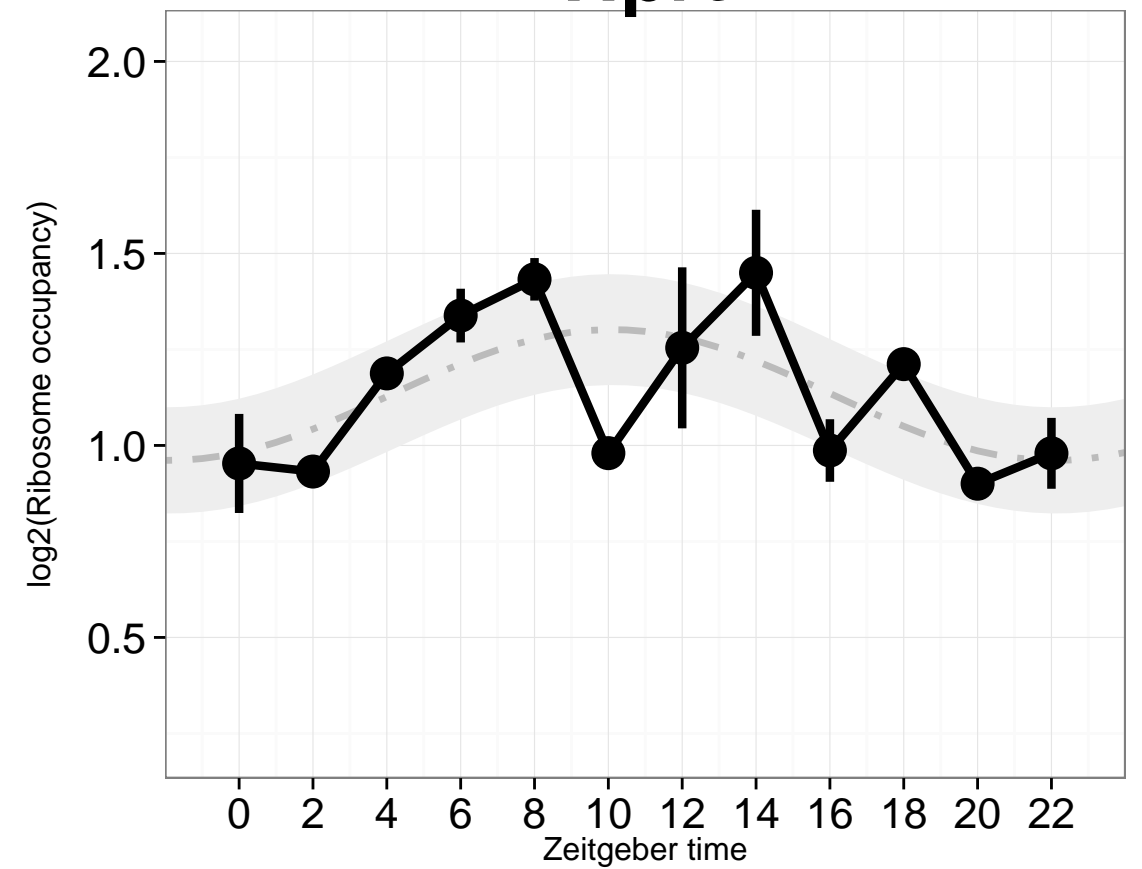

Supplement: Supplementary file 10430 [file 1]

# Grpel2

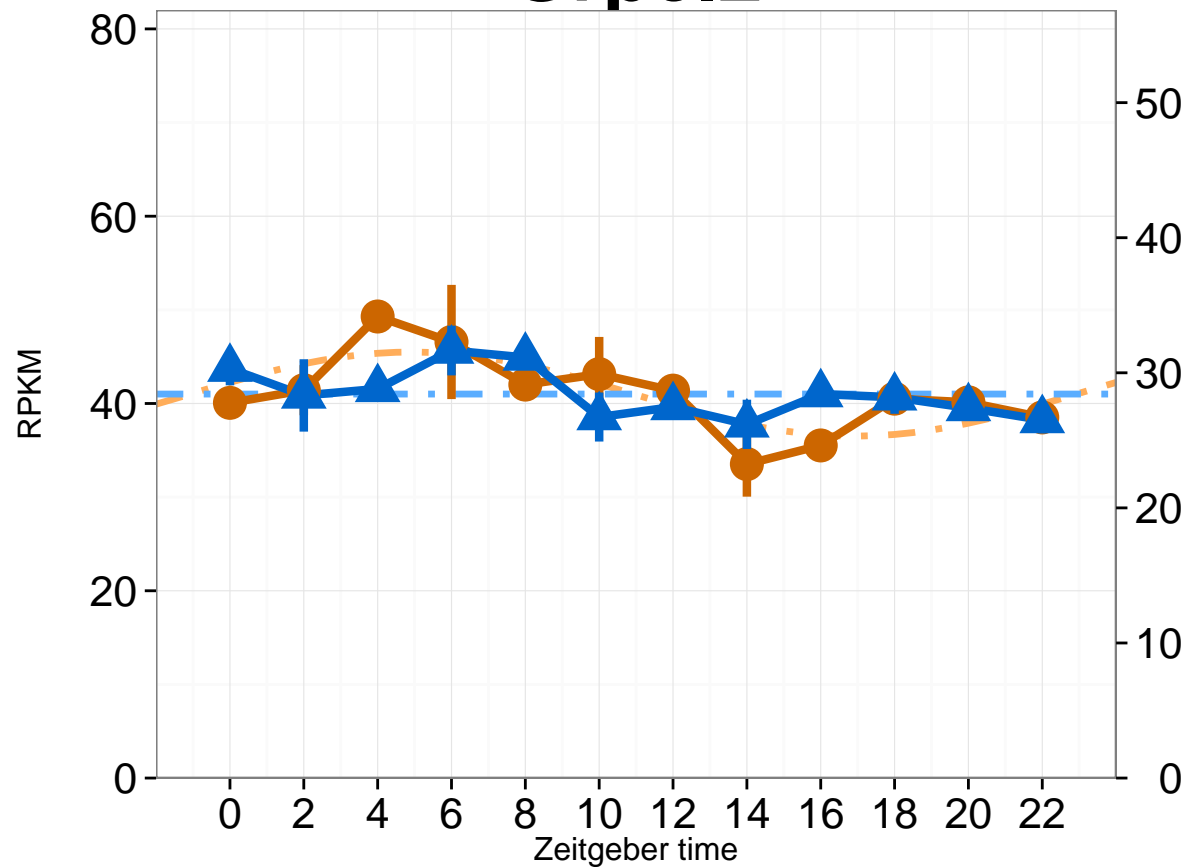

# Grpel2

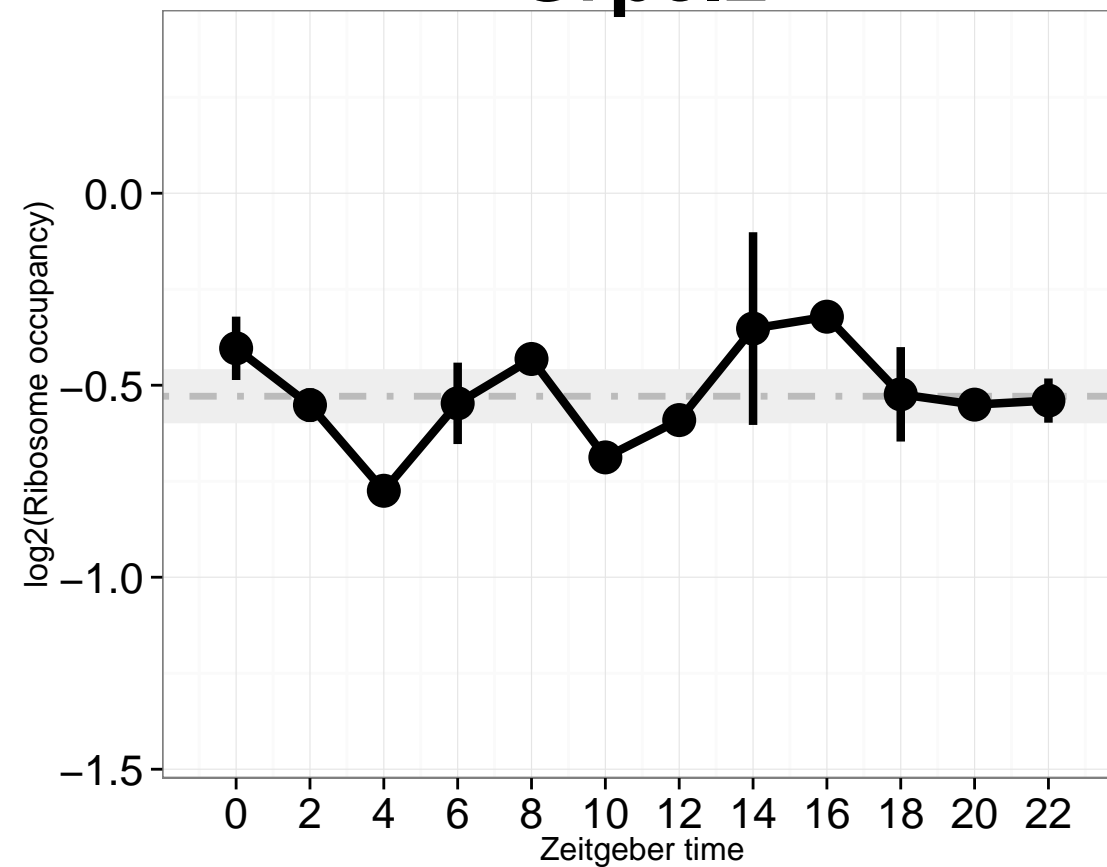

Supplement: Supplementary file 10431 [file 1]

## 4632415L05Rik

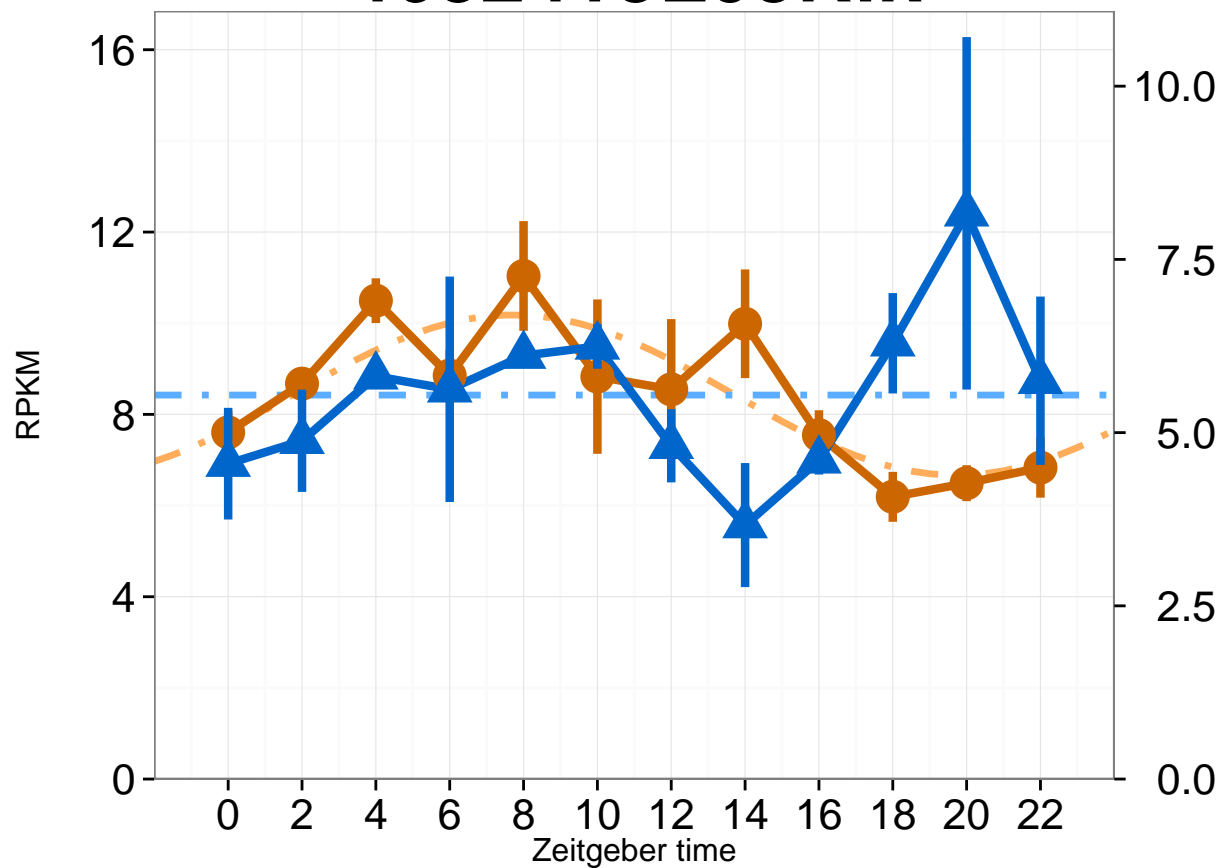

## 4632415L05Rik

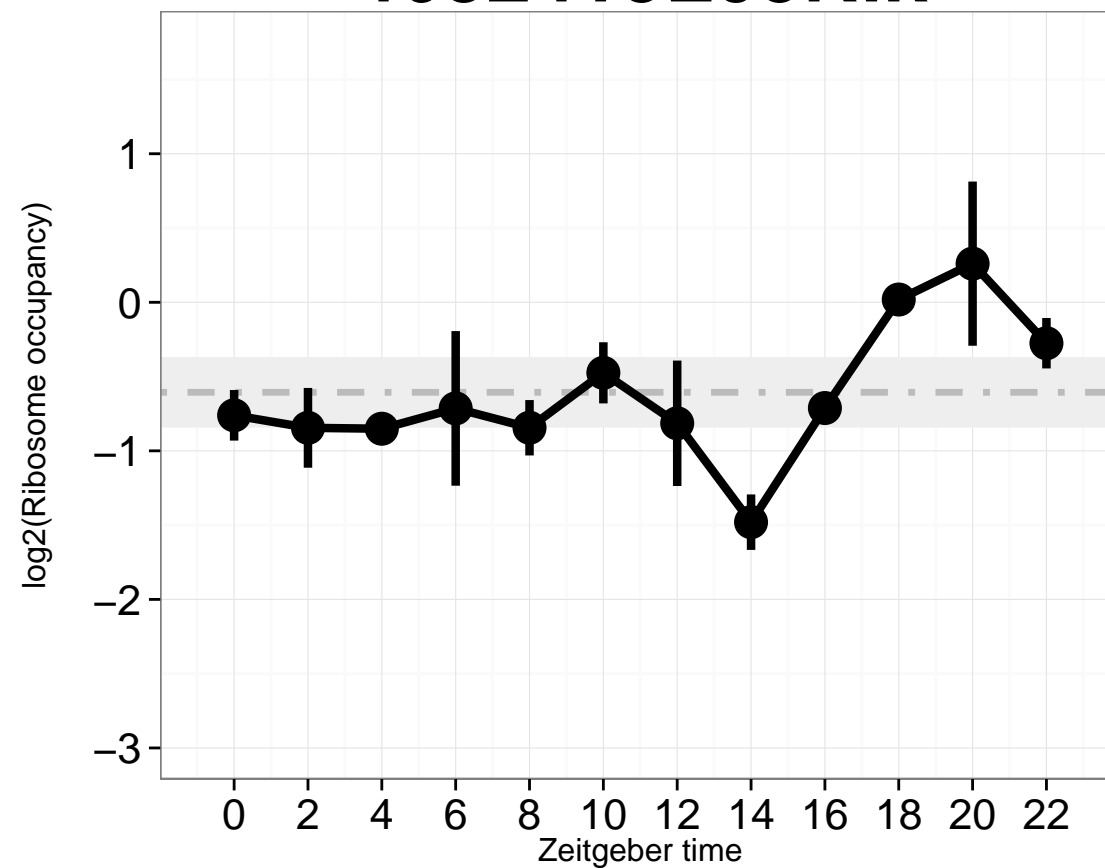

Supplement: Supplementary file 10432 [file 1]

## Ube2n

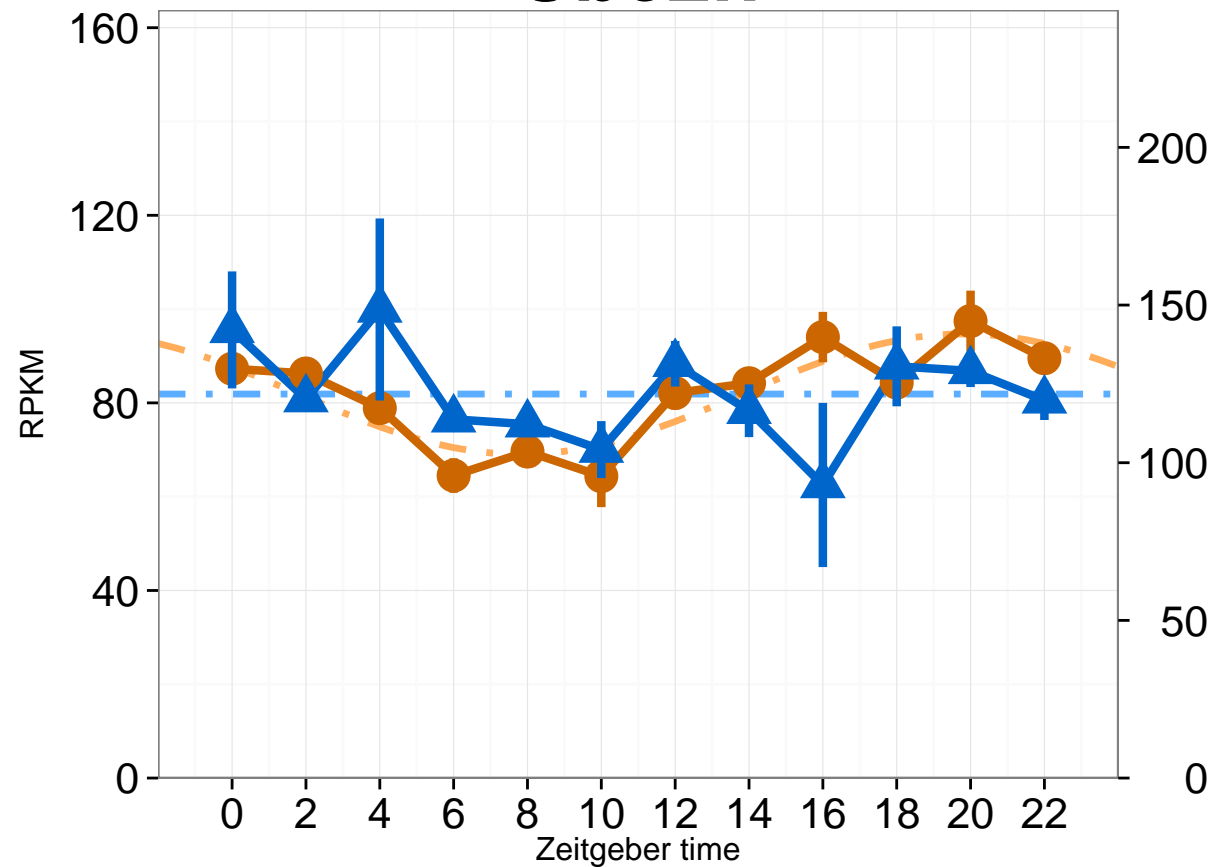

## Ube2n

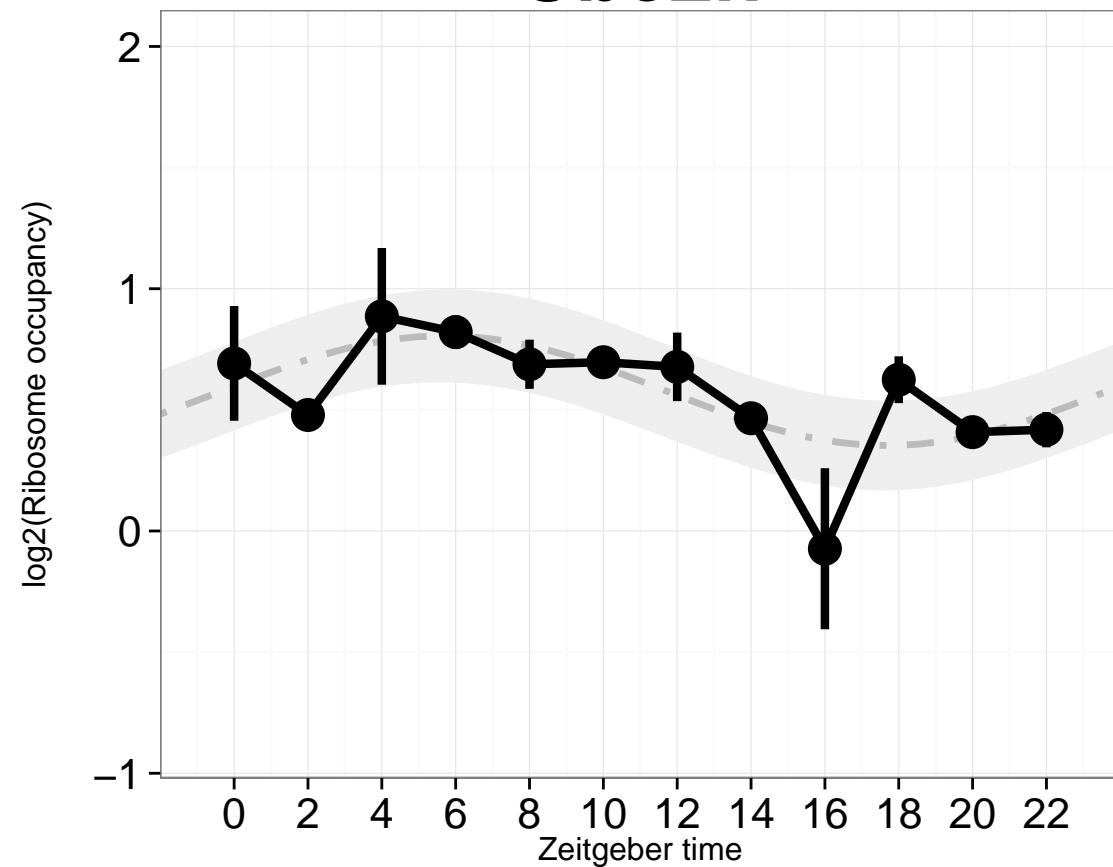

Supplement: Supplementary file 10433 [file 1]

# Atp5j2

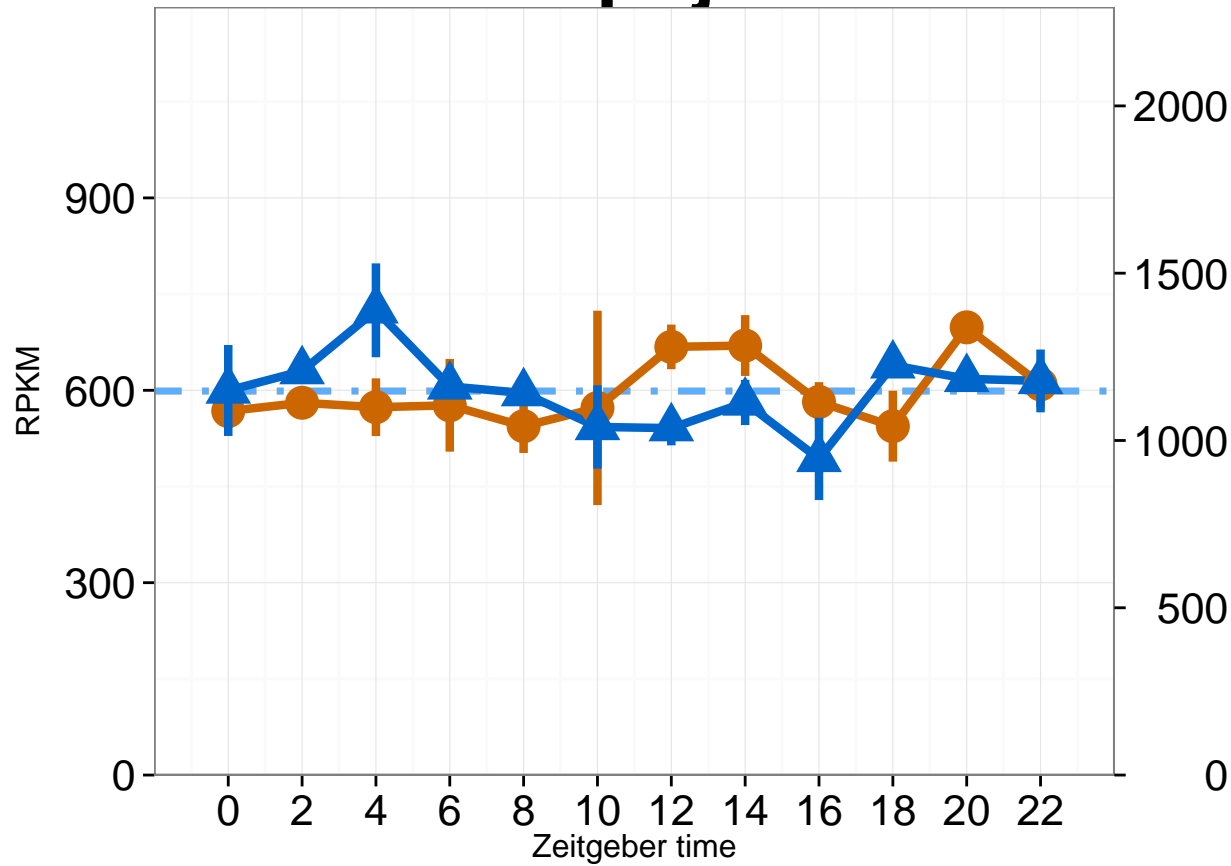

# Atp5j2

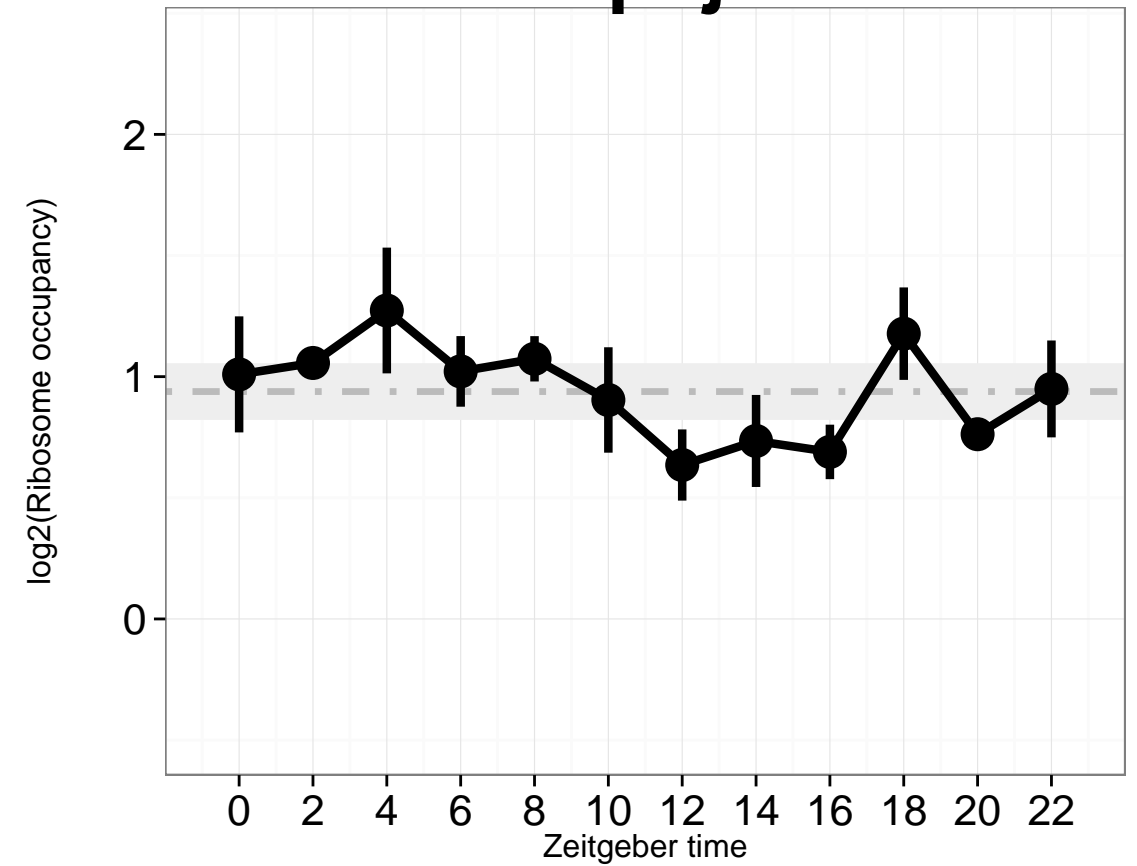

Supplement: Supplementary file 10434 [file 1]

## Atr

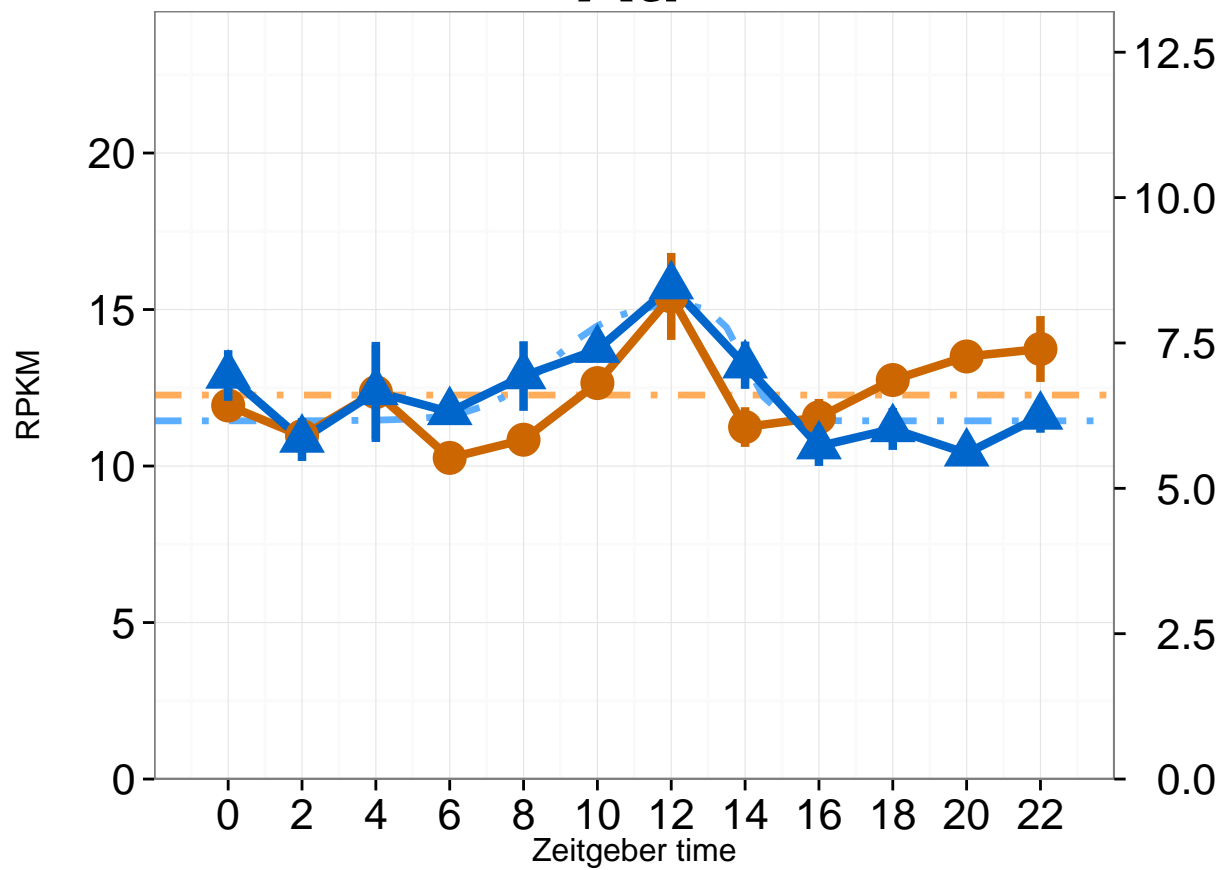

## Atr

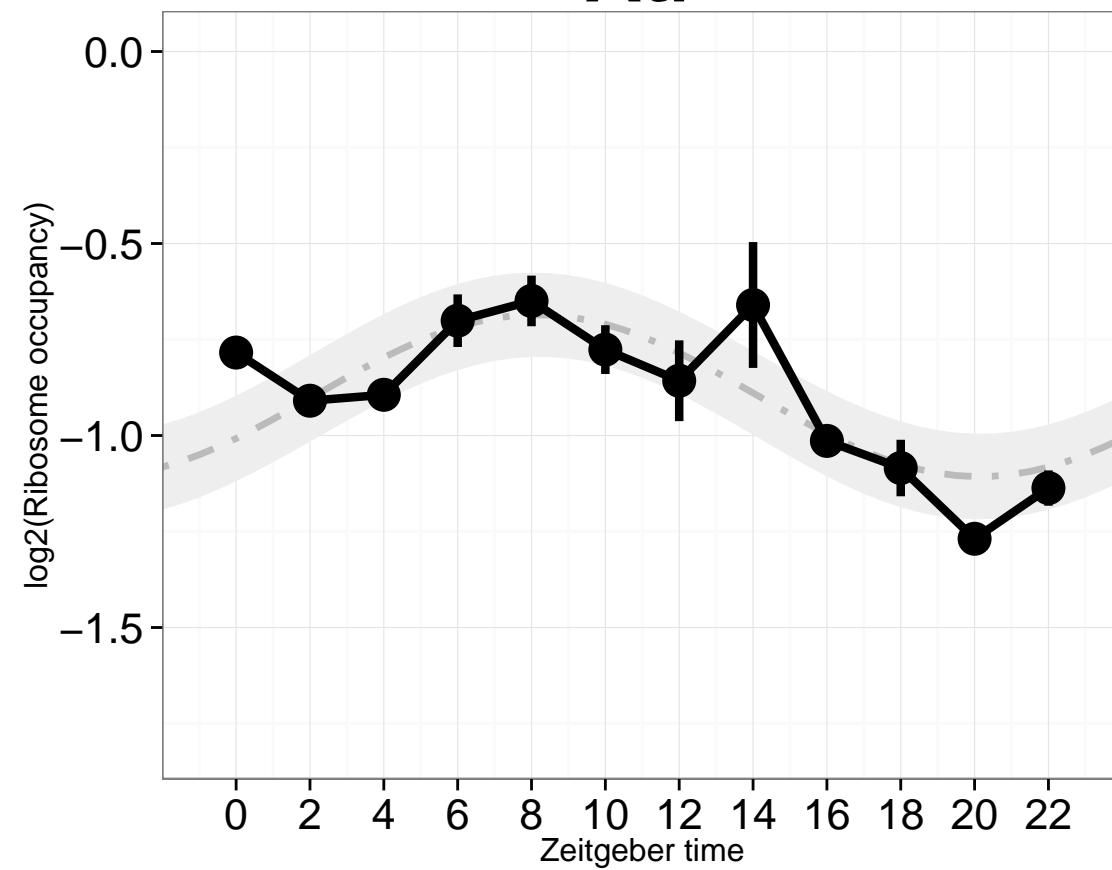

Supplement: Supplementary file 10435 [file 1]

## Tbce

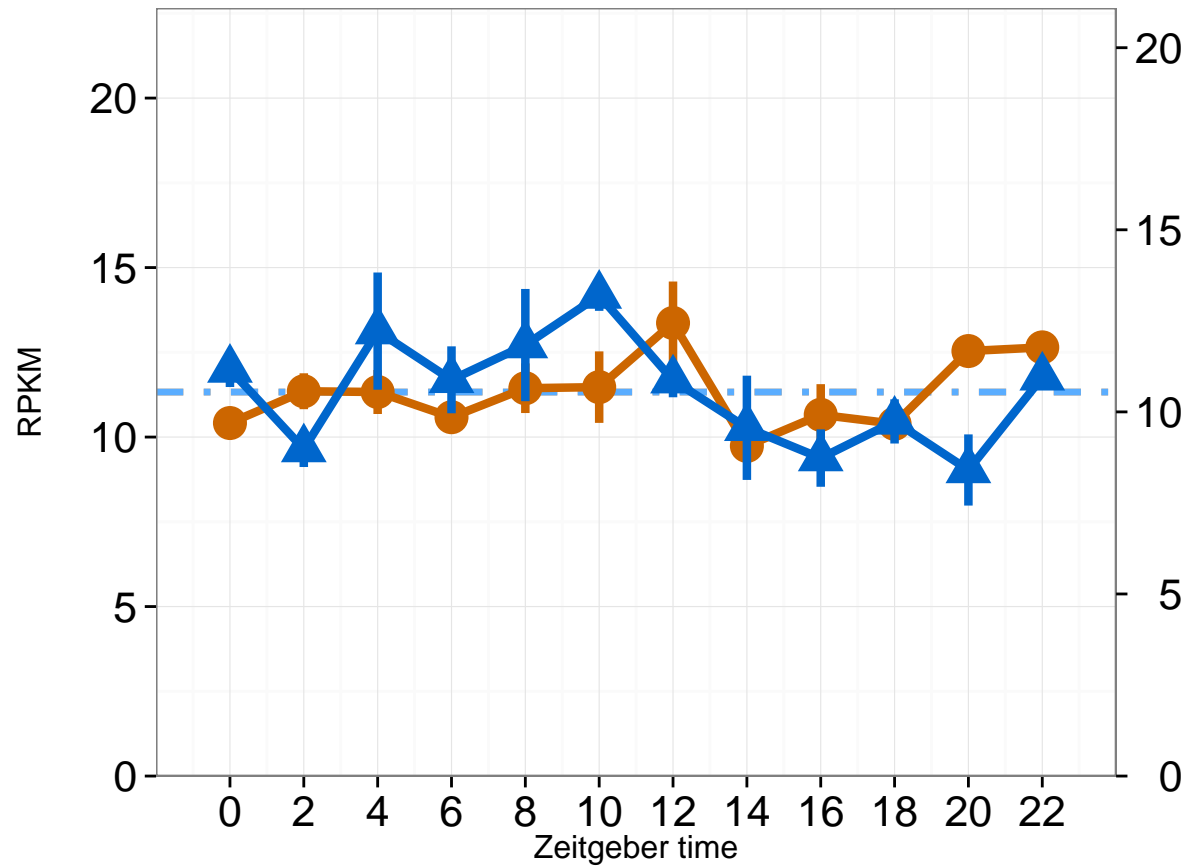

## Tbce

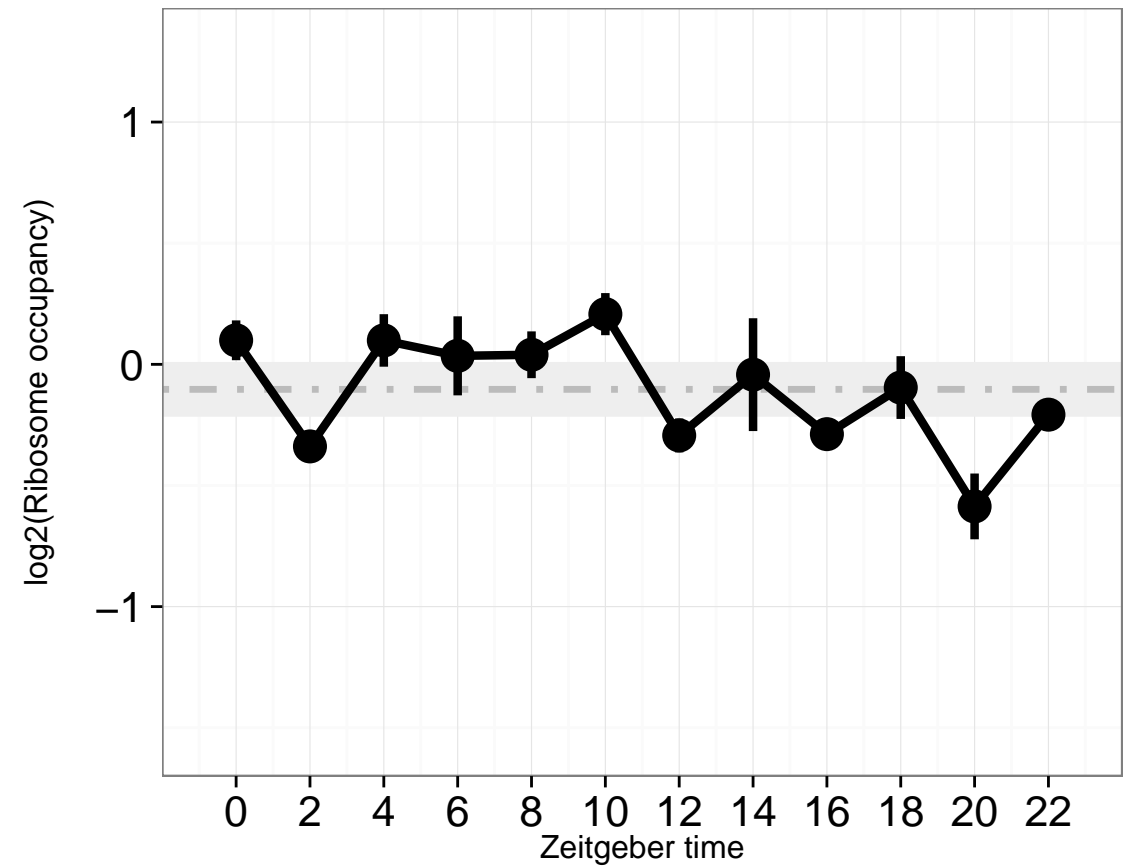

Supplement: Supplementary file 10436 [file 1]

# S100a11

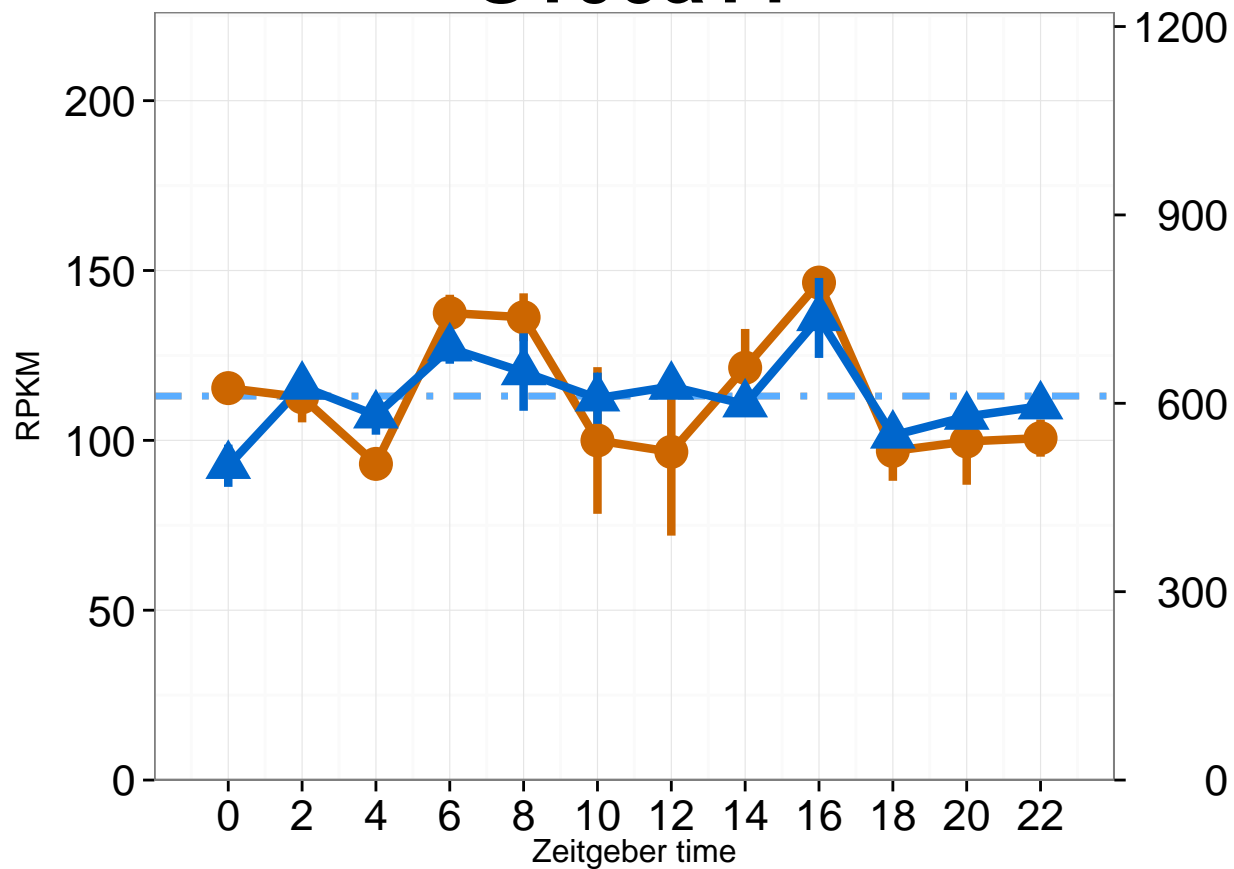

# S100a11

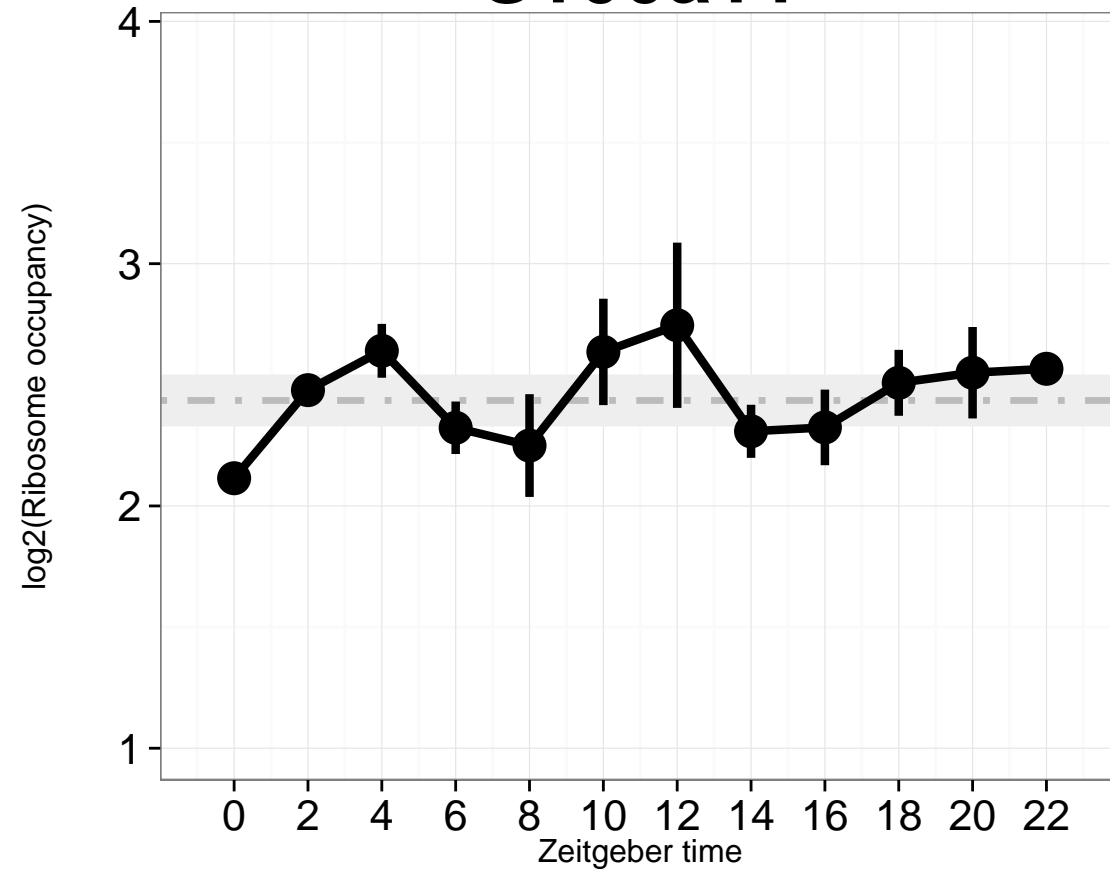

Supplement: Supplementary file 10437 [file 1]

# Hist1h2bm

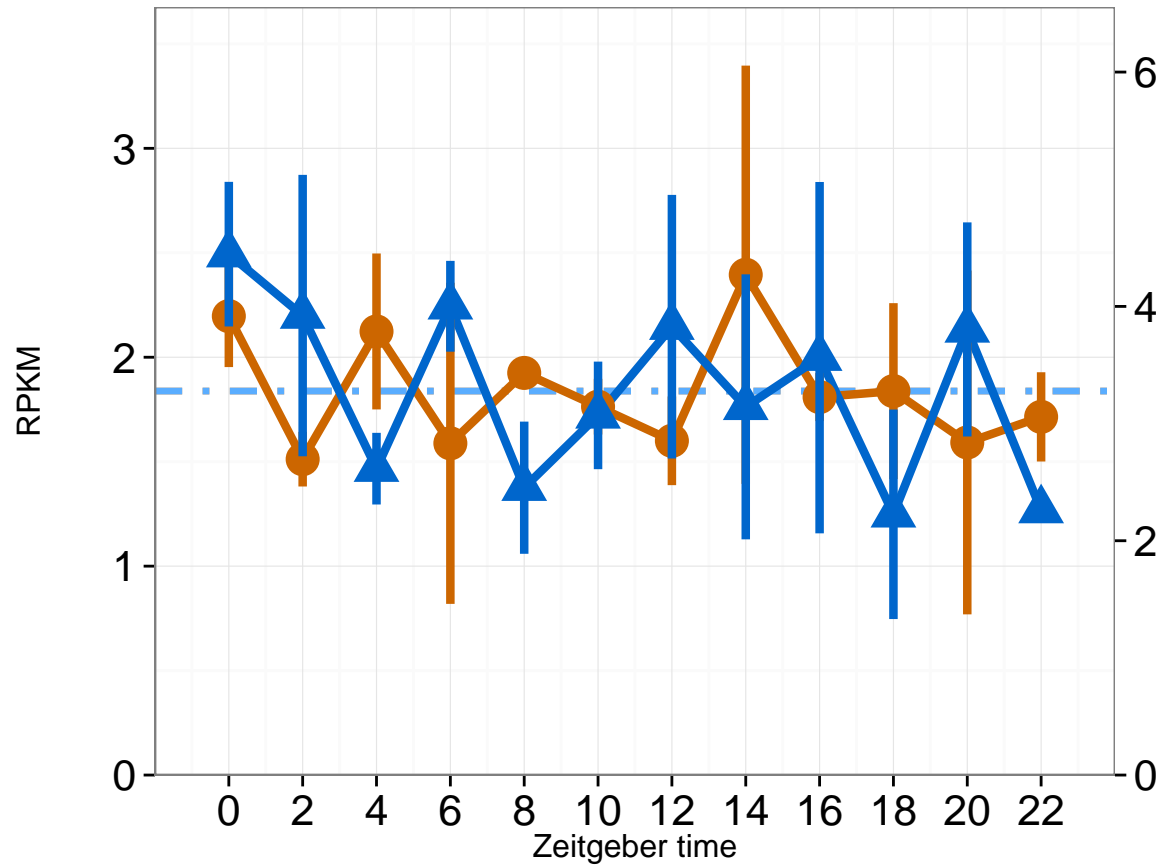

# Hist1h2bm

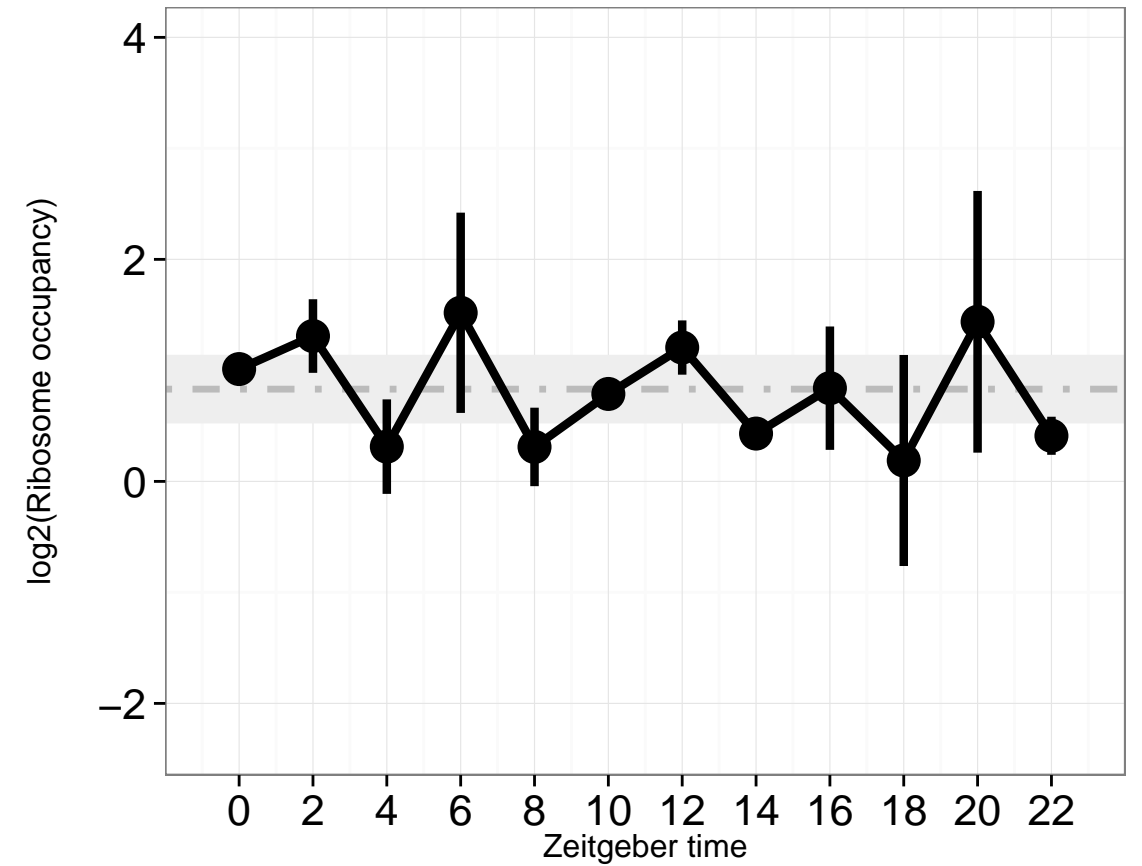

Supplement: Supplementary file 10438 [file 1]

# Cmtm7

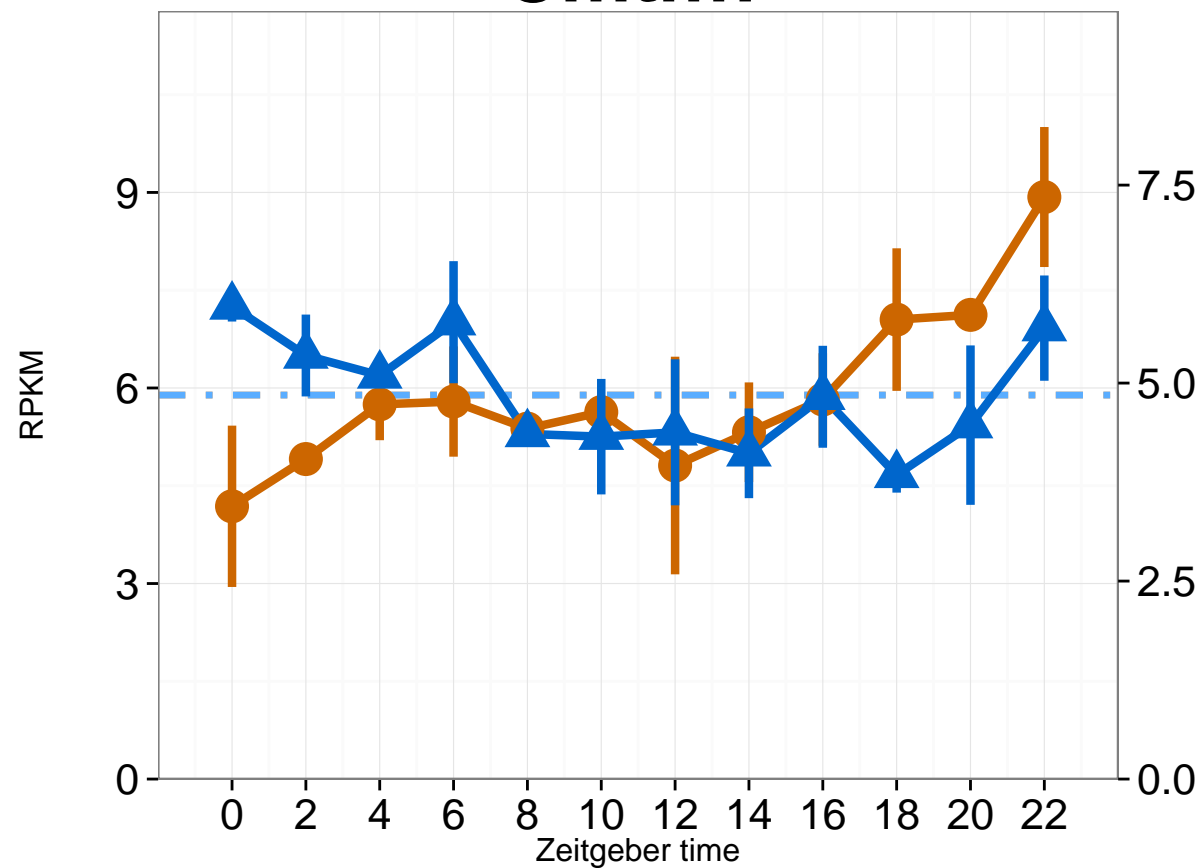

# Cmtm7

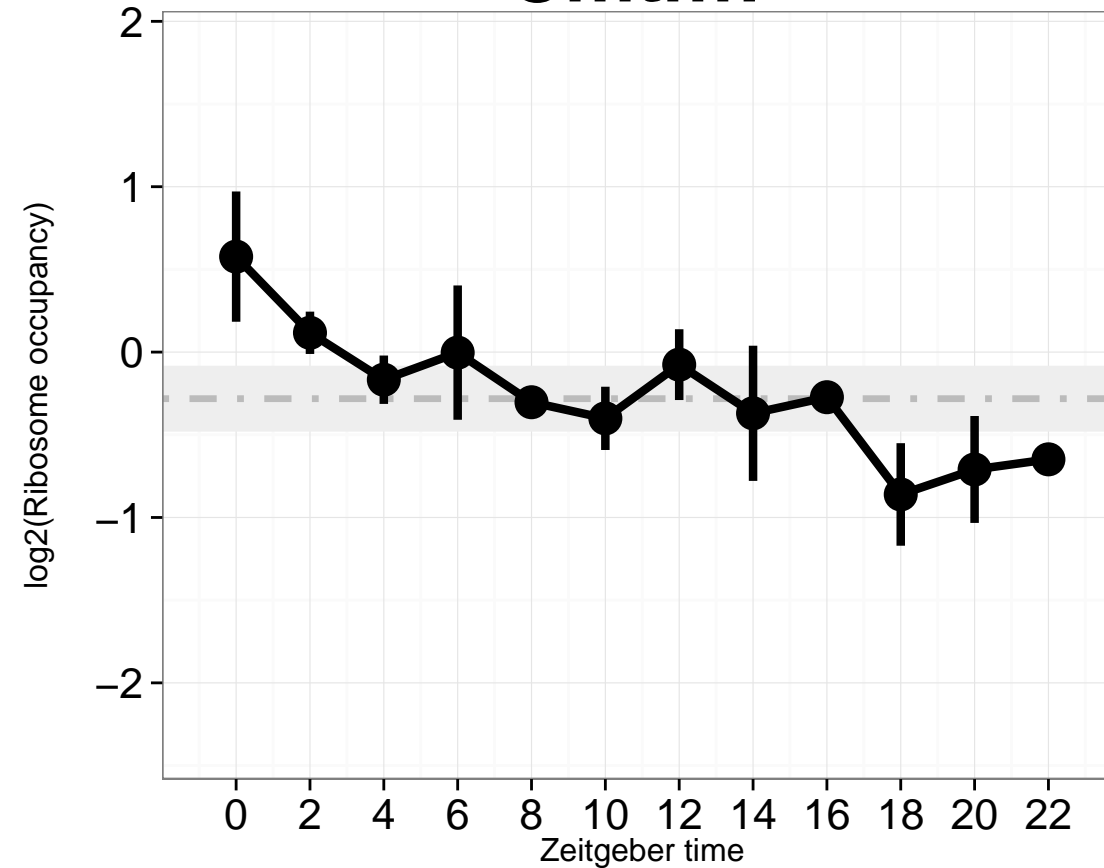

Supplement: Supplementary file 10439 [file 1]
