# Supplementary material (part 105 of 133)
Source: publisher figshare collection journal article supplement (https://springernature.figshare.com/articles/dataset/_/4903193)

# Sim2

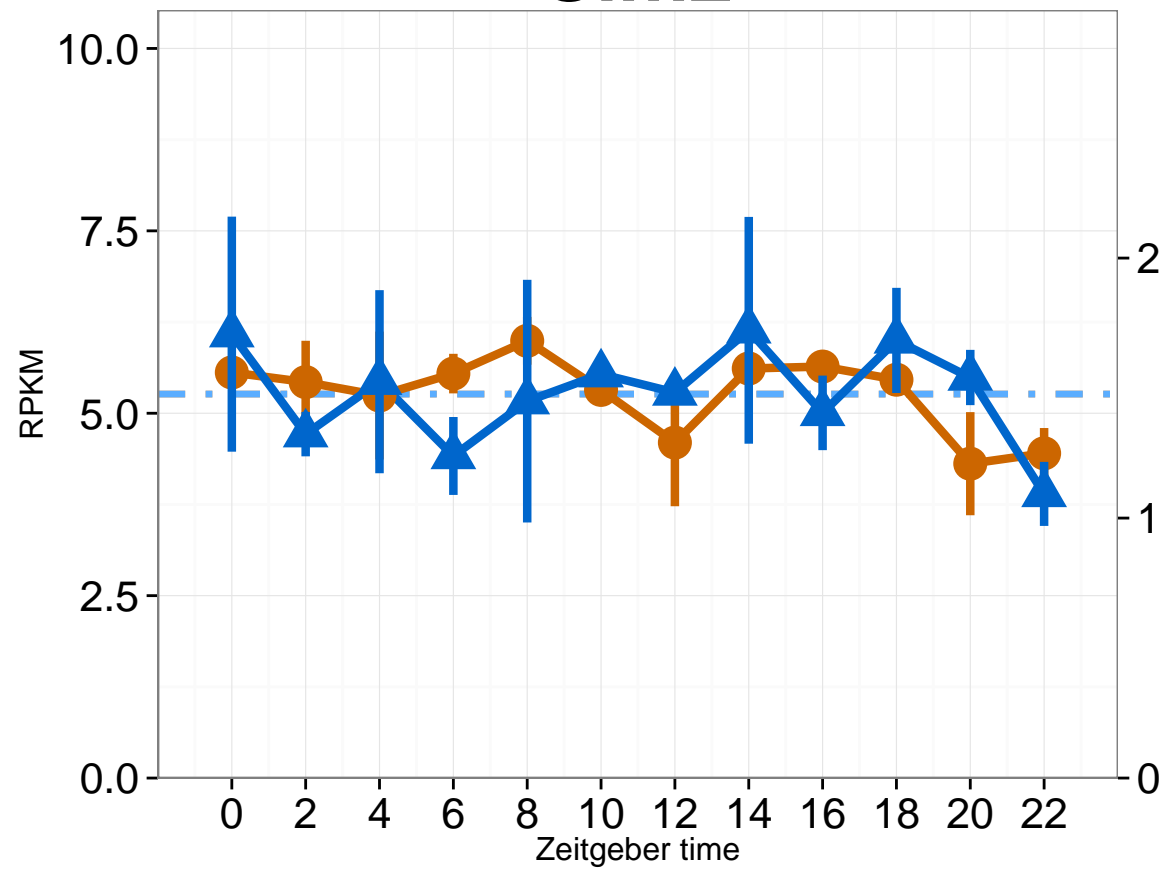

# Sim2

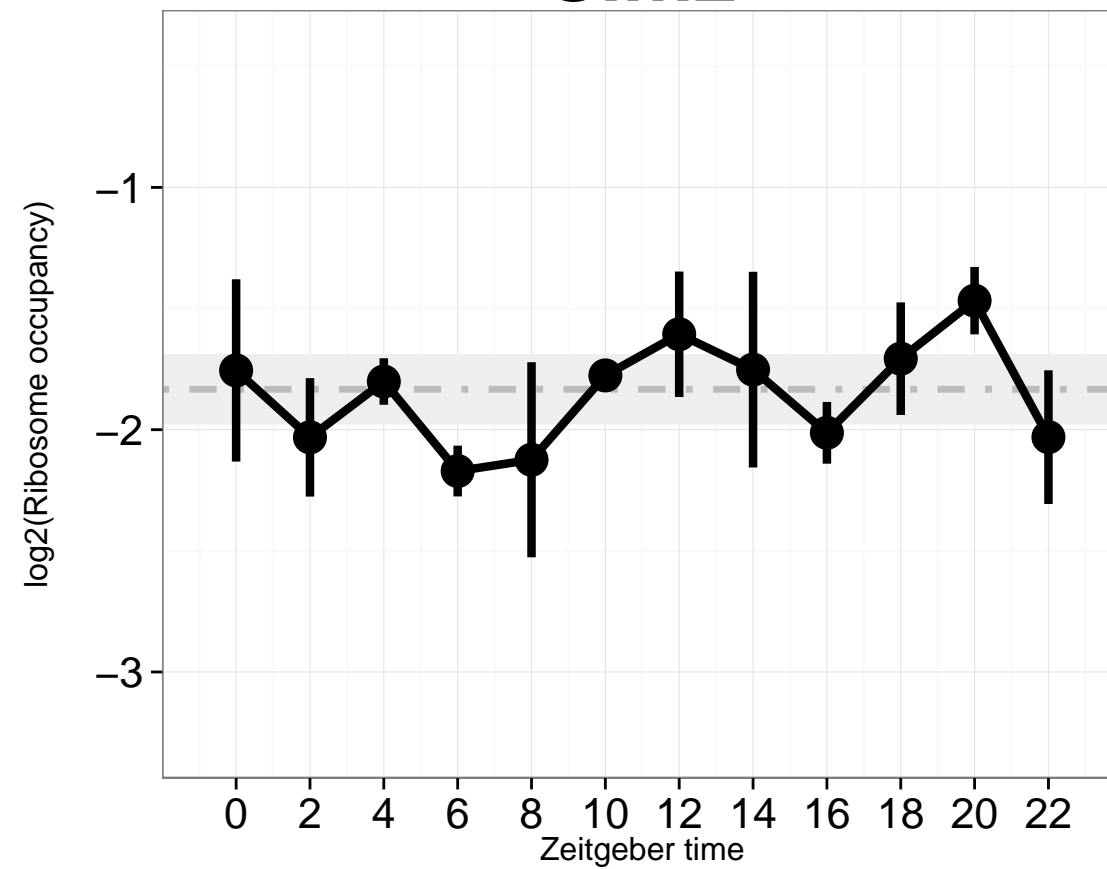

Supplement: Supplementary file 10440 [file 1]

**Ttk TR**

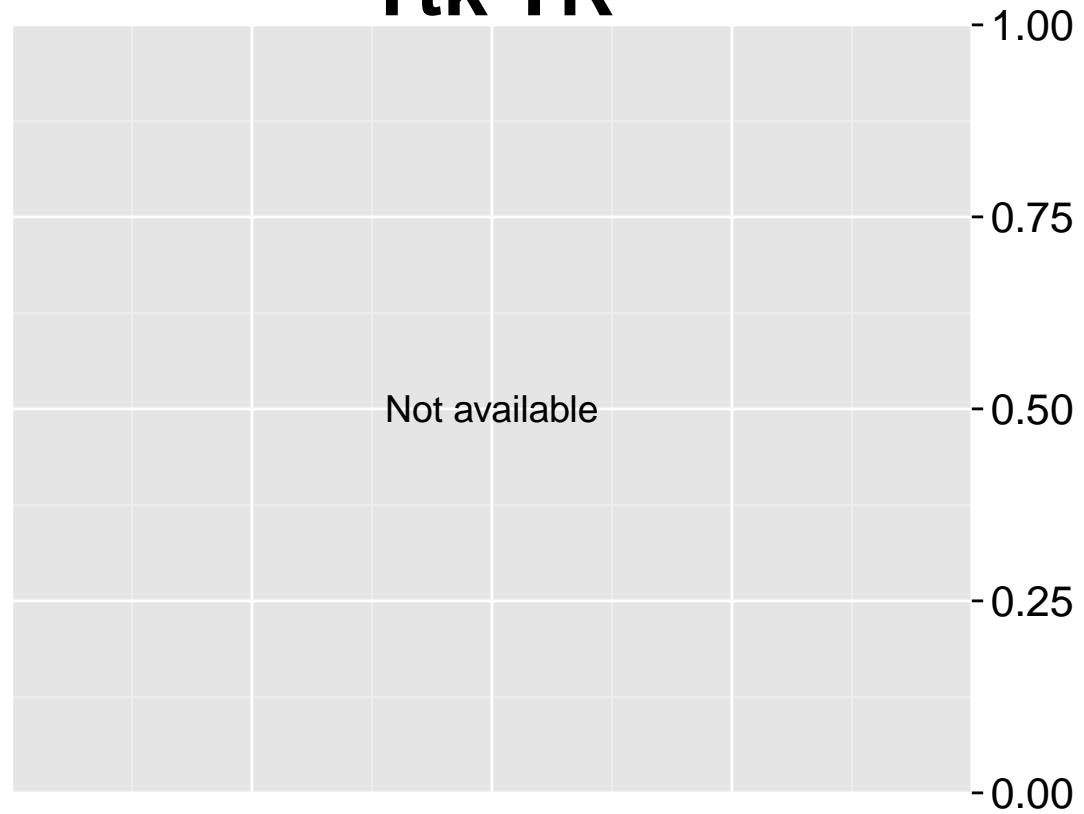

**Ttk log2(Ribosome occupancy)**

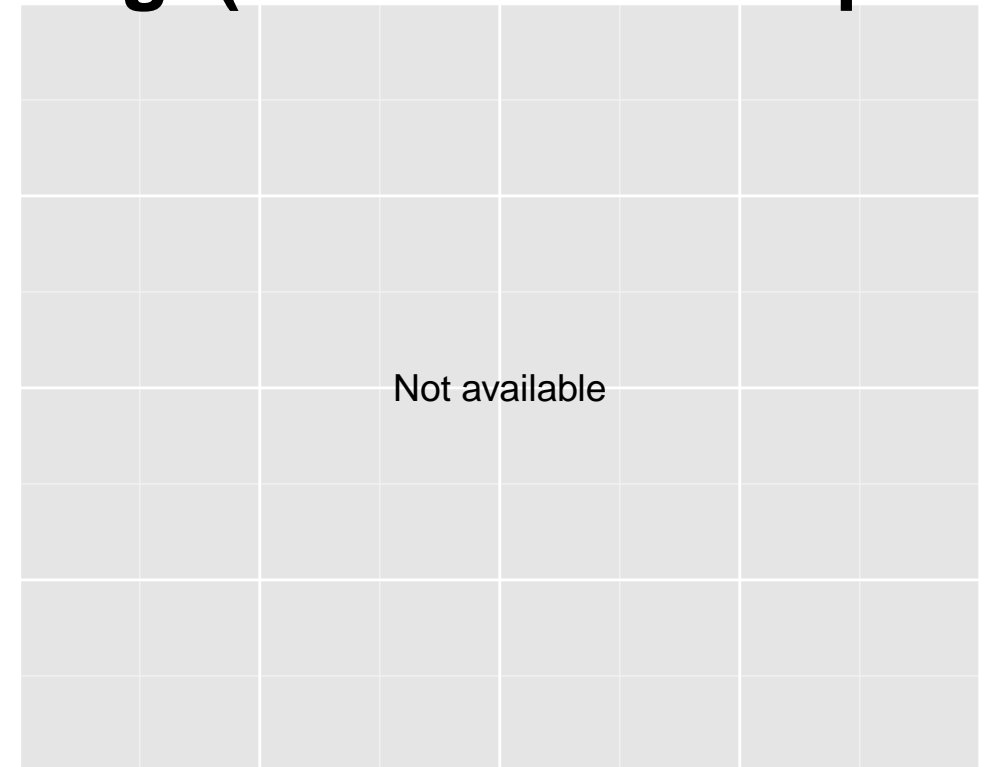

Supplement: Supplementary file 10441 [file 1]

## Fer

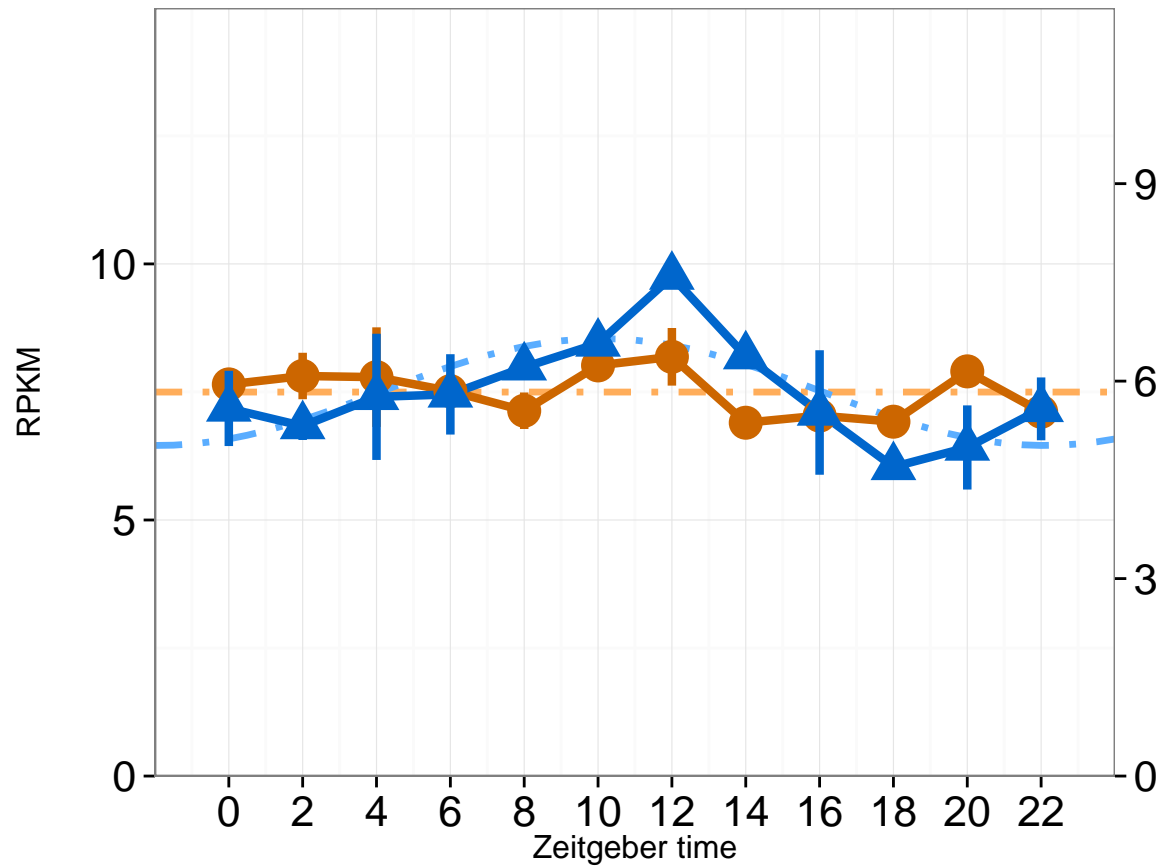

## Fer

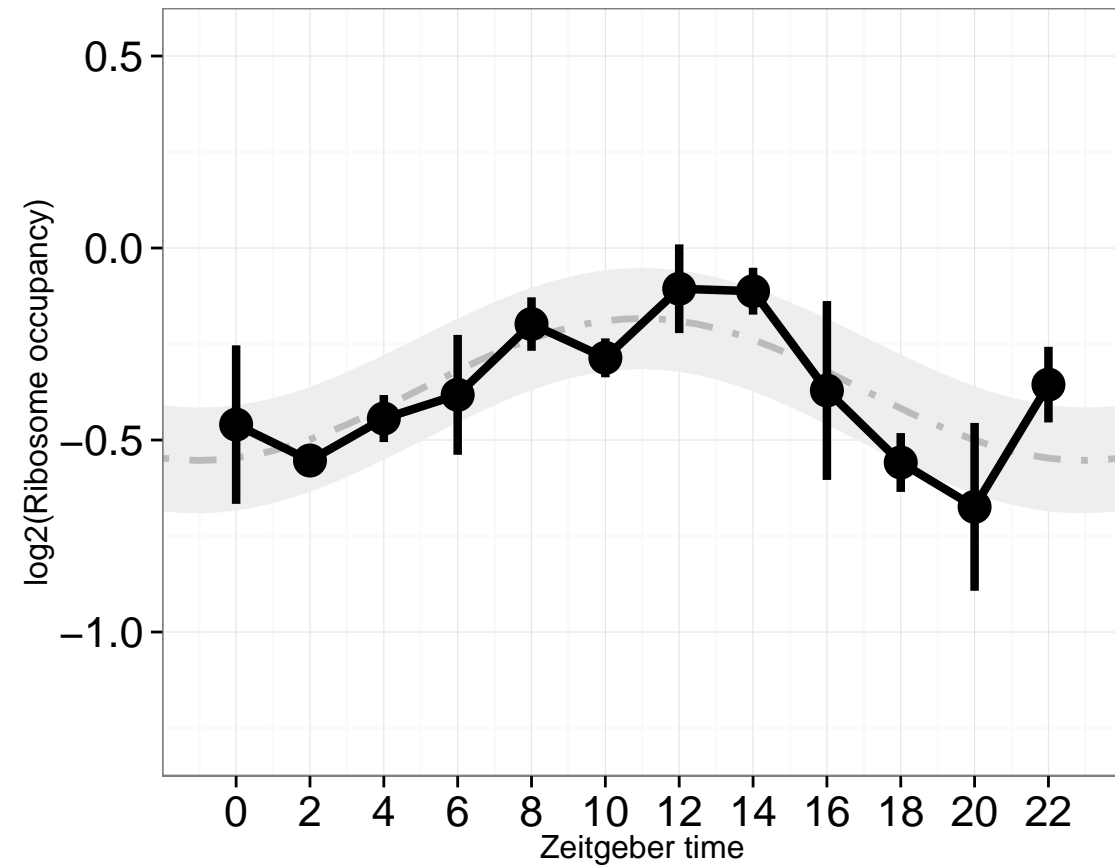

Supplement: Supplementary file 10442 [file 1]

# Gal3st1

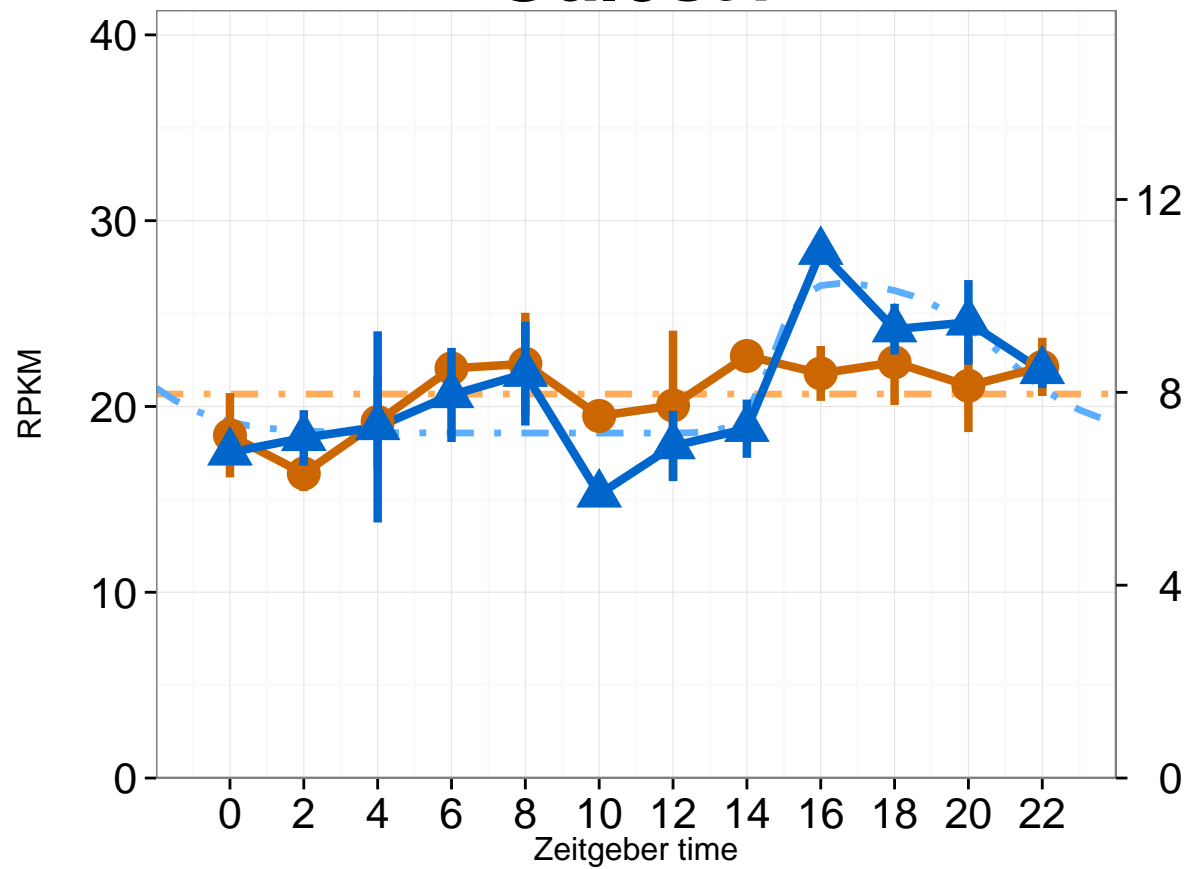

# Gal3st1

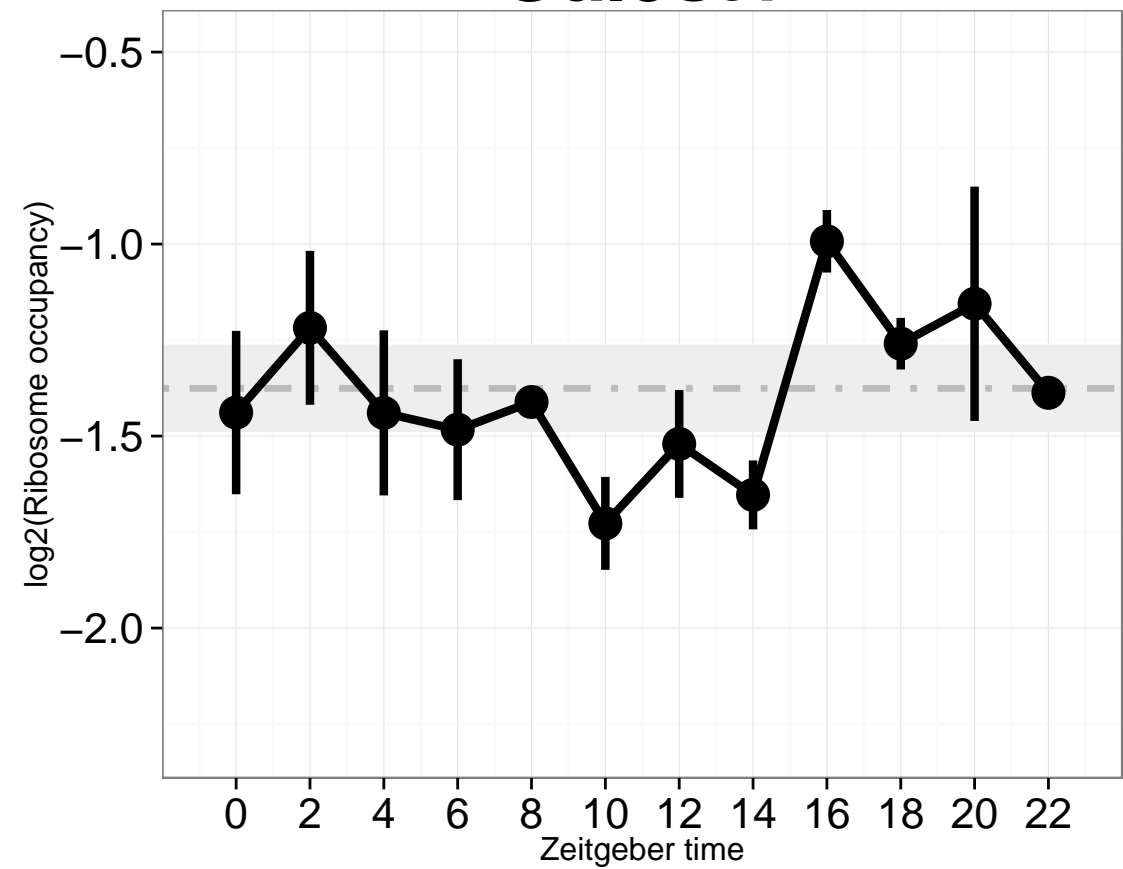

Supplement: Supplementary file 10443 [file 1]

## Rgl2

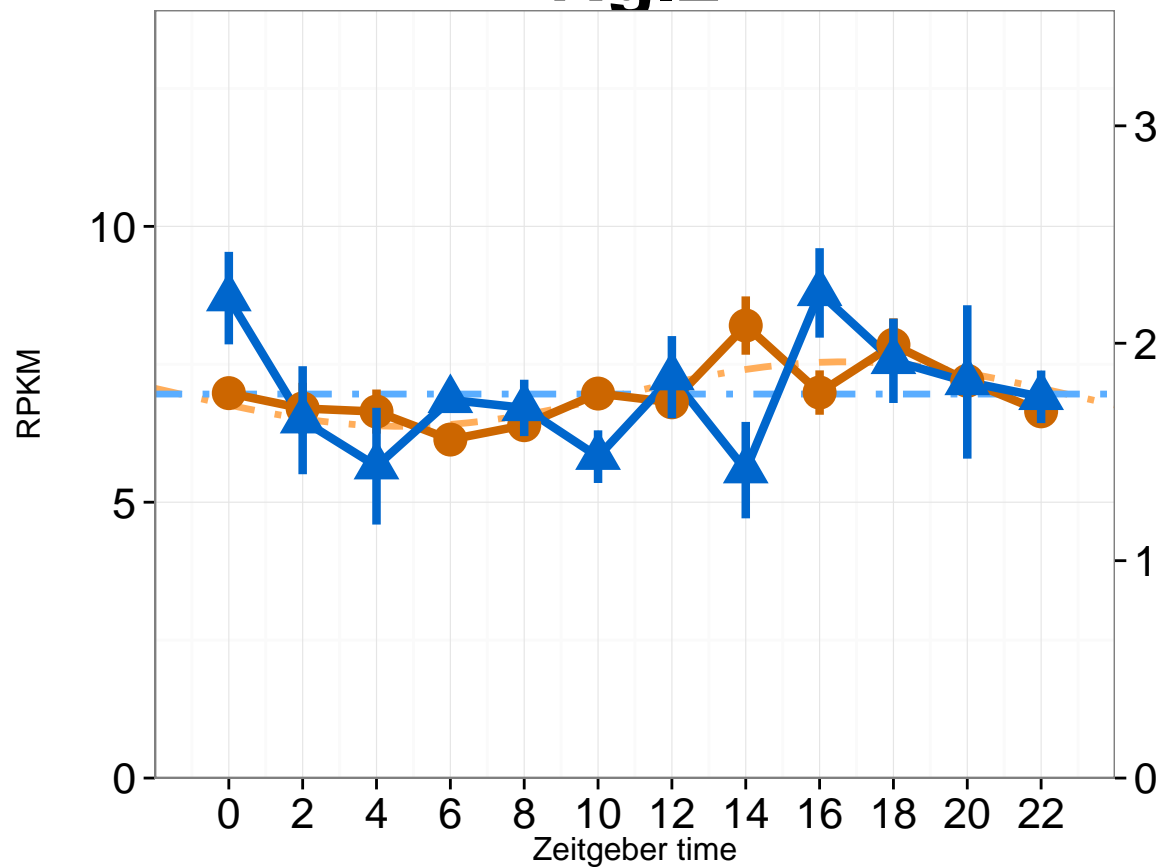

## Rgl2

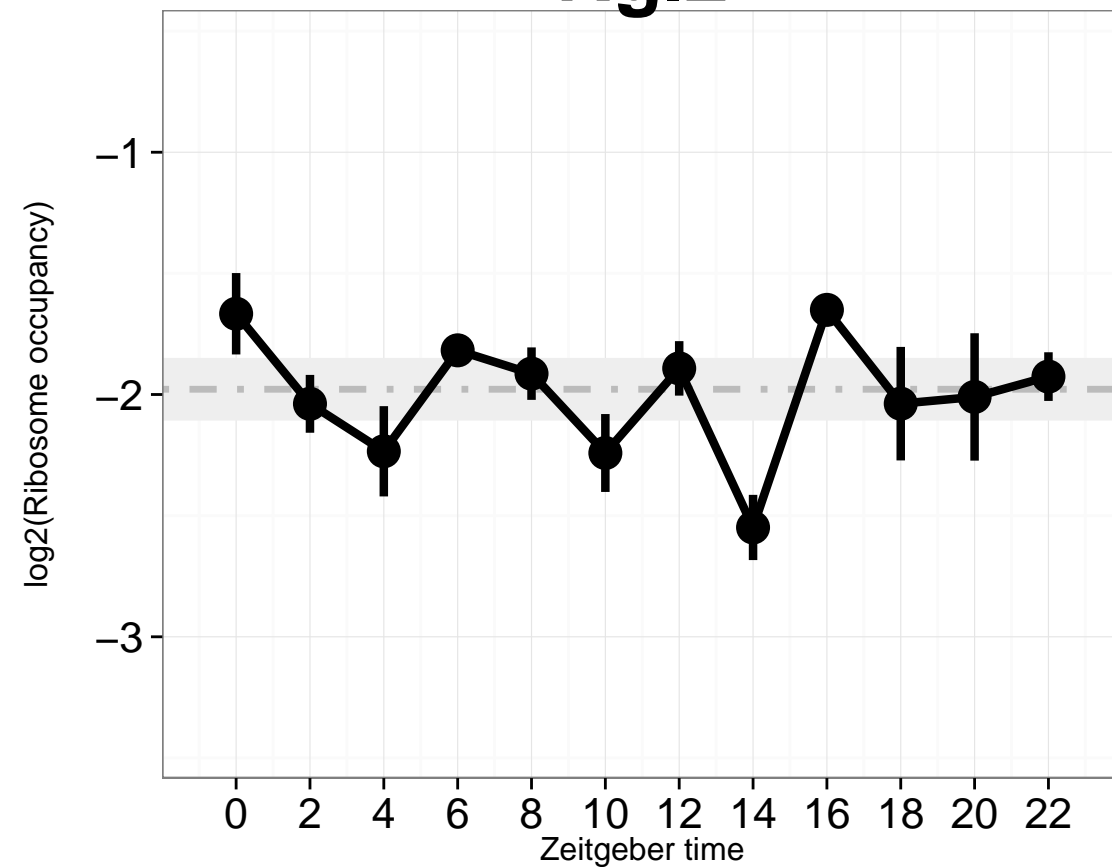

Supplement: Supplementary file 10444 [file 1]

# Zfp775

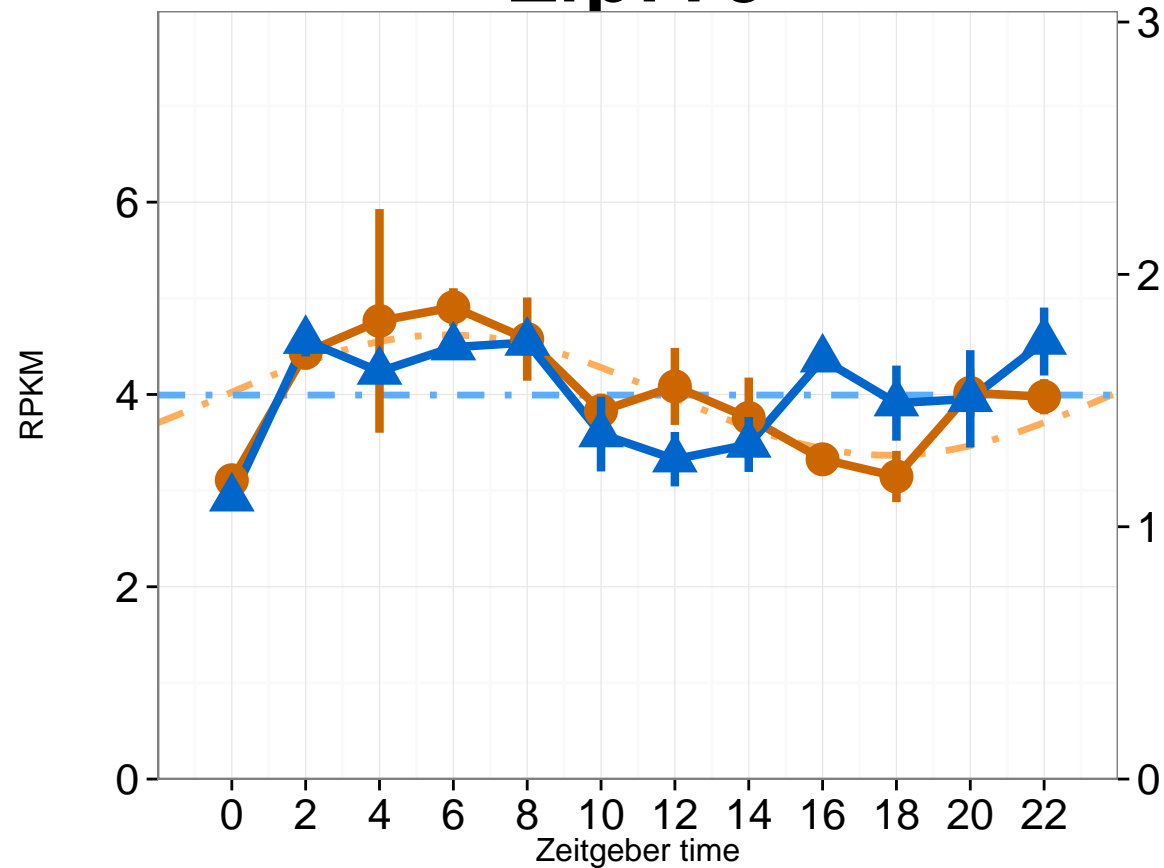

# Zfp775

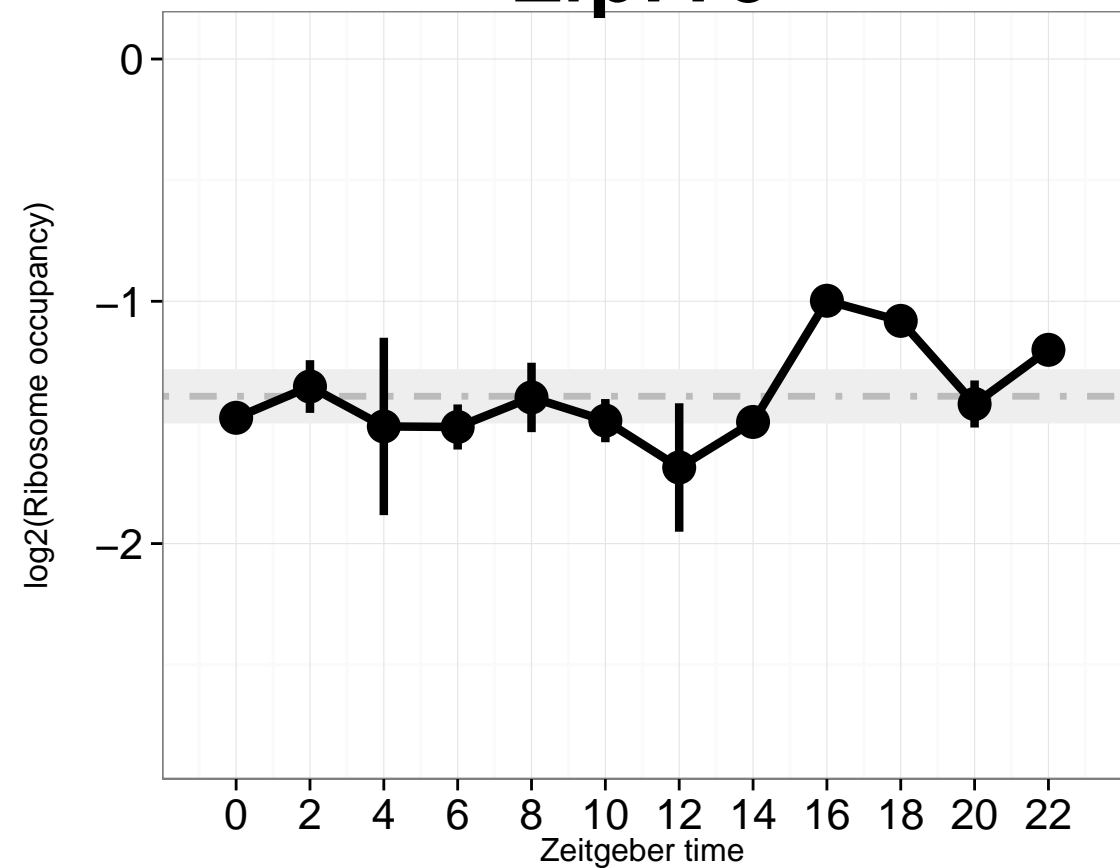

Supplement: Supplementary file 10445 [file 1]

## Cnp

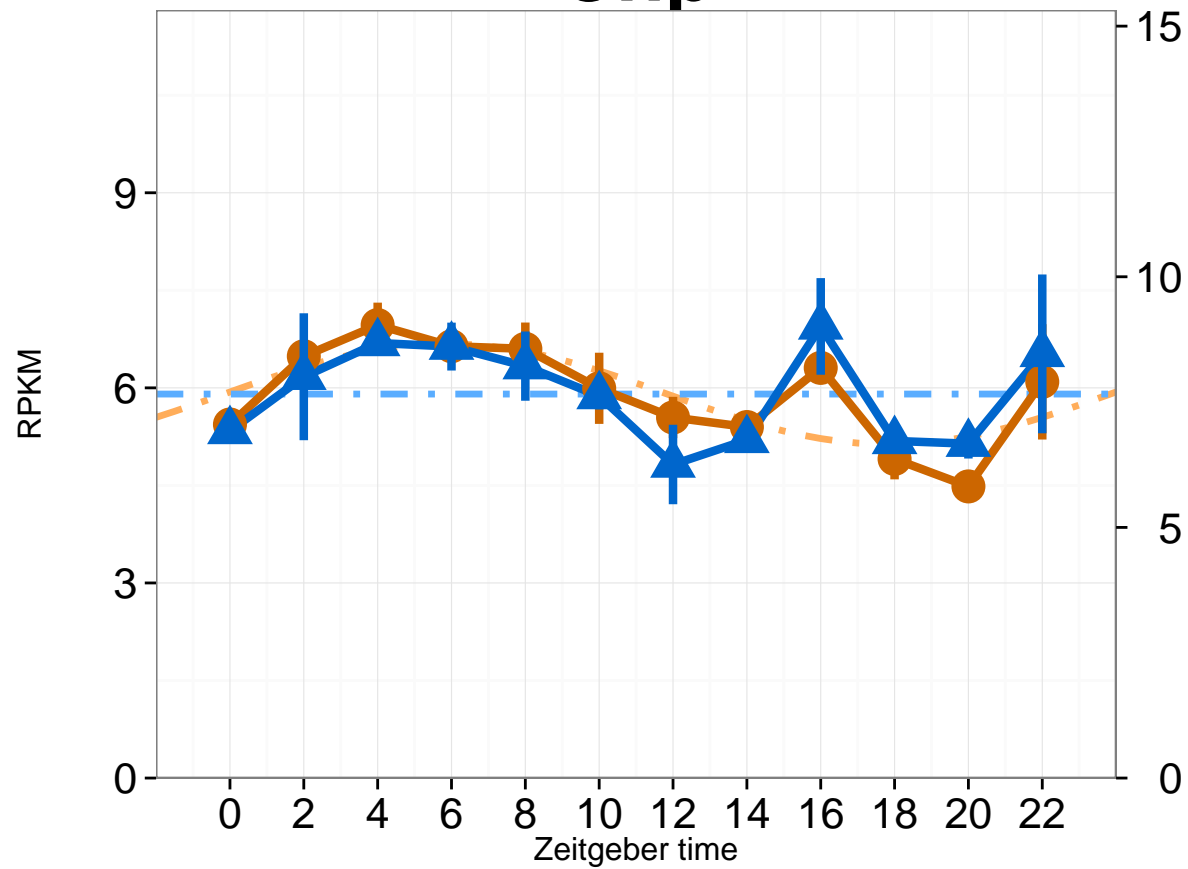

## Cnp

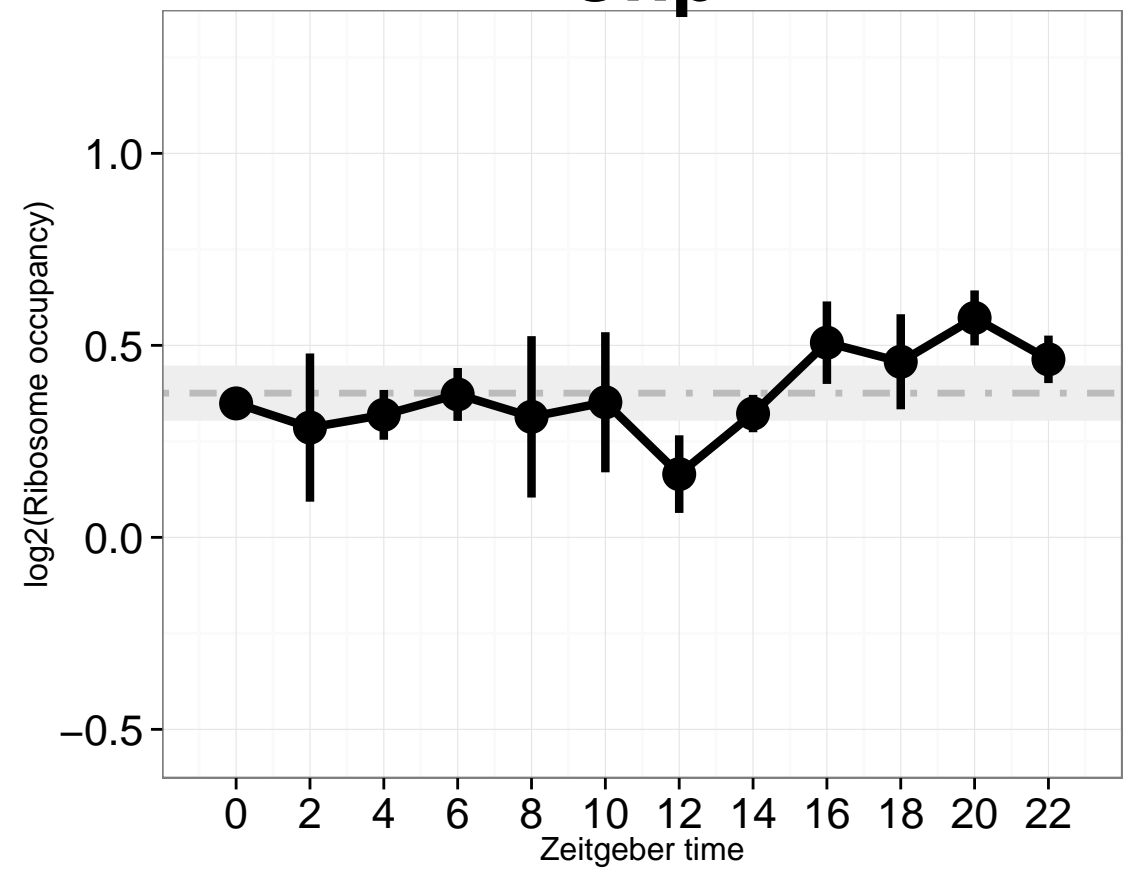

Supplement: Supplementary file 10446 [file 1]

## Tmem261

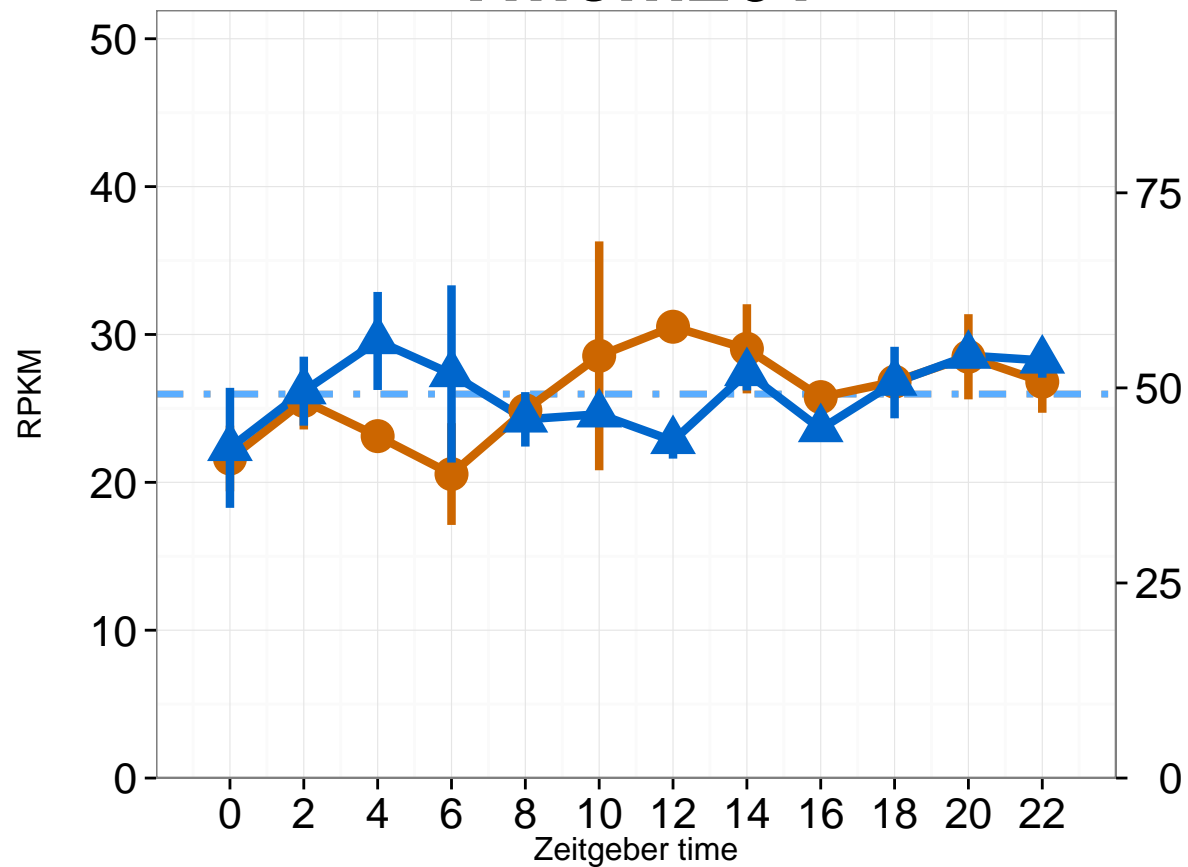

## Tmem261

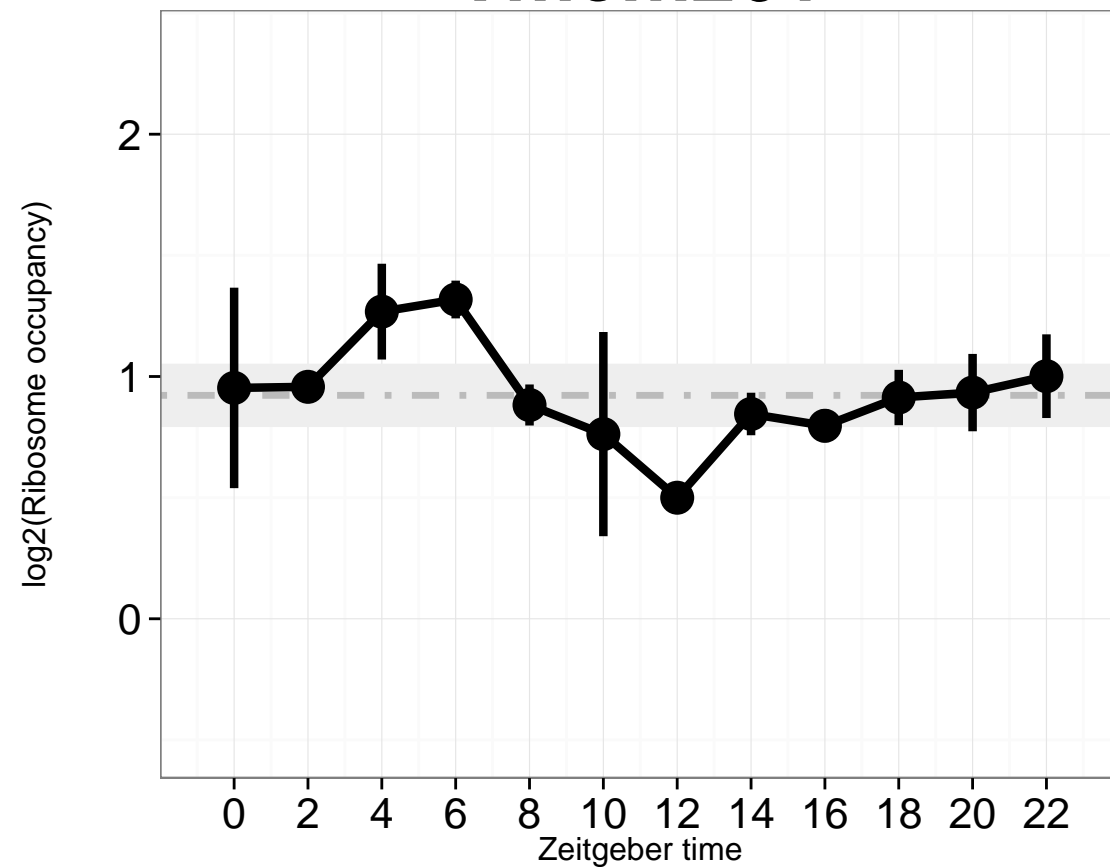

Supplement: Supplementary file 10447 [file 1]

## Tcf21

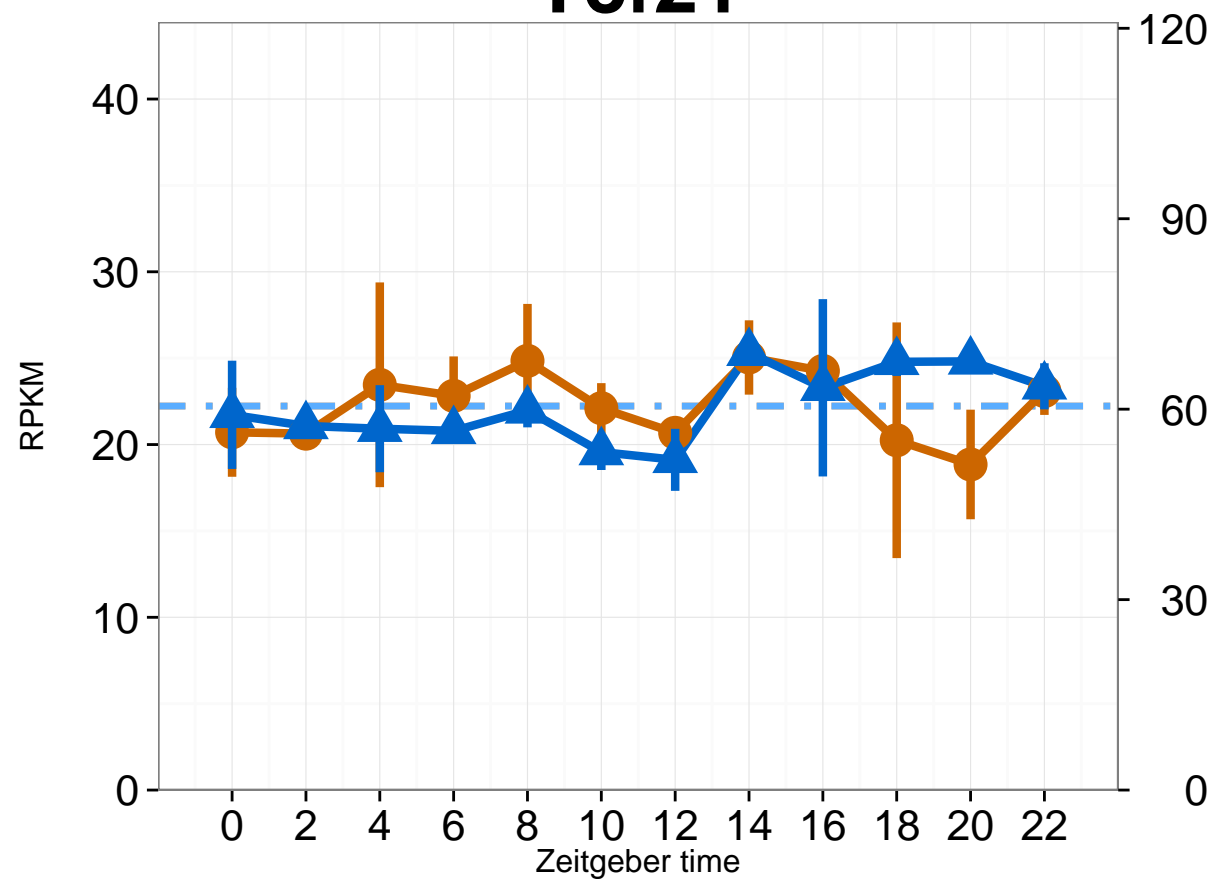

## Tcf21

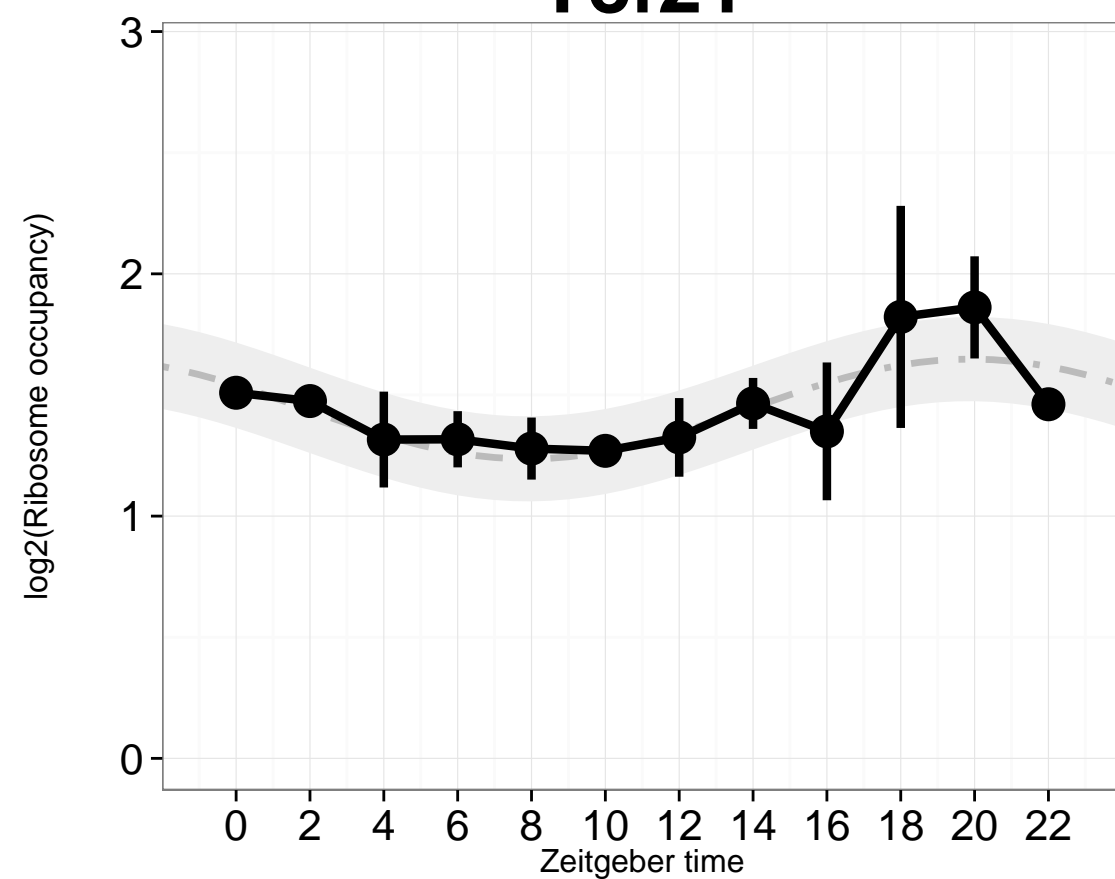

Supplement: Supplementary file 10448 [file 1]

# Psmd11

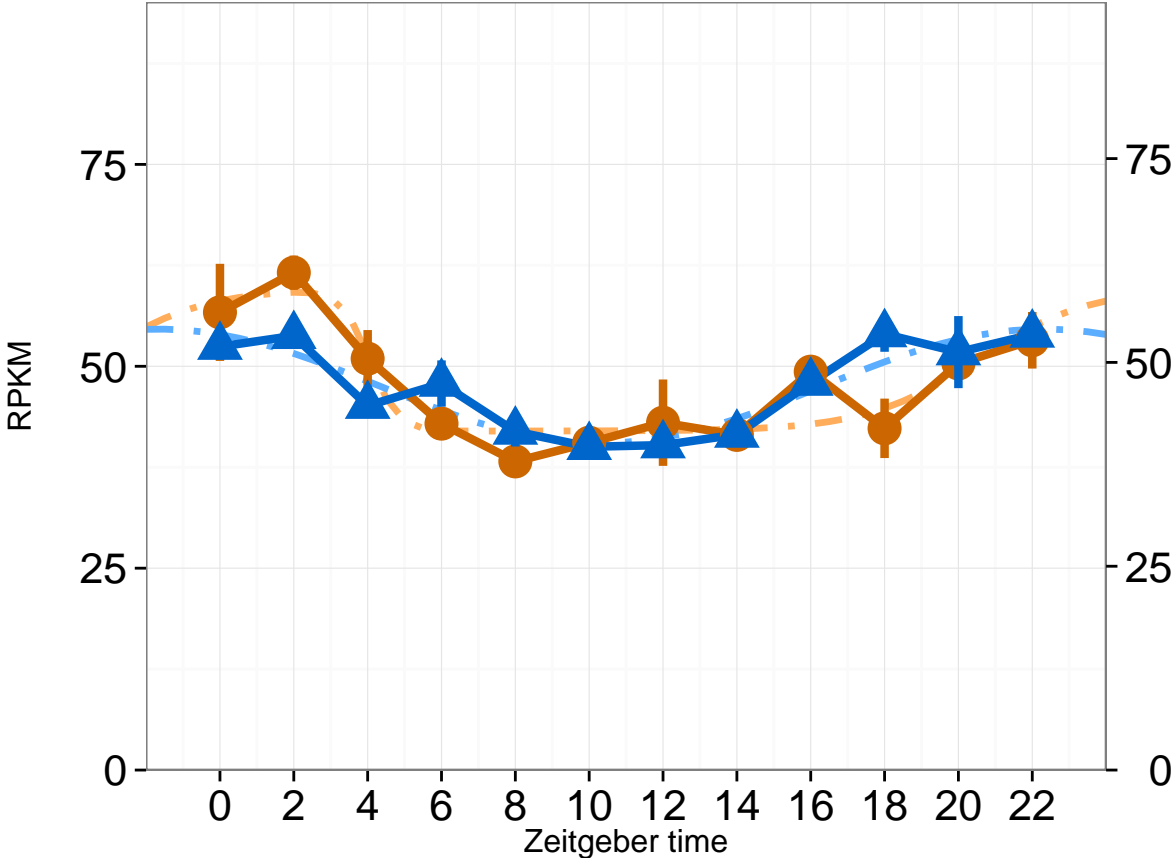

# Psmd11

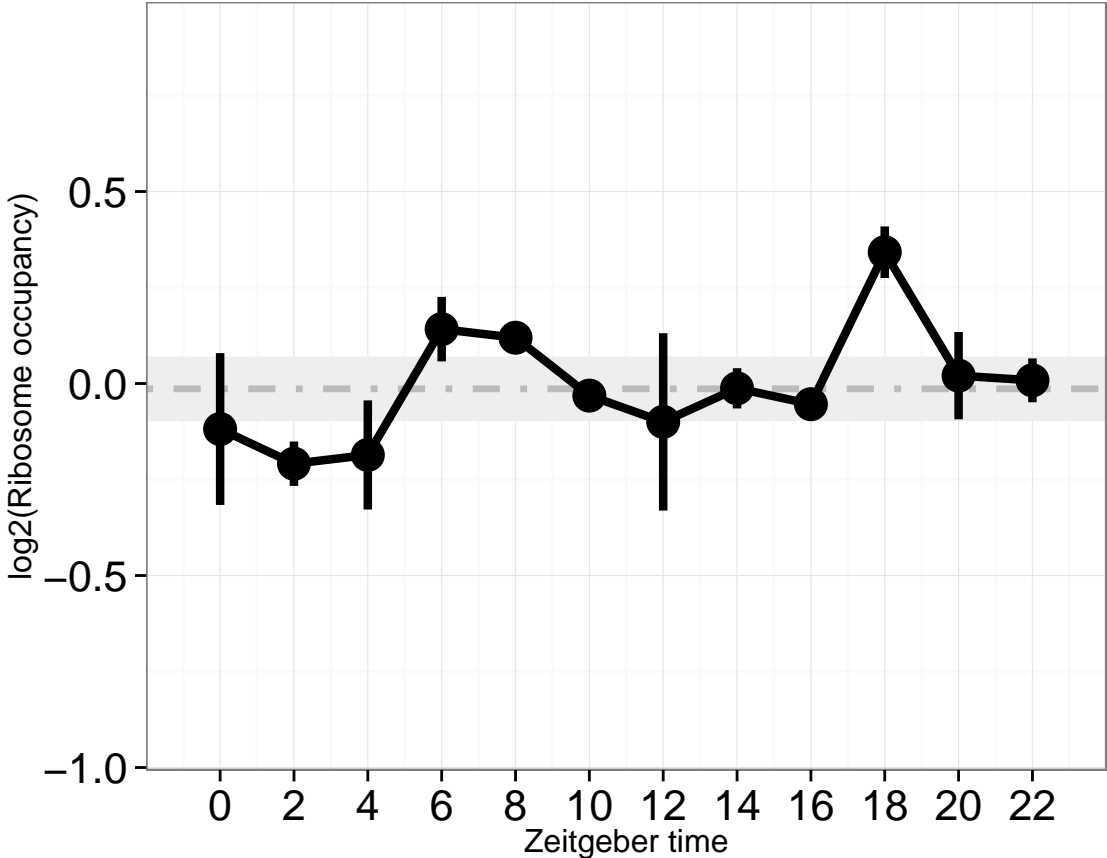

Supplement: Supplementary file 10449 [file 1]

# Rpl11

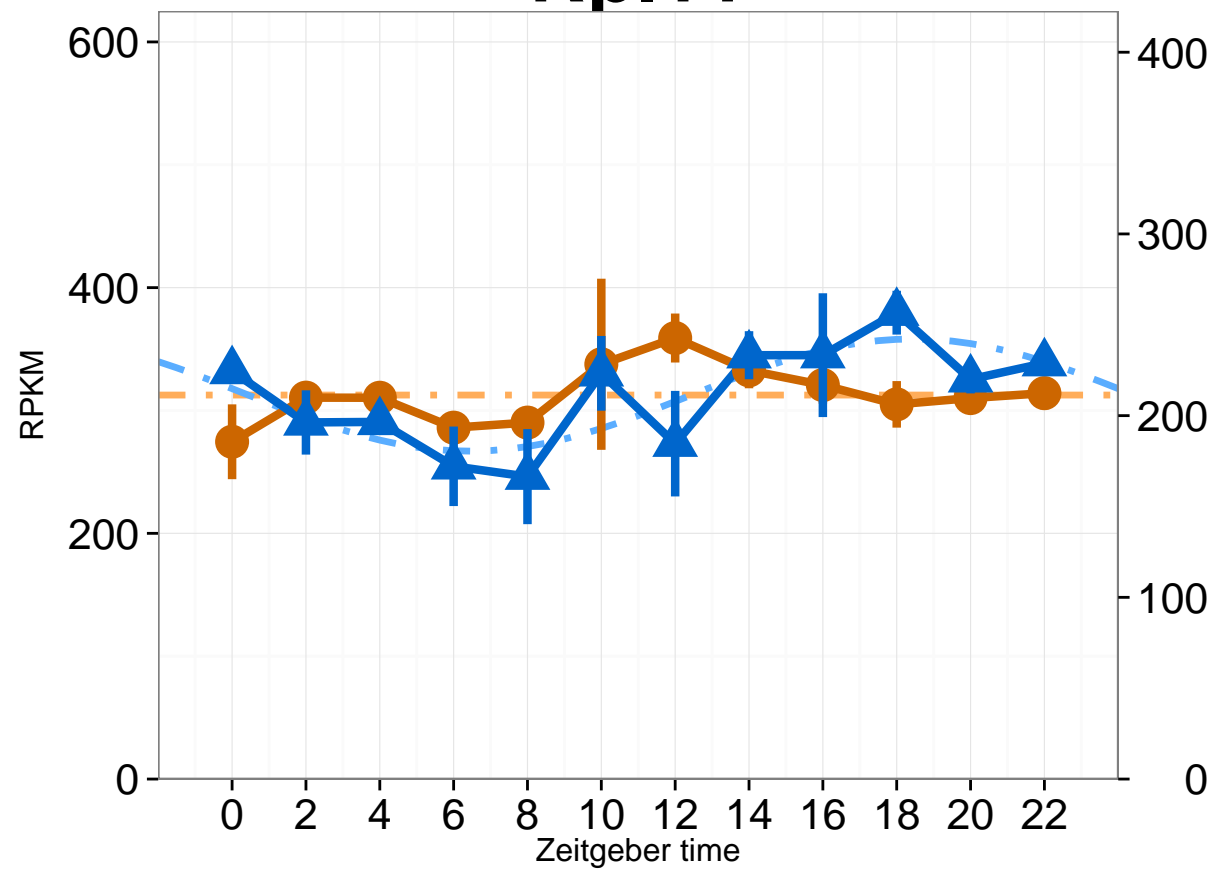

# Rpl11

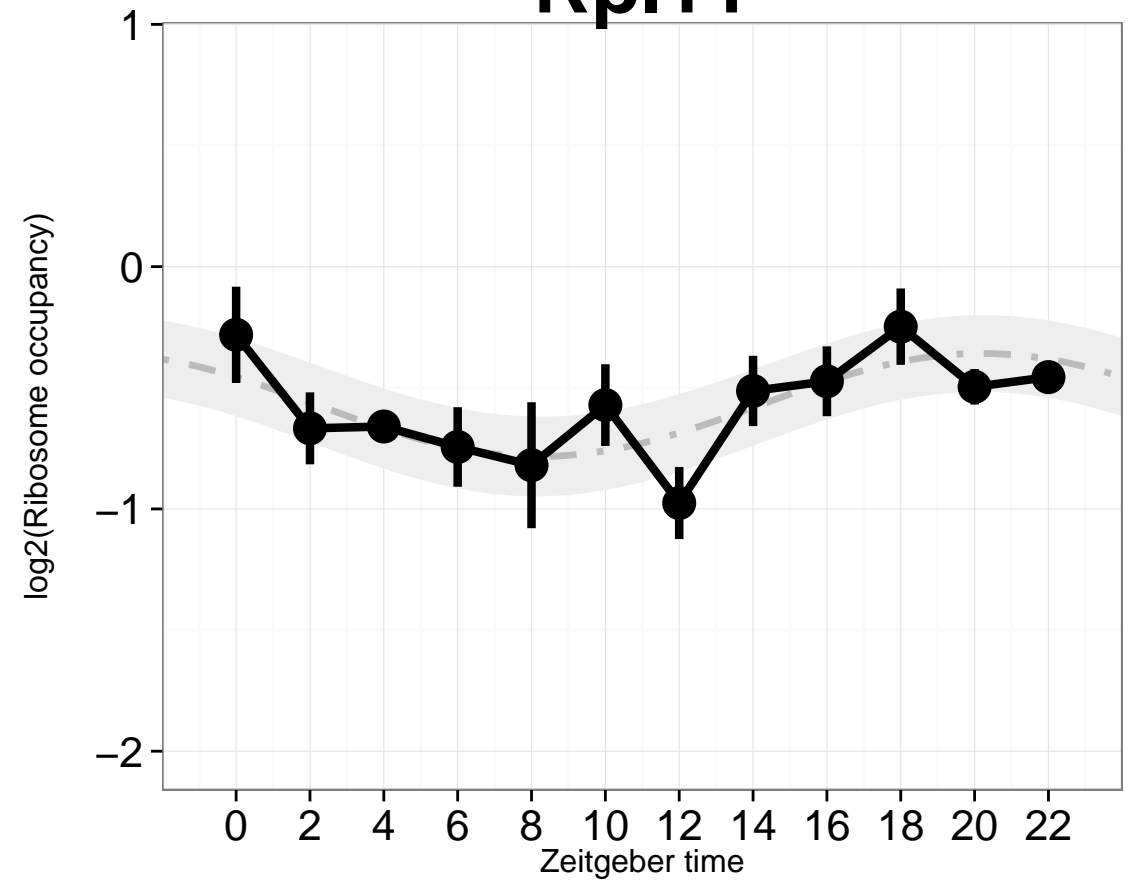

Supplement: Supplementary file 10450 [file 1]

# Trp53bp1

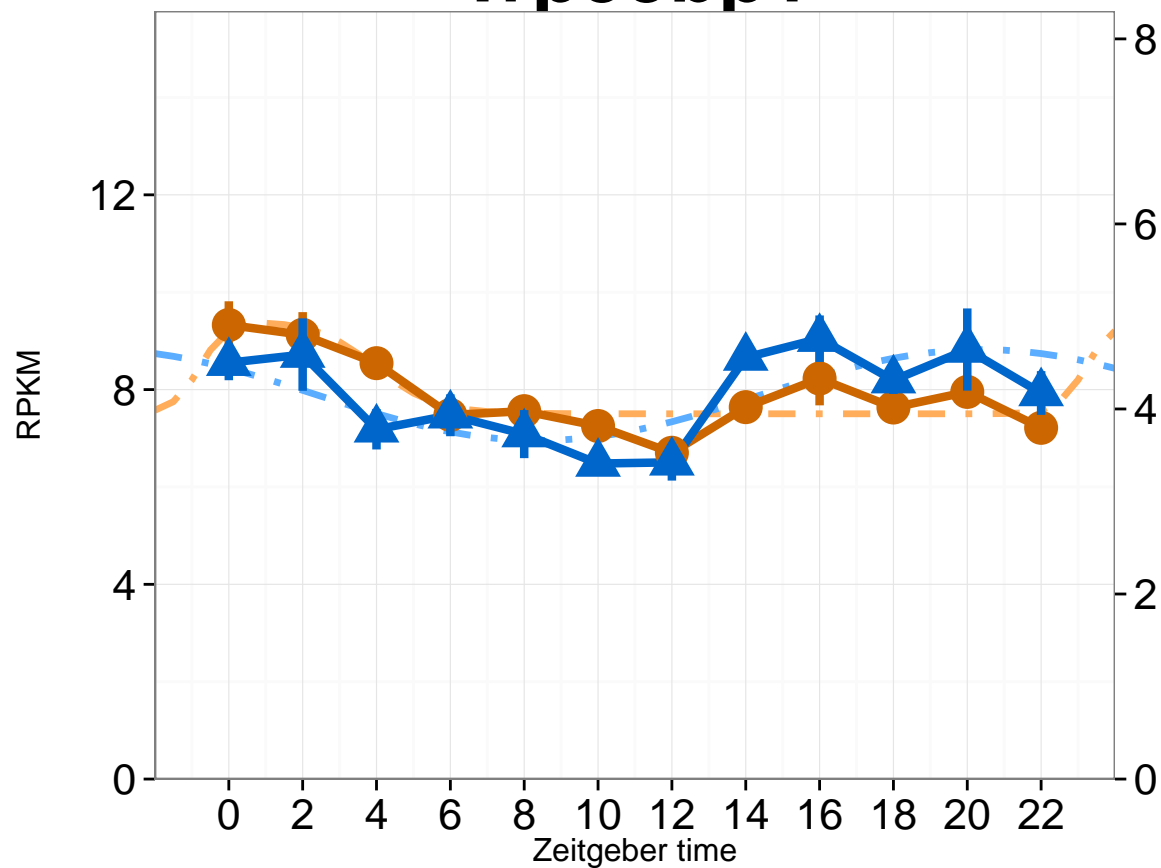

# Trp53bp1

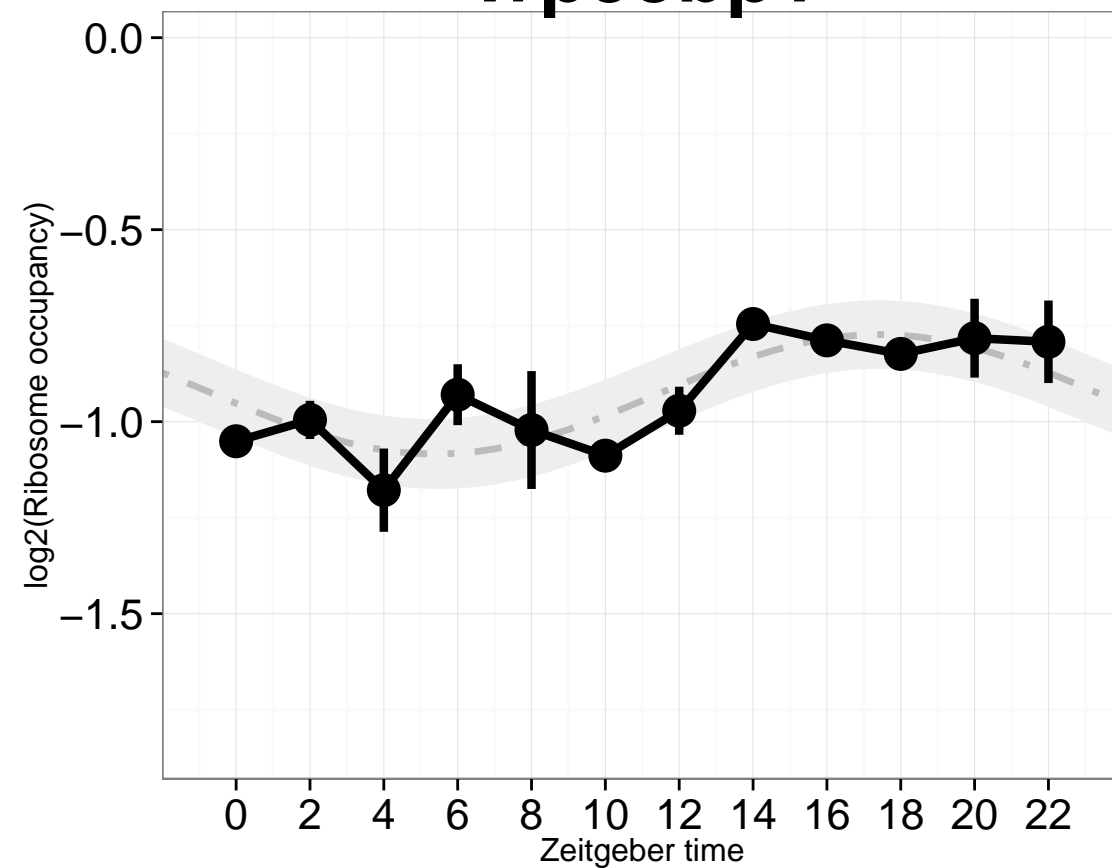

Supplement: Supplementary file 10451 [file 1]

## Ccny

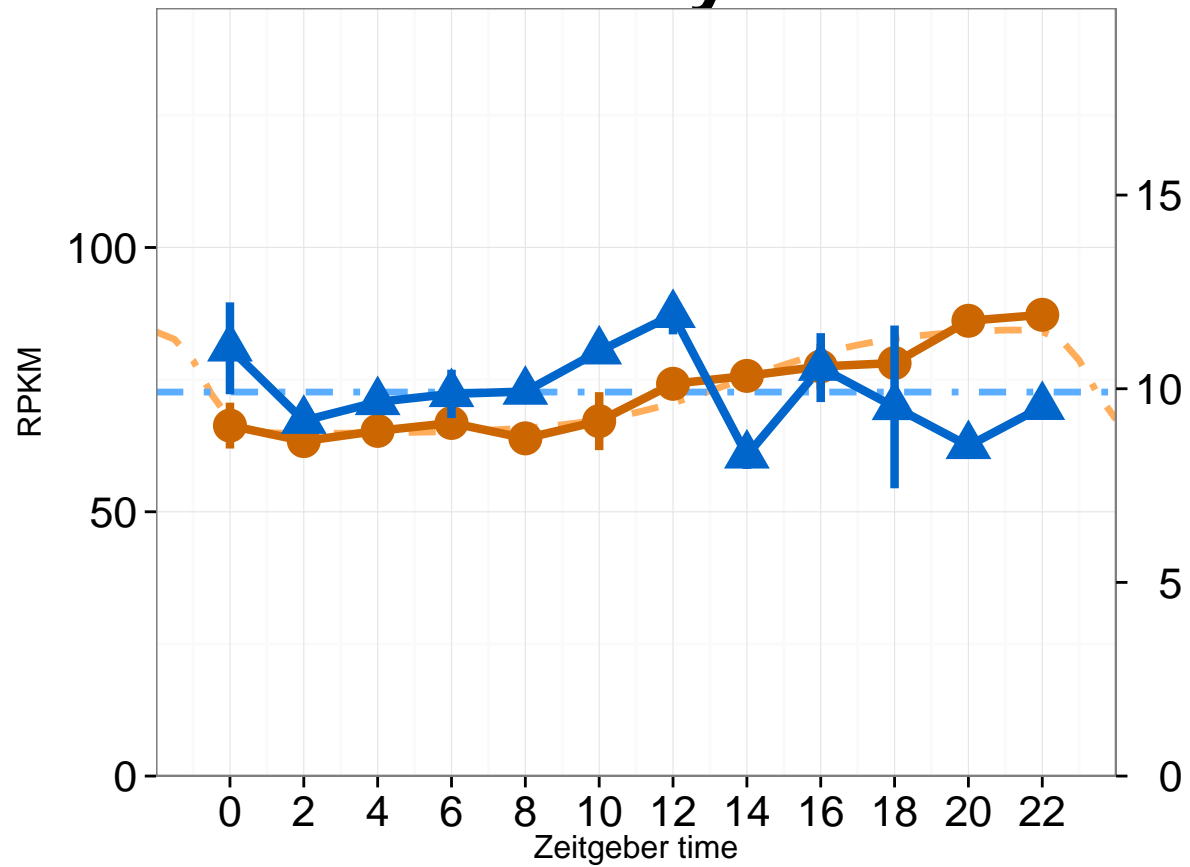

## Ccny

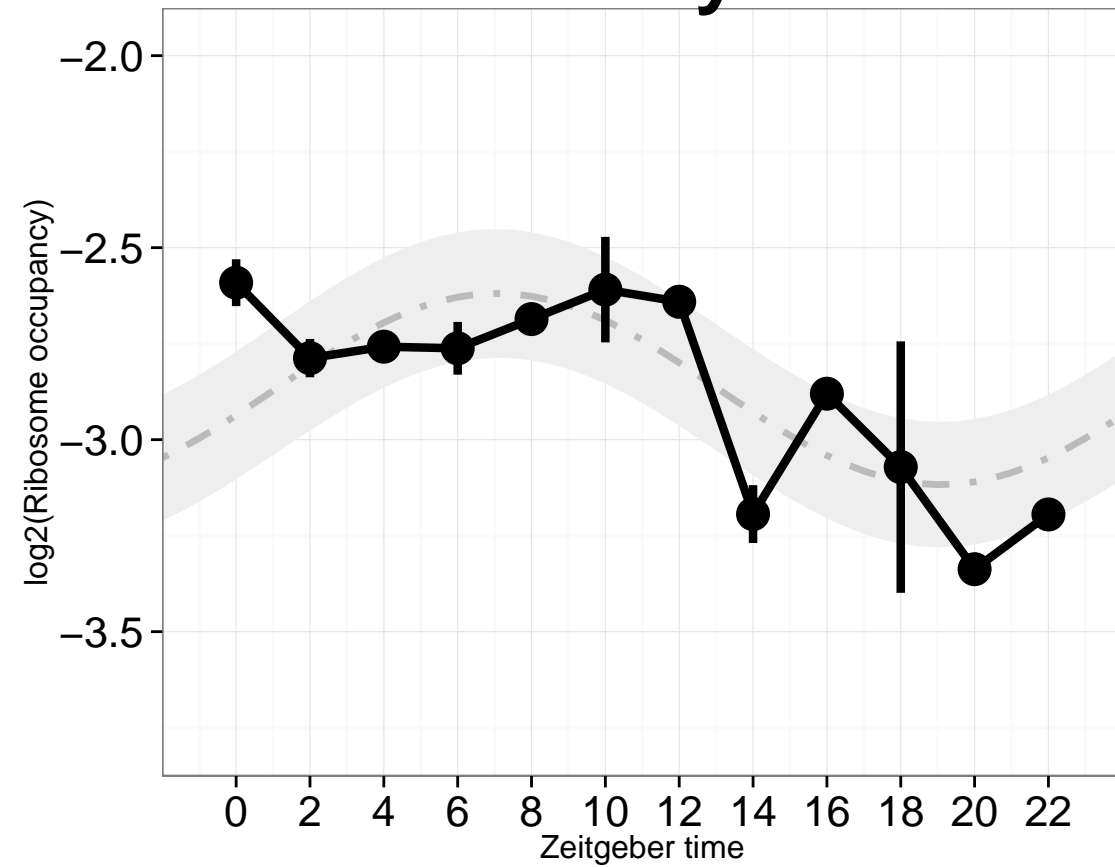

Supplement: Supplementary file 10452 [file 1]

# Capn5

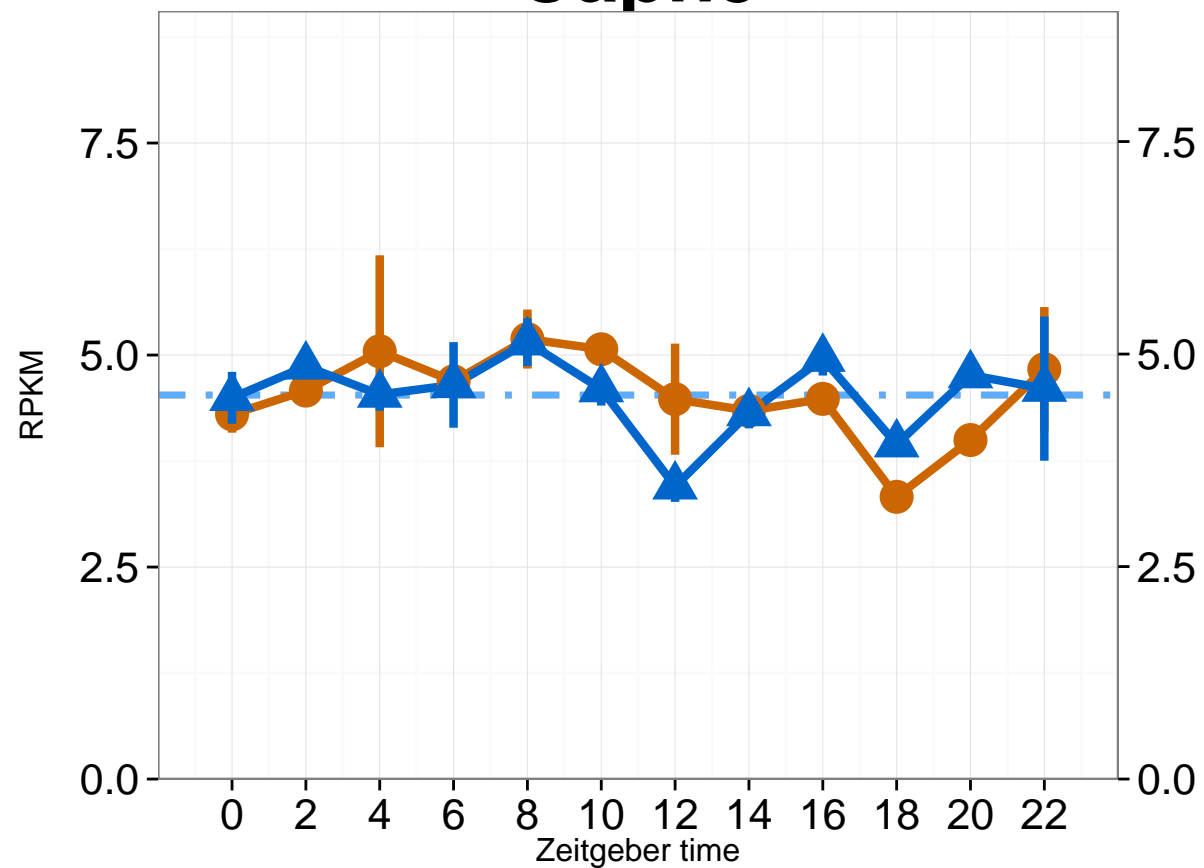

# Capn5

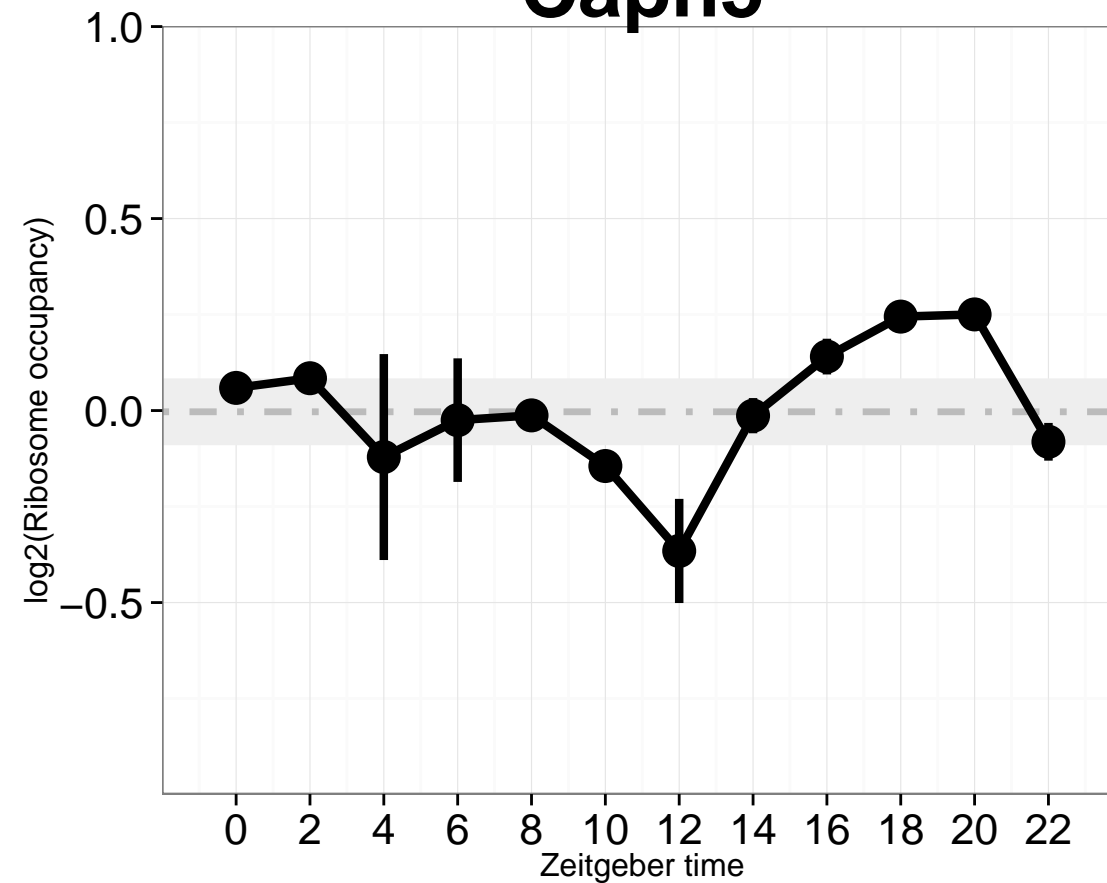

Supplement: Supplementary file 10453 [file 1]

# Ddx28

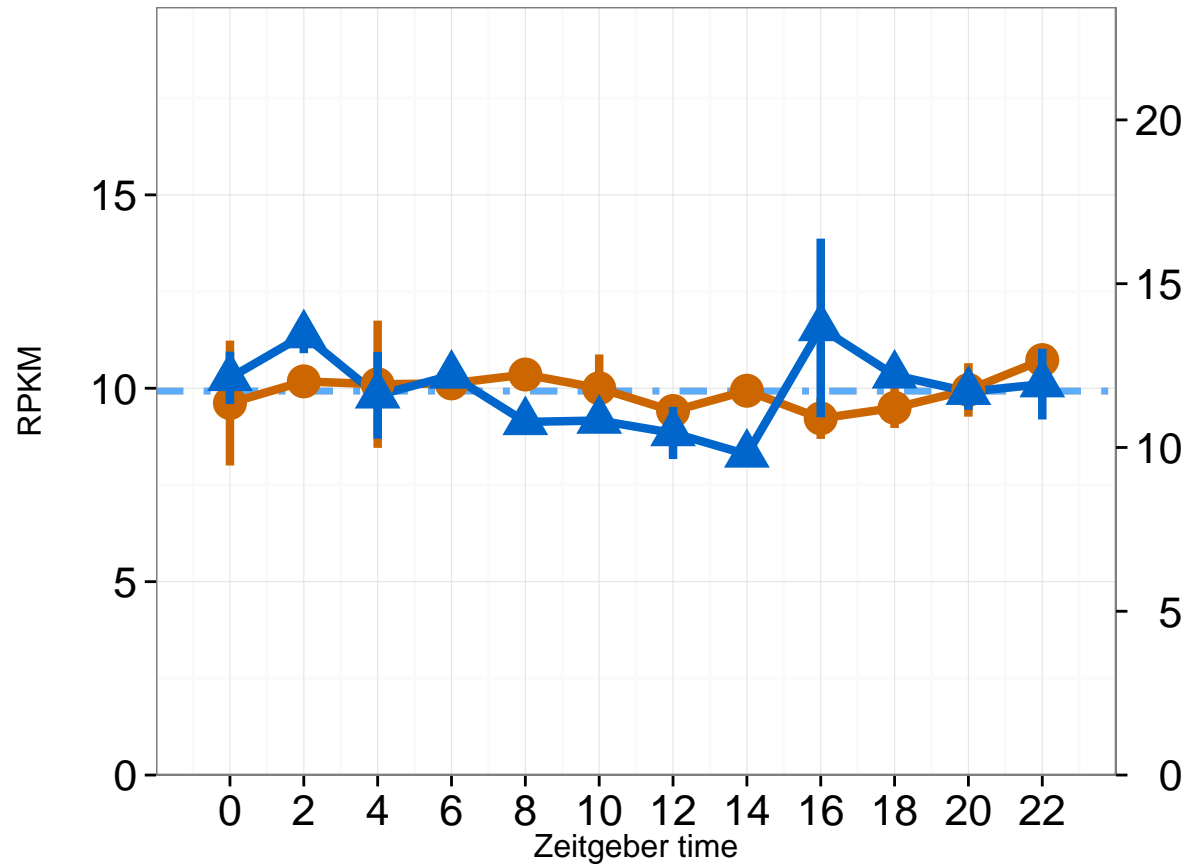

# Ddx28

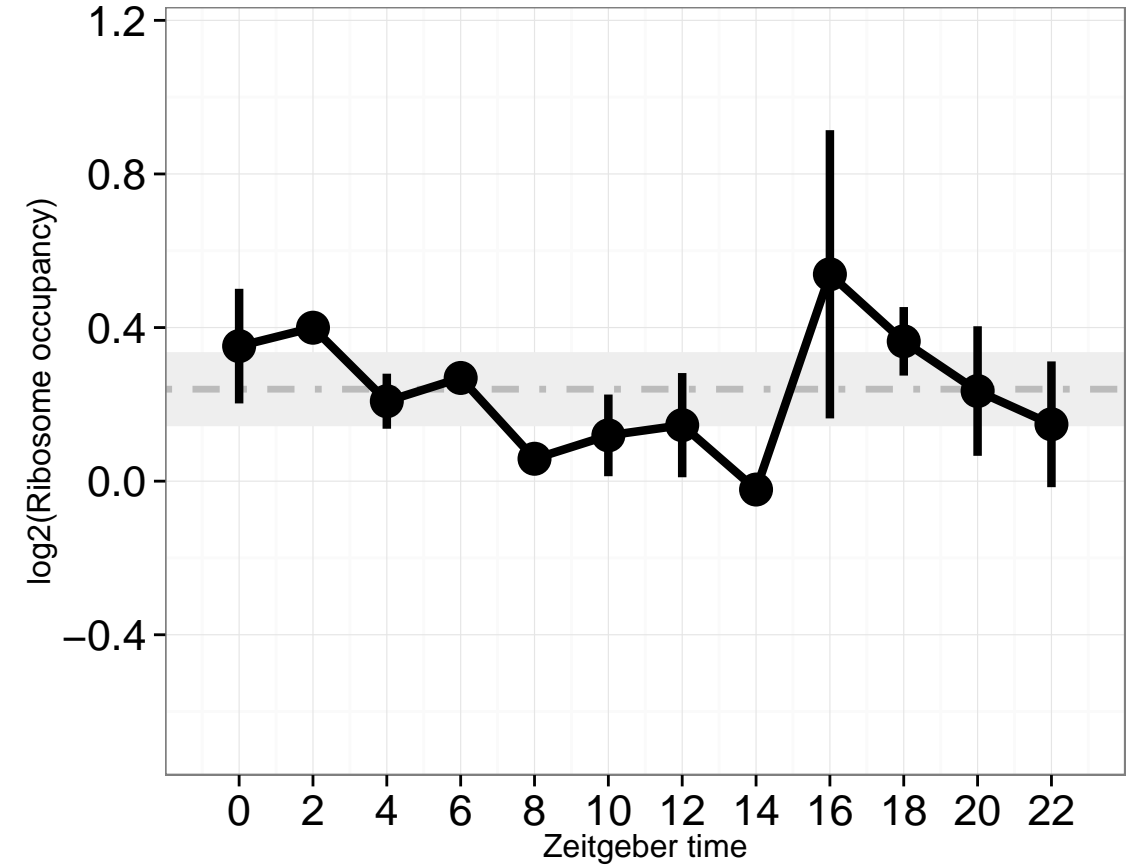

Supplement: Supplementary file 10454 [file 1]

## Phc3

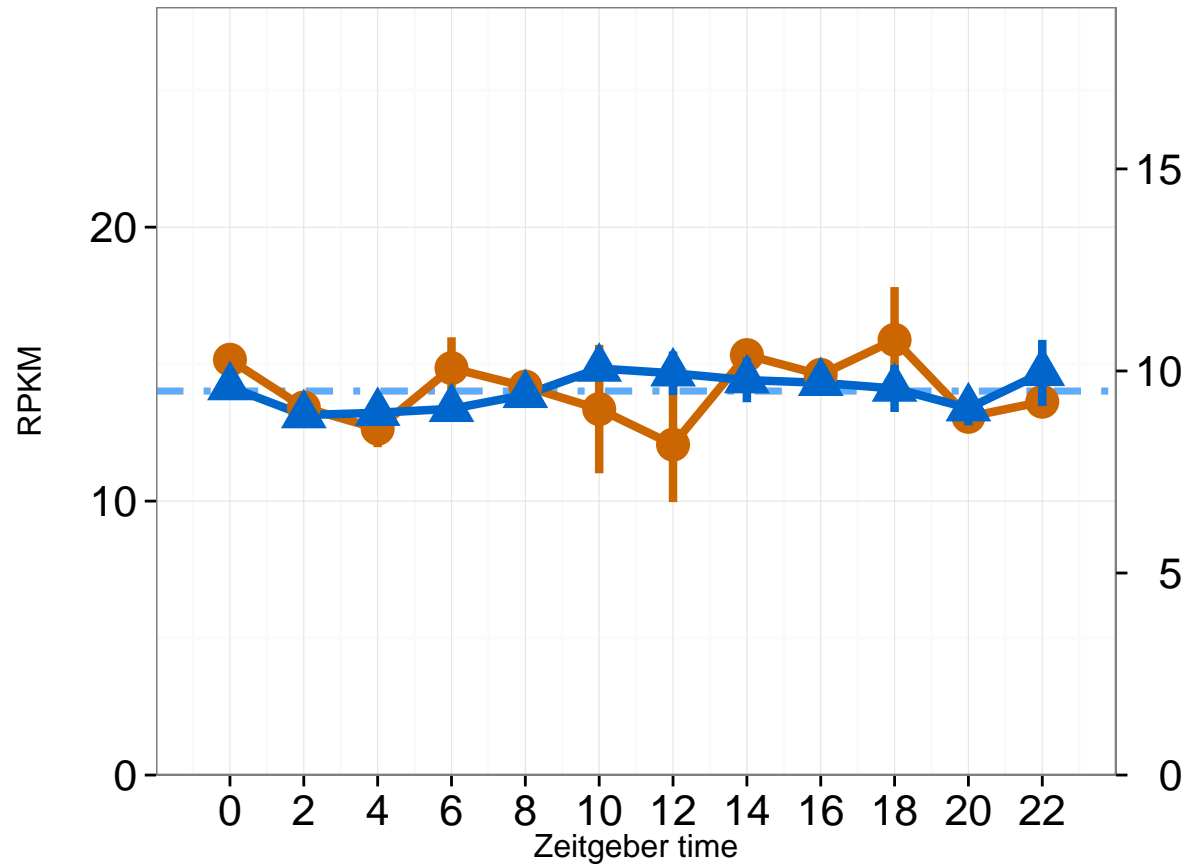

## Phc3

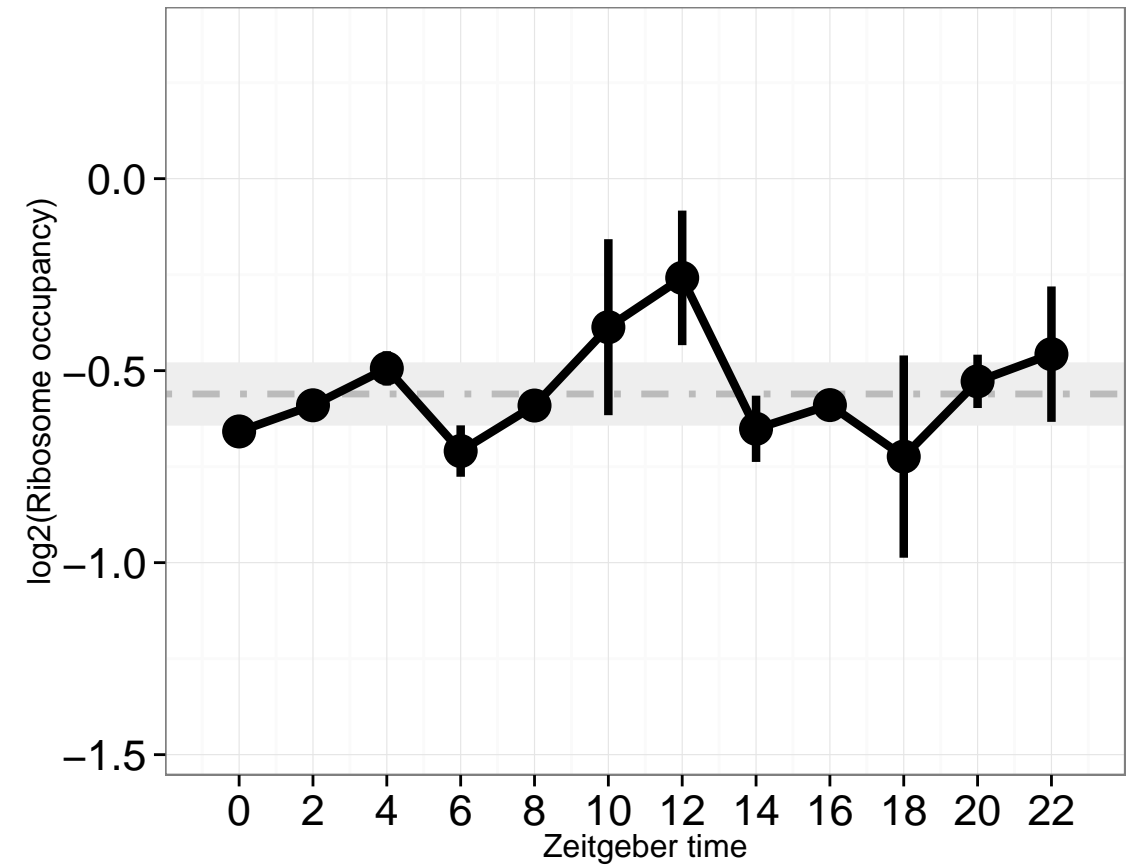

Supplement: Supplementary file 10455 [file 1]

## 4930546H06Rik

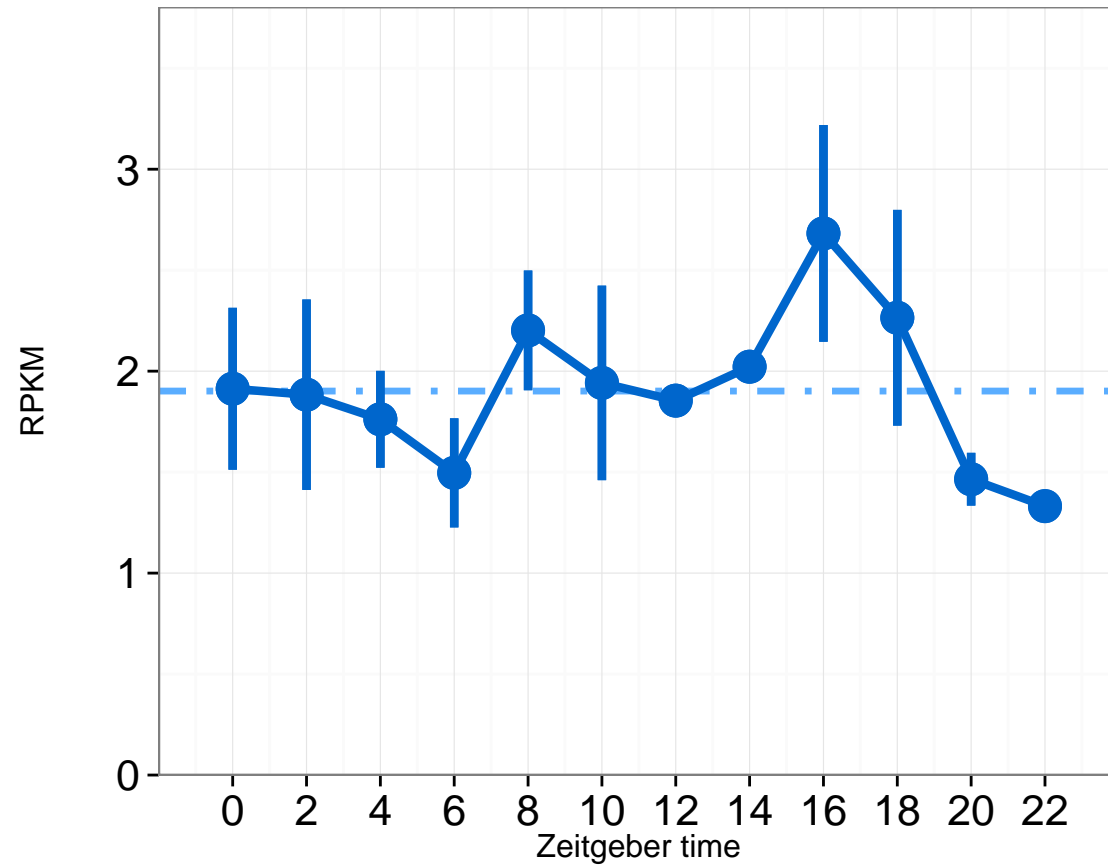

## 4930546H06Rik log2(Ribosome occup

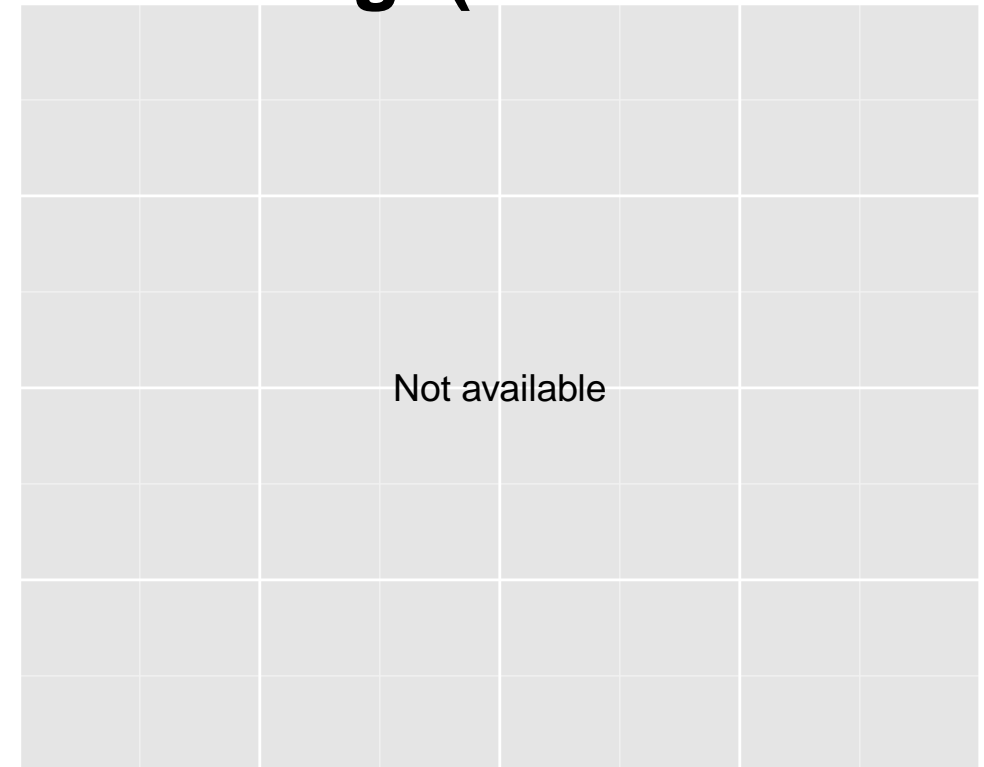

Supplement: Supplementary file 10456 [file 1]

# Enoph1

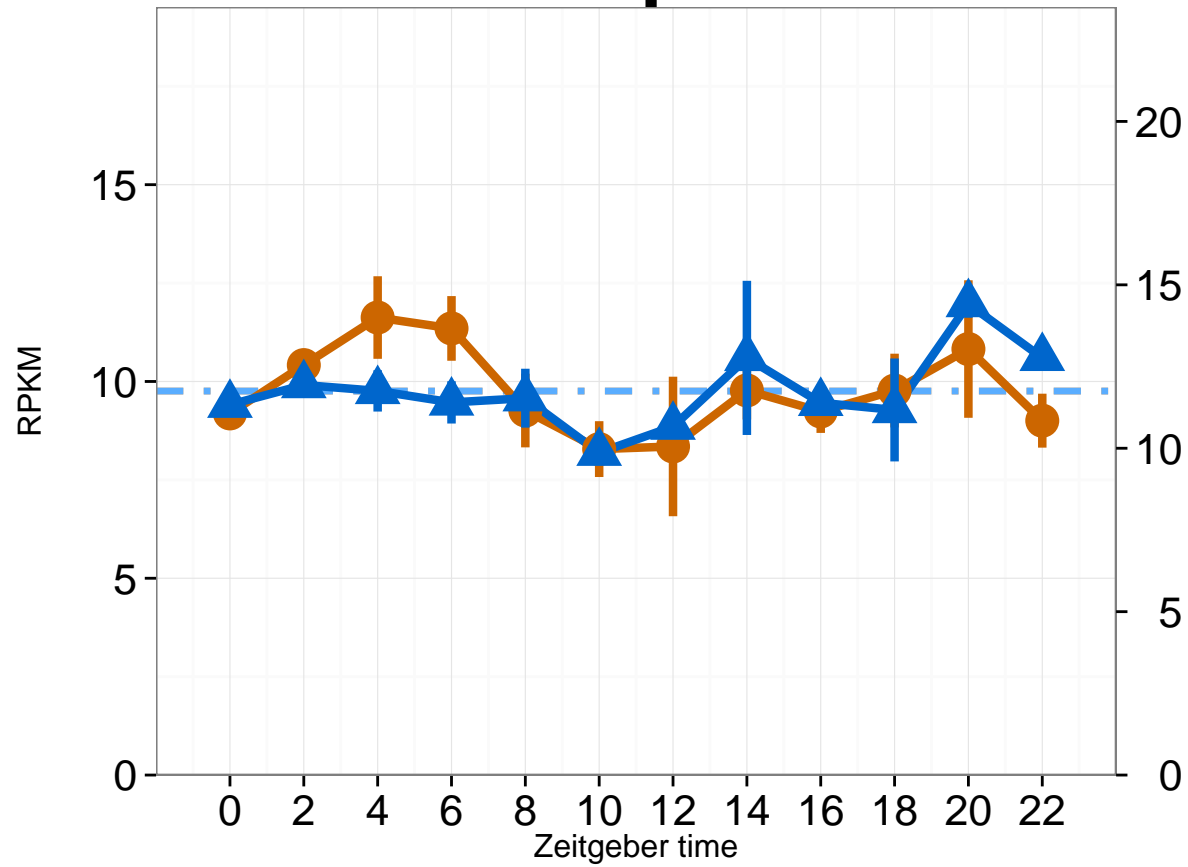

# Enoph1

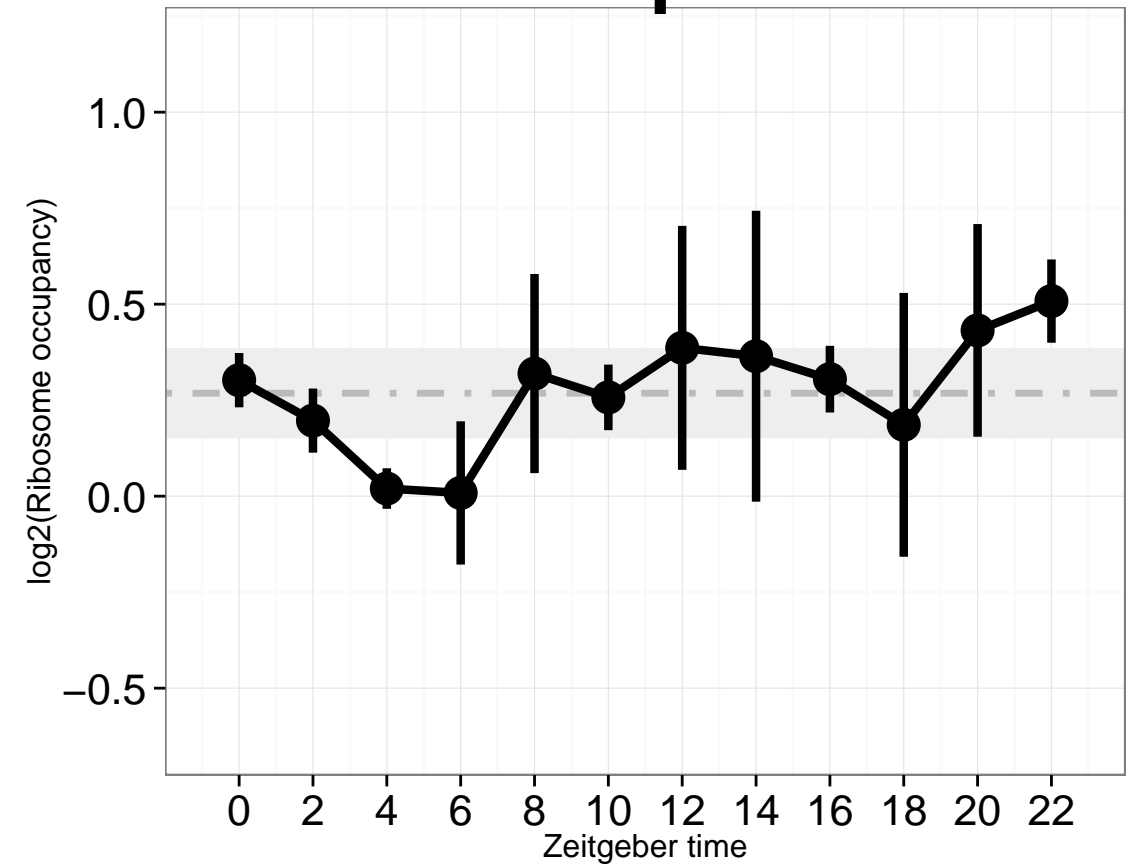

Supplement: Supplementary file 10457 [file 1]

## Fhl1

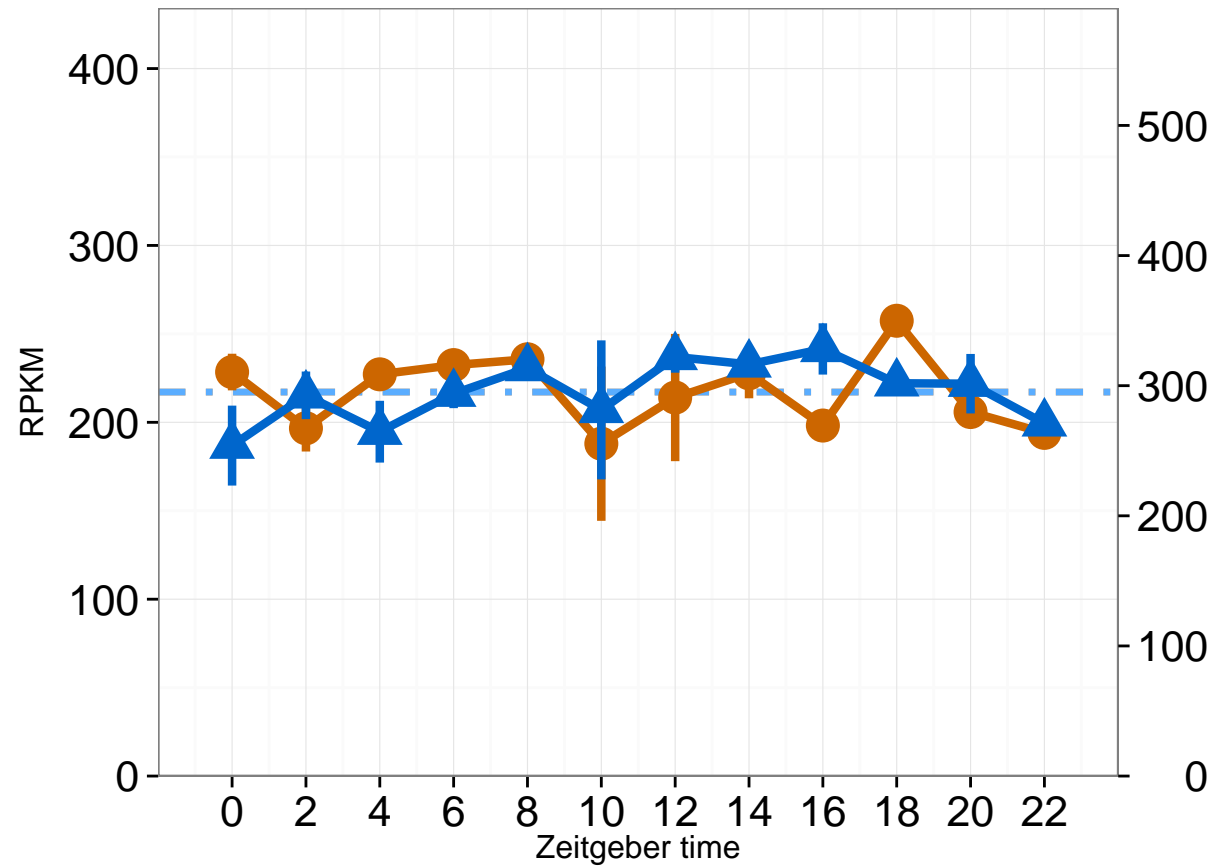

## Fhl1

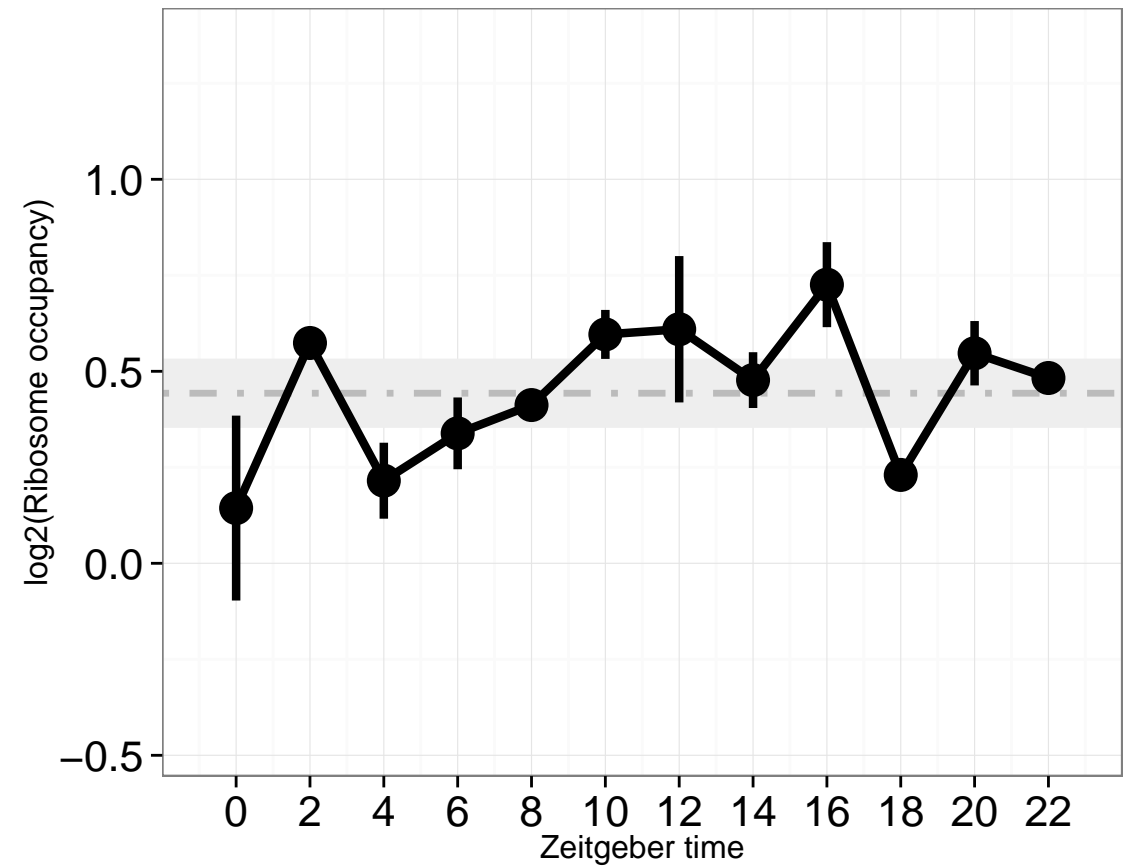

Supplement: Supplementary file 10458 [file 1]

## Sp100

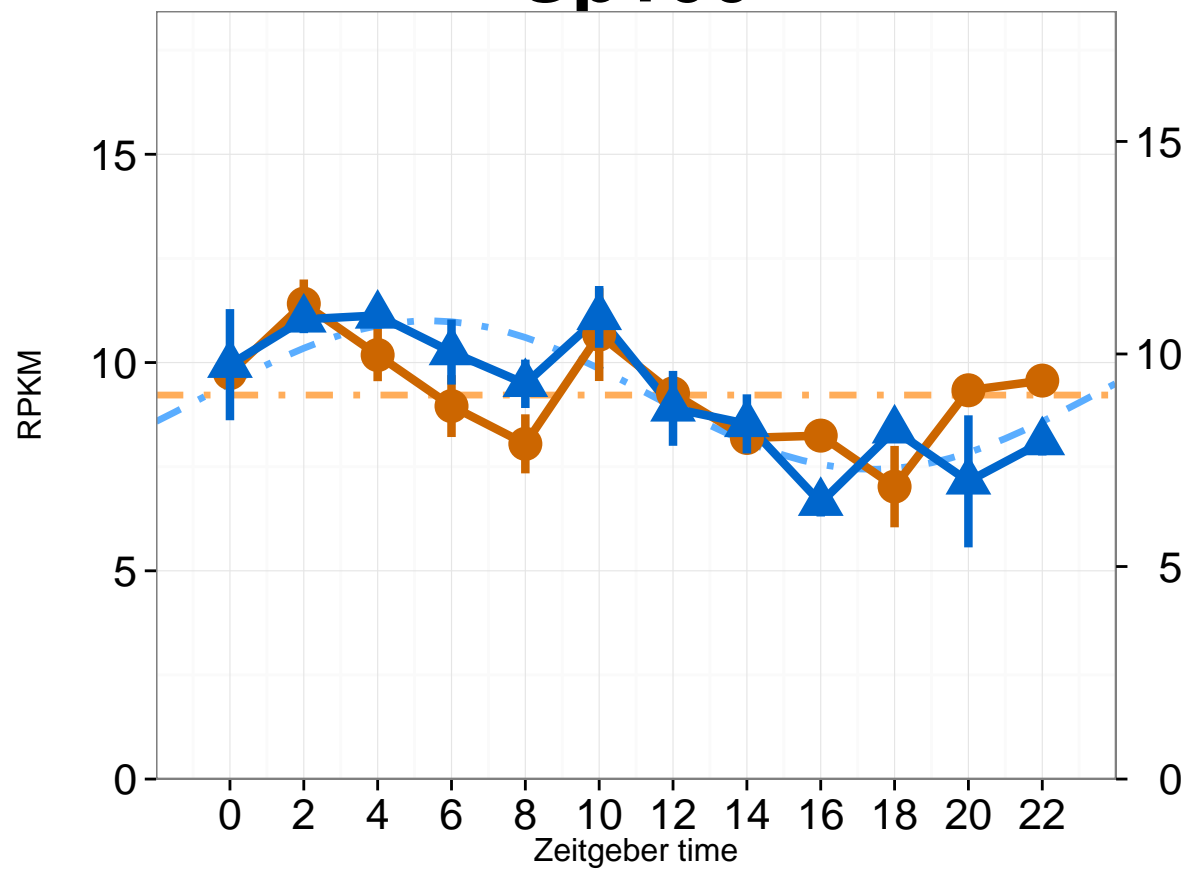

## Sp100

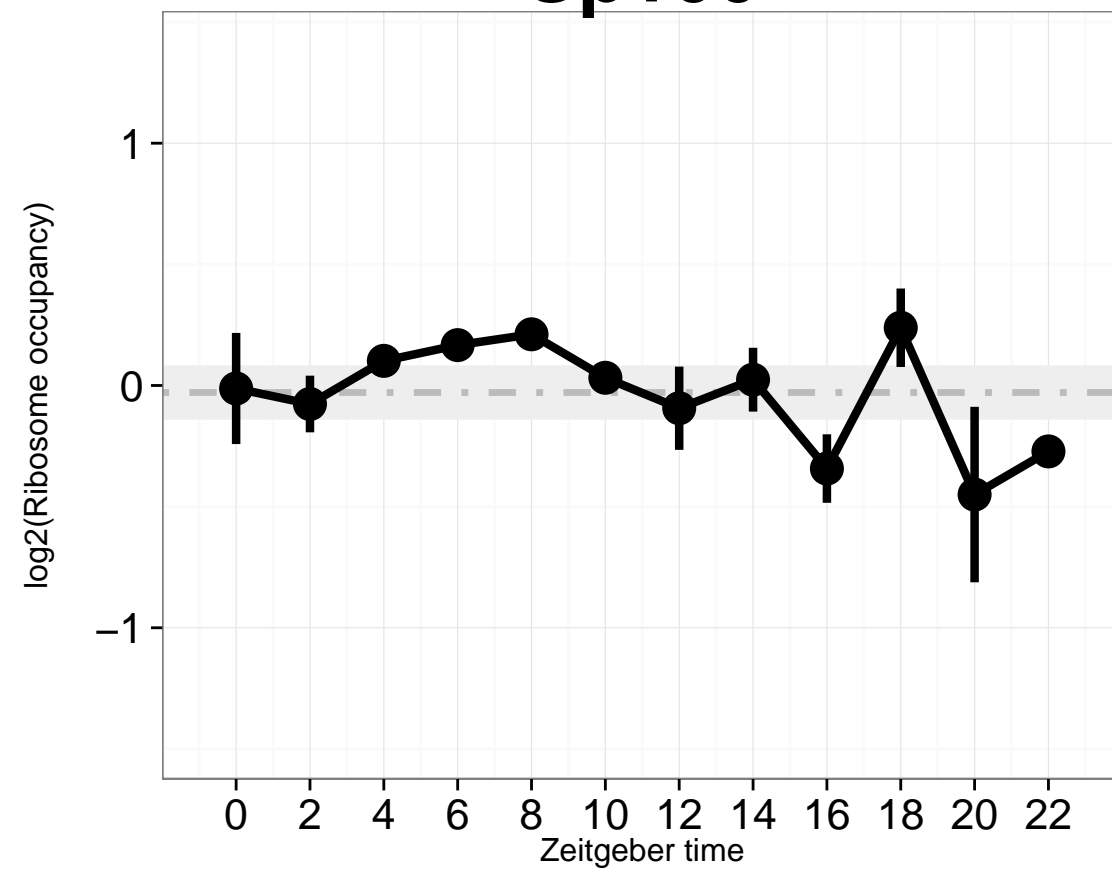

Supplement: Supplementary file 10459 [file 1]

# Asf1a

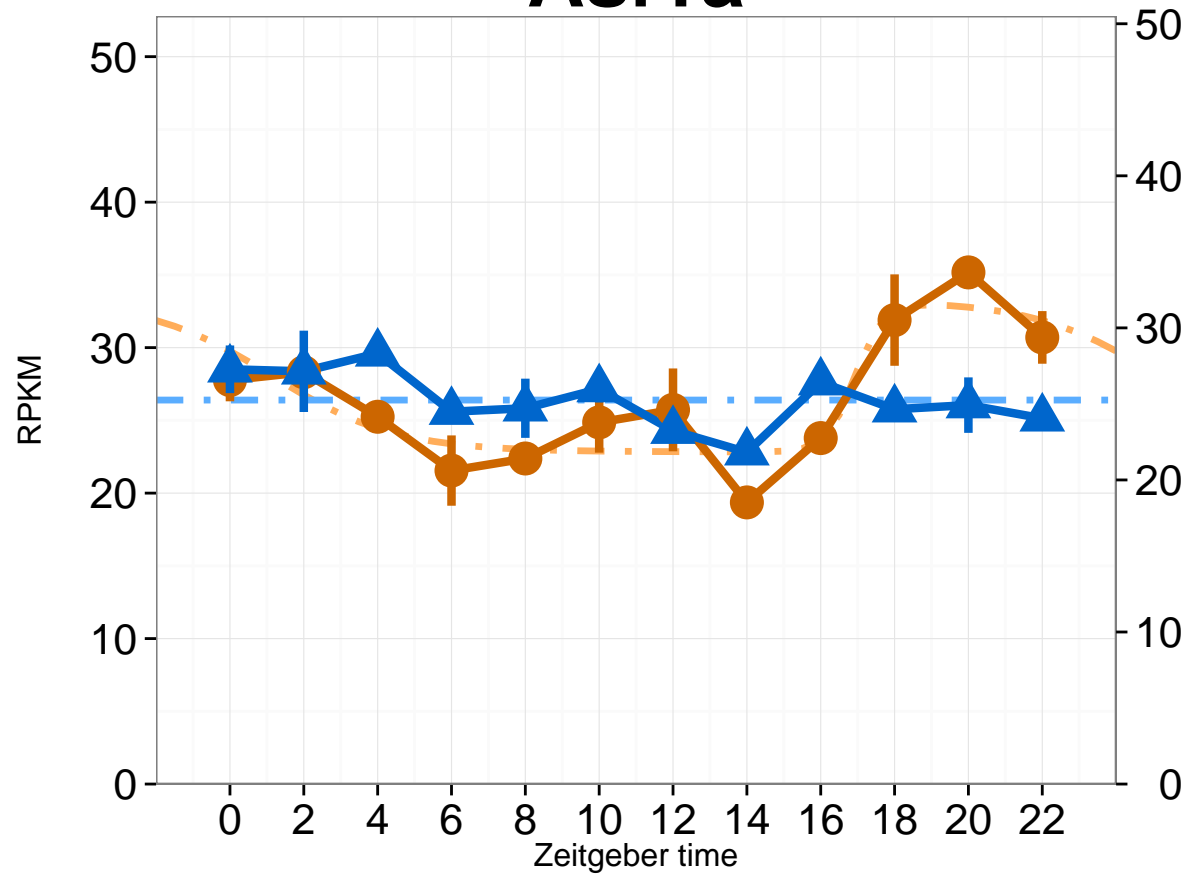

# Asf1a

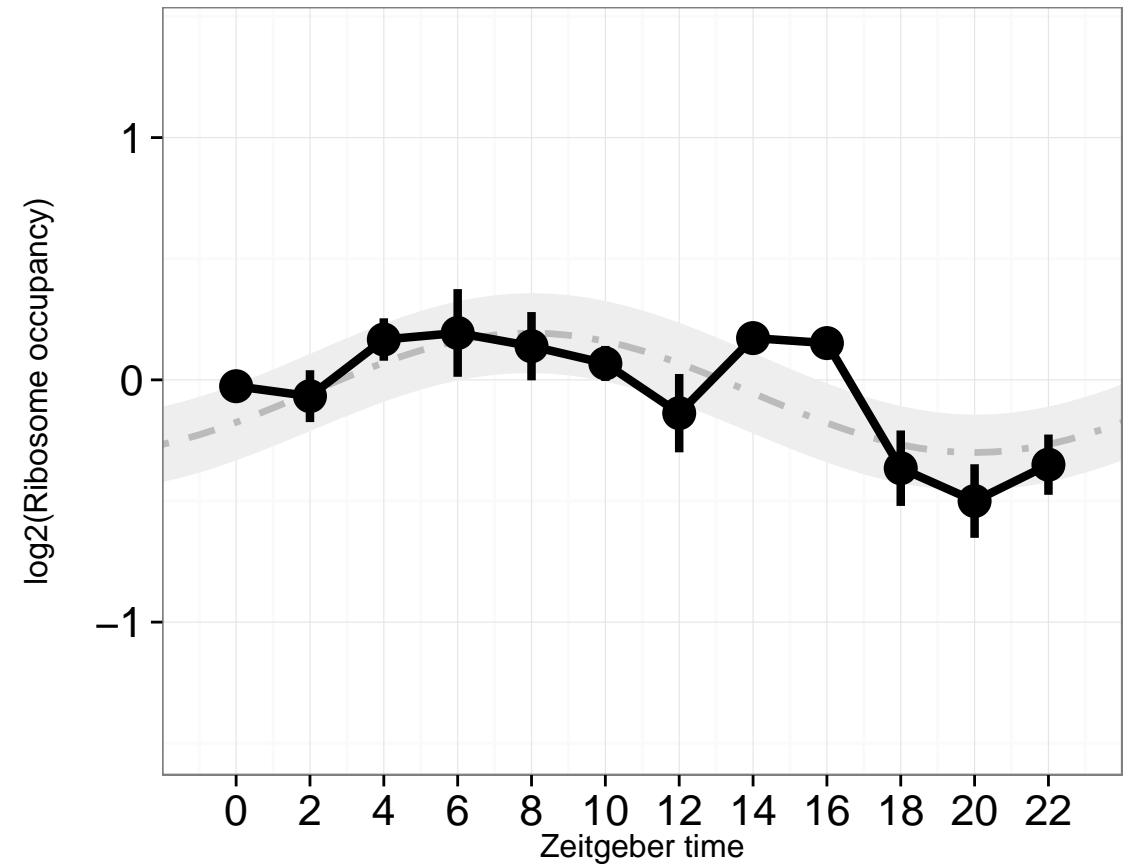

Supplement: Supplementary file 10460 [file 1]

# Rbm28

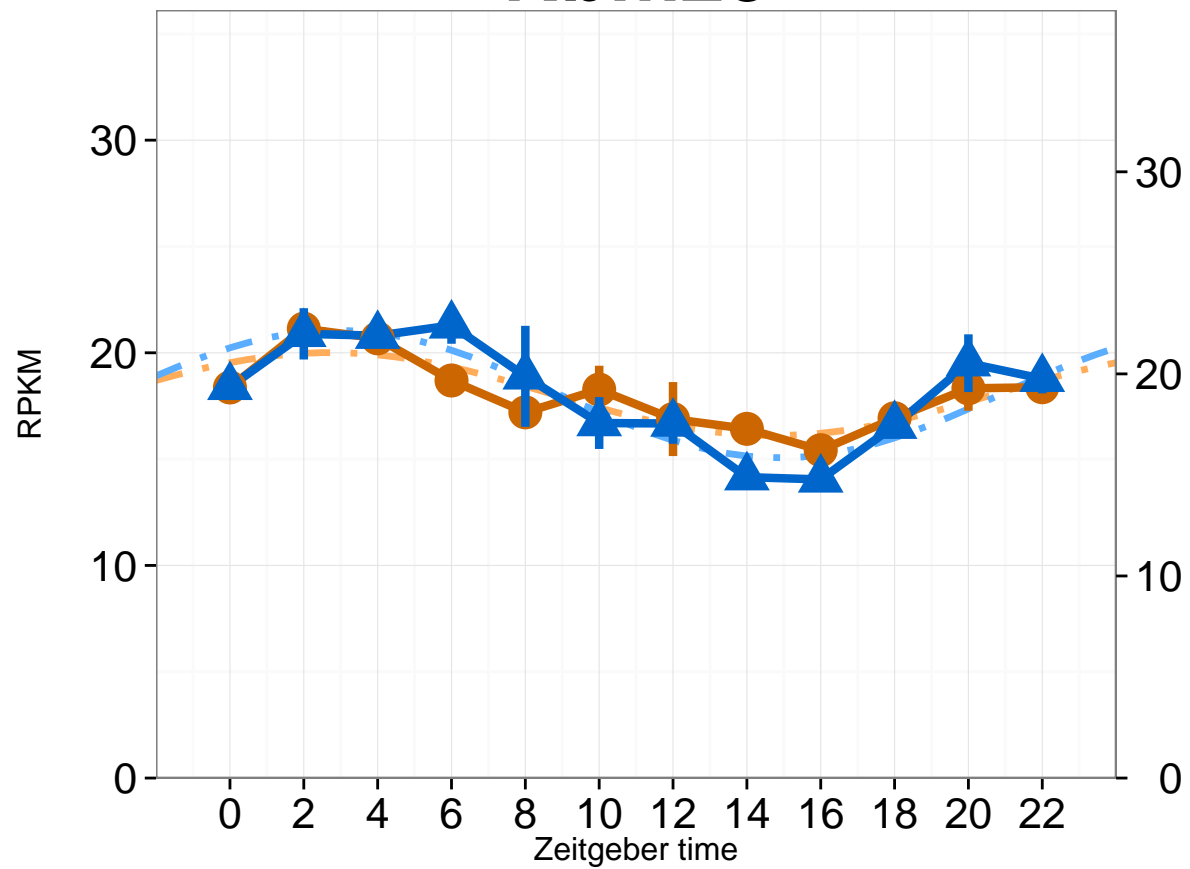

# Rbm28

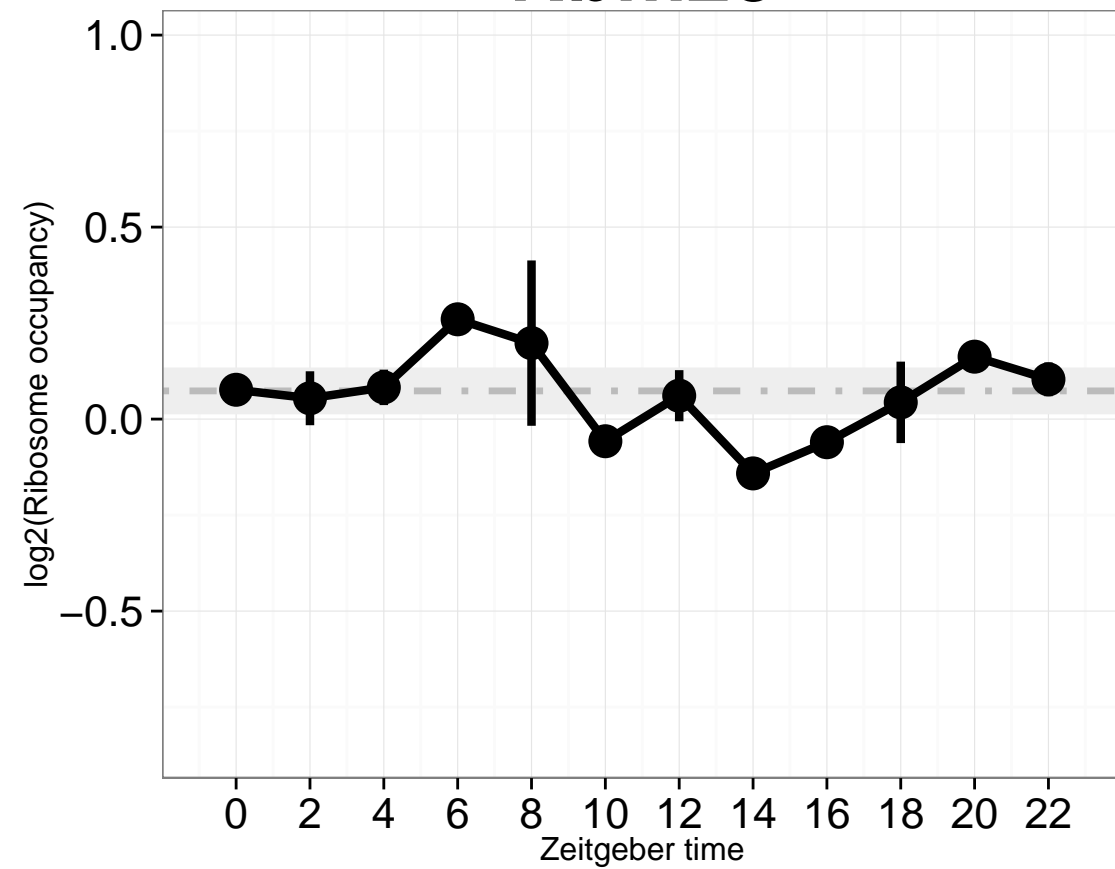

Supplement: Supplementary file 10461 [file 1]

# Ahcy1l1

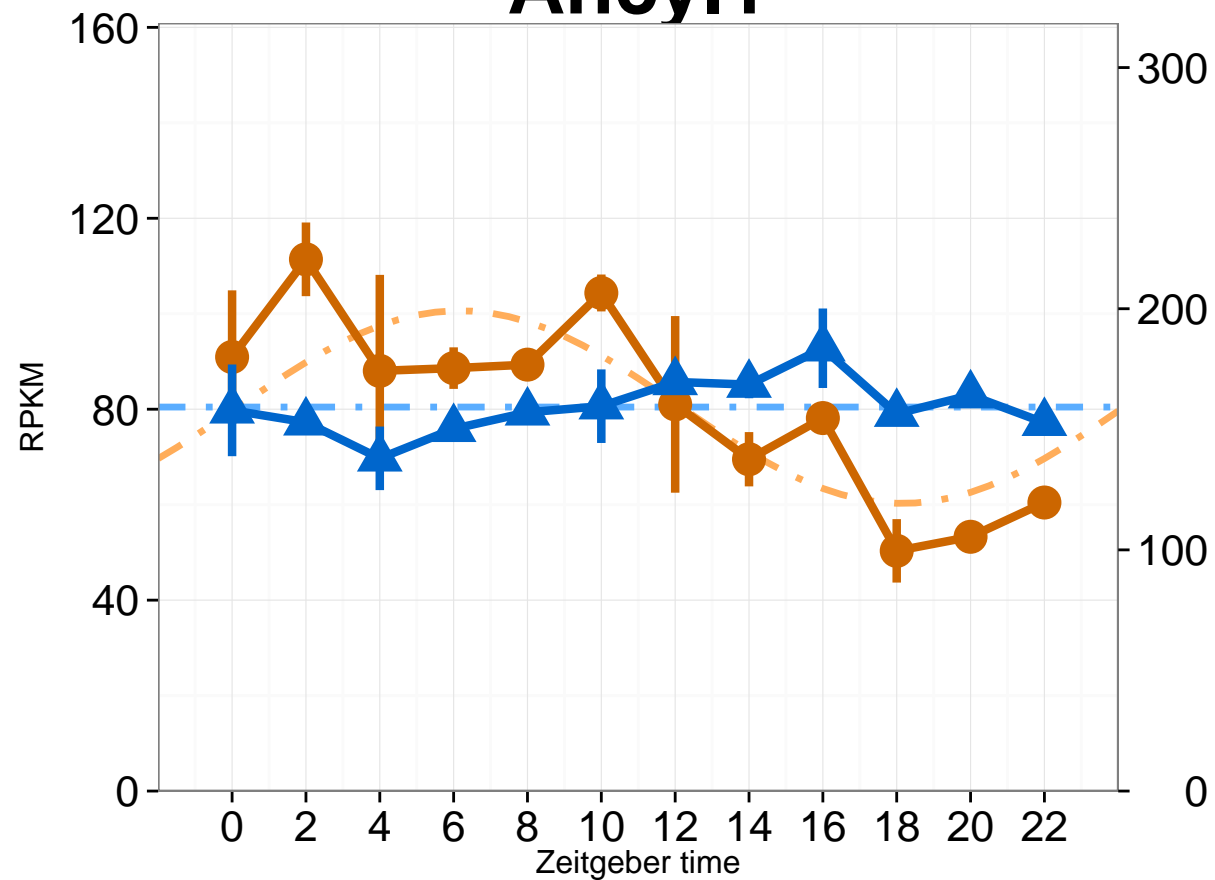

# Ahcy1l1

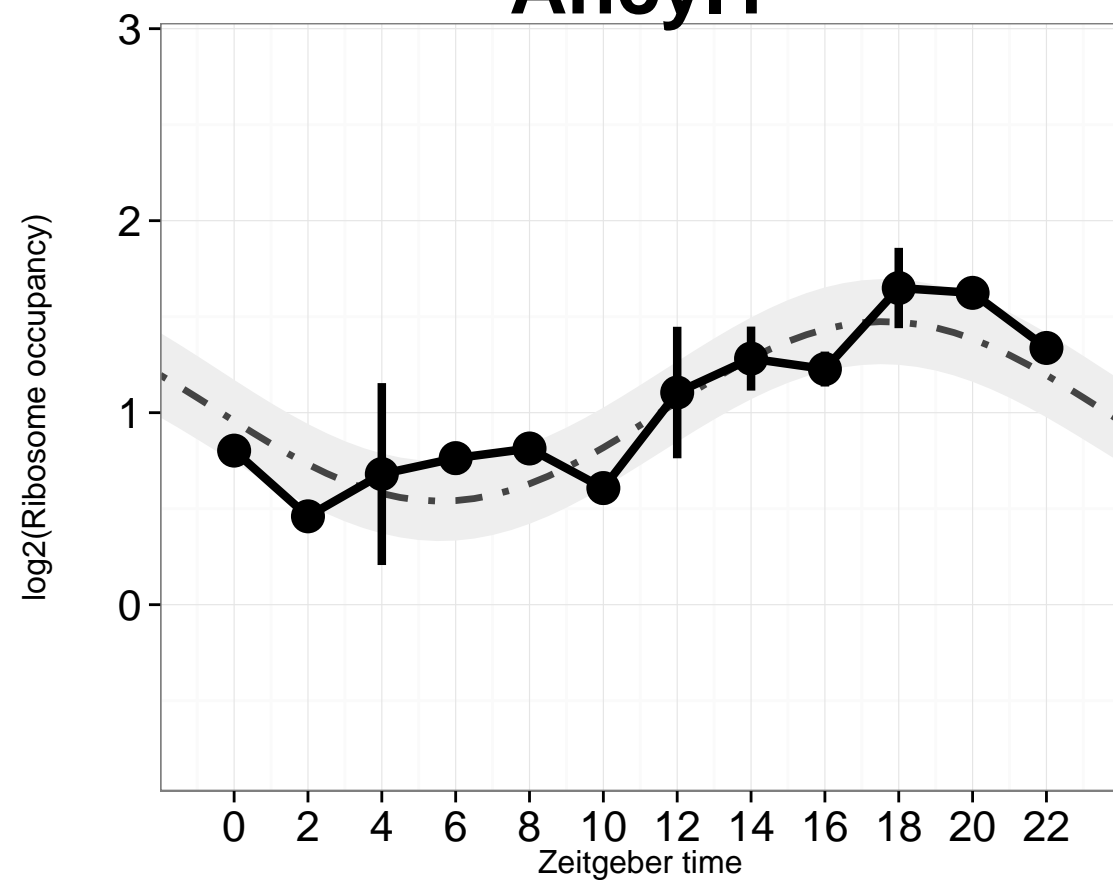

Supplement: Supplementary file 10462 [file 1]

Vtn

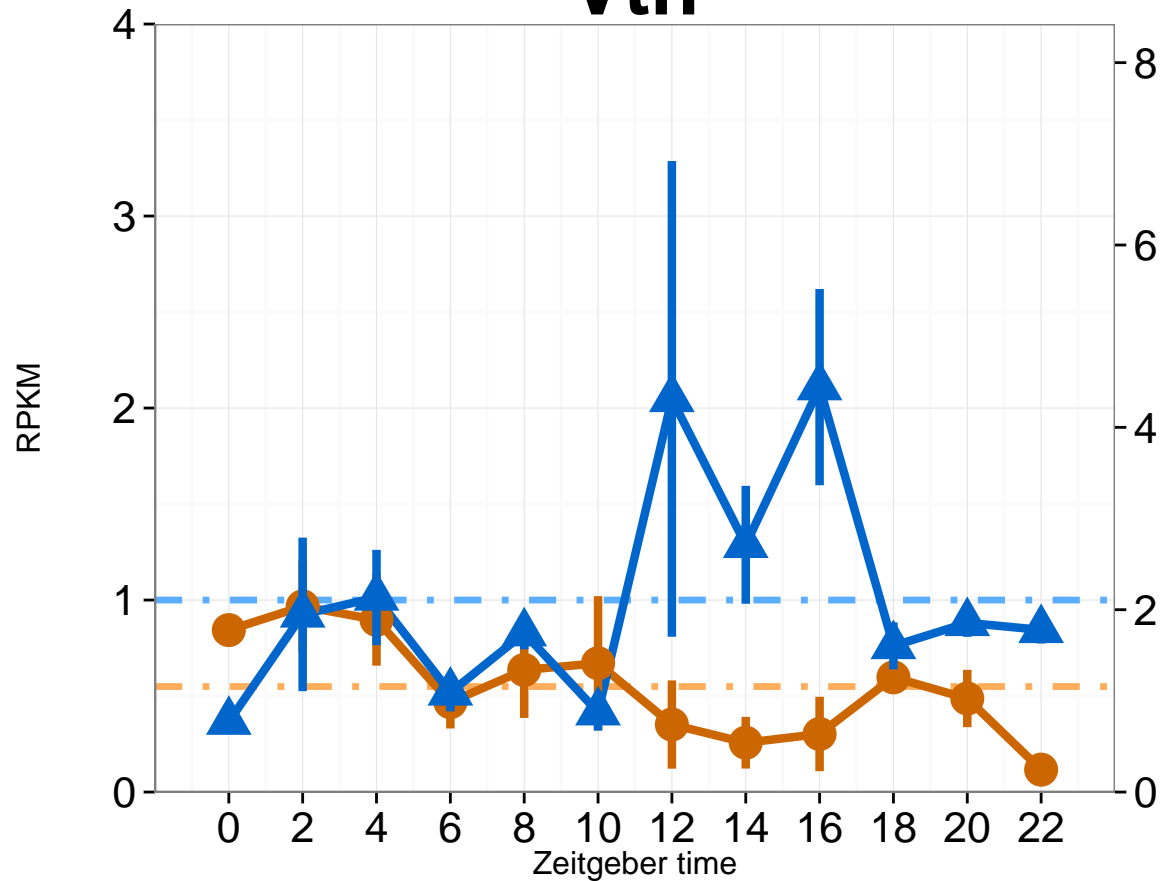

Vtn

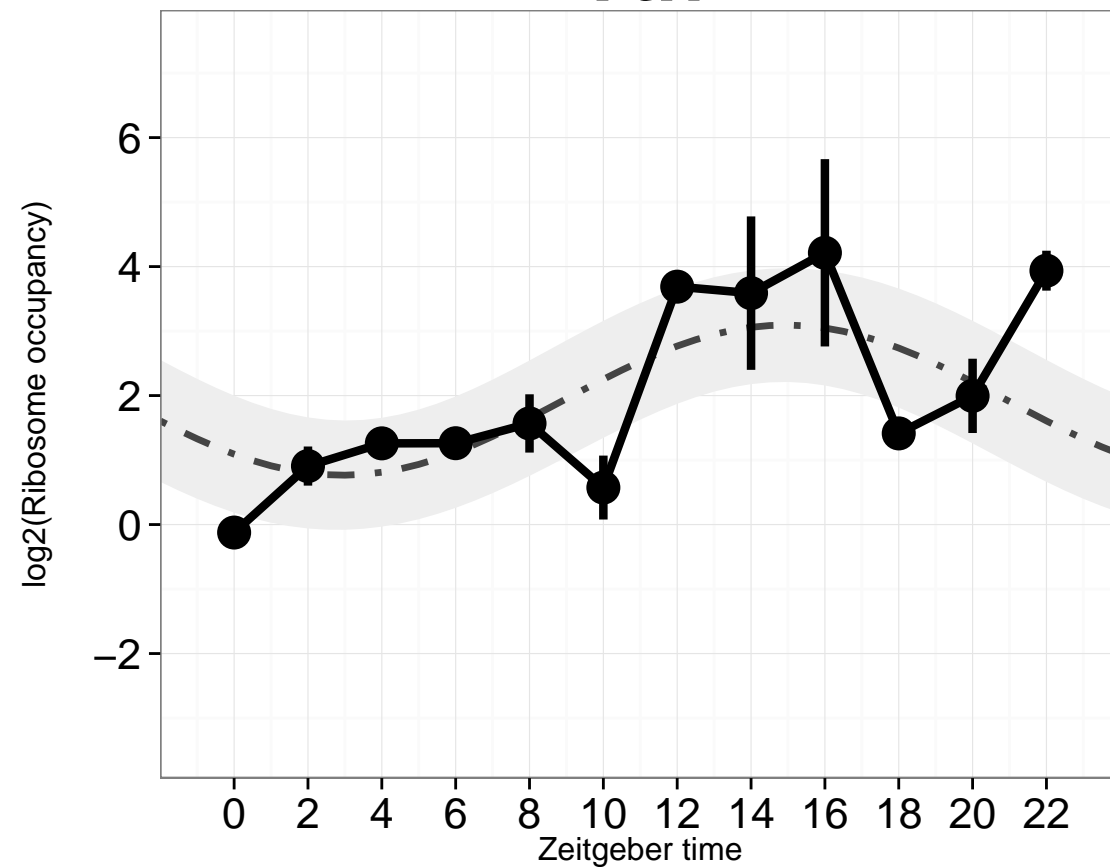

Supplement: Supplementary file 10463 [file 1]

## Fabp5

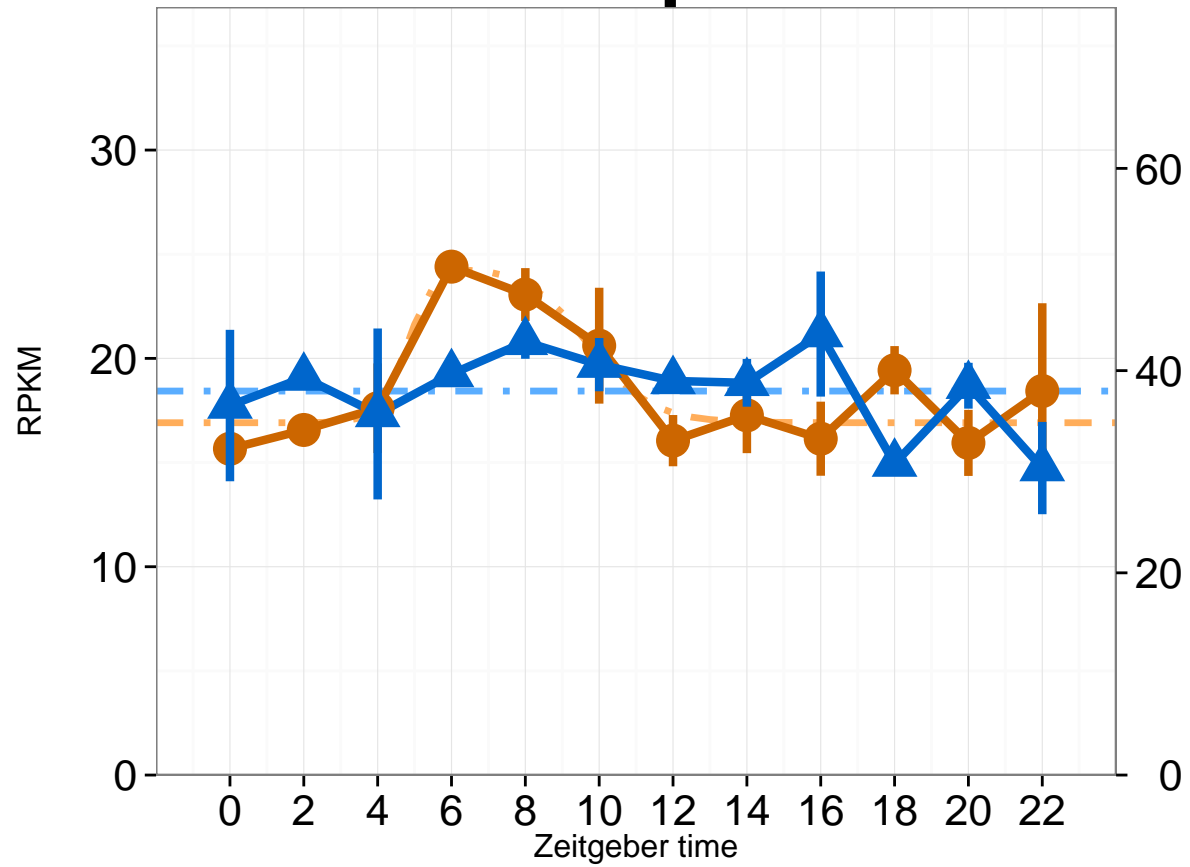

## Fabp5

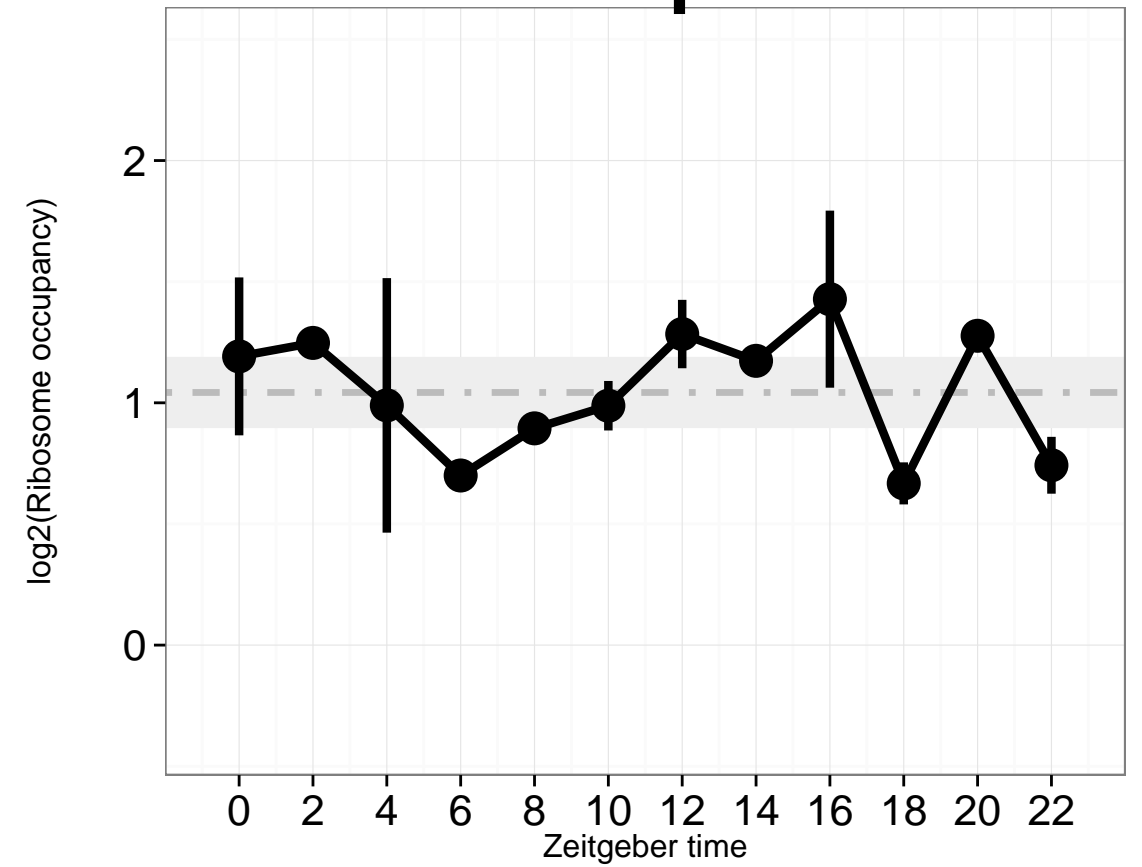

Supplement: Supplementary file 10464 [file 1]

**Fam227a**

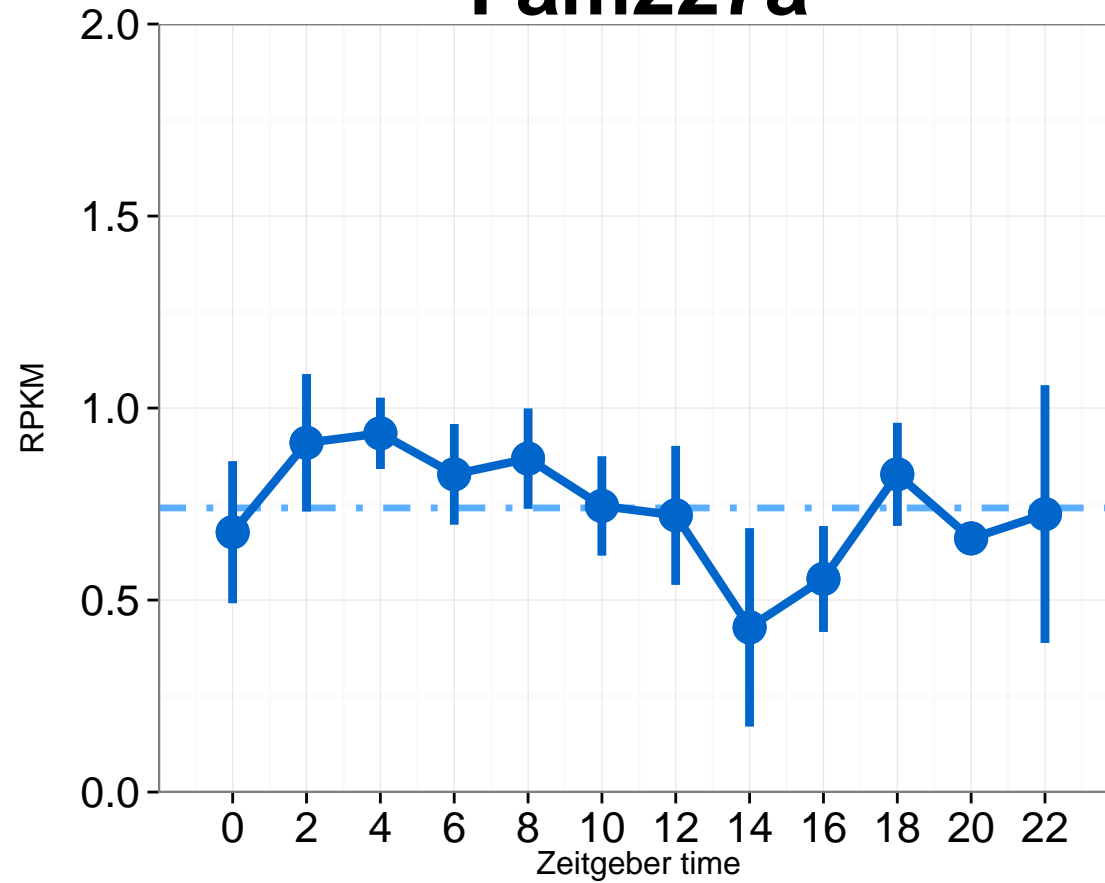

**Fam227a log2(Ribosome occupanc**

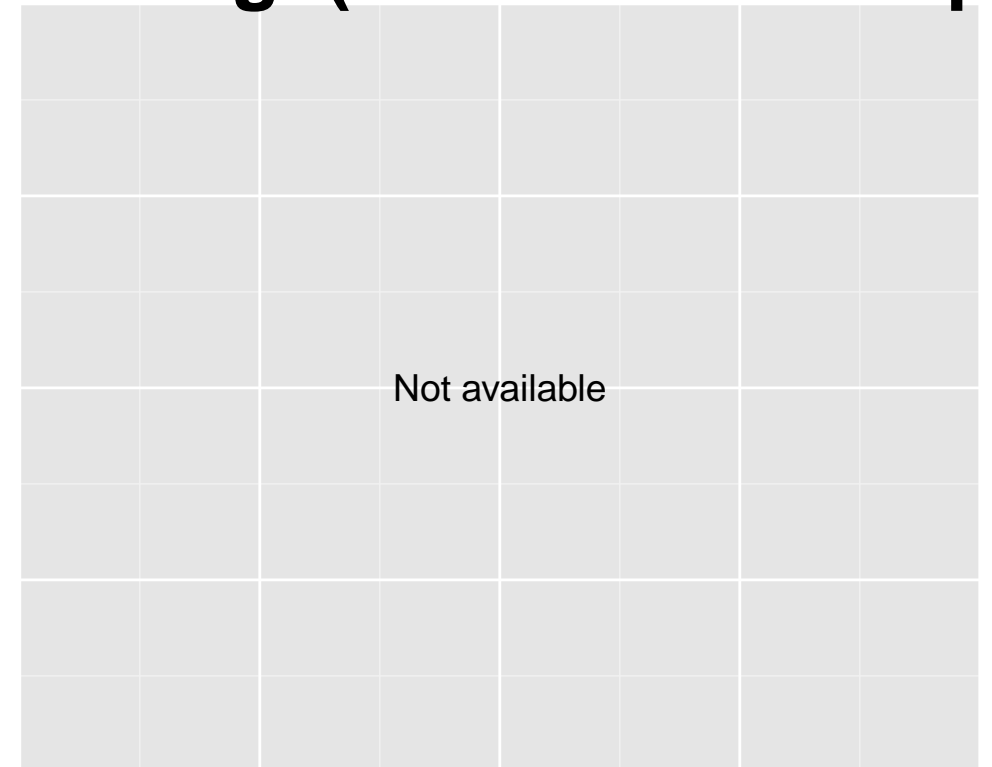

Supplement: Supplementary file 10465 [file 1]

## Eri2

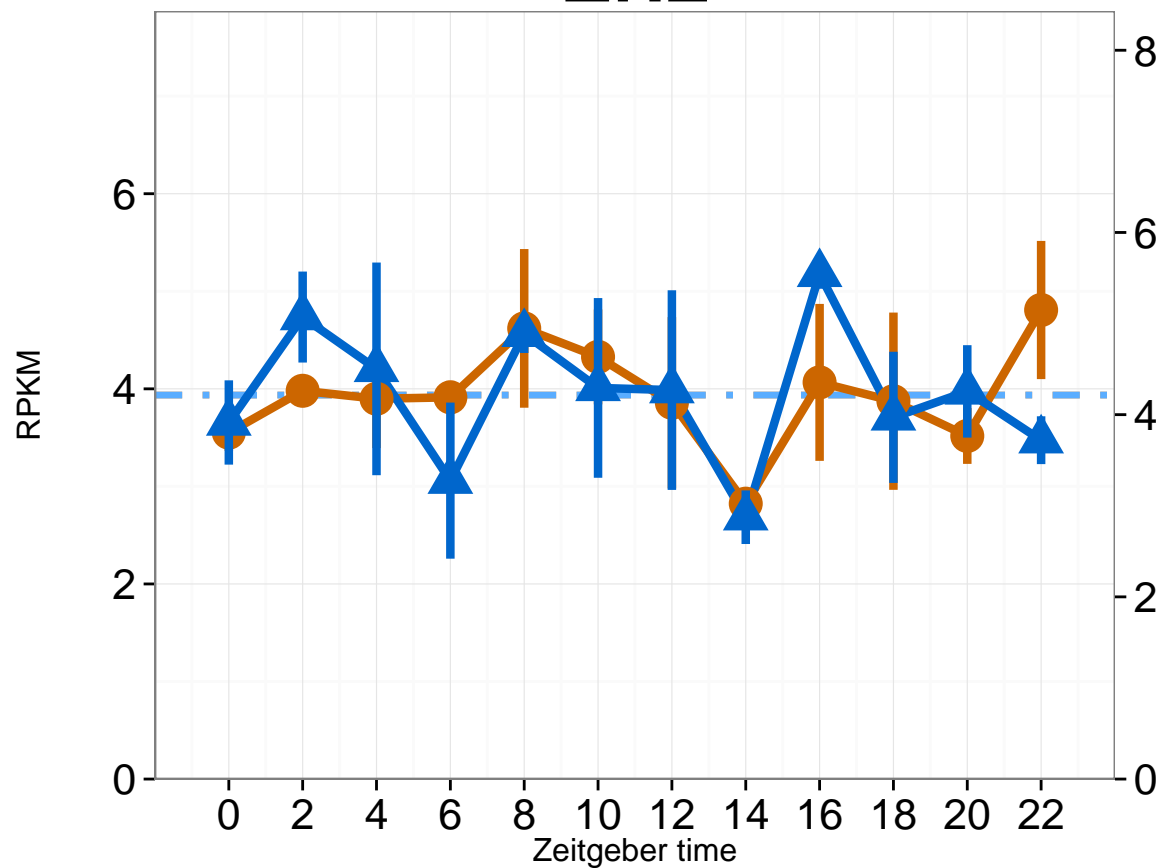

## Eri2

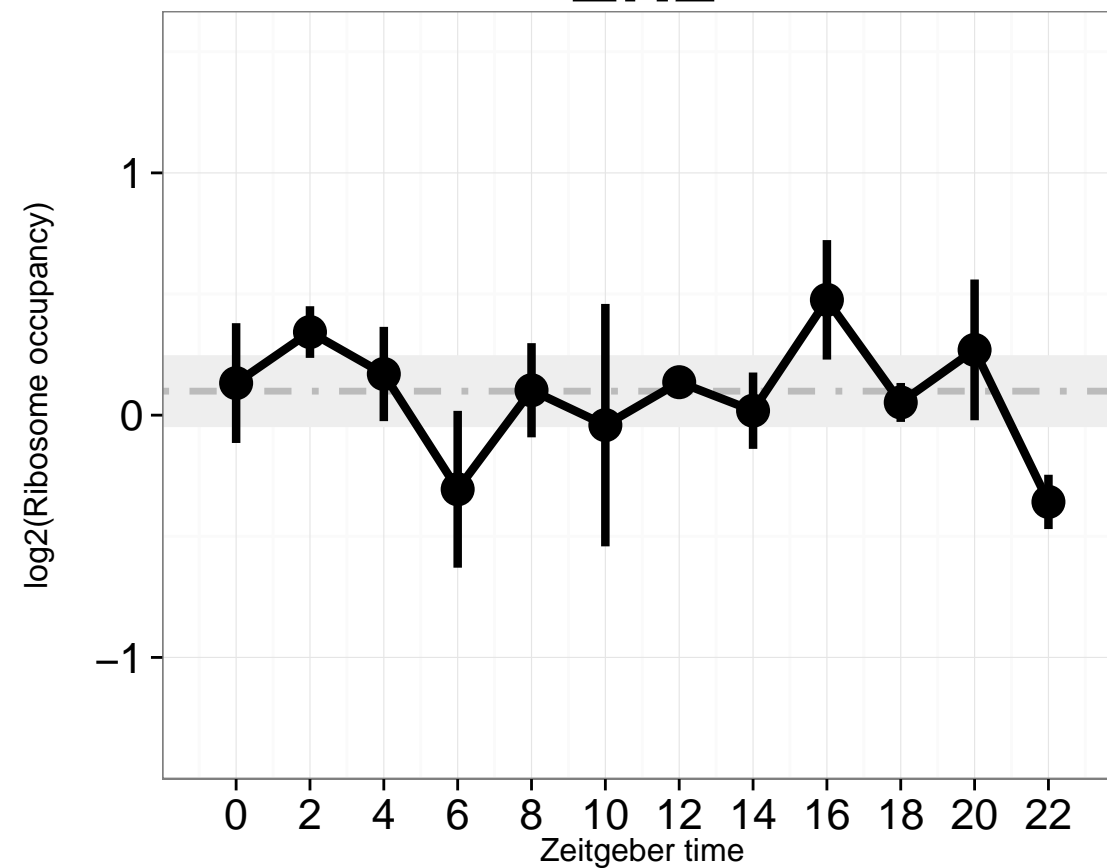

Supplement: Supplementary file 10466 [file 1]

## Sall3

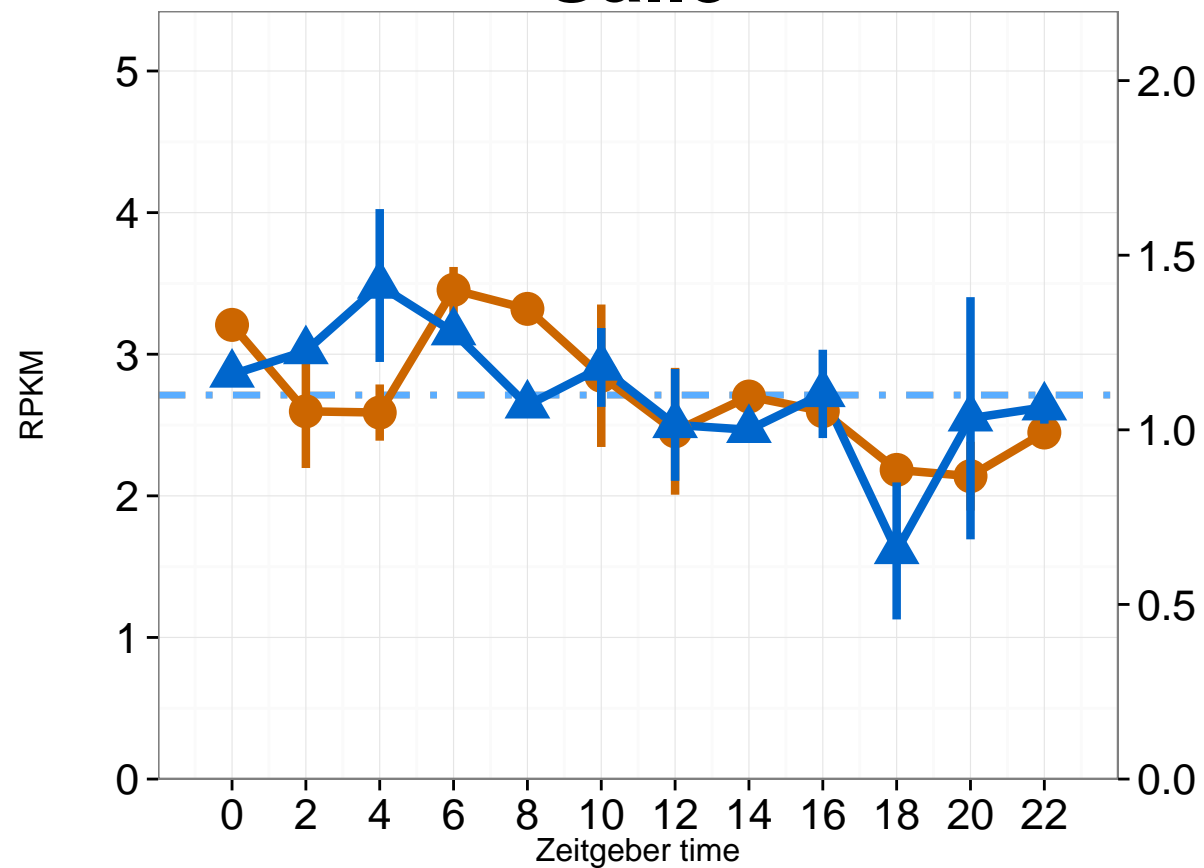

## Sall3

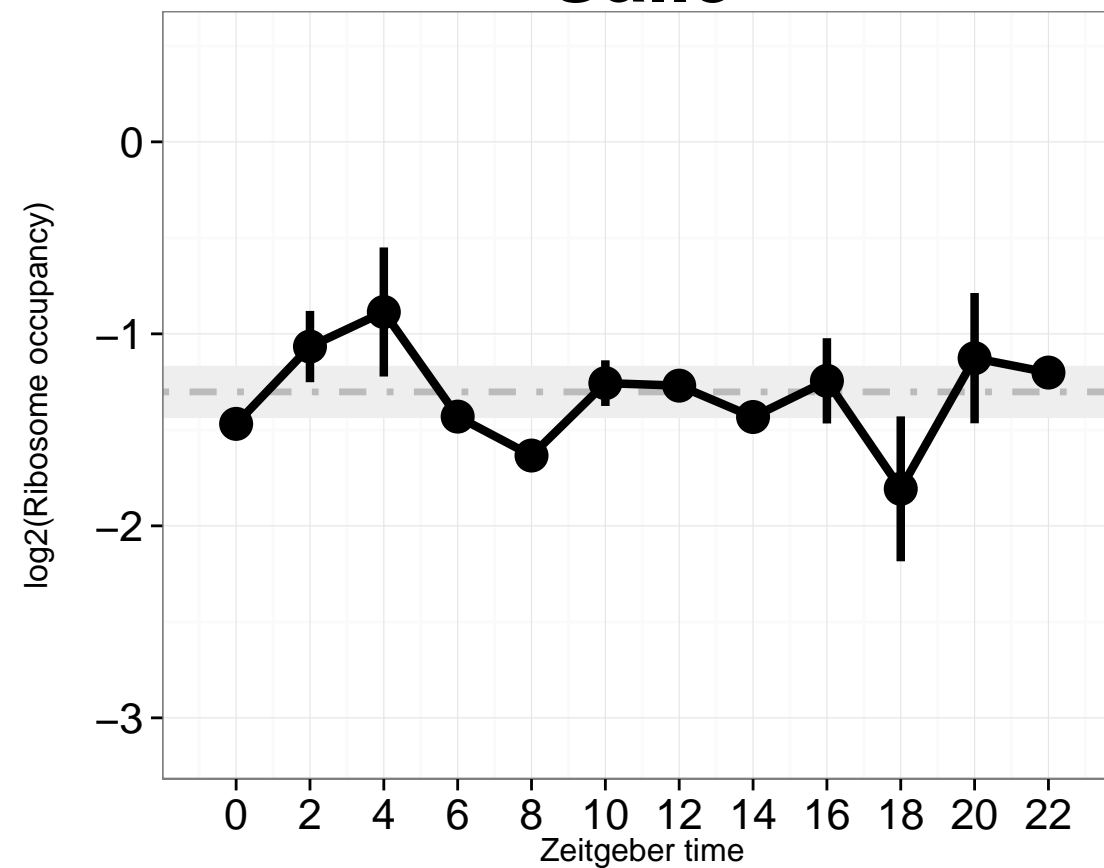

Supplement: Supplementary file 10467 [file 1]

# Ptms

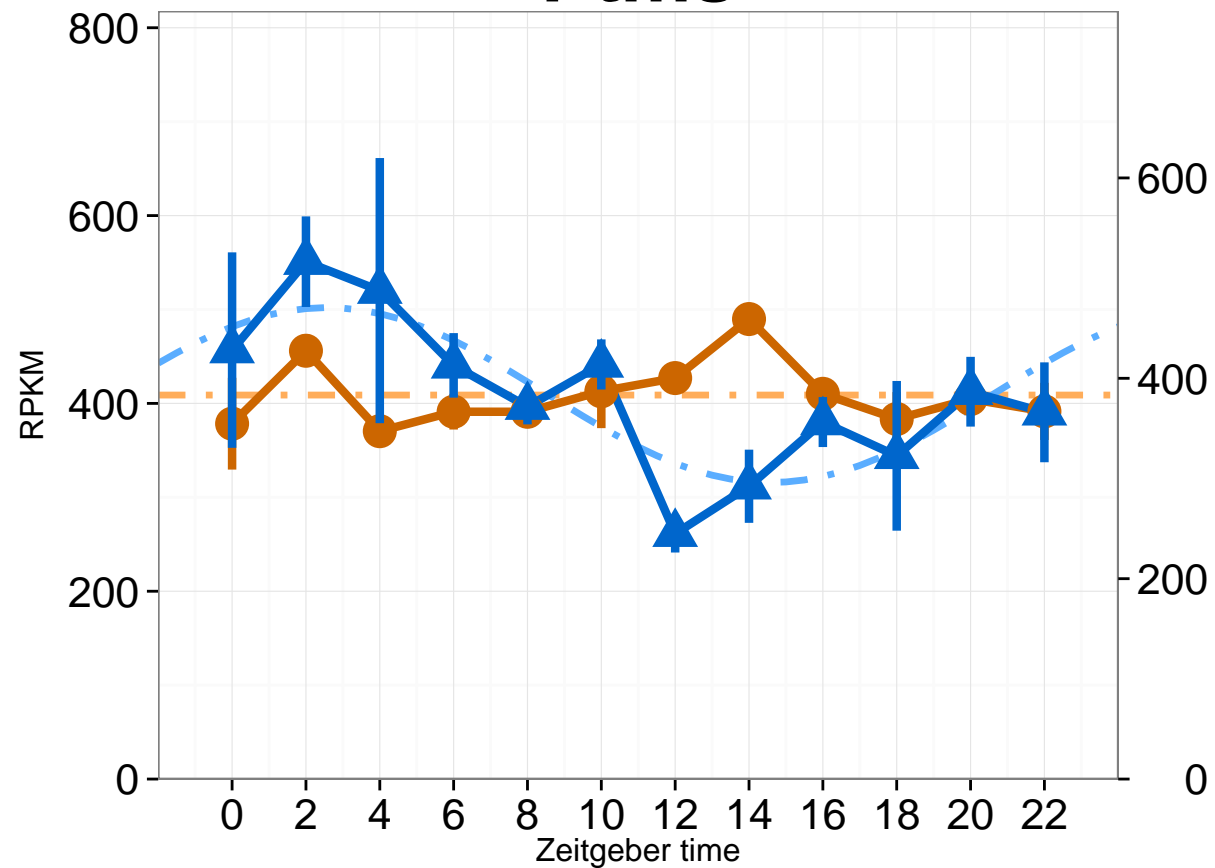

# Ptms

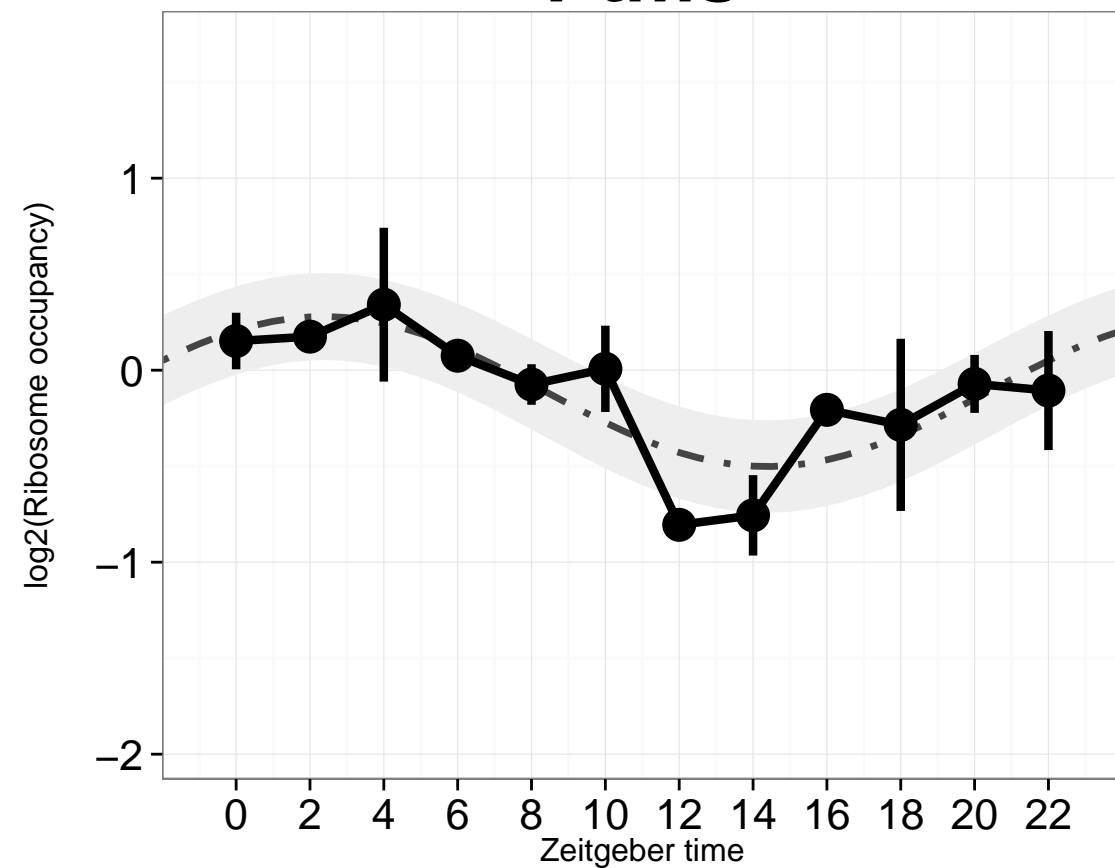

Supplement: Supplementary file 10468 [file 1]

# Acap3

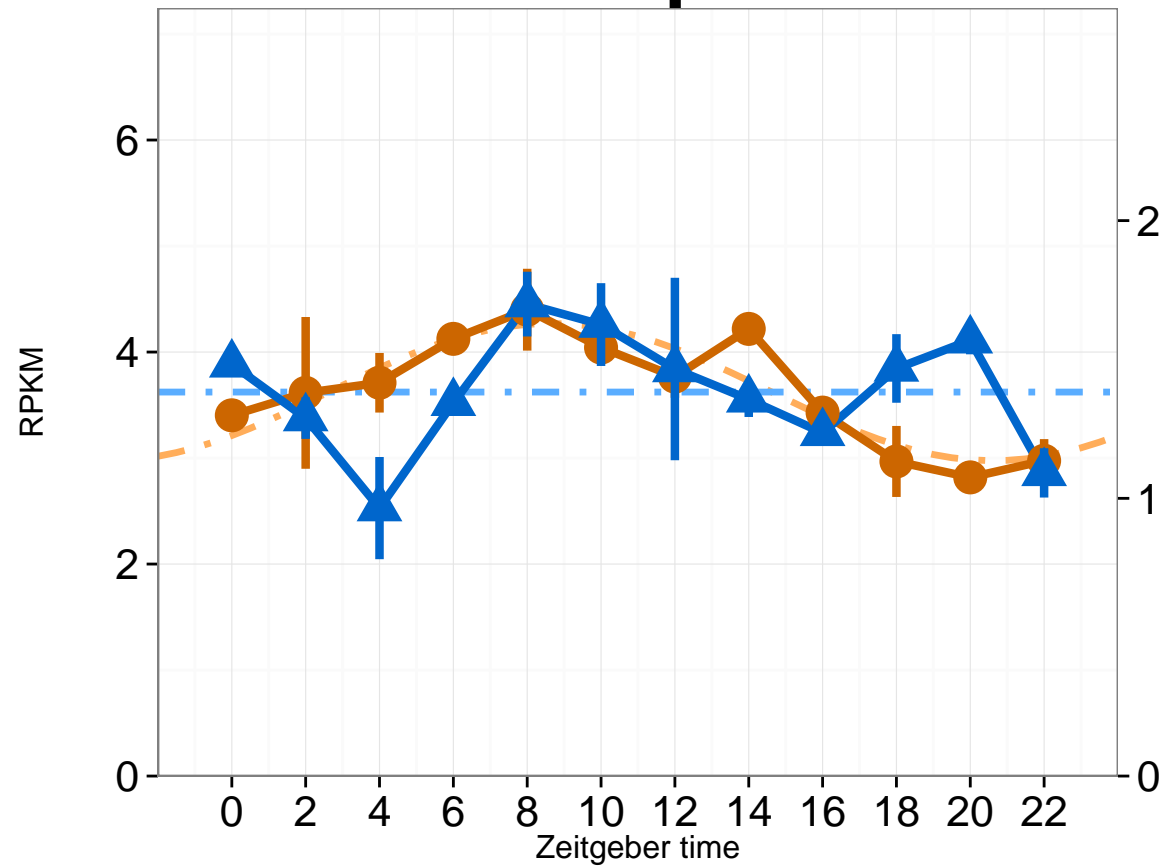

# Acap3

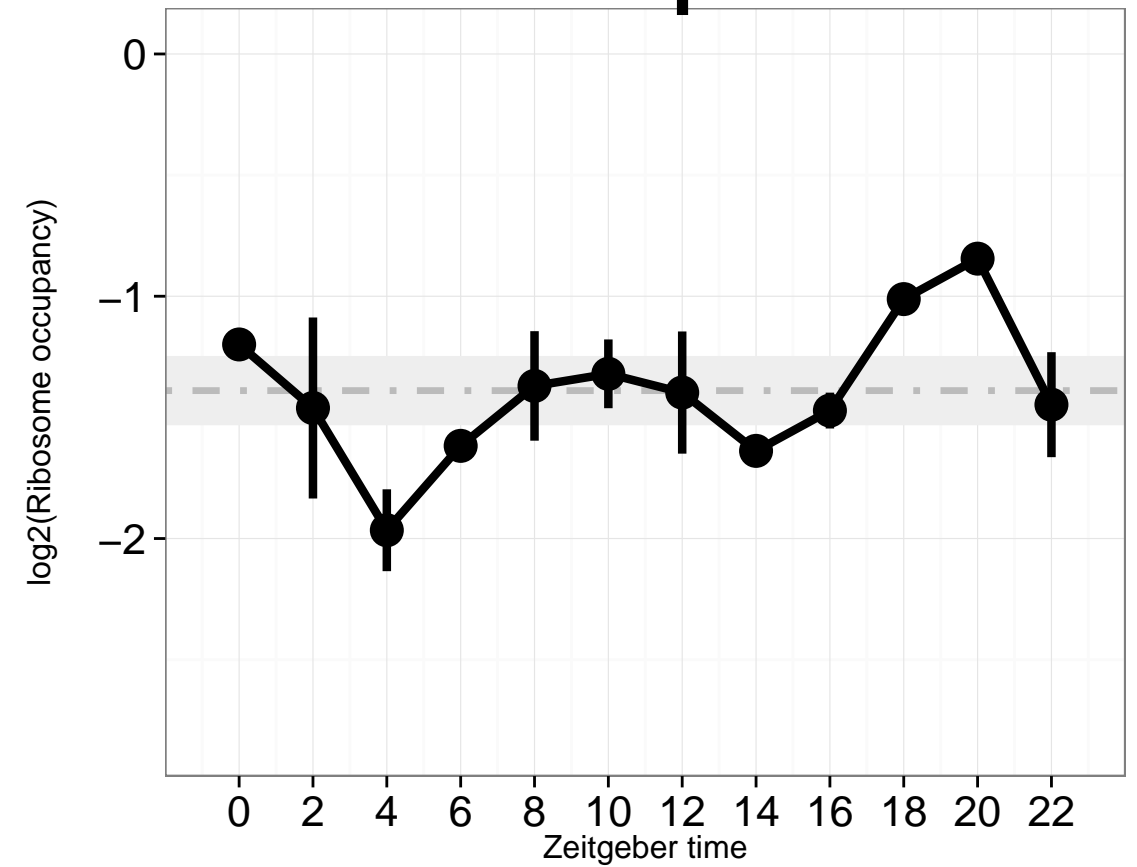

Supplement: Supplementary file 10469 [file 1]

## Elf5

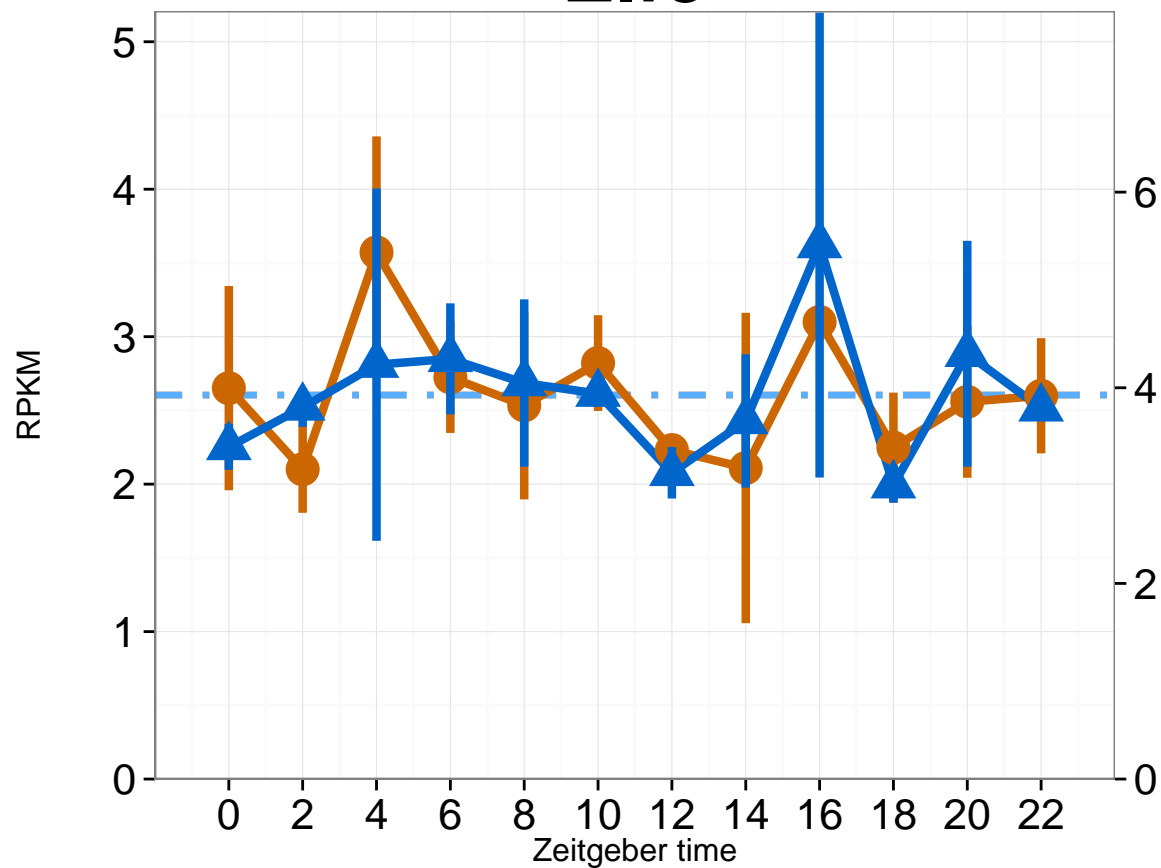

## Elf5

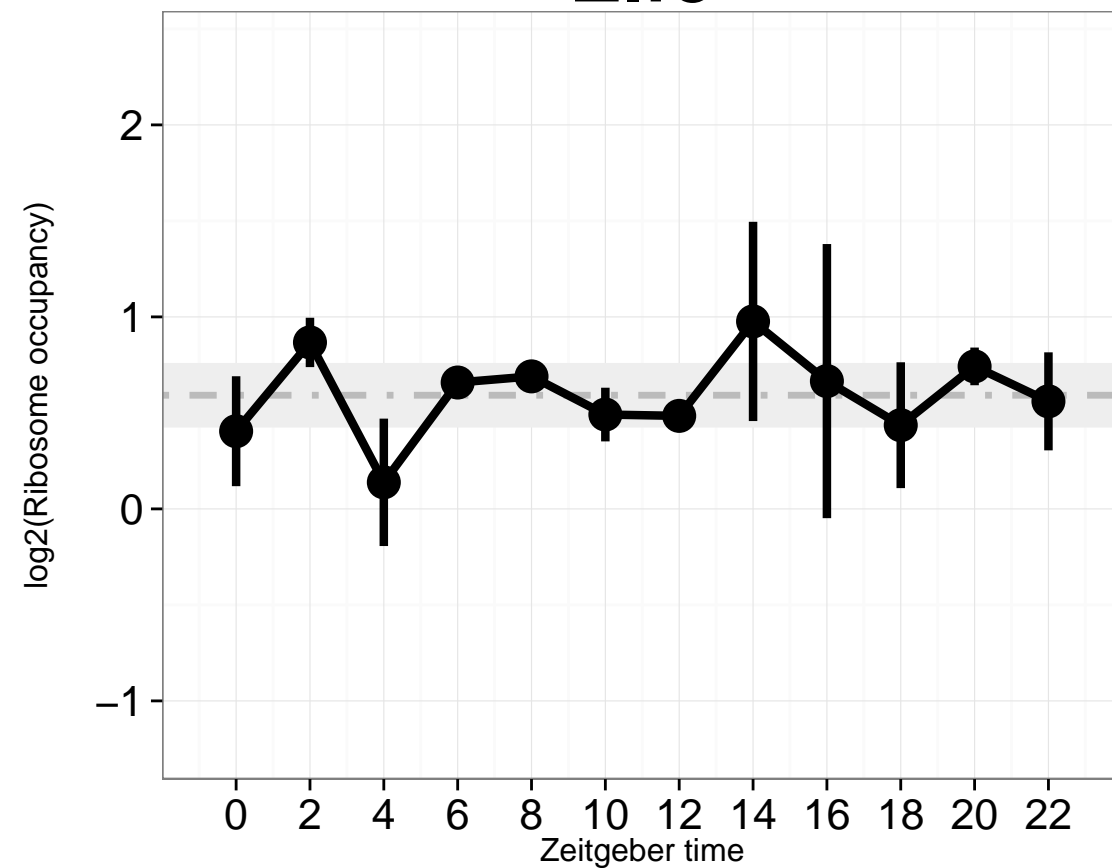

Supplement: Supplementary file 10470 [file 1]

# C2cd5

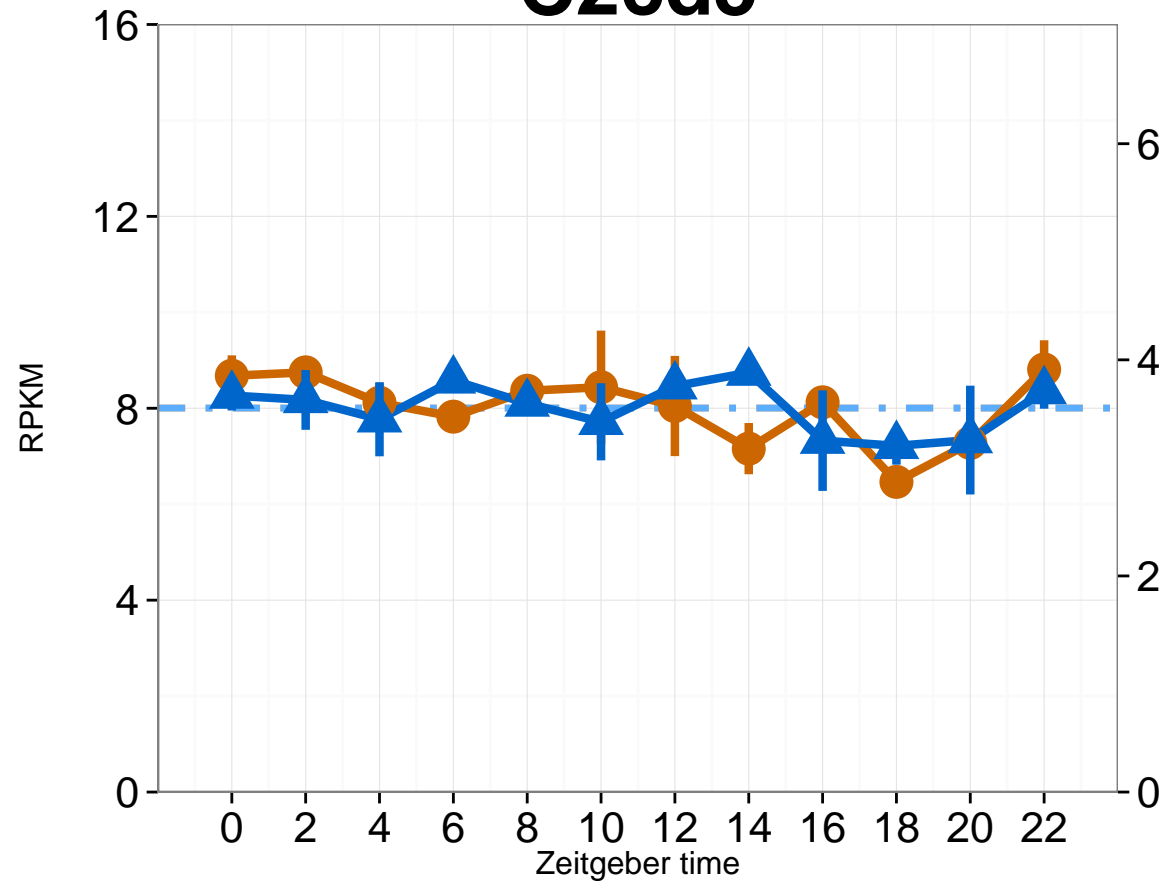

# C2cd5

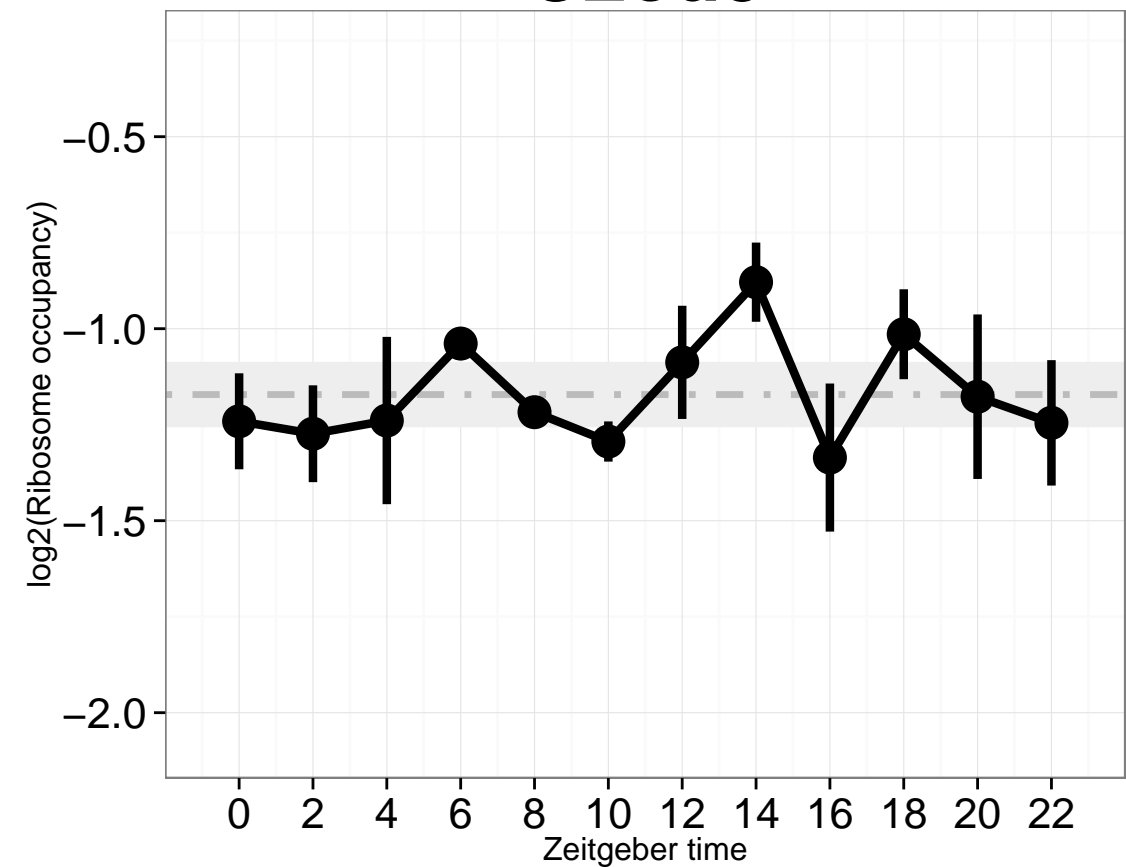

Supplement: Supplementary file 10471 [file 1]

## Usp38

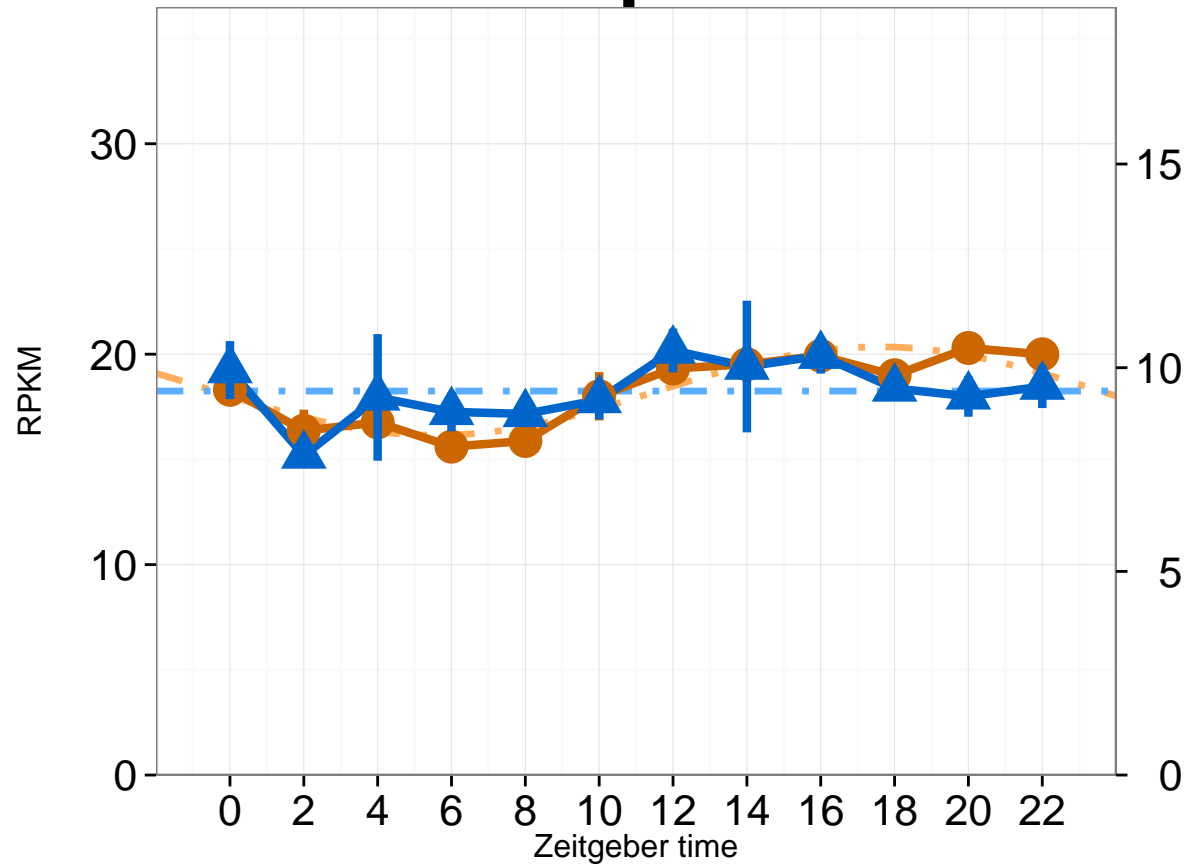

## Usp38

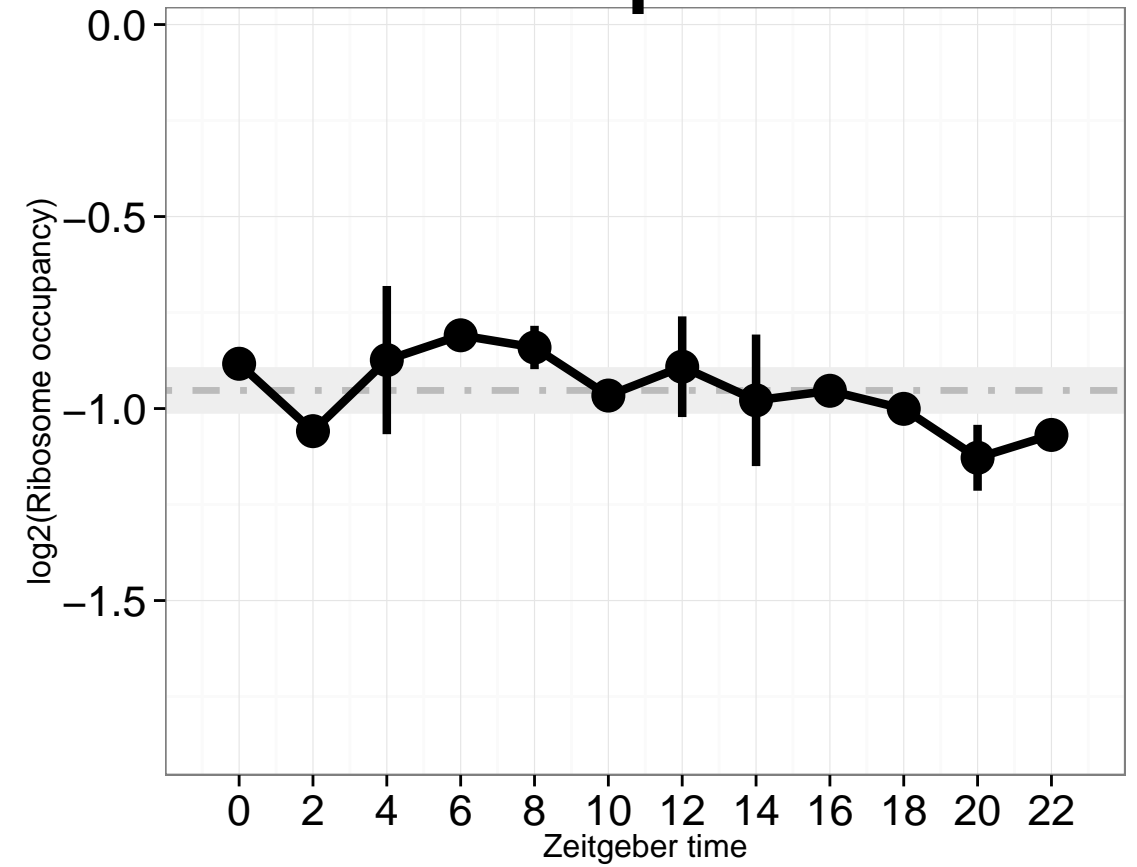

Supplement: Supplementary file 10472 [file 1]

## BC016423

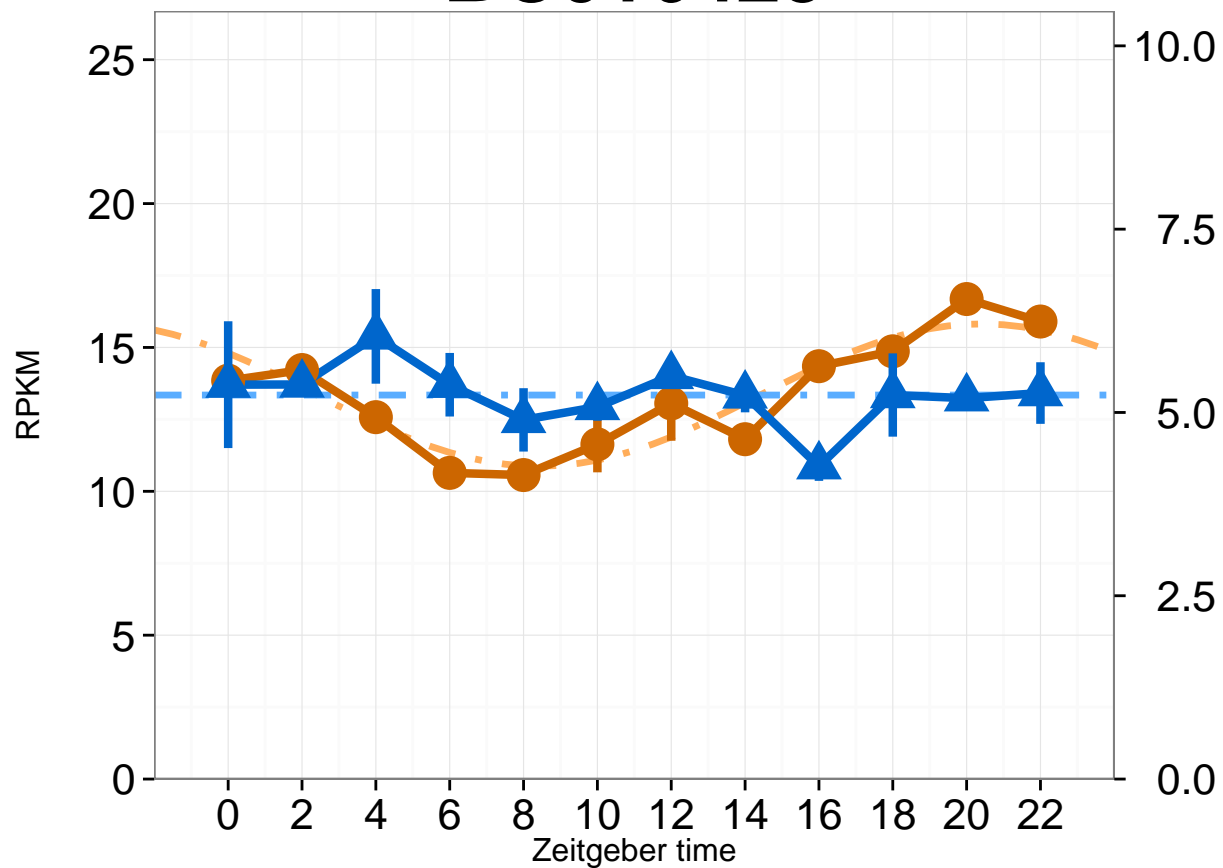

## BC016423

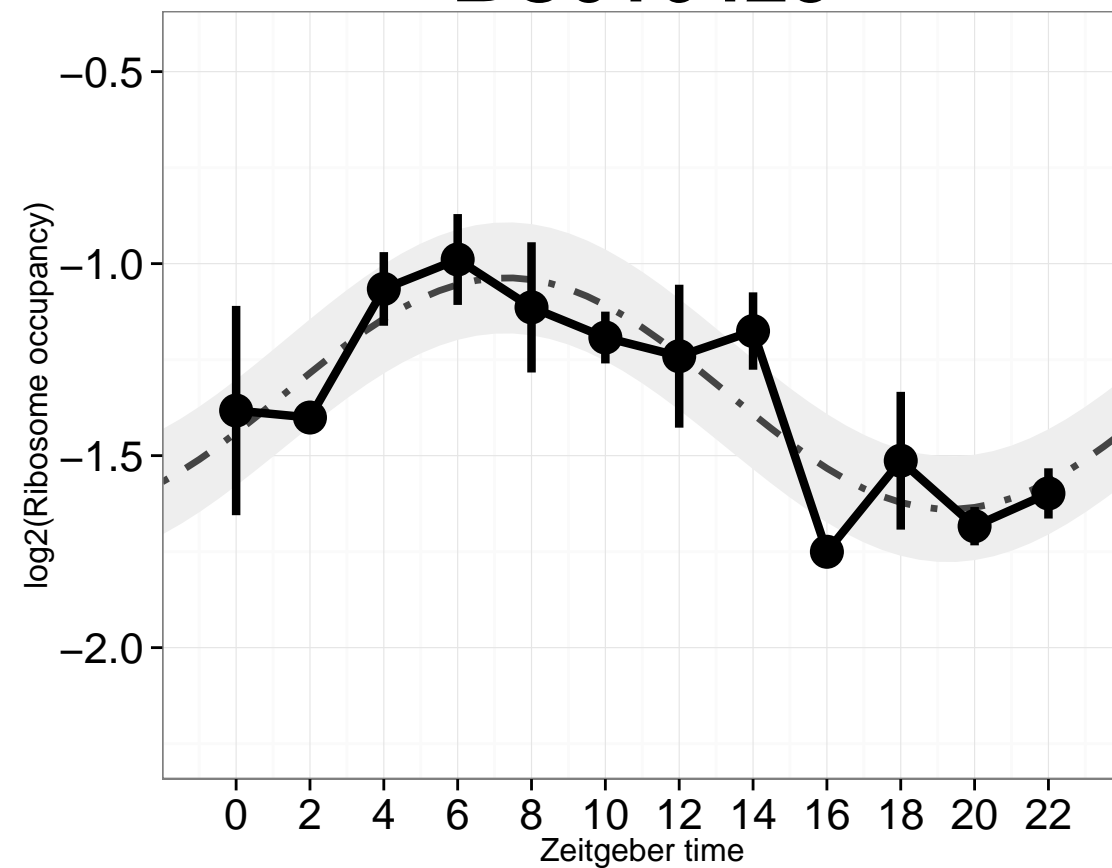

Supplement: Supplementary file 10473 [file 1]

## Col4a3bp

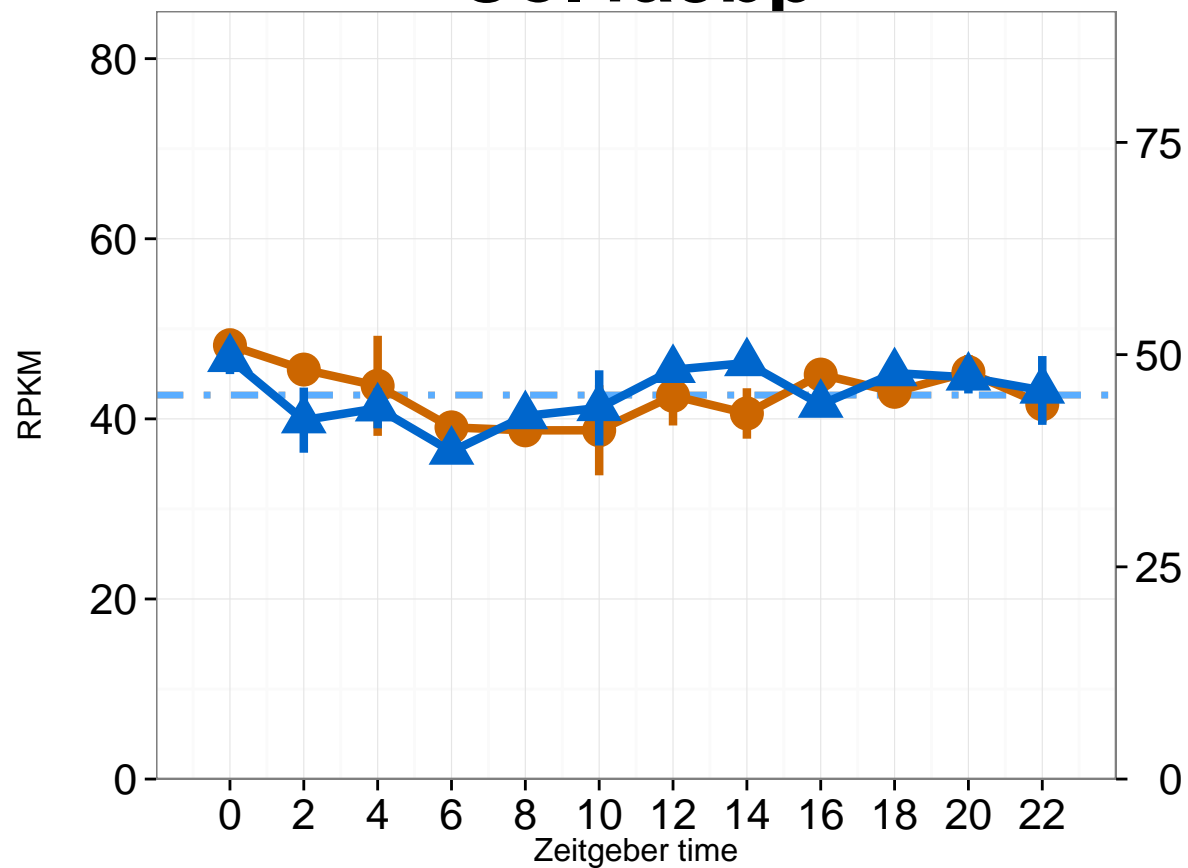

## Col4a3bp

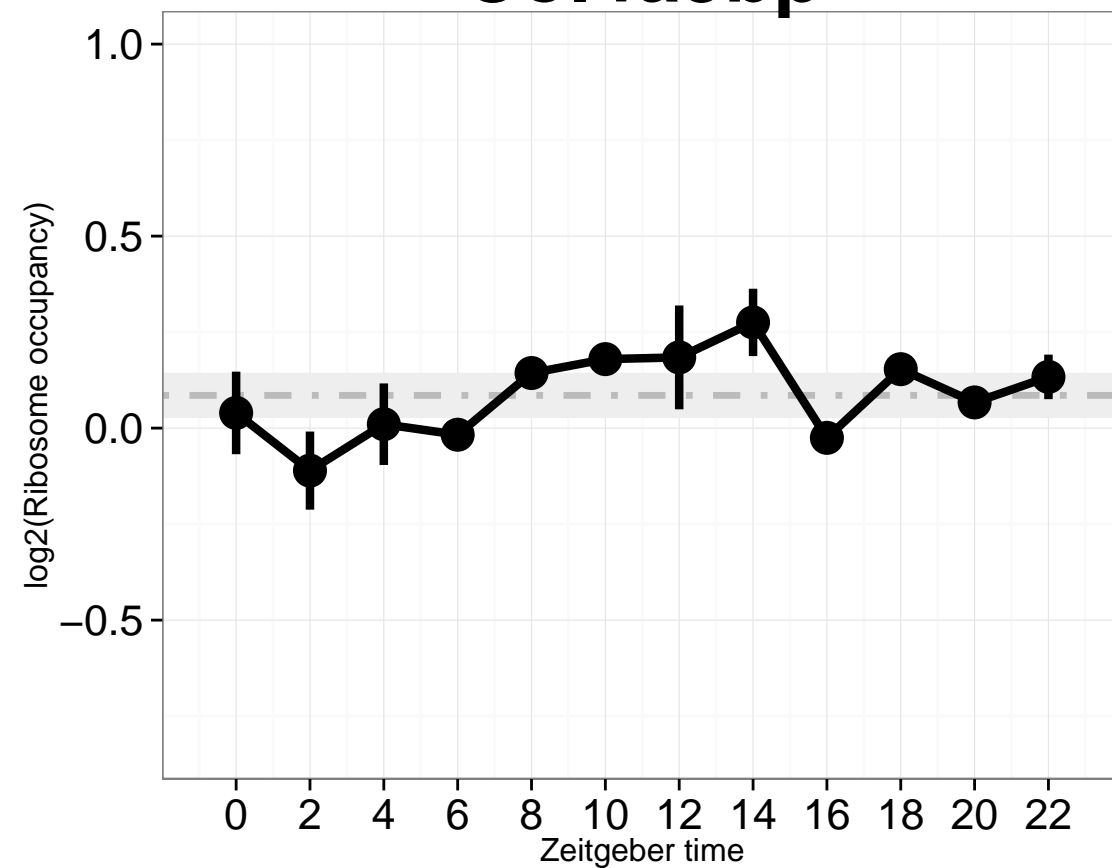

Supplement: Supplementary file 10474 [file 1]

# Stk32c

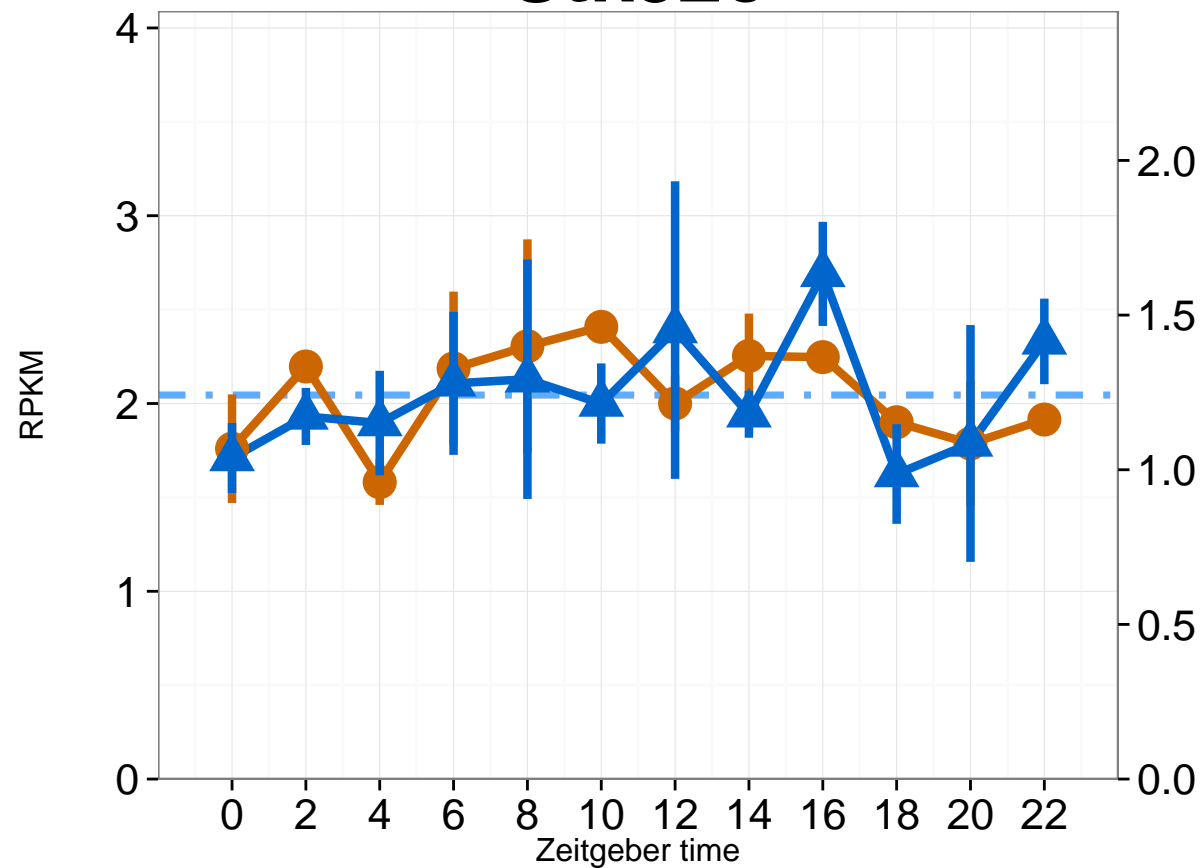

# Stk32c

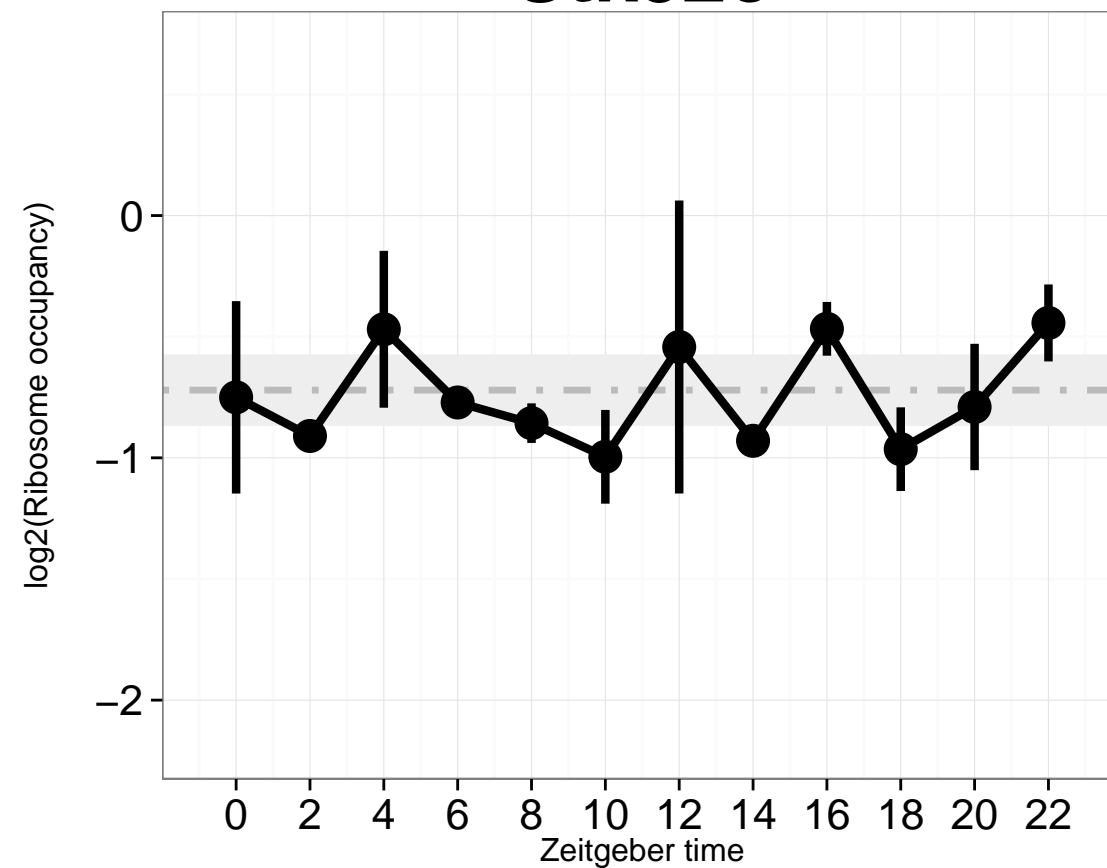

Supplement: Supplementary file 10475 [file 1]

## Smcp

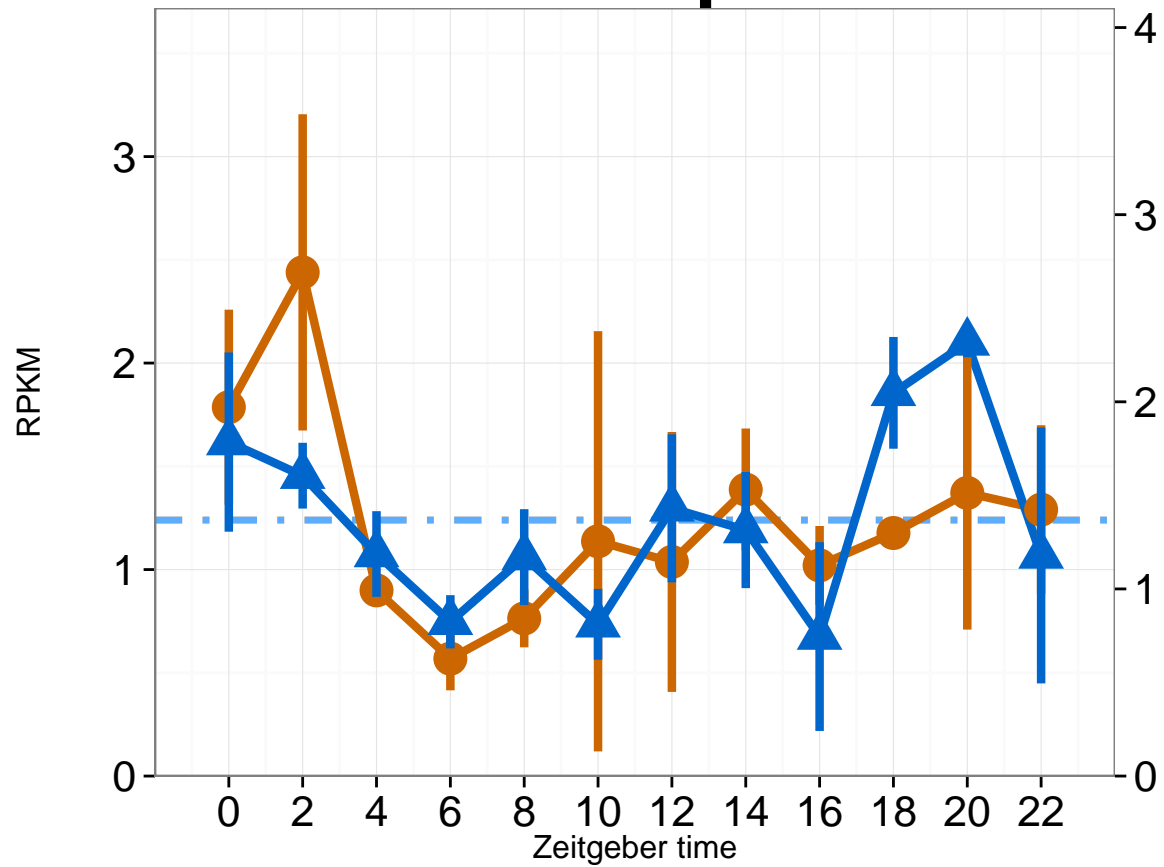

## Smcp

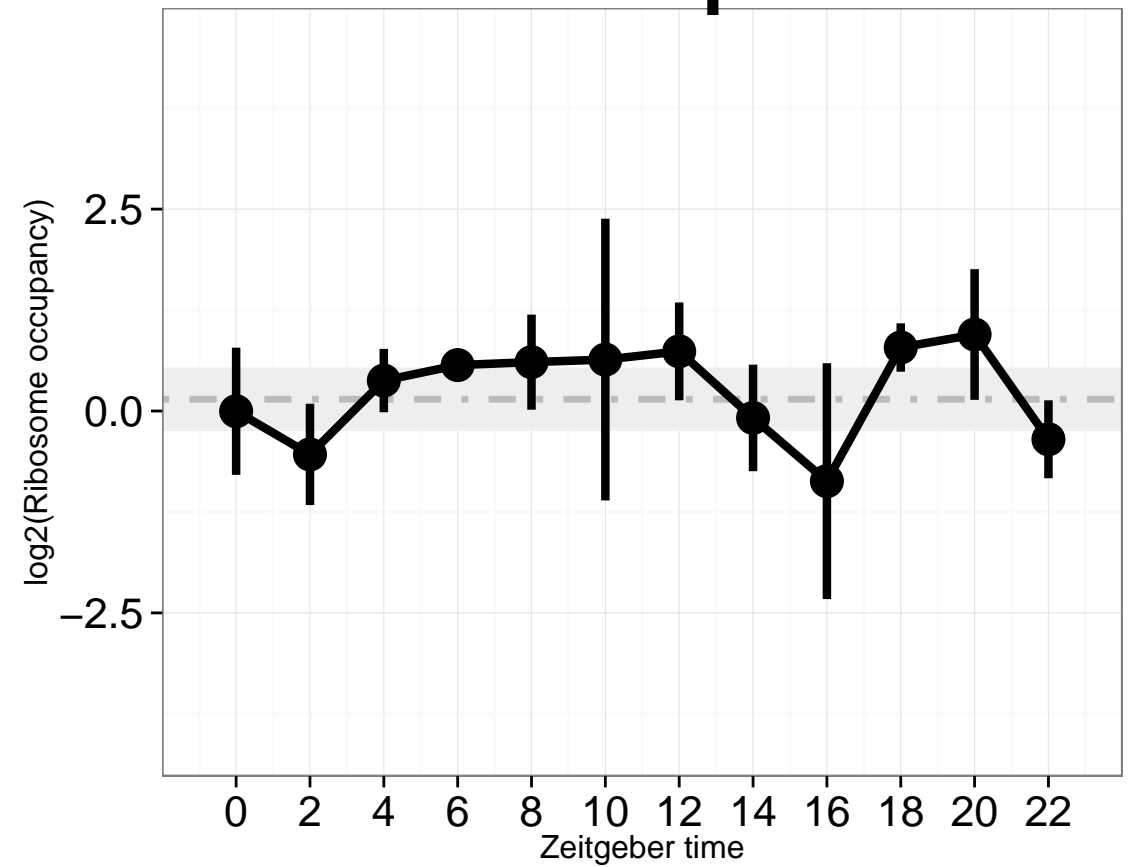

Supplement: Supplementary file 10476 [file 1]

## Gdf7

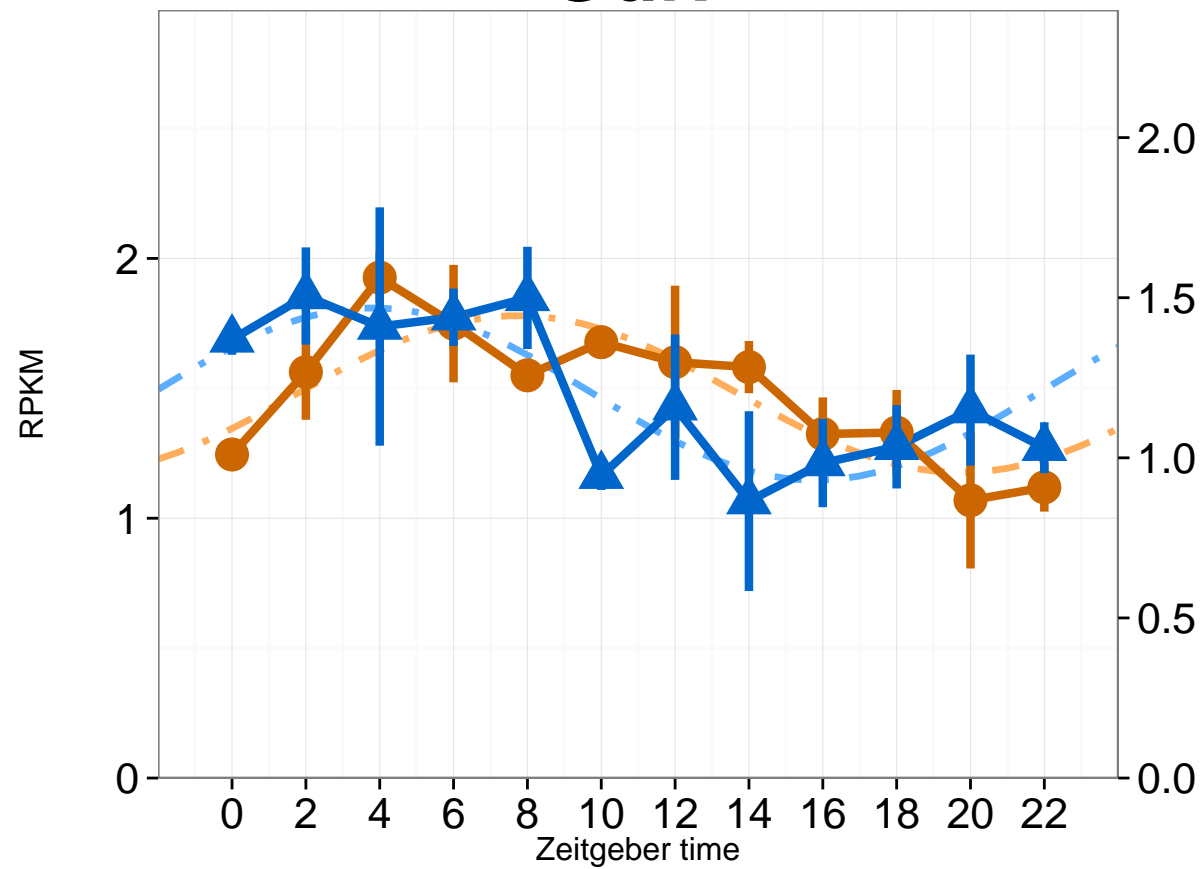

## Gdf7

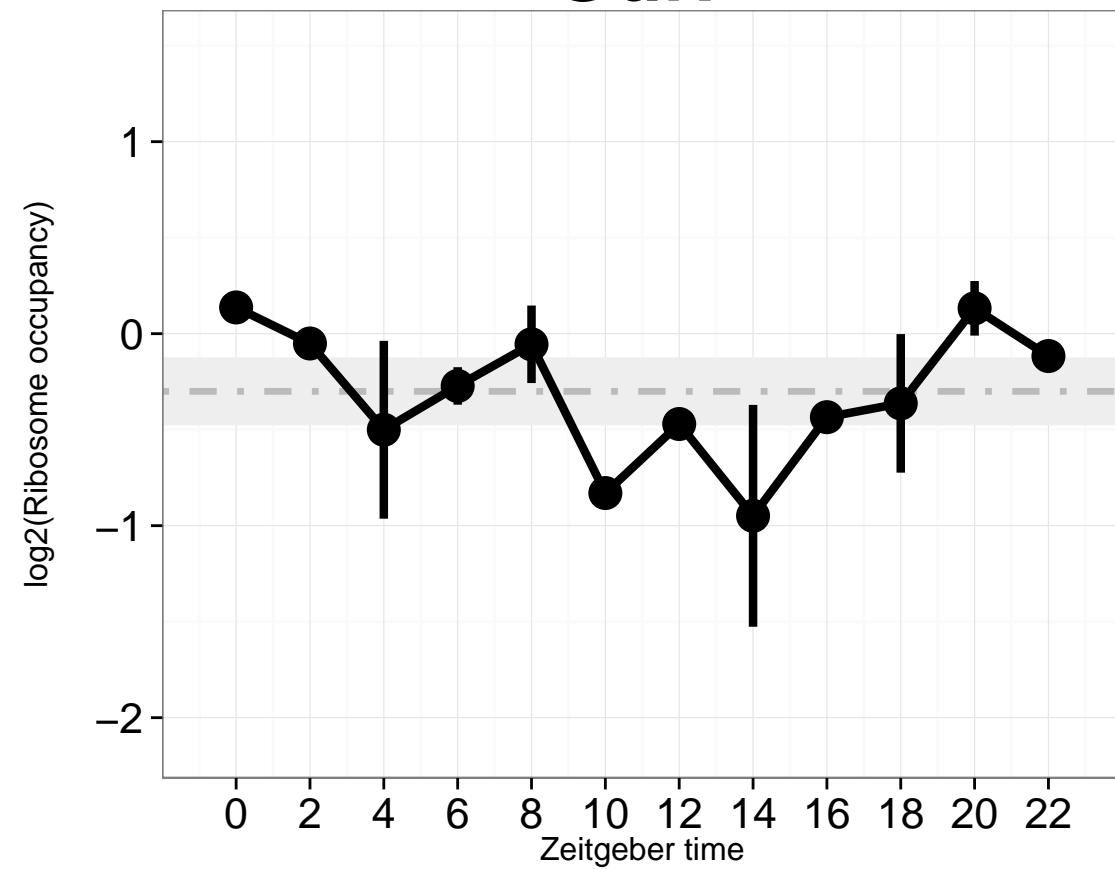

Supplement: Supplementary file 10477 [file 1]

## Rnf40

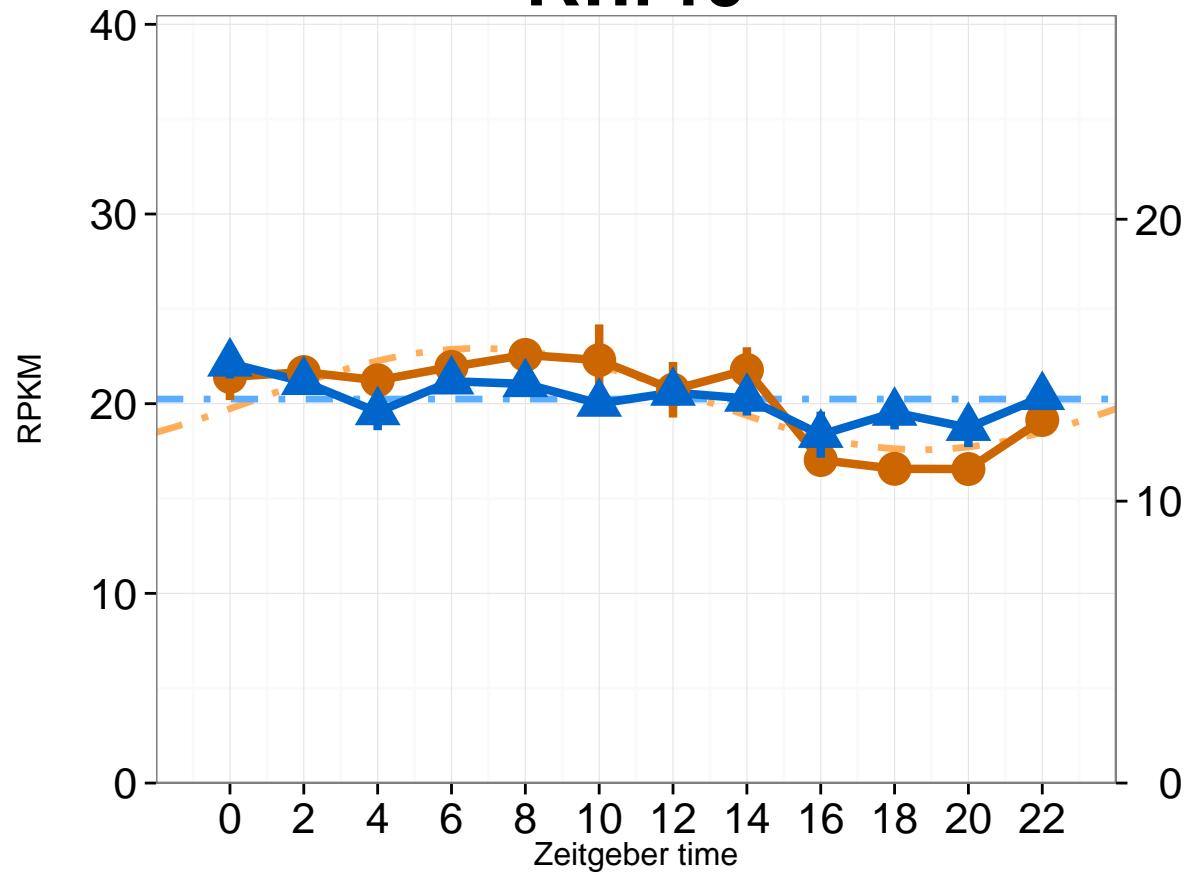

## Rnf40

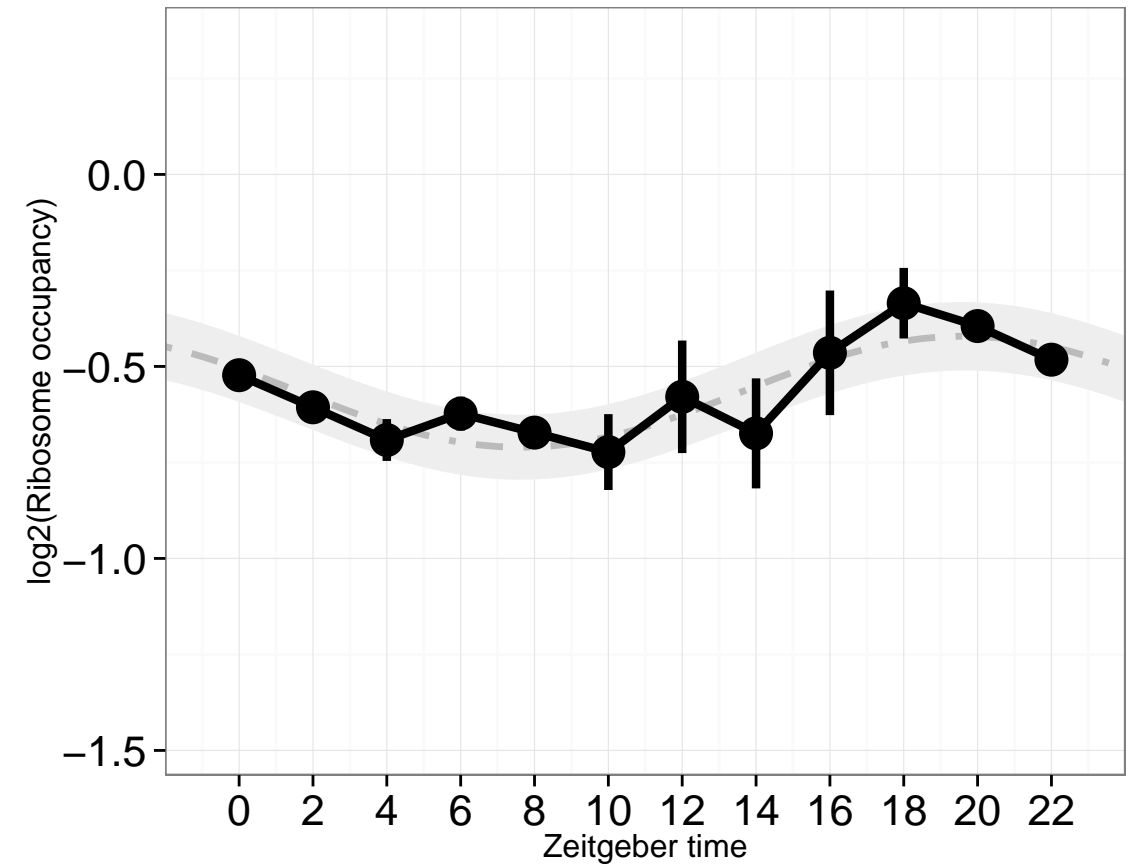

Supplement: Supplementary file 10478 [file 1]

## Esco2

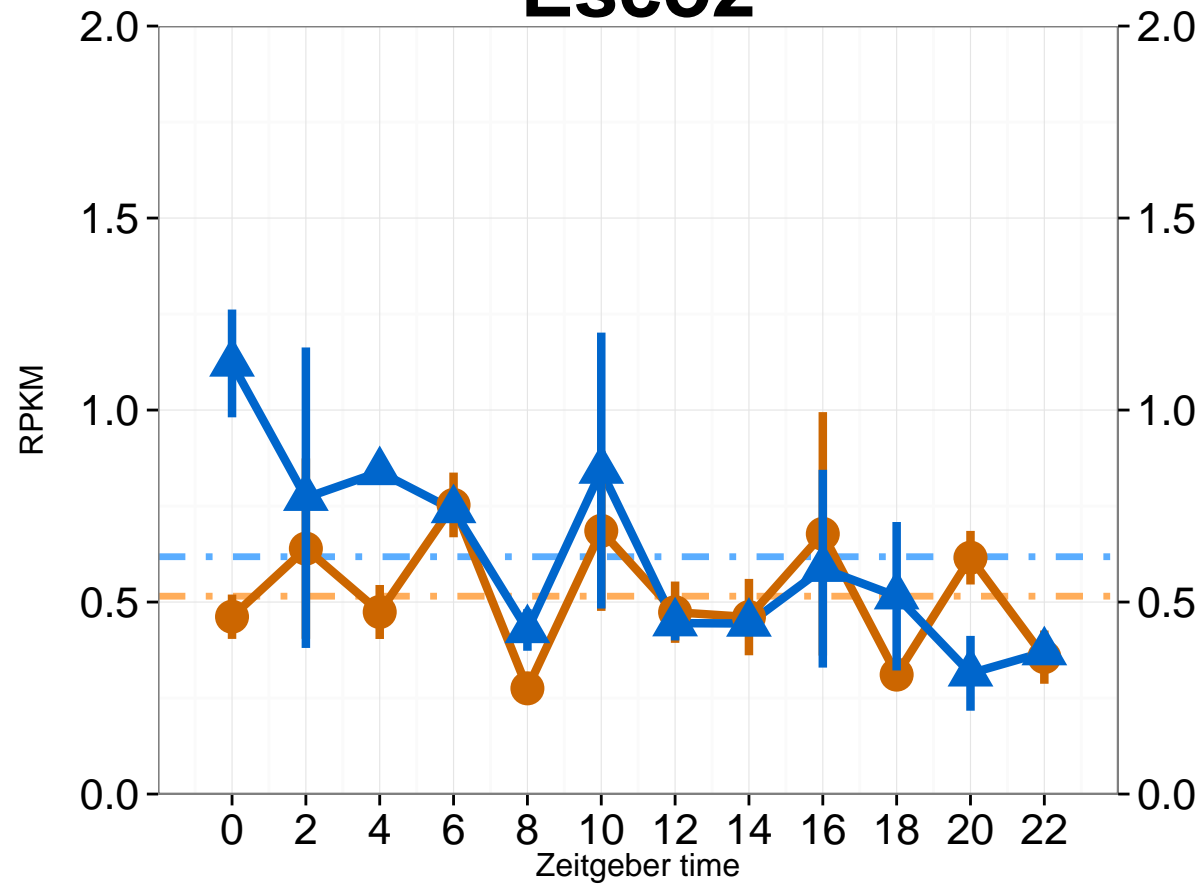

## Esco2

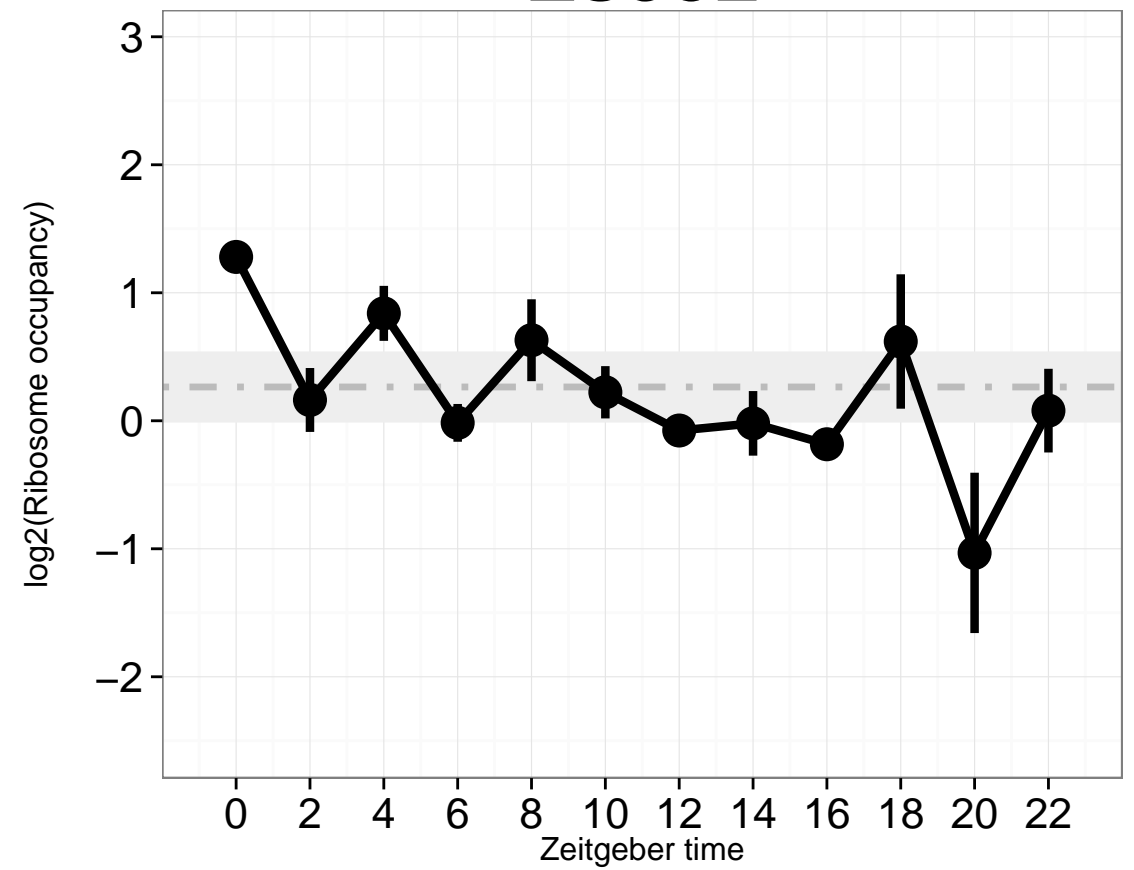

Supplement: Supplementary file 10479 [file 1]

## Met

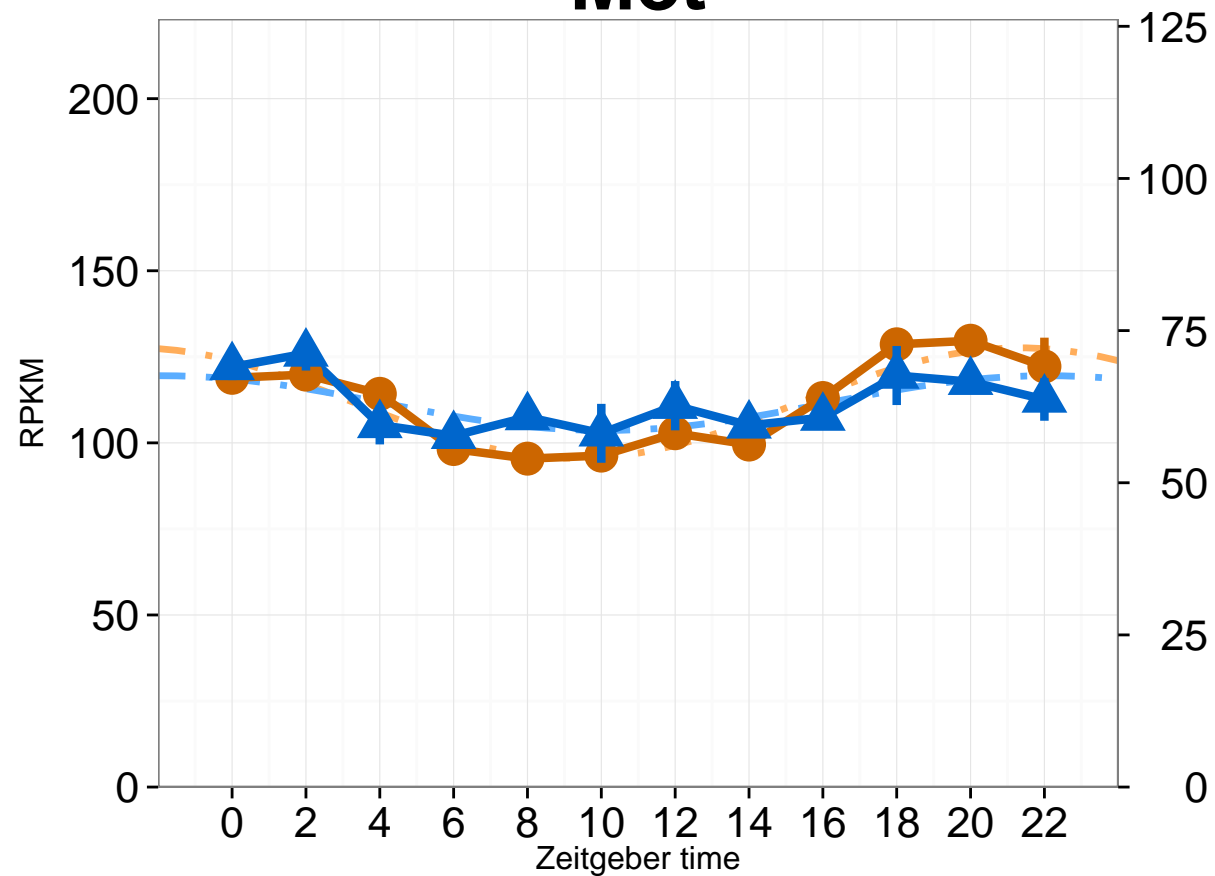

## Met

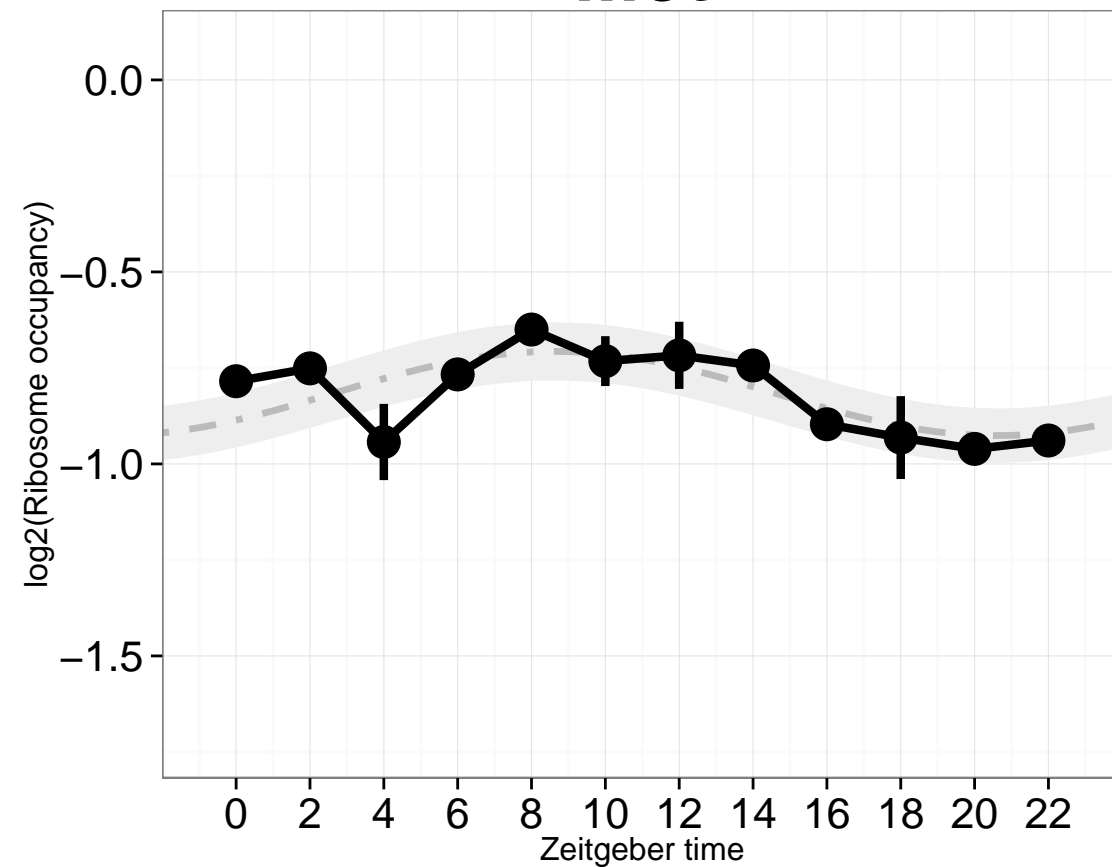

Supplement: Supplementary file 10480 [file 1]

## Sptbn1

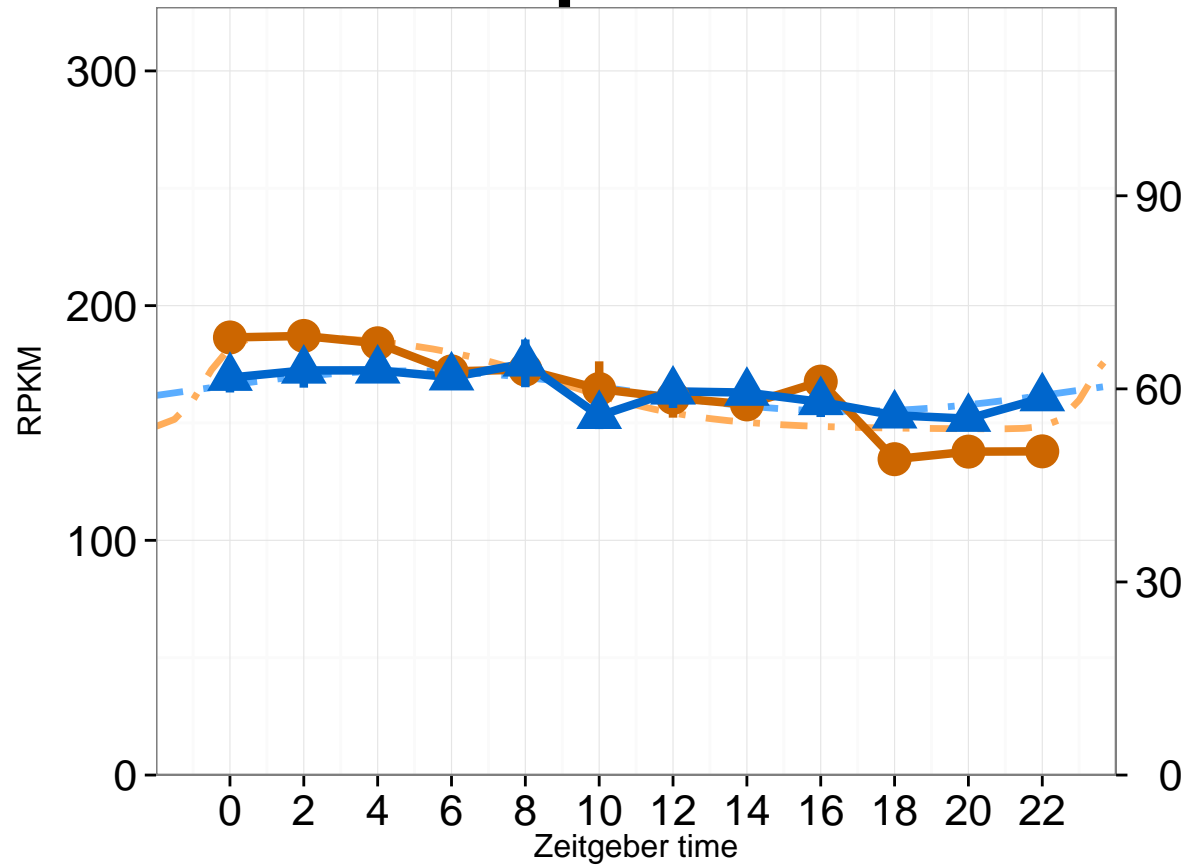

## Sptbn1

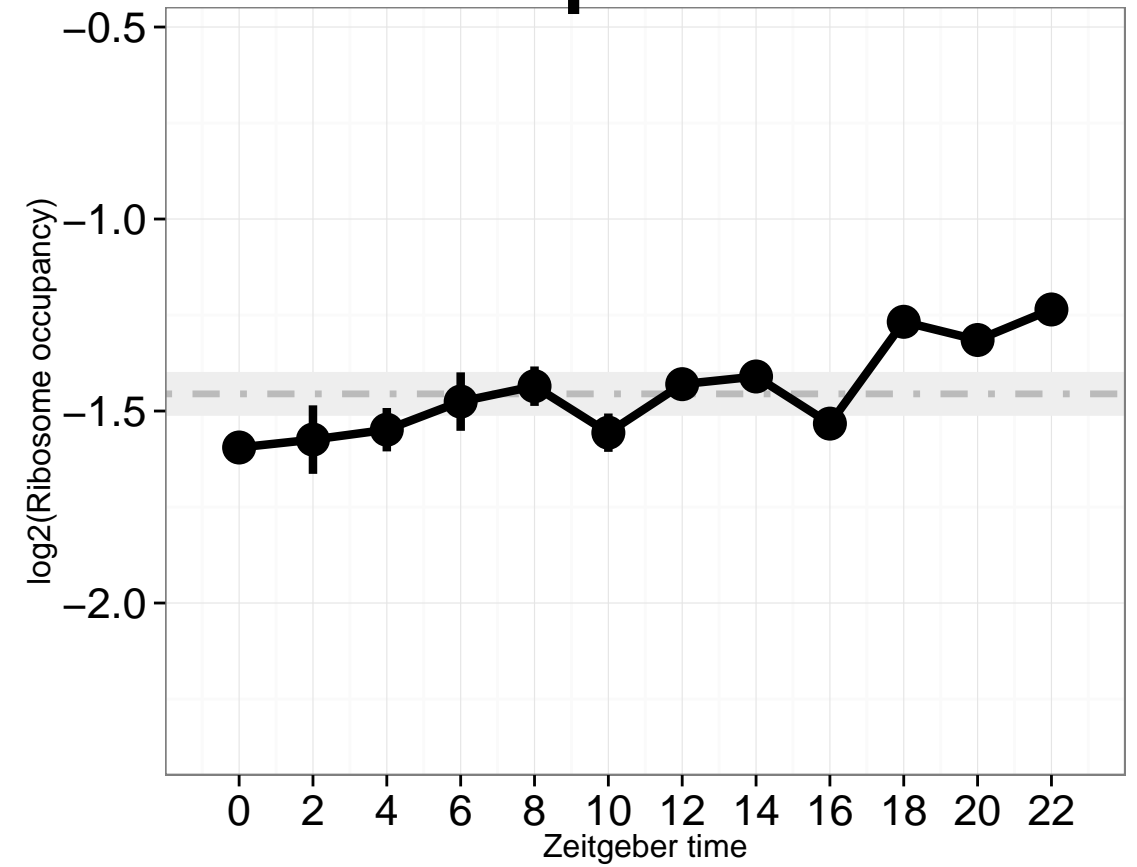

Supplement: Supplementary file 10481 [file 1]

## Rpa2

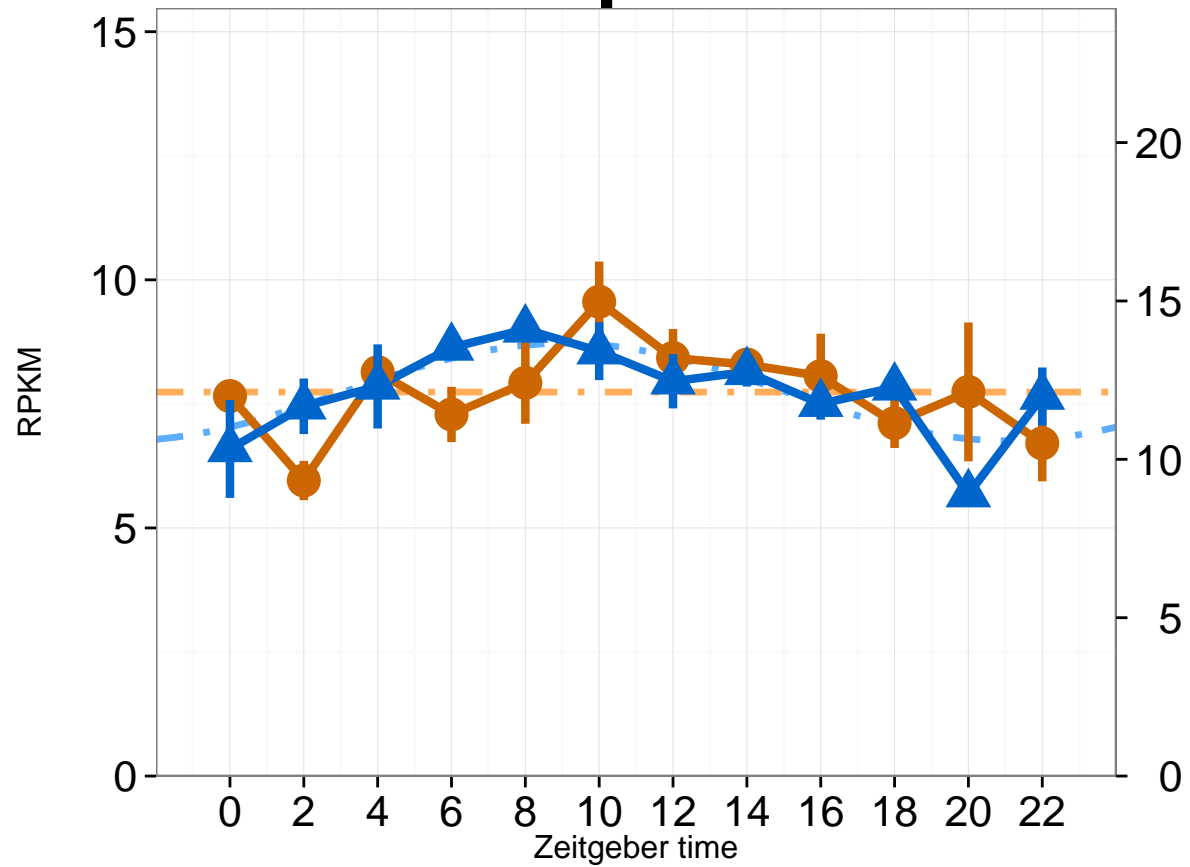

## Rpa2

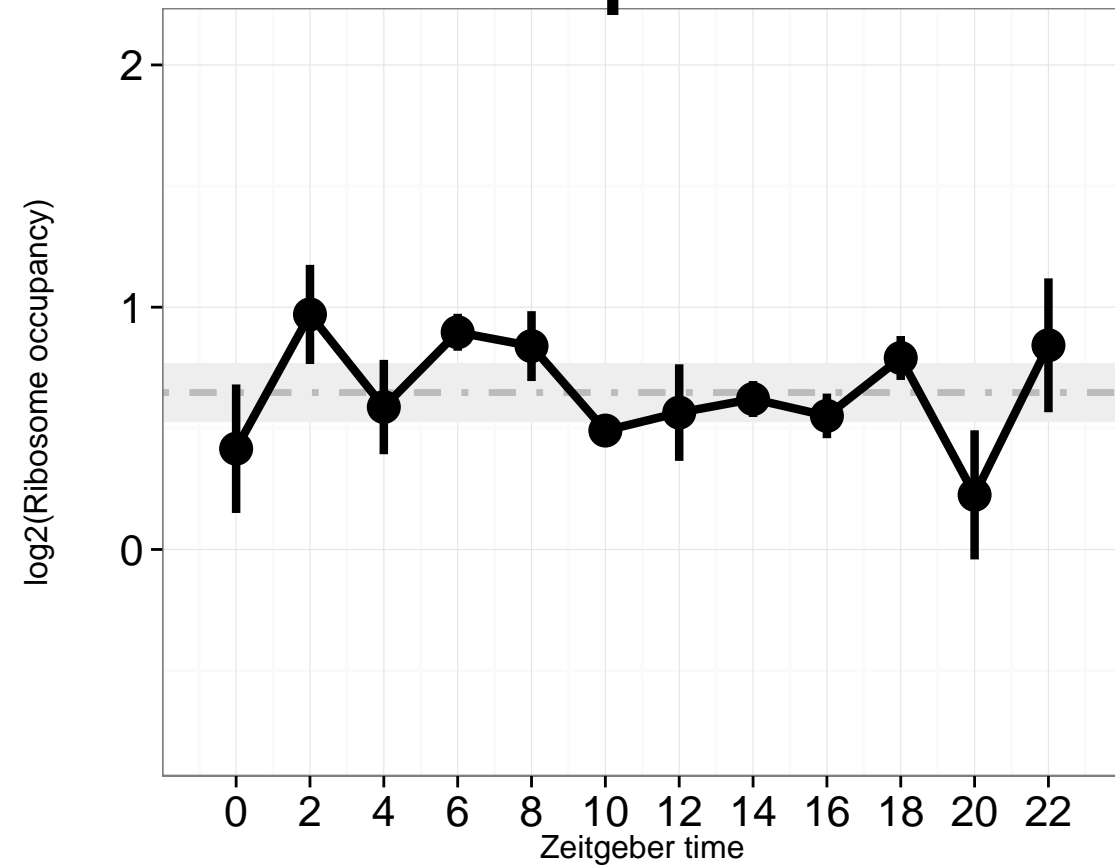

Supplement: Supplementary file 10482 [file 1]

# Car13

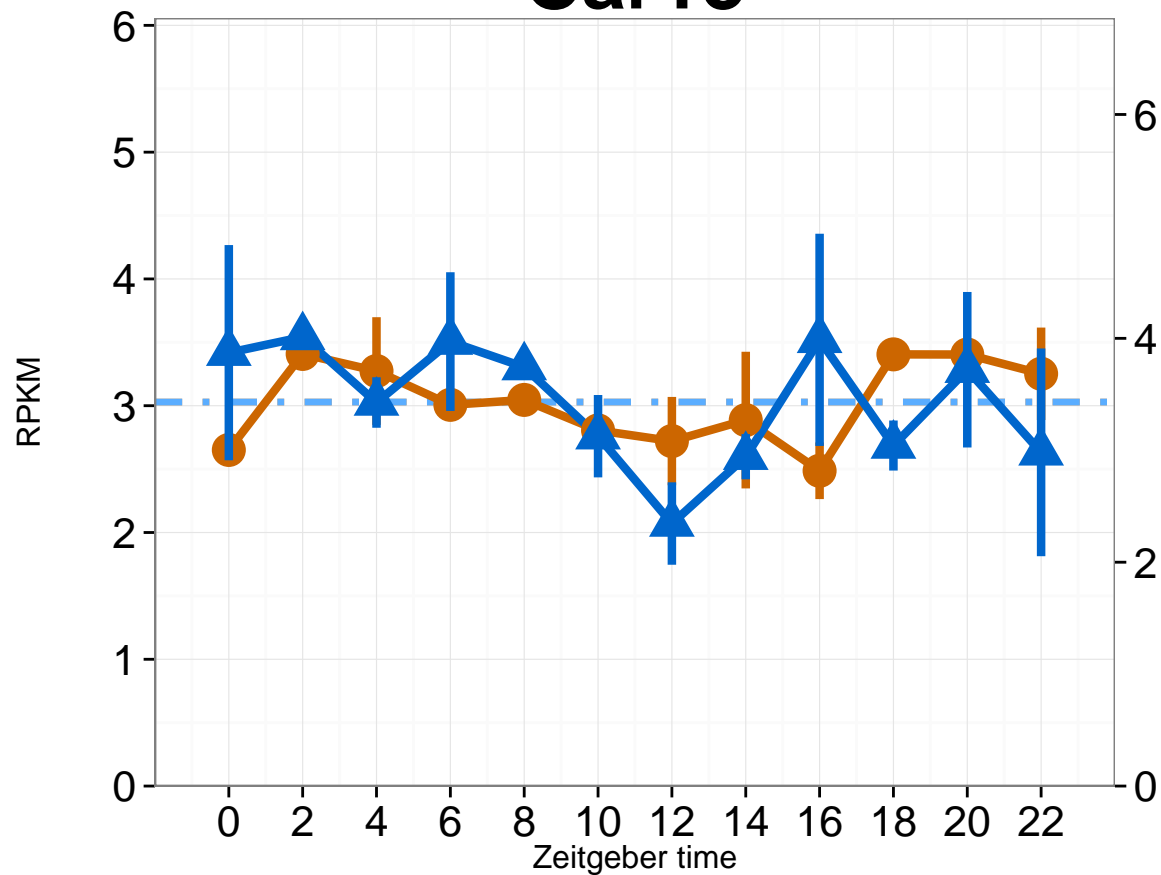

# Car13

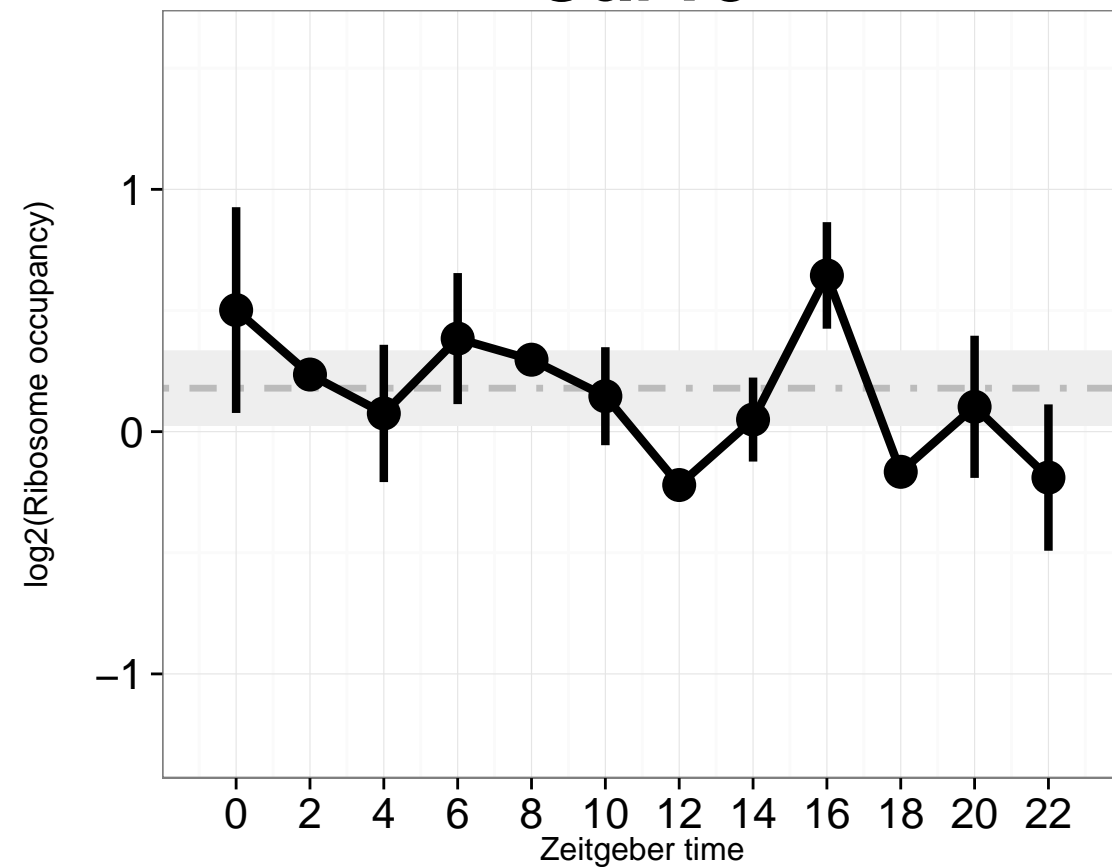

Supplement: Supplementary file 10483 [file 1]

## Daxx

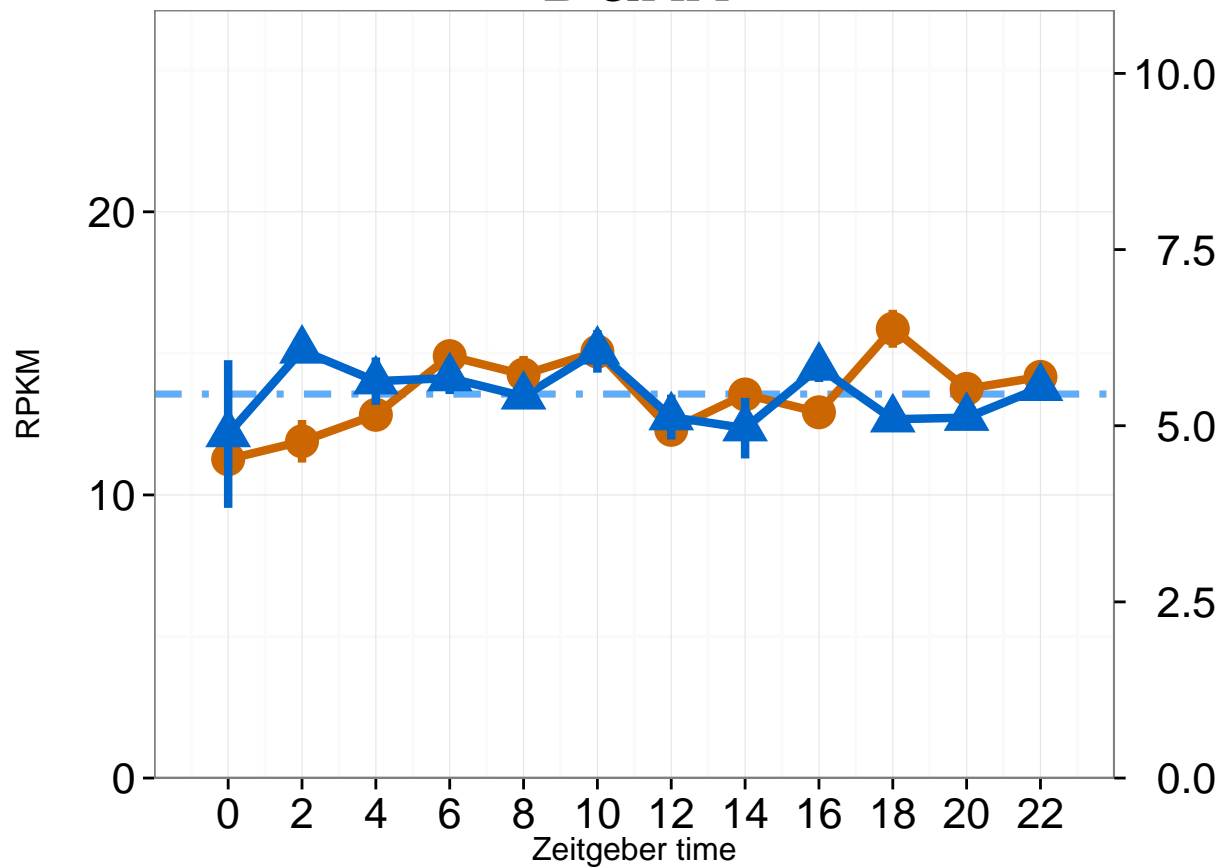

## Daxx

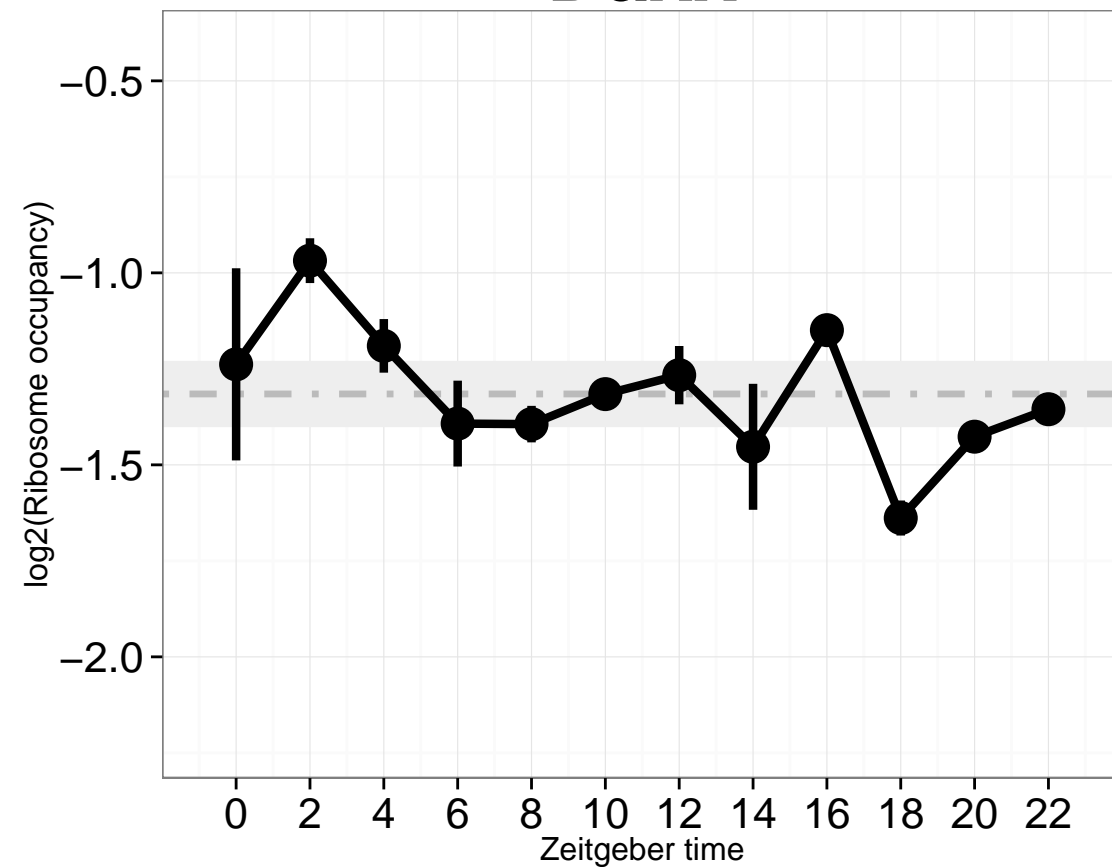

Supplement: Supplementary file 10484 [file 1]

# Wac

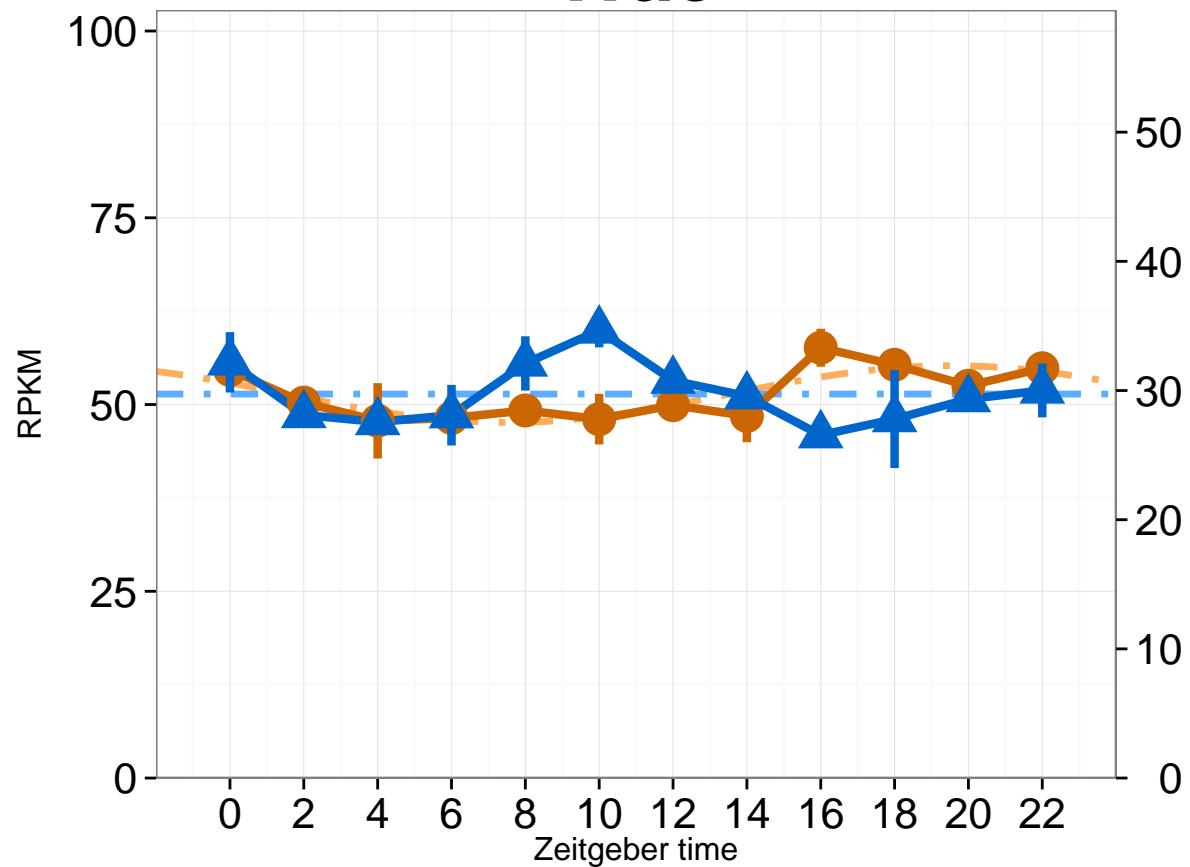

# Wac

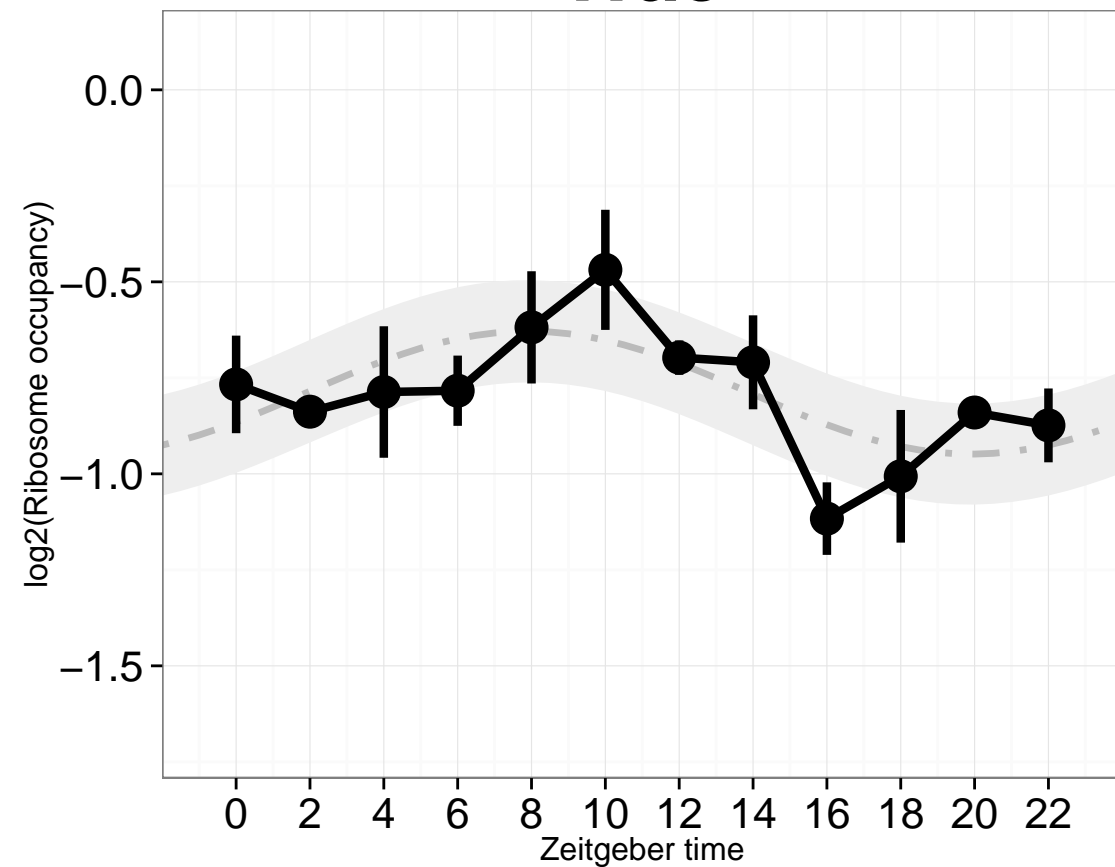

Supplement: Supplementary file 10485 [file 1]

## Scube2

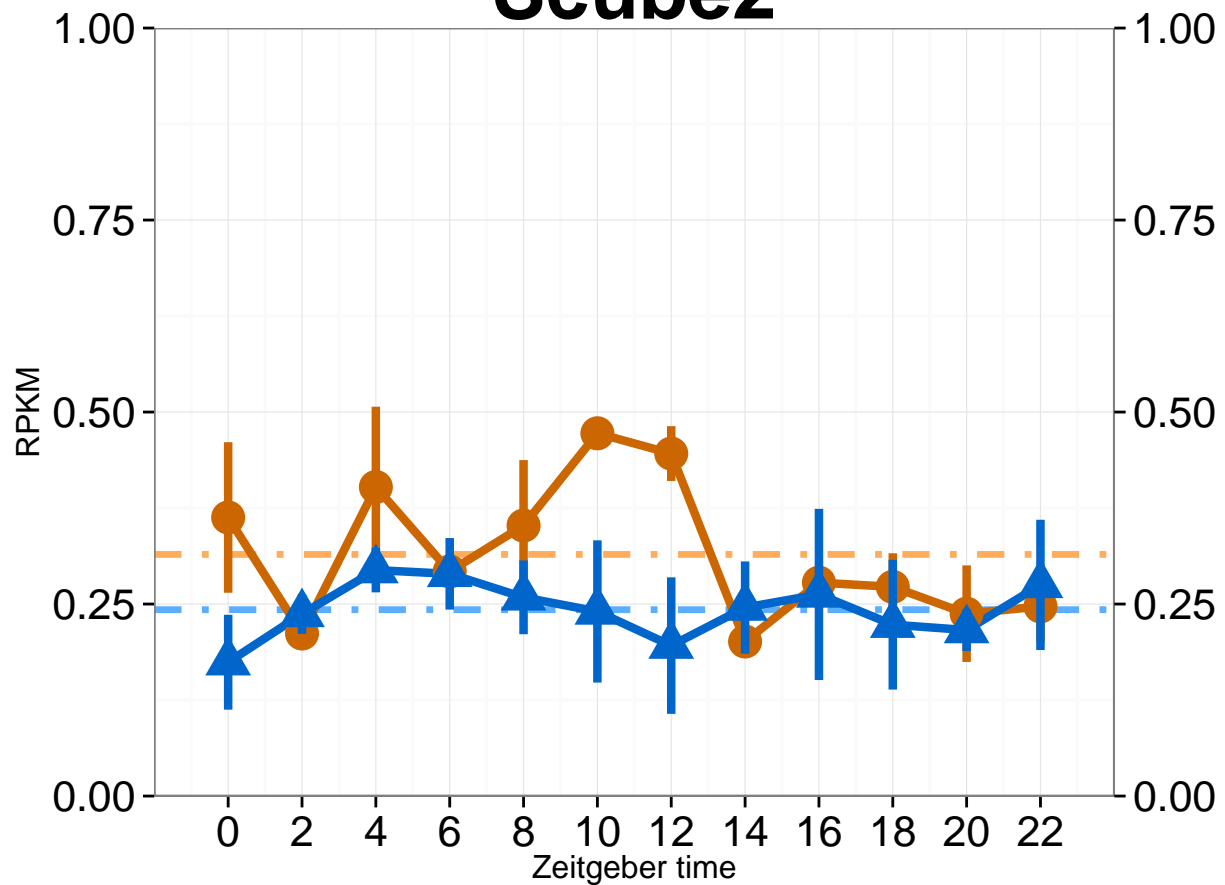

## Scube2

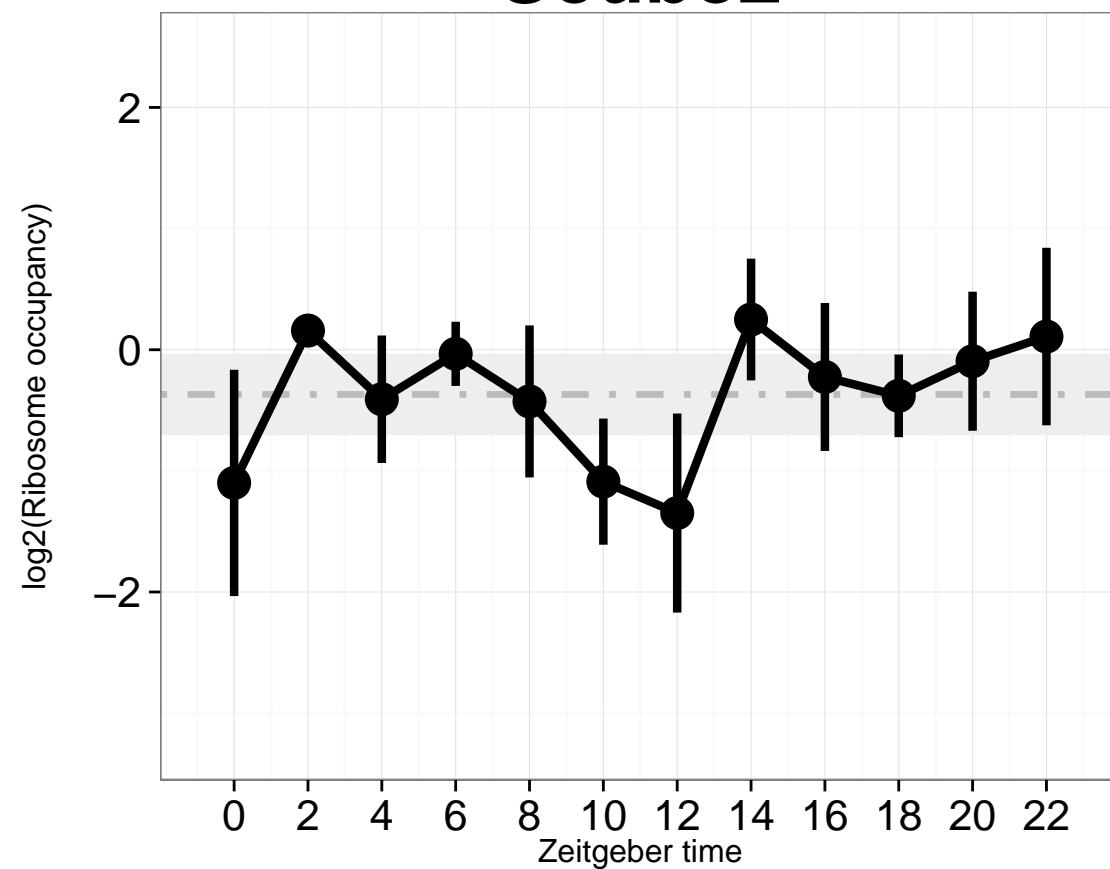

Supplement: Supplementary file 10486 [file 1]

# Tmem66

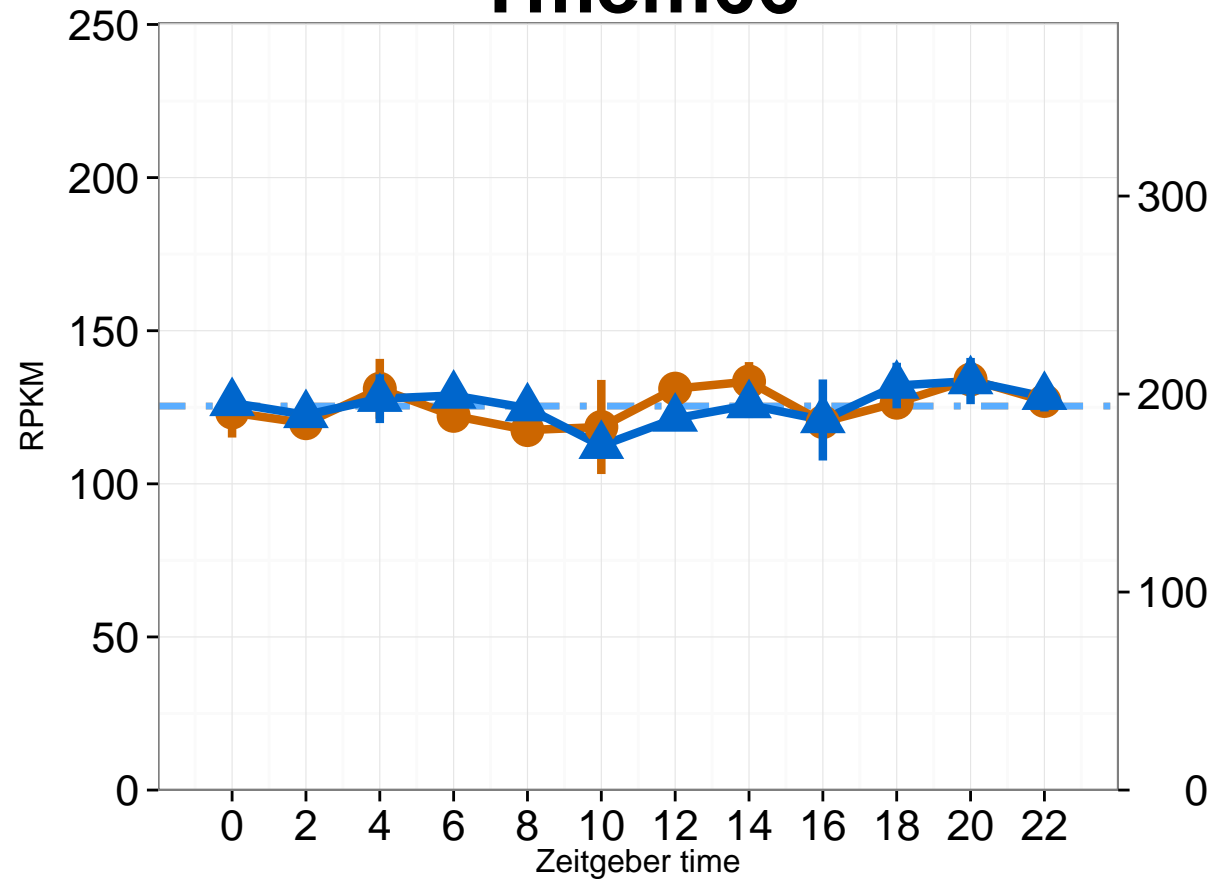

# Tmem66

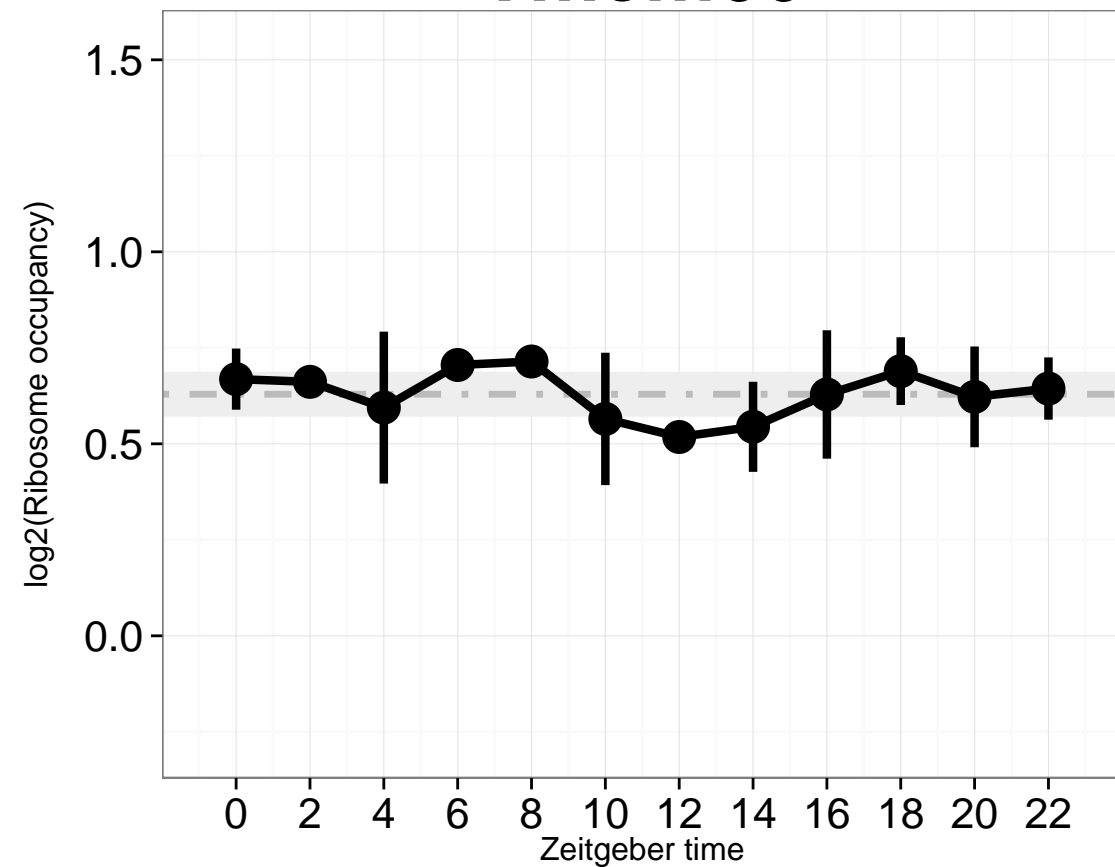

Supplement: Supplementary file 10487 [file 1]

## Spata7

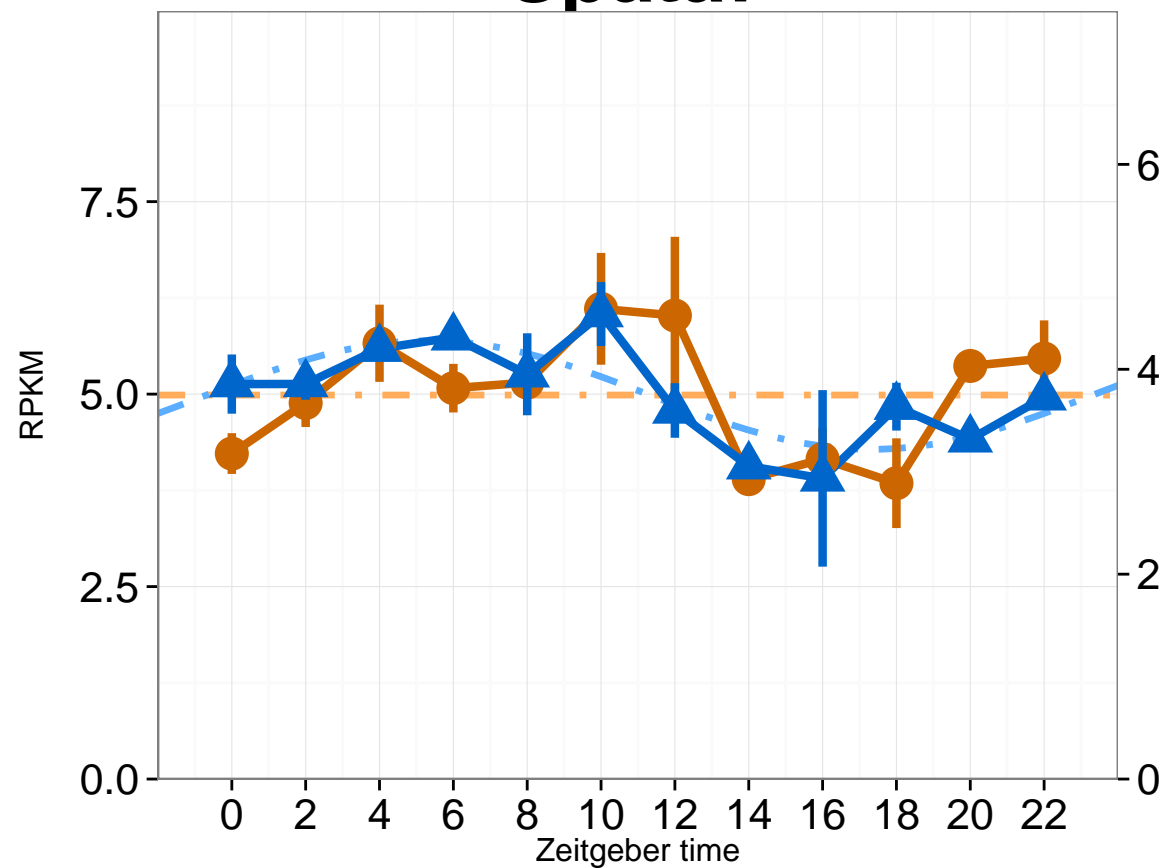

## Spata7

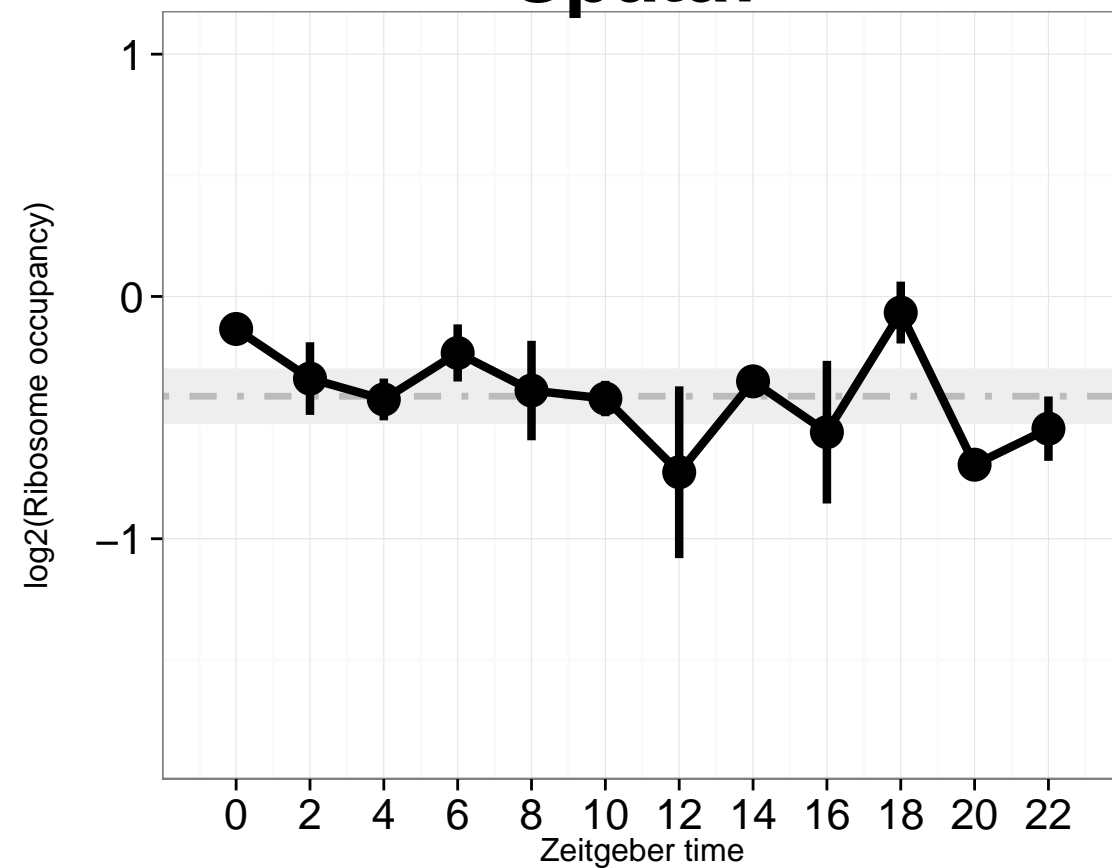

Supplement: Supplementary file 10488 [file 1]

# Cyp20a1

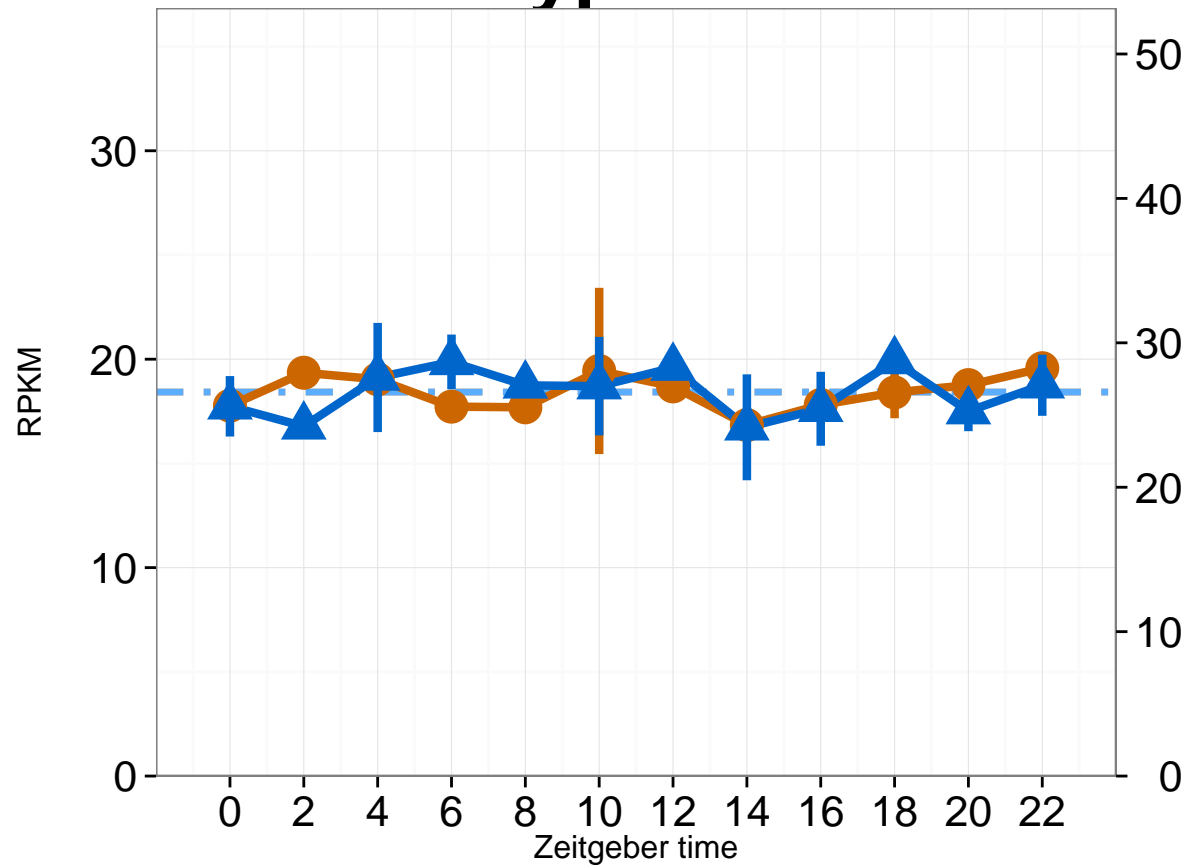

# Cyp20a1

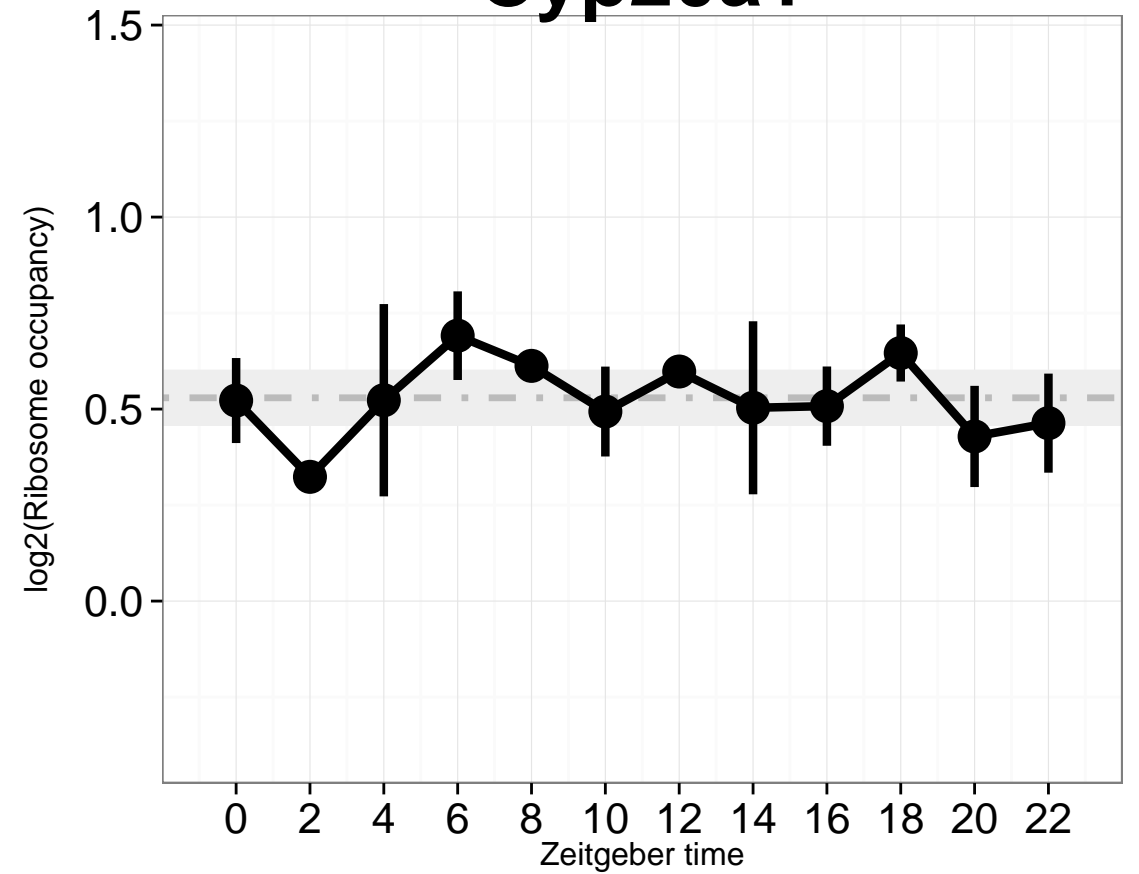

Supplement: Supplementary file 10489 [file 1]

## Relb

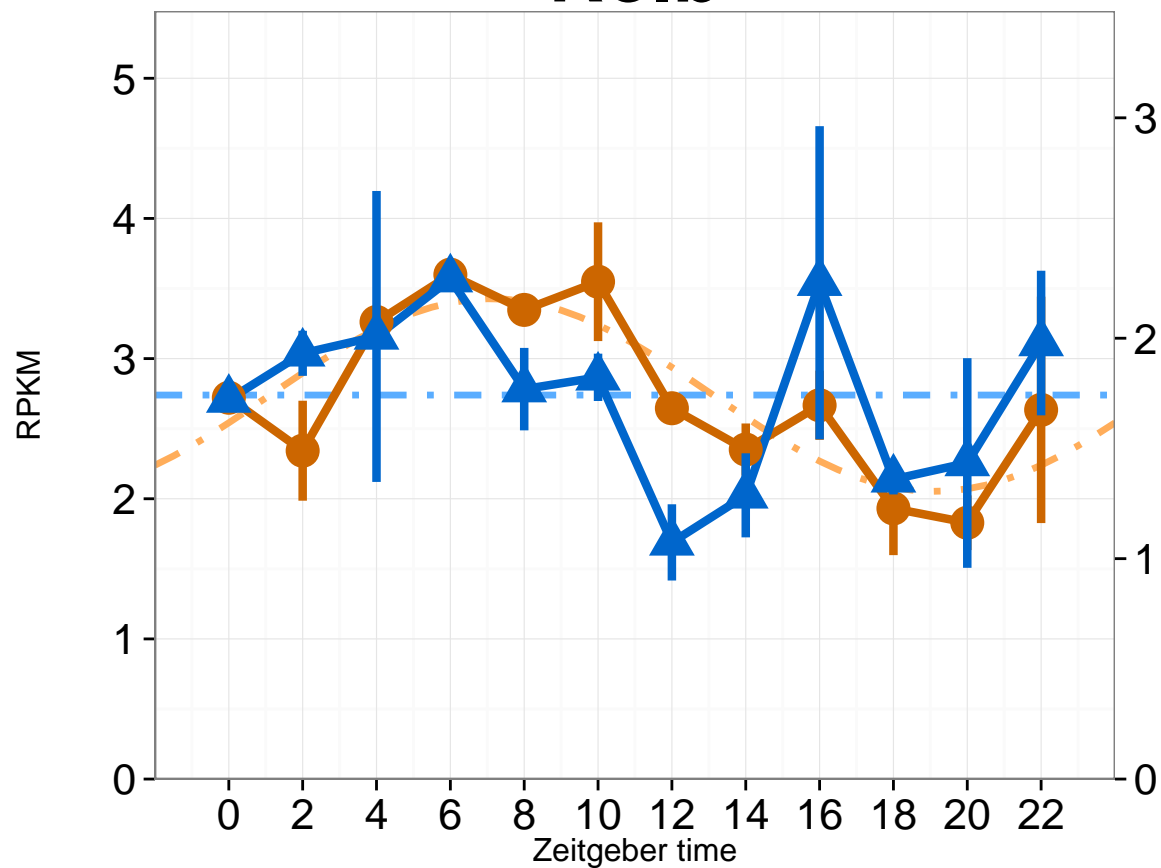

## Relb

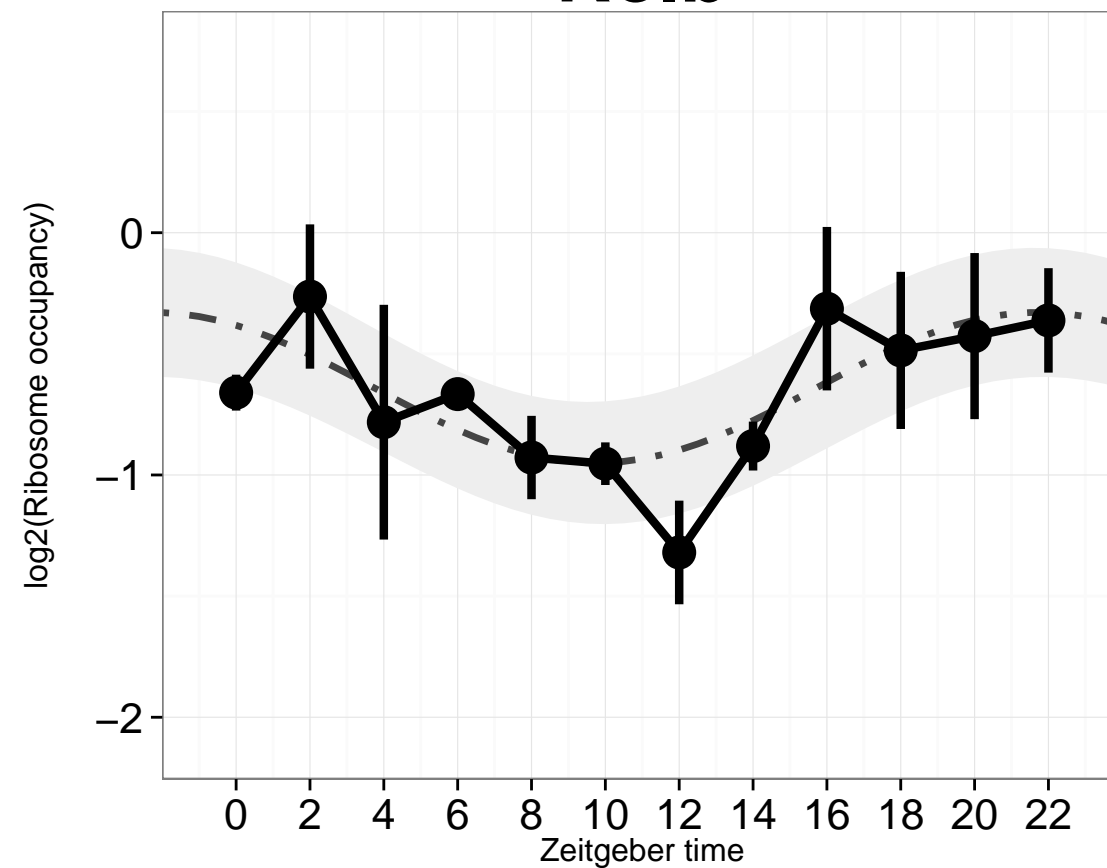

Supplement: Supplementary file 10490 [file 1]

## Nacc2

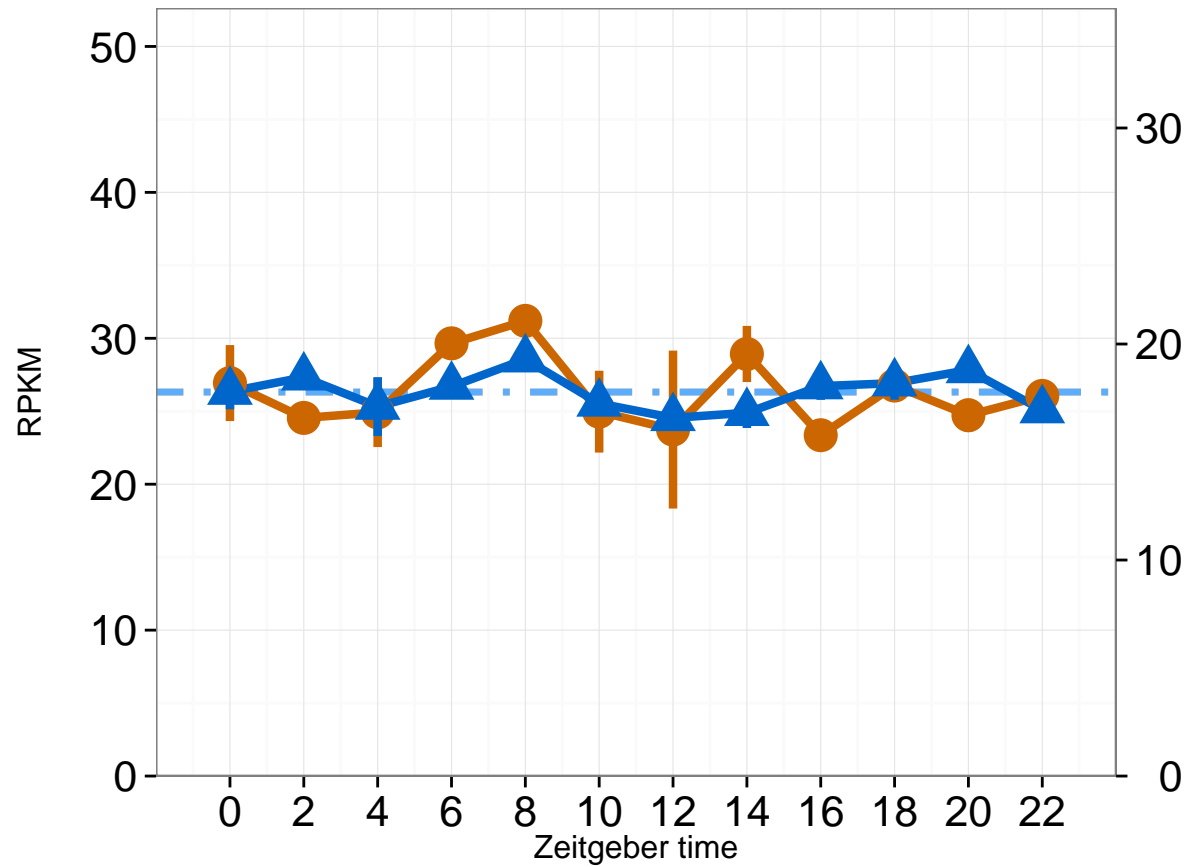

## Nacc2

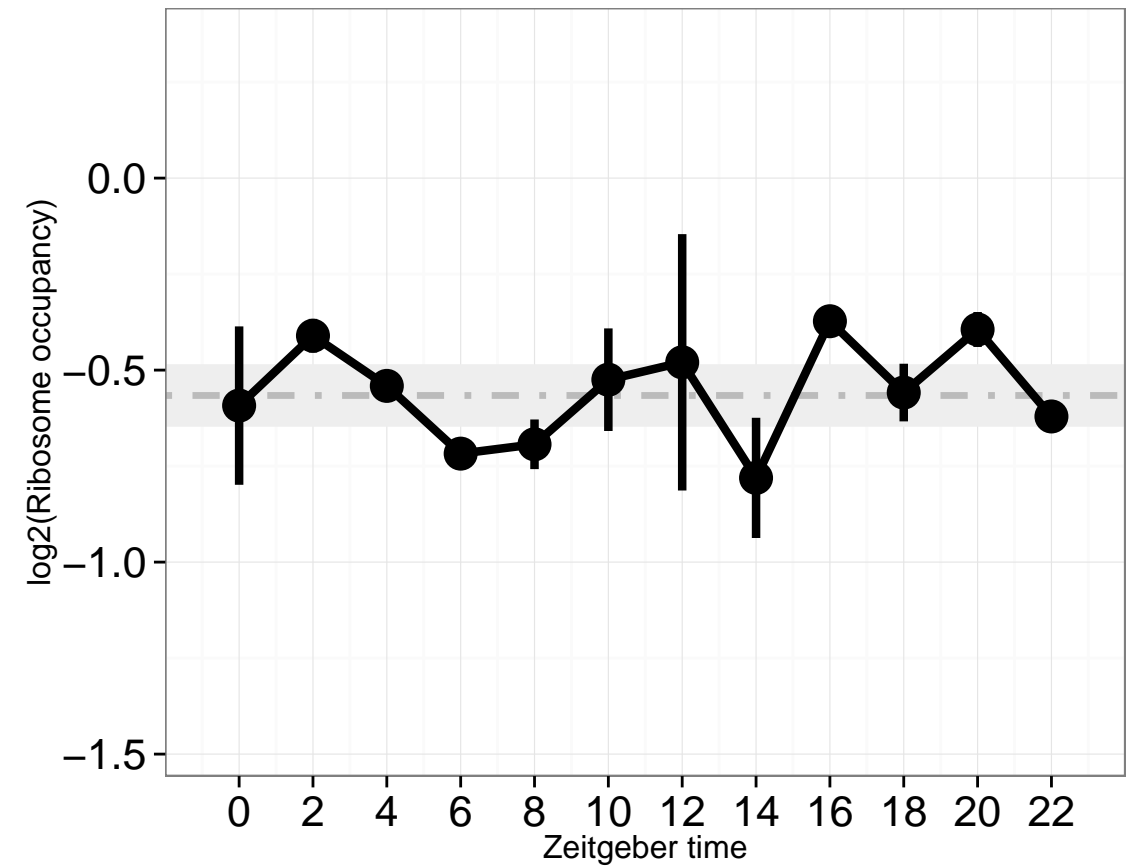

Supplement: Supplementary file 10491 [file 1]

# Setd5

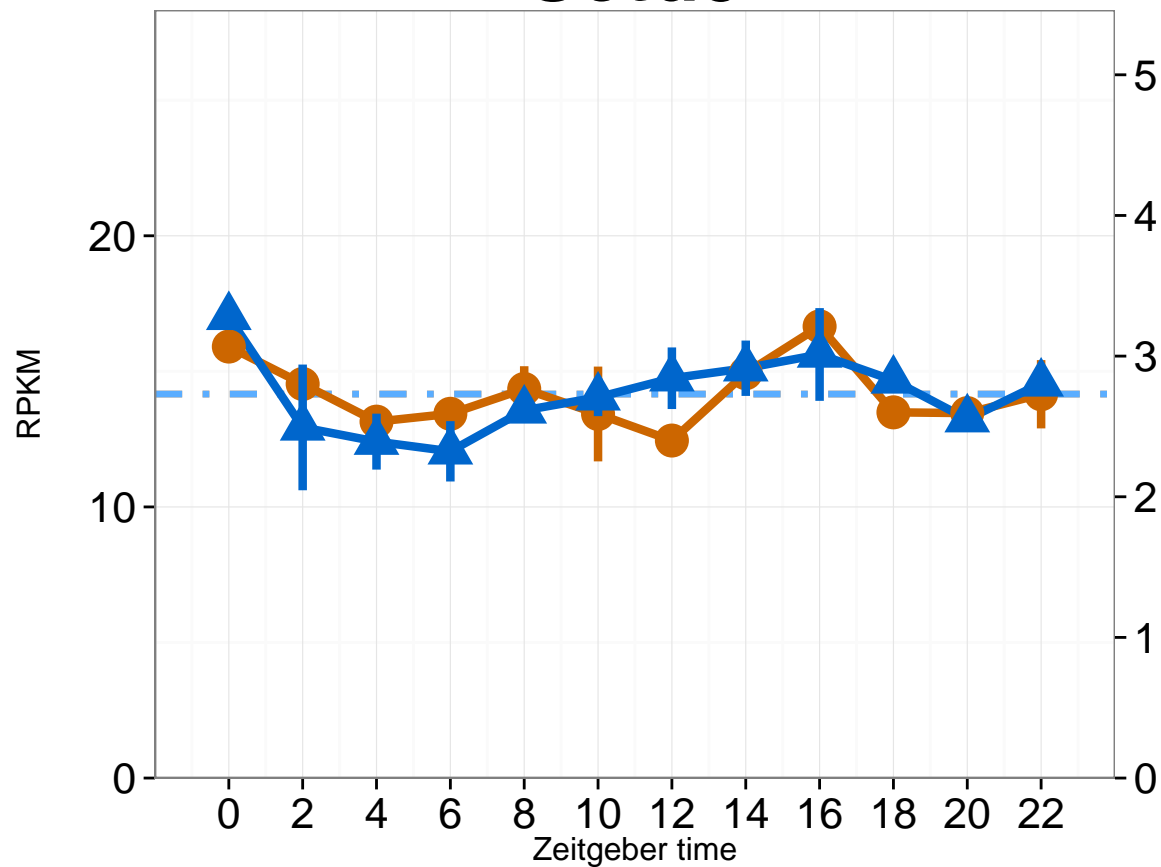

# Setd5

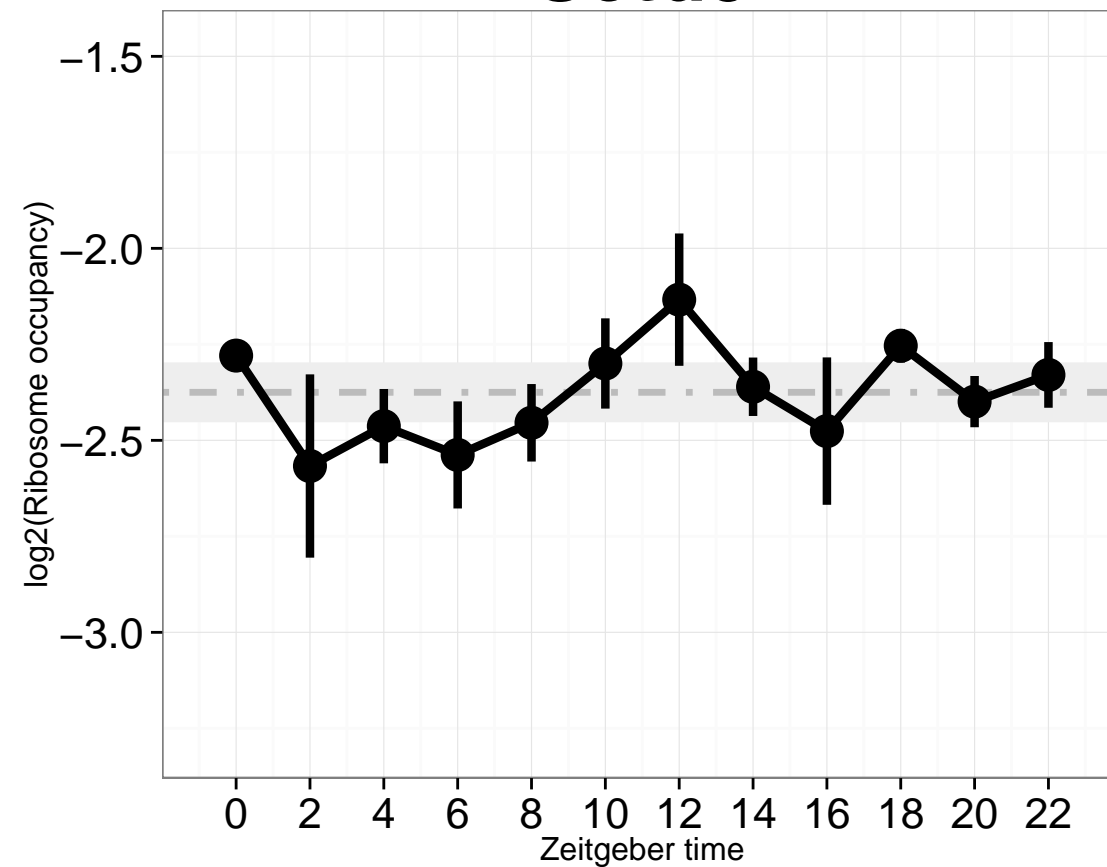

Supplement: Supplementary file 10492 [file 1]

# Cyp2j5

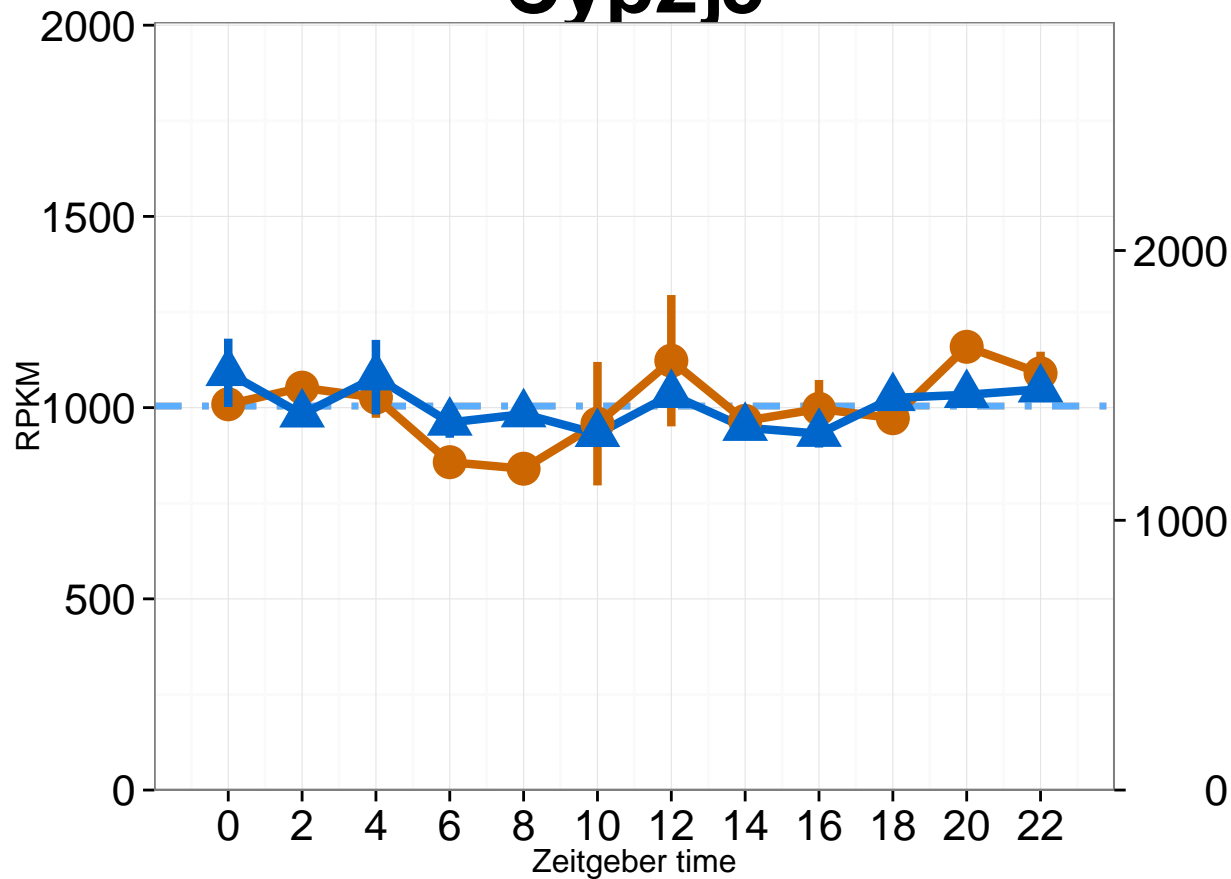

# Cyp2j5

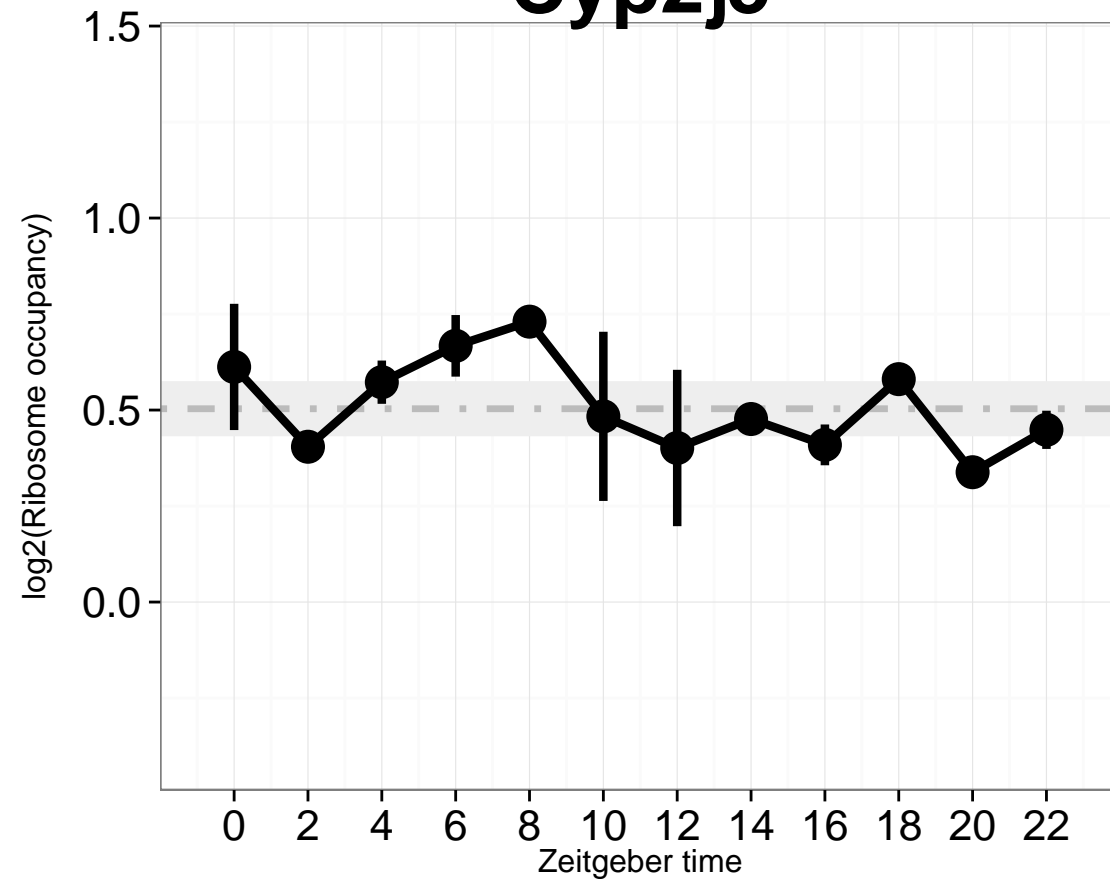

Supplement: Supplementary file 10493 [file 1]

## Pls3

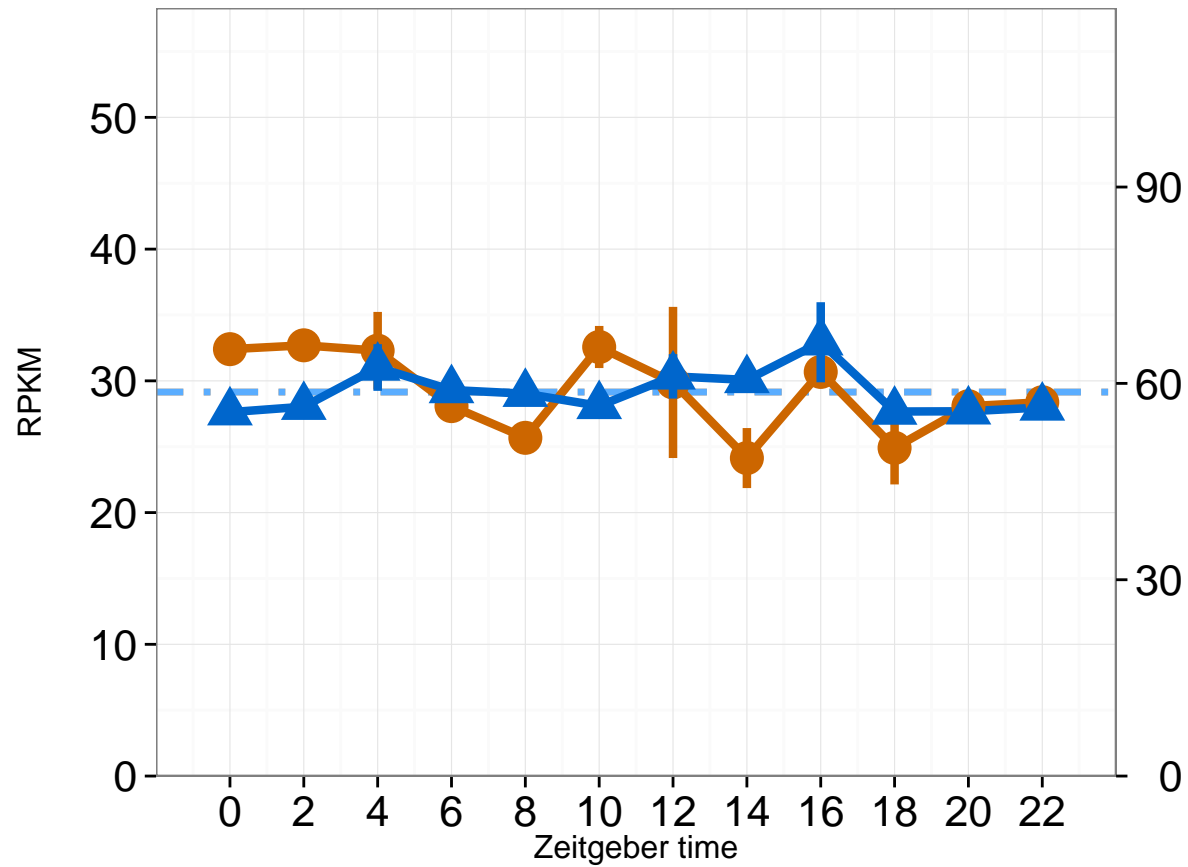

## Pls3

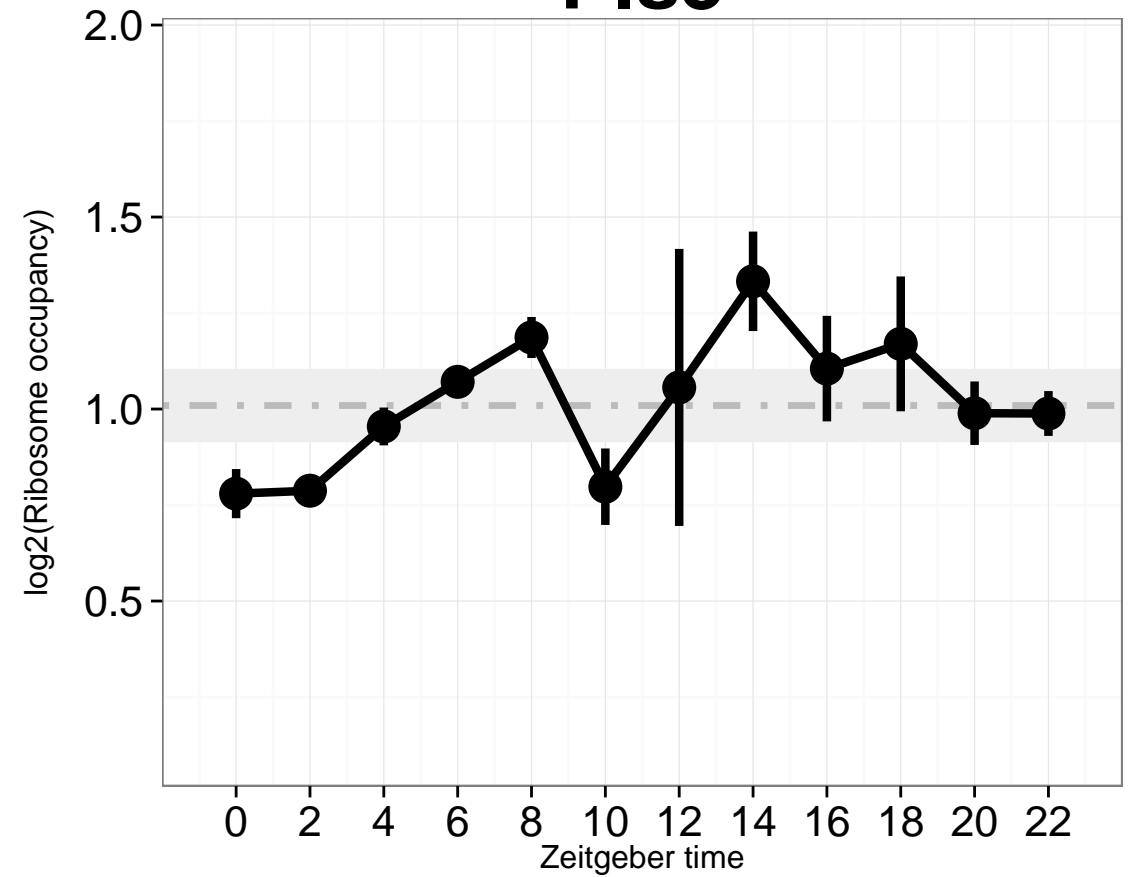

Supplement: Supplementary file 10494 [file 1]

## Tmem25

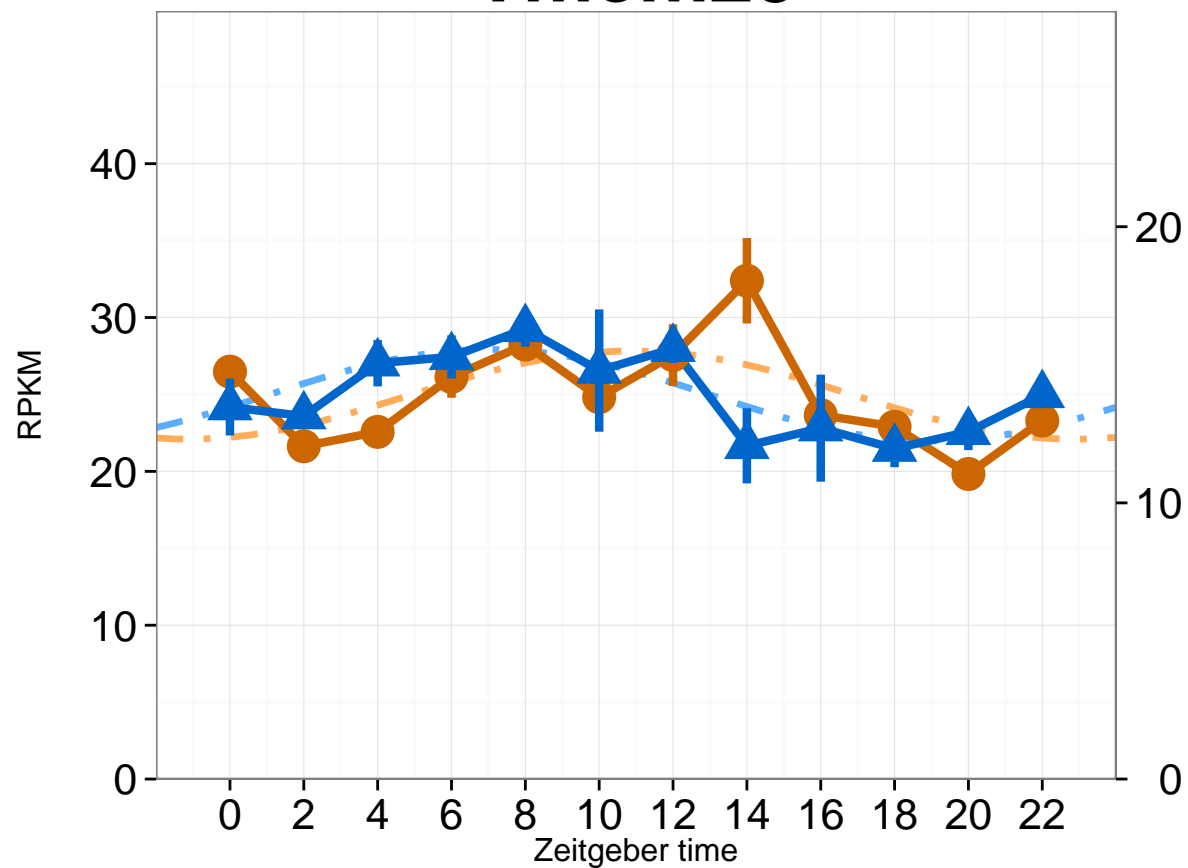

## Tmem25

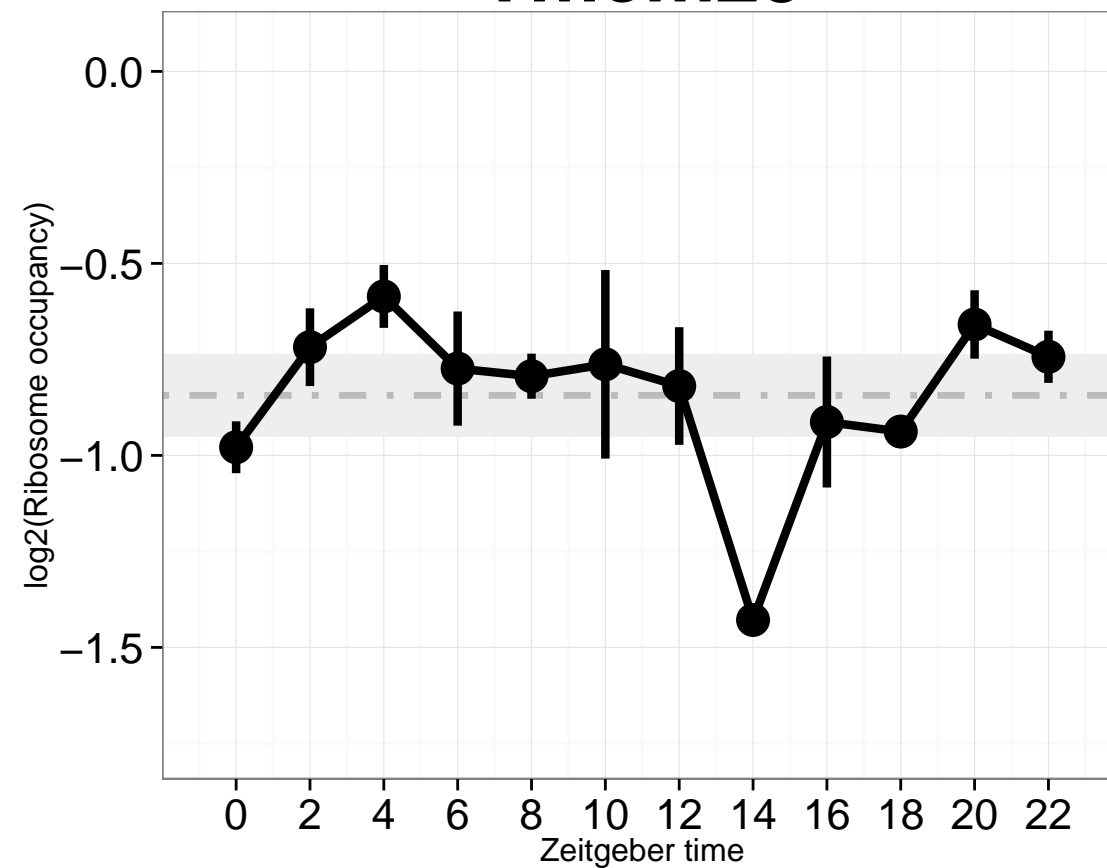

Supplement: Supplementary file 10495 [file 1]

## Apopt1

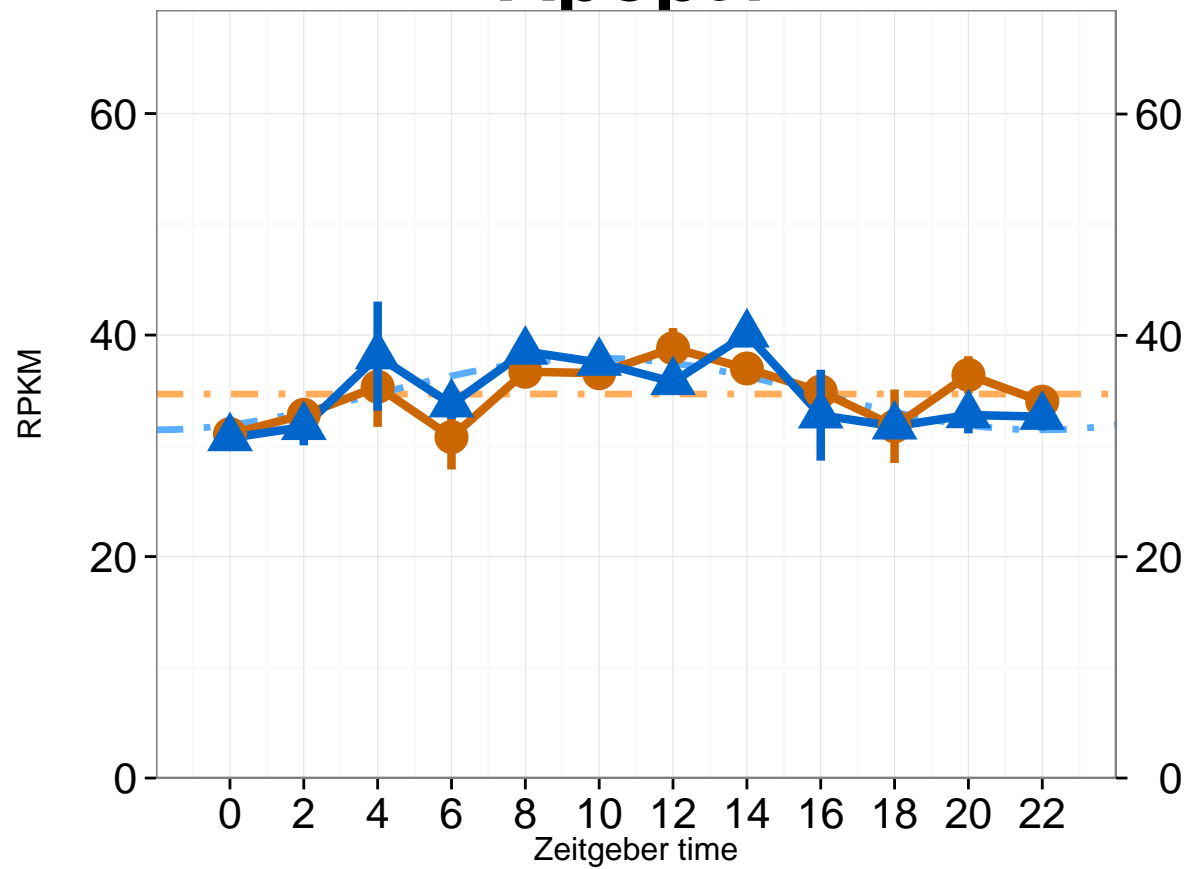

## Apopt1

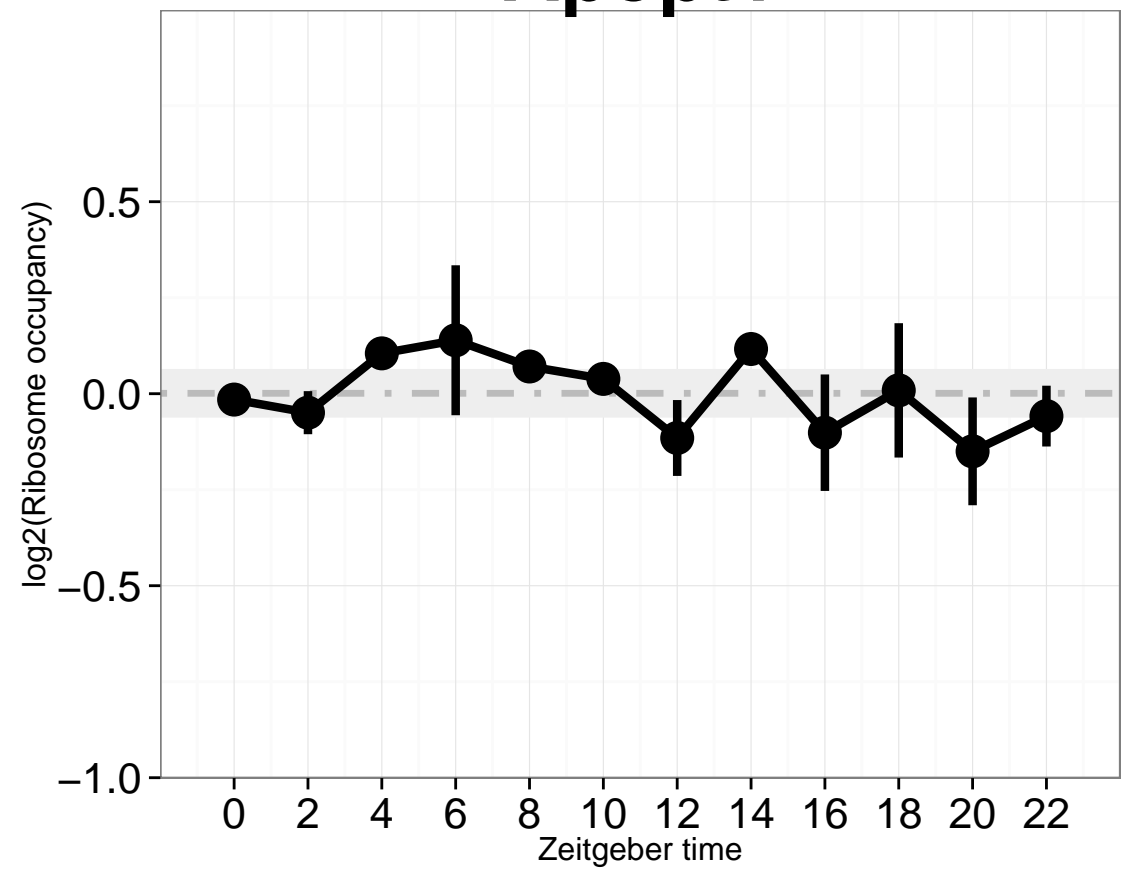

Supplement: Supplementary file 10496 [file 1]

## Amdhd2

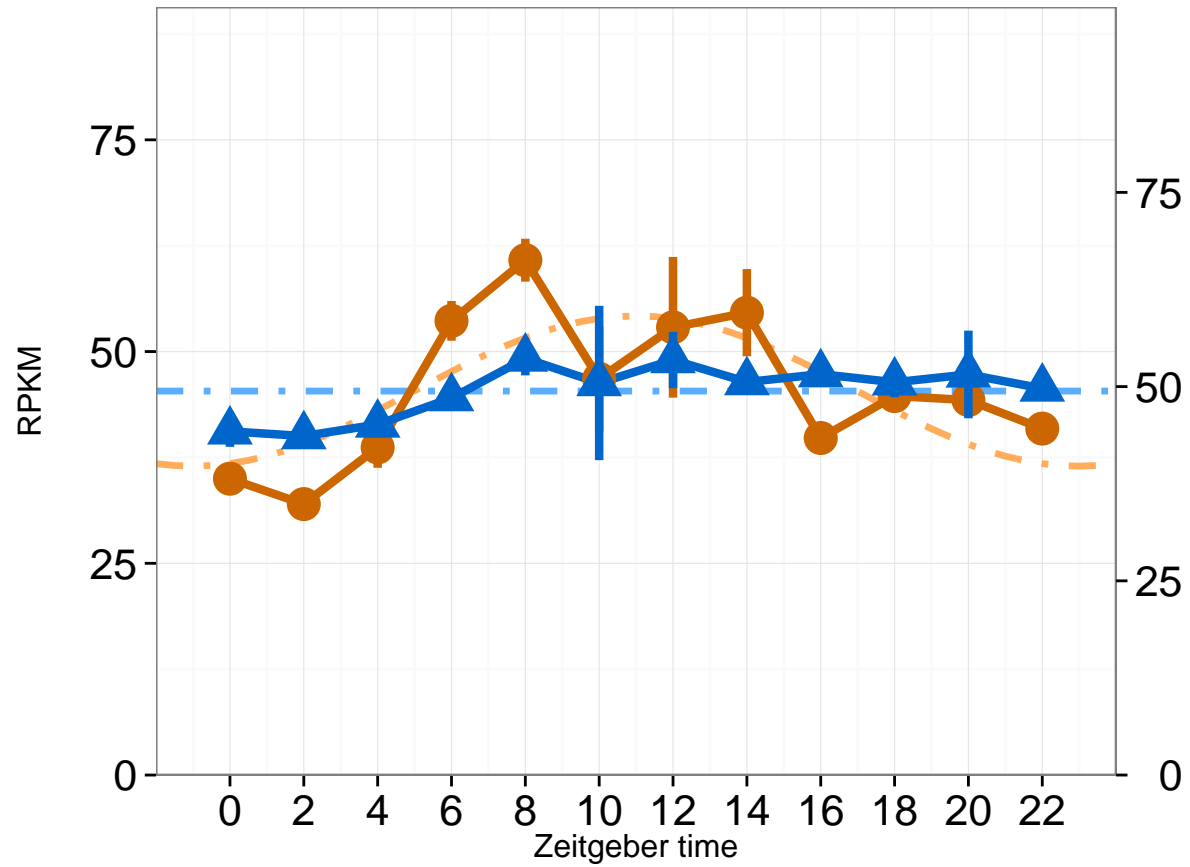

## Amdhd2

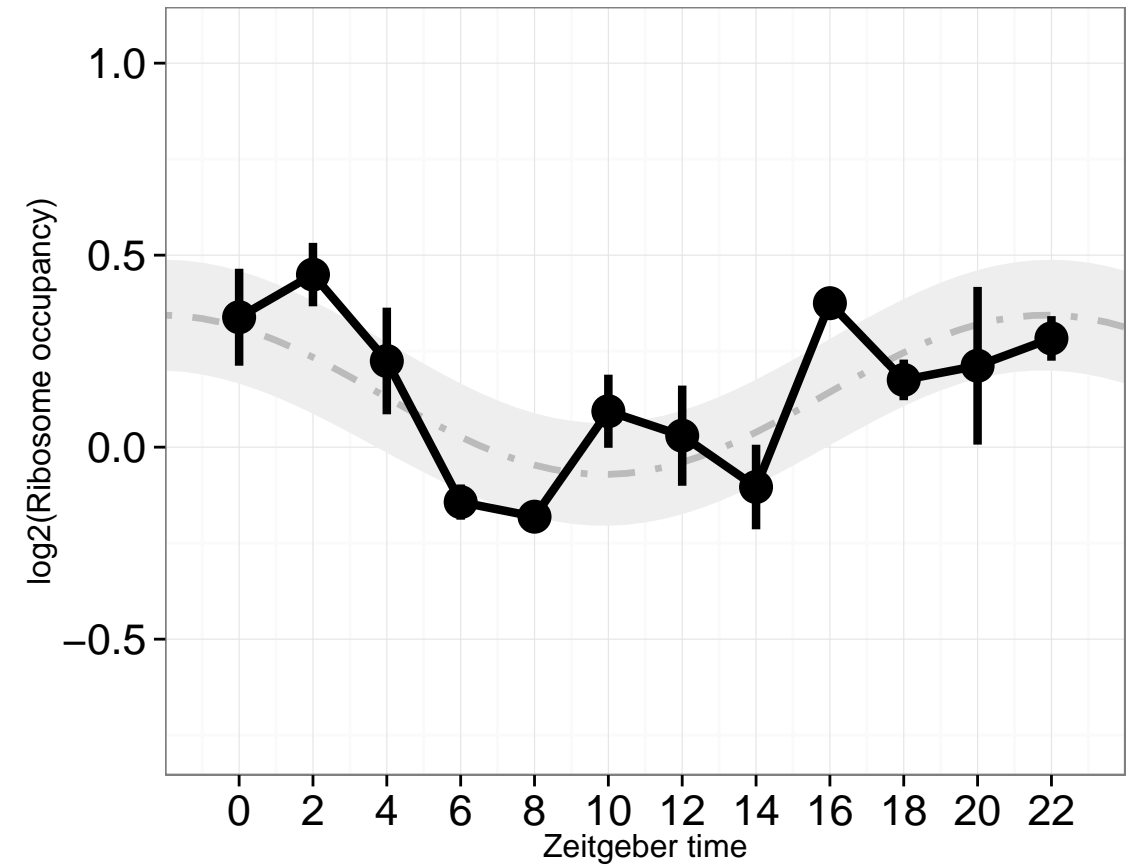

Supplement: Supplementary file 10497 [file 1]

# Rab8a

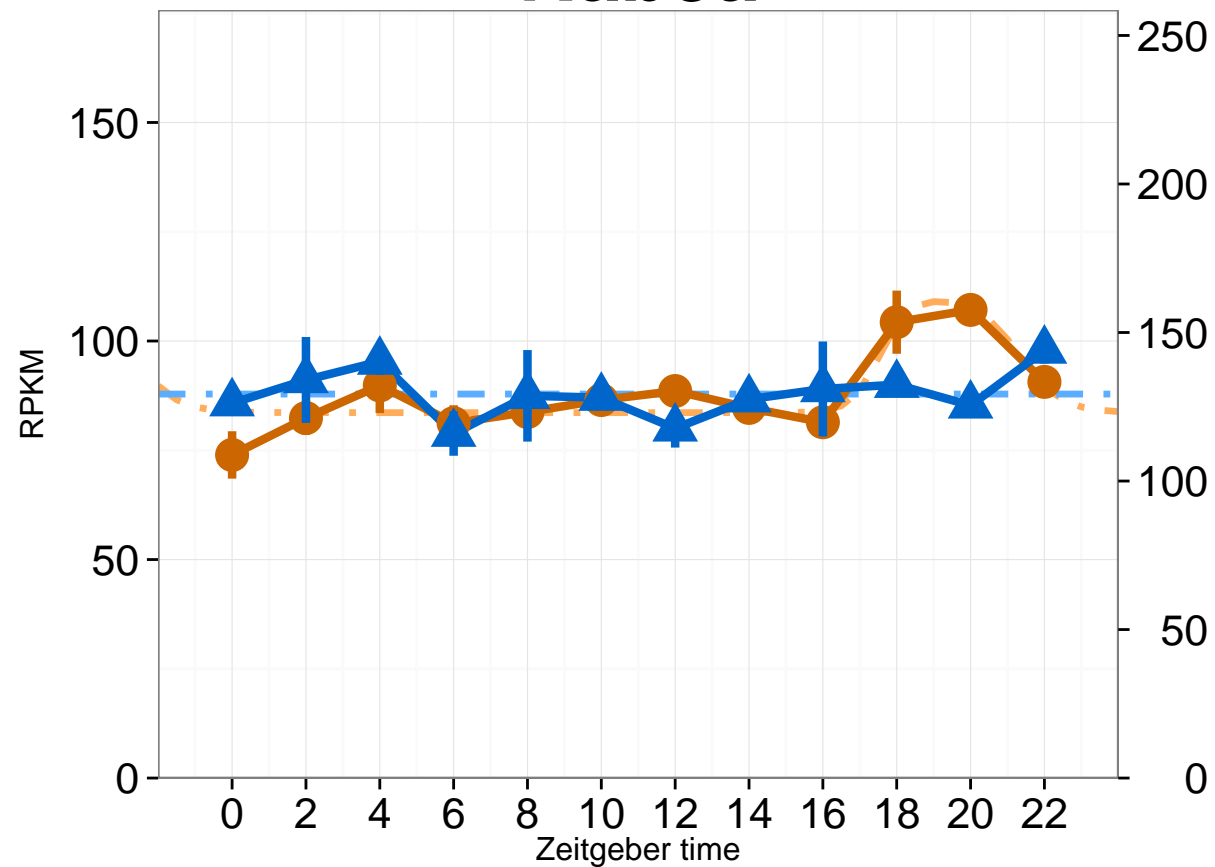

# Rab8a

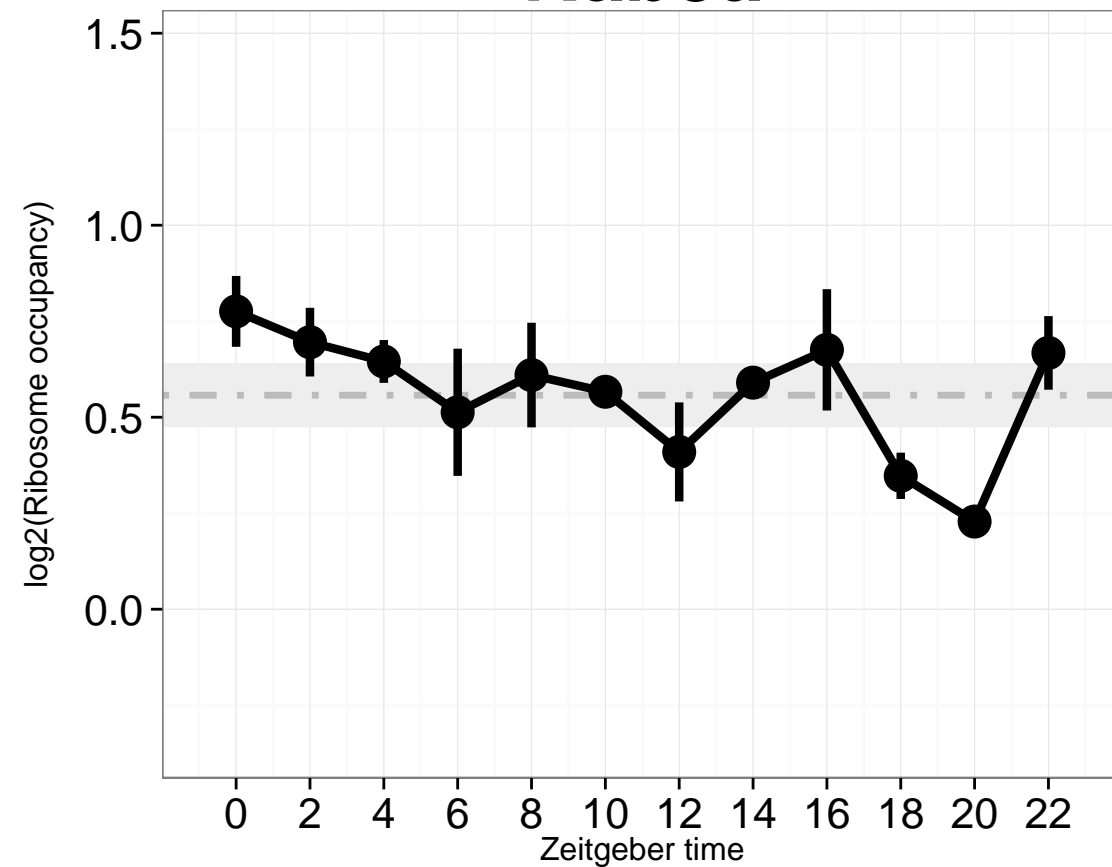

Supplement: Supplementary file 10498 [file 1]

# Atp6v1b2

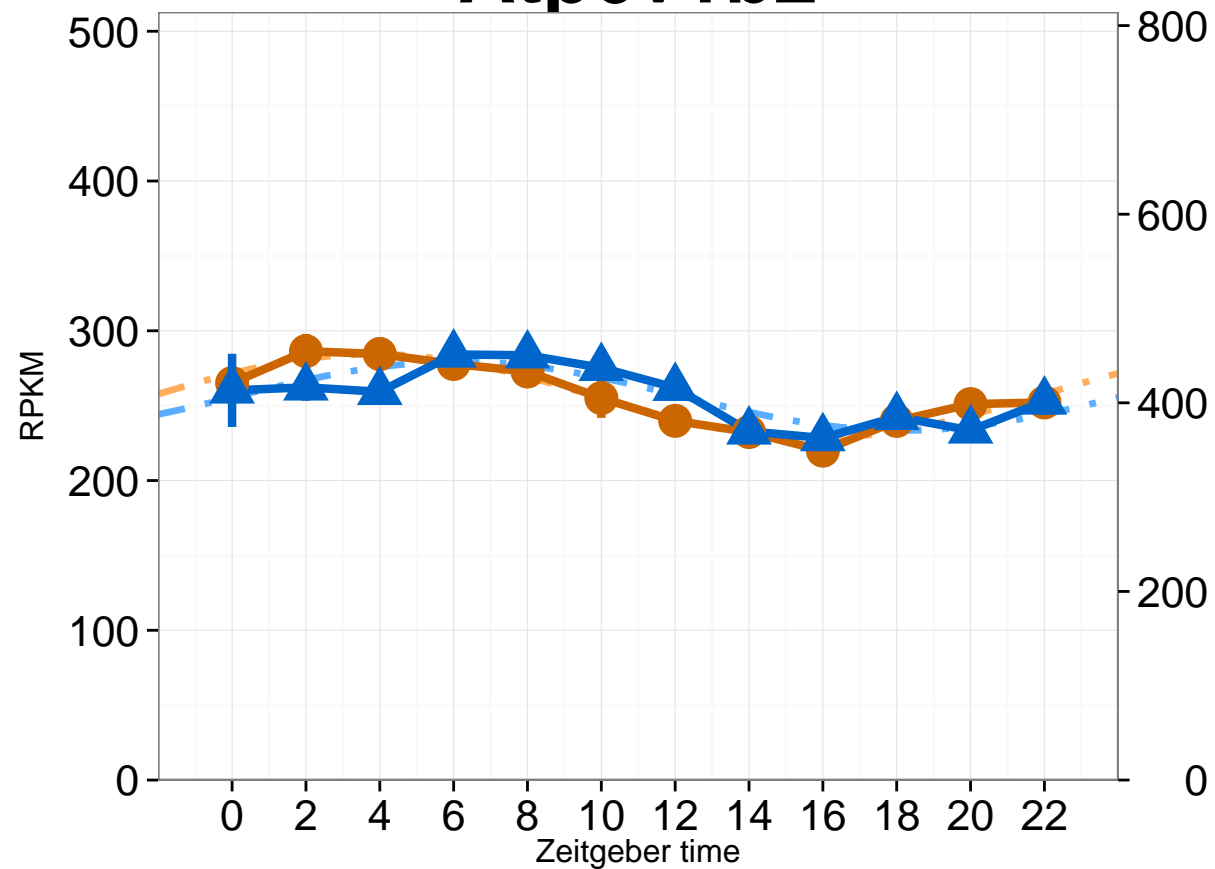

# Atp6v1b2

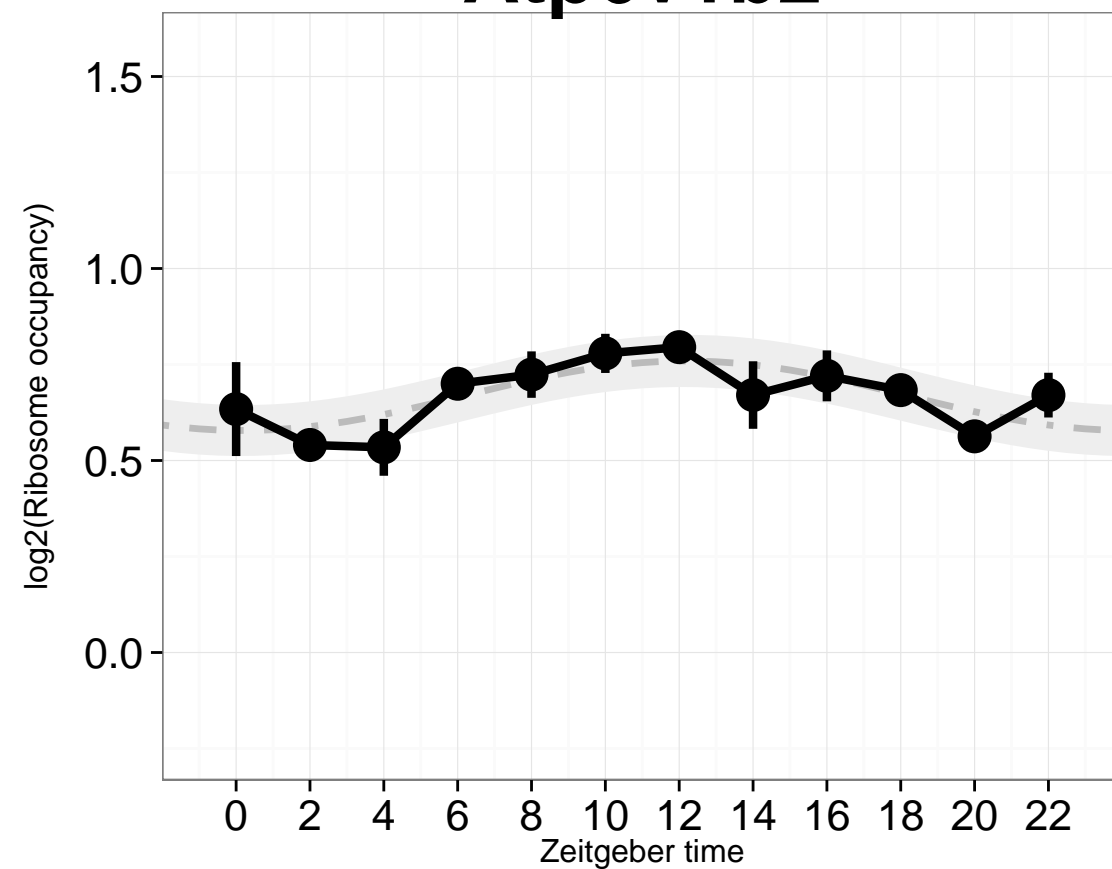

Supplement: Supplementary file 10499 [file 1]

## Gna12

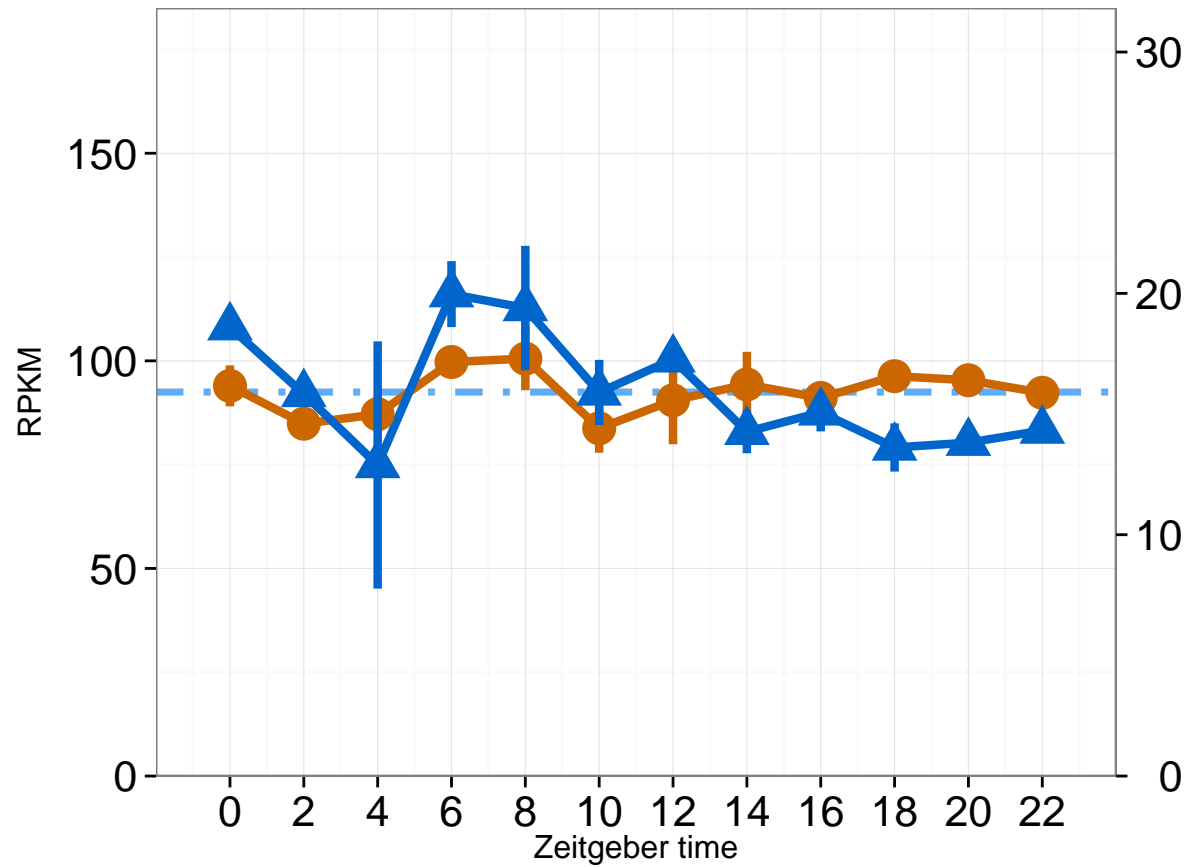

## Gna12

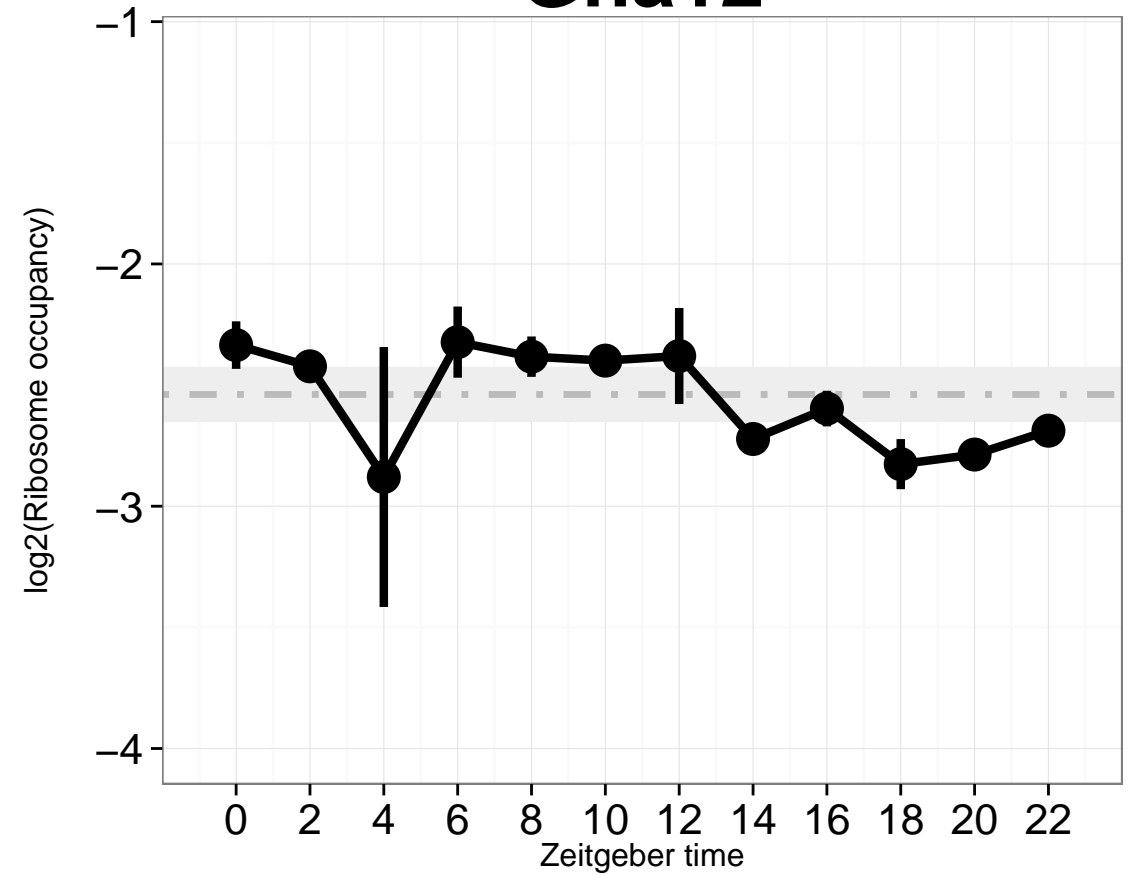

Supplement: Supplementary file 10500 [file 1]

## Plbd2

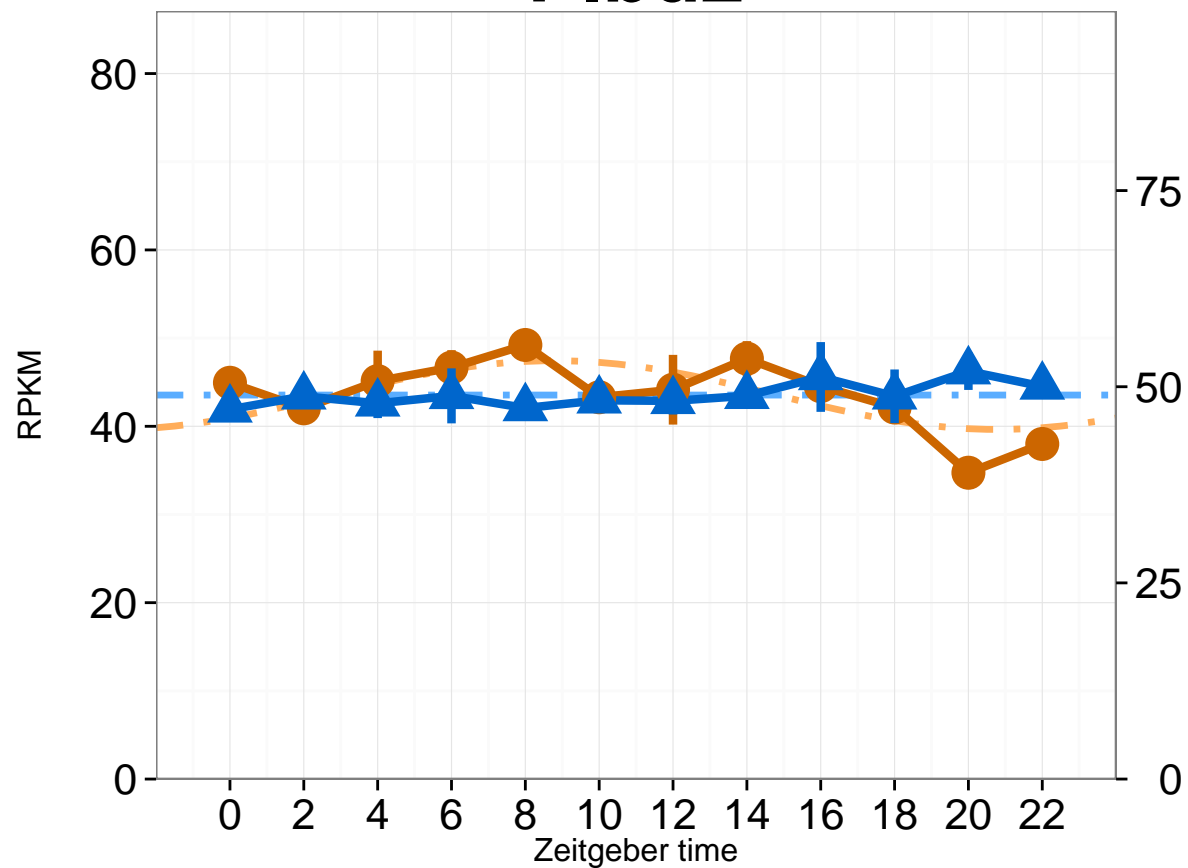

## Plbd2

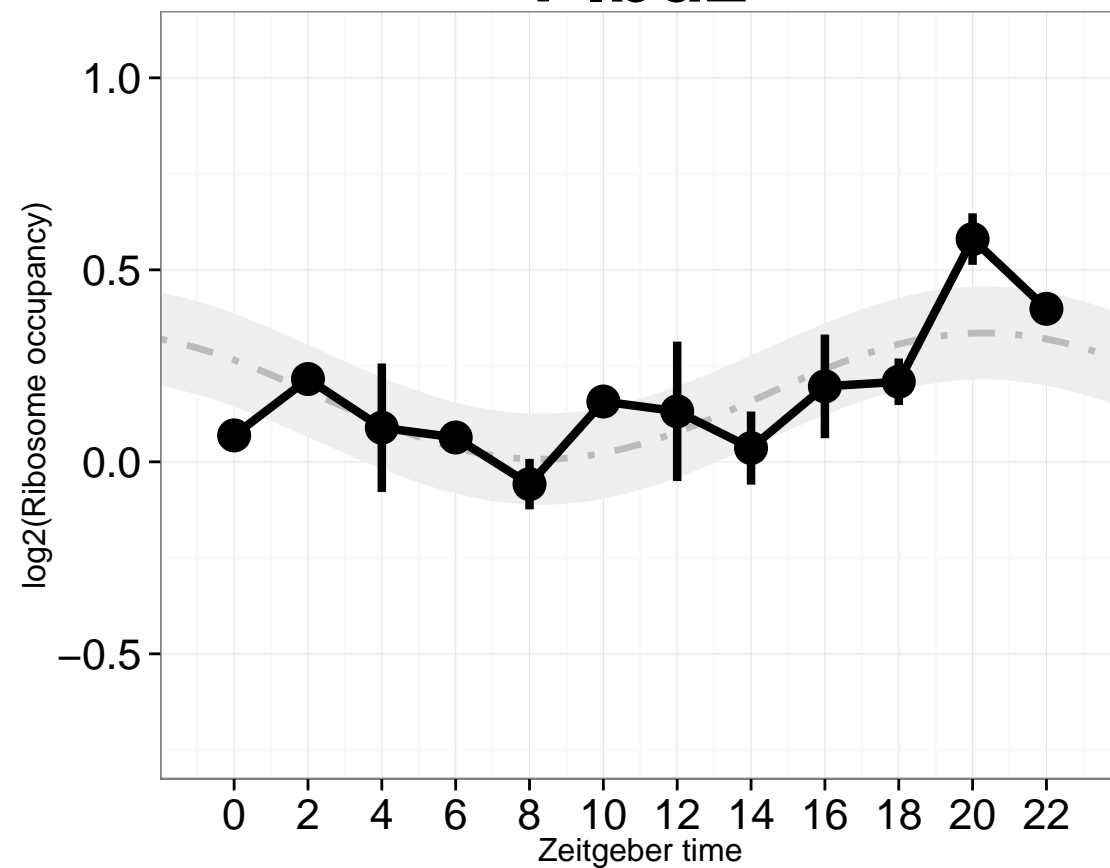

Supplement: Supplementary file 10501 [file 1]

## Clasp1

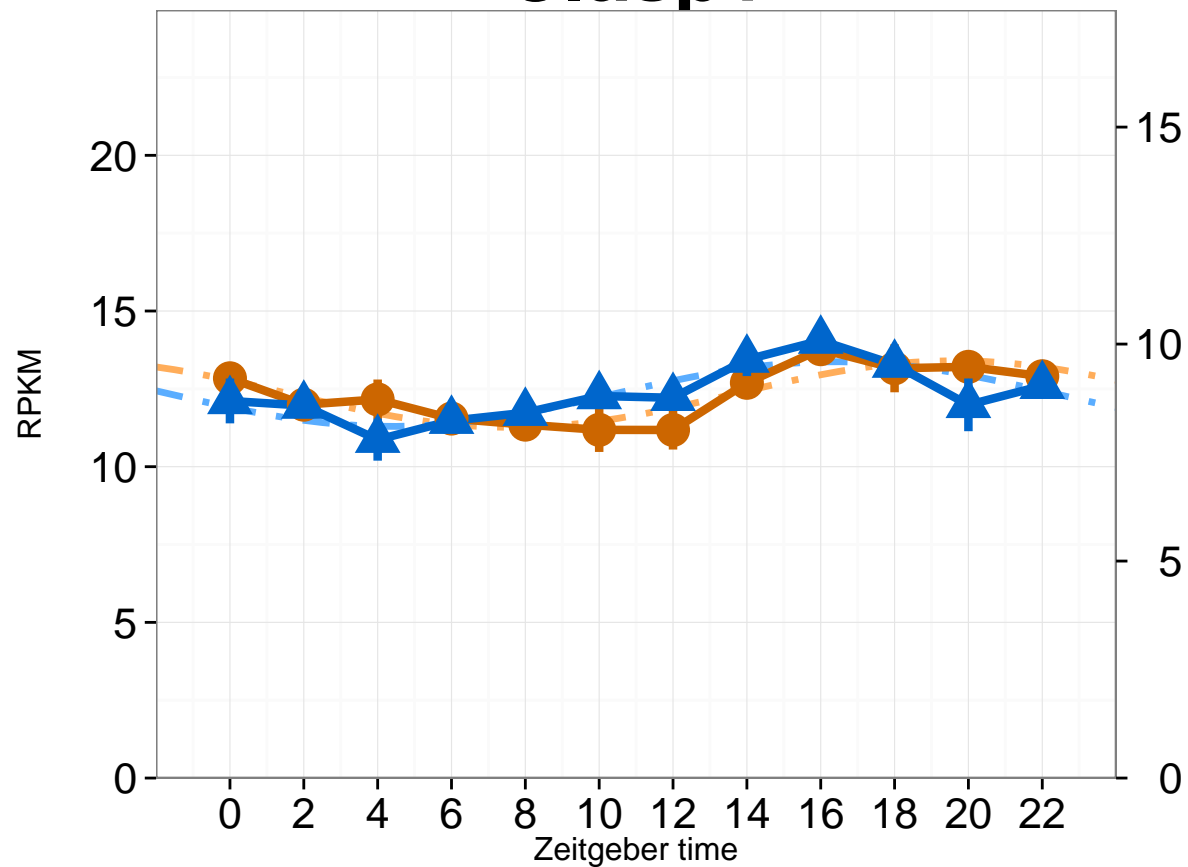

## Clasp1

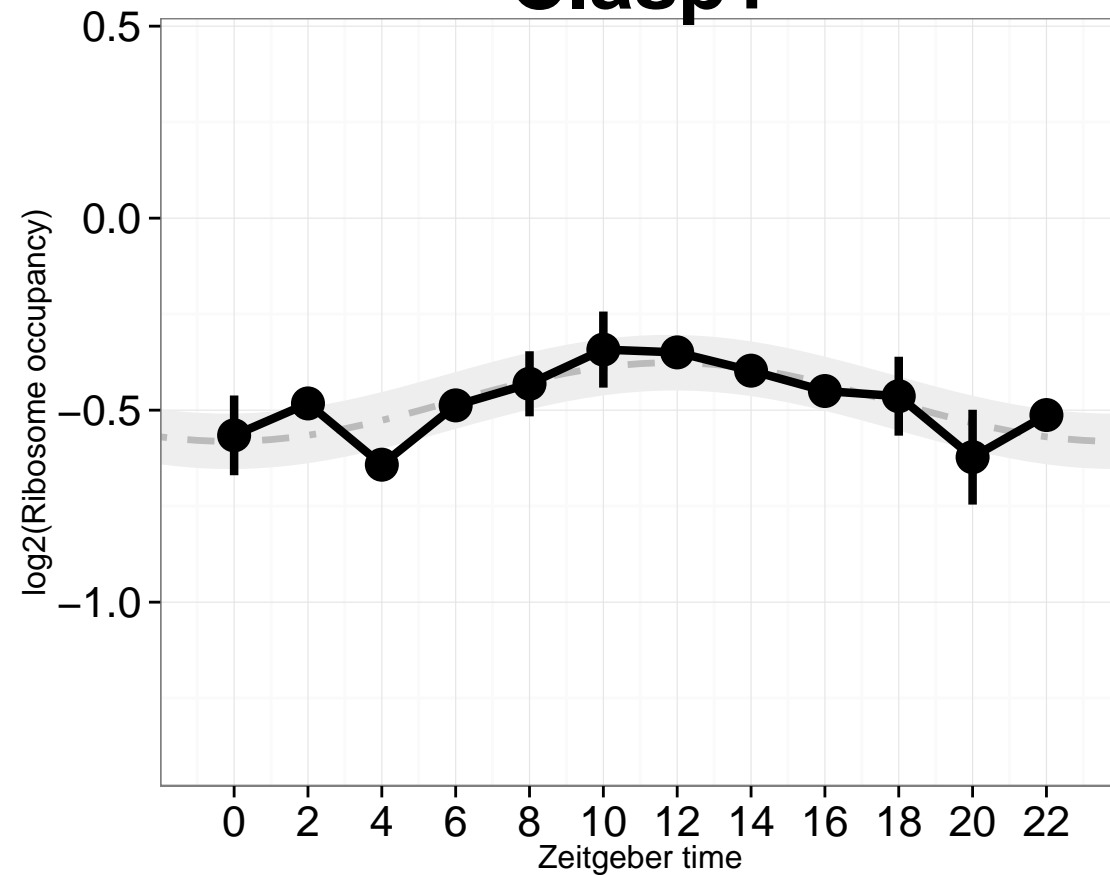

Supplement: Supplementary file 10502 [file 1]

# Nos1ap

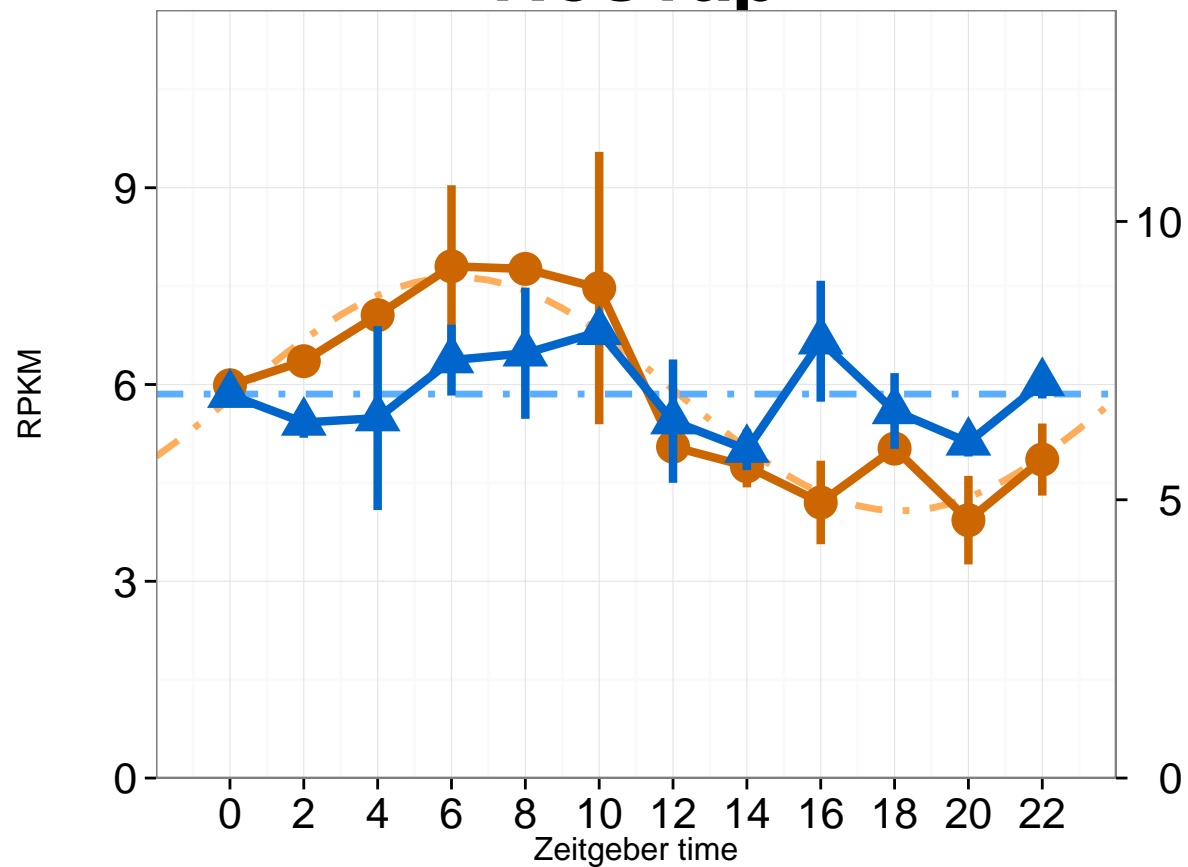

# Nos1ap

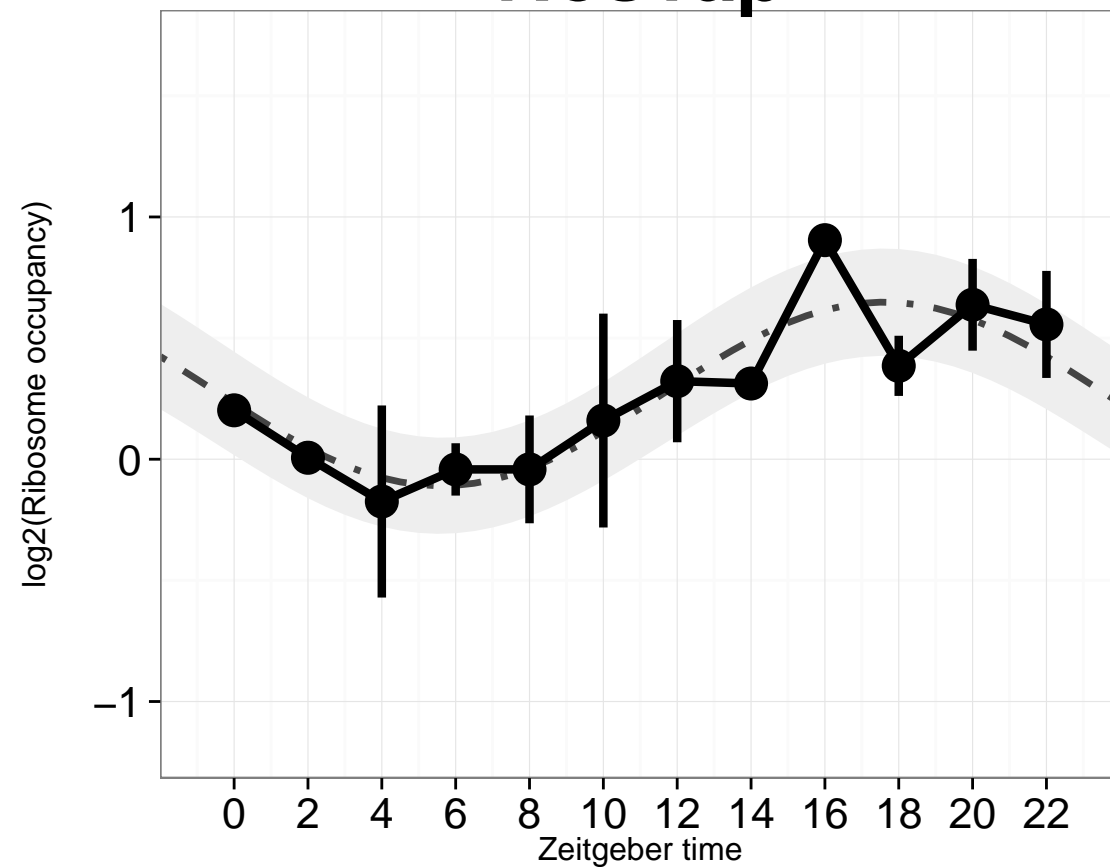

Supplement: Supplementary file 10503 [file 1]

# Fam193a

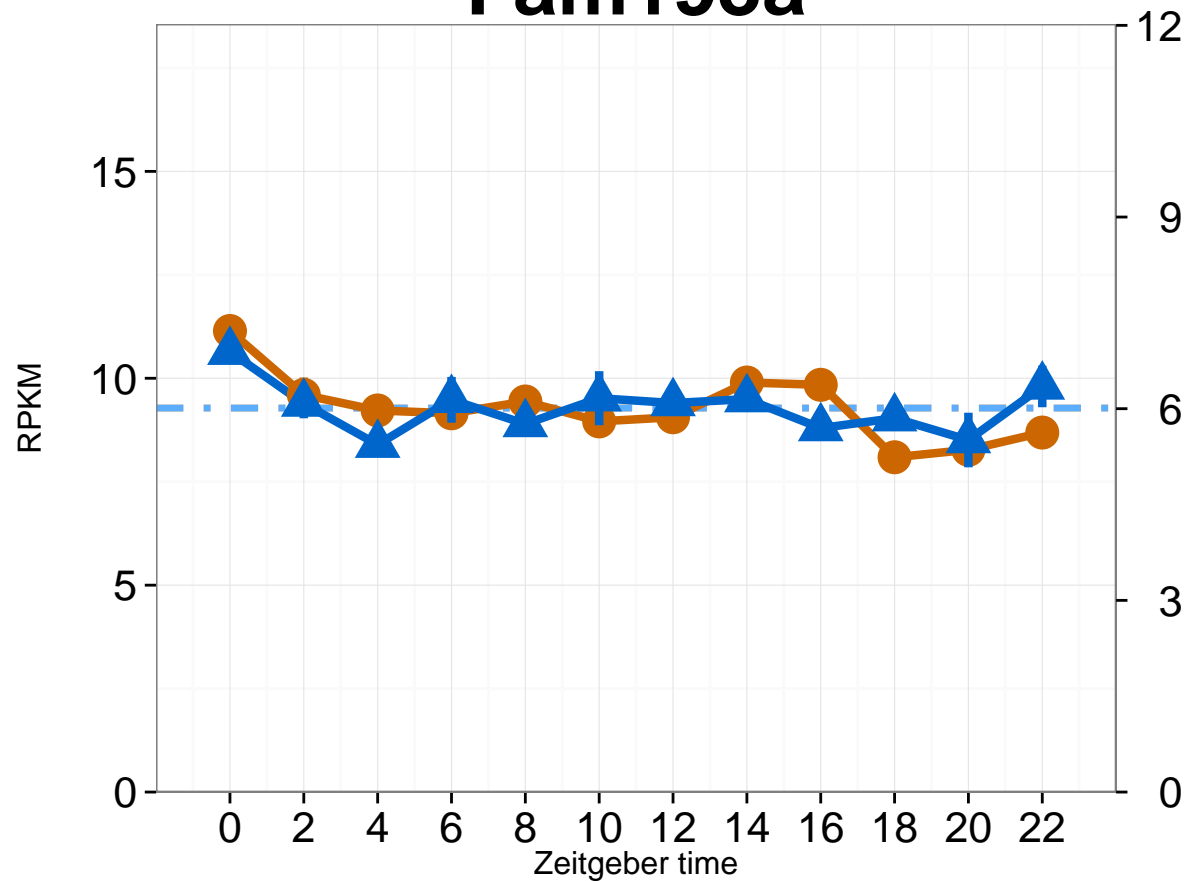

# Fam193a

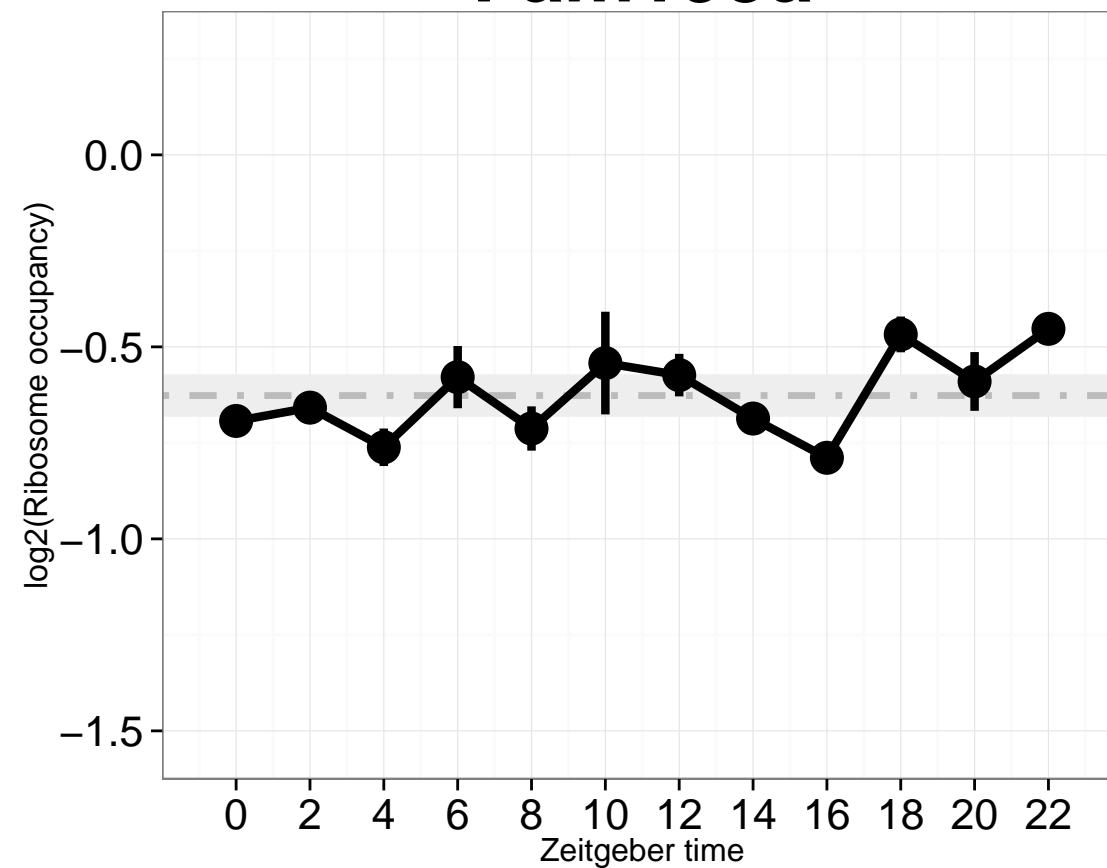

Supplement: Supplementary file 10504 [file 1]

## Mfsd9

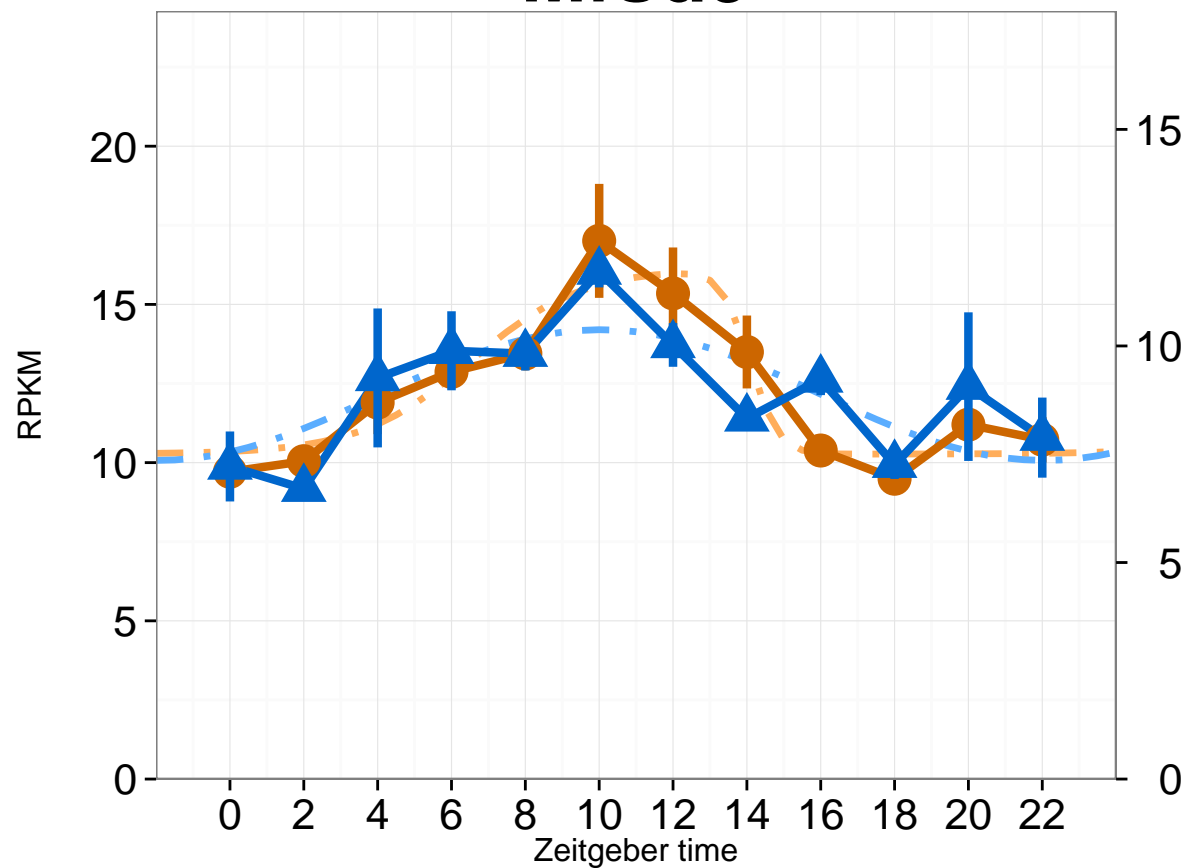

## Mfsd9

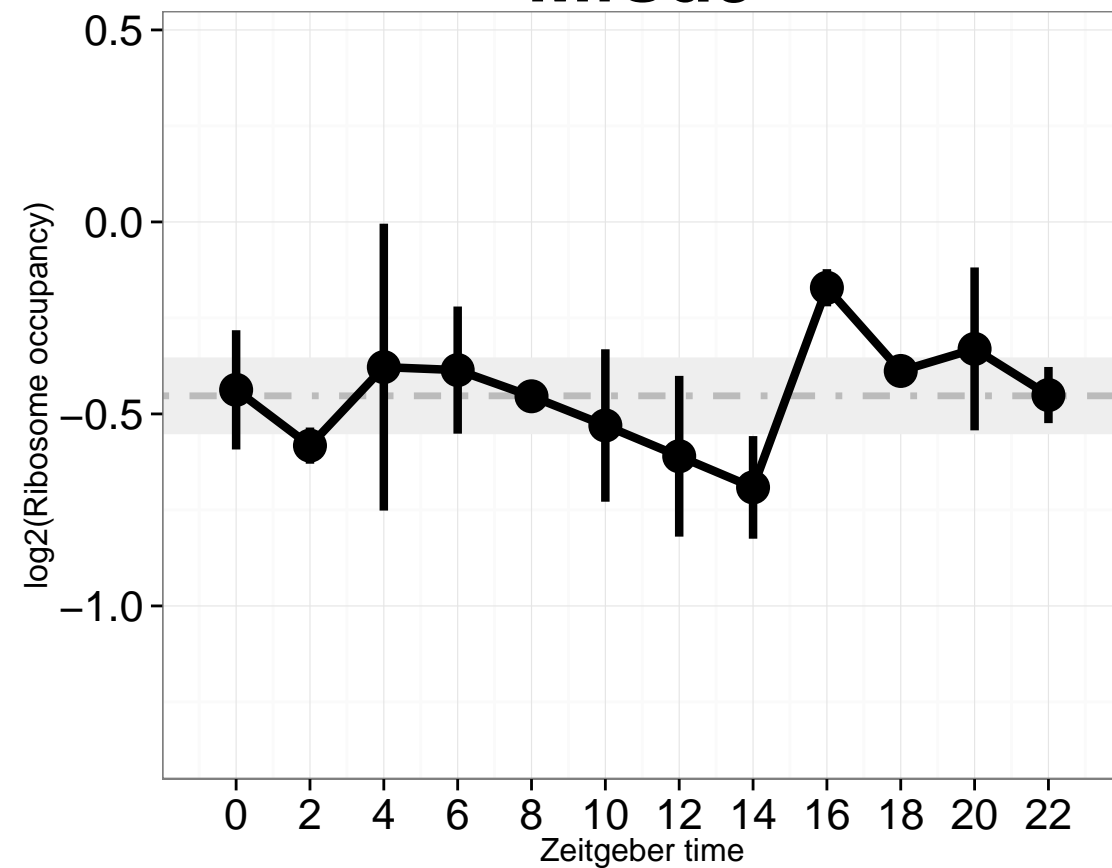

Supplement: Supplementary file 10505 [file 1]

## Lgmn

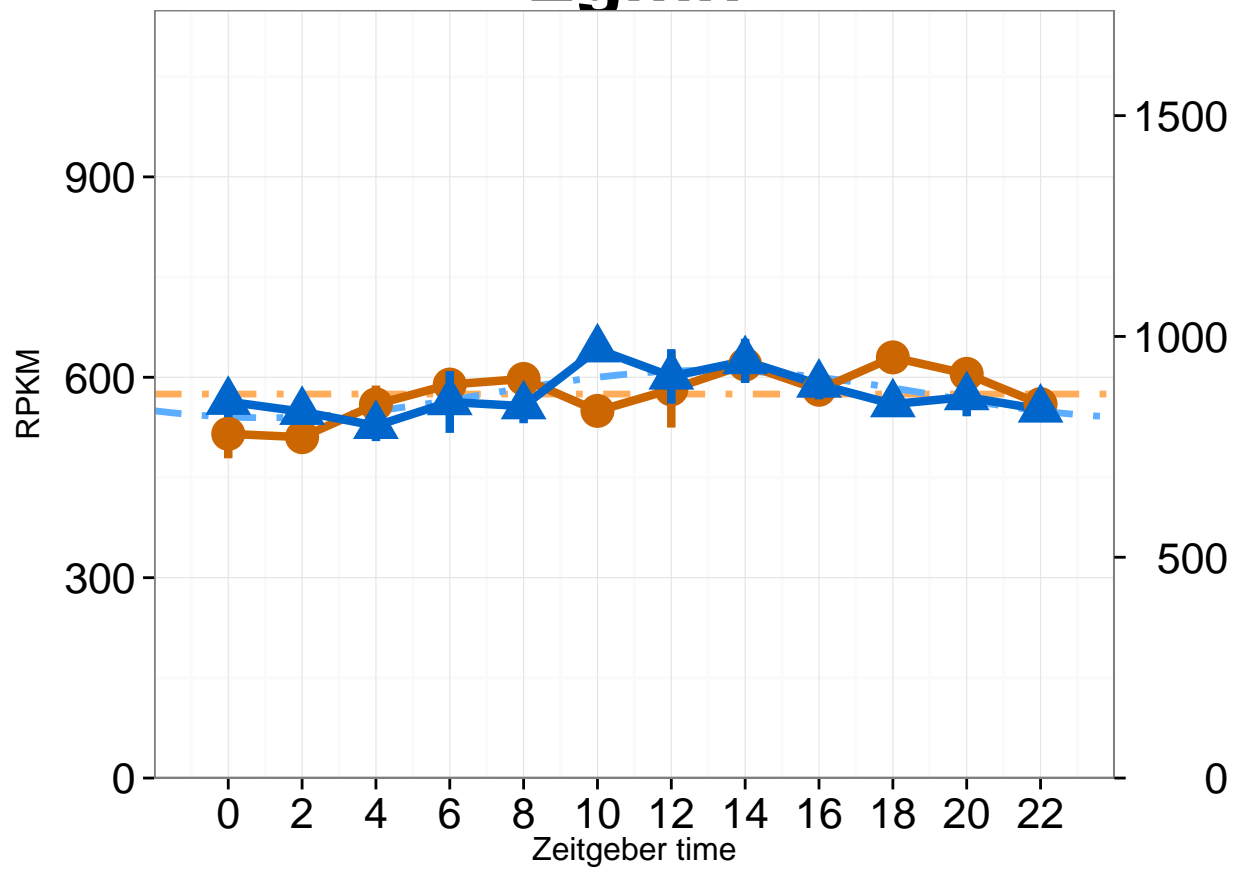

## Lgmn

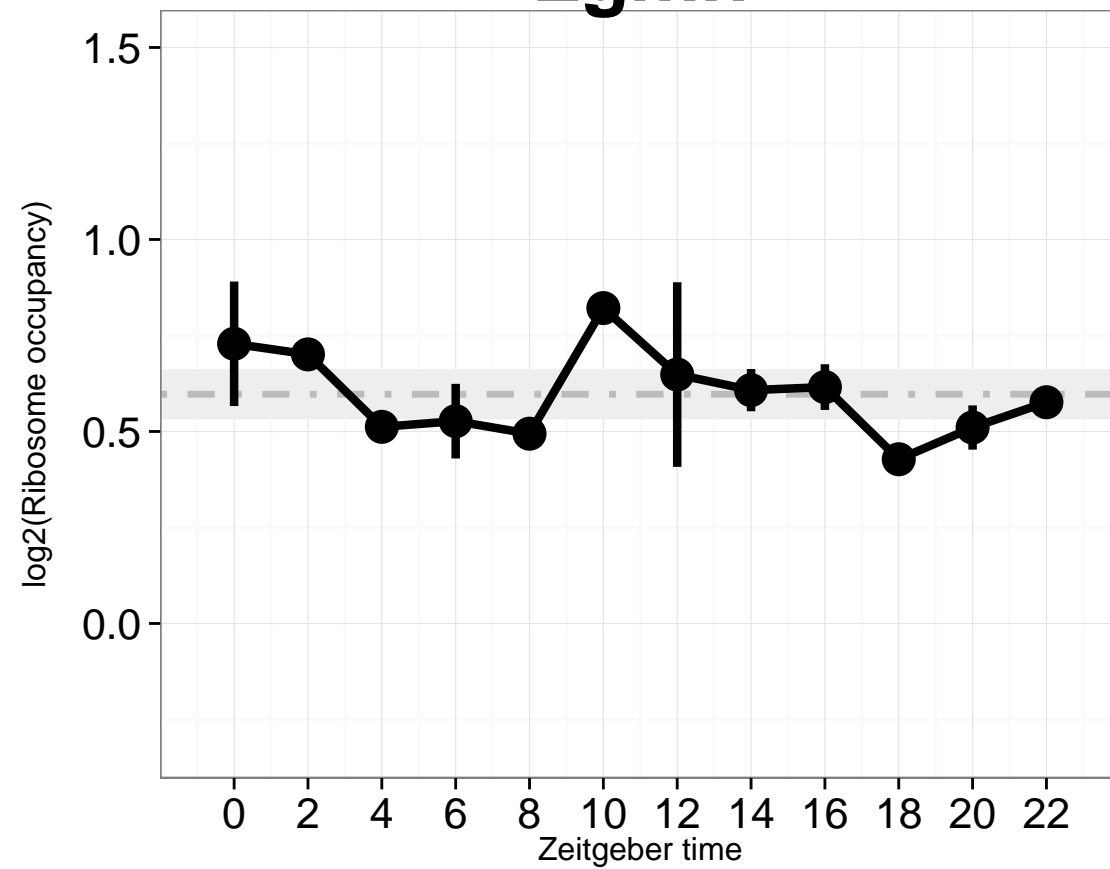

Supplement: Supplementary file 10506 [file 1]

# Efemp1

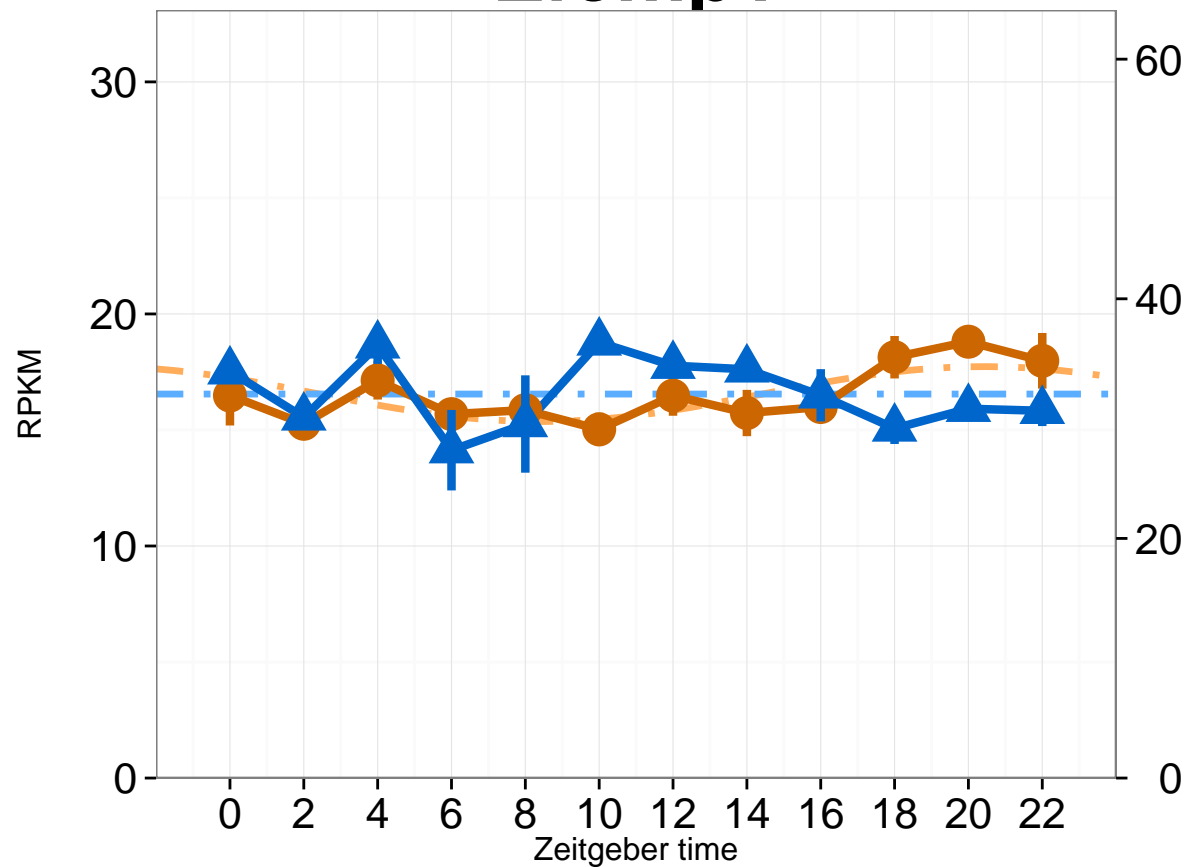

# Efemp1

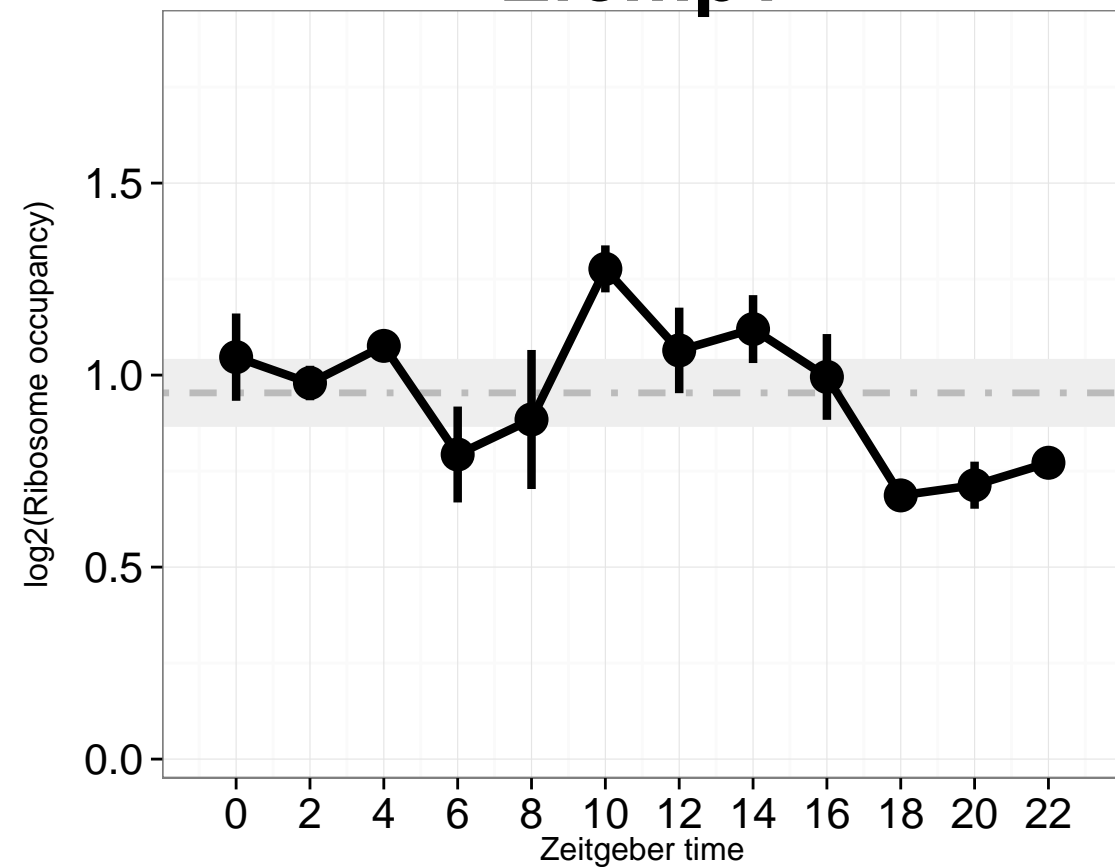

Supplement: Supplementary file 10507 [file 1]

## Tm9sf4

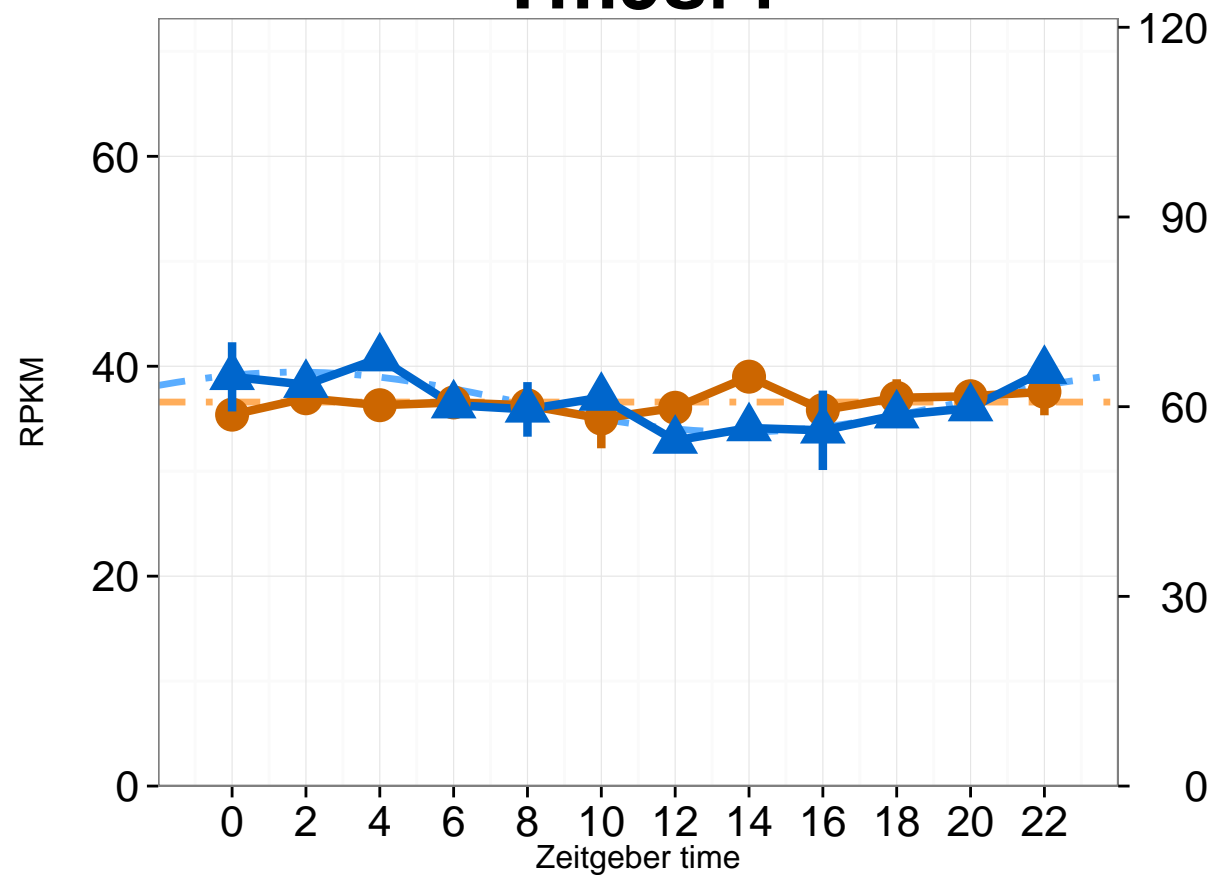

## Tm9sf4

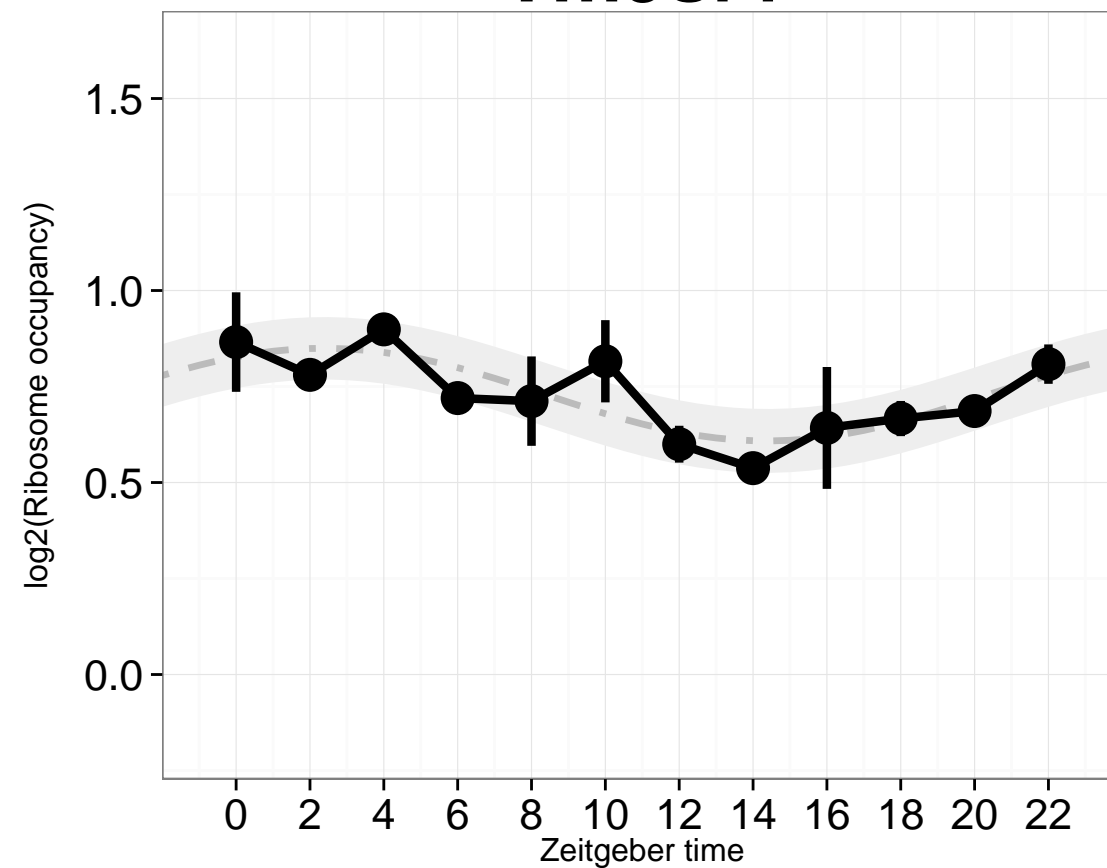

Supplement: Supplementary file 10508 [file 1]

## Klhdc2

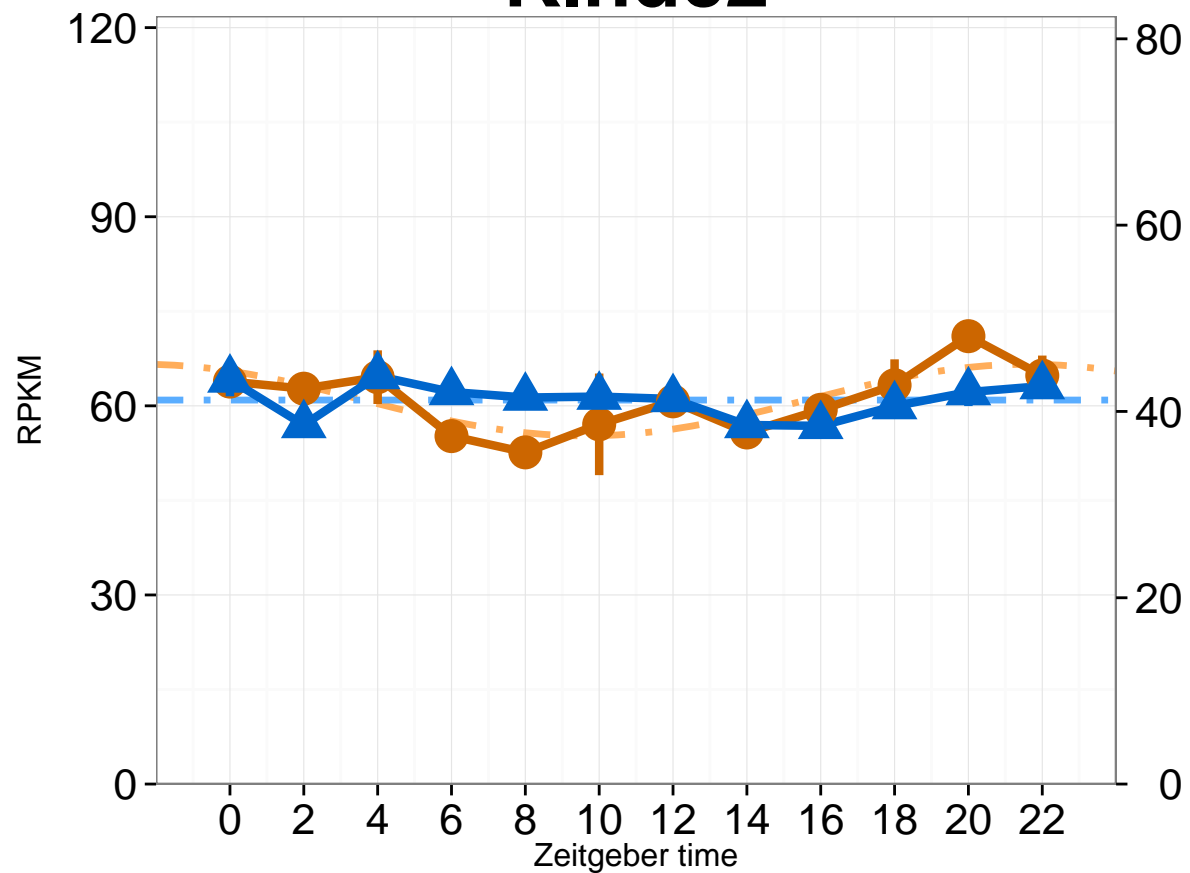

## Klhdc2

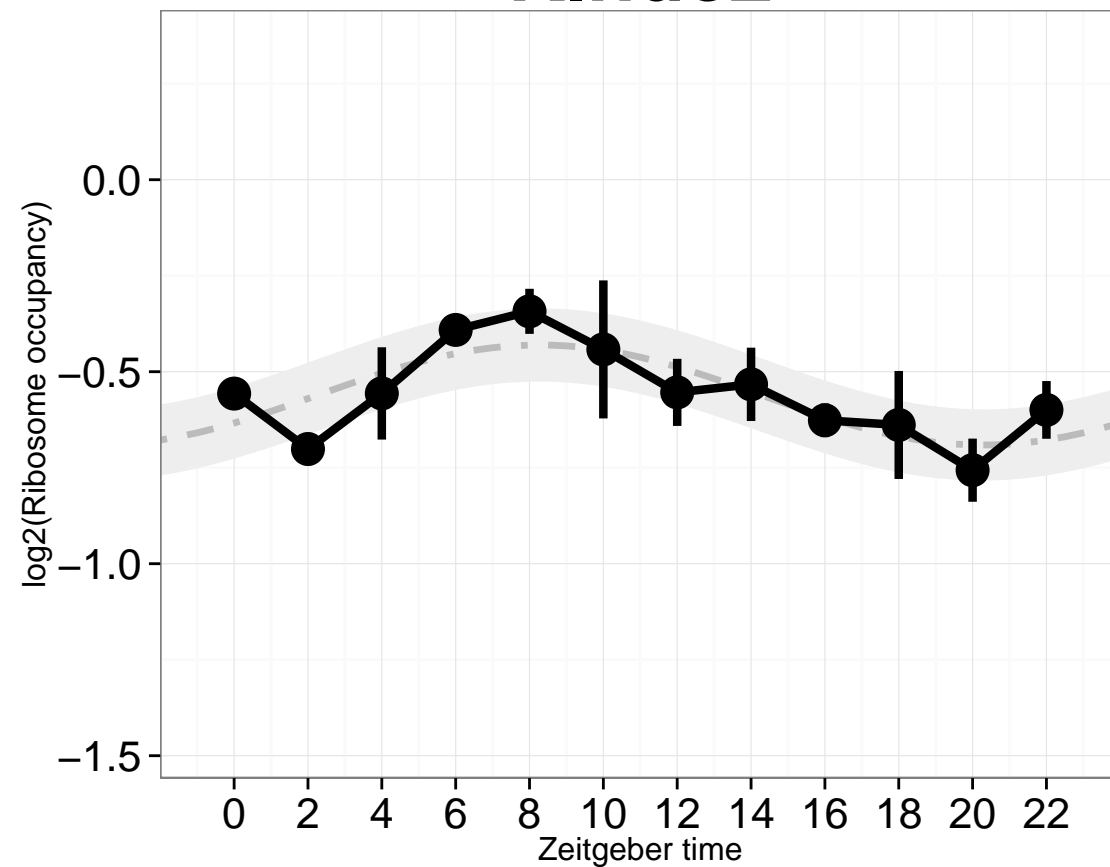

Supplement: Supplementary file 10509 [file 1]

## Gabra3

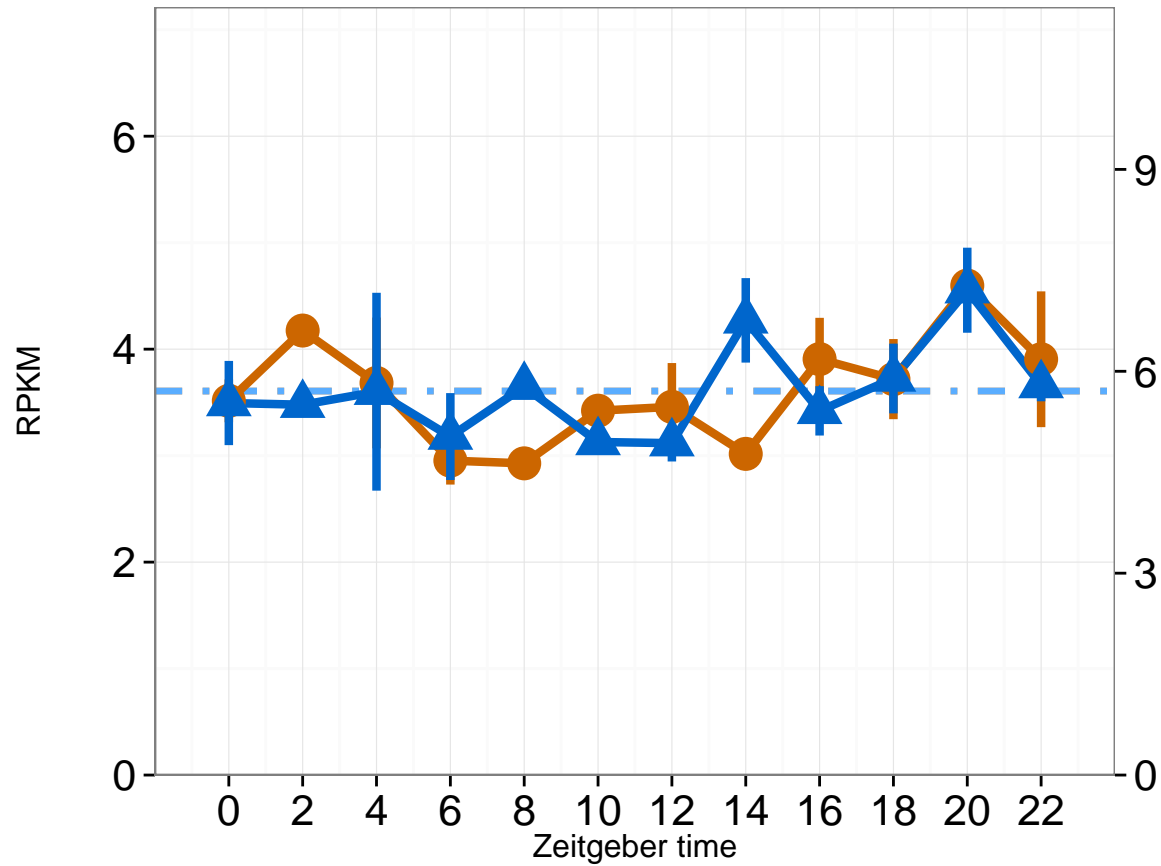

## Gabra3

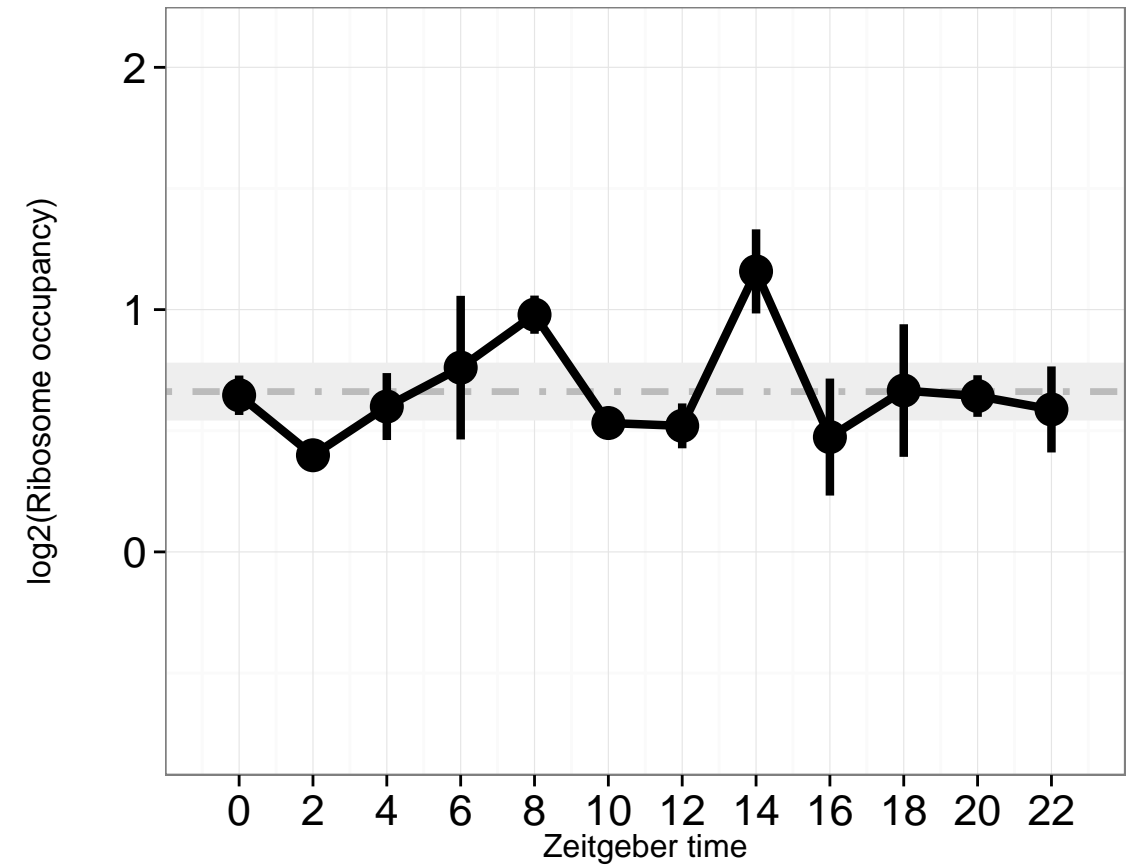

Supplement: Supplementary file 10510 [file 1]

## Aldh7a1

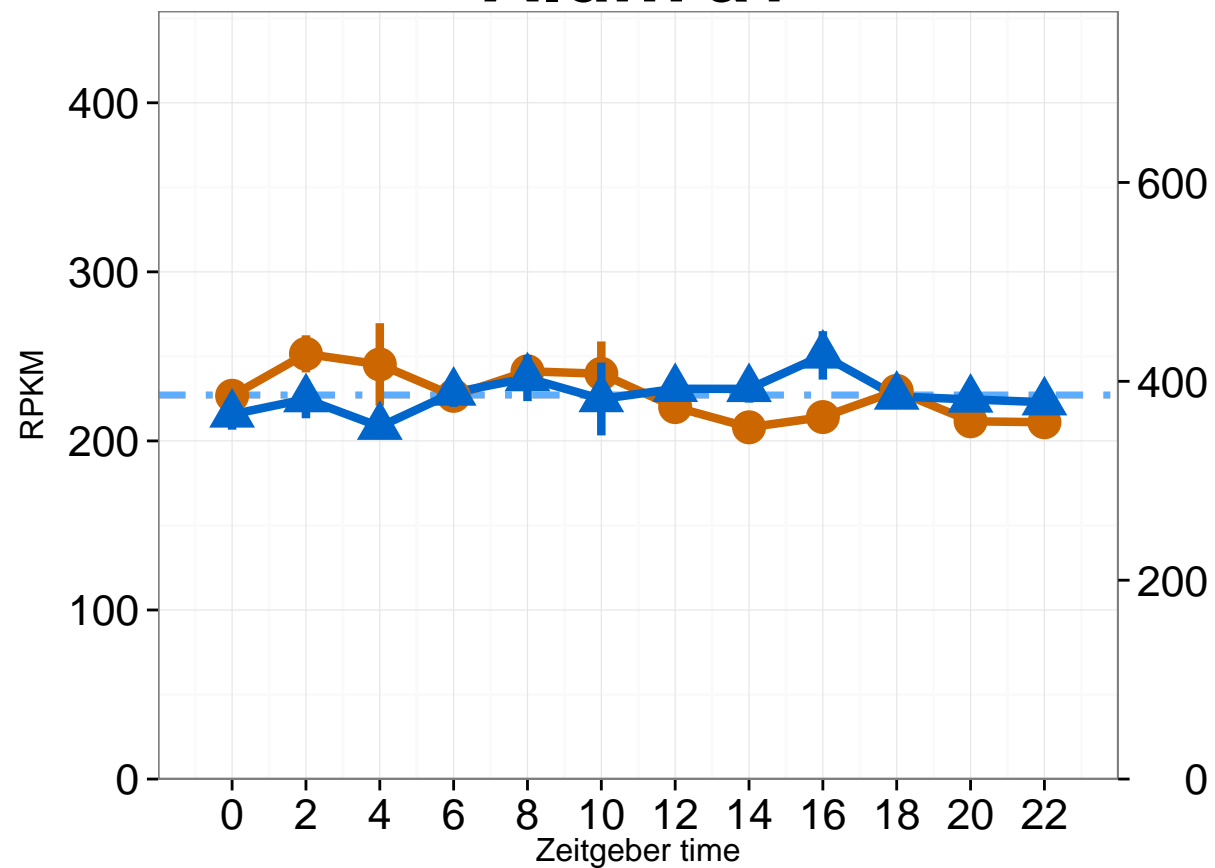

## Aldh7a1

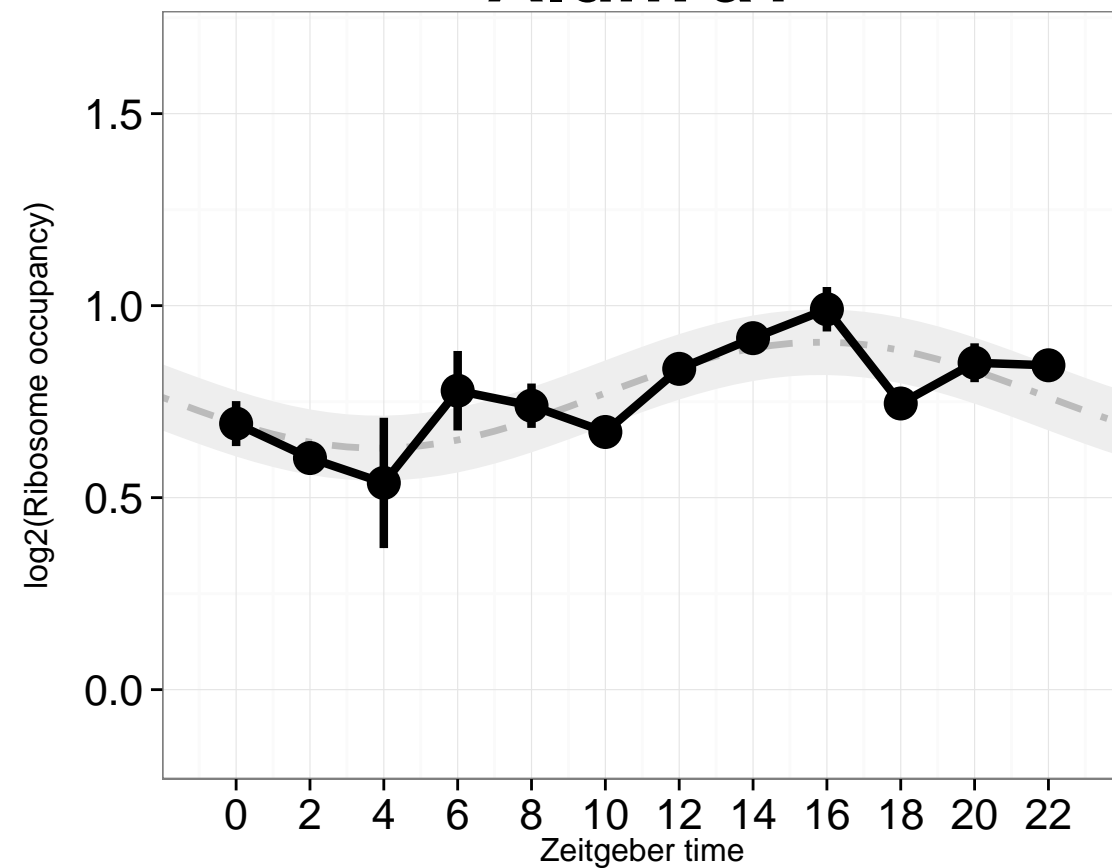

Supplement: Supplementary file 10511 [file 1]

**Scamp3**

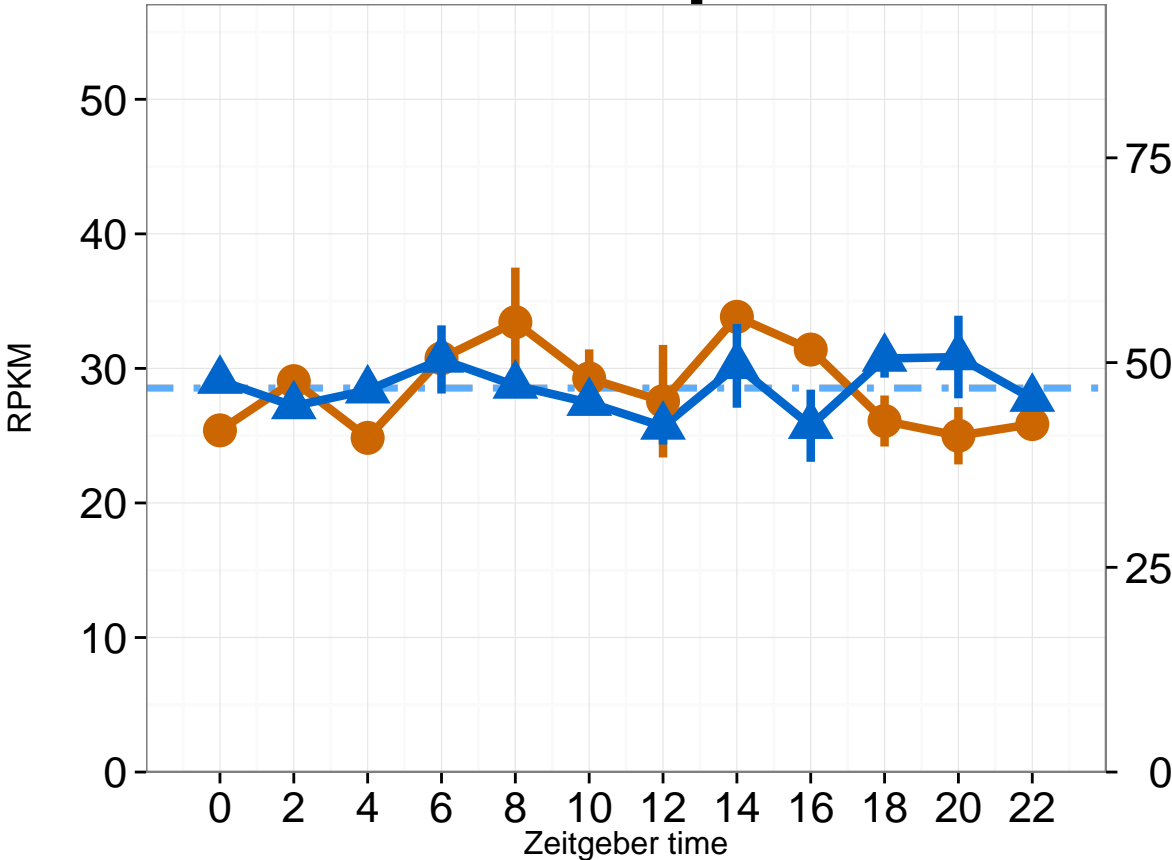

**Scamp3**

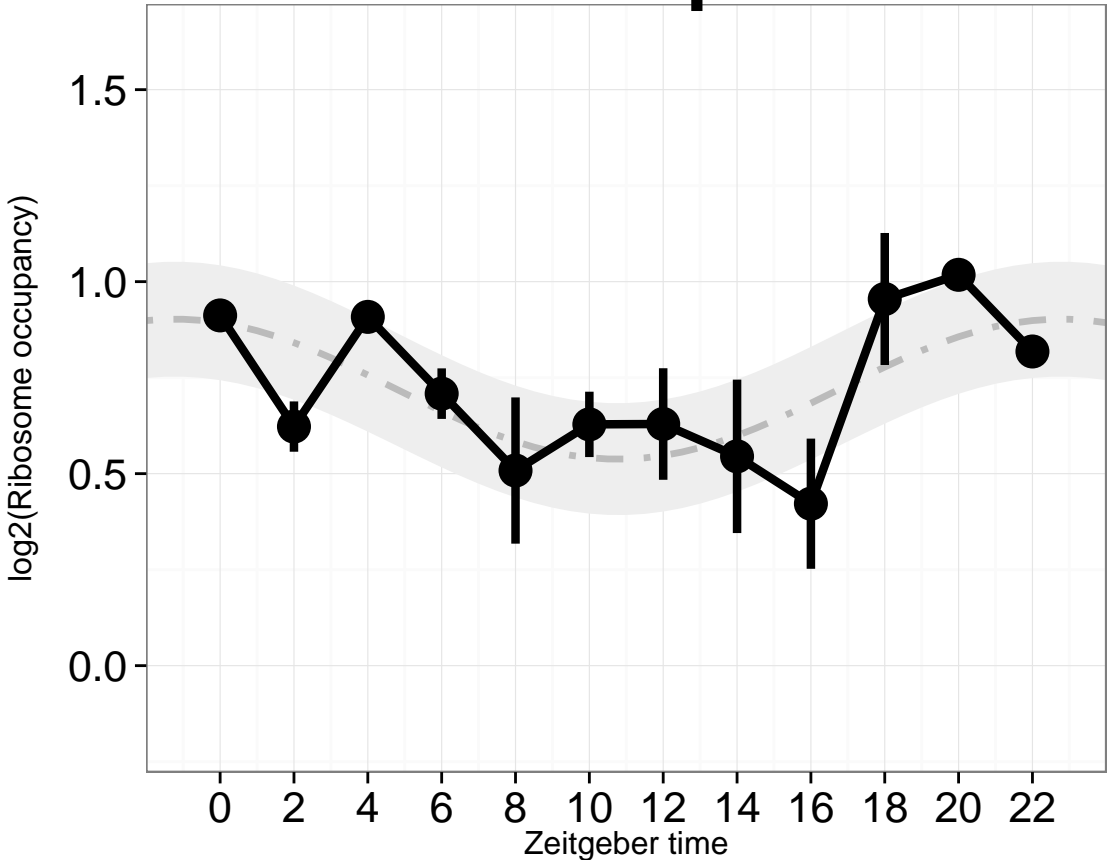

Supplement: Supplementary file 10512 [file 1]

# Wnt9b

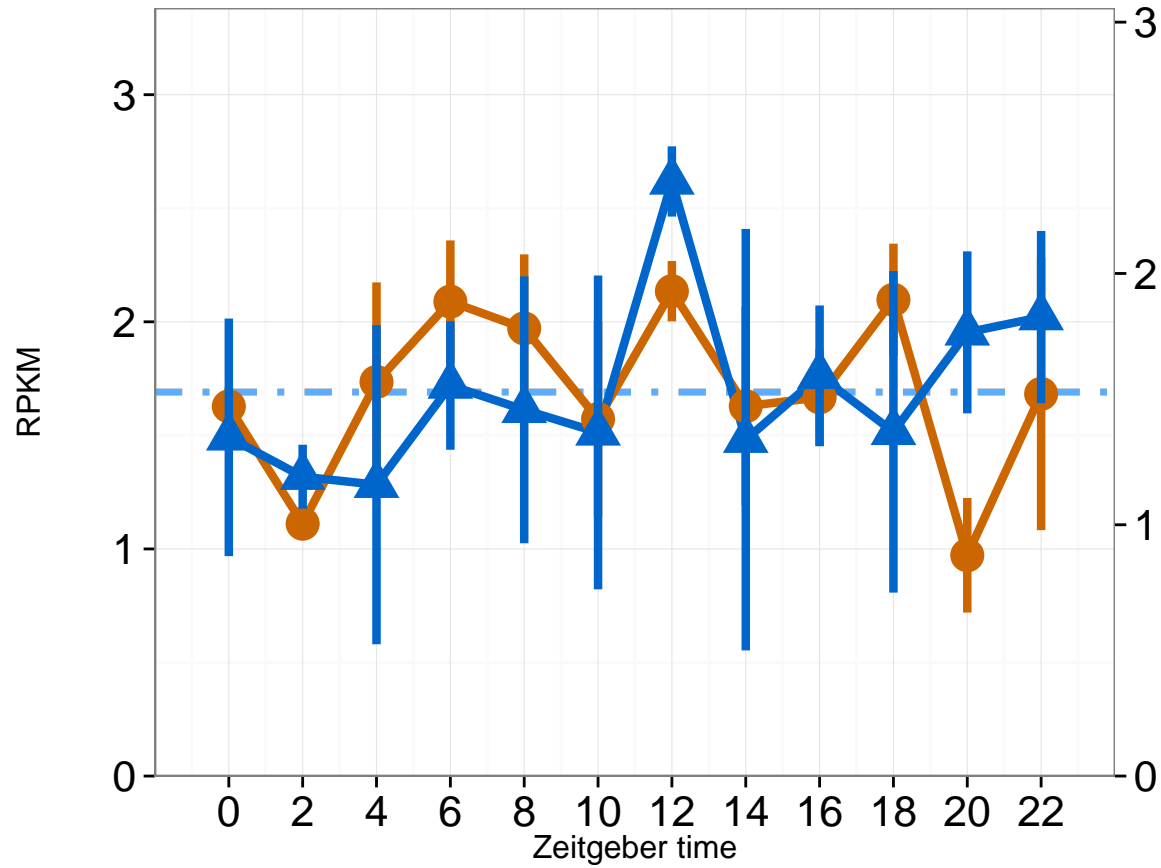

# Wnt9b

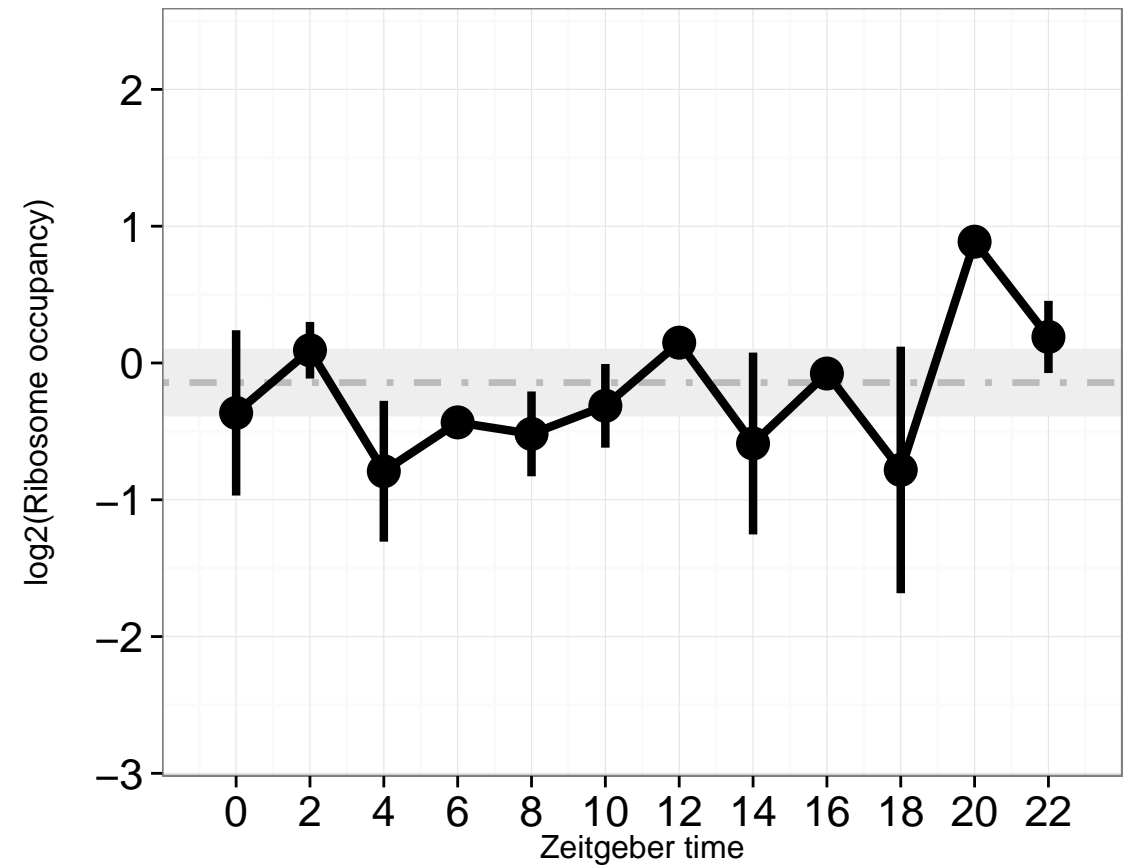

Supplement: Supplementary file 10513 [file 1]

# Tmem127

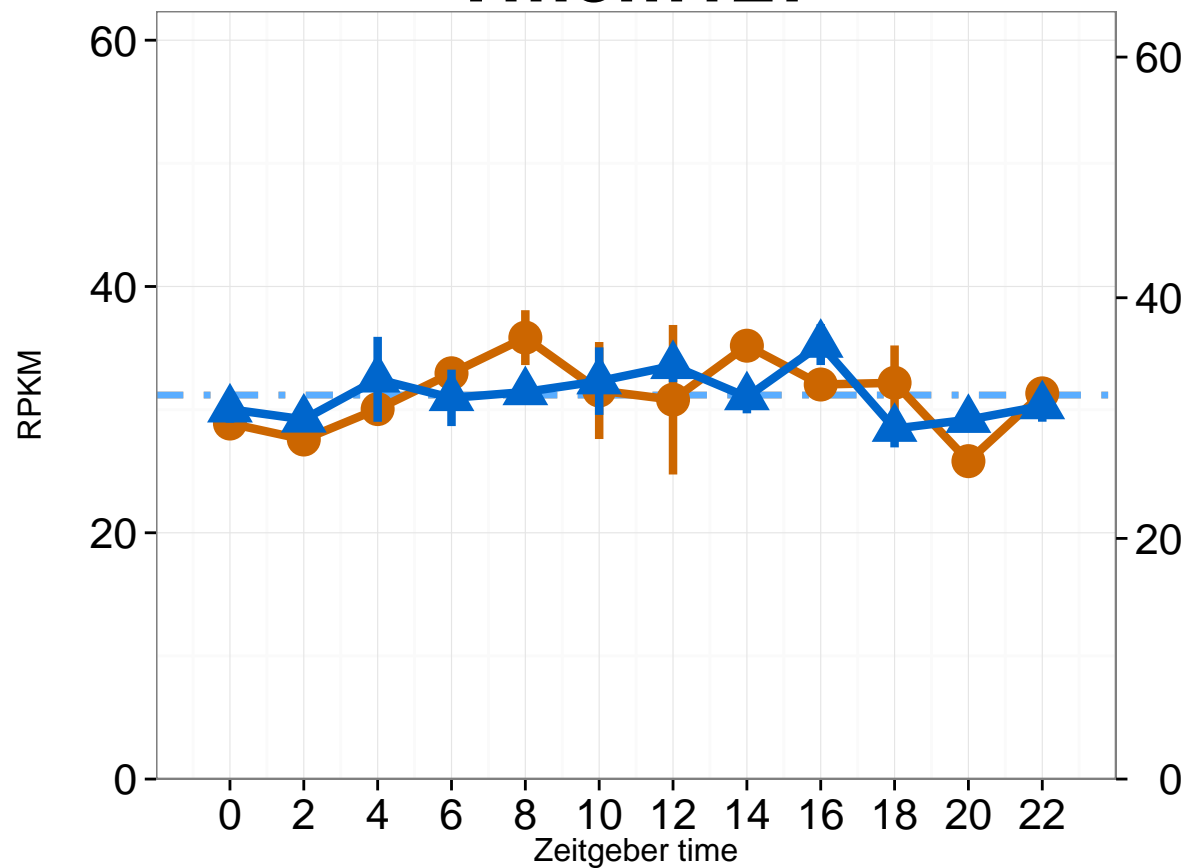

# Tmem127

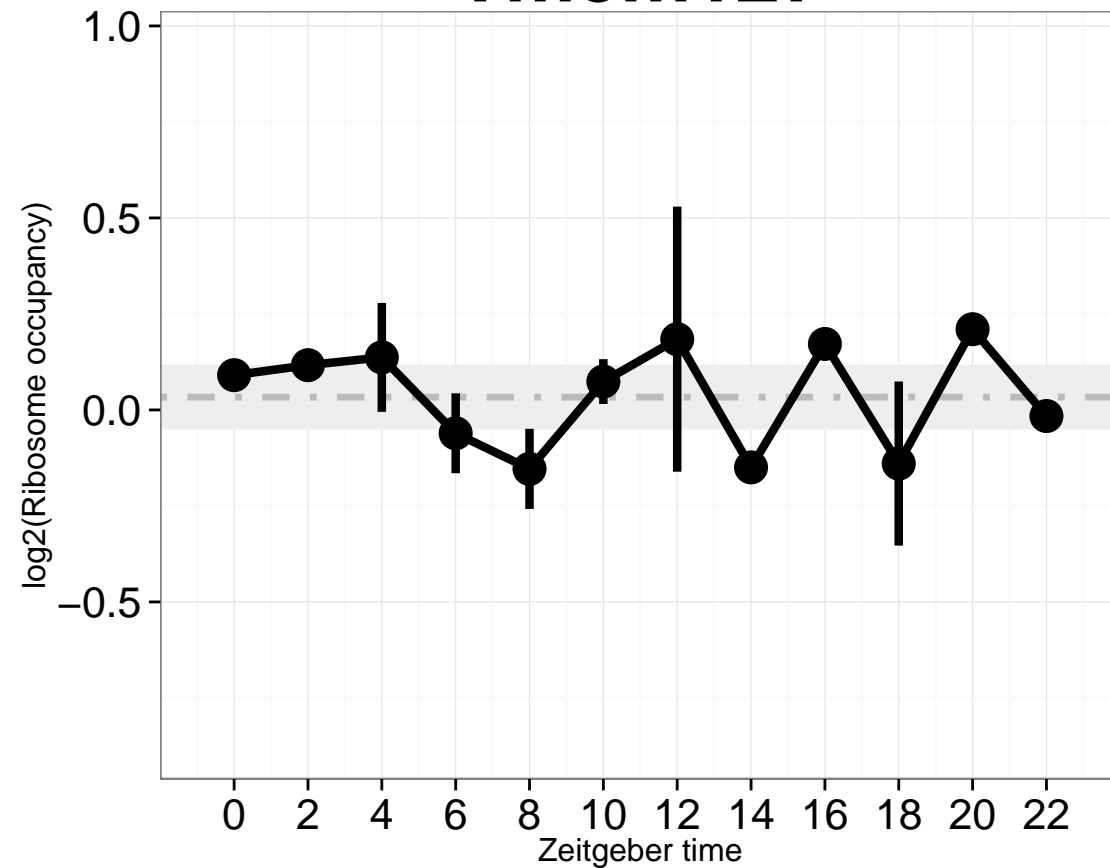

Supplement: Supplementary file 10514 [file 1]

# Med12l

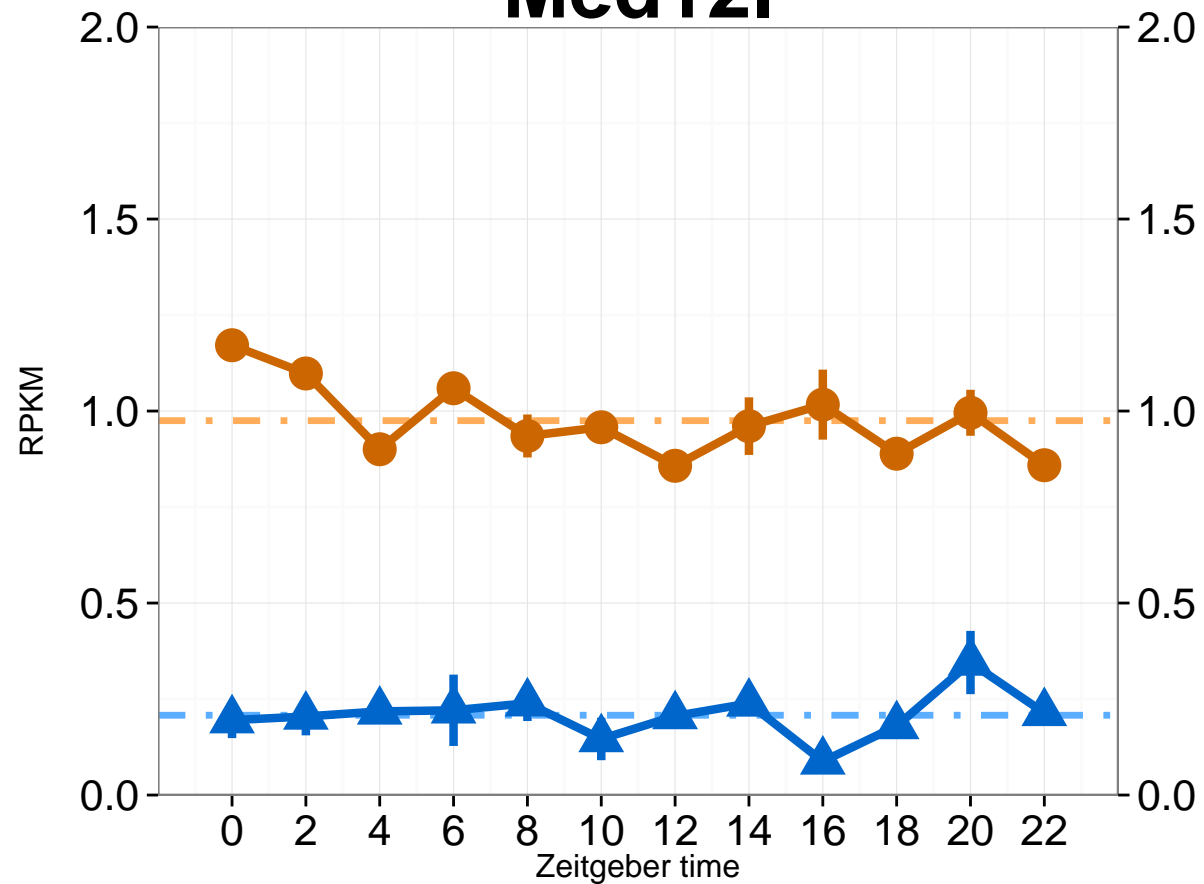

# Med12l

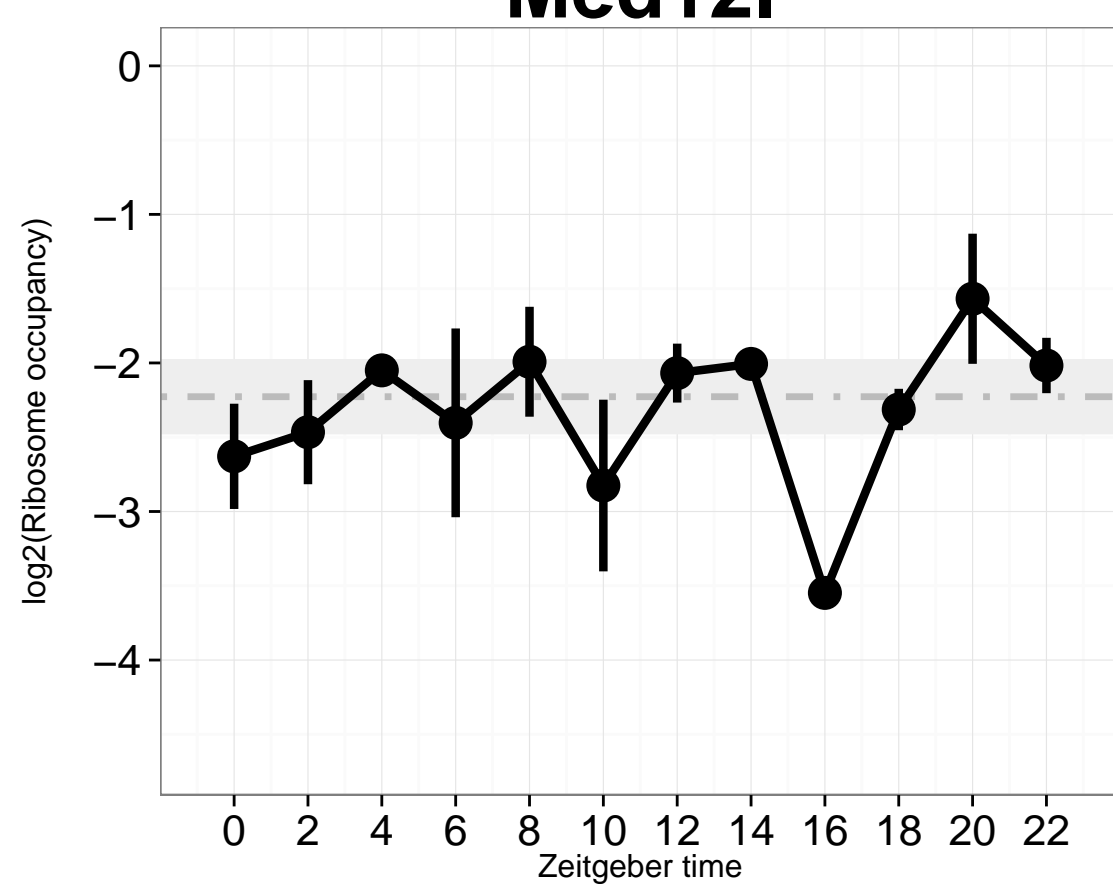

Supplement: Supplementary file 10515 [file 1]

## Nono

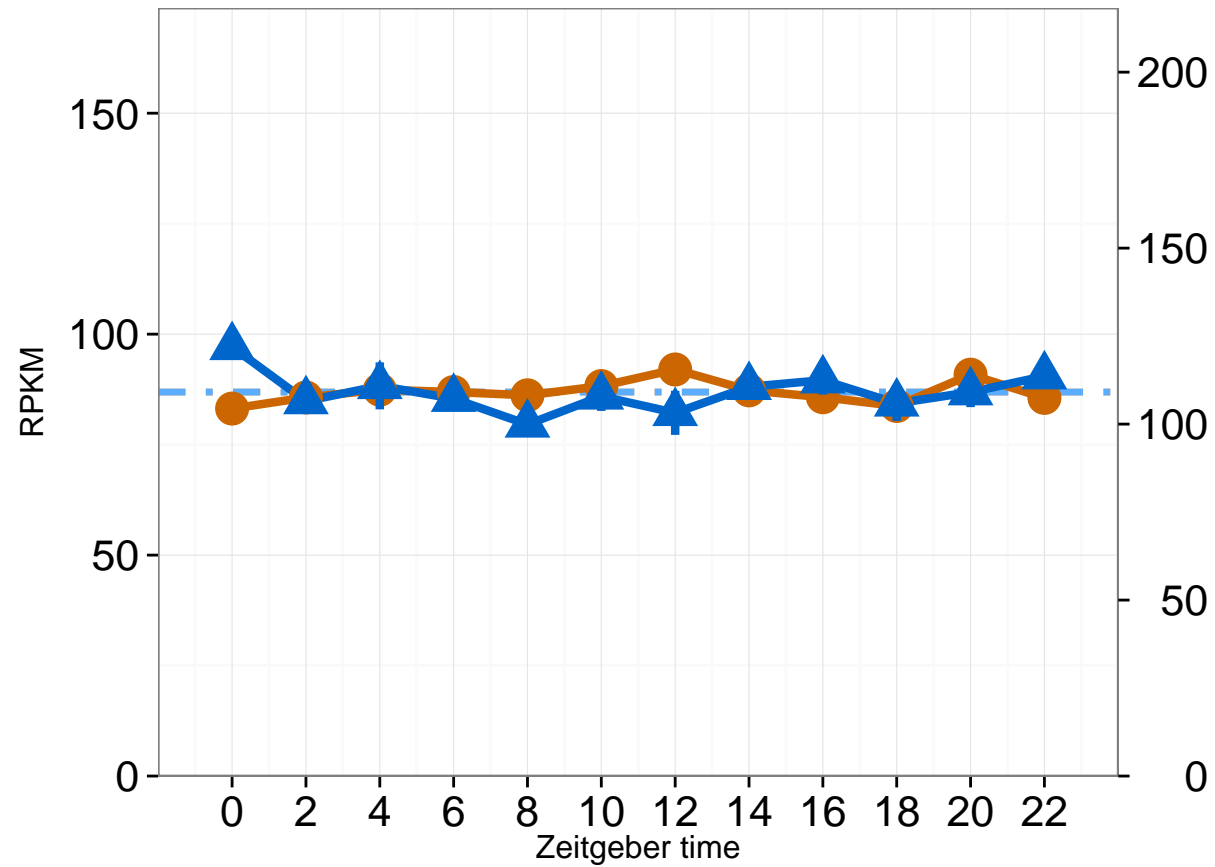

## Nono

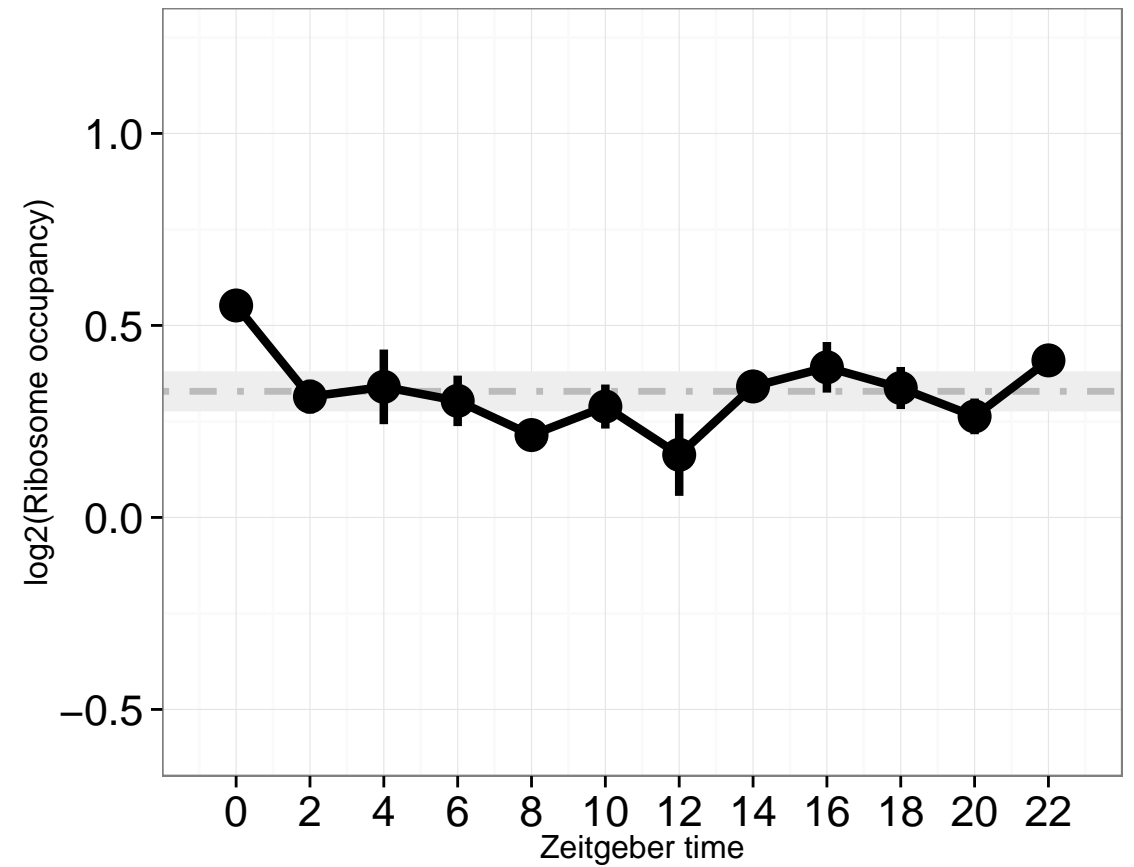

Supplement: Supplementary file 10516 [file 1]

# Prdm9

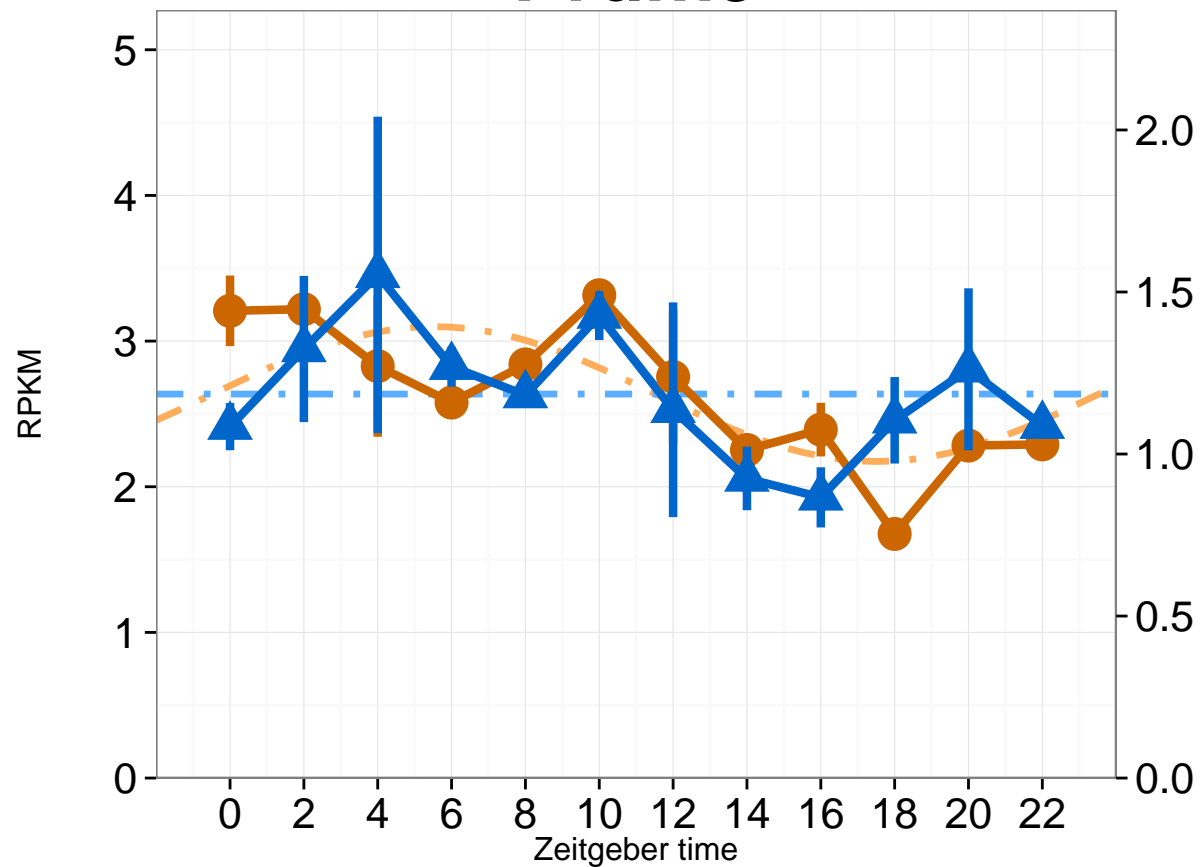

# Prdm9

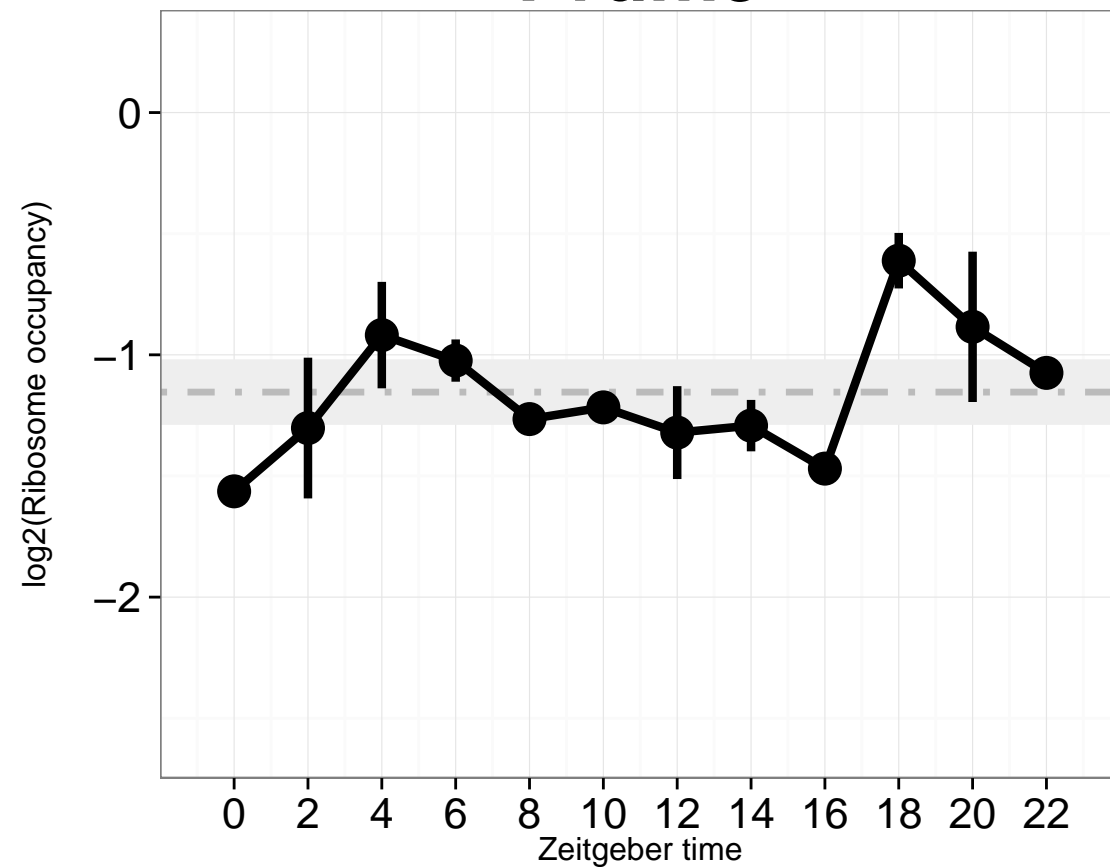

Supplement: Supplementary file 10517 [file 1]

## Nbea

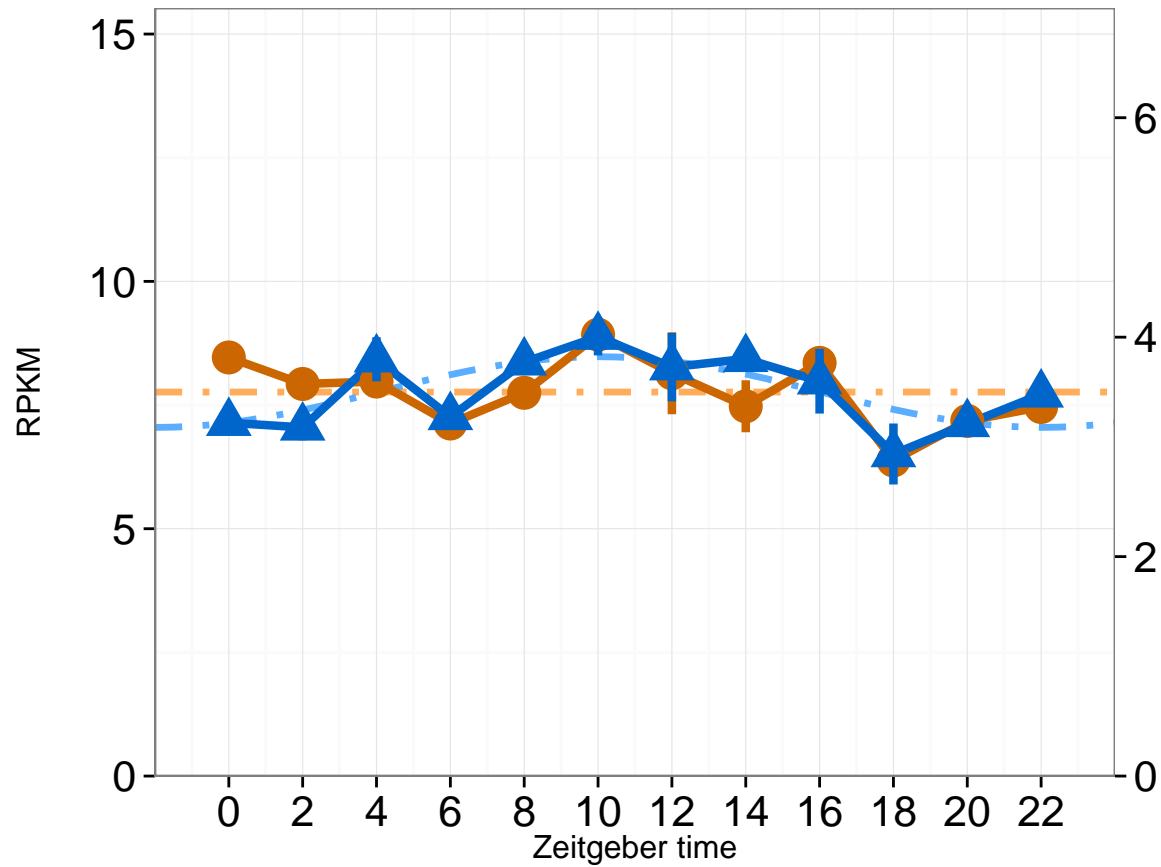

## Nbea

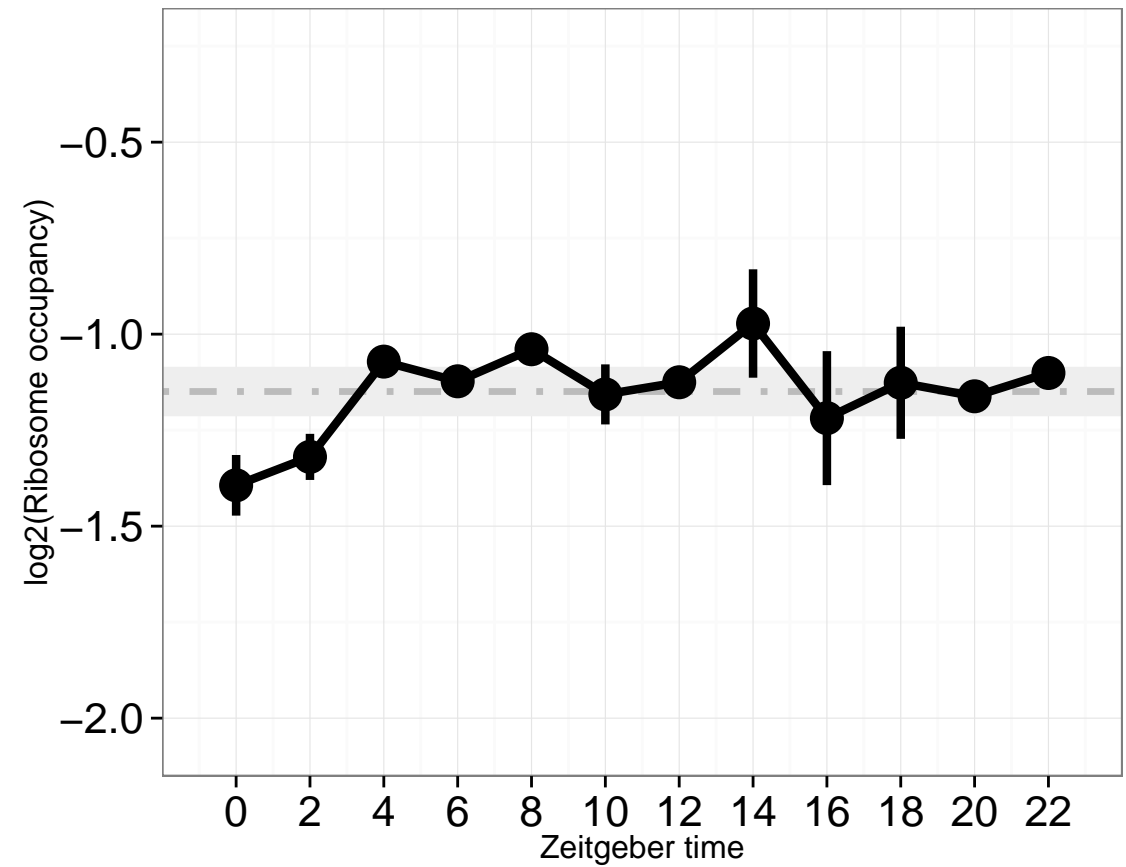

Supplement: Supplementary file 10518 [file 1]

# Arhgap23

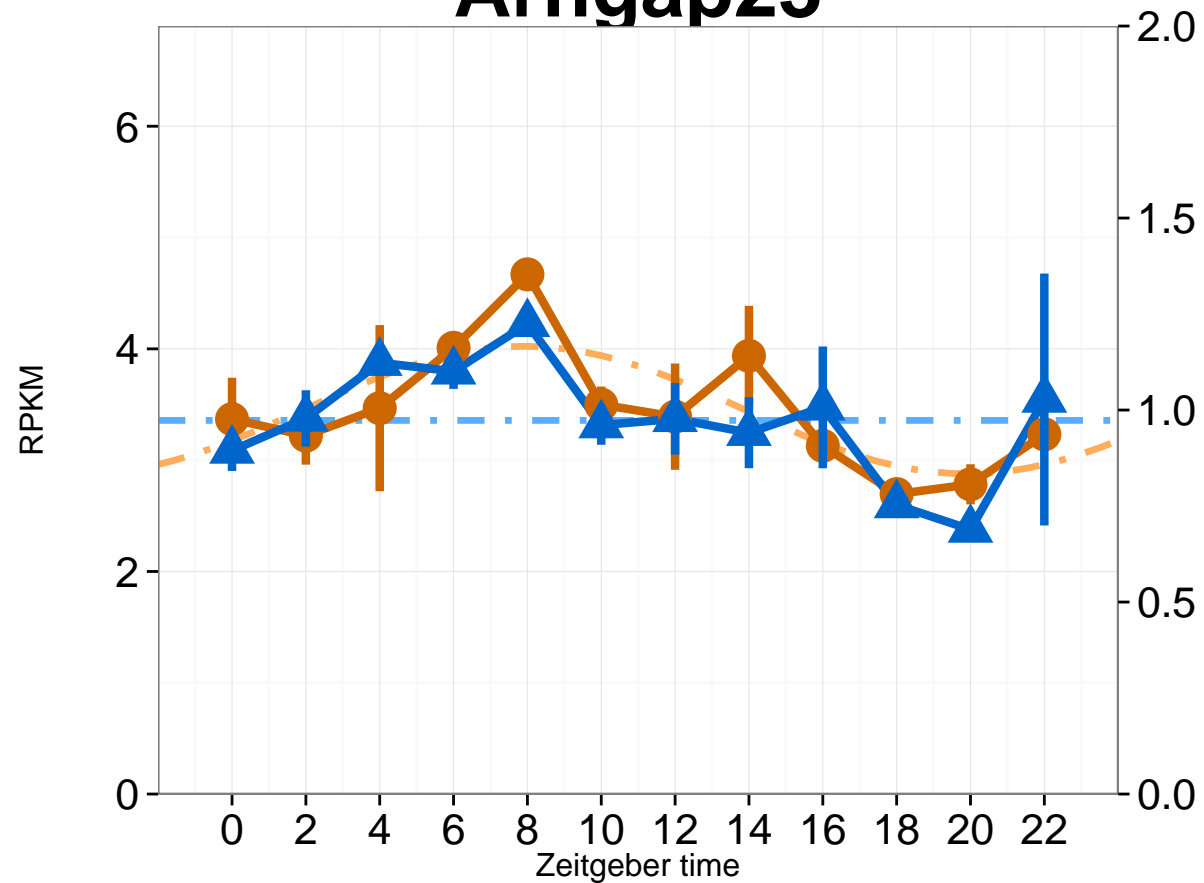

# Arhgap23

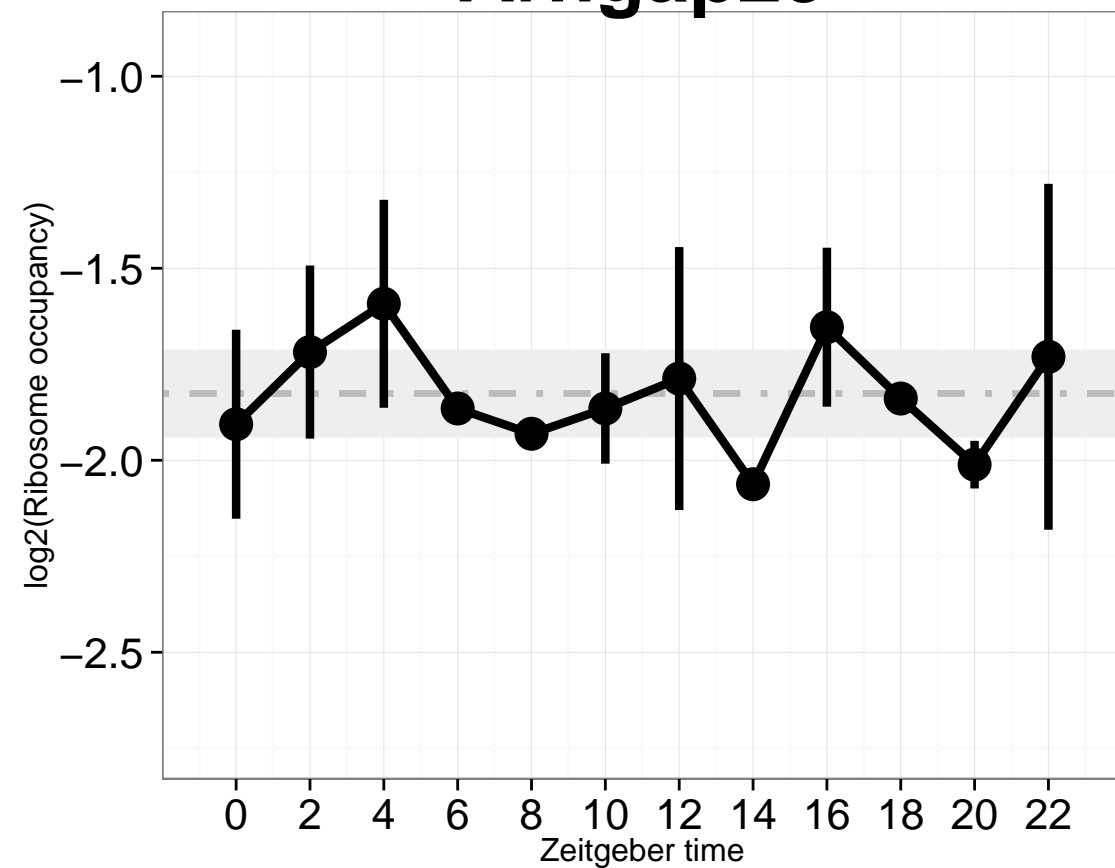

Supplement: Supplementary file 10519 [file 1]

# Dnajc4

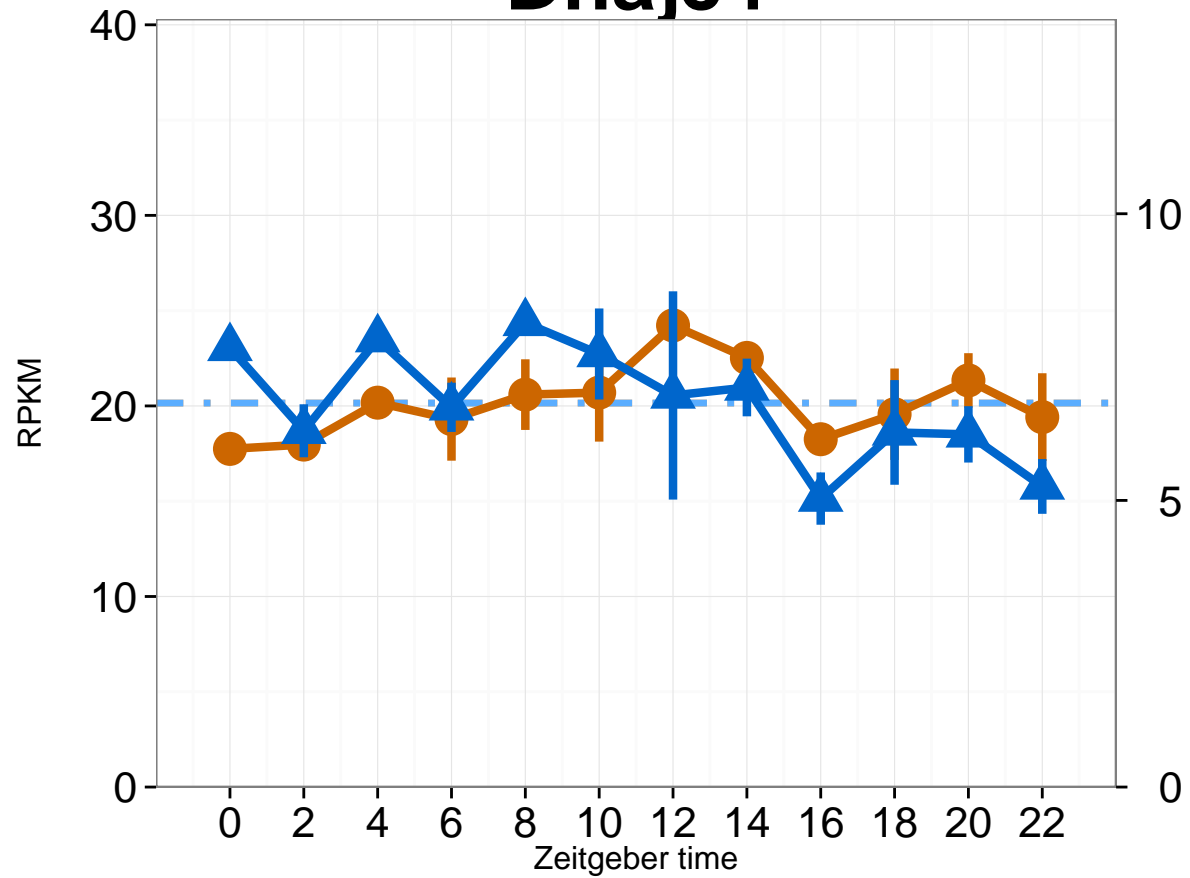

# Dnajc4

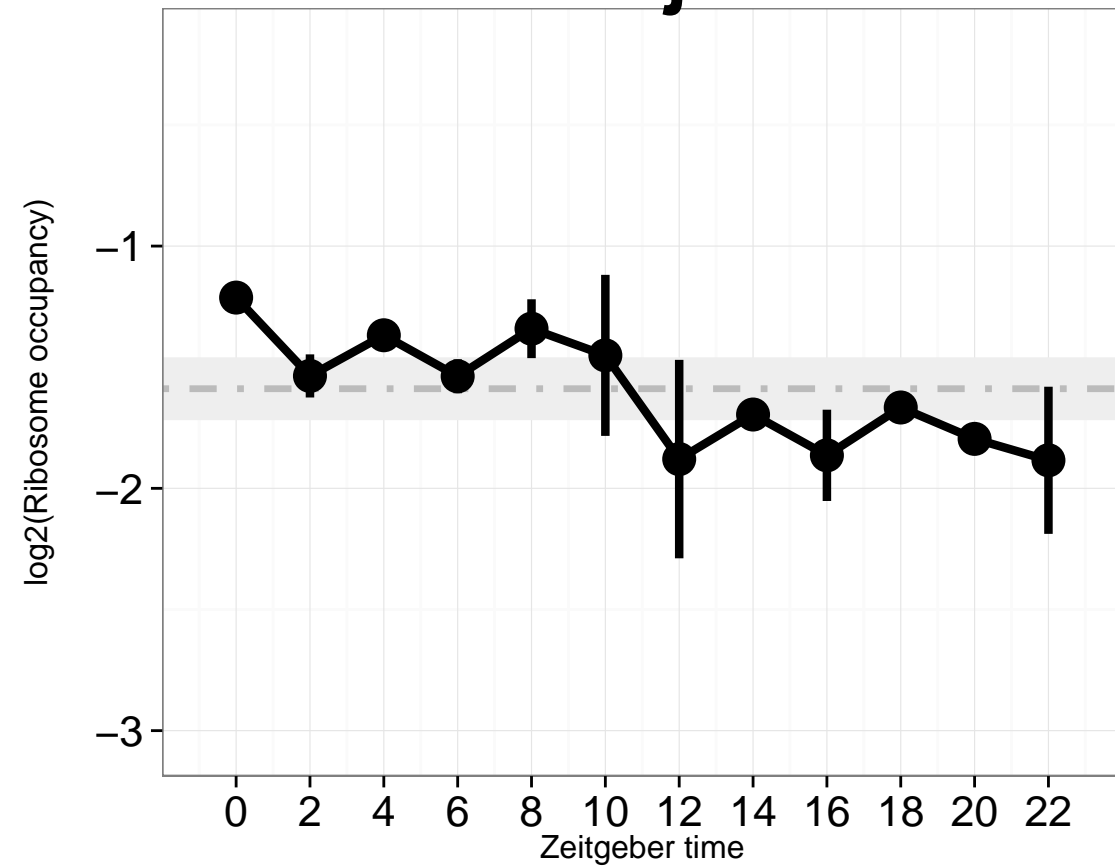

Supplement: Supplementary file 10520 [file 1]

## Hnrnpd

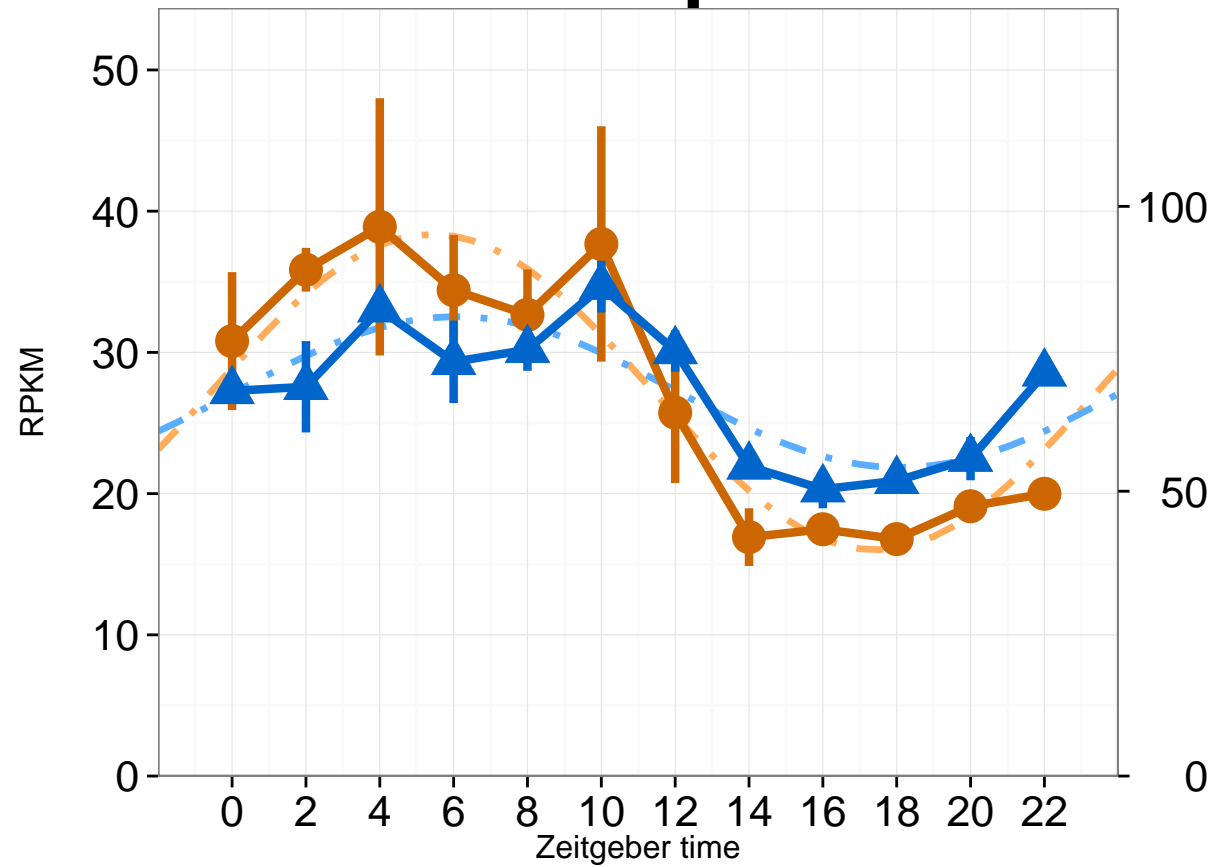

## Hnrnpd

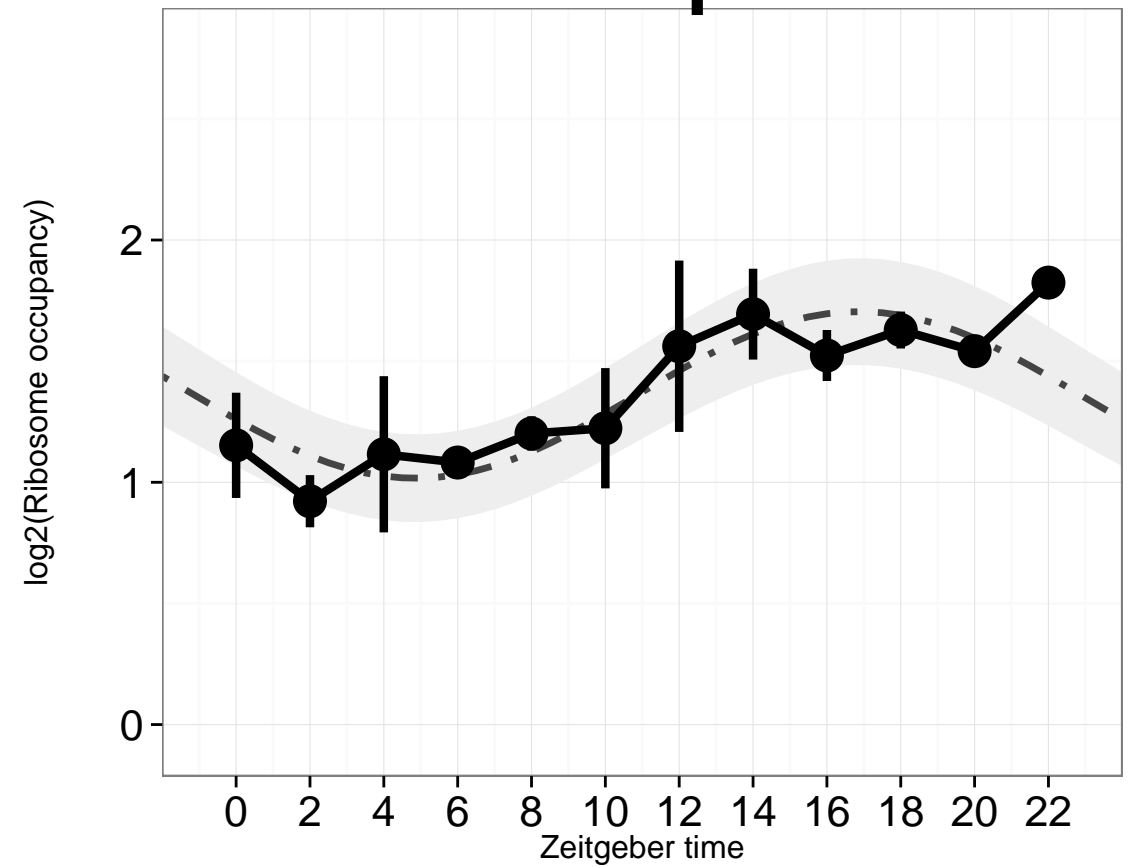

Supplement: Supplementary file 10521 [file 1]

## Invs

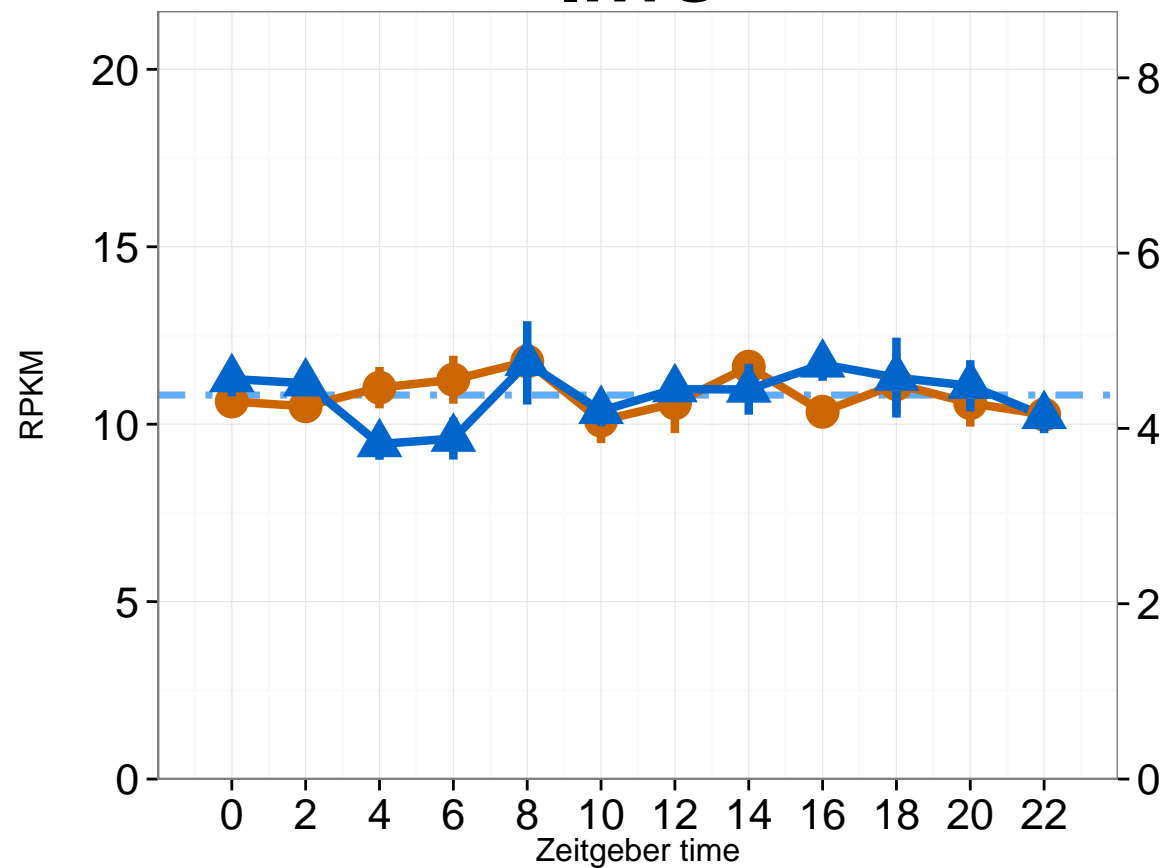

## Invs

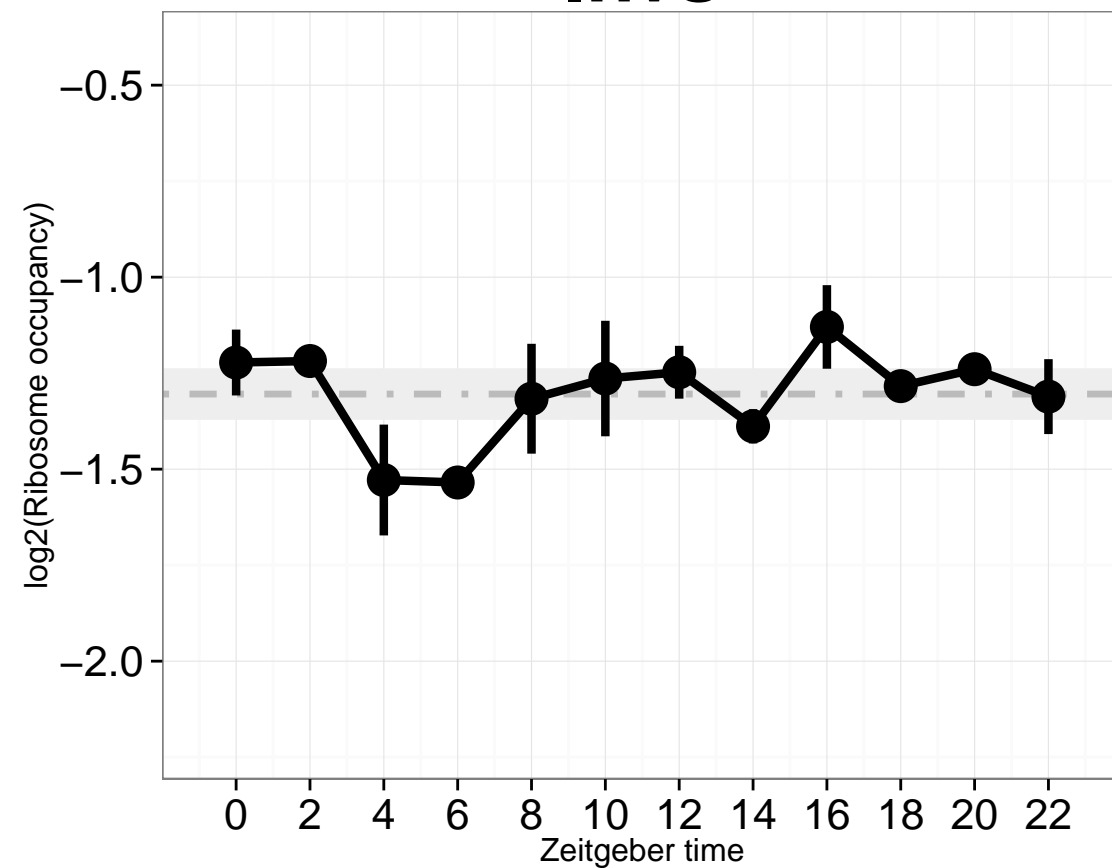

Supplement: Supplementary file 10522 [file 1]

## Ddi2

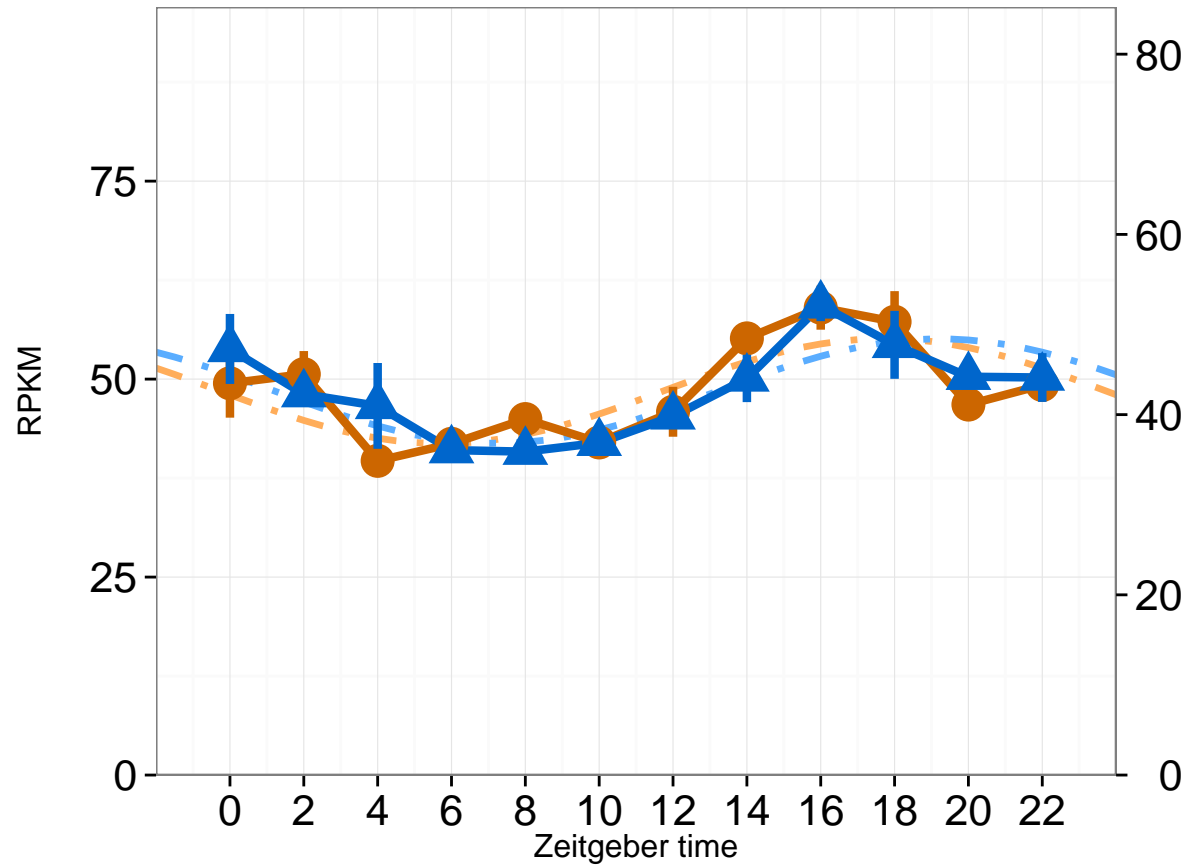

## Ddi2

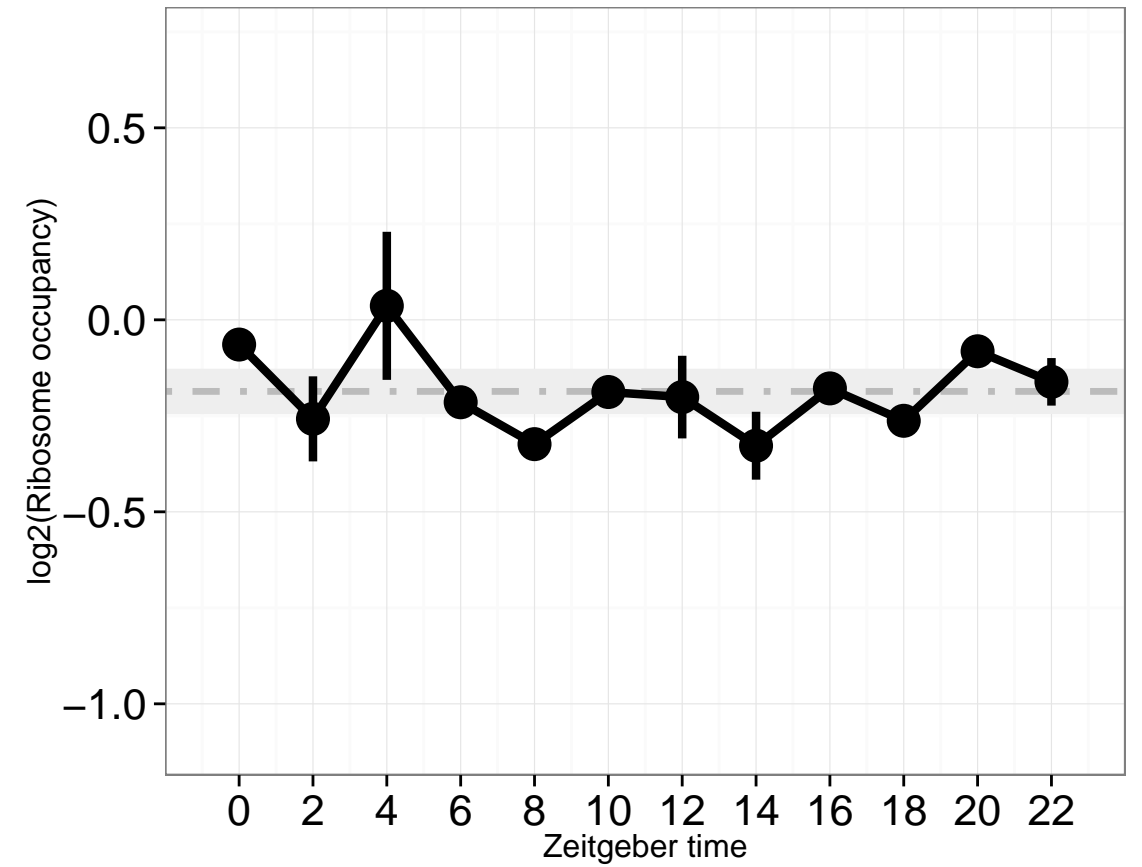

Supplement: Supplementary file 10523 [file 1]

# Mmp11

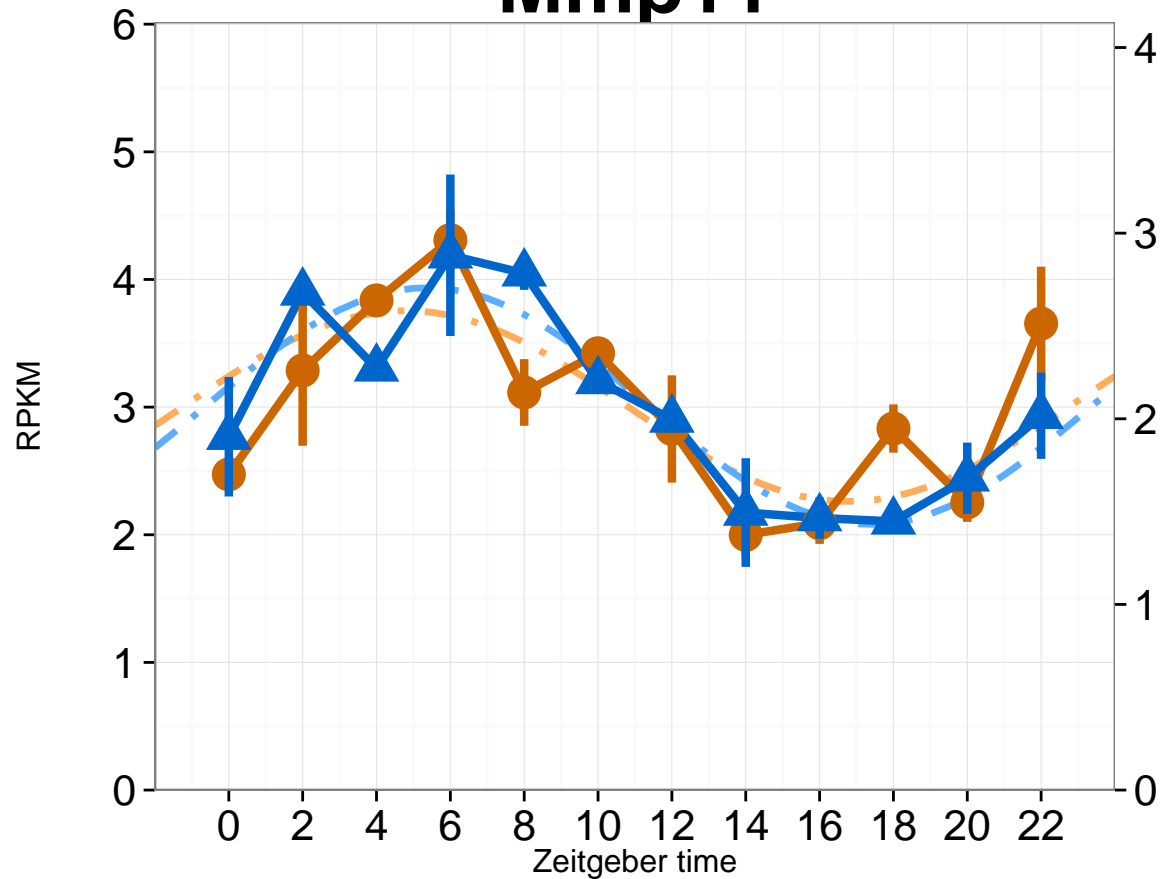

# Mmp11

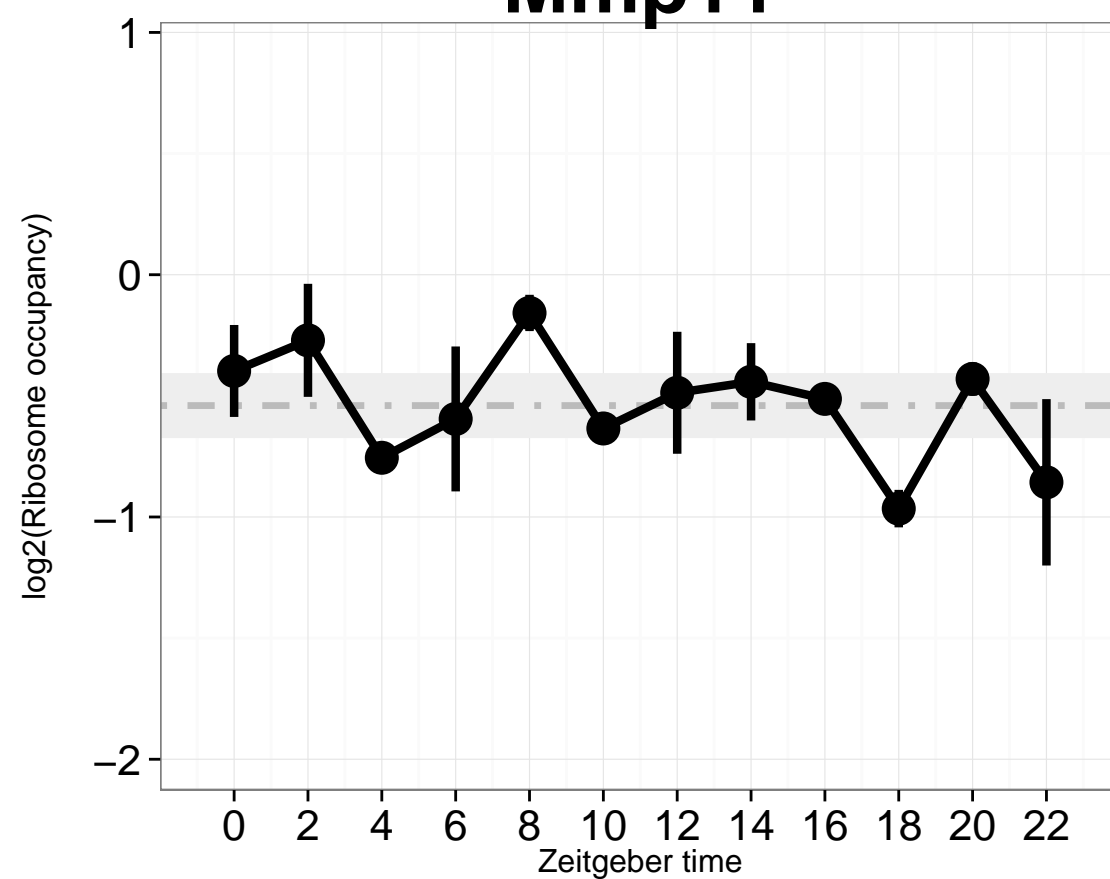

Supplement: Supplementary file 10524 [file 1]

# HapIn1

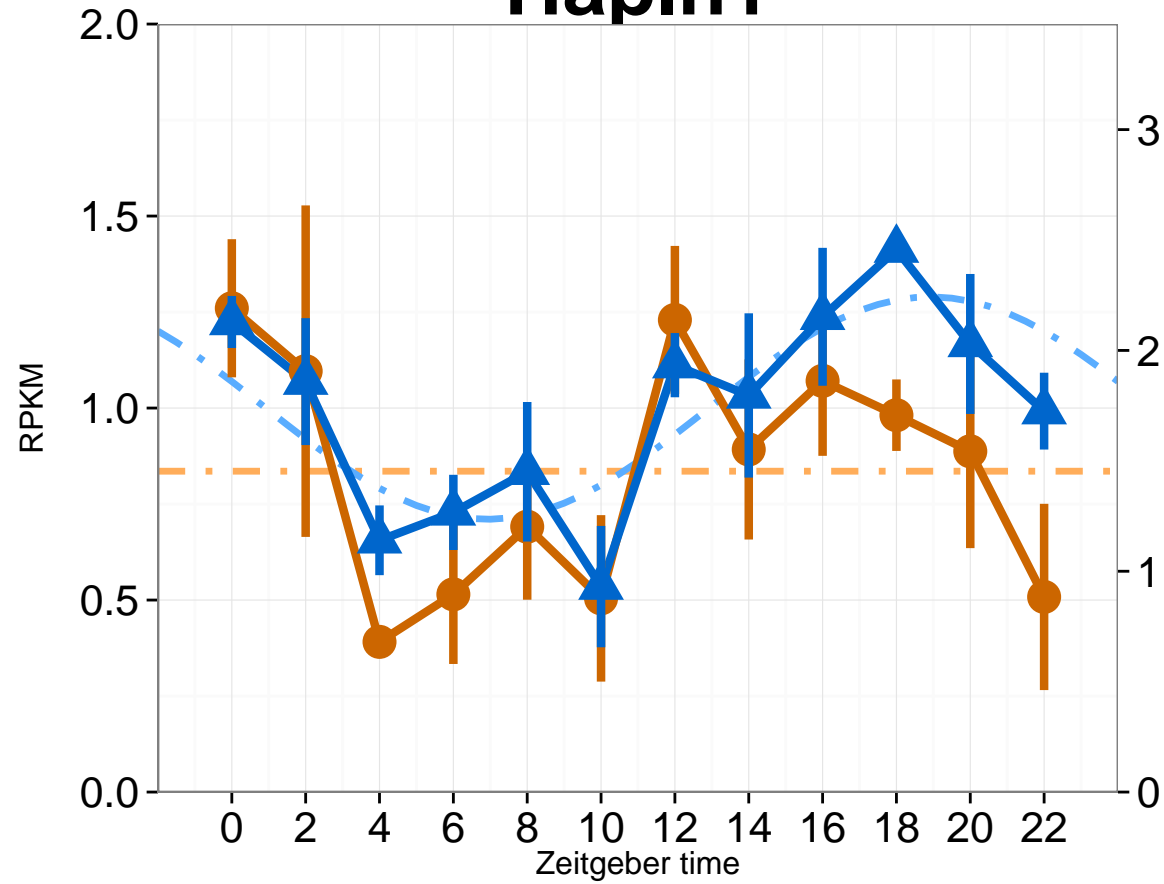

# HapIn1

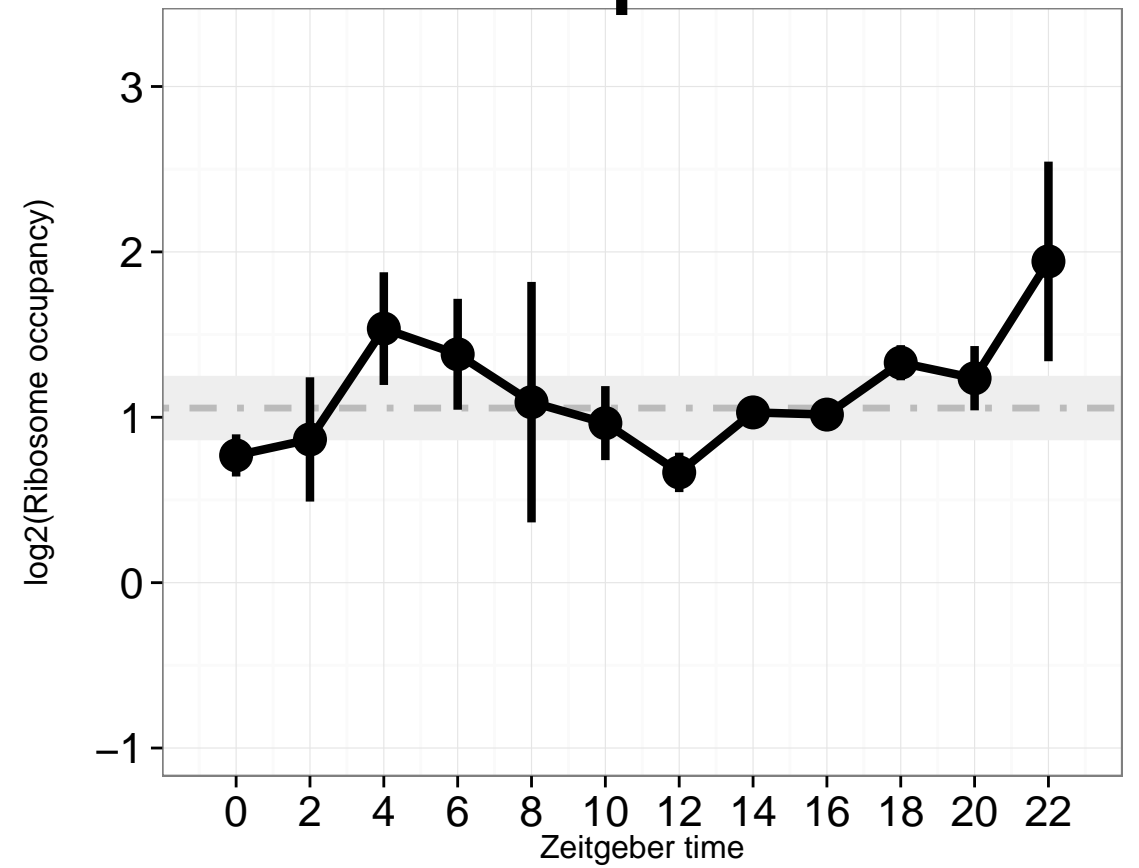

Supplement: Supplementary file 10525 [file 1]

# Coq7

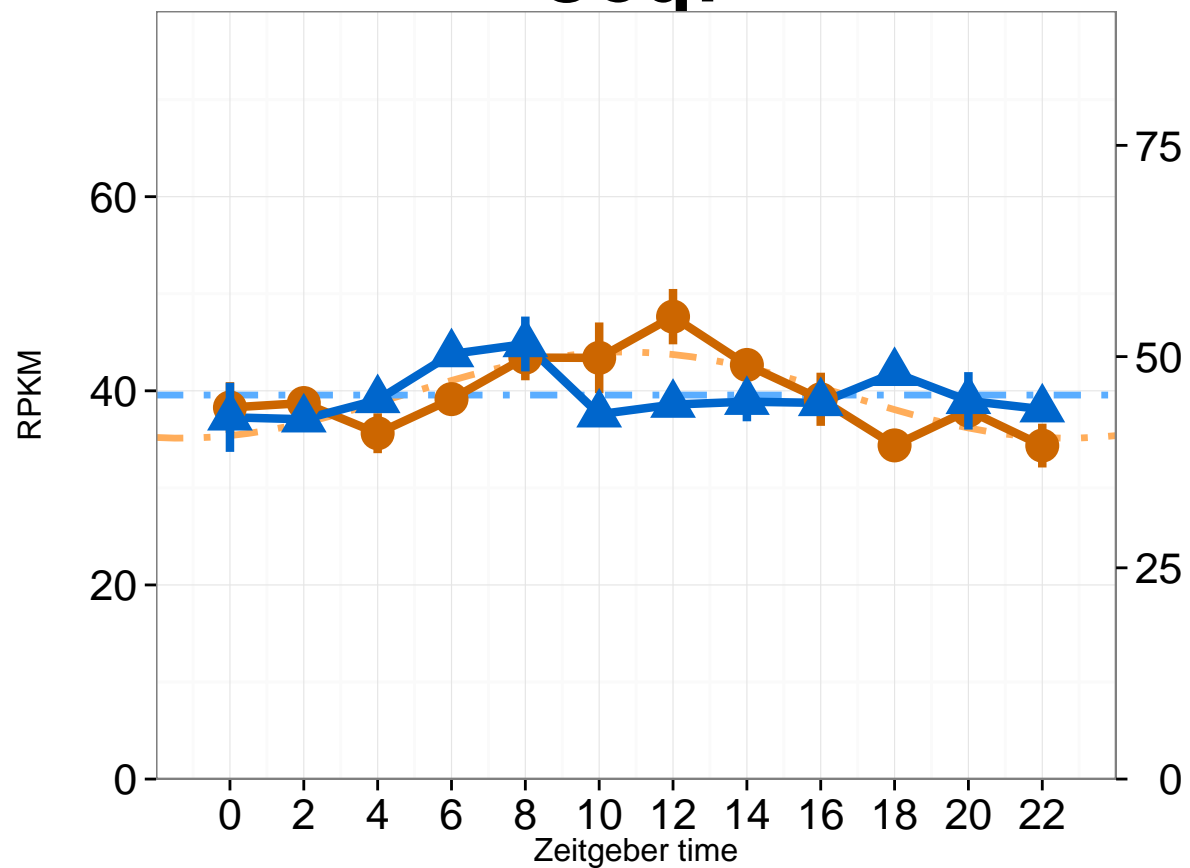

# Coq7

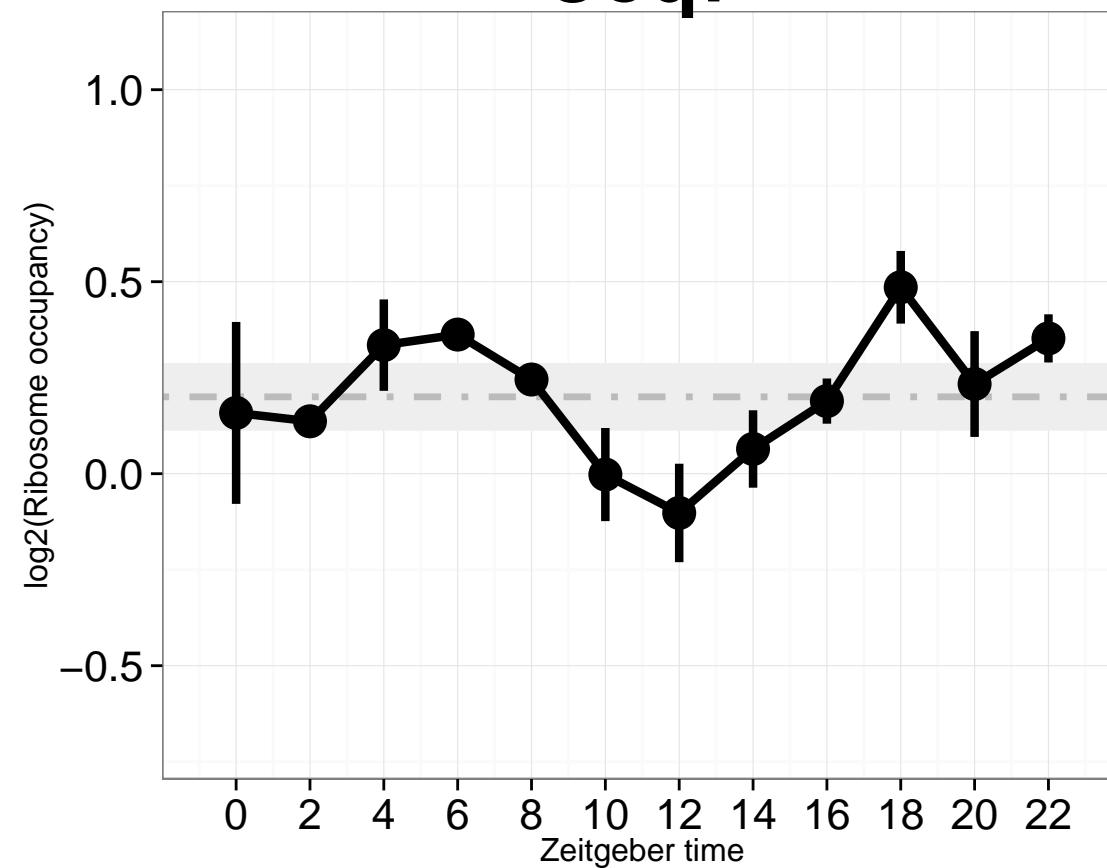

Supplement: Supplementary file 10526 [file 1]

## Plekha6

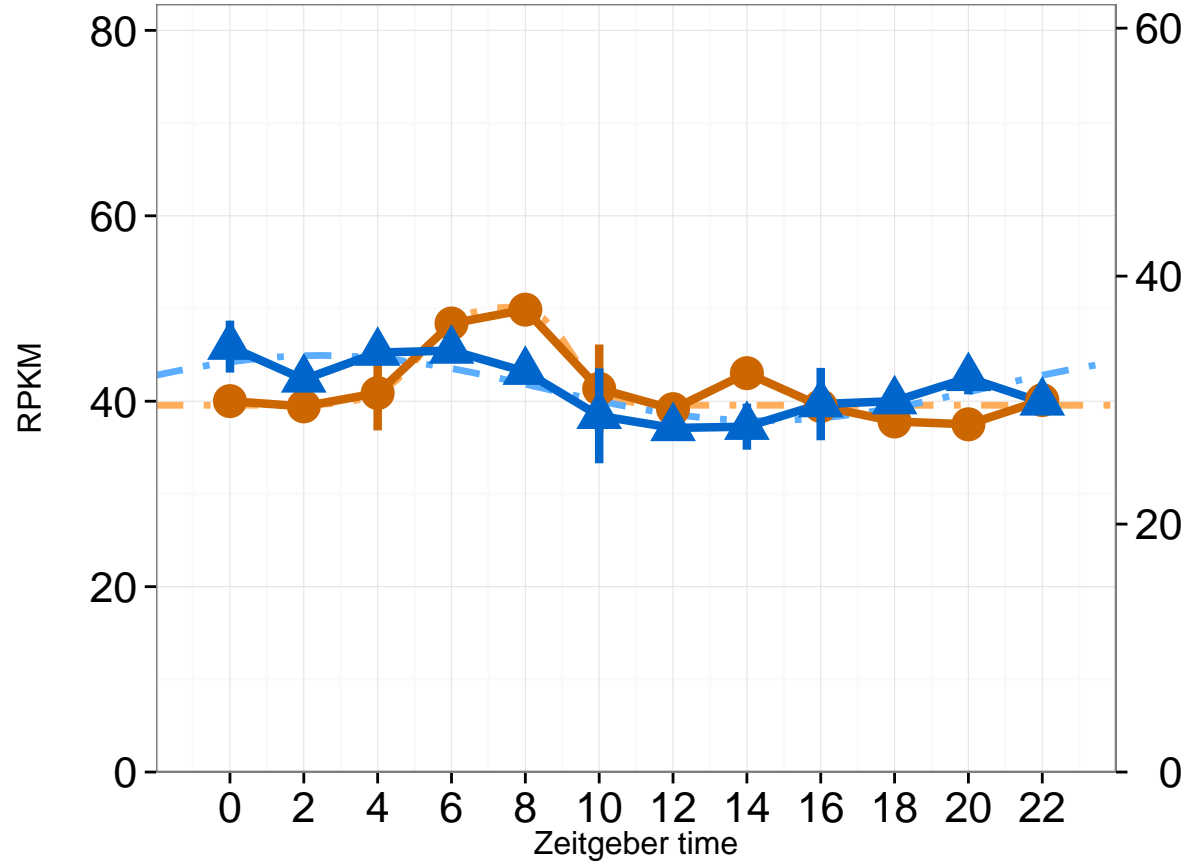

## Plekha6

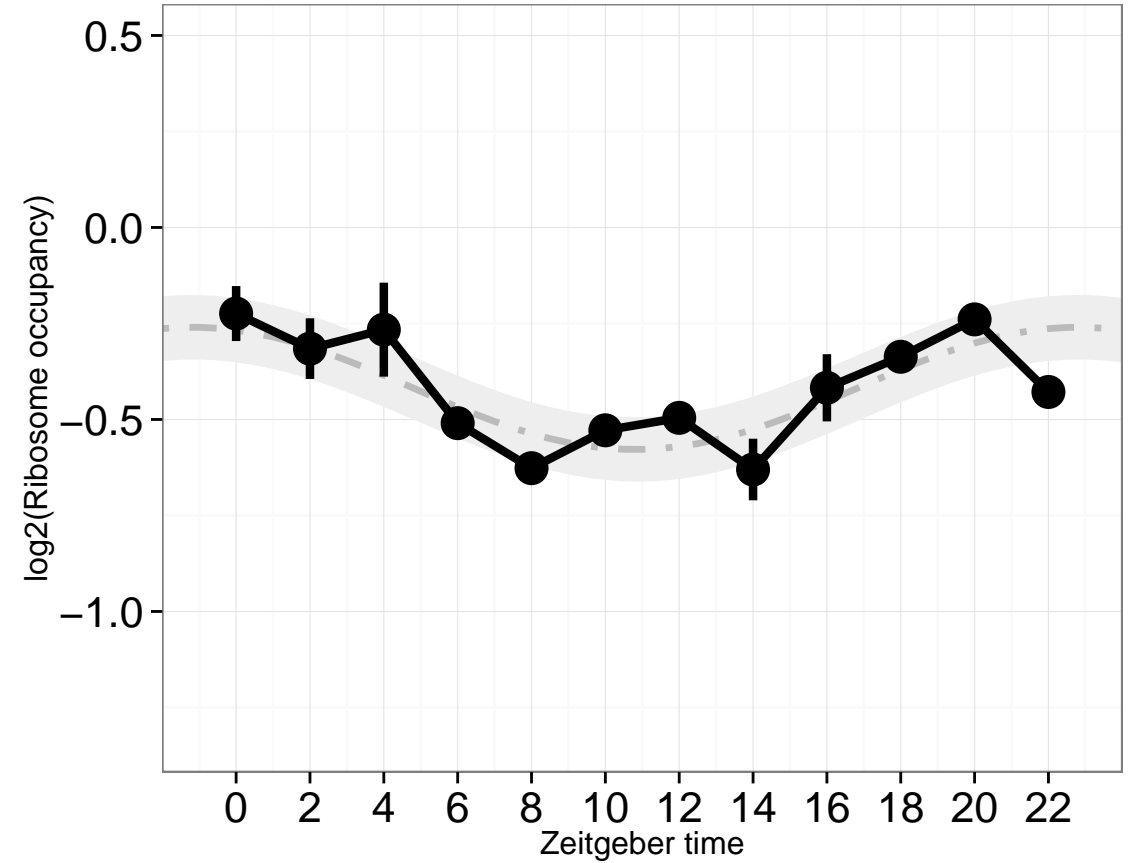

Supplement: Supplementary file 10527 [file 1]

## Blvrb

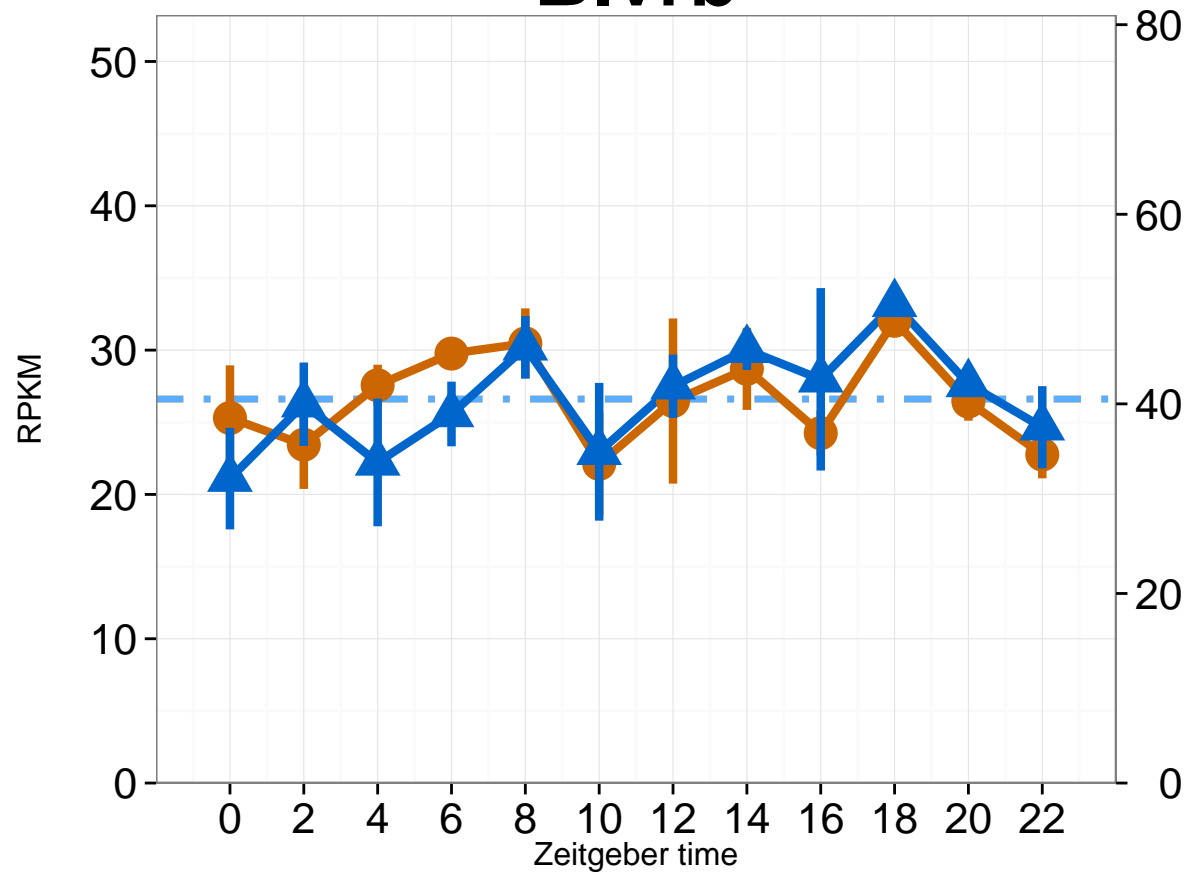

## Blvrb

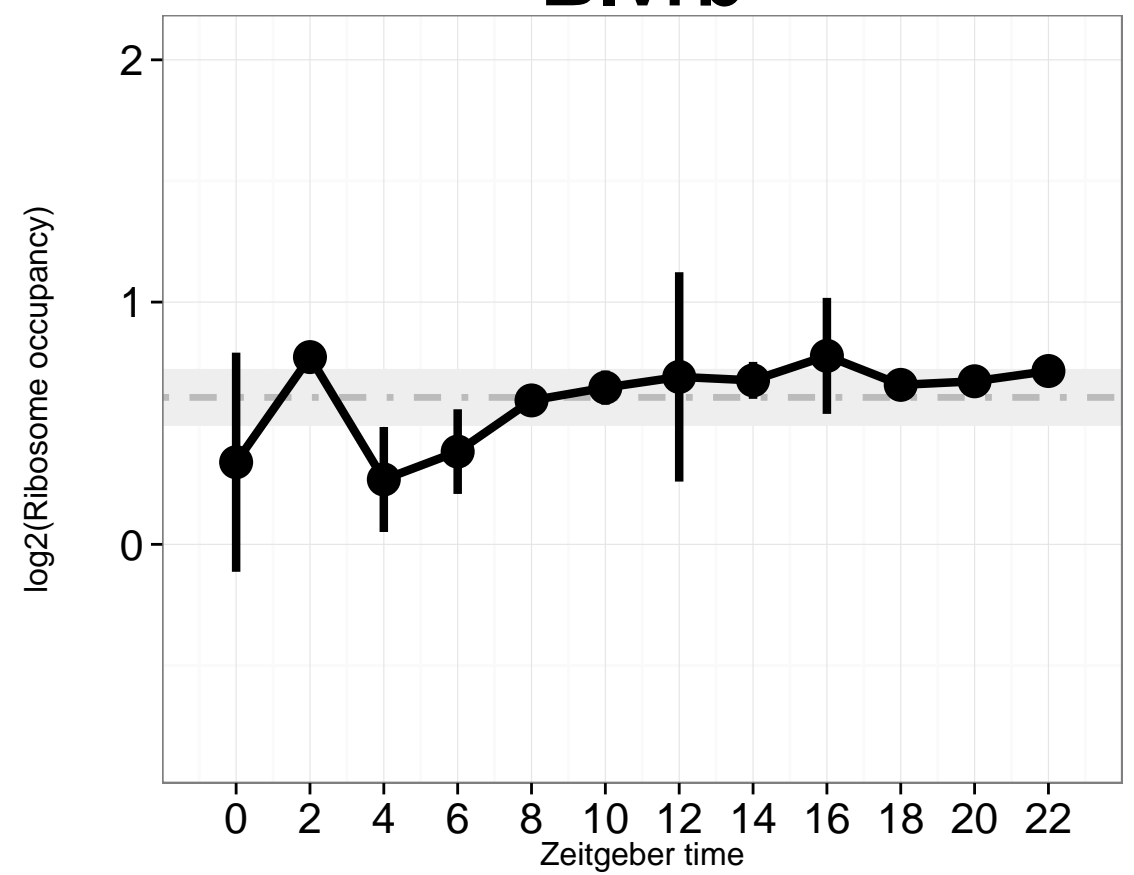

Supplement: Supplementary file 10528 [file 1]

## Alkbh8

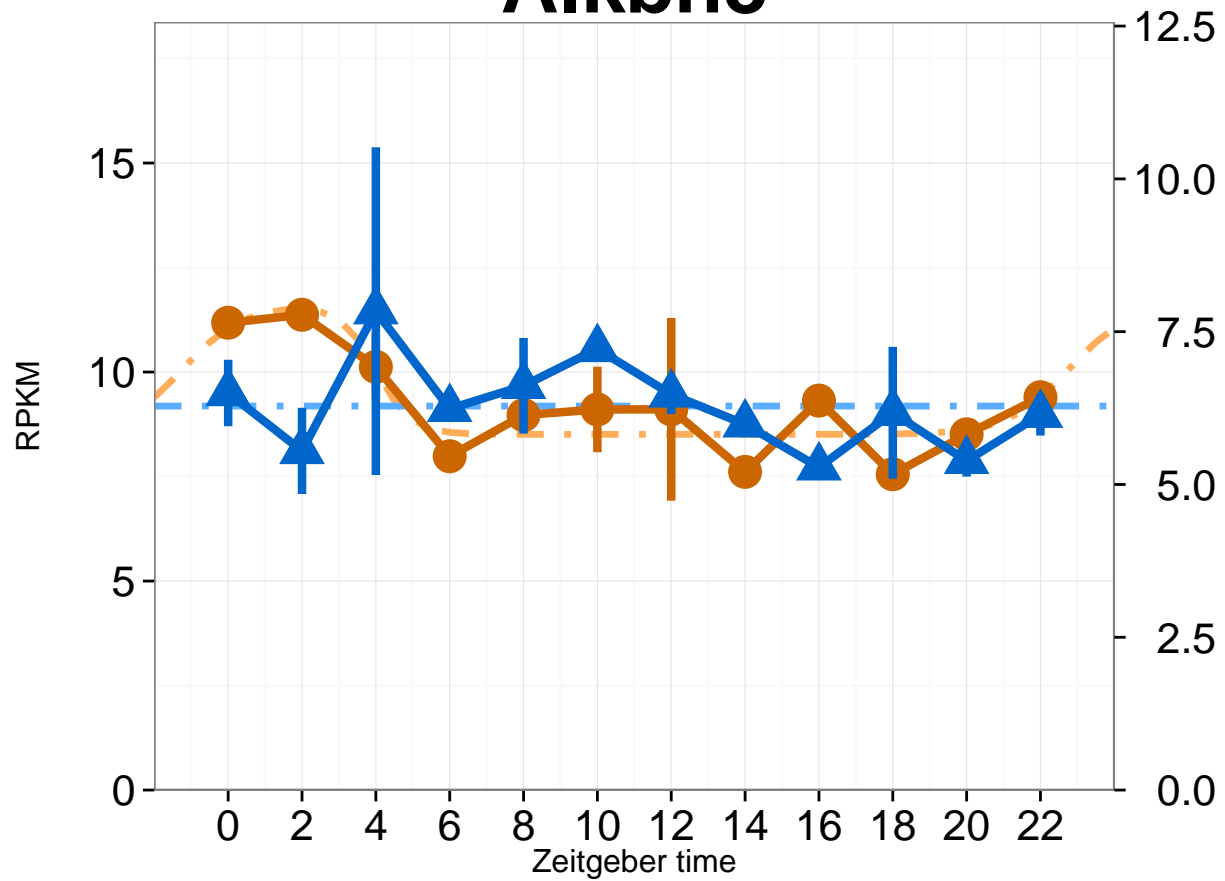

## Alkbh8

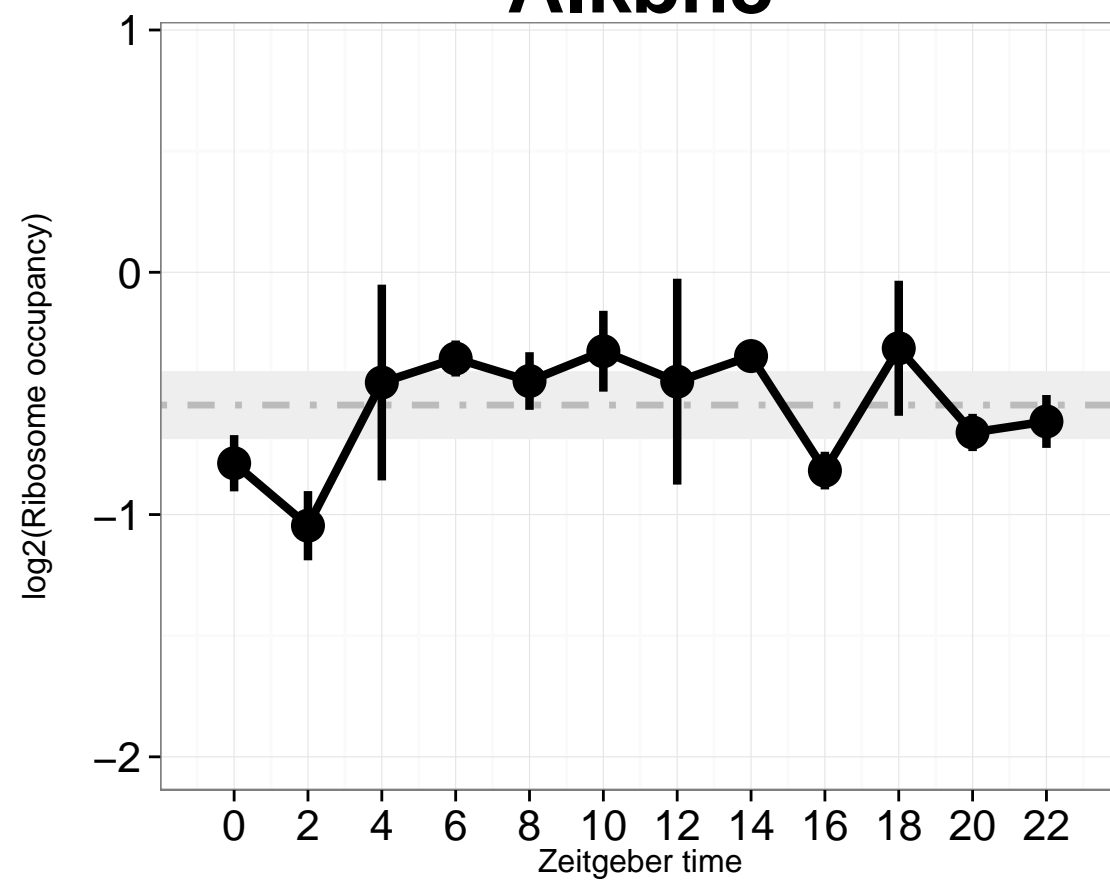

Supplement: Supplementary file 10529 [file 1]

## Uba3

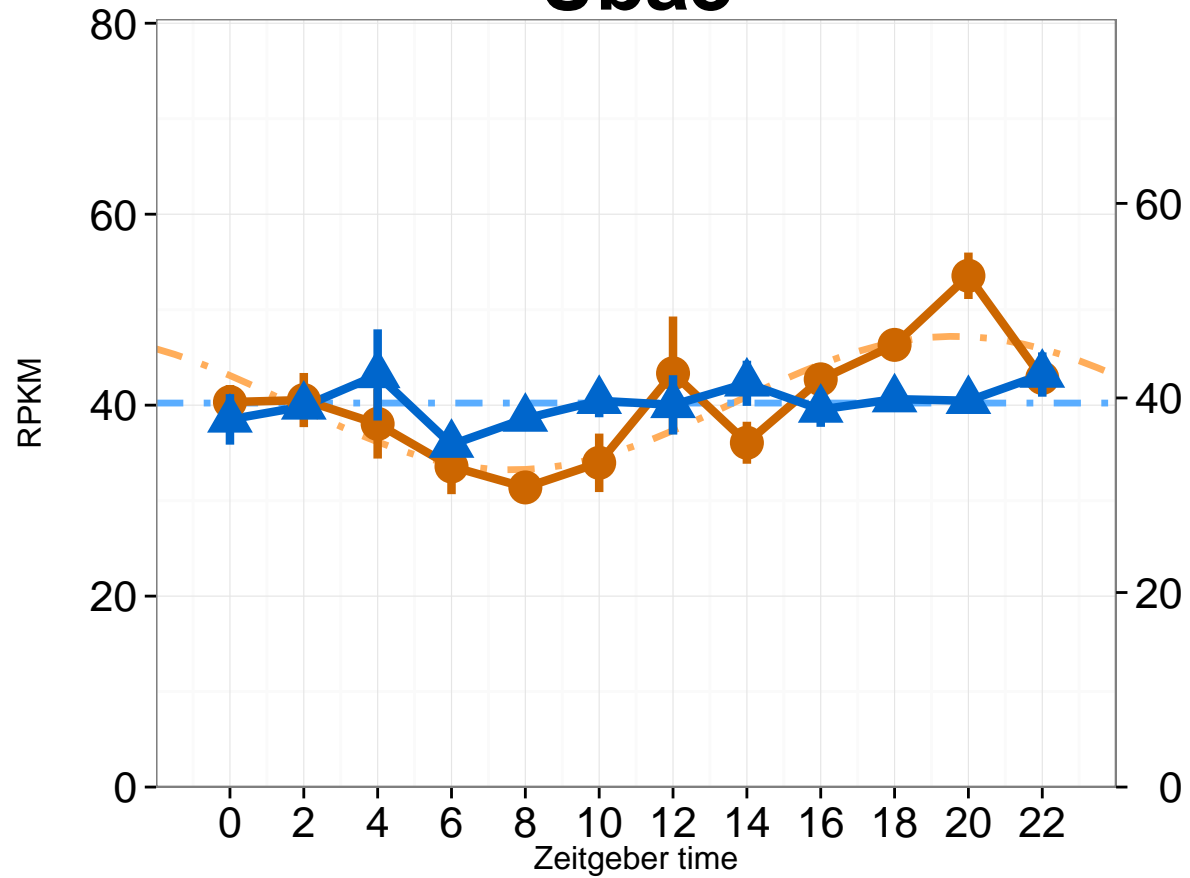

## Uba3

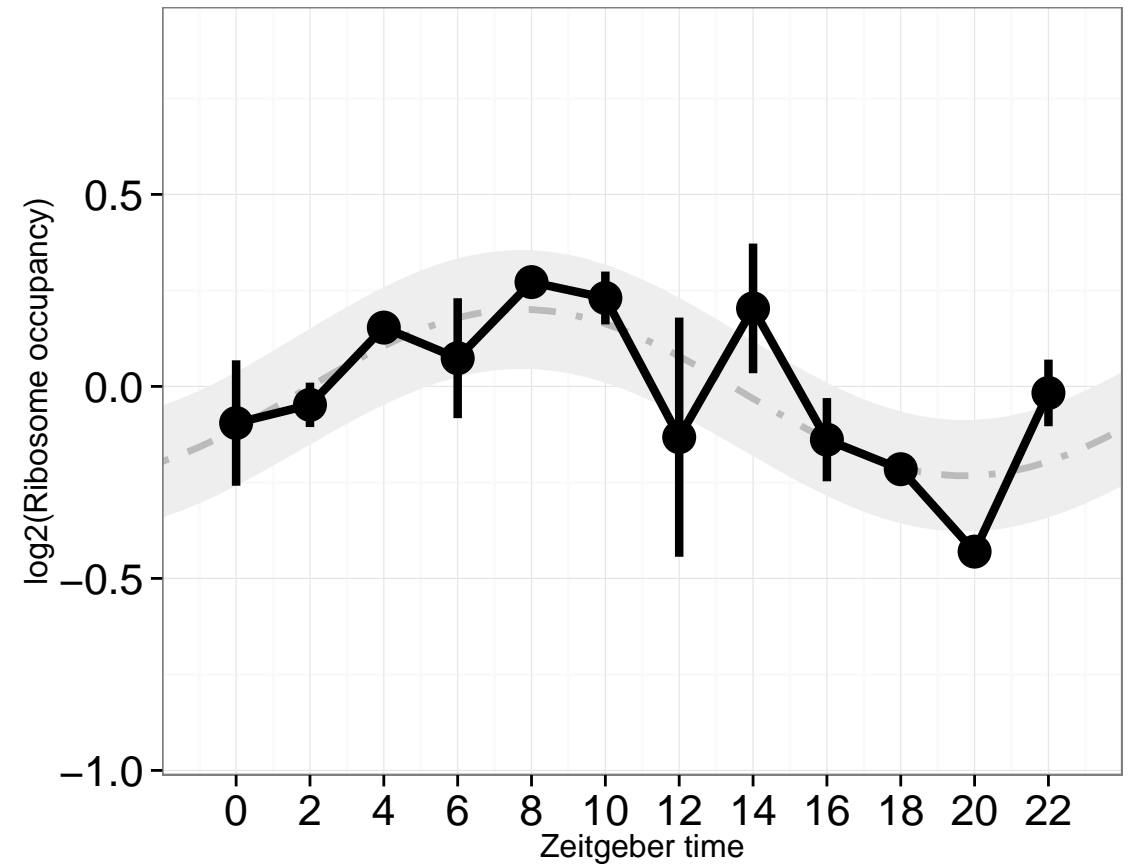

Supplement: Supplementary file 10530 [file 1]

## Mgat1

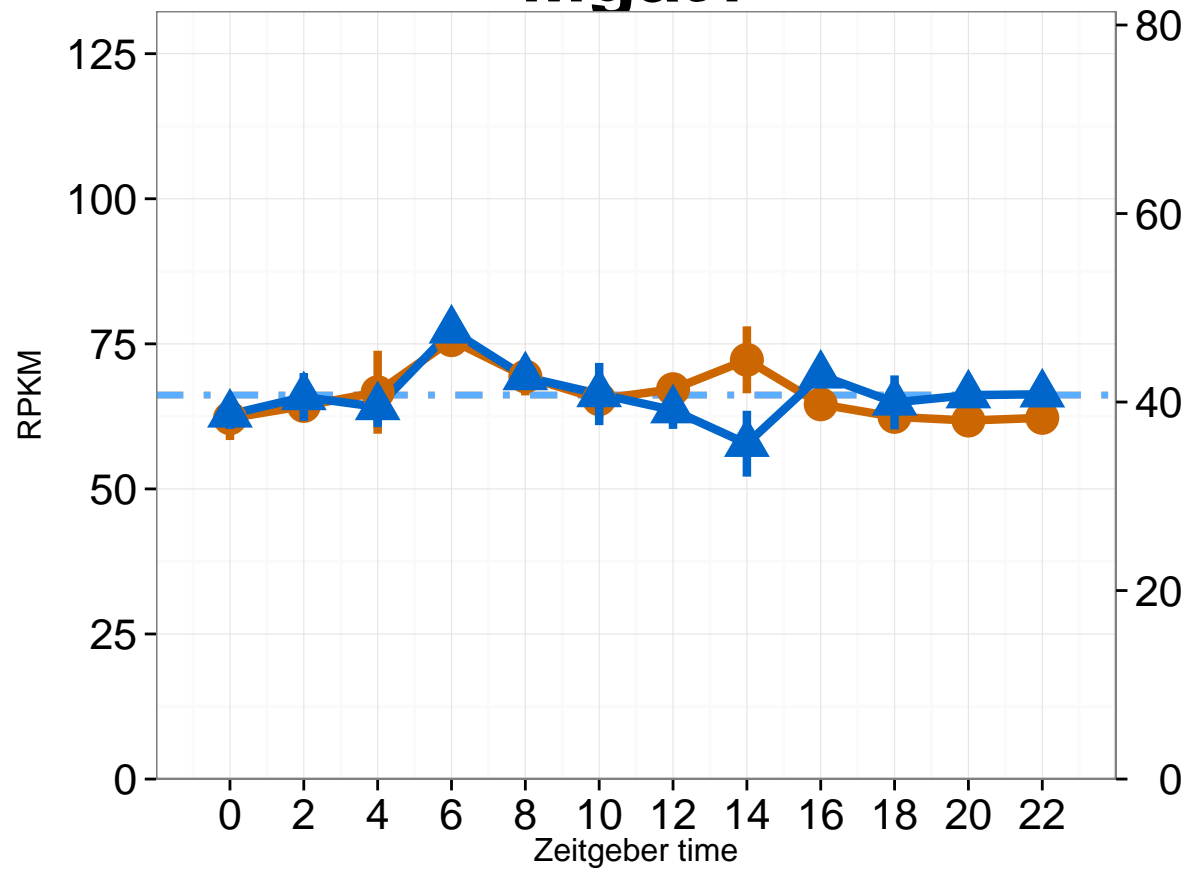

## Mgat1

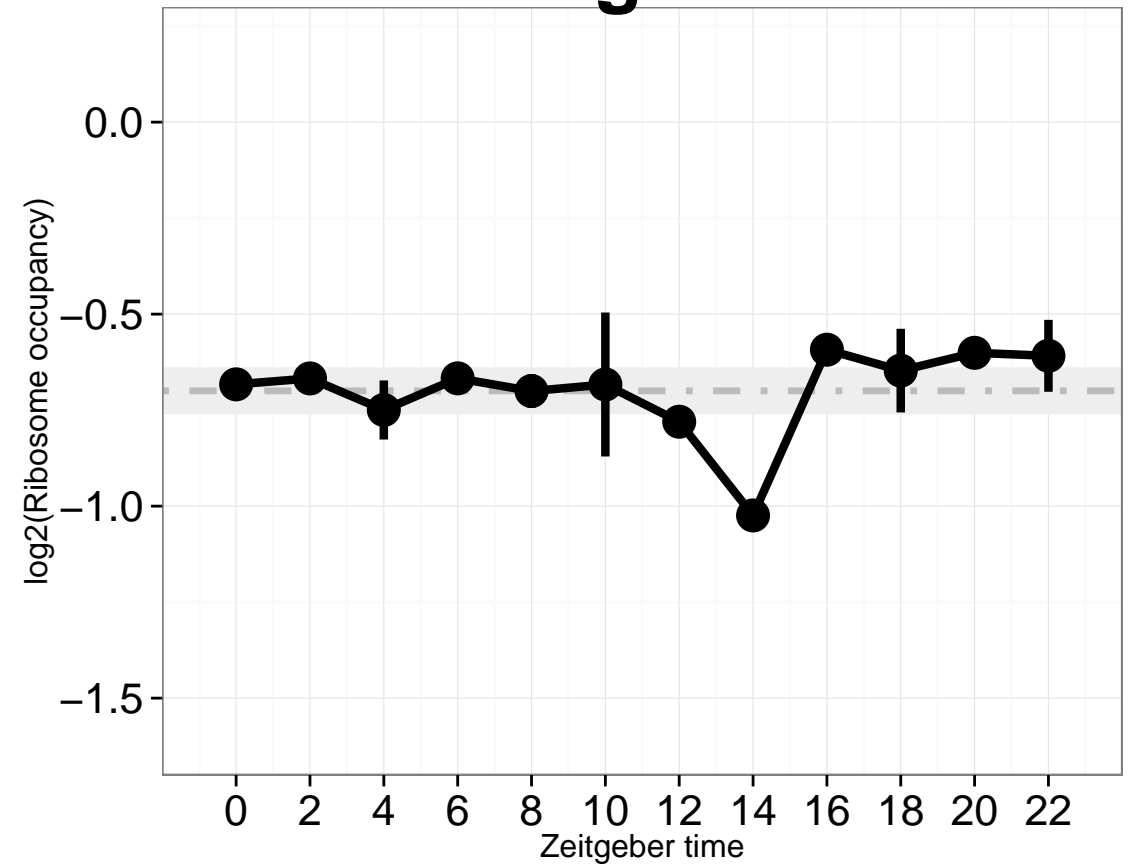

Supplement: Supplementary file 10531 [file 1]

# Dnajc13

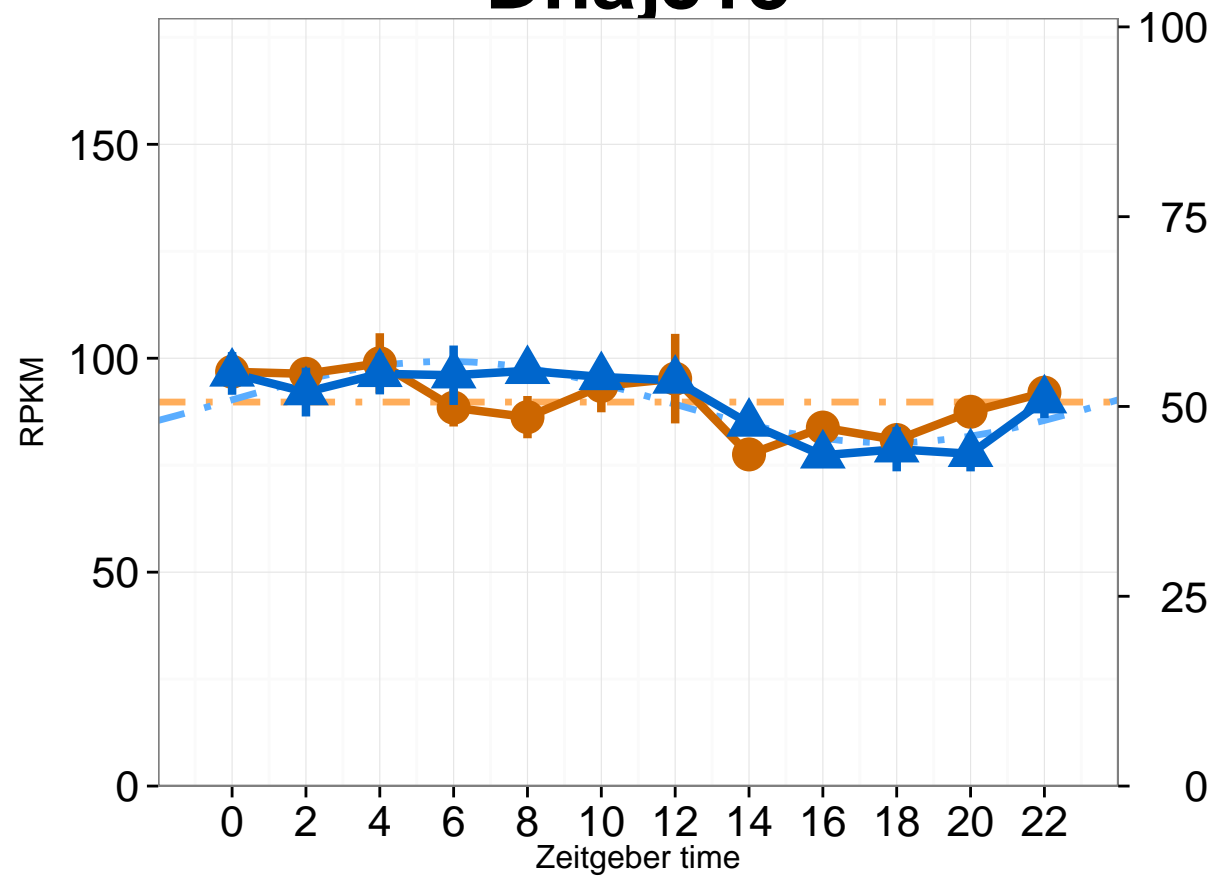

# Dnajc13

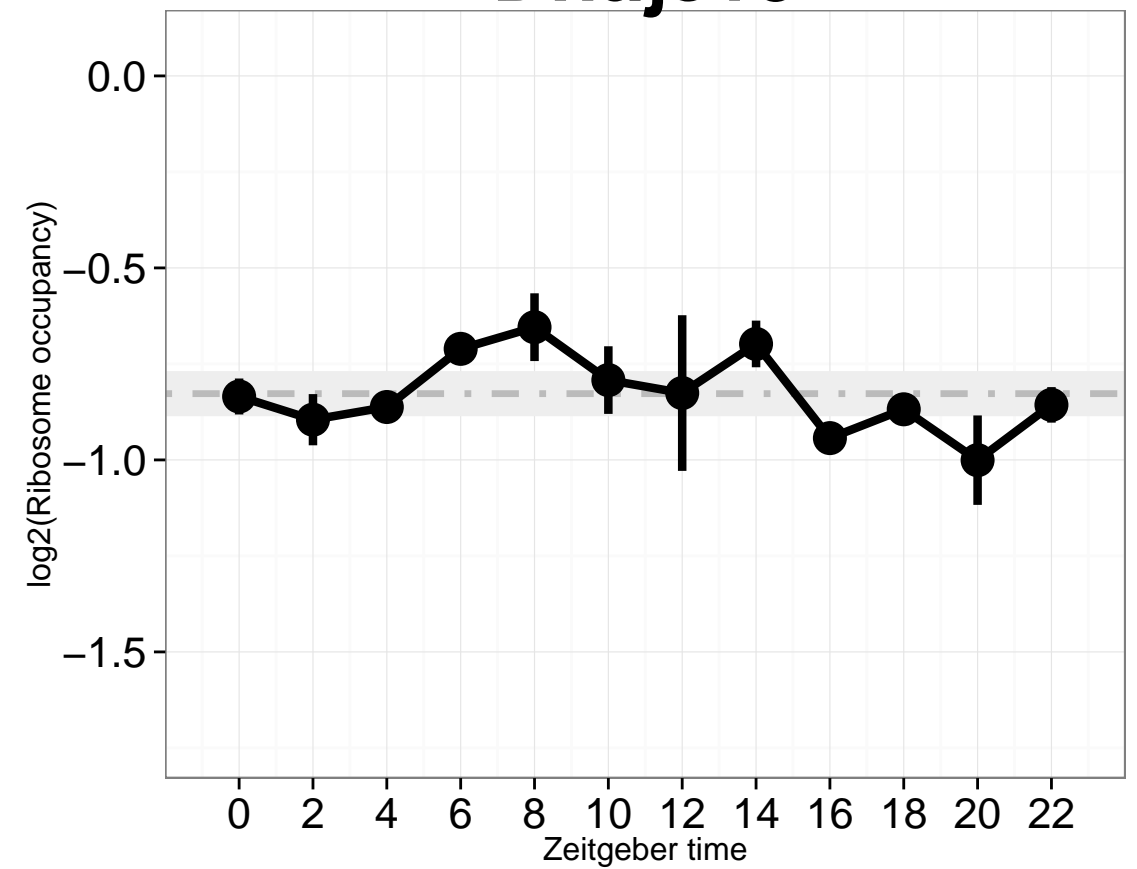

Supplement: Supplementary file 10532 [file 1]

# Lemd2

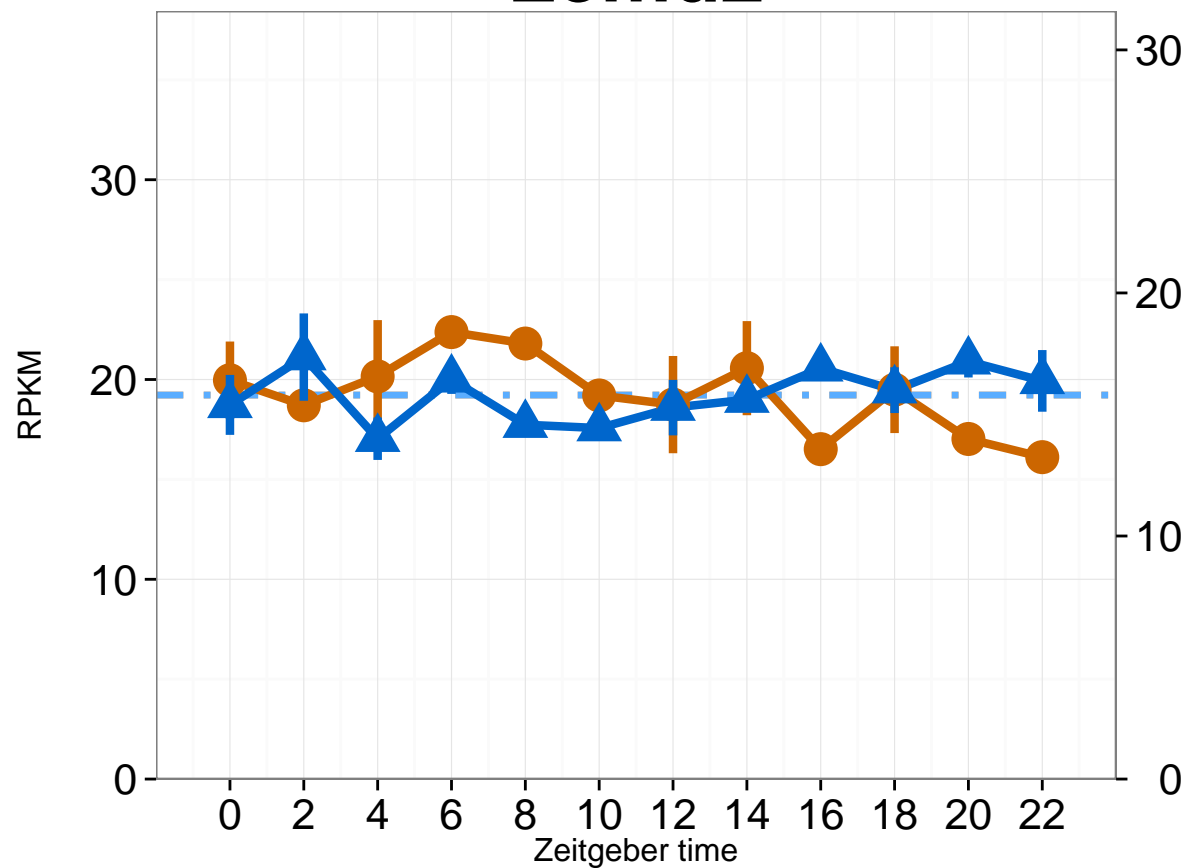

# Lemd2

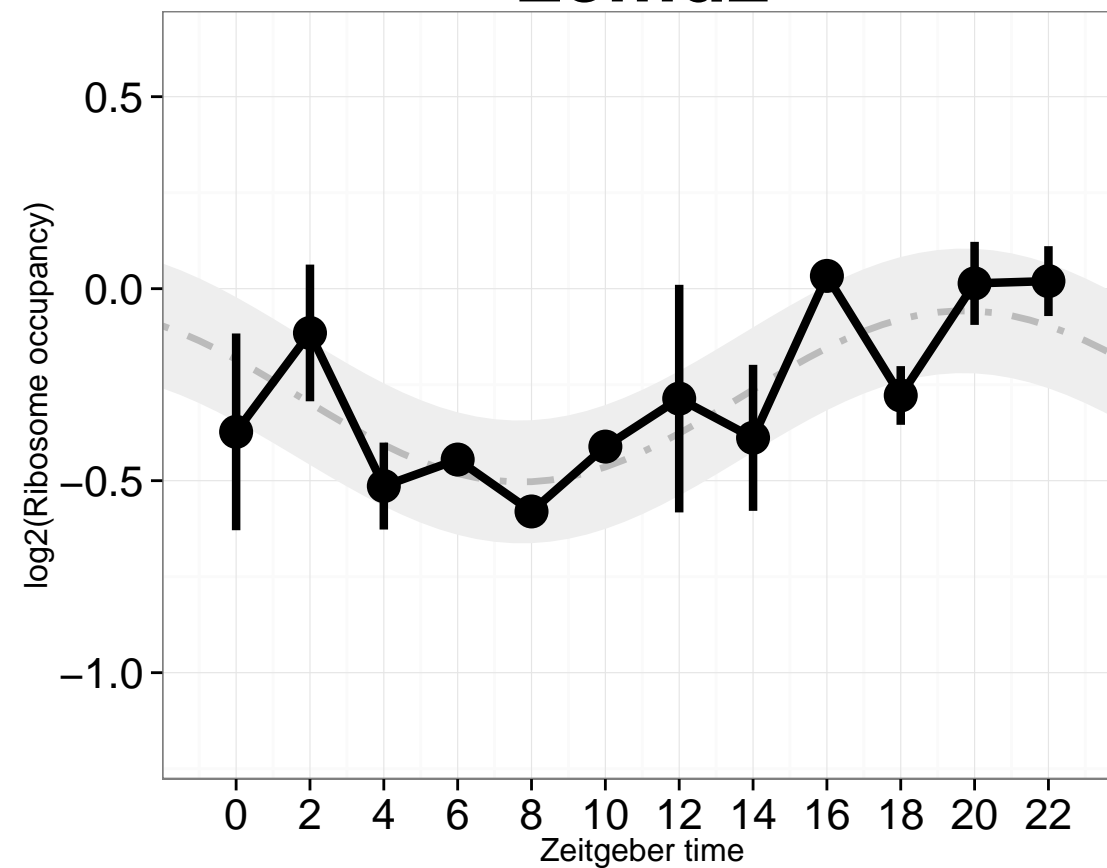

Supplement: Supplementary file 10533 [file 1]

## Ssbp4

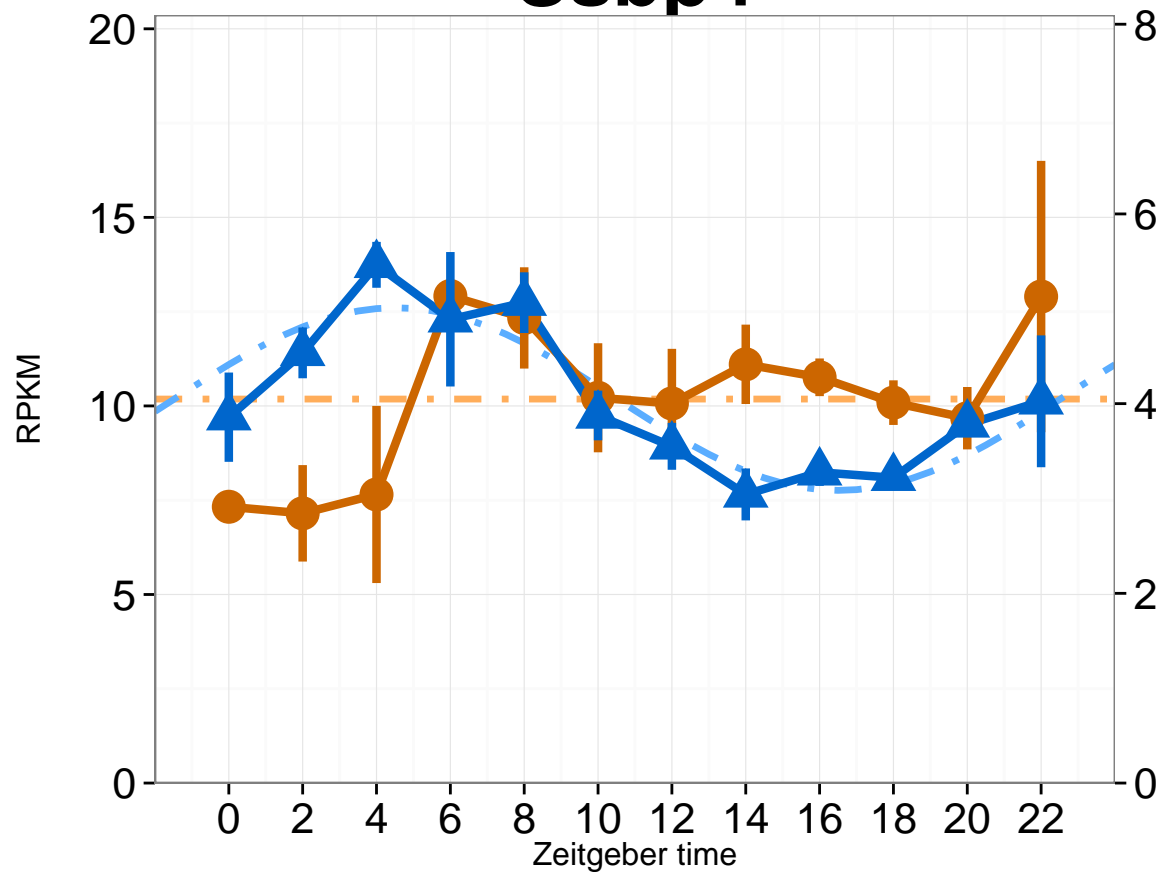

## Ssbp4

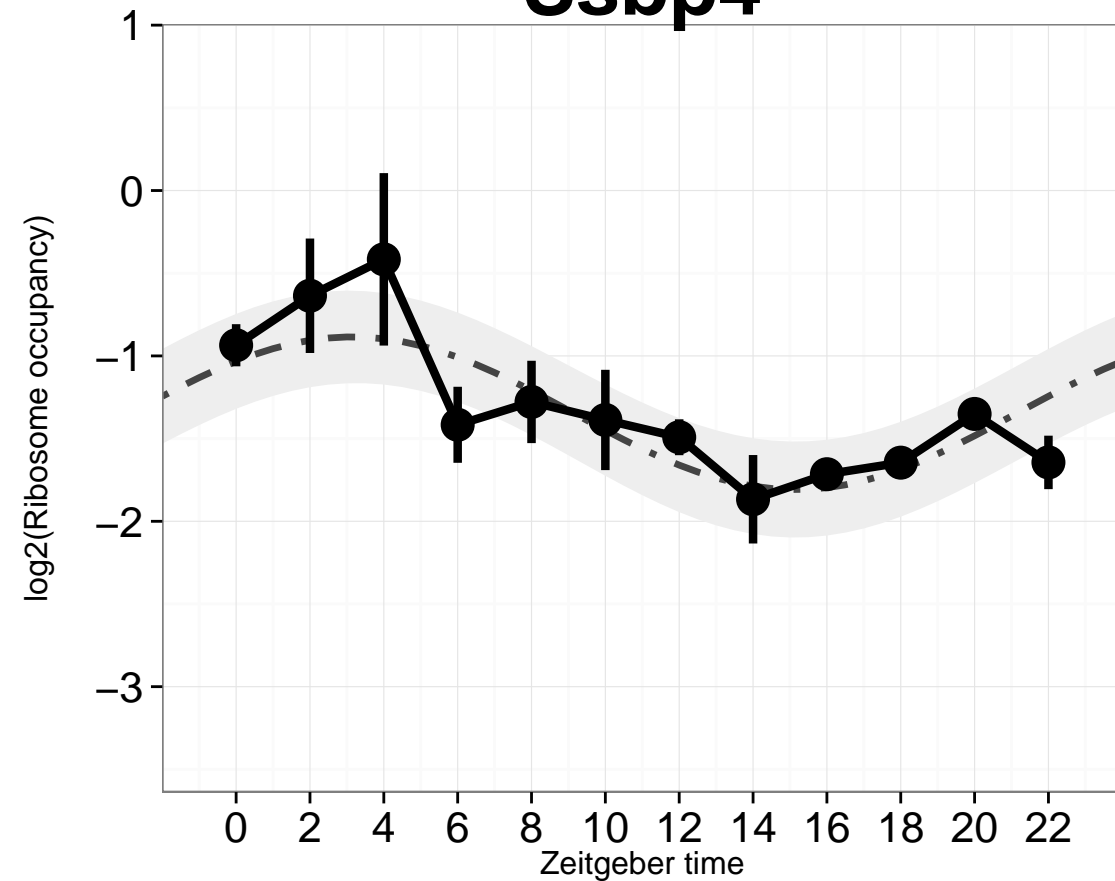

Supplement: Supplementary file 10534 [file 1]

## Git2

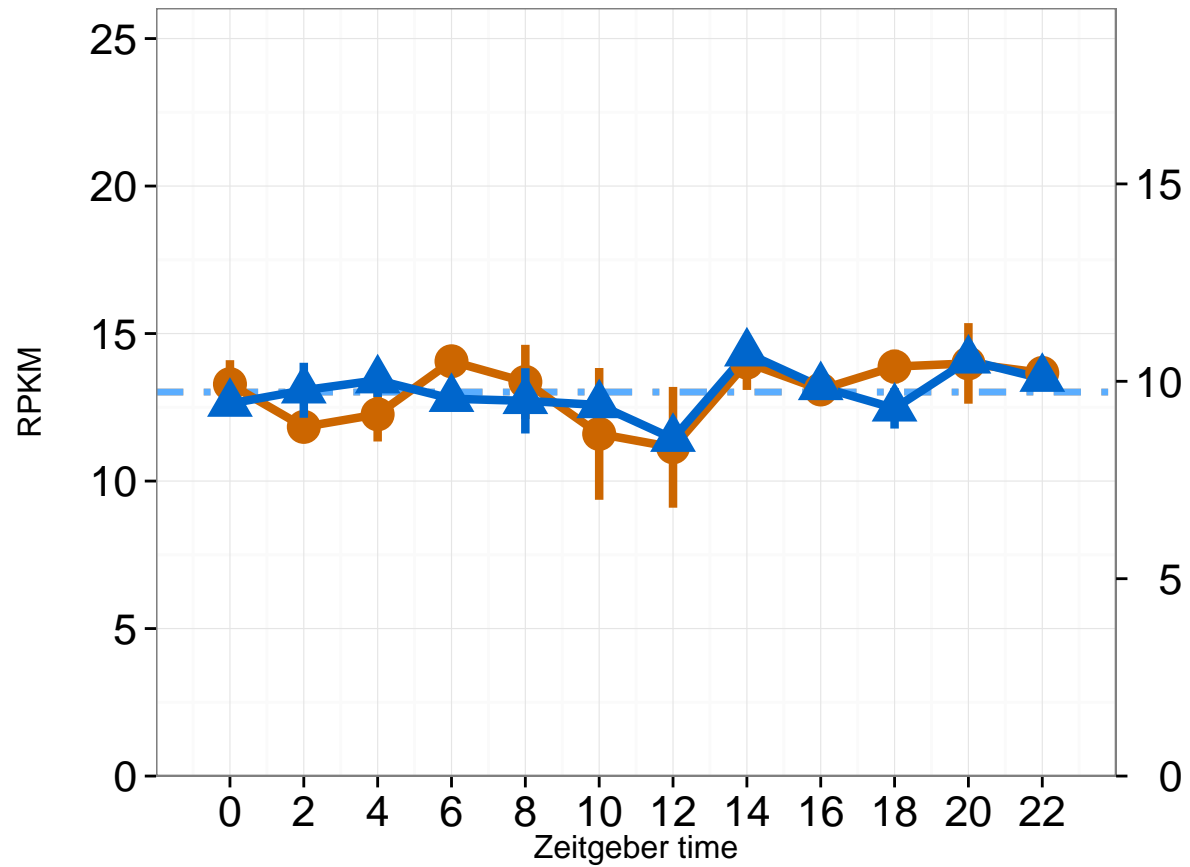

## Git2

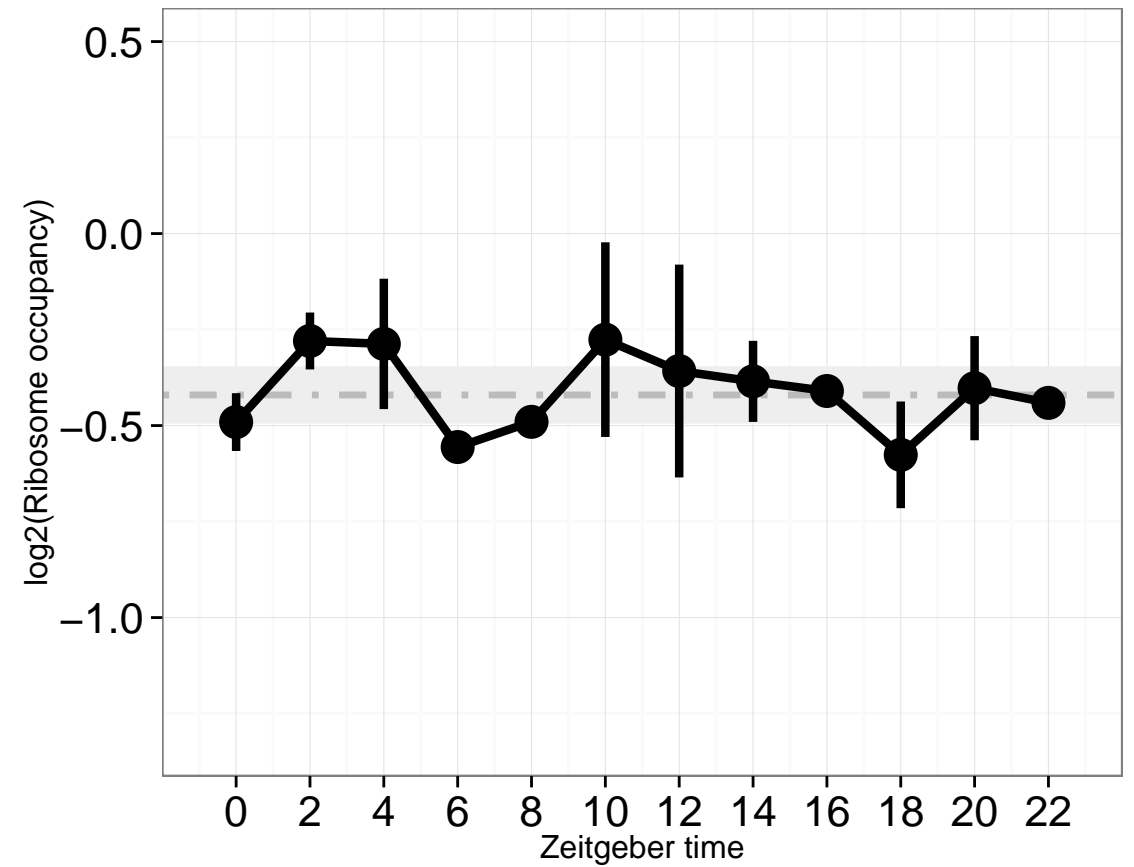

Supplement: Supplementary file 10535 [file 1]

## Golm1

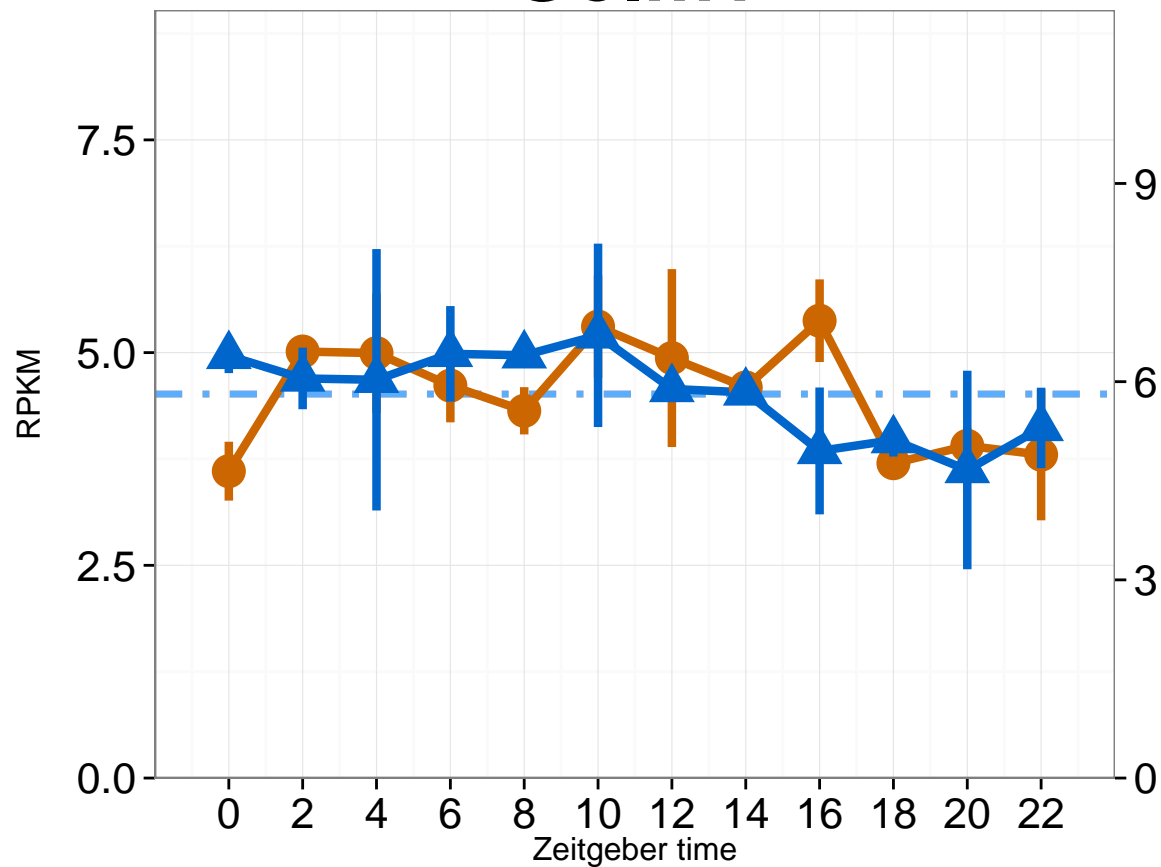

## Golm1

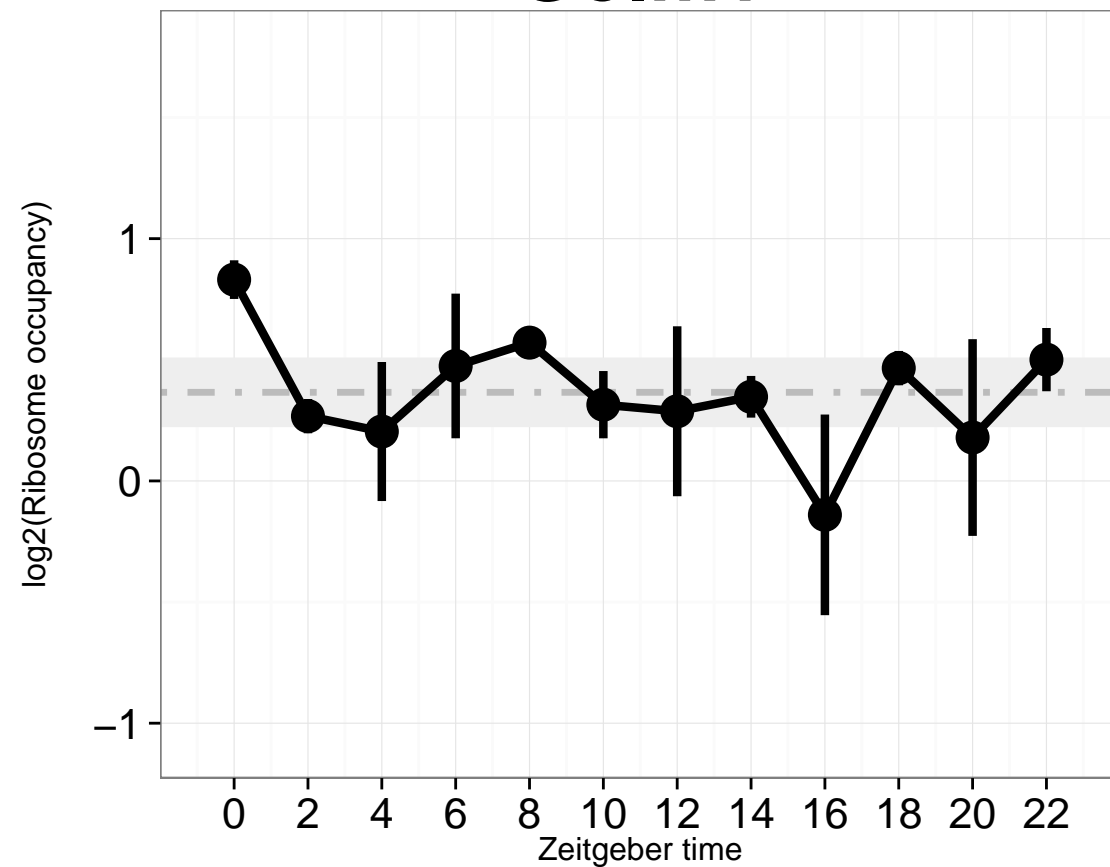

Supplement: Supplementary file 10536 [file 1]

## Gm14403

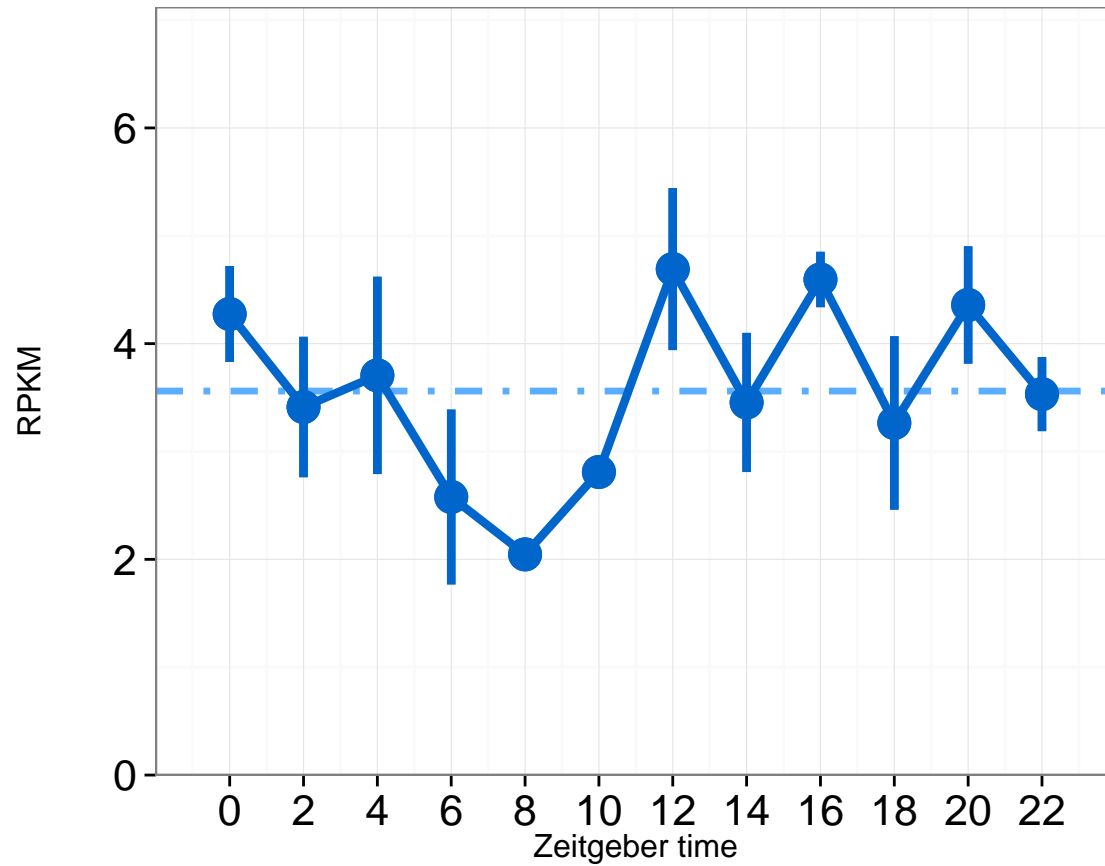

## Gm14403 log2(Ribosome occupanc

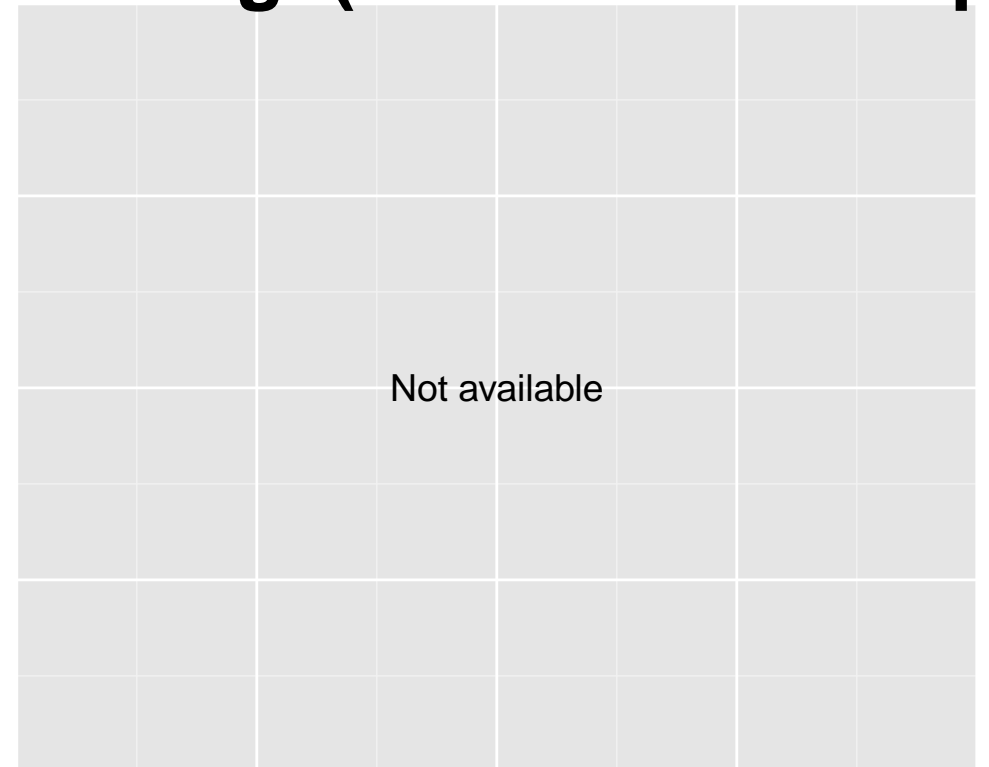

Supplement: Supplementary file 10537 [file 1]

# Ndrp3

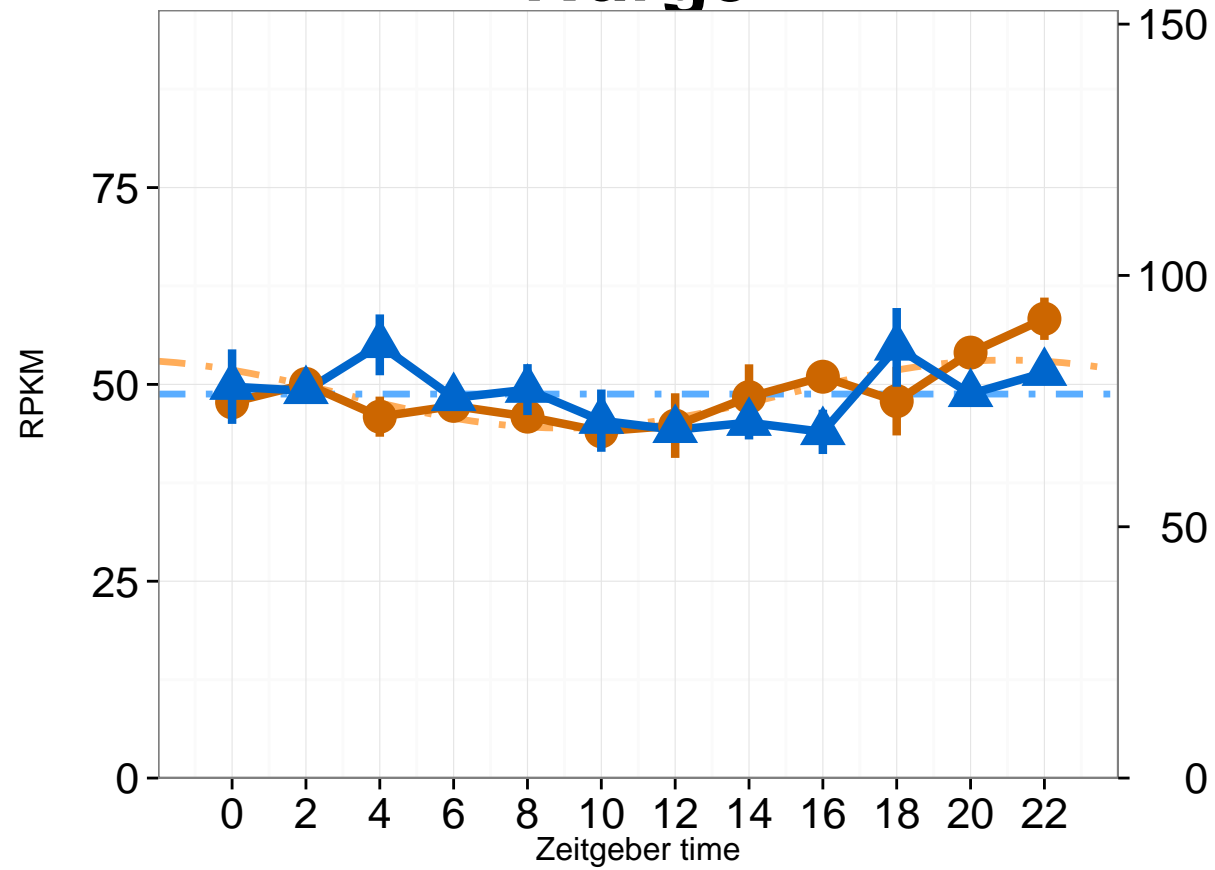

# Ndrp3

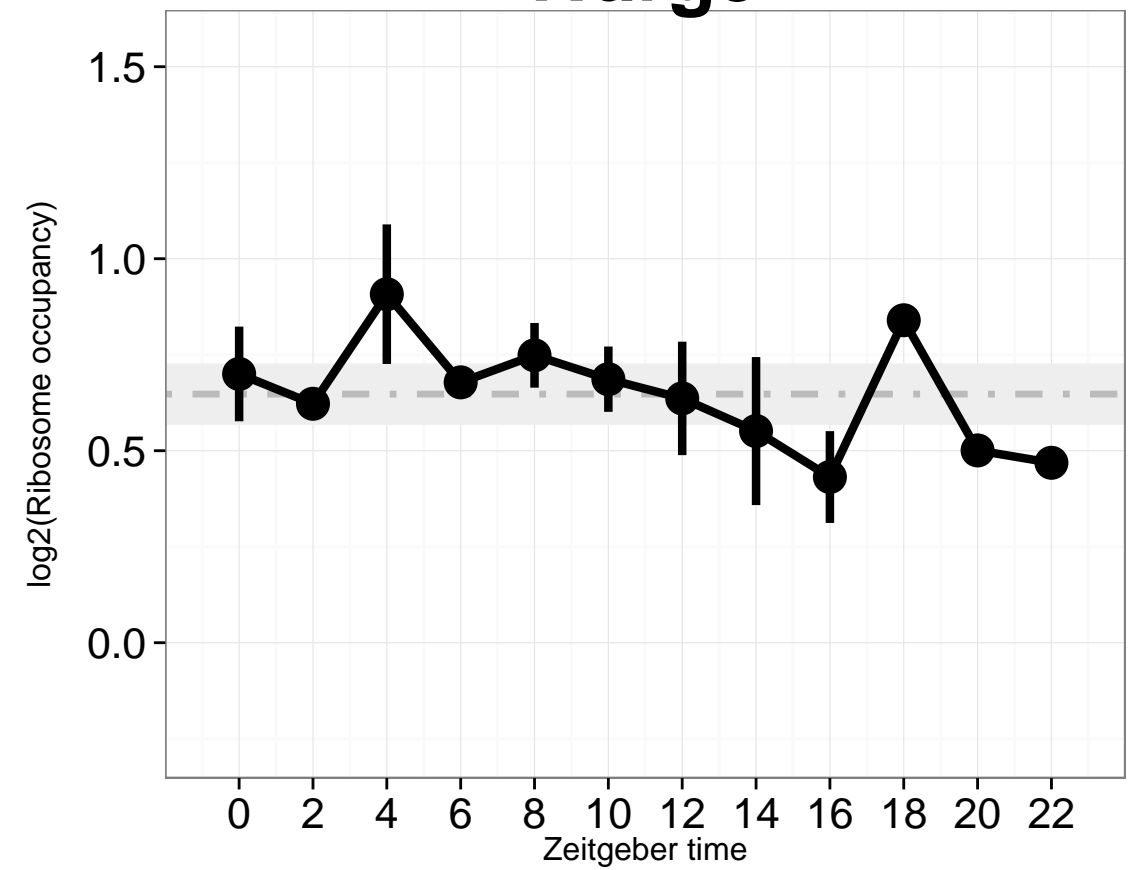

Supplement: Supplementary file 10538 [file 1]

## Nadk

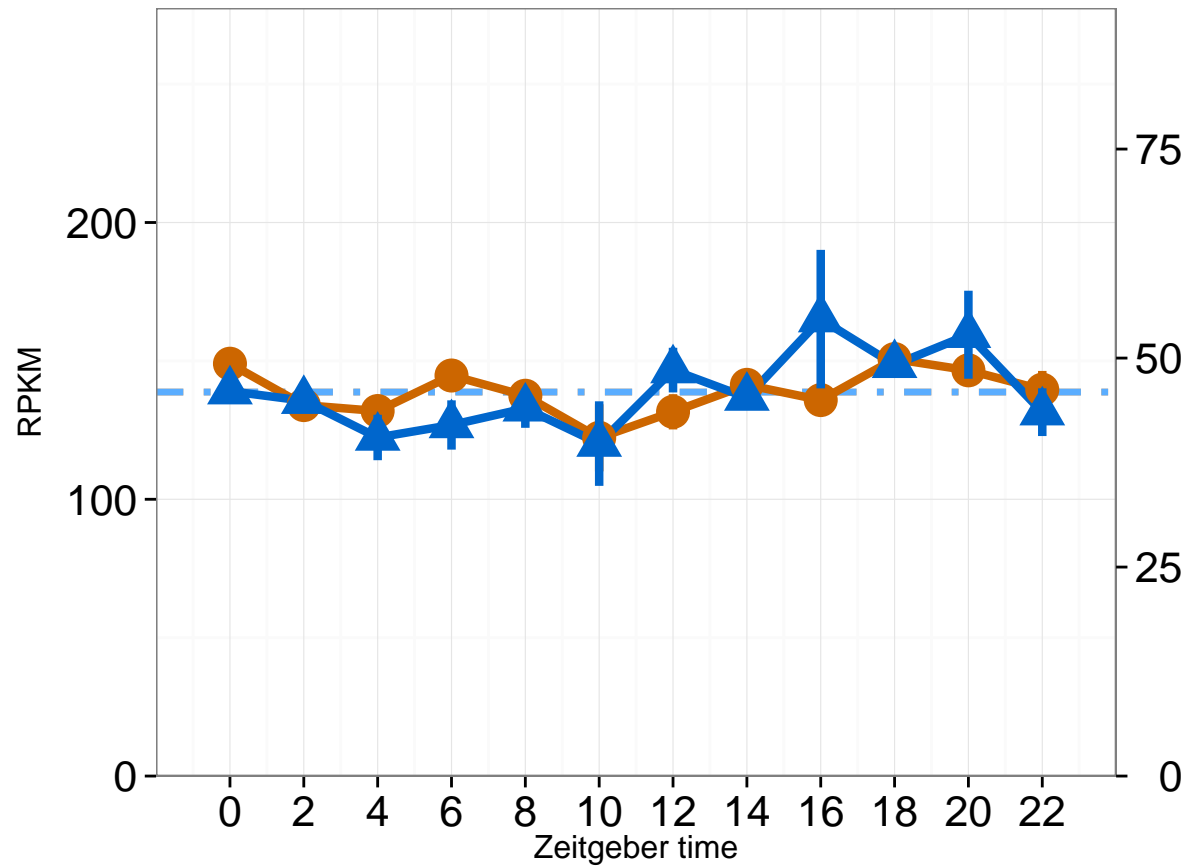

## Nadk

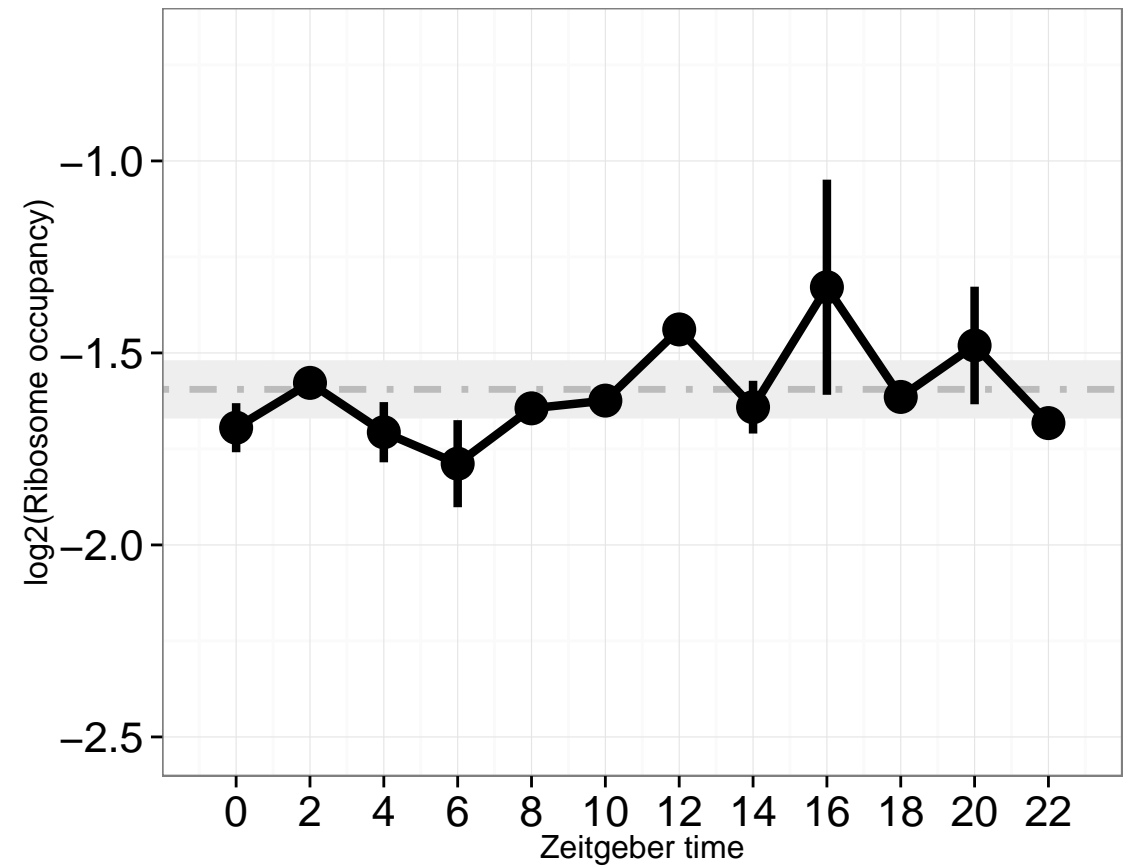

Supplement: Supplementary file 10539 [file 1]
