# Supplementary material (part 106 of 133)
Source: publisher figshare collection journal article supplement (https://springernature.figshare.com/articles/dataset/_/4903193)

## Fosl2

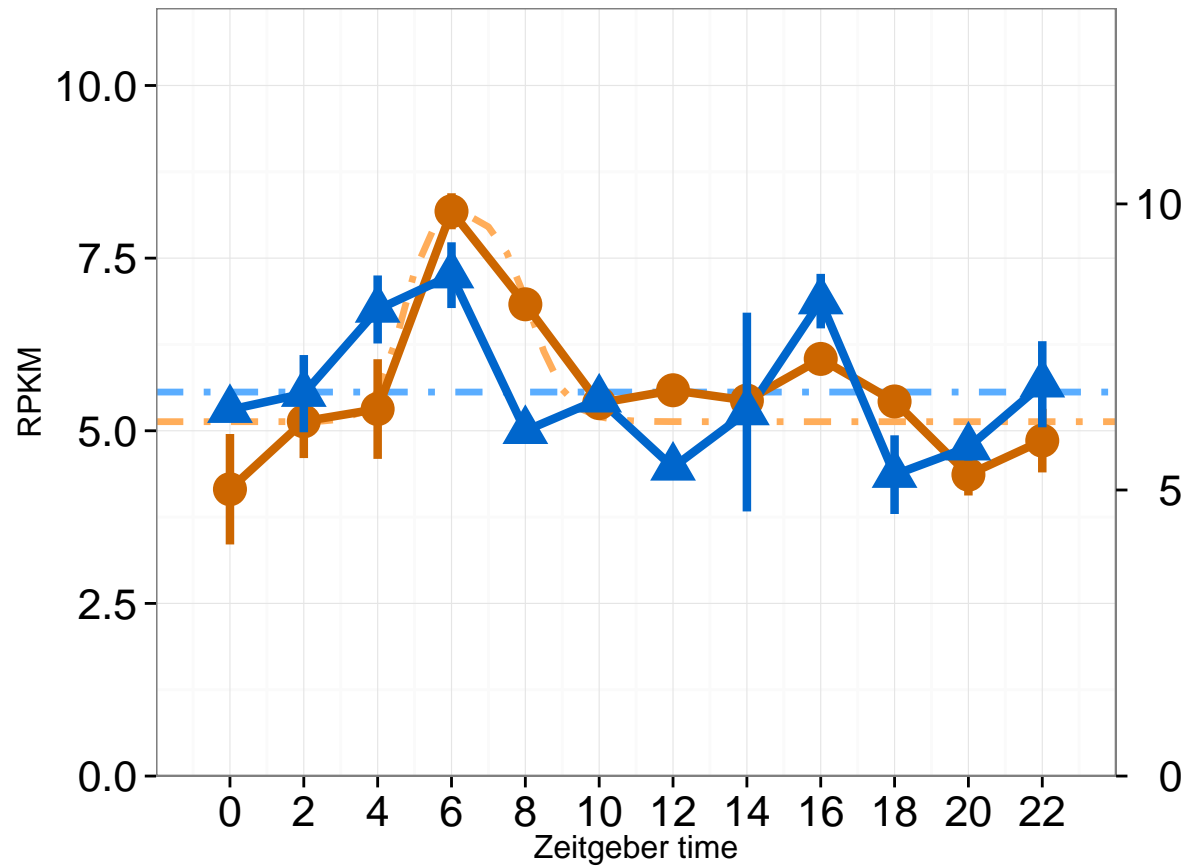

## Fosl2

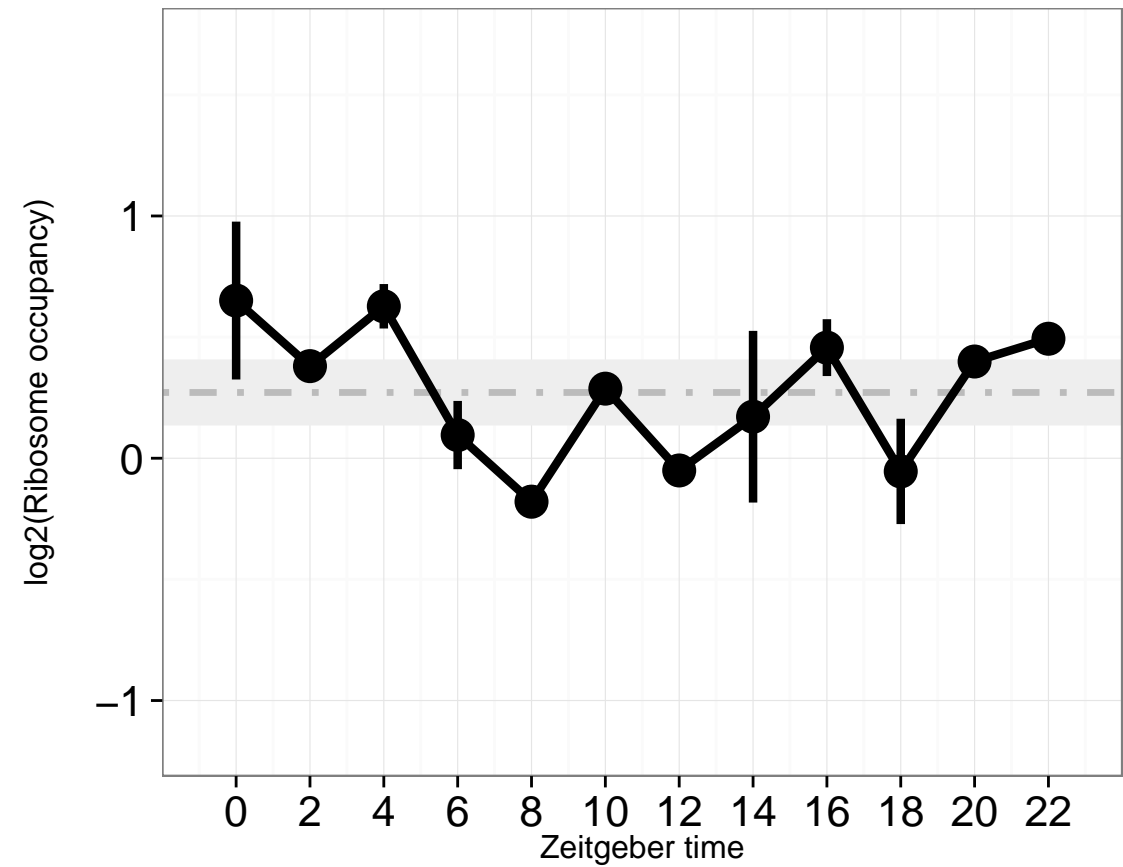

Supplement: Supplementary file 10540 [file 1]

# Dyrk1b

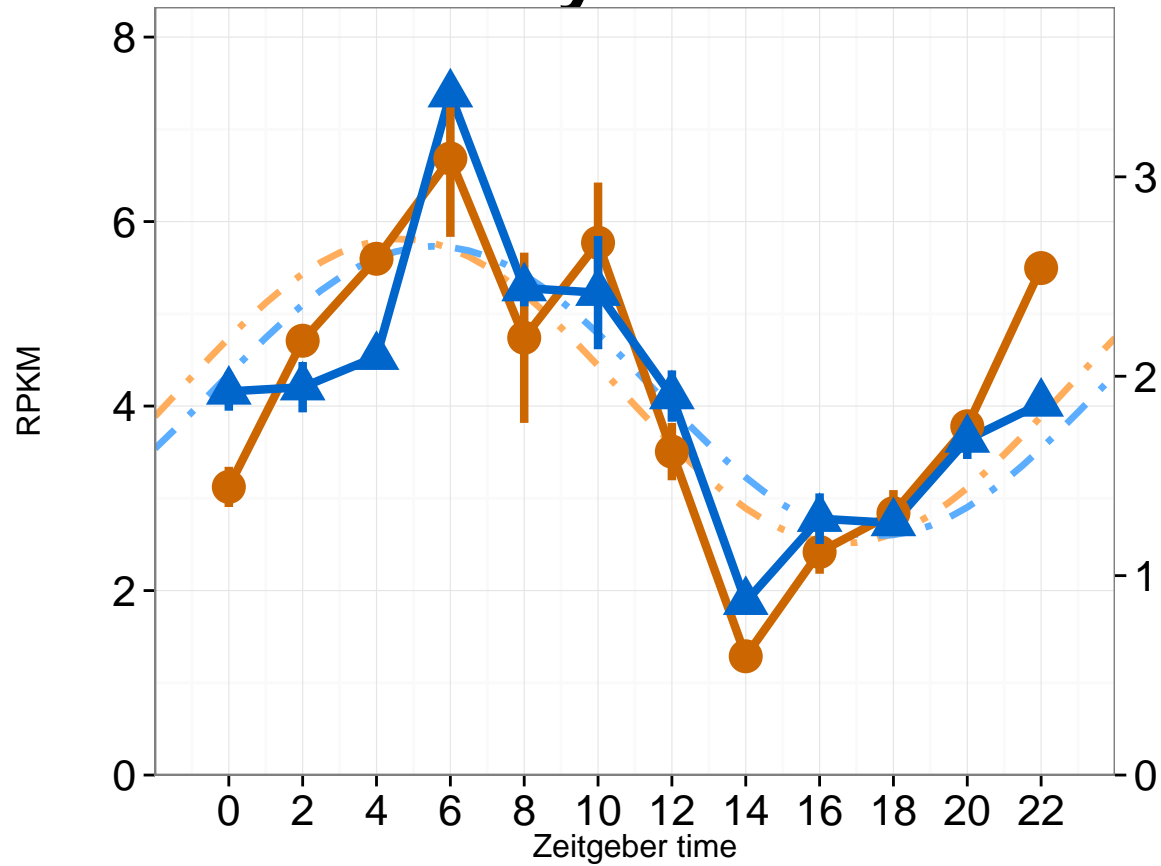

# Dyrk1b

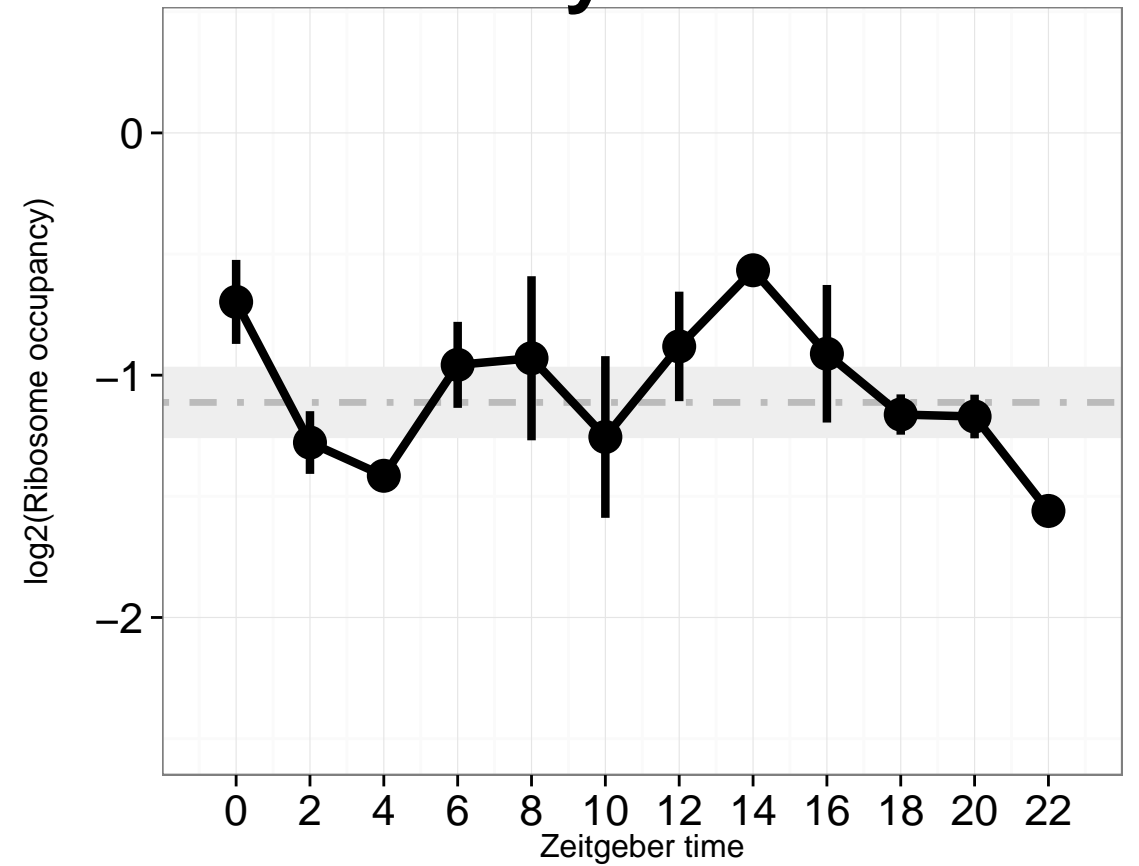

Supplement: Supplementary file 10541 [file 1]

# Zfp442

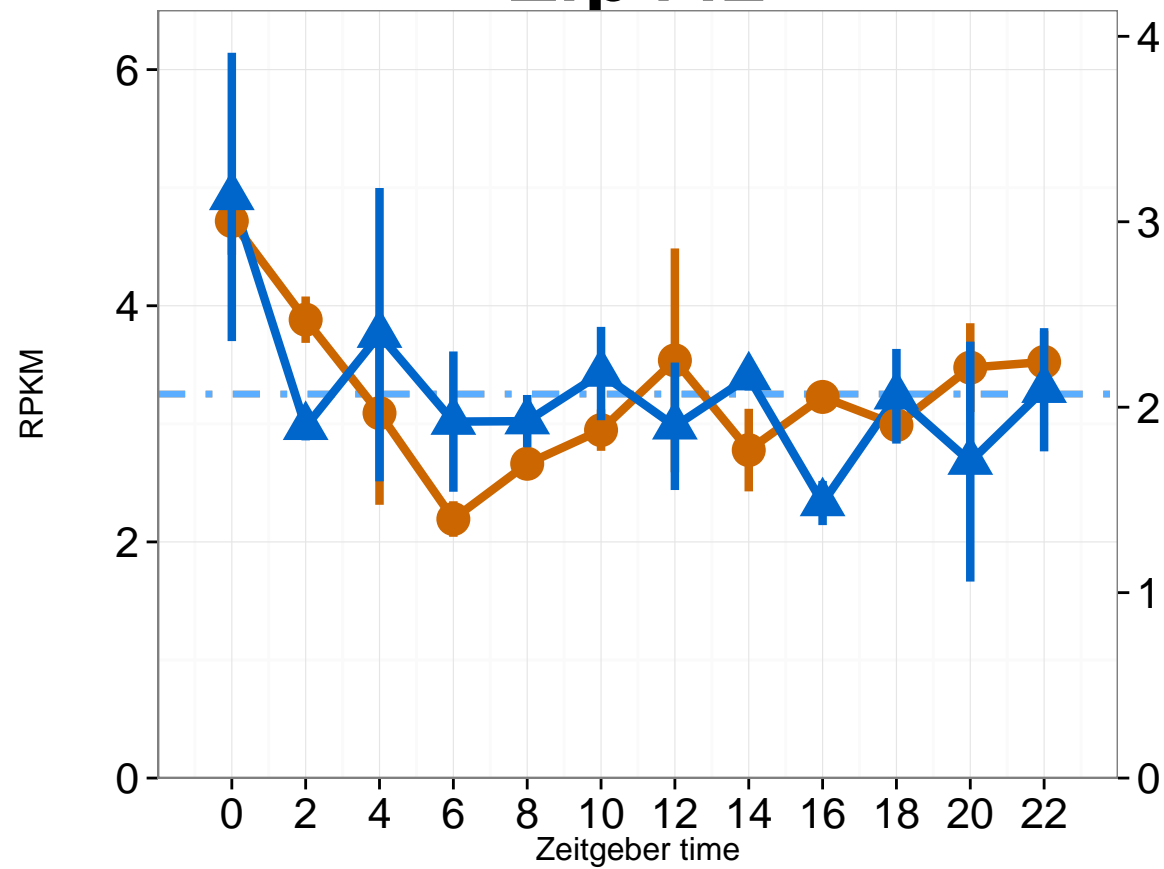

# Zfp442

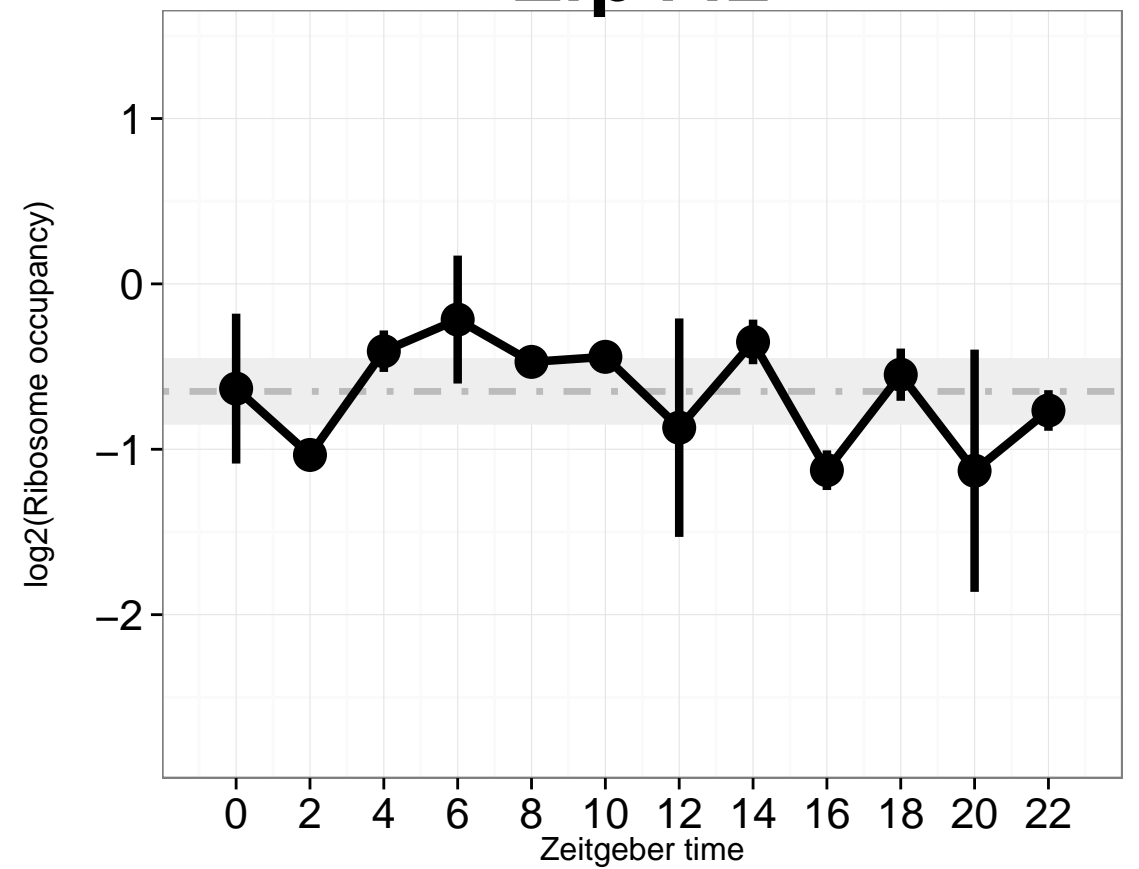

Supplement: Supplementary file 10542 [file 1]

## Upp2

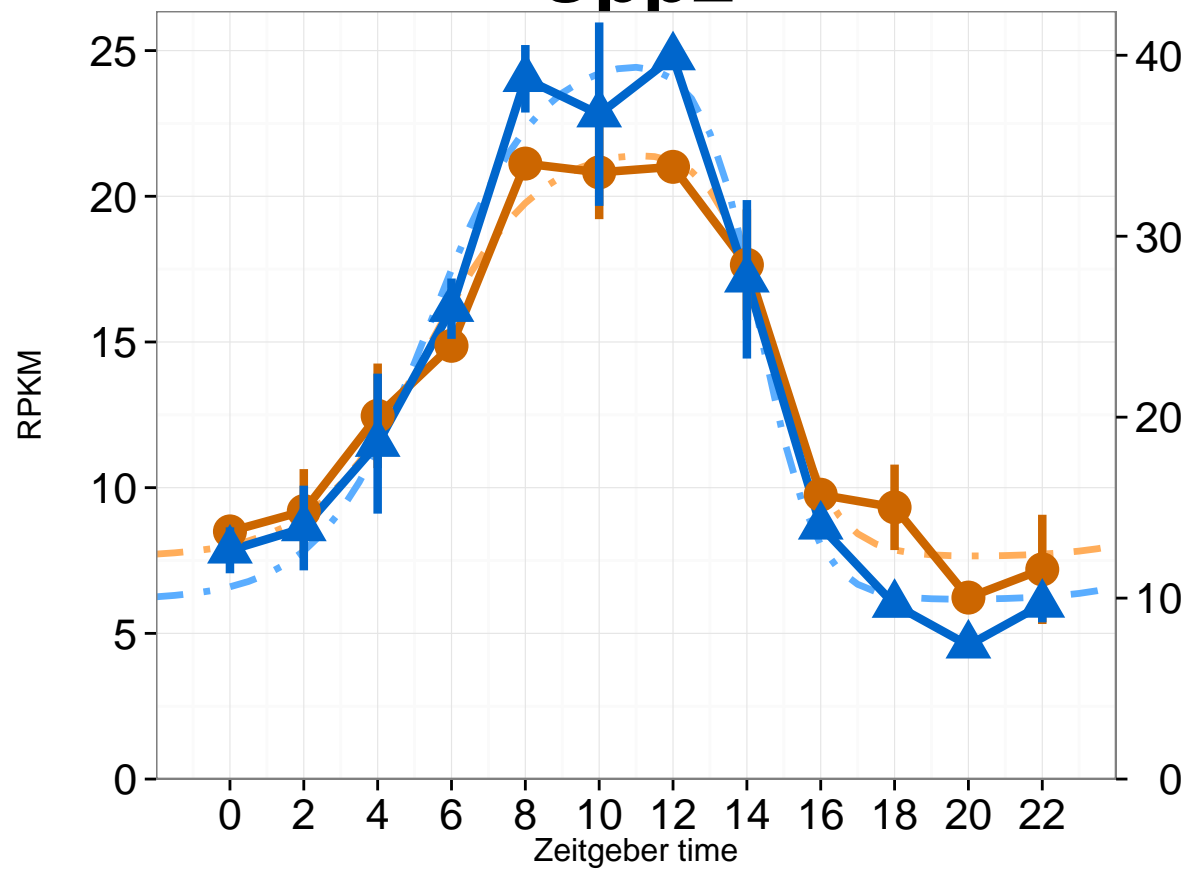

## Upp2

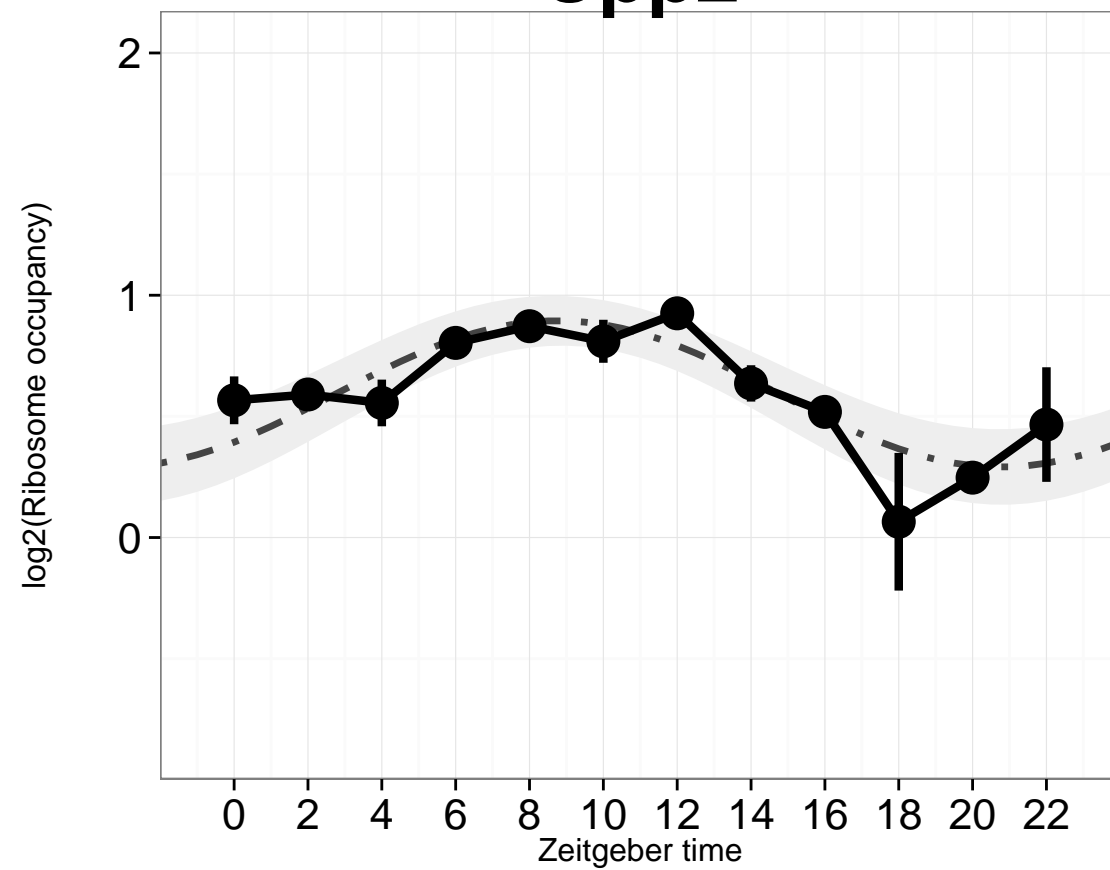

Supplement: Supplementary file 10543 [file 1]

# Vegfa

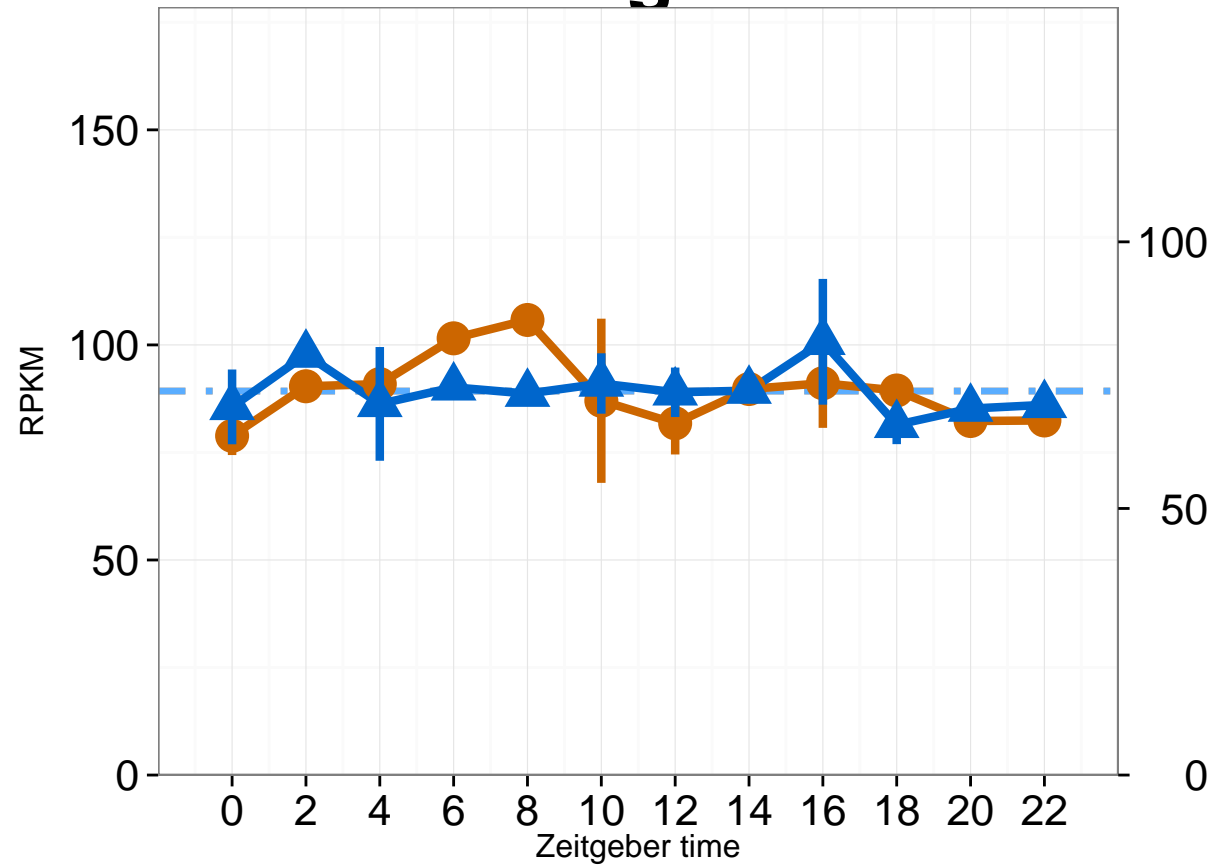

# Vegfa

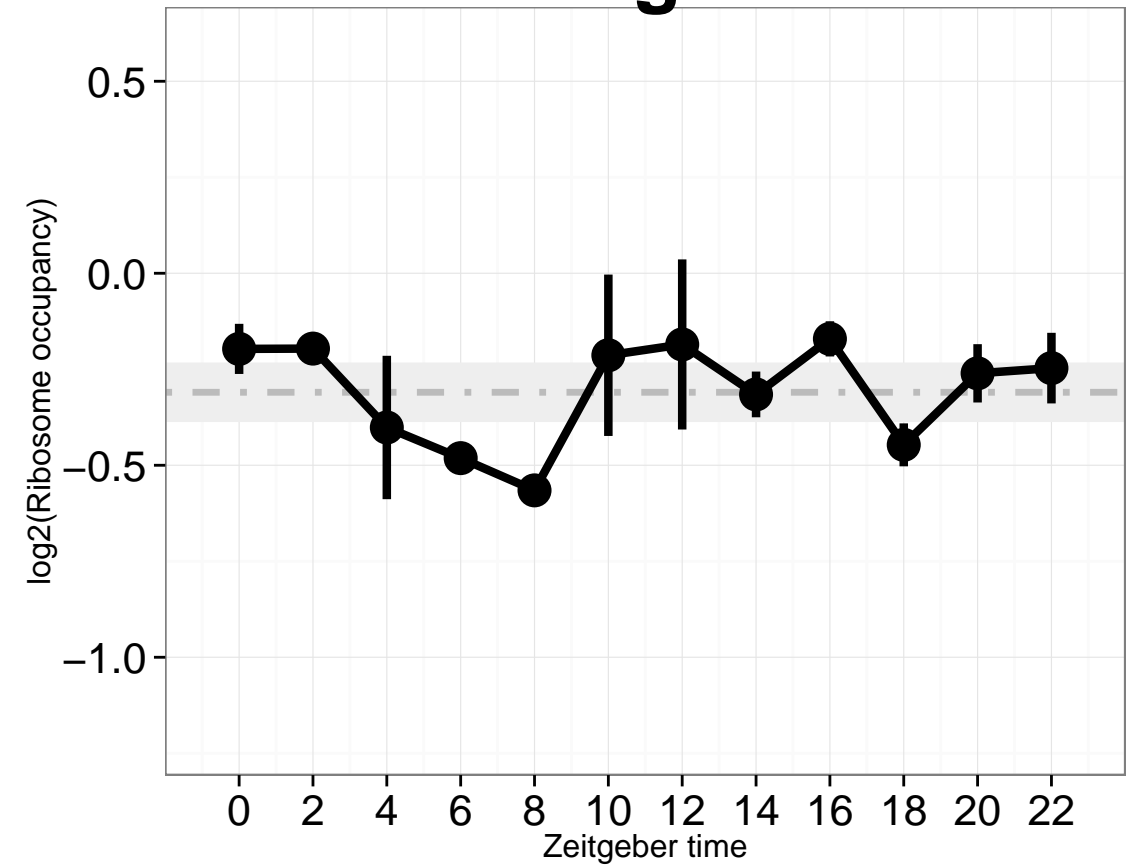

Supplement: Supplementary file 10544 [file 1]

## Actr10

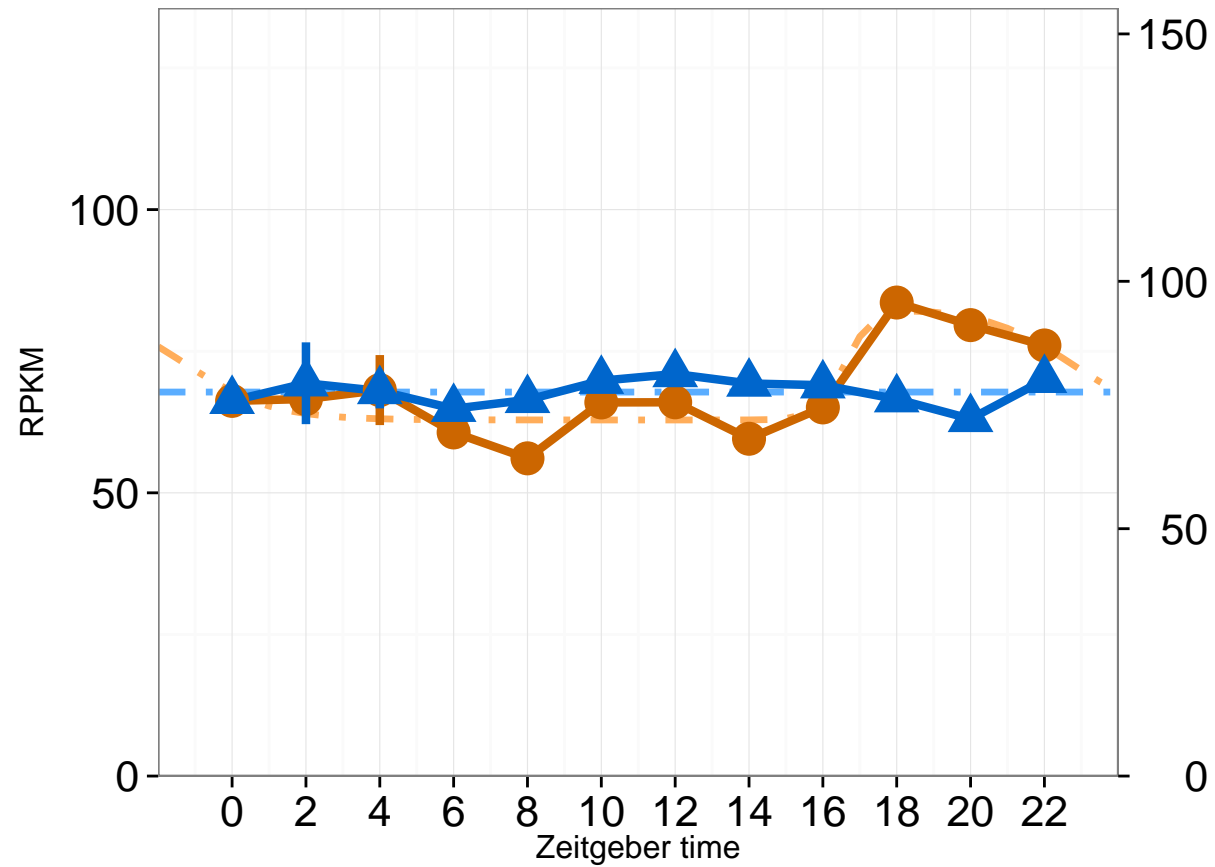

## Actr10

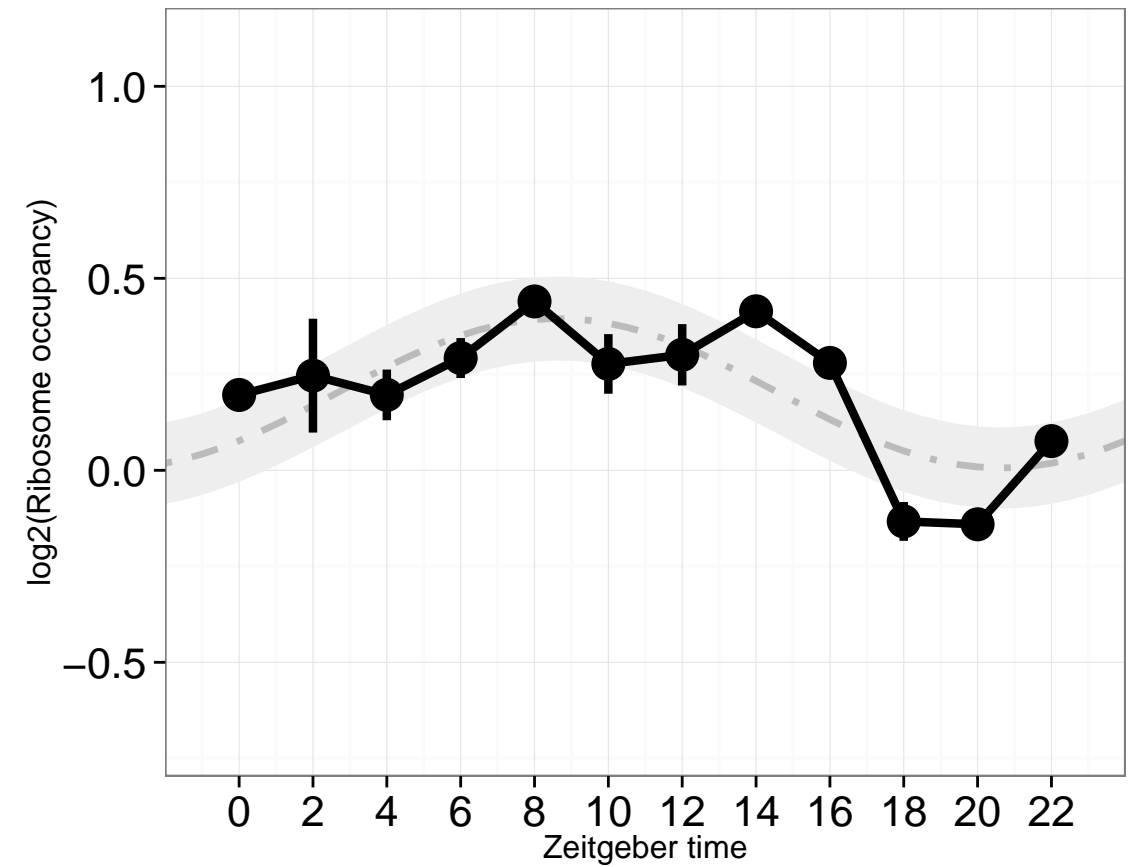

Supplement: Supplementary file 10545 [file 1]

## Eng

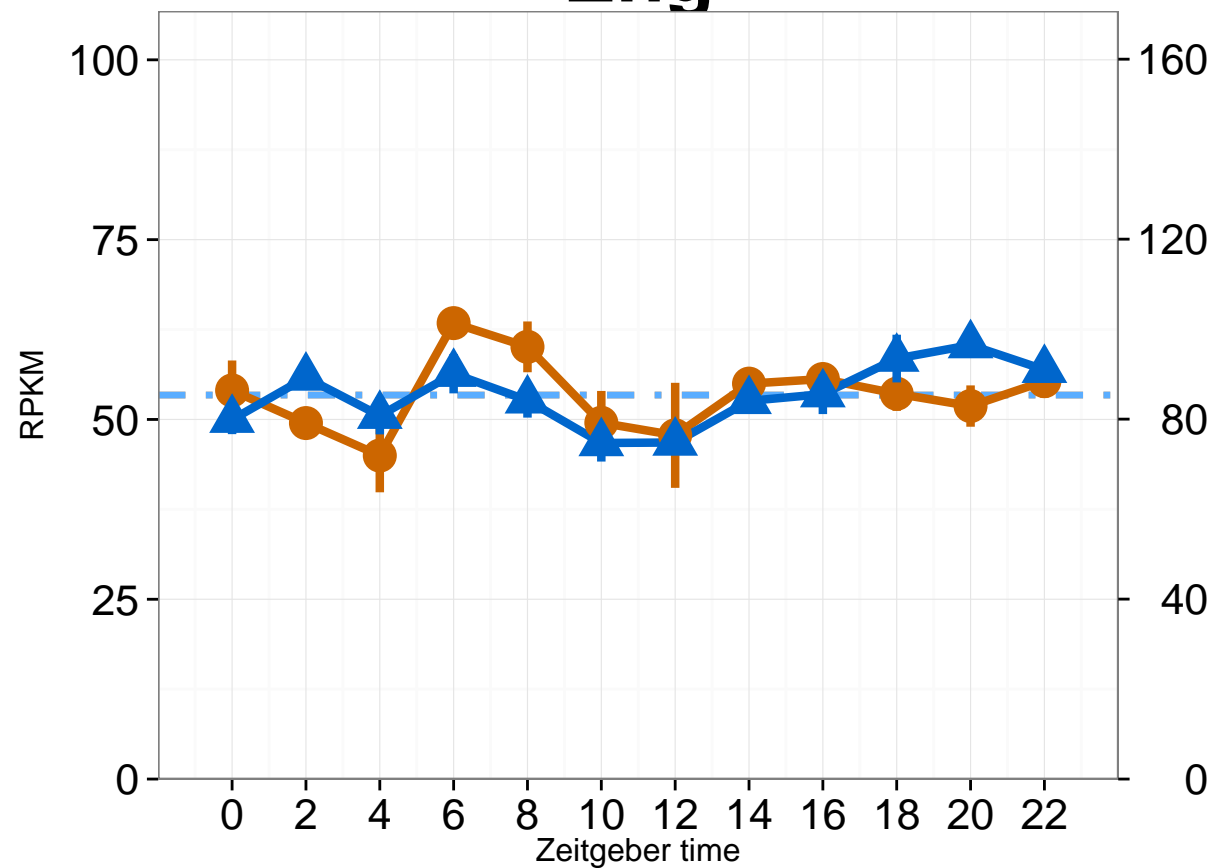

## Eng

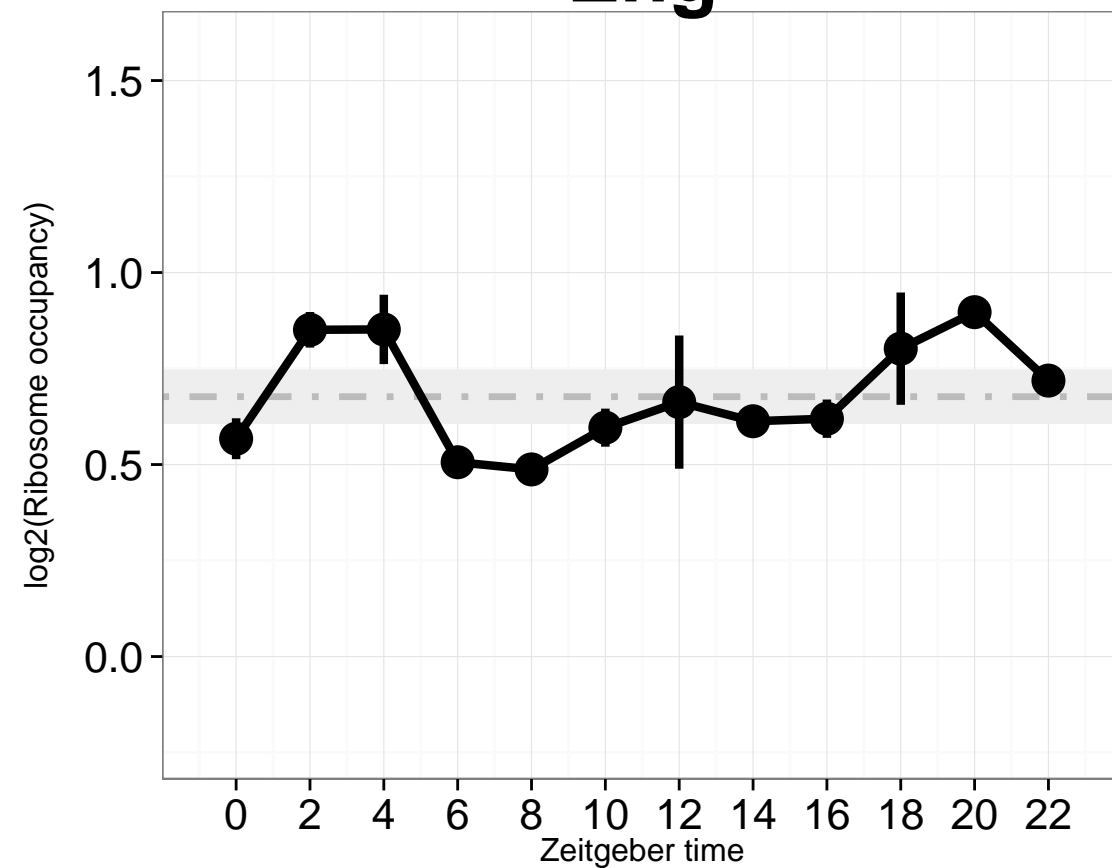

Supplement: Supplementary file 10546 [file 1]

# Ephb1

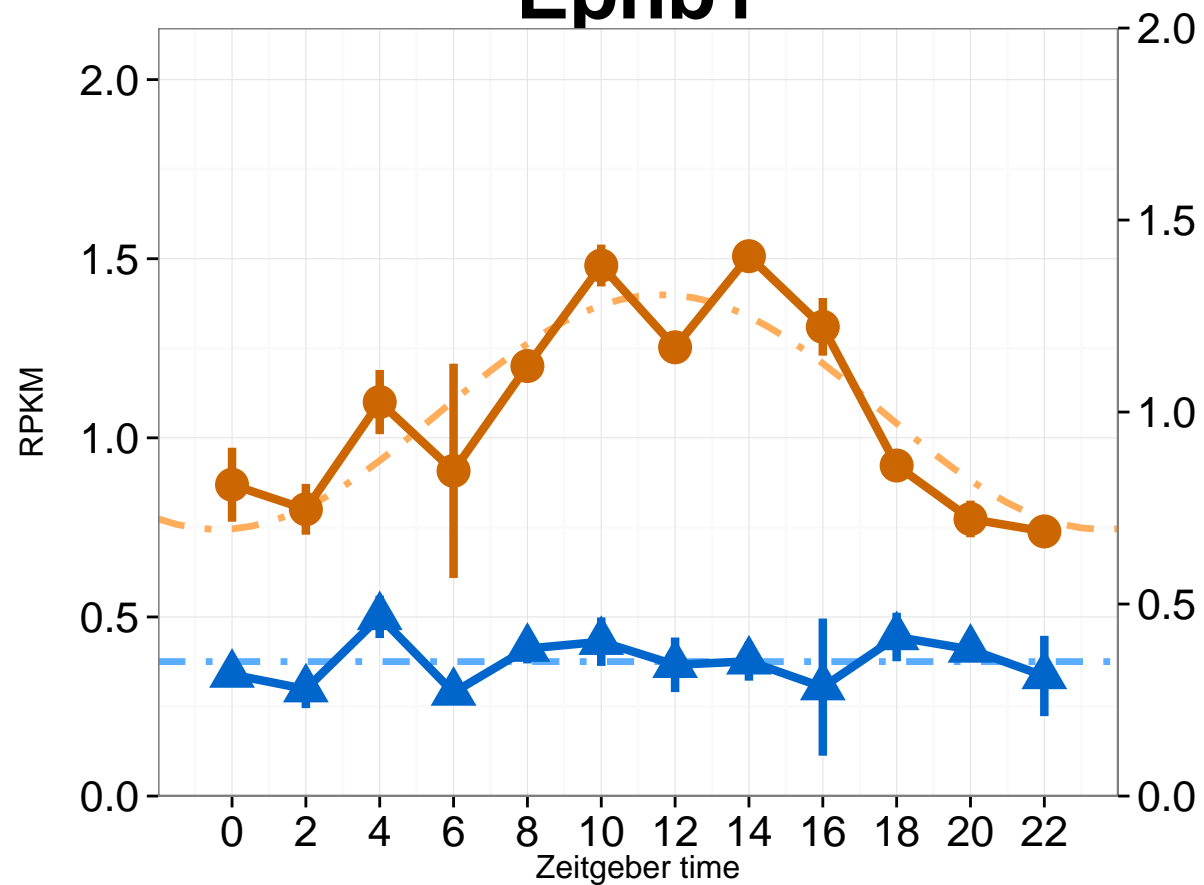

# Ephb1

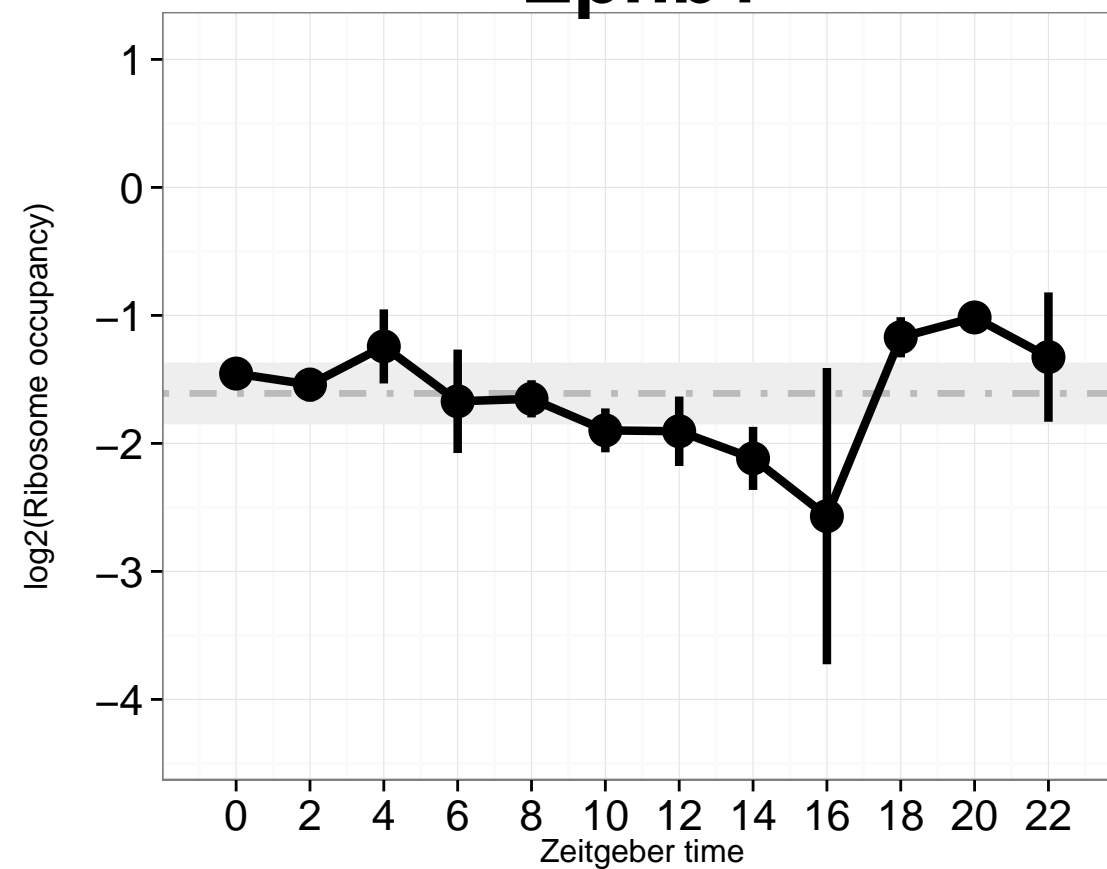

Supplement: Supplementary file 10547 [file 1]

# Tmem207

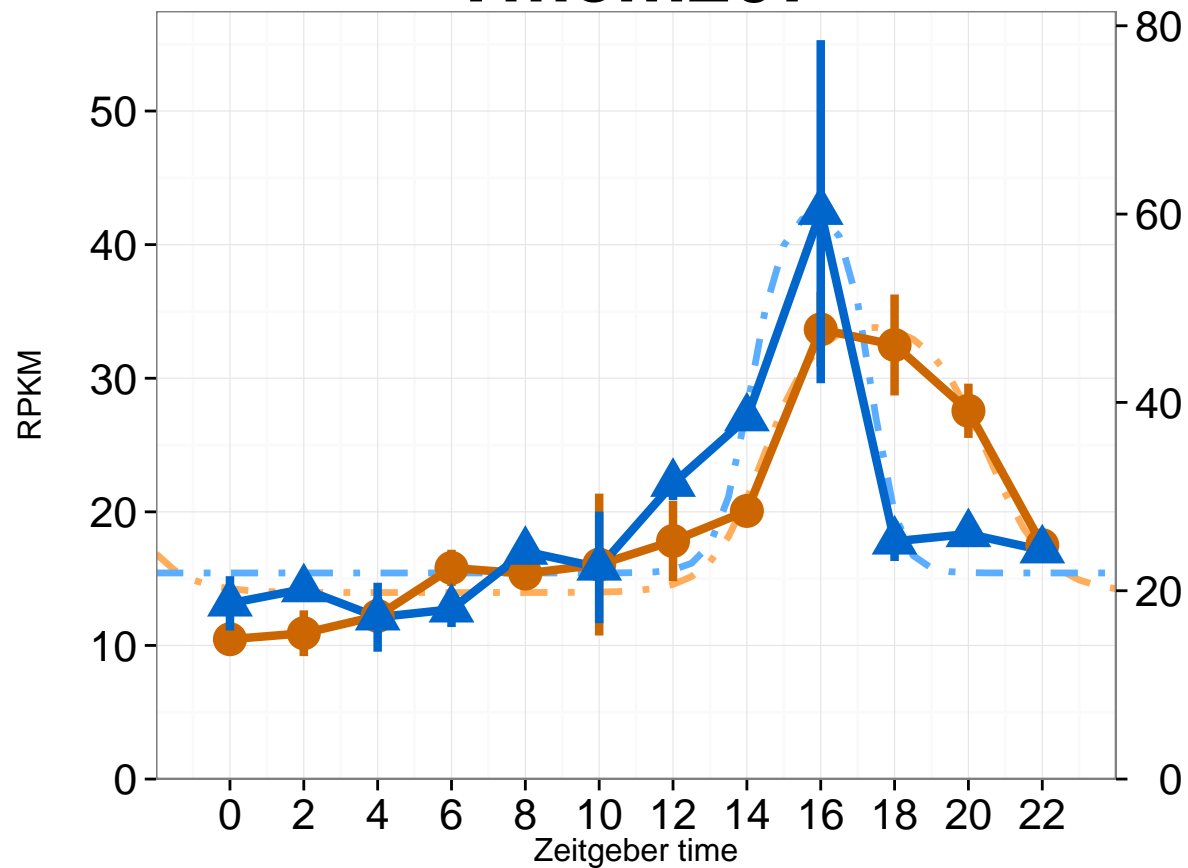

# Tmem207

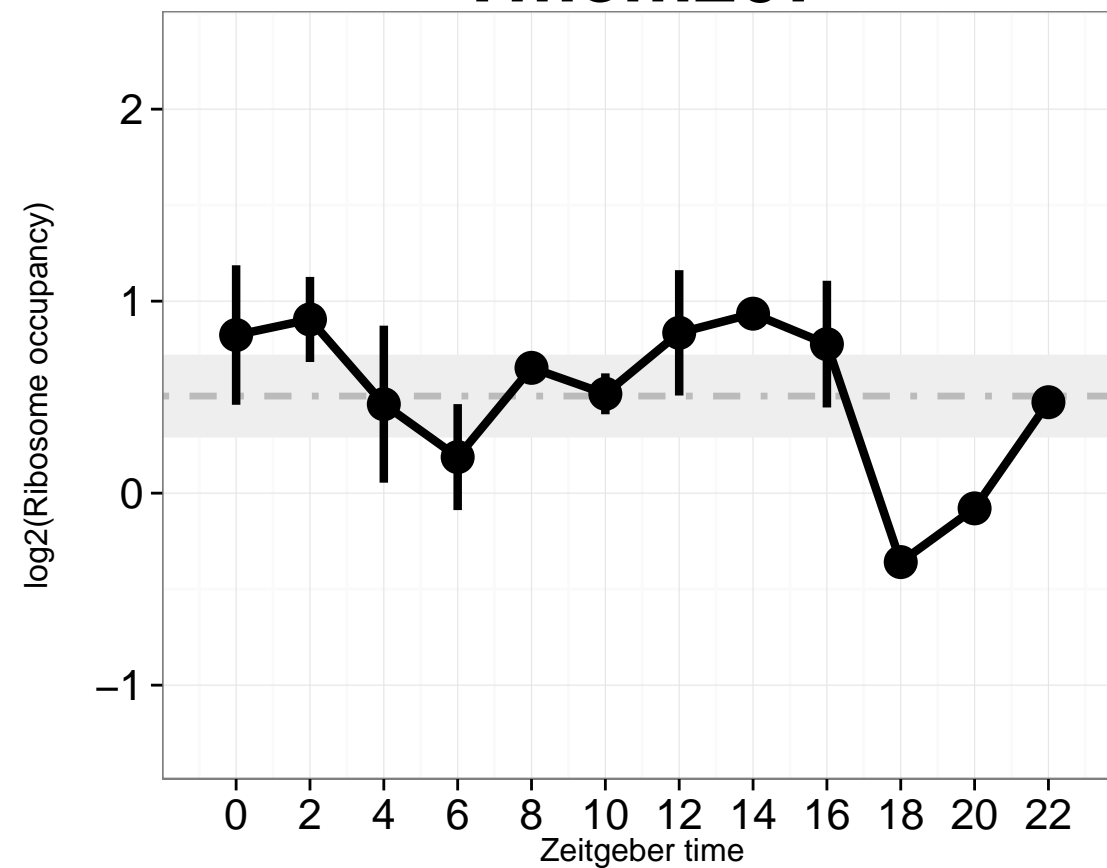

Supplement: Supplementary file 10548 [file 1]

# Dcun1d3

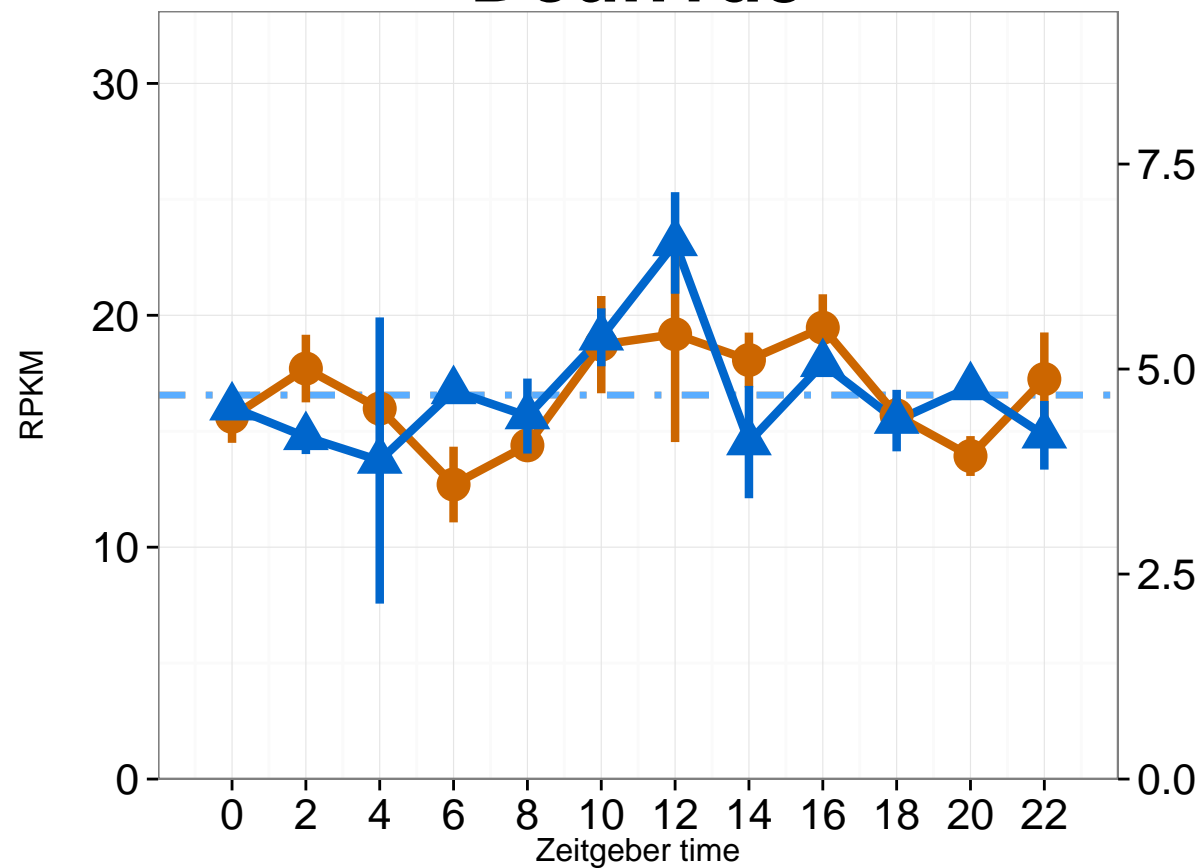

# Dcun1d3

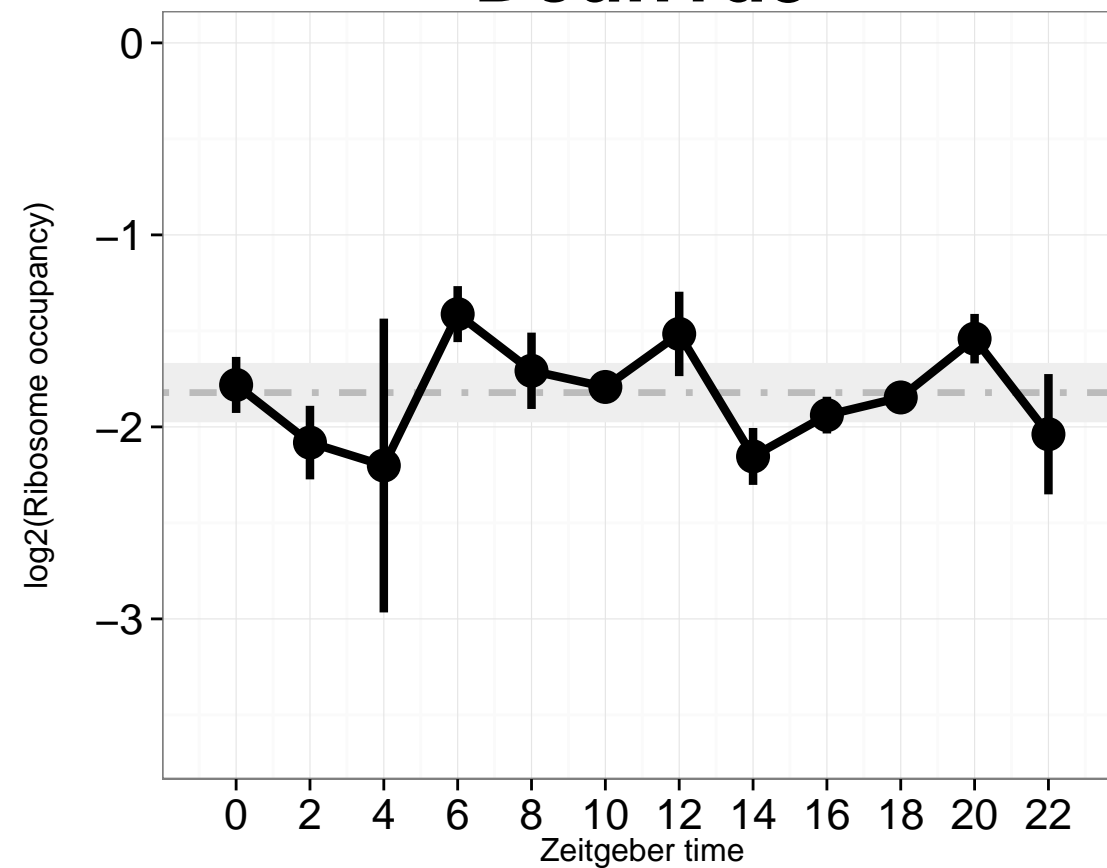

Supplement: Supplementary file 10549 [file 1]

# Bmf

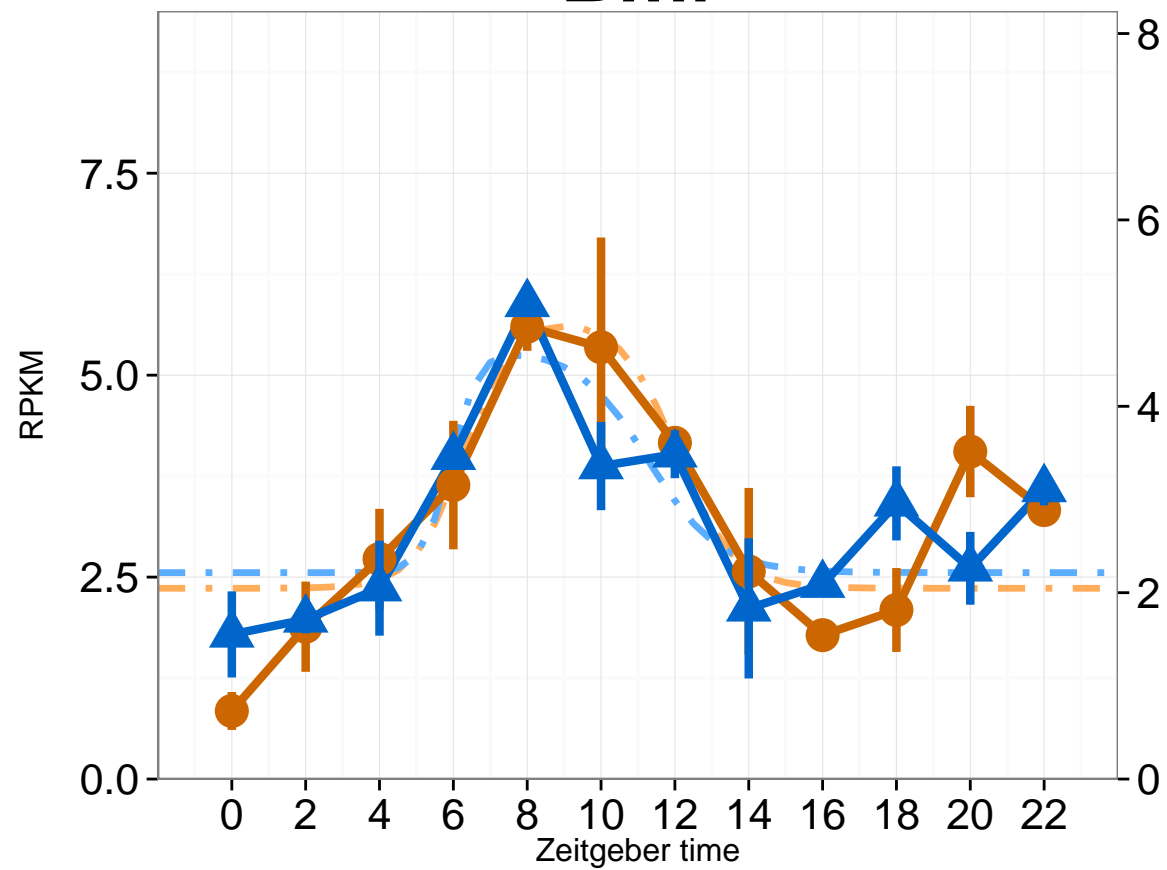

# Bmf

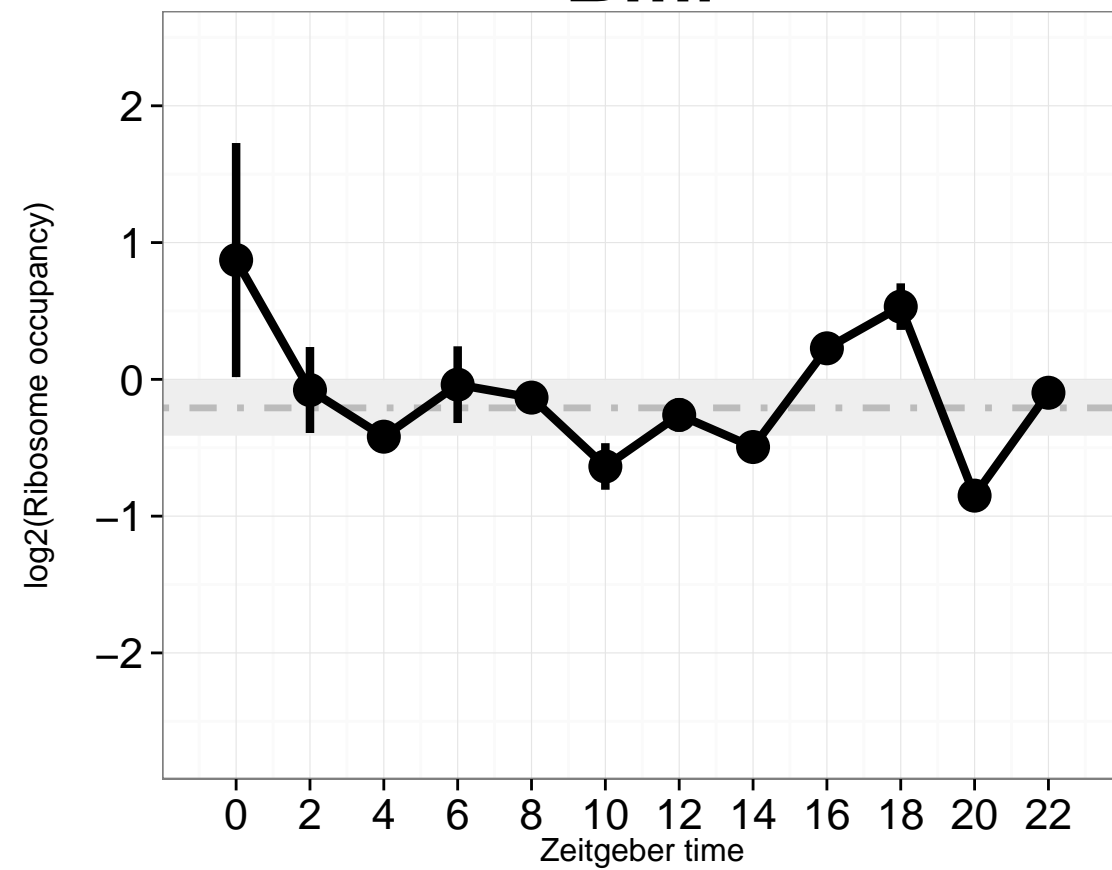

Supplement: Supplementary file 10550 [file 1]

# D630003M21Rik

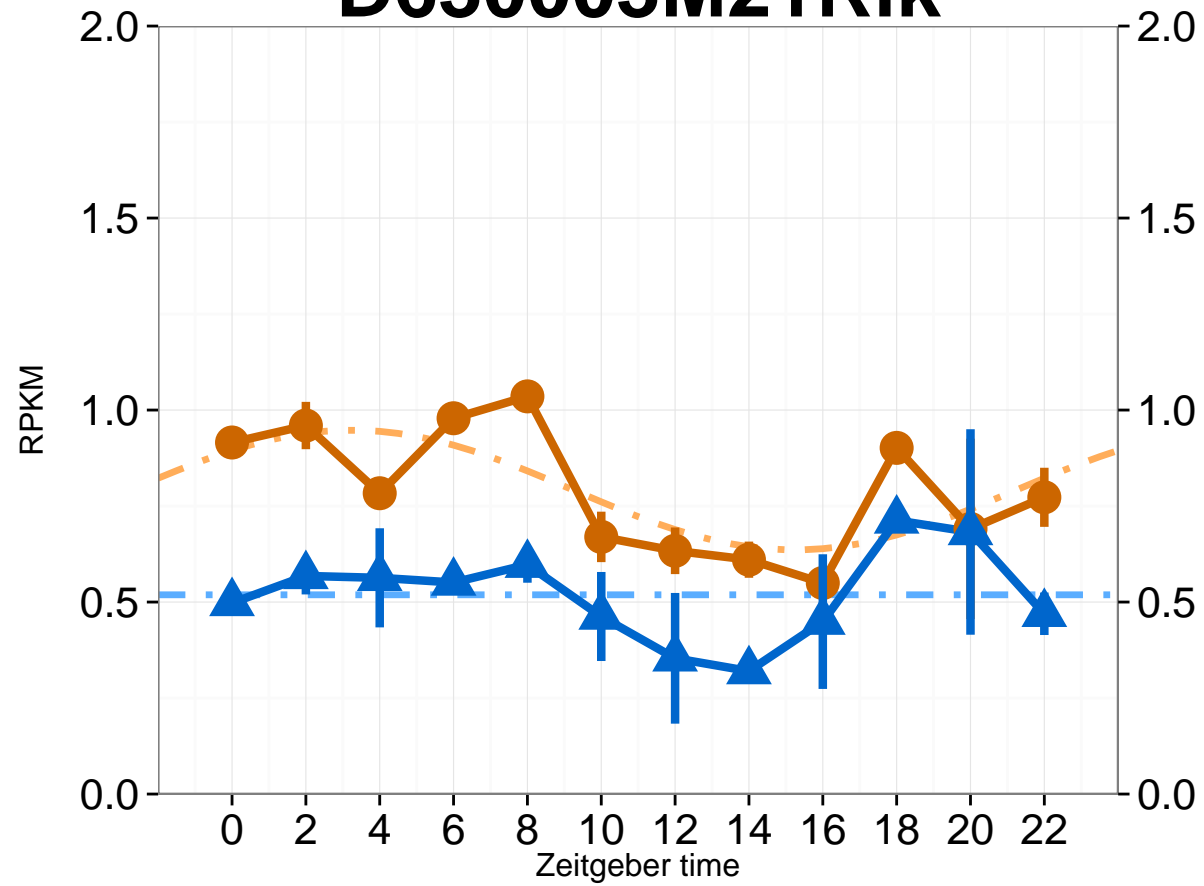

# D630003M21Rik

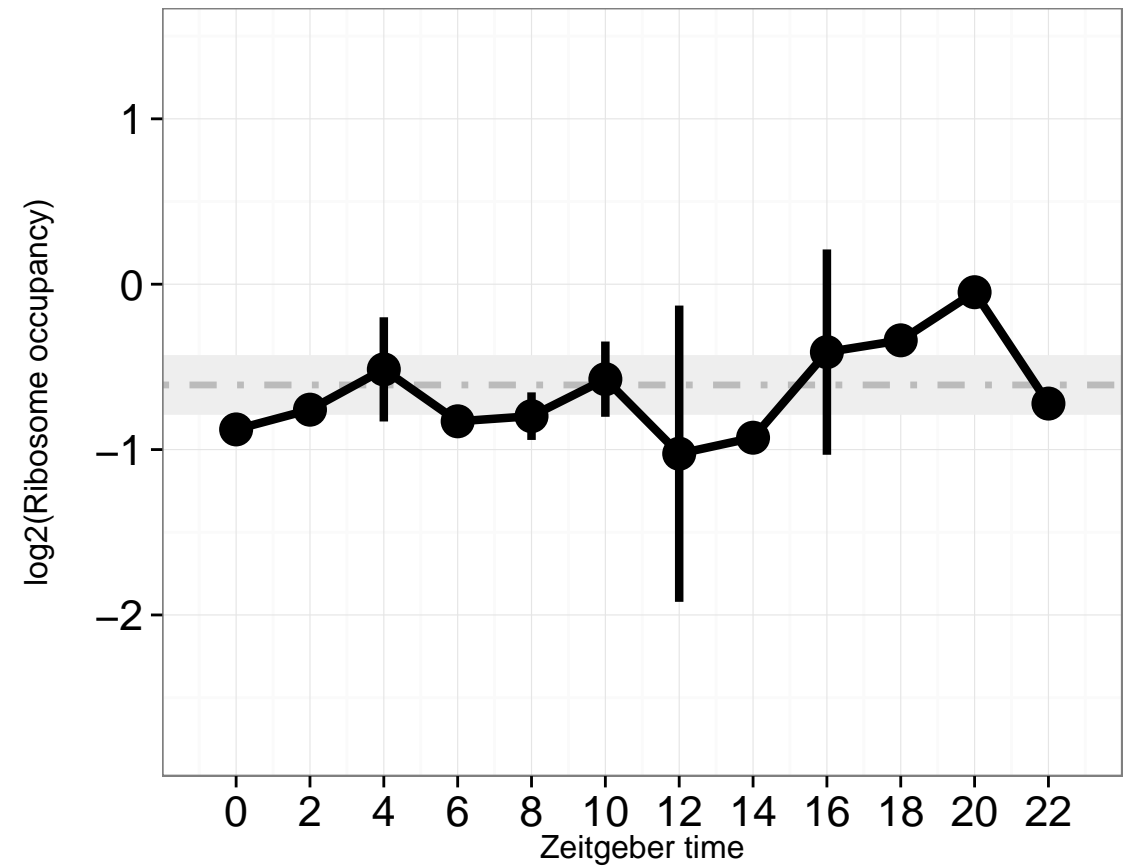

Supplement: Supplementary file 10551 [file 1]

# Nat14

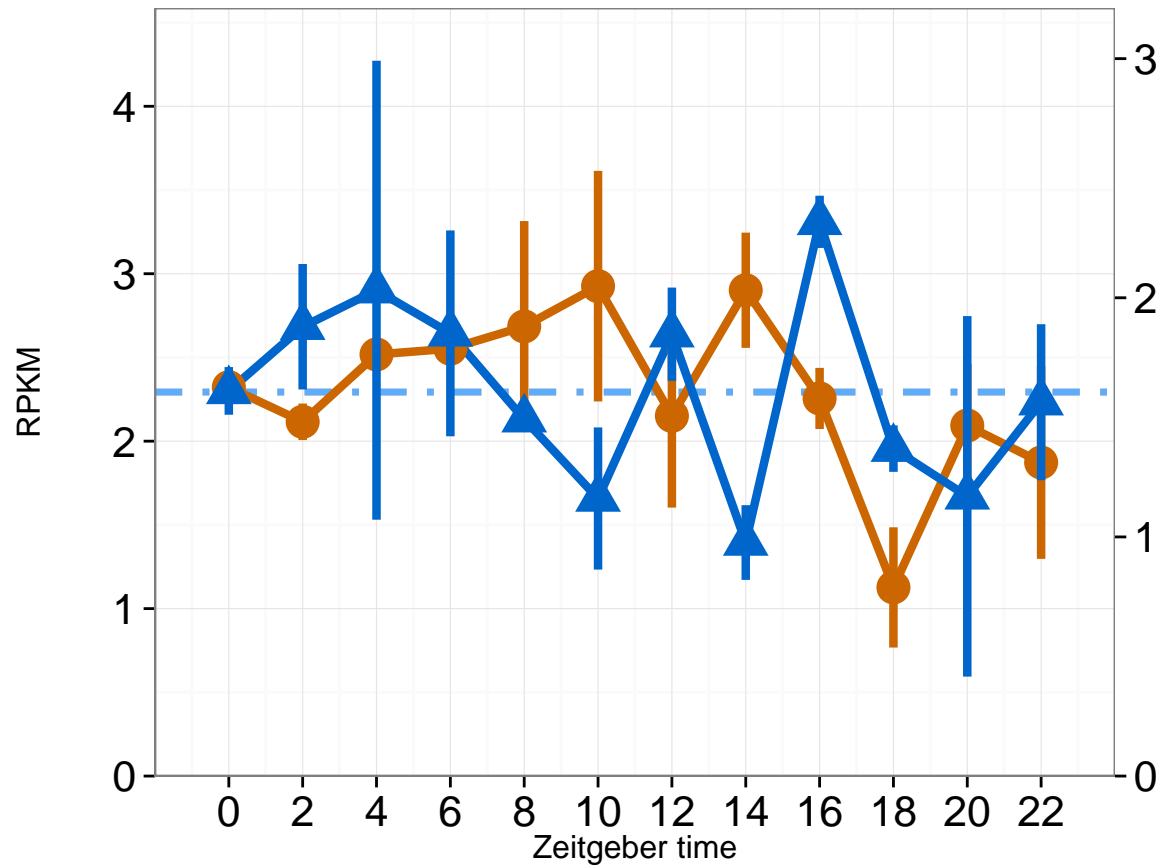

# Nat14

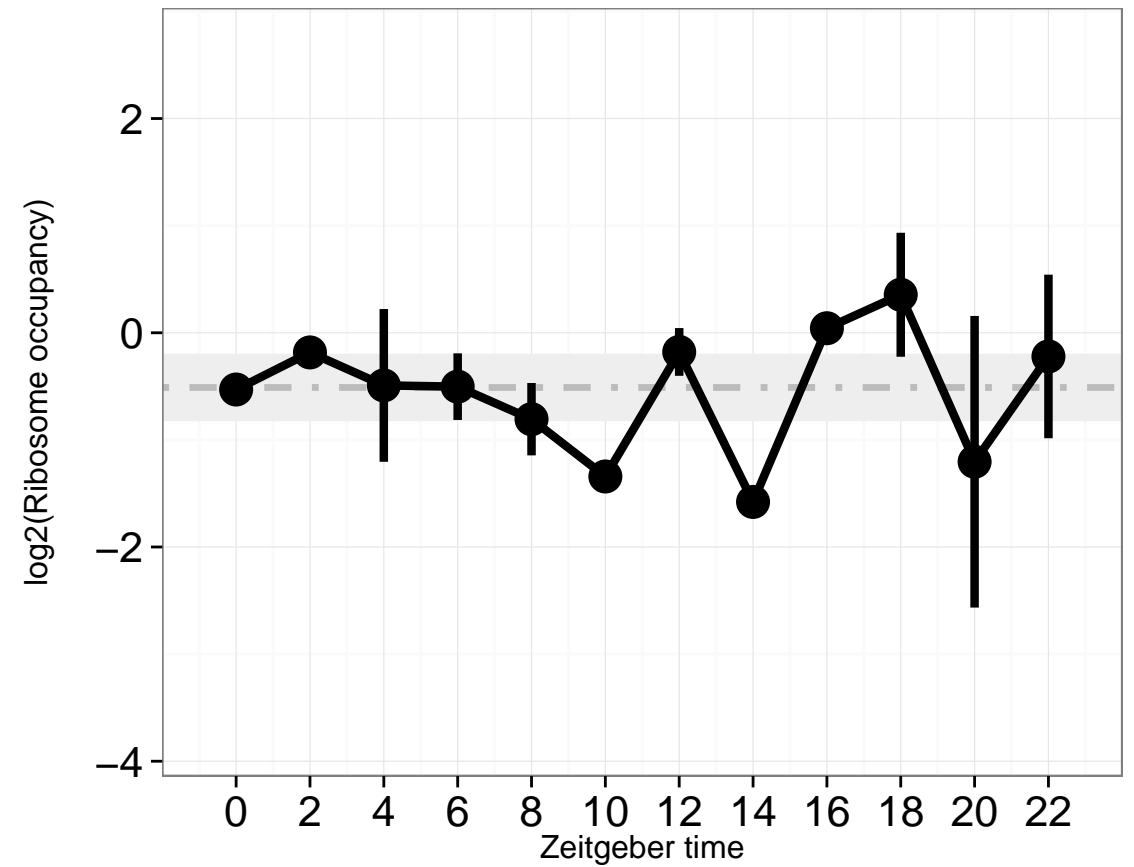

Supplement: Supplementary file 10552 [file 1]

## Adssl1

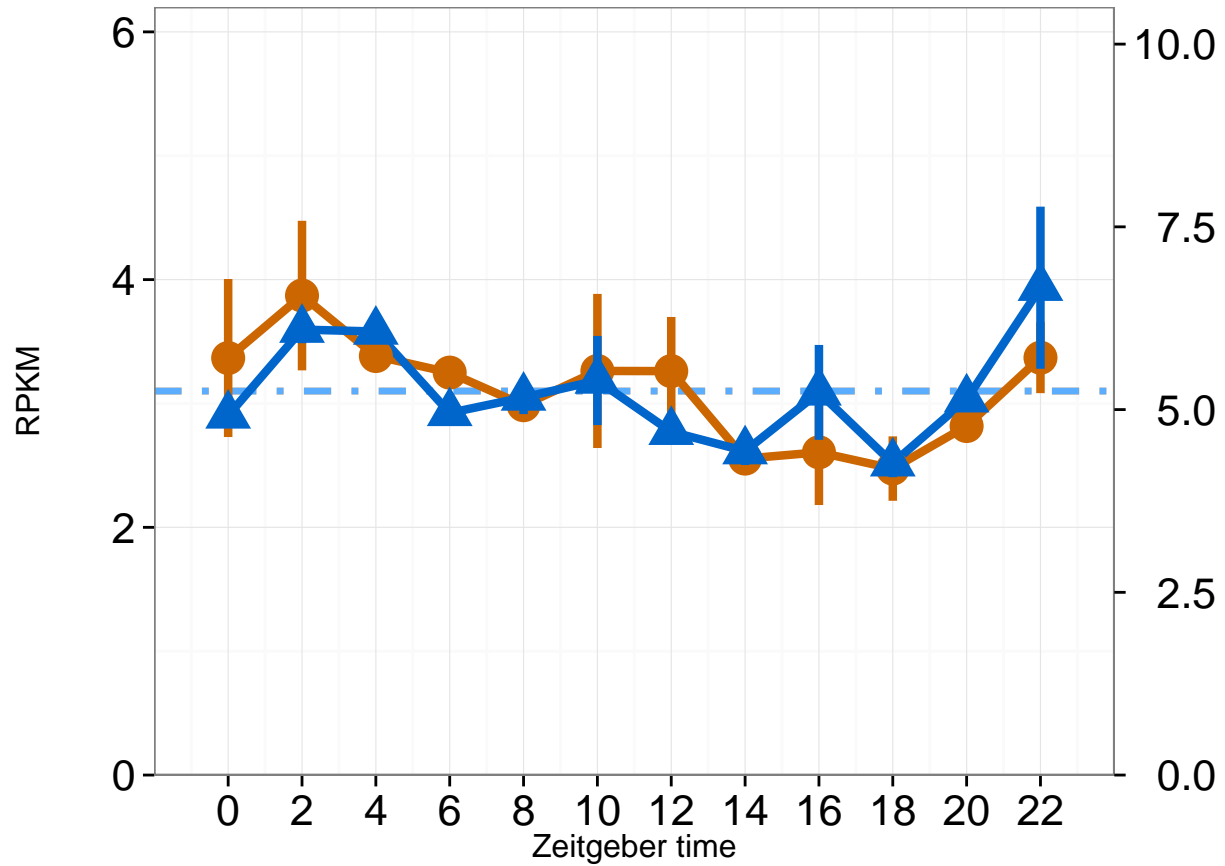

## Adssl1

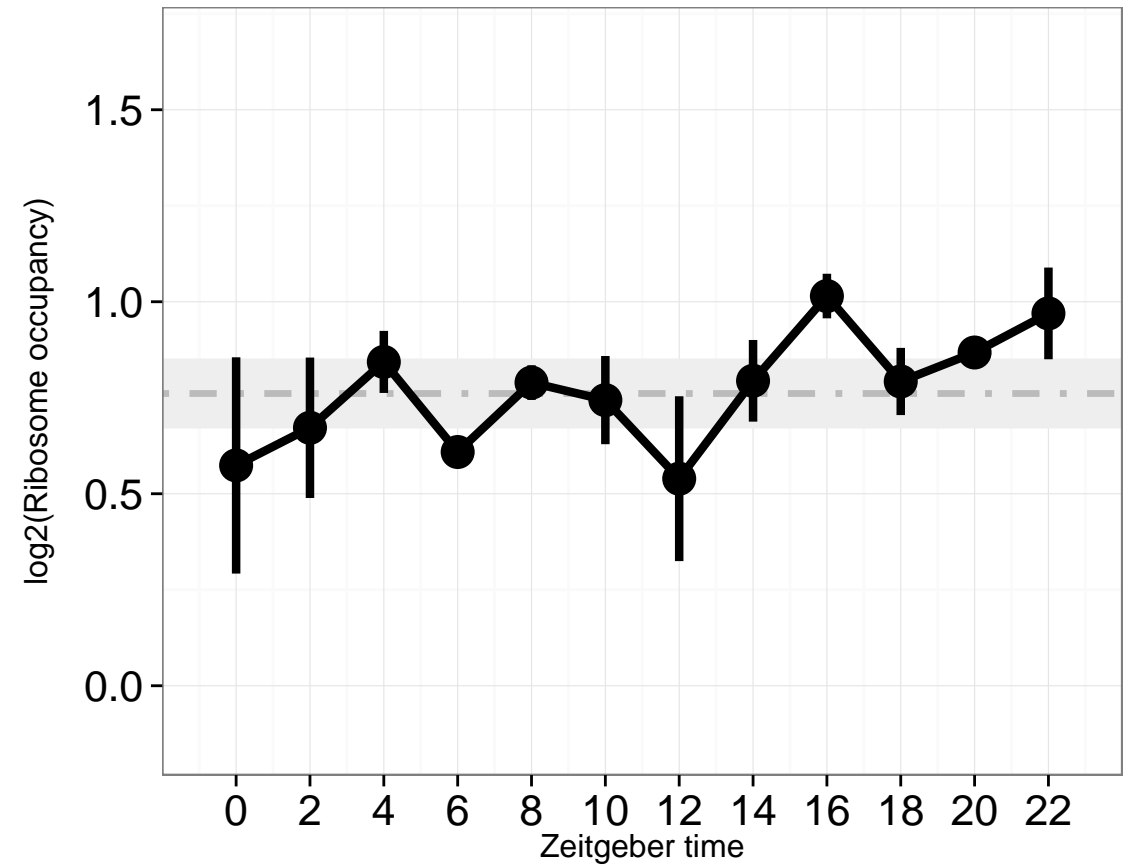

Supplement: Supplementary file 10553 [file 1]

## Rcbtb1

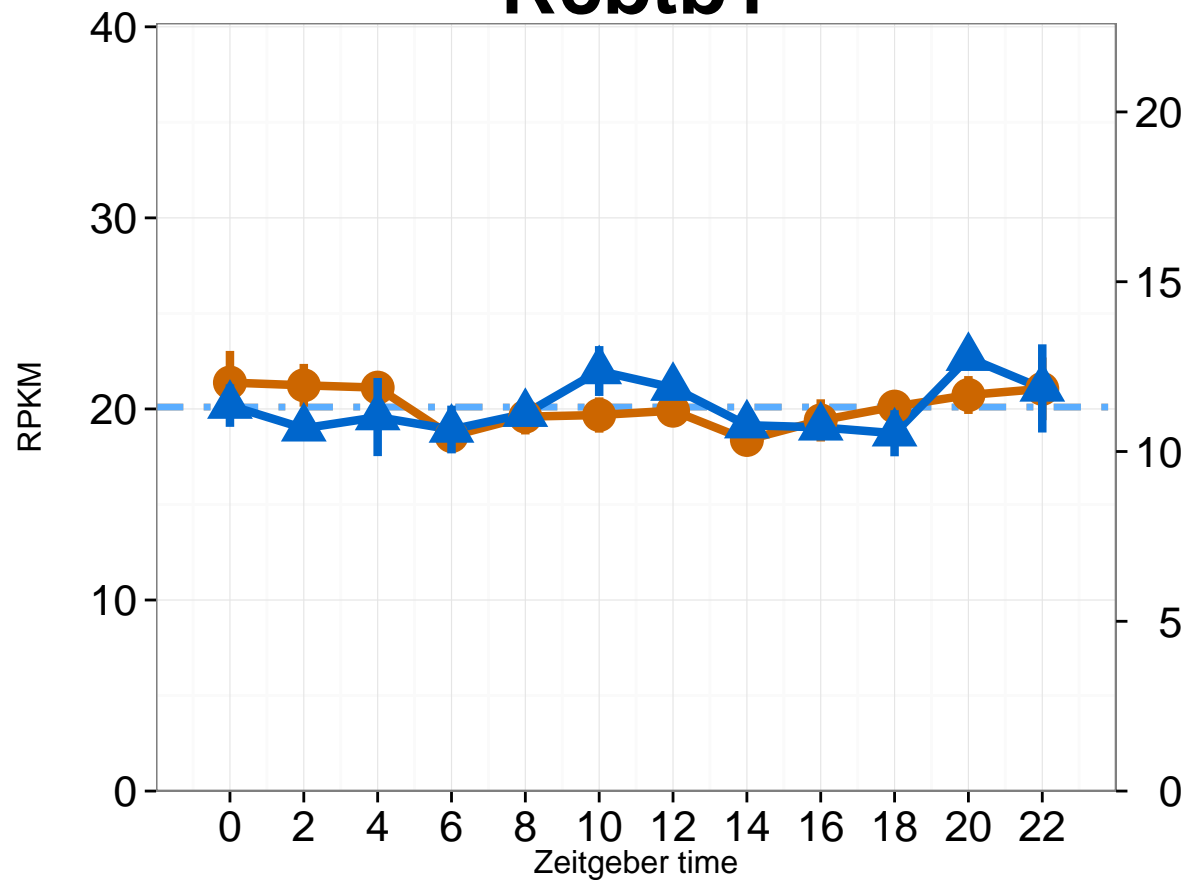

## Rcbtb1

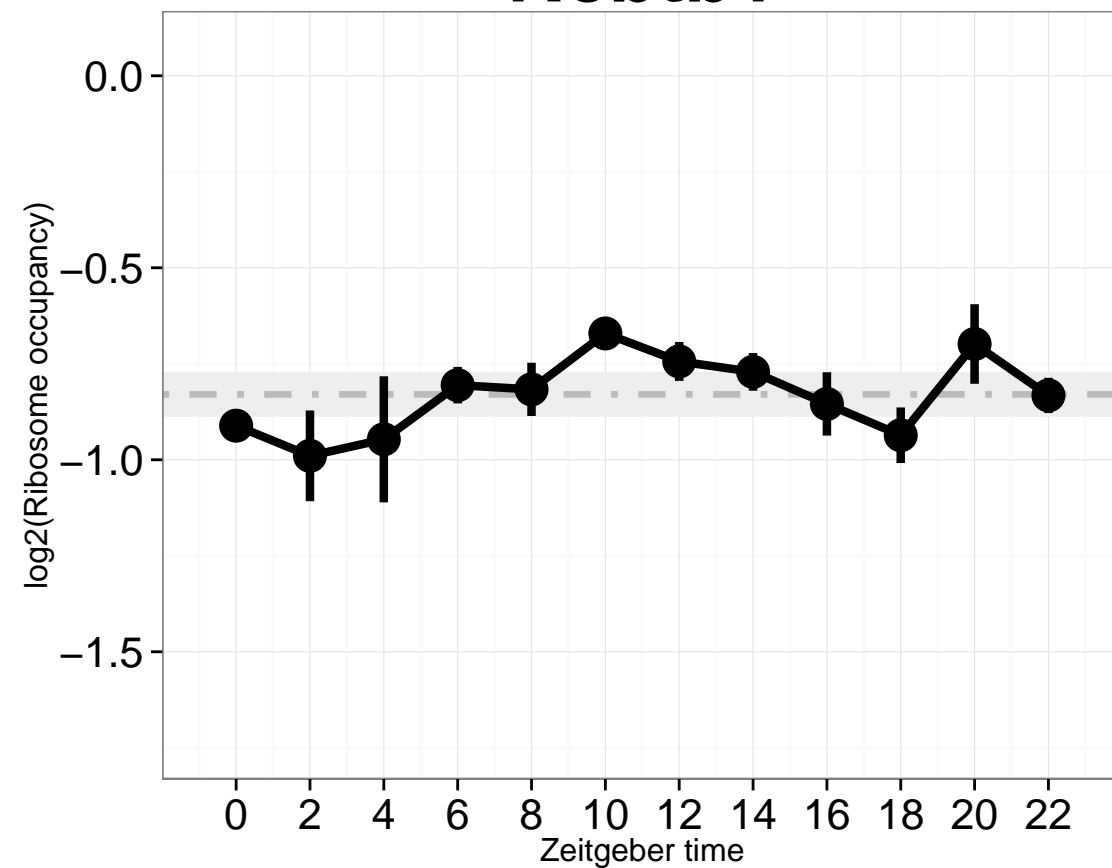

Supplement: Supplementary file 10554 [file 1]

## Vill

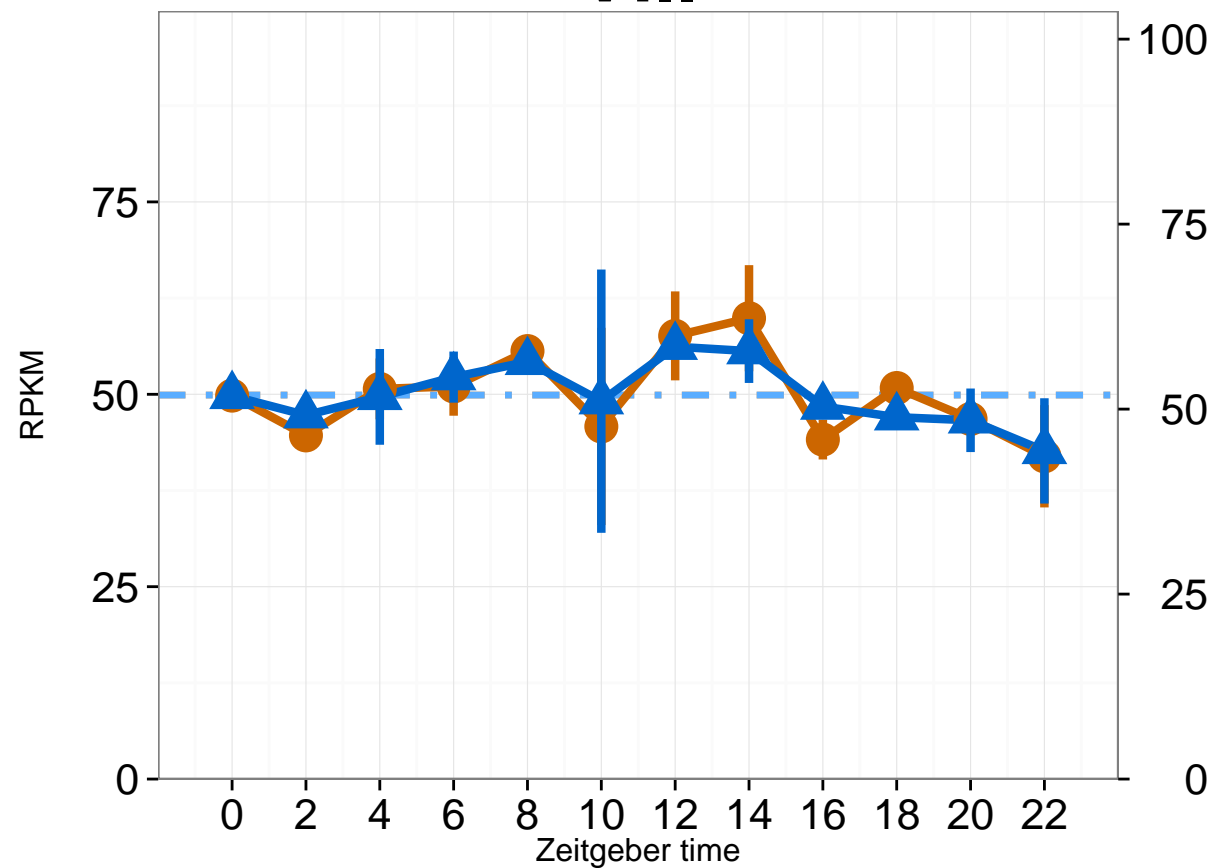

## Vill

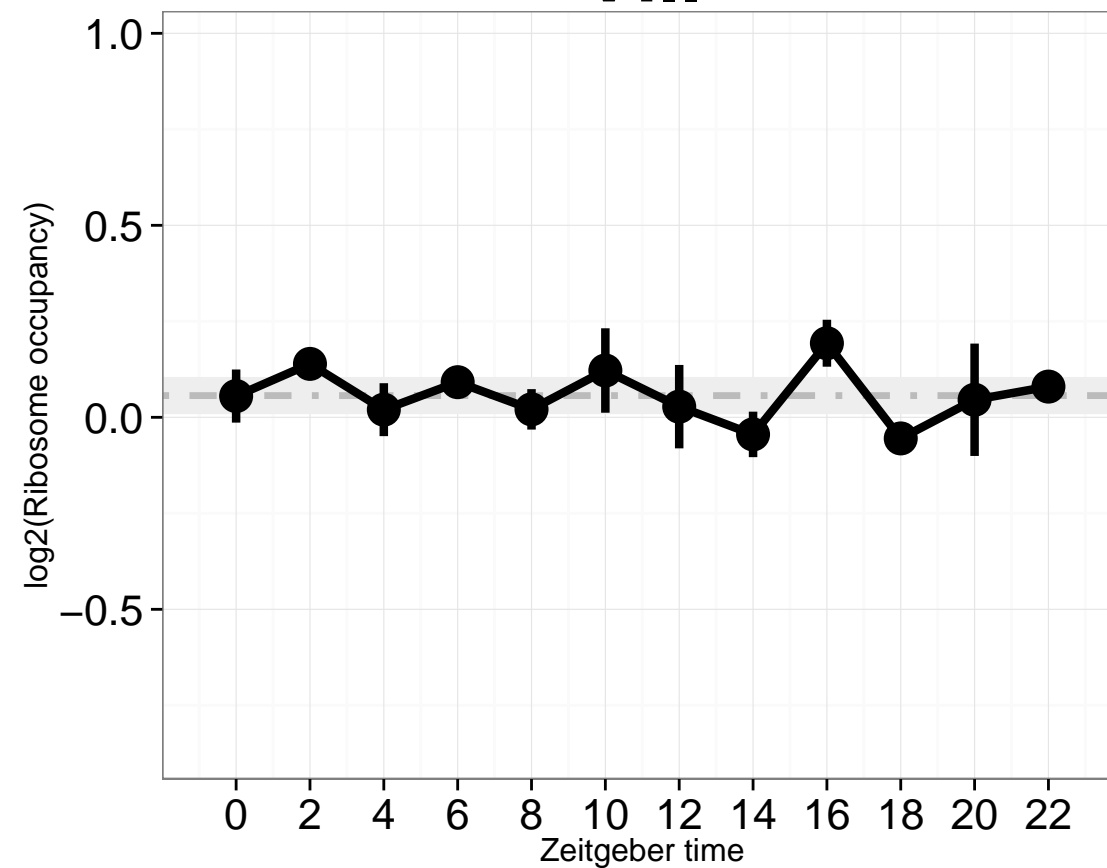

Supplement: Supplementary file 10555 [file 1]

## Fkbp2

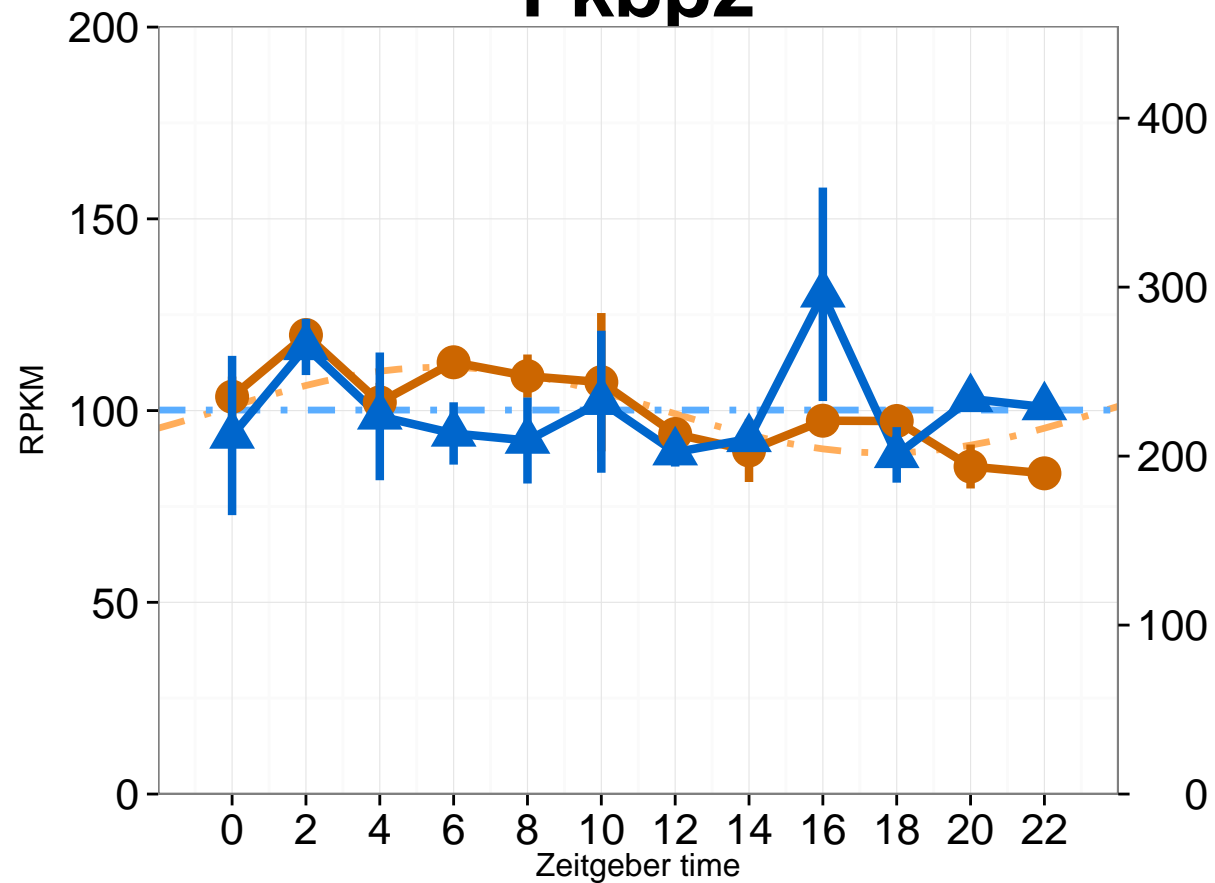

## Fkbp2

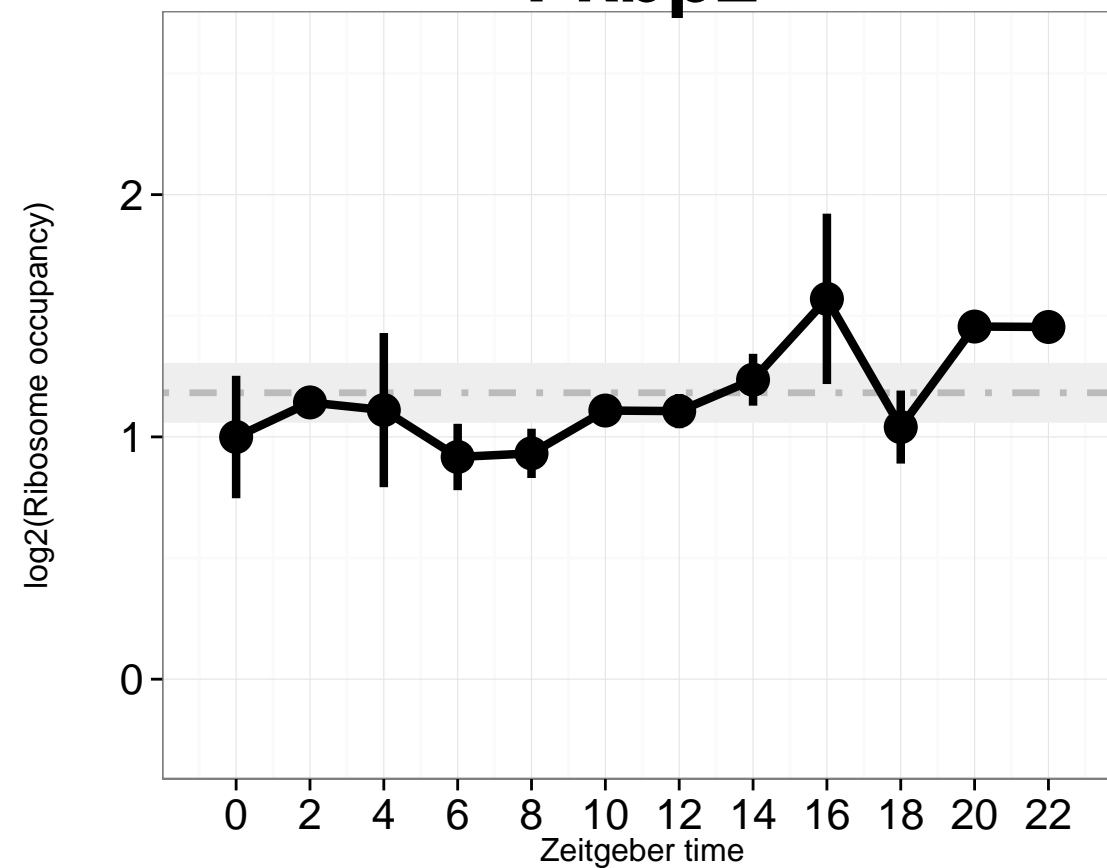

Supplement: Supplementary file 10556 [file 1]

## Slc25a22

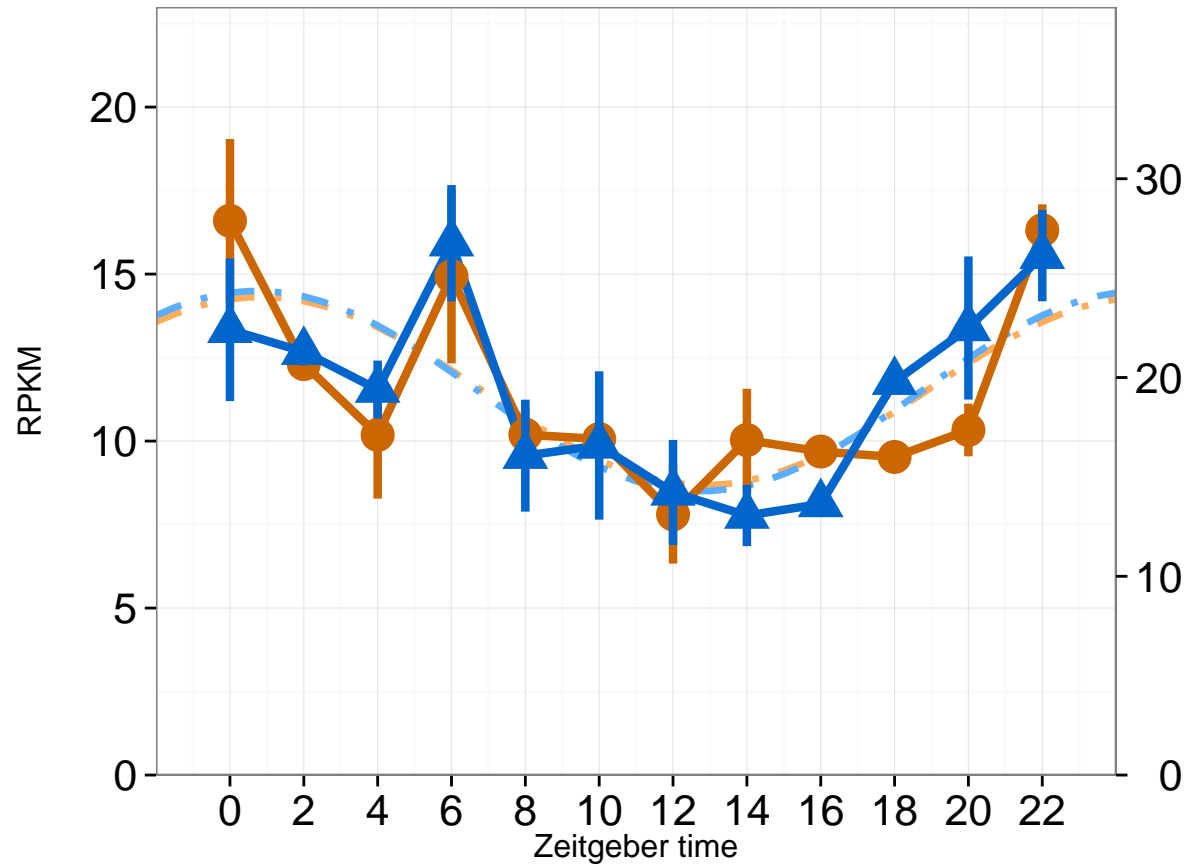

## Slc25a22

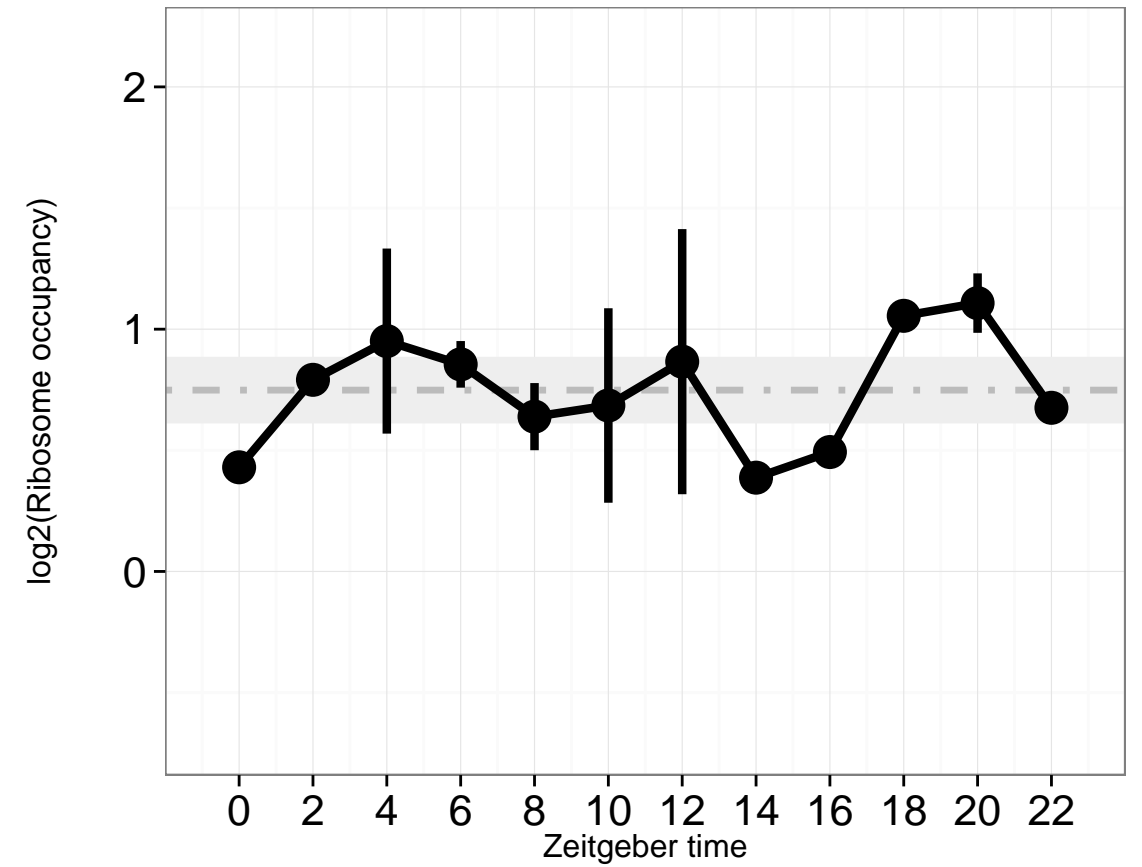

Supplement: Supplementary file 10557 [file 1]

# Atp7b

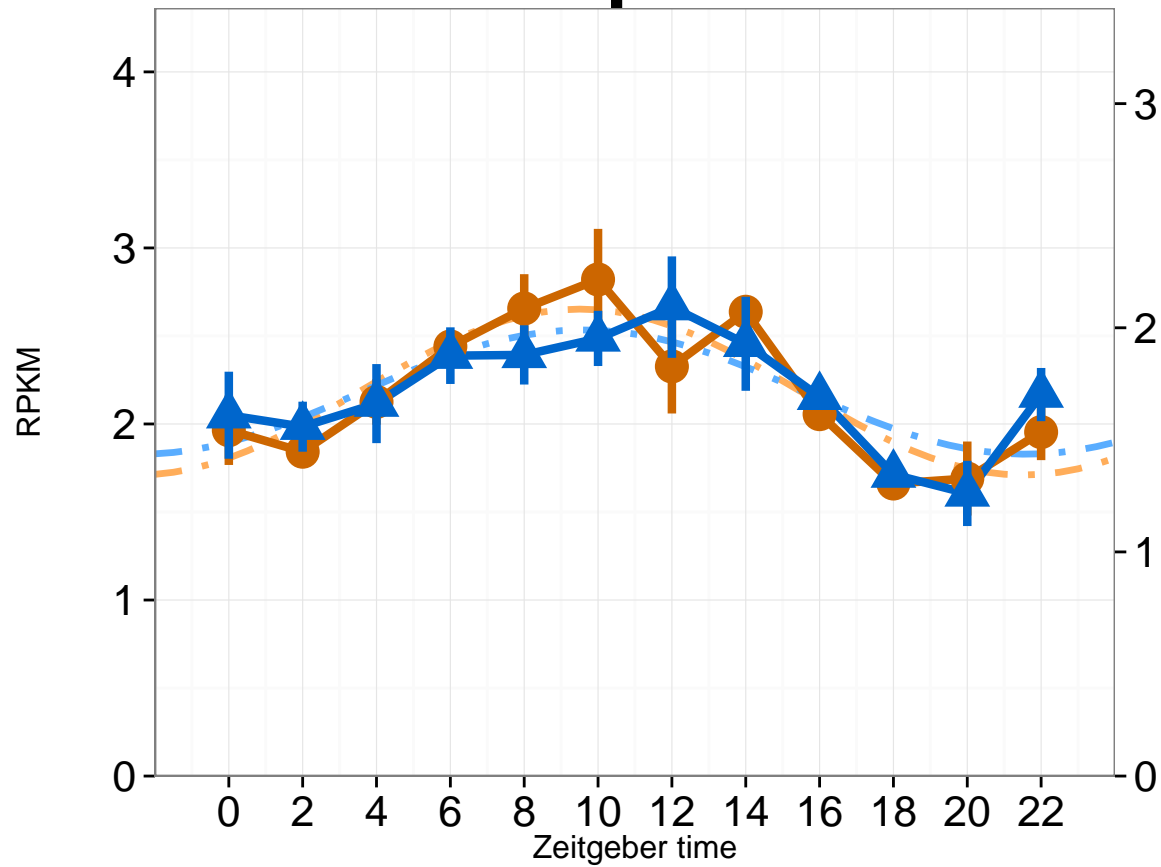

# Atp7b

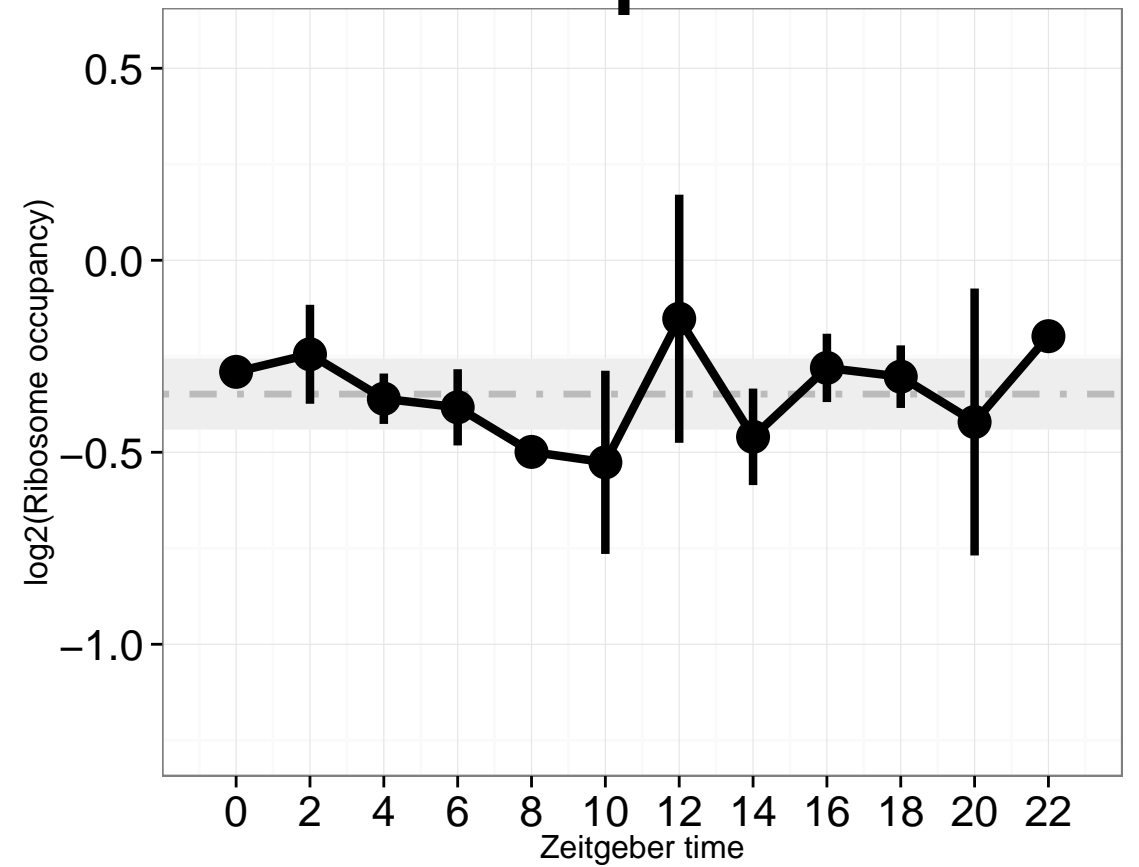

Supplement: Supplementary file 10558 [file 1]

# Lama5

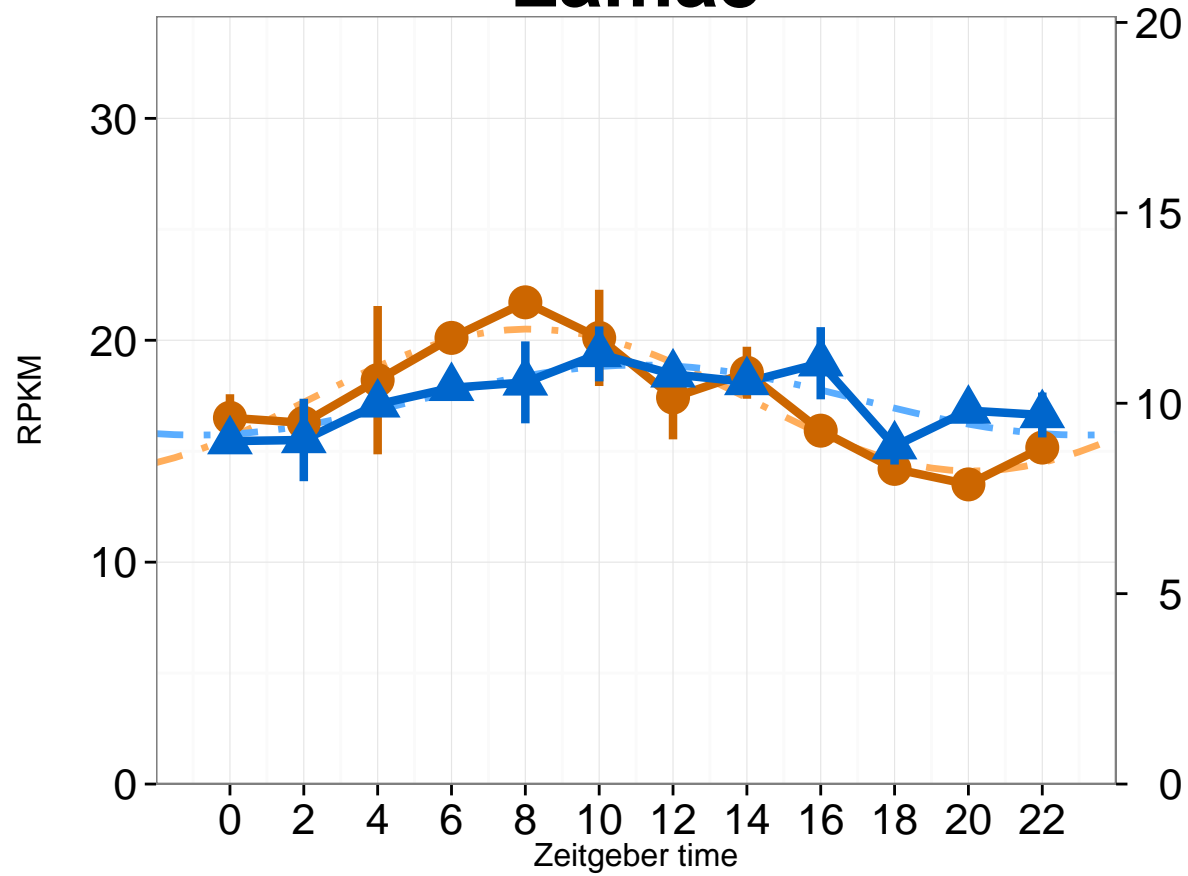

# Lama5

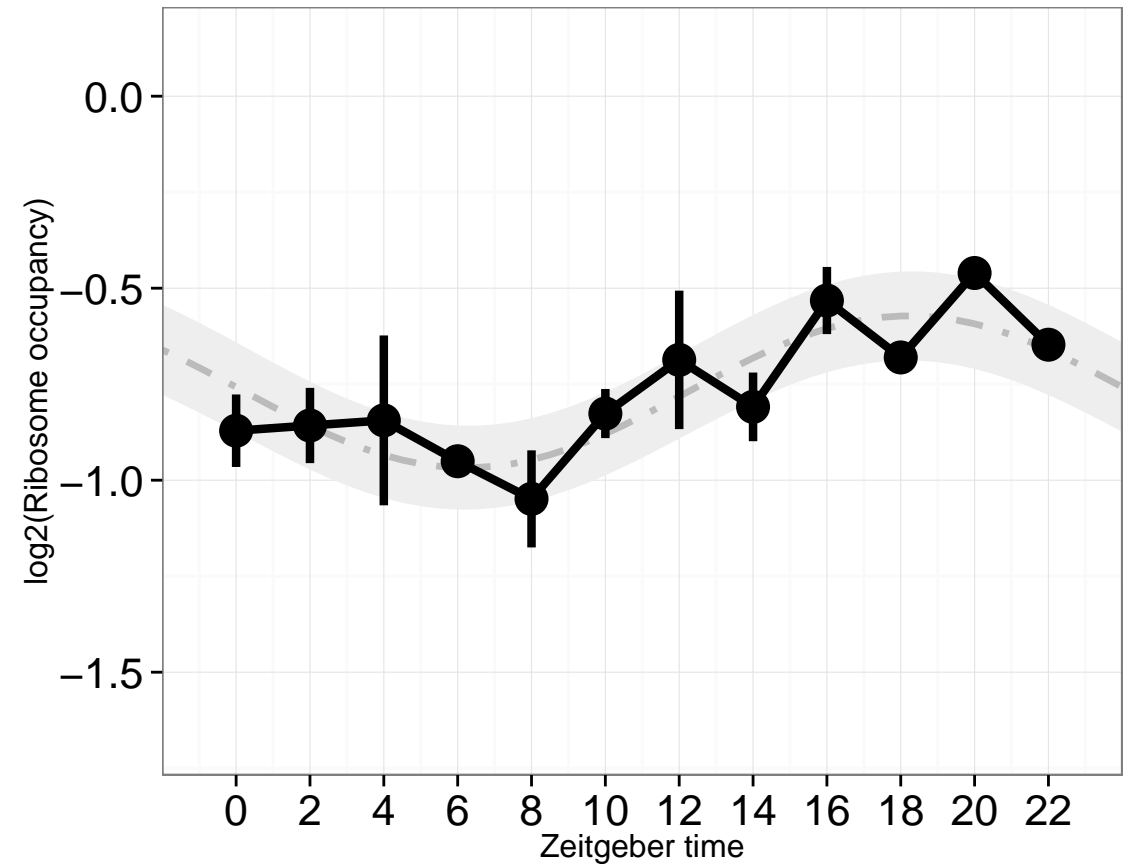

Supplement: Supplementary file 10559 [file 1]

# Trpv2

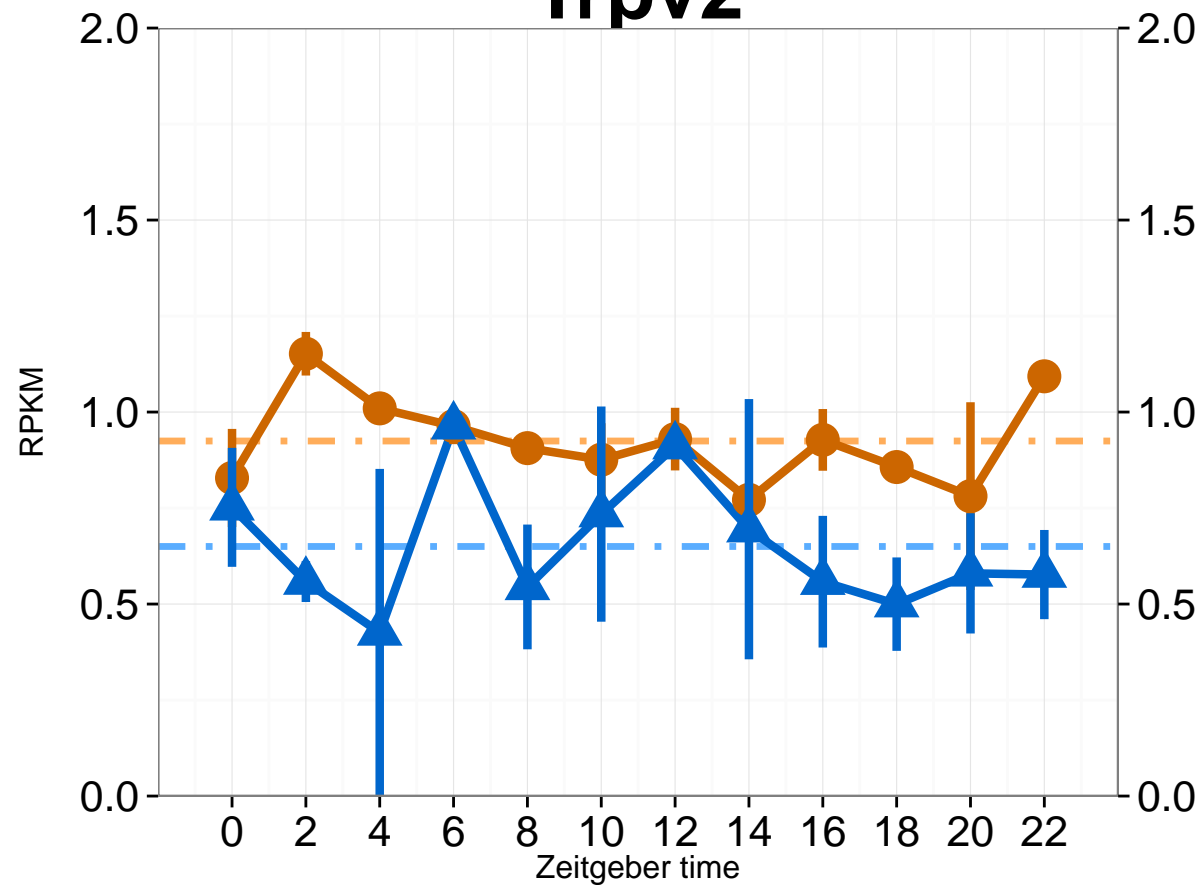

# Trpv2

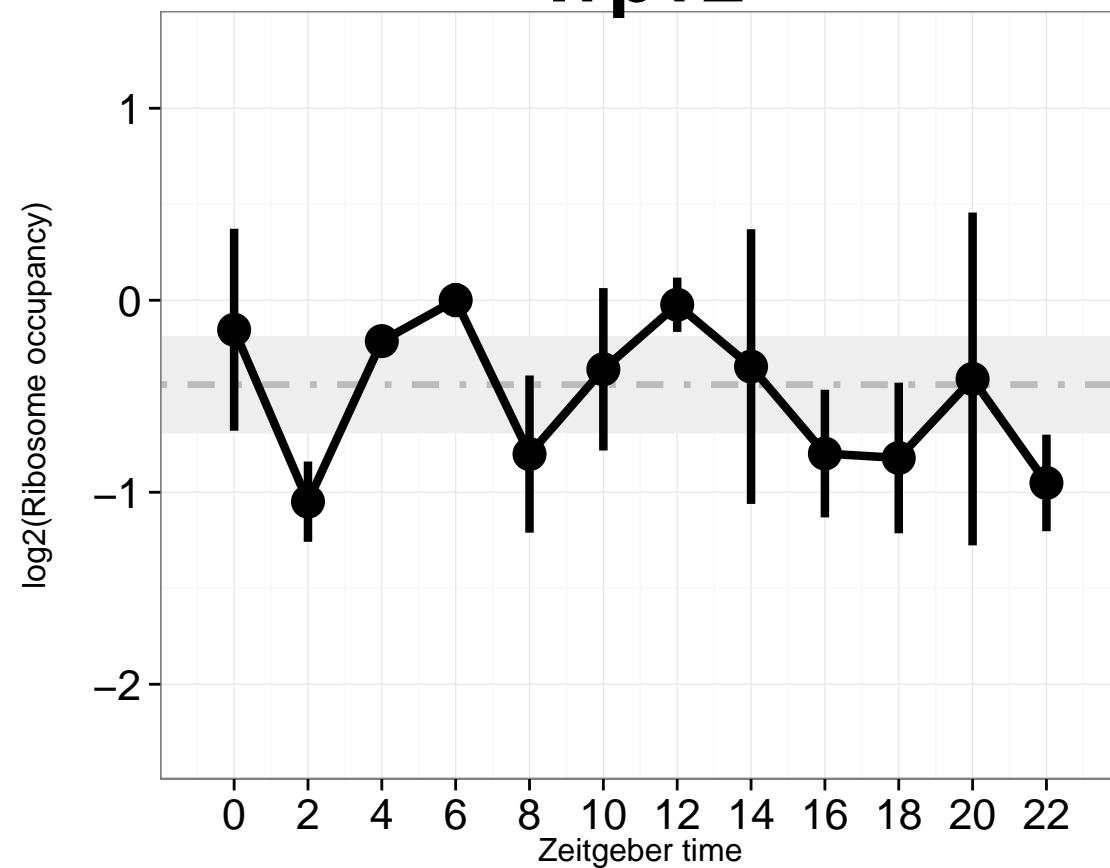

Supplement: Supplementary file 10560 [file 1]

## 4732465J04Rik

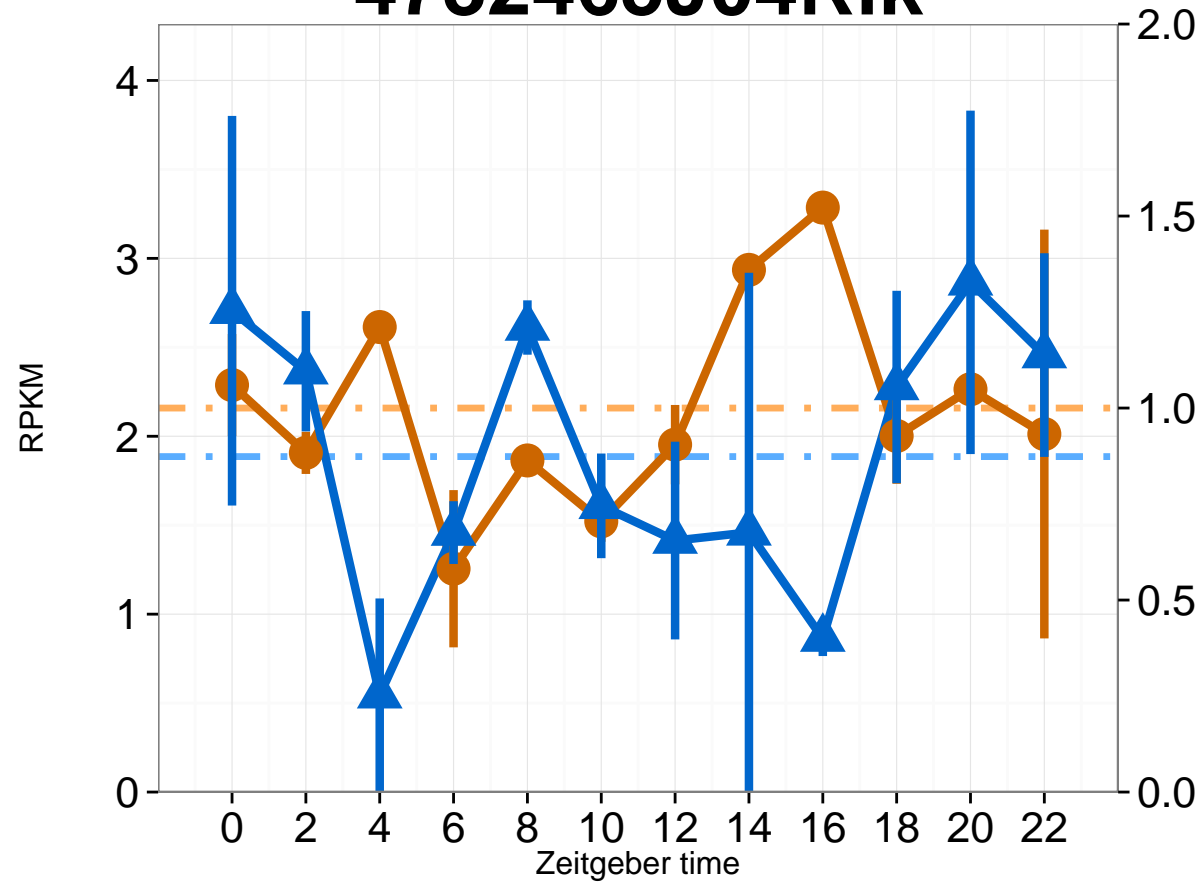

## 4732465J04Rik

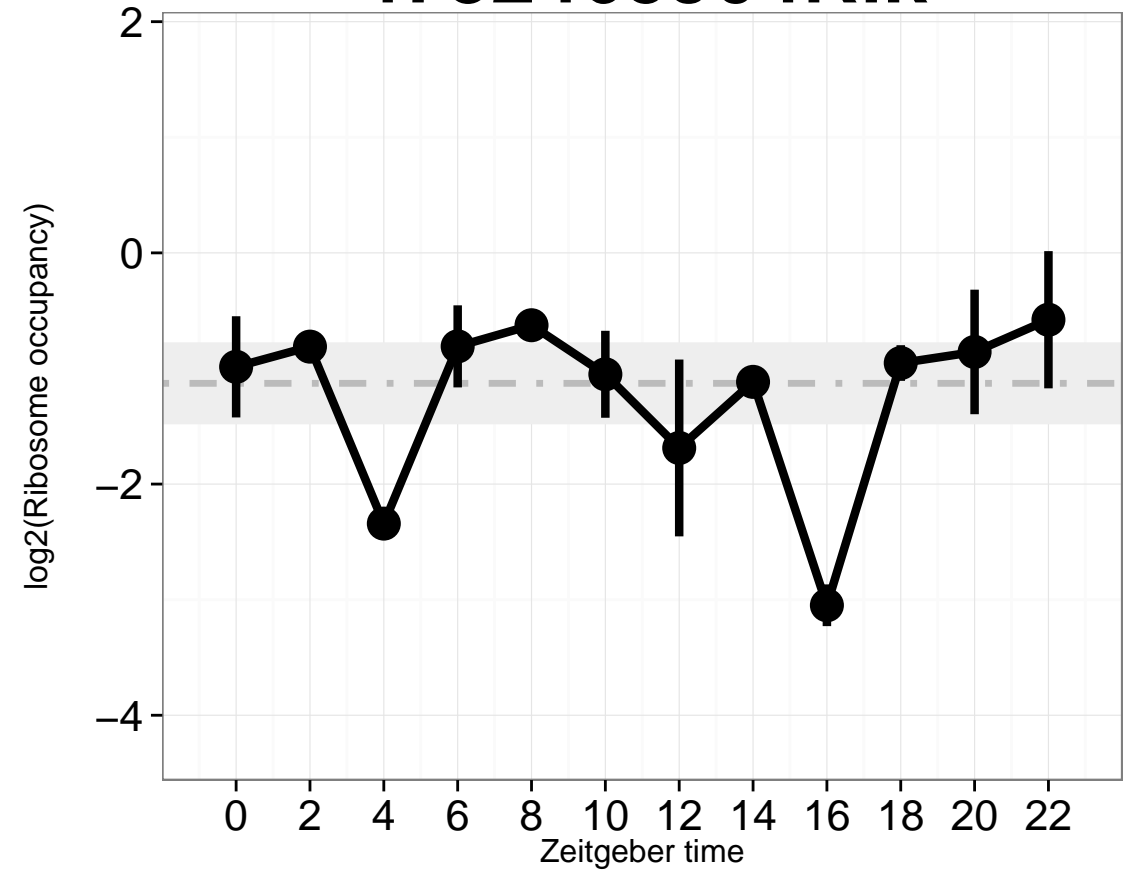

Supplement: Supplementary file 10561 [file 1]

# Hmgcs2

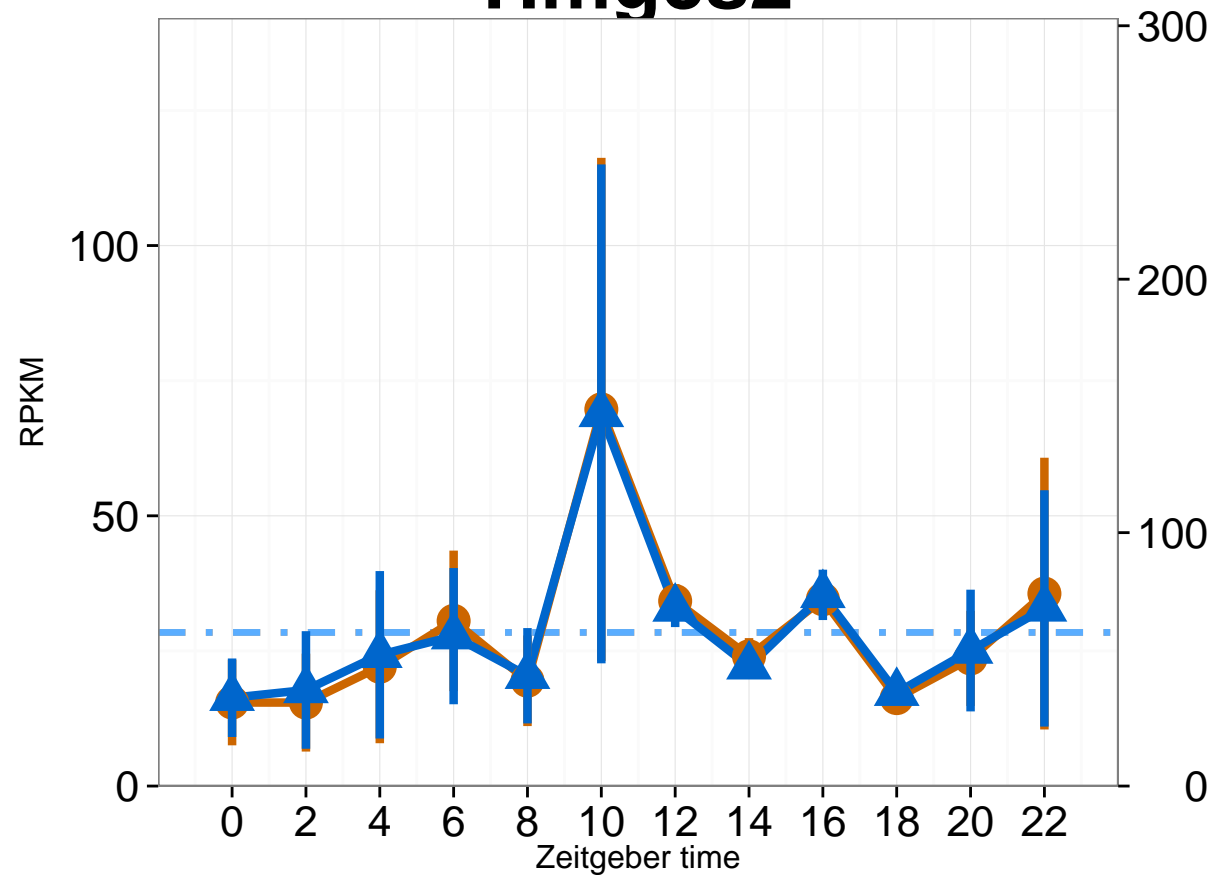

# Hmgcs2

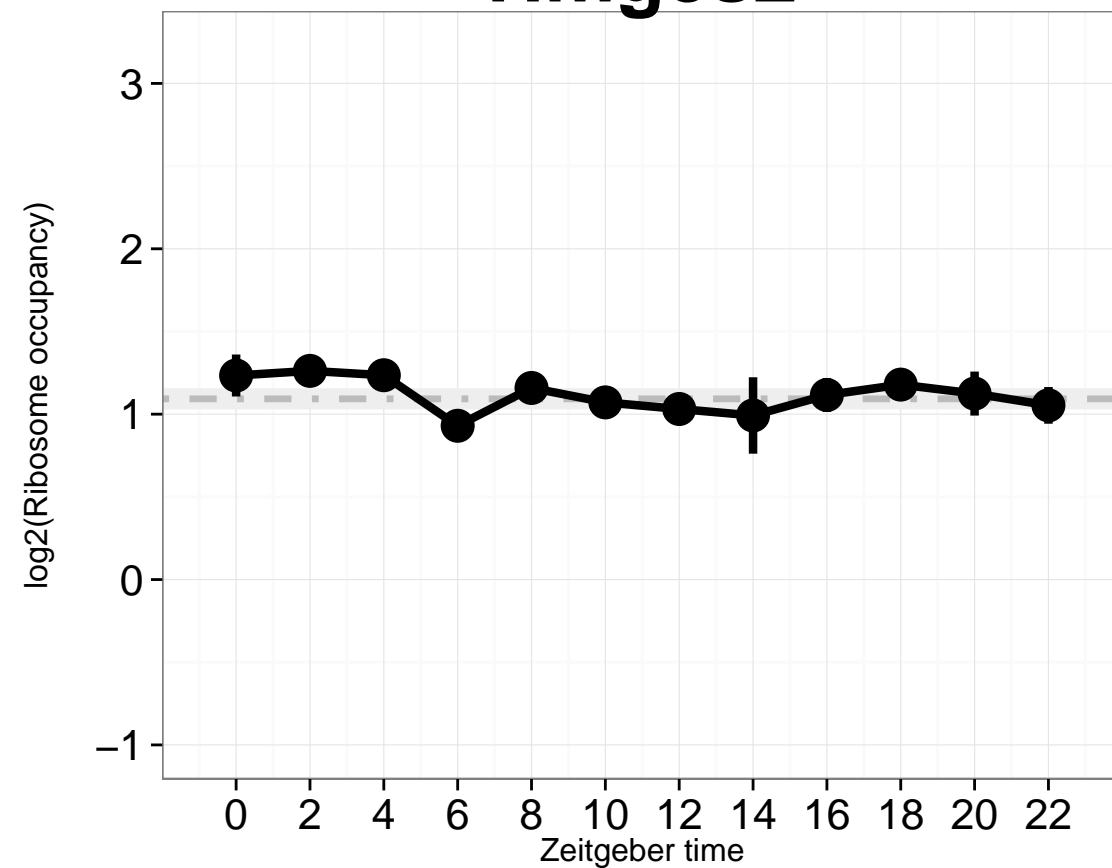

Supplement: Supplementary file 10562 [file 1]

## Vav3

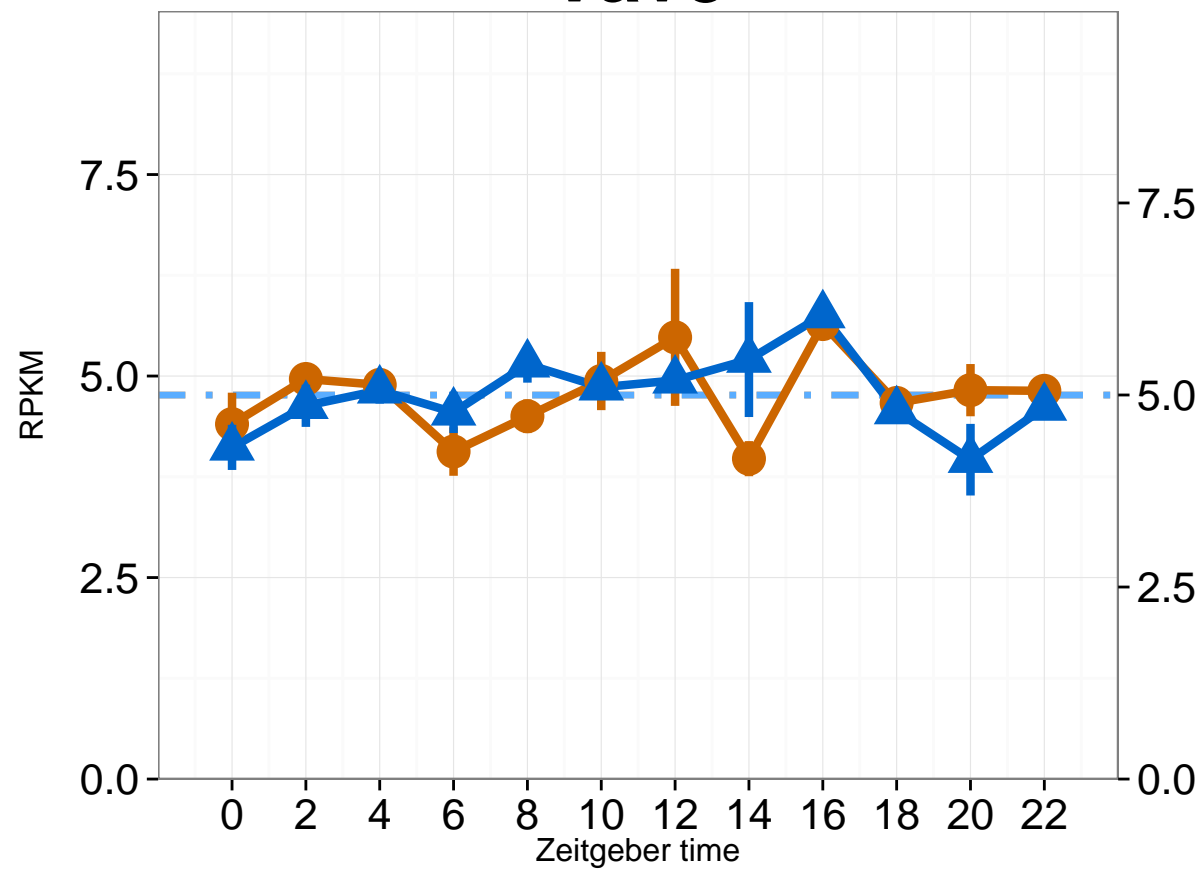

## Vav3

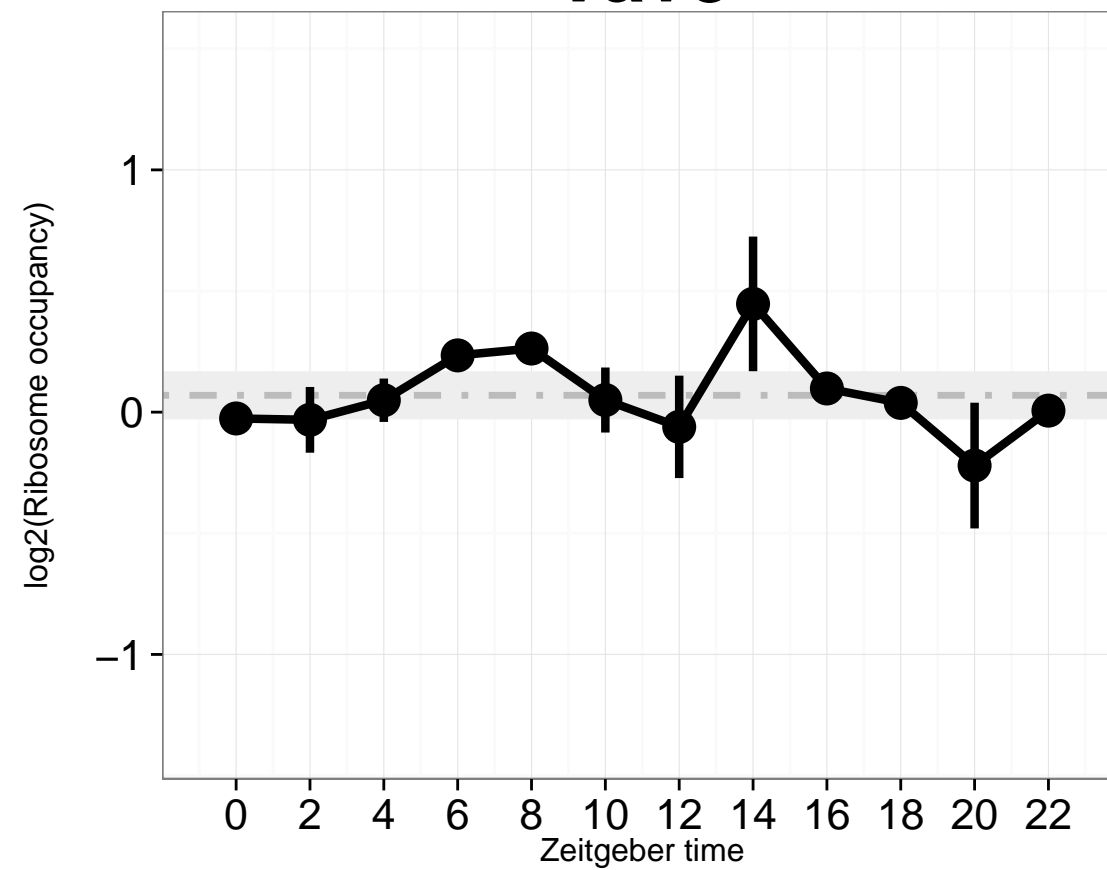

Supplement: Supplementary file 10563 [file 1]

## Klk1b3

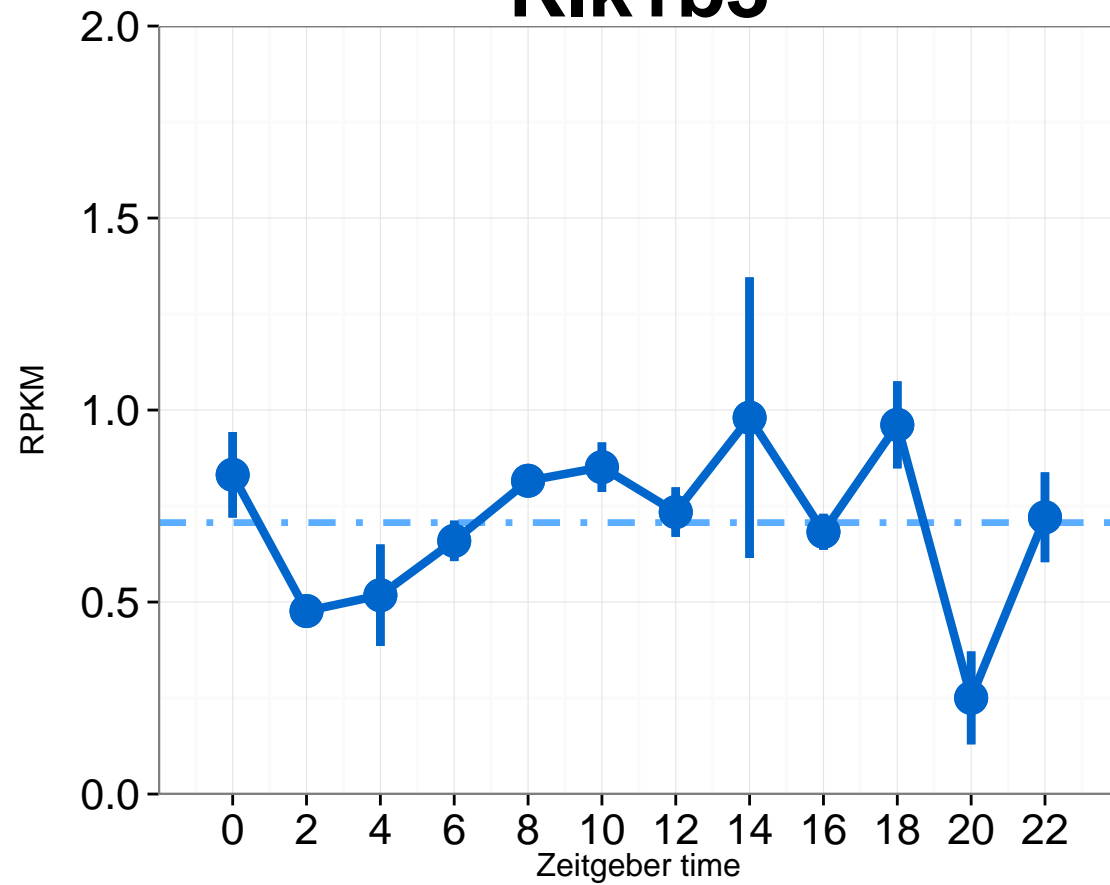

## Klk1b3 log2(Ribosome occupancy

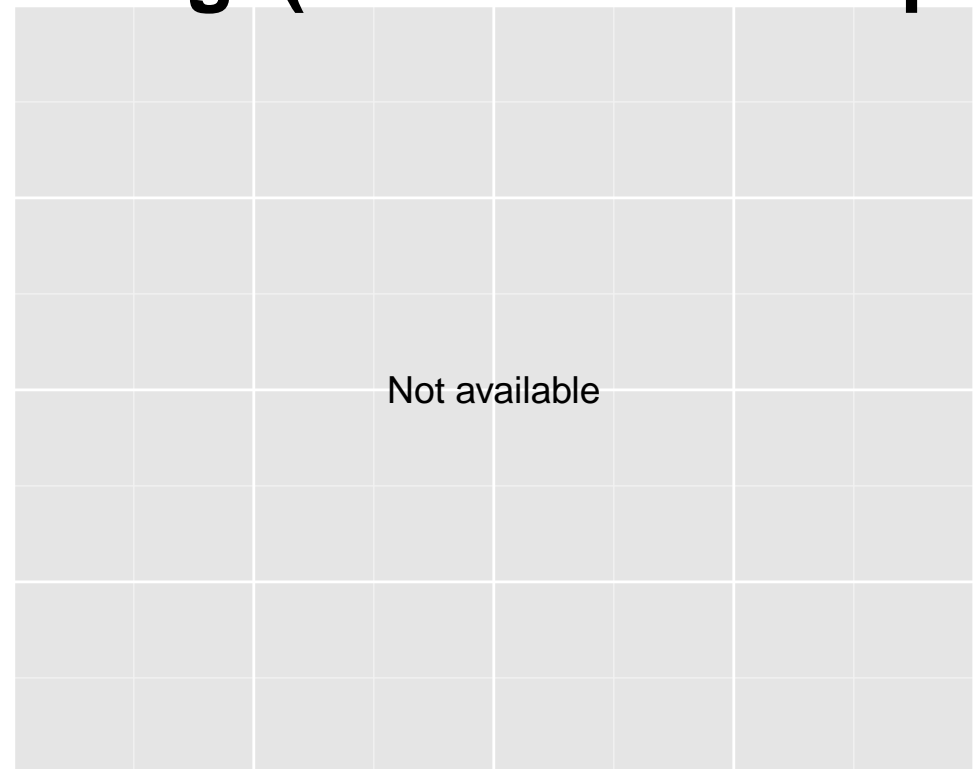

Supplement: Supplementary file 10564 [file 1]

## Aak1

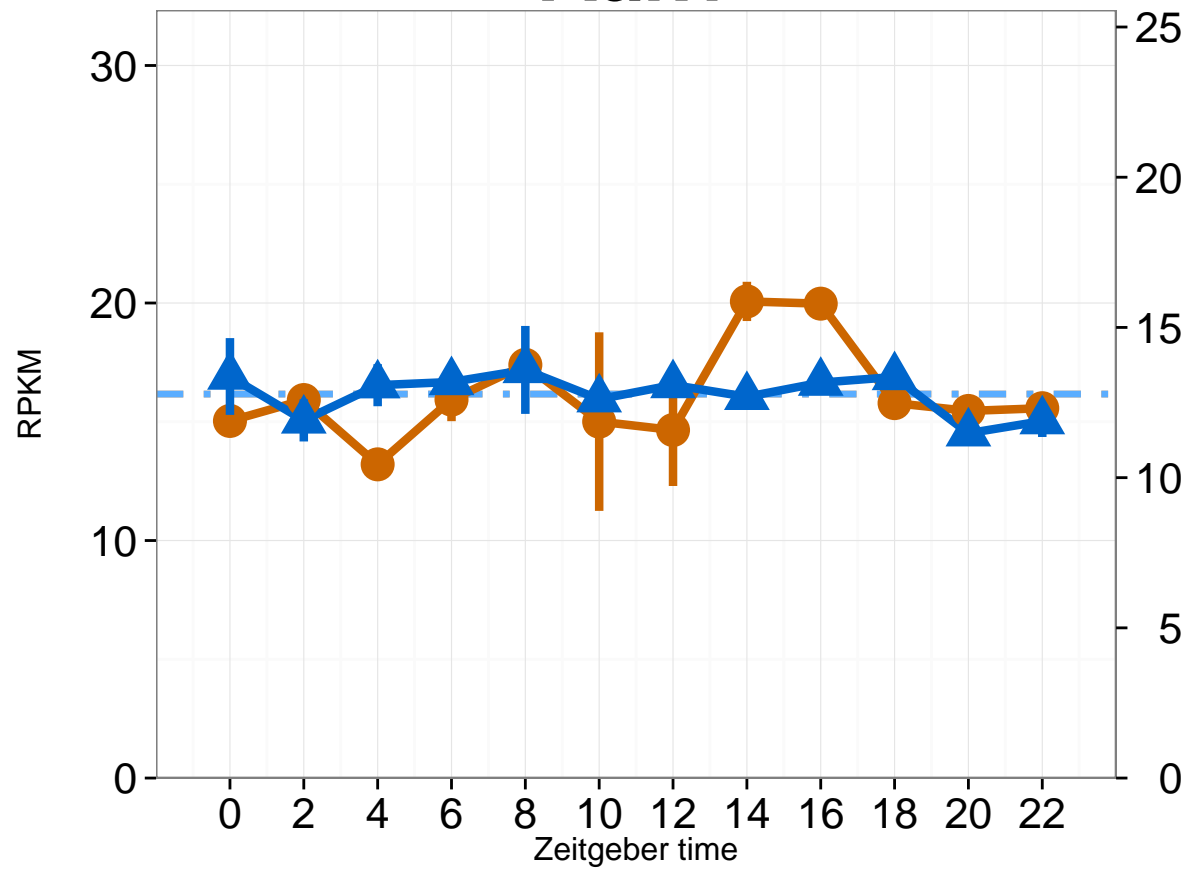

## Aak1

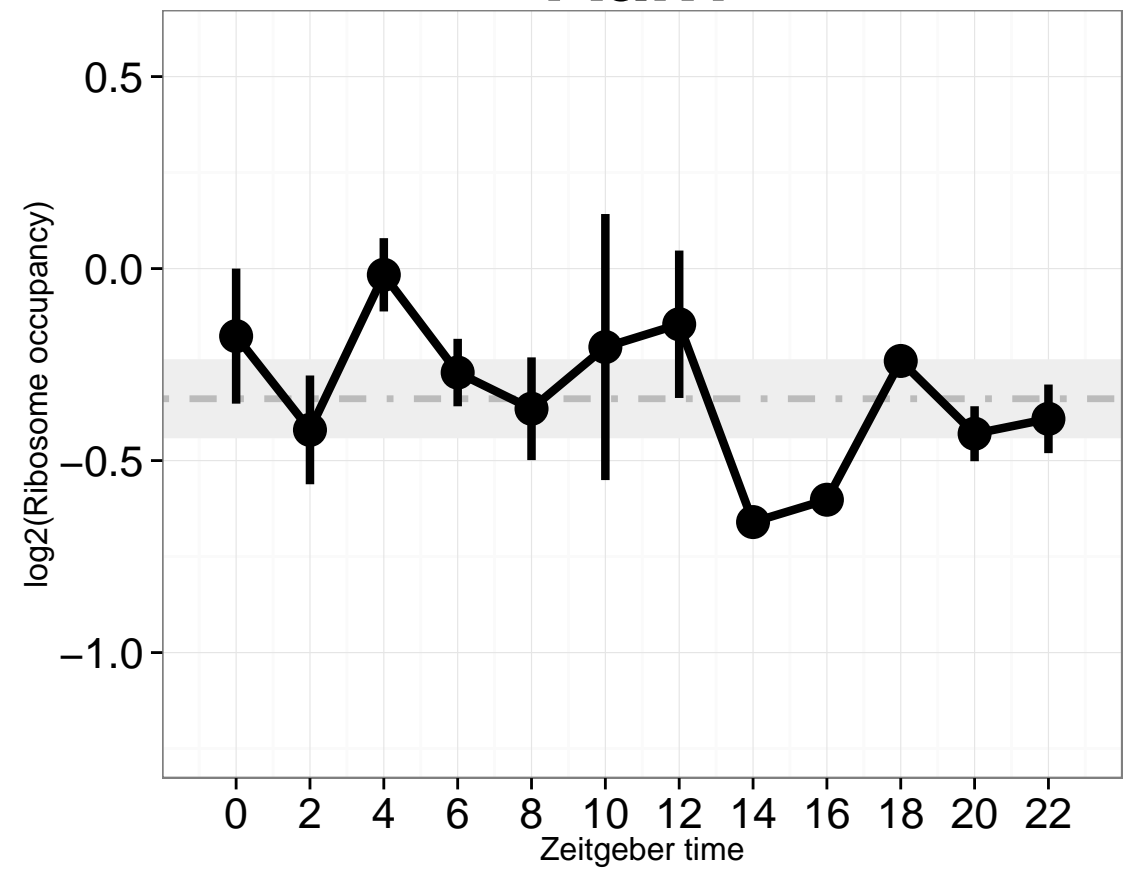

Supplement: Supplementary file 10565 [file 1]

## Nap1l1

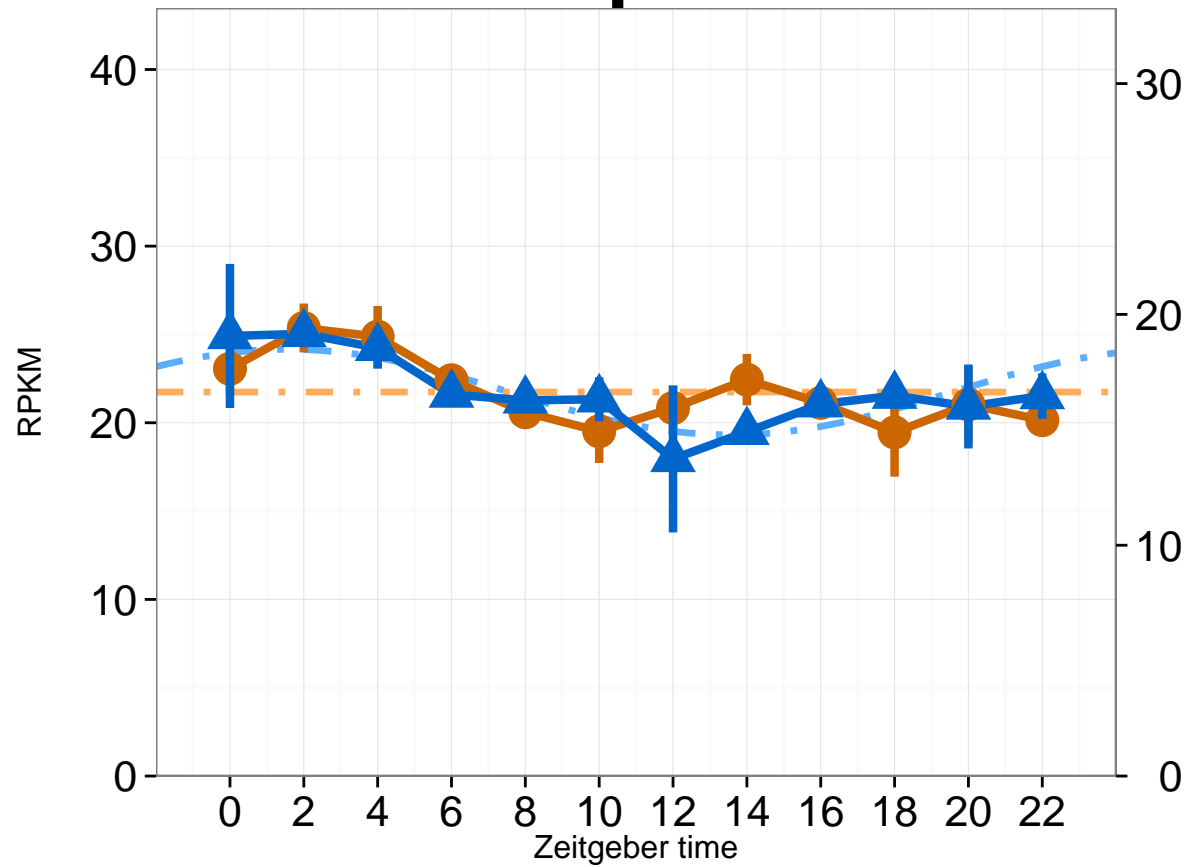

## Nap1l1

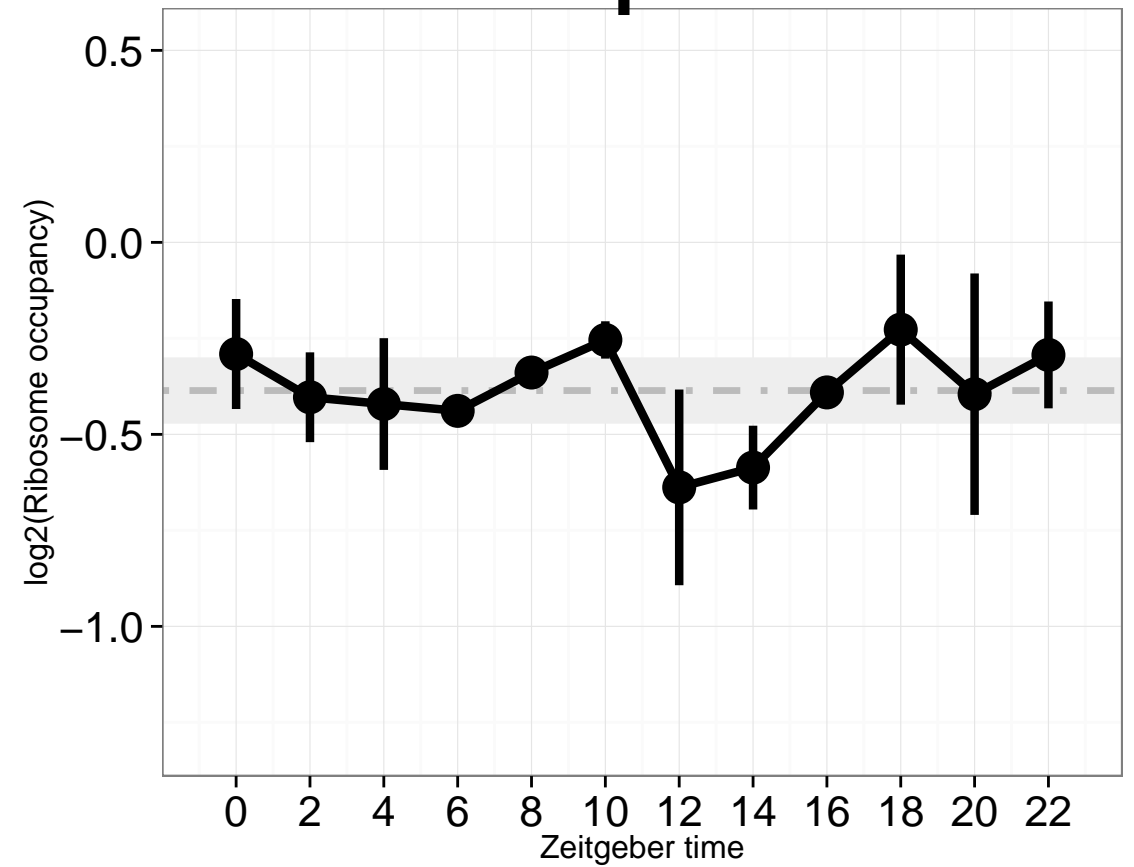

Supplement: Supplementary file 10566 [file 1]

# Rp2h

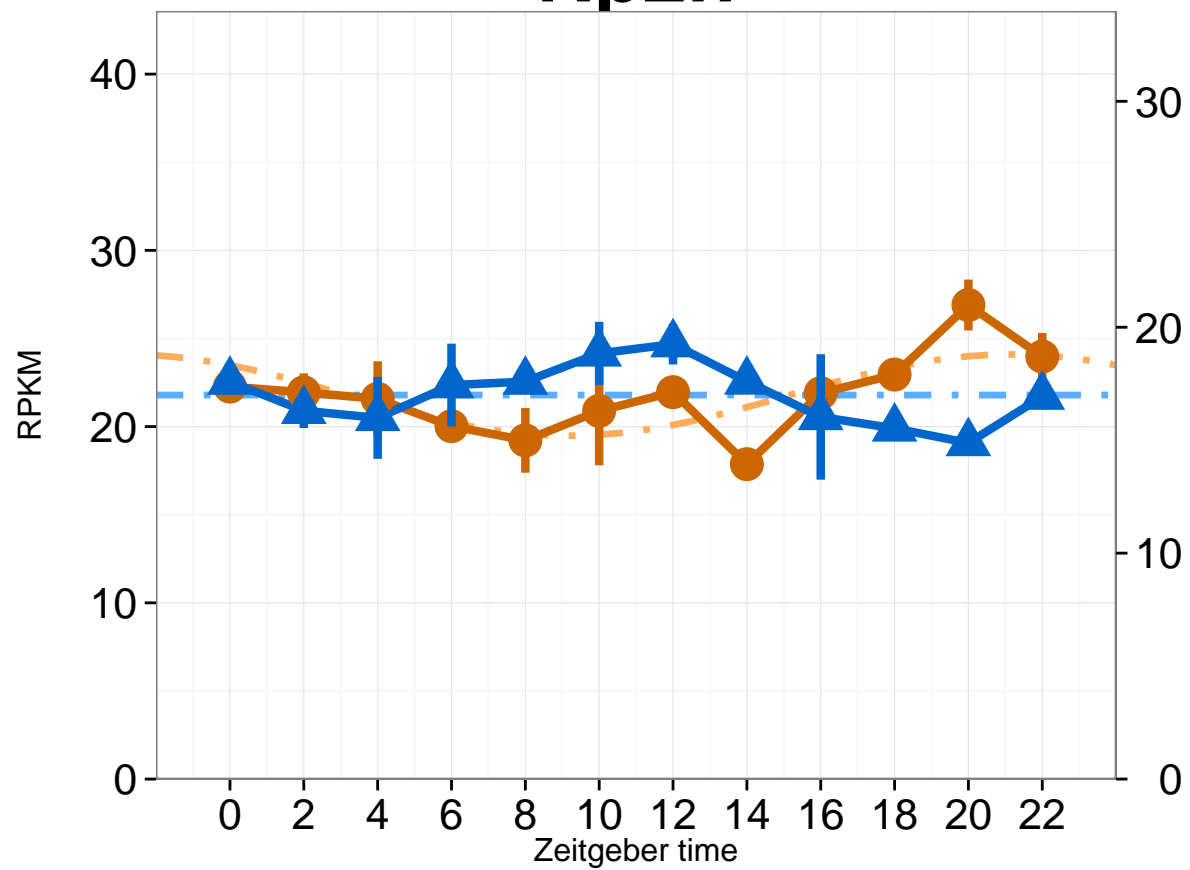

# Rp2h

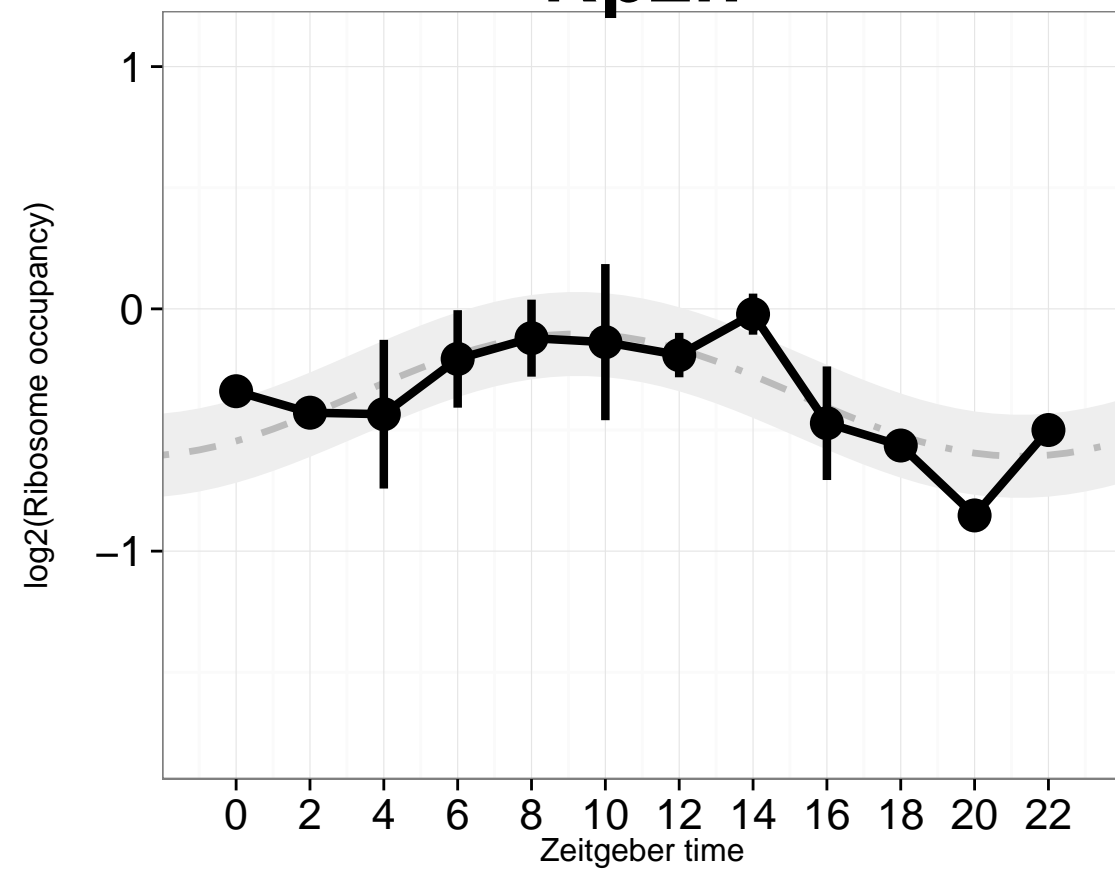

Supplement: Supplementary file 10567 [file 1]

# Tbrg4

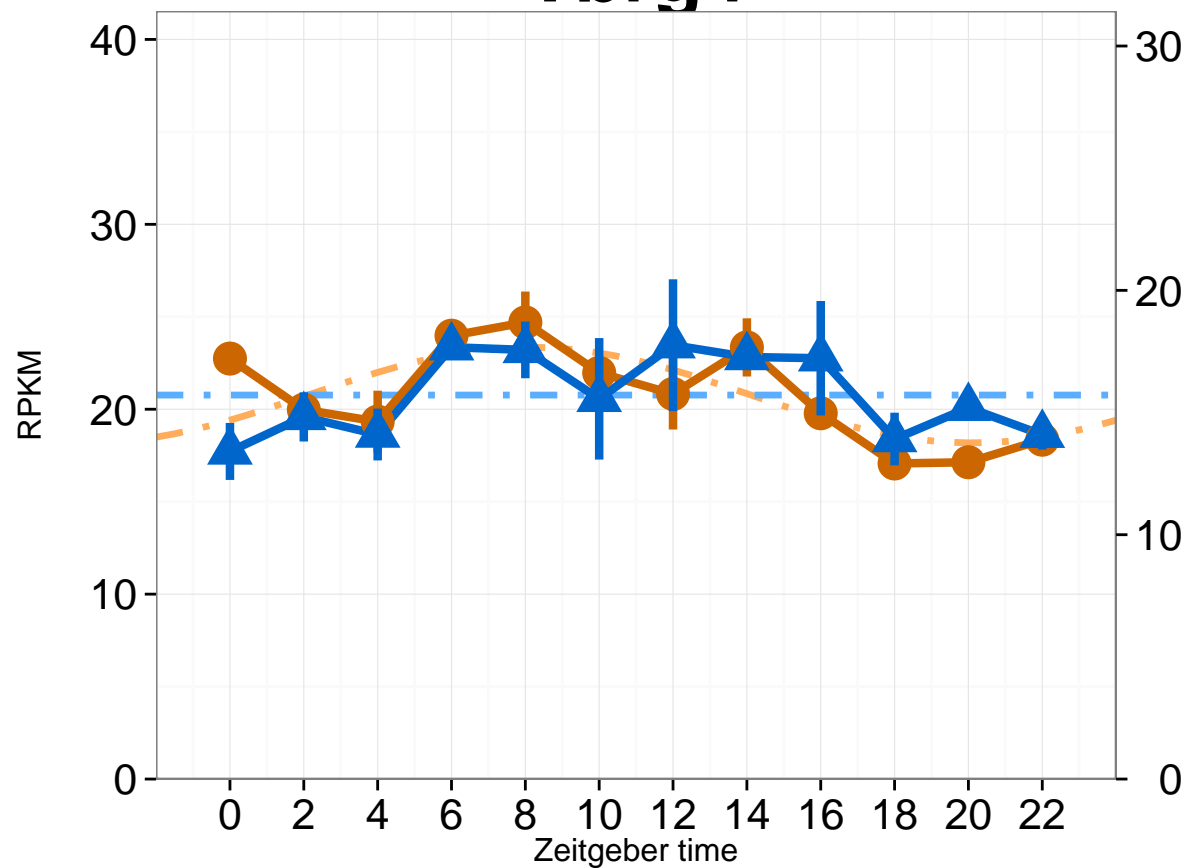

# Tbrg4

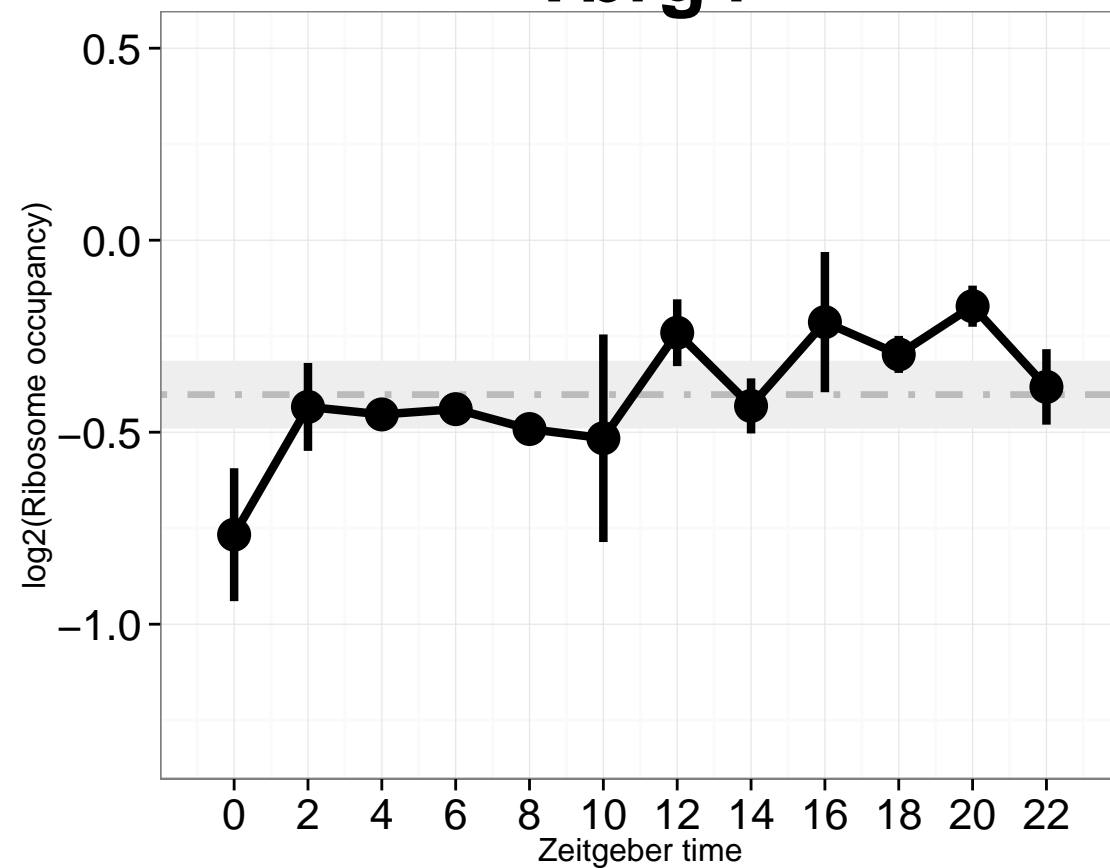

Supplement: Supplementary file 10568 [file 1]

# Efhc2

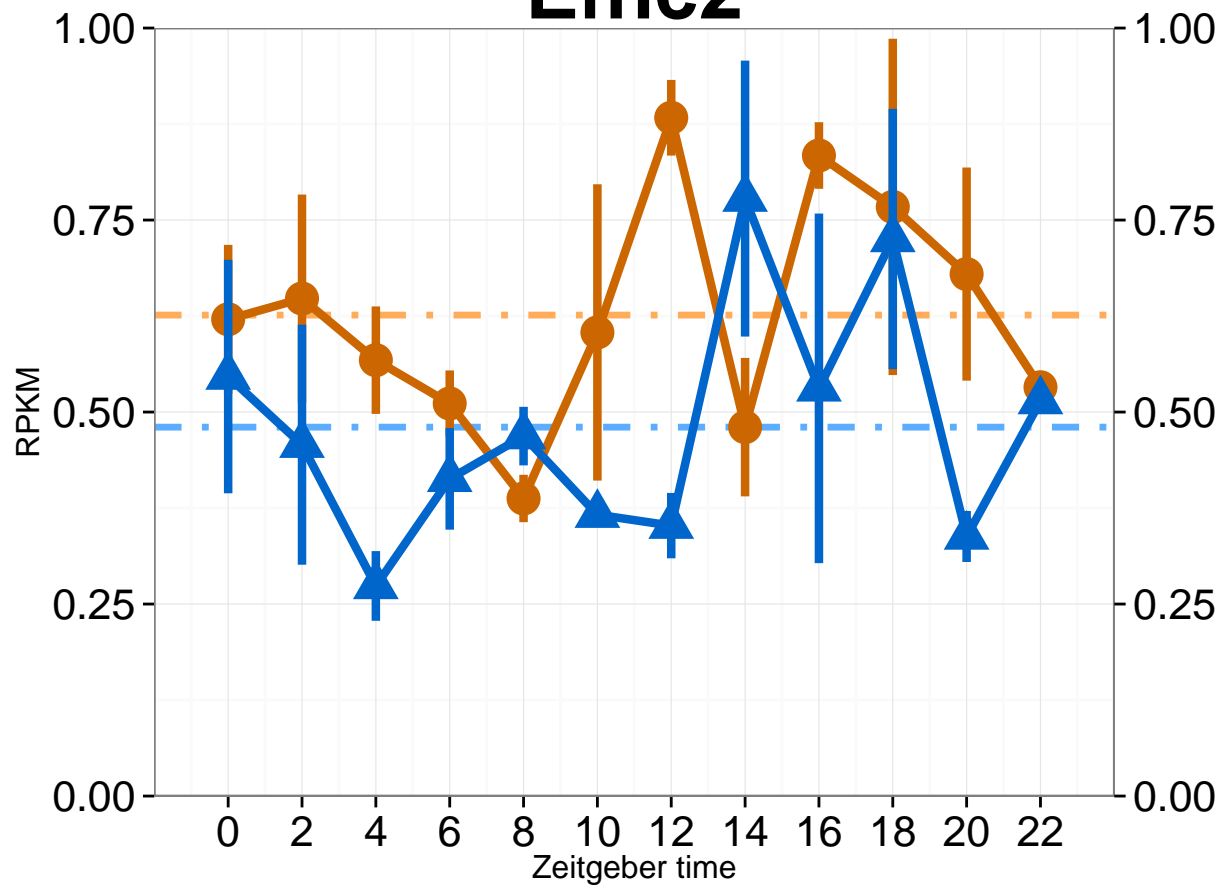

# Efhc2

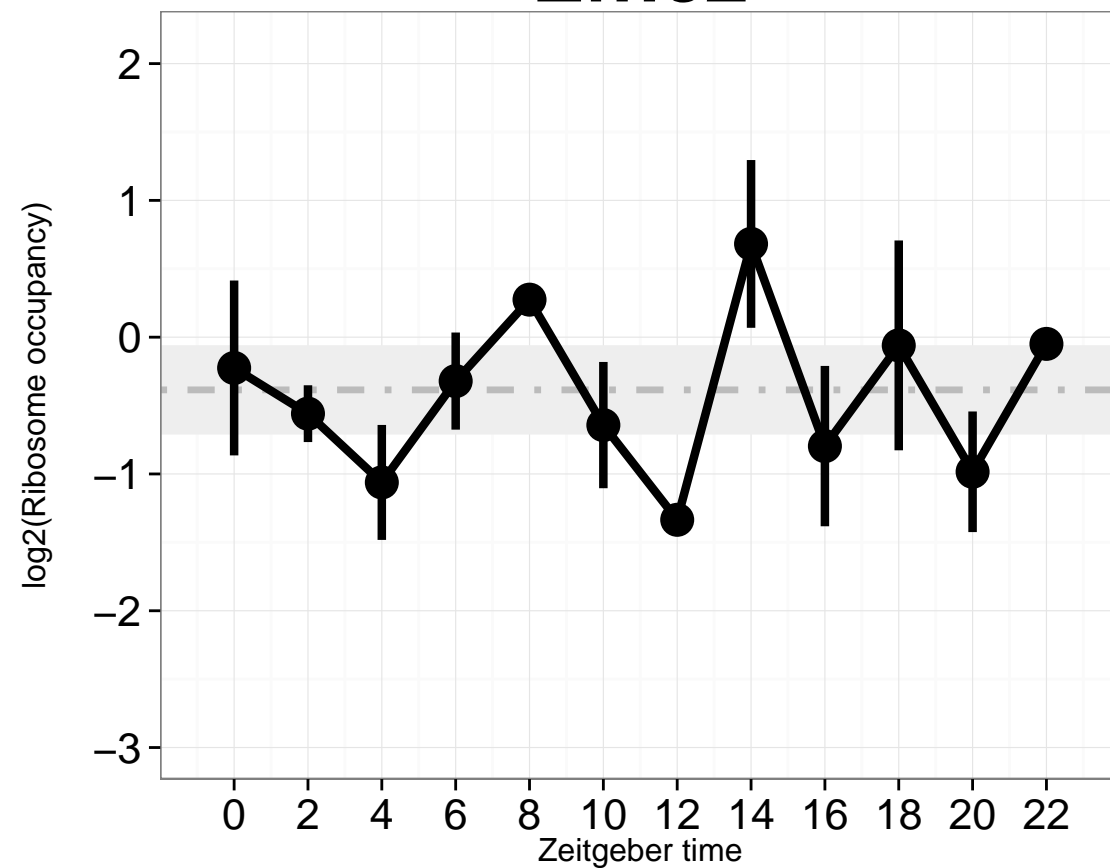

Supplement: Supplementary file 10569 [file 1]

# Osbpl6

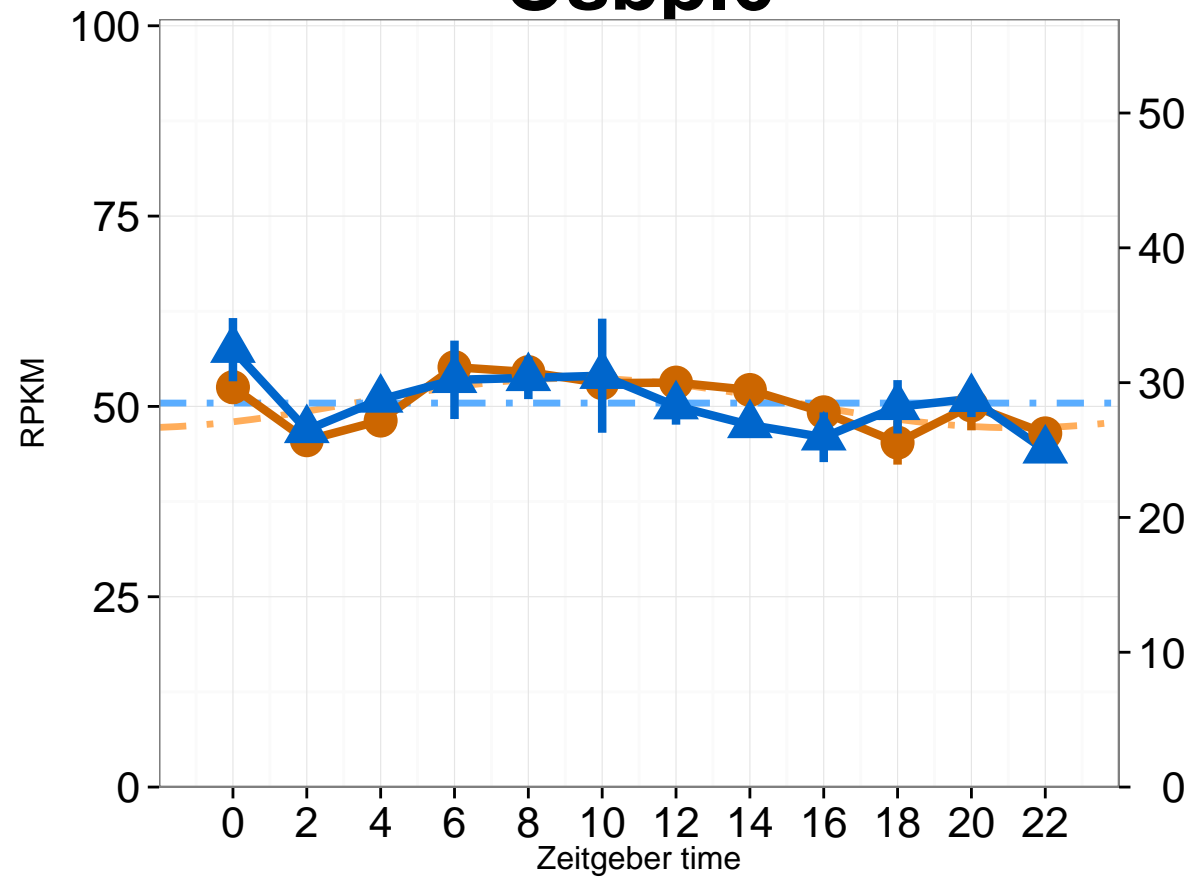

# Osbpl6

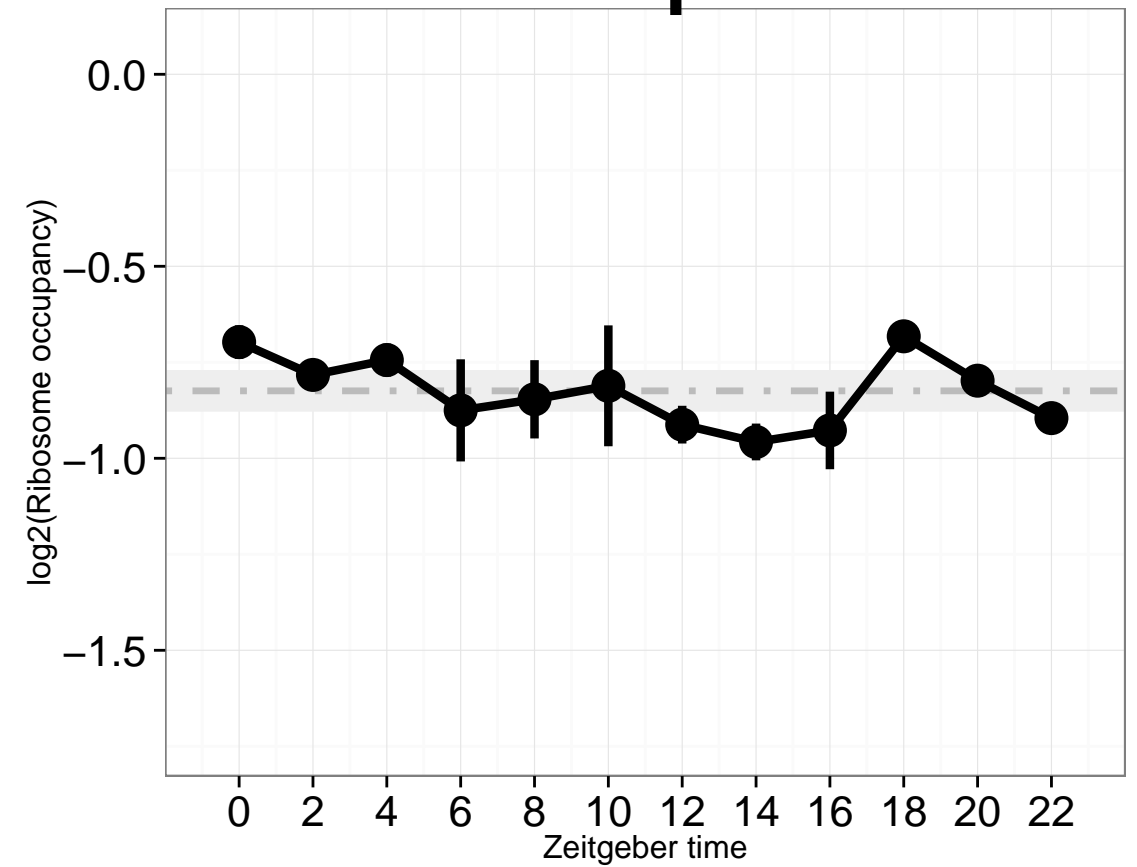

Supplement: Supplementary file 10570 [file 1]

## Ror2

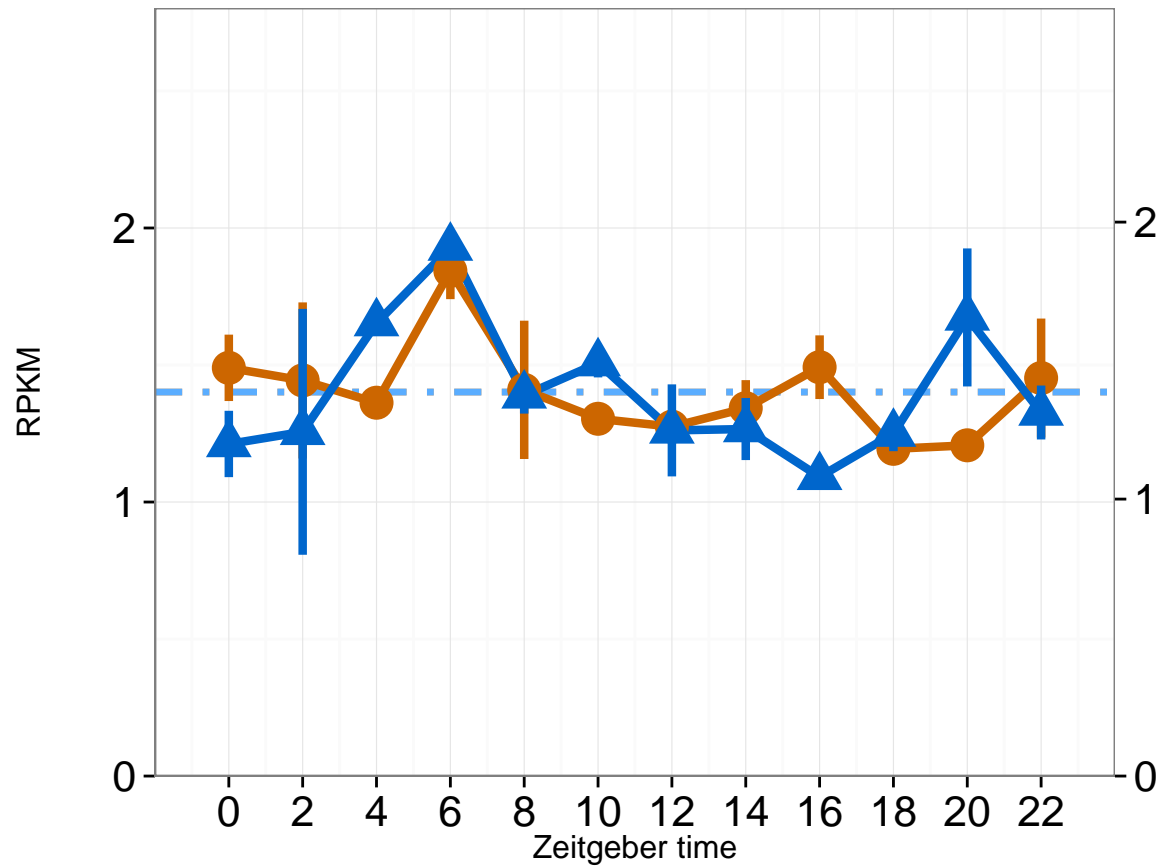

## Ror2

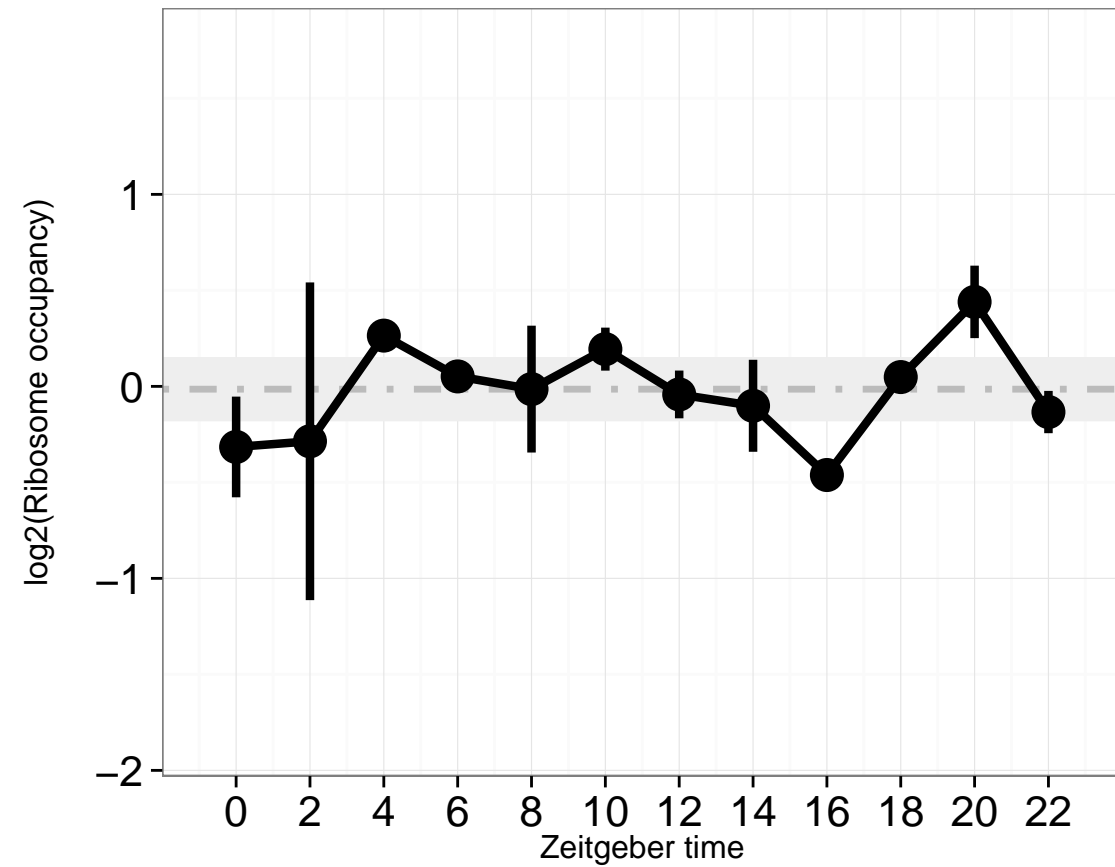

Supplement: Supplementary file 10571 [file 1]

# Aldh1a7

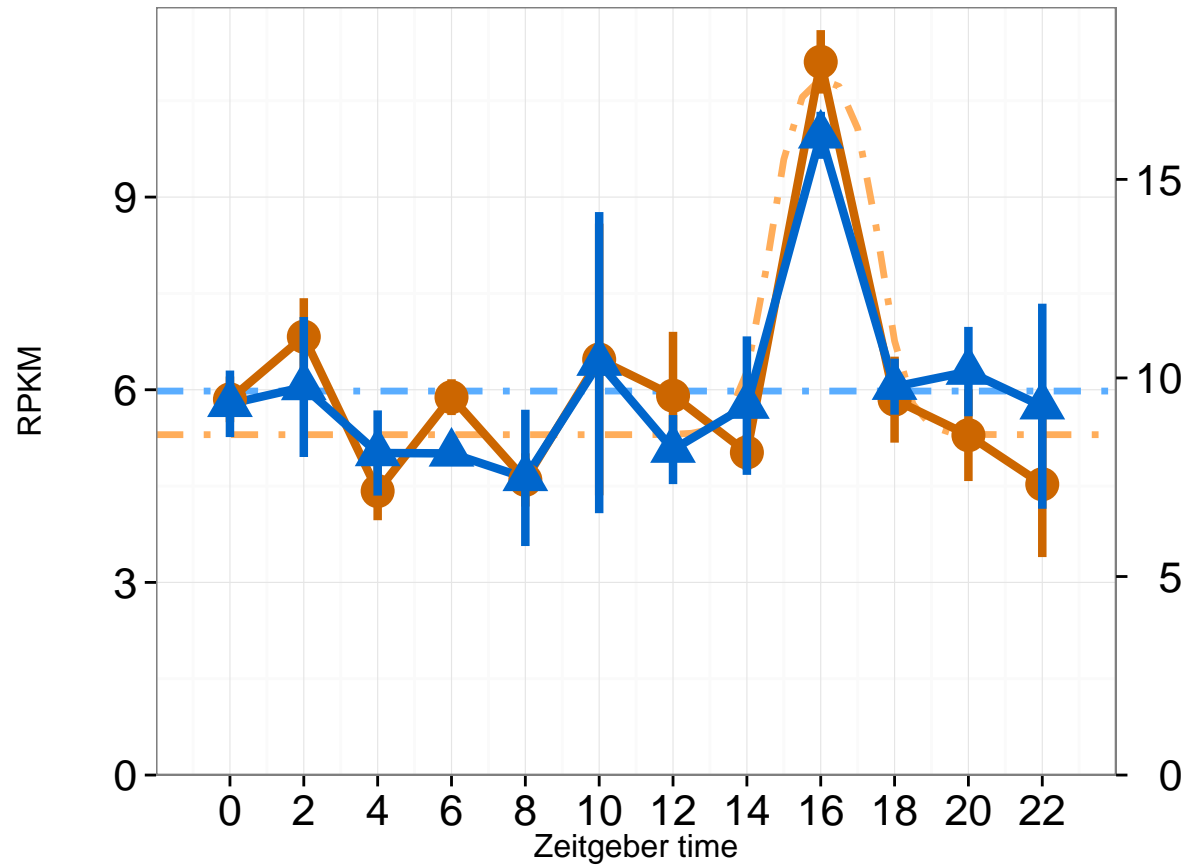

# Aldh1a7

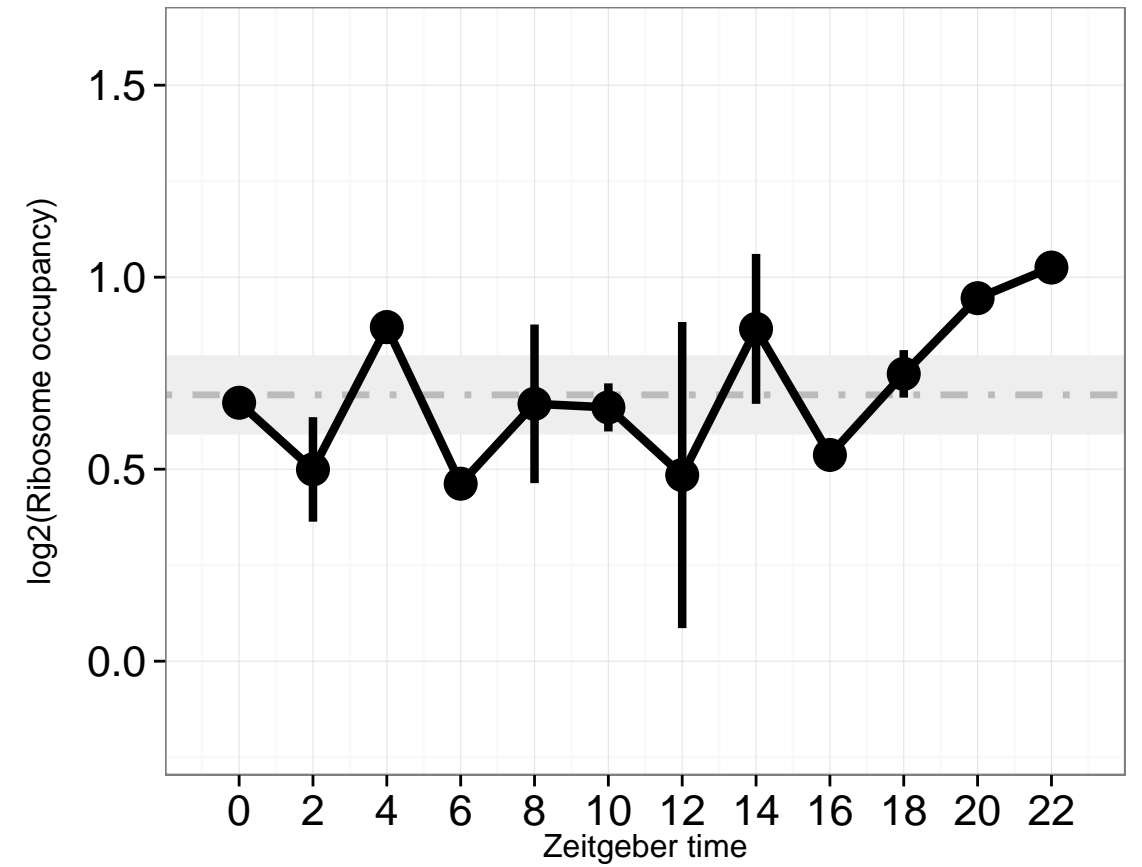

Supplement: Supplementary file 10572 [file 1]

## Dtna

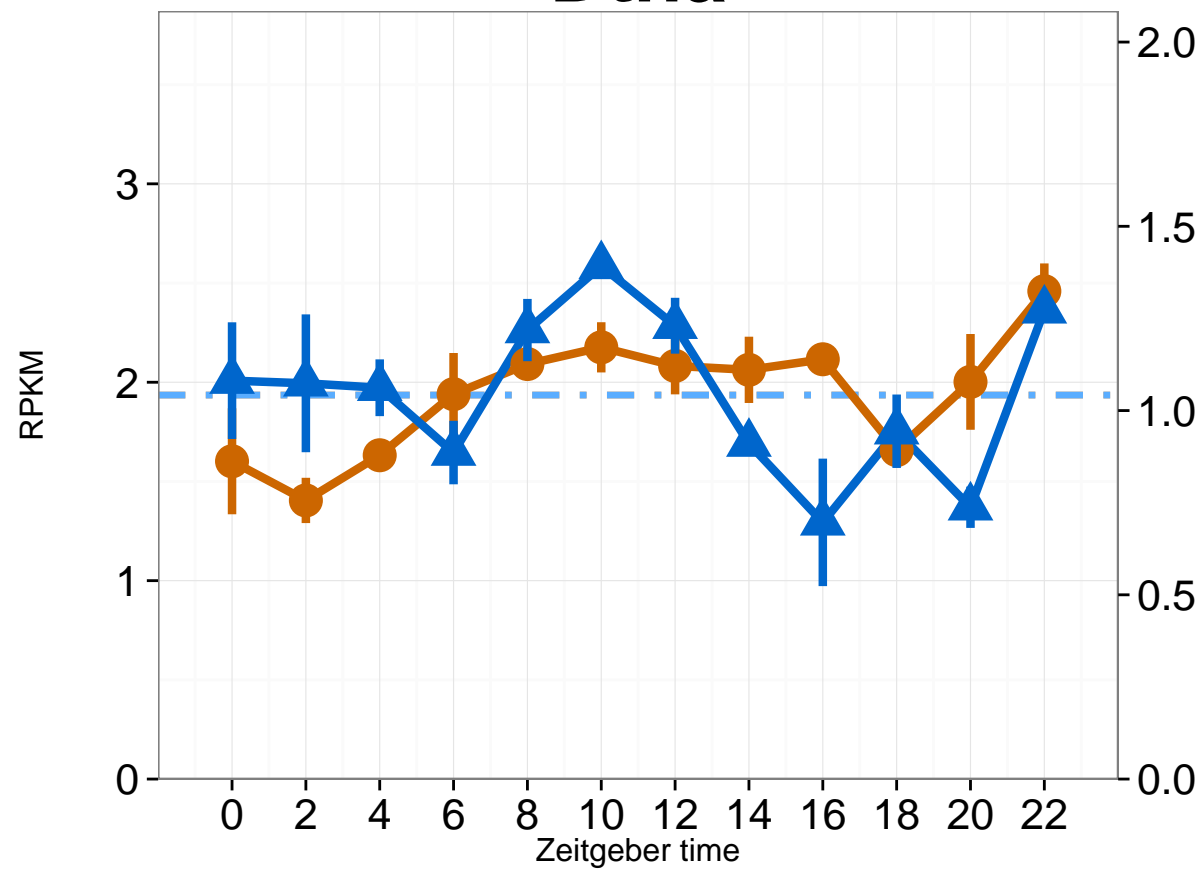

## Dtna

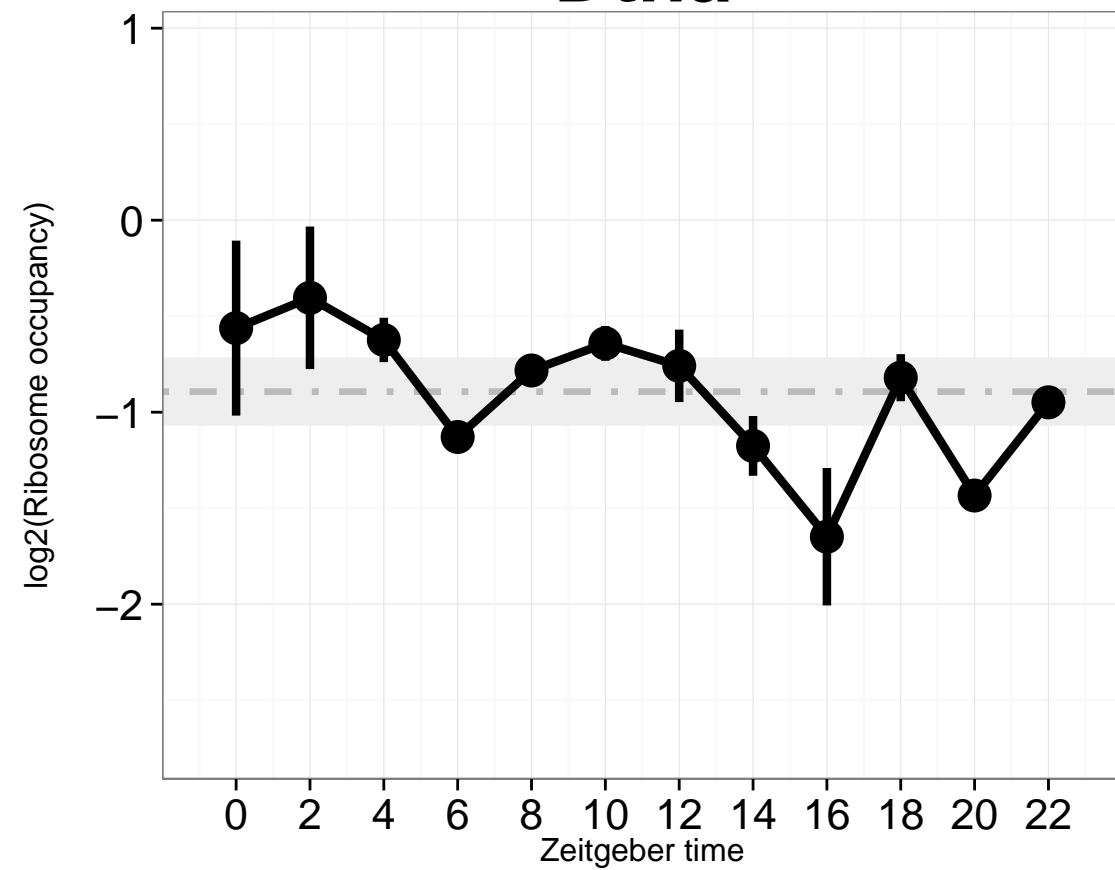

Supplement: Supplementary file 10573 [file 1]

# Tmem37

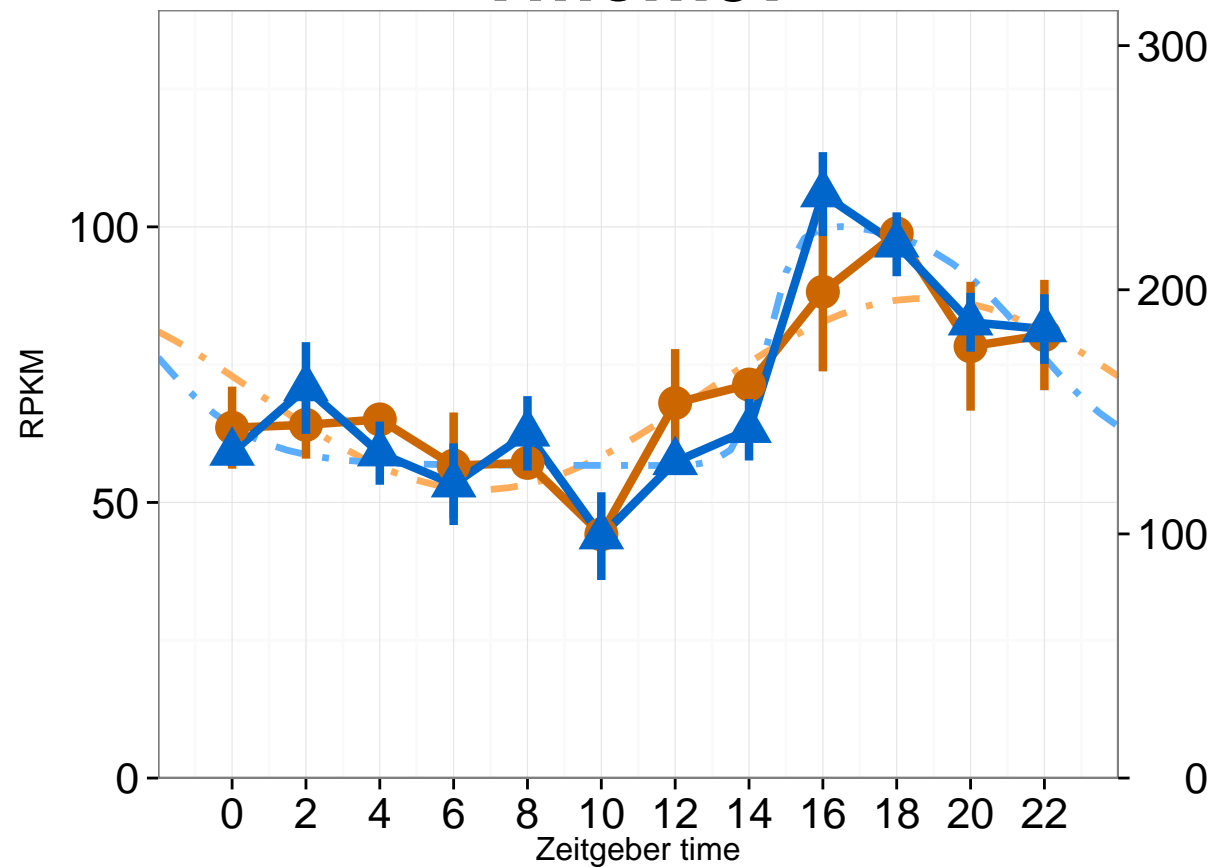

# Tmem37

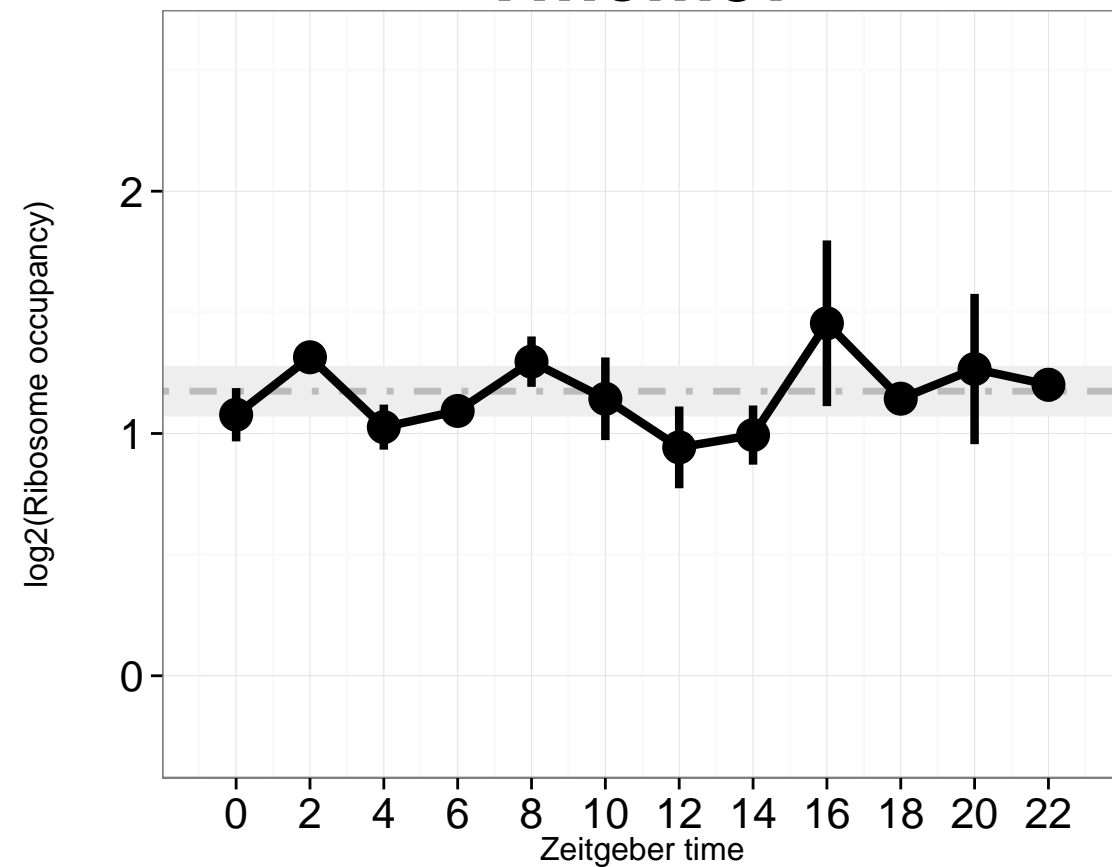

Supplement: Supplementary file 10574 [file 1]

## Hdac1

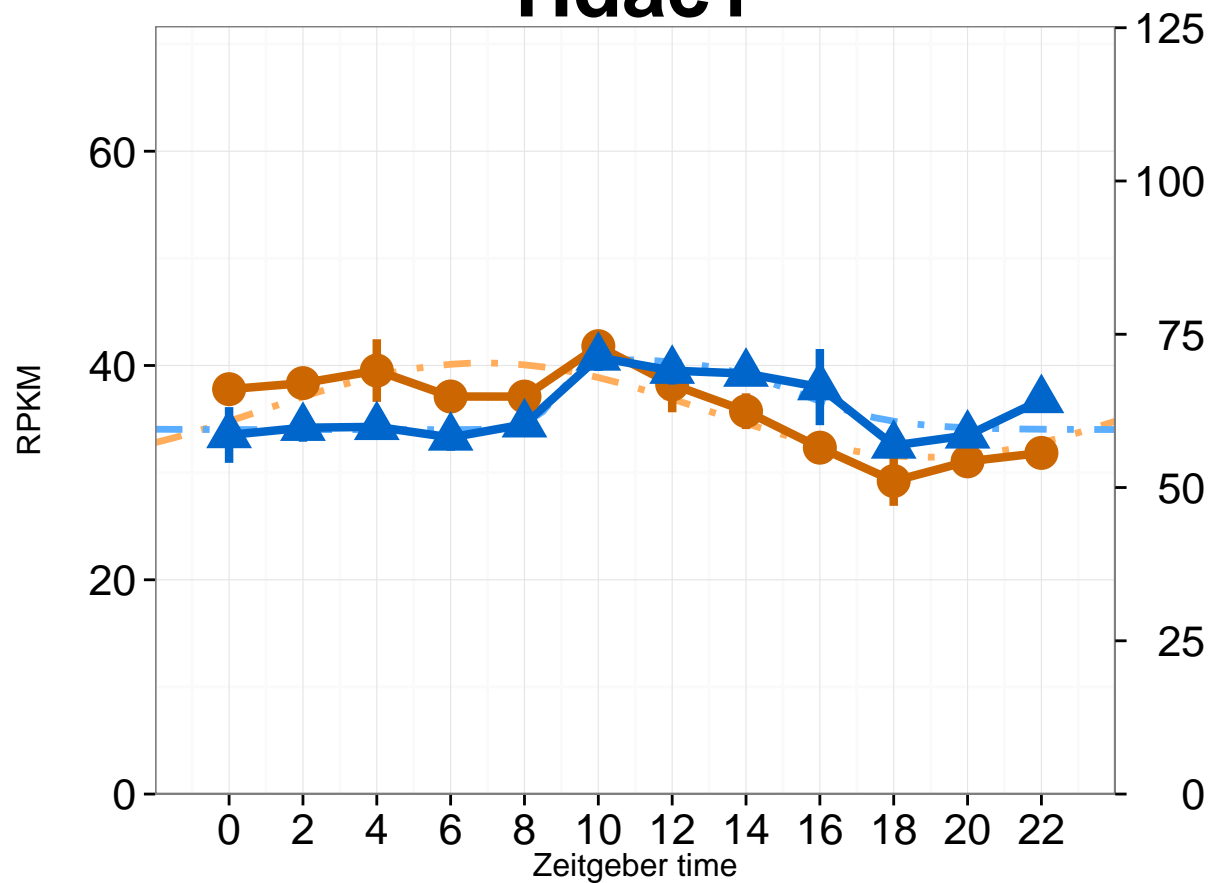

## Hdac1

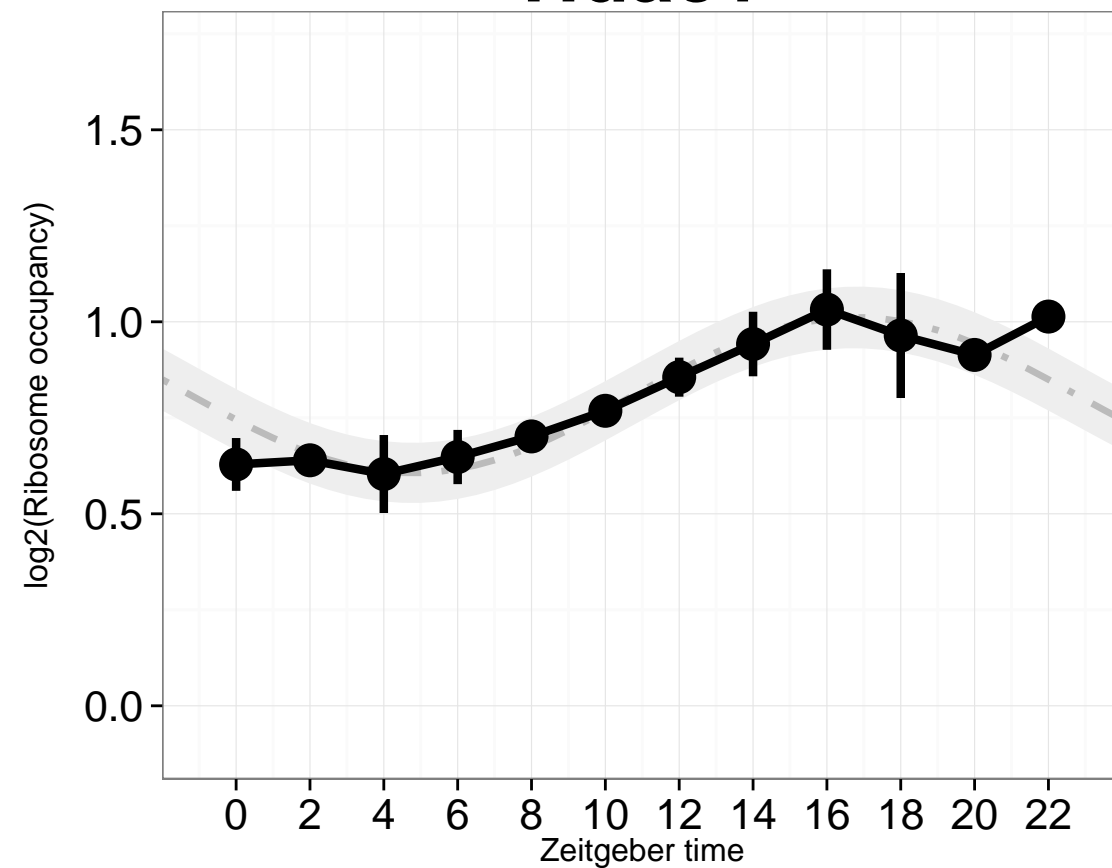

Supplement: Supplementary file 10575 [file 1]

# Dag1

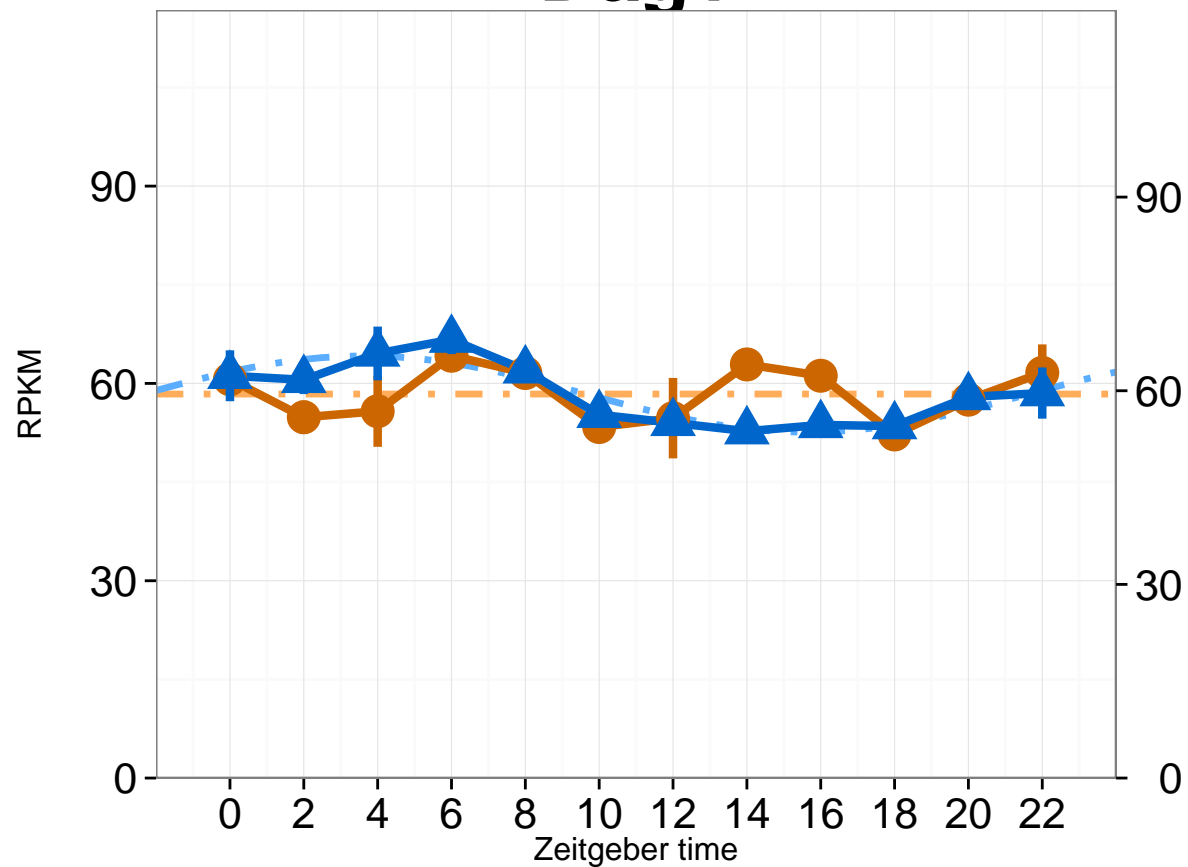

# Dag1

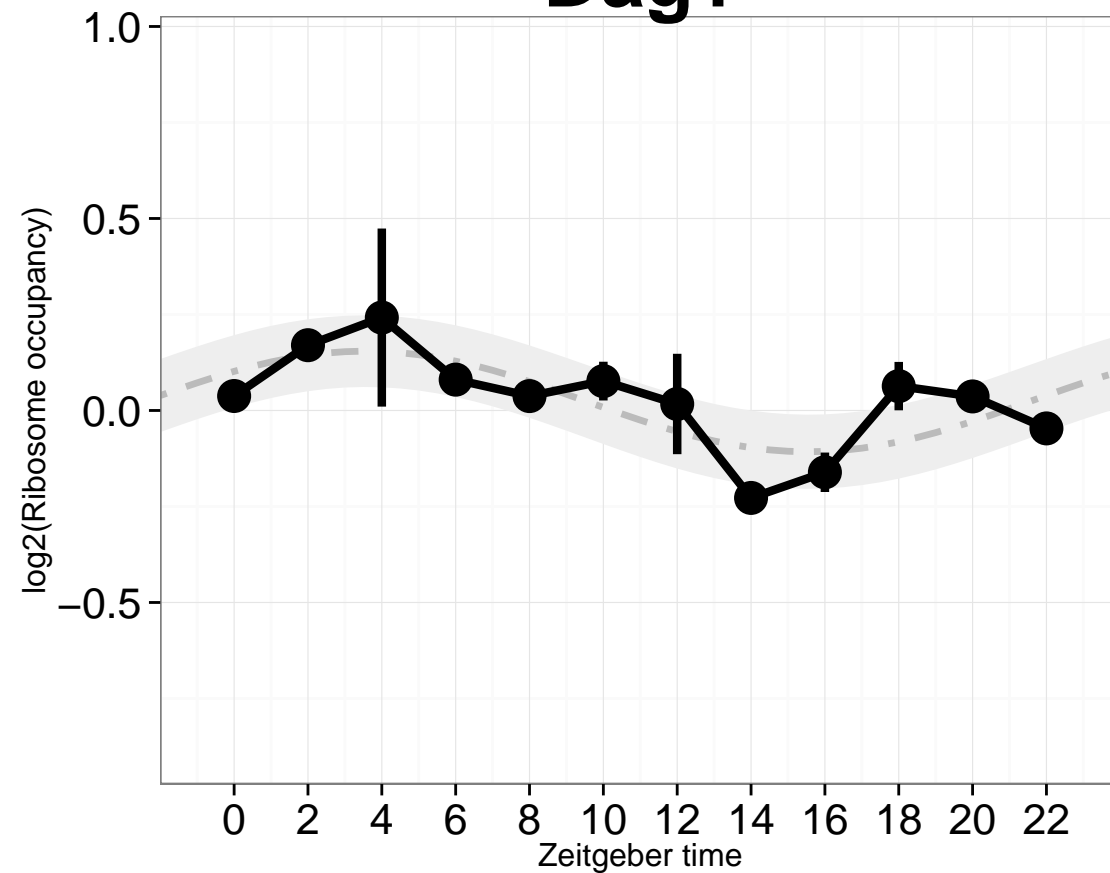

Supplement: Supplementary file 10576 [file 1]

## Mcee

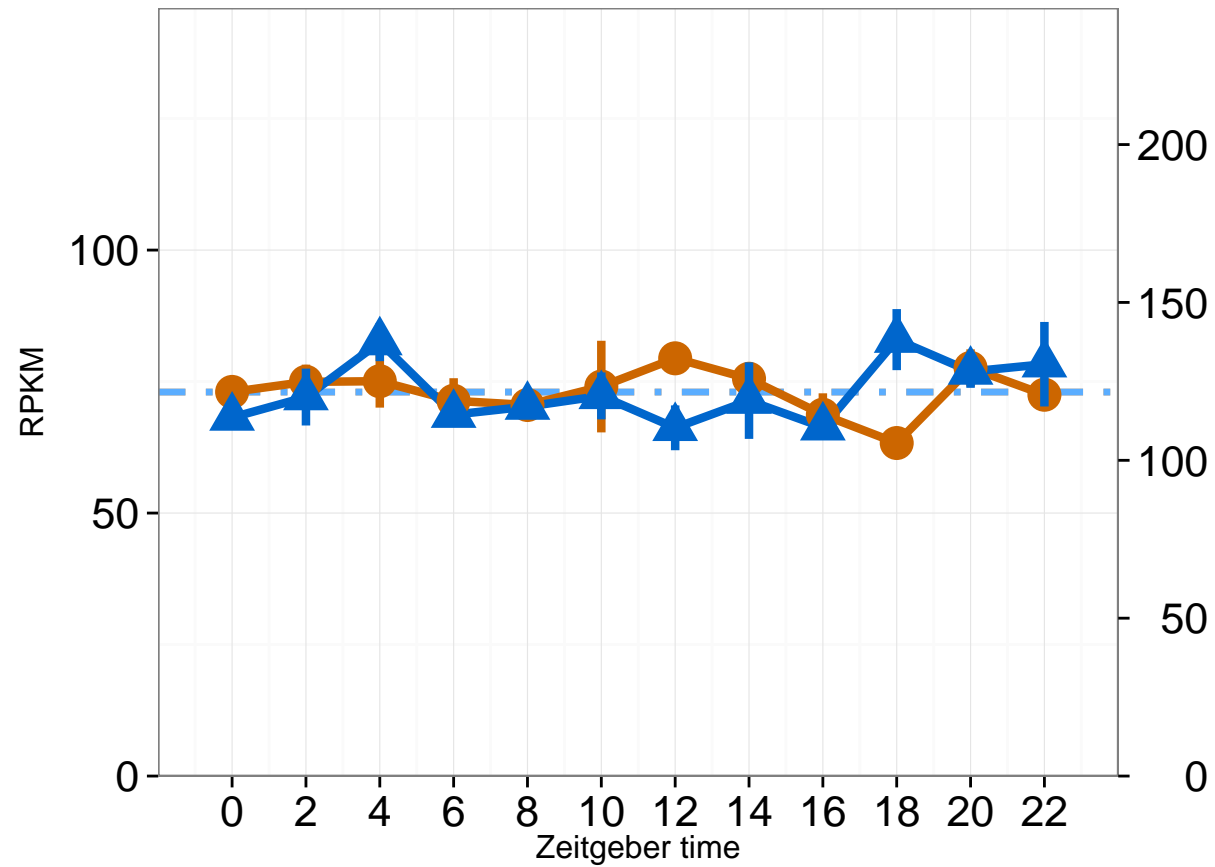

## Mcee

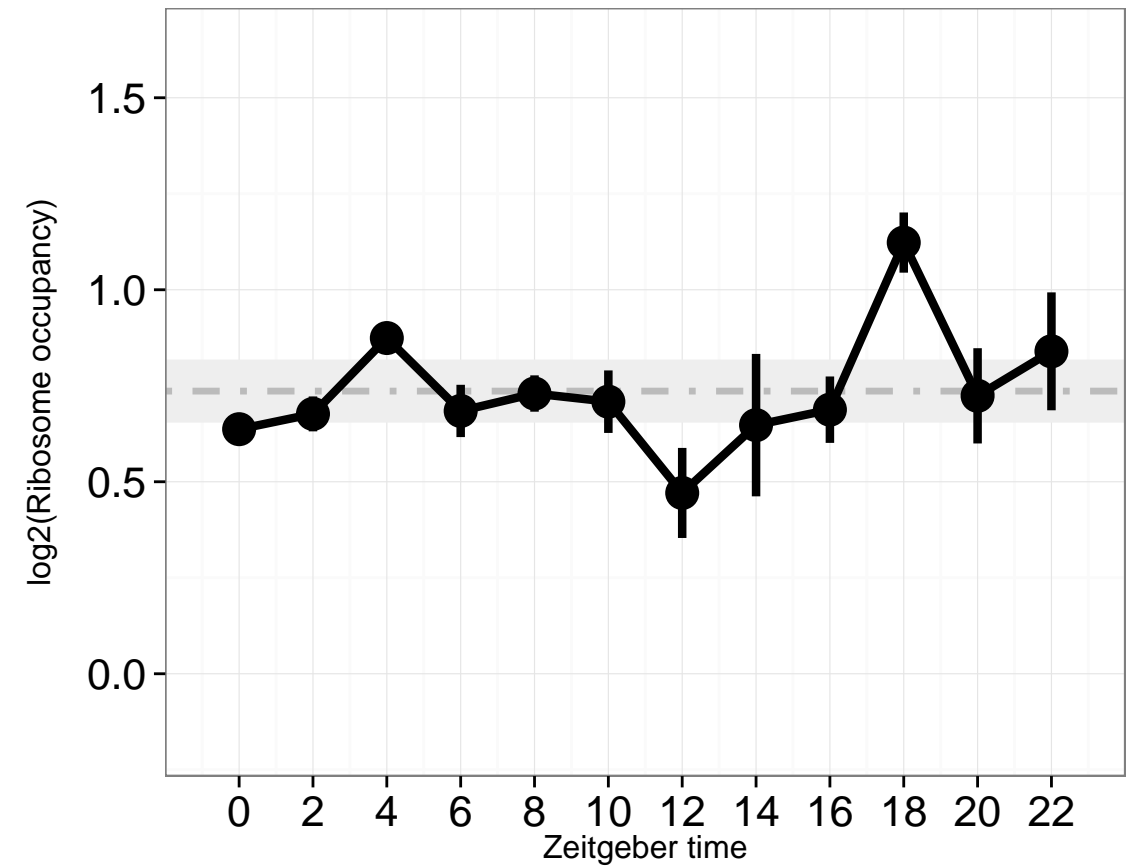

Supplement: Supplementary file 10577 [file 1]

## RnIs

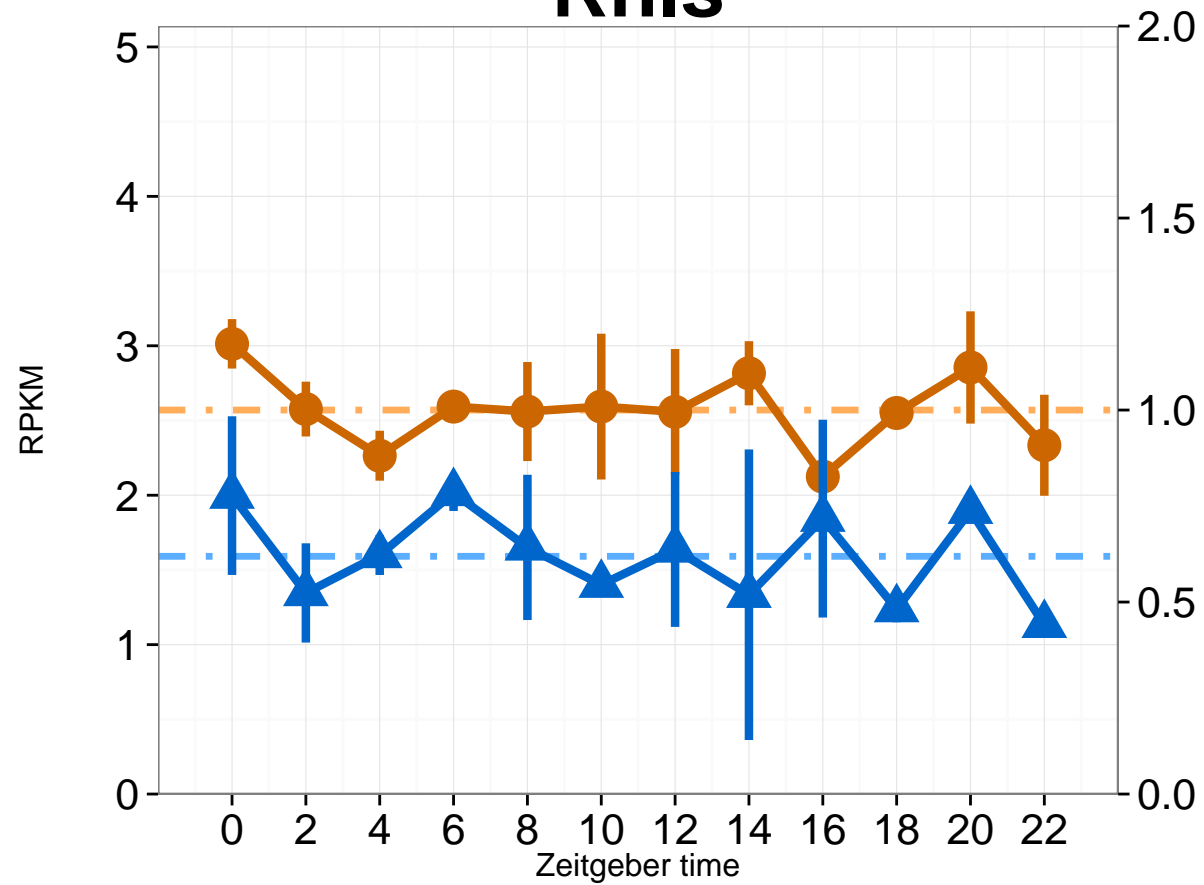

## RnIs

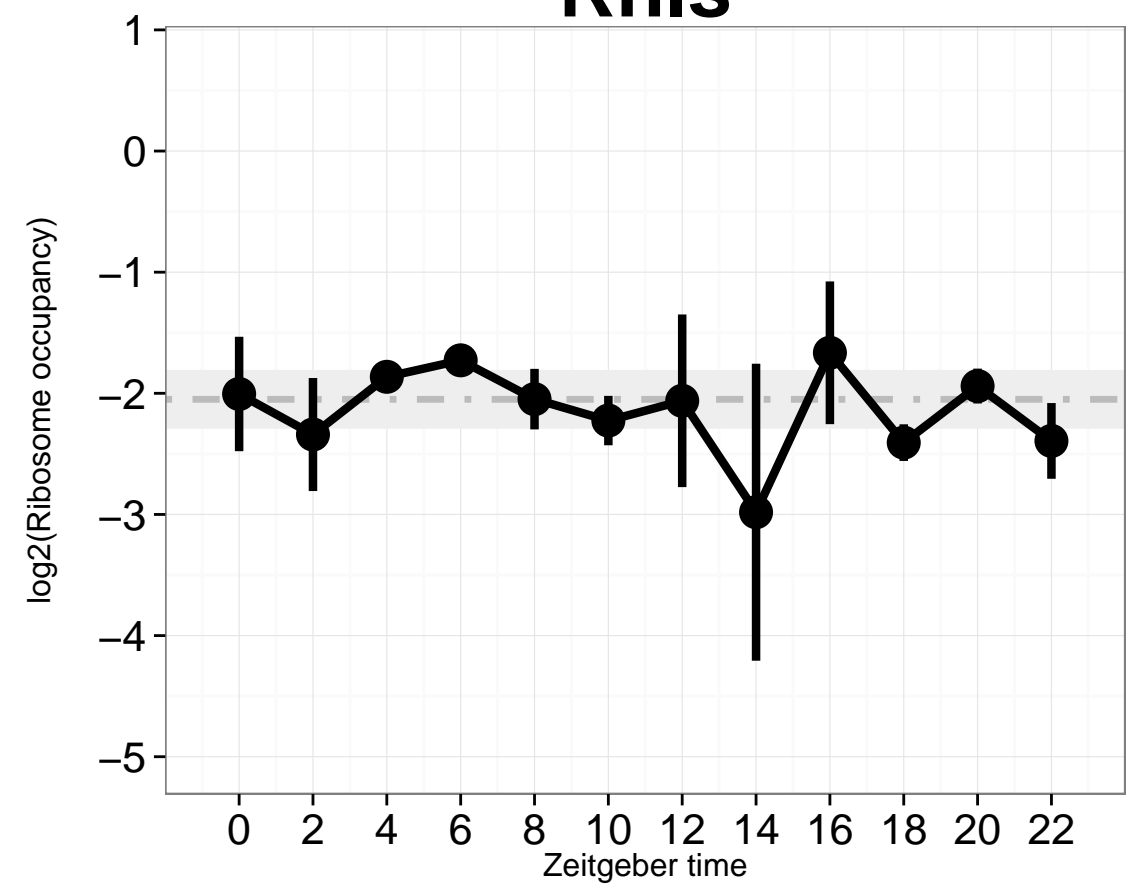

Supplement: Supplementary file 10578 [file 1]

## Cx3cl1

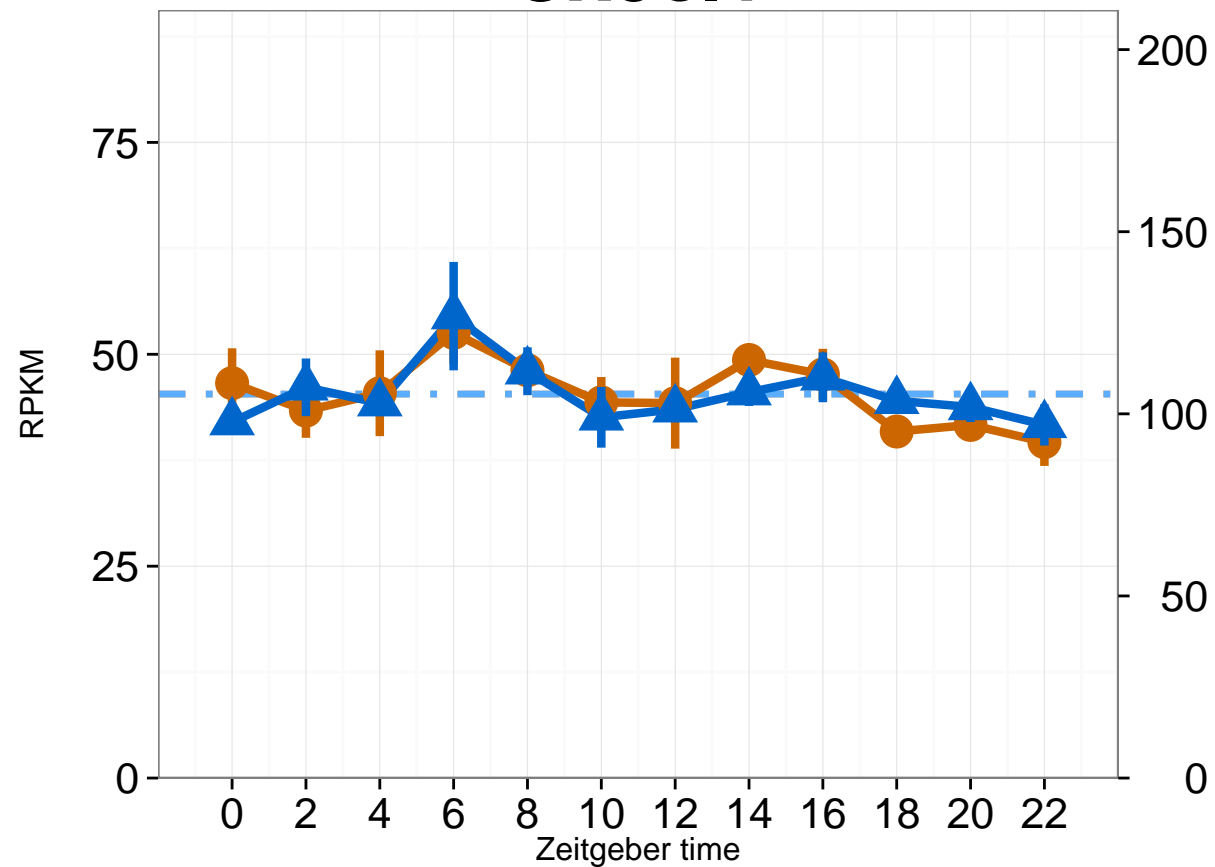

## Cx3cl1

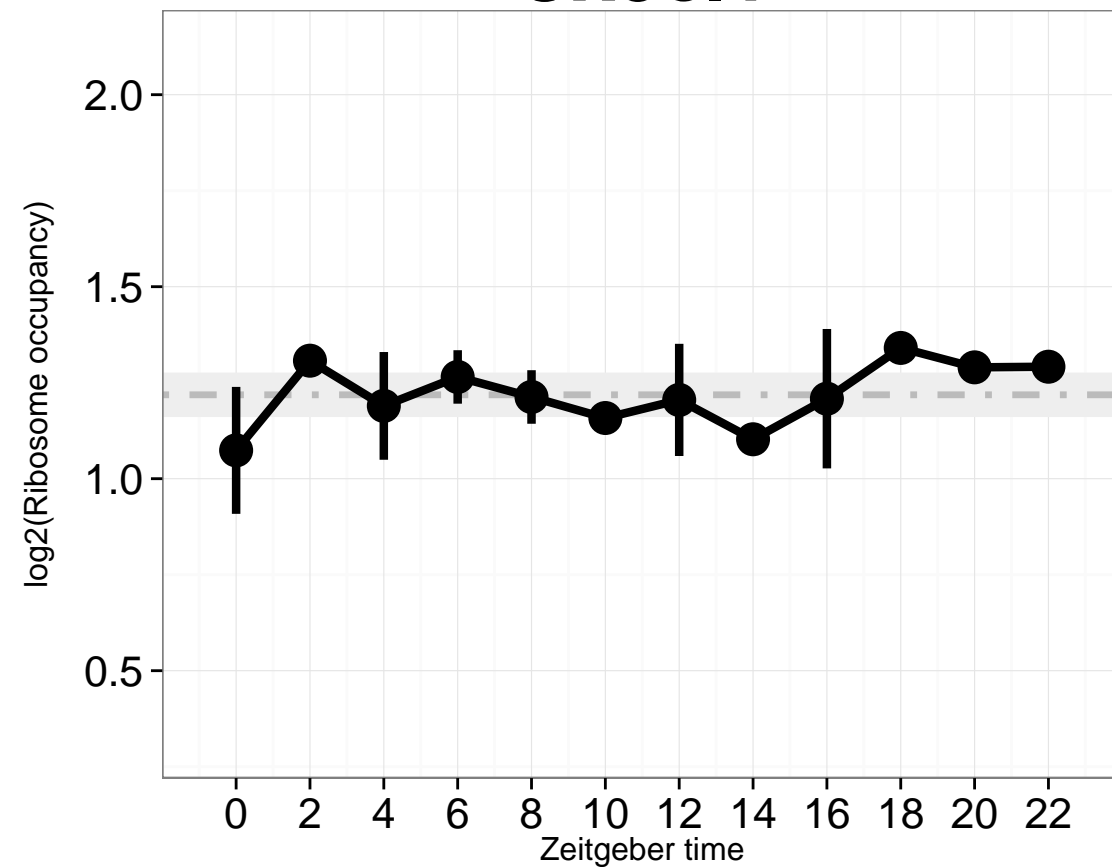

Supplement: Supplementary file 10579 [file 1]

# Tmsb4x

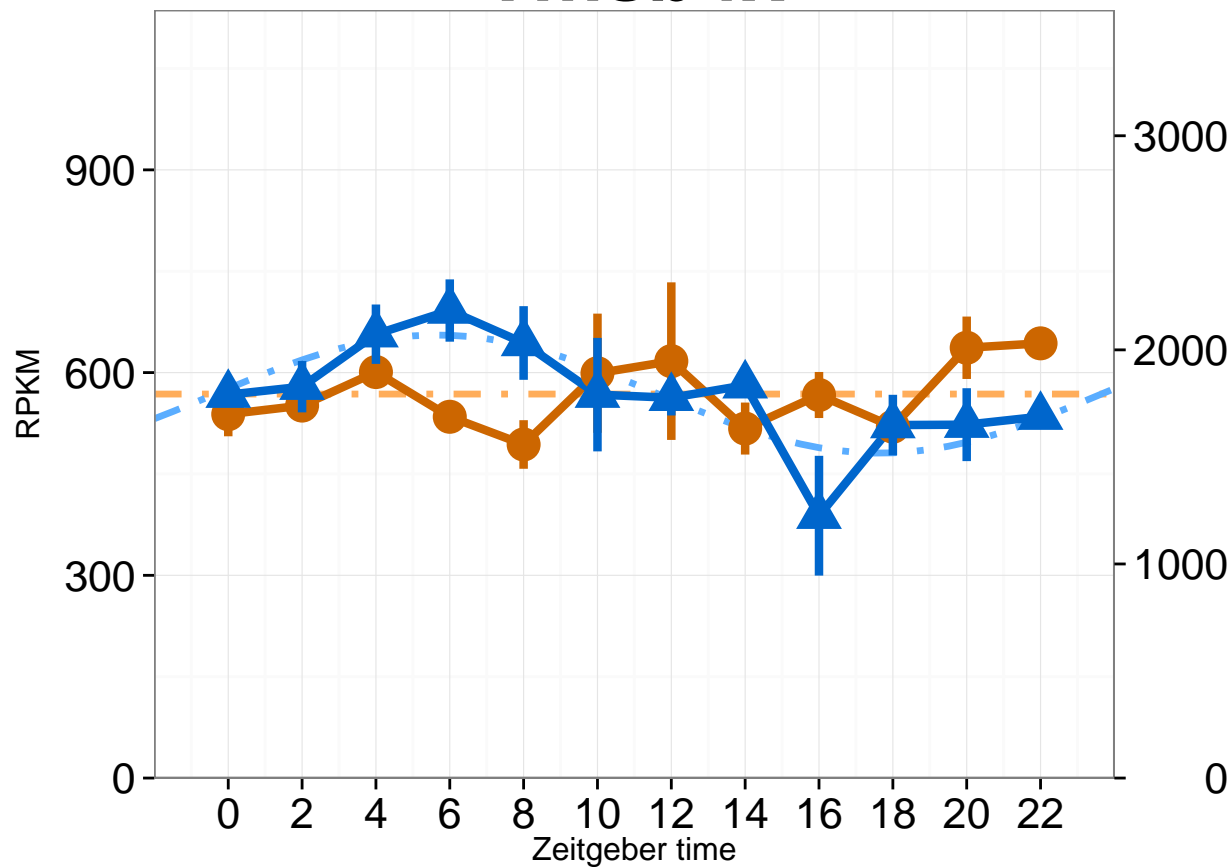

# Tmsb4x

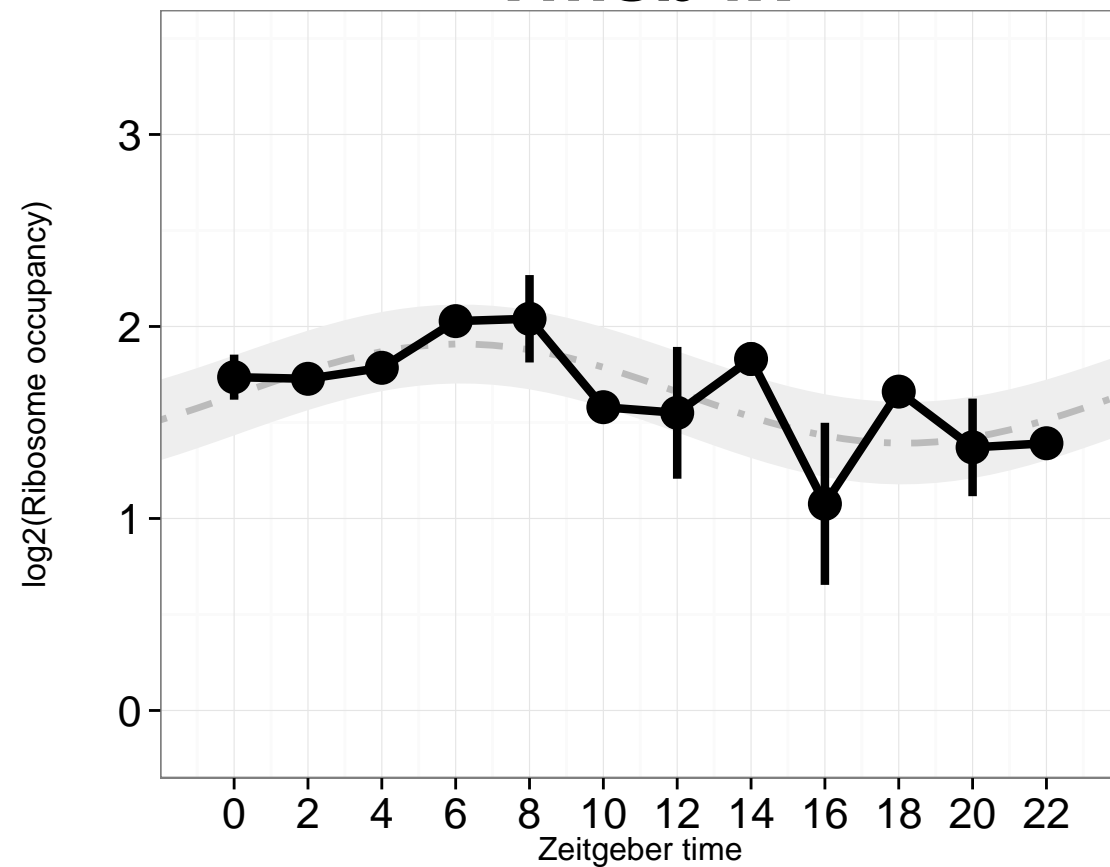

Supplement: Supplementary file 10580 [file 1]

# Trim8

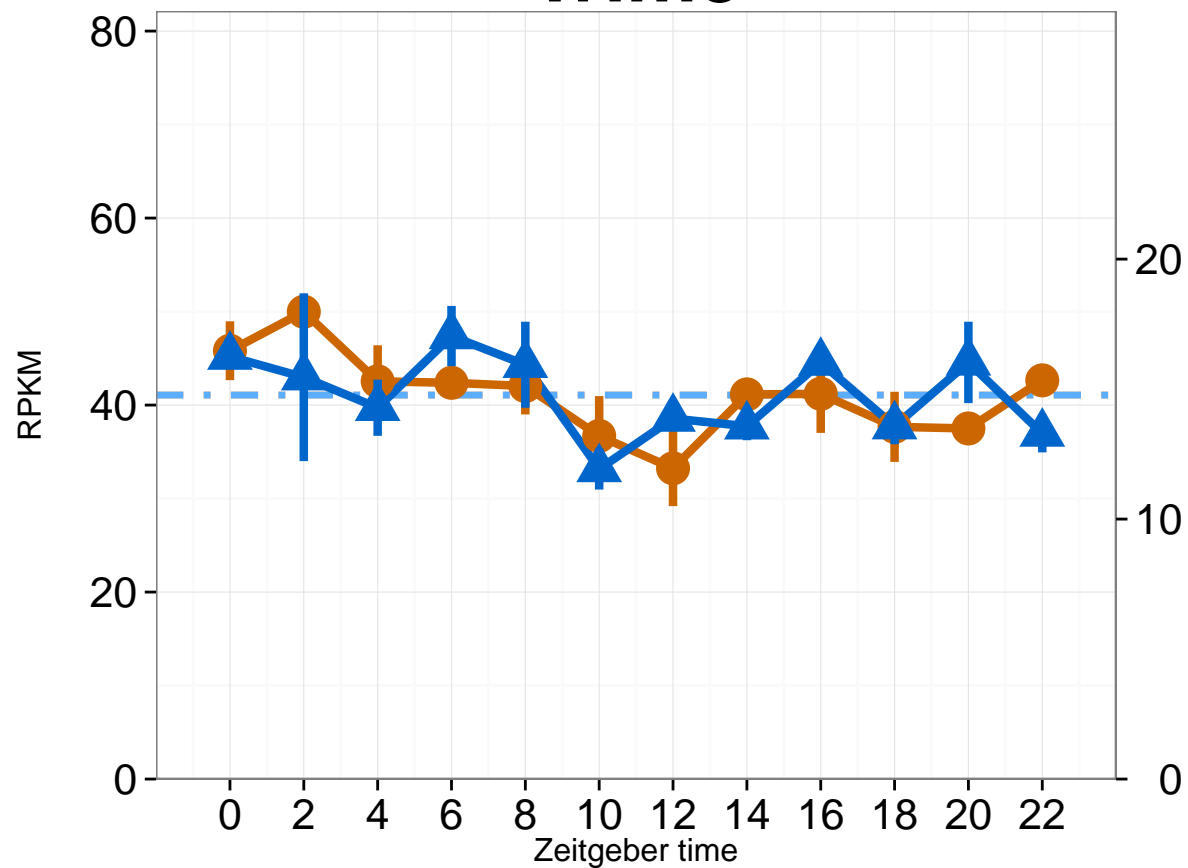

# Trim8

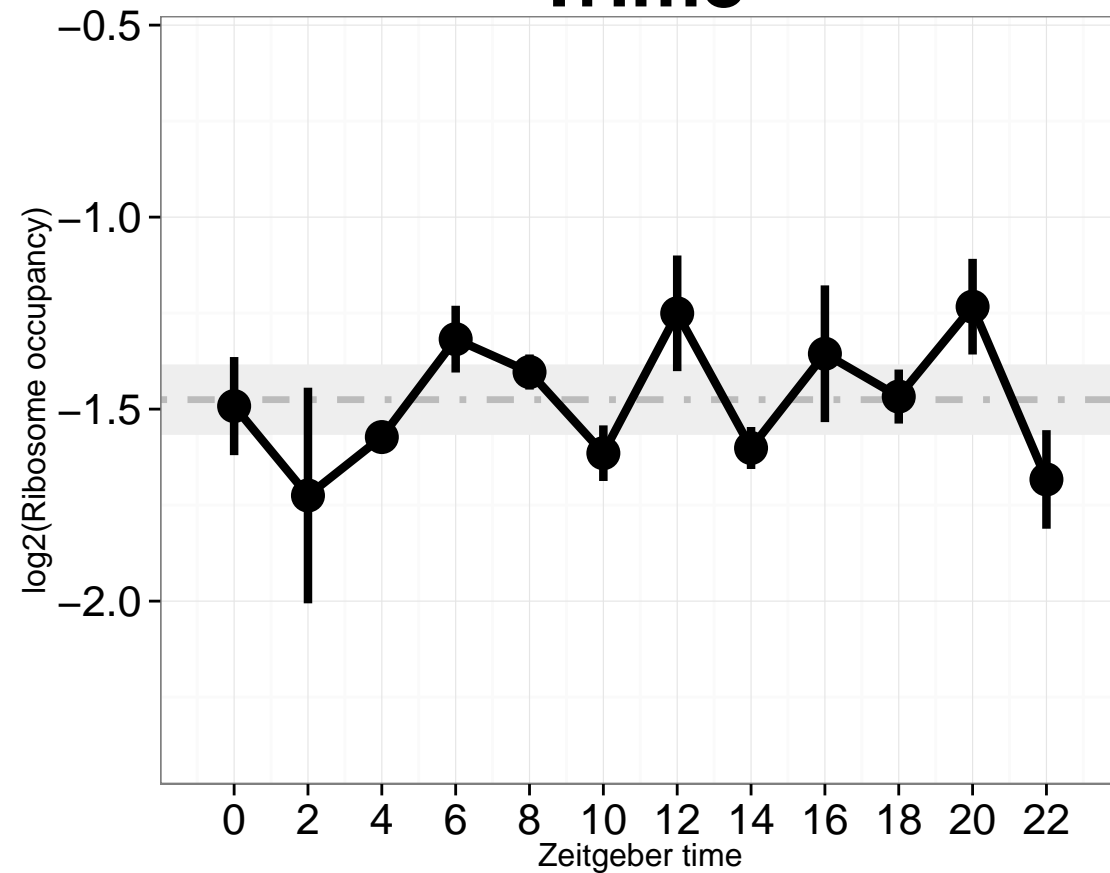

Supplement: Supplementary file 10581 [file 1]

## Wnt5b

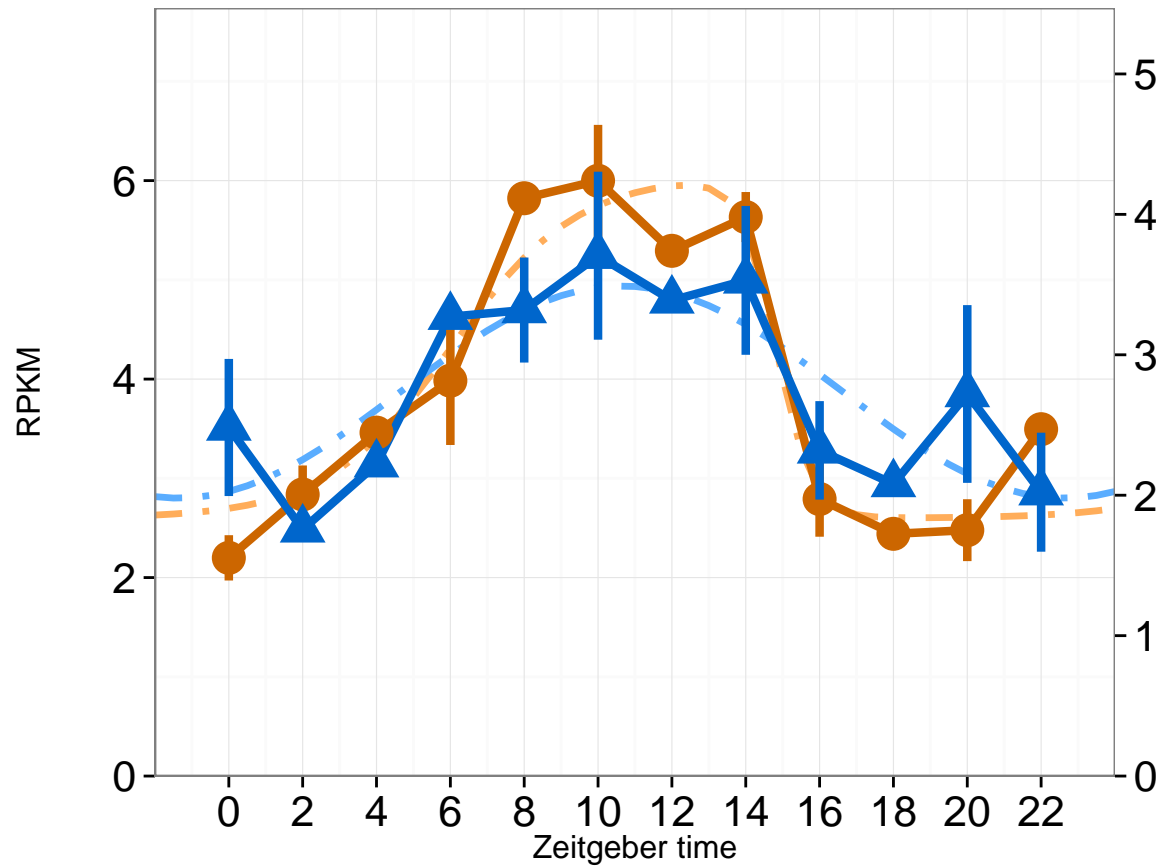

## Wnt5b

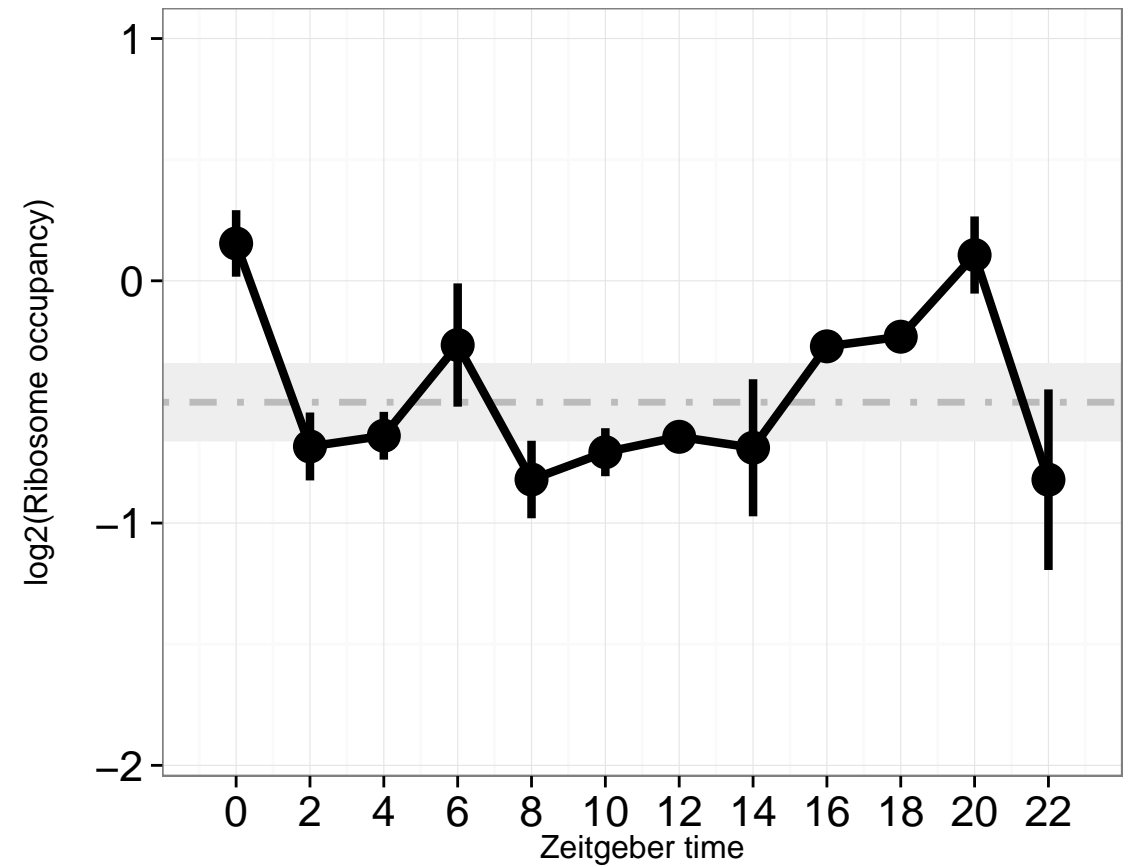

Supplement: Supplementary file 10582 [file 1]

## Arhgef9

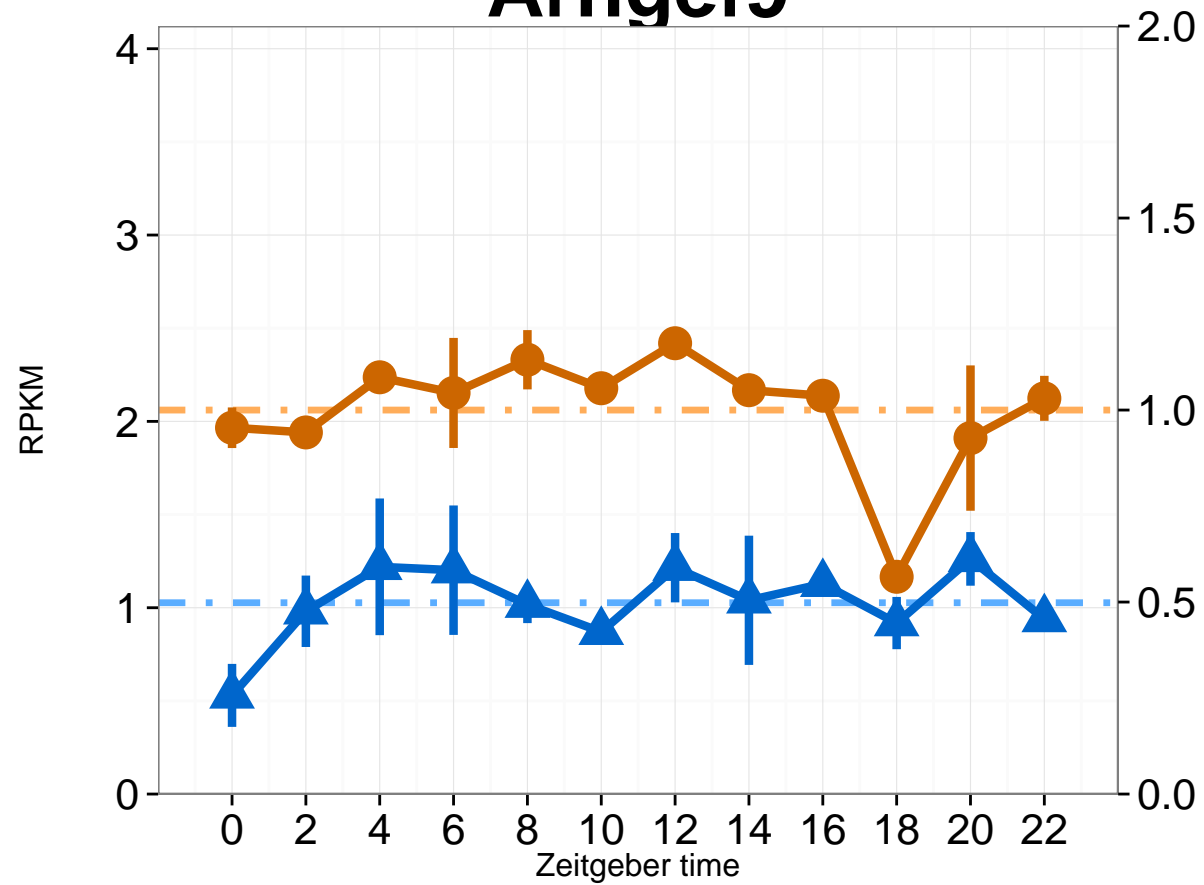

## Arhgef9

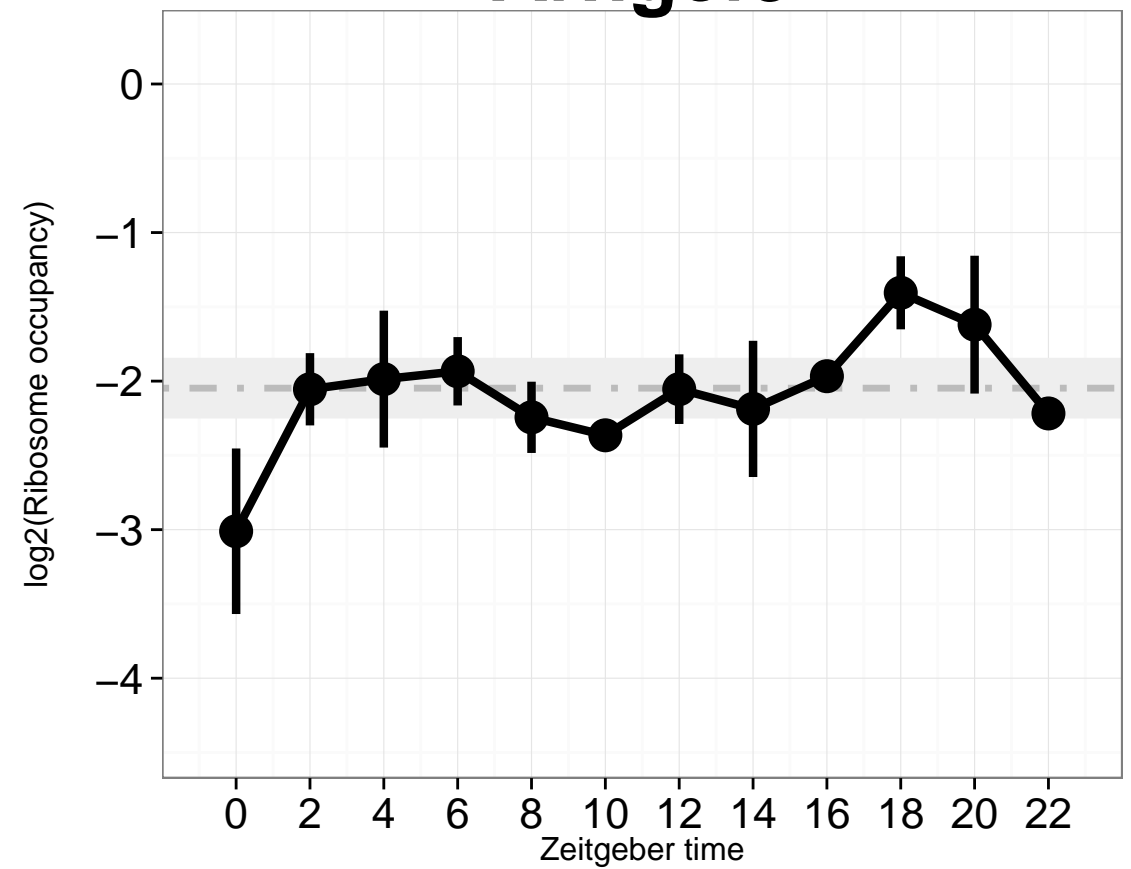

Supplement: Supplementary file 10583 [file 1]

## Ccm2l

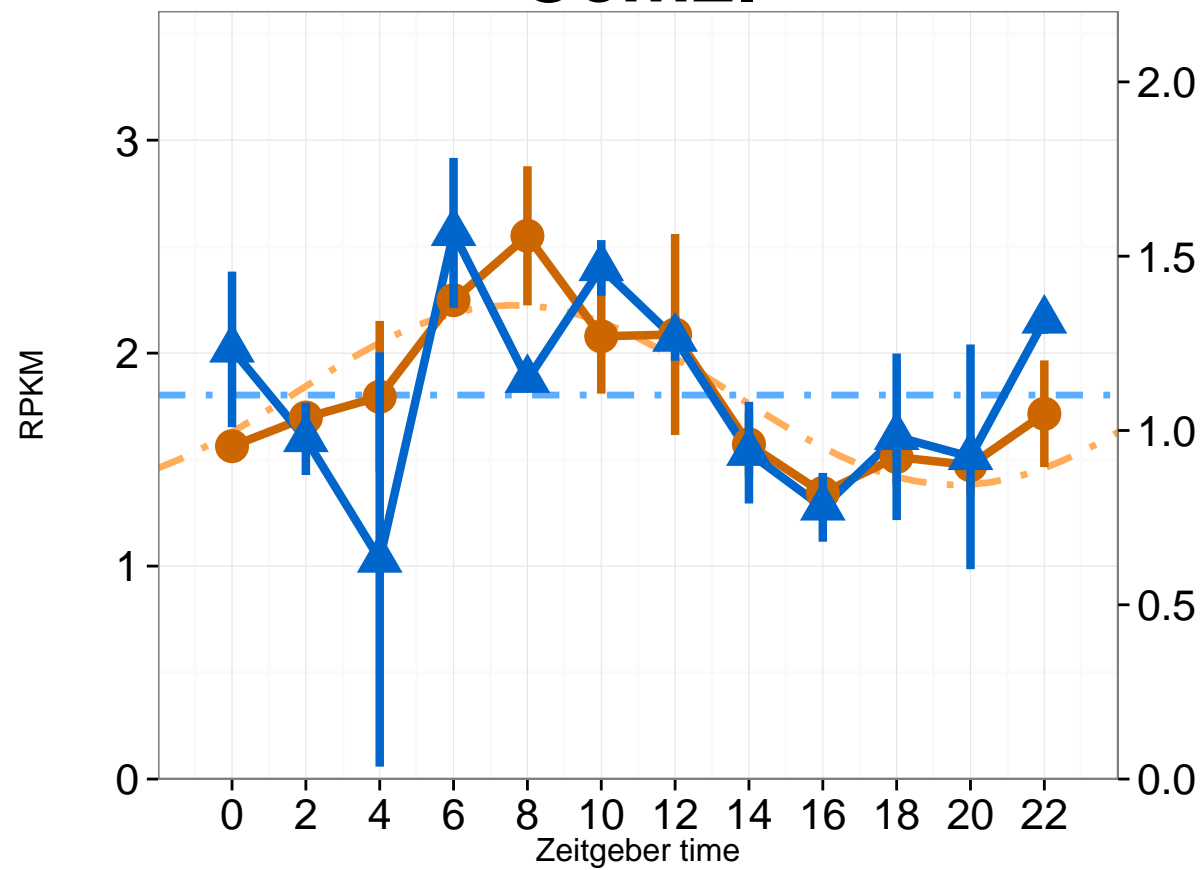

## Ccm2l

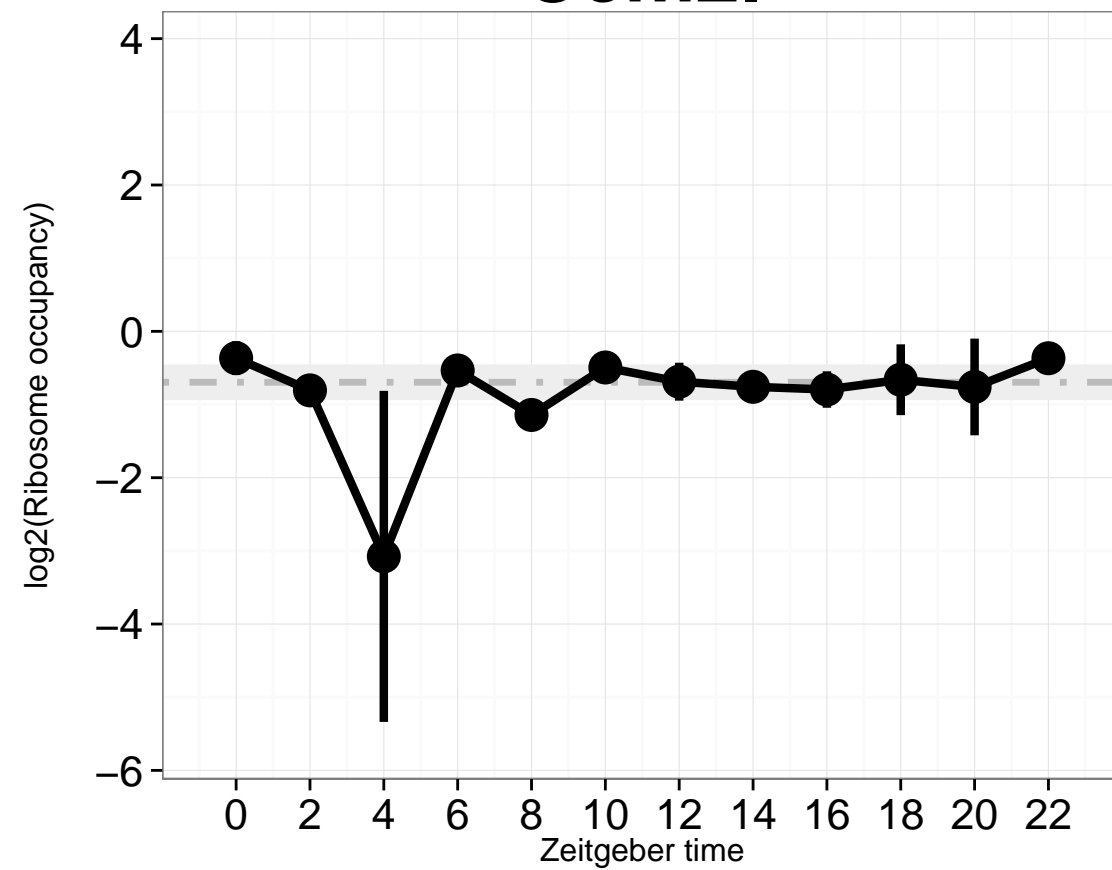

Supplement: Supplementary file 10584 [file 1]

# Gpn1

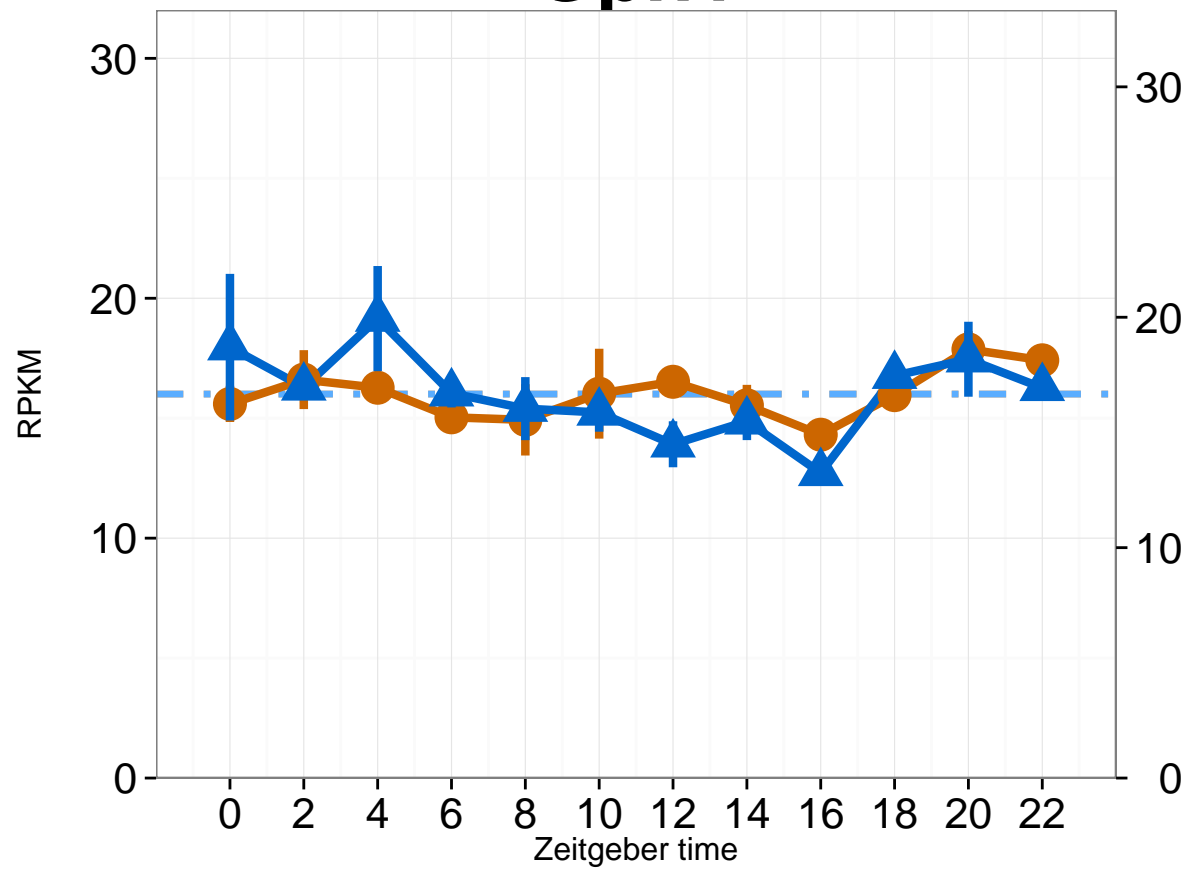

# Gpn1

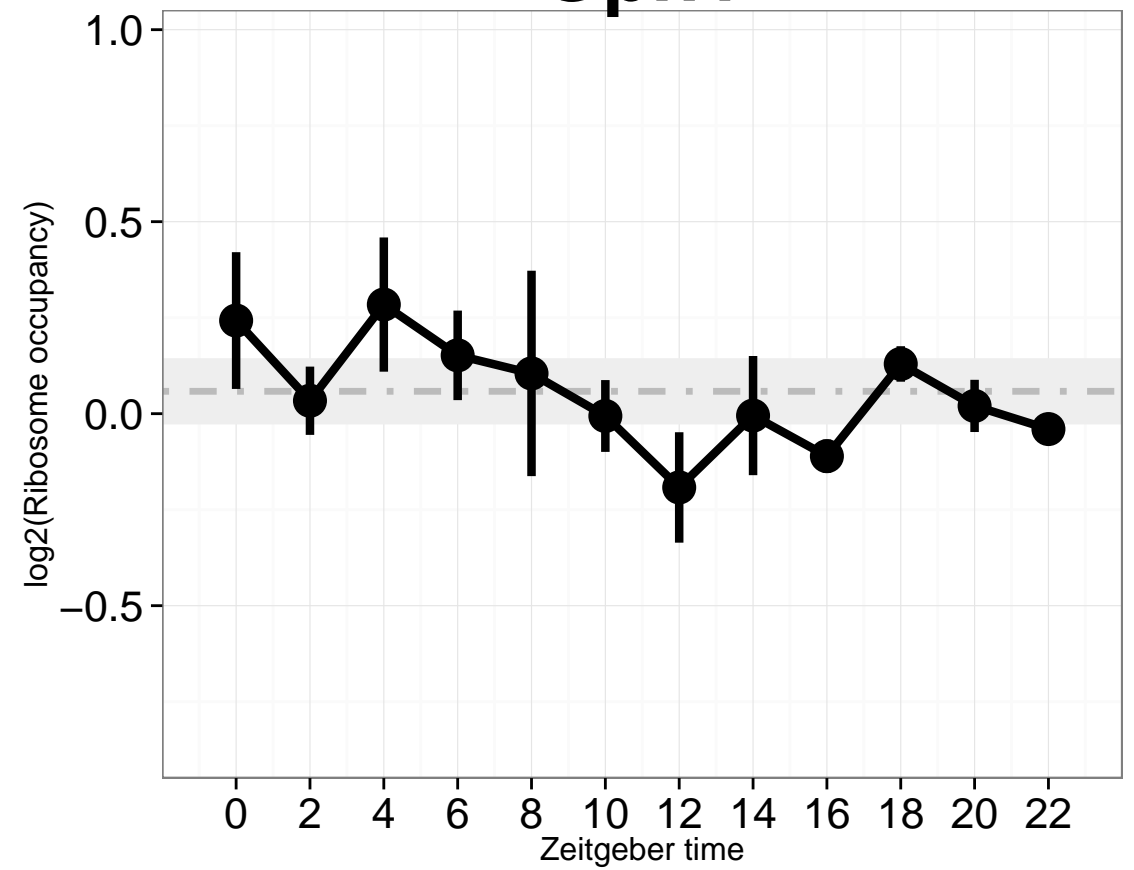

Supplement: Supplementary file 10585 [file 1]

## Exoc5

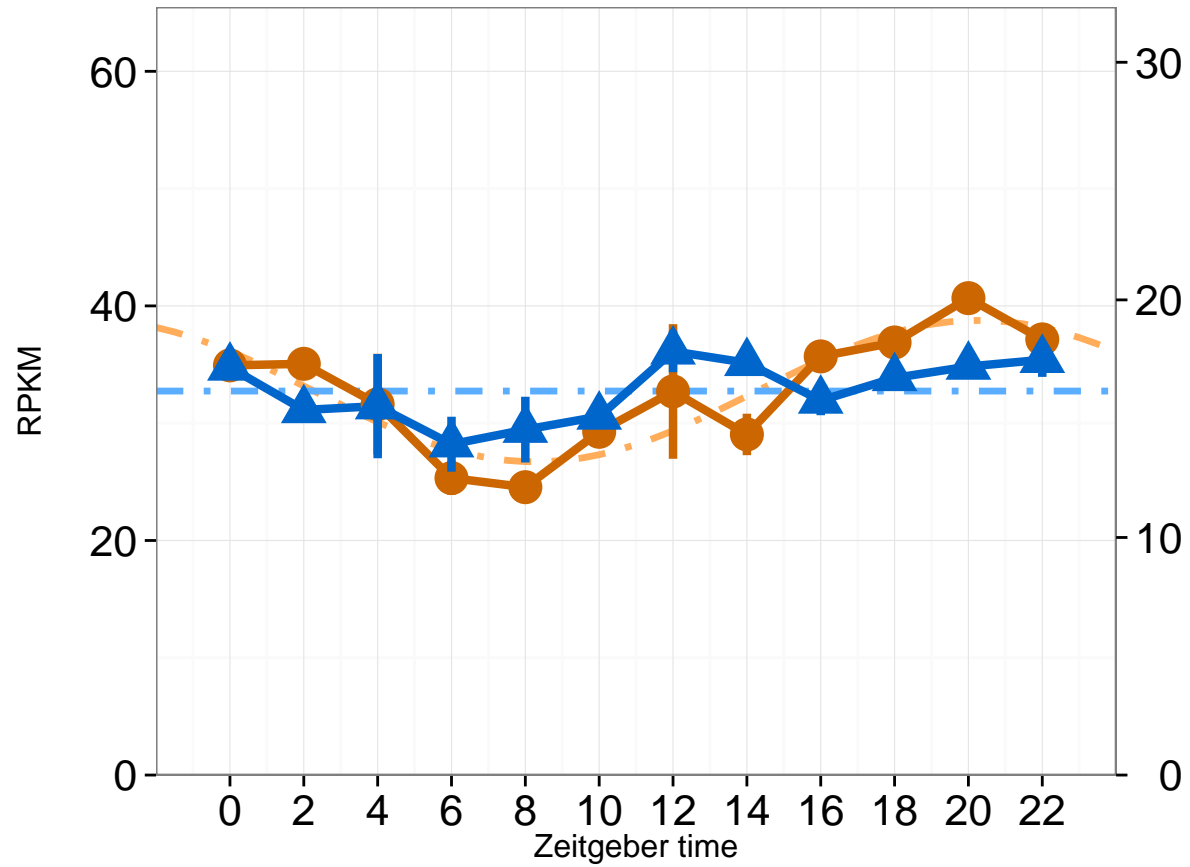

## Exoc5

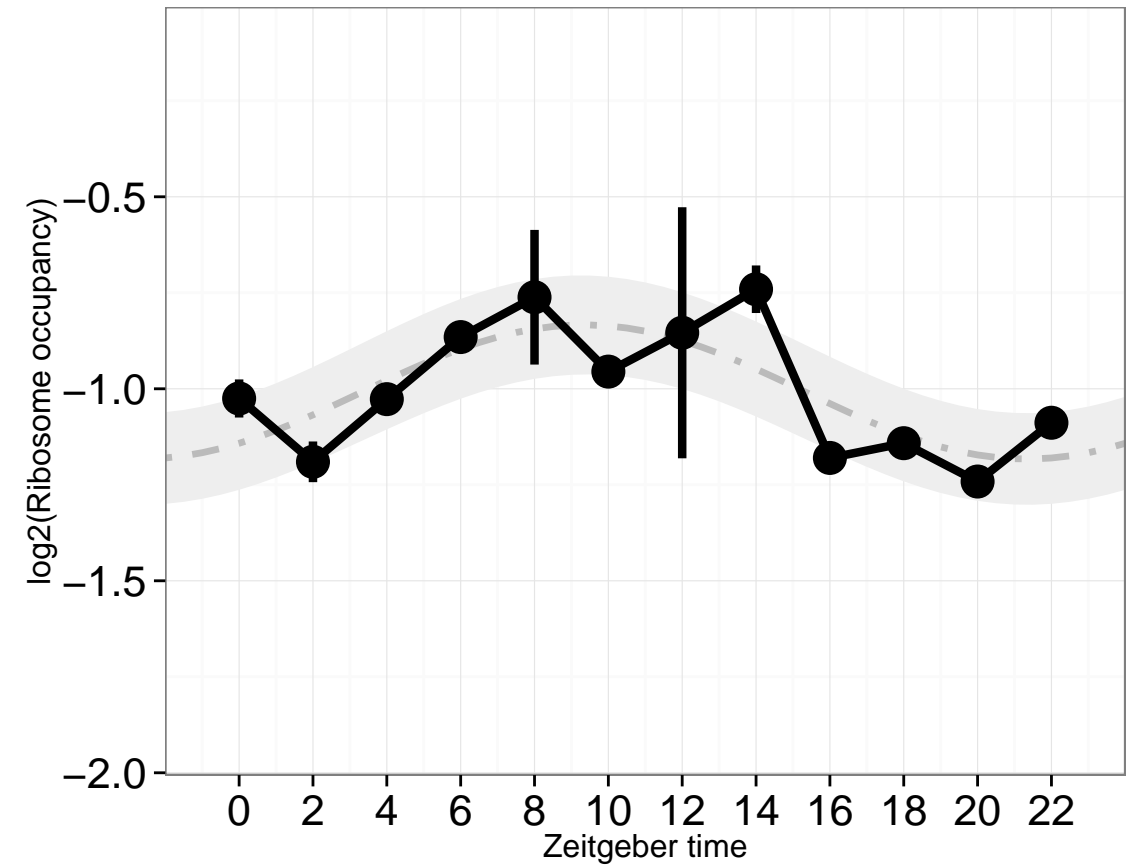

Supplement: Supplementary file 10586 [file 1]

## Fgr

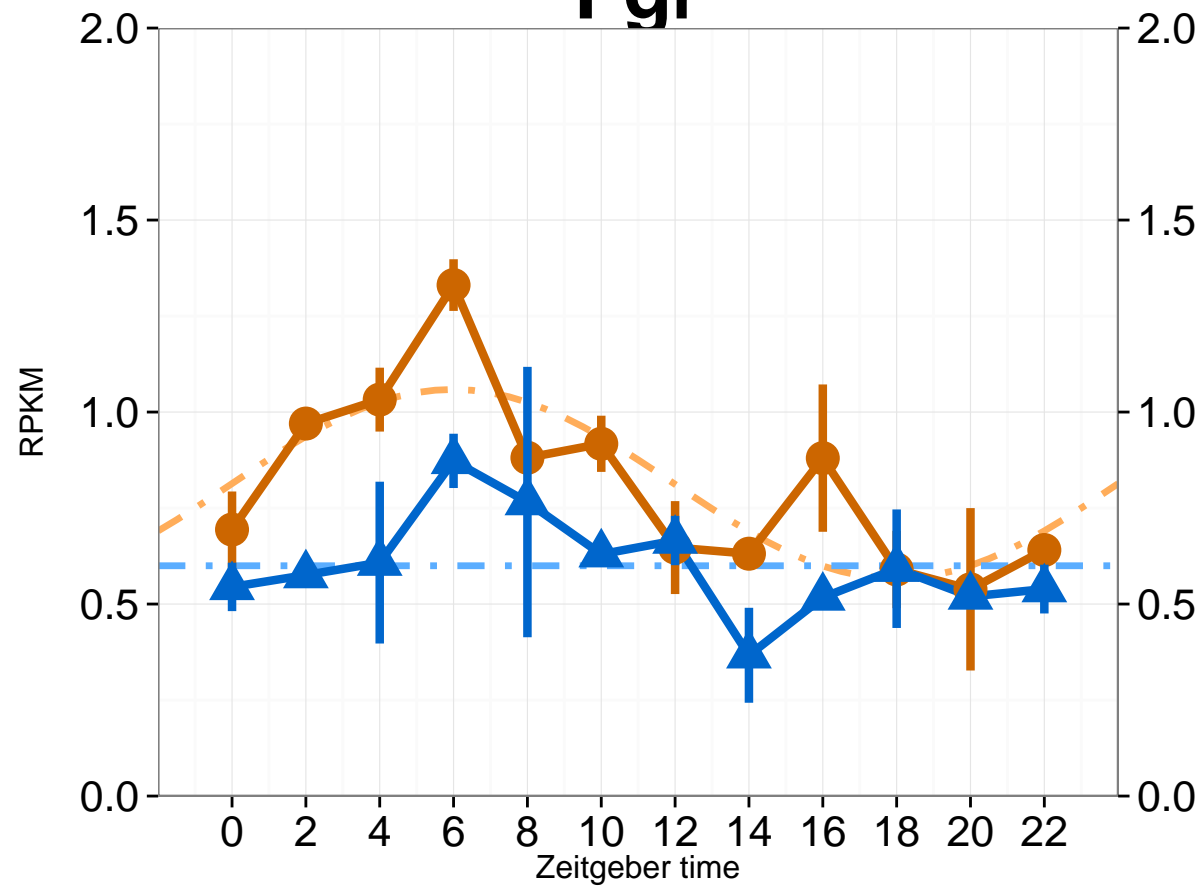

## Fgr

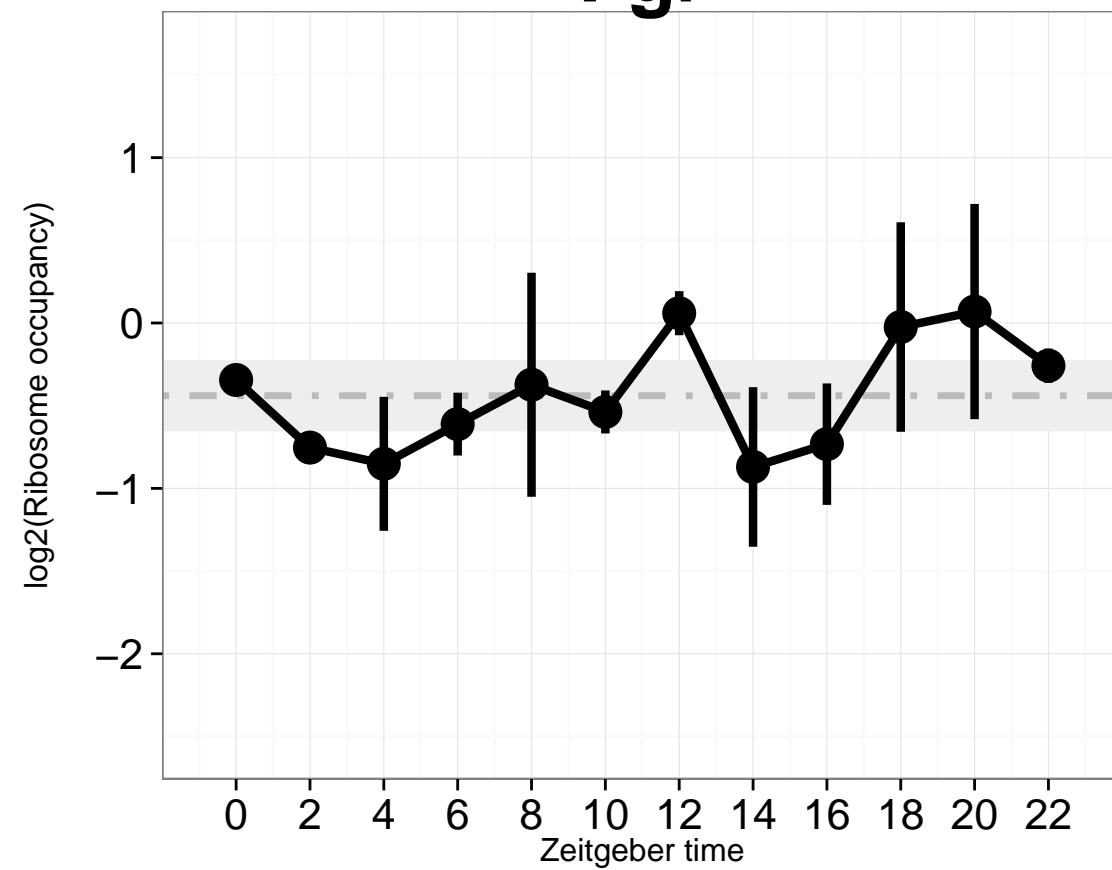

Supplement: Supplementary file 10587 [file 1]

## Fto

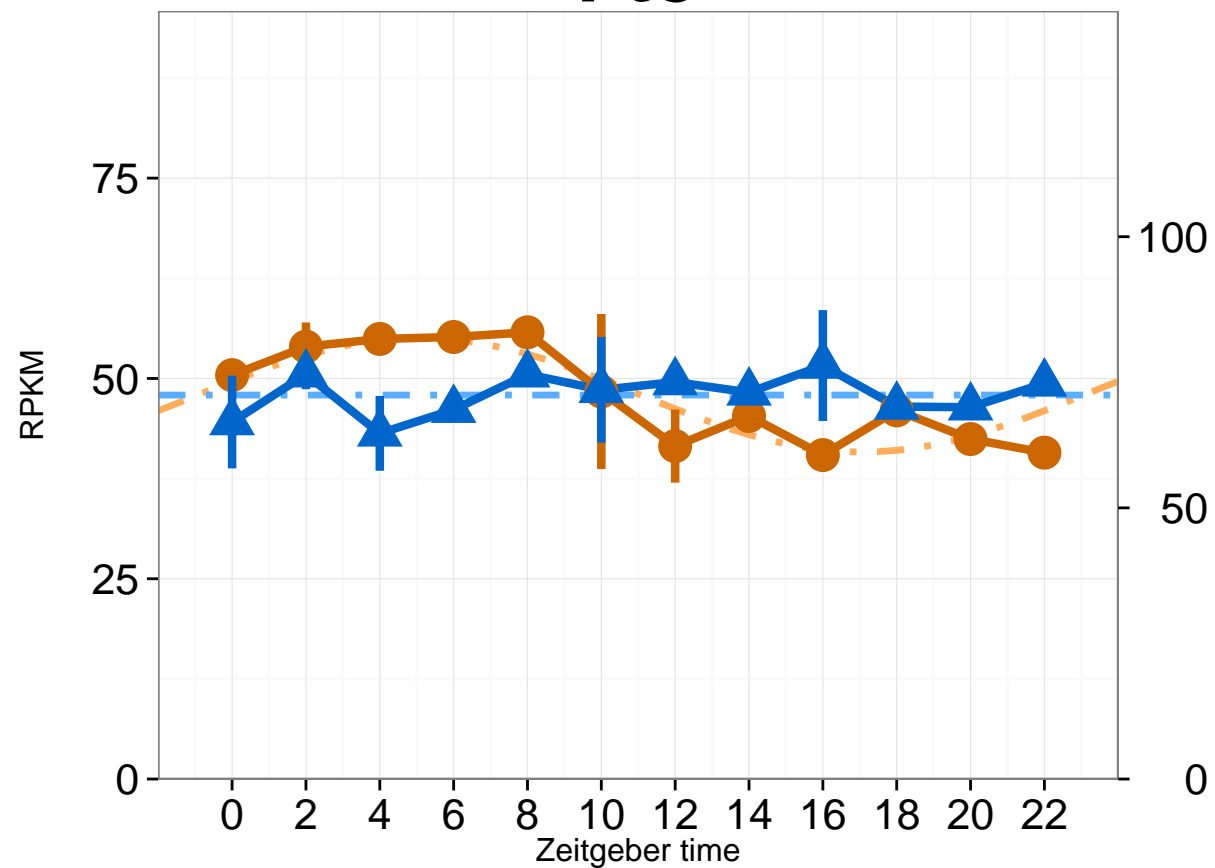

## Fto

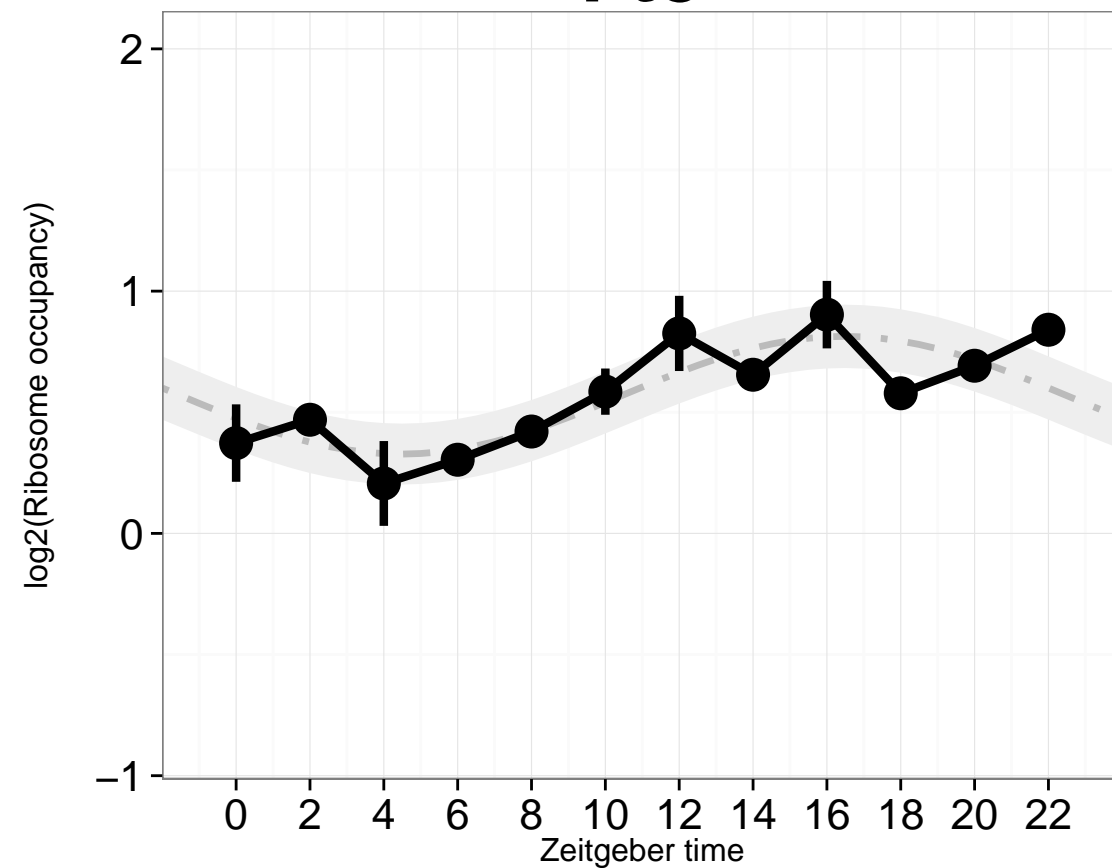

Supplement: Supplementary file 10588 [file 1]

## Bcs1l

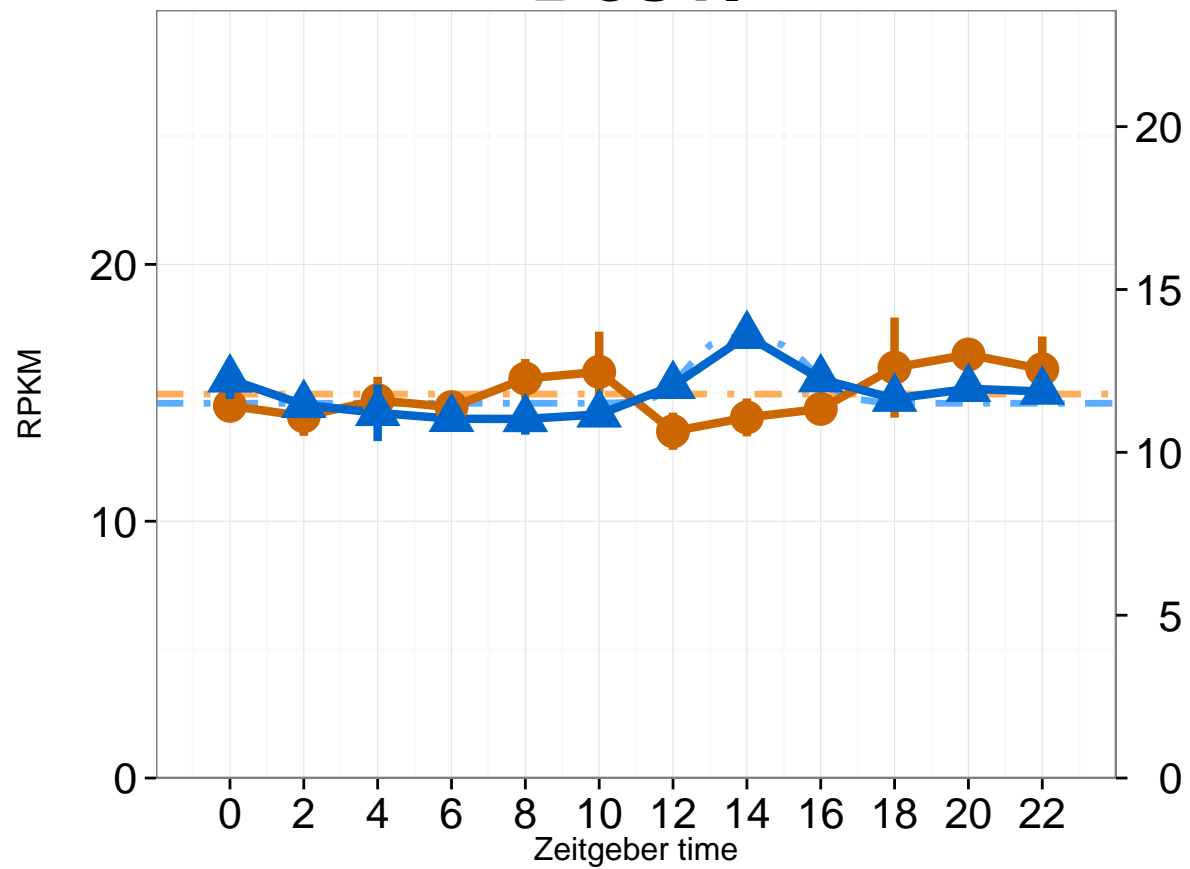

## Bcs1l

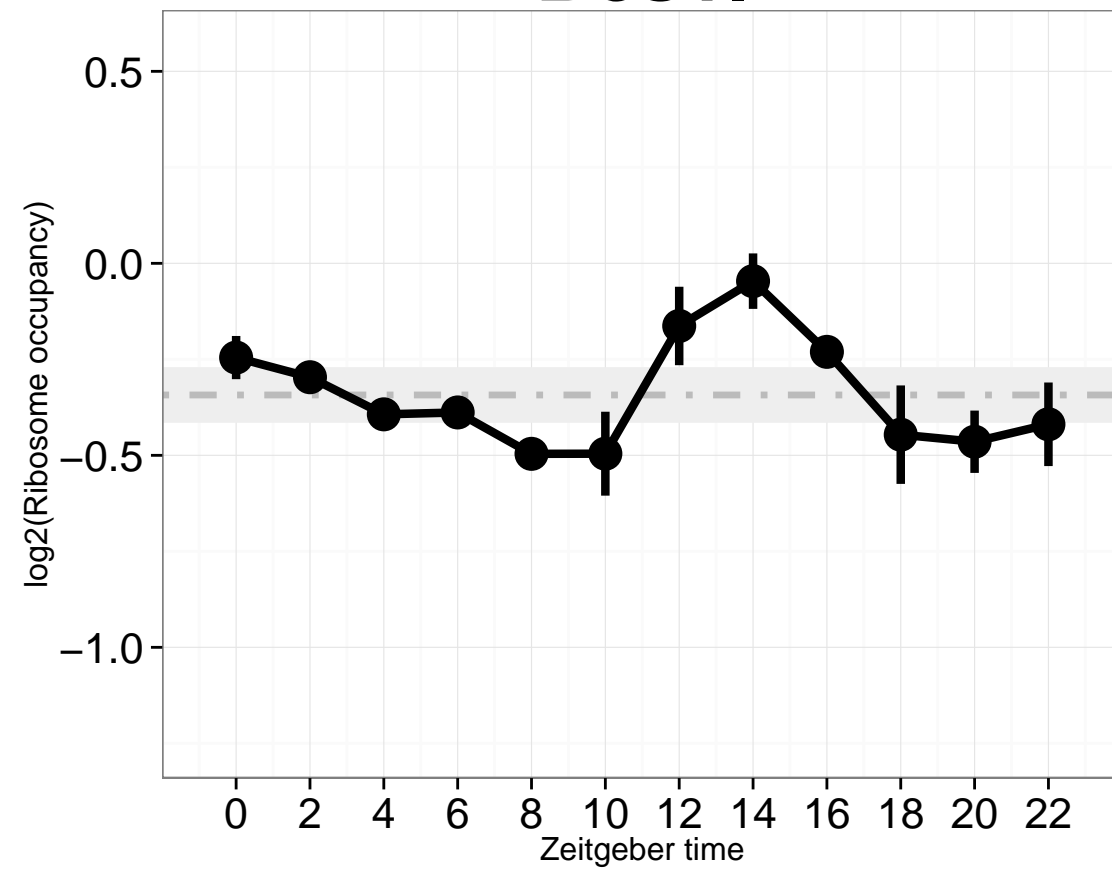

Supplement: Supplementary file 10589 [file 1]

## Smarca2

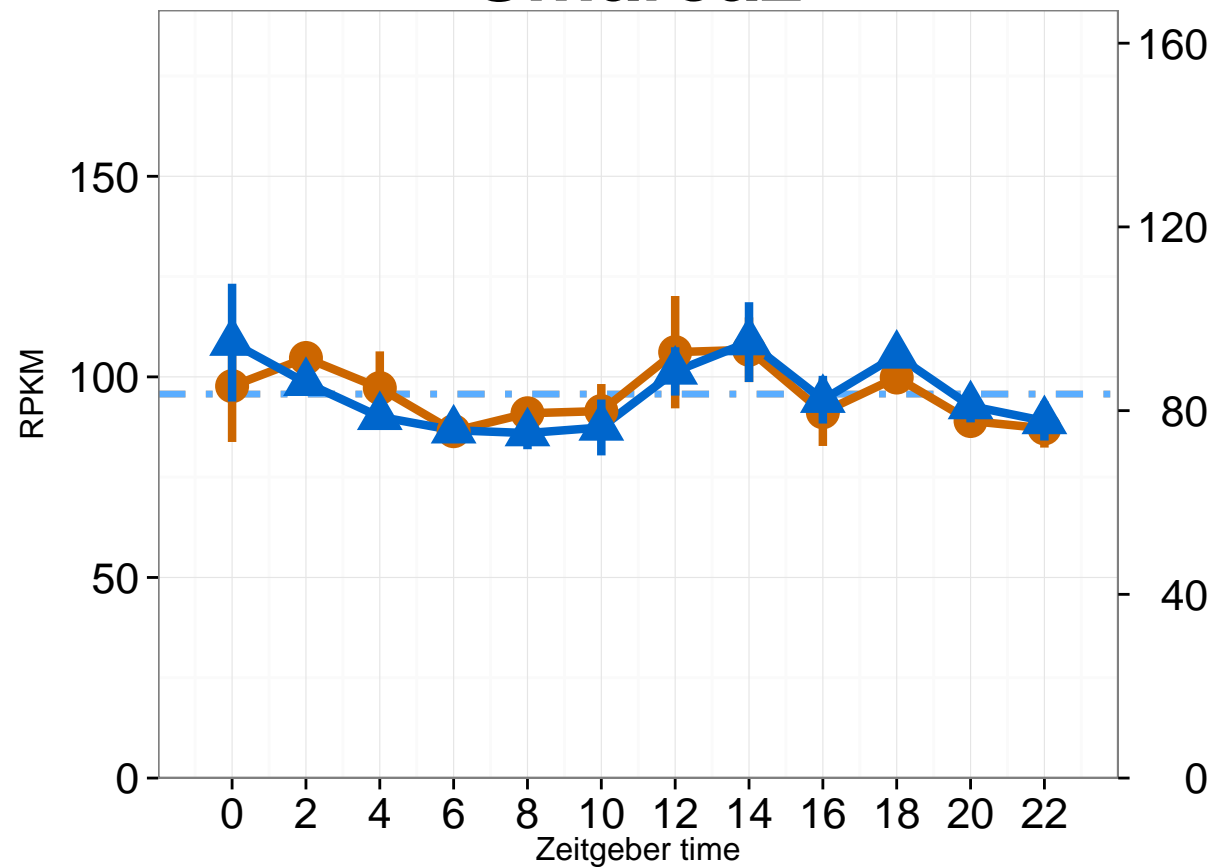

## Smarca2

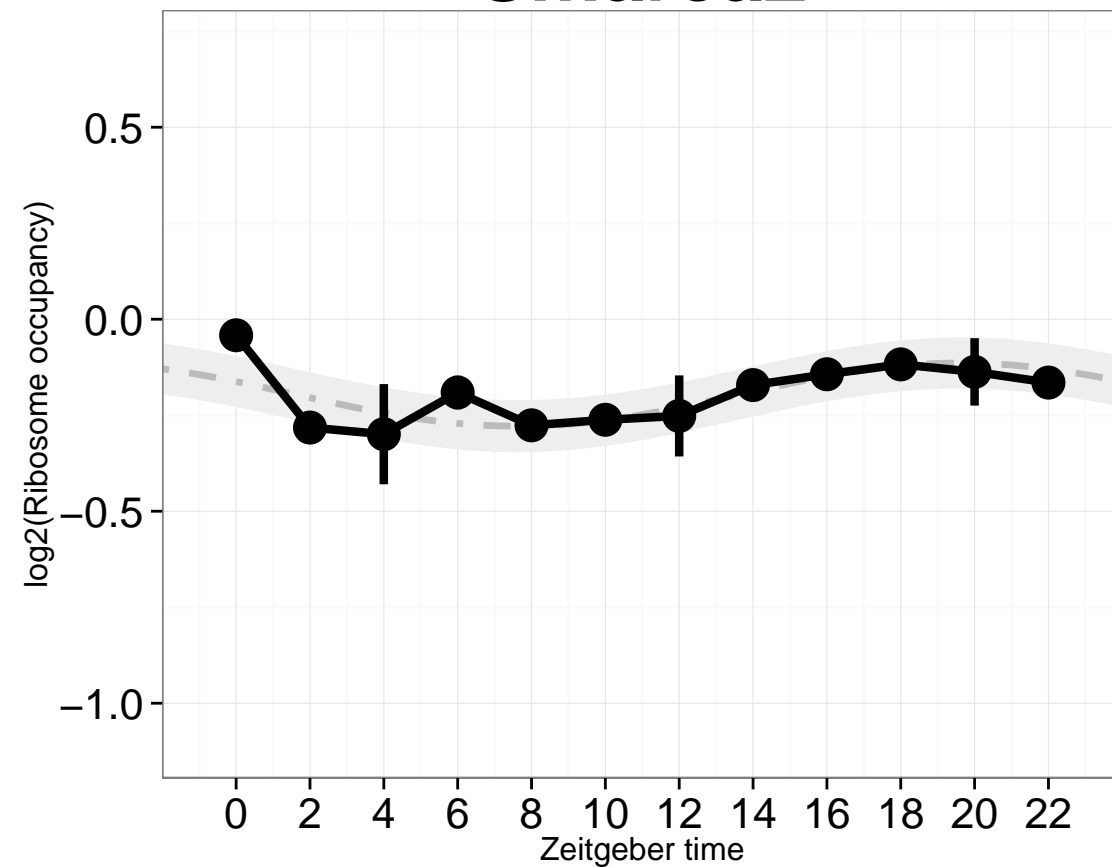

Supplement: Supplementary file 10590 [file 1]

# Dusp14

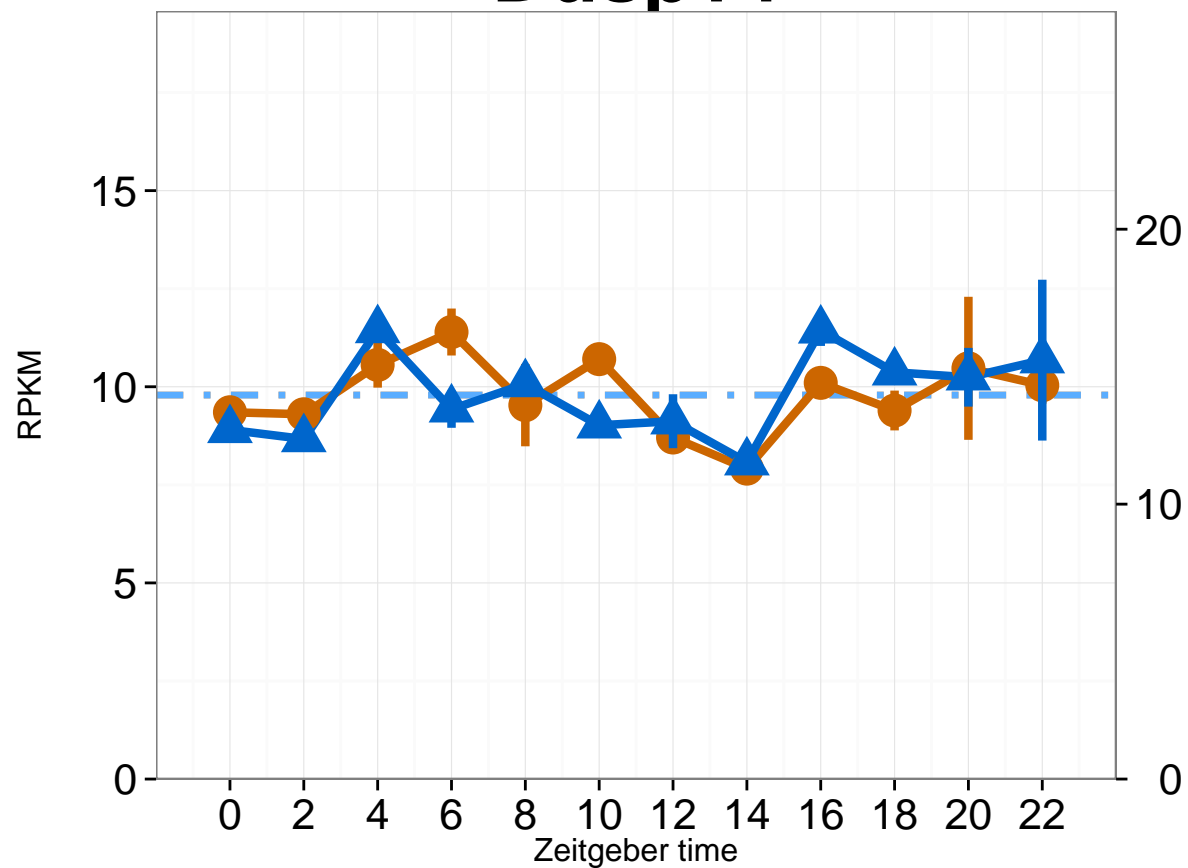

# Dusp14

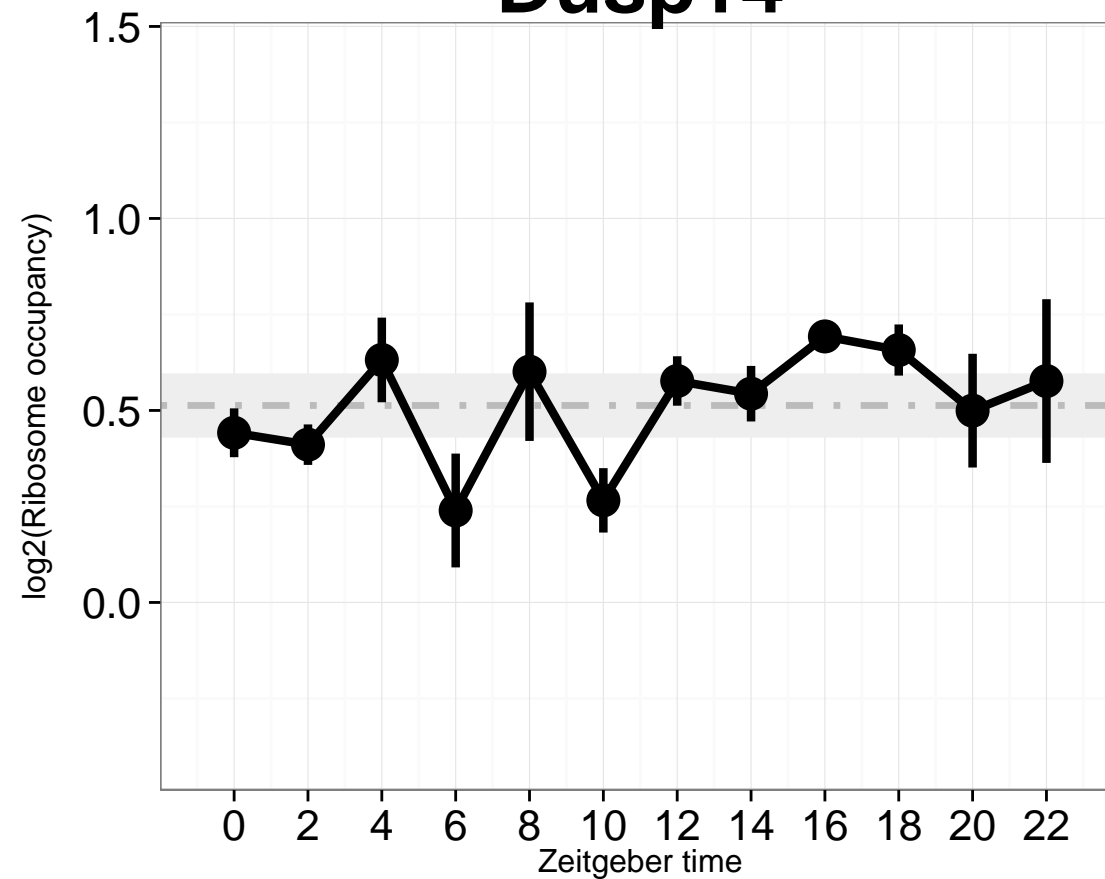

Supplement: Supplementary file 10591 [file 1]

## Arl1

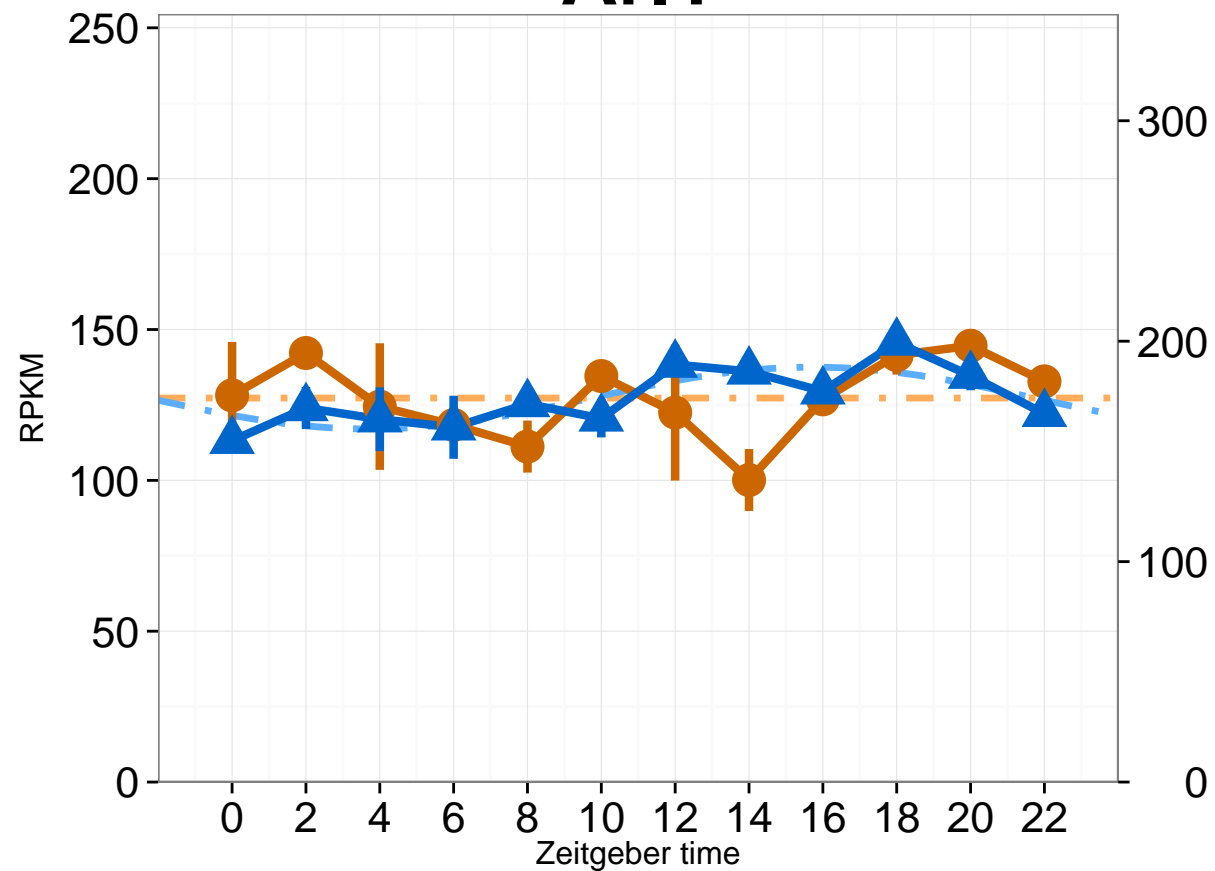

## Arl1

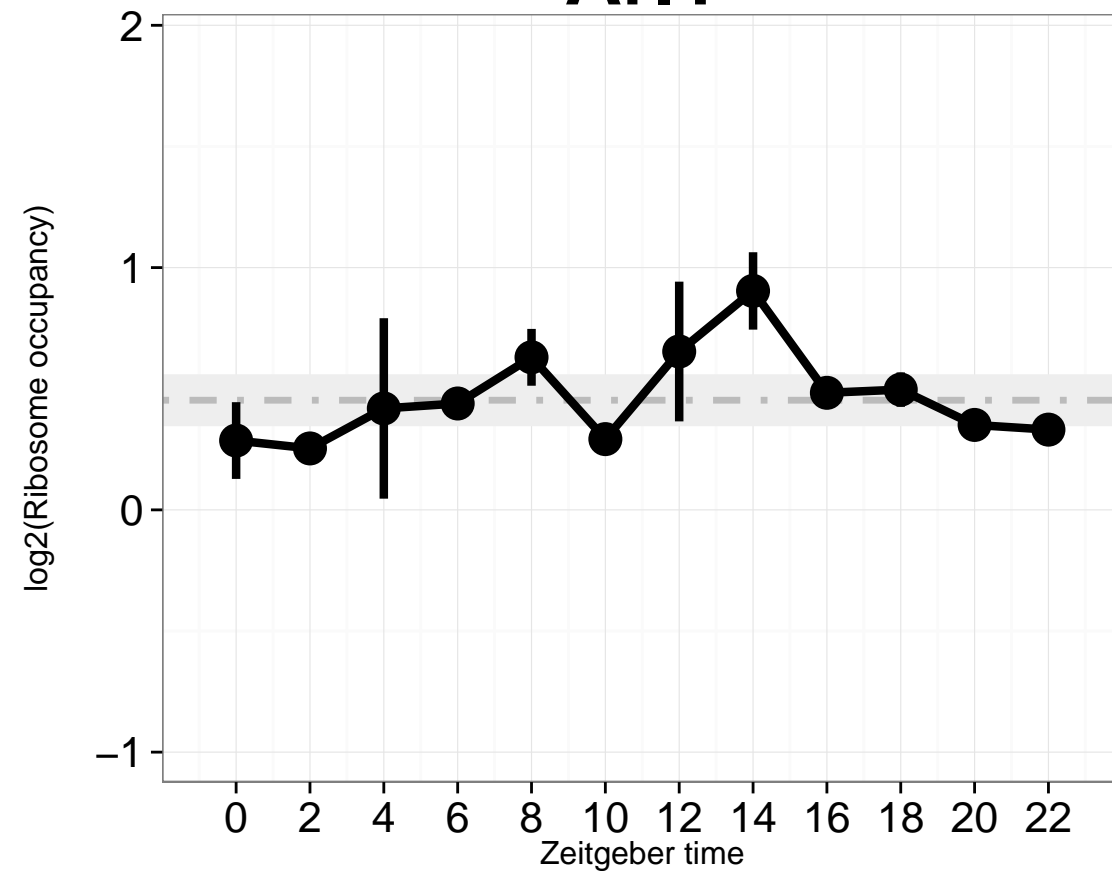

Supplement: Supplementary file 10592 [file 1]

# Tbc1d13

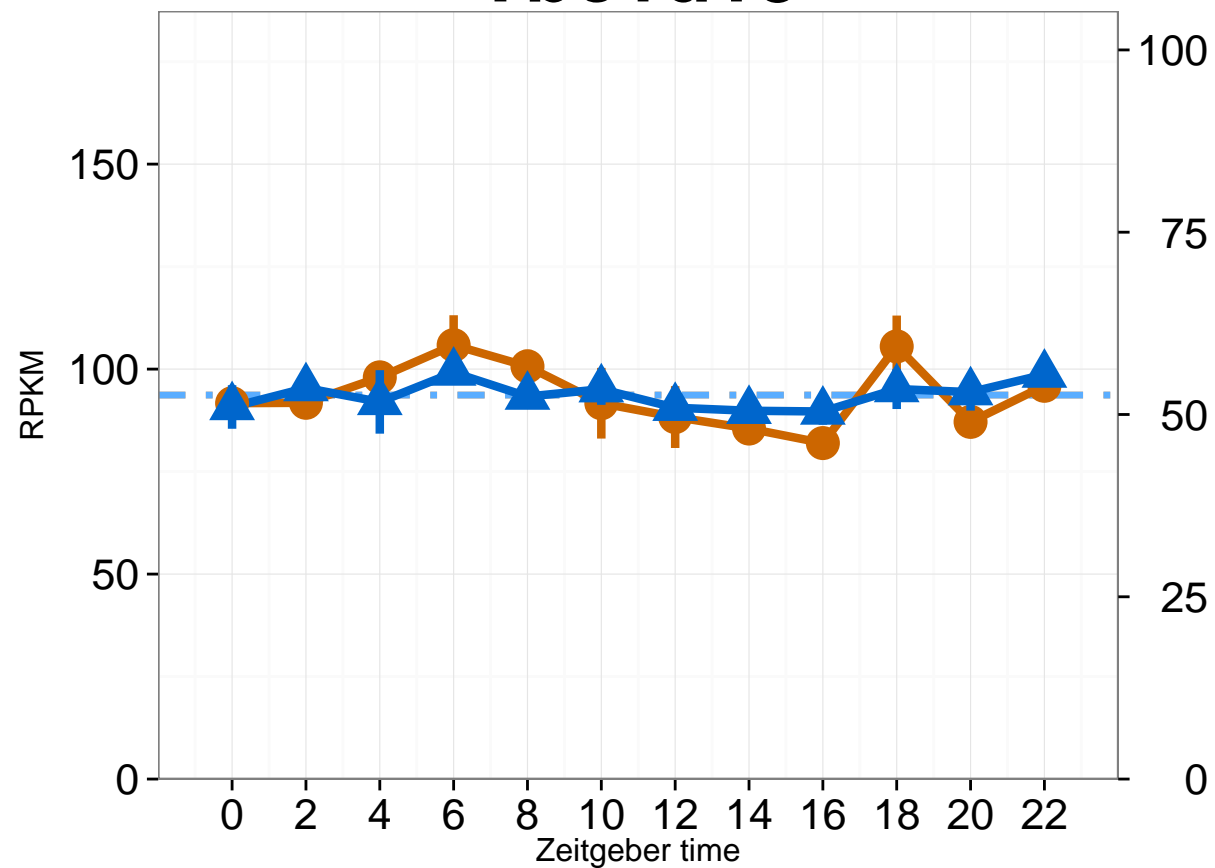

# Tbc1d13

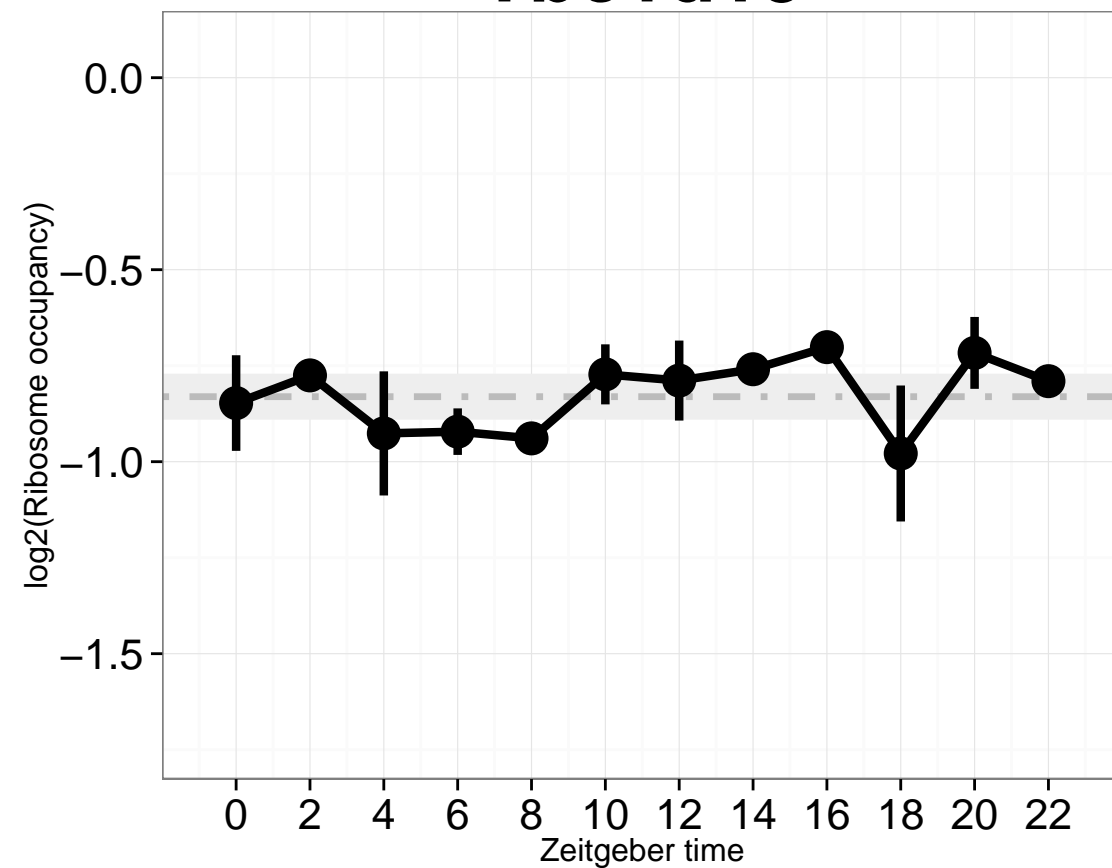

Supplement: Supplementary file 10593 [file 1]

## Serpini1

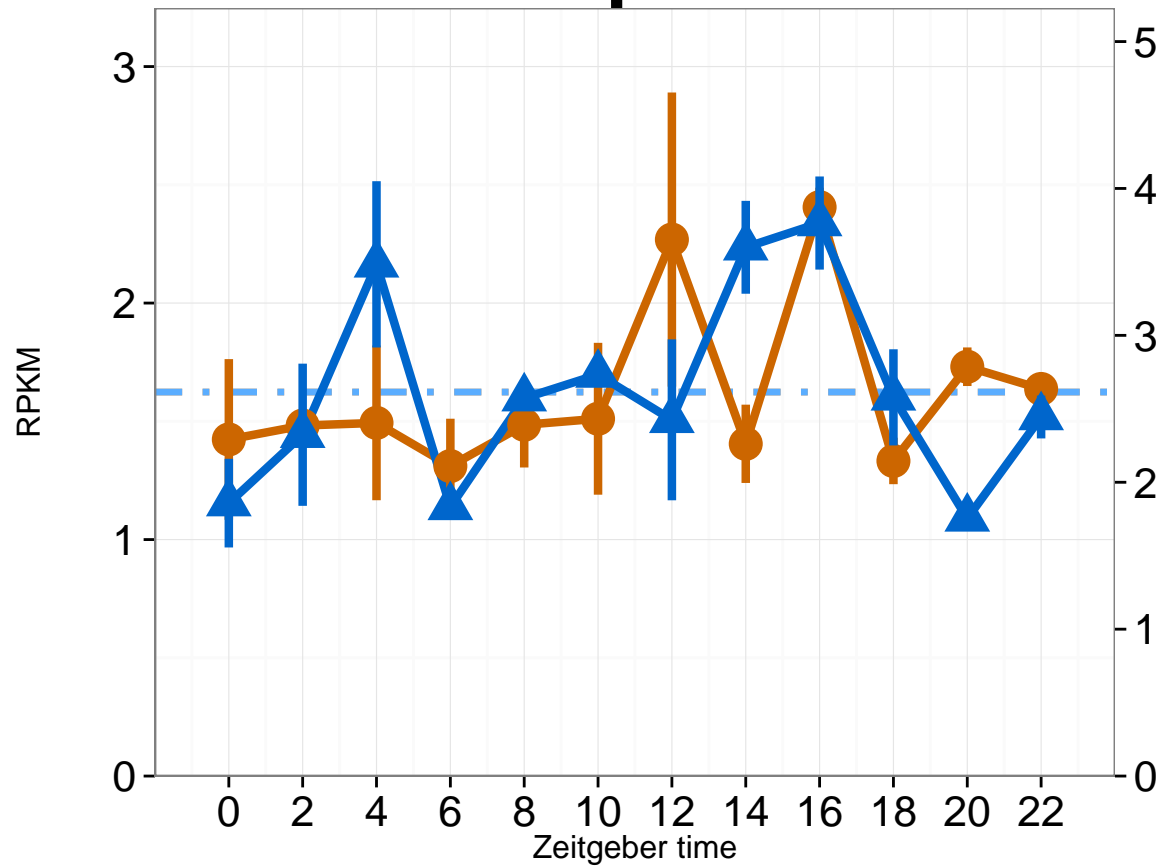

## Serpini1

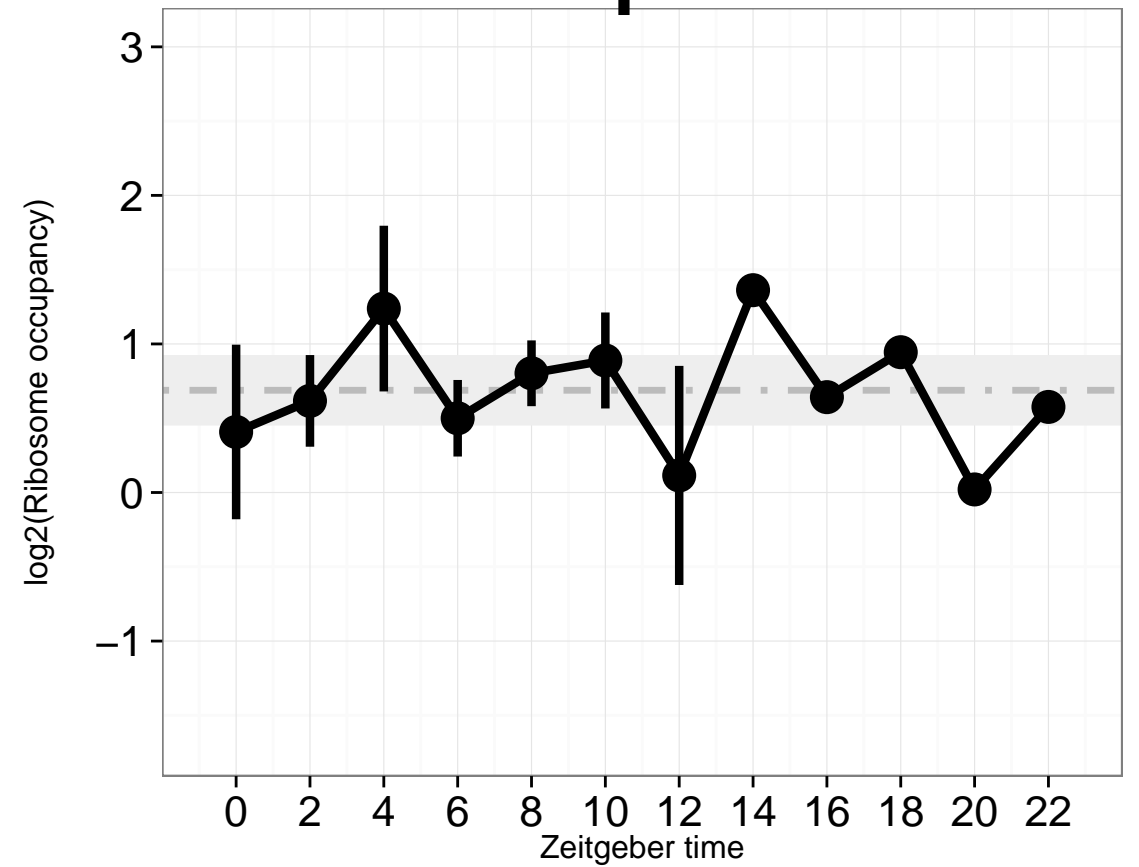

Supplement: Supplementary file 10594 [file 1]

# Copz1

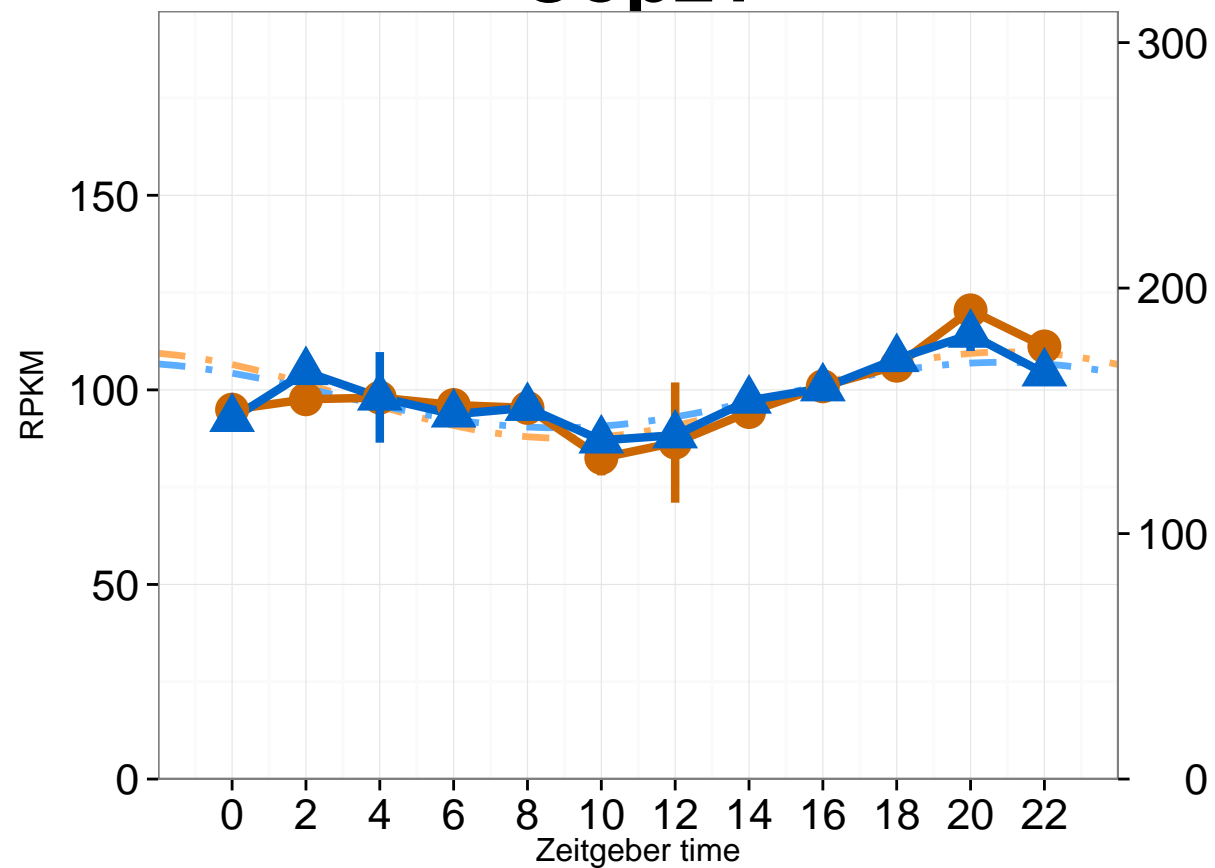

# Copz1

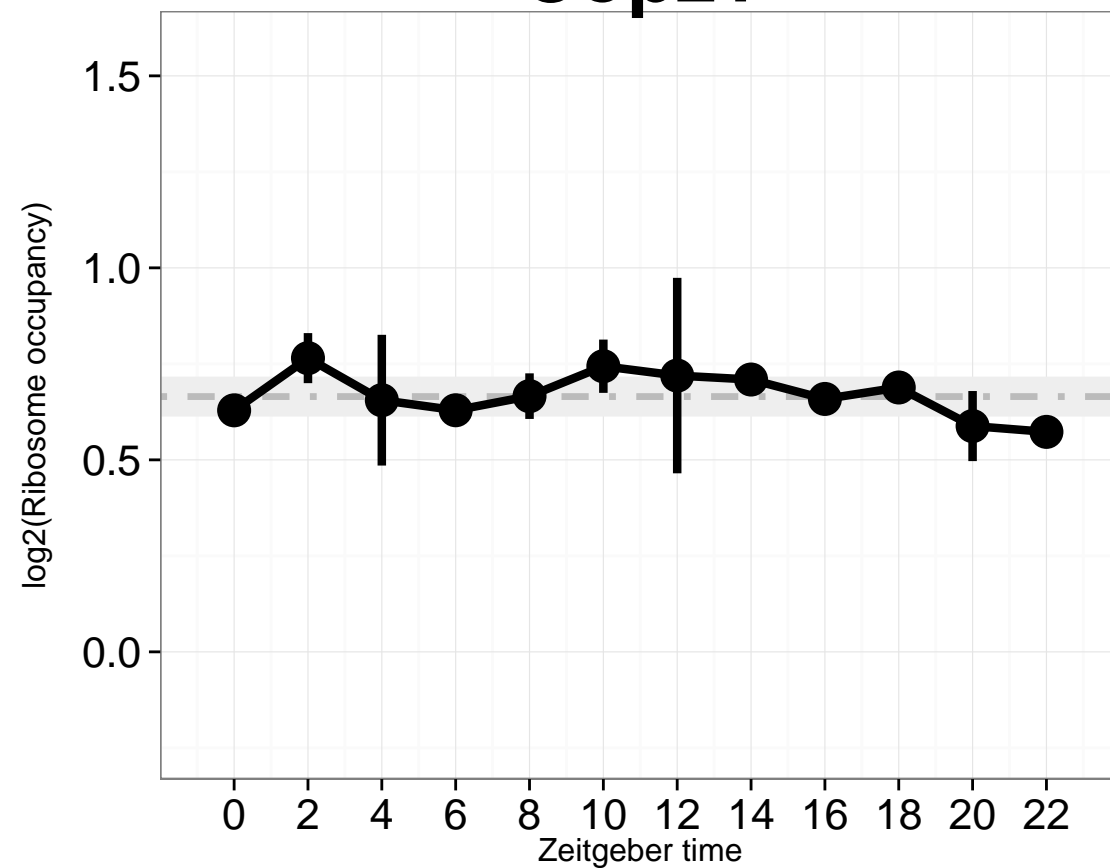

Supplement: Supplementary file 10595 [file 1]

# St6galnac3

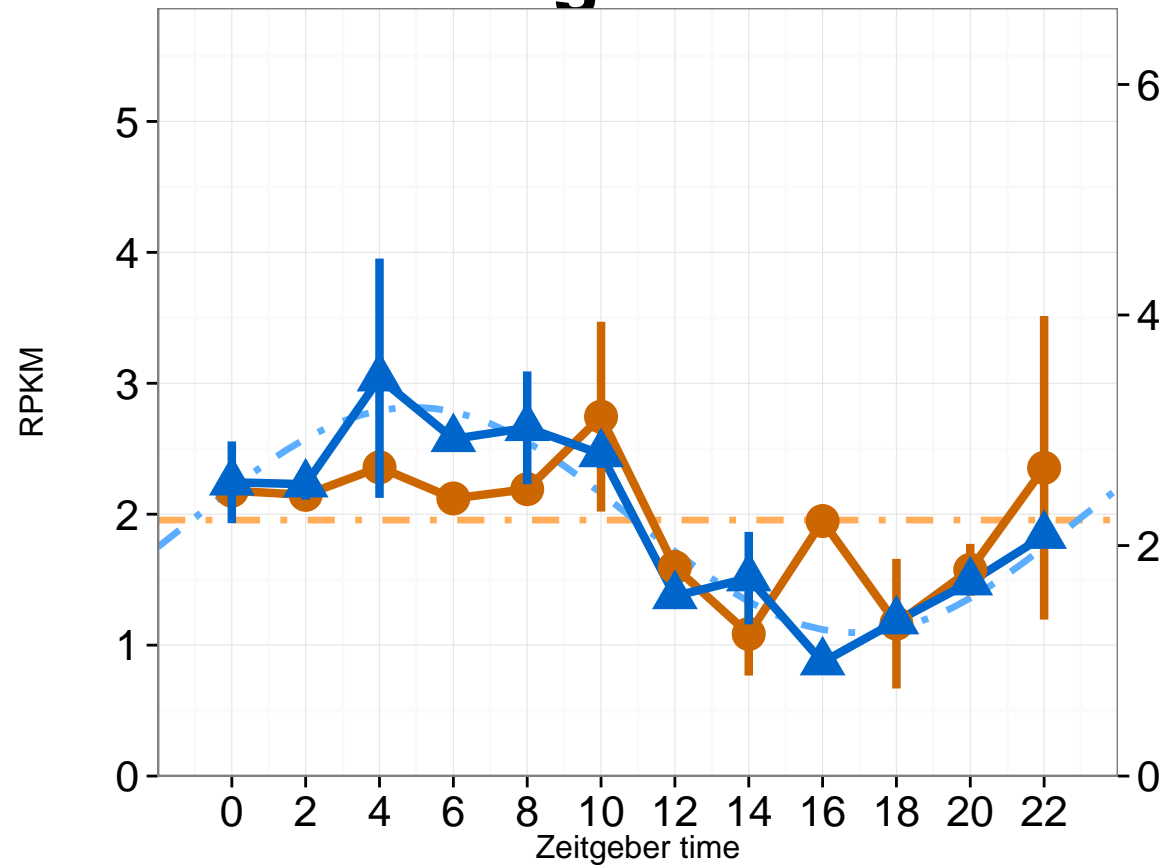

# St6galnac3

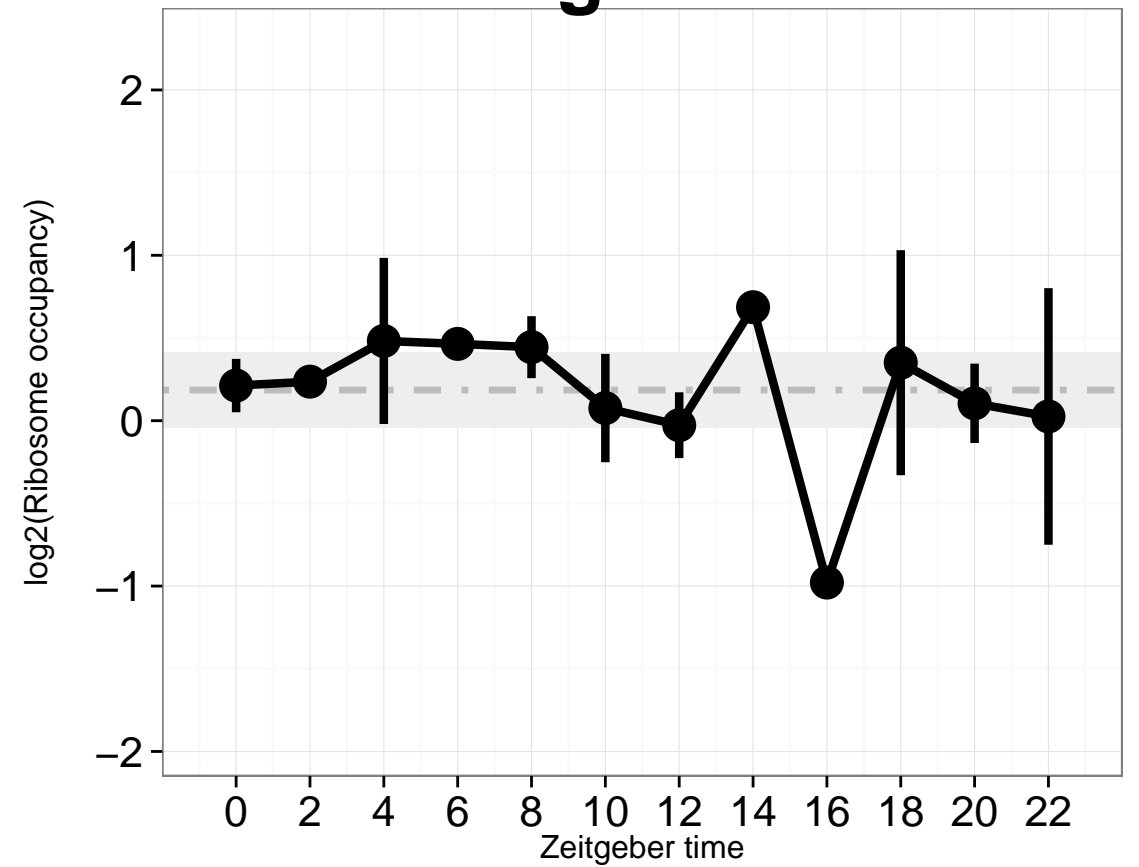

Supplement: Supplementary file 10596 [file 1]

## Enpep

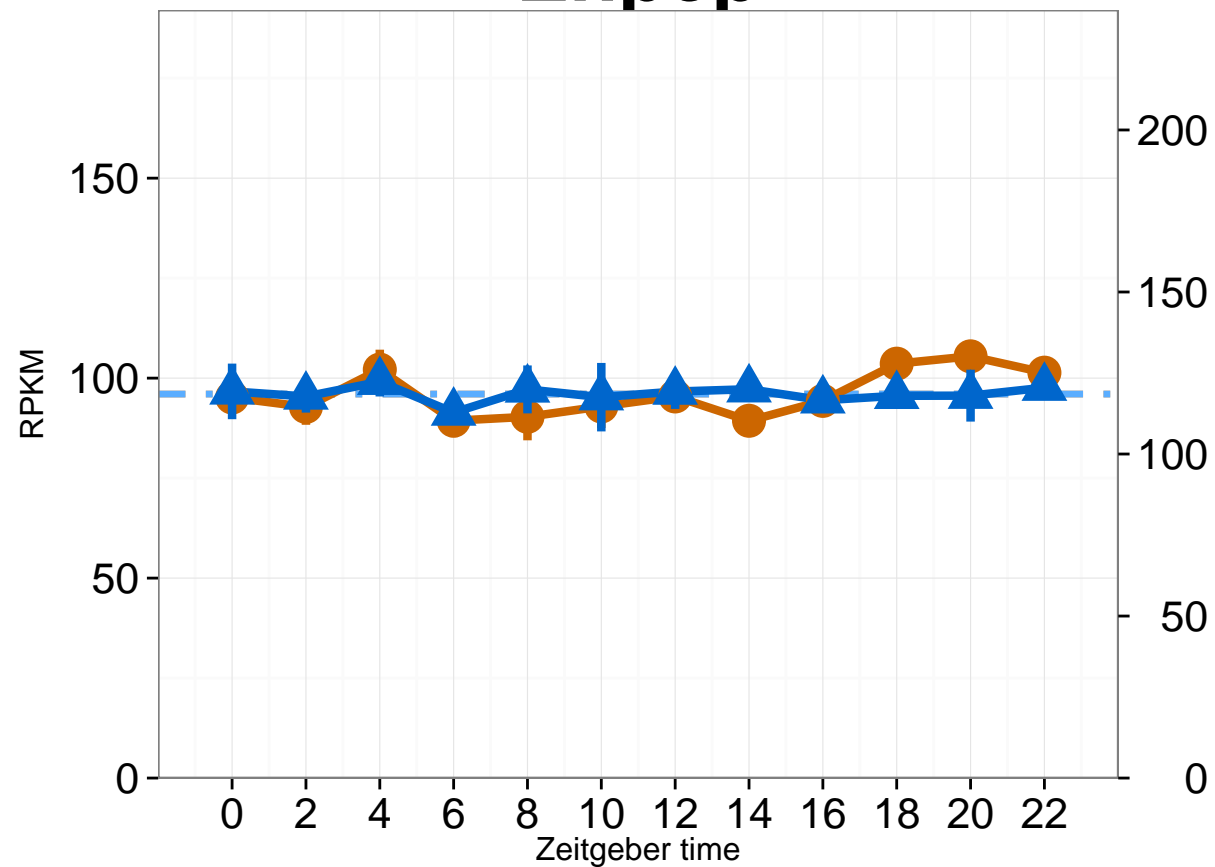

## Enpep

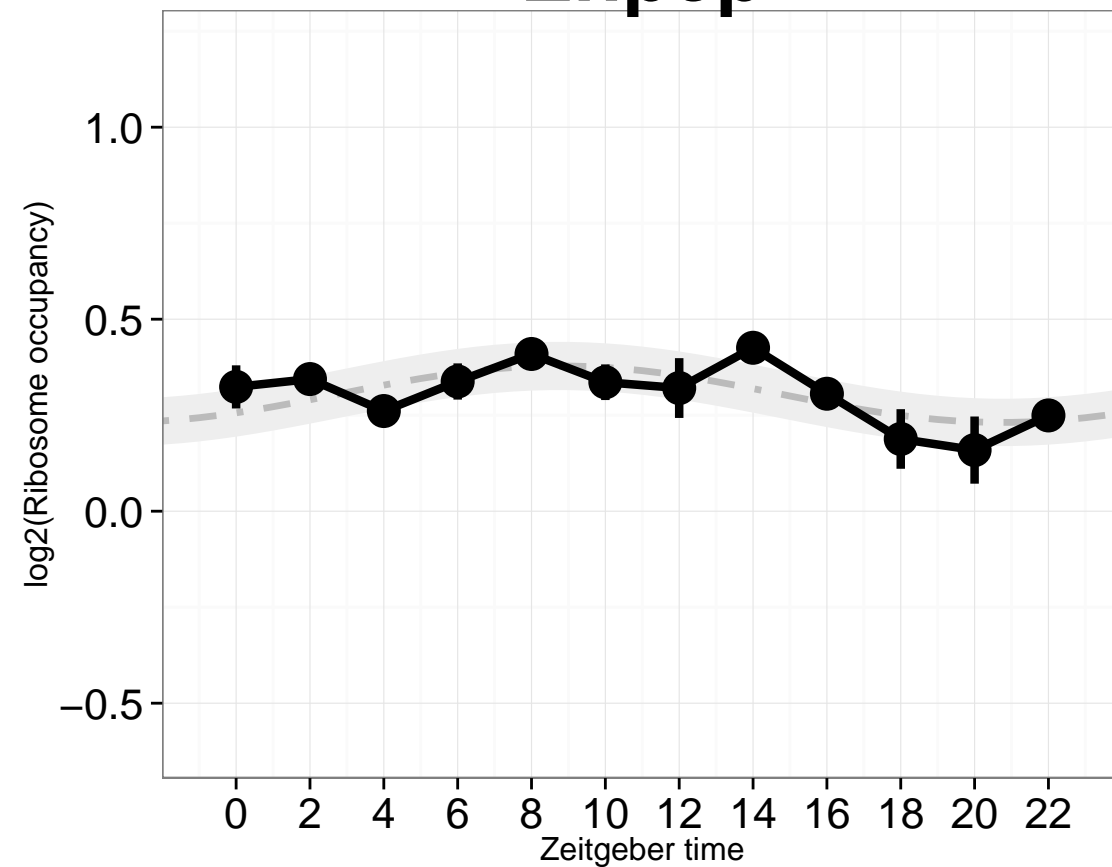

Supplement: Supplementary file 10597 [file 1]

# Avpr1a

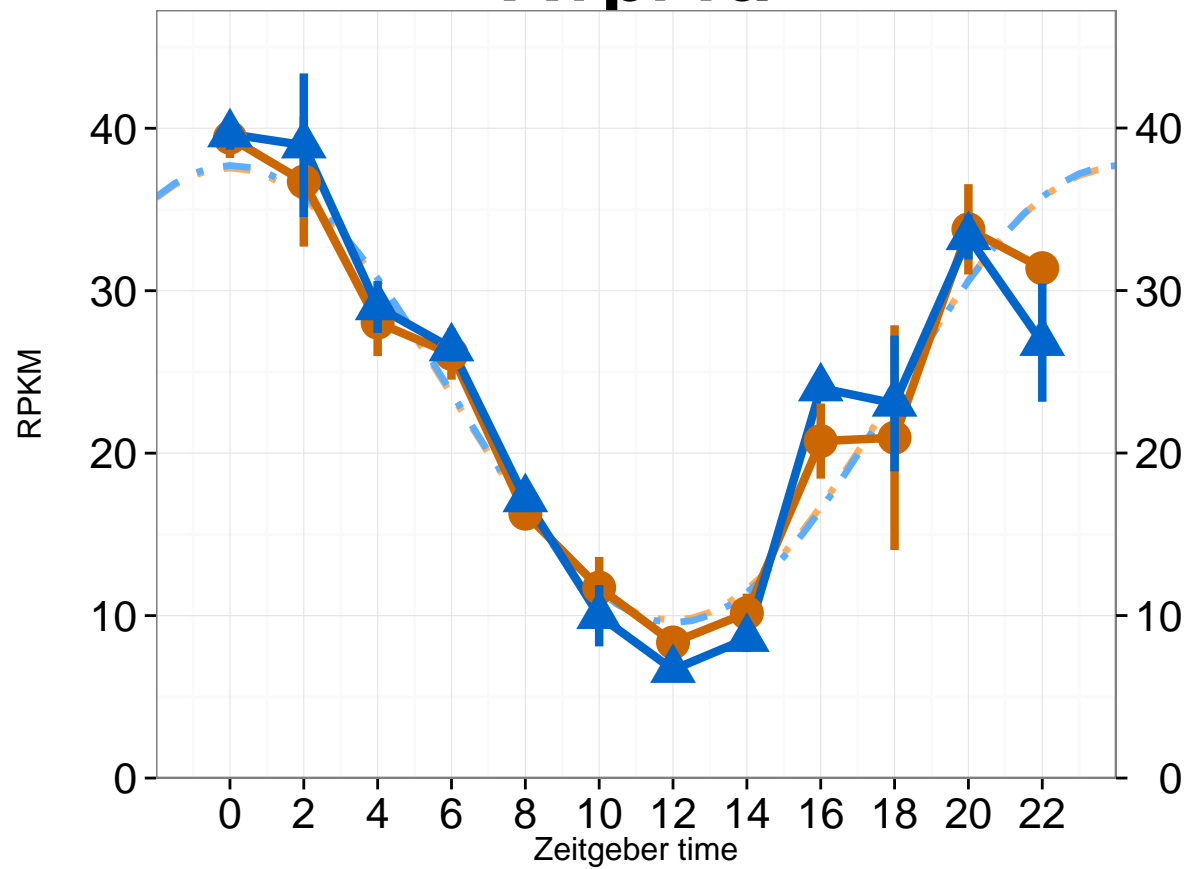

# Avpr1a

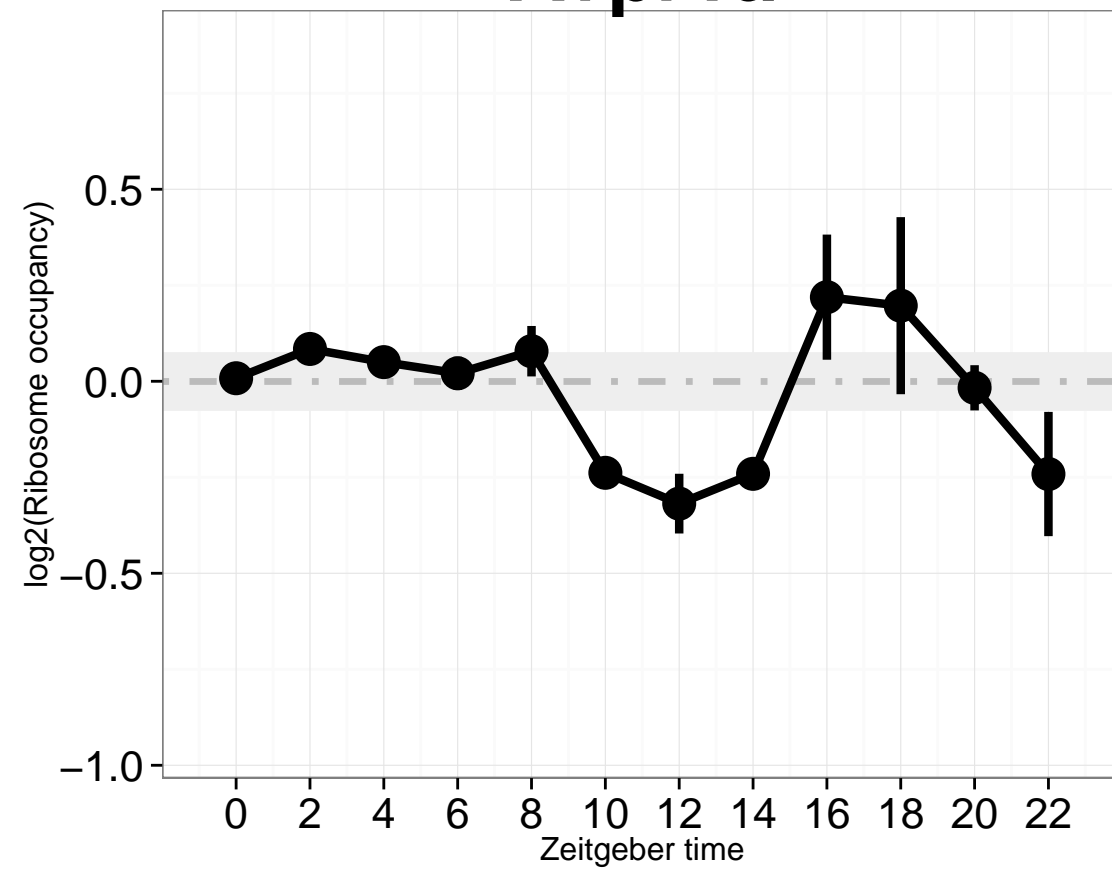

Supplement: Supplementary file 10598 [file 1]

# Chordc1

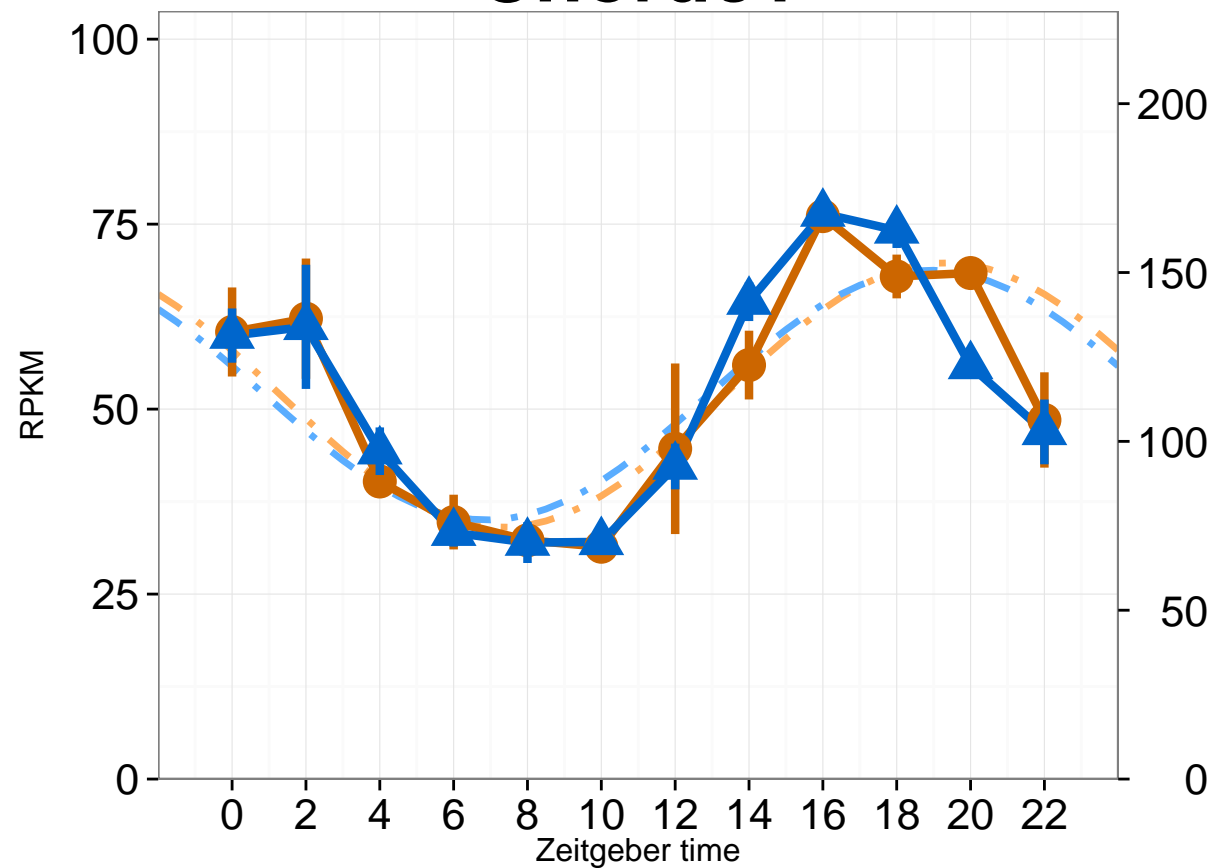

# Chordc1

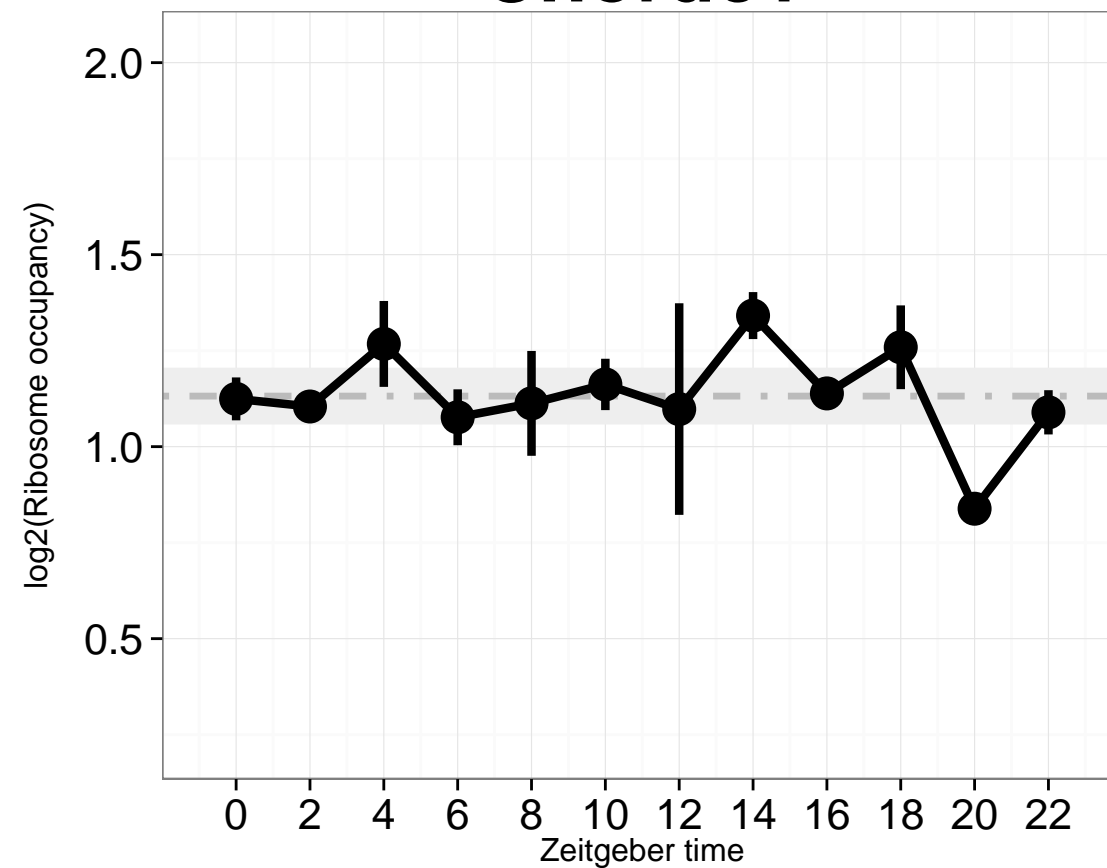

Supplement: Supplementary file 10599 [file 1]

## Nbl1

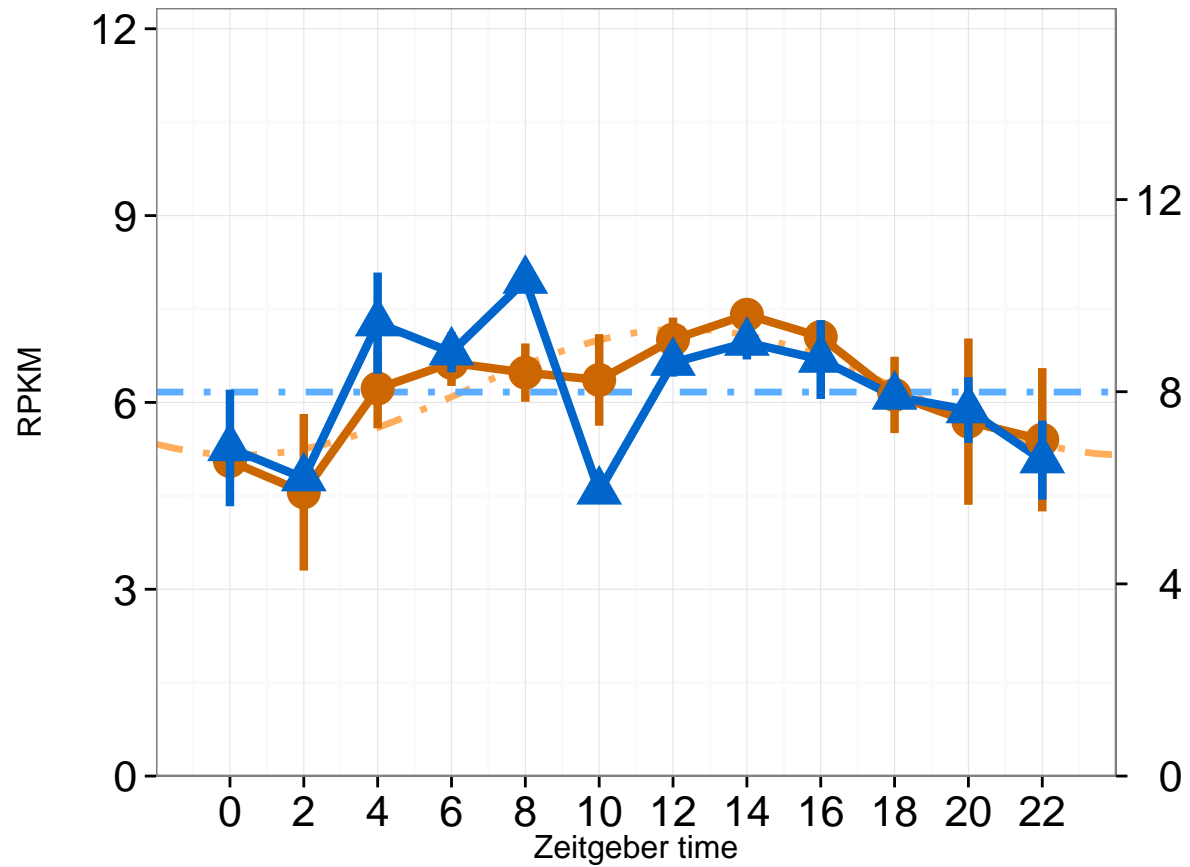

## Nbl1

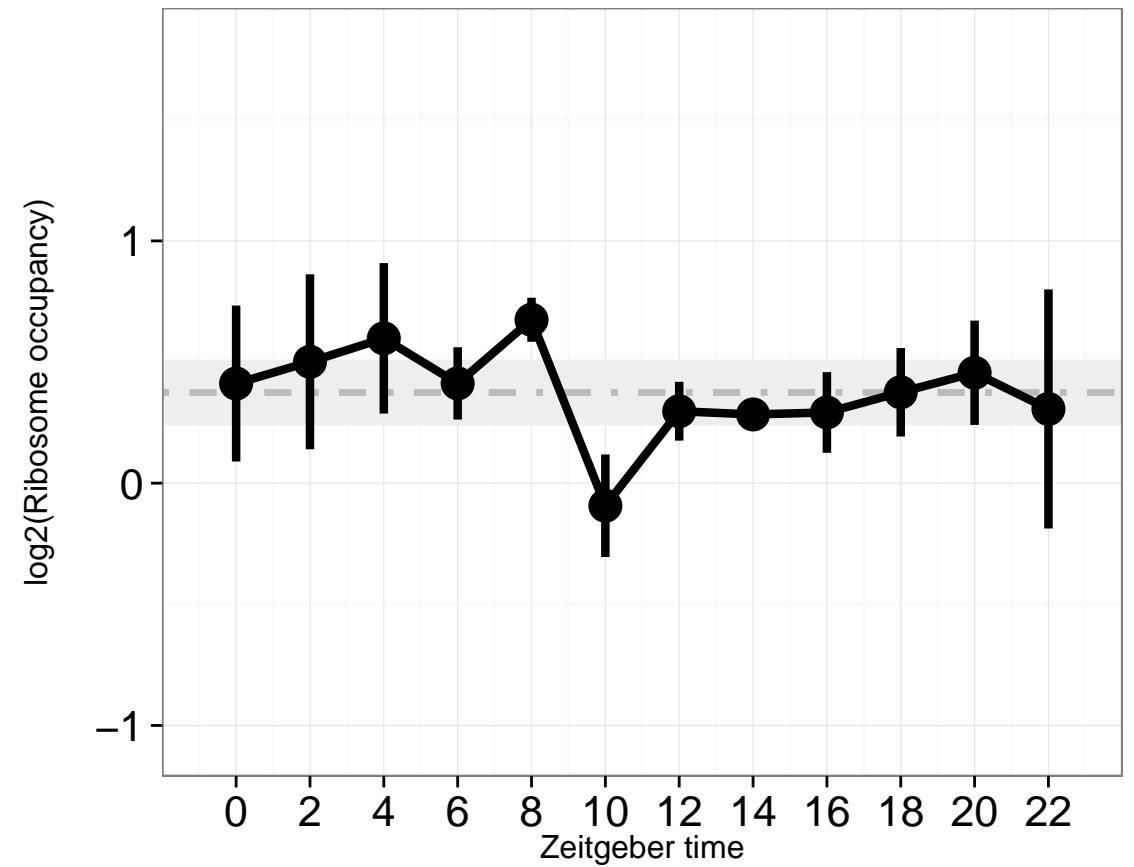

Supplement: Supplementary file 10600 [file 1]

# Upk1a

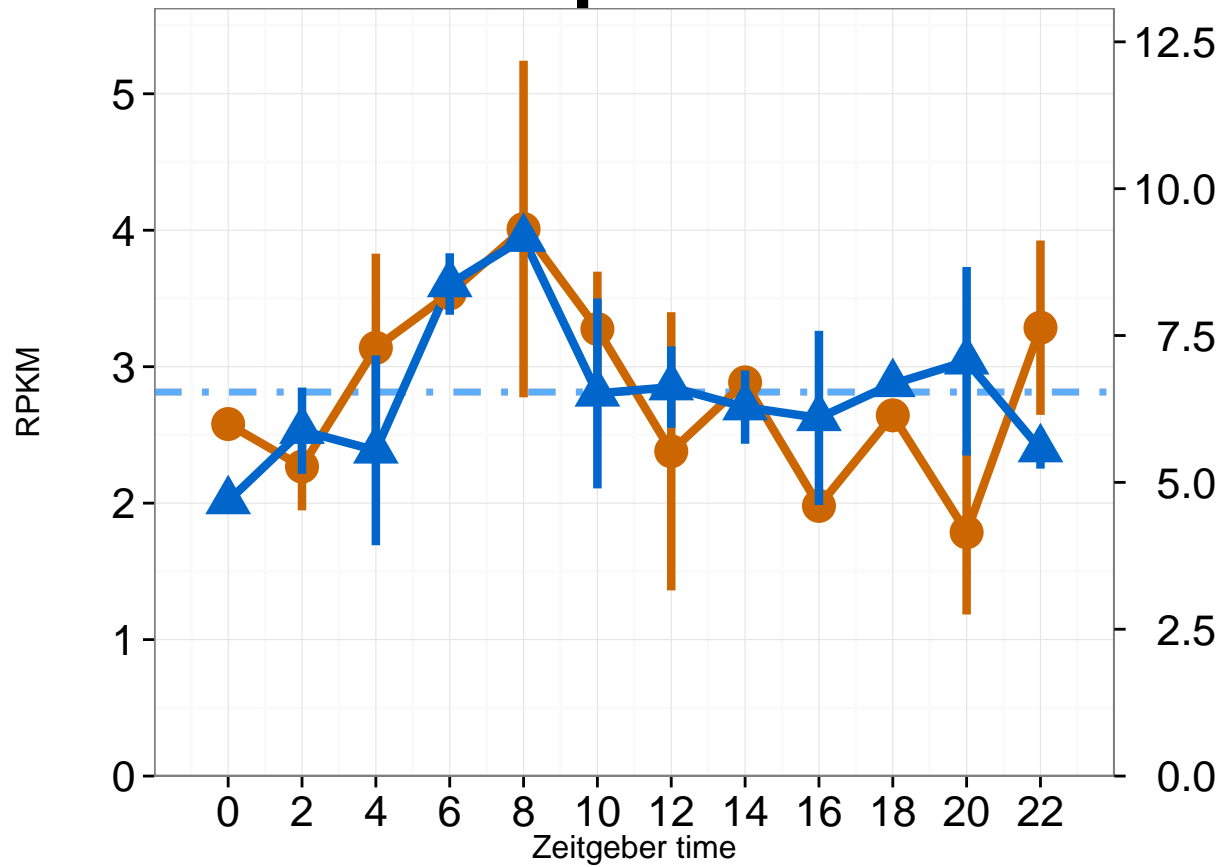

# Upk1a

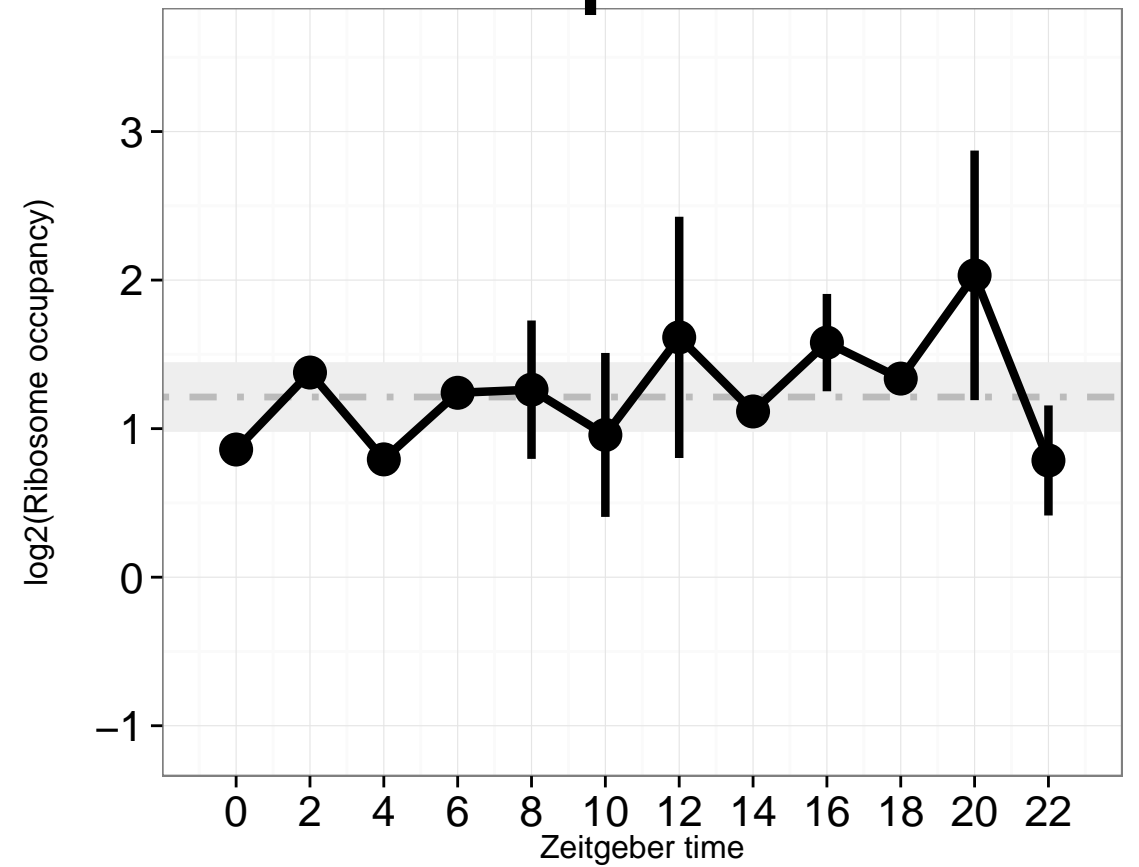

Supplement: Supplementary file 10601 [file 1]

## Lrif1

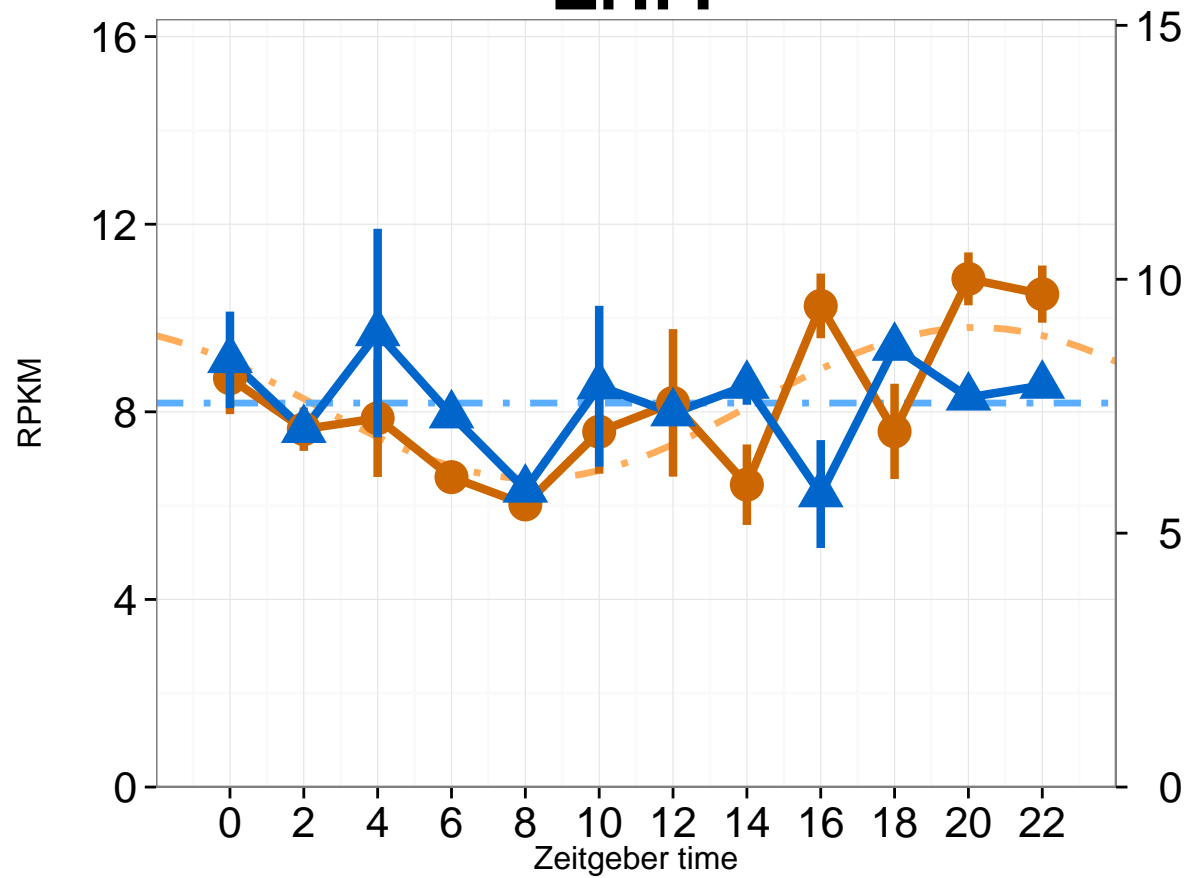

## Lrif1

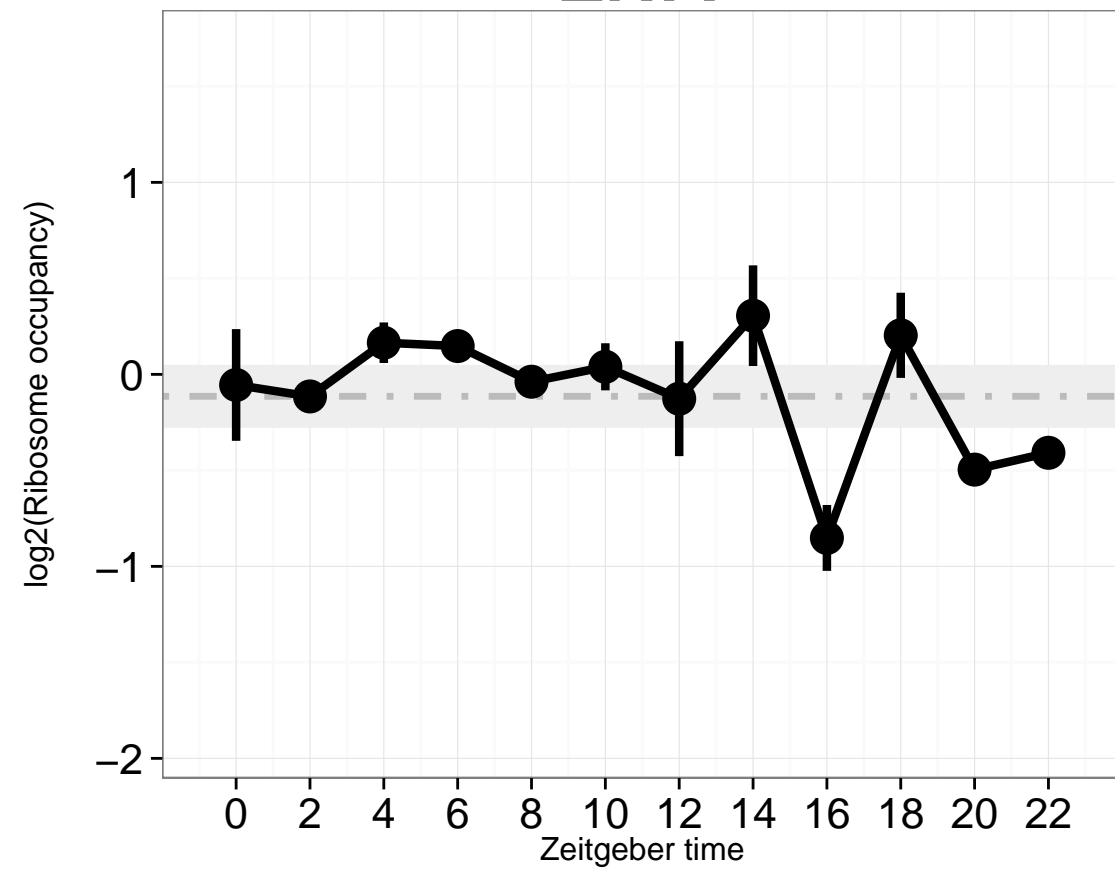

Supplement: Supplementary file 10602 [file 1]

## Palm

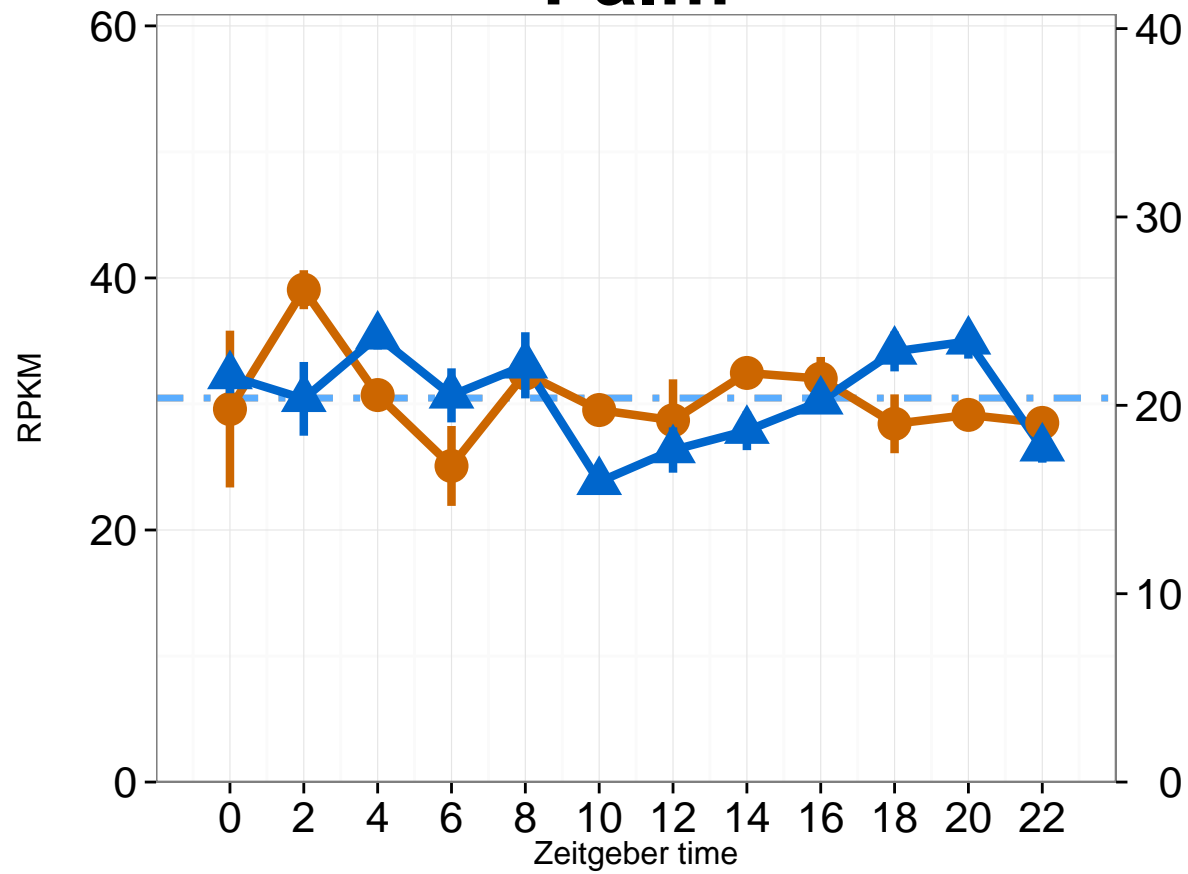

## Palm

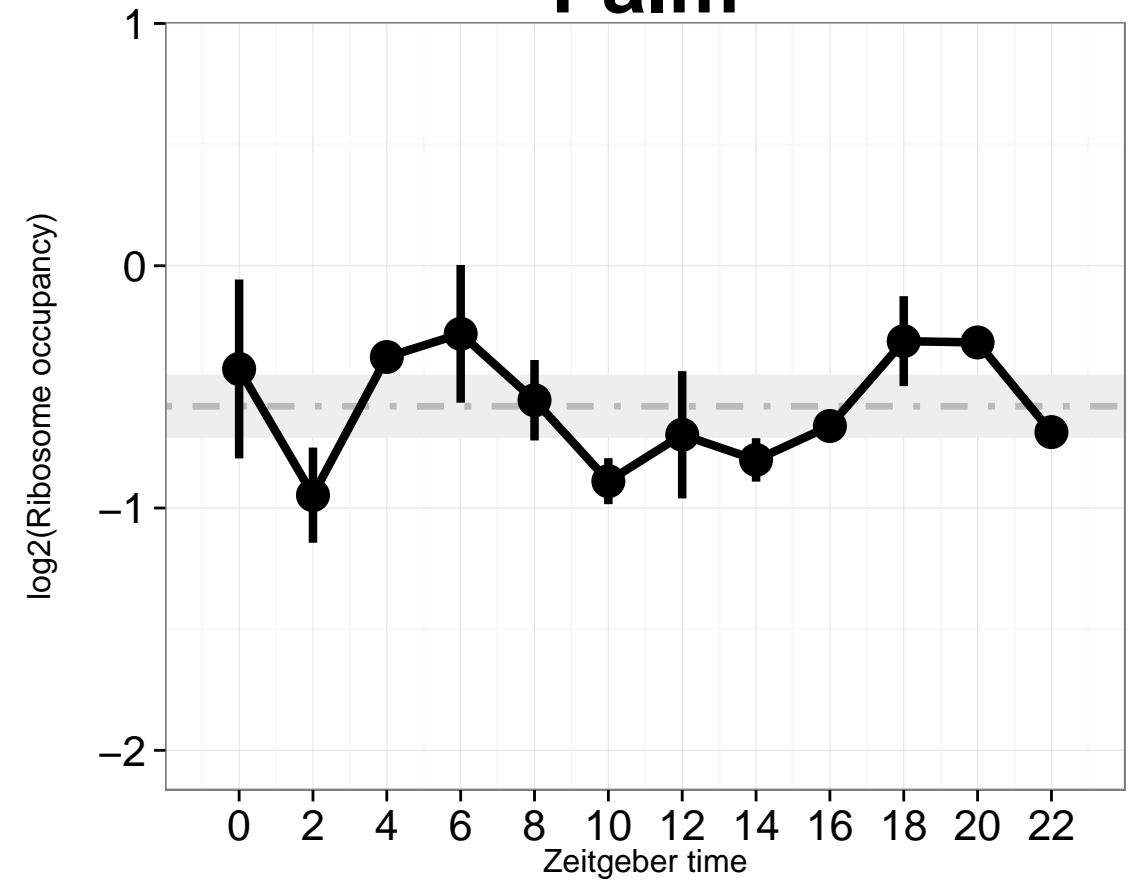

Supplement: Supplementary file 10603 [file 1]

## Tbc1d2

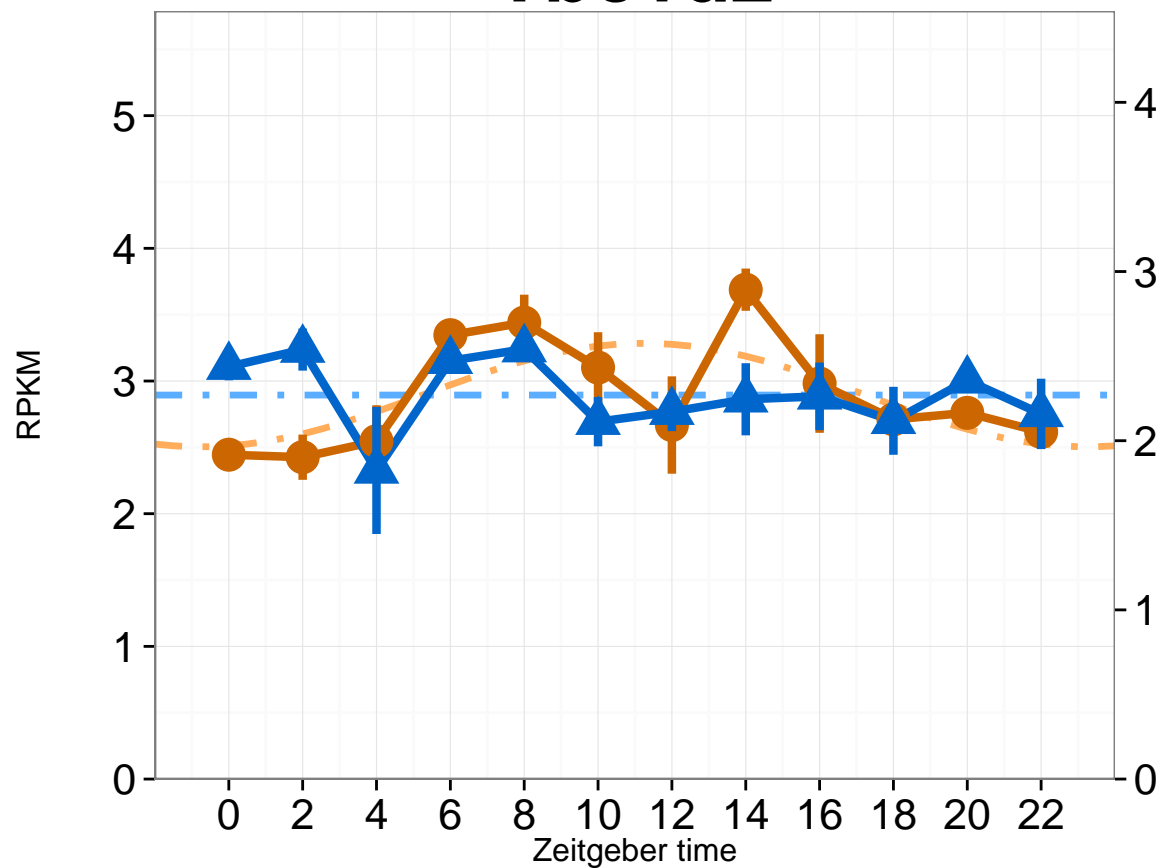

## Tbc1d2

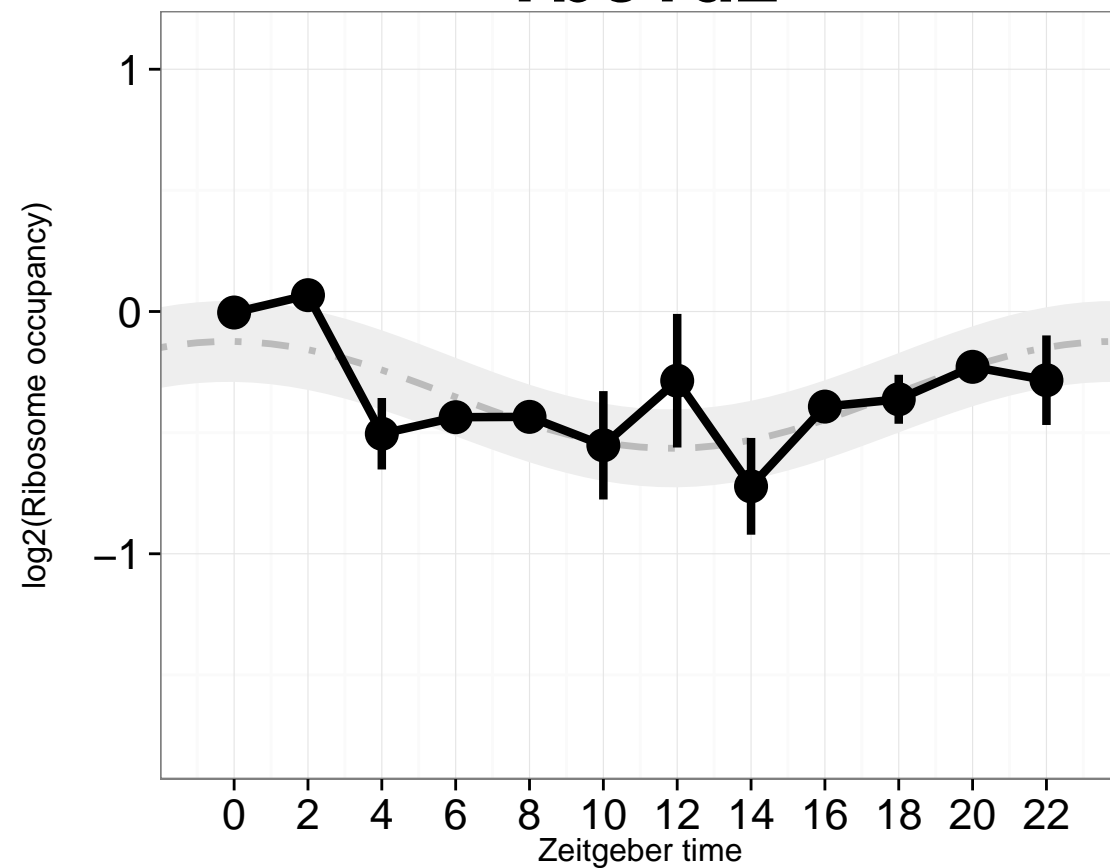

Supplement: Supplementary file 10604 [file 1]

Tubgcp3

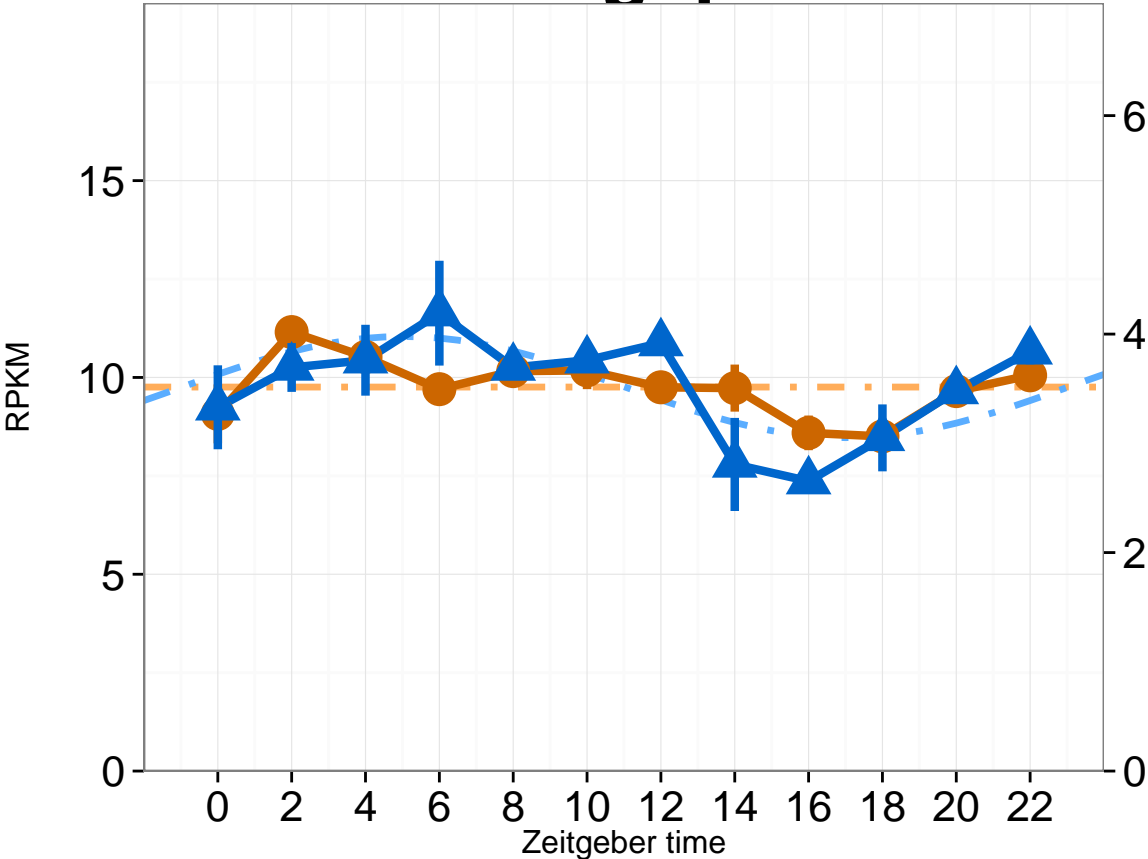

Tubgcp3

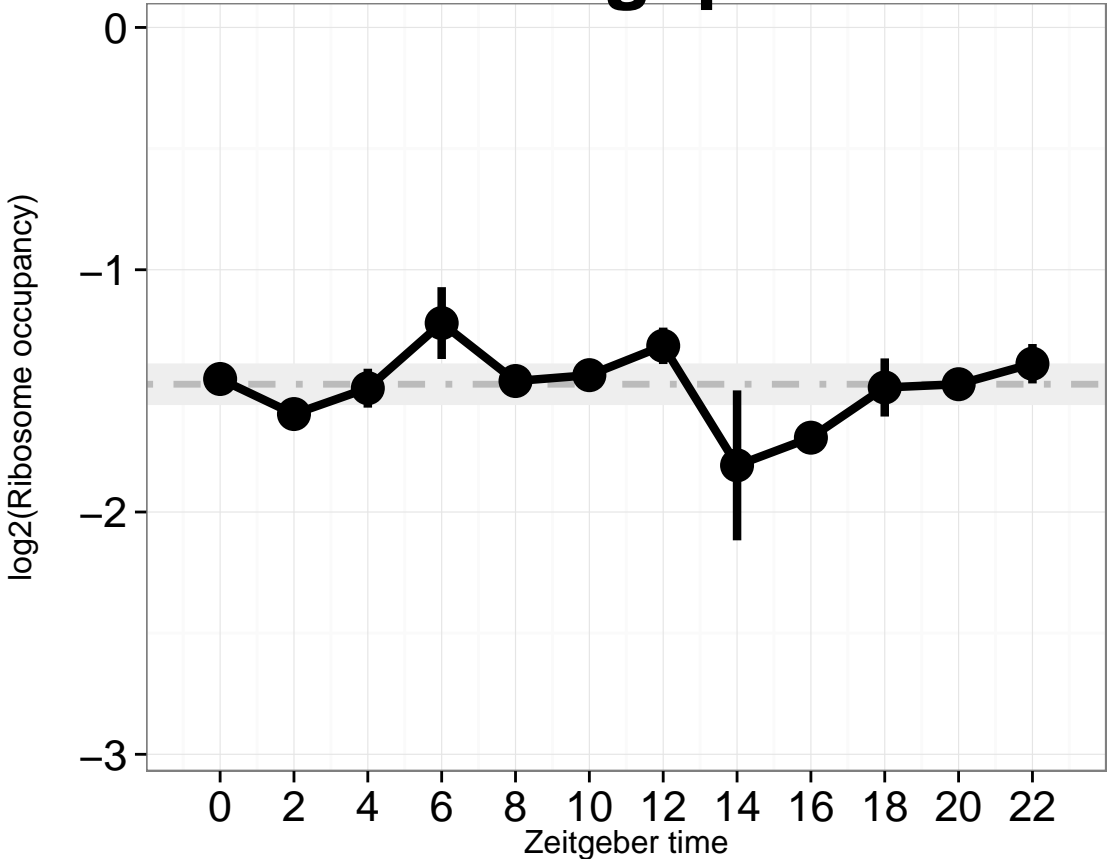

Supplement: Supplementary file 10605 [file 1]

## Gpaa1

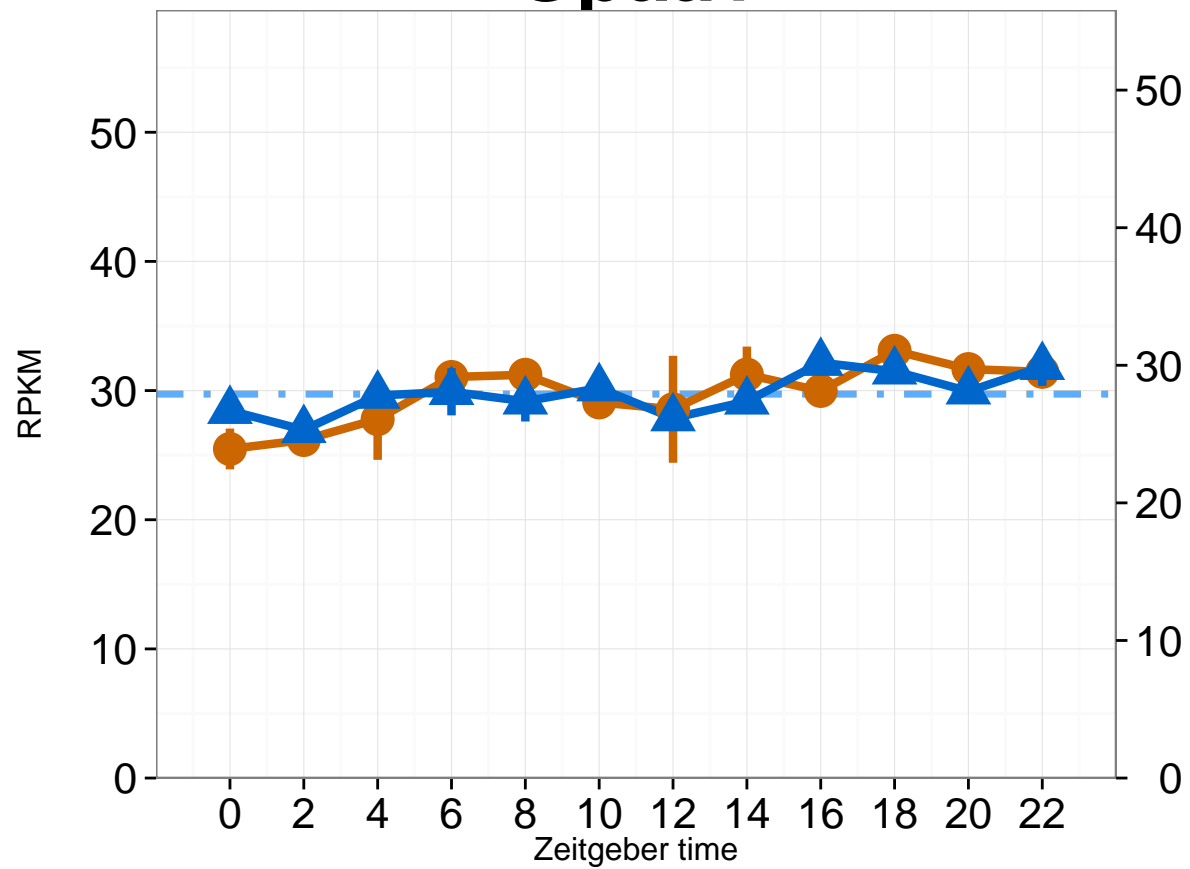

## Gpaa1

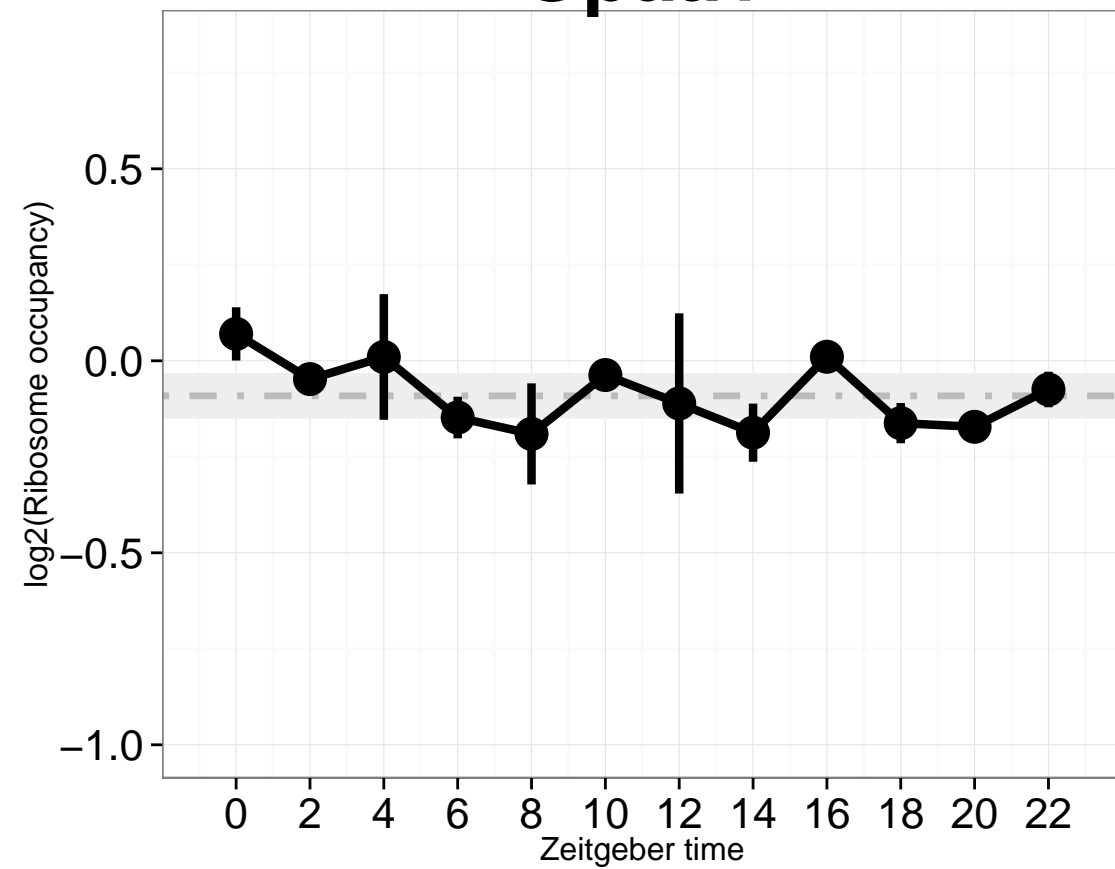

Supplement: Supplementary file 10606 [file 1]

## Rad51

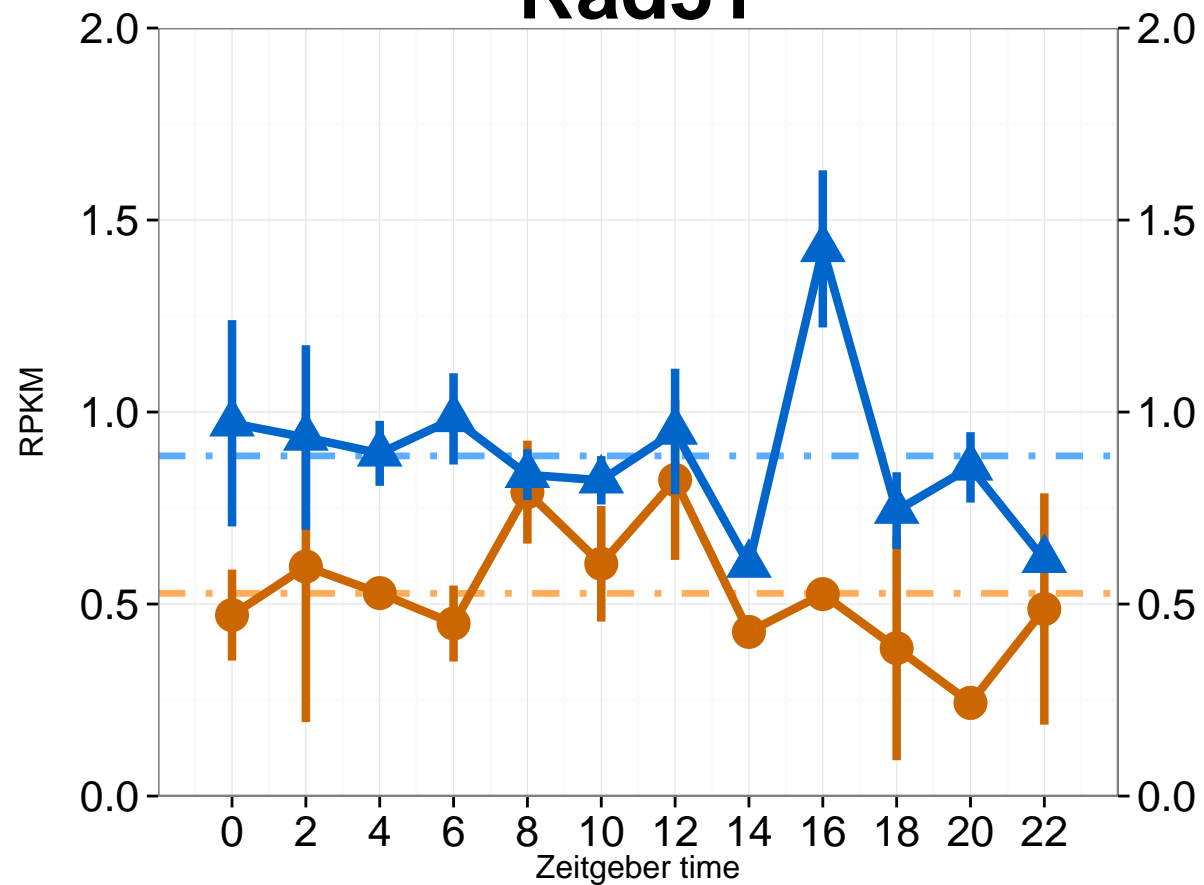

## Rad51

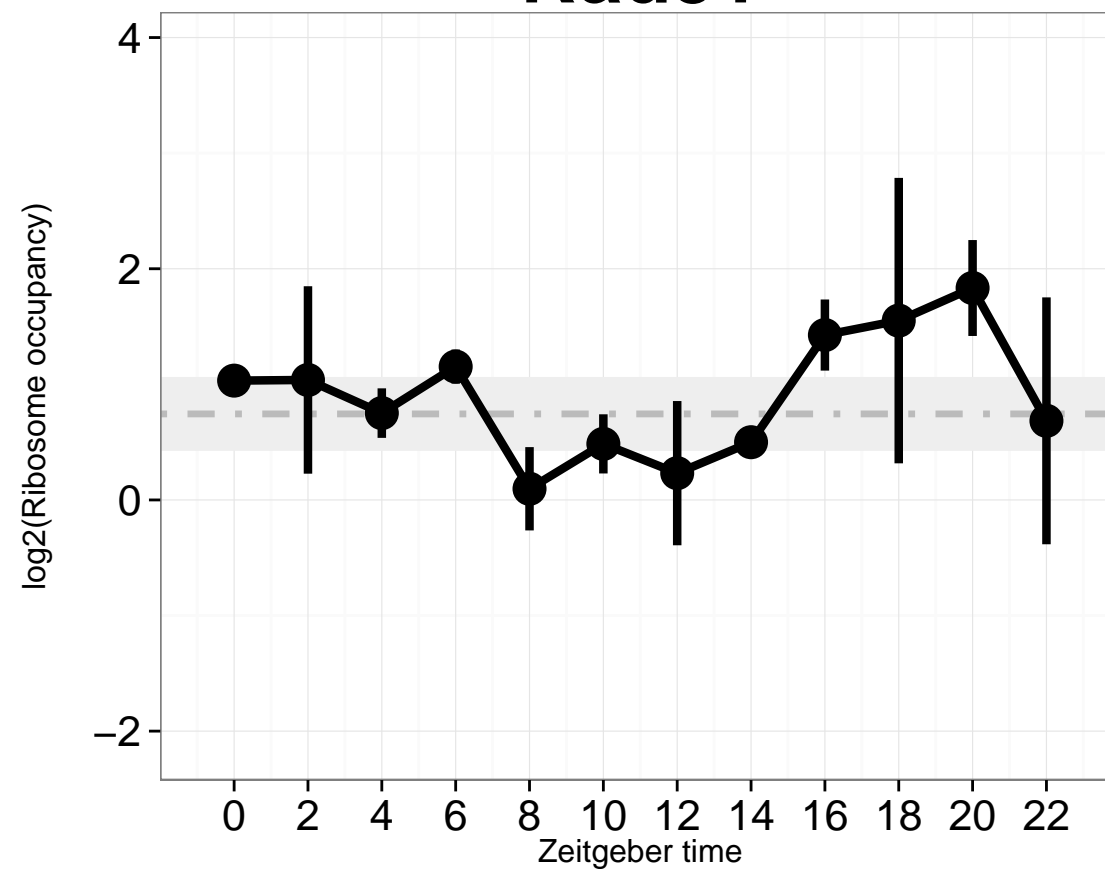

Supplement: Supplementary file 10607 [file 1]

# Tdg

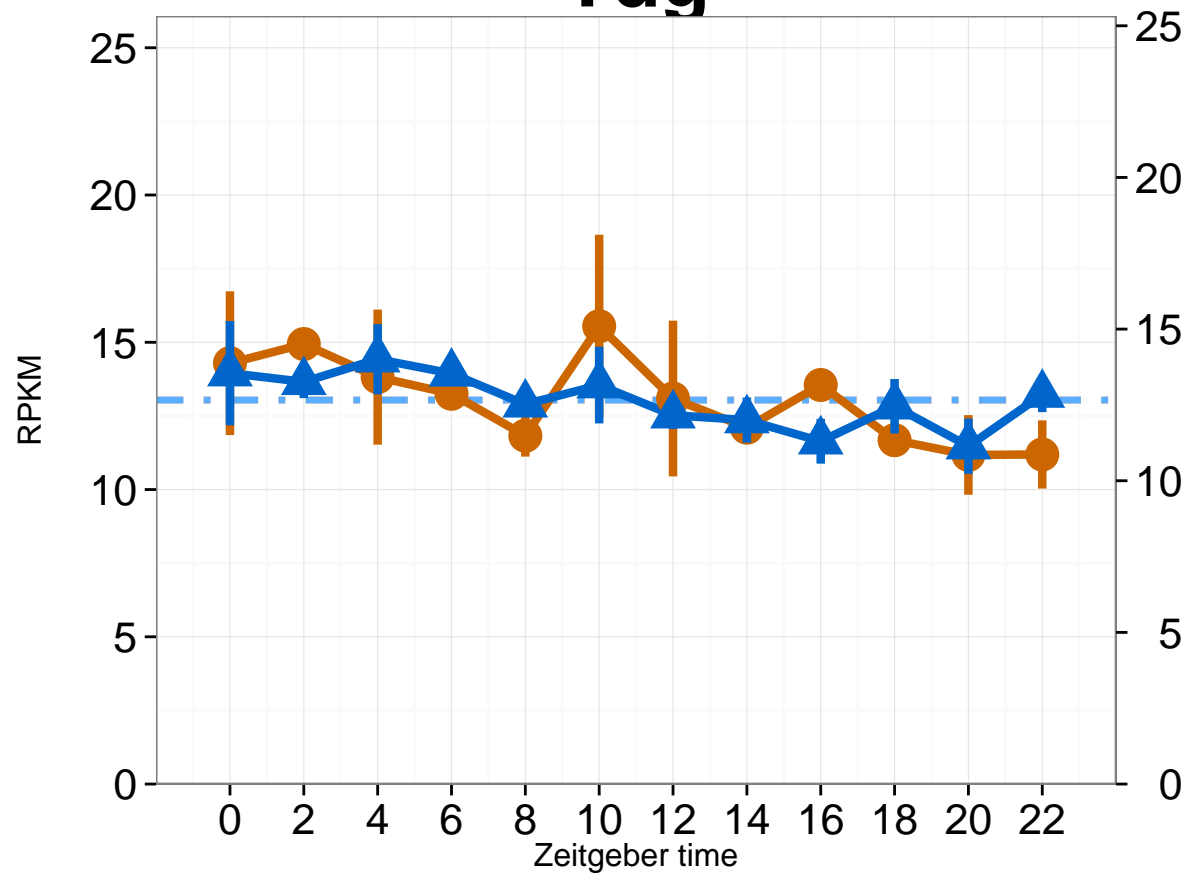

# Tdg

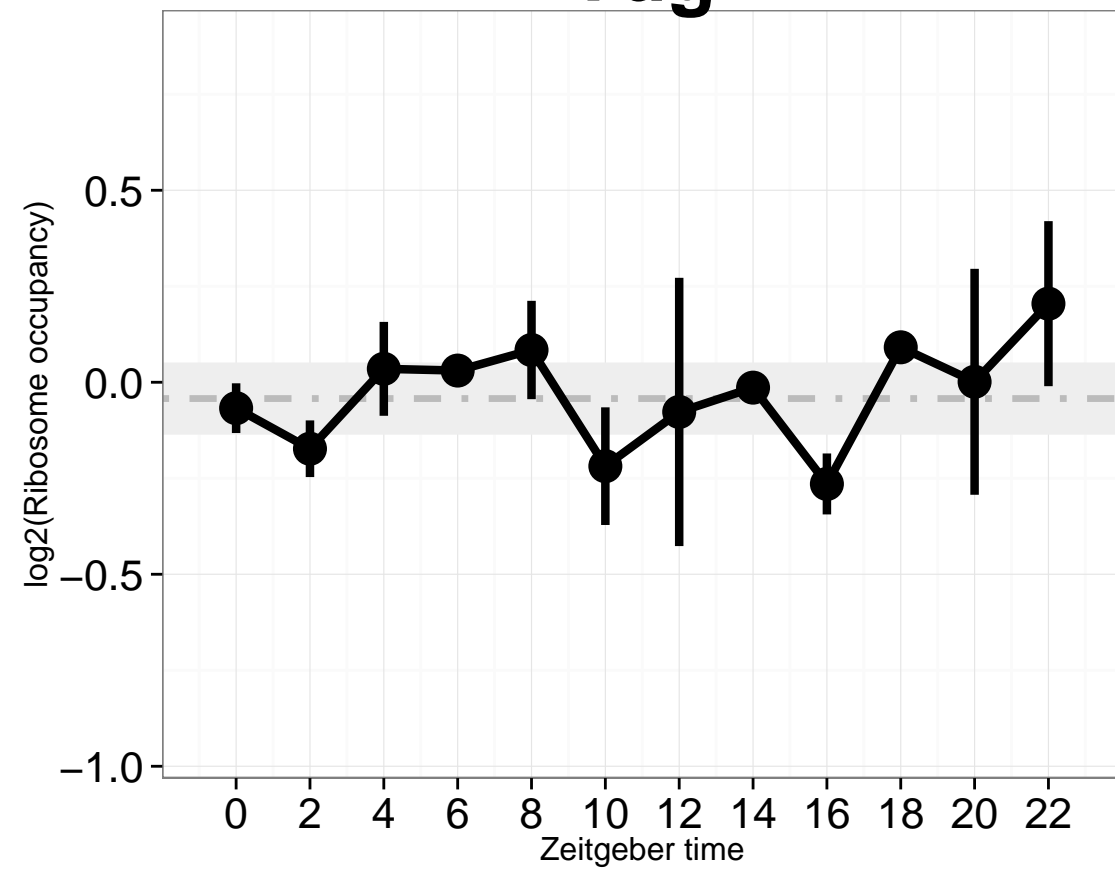

Supplement: Supplementary file 10608 [file 1]

## Slc25a22



## Slc25a22

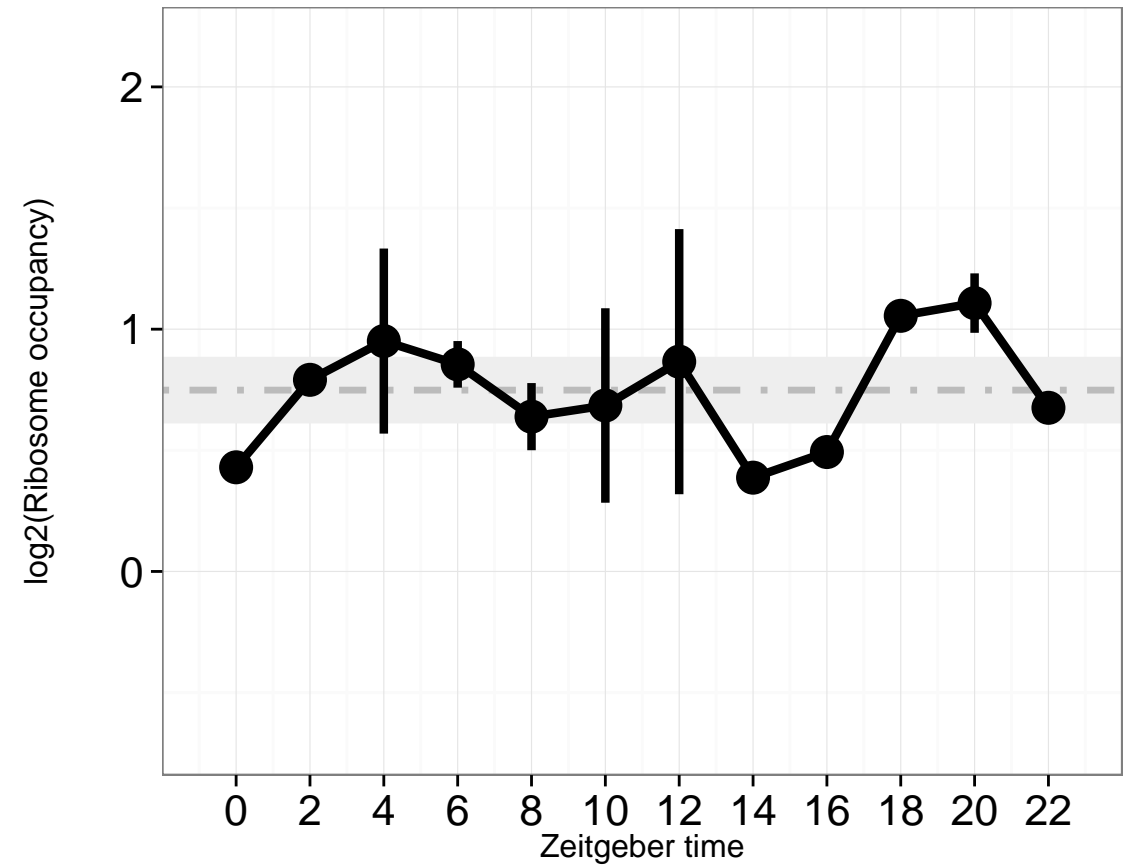

Supplement: Supplementary file 10609 [file 1]

## Emc6

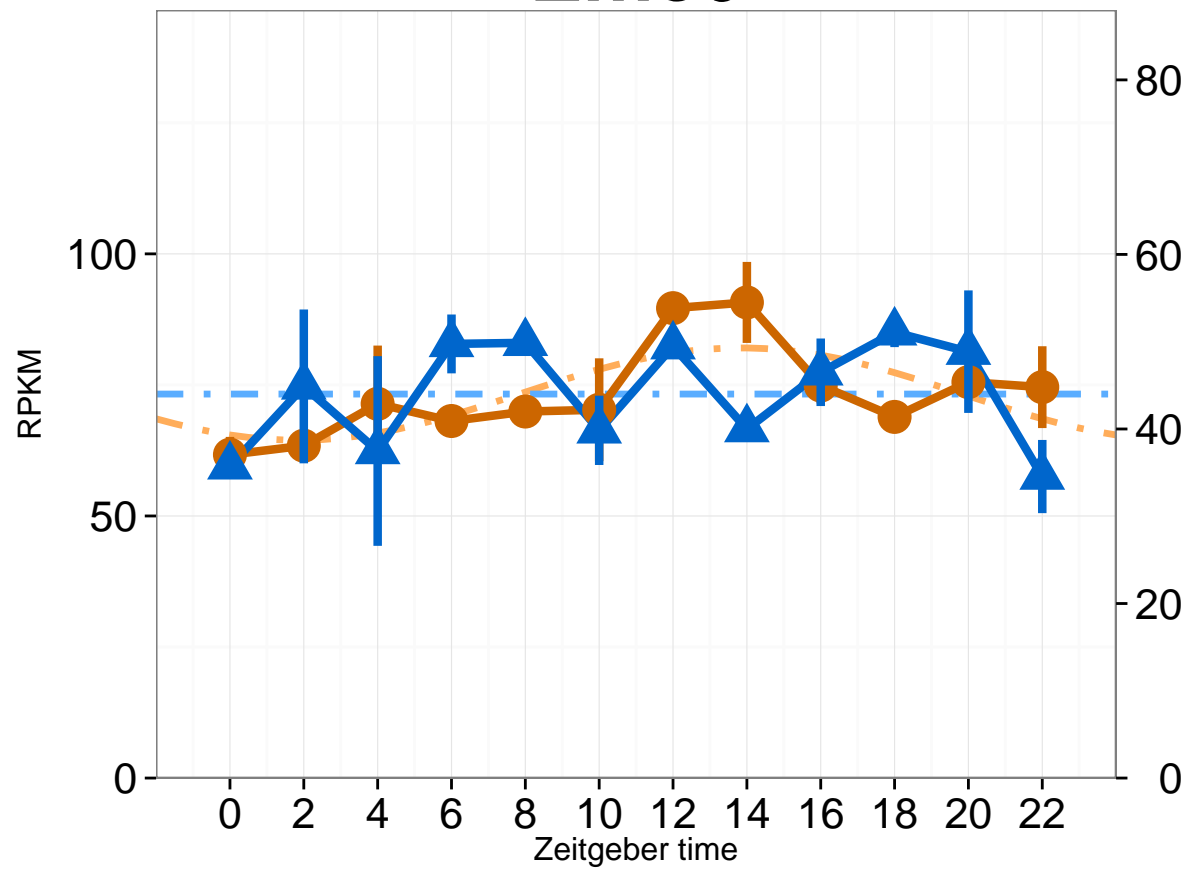

## Emc6

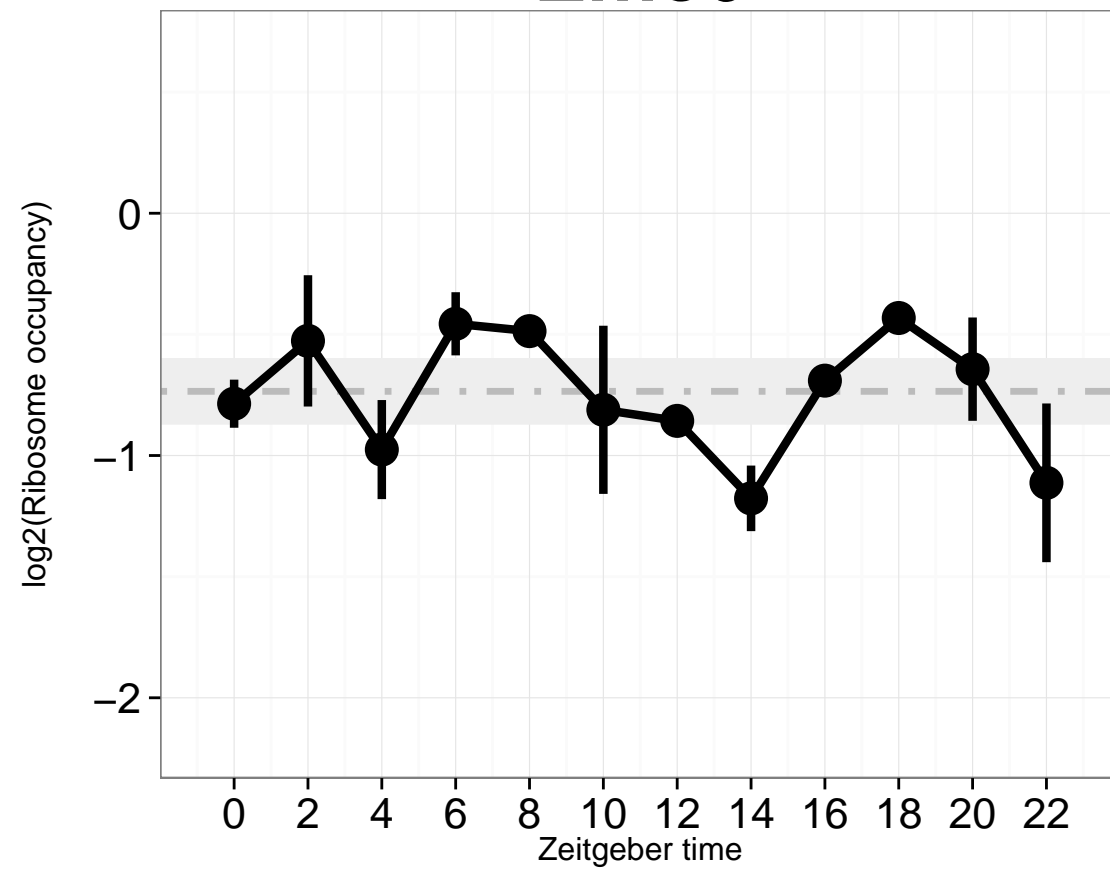

Supplement: Supplementary file 10610 [file 1]

## Focad

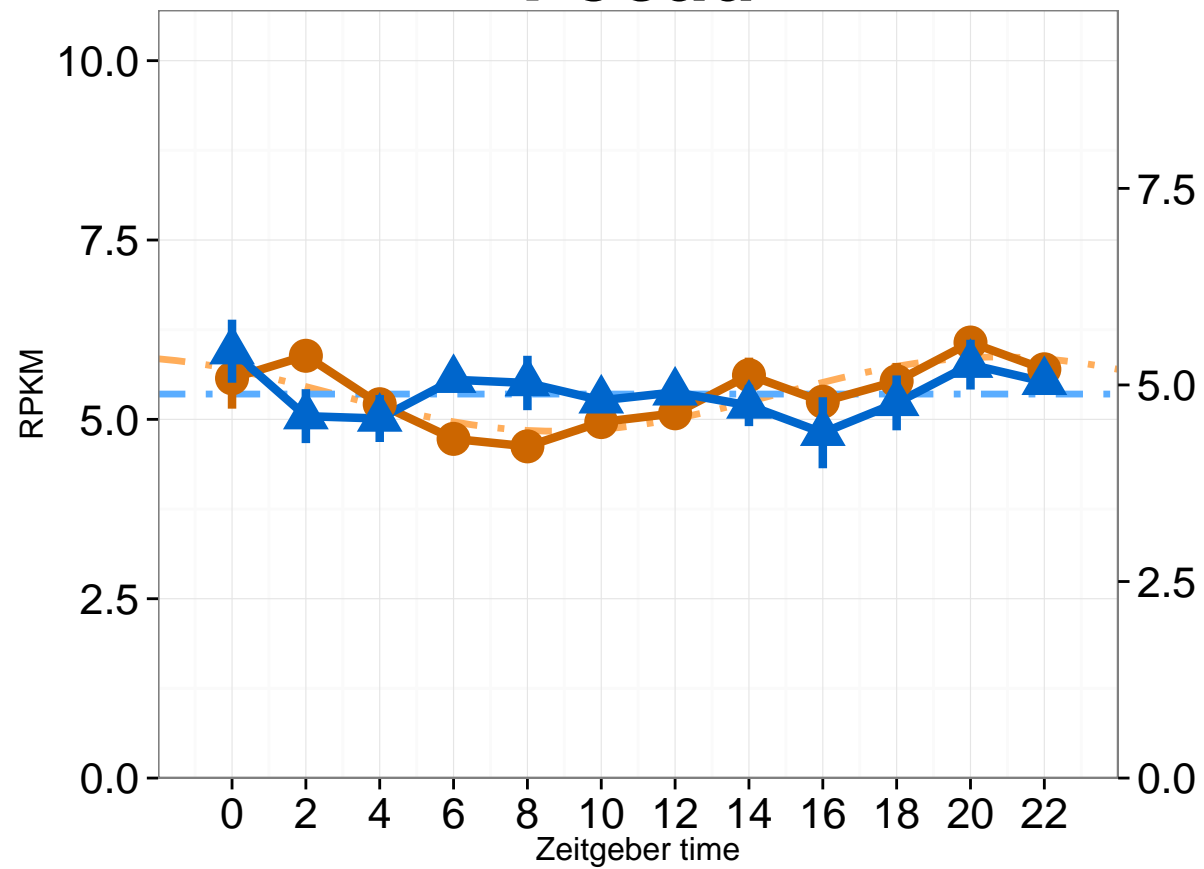

## Focad

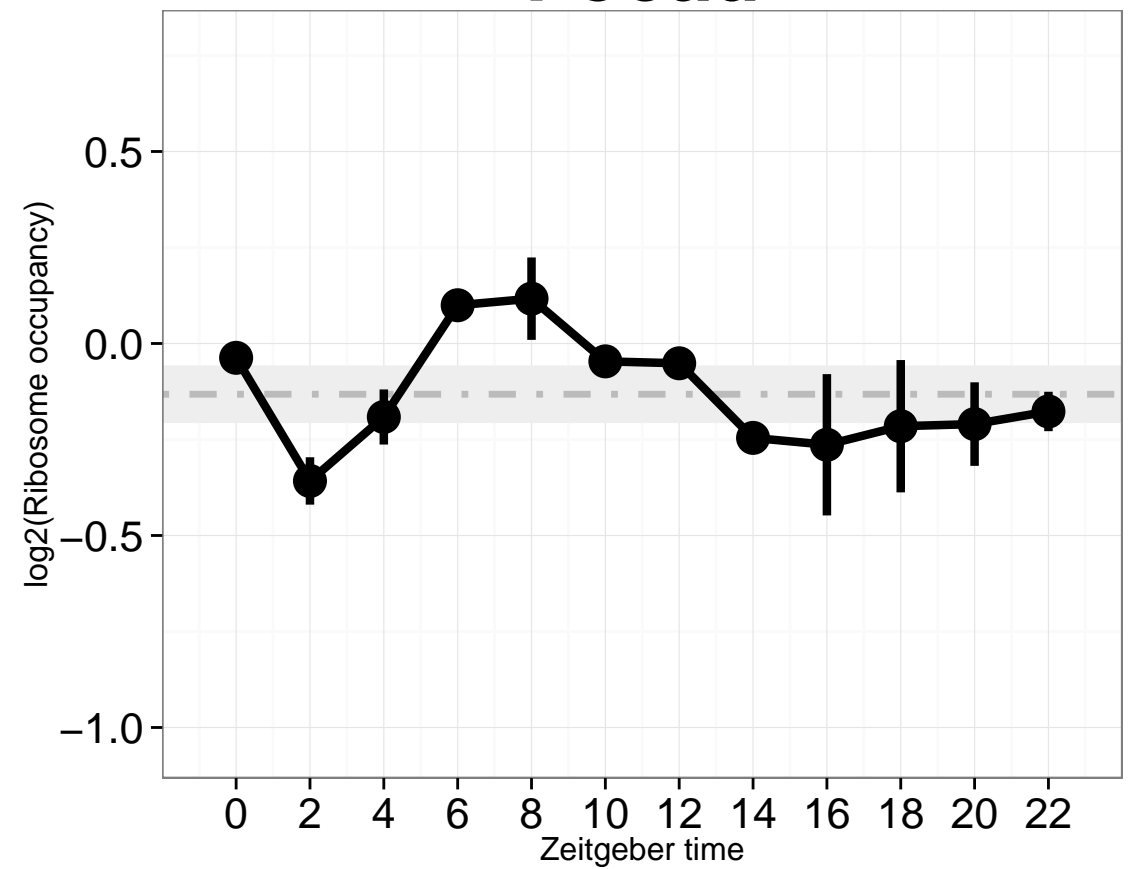

Supplement: Supplementary file 10611 [file 1]

# B3gnt1

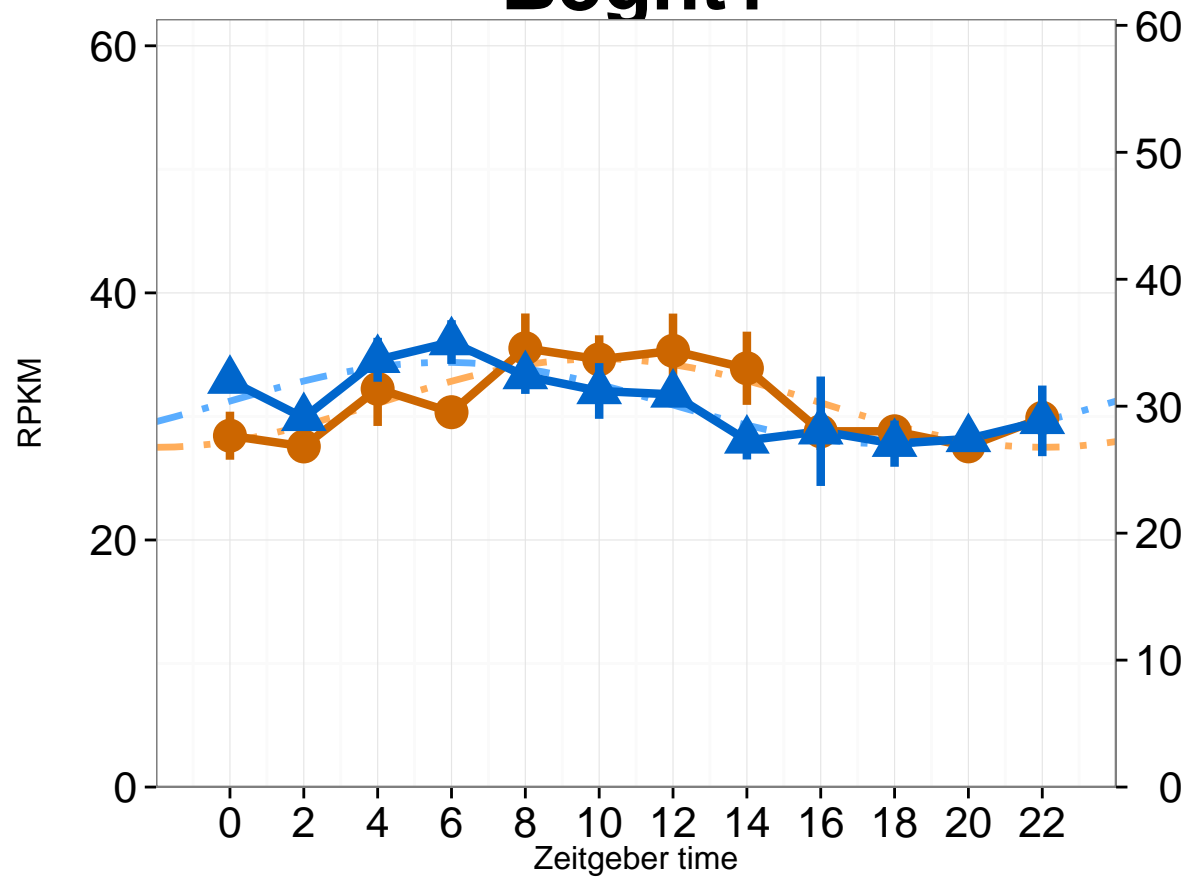

# B3gnt1

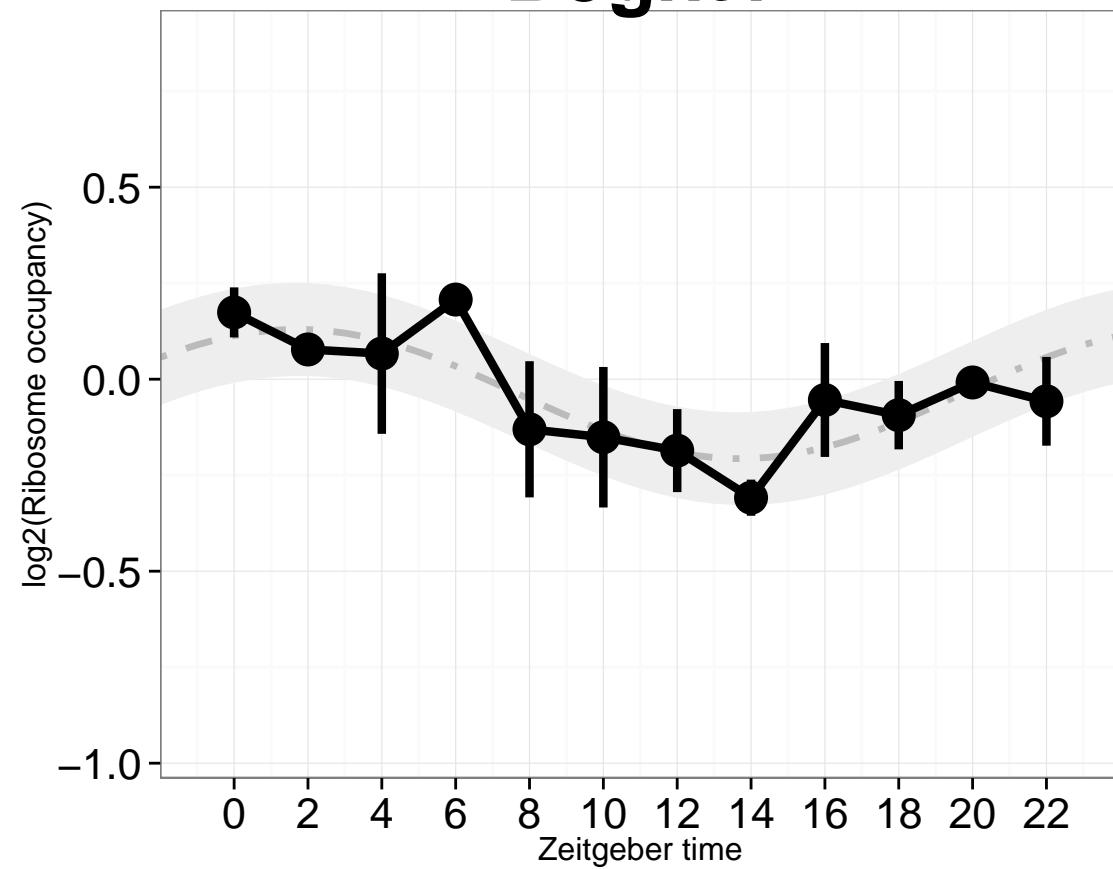

Supplement: Supplementary file 10612 [file 1]

# Aig1

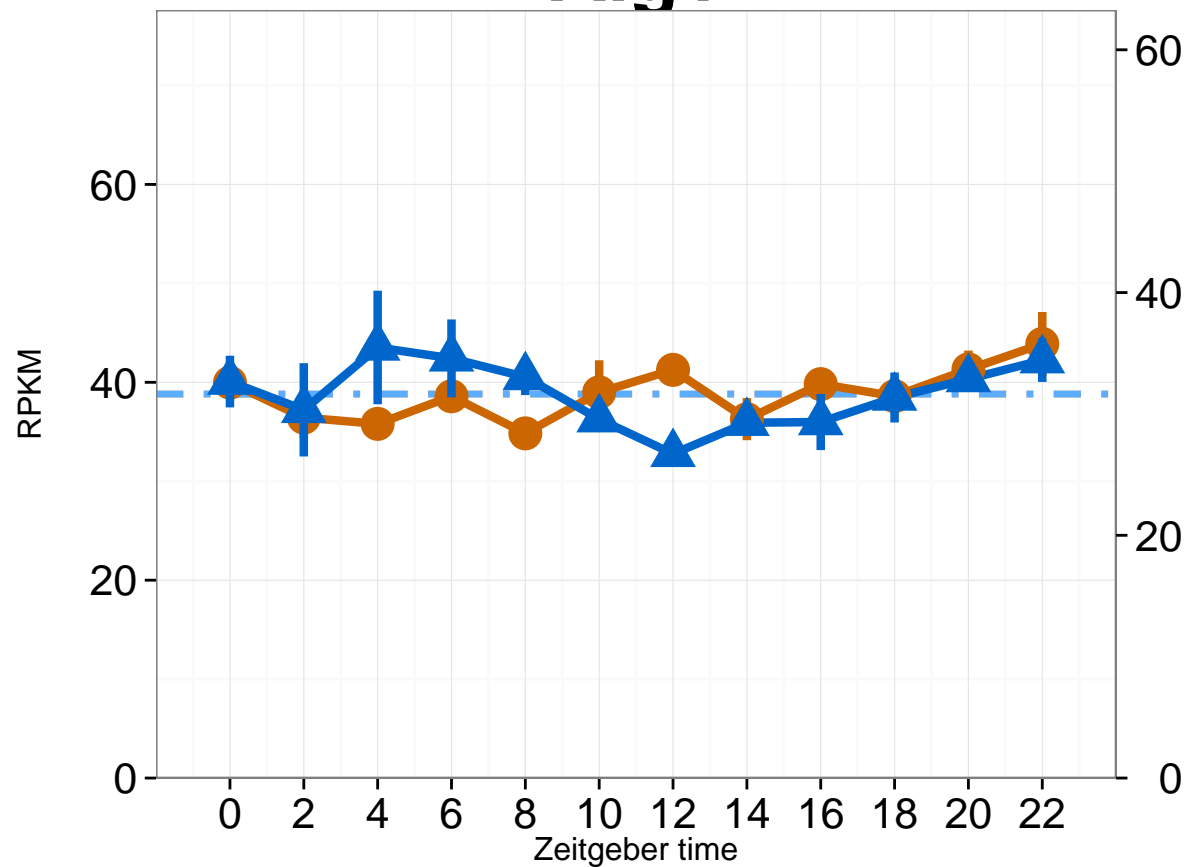

# Aig1

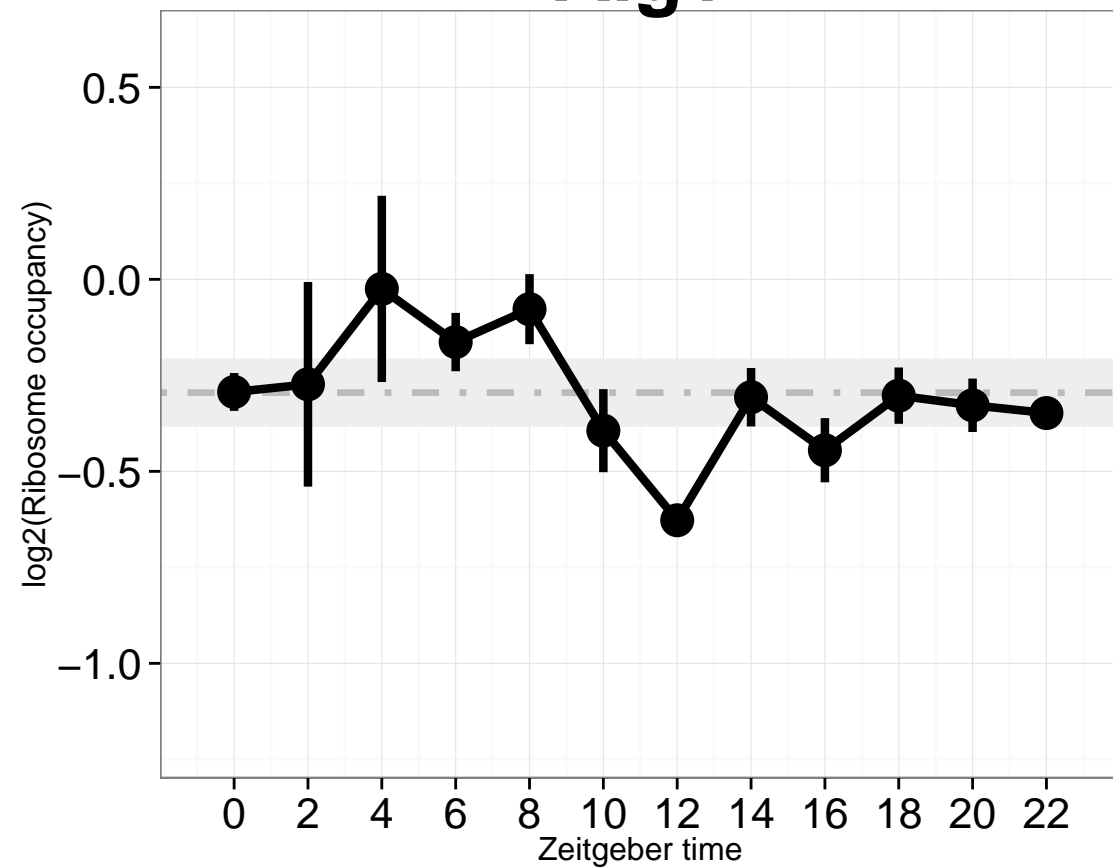

Supplement: Supplementary file 10613 [file 1]

# Trim30d

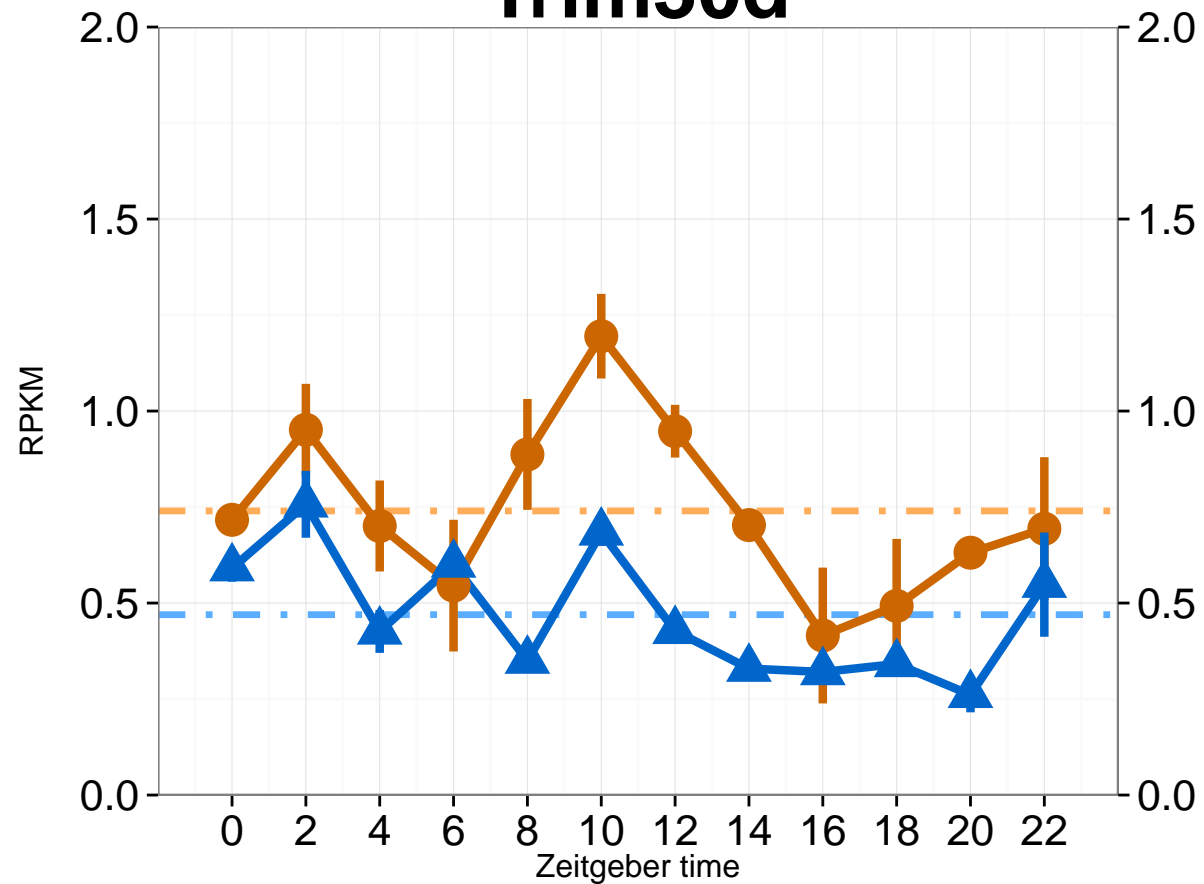

# Trim30d

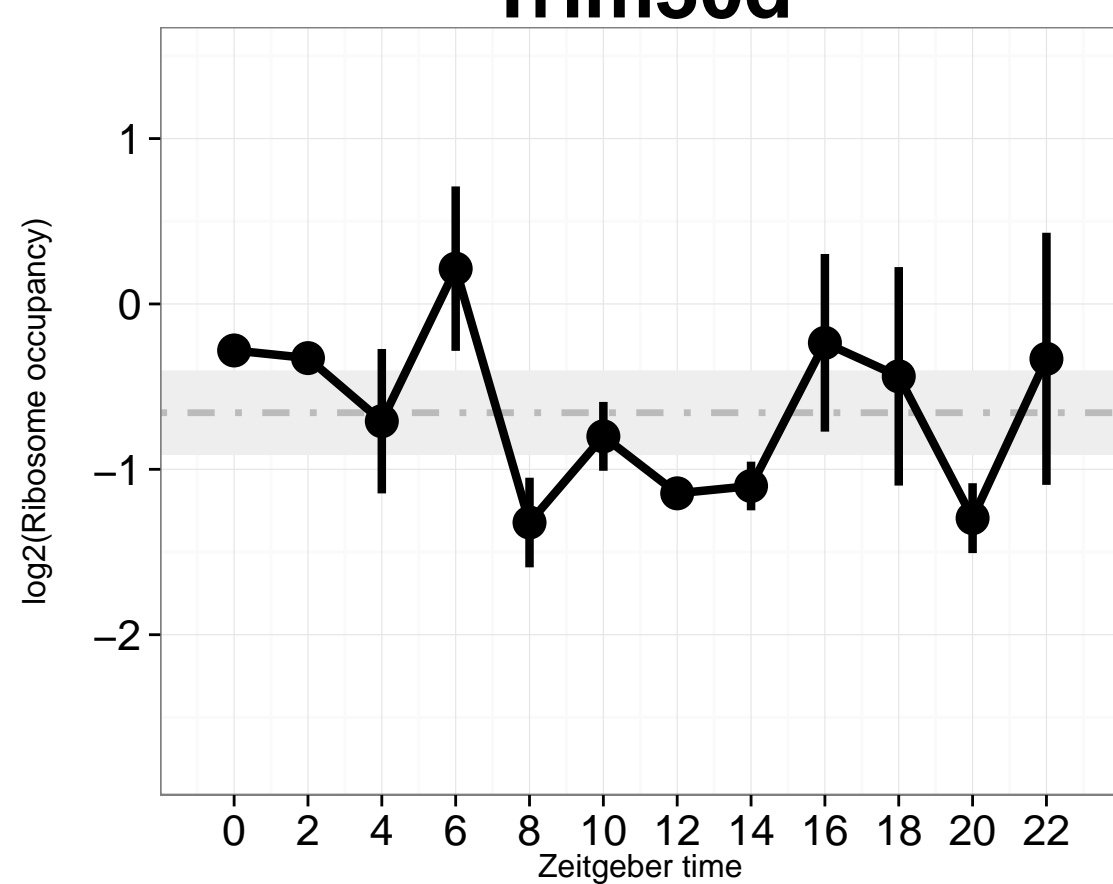

Supplement: Supplementary file 10614 [file 1]

# Arhgef16

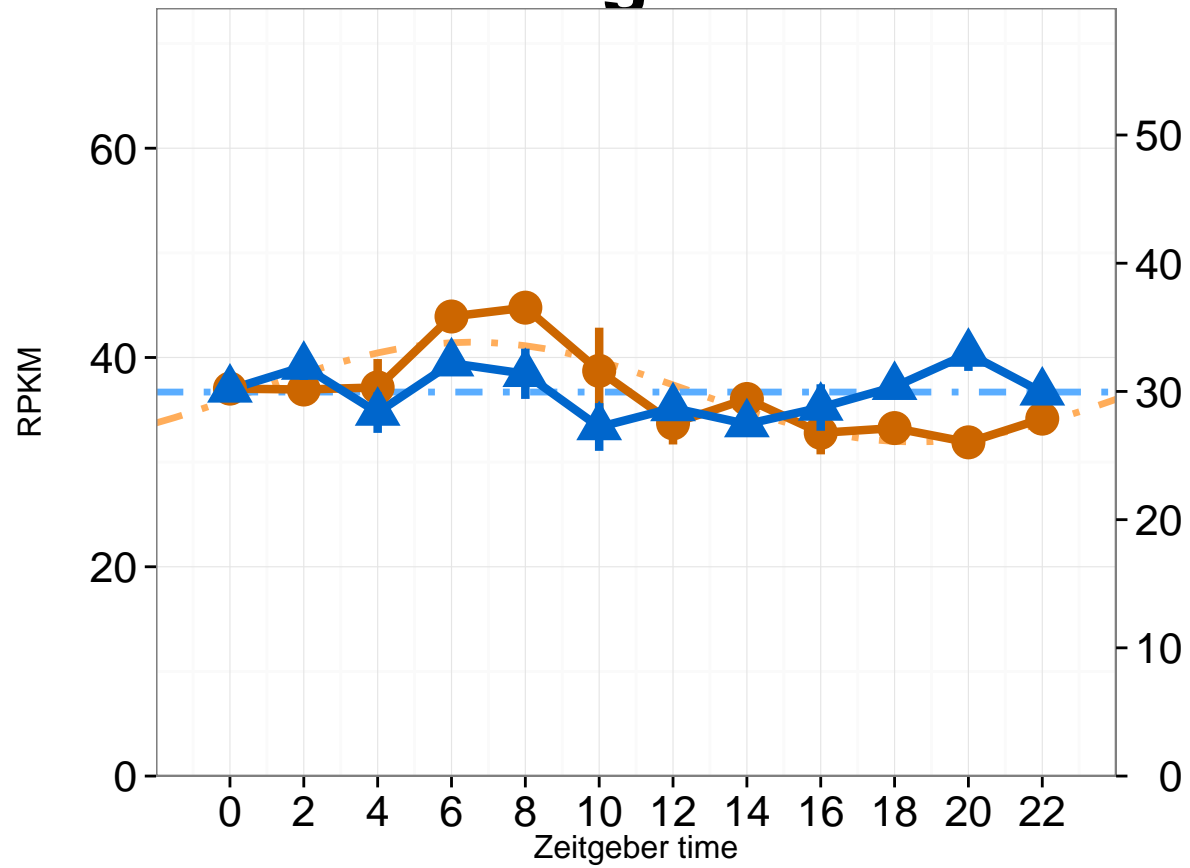

# Arhgef16

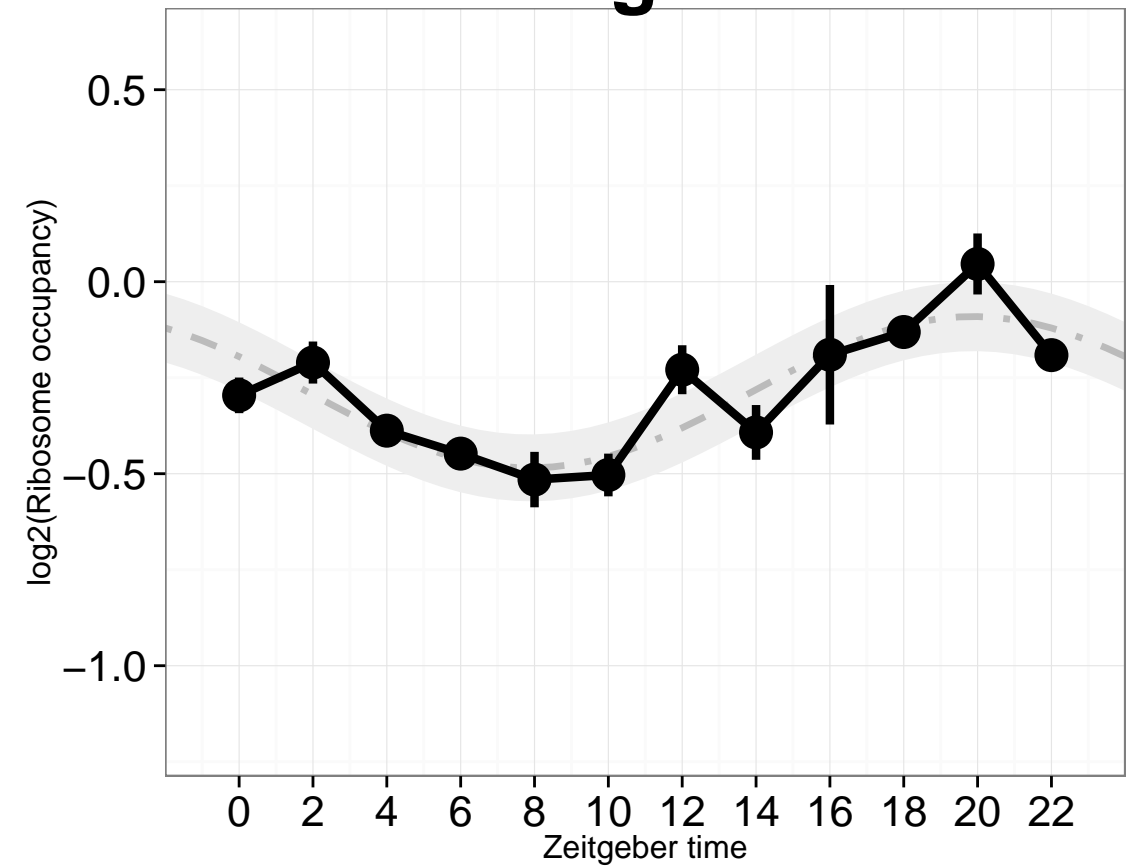

Supplement: Supplementary file 10615 [file 1]

# Lurap1

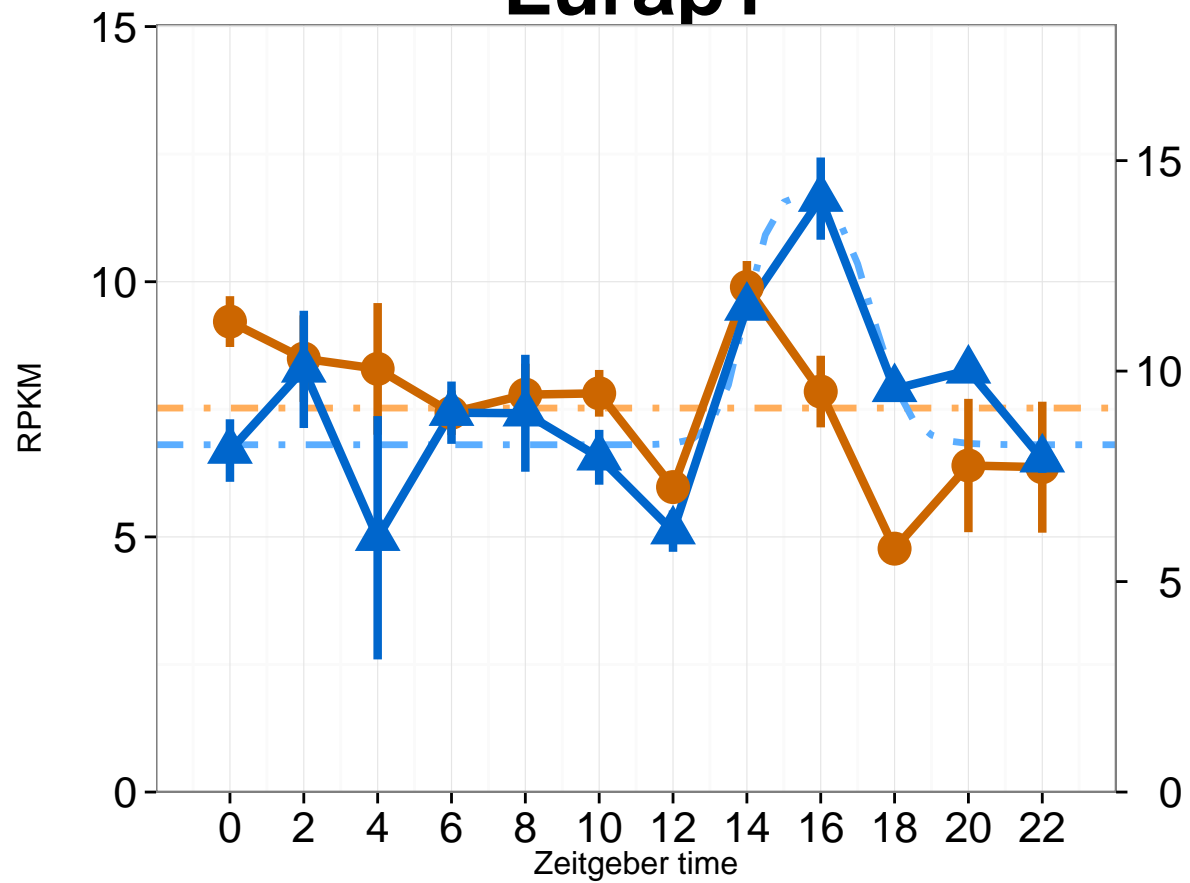

# Lurap1

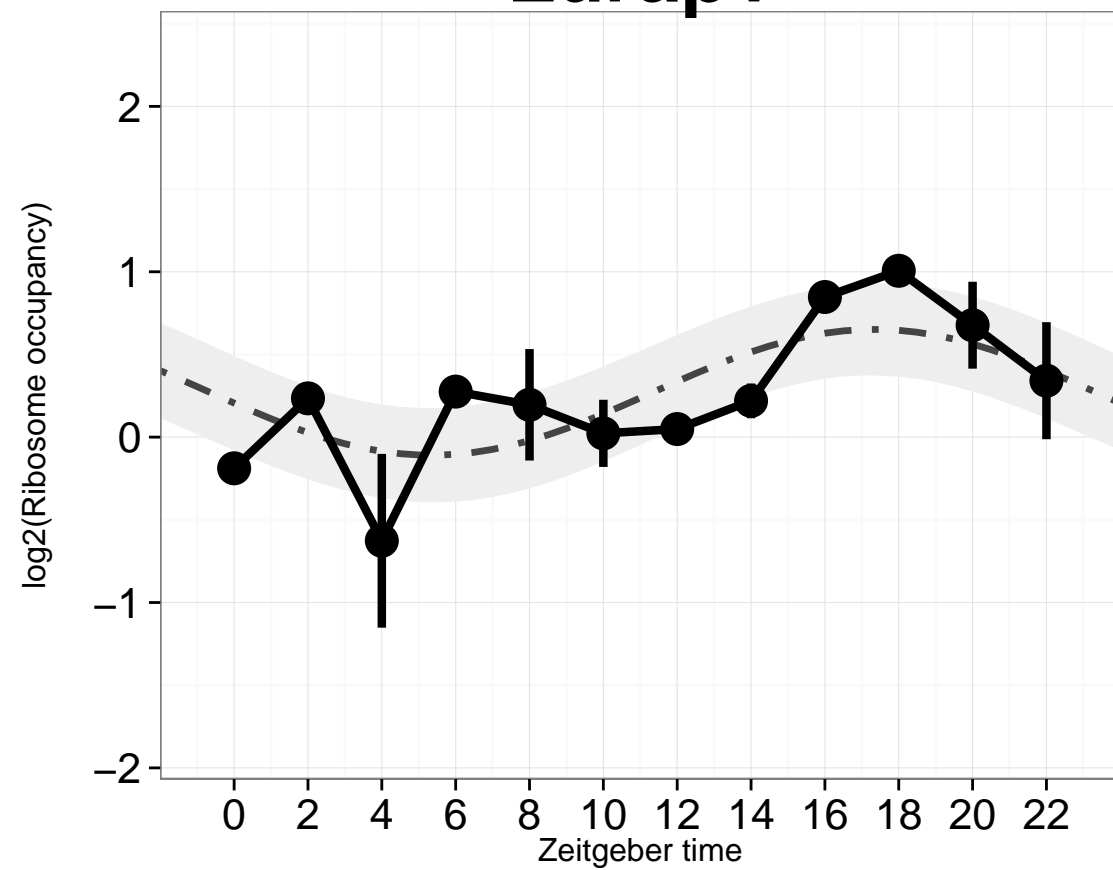

Supplement: Supplementary file 10616 [file 1]

# Psm6

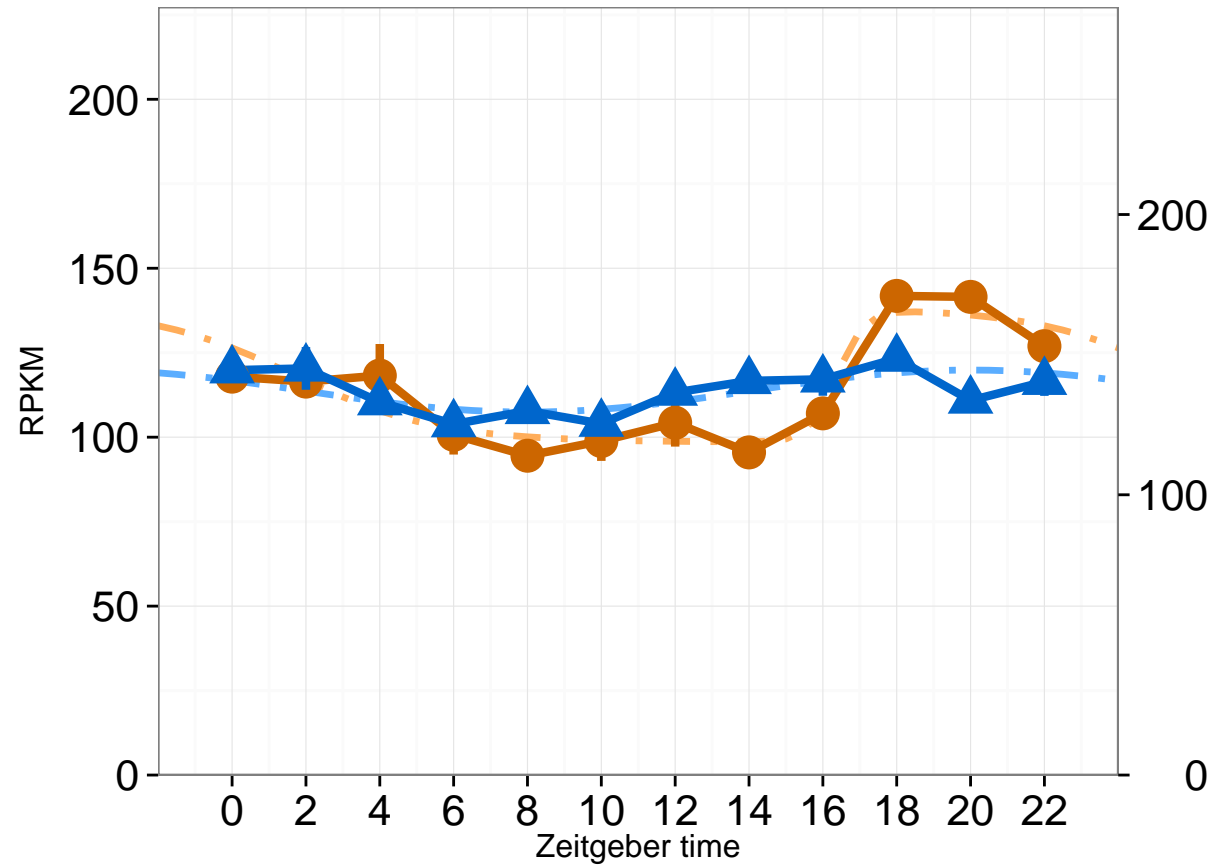

# Psm6

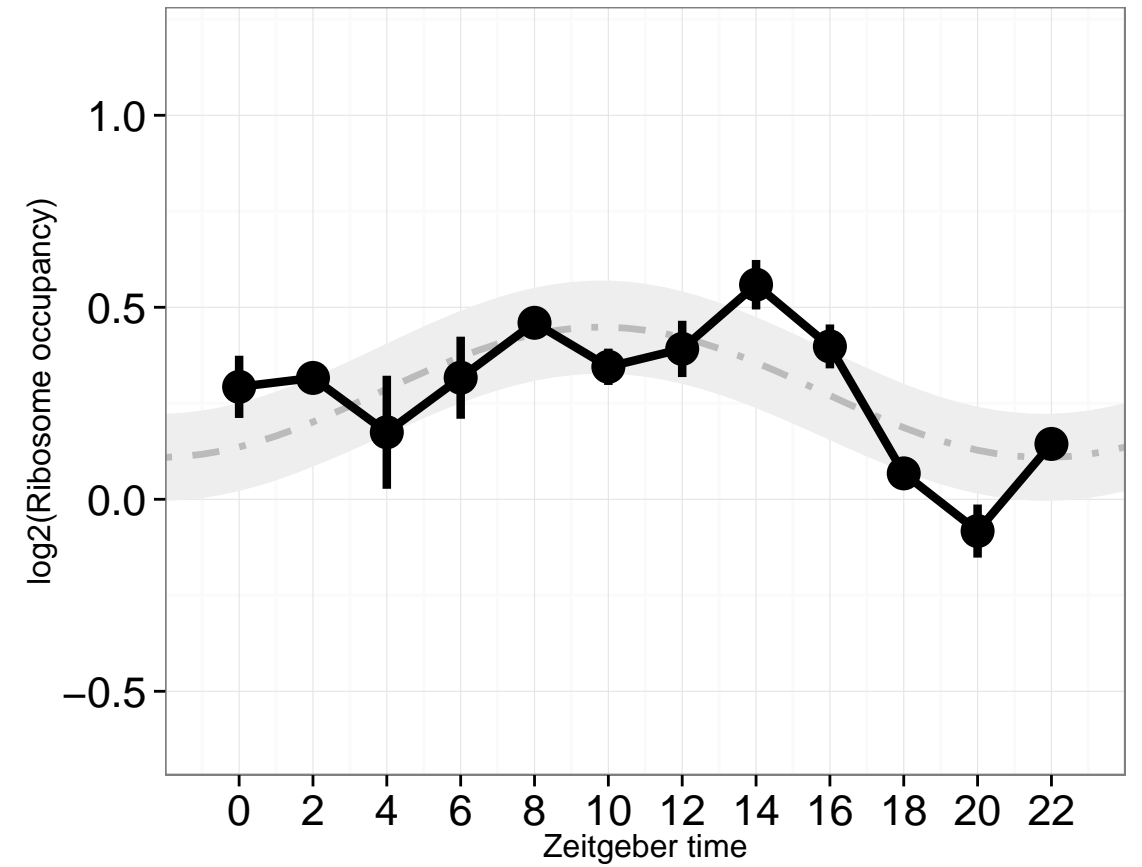

Supplement: Supplementary file 10618 [file 1]

## Fech

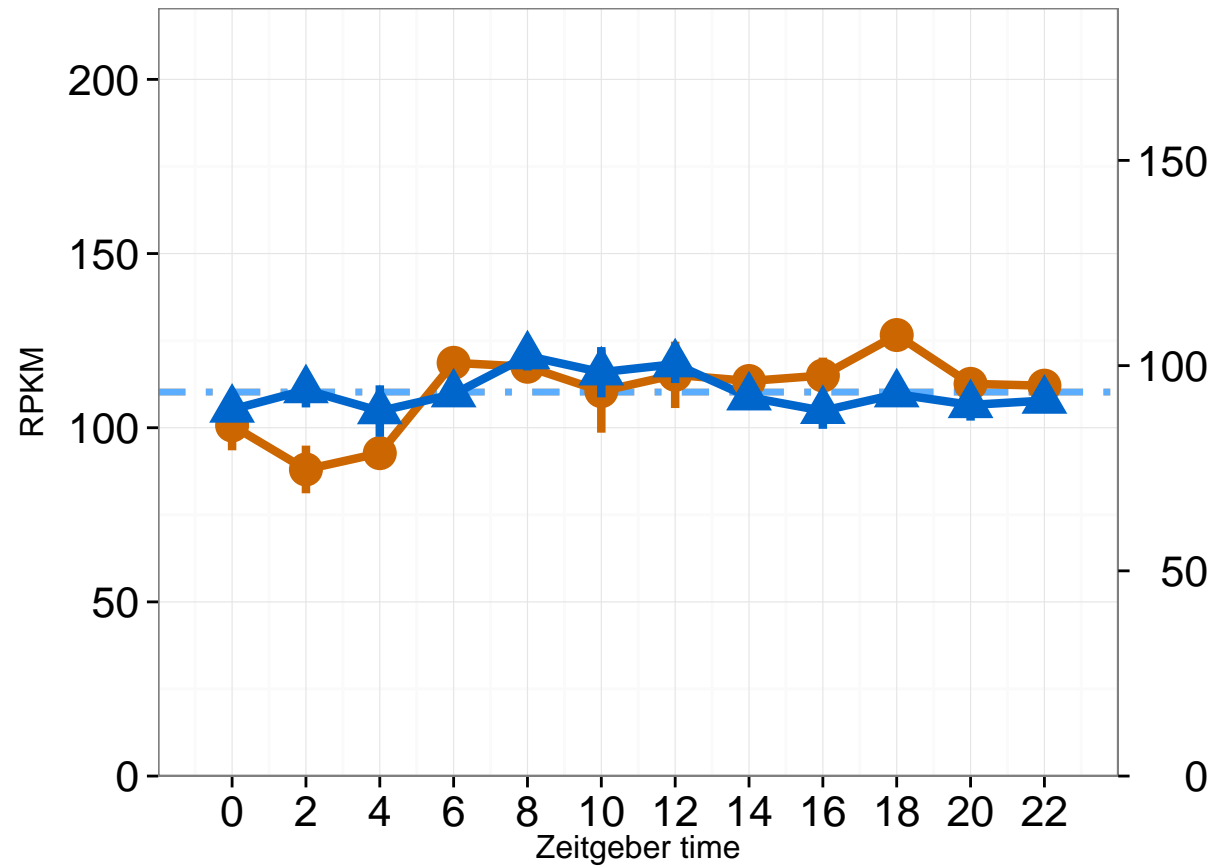

## Fech

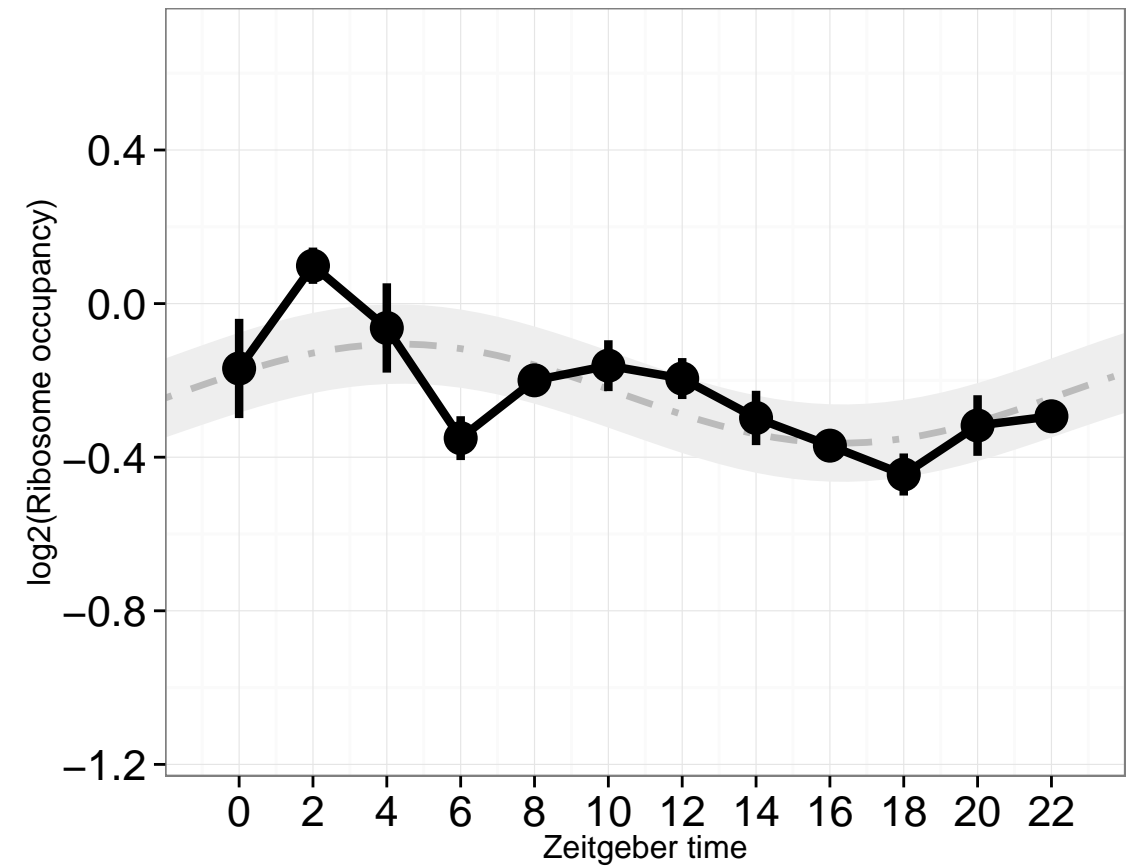

Supplement: Supplementary file 10619 [file 1]

# Gm4477

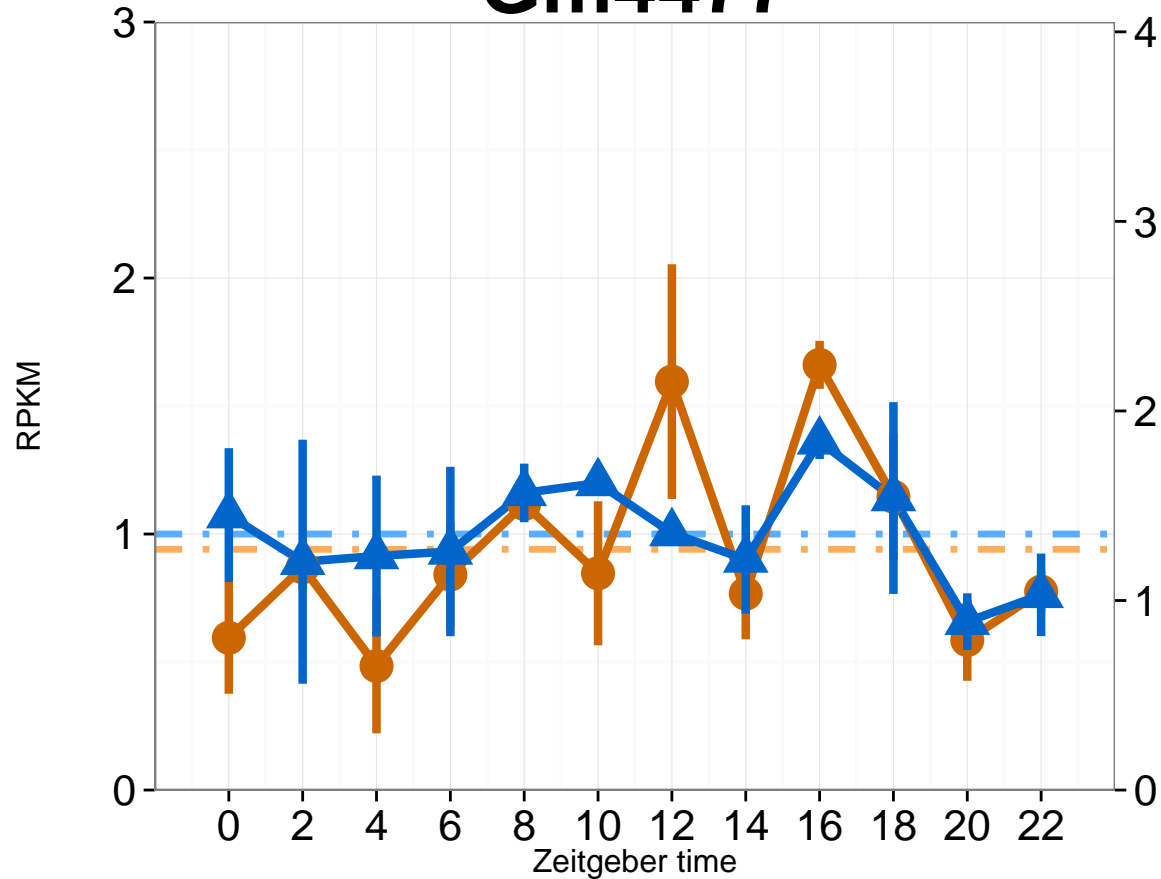

# Gm4477

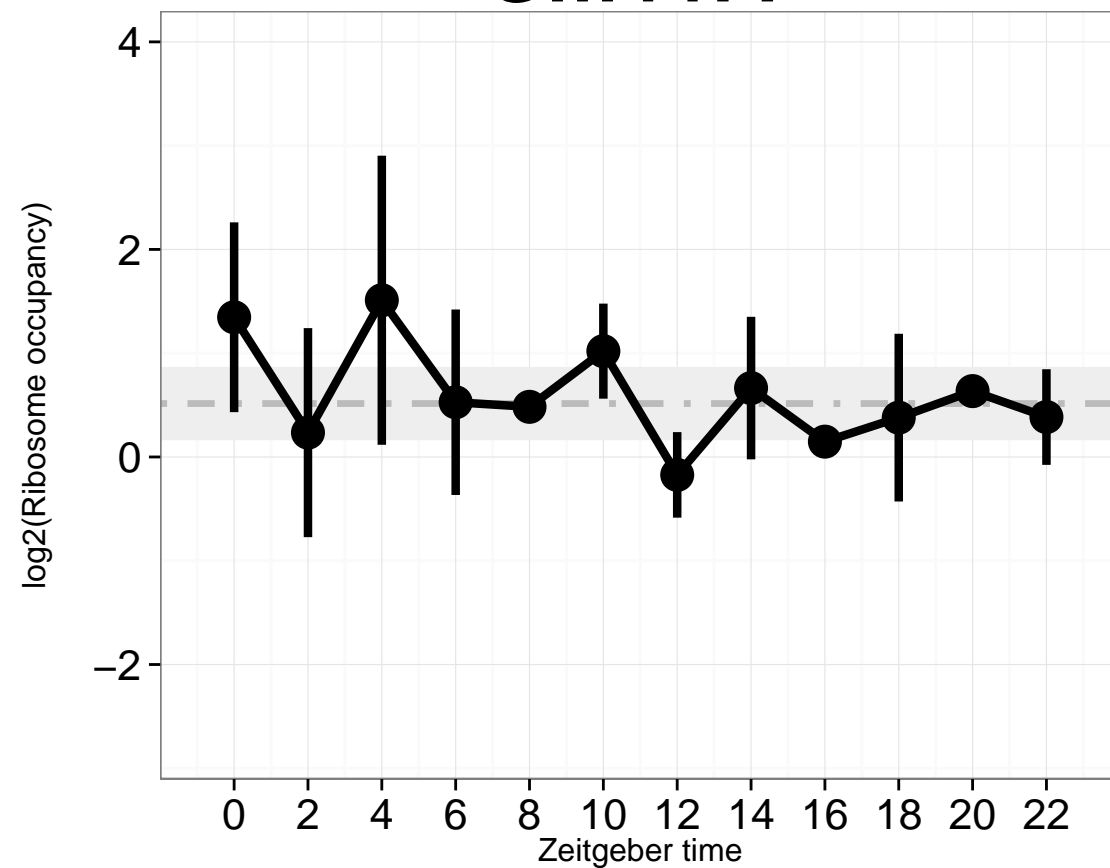

Supplement: Supplementary file 10620 [file 1]

## Fam13a

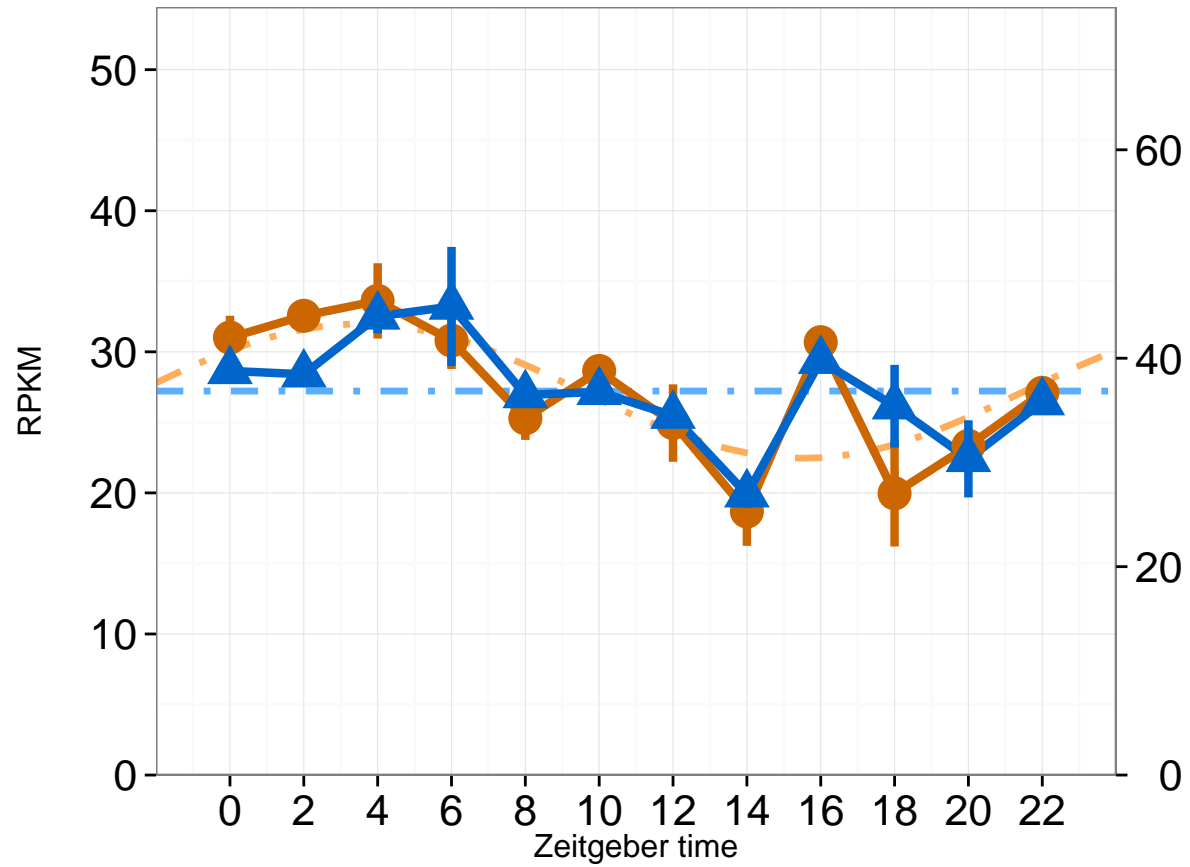

## Fam13a

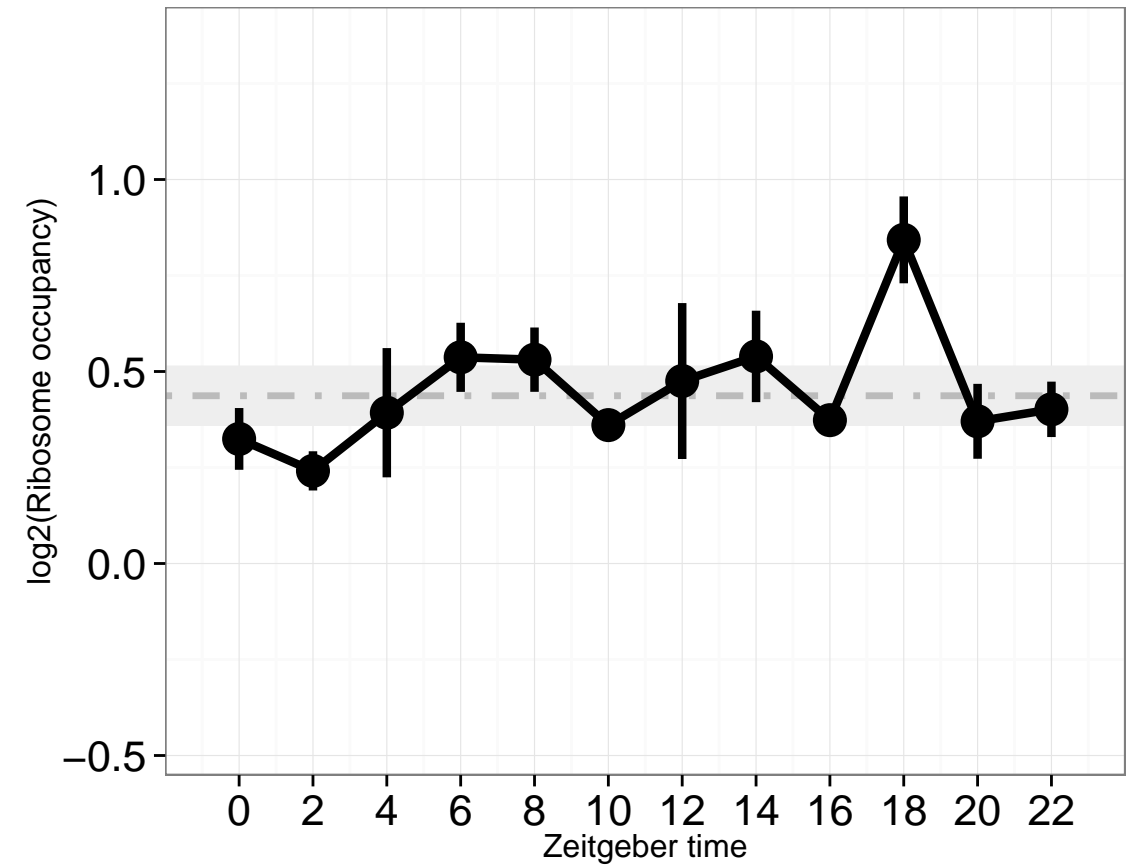

Supplement: Supplementary file 10621 [file 1]

## Rnaseh2b

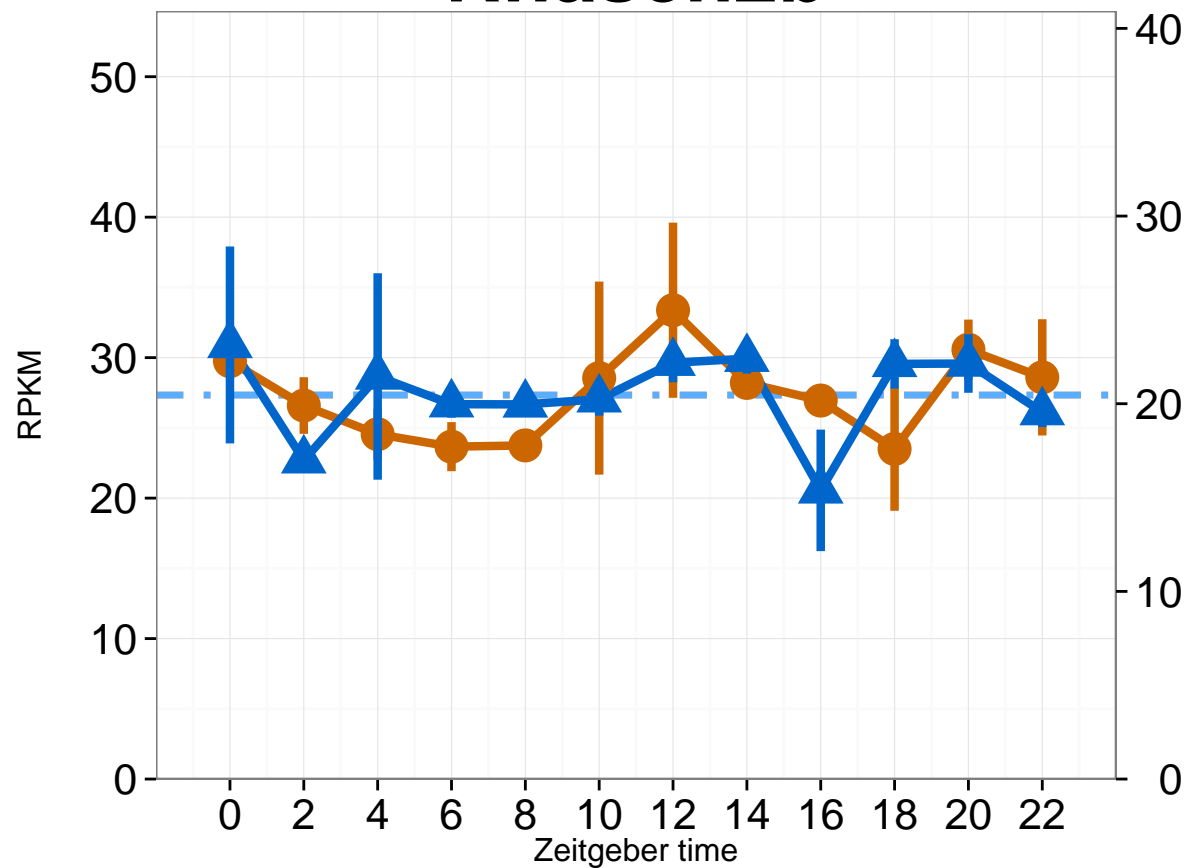

## Rnaseh2b

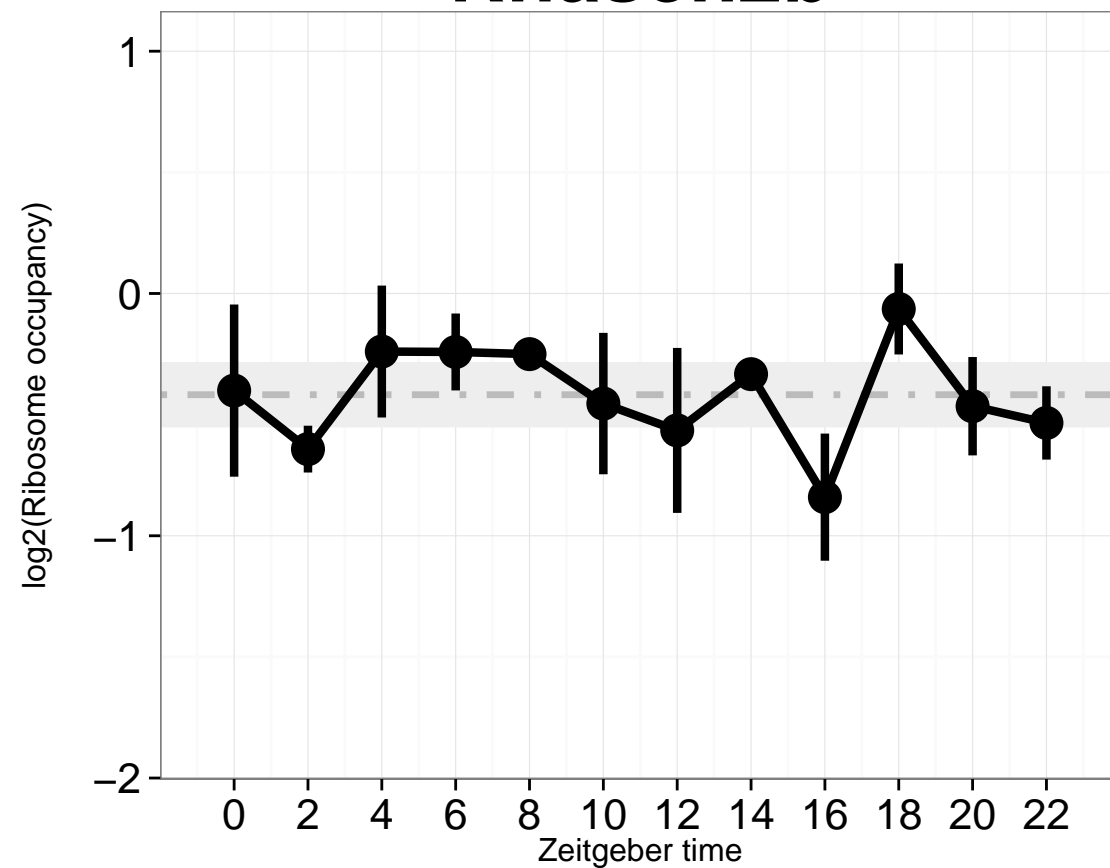

Supplement: Supplementary file 10622 [file 1]

## Seh1l

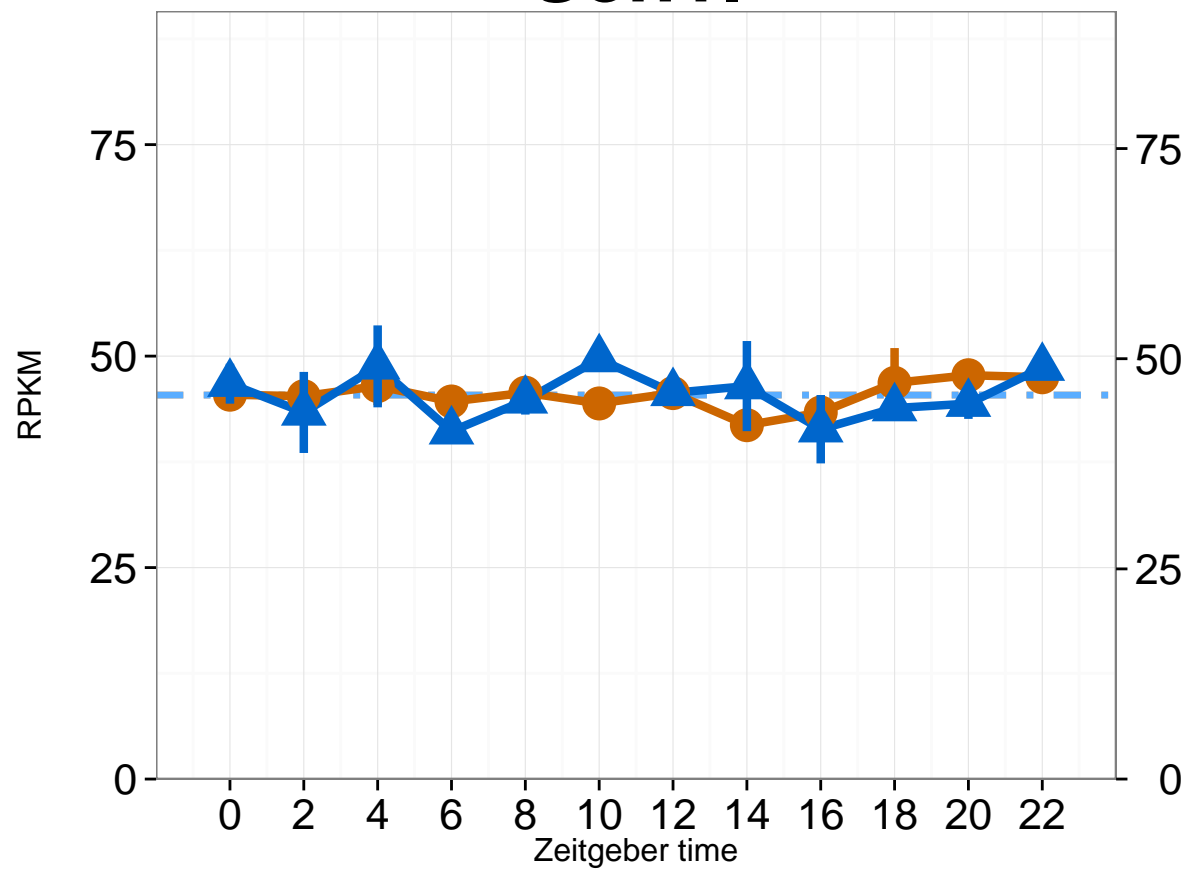

## Seh1l

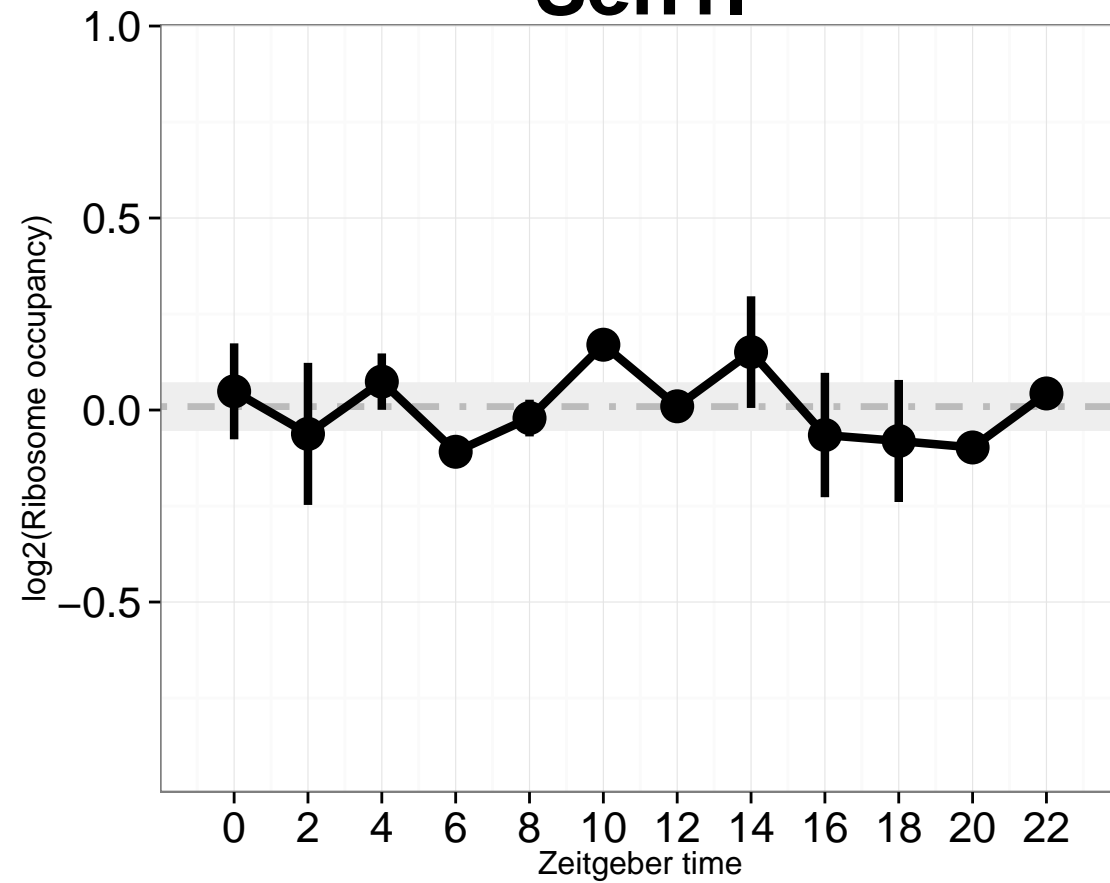

Supplement: Supplementary file 10623 [file 1]

## Ddx59

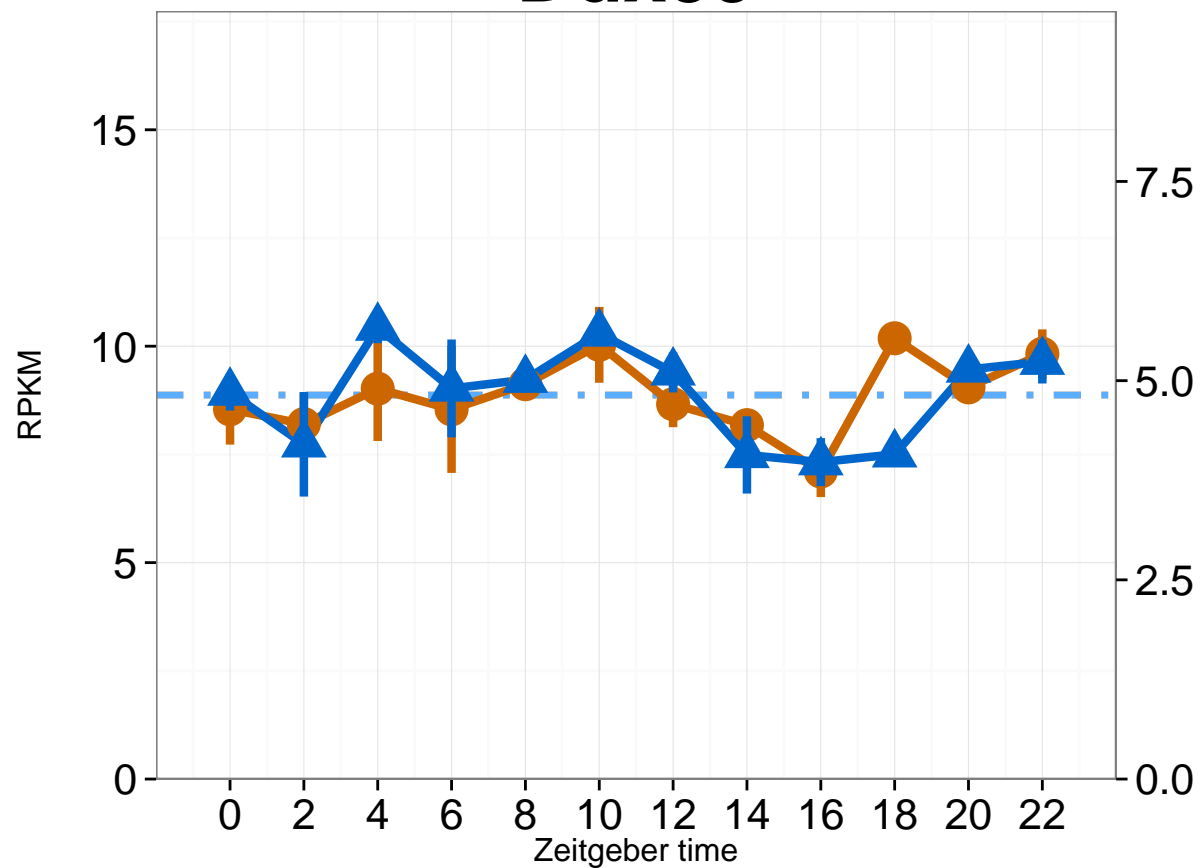

## Ddx59

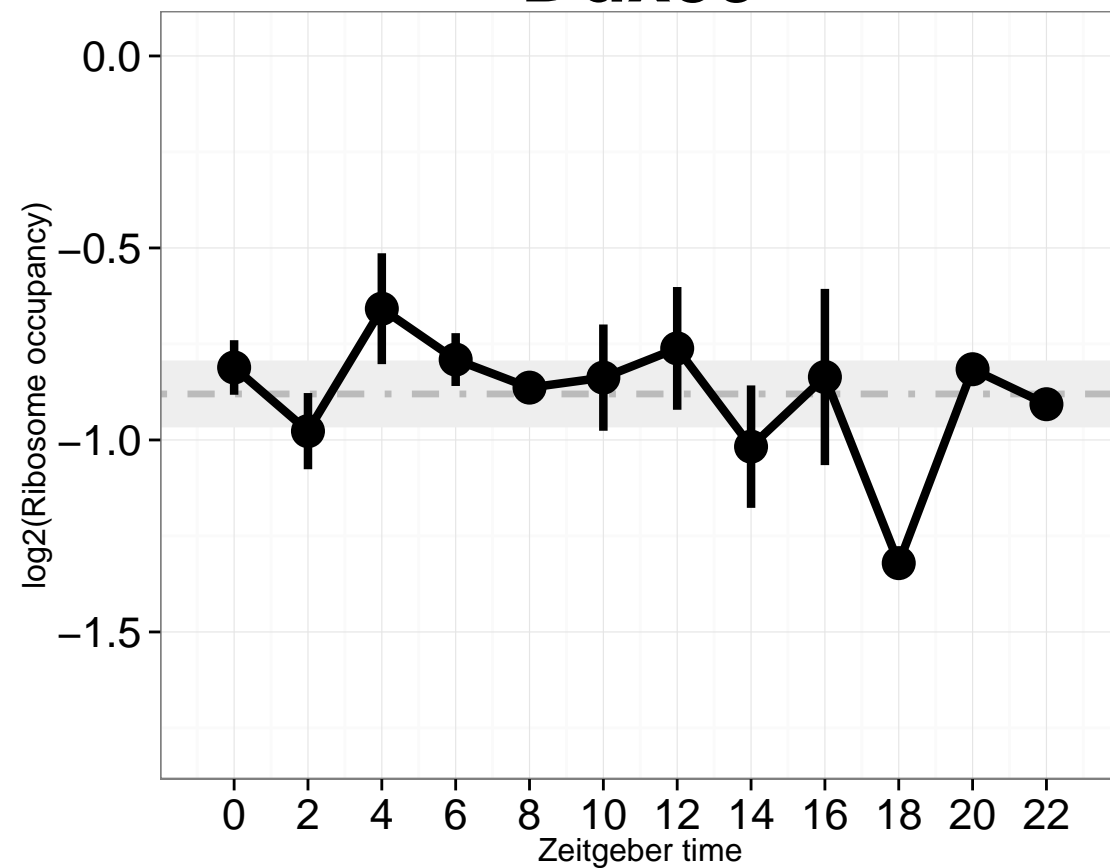

Supplement: Supplementary file 10624 [file 1]

# Tmem163

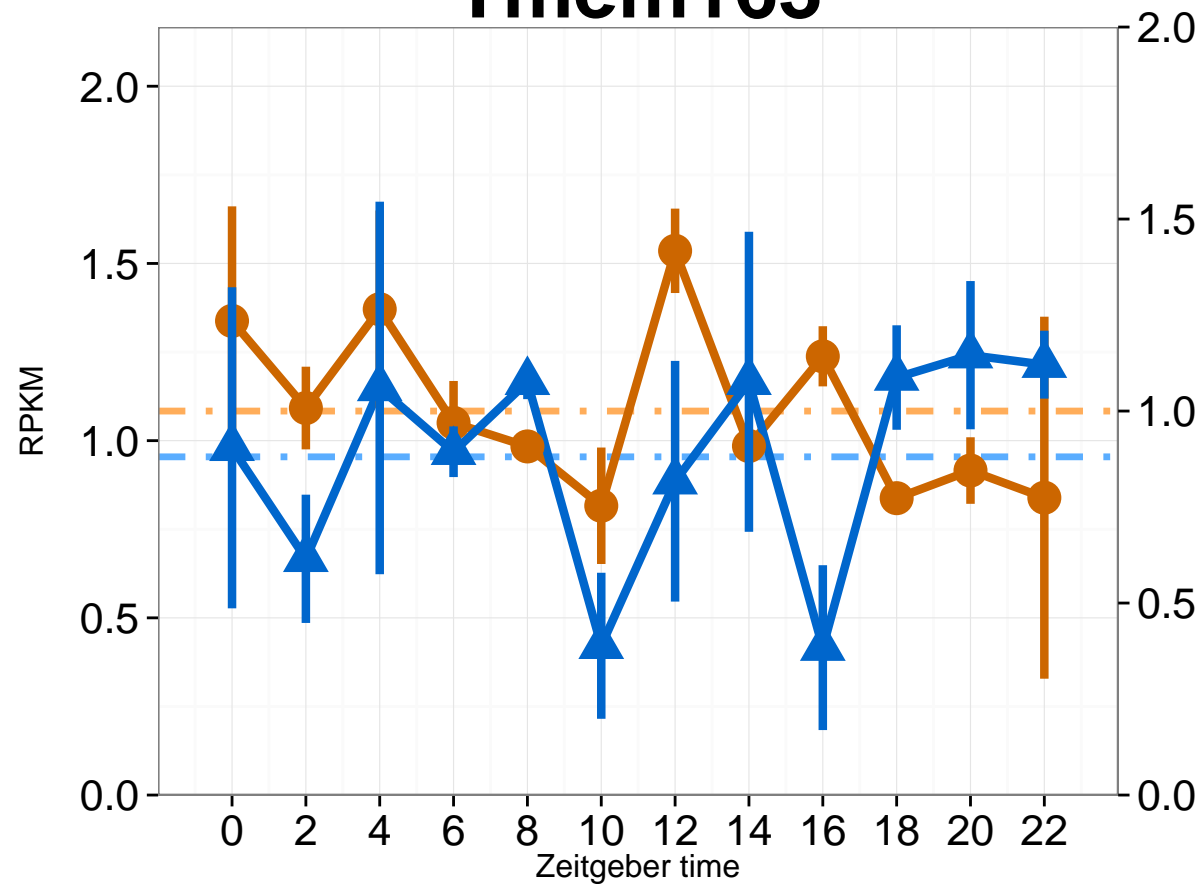

# Tmem163

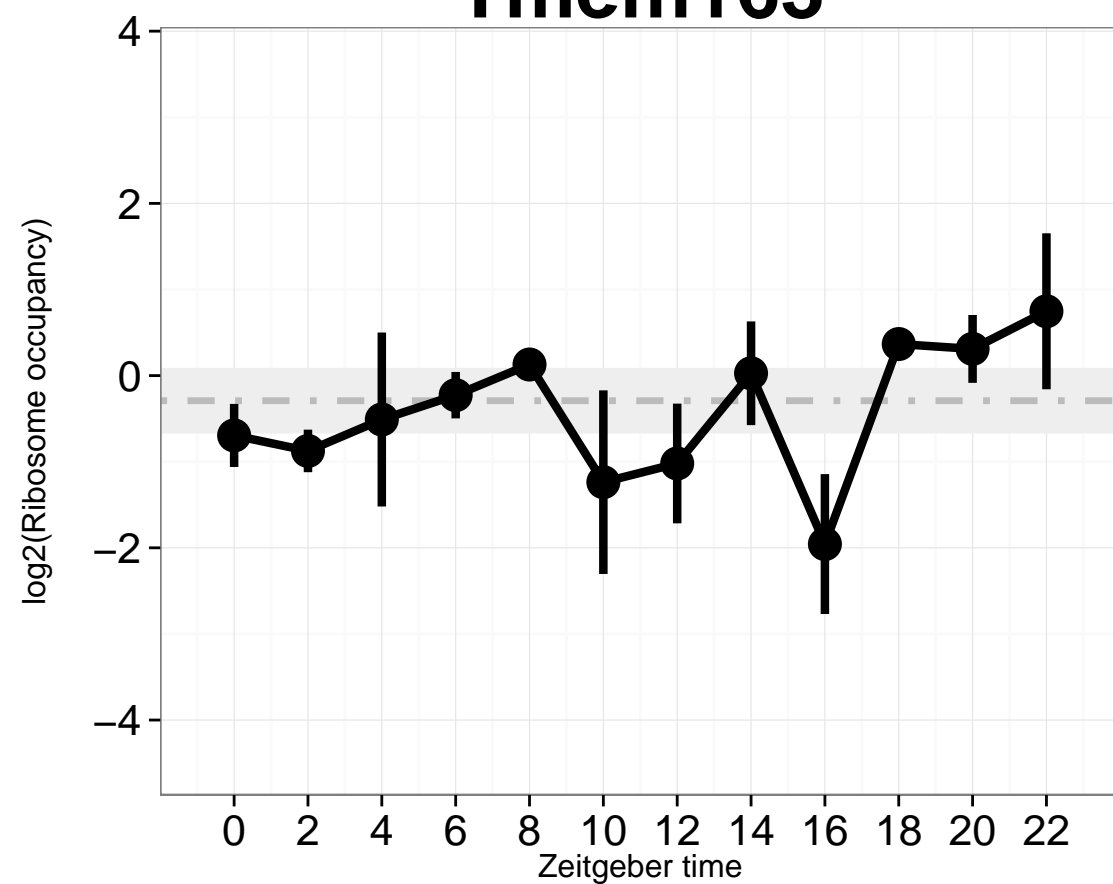

Supplement: Supplementary file 10625 [file 1]

# 1110008J03Rik

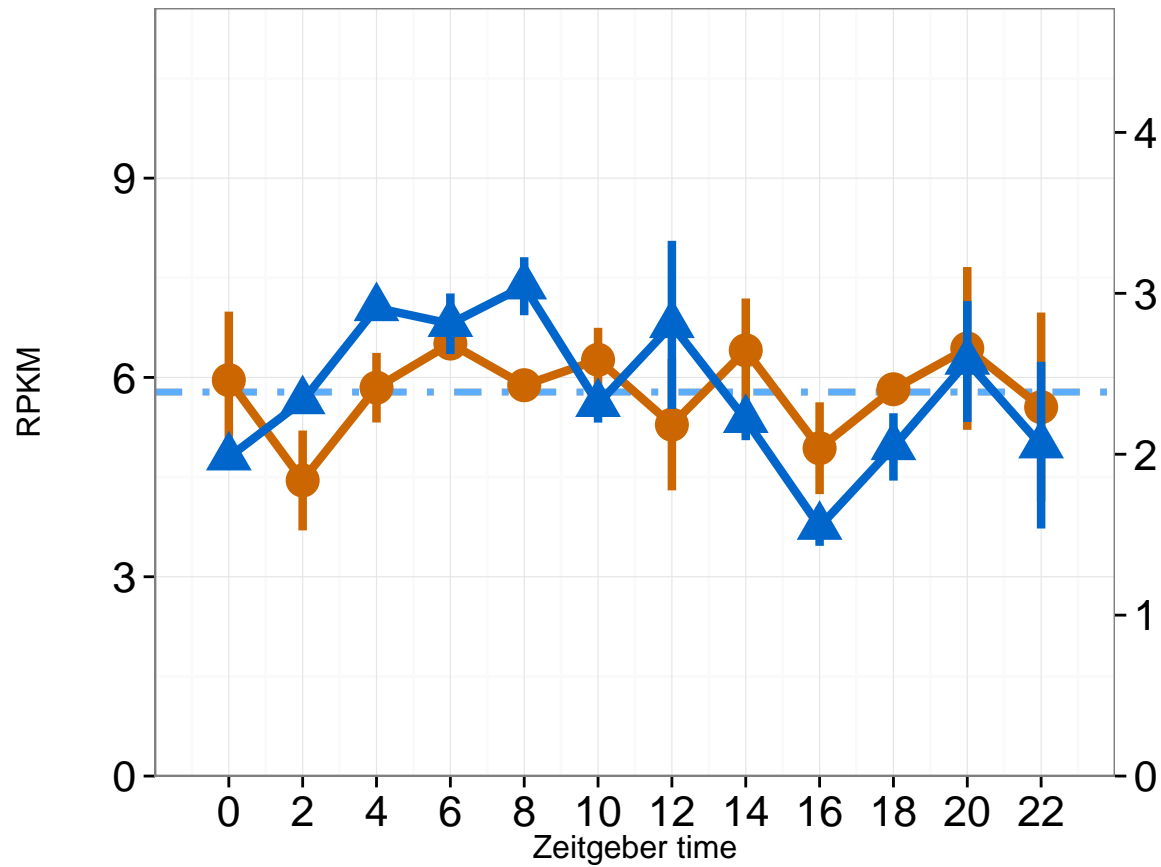

# 1110008J03Rik

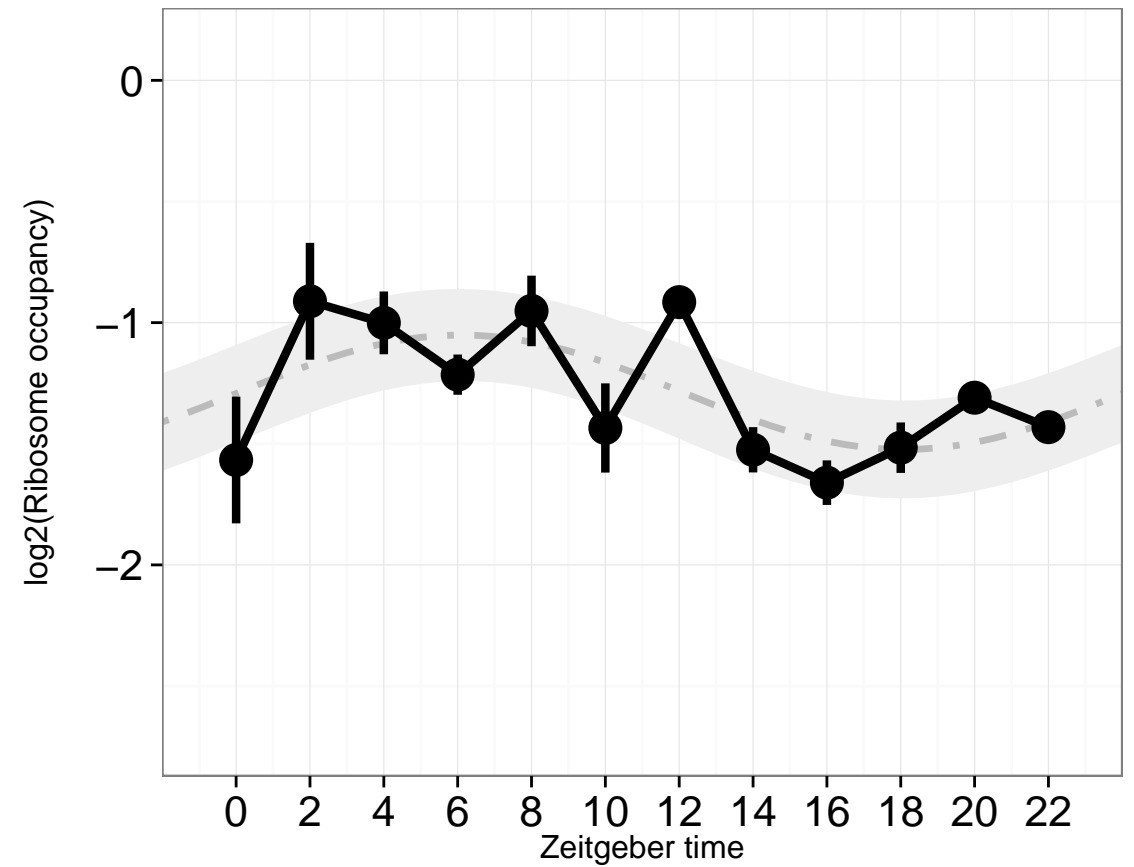

Supplement: Supplementary file 10626 [file 1]

## Mettl17

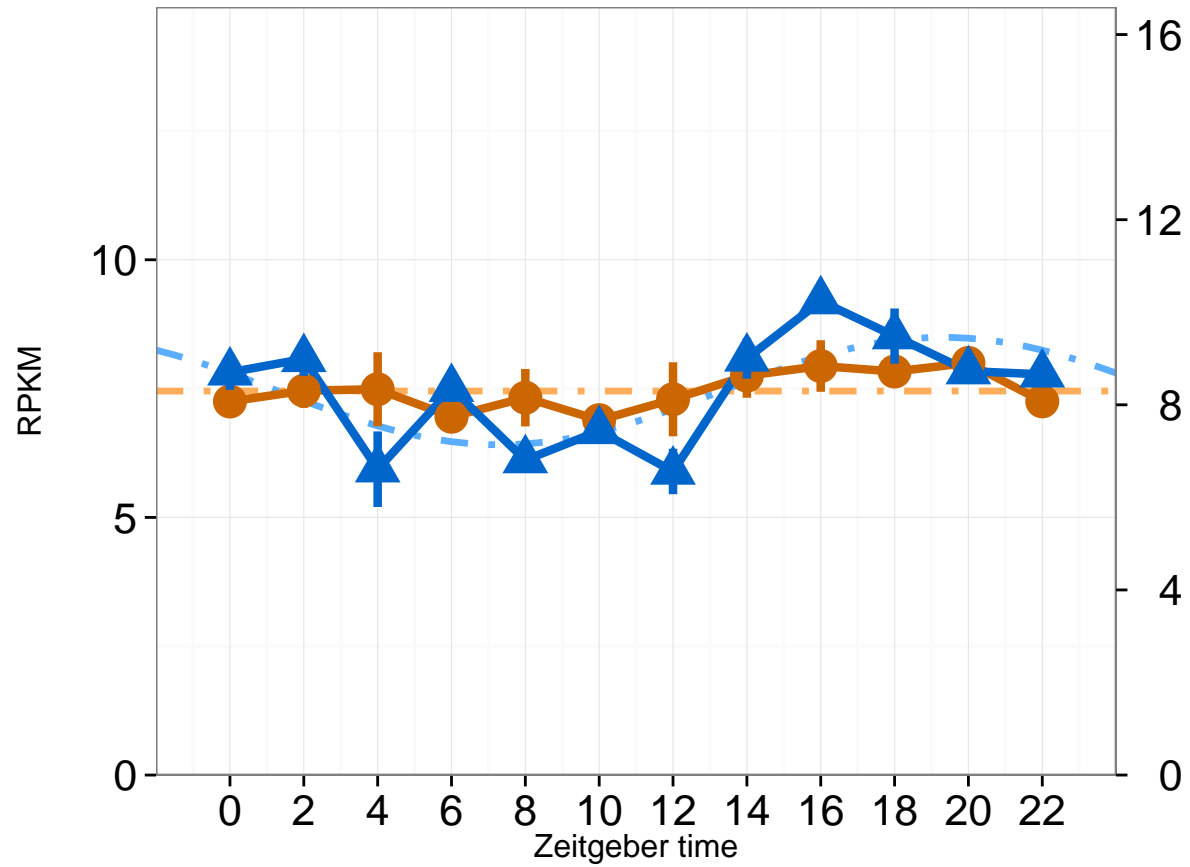

## Mettl17

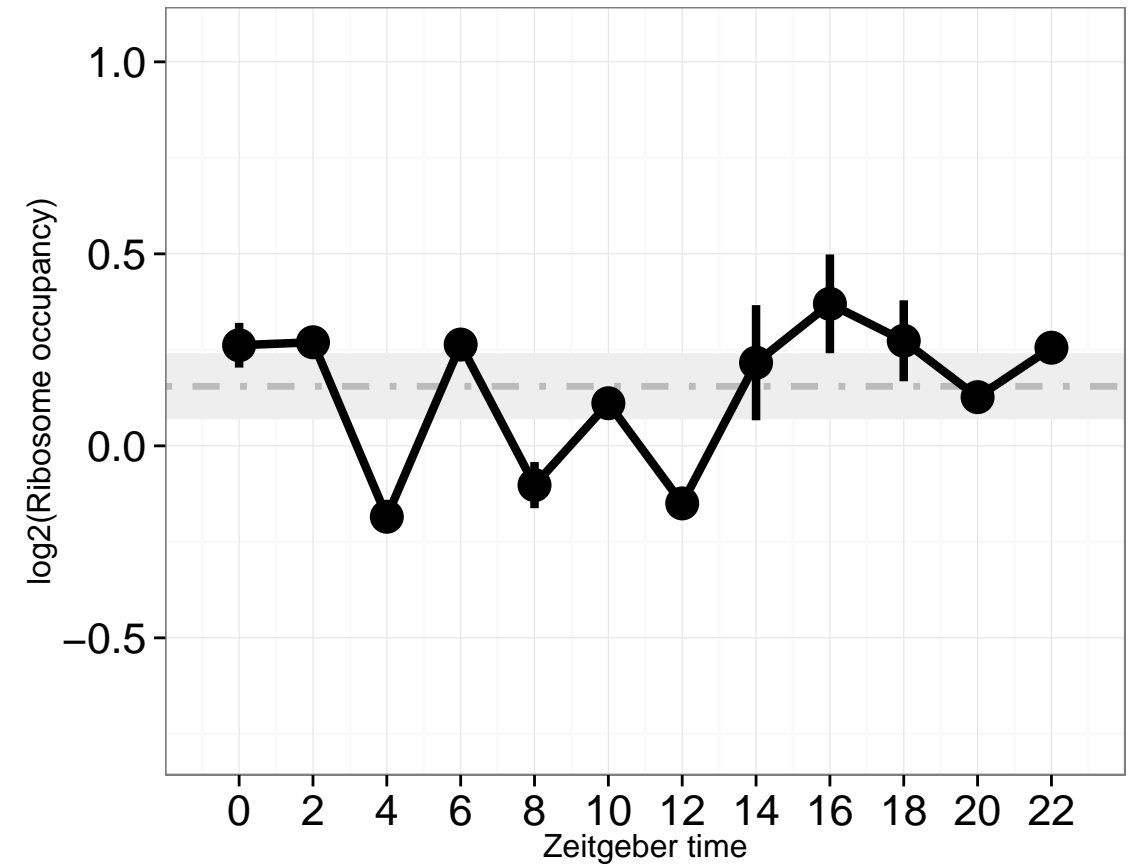

Supplement: Supplementary file 10627 [file 1]

## Ist1

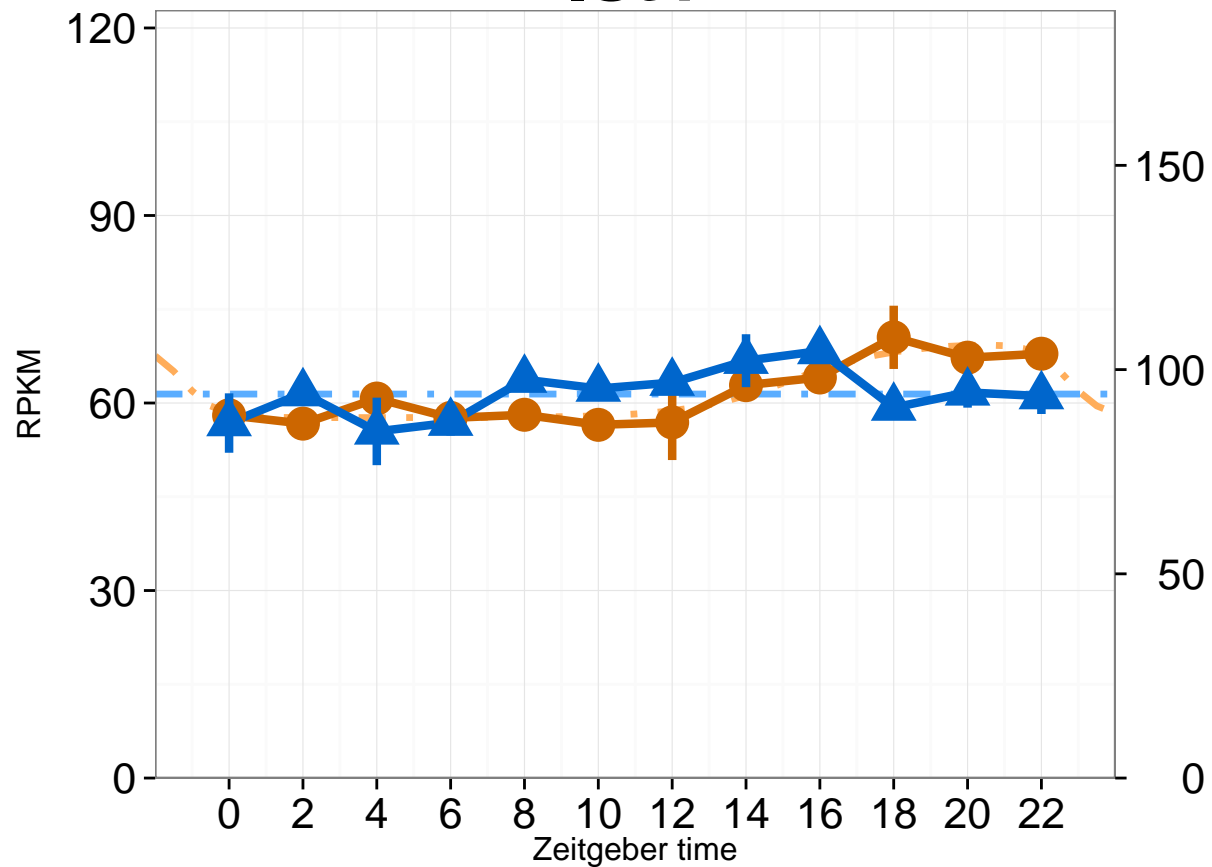

## Ist1

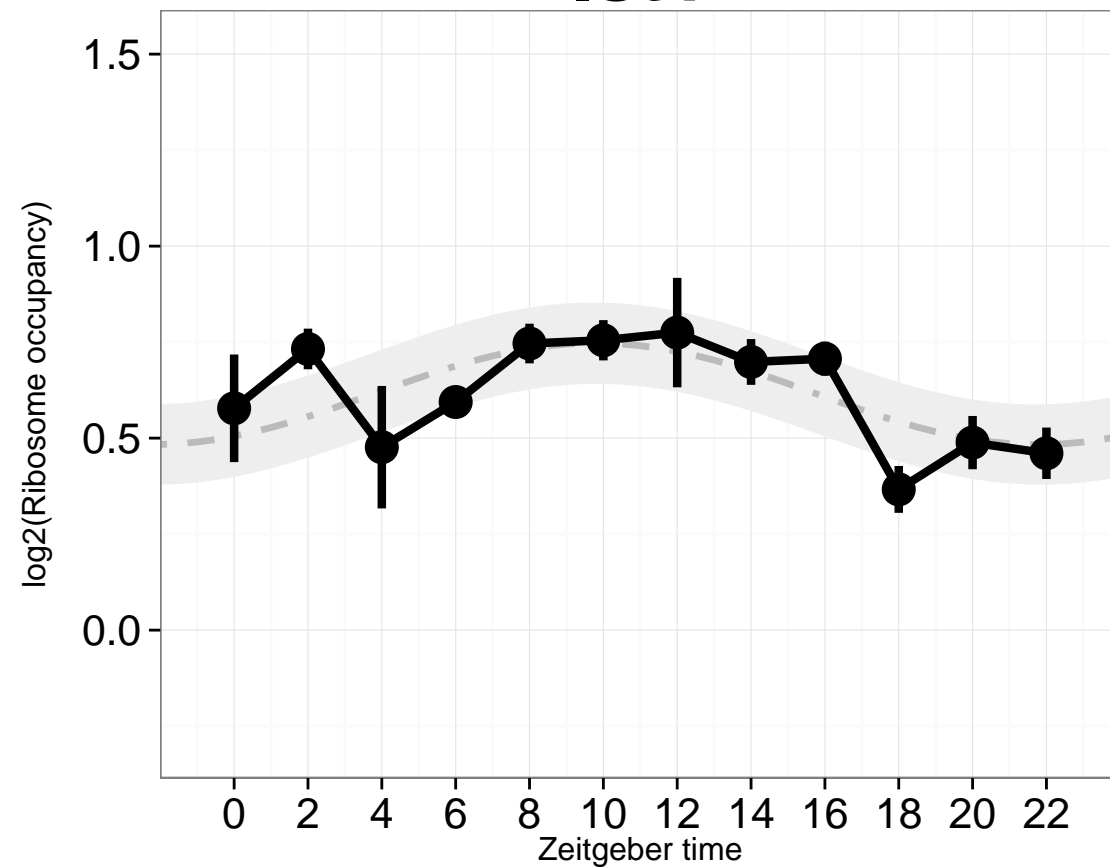

Supplement: Supplementary file 10628 [file 1]

## AA986860

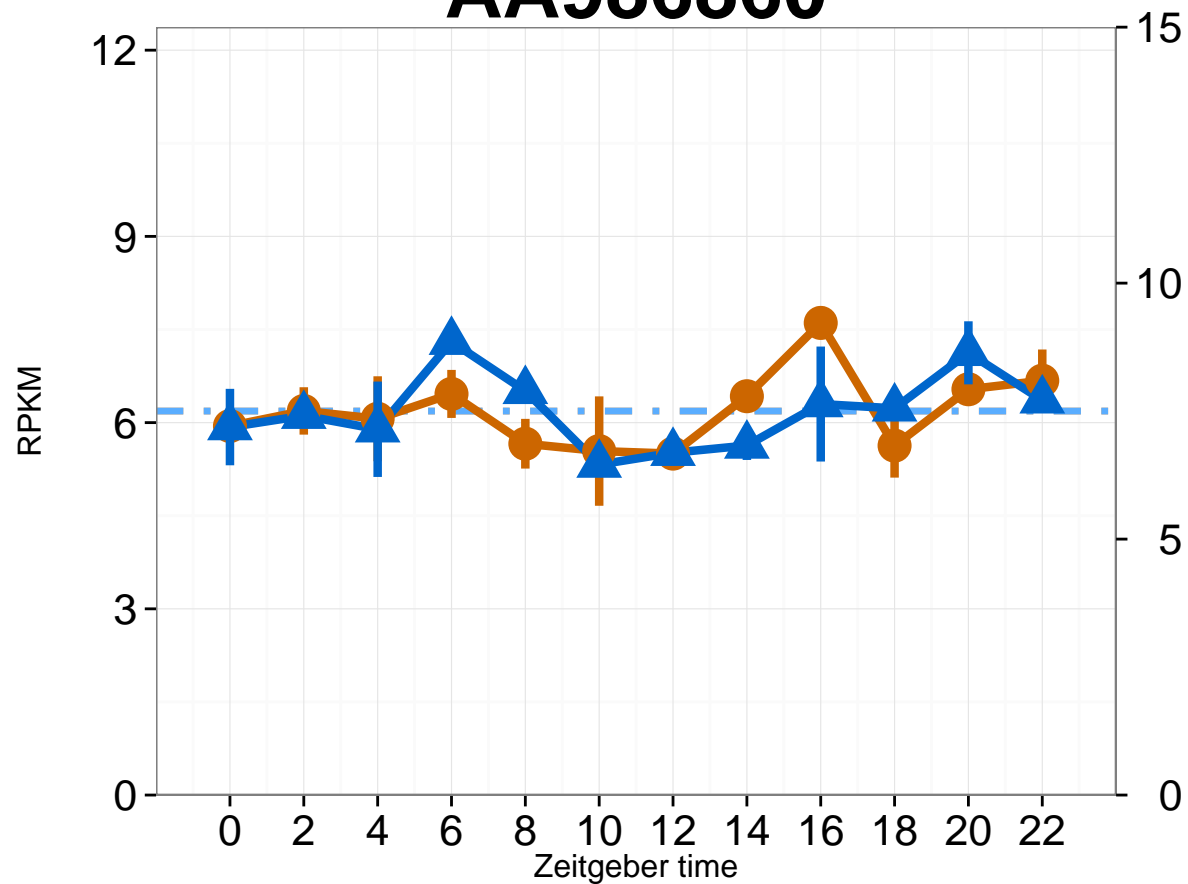

## AA986860

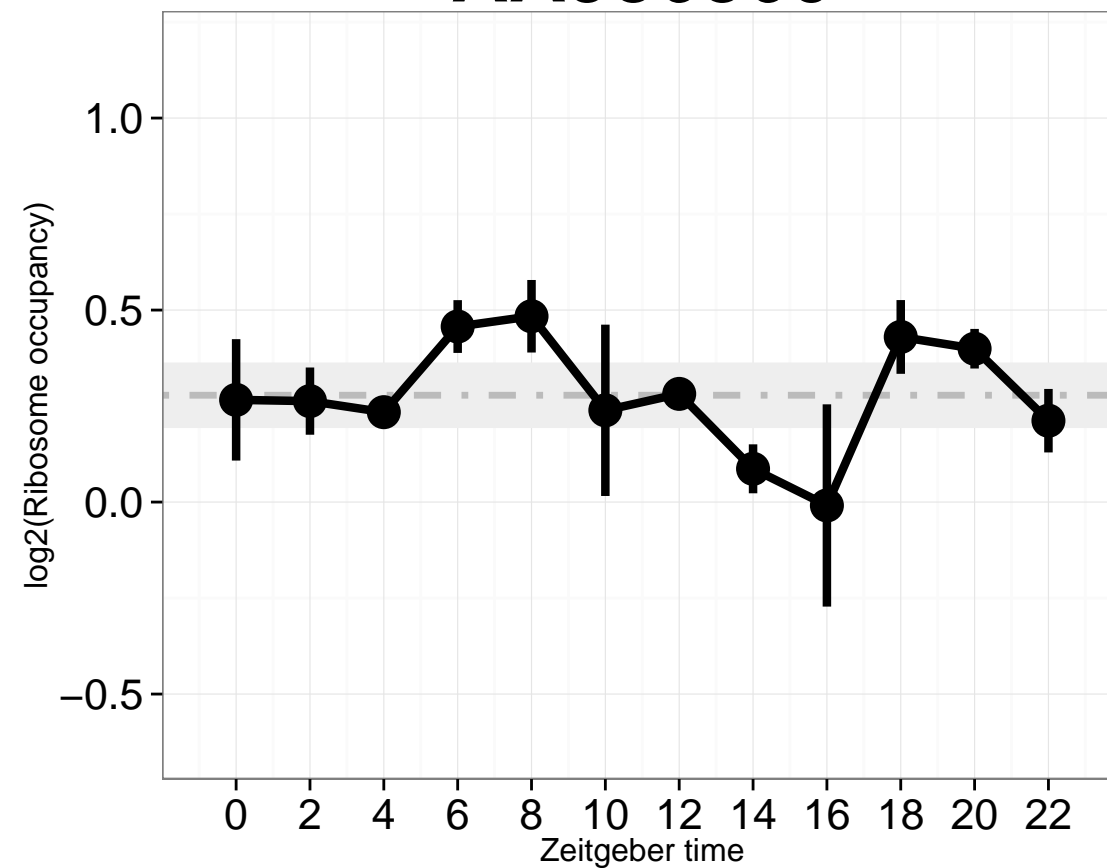

Supplement: Supplementary file 10629 [file 1]

# Otud6b

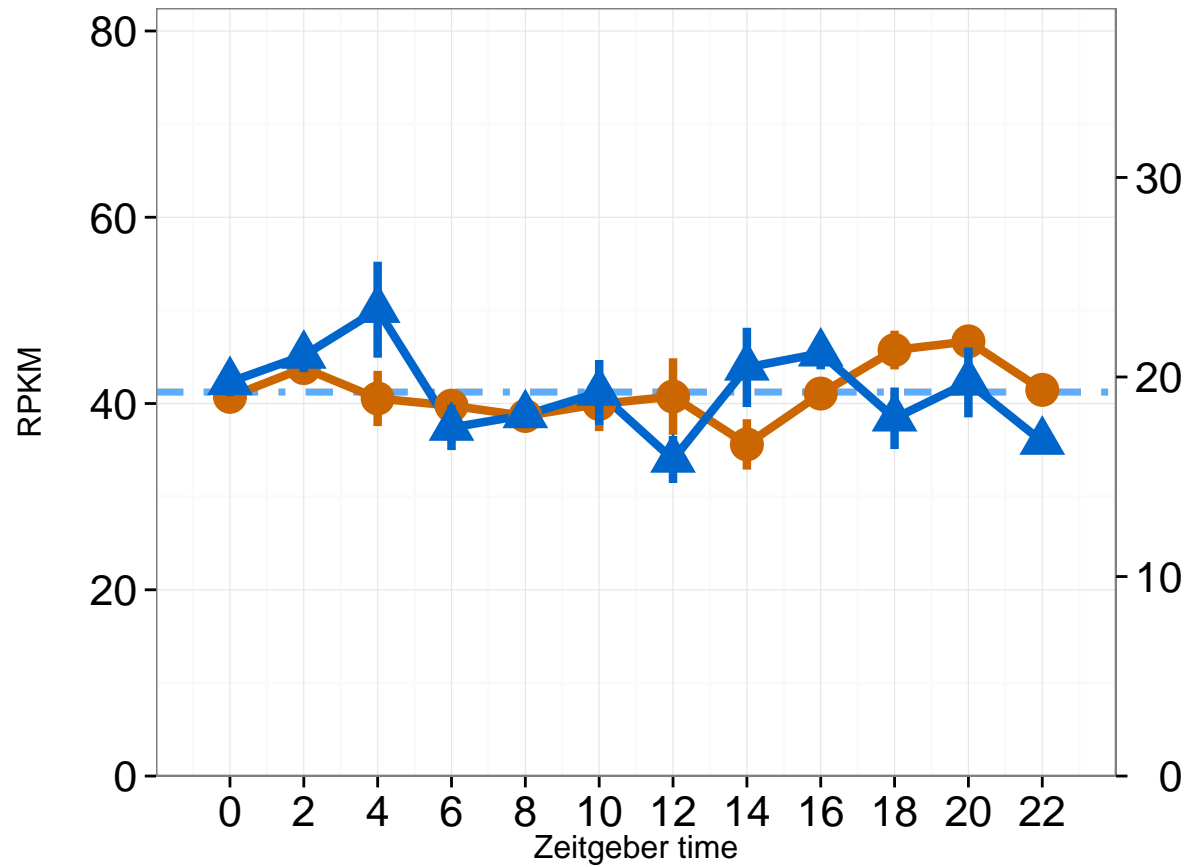

# Otud6b

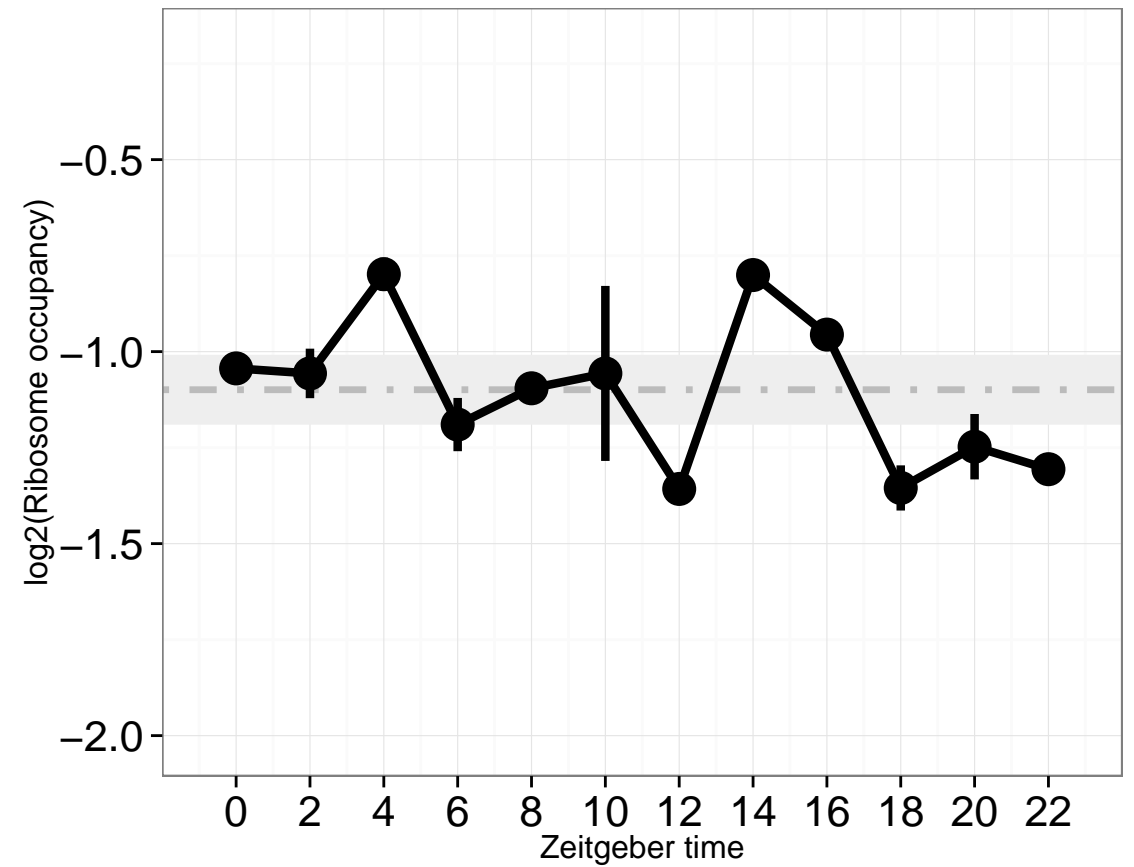

Supplement: Supplementary file 10630 [file 1]

# Rab2a

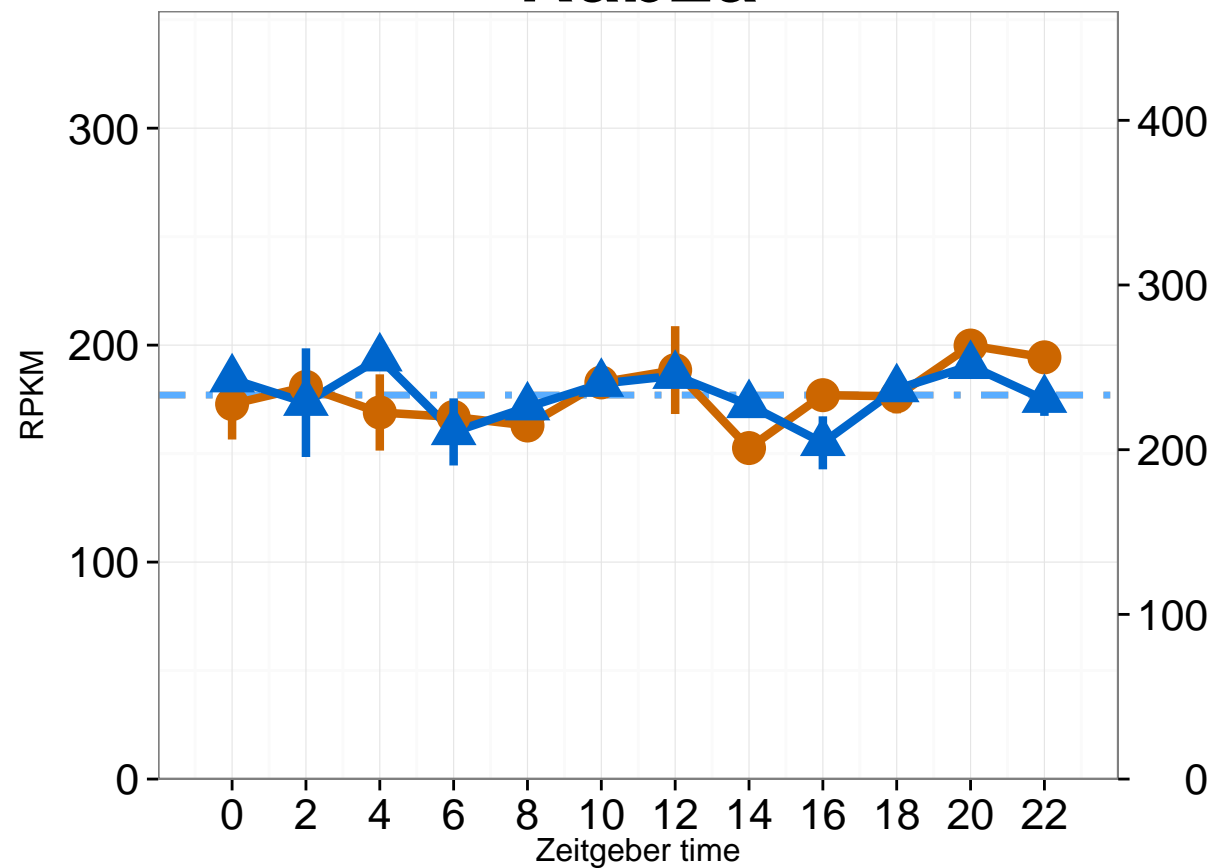

# Rab2a

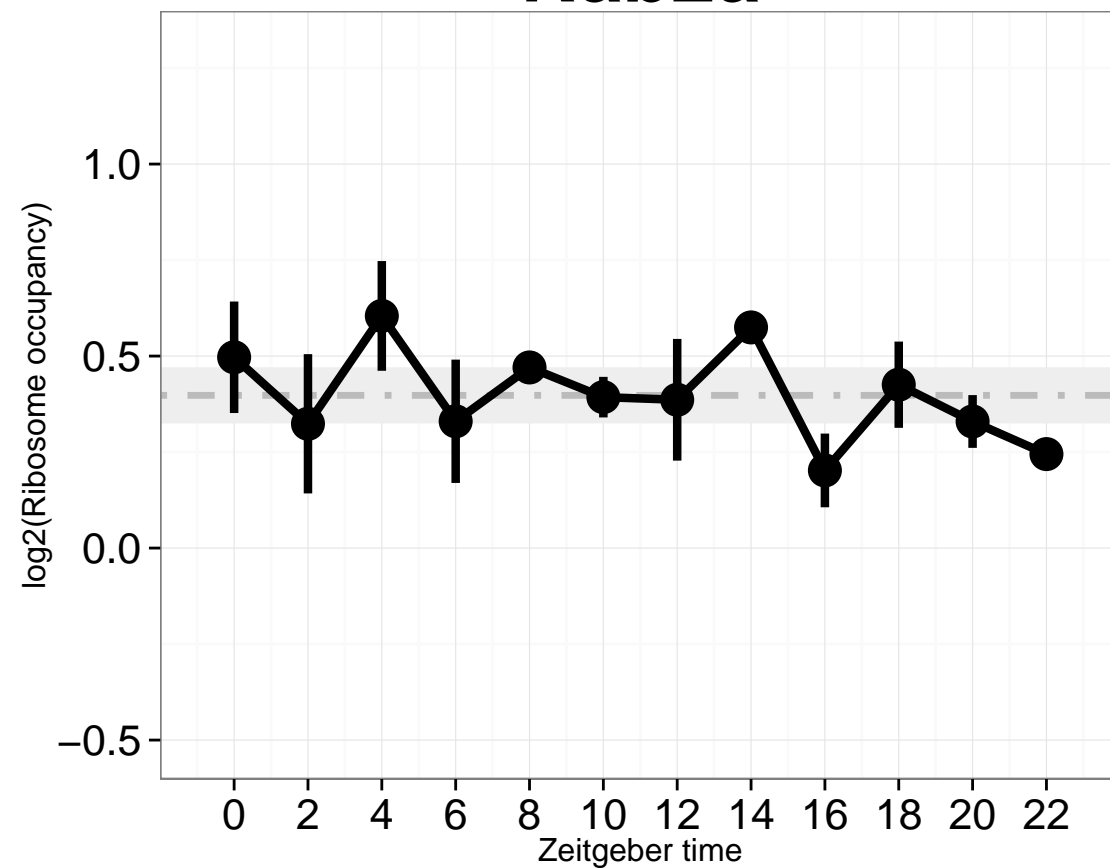

Supplement: Supplementary file 10631 [file 1]

# Bst1

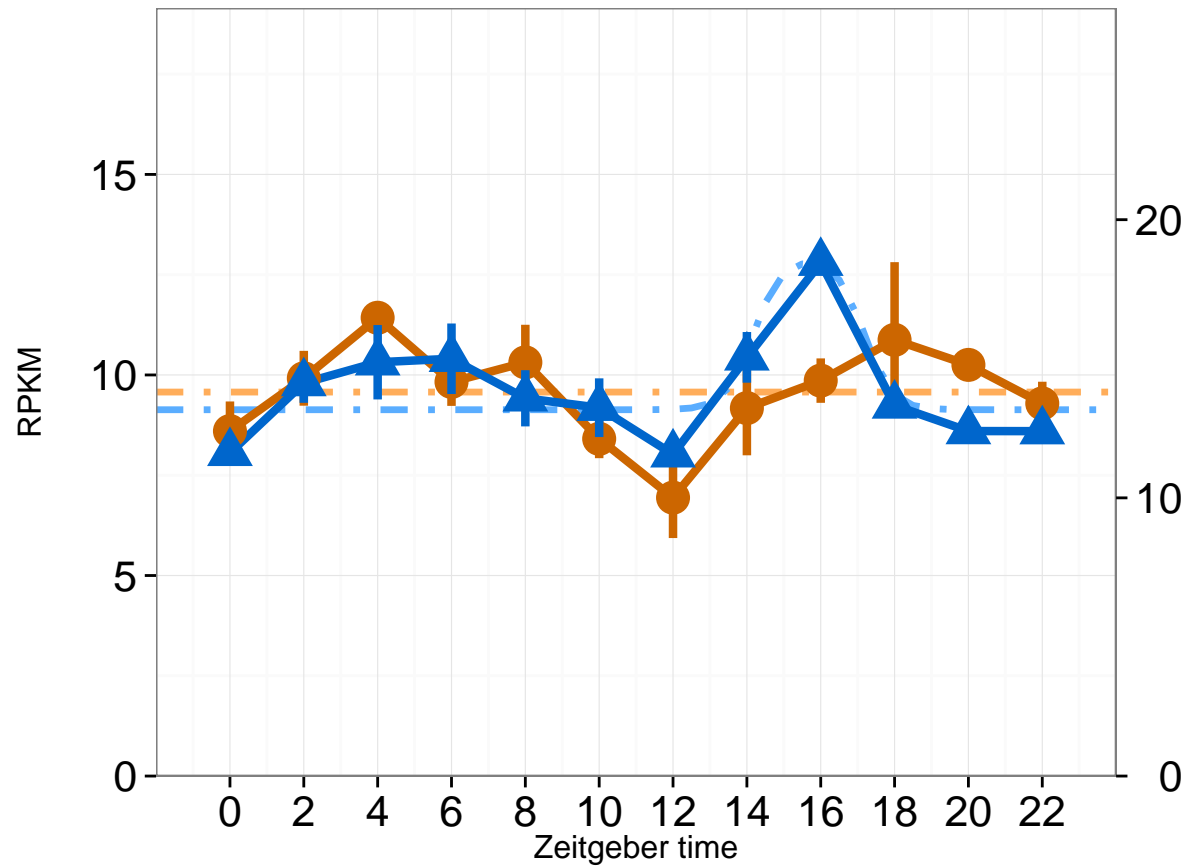

# Bst1

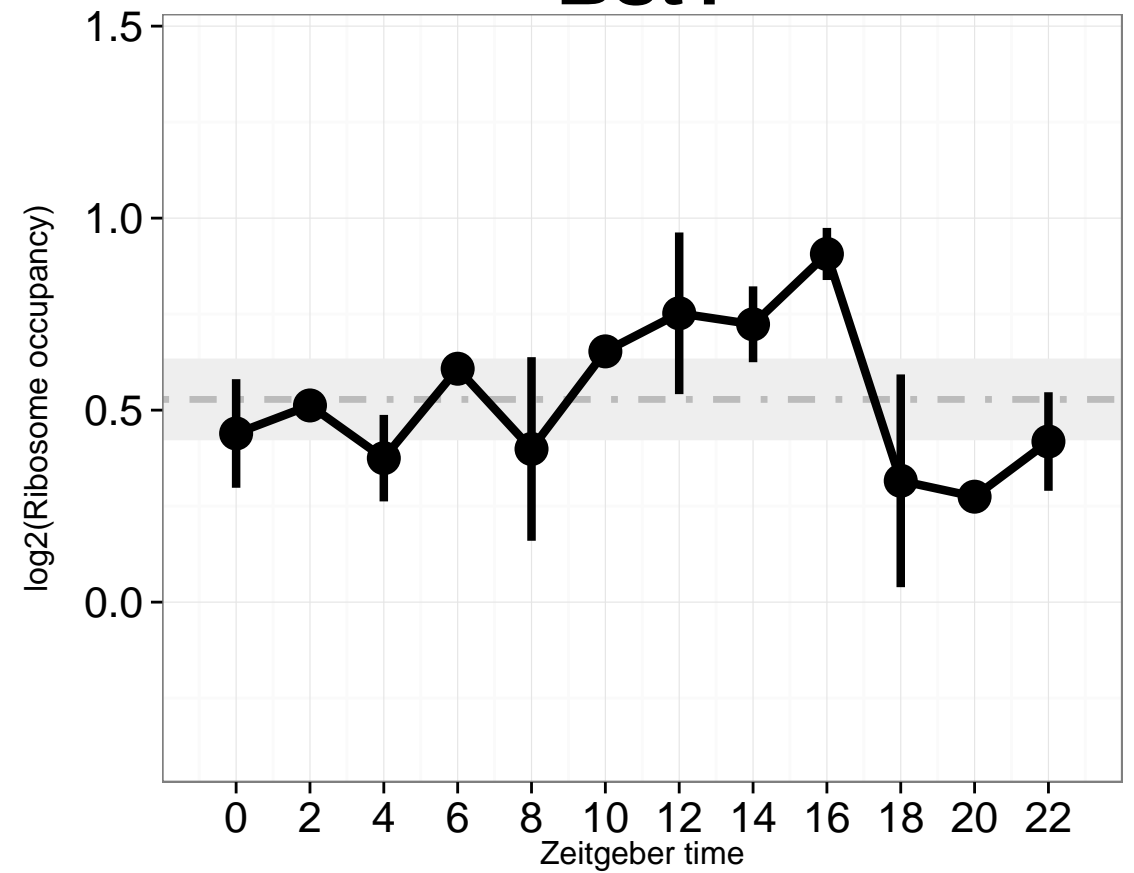

Supplement: Supplementary file 10632 [file 1]

# Ap4e1

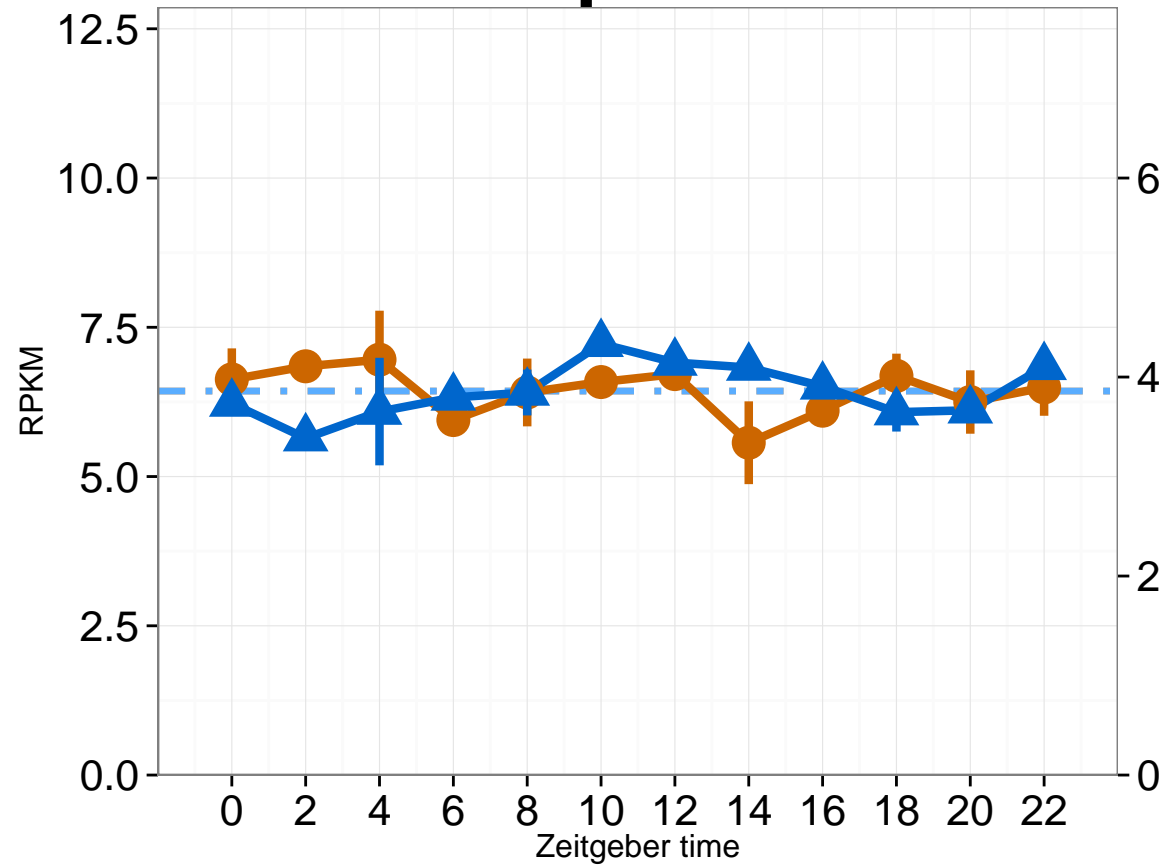

# Ap4e1

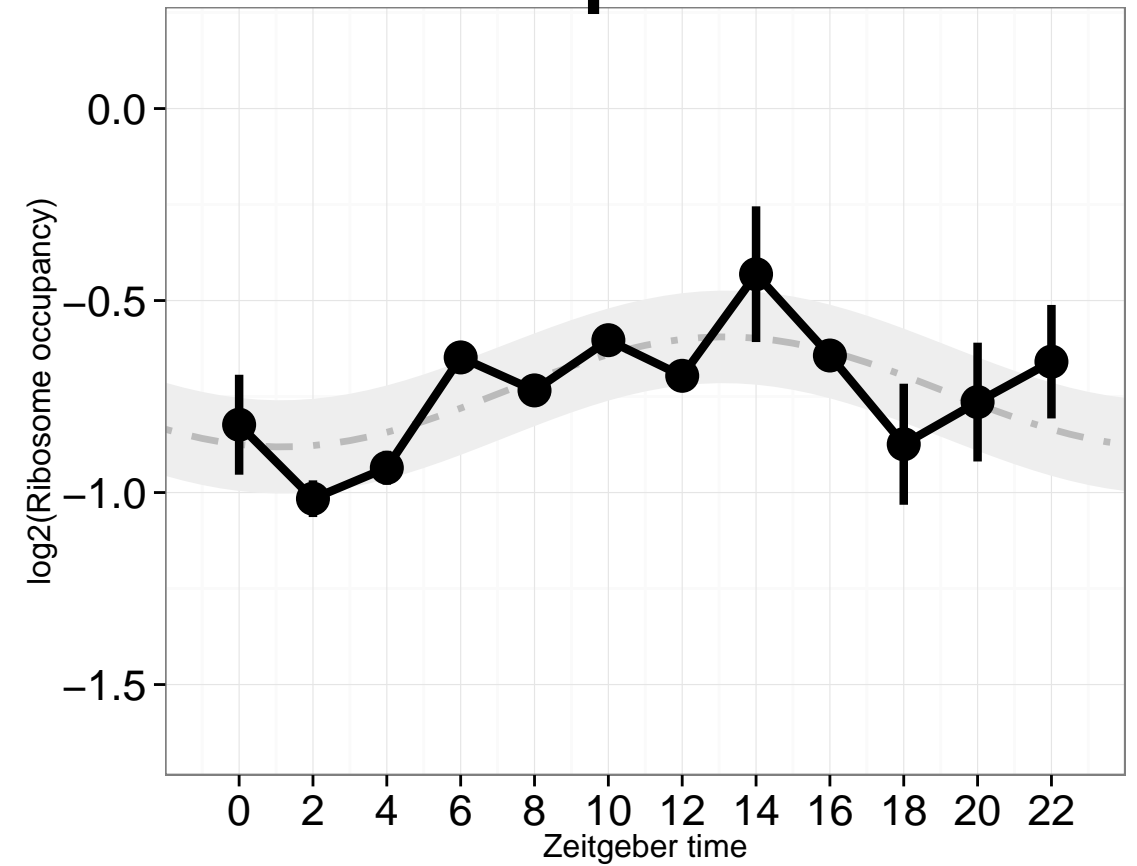

Supplement: Supplementary file 10633 [file 1]

# Fam126a

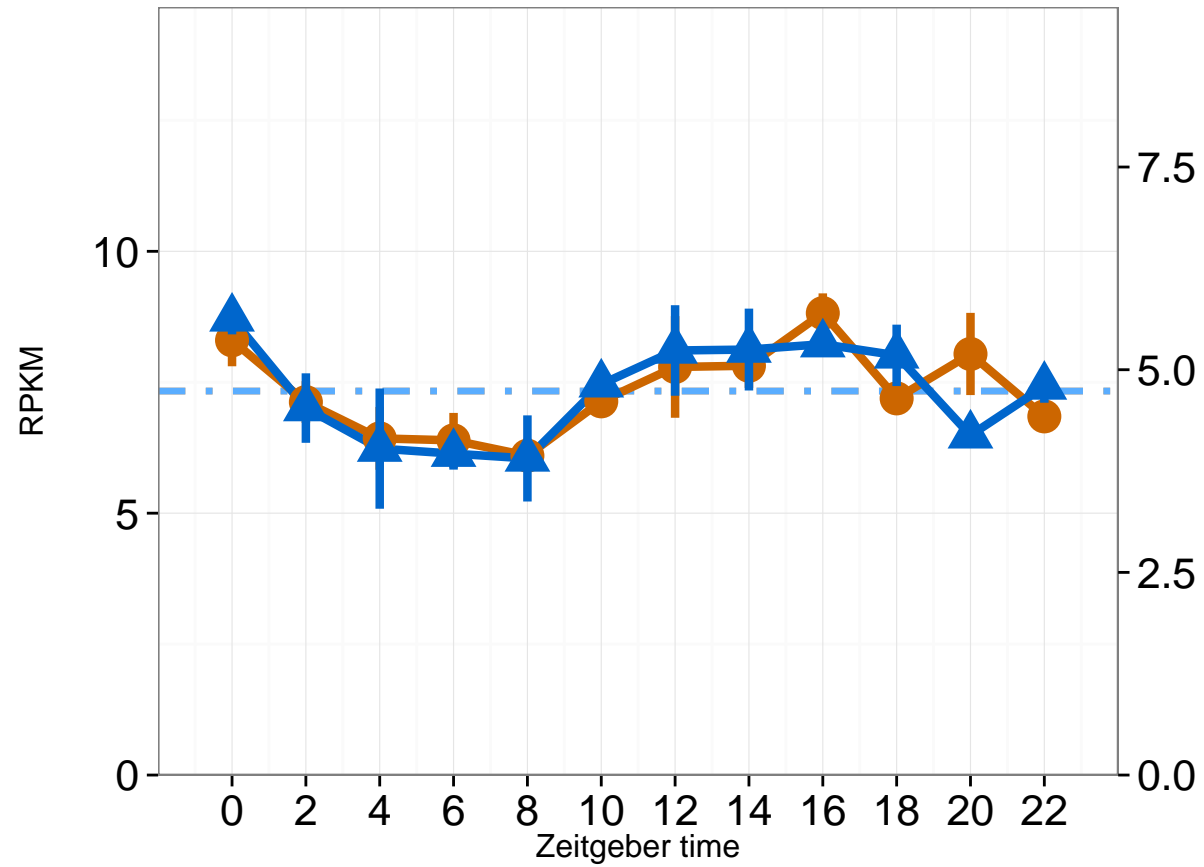

# Fam126a

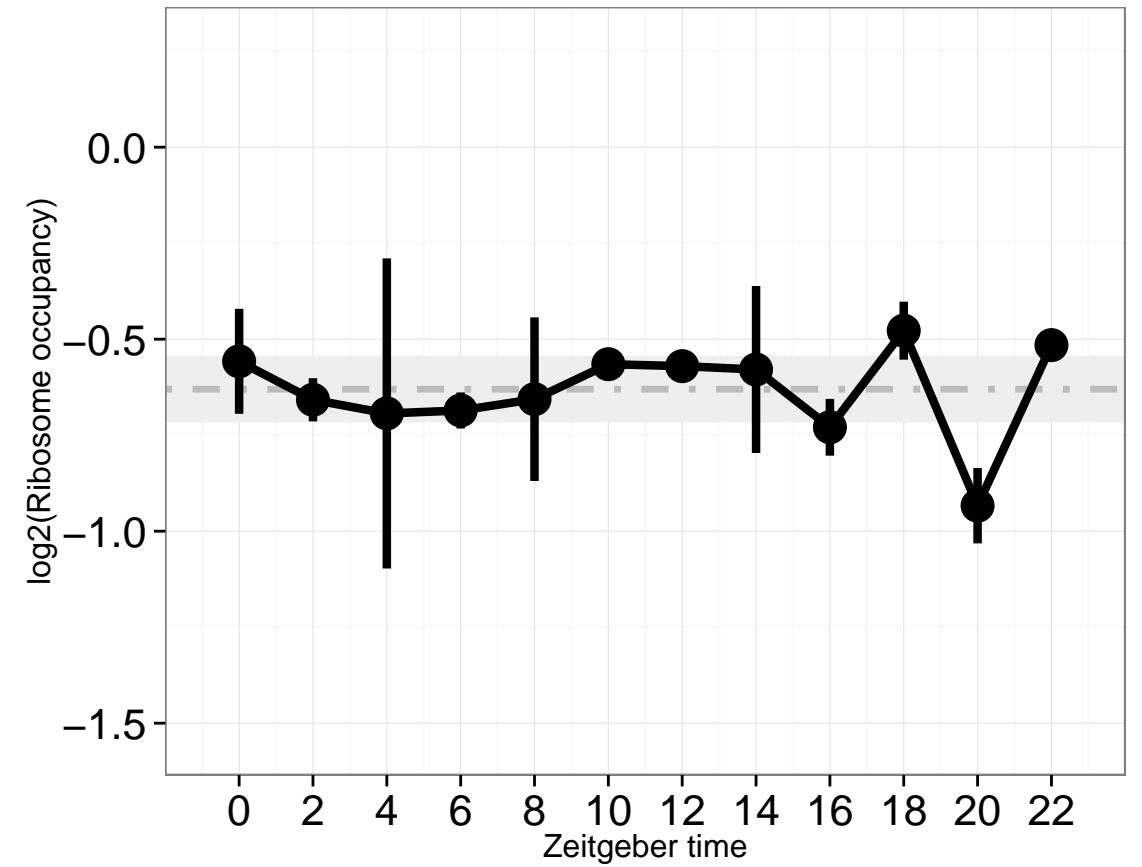

Supplement: Supplementary file 10634 [file 1]

# Copb1

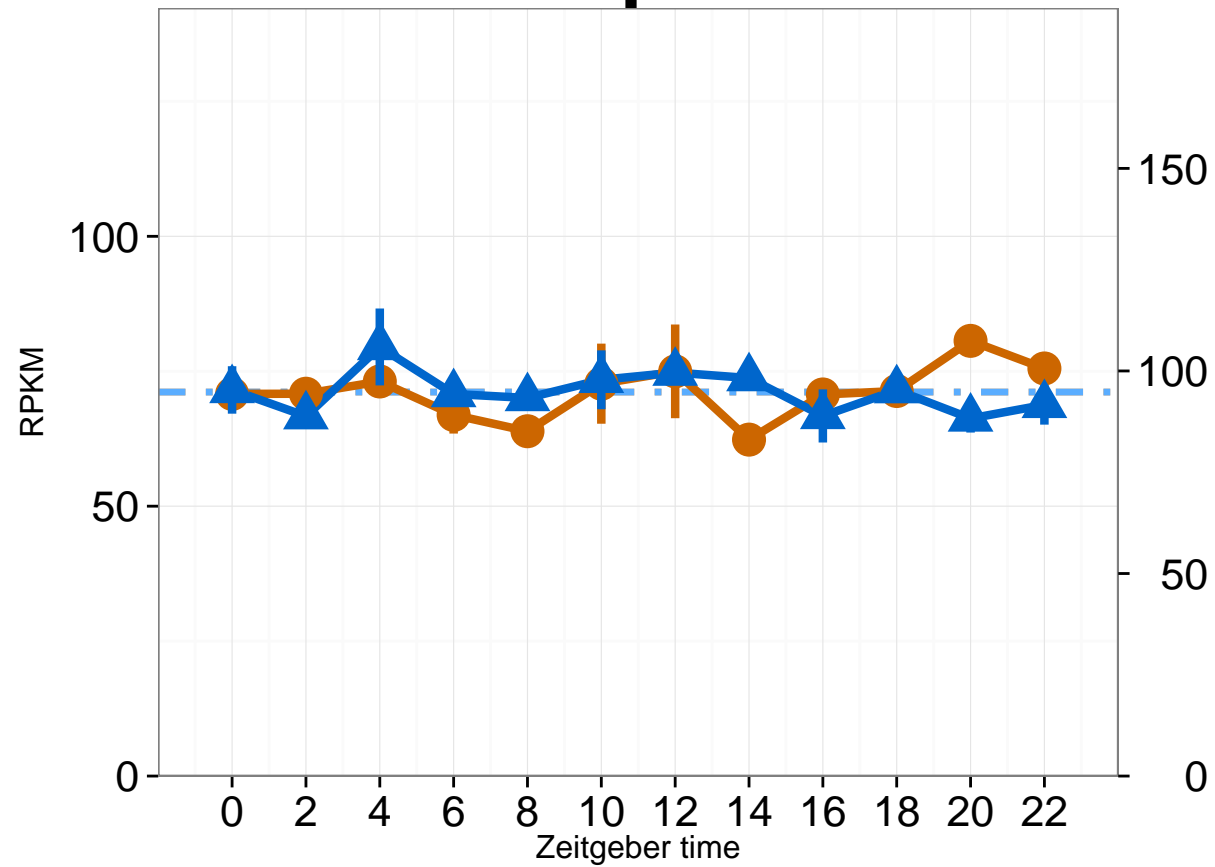

# Copb1

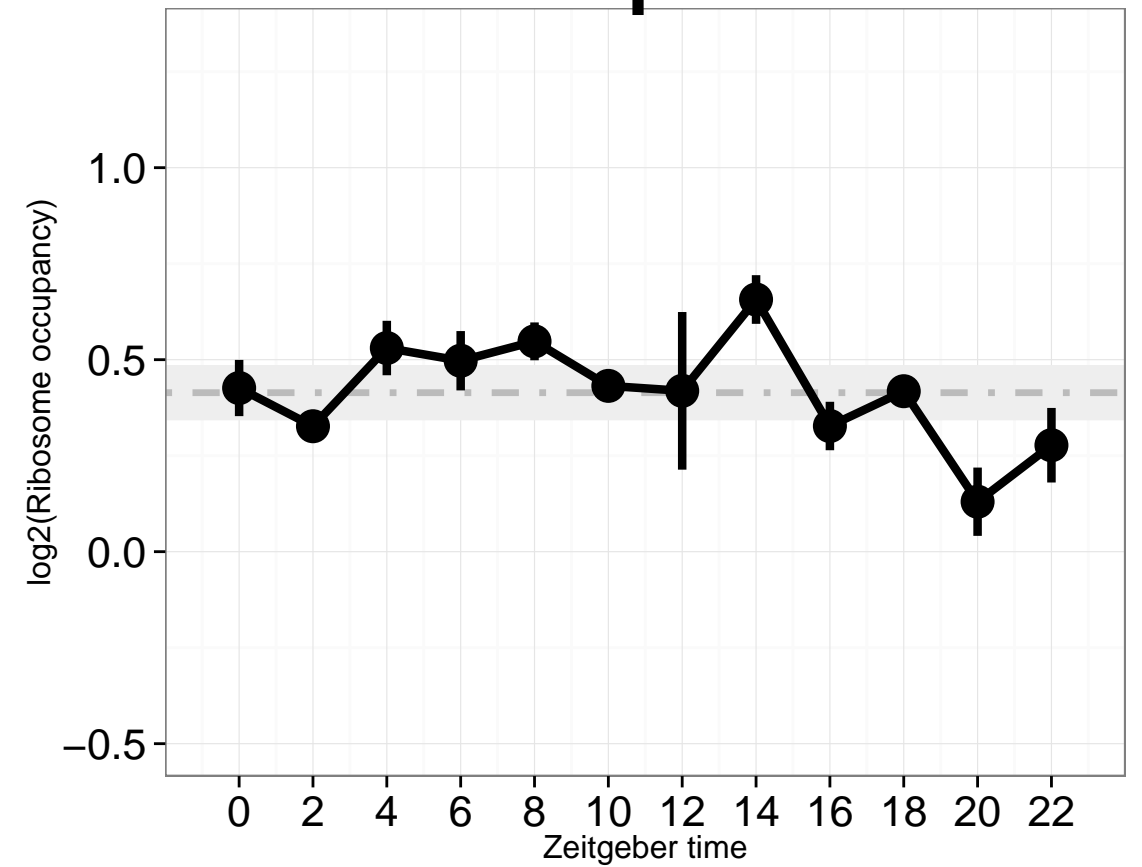

Supplement: Supplementary file 10635 [file 1]

## Nipa1

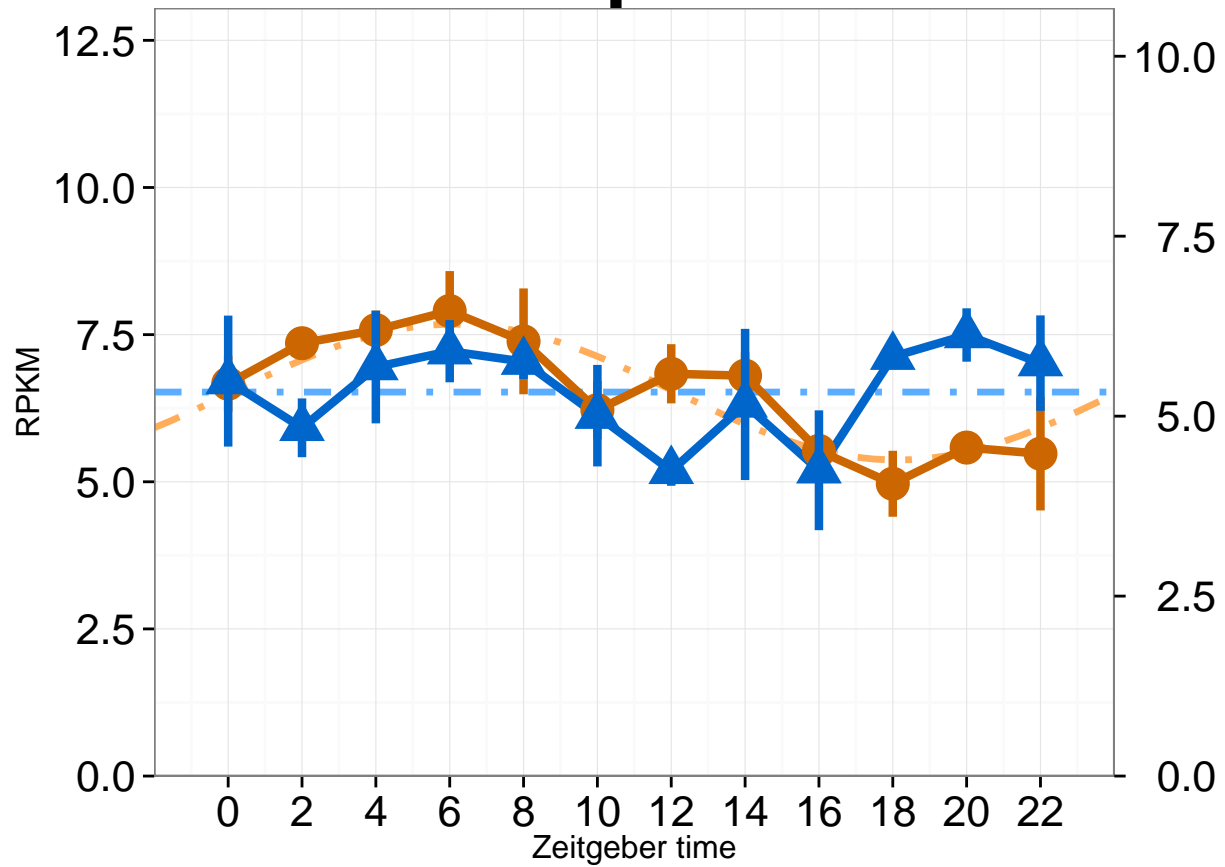

## Nipa1

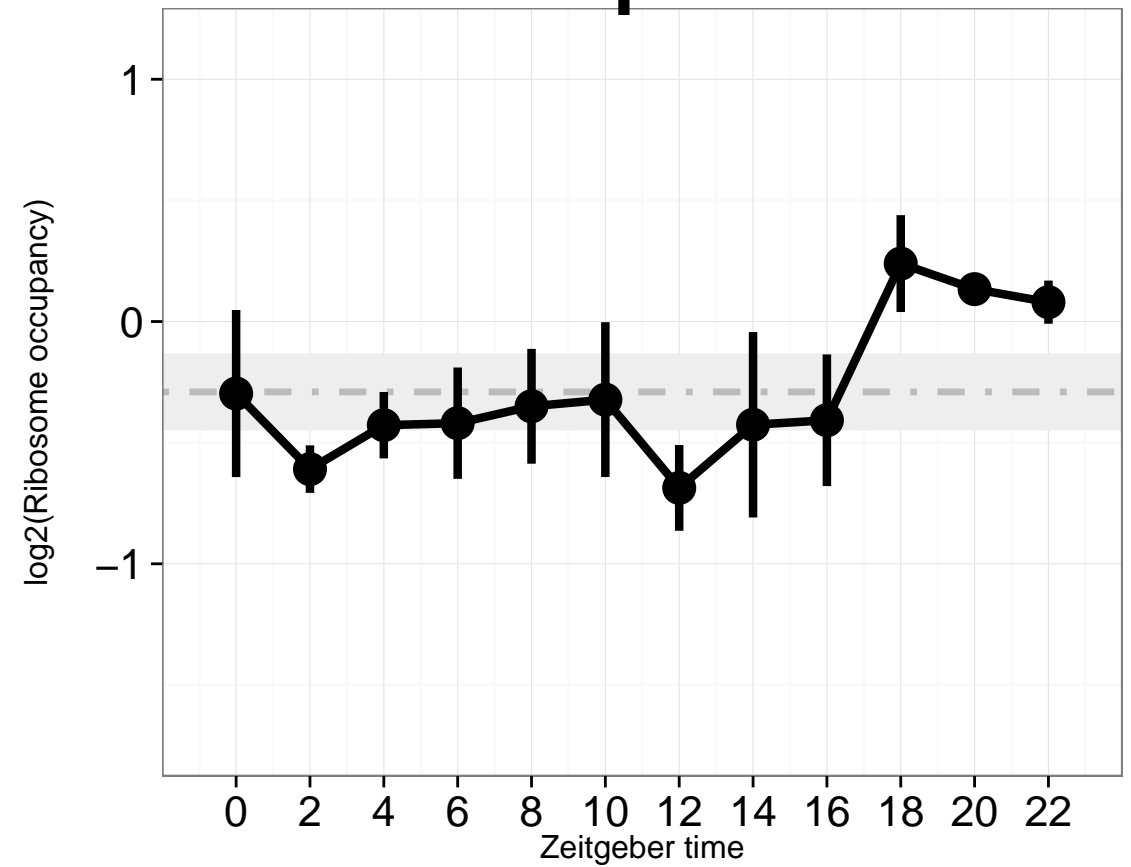

Supplement: Supplementary file 10636 [file 1]

## Gsdmc2

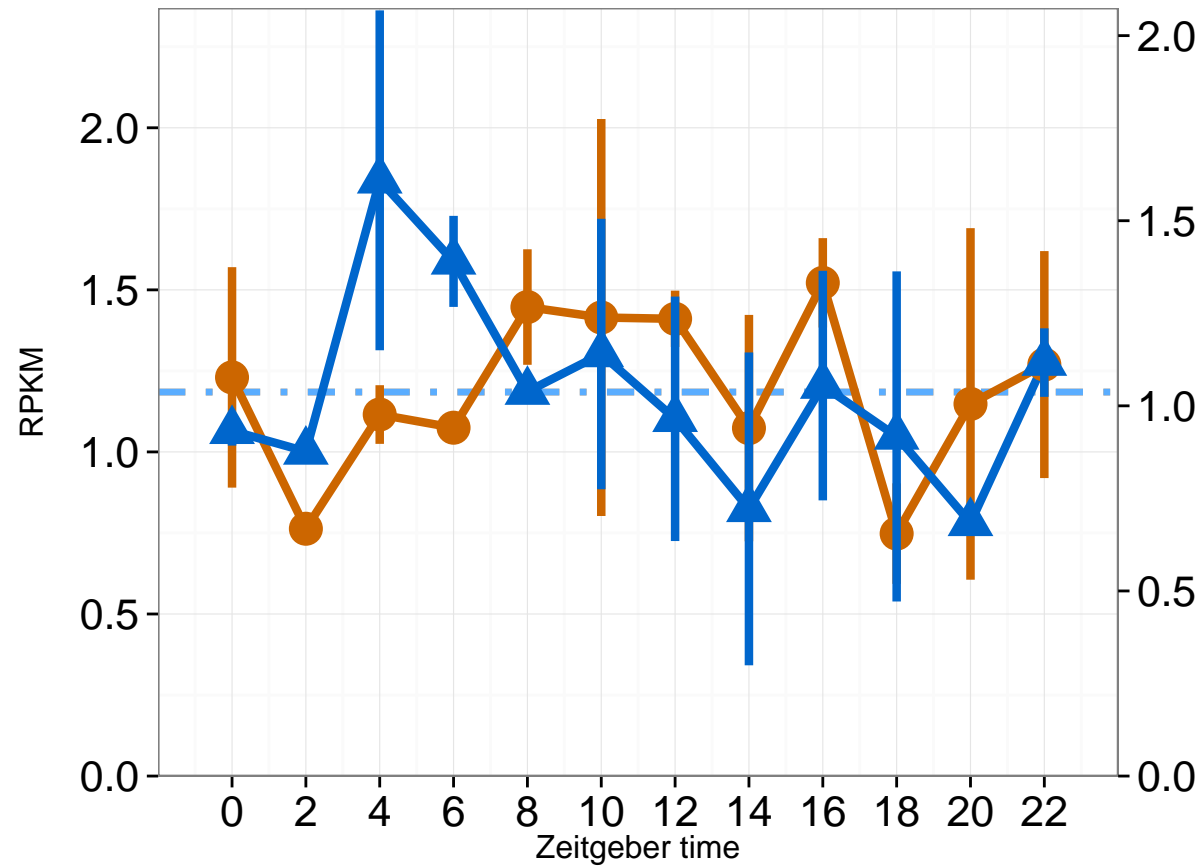

## Gsdmc2

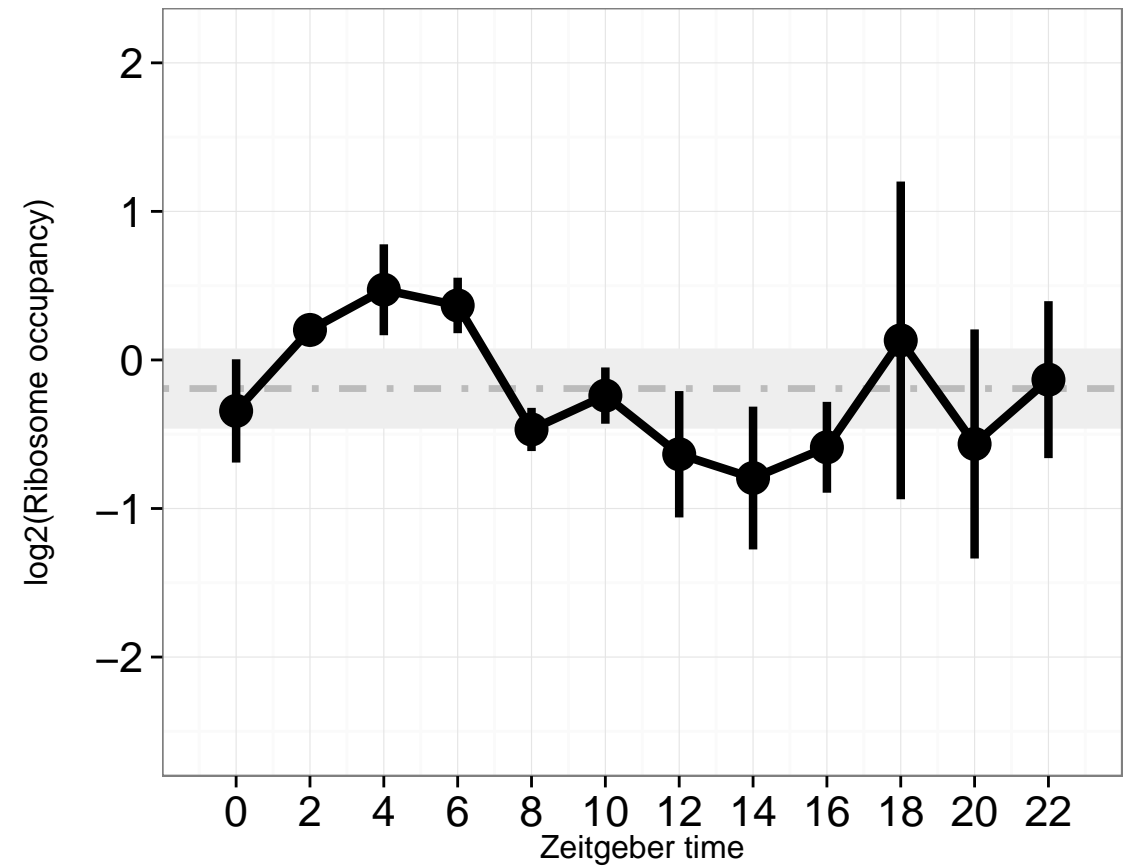

Supplement: Supplementary file 10637 [file 1]

## Gna14

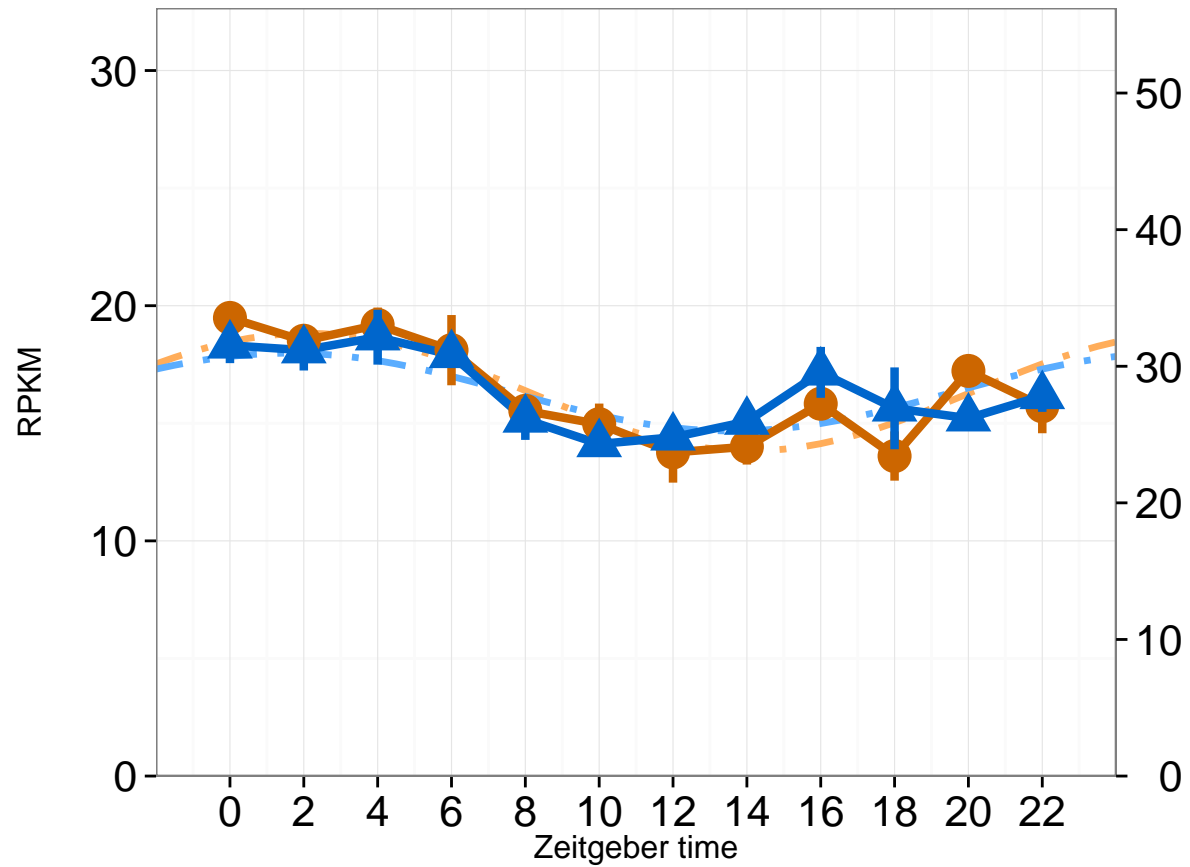

## Gna14

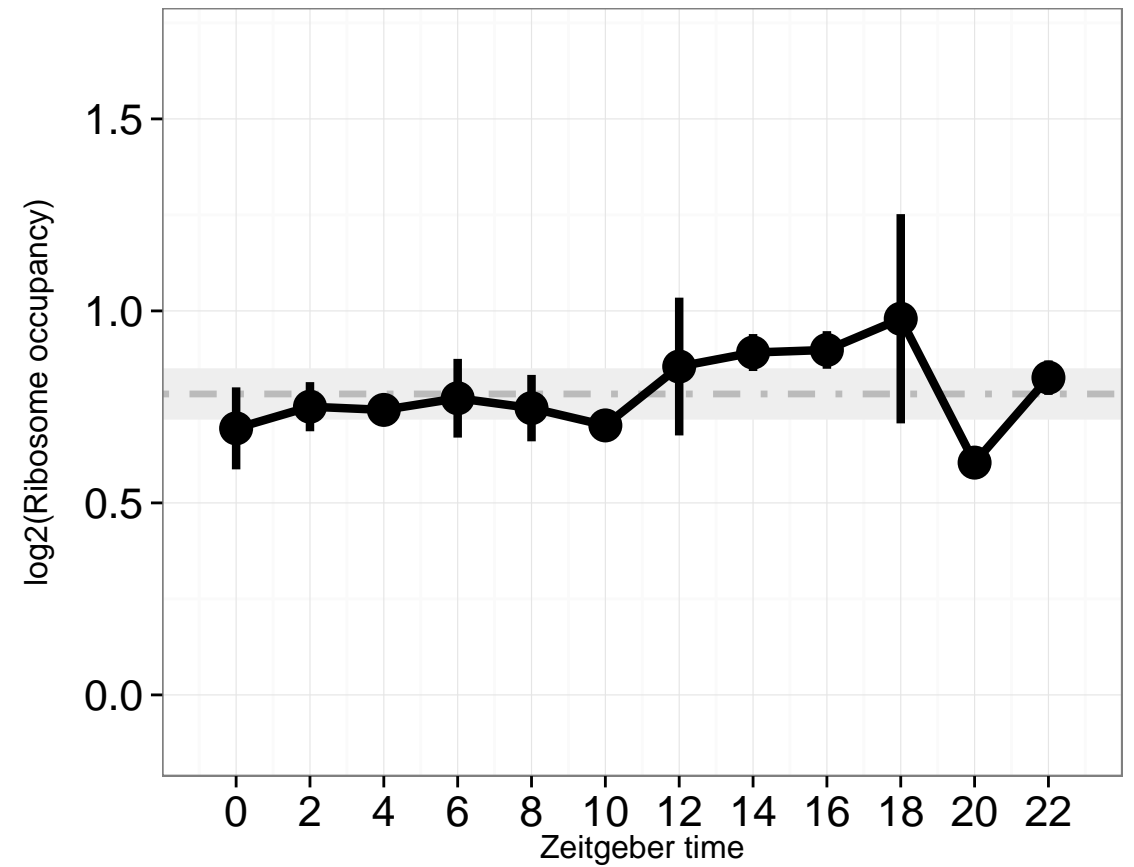

Supplement: Supplementary file 10638 [file 1]

# Arhgap21

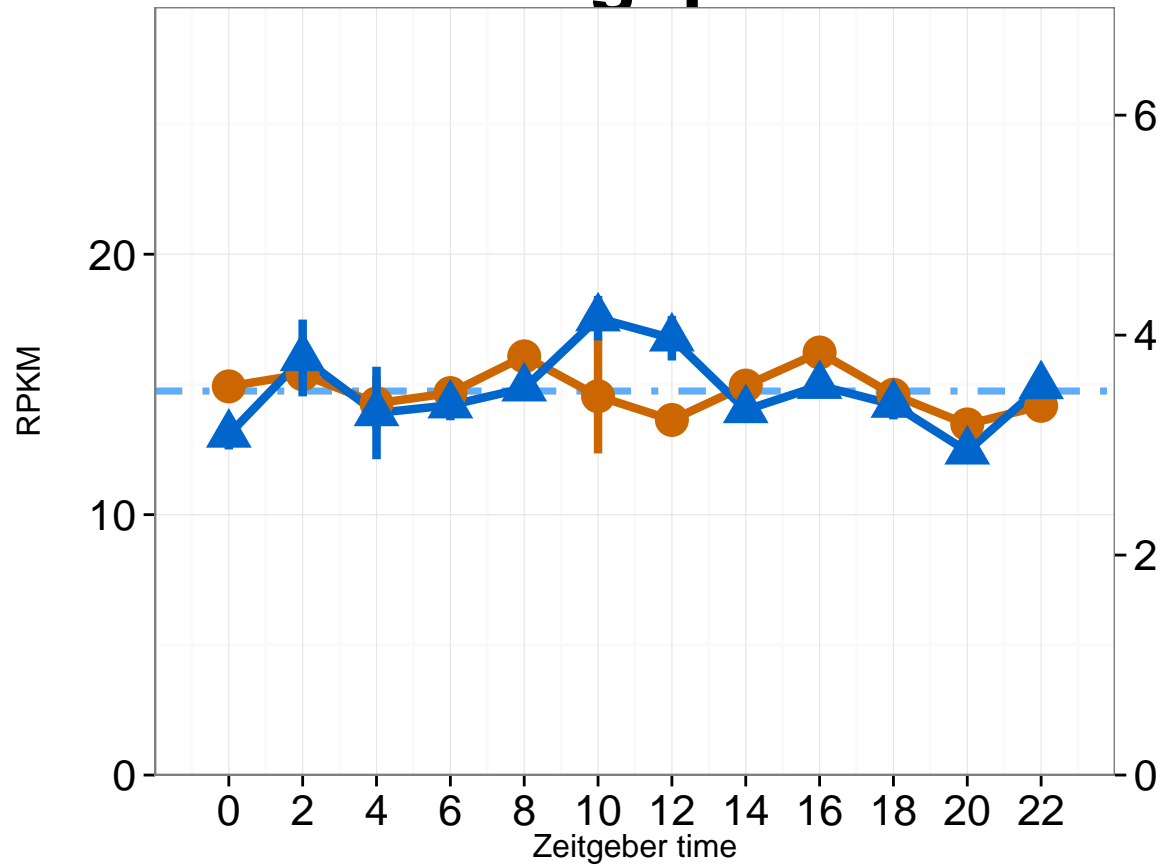

# Arhgap21

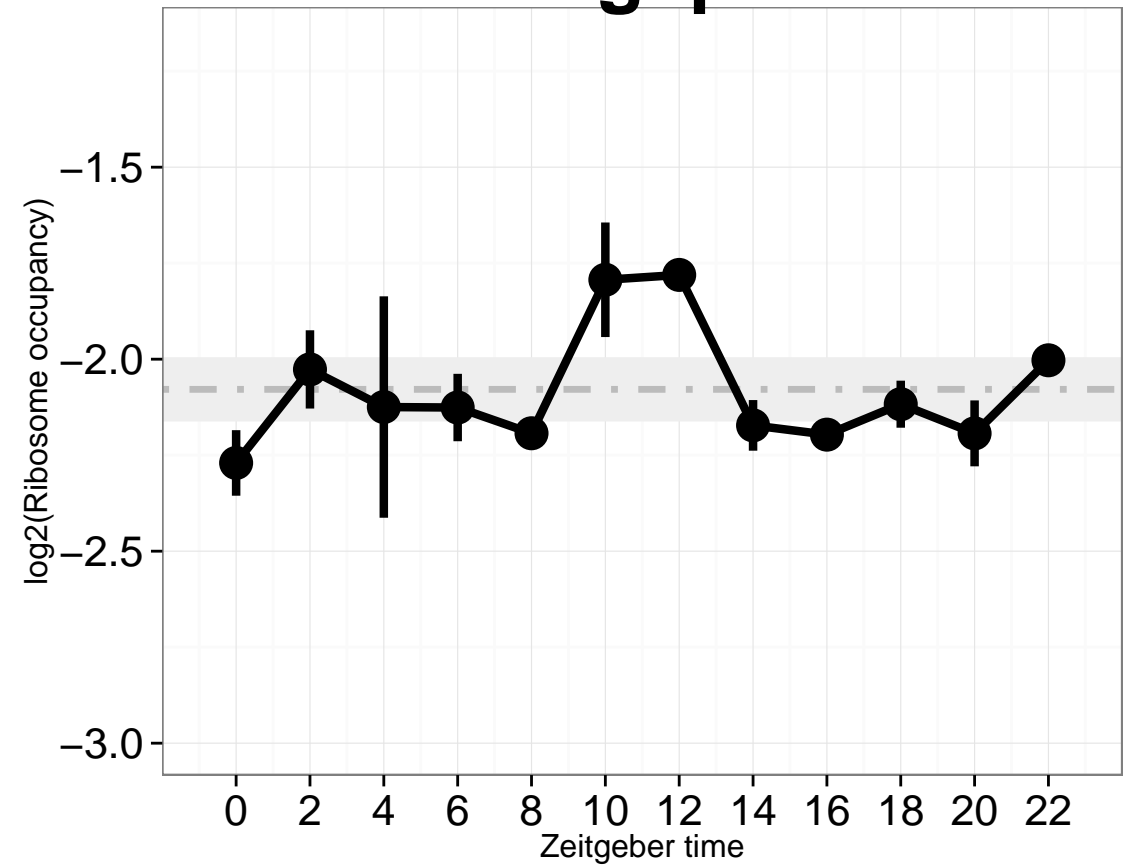

Supplement: Supplementary file 10639 [file 1]

## Nus1

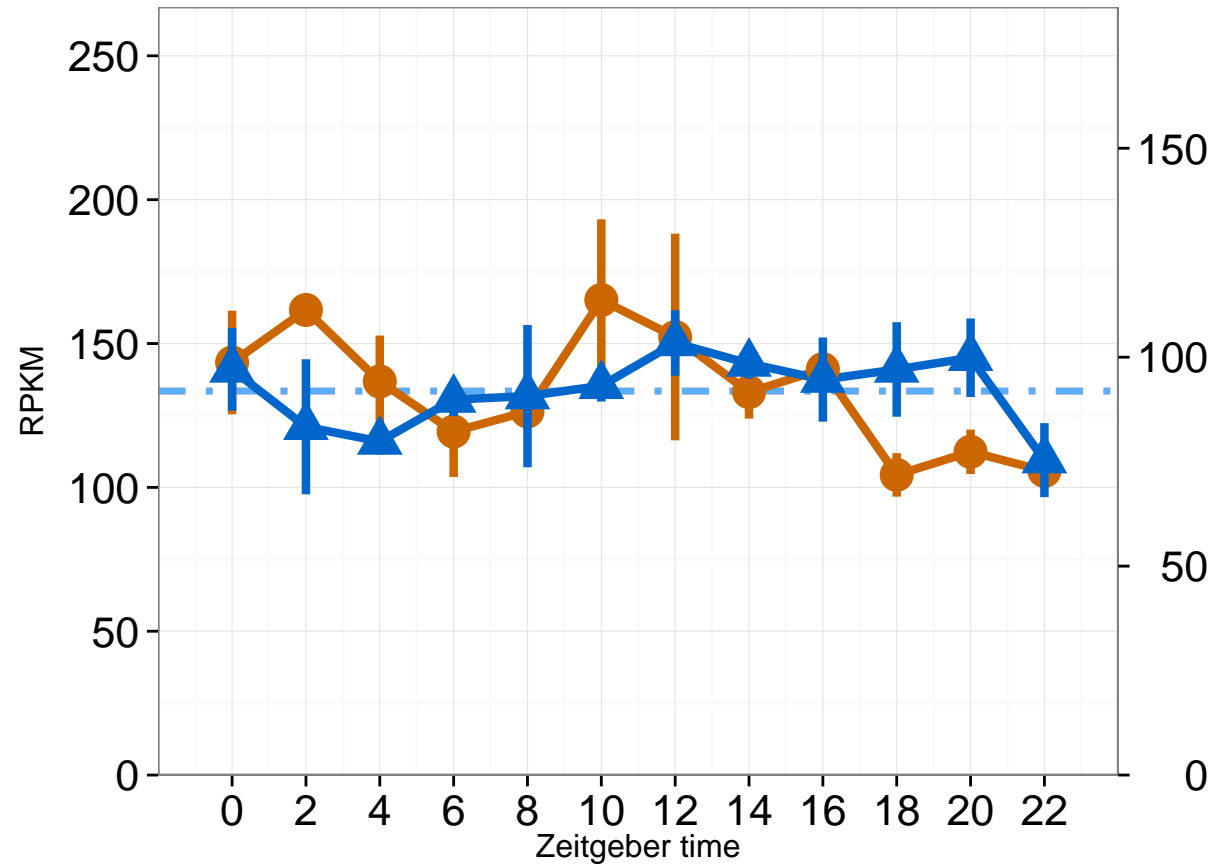

## Nus1

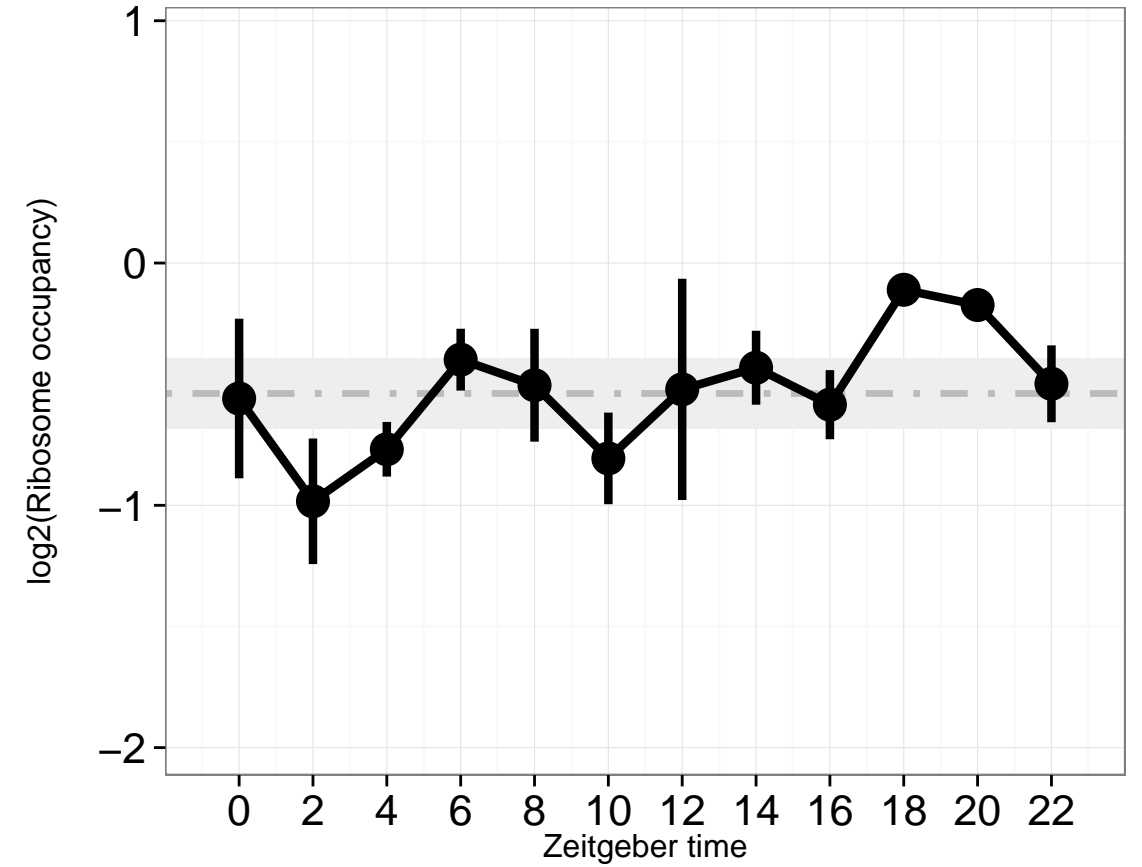

Supplement: Supplementary file 10640 [file 1]
