# Supplementary material (part 107 of 133)
Source: publisher figshare collection journal article supplement (https://springernature.figshare.com/articles/dataset/_/4903193)

## Parp14

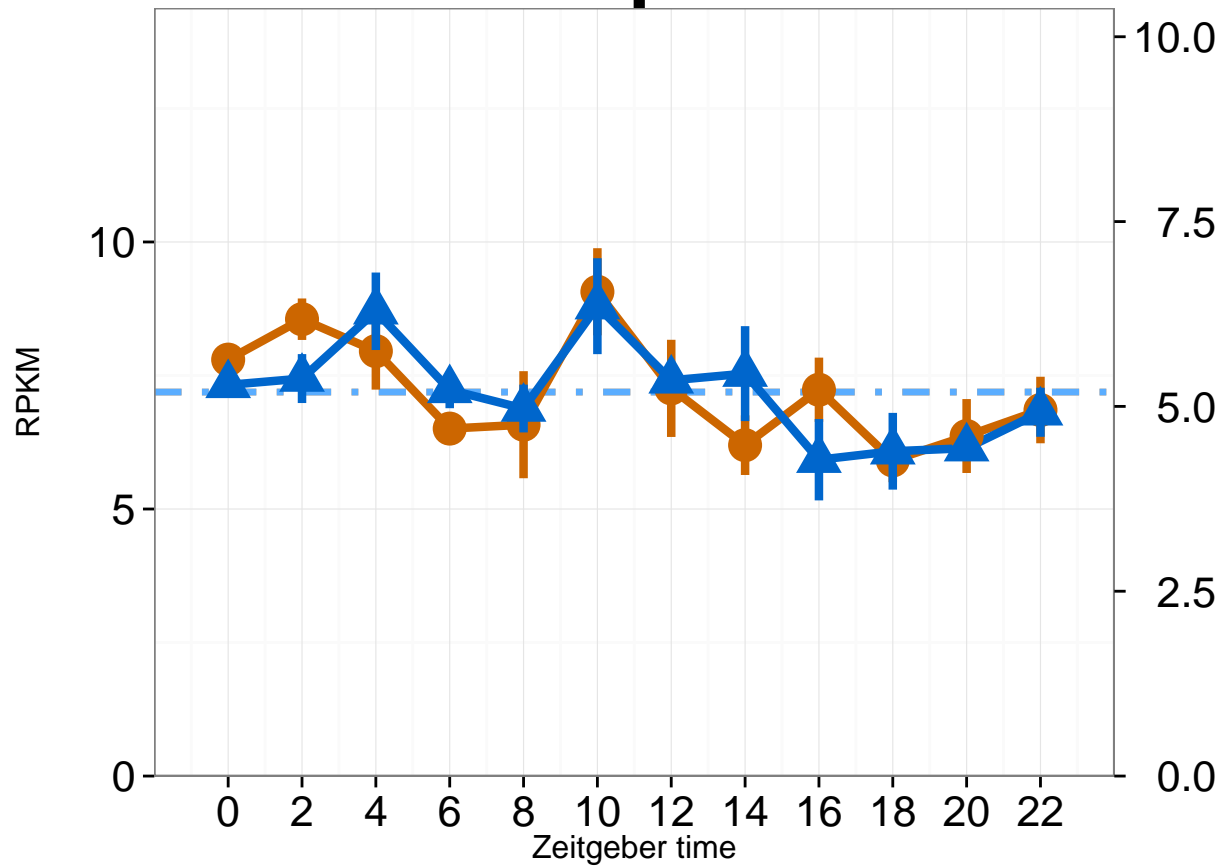

## Parp14

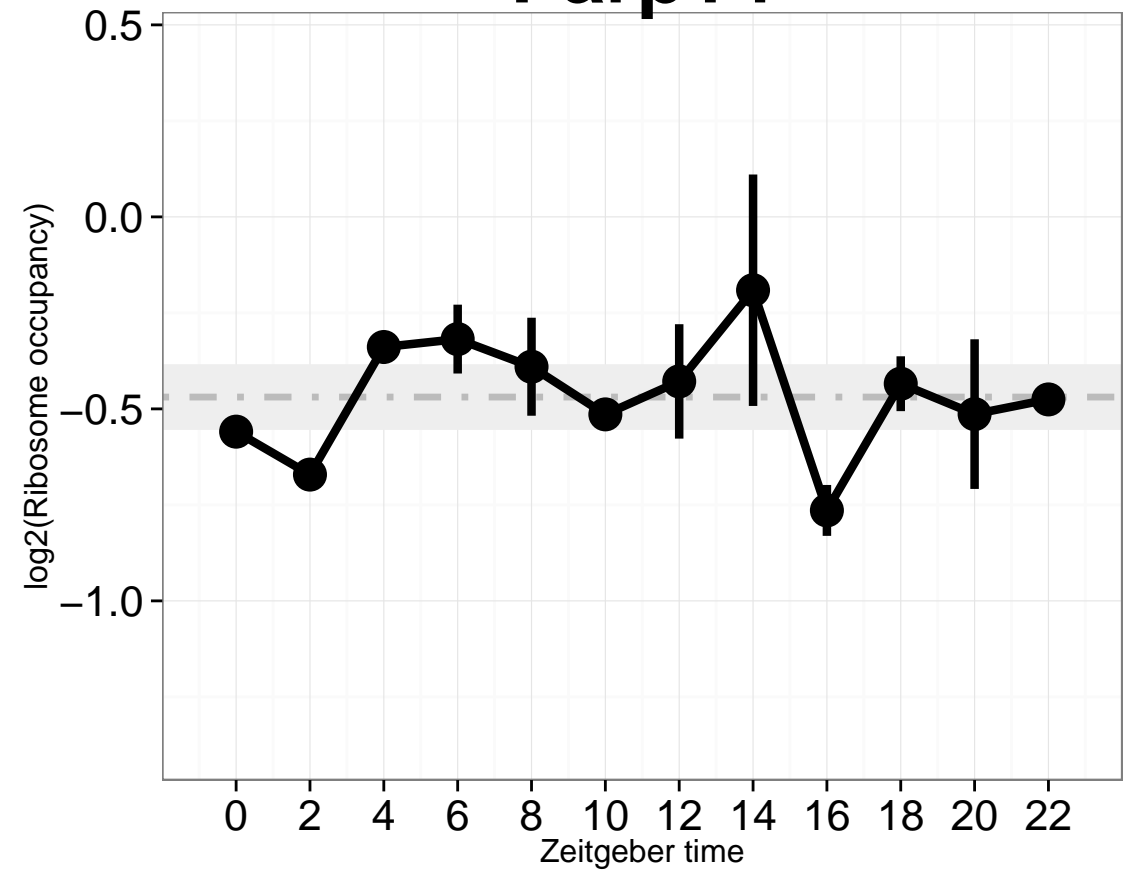

Supplement: Supplementary file 10641 [file 1]

# Sharpin

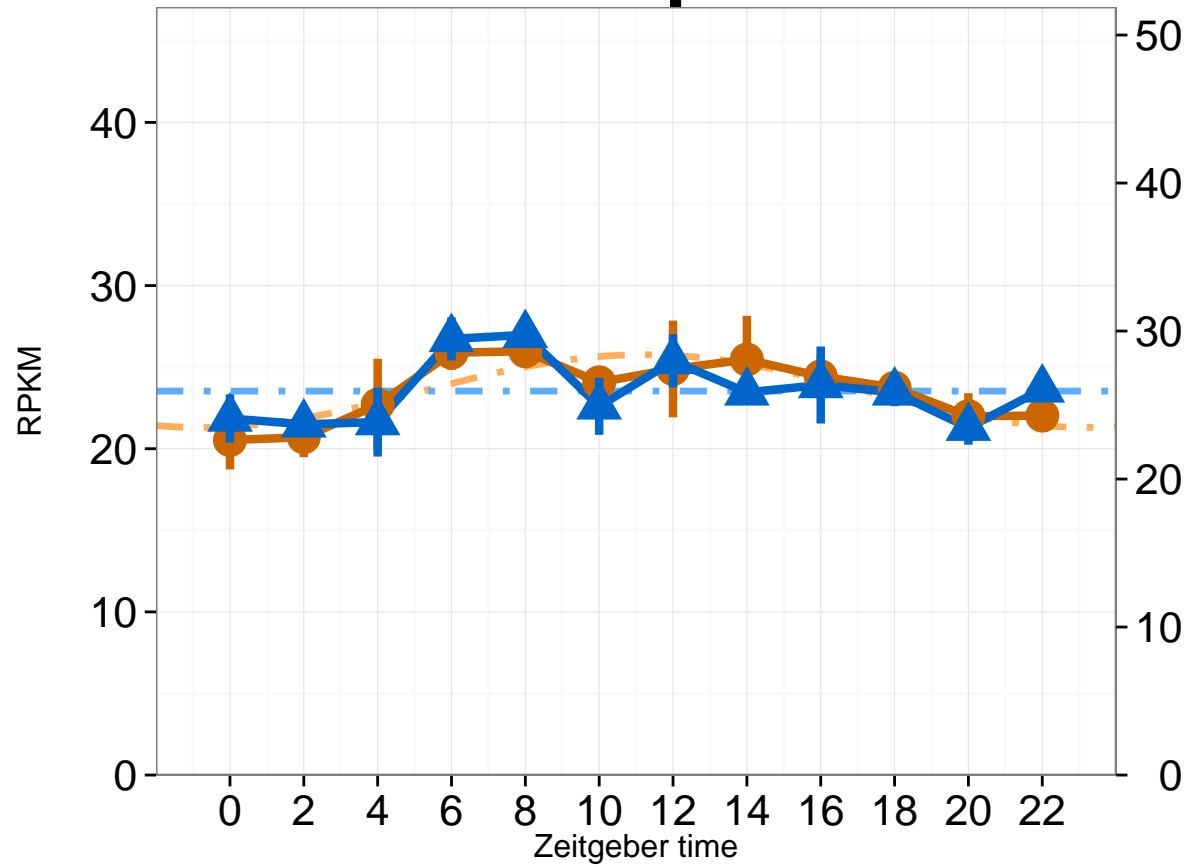

# Sharpin

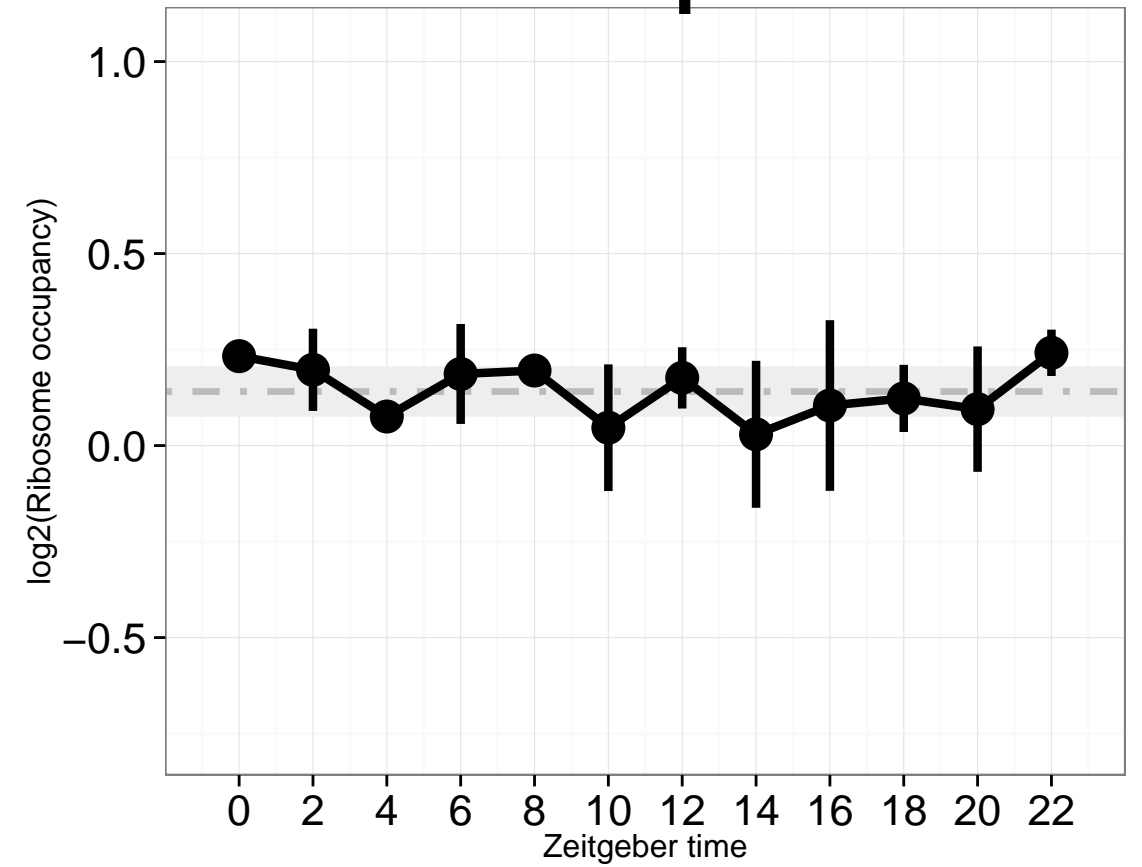

Supplement: Supplementary file 10642 [file 1]

## Ctnnb1

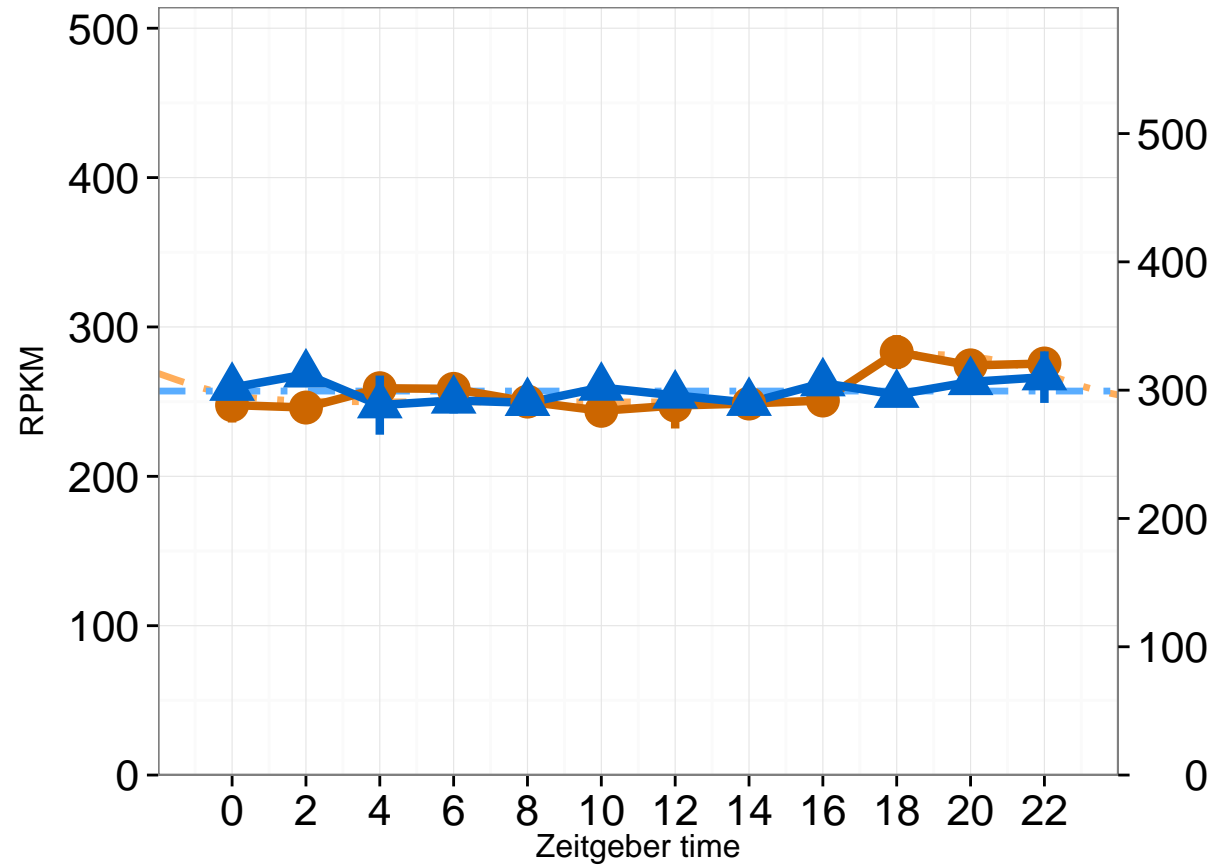

## Ctnnb1

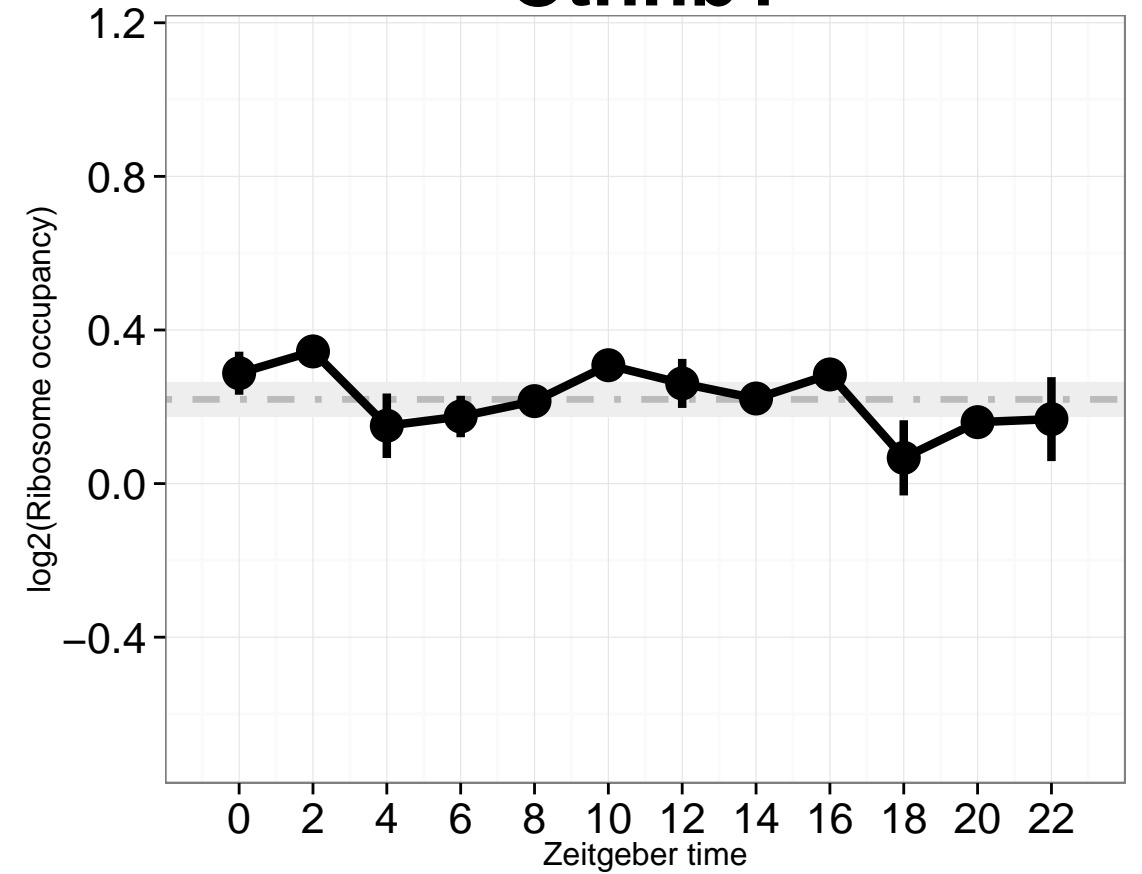

Supplement: Supplementary file 10643 [file 1]

# Spc24

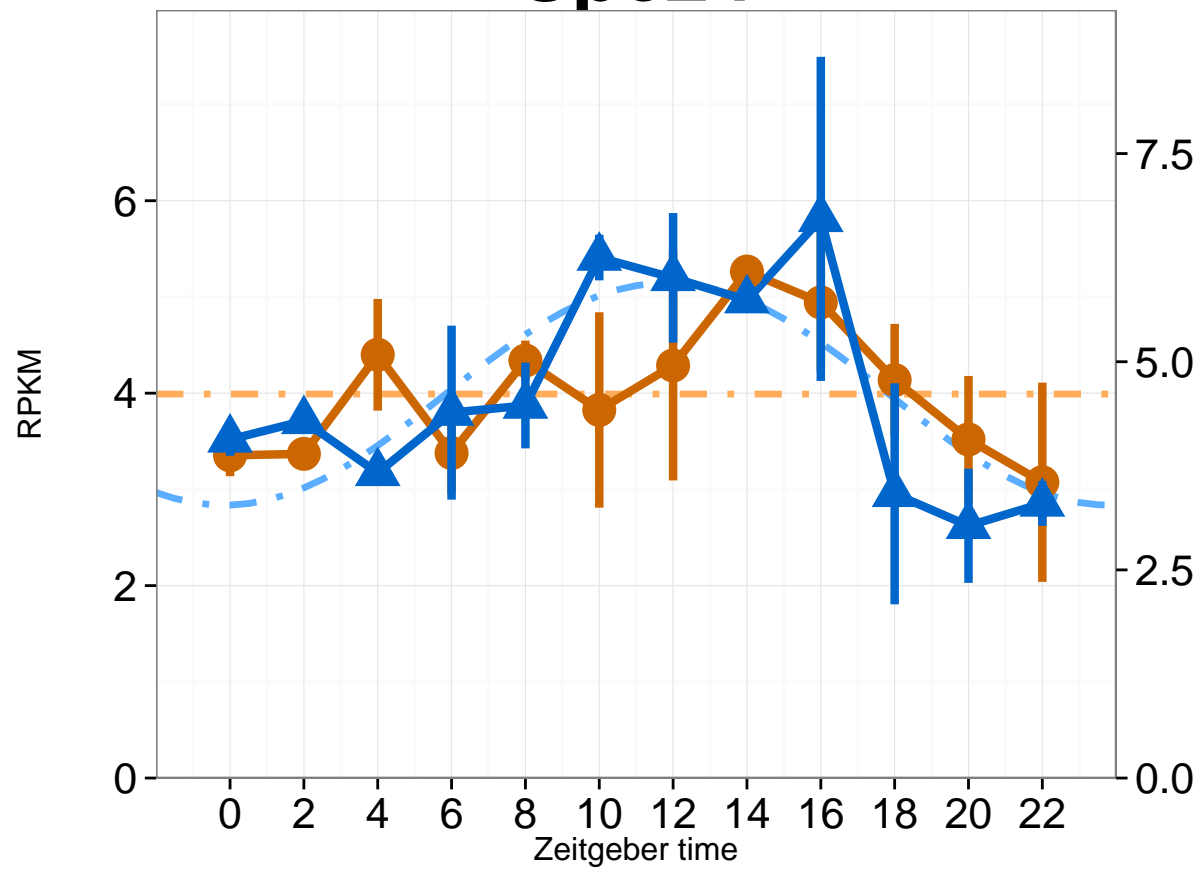

# Spc24

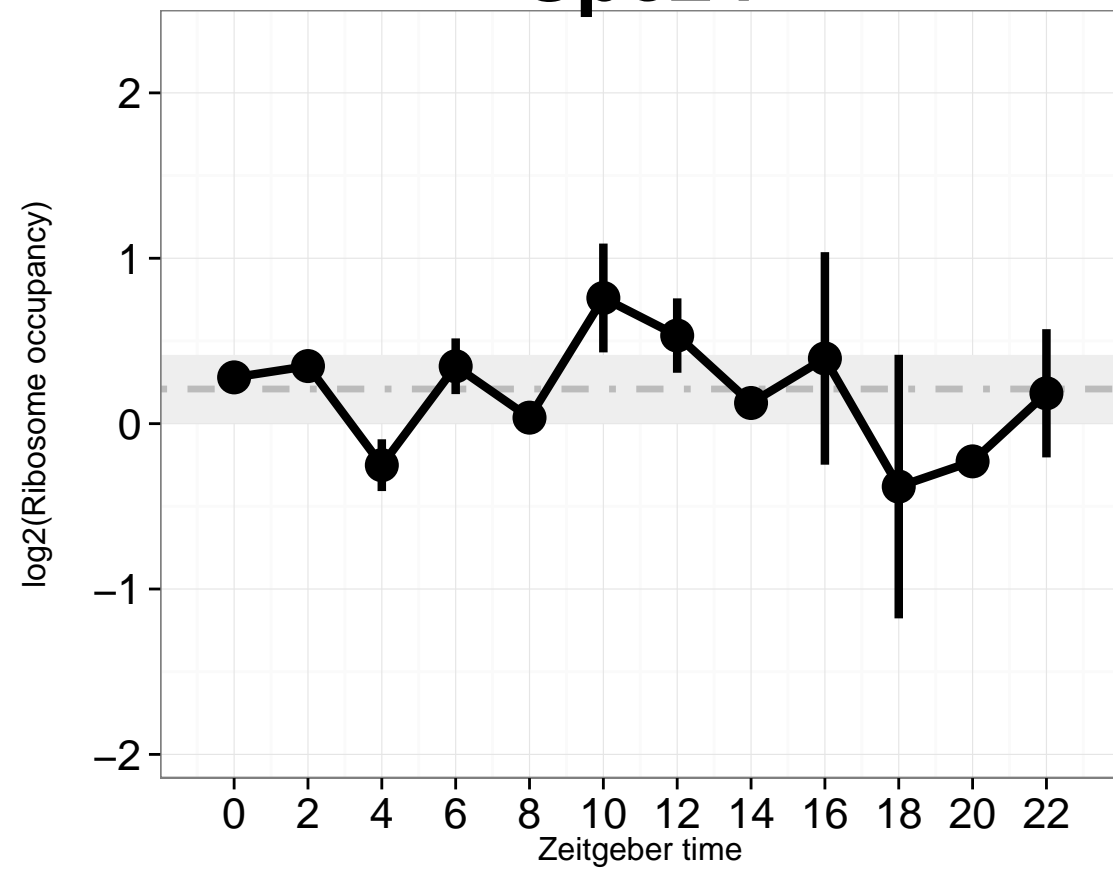

Supplement: Supplementary file 10644 [file 1]

# 0610011F06Rik

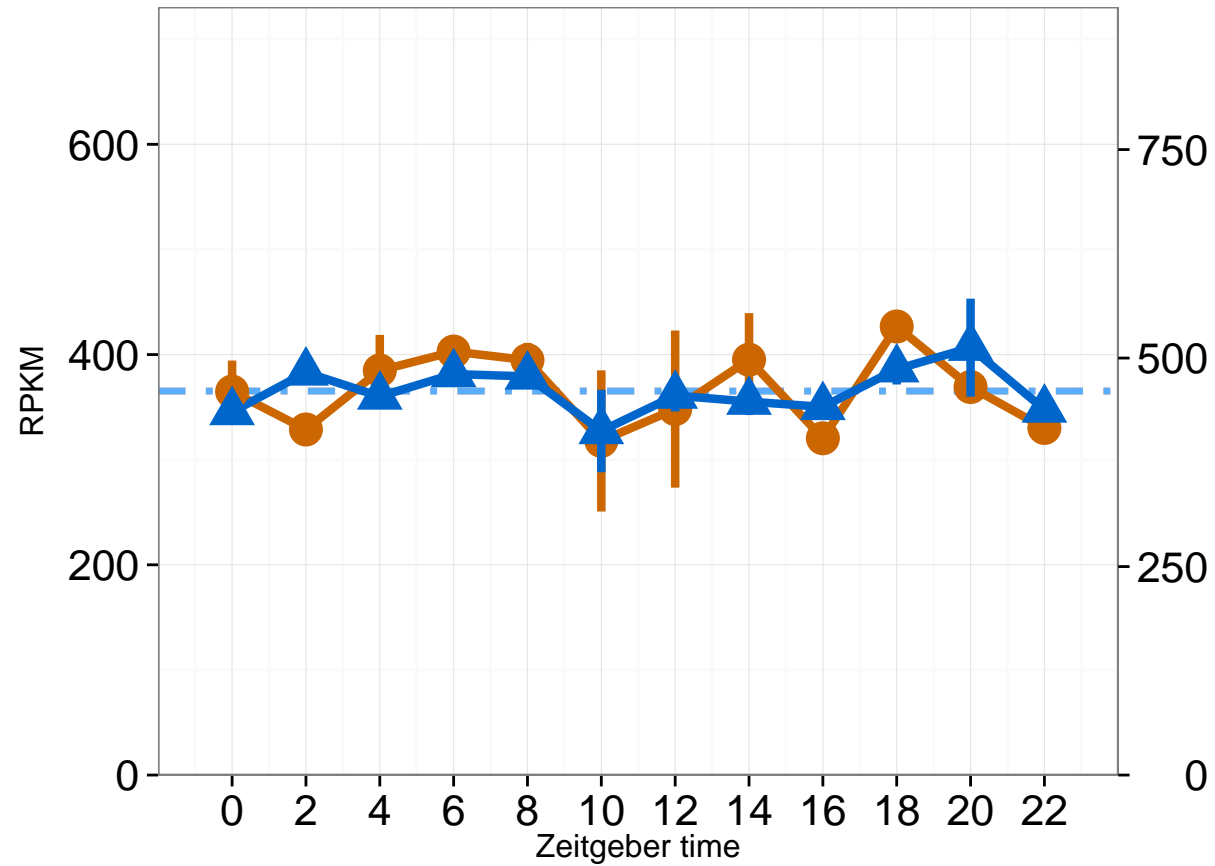

# 0610011F06Rik

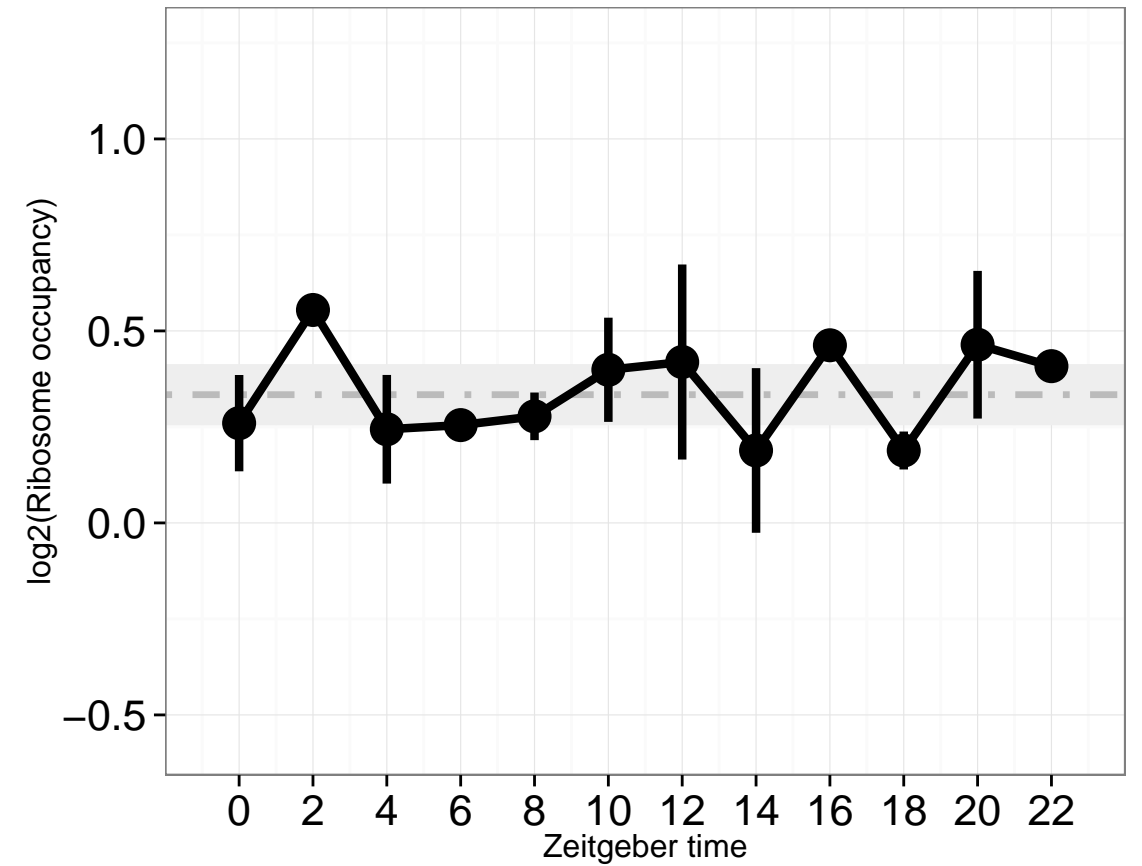

Supplement: Supplementary file 10645 [file 1]

# Slc18a1

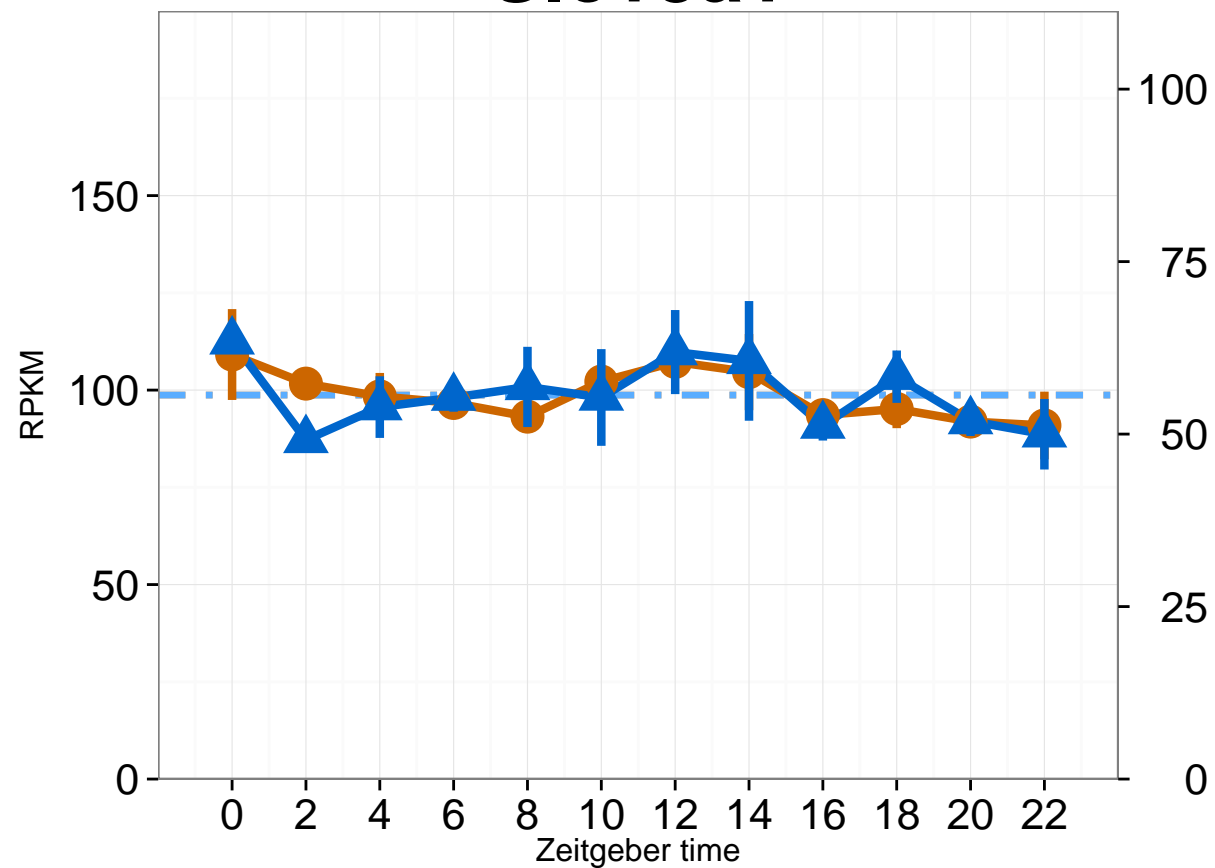

# Slc18a1

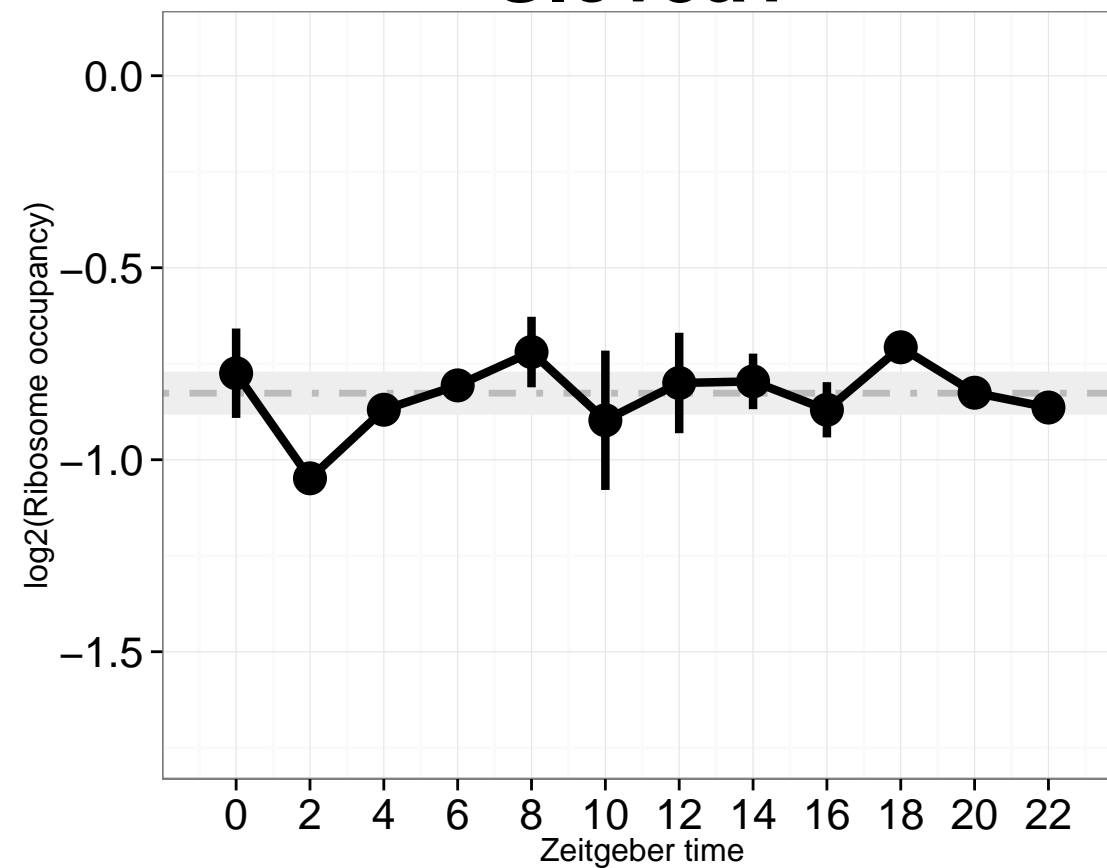

Supplement: Supplementary file 10646 [file 1]

# Adal

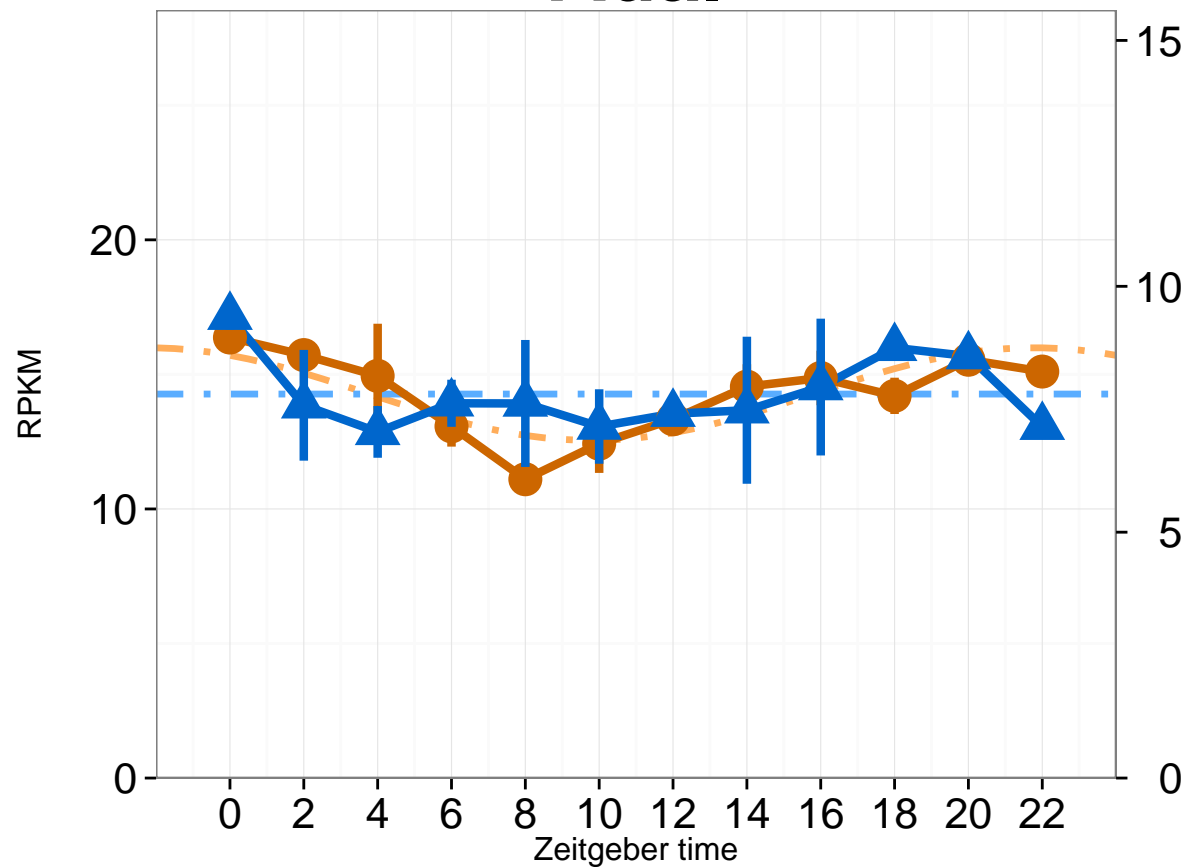

# Adal

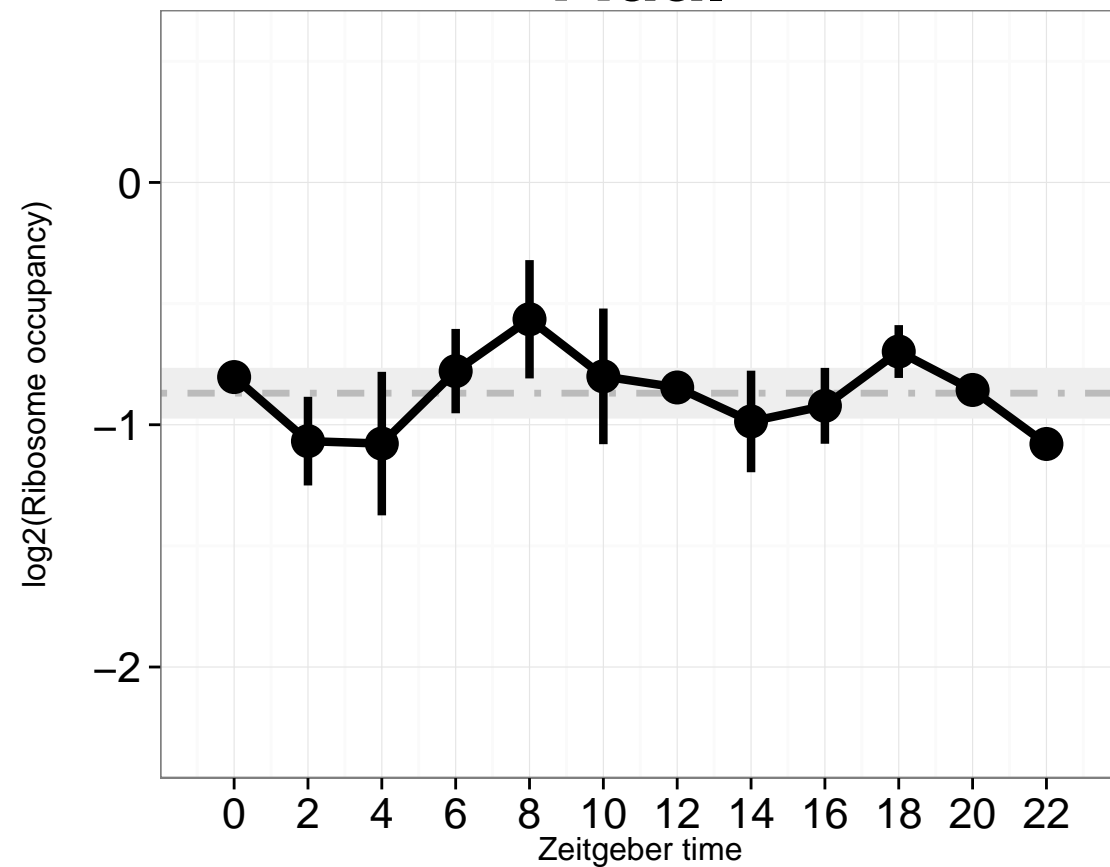

Supplement: Supplementary file 10647 [file 1]

# Fam213b

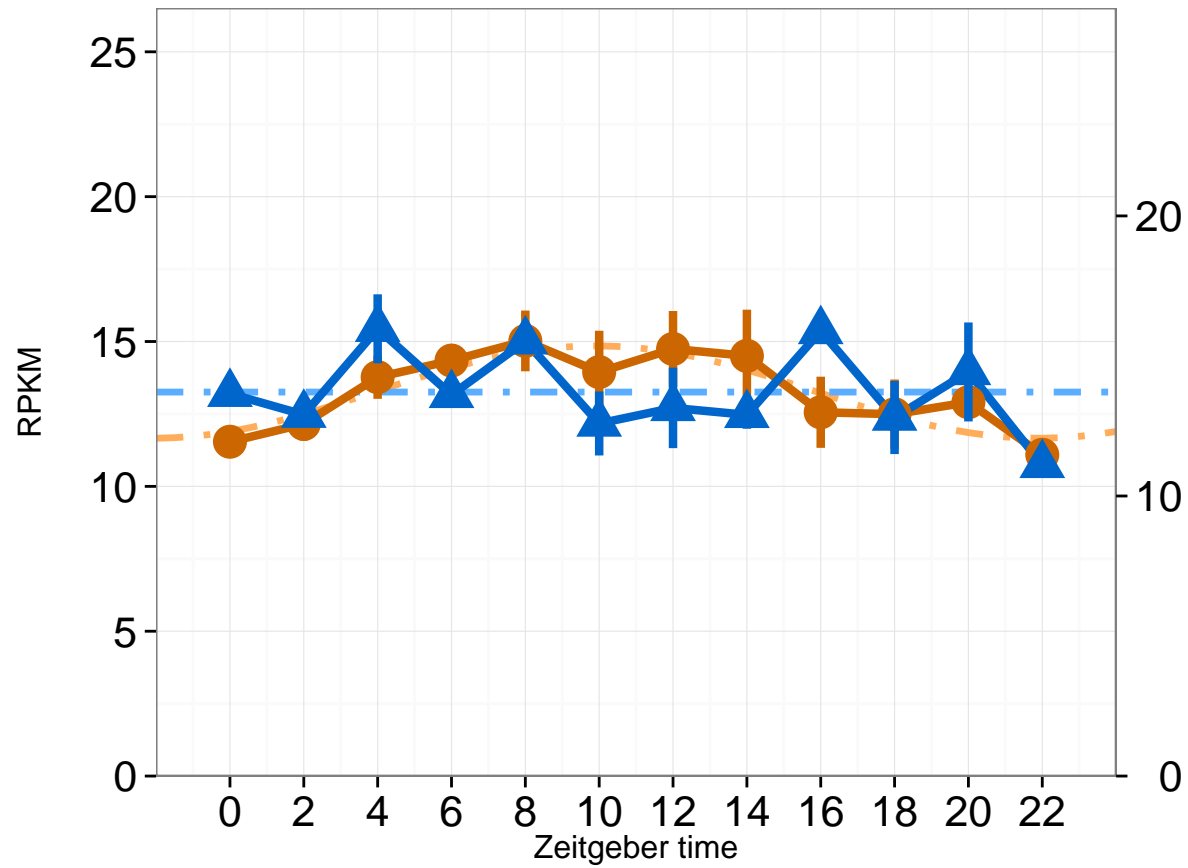

# Fam213b

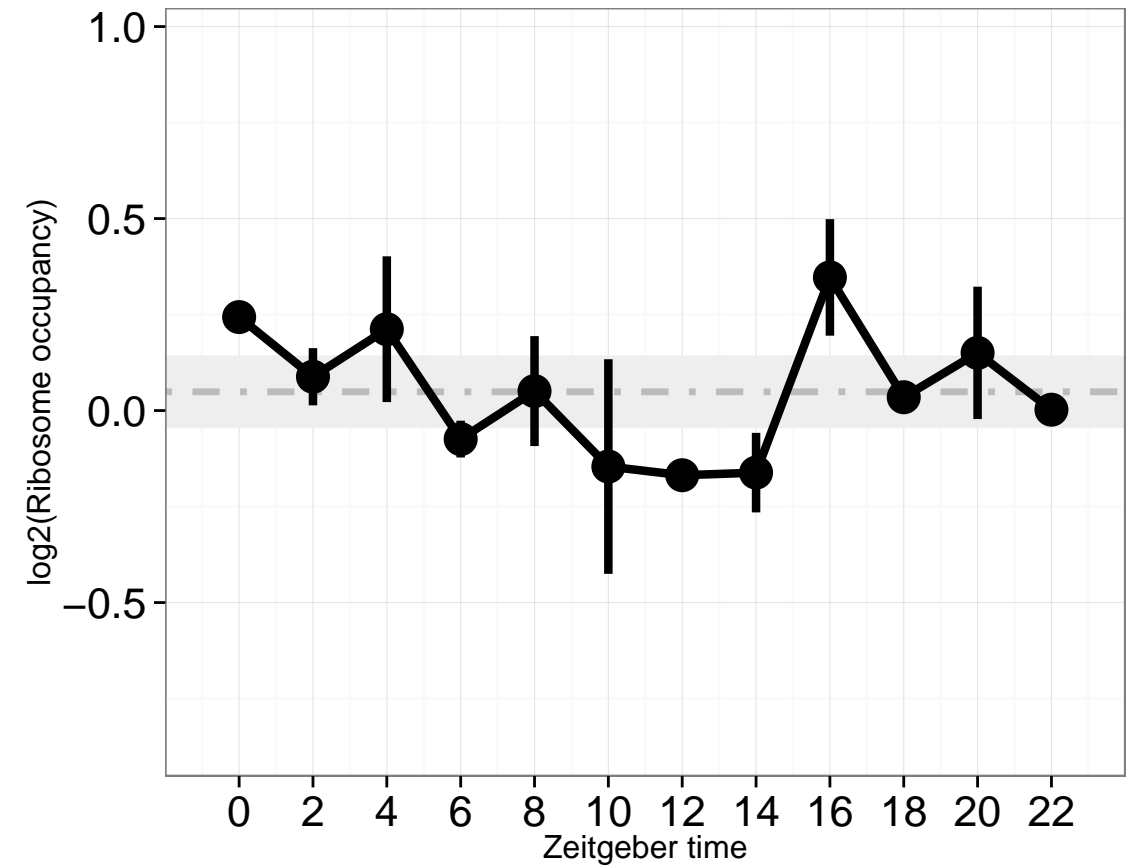

Supplement: Supplementary file 10648 [file 1]

## 2310047M10Rik

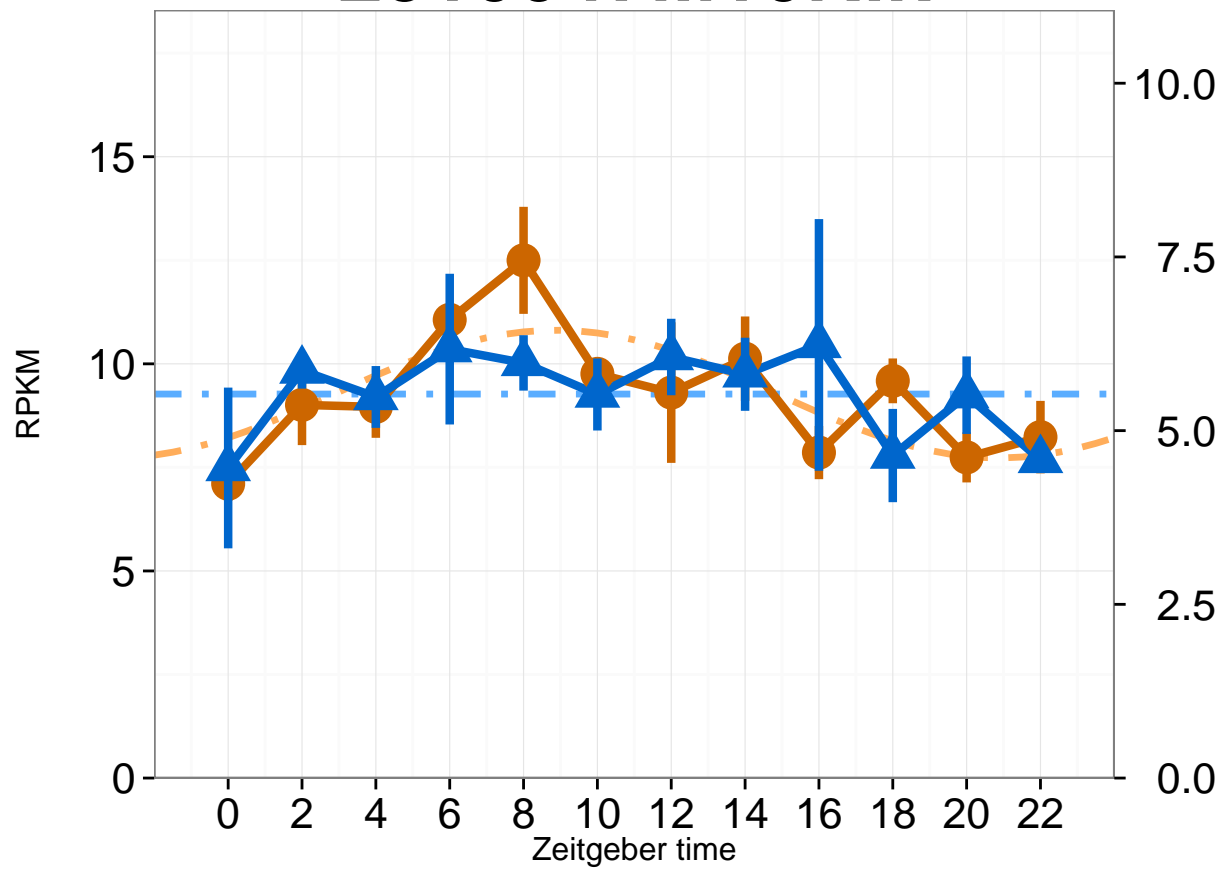

## 2310047M10Rik

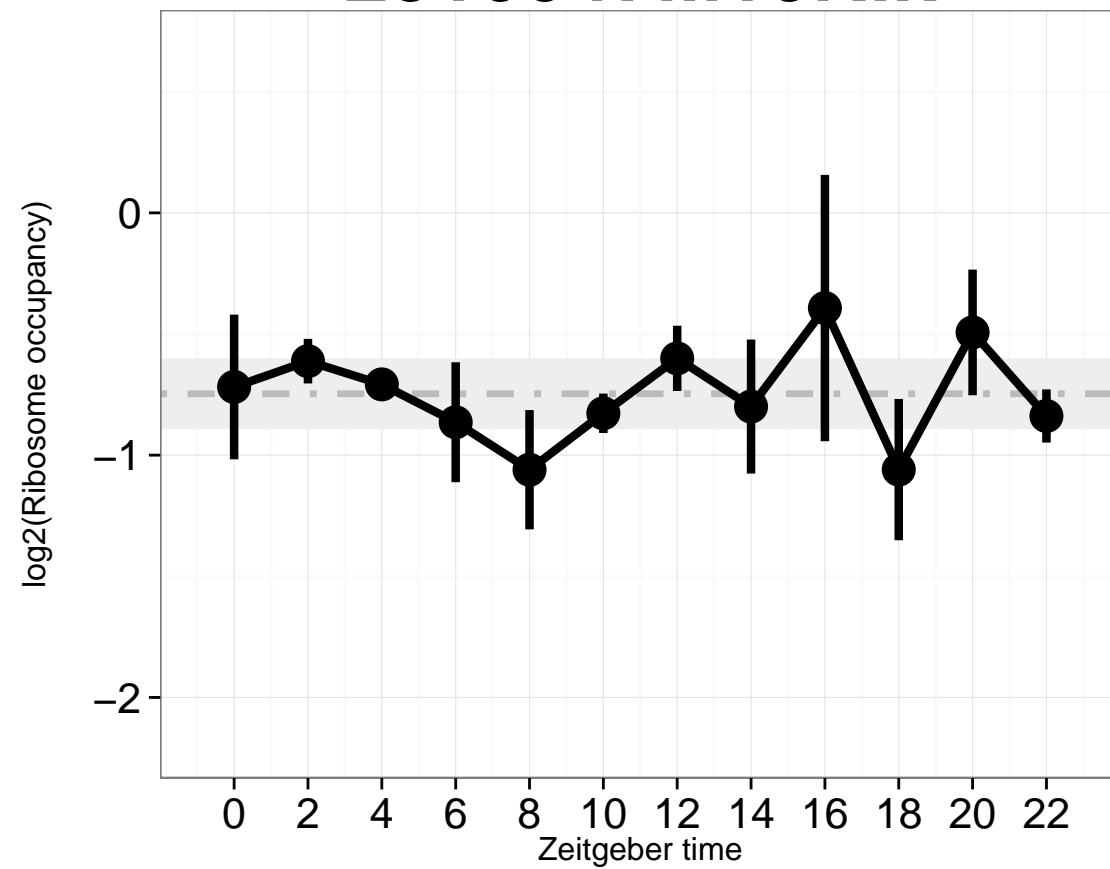

Supplement: Supplementary file 10649 [file 1]

# Fv1

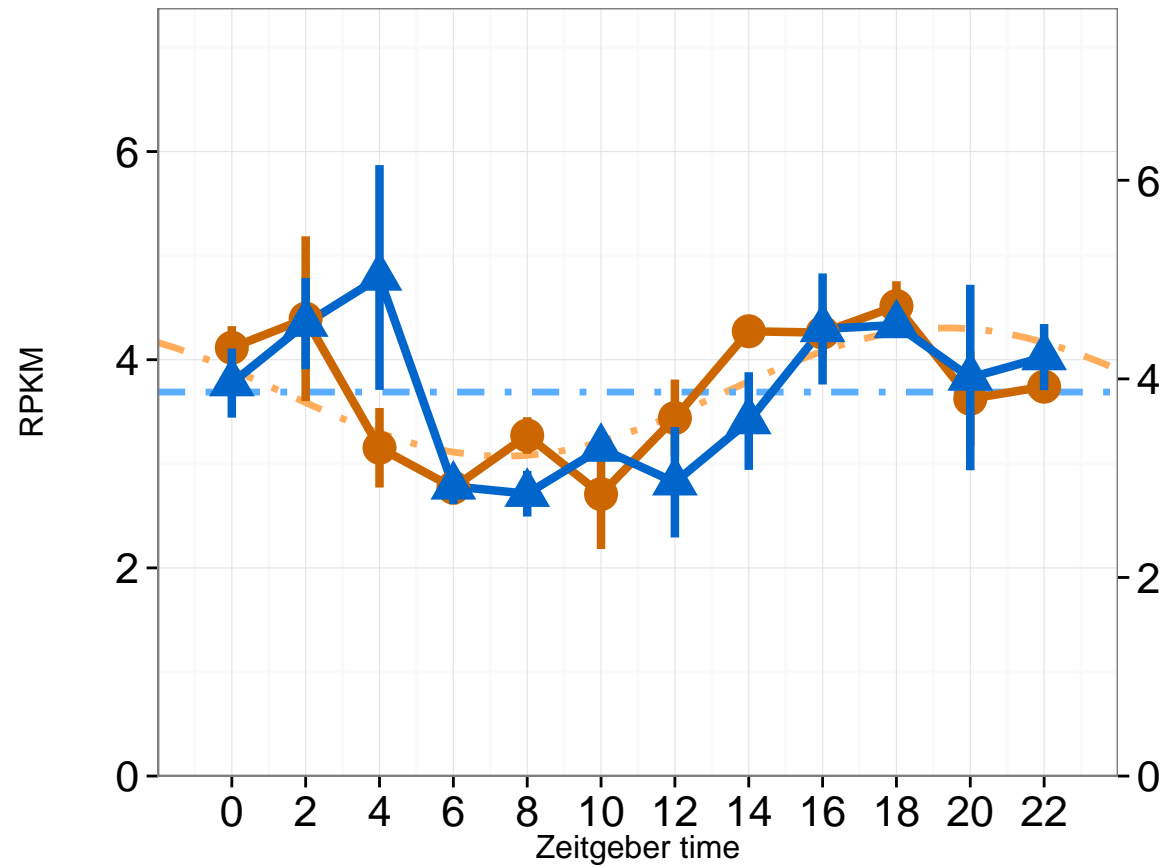

# Fv1

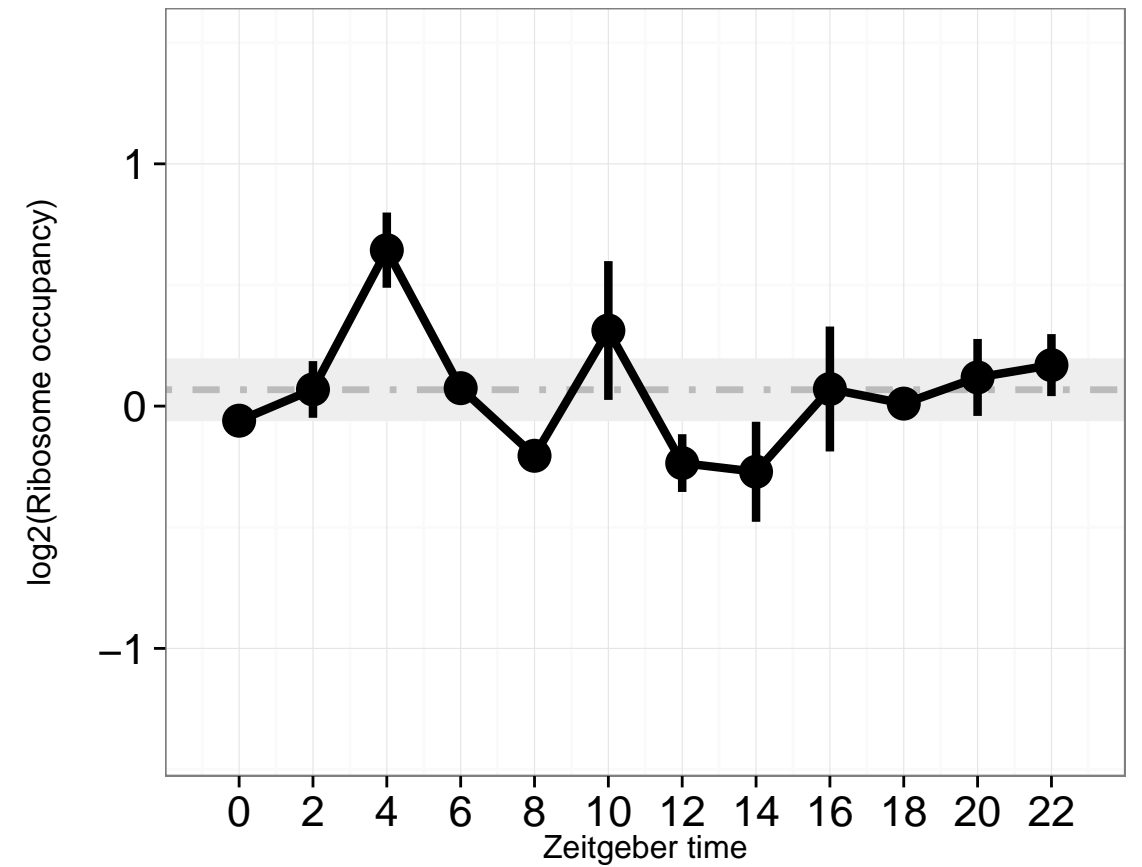

Supplement: Supplementary file 10650 [file 1]

## Etfb

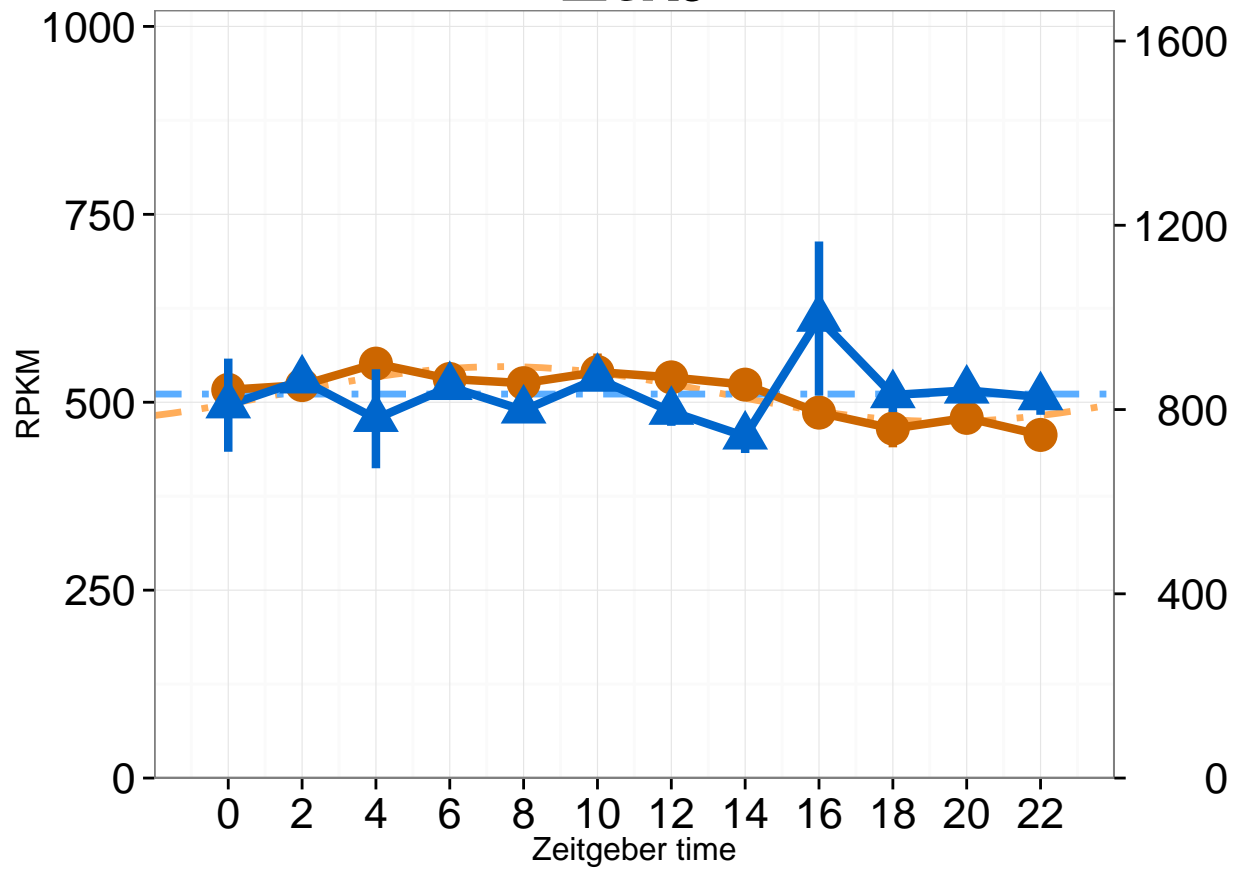

## Etfb

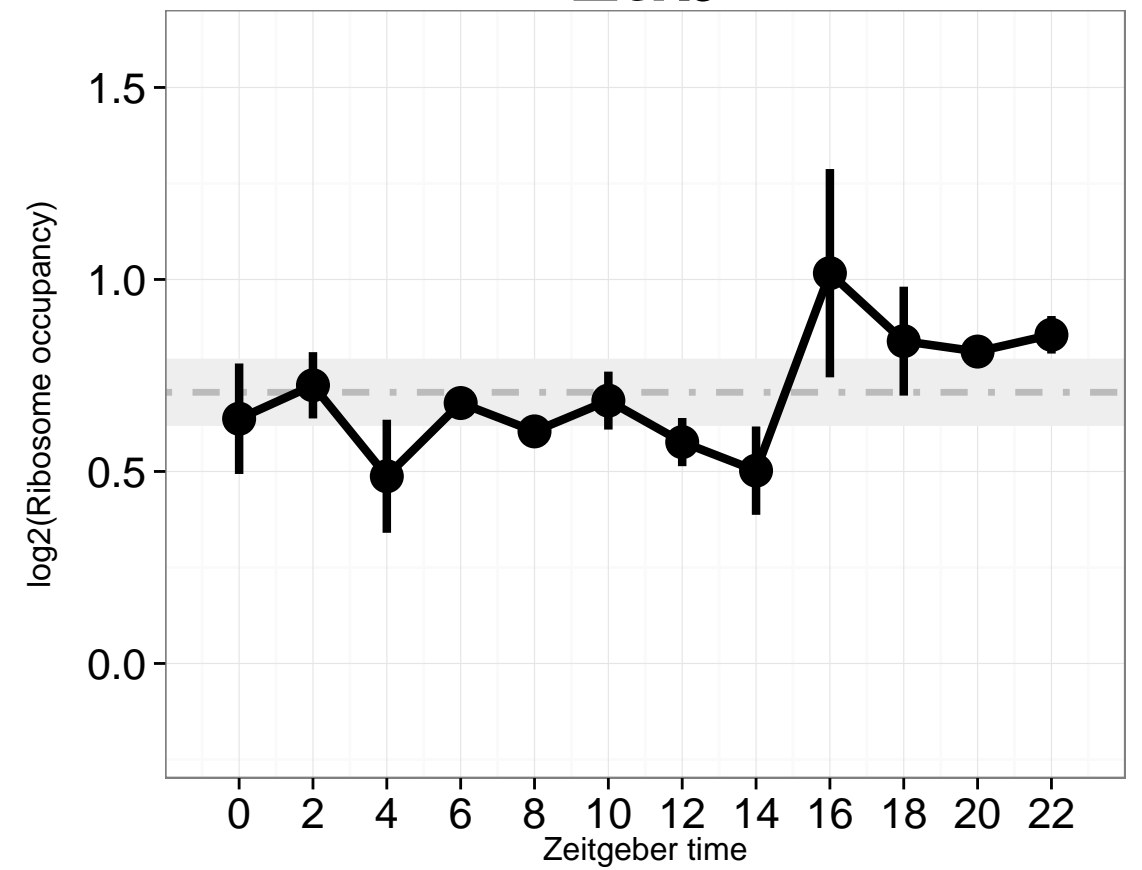

Supplement: Supplementary file 10651 [file 1]

# Lrwd1

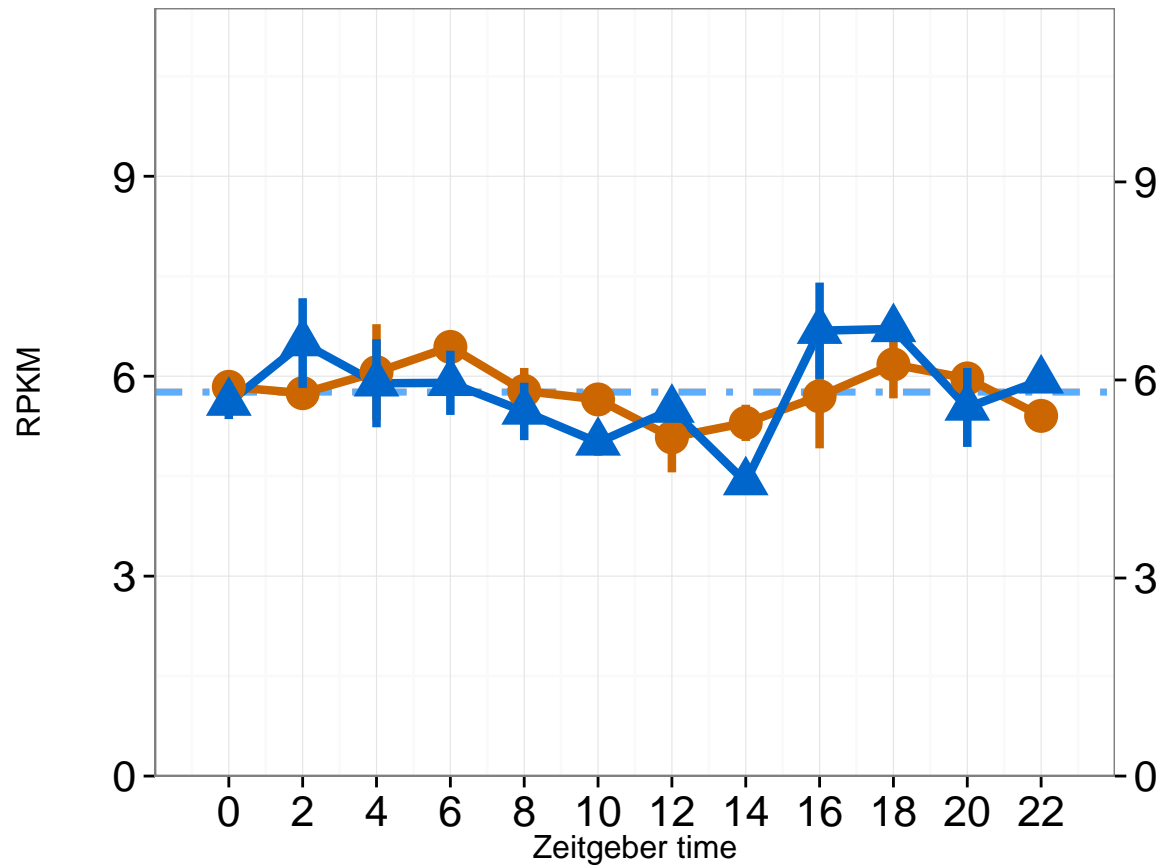

# Lrwd1

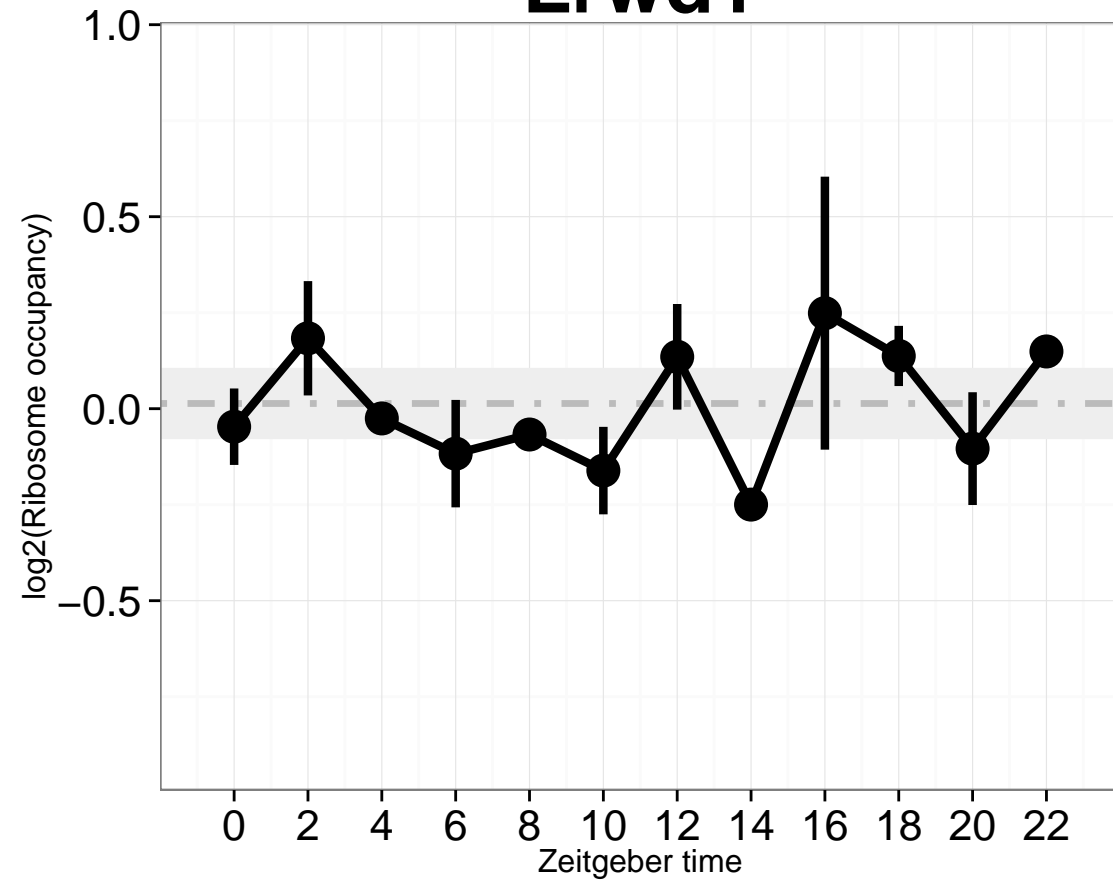

Supplement: Supplementary file 10652 [file 1]

## Stoml1

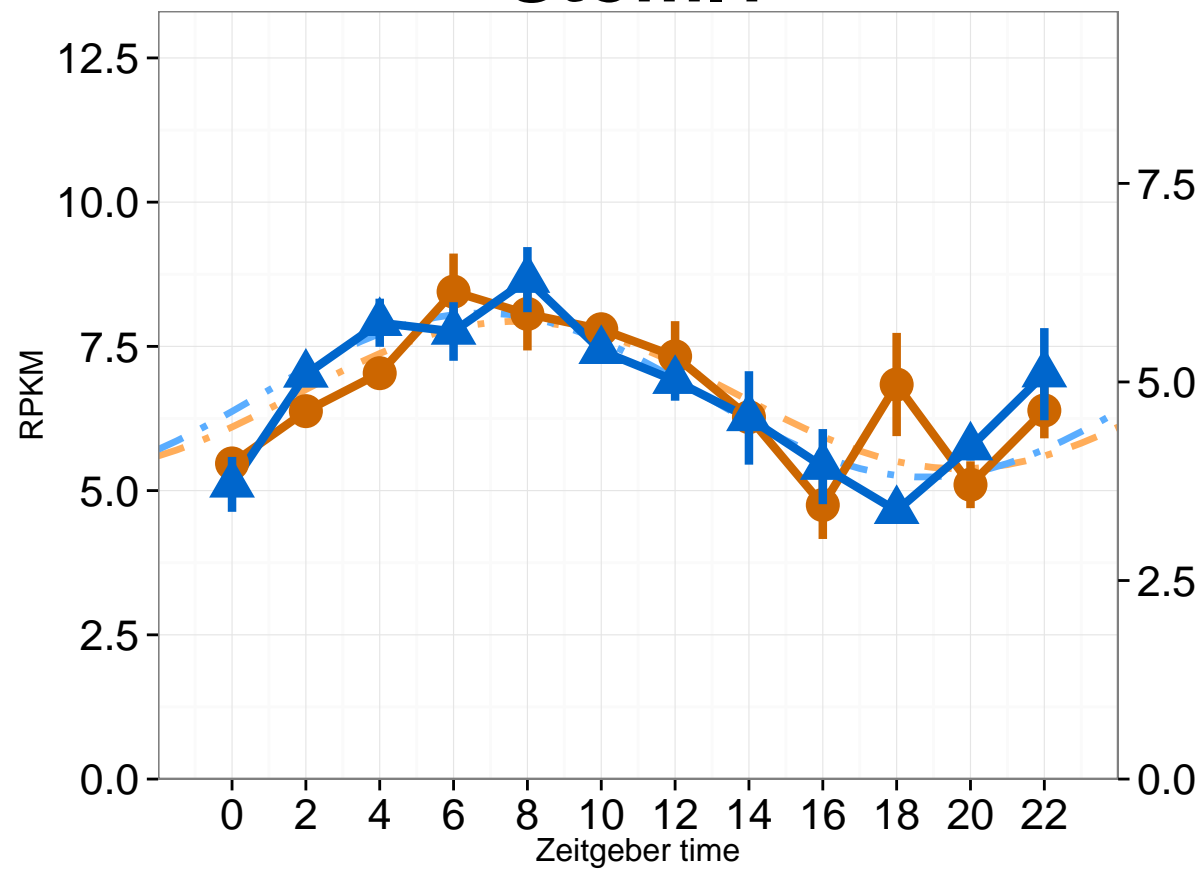

## Stoml1

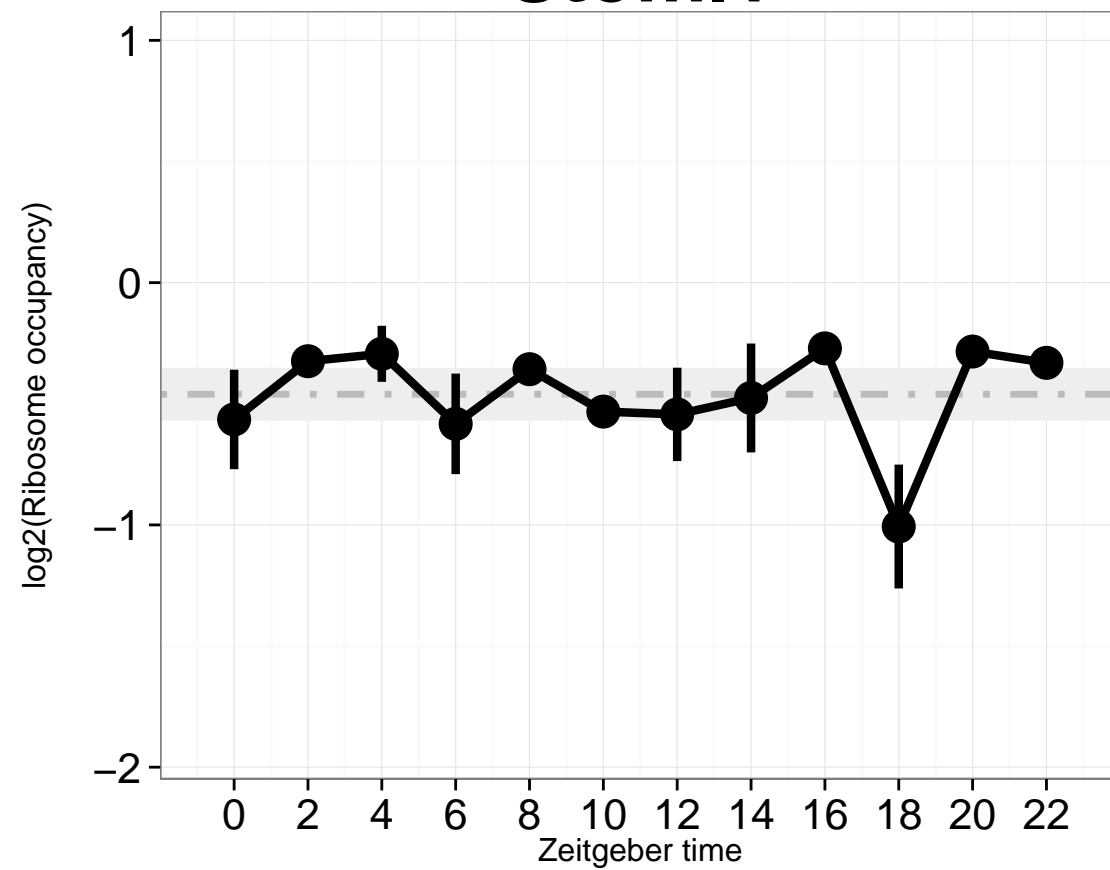

Supplement: Supplementary file 10653 [file 1]

# Serpina3k

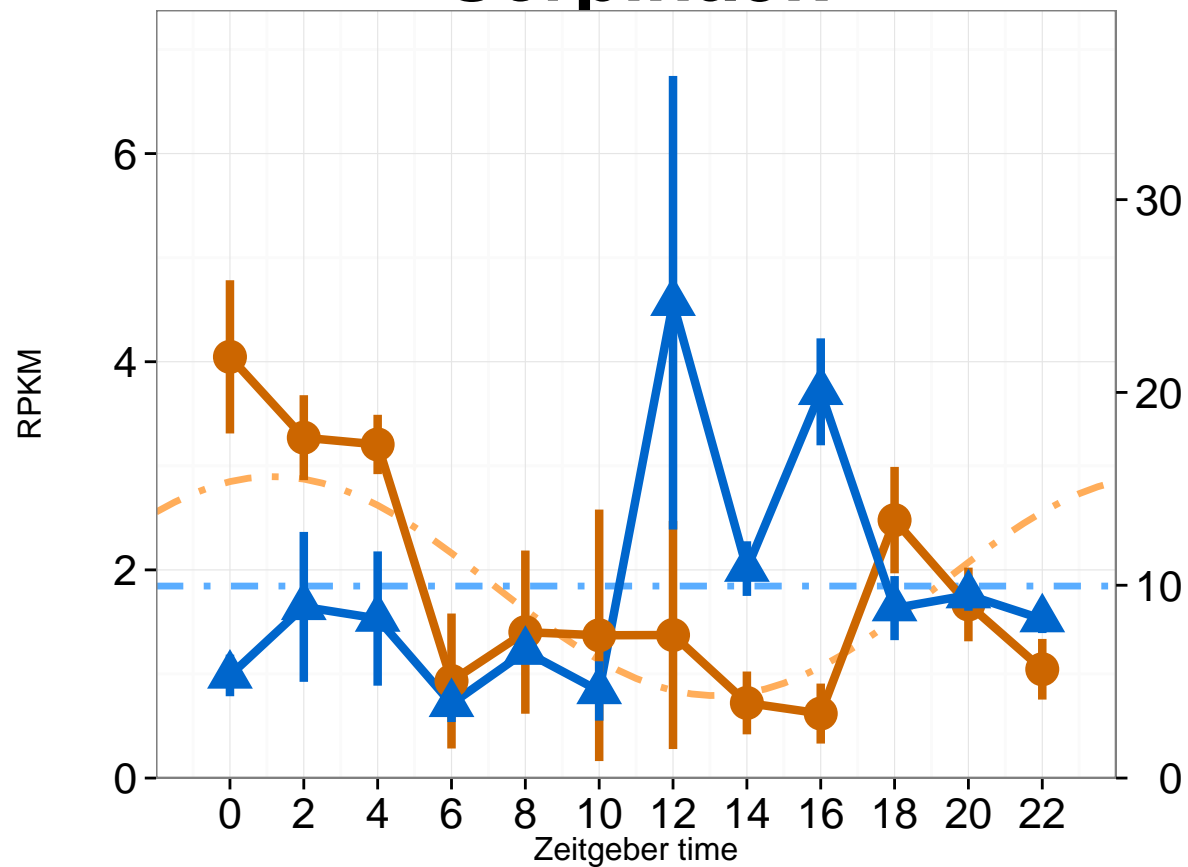

# Serpina3k

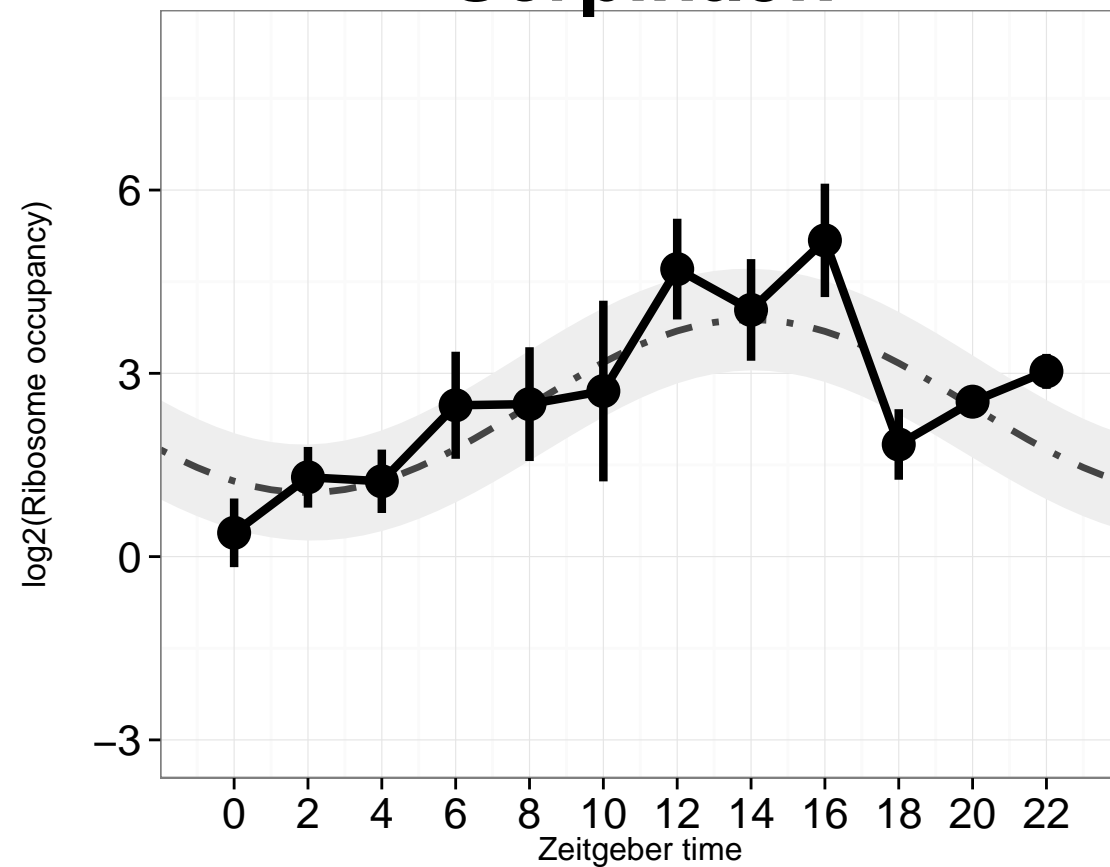

Supplement: Supplementary file 10654 [file 1]

## Tefm

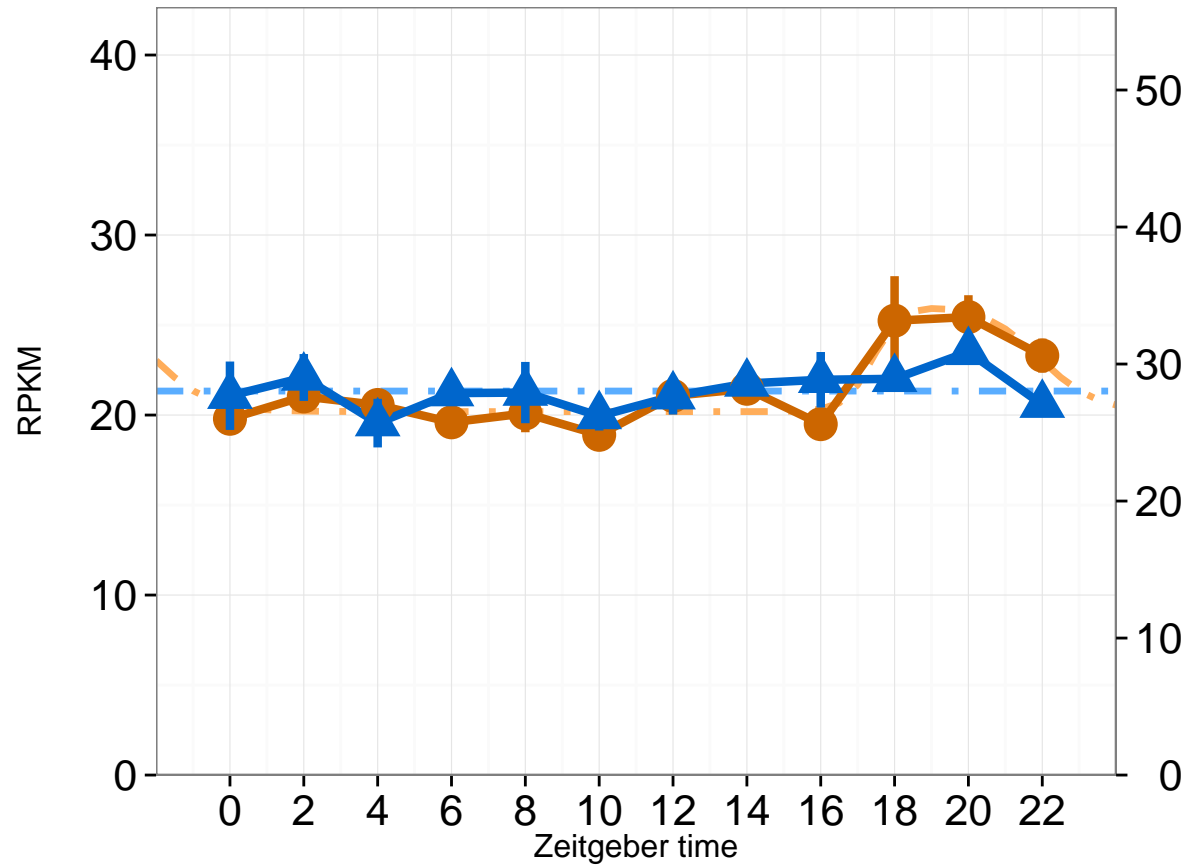

## Tefm

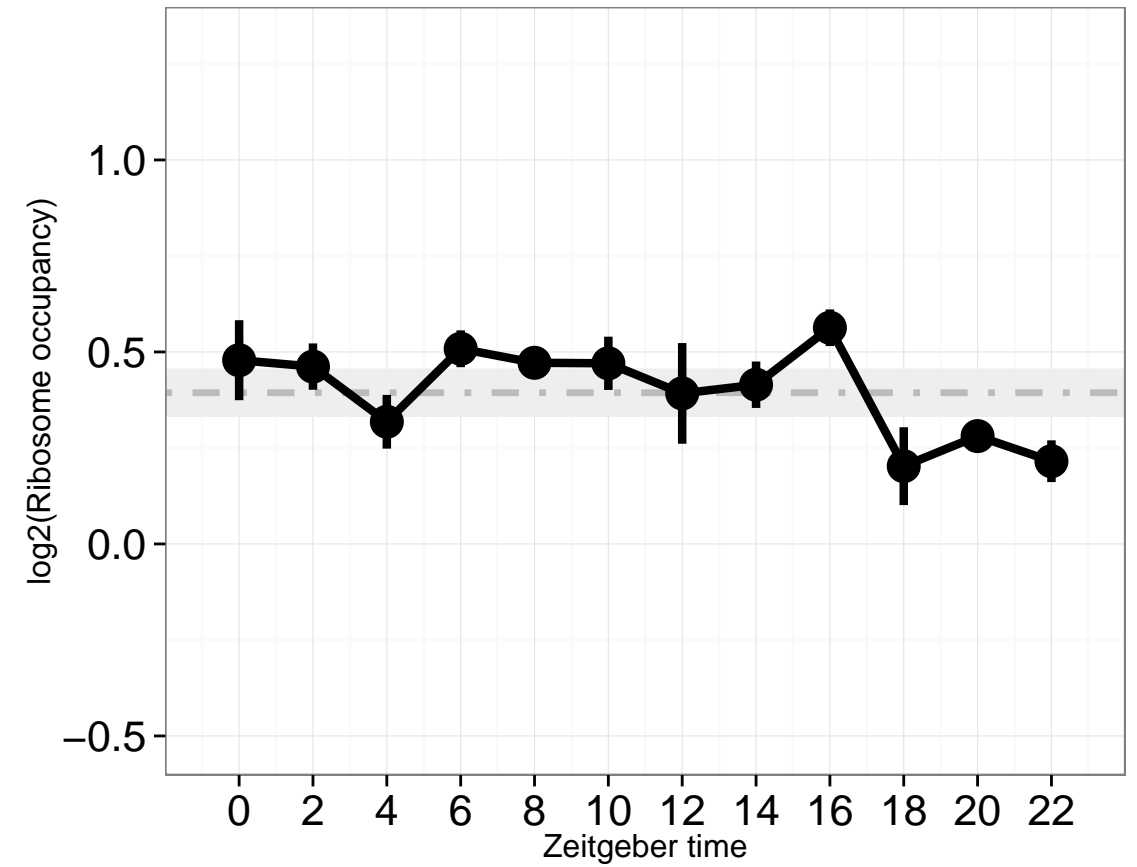

Supplement: Supplementary file 10655 [file 1]

## Ppbp

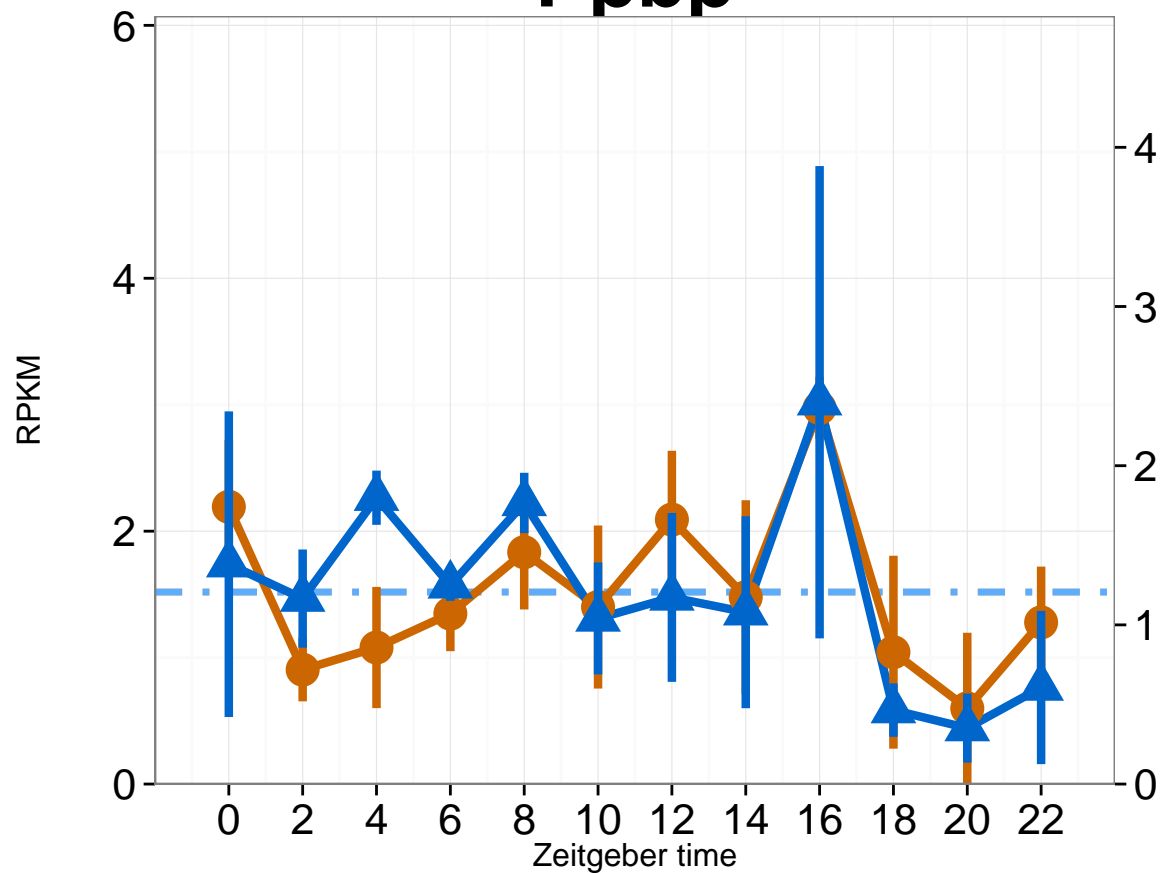

## Ppbp

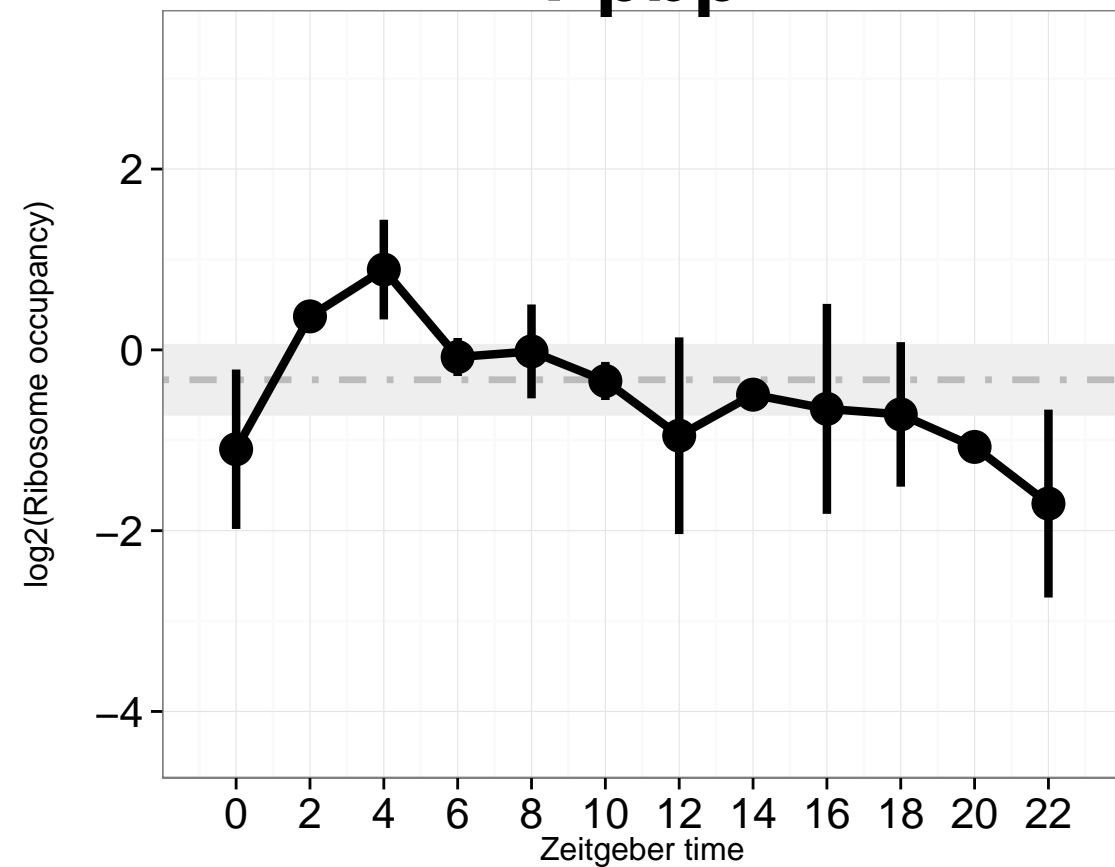

Supplement: Supplementary file 10656 [file 1]

## ler3ip1

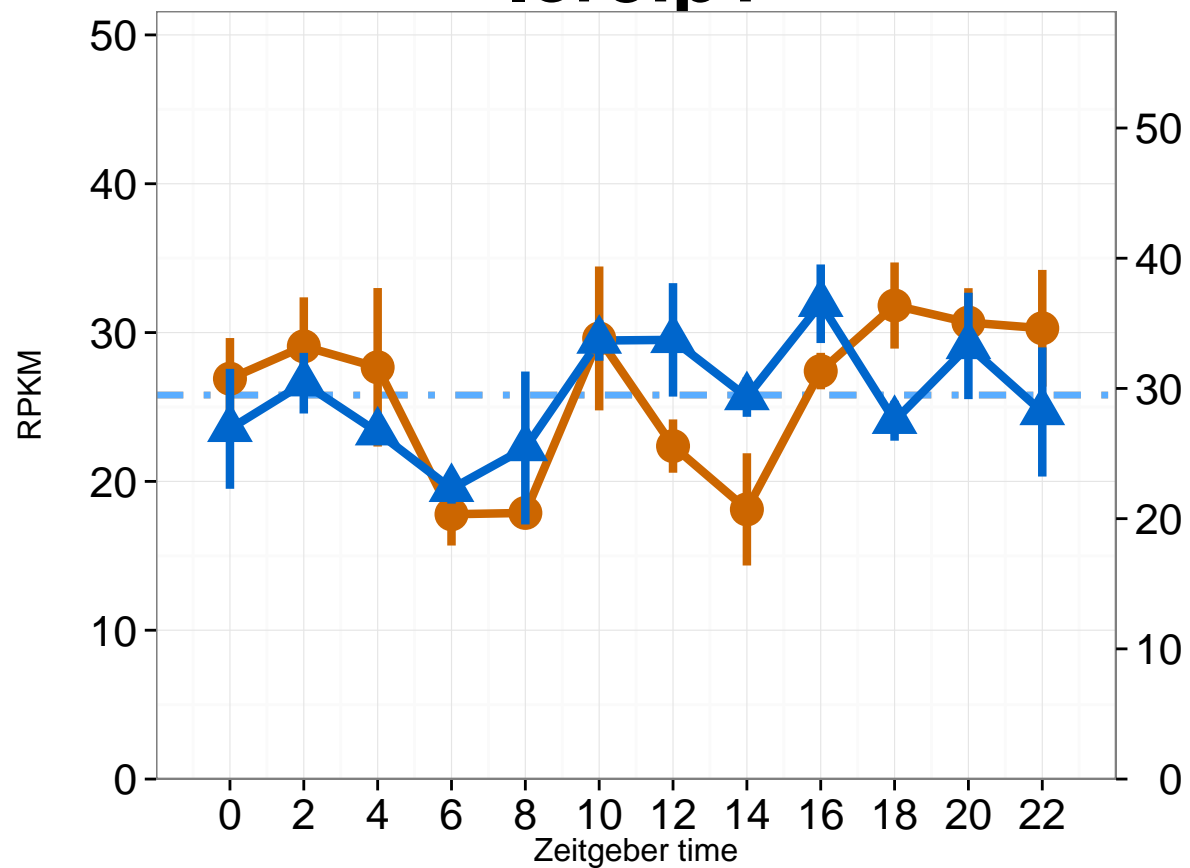

## ler3ip1

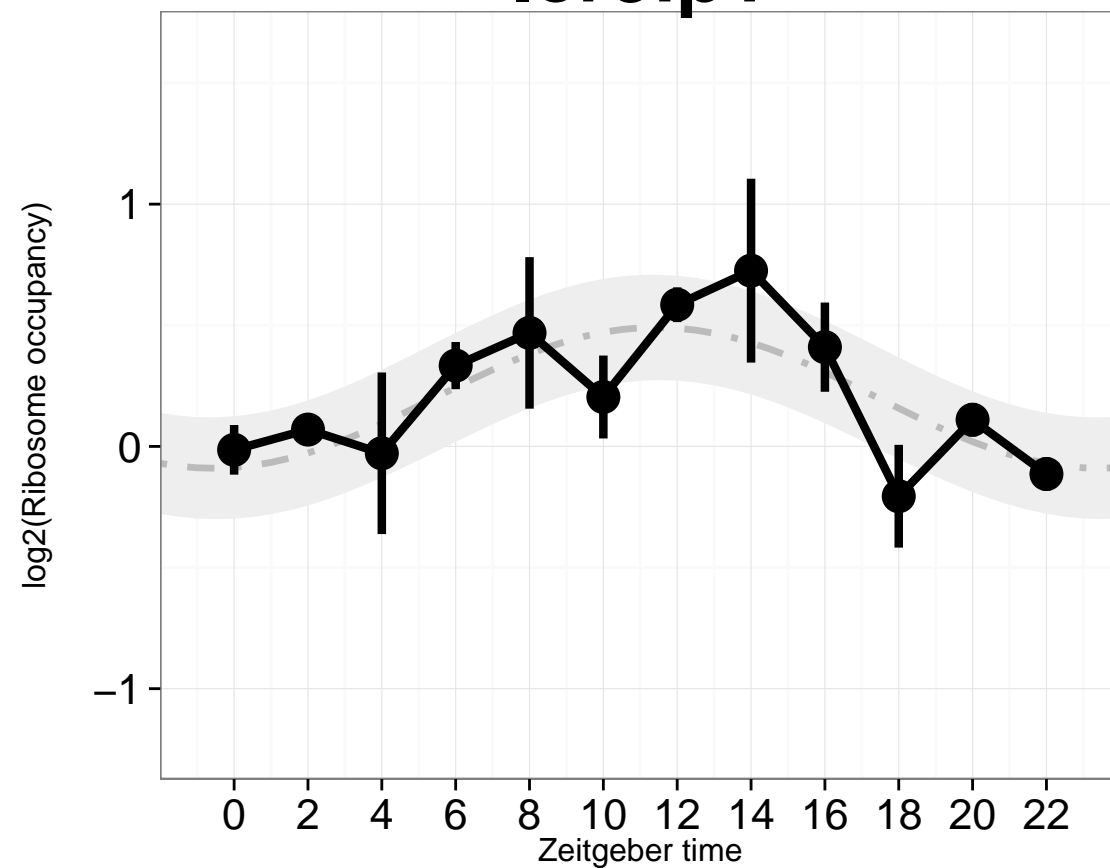

Supplement: Supplementary file 10657 [file 1]

## PIk5

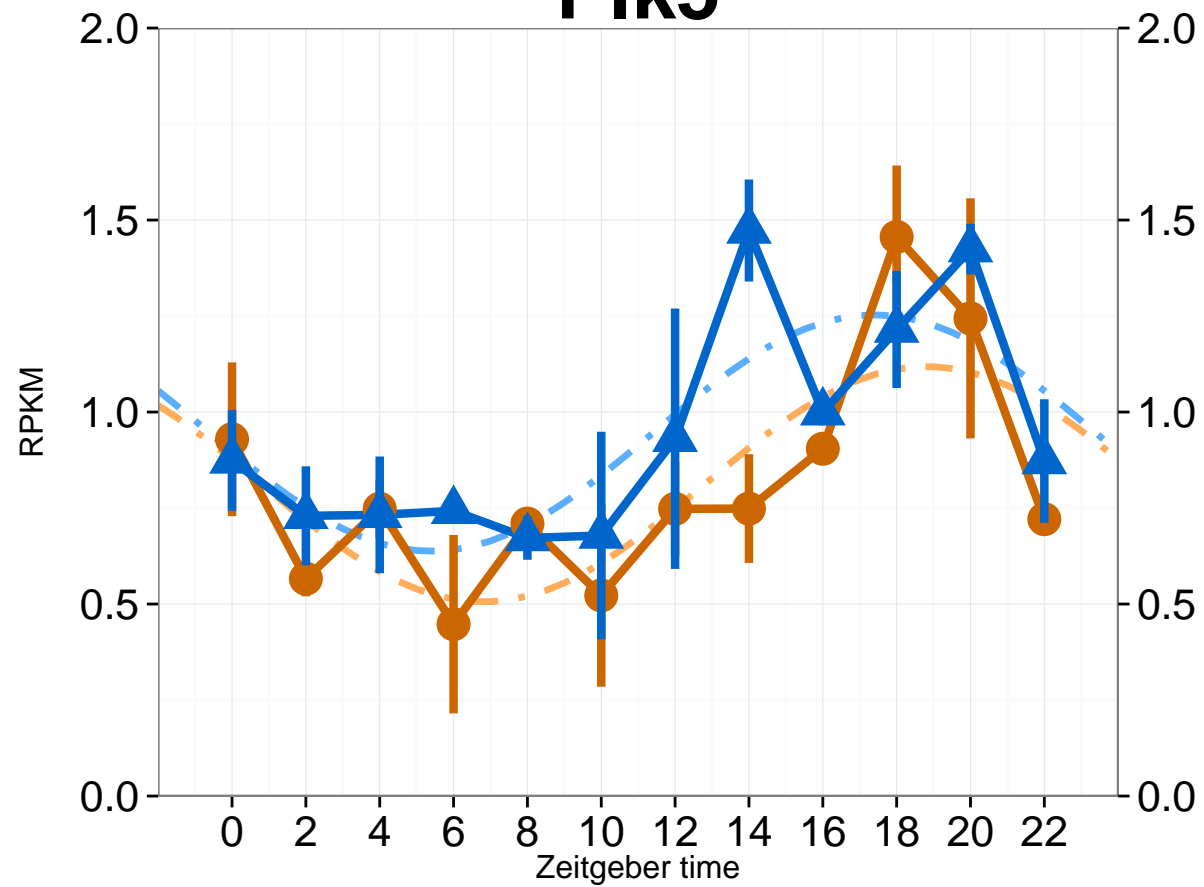

## PIk5

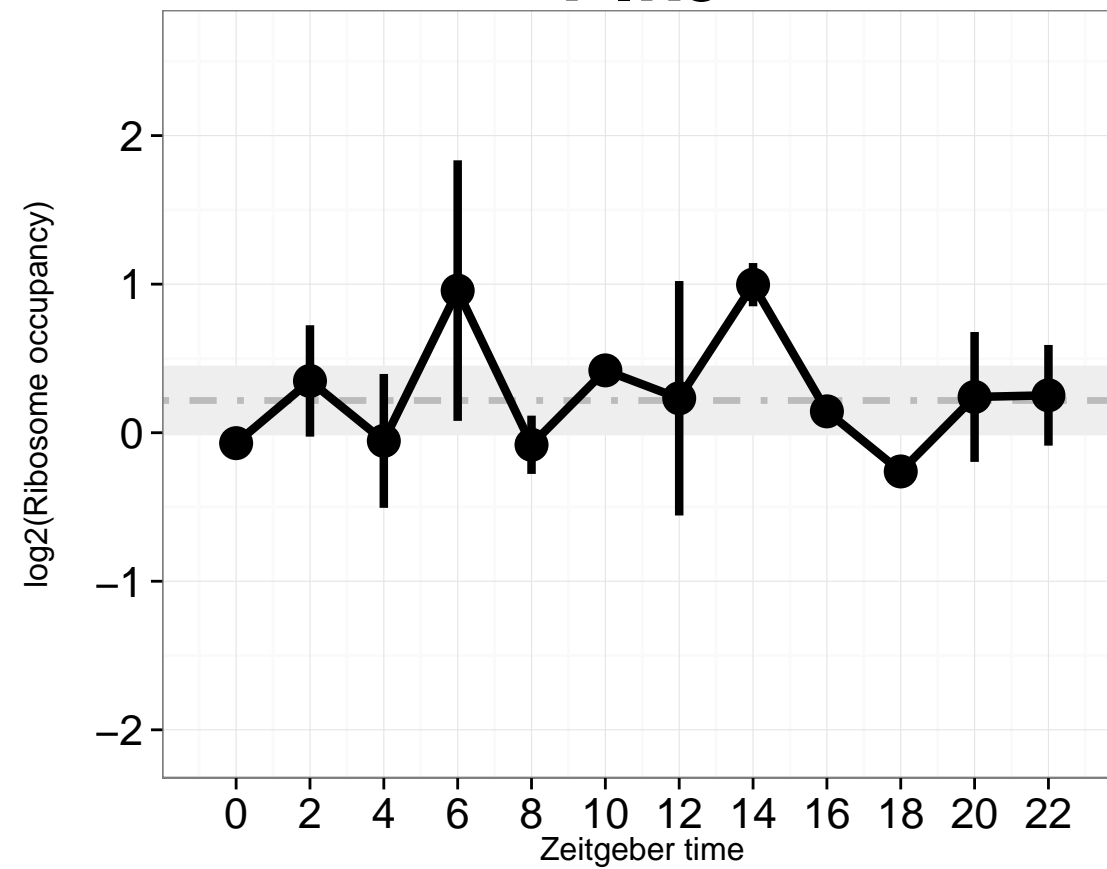

Supplement: Supplementary file 10658 [file 1]

## Nudt12

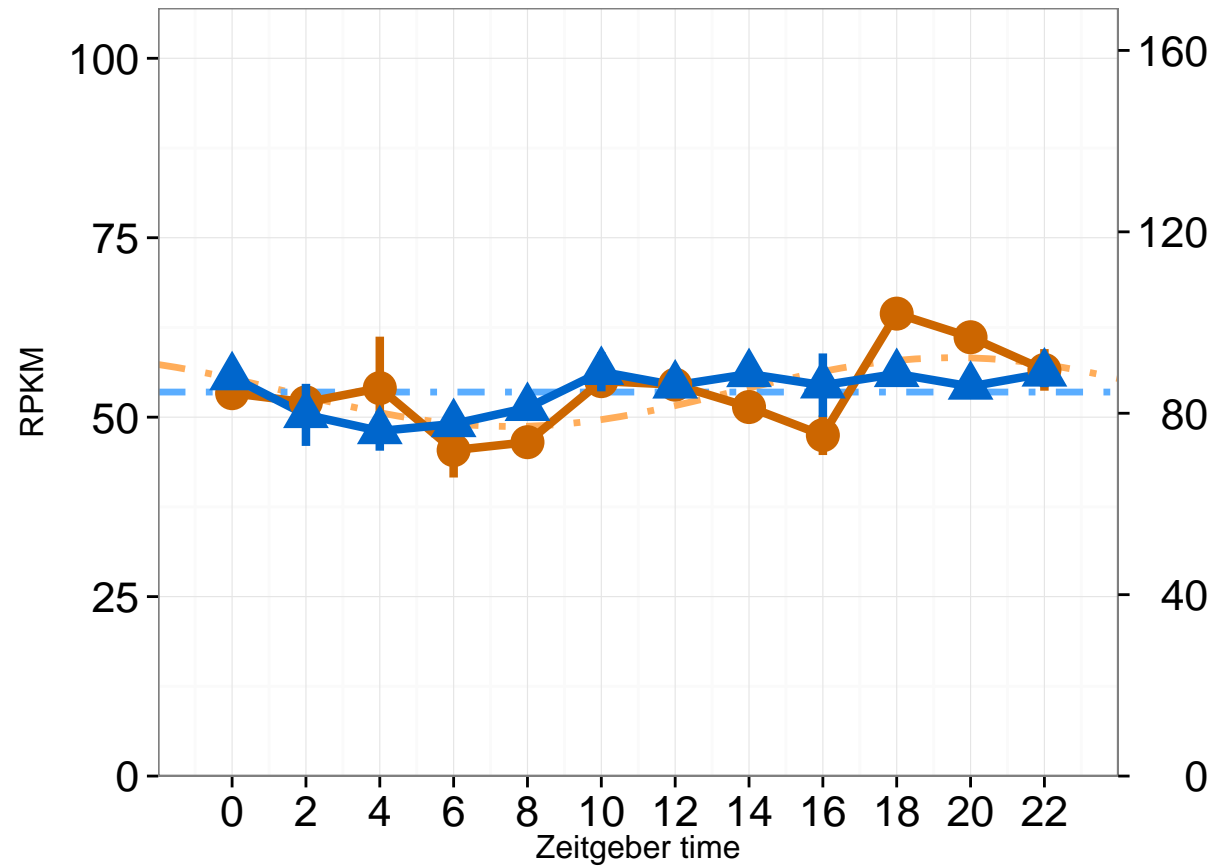

## Nudt12

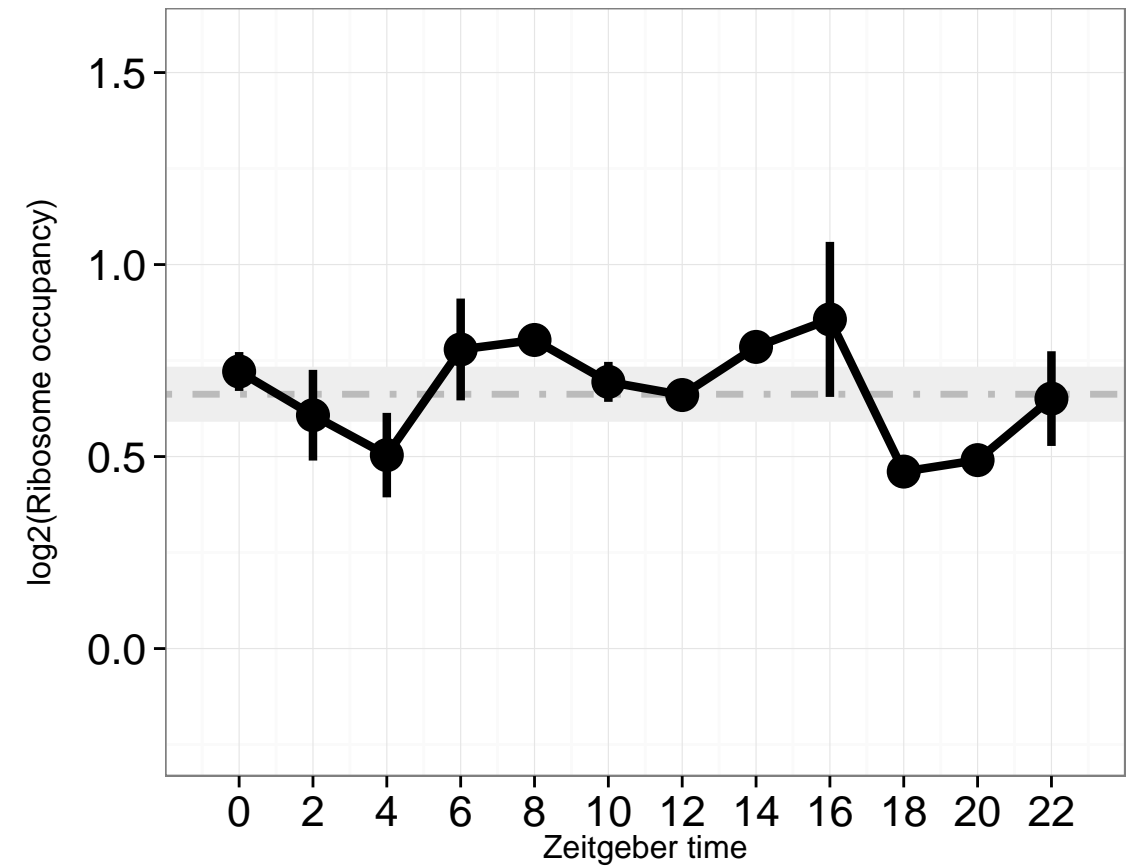

Supplement: Supplementary file 10659 [file 1]

**Nrgn TR**

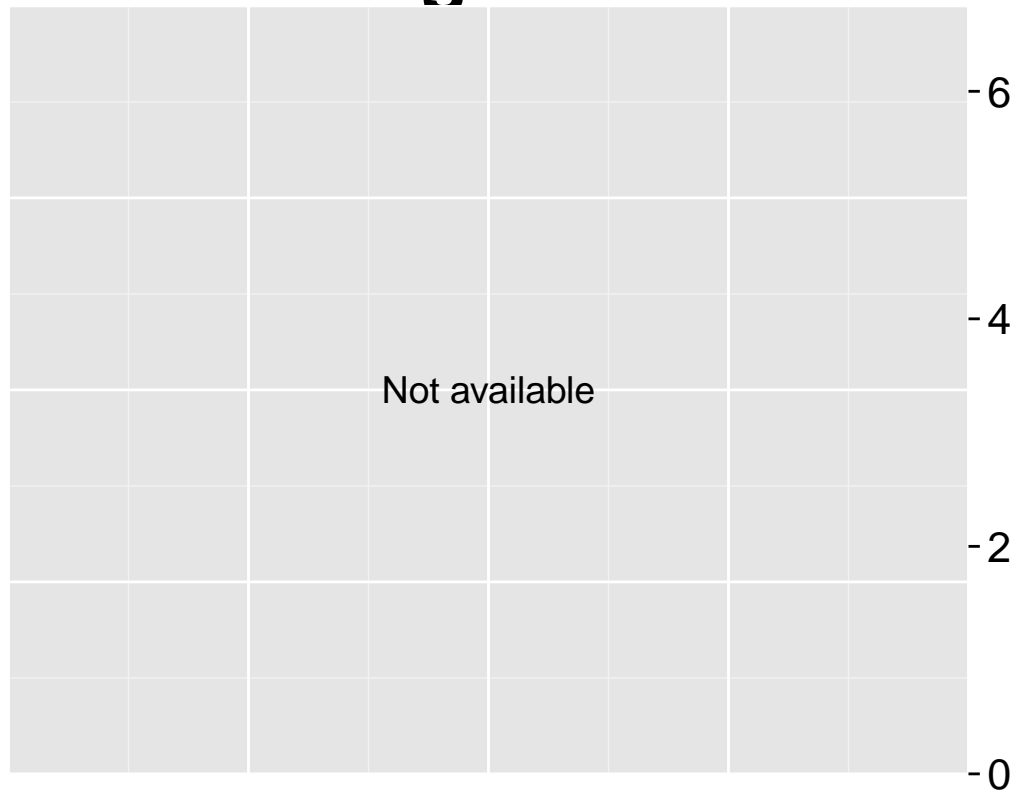

**Nrgn log2(Ribosome occupancy)**

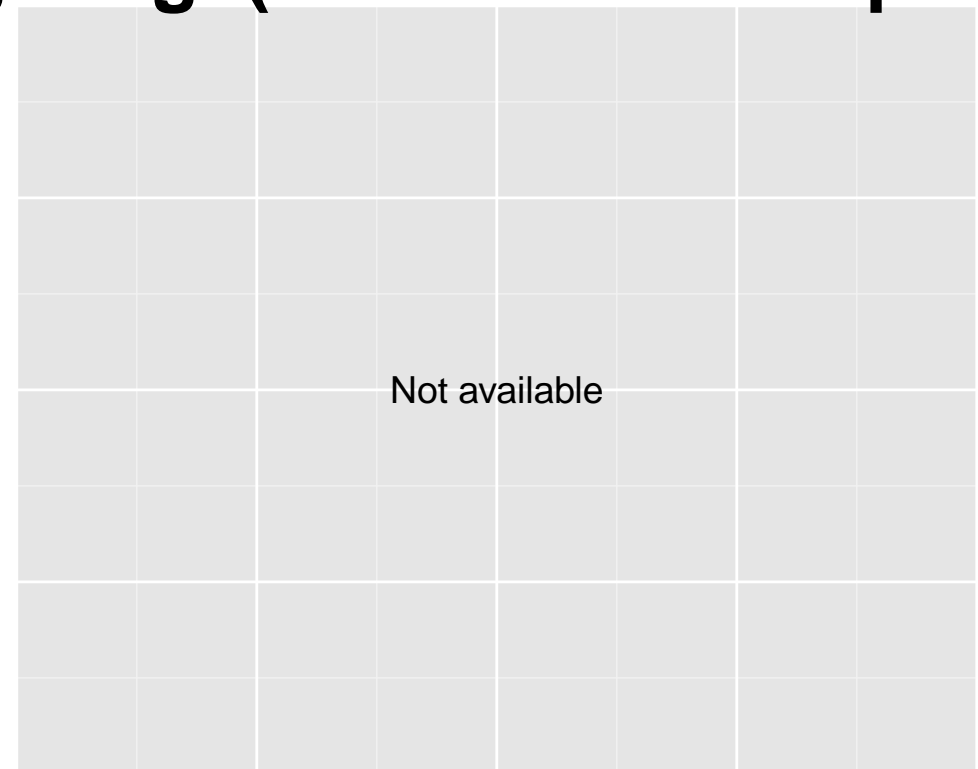

Supplement: Supplementary file 10660 [file 1]

## A930005H10Rik

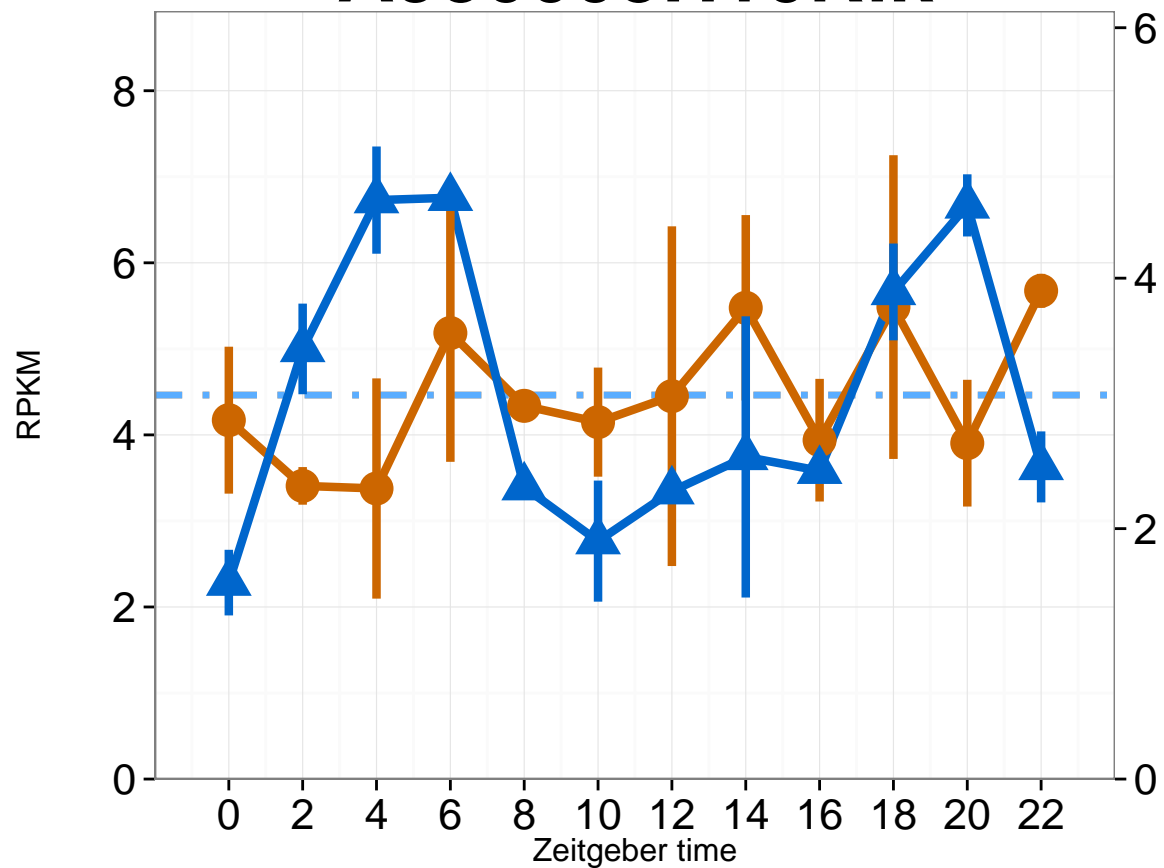

## A930005H10Rik

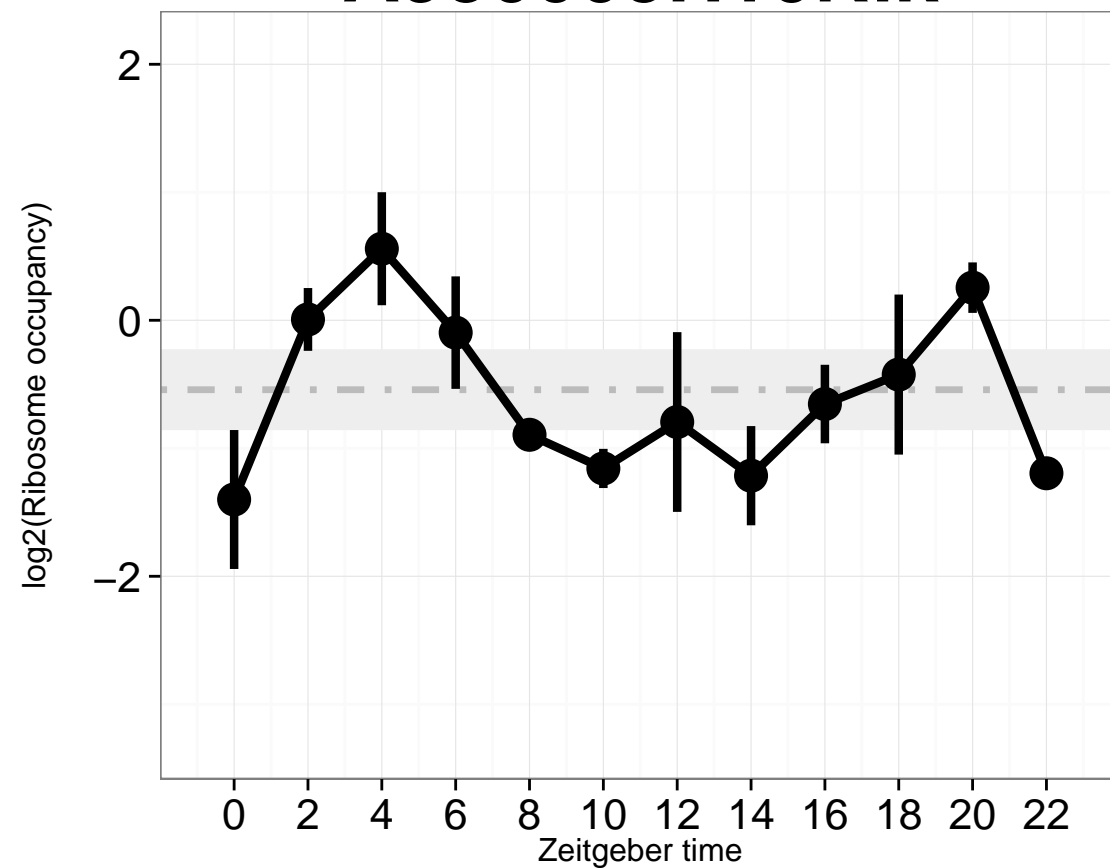

Supplement: Supplementary file 10661 [file 1]

# Igsf10

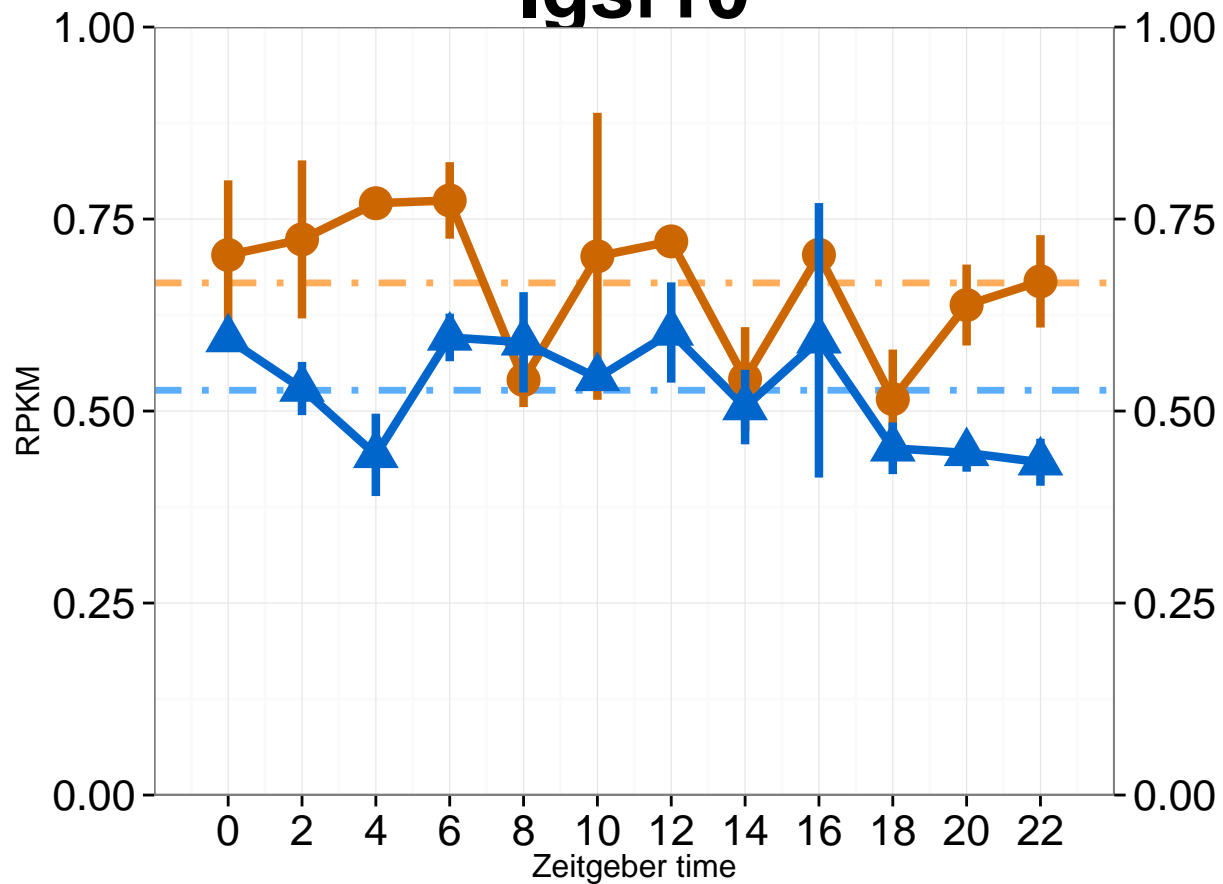

# Igsf10

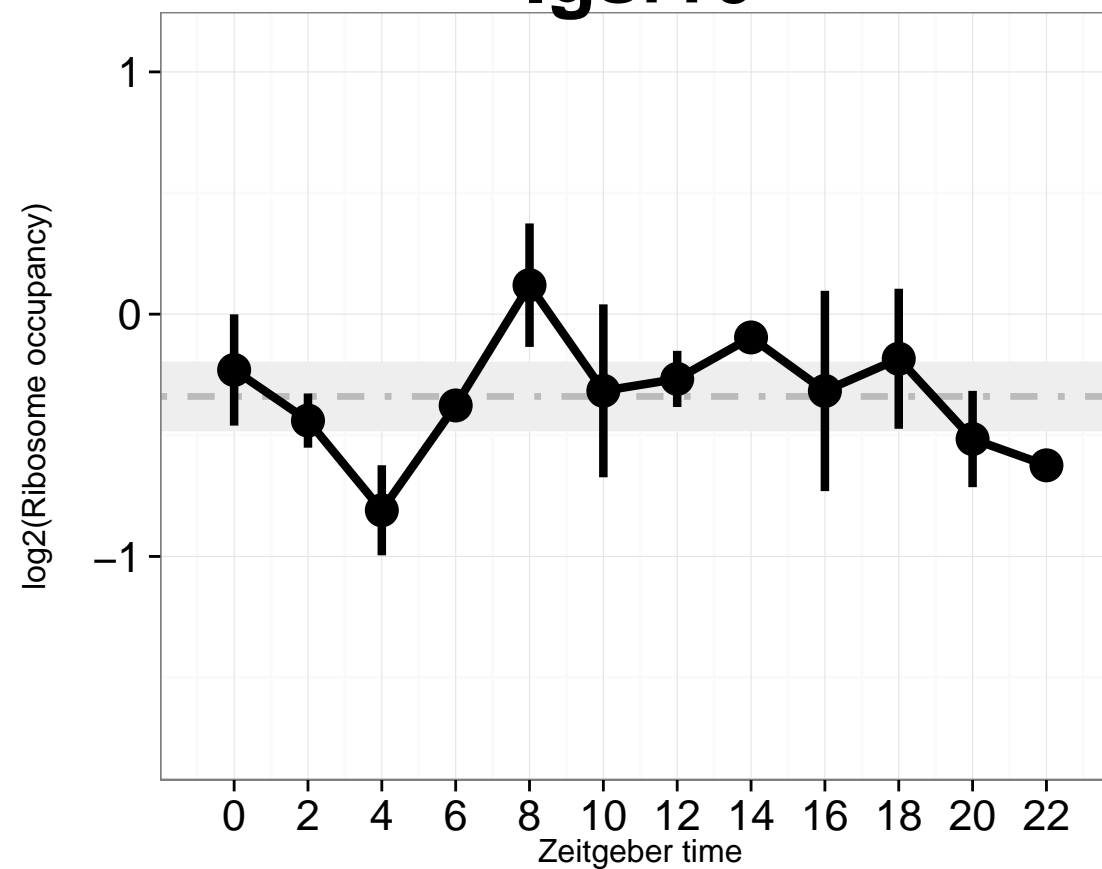

Supplement: Supplementary file 10662 [file 1]

## Farsb

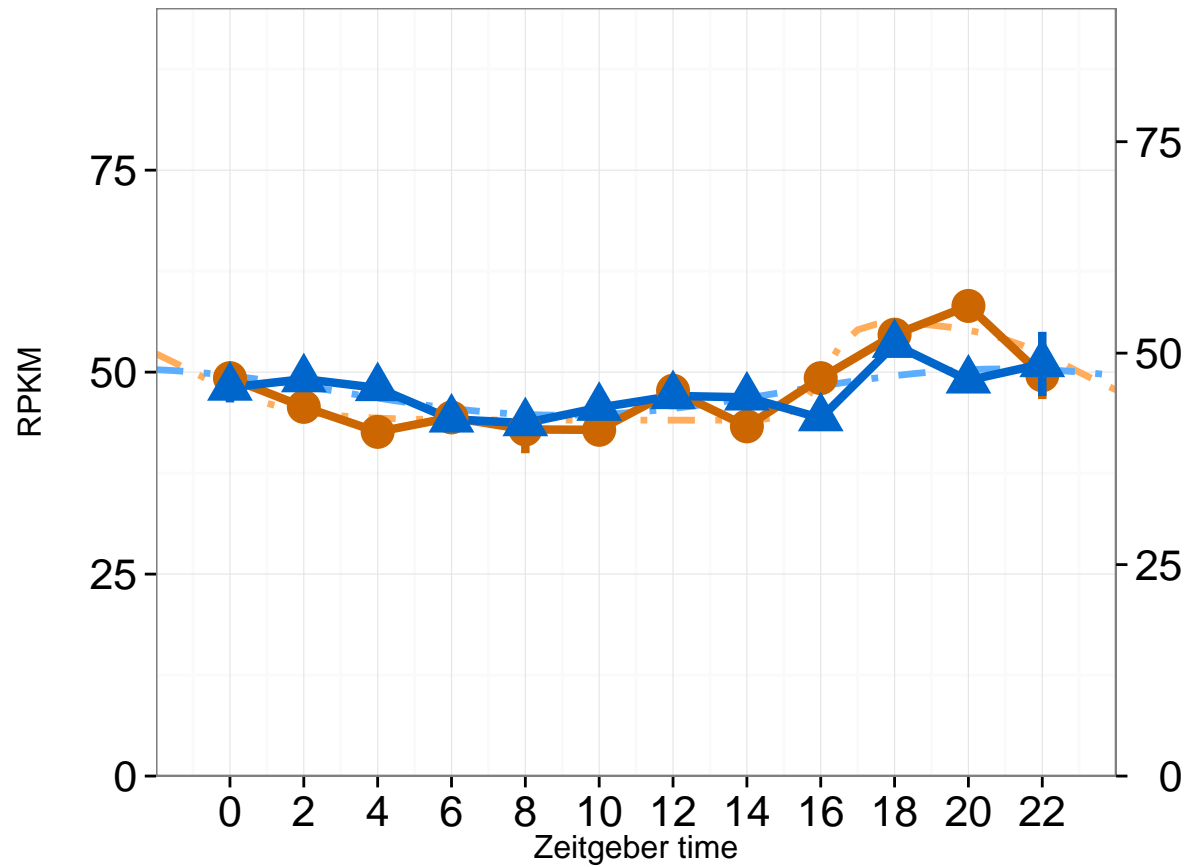

## Farsb

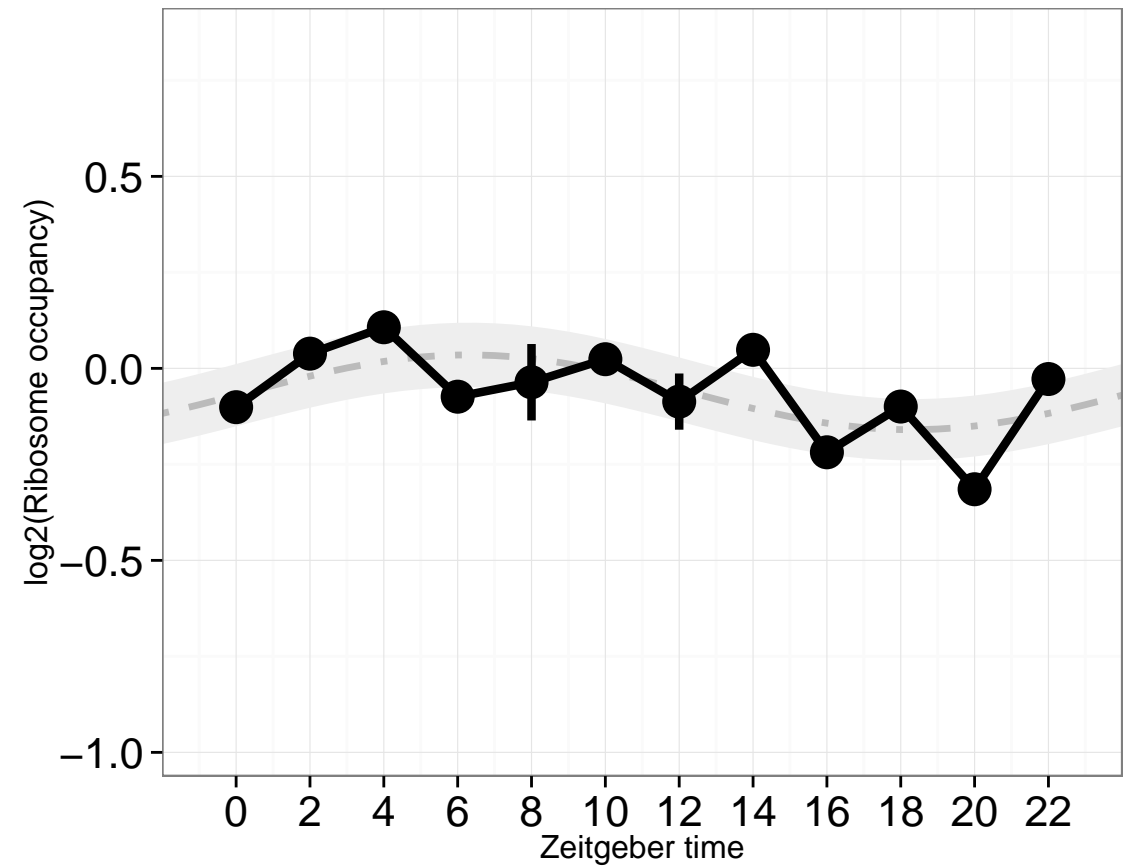

Supplement: Supplementary file 10663 [file 1]

## Pkd2

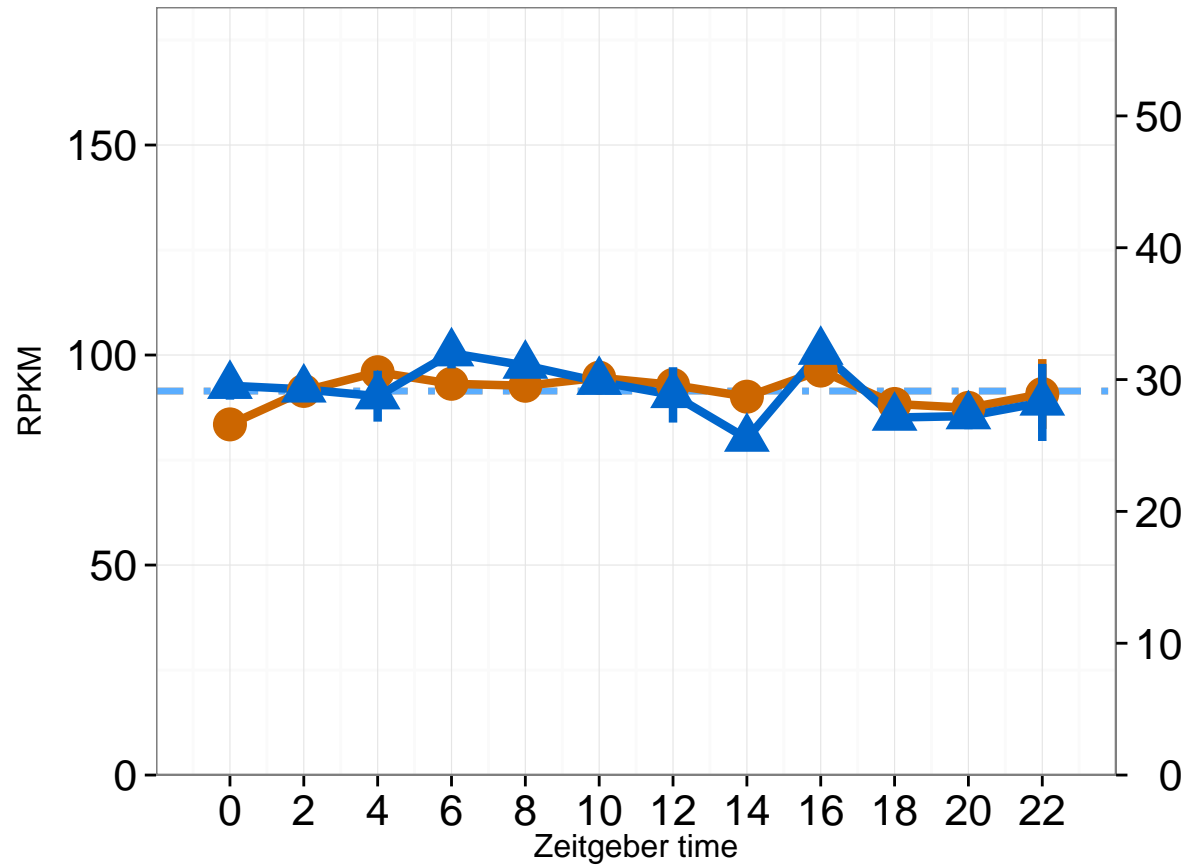

## Pkd2

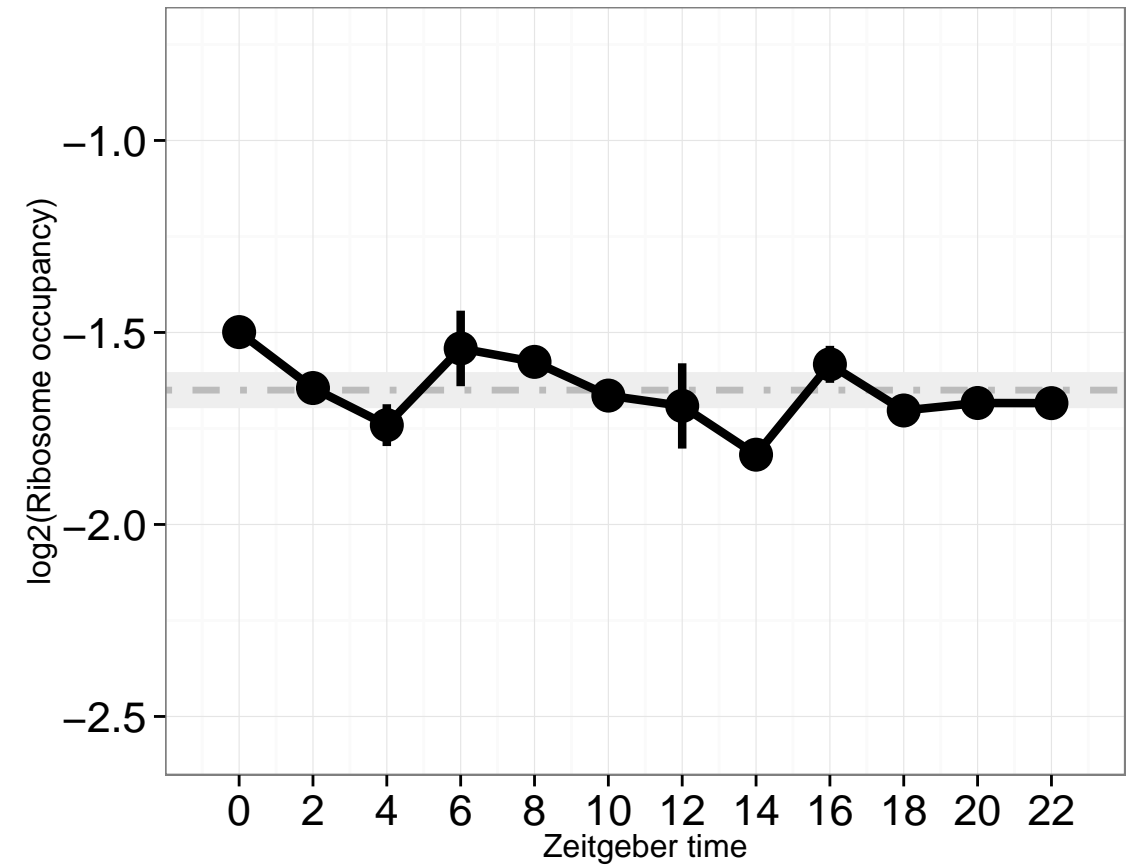

Supplement: Supplementary file 10664 [file 1]

## Galk2

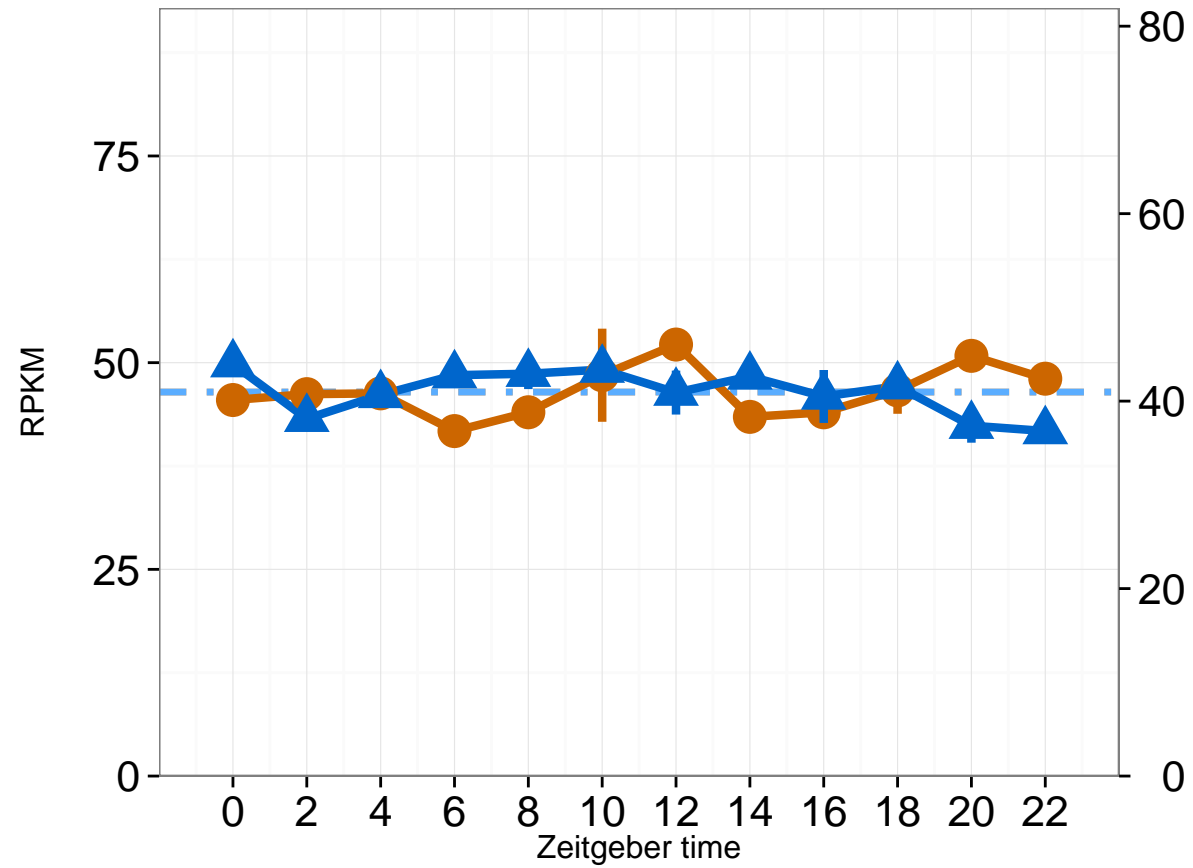

## Galk2

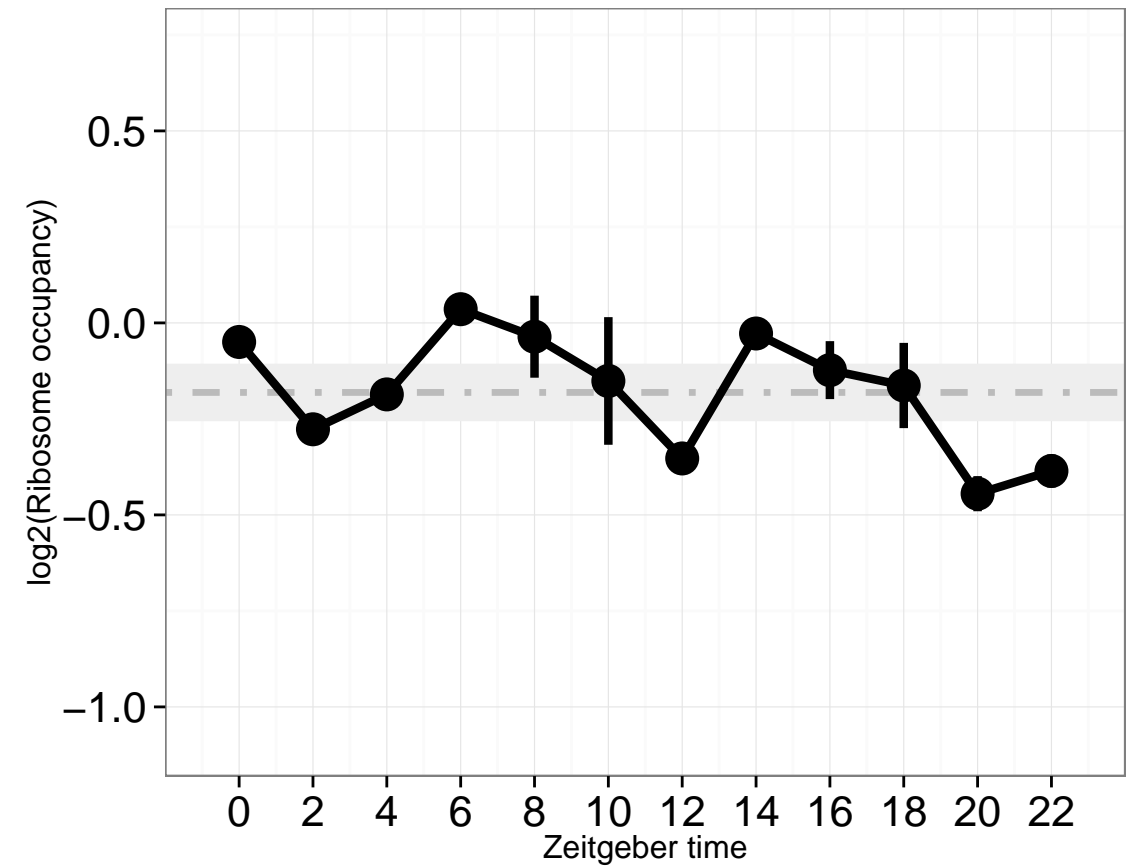

Supplement: Supplementary file 10665 [file 1]

## Nudt21

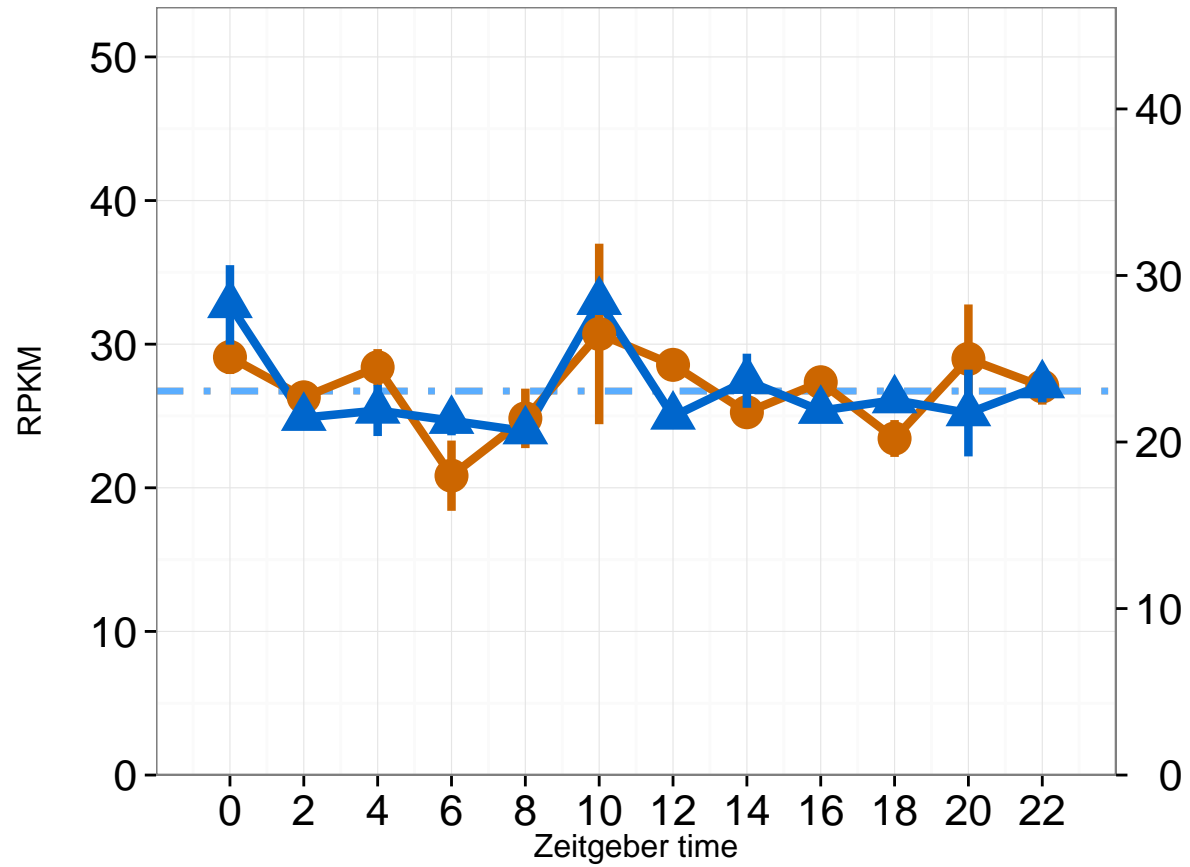

## Nudt21

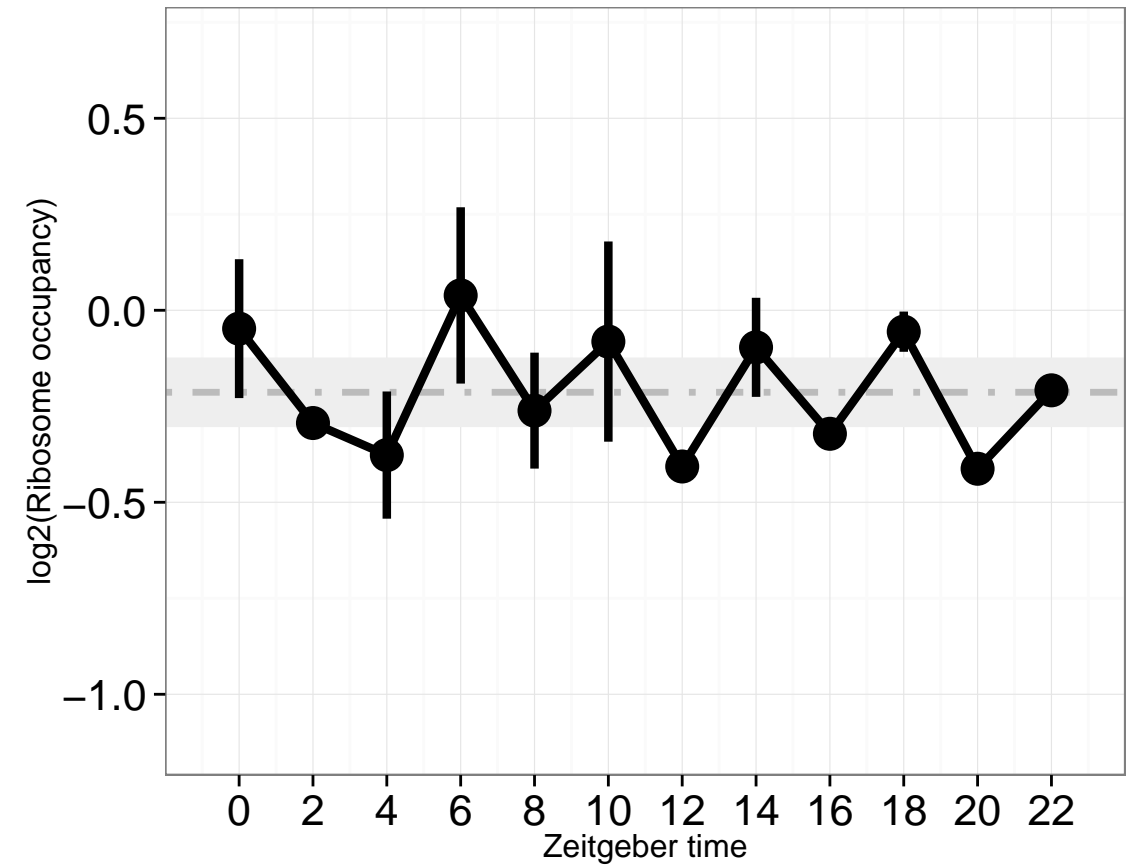

Supplement: Supplementary file 10666 [file 1]

# Hist2h3b

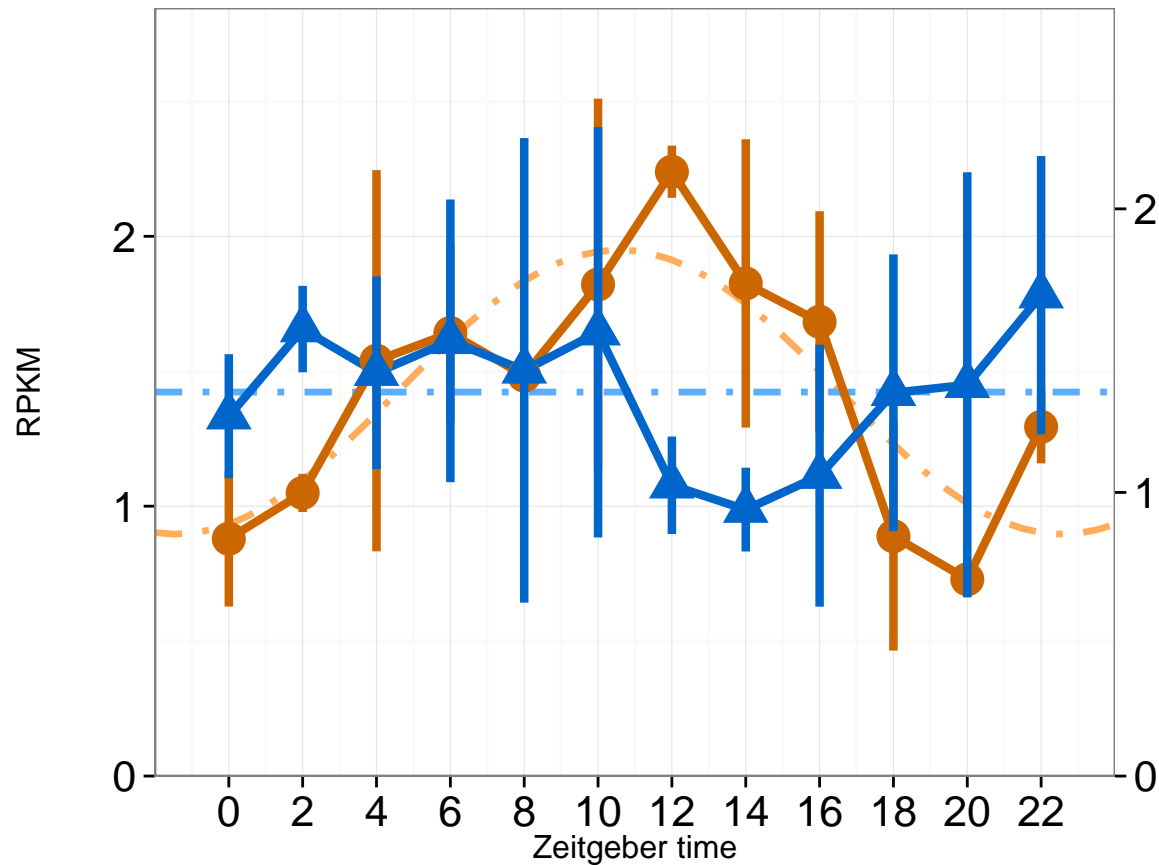

# Hist2h3b

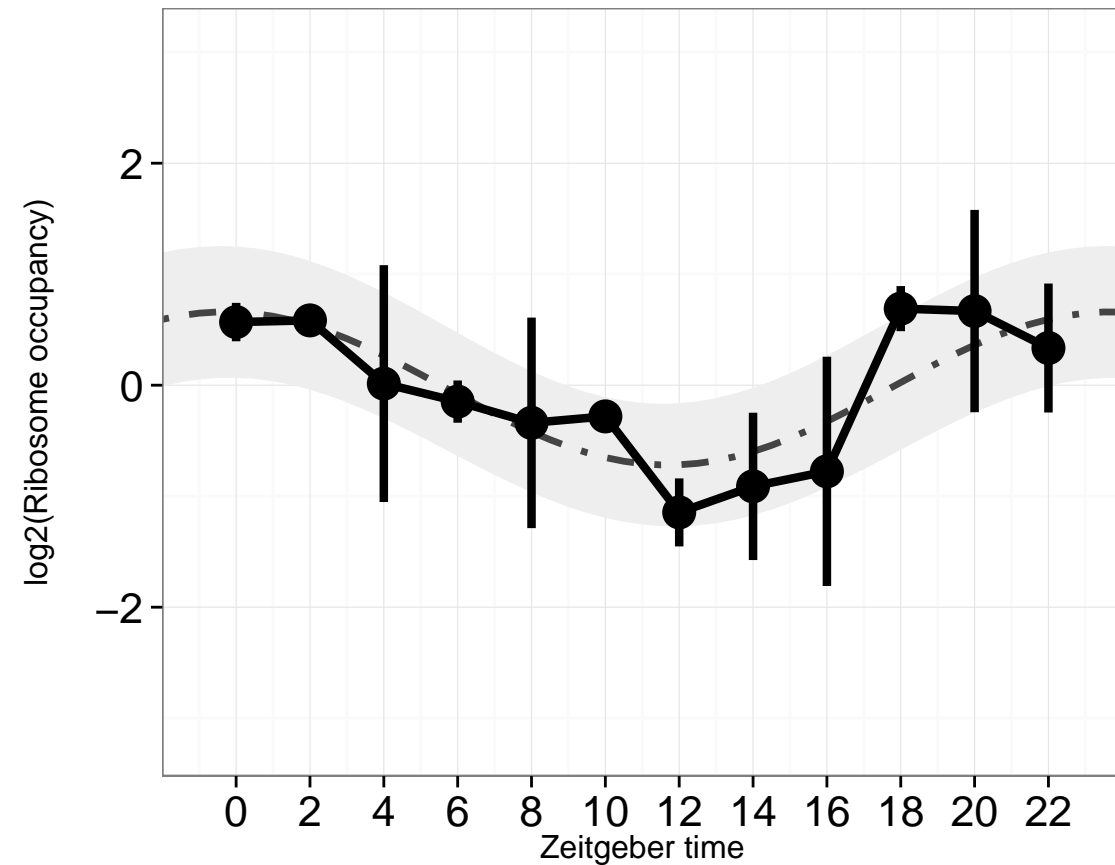

Supplement: Supplementary file 10667 [file 1]

# Brat1

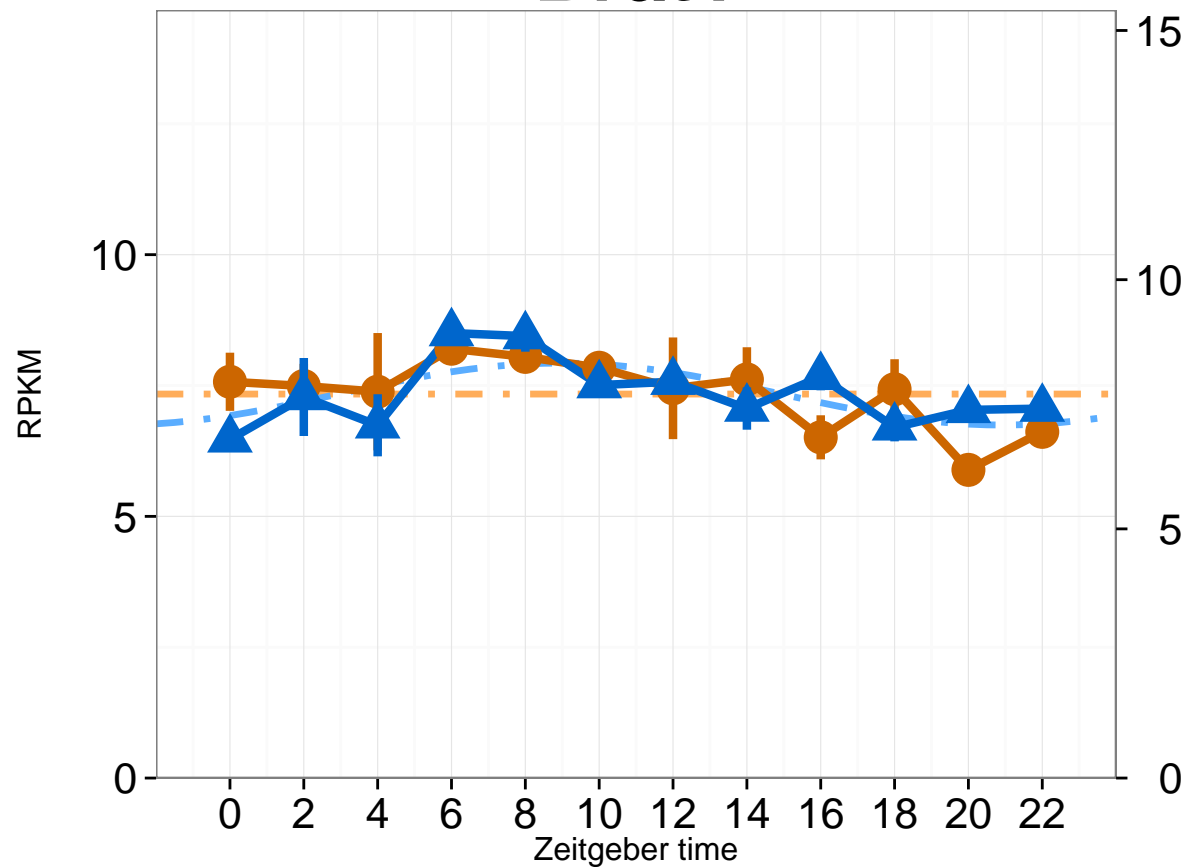

# Brat1

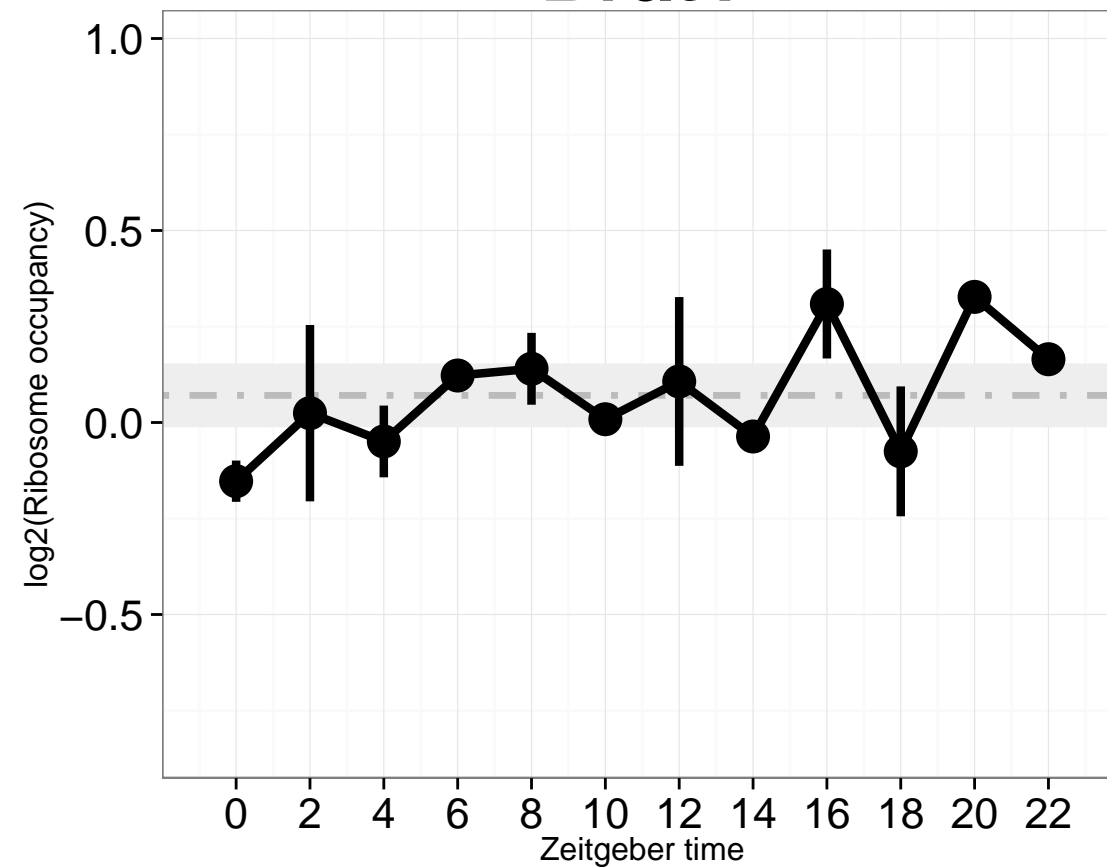

Supplement: Supplementary file 10668 [file 1]

## Nphs1

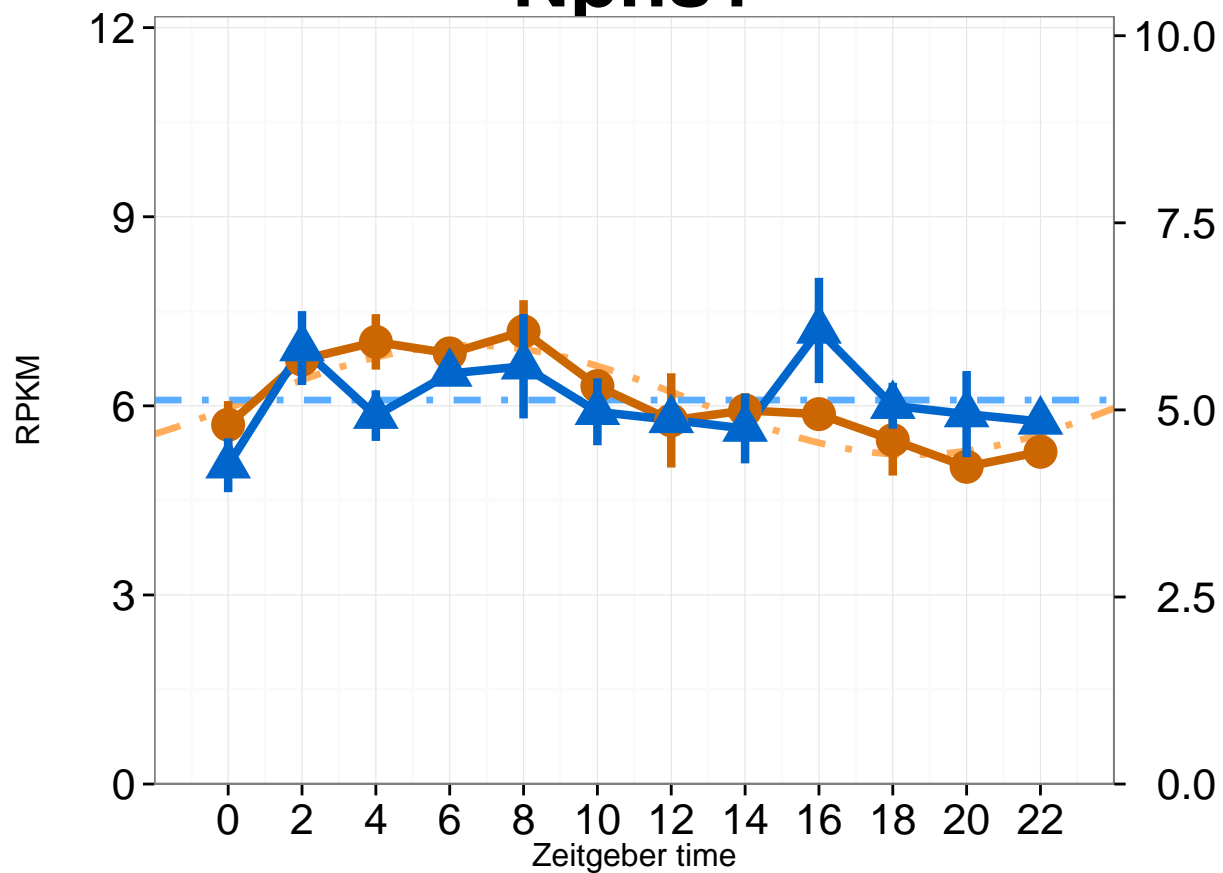

## Nphs1

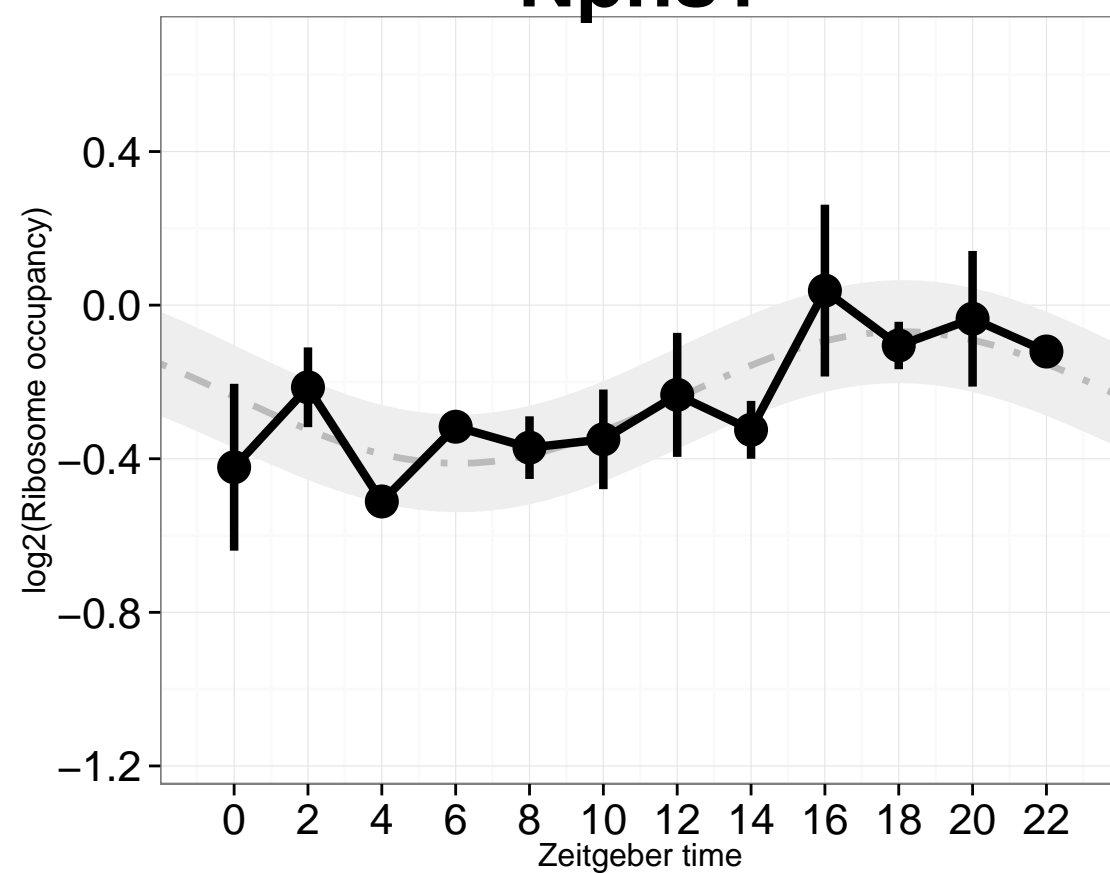

Supplement: Supplementary file 10669 [file 1]

## Phgdh

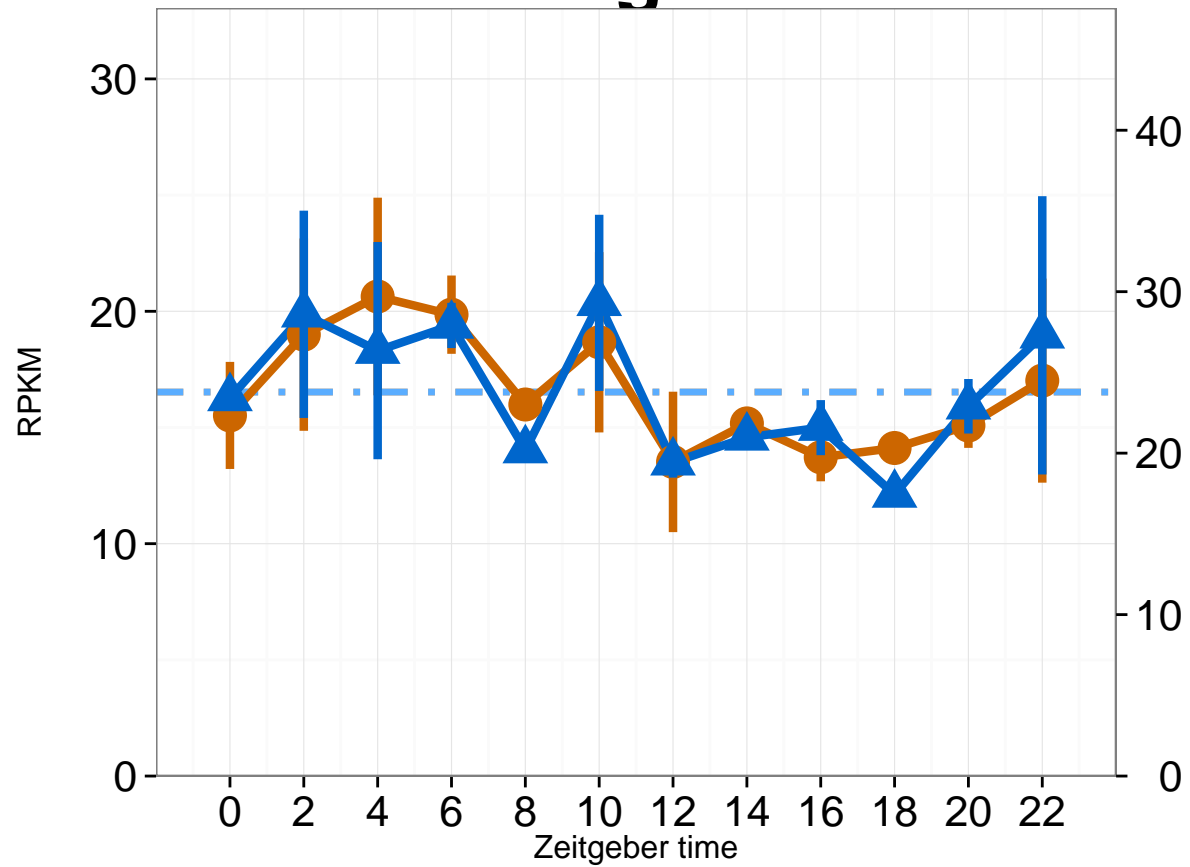

## Phgdh

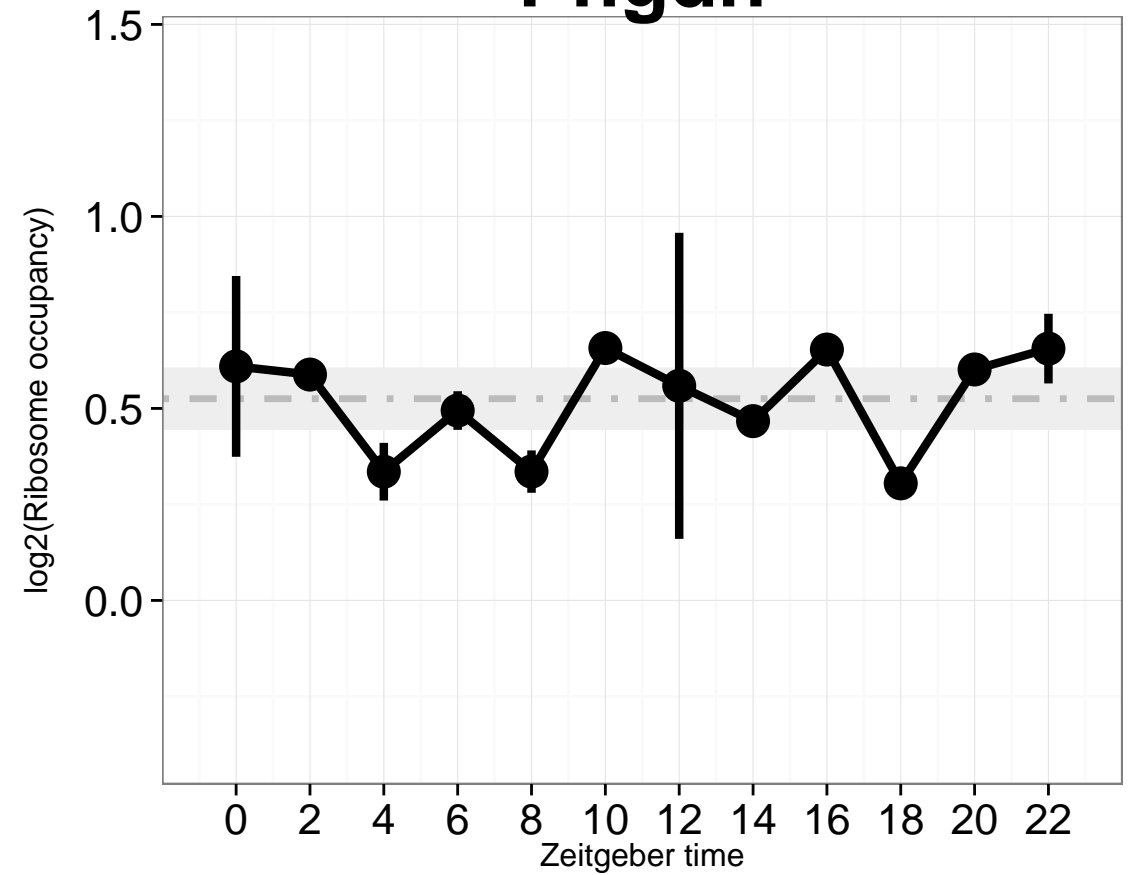

Supplement: Supplementary file 10670 [file 1]

# Gbgt1

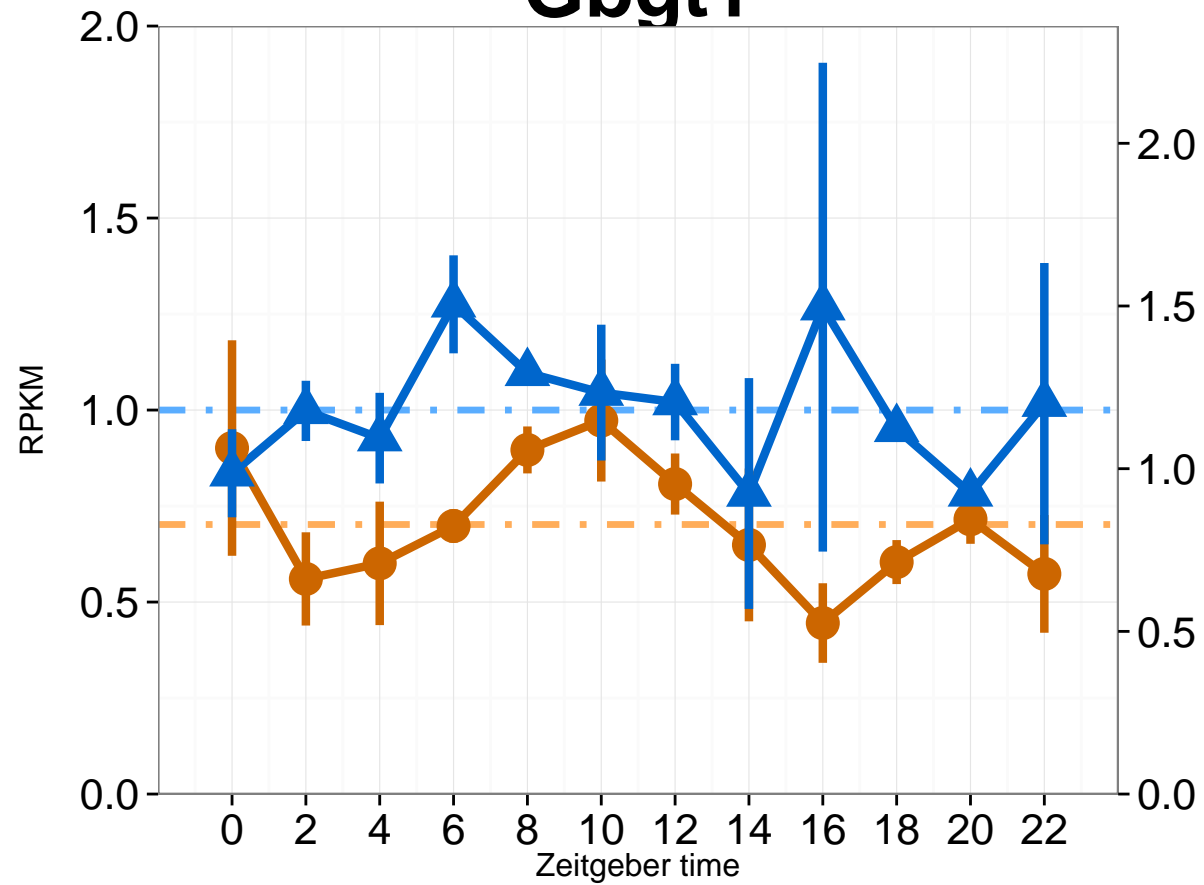

# Gbgt1

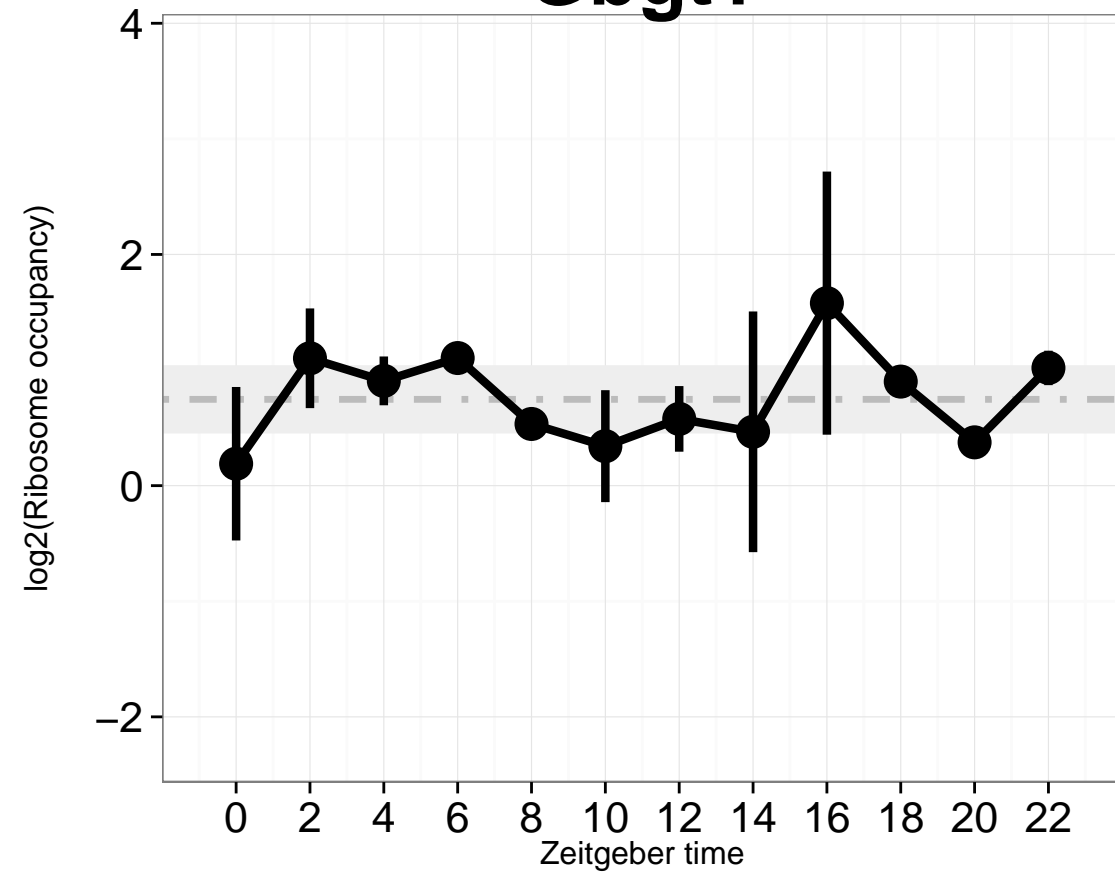

Supplement: Supplementary file 10671 [file 1]

## Ggct

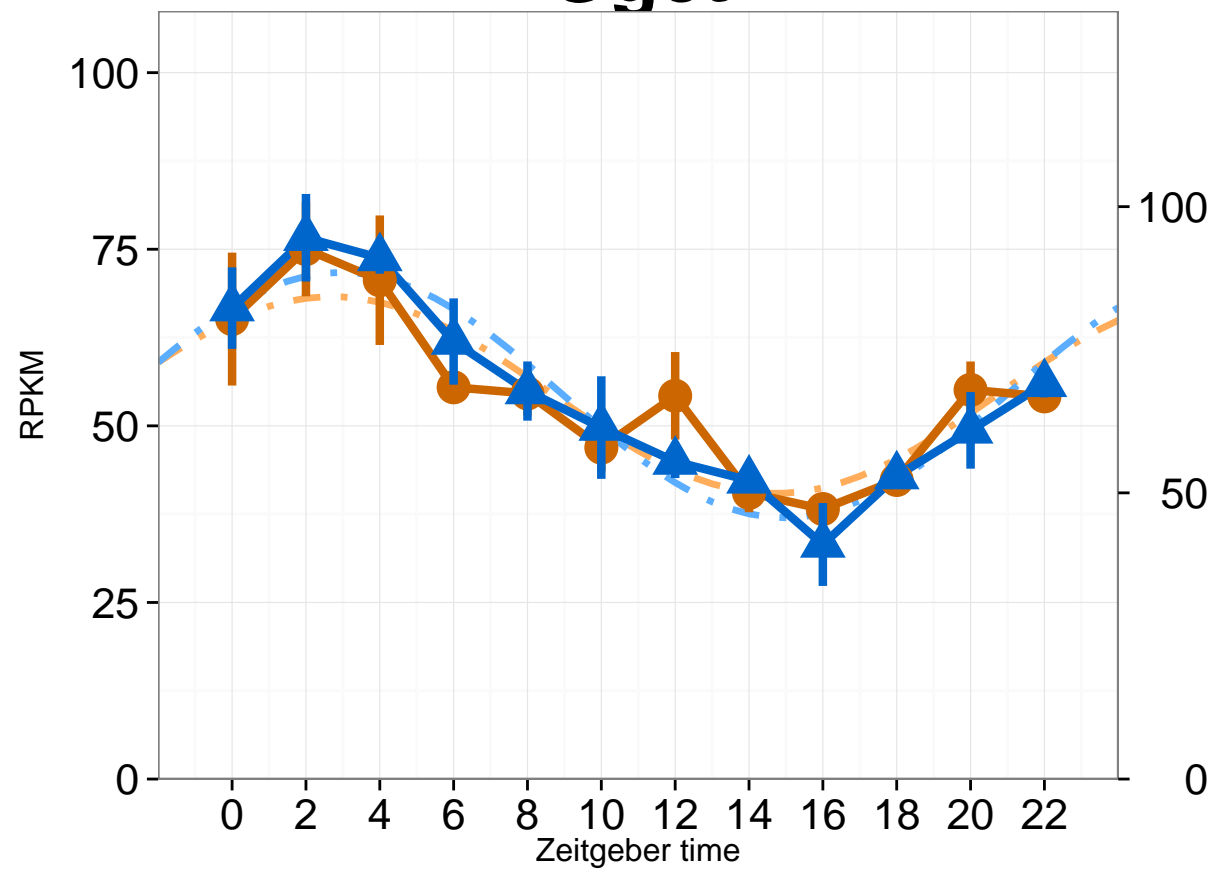

## Ggct

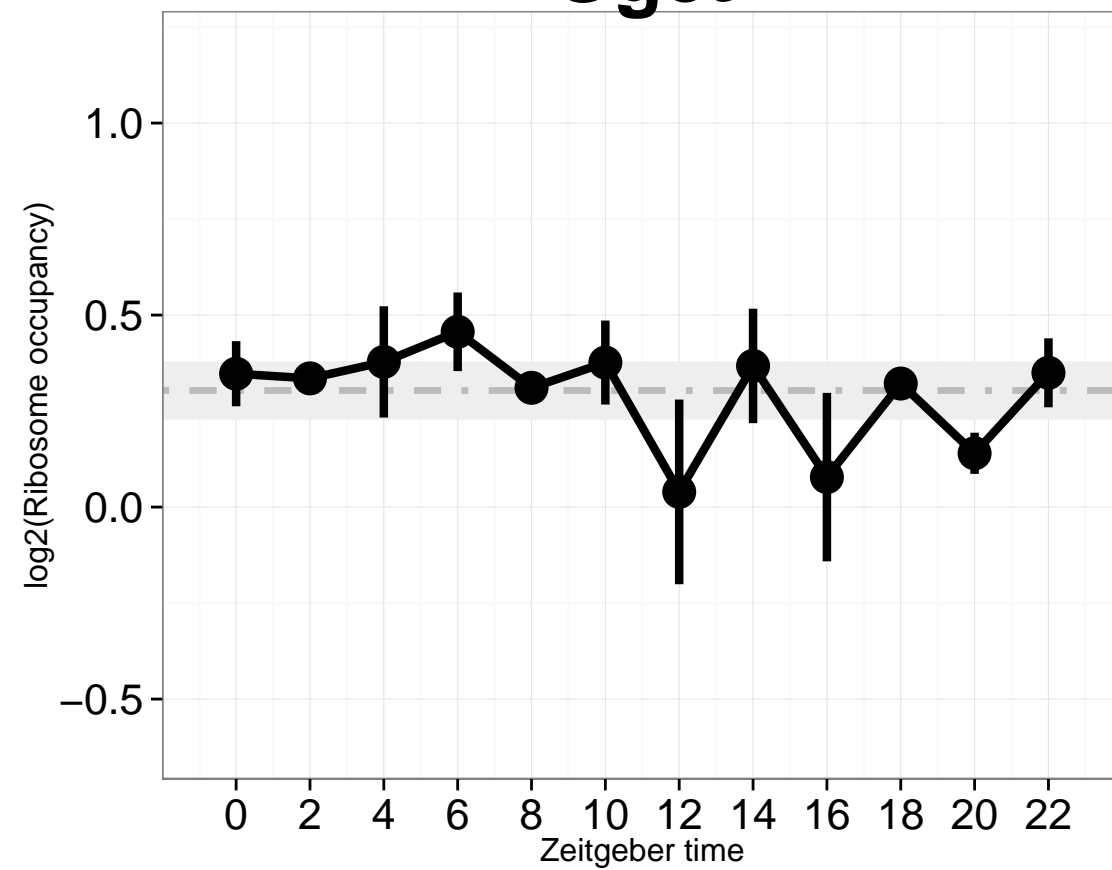

Supplement: Supplementary file 10672 [file 1]

## Hdac6

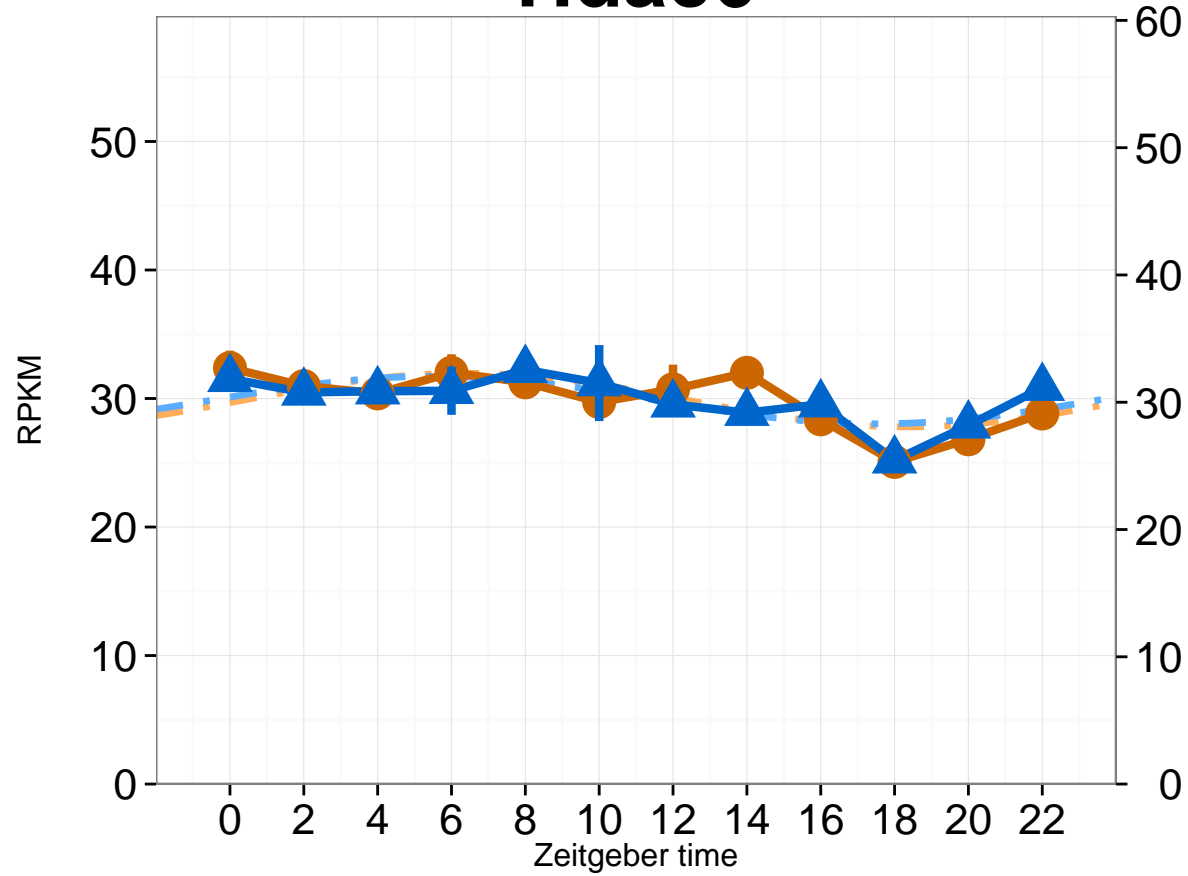

## Hdac6

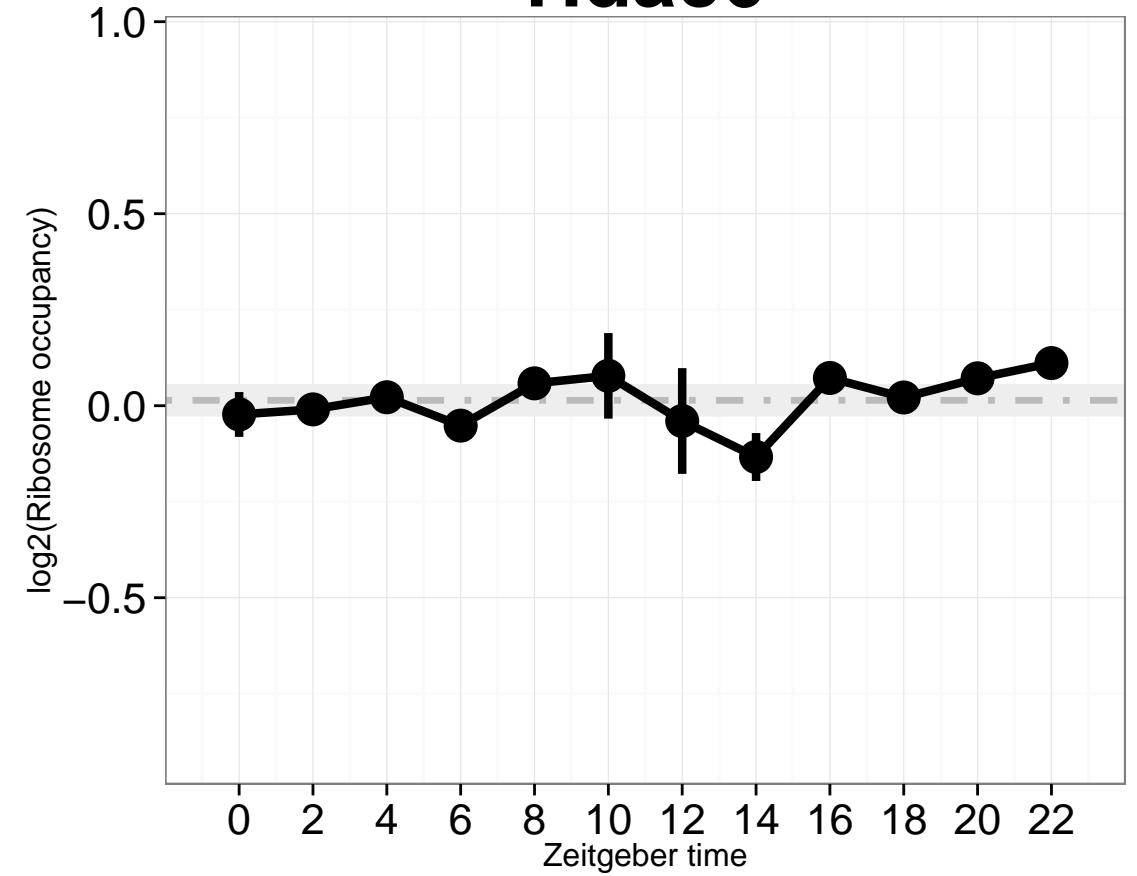

Supplement: Supplementary file 10673 [file 1]

## Ankrd52

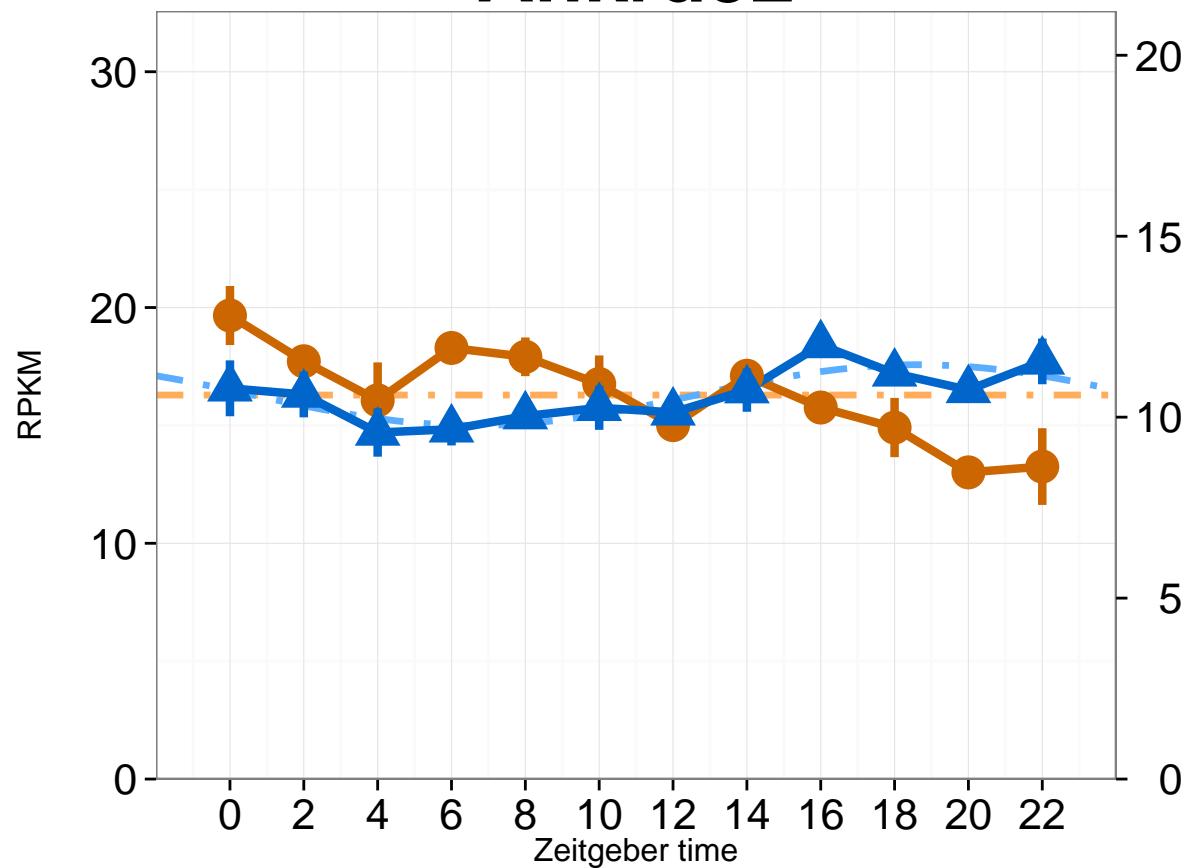

## Ankrd52

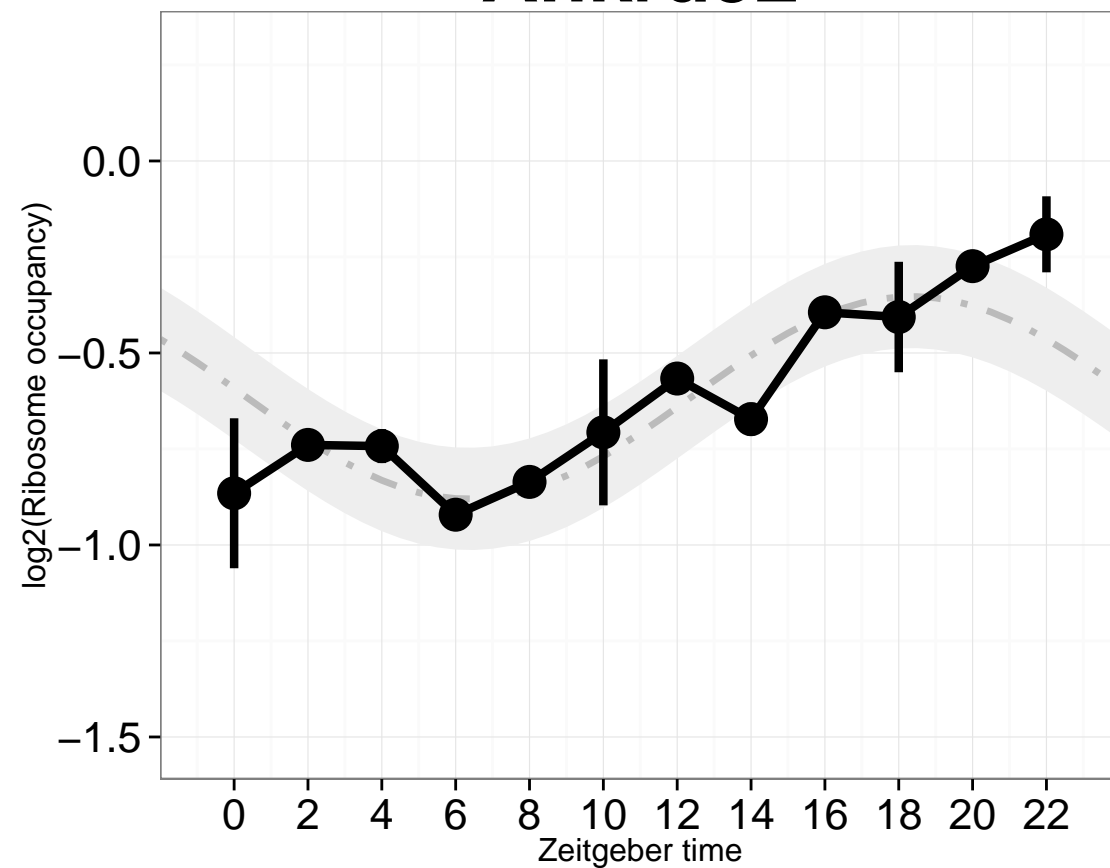

Supplement: Supplementary file 10674 [file 1]

## Cirbp

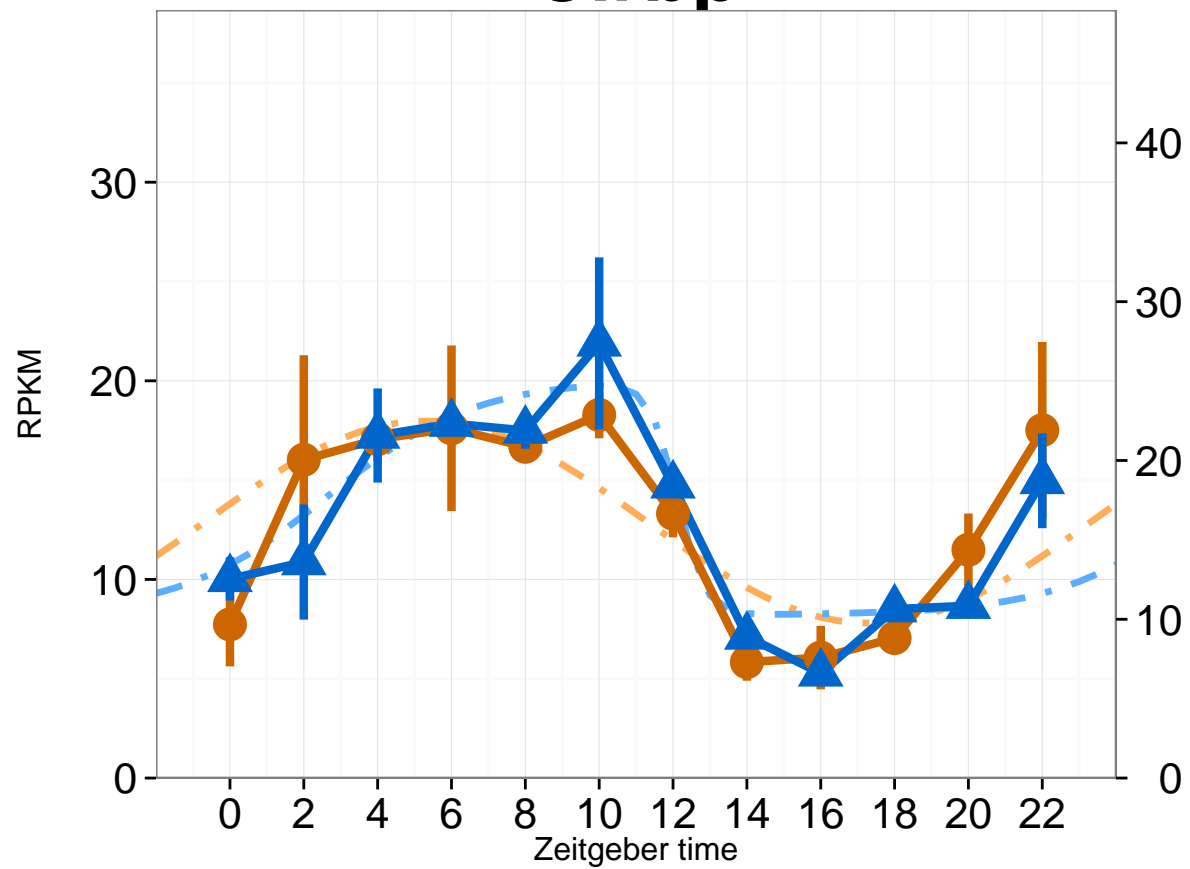

## Cirbp

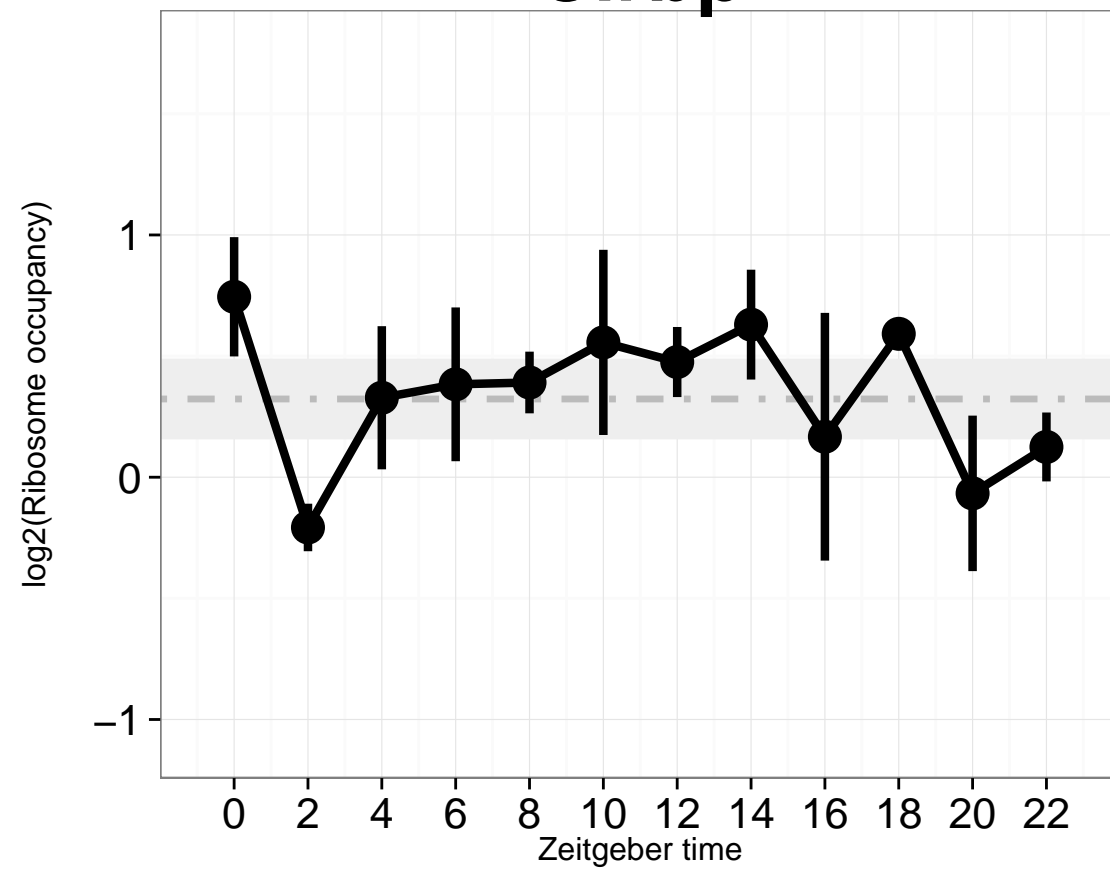

Supplement: Supplementary file 10675 [file 1]

# Srp72

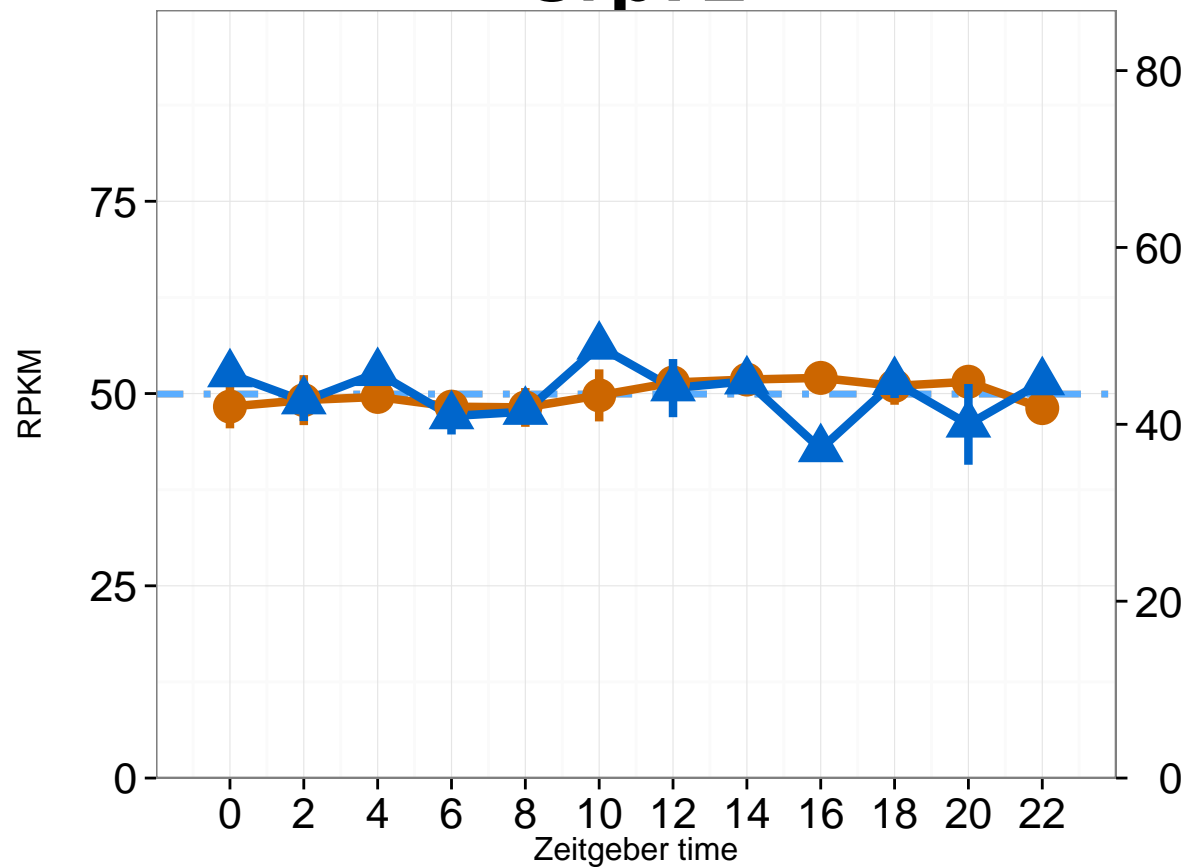

# Srp72

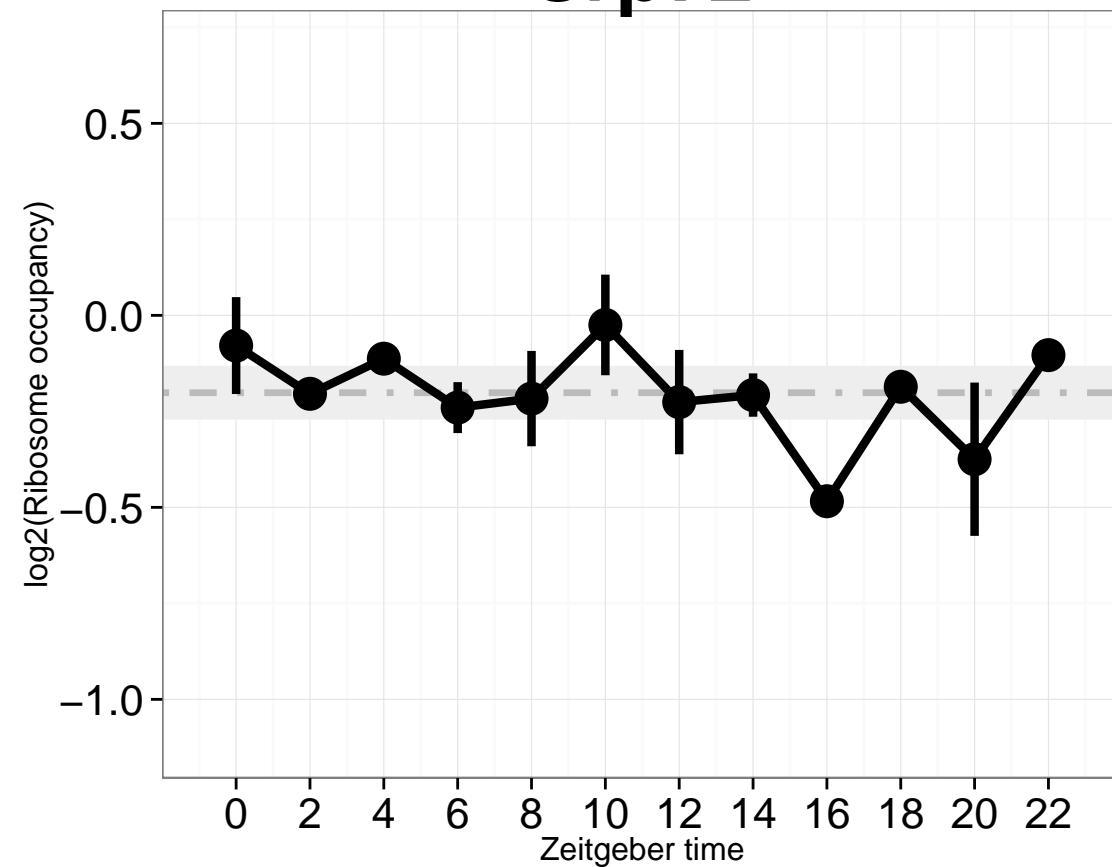

Supplement: Supplementary file 10676 [file 1]

# Acsbg1

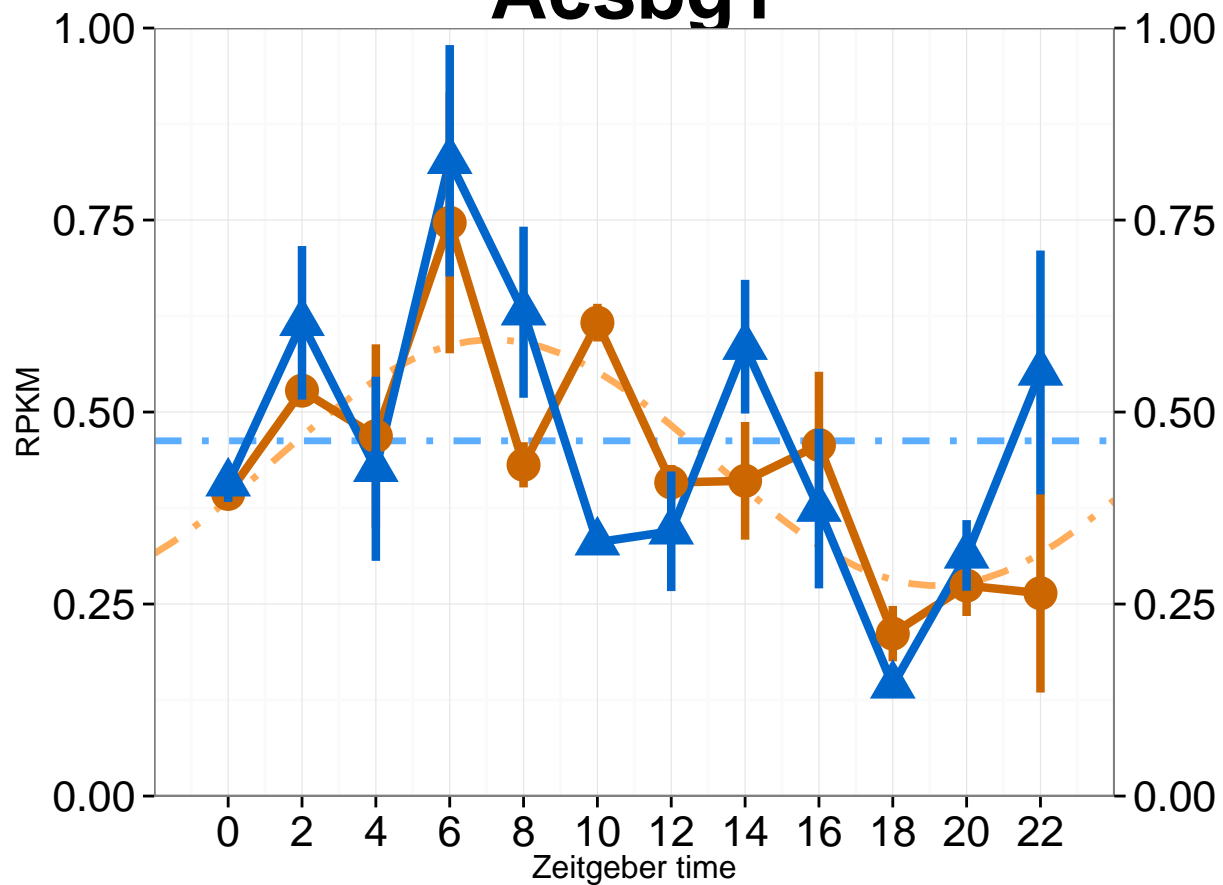

# Acsbg1

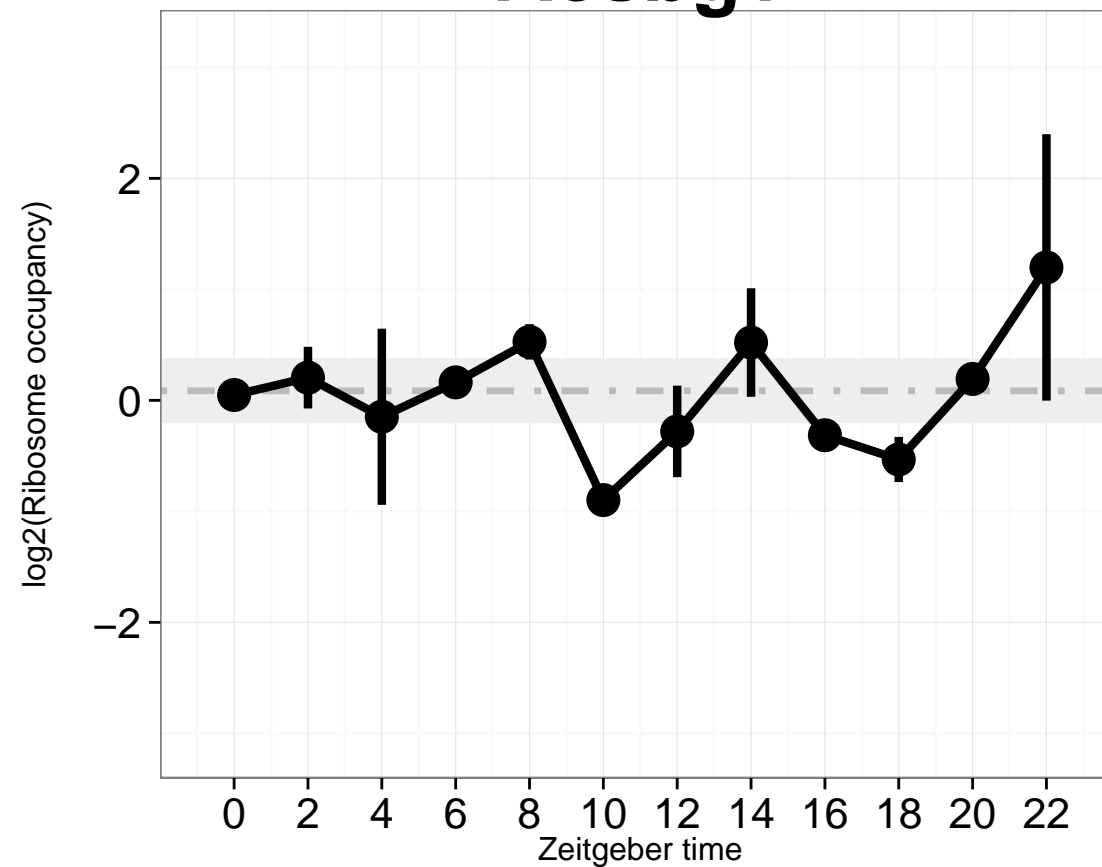

Supplement: Supplementary file 10677 [file 1]

# Gadd45gip1

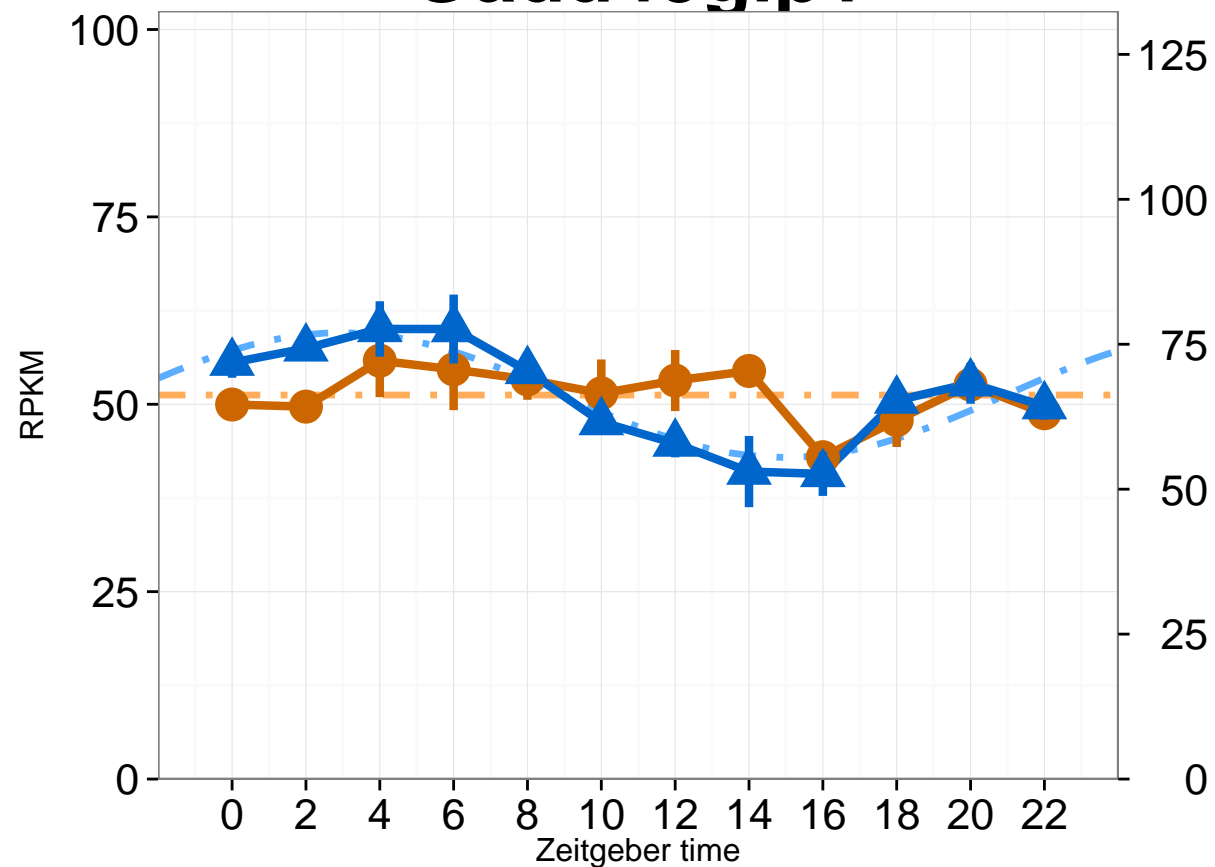

# Gadd45gip1

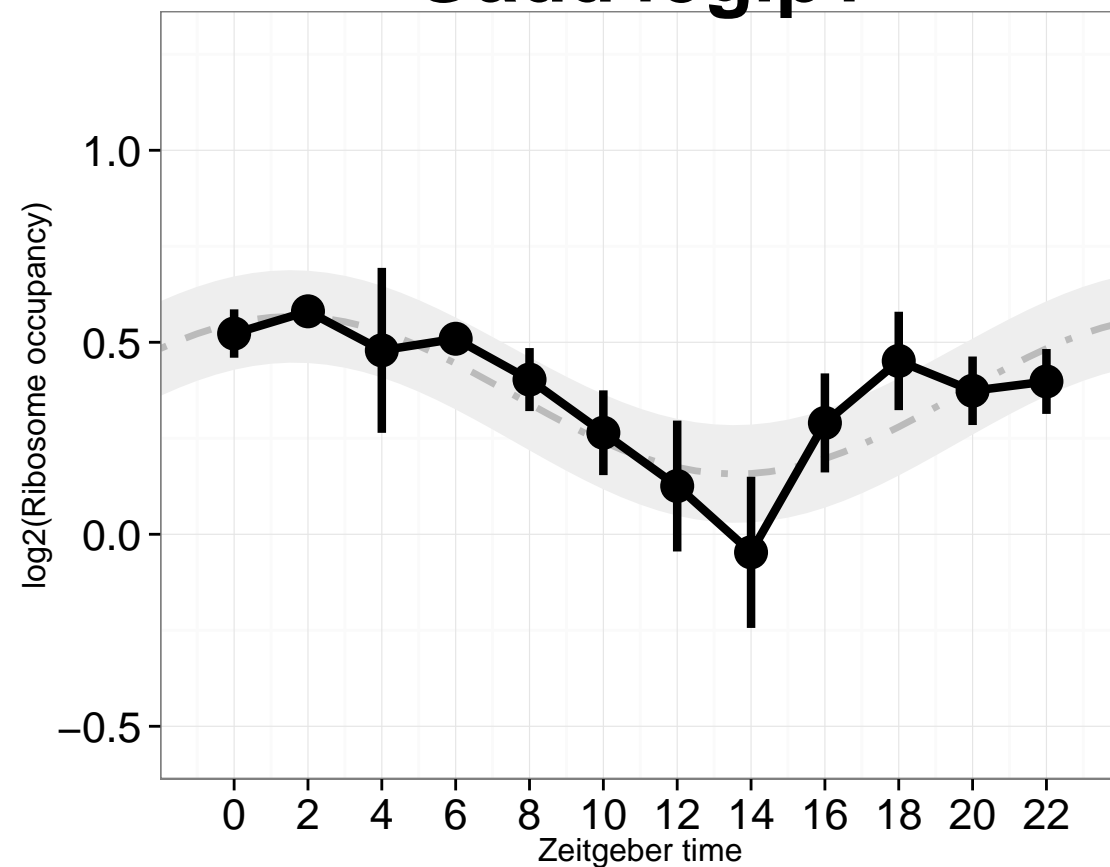

Supplement: Supplementary file 10678 [file 1]

# Txndc9

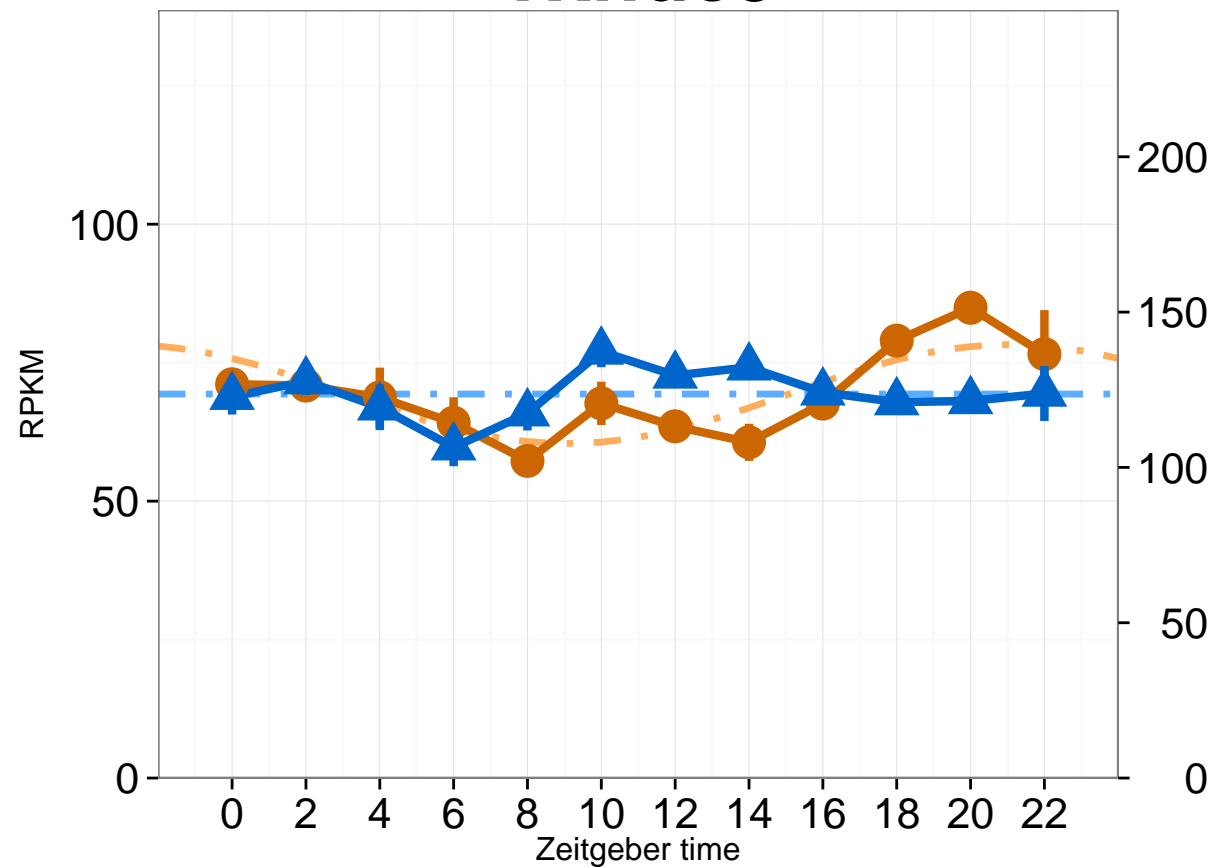

# Txndc9

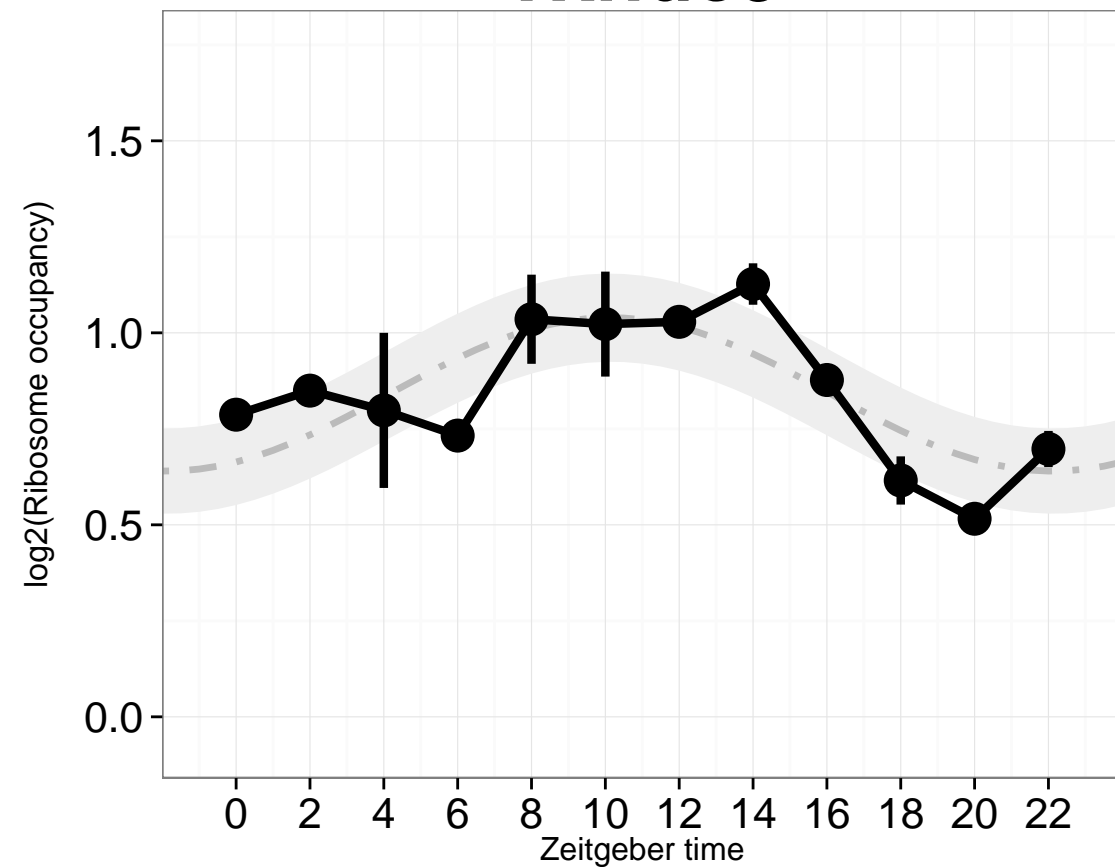

Supplement: Supplementary file 10679 [file 1]

Ccdc173

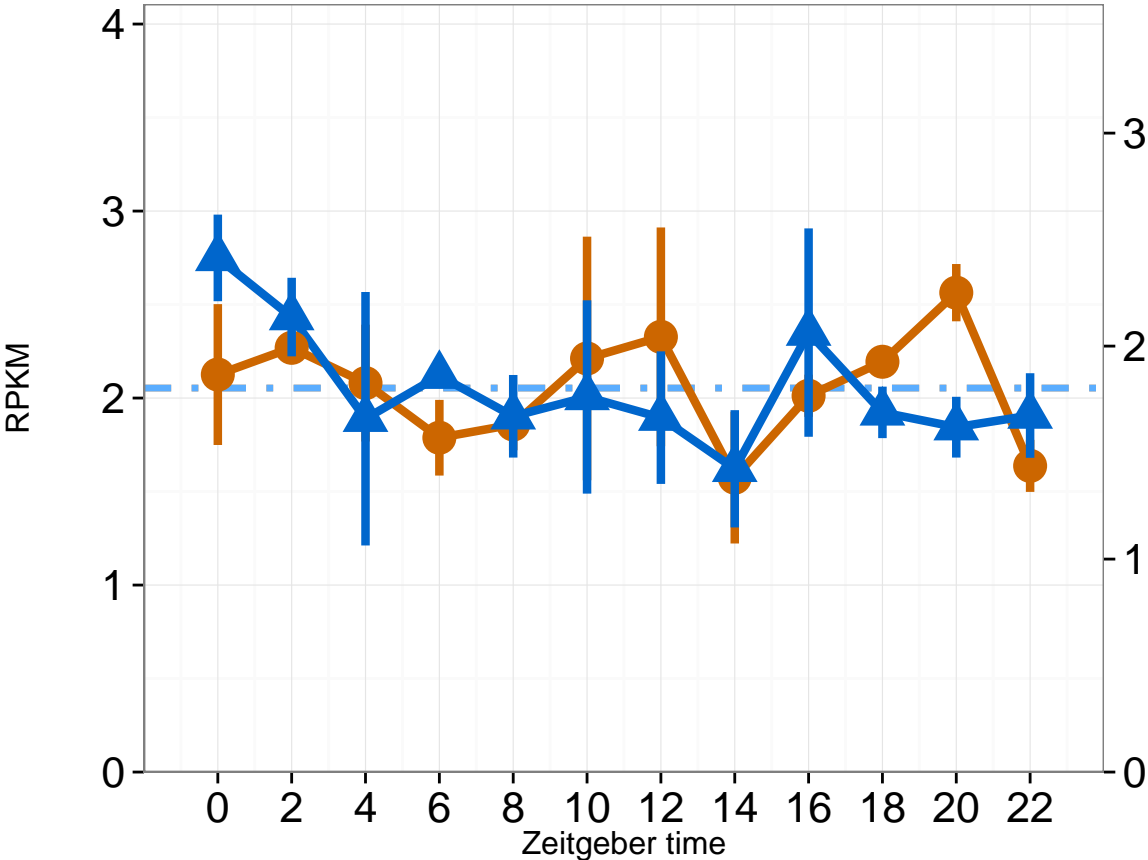

Ccdc173

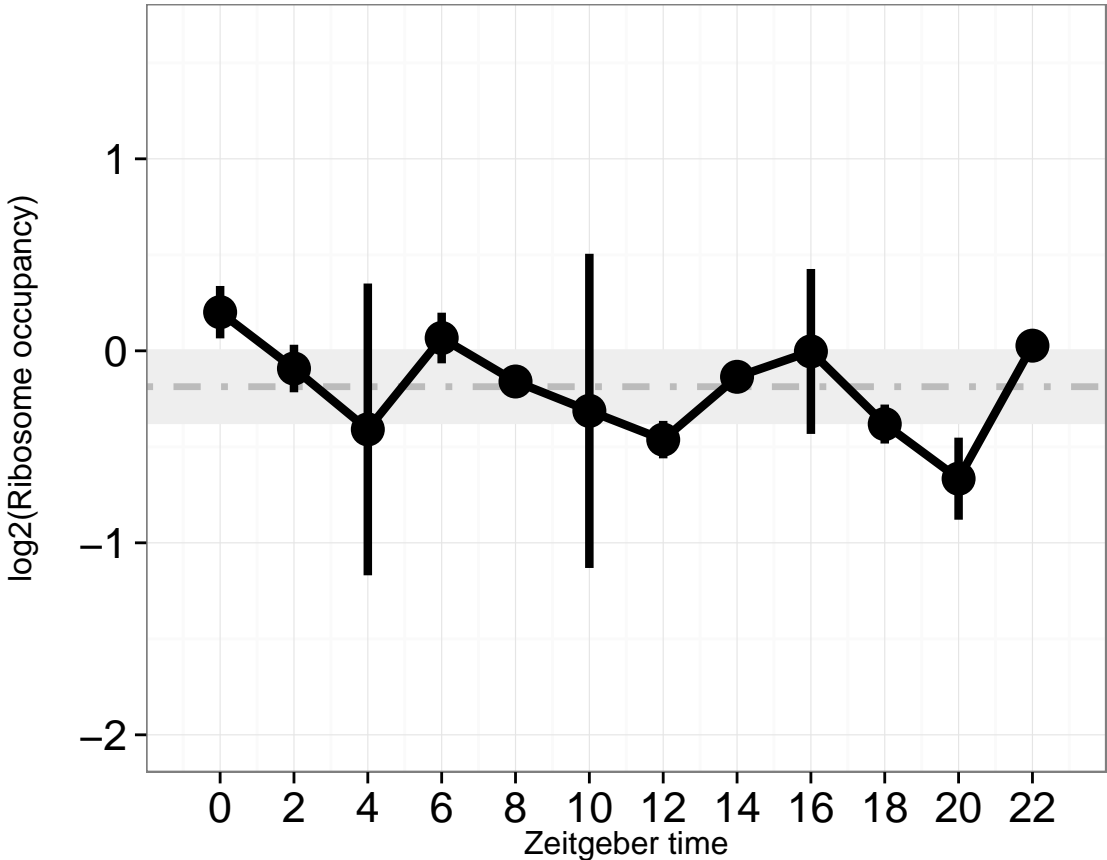

Supplement: Supplementary file 10680 [file 1]

# Gcnt3

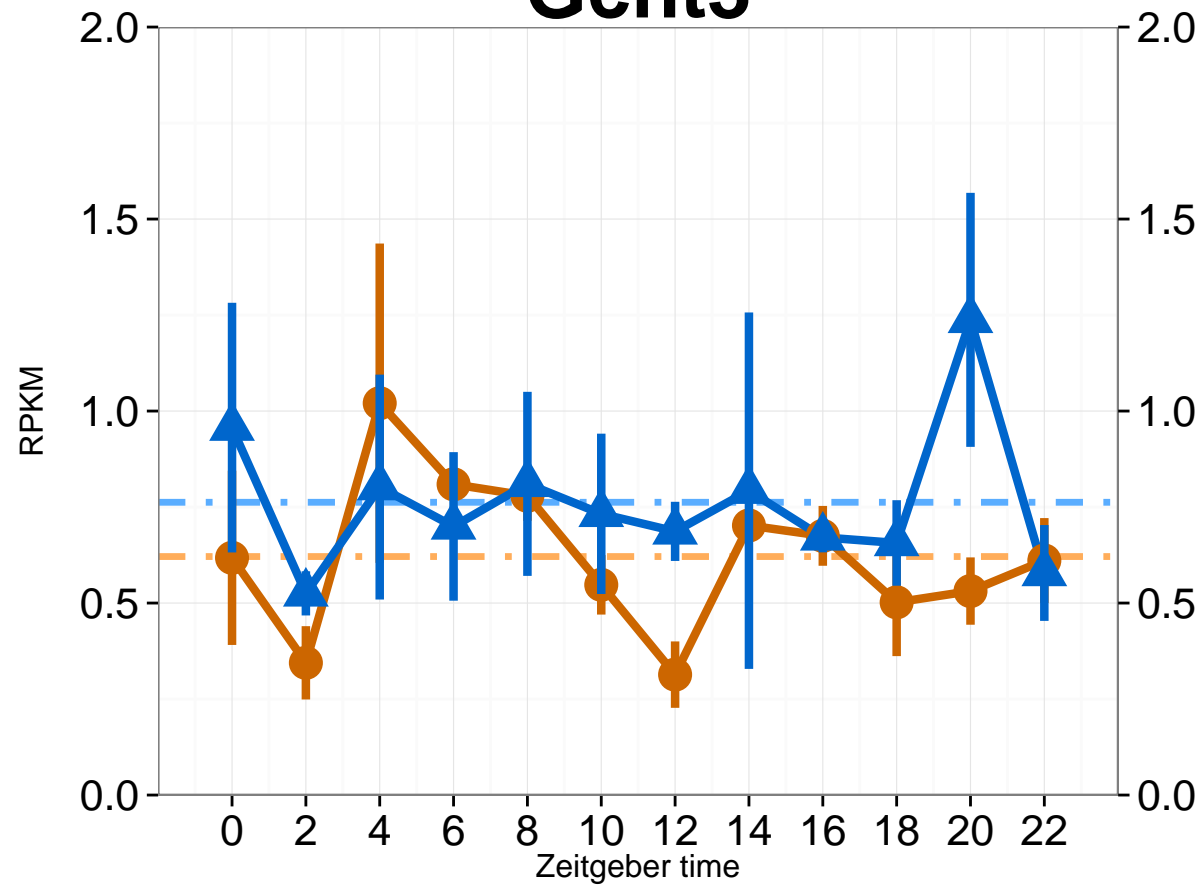

# Gcnt3

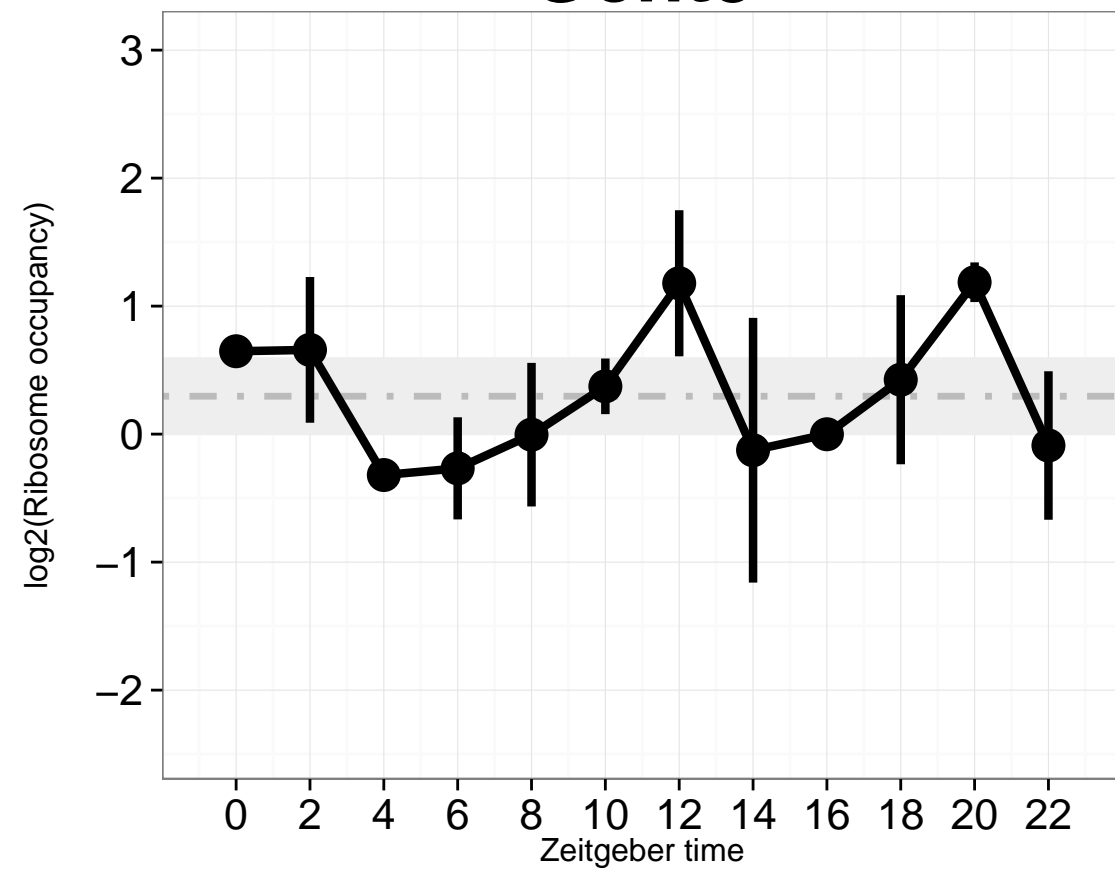

Supplement: Supplementary file 10681 [file 1]

# Cyp2c69

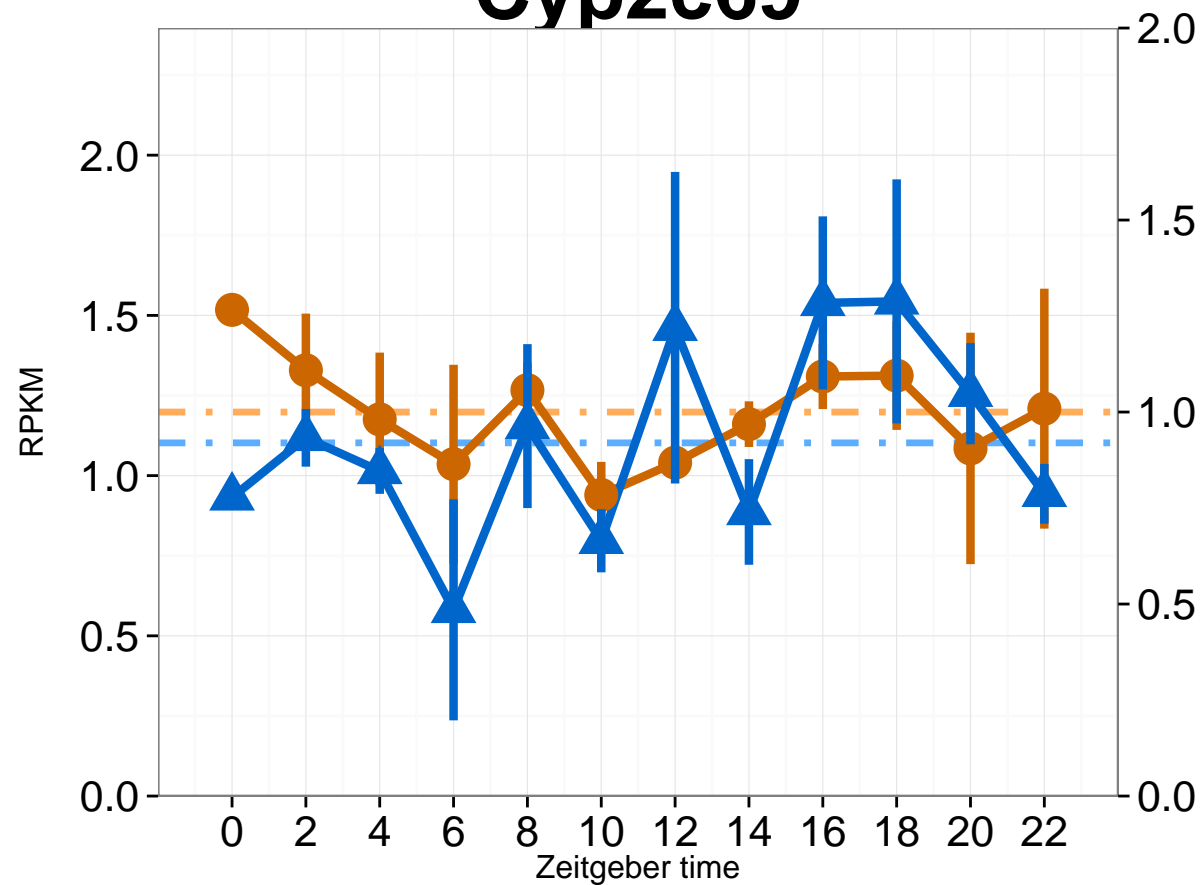

# Cyp2c69

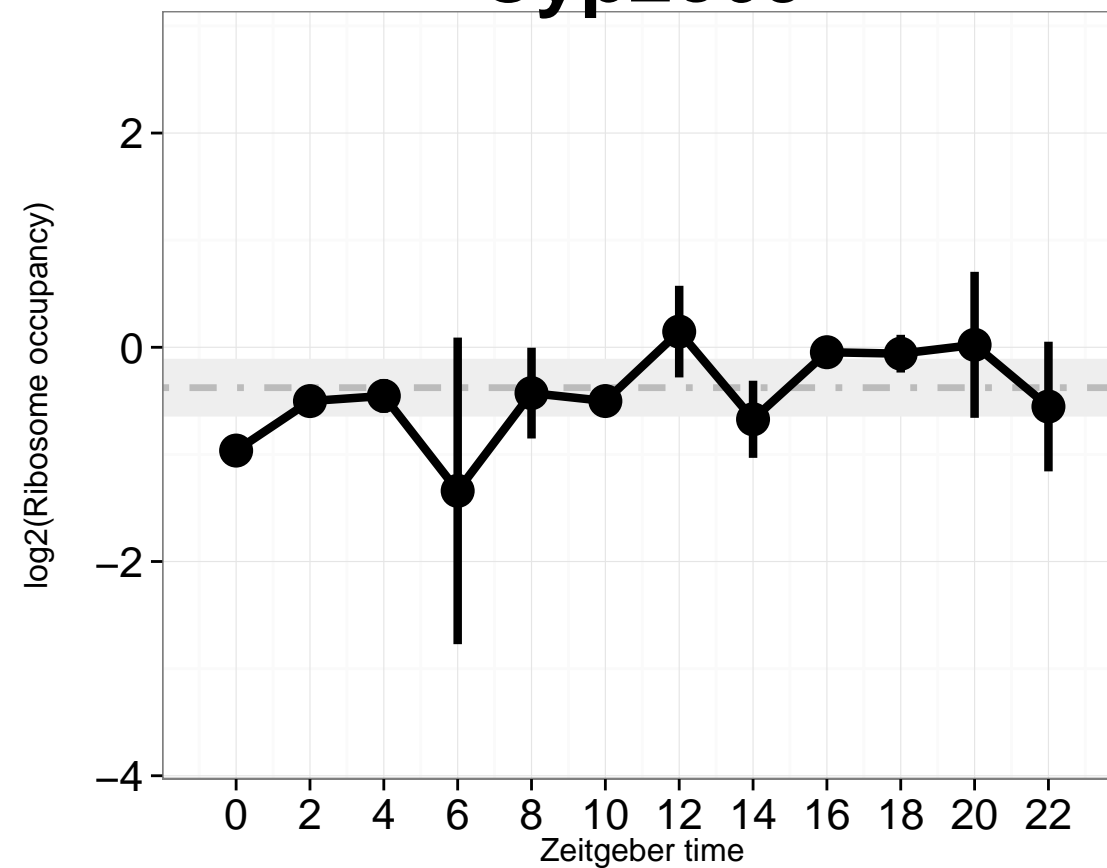

Supplement: Supplementary file 10682 [file 1]

## Dhx32

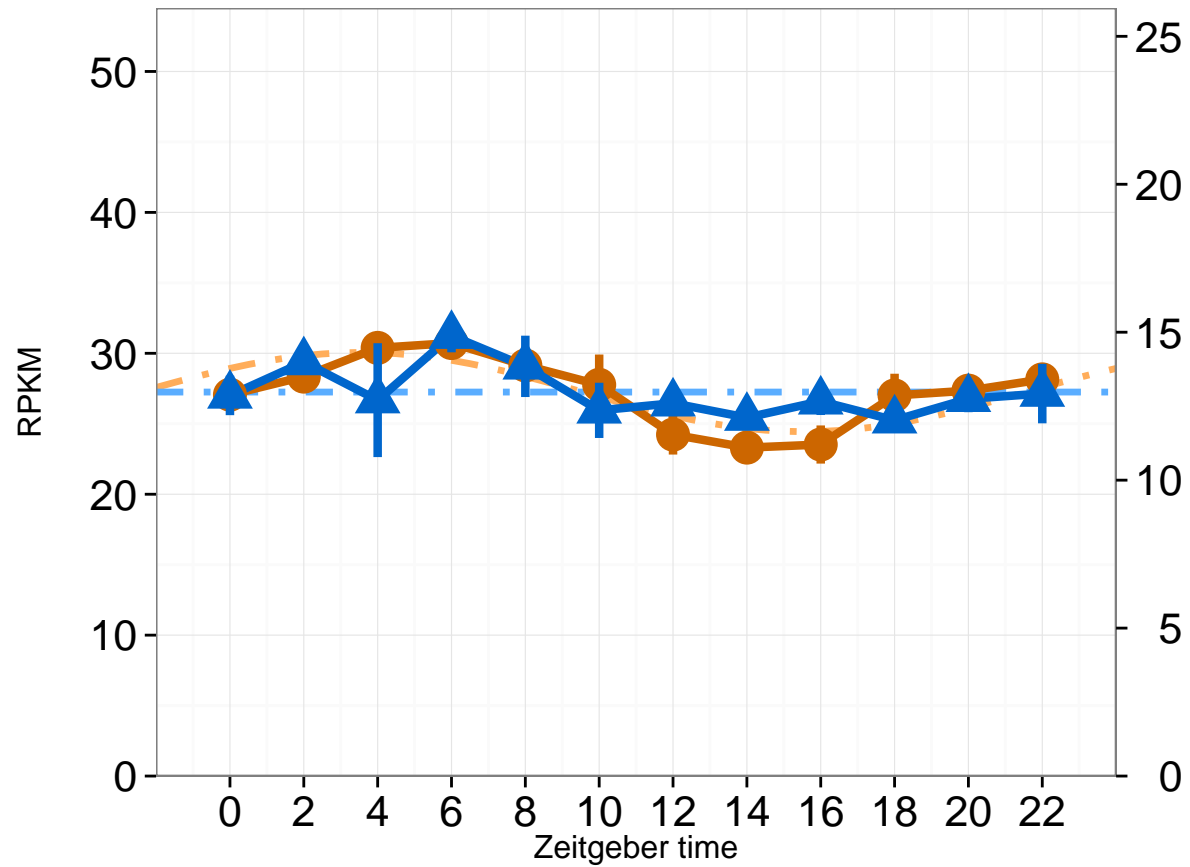

## Dhx32

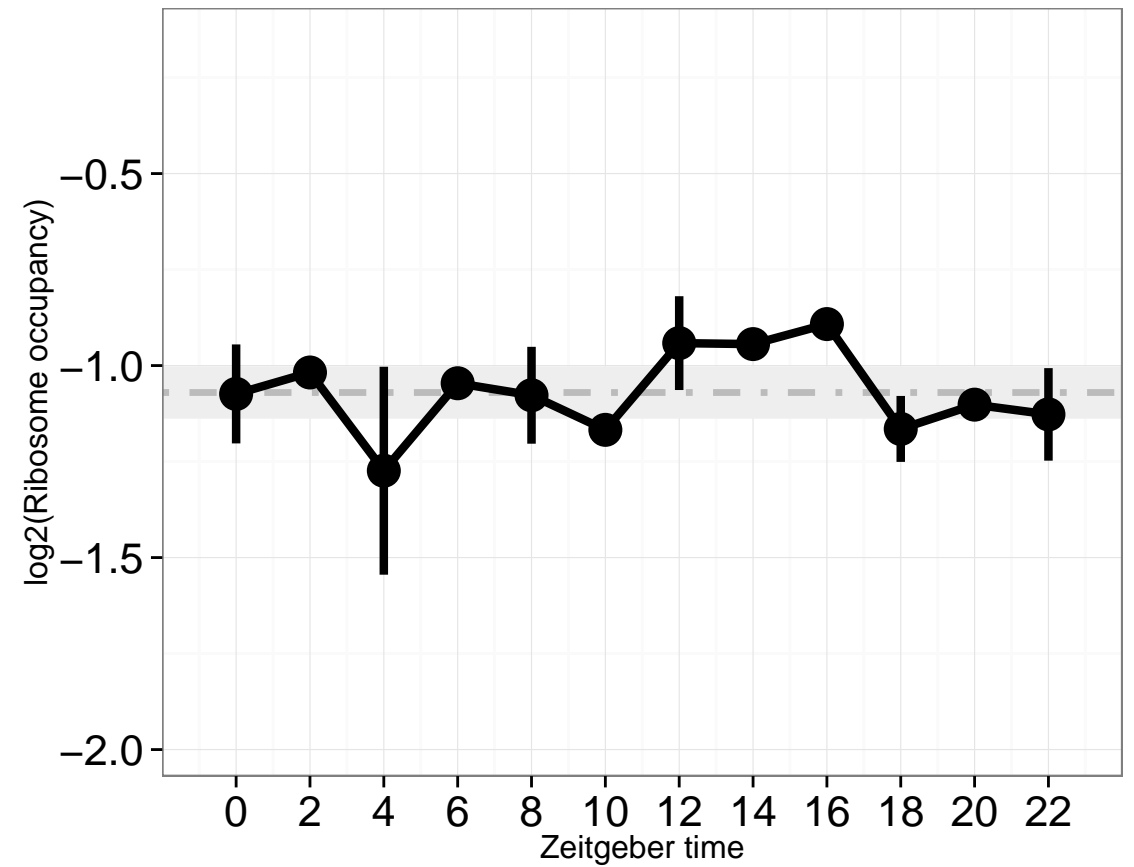

Supplement: Supplementary file 10683 [file 1]

# Zfp142

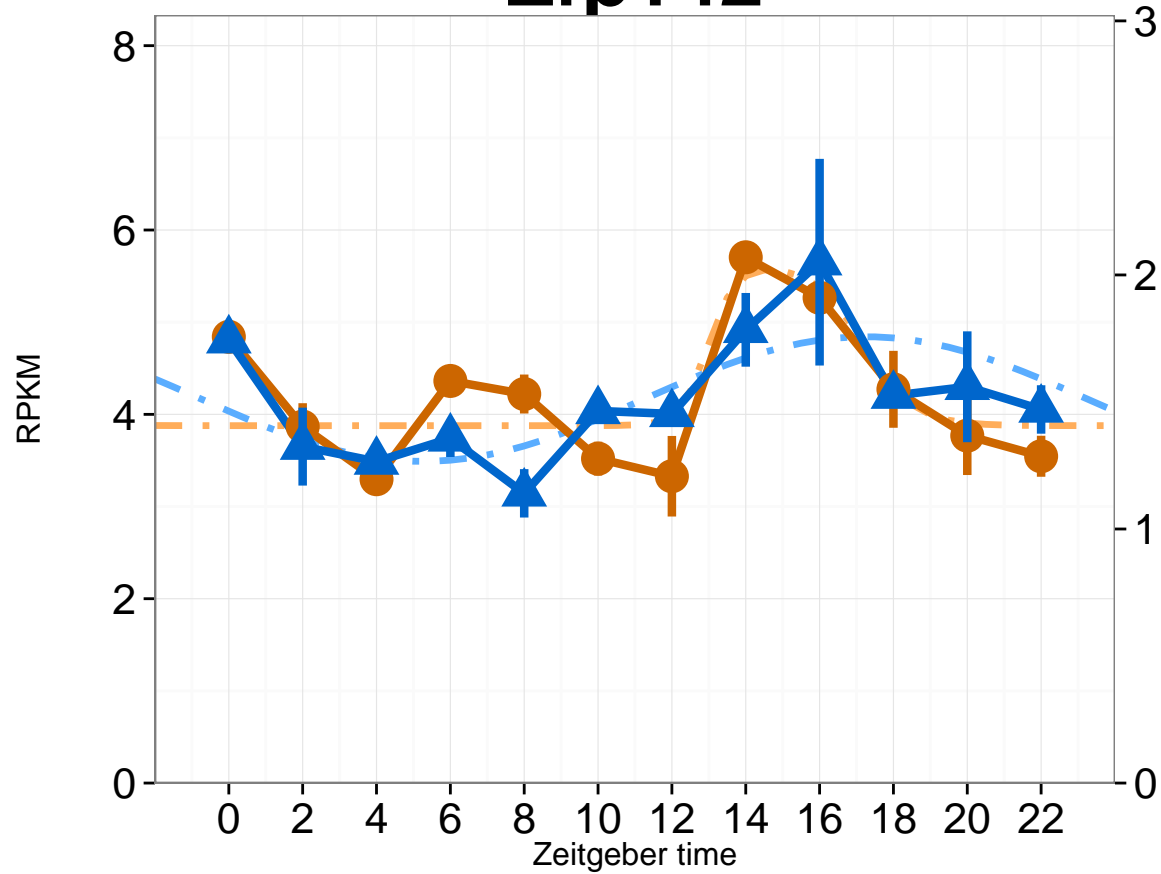

# Zfp142

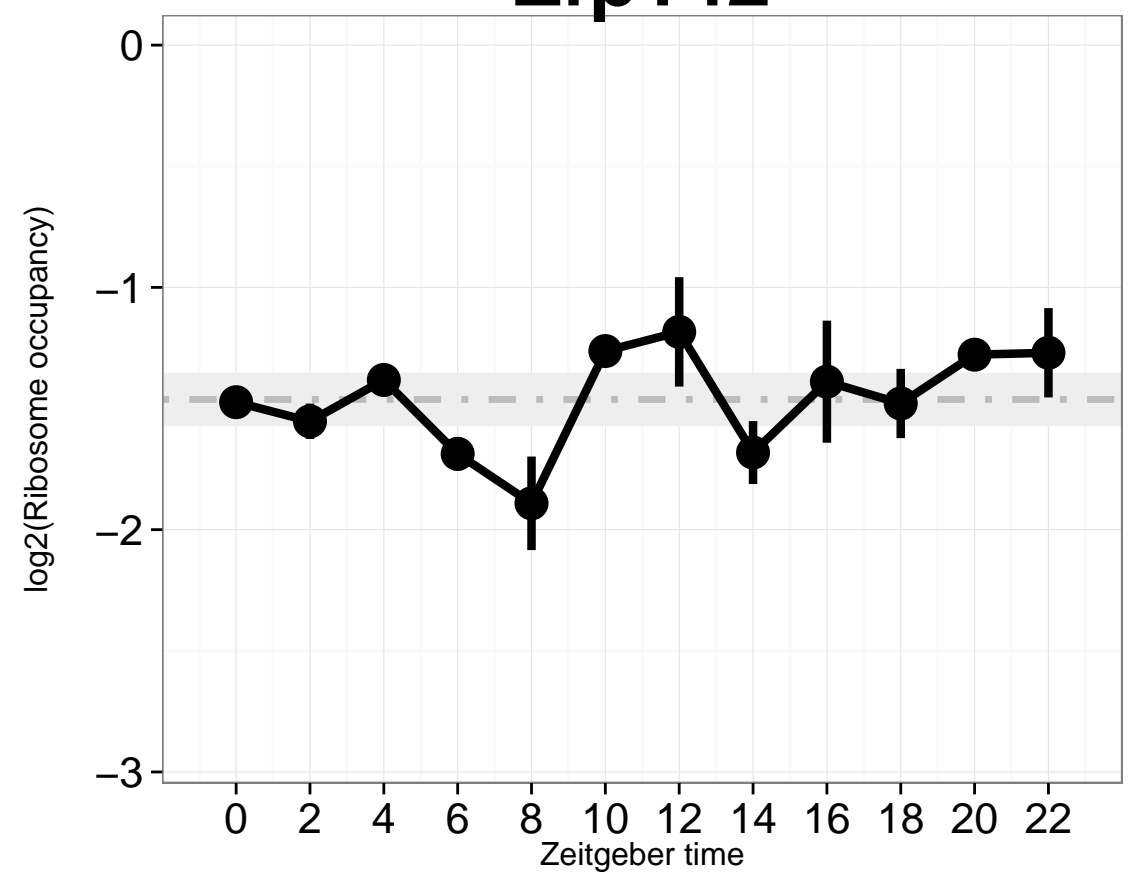

Supplement: Supplementary file 10684 [file 1]

## Rassf8

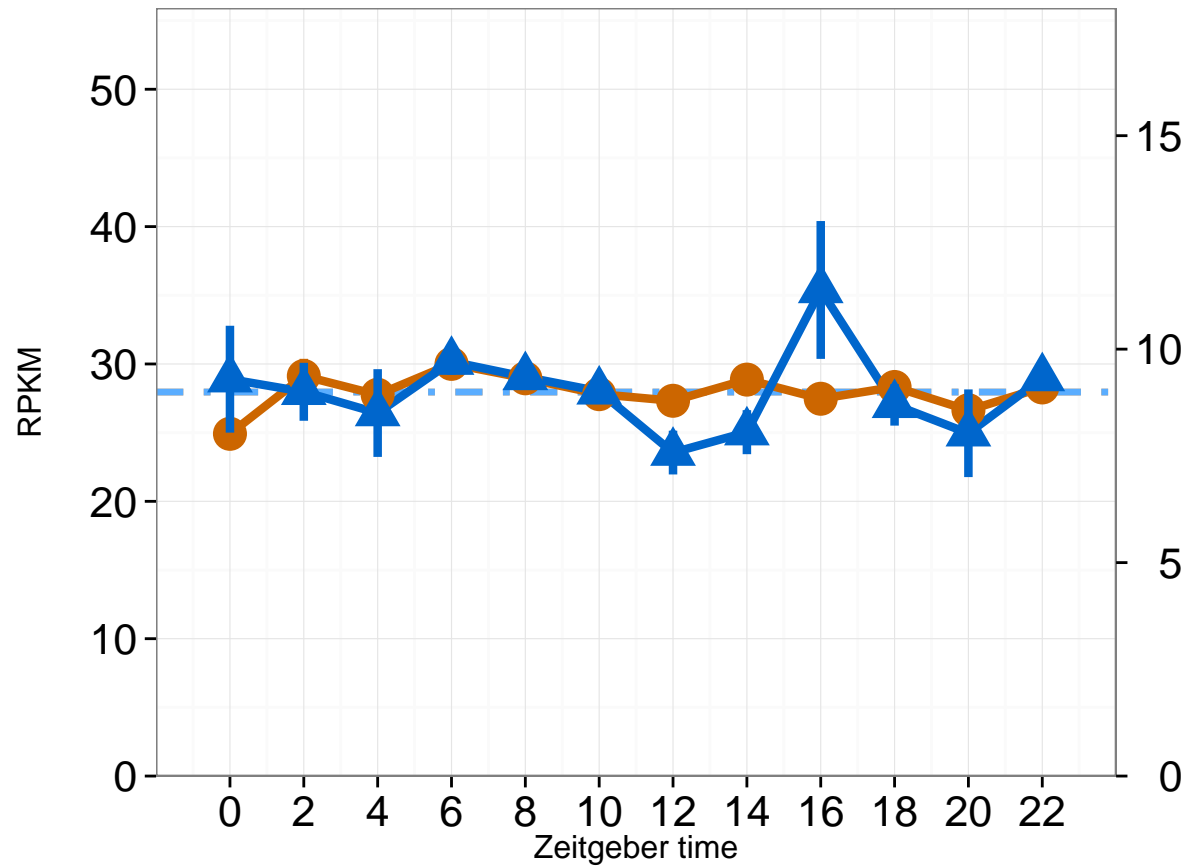

## Rassf8

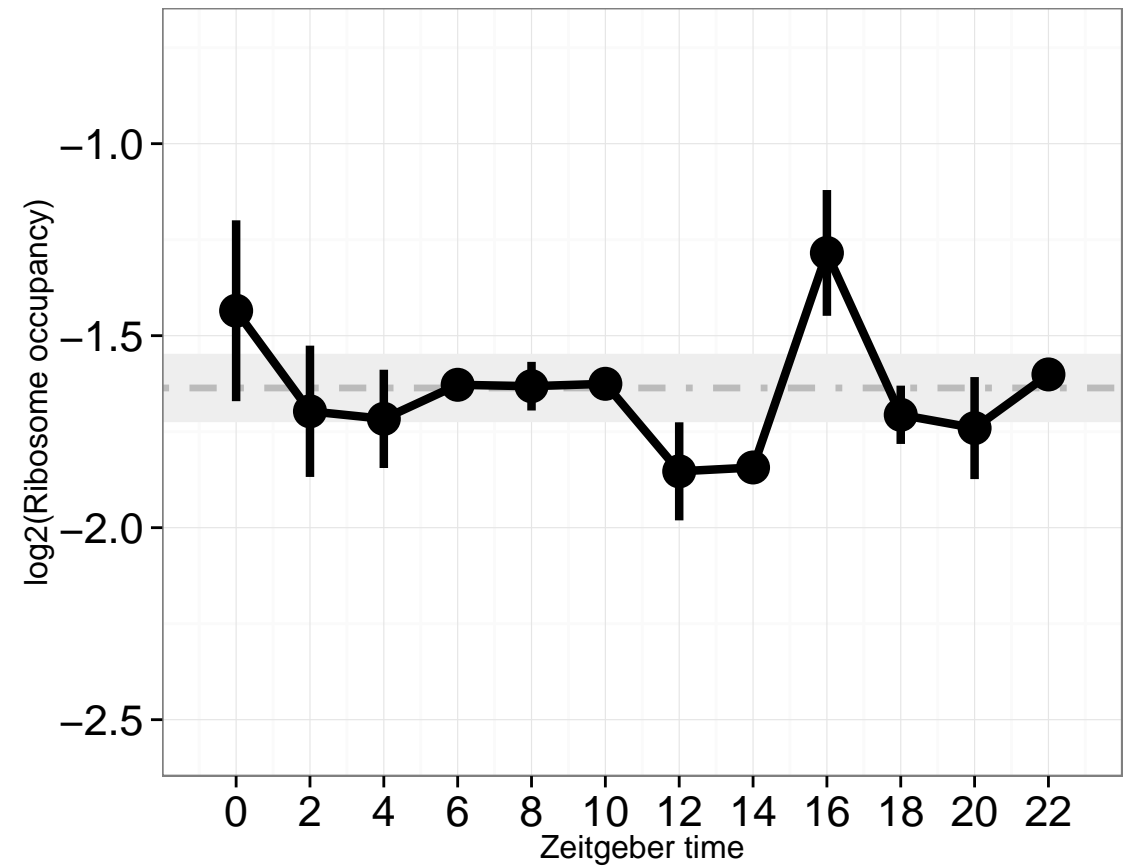

Supplement: Supplementary file 10685 [file 1]

## Ak3

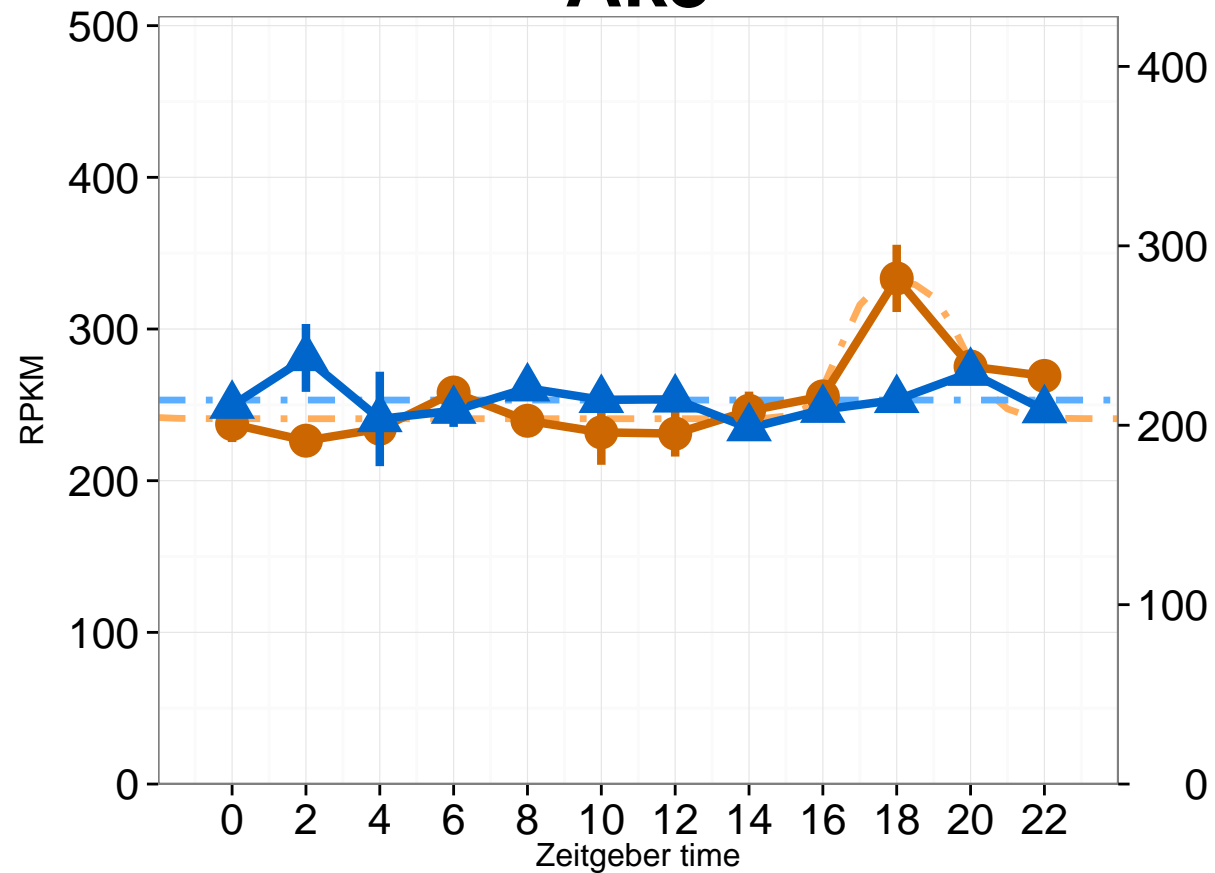

## Ak3

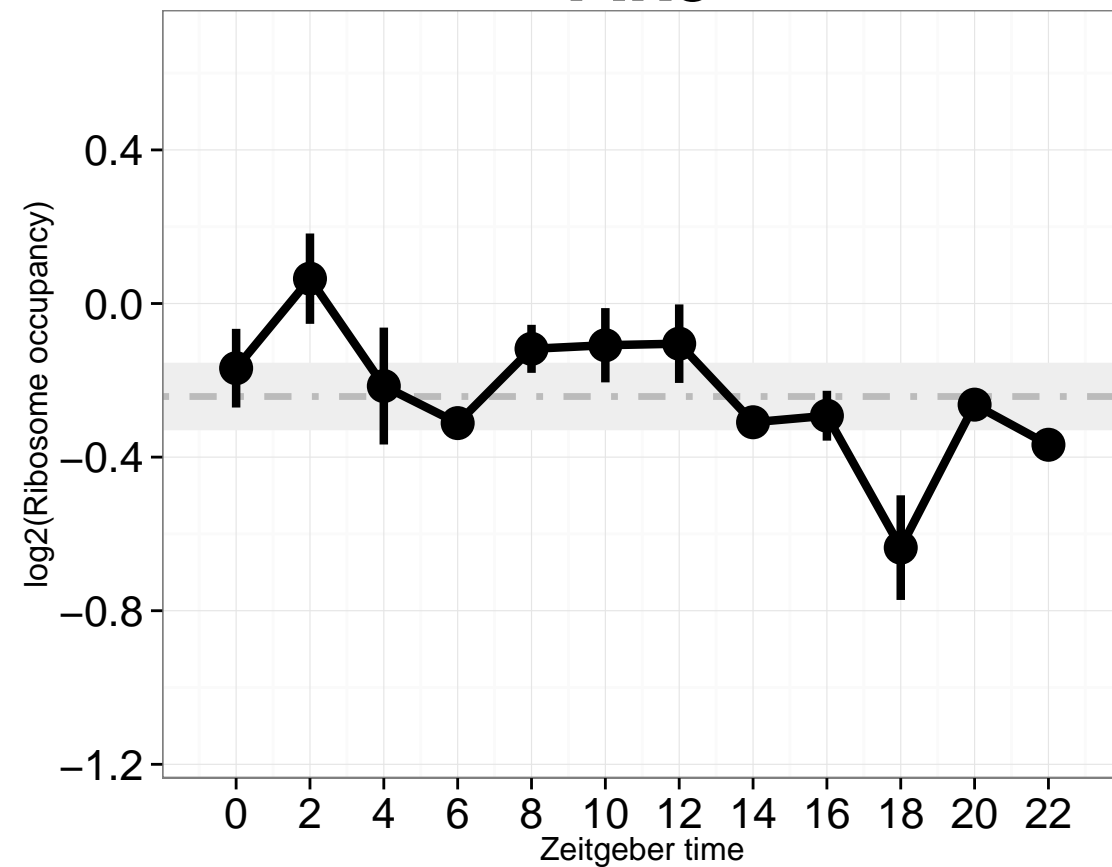

Supplement: Supplementary file 10686 [file 1]

# Mrps9

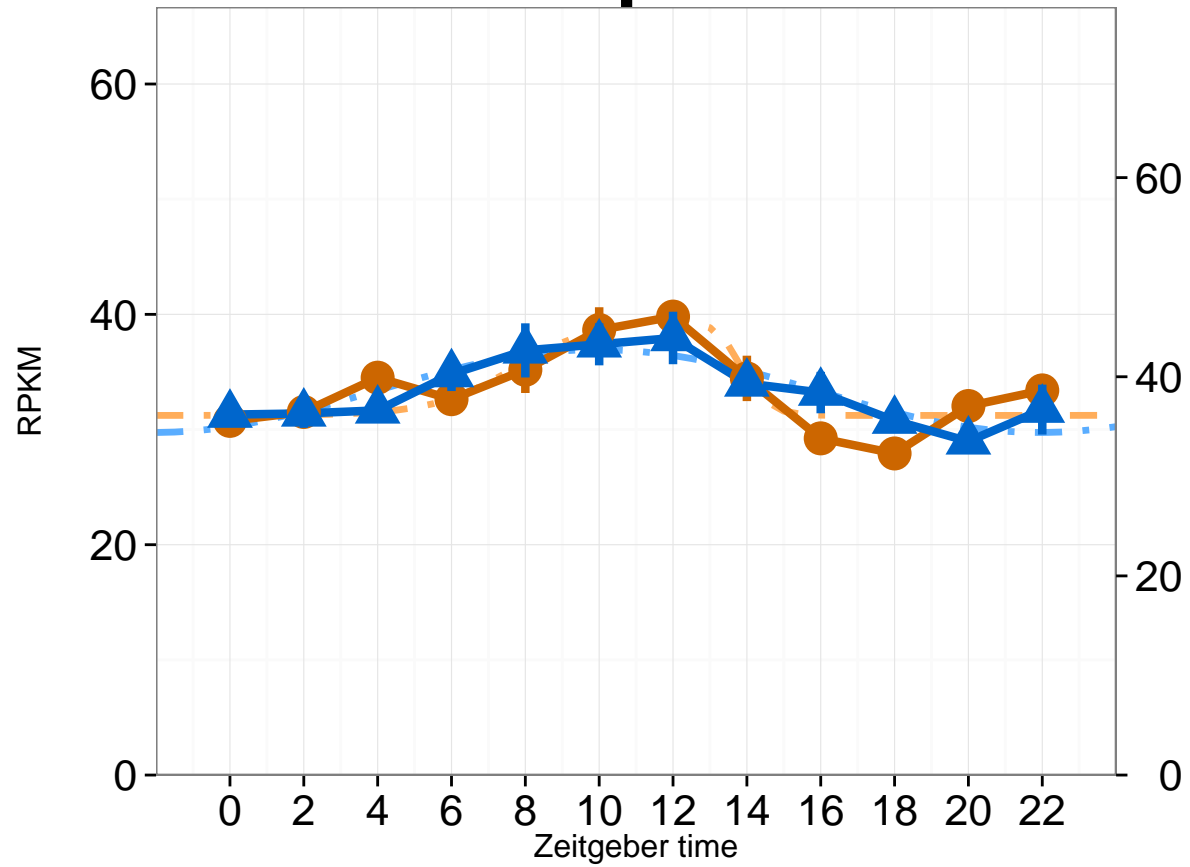

# Mrps9

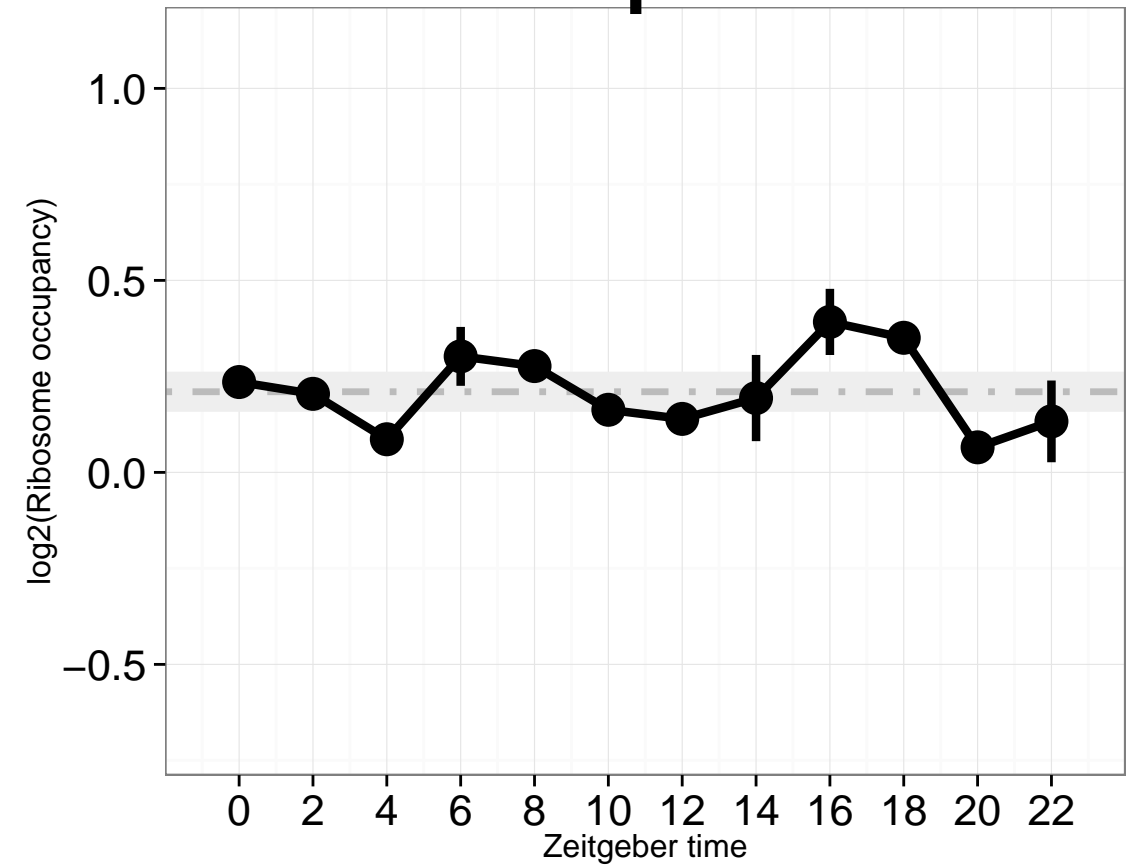

Supplement: Supplementary file 10687 [file 1]

## Ln<sub>x</sub>1

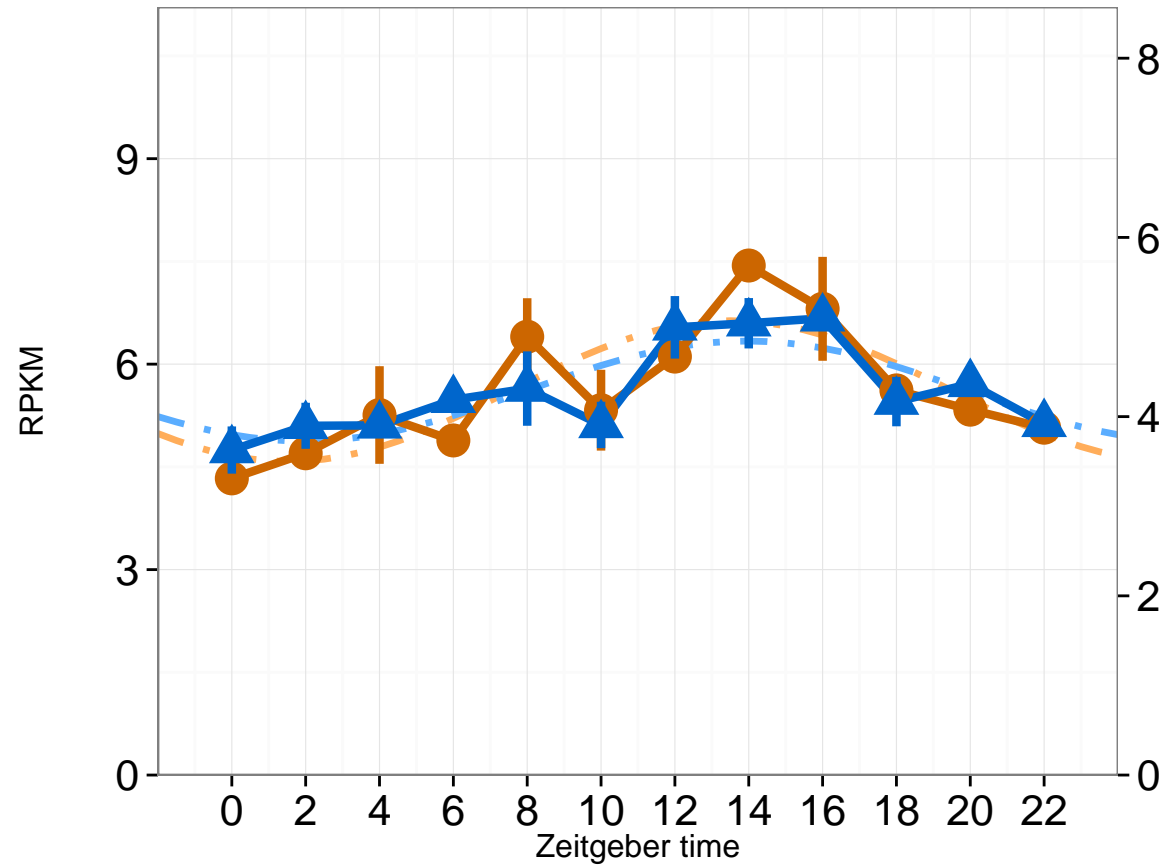

## Ln<sub>x</sub>1

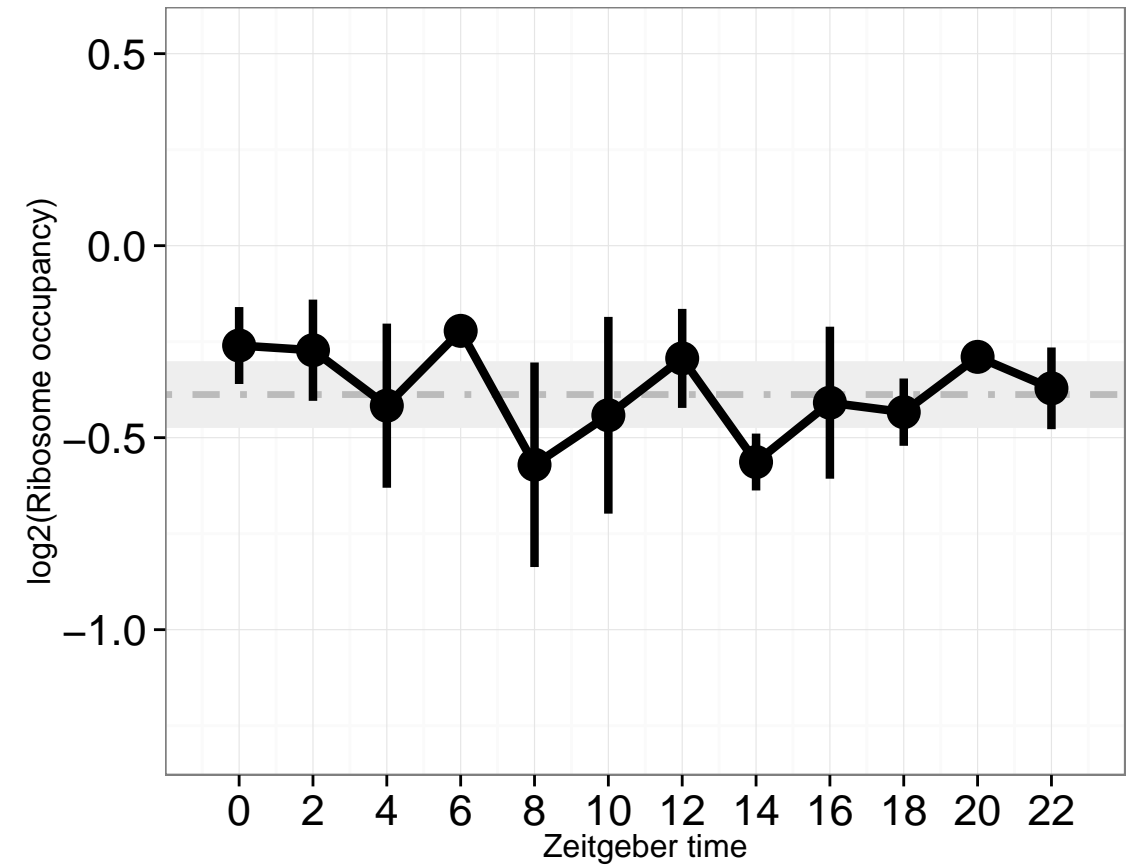

Supplement: Supplementary file 10688 [file 1]

## Foxo3

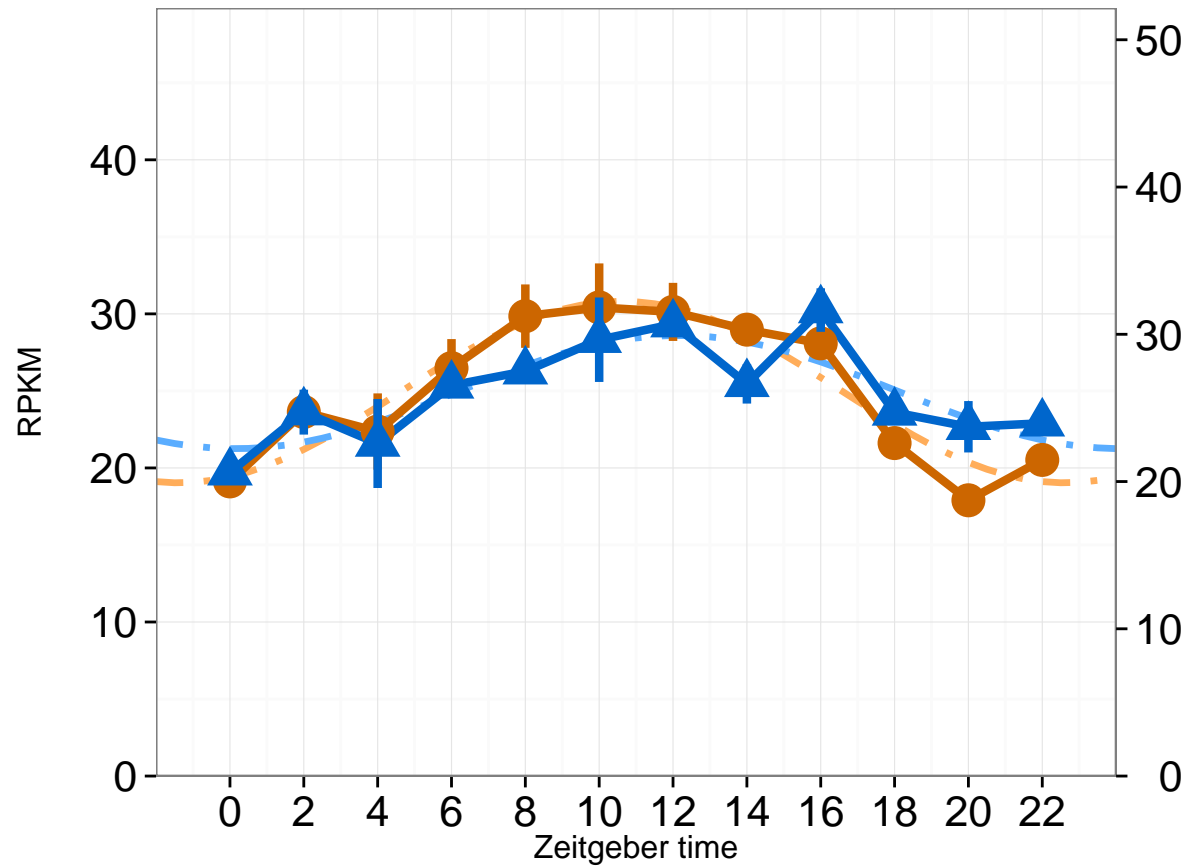

## Foxo3

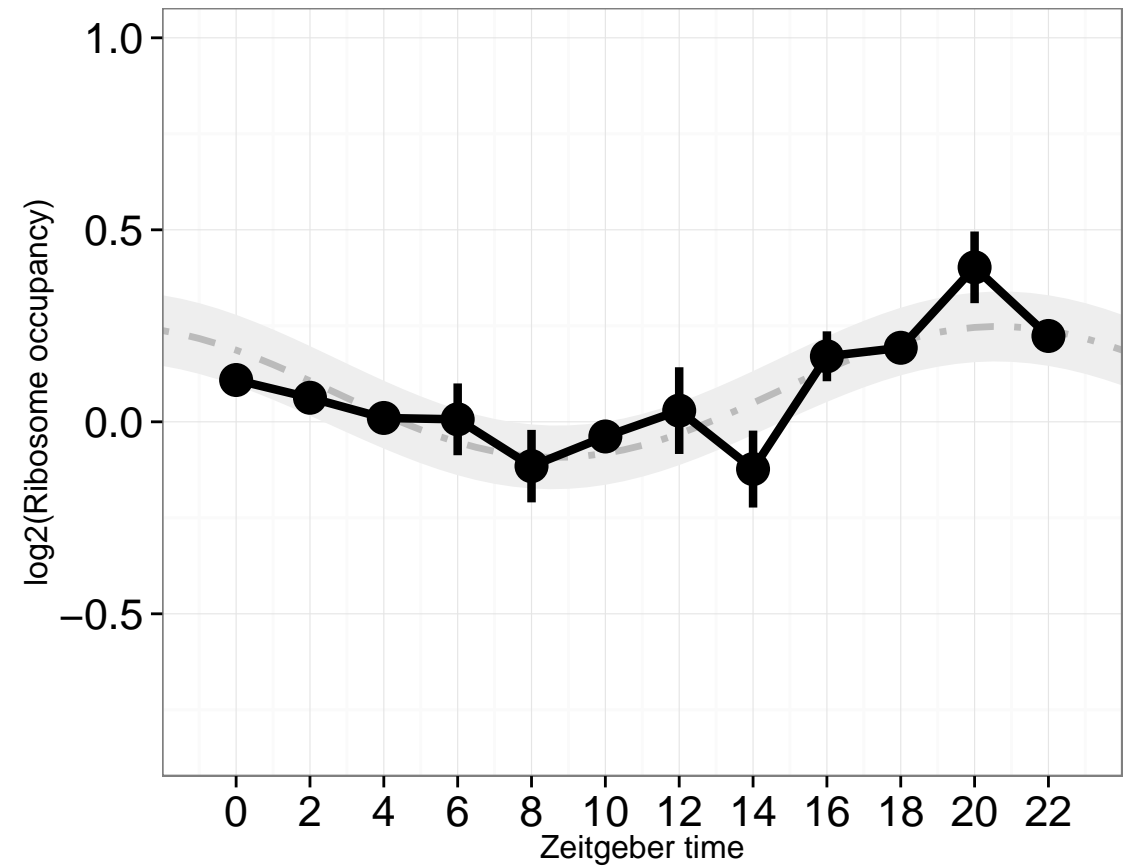

Supplement: Supplementary file 10689 [file 1]

## Psca

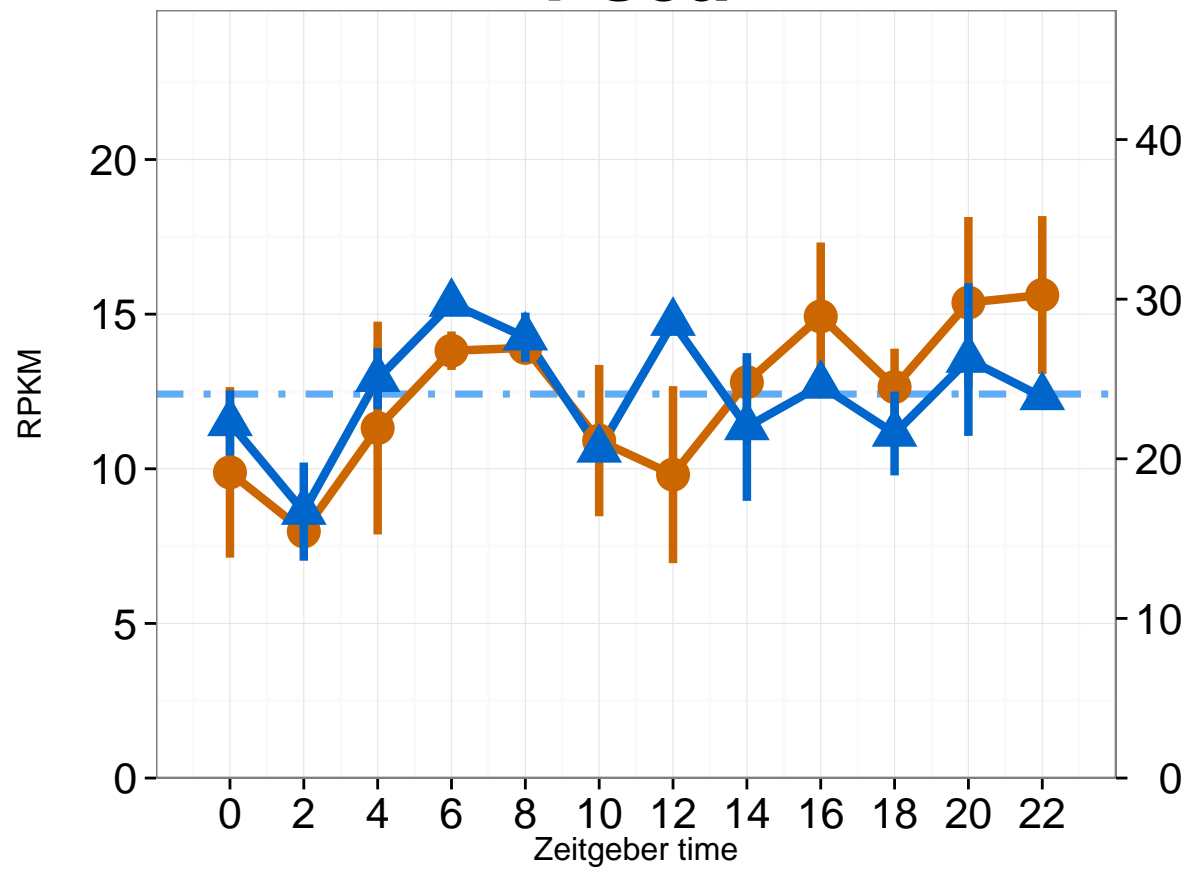

## Psca

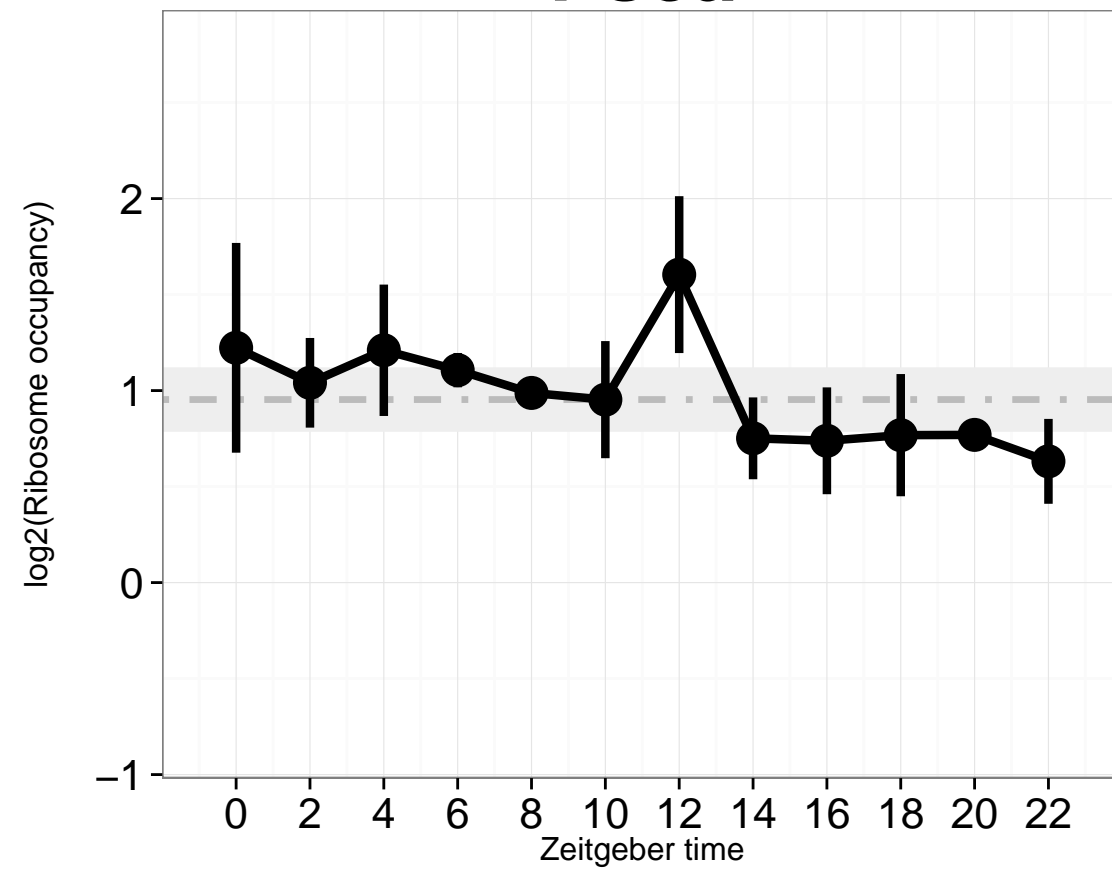

Supplement: Supplementary file 10690 [file 1]

## Pml

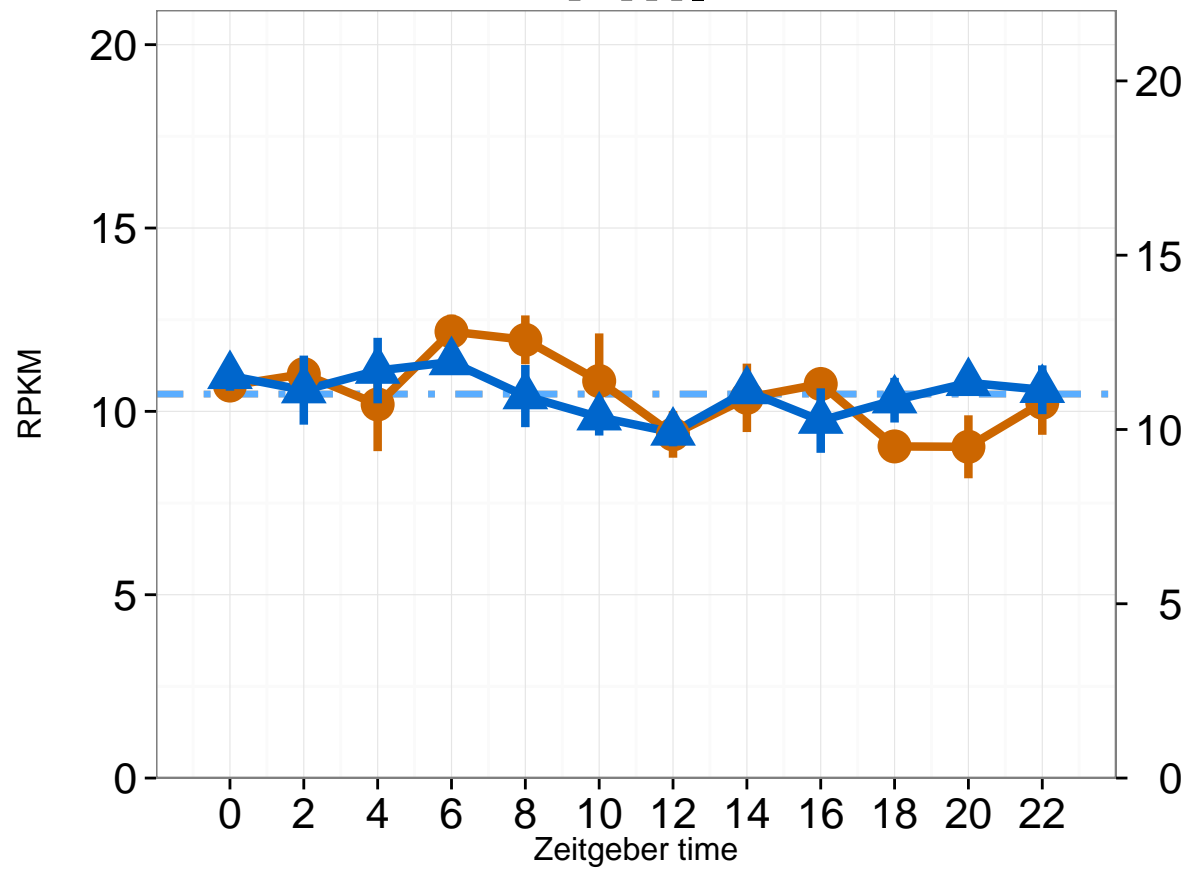

## Pml

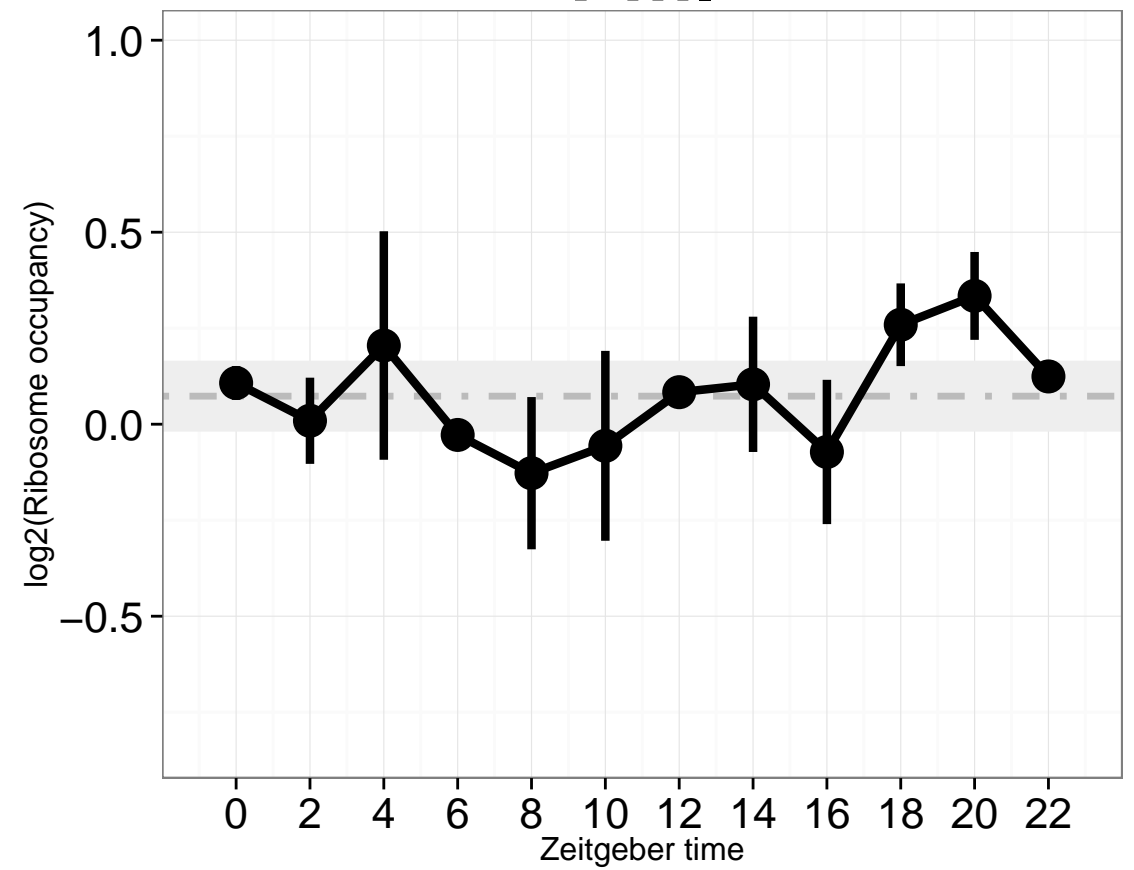

Supplement: Supplementary file 10691 [file 1]

## Dedd2

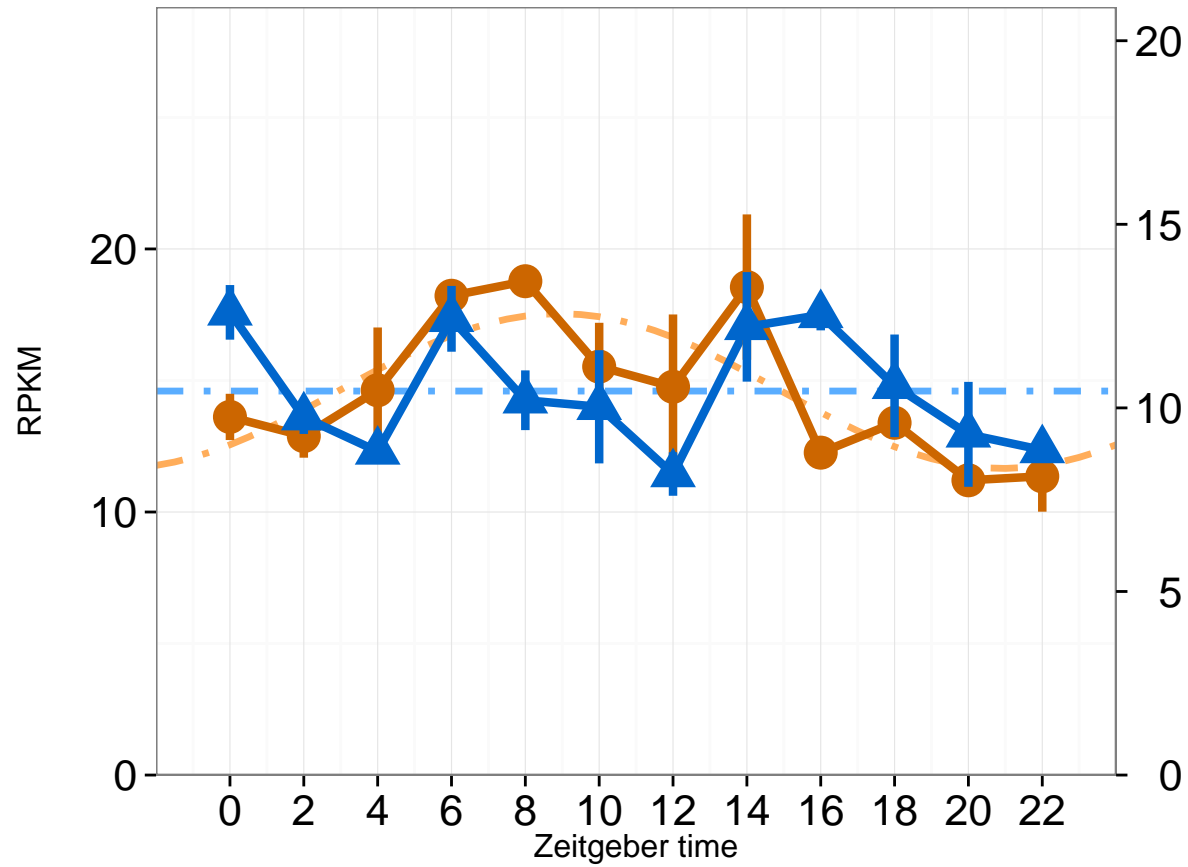

## Dedd2

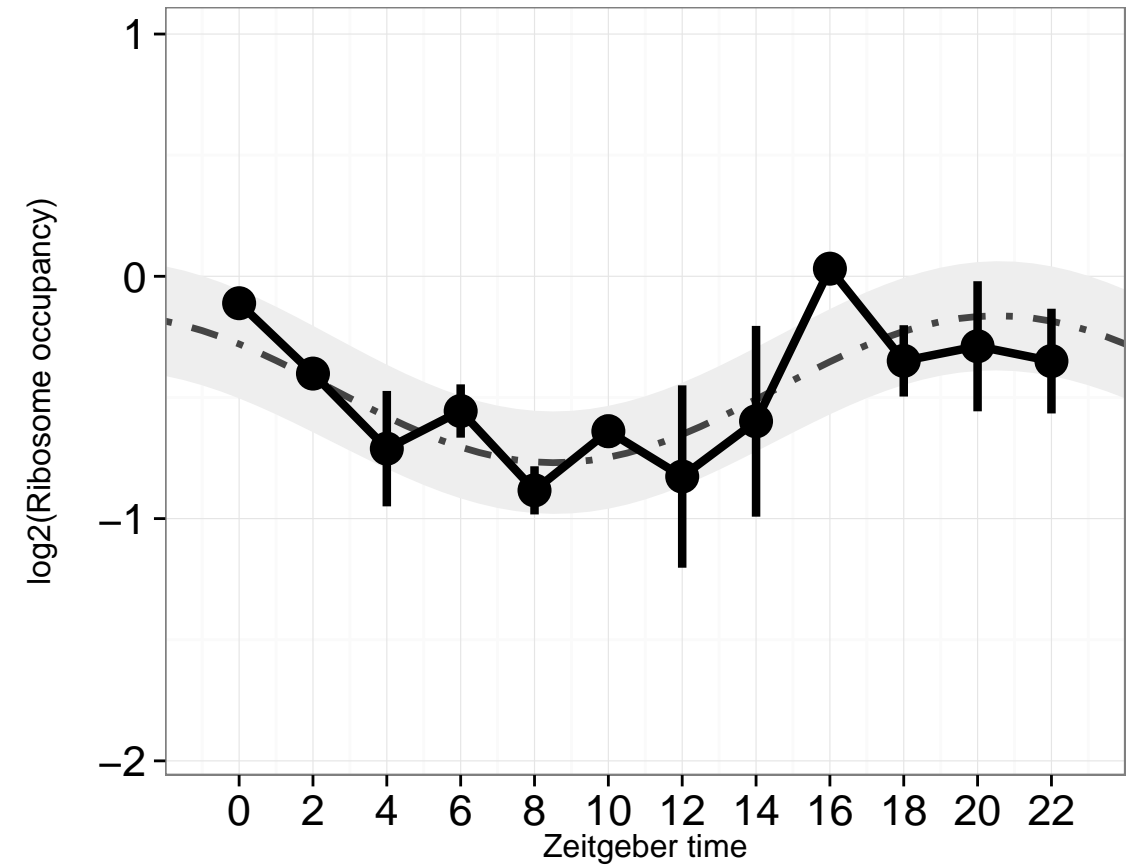

Supplement: Supplementary file 10692 [file 1]

# Hmx2

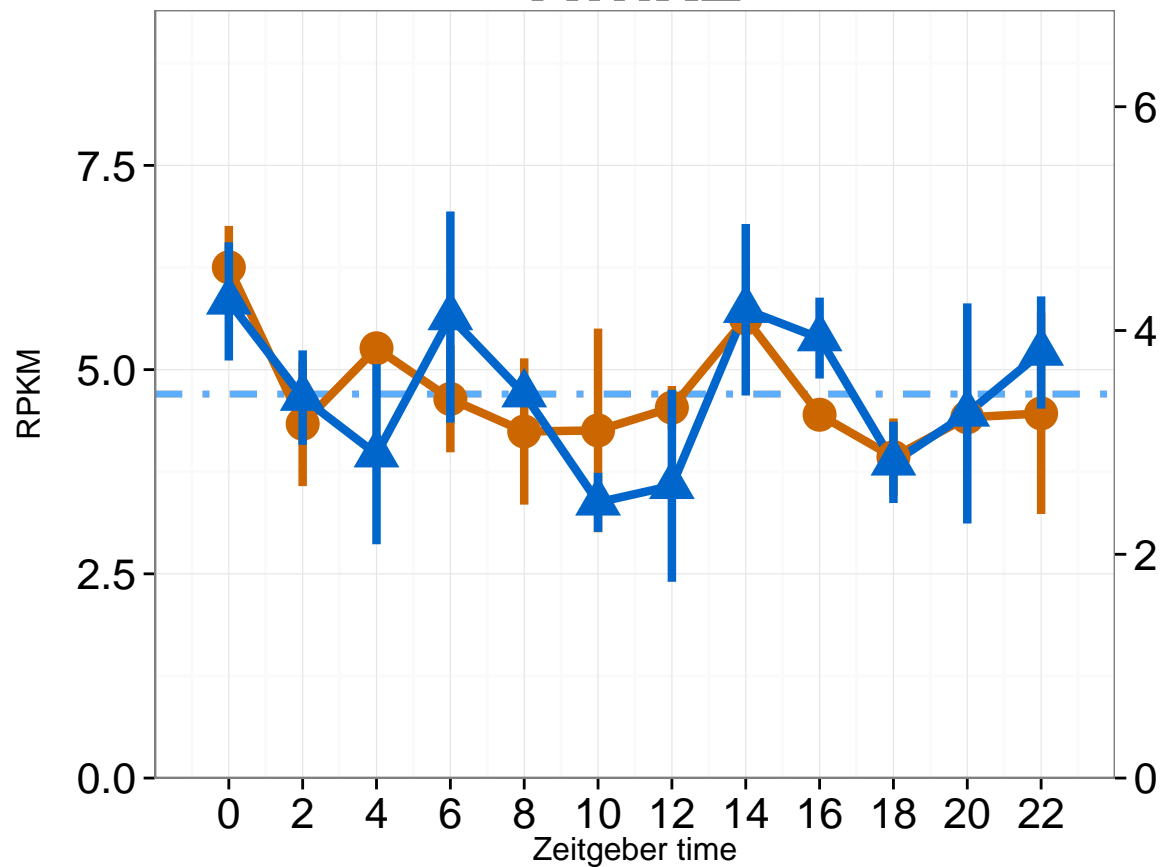

# Hmx2

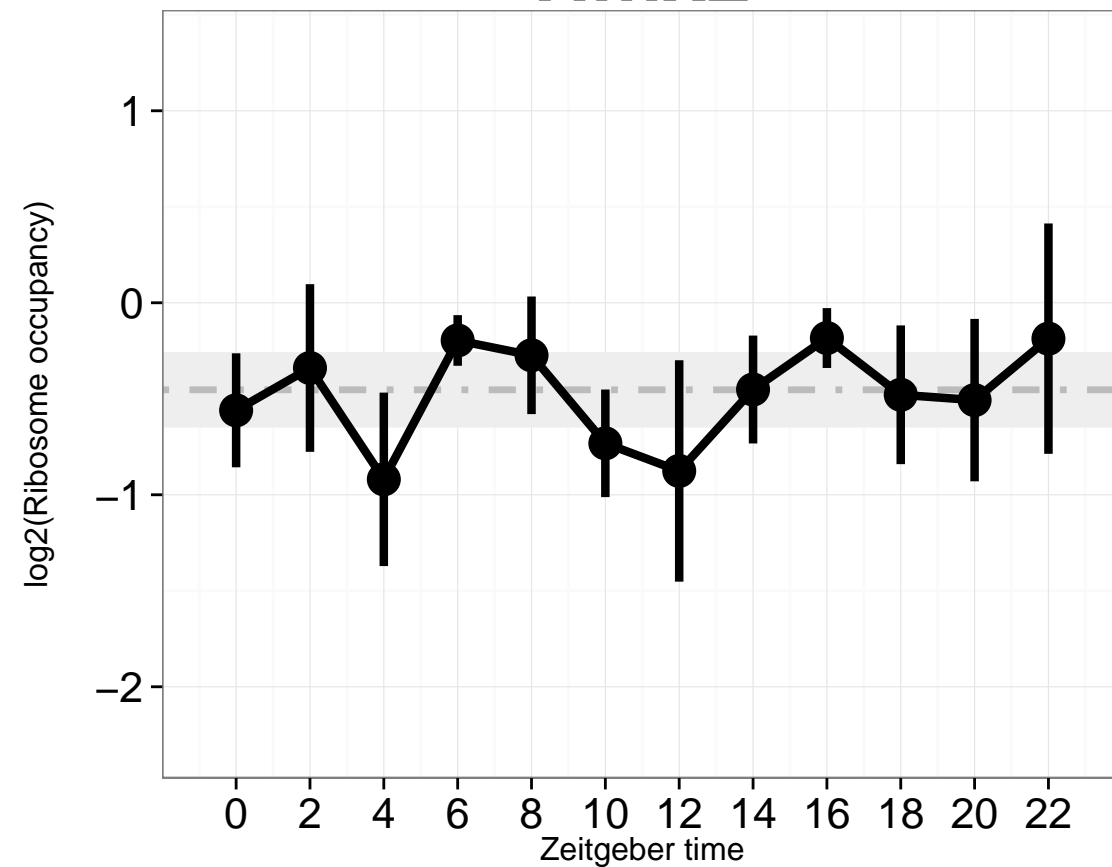

Supplement: Supplementary file 10693 [file 1]

## Mcm3

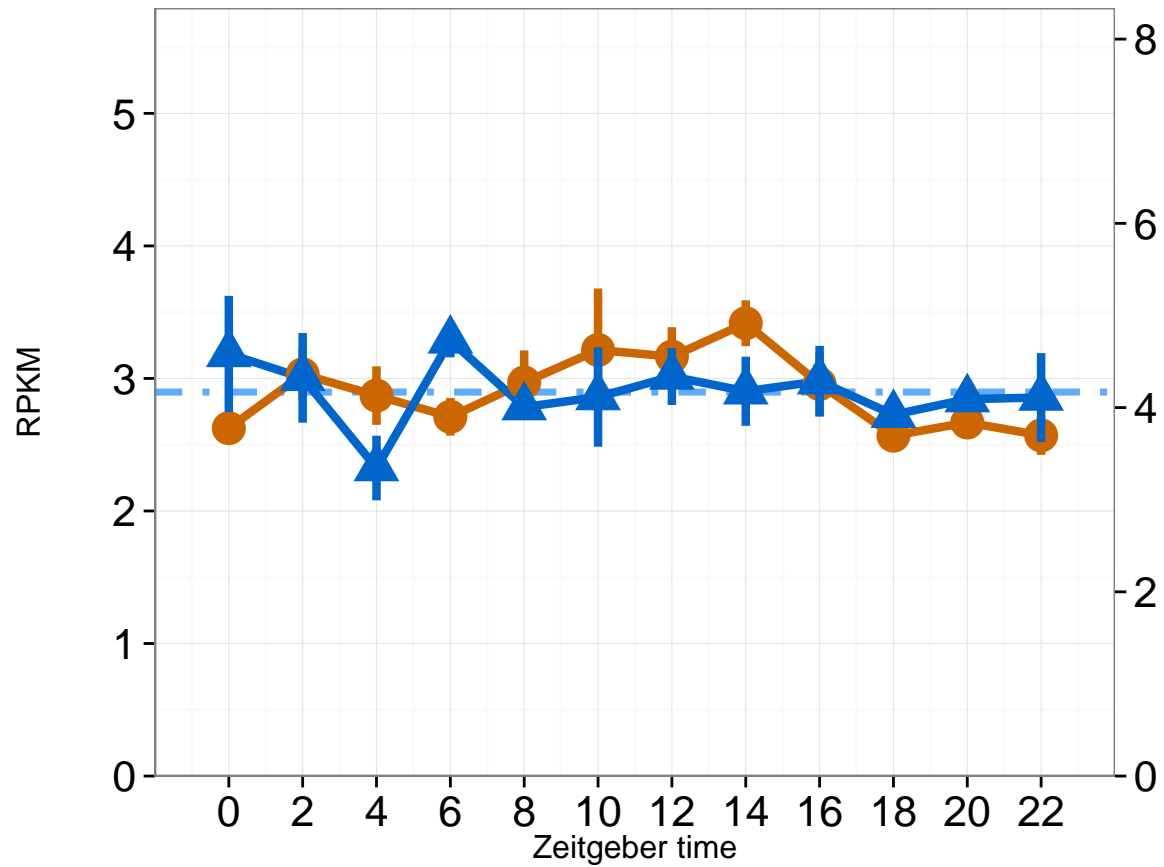

## Mcm3

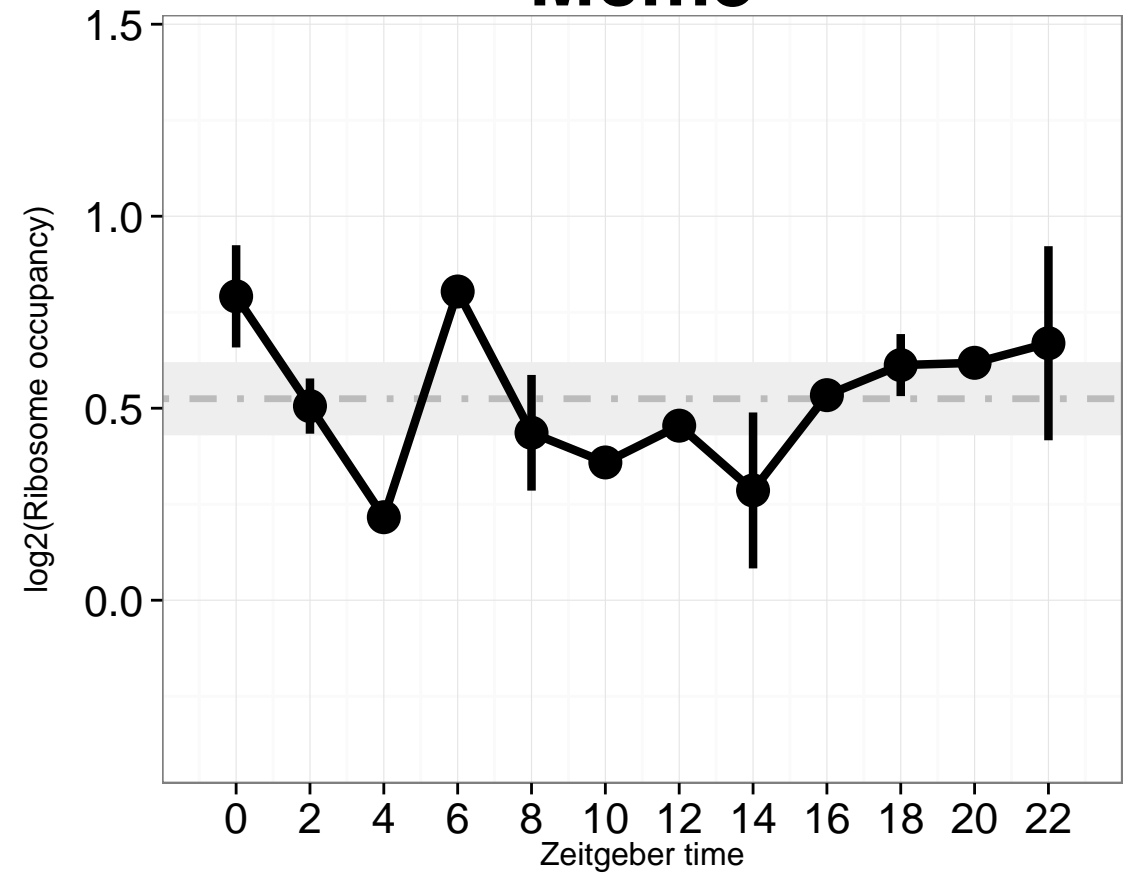

Supplement: Supplementary file 10694 [file 1]

# Fam178a

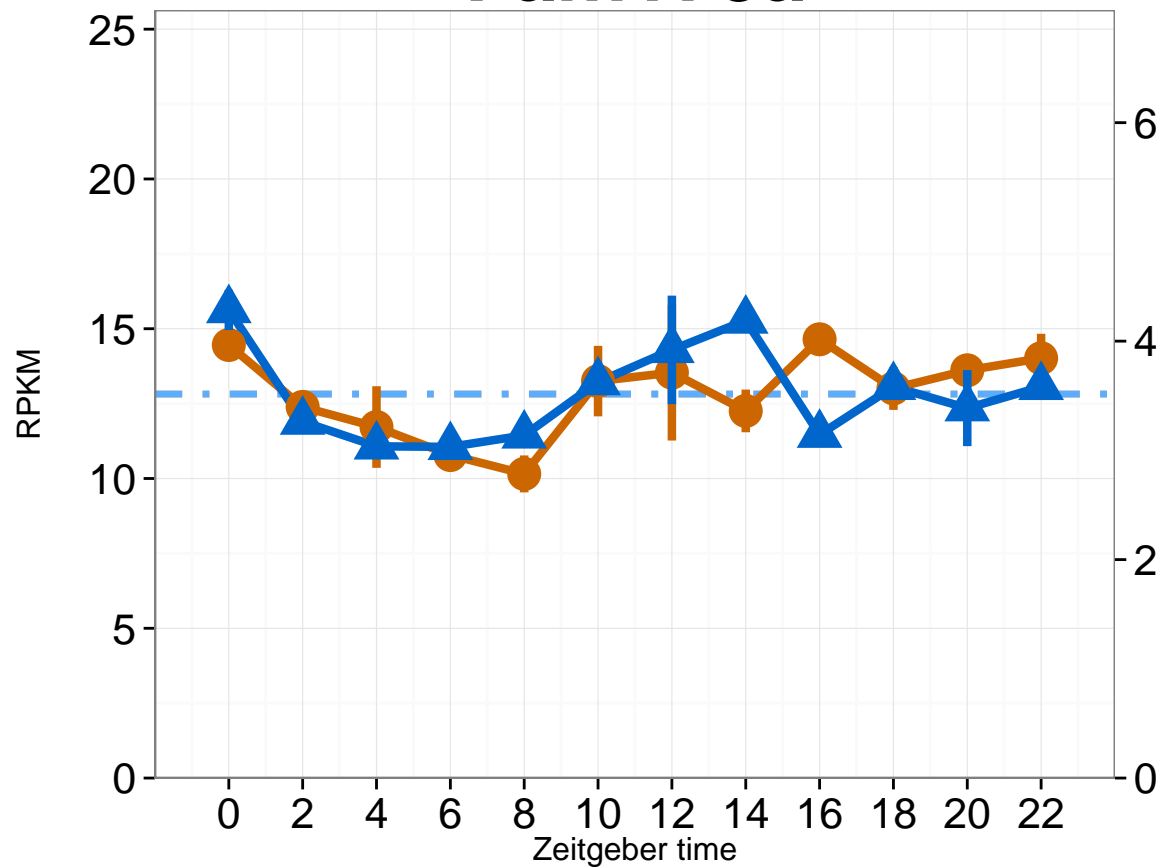

# Fam178a

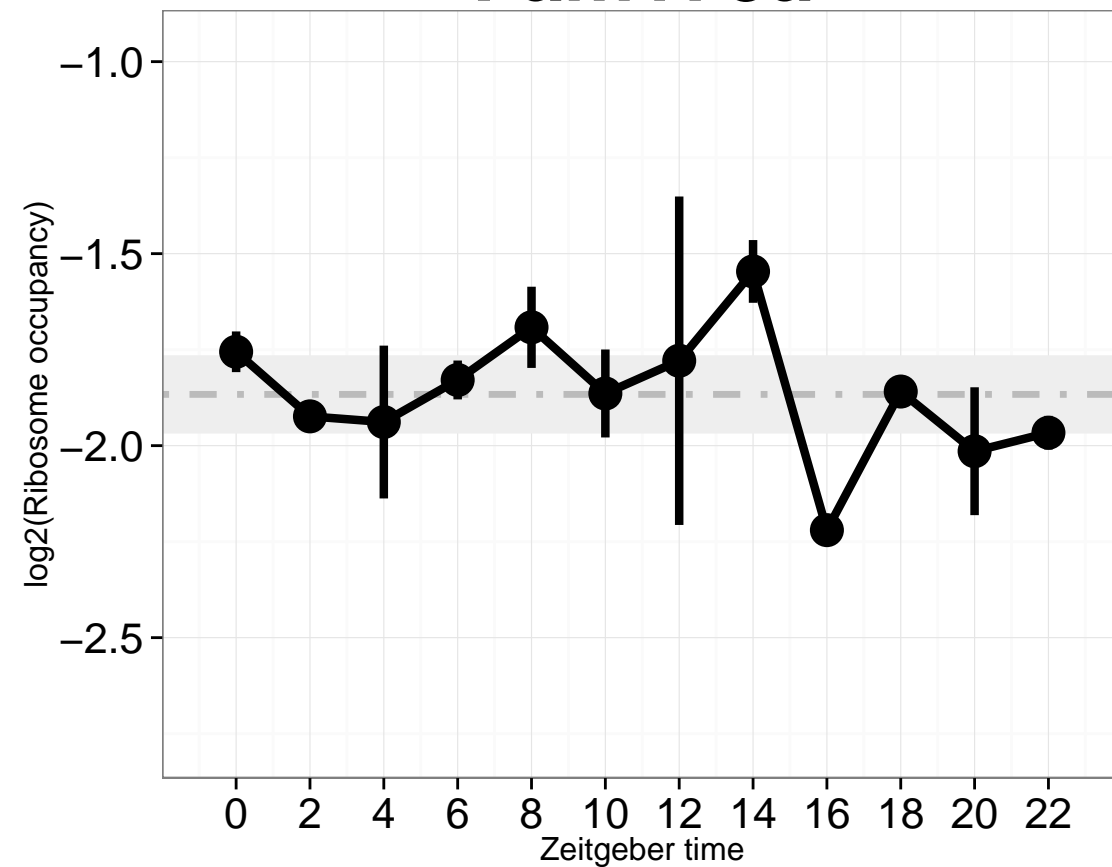

Supplement: Supplementary file 10695 [file 1]

## Znhit2

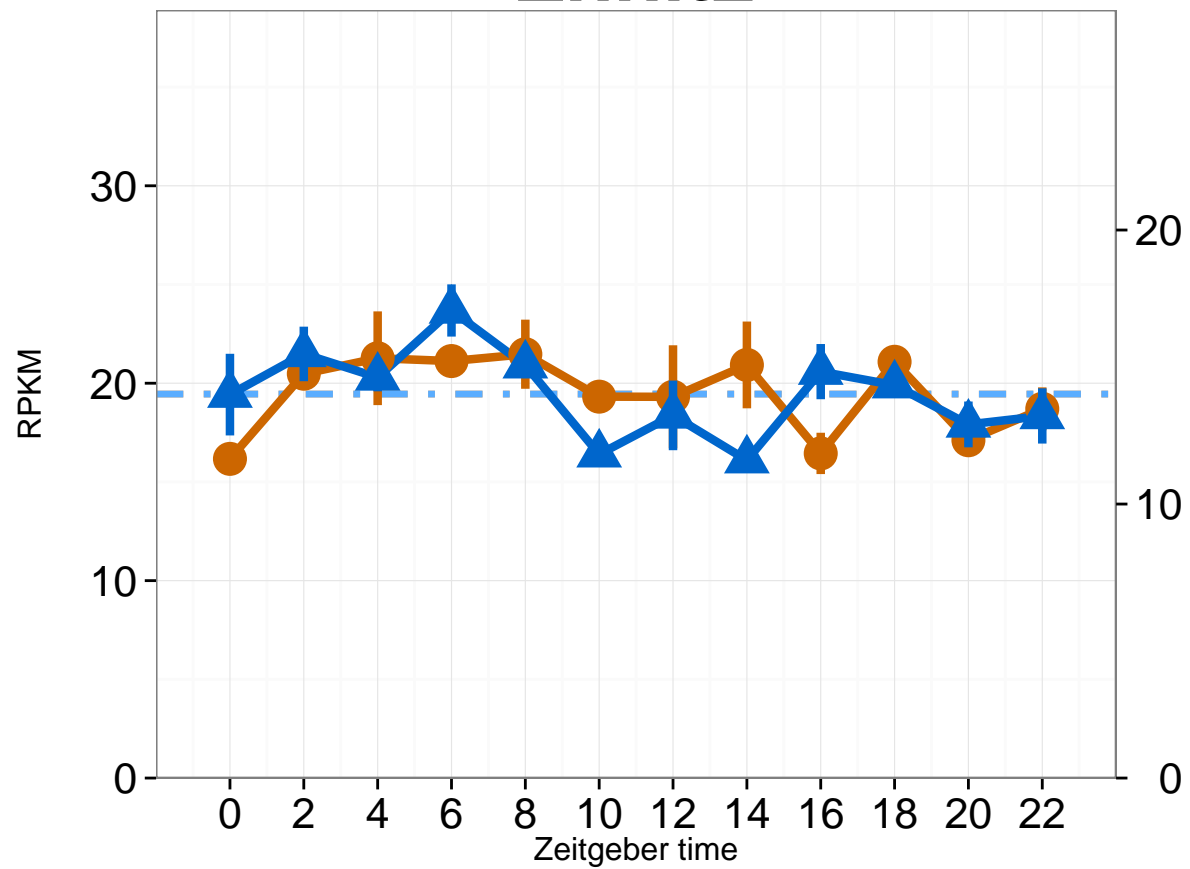

## Znhit2

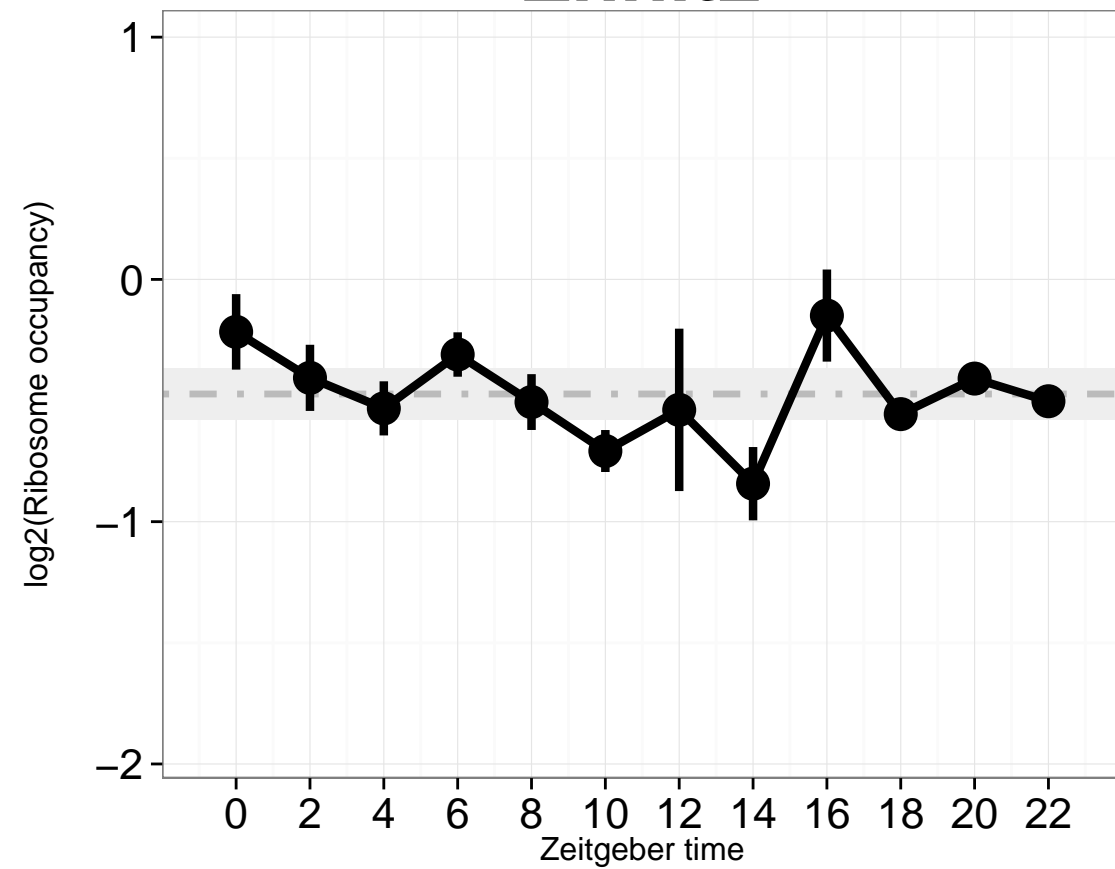

Supplement: Supplementary file 10696 [file 1]

# Slc25a45

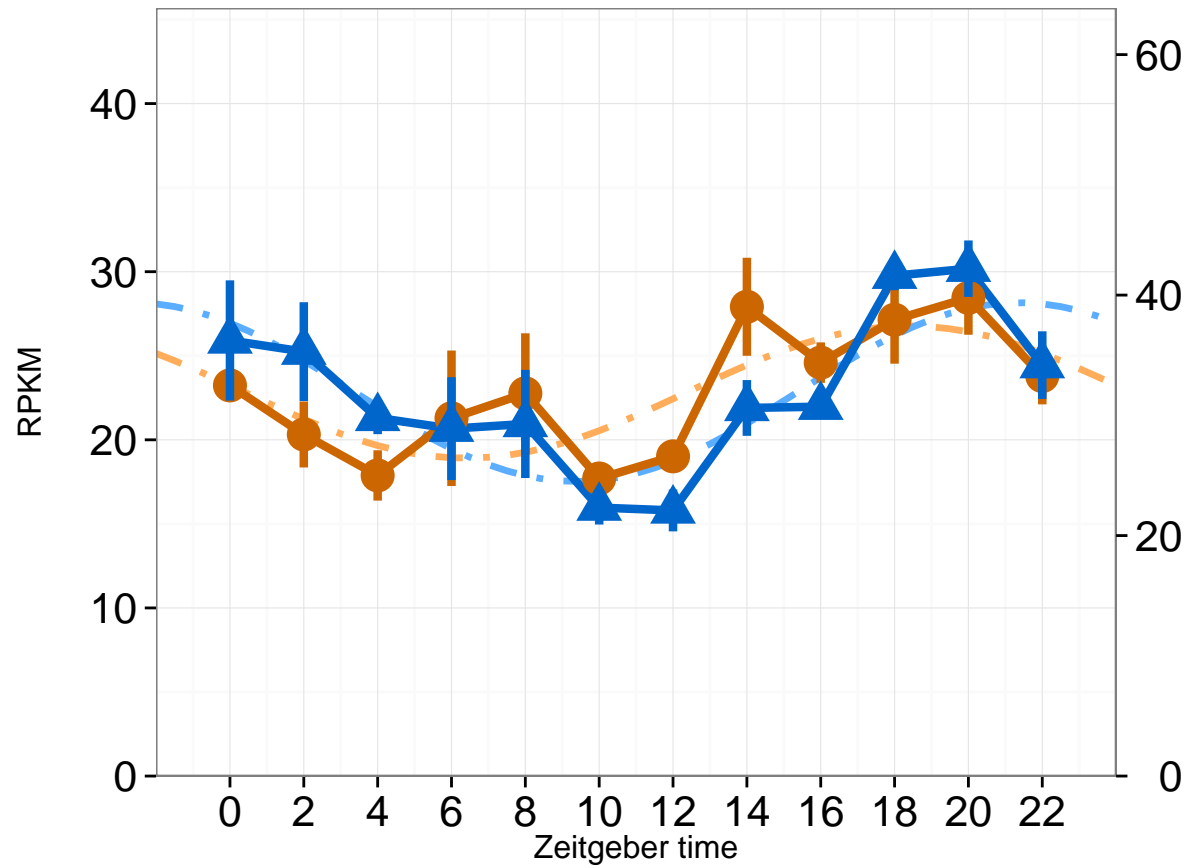

# Slc25a45

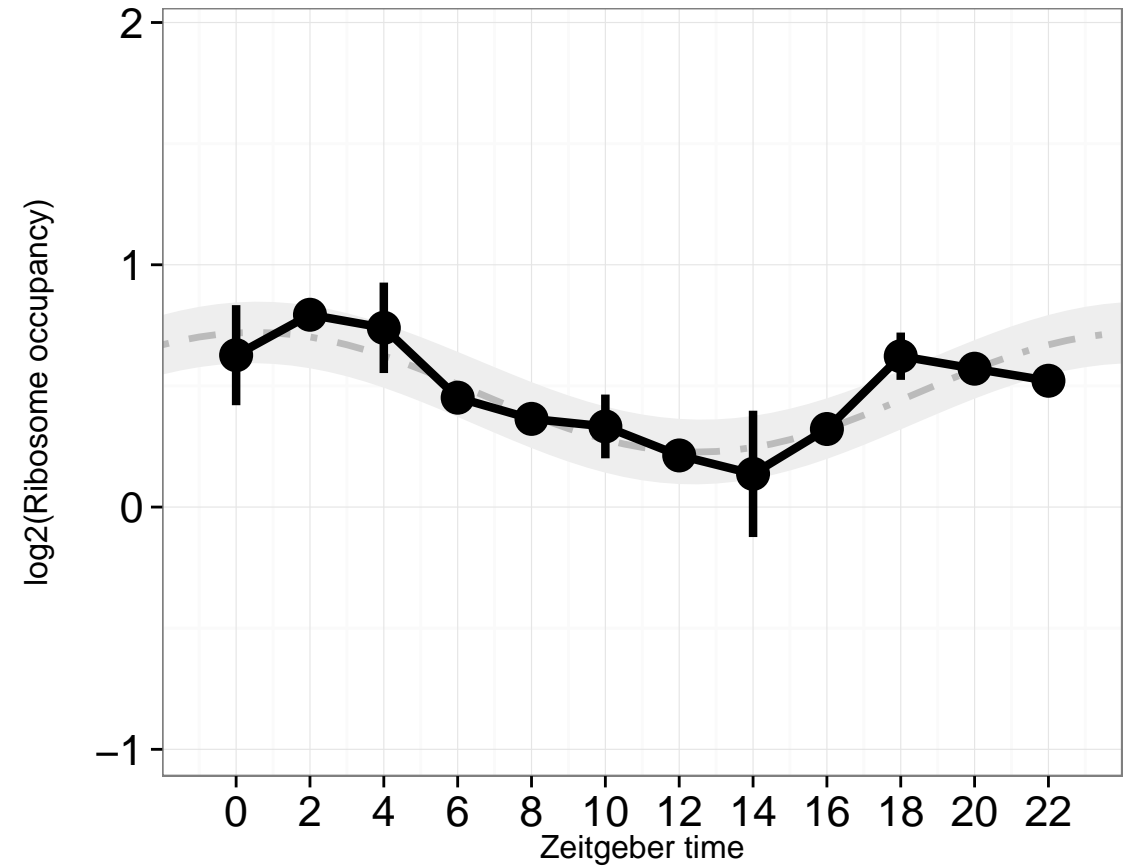

Supplement: Supplementary file 10697 [file 1]

# D6Wsu163e

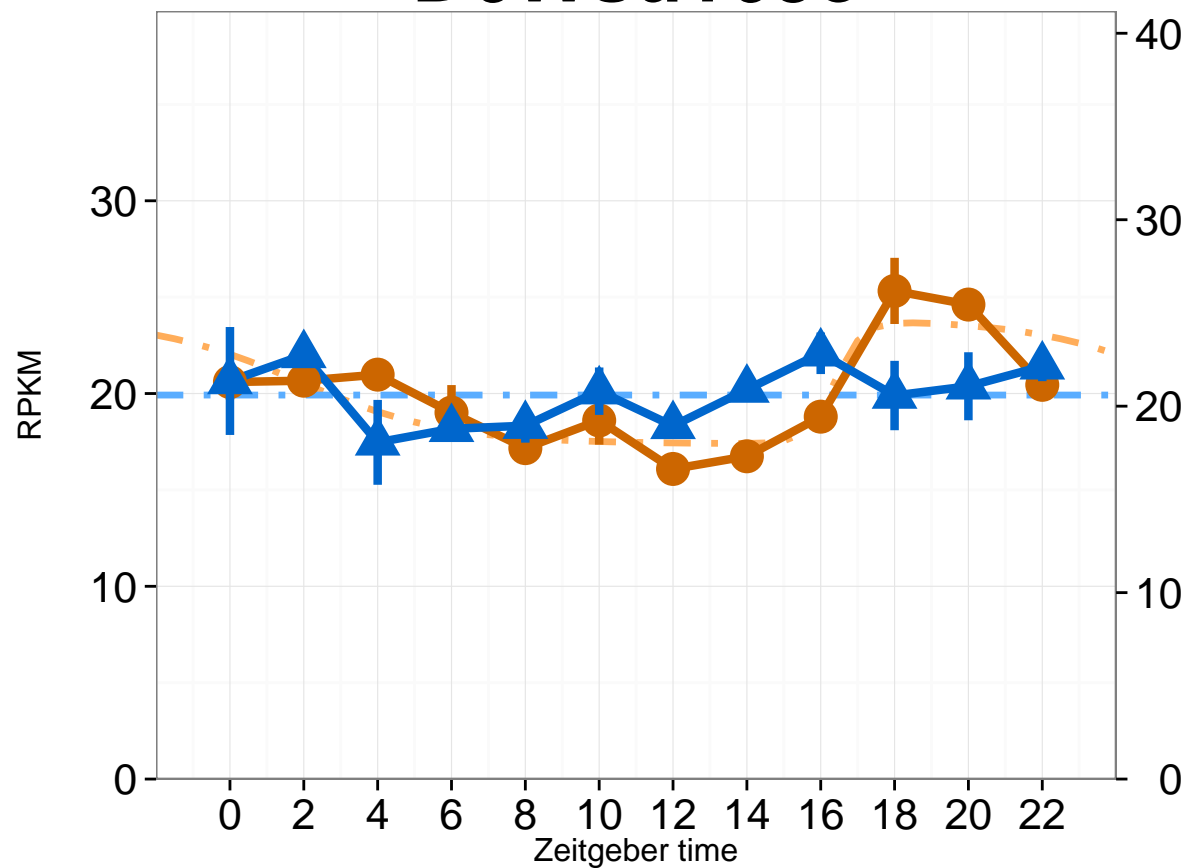

# D6Wsu163e

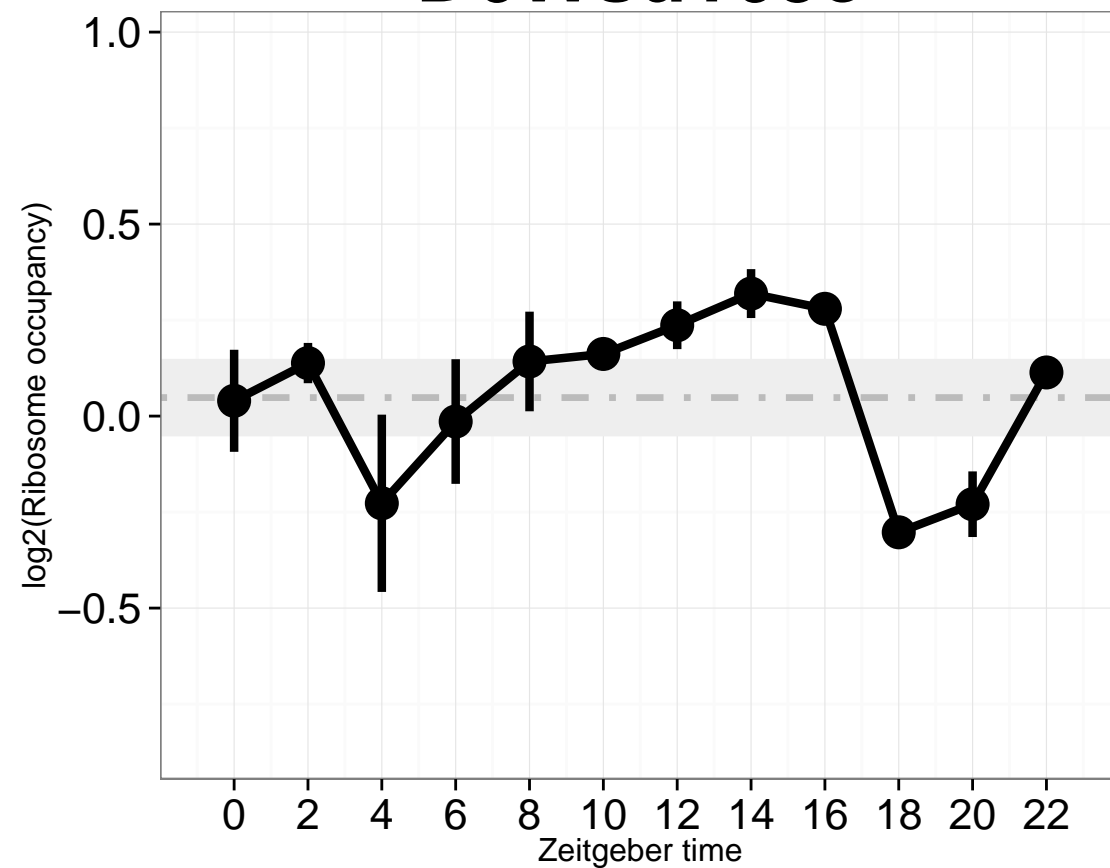

Supplement: Supplementary file 10698 [file 1]

# Cpne4

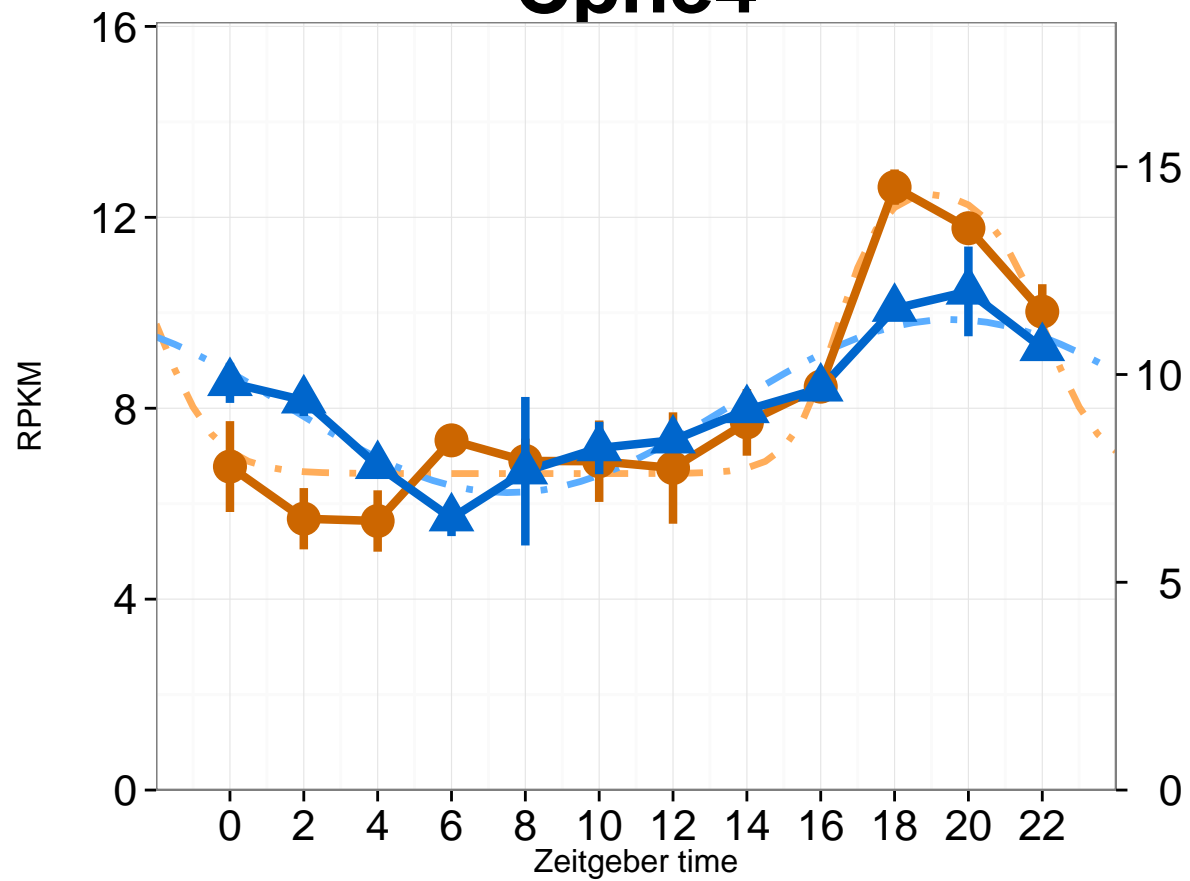

# Cpne4

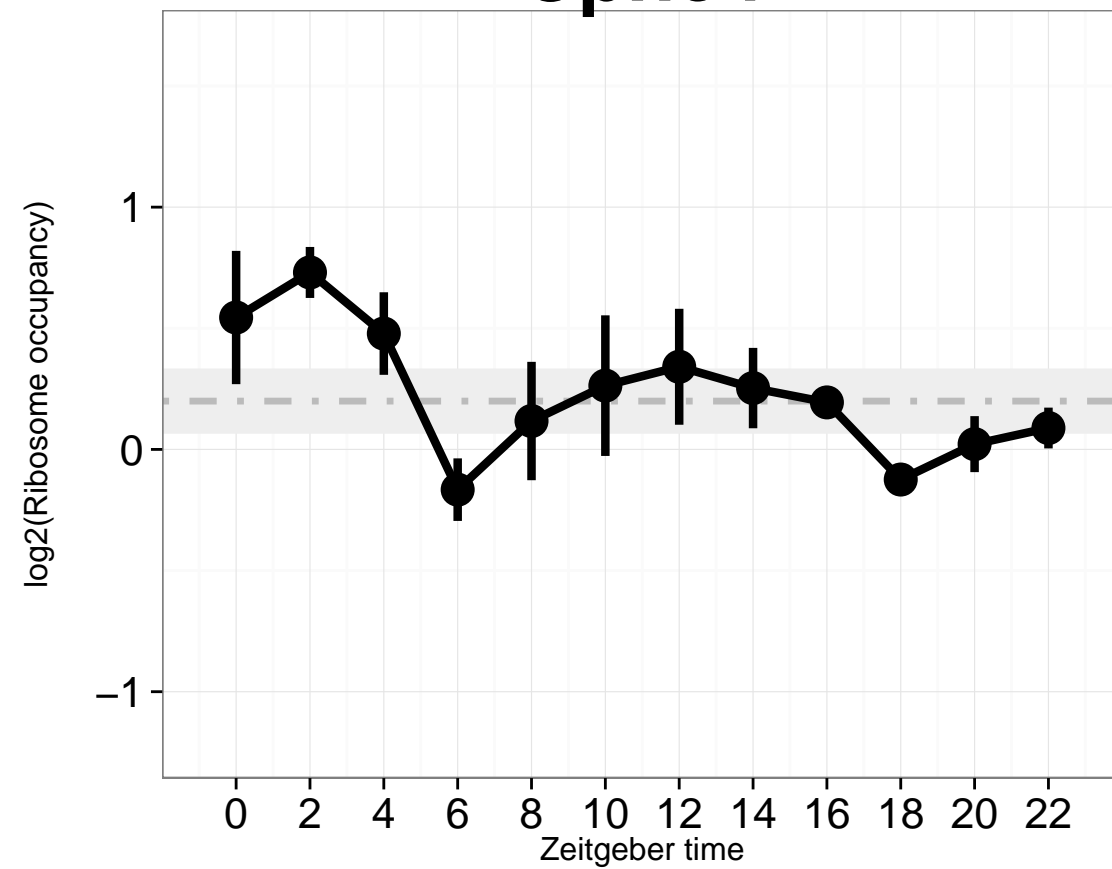

Supplement: Supplementary file 10699 [file 1]

## Usp15

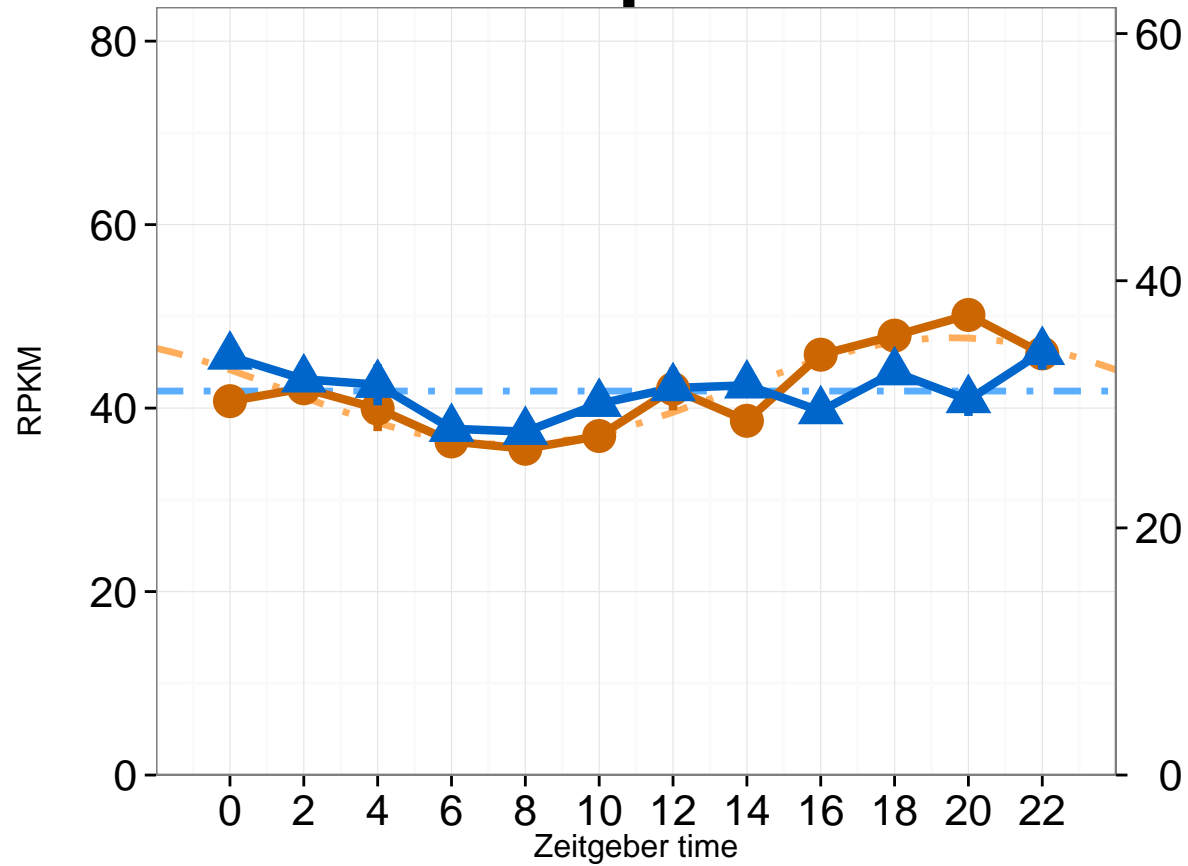

## Usp15

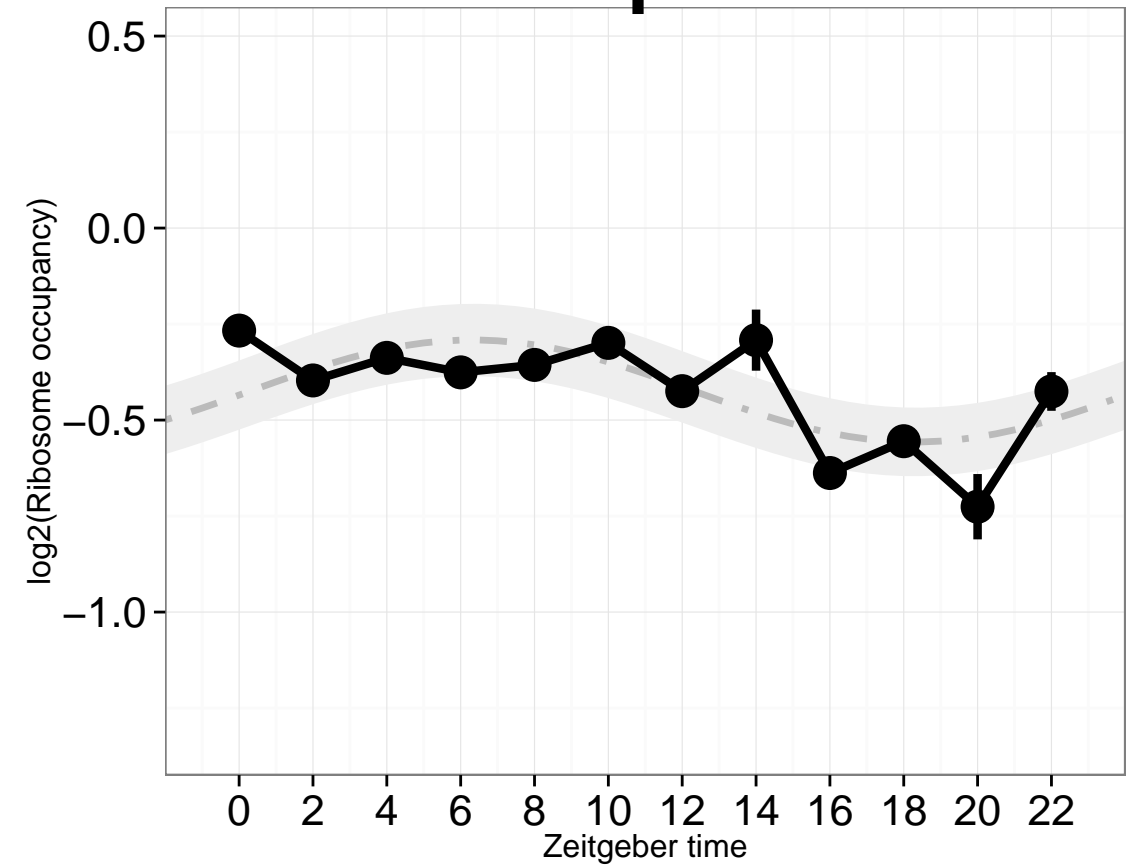

Supplement: Supplementary file 10700 [file 1]

## Bhmt

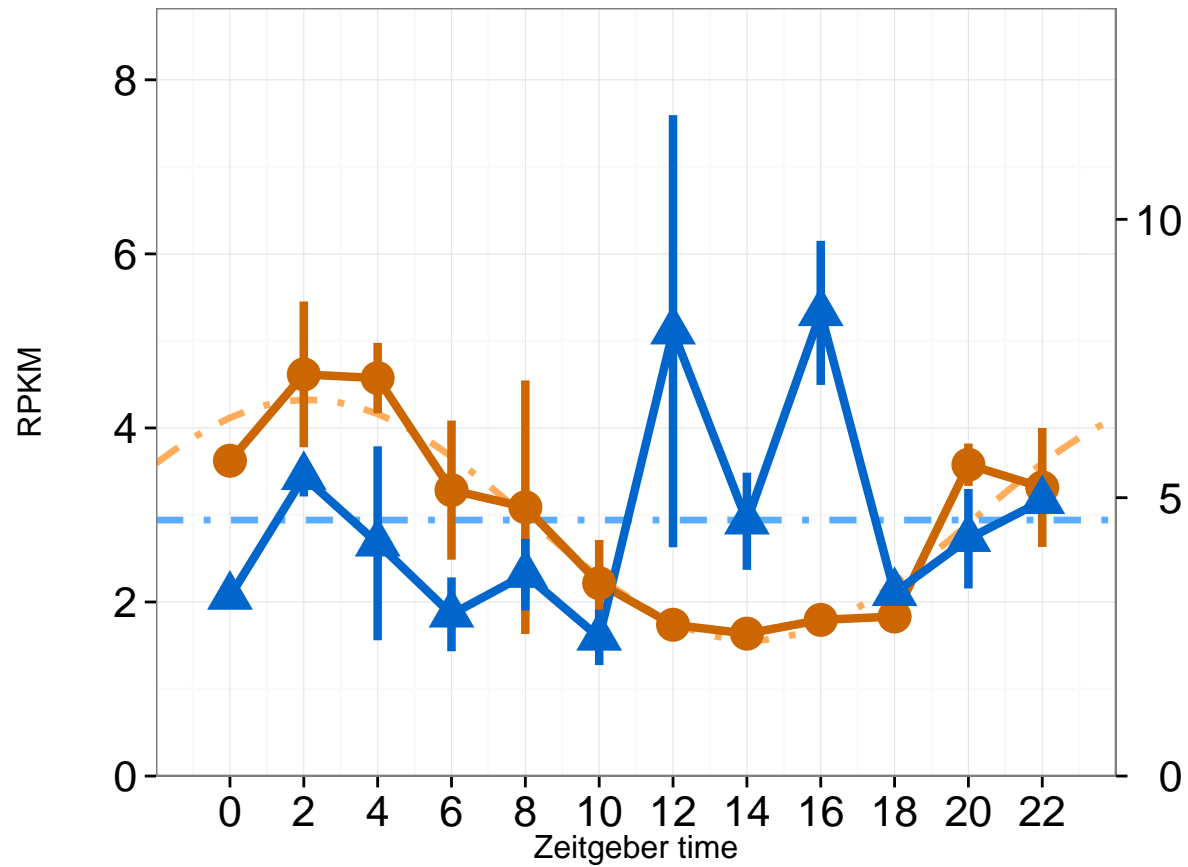

## Bhmt

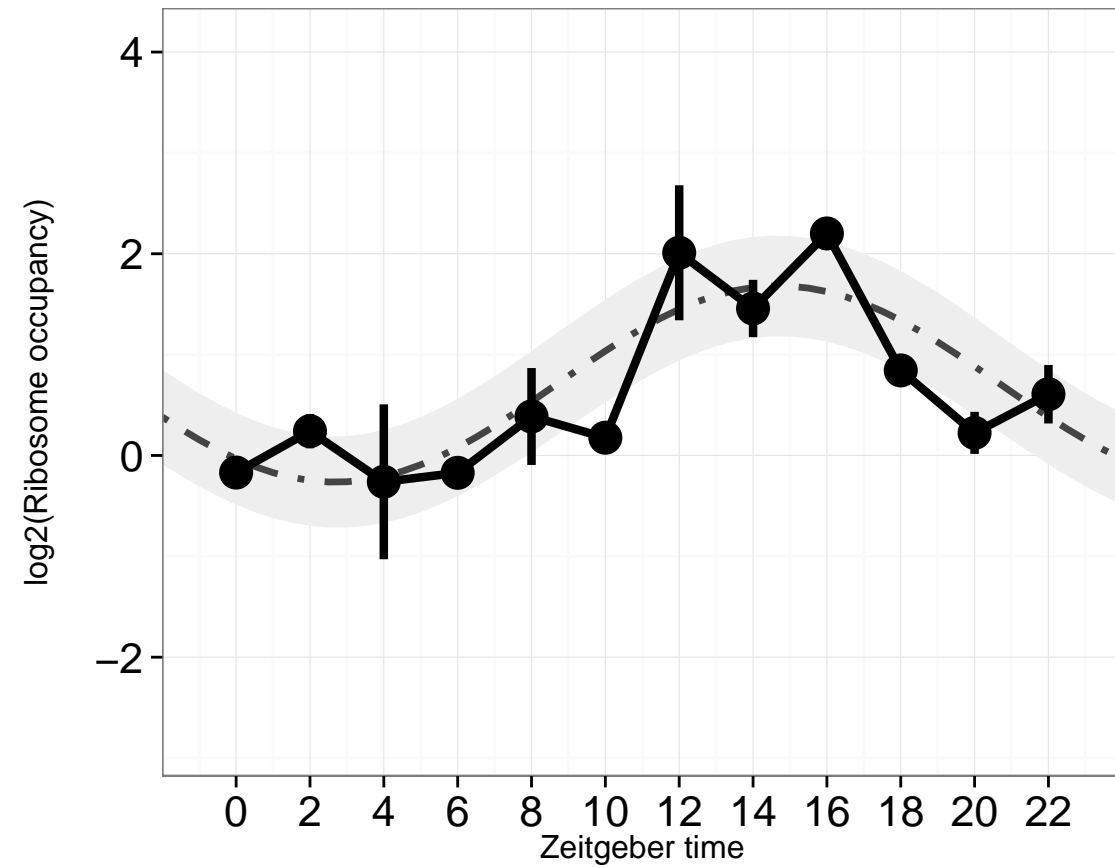

Supplement: Supplementary file 10701 [file 1]

## Cactin

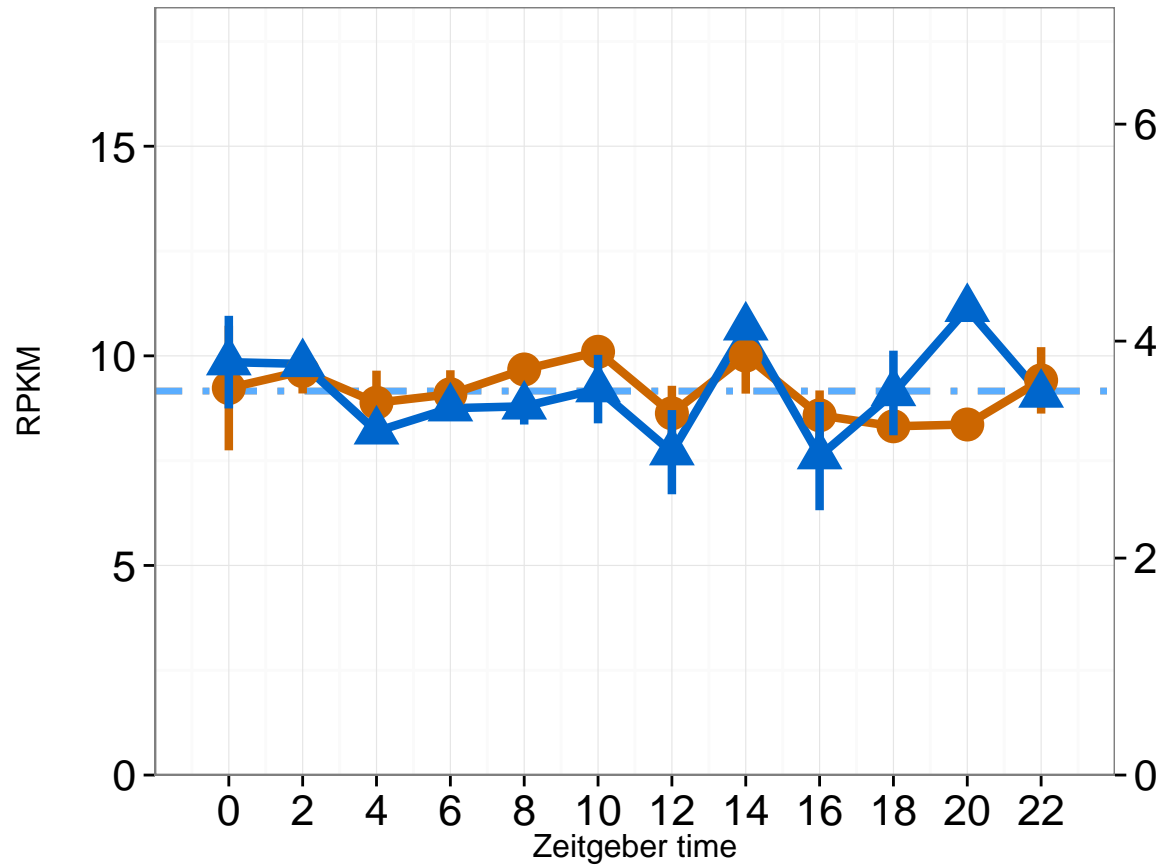

## Cactin

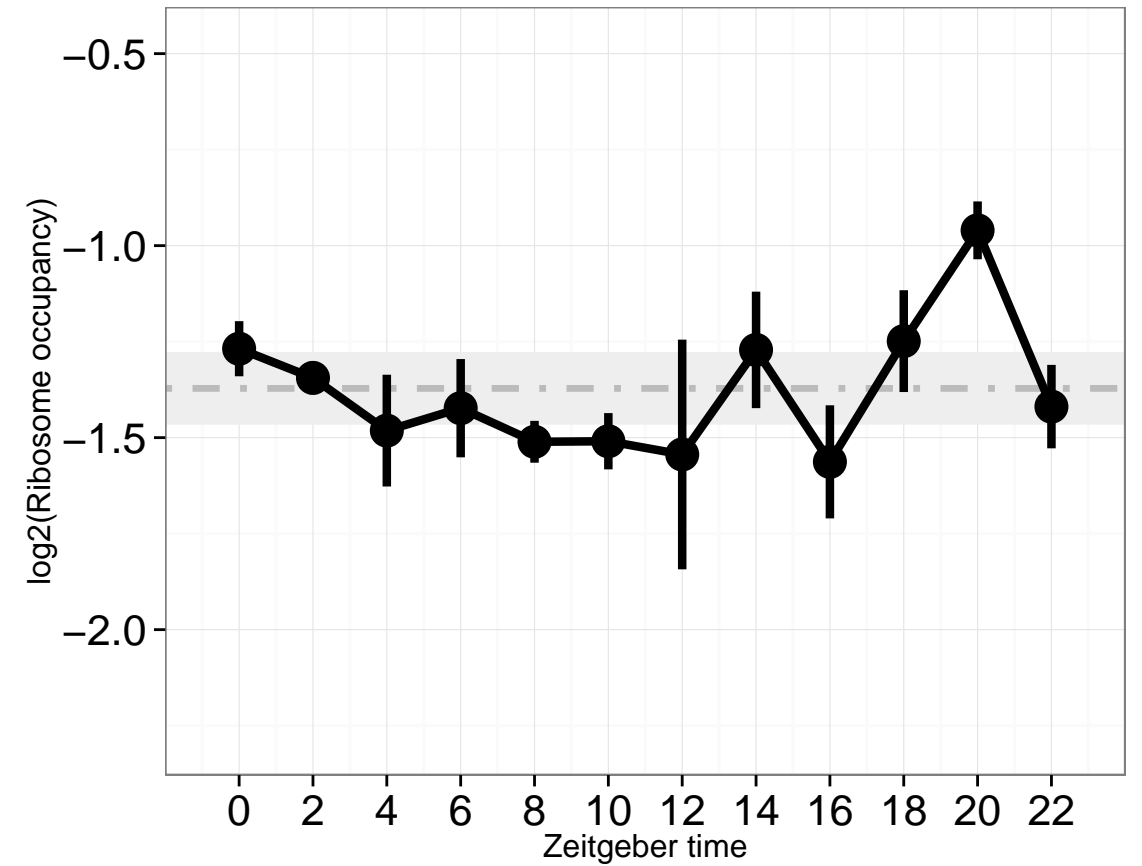

Supplement: Supplementary file 10702 [file 1]

## Aox3

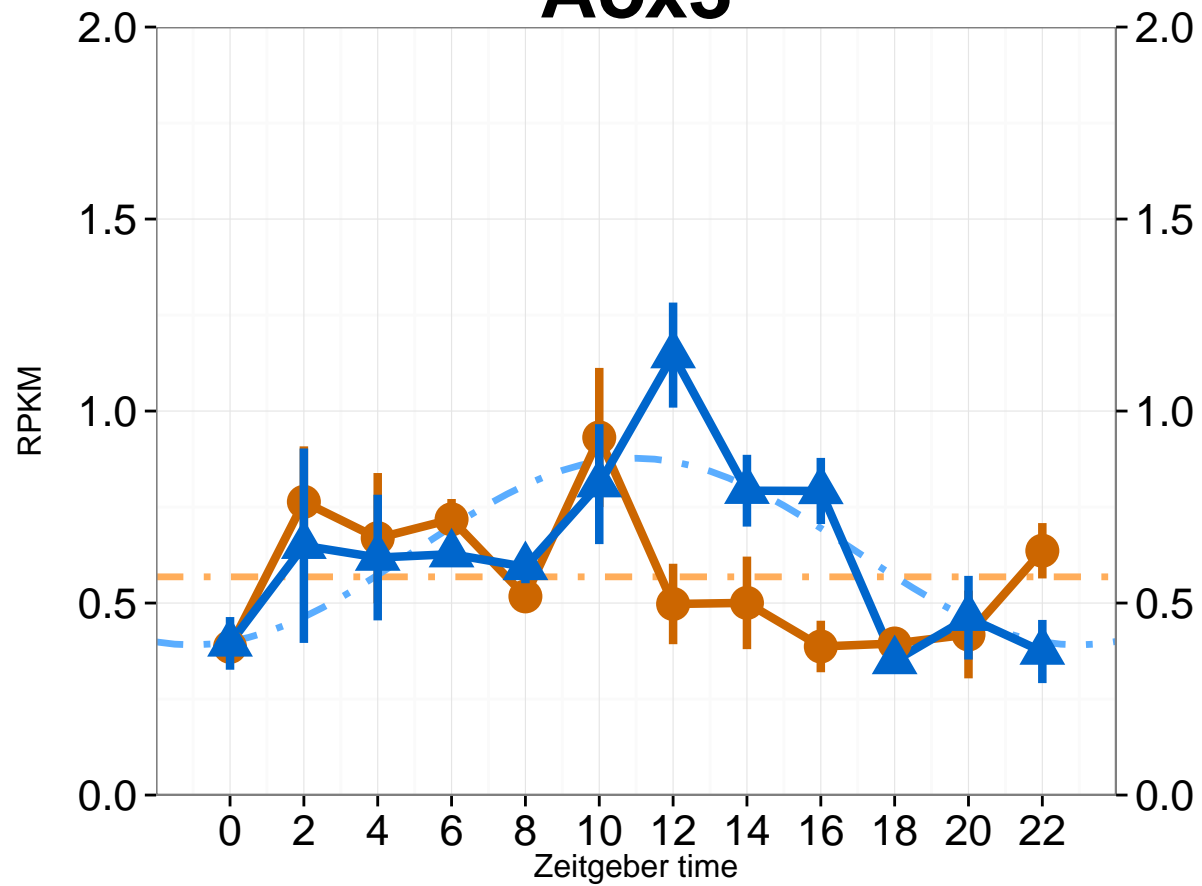

## Aox3

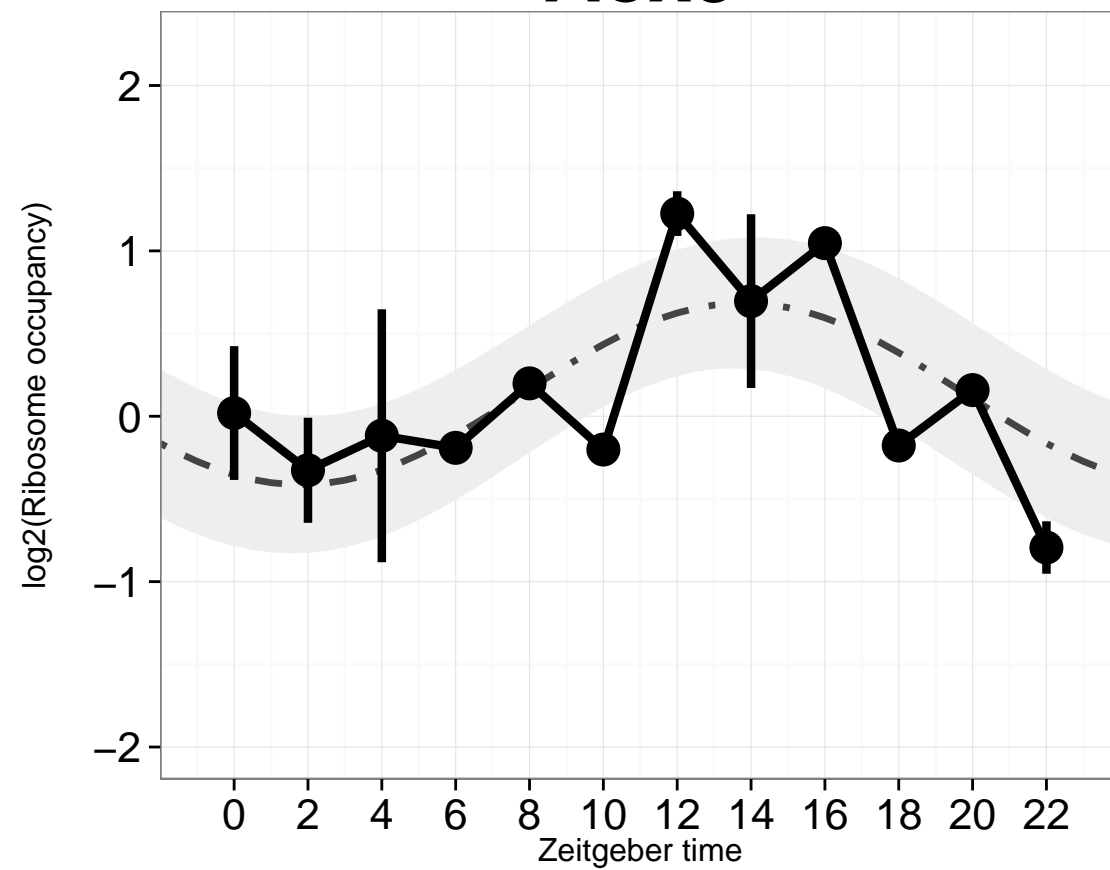

Supplement: Supplementary file 10703 [file 1]

## Nuak1

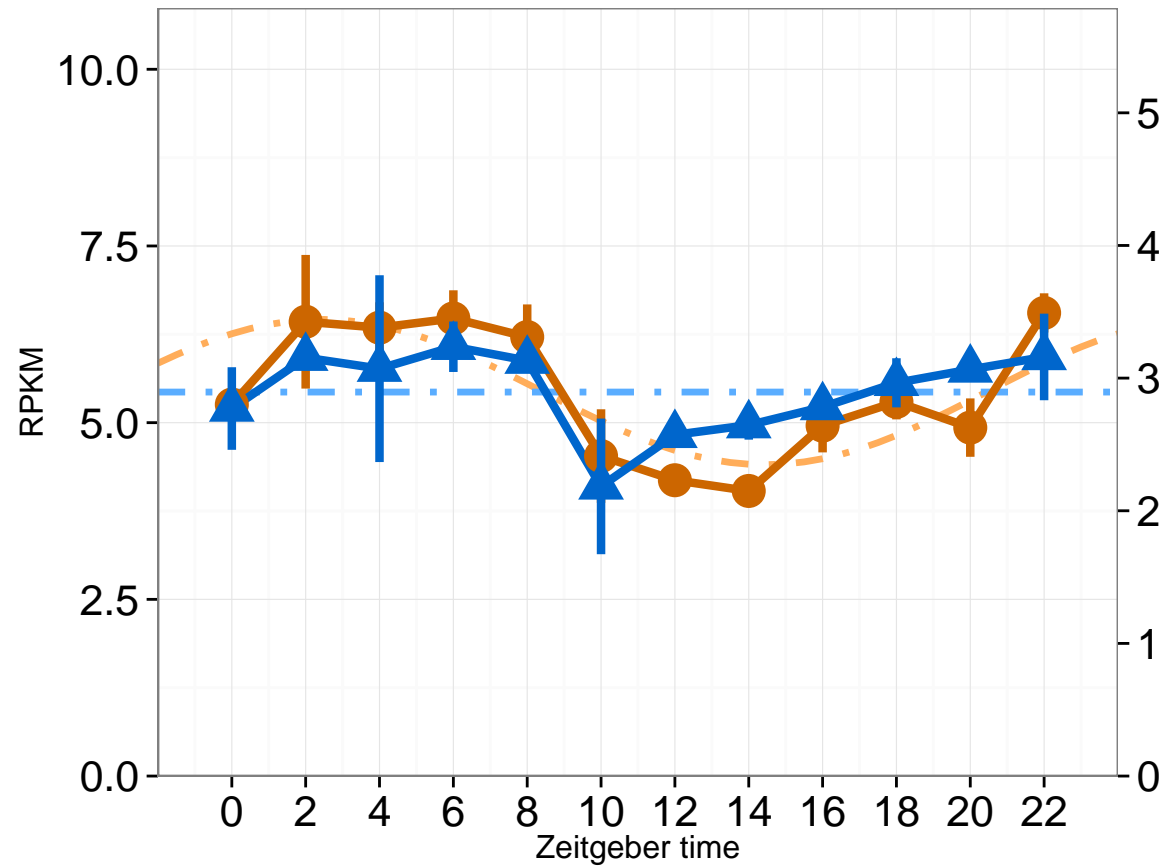

## Nuak1

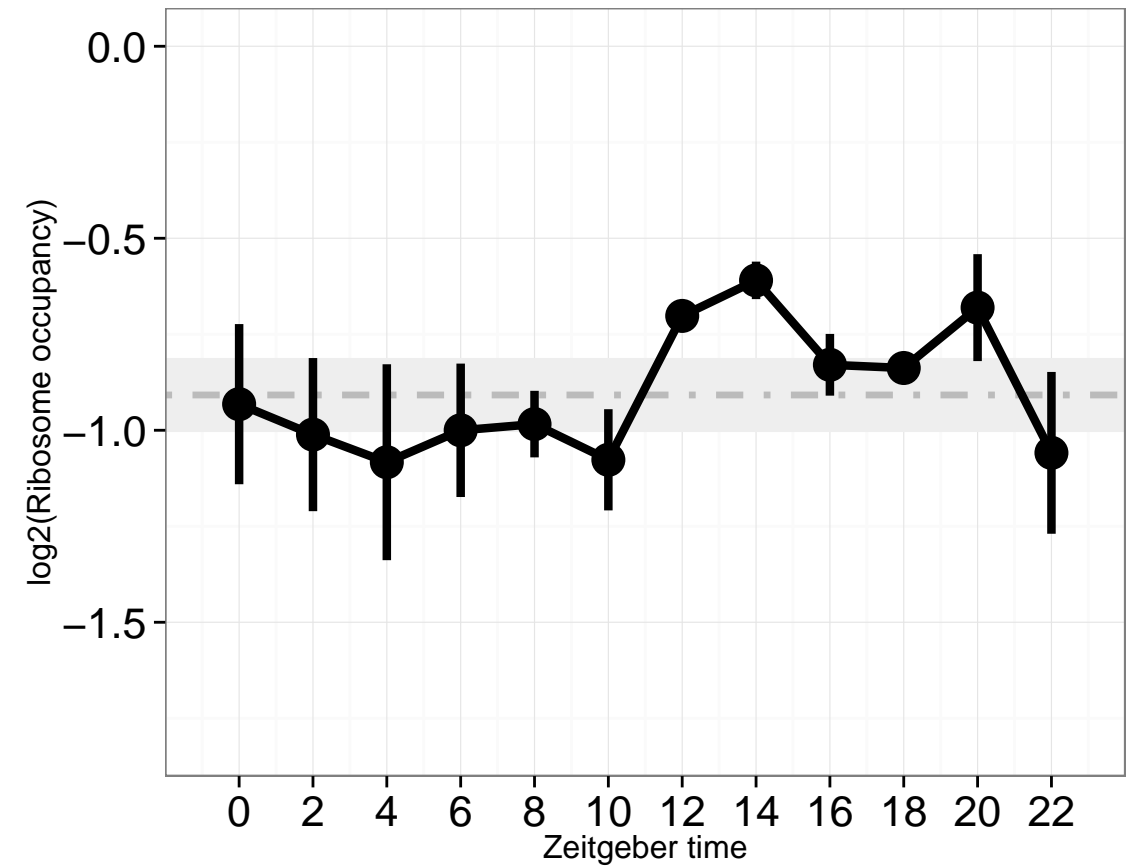

Supplement: Supplementary file 10704 [file 1]

## Zc3h8

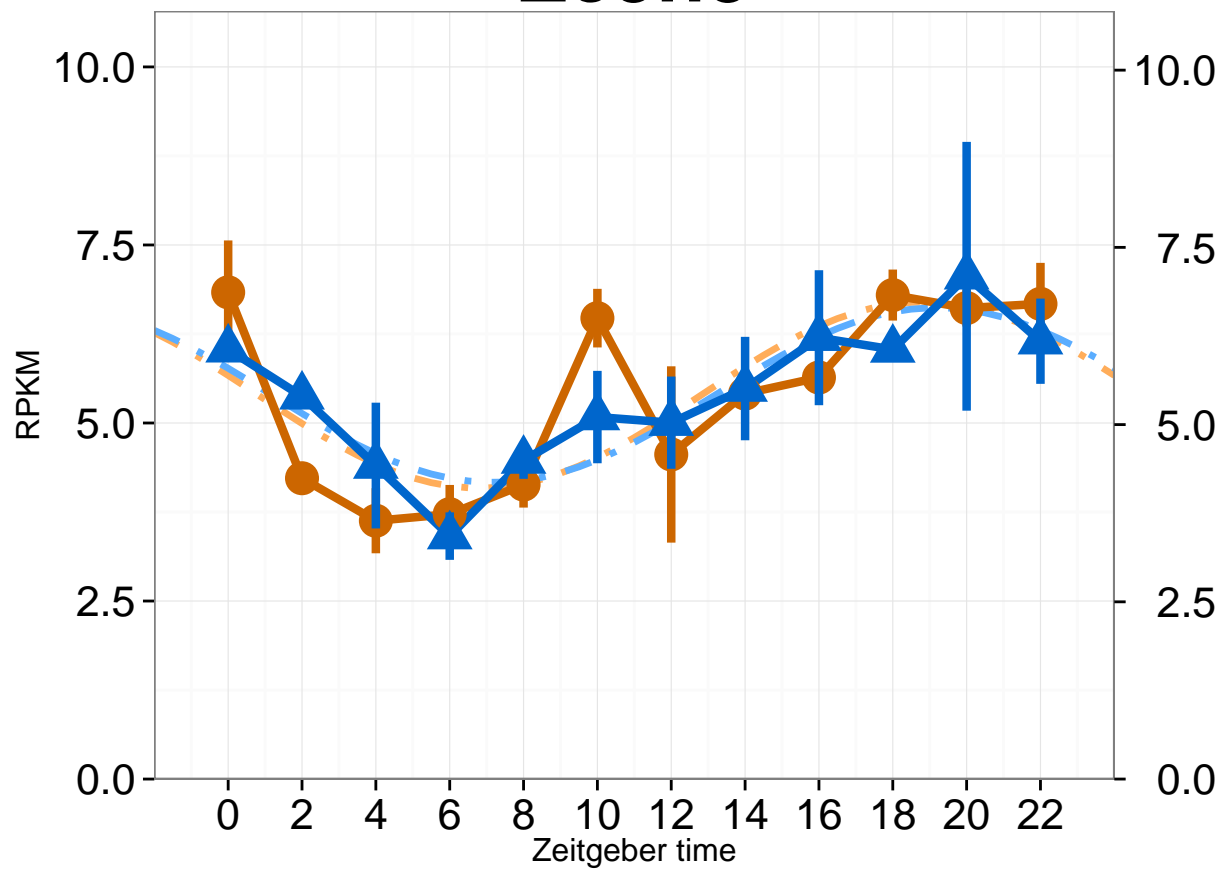

## Zc3h8

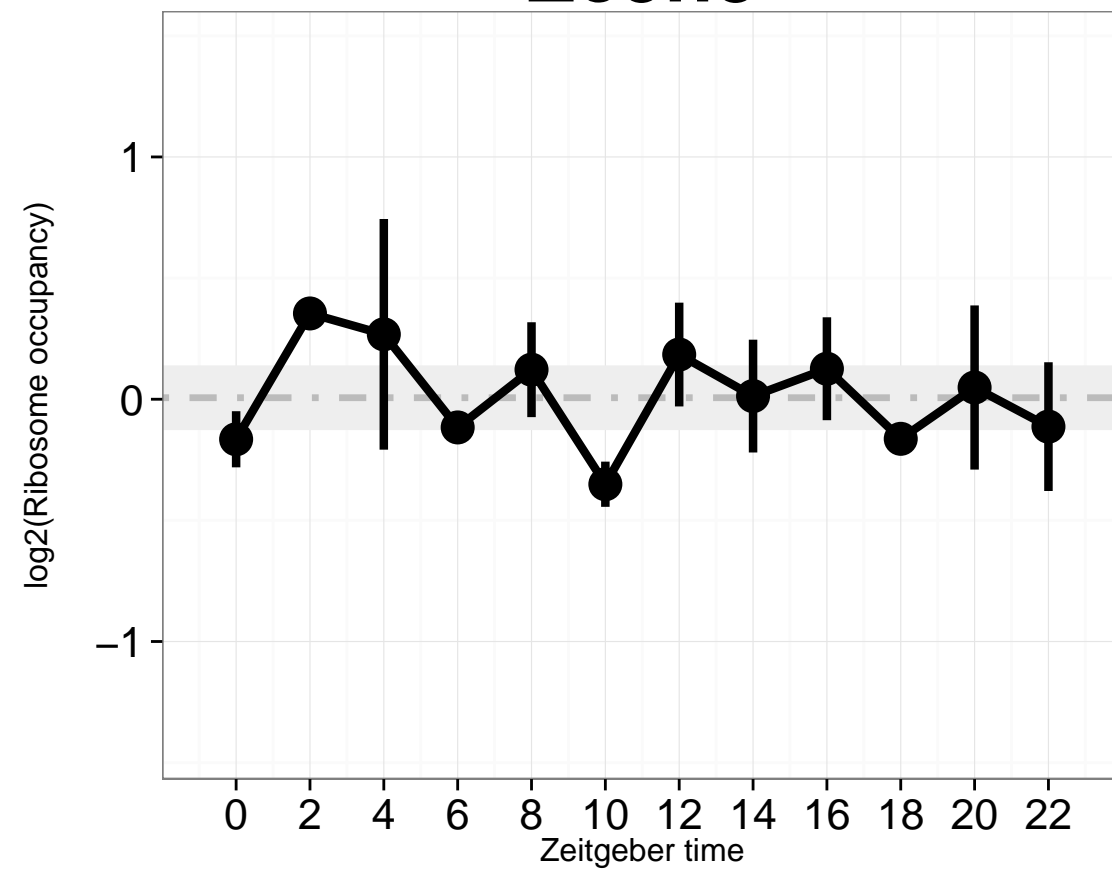

Supplement: Supplementary file 10705 [file 1]

# Mtx3

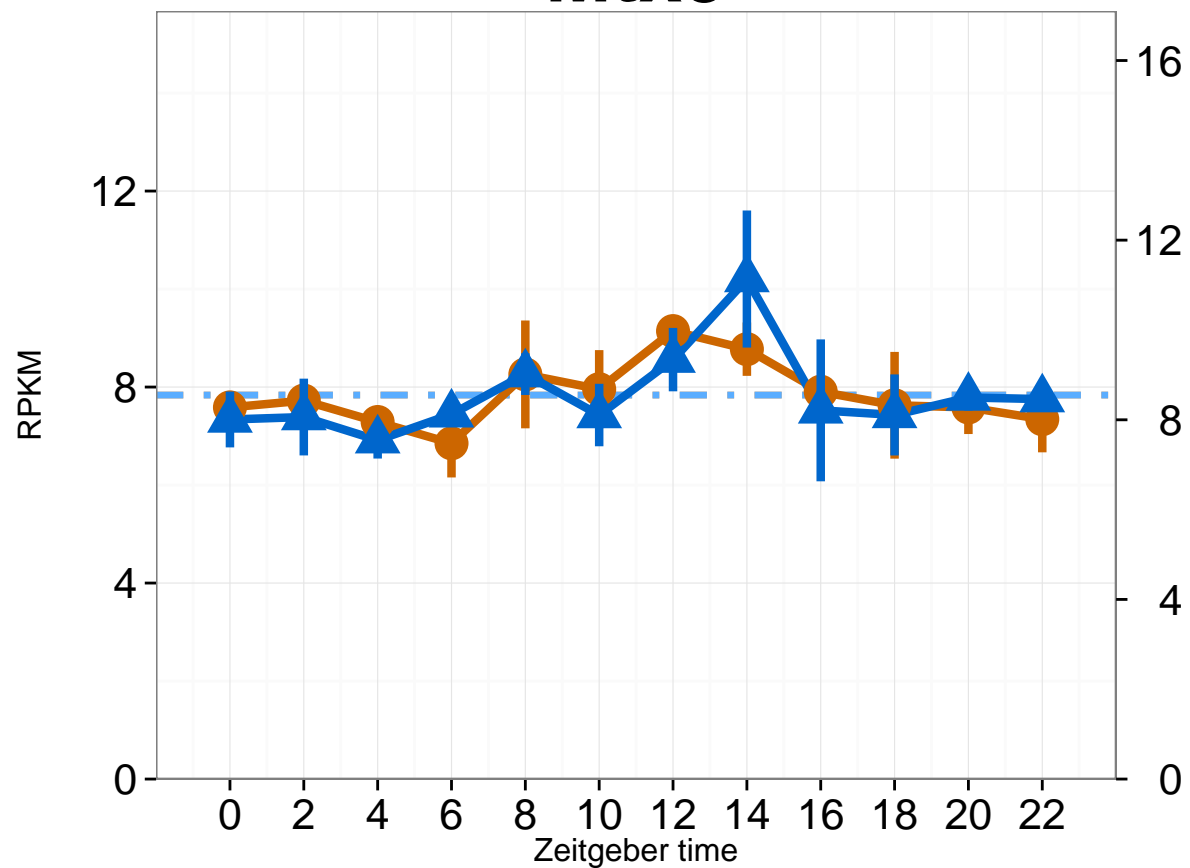

# Mtx3

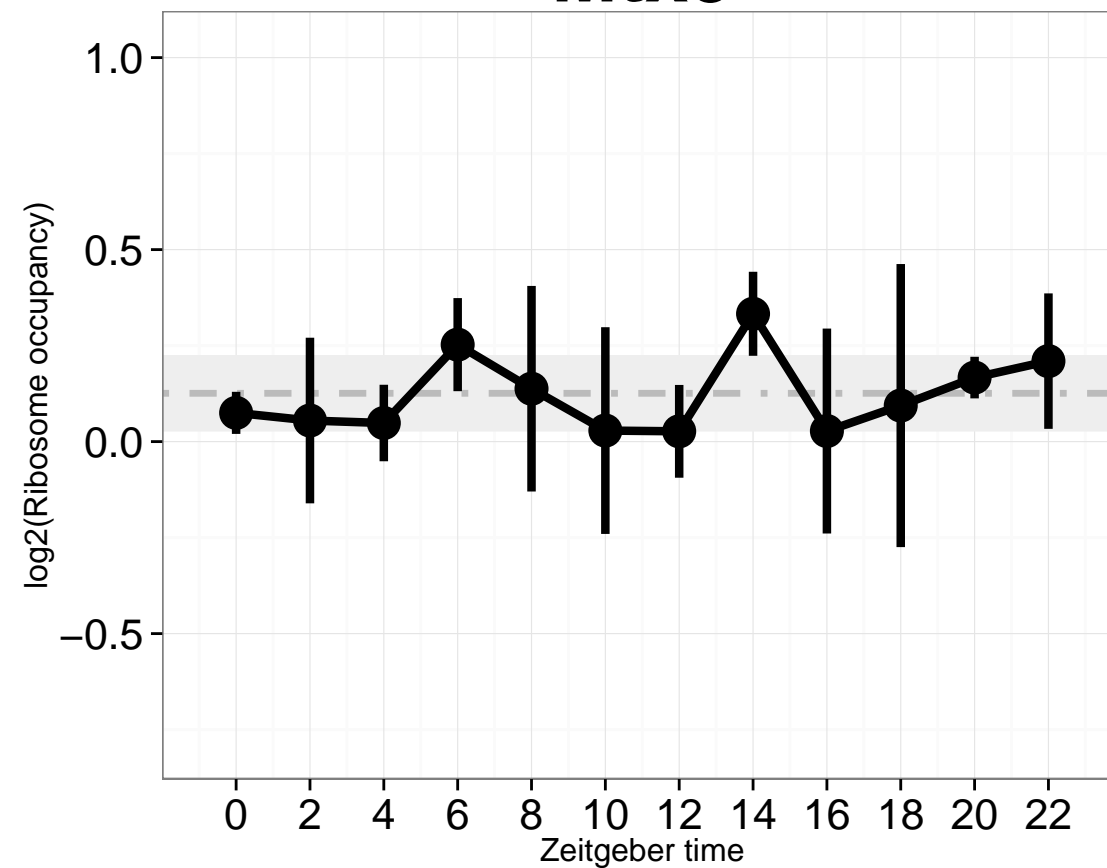

Supplement: Supplementary file 10706 [file 1]

## Aldoc

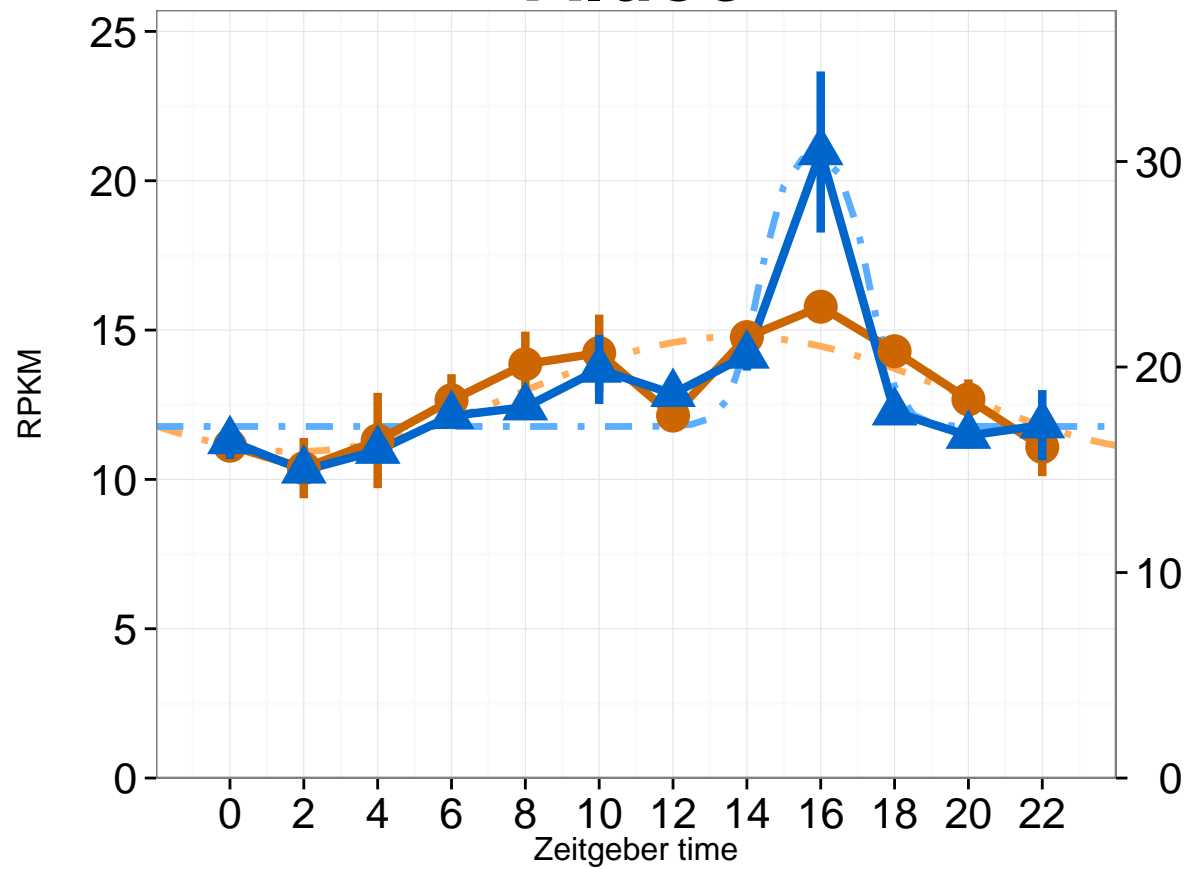

## Aldoc

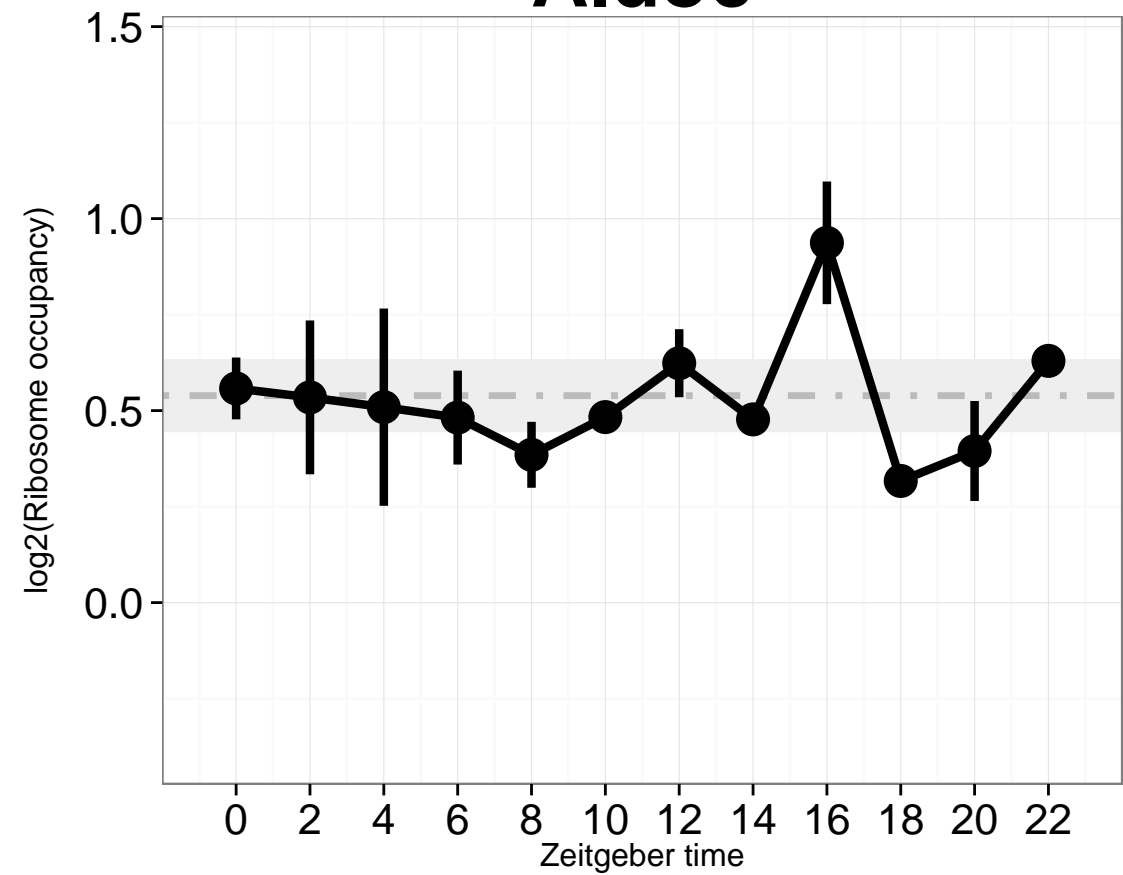

Supplement: Supplementary file 10707 [file 1]

# Zfp324

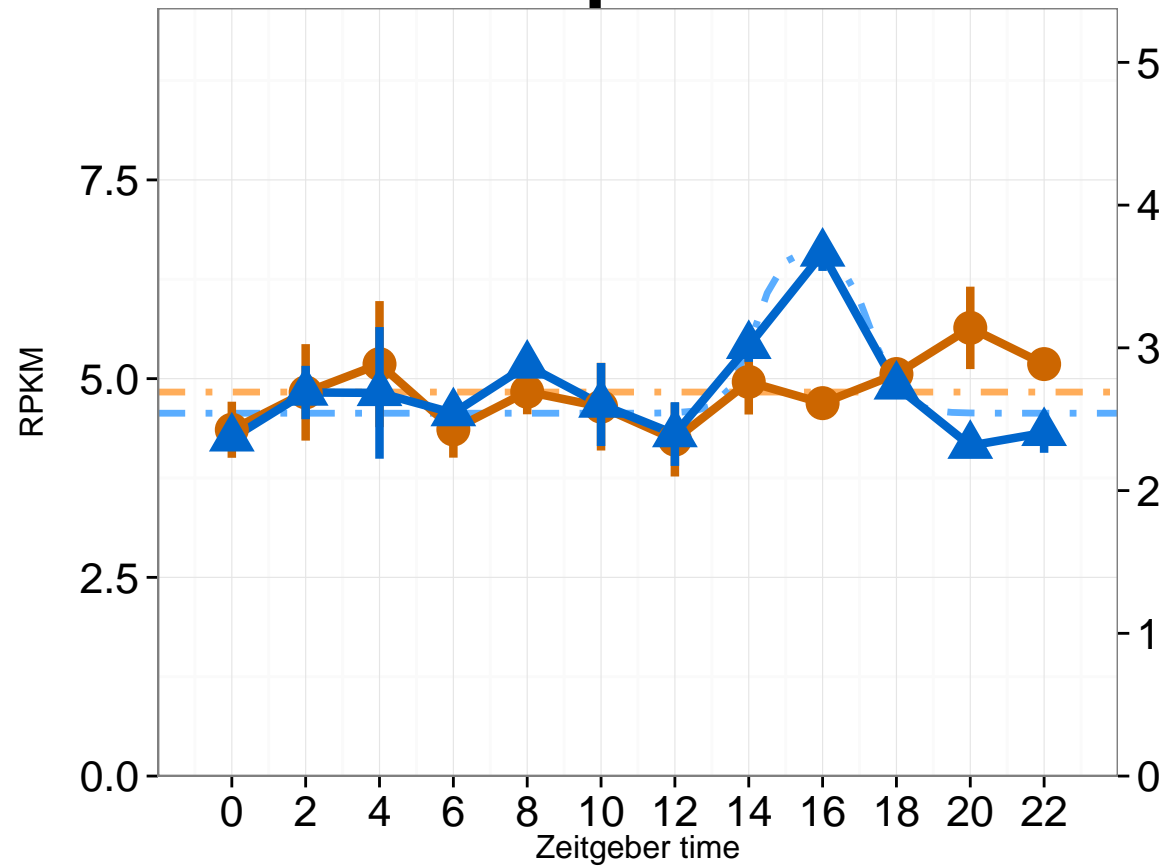

# Zfp324

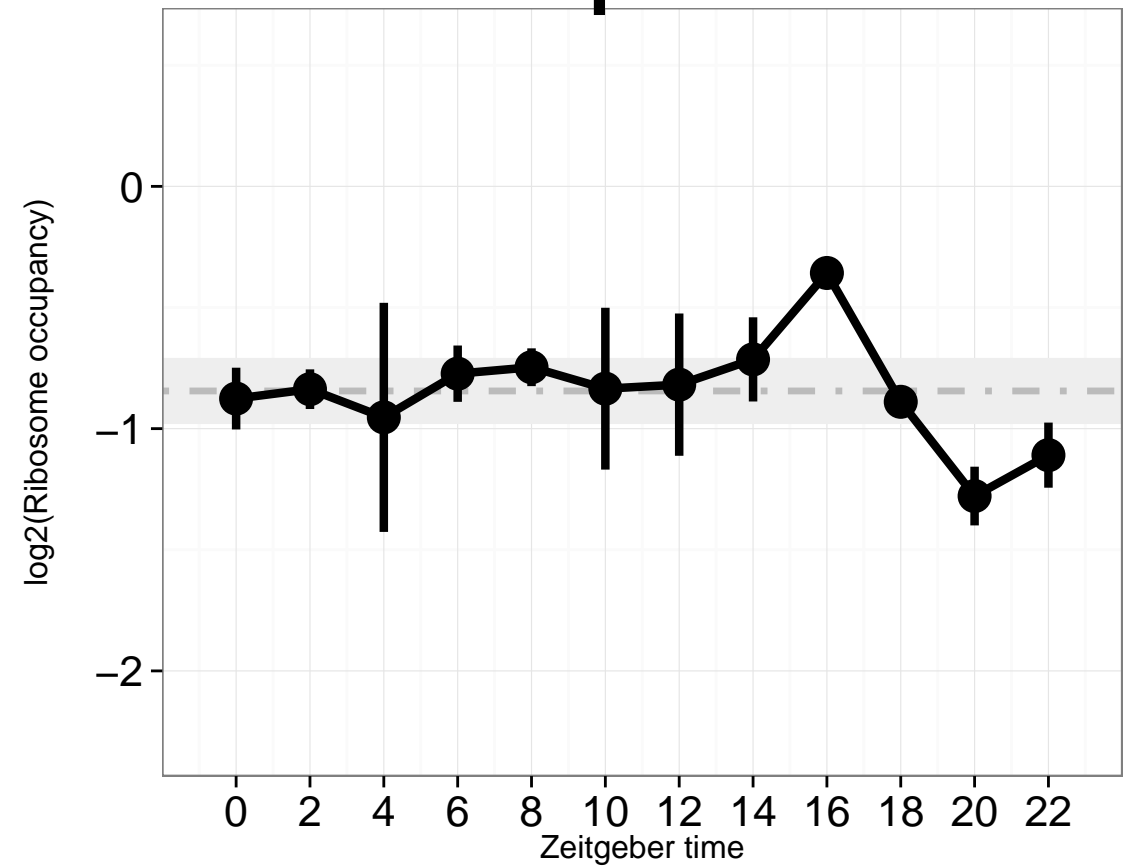

Supplement: Supplementary file 10708 [file 1]

## Pdzd8

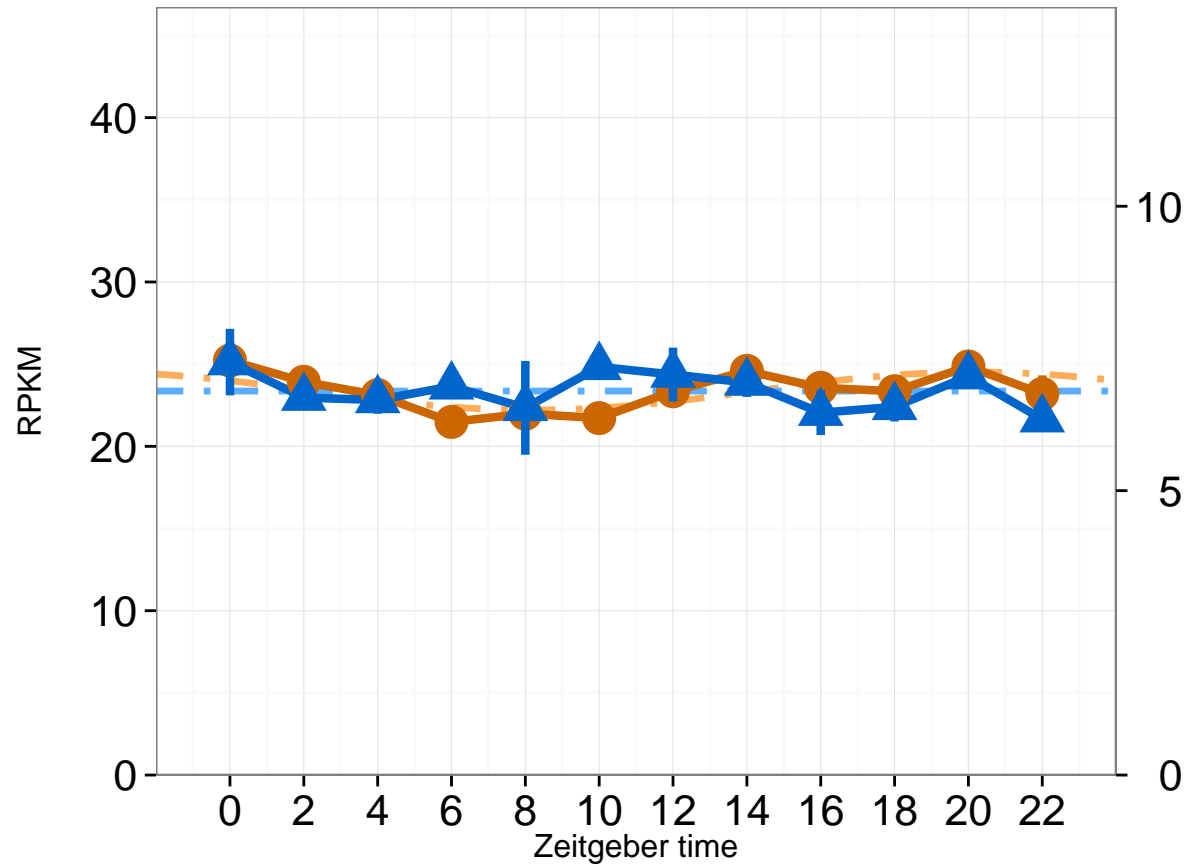

## Pdzd8

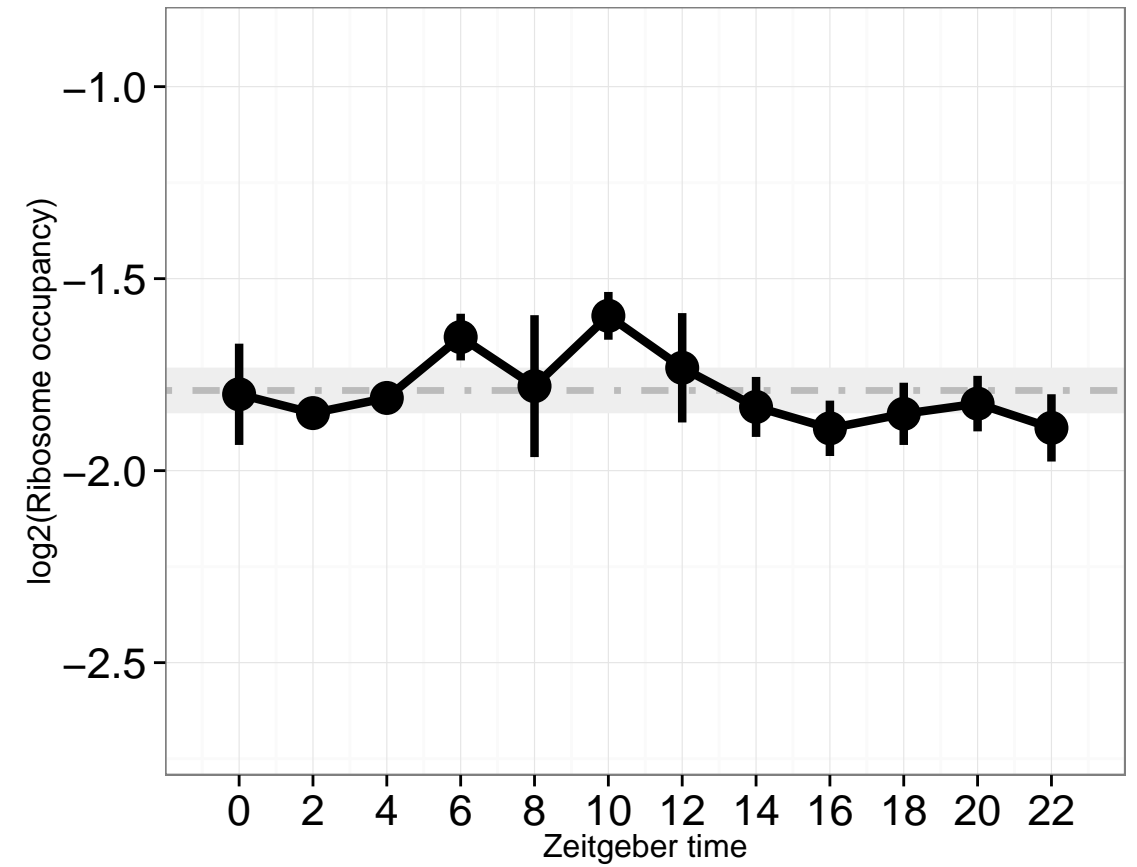

Supplement: Supplementary file 10709 [file 1]

# Fam149b

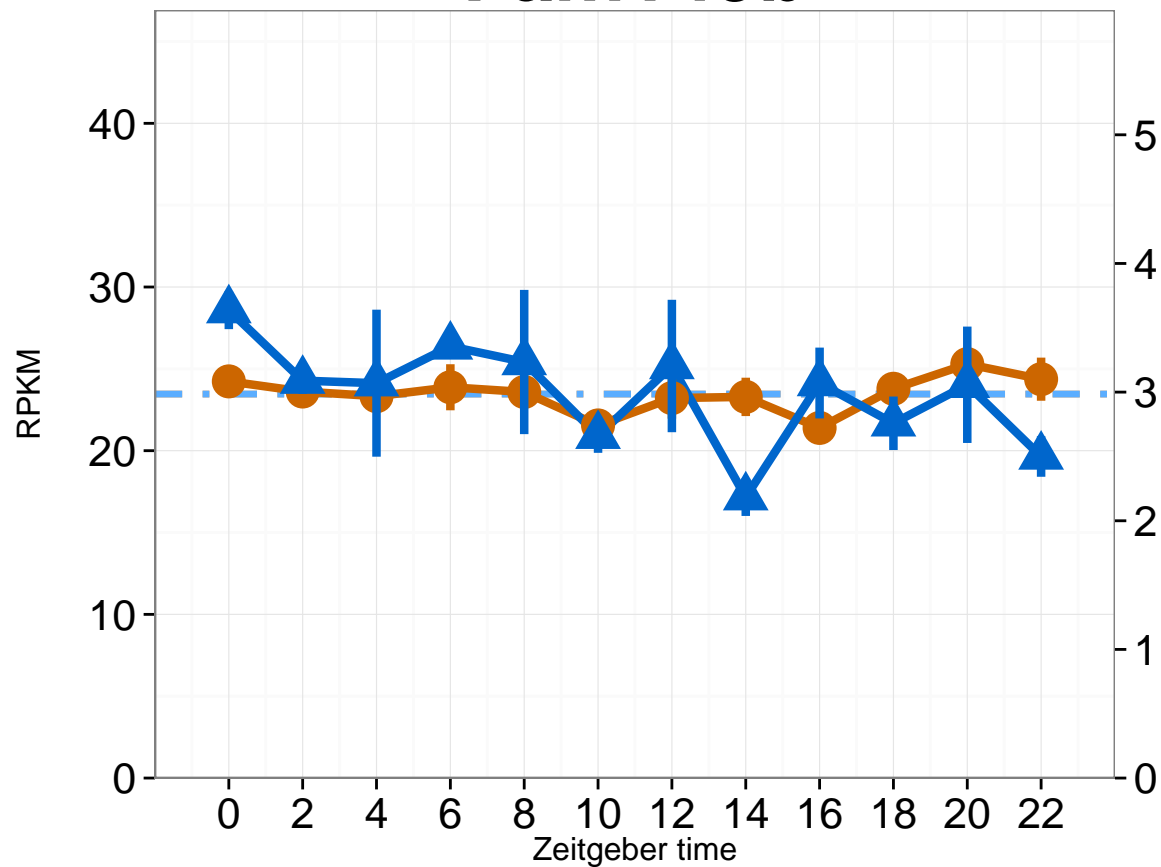

# Fam149b

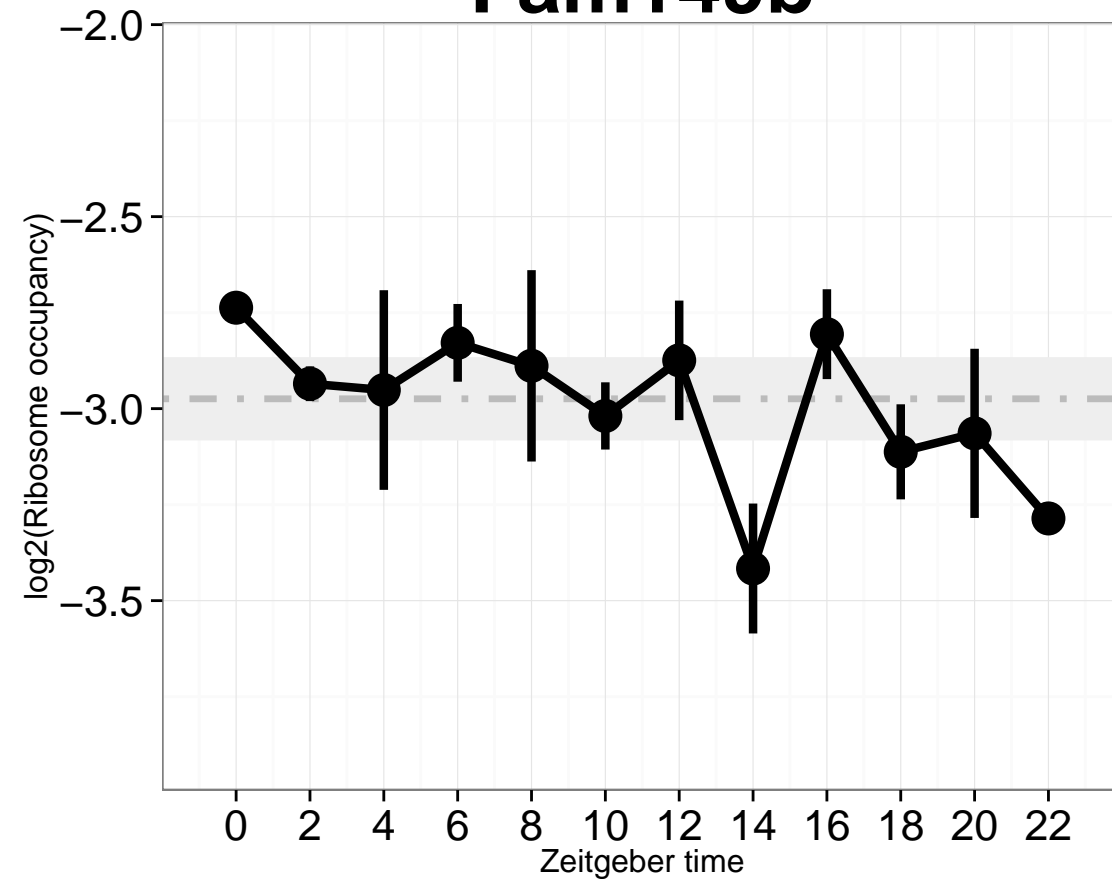

Supplement: Supplementary file 10710 [file 1]

# Faf1

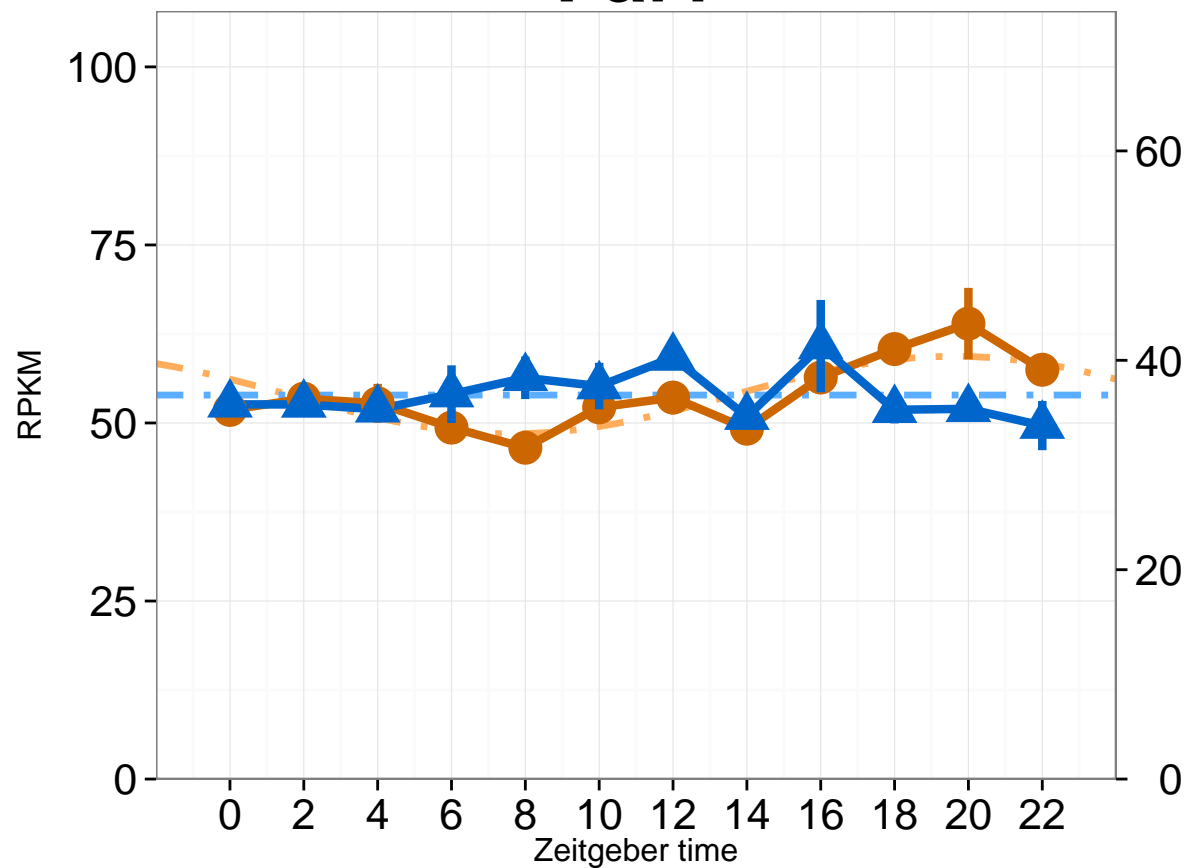

# Faf1

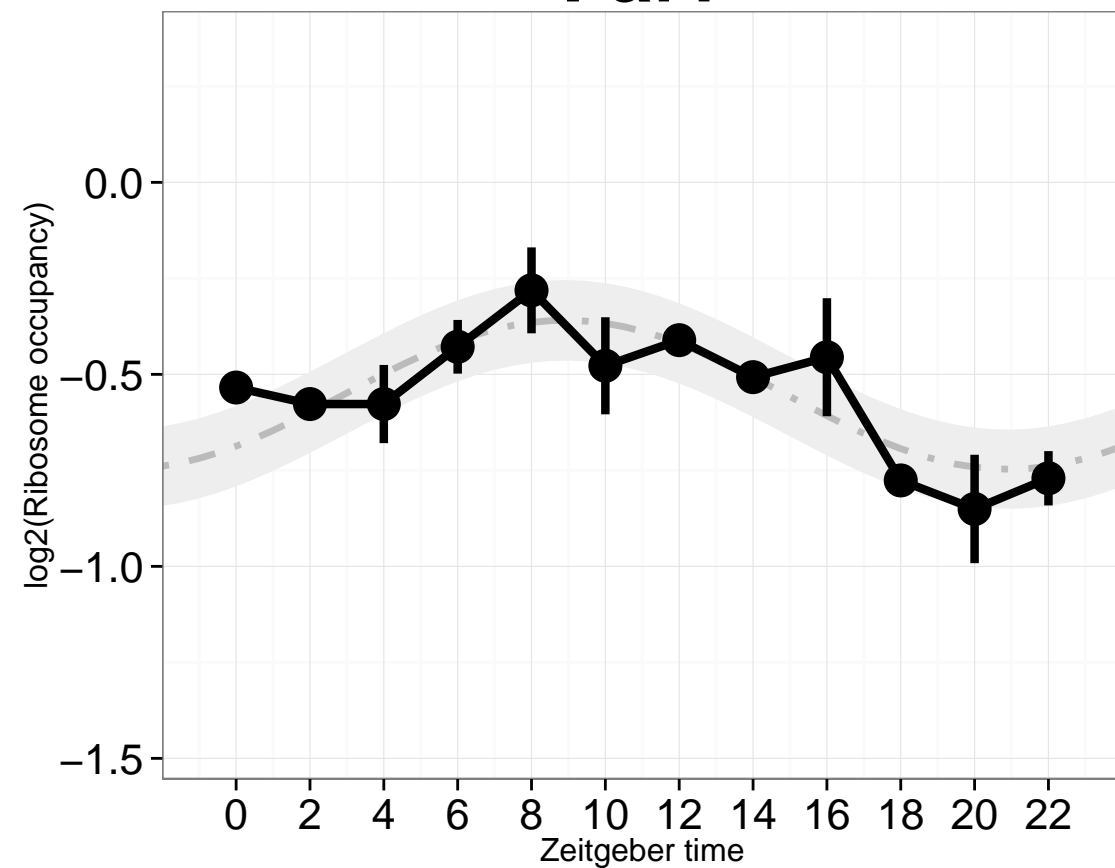

Supplement: Supplementary file 10711 [file 1]

## Ncf2

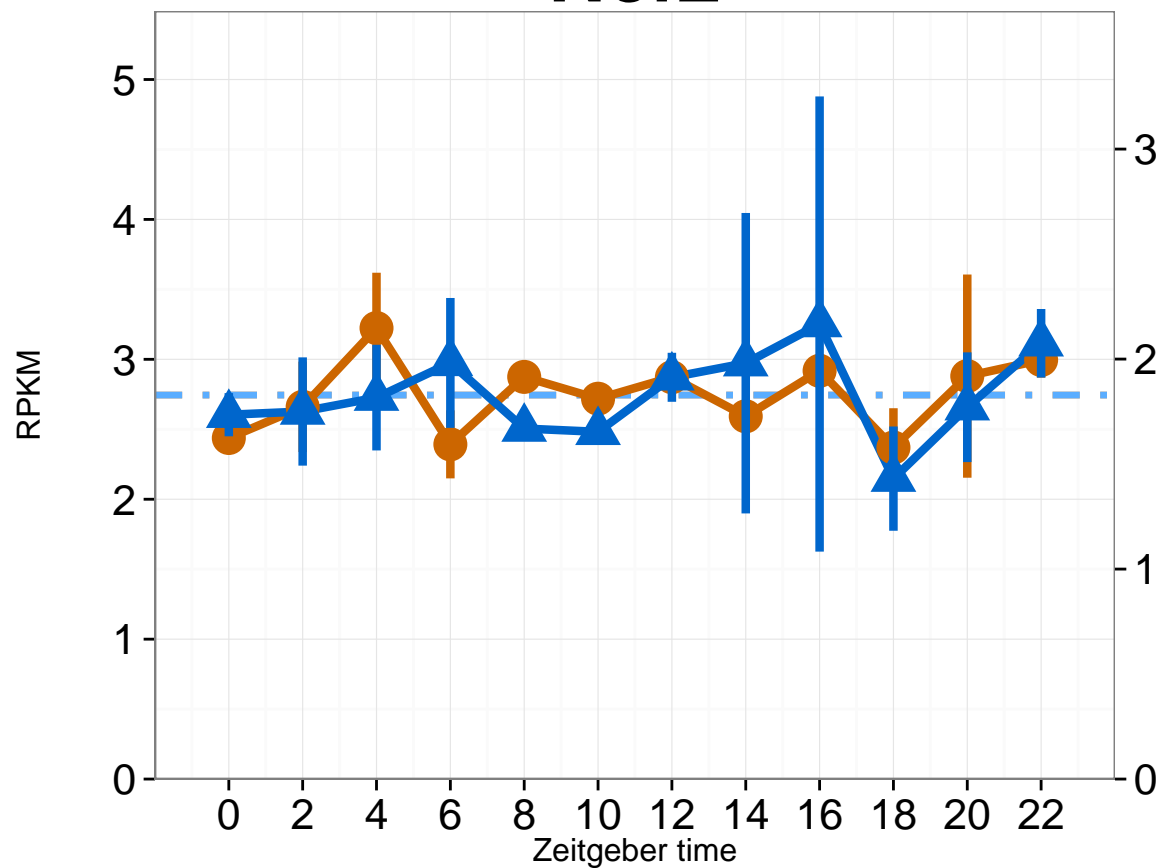

## Ncf2

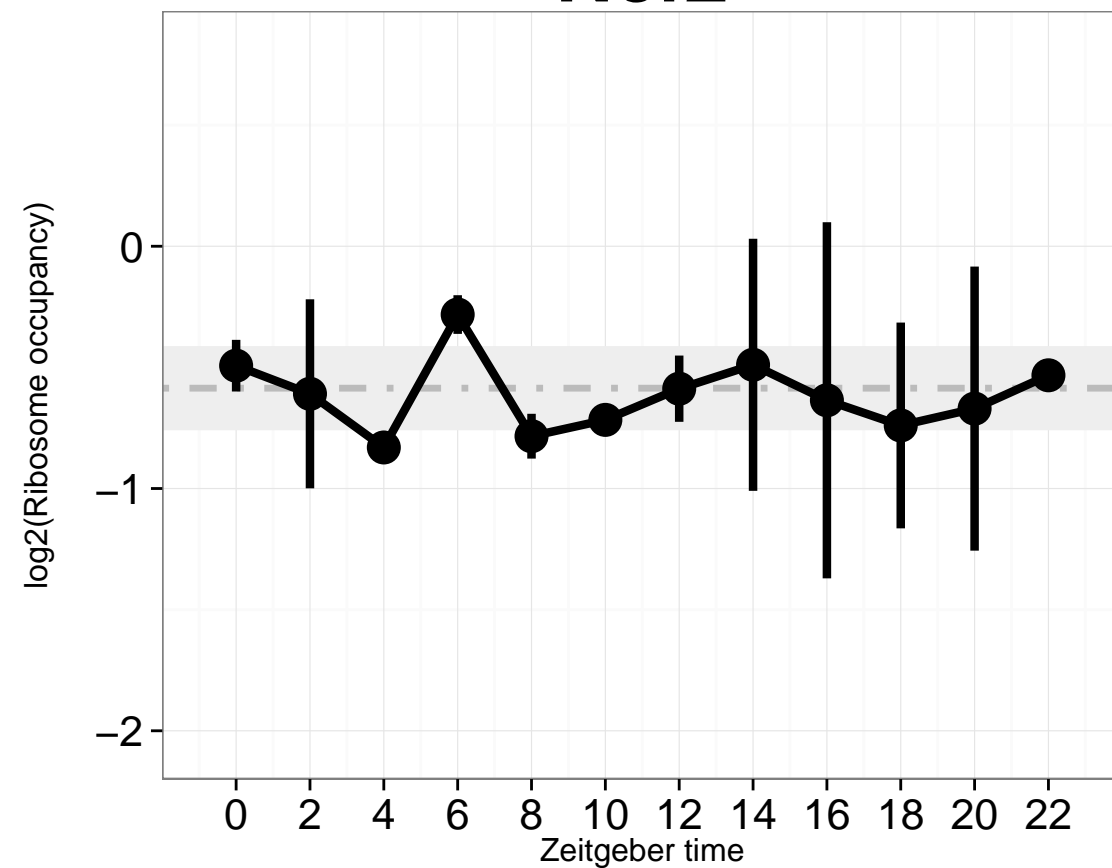

Supplement: Supplementary file 10712 [file 1]

# Eif4ebp2

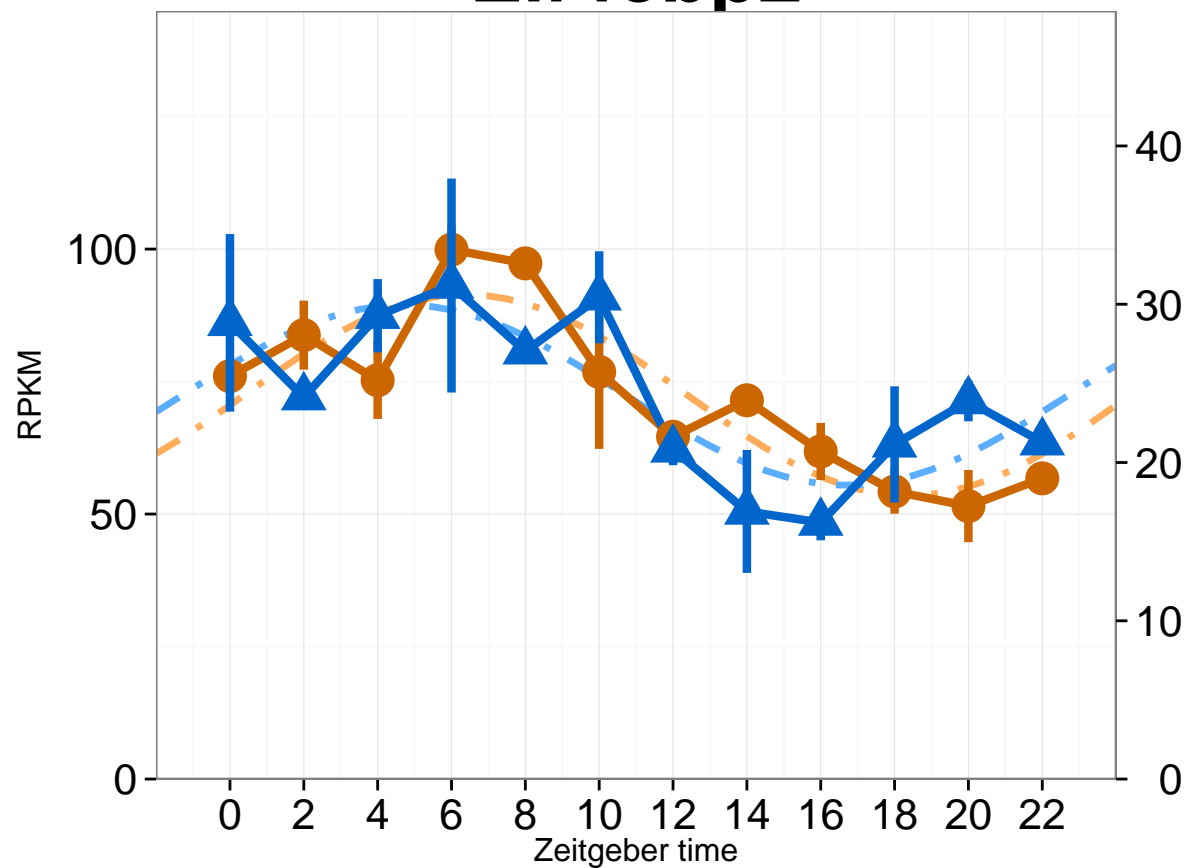

# Eif4ebp2

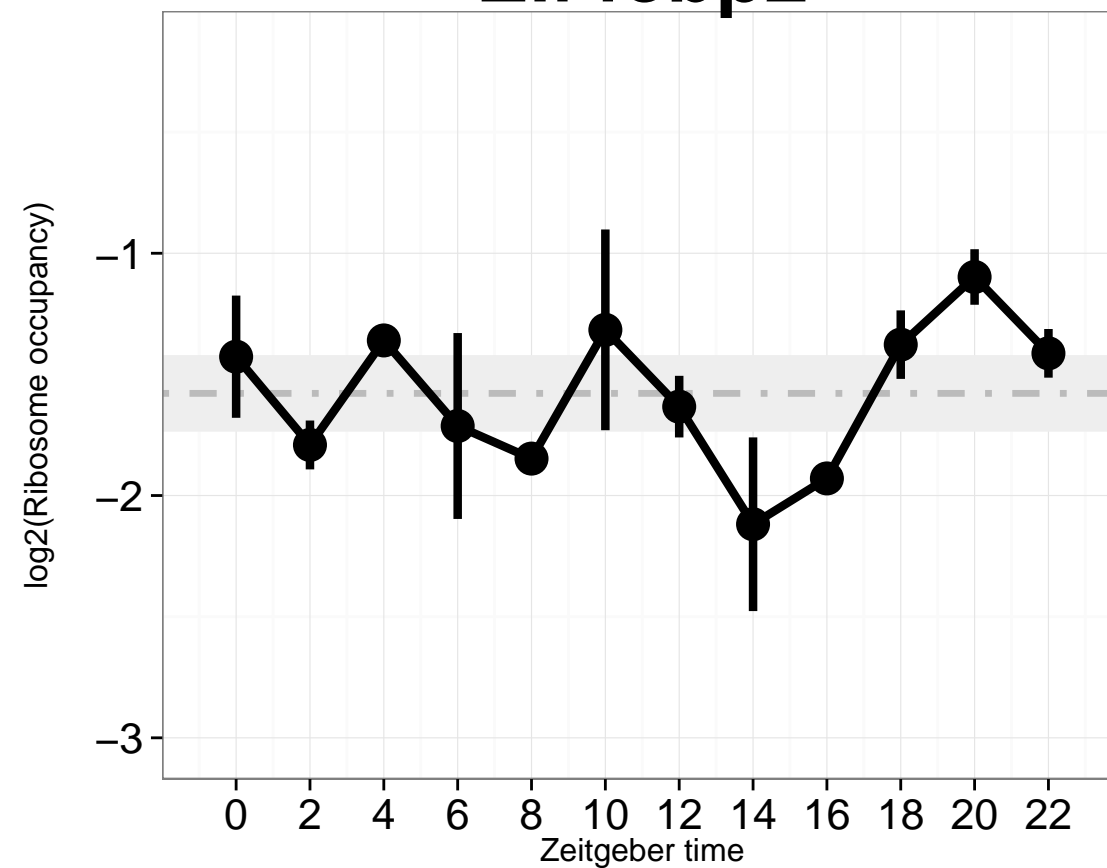

Supplement: Supplementary file 10713 [file 1]

## Prkd2

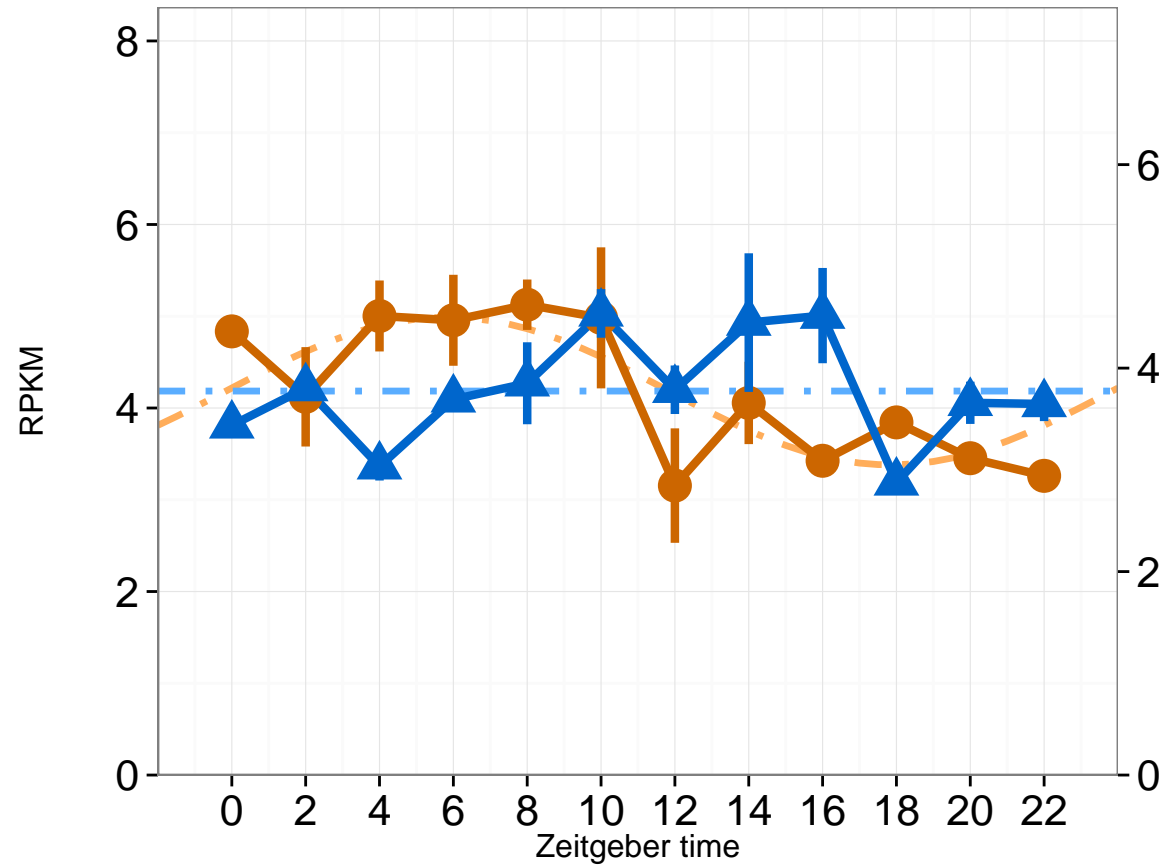

## Prkd2

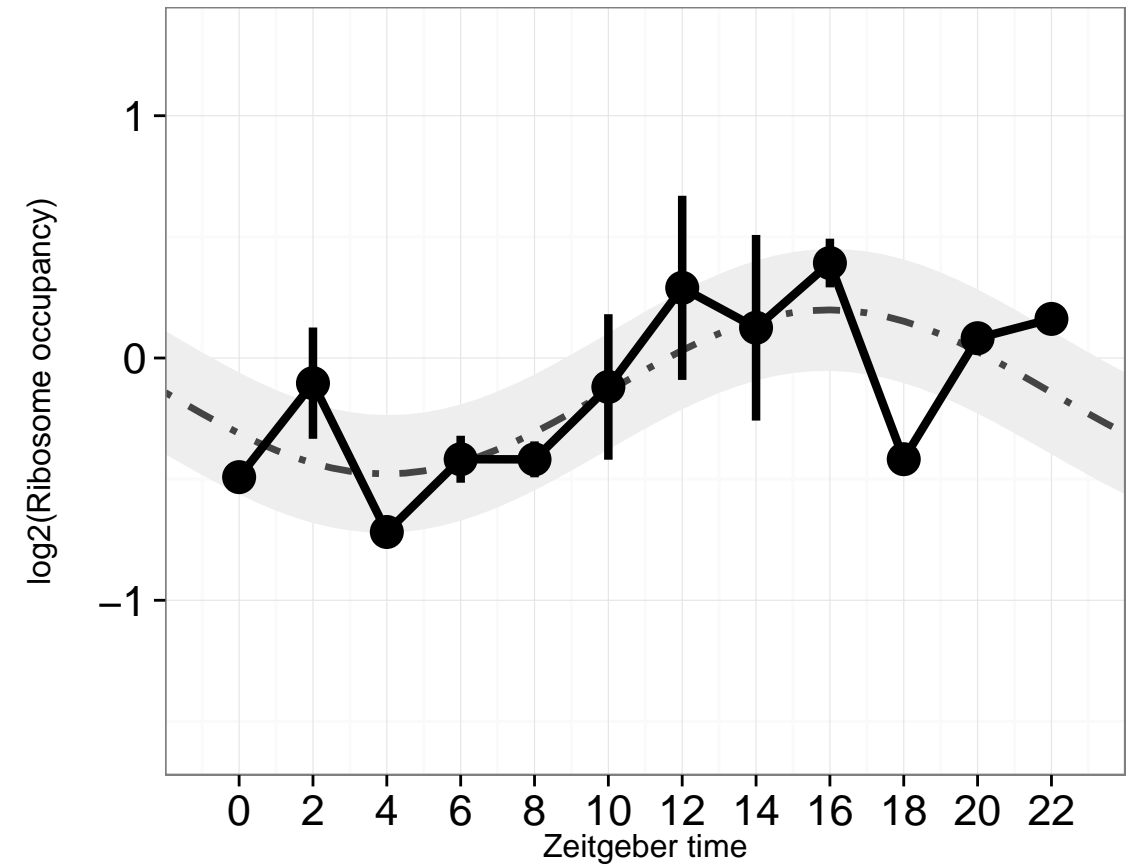

Supplement: Supplementary file 10714 [file 1]

## Misp

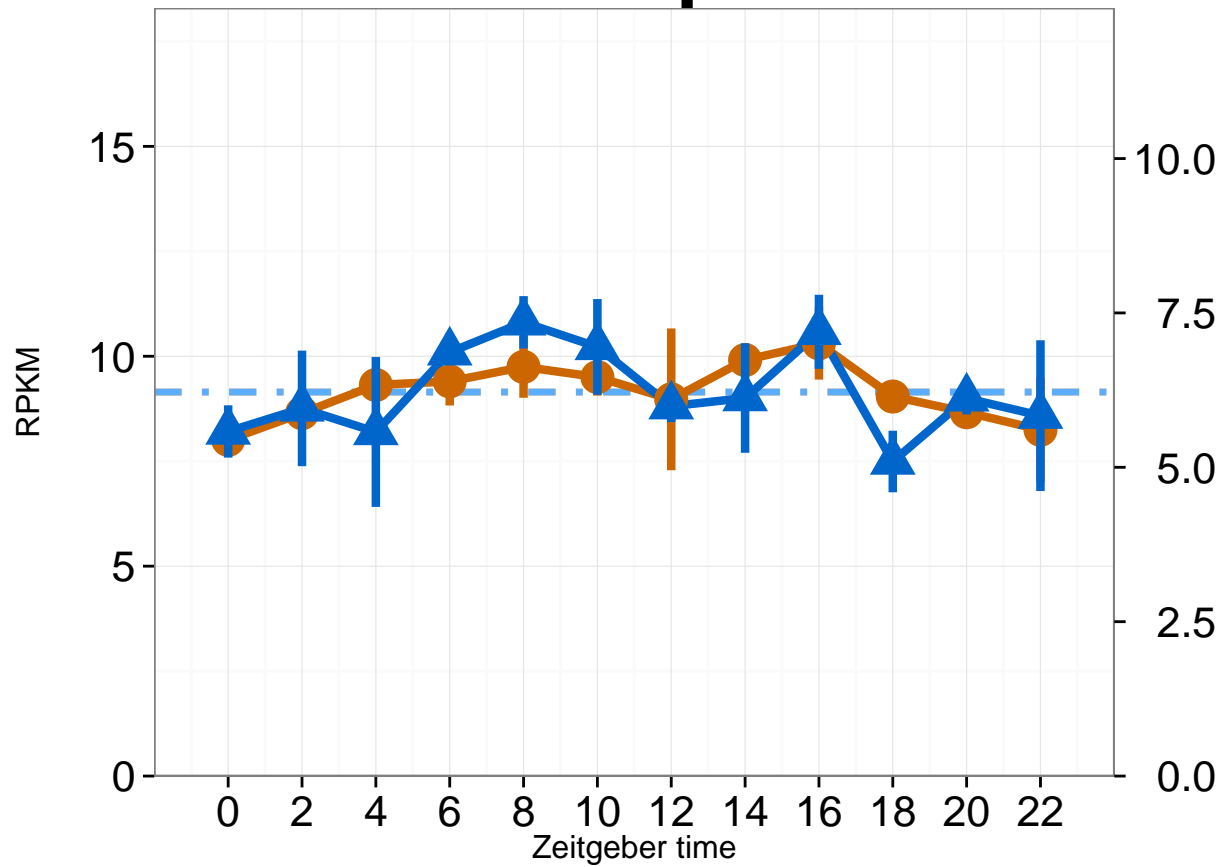

## Misp

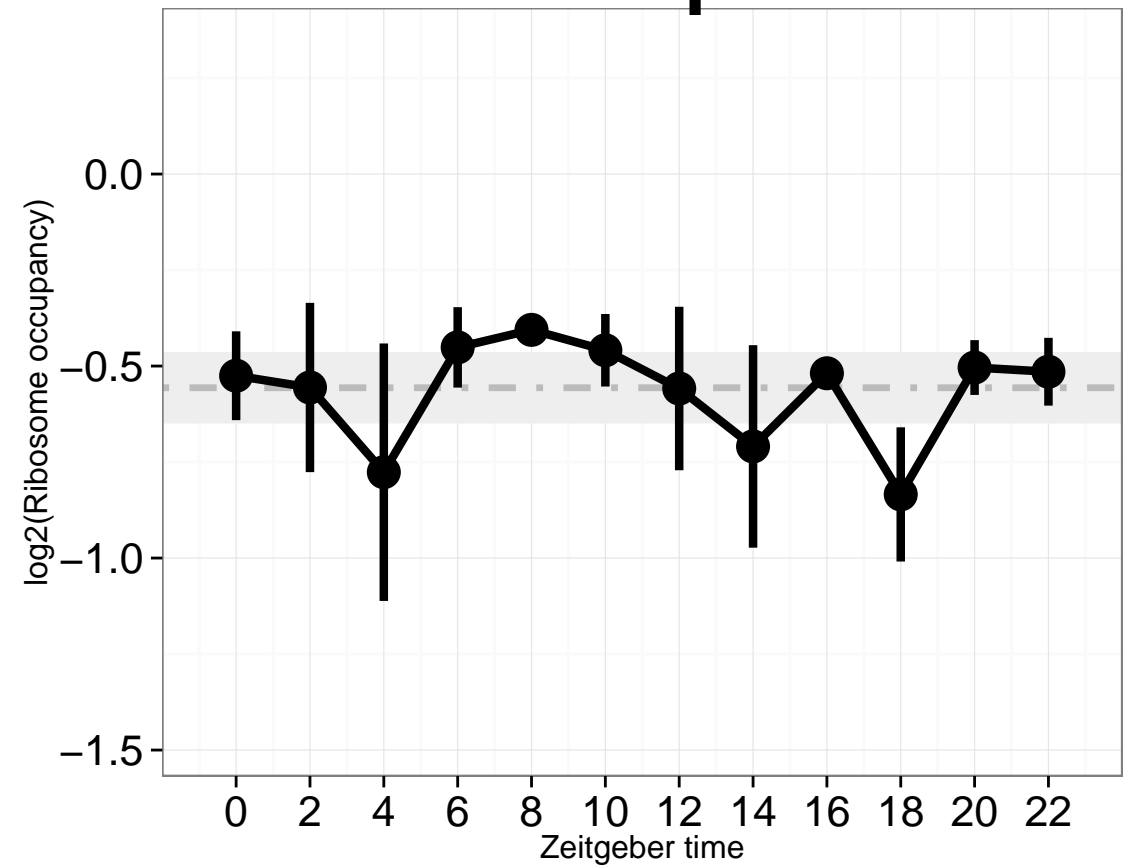

Supplement: Supplementary file 10715 [file 1]

## Uqcc2

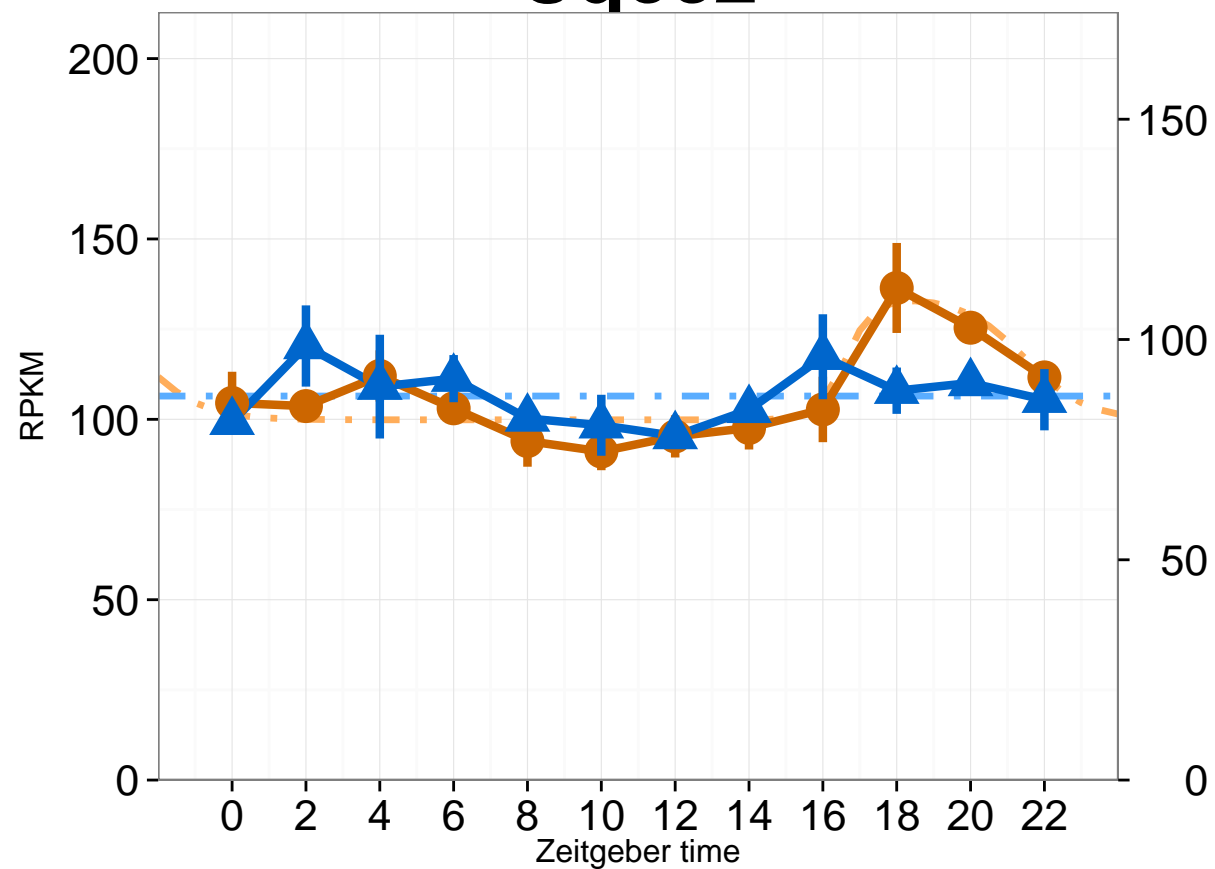

## Uqcc2

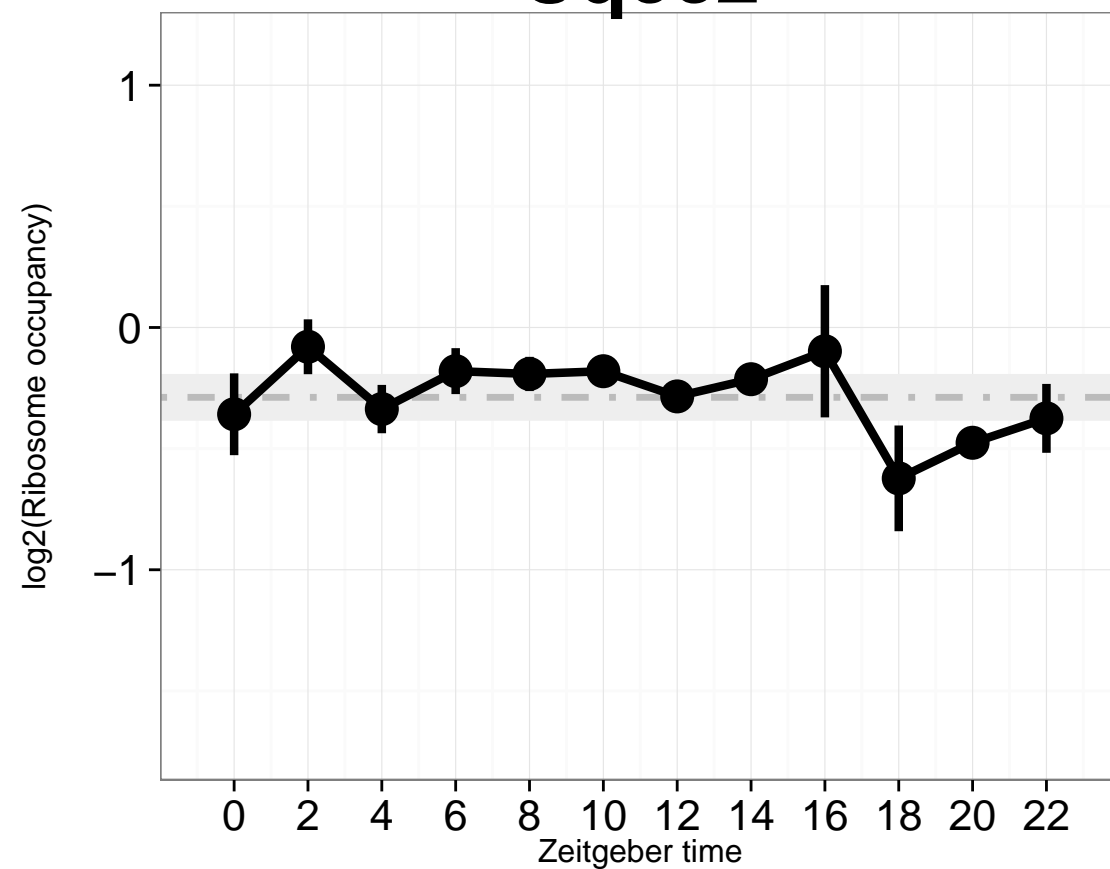

Supplement: Supplementary file 10716 [file 1]

## 2300009A05Rik

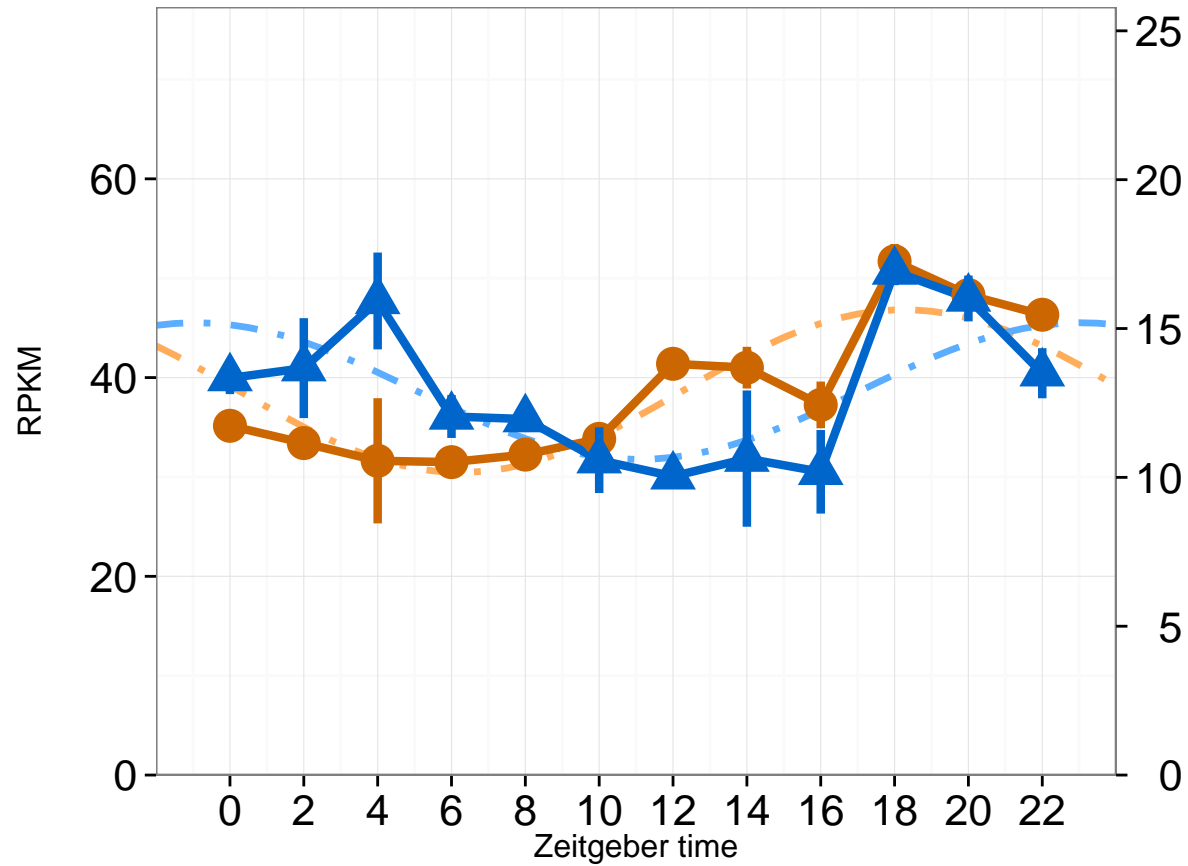

## 2300009A05Rik

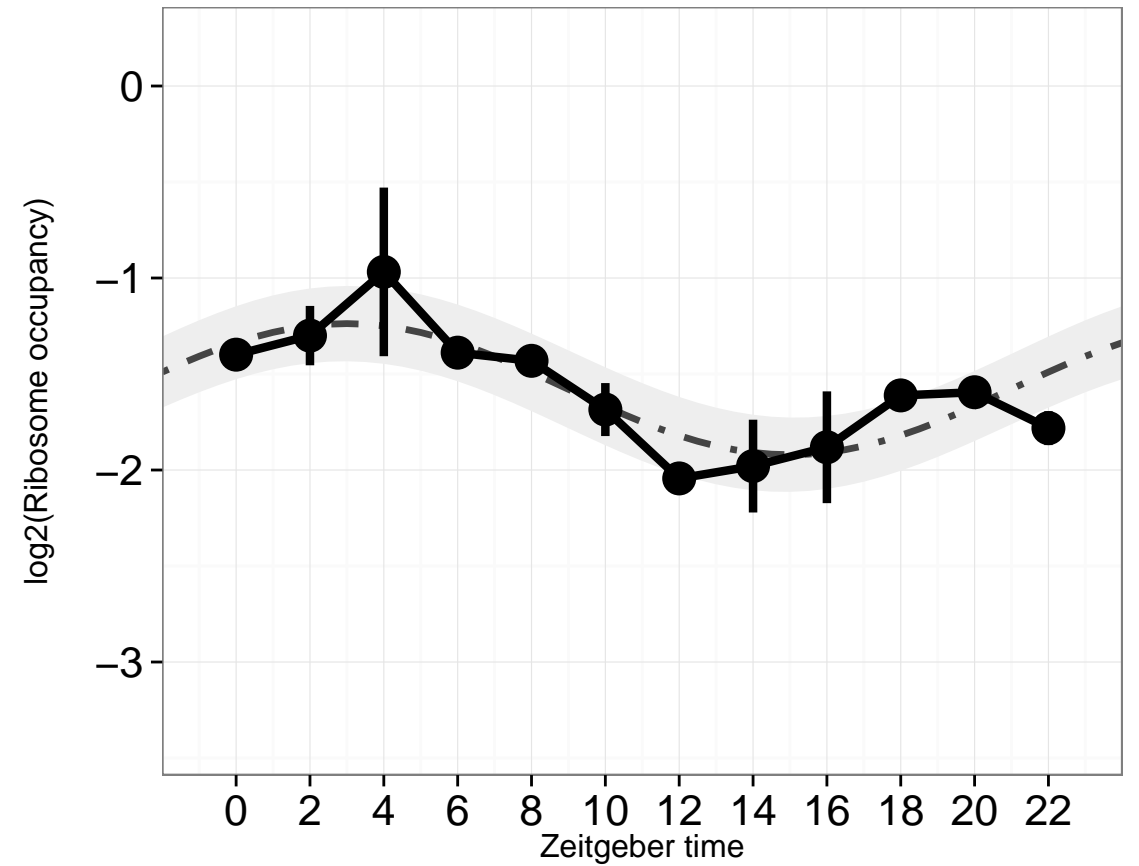

Supplement: Supplementary file 10717 [file 1]

**Sept5**

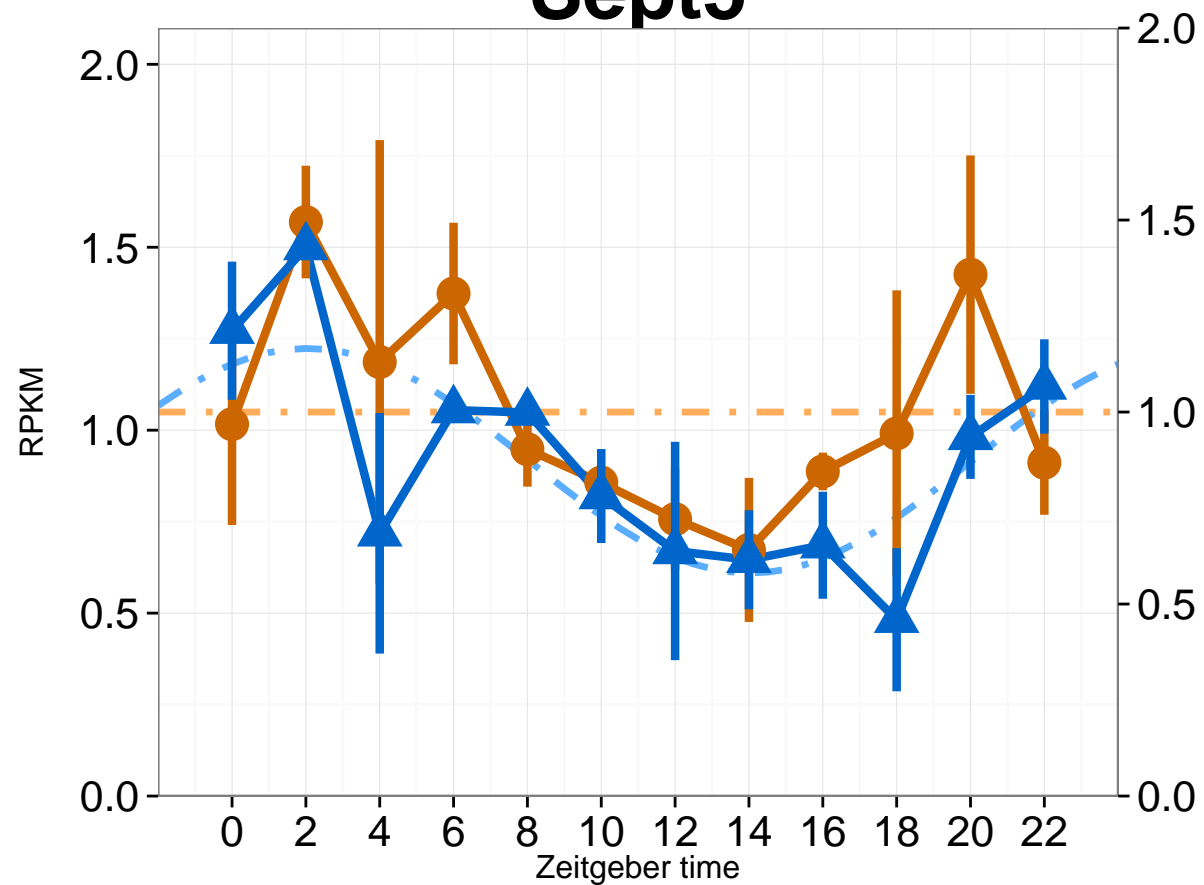

**Sept5**

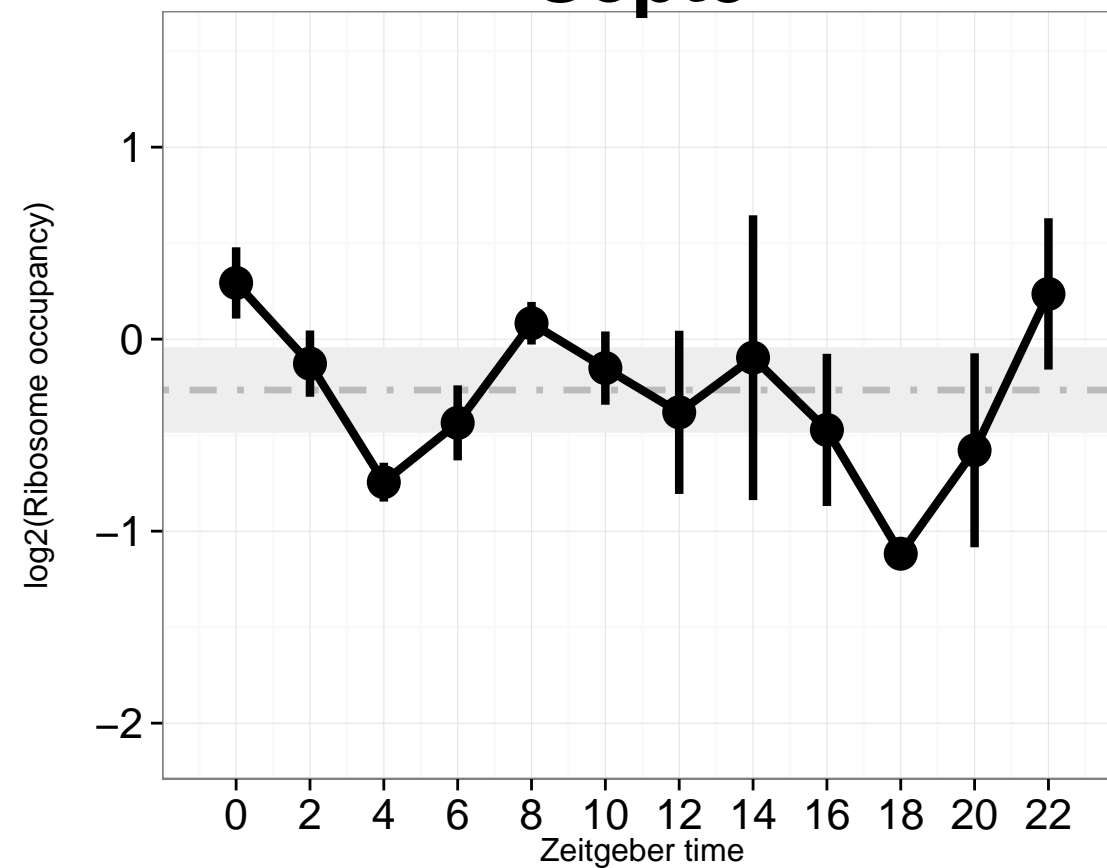

Supplement: Supplementary file 10718 [file 1]

## Slc7a6os

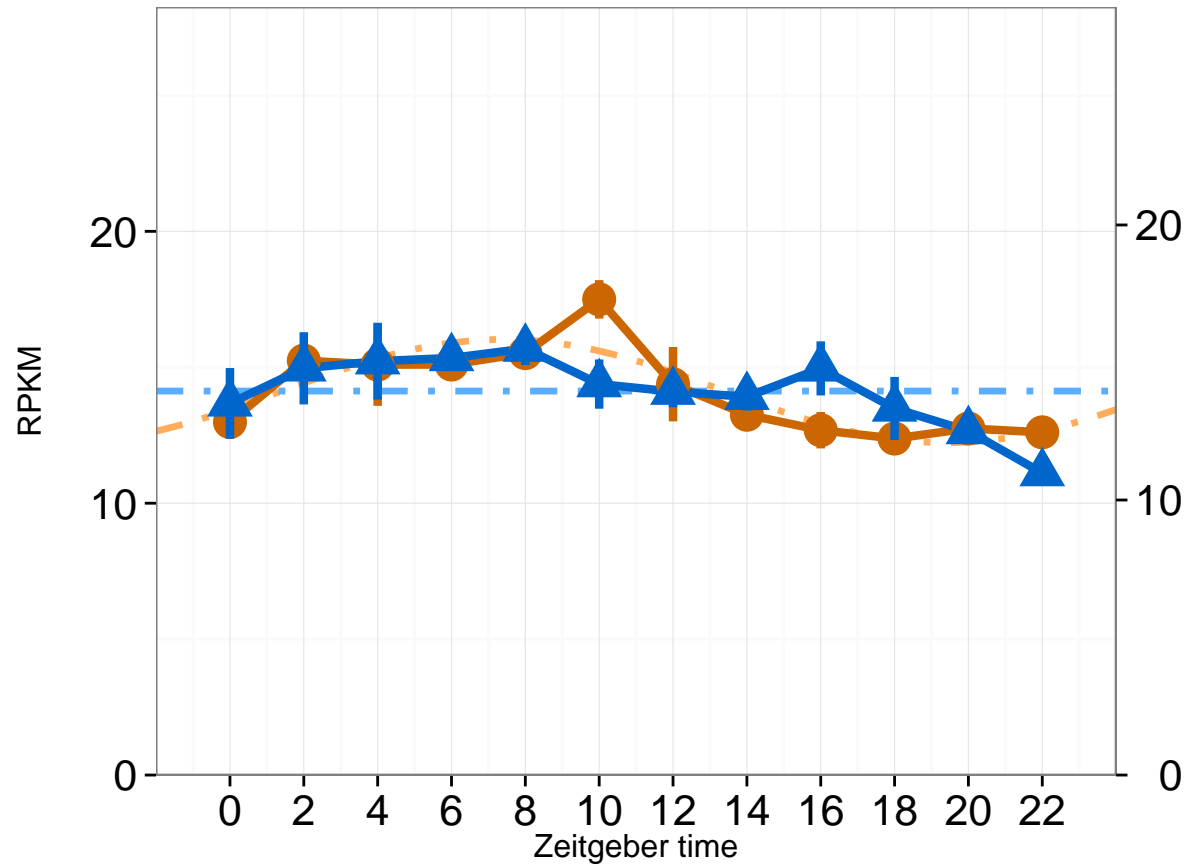

## Slc7a6os

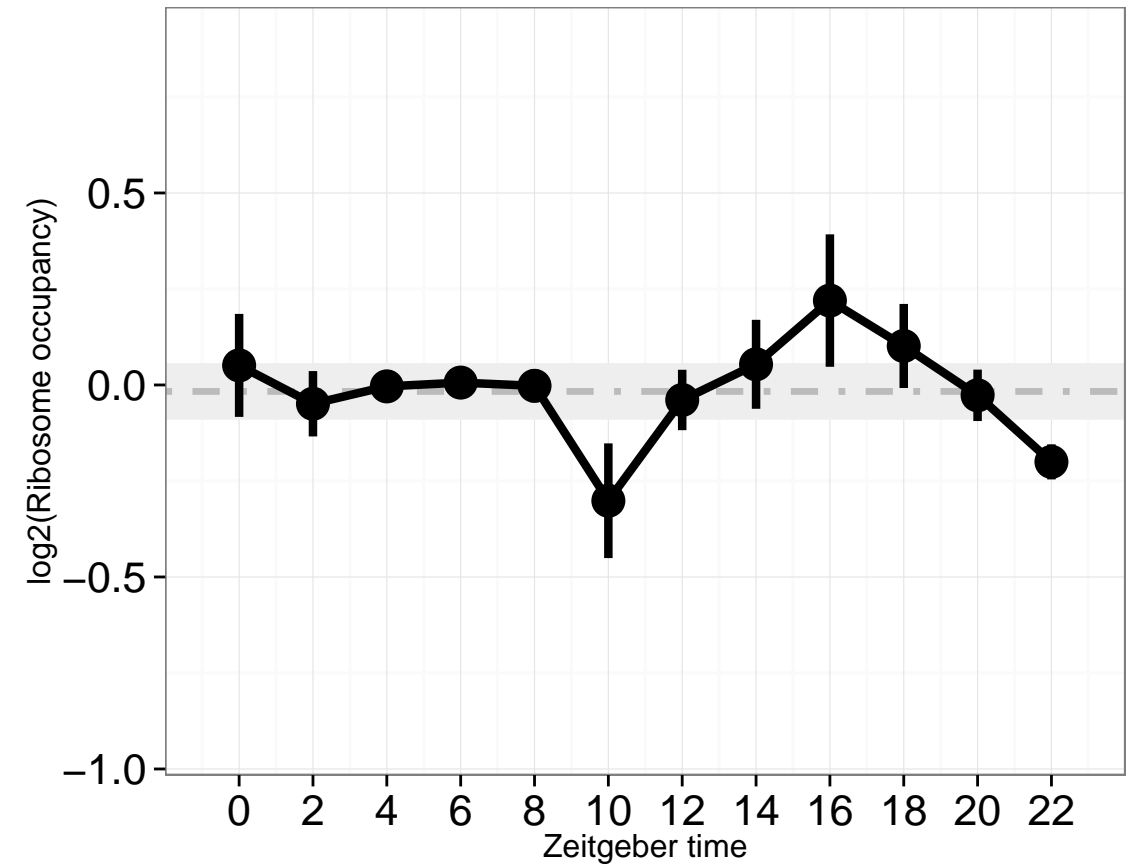

Supplement: Supplementary file 10719 [file 1]

# Ahctf1

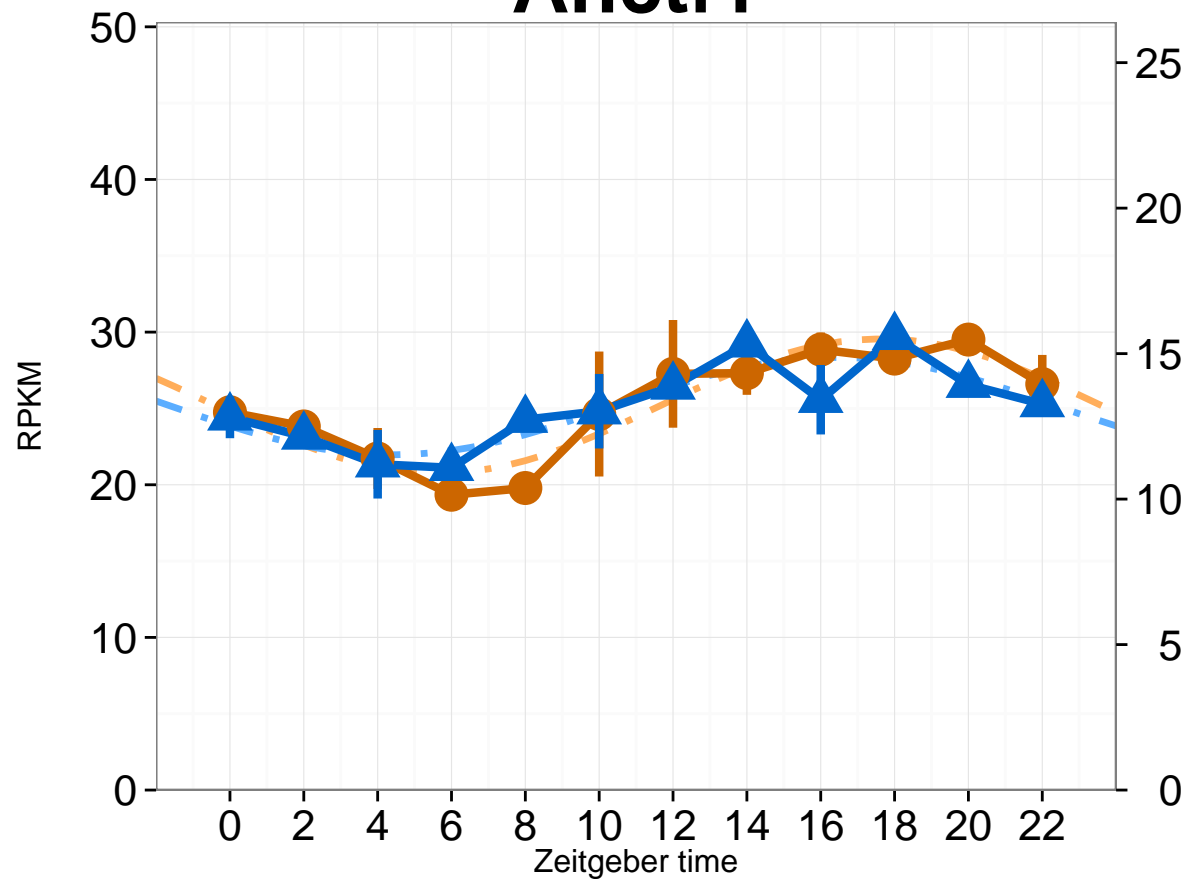

# Ahctf1

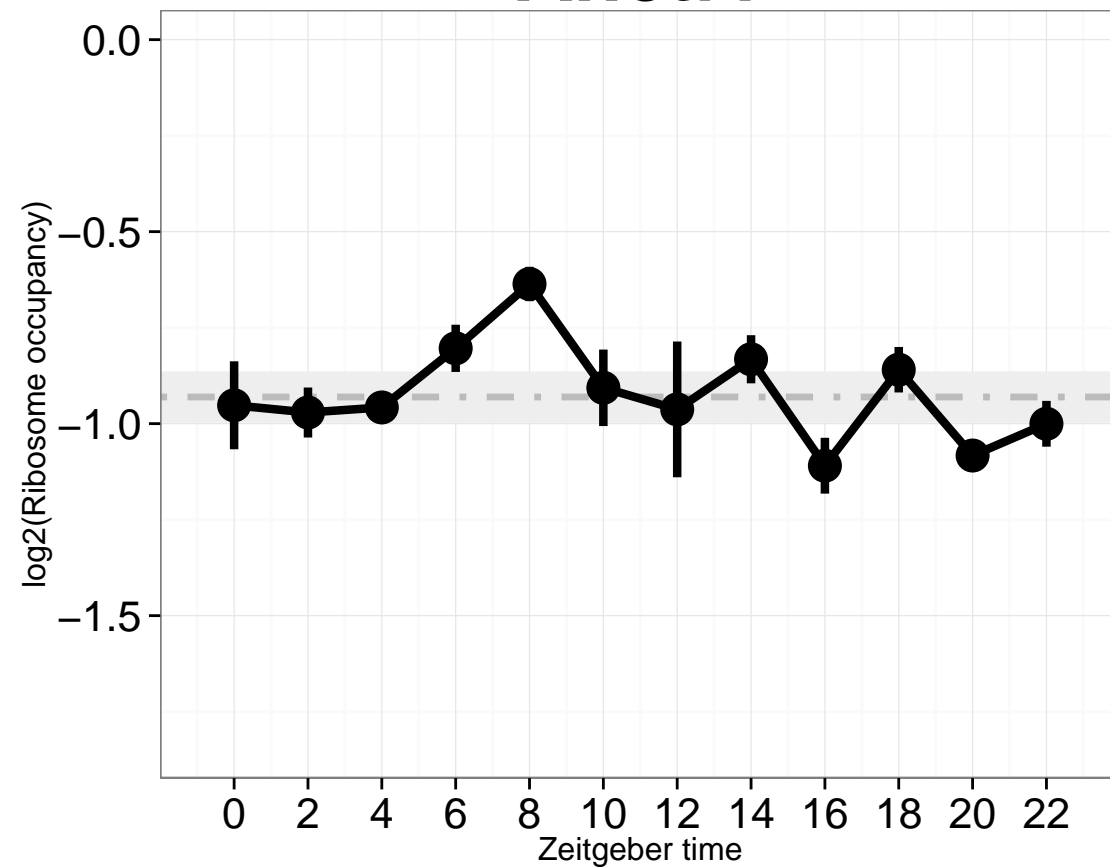

Supplement: Supplementary file 10720 [file 1]

## Bst2

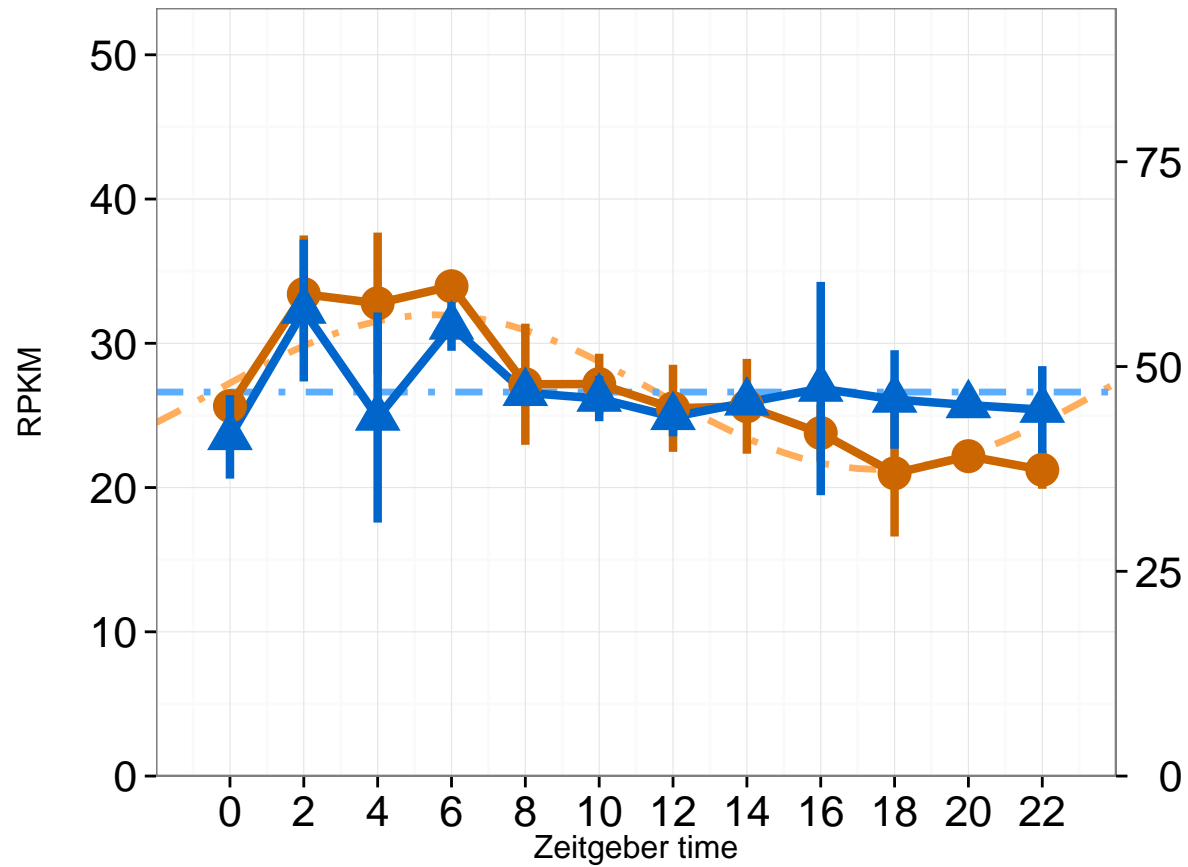

## Bst2

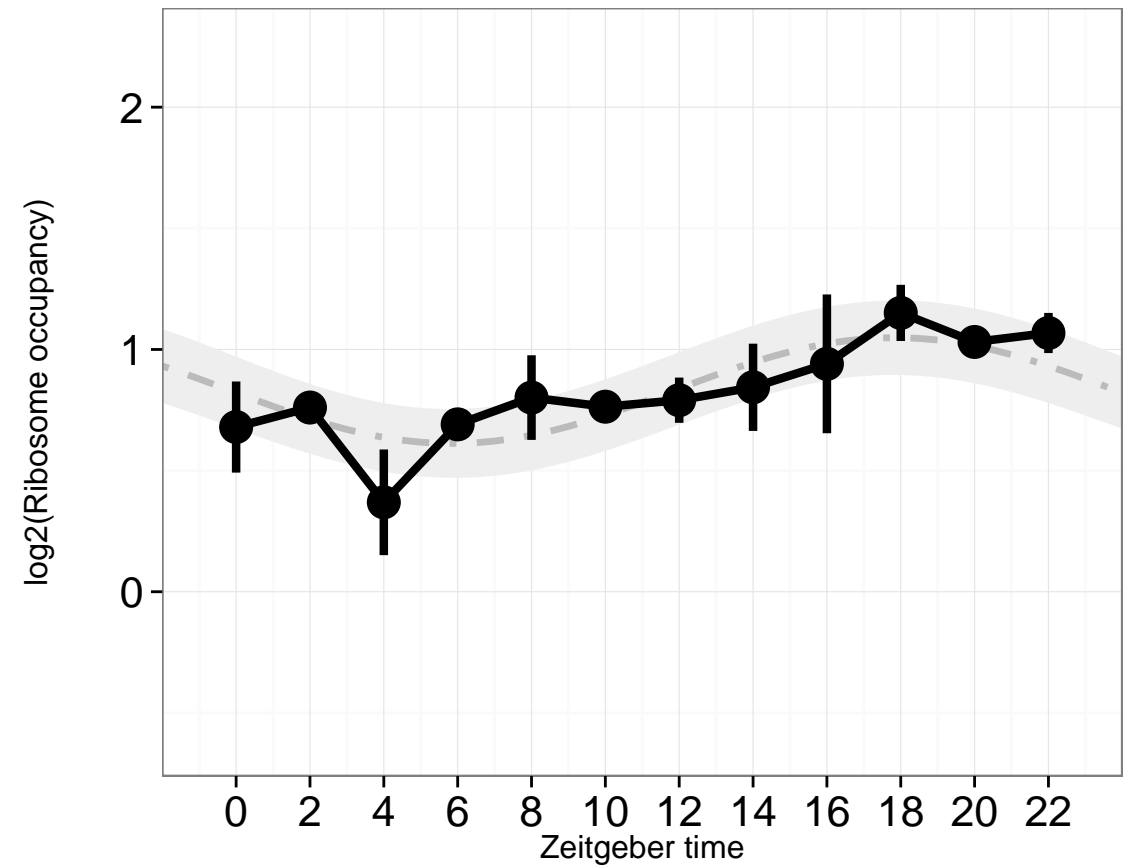

Supplement: Supplementary file 10721 [file 1]

## Ccr2

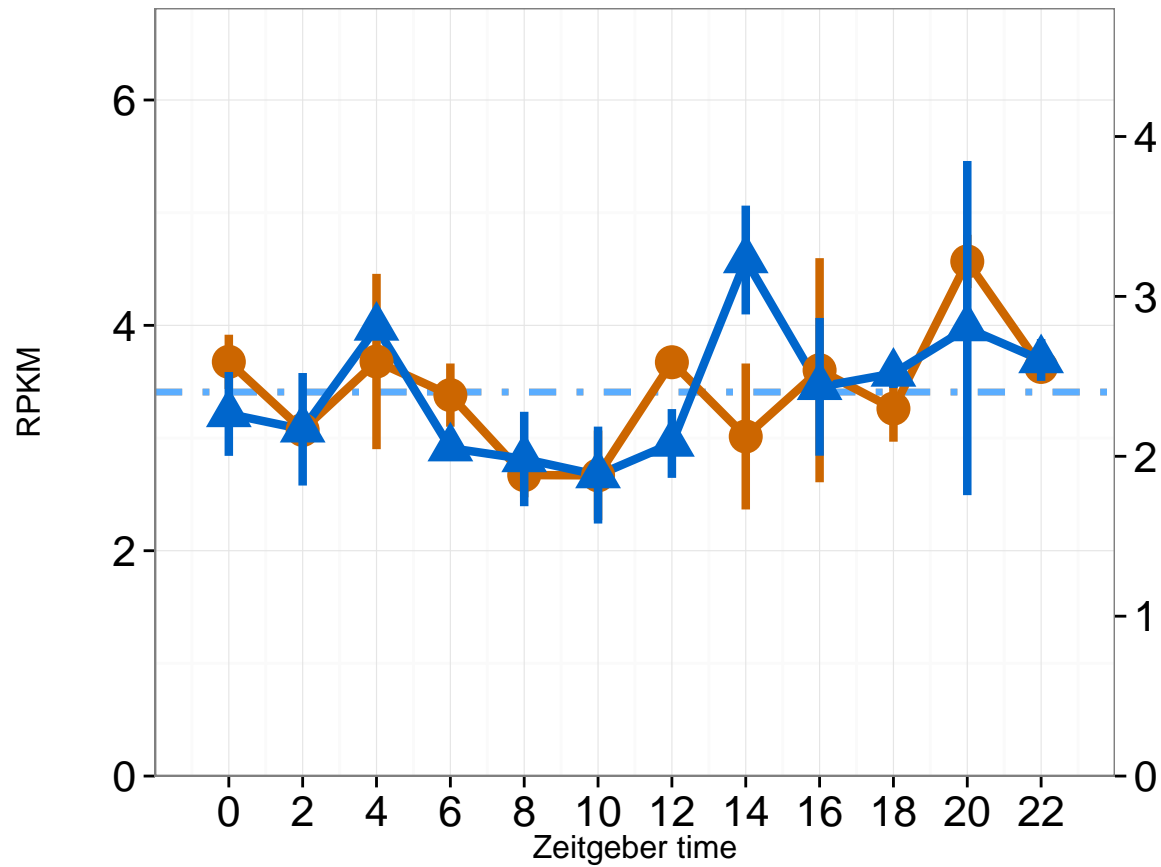

## Ccr2

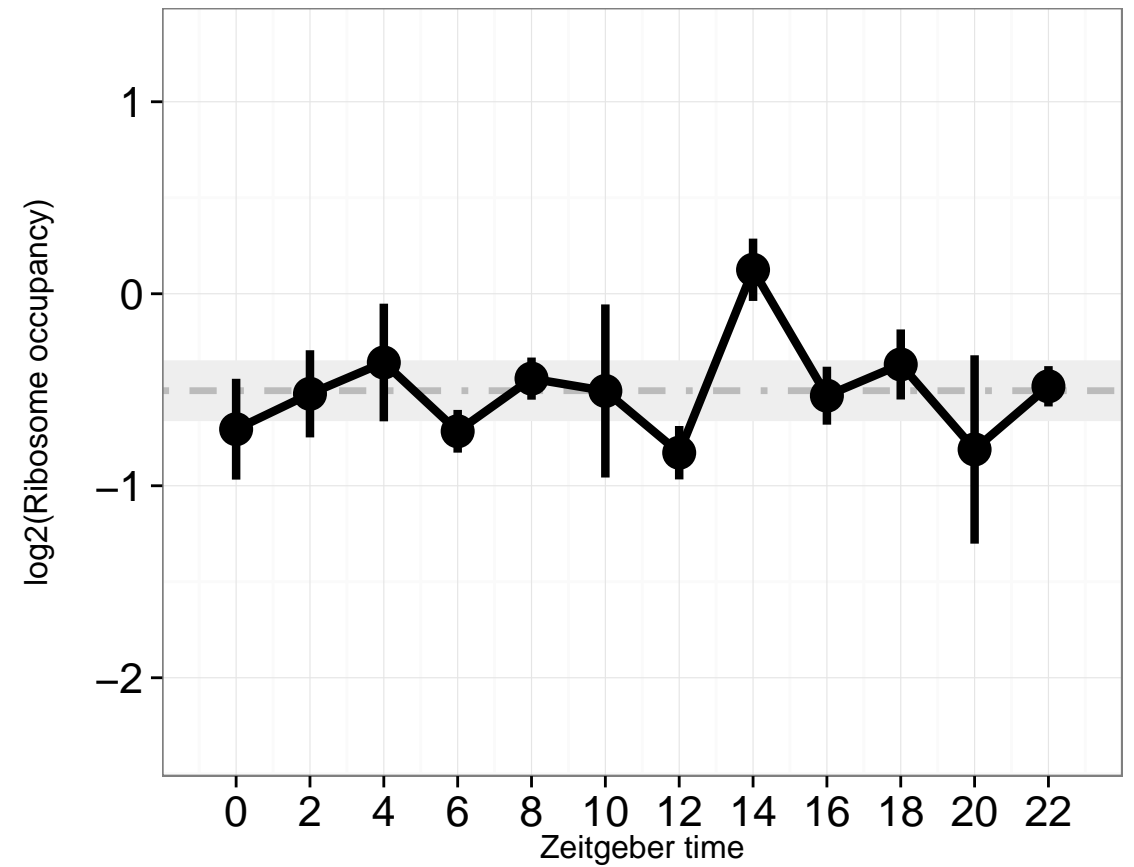

Supplement: Supplementary file 10722 [file 1]

# Slco3a1

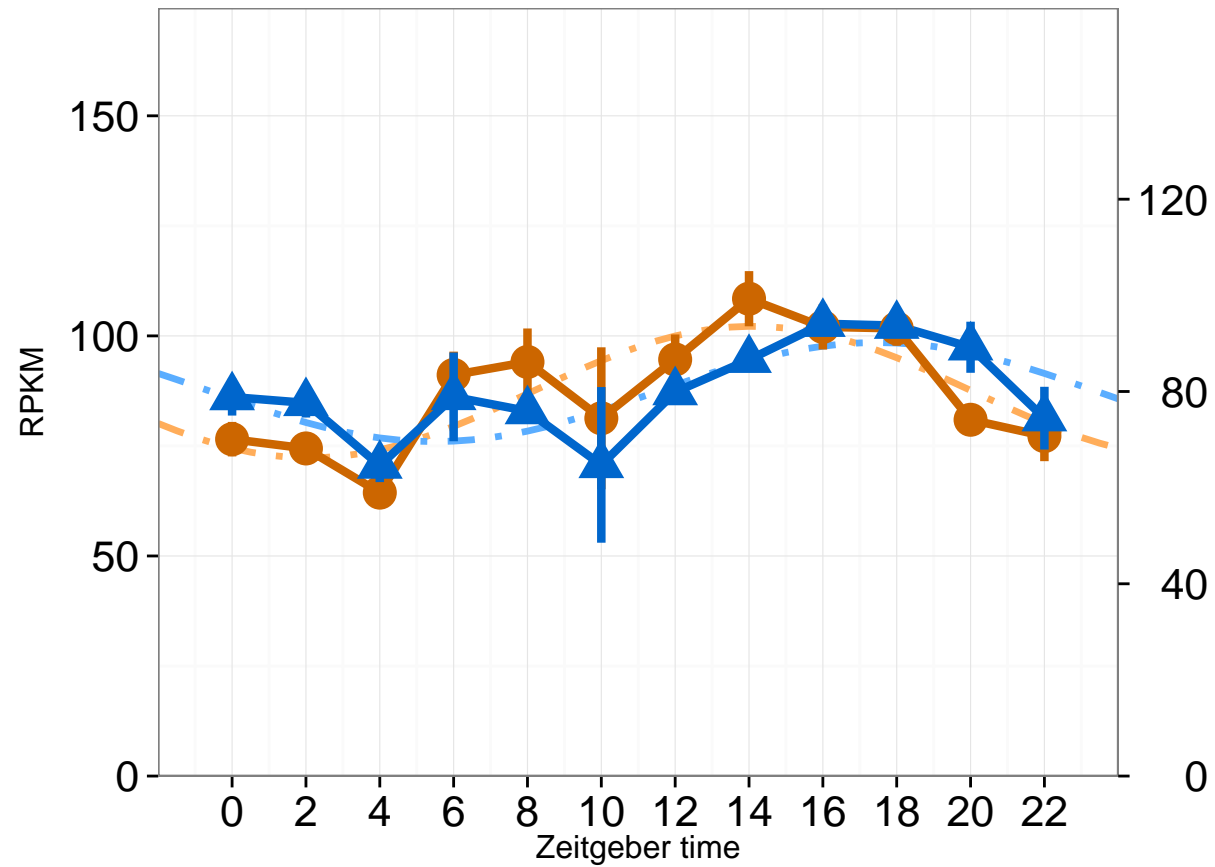

# Slco3a1

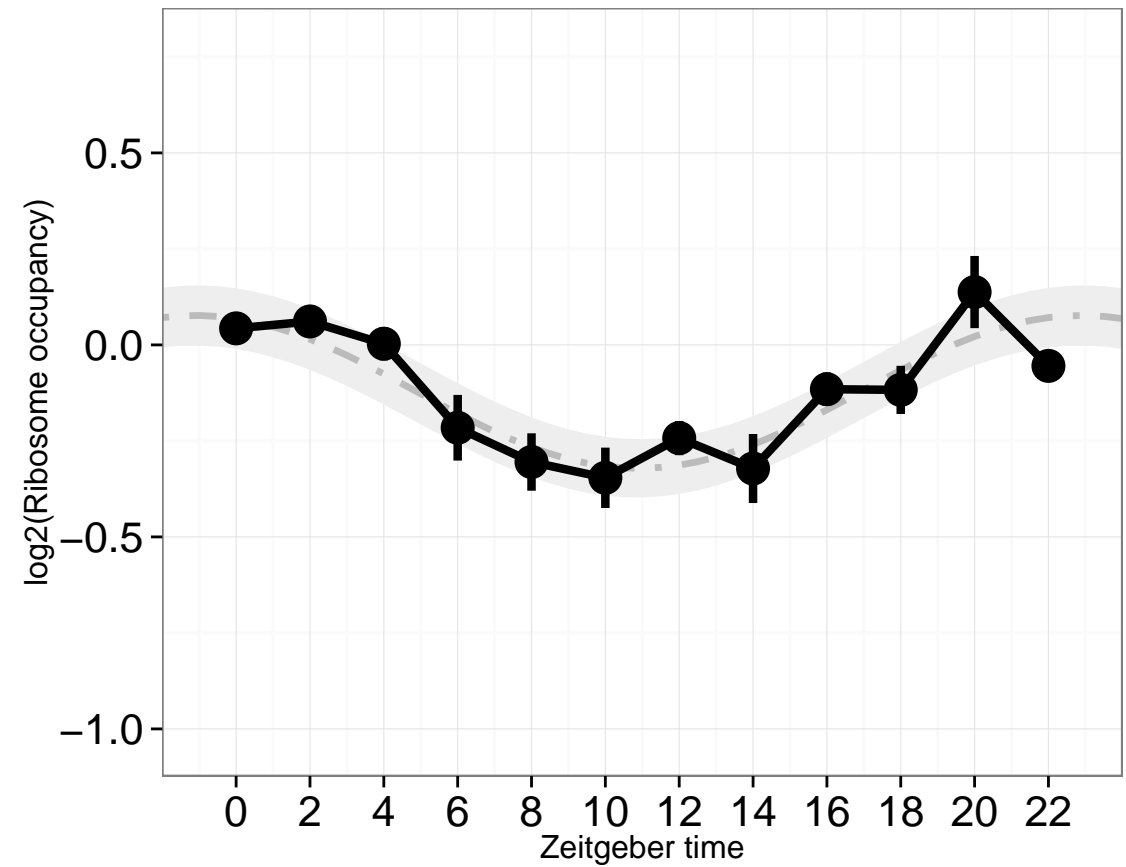

Supplement: Supplementary file 10723 [file 1]

# Cant1

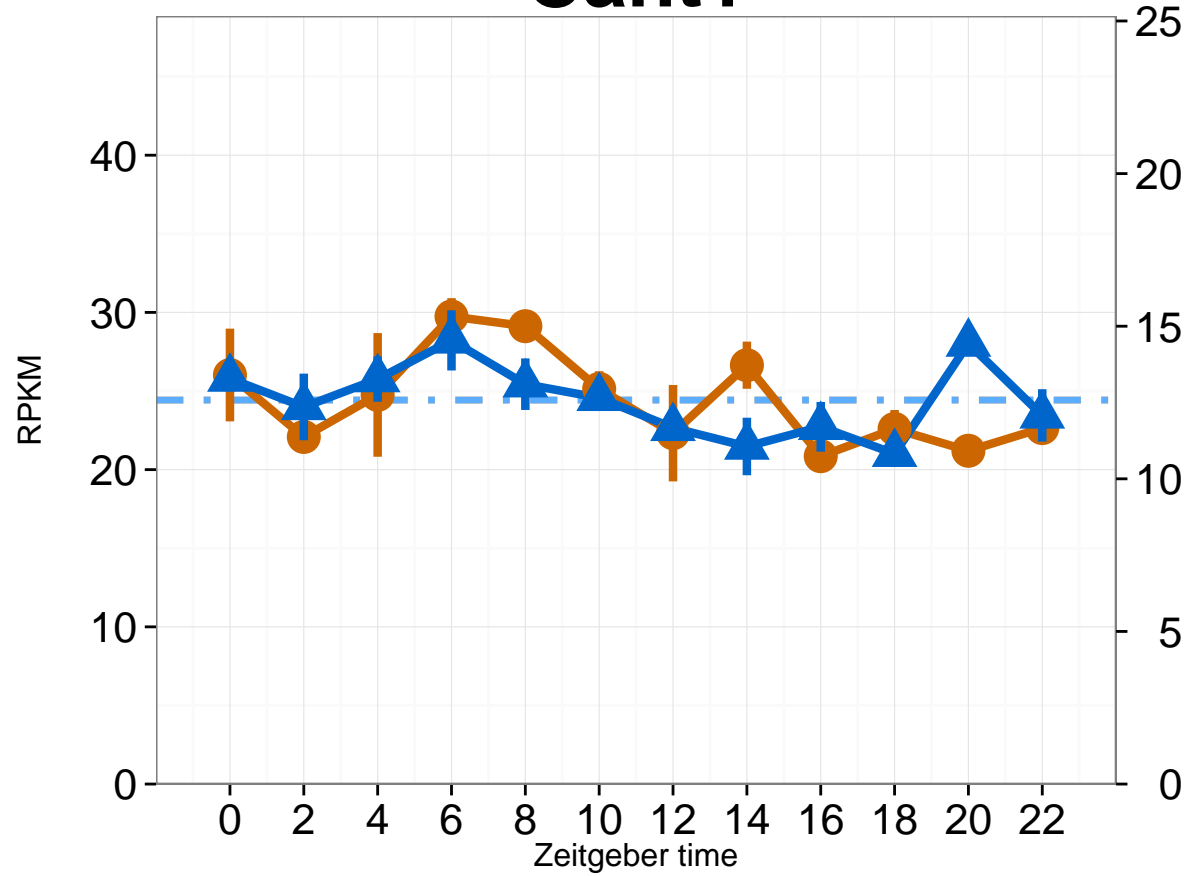

# Cant1

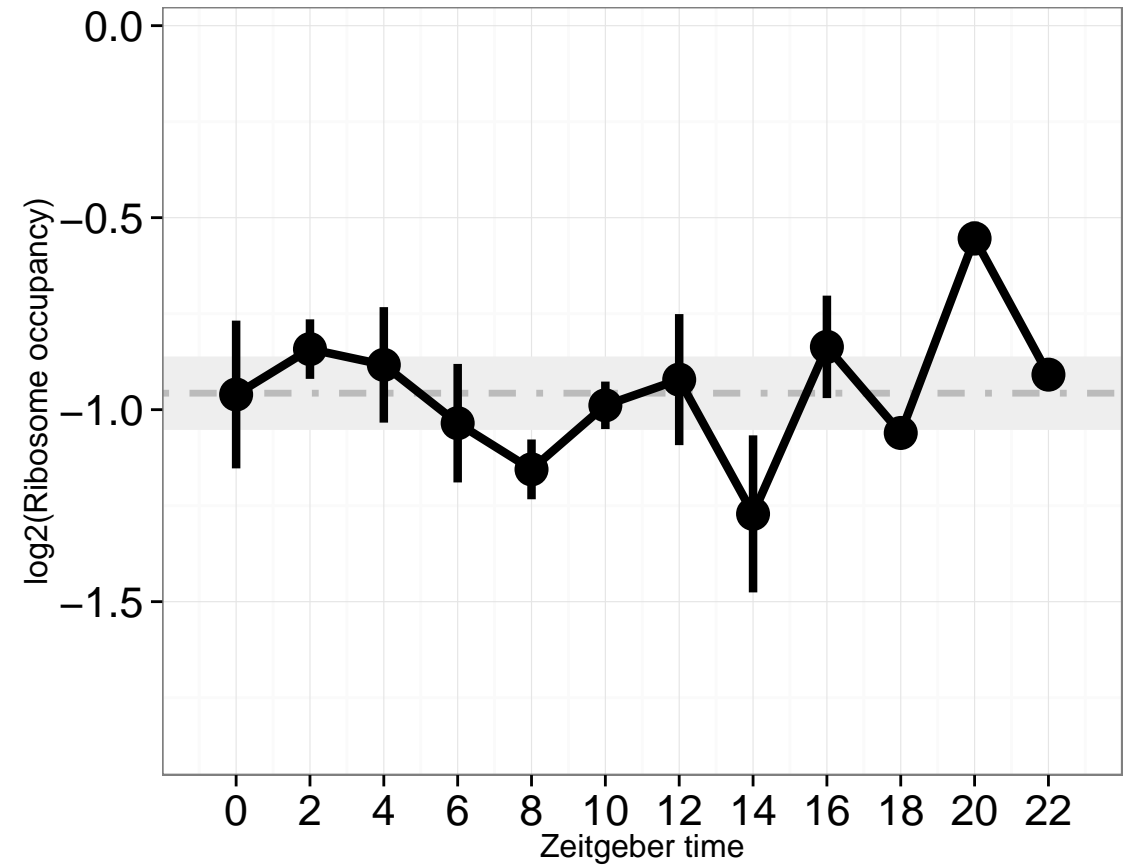

Supplement: Supplementary file 10724 [file 1]

## Notch2

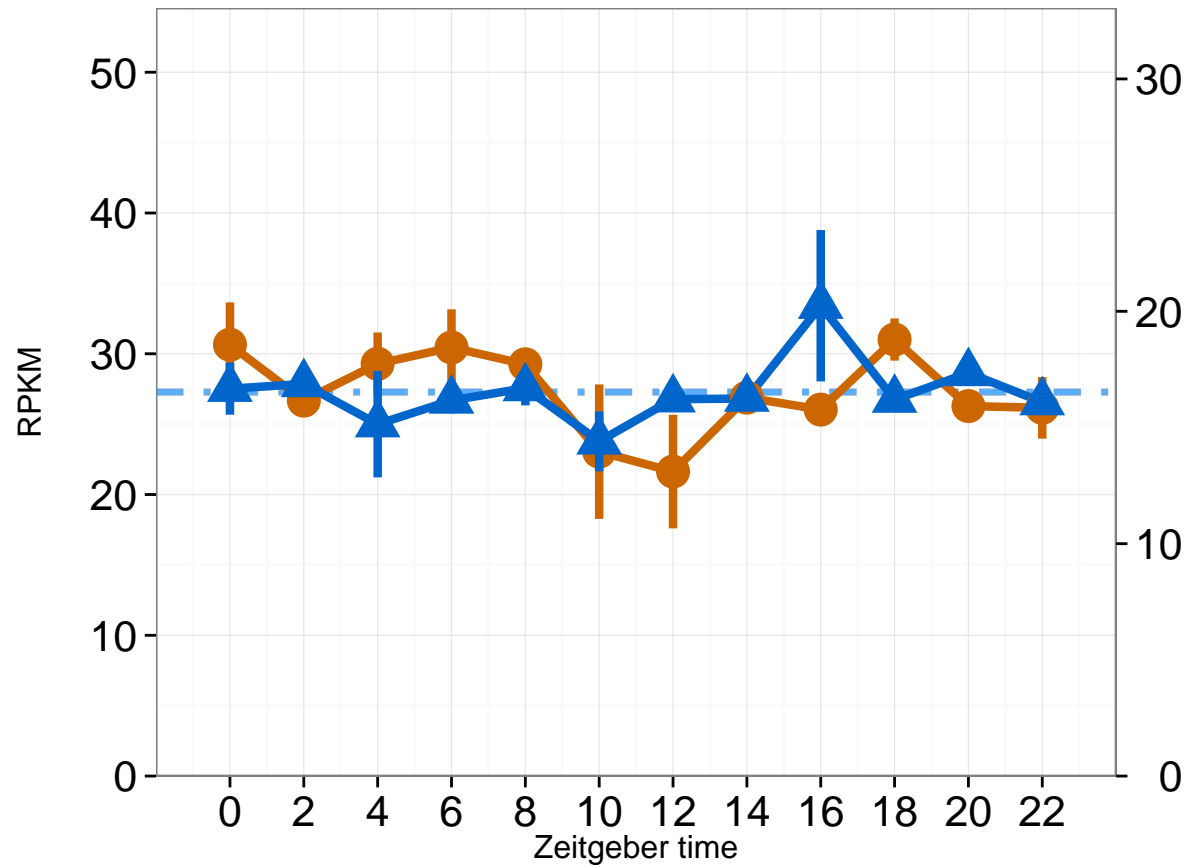

## Notch2

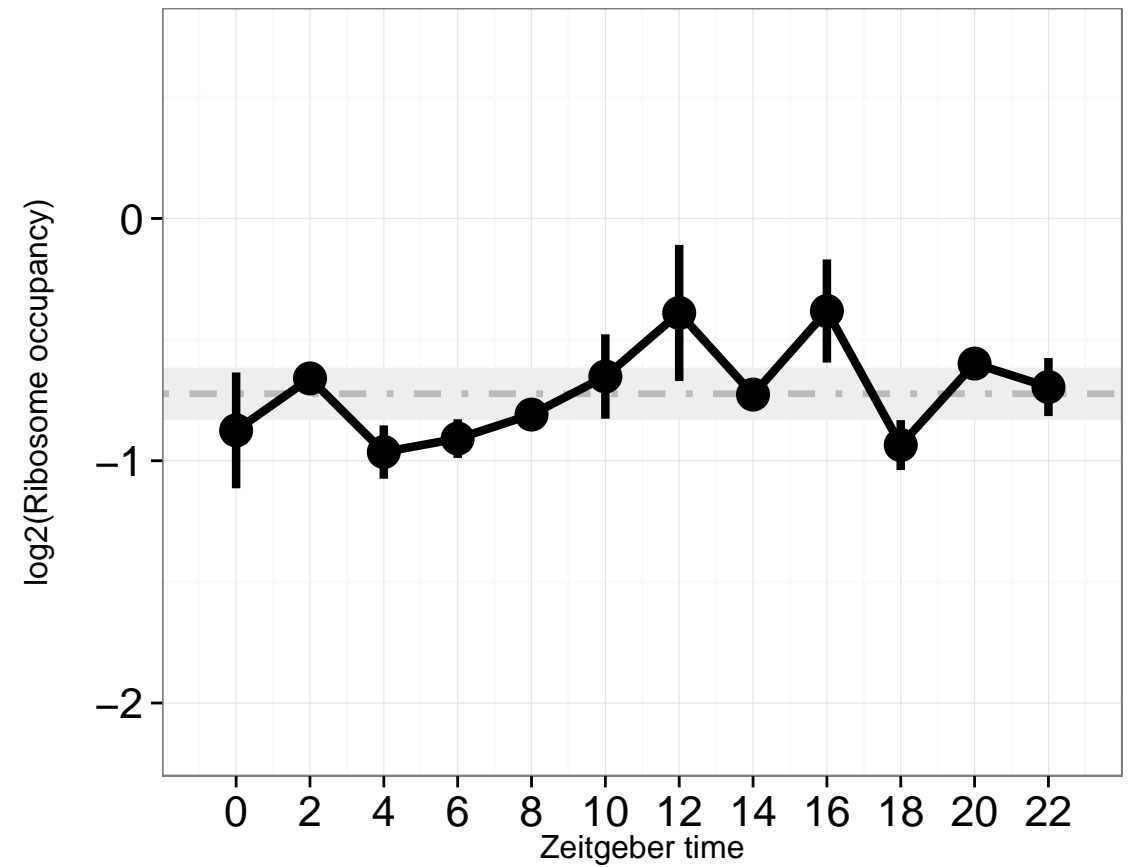

Supplement: Supplementary file 10725 [file 1]

## Ssfa2

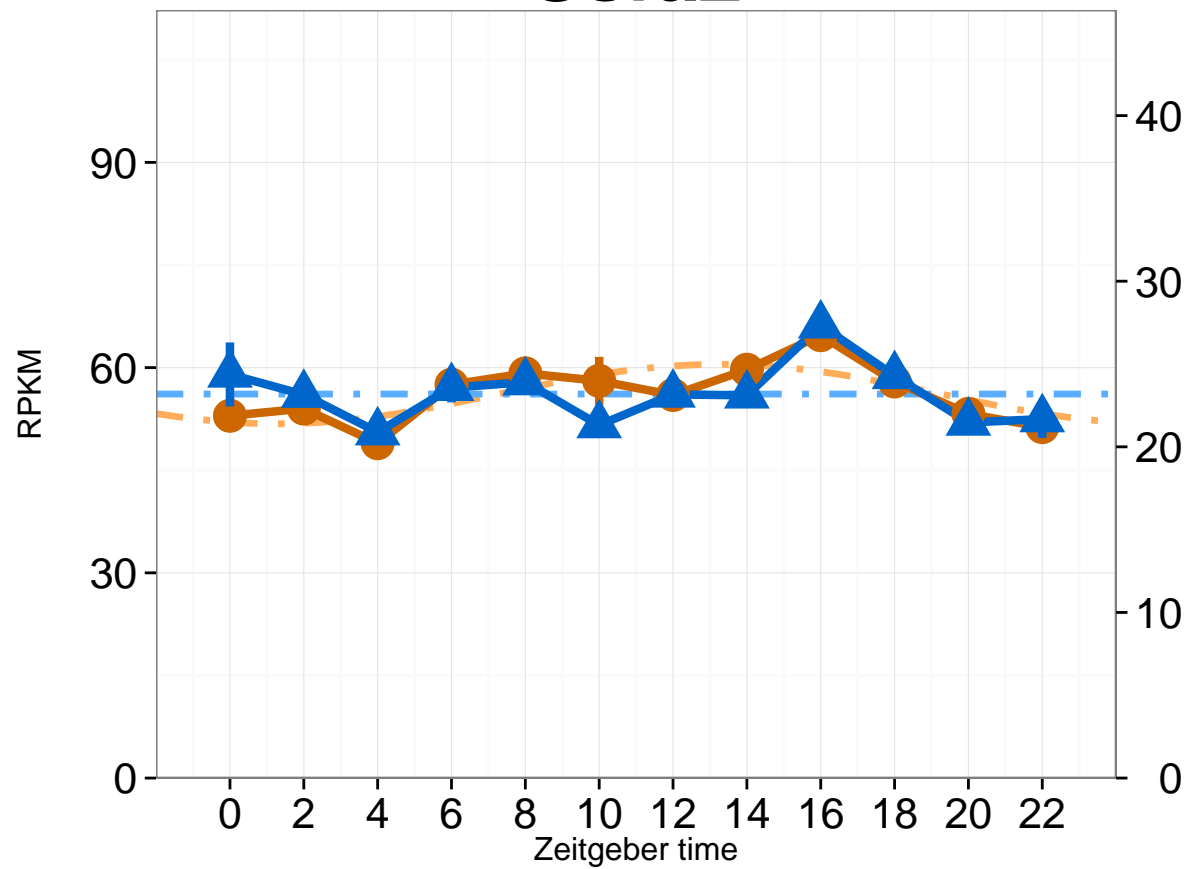

## Ssfa2

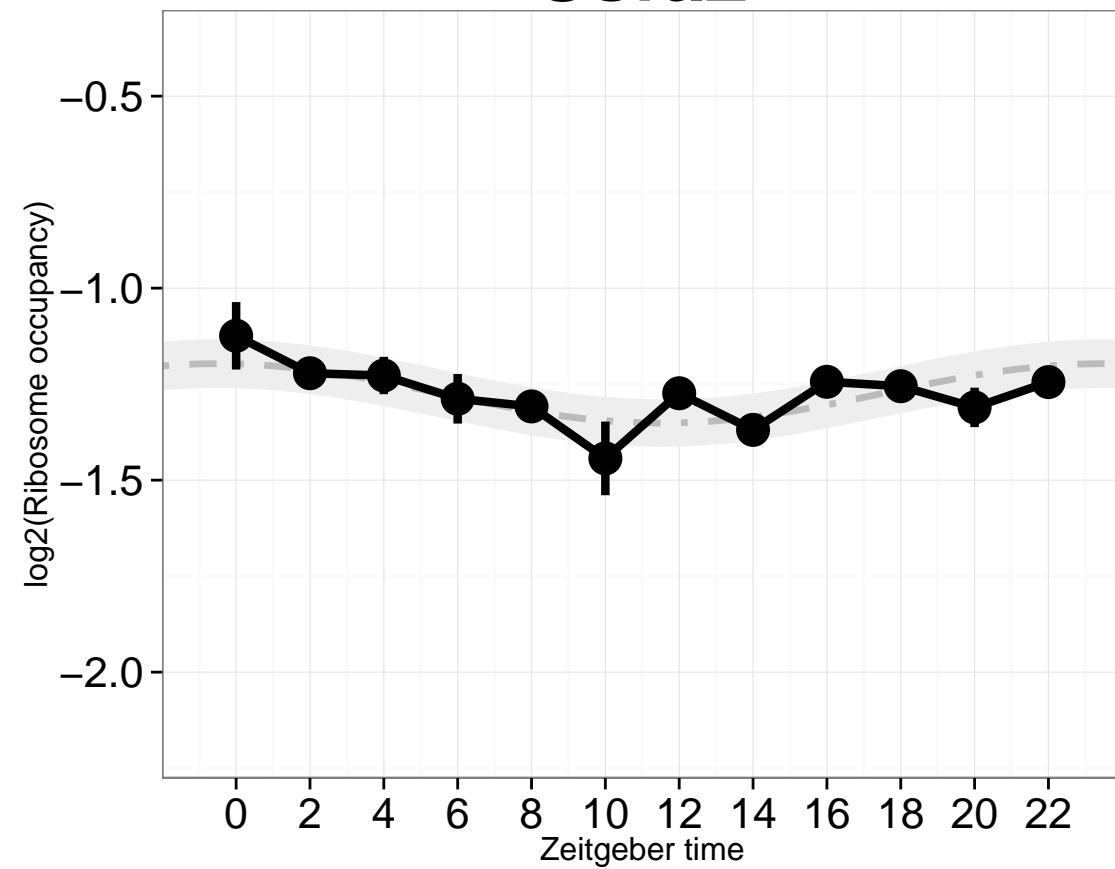

Supplement: Supplementary file 10726 [file 1]

## Dhx30

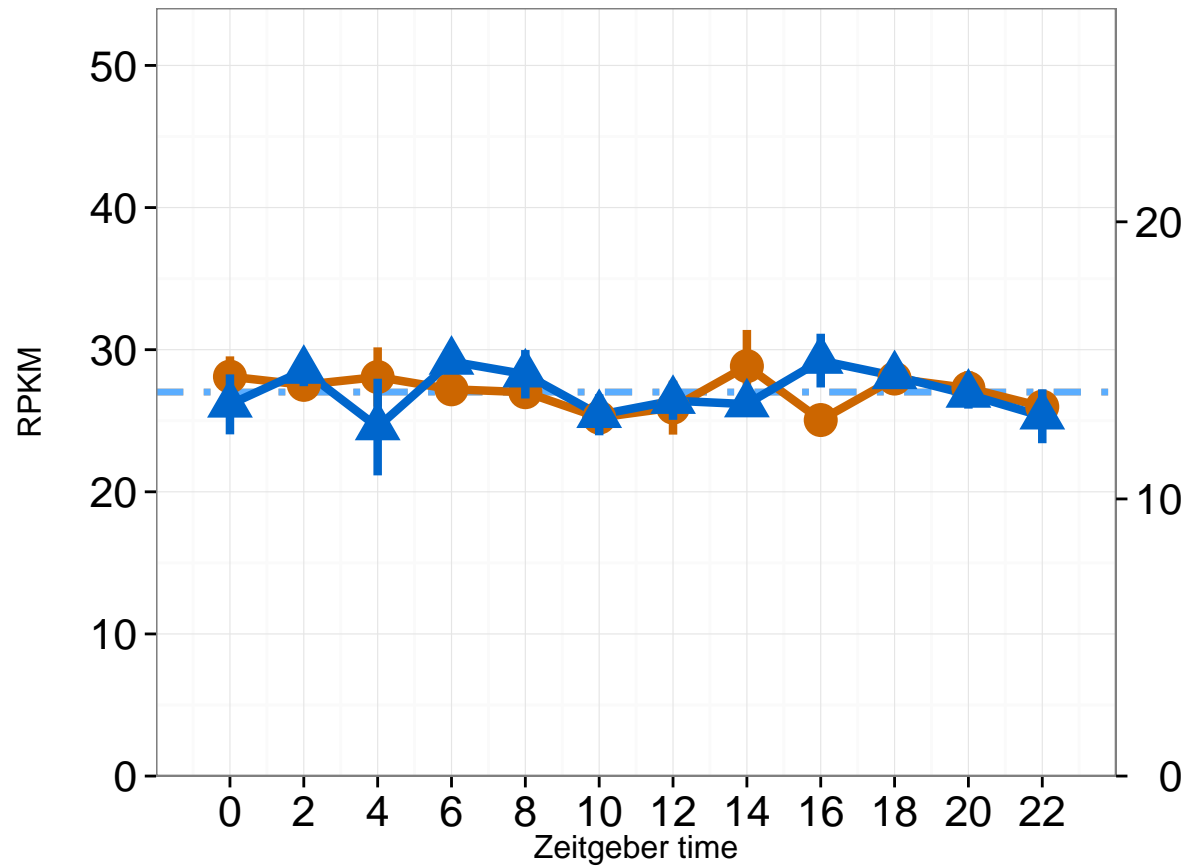

## Dhx30

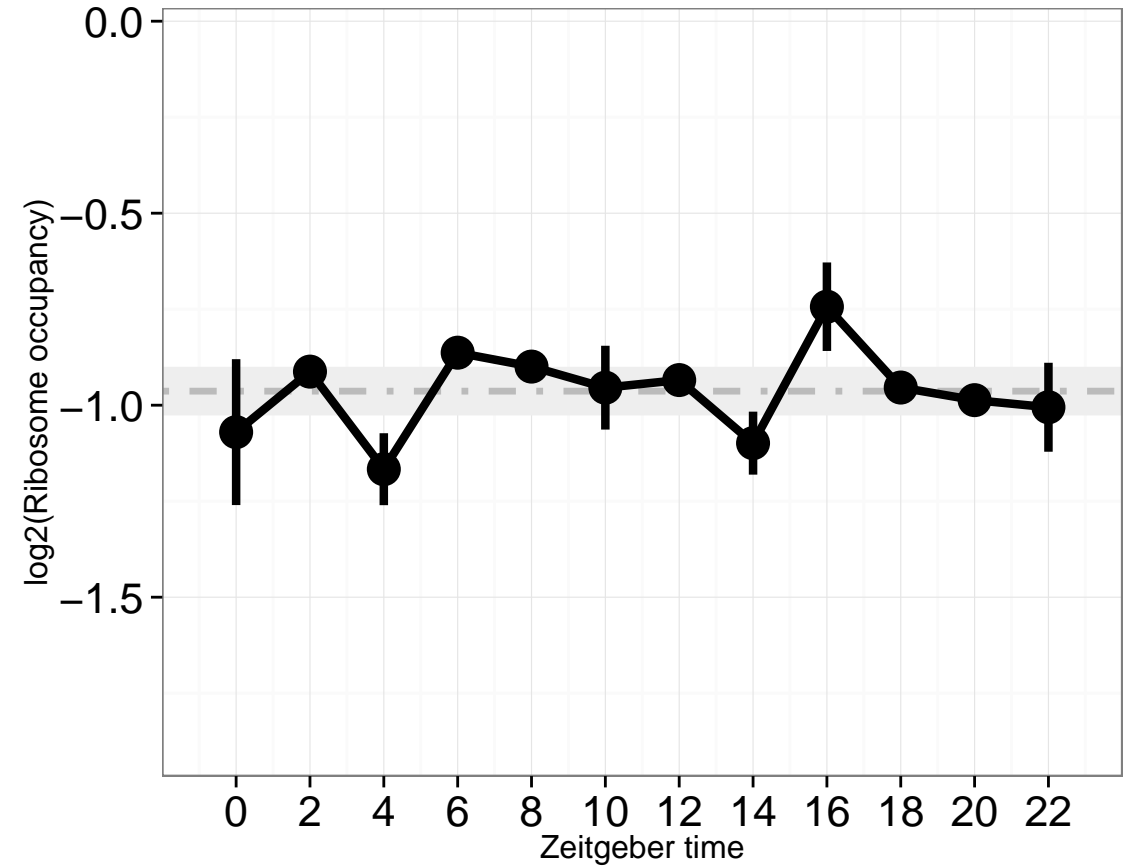

Supplement: Supplementary file 10727 [file 1]

## Vps36

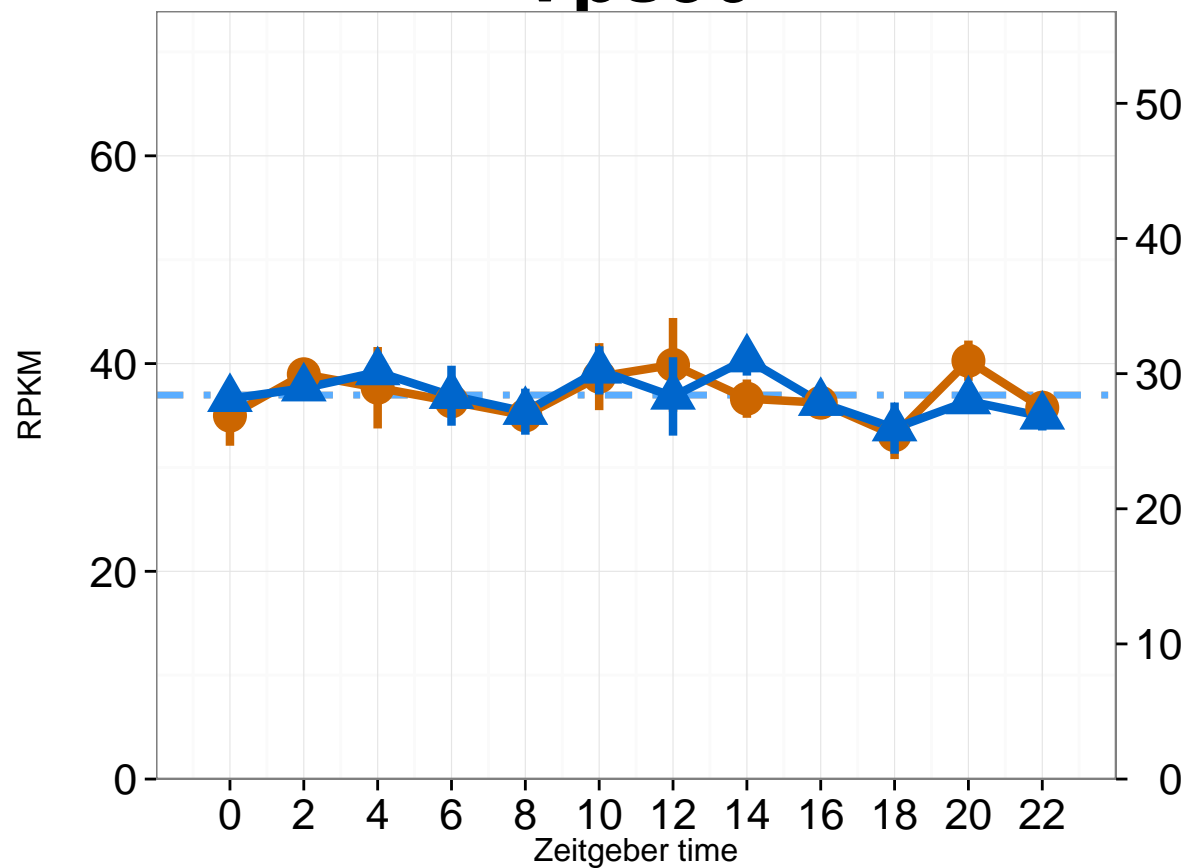

## Vps36

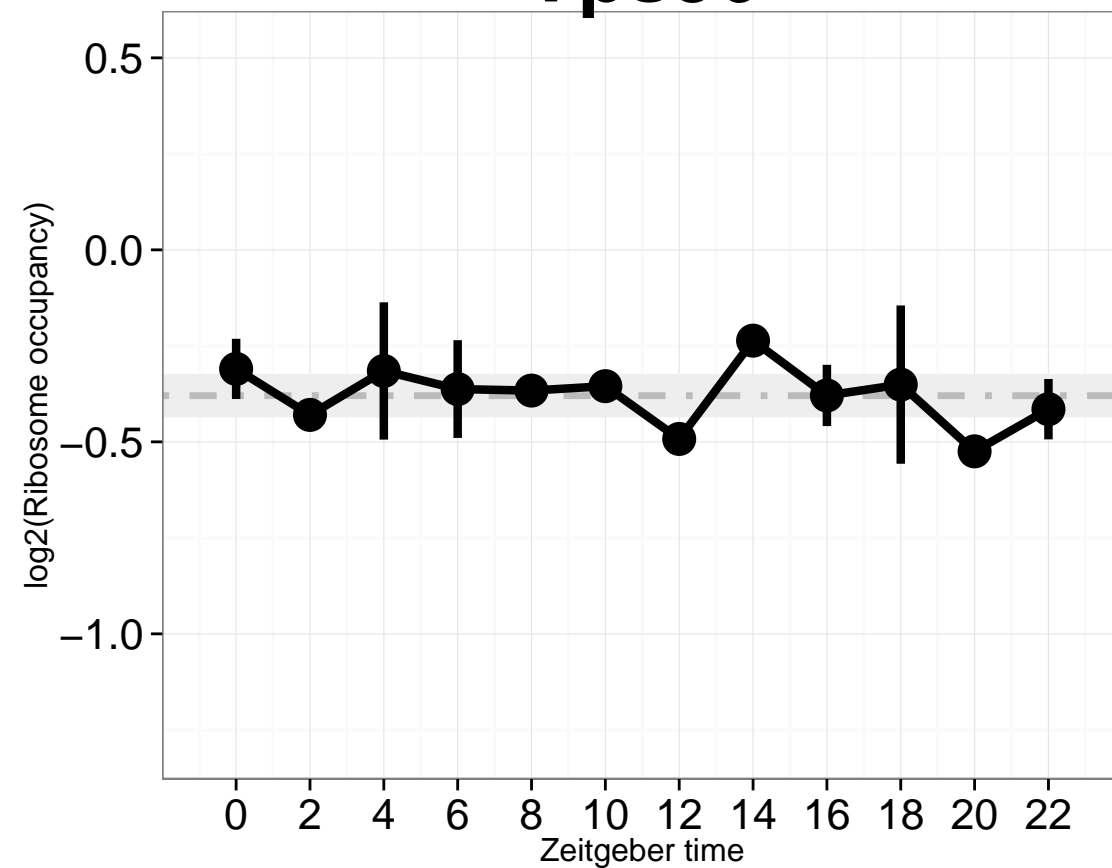

Supplement: Supplementary file 10728 [file 1]

# Gltscr1

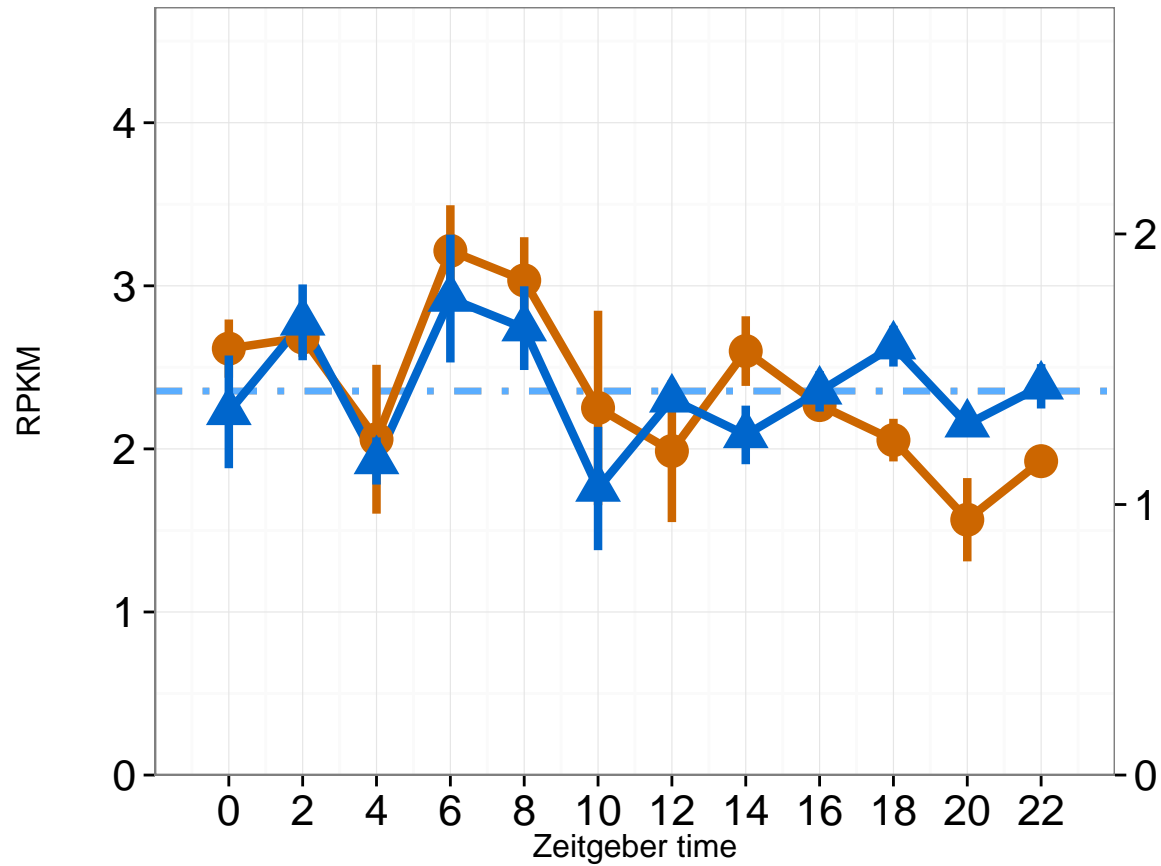

# Gltscr1

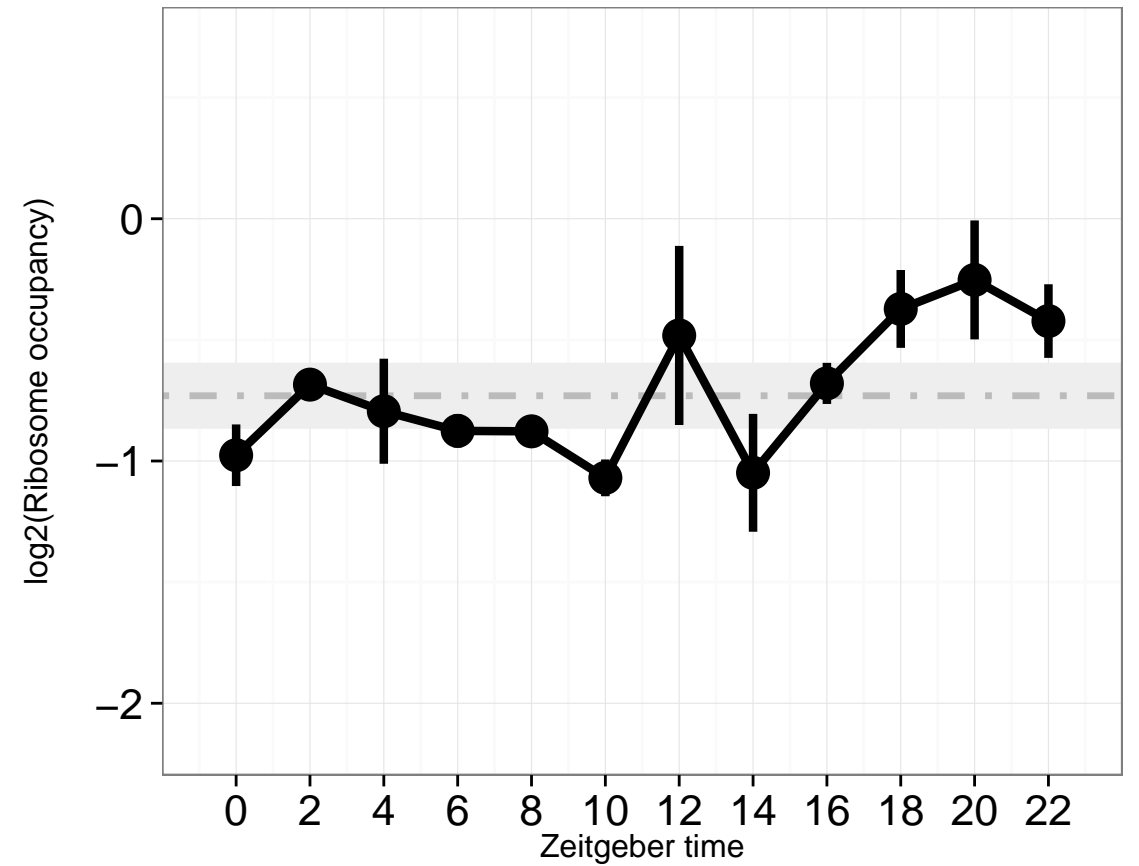

Supplement: Supplementary file 10729 [file 1]

## Rpl30

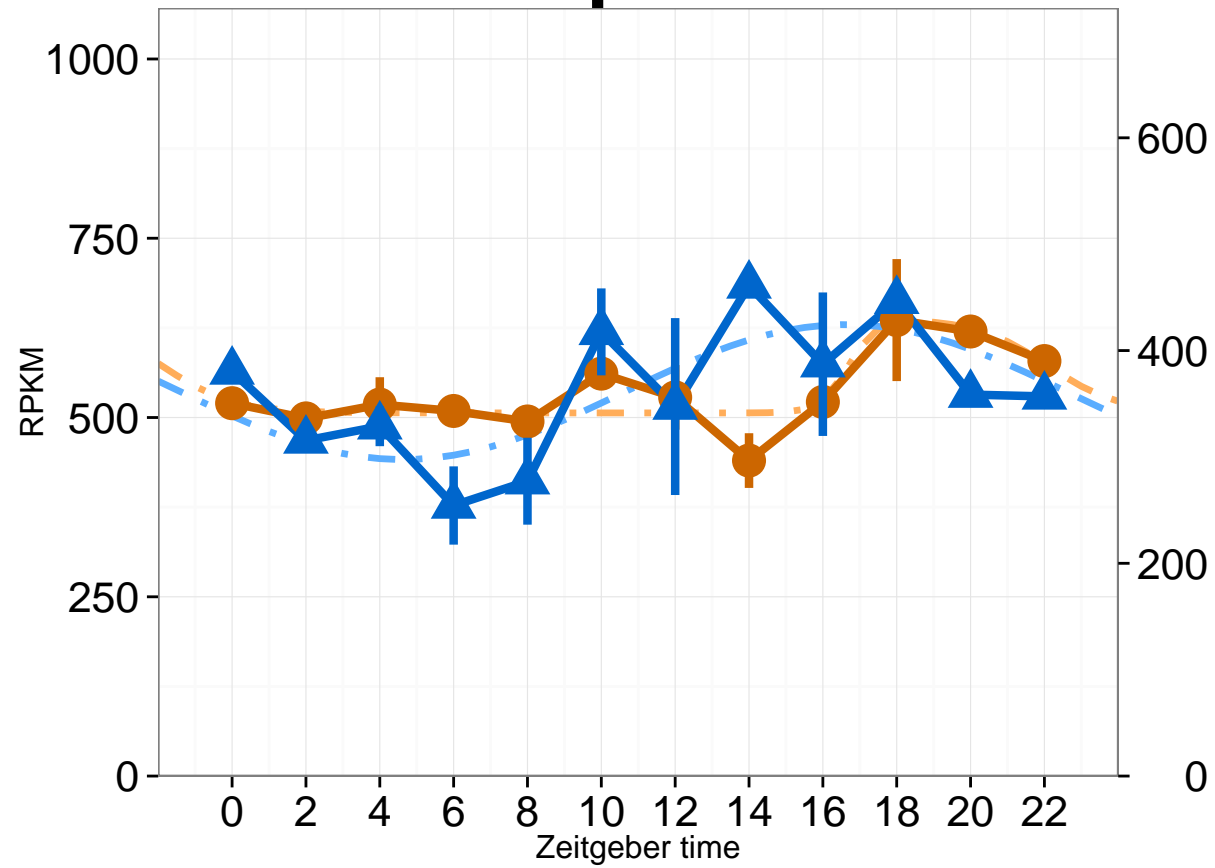

## Rpl30

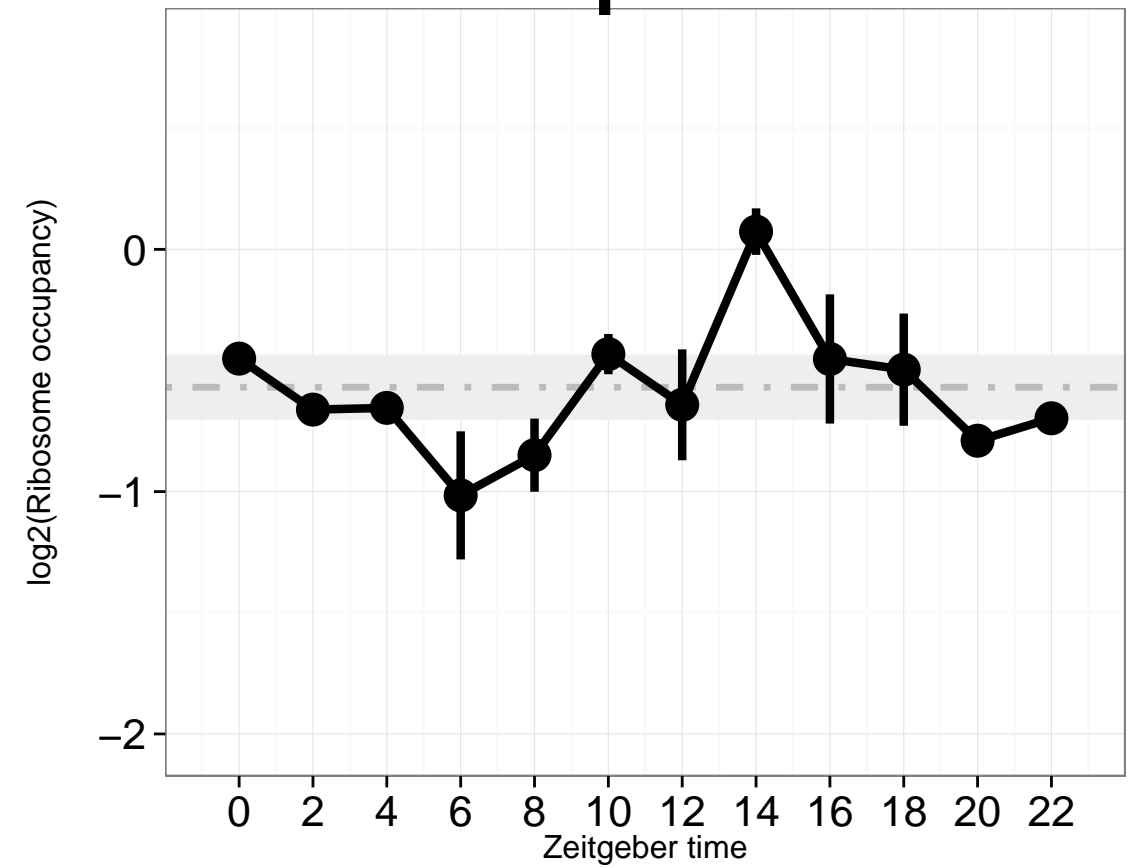

Supplement: Supplementary file 10730 [file 1]

# Dtl

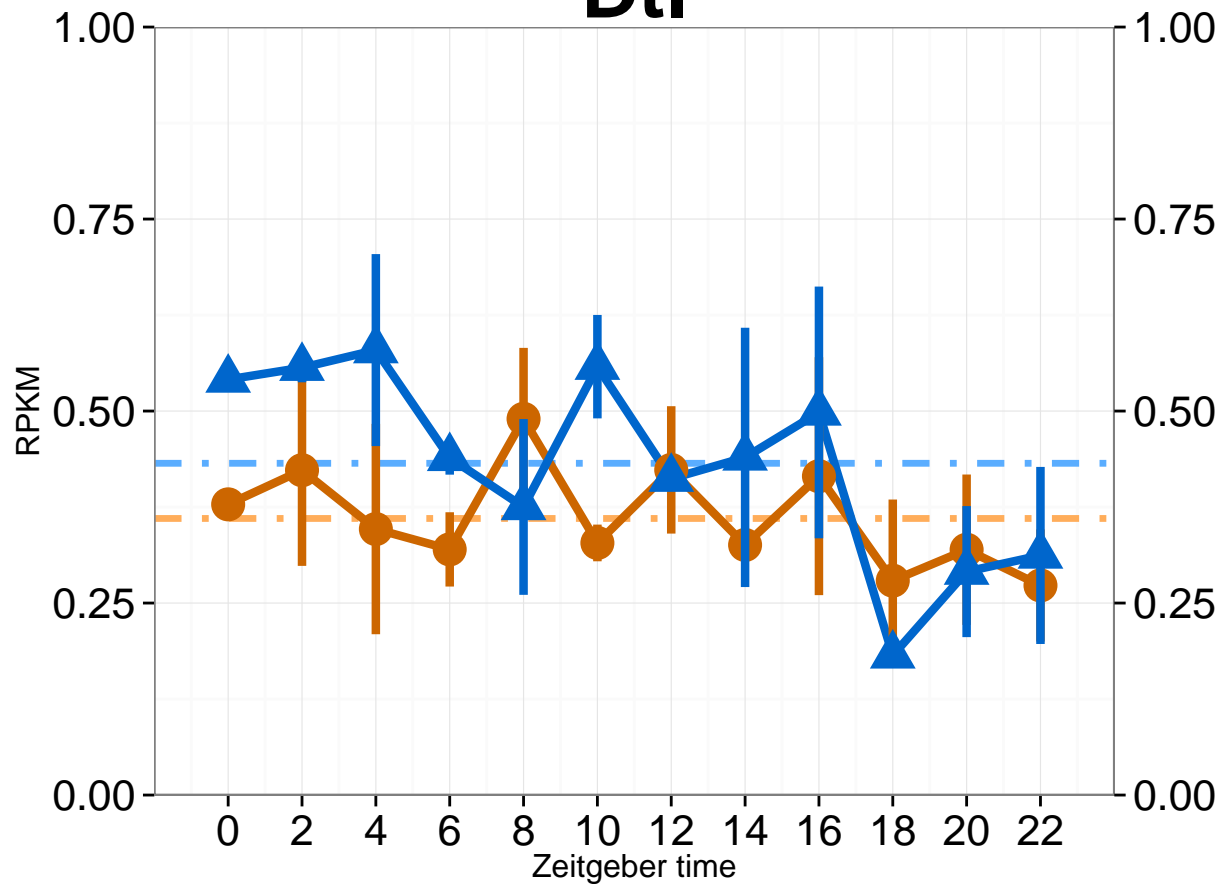

# Dtl

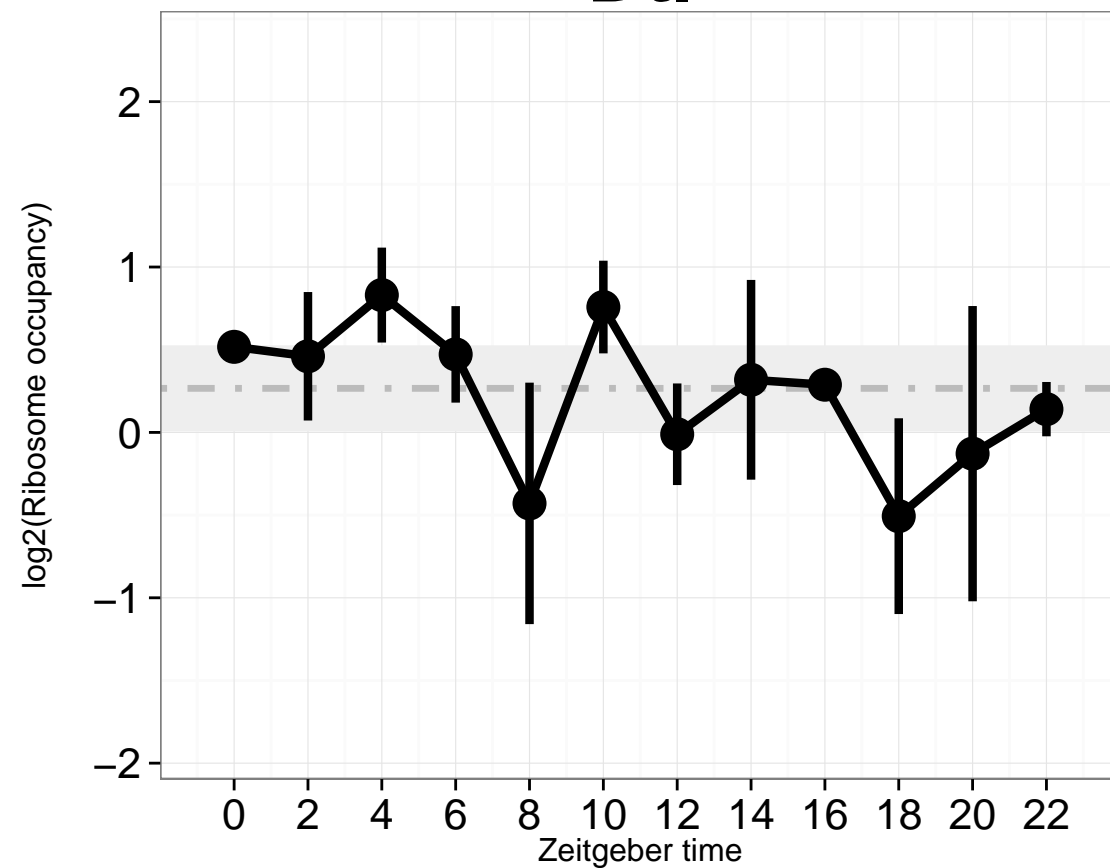

Supplement: Supplementary file 10731 [file 1]

# Defb19

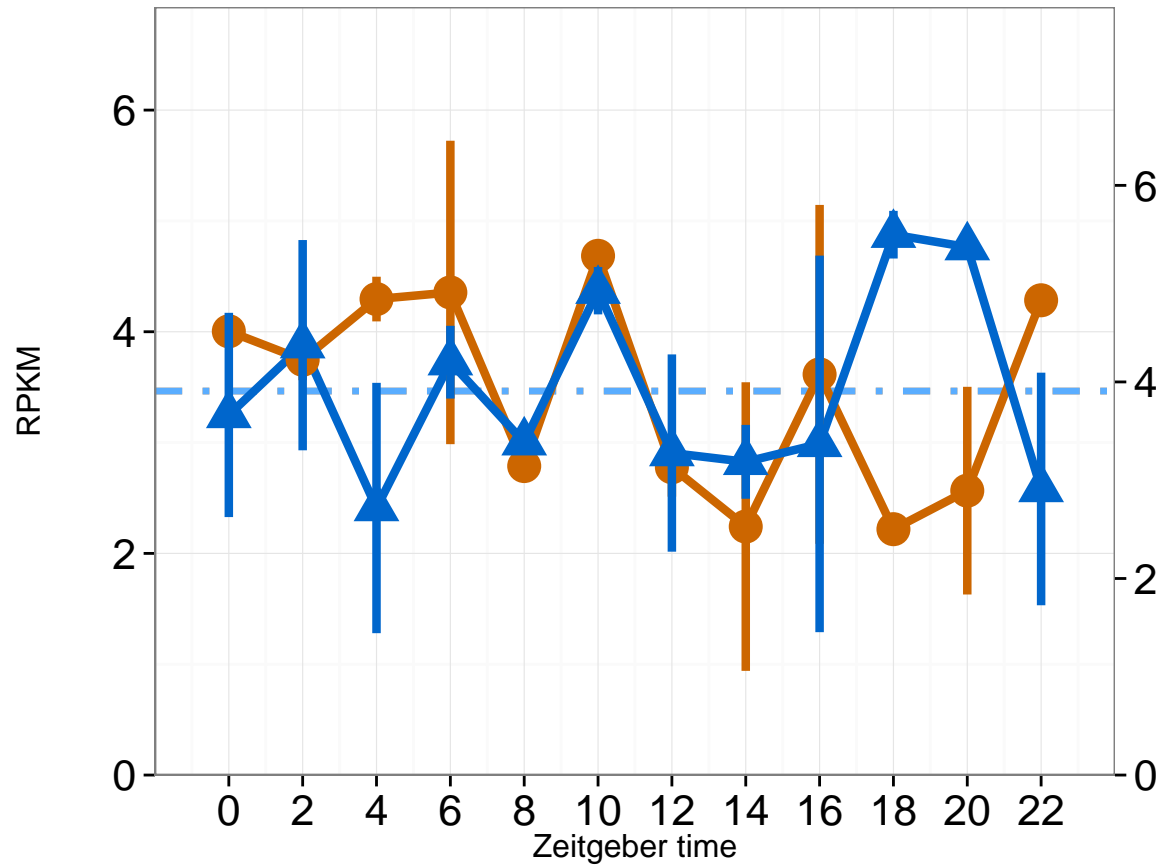

# Defb19

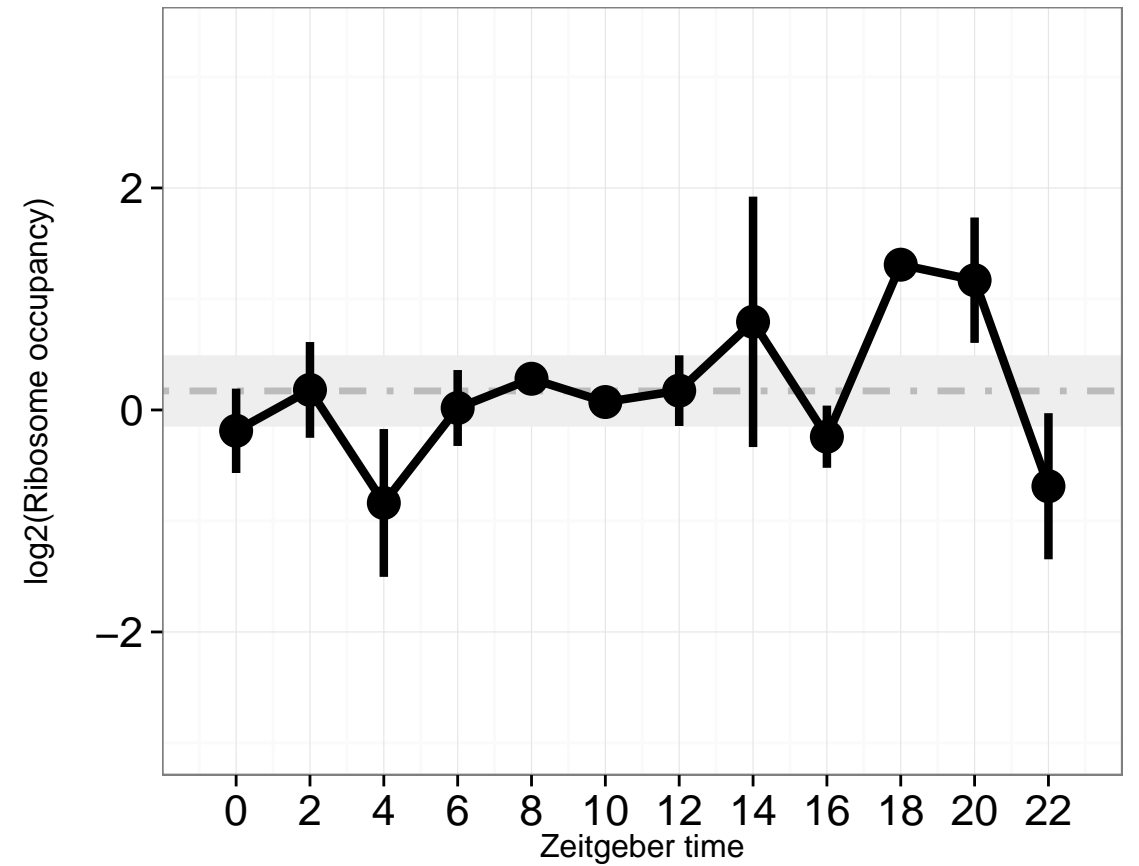

Supplement: Supplementary file 10732 [file 1]

# Mep1b

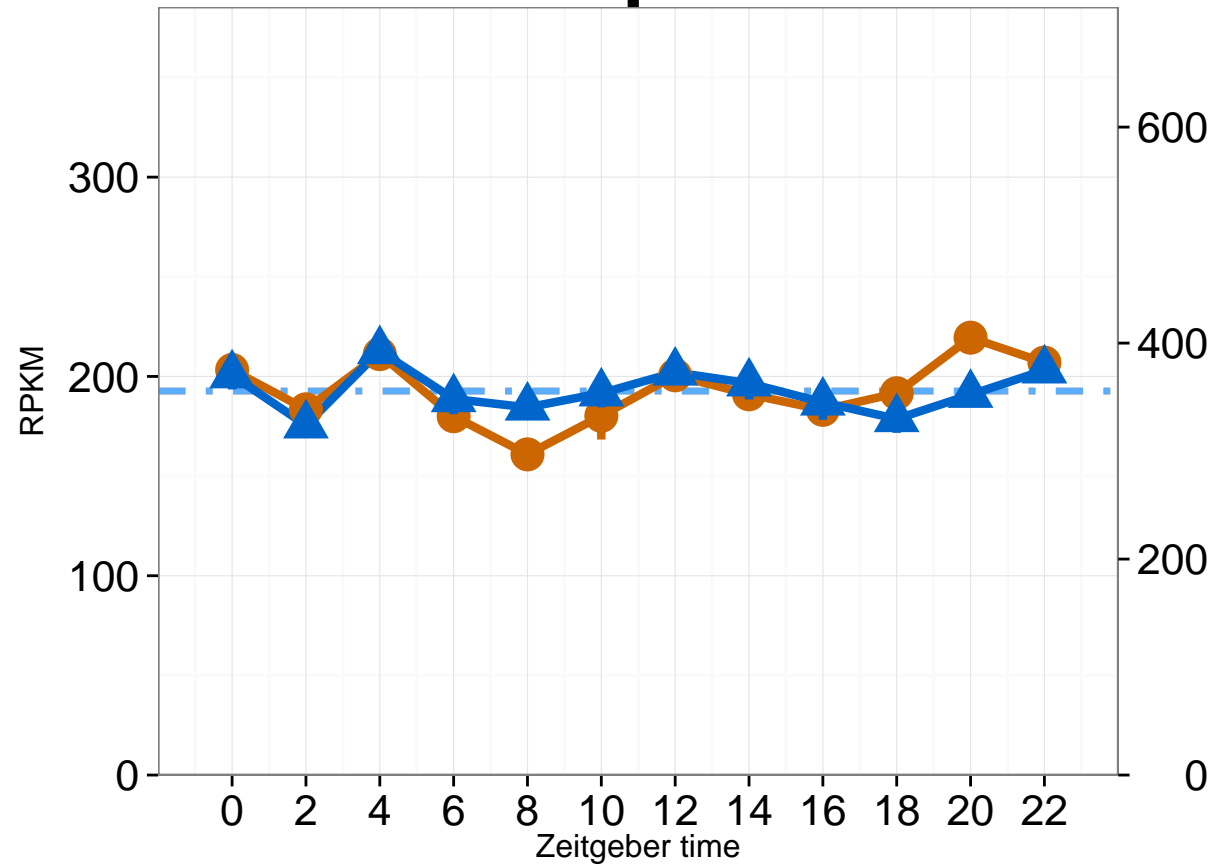

# Mep1b

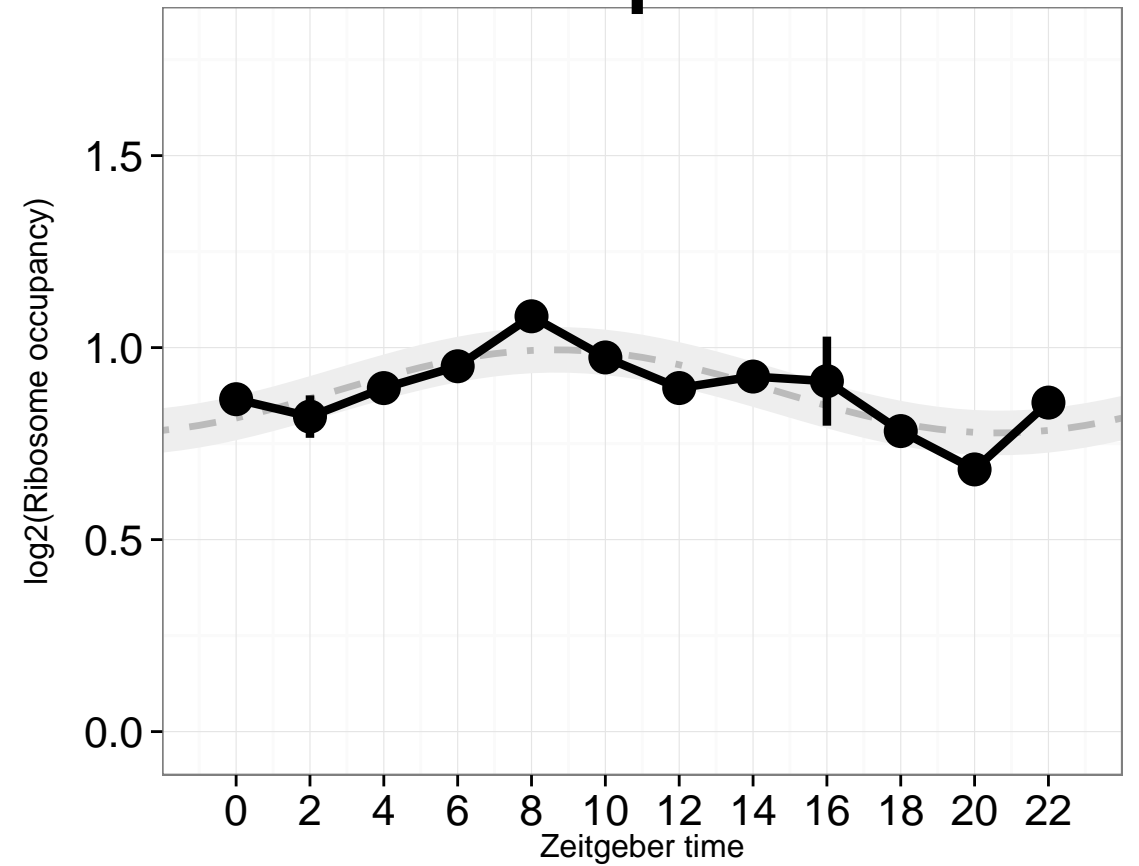

Supplement: Supplementary file 10733 [file 1]

## Dolpp1

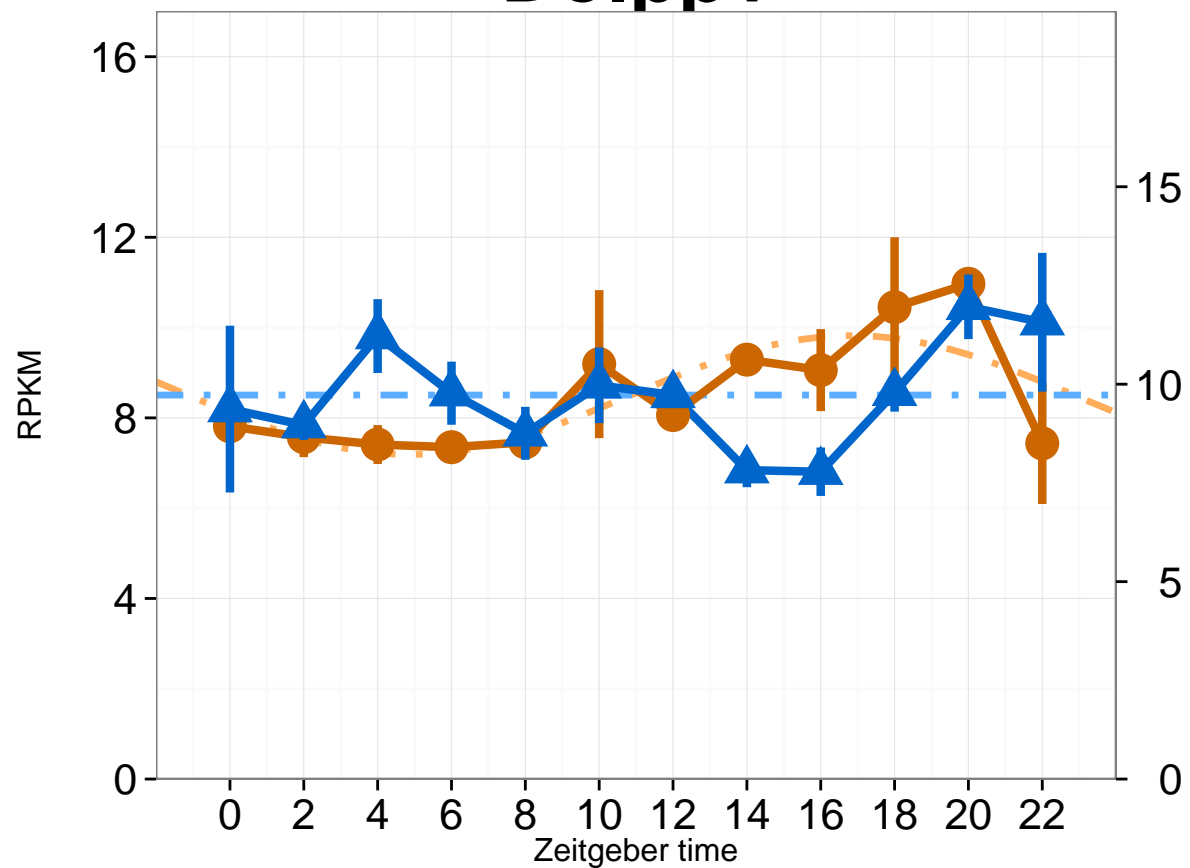

## Dolpp1

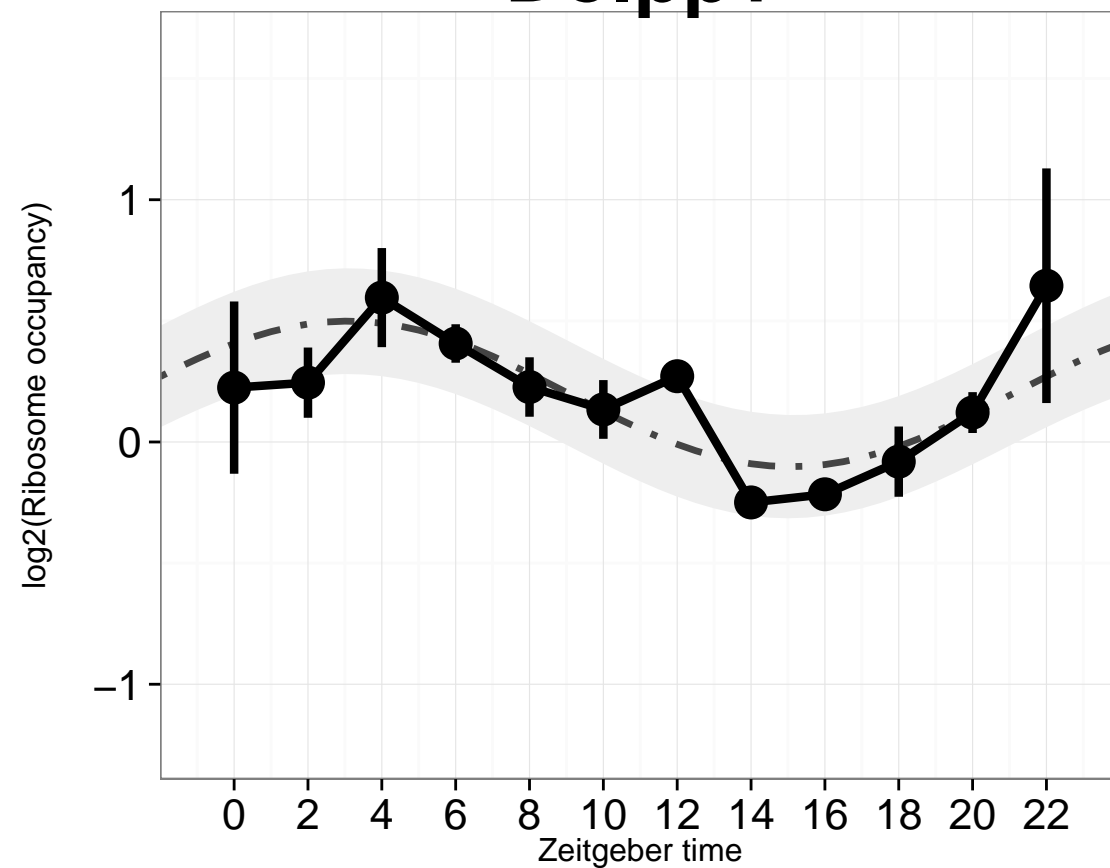

Supplement: Supplementary file 10734 [file 1]

## Mif

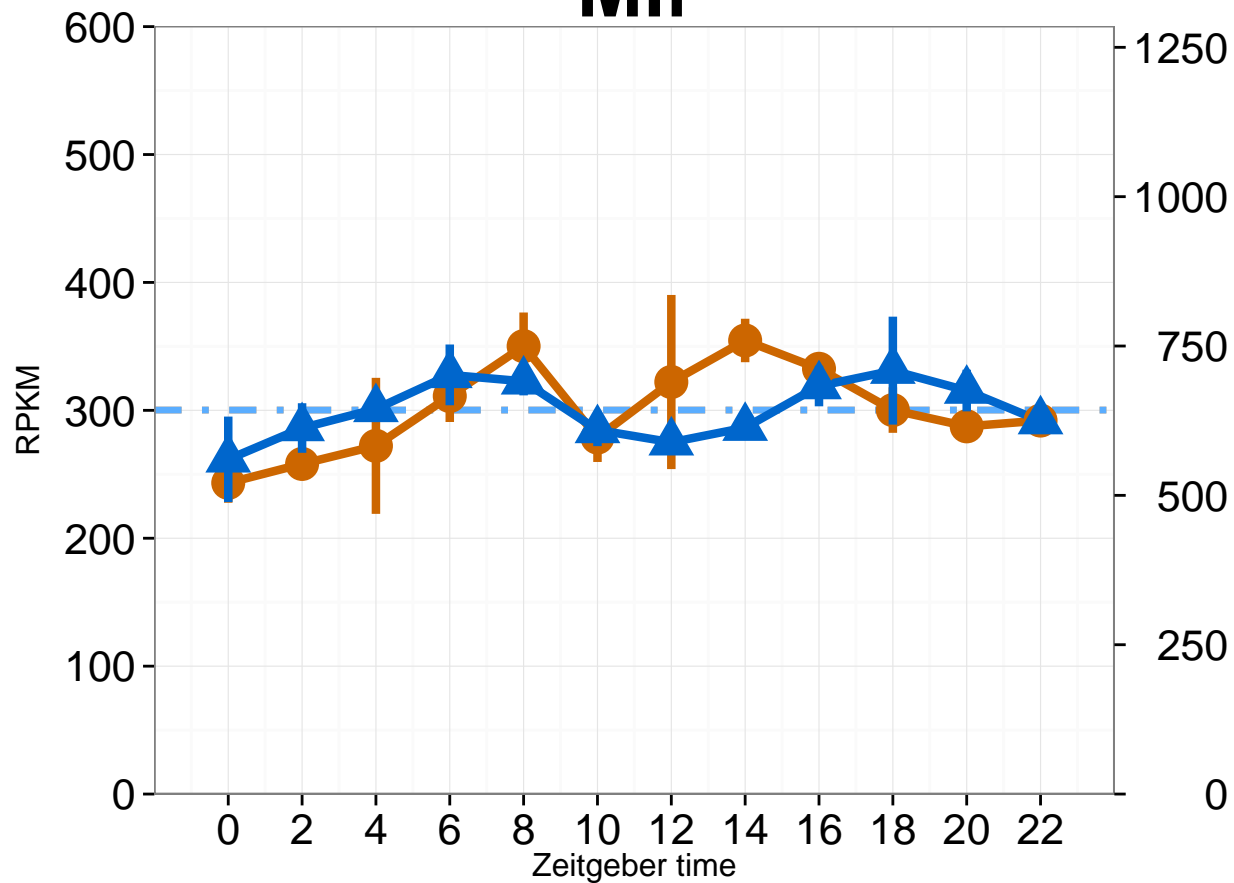

## Mif

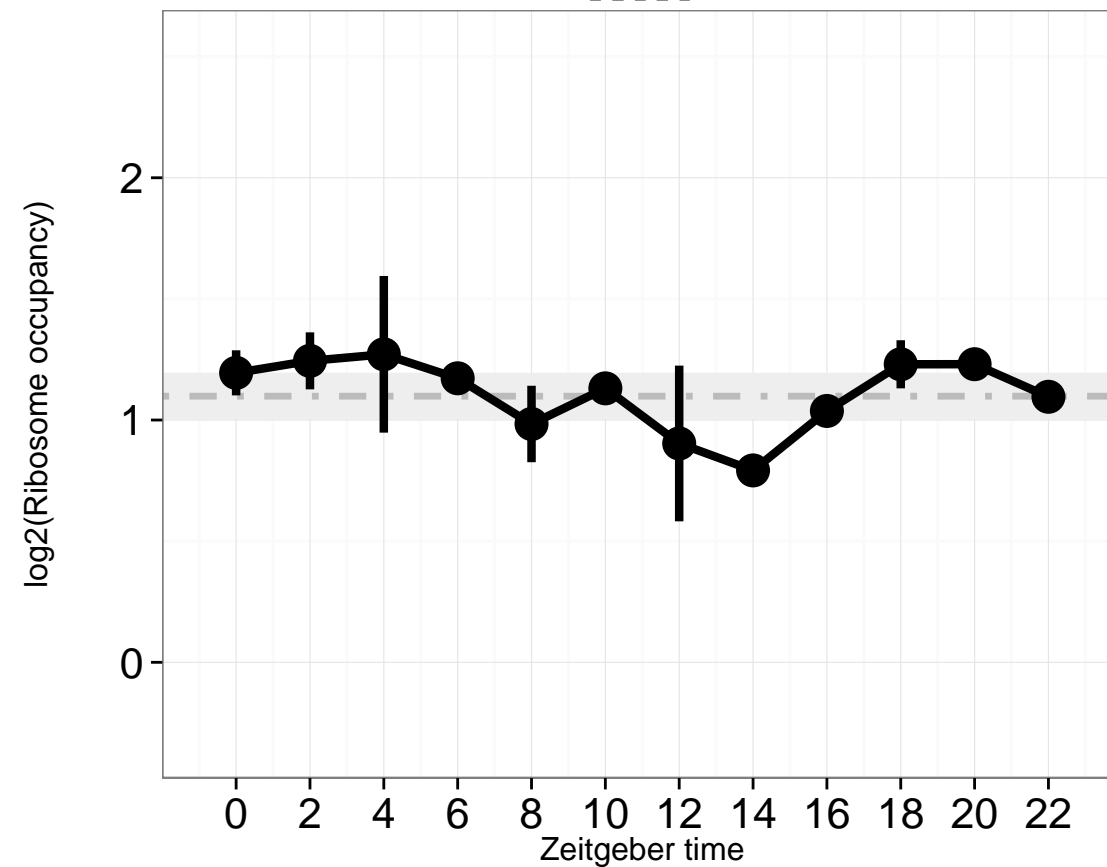

Supplement: Supplementary file 10735 [file 1]

# Sfrp4

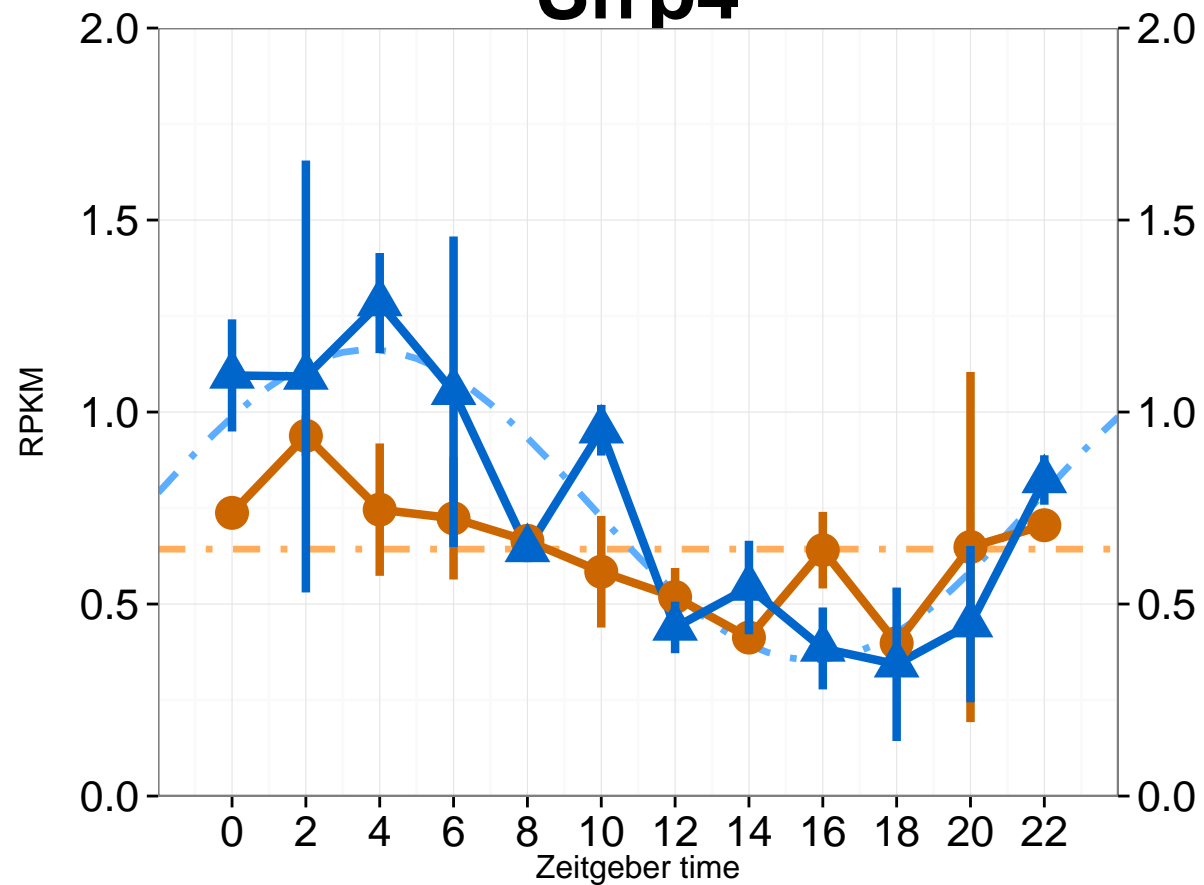

# Sfrp4

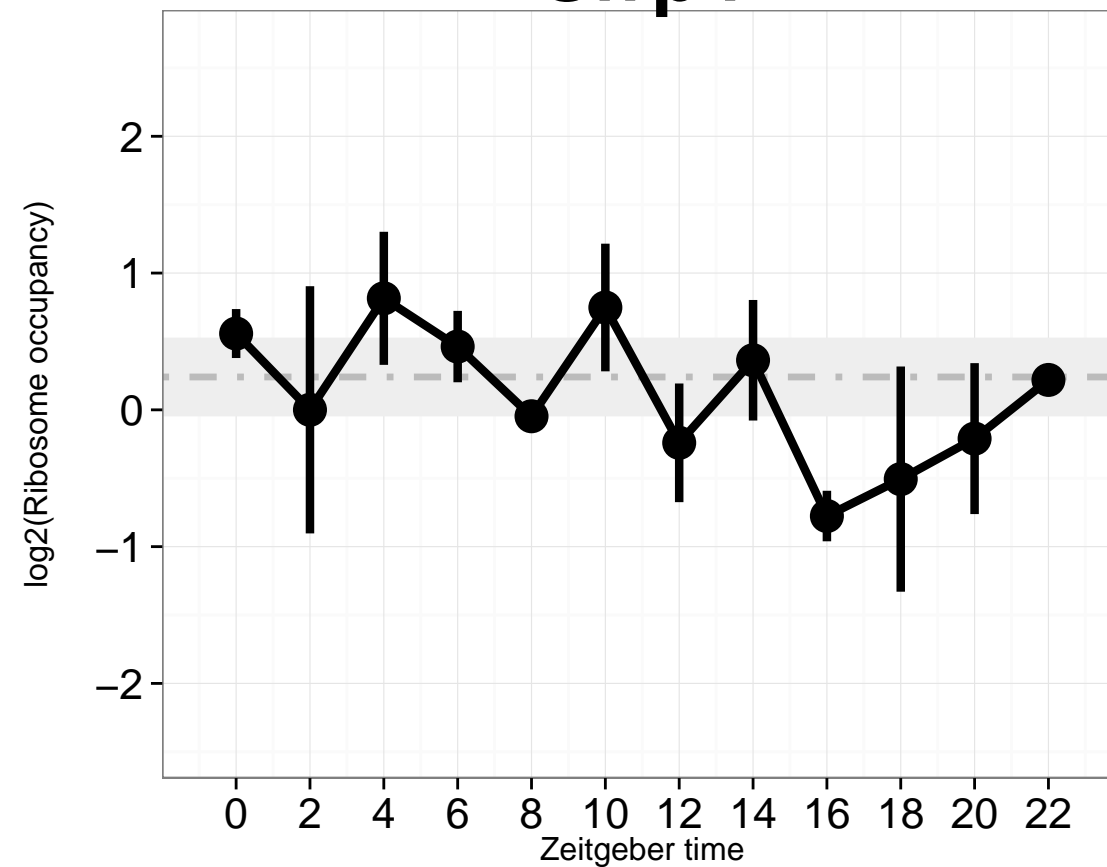

Supplement: Supplementary file 10736 [file 1]

# Rpp38

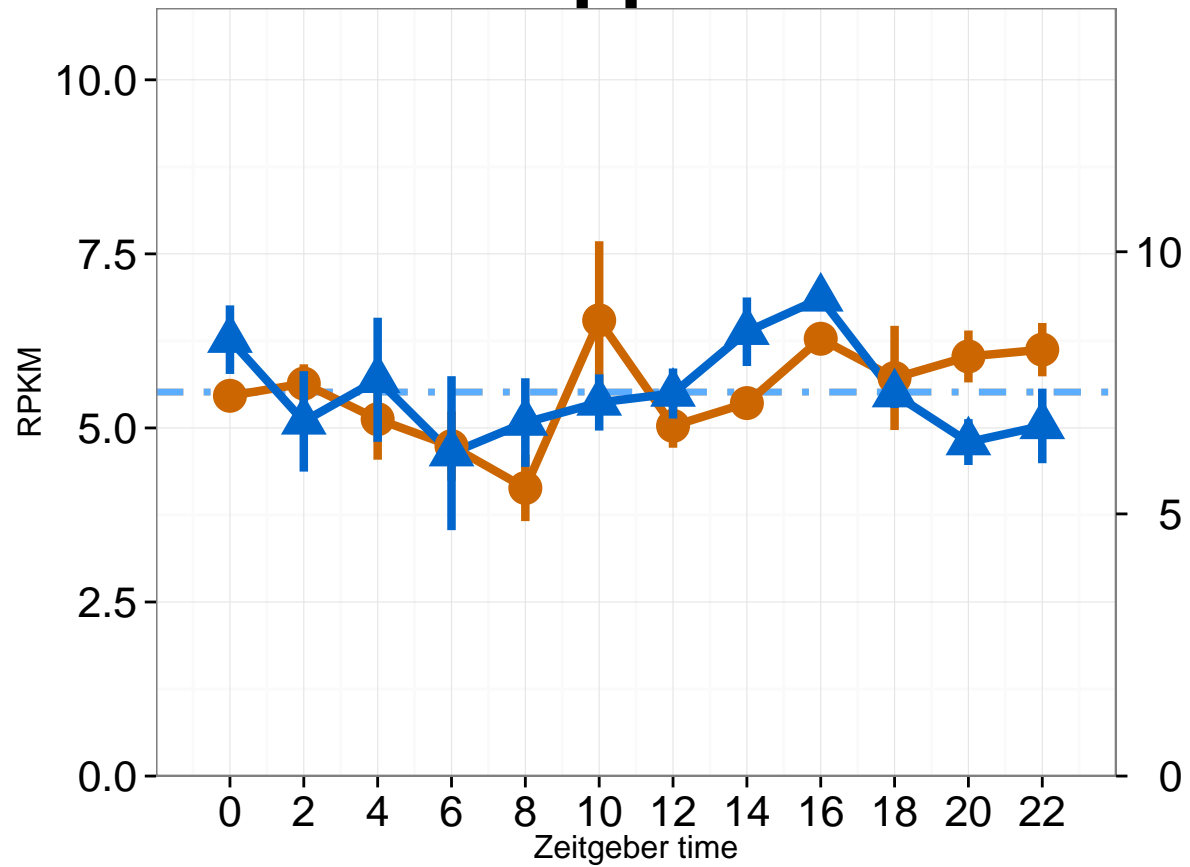

# Rpp38

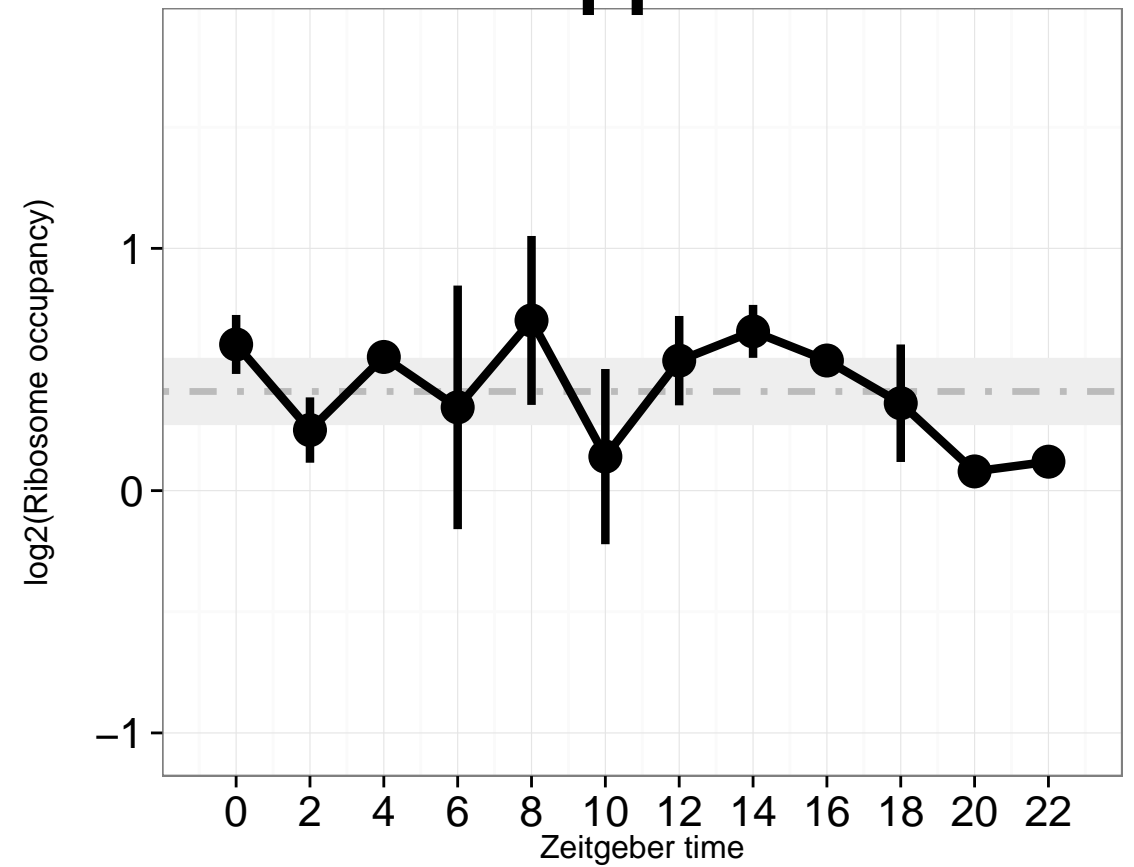

Supplement: Supplementary file 10737 [file 1]

## Herc3

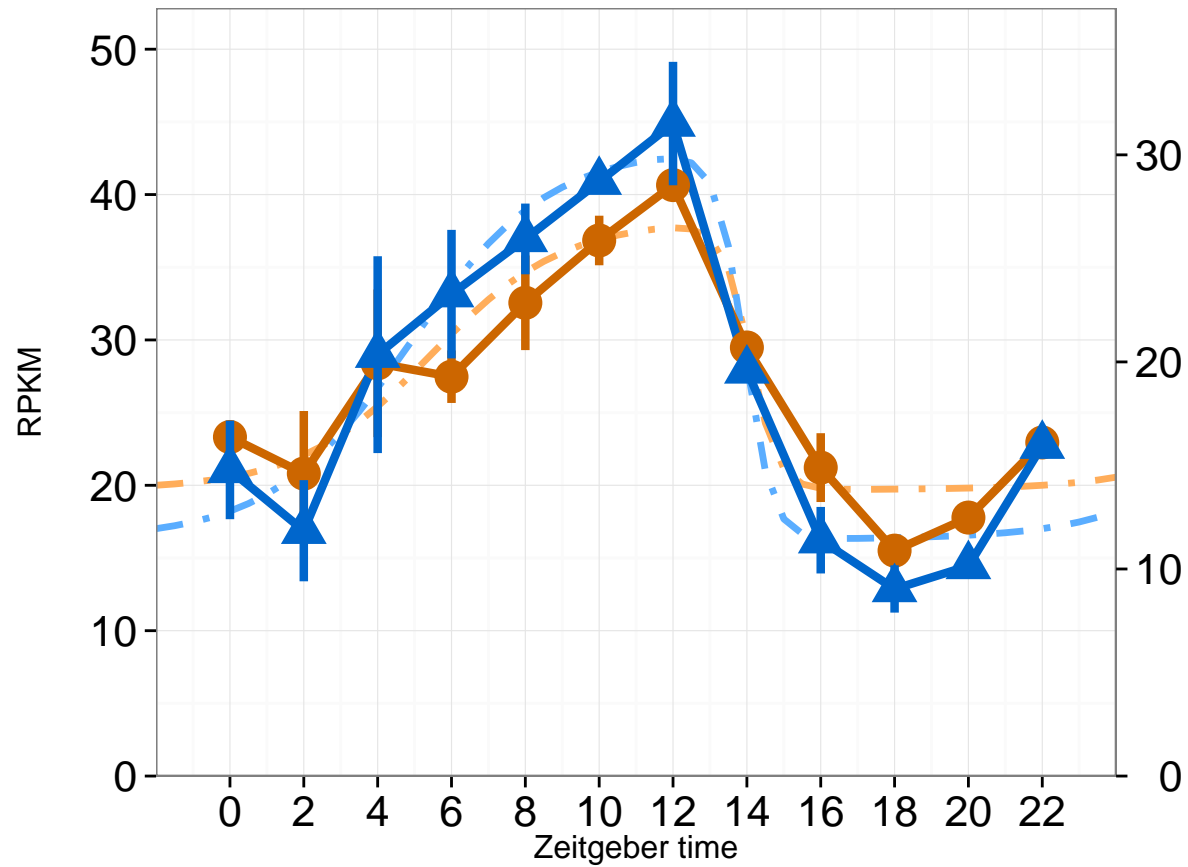

## Herc3

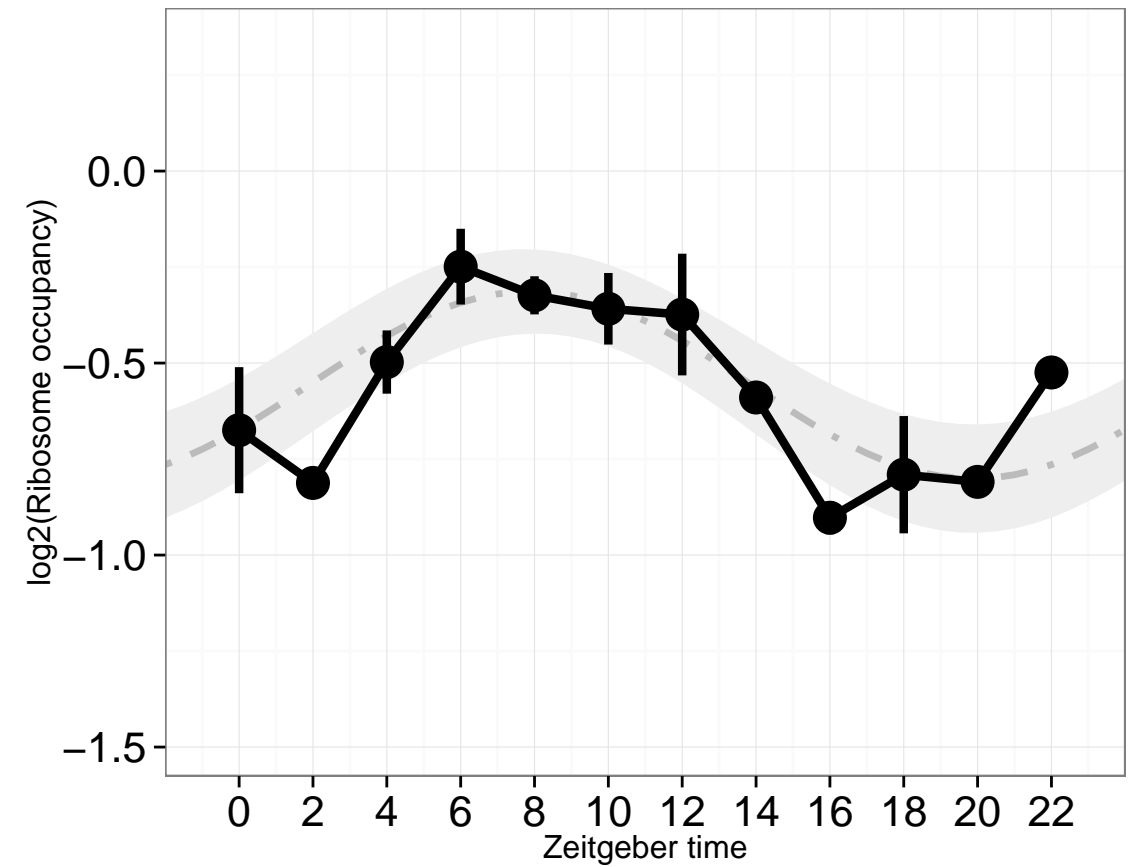

Supplement: Supplementary file 10738 [file 1]

# Gramd1b

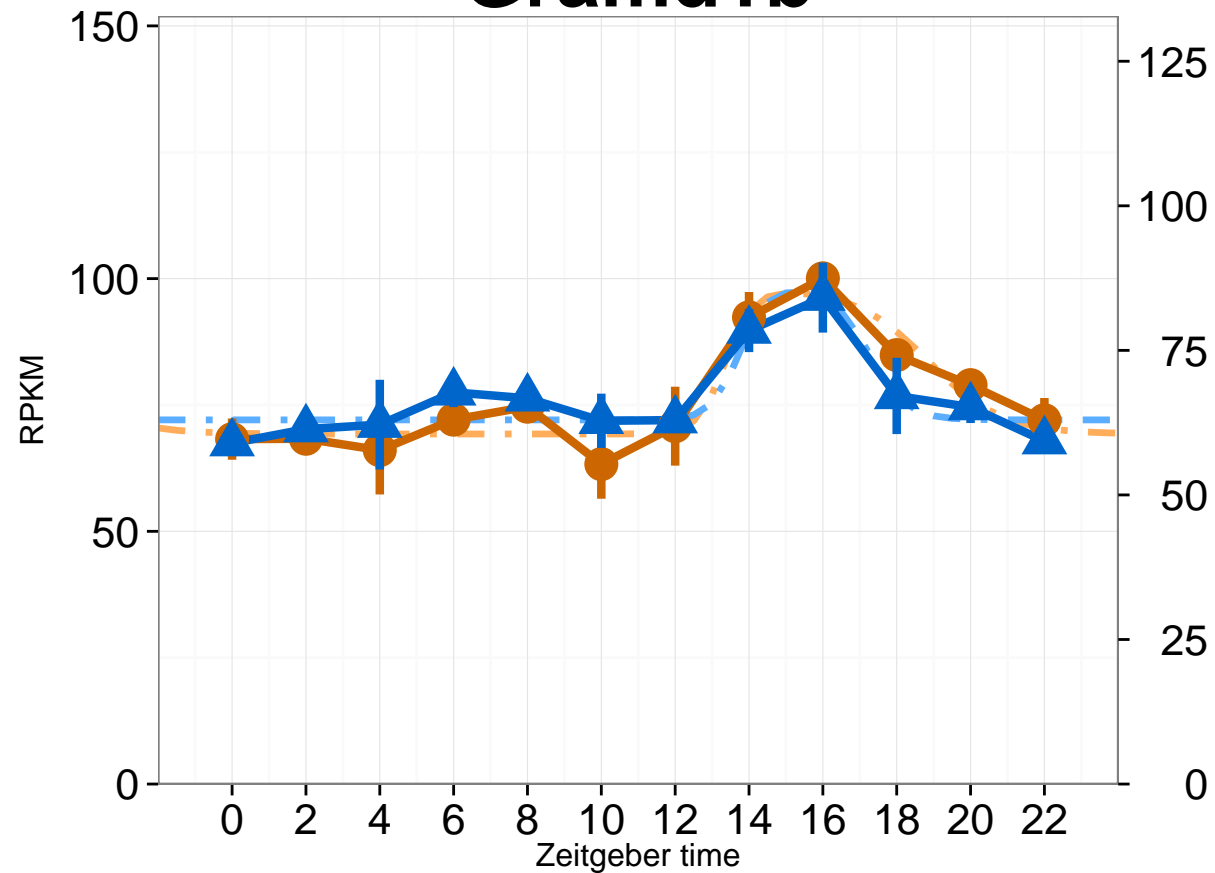

# Gramd1b

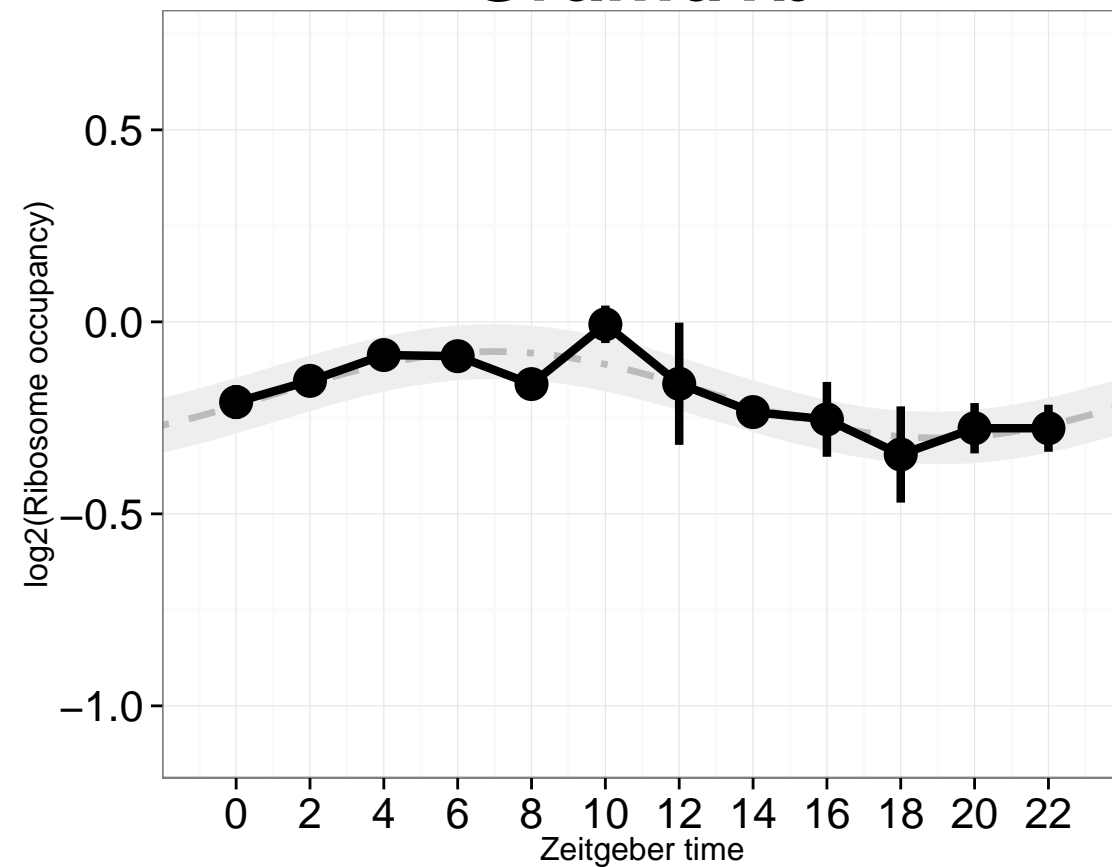

Supplement: Supplementary file 10739 [file 1]

# F13a1

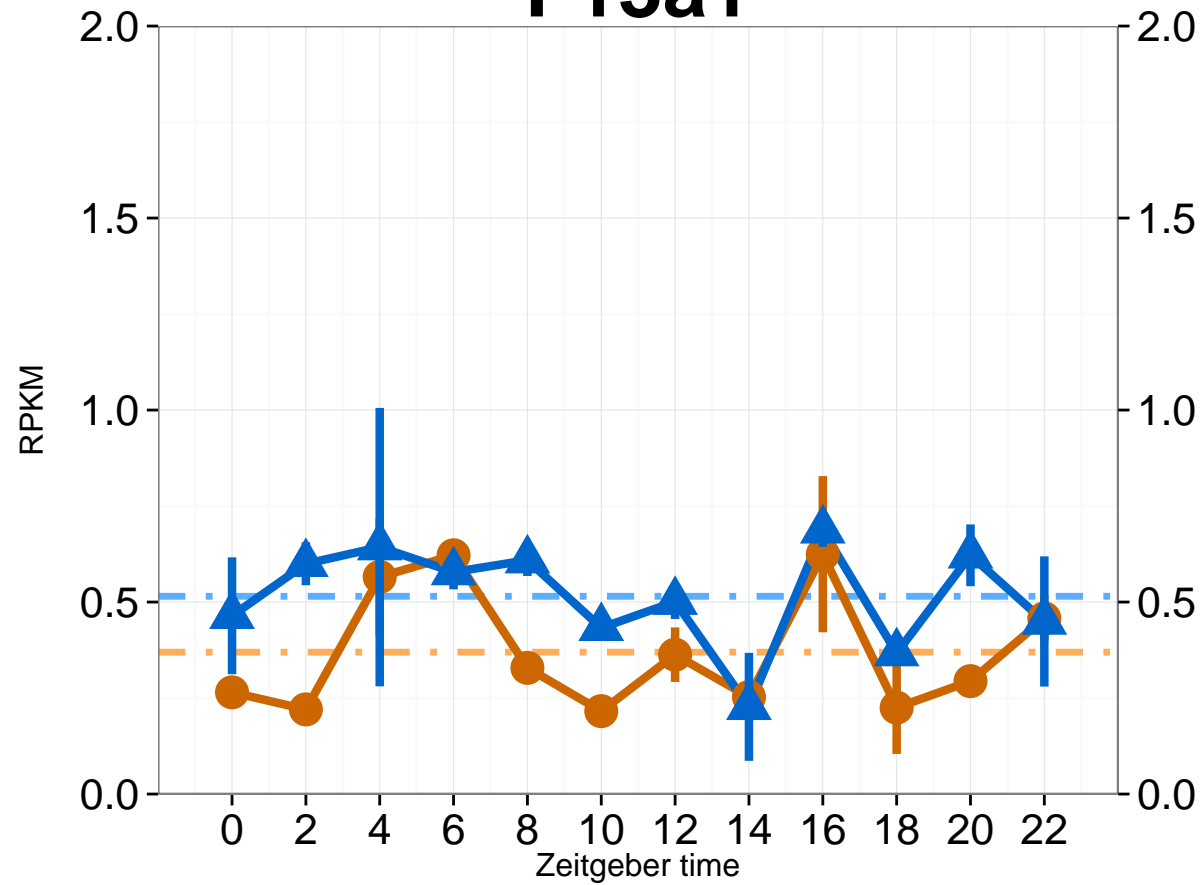

# F13a1

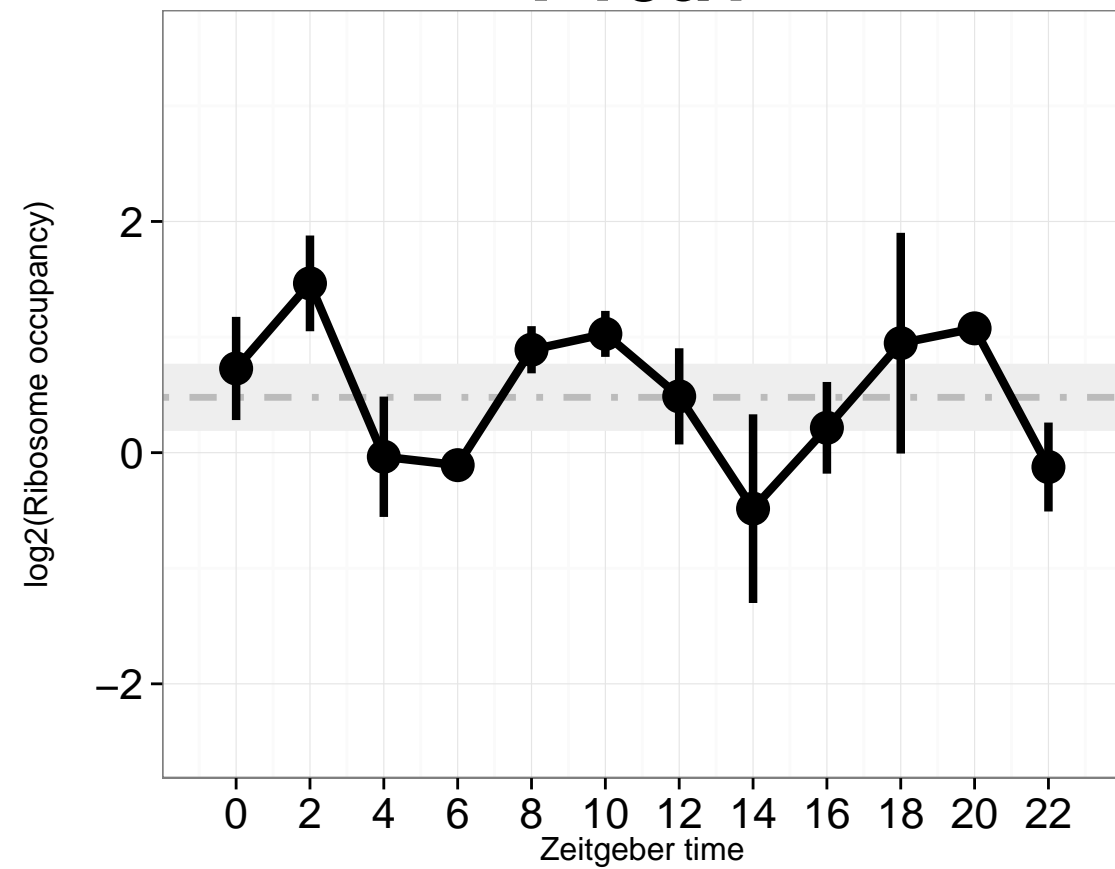

Supplement: Supplementary file 10740 [file 1]
