# Supplementary material (part 108 of 133)
Source: publisher figshare collection journal article supplement (https://springernature.figshare.com/articles/dataset/_/4903193)

# Mpdu1

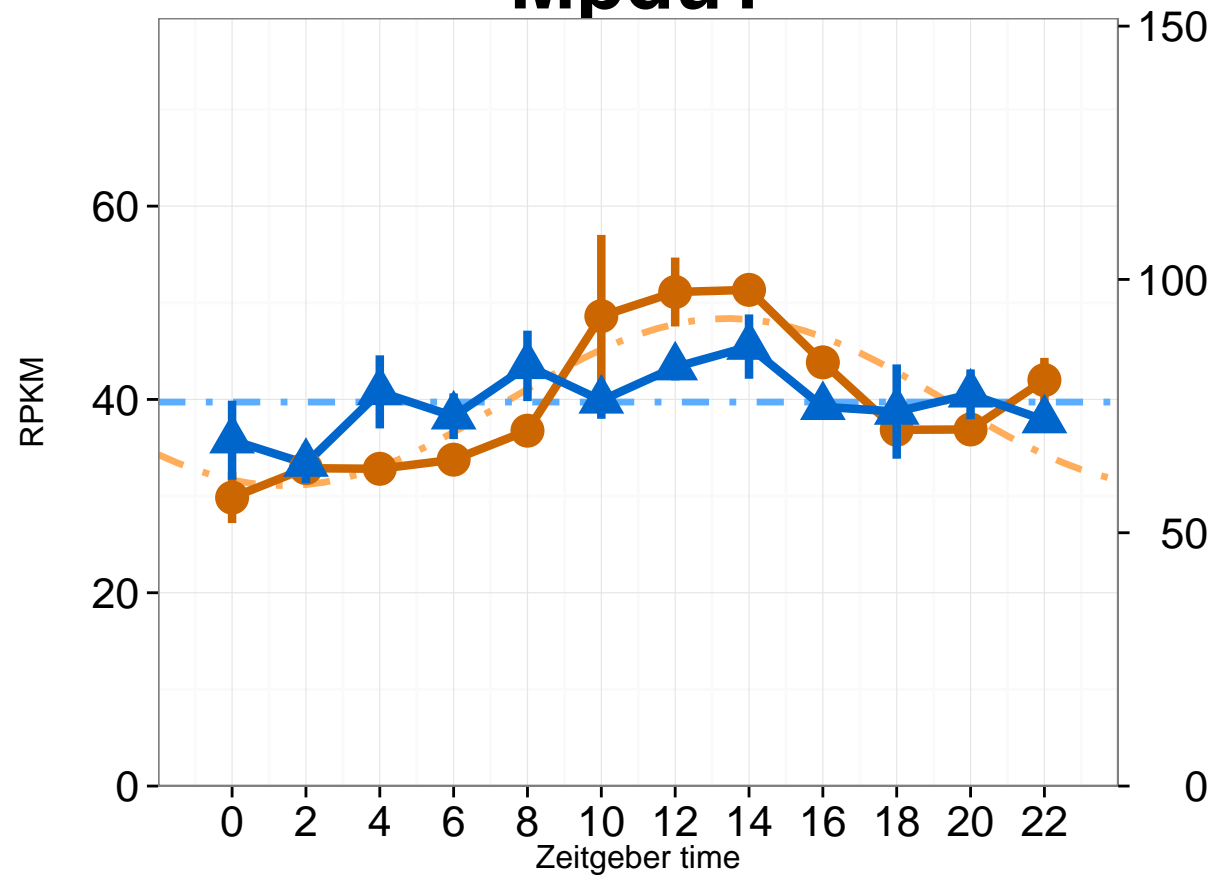

# Mpdu1

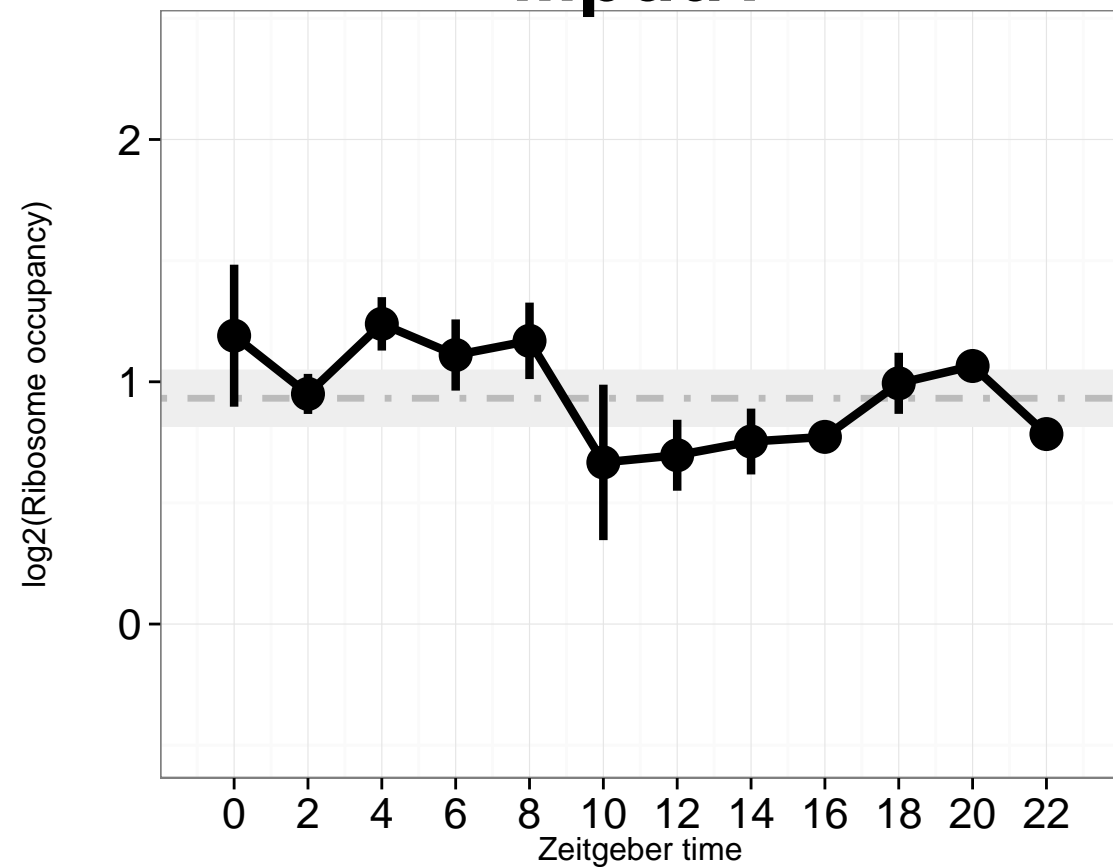

Supplement: Supplementary file 10741 [file 1]

# 0610031J06Rik

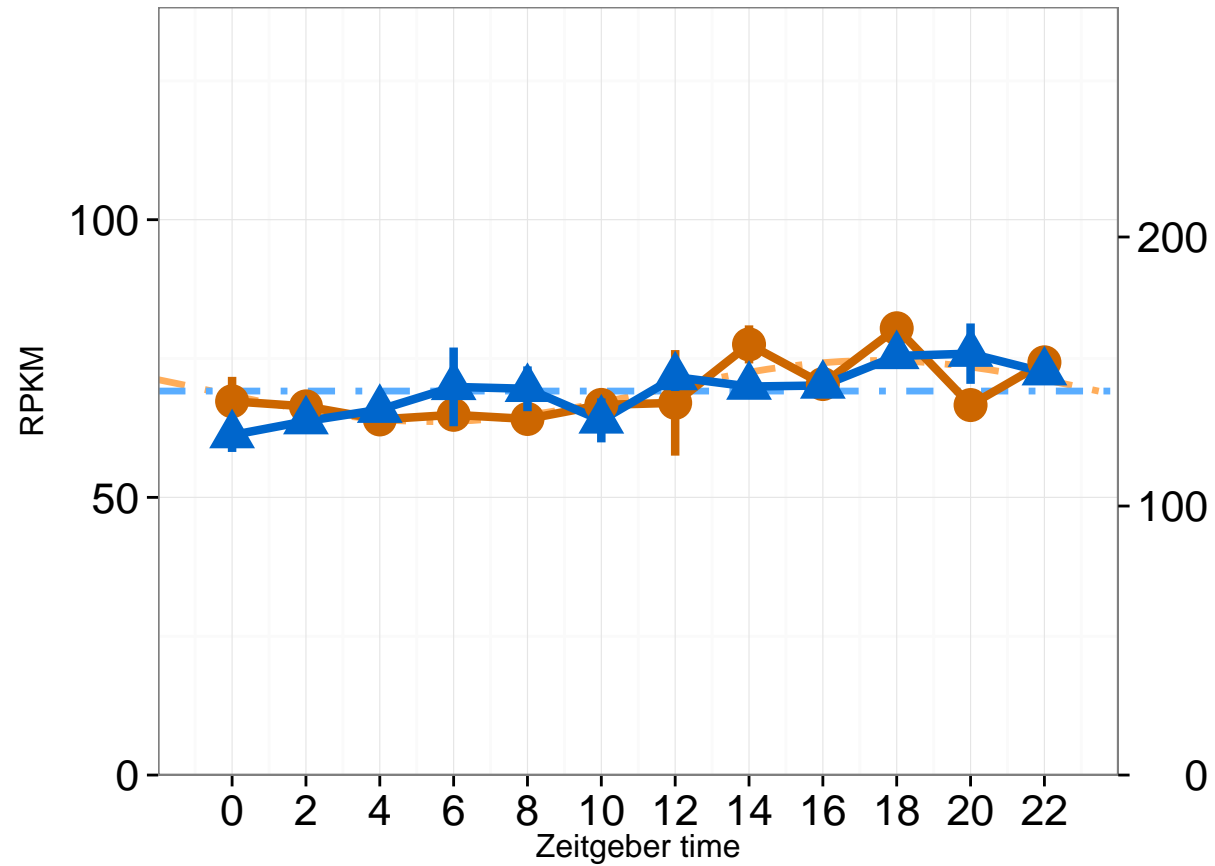

# 0610031J06Rik

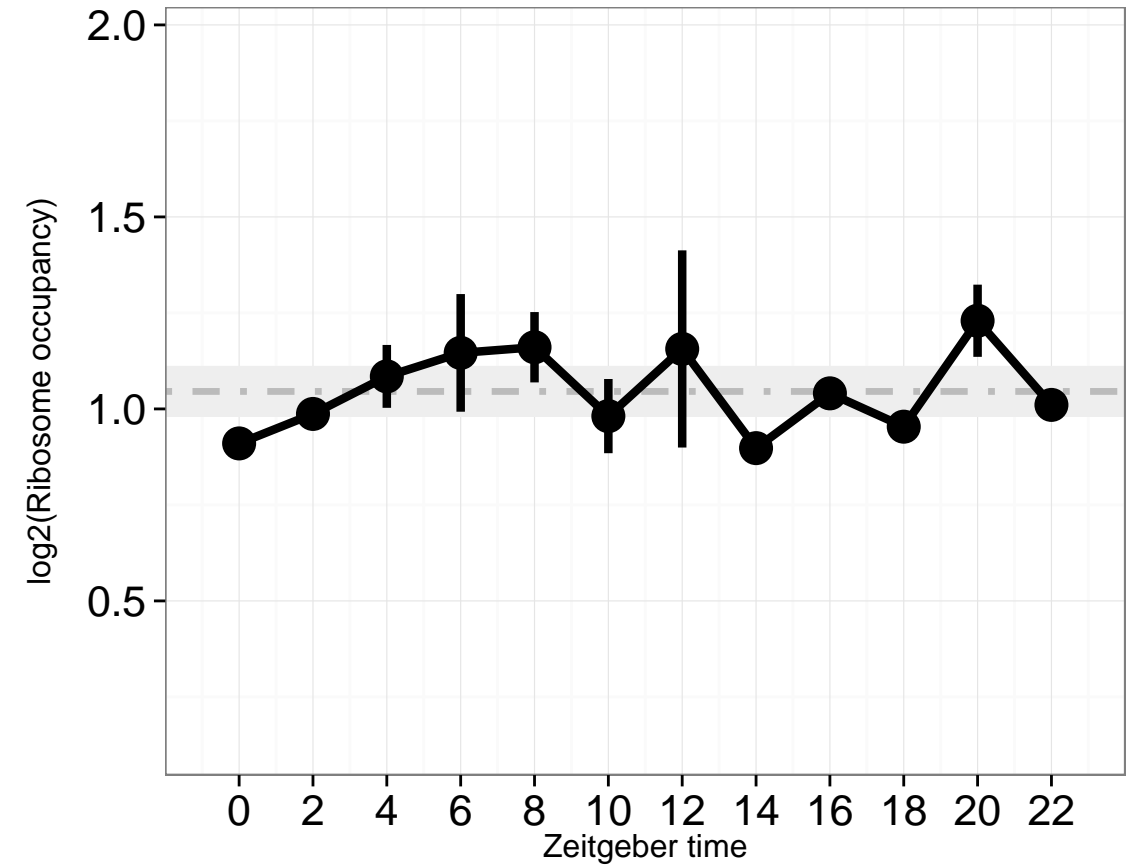

Supplement: Supplementary file 10742 [file 1]

## Prickle2

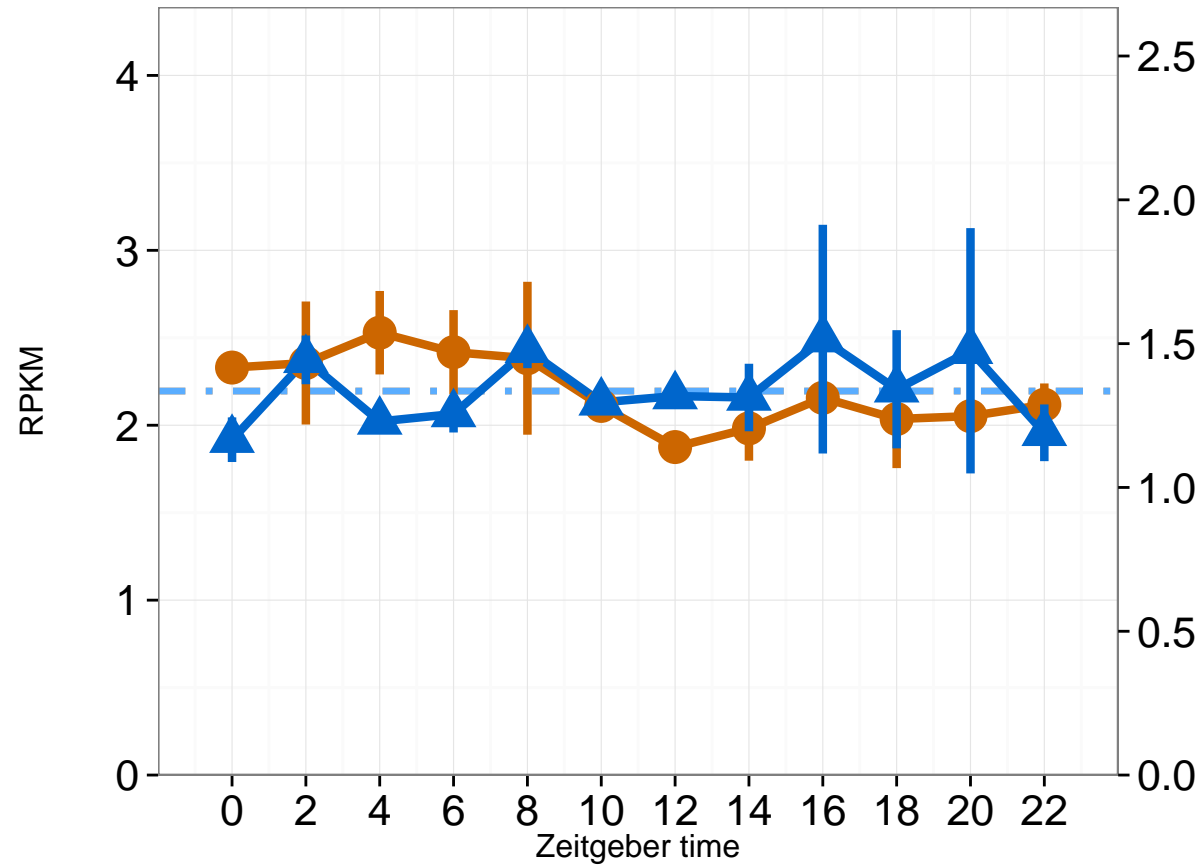

## Prickle2

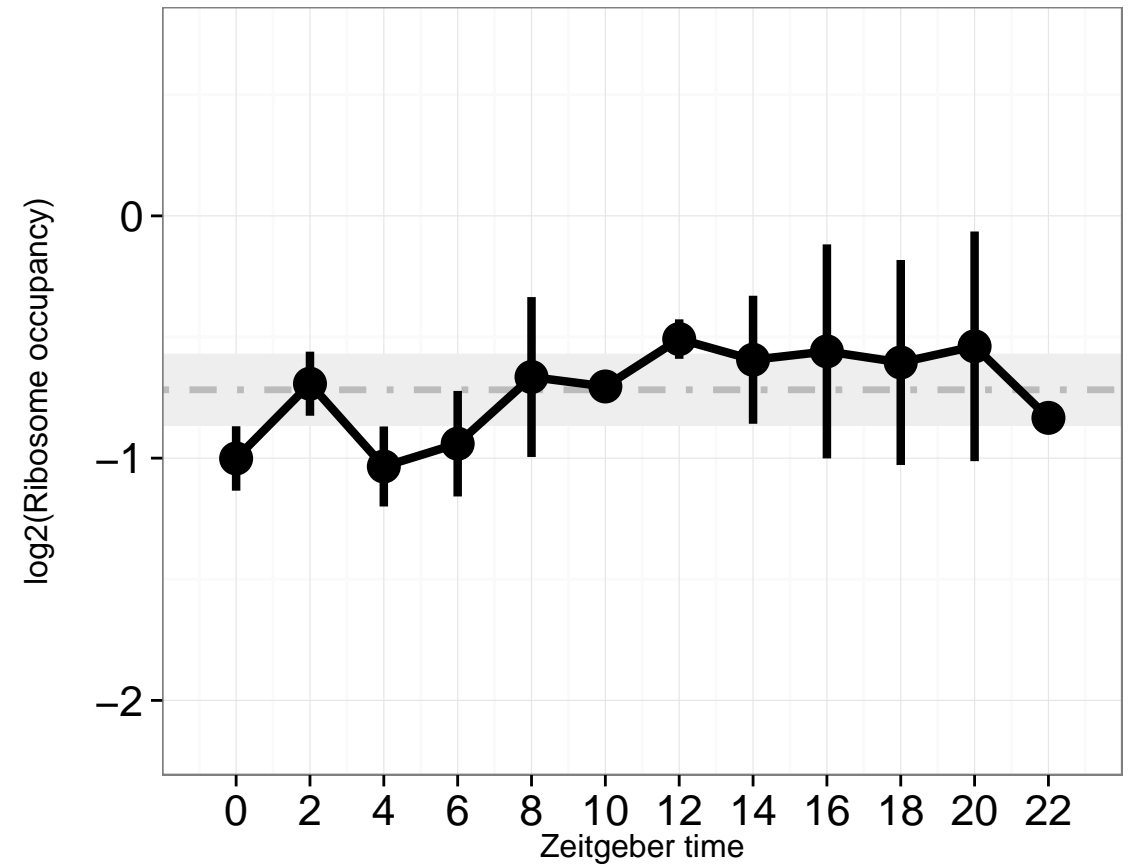

Supplement: Supplementary file 10743 [file 1]

# Fam3a

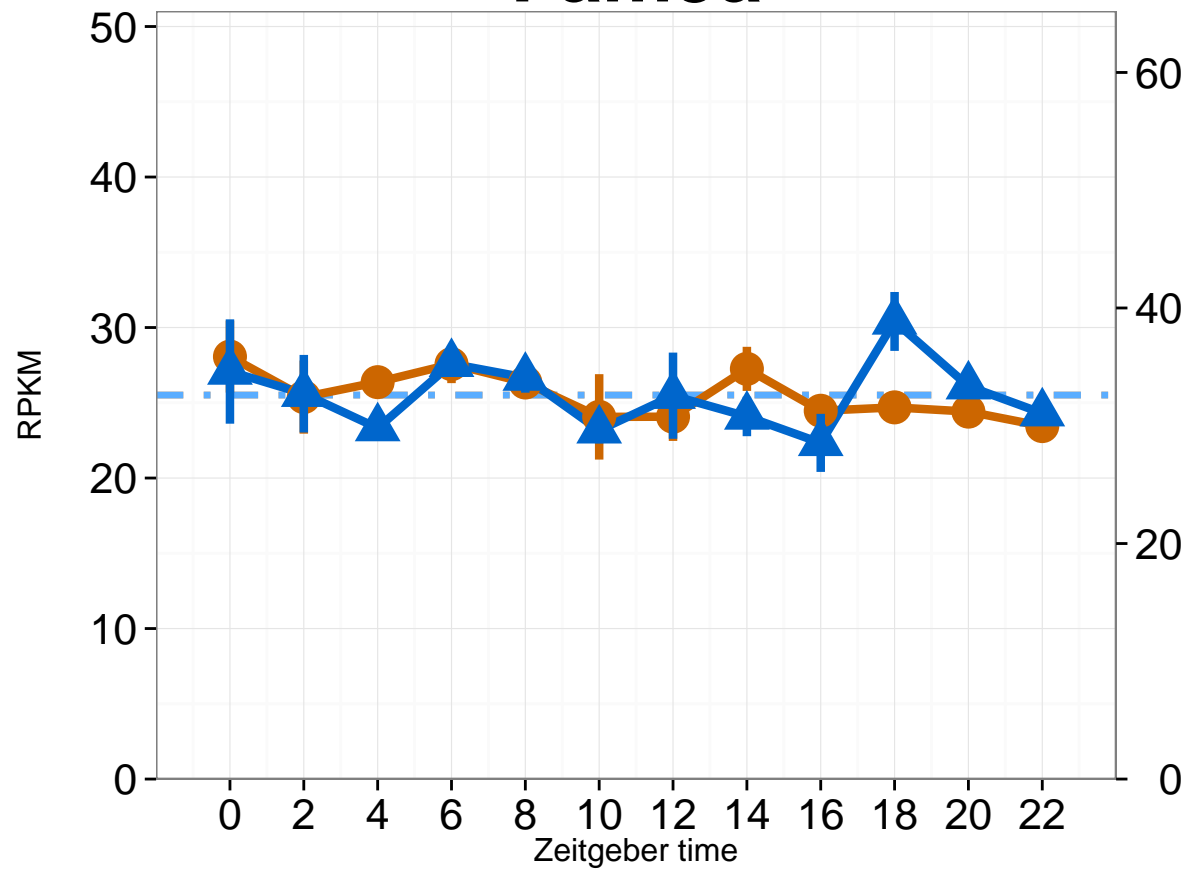

# Fam3a

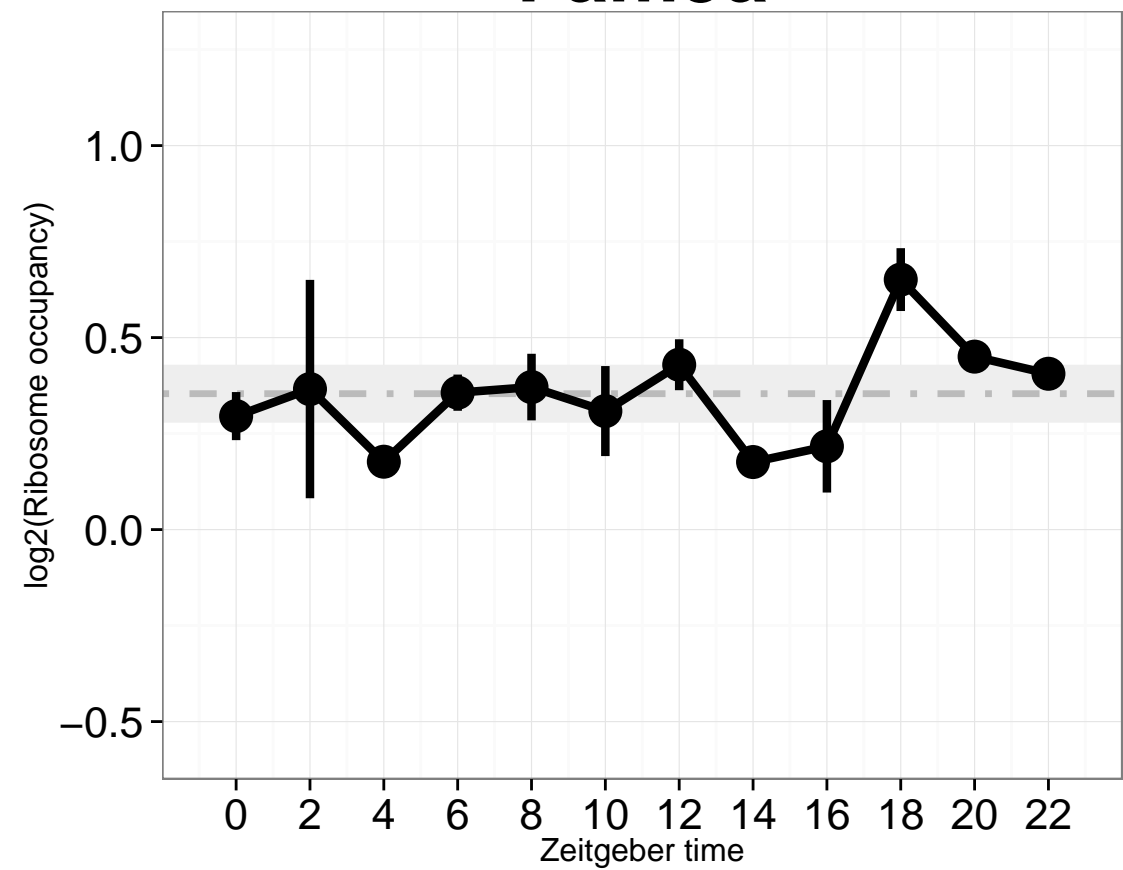

Supplement: Supplementary file 10744 [file 1]

## Slc2a2

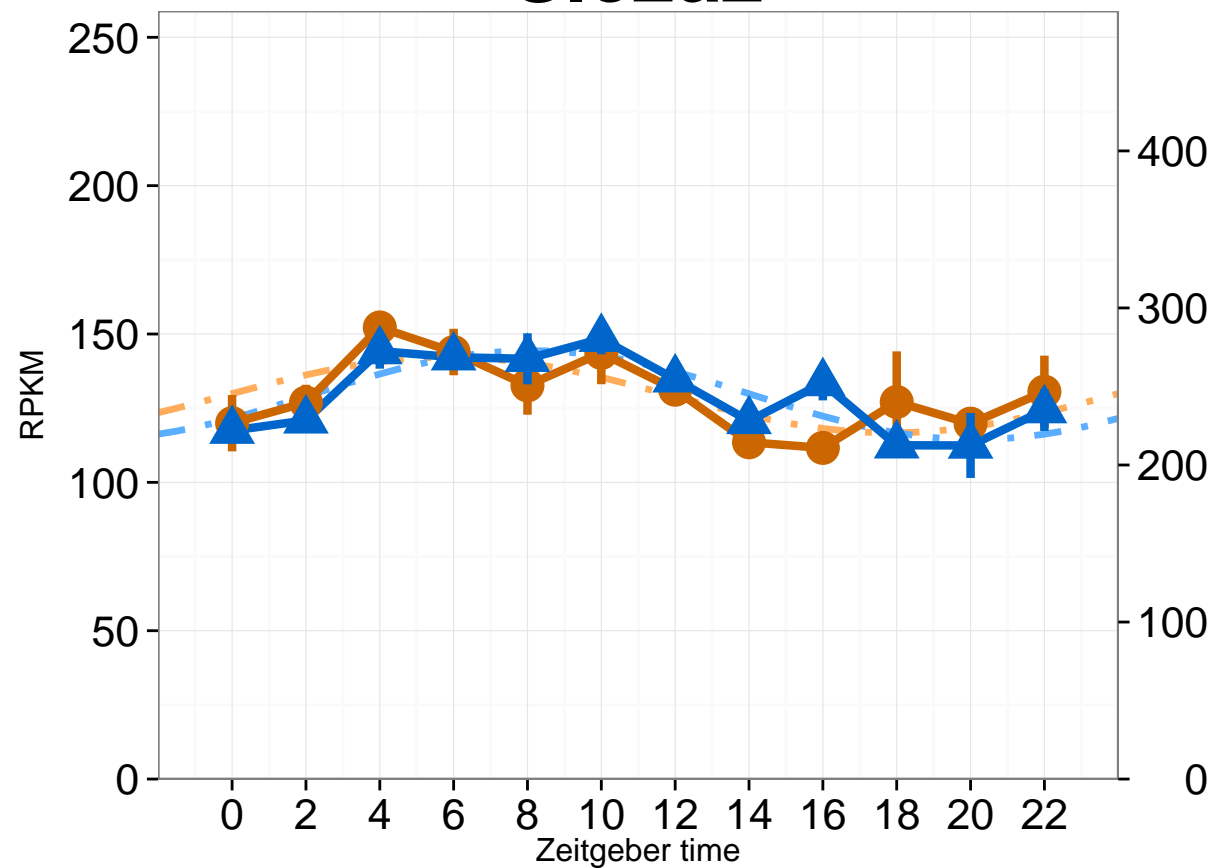

## Slc2a2

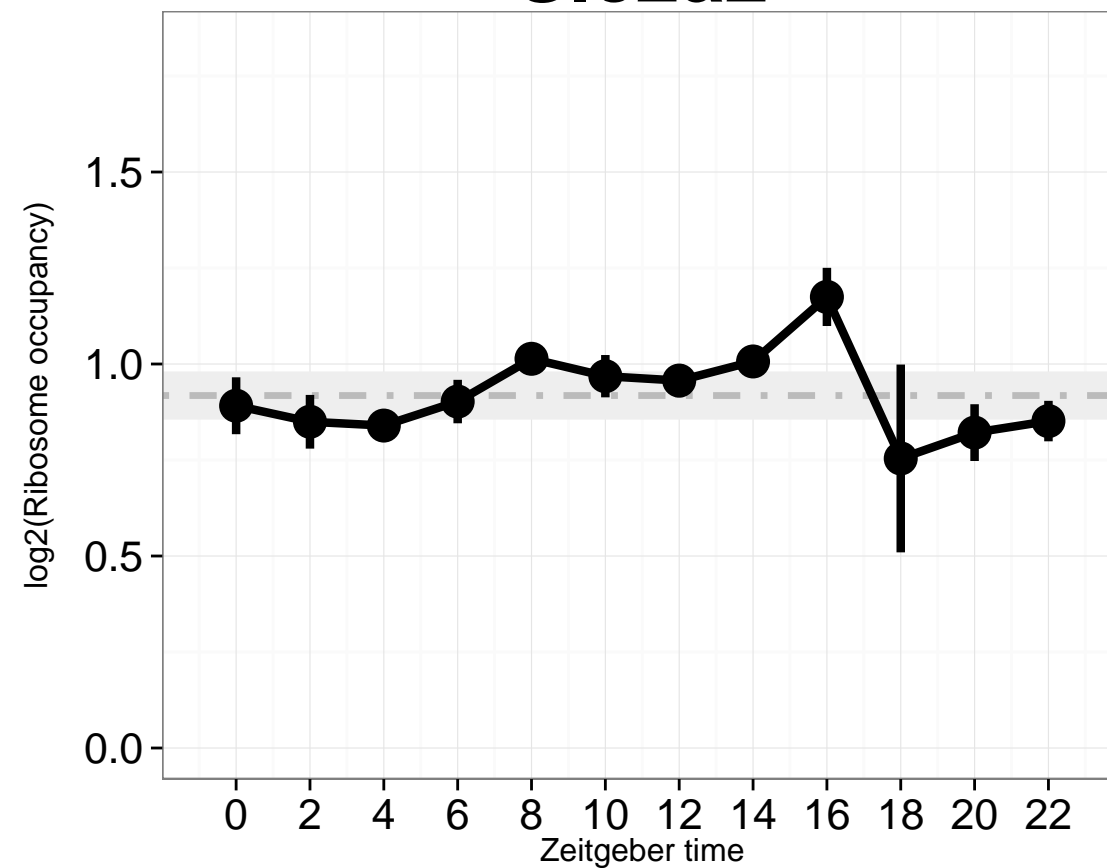

Supplement: Supplementary file 10745 [file 1]

## 9530068E07Rik

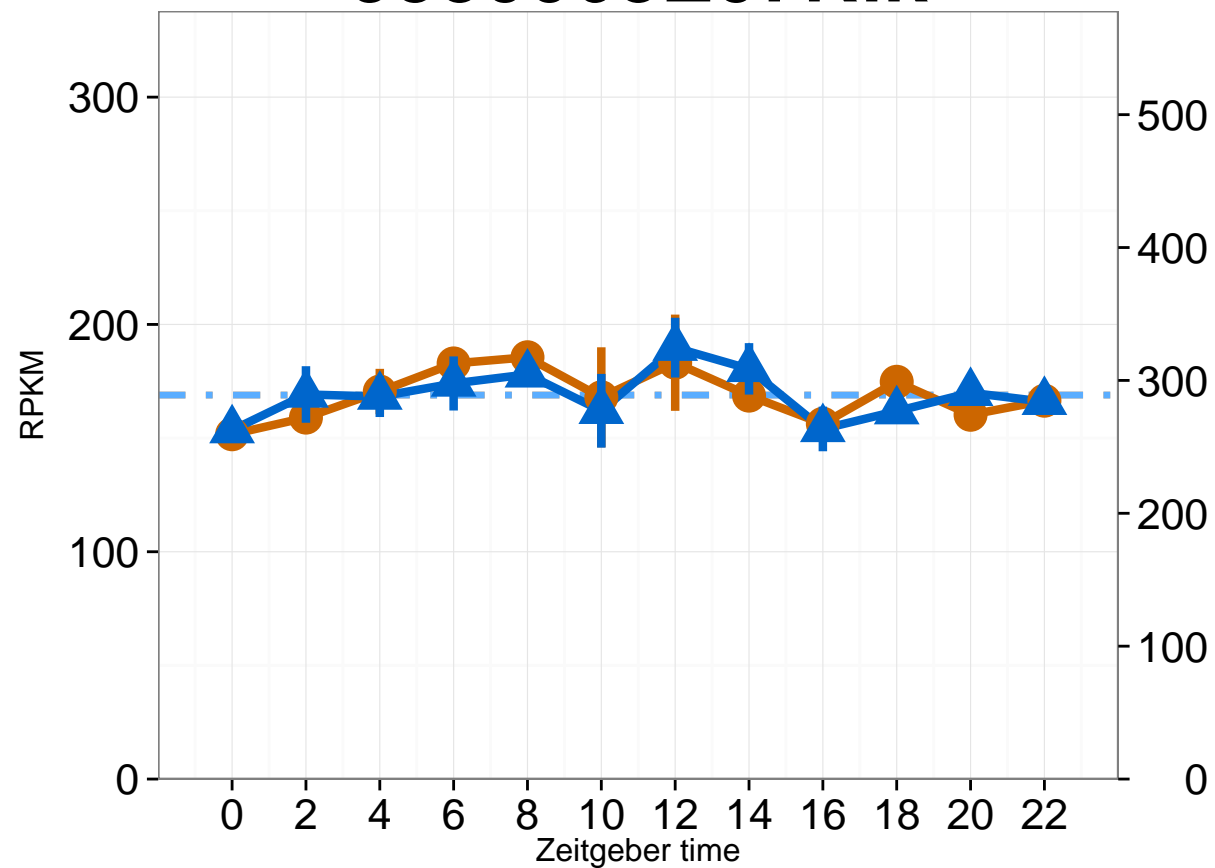

## 9530068E07Rik

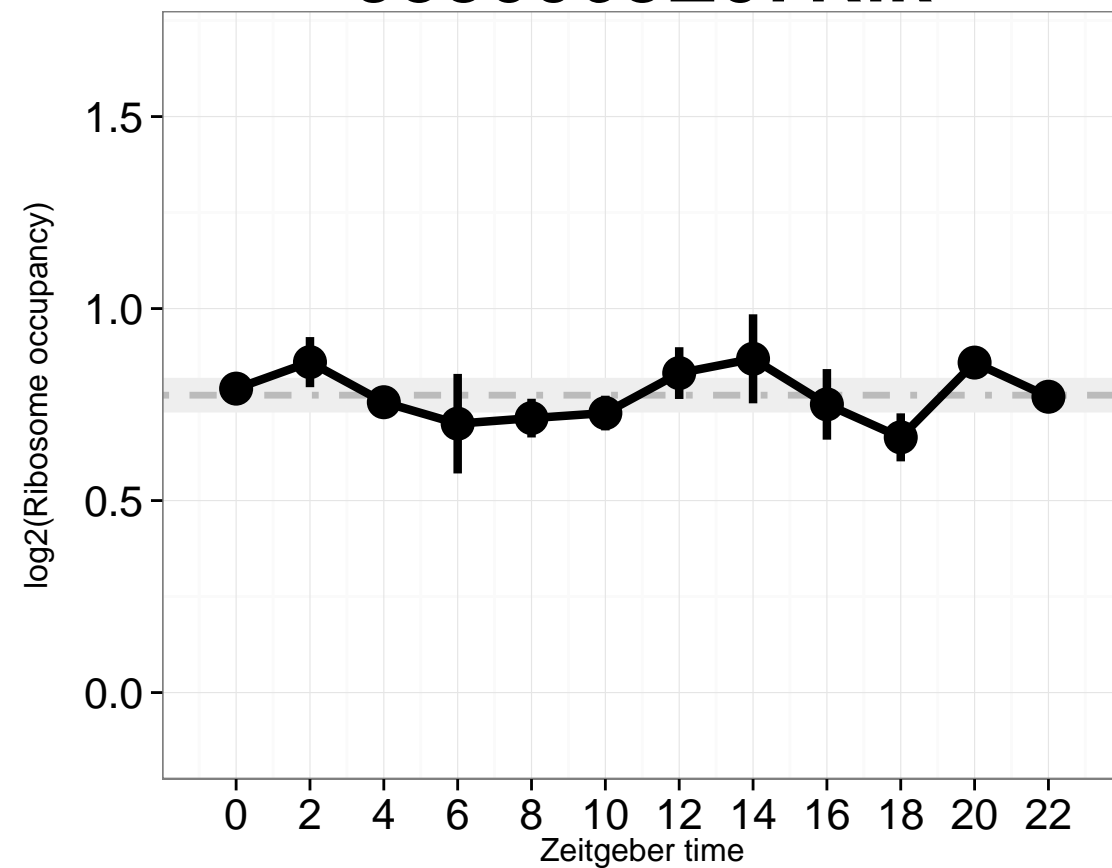

Supplement: Supplementary file 10746 [file 1]

## Ing1

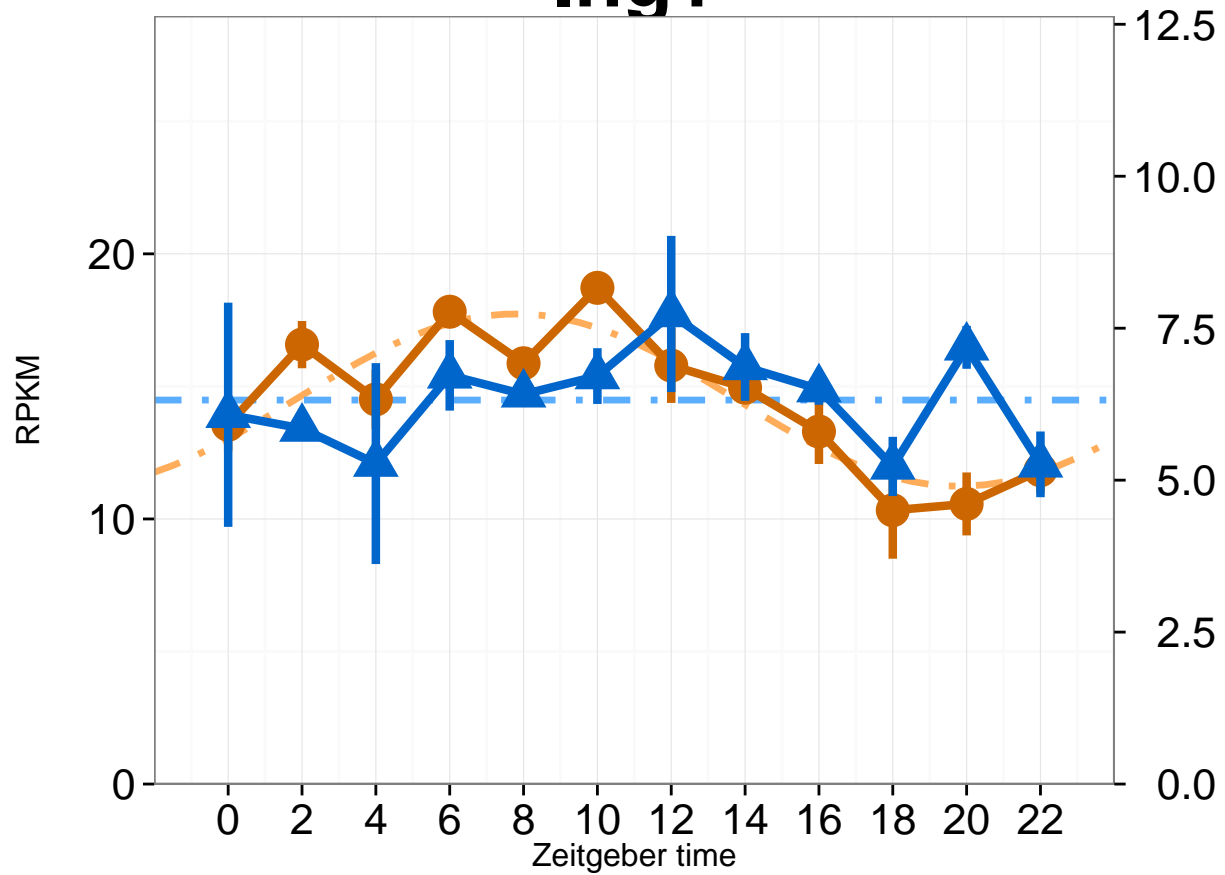

## Ing1

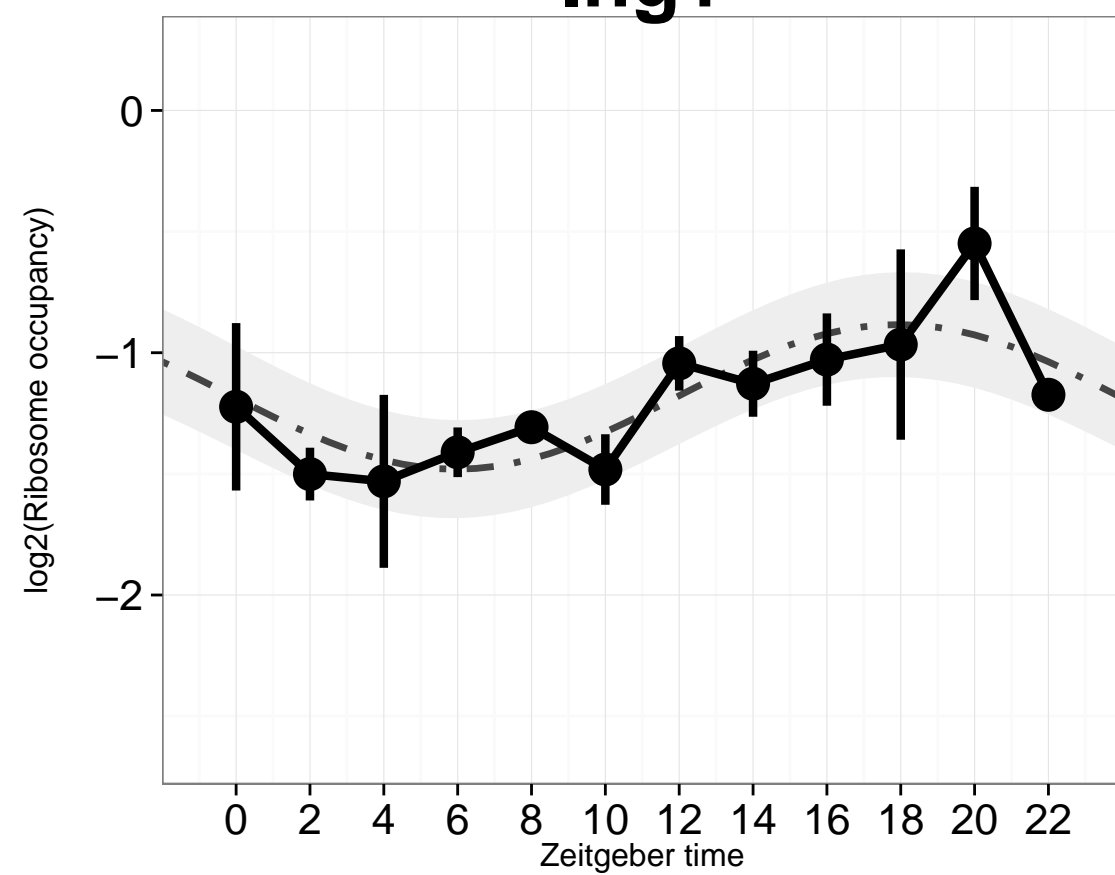

Supplement: Supplementary file 10747 [file 1]

# Lrp6

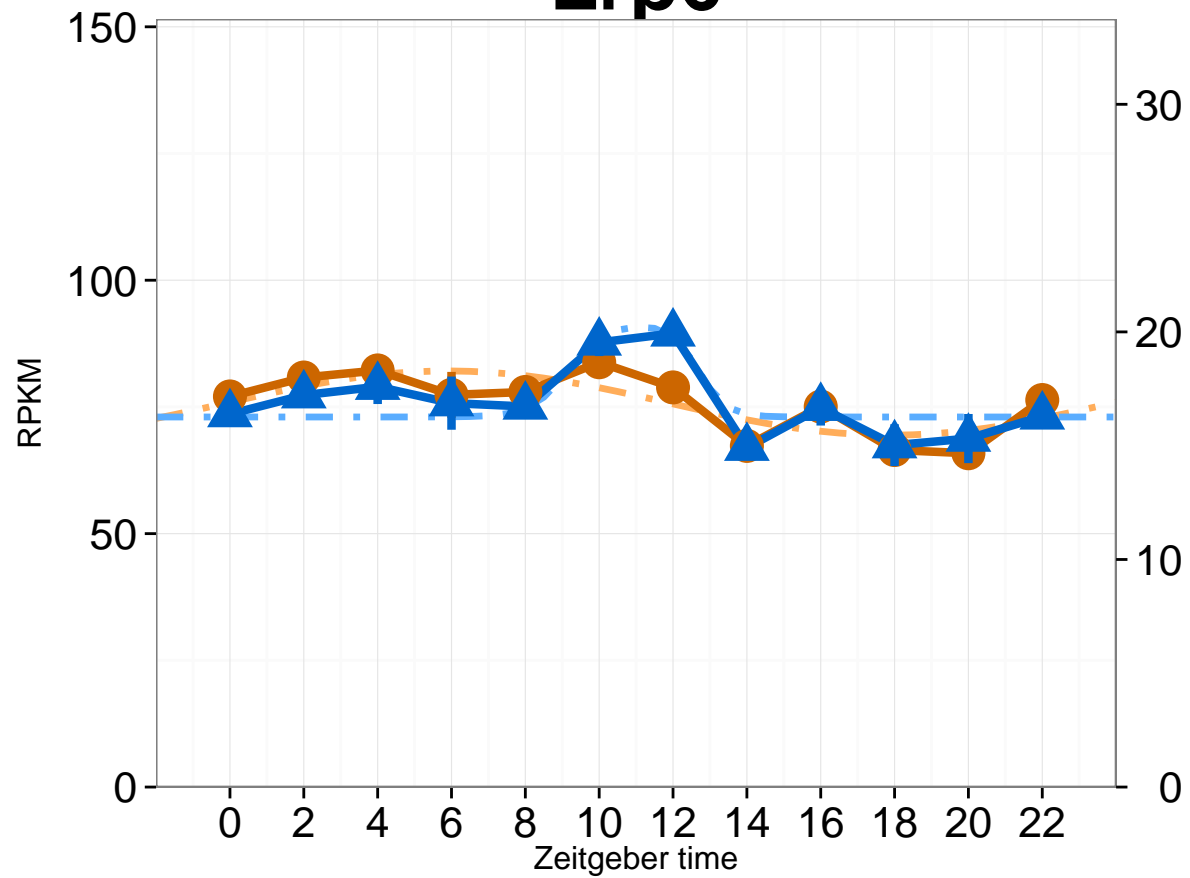

# Lrp6

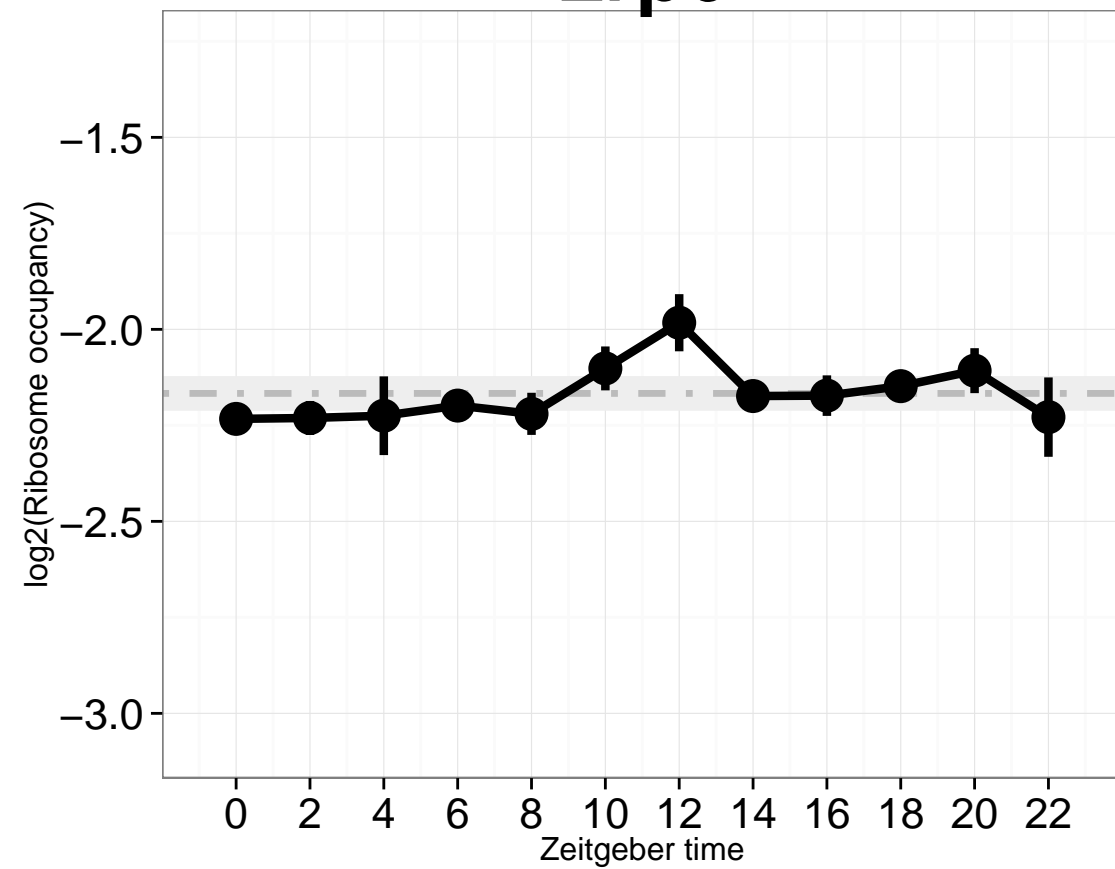

Supplement: Supplementary file 10748 [file 1]

# Snrpd2

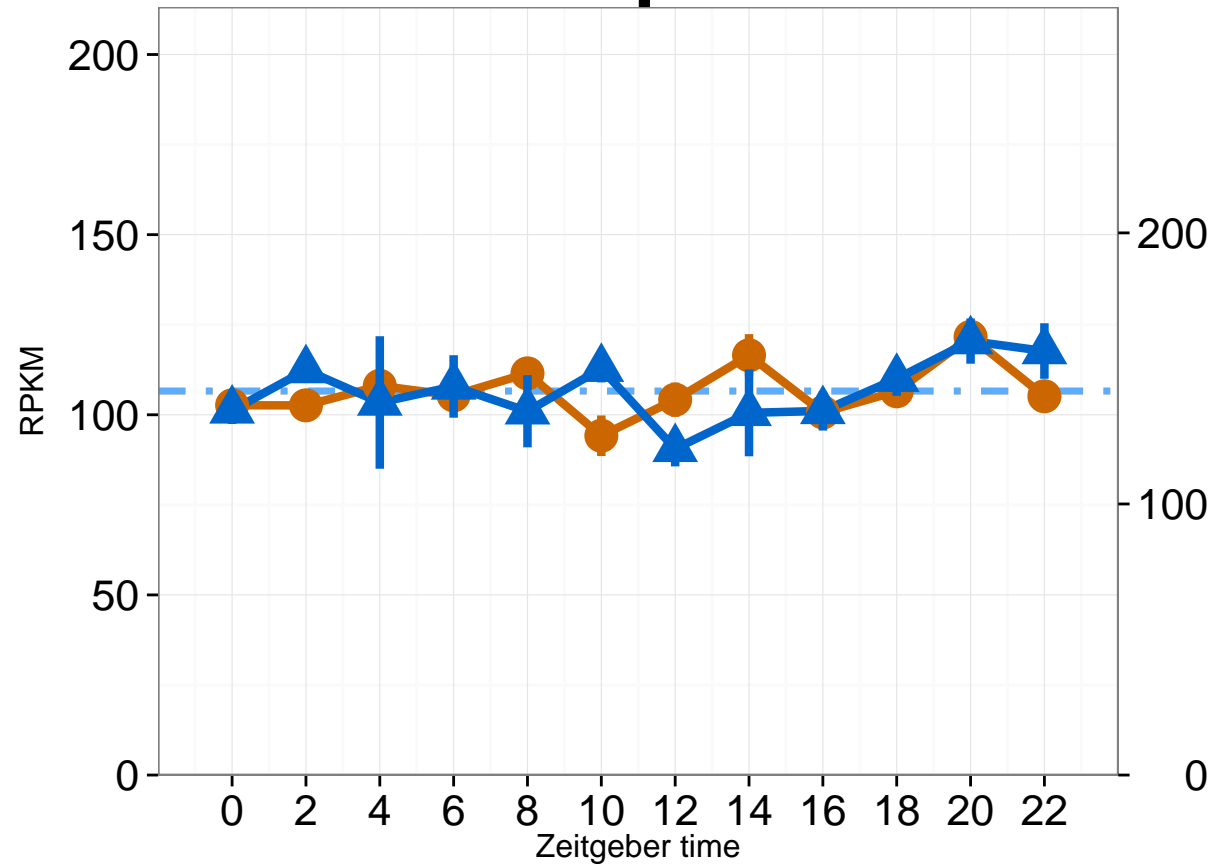

# Snrpd2

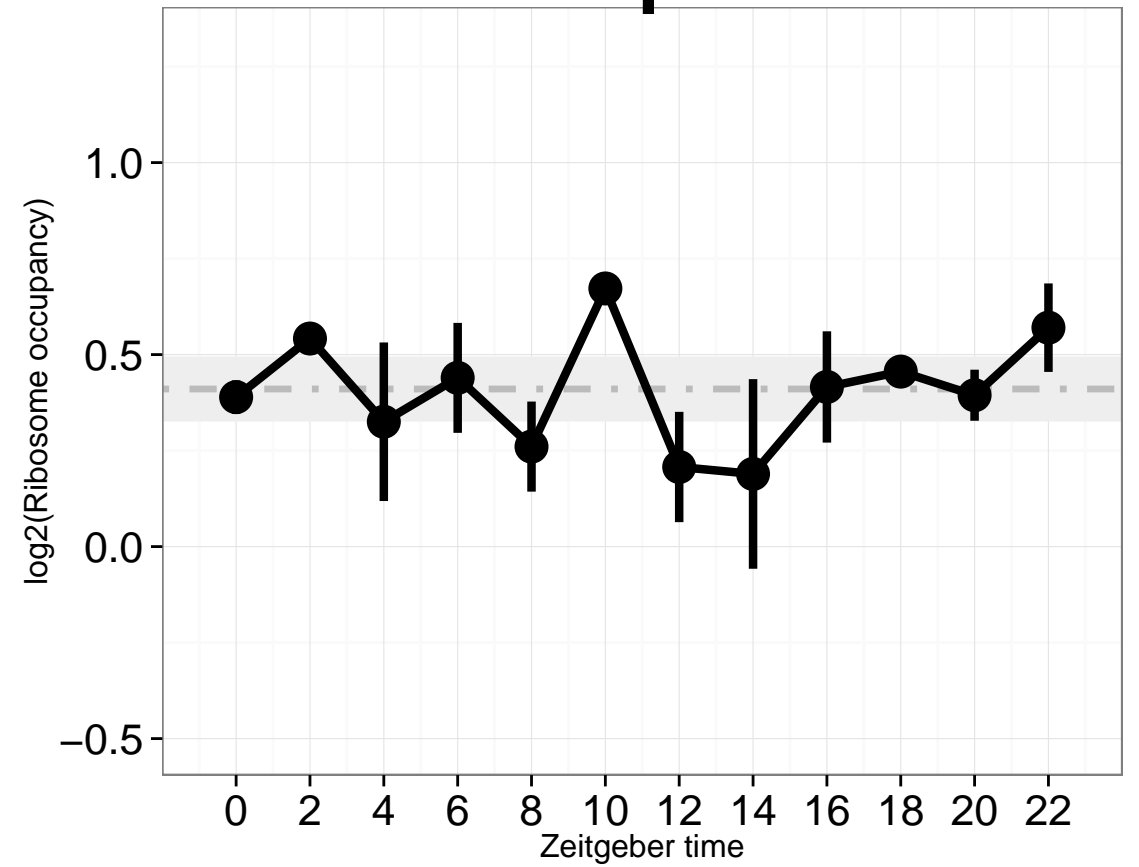

Supplement: Supplementary file 10749 [file 1]

## Gpatch2l

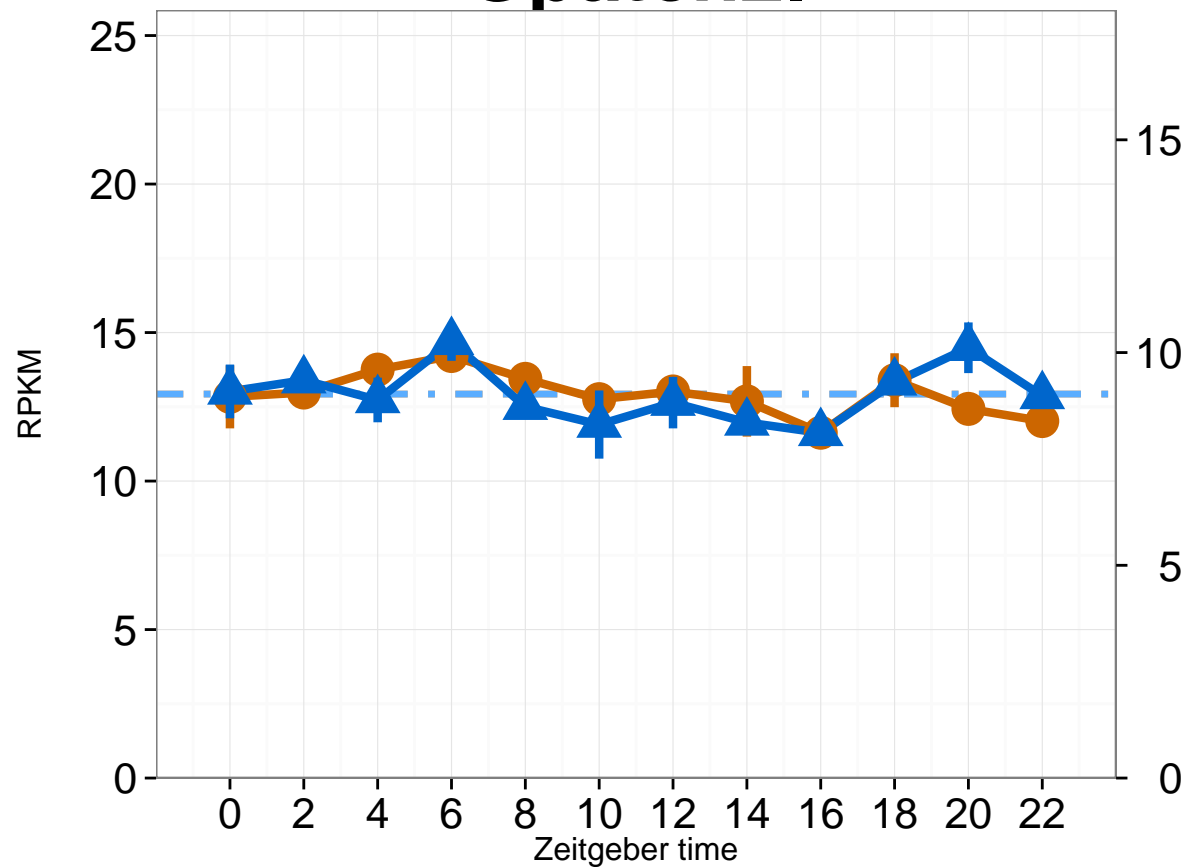

## Gpatch2l

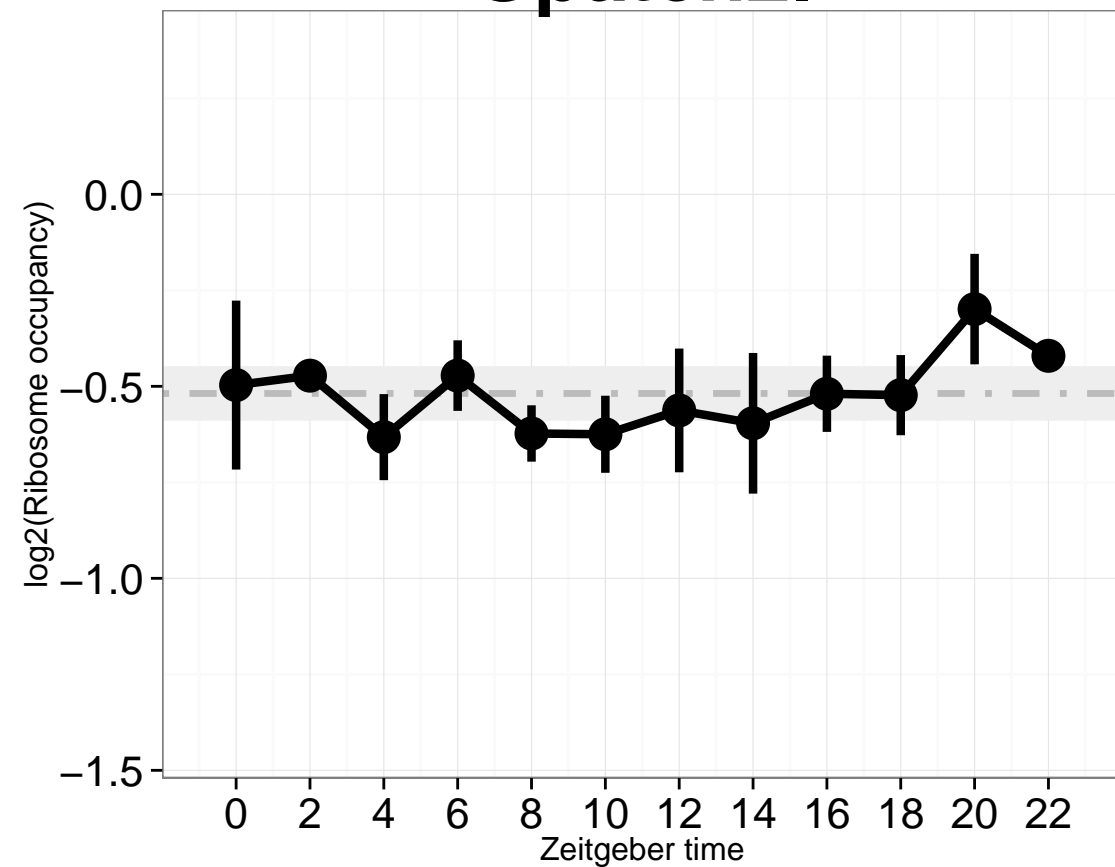

Supplement: Supplementary file 10750 [file 1]

# Cpb2

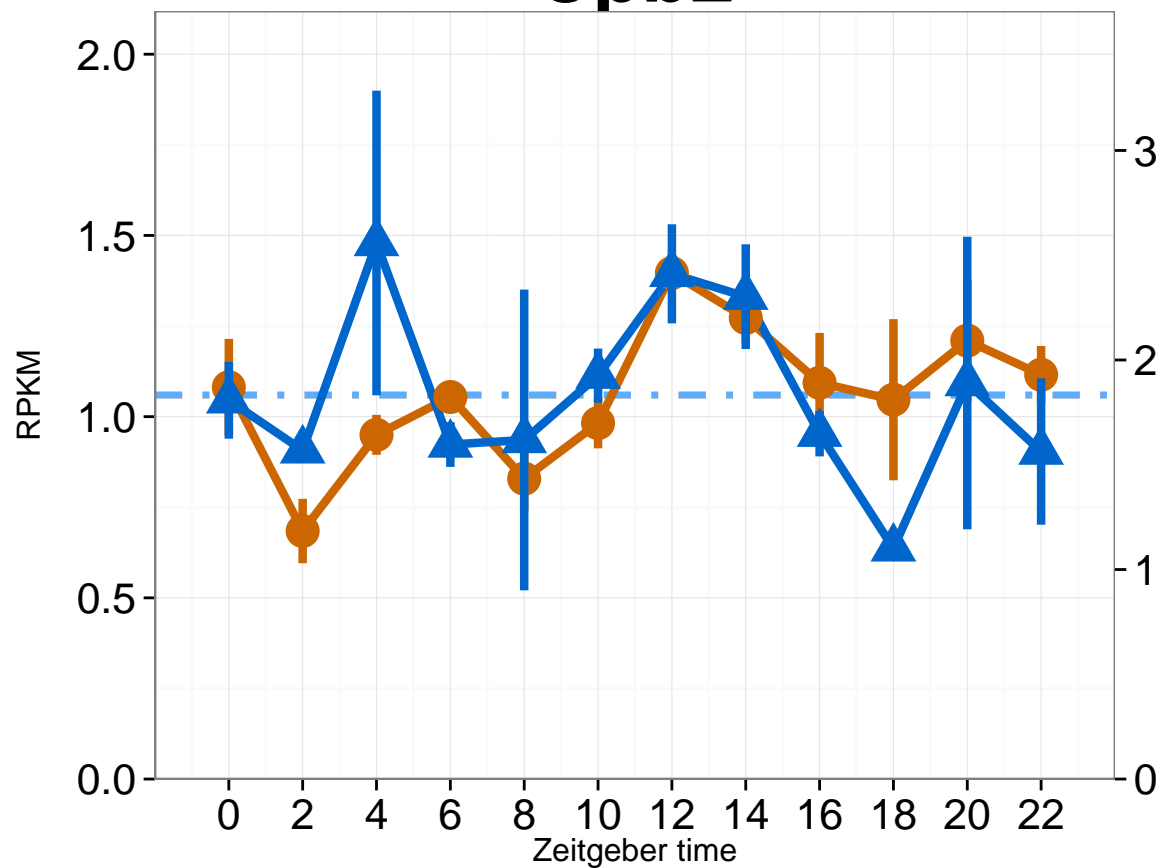

# Cpb2

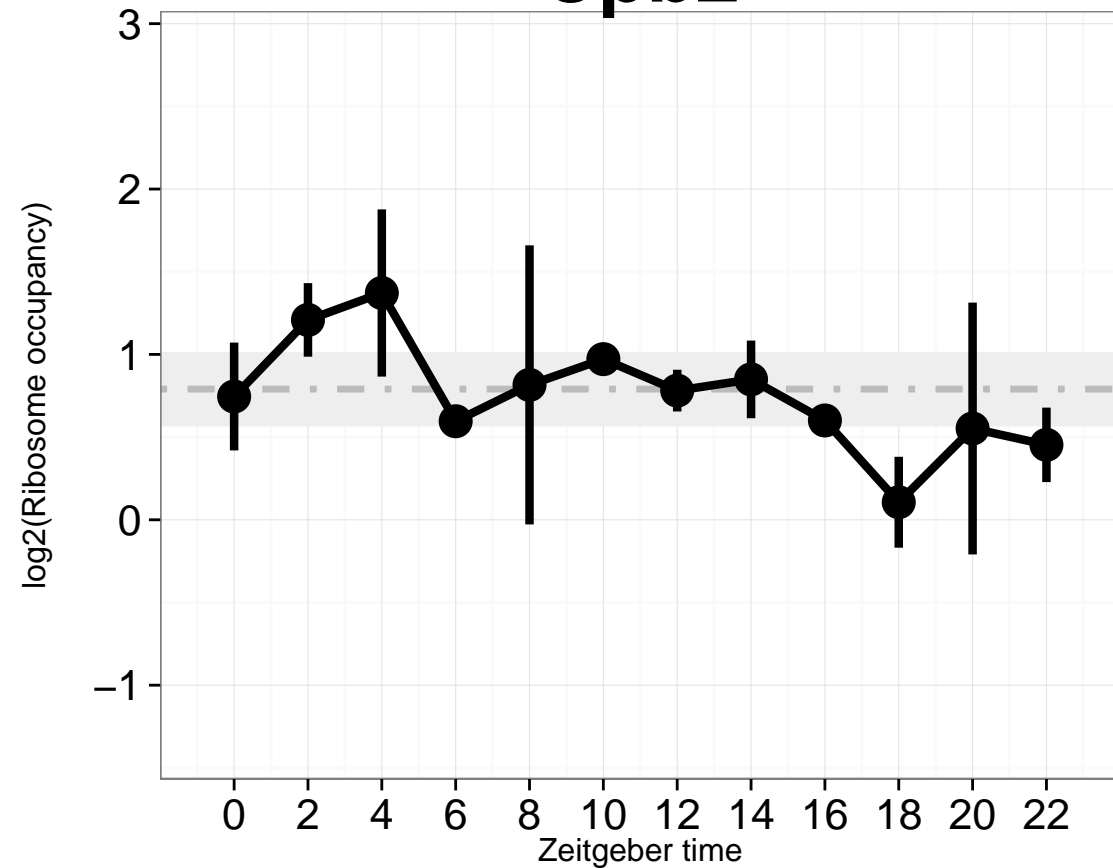

Supplement: Supplementary file 10751 [file 1]

## Slc16a13

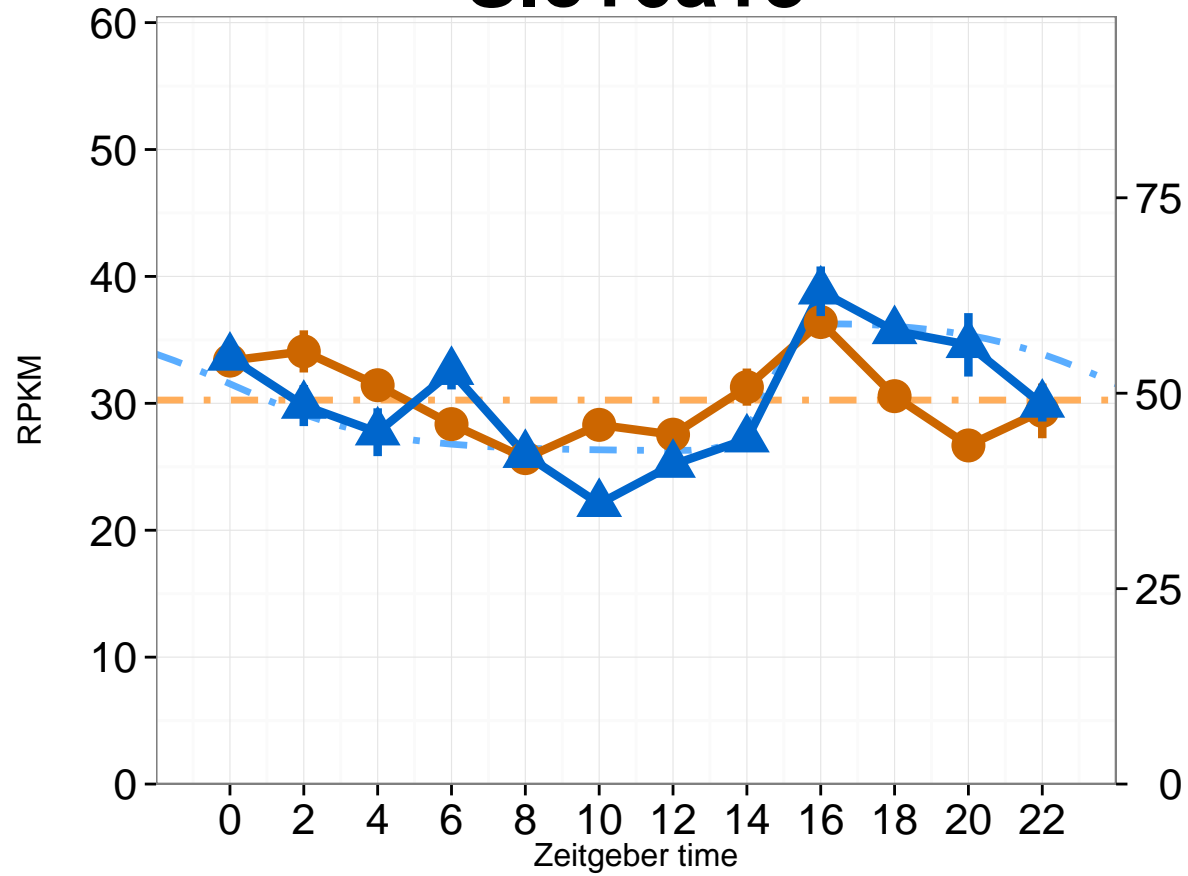

## Slc16a13

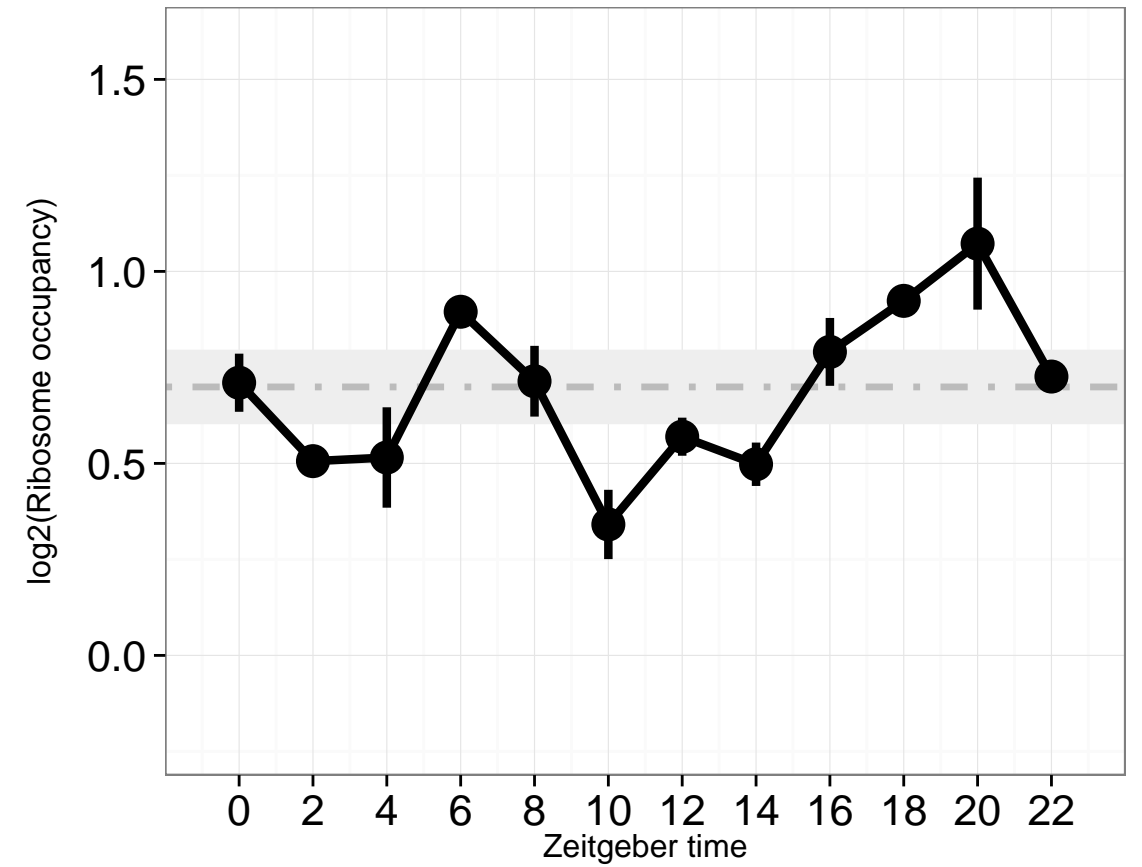

Supplement: Supplementary file 10752 [file 1]

## Scg5

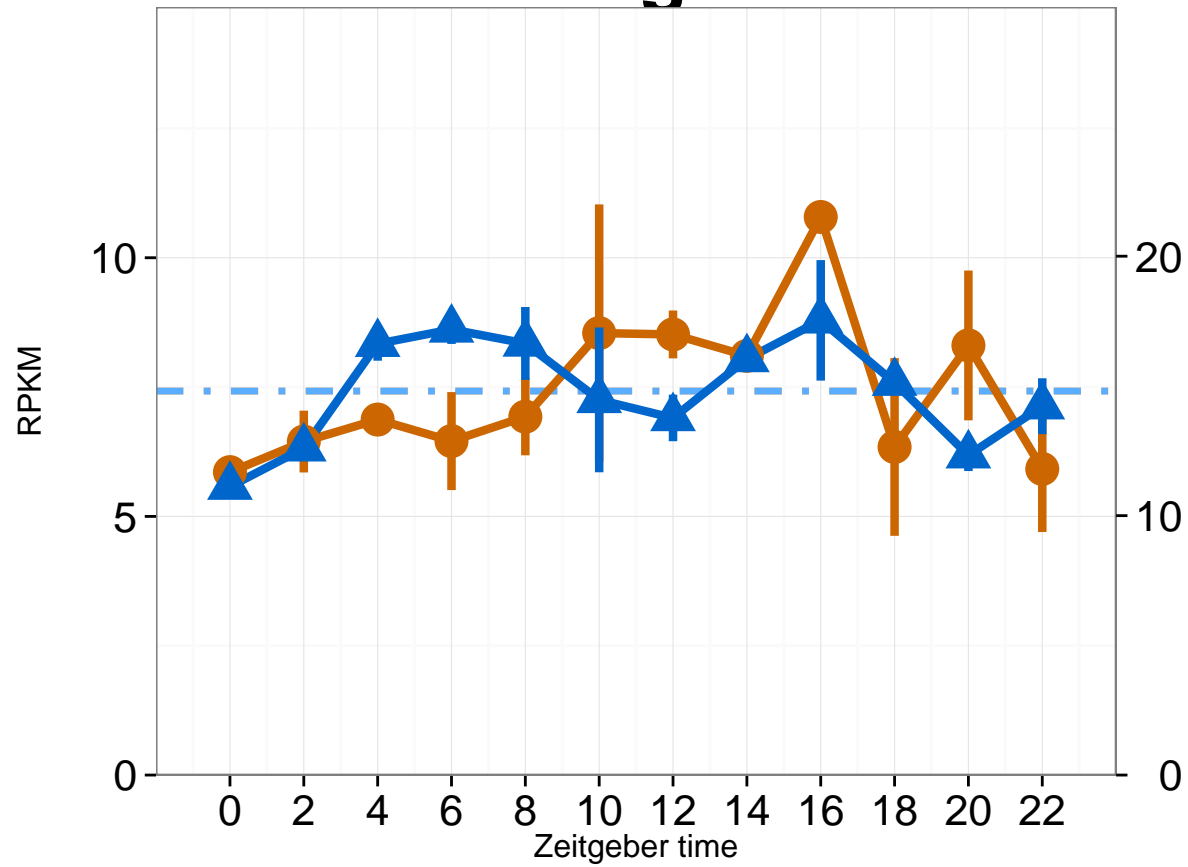

## Scg5

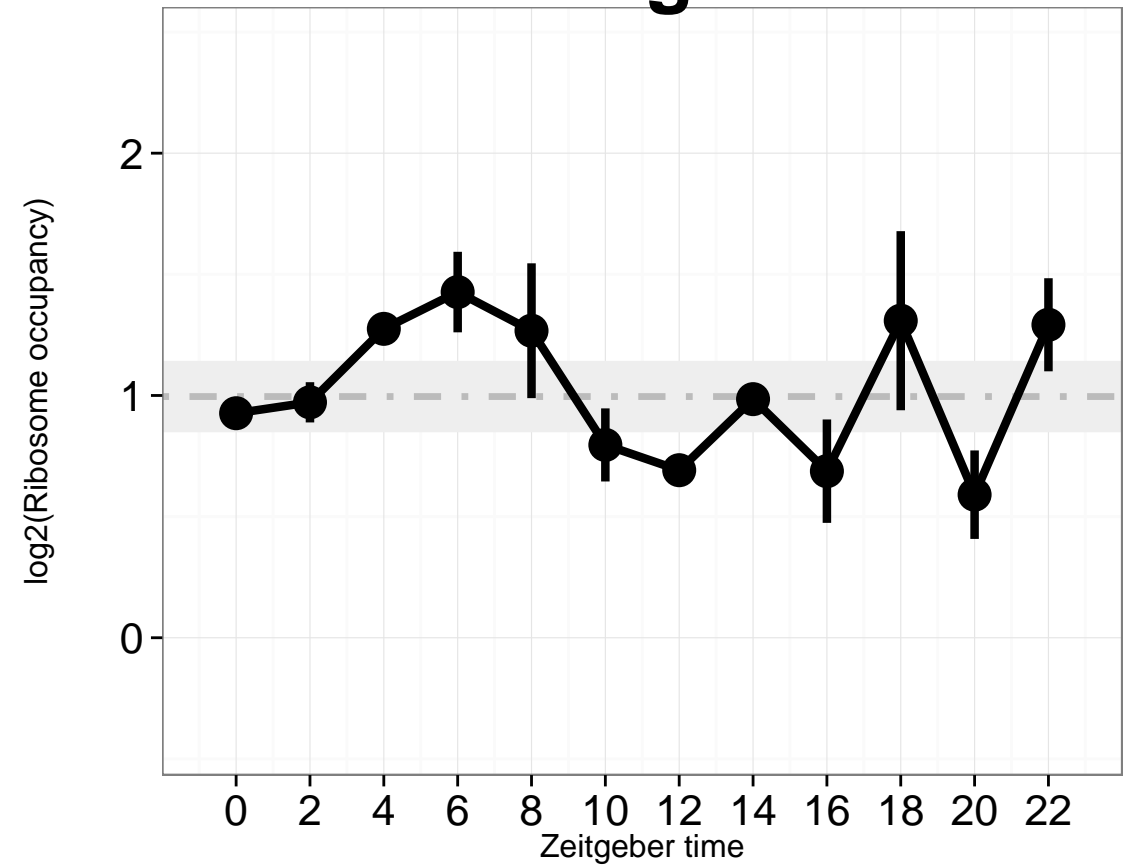

Supplement: Supplementary file 10753 [file 1]

## Lhfpl2

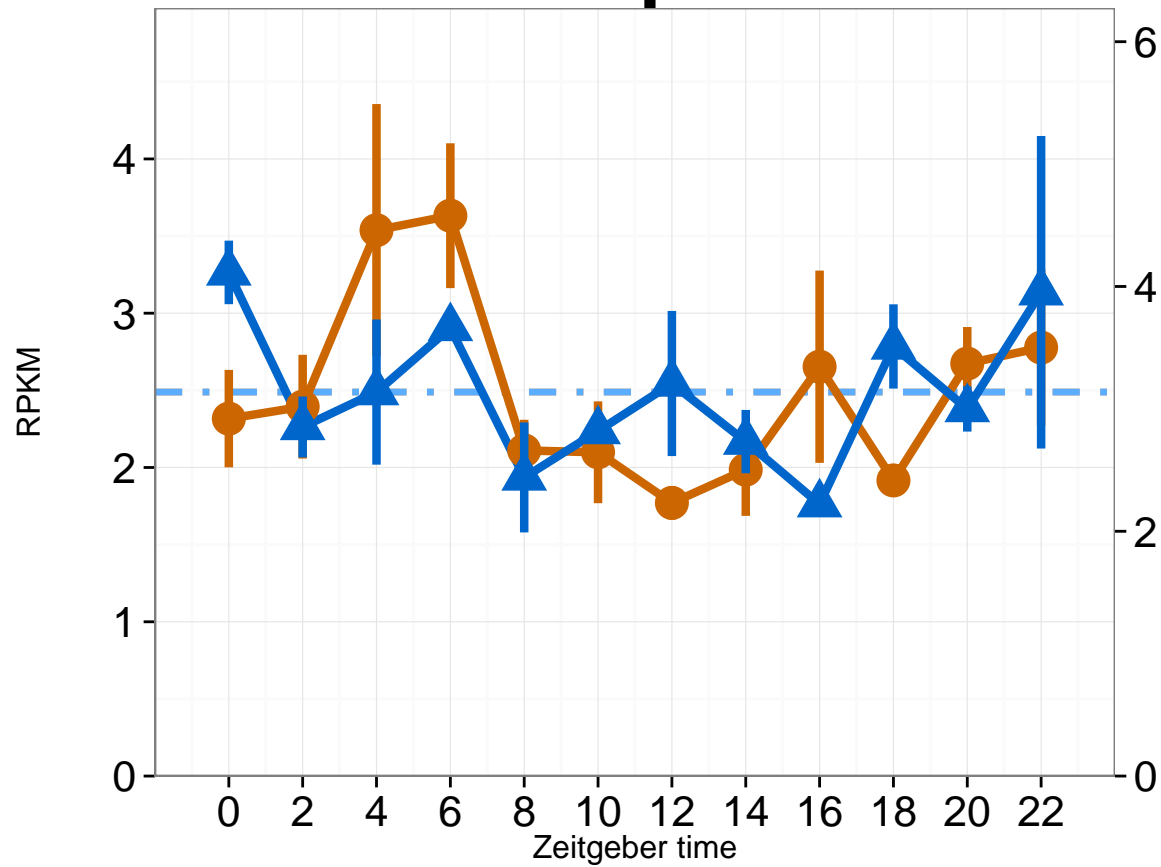

## Lhfpl2

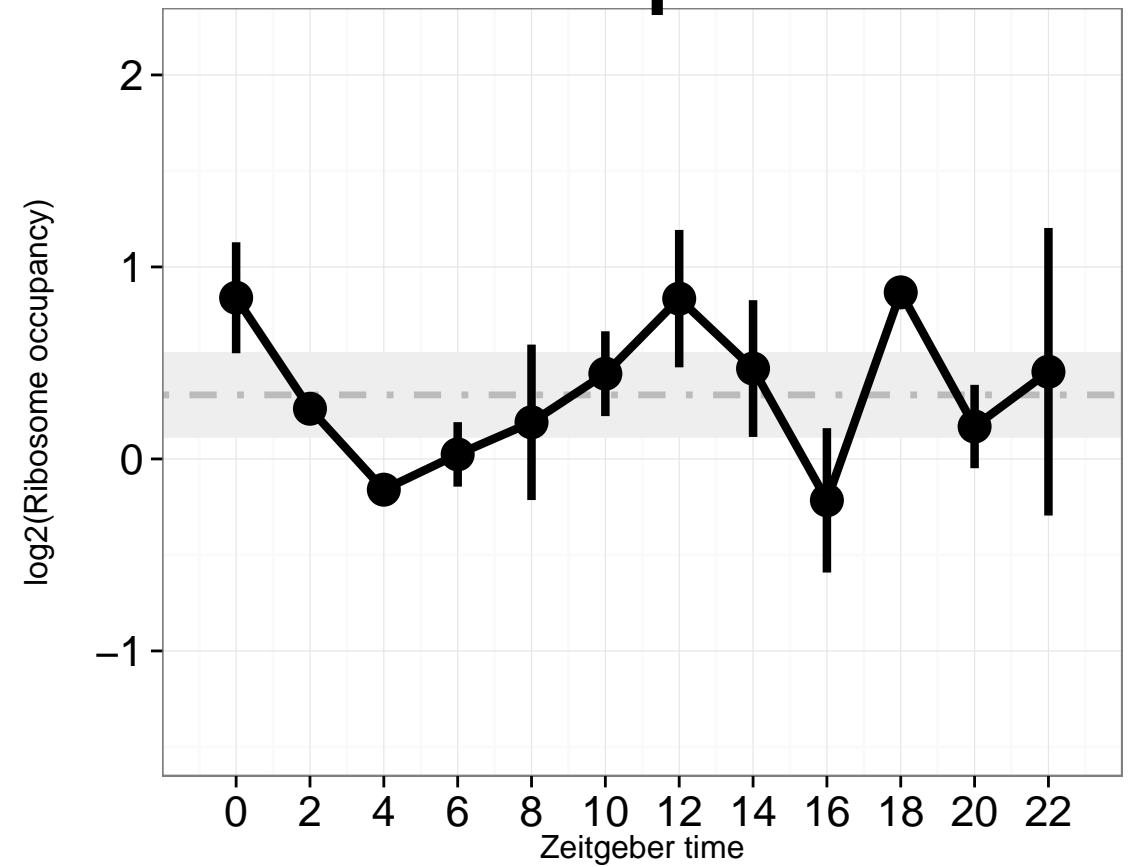

Supplement: Supplementary file 10754 [file 1]

## Brwd1

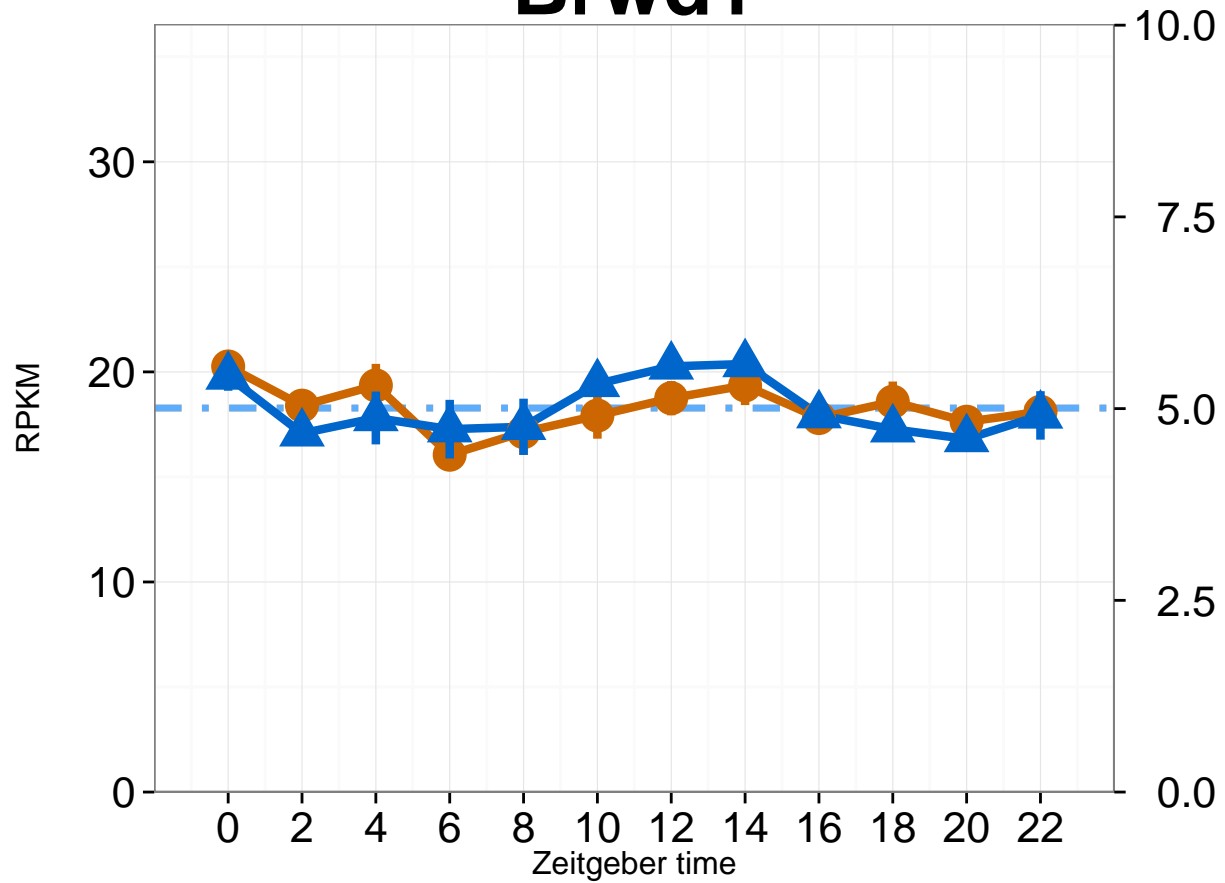

## Brwd1

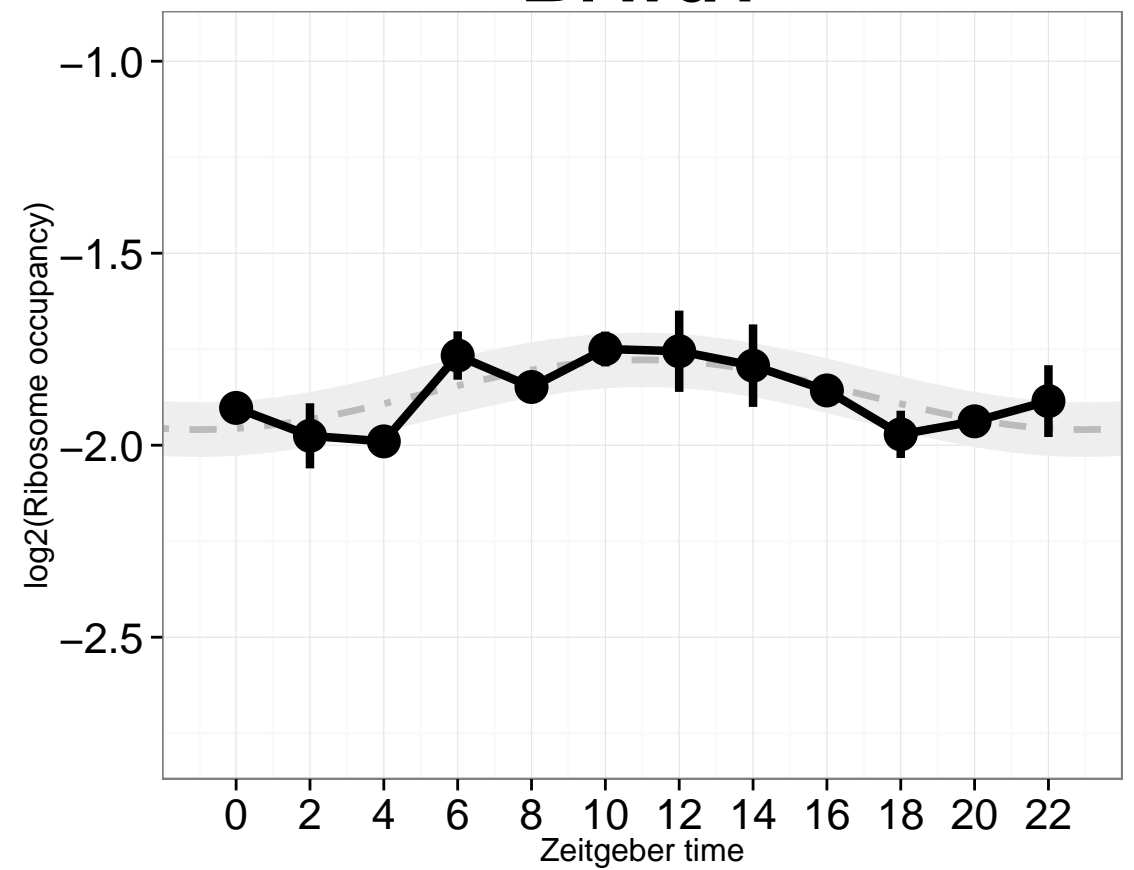

Supplement: Supplementary file 10755 [file 1]

## Rabepk

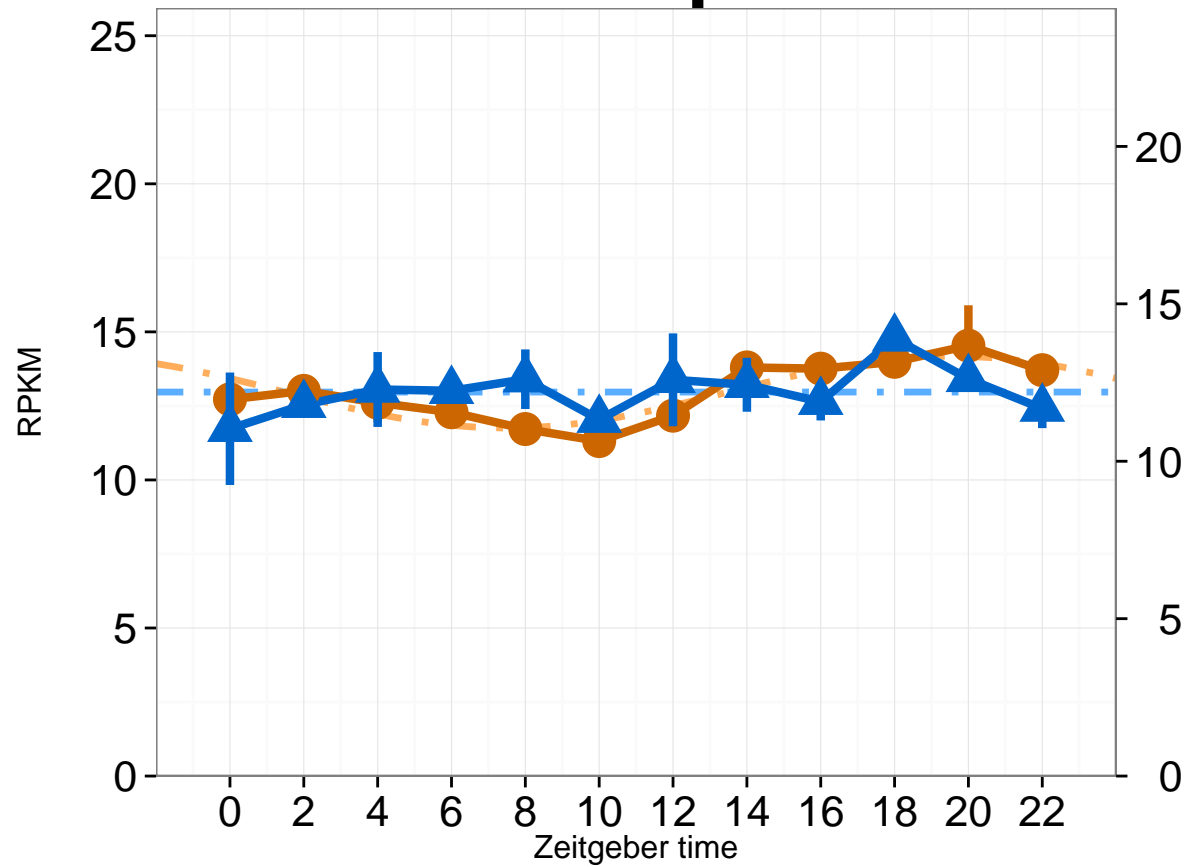

## Rabepk

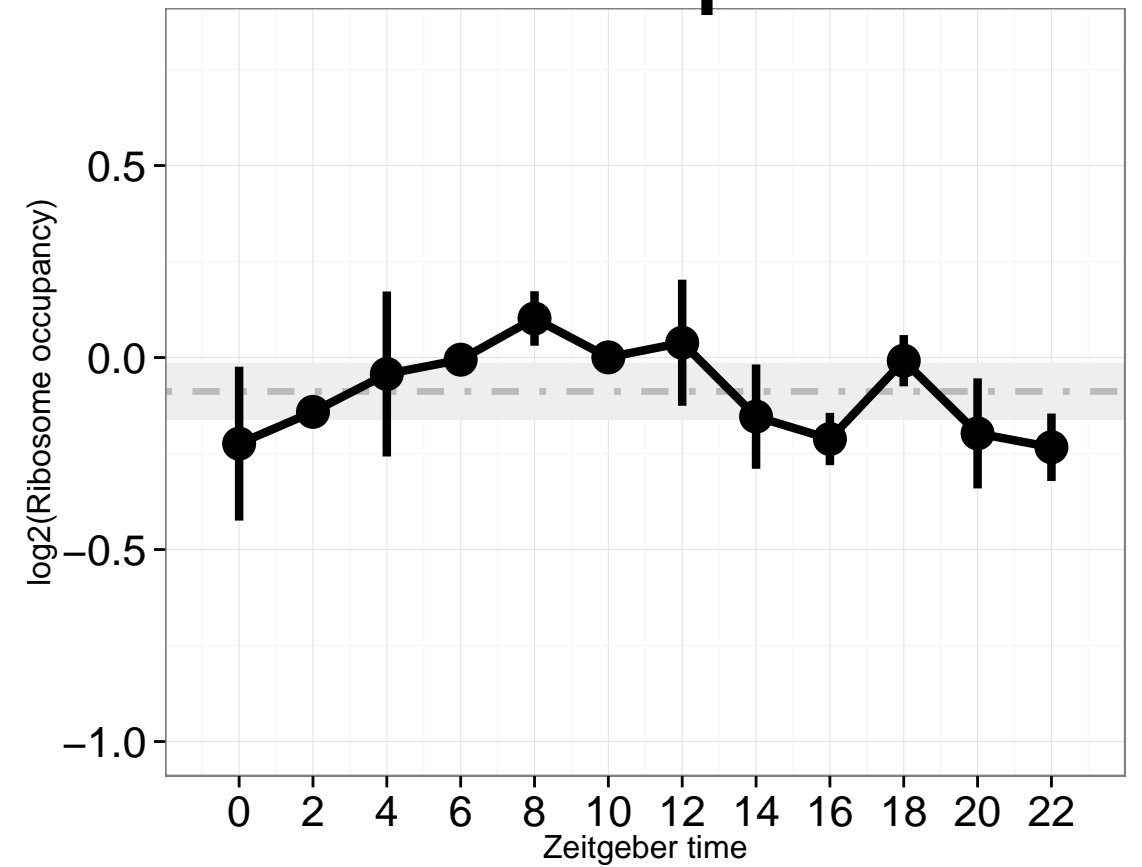

Supplement: Supplementary file 10756 [file 1]

# Mybl1

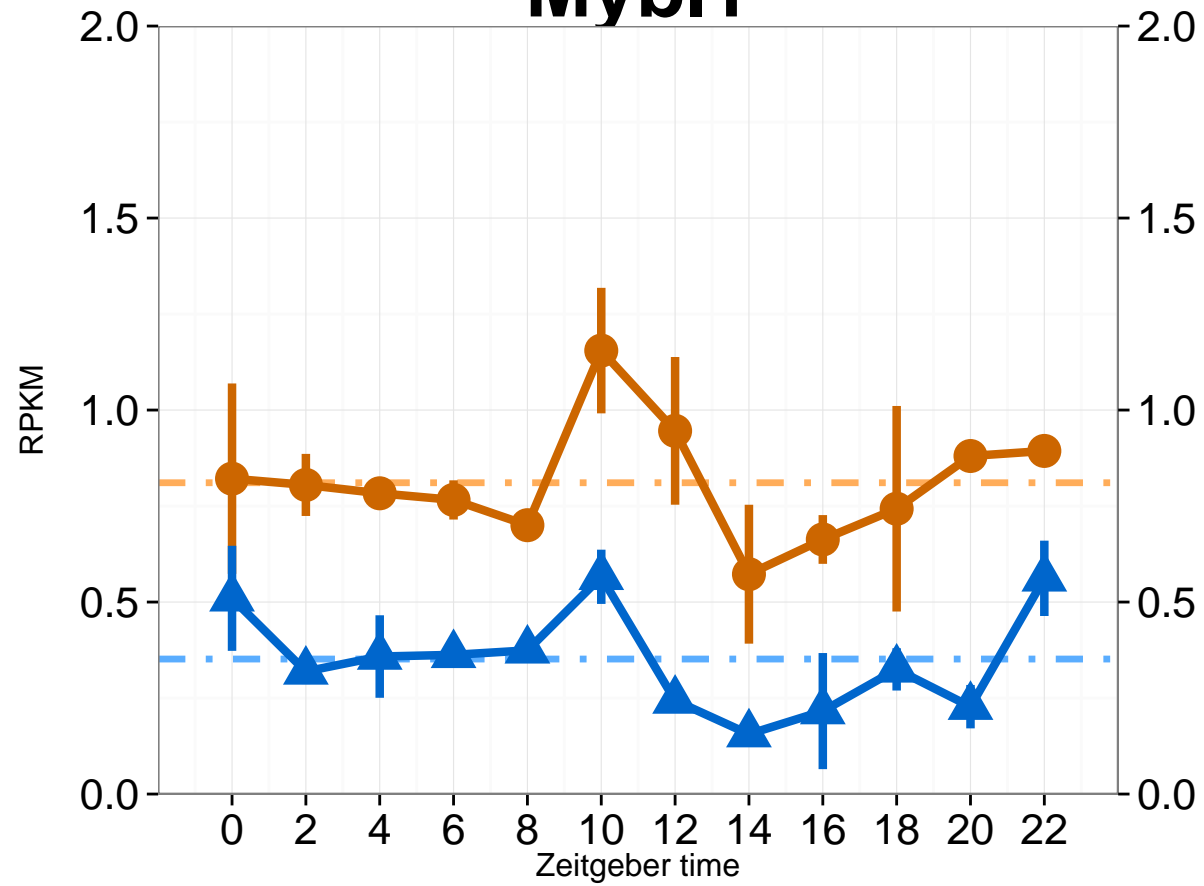

# Mybl1

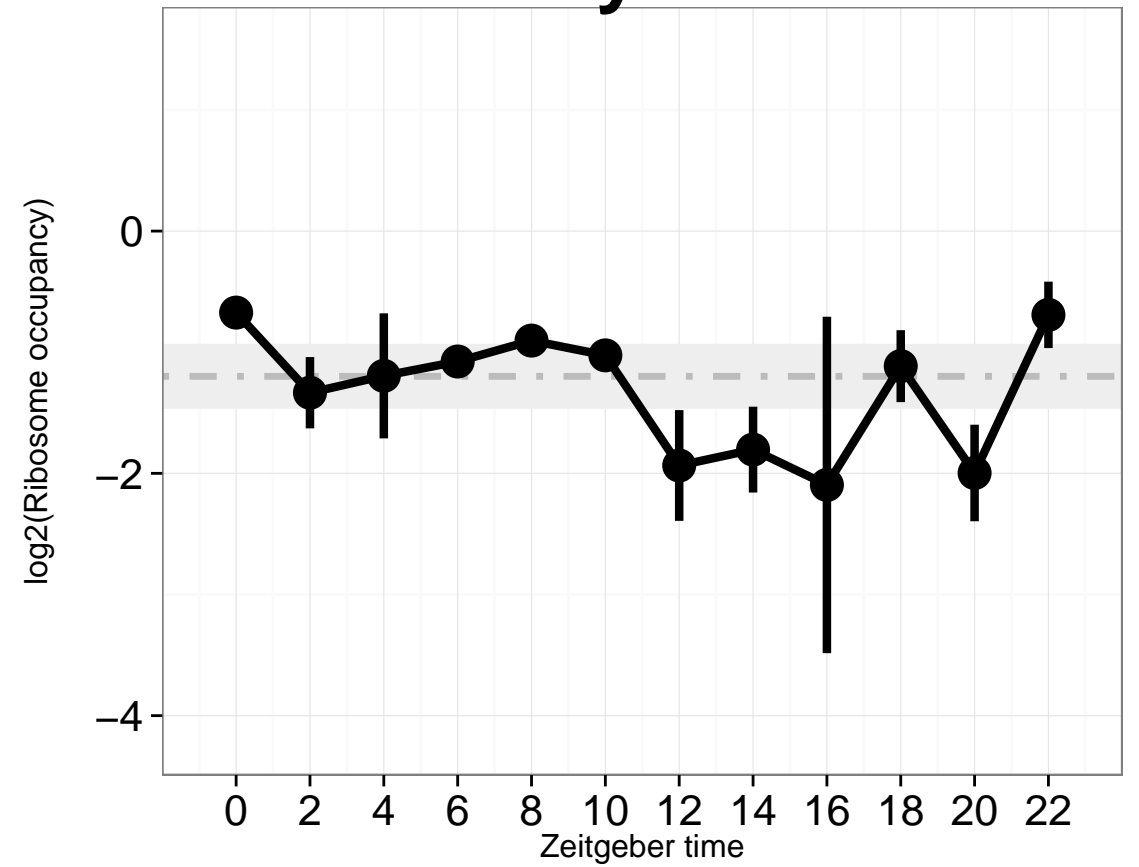

Supplement: Supplementary file 10757 [file 1]

## Plekho1

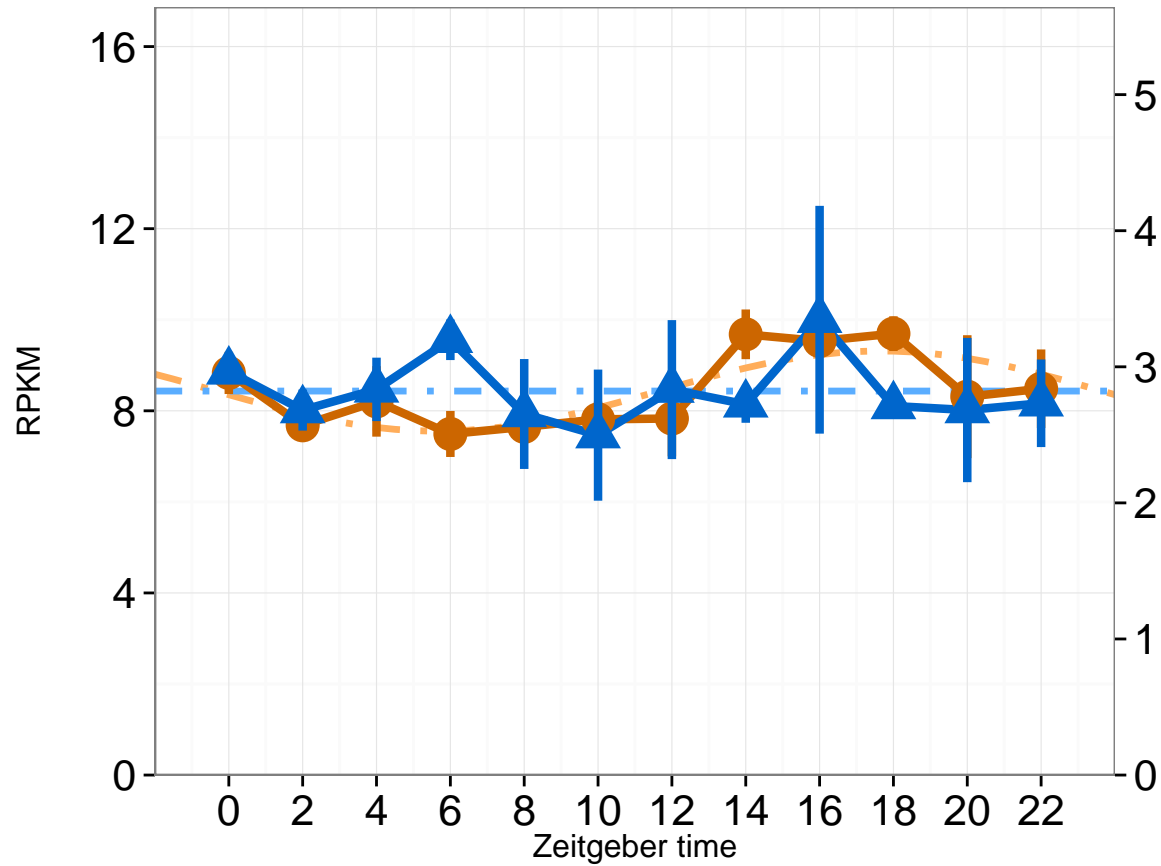

## Plekho1

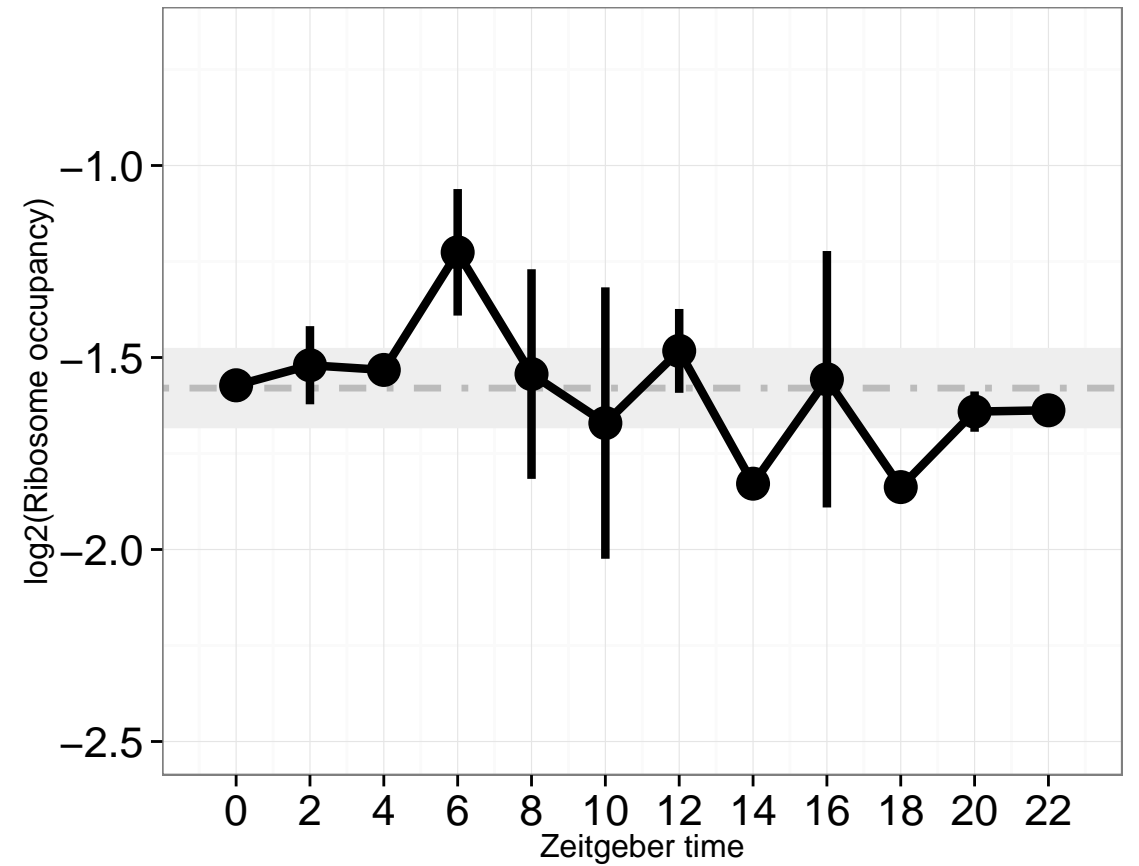

Supplement: Supplementary file 10758 [file 1]

## Myo10

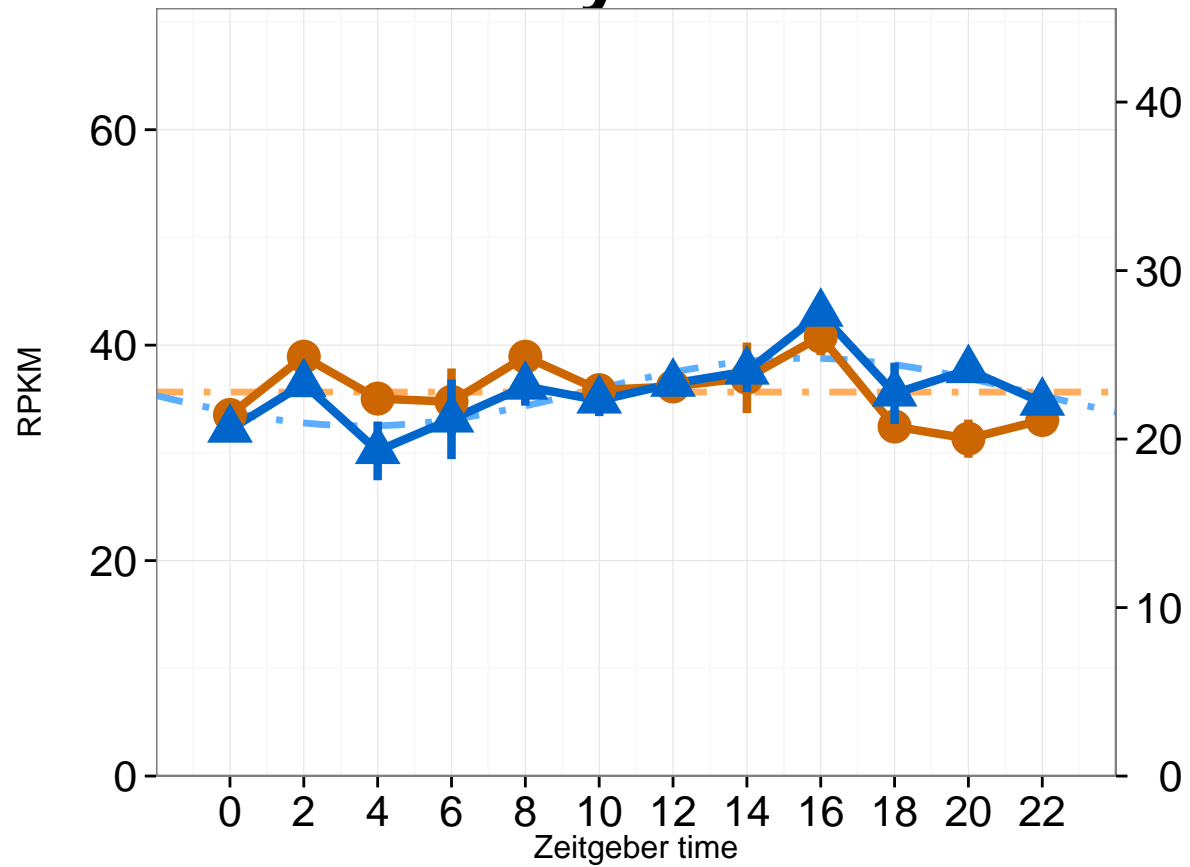

## Myo10

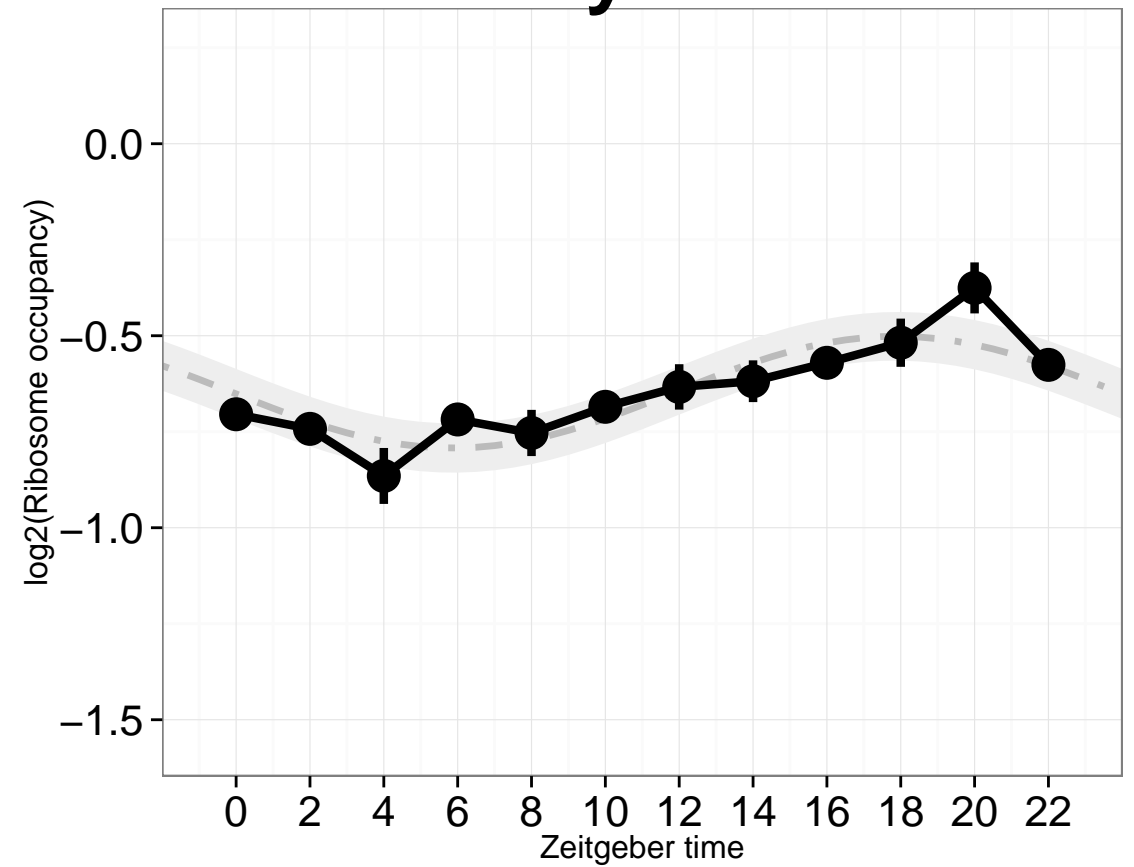

Supplement: Supplementary file 10759 [file 1]

## Maml3

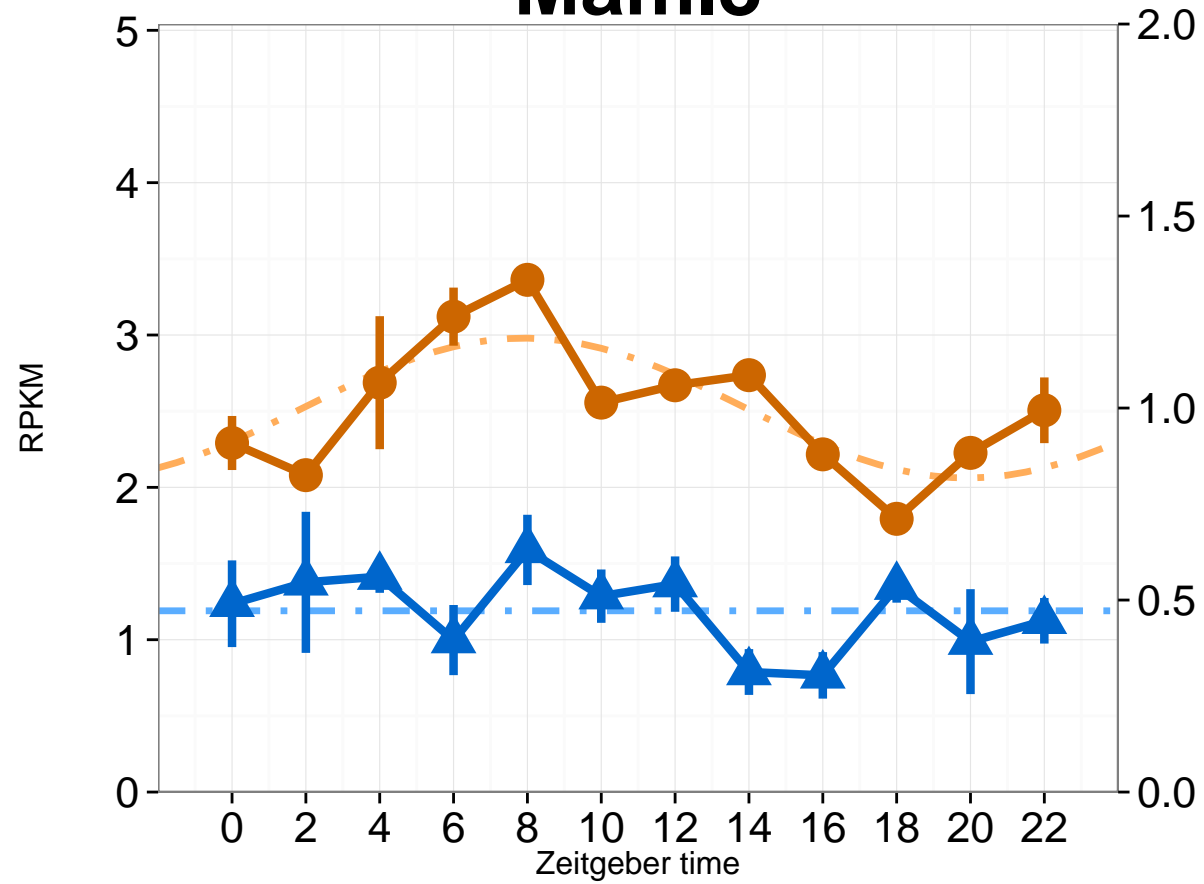

## Maml3

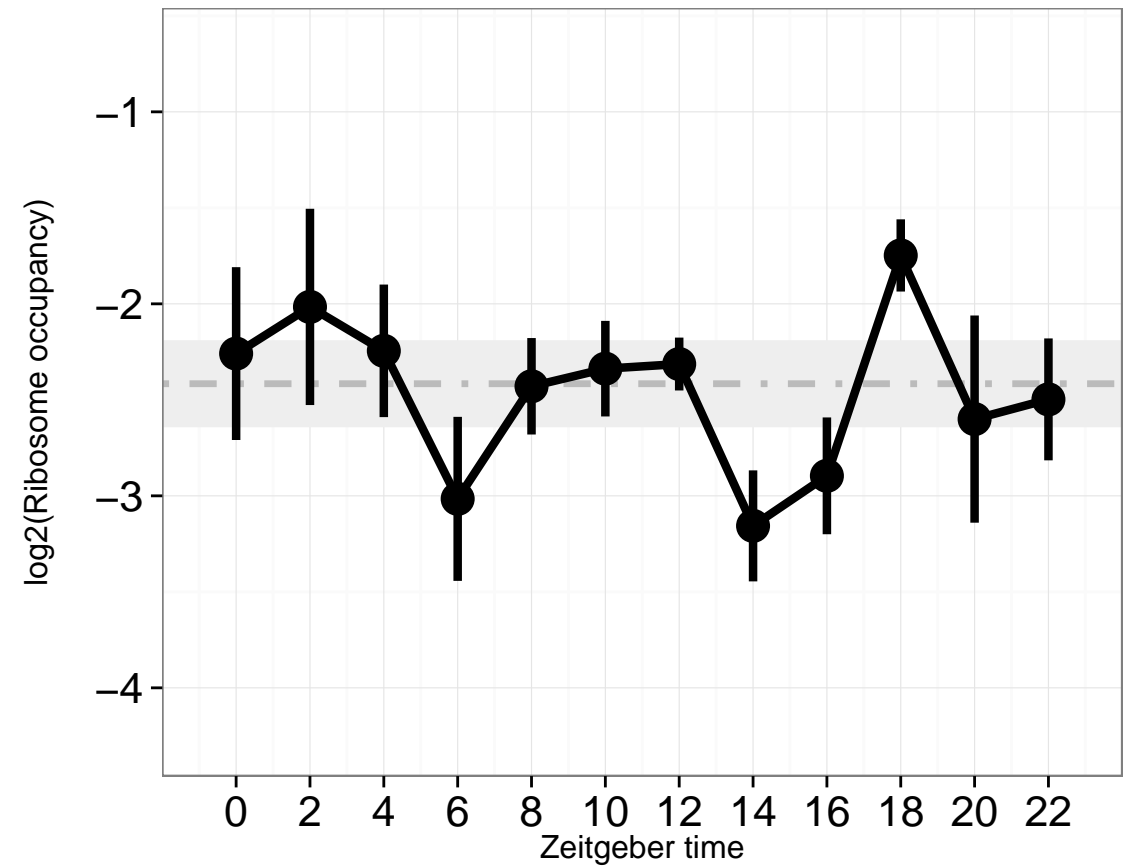

Supplement: Supplementary file 10760 [file 1]

# Lmf1

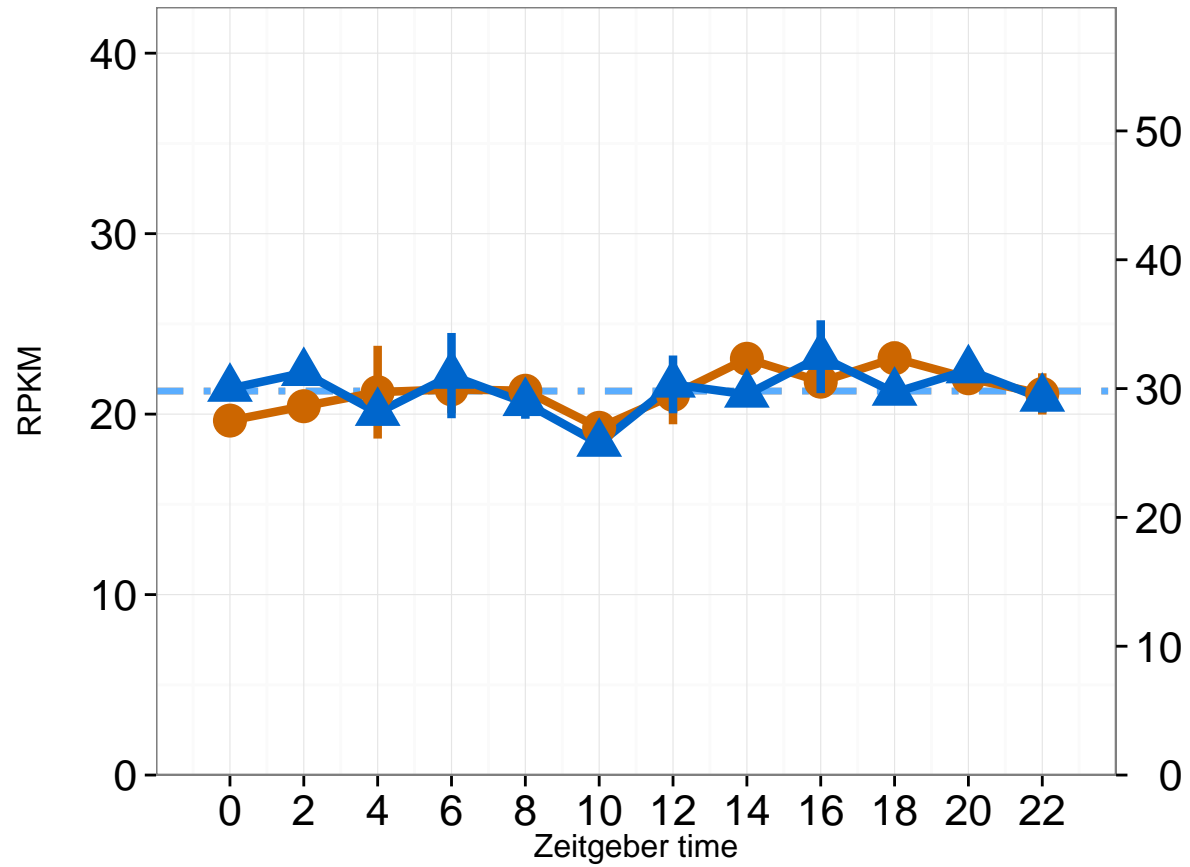

# Lmf1

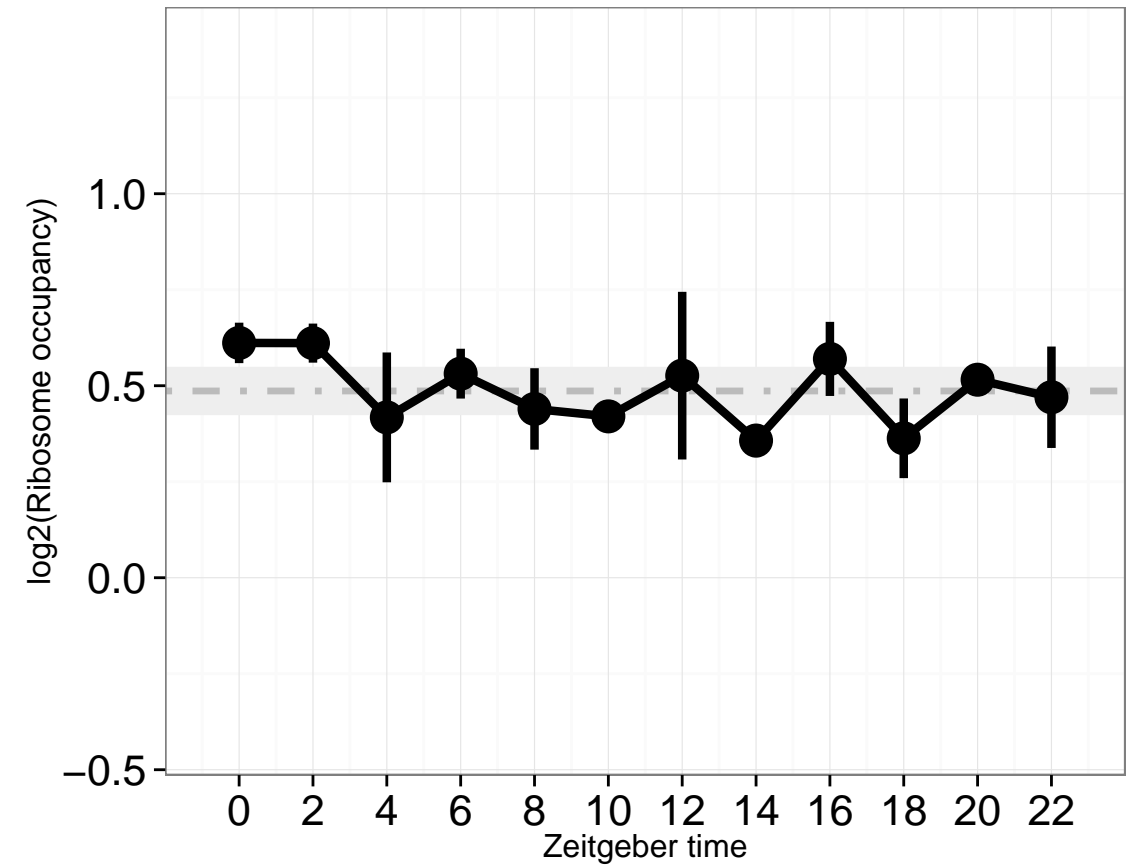

Supplement: Supplementary file 10761 [file 1]

# Zfp1

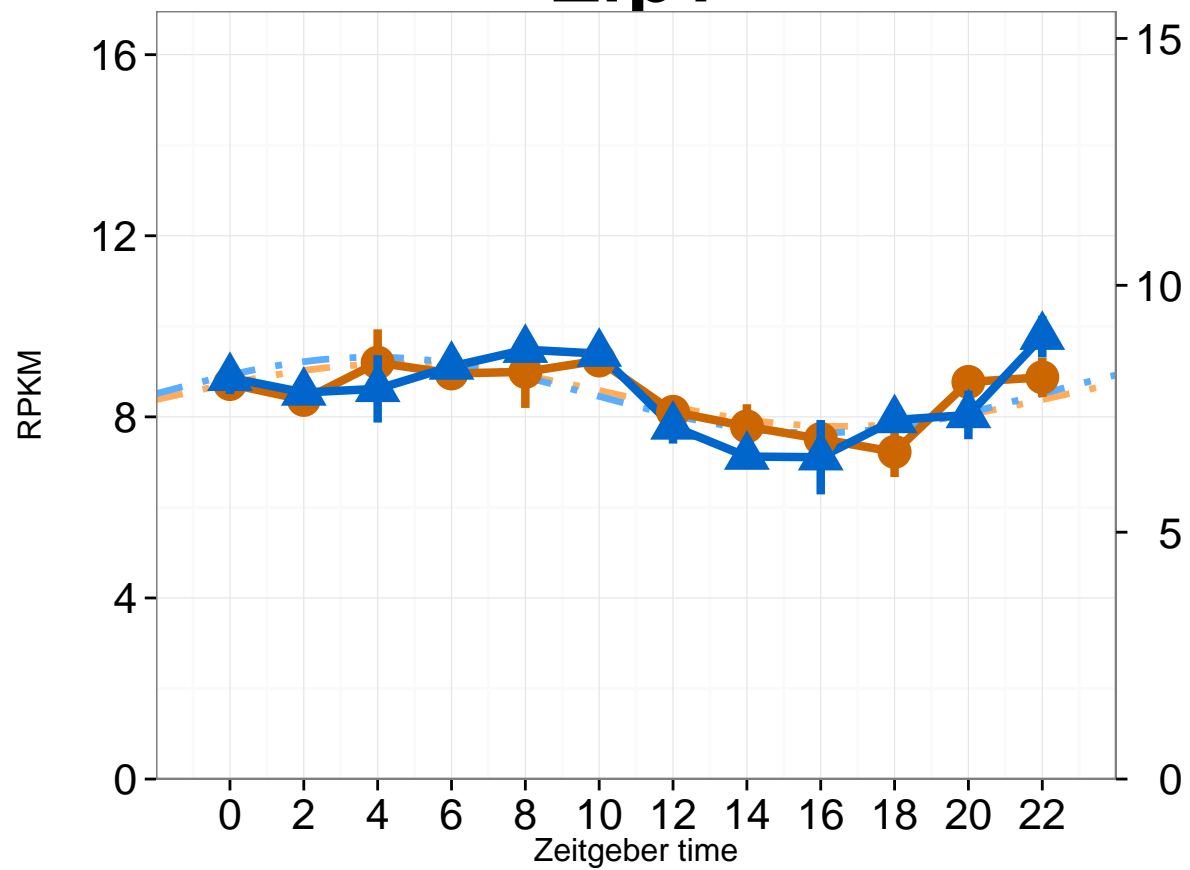

# Zfp1

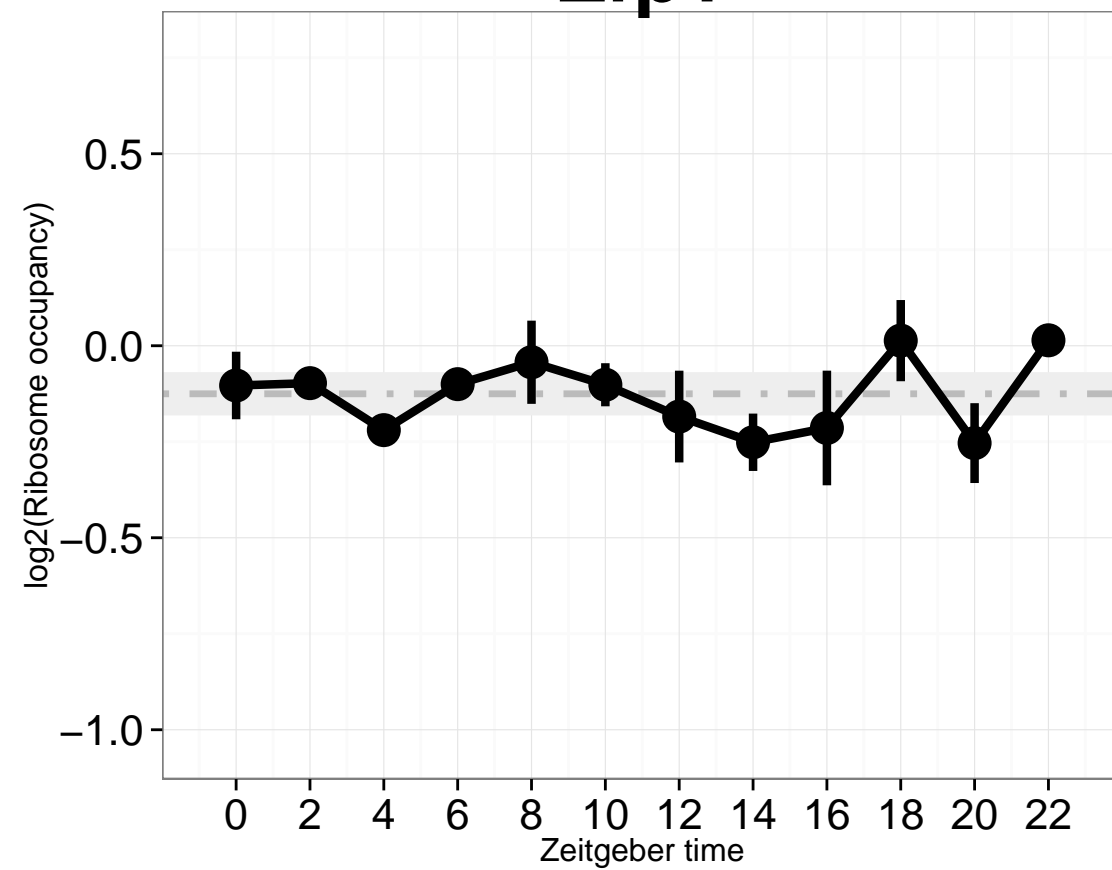

Supplement: Supplementary file 10762 [file 1]

## Mob4

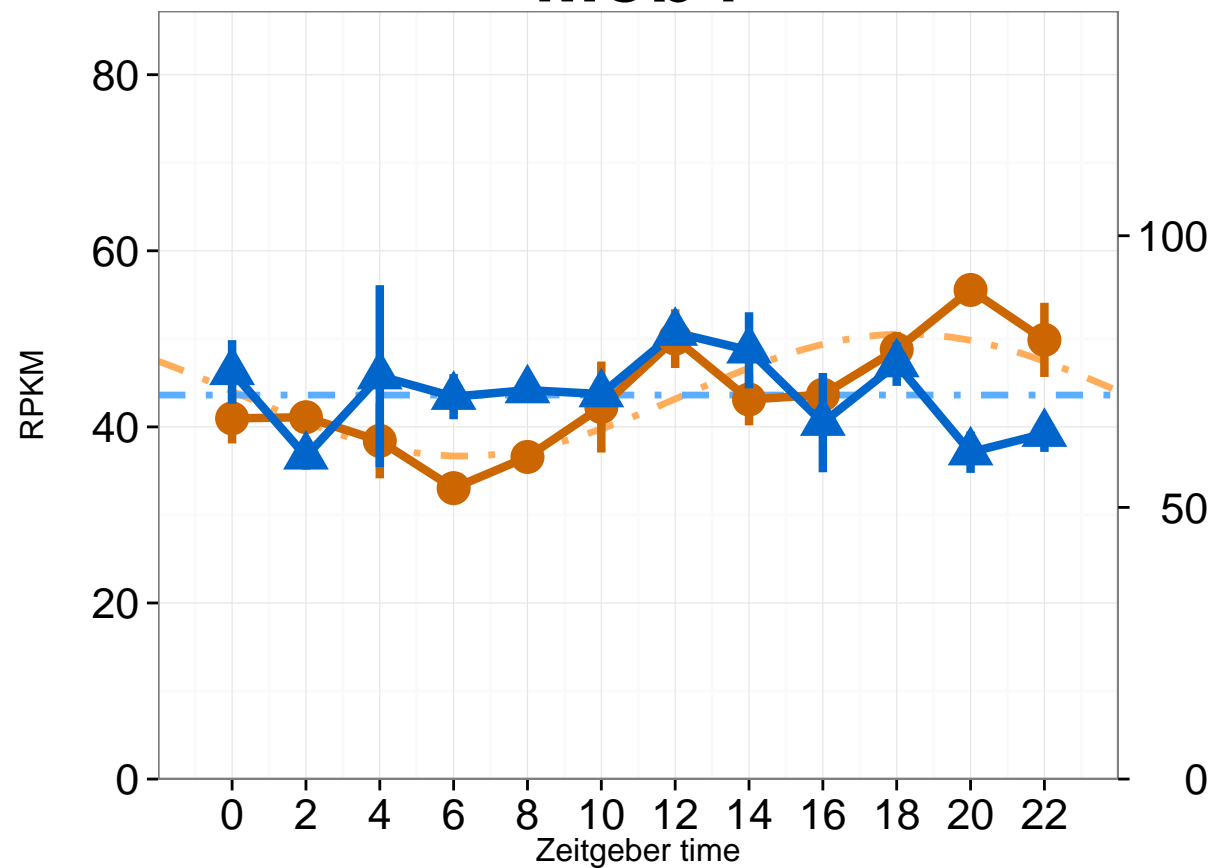

## Mob4

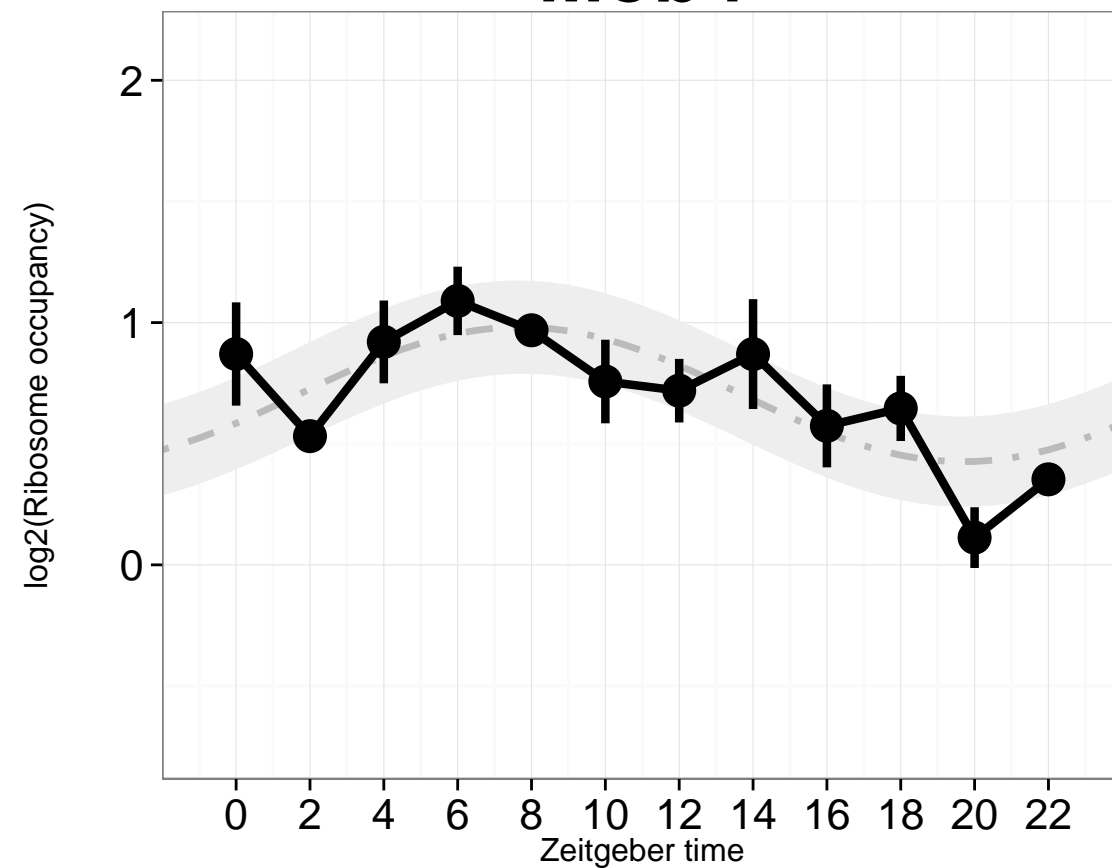

Supplement: Supplementary file 10763 [file 1]

Timm22

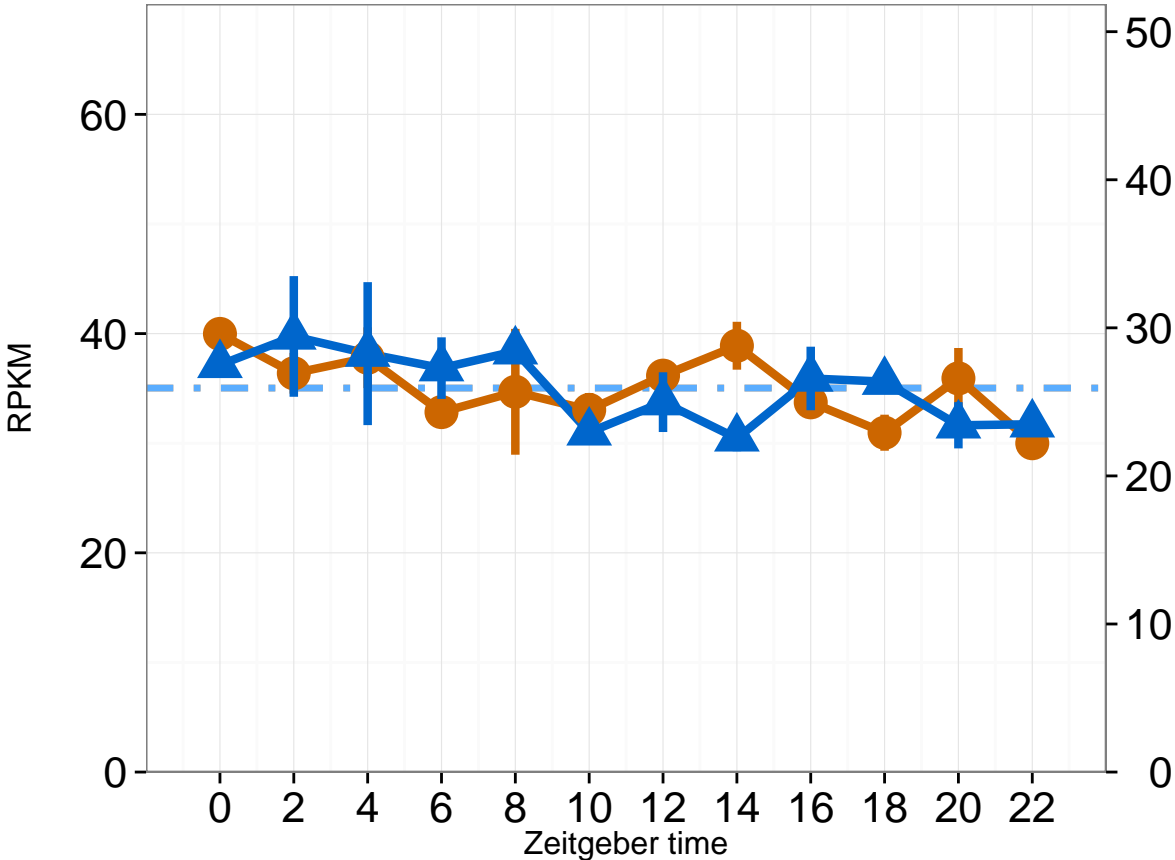

Timm22

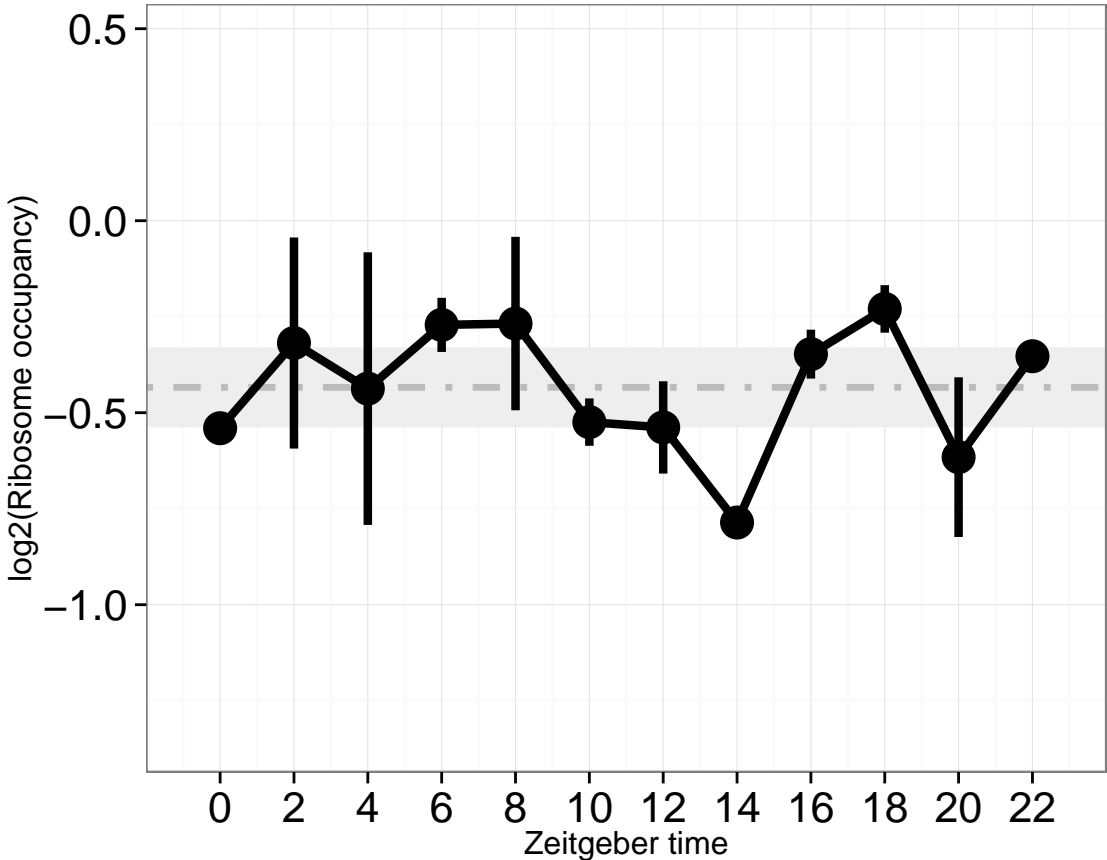

Supplement: Supplementary file 10764 [file 1]

# Armc8

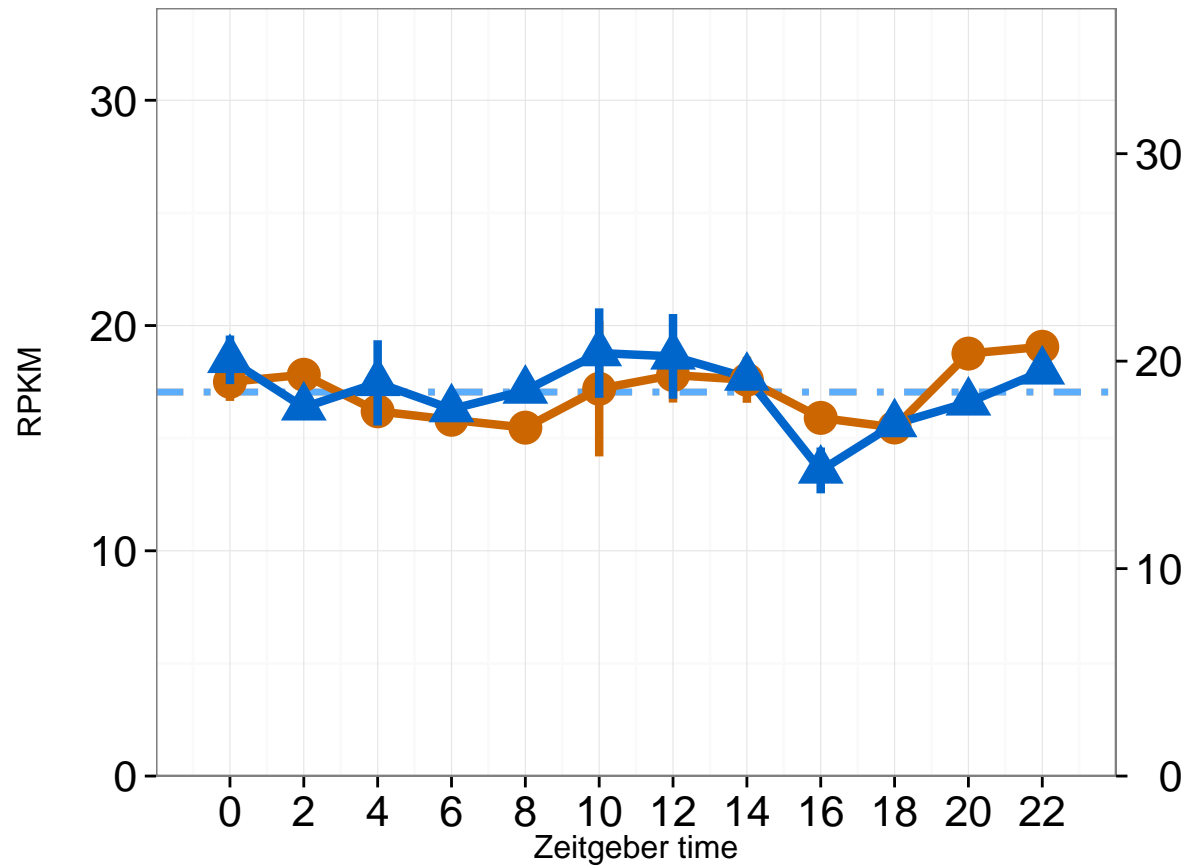

# Armc8

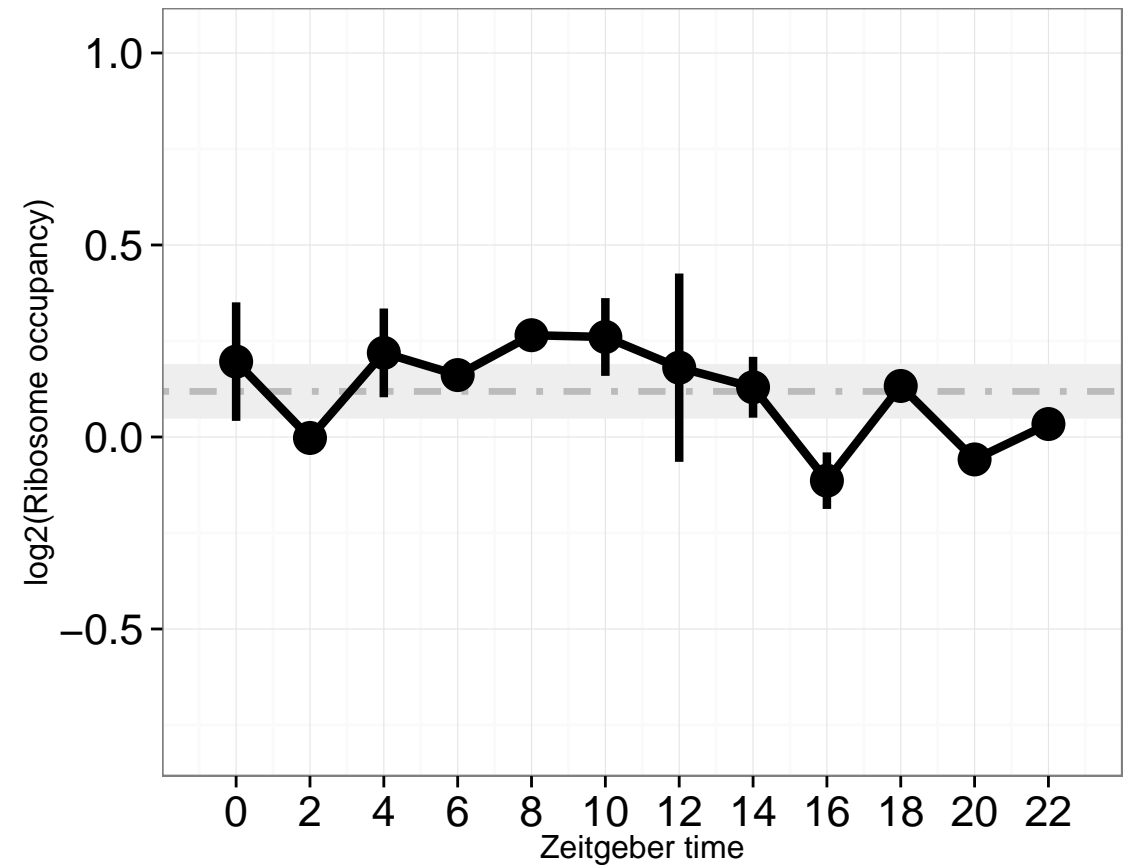

Supplement: Supplementary file 10765 [file 1]

## Spns1

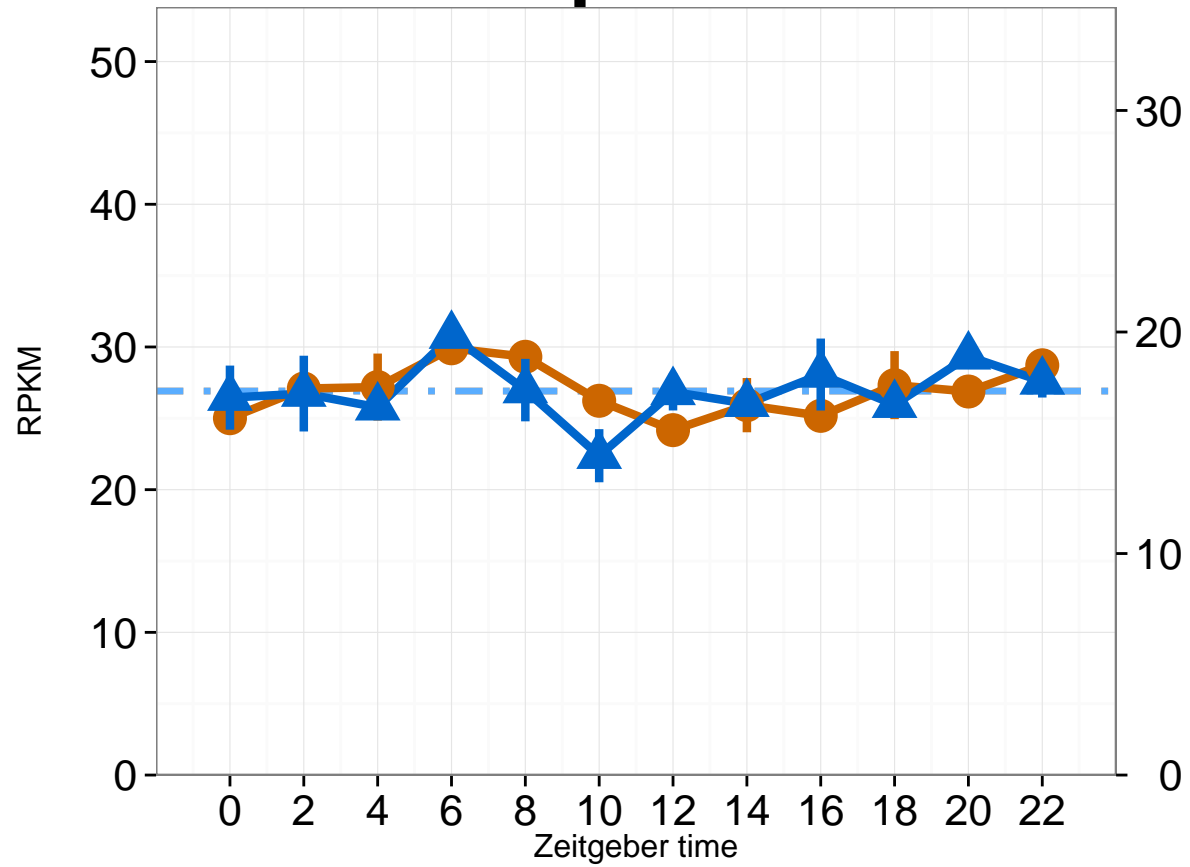

## Spns1

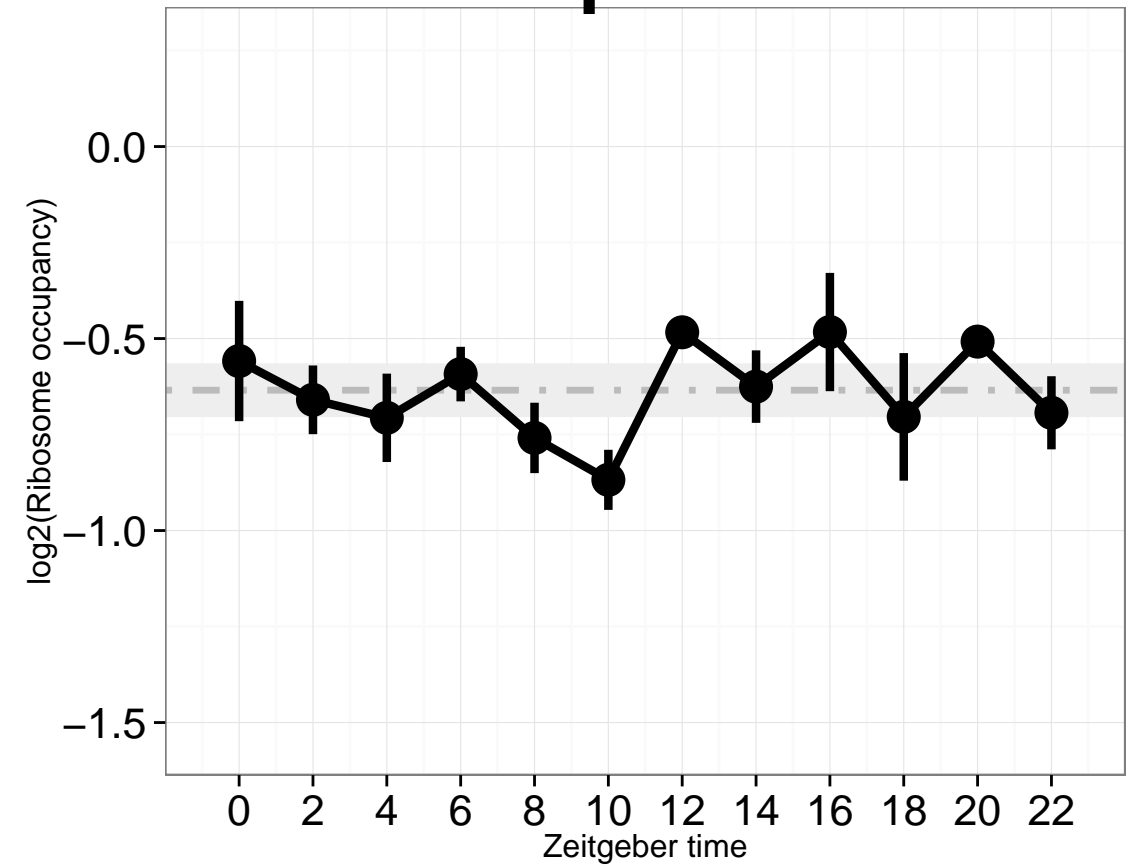

Supplement: Supplementary file 10766 [file 1]

## Abhd4

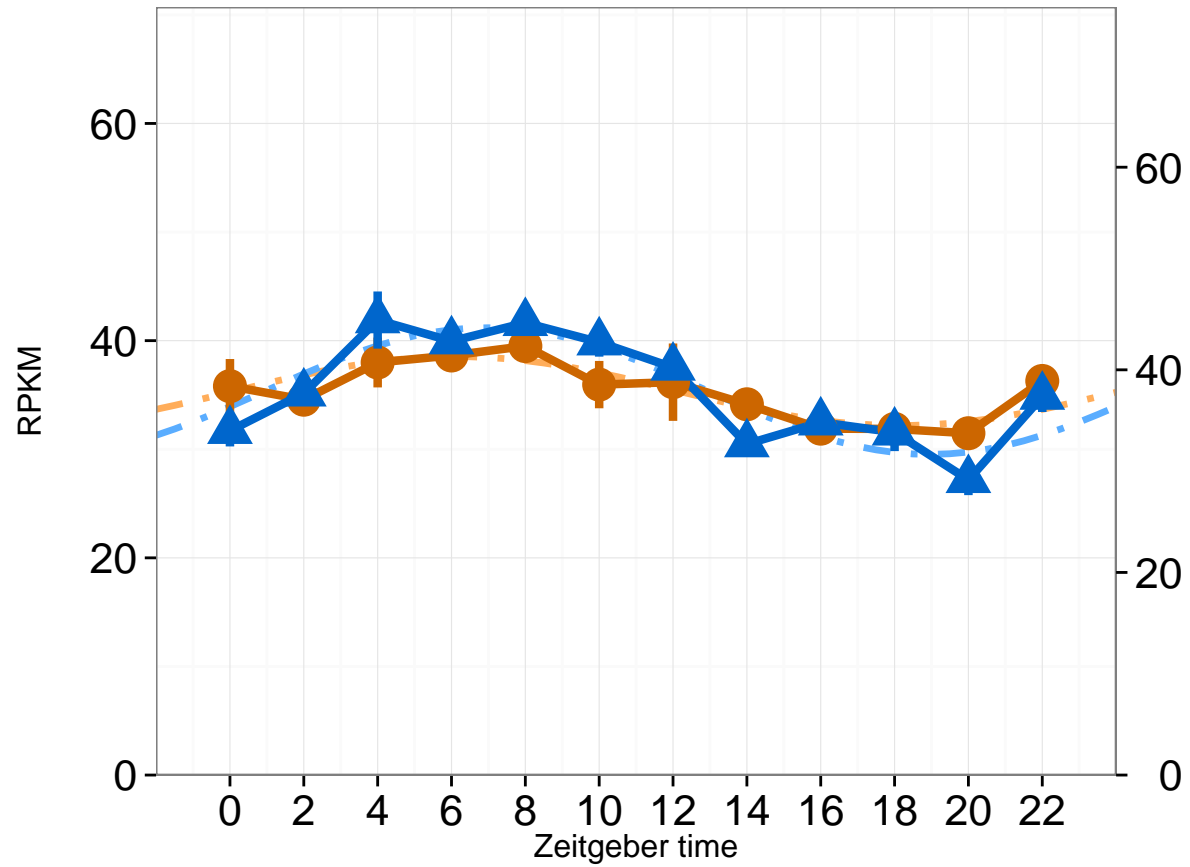

## Abhd4

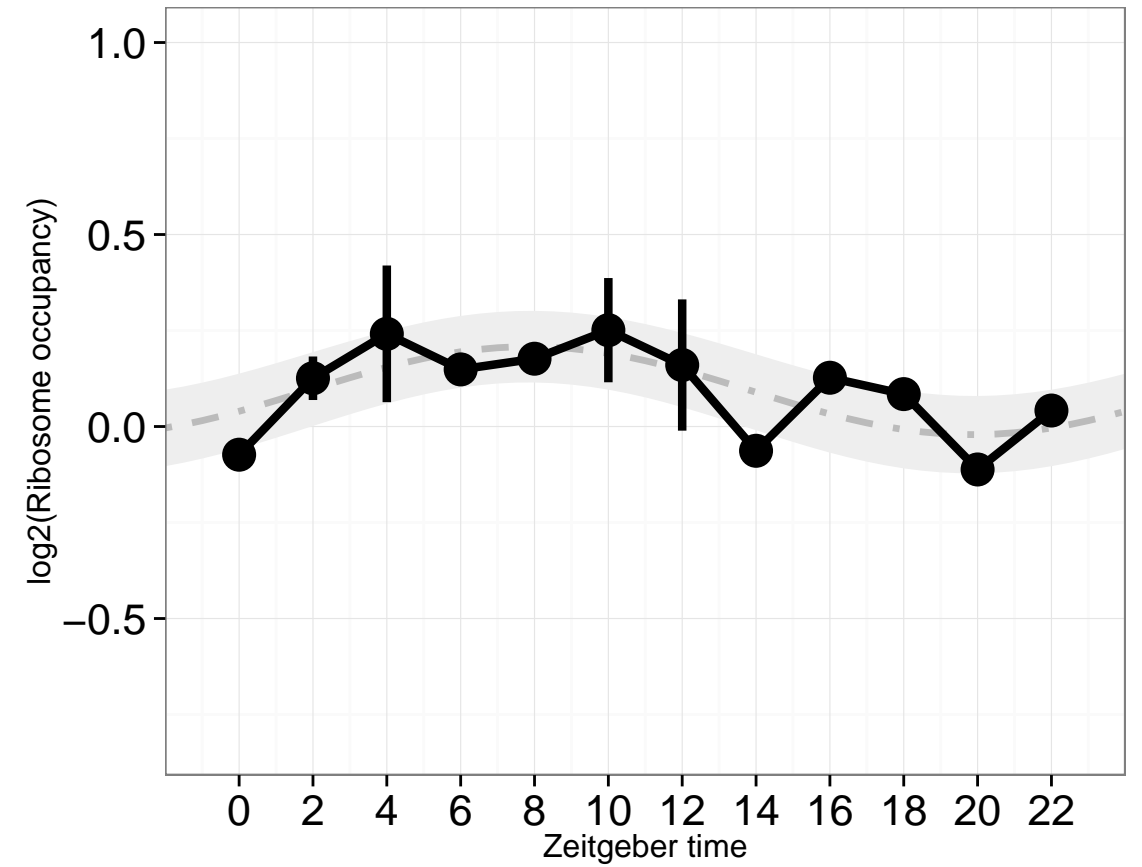

Supplement: Supplementary file 10767 [file 1]

# Adora2b

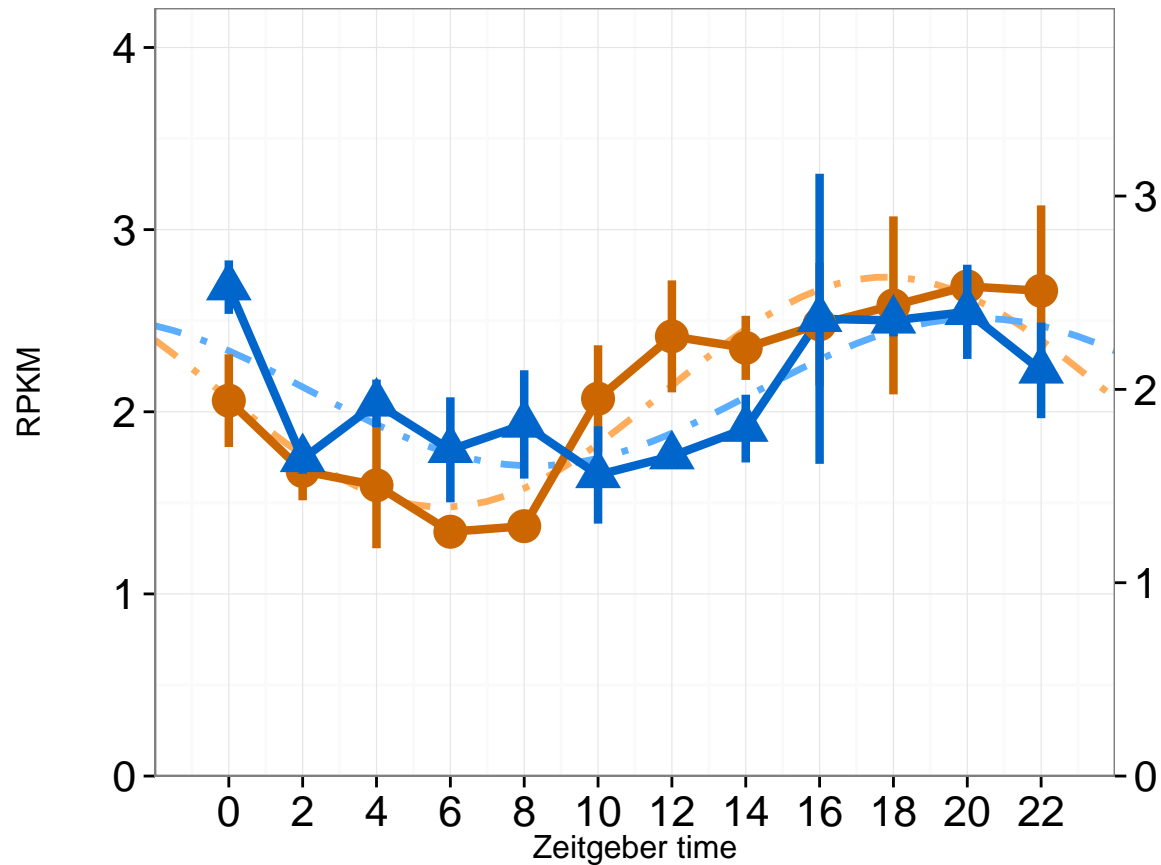

# Adora2b

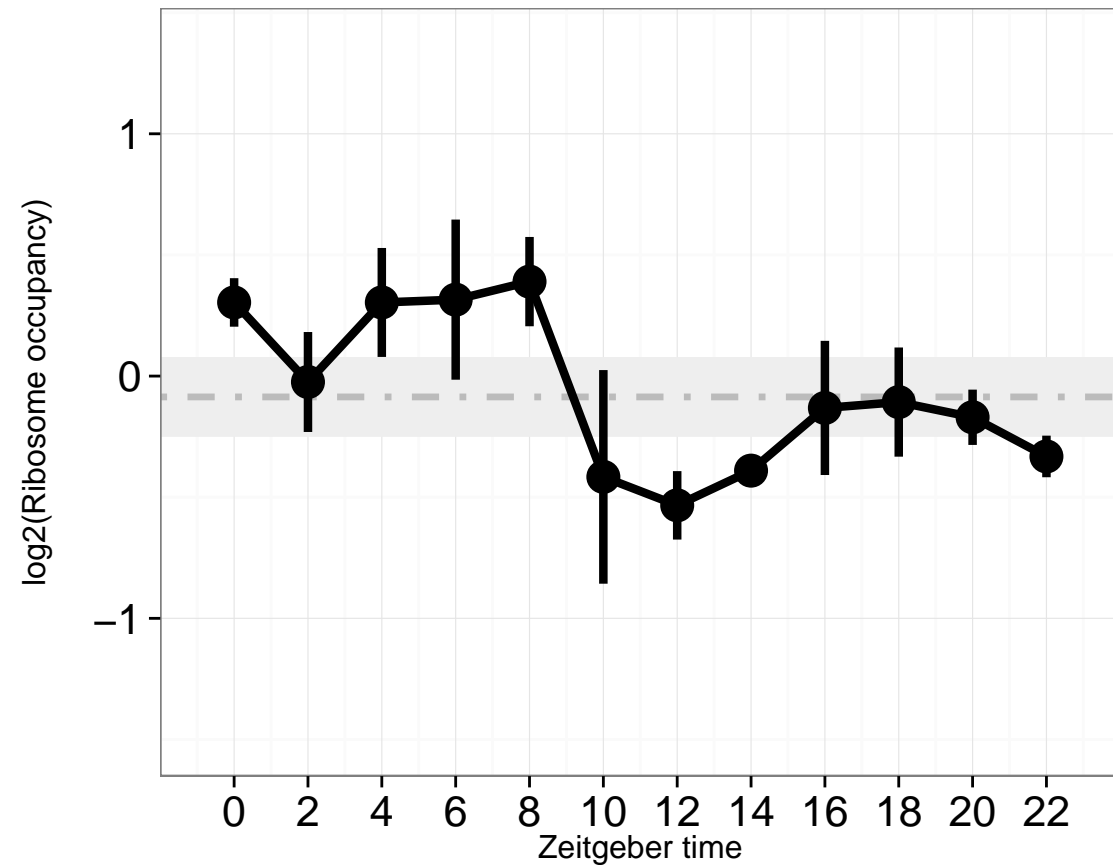

Supplement: Supplementary file 10768 [file 1]

## Ccdc137

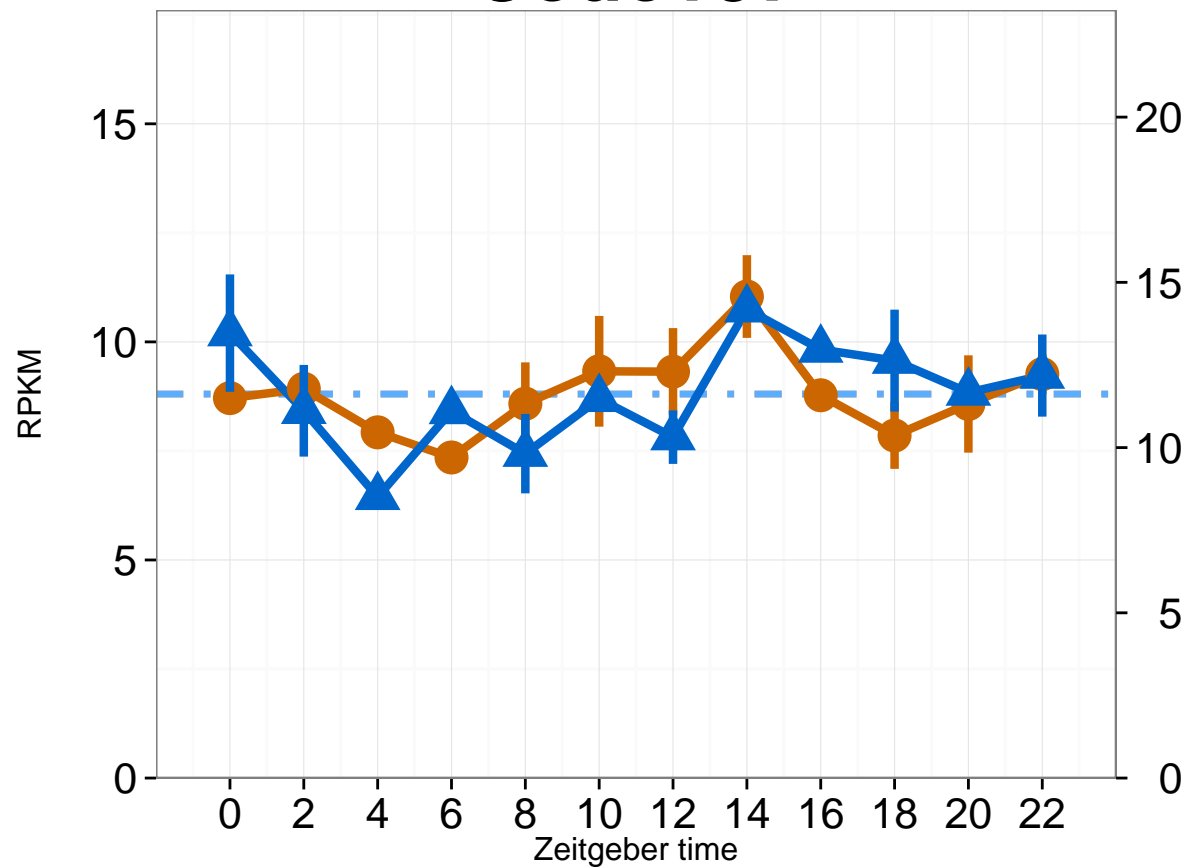

## Ccdc137

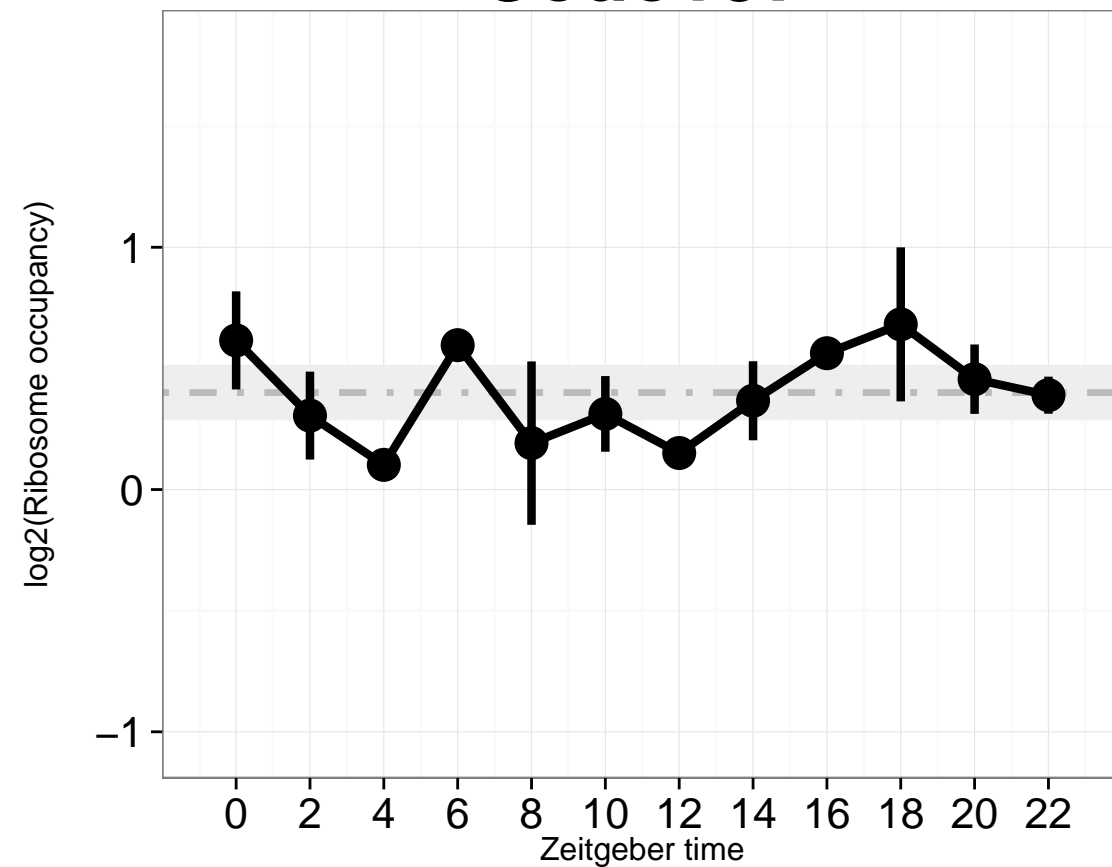

Supplement: Supplementary file 10769 [file 1]

## Osmr

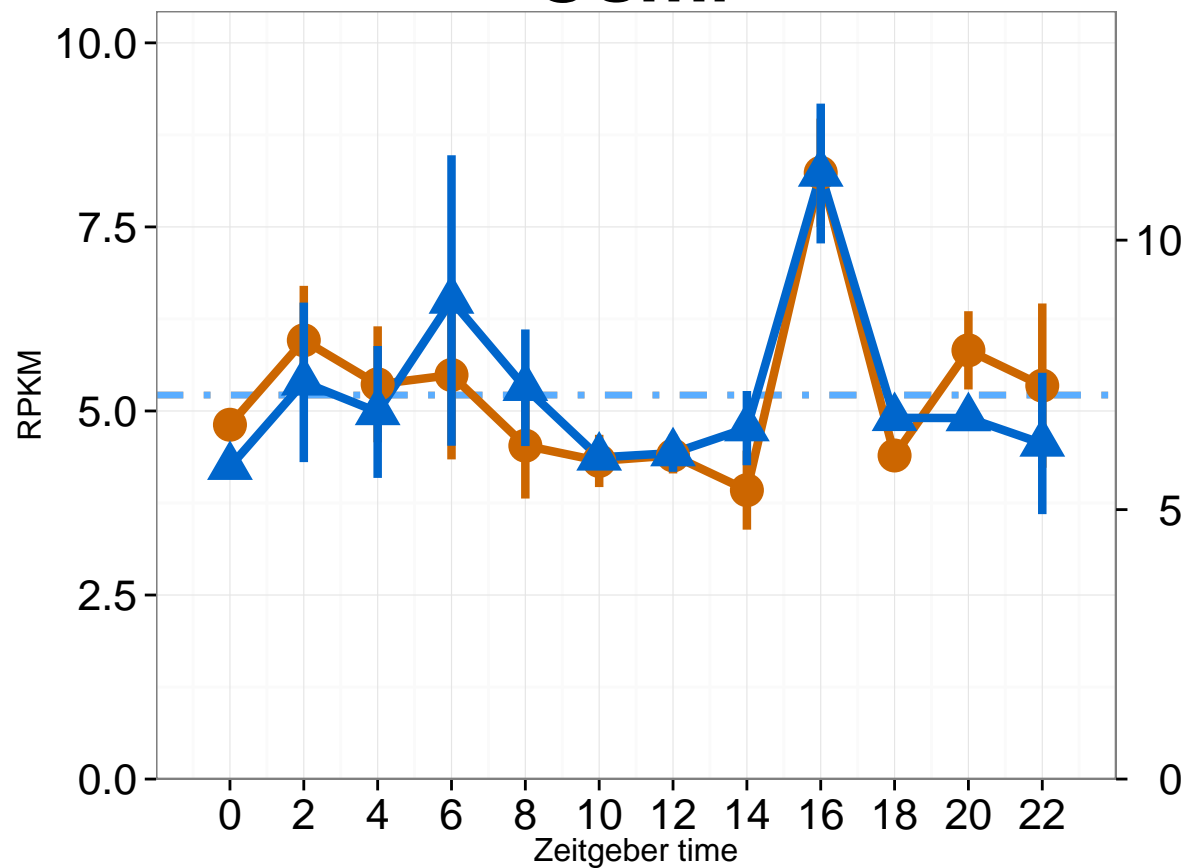

## Osmr

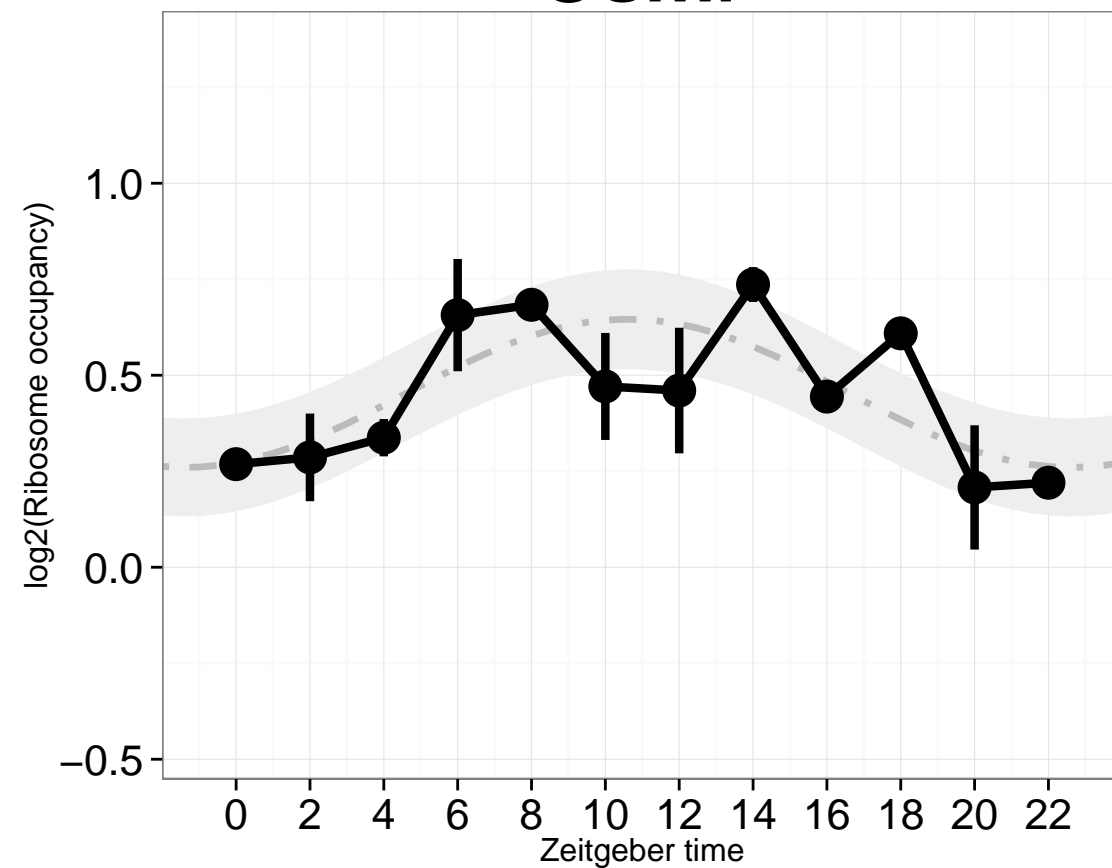

Supplement: Supplementary file 10770 [file 1]

# Ccdc102a

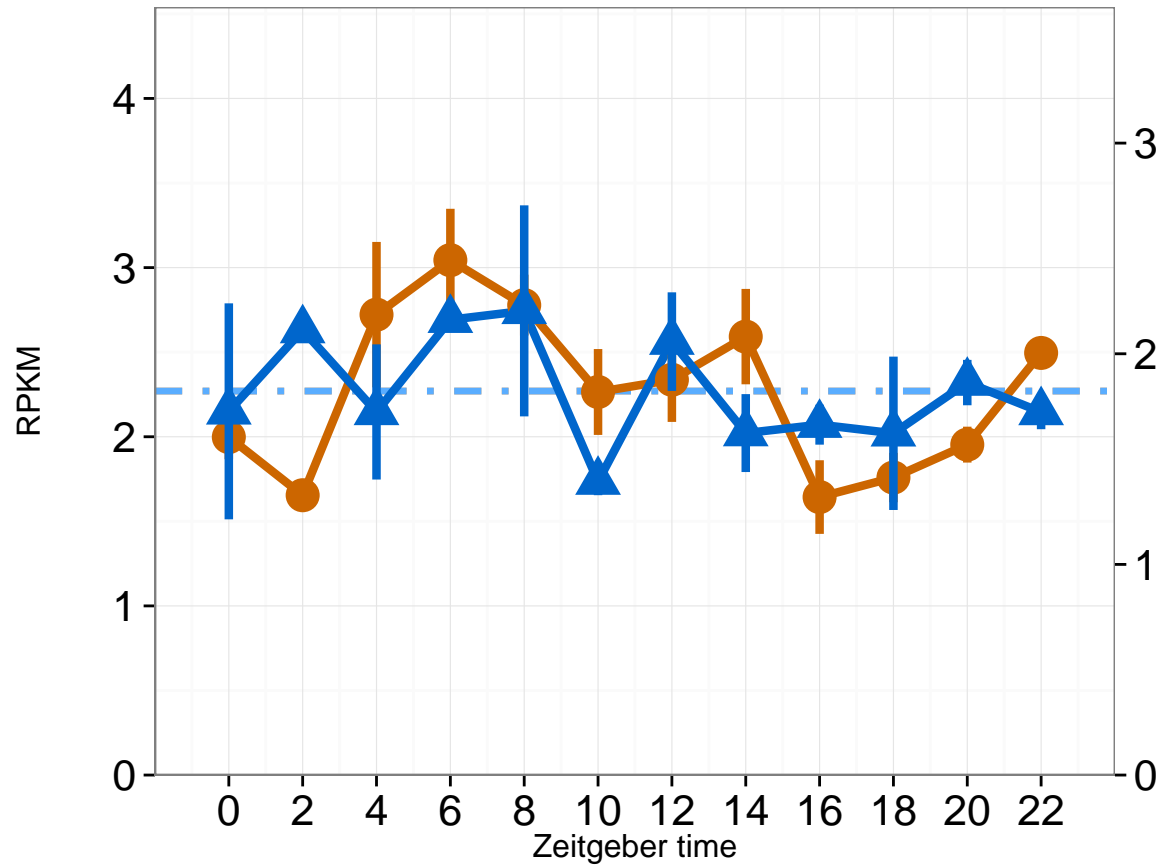

# Ccdc102a

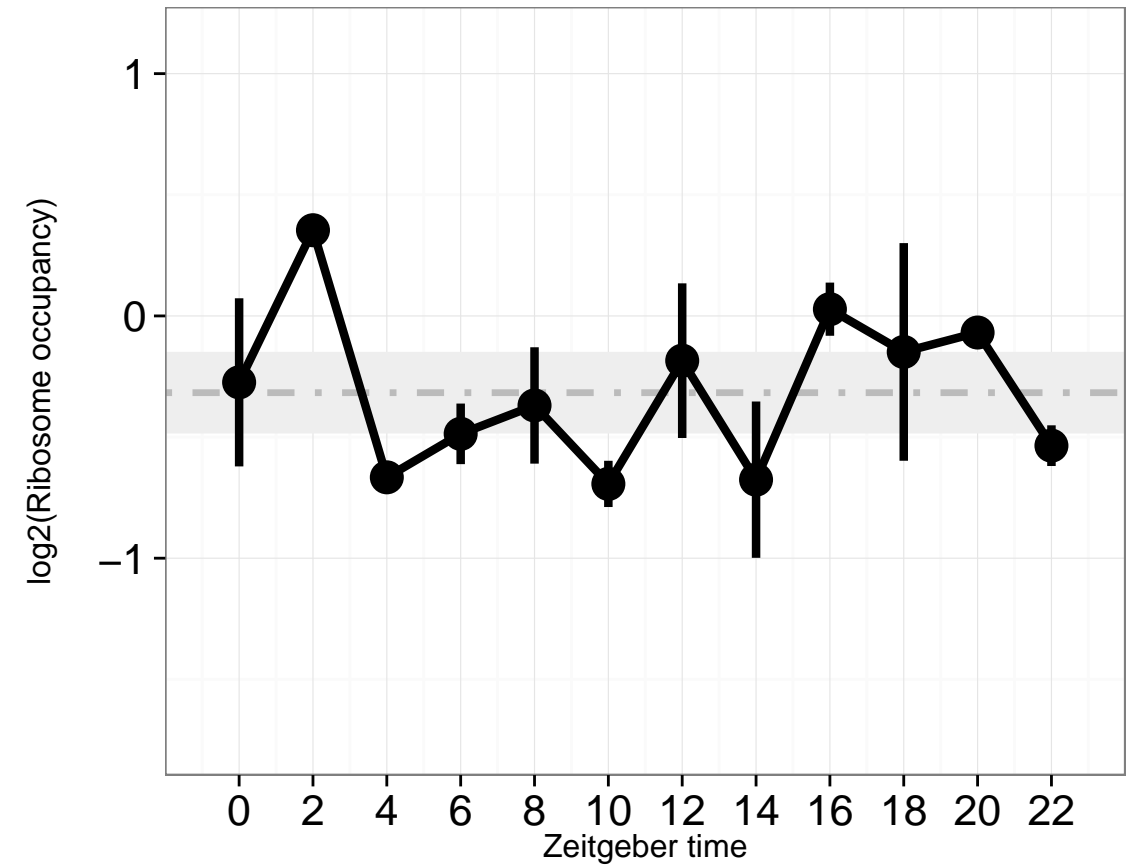

Supplement: Supplementary file 10771 [file 1]

## Dcaf15

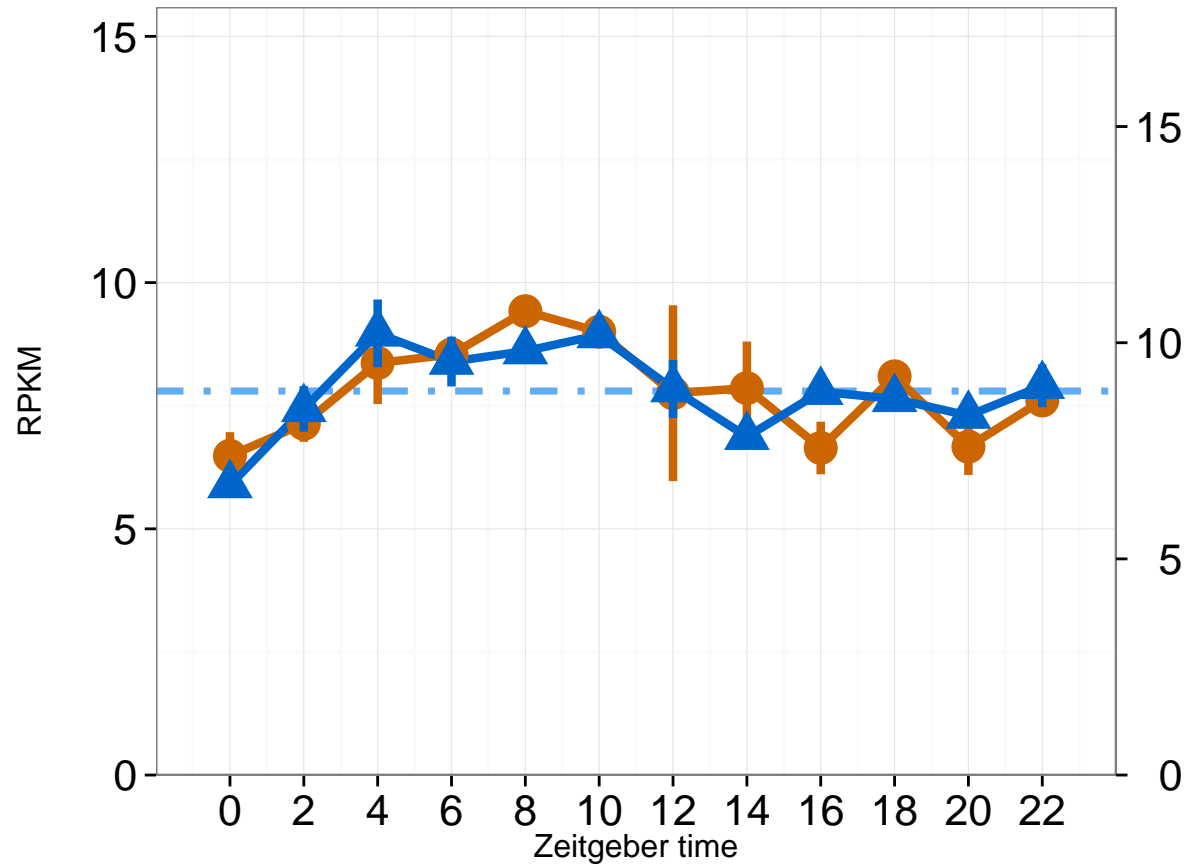

## Dcaf15

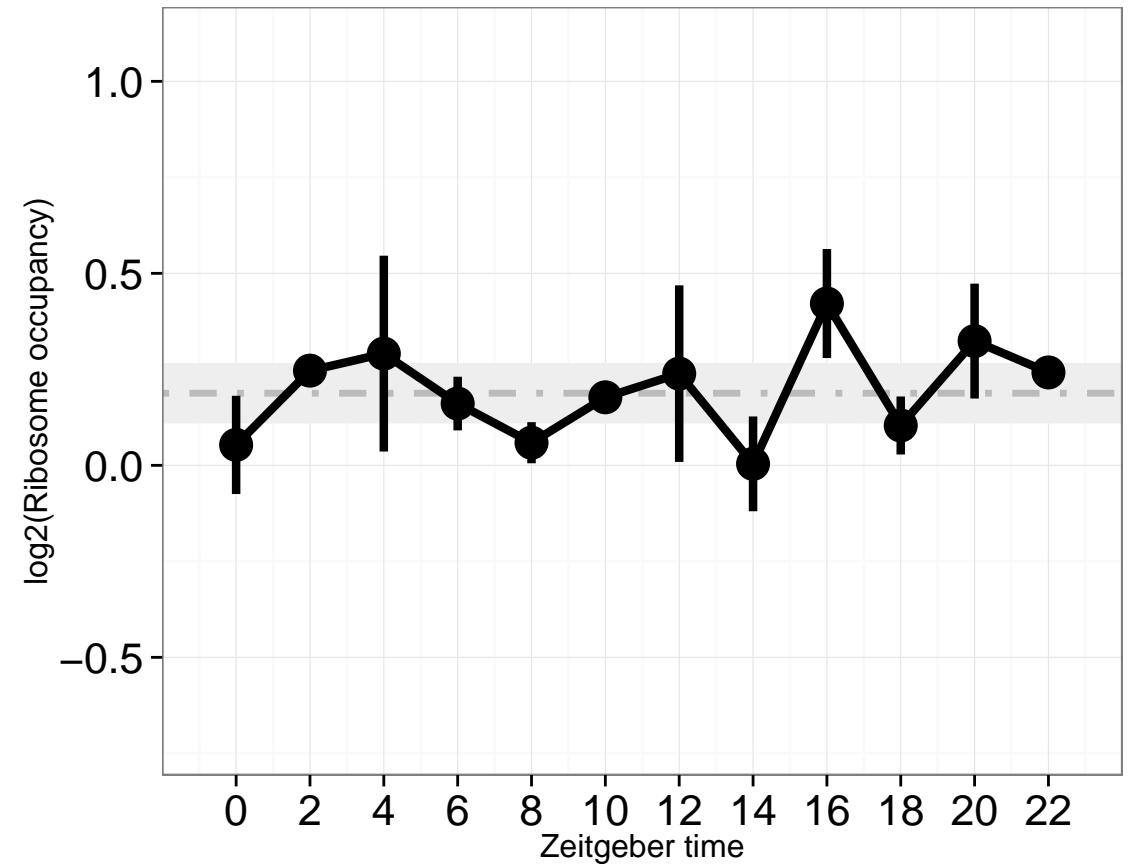

Supplement: Supplementary file 10772 [file 1]

## Zeb2

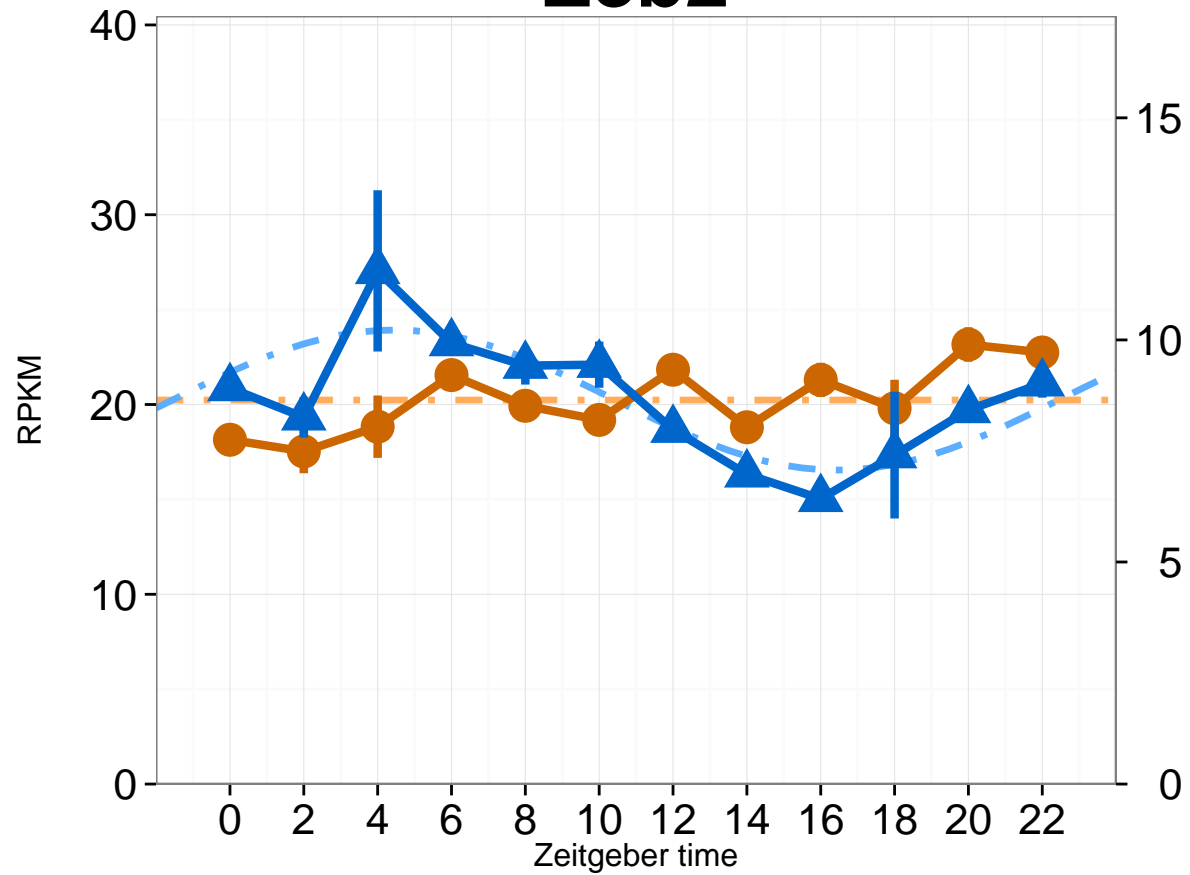

## Zeb2

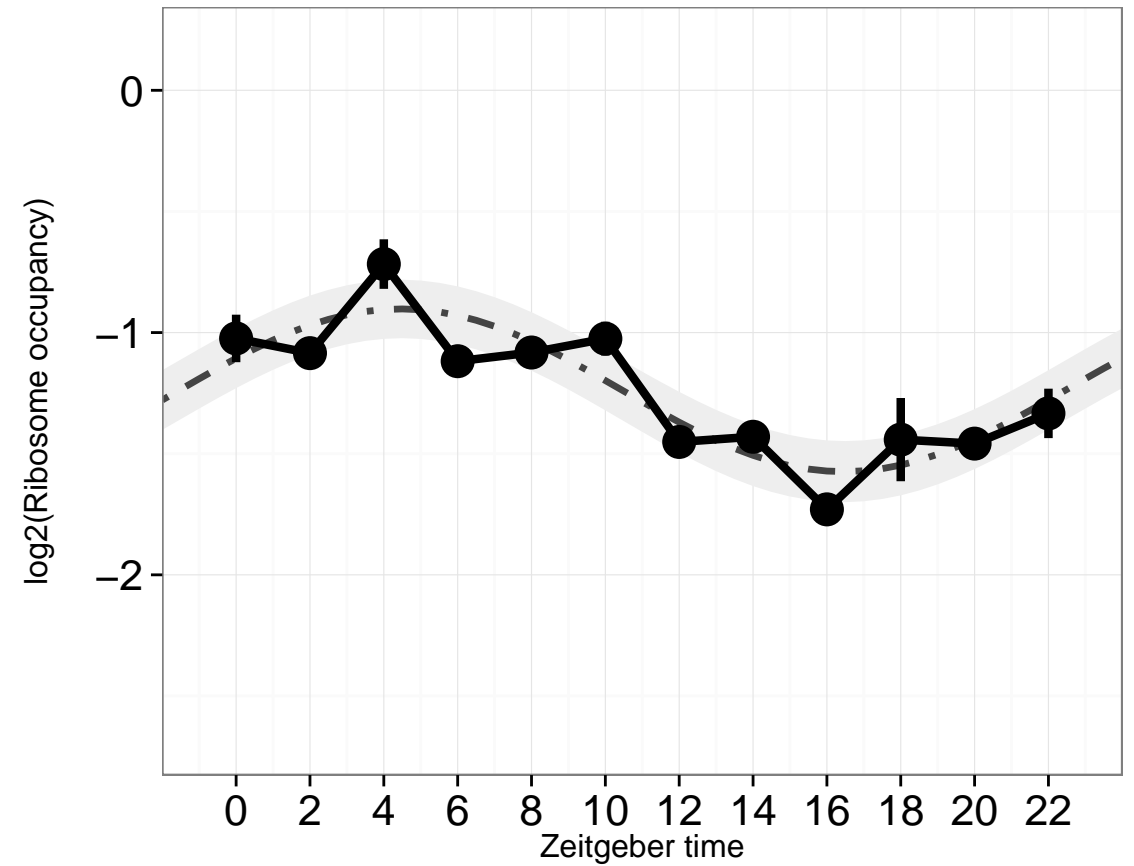

Supplement: Supplementary file 10773 [file 1]

## Susd5

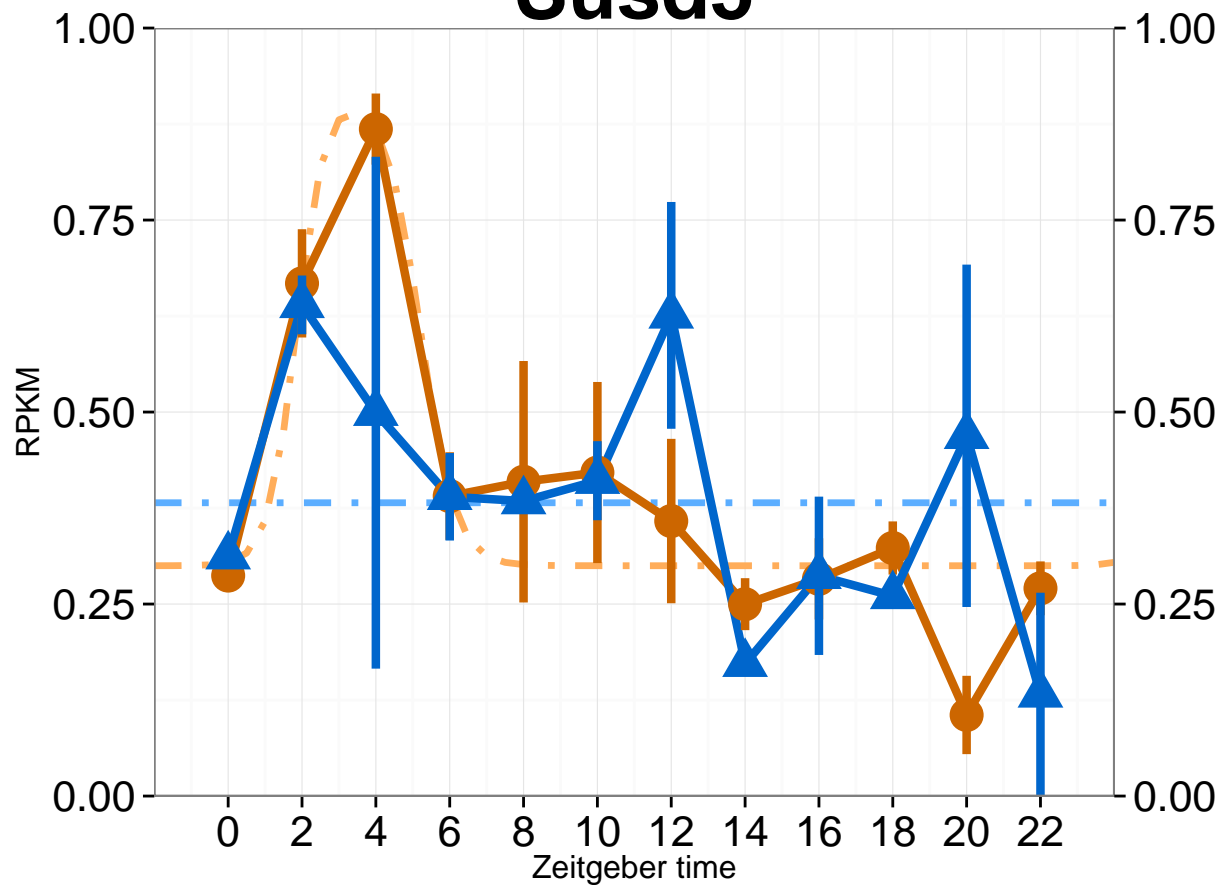

## Susd5

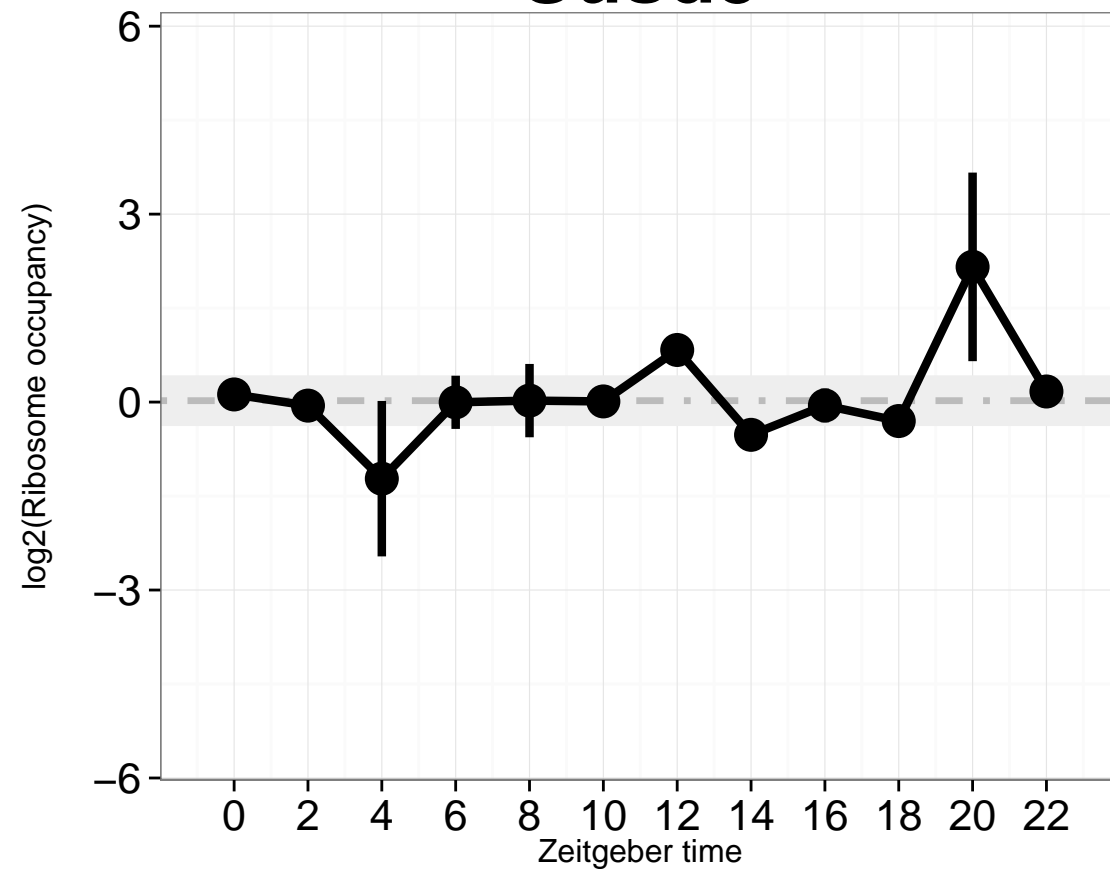

Supplement: Supplementary file 10774 [file 1]

## Ncdn

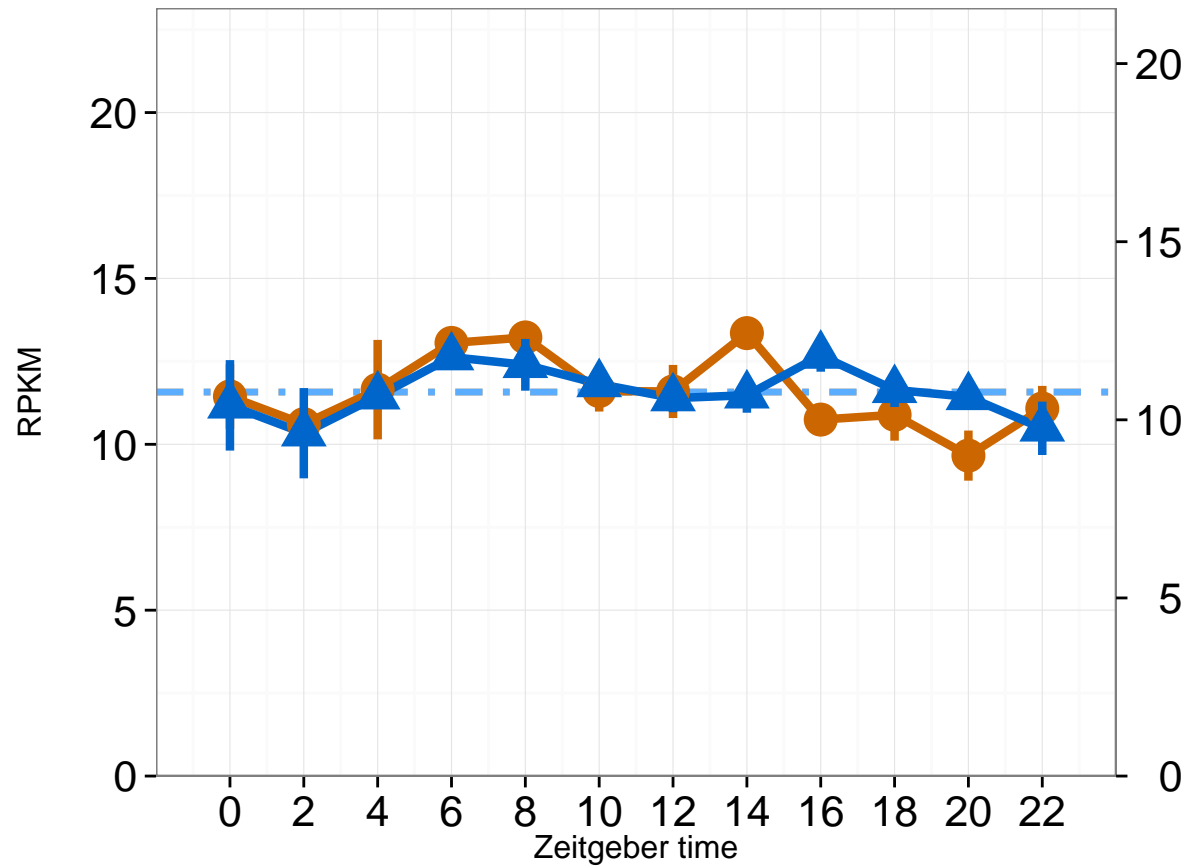

## Ncdn

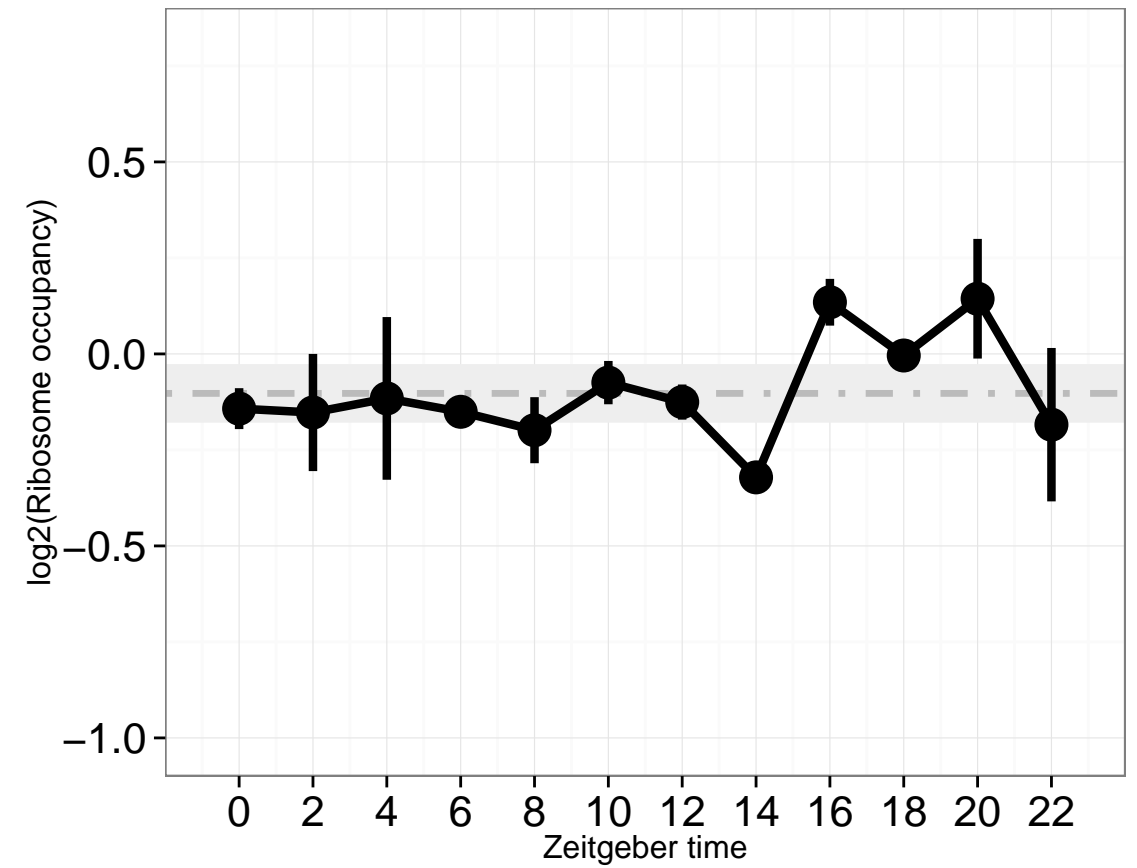

Supplement: Supplementary file 10775 [file 1]

## Srgn

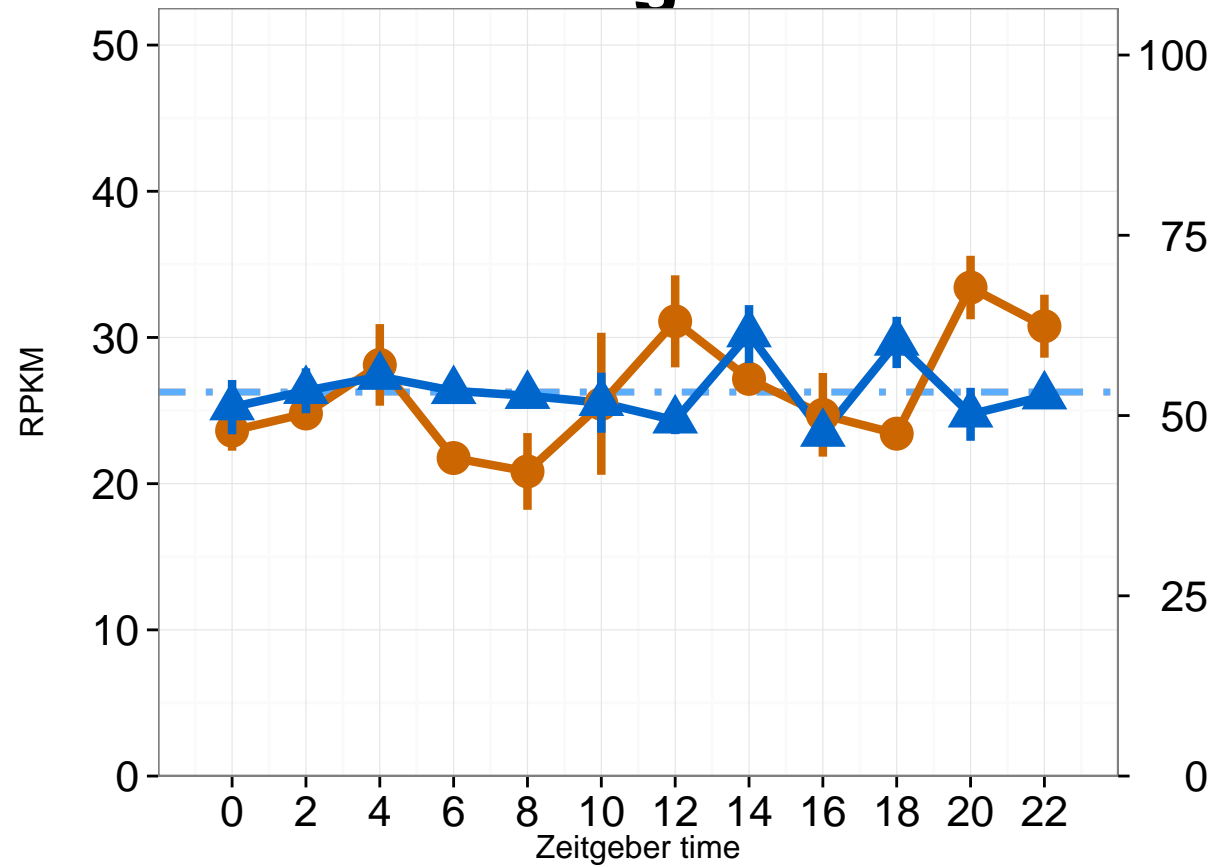

## Srgn

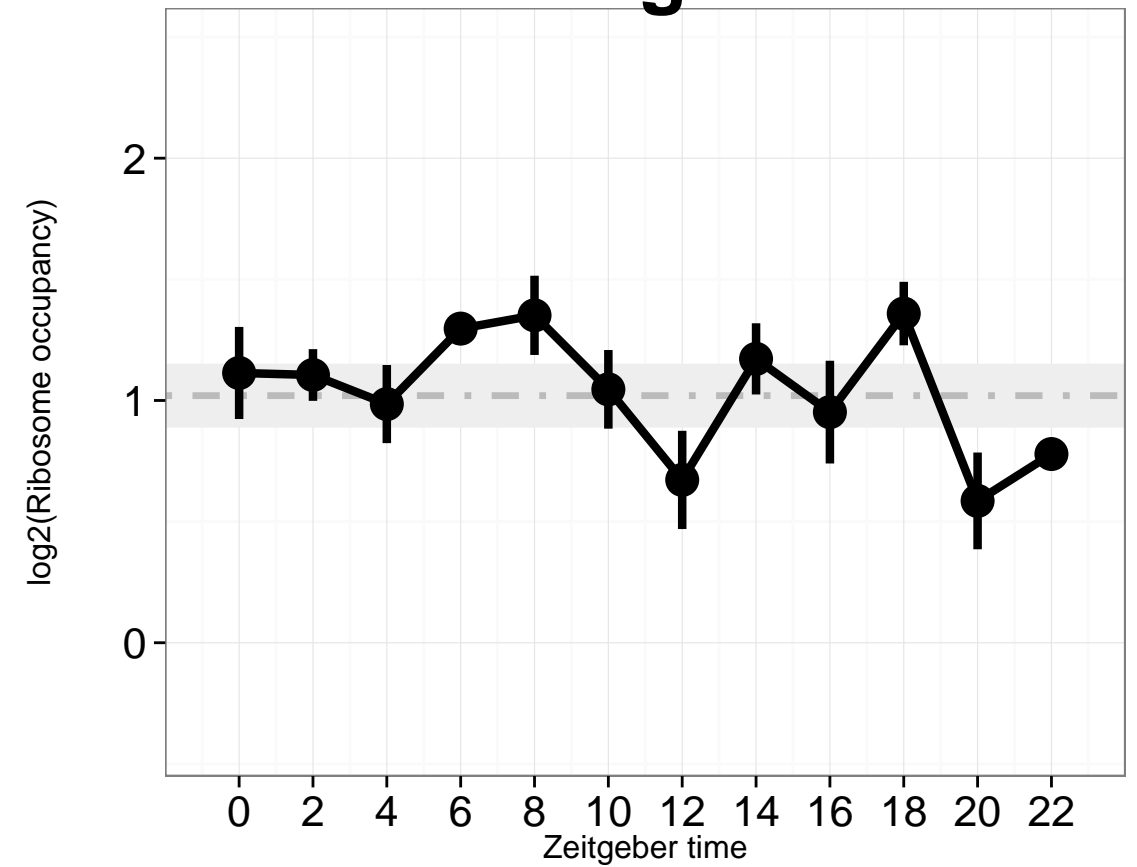

Supplement: Supplementary file 10776 [file 1]

**Apoc1 TR**

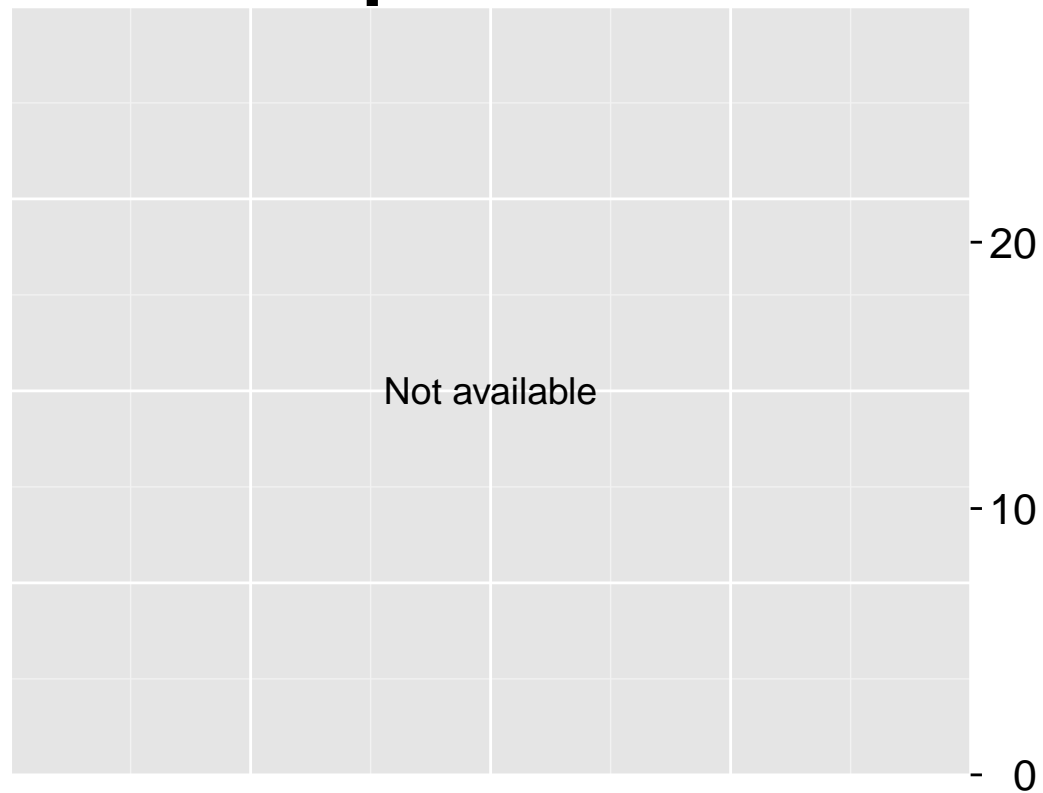

**Apoc1 log2(Ribosome occupancy**

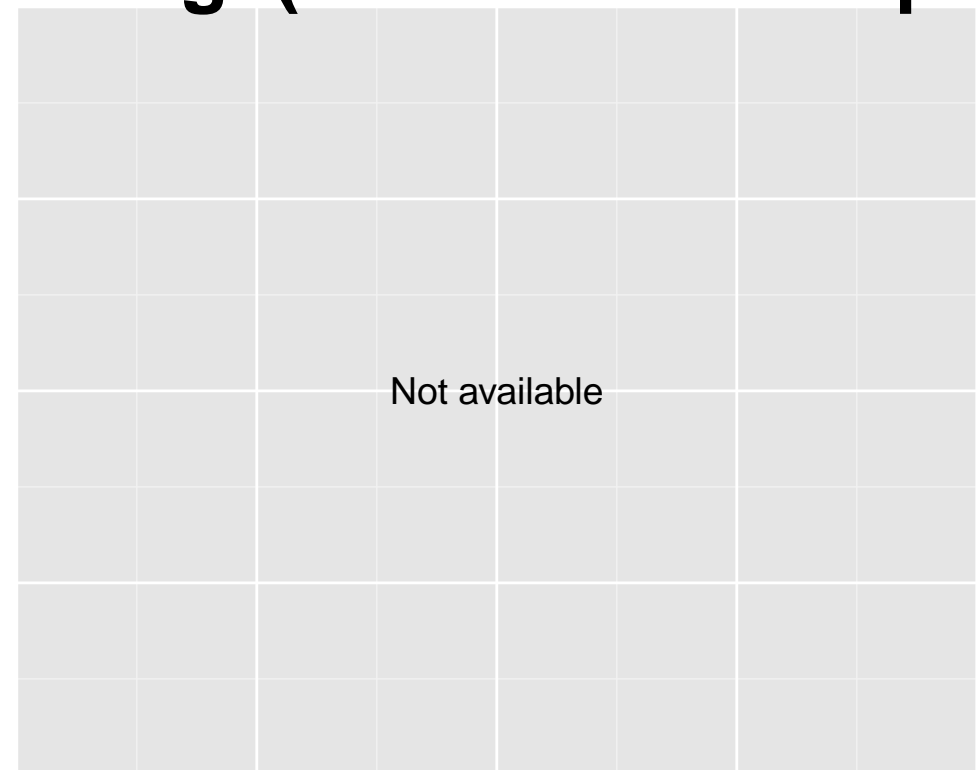

Supplement: Supplementary file 10777 [file 1]

## 2610044O15Rik8

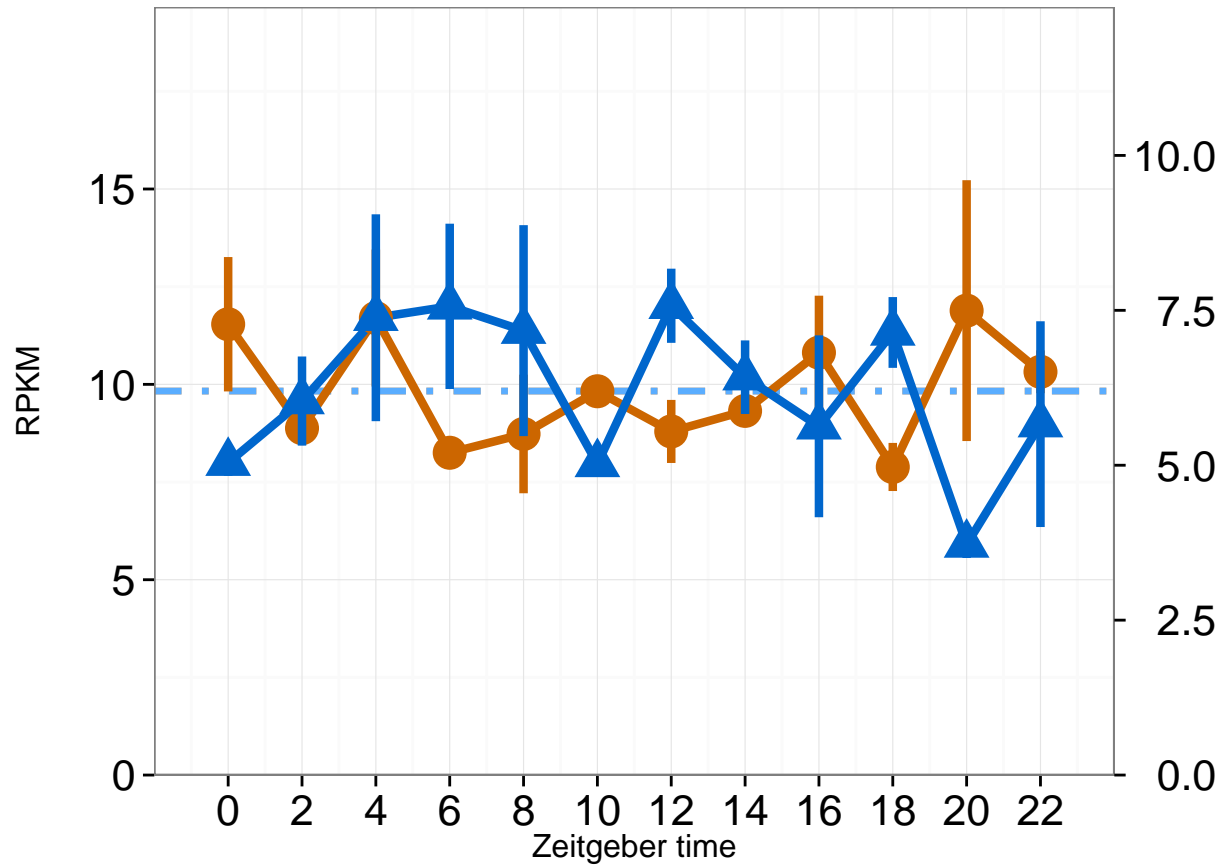

## 2610044O15Rik8

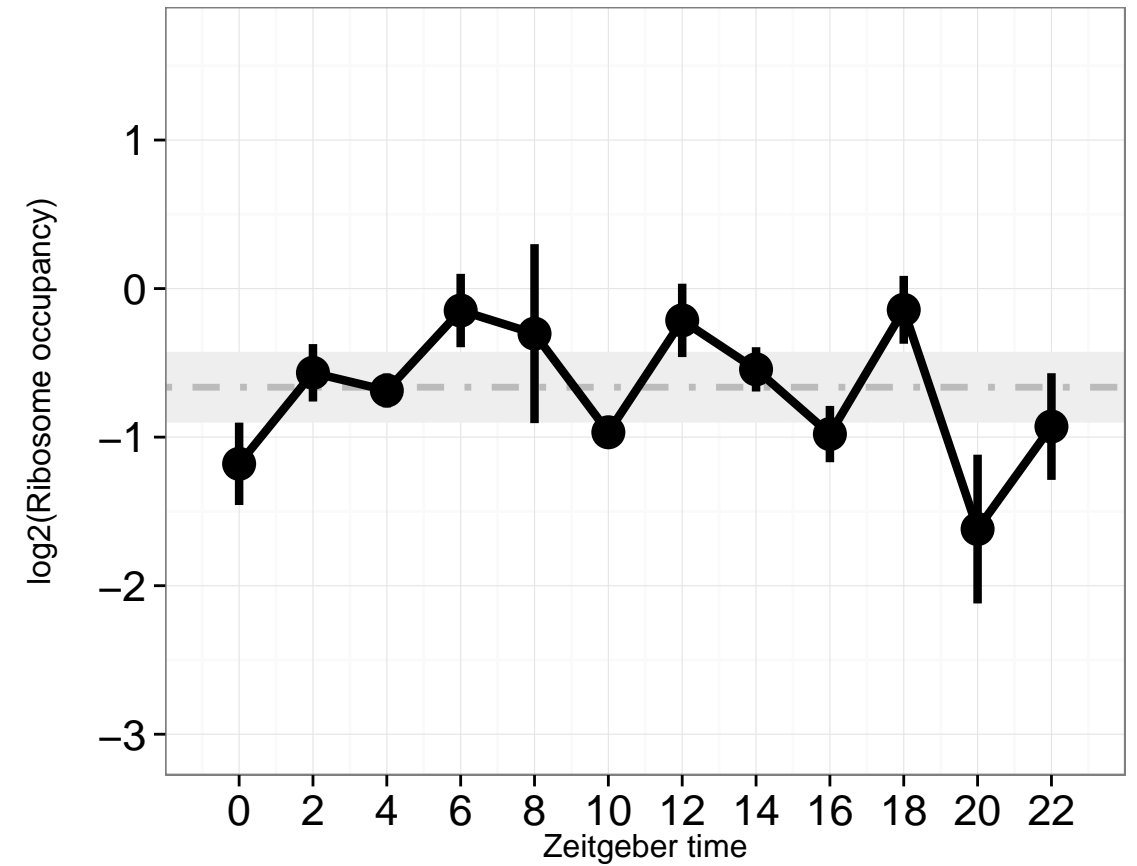

Supplement: Supplementary file 10778 [file 1]

# Lrrc51

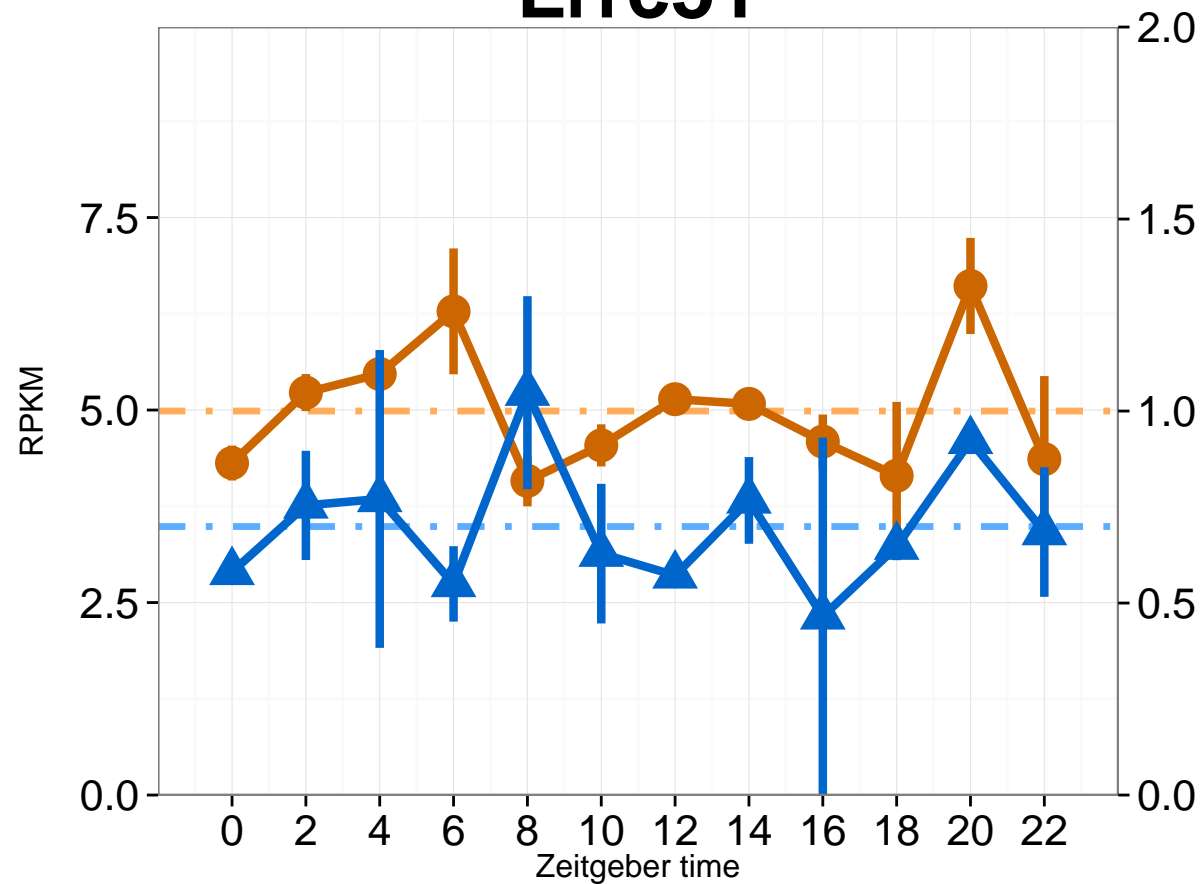

# Lrrc51

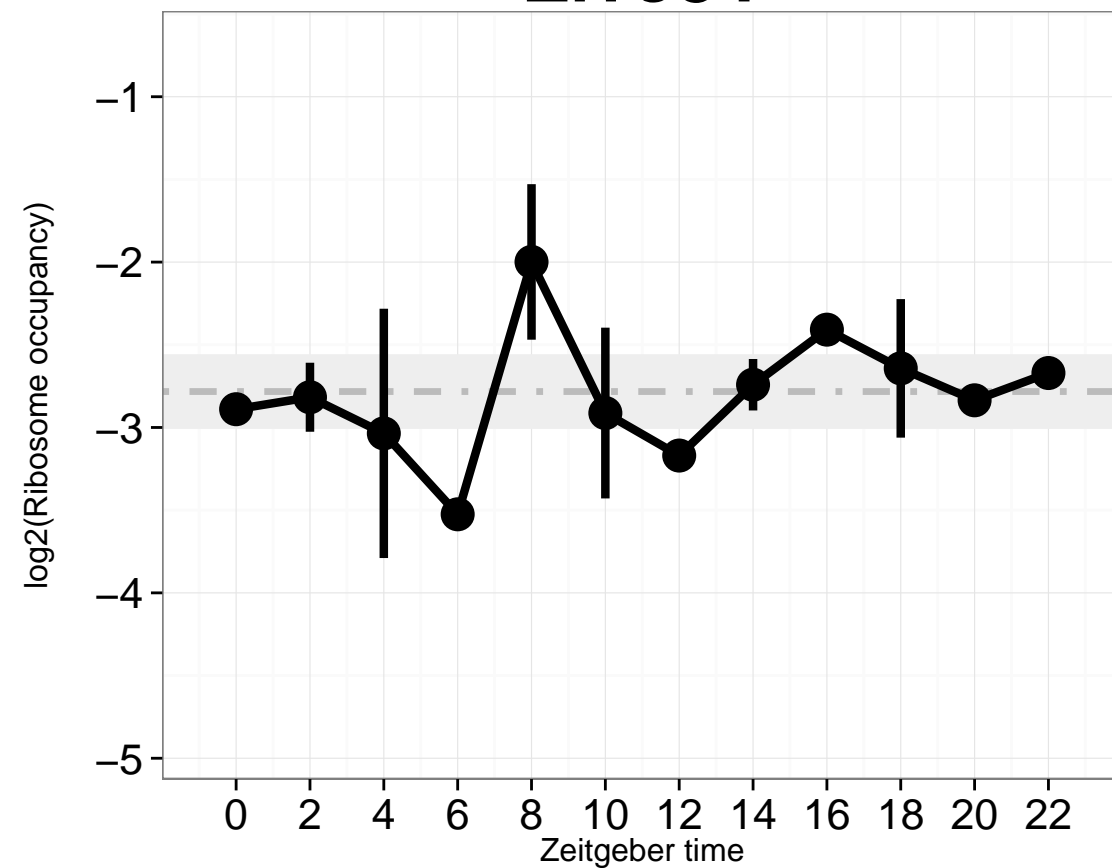

Supplement: Supplementary file 10779 [file 1]

## Emc3

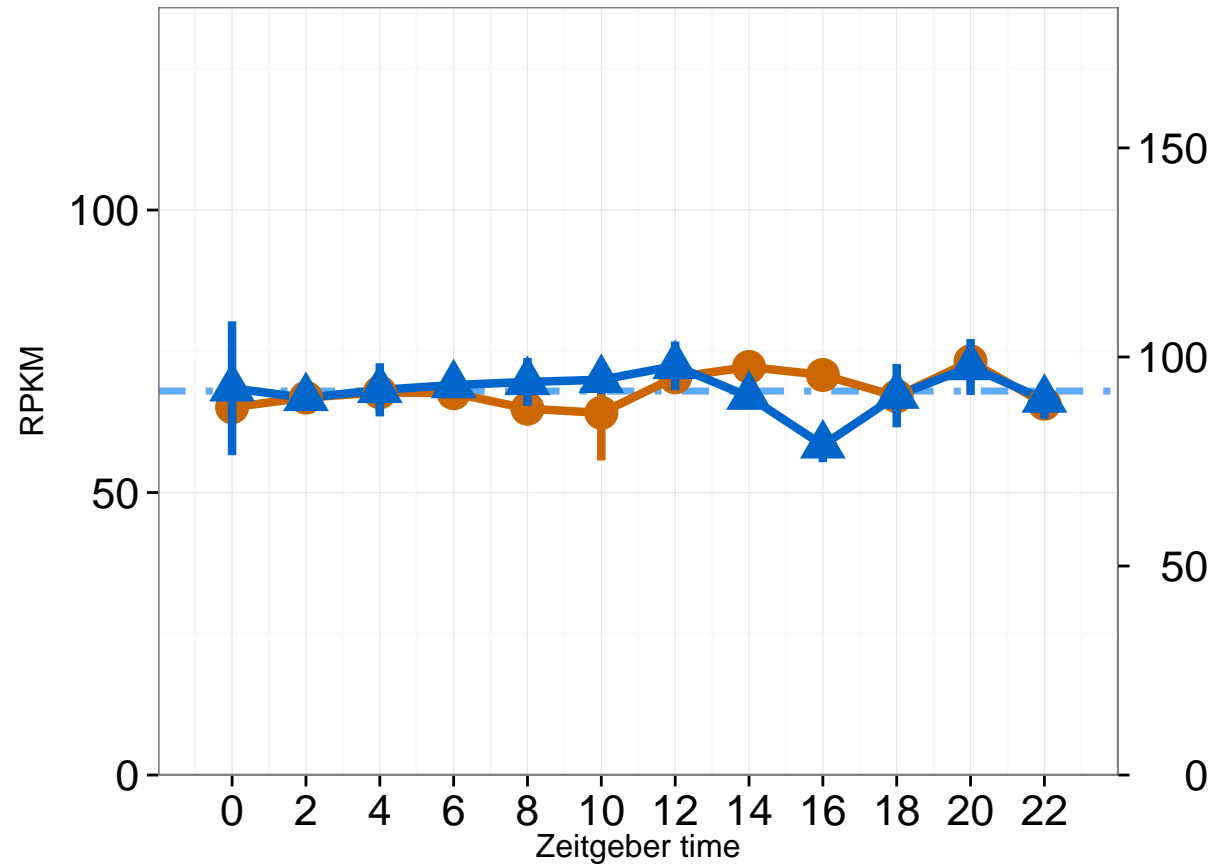

## Emc3

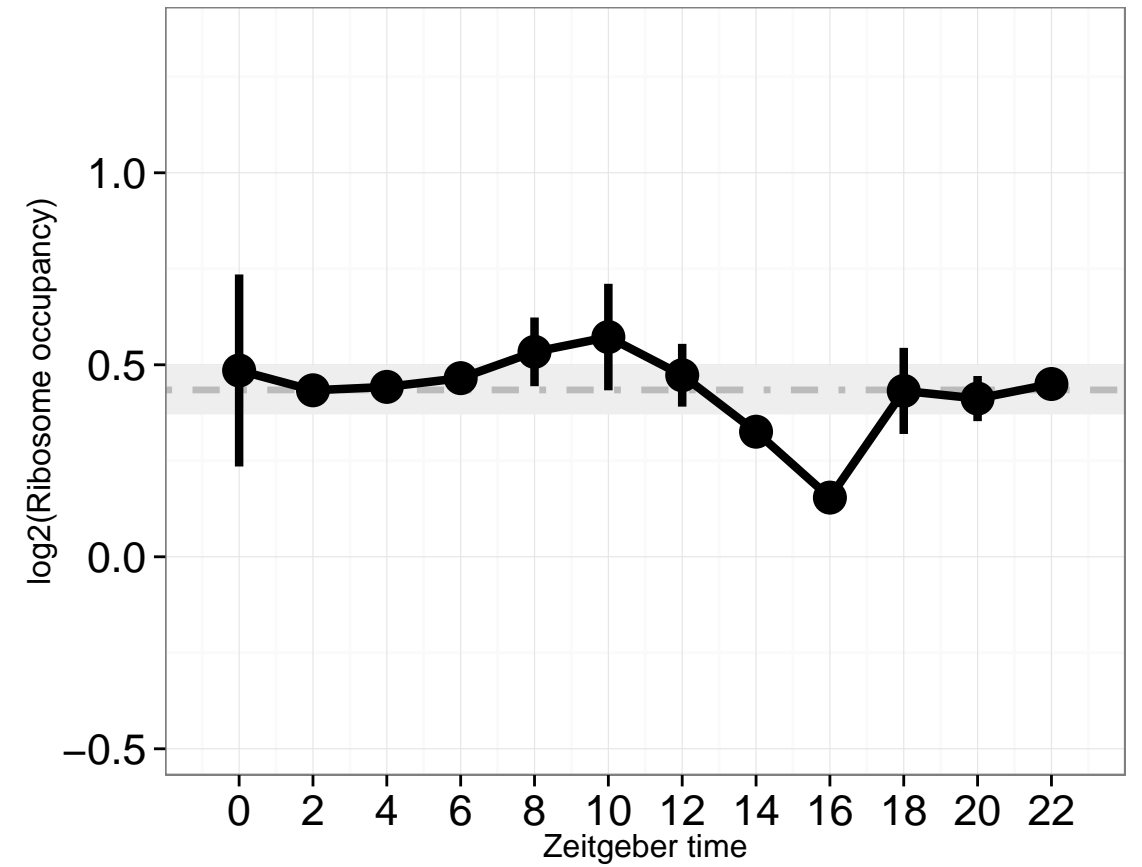

Supplement: Supplementary file 10780 [file 1]

## Klh18

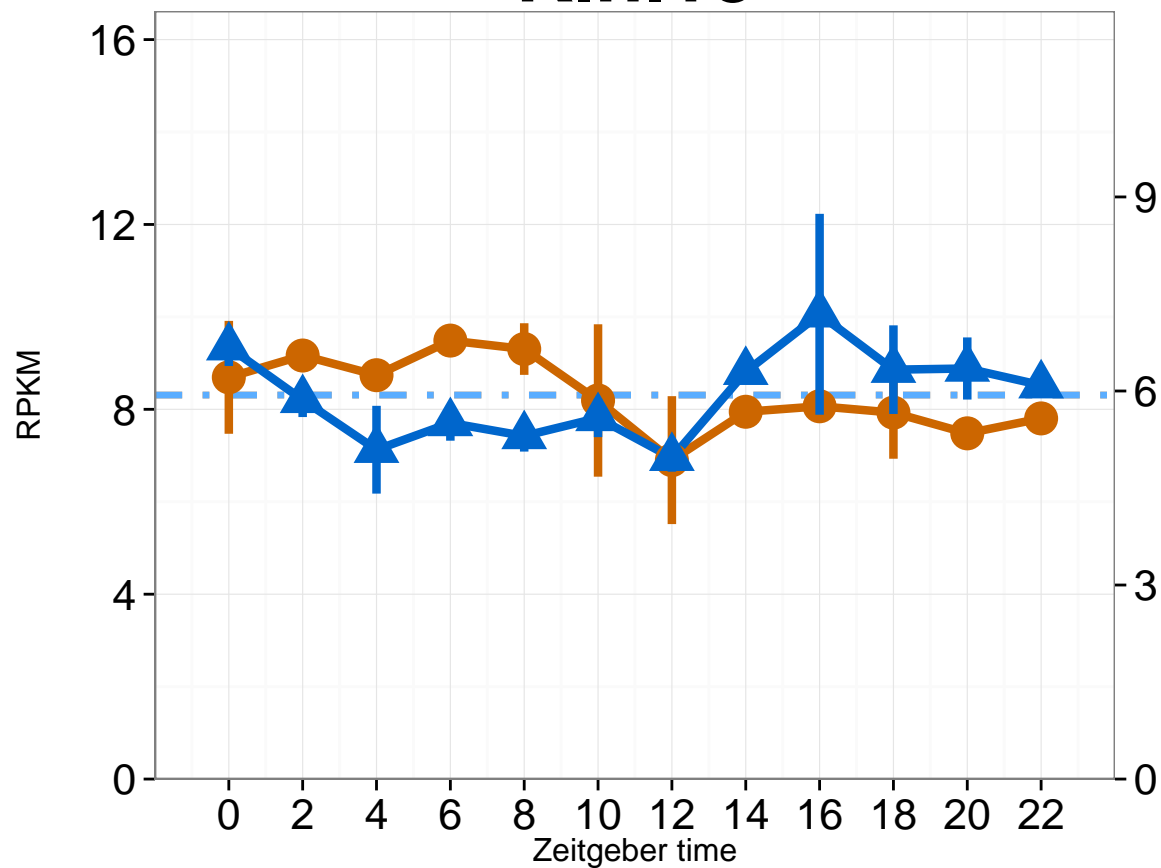

## Klh18

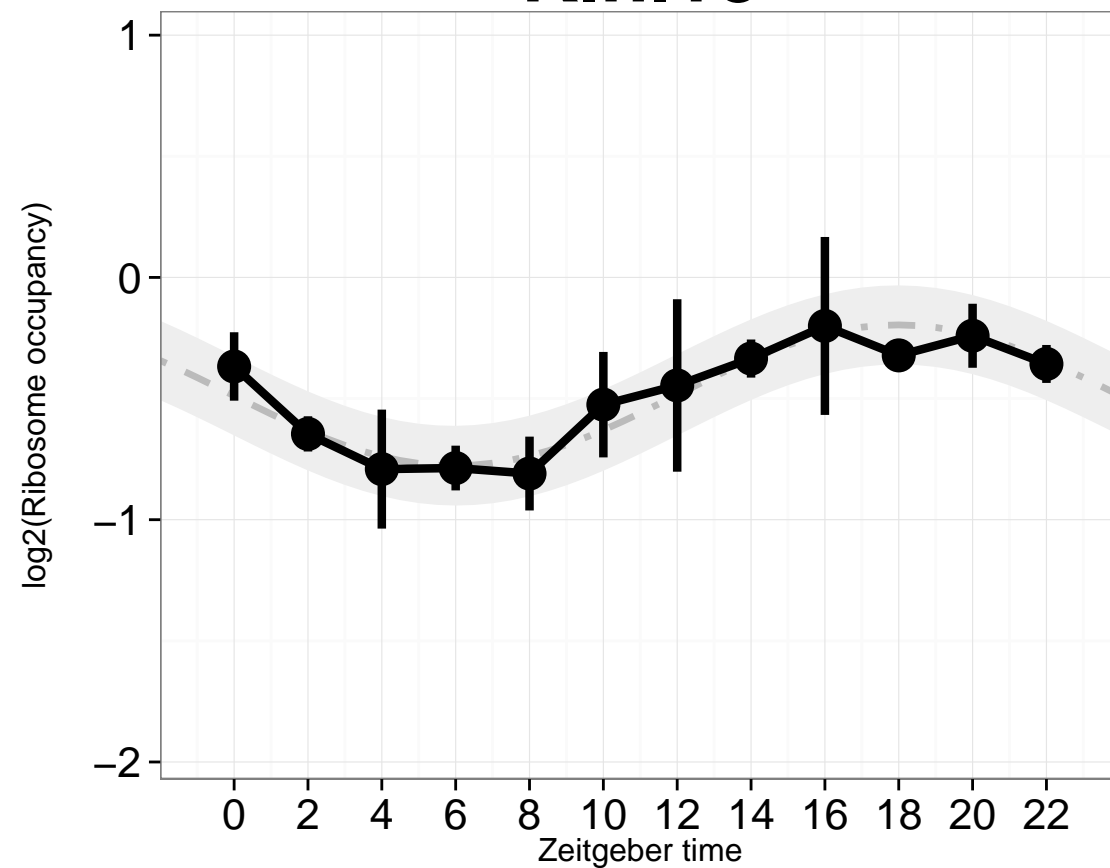

Supplement: Supplementary file 10781 [file 1]

## Tchp

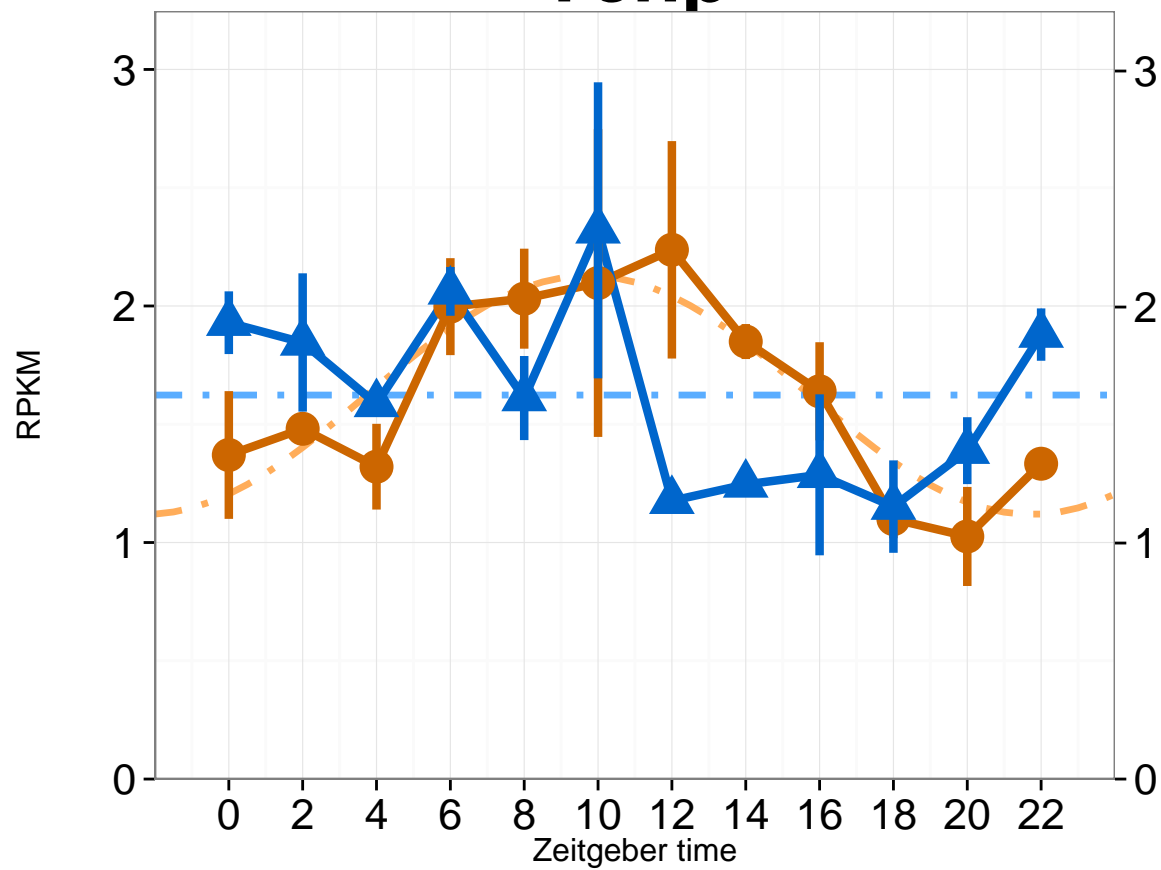

## Tchp

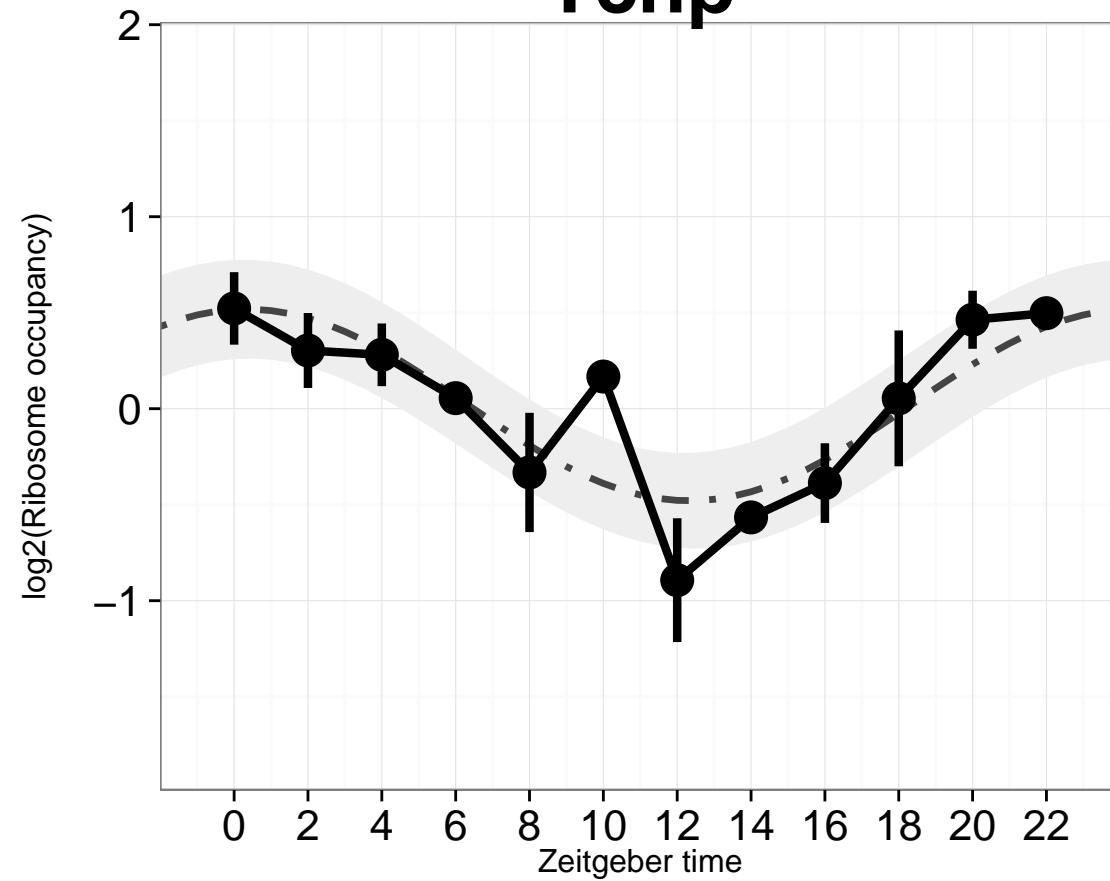

Supplement: Supplementary file 10782 [file 1]

## Rnpep

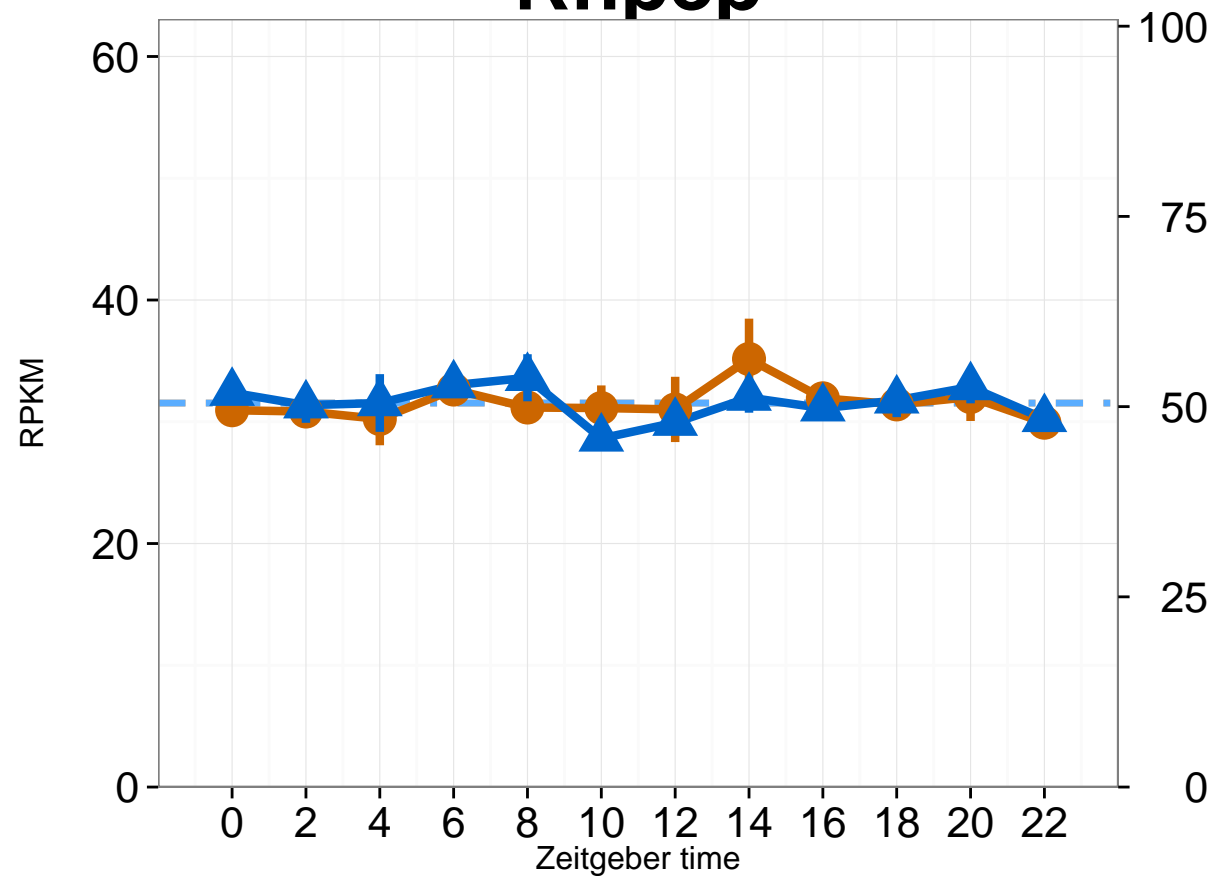

## Rnpep

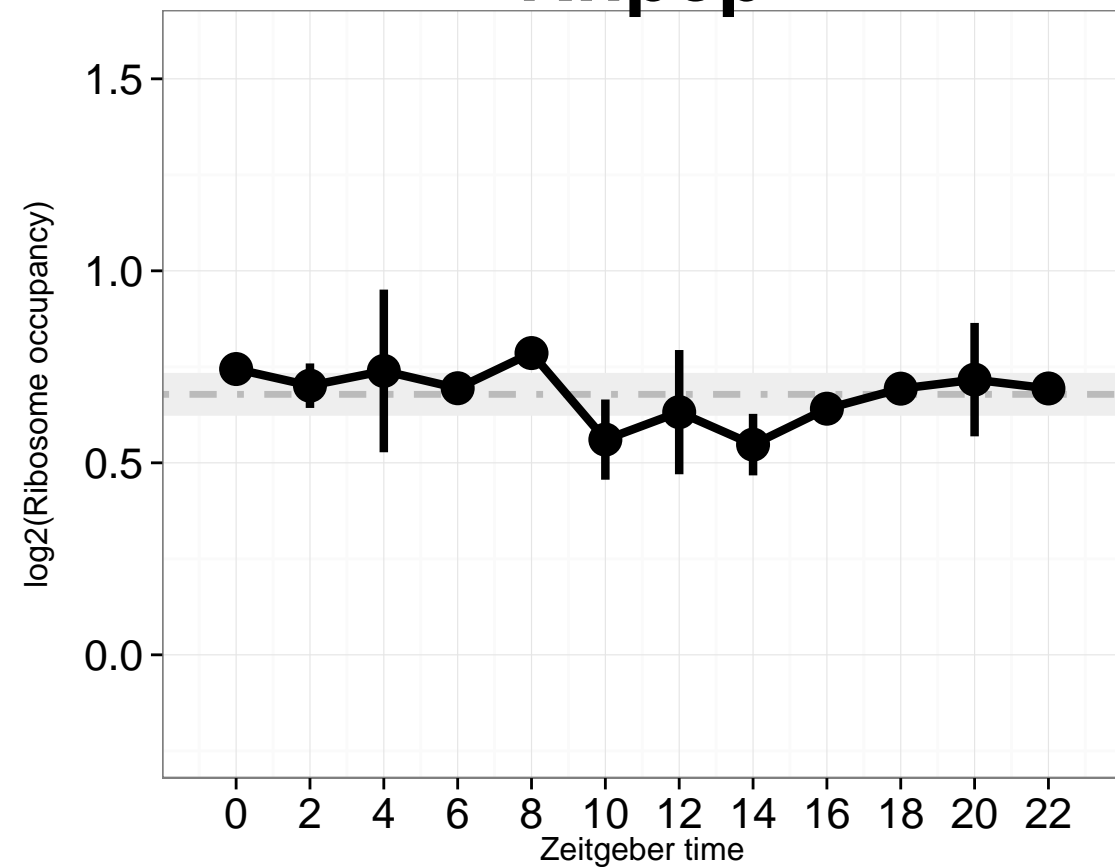

Supplement: Supplementary file 10783 [file 1]

# TxIng

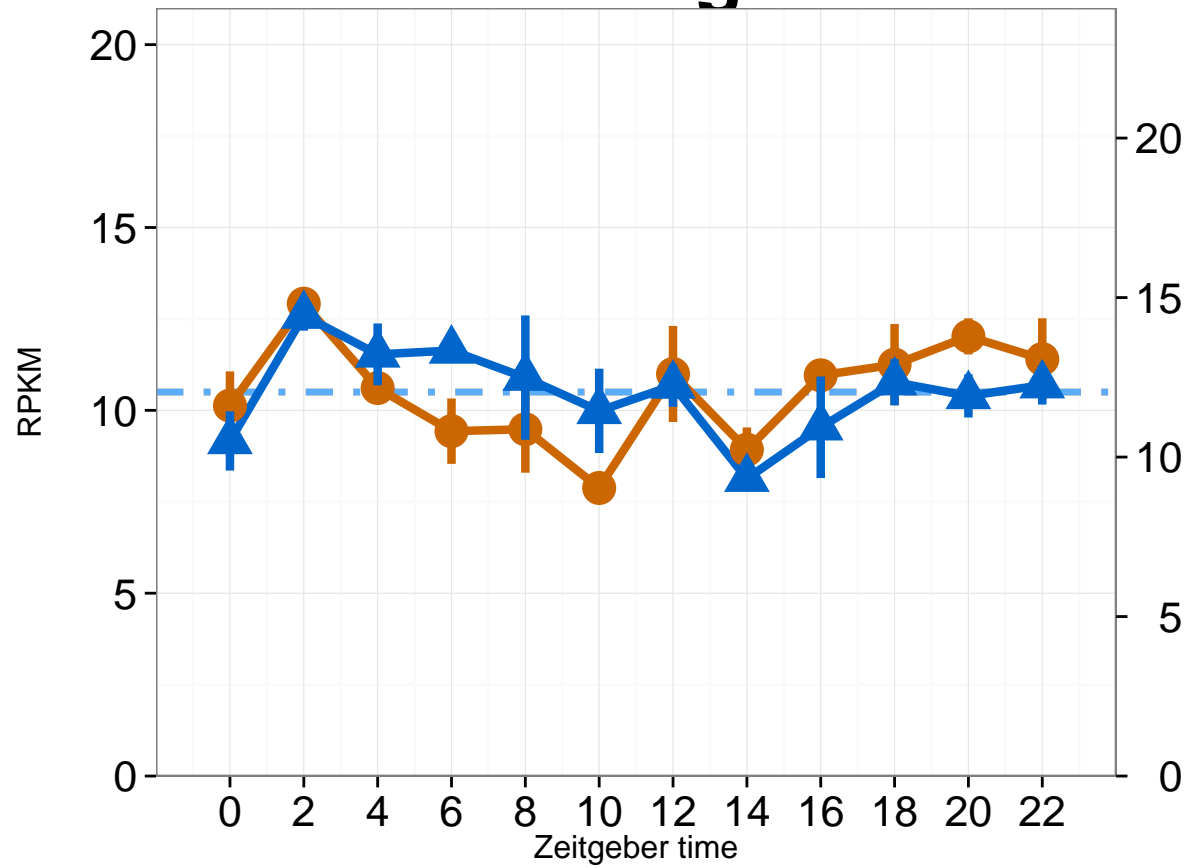

# TxIng

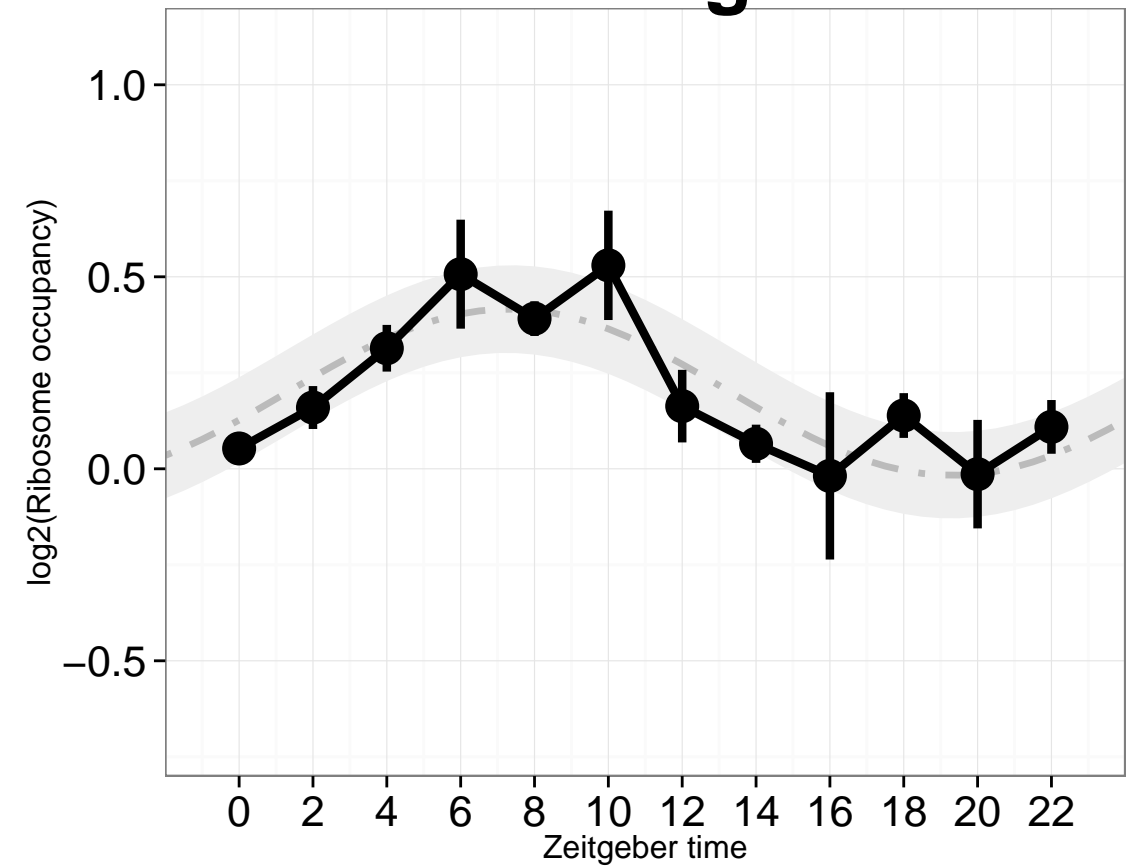

Supplement: Supplementary file 10784 [file 1]

## 2310011J03Rik

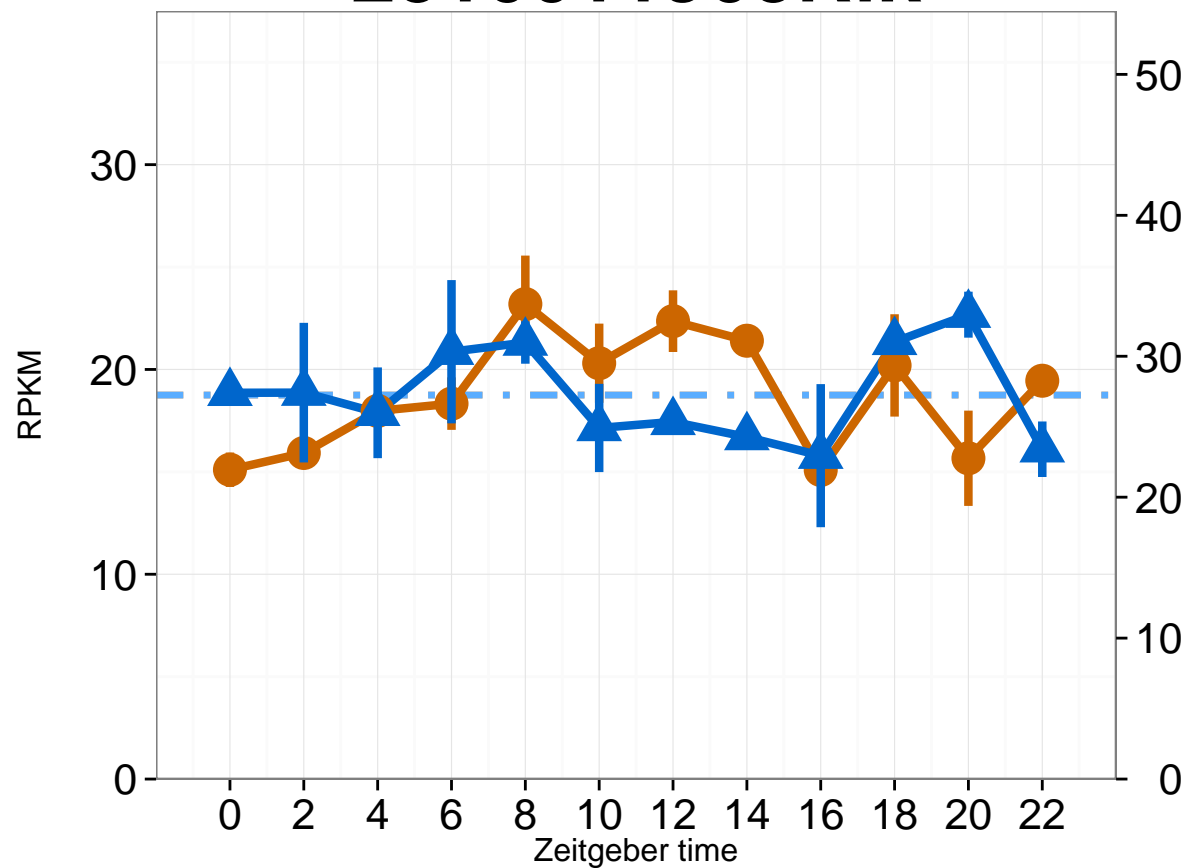

## 2310011J03Rik

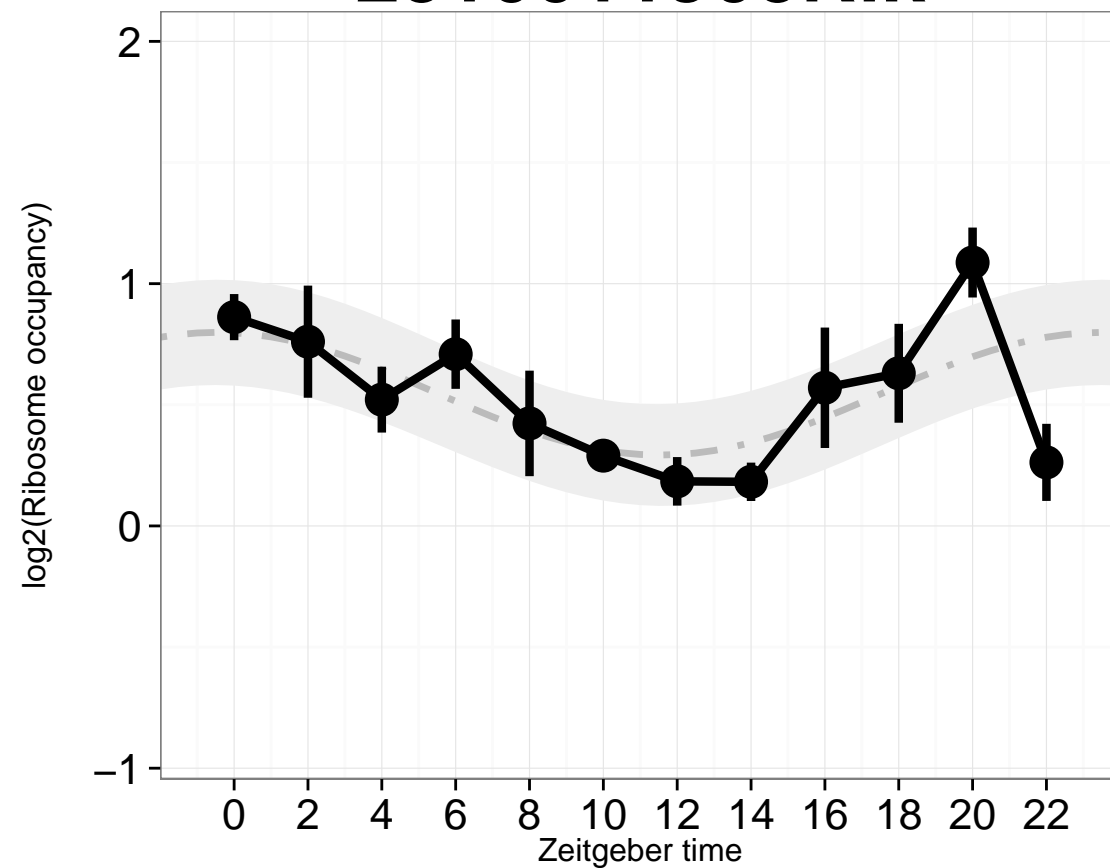

Supplement: Supplementary file 10785 [file 1]

# Psmg2

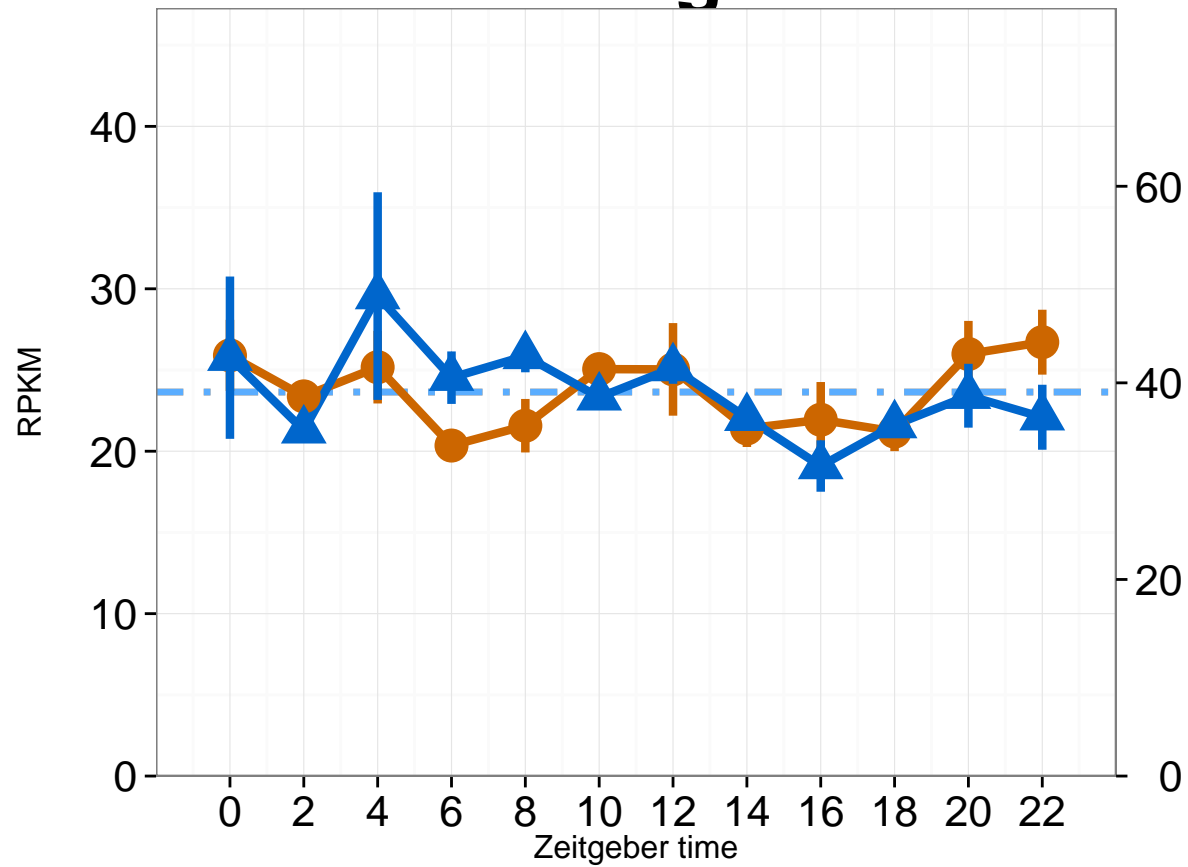

# Psmg2

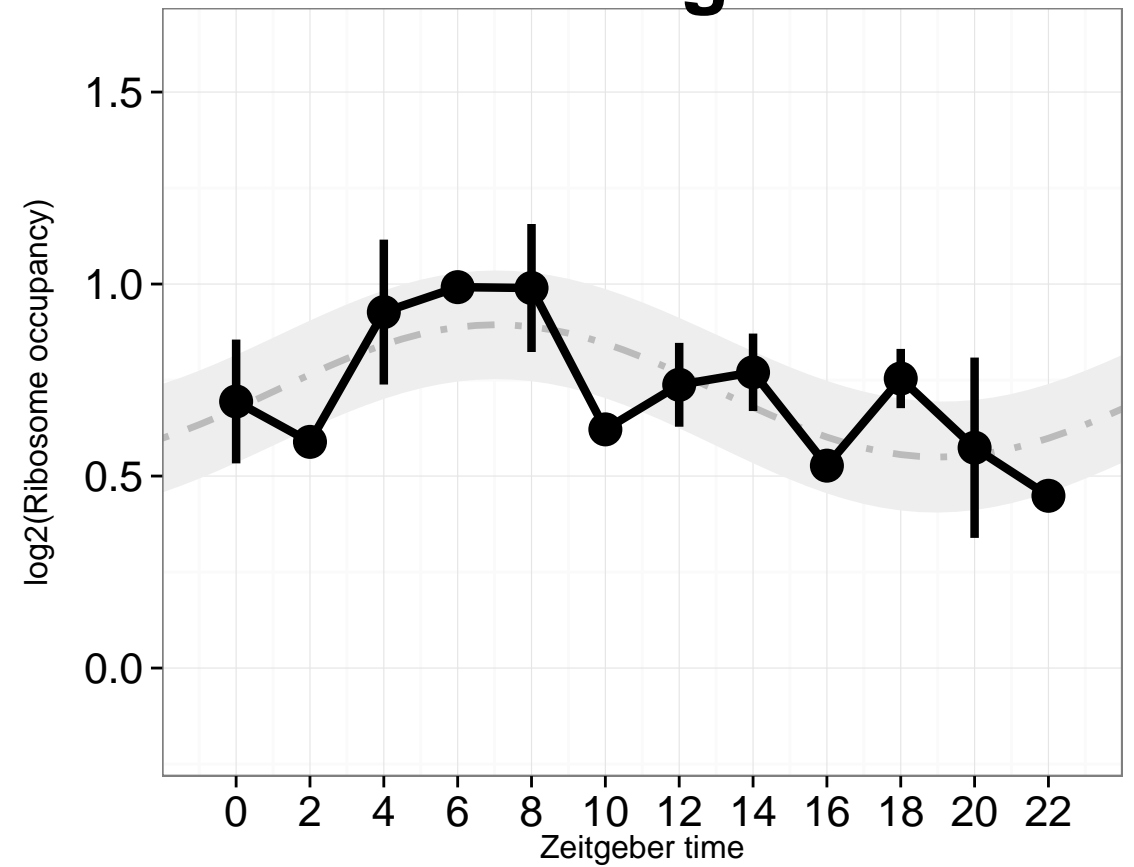

Supplement: Supplementary file 10786 [file 1]

## Fbxw2

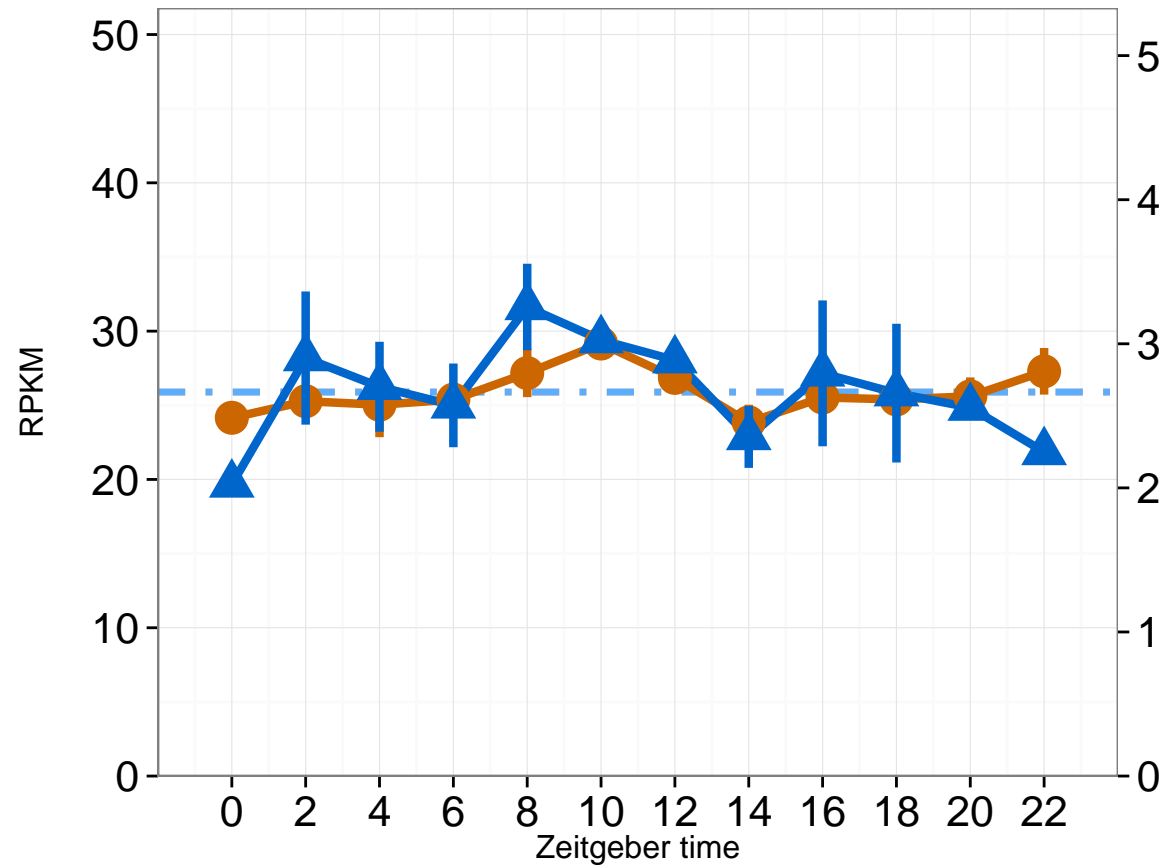

## Fbxw2

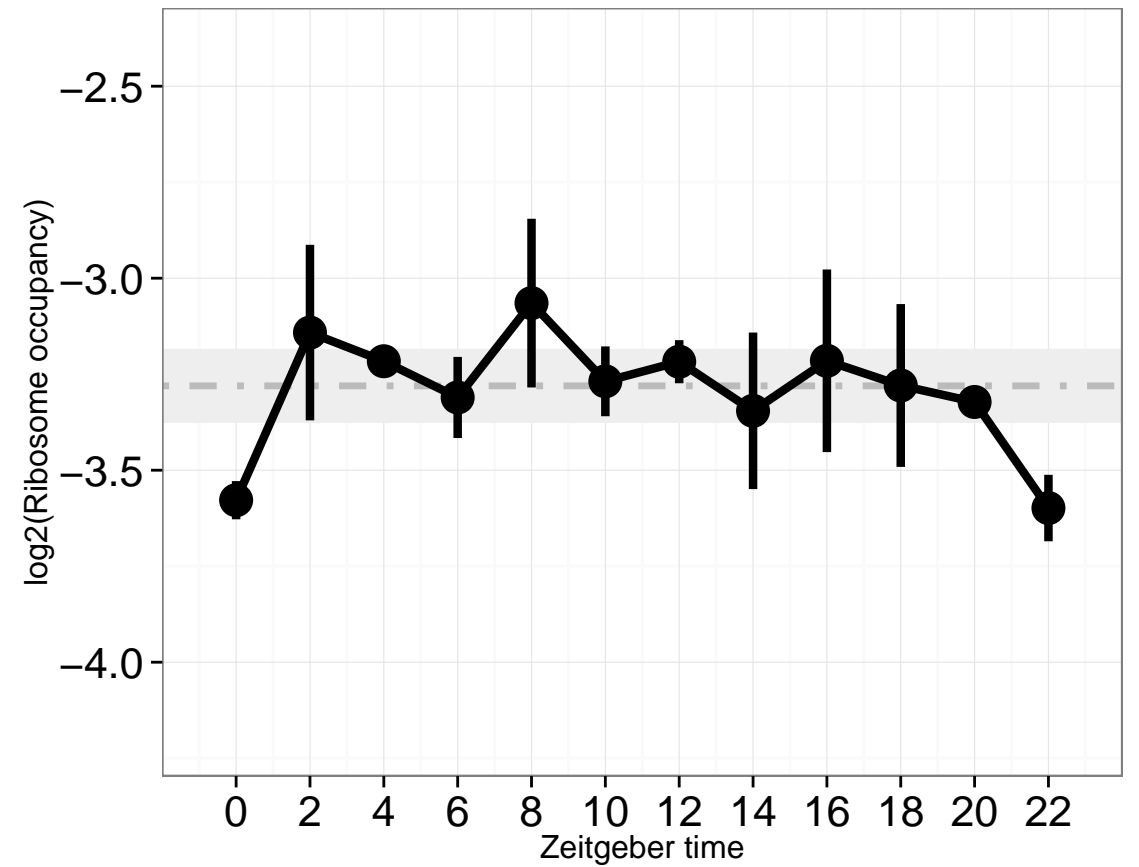

Supplement: Supplementary file 10787 [file 1]

## Atf5

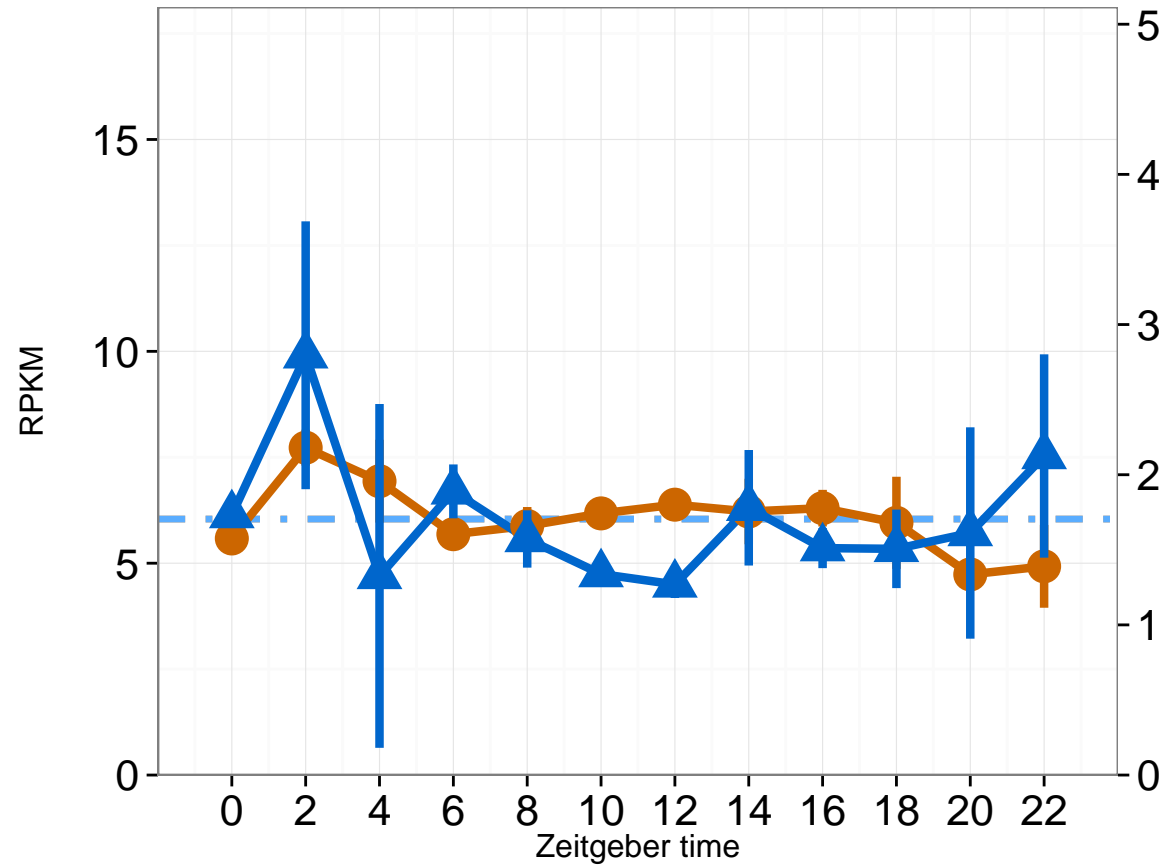

## Atf5

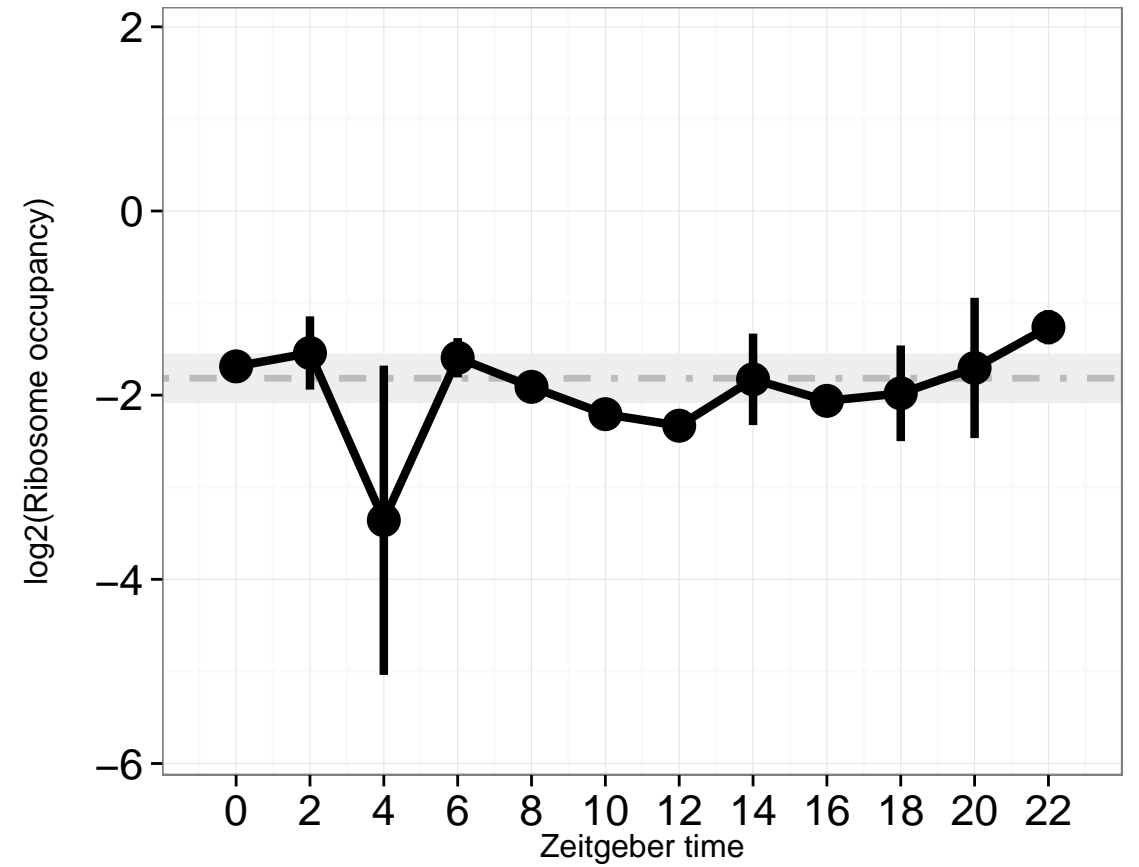

Supplement: Supplementary file 10788 [file 1]

# Prdm11

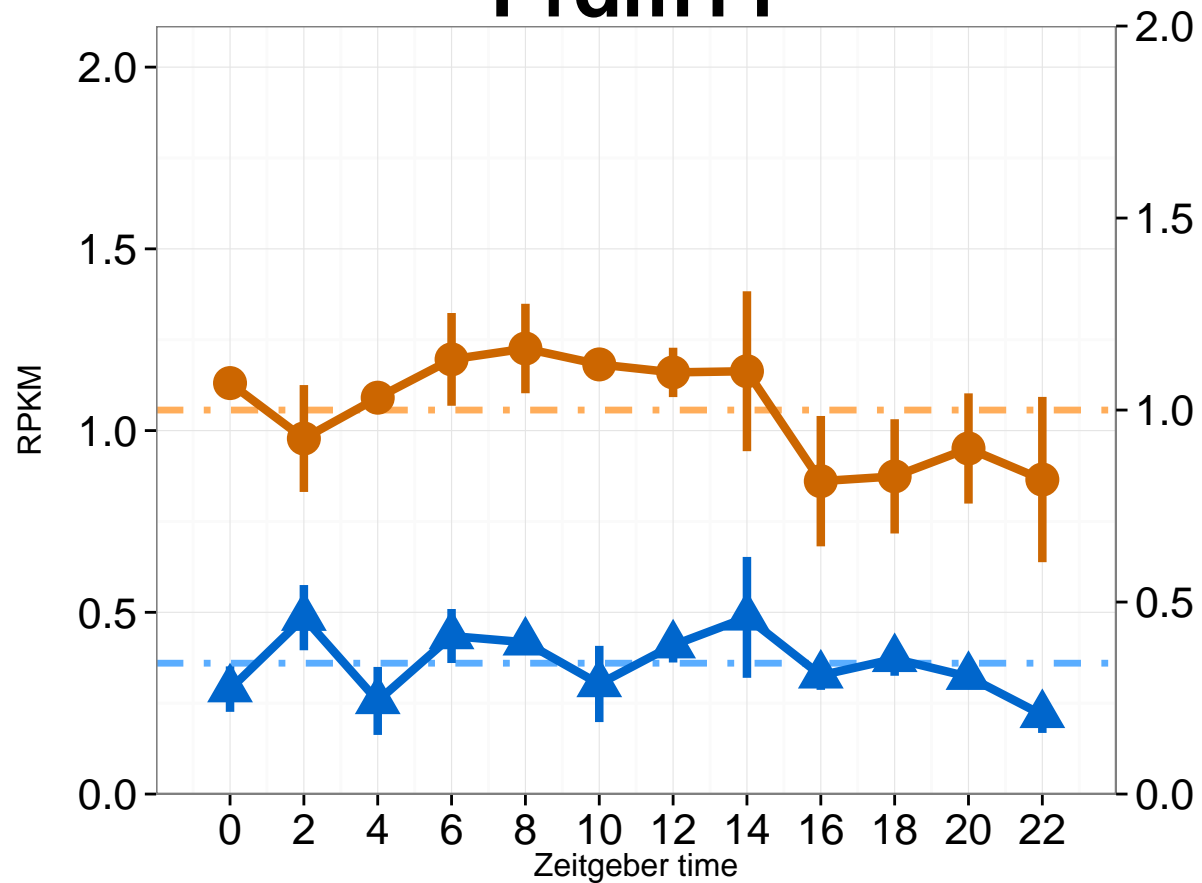

# Prdm11

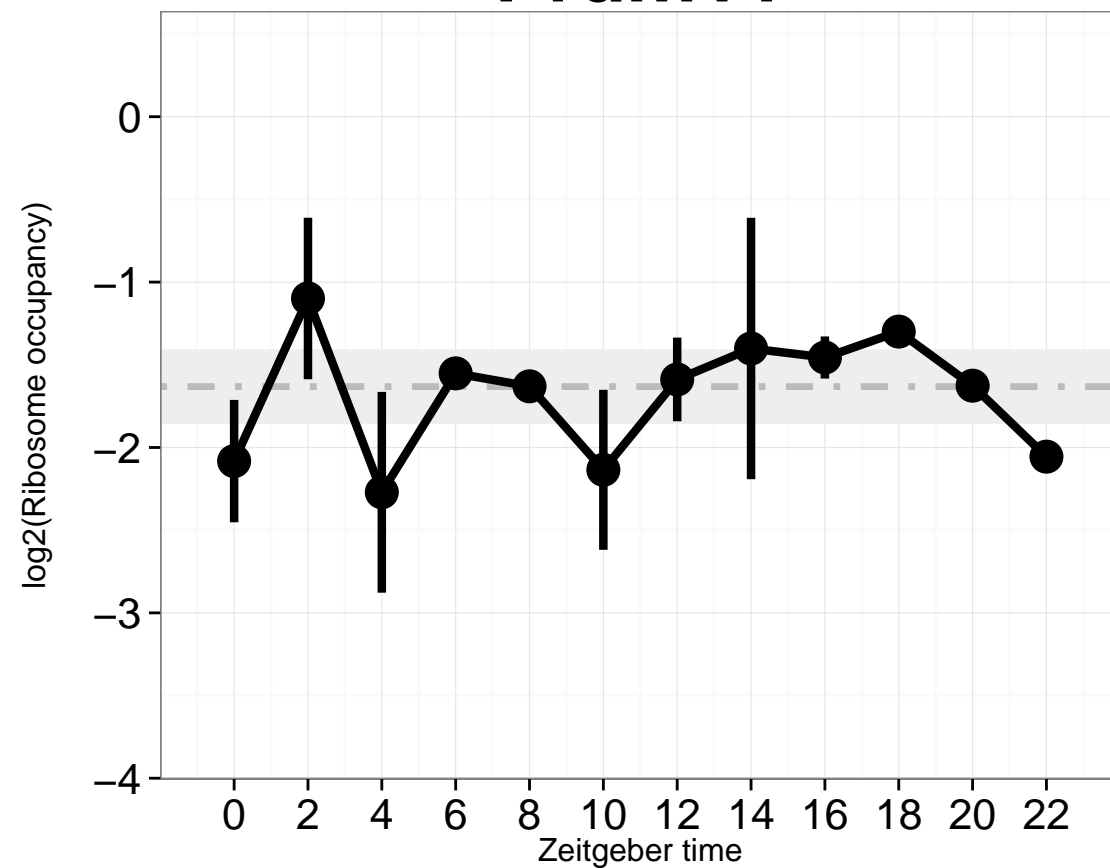

Supplement: Supplementary file 10789 [file 1]

## Swi5

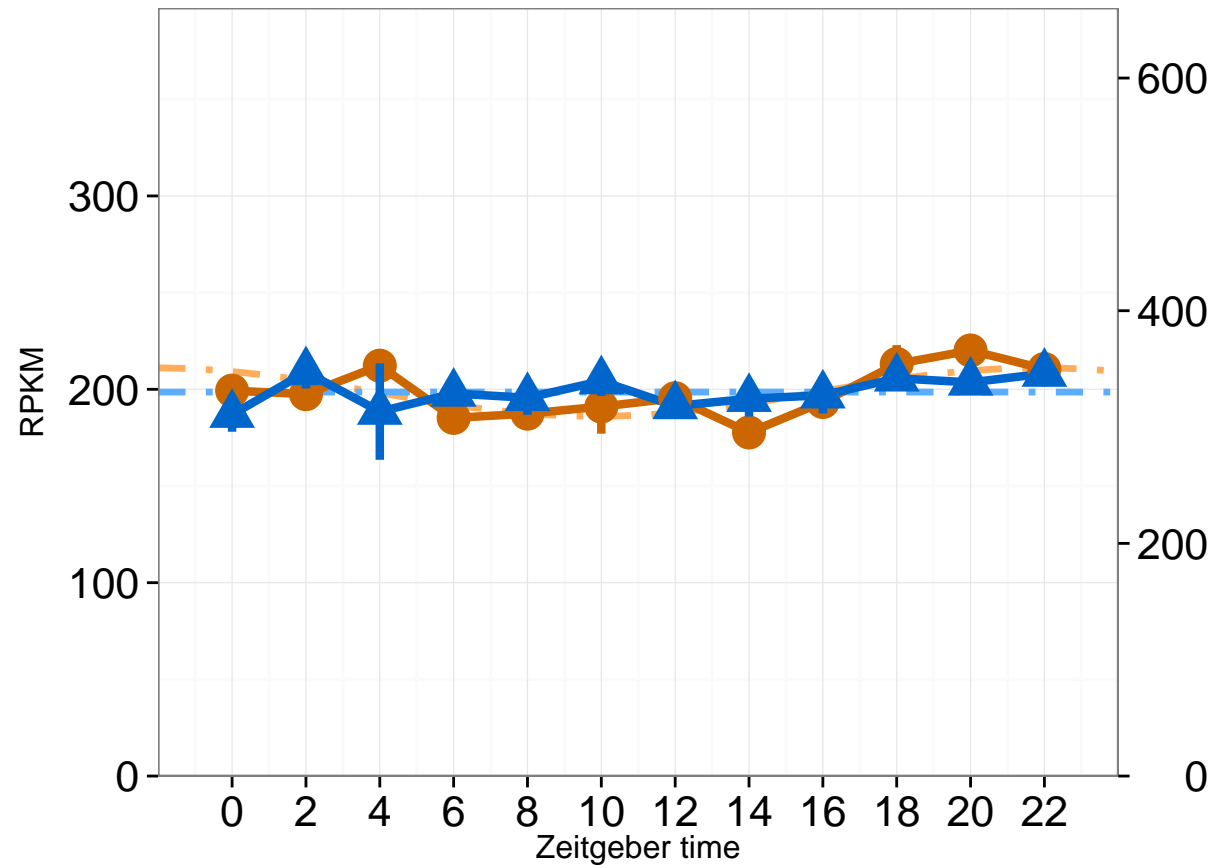

## Swi5

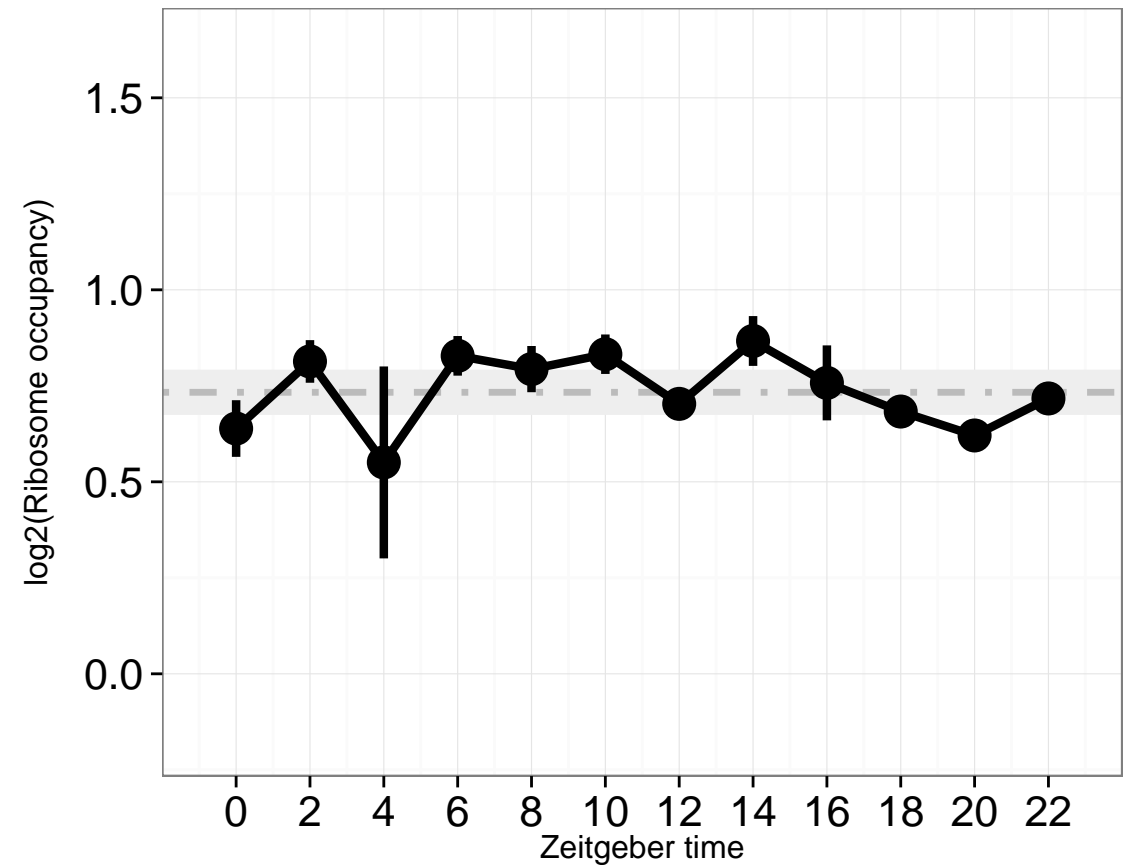

Supplement: Supplementary file 10790 [file 1]

## Ostm1

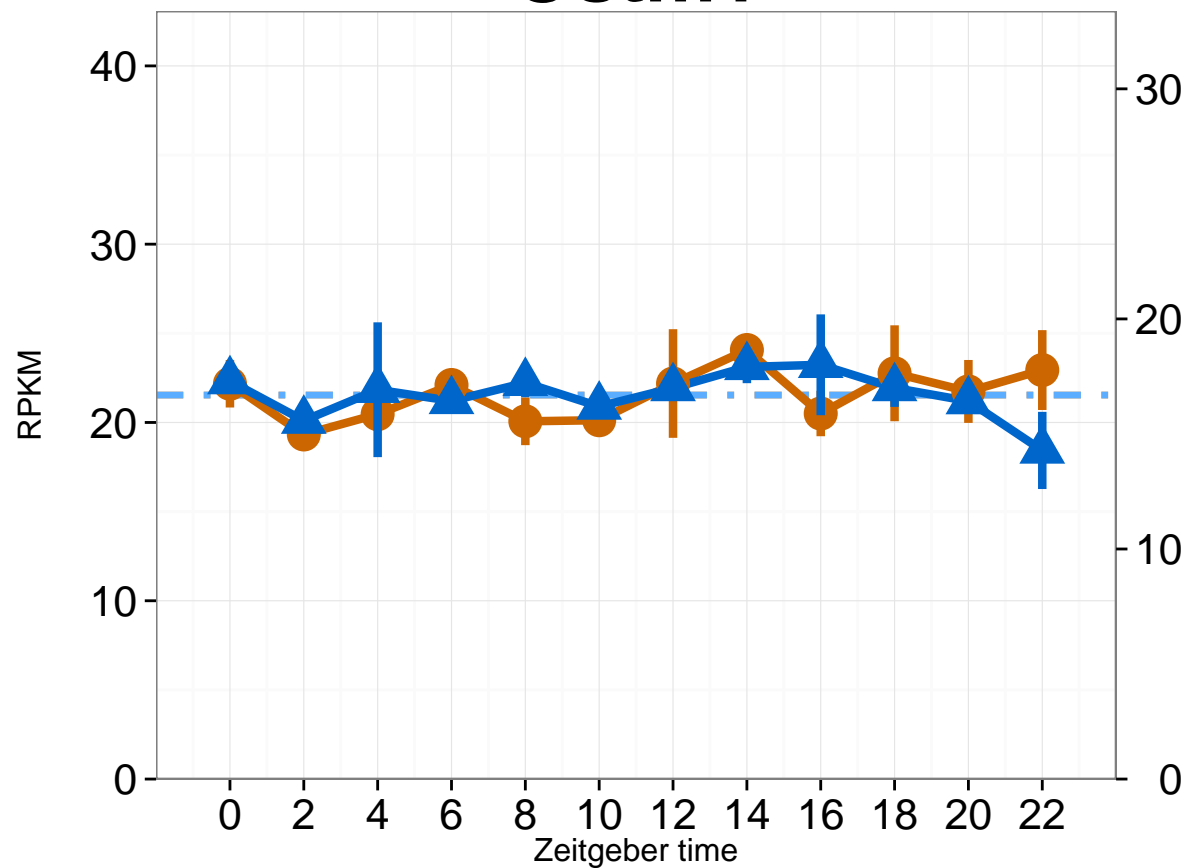

## Ostm1

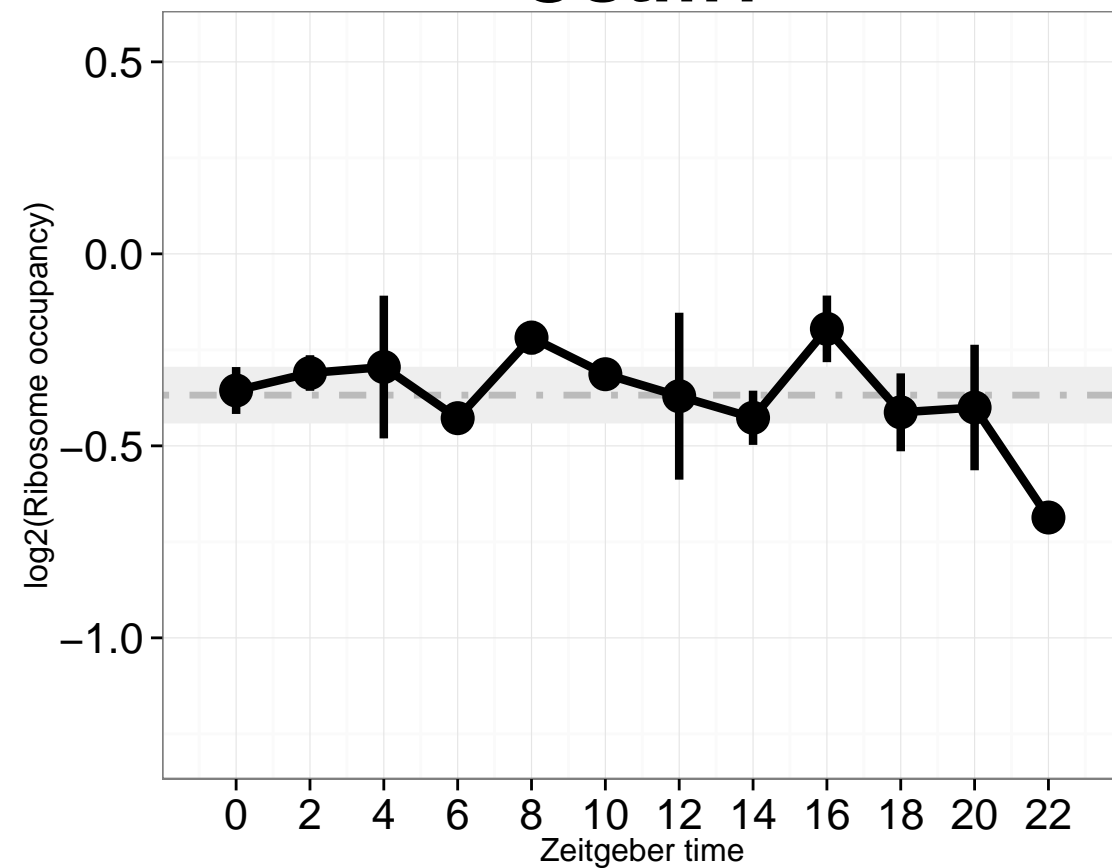

Supplement: Supplementary file 10791 [file 1]

## Cog7

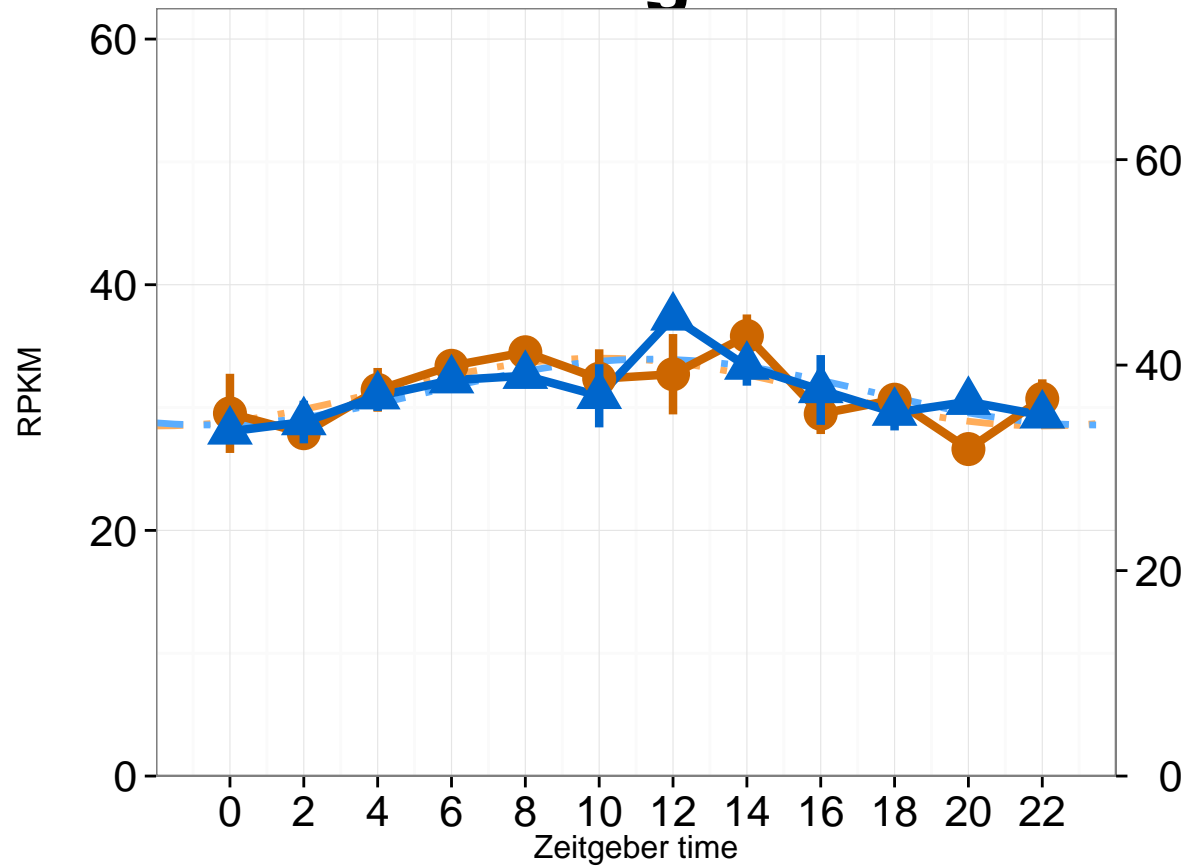

## Cog7

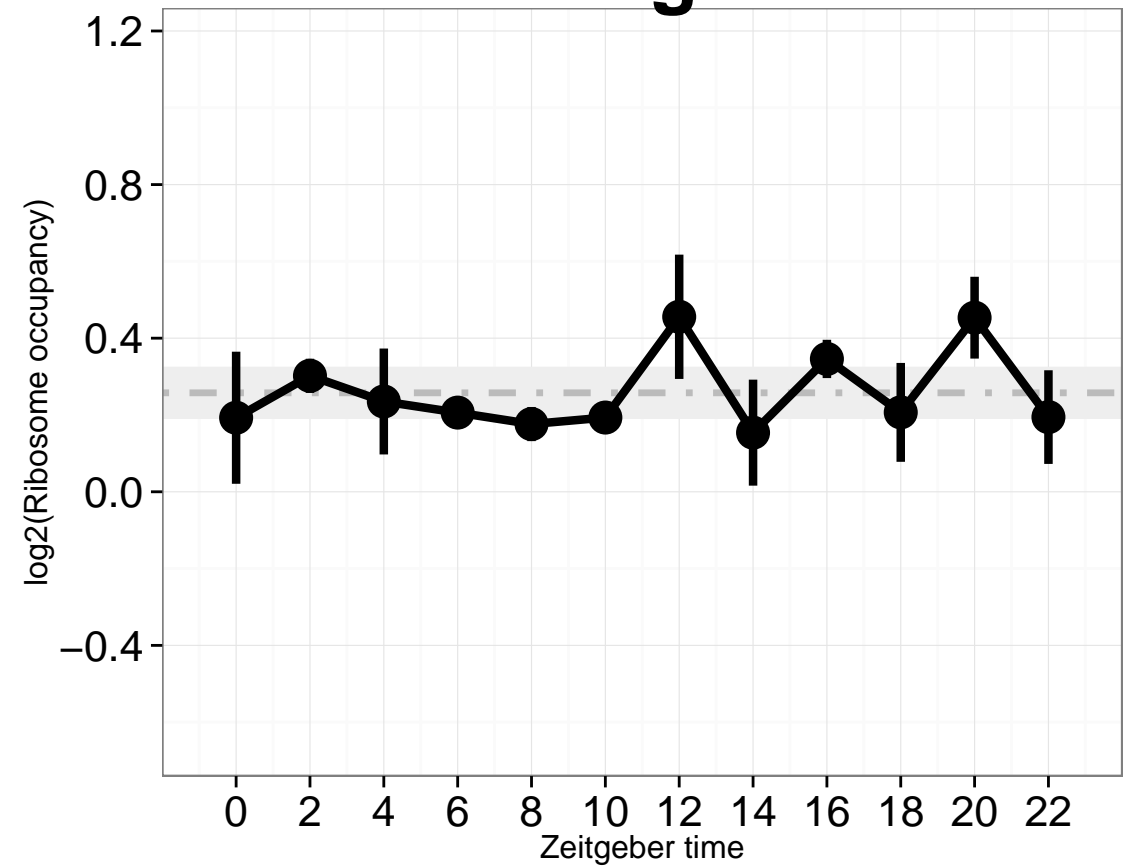

Supplement: Supplementary file 10792 [file 1]

## Leprot

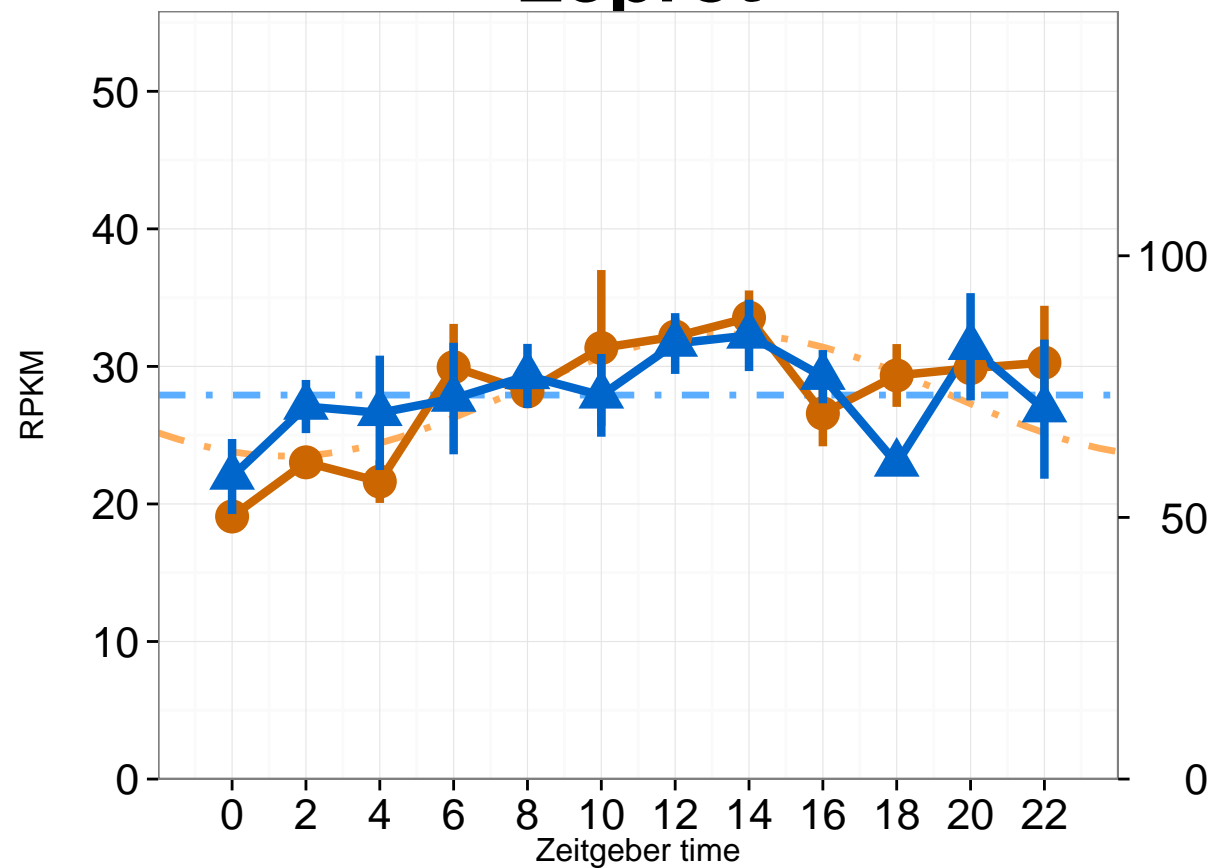

## Leprot

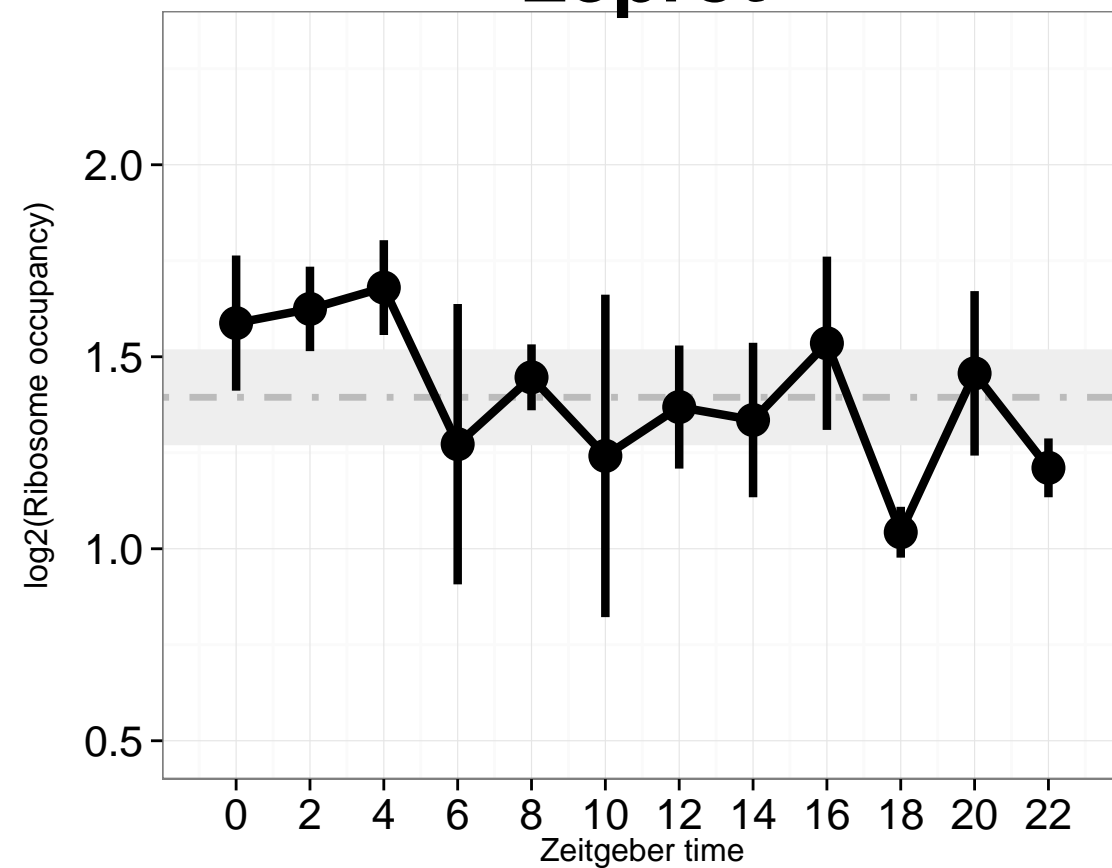

Supplement: Supplementary file 10793 [file 1]

## Osr1

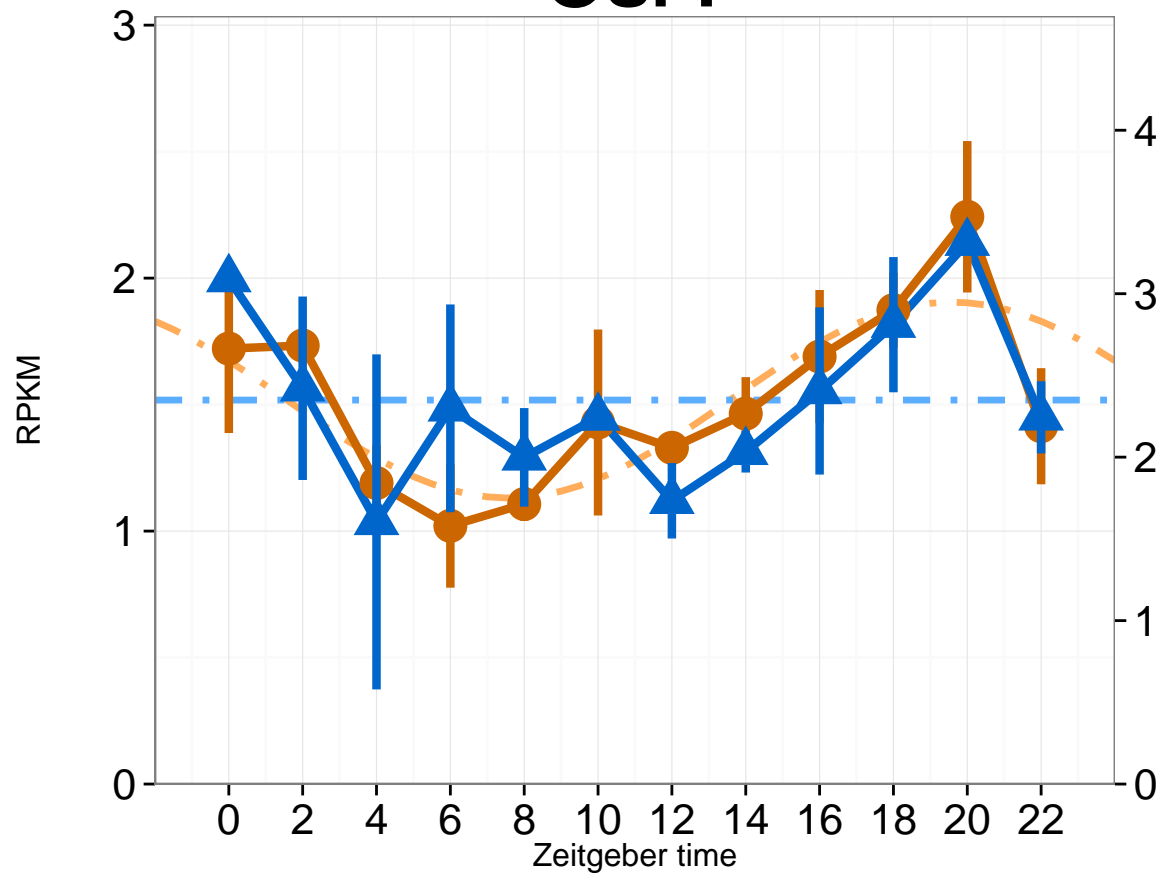

## Osr1

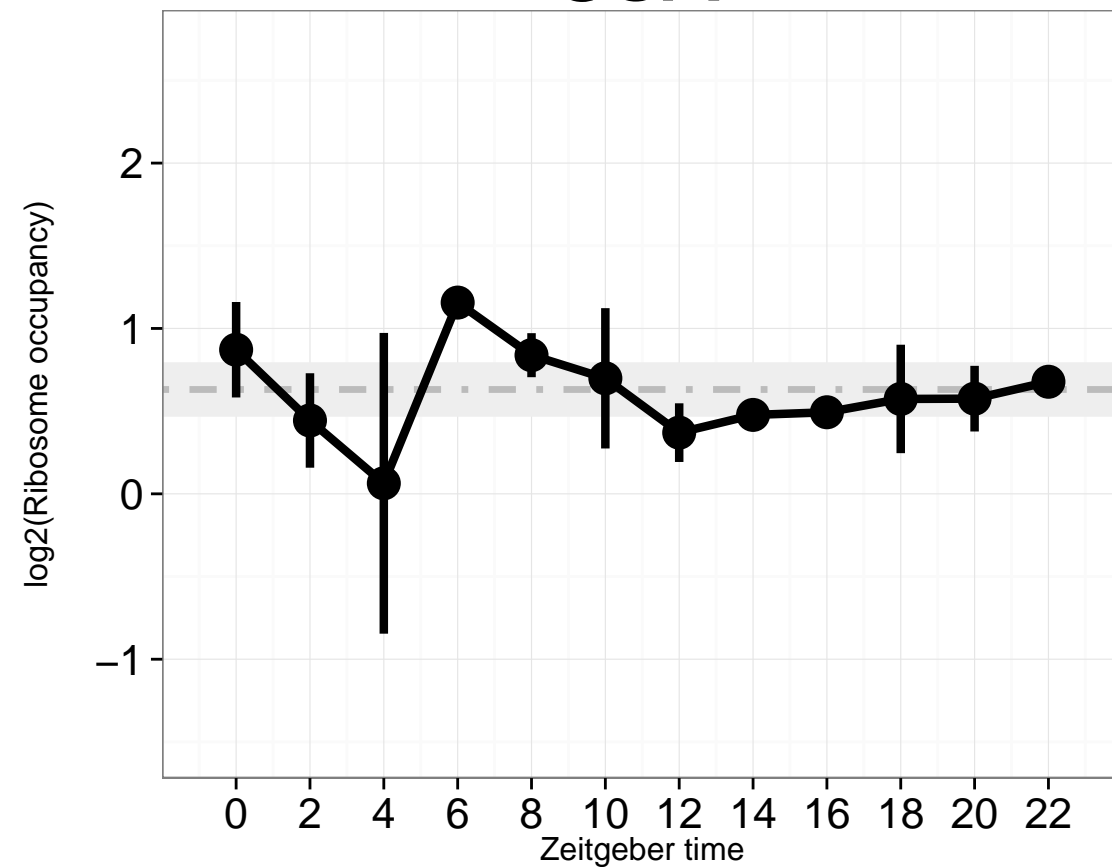

Supplement: Supplementary file 10794 [file 1]

## Lrrc42

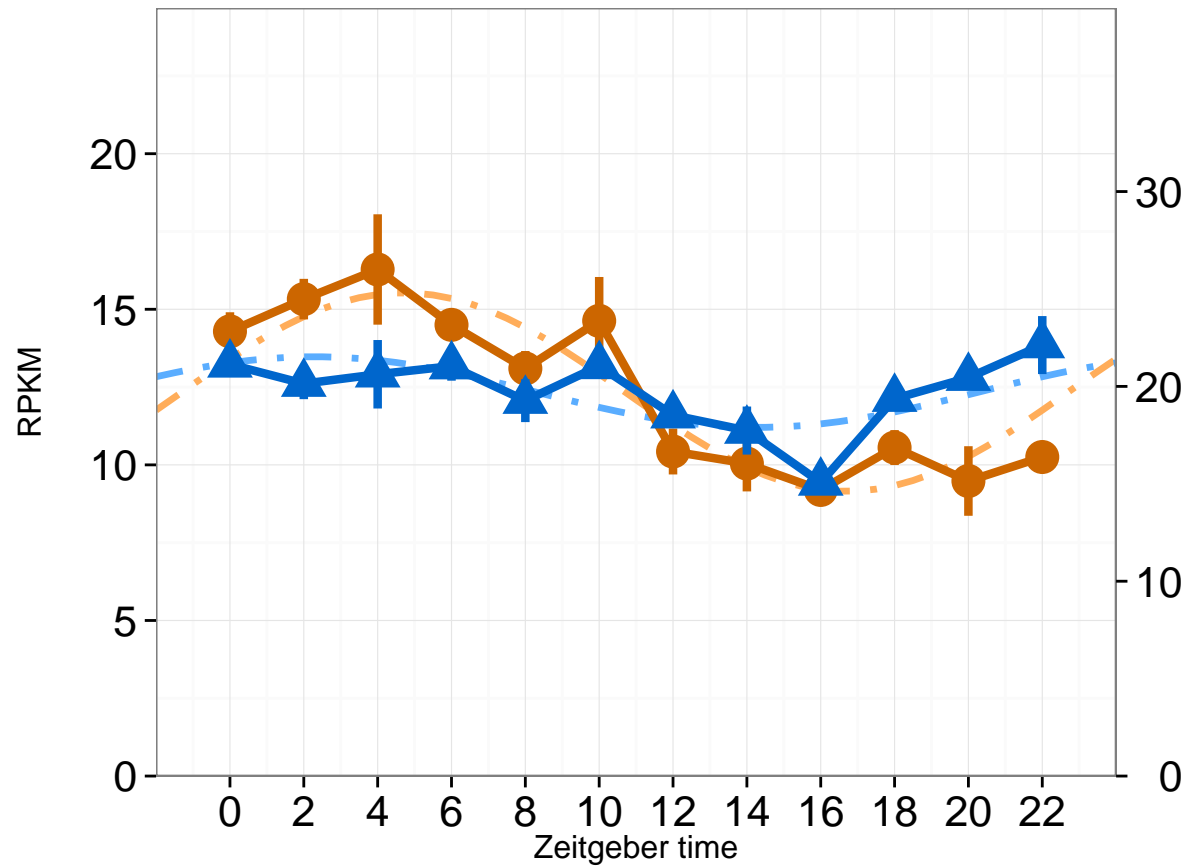

## Lrrc42

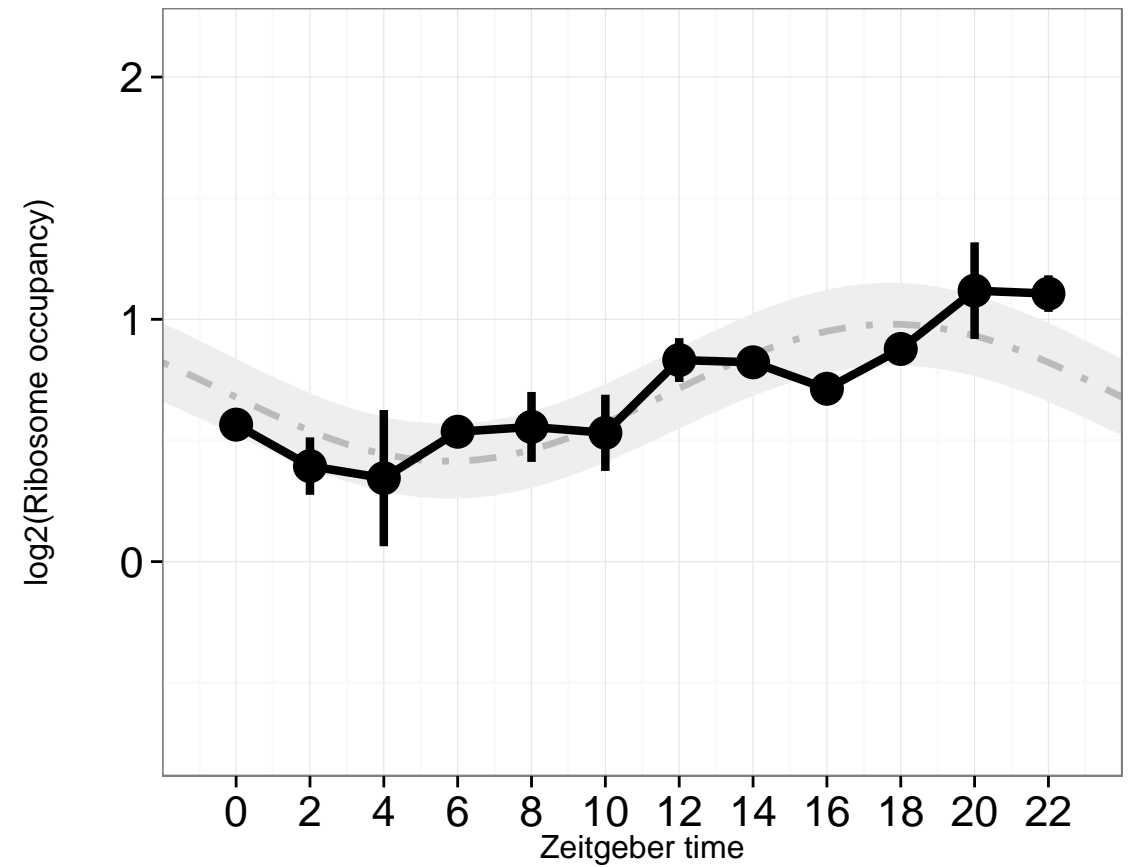

Supplement: Supplementary file 10795 [file 1]

# Frmpd4

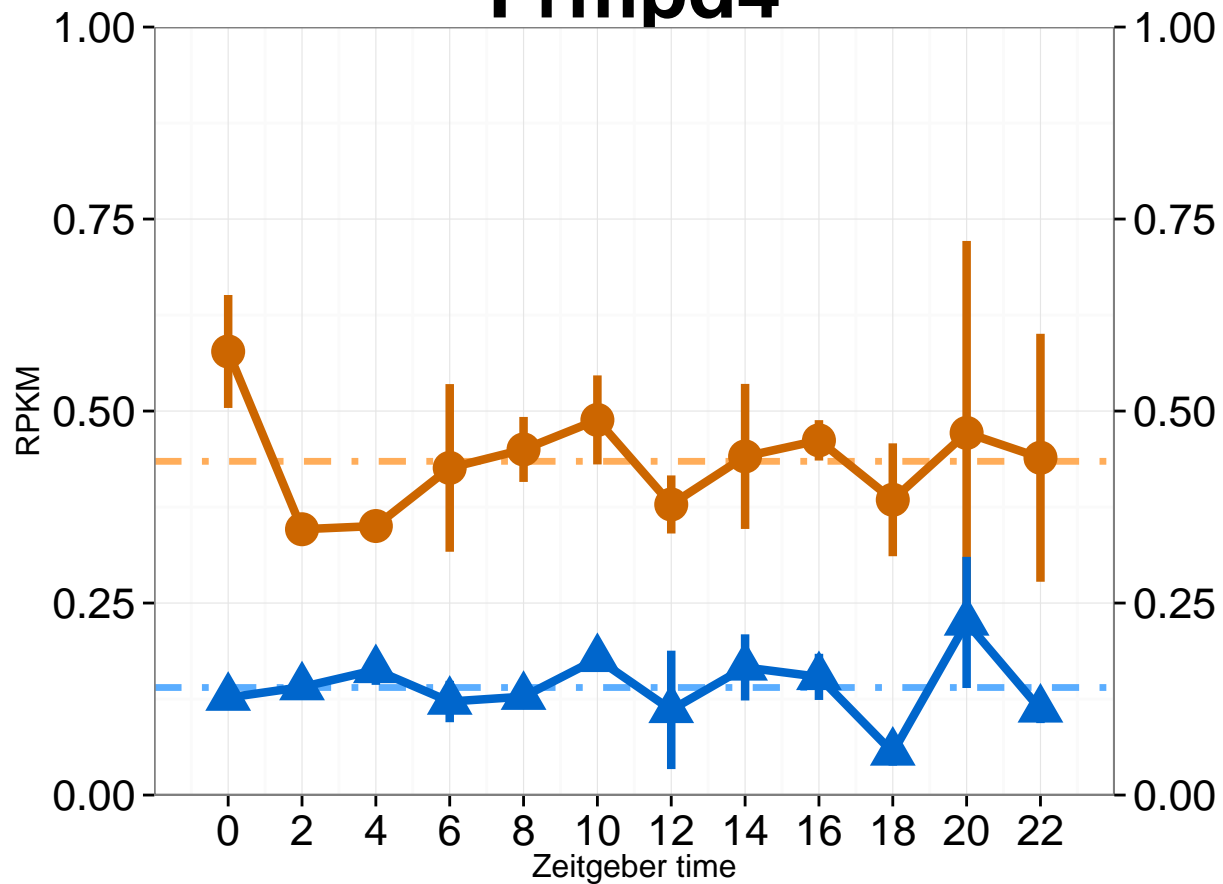

# Frmpd4

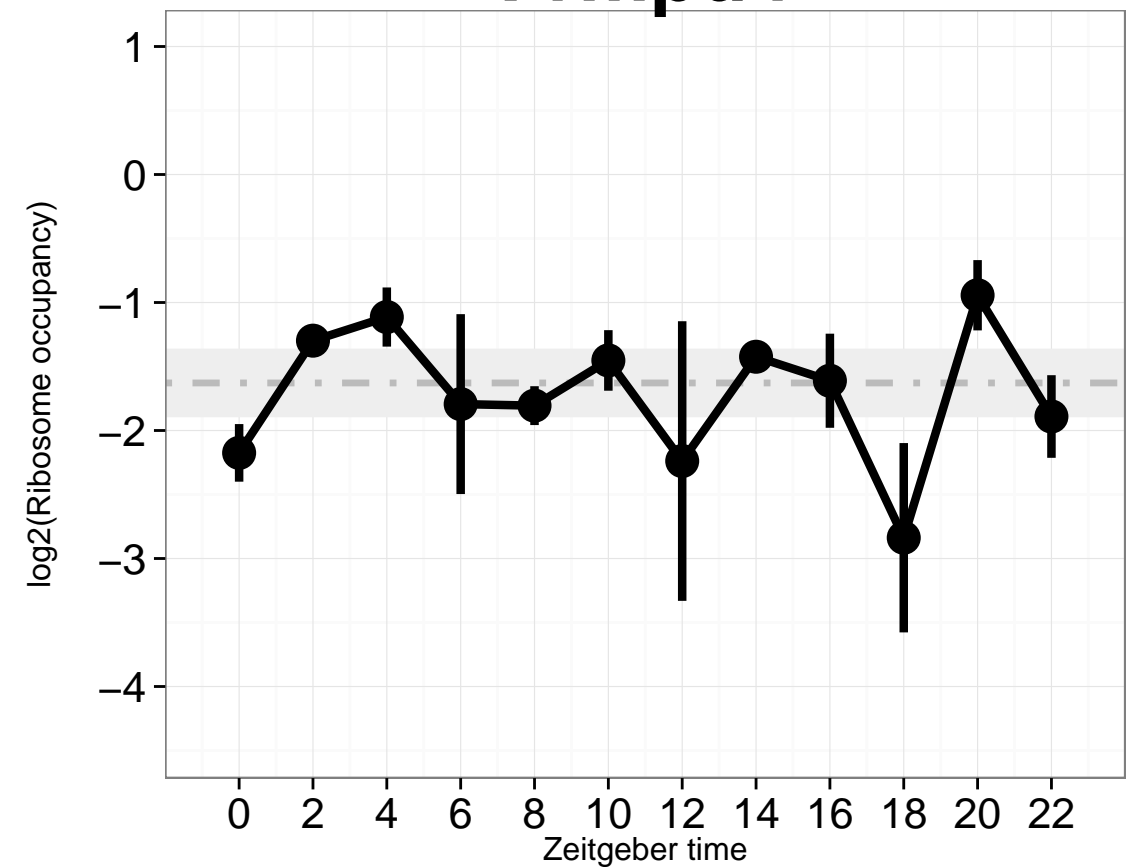

Supplement: Supplementary file 10796 [file 1]

# Foxm1

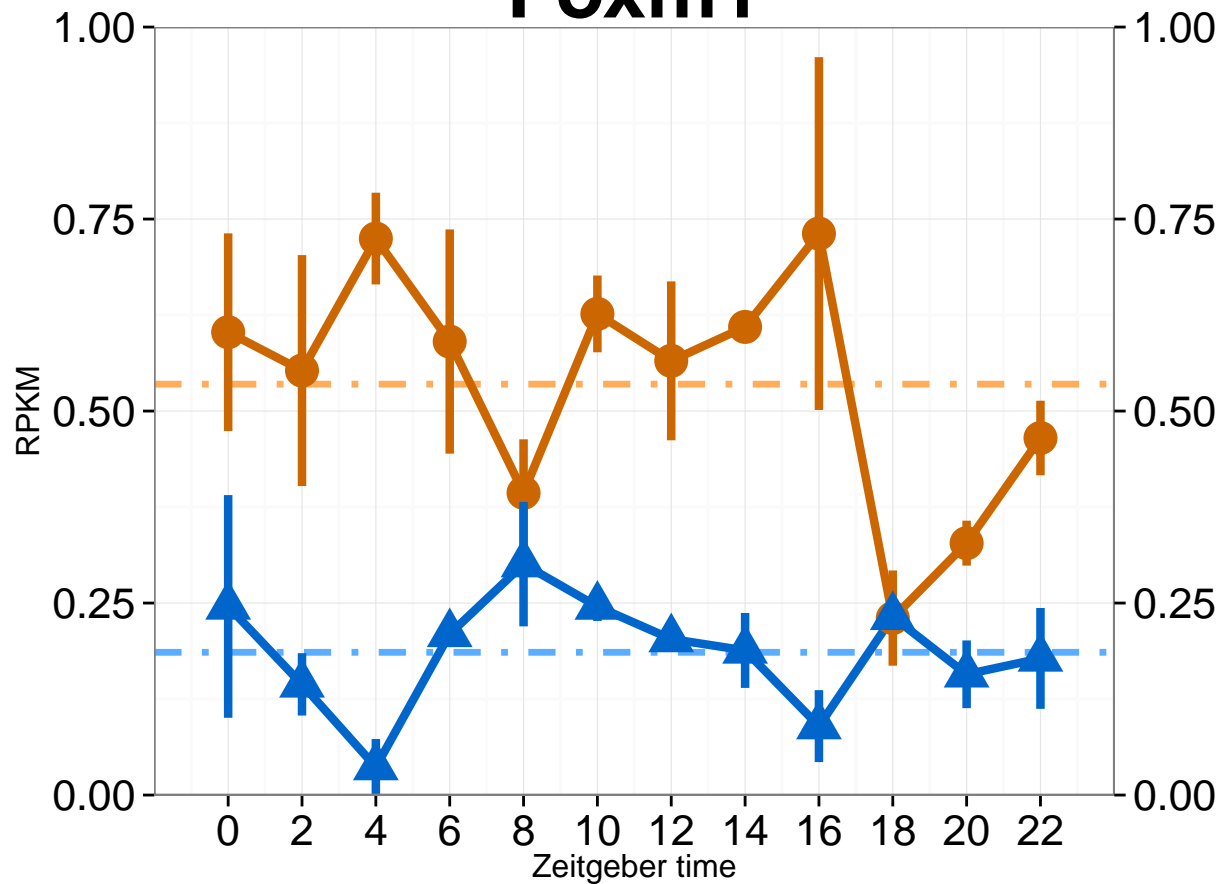

# Foxm1

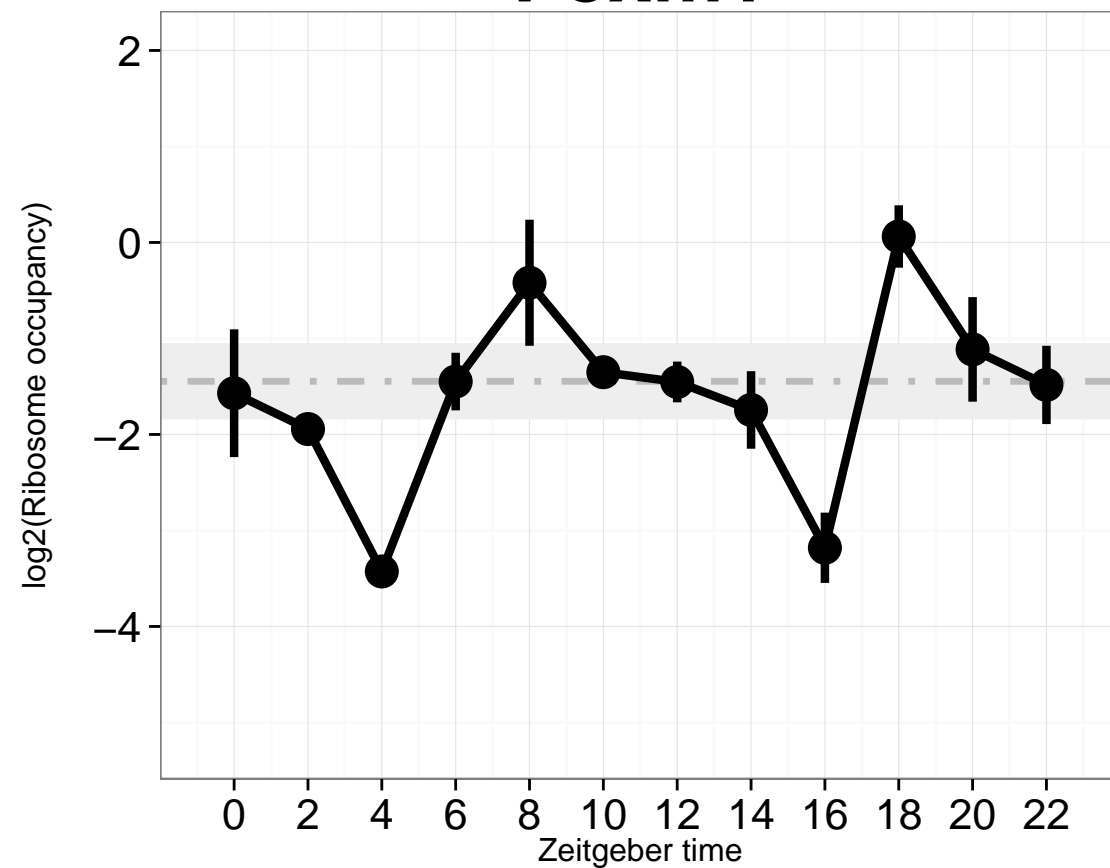

Supplement: Supplementary file 10797 [file 1]

## Il21r

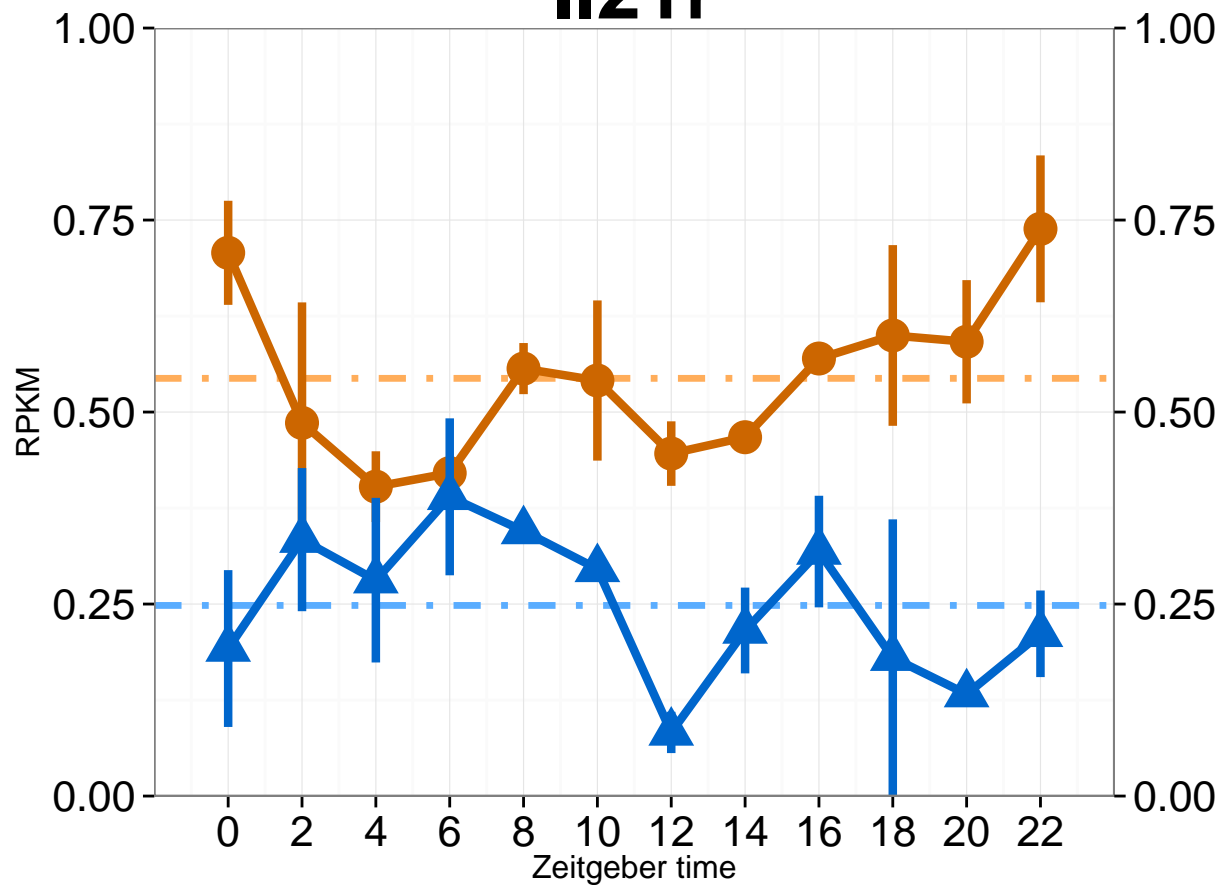

## Il21r

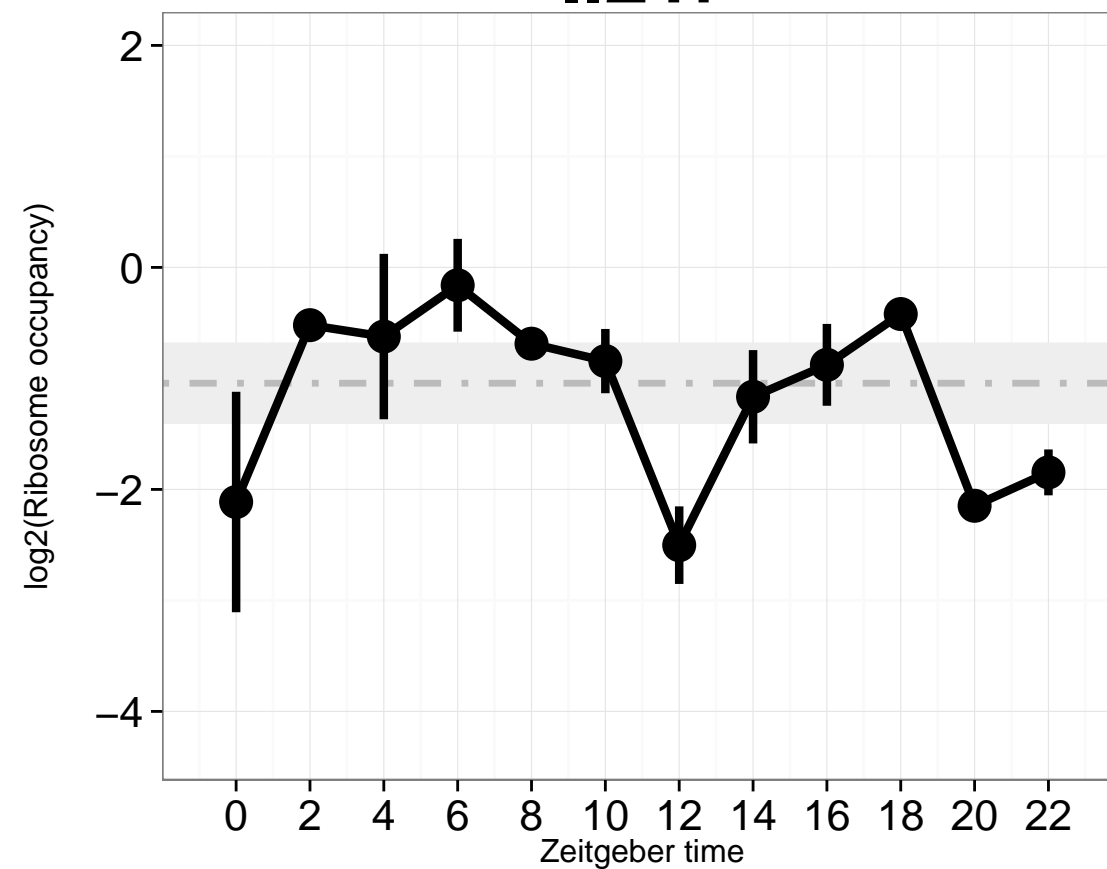

Supplement: Supplementary file 10798 [file 1]

# Lin37

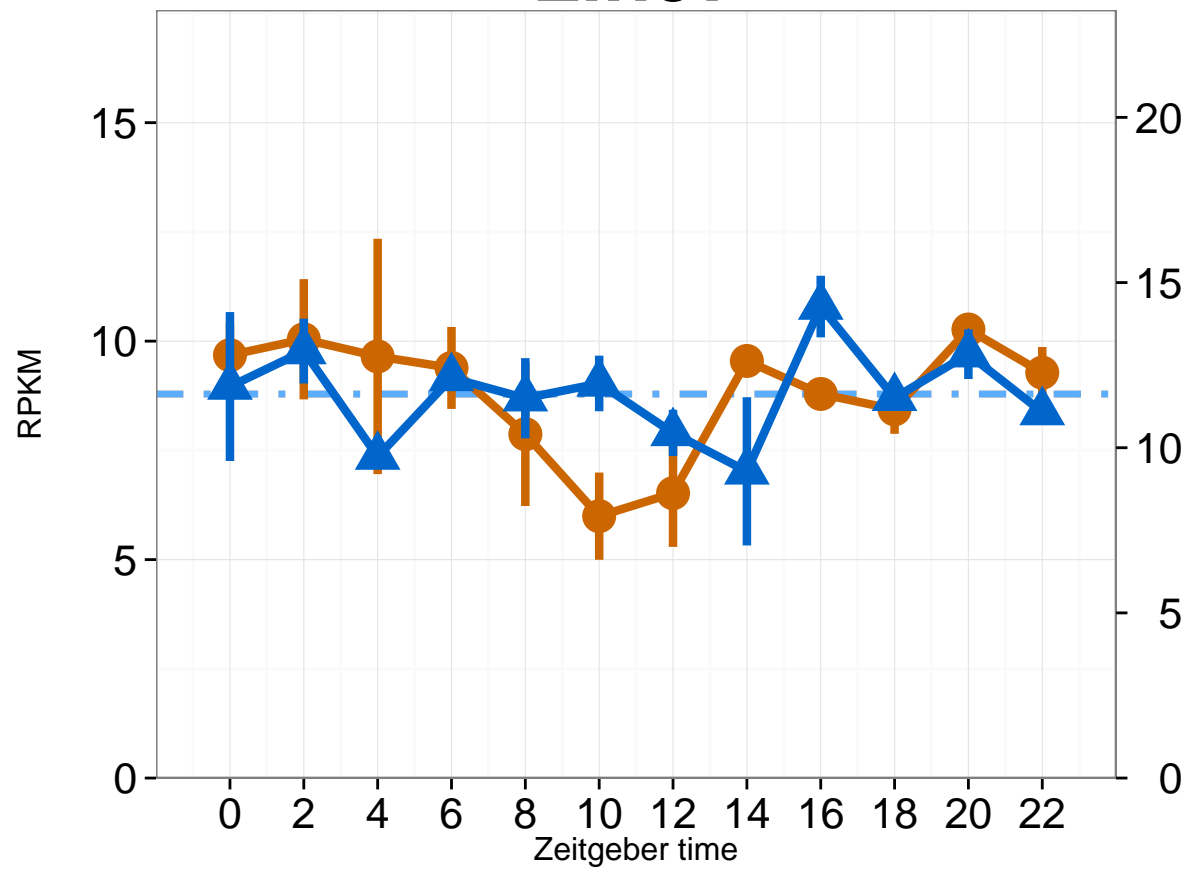

# Lin37

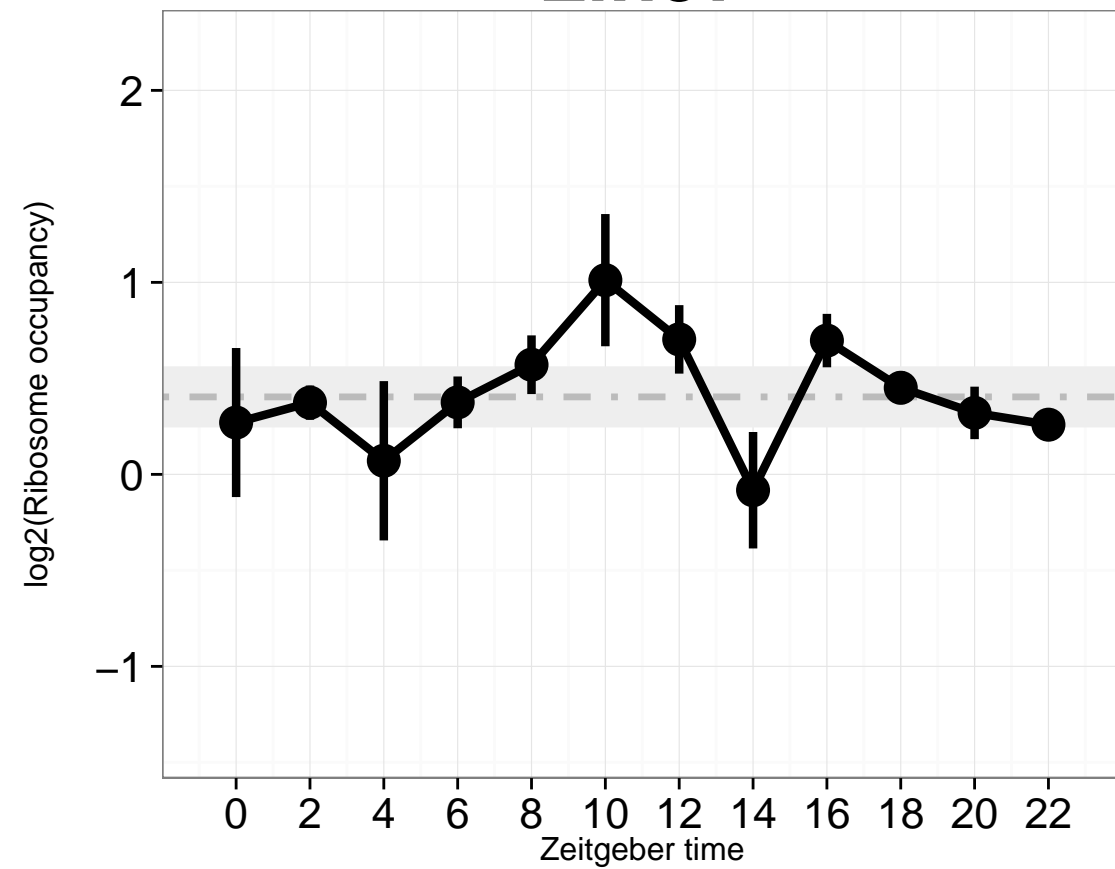

Supplement: Supplementary file 10799 [file 1]

## 2610301B20Rik

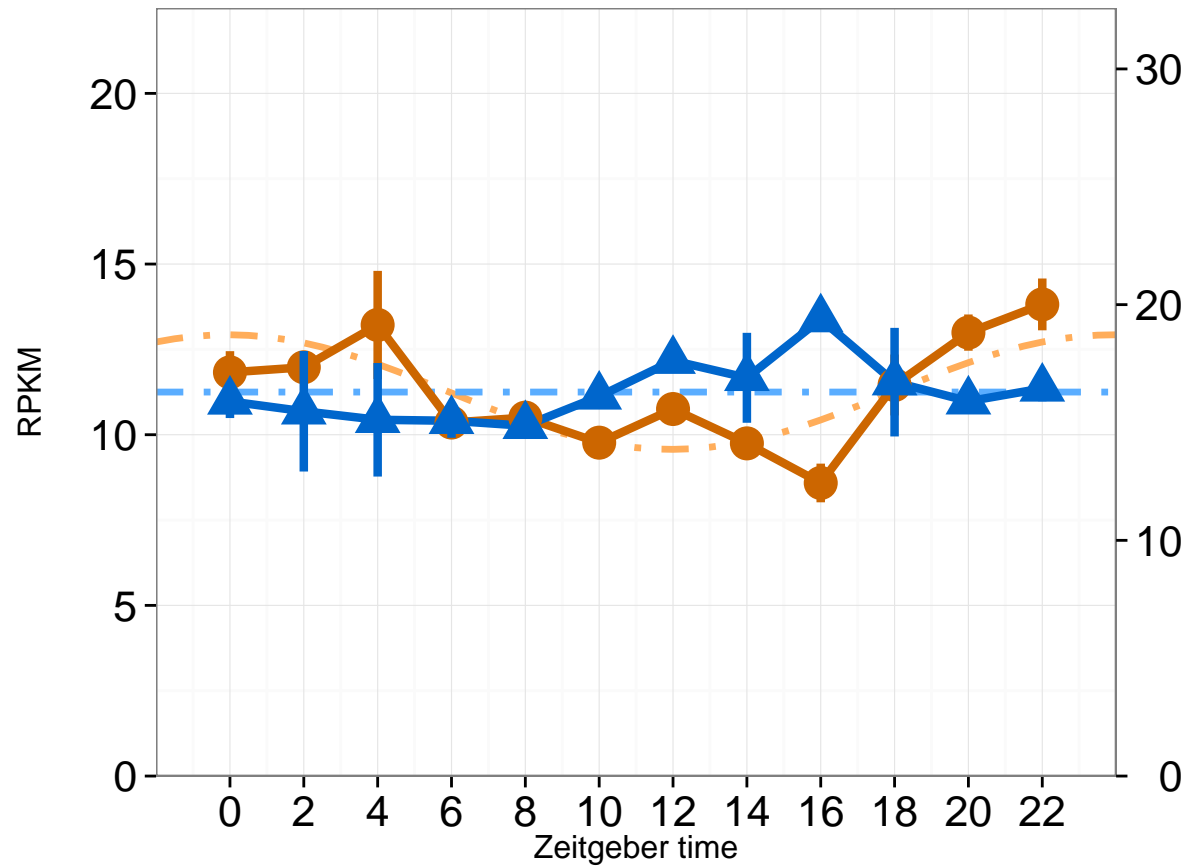

## 2610301B20Rik

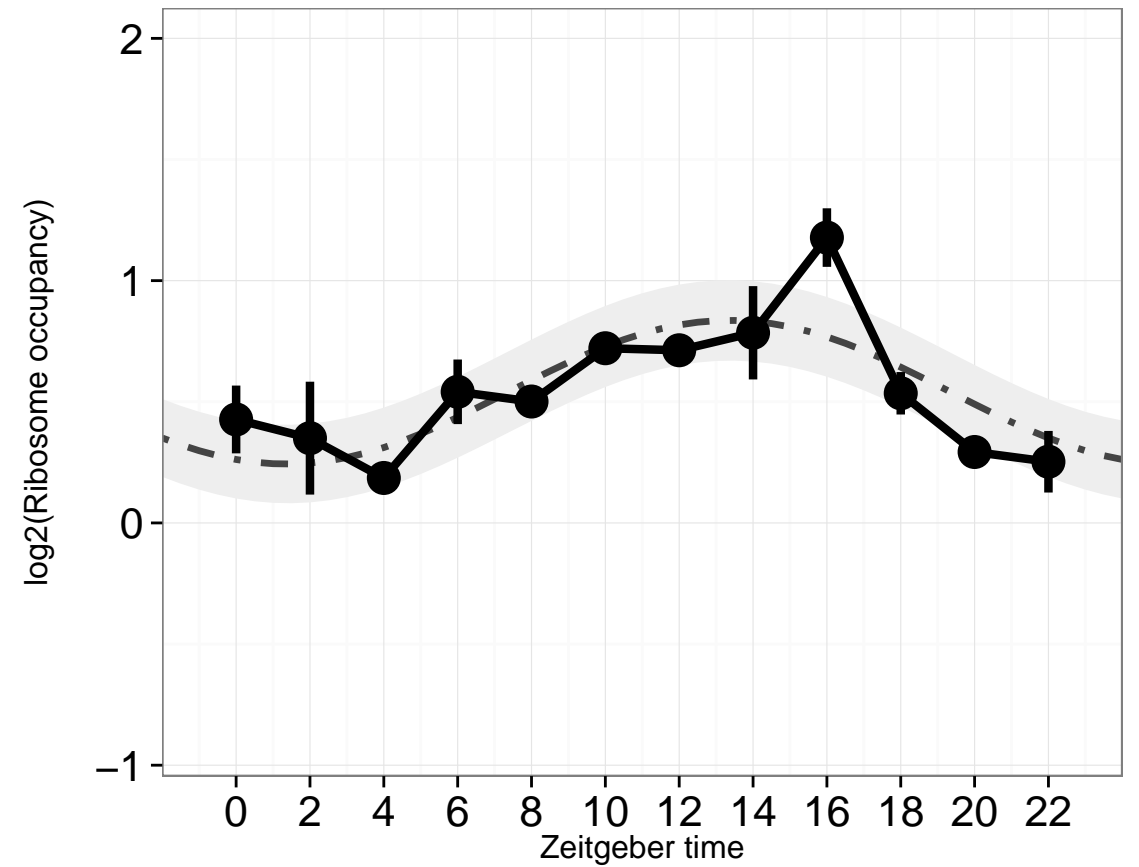

Supplement: Supplementary file 10800 [file 1]

# Zfp429

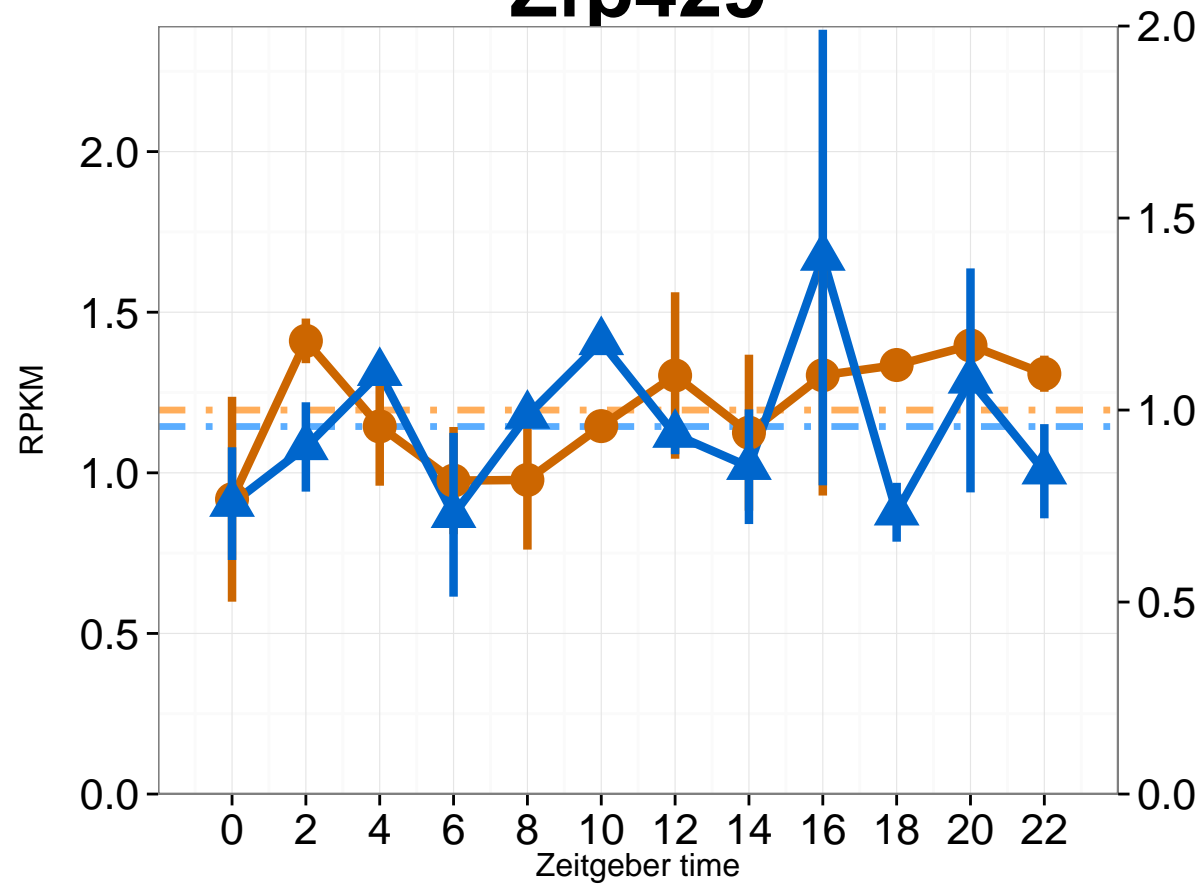

# Zfp429

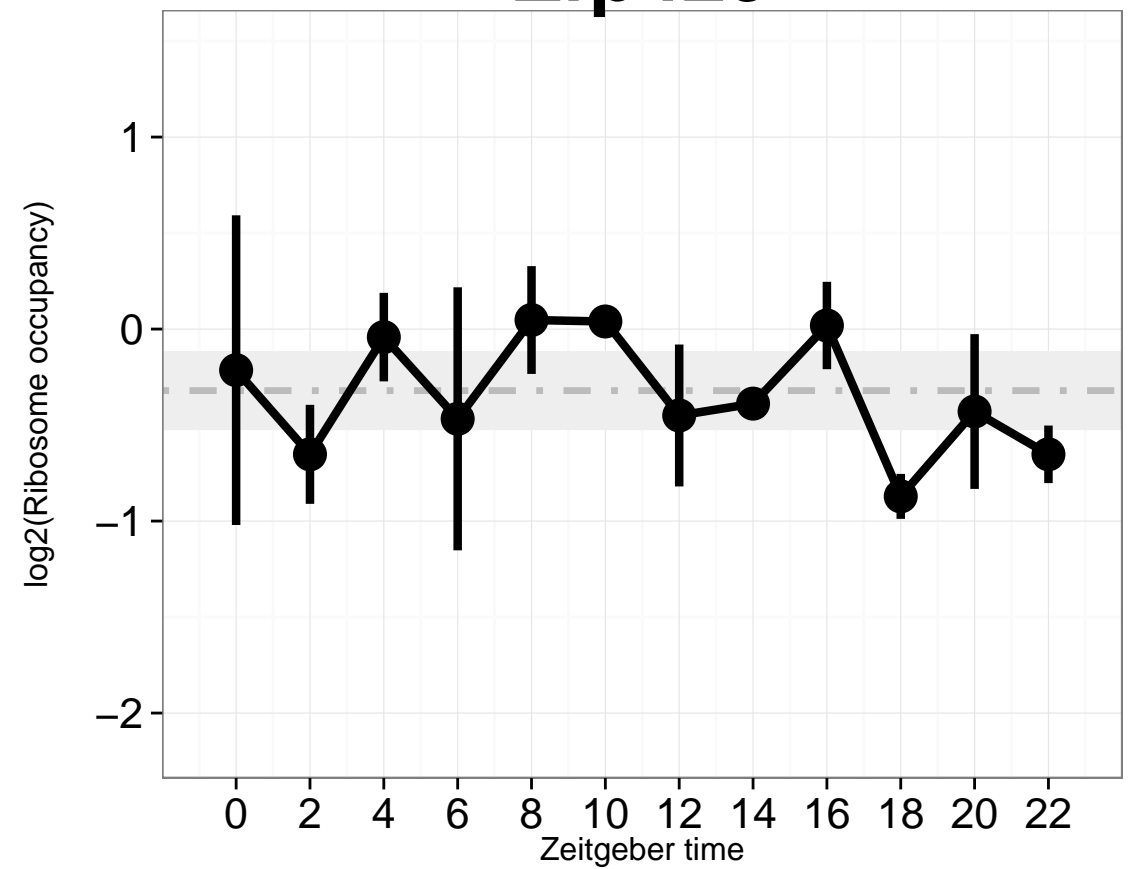

Supplement: Supplementary file 10801 [file 1]

## Bnip1

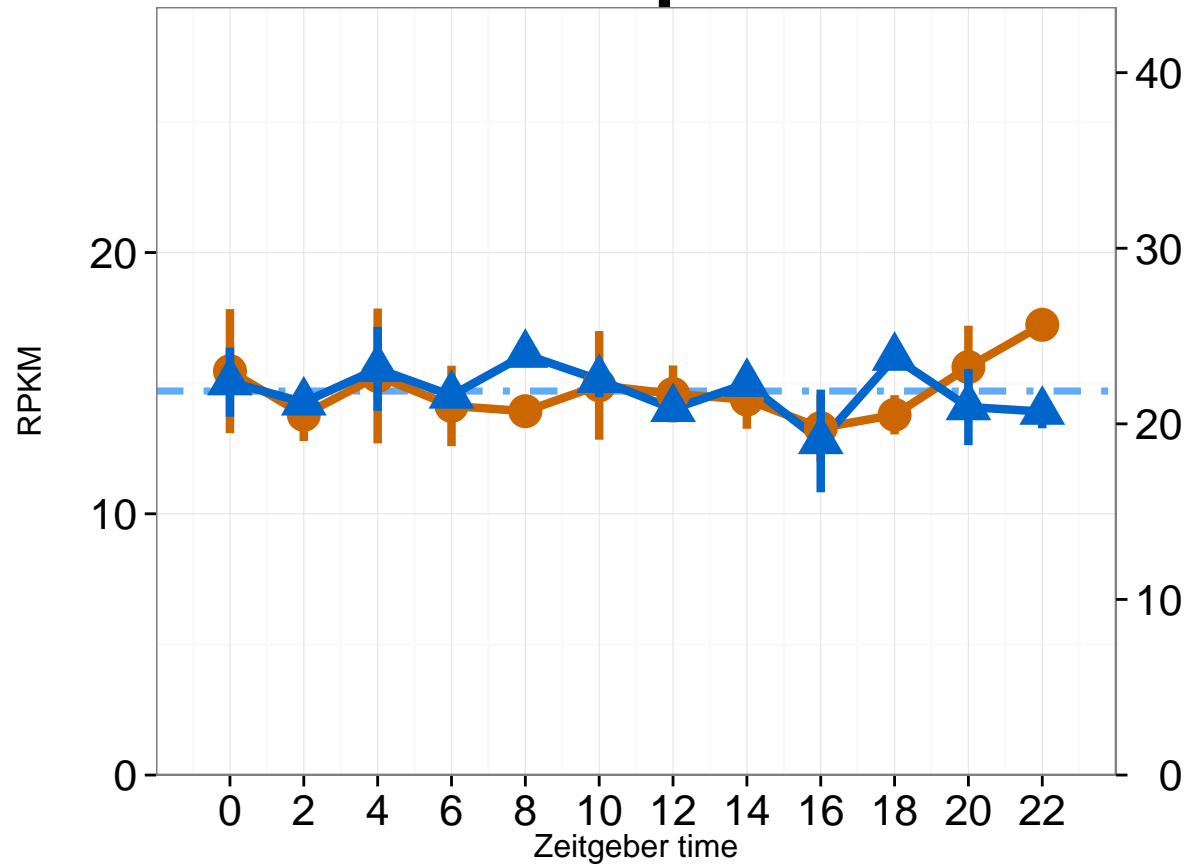

## Bnip1

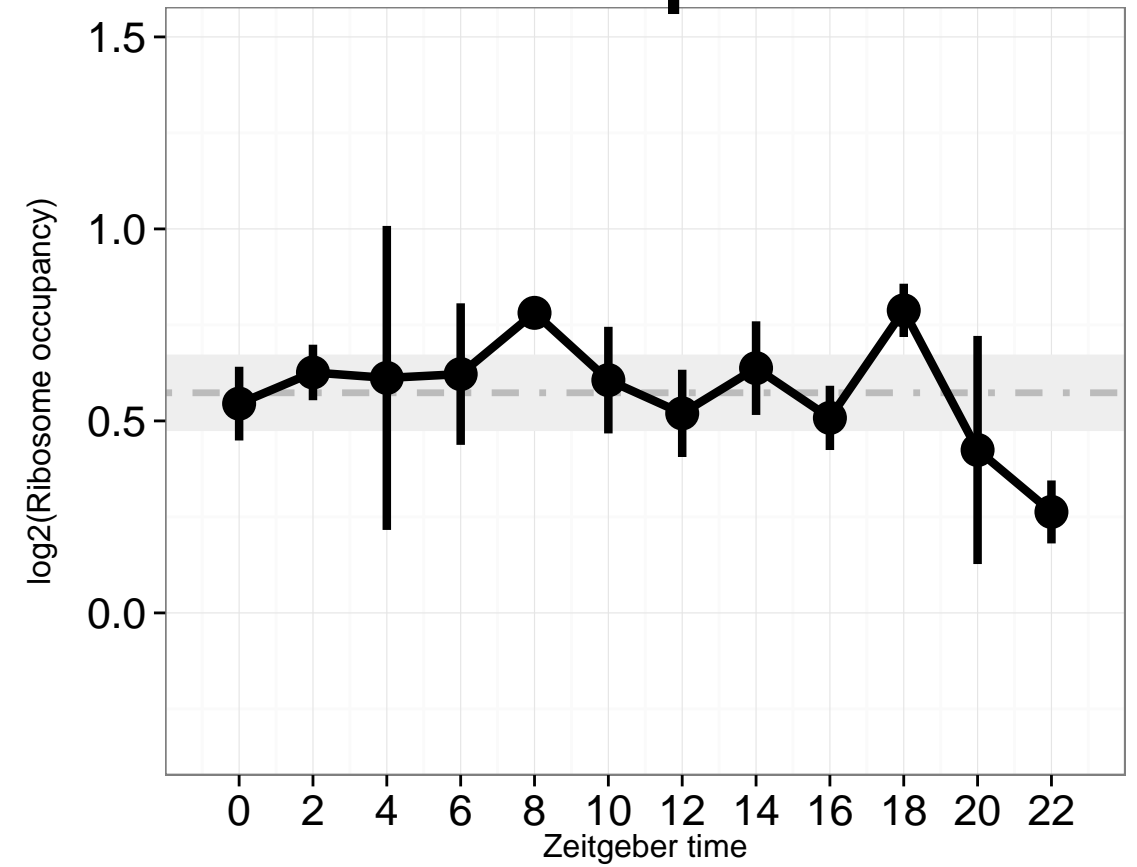

Supplement: Supplementary file 10802 [file 1]

# Dgkd

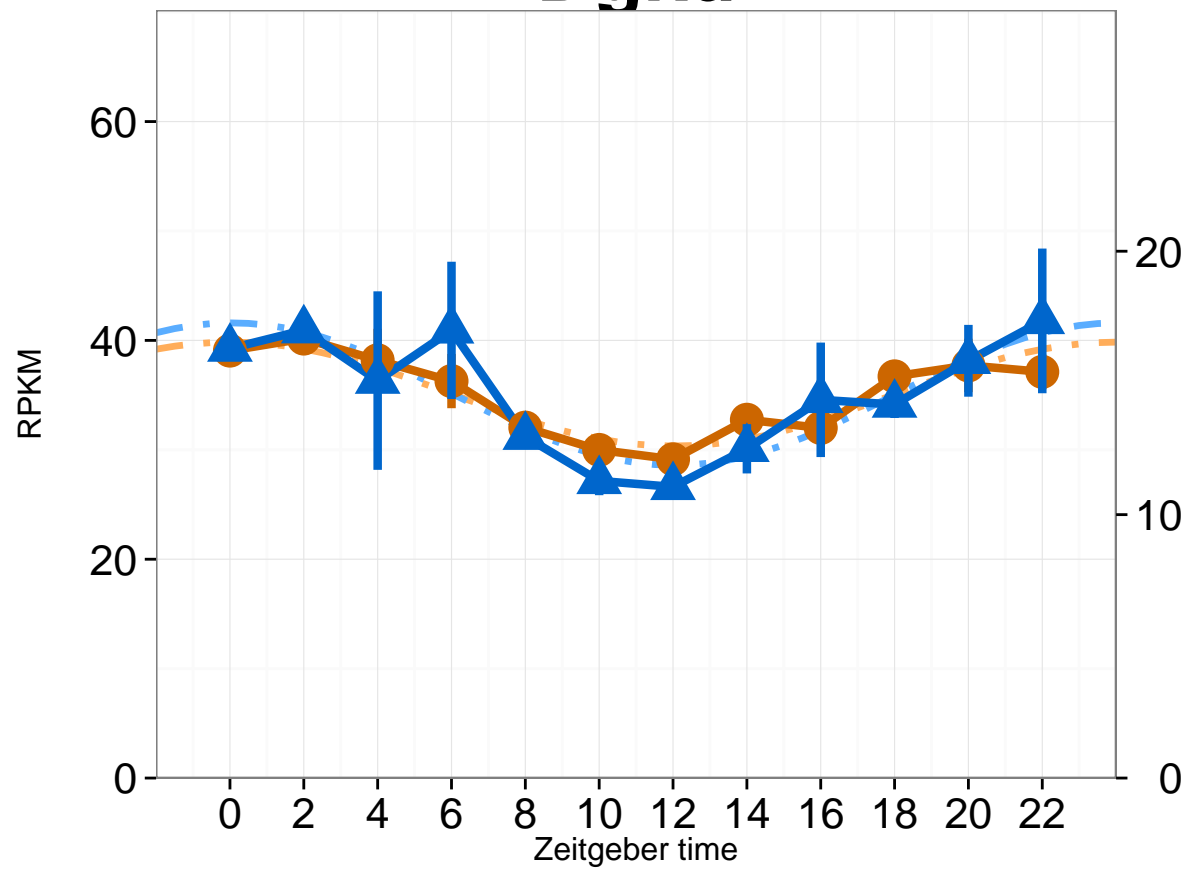

# Dgkd

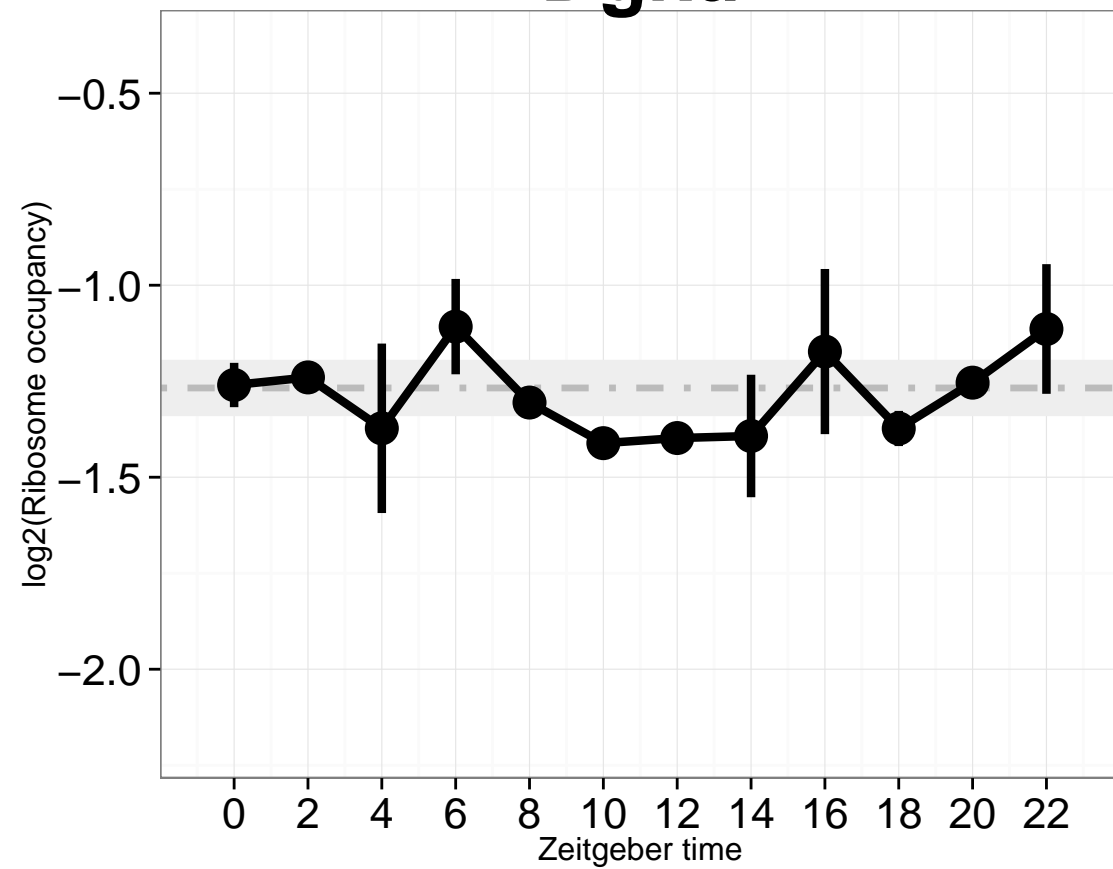

Supplement: Supplementary file 10803 [file 1]

## Zfp191

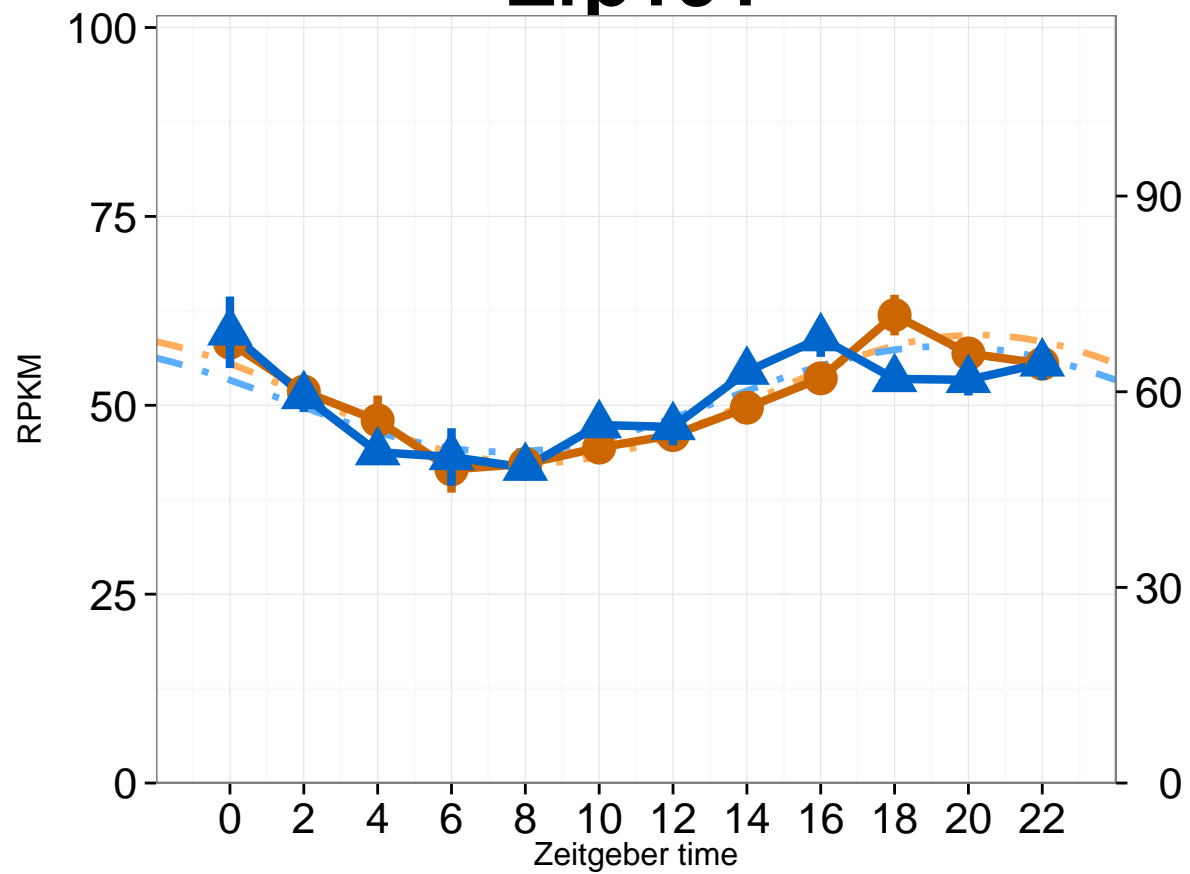

## Zfp191

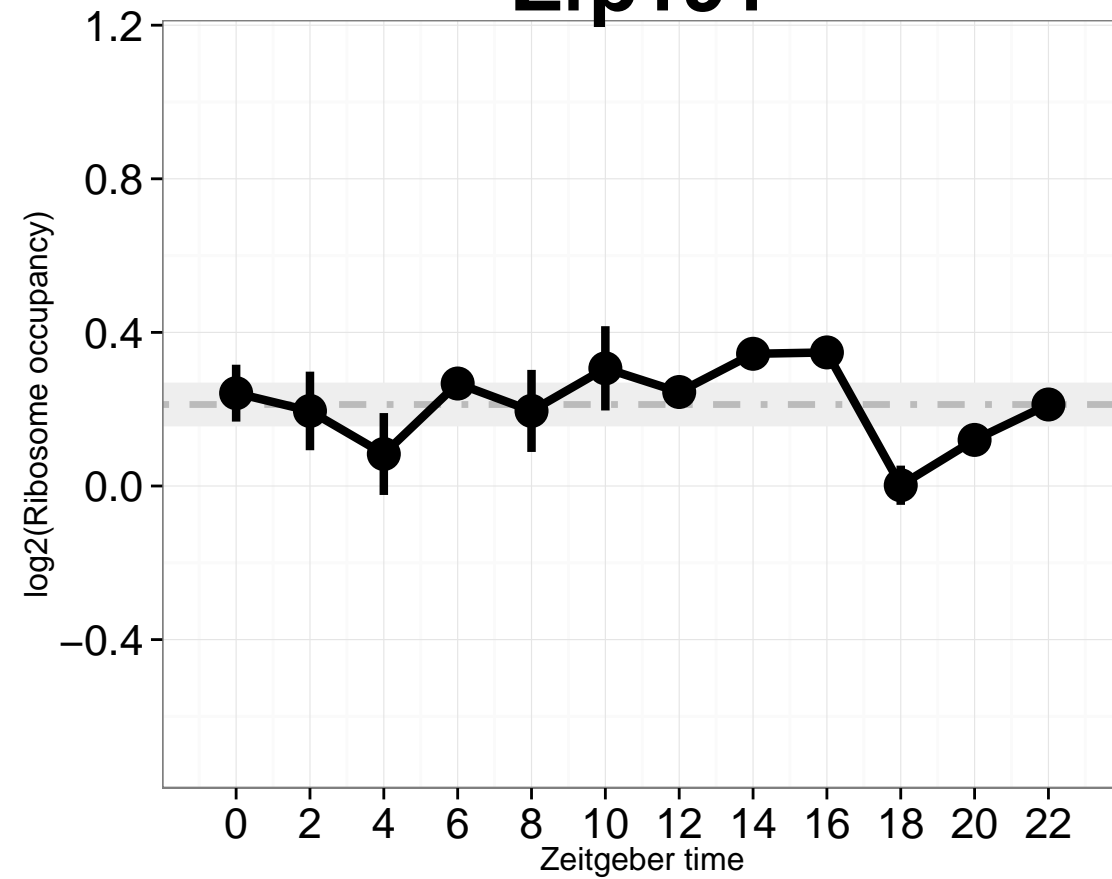

Supplement: Supplementary file 10804 [file 1]

## Gapvd1

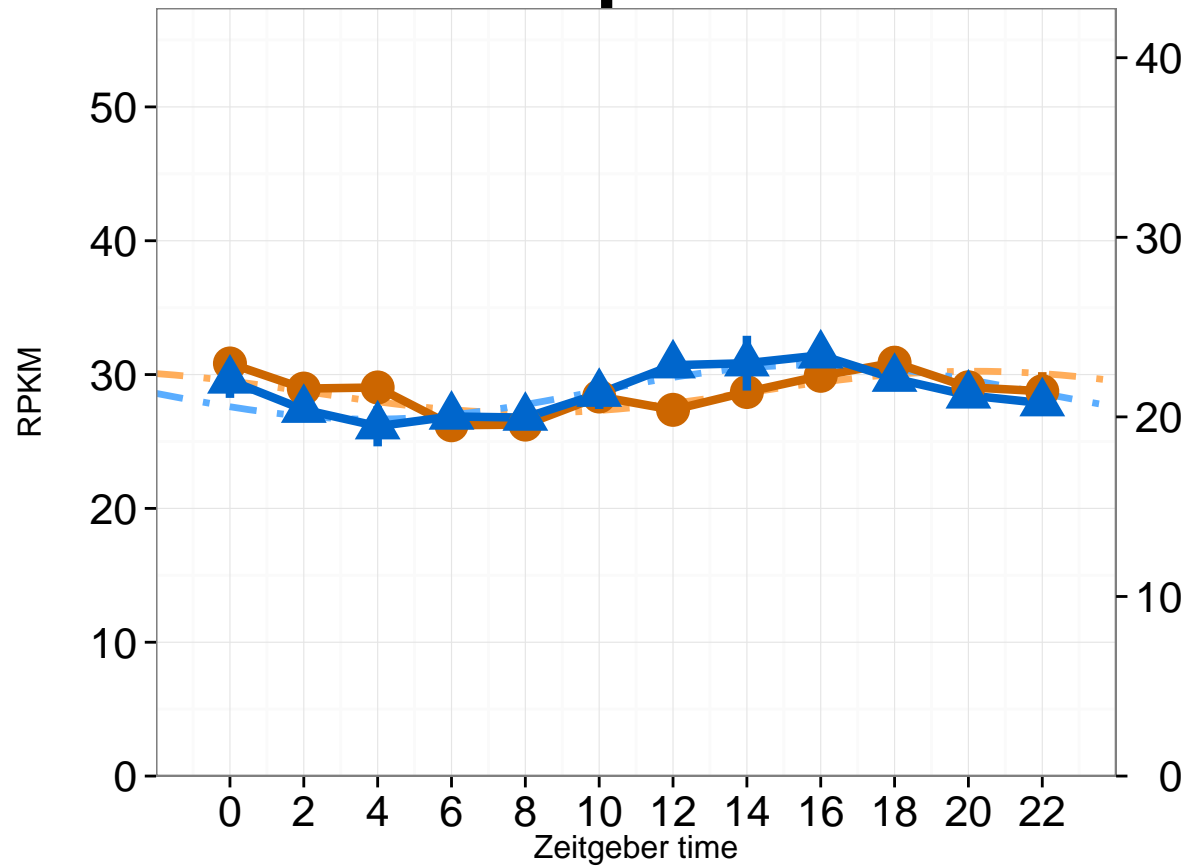

## Gapvd1

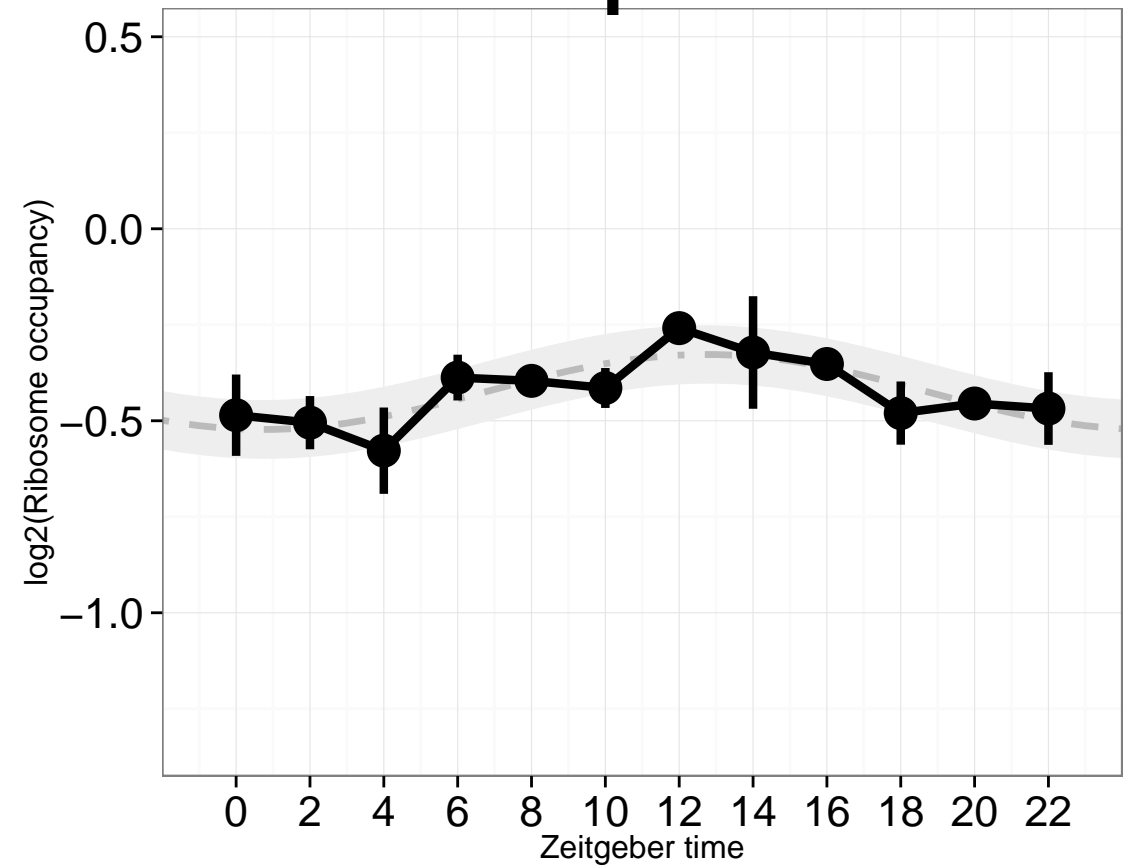

Supplement: Supplementary file 10805 [file 1]

# Zfp672

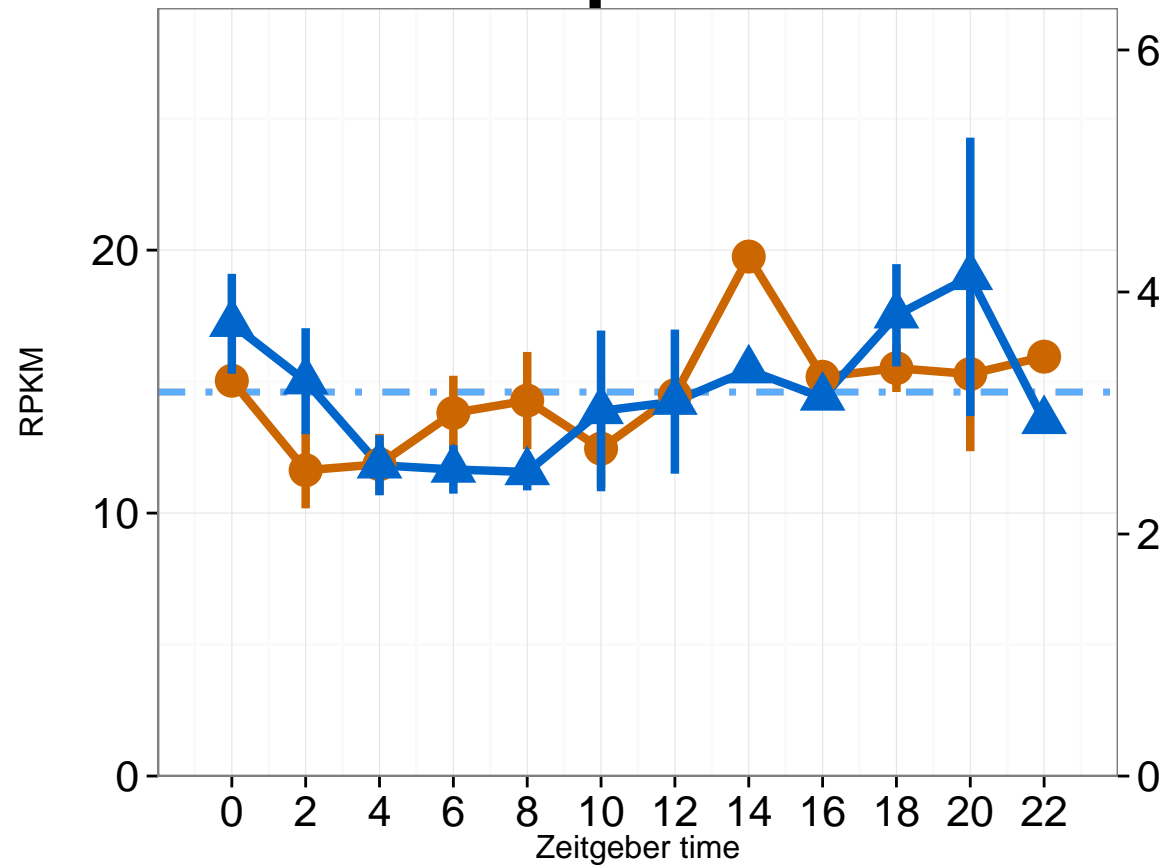

# Zfp672

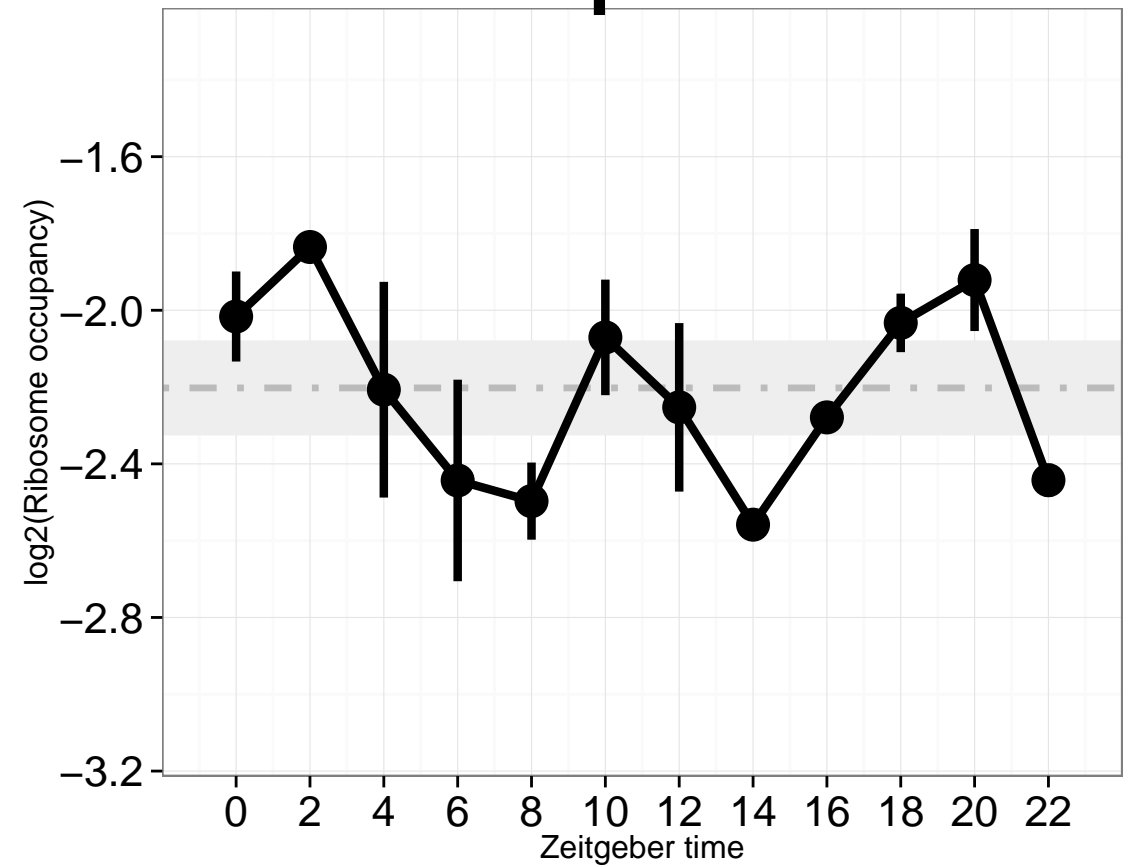

Supplement: Supplementary file 10806 [file 1]

## Calm1

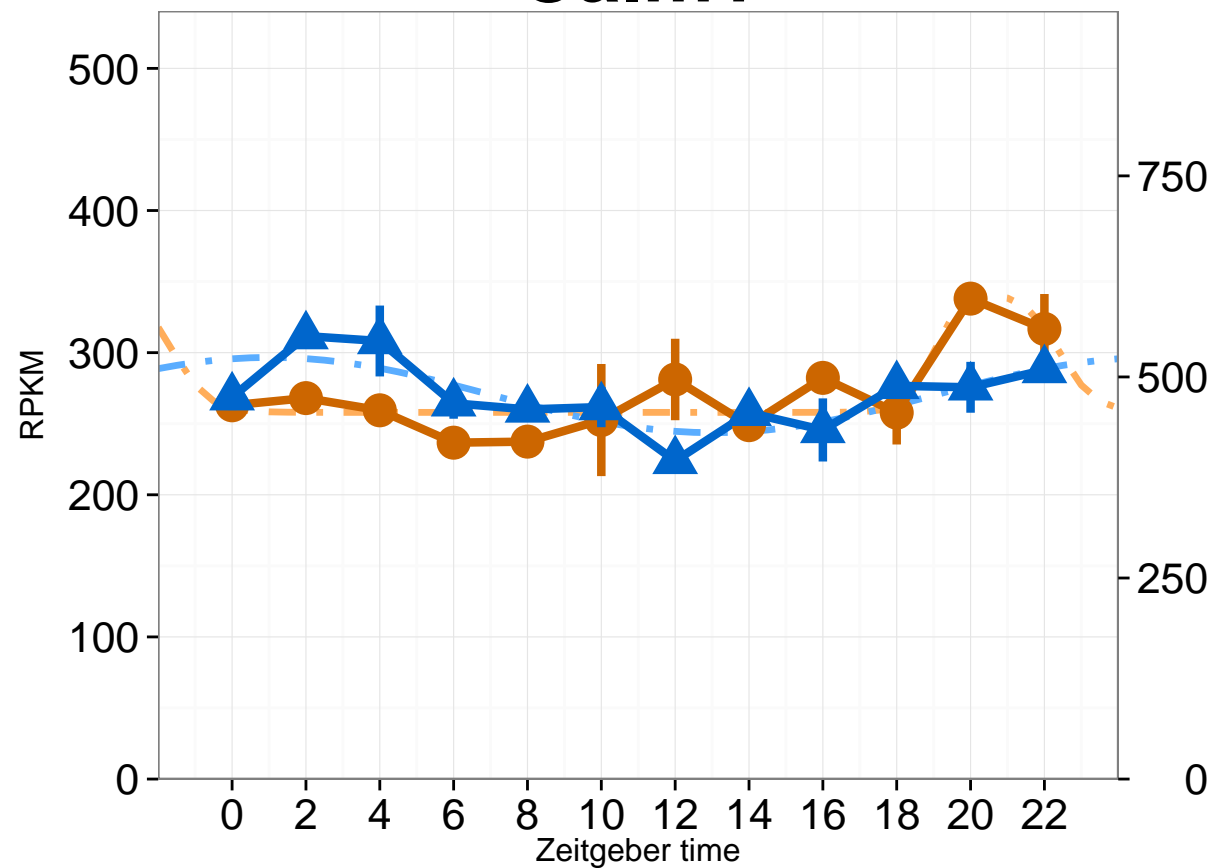

## Calm1

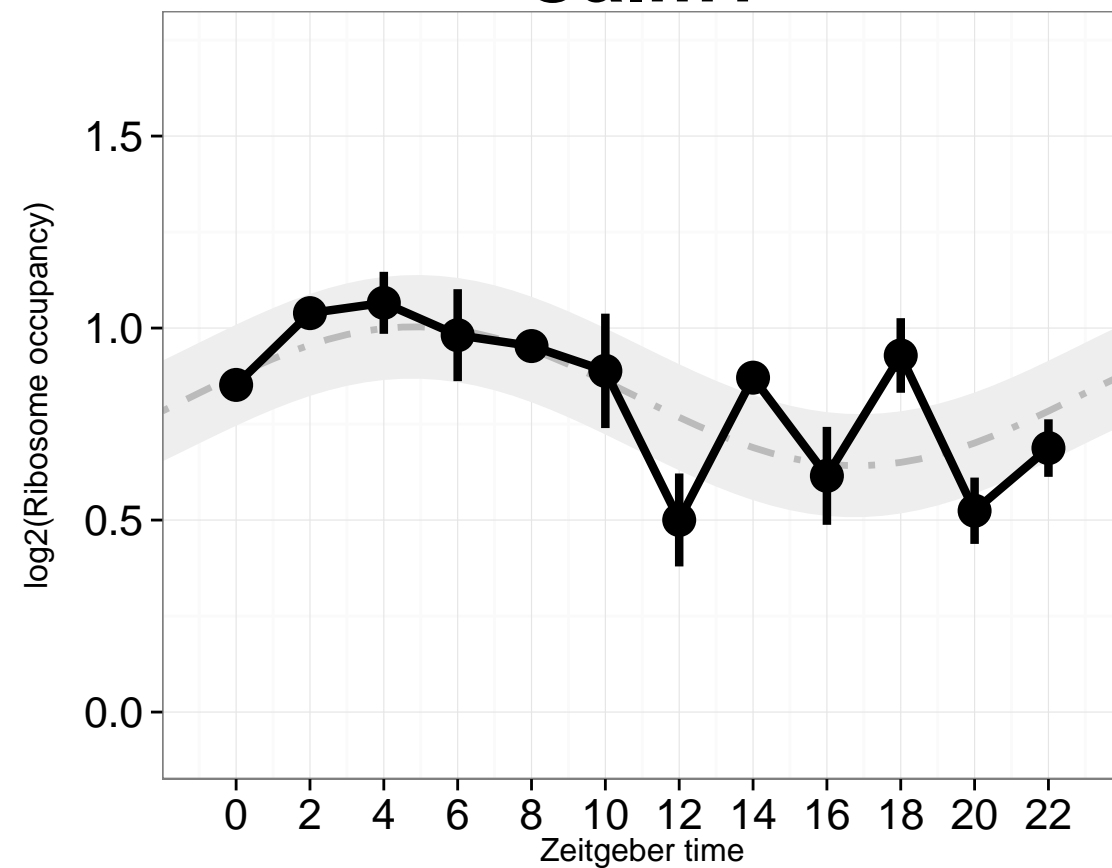

Supplement: Supplementary file 10807 [file 1]

## Srsf5

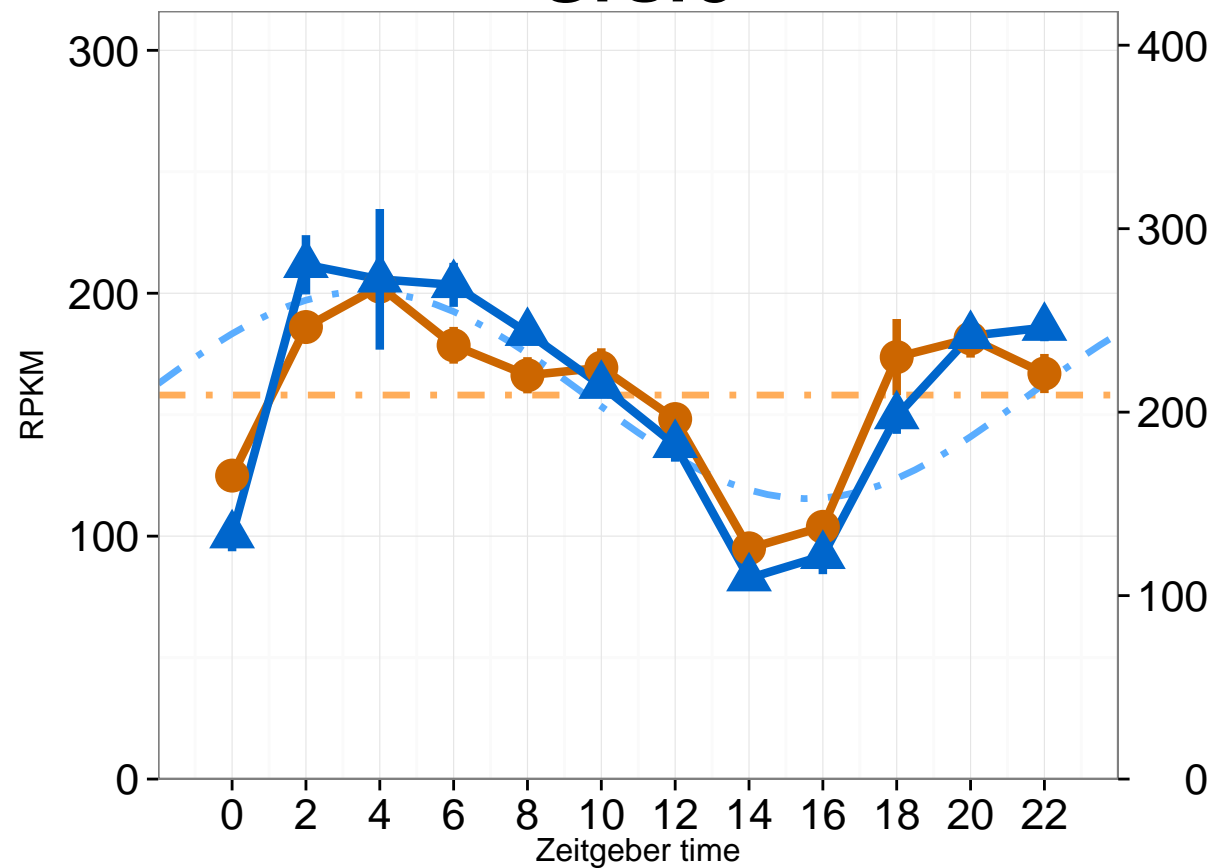

## Srsf5

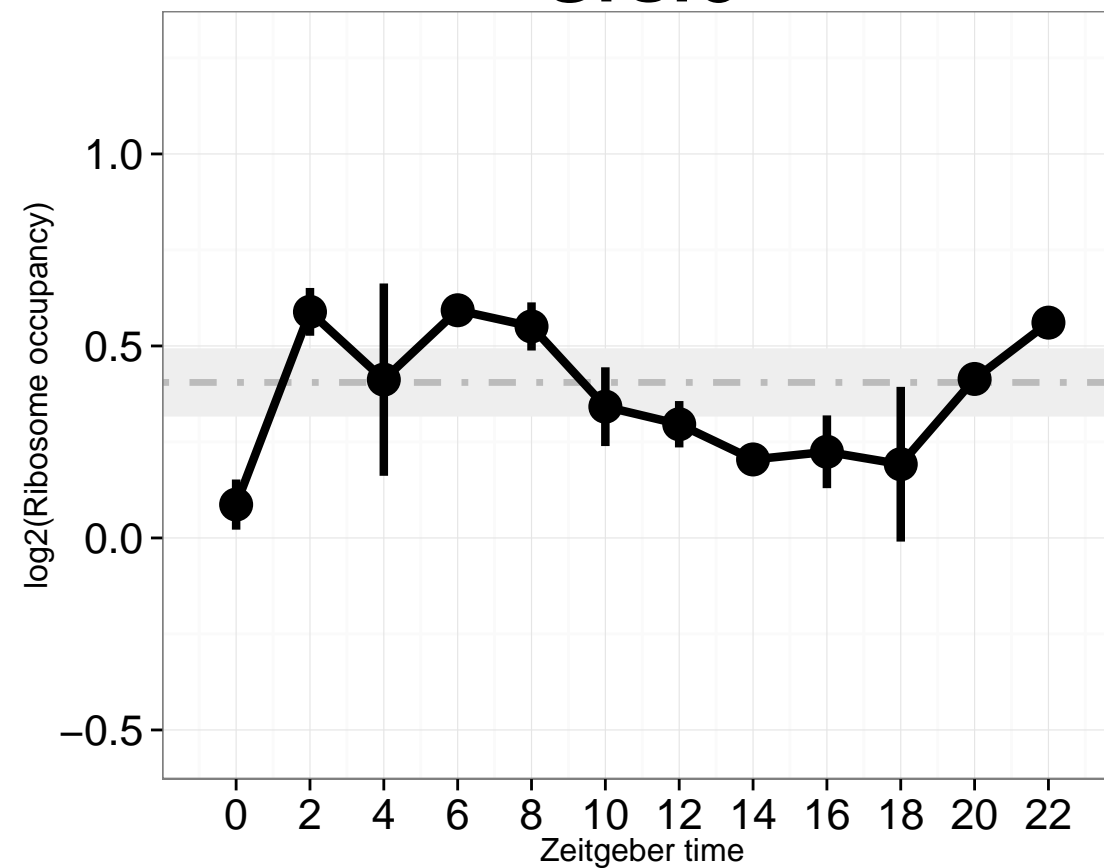

Supplement: Supplementary file 10808 [file 1]

## Hmgb2

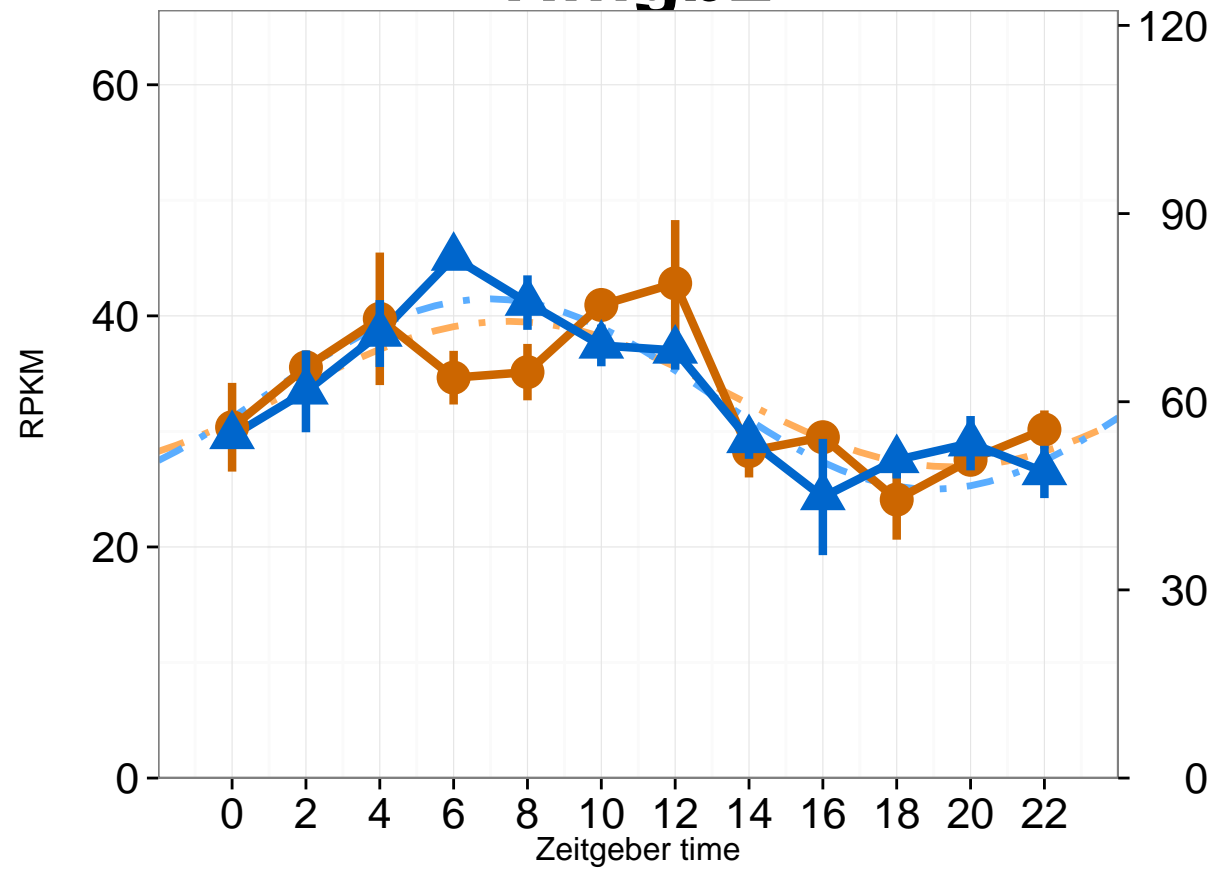

## Hmgb2

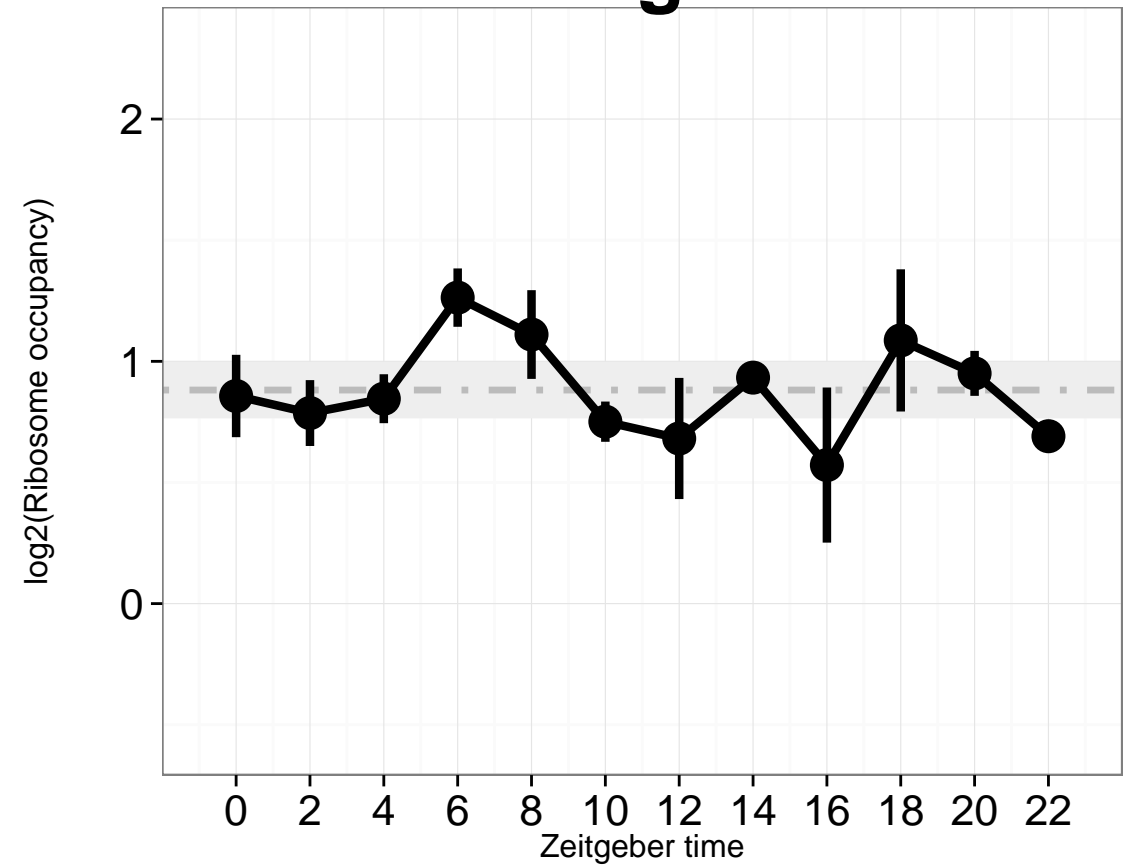

Supplement: Supplementary file 10809 [file 1]

# 1110057K04Rik

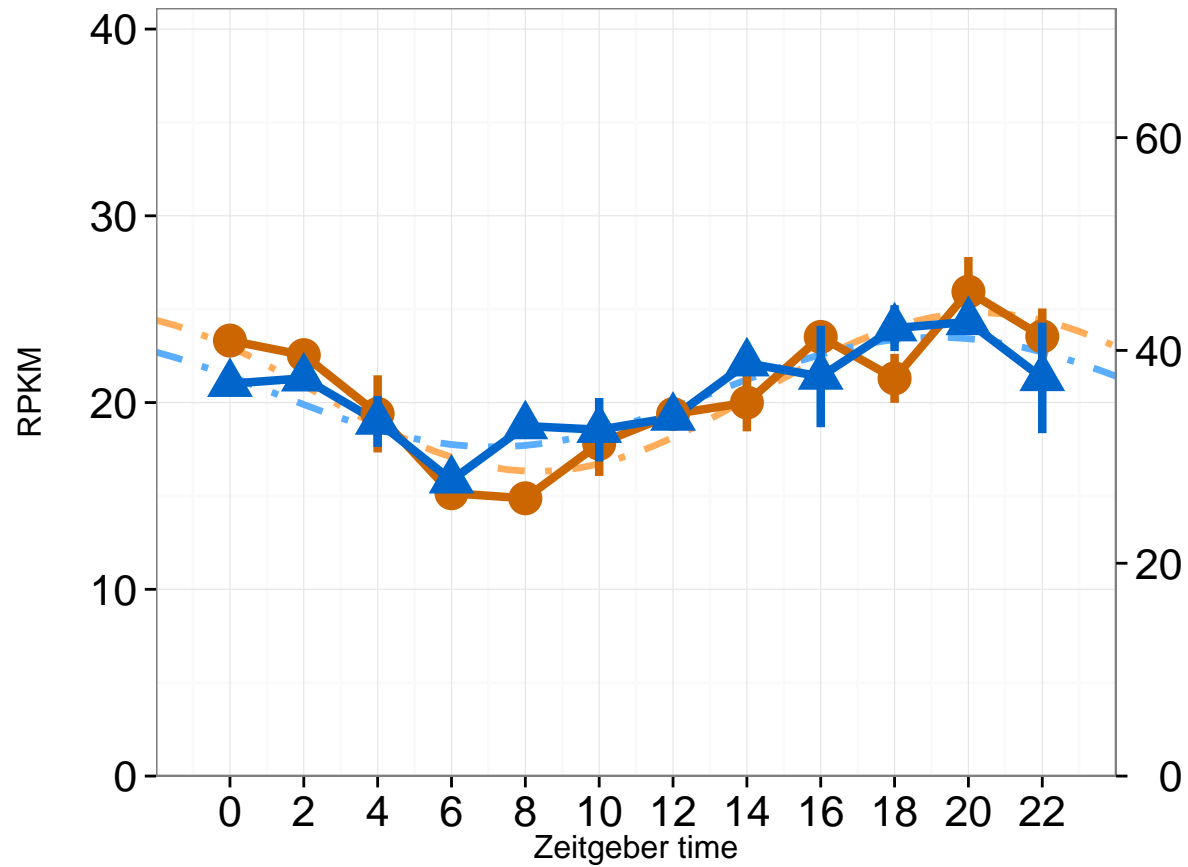

# 1110057K04Rik

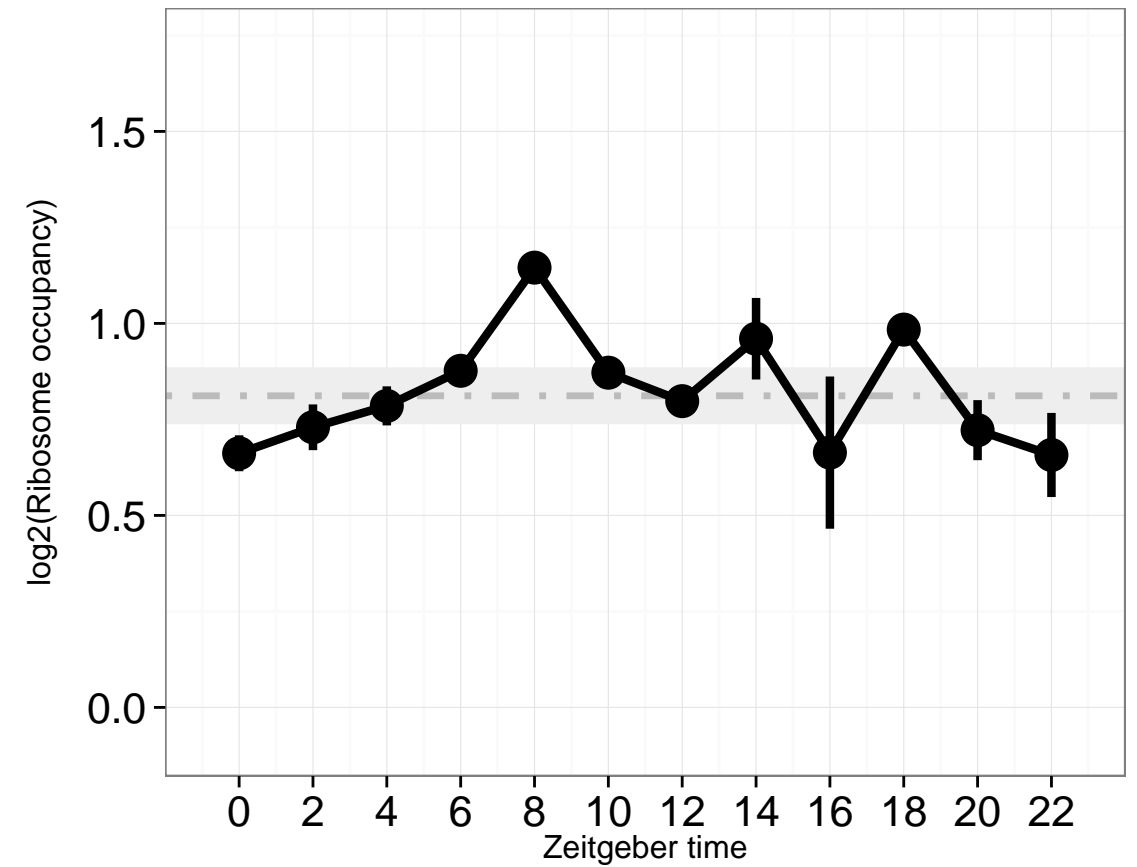

Supplement: Supplementary file 10810 [file 1]

## Xylt1

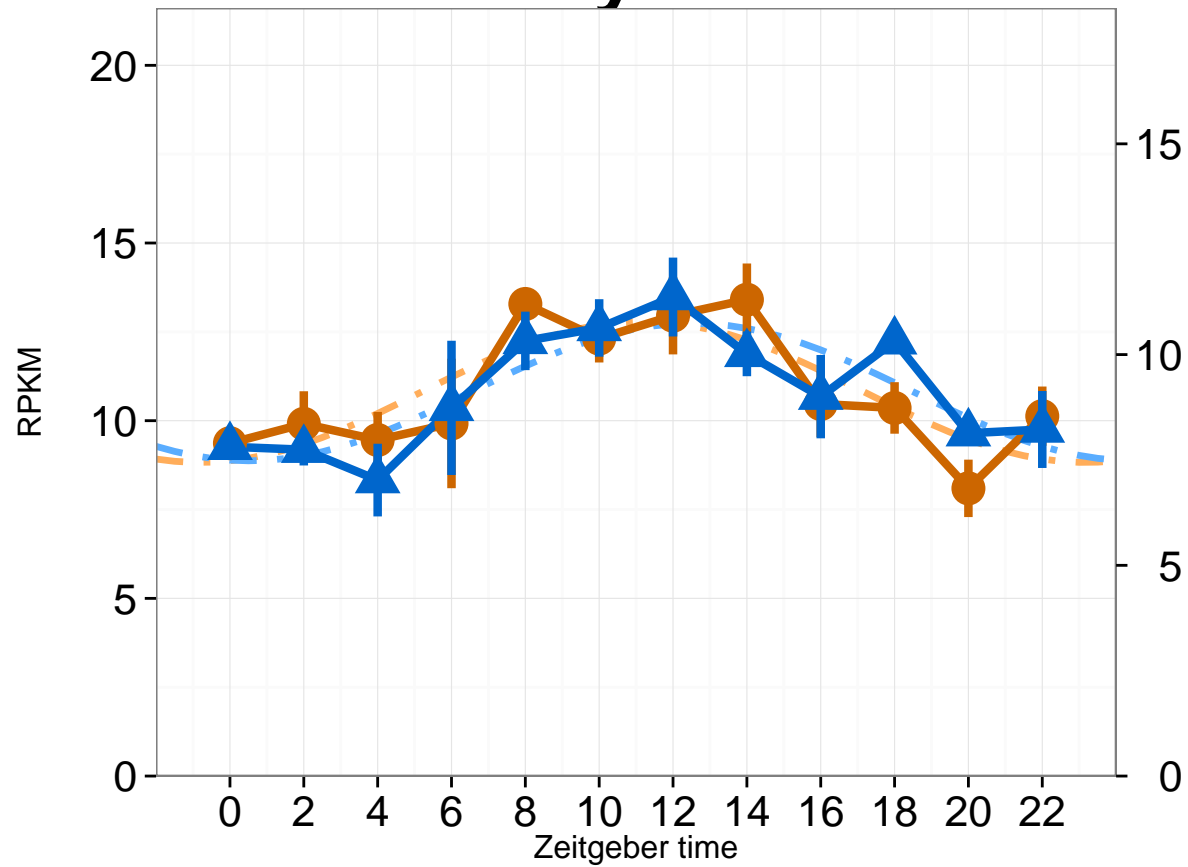

## Xylt1

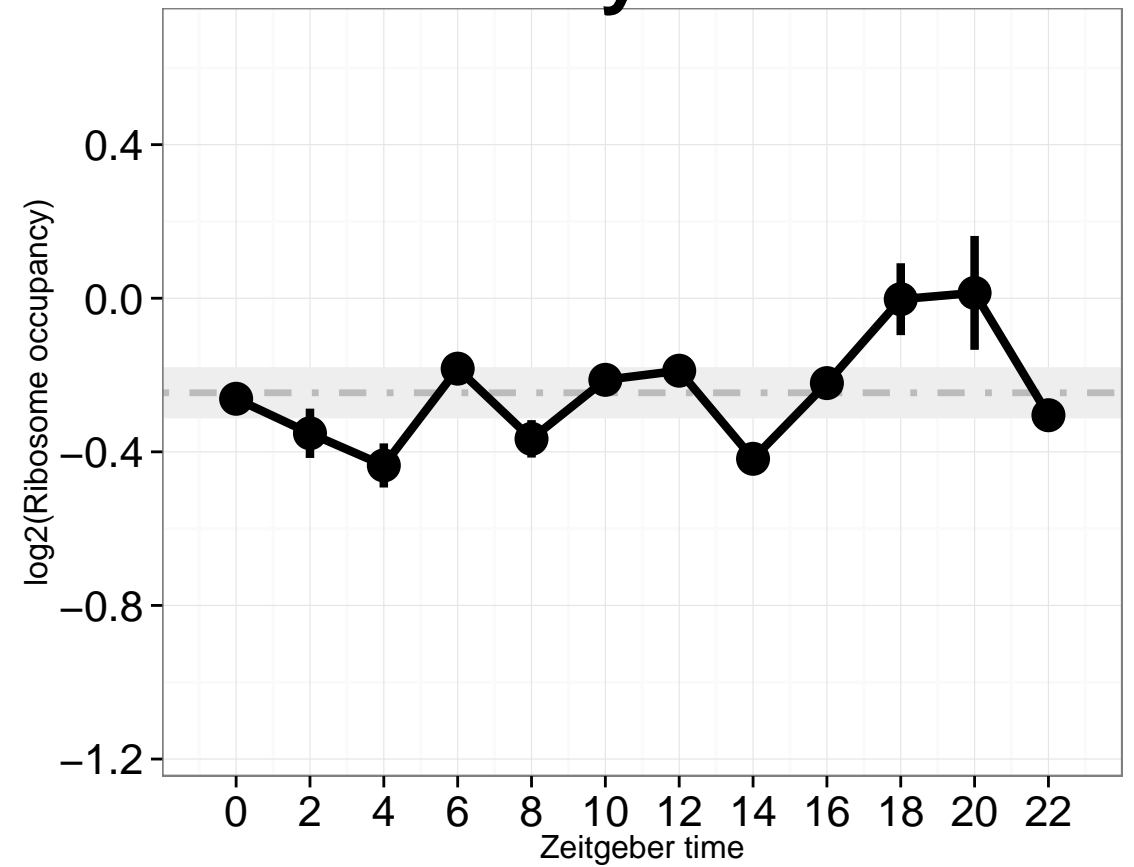

Supplement: Supplementary file 10811 [file 1]

# Spata17

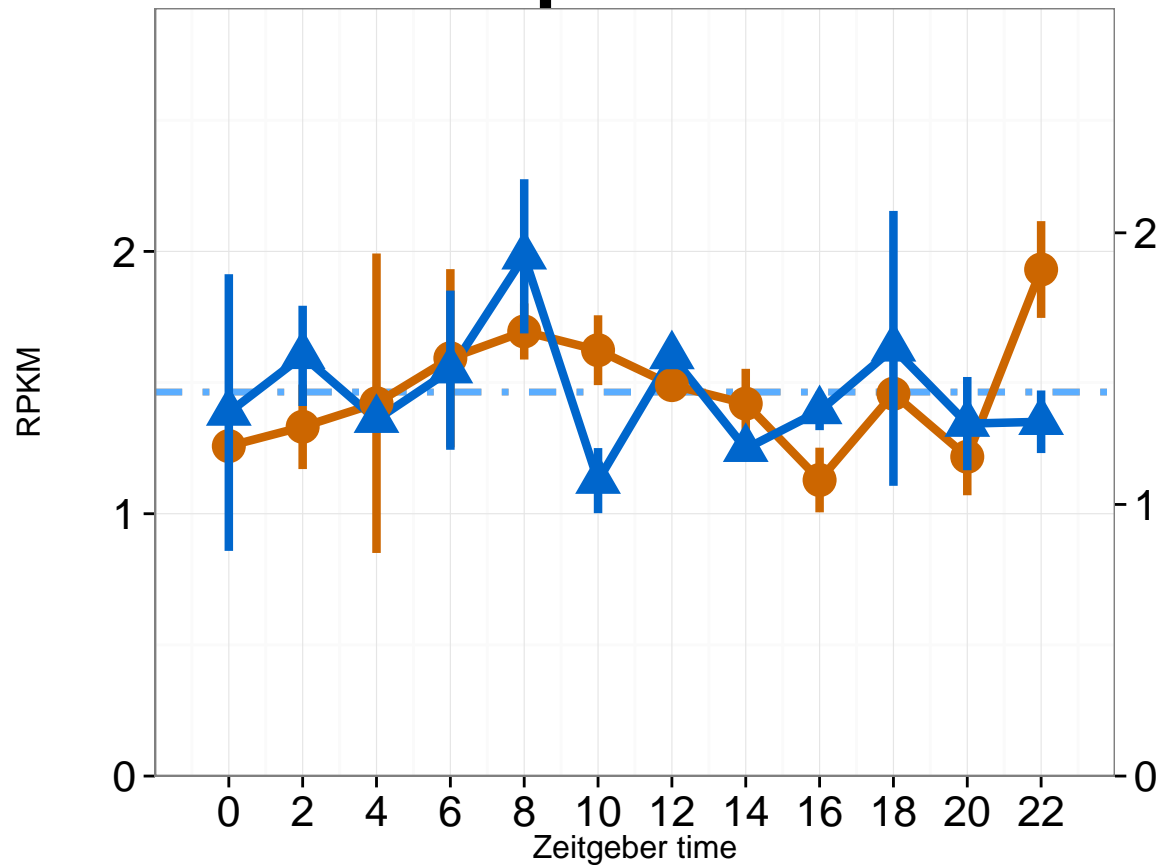

# Spata17

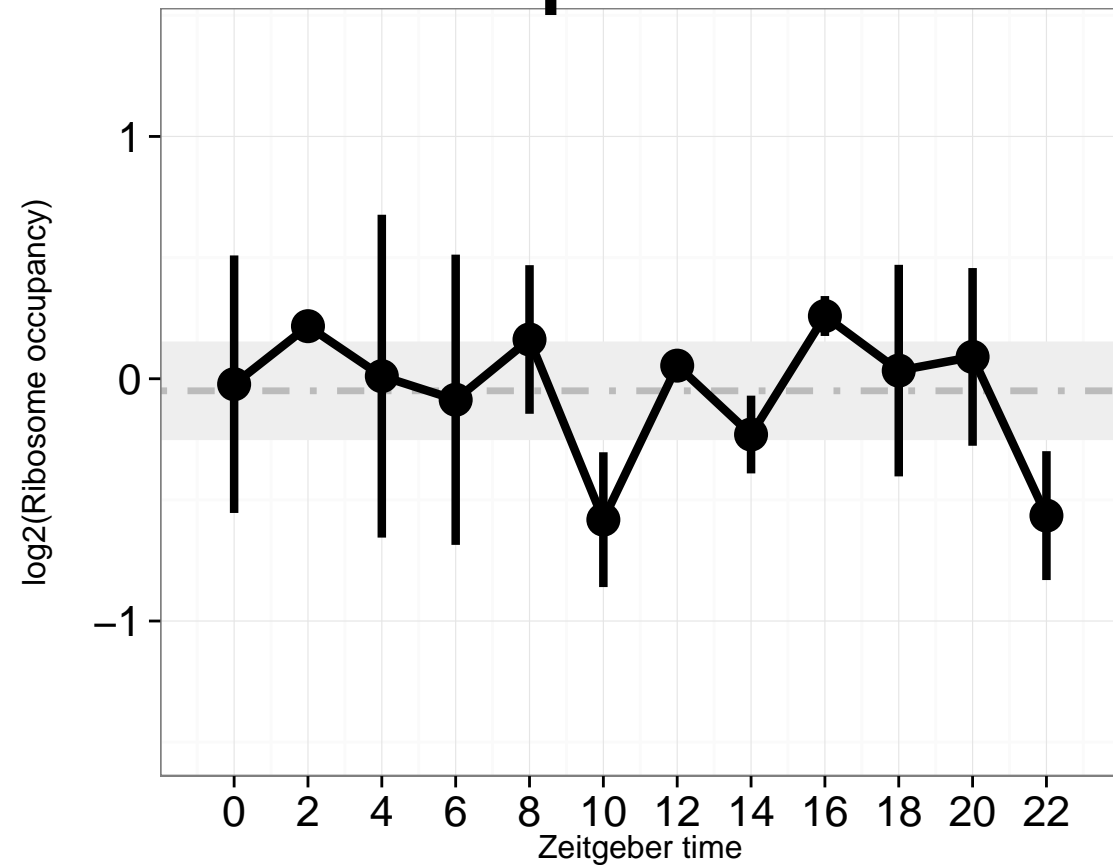

Supplement: Supplementary file 10812 [file 1]

# Pcf11

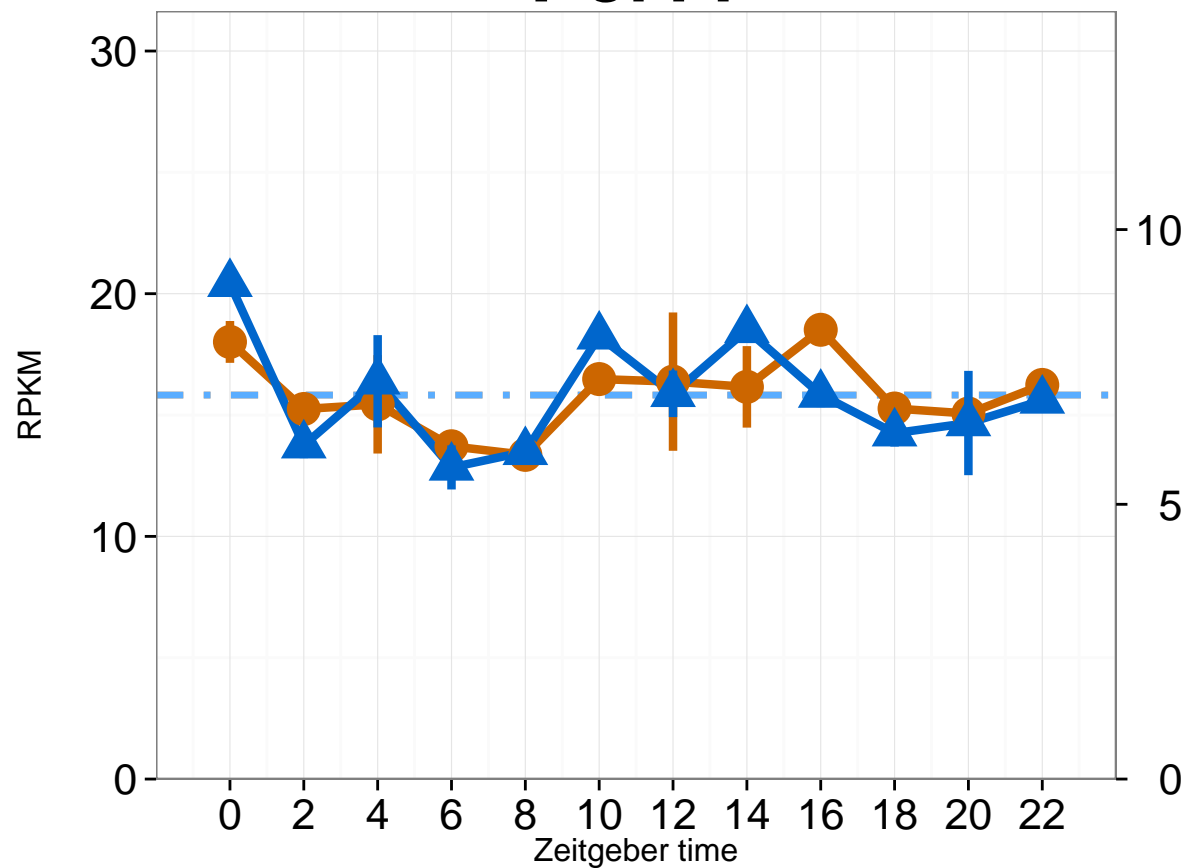

# Pcf11

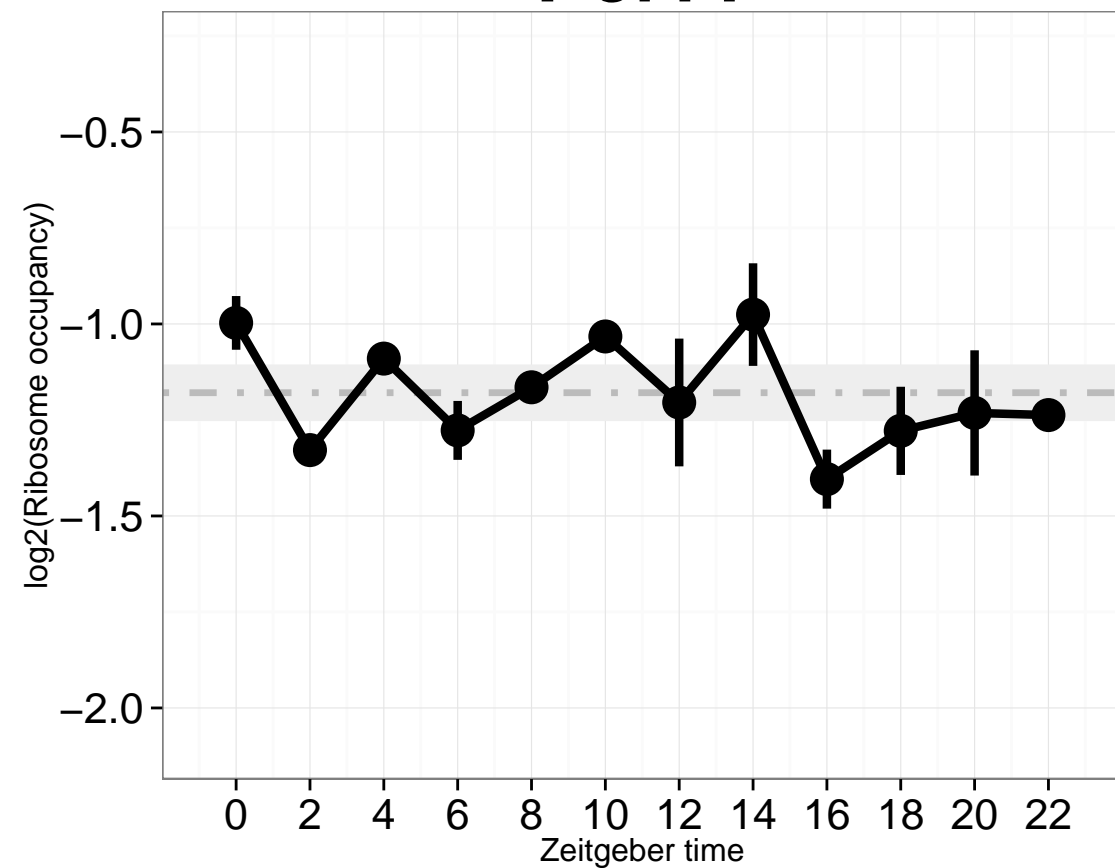

Supplement: Supplementary file 10813 [file 1]

## Rad23b

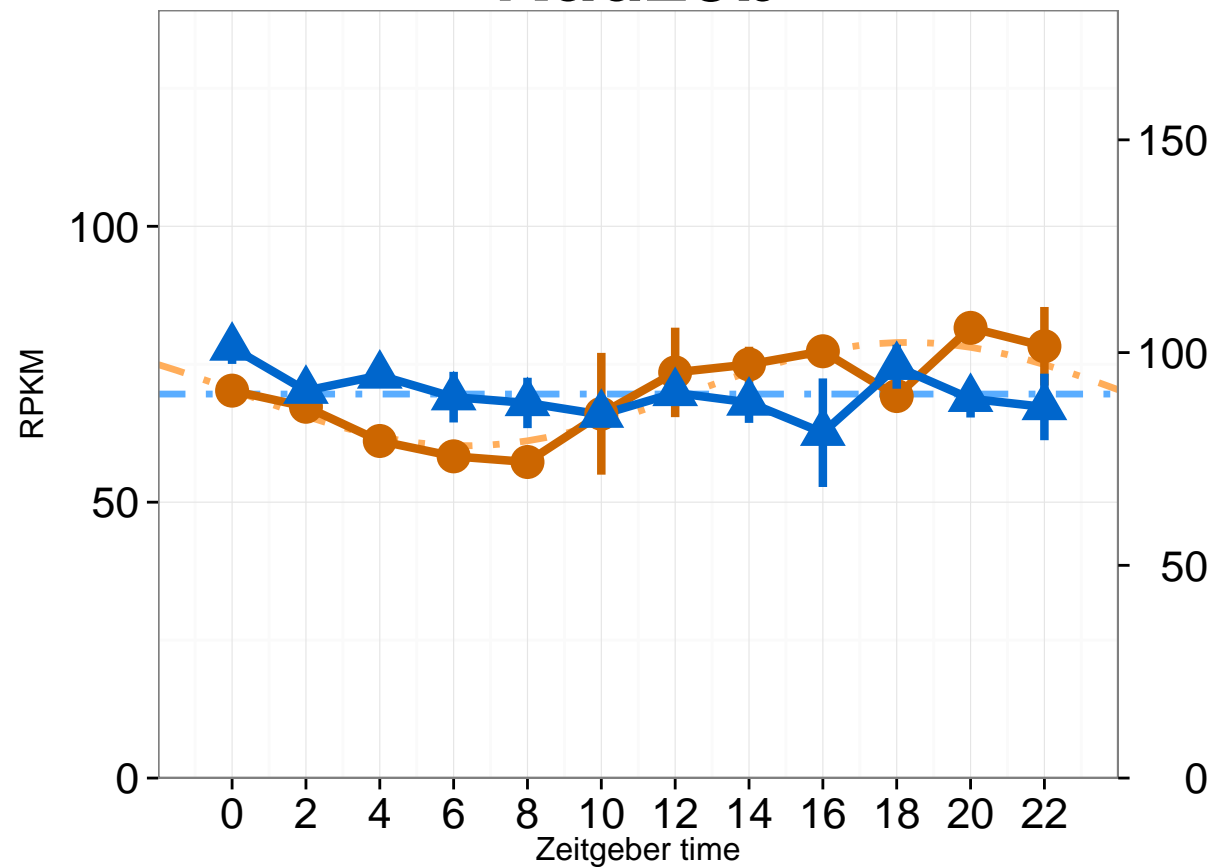

## Rad23b

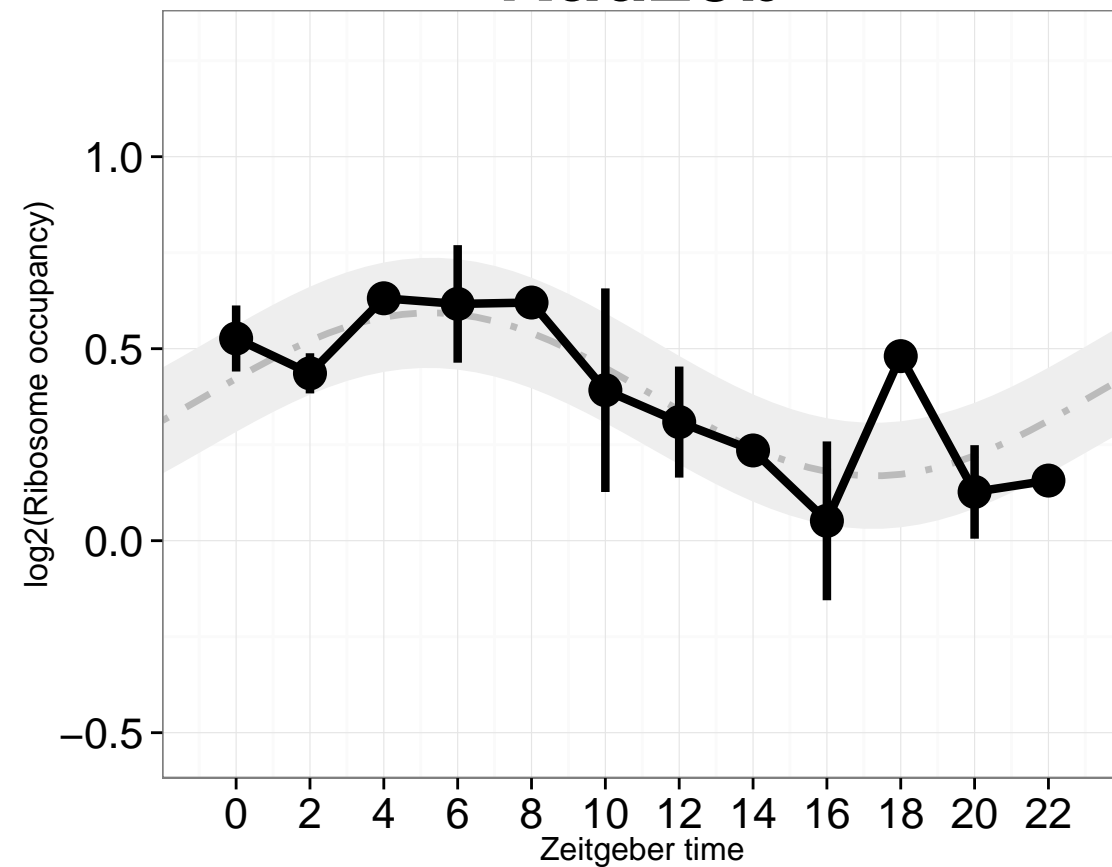

Supplement: Supplementary file 10814 [file 1]

## Stk3

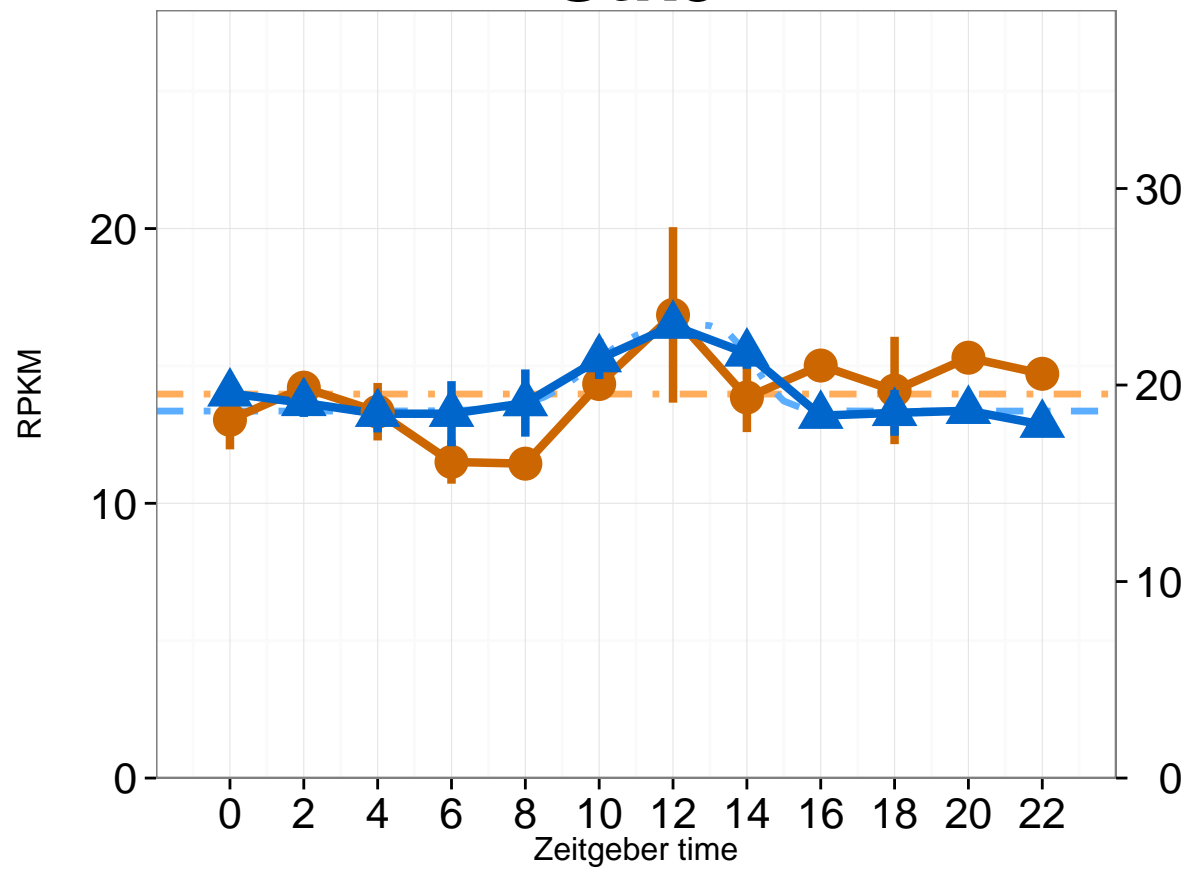

## Stk3

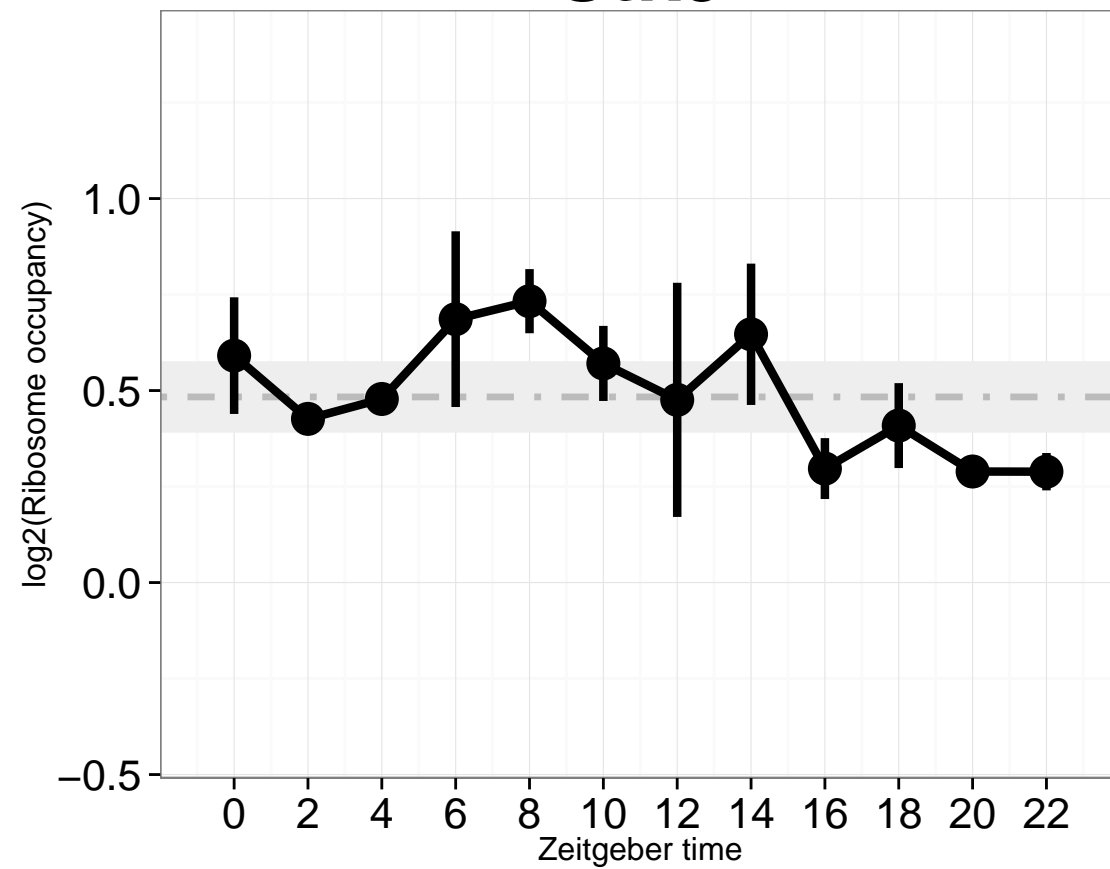

Supplement: Supplementary file 10815 [file 1]

## Insrr

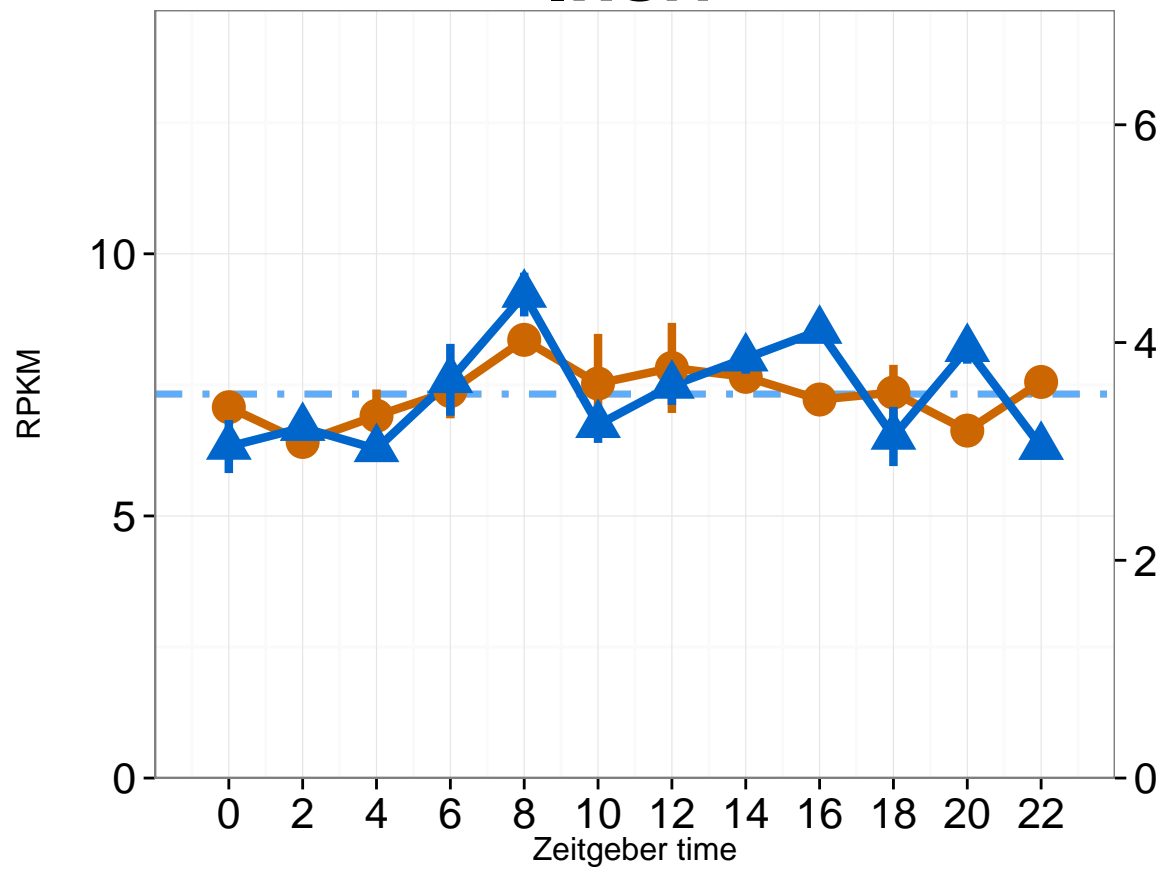

## Insrr

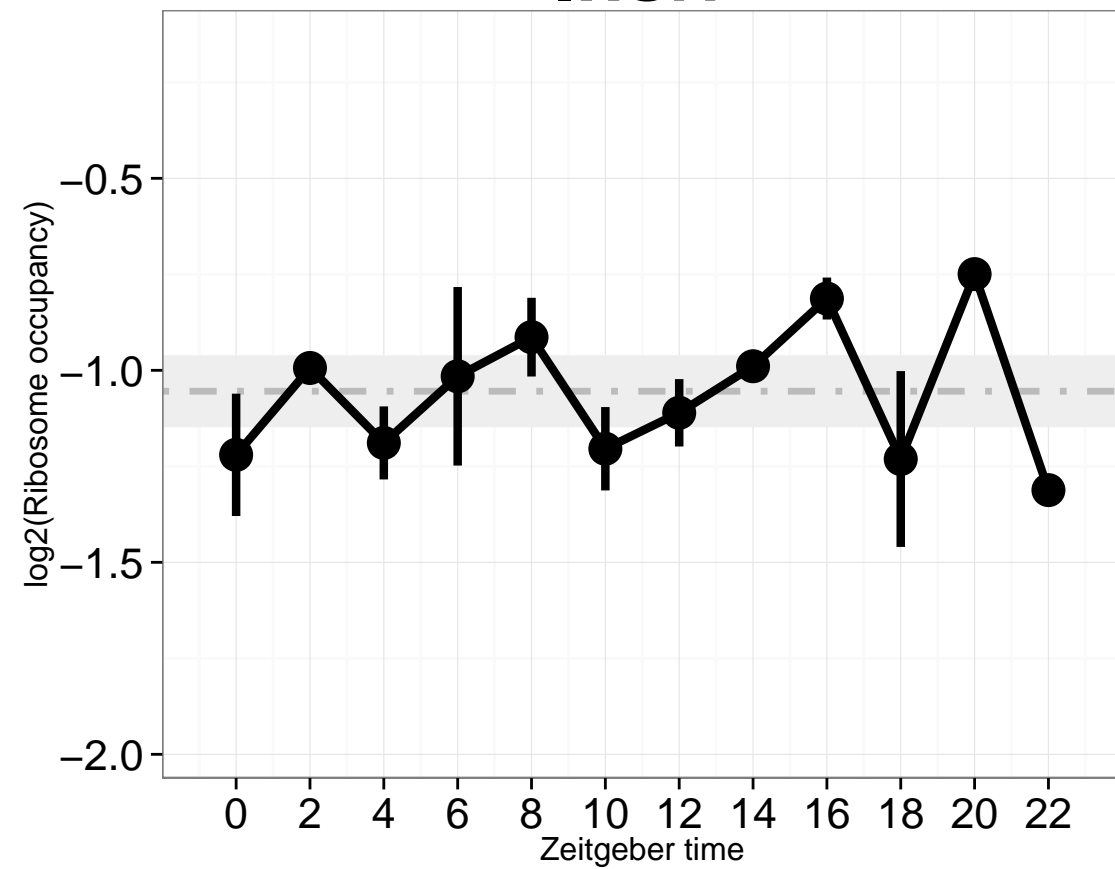

Supplement: Supplementary file 10816 [file 1]

## Ano4

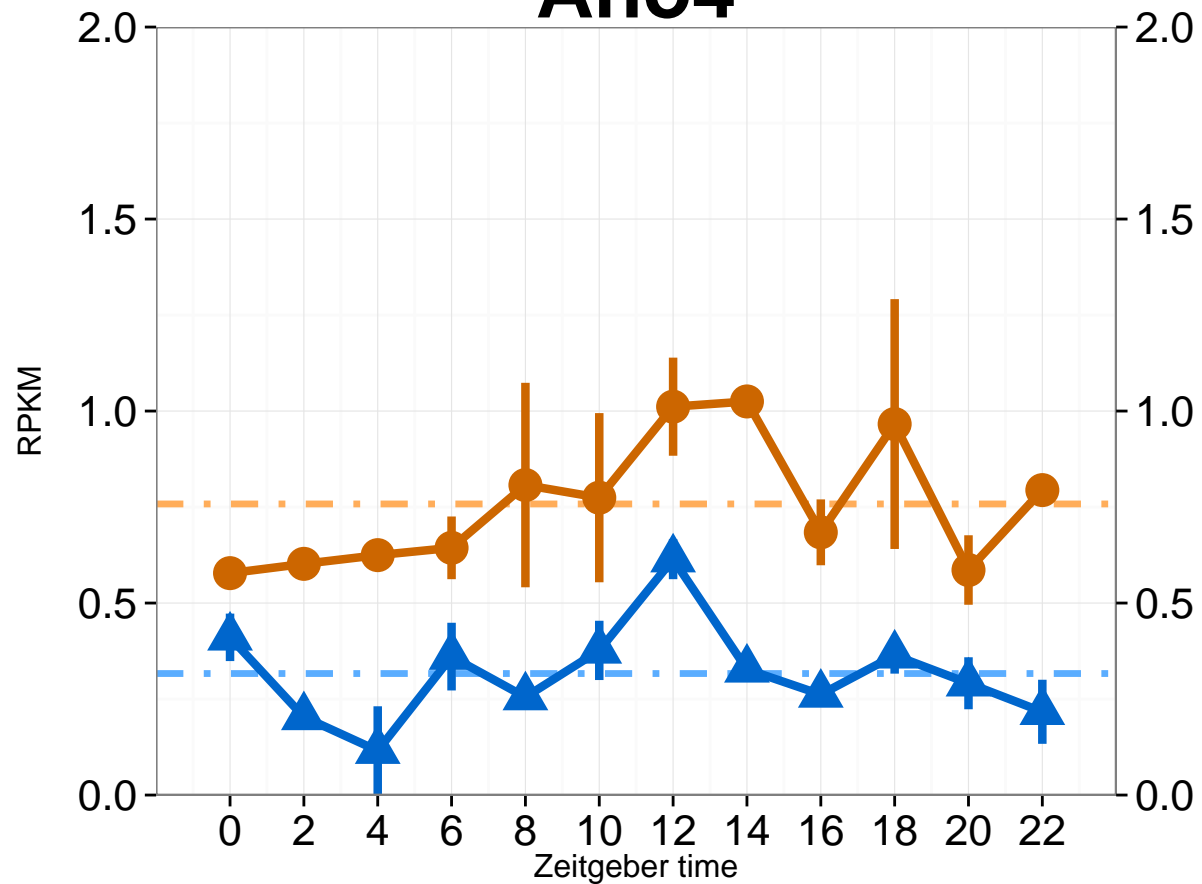

## Ano4

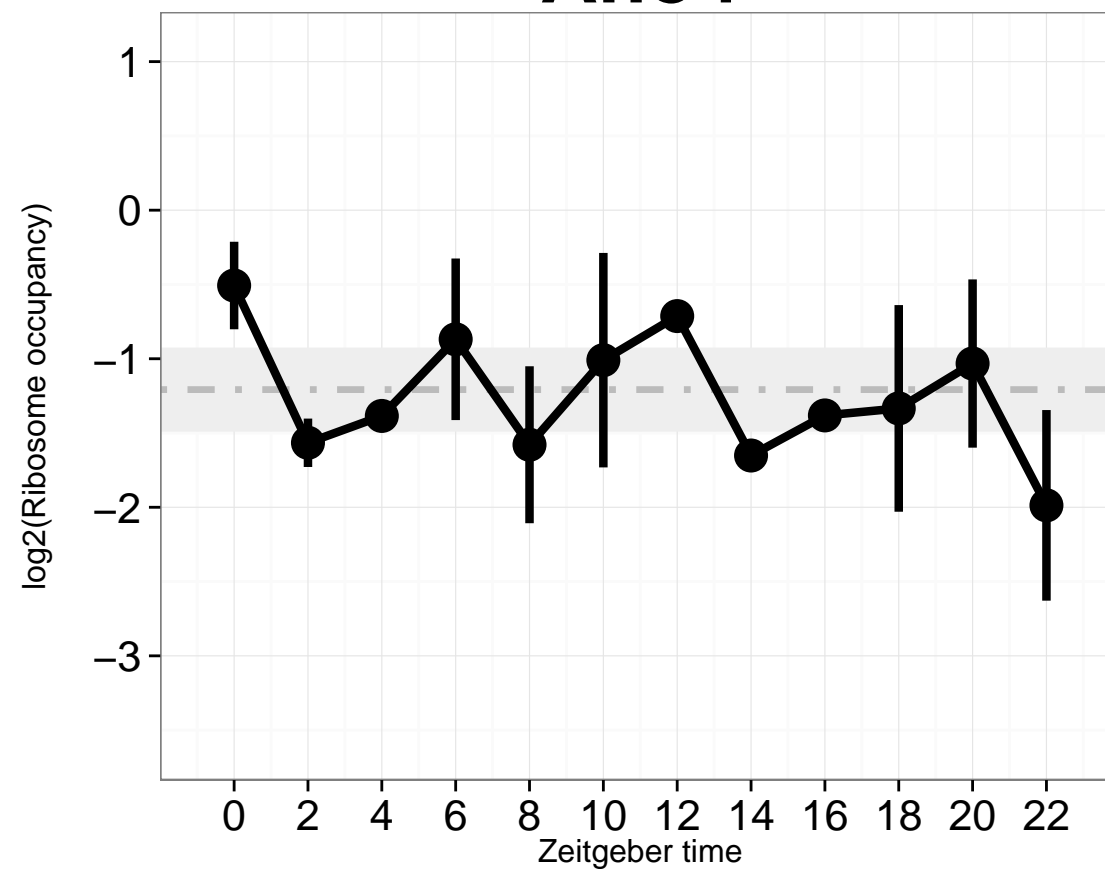

Supplement: Supplementary file 10817 [file 1]

# Zfp317

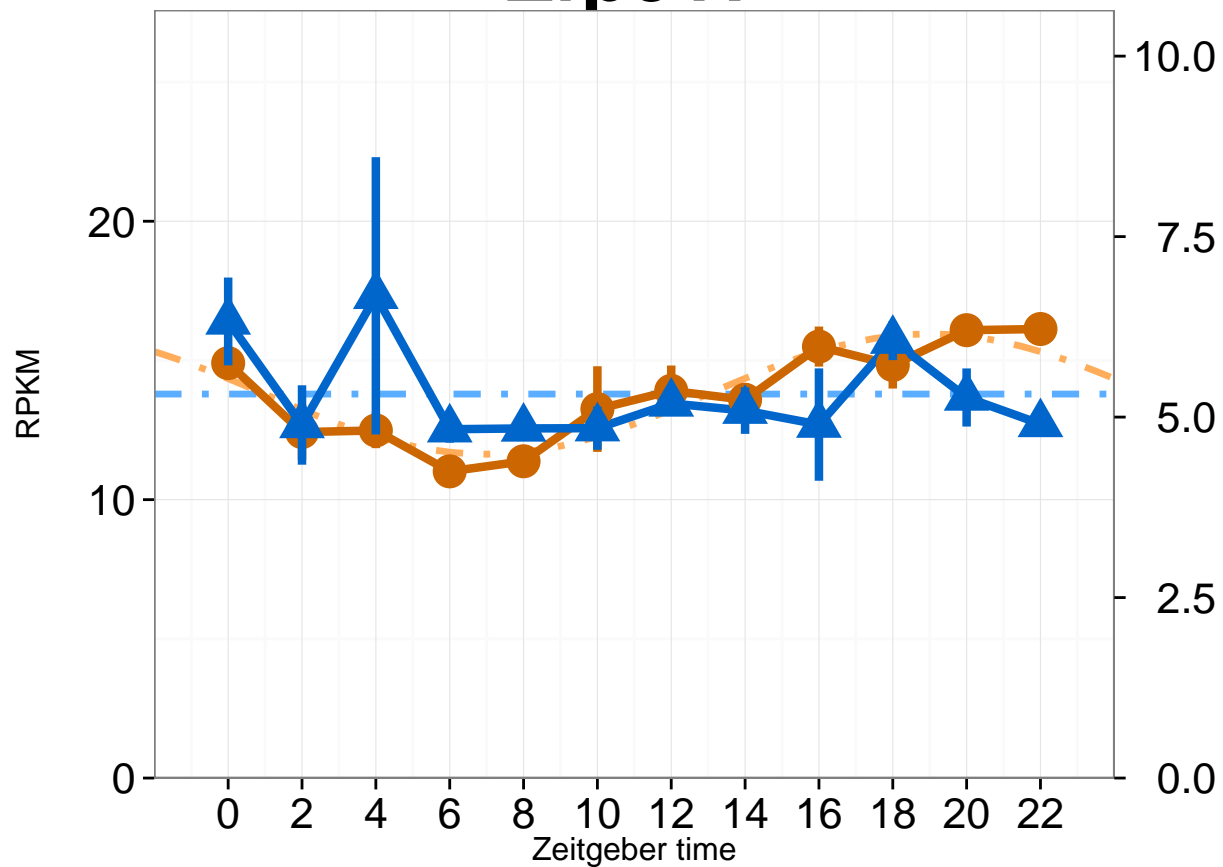

# Zfp317

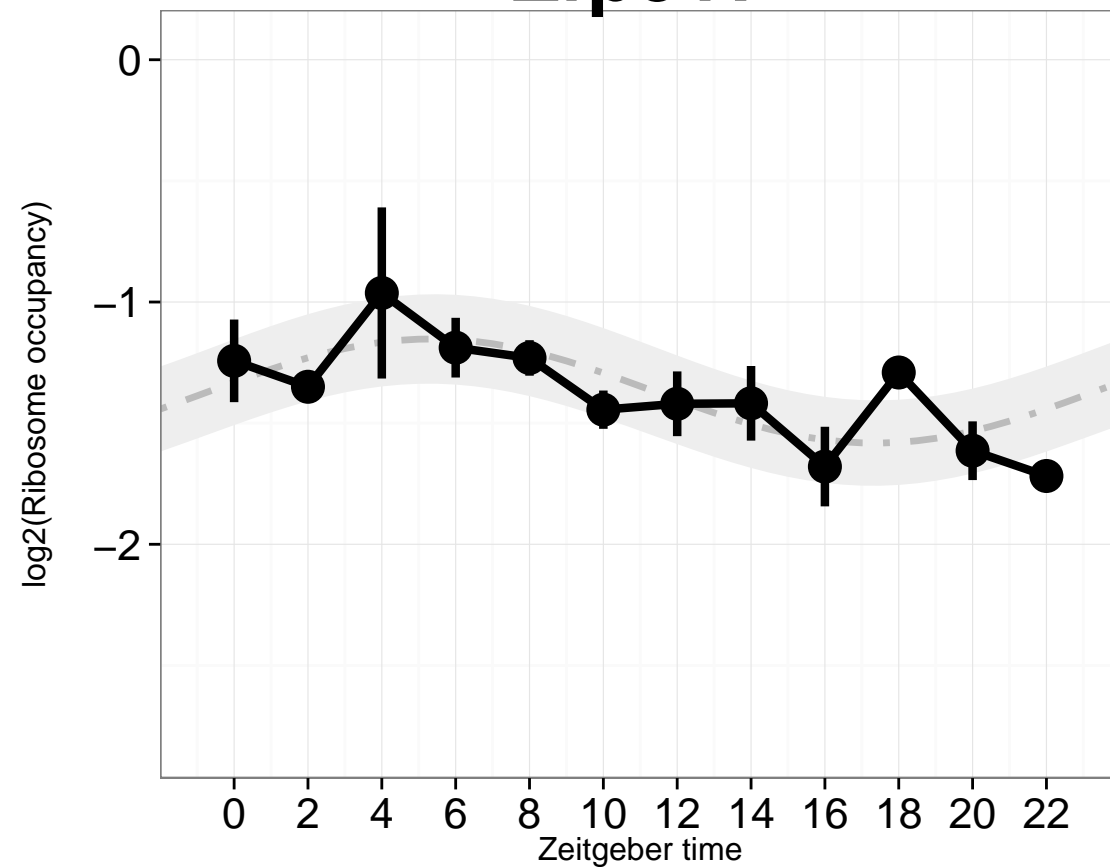

Supplement: Supplementary file 10818 [file 1]

## Pja2

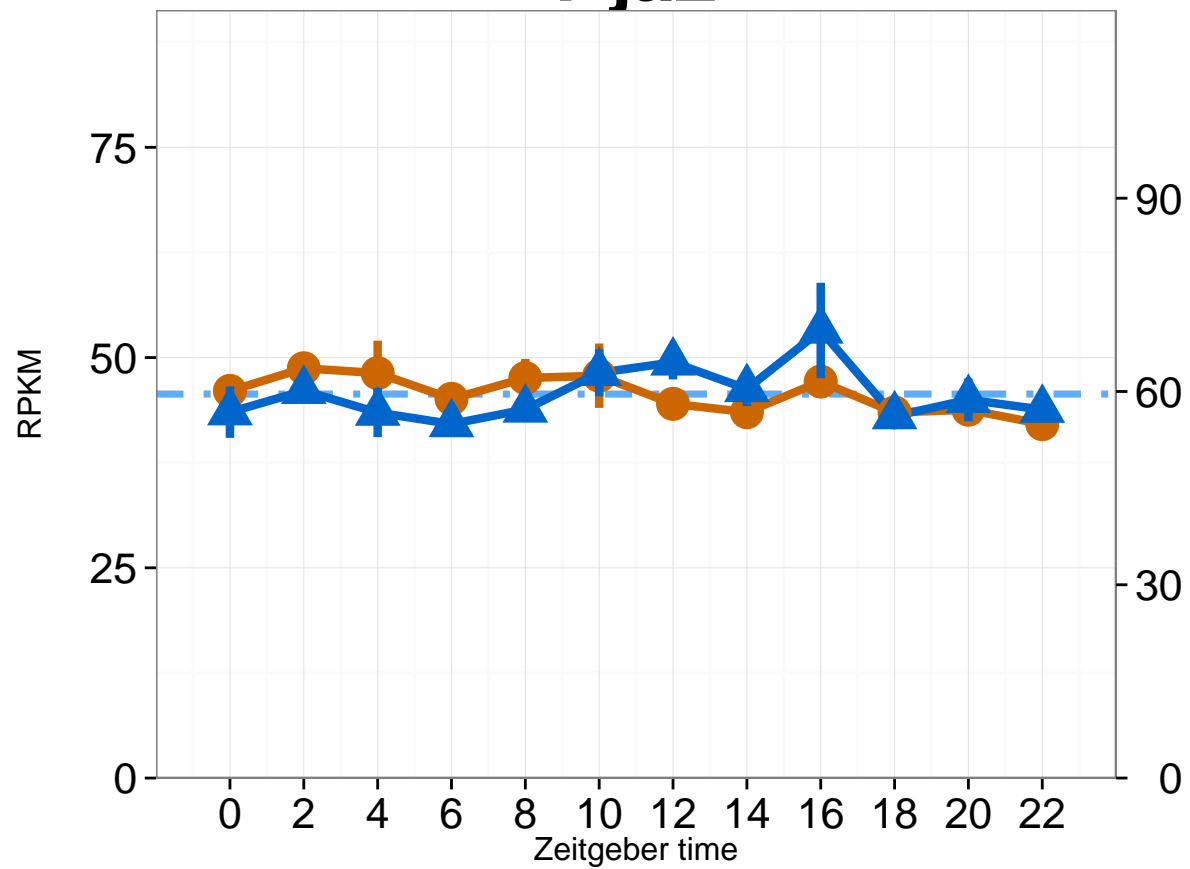

## Pja2

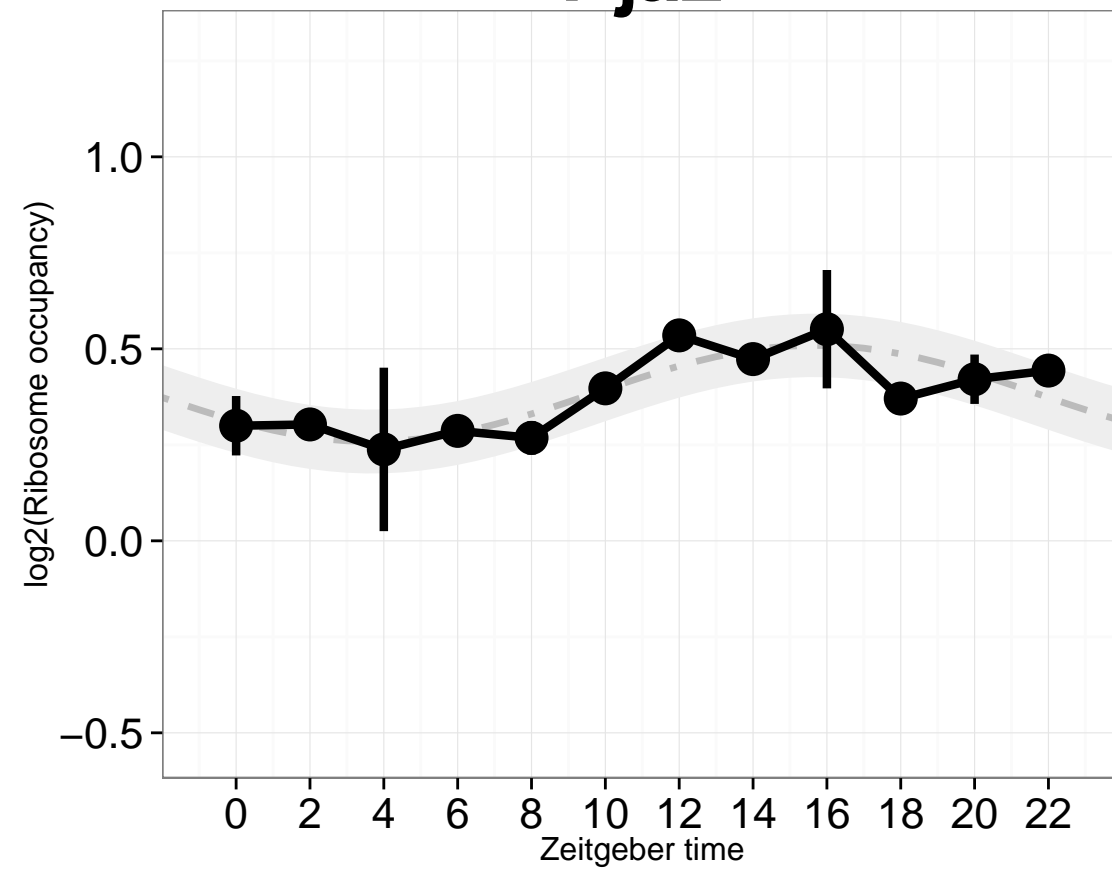

Supplement: Supplementary file 10819 [file 1]

## Apoh

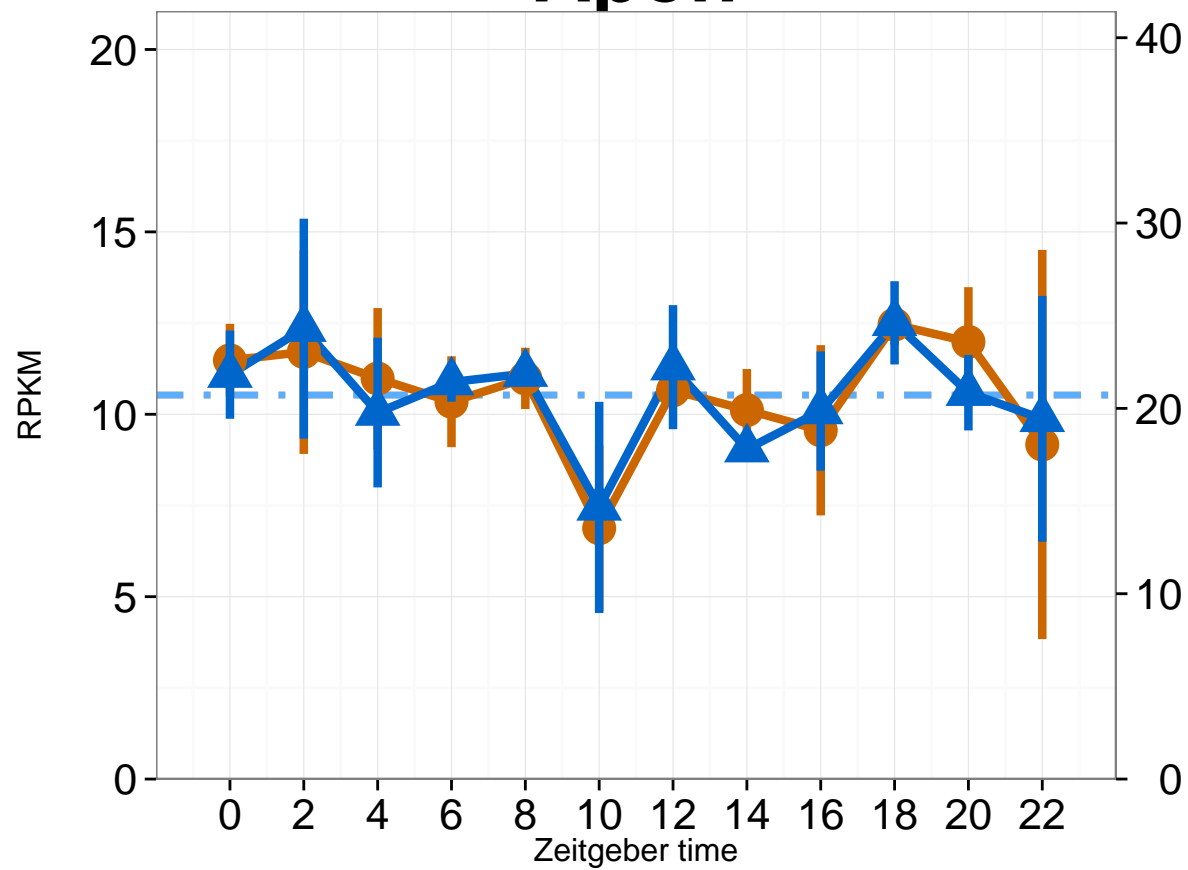

## Apoh

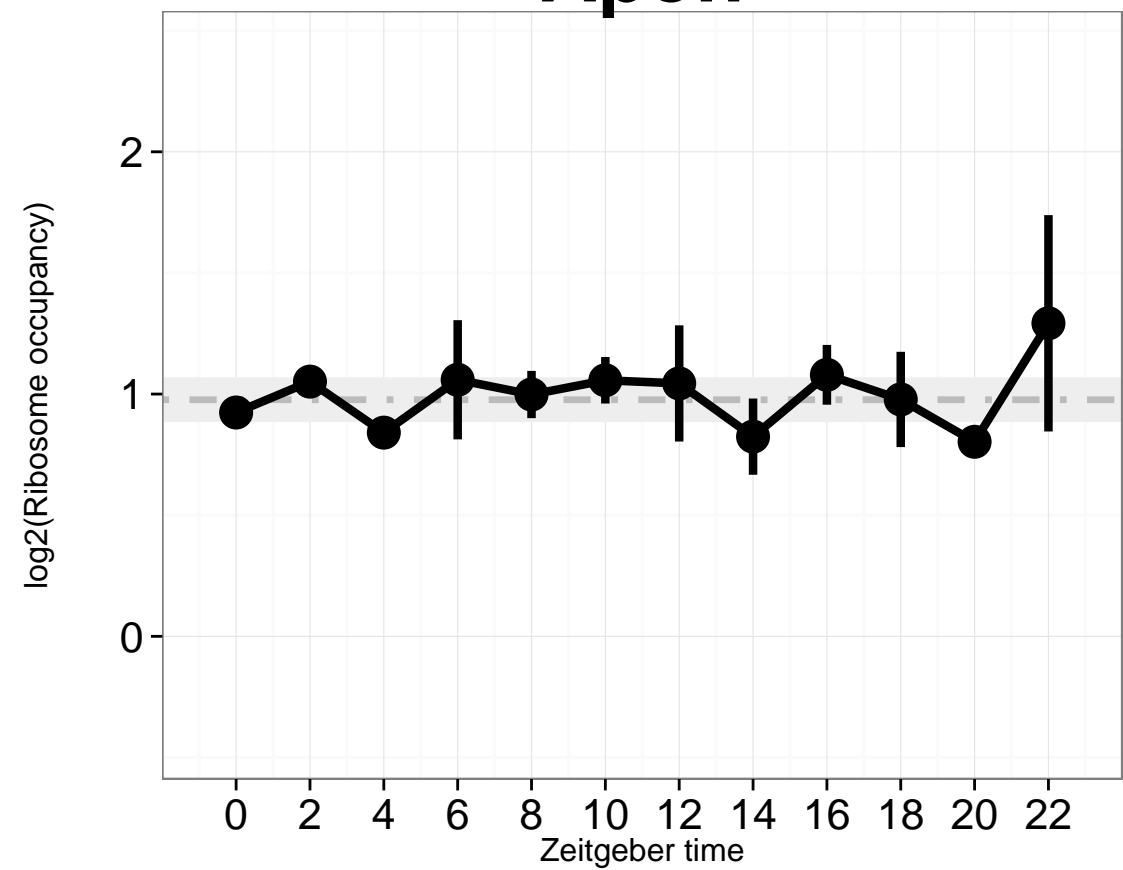

Supplement: Supplementary file 10820 [file 1]

## Pcnt

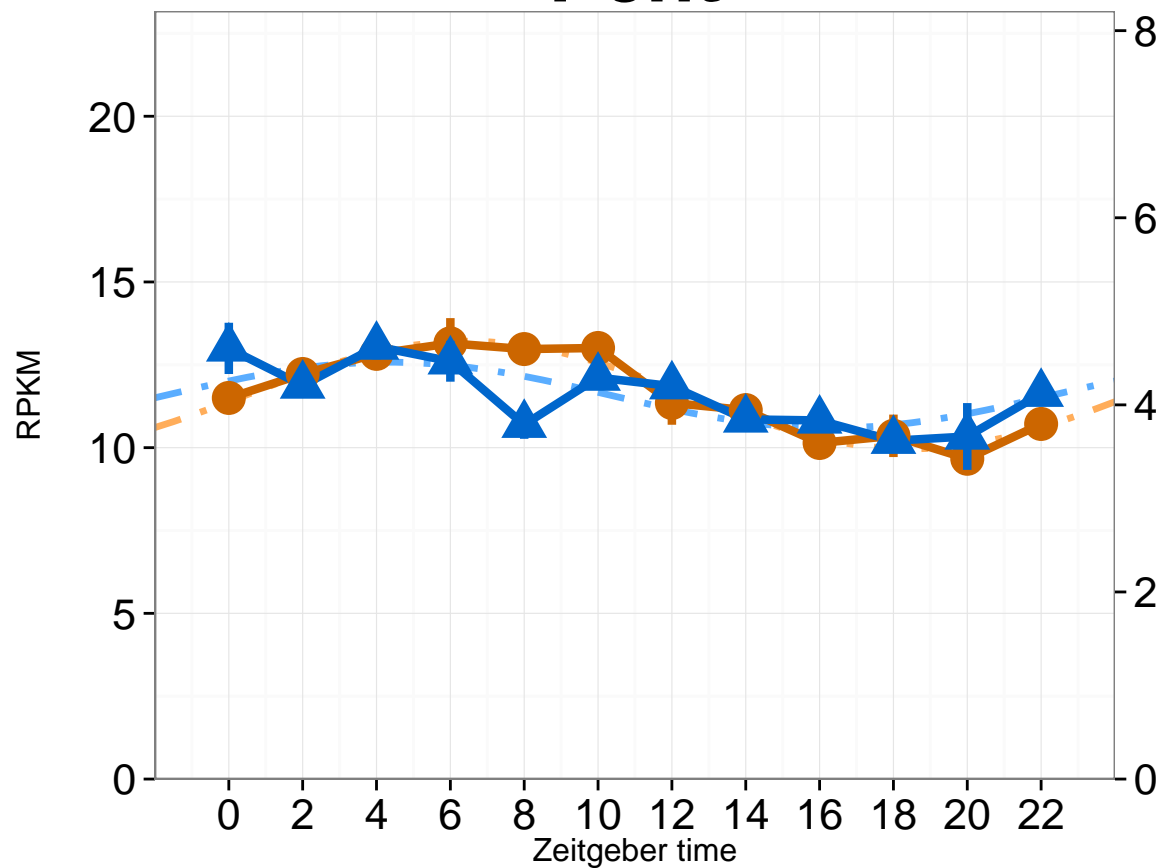

## Pcnt

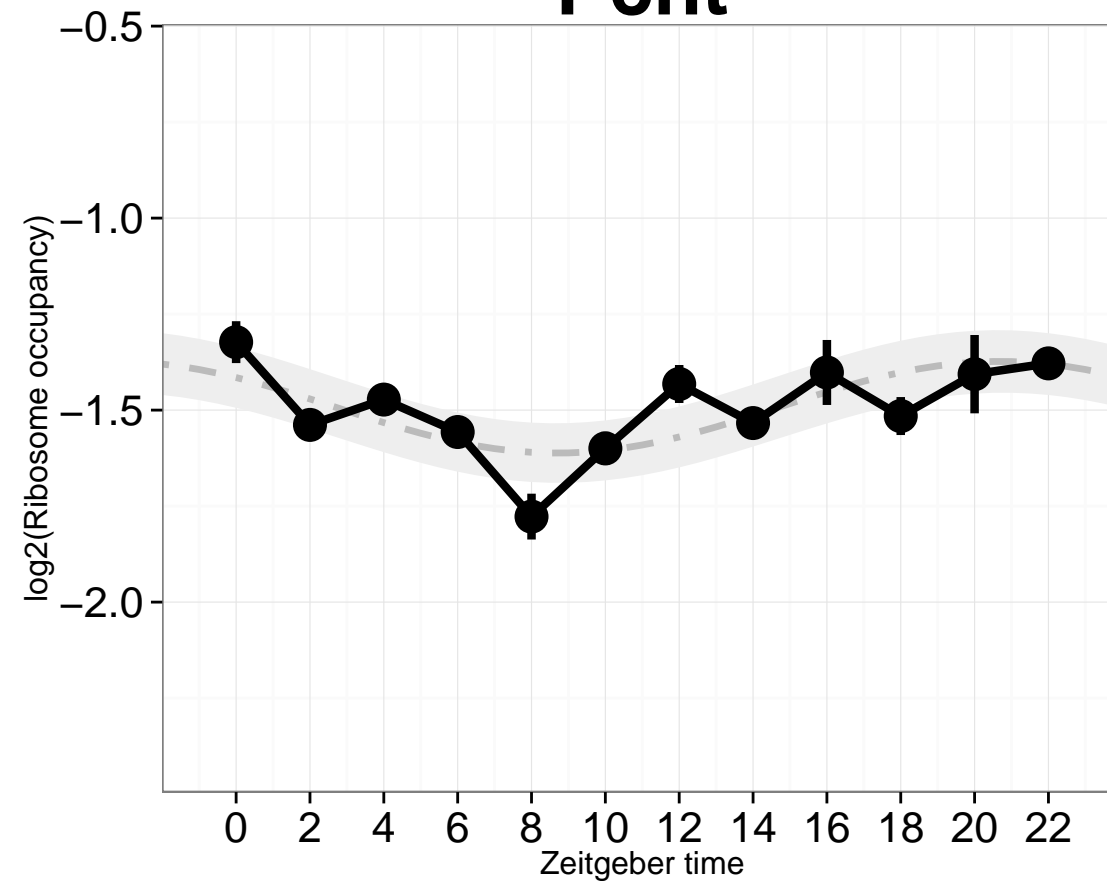

Supplement: Supplementary file 10821 [file 1]

## Npas2

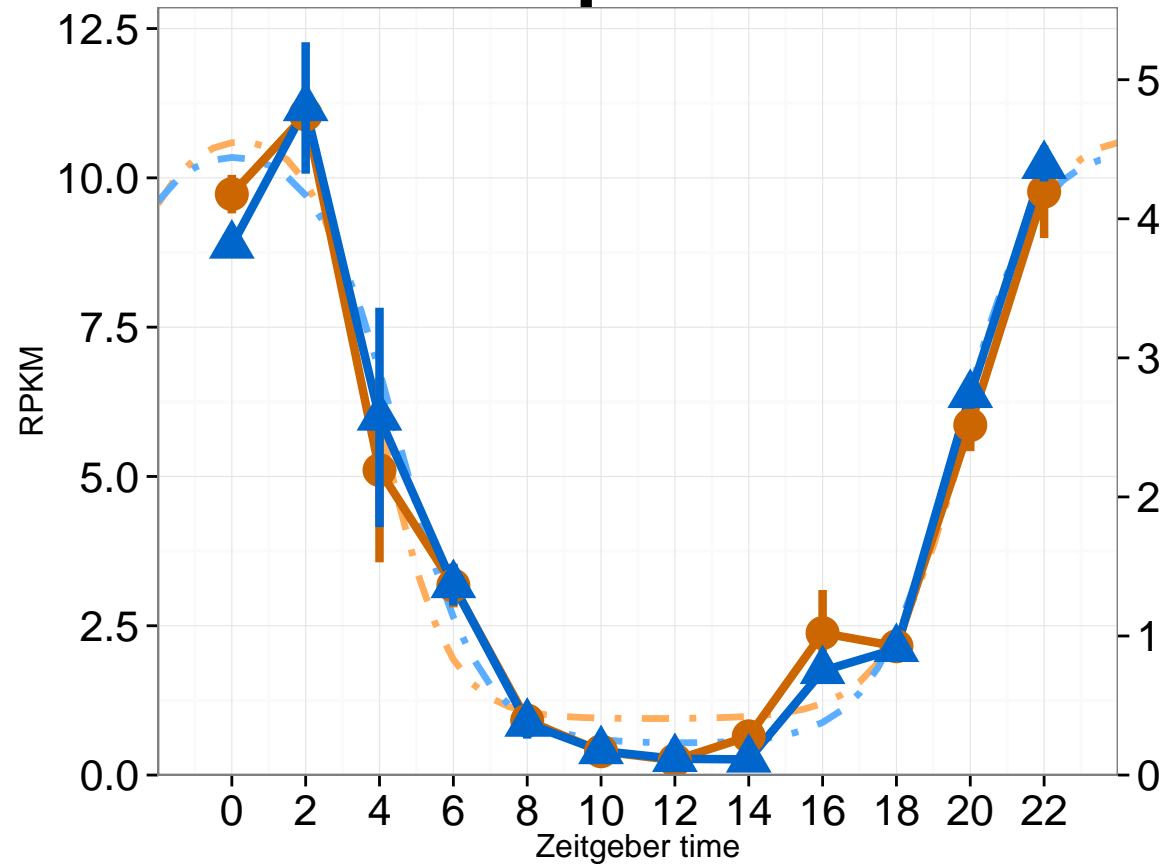

## Npas2

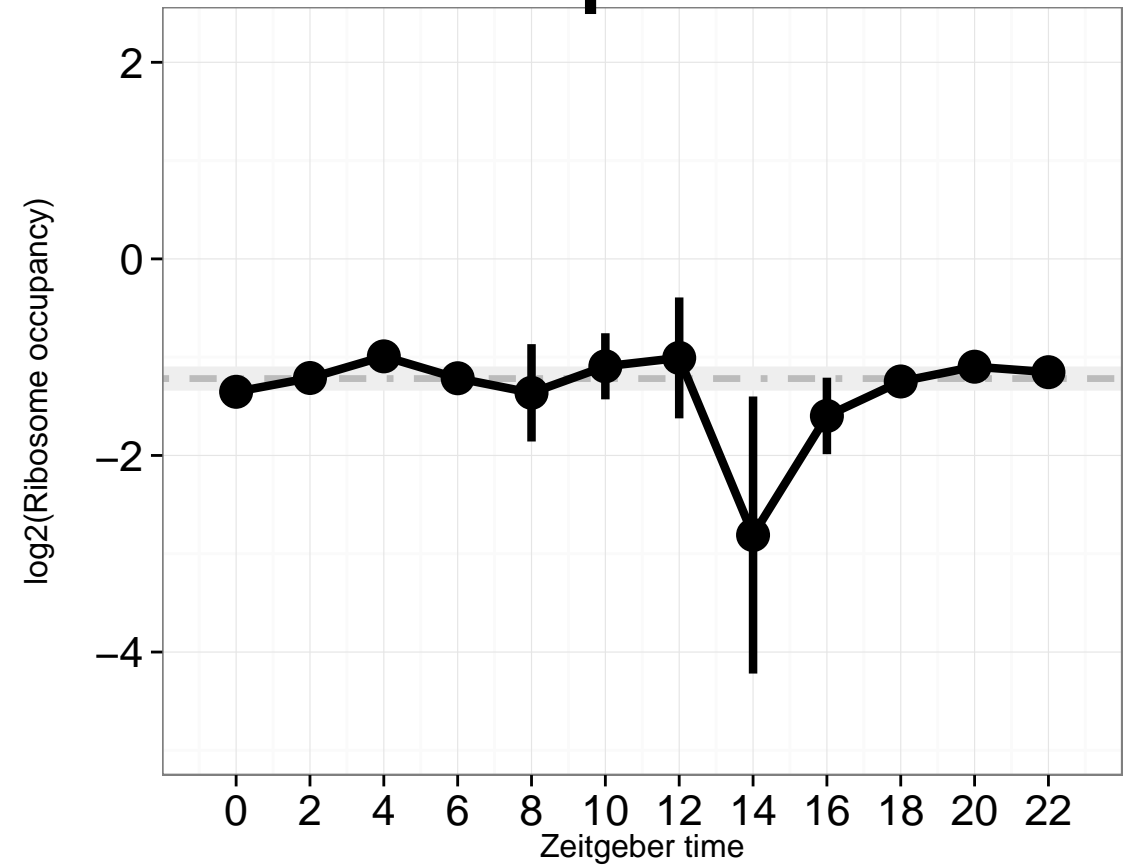

Supplement: Supplementary file 10822 [file 1]

# Cct8

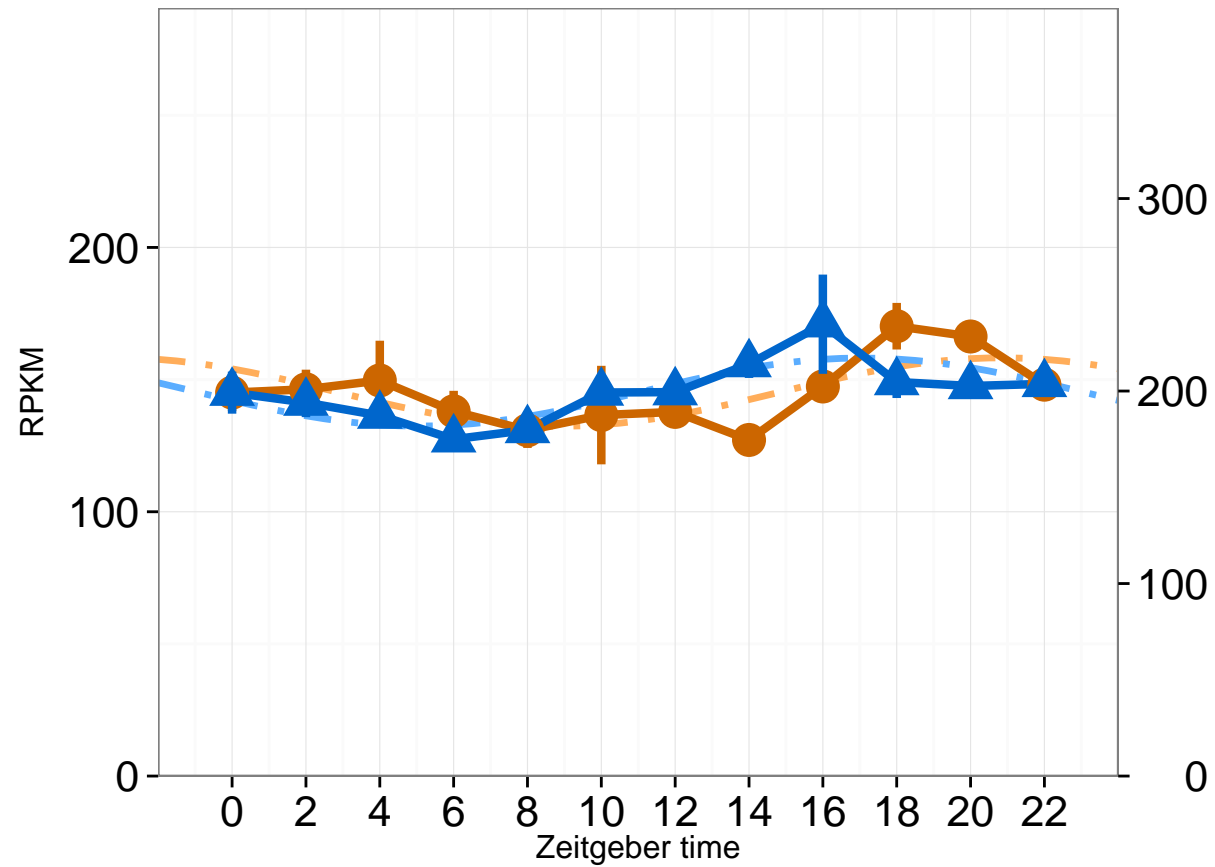

# Cct8

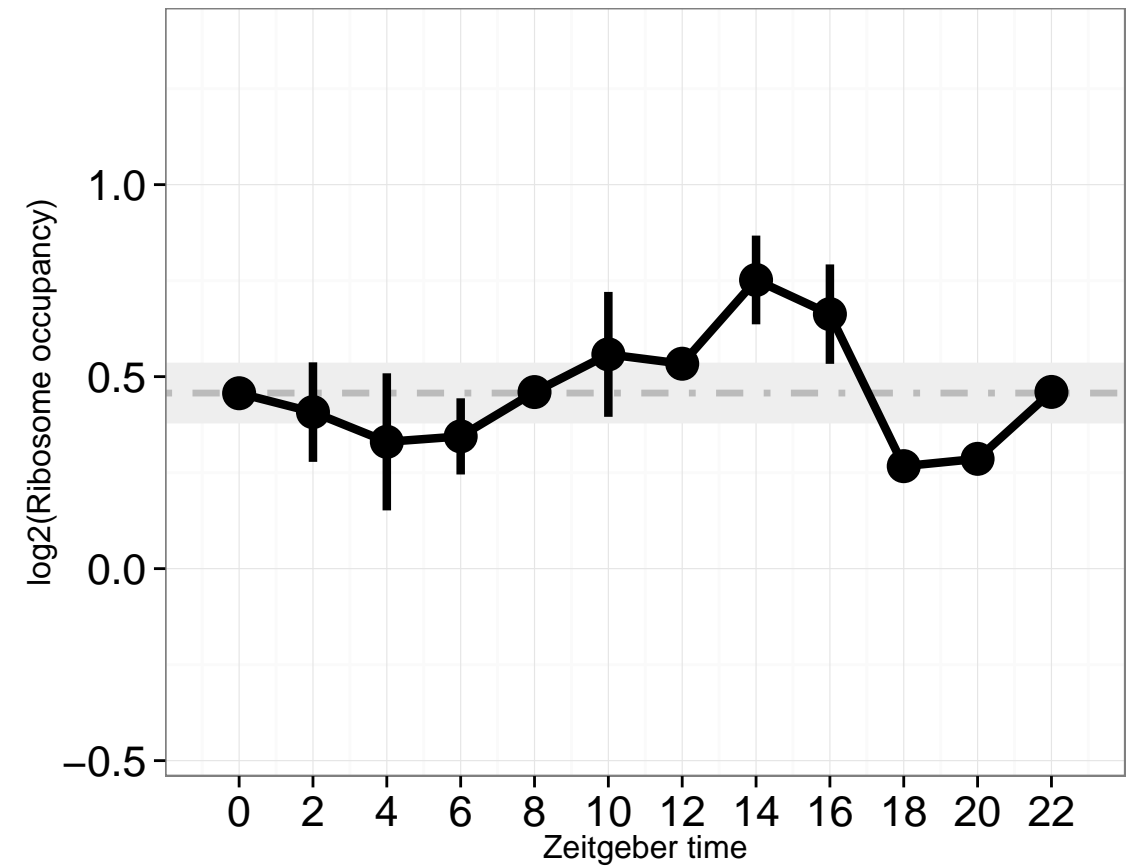

Supplement: Supplementary file 10823 [file 1]

## Slc25a30

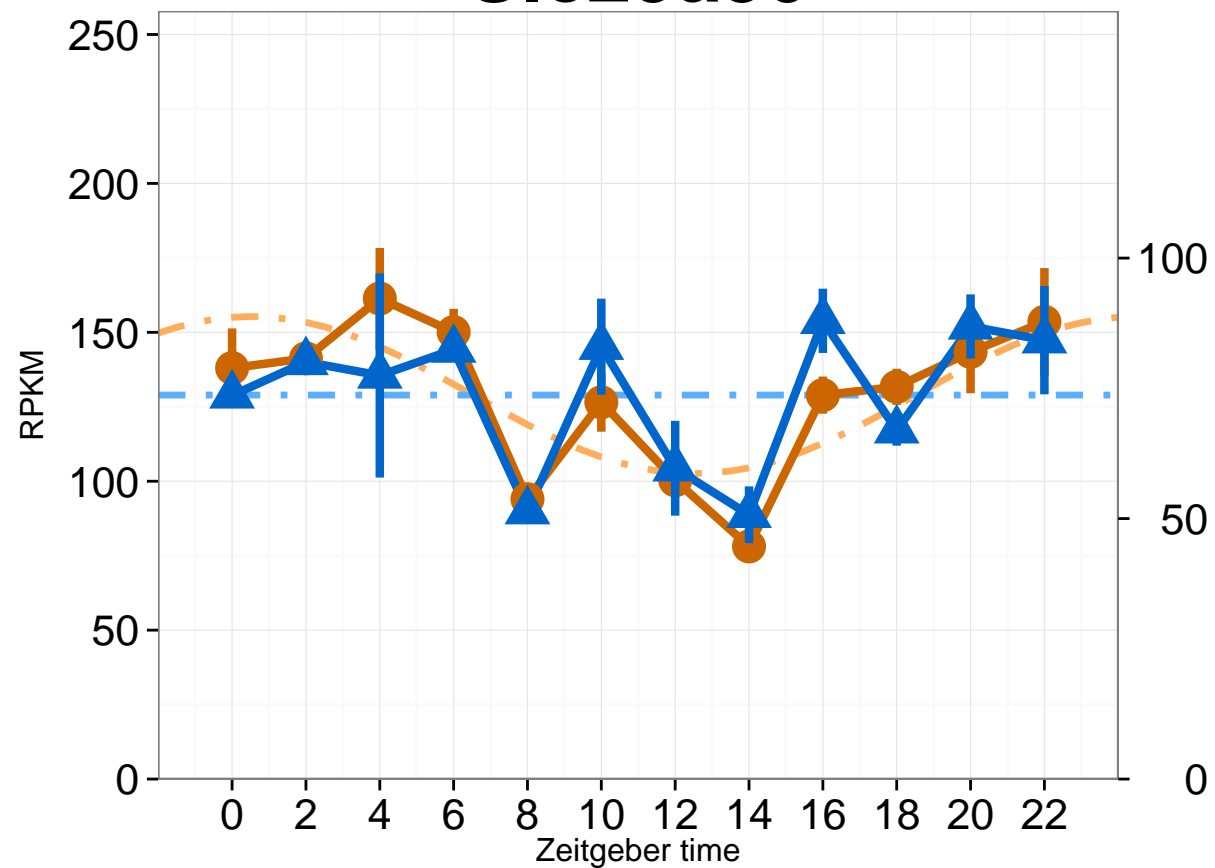

## Slc25a30

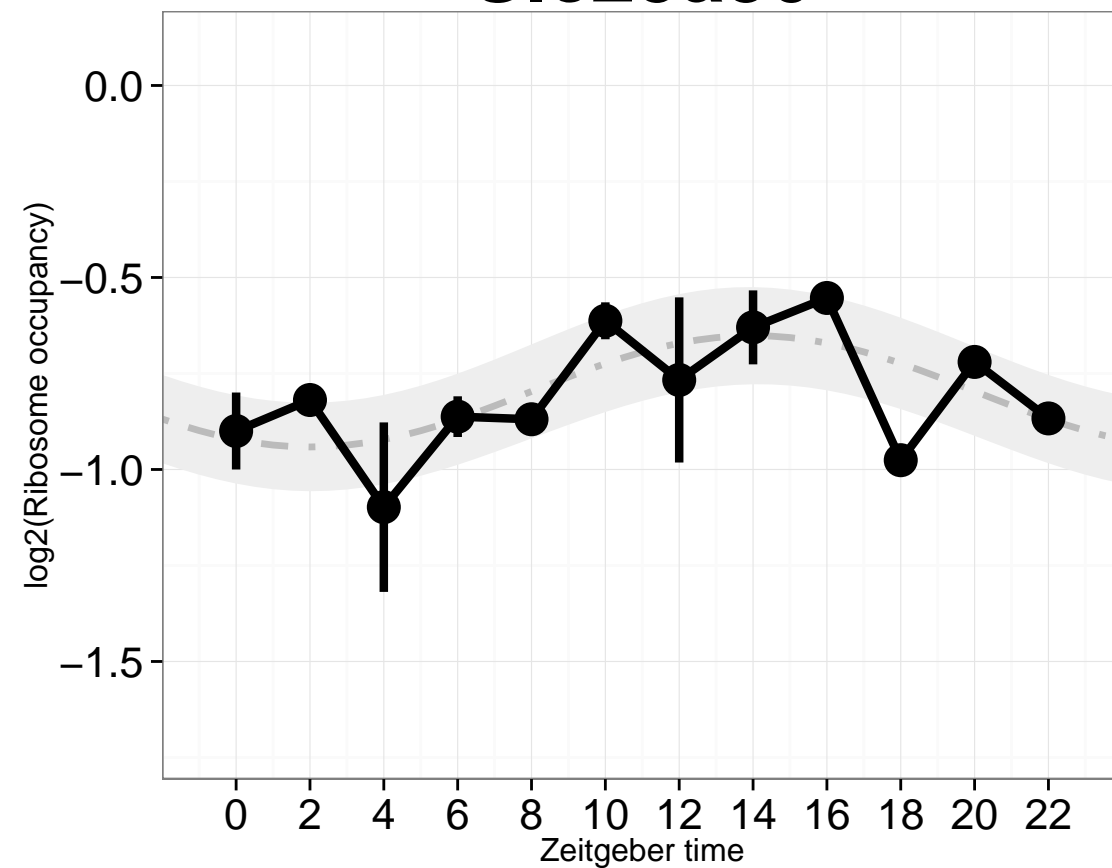

Supplement: Supplementary file 10824 [file 1]

## Mettl7a2

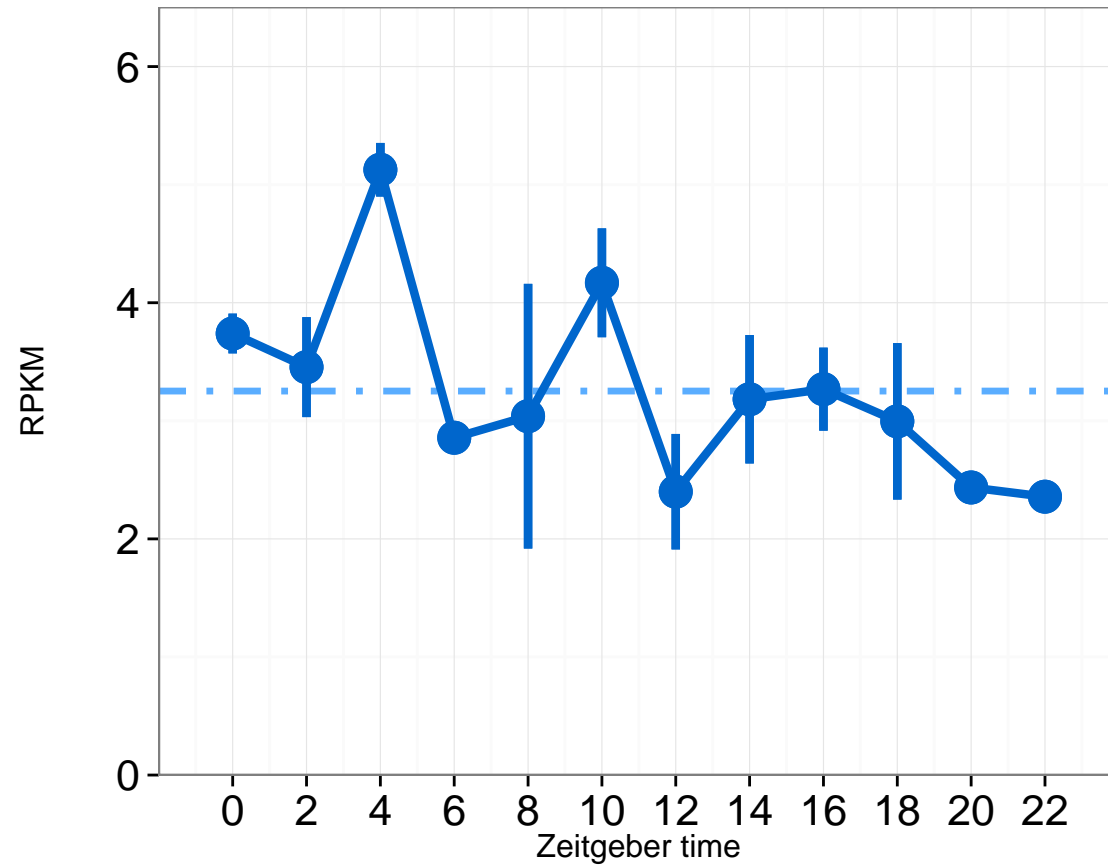

## Mettl7a2 log2(Ribosome occupanc

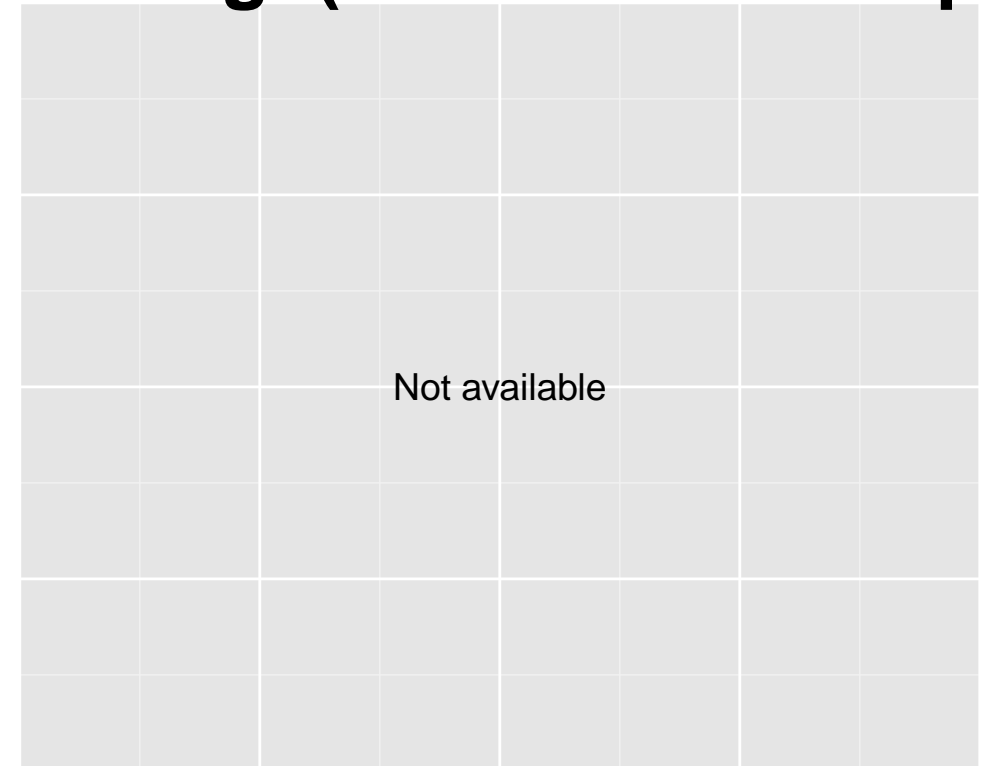

Supplement: Supplementary file 10825 [file 1]

# Paqr5

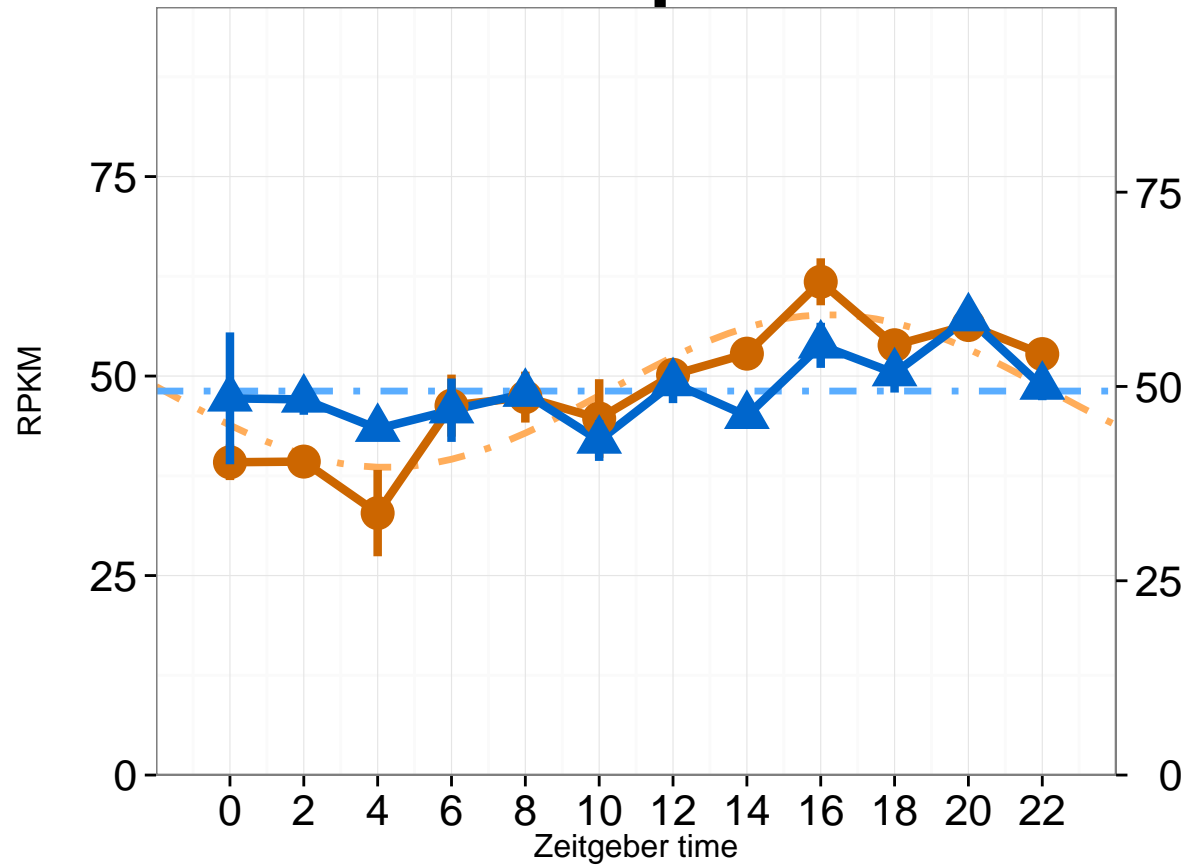

# Paqr5

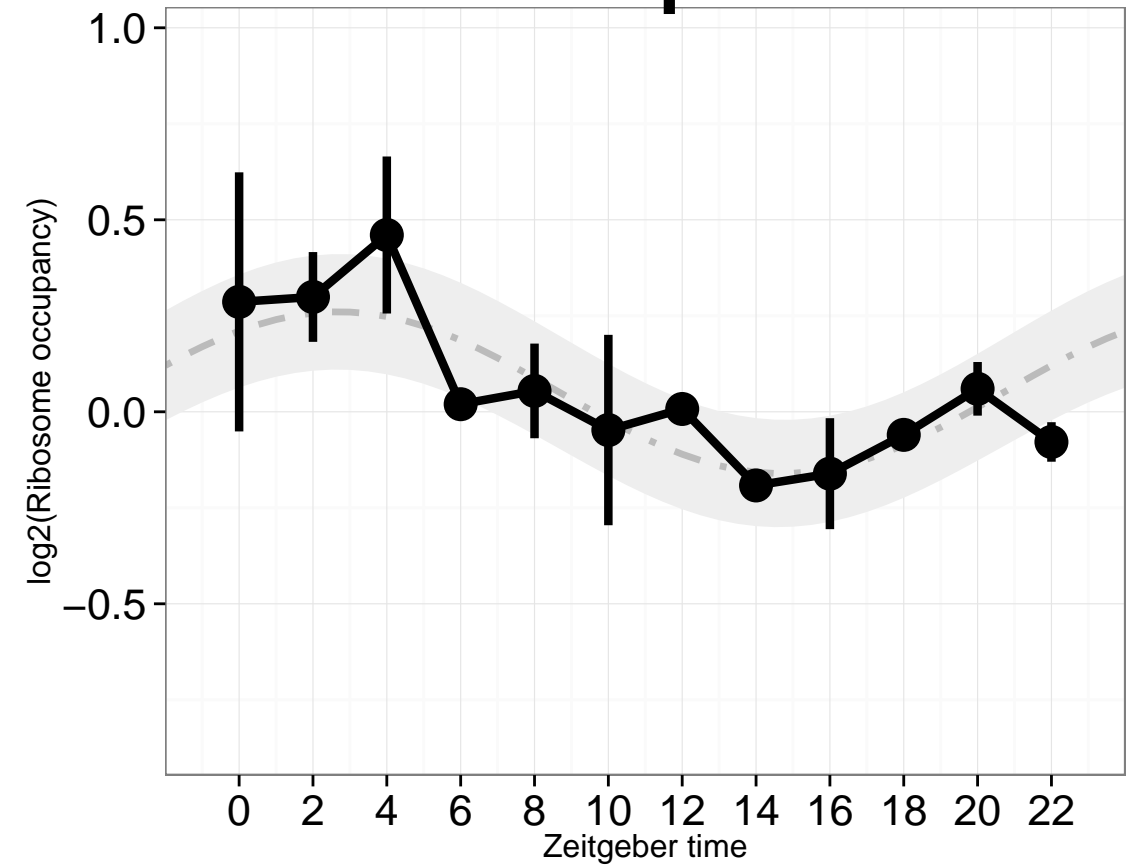

Supplement: Supplementary file 10826 [file 1]

# Prelid1

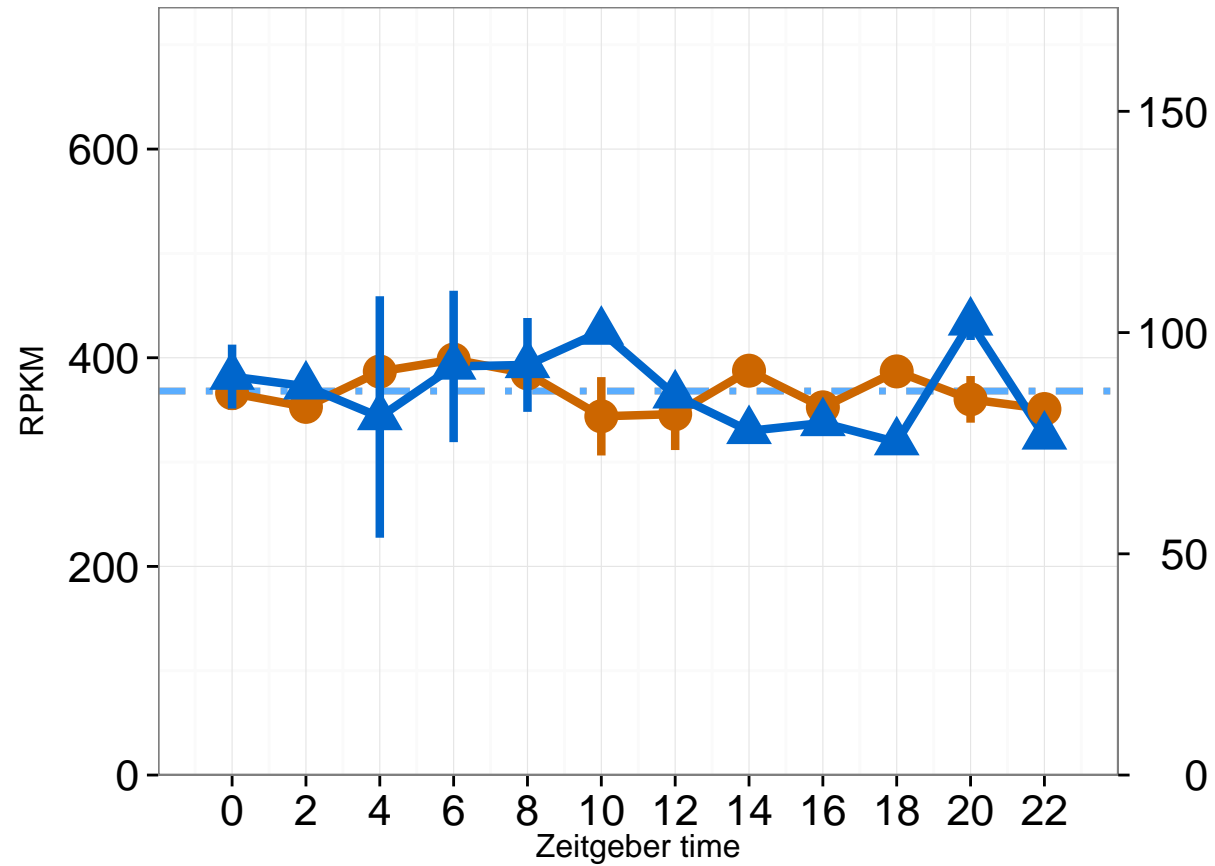

# Prelid1

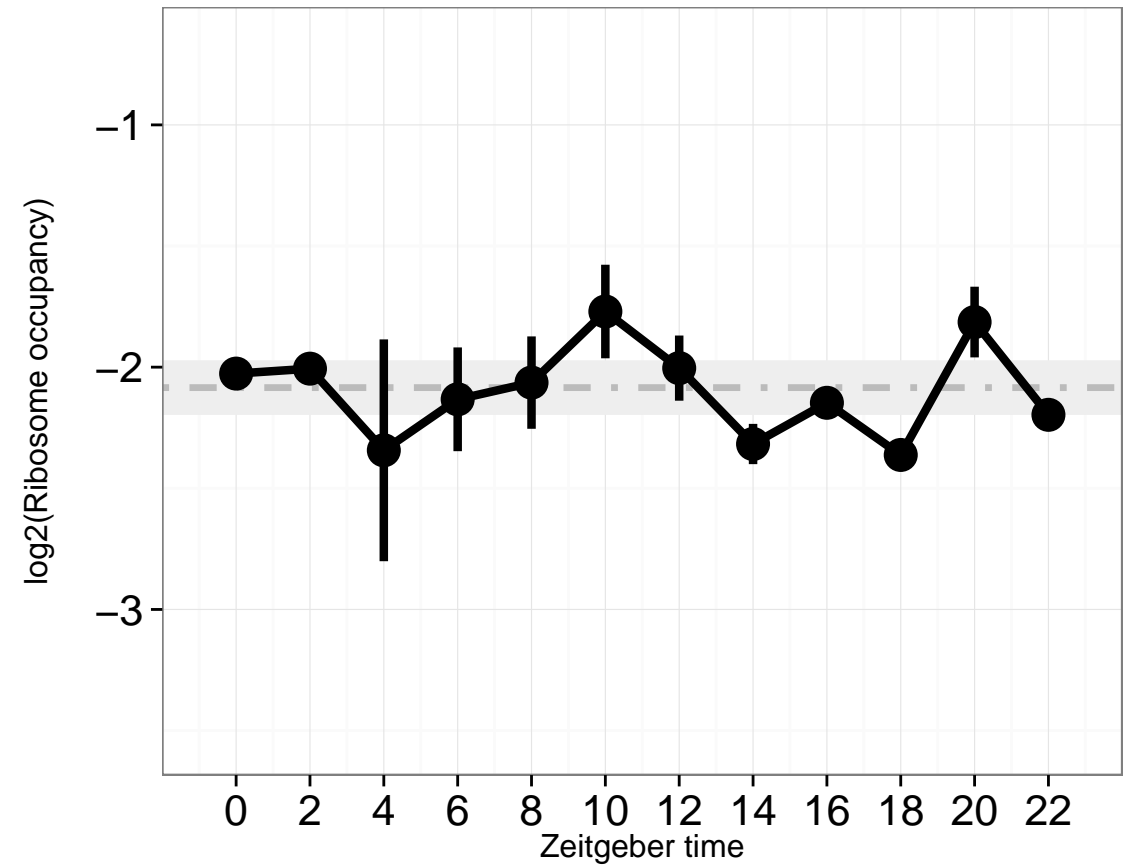

Supplement: Supplementary file 10827 [file 1]

# Pgam1

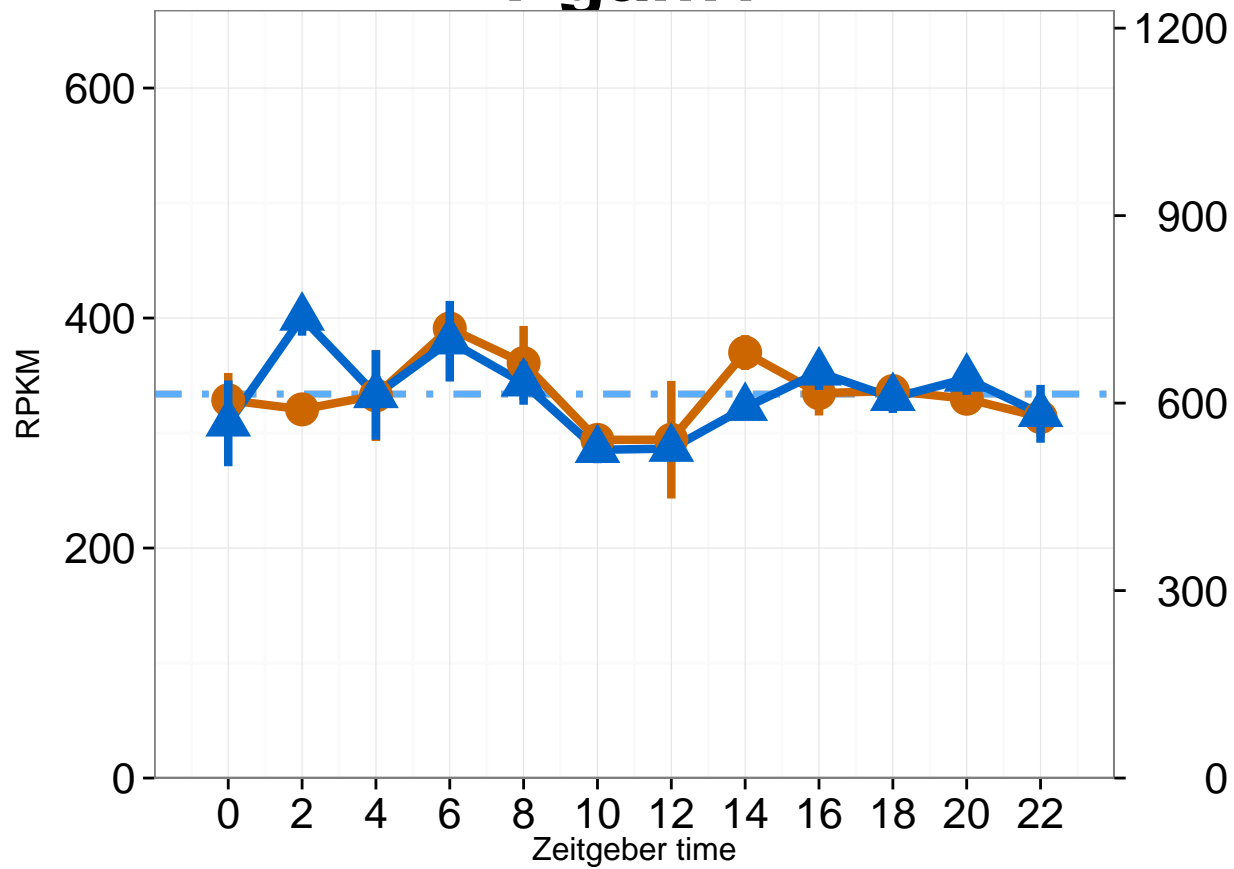

# Pgam1

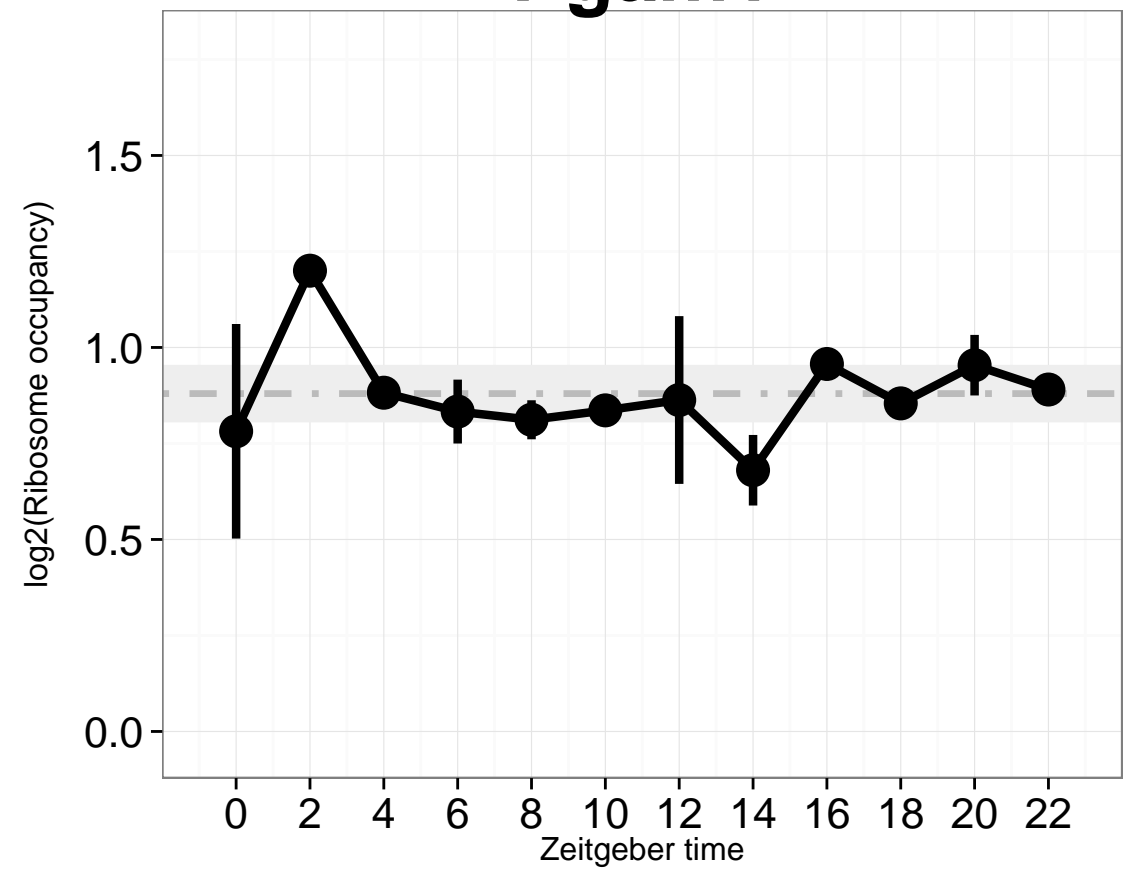

Supplement: Supplementary file 10828 [file 1]

## Hcn3

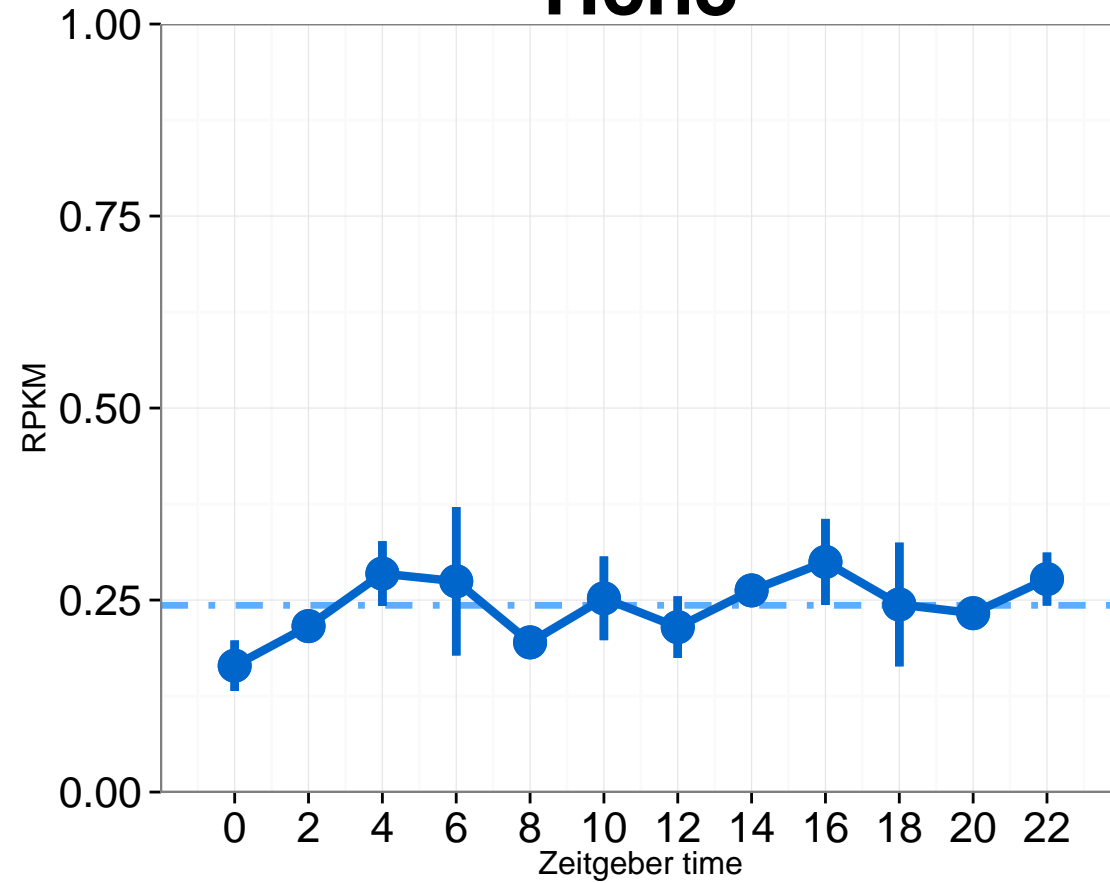

## Hcn3 log2(Ribosome occupancy)

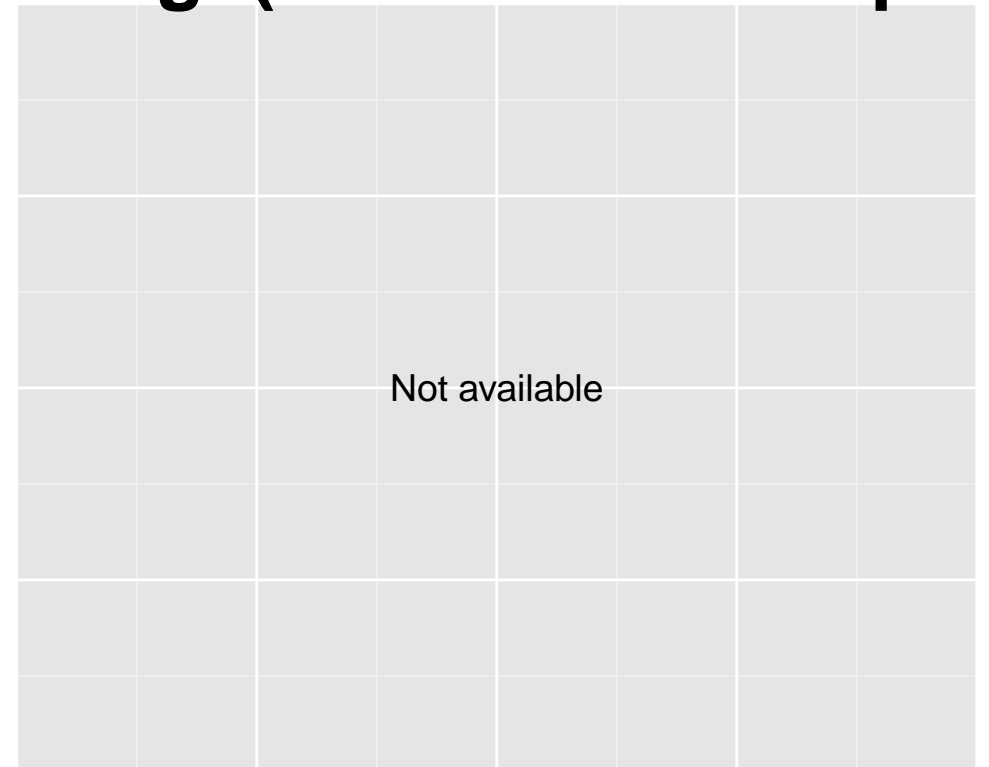

Supplement: Supplementary file 10829 [file 1]

# Gpr110

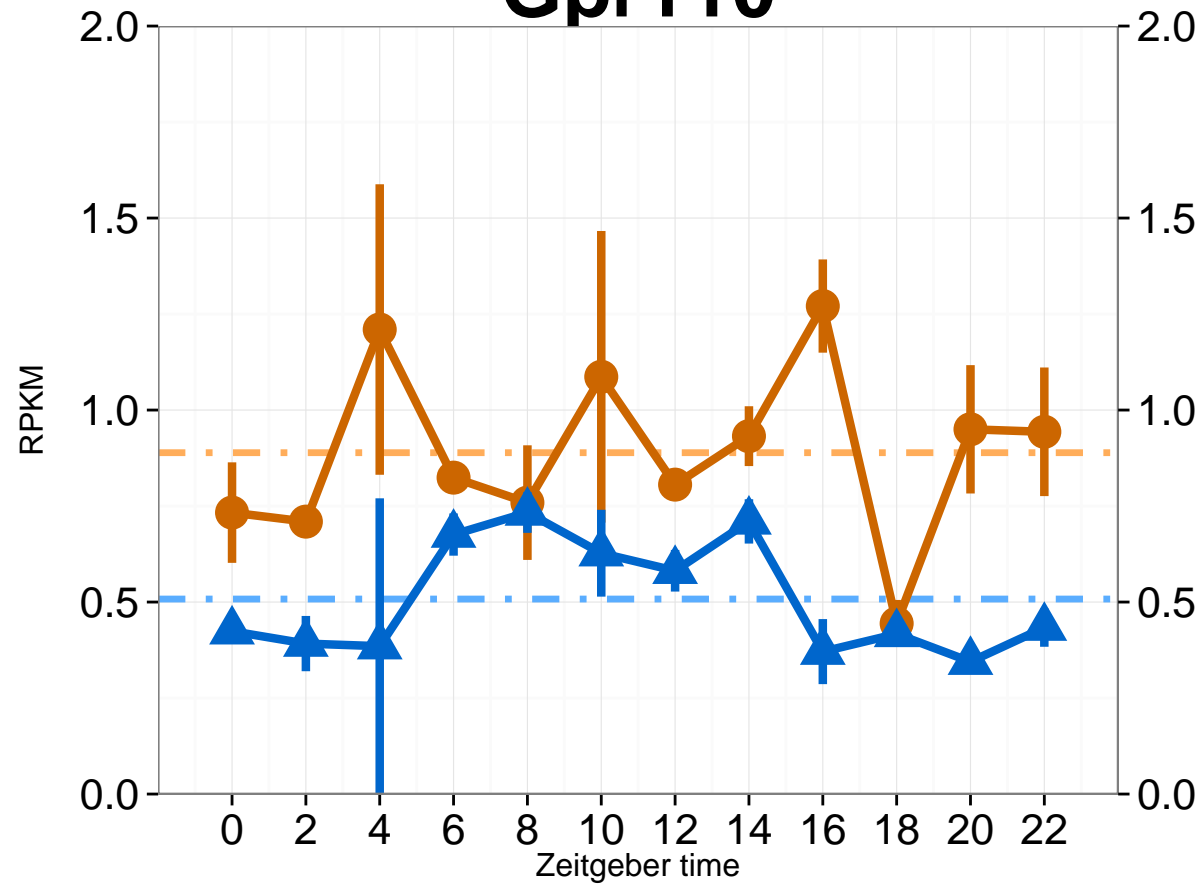

# Gpr110

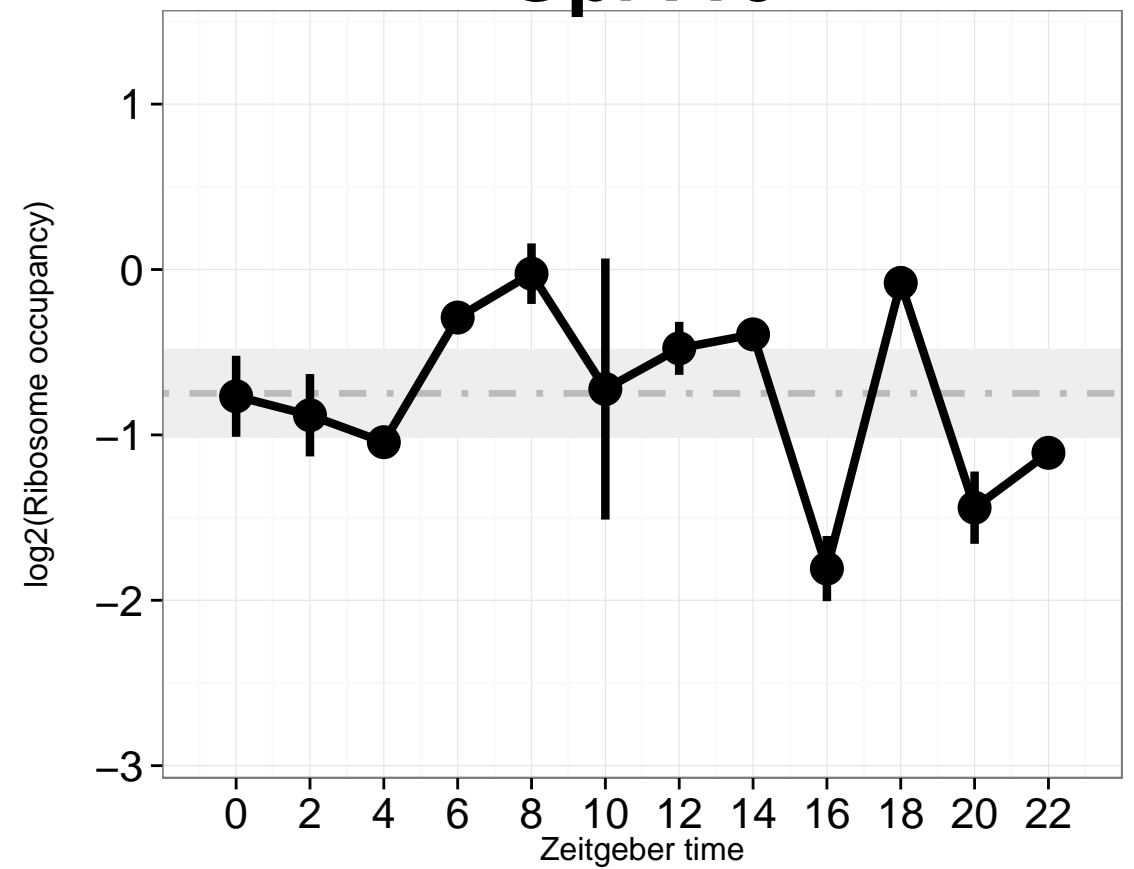

Supplement: Supplementary file 10830 [file 1]

# Rps6kc1

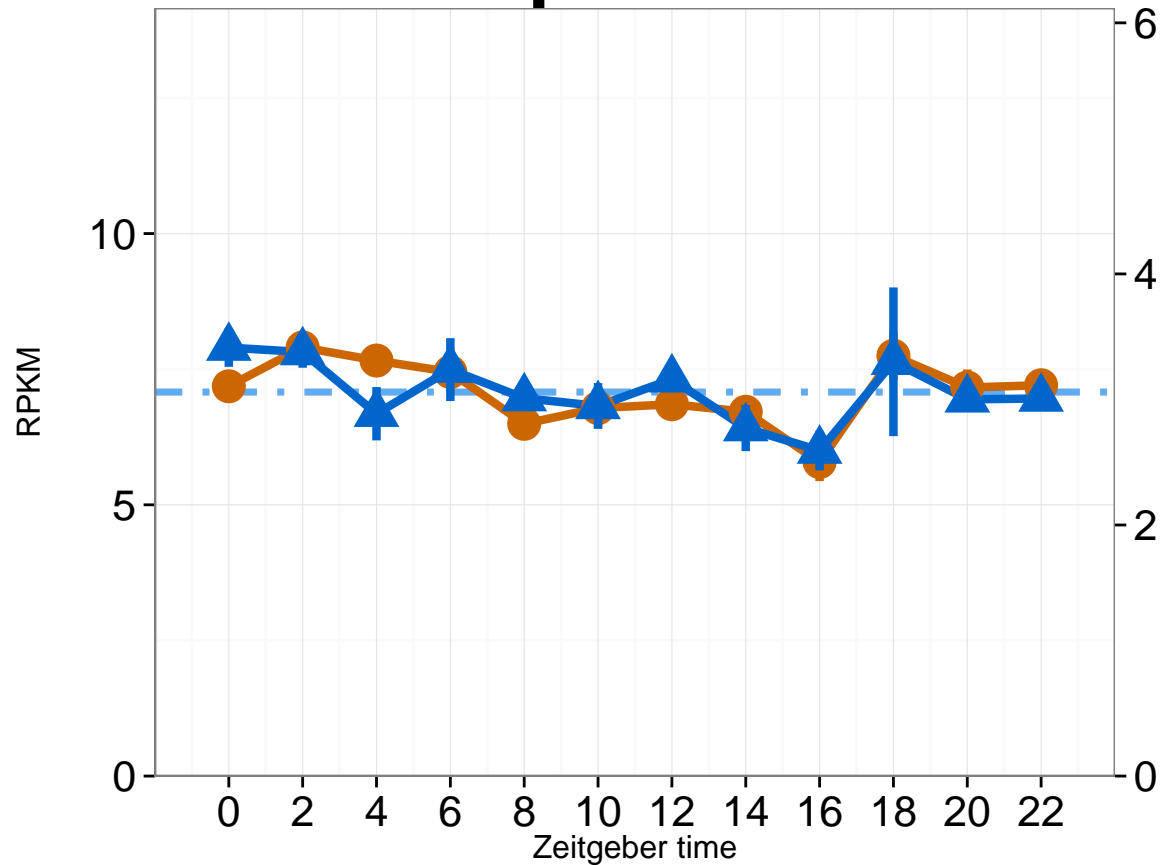

# Rps6kc1

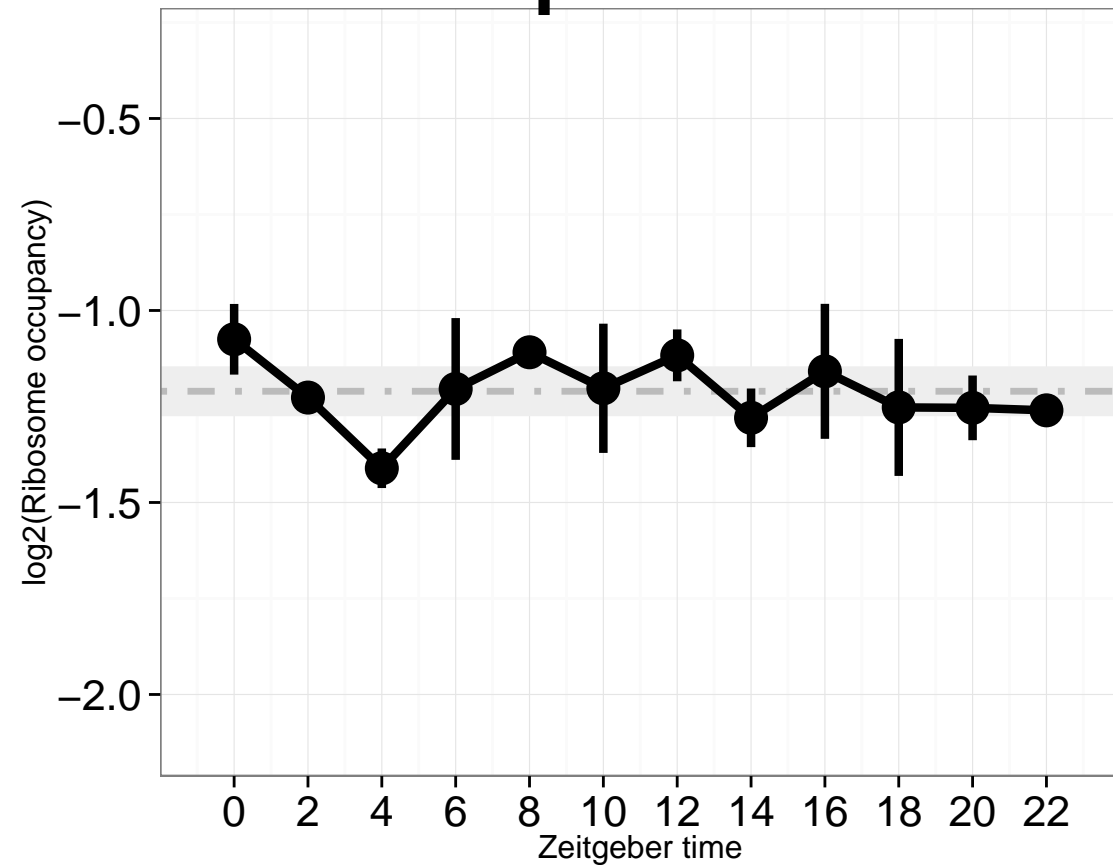

Supplement: Supplementary file 10831 [file 1]

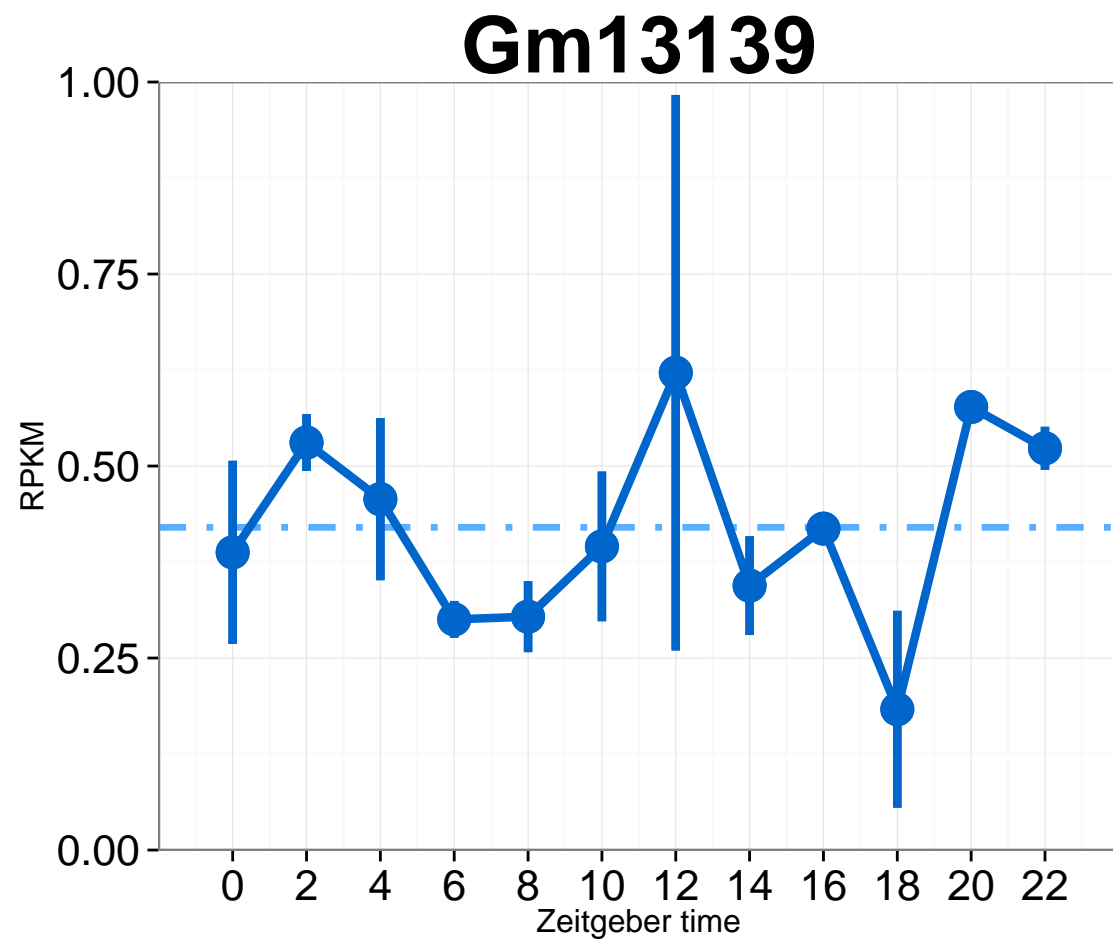

### Gm13139 log<sub>2</sub>(Ribosome occupanc

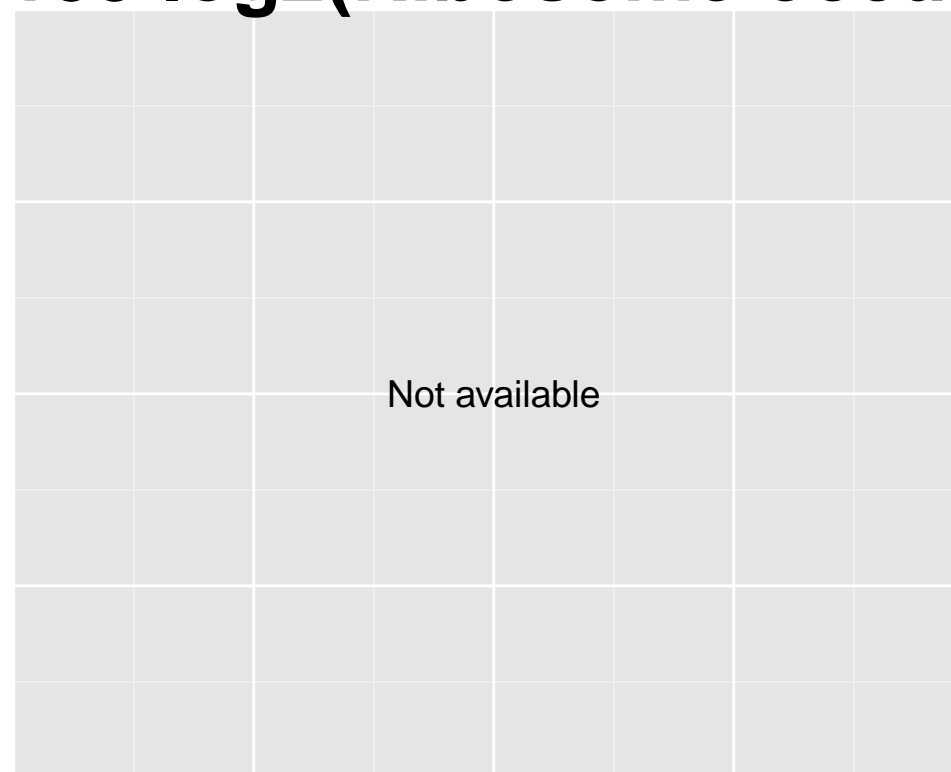

Supplement: Supplementary file 10832 [file 1]

# Chst14

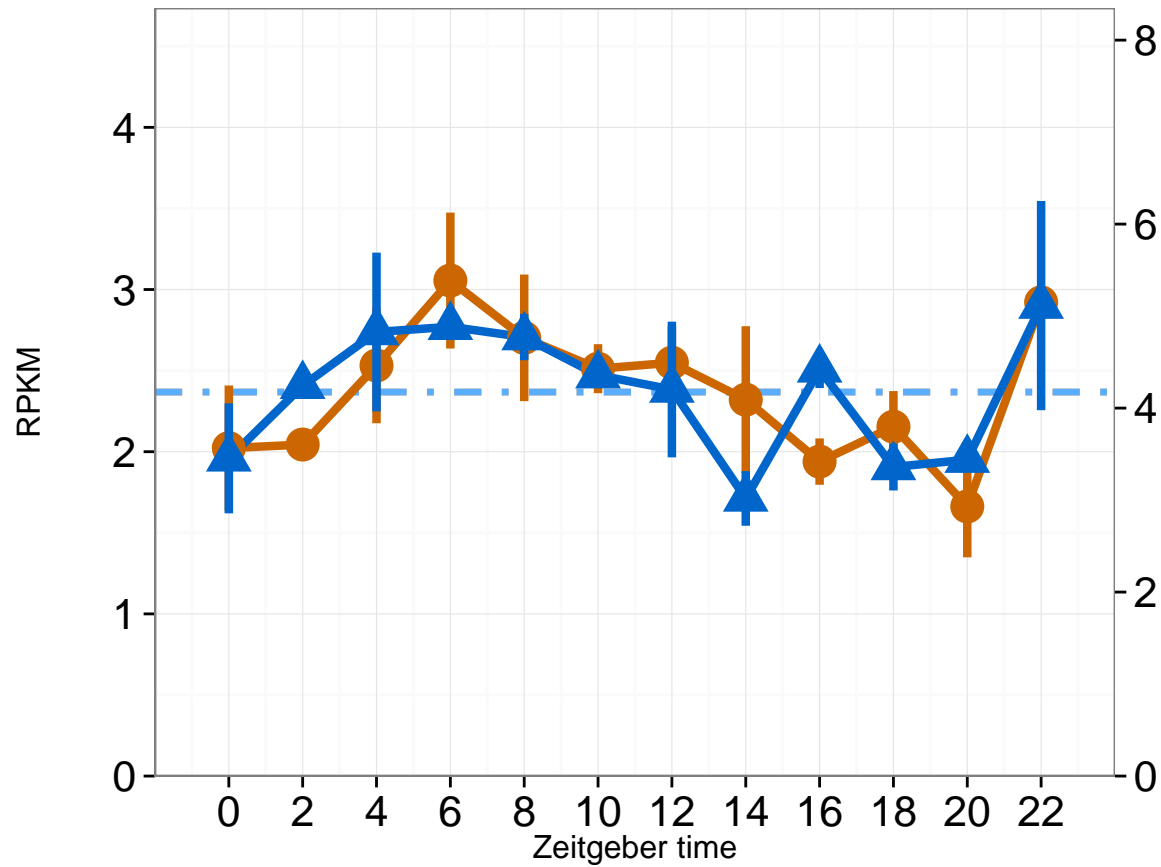

# Chst14

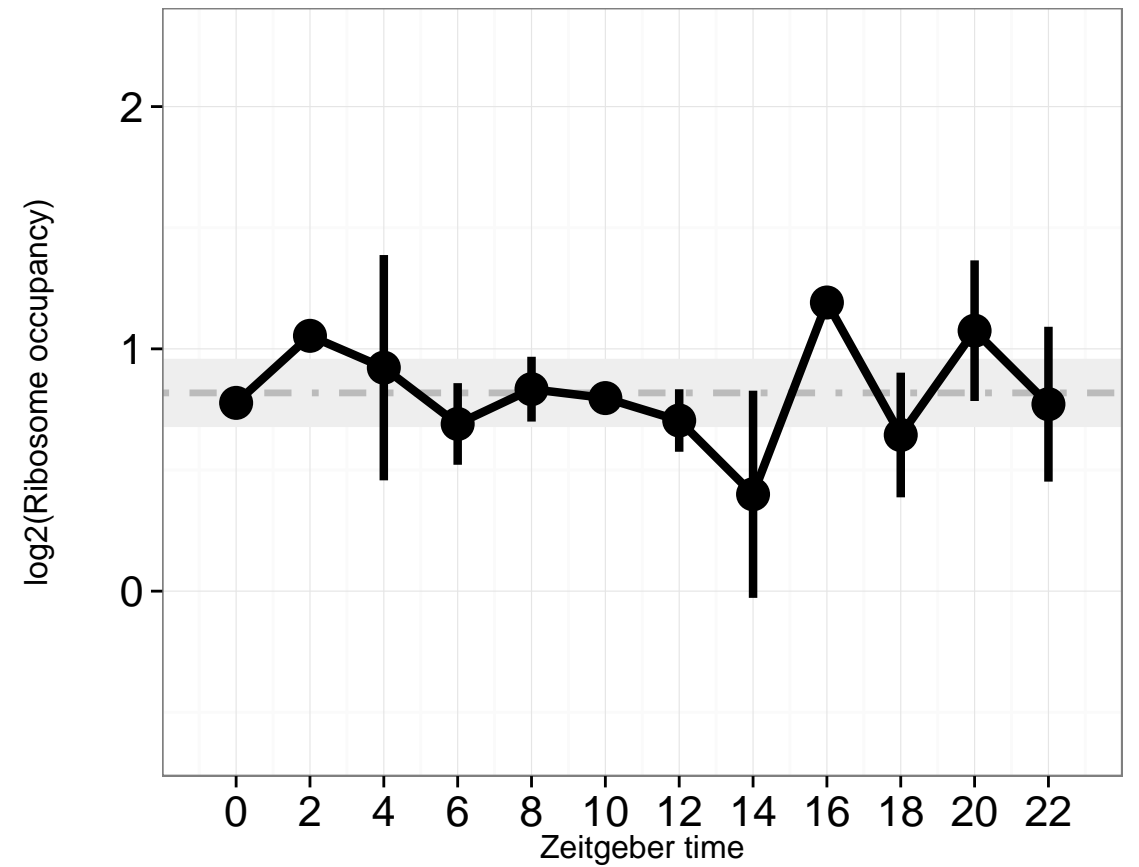

Supplement: Supplementary file 10833 [file 1]

**0610037L13Rik**

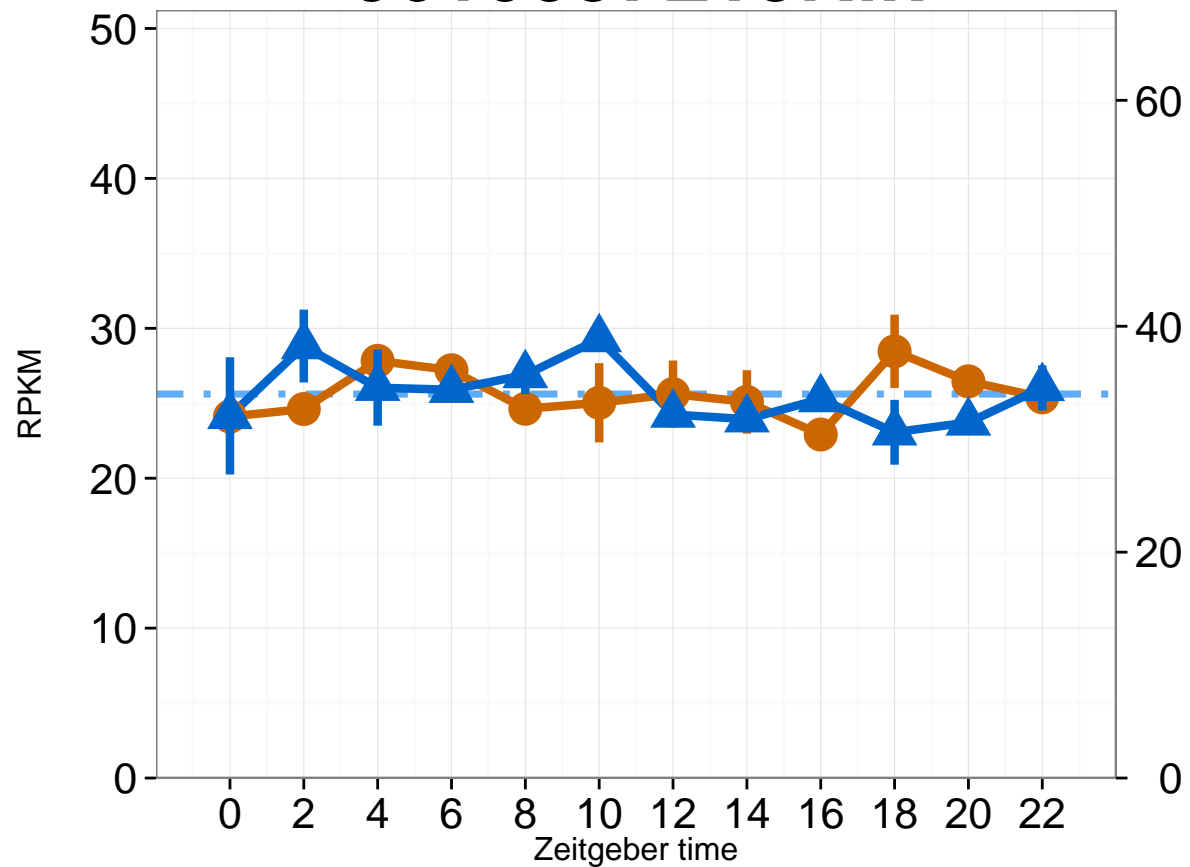

**0610037L13Rik**

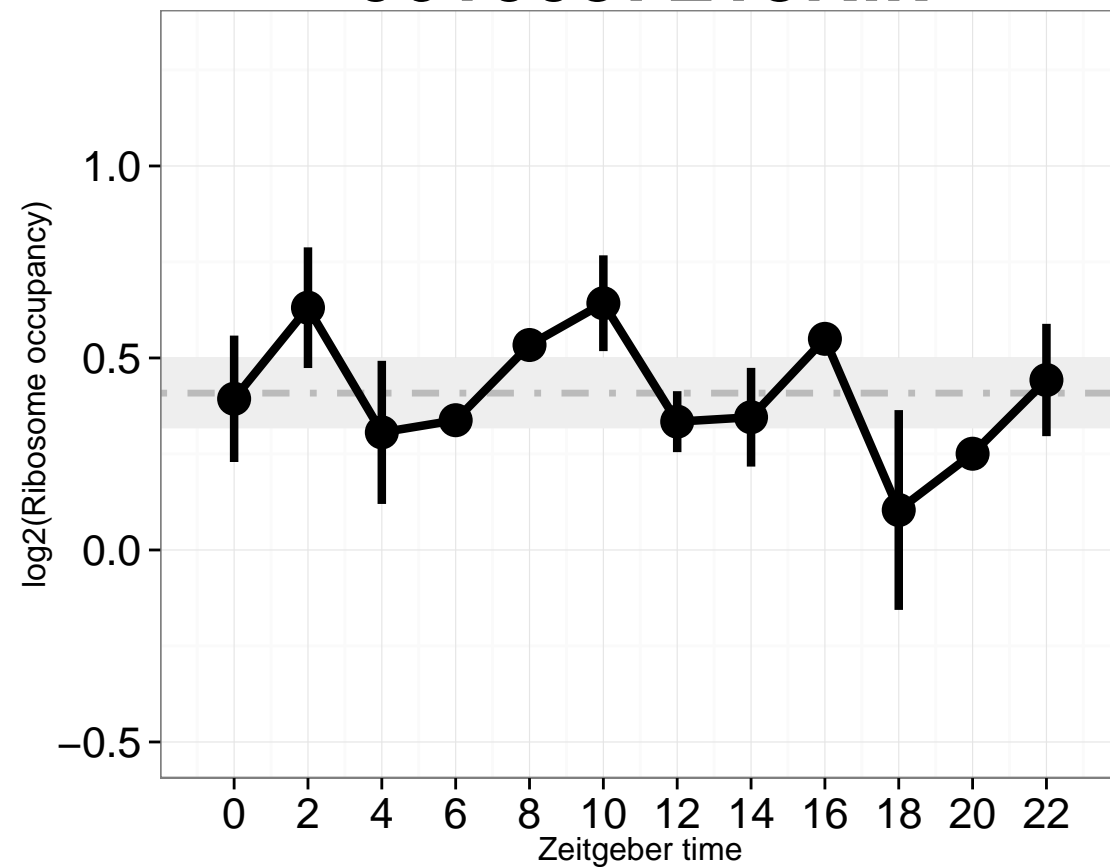

Supplement: Supplementary file 10834 [file 1]

## Naa35

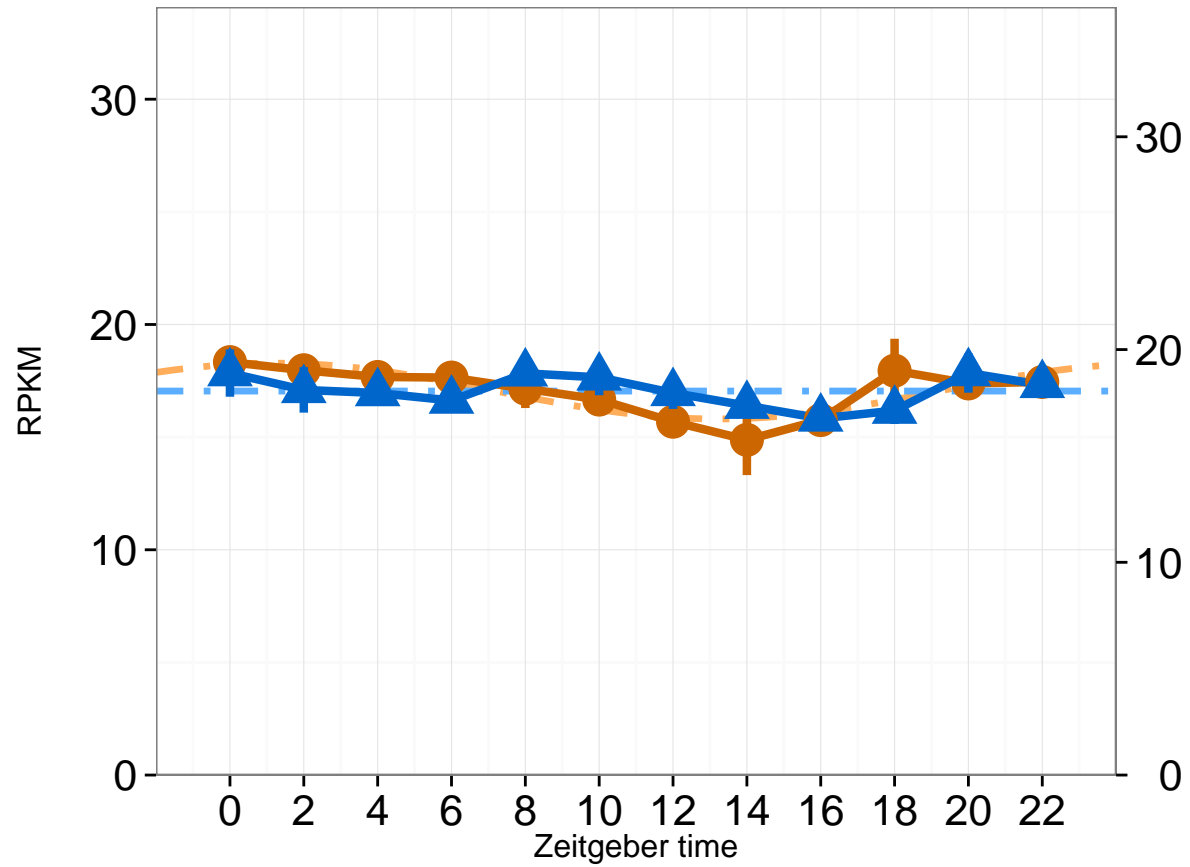

## Naa35

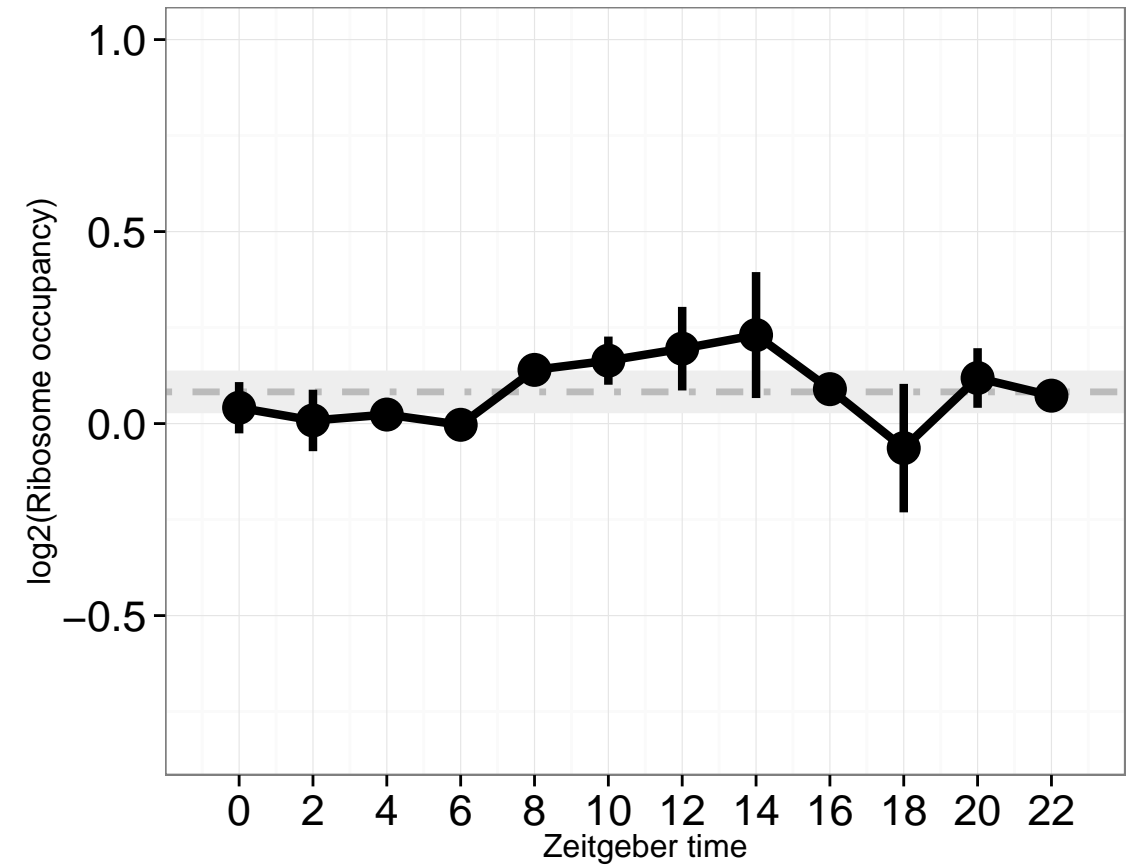

Supplement: Supplementary file 10835 [file 1]

## Ipo11

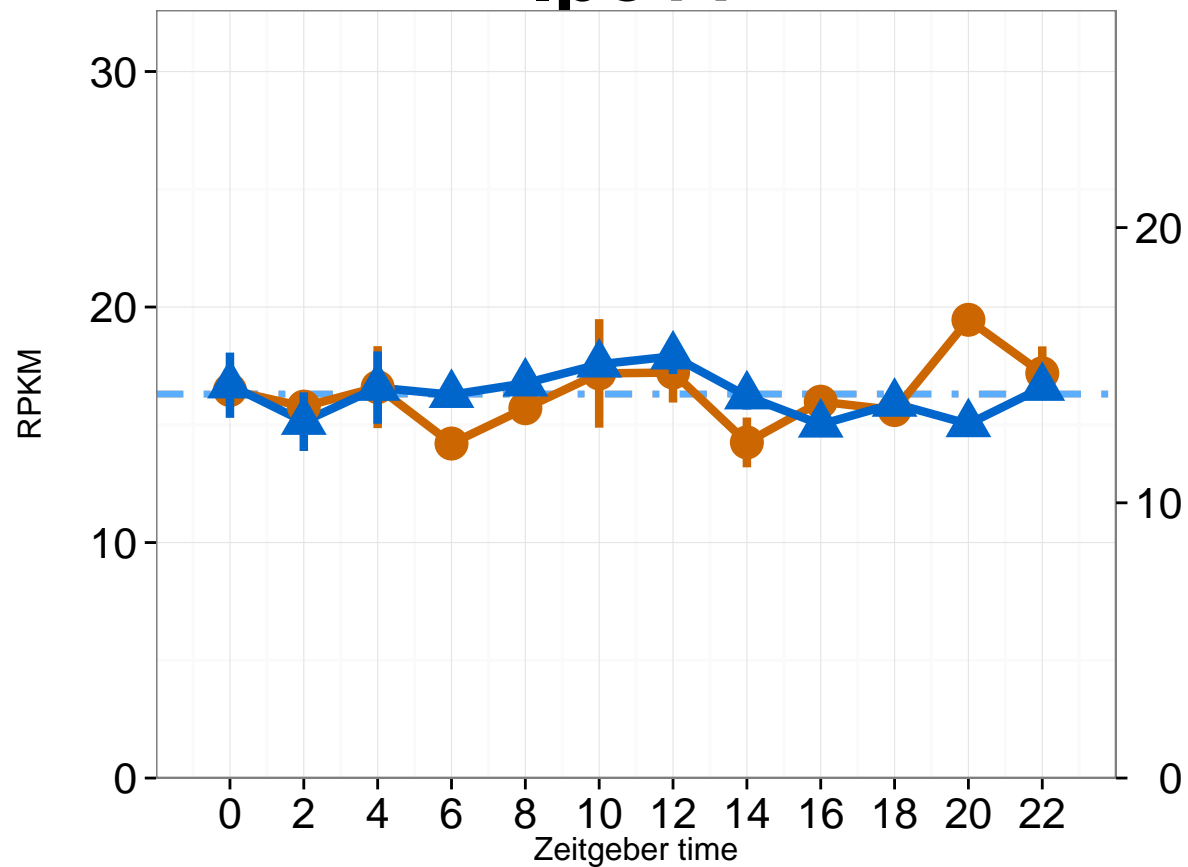

## Ipo11

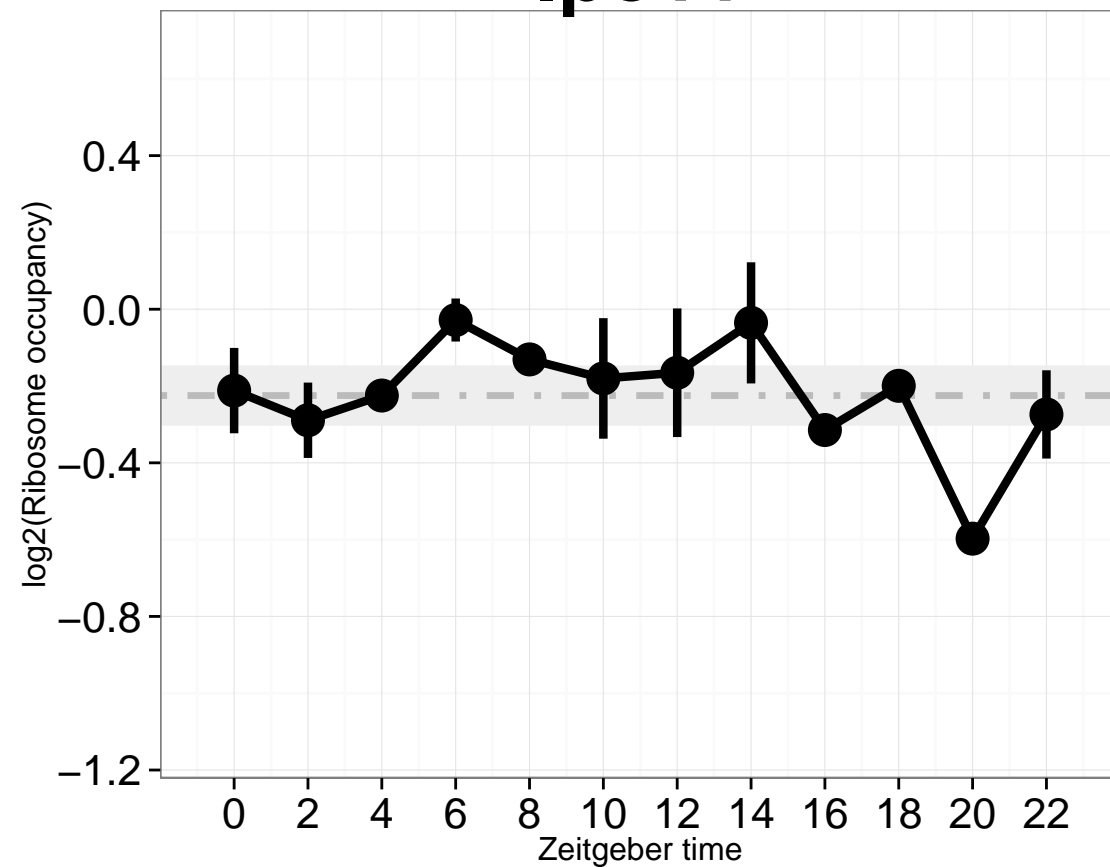

Supplement: Supplementary file 10836 [file 1]

# Rap2a

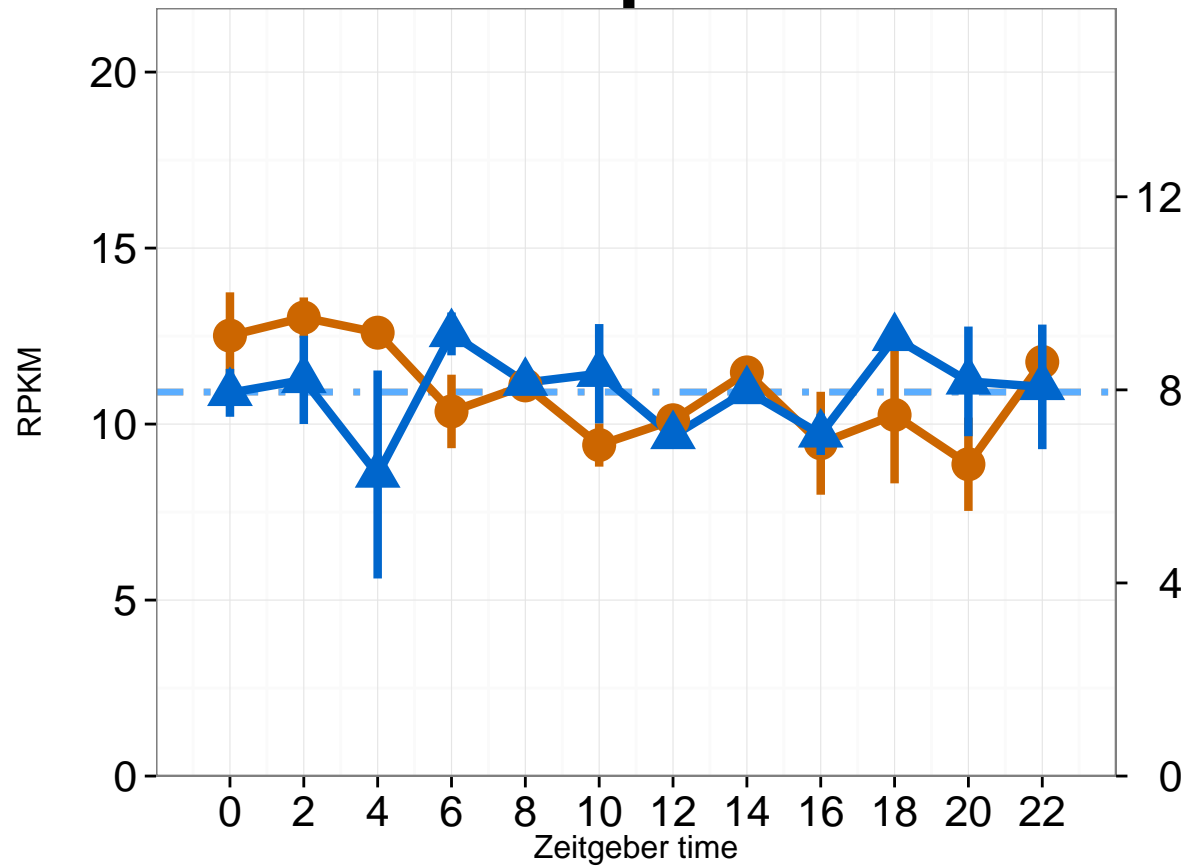

# Rap2a

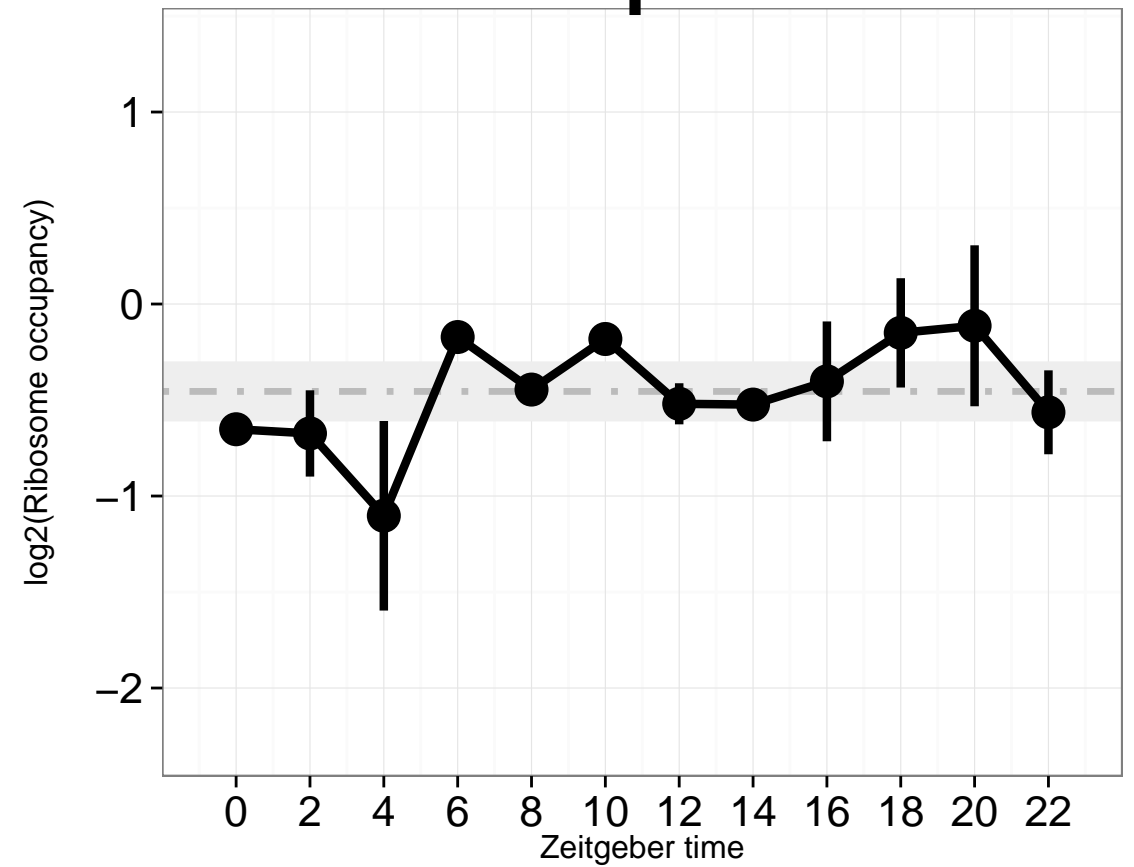

Supplement: Supplementary file 10837 [file 1]

## Il10ra

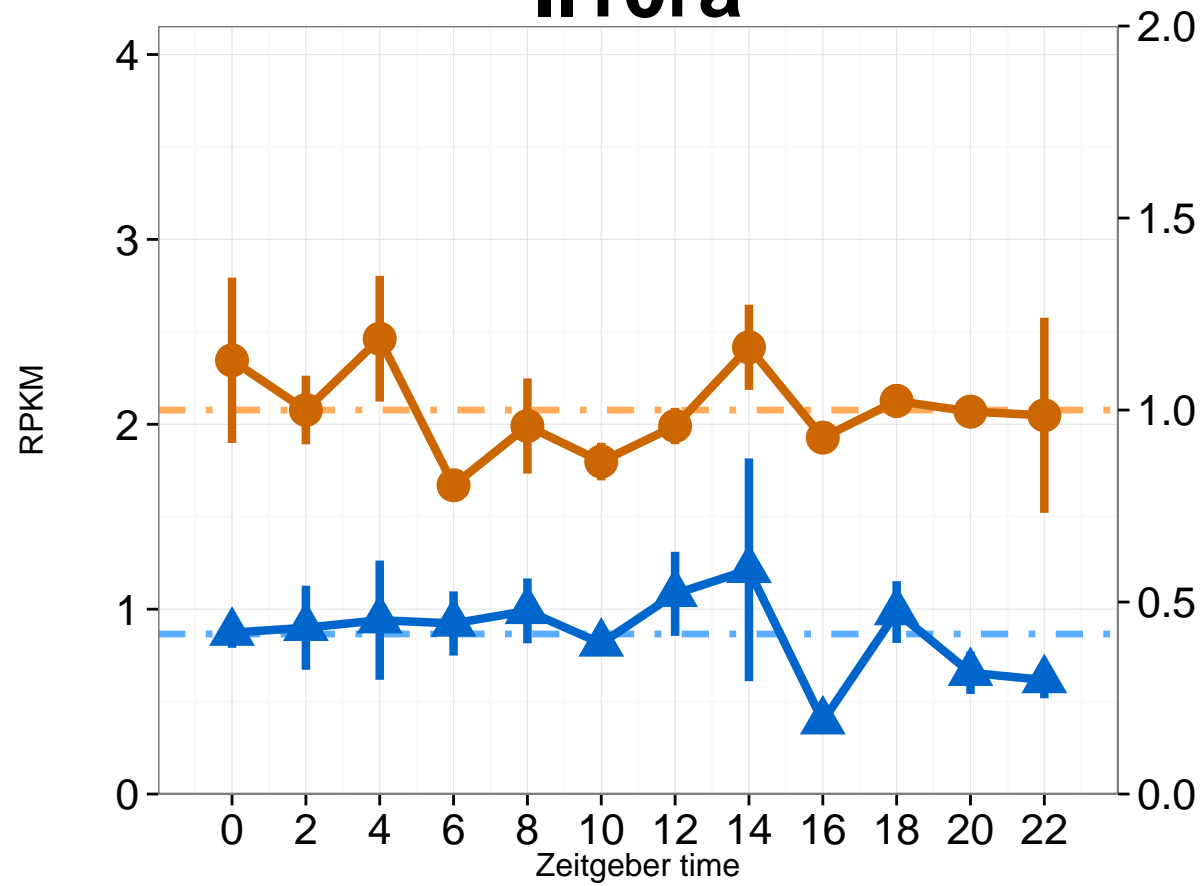

## Il10ra

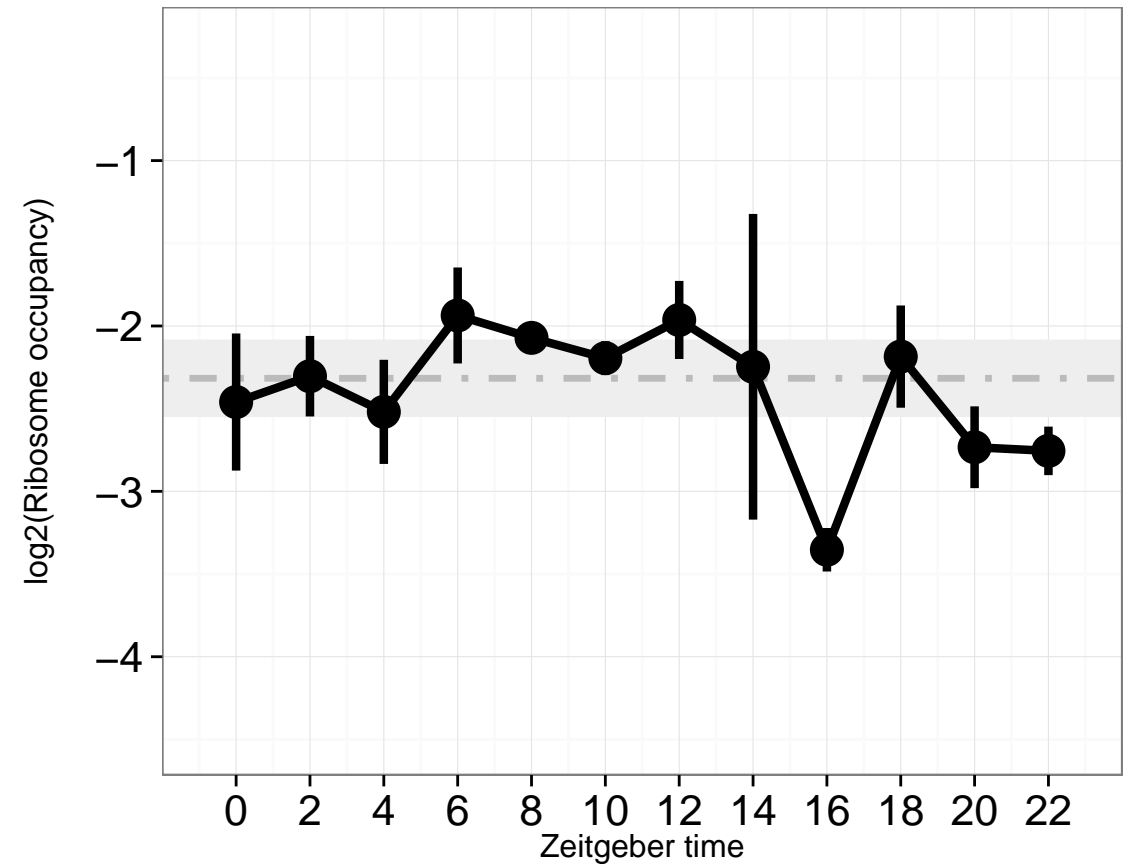

Supplement: Supplementary file 10838 [file 1]

## Msn

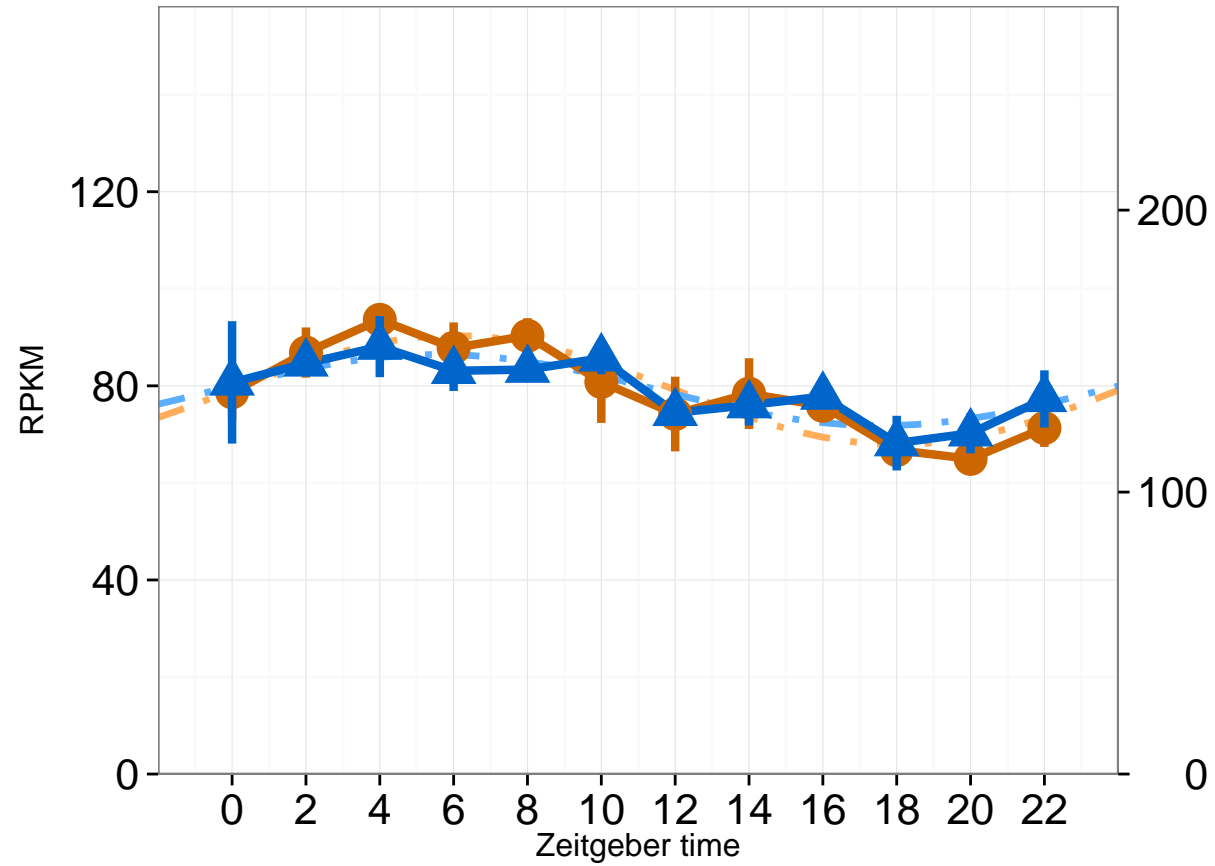

## Msn

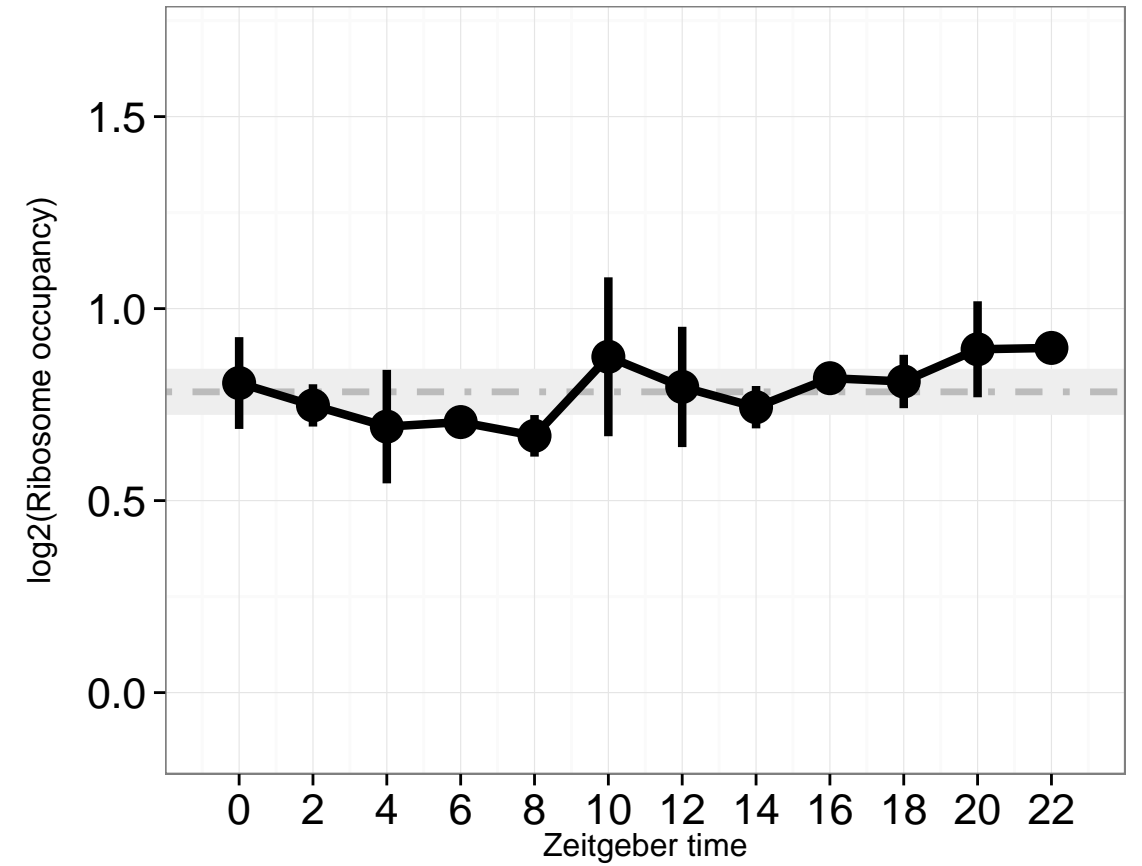

Supplement: Supplementary file 10839 [file 1]

## Ccrl2

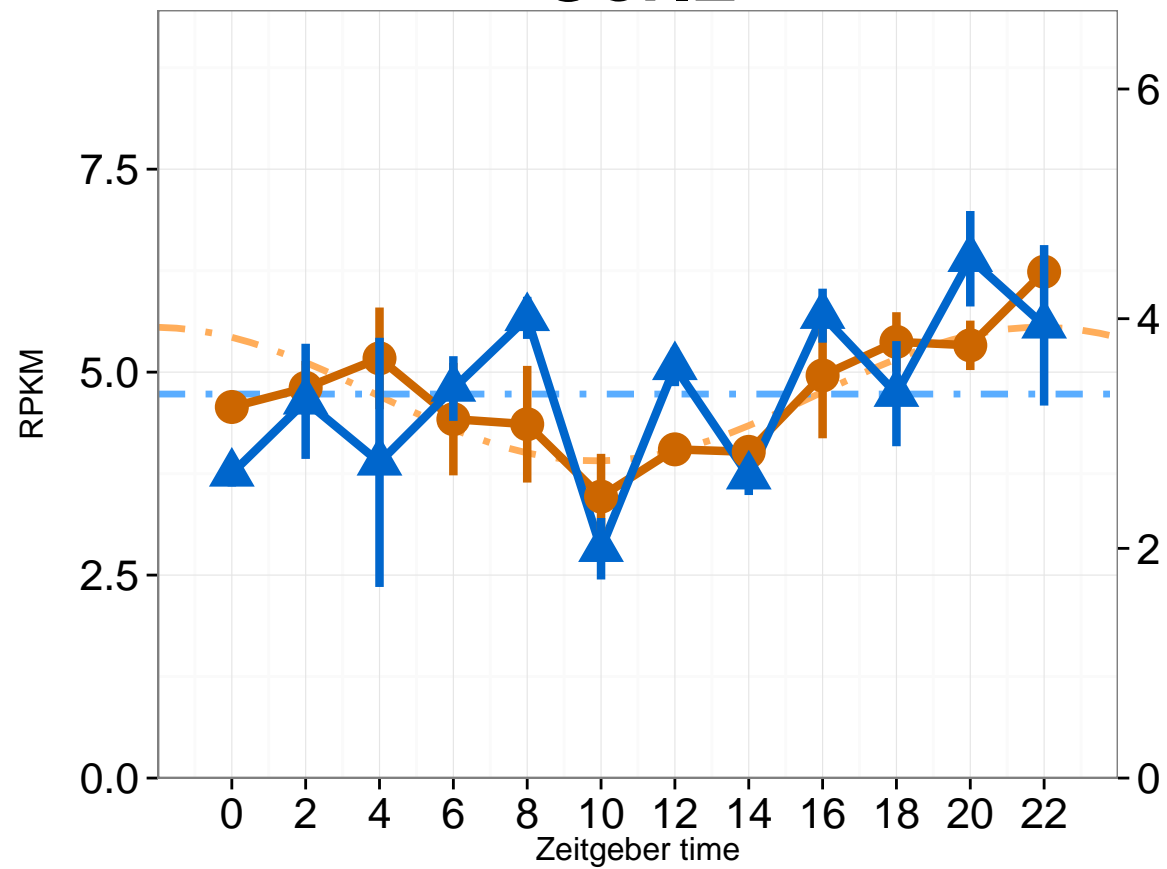

## Ccrl2

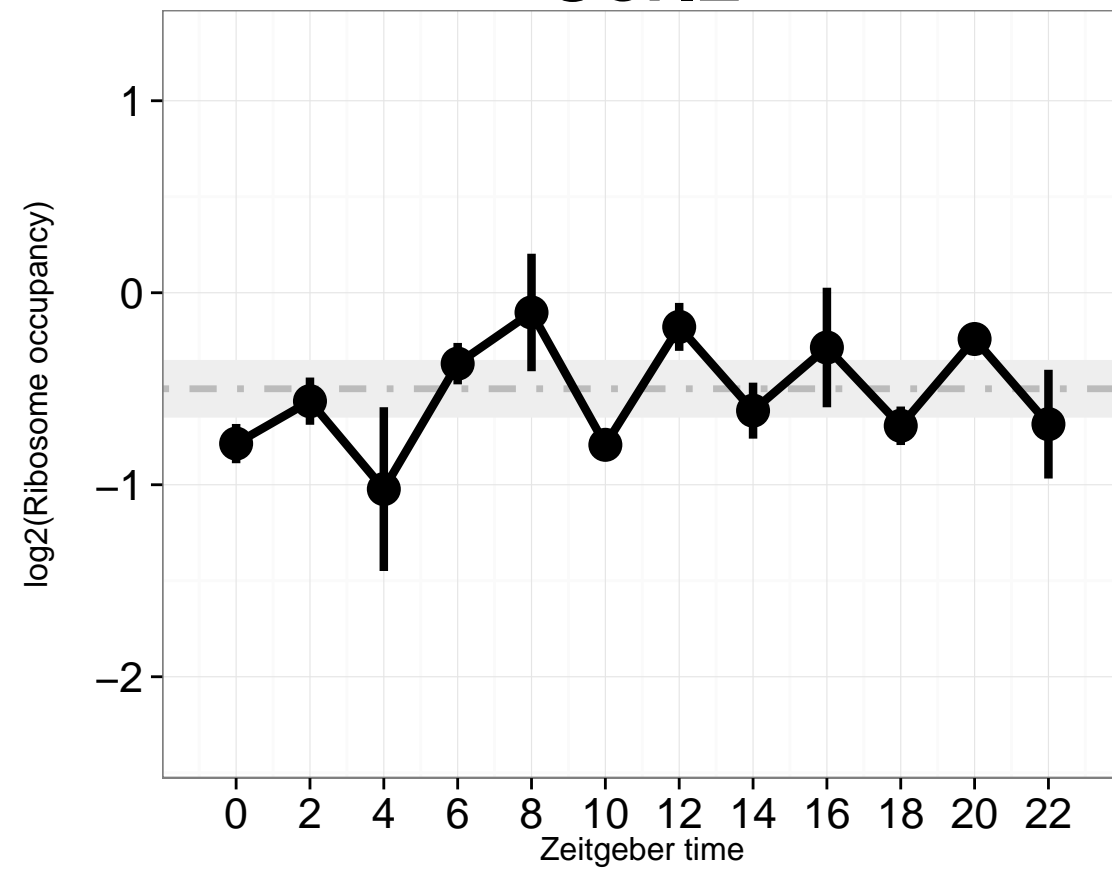

Supplement: Supplementary file 10840 [file 1]
