# Supplementary material (part 109 of 133)
Source: publisher figshare collection journal article supplement (https://springernature.figshare.com/articles/dataset/_/4903193)

# Crebrf

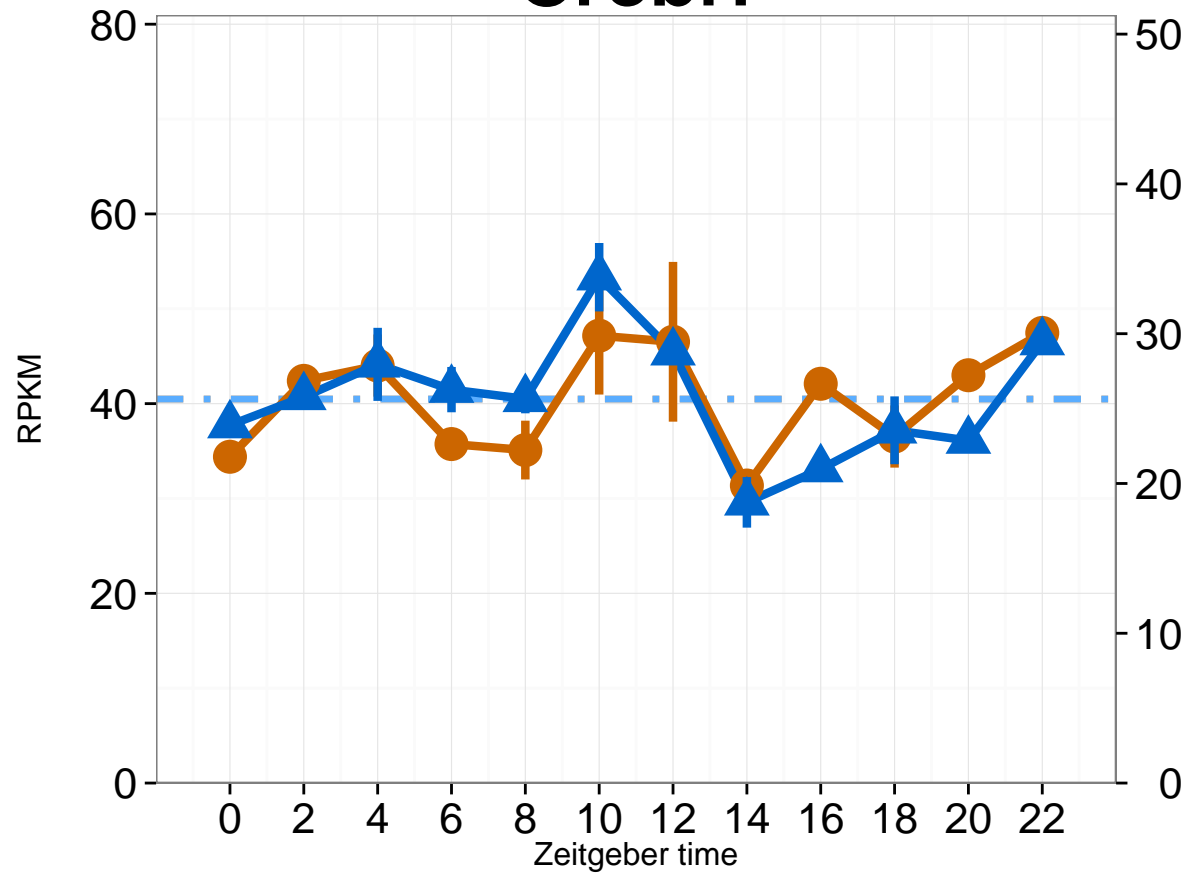

# Crebrf

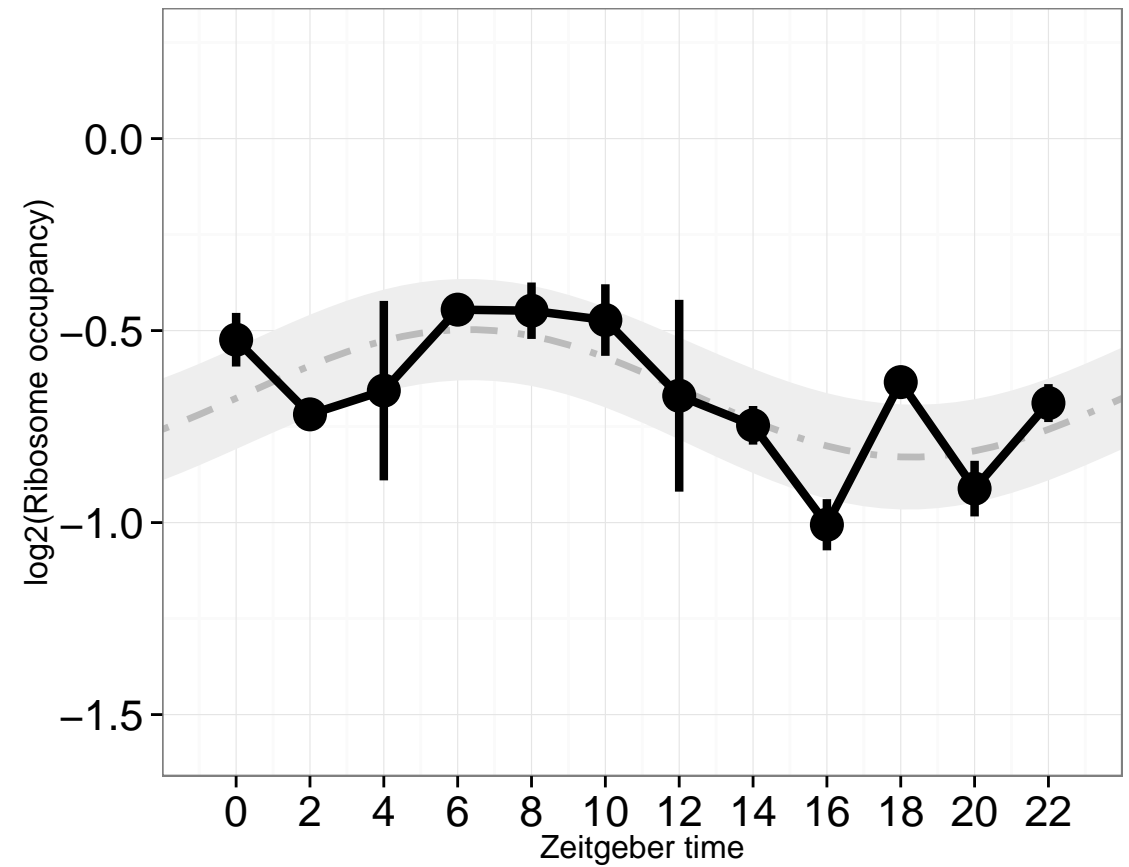

Supplement: Supplementary file 10841 [file 1]

# TtII7

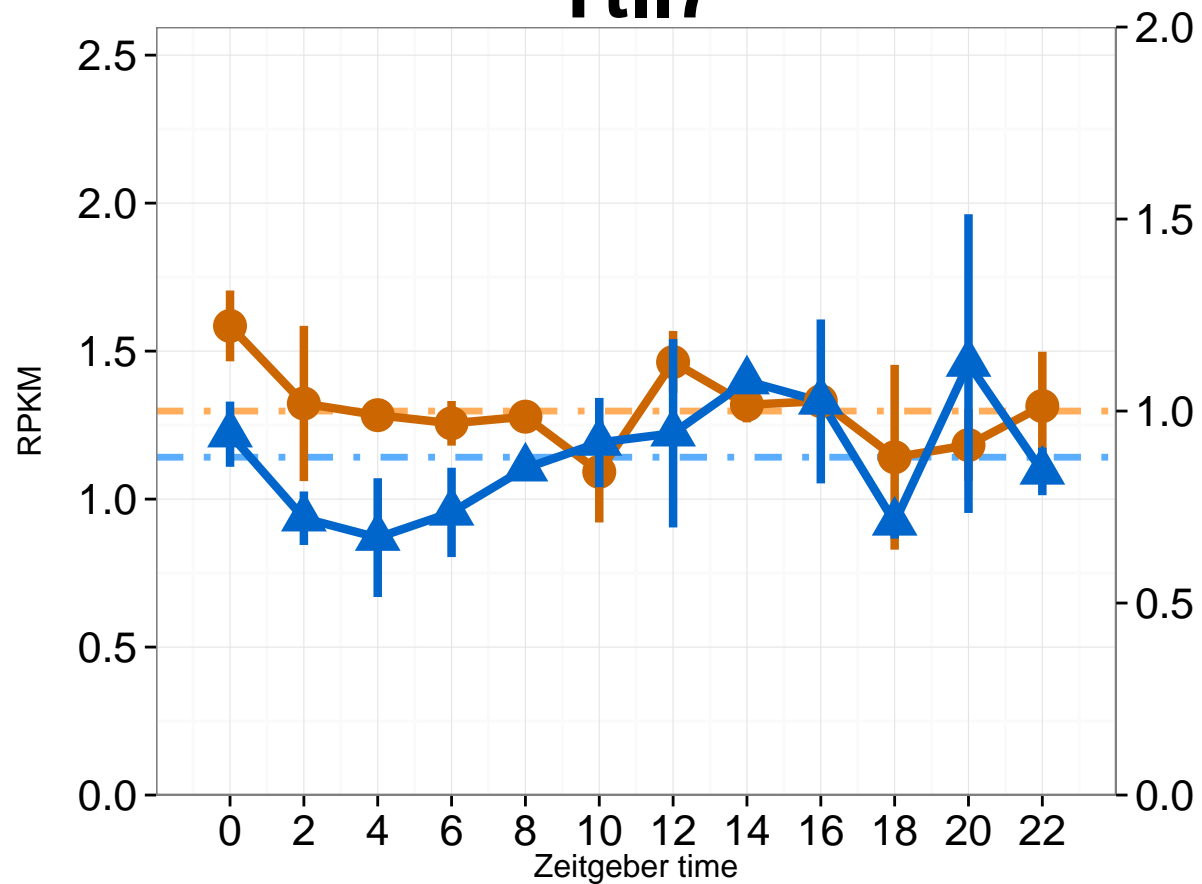

# TtII7

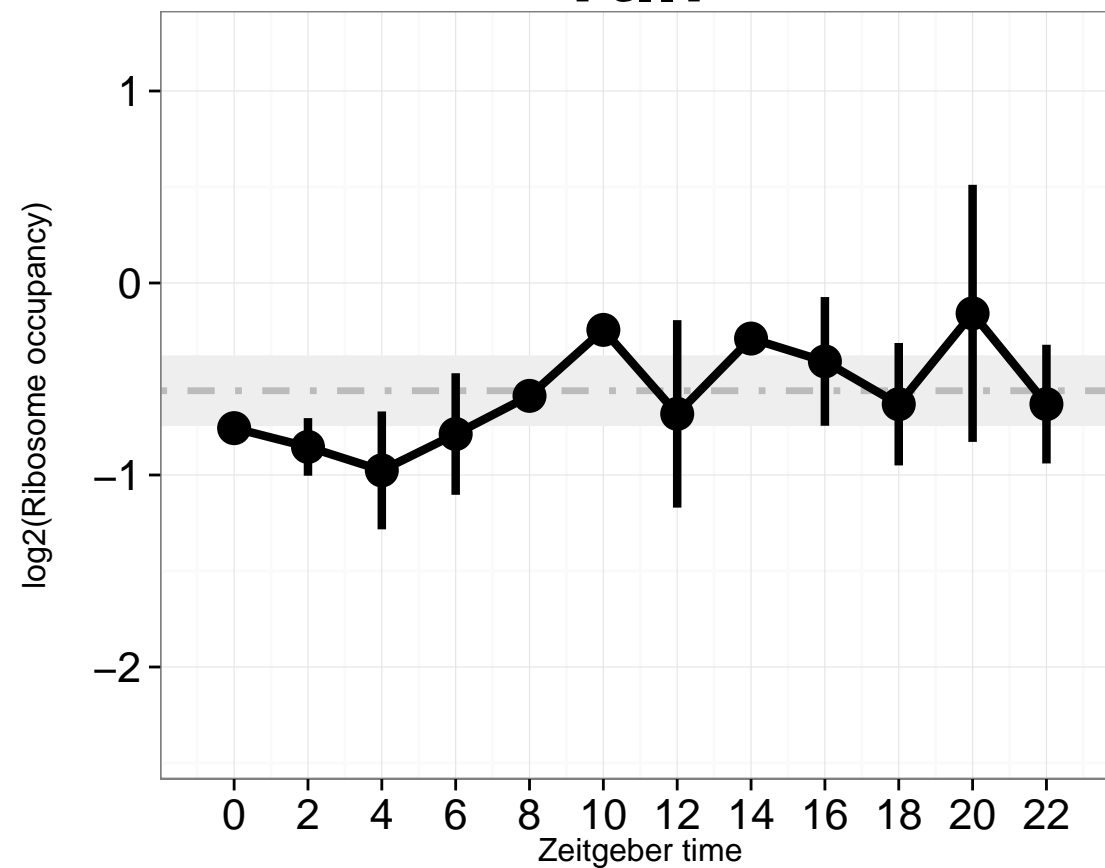

Supplement: Supplementary file 10842 [file 1]

## Oxa1l

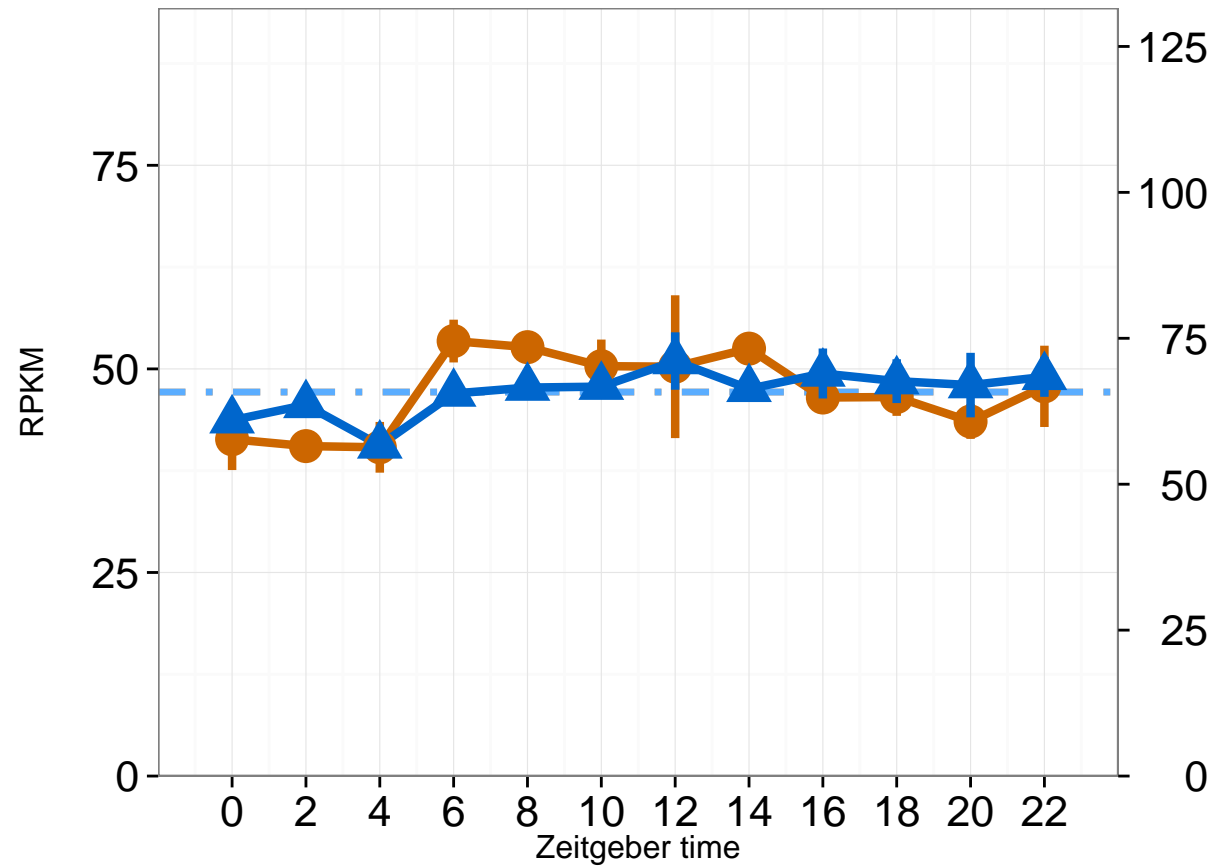

## Oxa1l

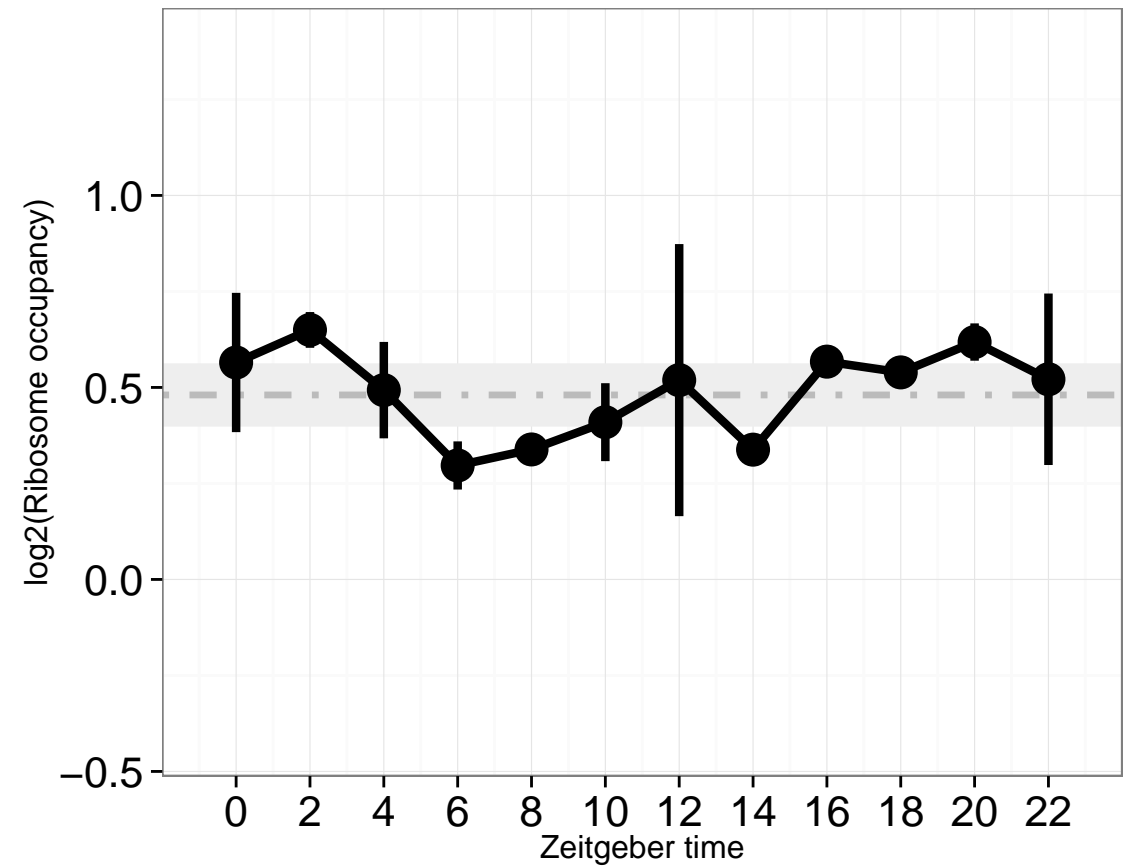

Supplement: Supplementary file 10843 [file 1]

# Mat2a

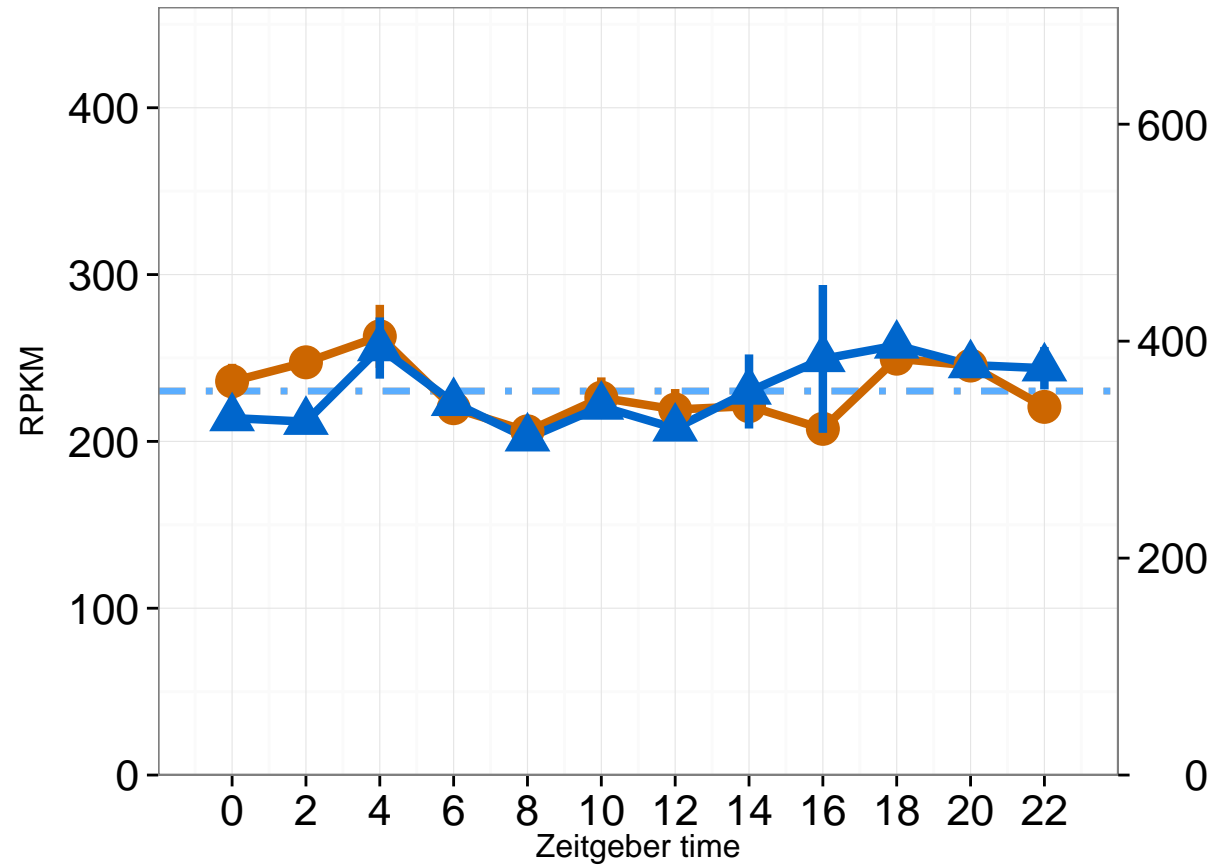

# Mat2a

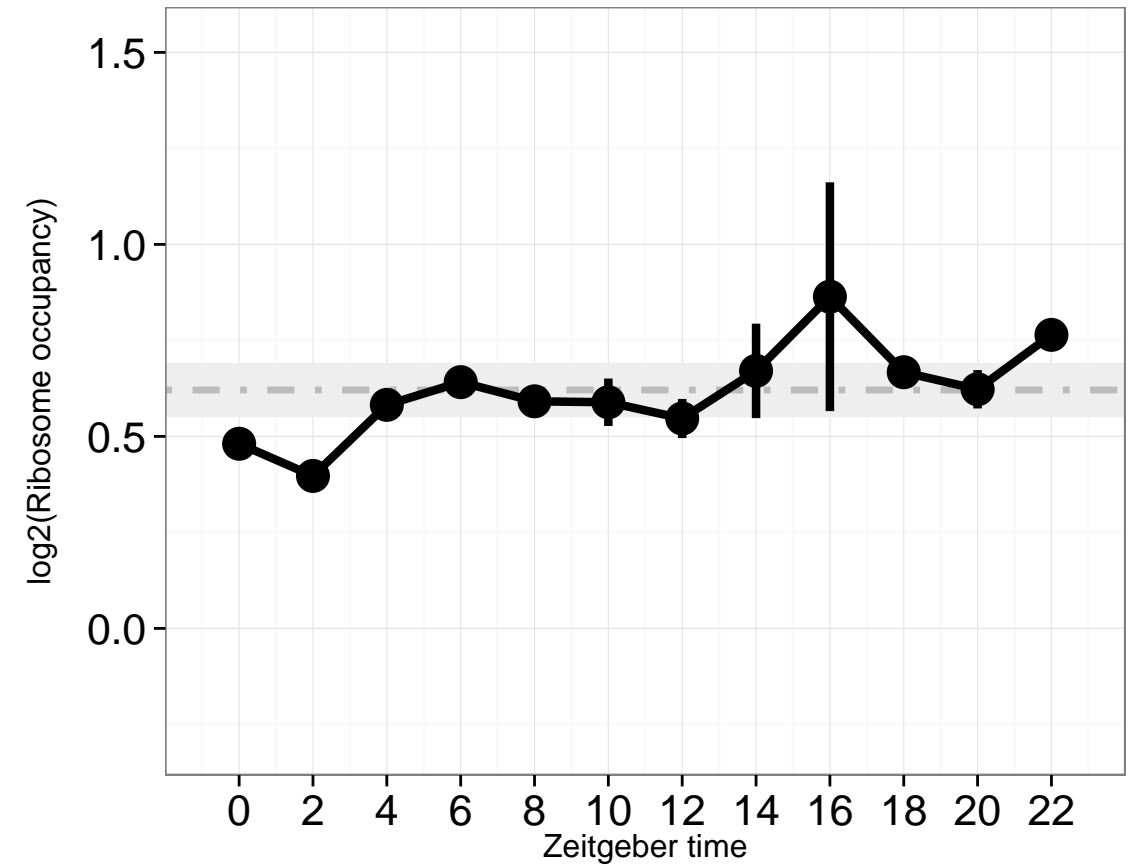

Supplement: Supplementary file 10844 [file 1]

# Gpr4

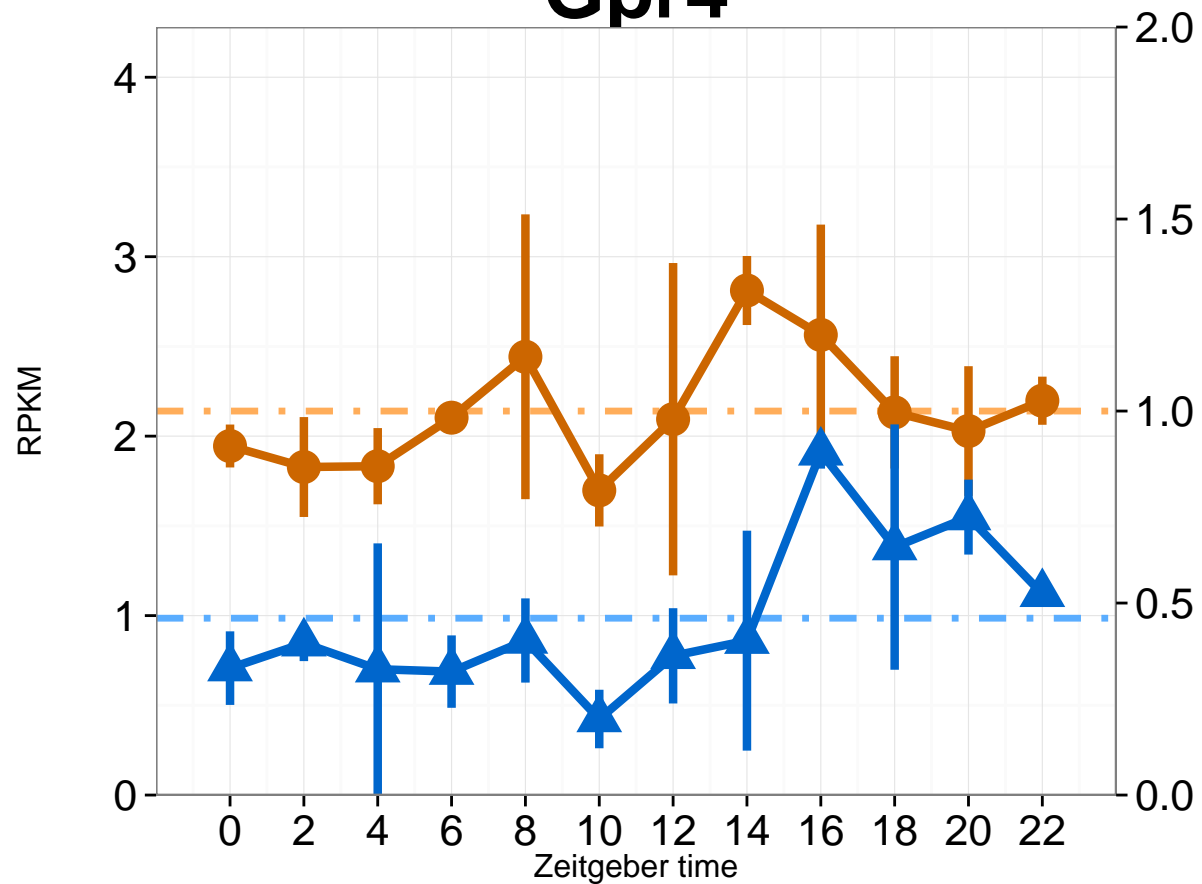

# Gpr4

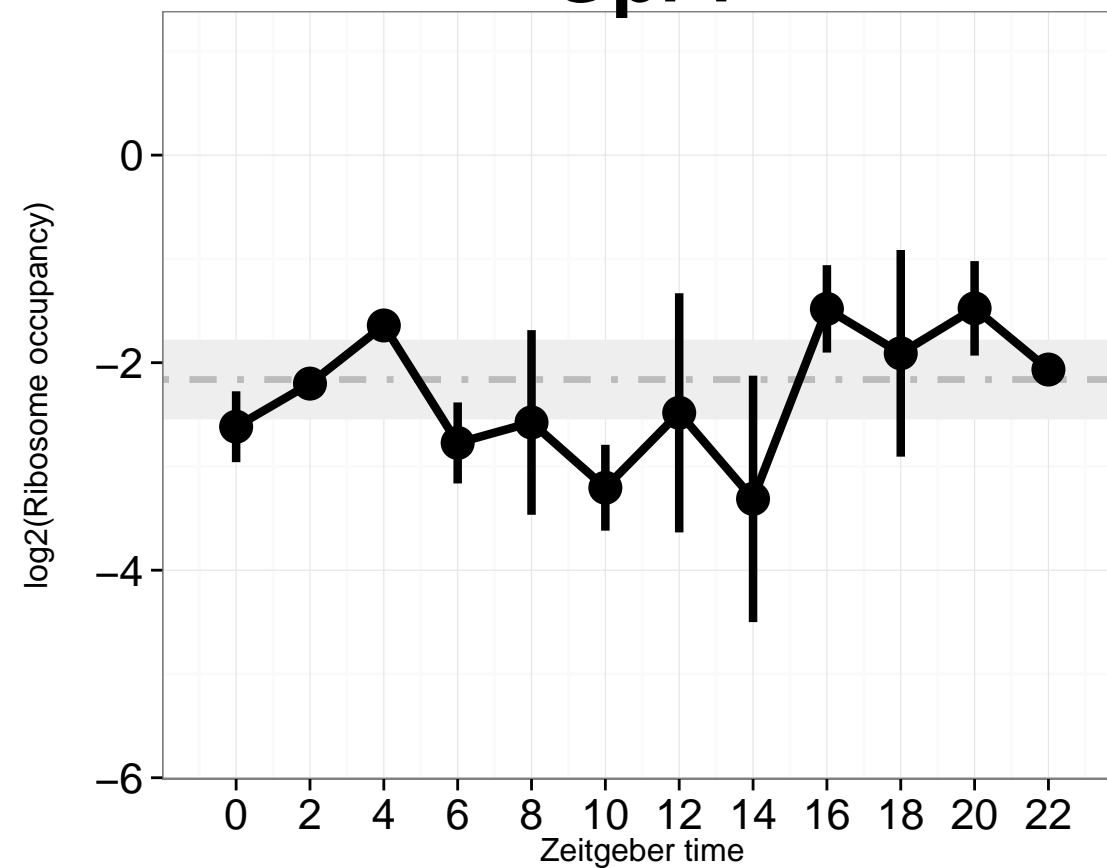

Supplement: Supplementary file 10845 [file 1]

## Ccdc61

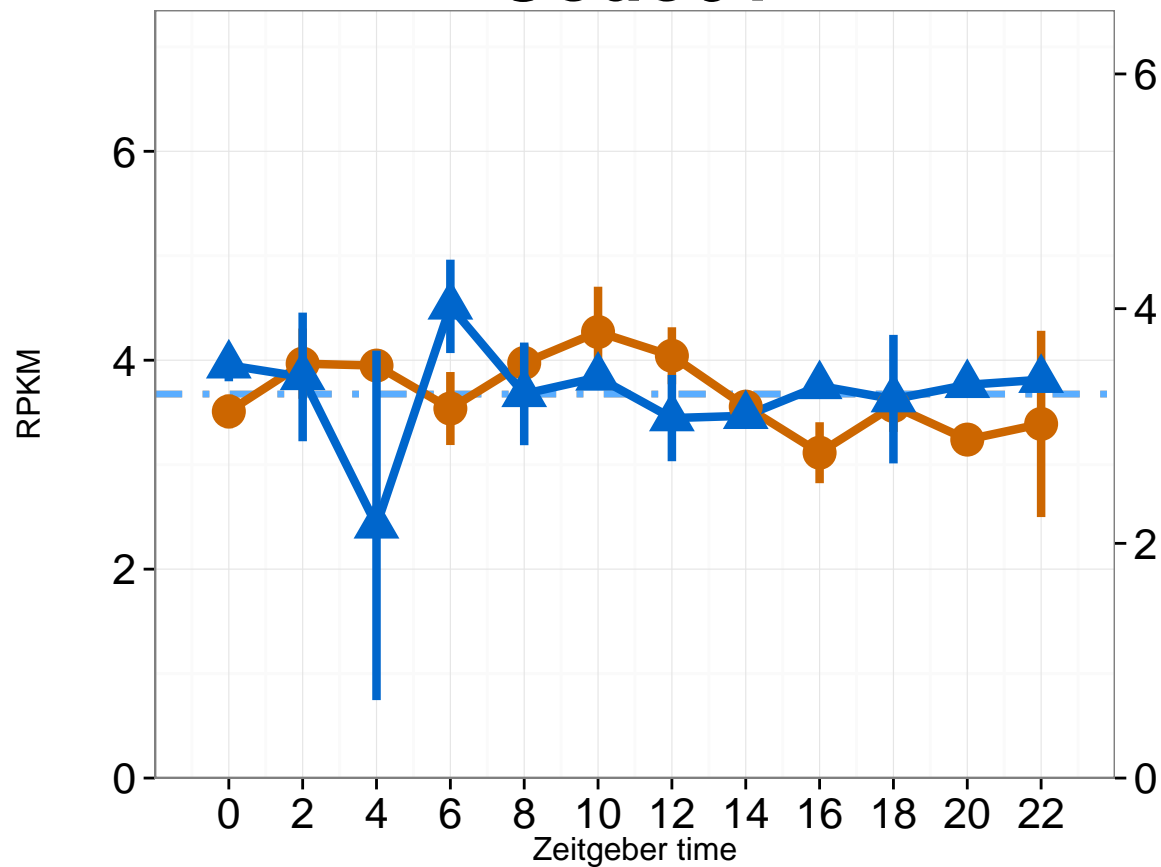

## Ccdc61

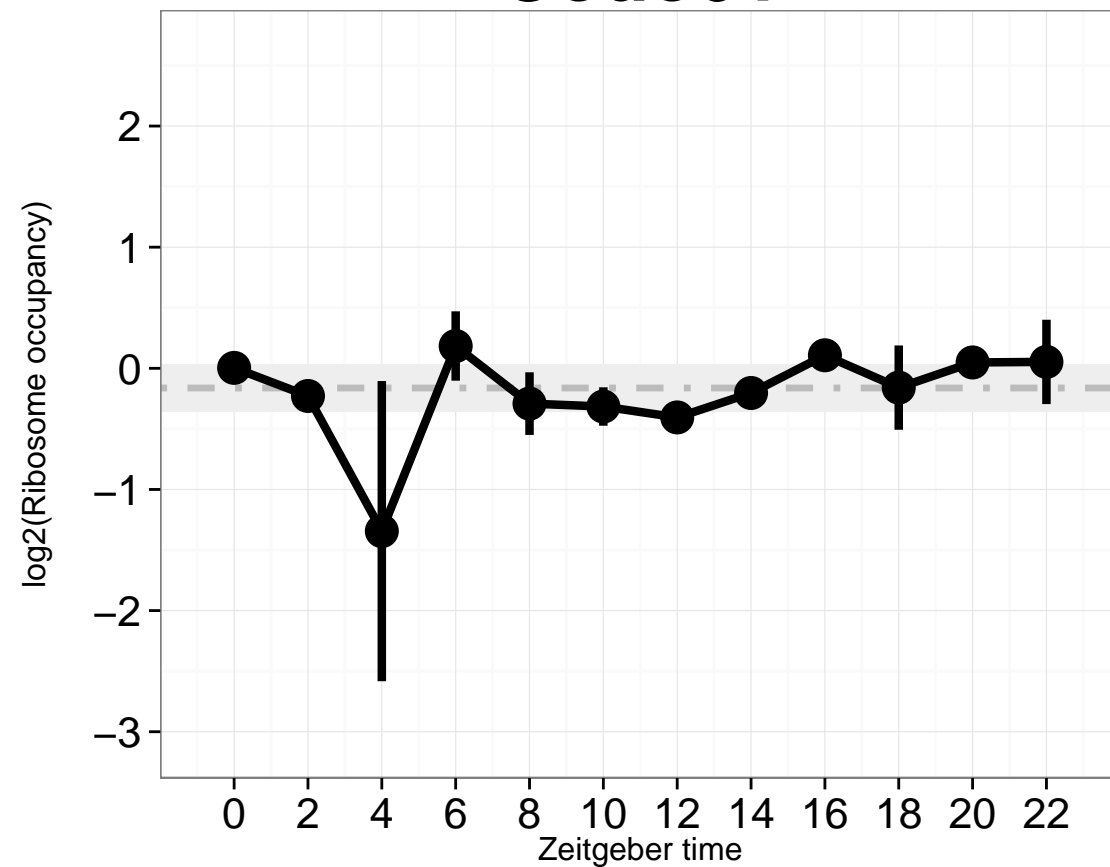

Supplement: Supplementary file 10846 [file 1]

# Syap1

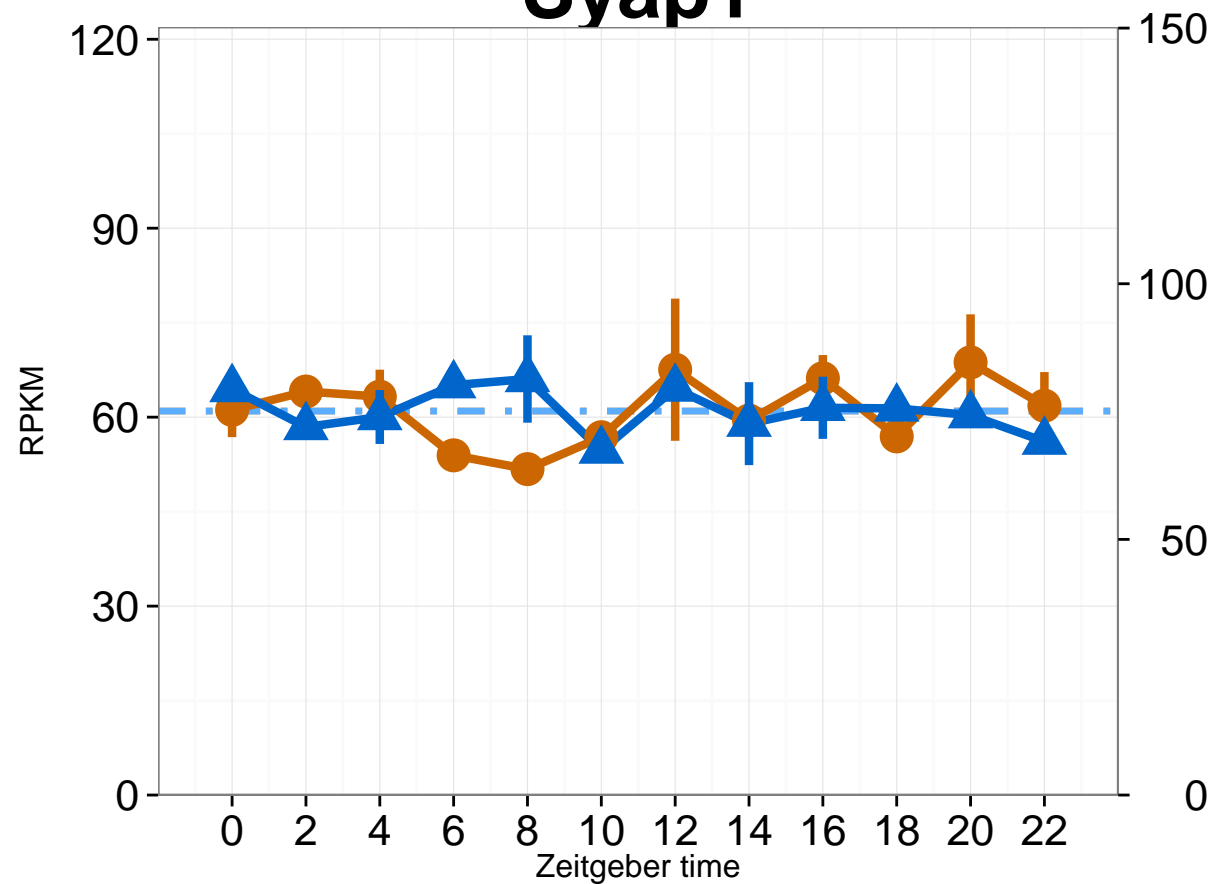

# Syap1

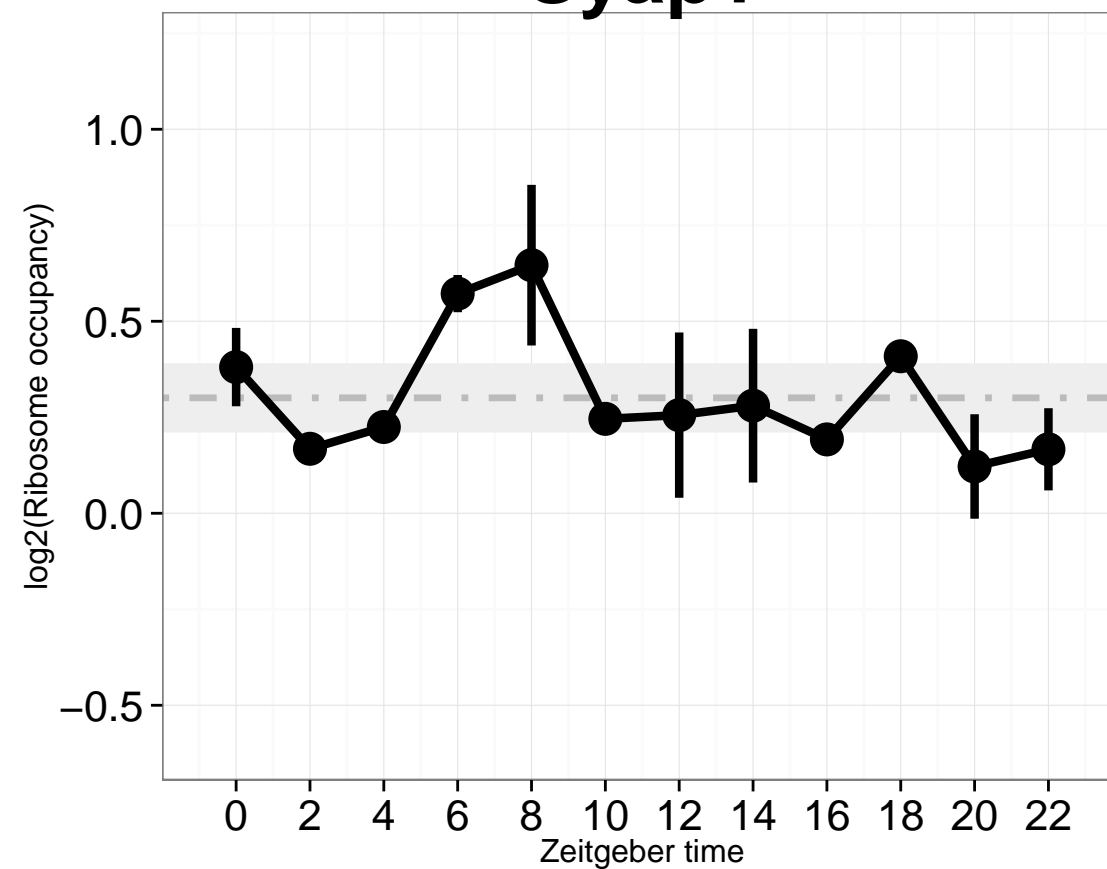

Supplement: Supplementary file 10847 [file 1]

# Dnaja1

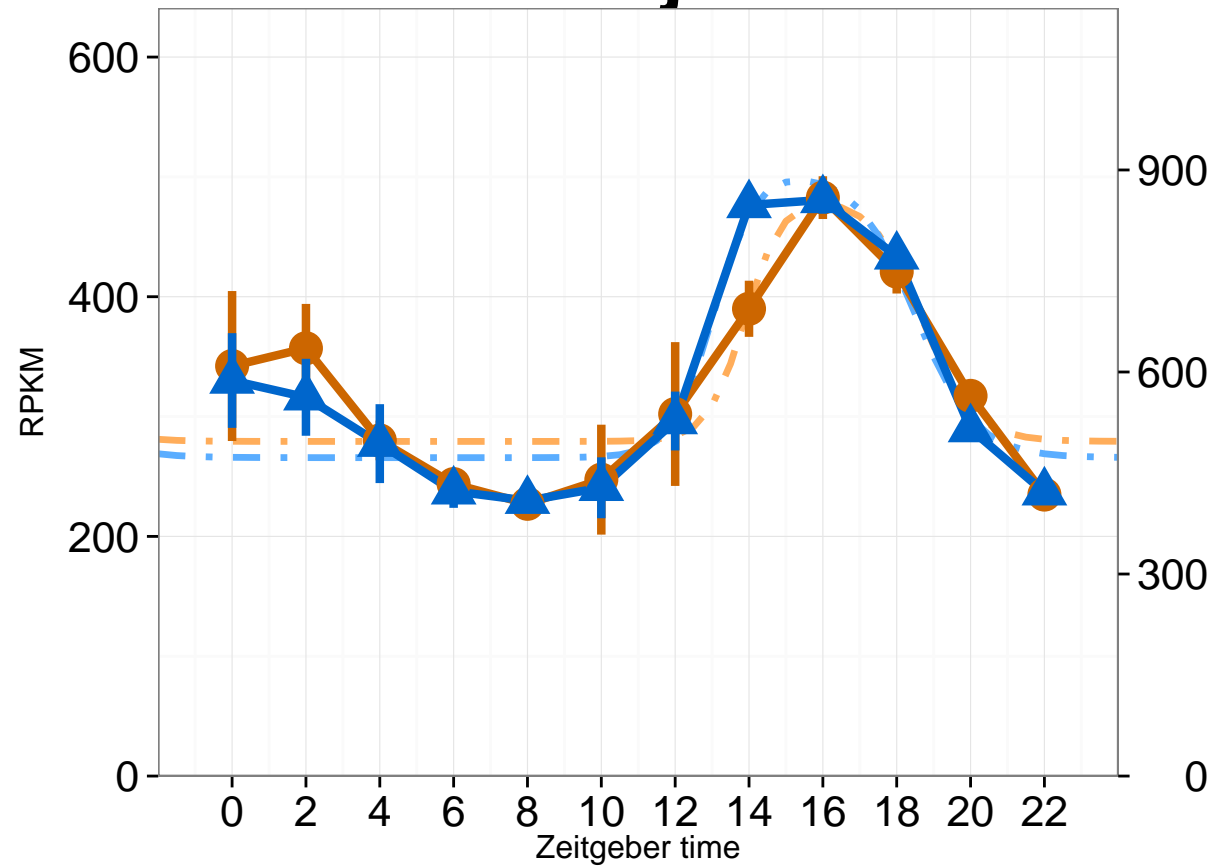

# Dnaja1

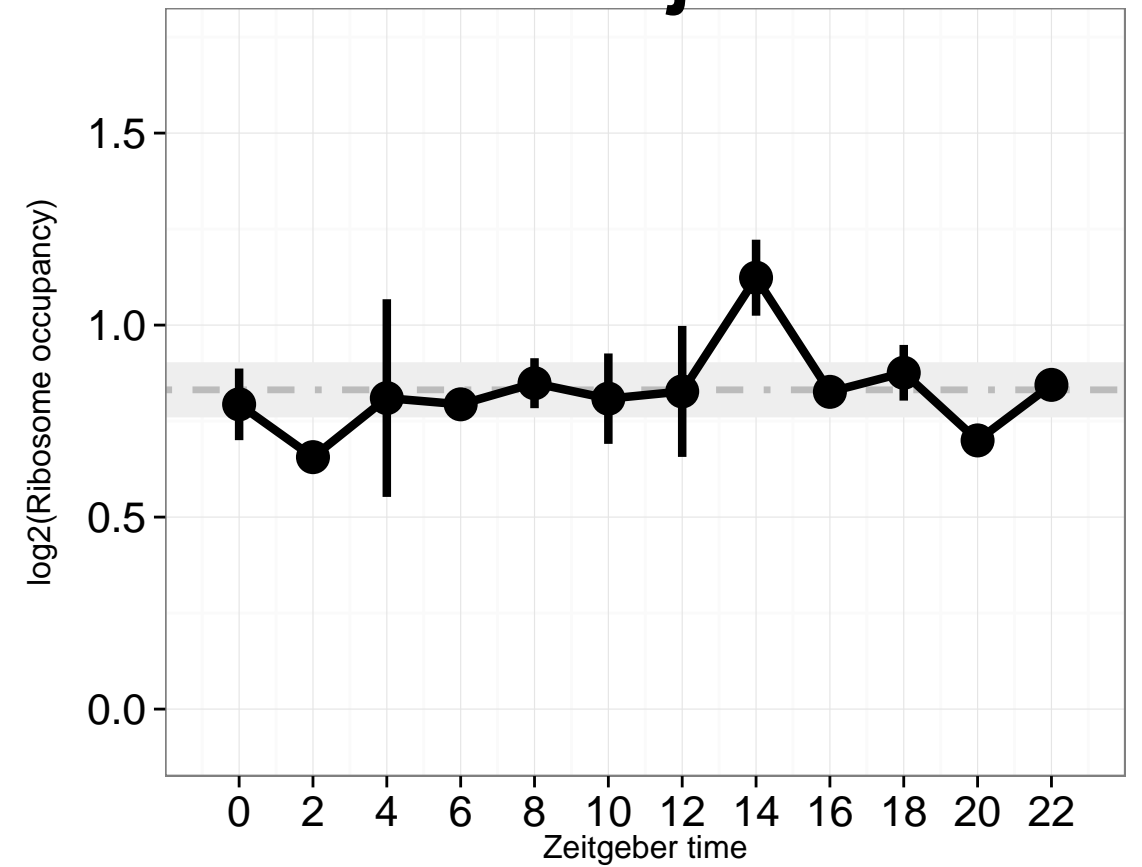

Supplement: Supplementary file 10848 [file 1]

## Gmppb

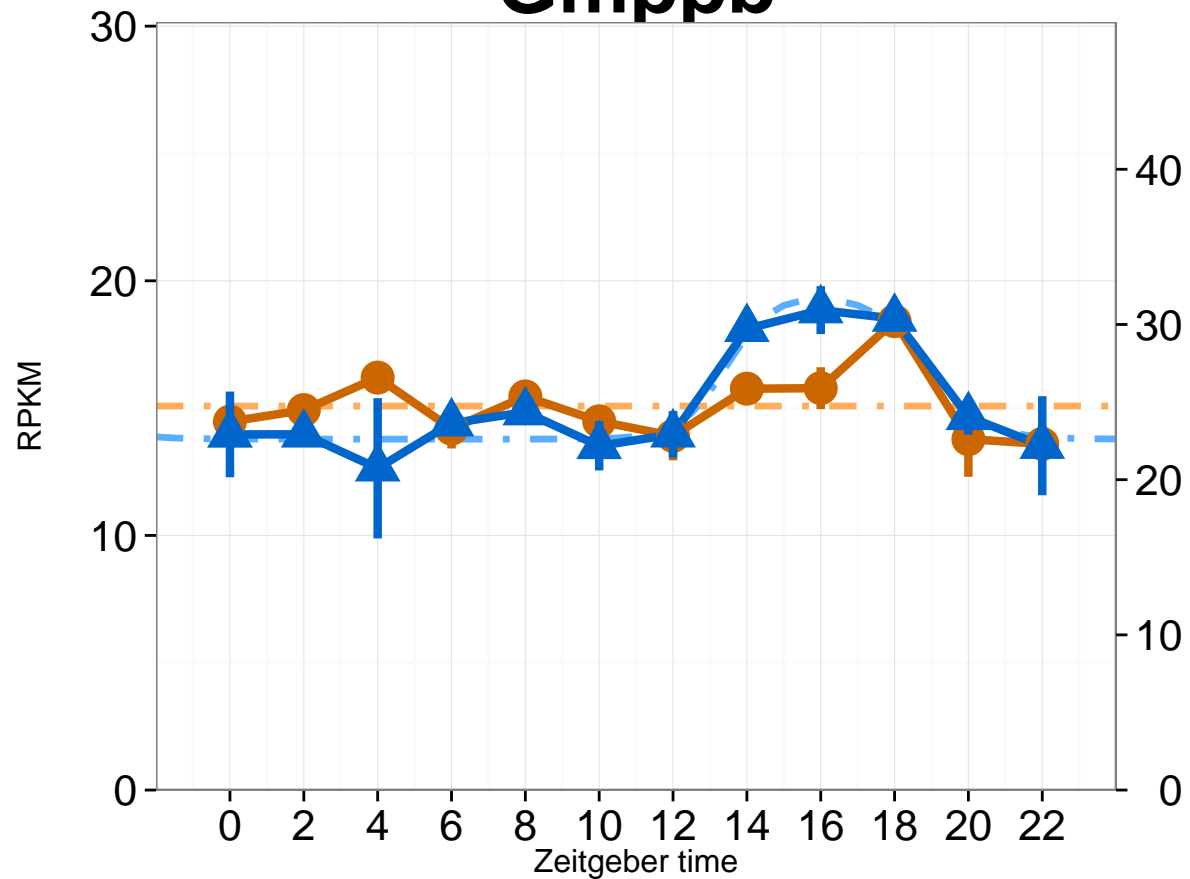

## Gmppb

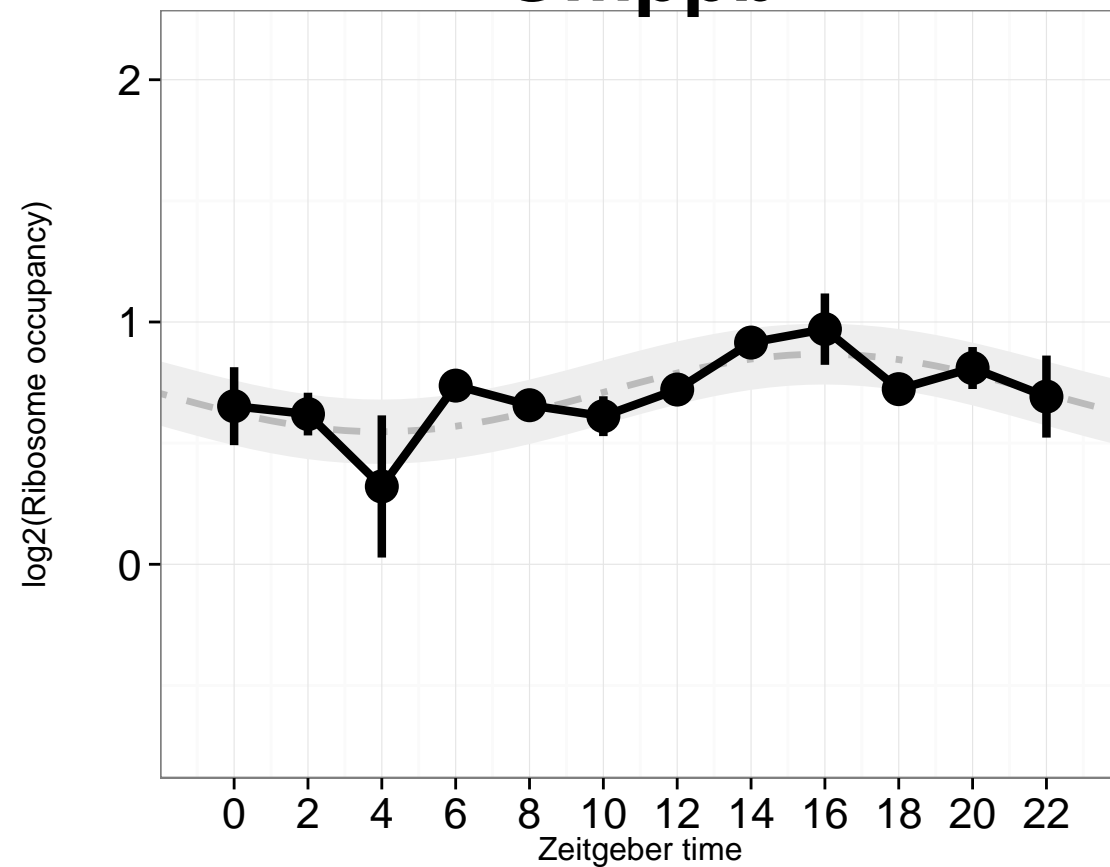

Supplement: Supplementary file 10849 [file 1]

## Wrb

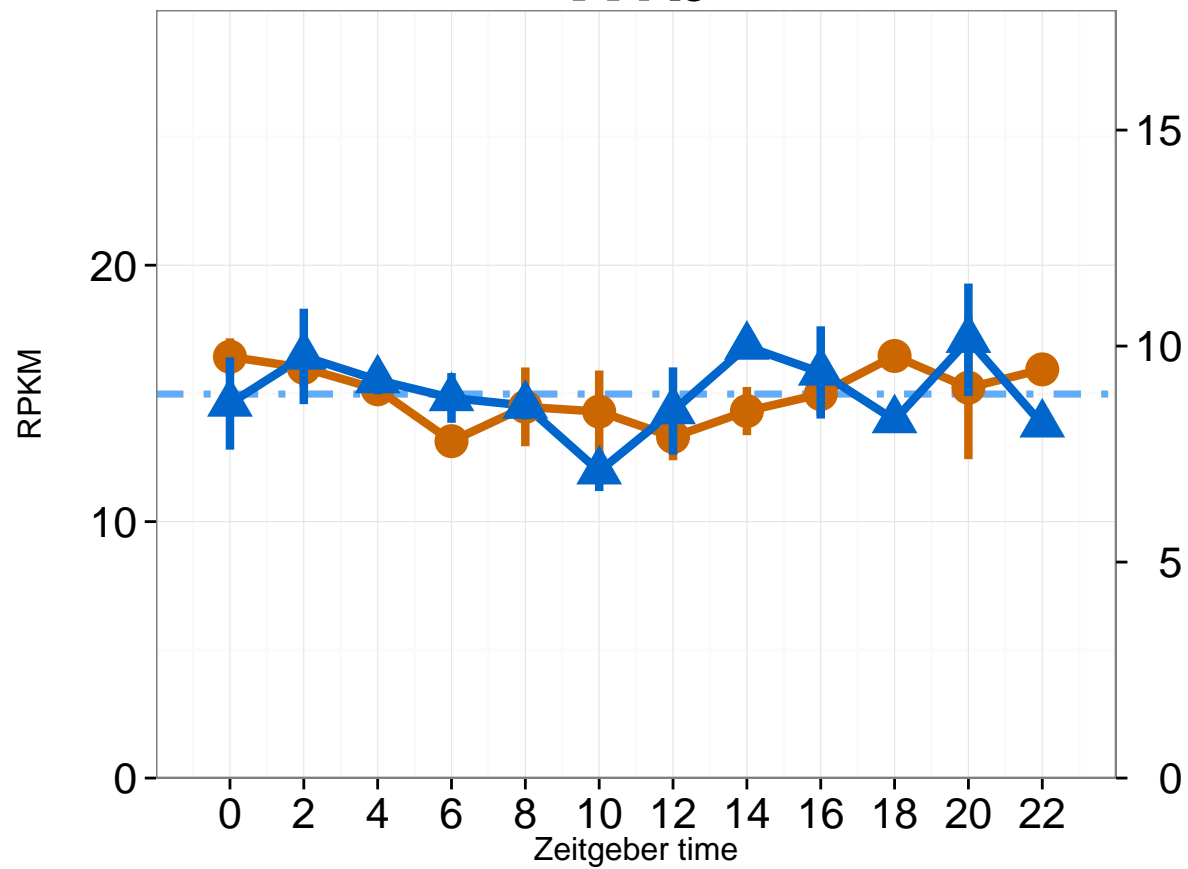

## Wrb

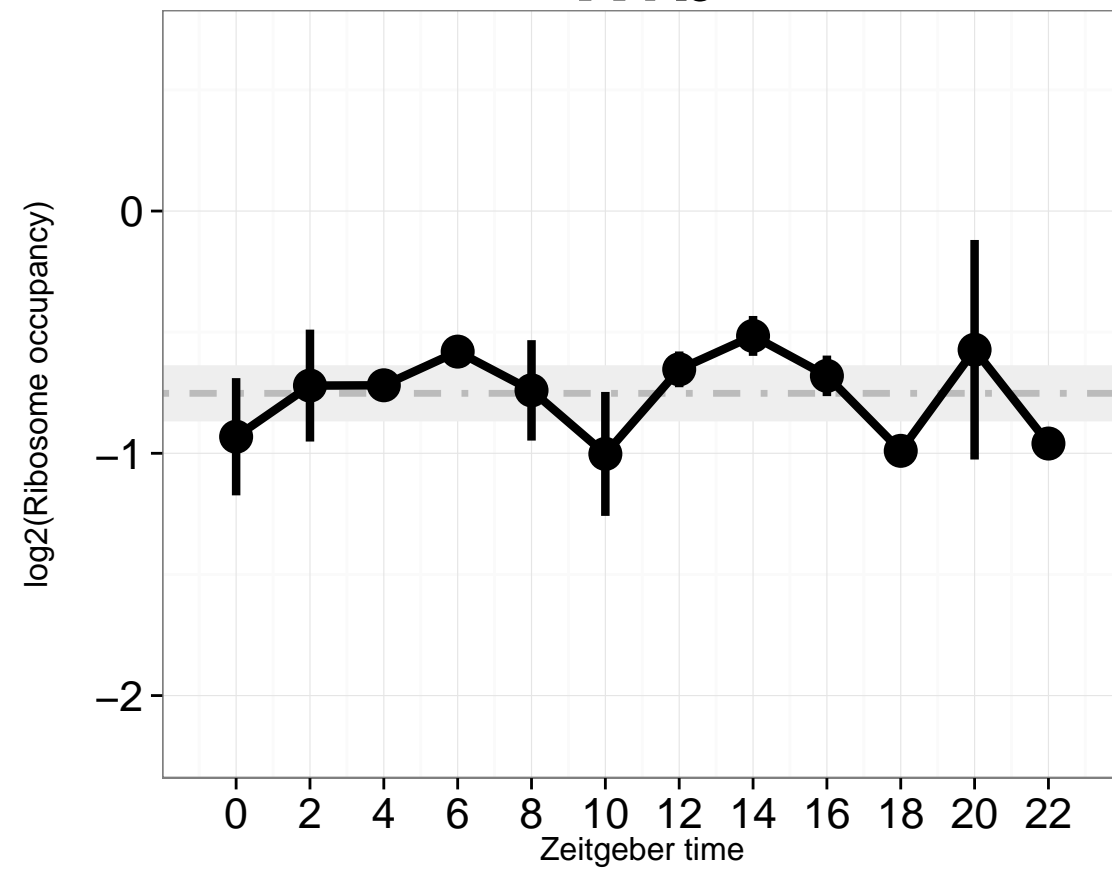

Supplement: Supplementary file 10850 [file 1]

# Lipt2

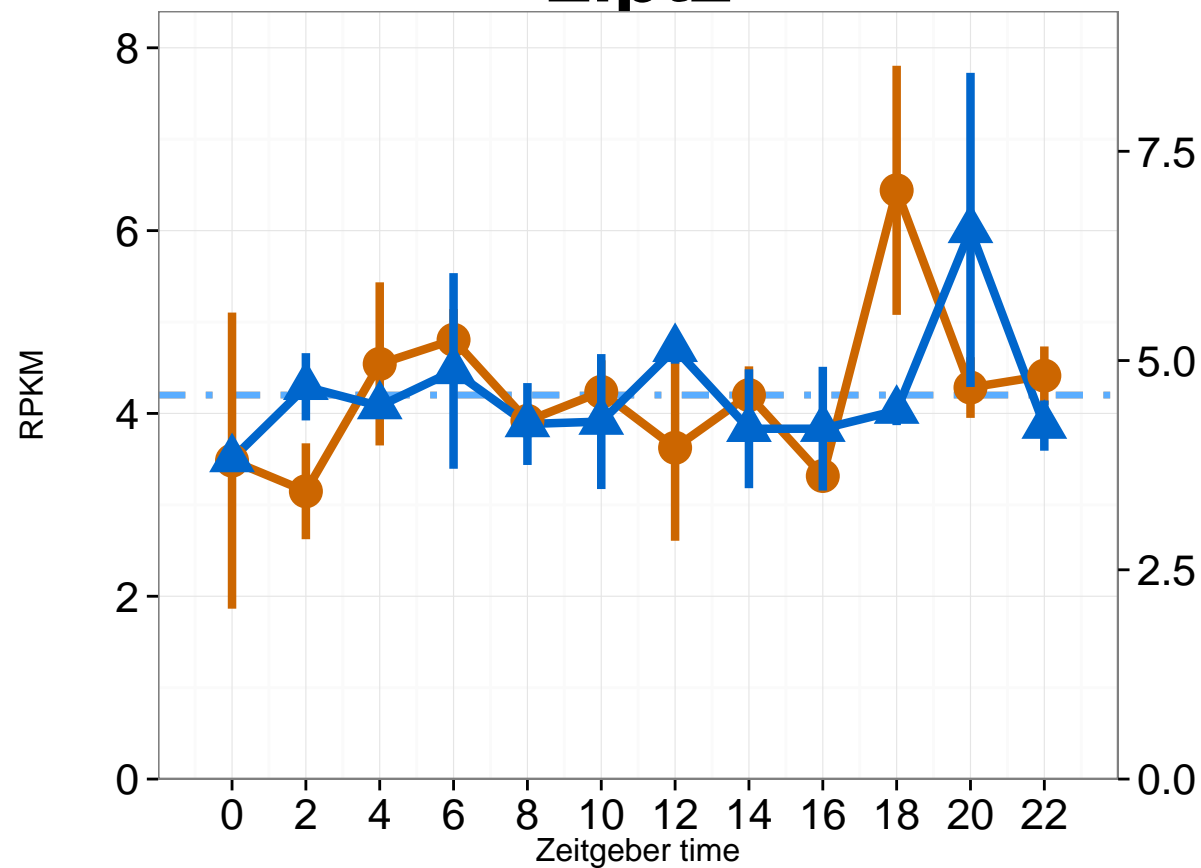

# Lipt2

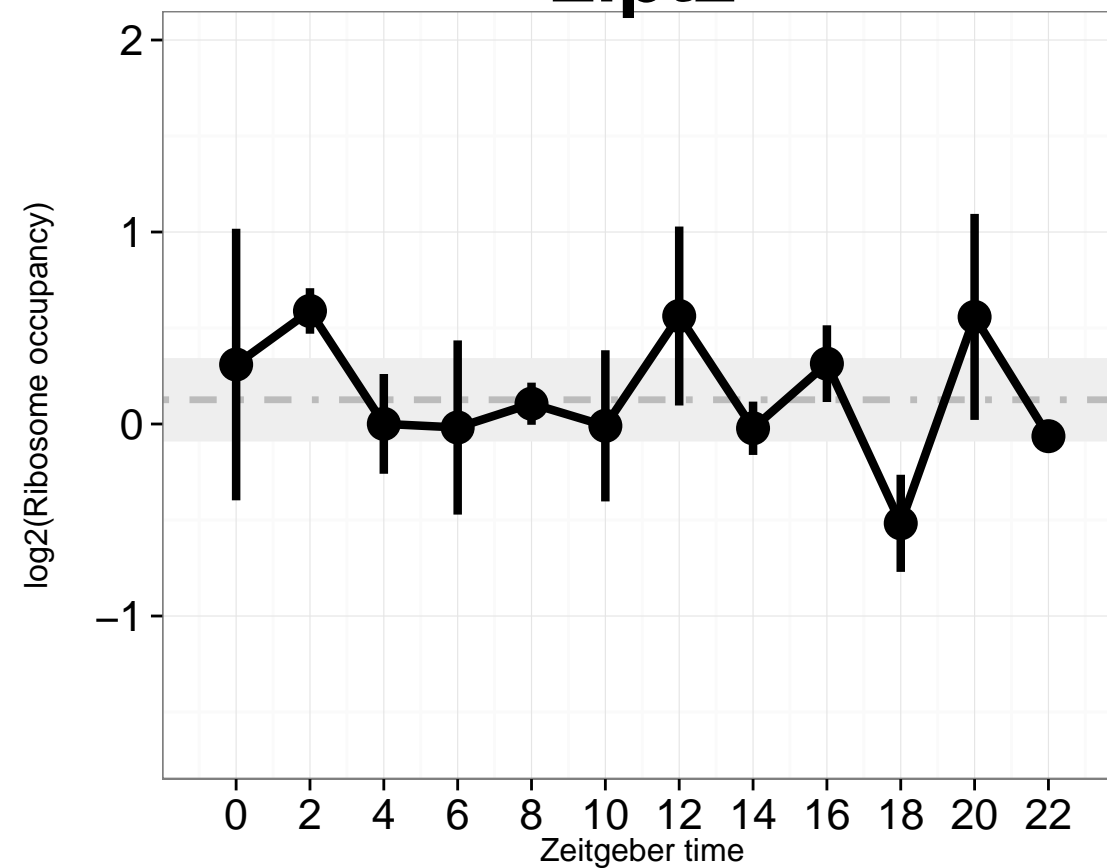

Supplement: Supplementary file 10851 [file 1]

## H2afy2

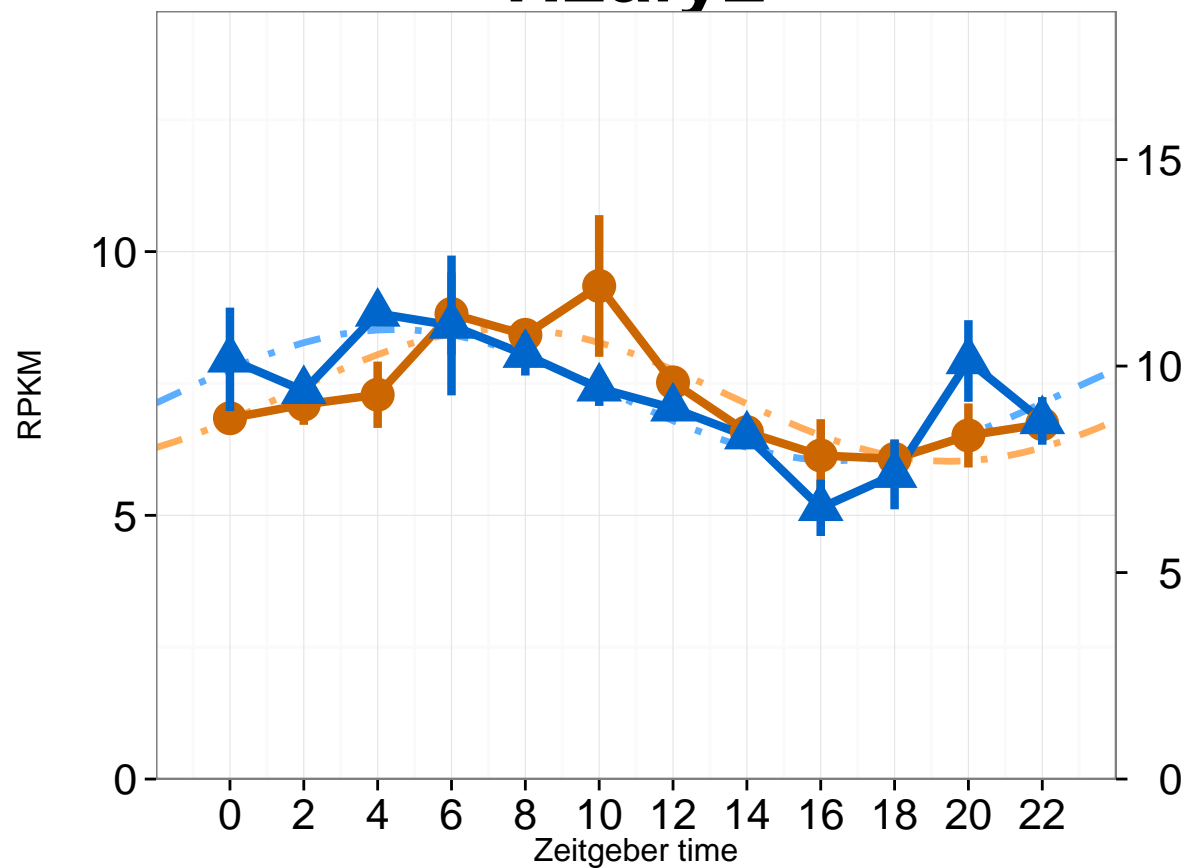

## H2afy2

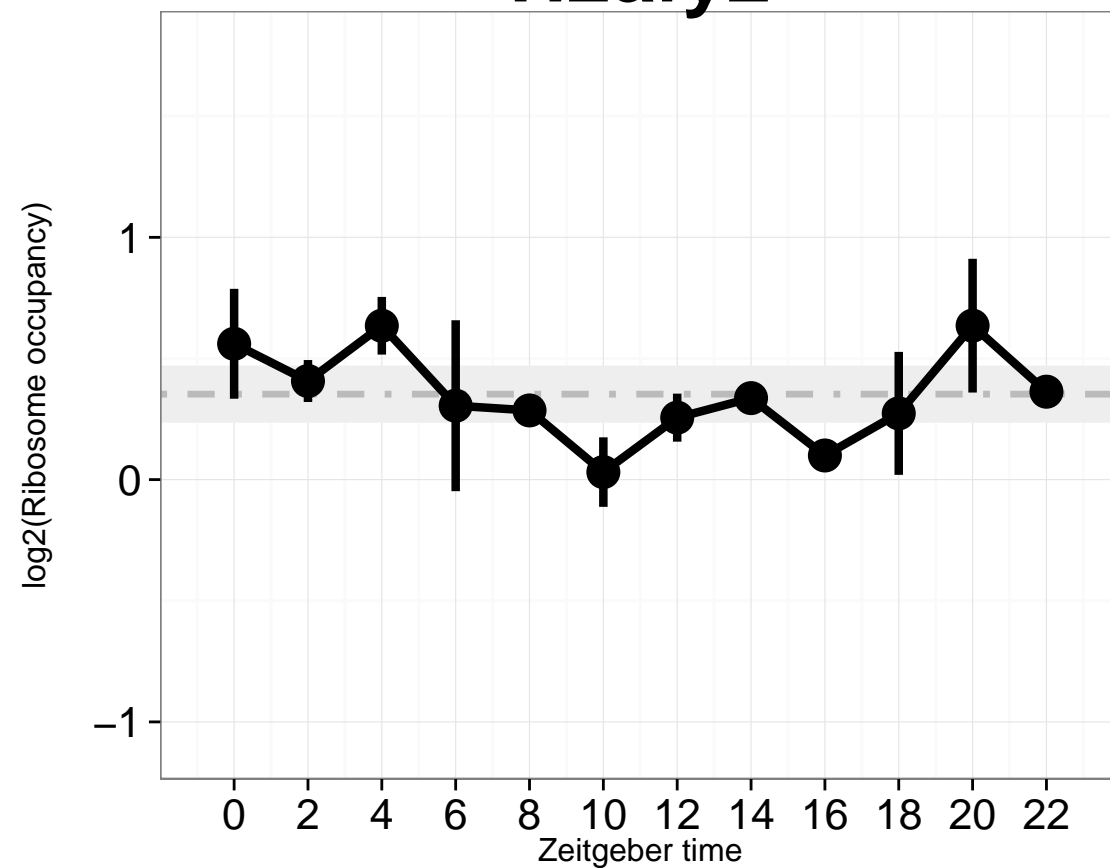

Supplement: Supplementary file 10852 [file 1]

# Cps1

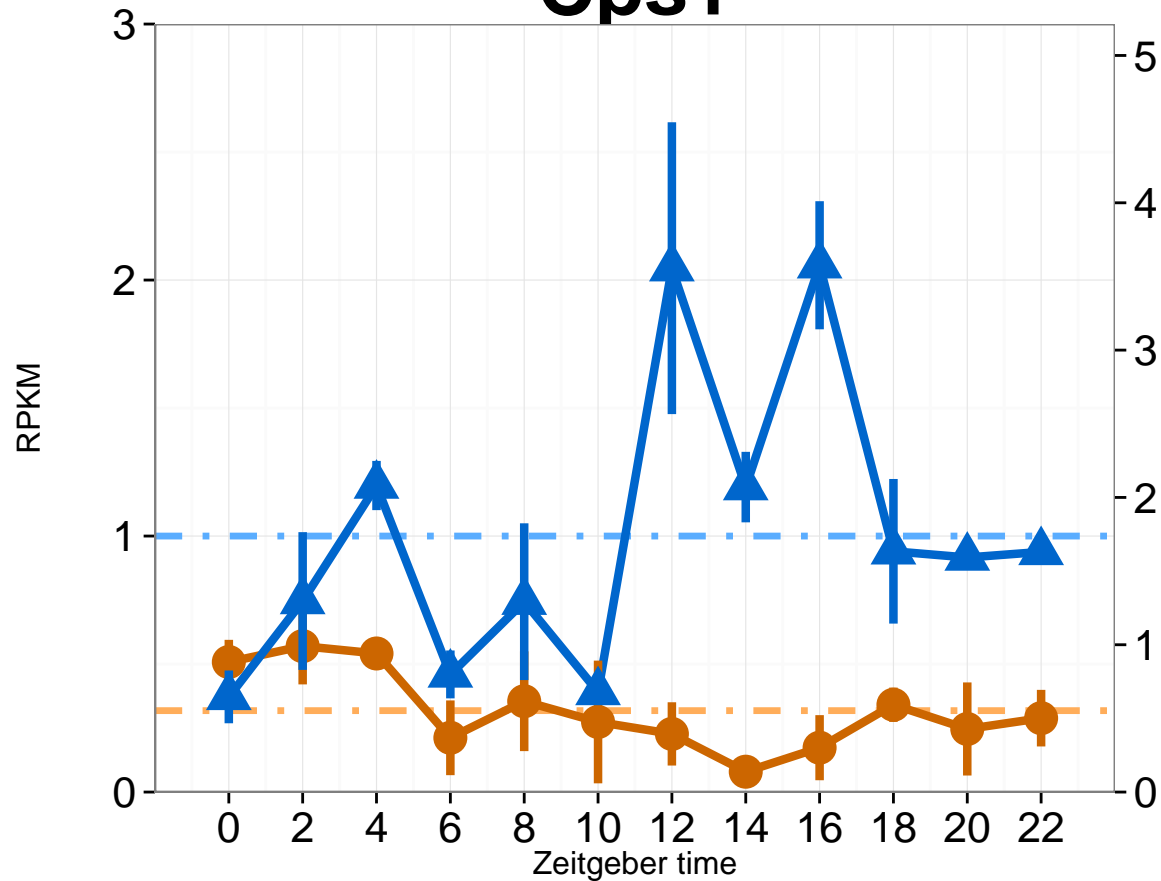

# Cps1

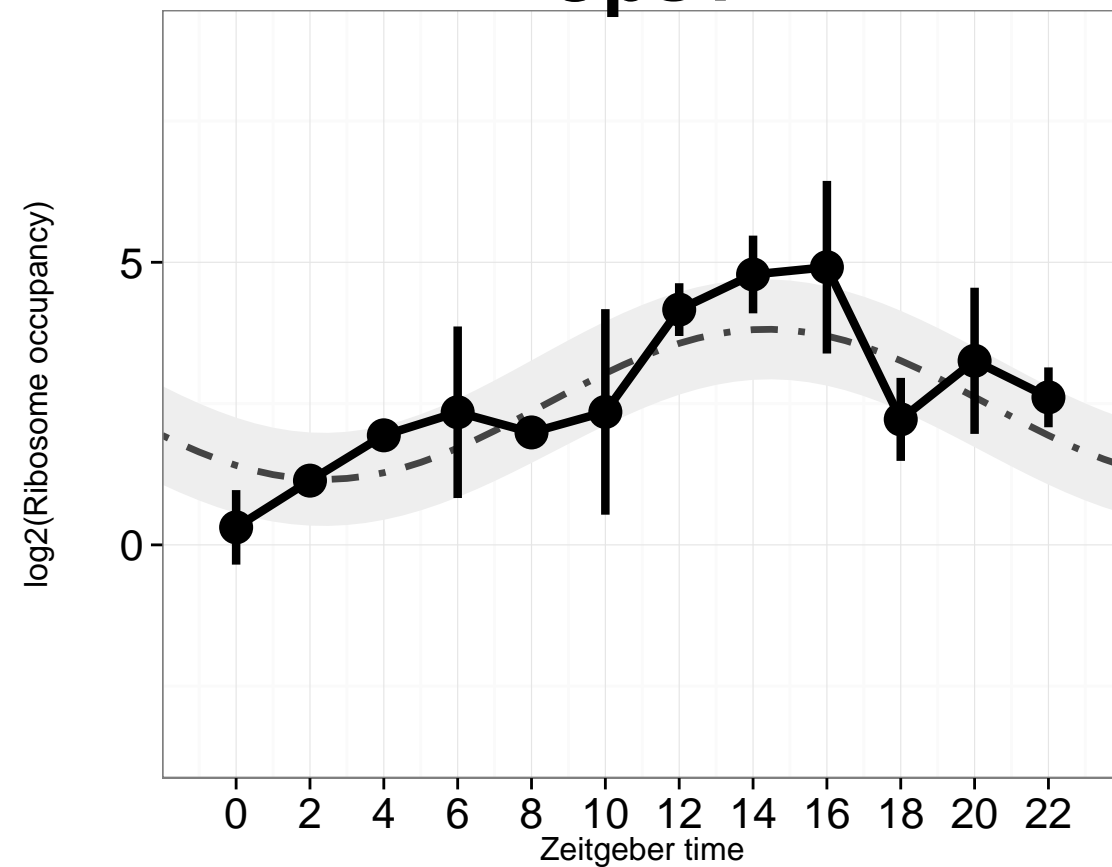

Supplement: Supplementary file 10853 [file 1]

## Tufm

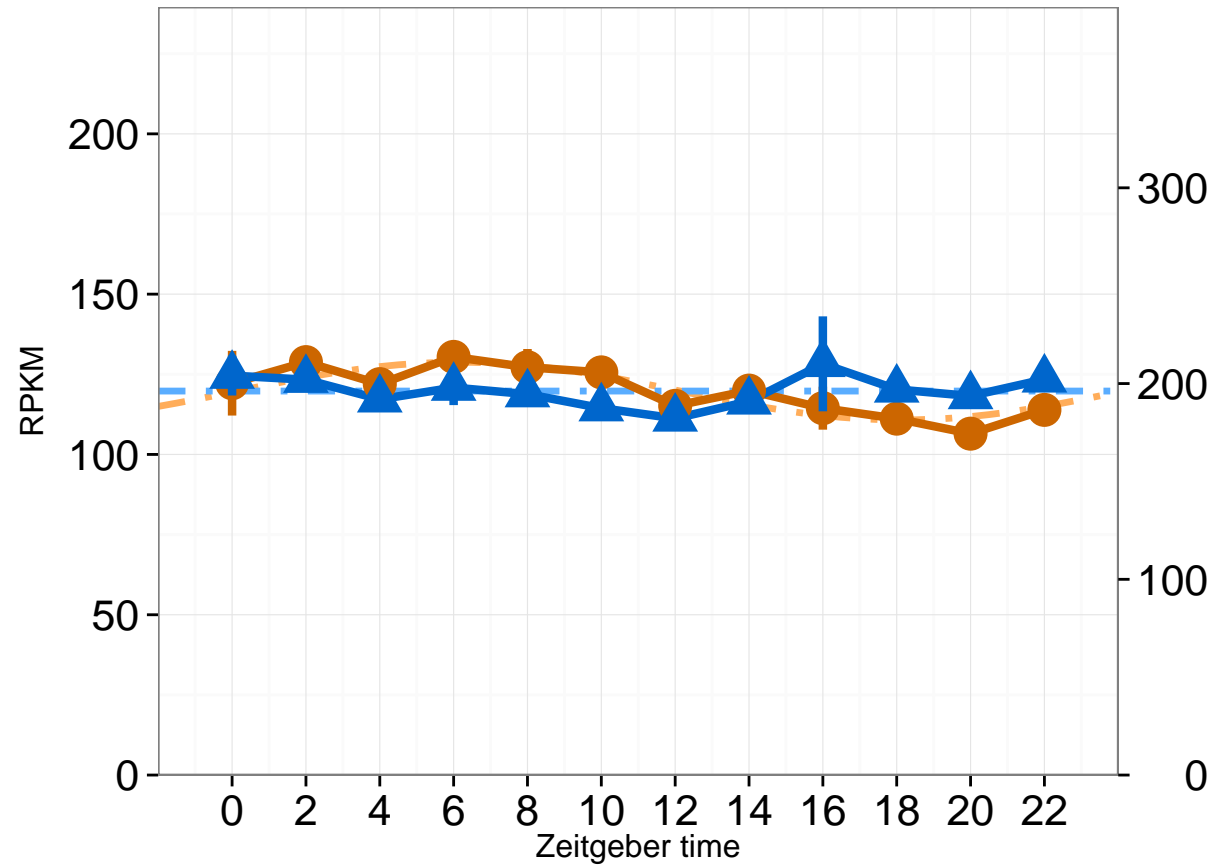

## Tufm

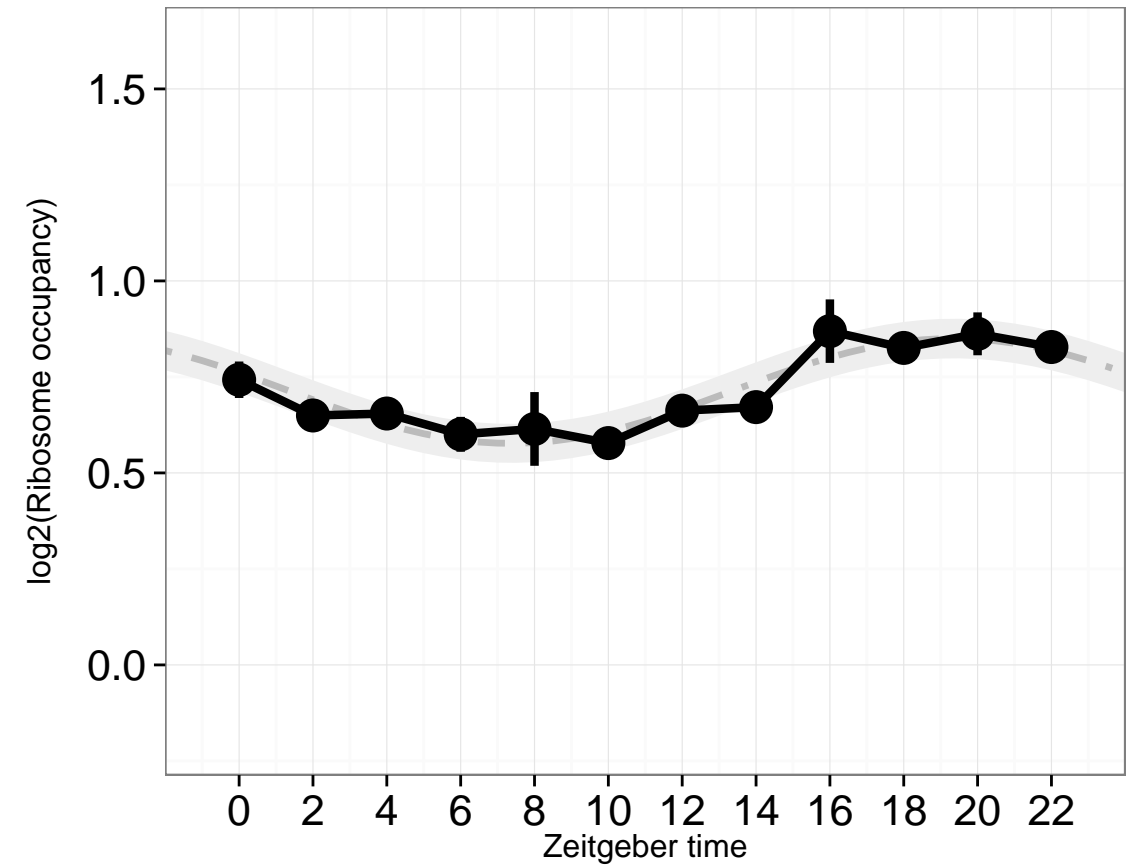

Supplement: Supplementary file 10854 [file 1]

# Atp6v1c2

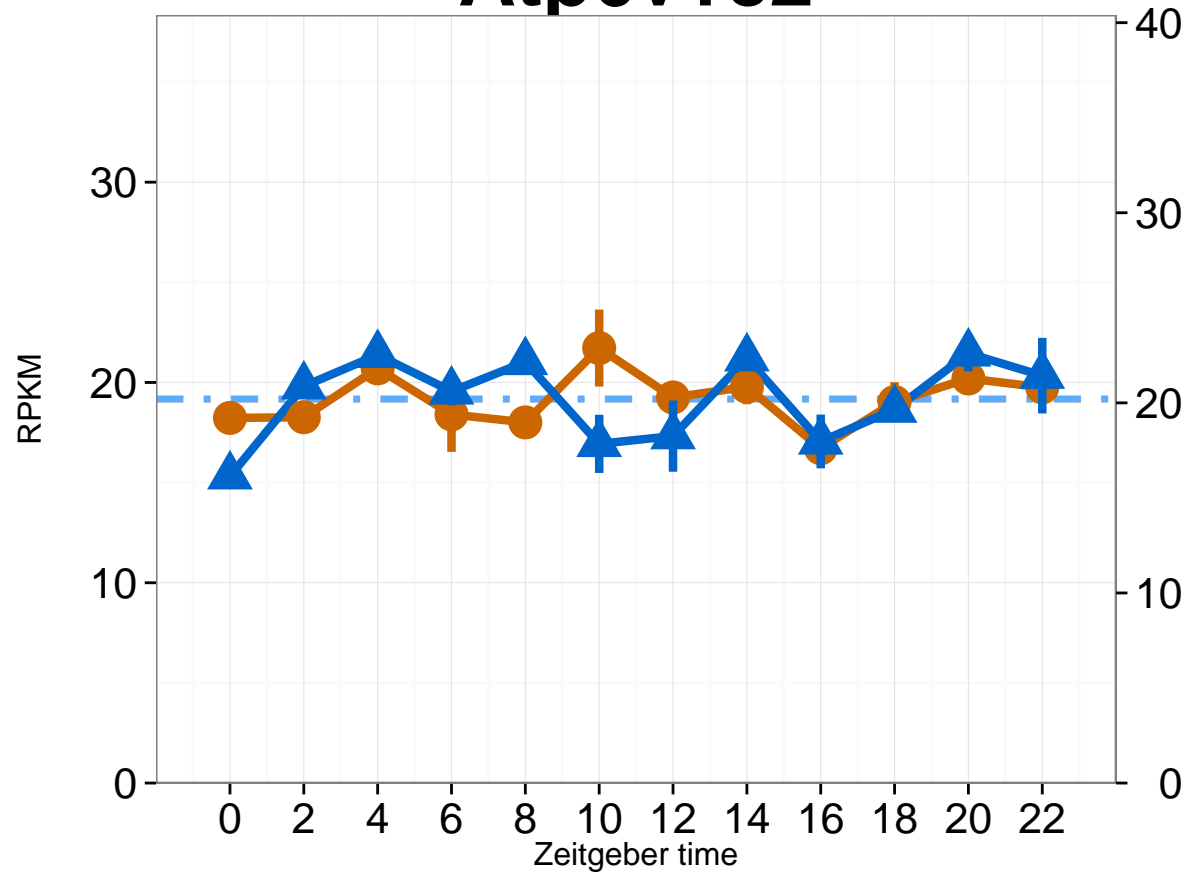

# Atp6v1c2

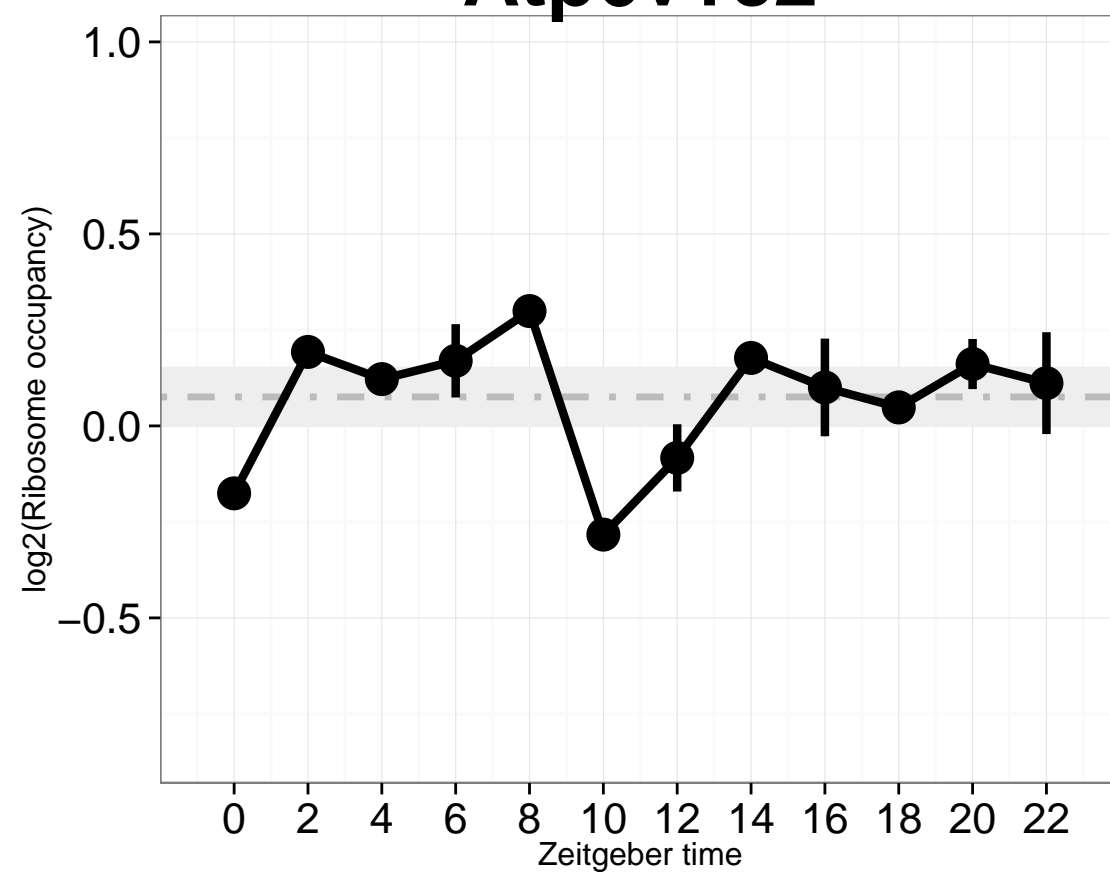

Supplement: Supplementary file 10855 [file 1]

# Srgap1

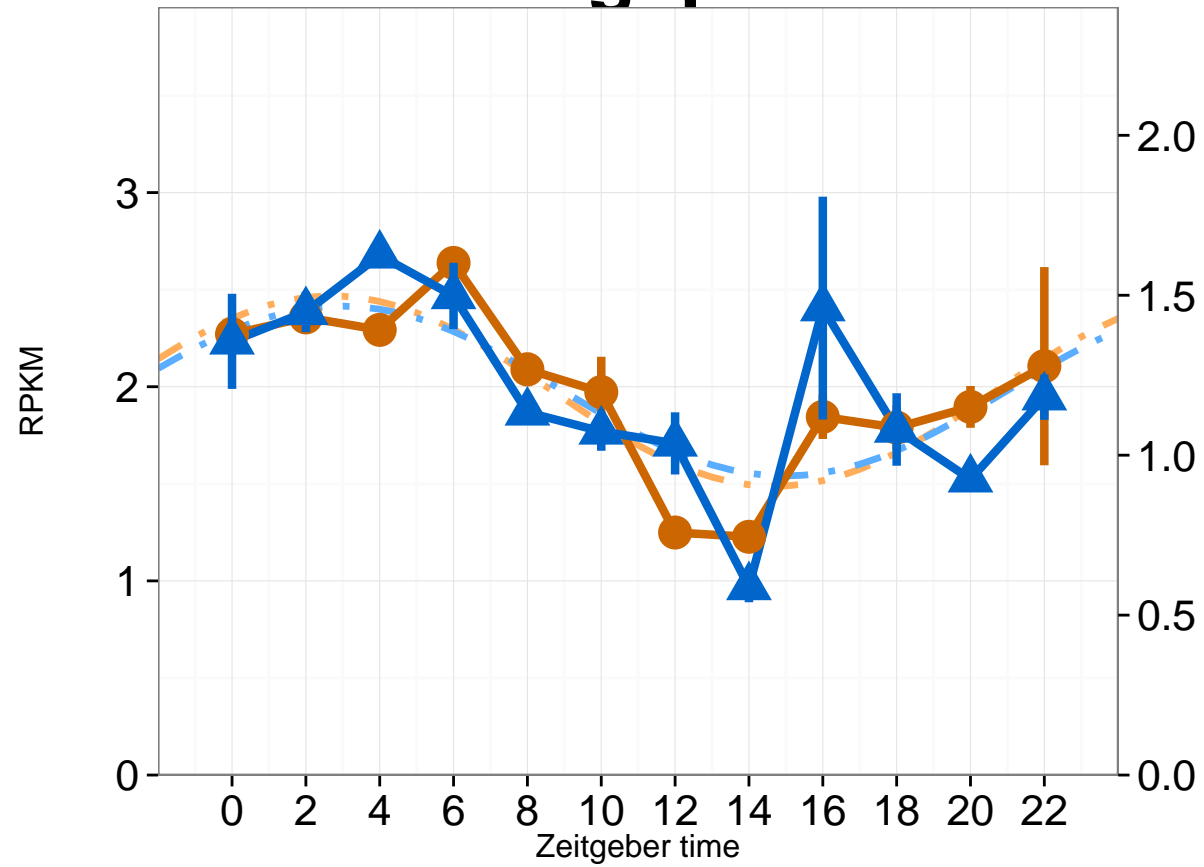

# Srgap1

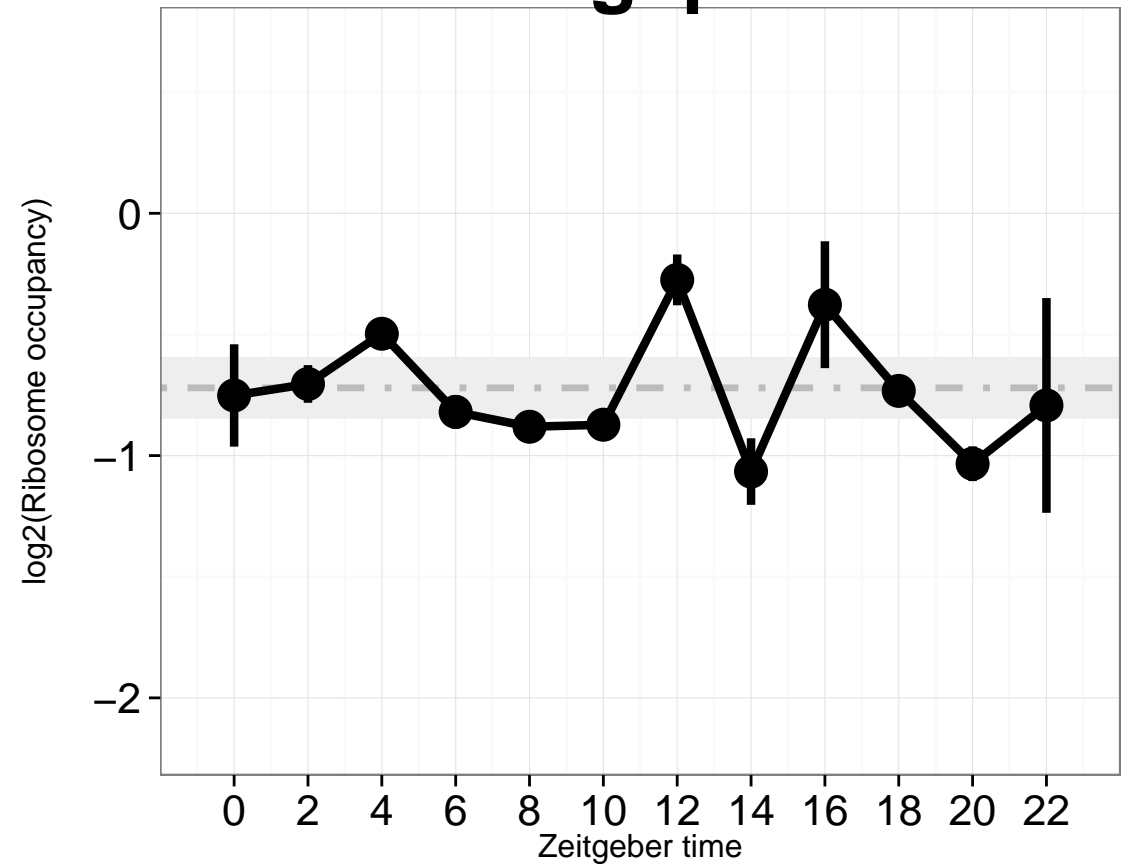

Supplement: Supplementary file 10856 [file 1]

## Srpr

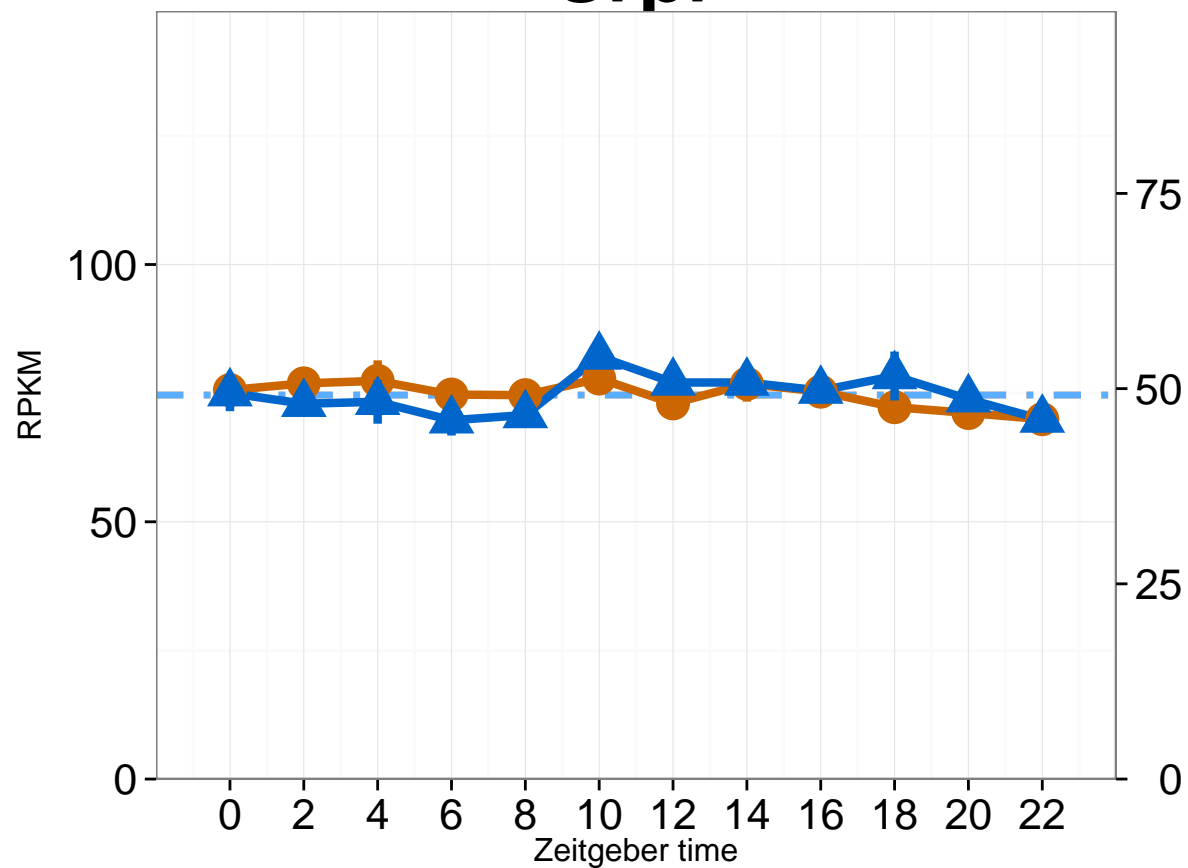

## Srpr

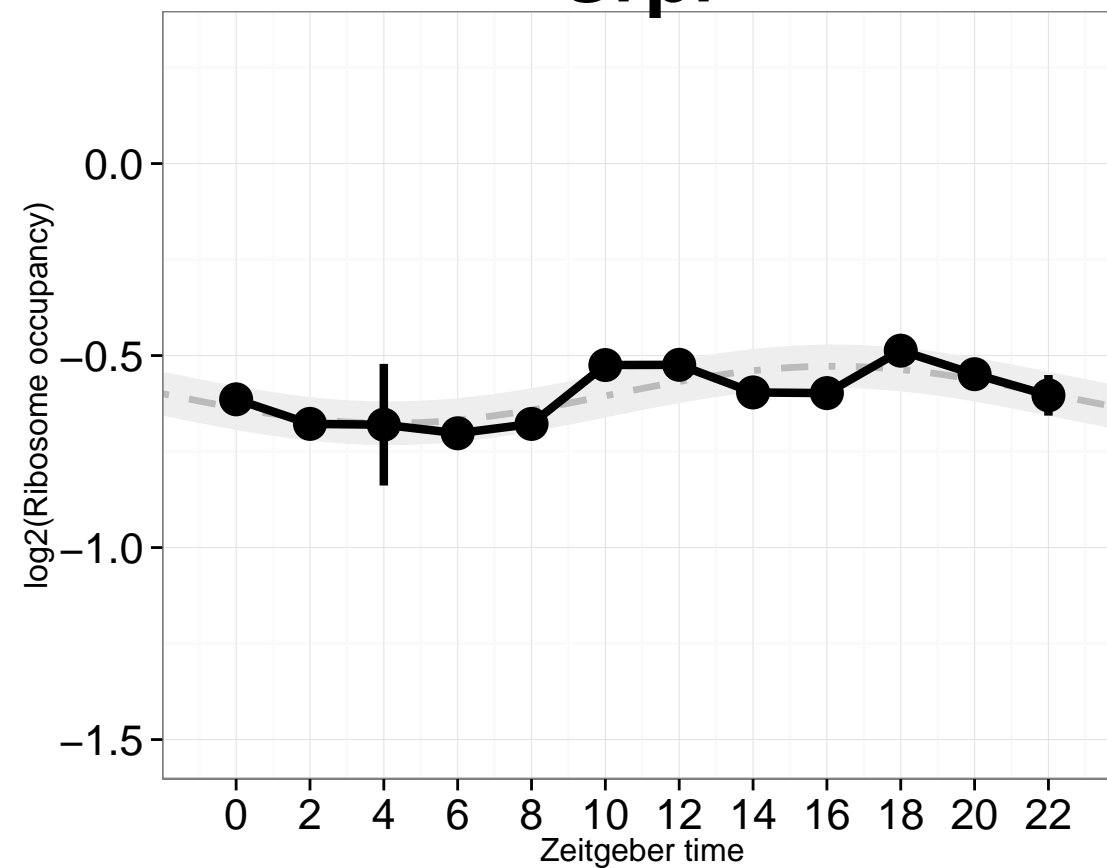

Supplement: Supplementary file 10857 [file 1]

# Hist1h1a

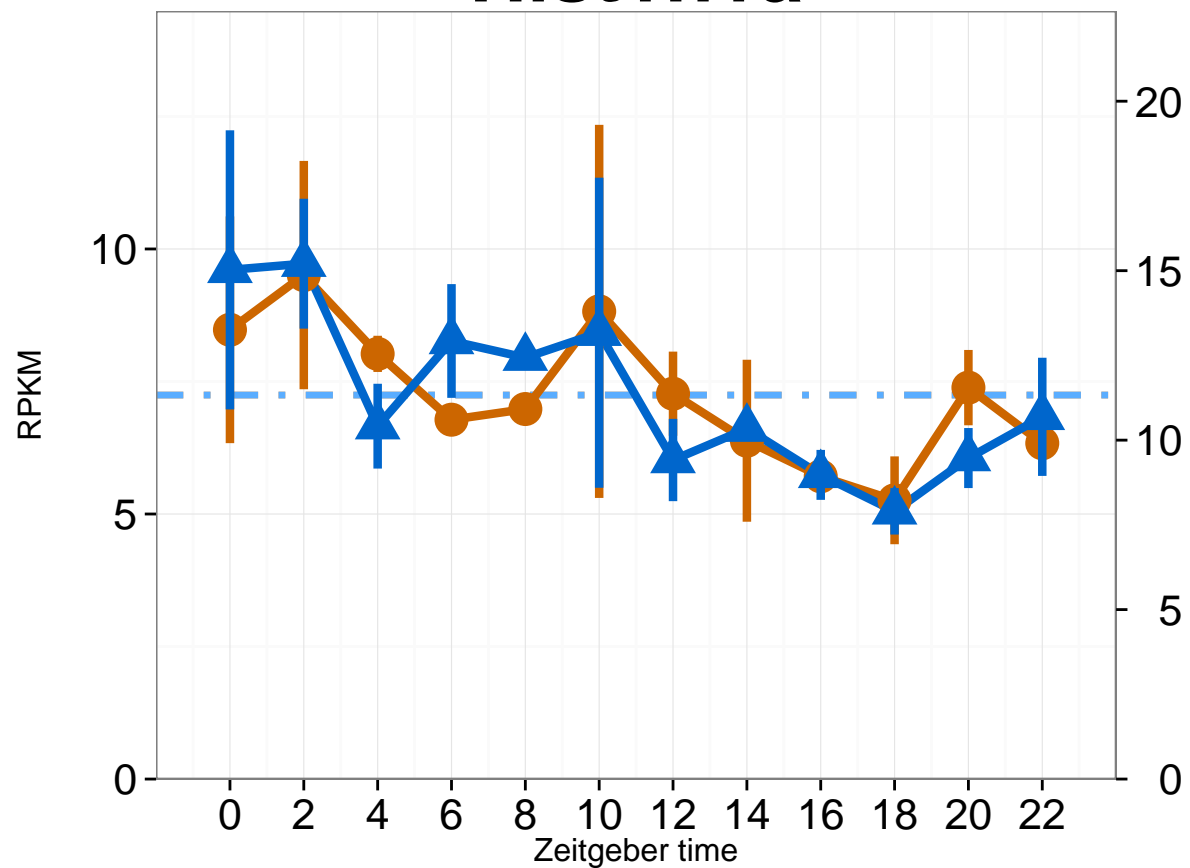

# Hist1h1a

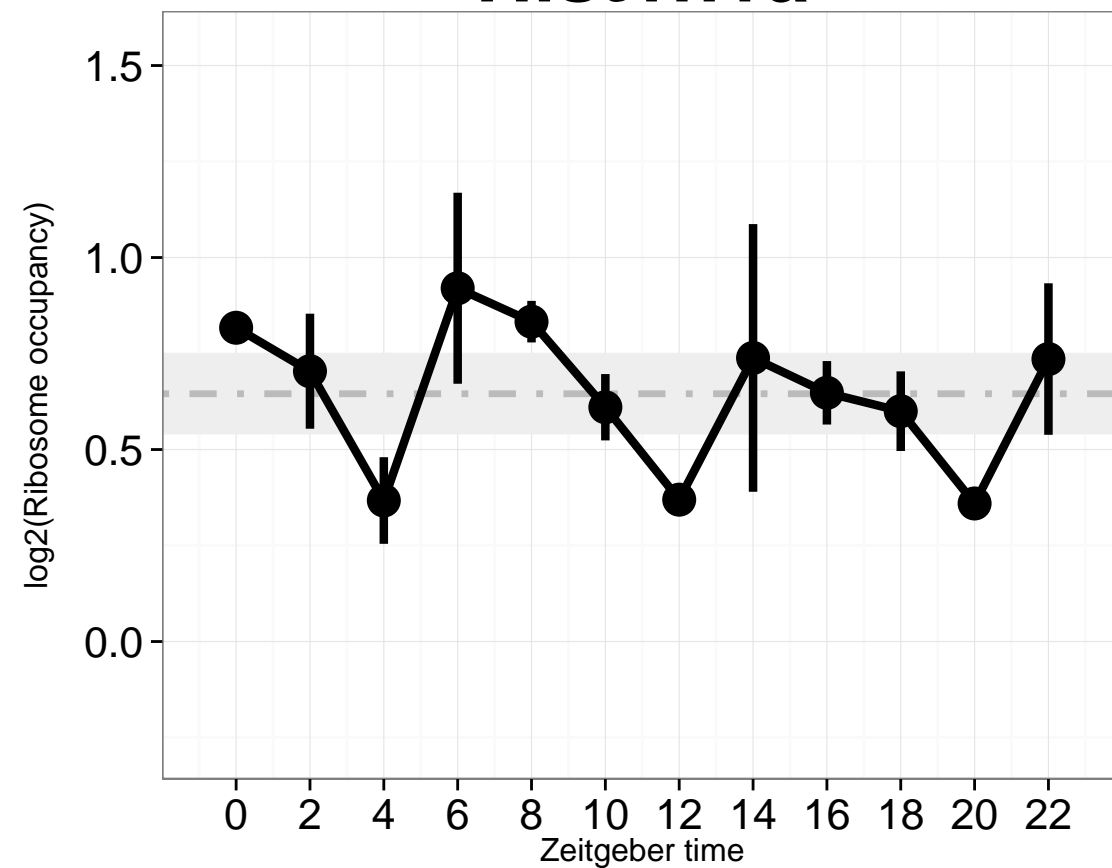

Supplement: Supplementary file 10858 [file 1]

# Ube2q2

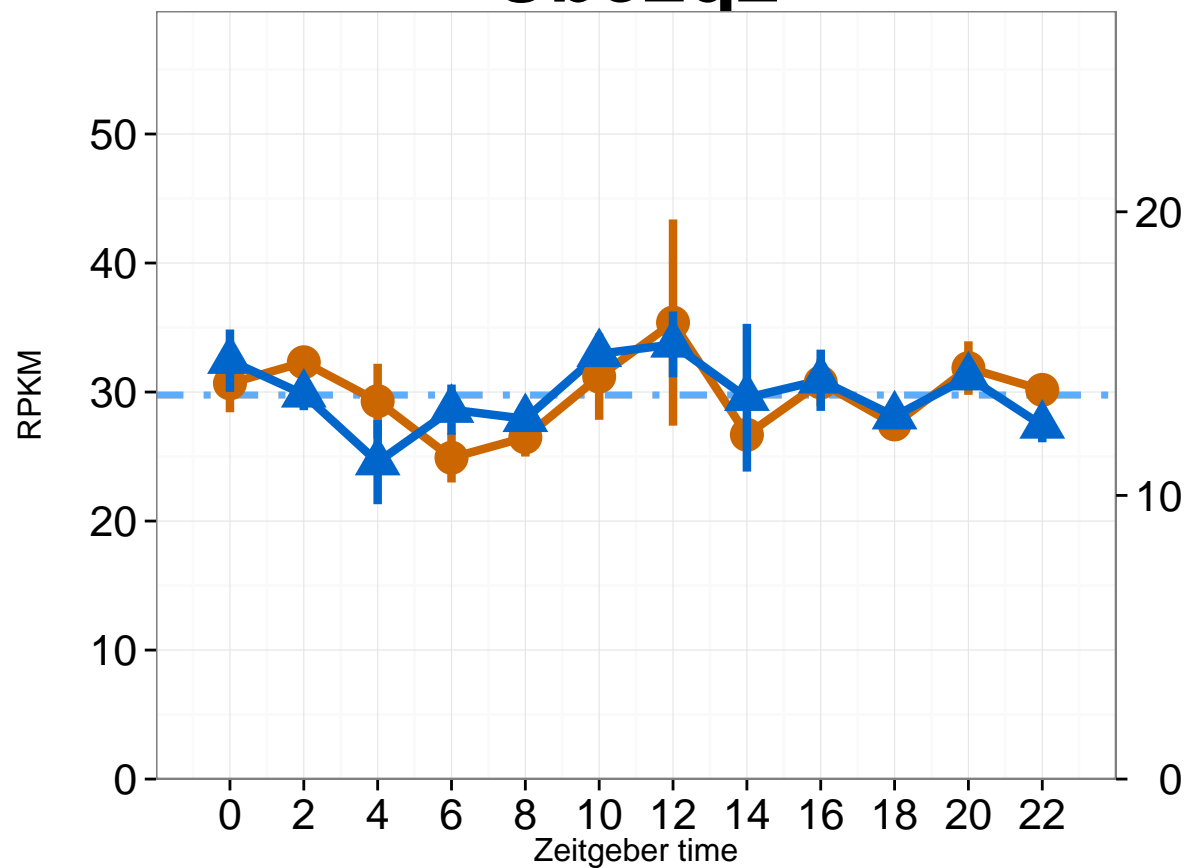

# Ube2q2

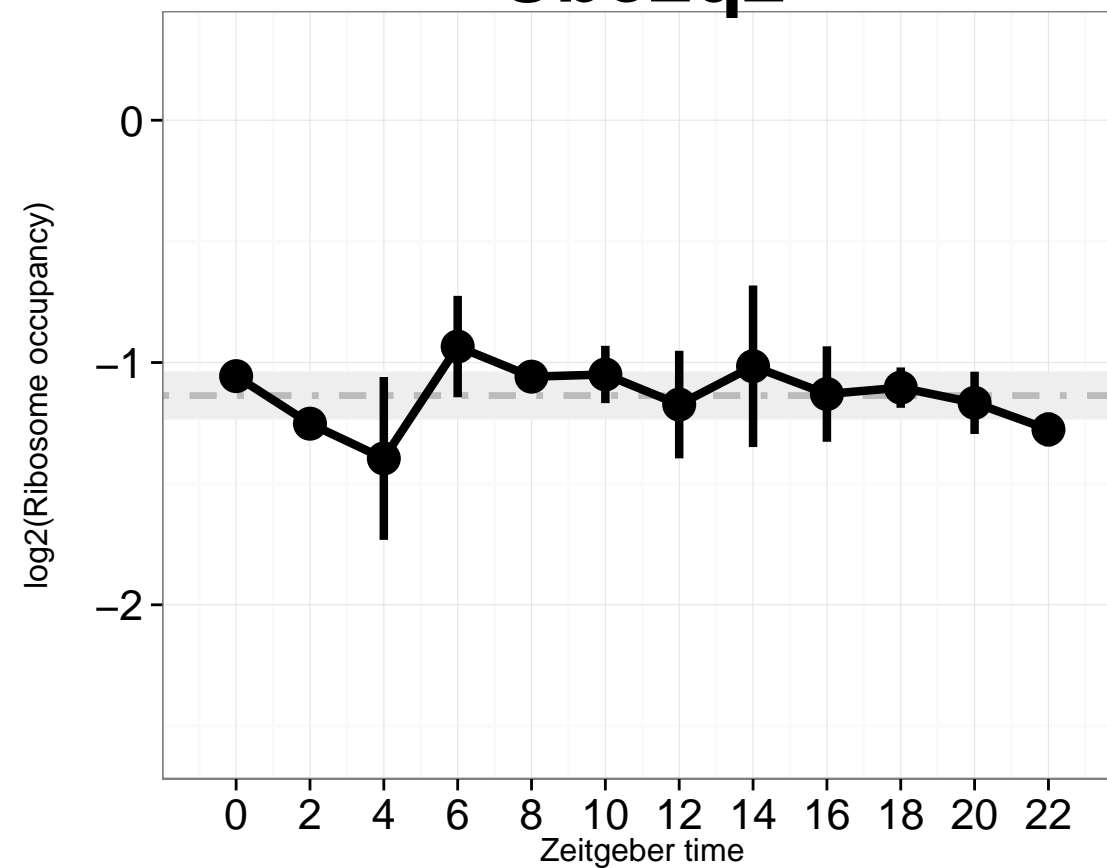

Supplement: Supplementary file 10859 [file 1]

## Hmgcll1

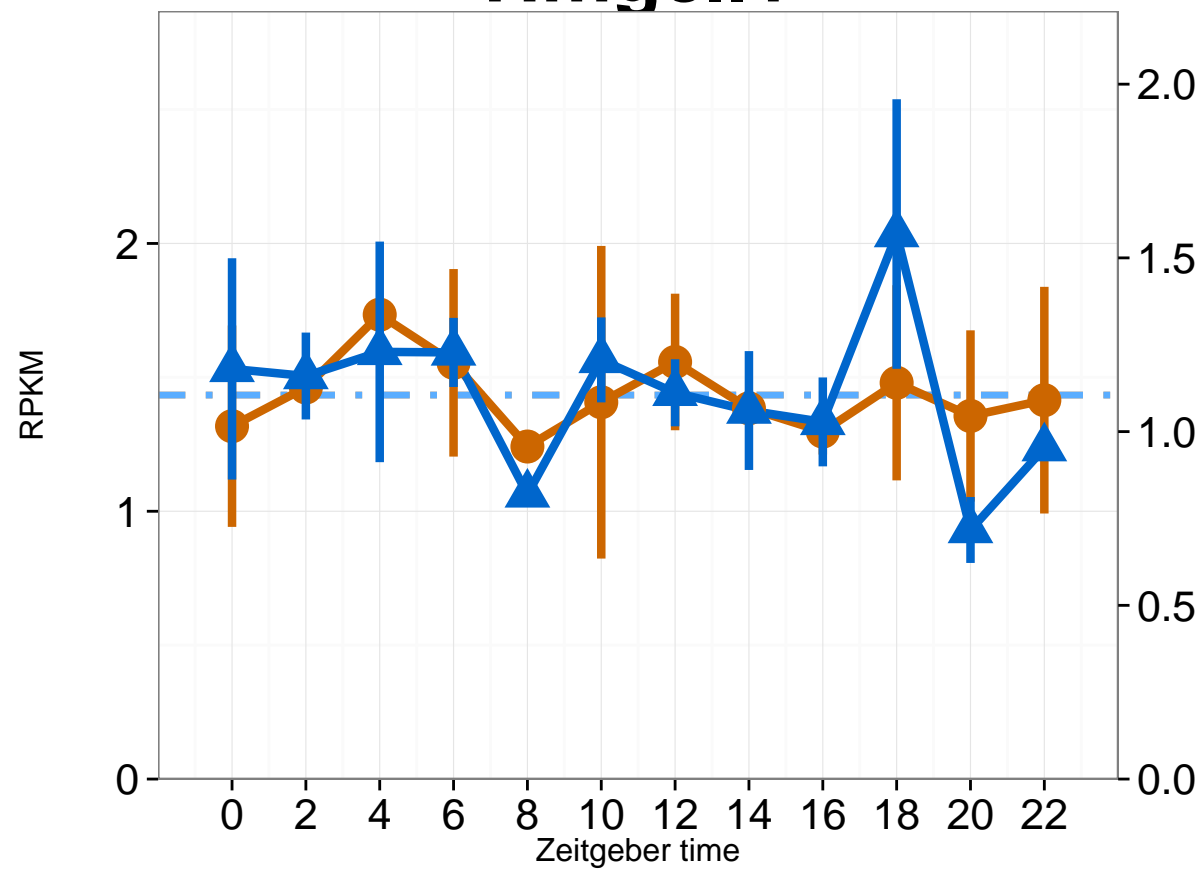

## Hmgcll1

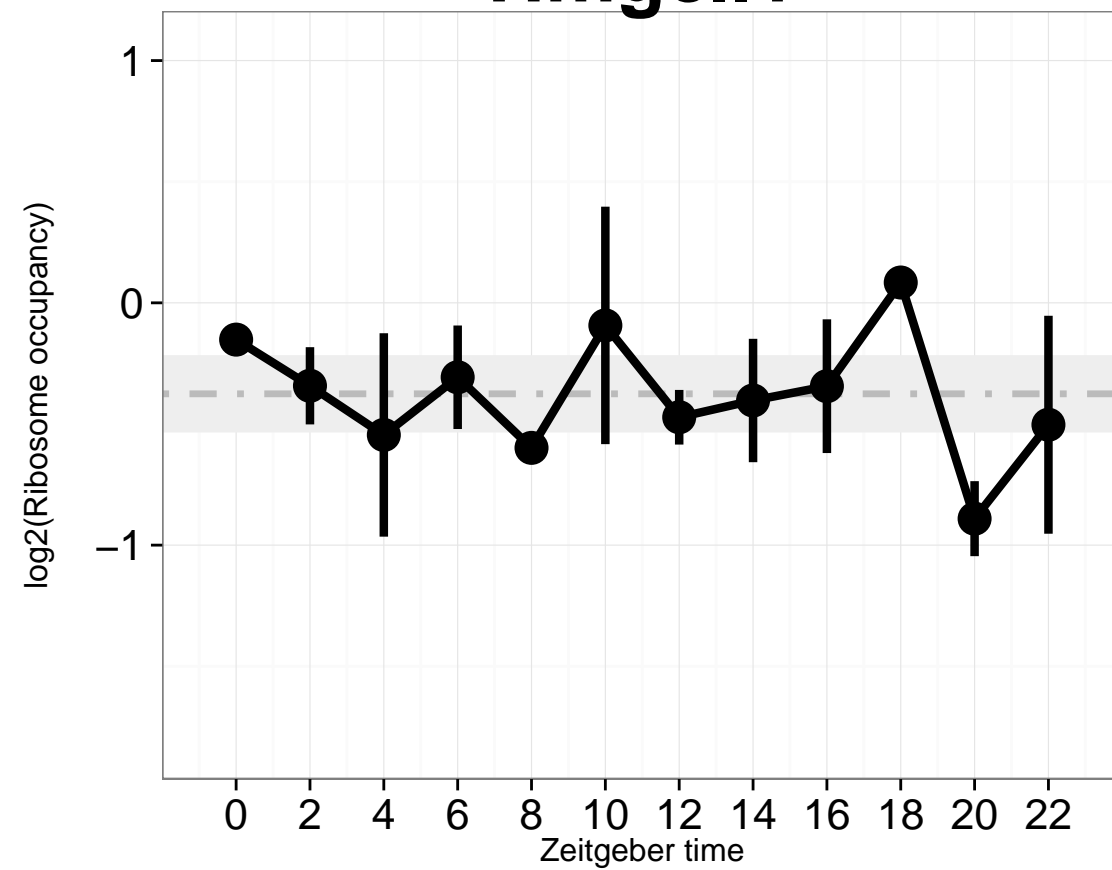

Supplement: Supplementary file 10860 [file 1]

## Dis3l

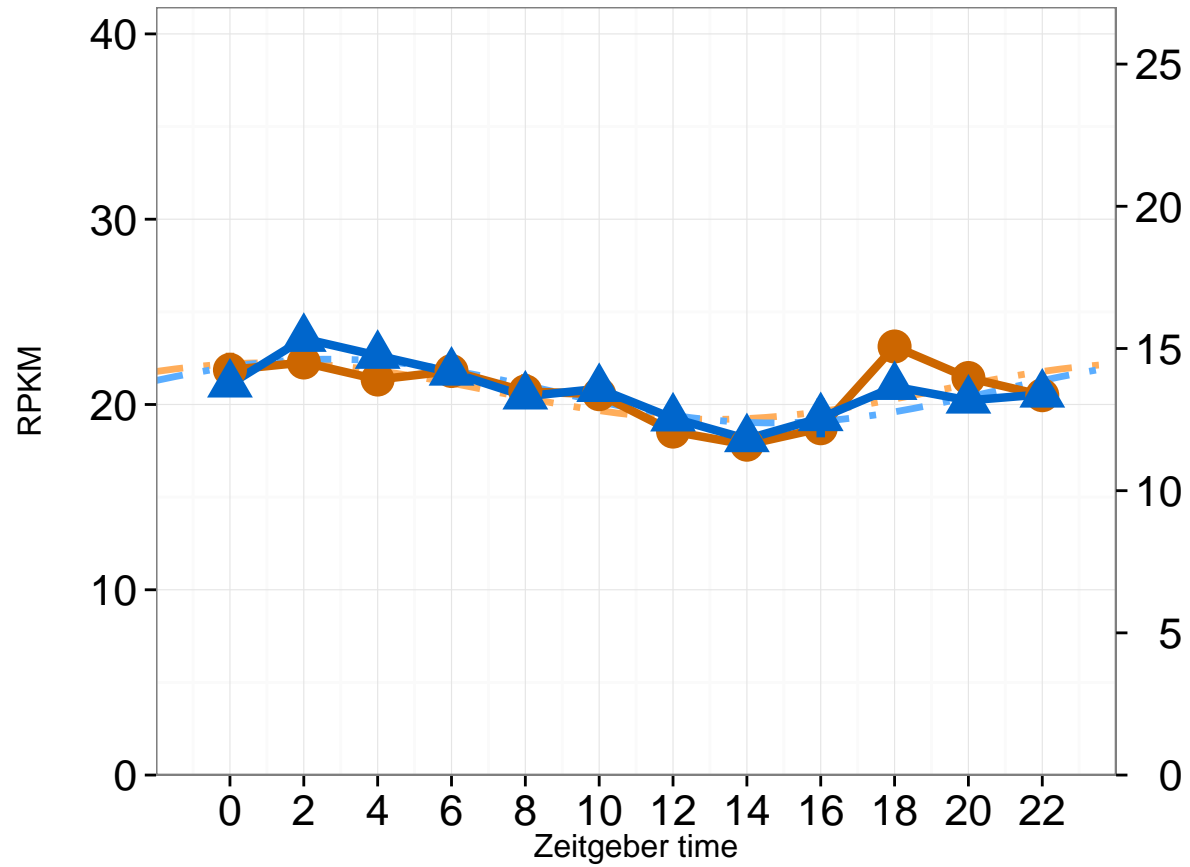

## Dis3l

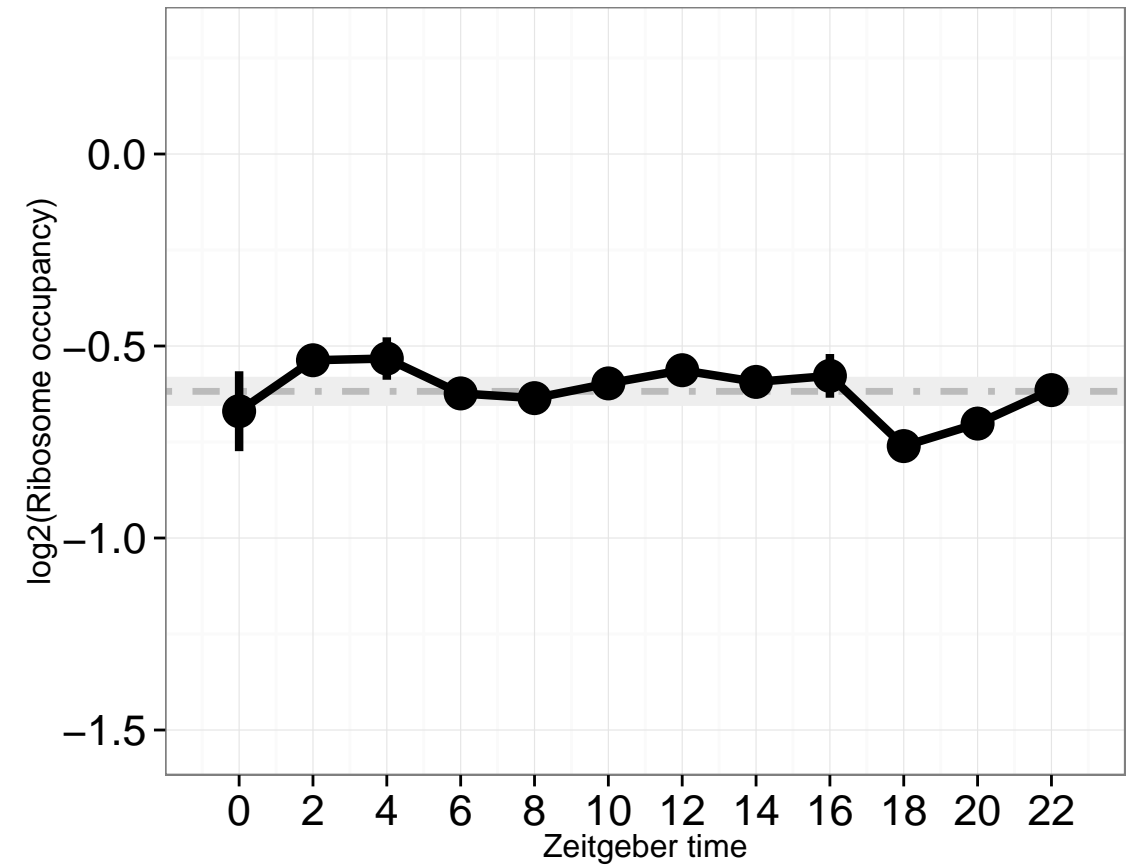

Supplement: Supplementary file 10861 [file 1]

## Nuf2

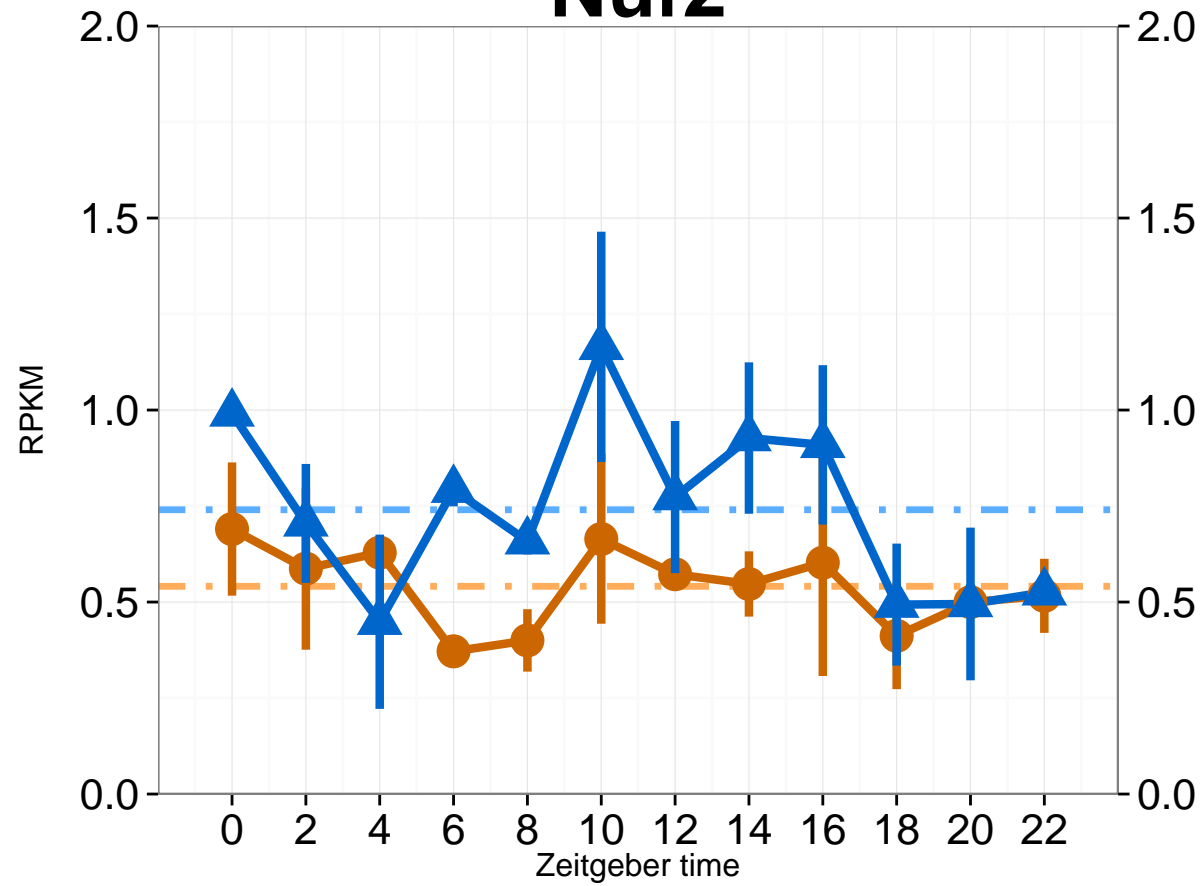

## Nuf2

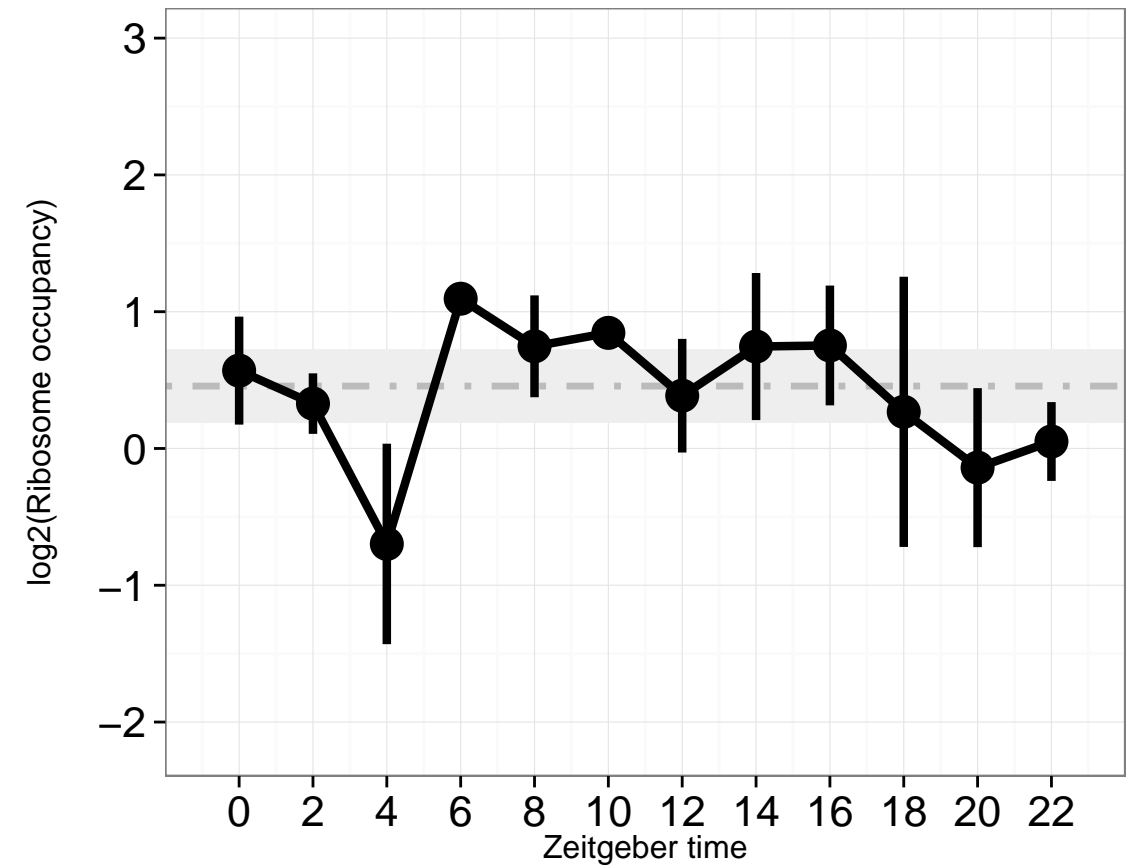

Supplement: Supplementary file 10862 [file 1]

# Reep5

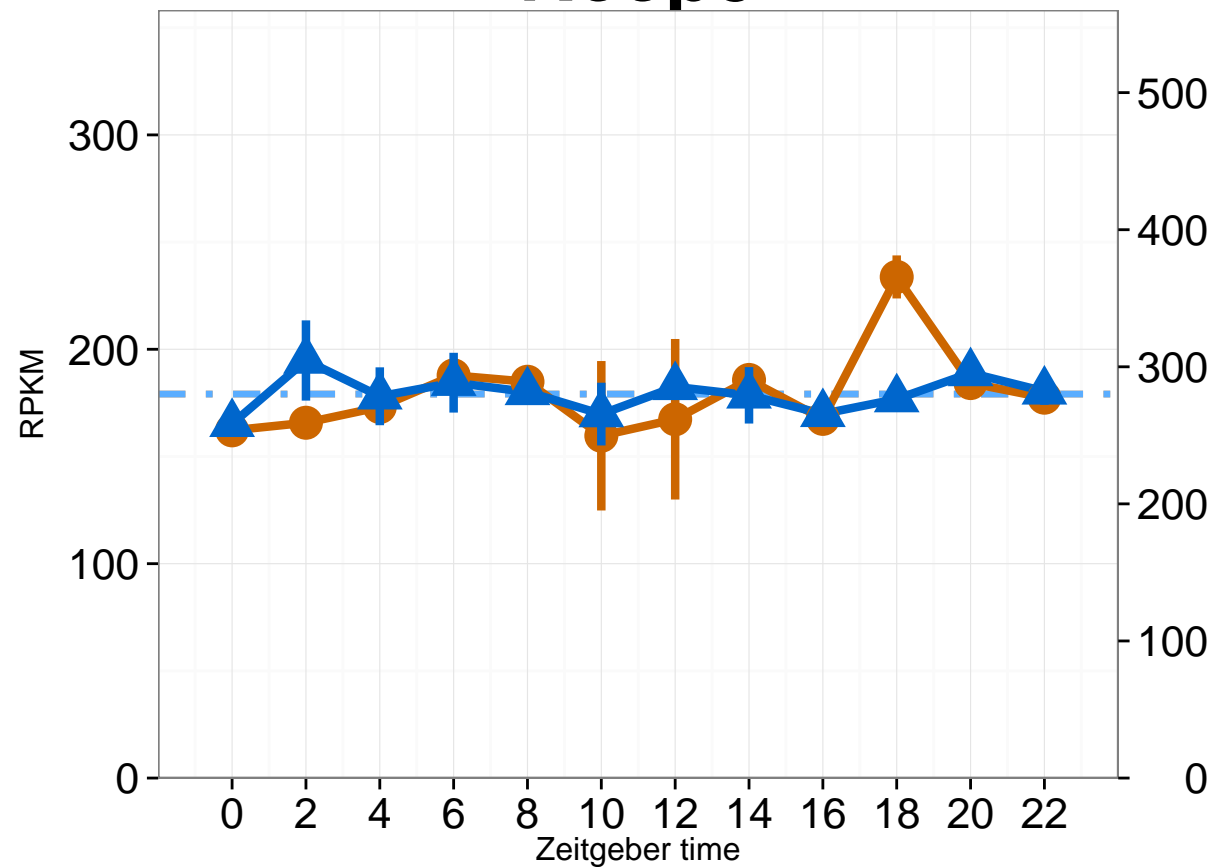

# Reep5

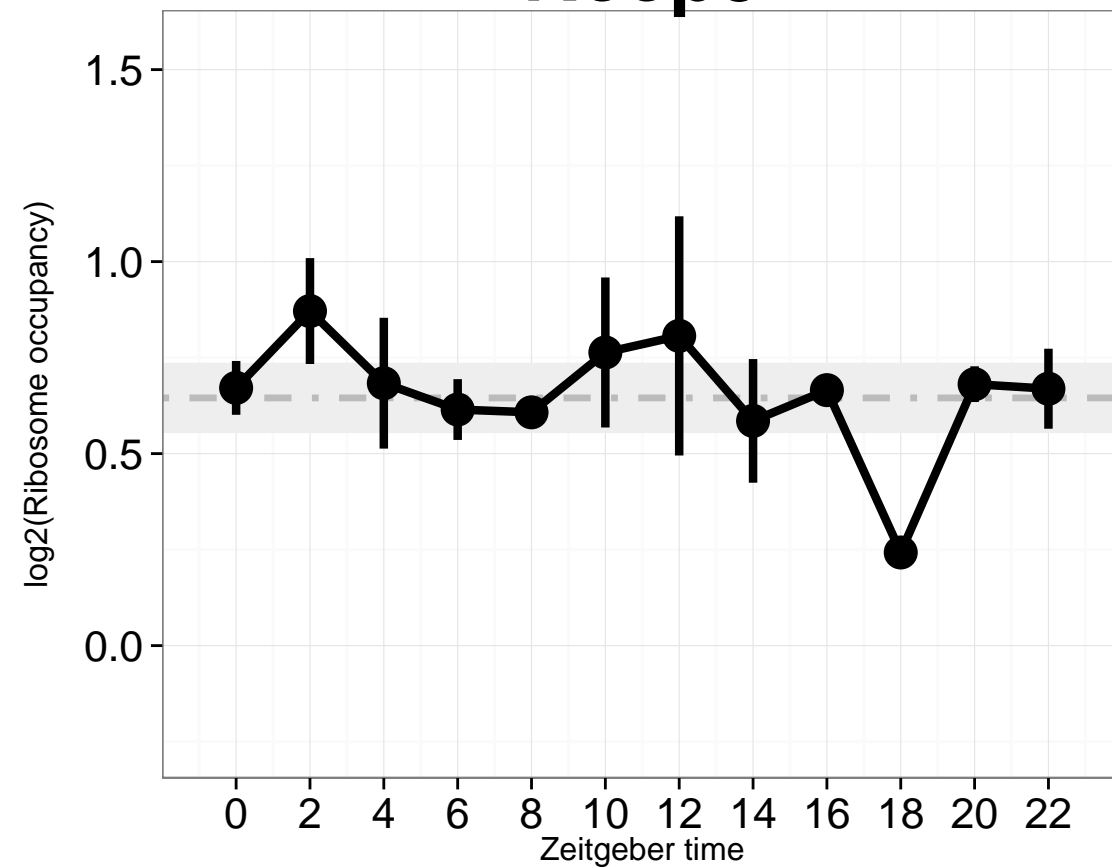

Supplement: Supplementary file 10863 [file 1]

# Lrrc8b

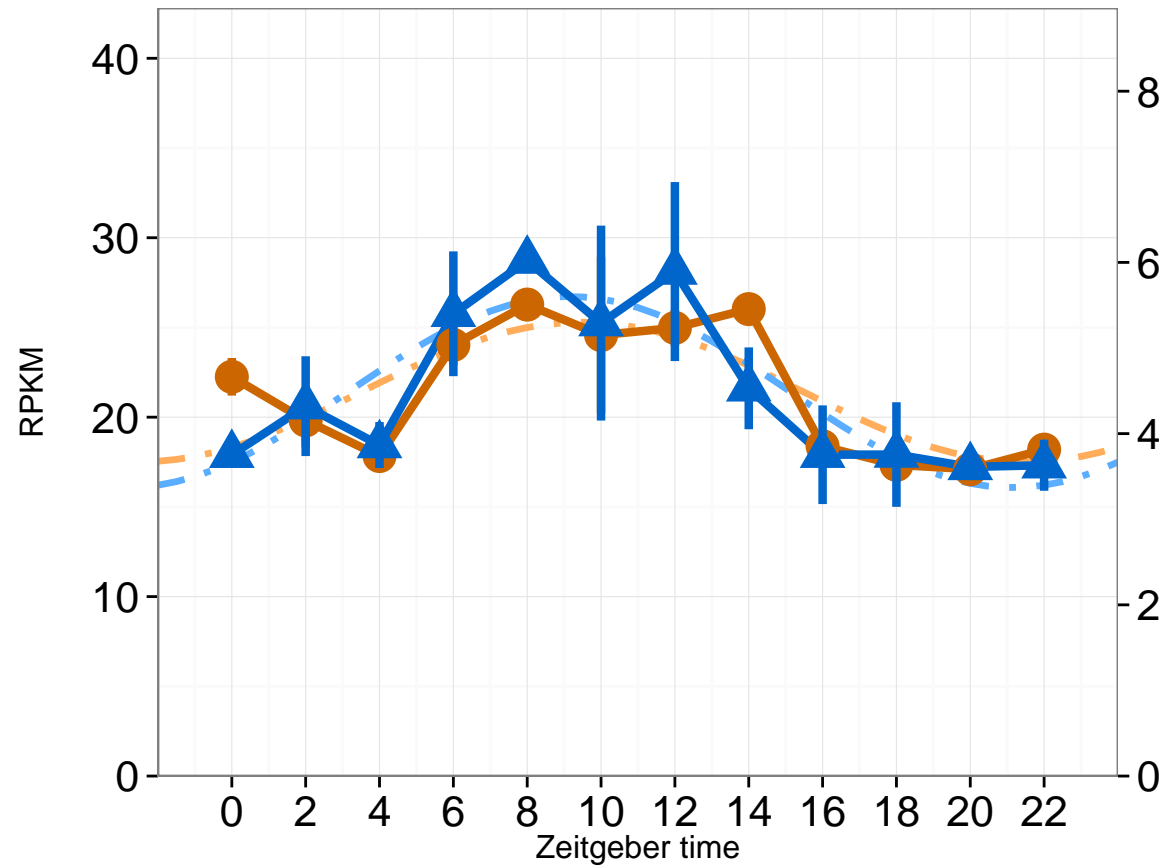

# Lrrc8b

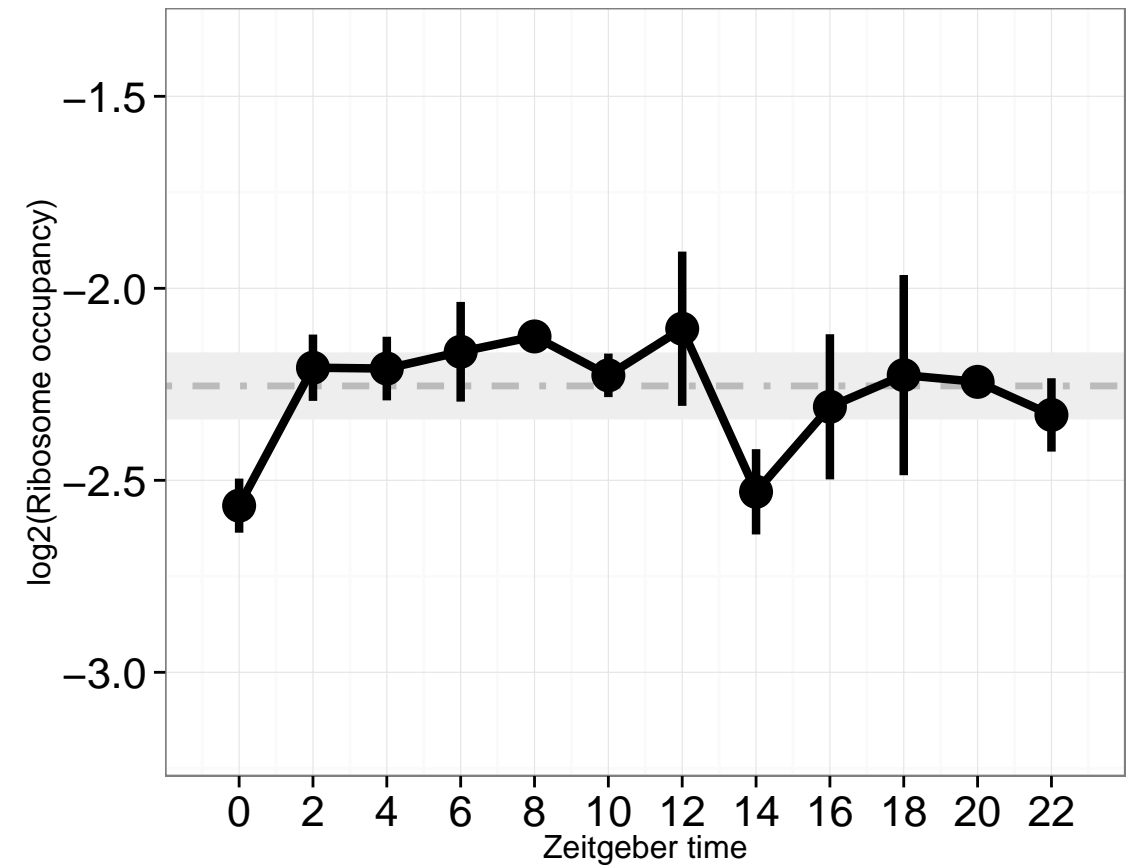

Supplement: Supplementary file 10864 [file 1]

# Apoa4

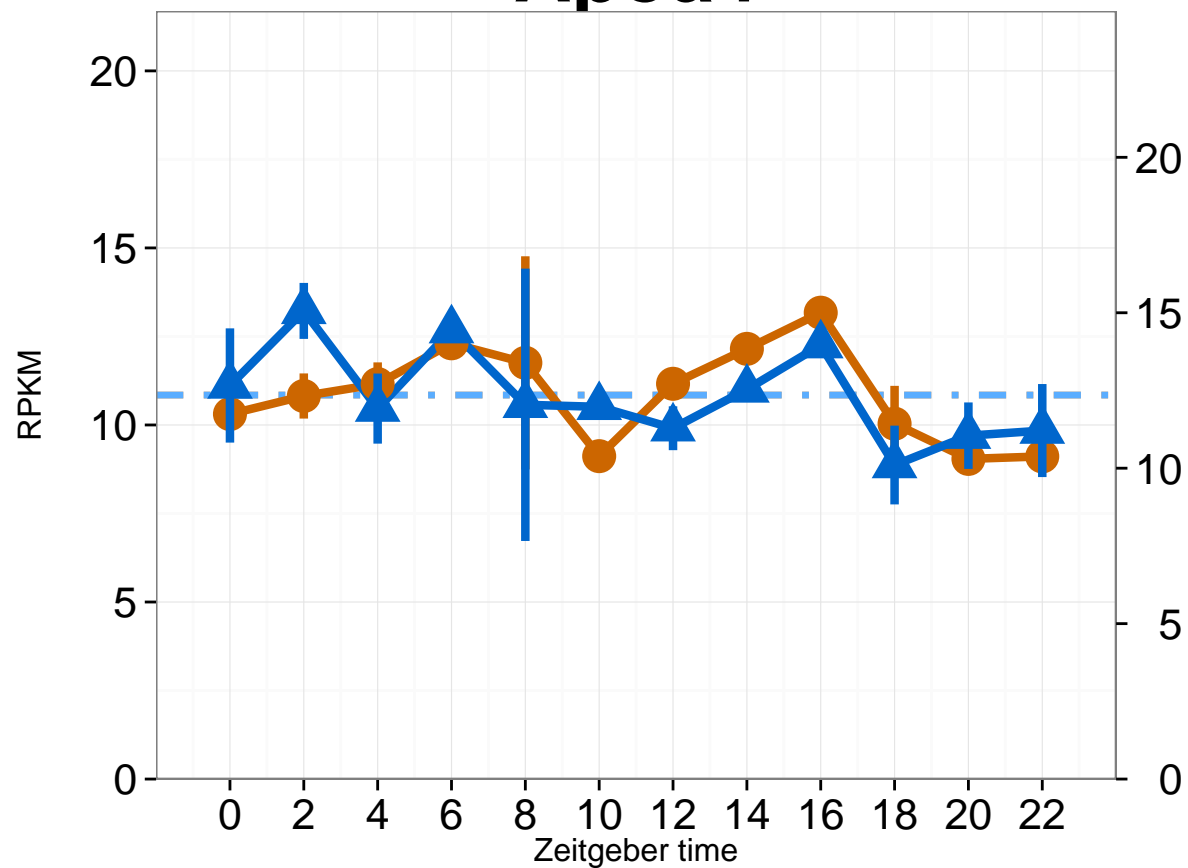

# Apoa4

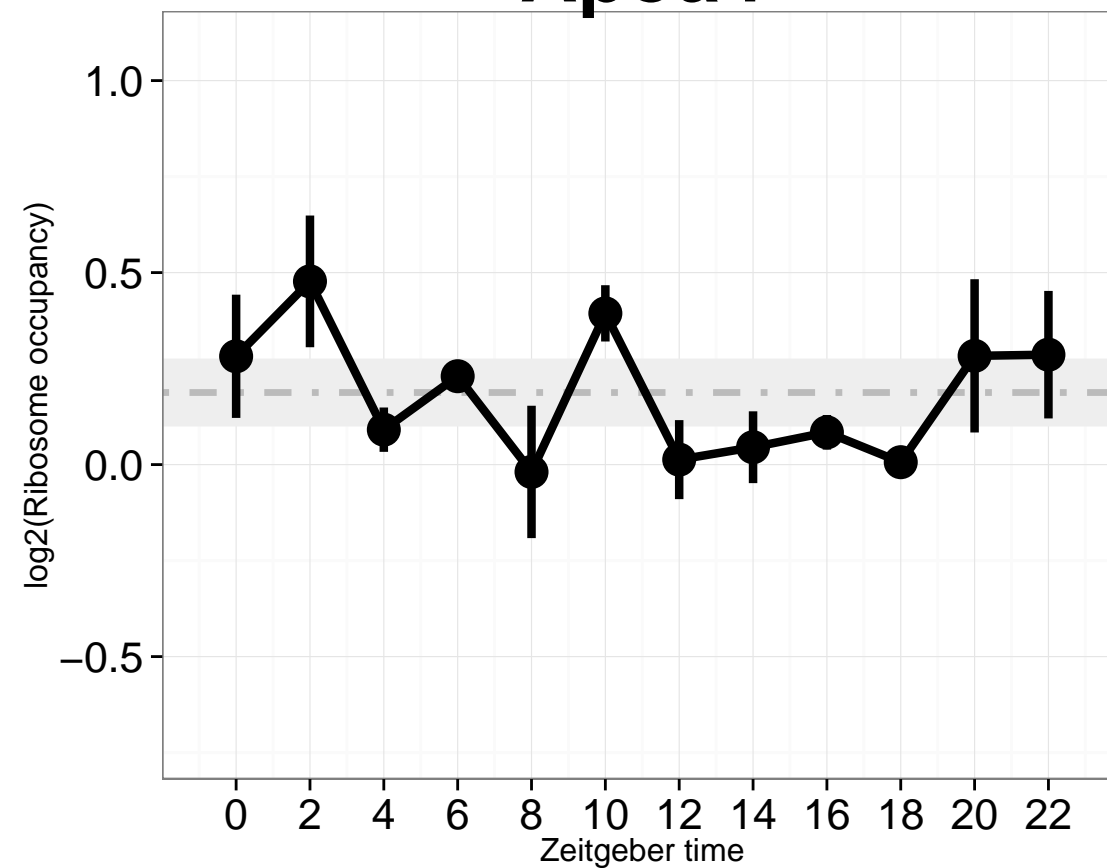

Supplement: Supplementary file 10865 [file 1]

# Tmem17

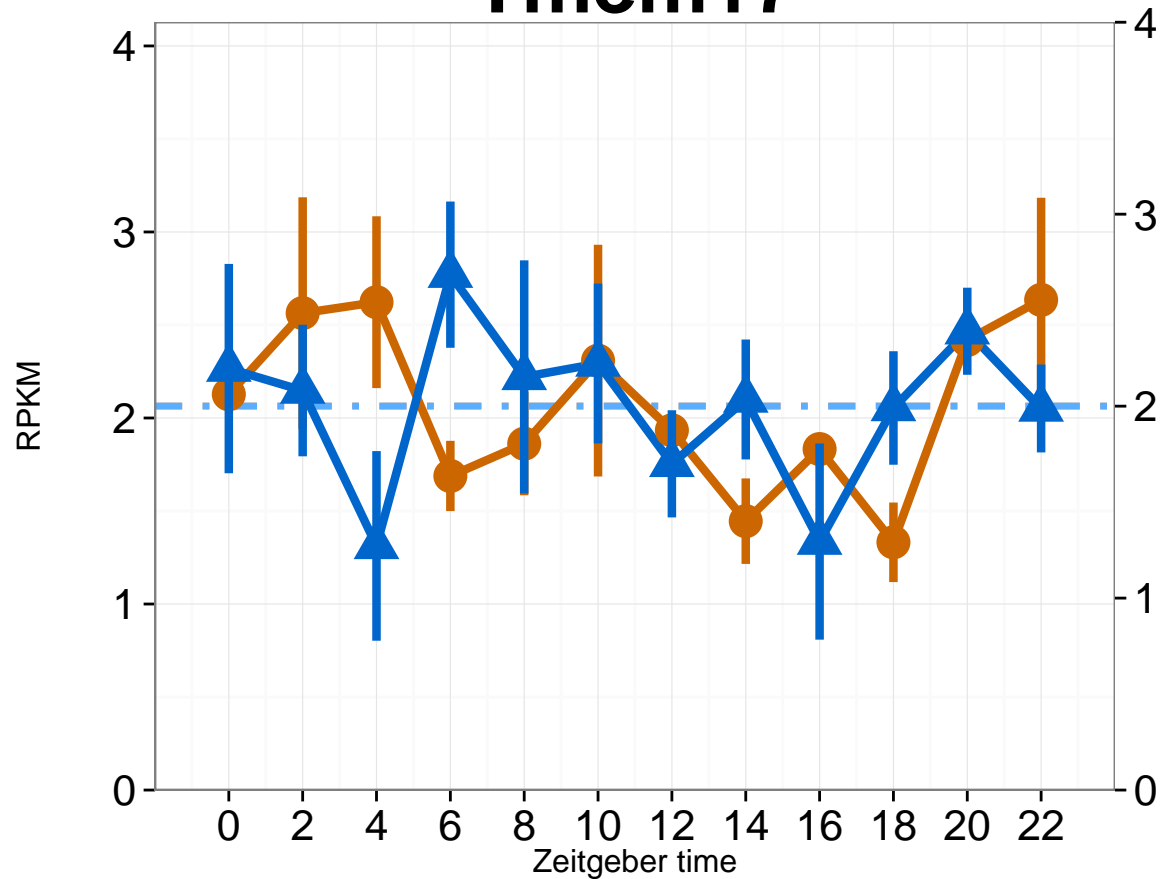

# Tmem17

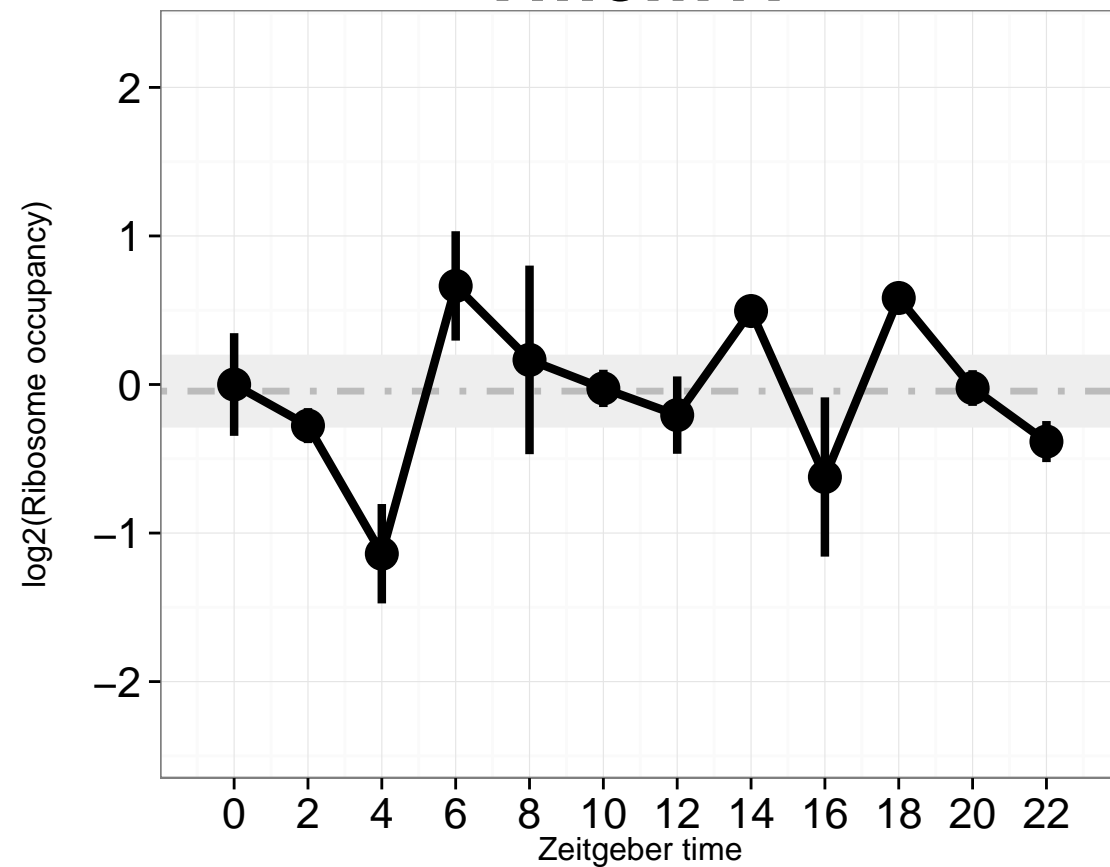

Supplement: Supplementary file 10866 [file 1]

# Setd1a

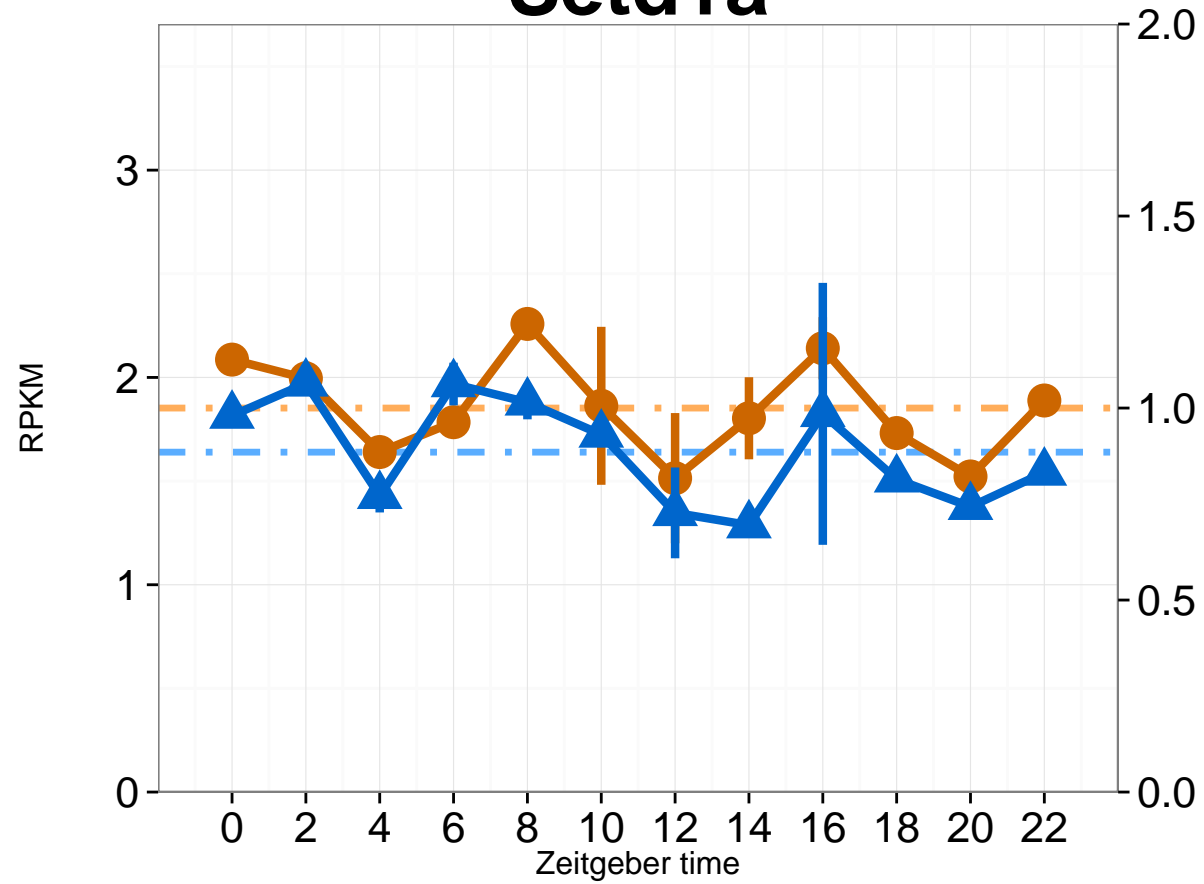

# Setd1a

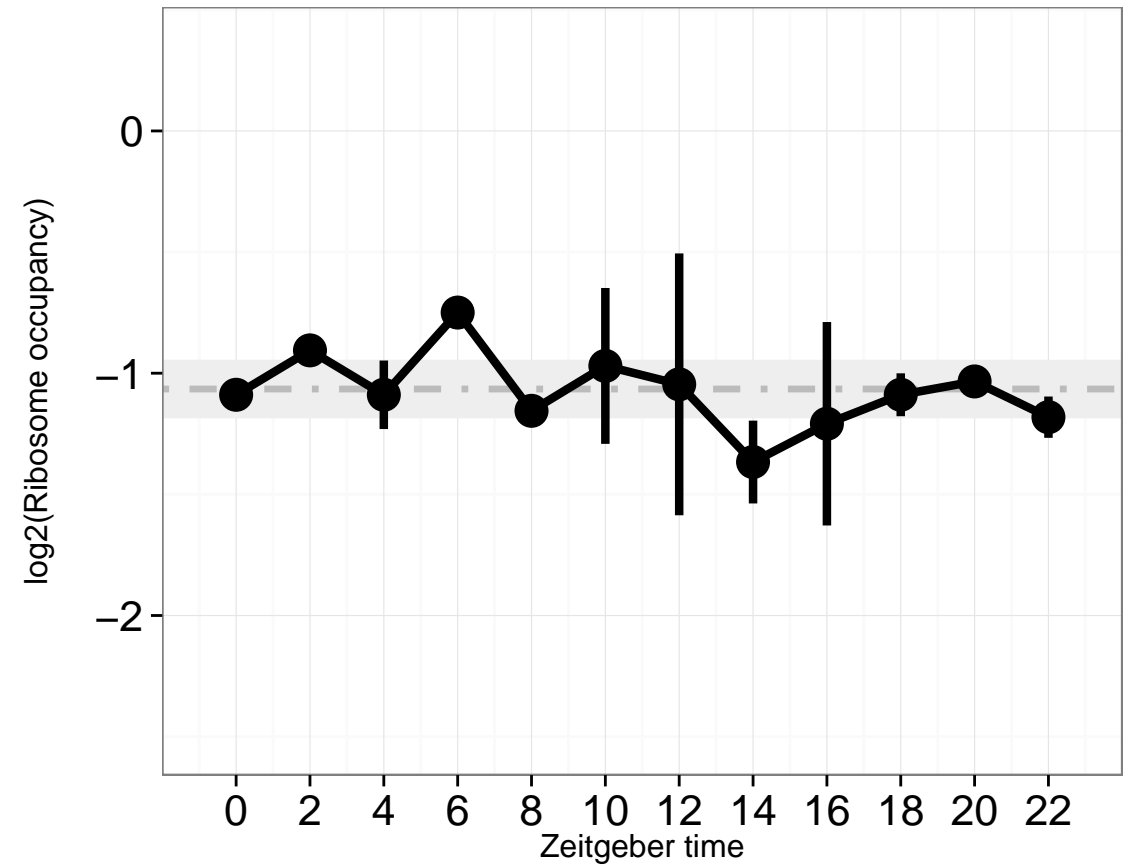

Supplement: Supplementary file 10867 [file 1]

## St6galnac2

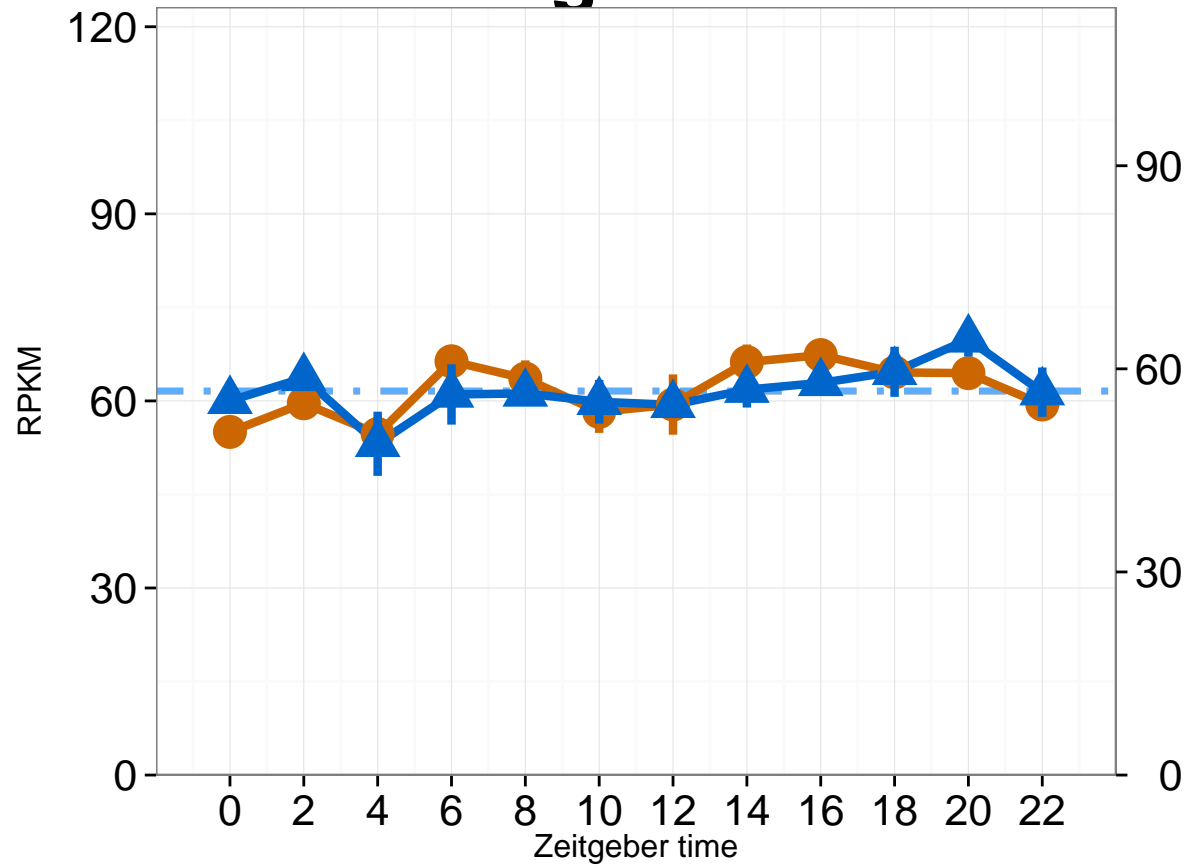

## St6galnac2

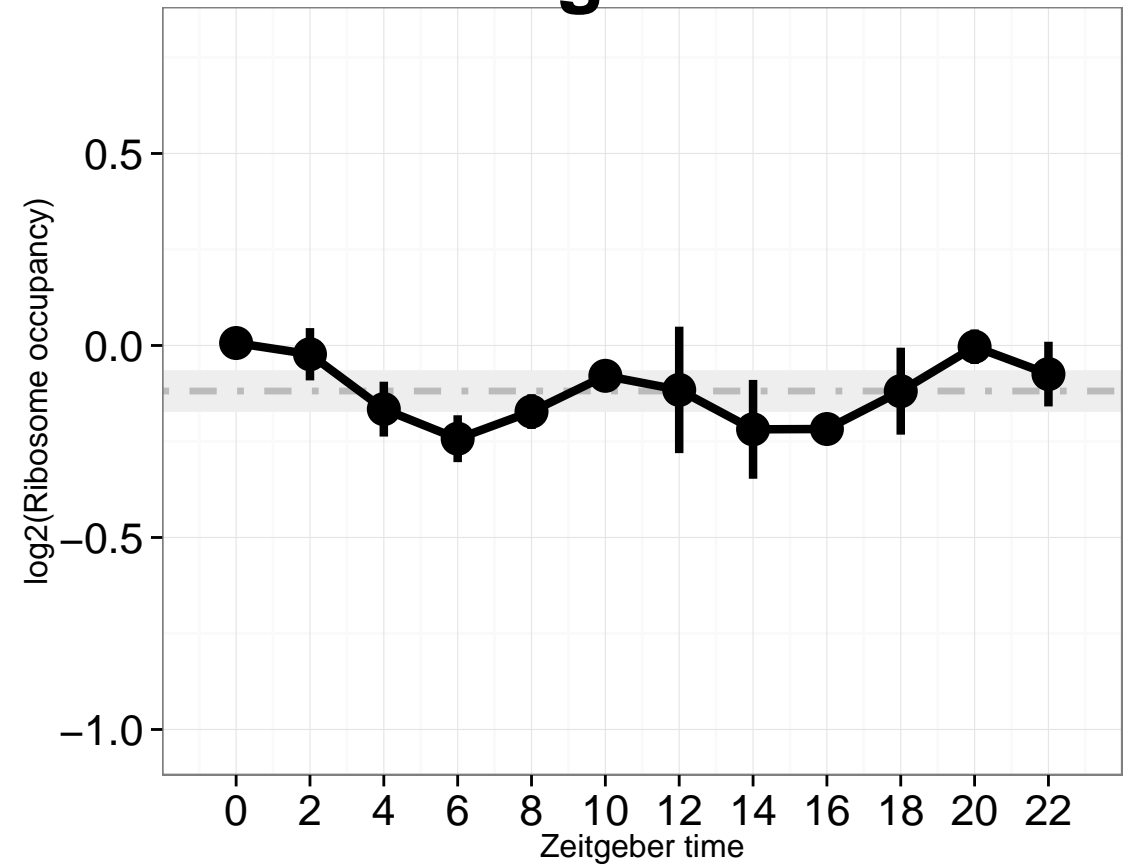

Supplement: Supplementary file 10868 [file 1]

## Mlph

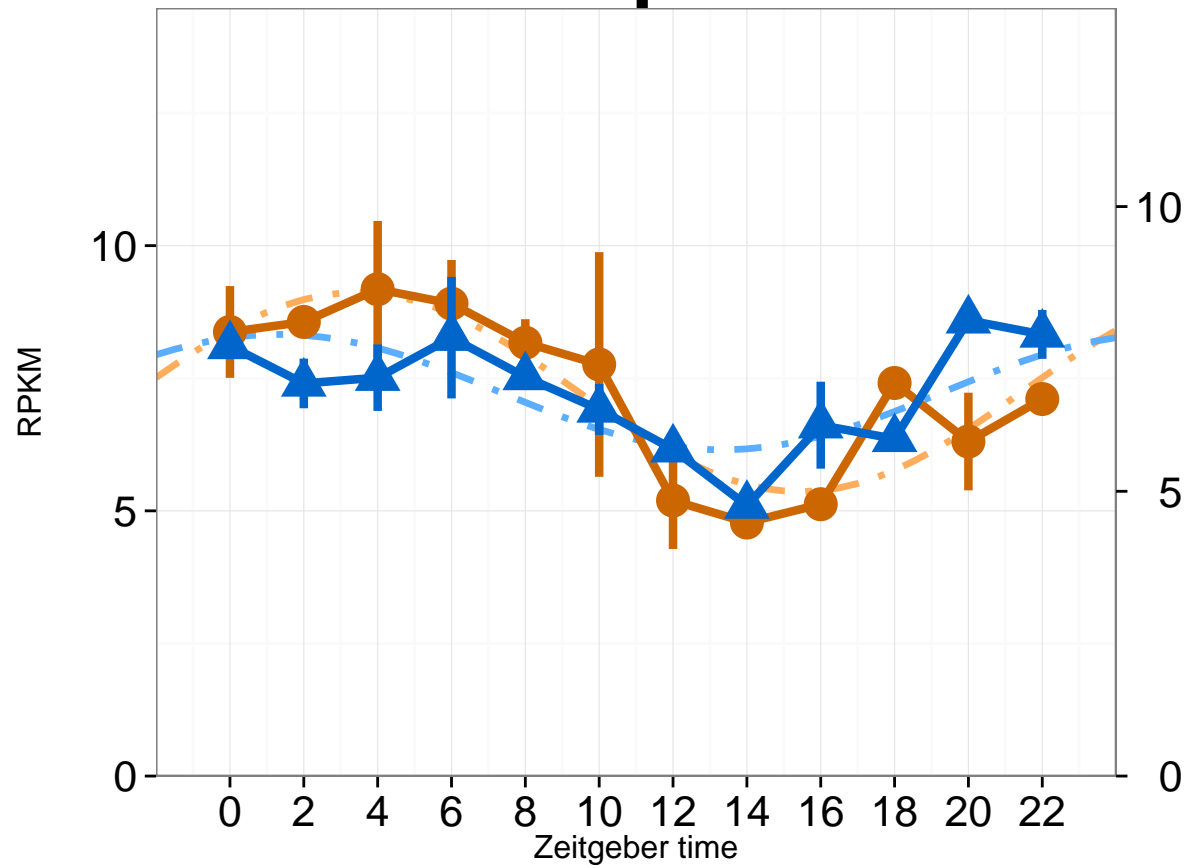

## Mlph

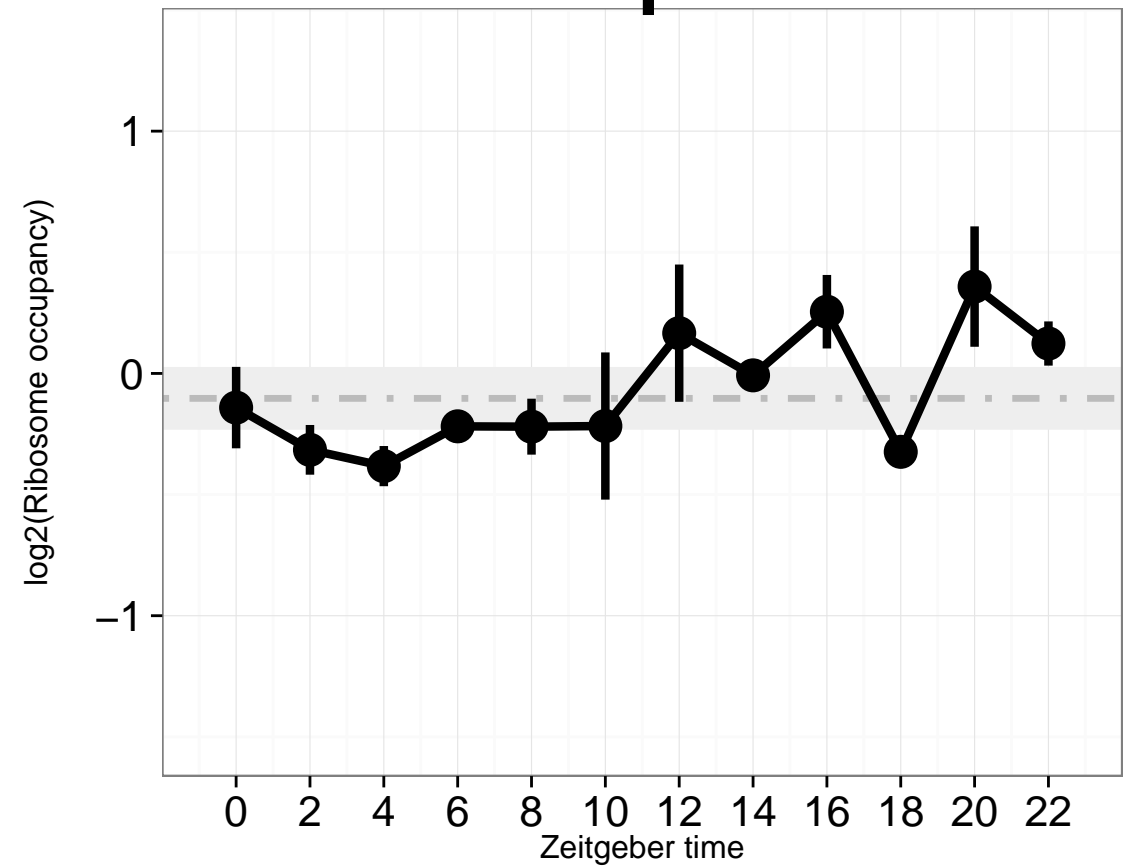

Supplement: Supplementary file 10869 [file 1]

# Abcb1a

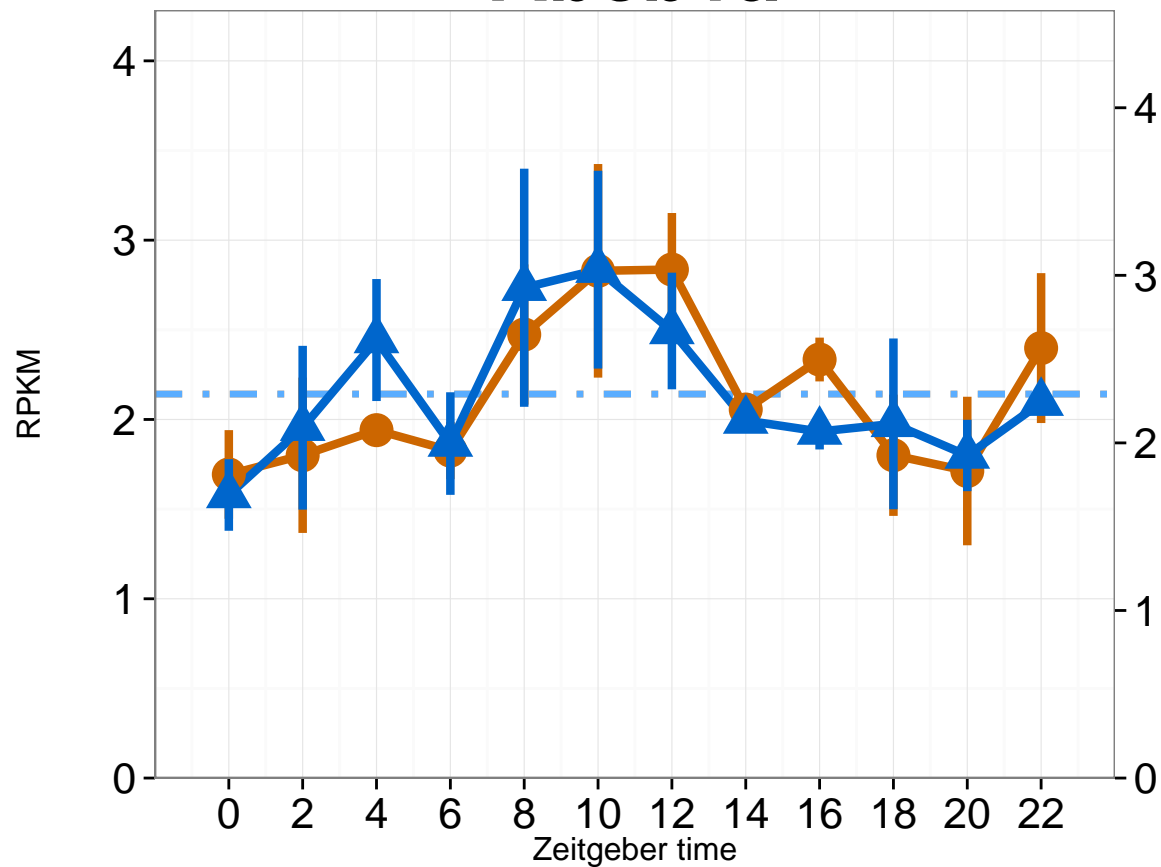

# Abcb1a

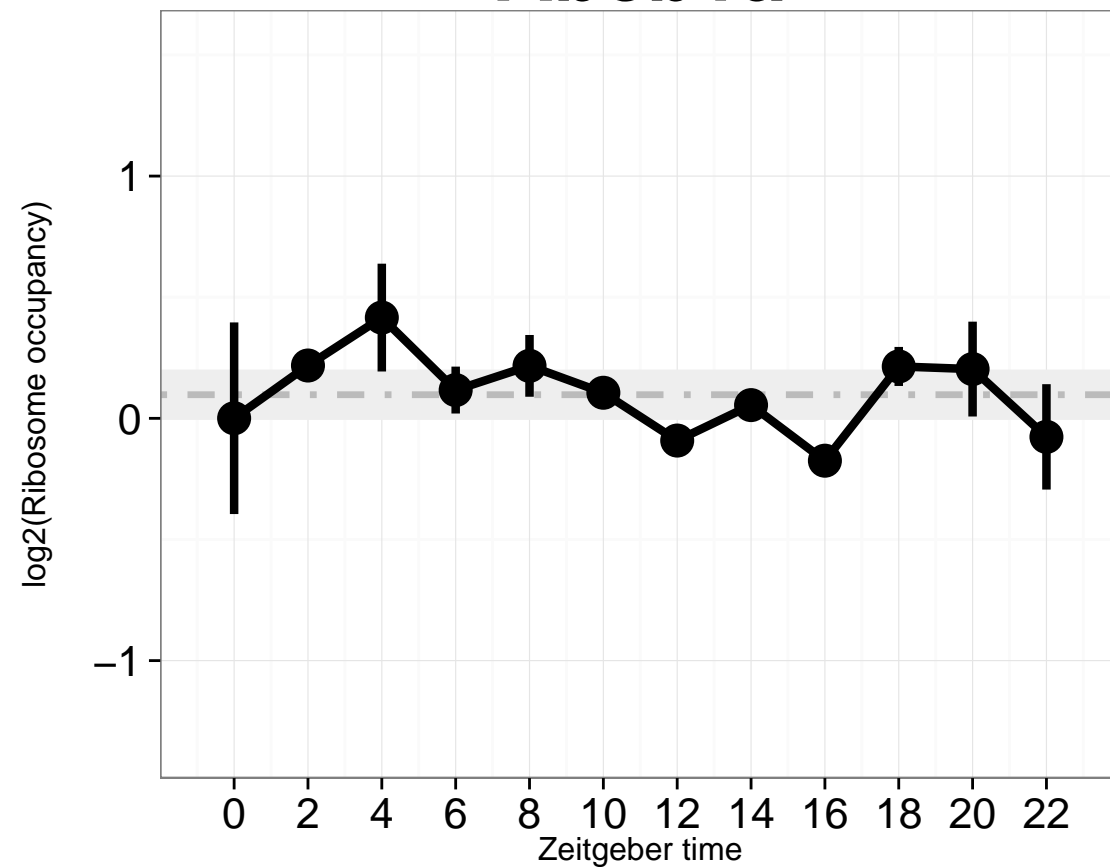

Supplement: Supplementary file 10870 [file 1]

## Dnajc9

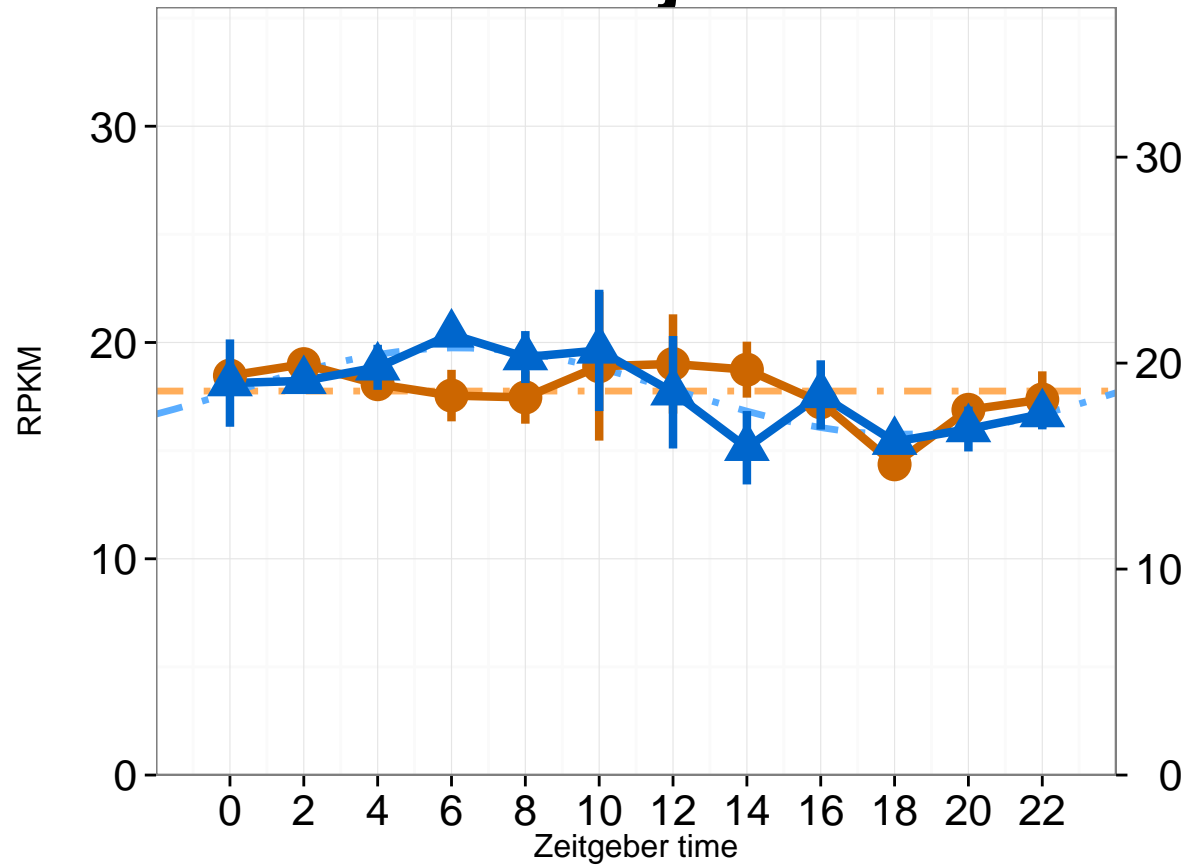

## Dnajc9

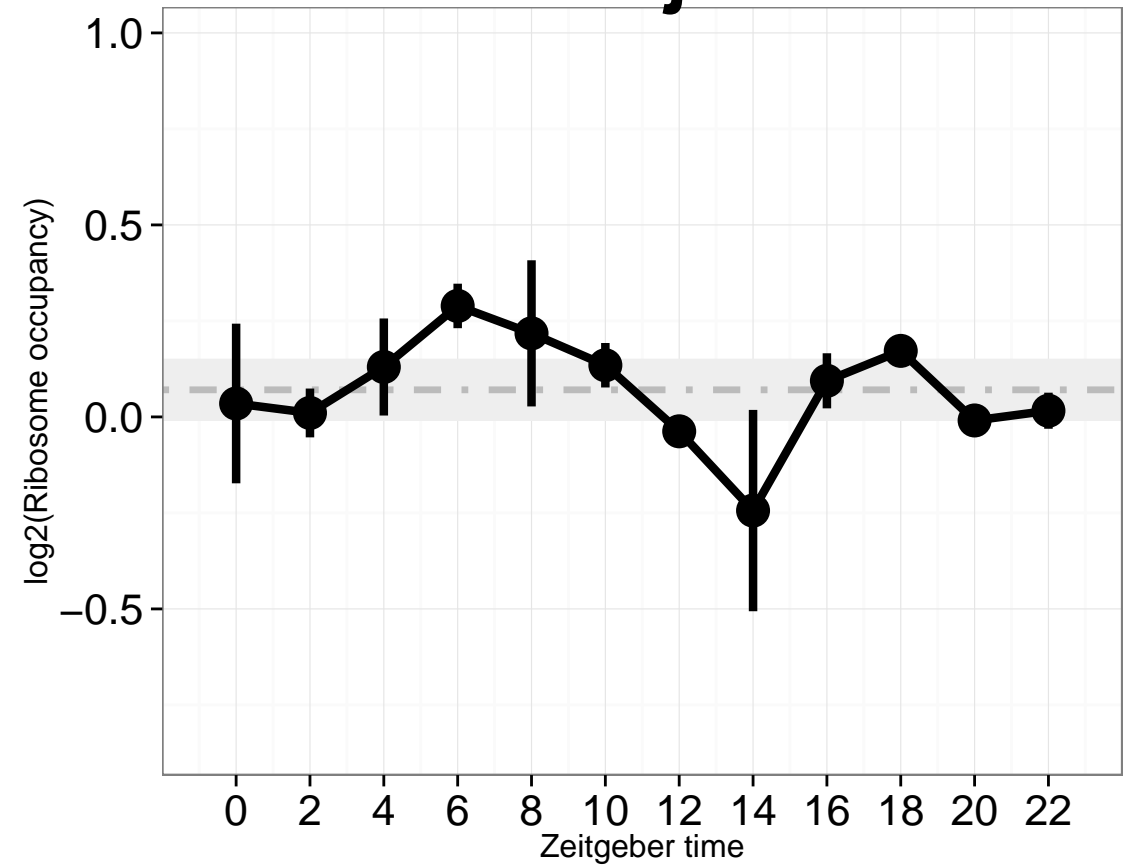

Supplement: Supplementary file 10871 [file 1]

# Tmem256

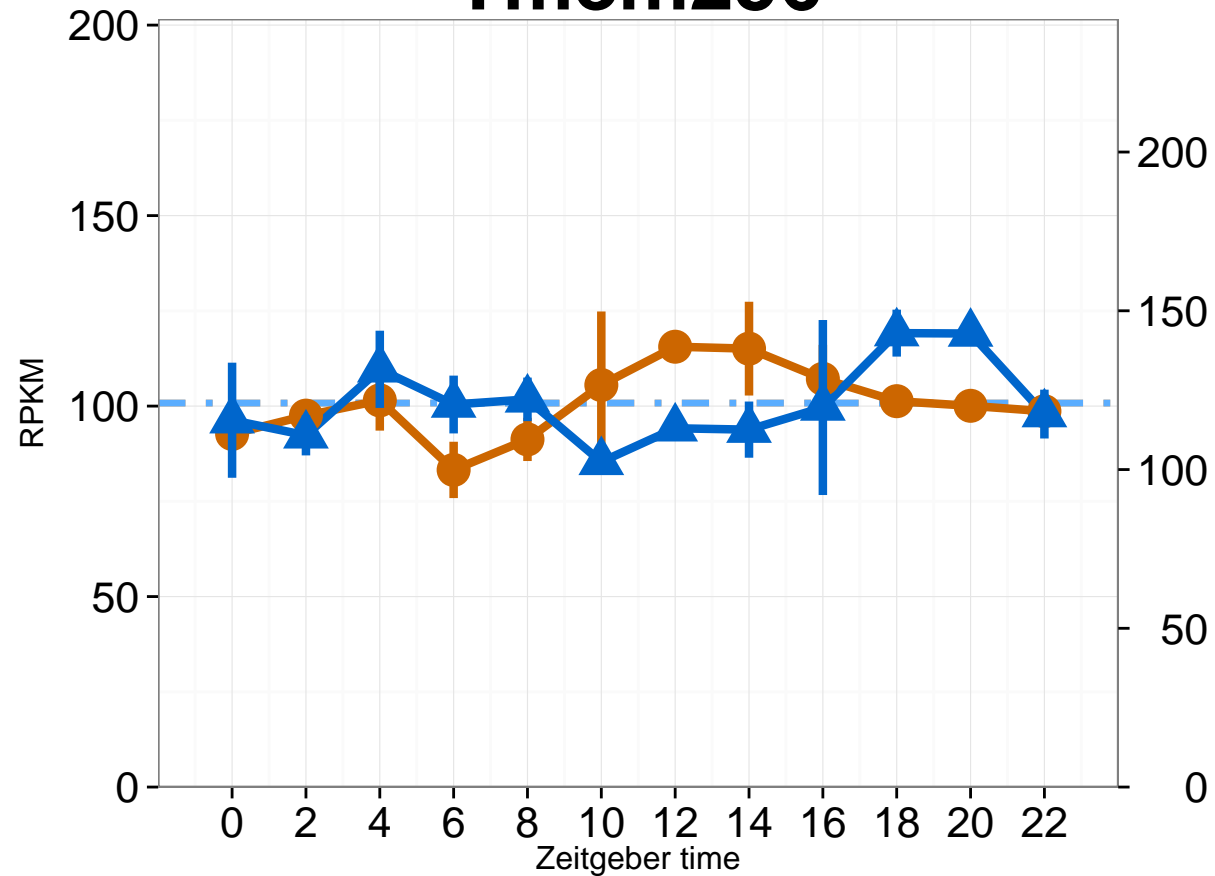

# Tmem256

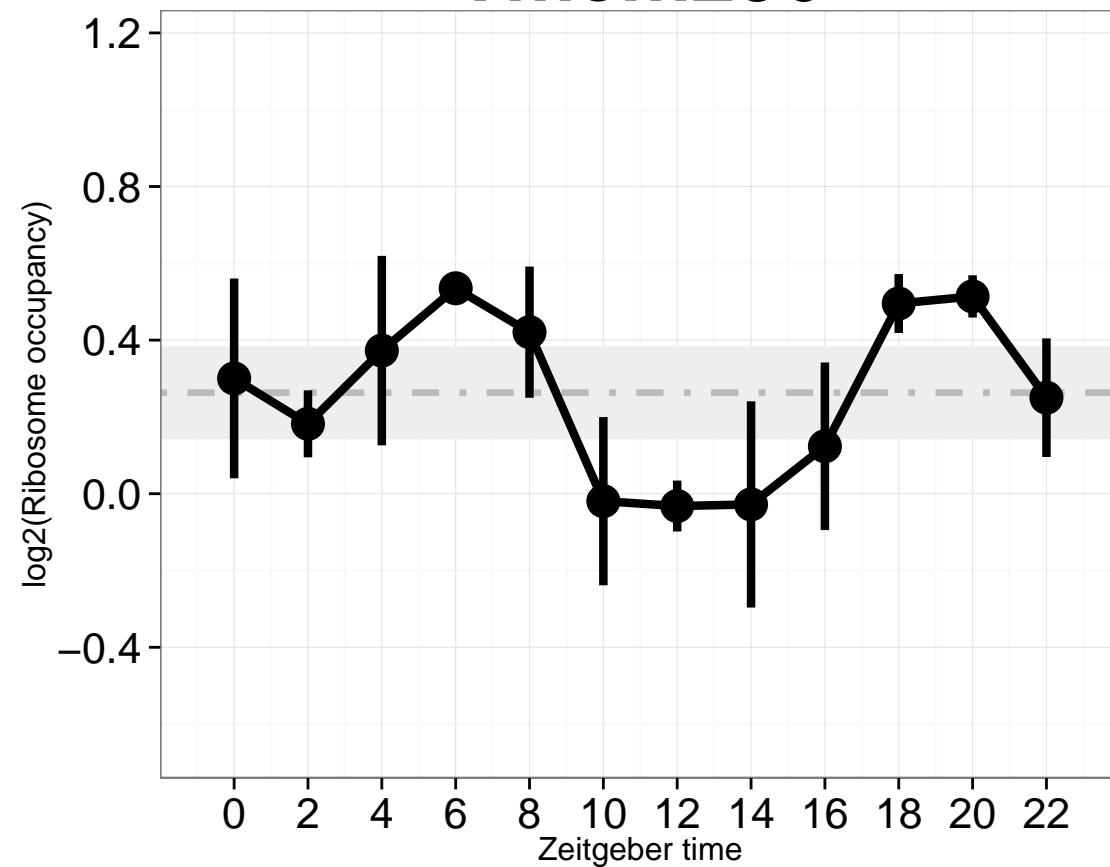

Supplement: Supplementary file 10872 [file 1]

# Trdn

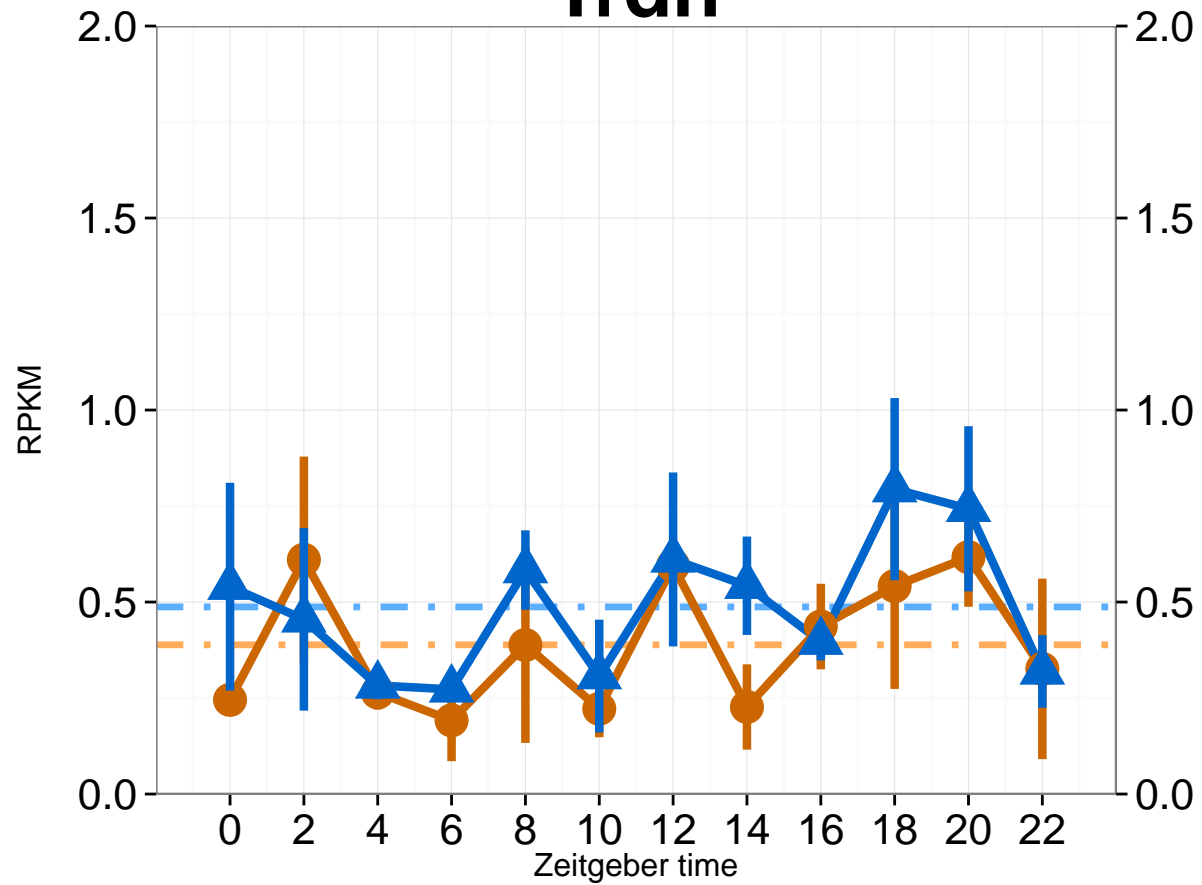

# Trdn

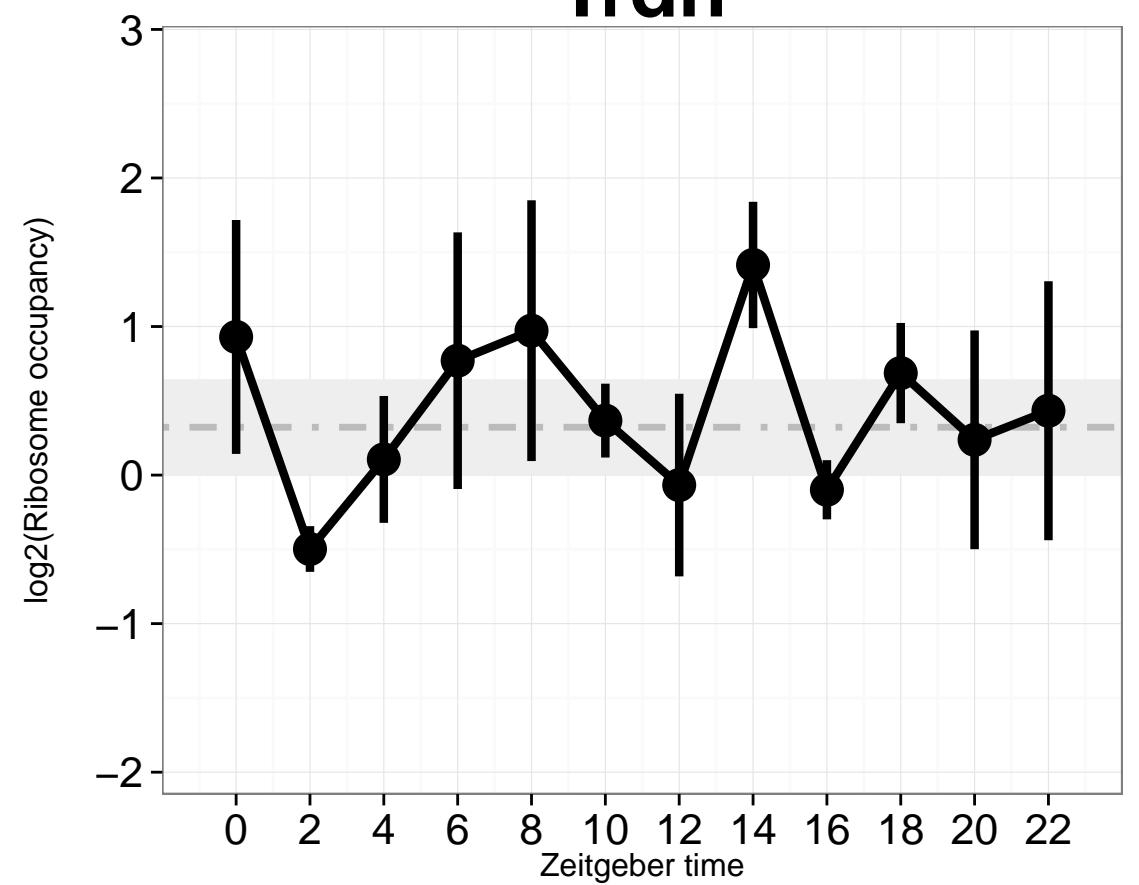

Supplement: Supplementary file 10873 [file 1]

## Nsun2

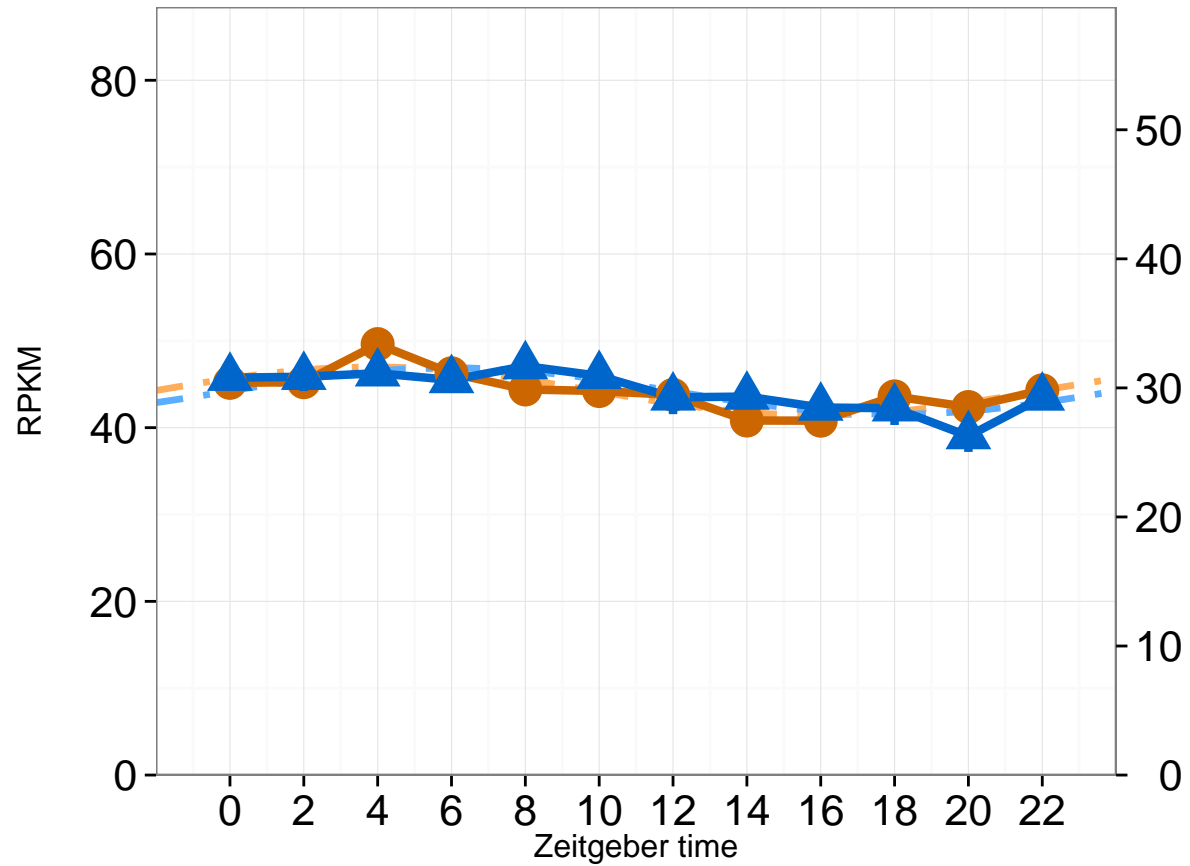

## Nsun2

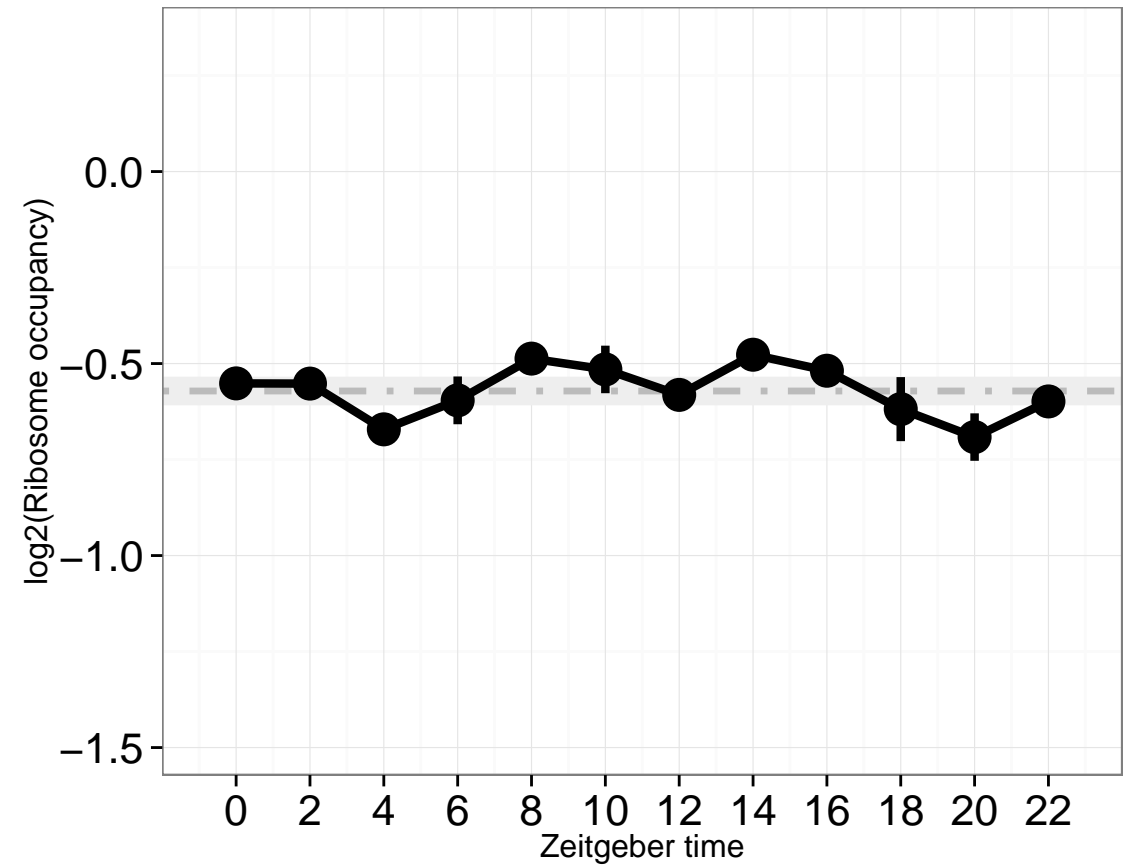

Supplement: Supplementary file 10874 [file 1]

## Rela

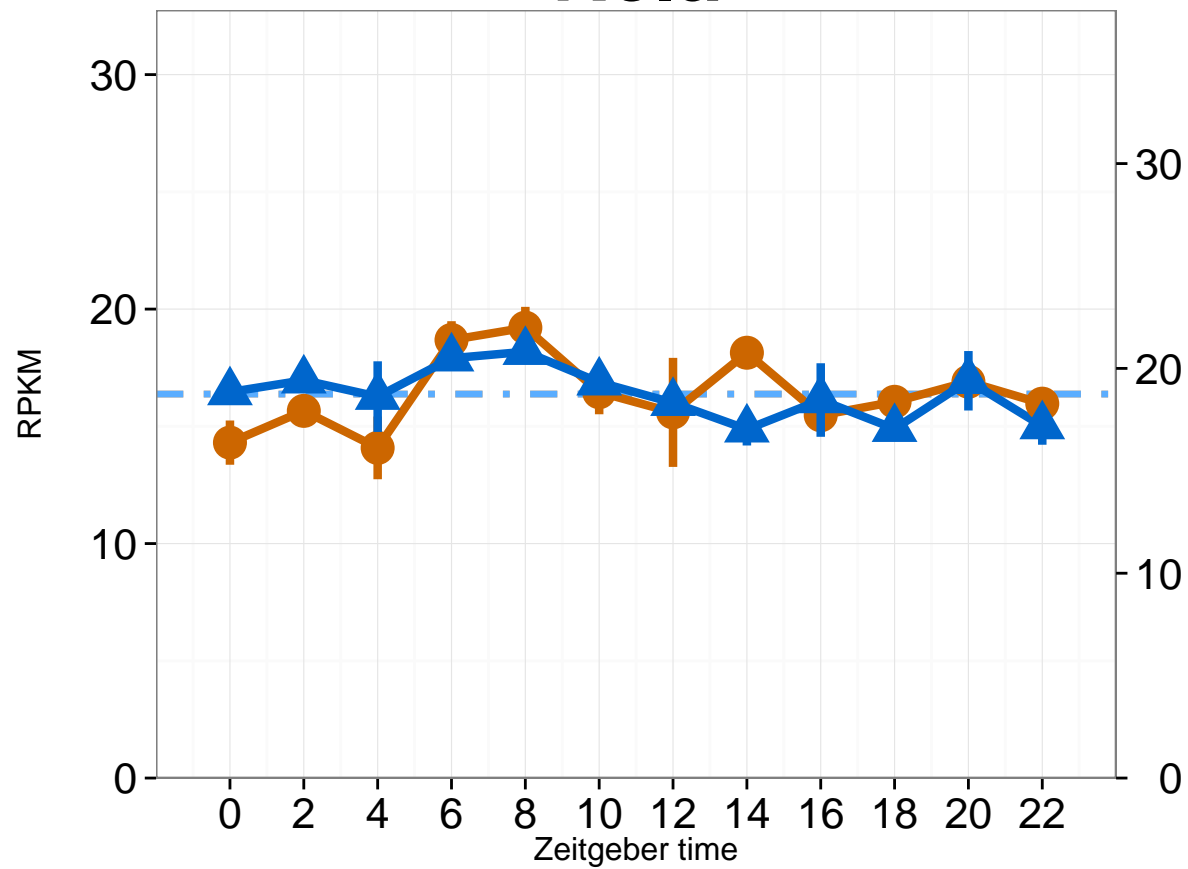

## Rela

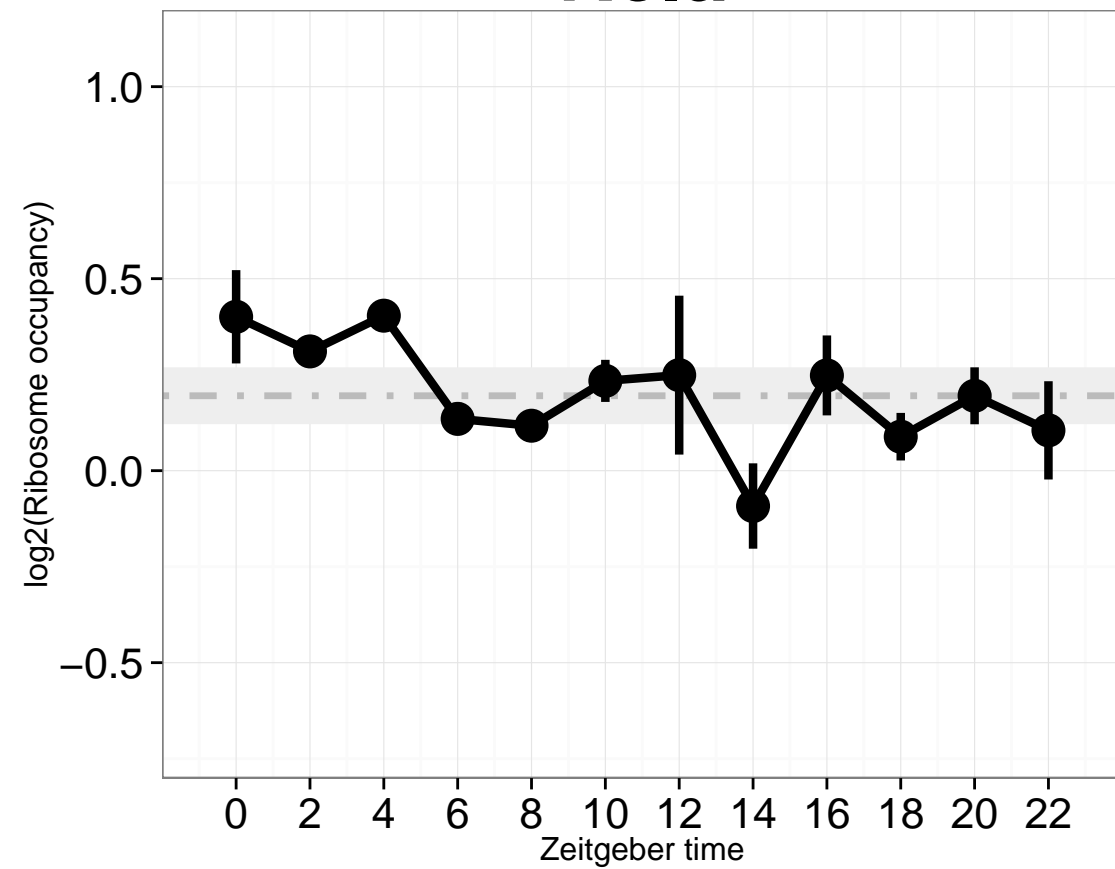

Supplement: Supplementary file 10875 [file 1]

# Ctps2

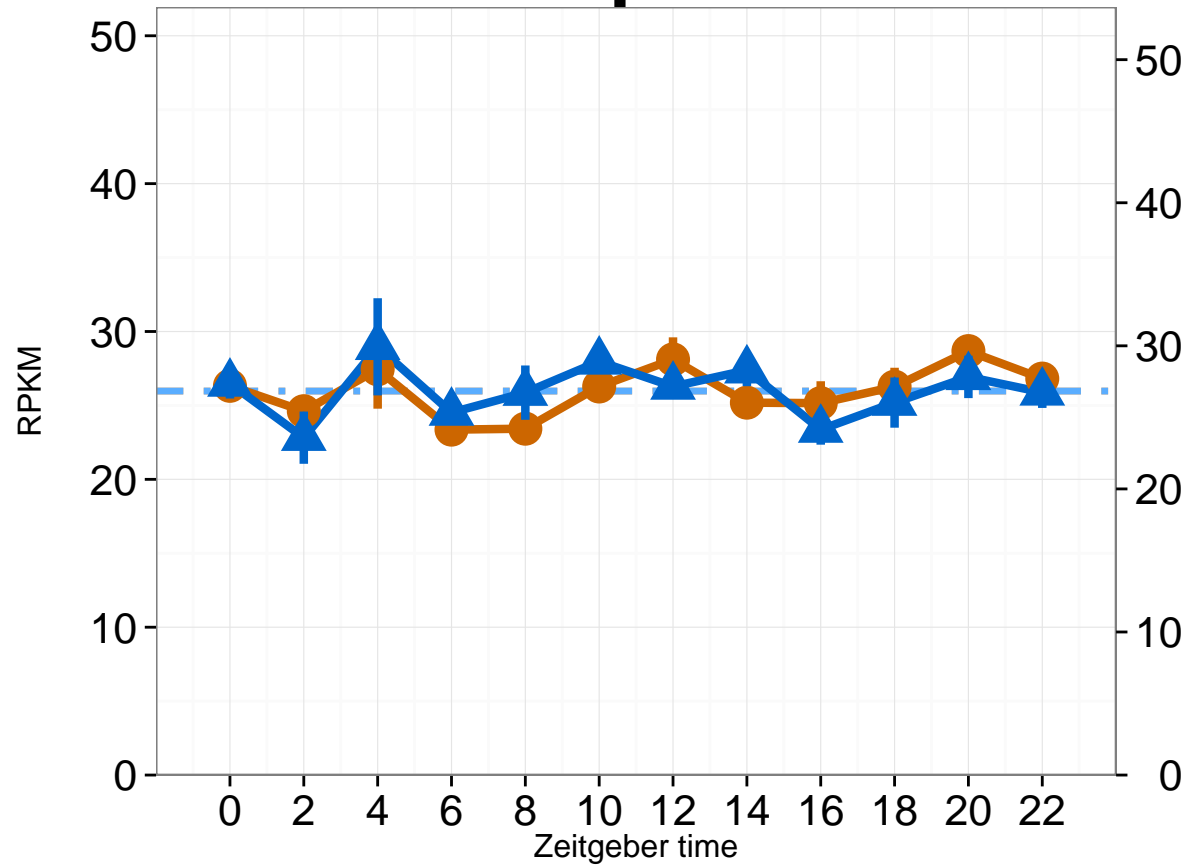

# Ctps2

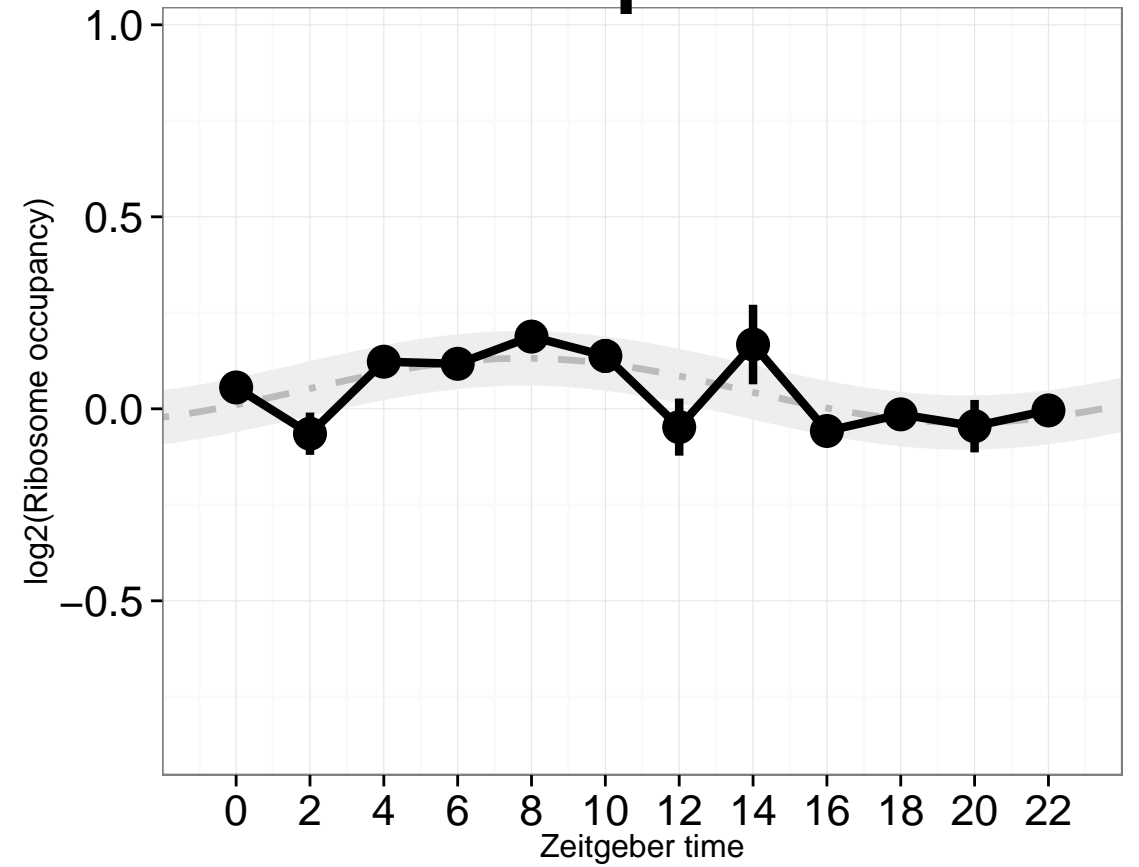

Supplement: Supplementary file 10876 [file 1]

# Ric3

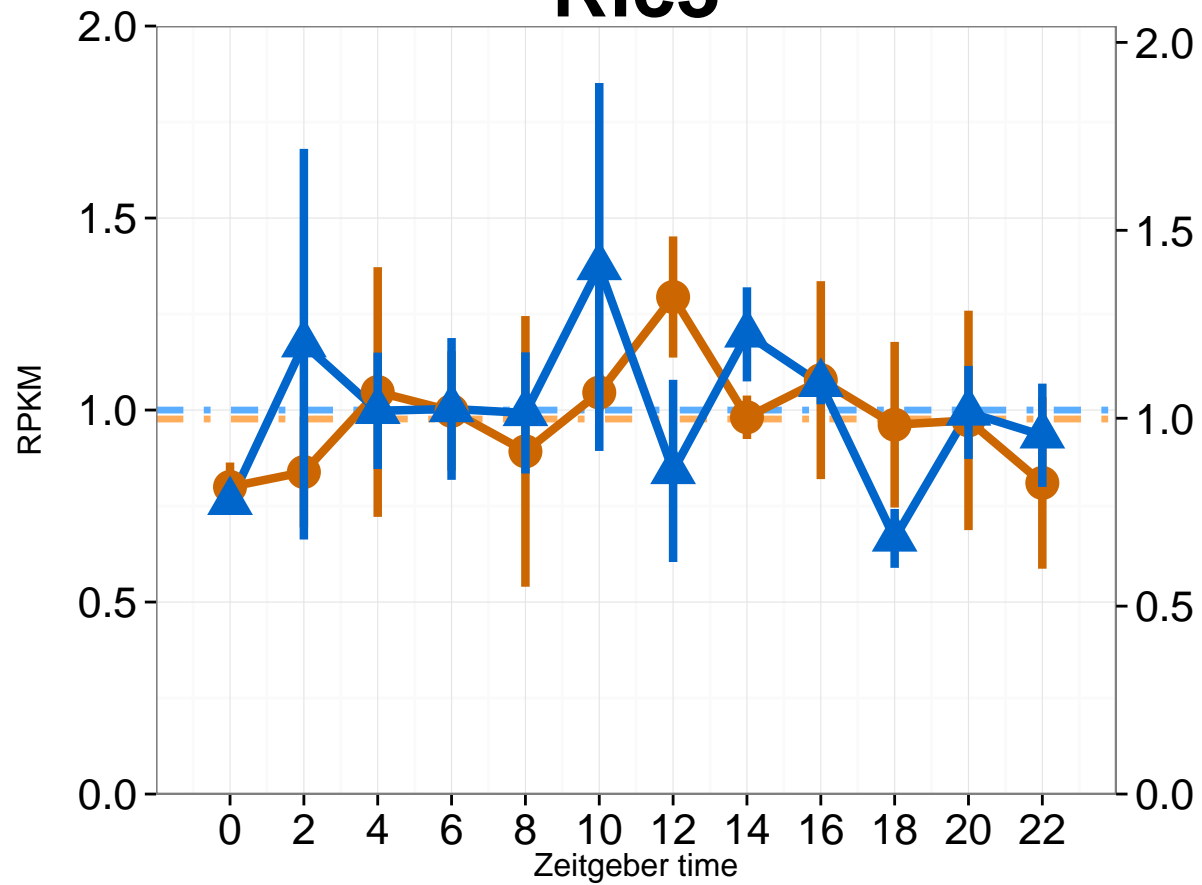

# Ric3

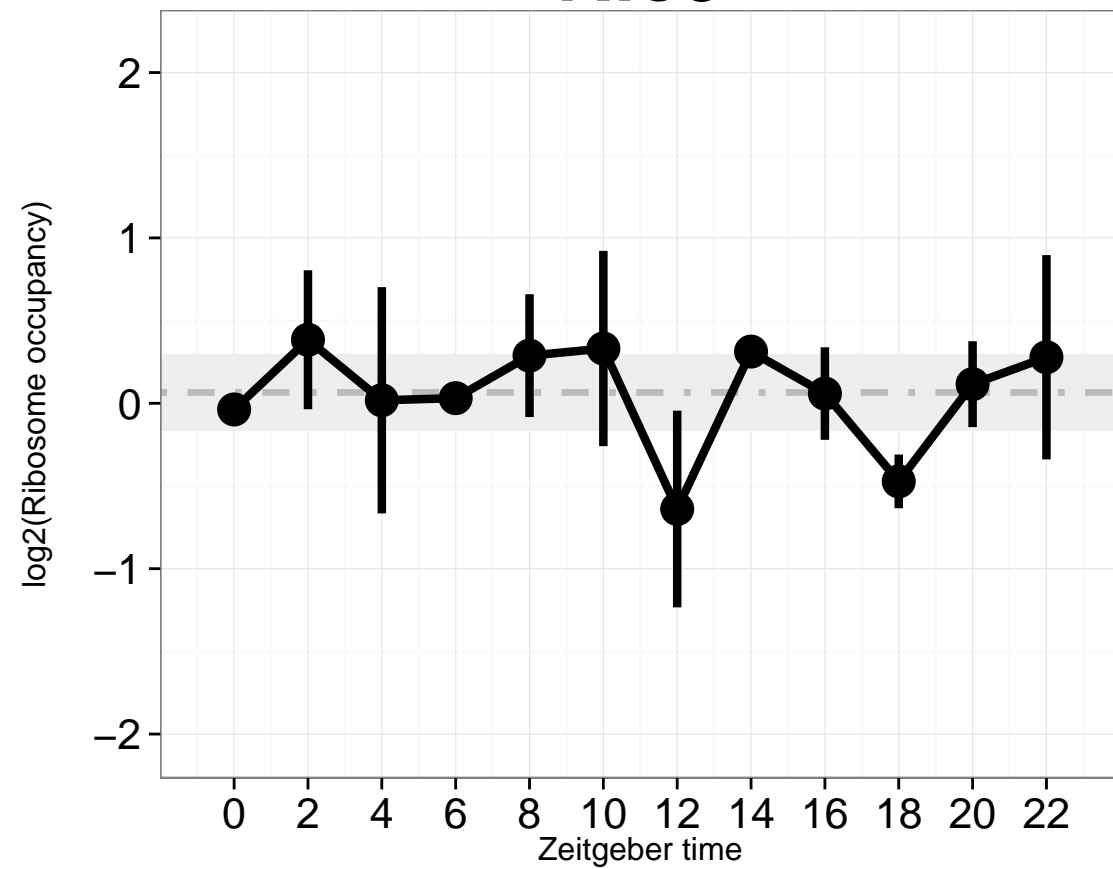

Supplement: Supplementary file 10877 [file 1]

## Jam3

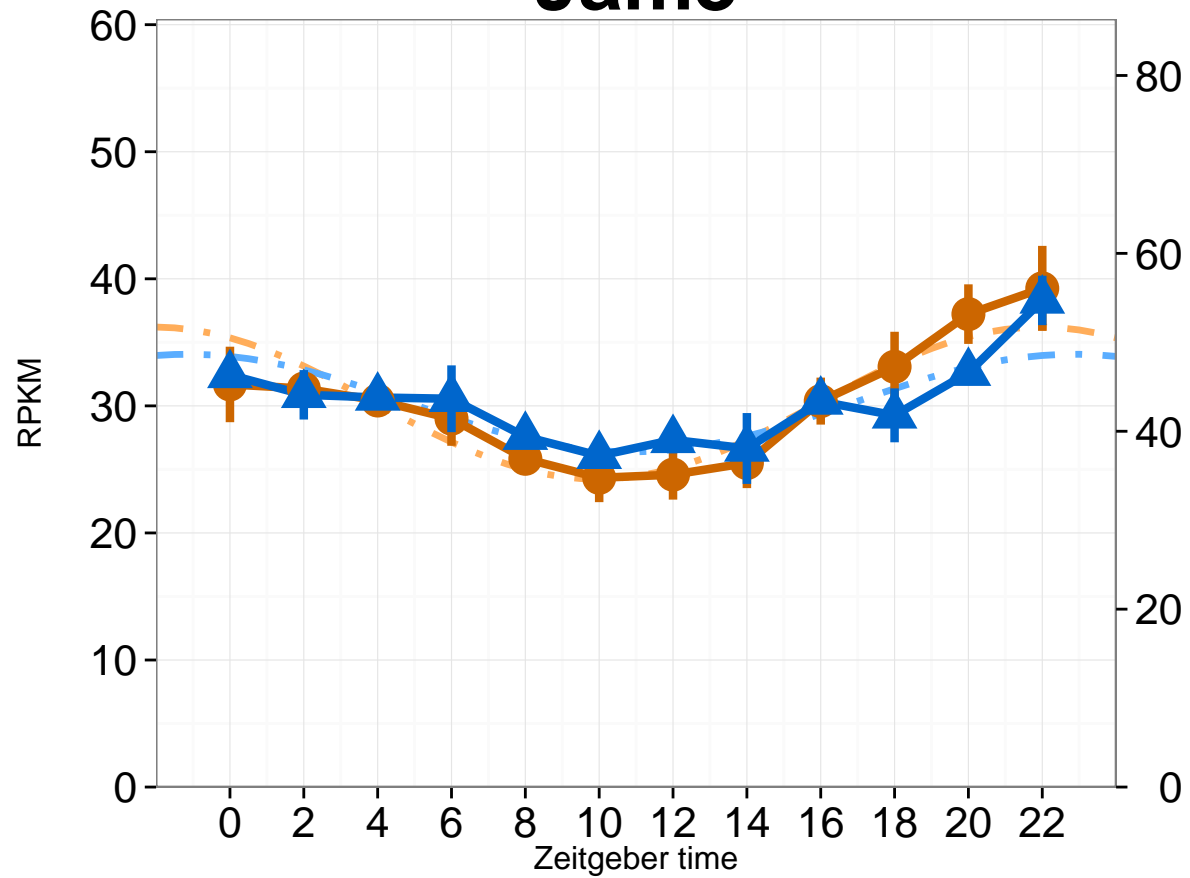

## Jam3

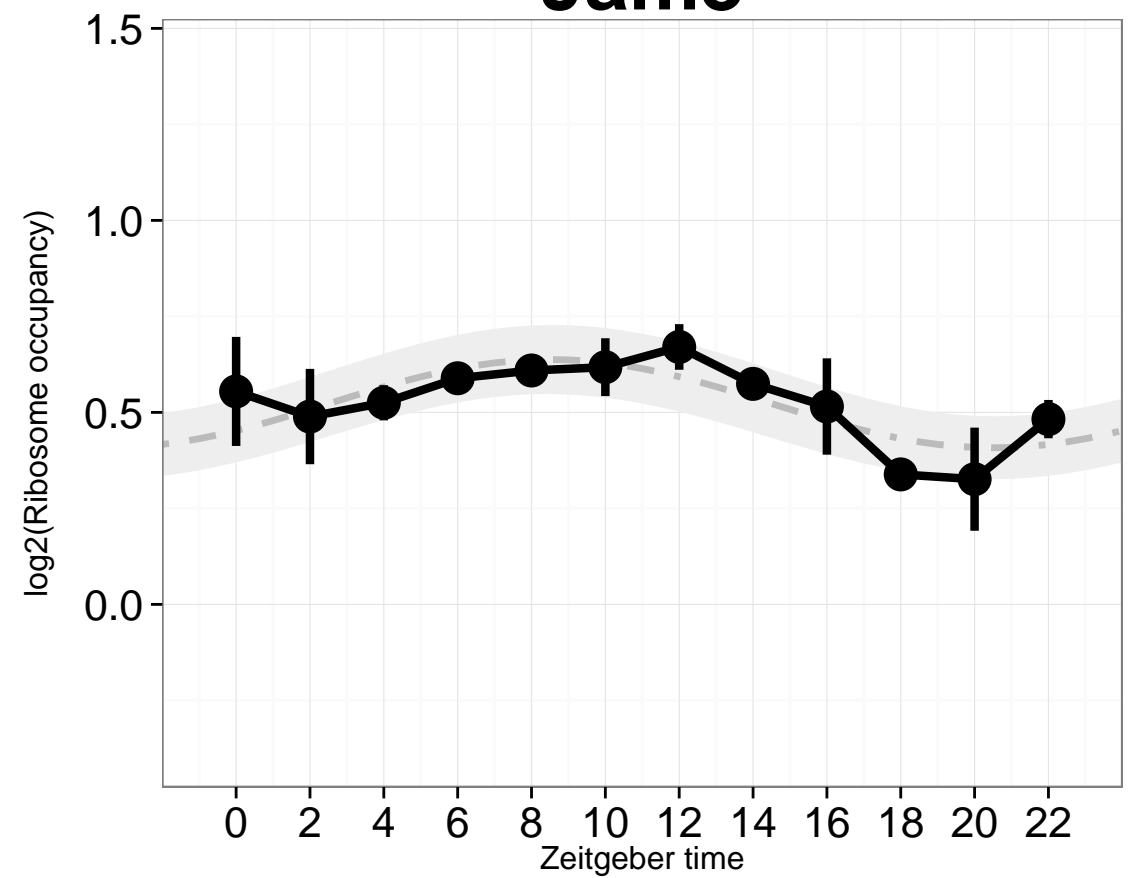

Supplement: Supplementary file 10878 [file 1]

# Osgin1

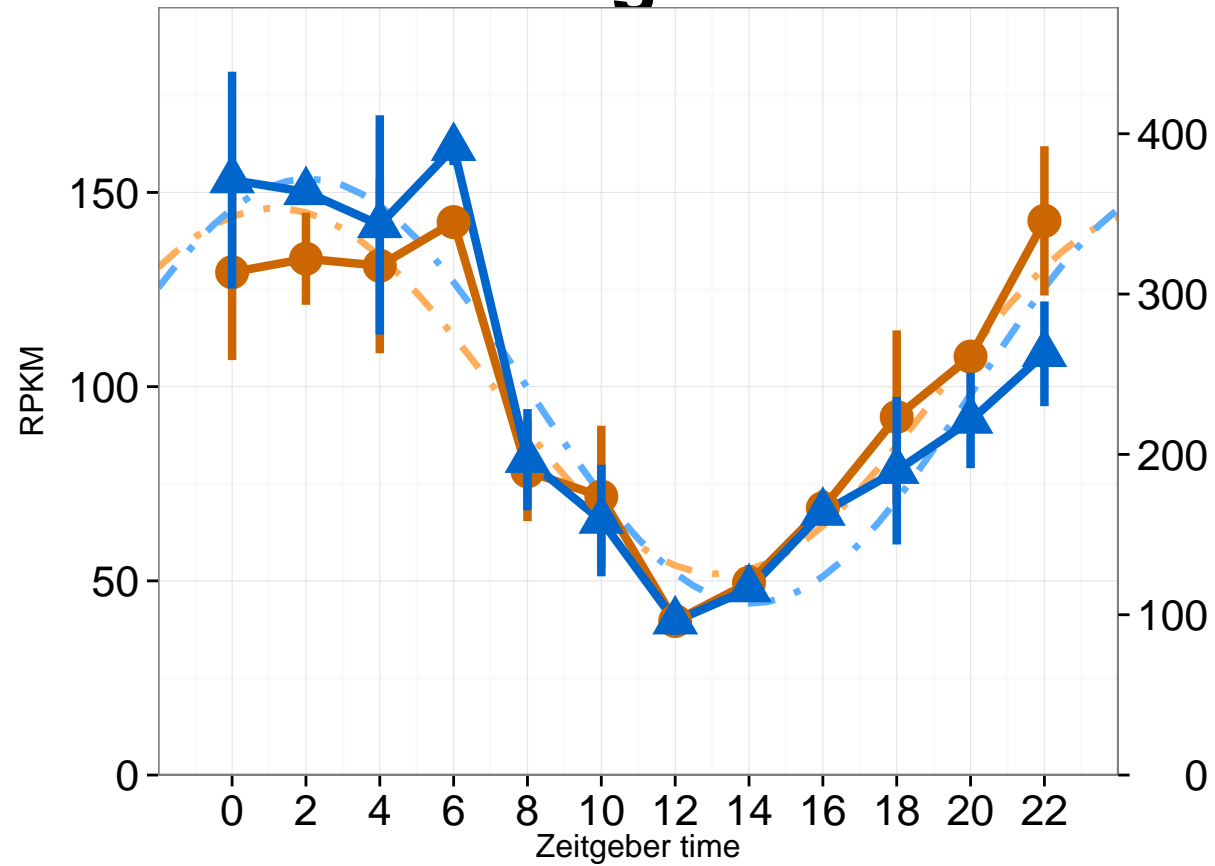

# Osgin1

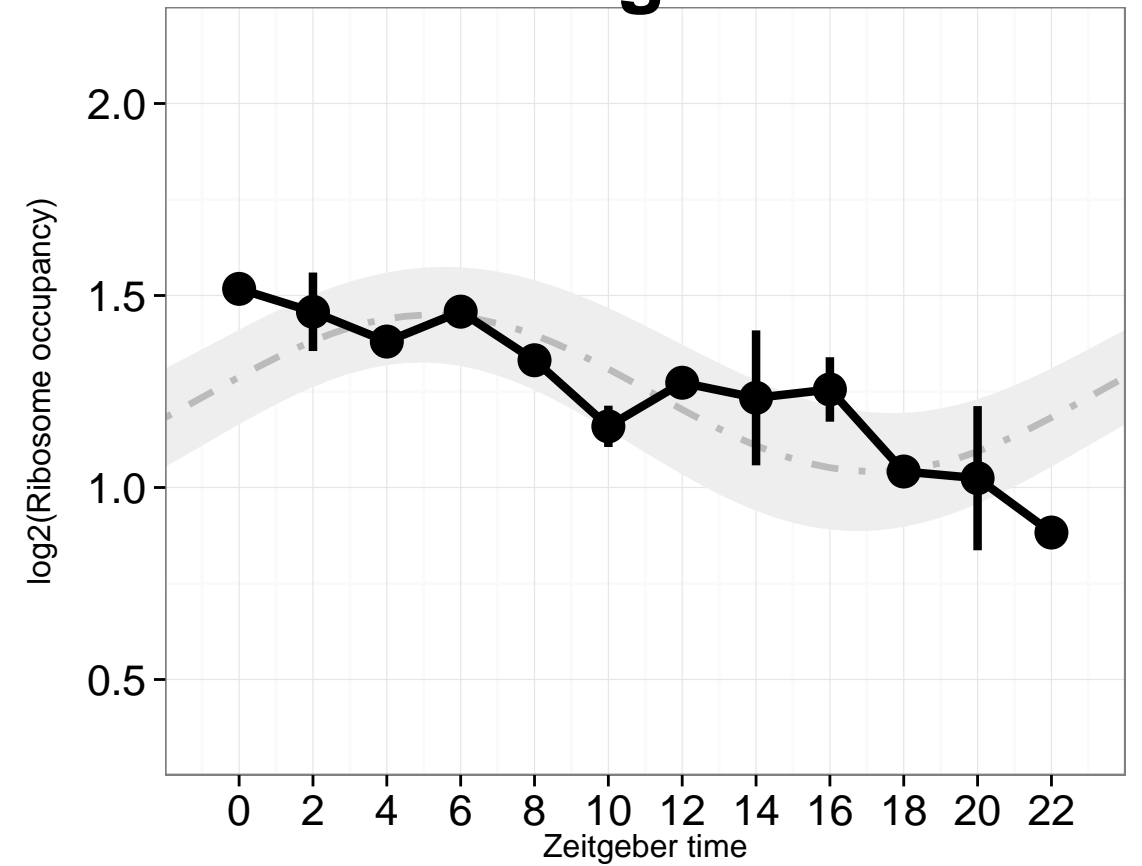

Supplement: Supplementary file 10879 [file 1]

# Aqp6

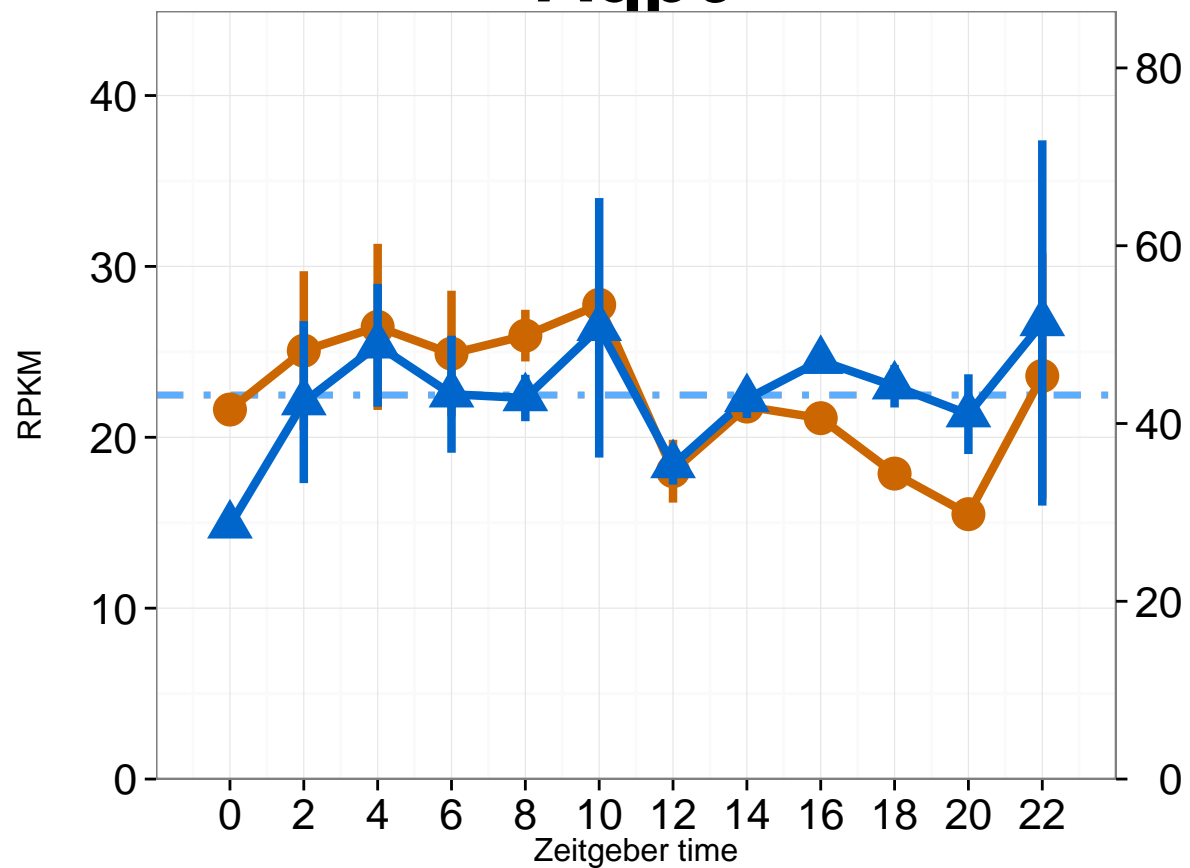

# Aqp6

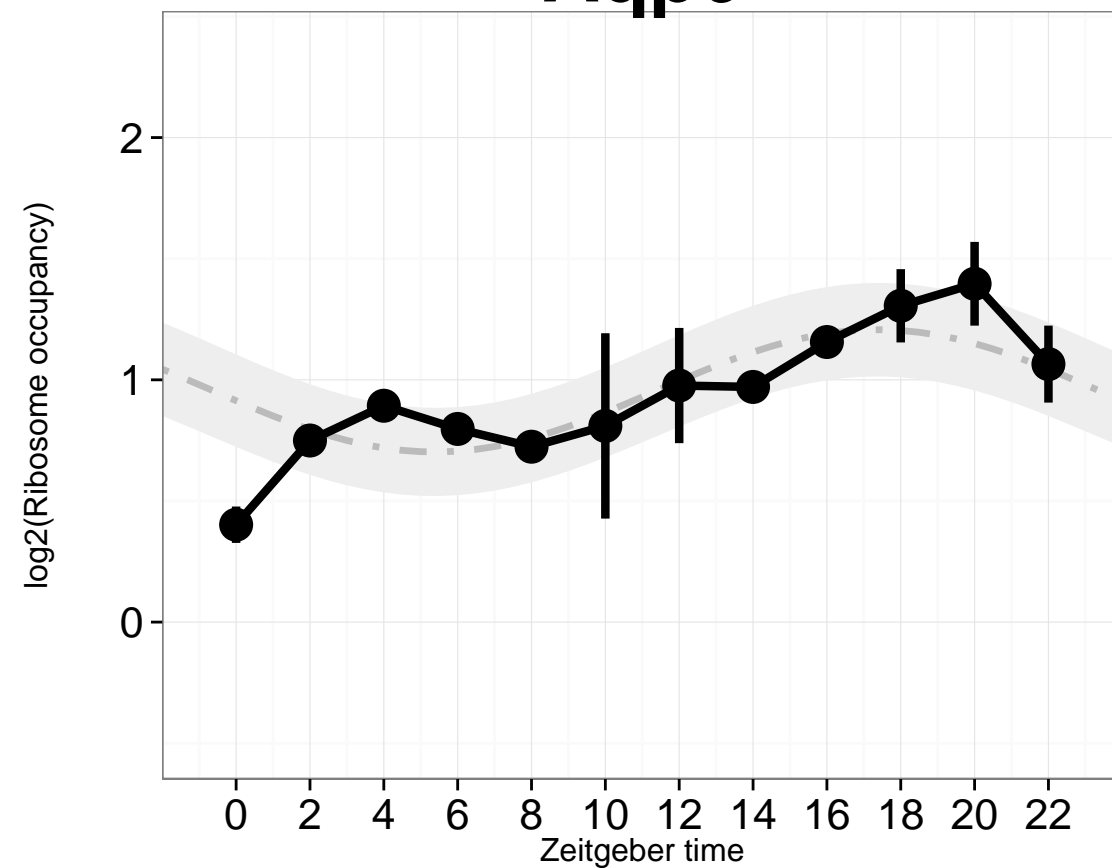

Supplement: Supplementary file 10880 [file 1]

## Dhx40

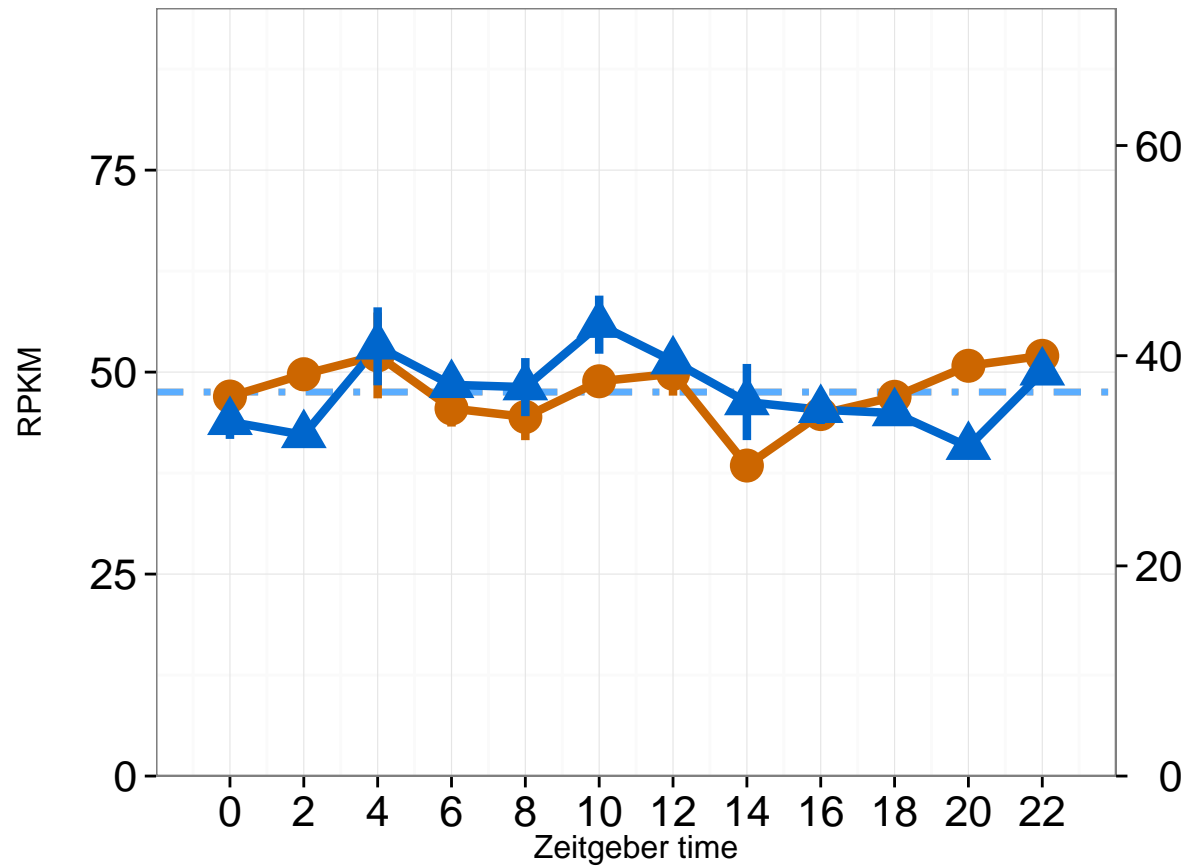

## Dhx40

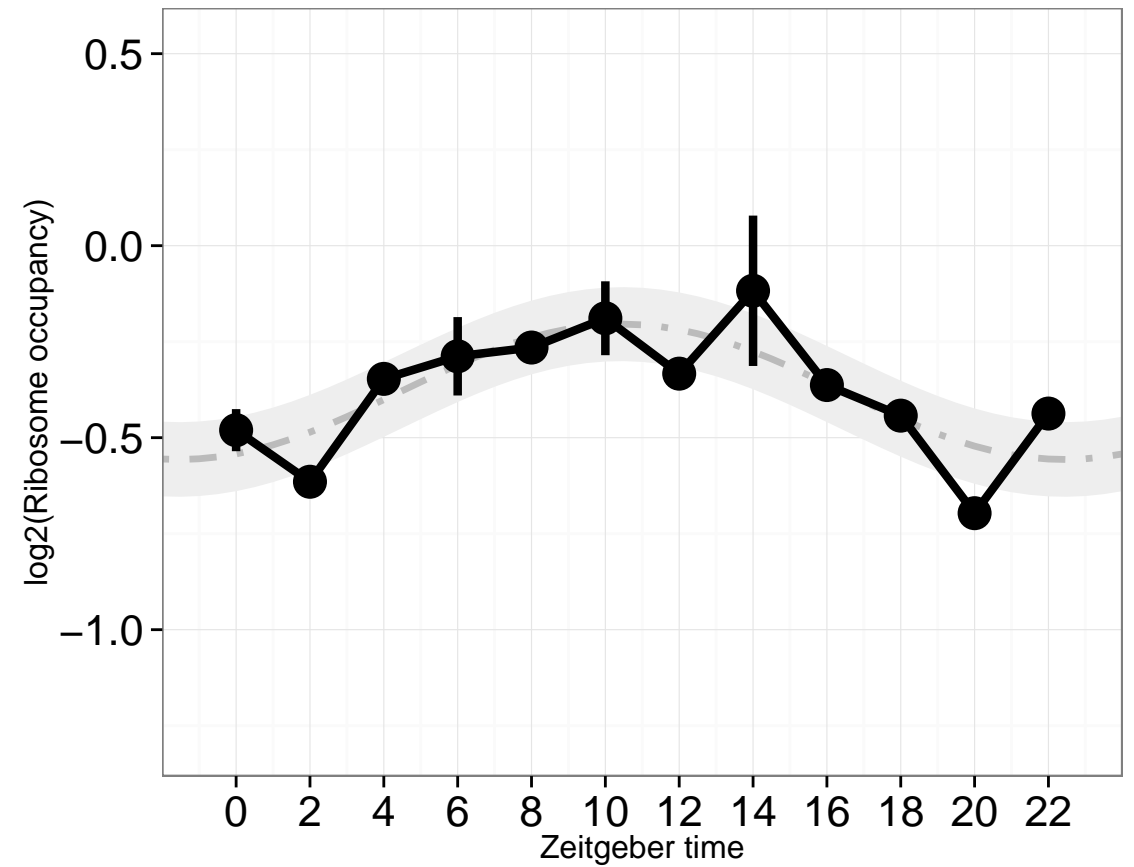

Supplement: Supplementary file 10881 [file 1]

# Lrrc27

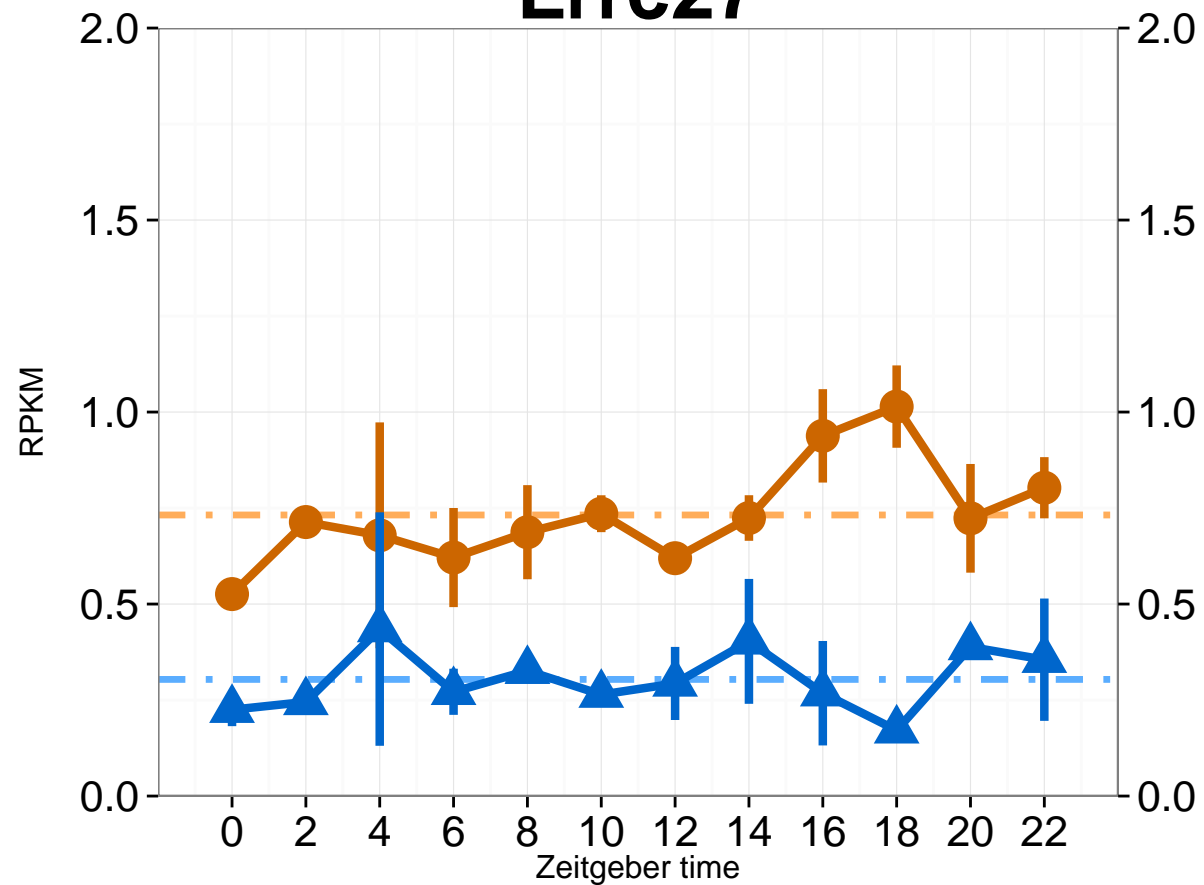

# Lrrc27

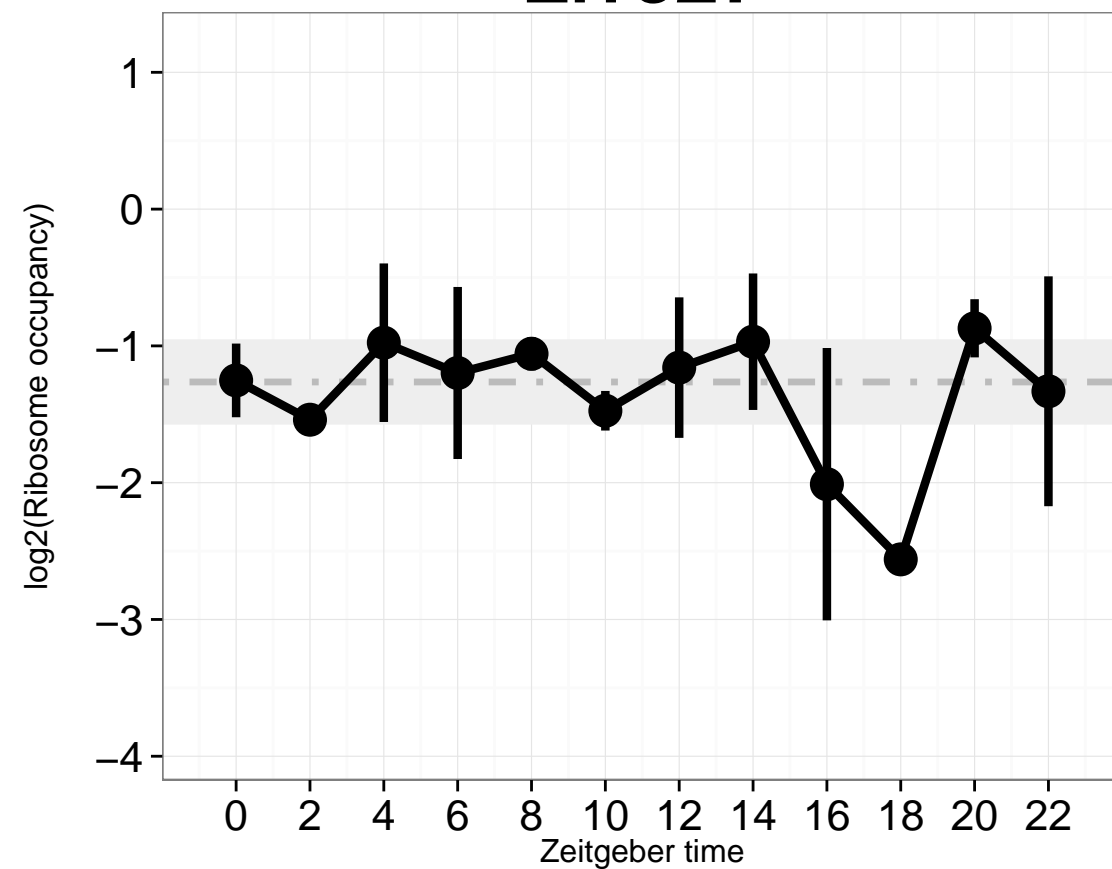

Supplement: Supplementary file 10882 [file 1]

# lqgap2

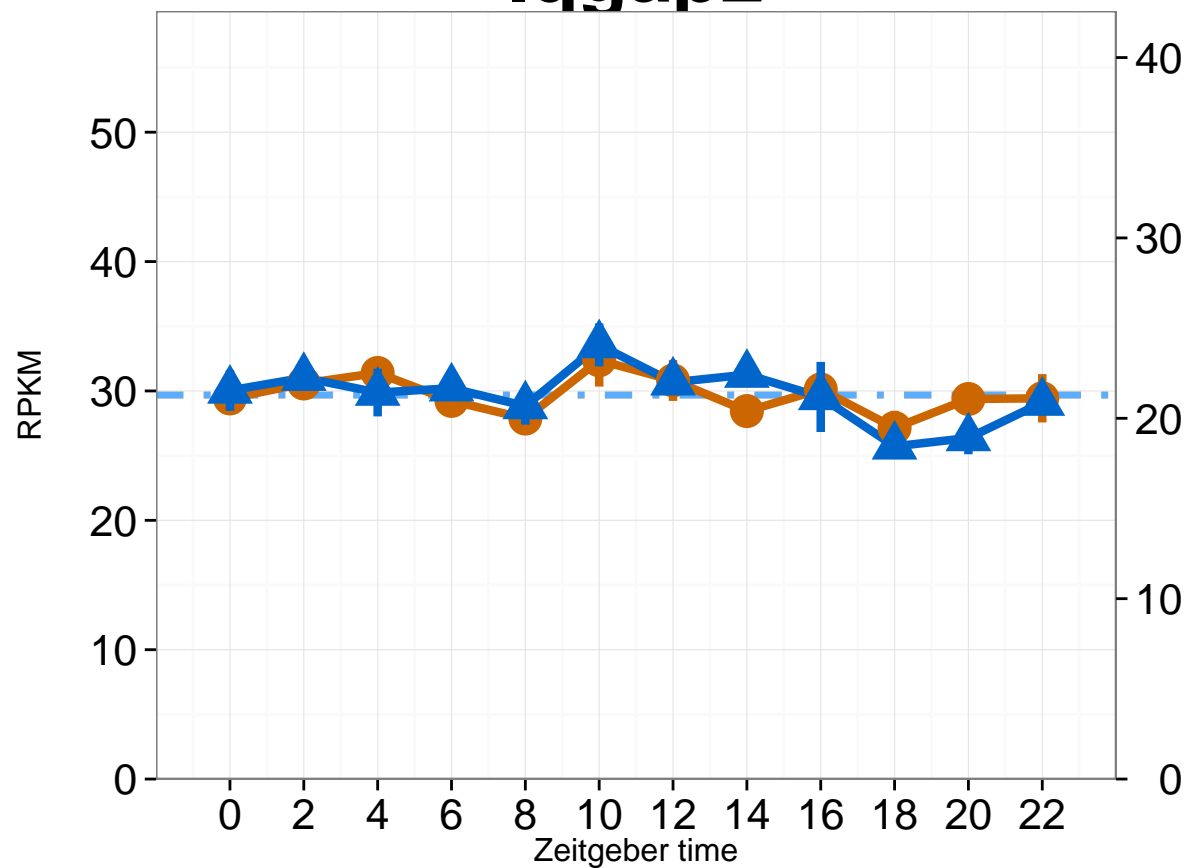

# lqgap2

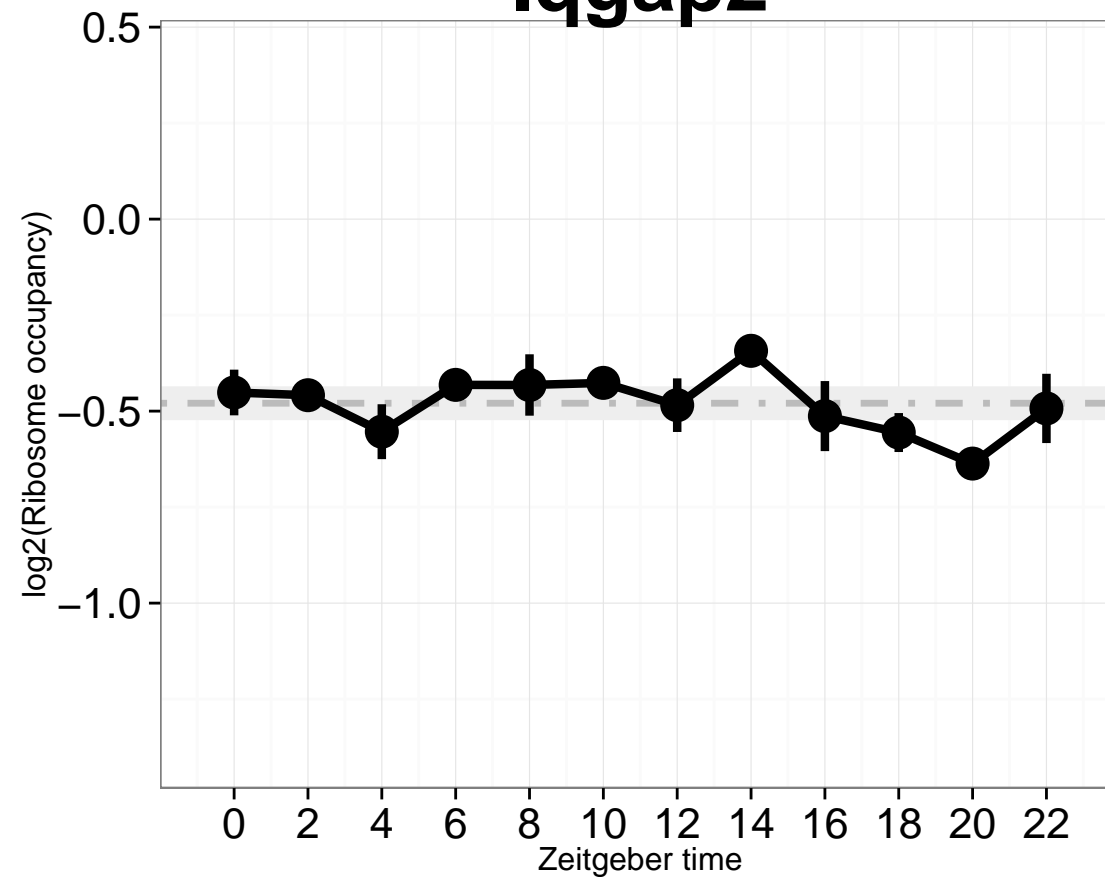

Supplement: Supplementary file 10883 [file 1]

# Igsf3

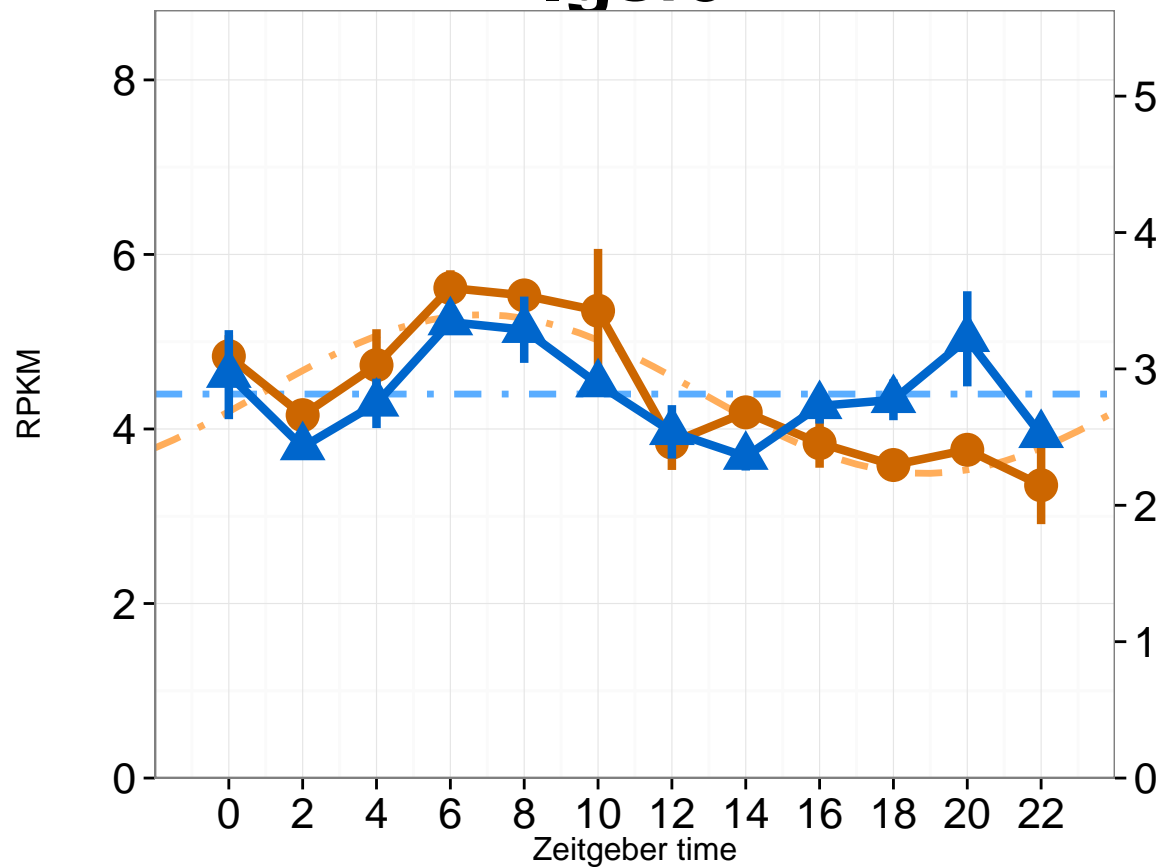

# Igsf3

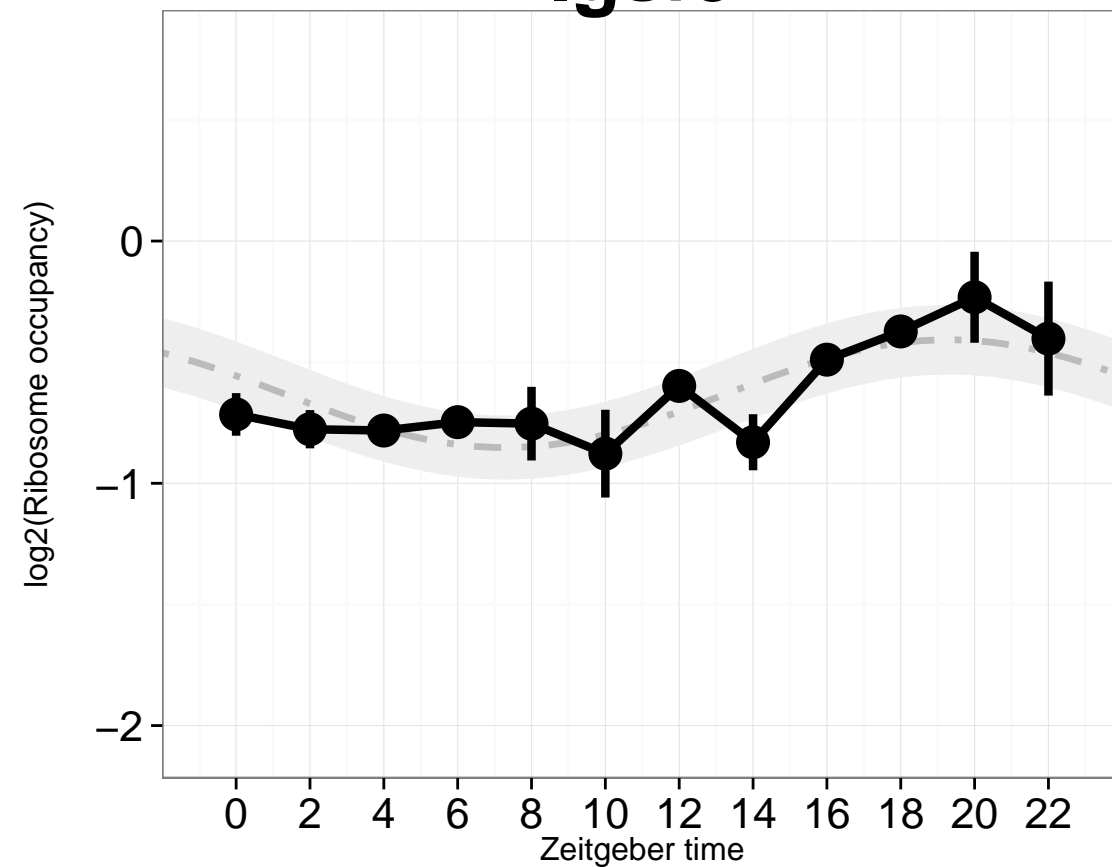

Supplement: Supplementary file 10884 [file 1]

# Spred1

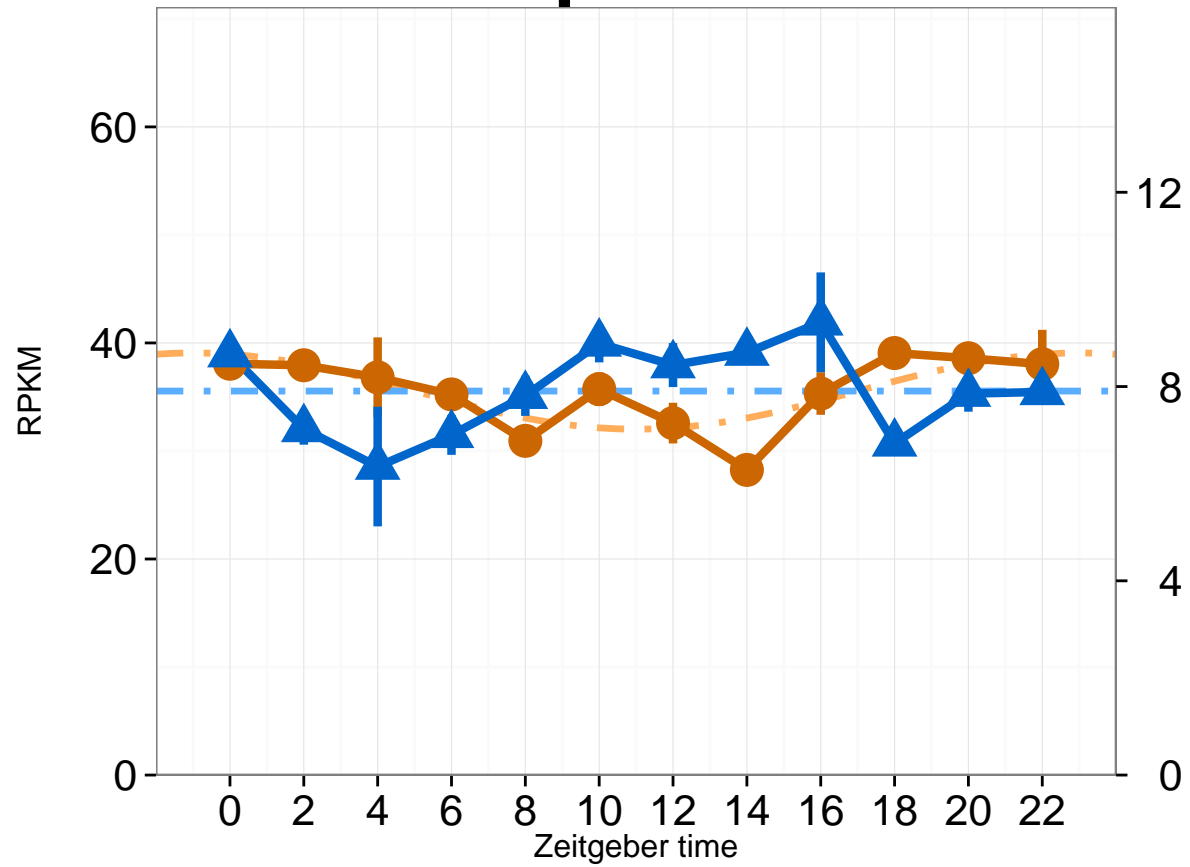

# Spred1

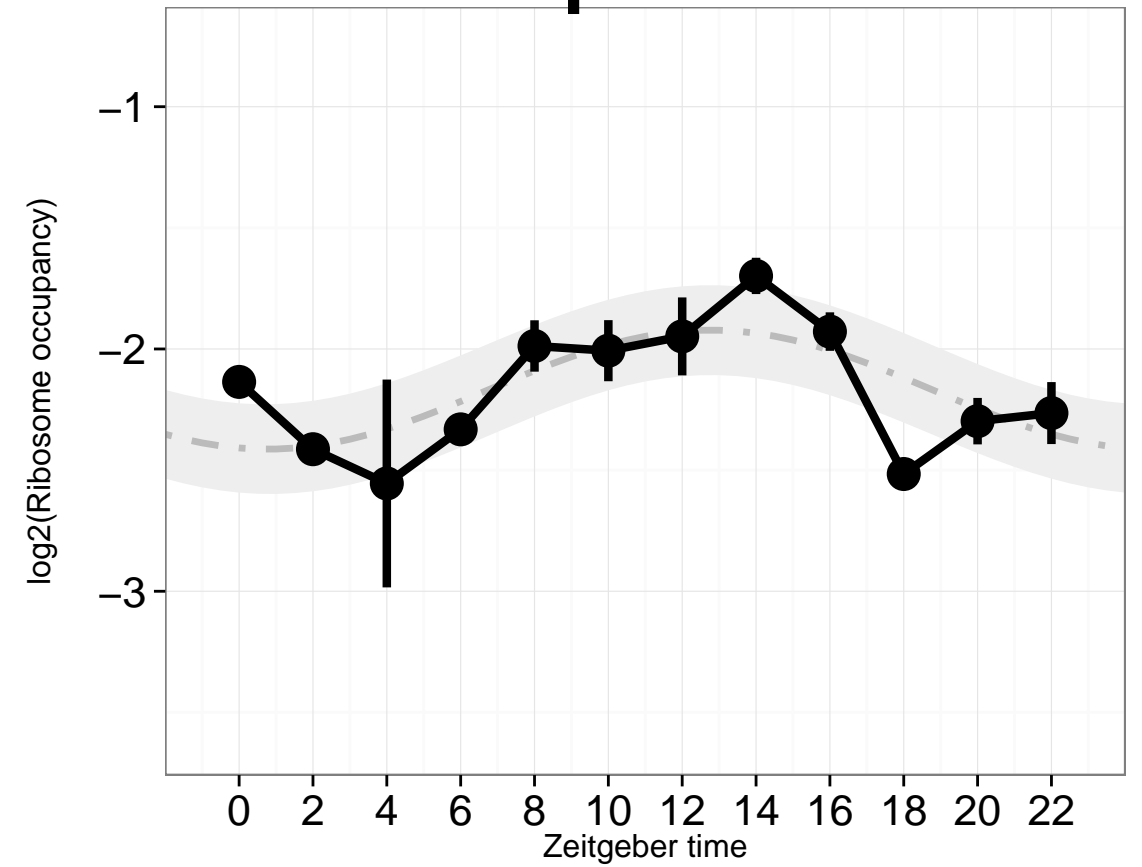

Supplement: Supplementary file 10885 [file 1]

## Fut9

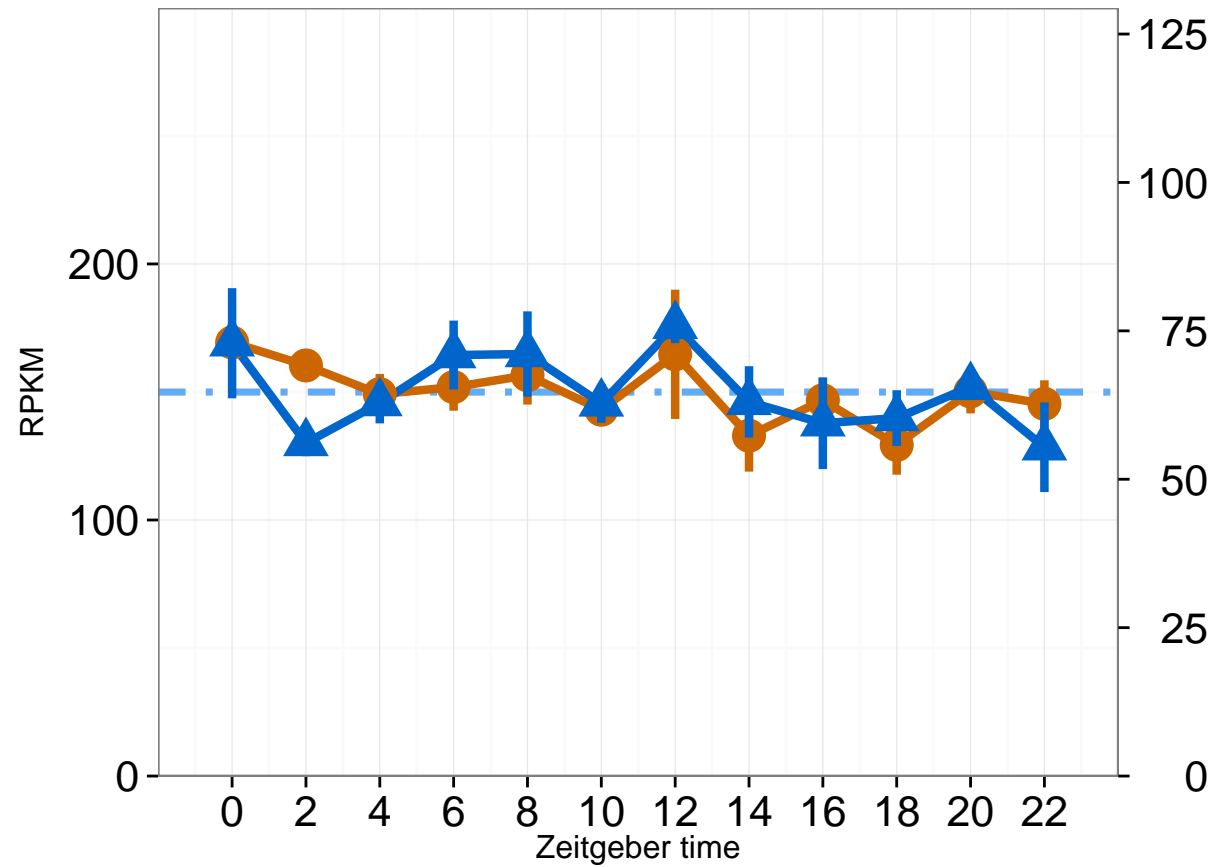

## Fut9

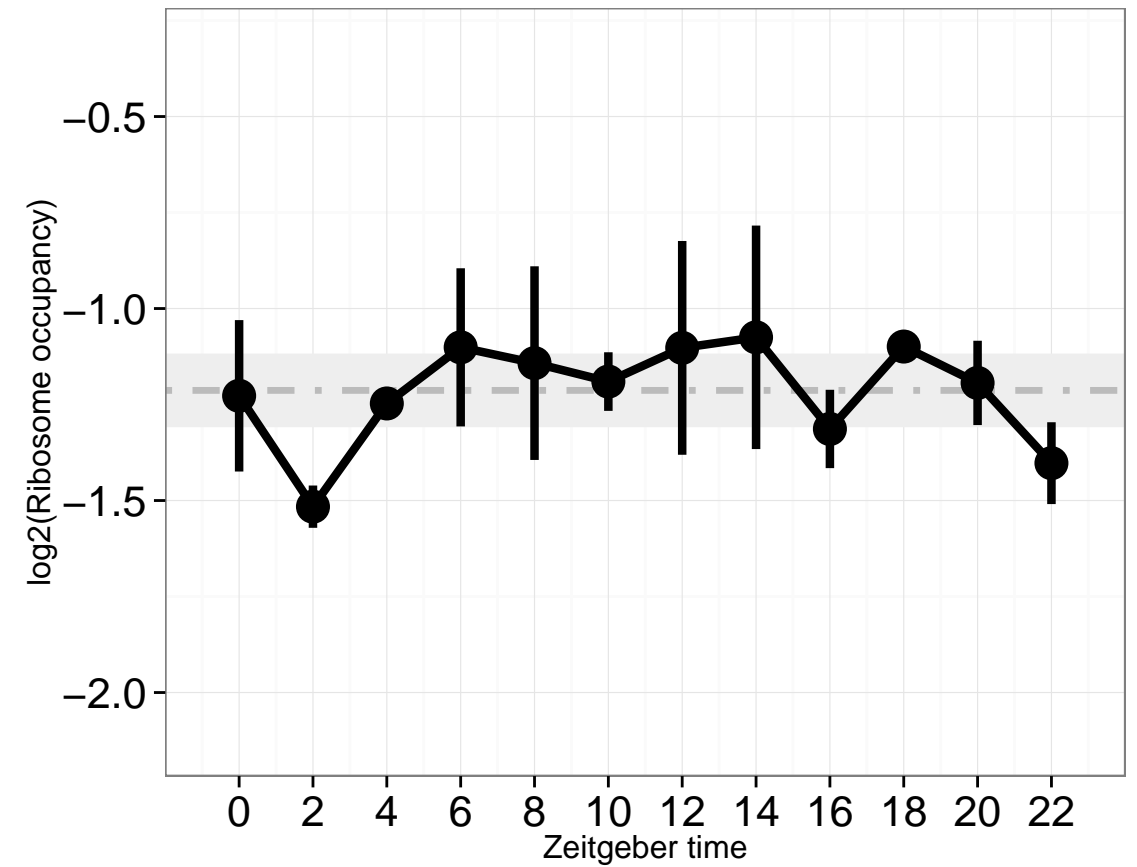

Supplement: Supplementary file 10886 [file 1]

## Oas3

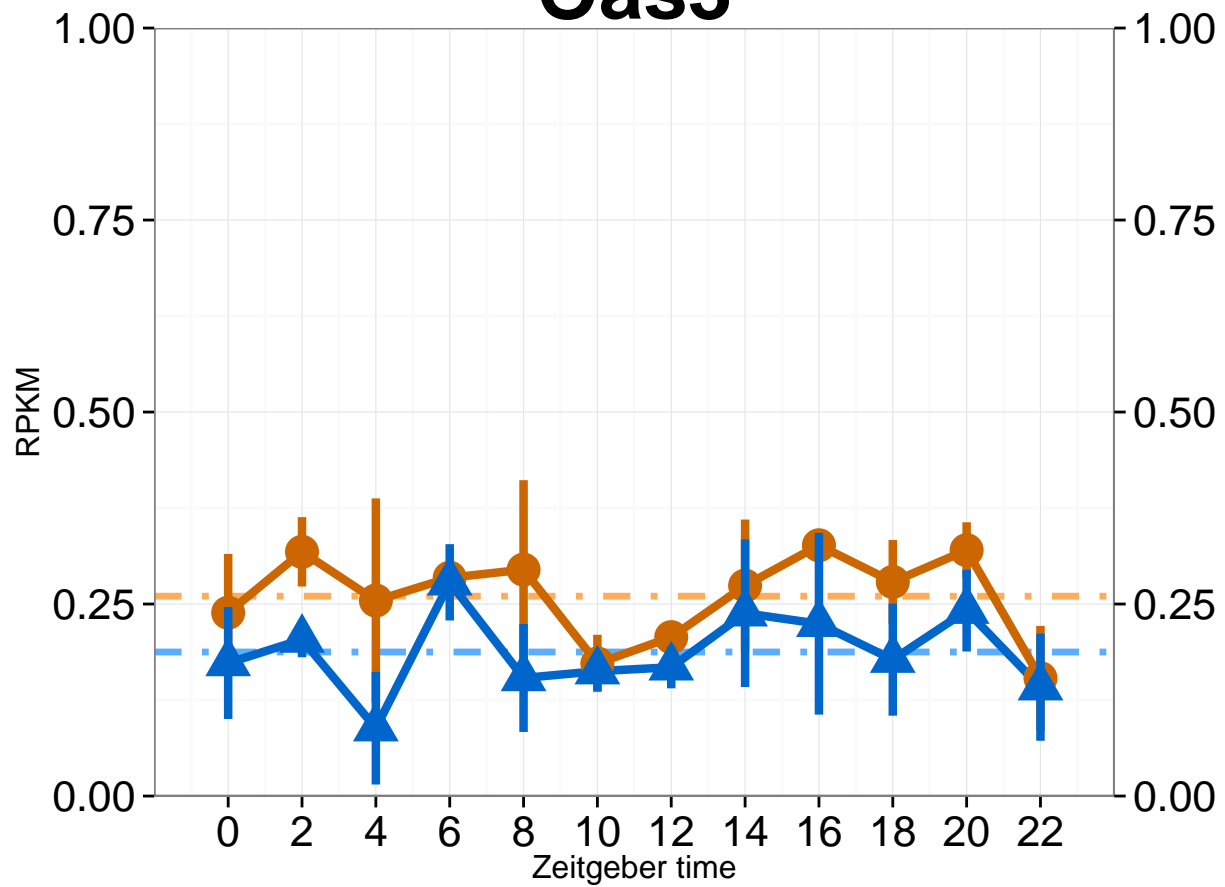

## Oas3

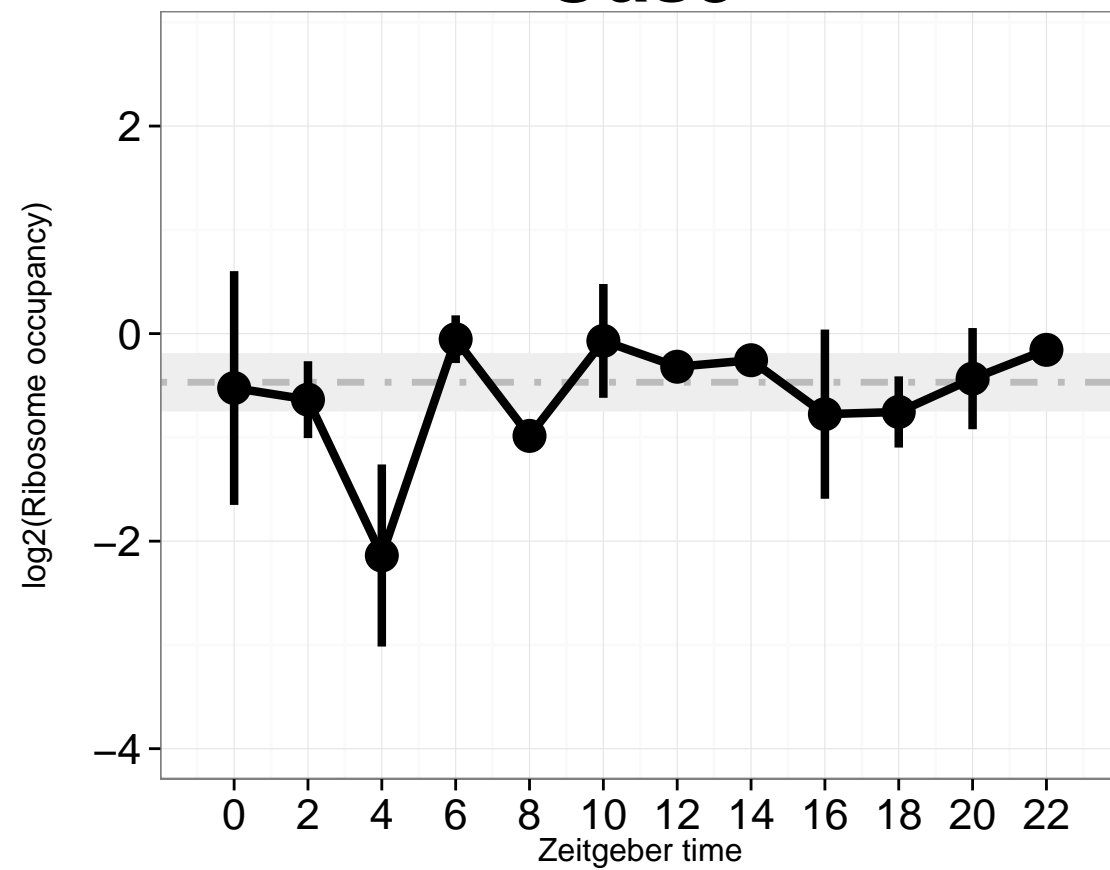

Supplement: Supplementary file 10887 [file 1]

## Mypop

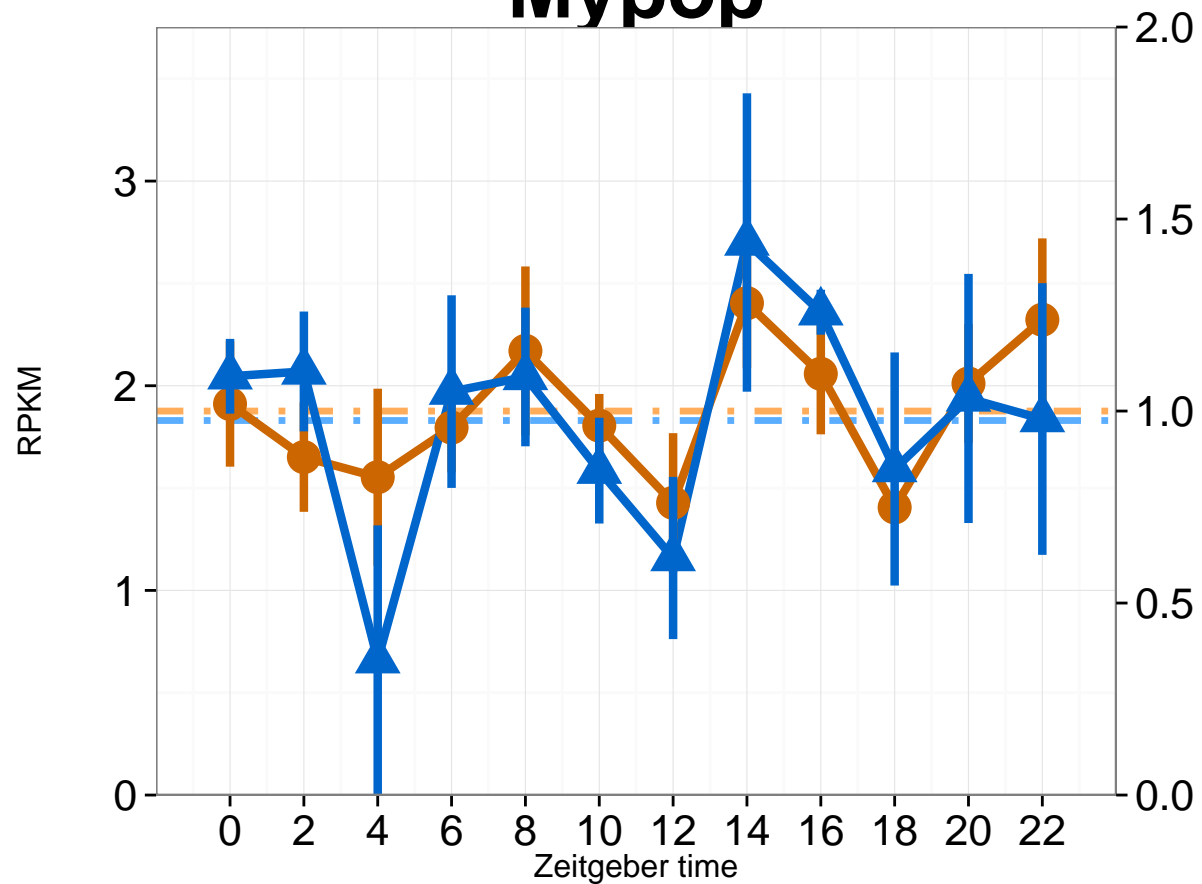

## Mypop

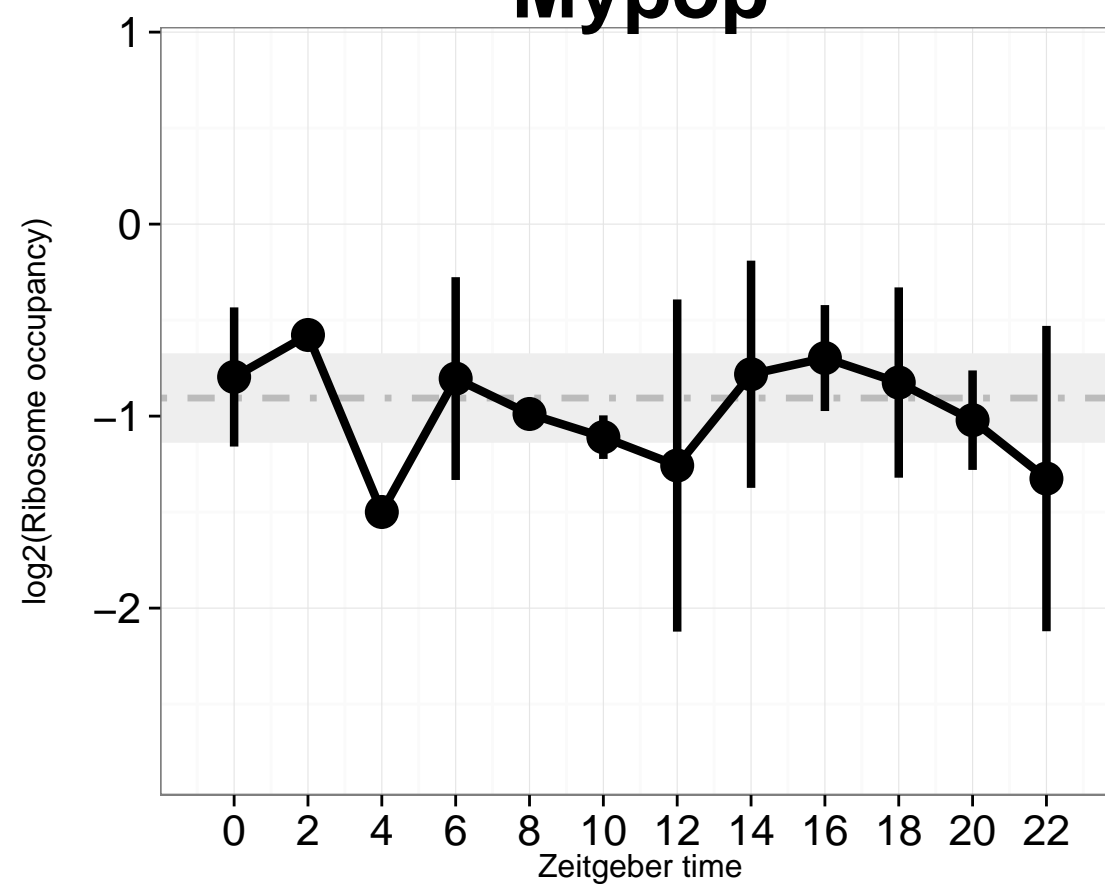

Supplement: Supplementary file 10888 [file 1]

## Lima1

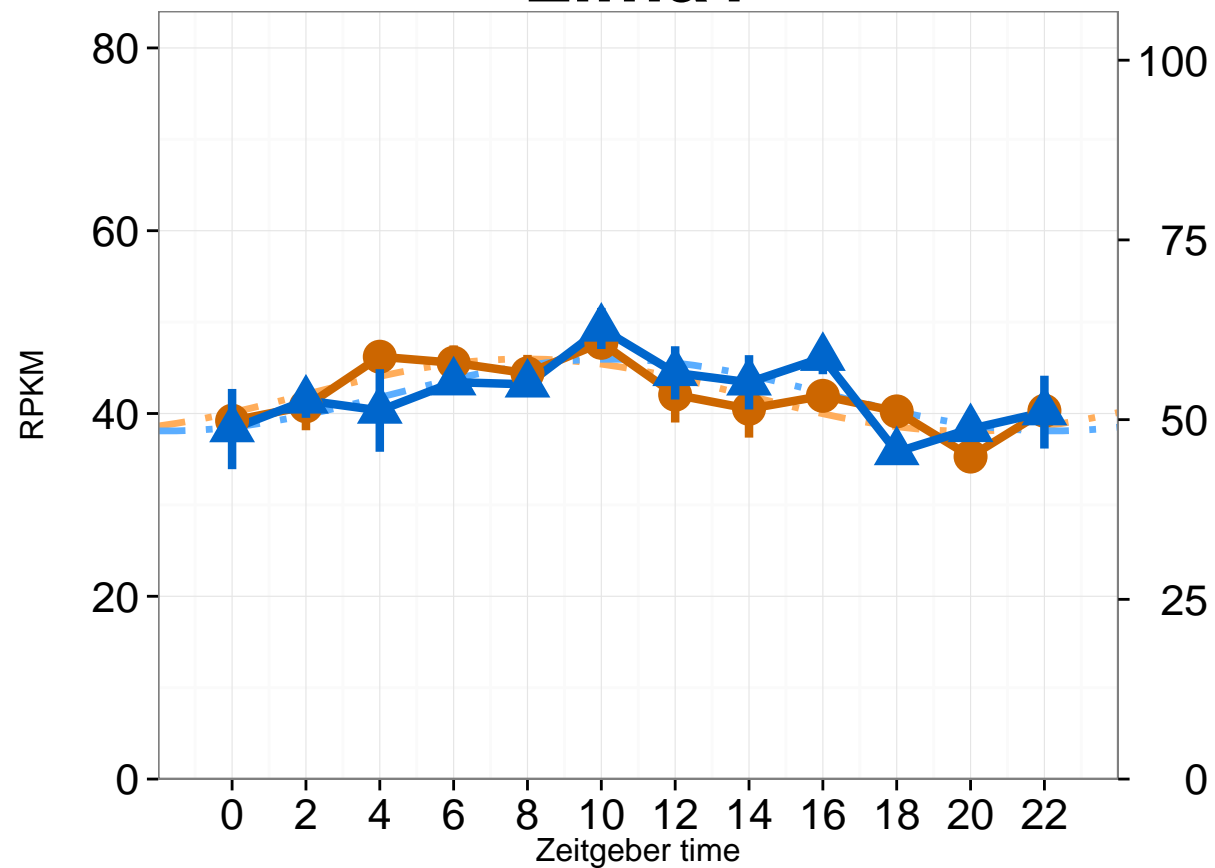

## Lima1

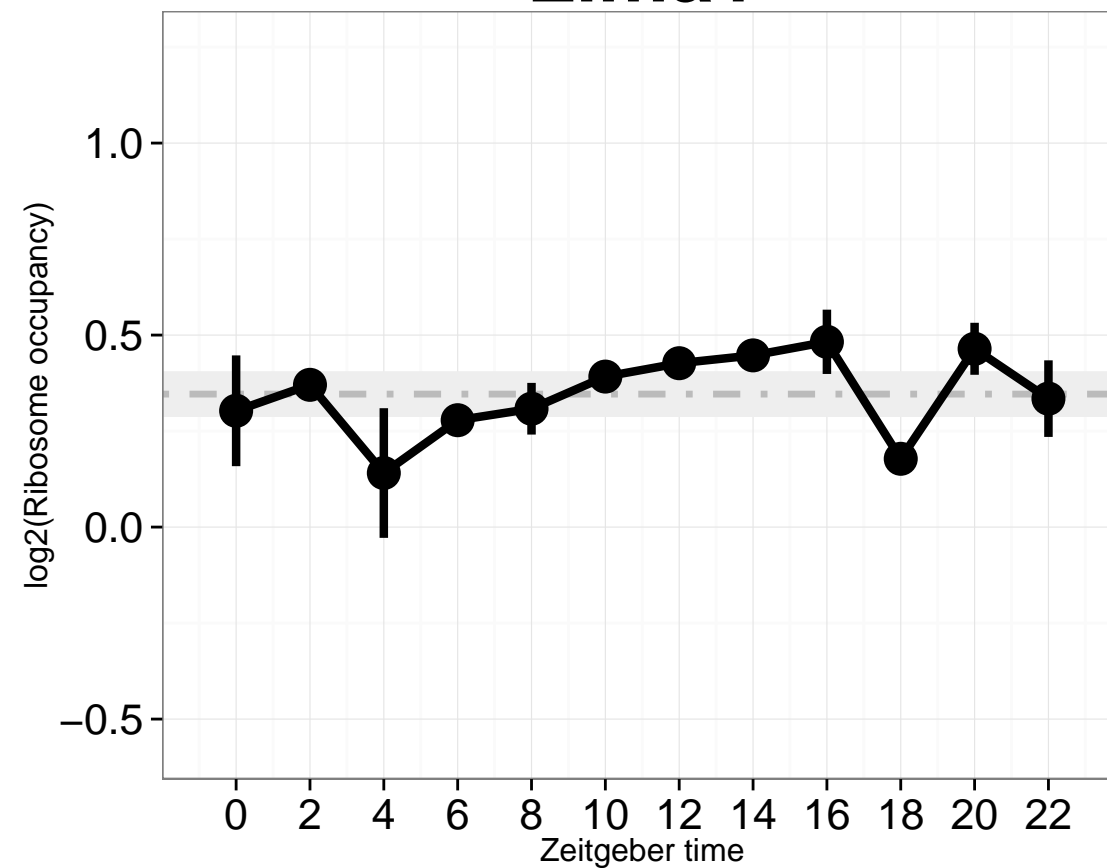

Supplement: Supplementary file 10889 [file 1]

## Elmo2

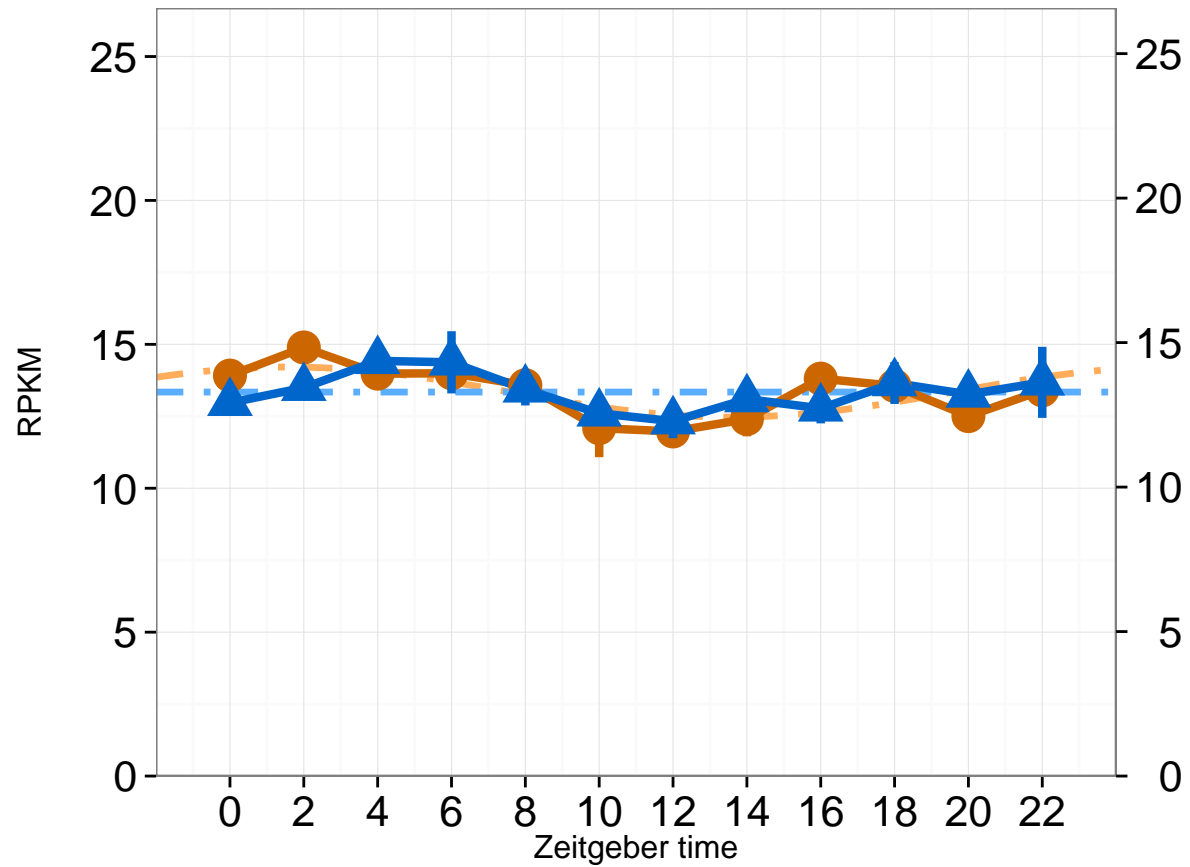

## Elmo2

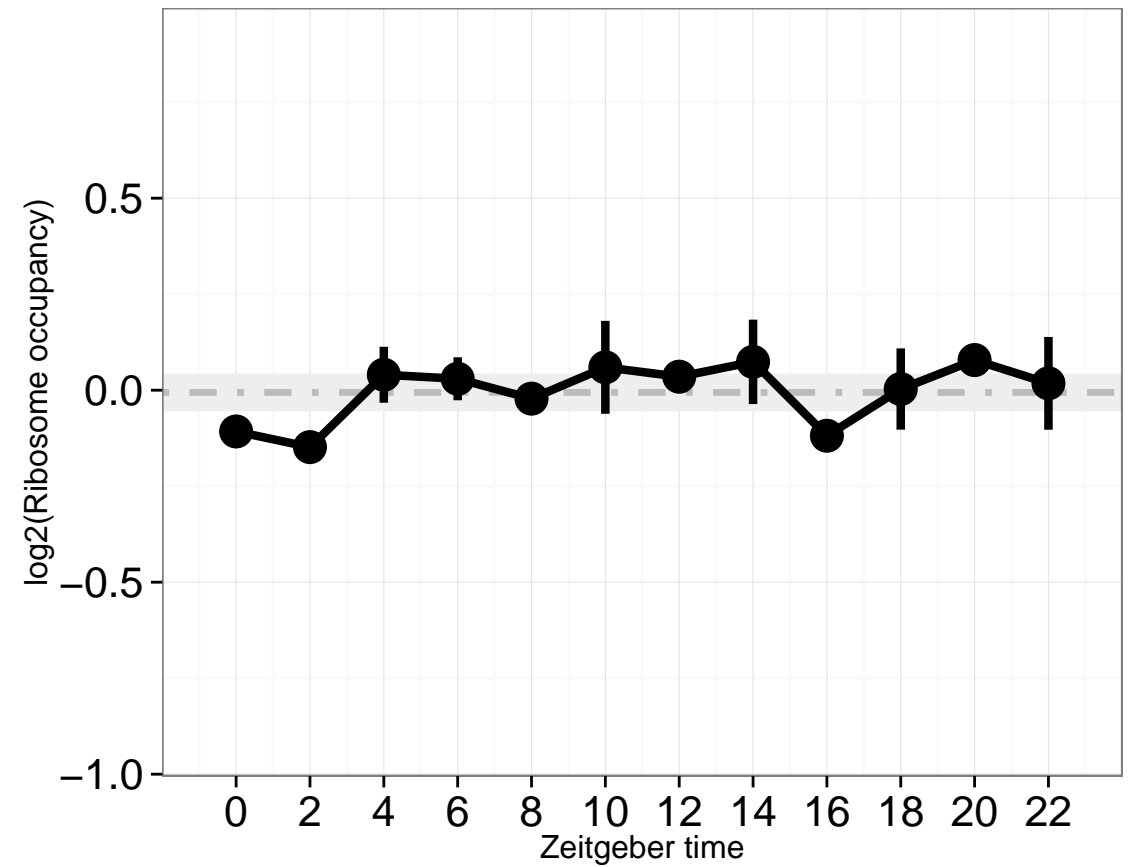

Supplement: Supplementary file 10890 [file 1]

# Zfp125

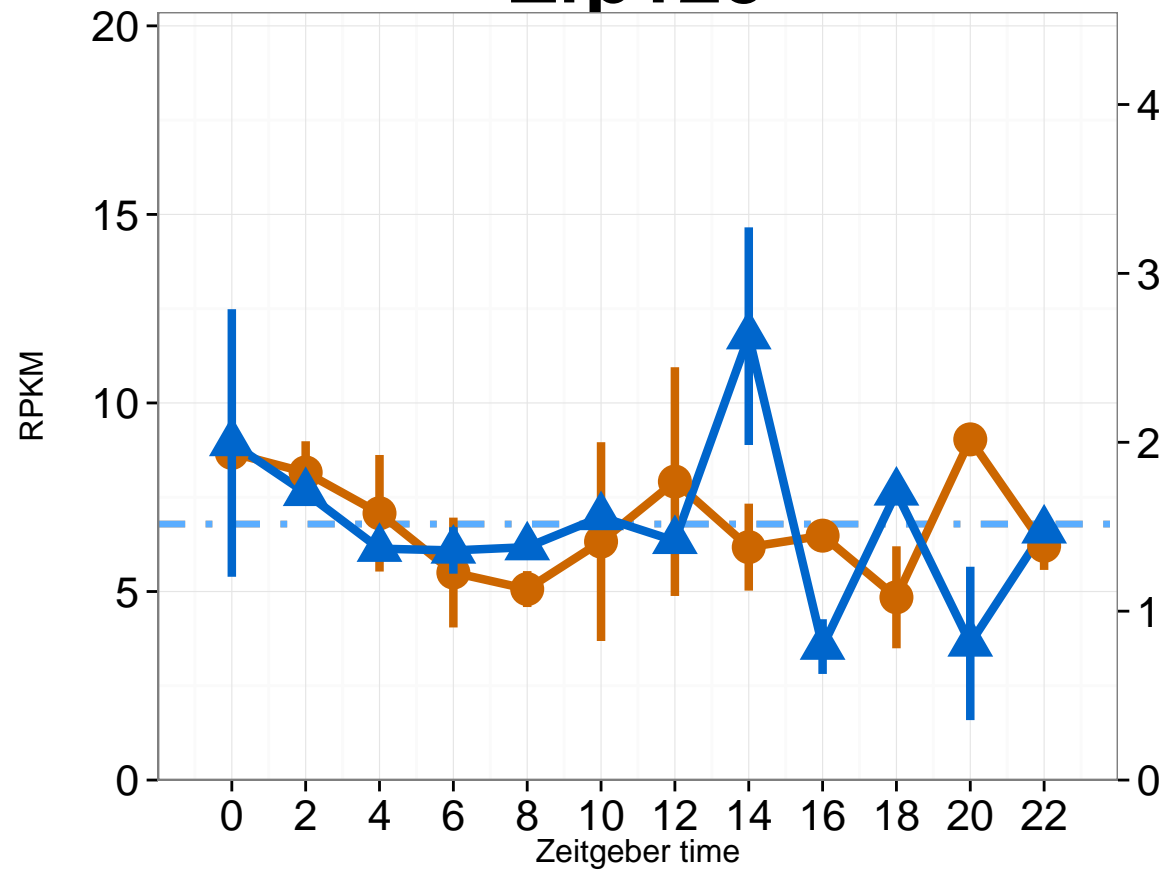

# Zfp125

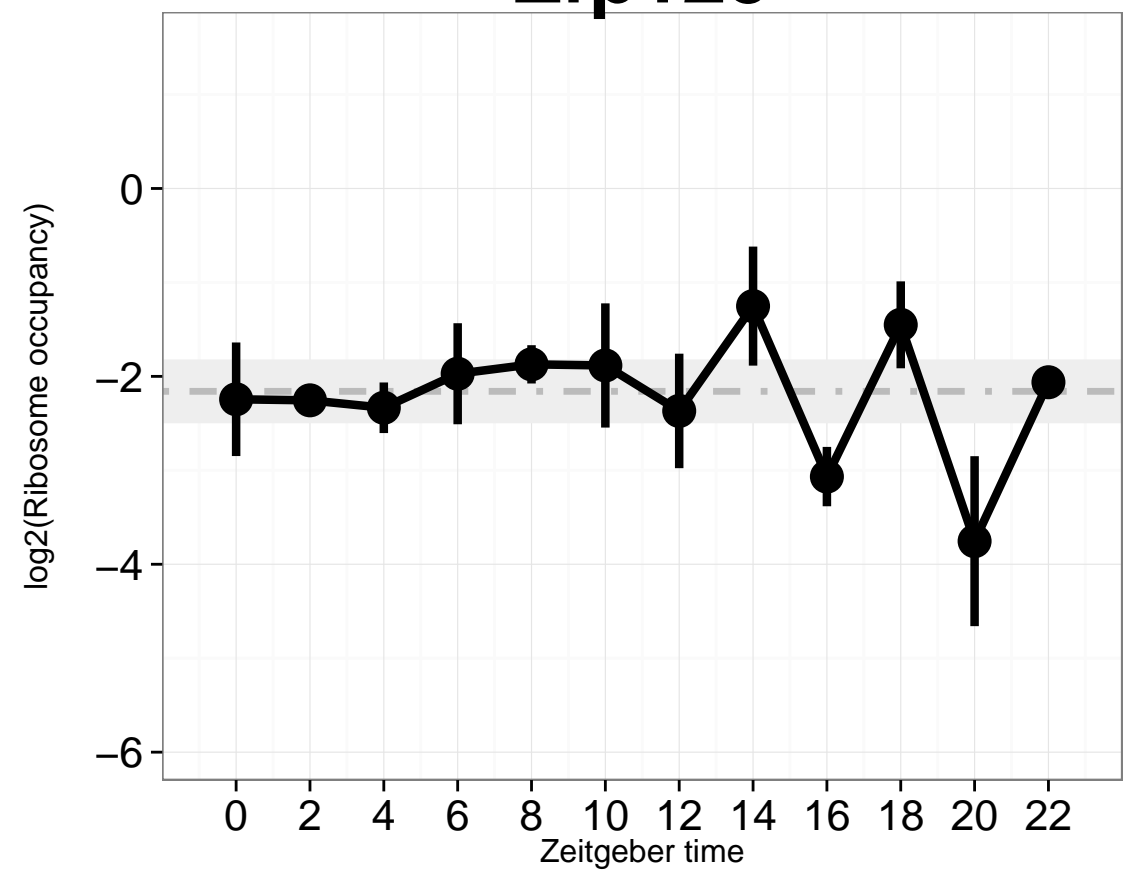

Supplement: Supplementary file 10891 [file 1]

## Ahsa2

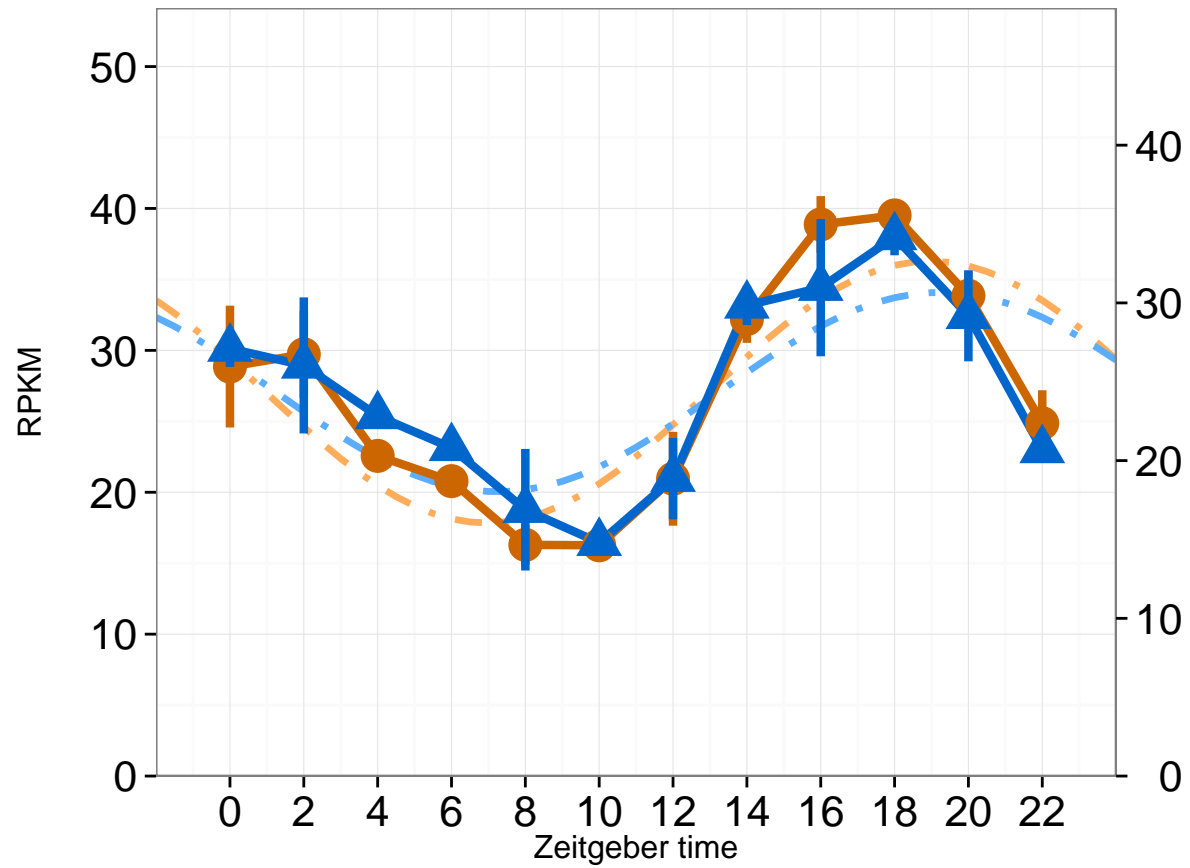

## Ahsa2

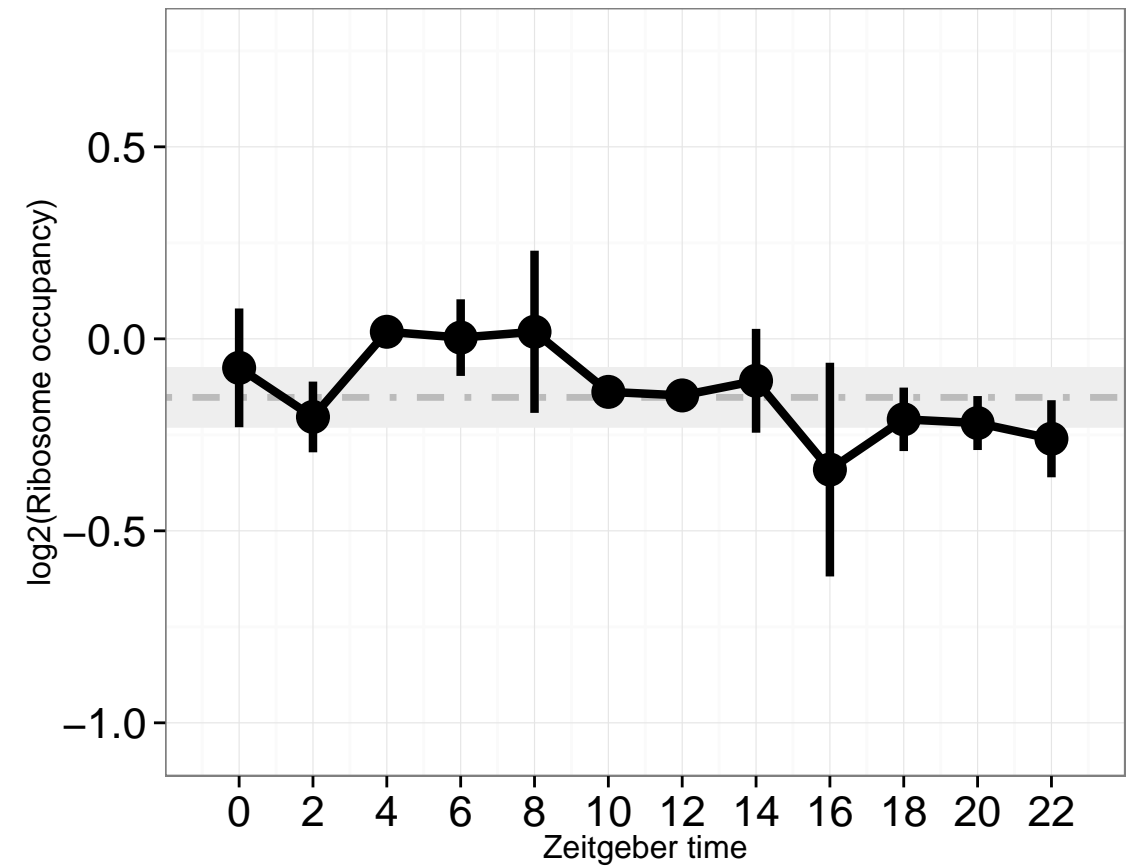

Supplement: Supplementary file 10892 [file 1]

# Mrps11

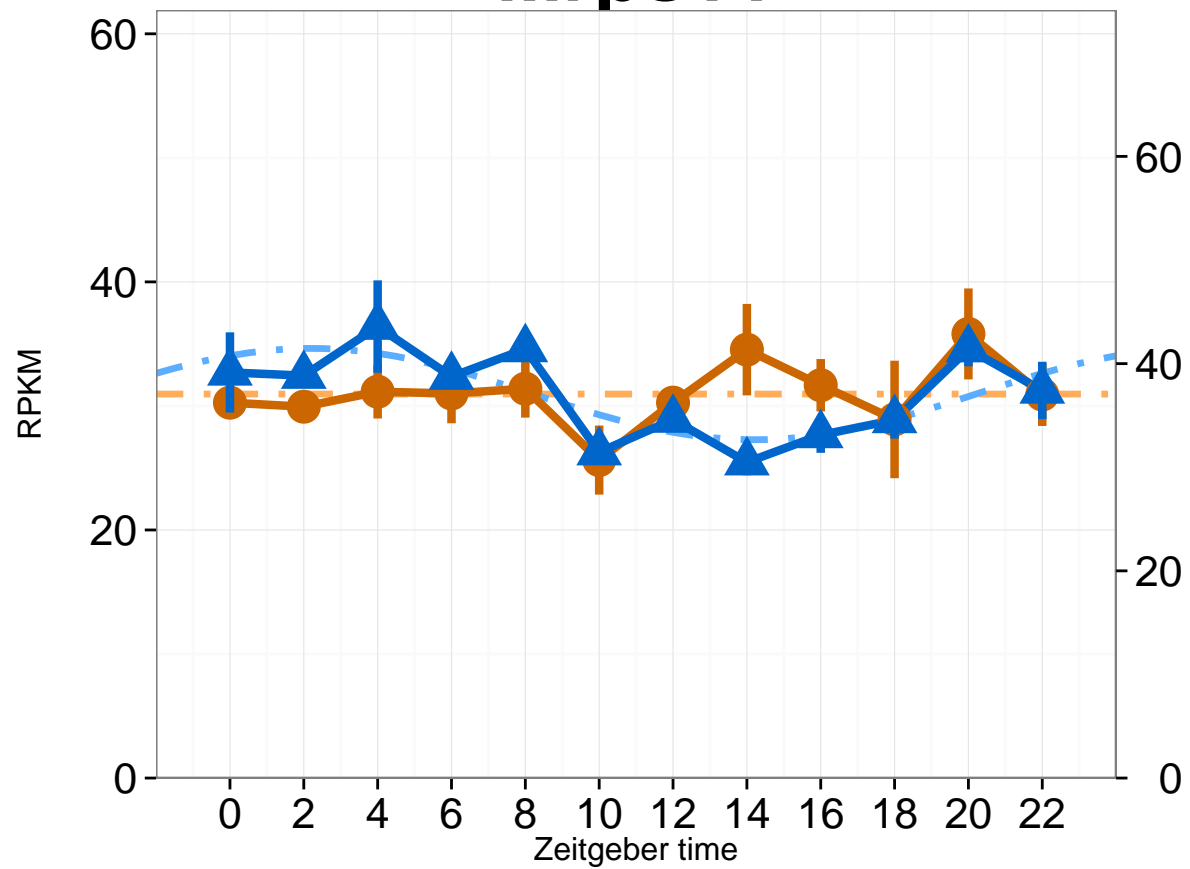

# Mrps11

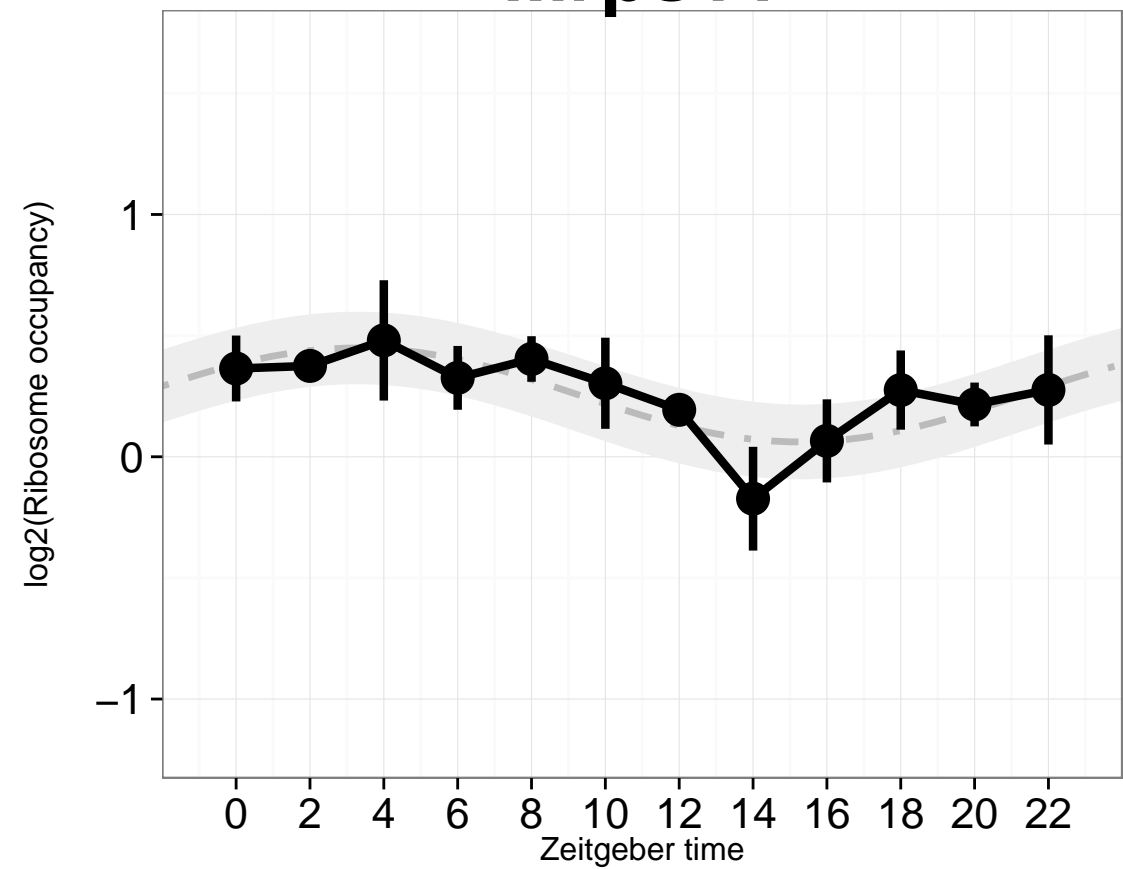

Supplement: Supplementary file 10893 [file 1]

## Dgkz

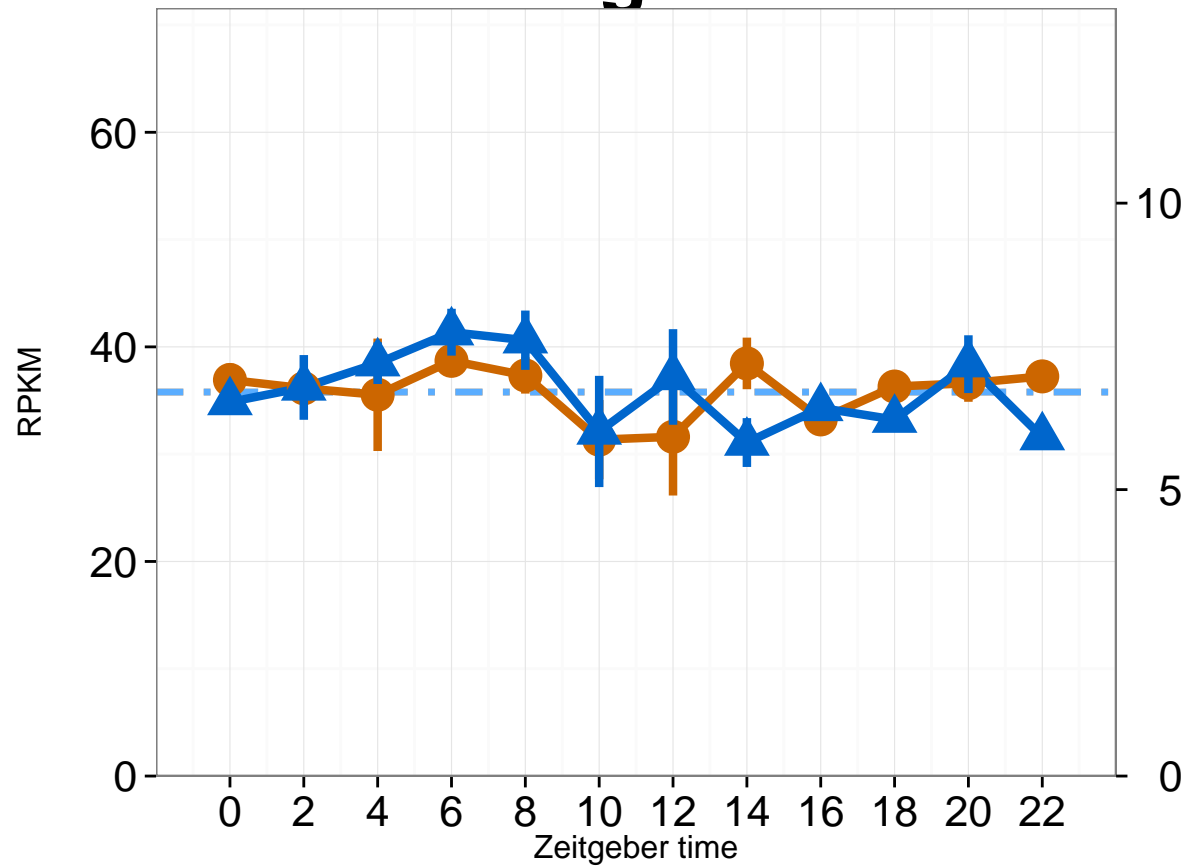

## Dgkz

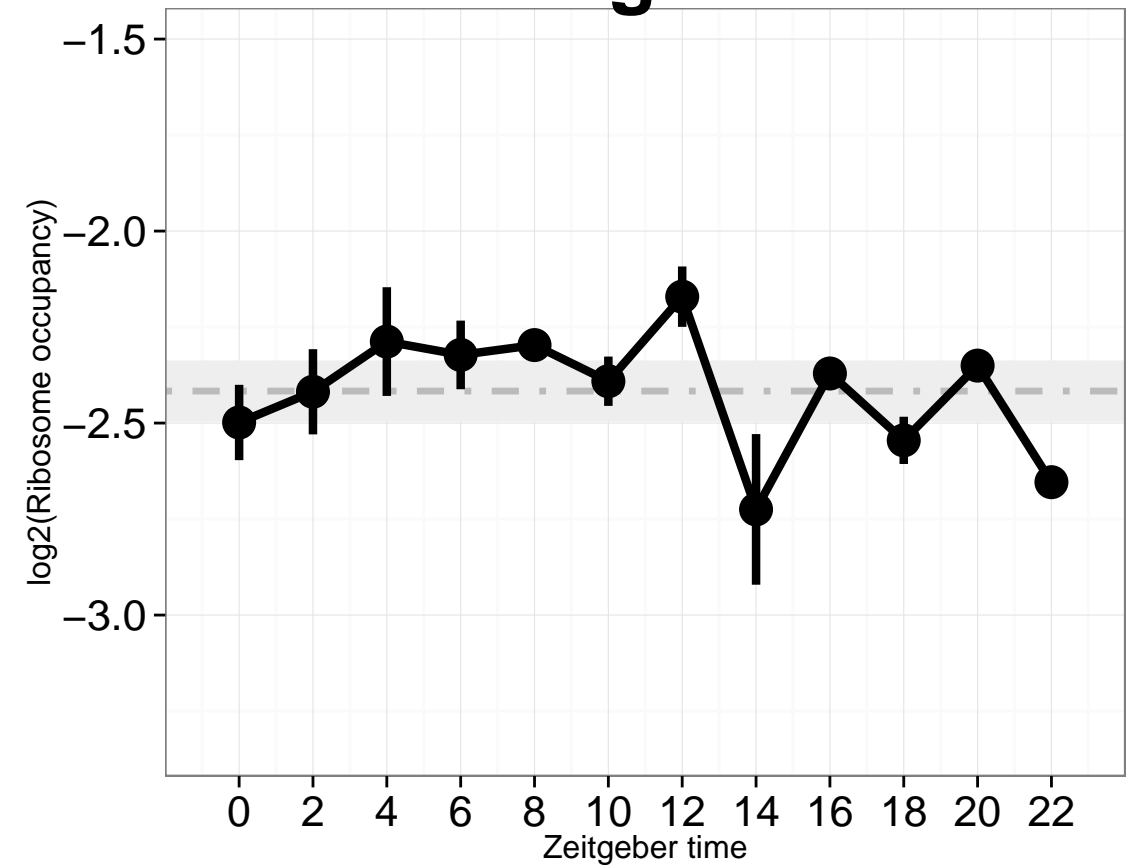

Supplement: Supplementary file 10894 [file 1]

## Gchfr

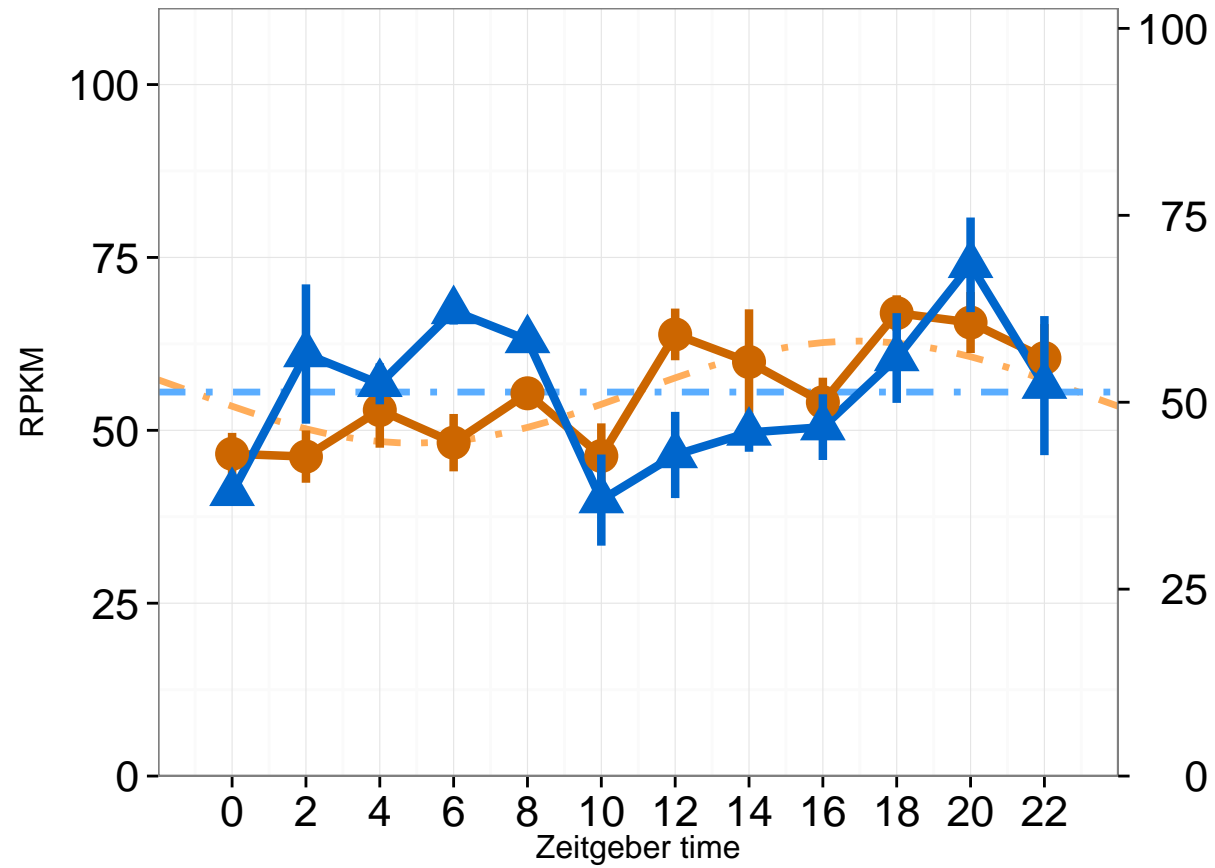

## Gchfr

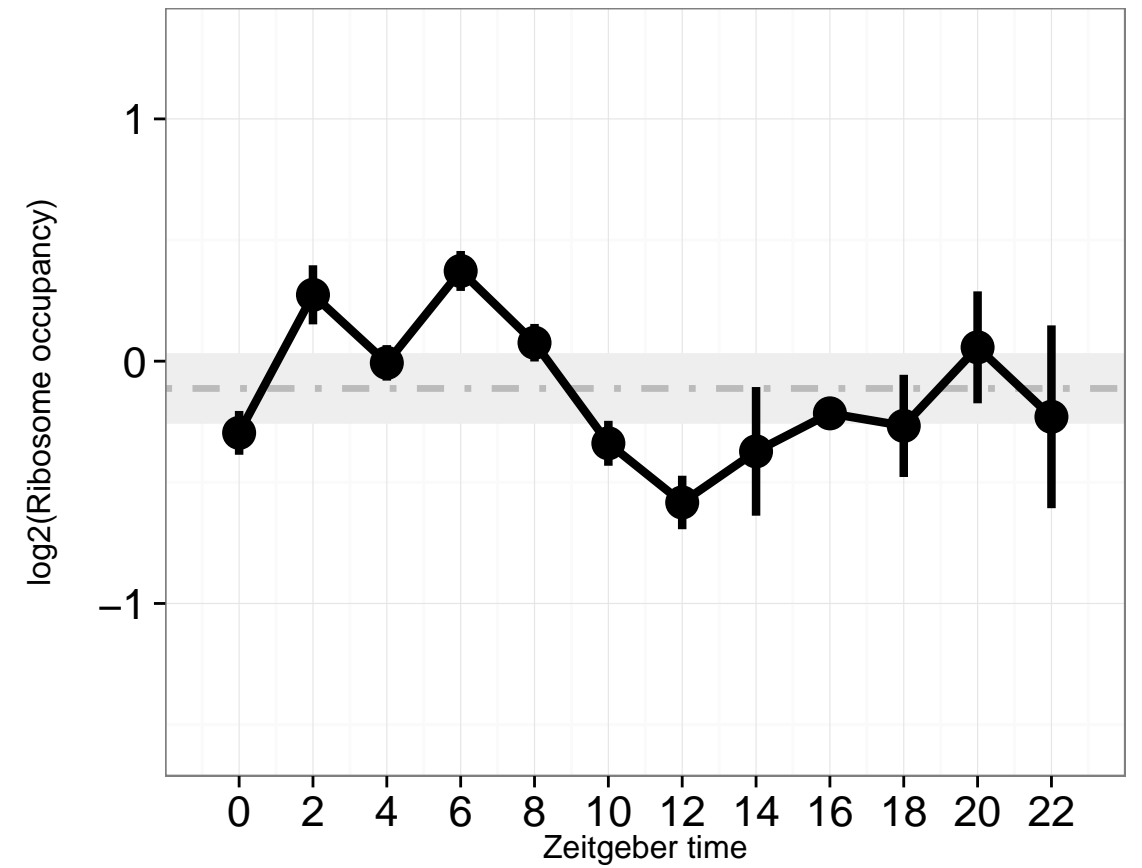

Supplement: Supplementary file 10895 [file 1]

## Glud1

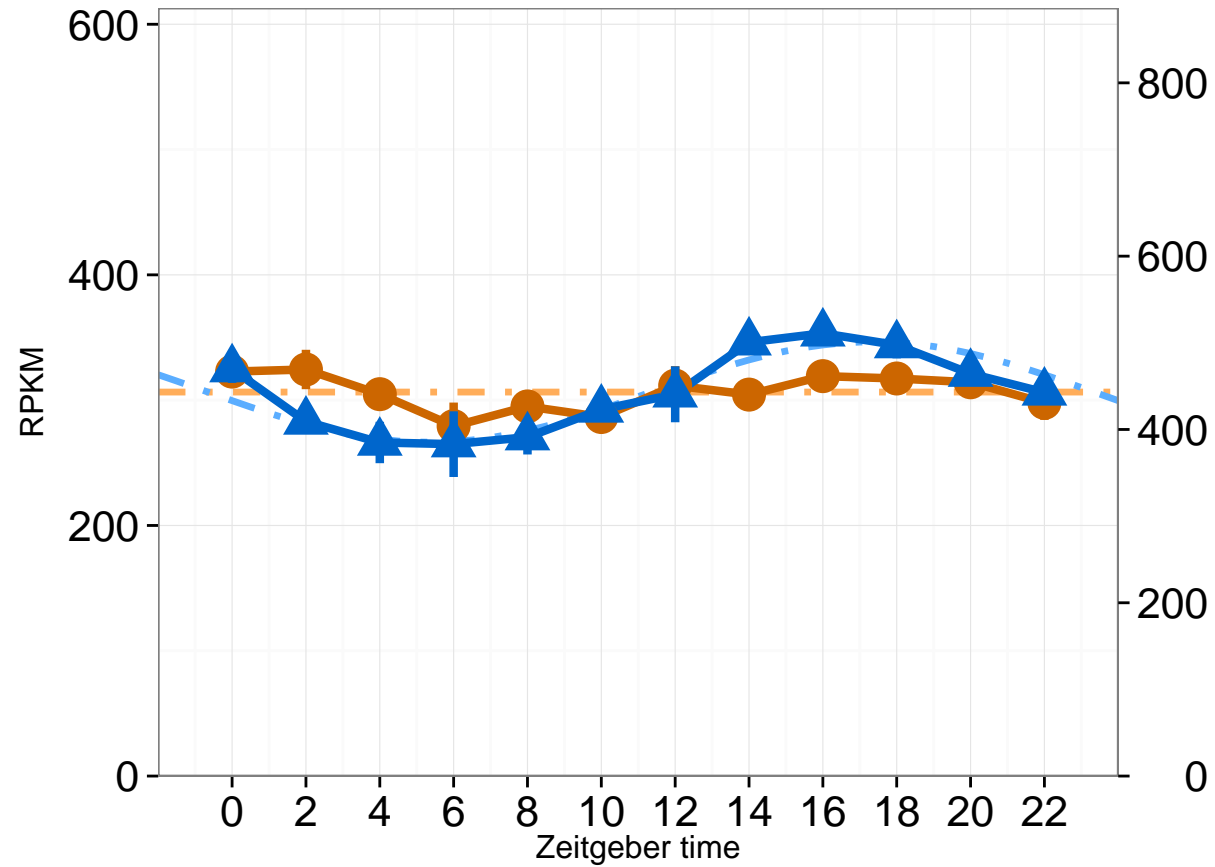

## Glud1

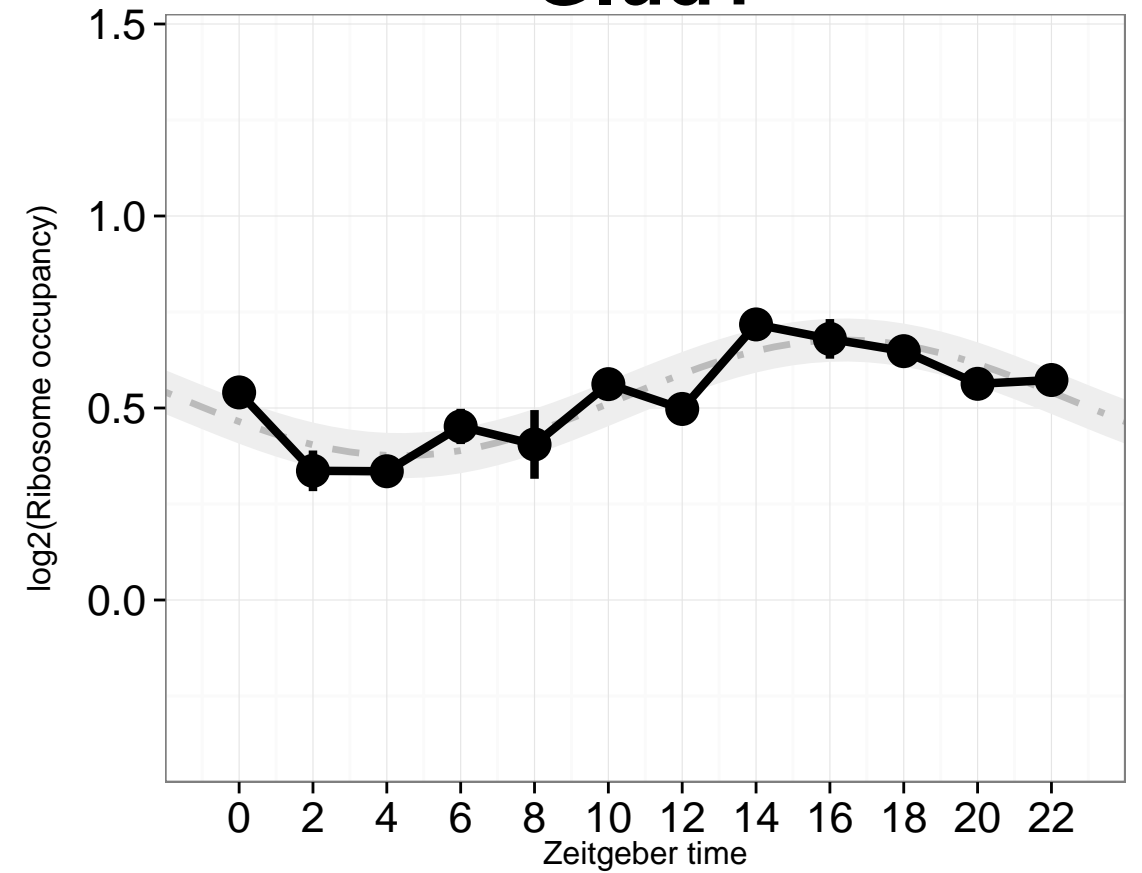

Supplement: Supplementary file 10896 [file 1]

# Rab16

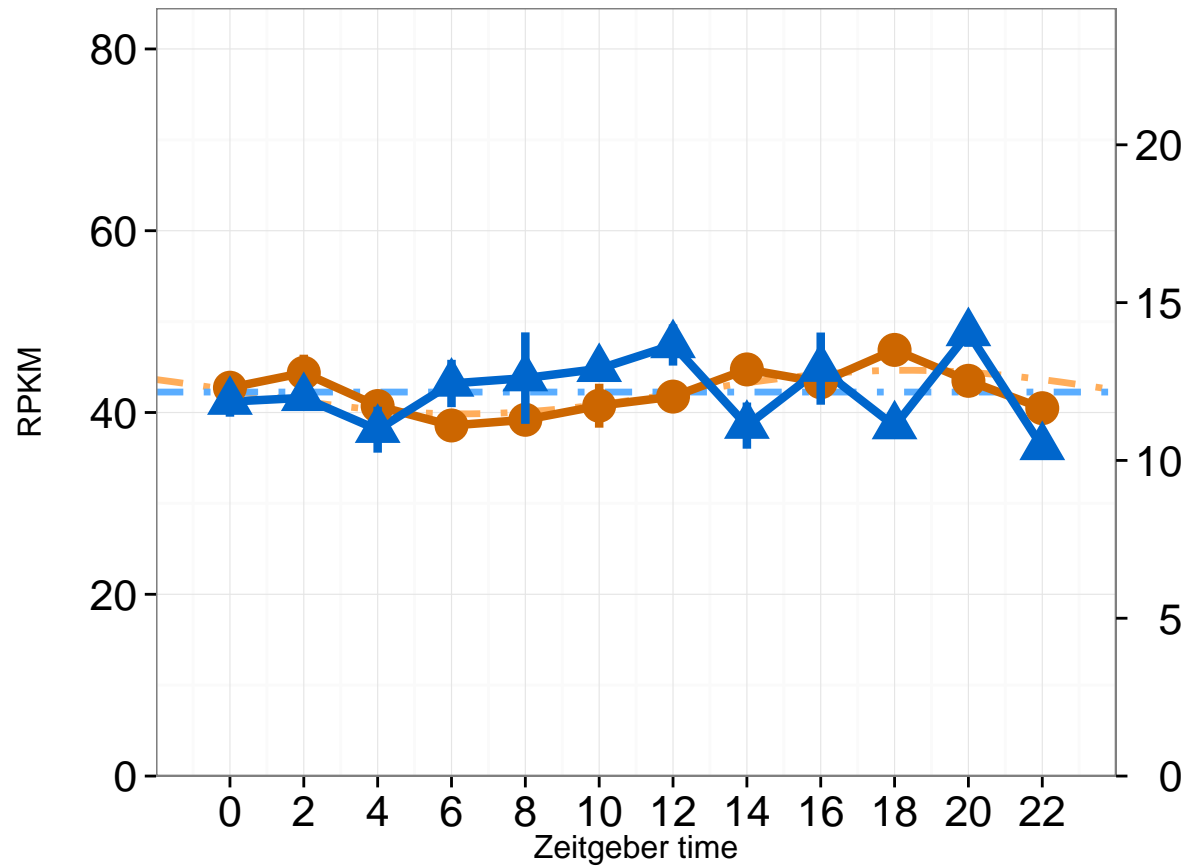

# Rab16

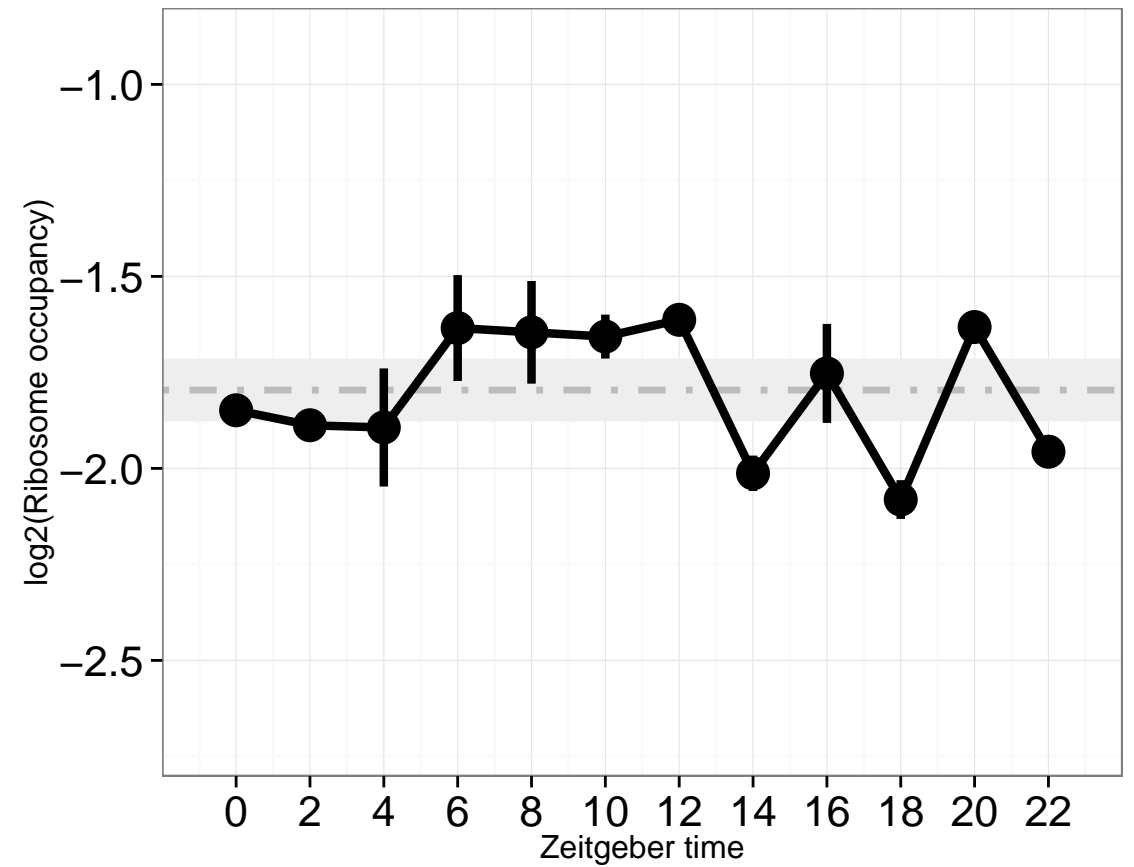

Supplement: Supplementary file 10897 [file 1]

**Cadm2 TR**

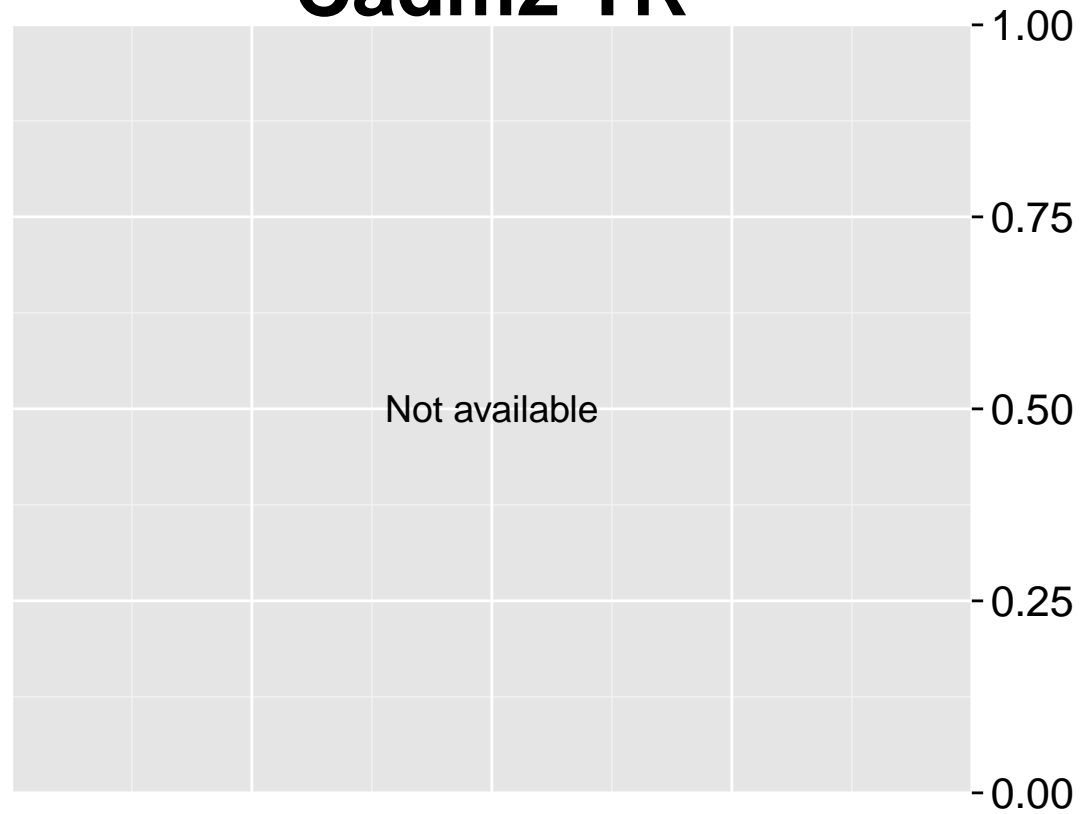

**Cadm2 log2(Ribosome occupancy**

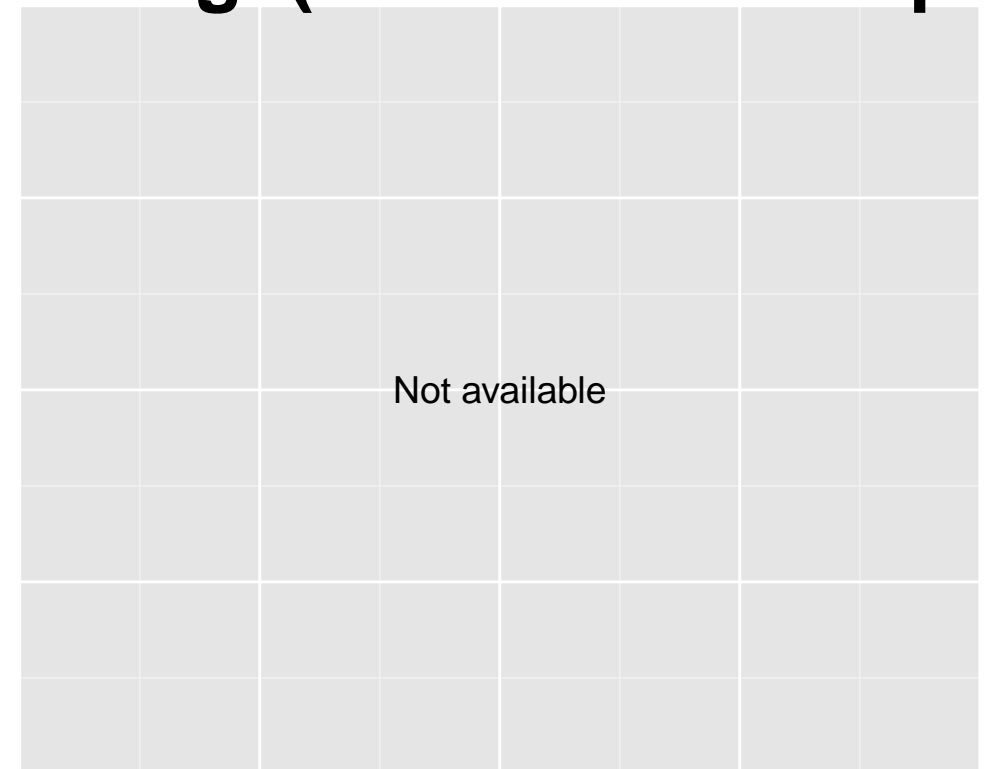

Supplement: Supplementary file 10898 [file 1]

## Kifap3

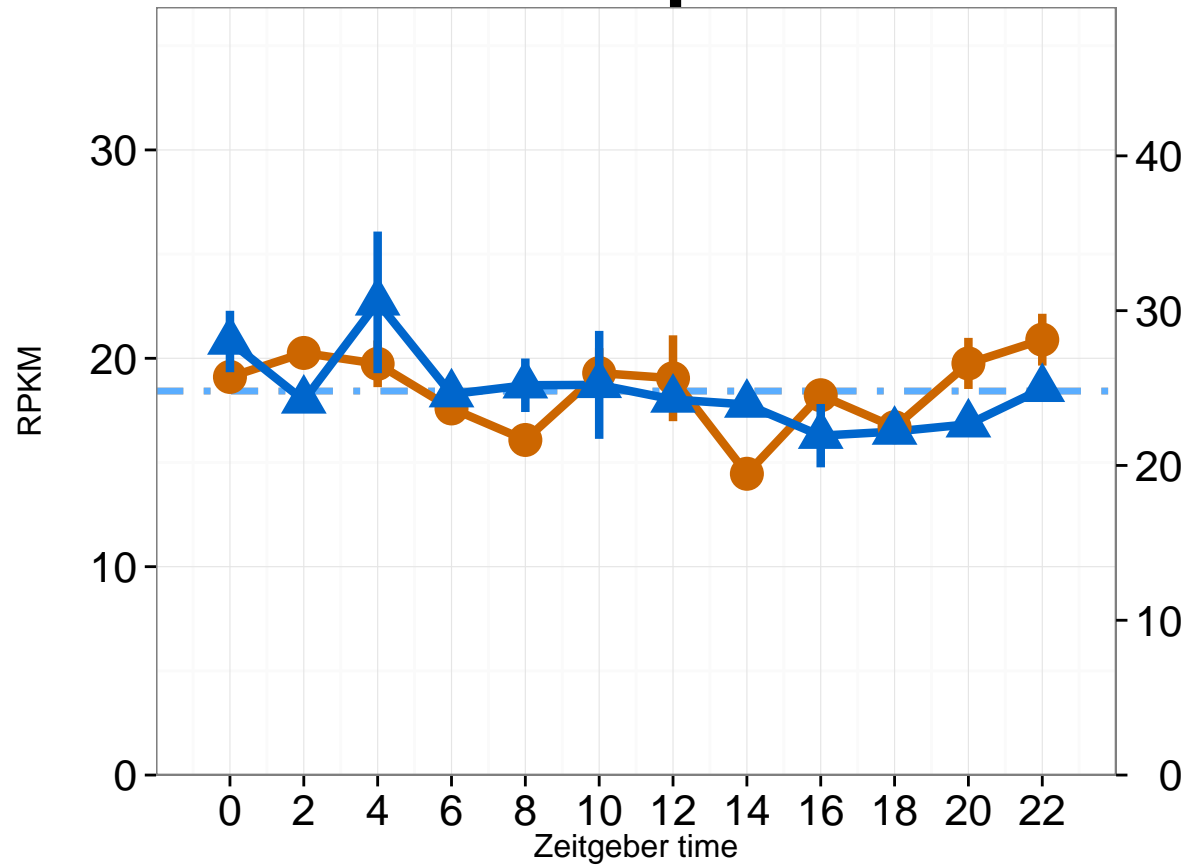

## Kifap3

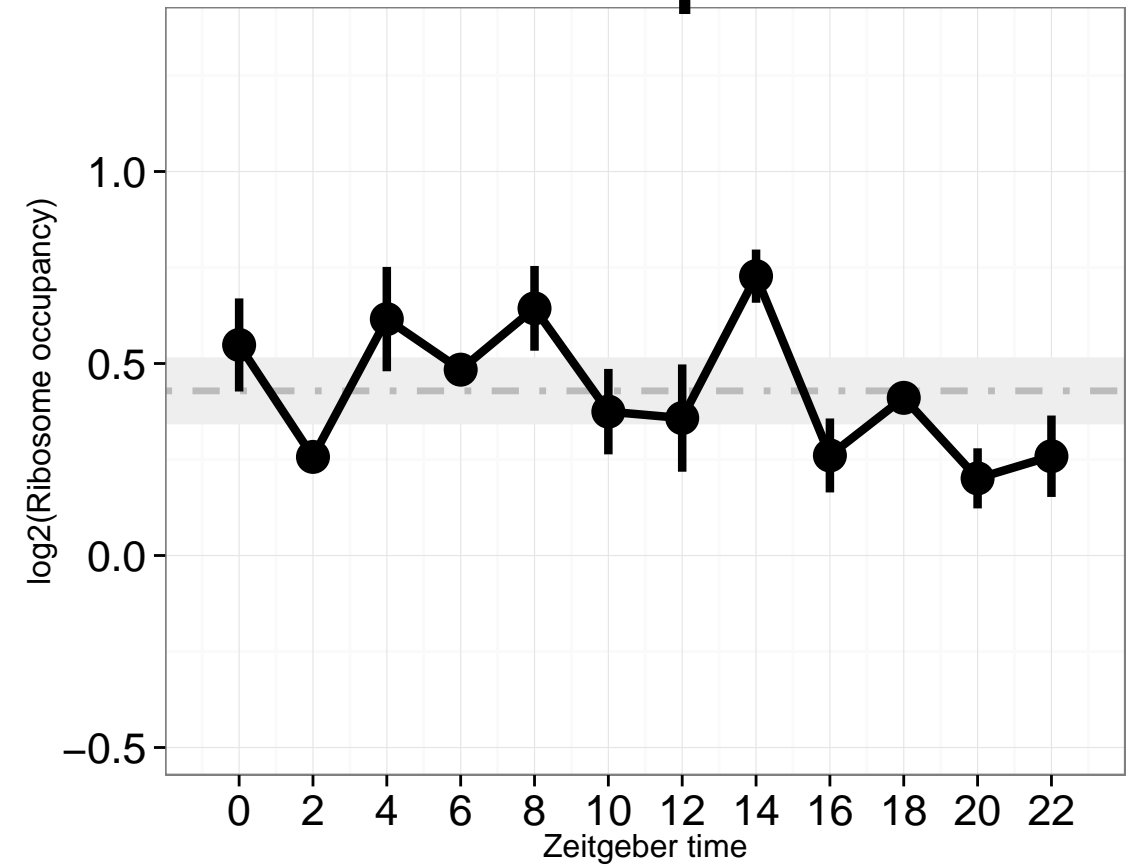

Supplement: Supplementary file 10899 [file 1]

## Arf4

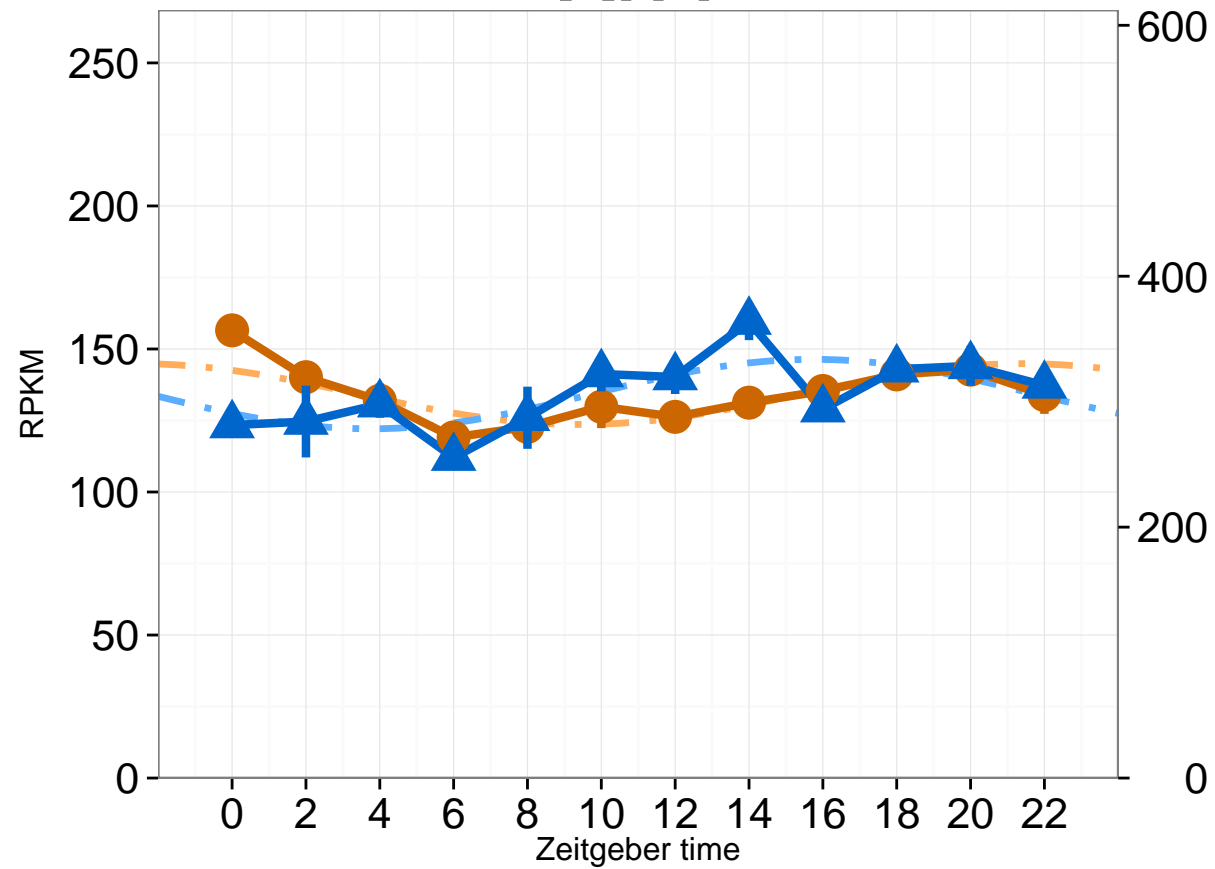

## Arf4

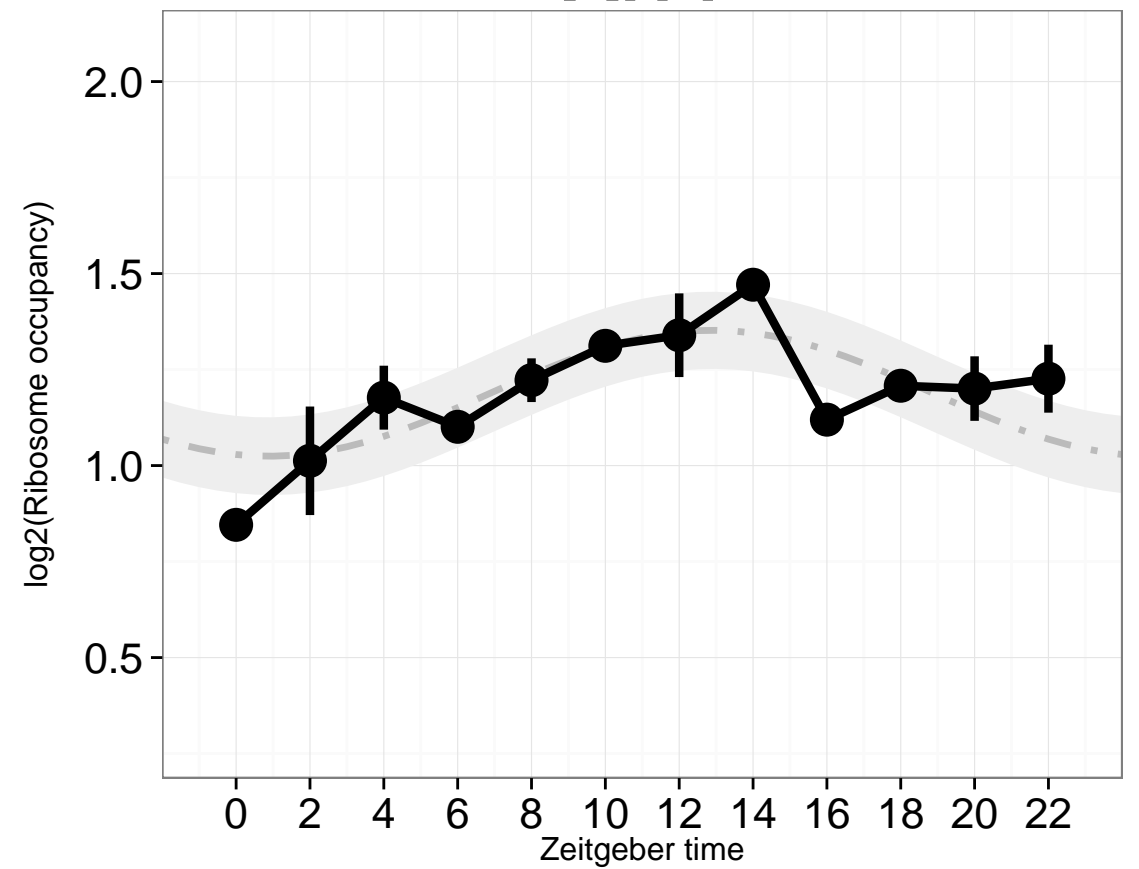

Supplement: Supplementary file 10900 [file 1]

# Bmp4

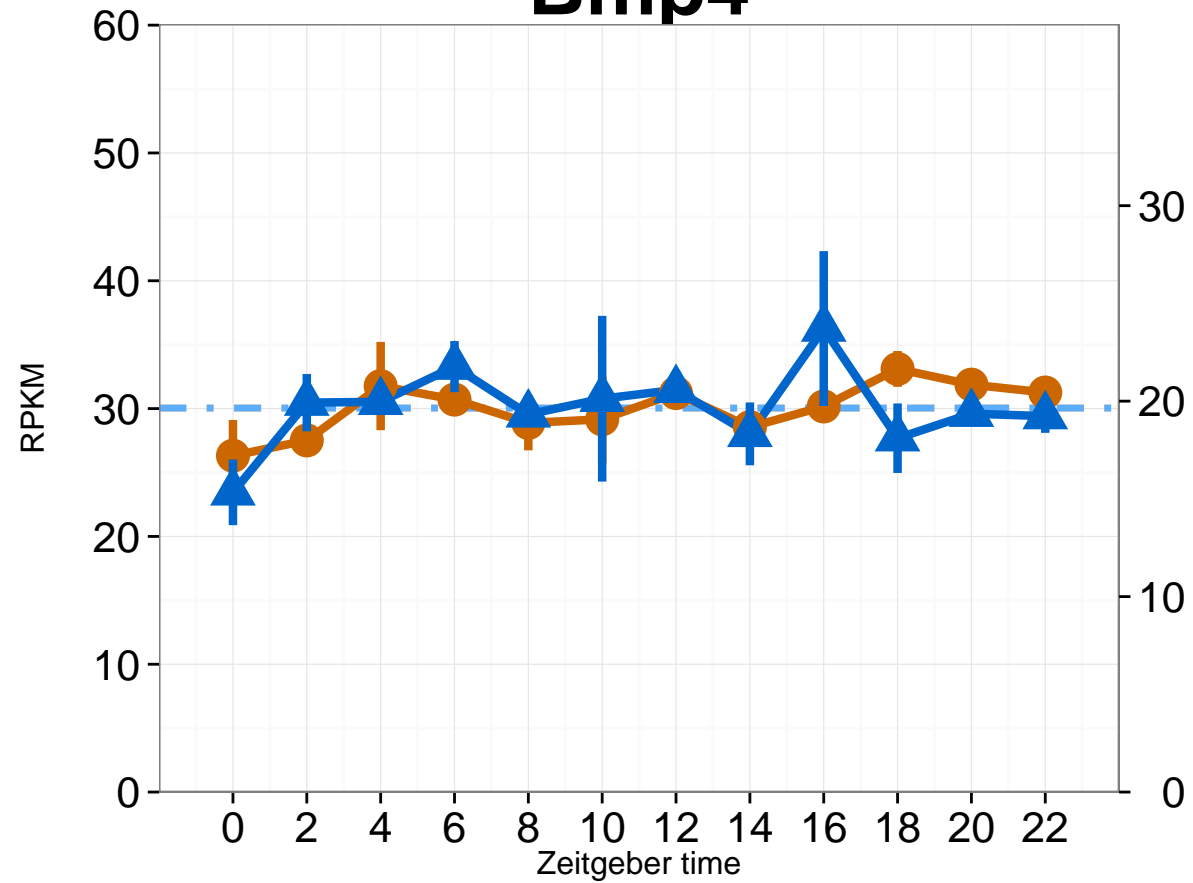

# Bmp4

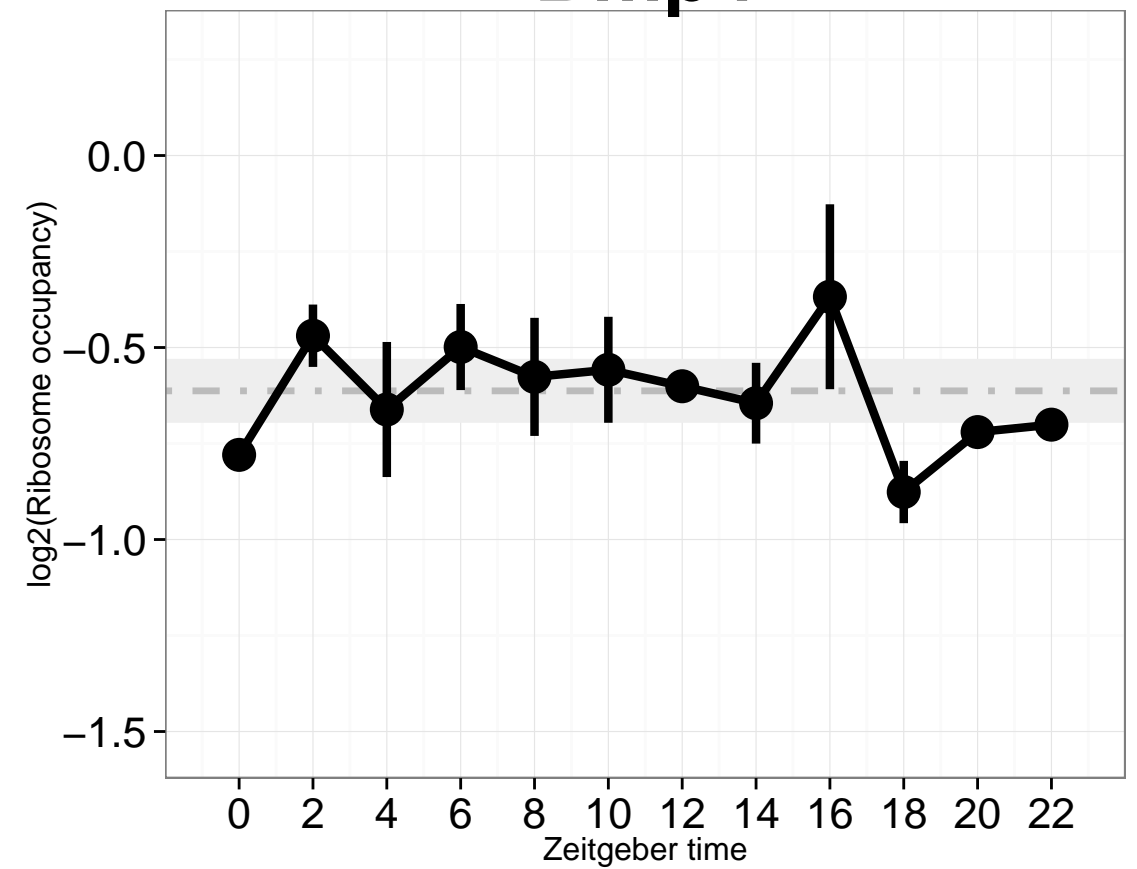

Supplement: Supplementary file 10901 [file 1]

# Rad18

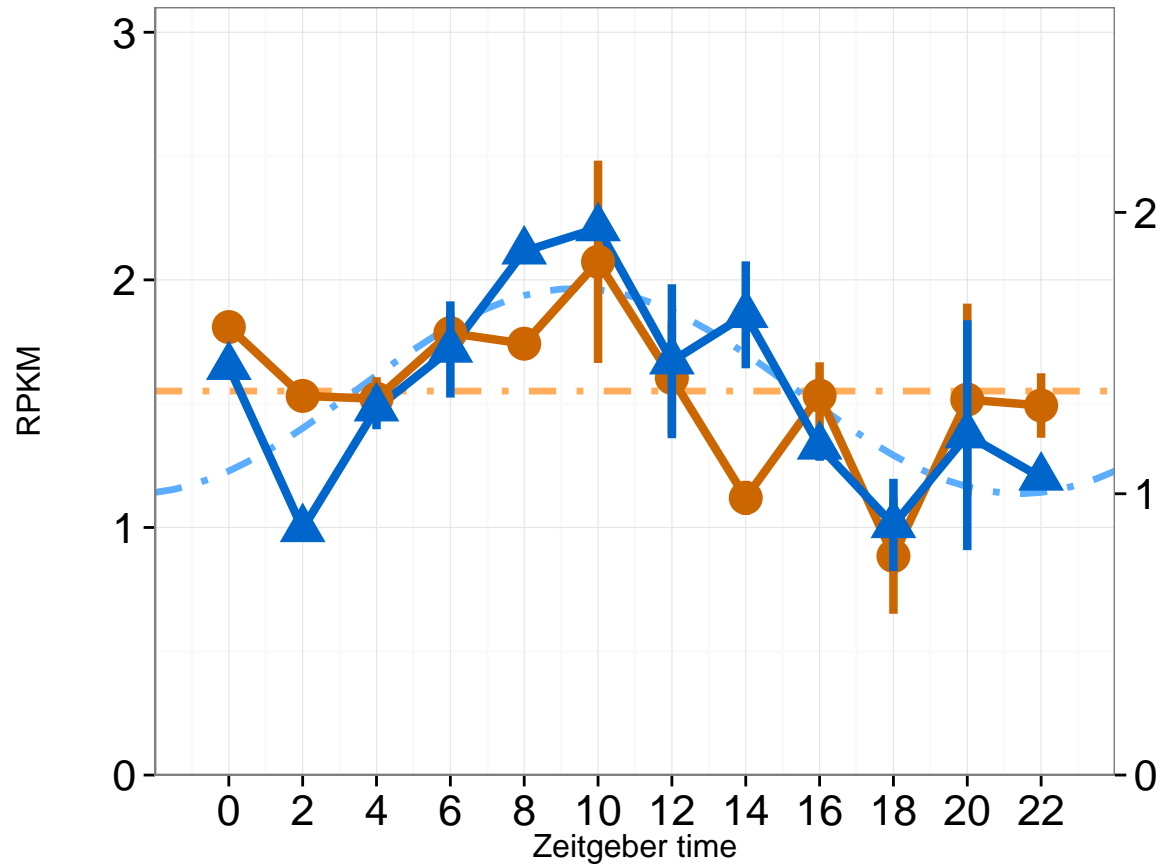

# Rad18

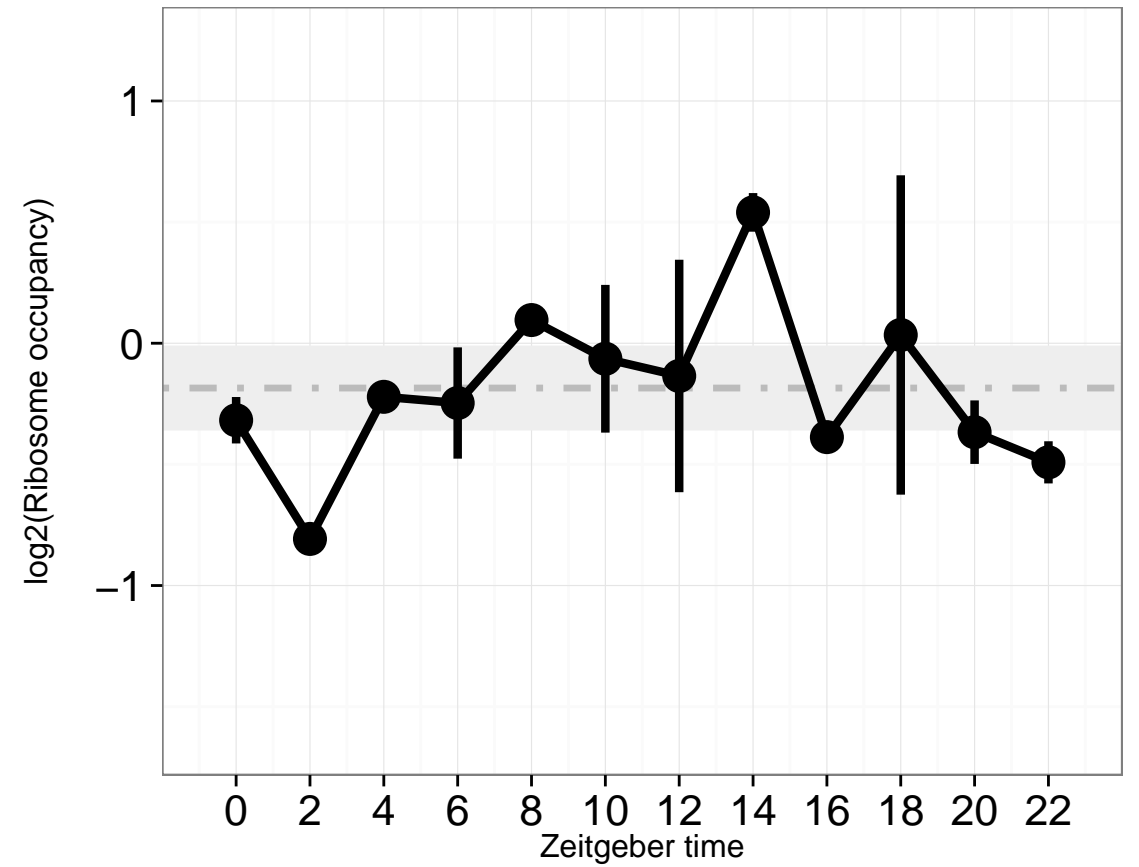

Supplement: Supplementary file 10902 [file 1]

## Cope

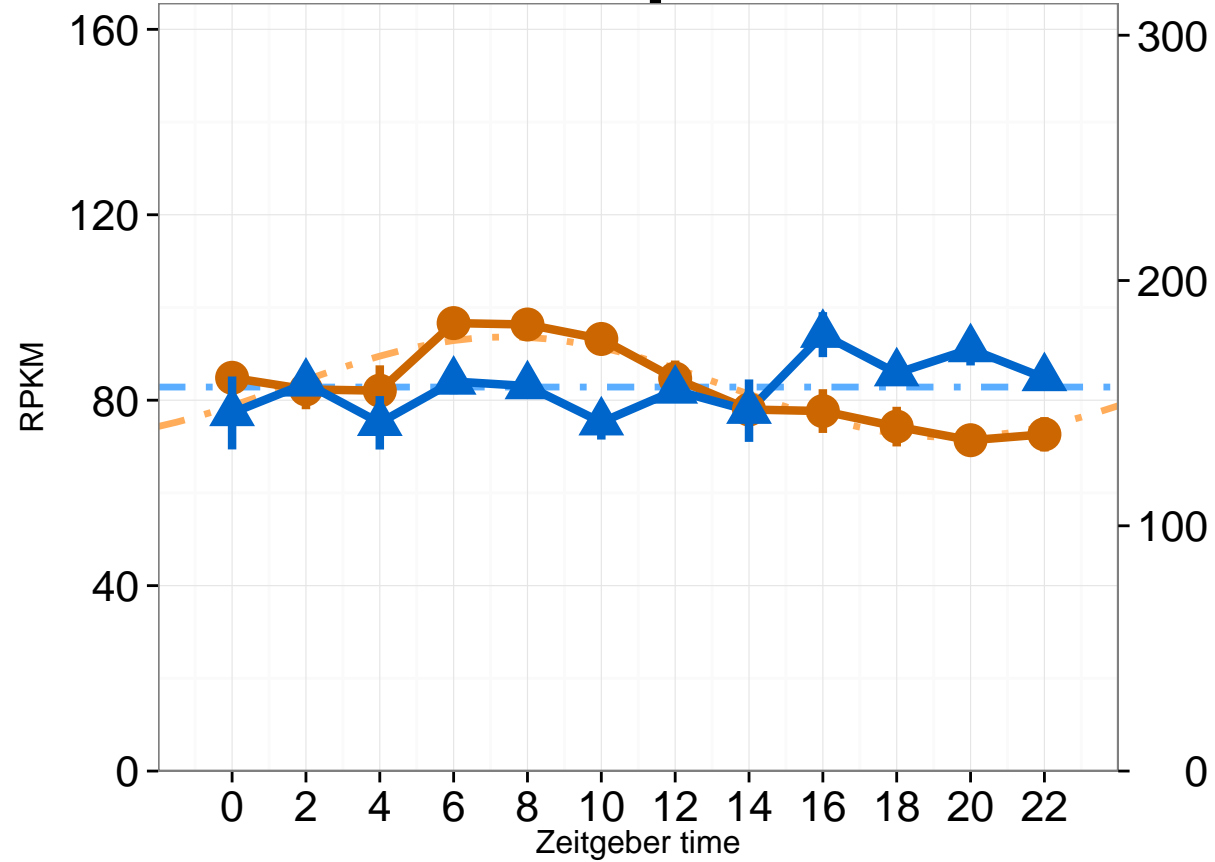

## Cope

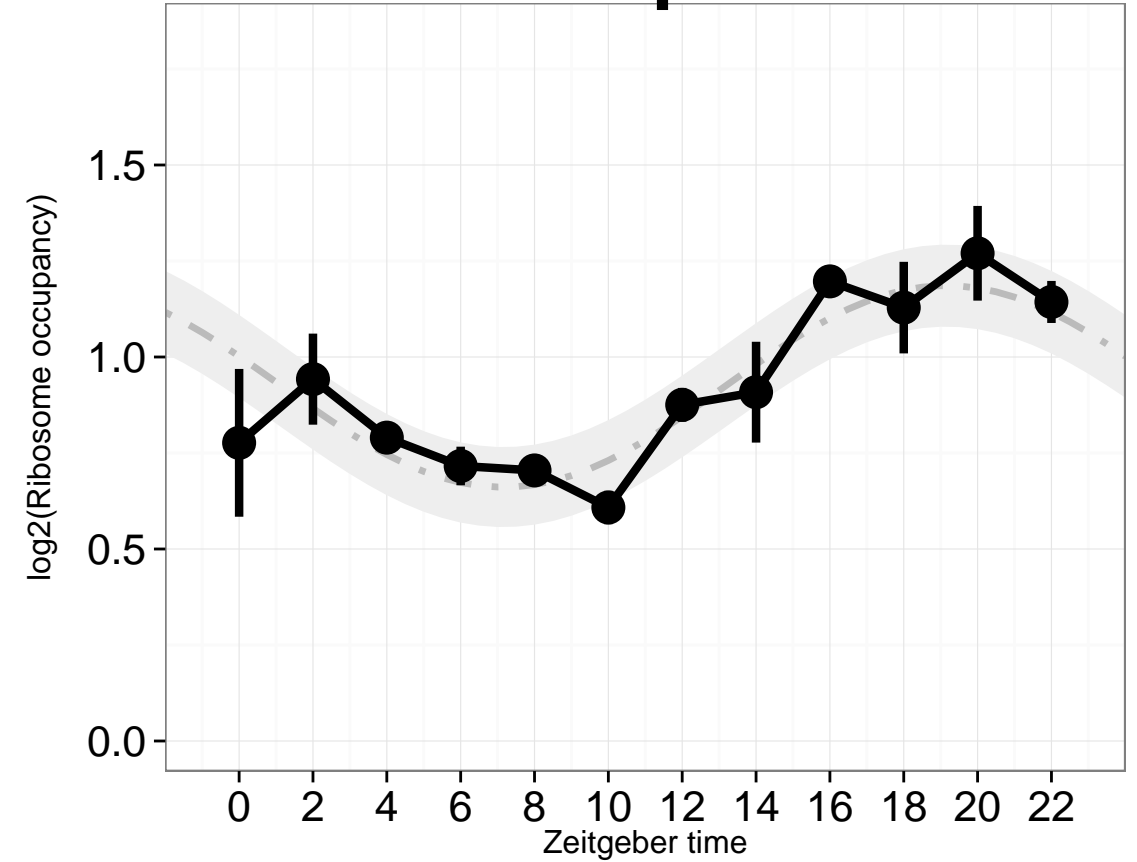

Supplement: Supplementary file 10903 [file 1]

# Taf1b

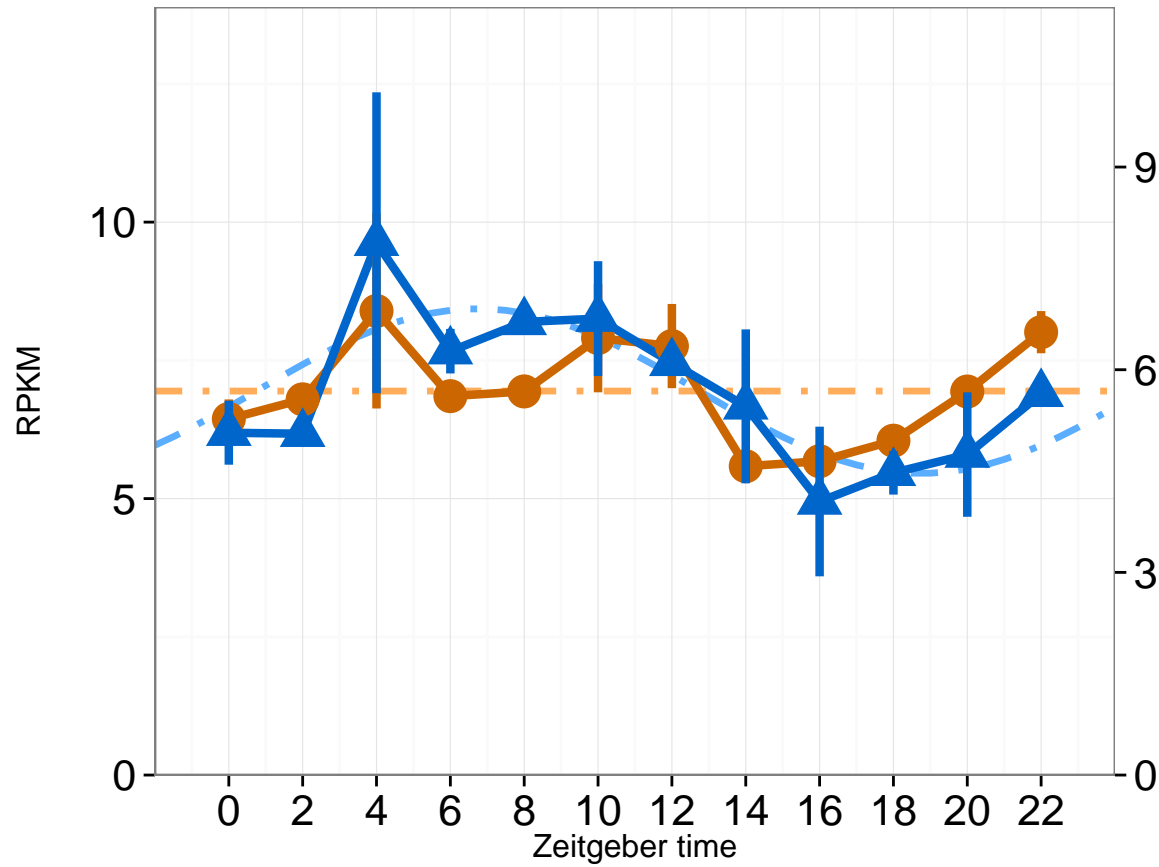

# Taf1b

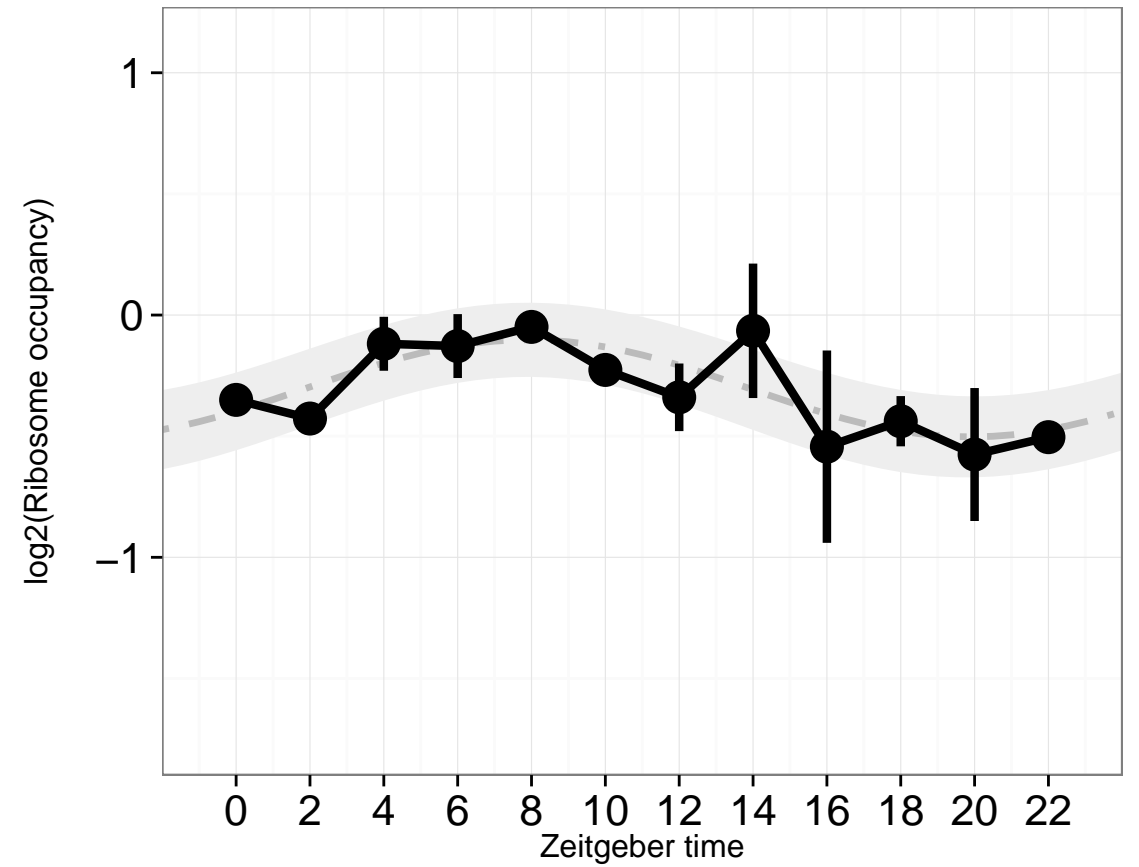

Supplement: Supplementary file 10904 [file 1]

# Nhp2l1

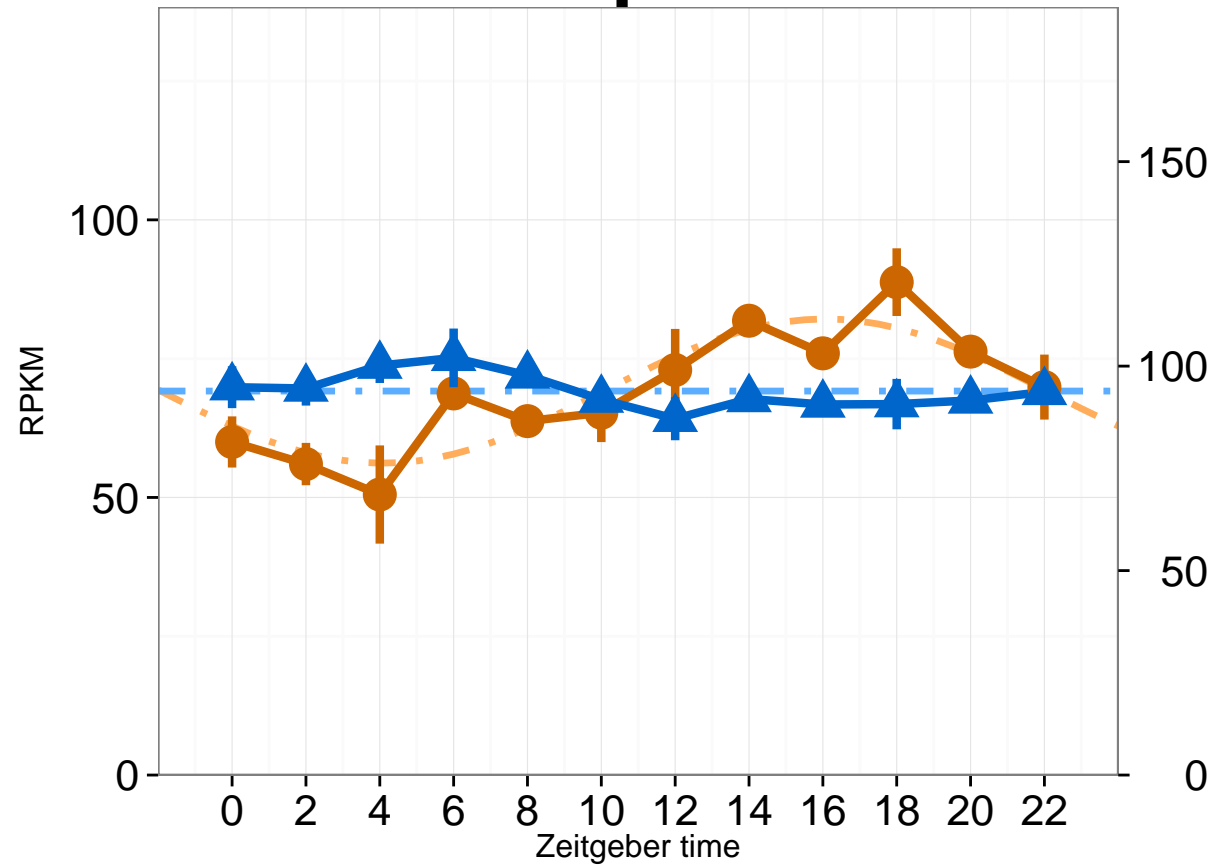

# Nhp2l1

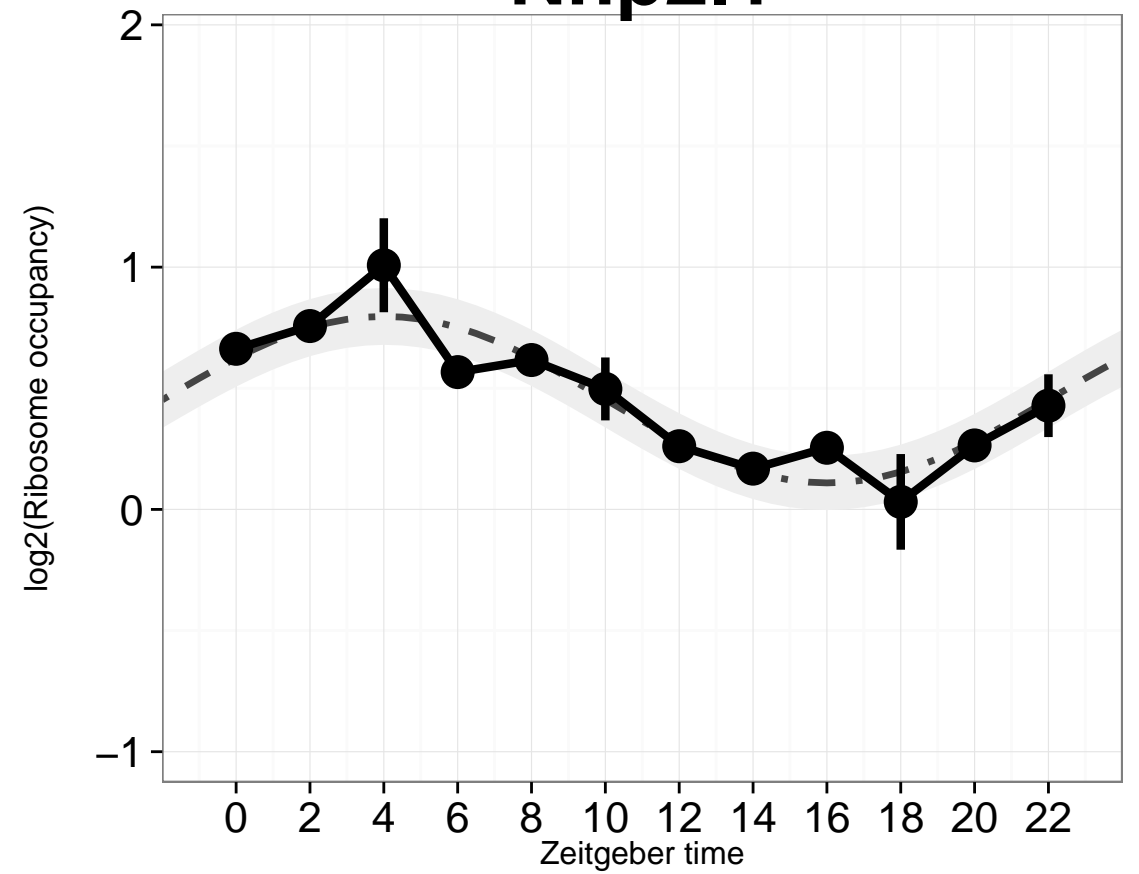

Supplement: Supplementary file 10905 [file 1]

## Serpine2

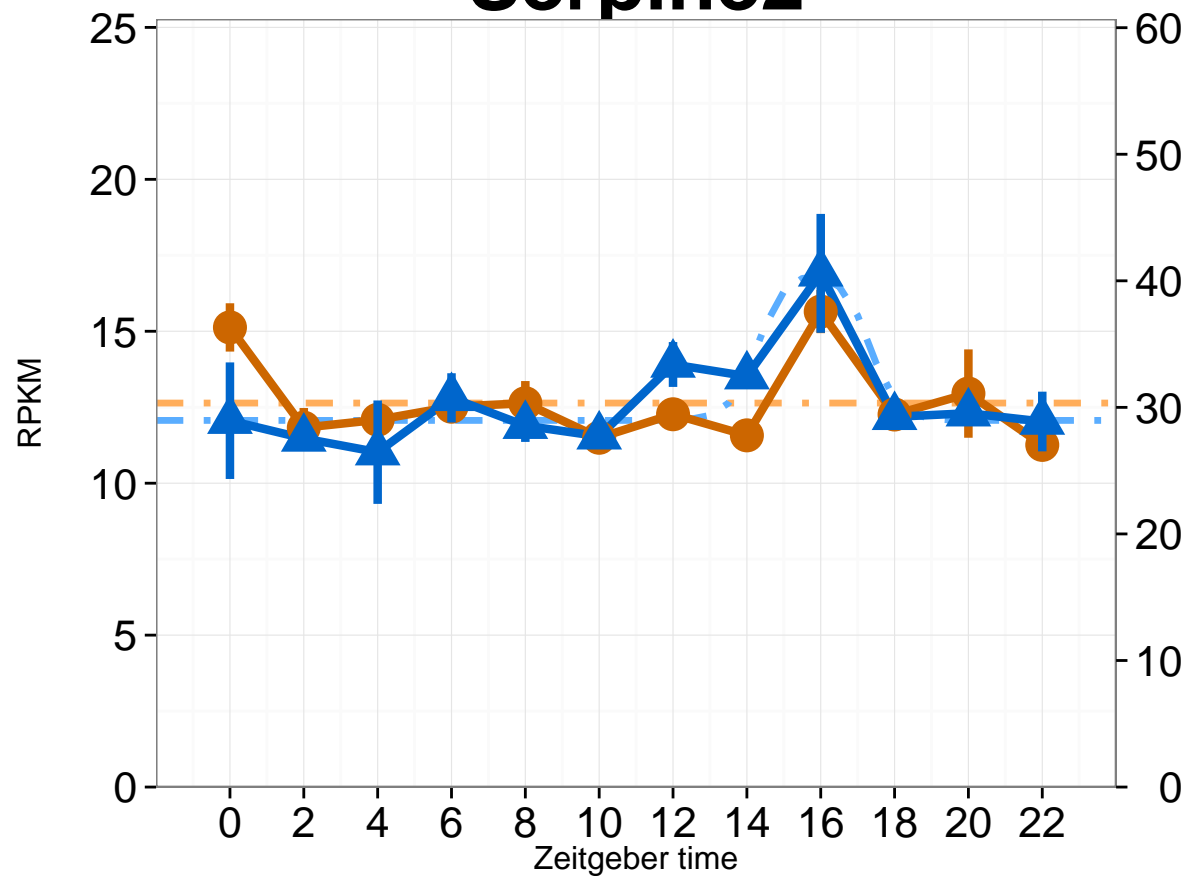

## Serpine2

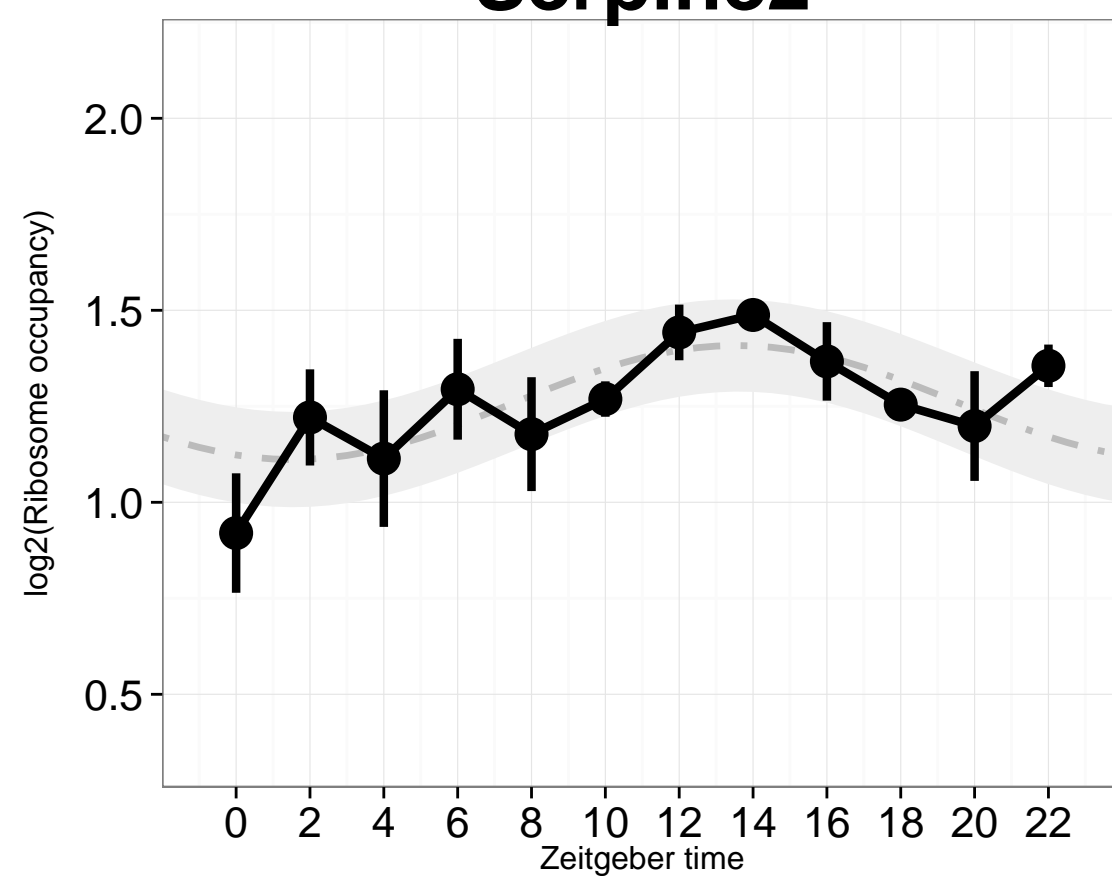

Supplement: Supplementary file 10906 [file 1]

# Agxt2

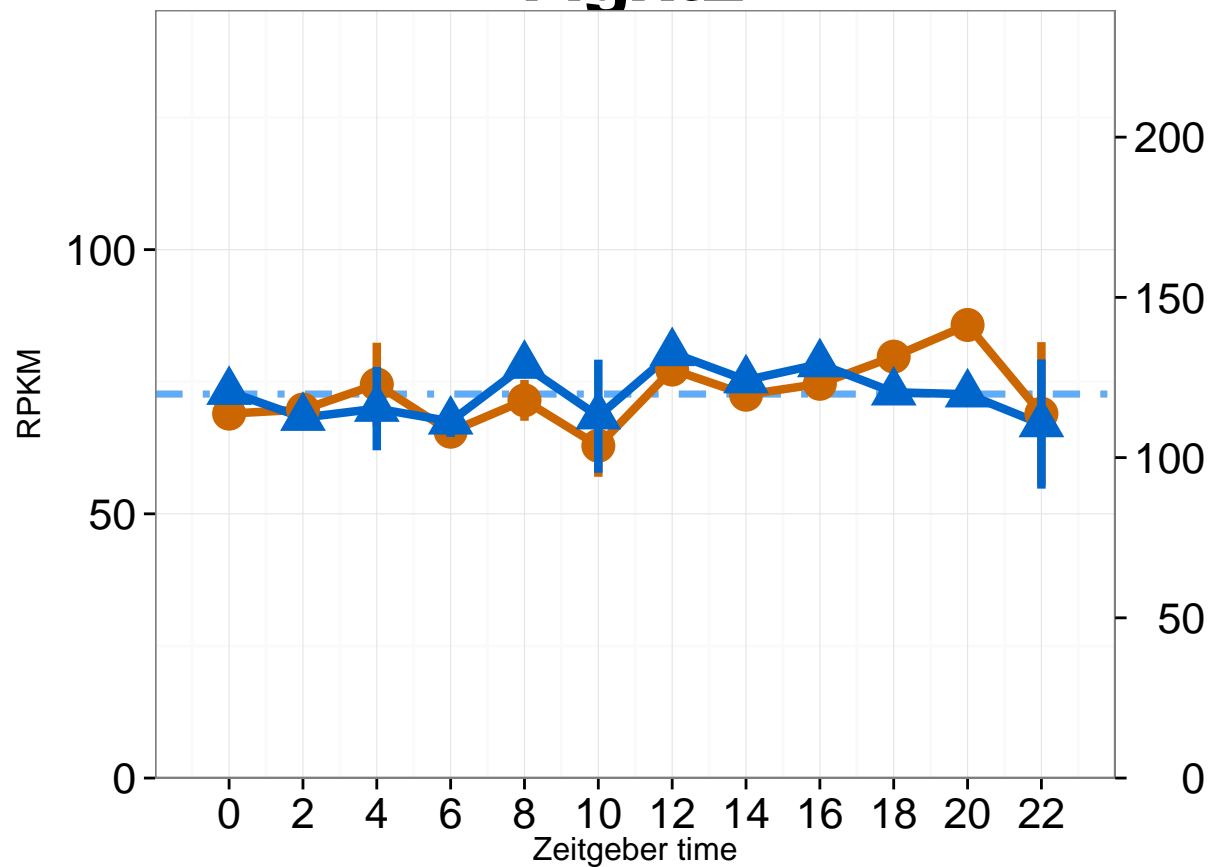

# Agxt2

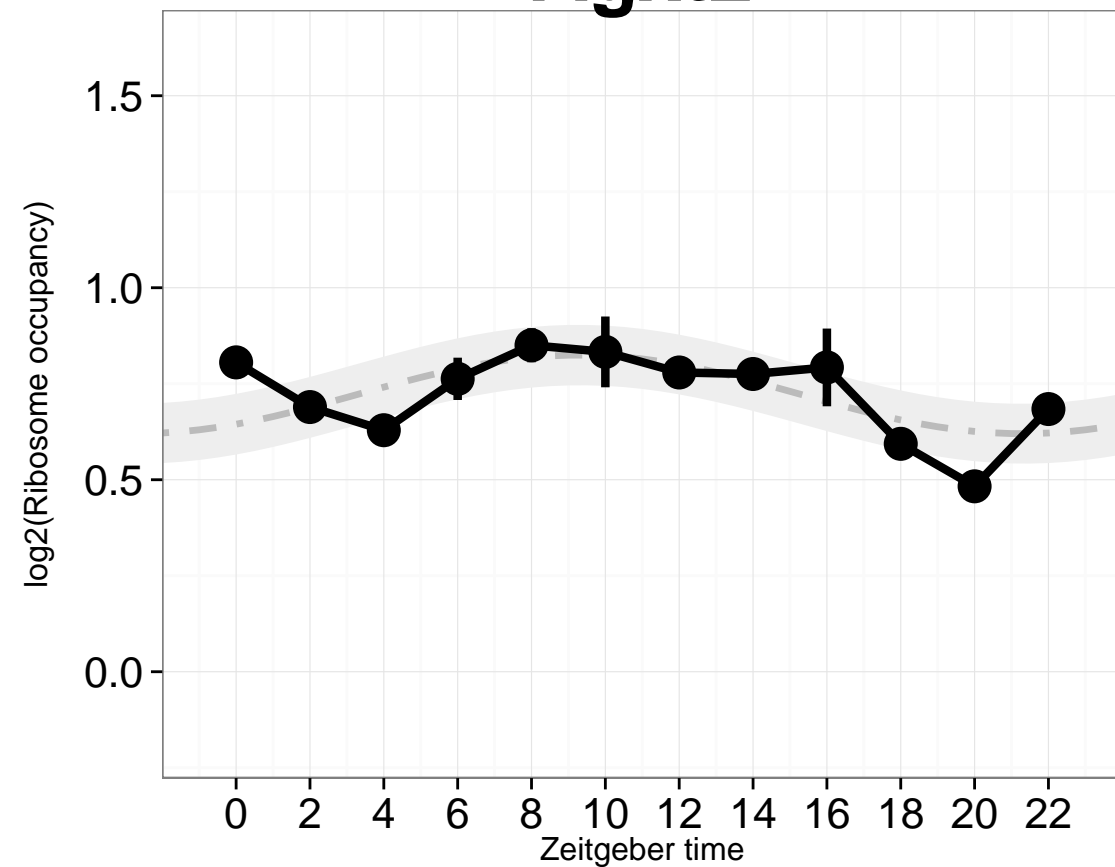

Supplement: Supplementary file 10907 [file 1]

## Kdm3b

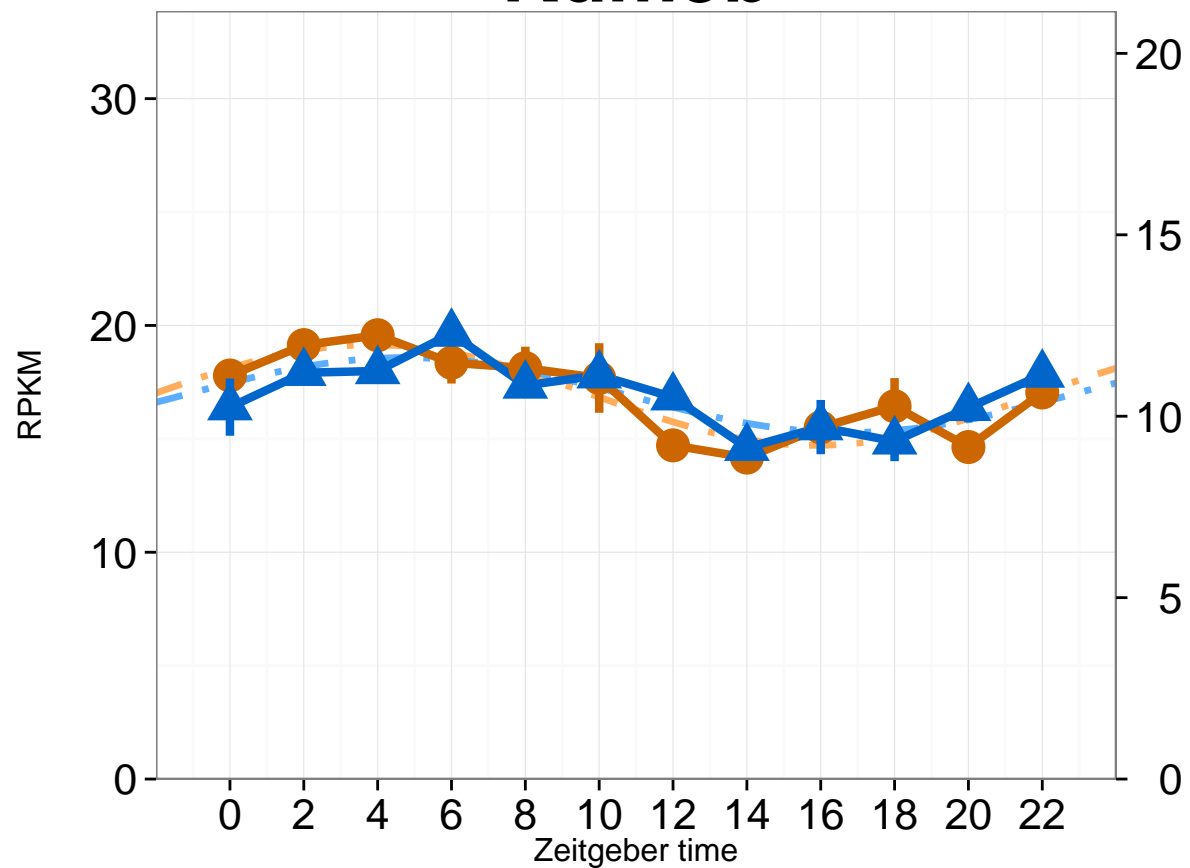

## Kdm3b

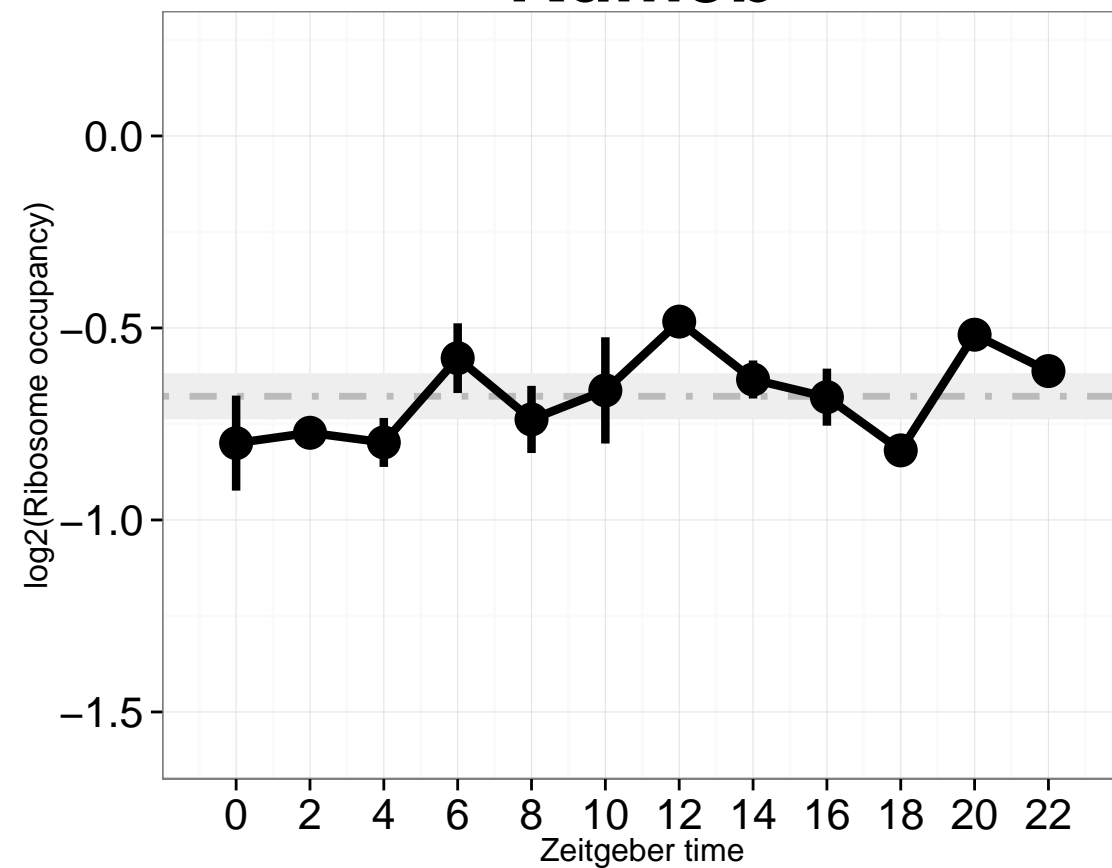

Supplement: Supplementary file 10908 [file 1]

# Hmgxb3

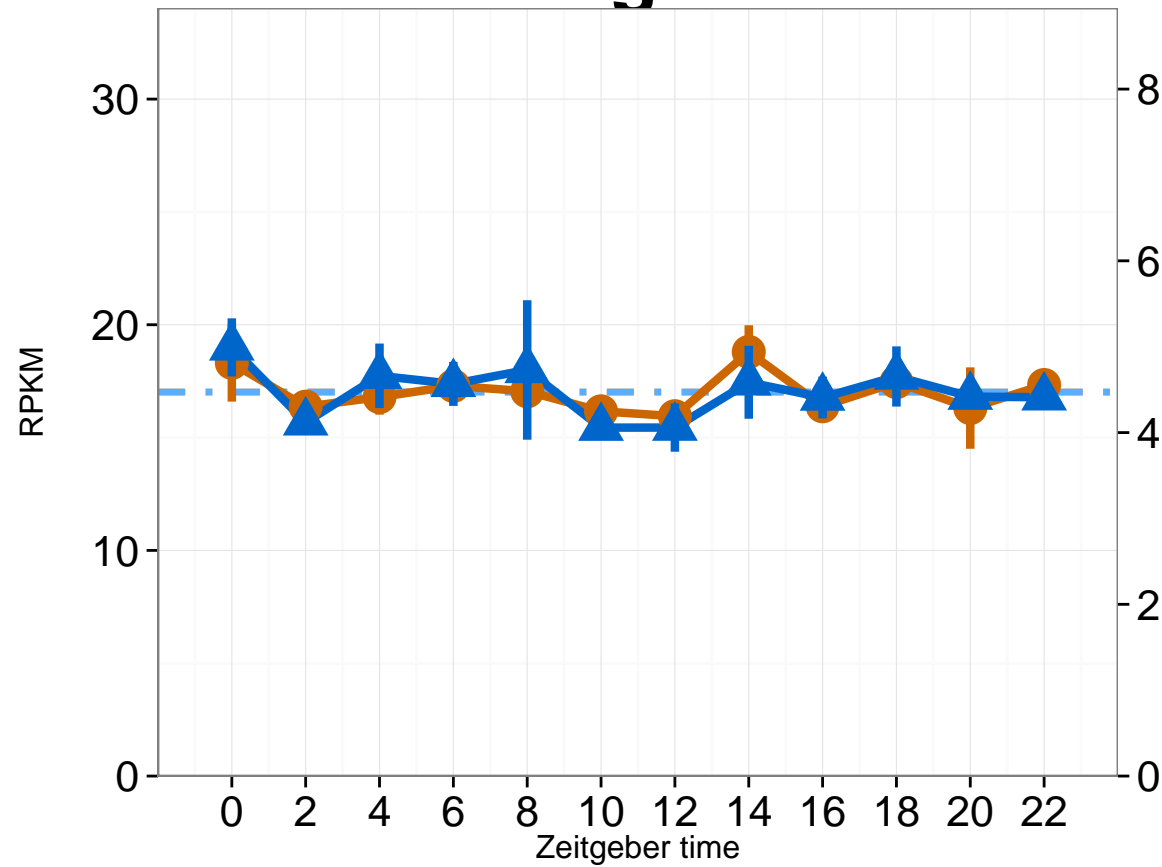

# Hmgxb3

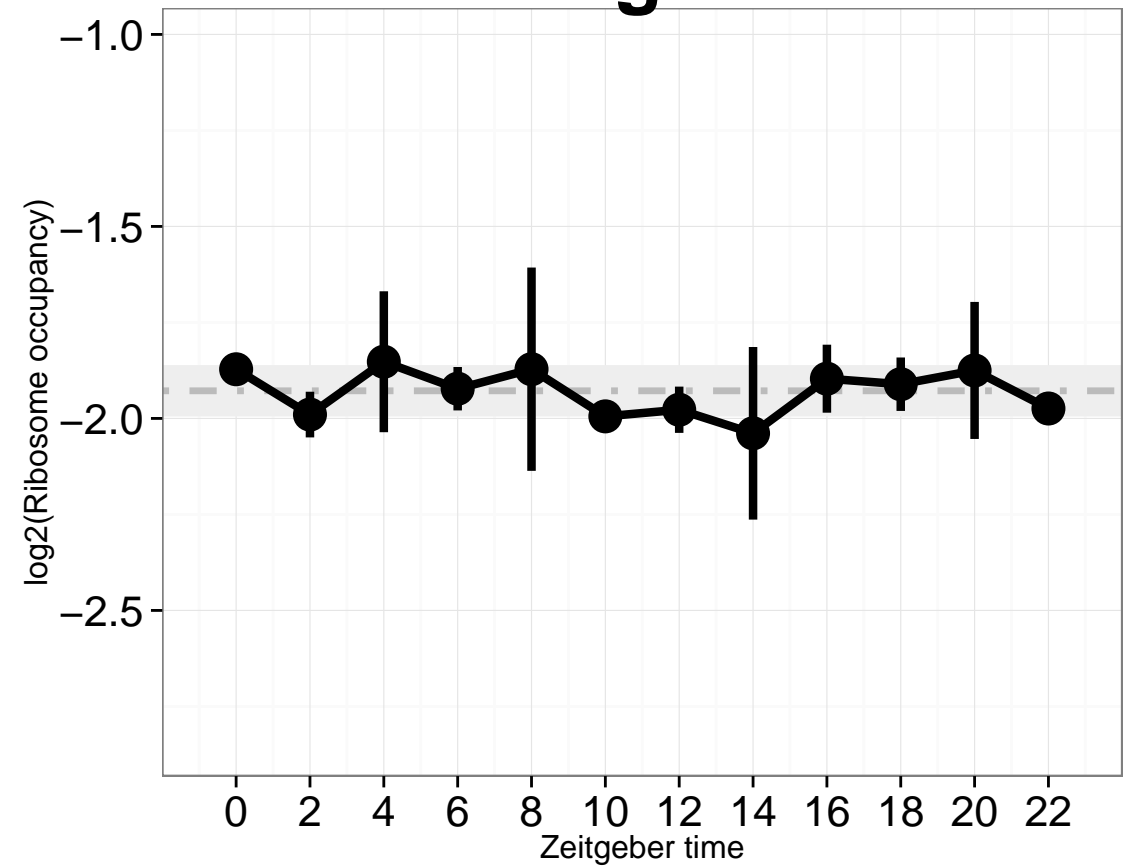

Supplement: Supplementary file 10909 [file 1]

# Sec24b

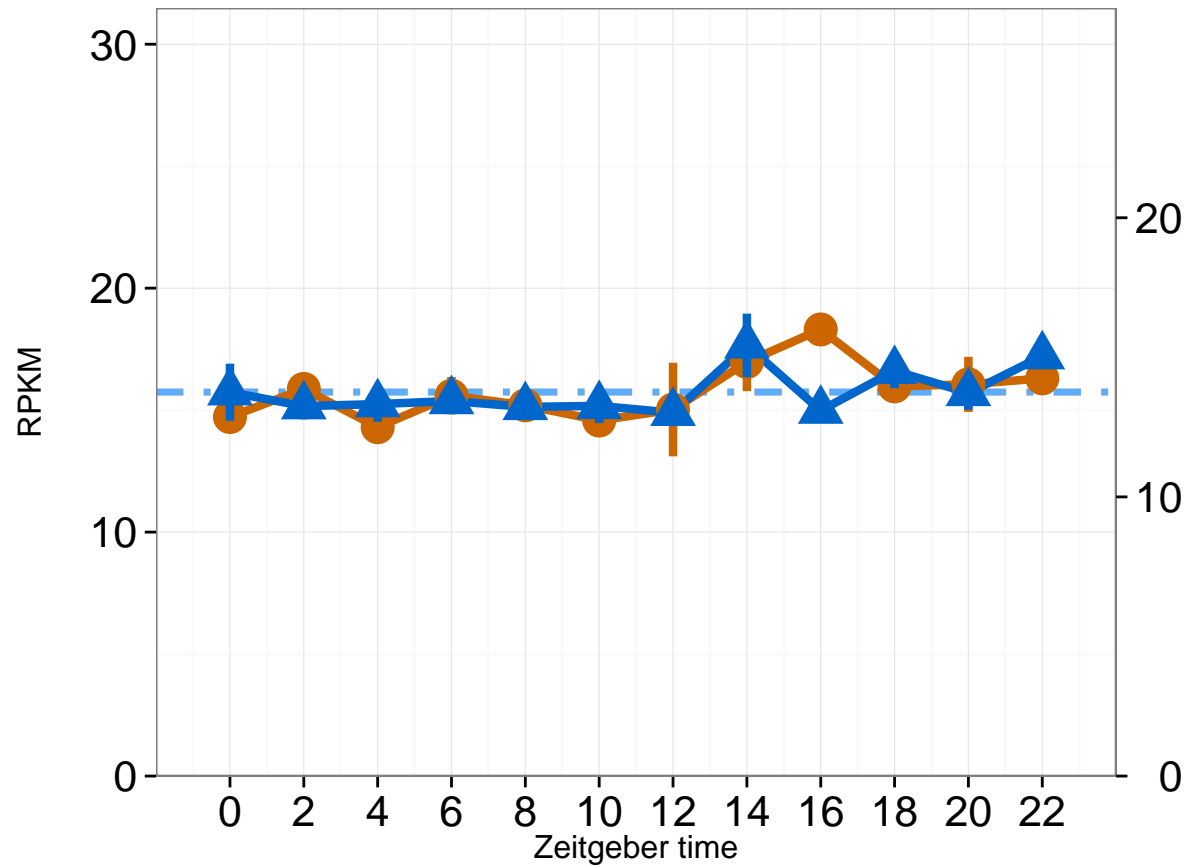

# Sec24b

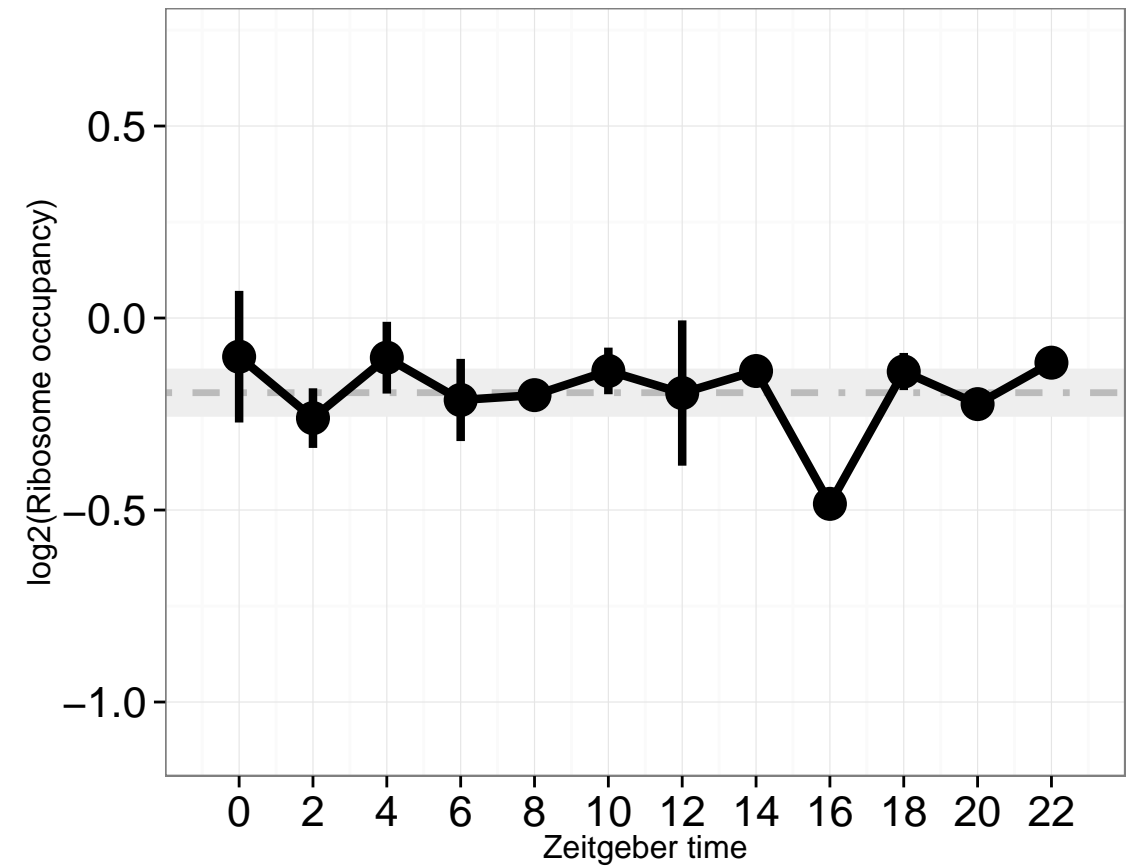

Supplement: Supplementary file 10910 [file 1]

## NoI10

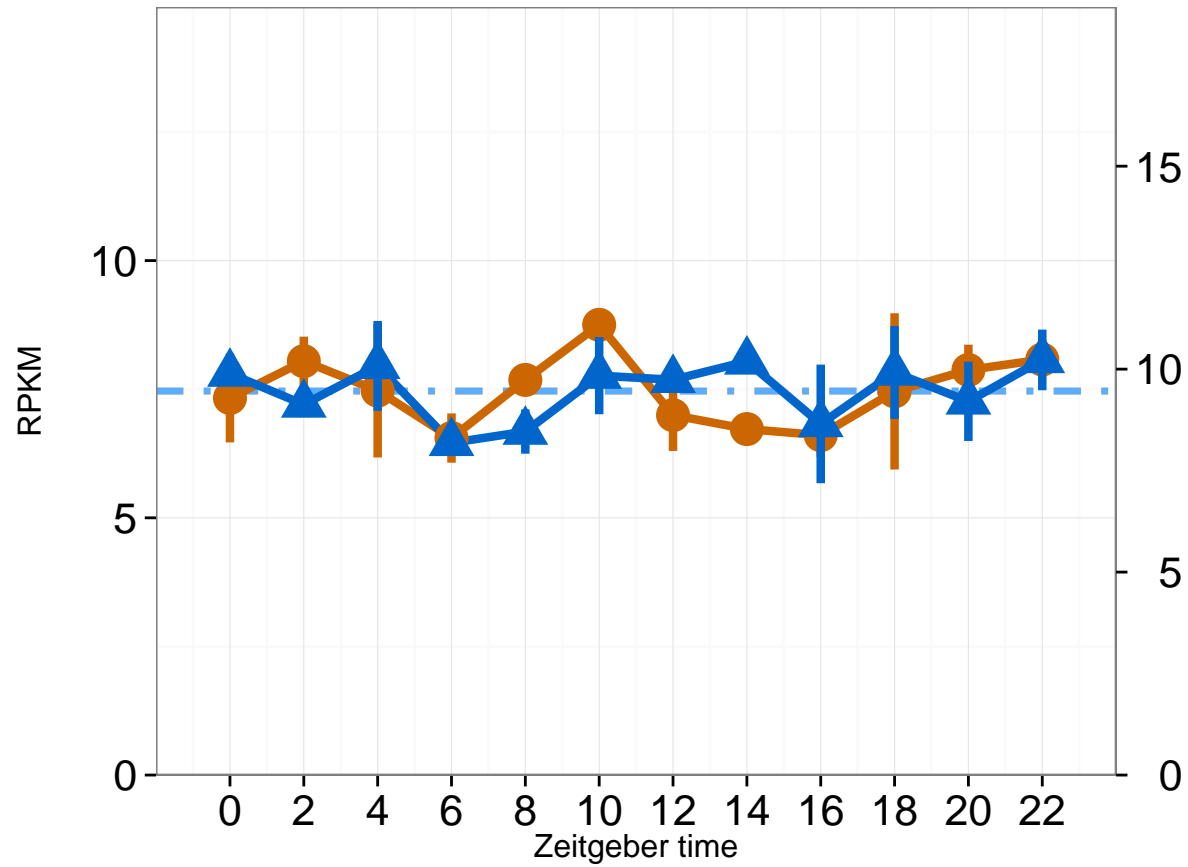

## NoI10

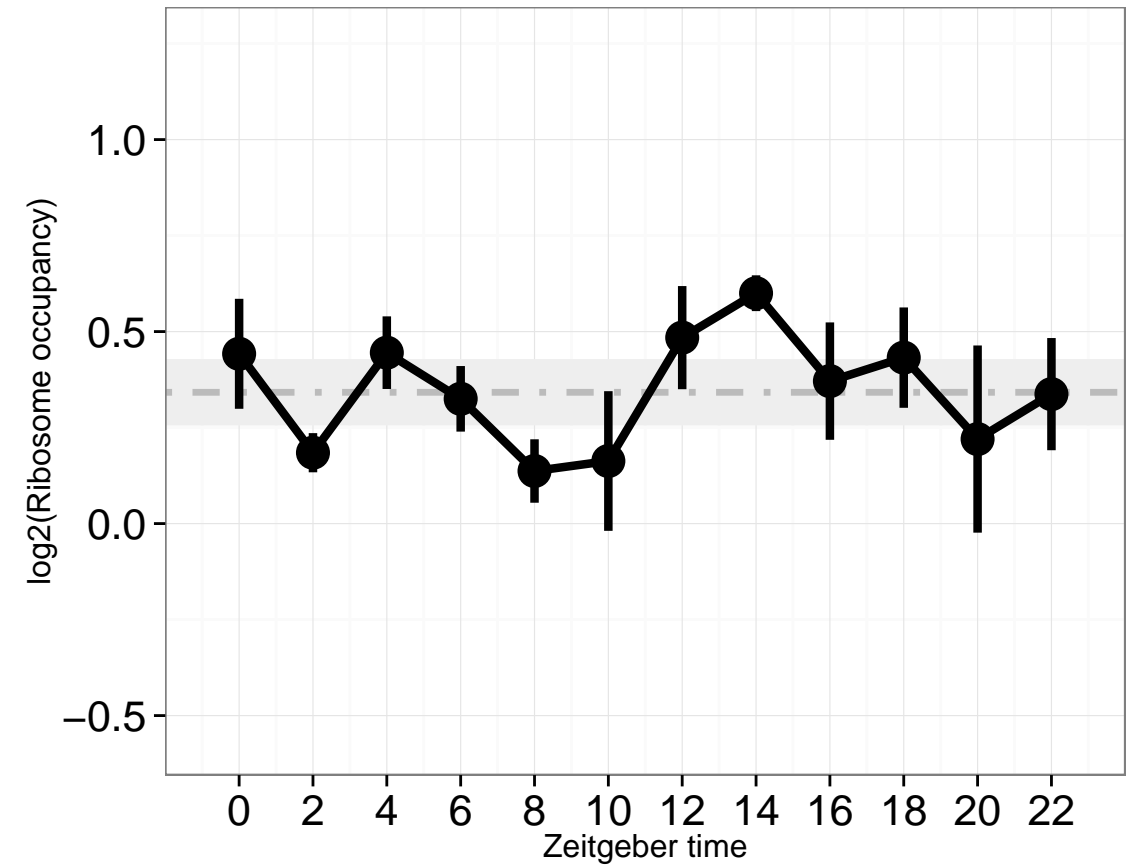

Supplement: Supplementary file 10911 [file 1]

# Adora2a

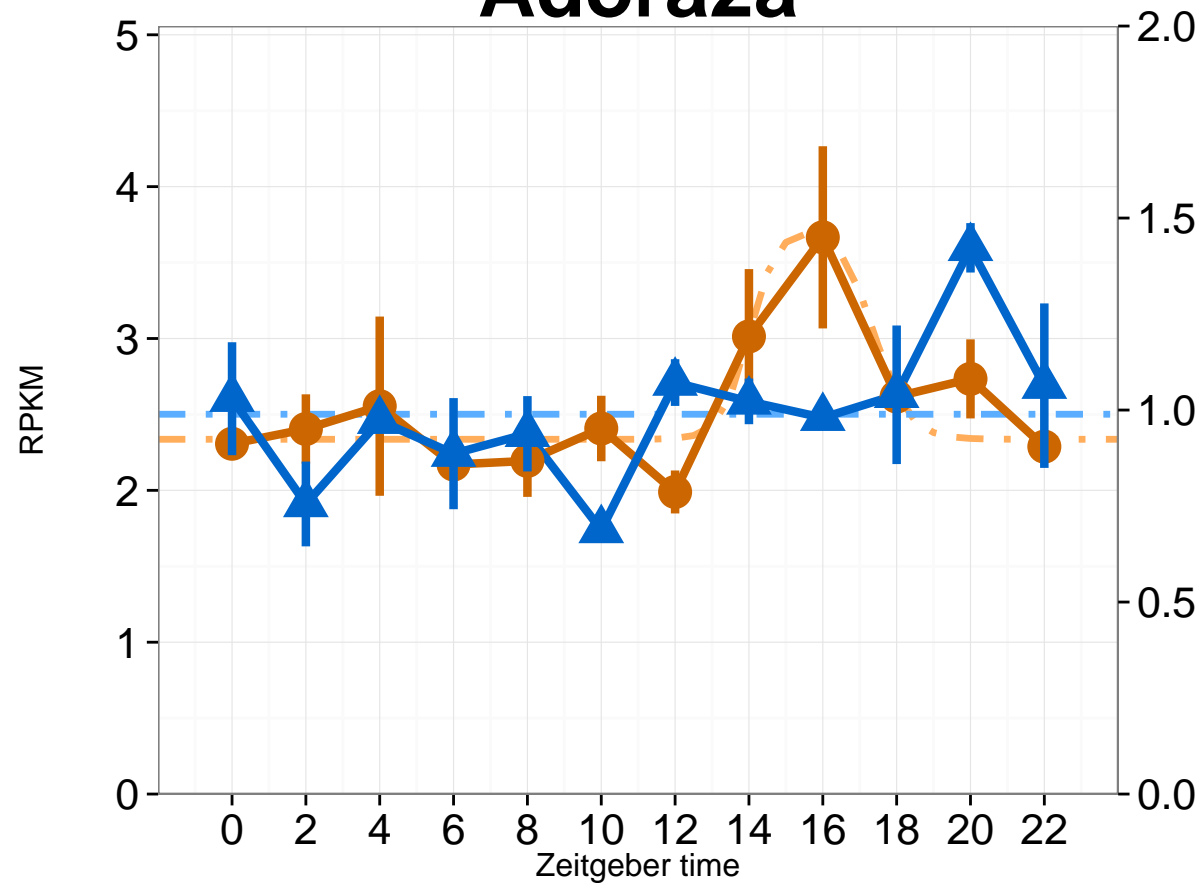

# Adora2a

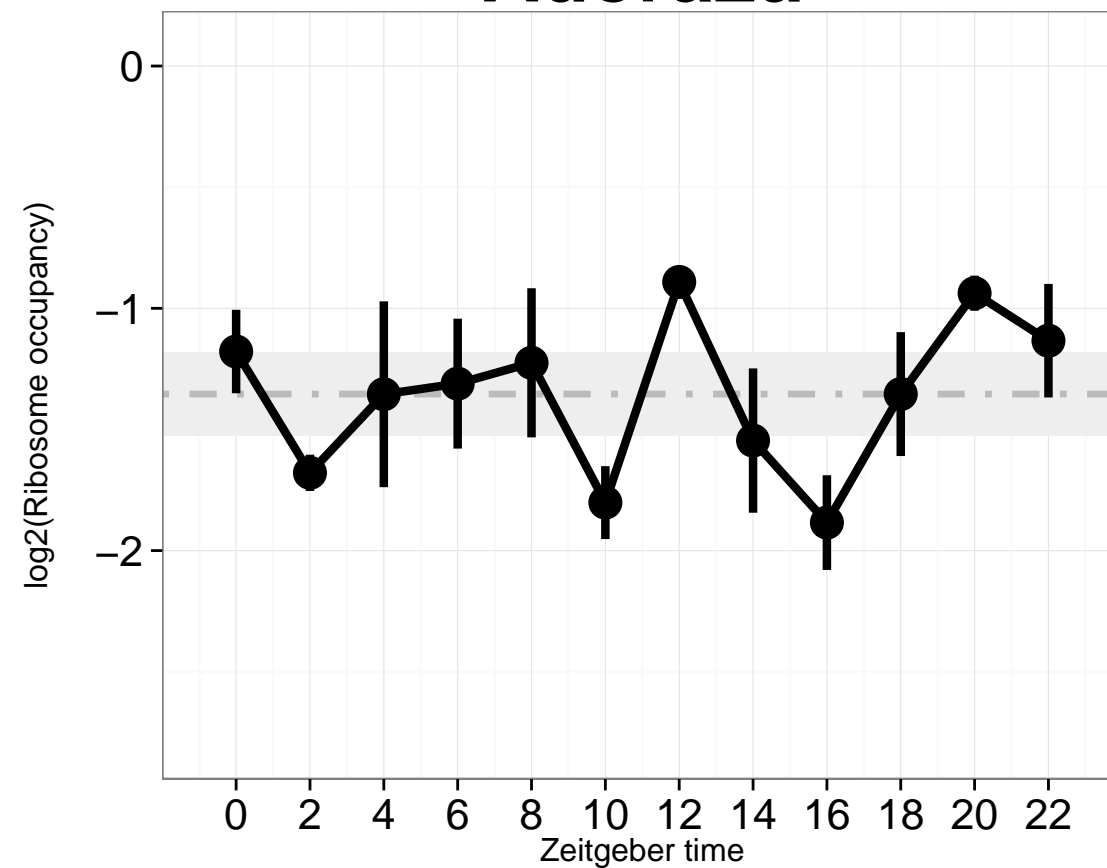

Supplement: Supplementary file 10912 [file 1]

## Ipo8

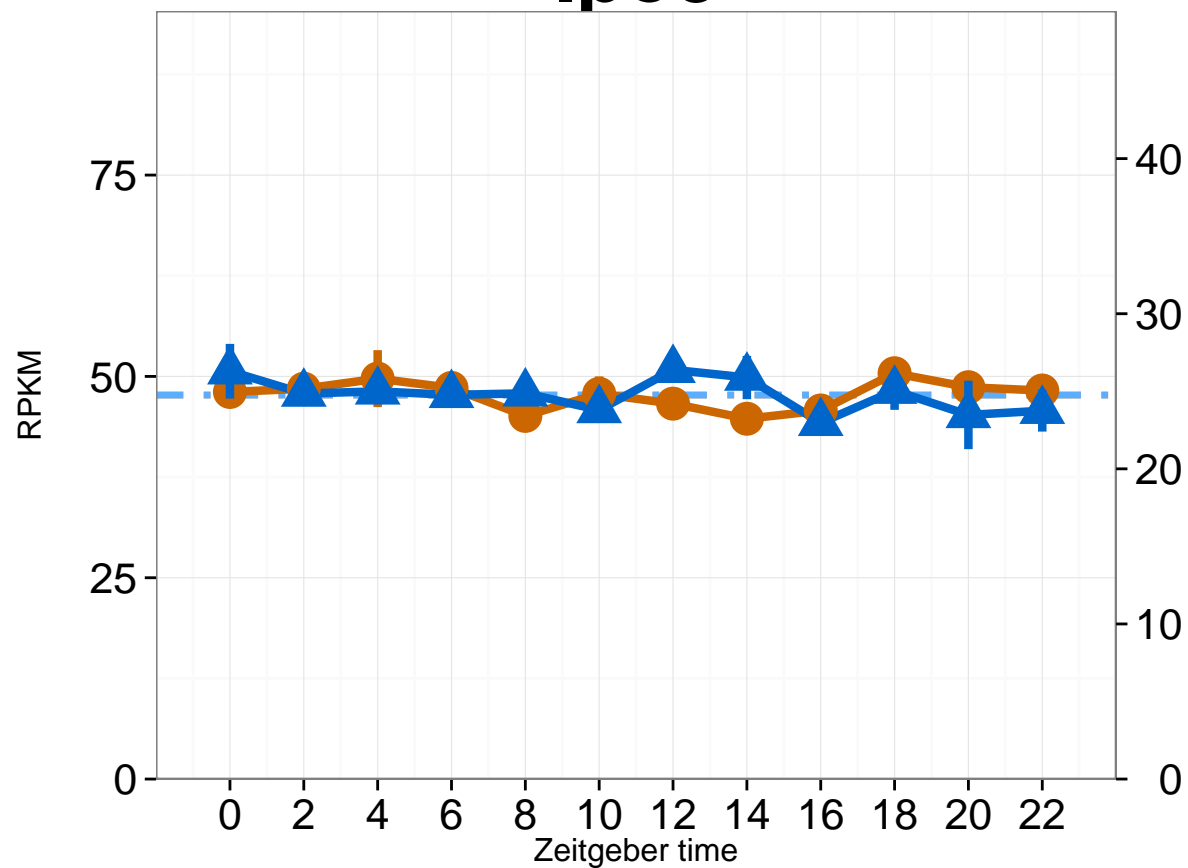

## Ipo8

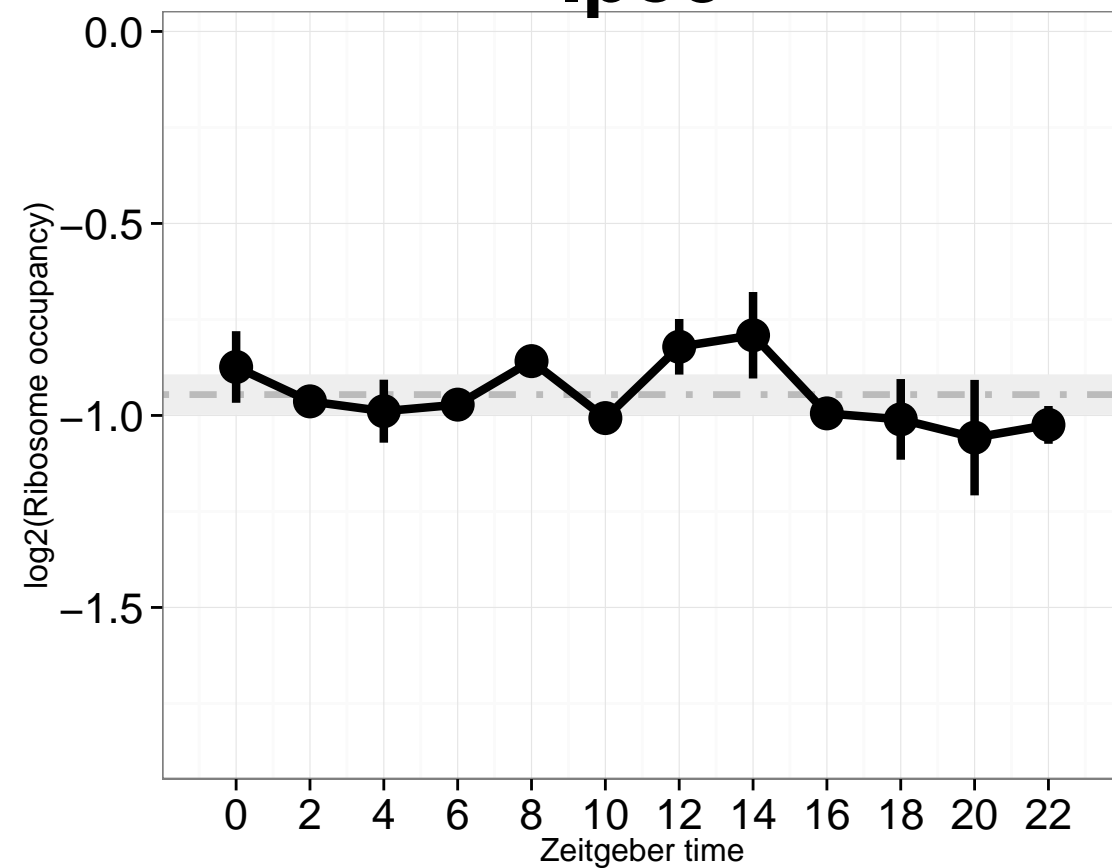

Supplement: Supplementary file 10913 [file 1]

## Aftph

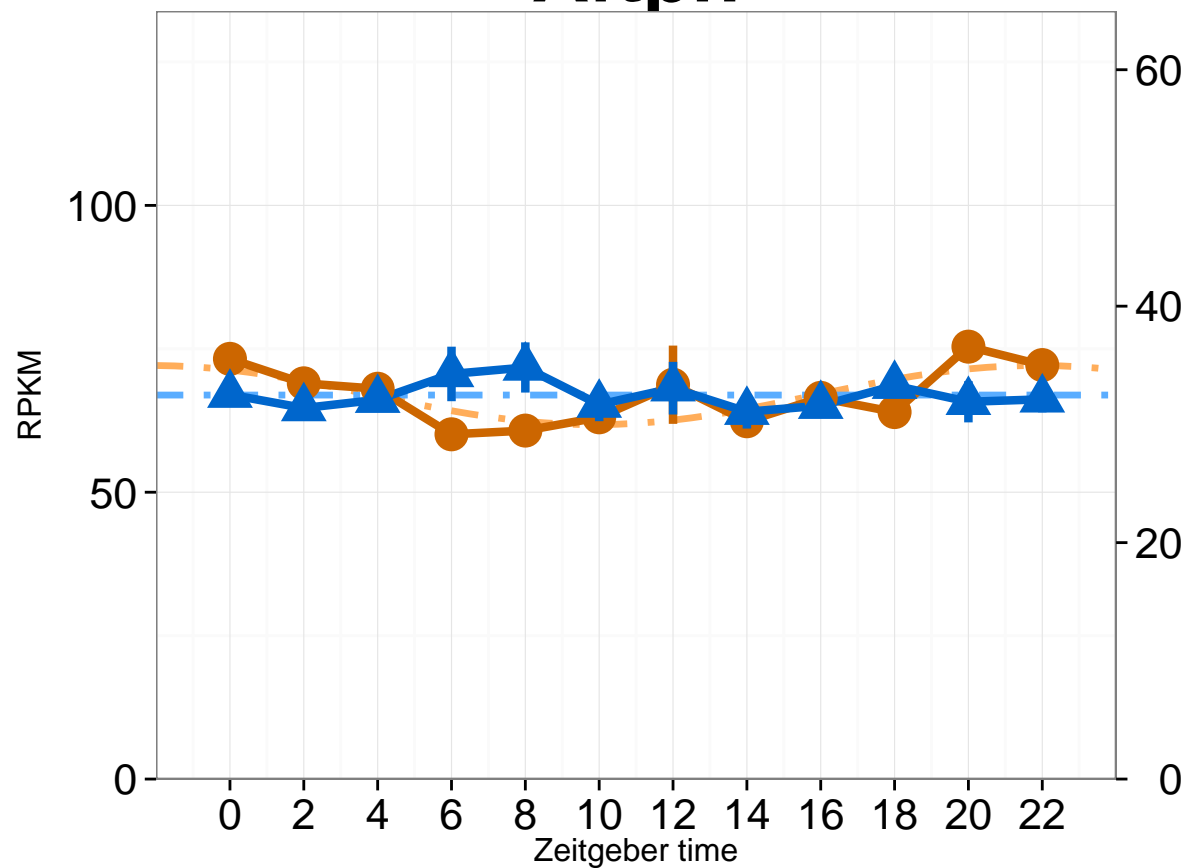

## Aftph

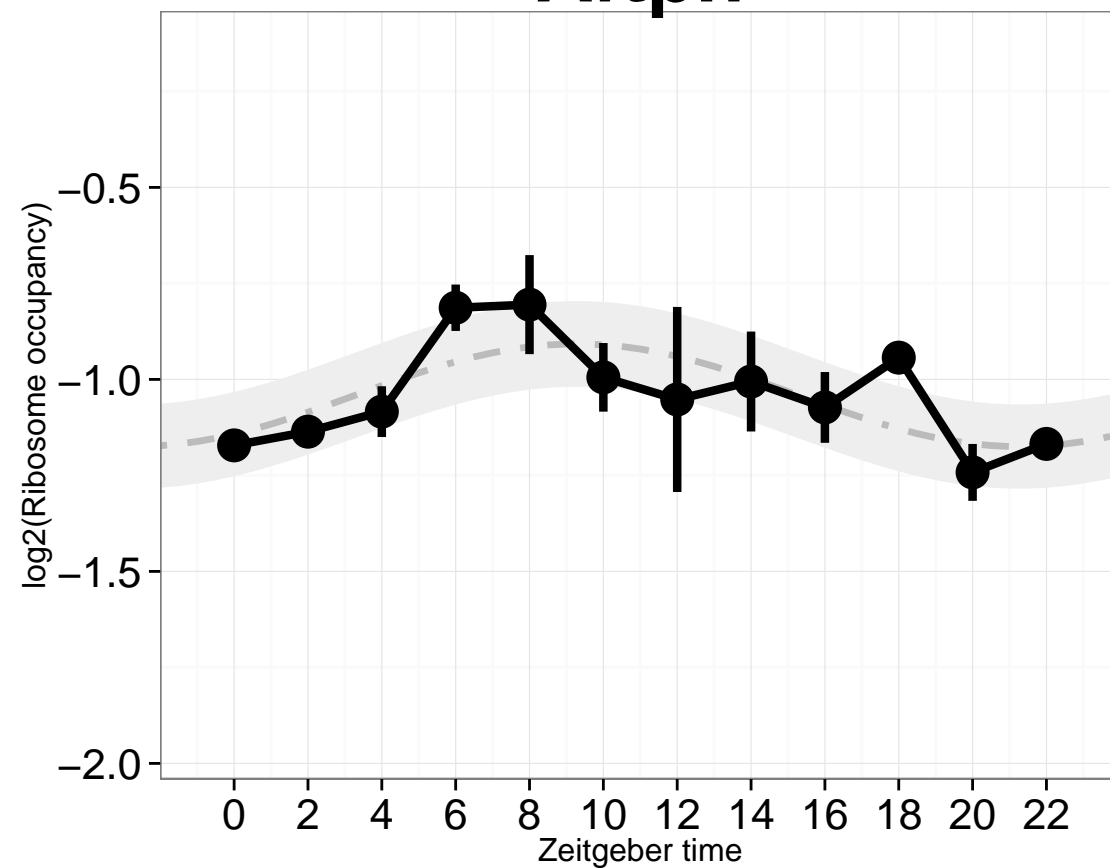

Supplement: Supplementary file 10914 [file 1]

# Ttc7

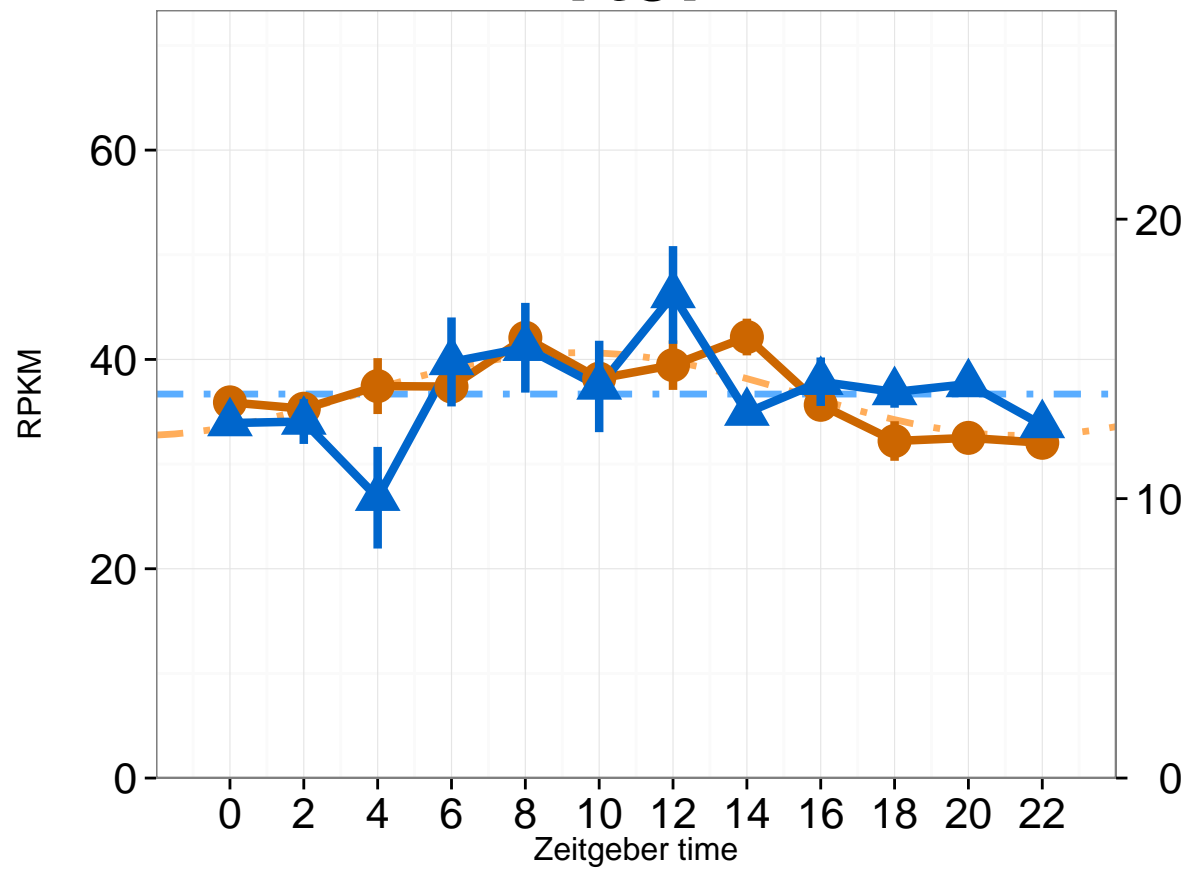

# Ttc7

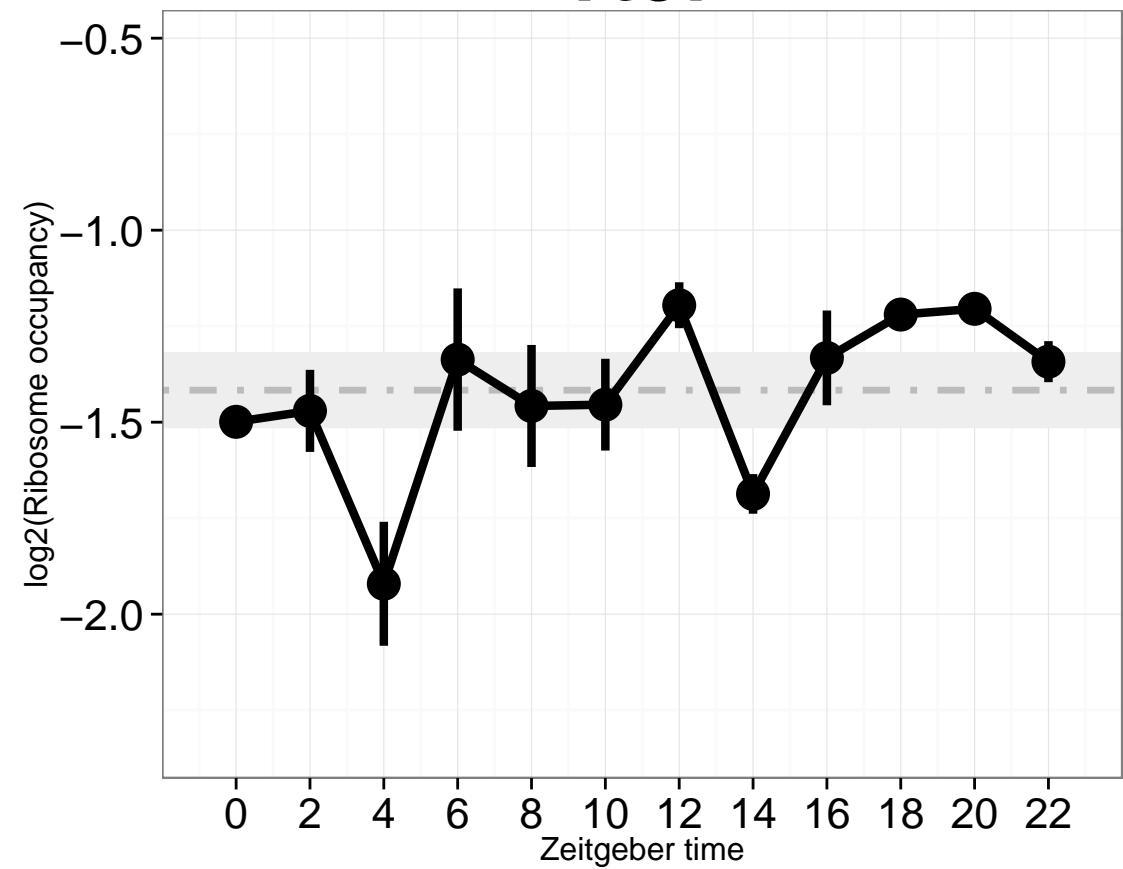

Supplement: Supplementary file 10915 [file 1]

## Tyrobp

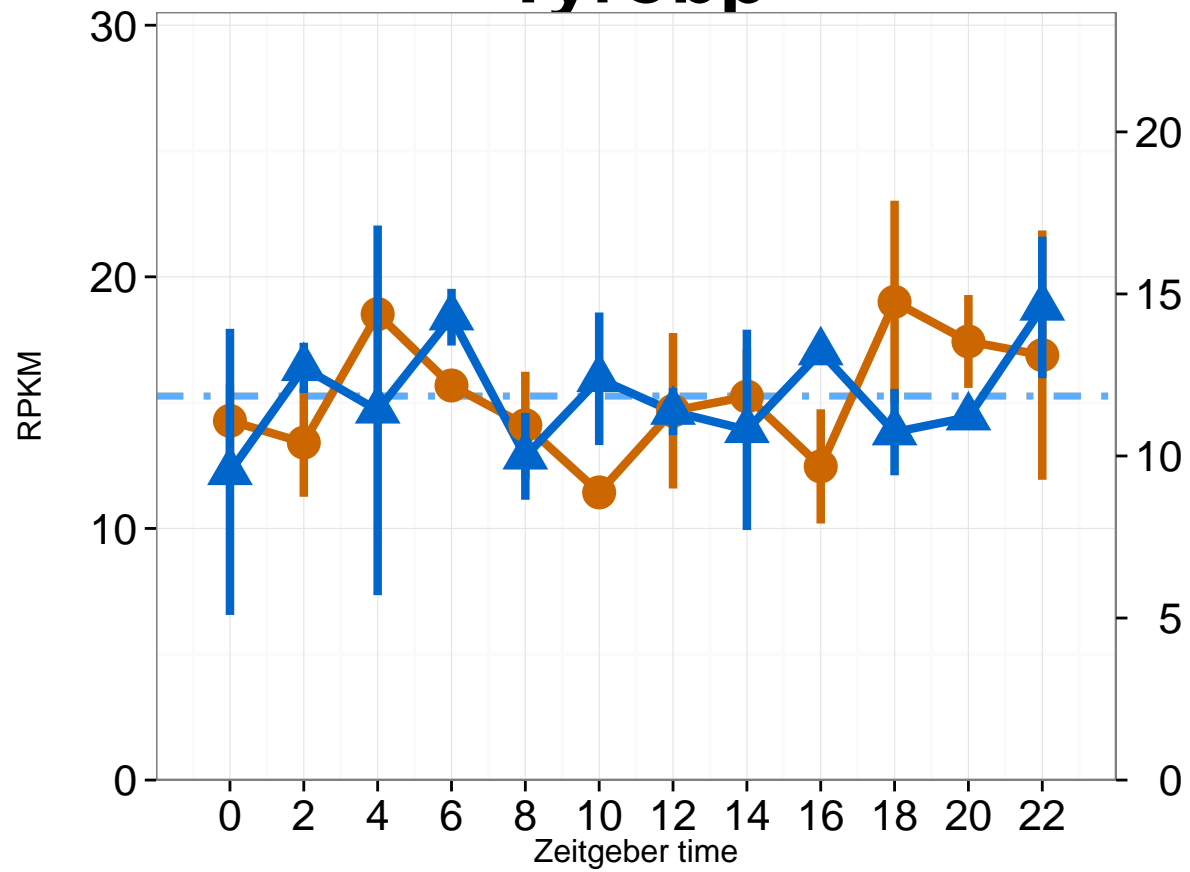

## Tyrobp

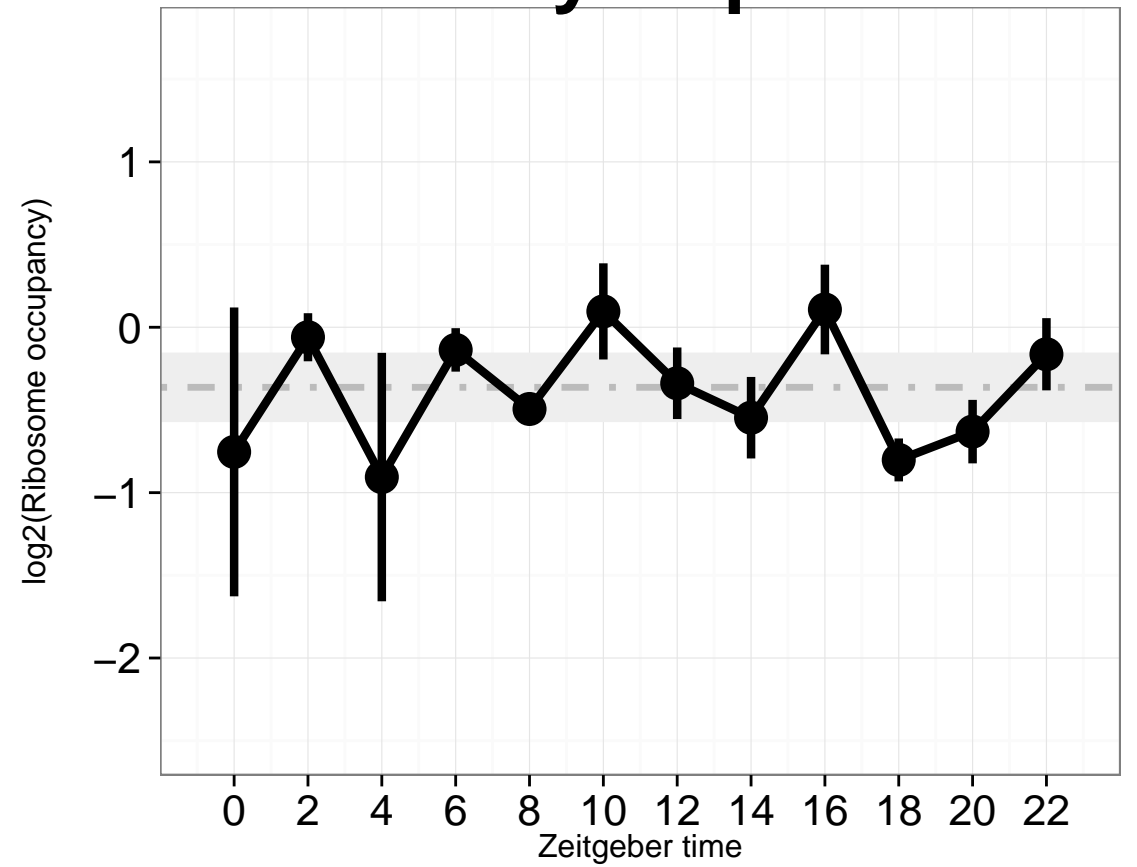

Supplement: Supplementary file 10916 [file 1]

## AW549877

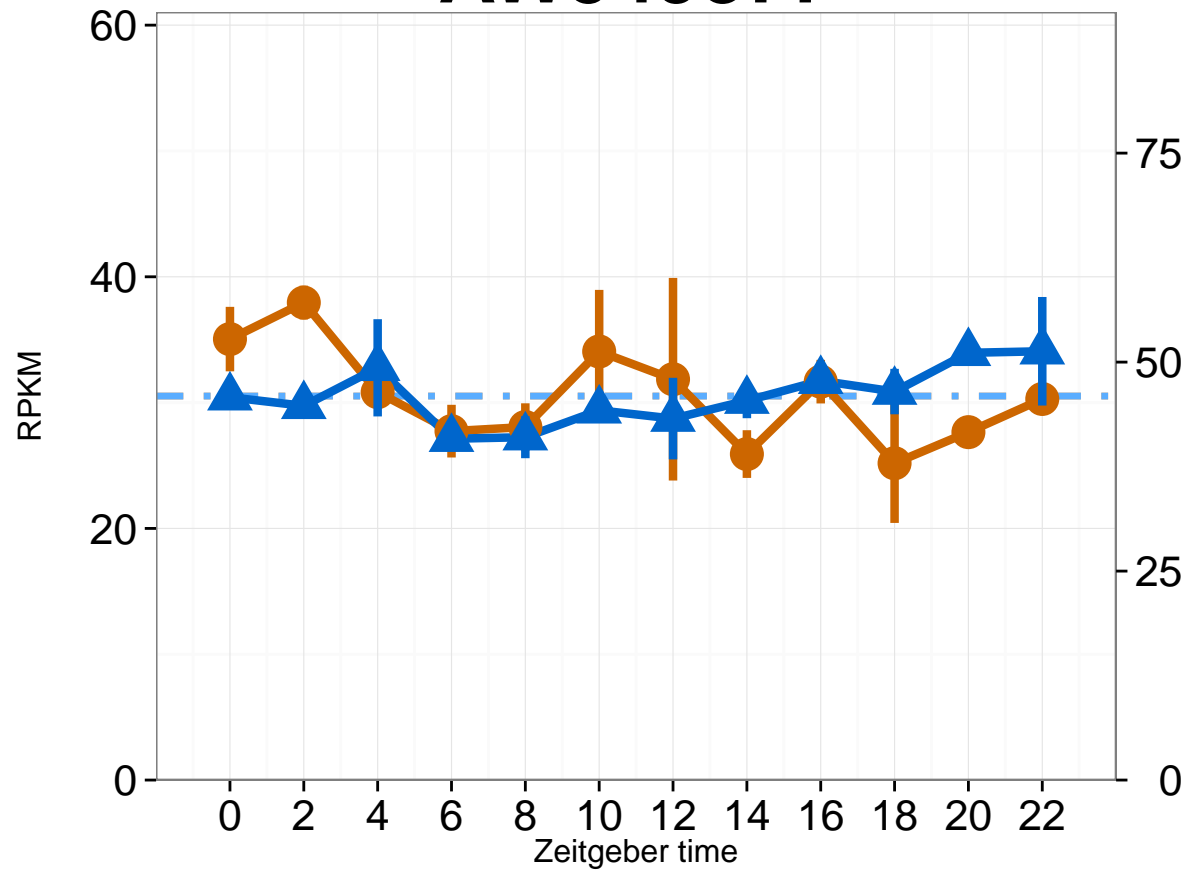

## AW549877

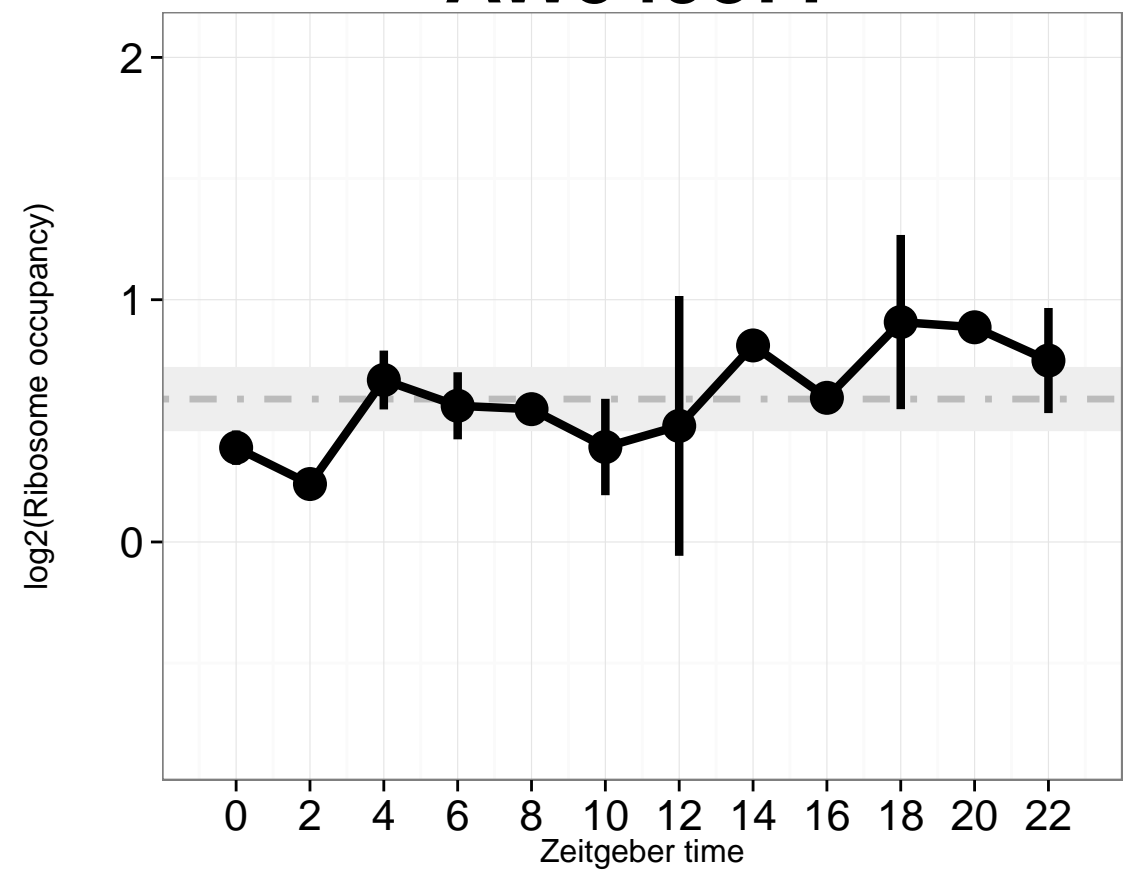

Supplement: Supplementary file 10917 [file 1]

## Nrde2

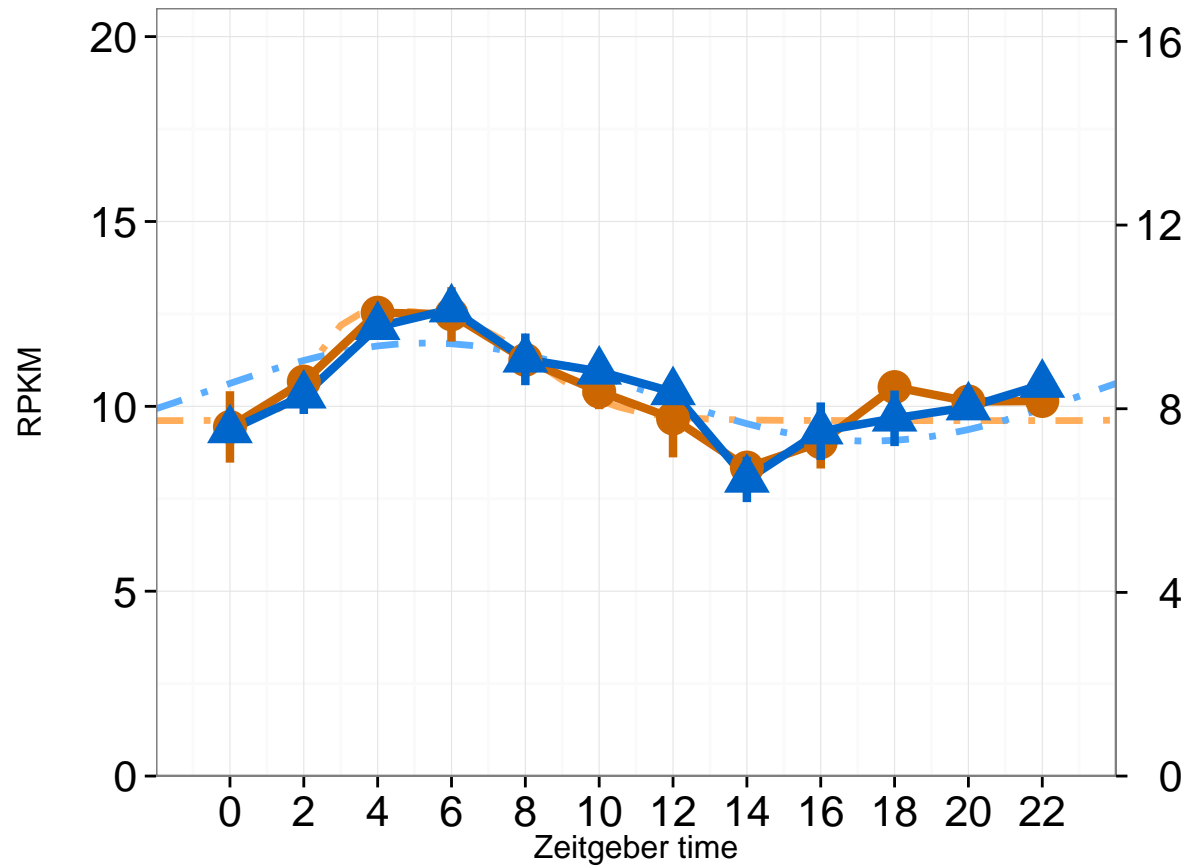

## Nrde2

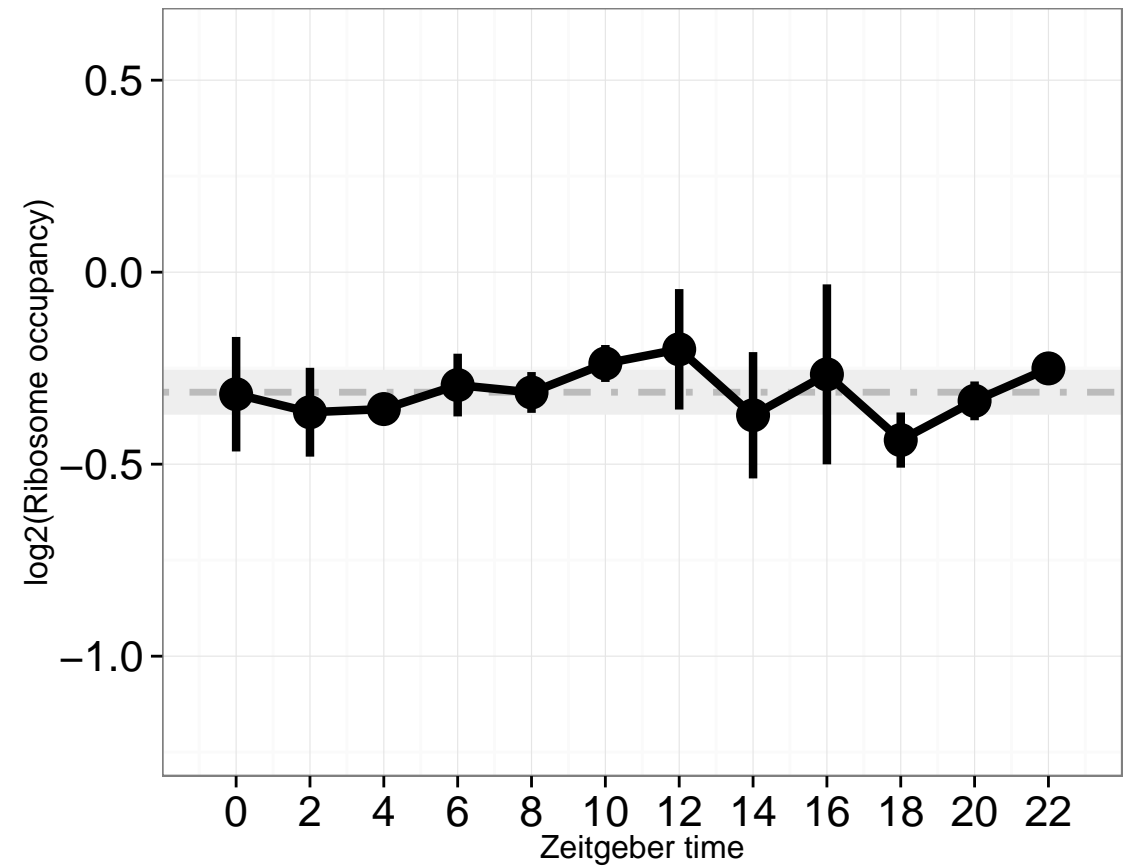

Supplement: Supplementary file 10918 [file 1]

## Nadsyn1

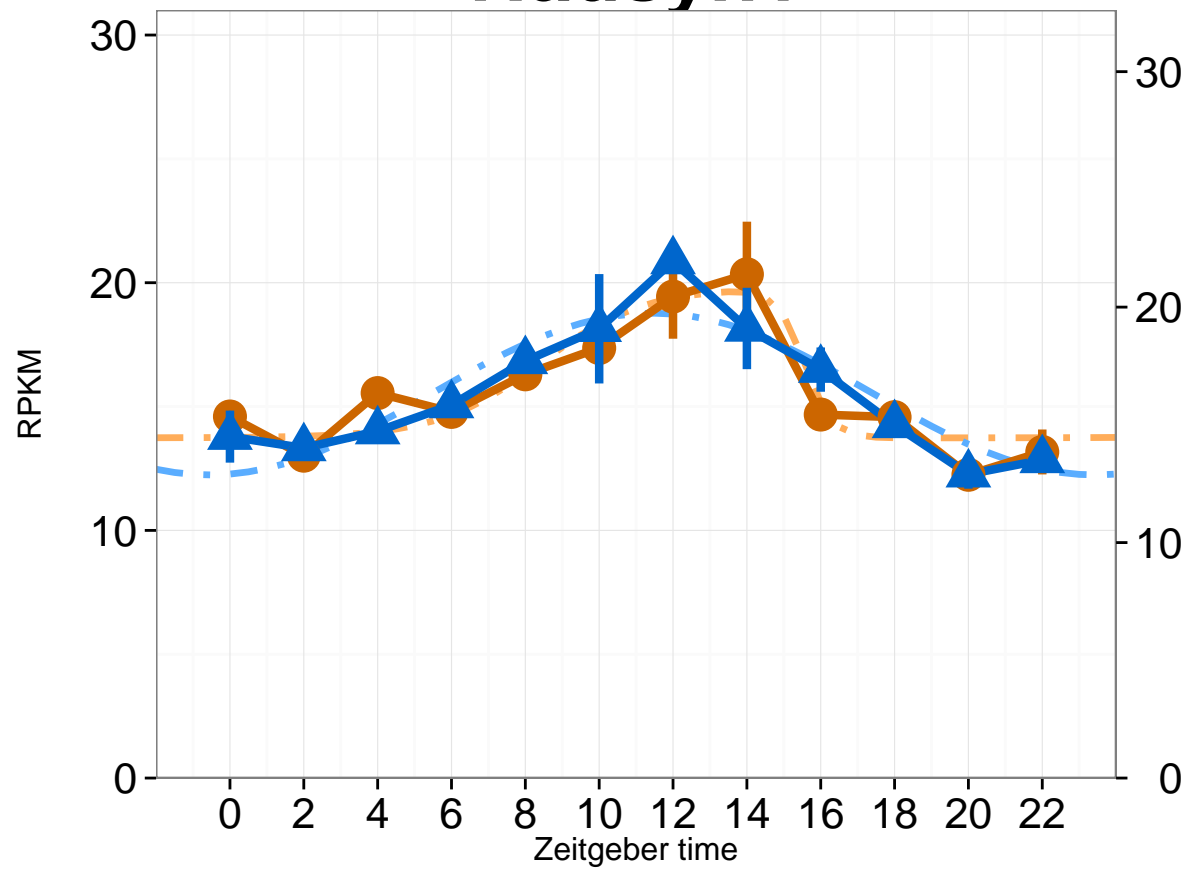

## Nadsyn1

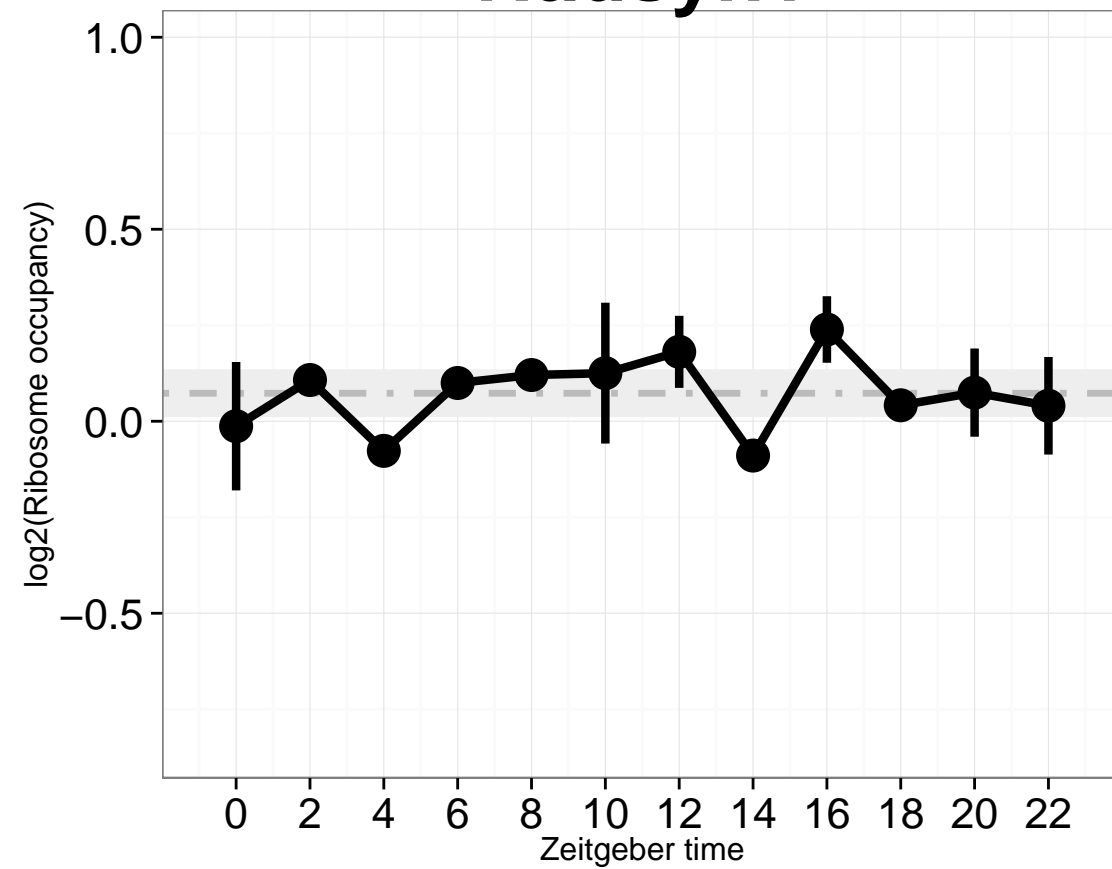

Supplement: Supplementary file 10919 [file 1]

## Cdkn1c

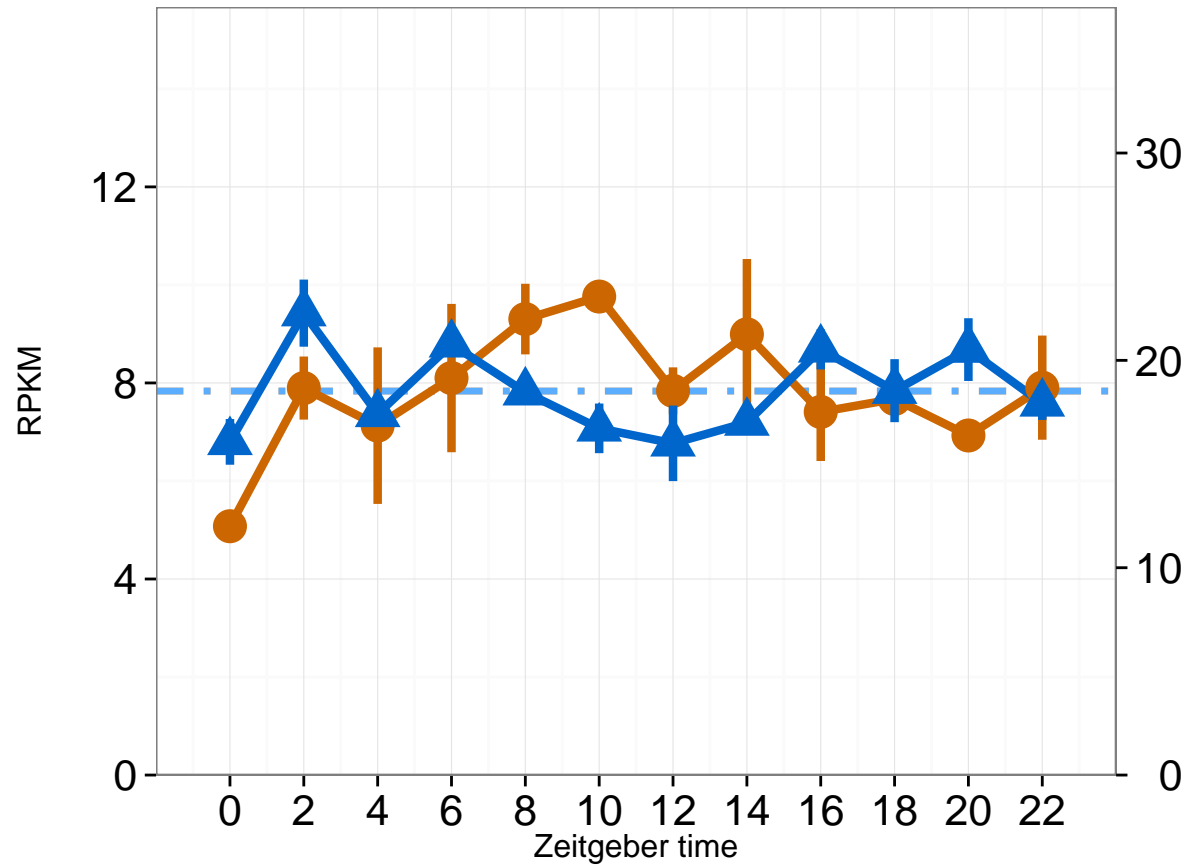

## Cdkn1c

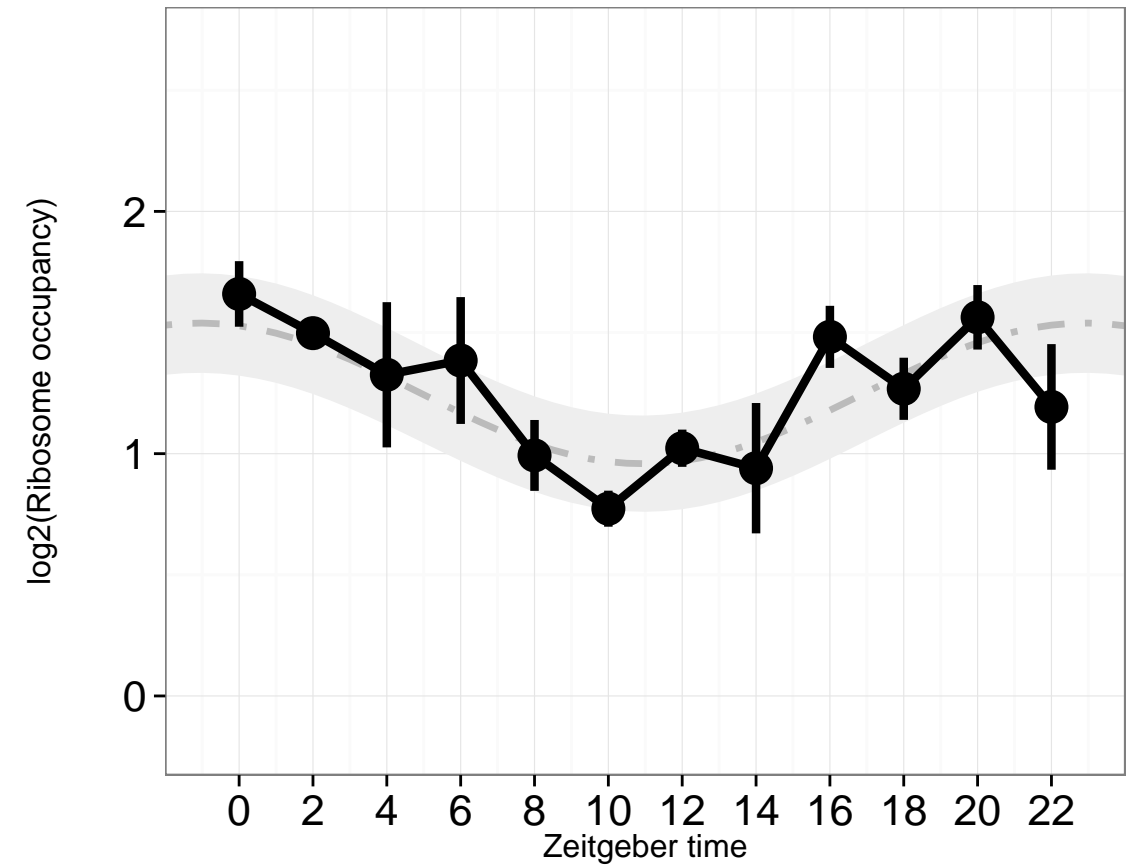

Supplement: Supplementary file 10920 [file 1]

# Mrpl34

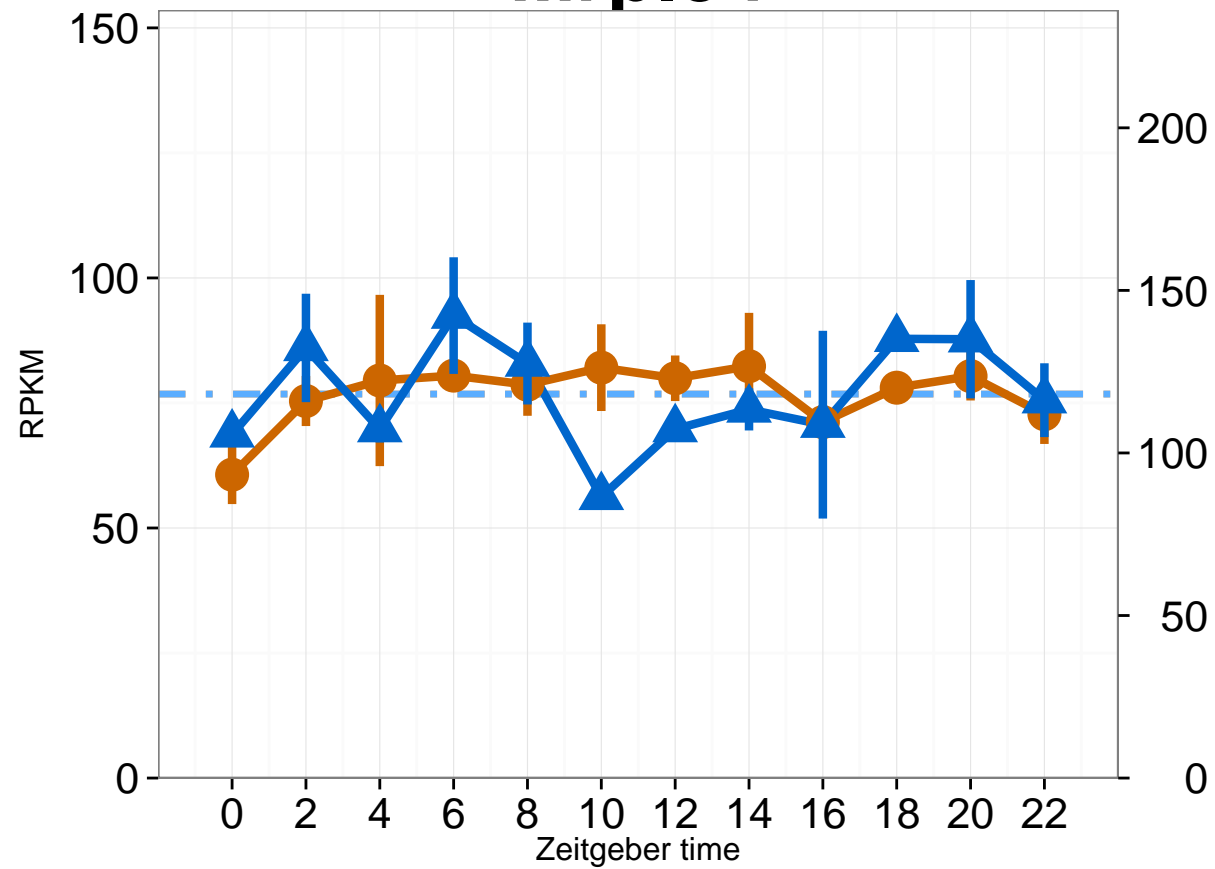

# Mrpl34

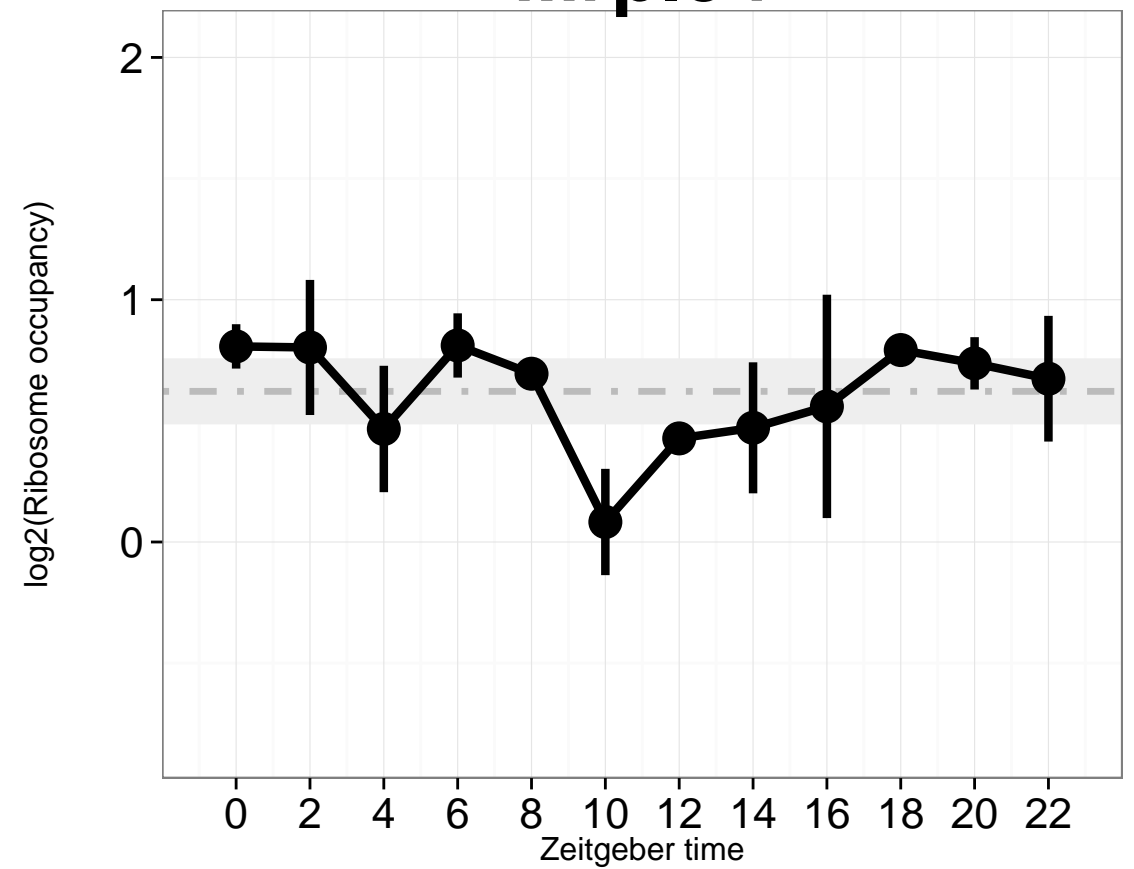

Supplement: Supplementary file 10921 [file 1]

# Trappc2

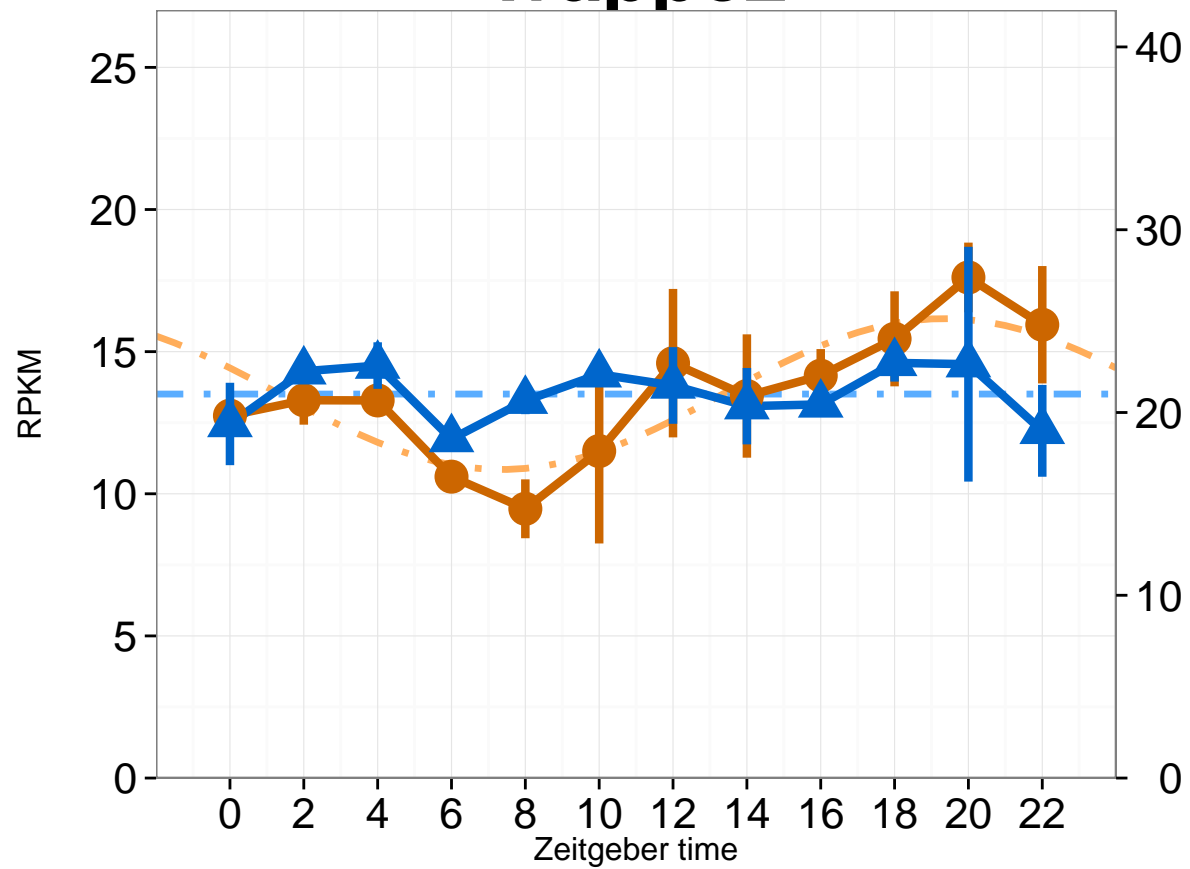

# Trappc2

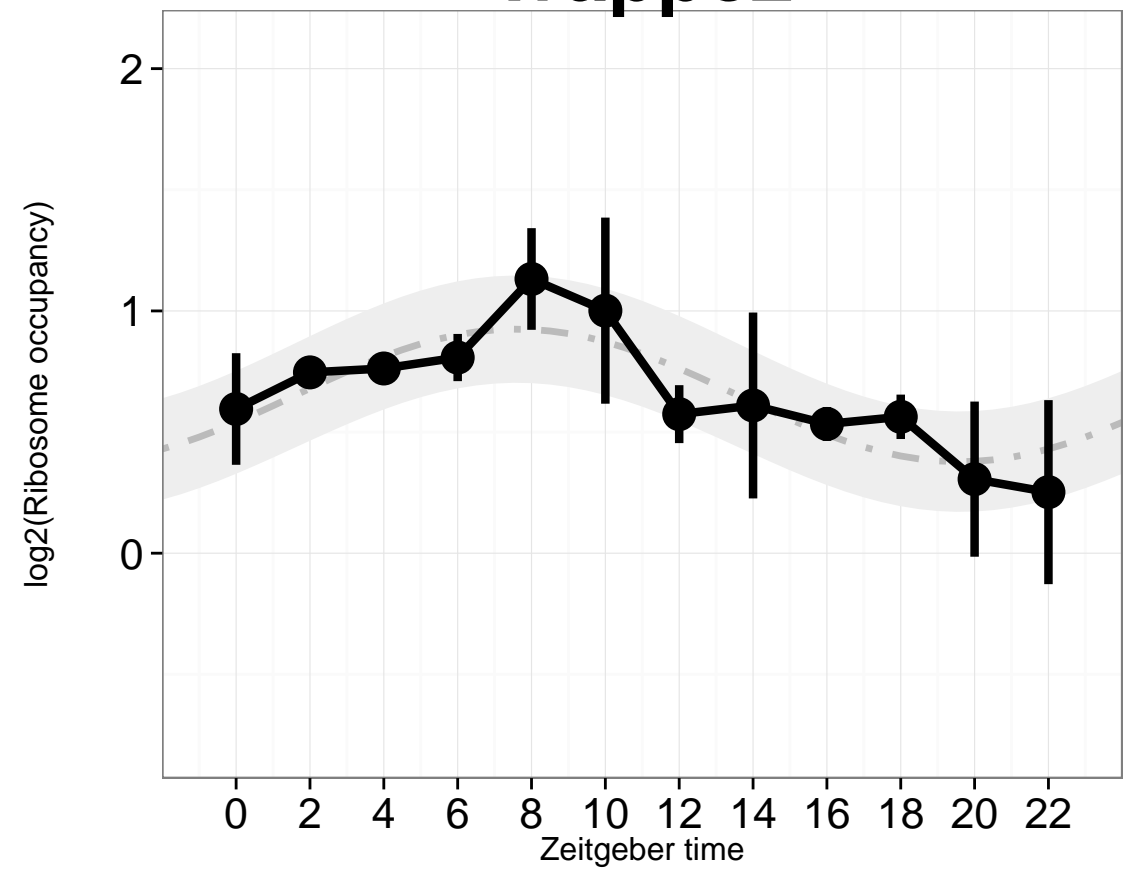

Supplement: Supplementary file 10922 [file 1]

# Mrpl12

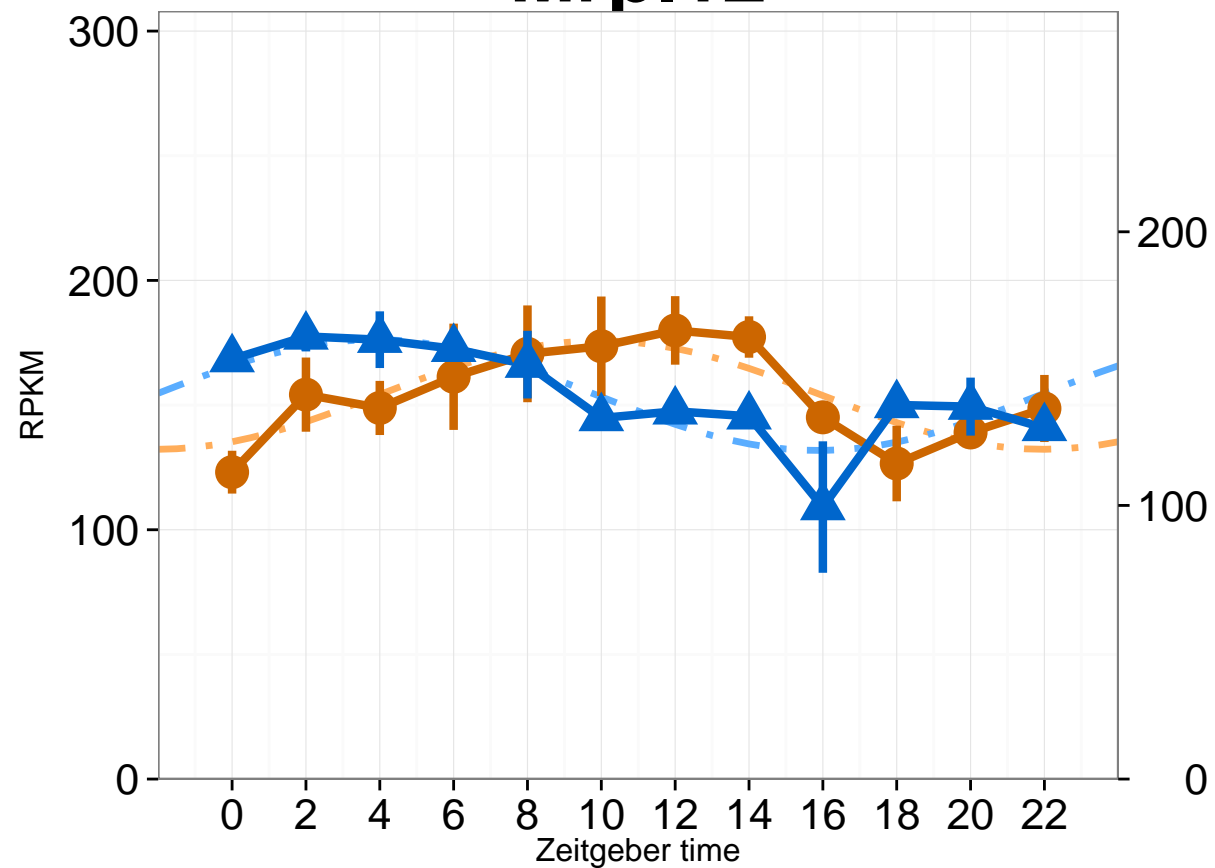

# Mrpl12

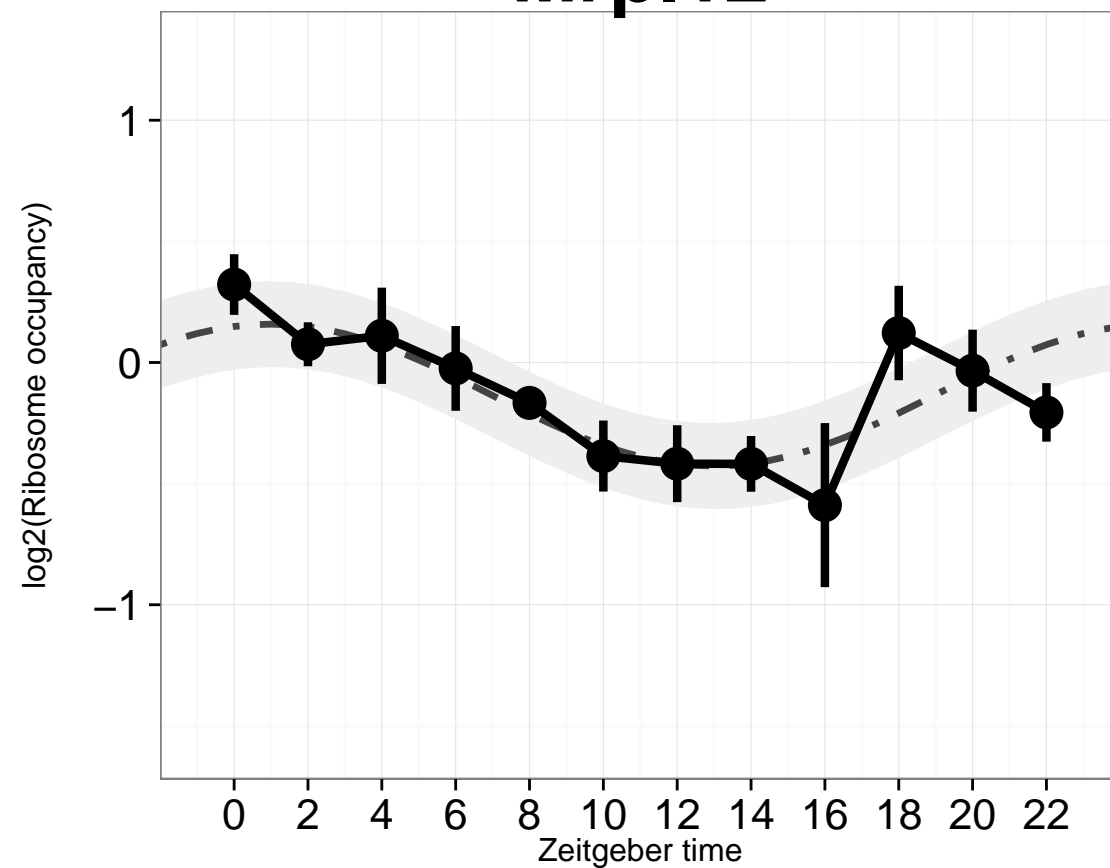

Supplement: Supplementary file 10923 [file 1]

# Cct6b

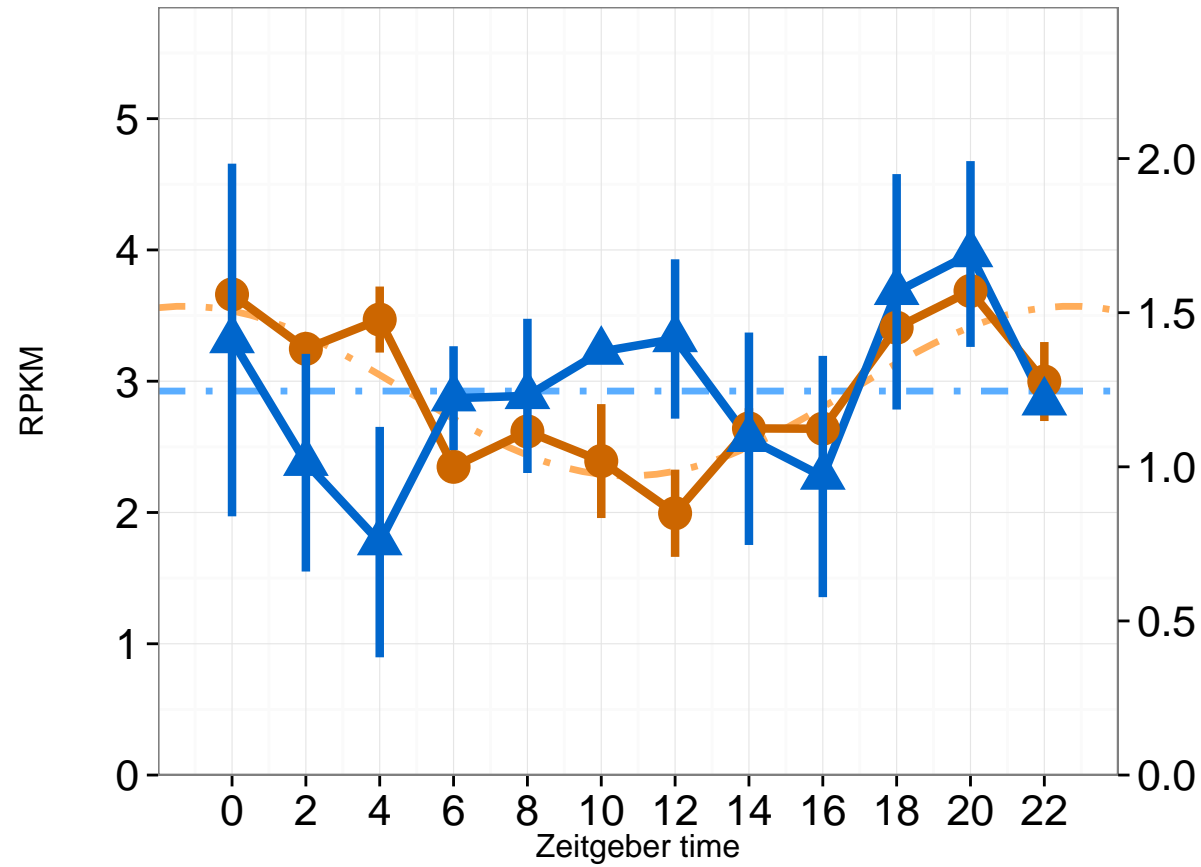

# Cct6b

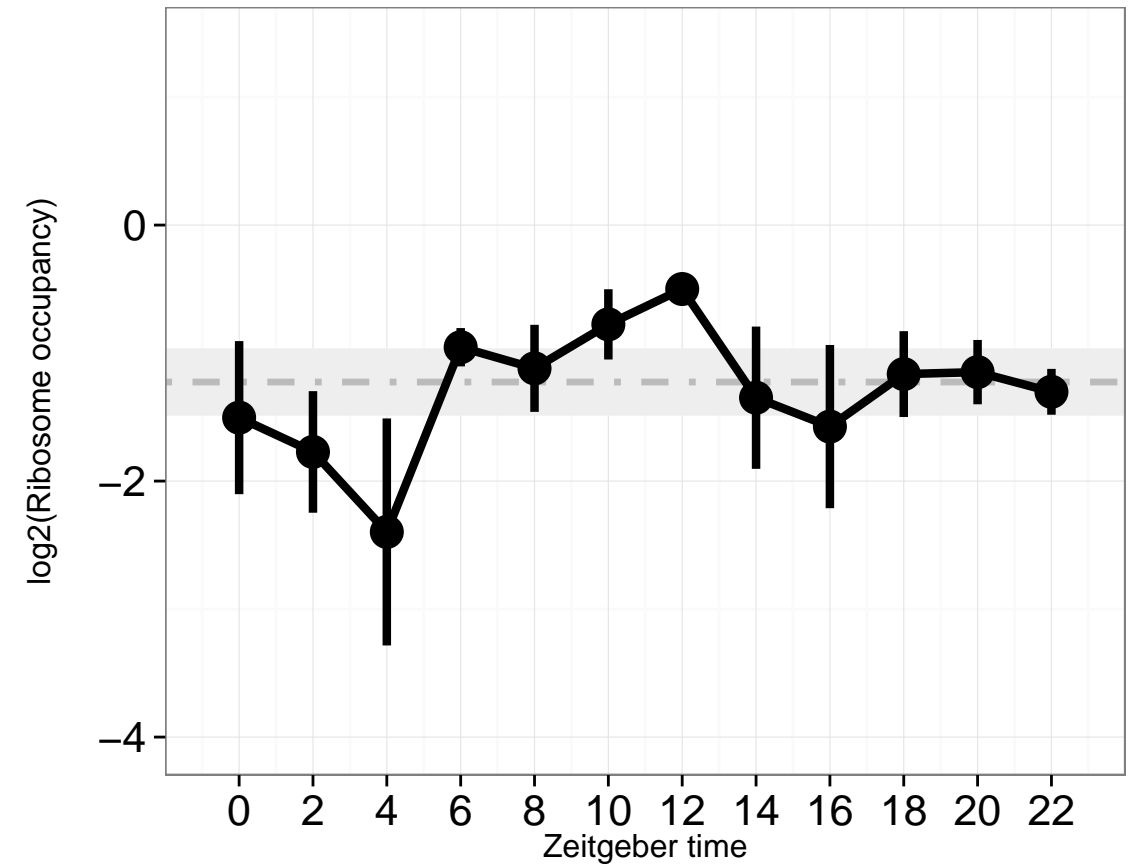

Supplement: Supplementary file 10924 [file 1]

# Ankrd16

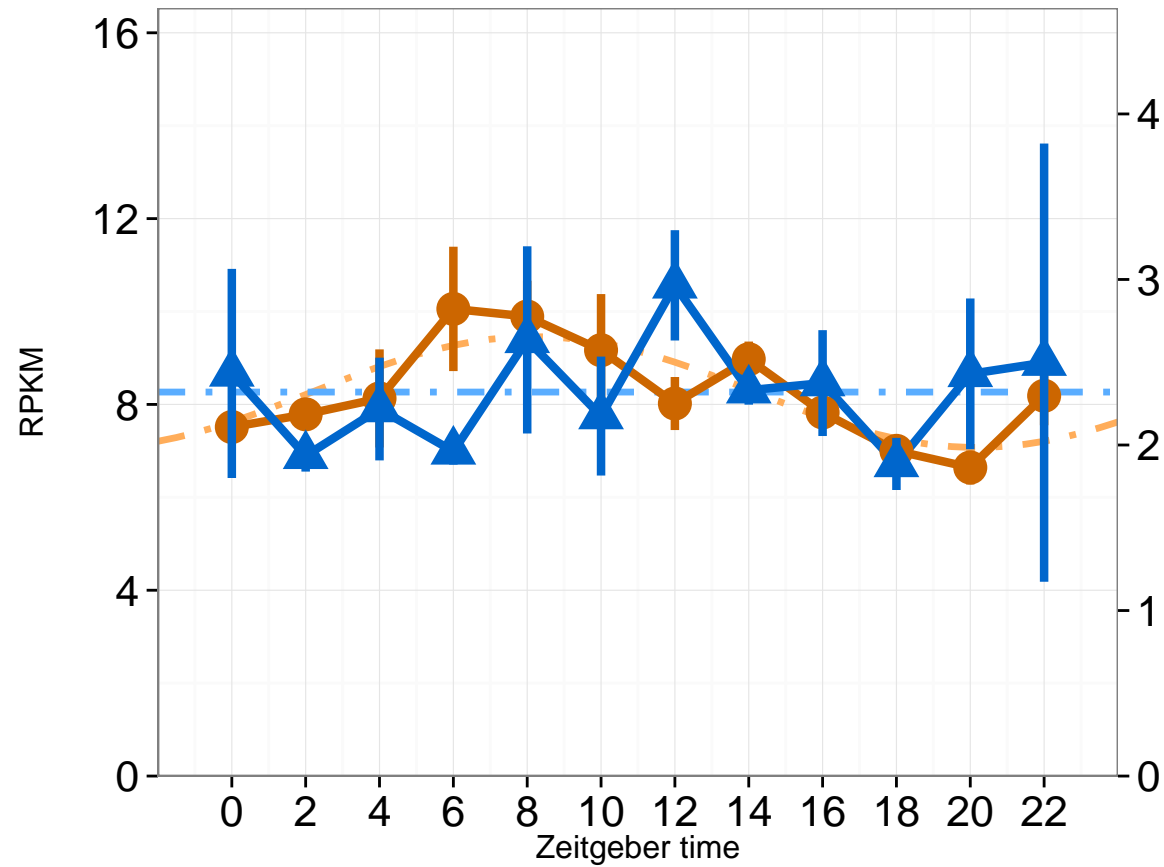

# Ankrd16

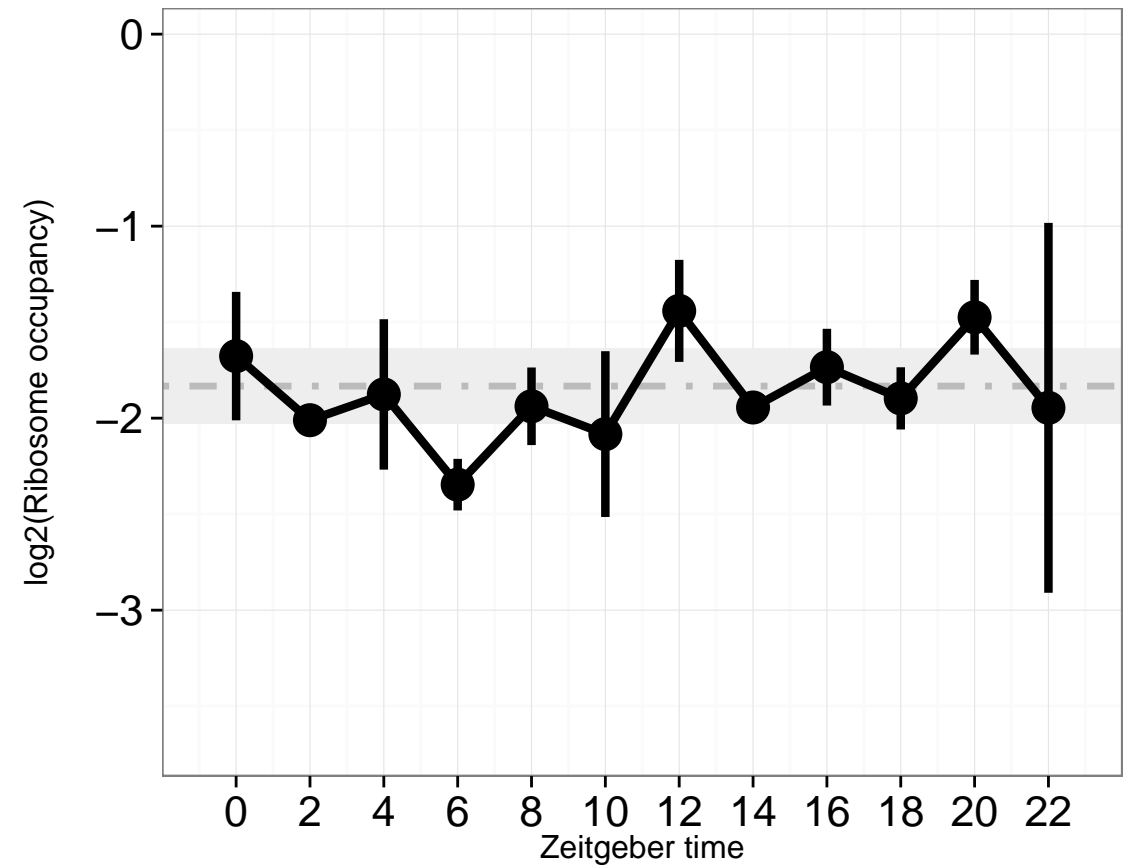

Supplement: Supplementary file 10925 [file 1]

# Tfap2a

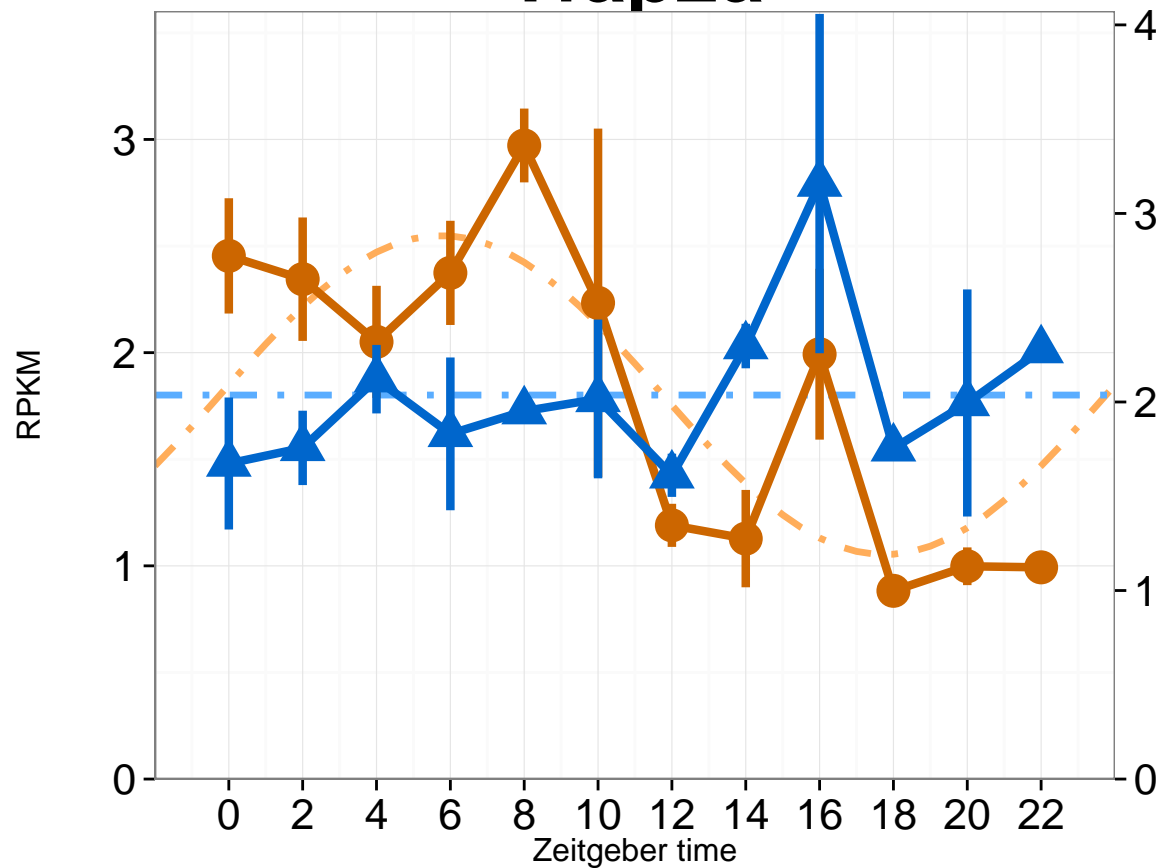

# Tfap2a

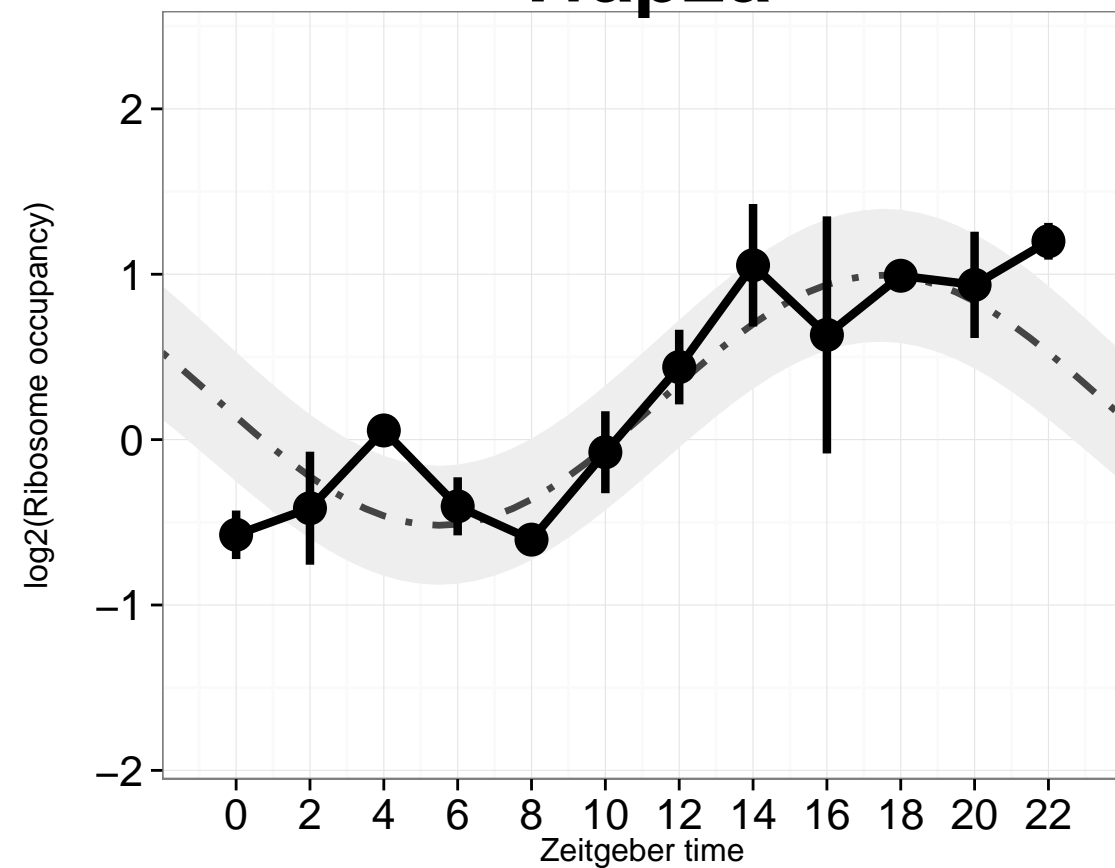

Supplement: Supplementary file 10926 [file 1]

## Sdf2l1

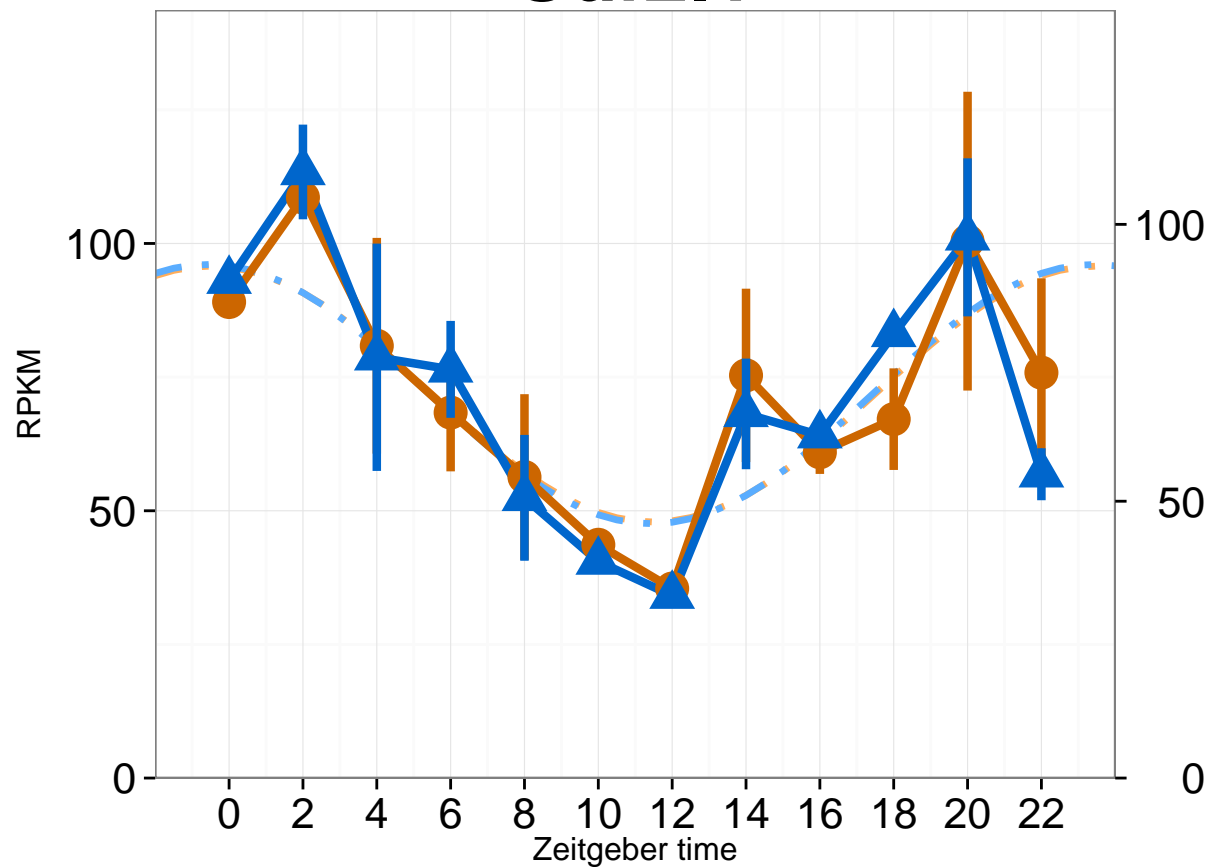

## Sdf2l1

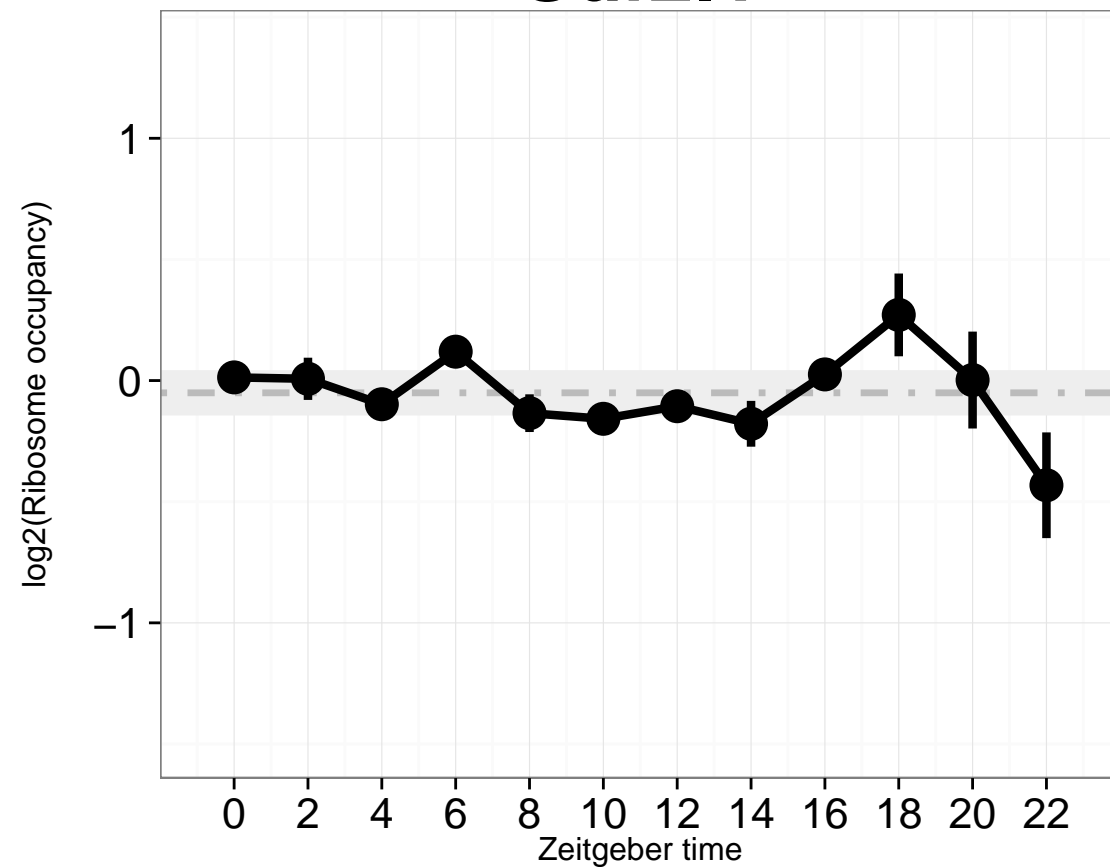

Supplement: Supplementary file 10927 [file 1]

# Rps27a

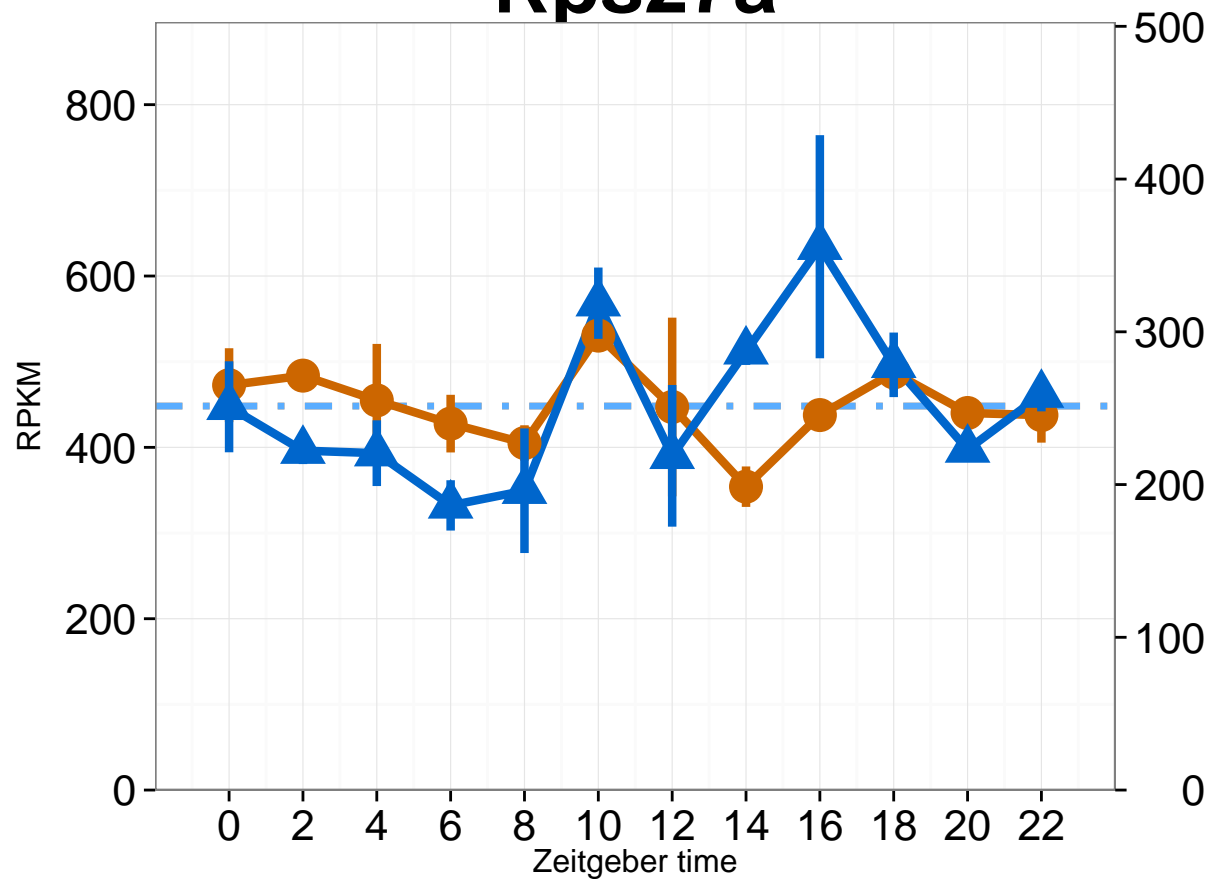

# Rps27a

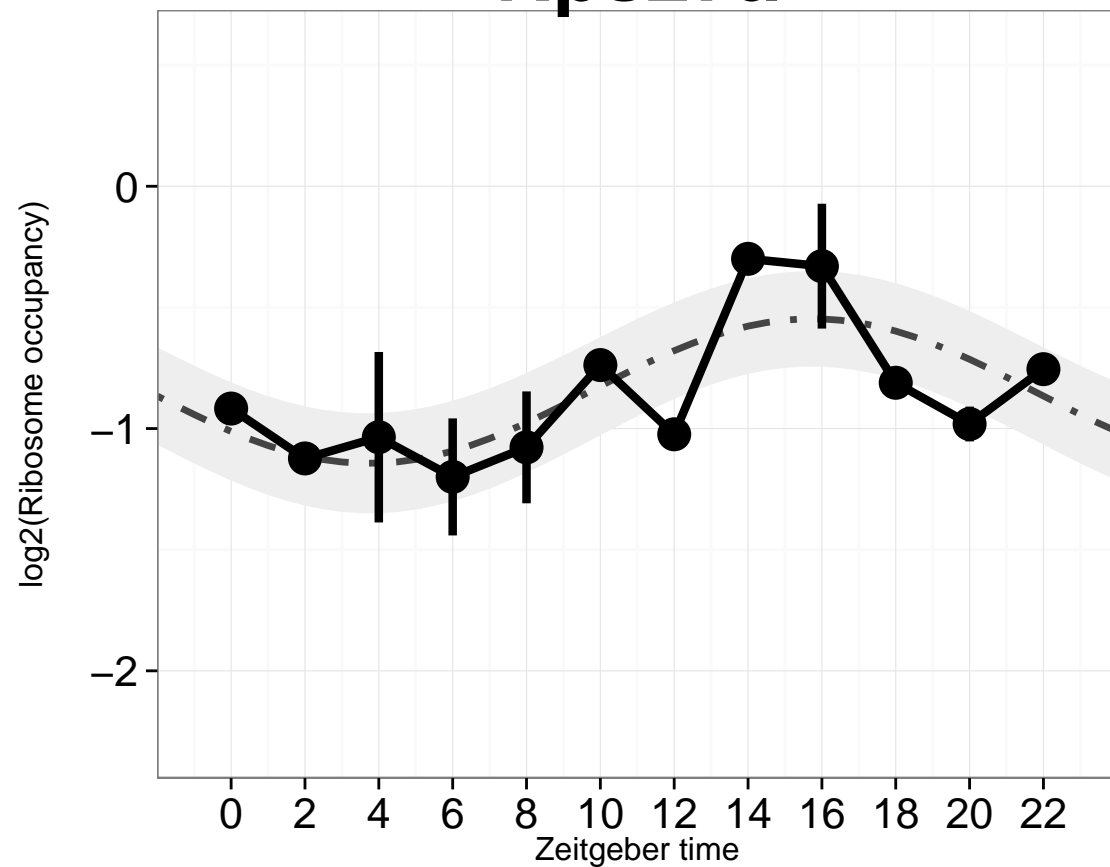

Supplement: Supplementary file 10928 [file 1]

## Stam2

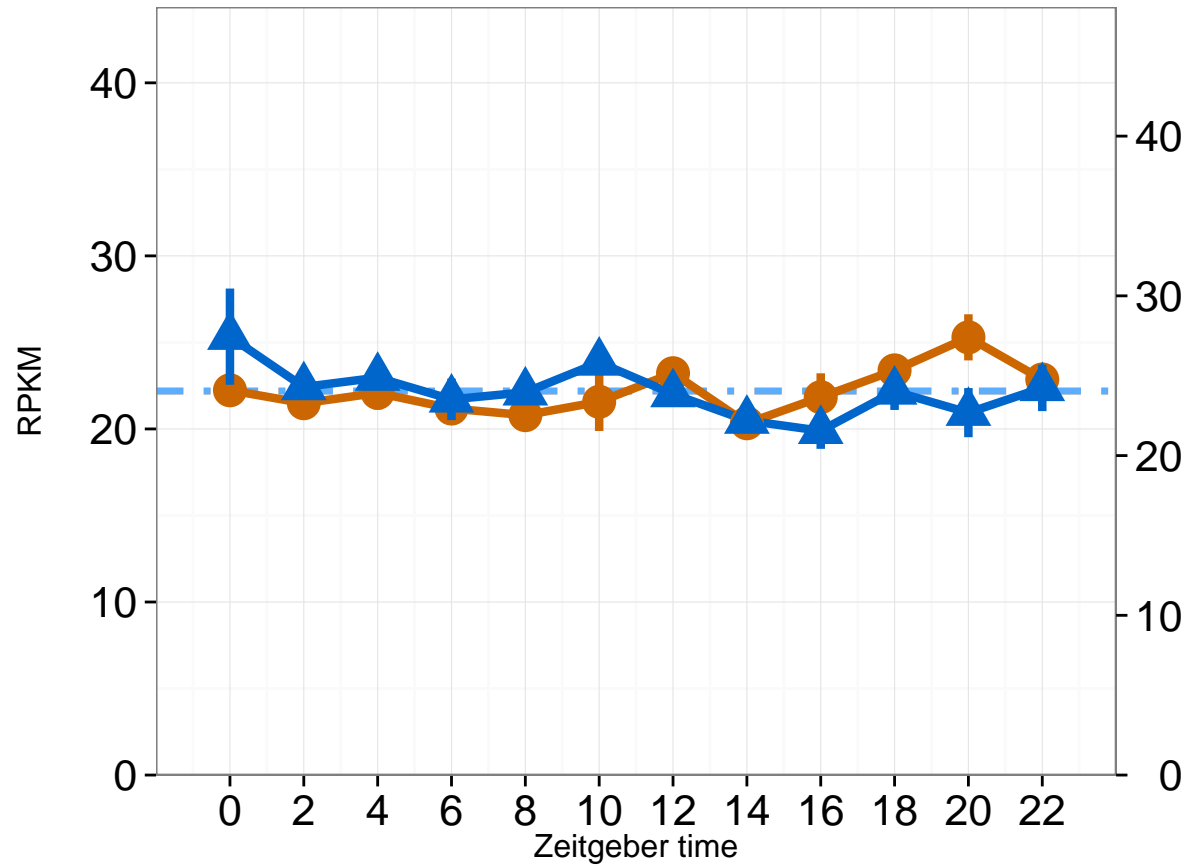

## Stam2

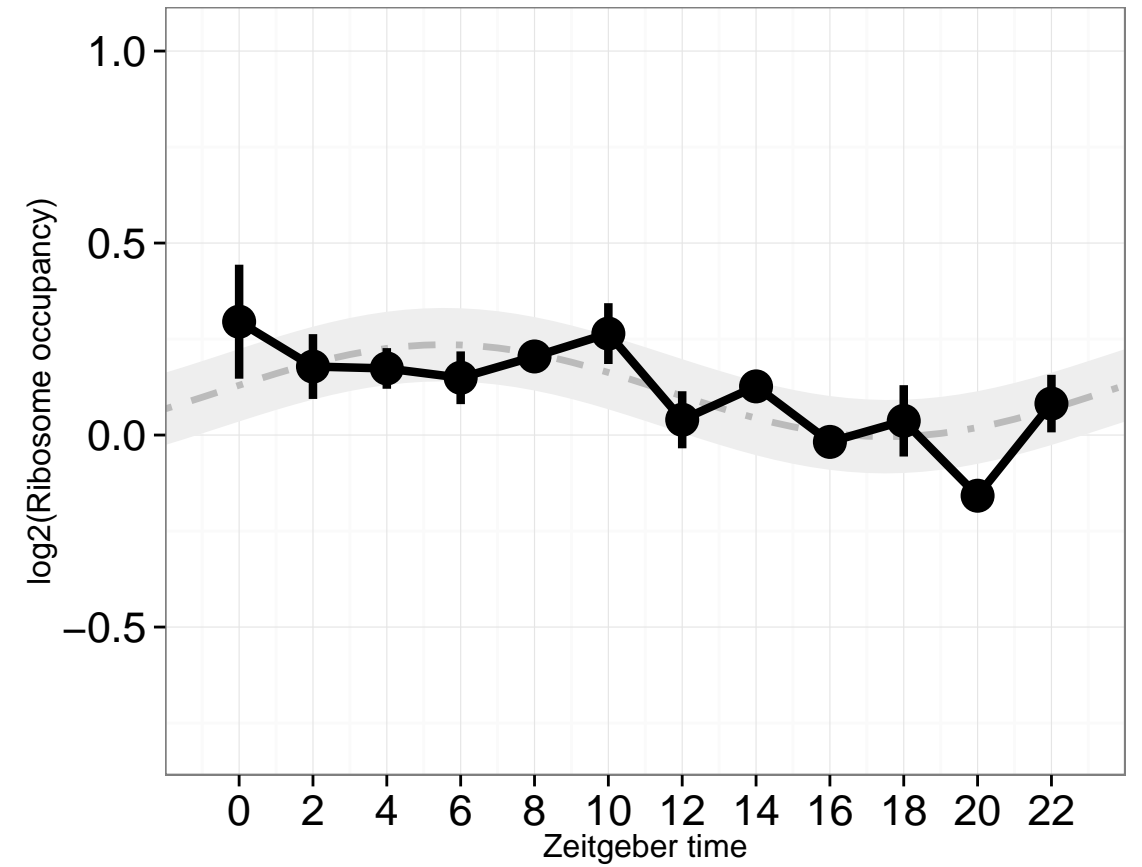

Supplement: Supplementary file 10929 [file 1]

## Fzd4

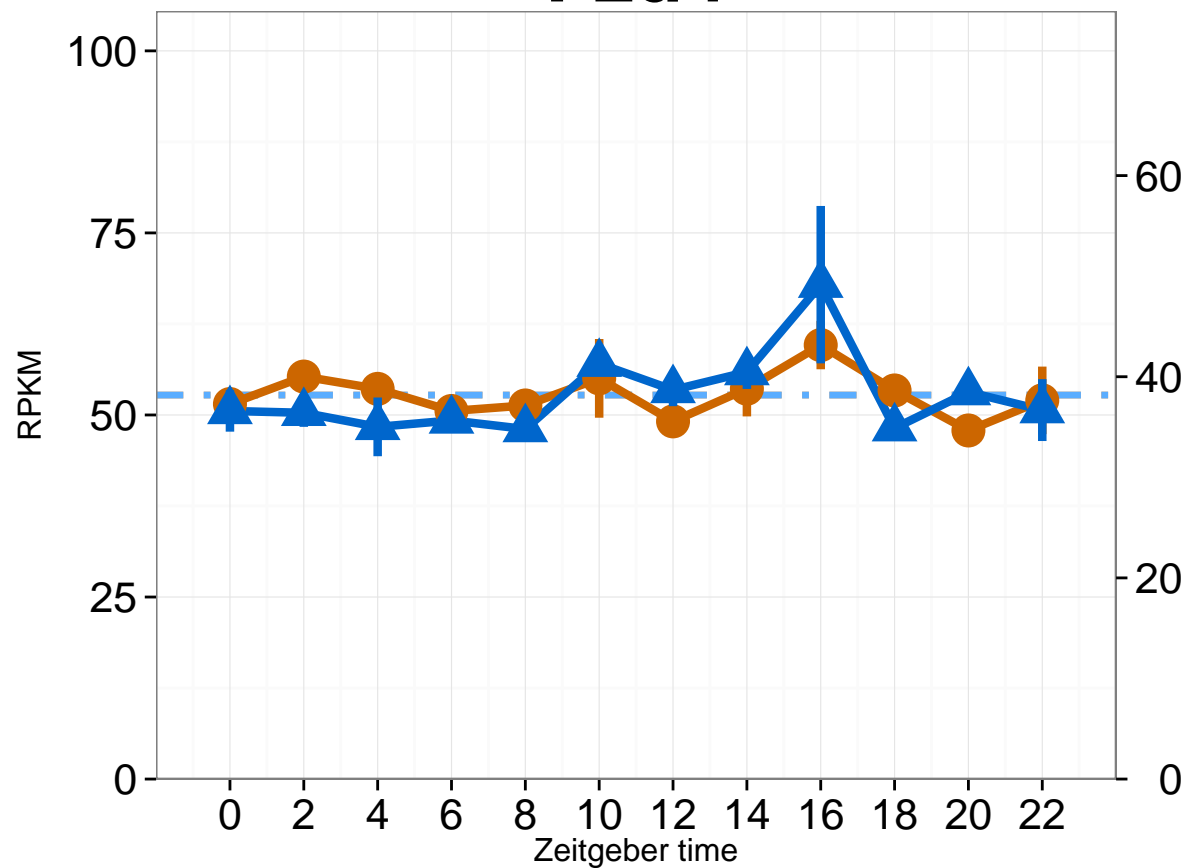

## Fzd4

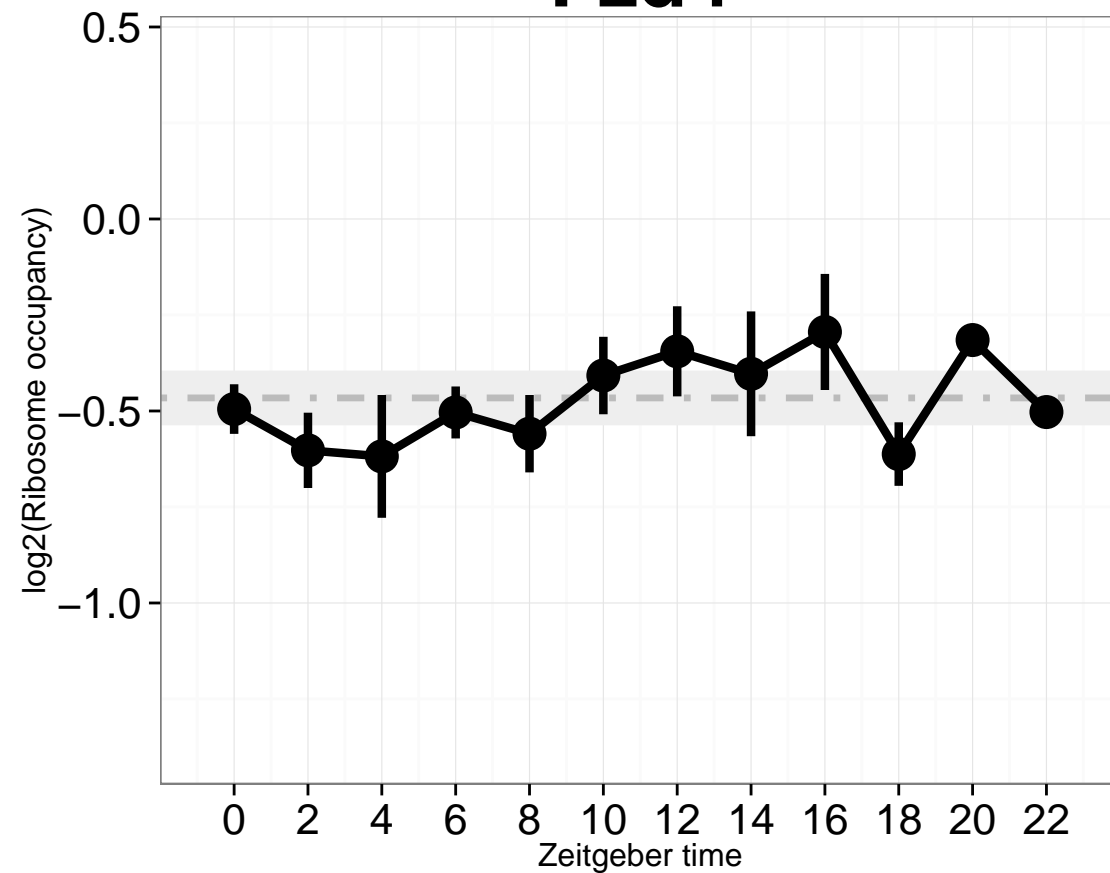

Supplement: Supplementary file 10930 [file 1]

## Nsg1

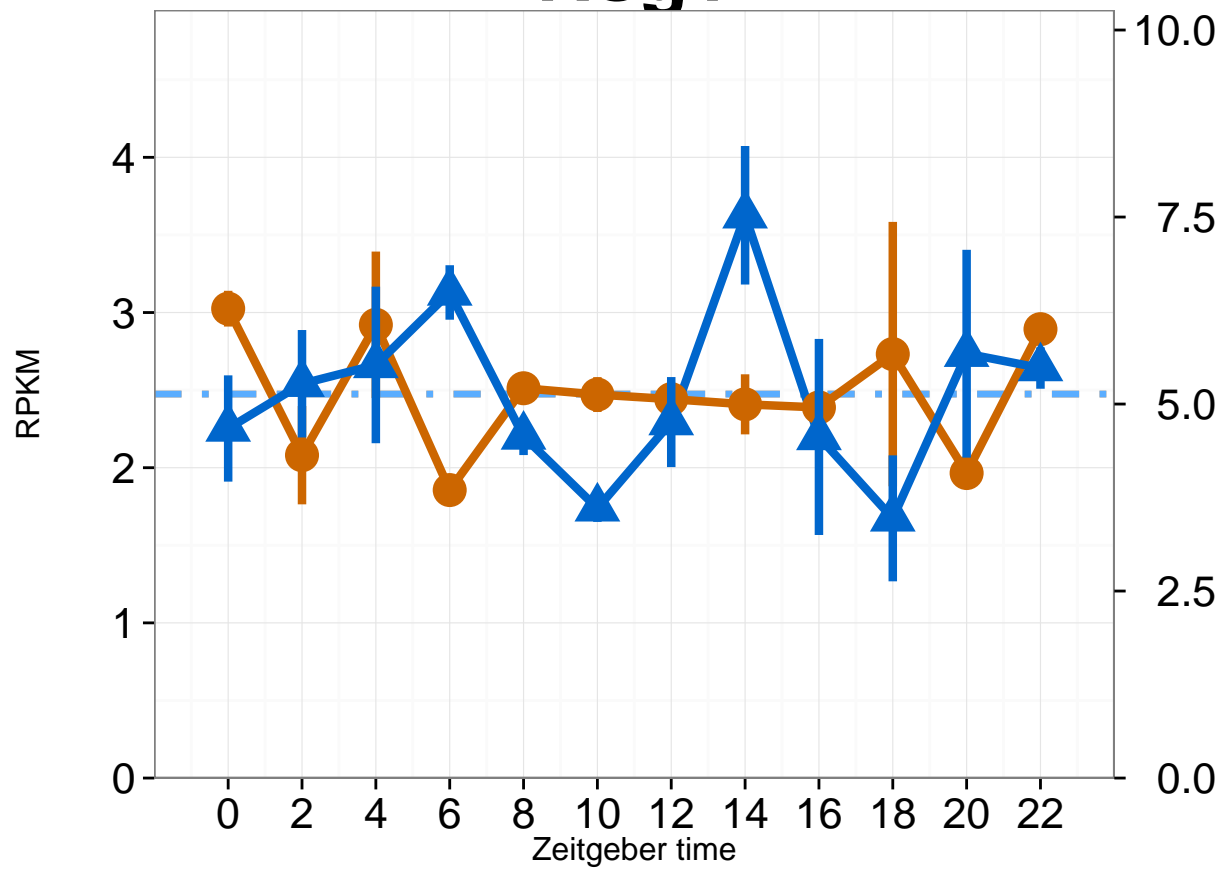

## Nsg1

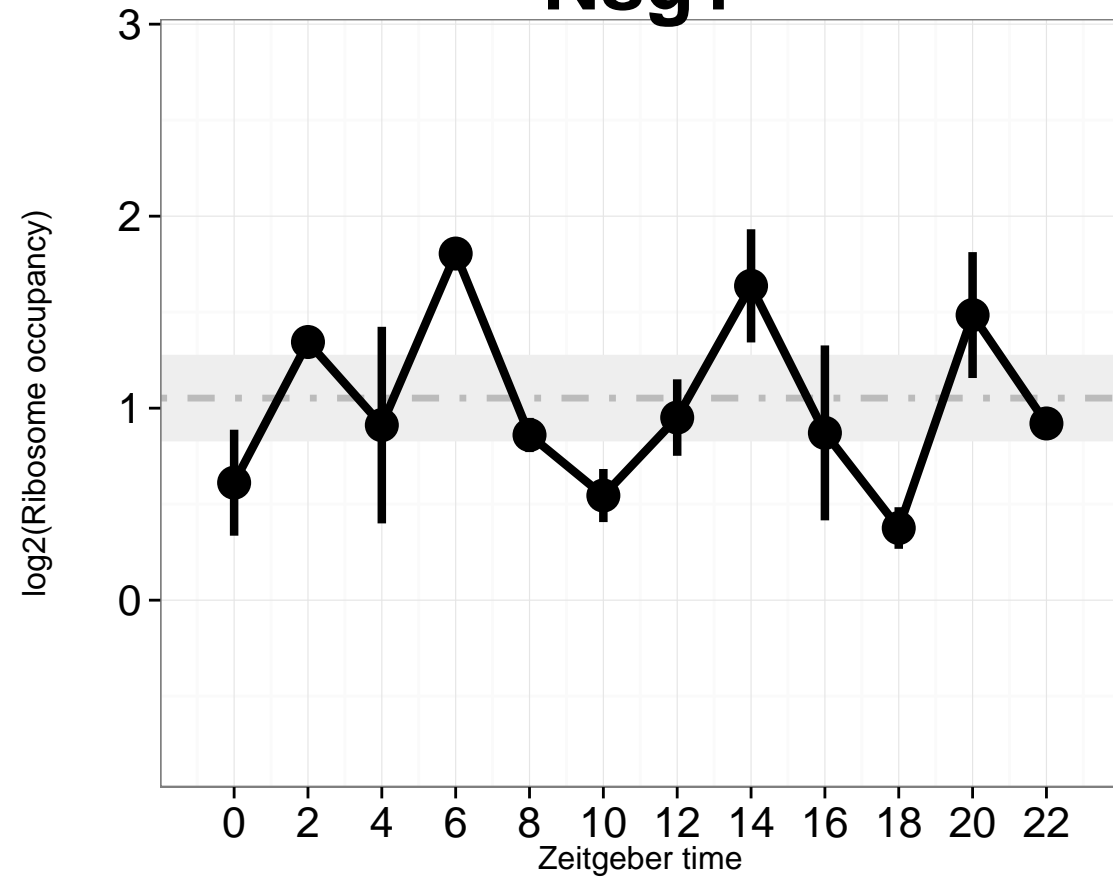

Supplement: Supplementary file 10931 [file 1]

# Slc7a13

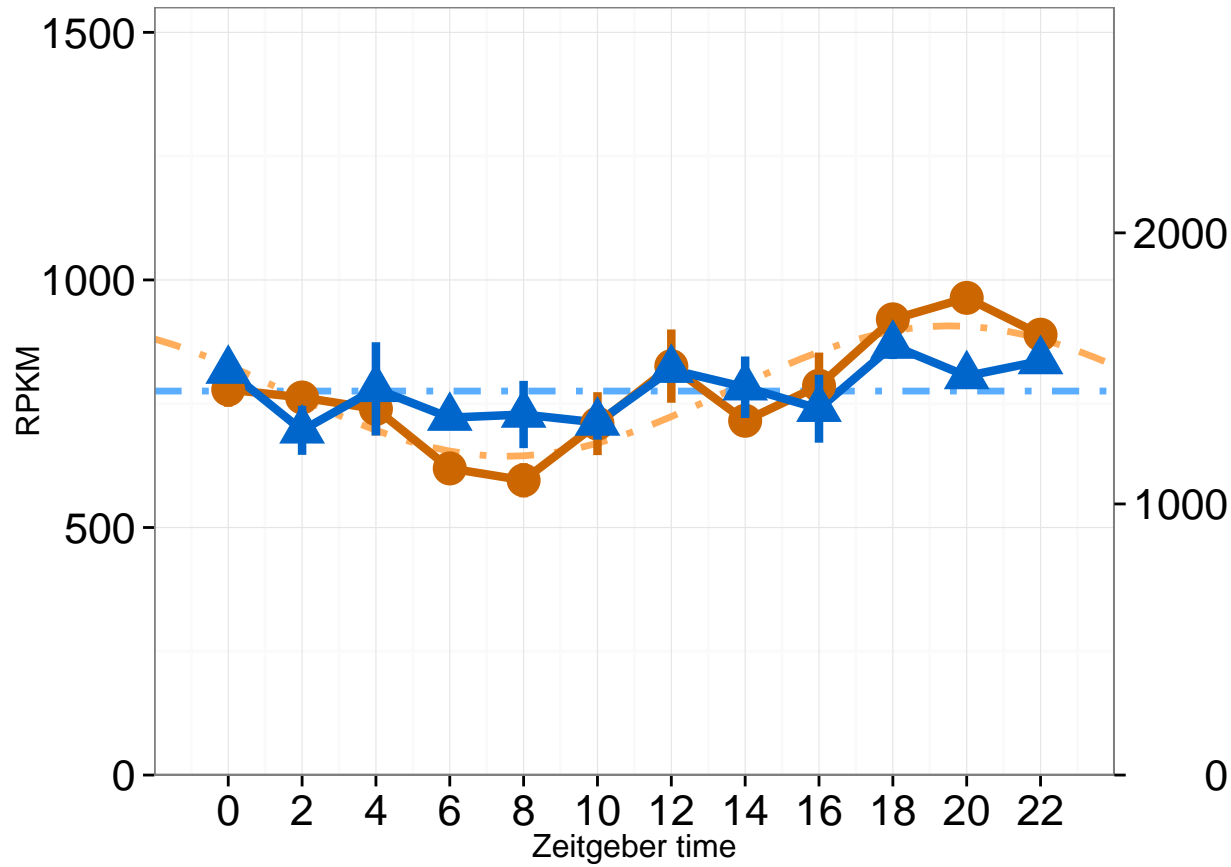

# Slc7a13

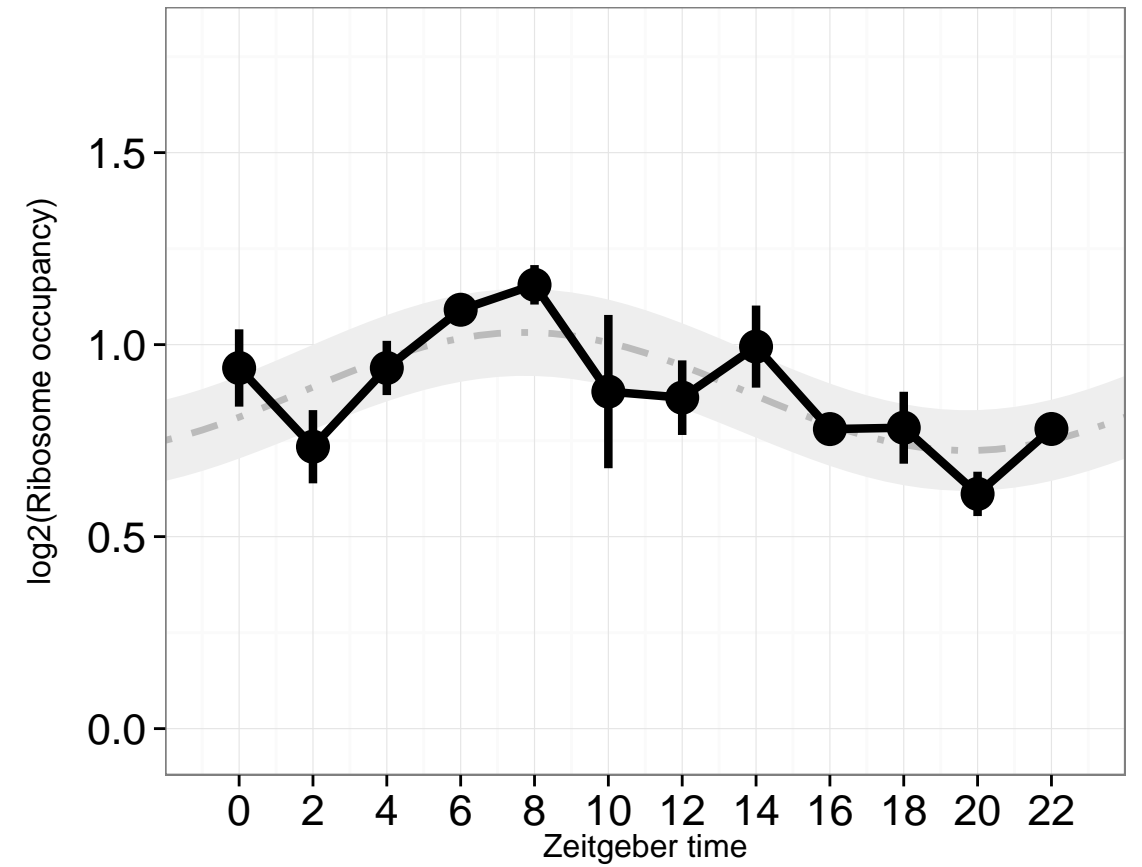

Supplement: Supplementary file 10932 [file 1]

## Sgsm3

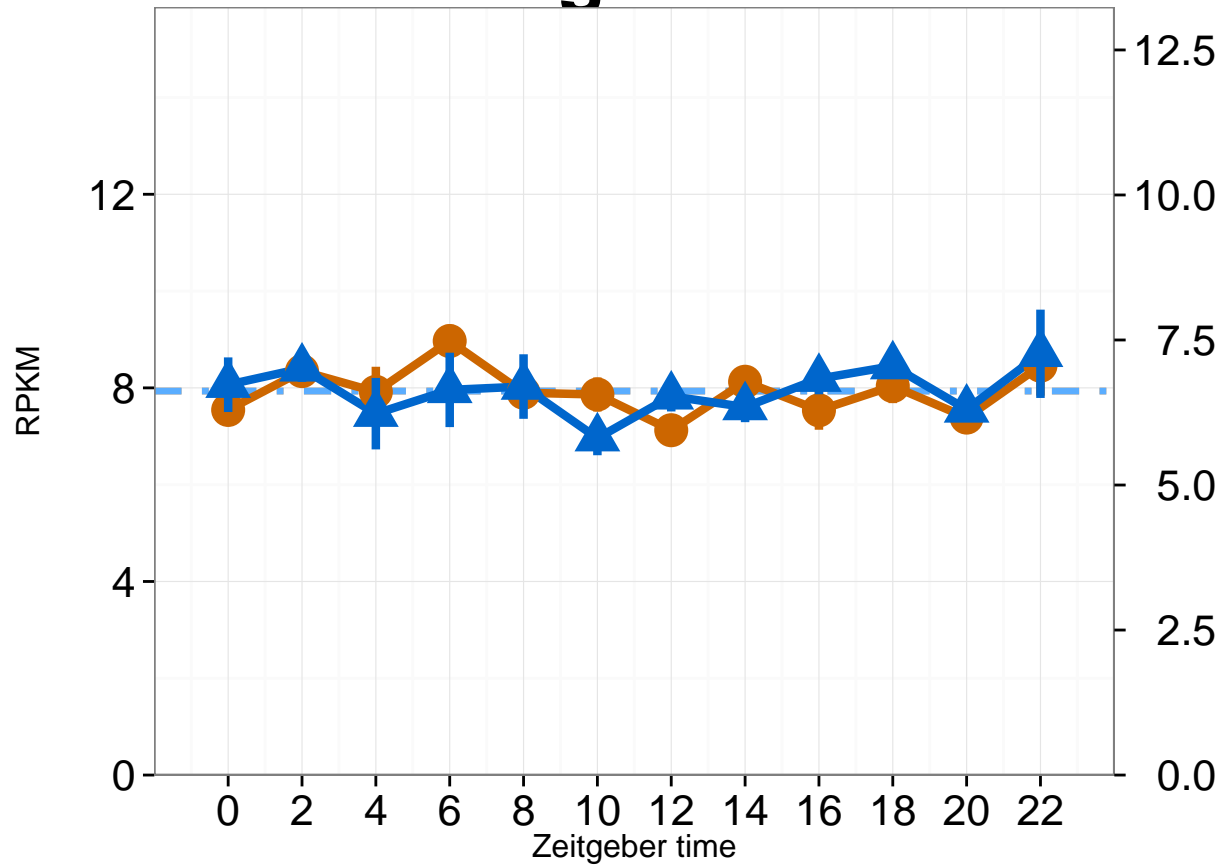

## Sgsm3

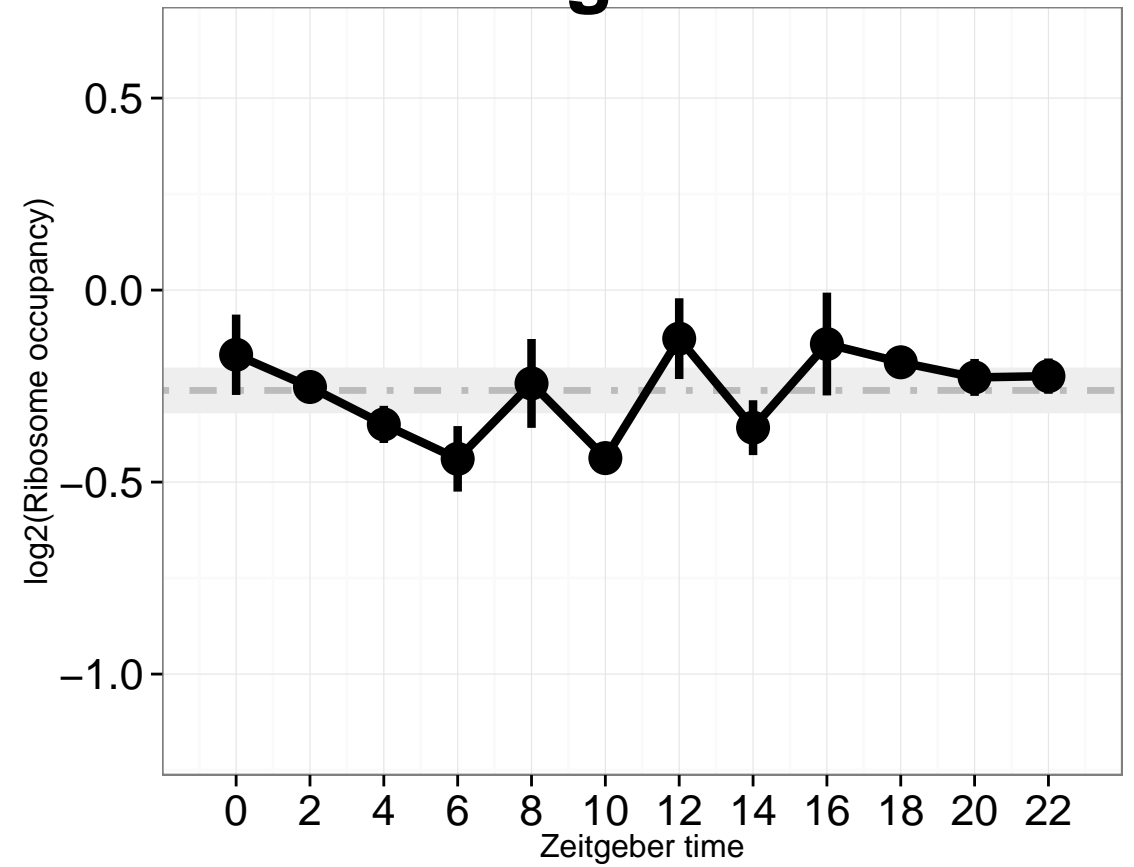

Supplement: Supplementary file 10933 [file 1]

## Tipr1

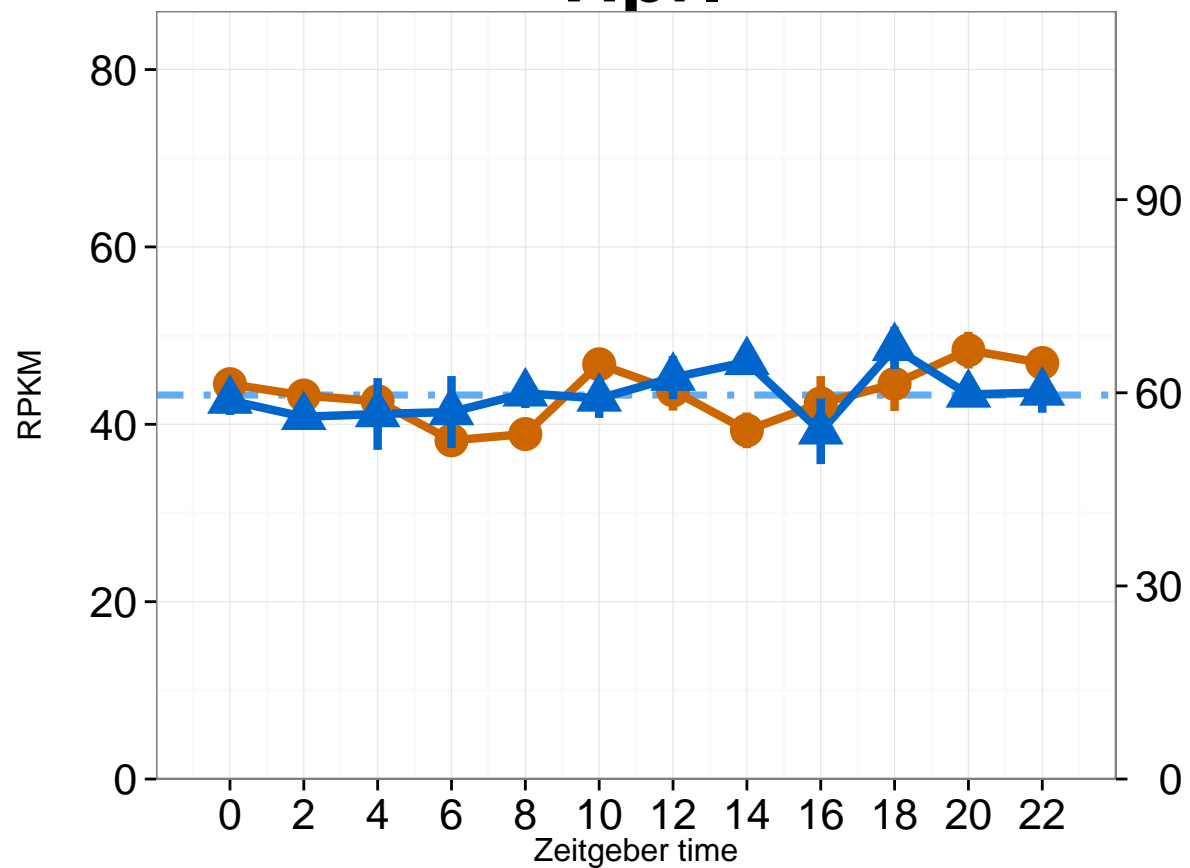

## Tipr1

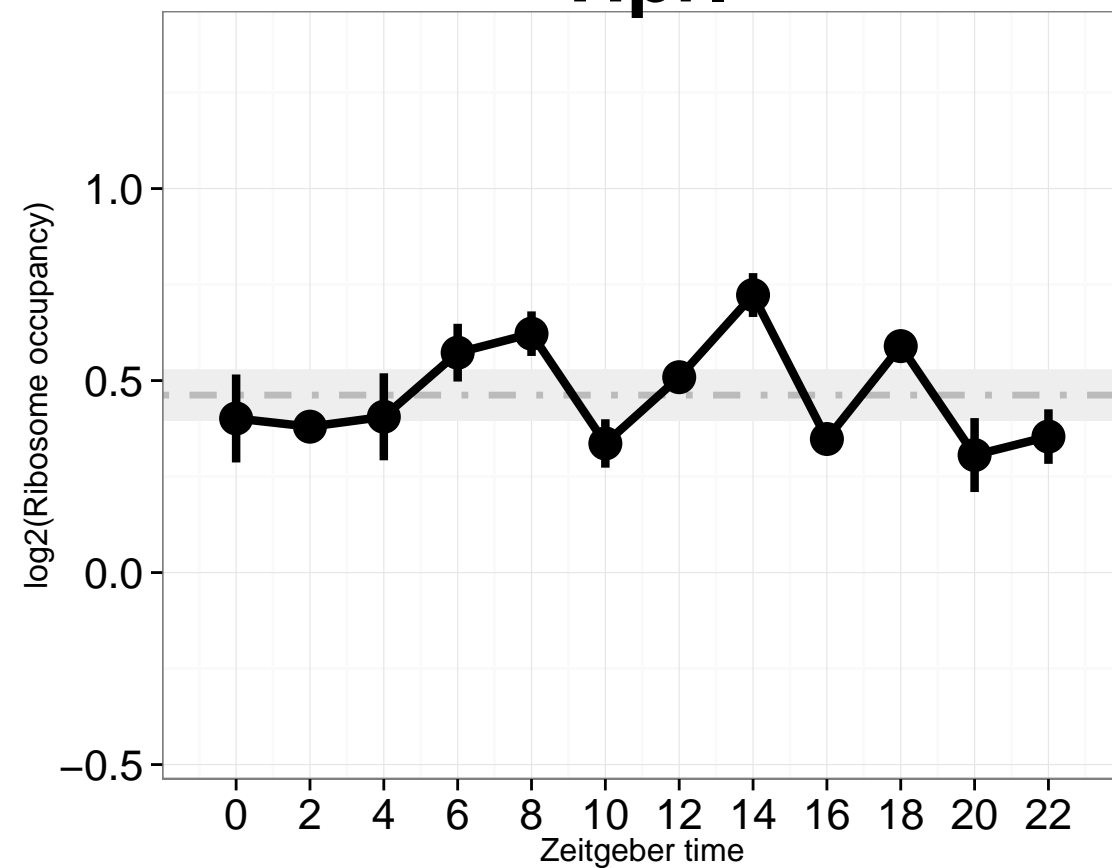

Supplement: Supplementary file 10934 [file 1]

# Sike1

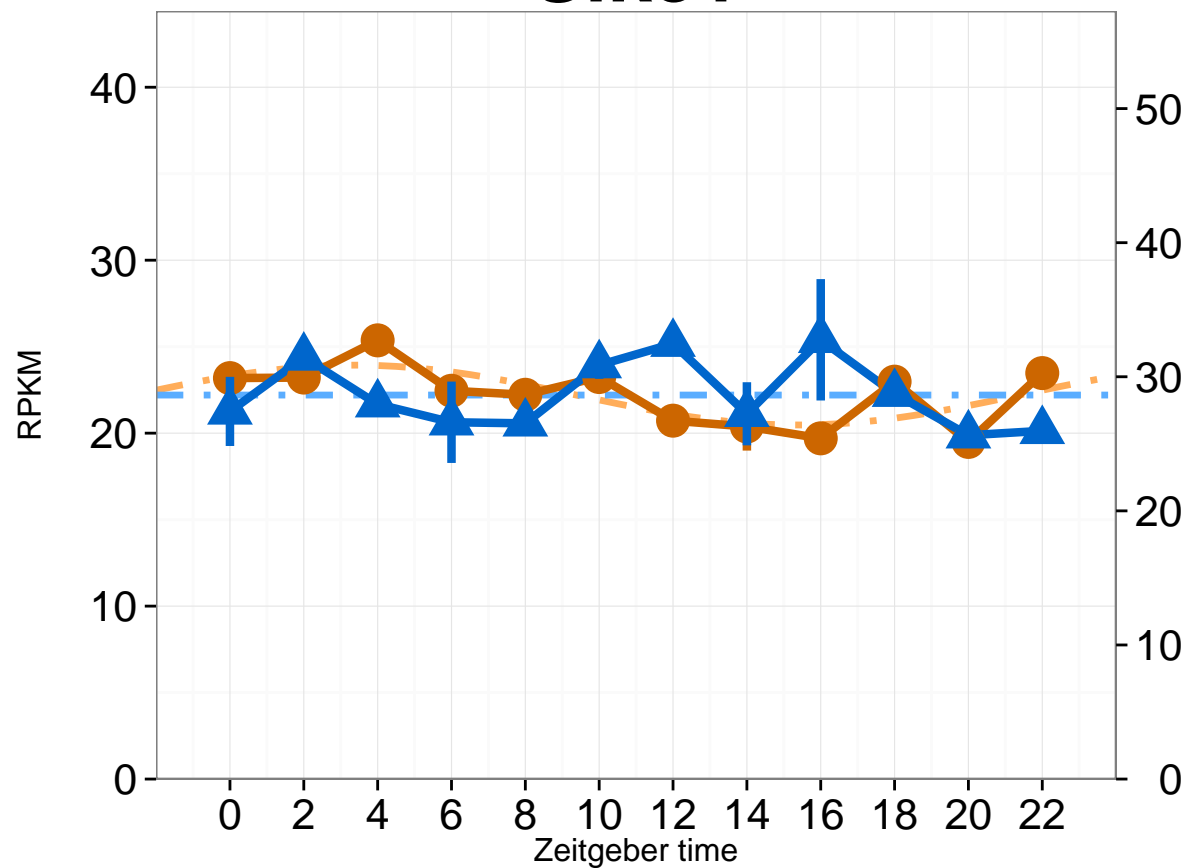

# Sike1

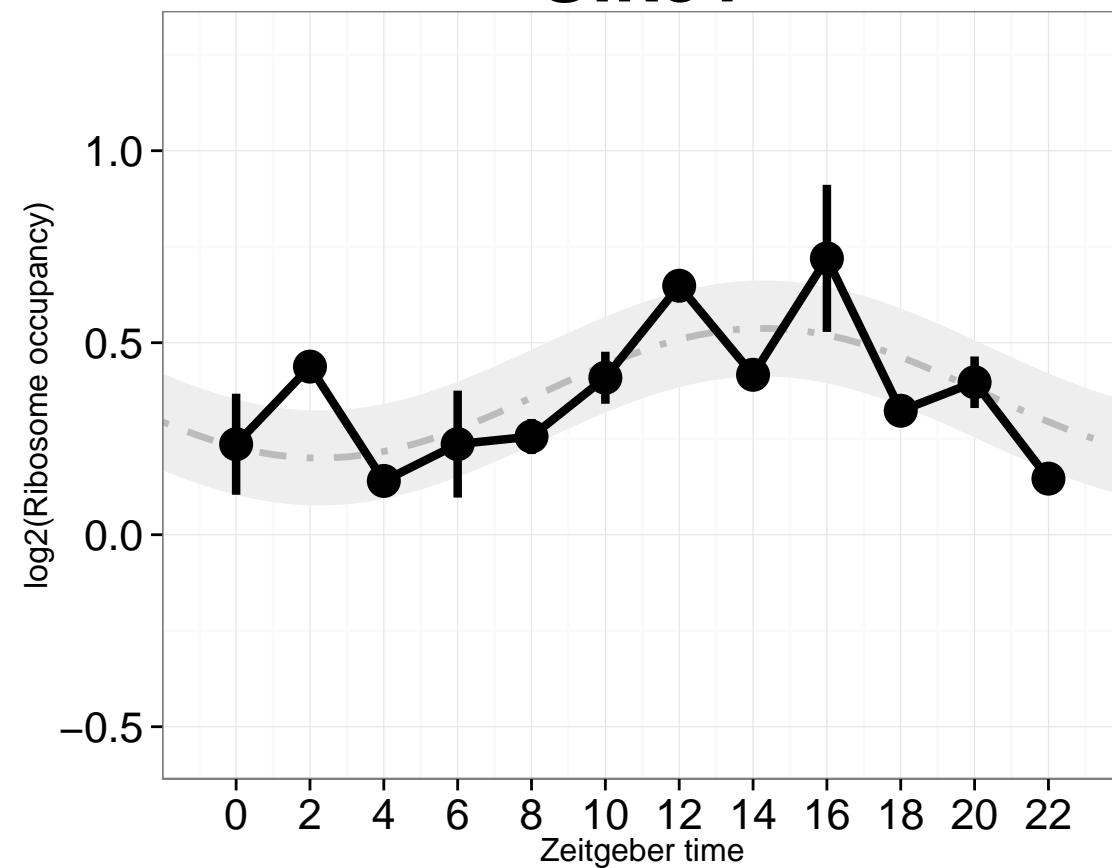

Supplement: Supplementary file 10935 [file 1]

# Card11

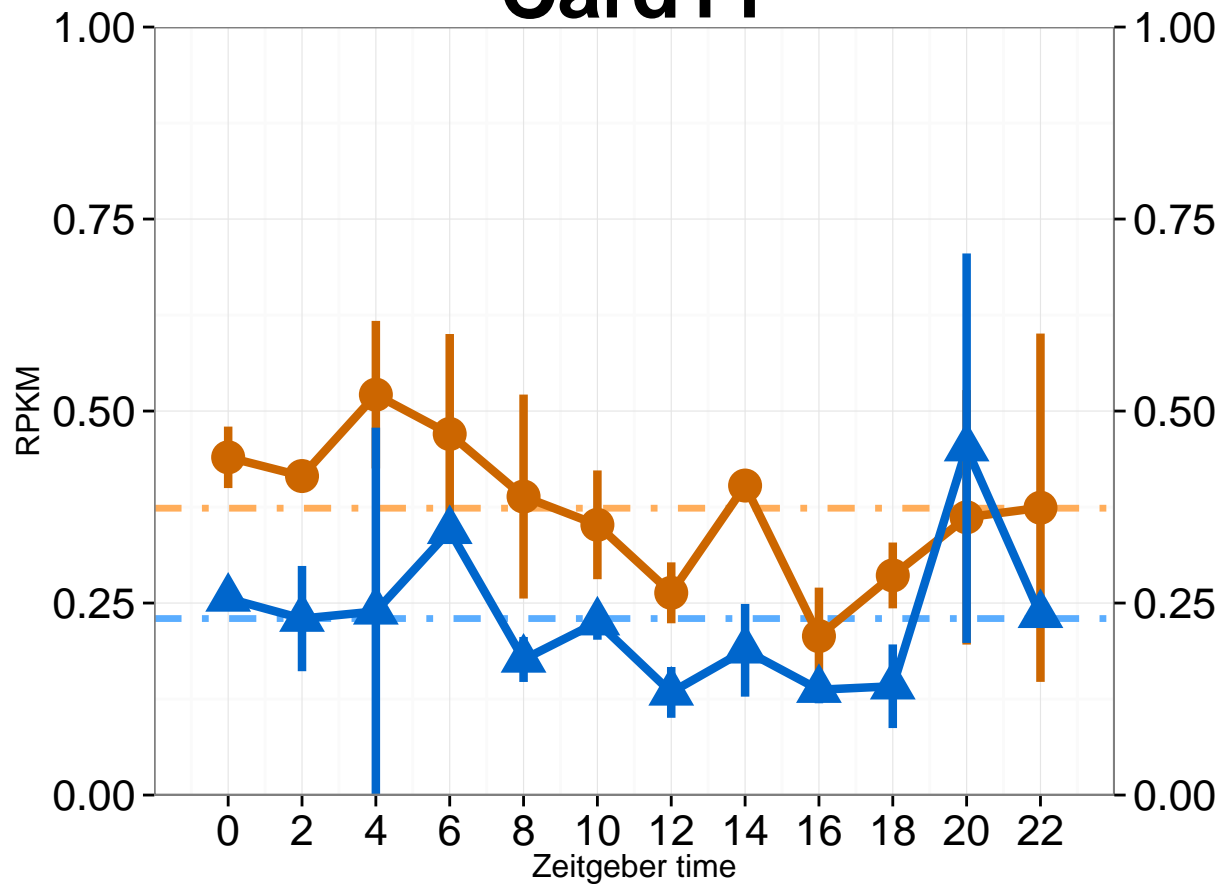

# Card11

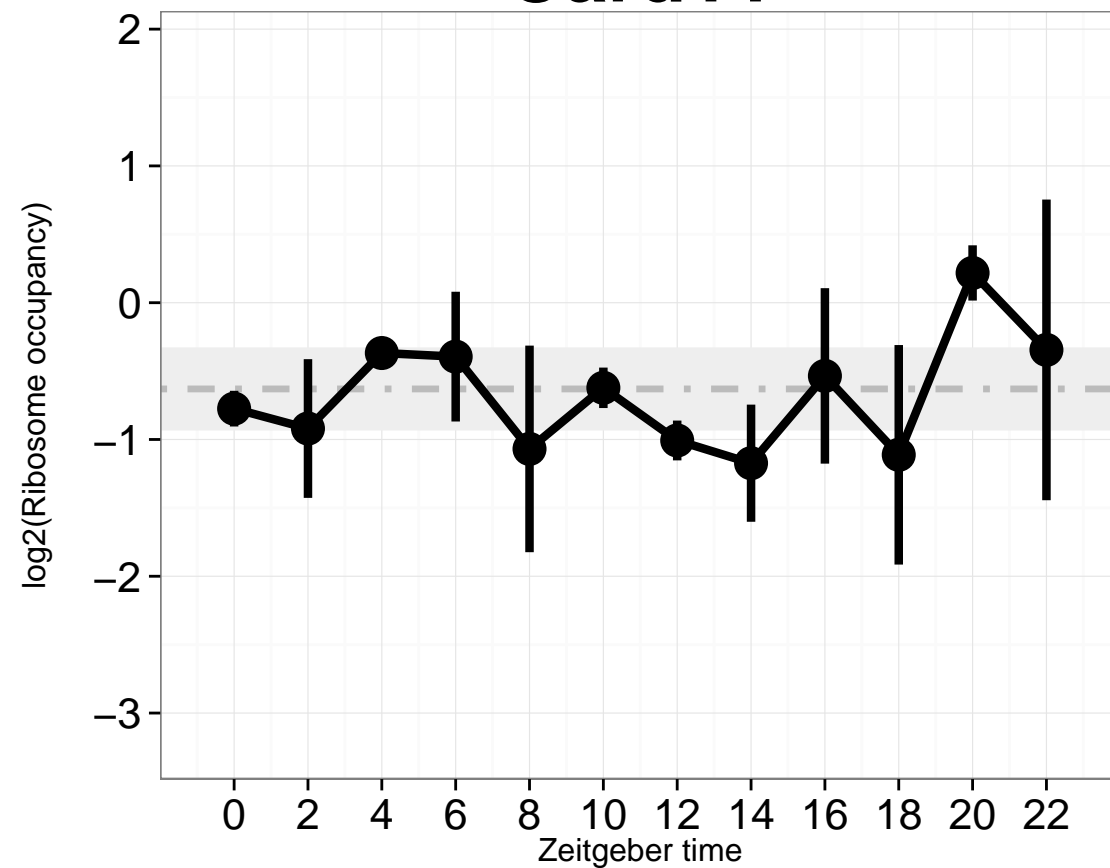

Supplement: Supplementary file 10936 [file 1]

## Zbtb40

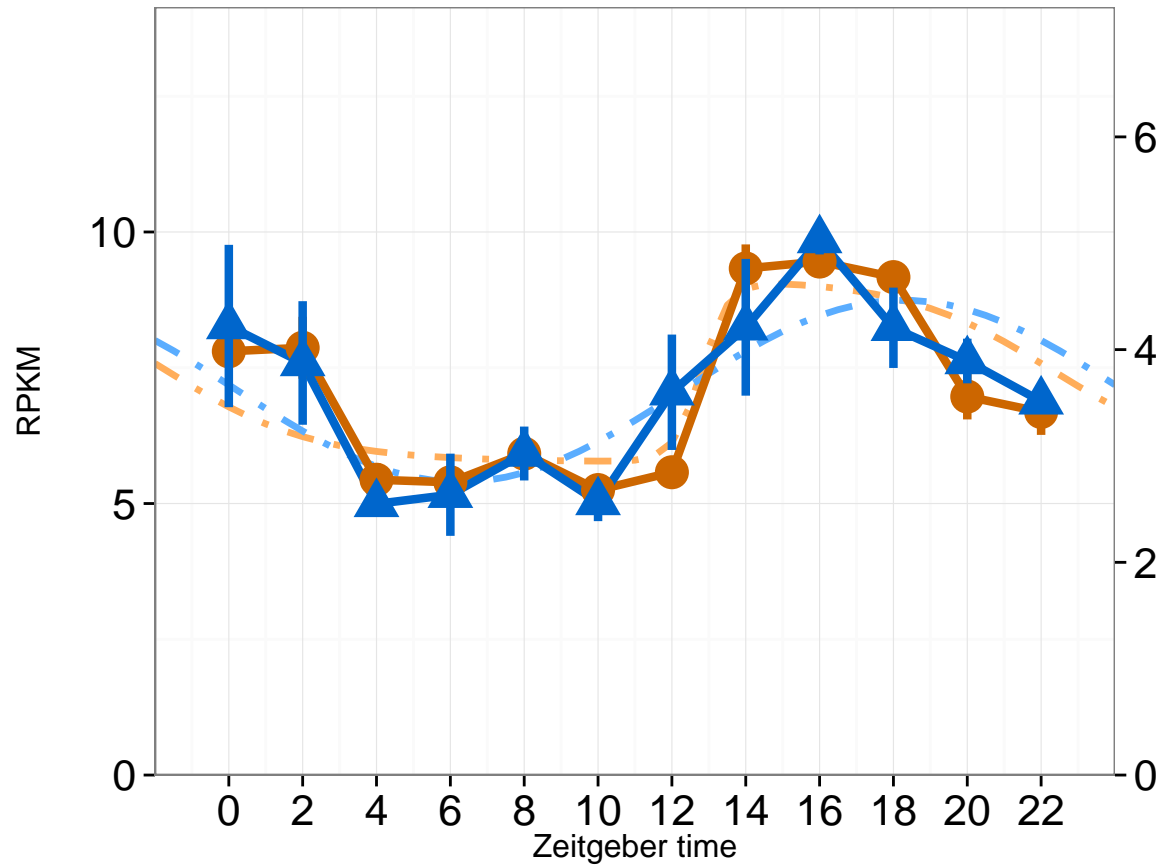

## Zbtb40

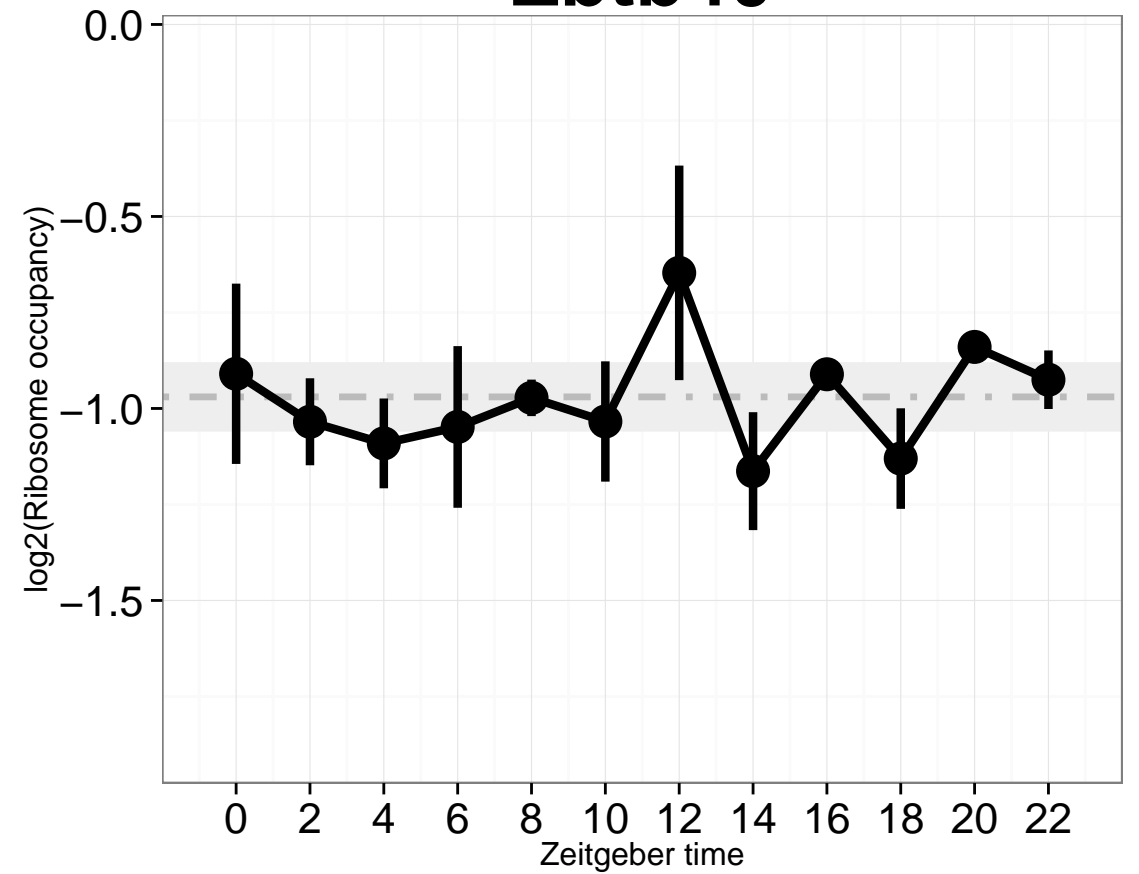

Supplement: Supplementary file 10937 [file 1]

# Slc11a1

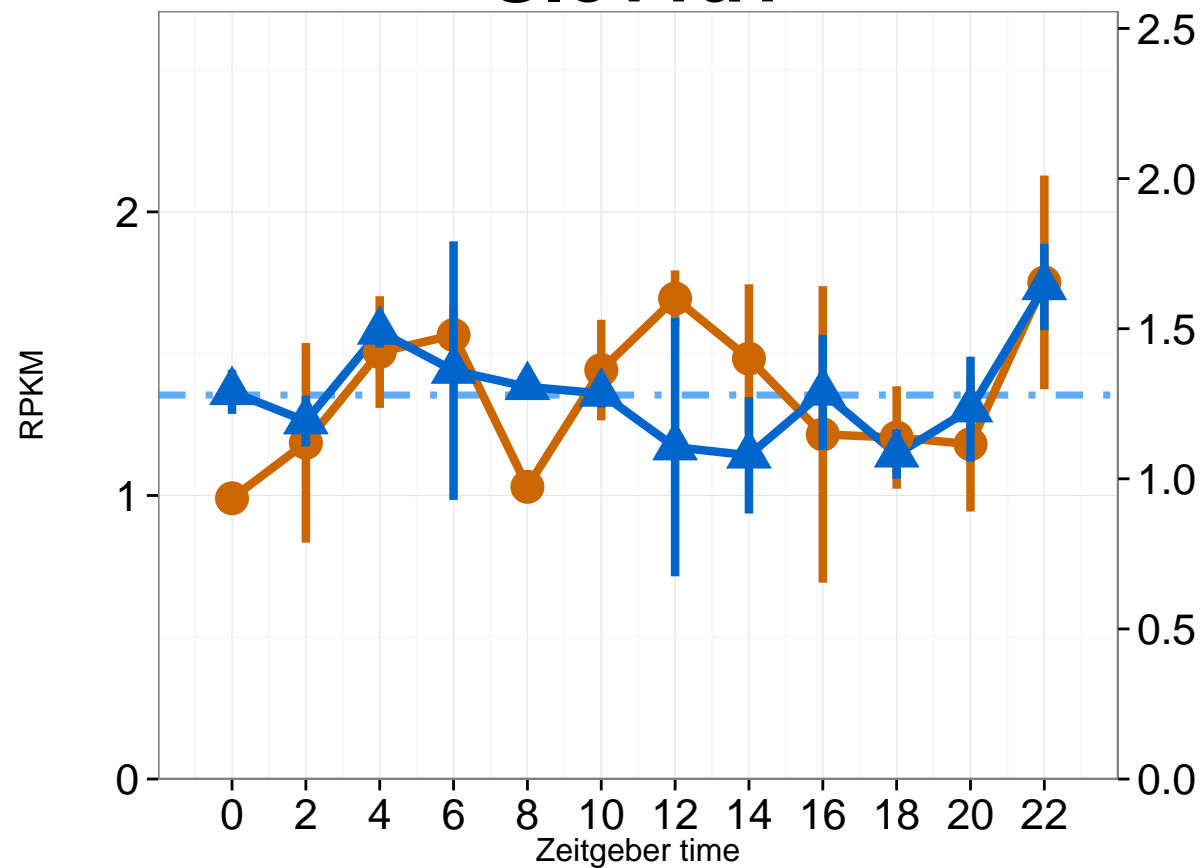

# Slc11a1

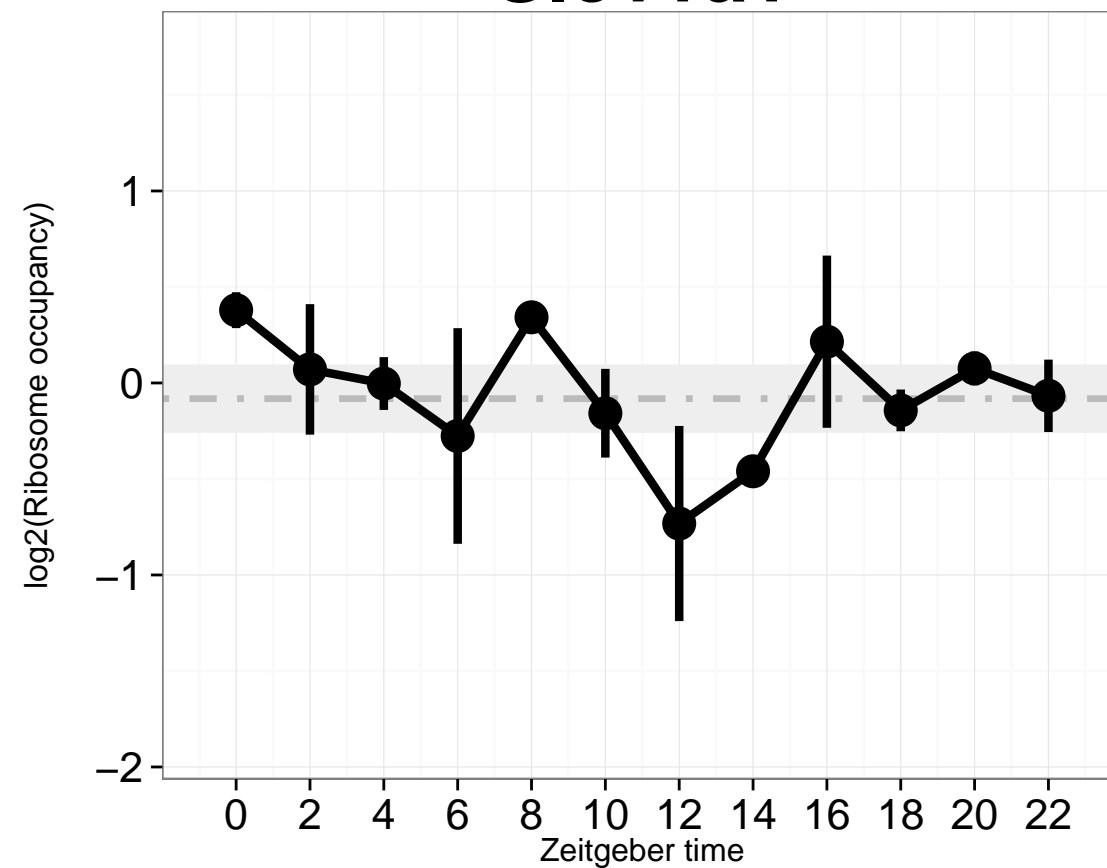

Supplement: Supplementary file 10938 [file 1]

# Hsf1

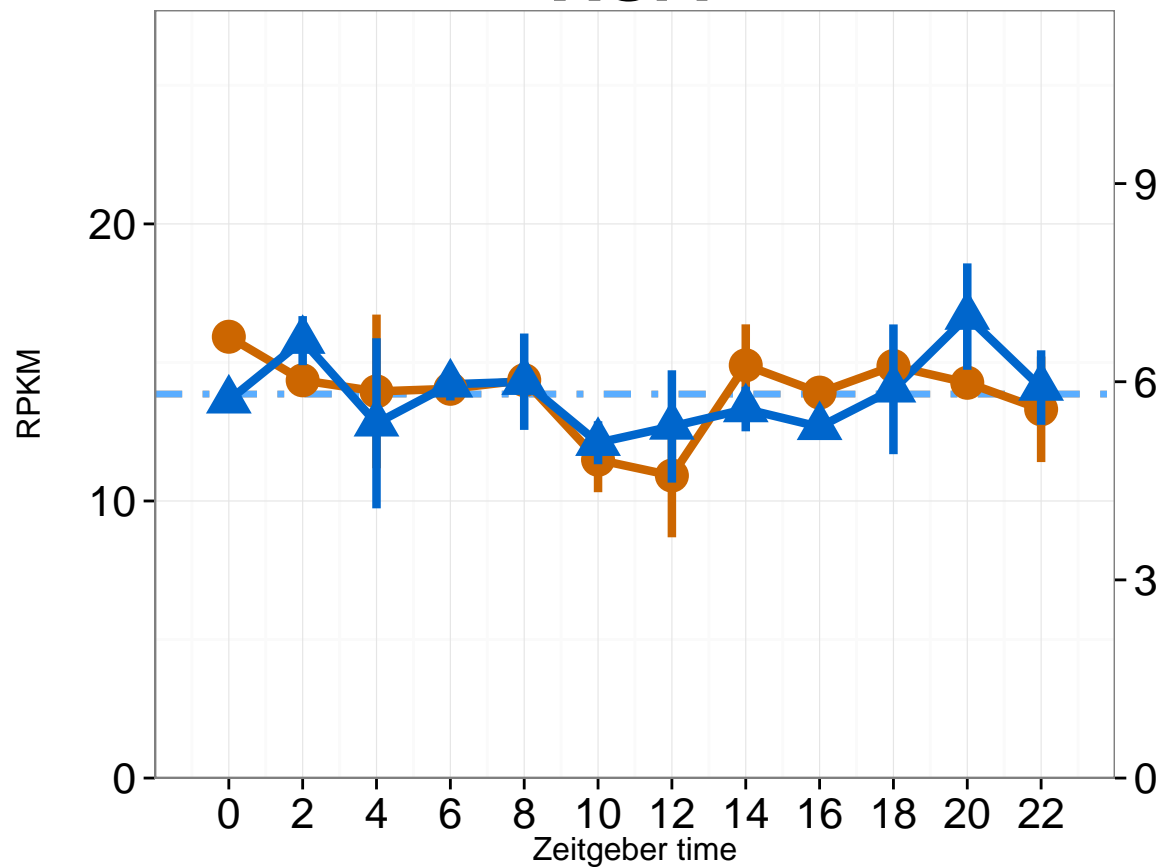

# Hsf1

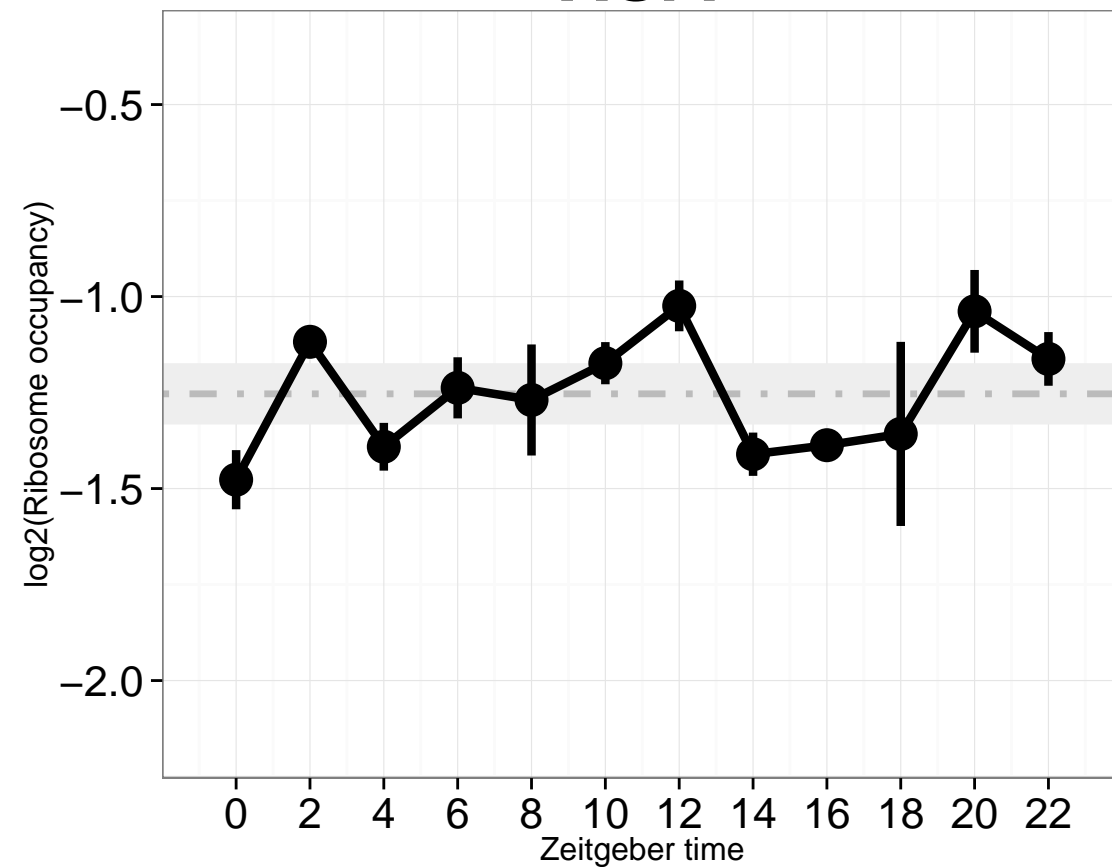

Supplement: Supplementary file 10939 [file 1]

# 2410004B18Rik

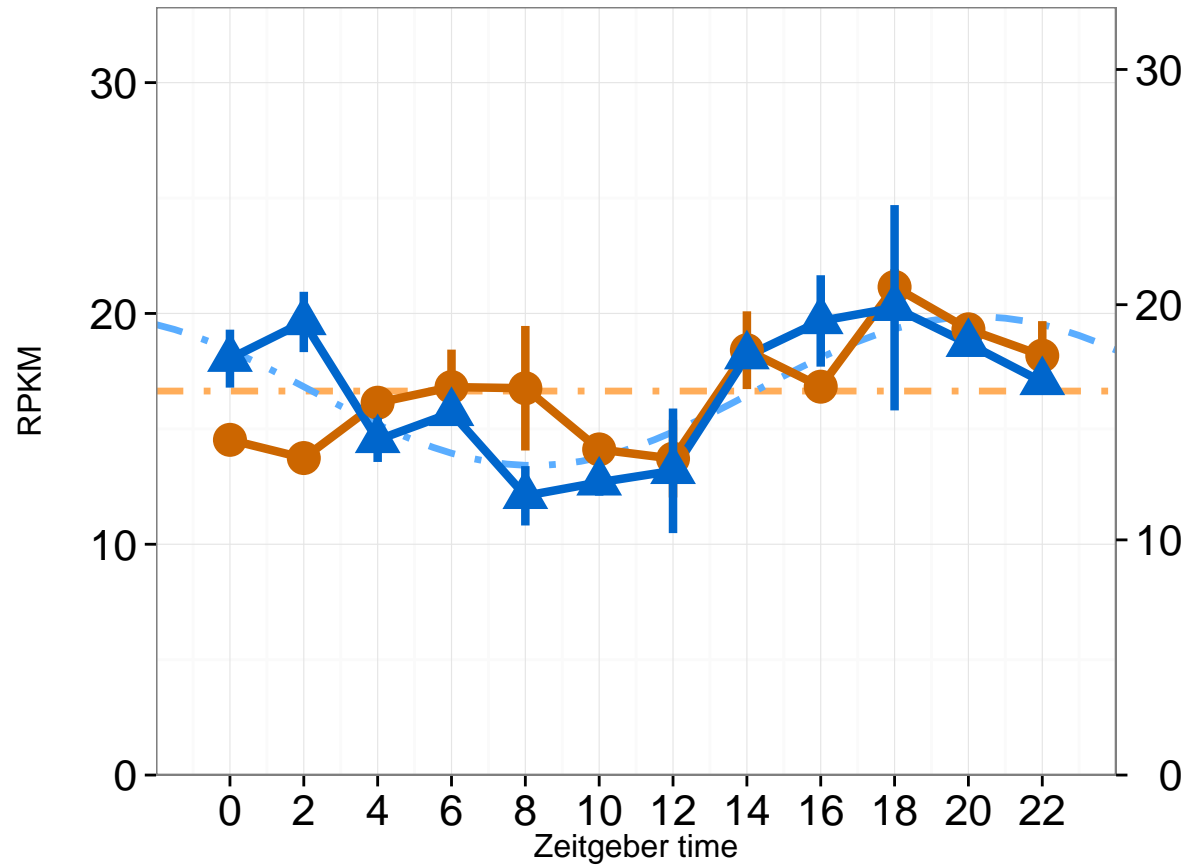

# 2410004B18Rik

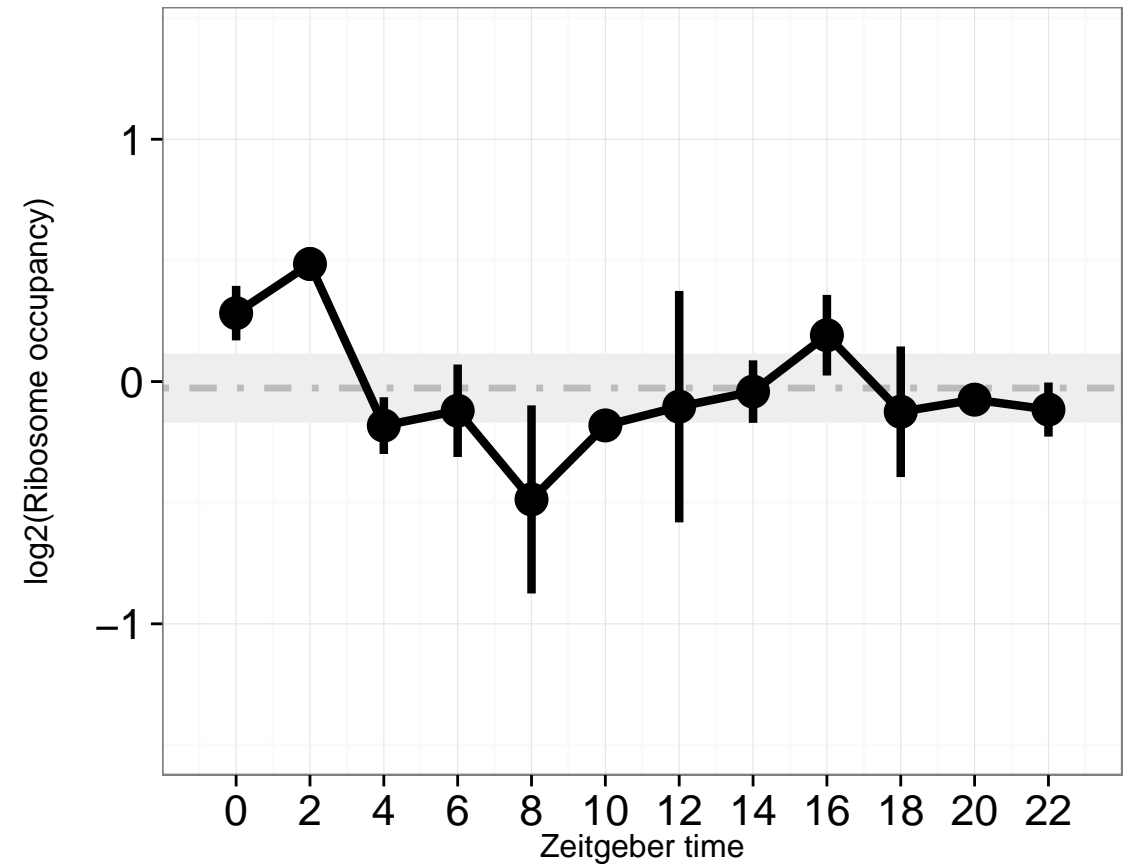

Supplement: Supplementary file 10940 [file 1]
