# Supplementary material (part 110 of 133)
Source: publisher figshare collection journal article supplement (https://springernature.figshare.com/articles/dataset/_/4903193)

# Men1

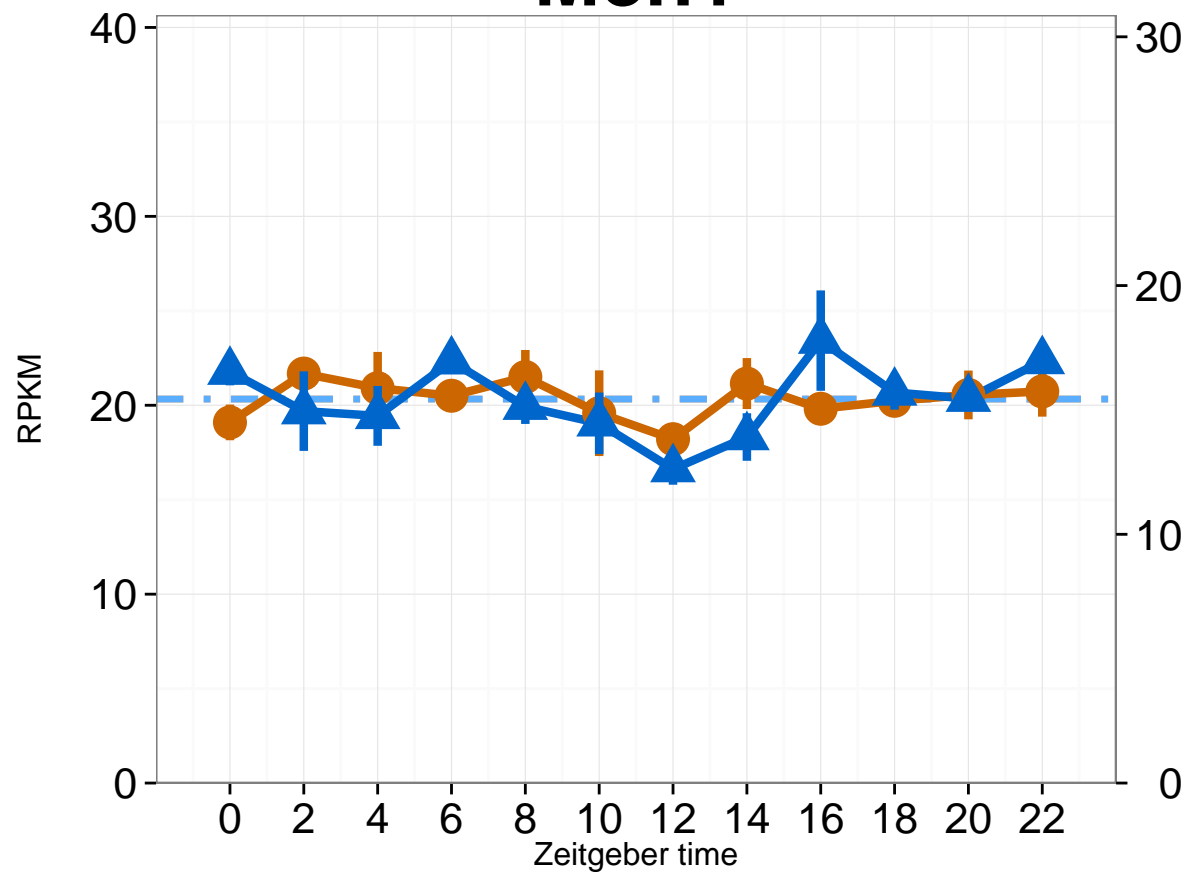

# Men1

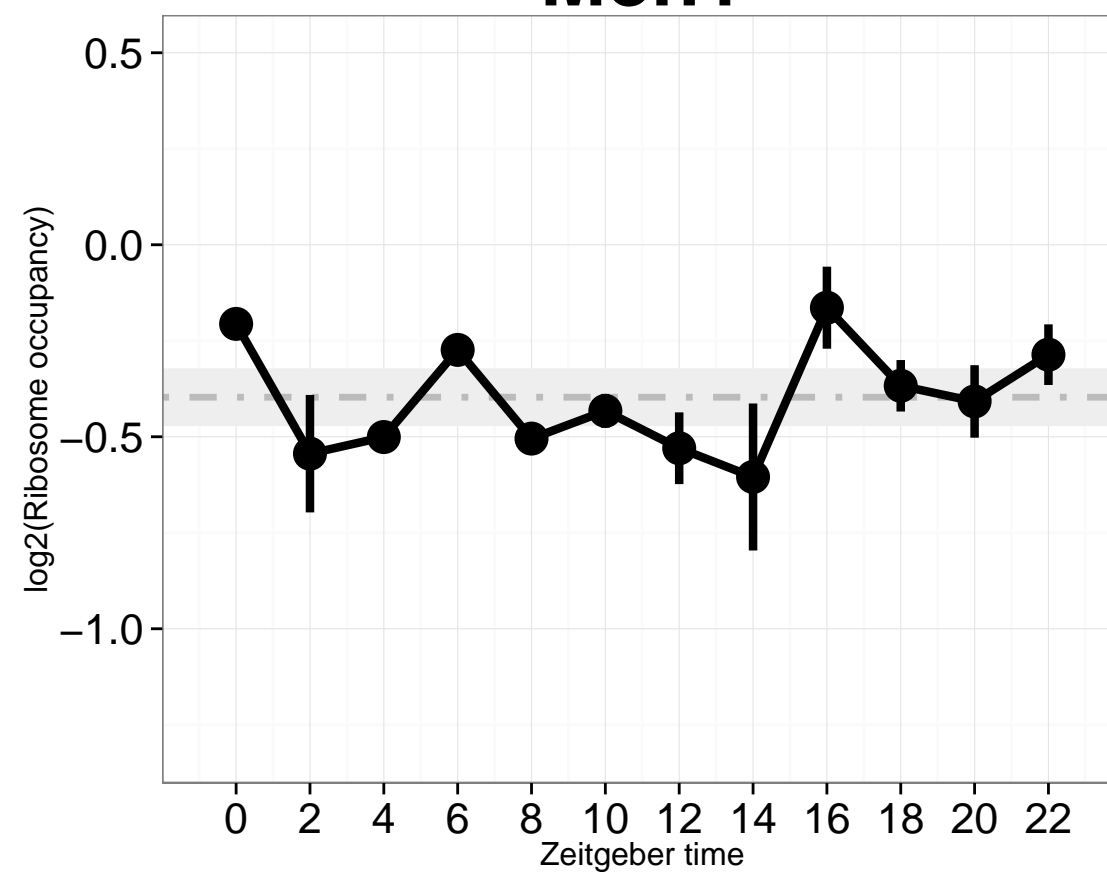

Supplement: Supplementary file 10941 [file 1]

## Tnk2

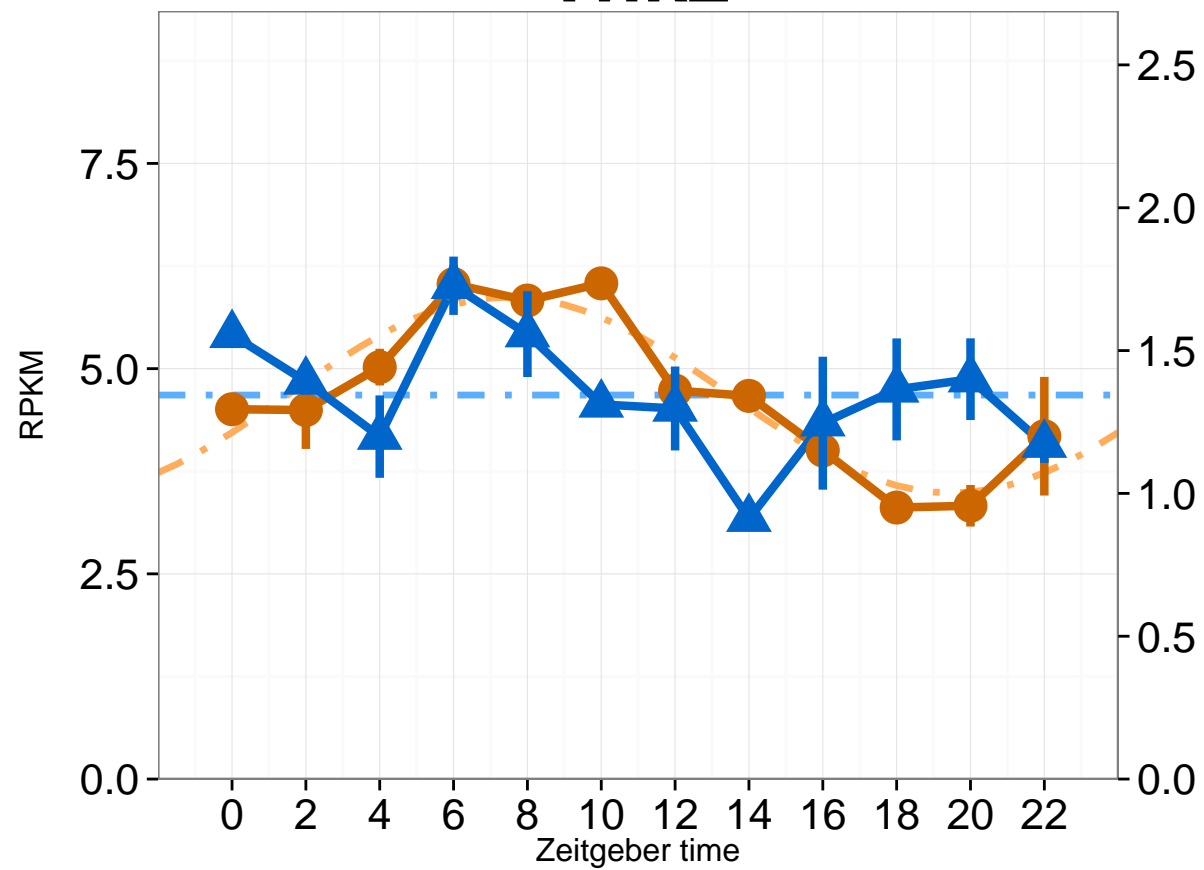

## Tnk2

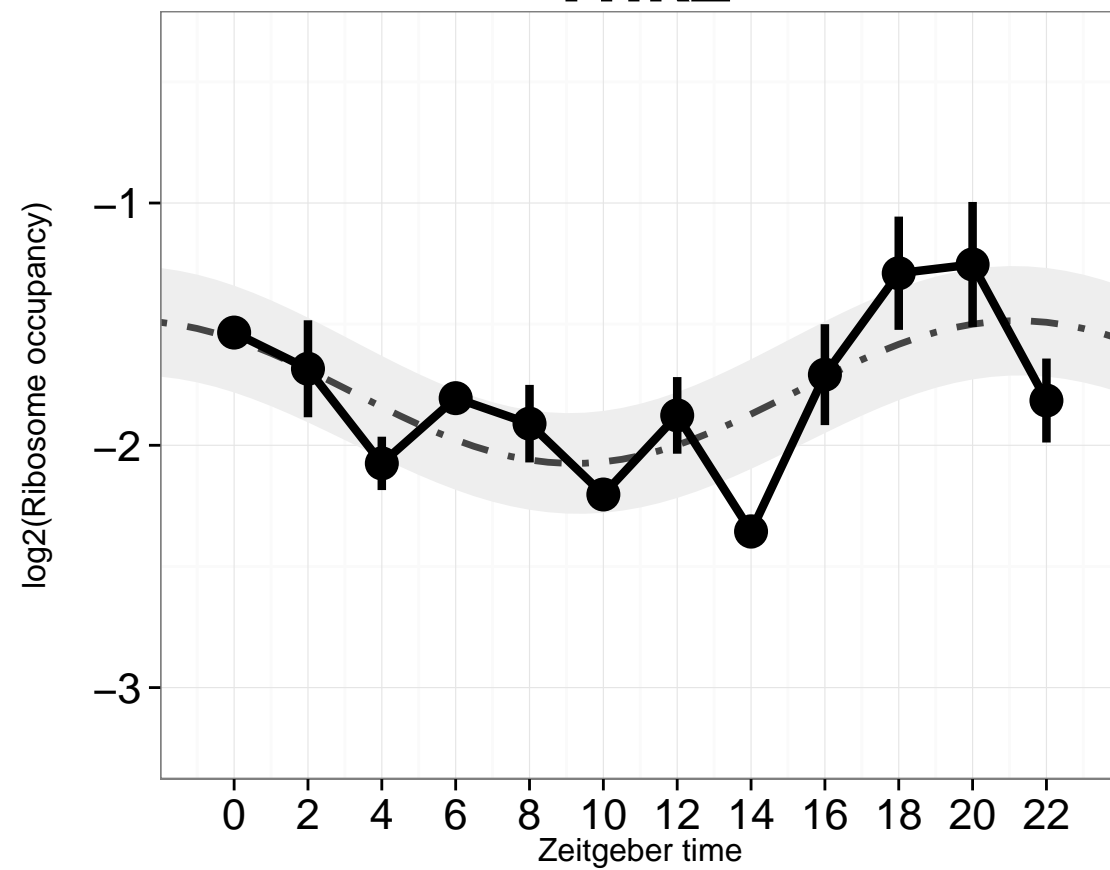

Supplement: Supplementary file 10942 [file 1]

# Slc17a3

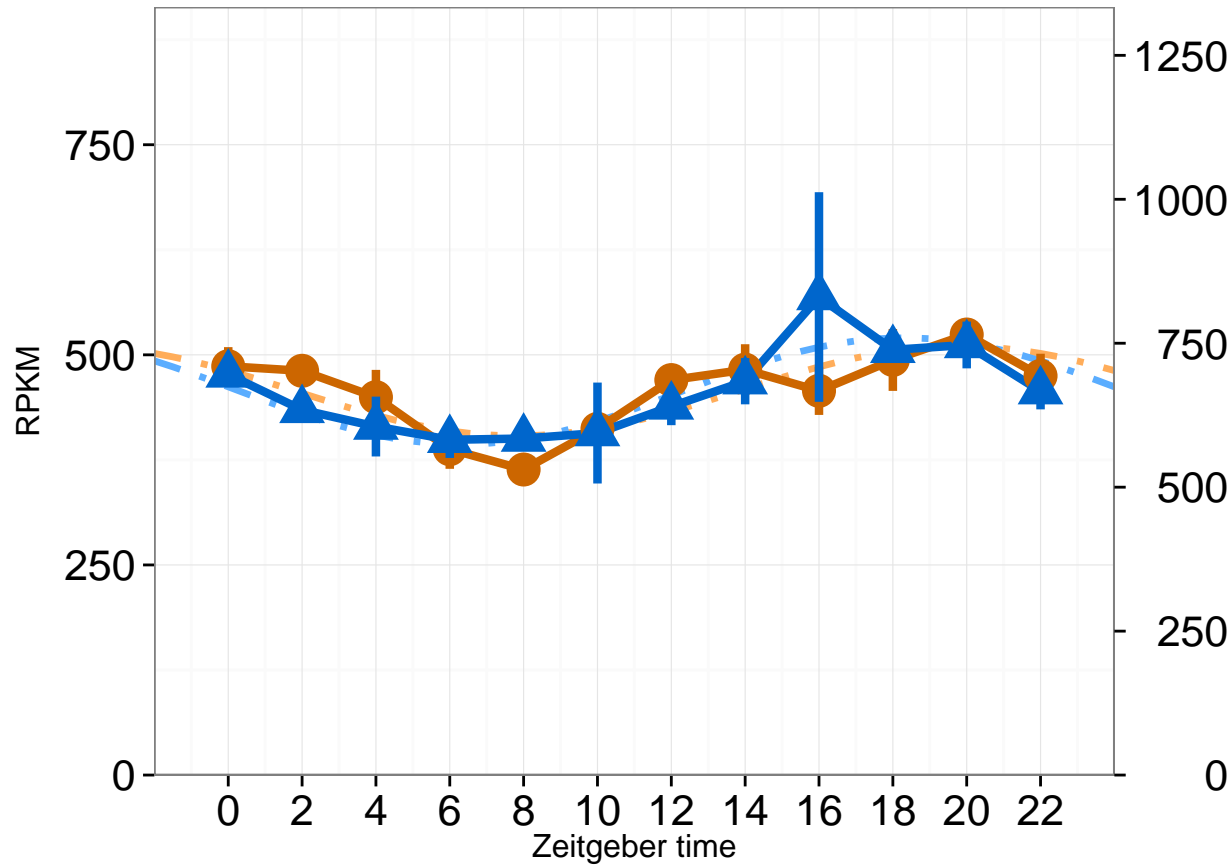

# Slc17a3

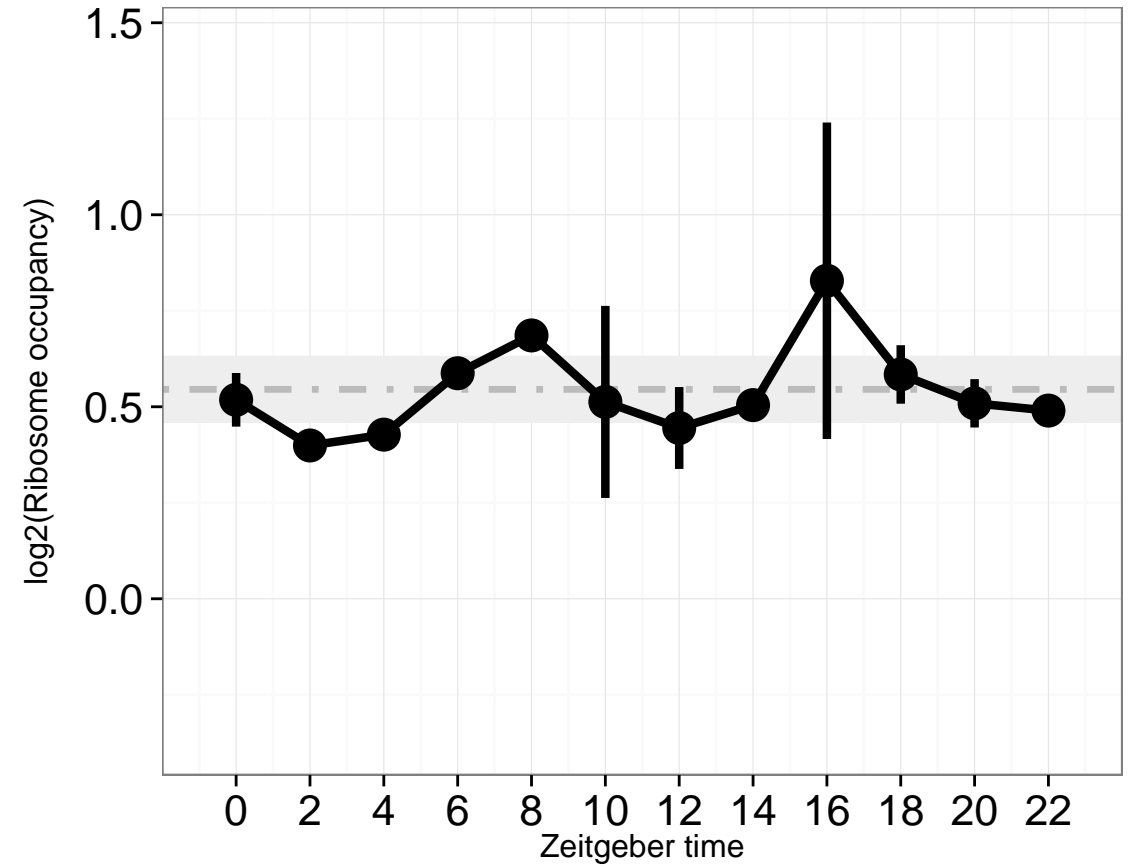

Supplement: Supplementary file 10943 [file 1]

# Ncoa5

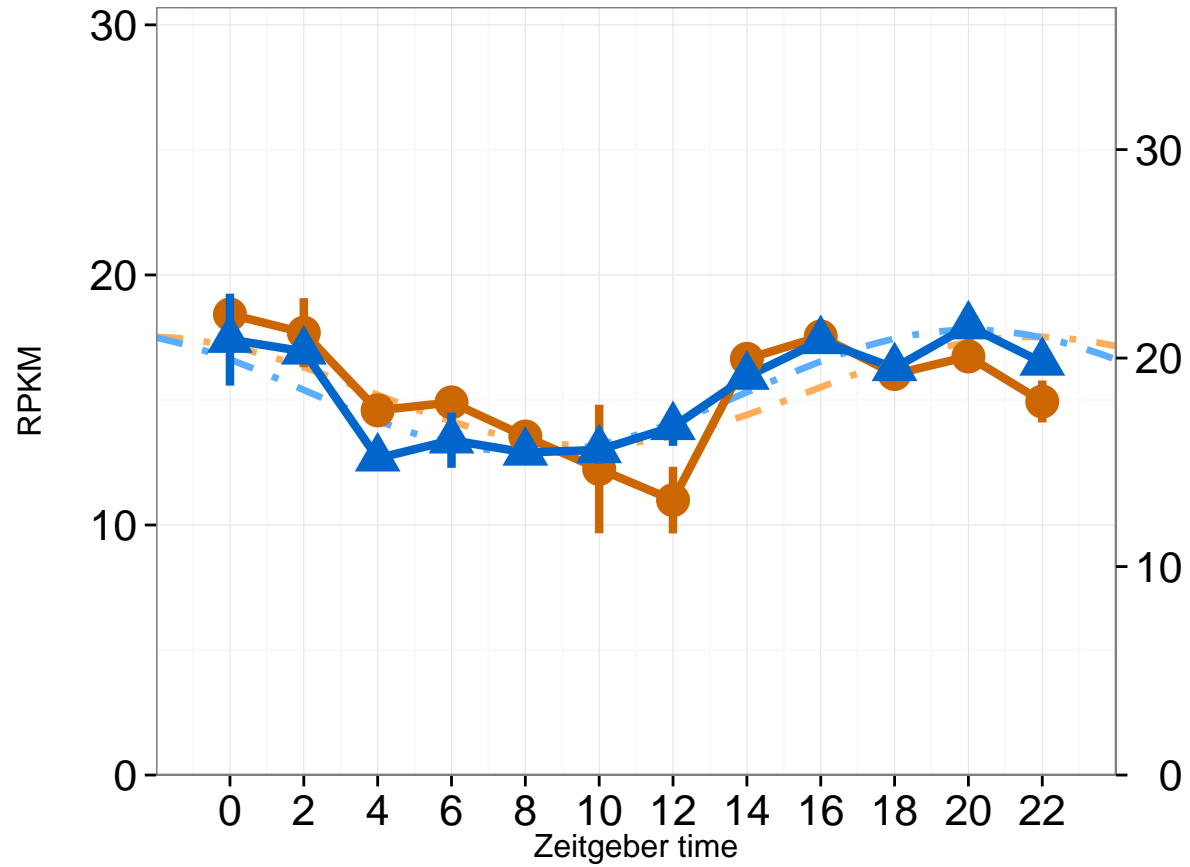

# Ncoa5

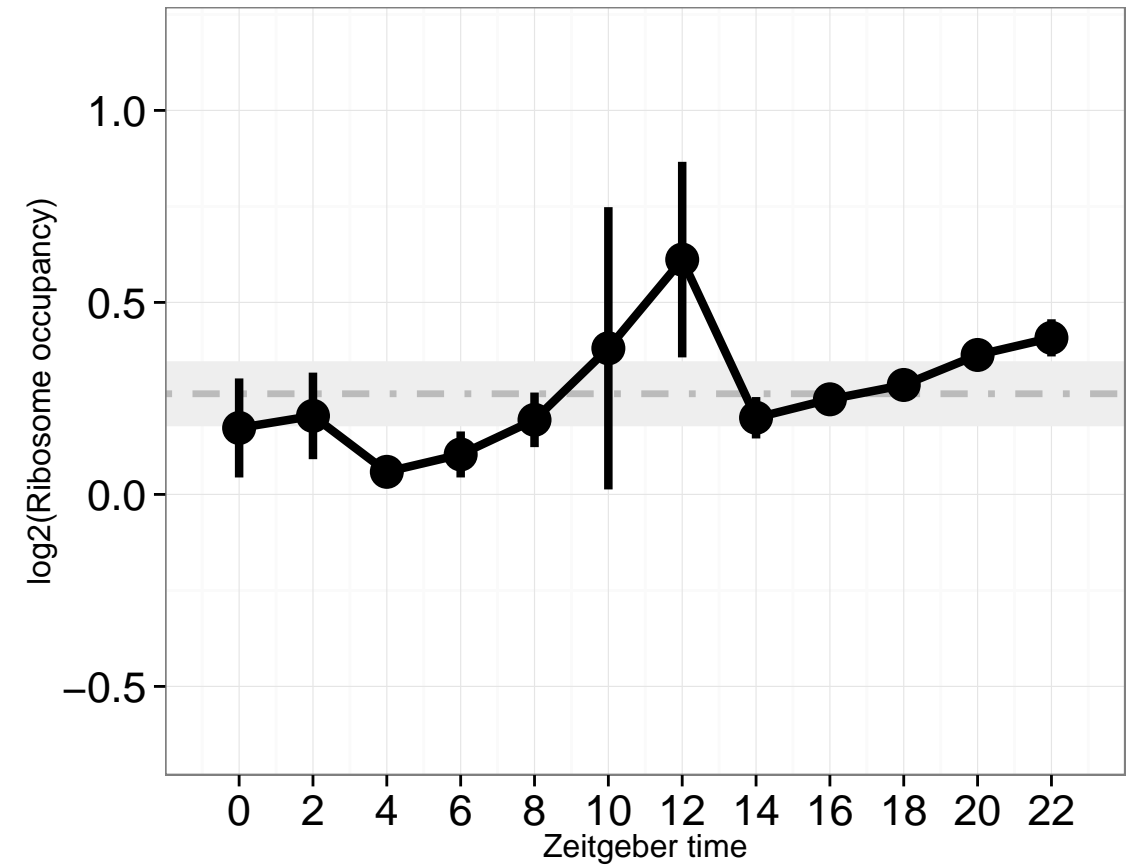

Supplement: Supplementary file 10944 [file 1]

# Rrp7a

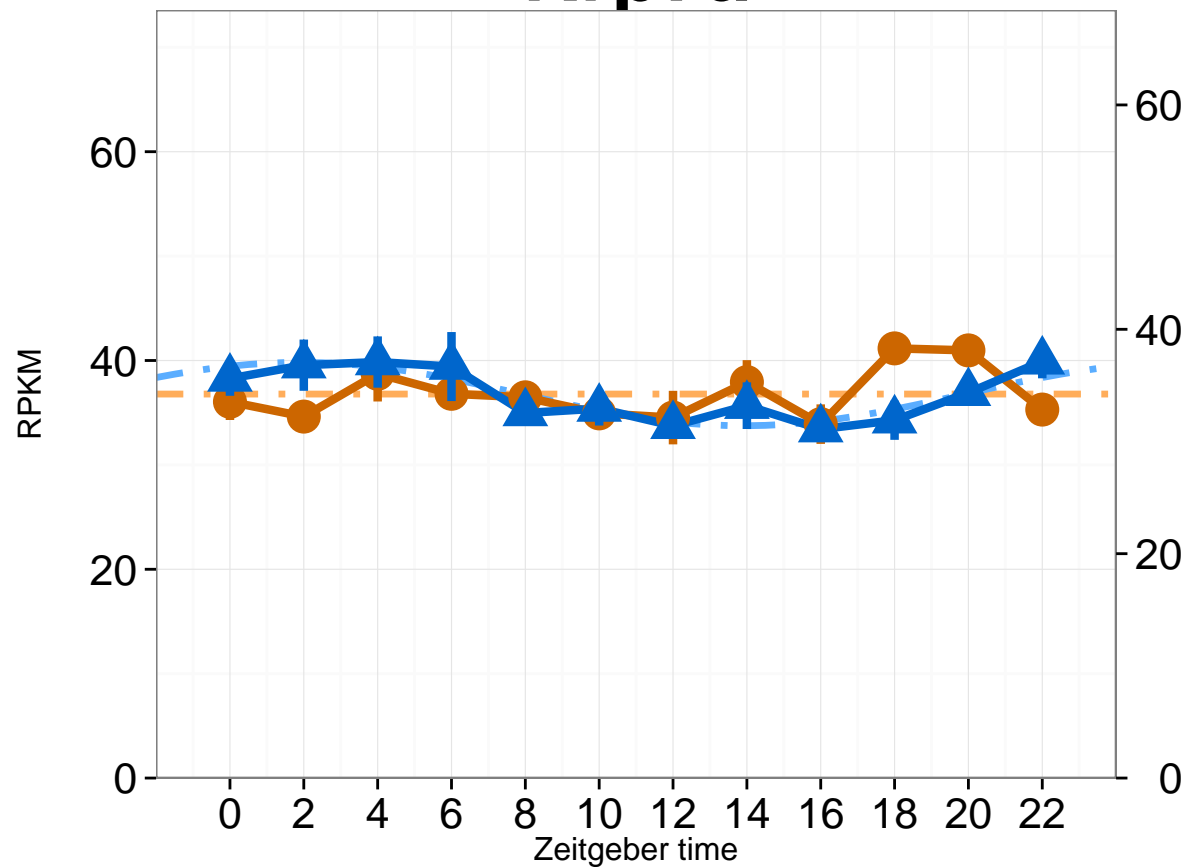

# Rrp7a

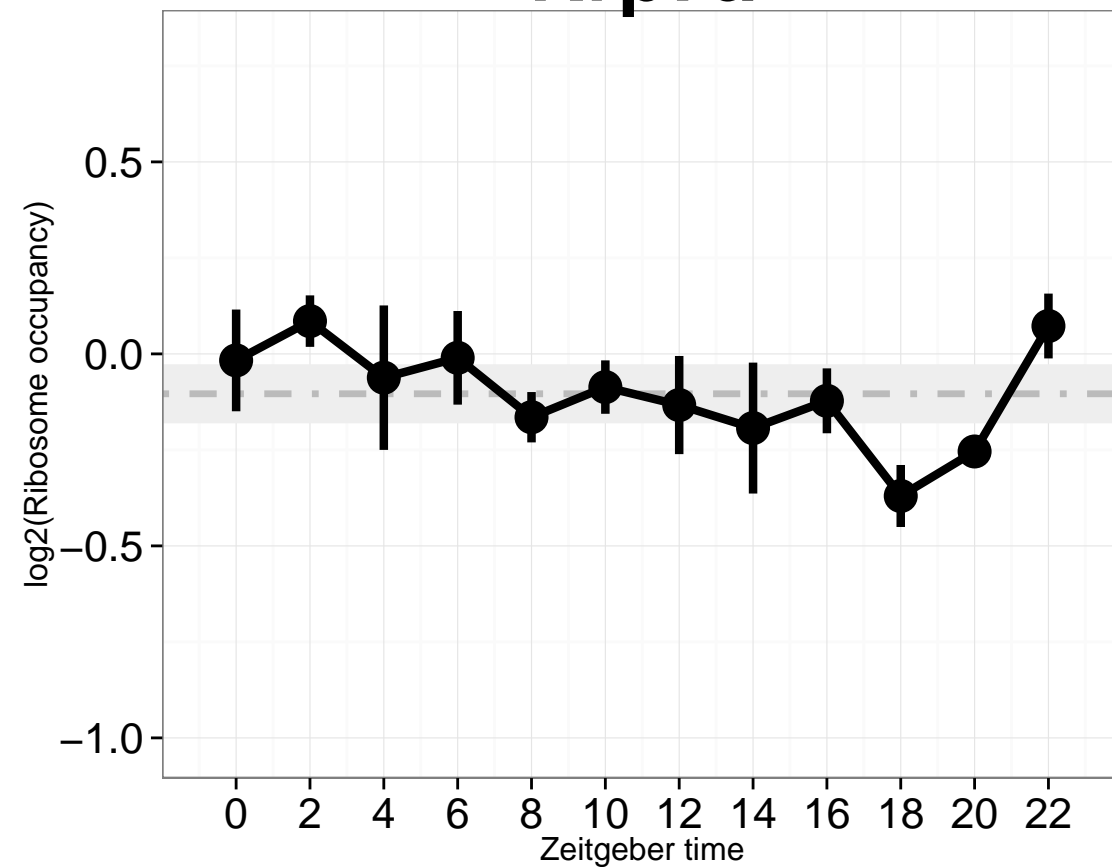

Supplement: Supplementary file 10945 [file 1]

## Syncrip

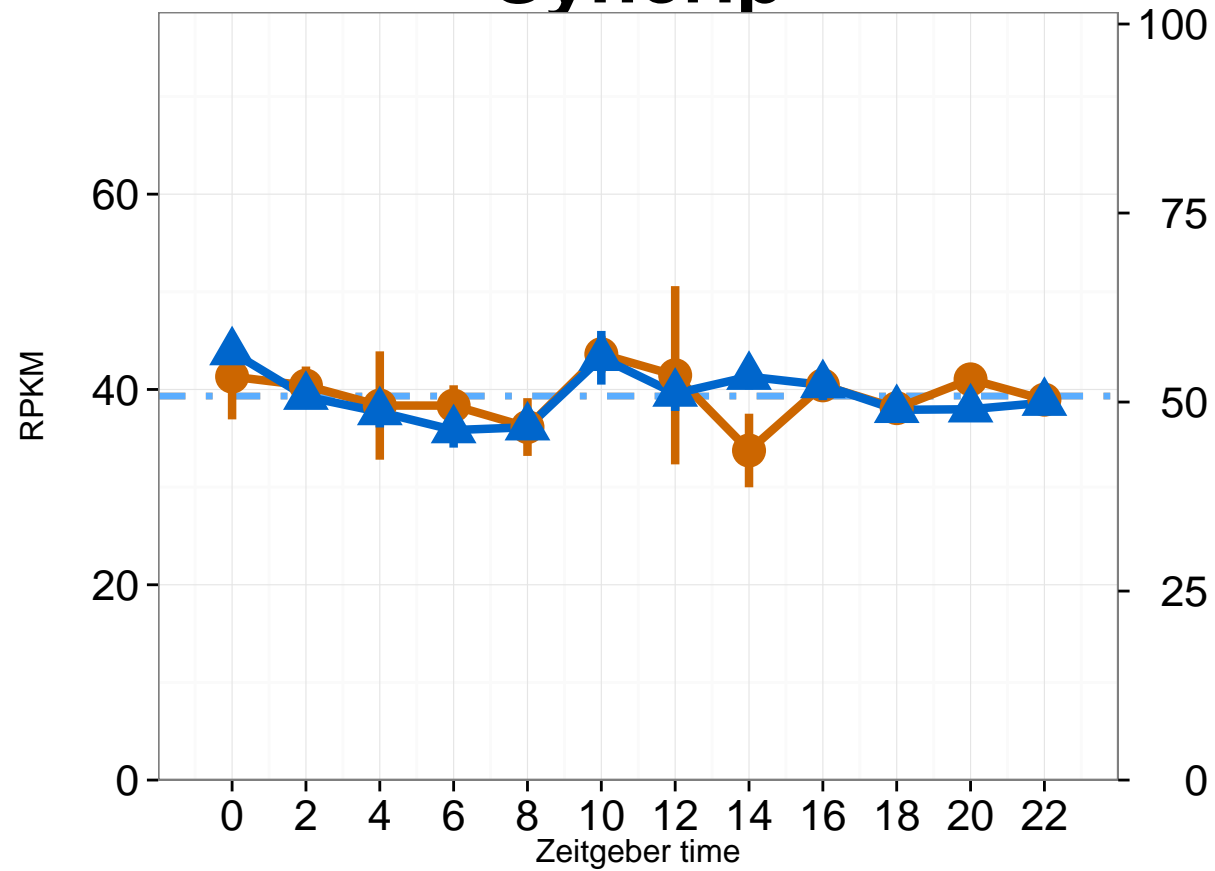

## Syncrip

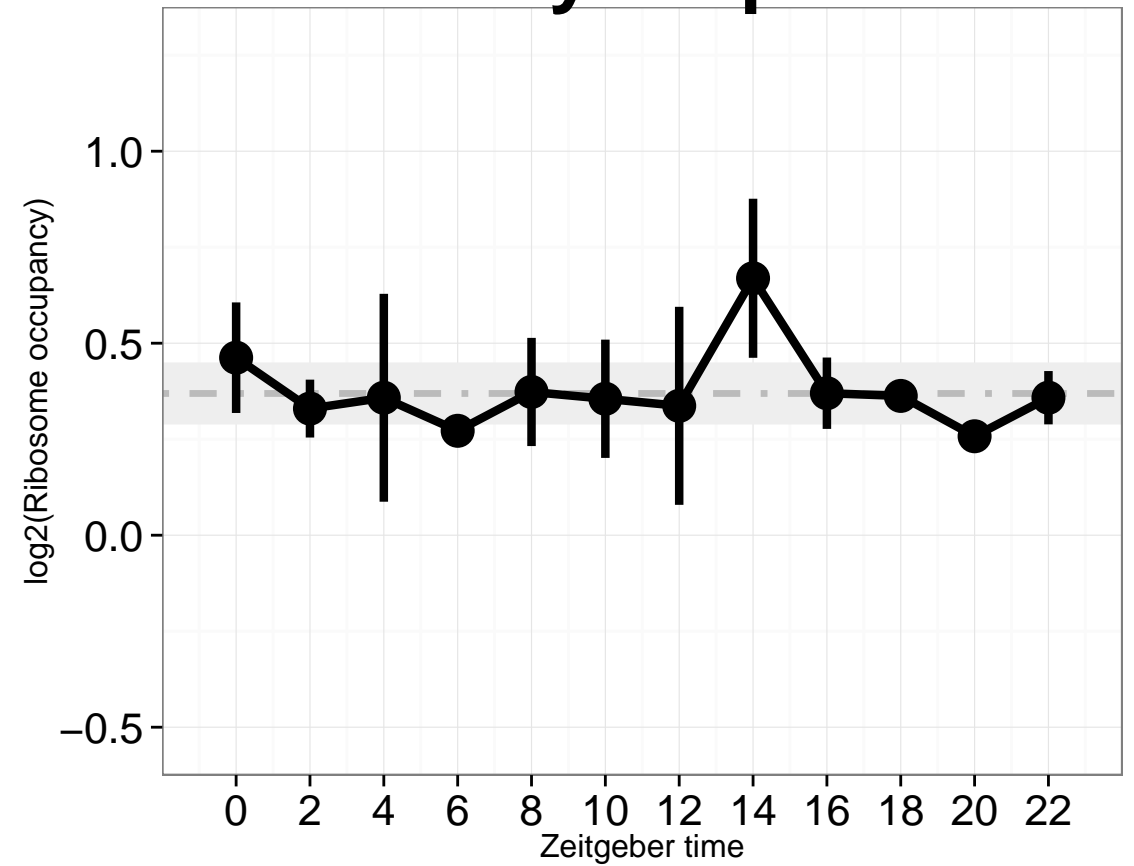

Supplement: Supplementary file 10946 [file 1]

## Nckap1l

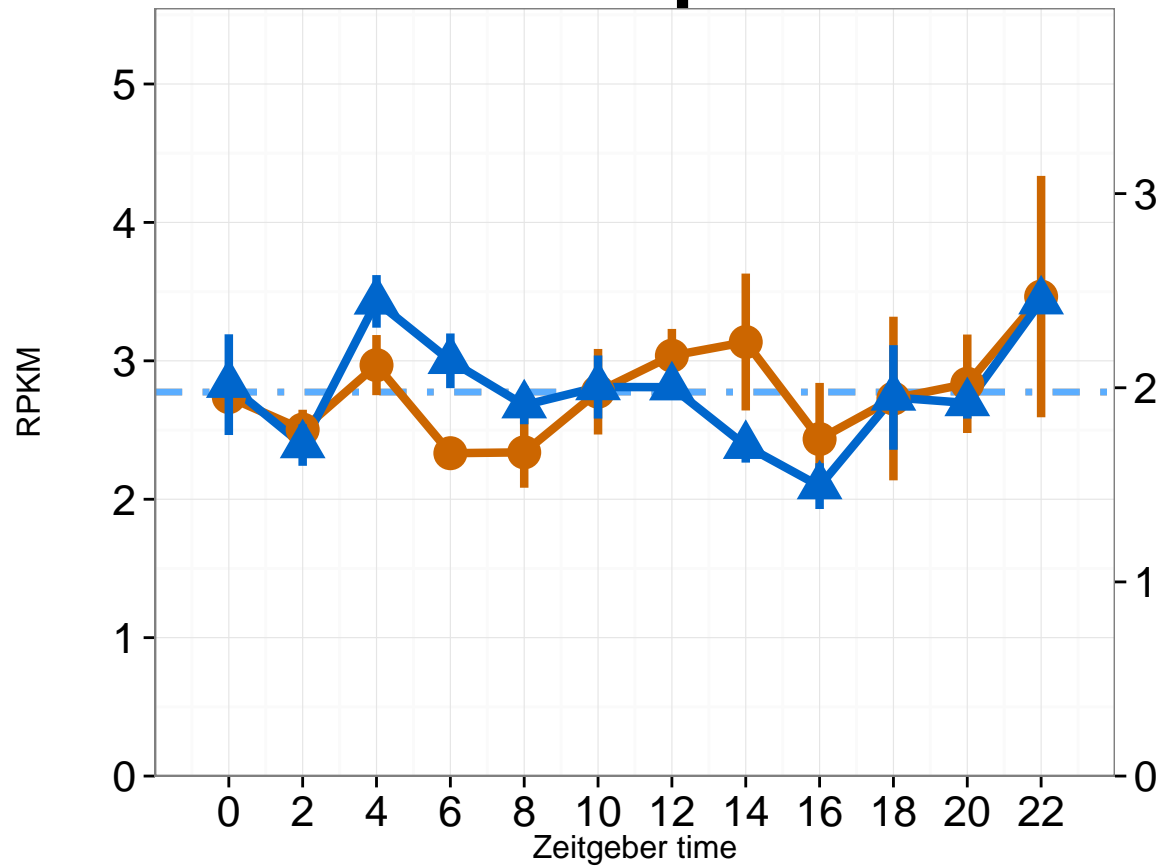

## Nckap1l

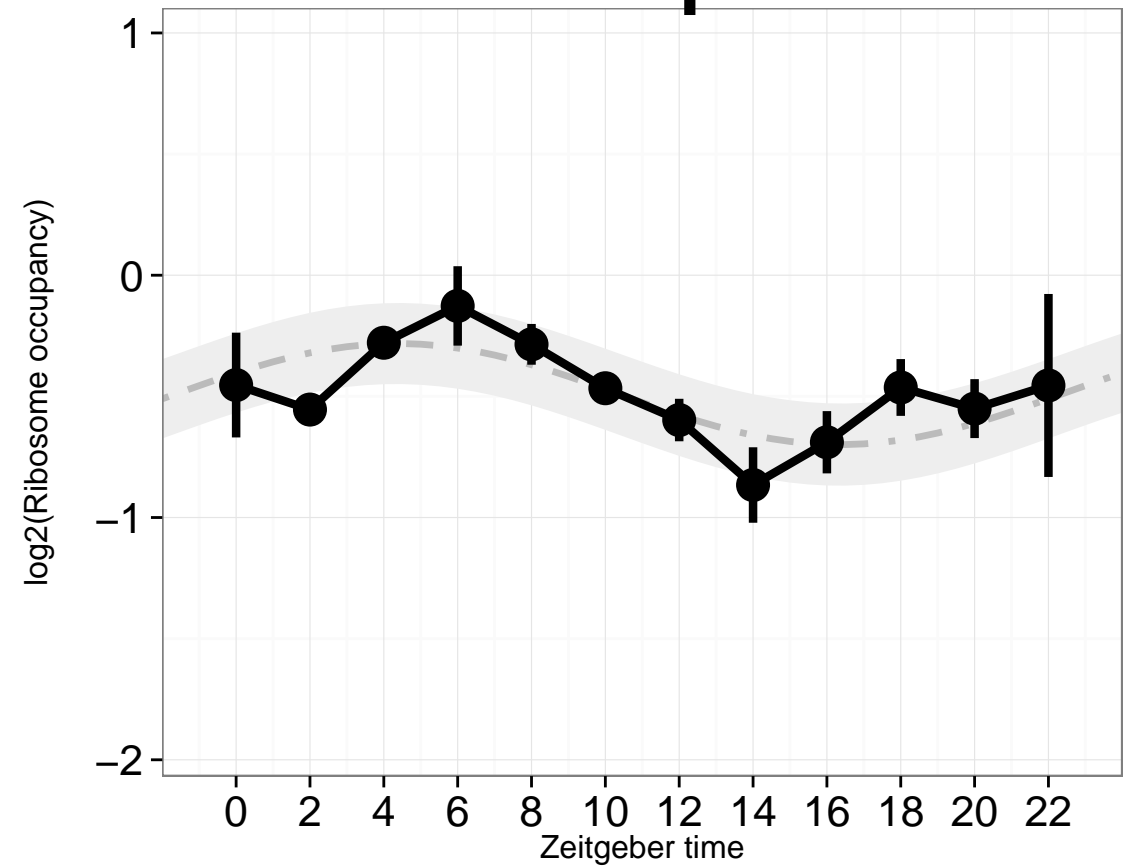

Supplement: Supplementary file 10947 [file 1]

## Thsd1

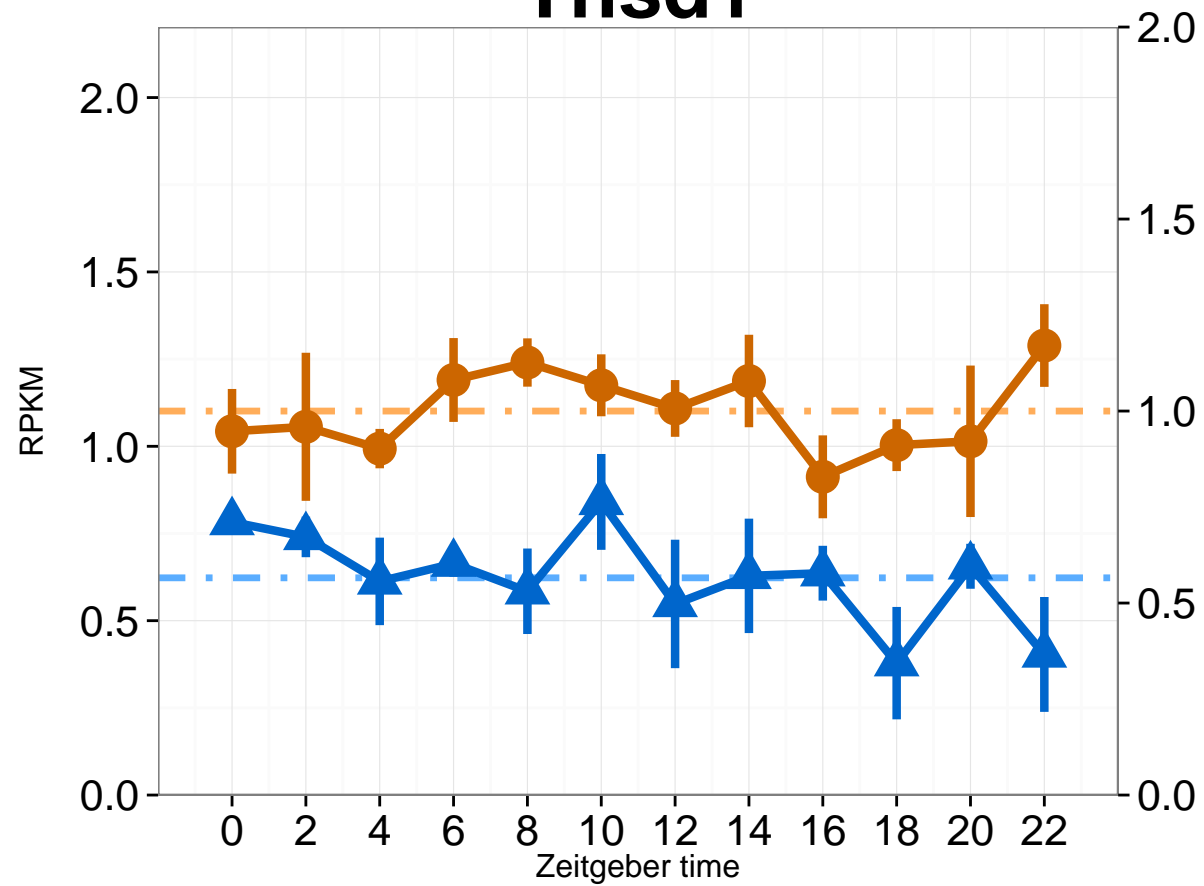

## Thsd1

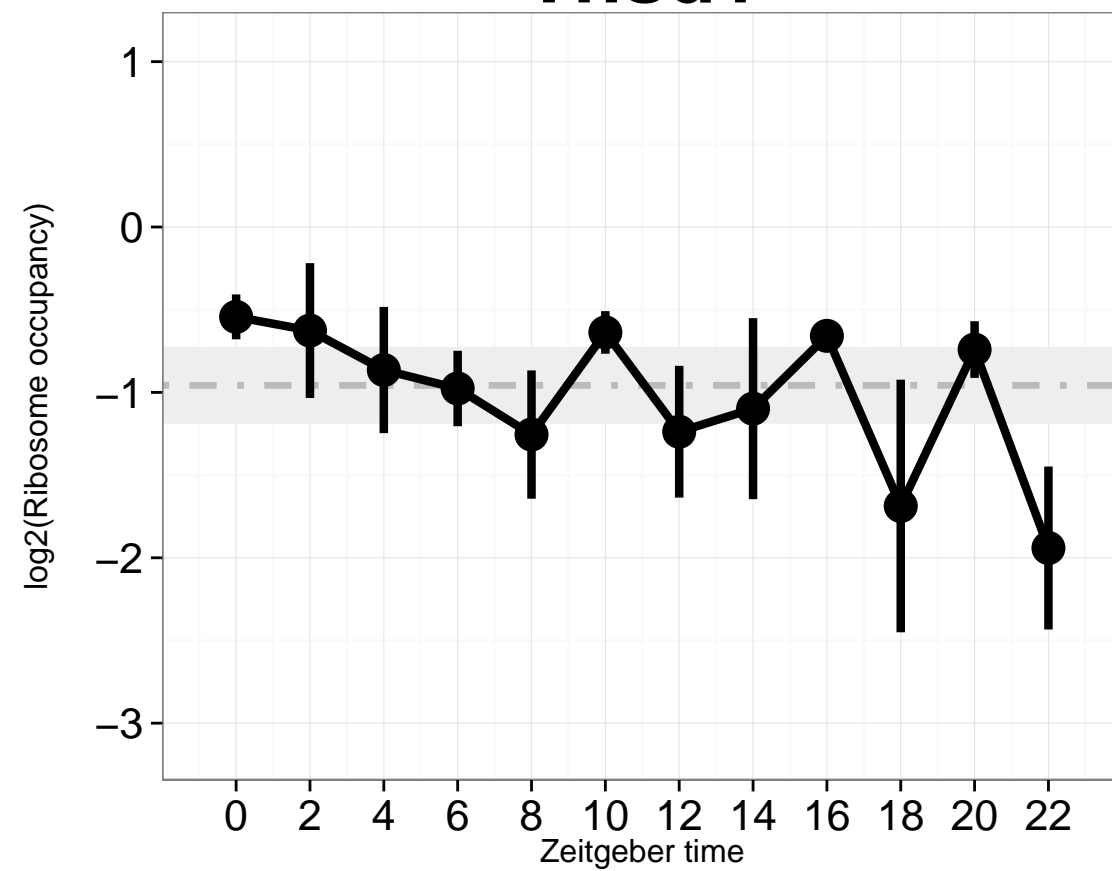

Supplement: Supplementary file 10948 [file 1]

**Ppl**

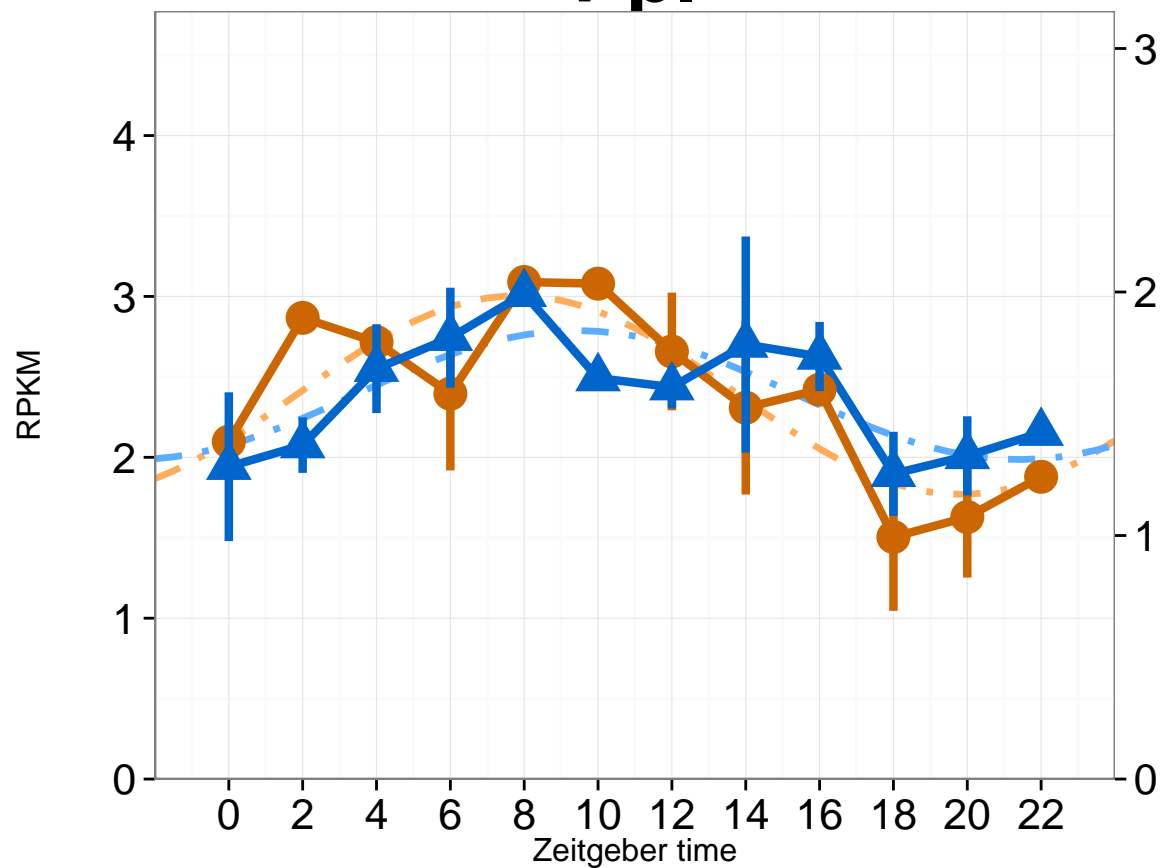

**Ppl**

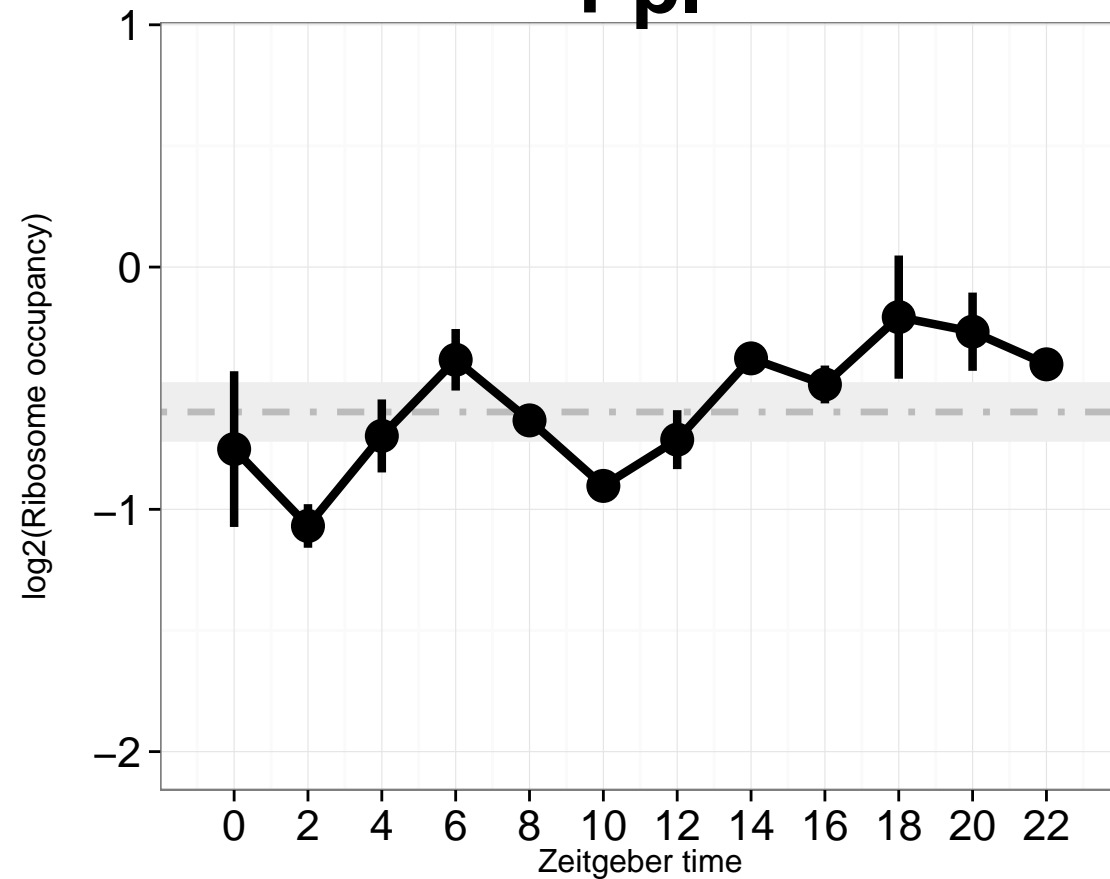

Supplement: Supplementary file 10949 [file 1]

# 1810022K09Rik

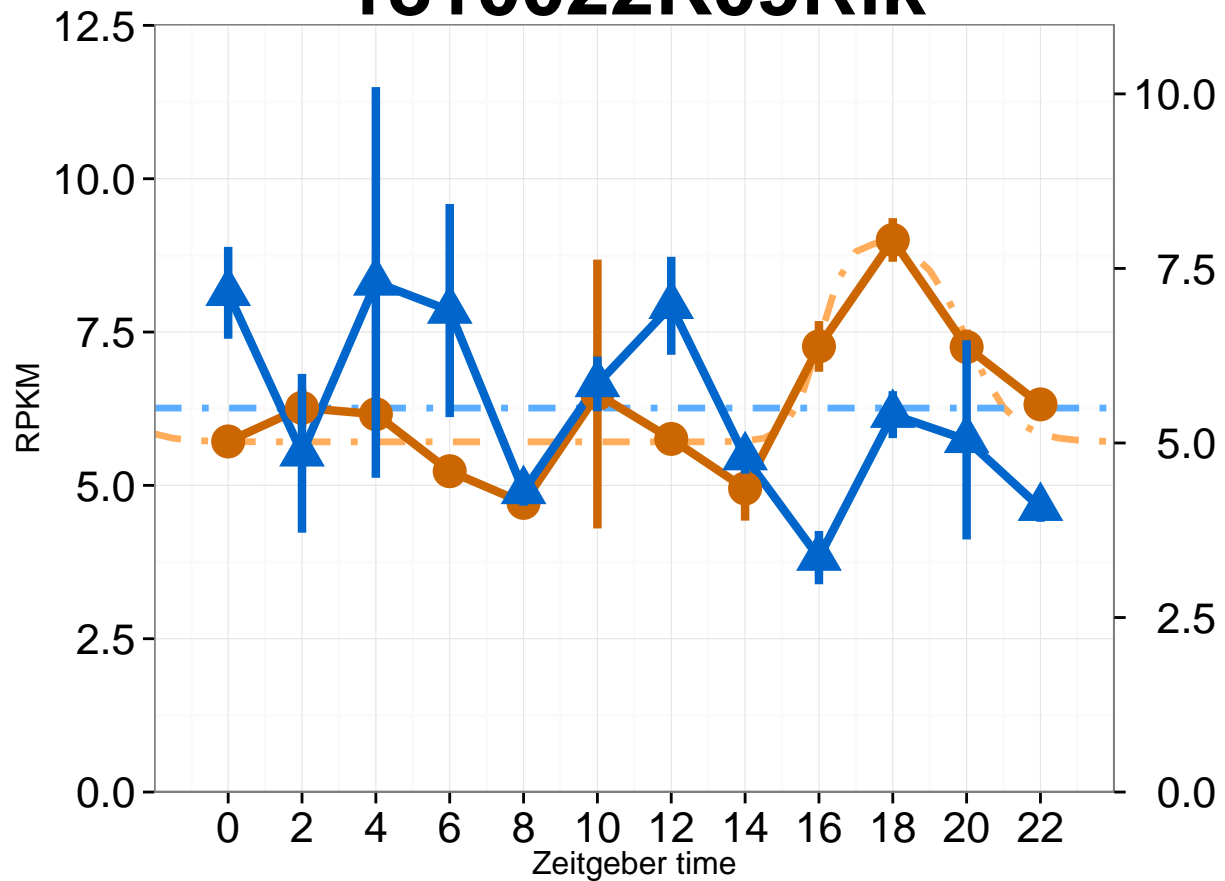

# 1810022K09Rik

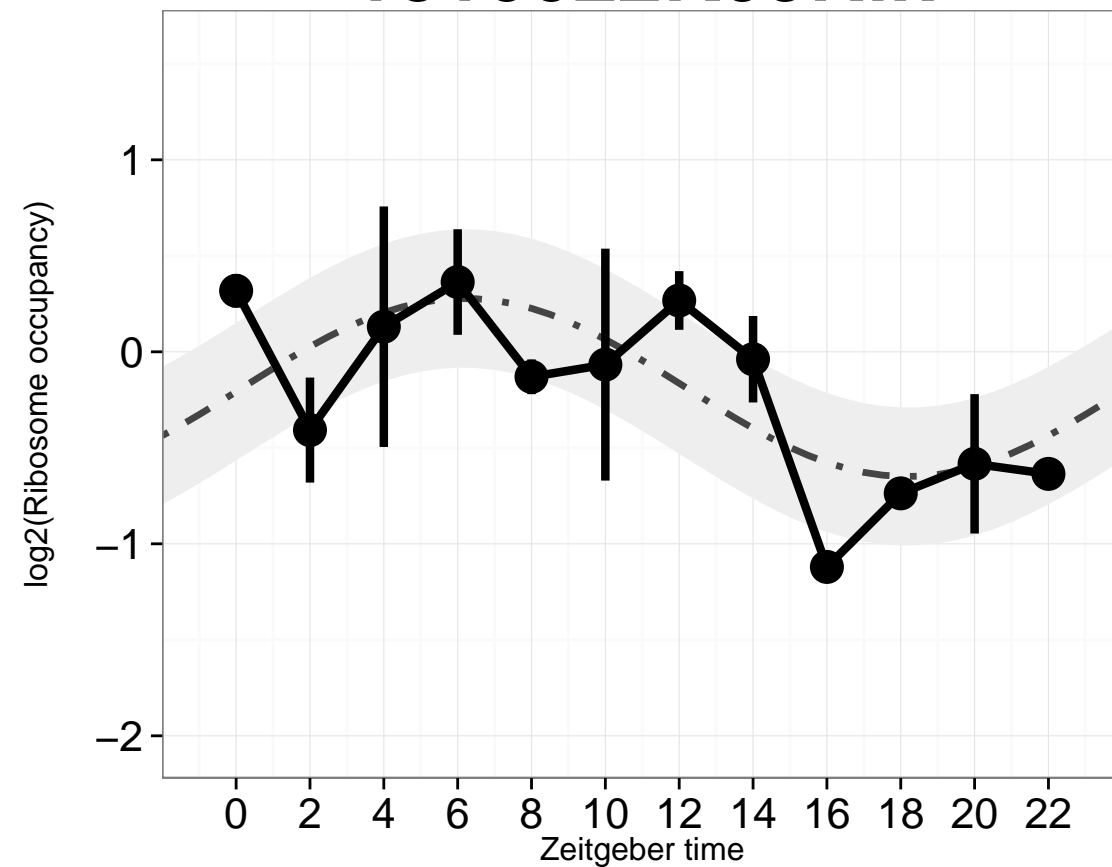

Supplement: Supplementary file 10950 [file 1]

## Llg1

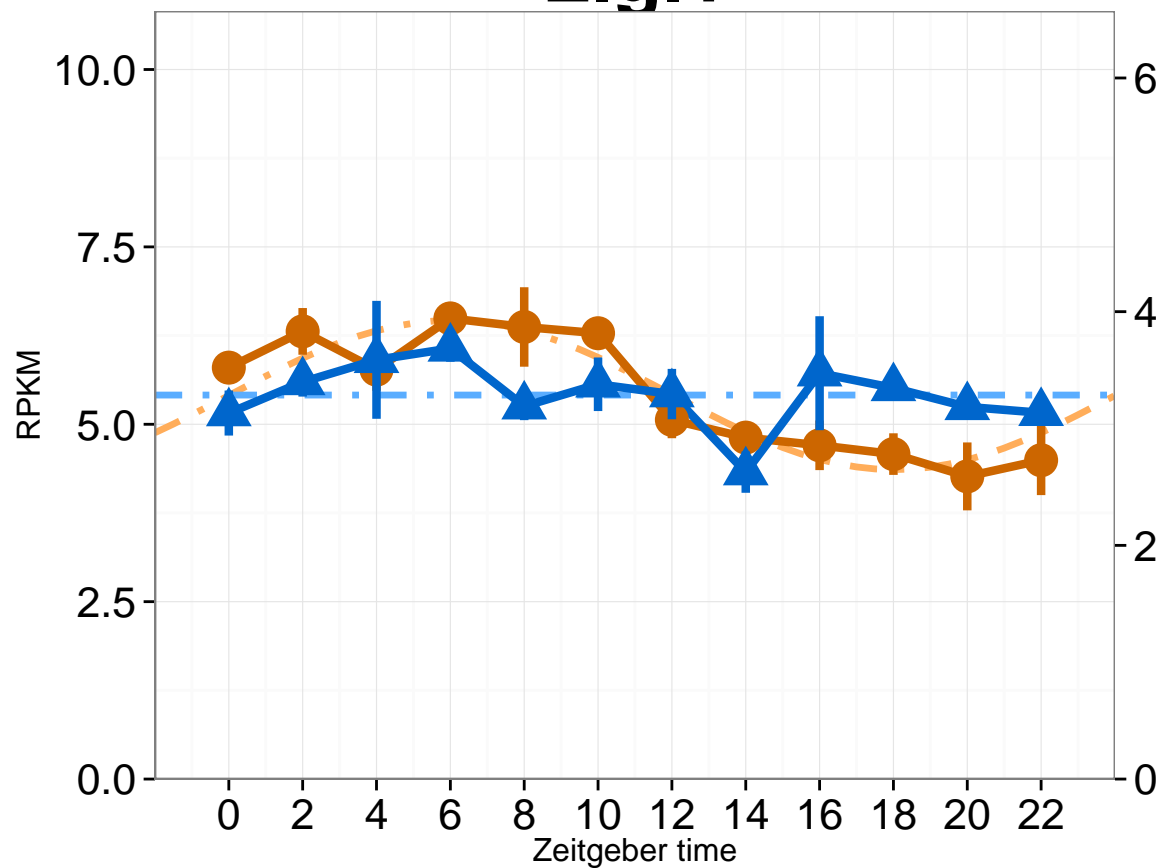

## Llg1

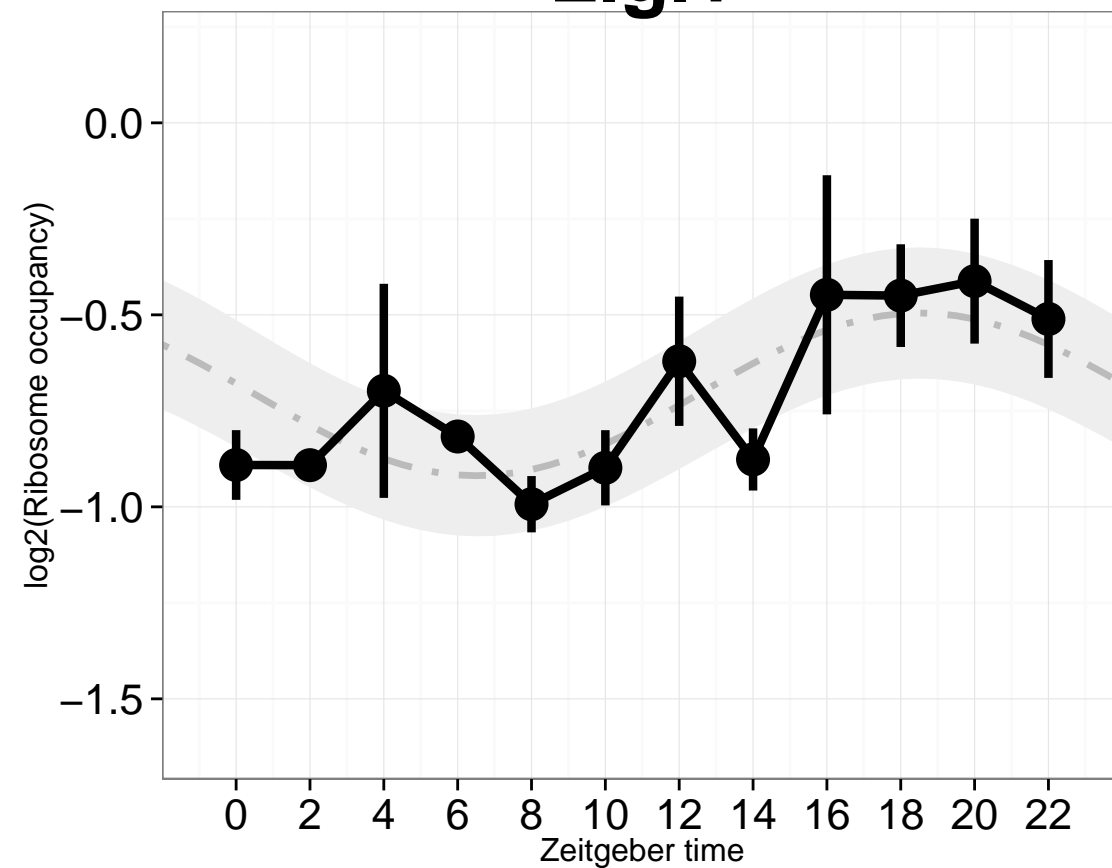

Supplement: Supplementary file 10951 [file 1]

## KIhl42

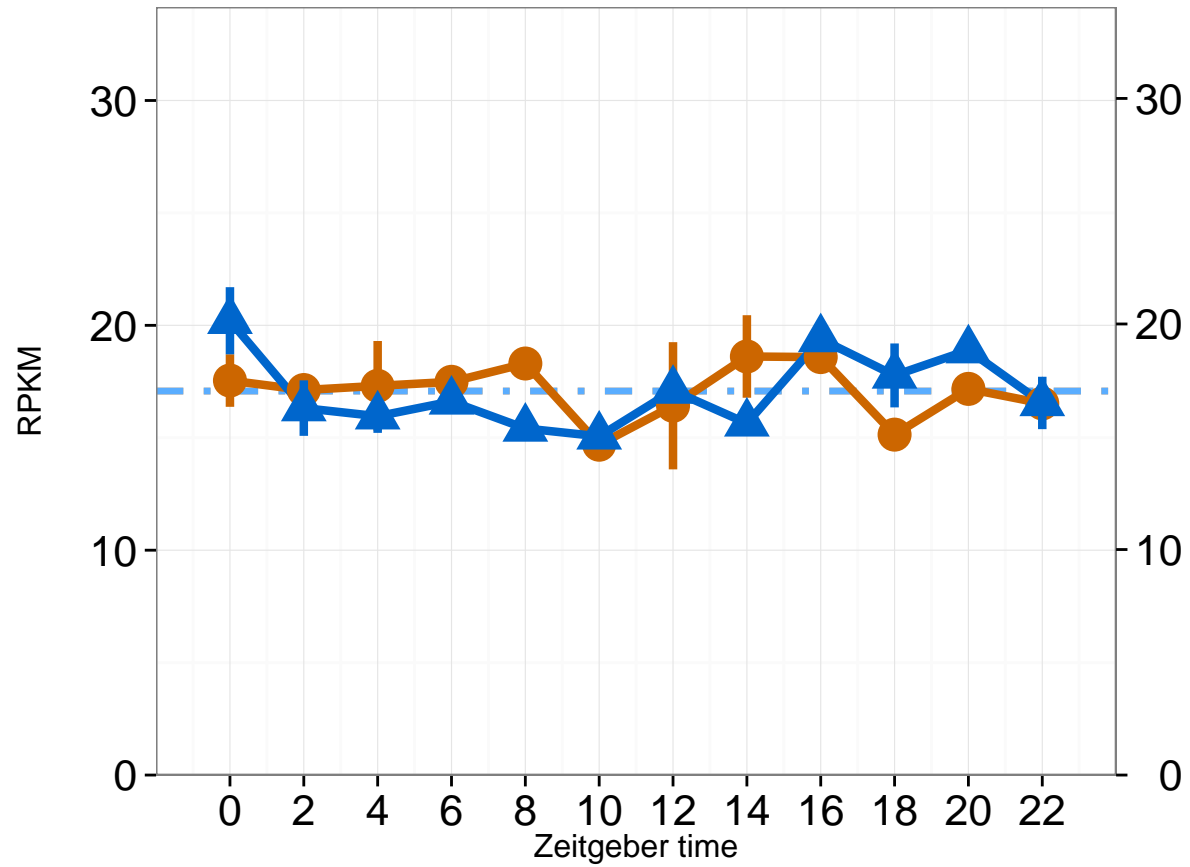

## KIhl42

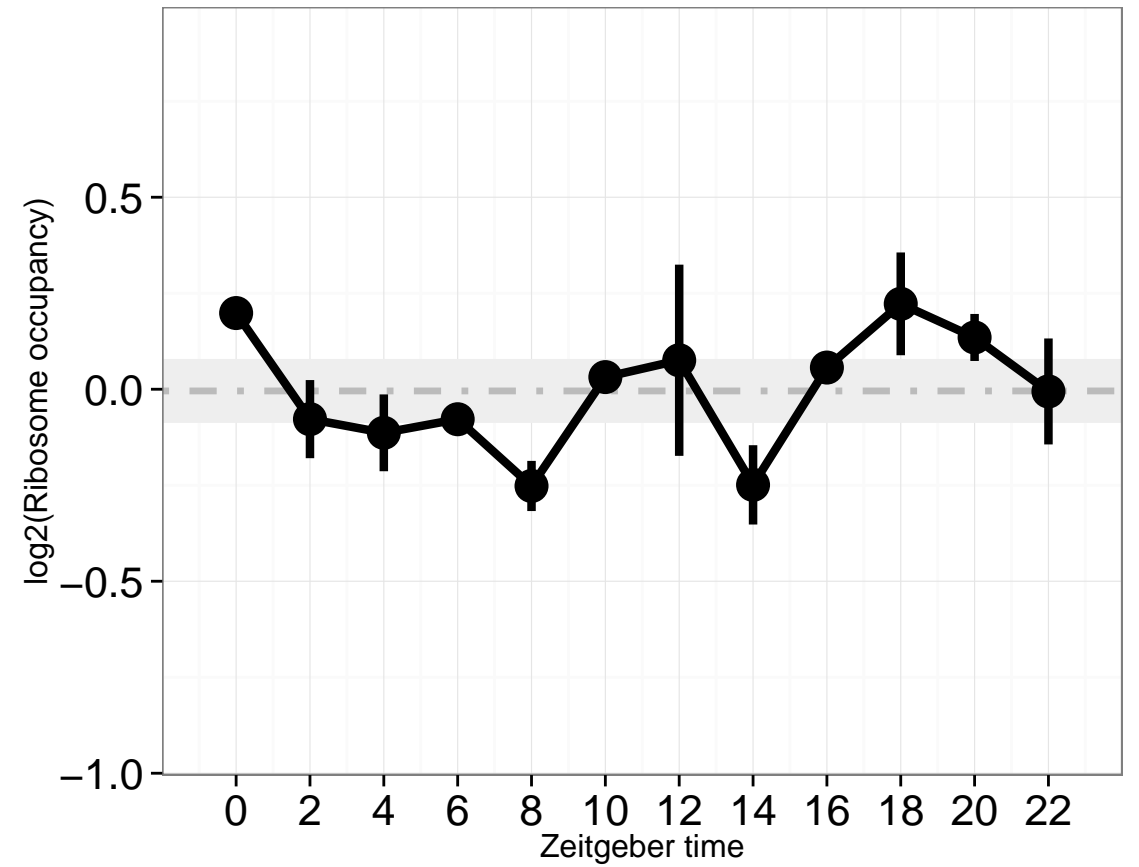

Supplement: Supplementary file 10952 [file 1]

# Apmap

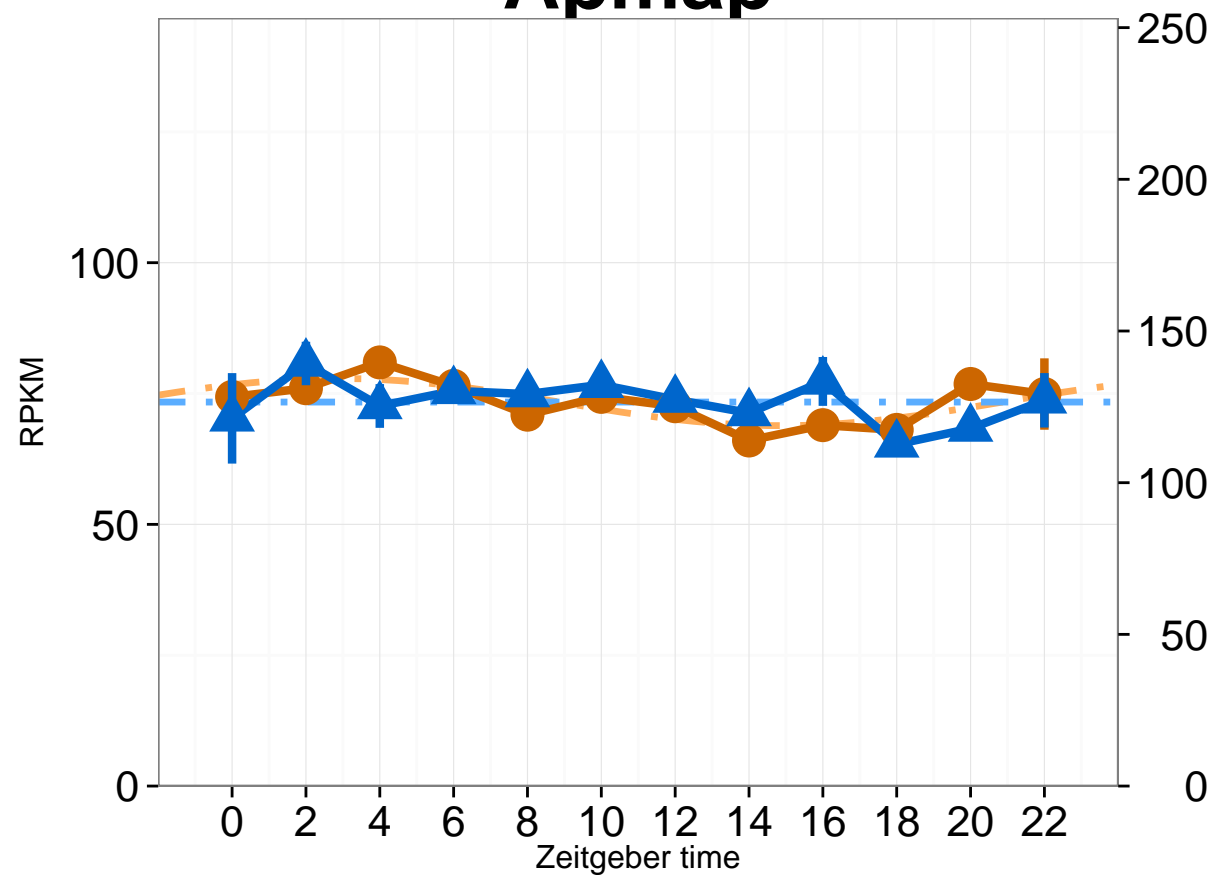

# Apmap

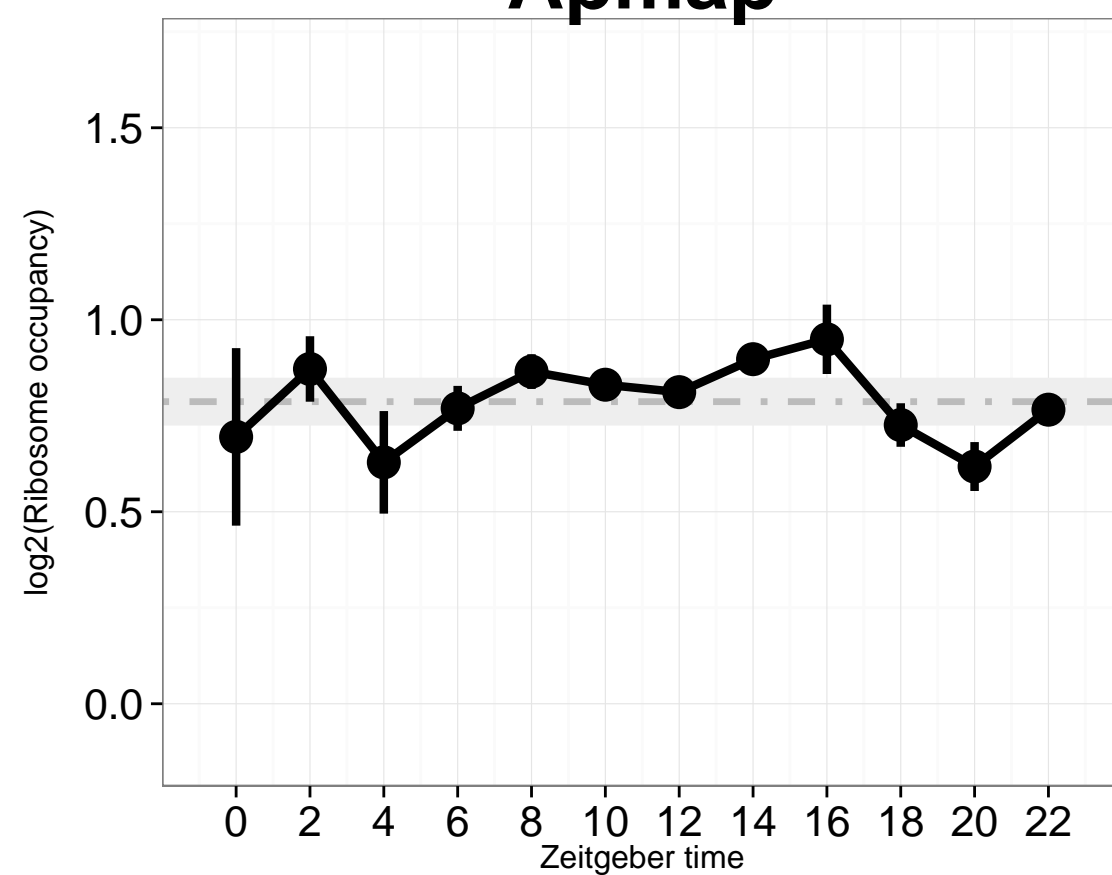

Supplement: Supplementary file 10953 [file 1]

# Zfp940

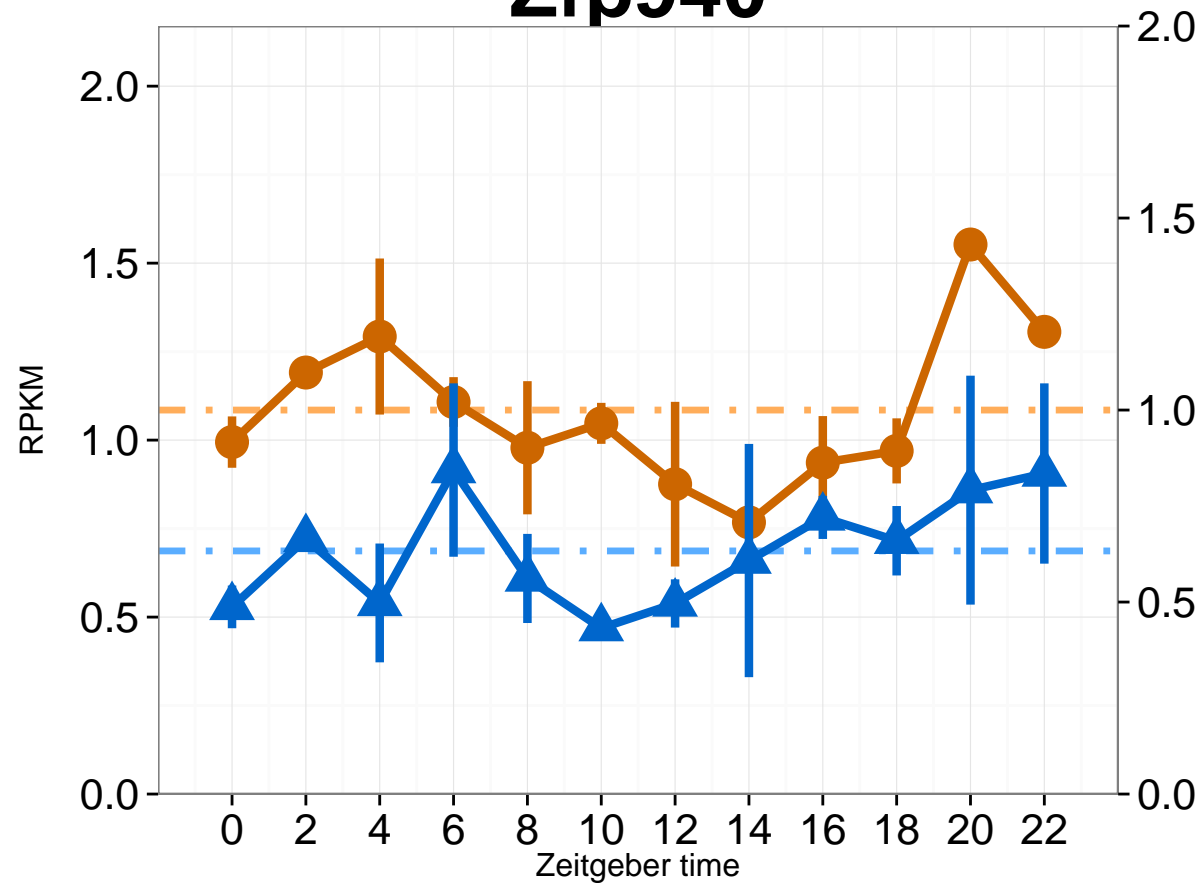

# Zfp940

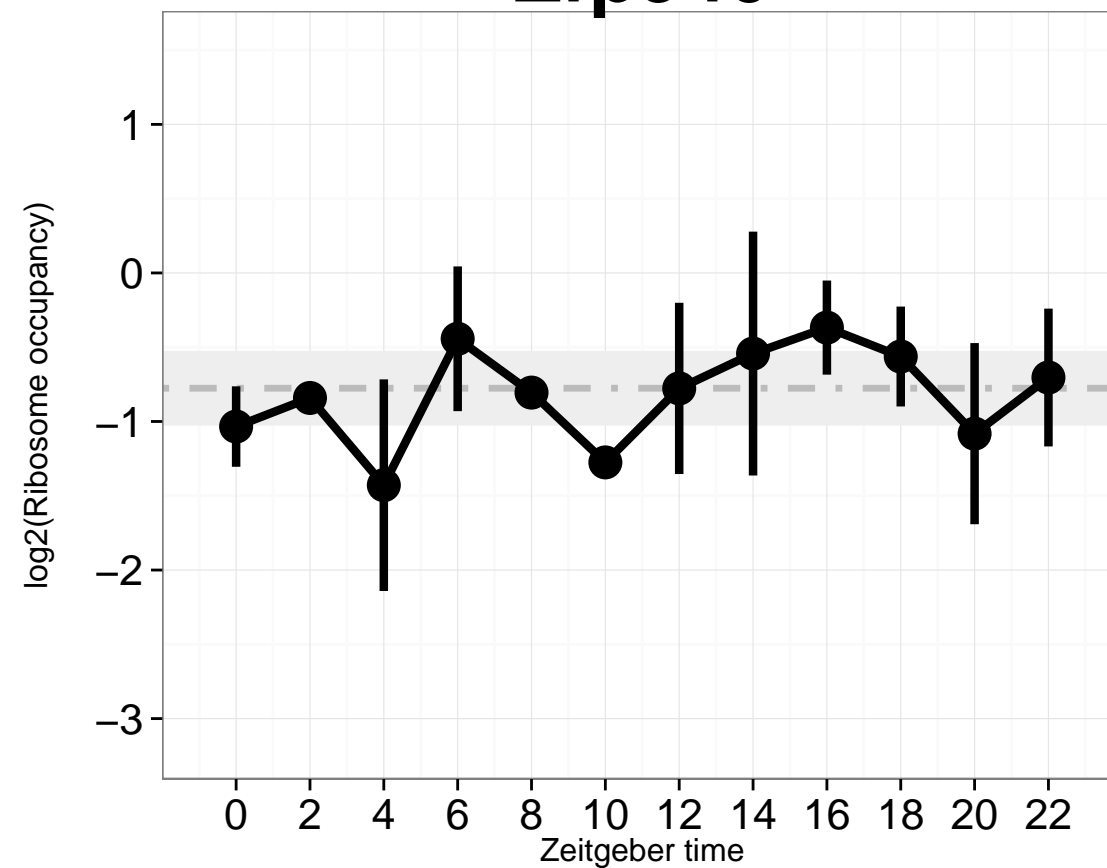

Supplement: Supplementary file 10954 [file 1]

## Elmsan1

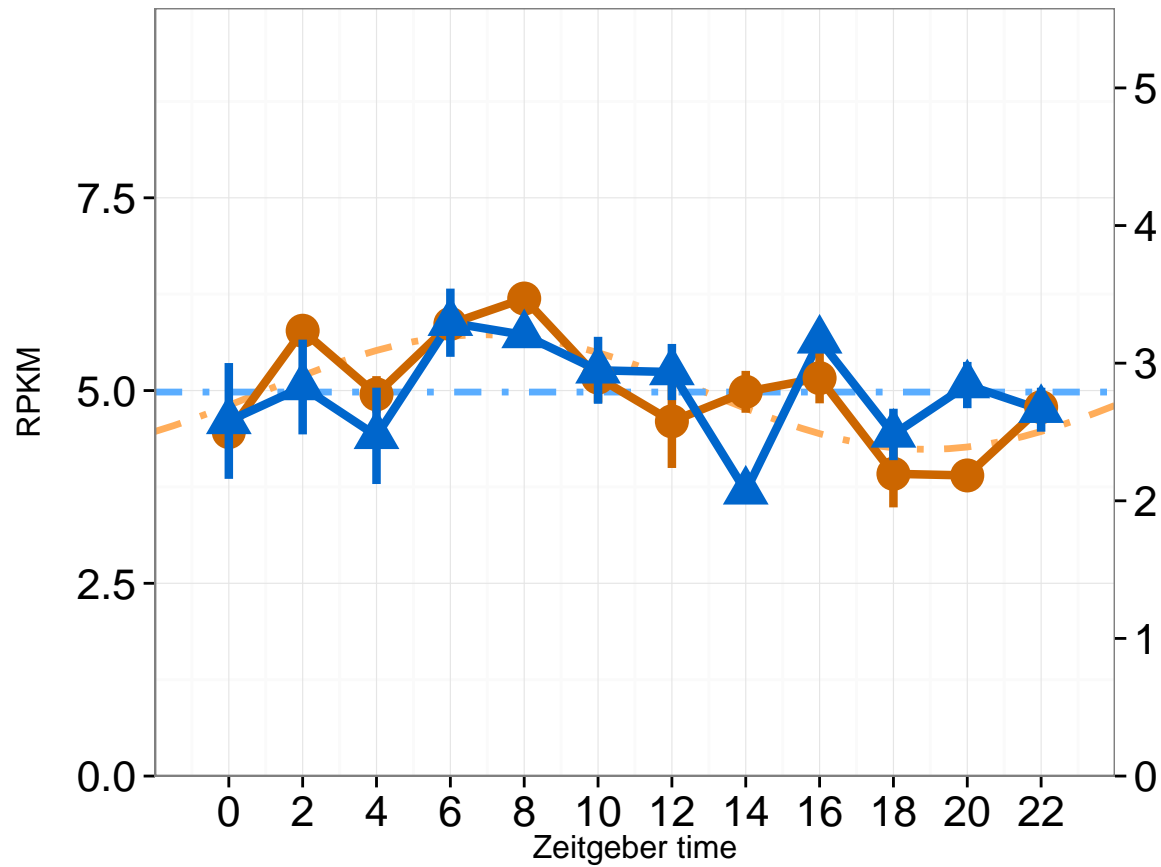

## Elmsan1

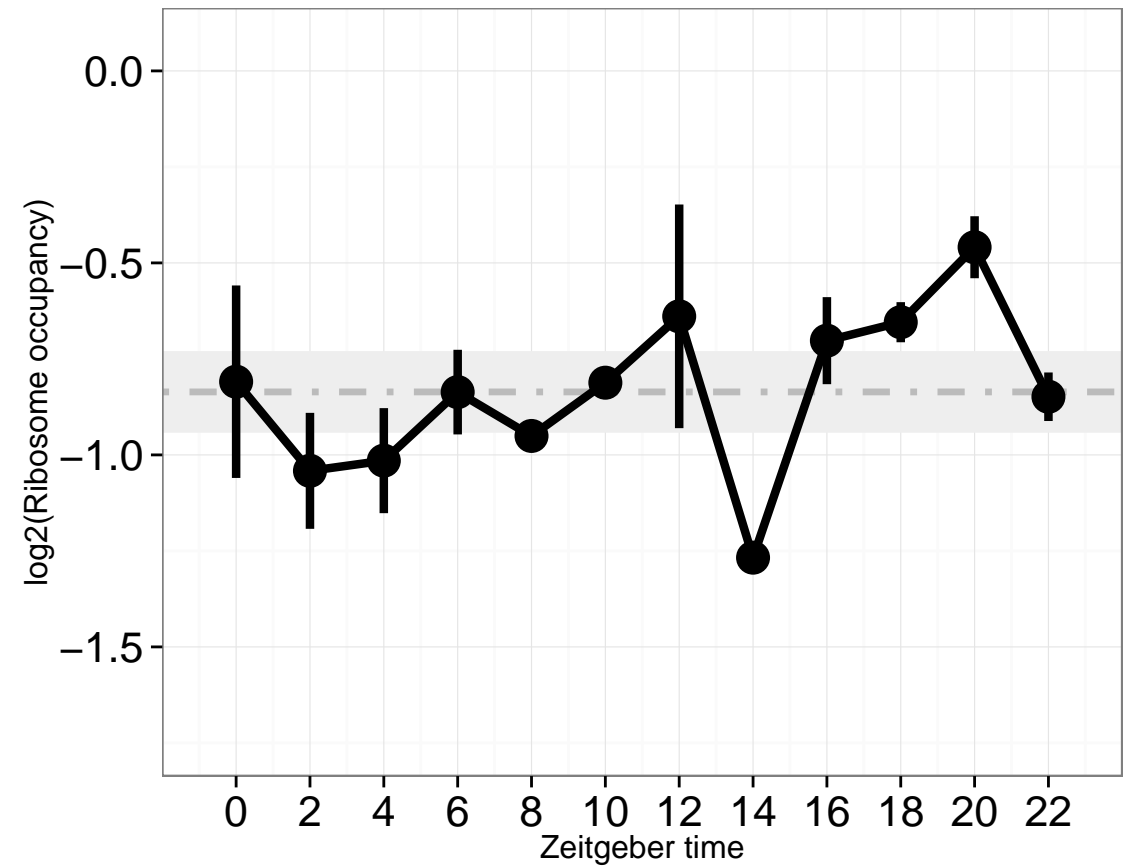

Supplement: Supplementary file 10955 [file 1]

## Tc2n

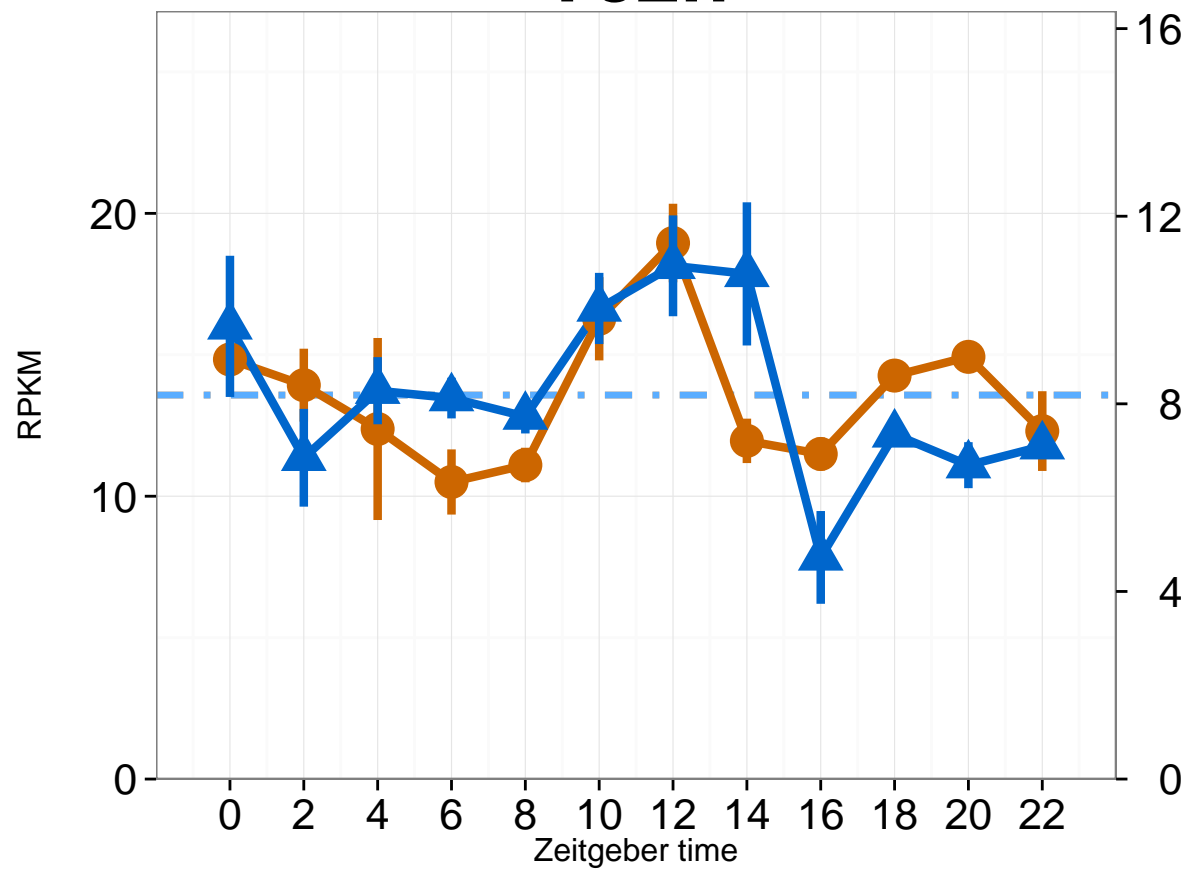

## Tc2n

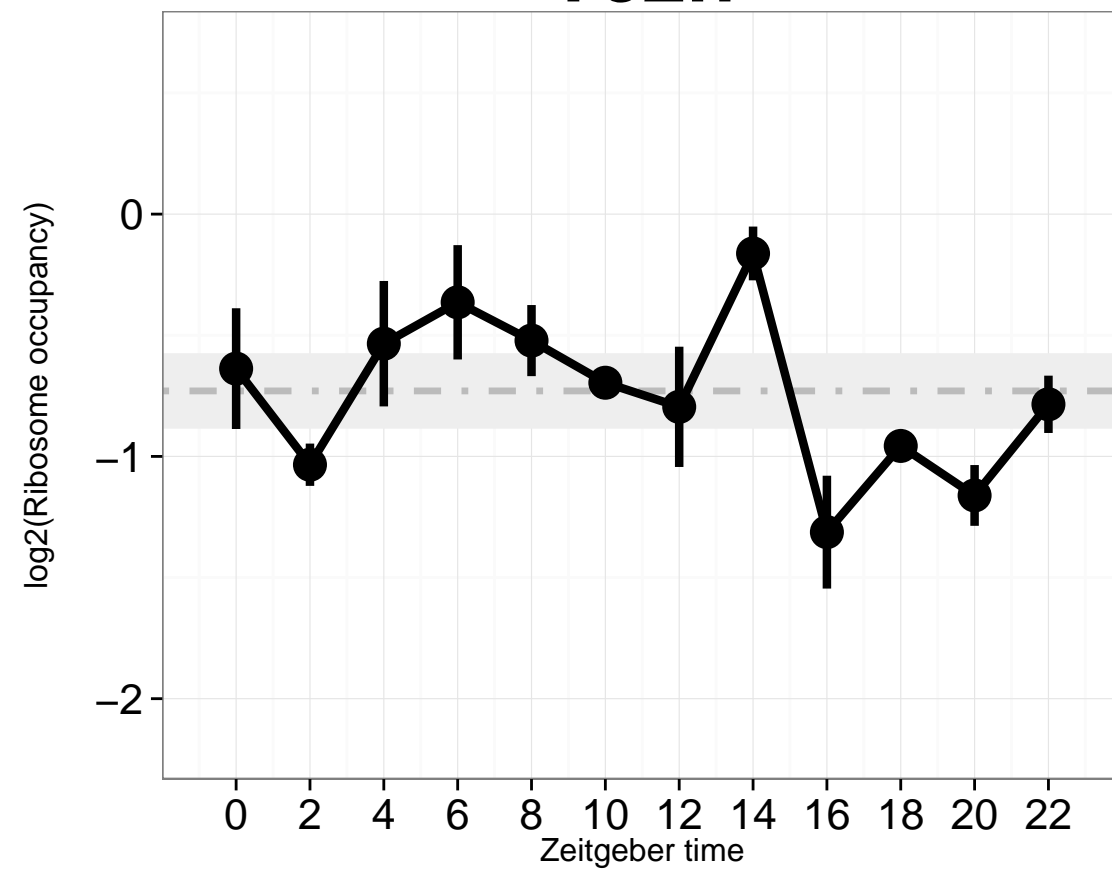

Supplement: Supplementary file 10956 [file 1]

# Chst12

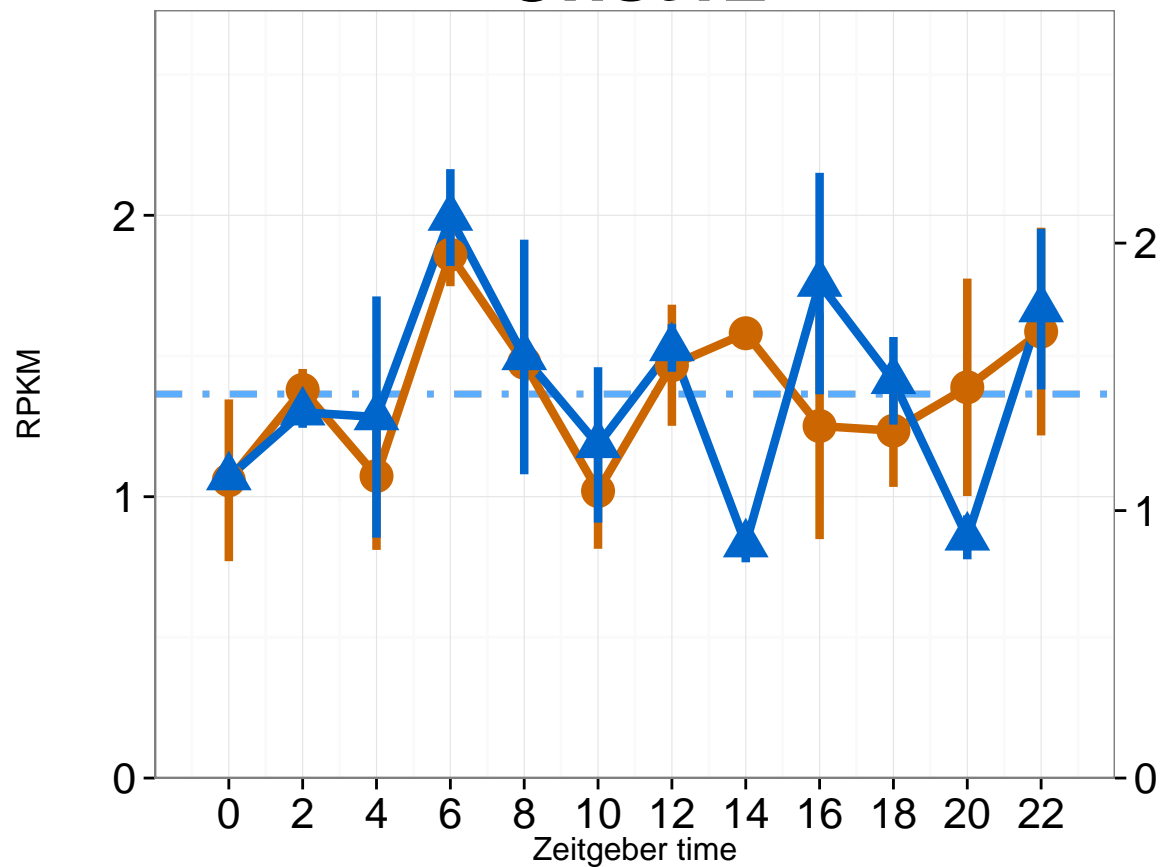

# Chst12

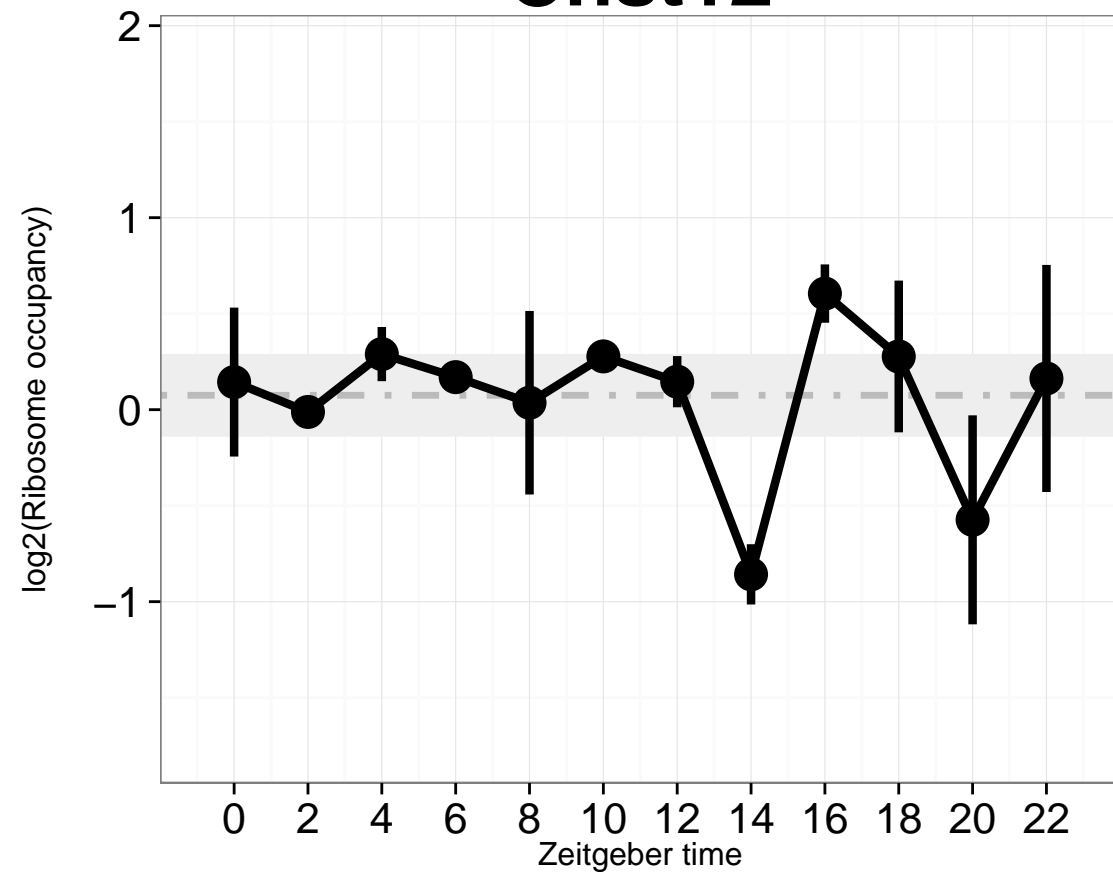

Supplement: Supplementary file 10957 [file 1]

## Dak

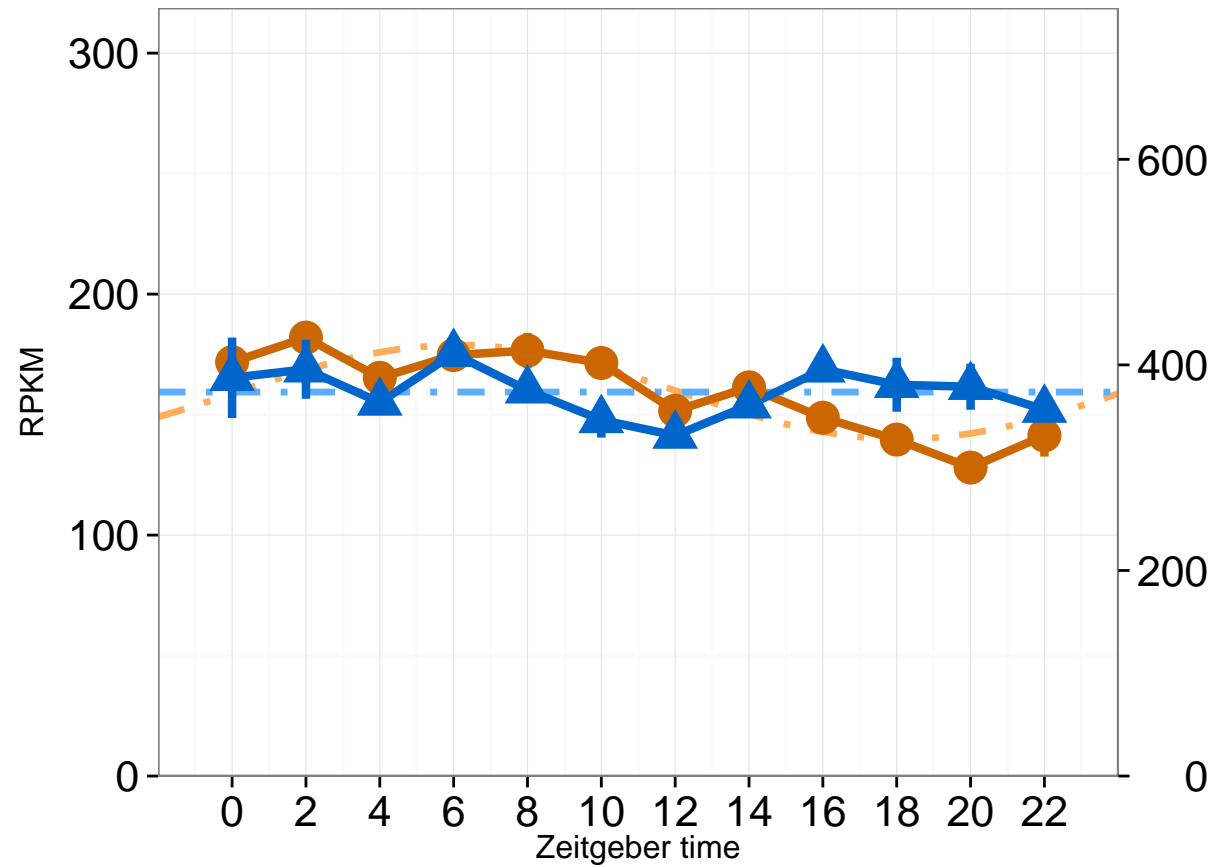

## Dak

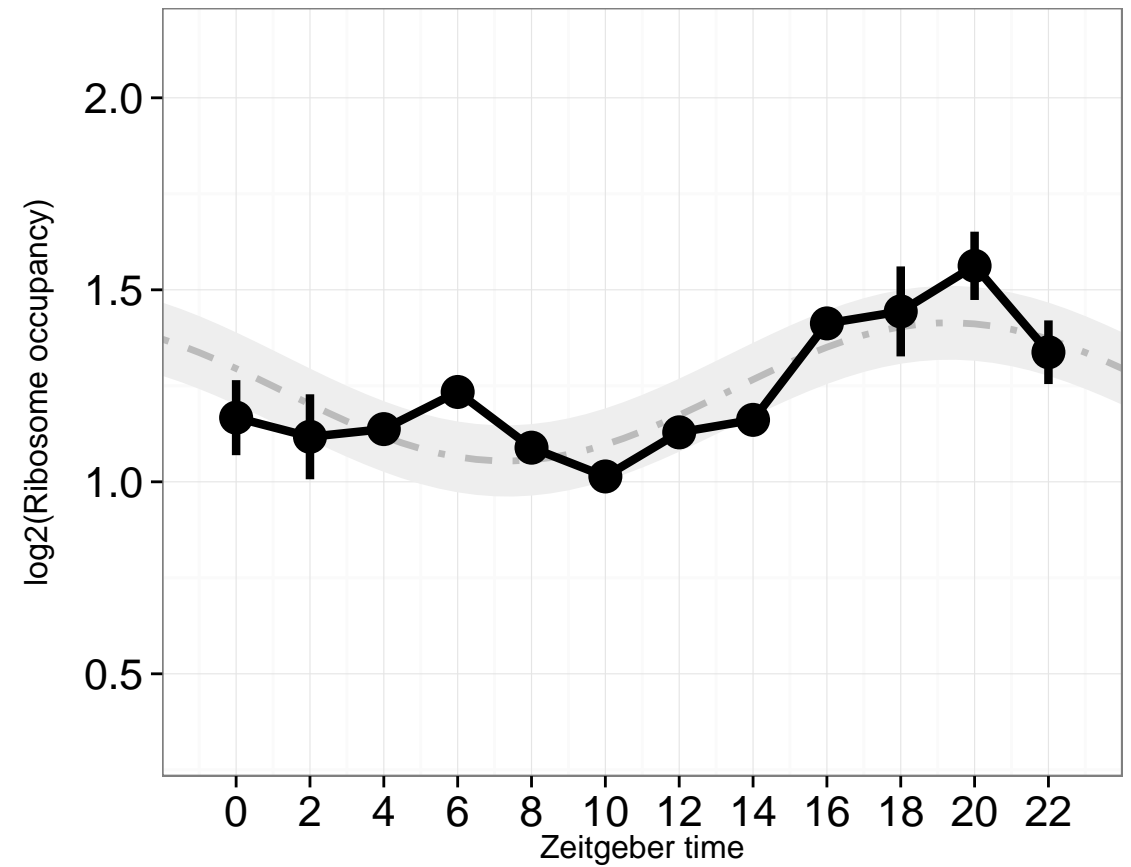

Supplement: Supplementary file 10958 [file 1]

# D15Ertd621e

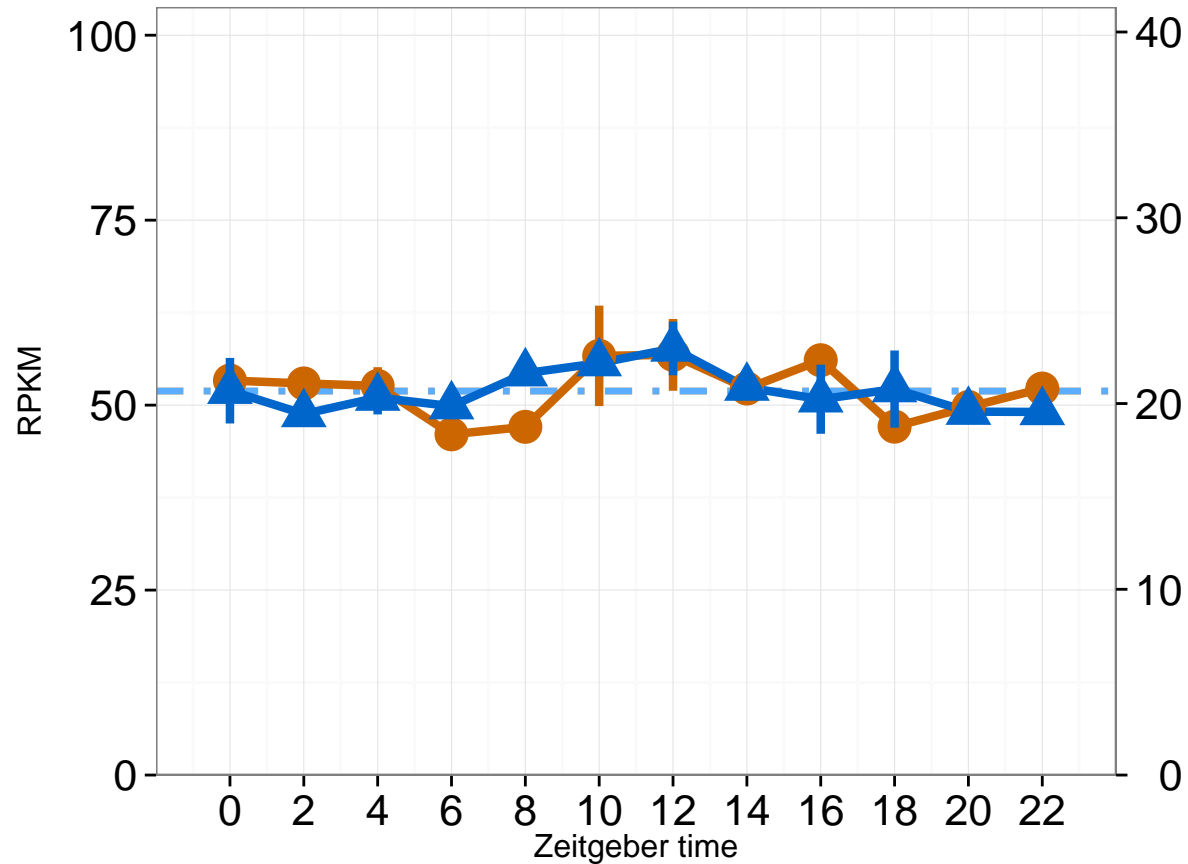

# D15Ertd621e

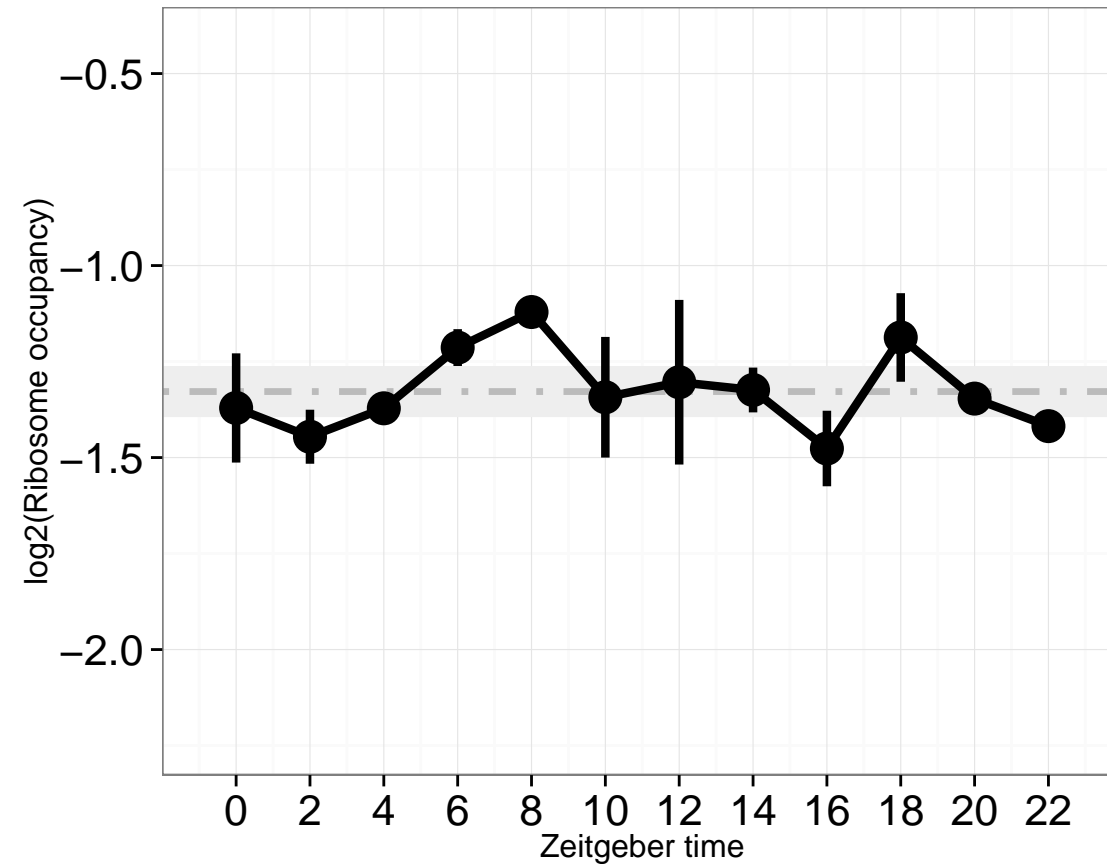

Supplement: Supplementary file 10959 [file 1]

# Ccl27a

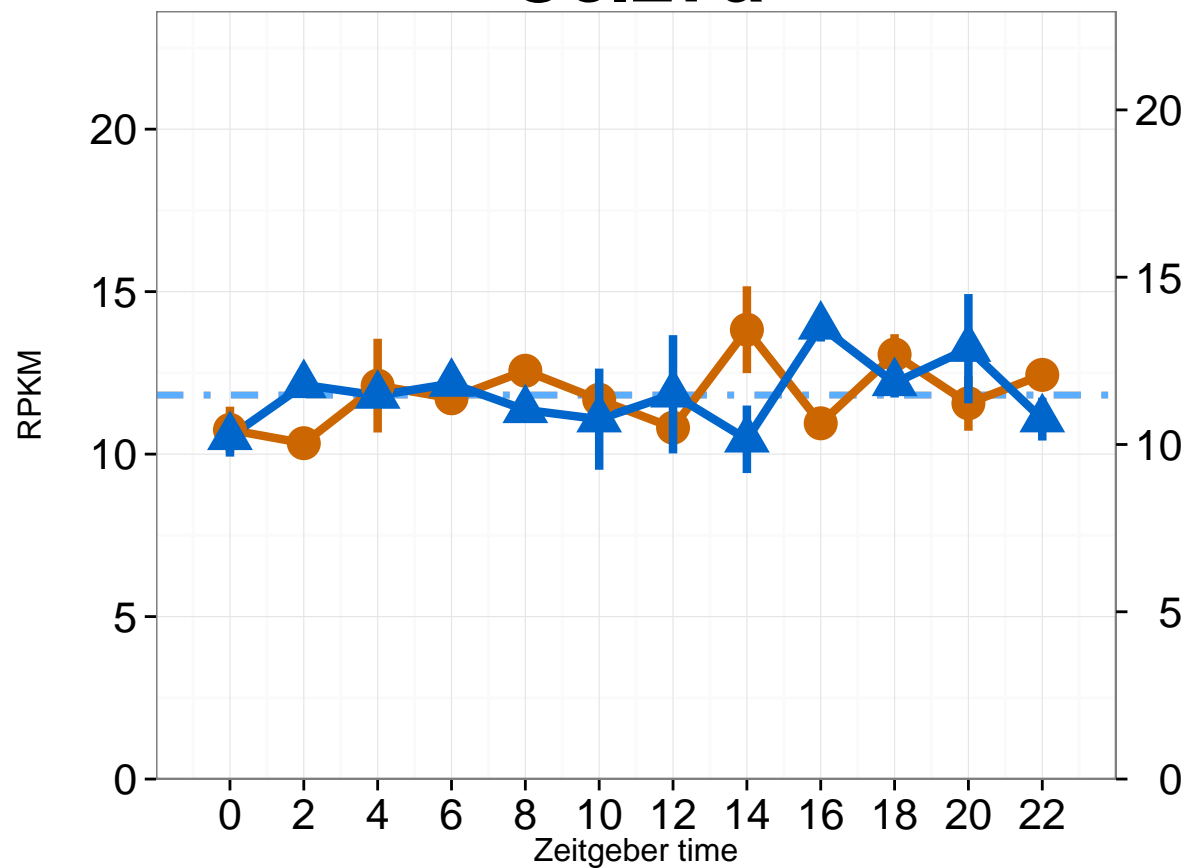

# Ccl27a

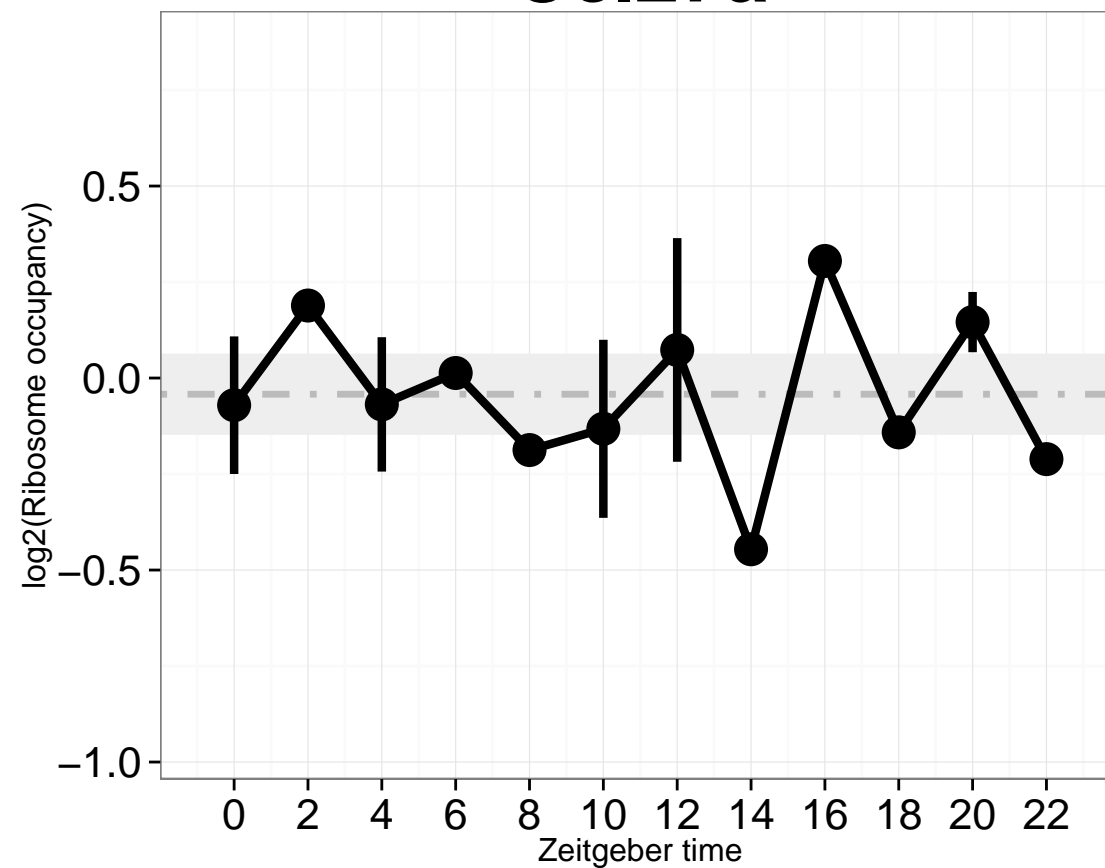

Supplement: Supplementary file 10960 [file 1]

## Emcn

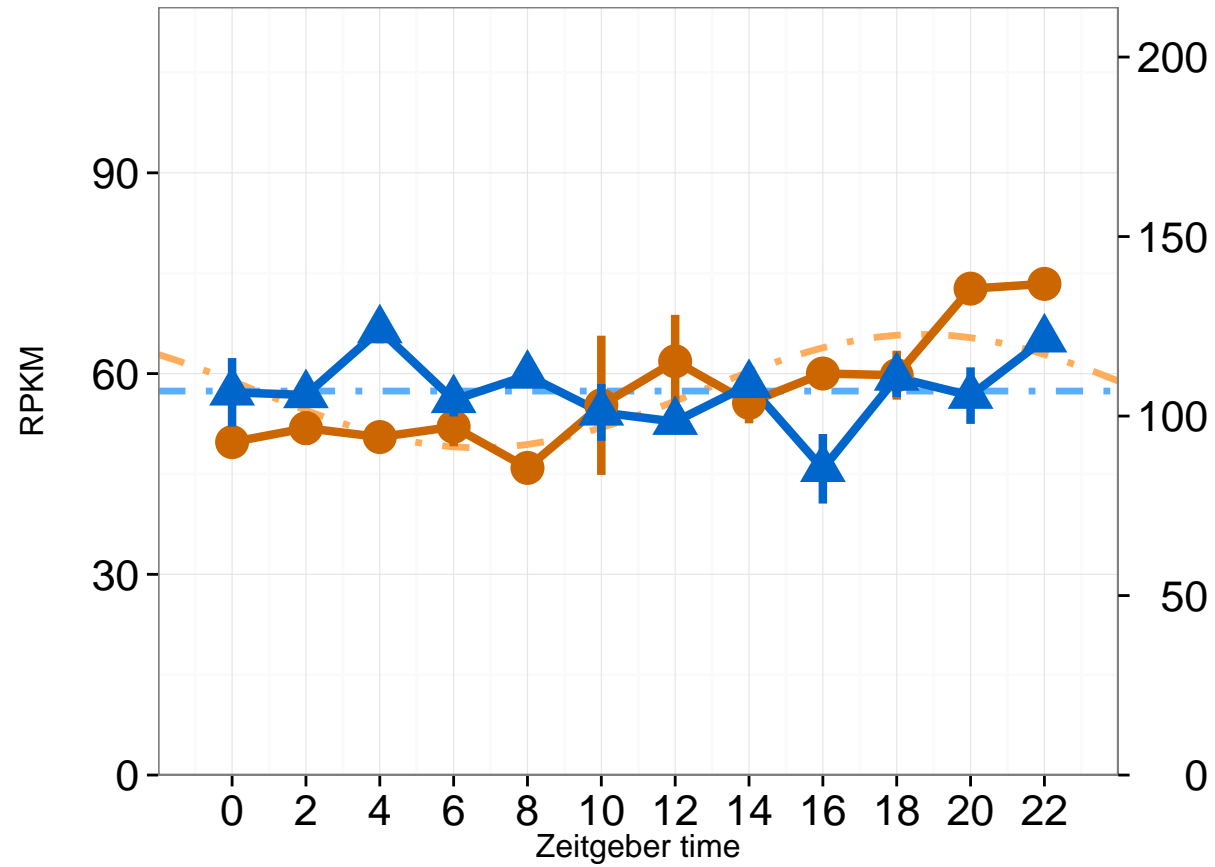

## Emcn

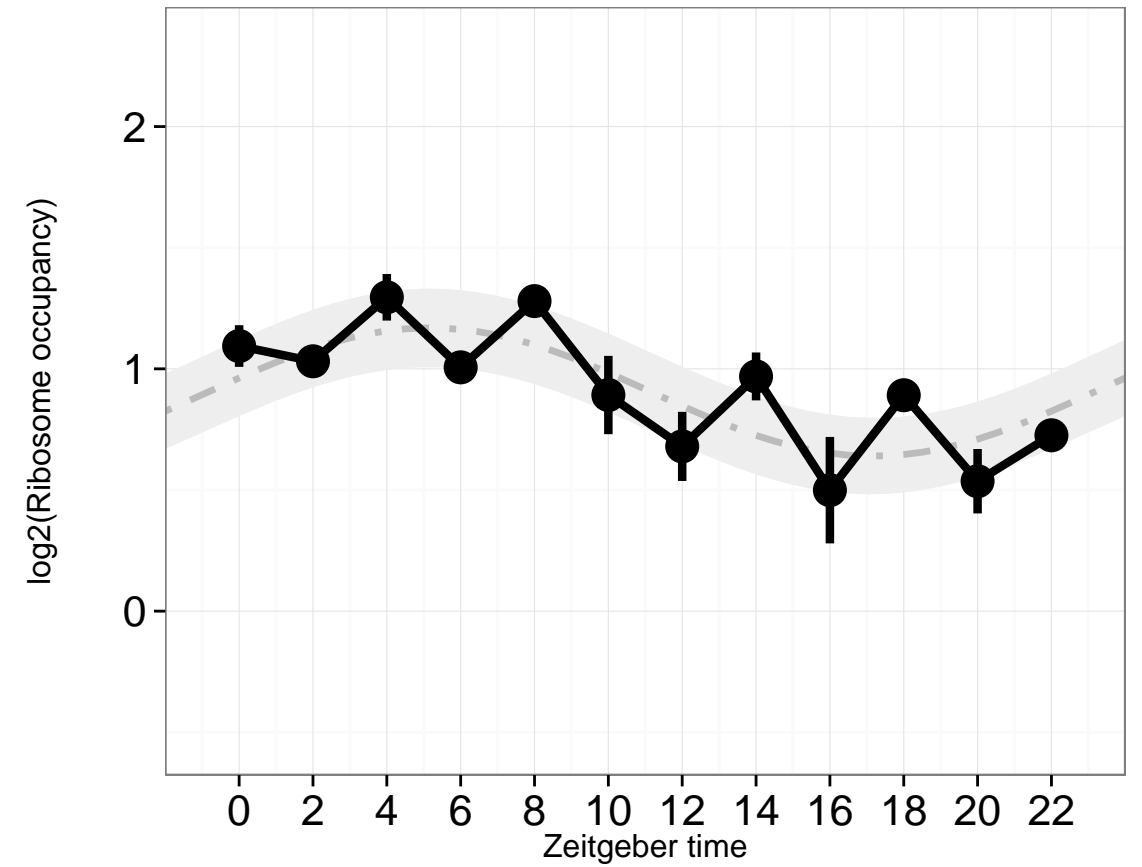

Supplement: Supplementary file 10961 [file 1]

# Sun1

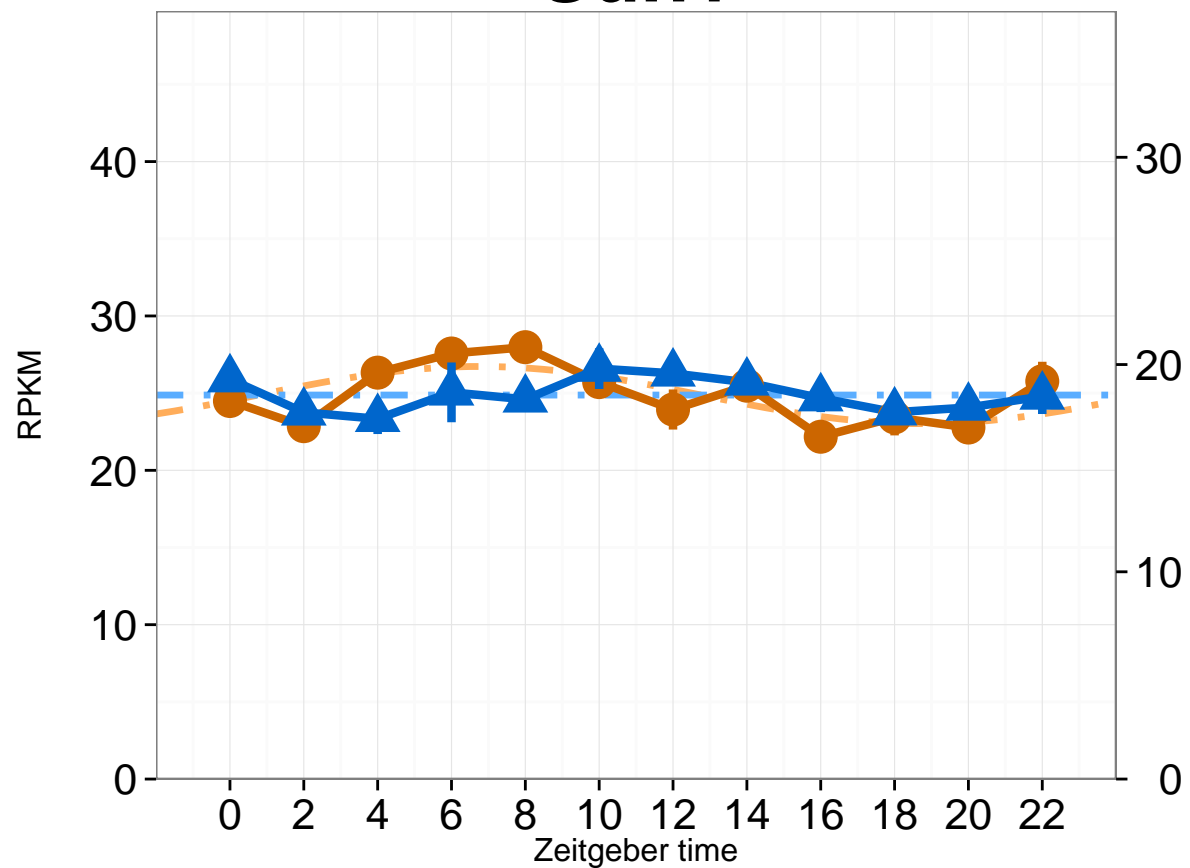

# Sun1

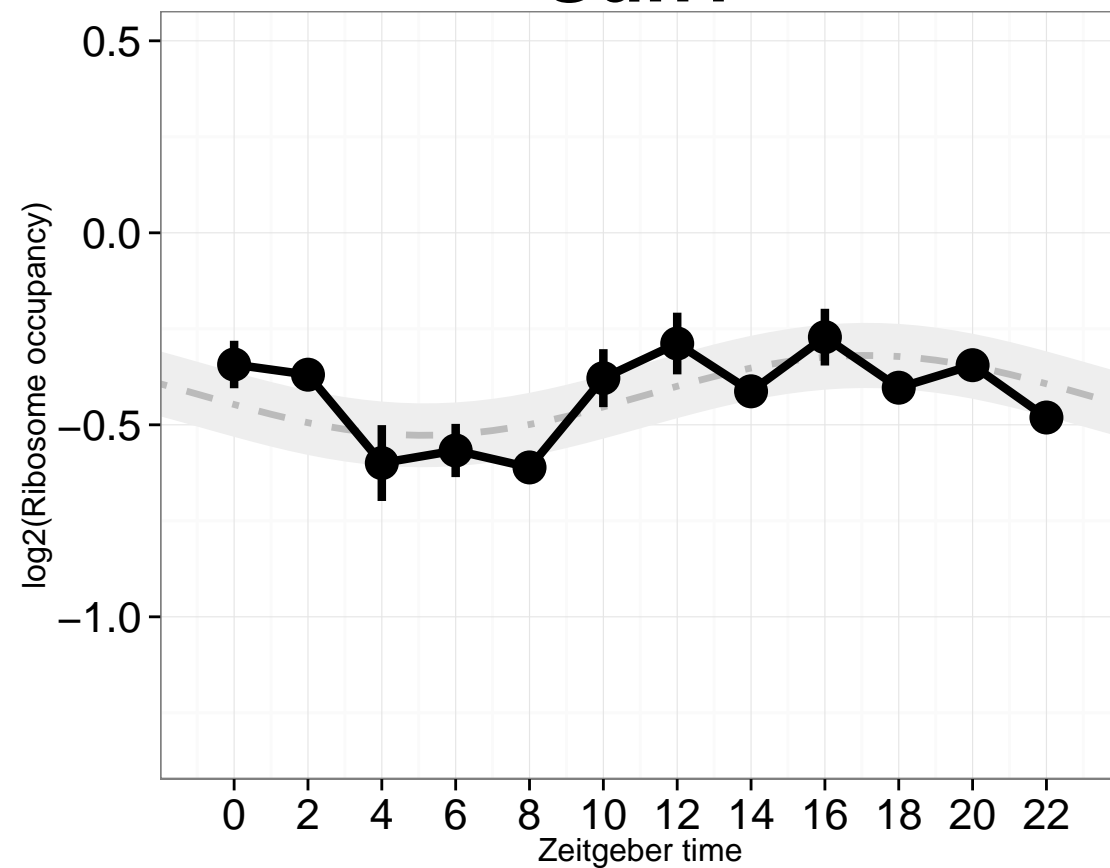

Supplement: Supplementary file 10962 [file 1]

## Phlda2

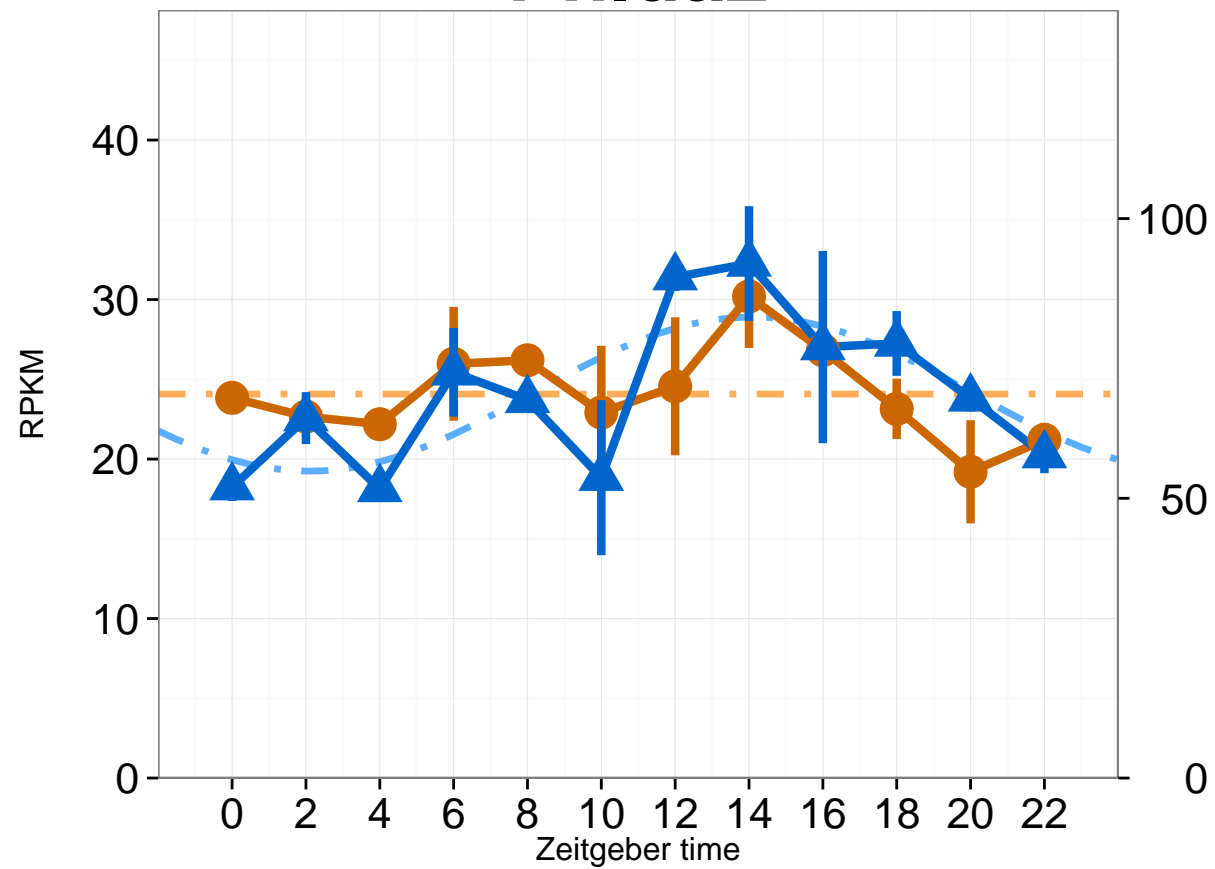

## Phlda2

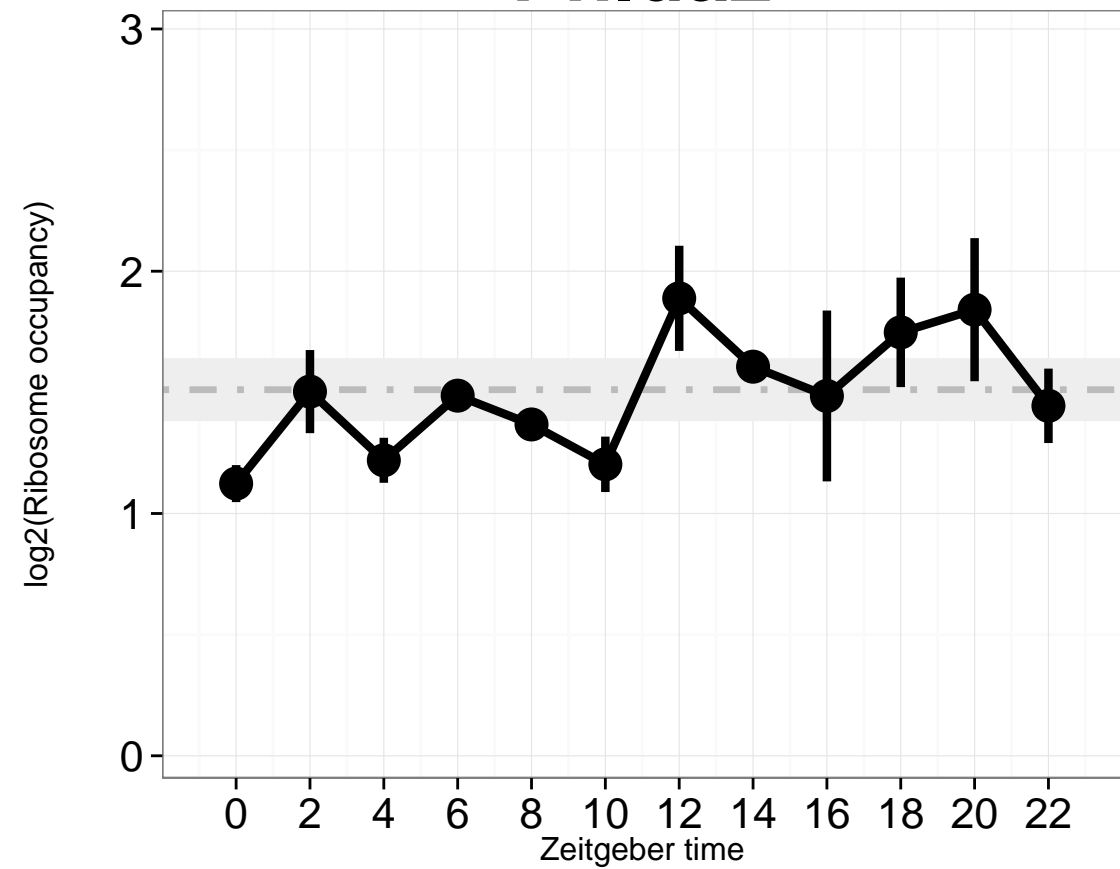

Supplement: Supplementary file 10963 [file 1]

## Evi2a

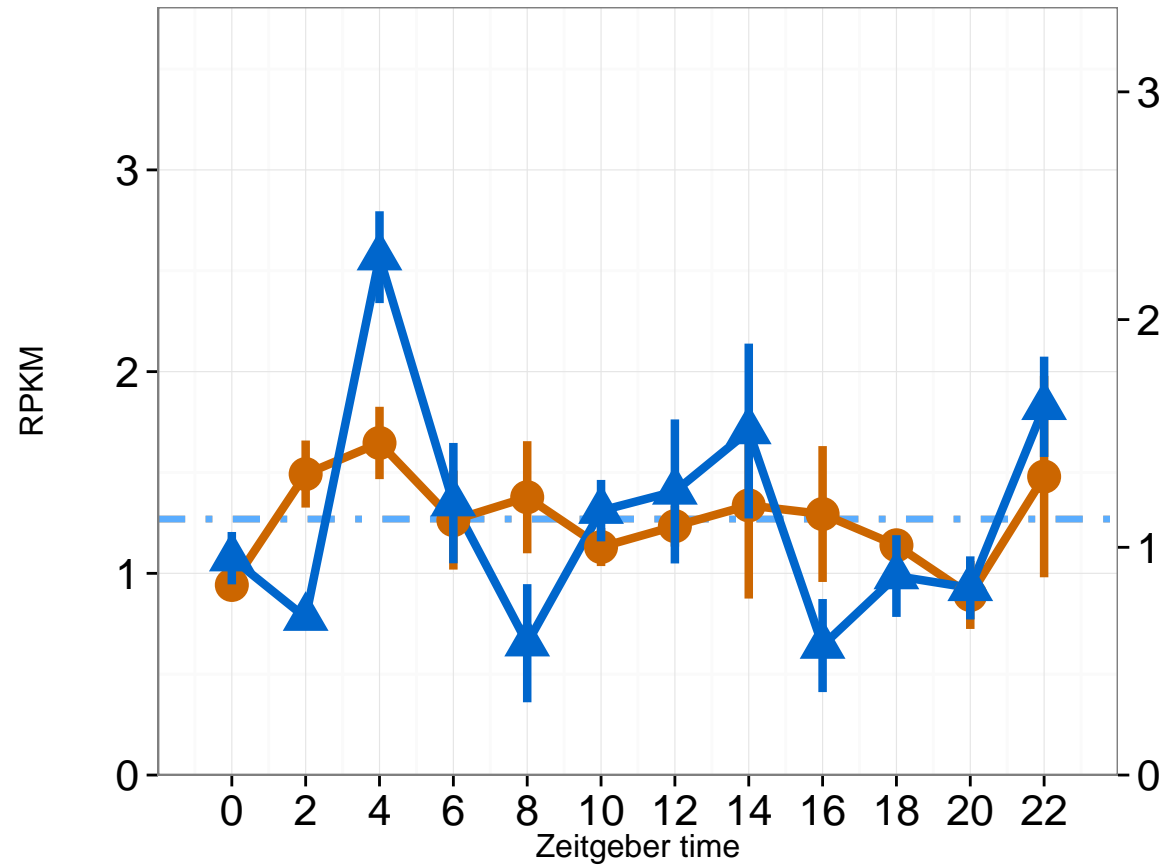

## Evi2a

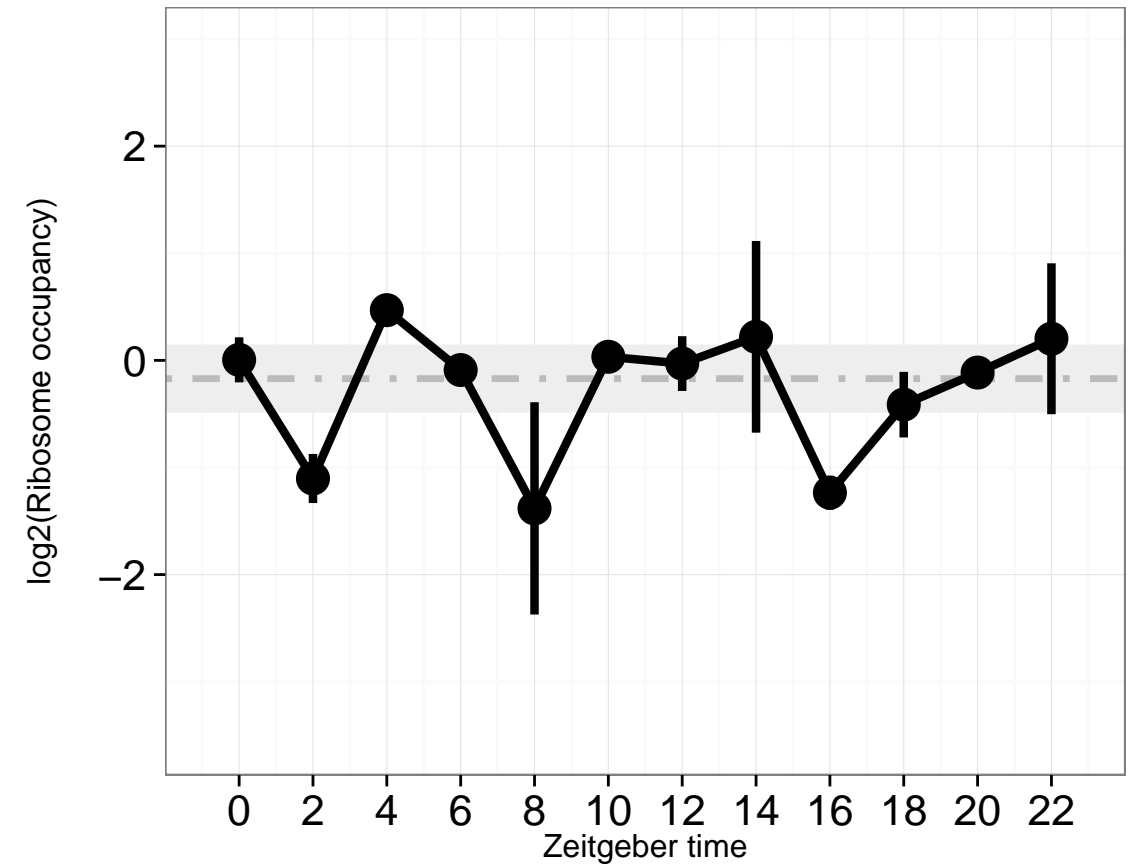

Supplement: Supplementary file 10964 [file 1]

## Hnrrnph3

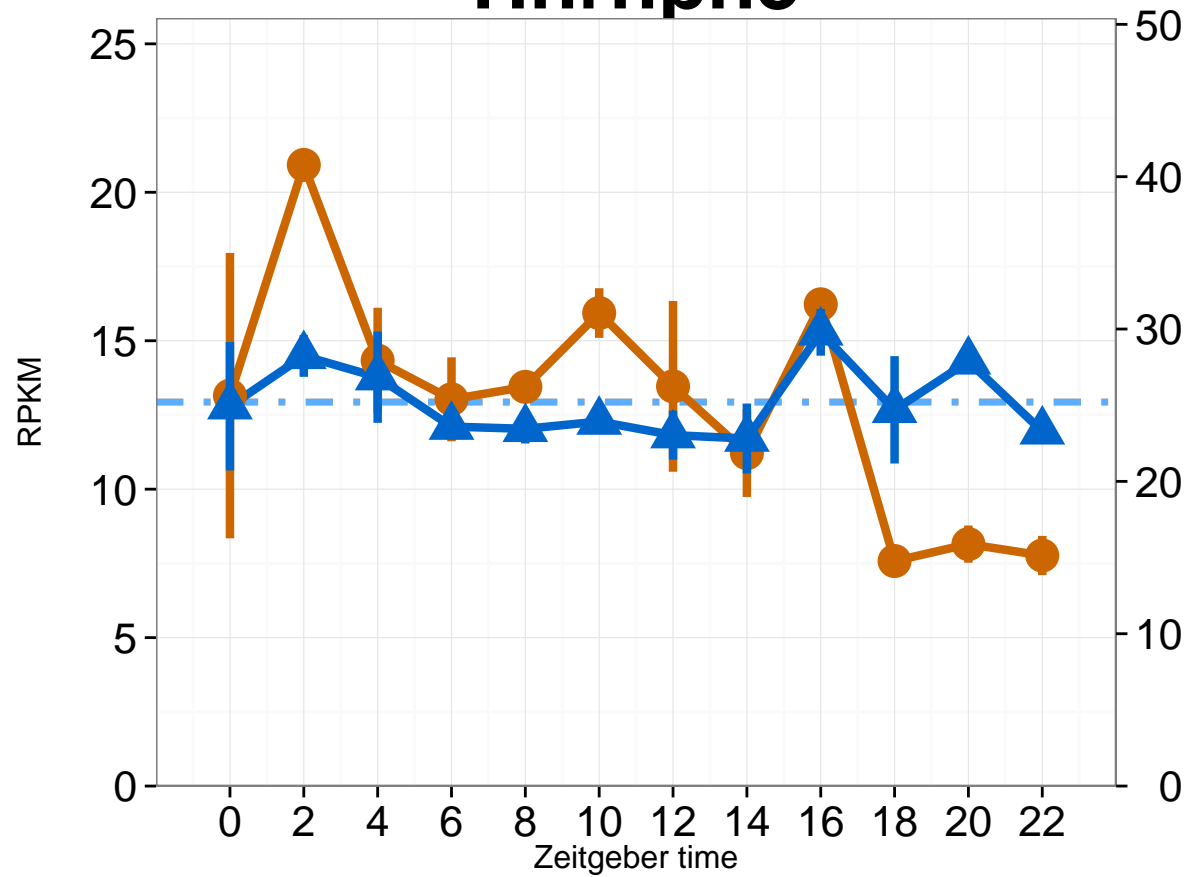

## Hnrrnph3

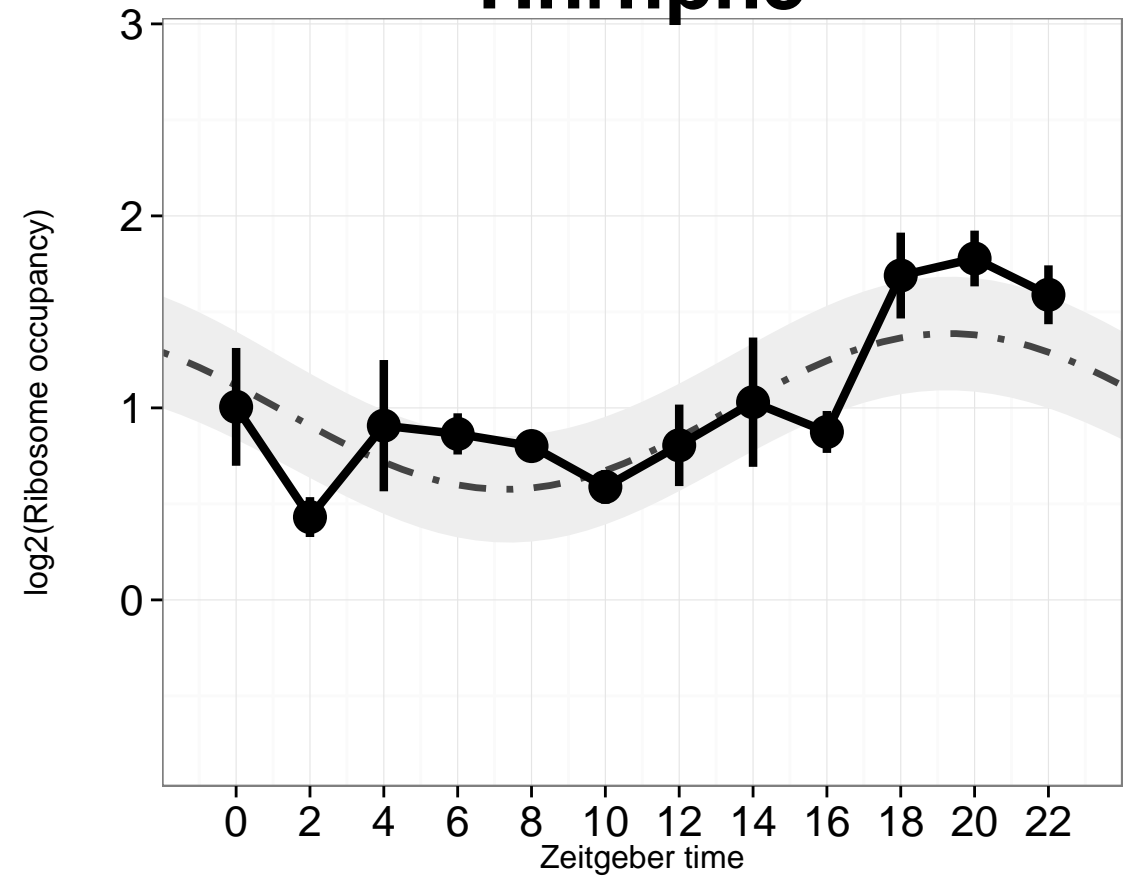

Supplement: Supplementary file 10965 [file 1]

## Limk2

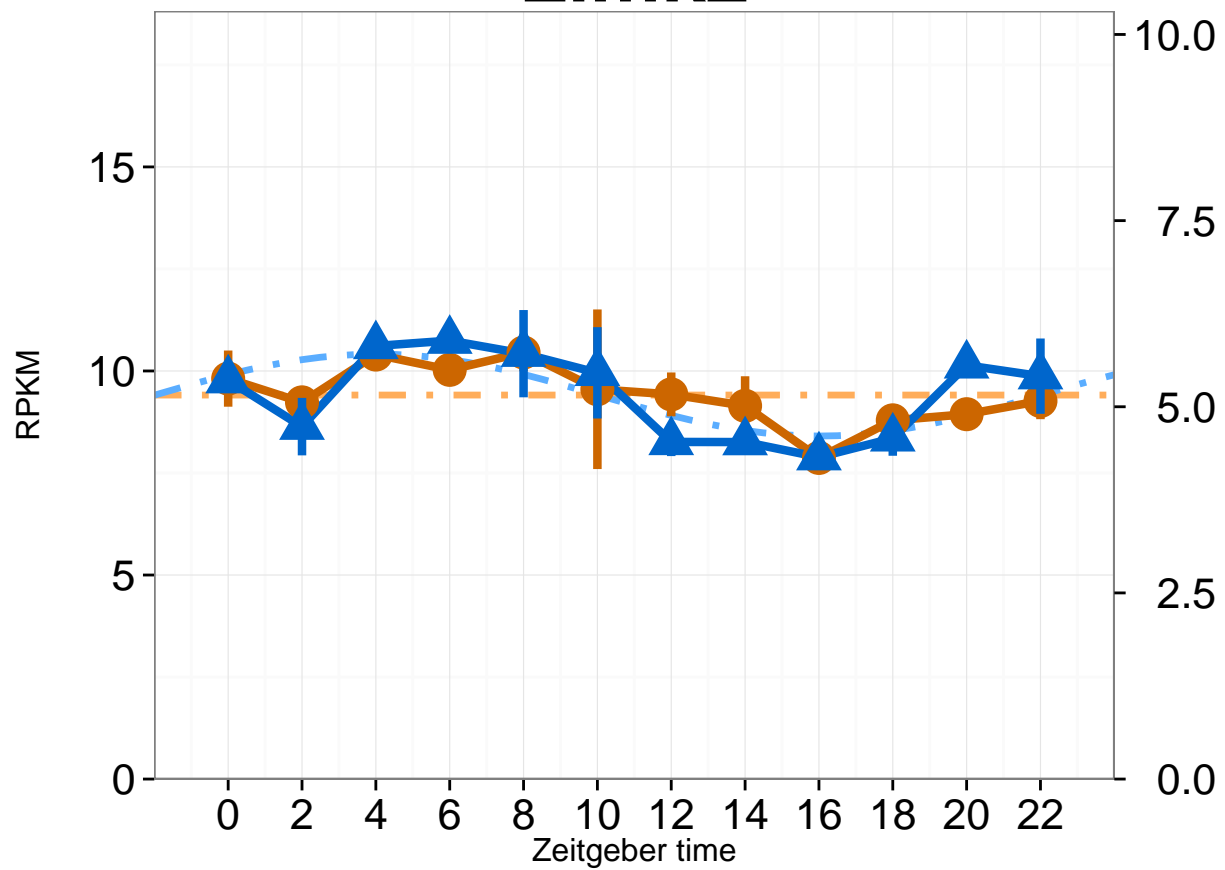

## Limk2

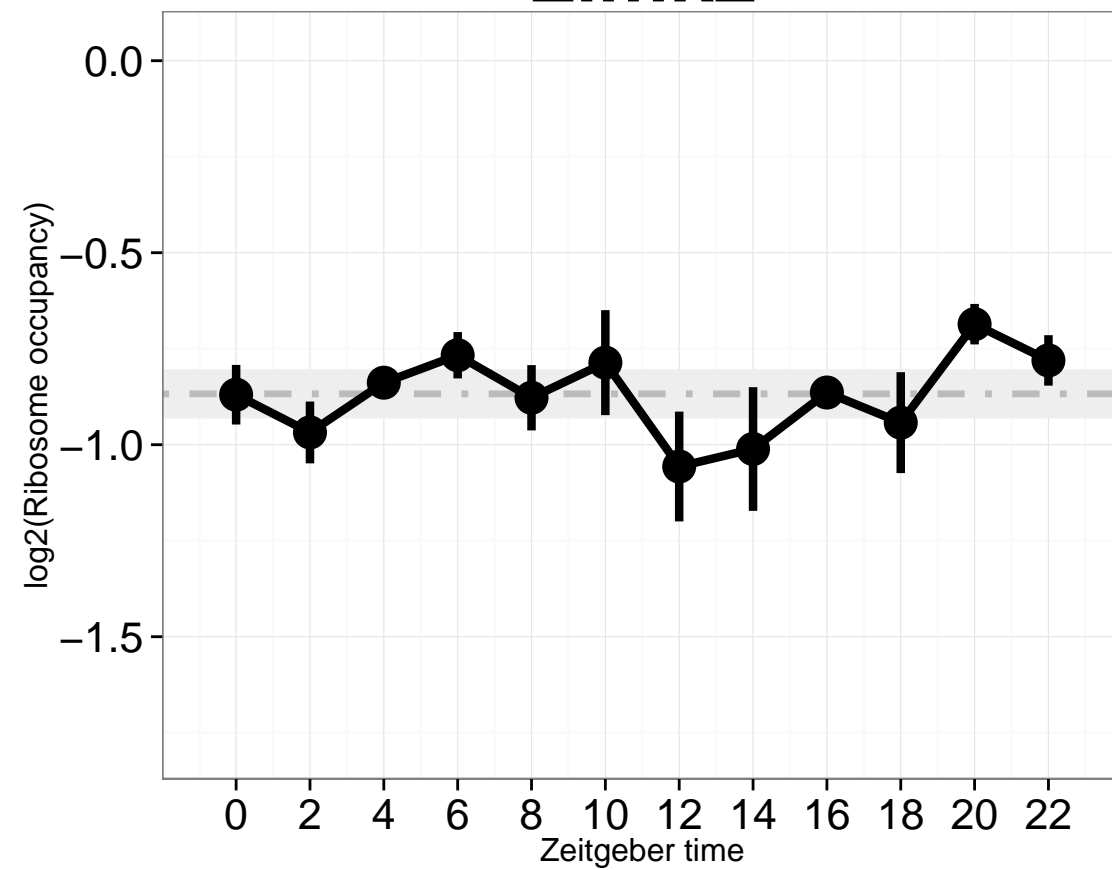

Supplement: Supplementary file 10966 [file 1]

## Akirin1

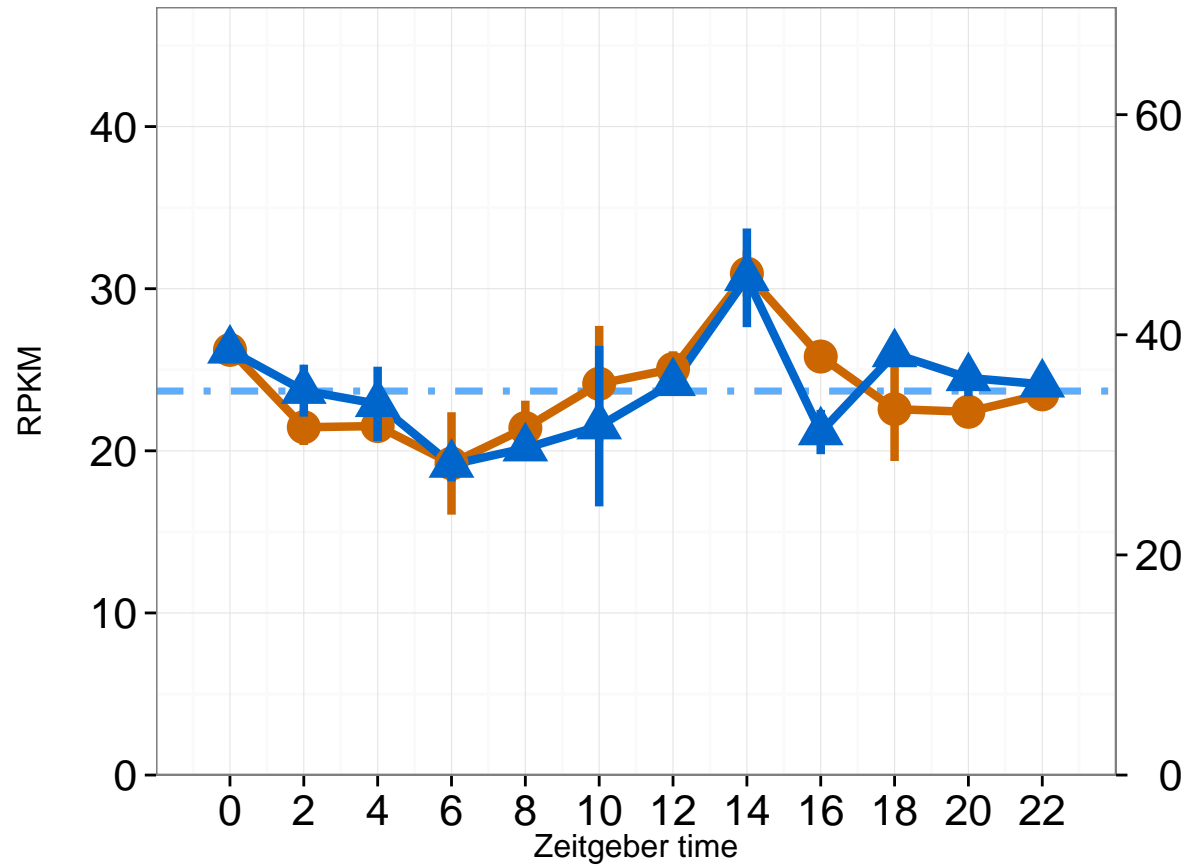

## Akirin1

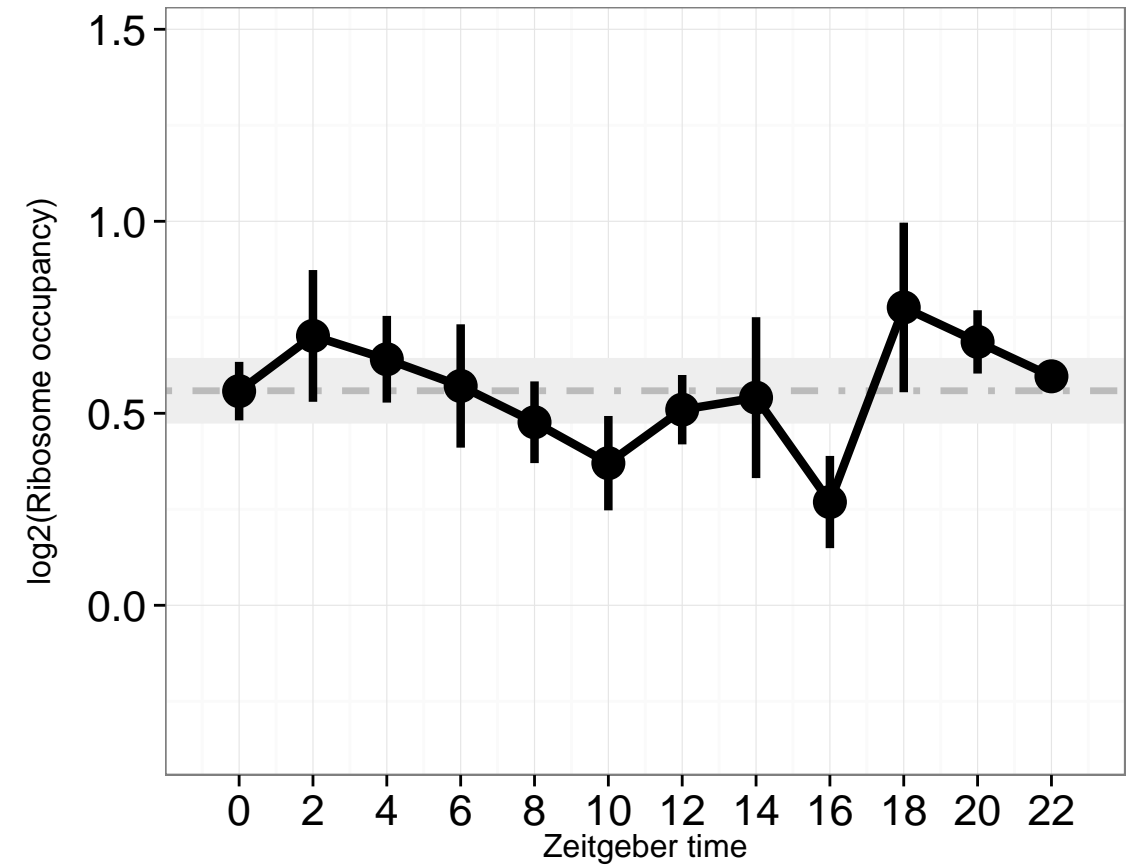

Supplement: Supplementary file 10967 [file 1]

## Clnk

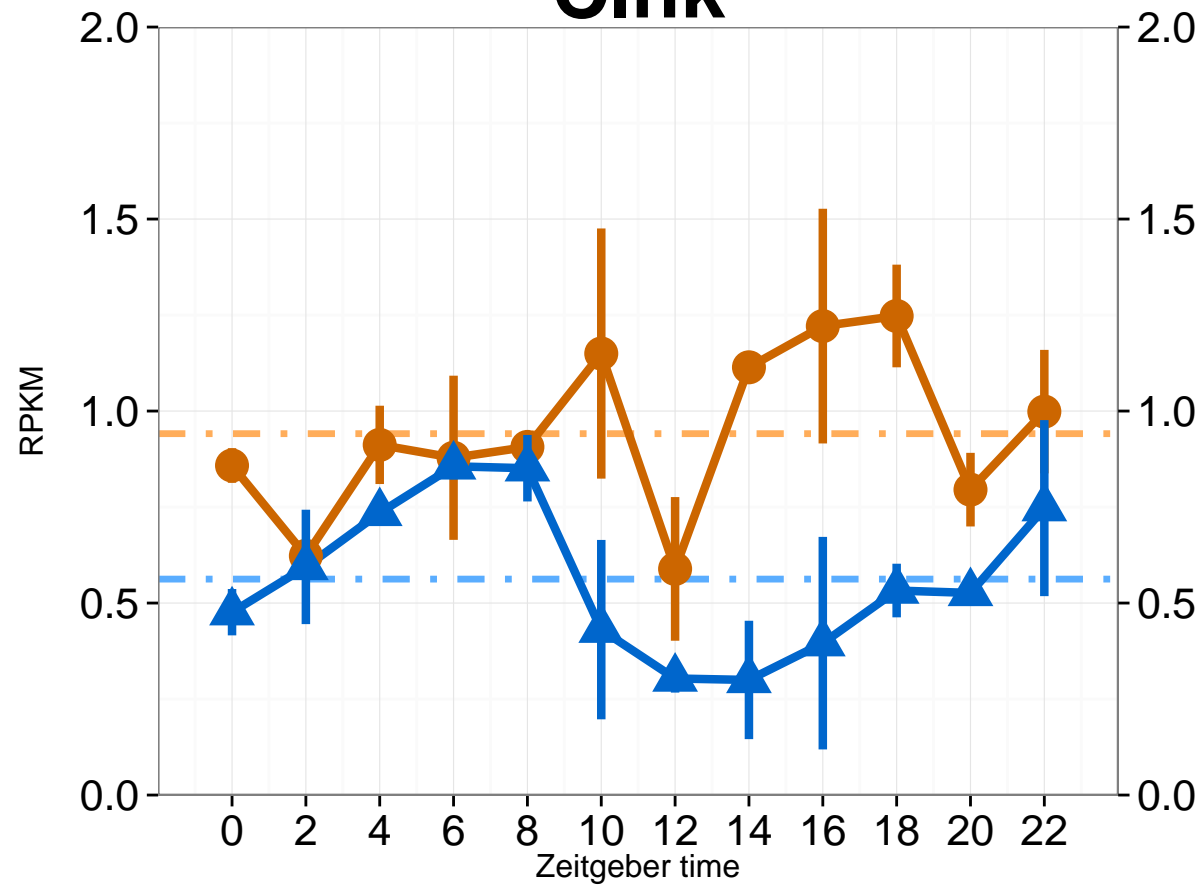

## Clnk

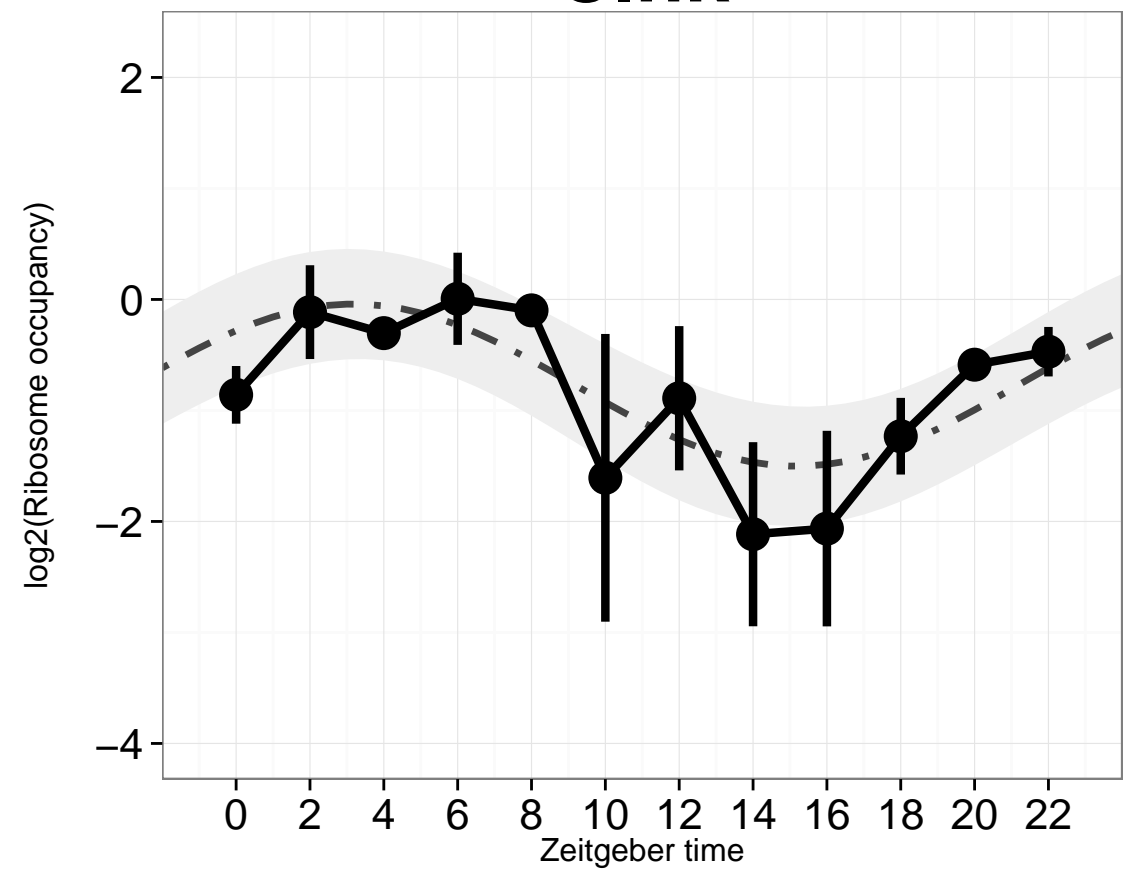

Supplement: Supplementary file 10968 [file 1]

## Adipor2

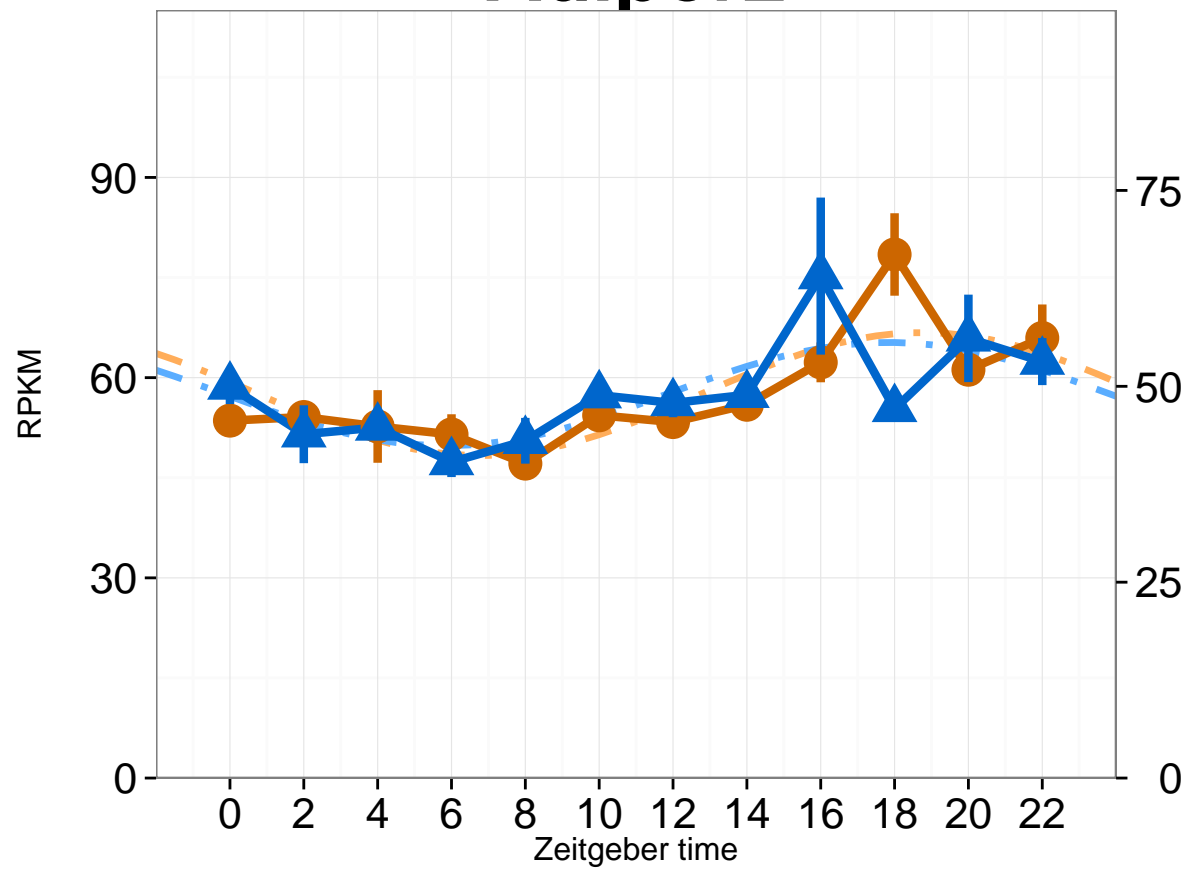

## Adipor2

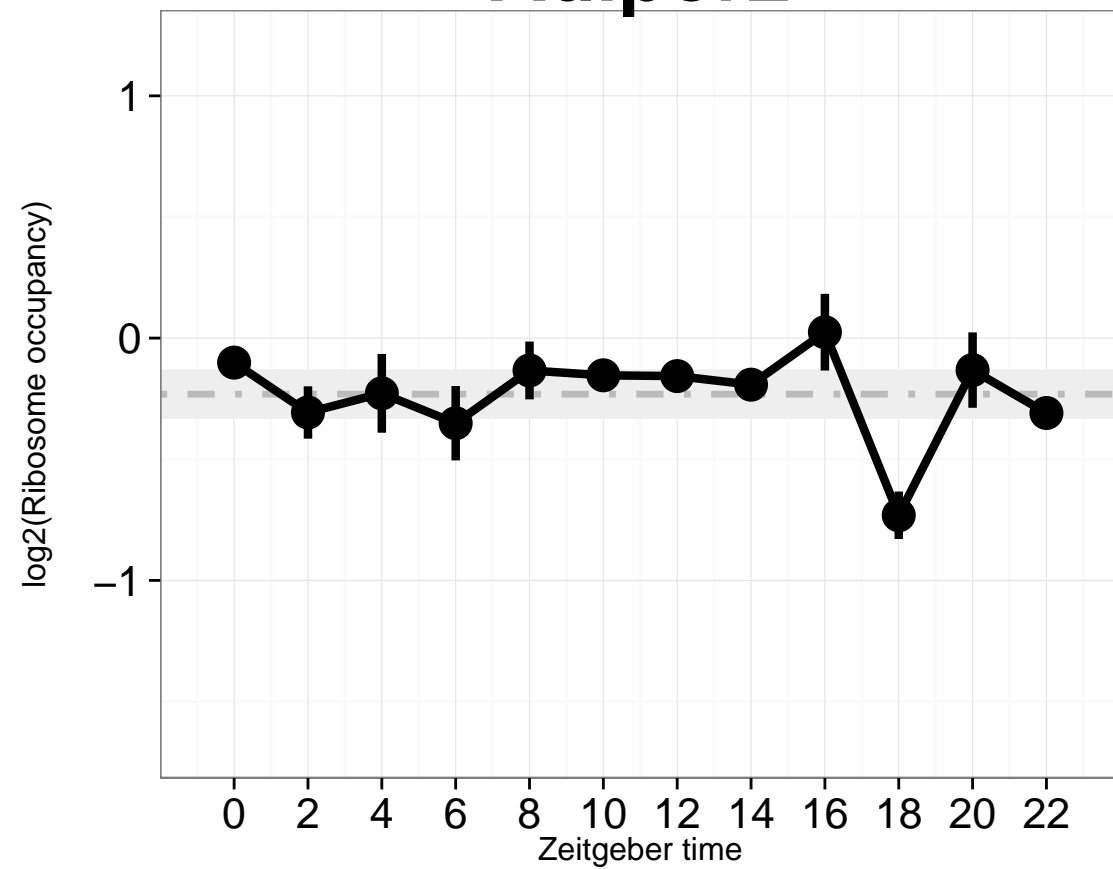

Supplement: Supplementary file 10969 [file 1]

# Tatdn2

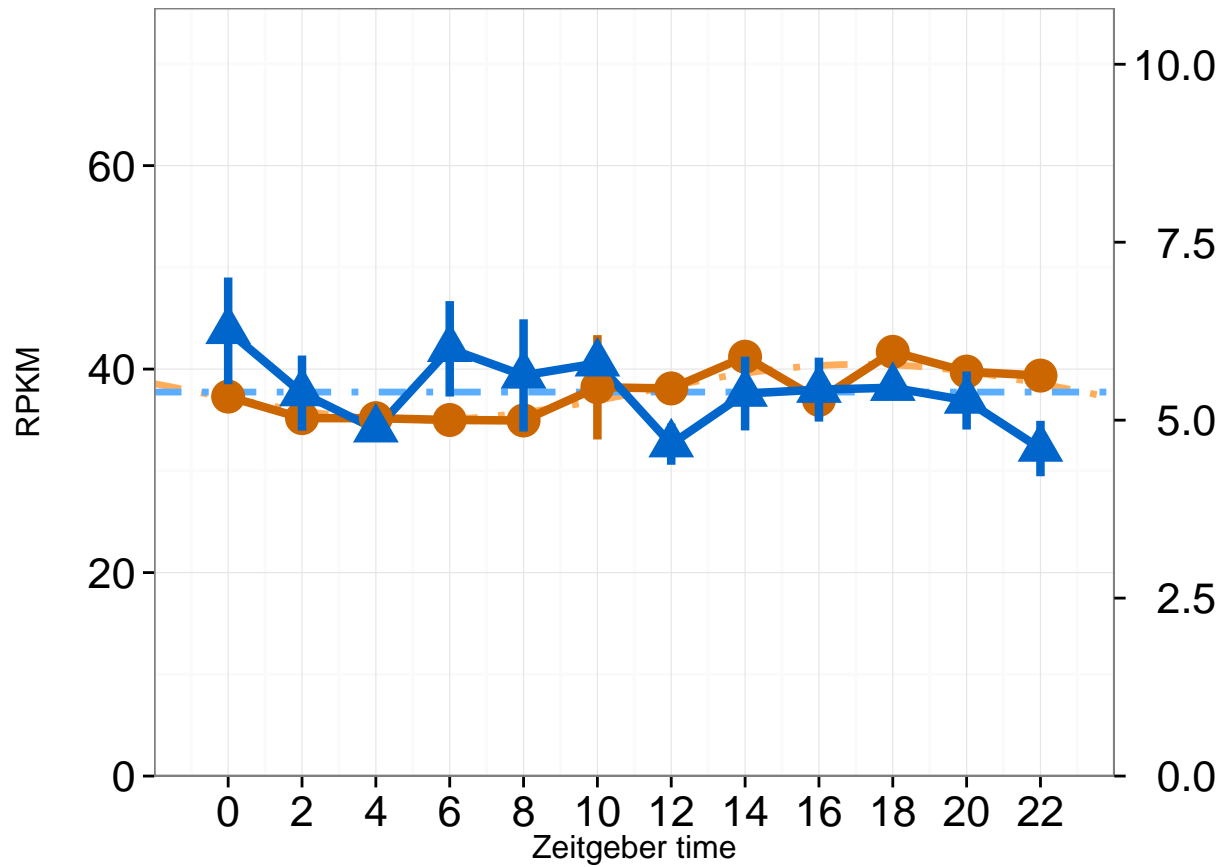

# Tatdn2

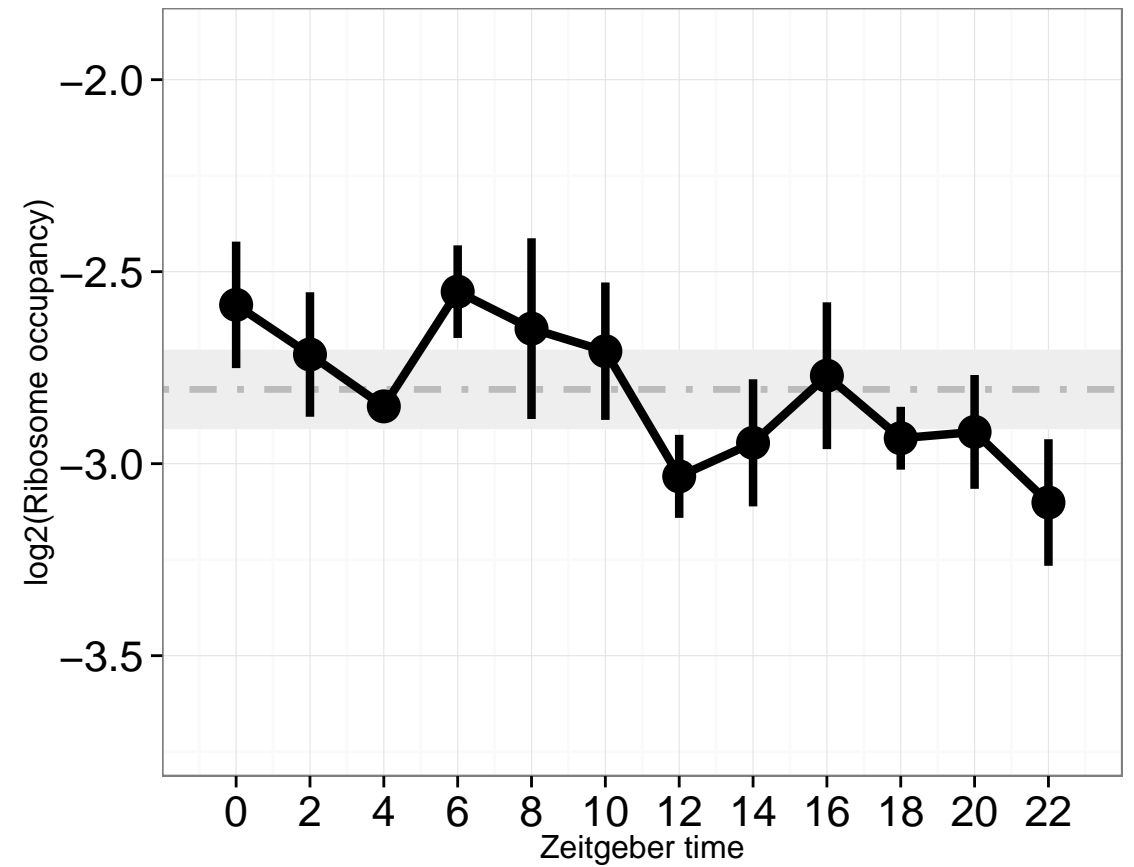

Supplement: Supplementary file 10970 [file 1]

## Bag4

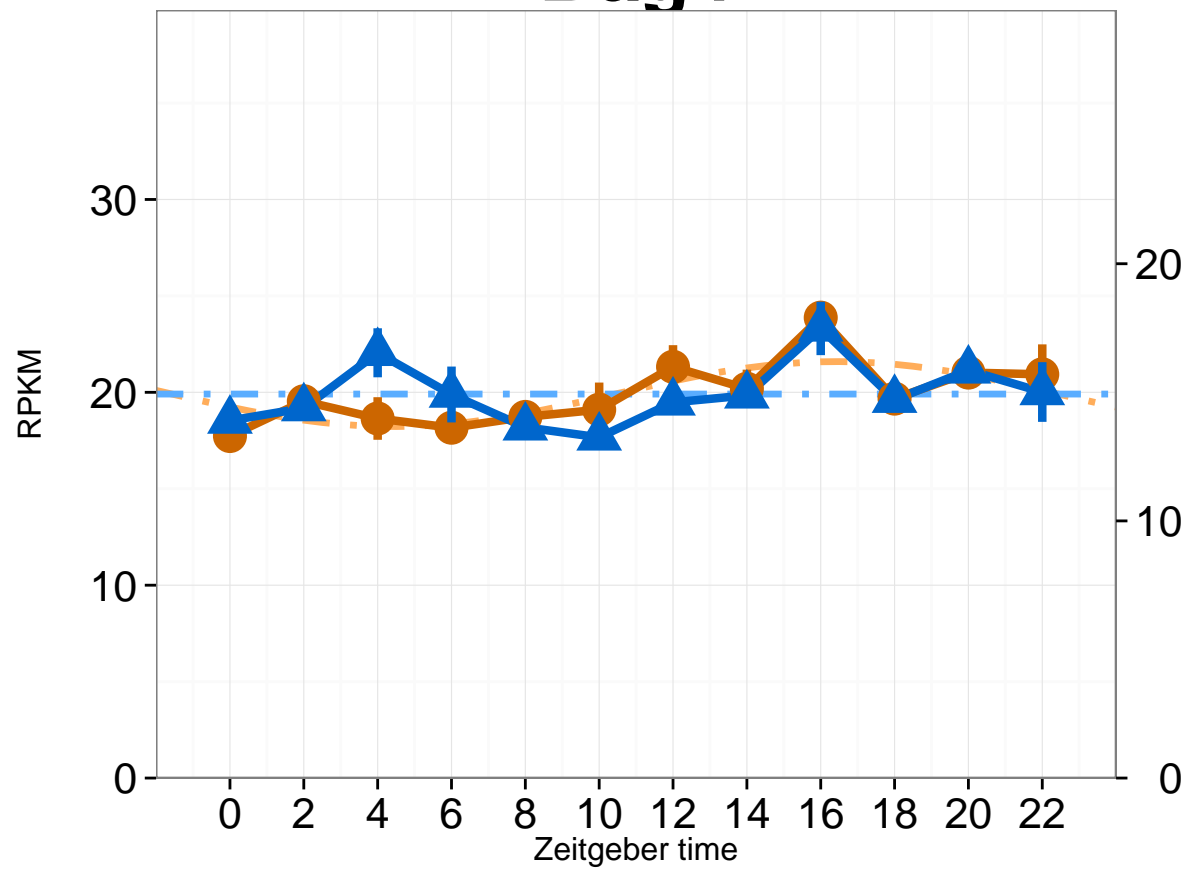

## Bag4

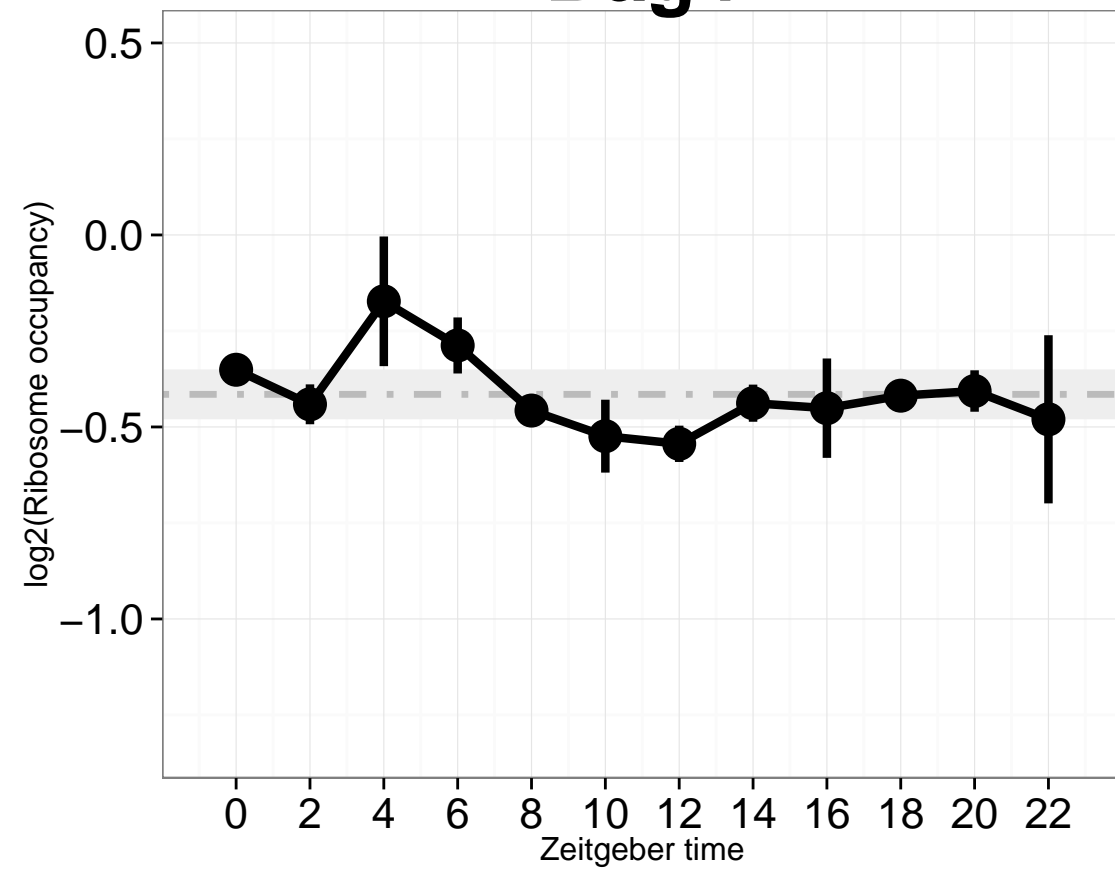

Supplement: Supplementary file 10971 [file 1]

# Rpusd4

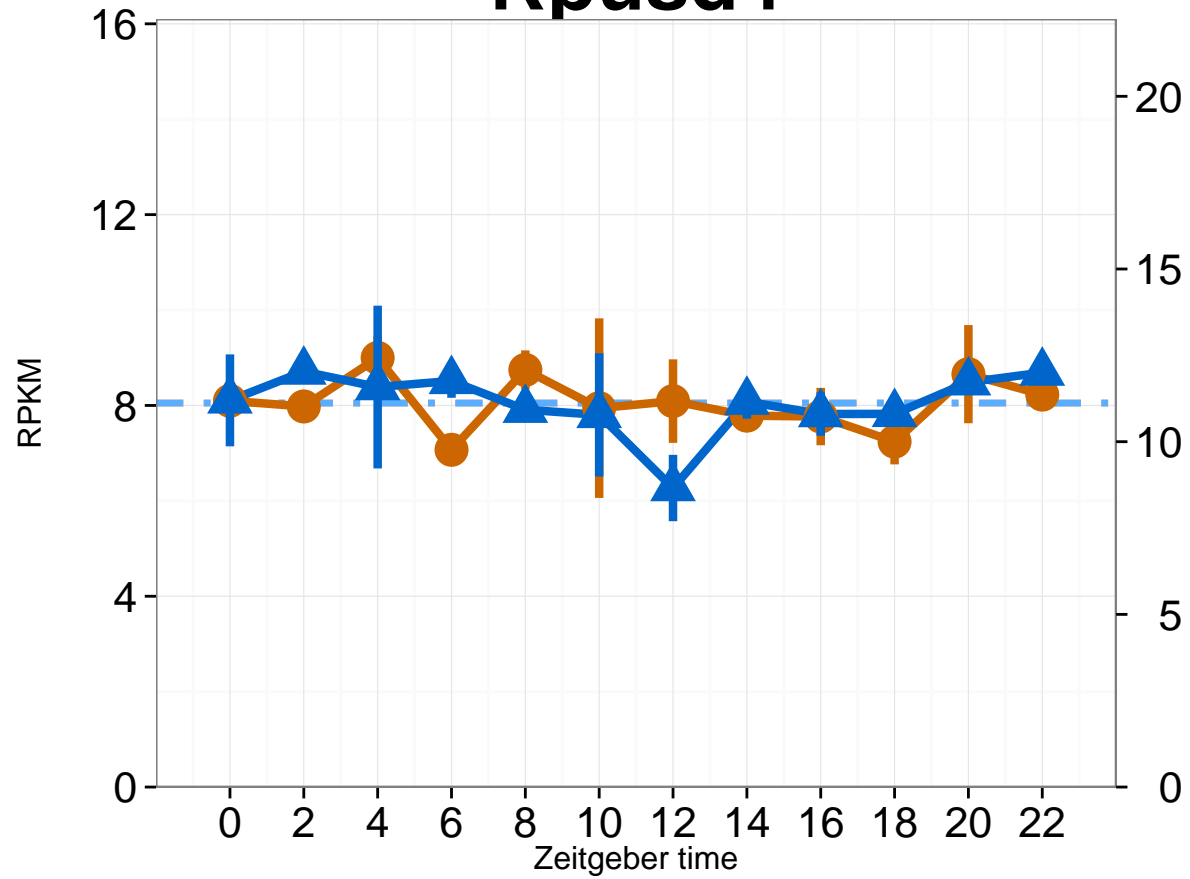

# Rpusd4

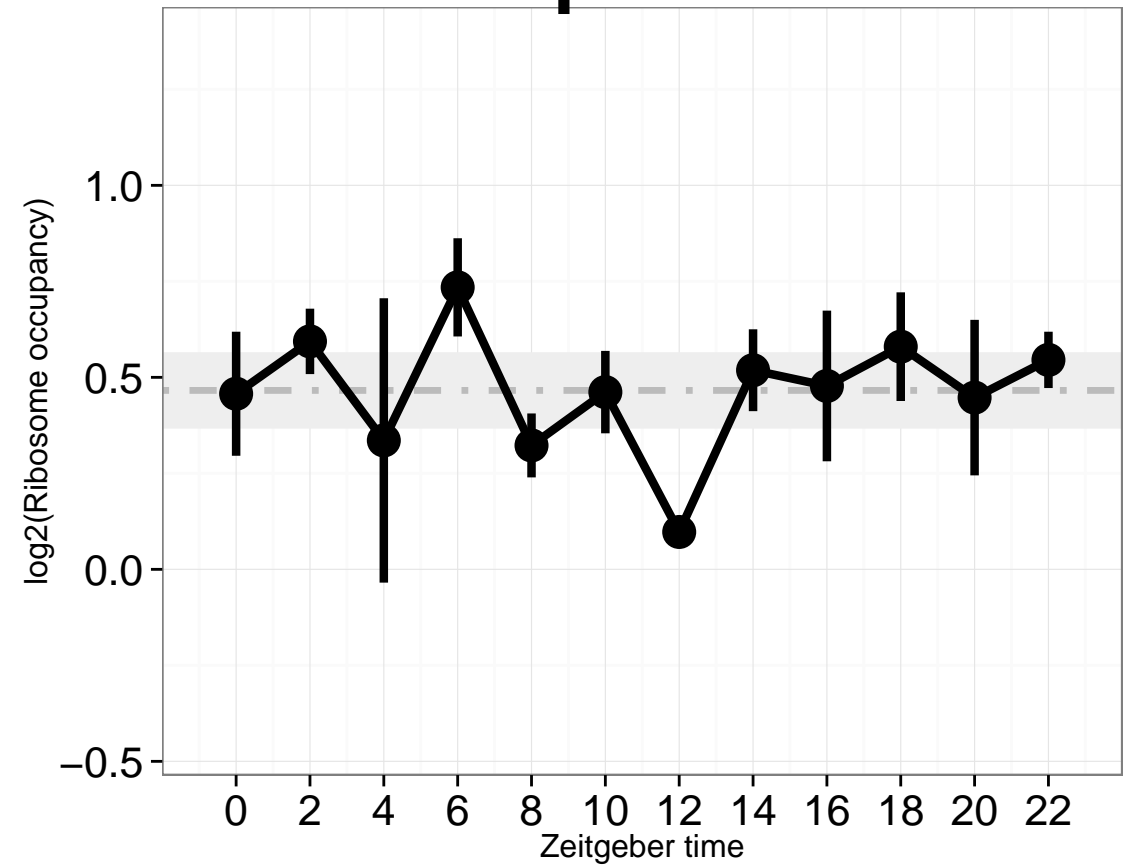

Supplement: Supplementary file 10972 [file 1]

# Pafah1b3

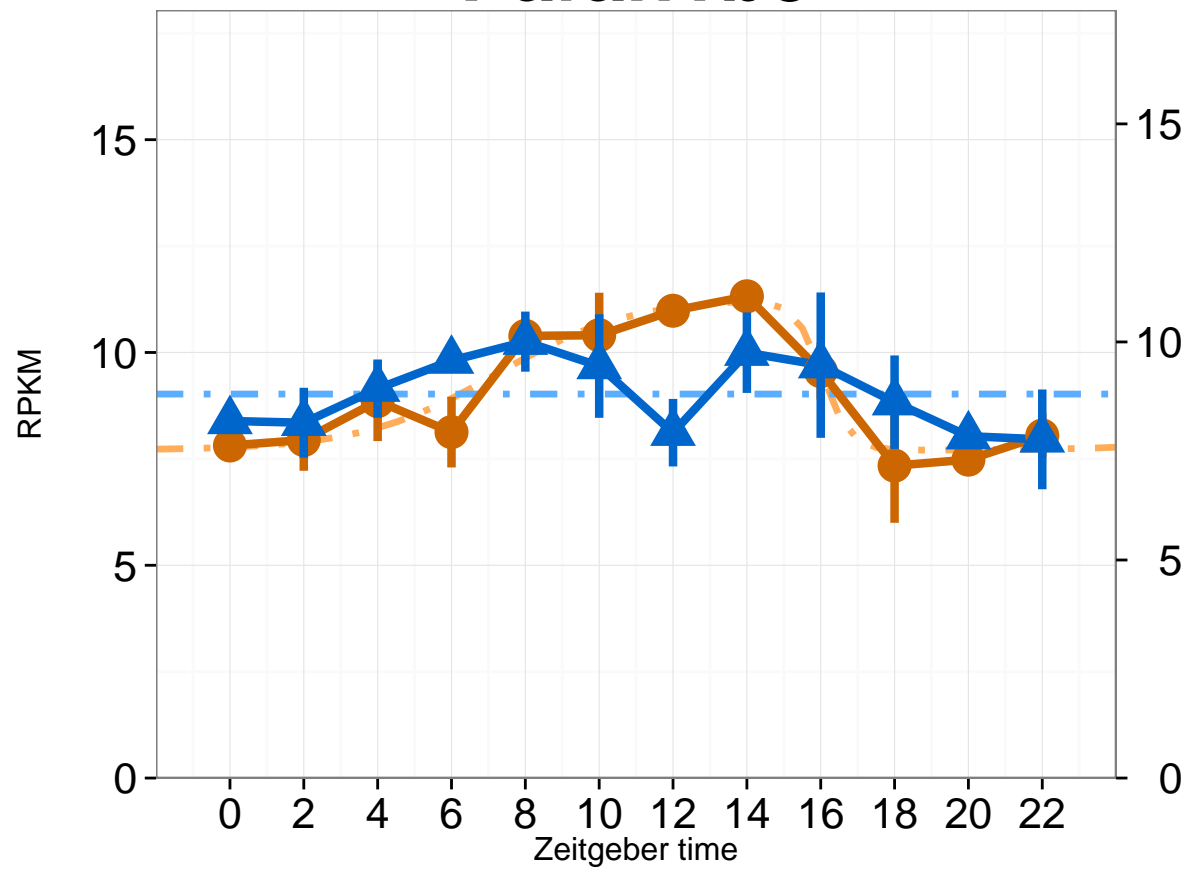

# Pafah1b3

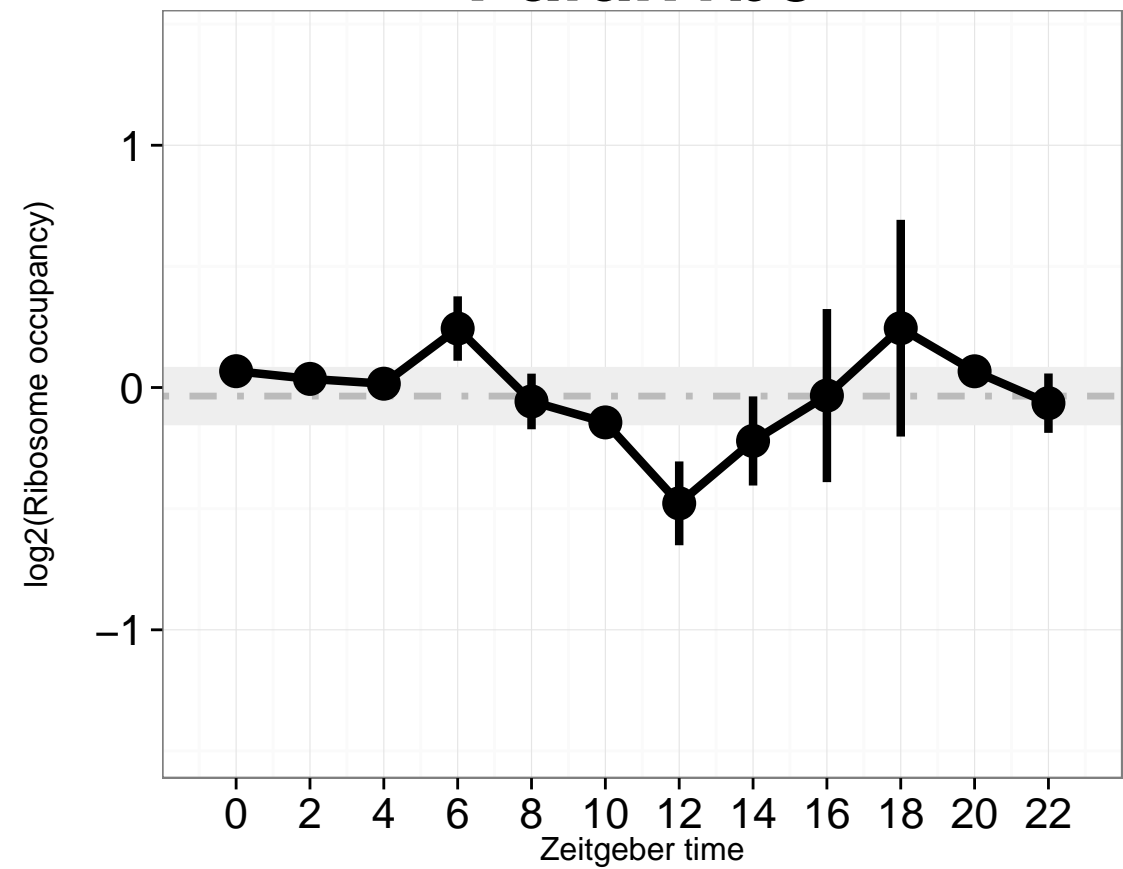

Supplement: Supplementary file 10973 [file 1]

## Abhd10

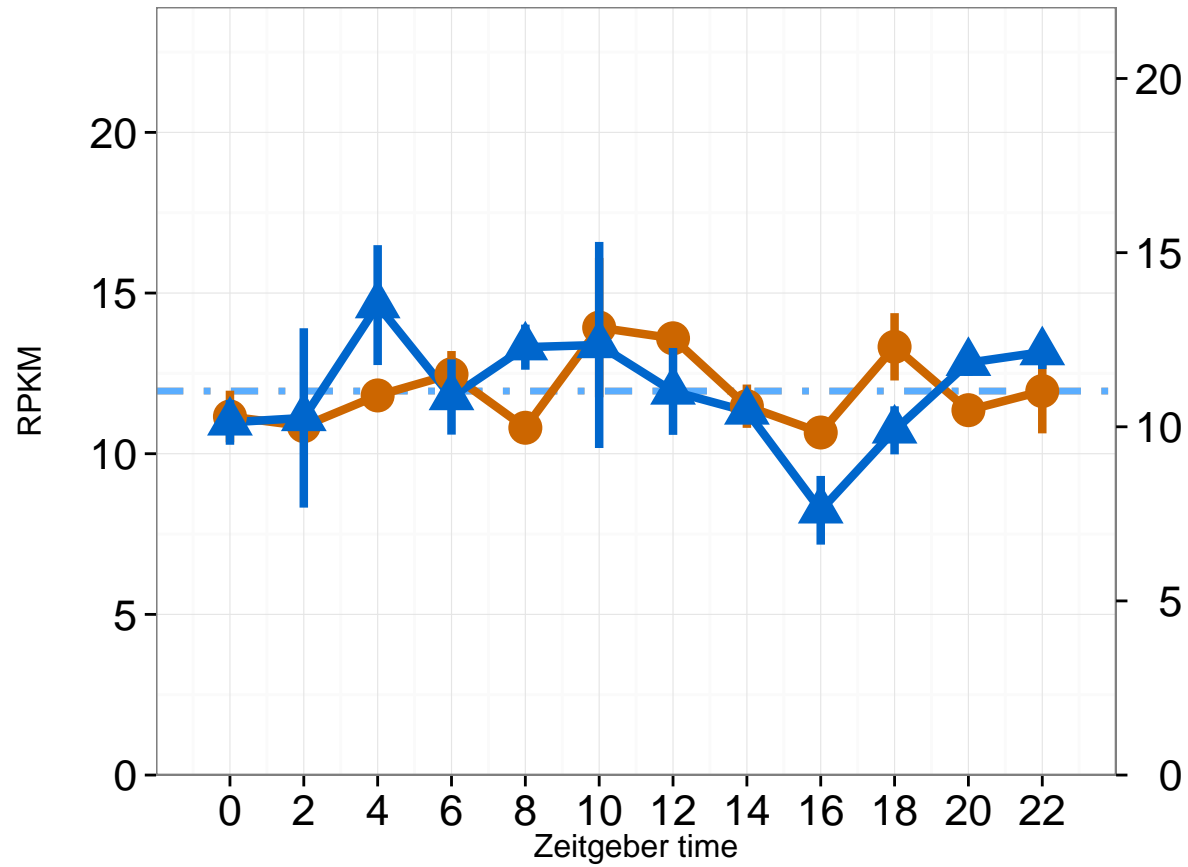

## Abhd10

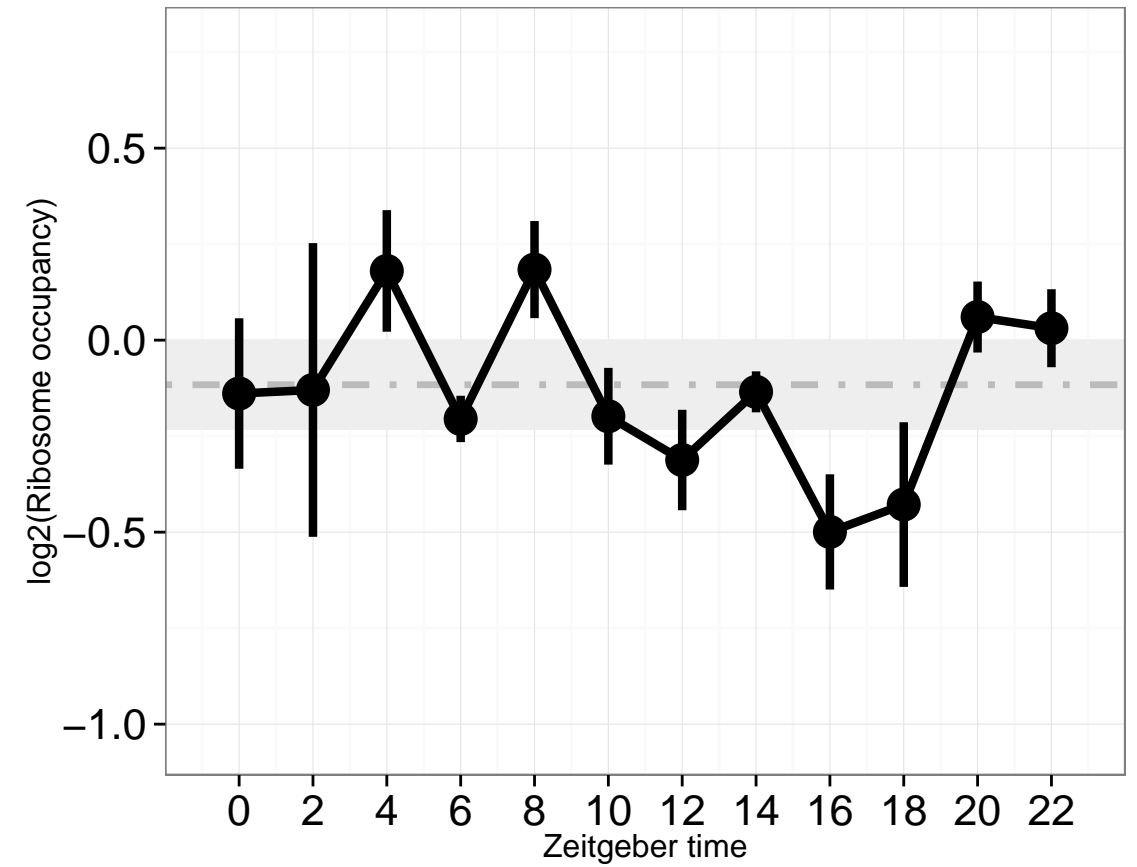

Supplement: Supplementary file 10974 [file 1]

# Gpr65

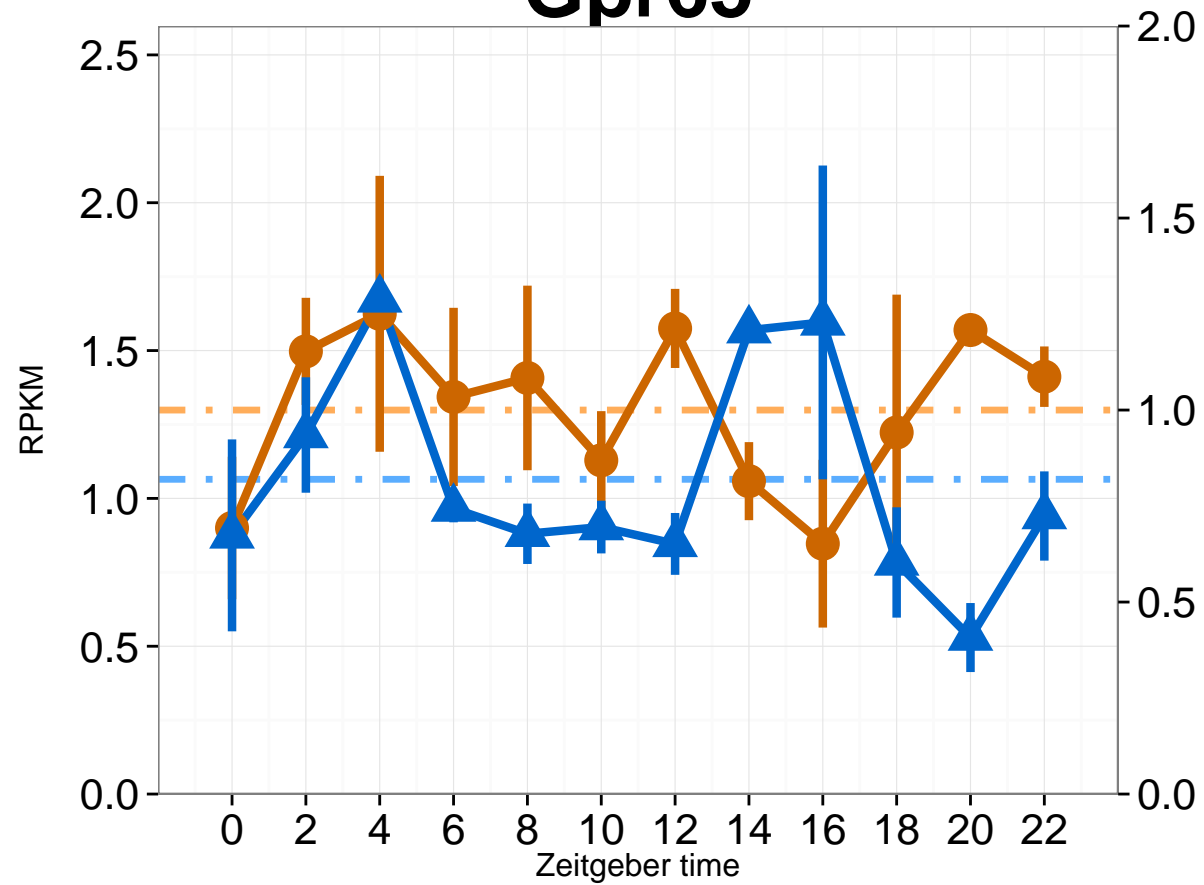

# Gpr65

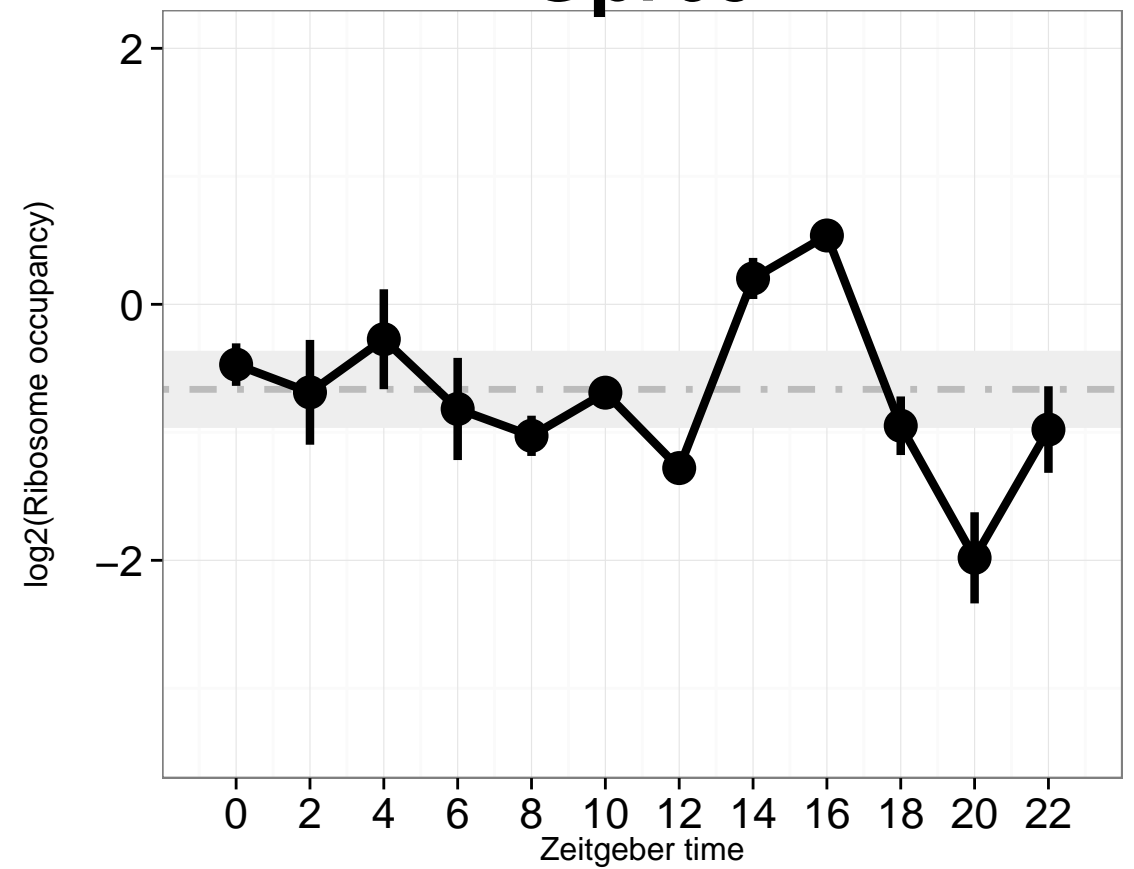

Supplement: Supplementary file 10975 [file 1]

**Fau TR**

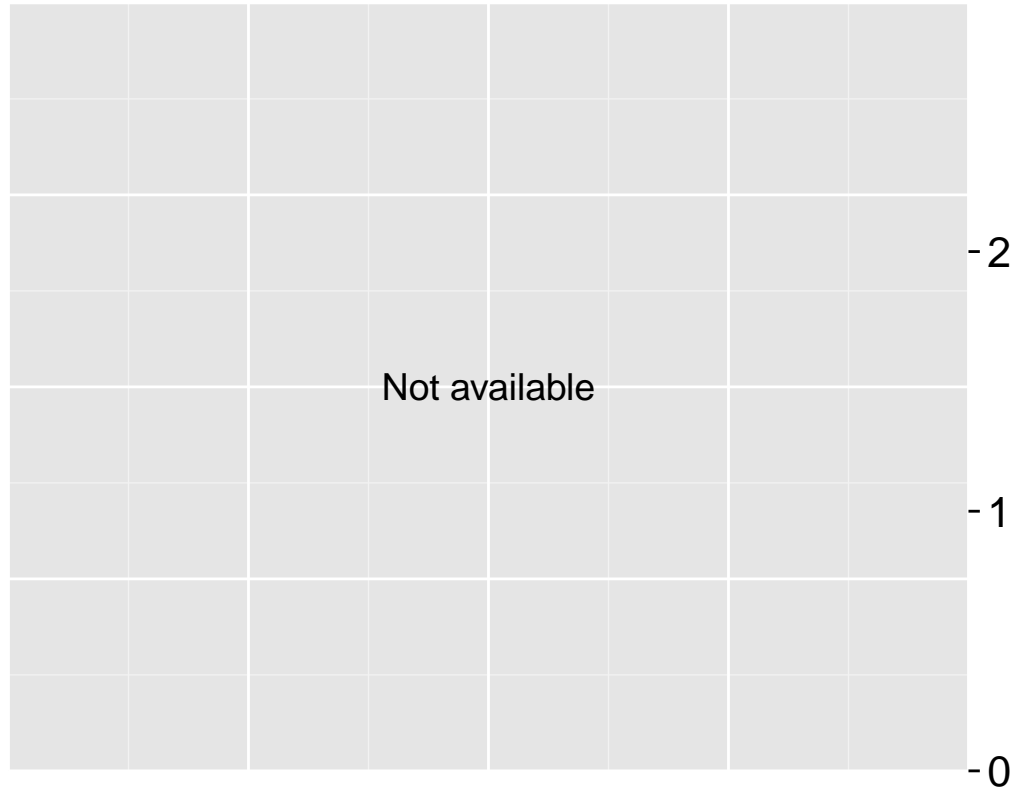

**Fau log2(Ribosome occupancy)**

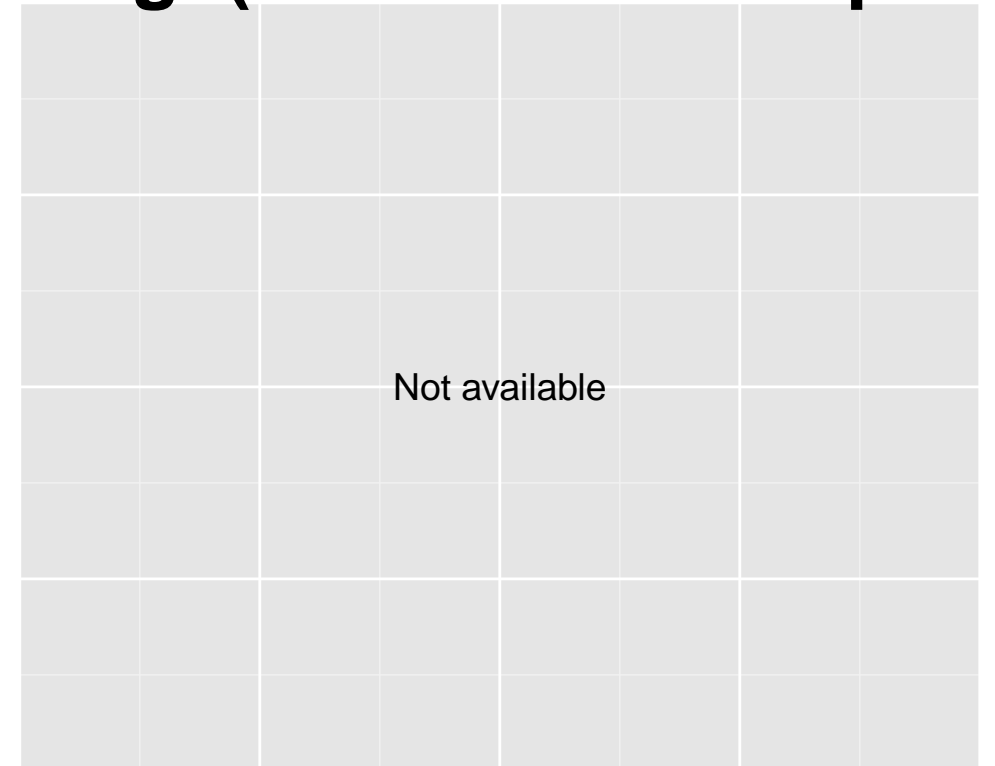

Supplement: Supplementary file 10976 [file 1]

## Car2

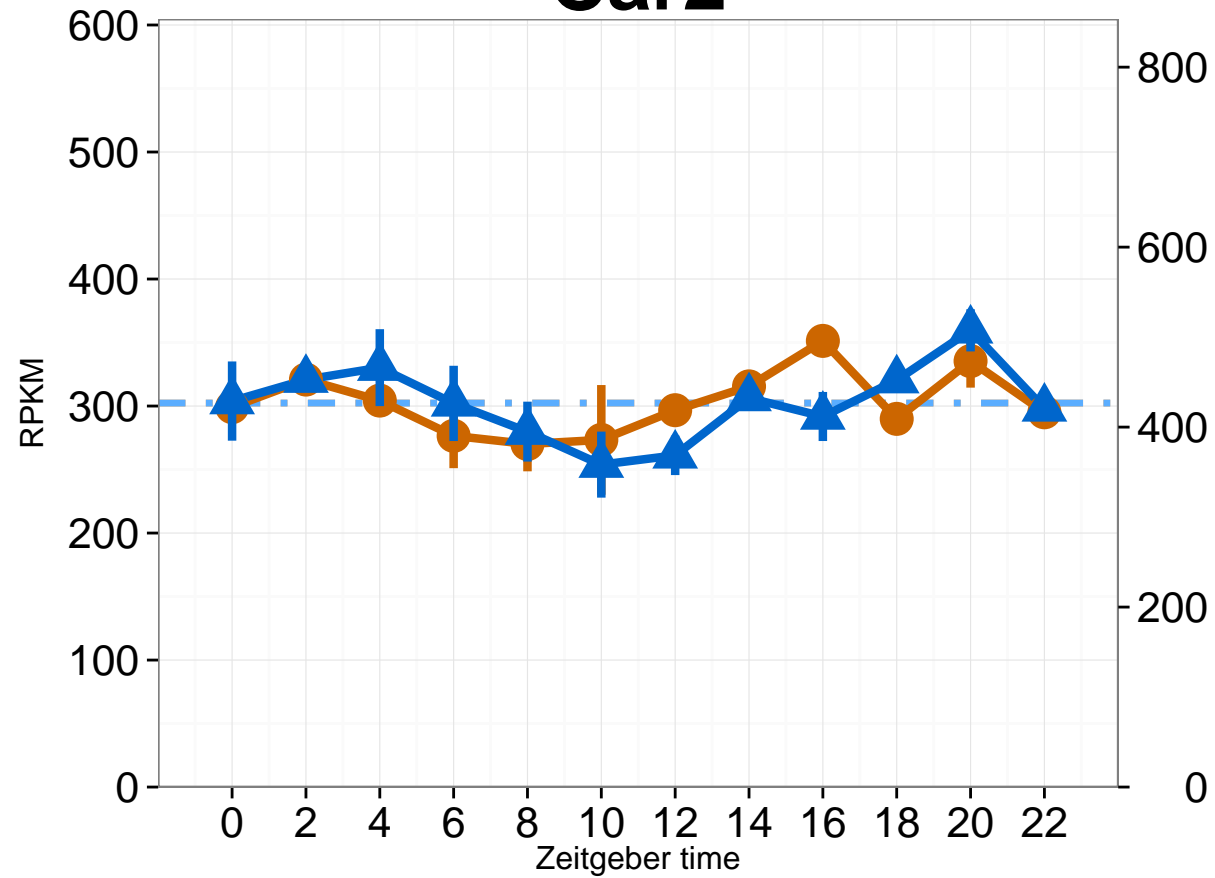

## Car2

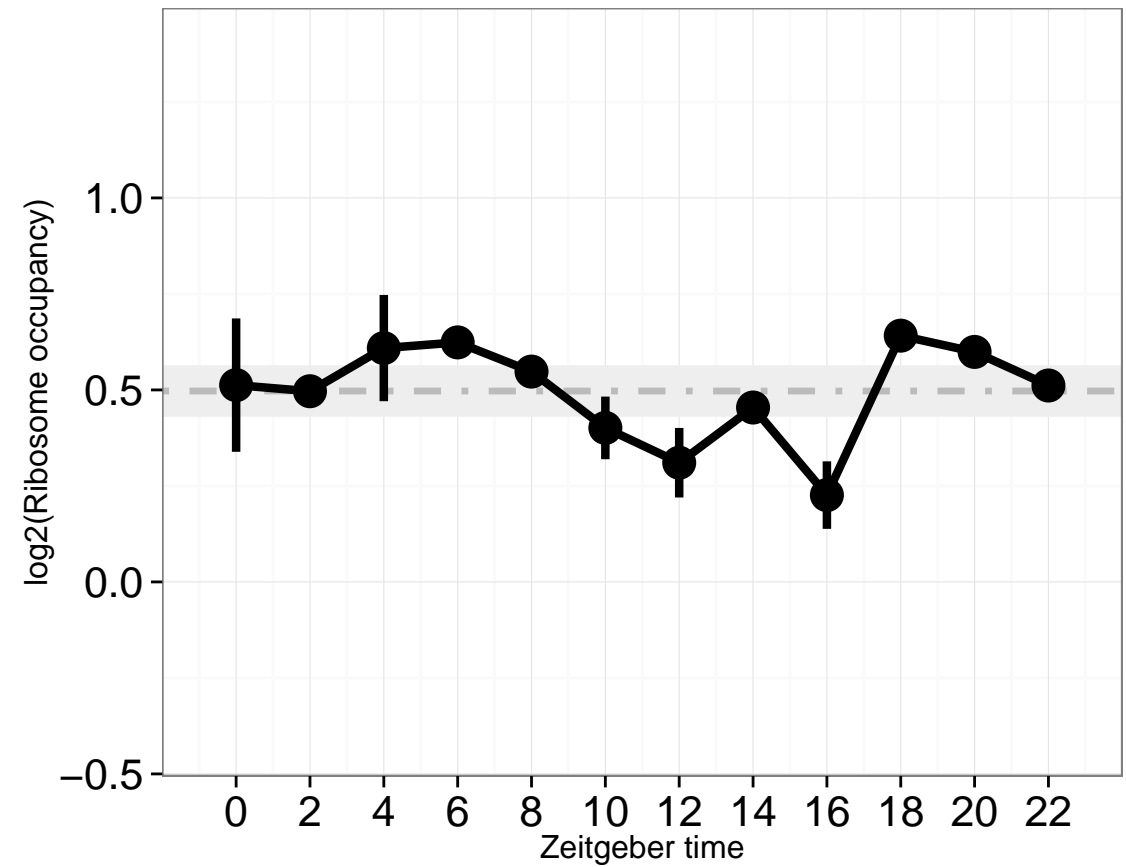

Supplement: Supplementary file 10977 [file 1]

## Six4

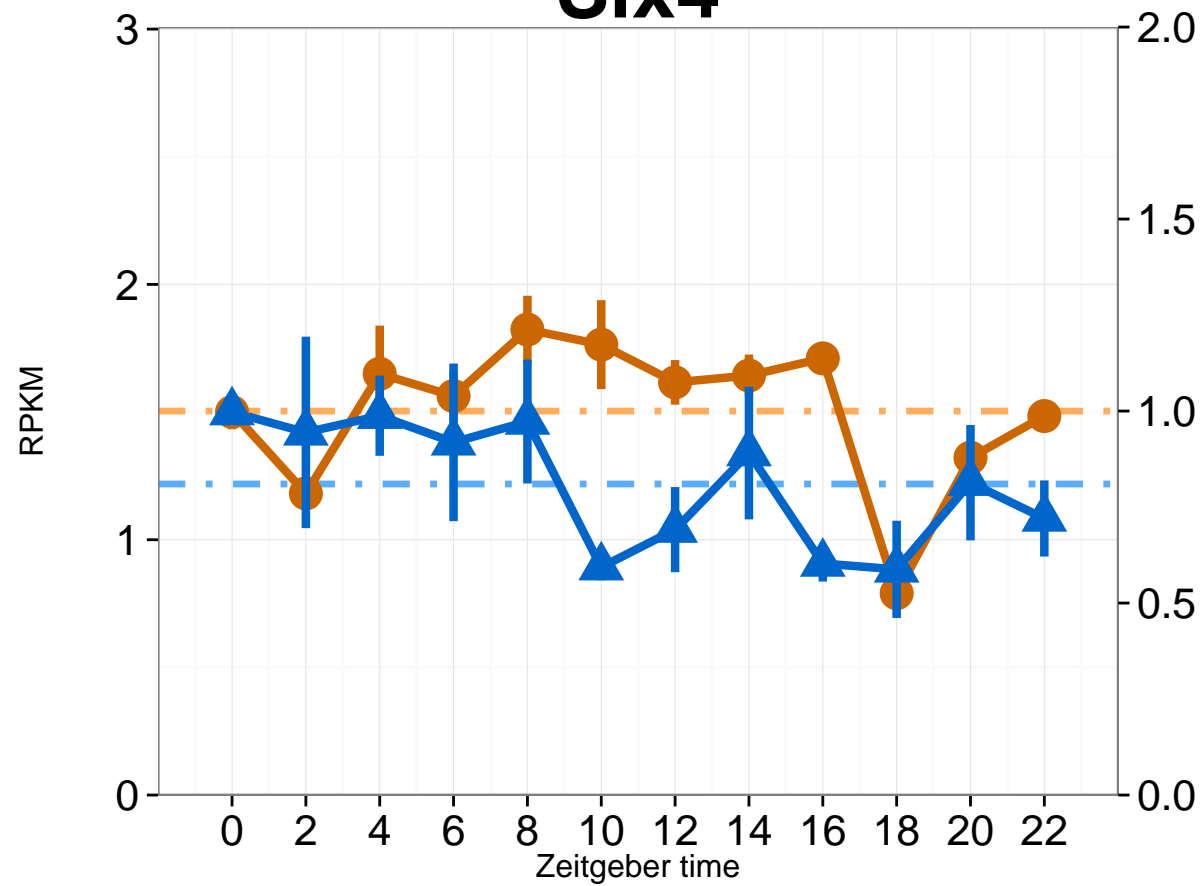

## Six4

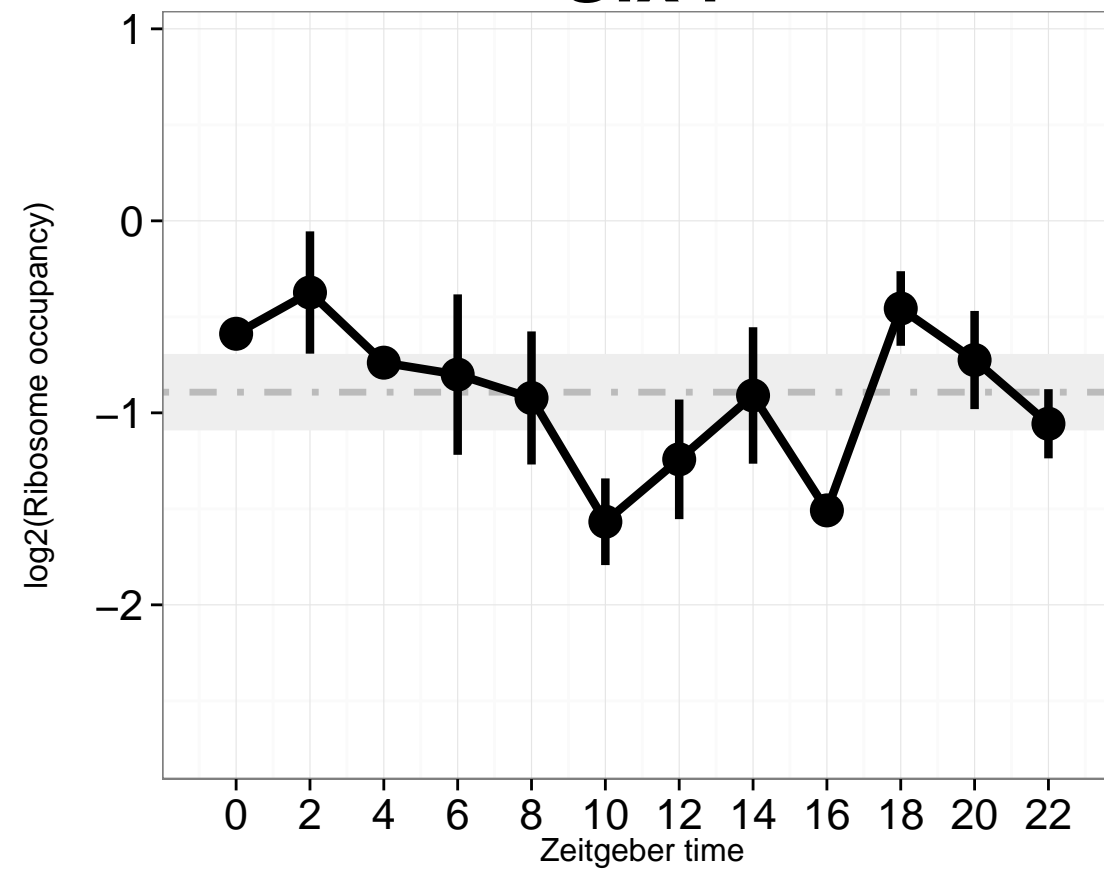

Supplement: Supplementary file 10978 [file 1]

## Abce1

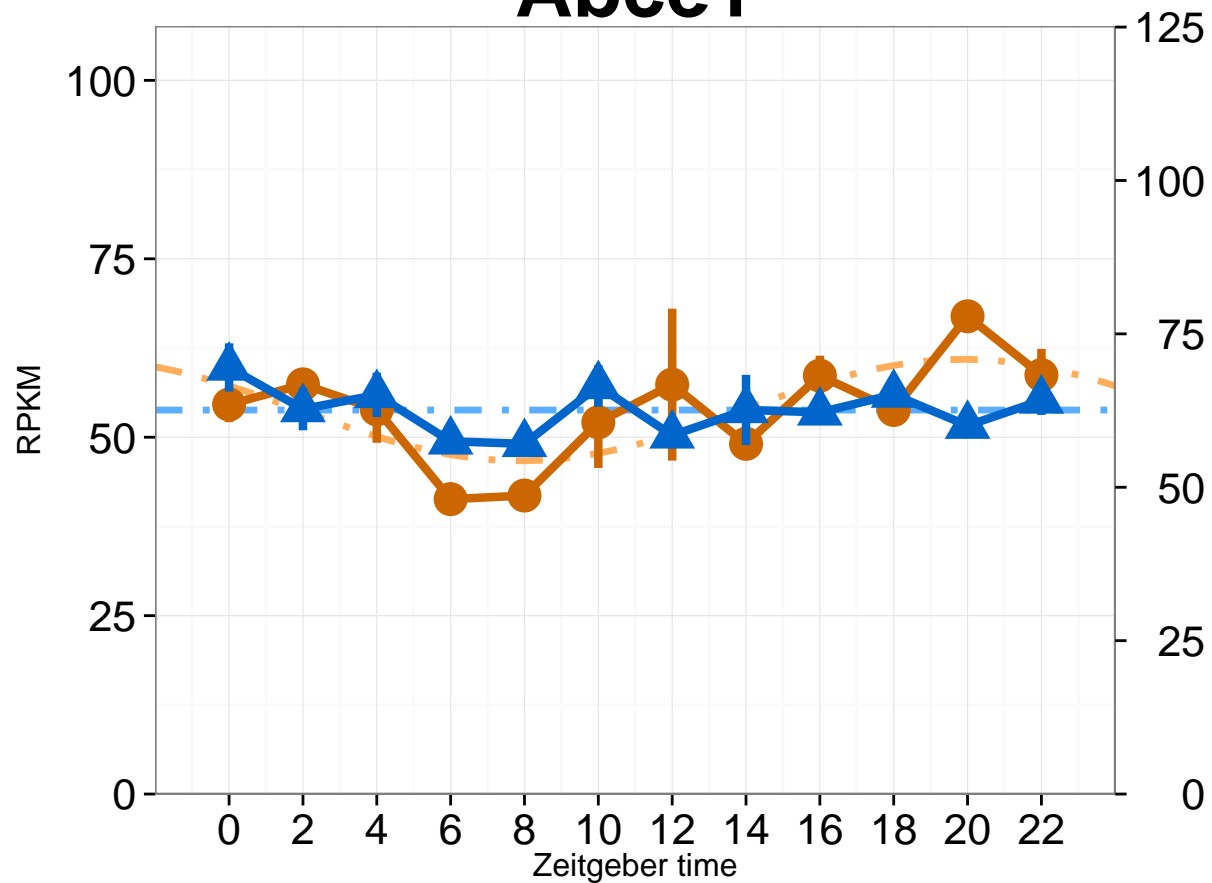

## Abce1

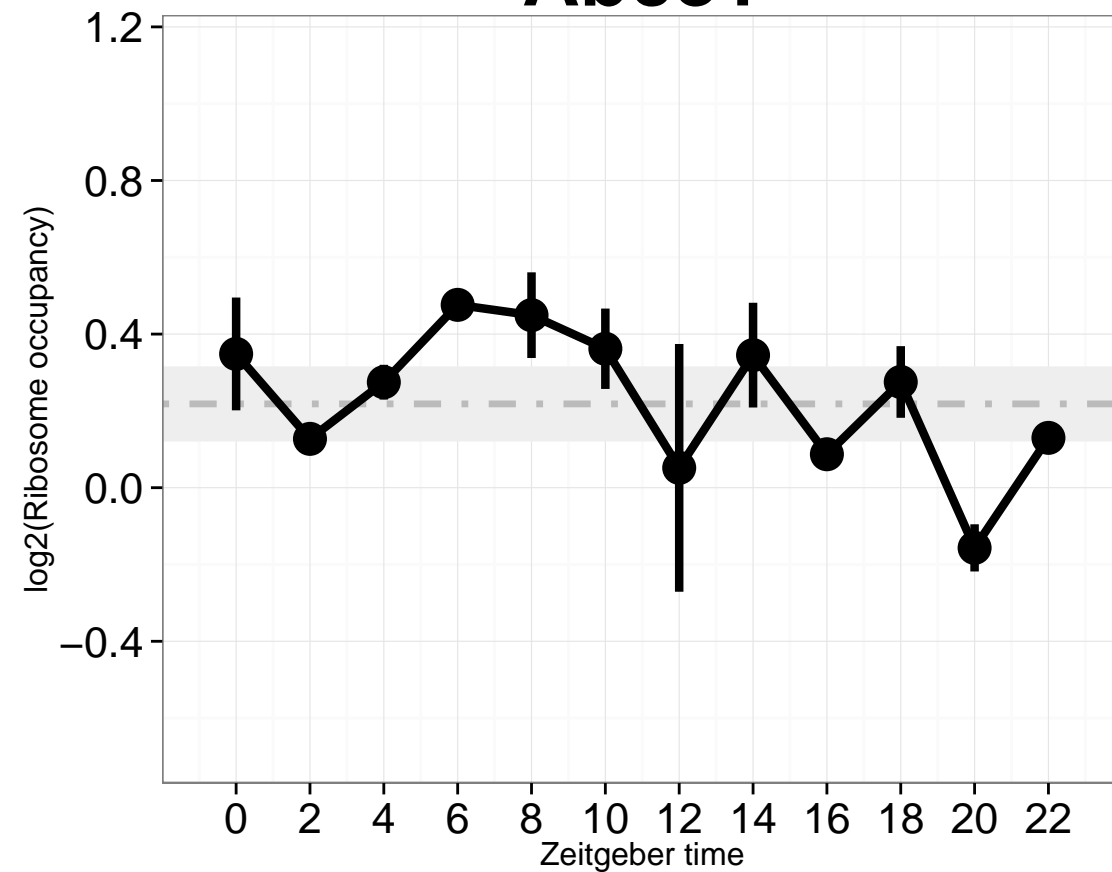

Supplement: Supplementary file 10979 [file 1]

# Fndc3a

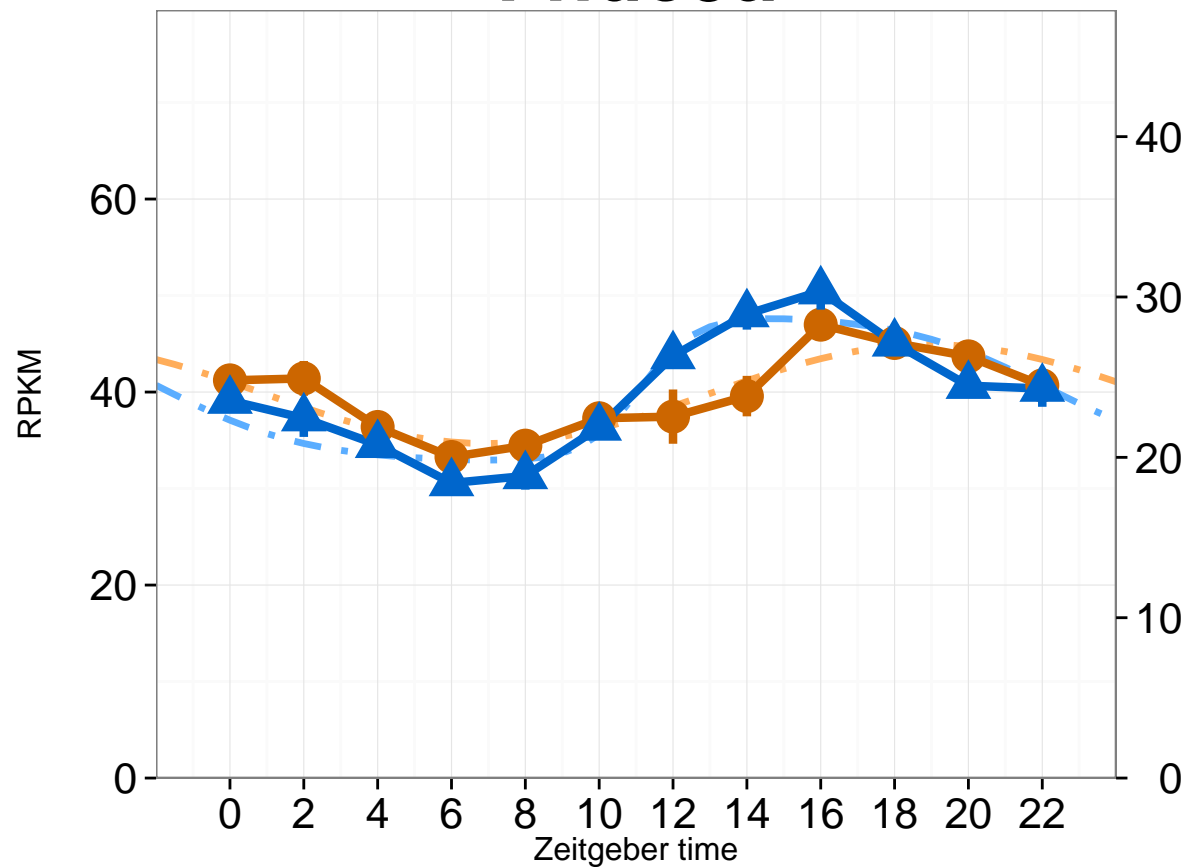

# Fndc3a

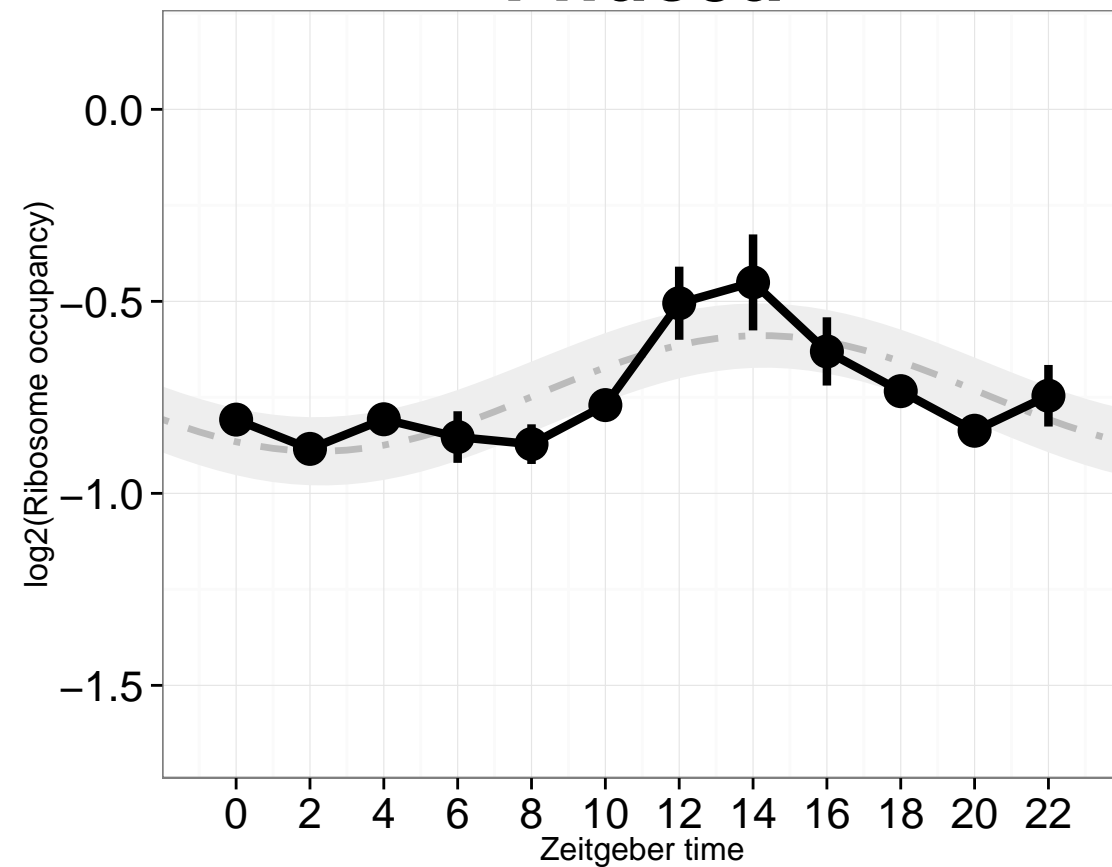

Supplement: Supplementary file 10980 [file 1]

## Lgals9

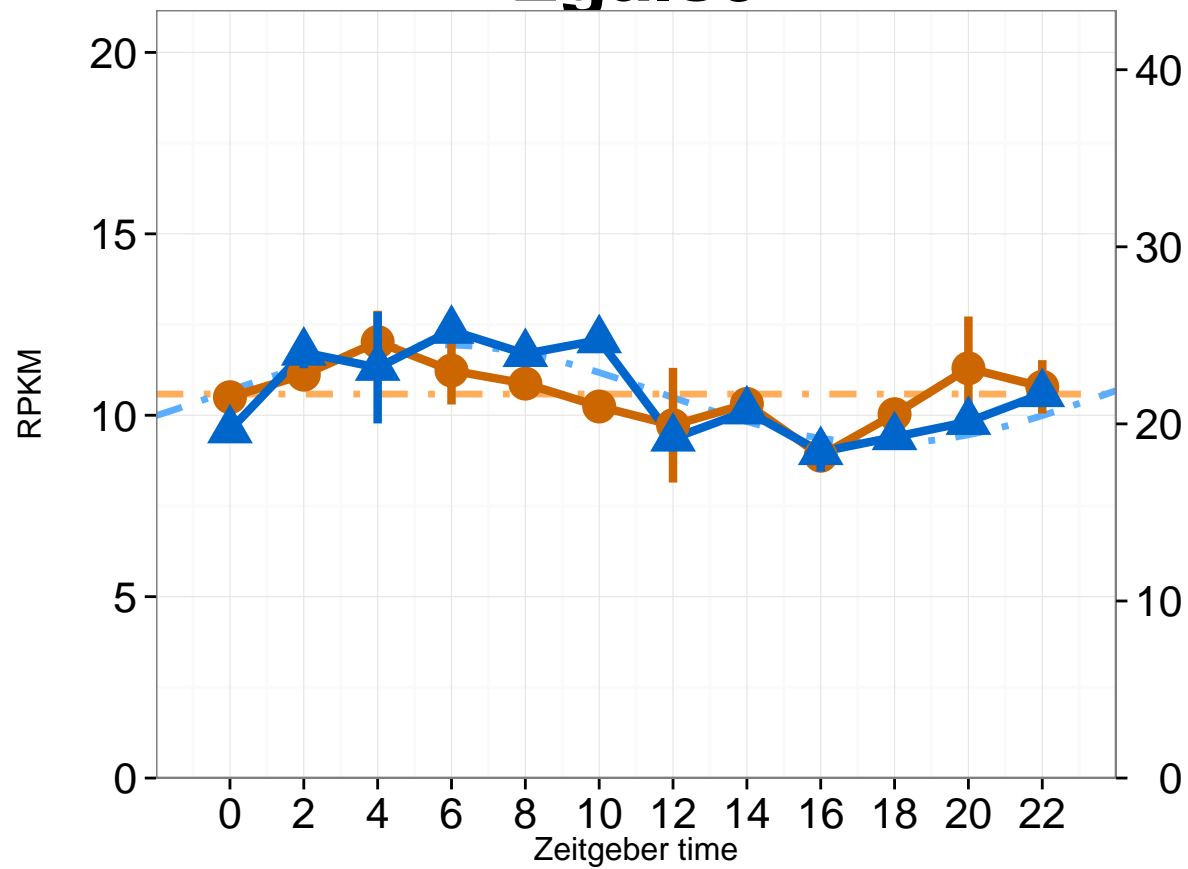

## Lgals9

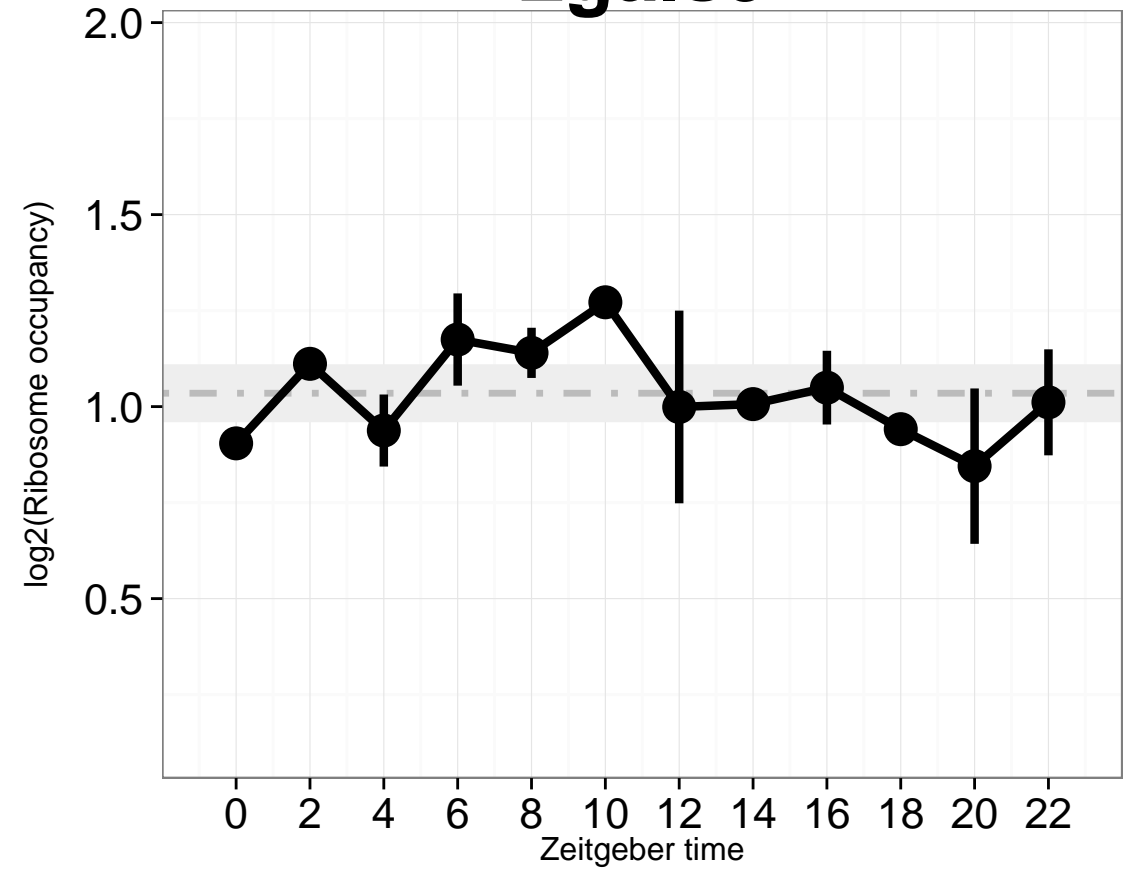

Supplement: Supplementary file 10981 [file 1]

## Ubiad1

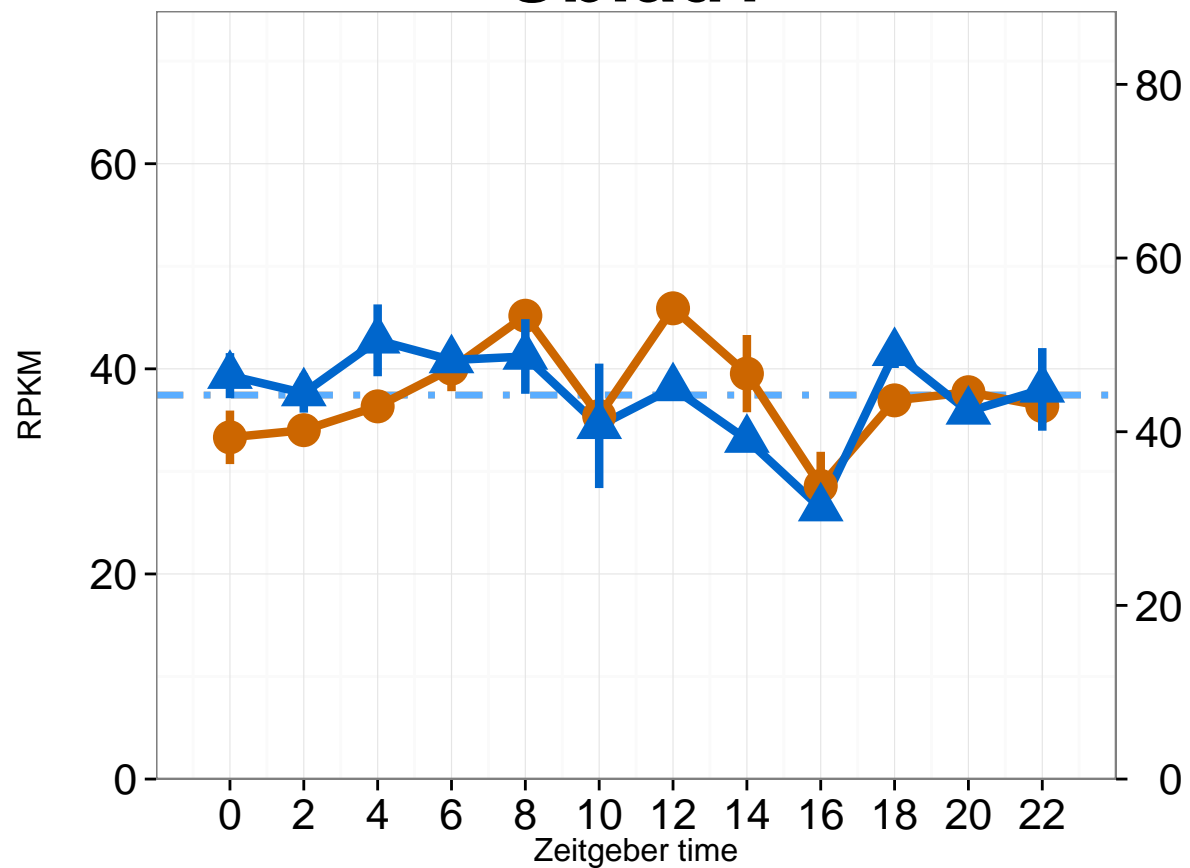

## Ubiad1

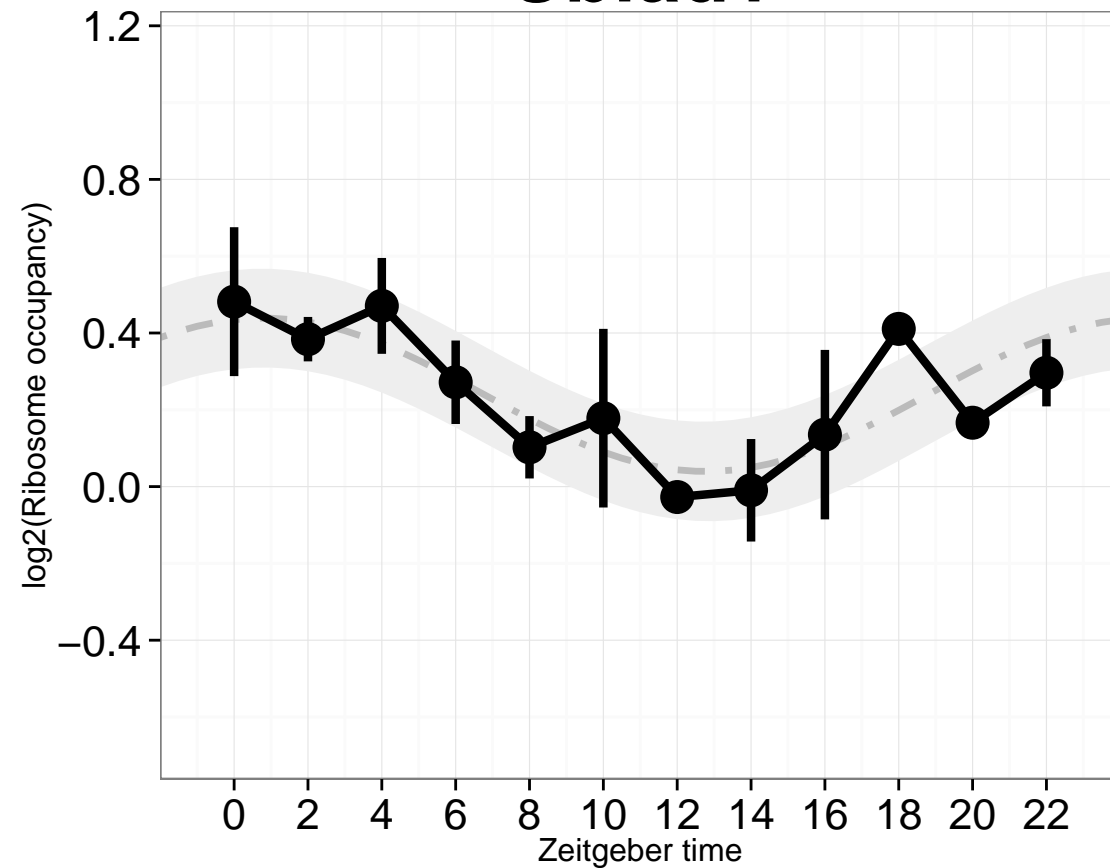

Supplement: Supplementary file 10982 [file 1]

# Pla1a

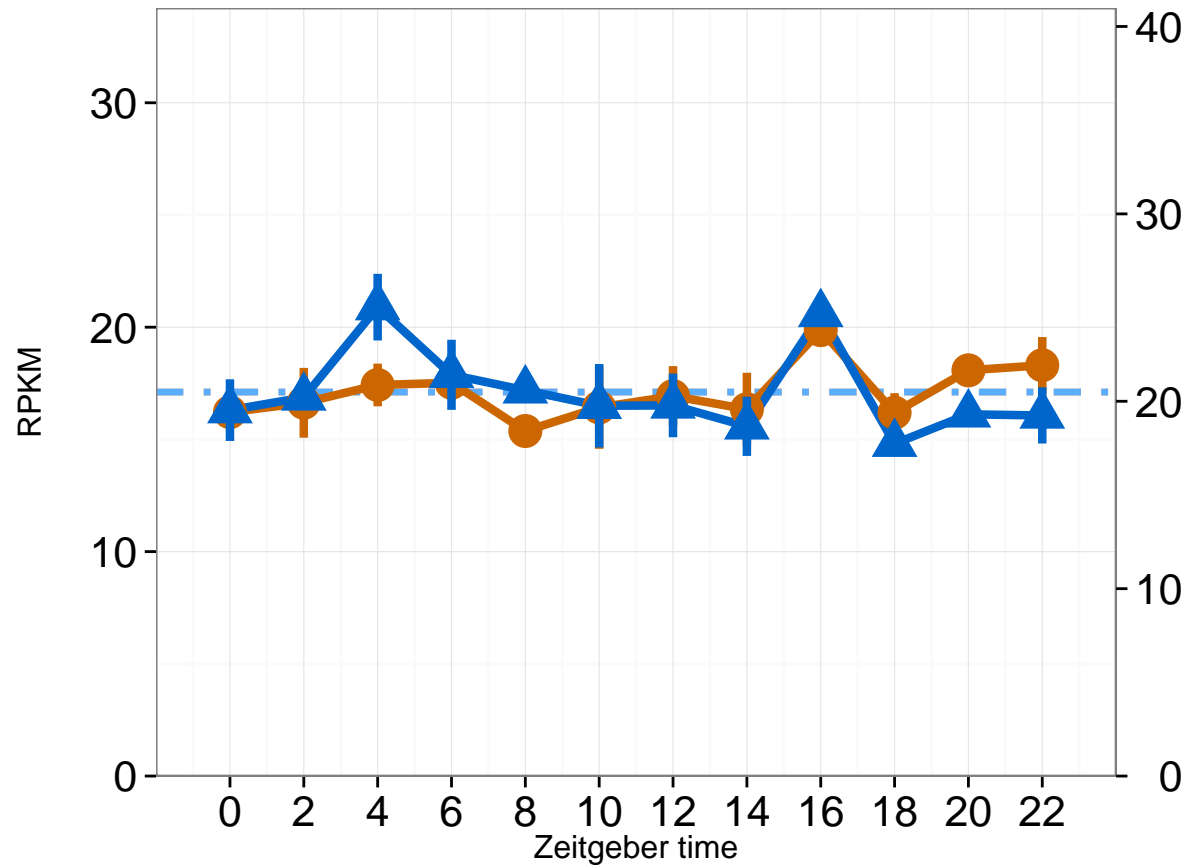

# Pla1a

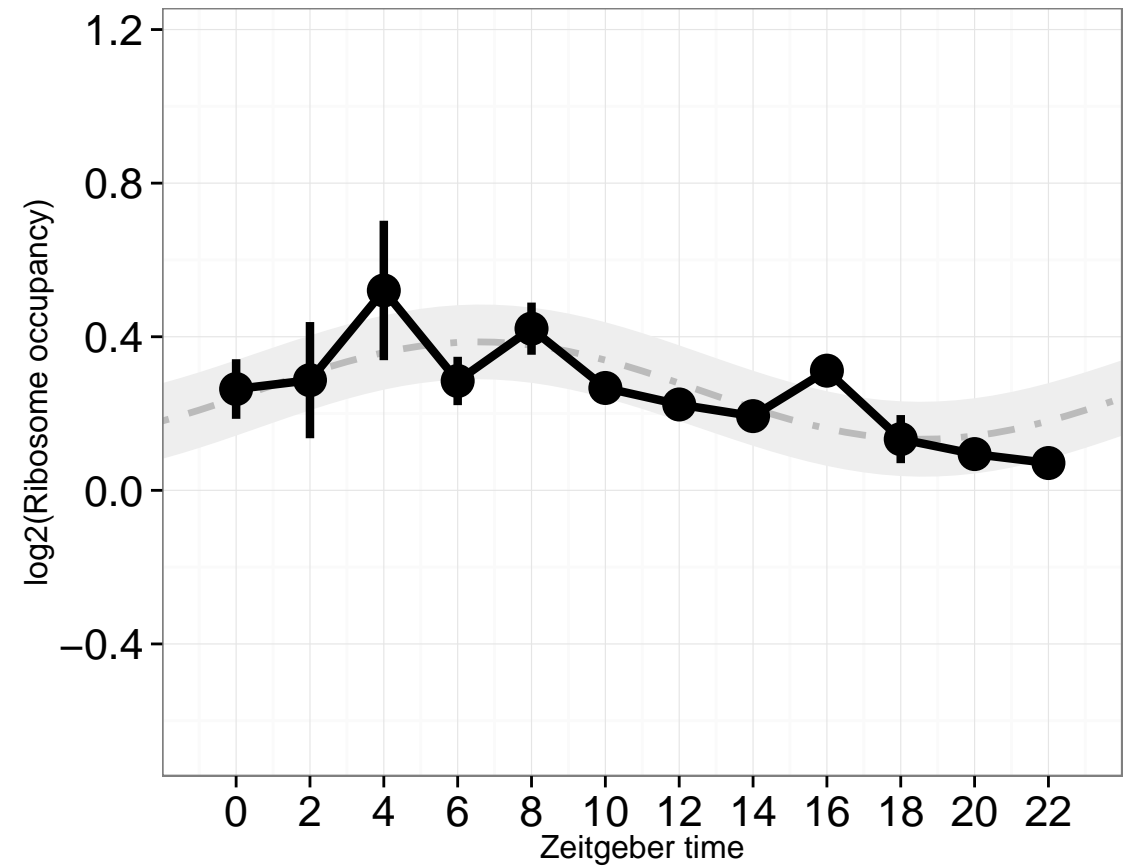

Supplement: Supplementary file 10983 [file 1]

# Sumo3

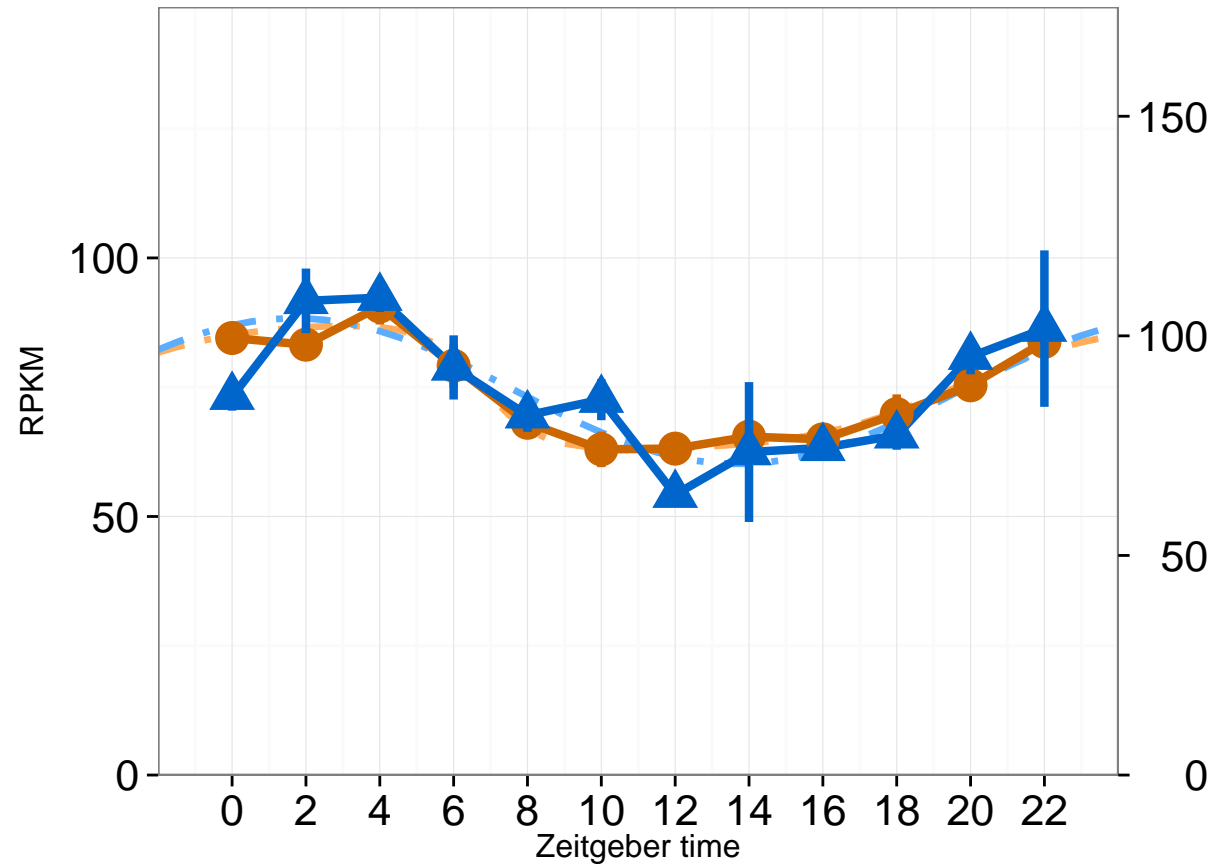

# Sumo3

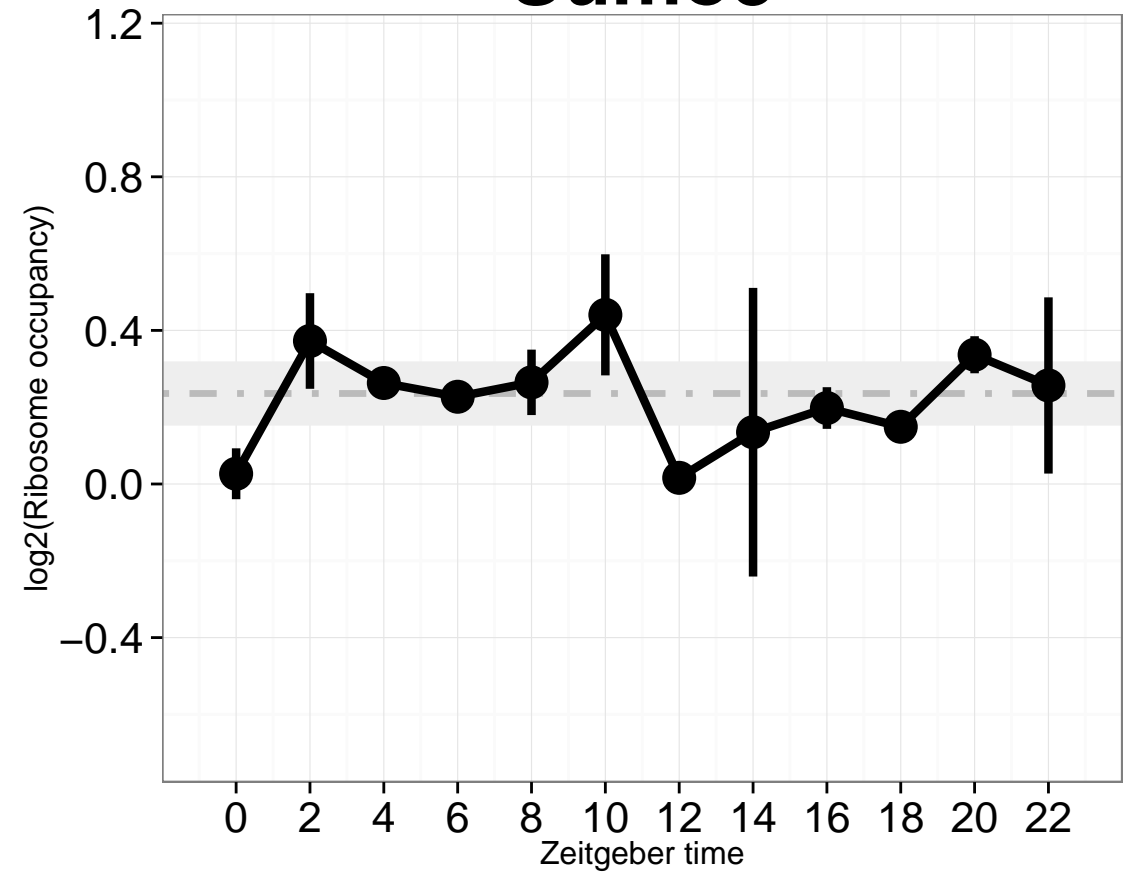

Supplement: Supplementary file 10984 [file 1]

## Chtop

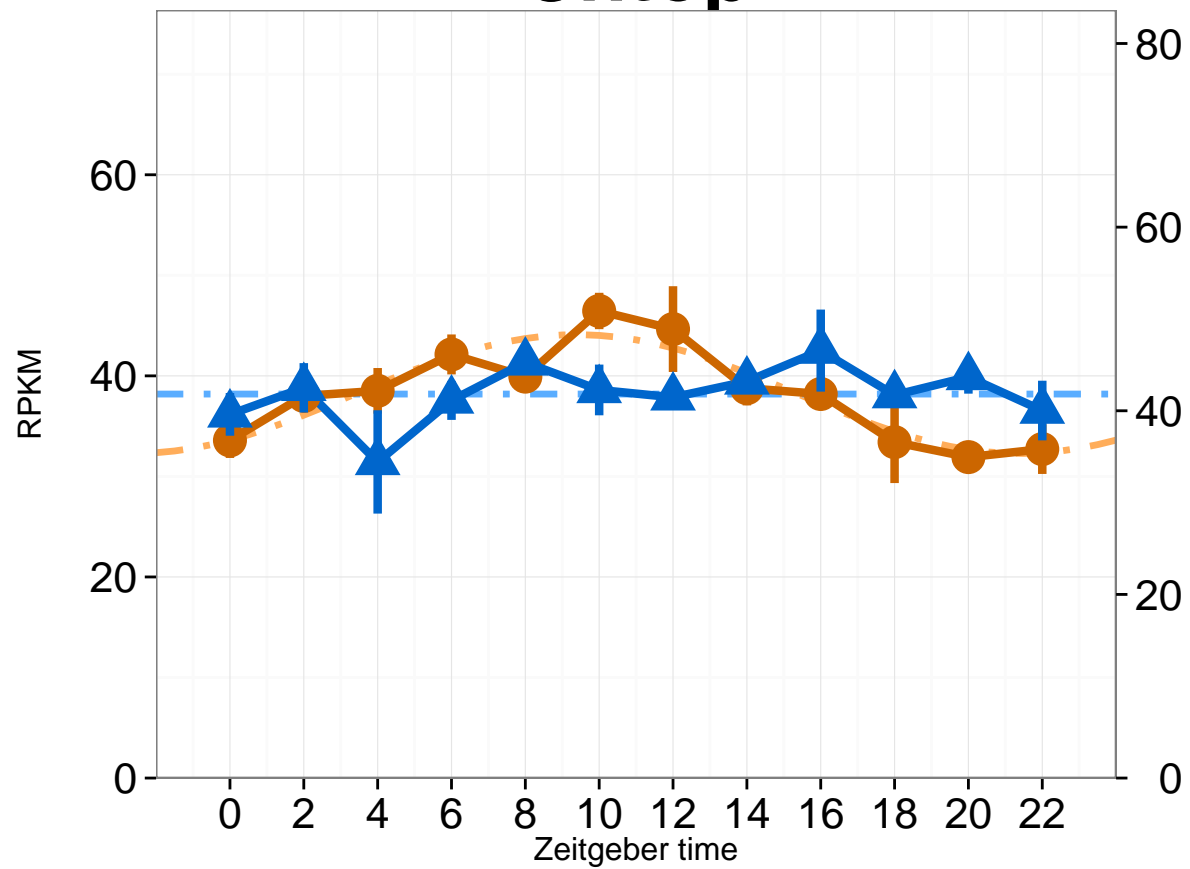

## Chtop

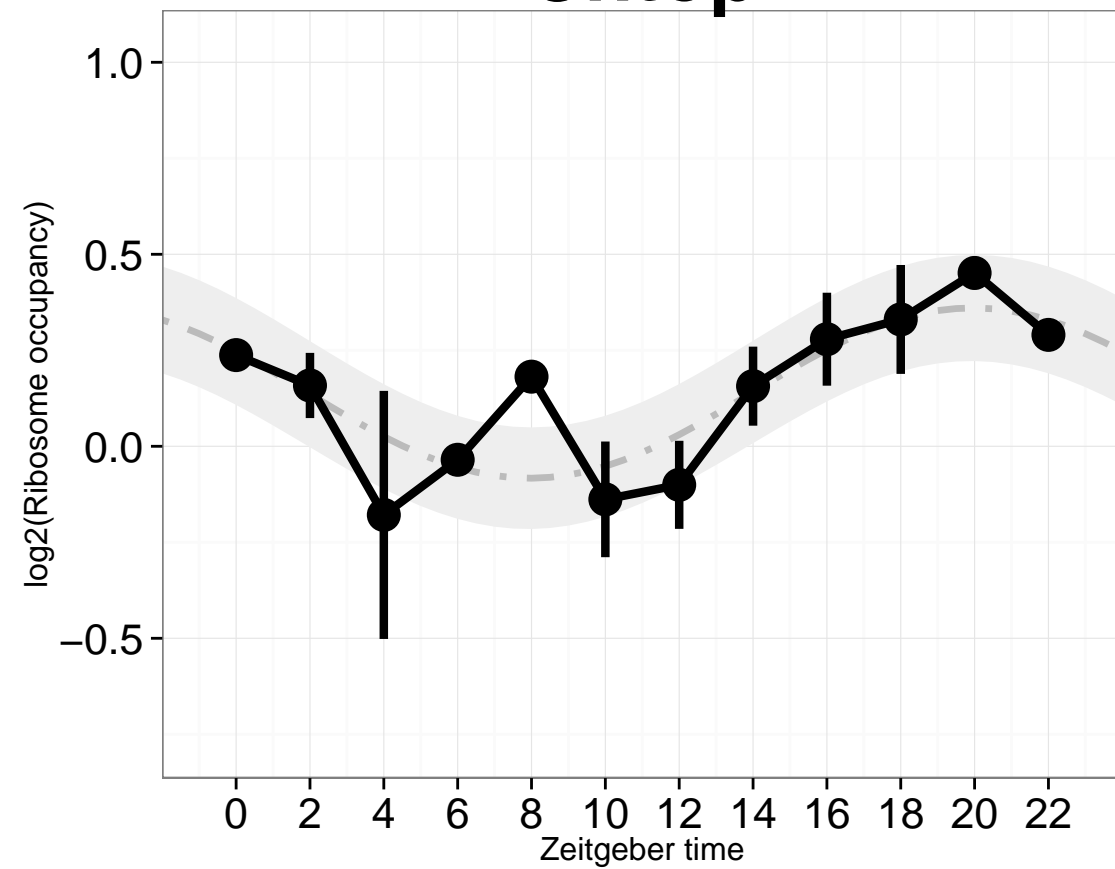

Supplement: Supplementary file 10985 [file 1]

# Zfp758

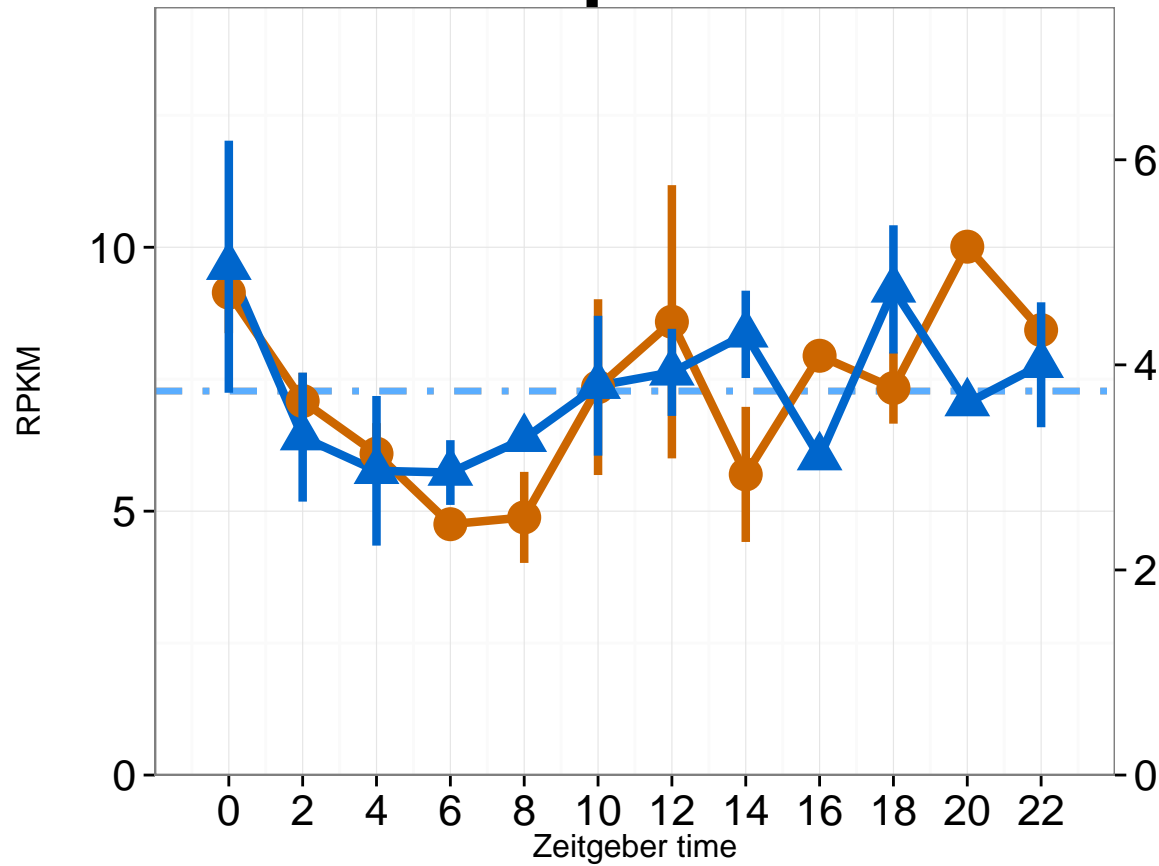

# Zfp758

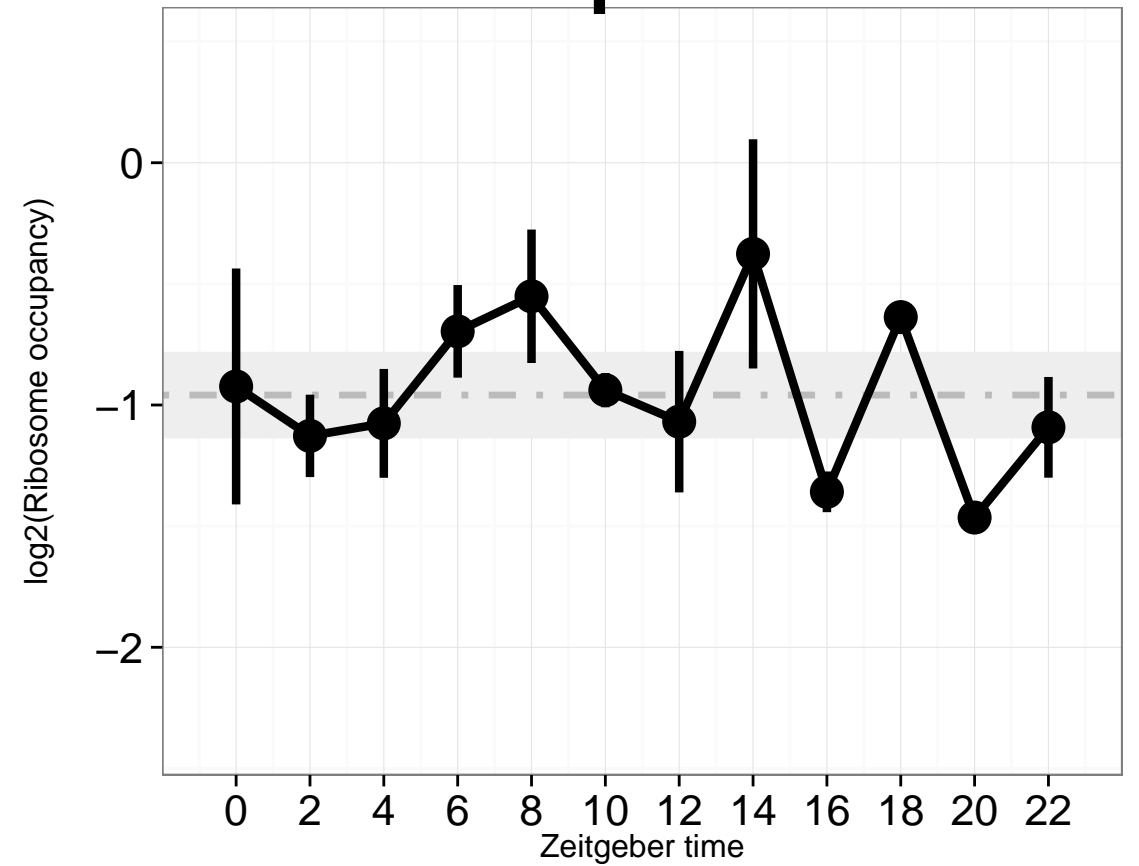

Supplement: Supplementary file 10986 [file 1]

# B3galt5

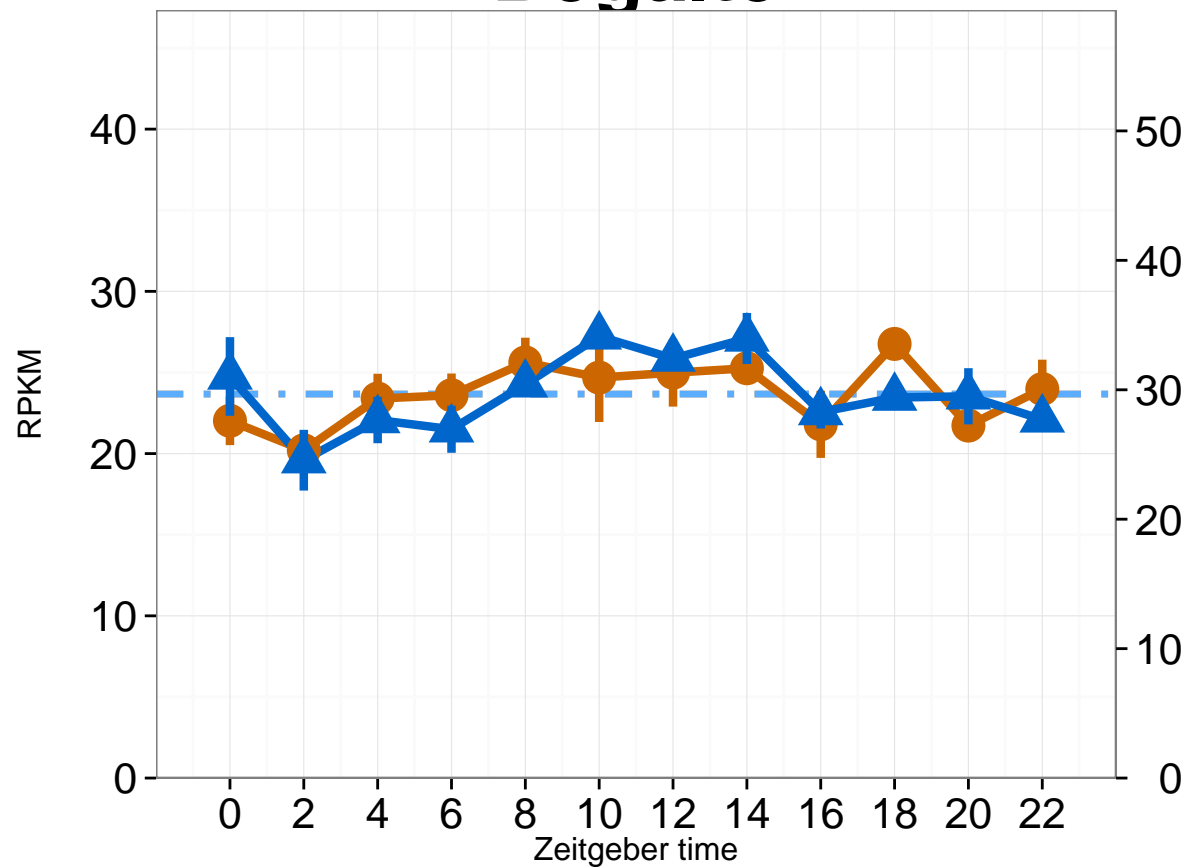

# B3galt5

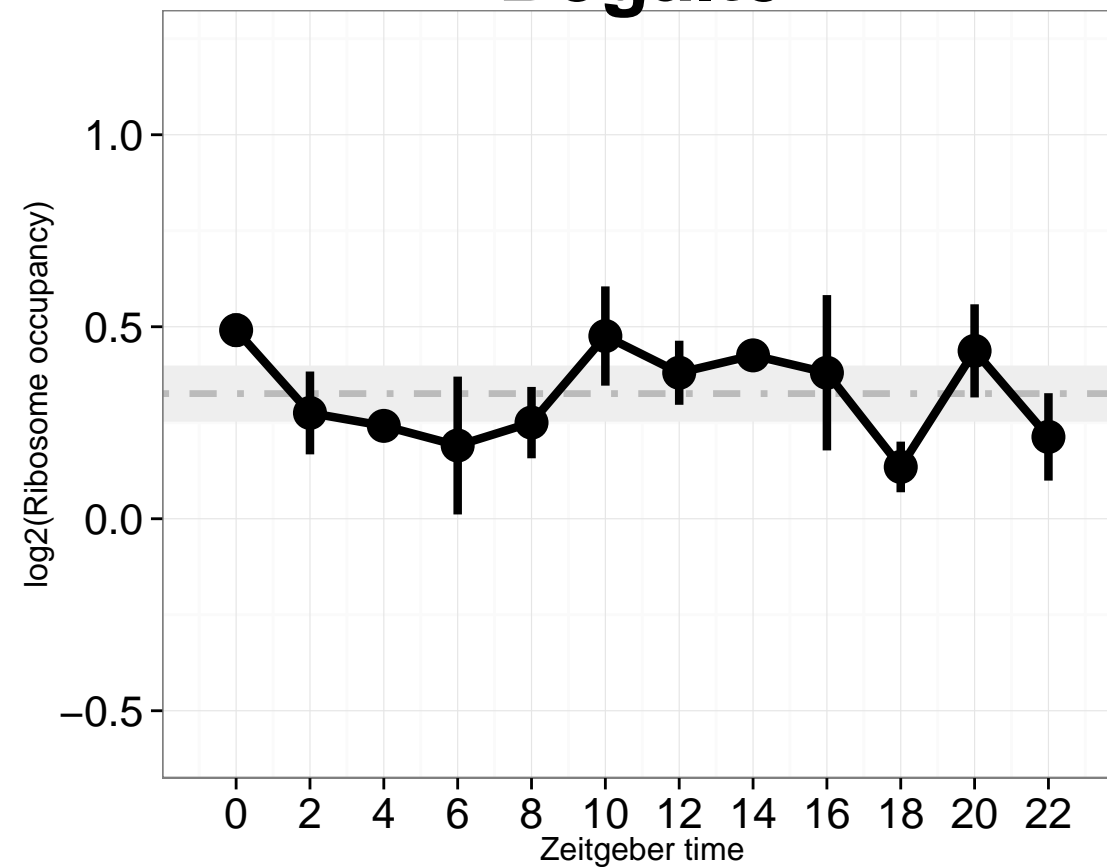

Supplement: Supplementary file 10987 [file 1]

## Casp3

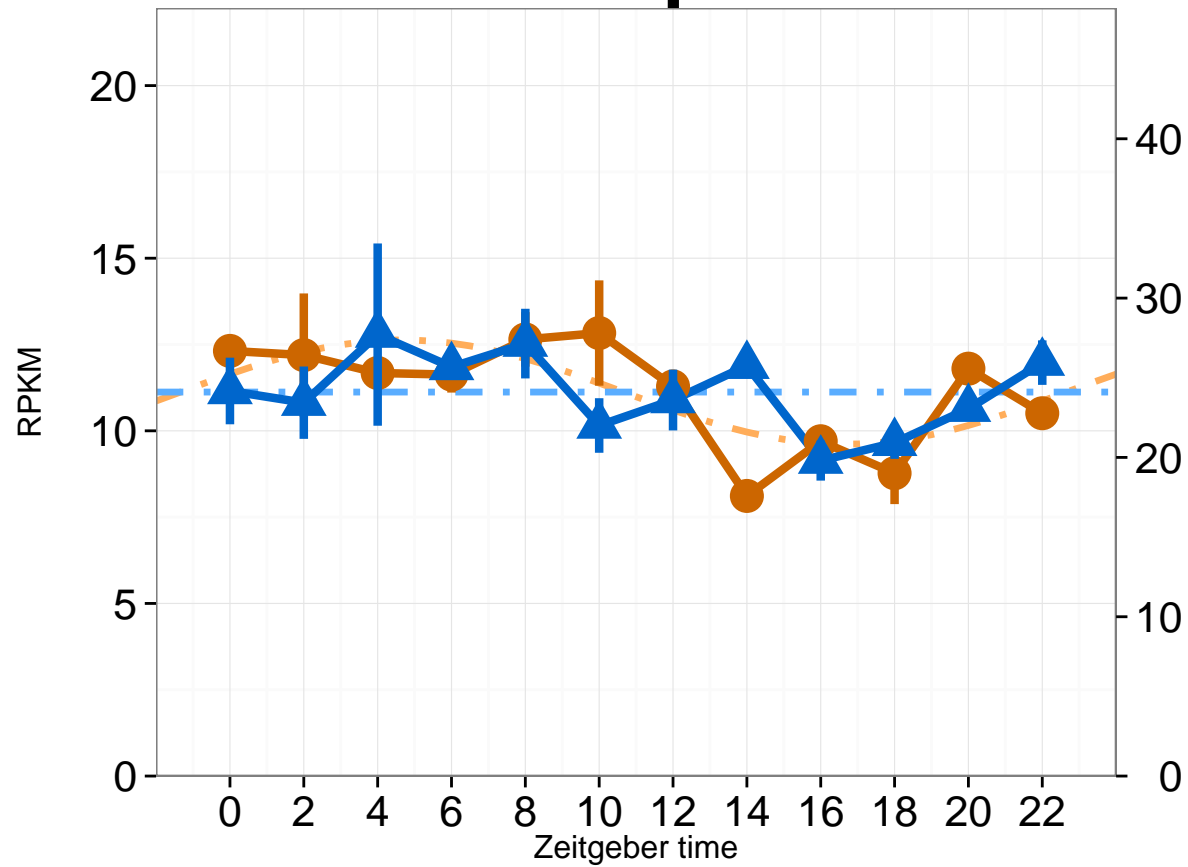

## Casp3

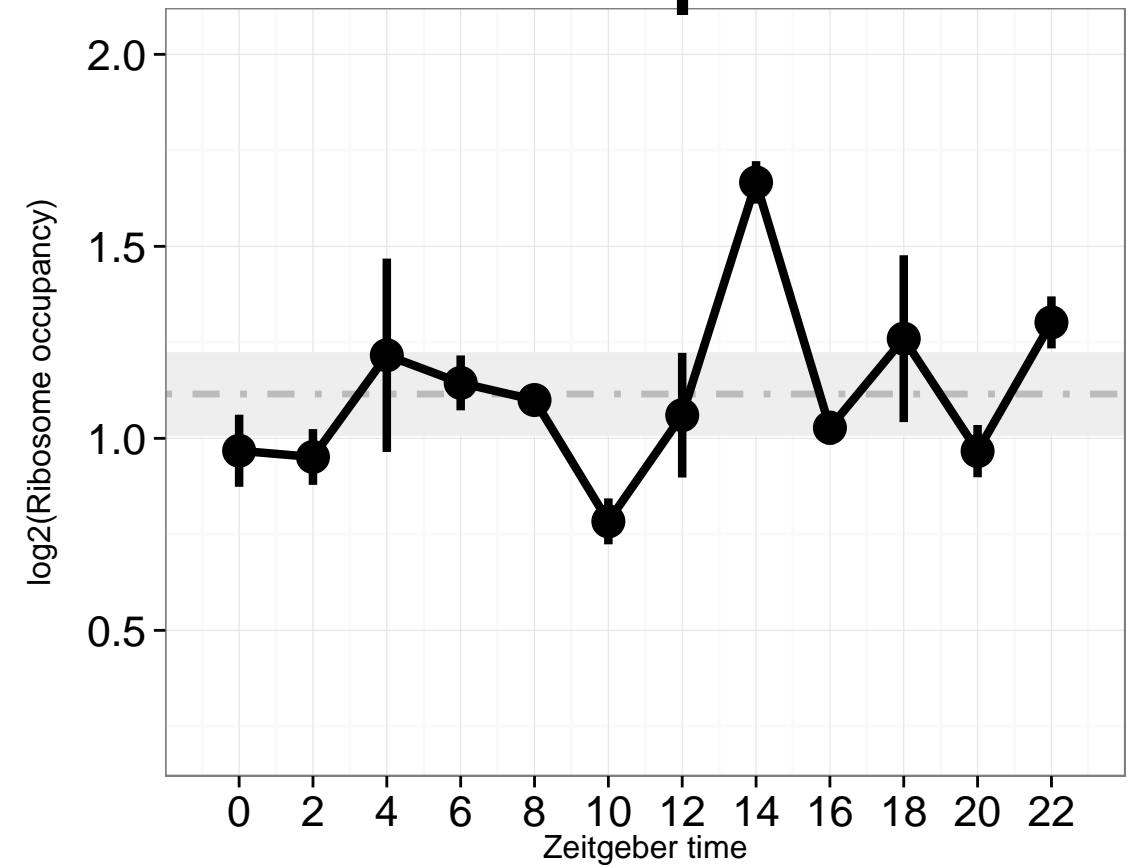

Supplement: Supplementary file 10988 [file 1]

## Haus3

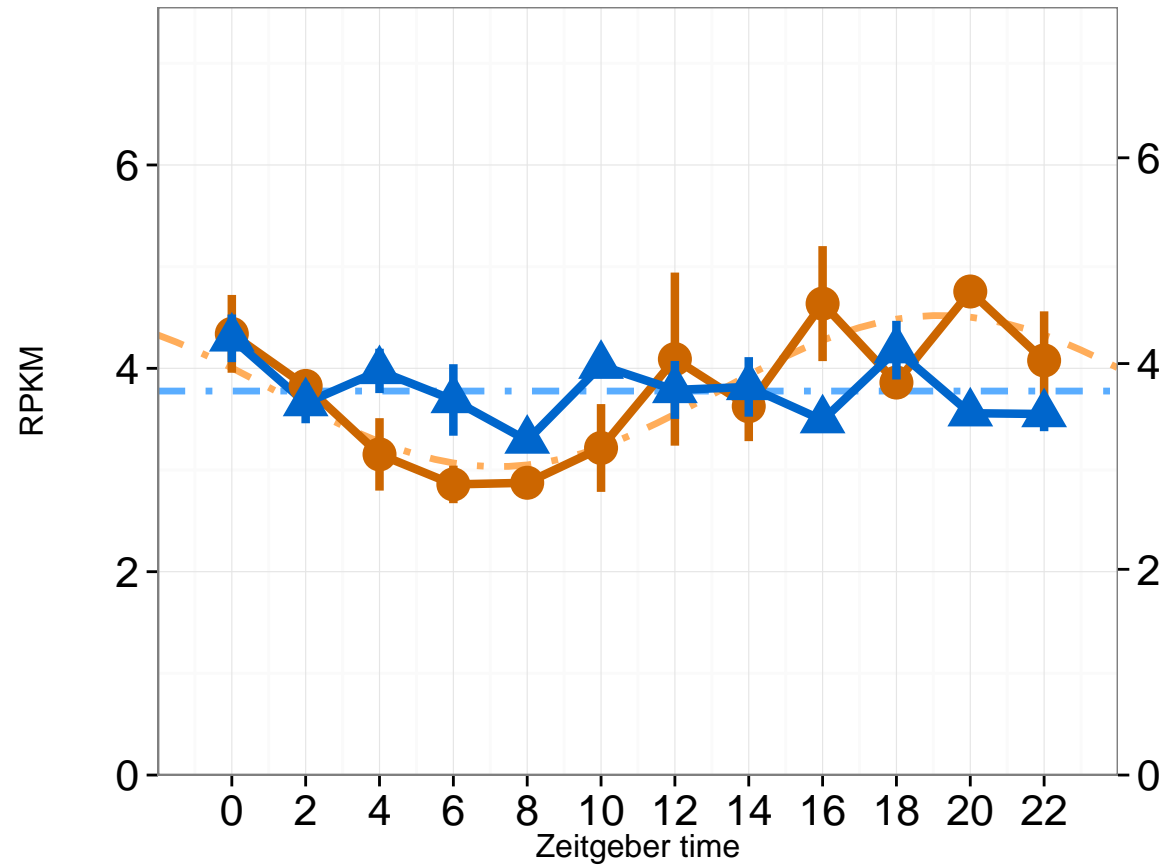

## Haus3

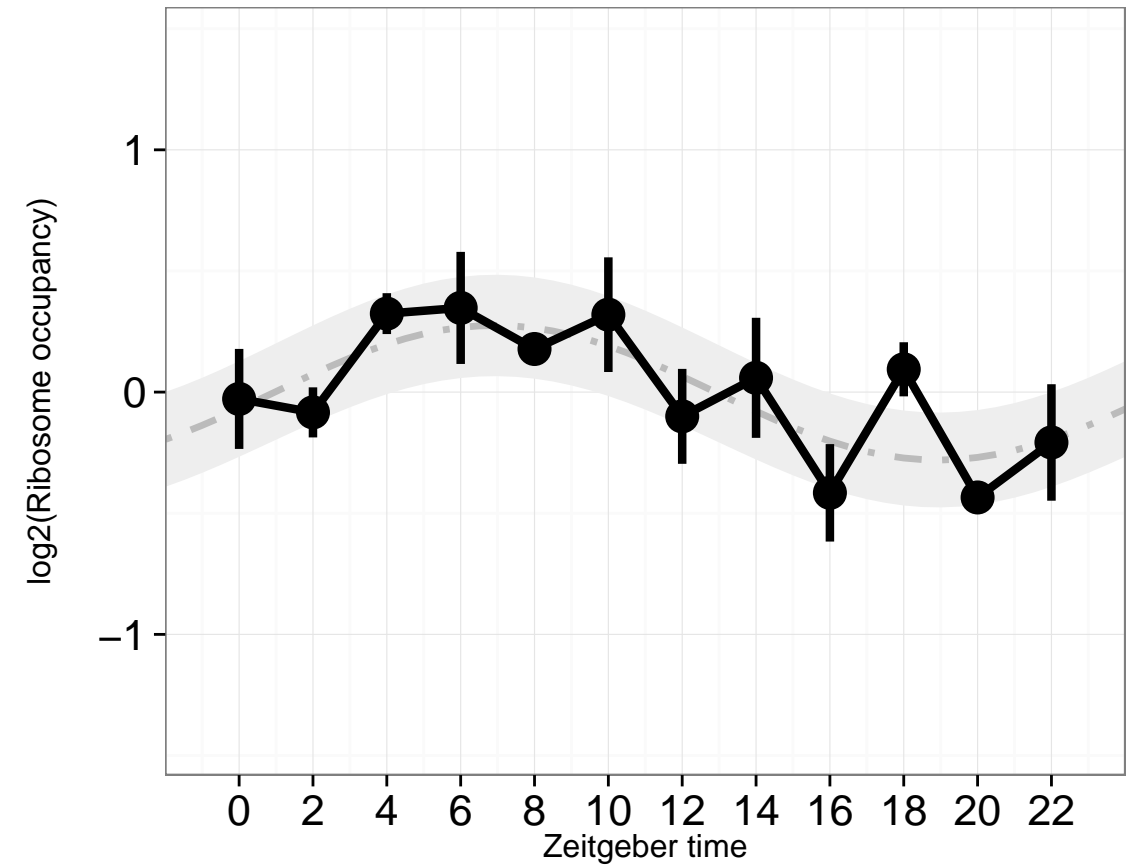

Supplement: Supplementary file 10989 [file 1]

# Errfi1

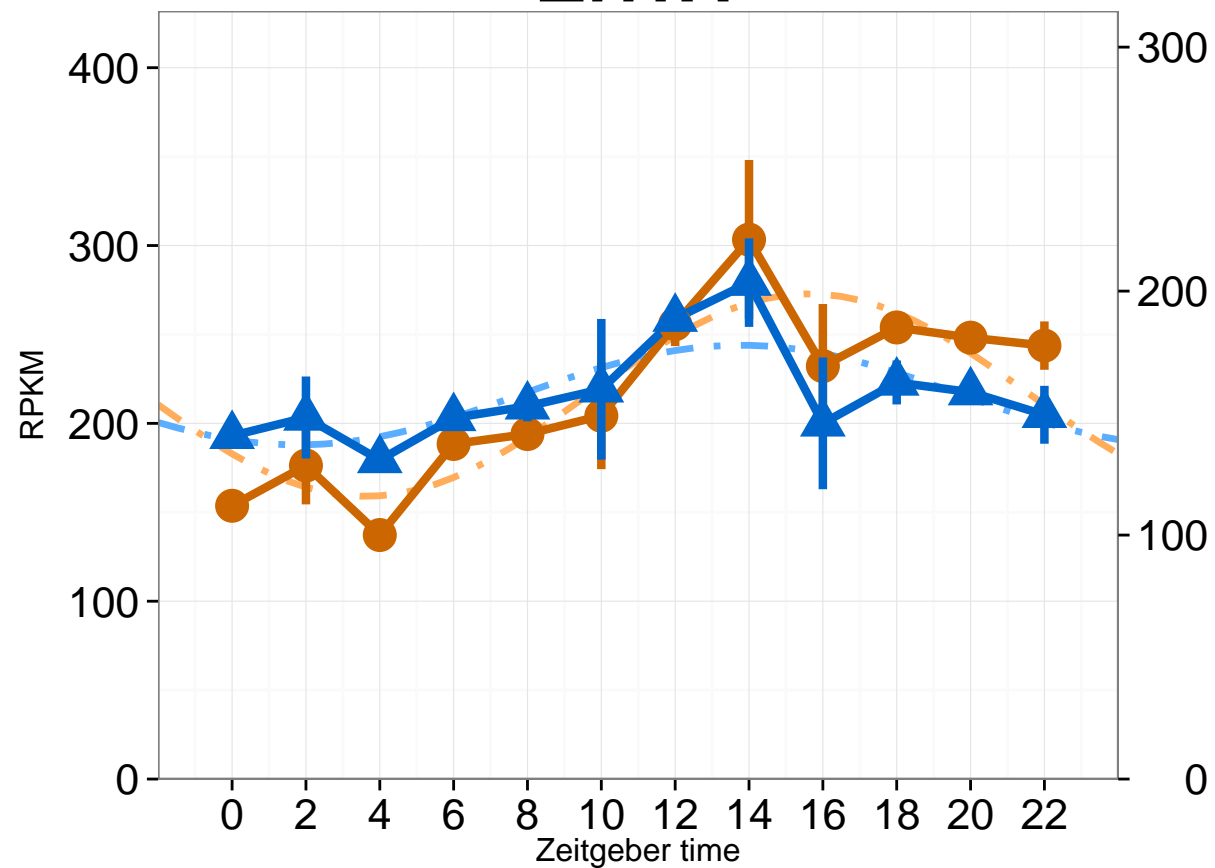

# Errfi1

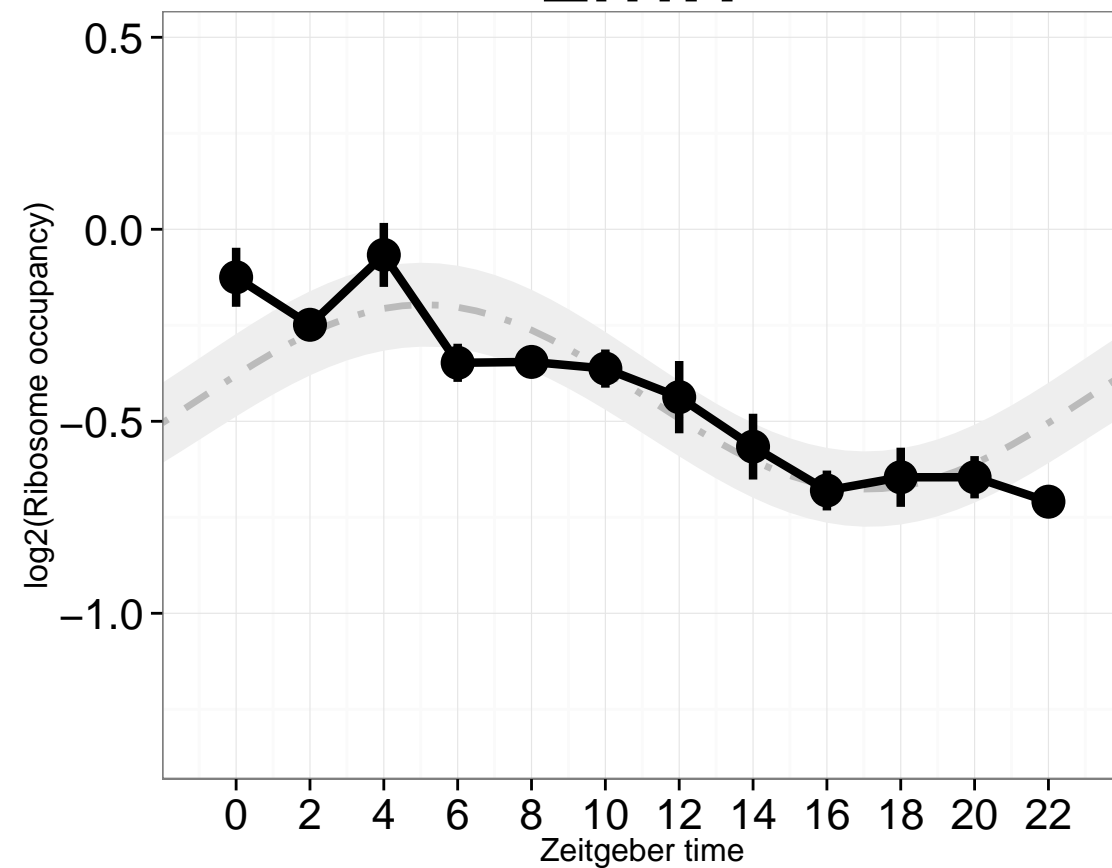

Supplement: Supplementary file 10990 [file 1]

# 6330416G13Rik

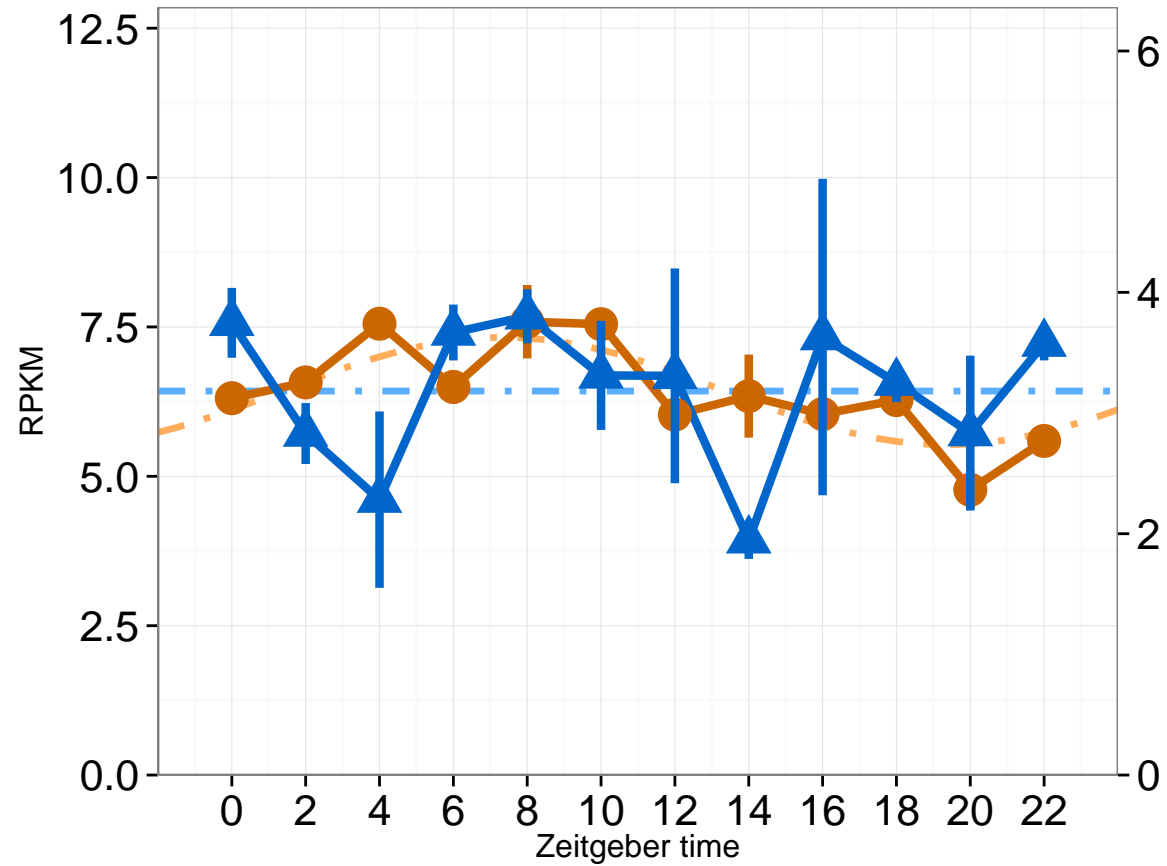

# 6330416G13Rik

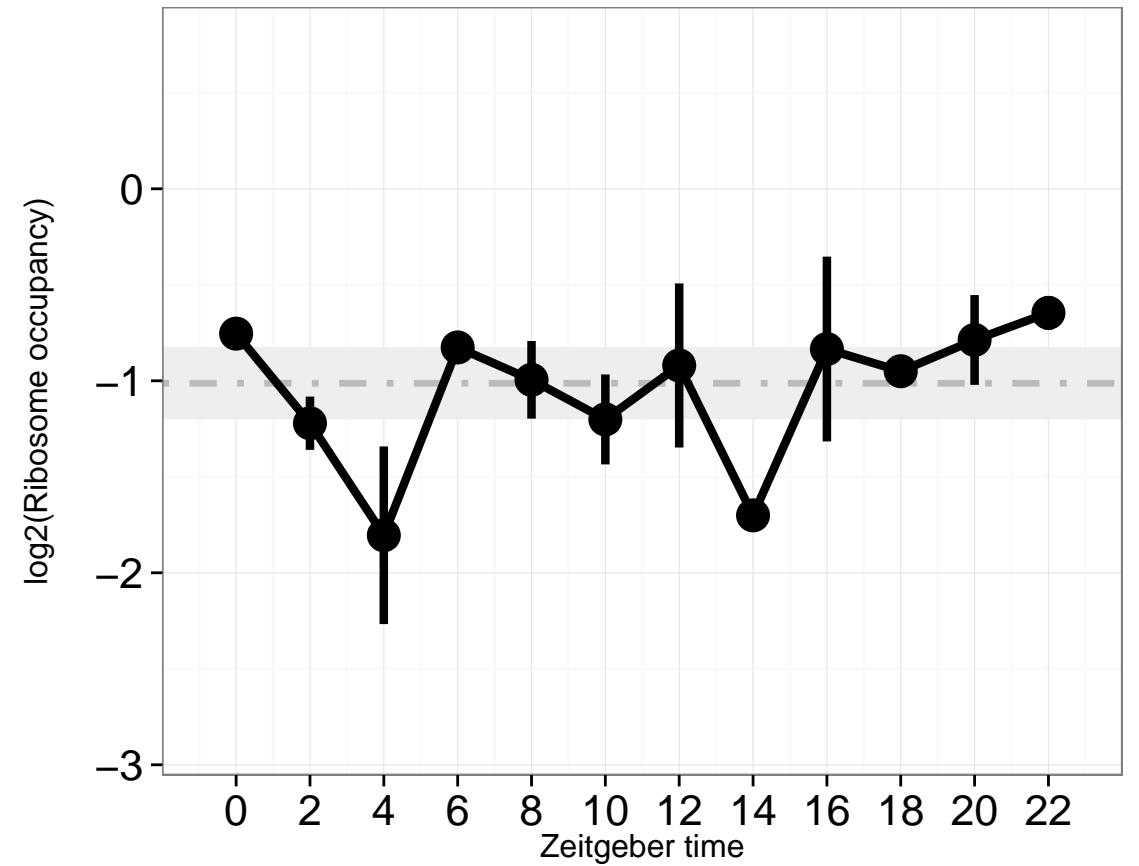

Supplement: Supplementary file 10991 [file 1]

# Trmt112

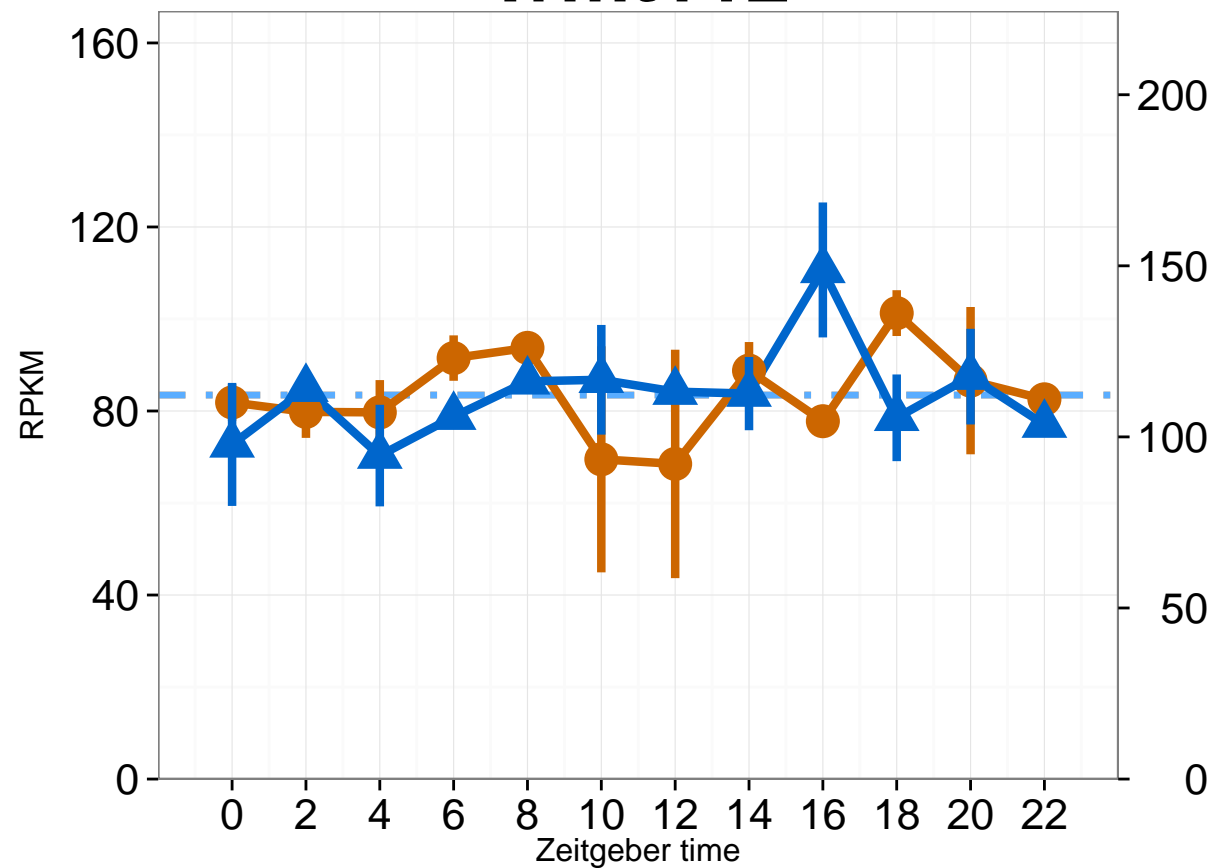

# Trmt112

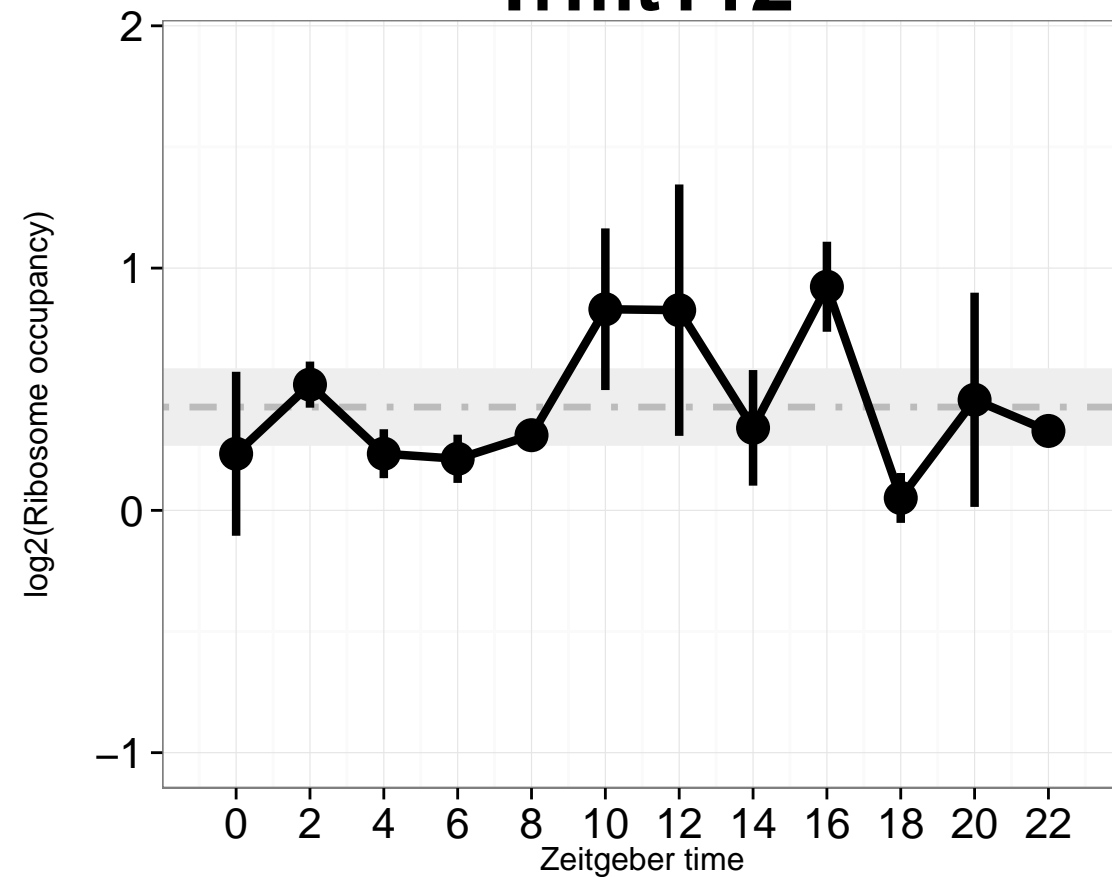

Supplement: Supplementary file 10992 [file 1]

# Rasgef1b

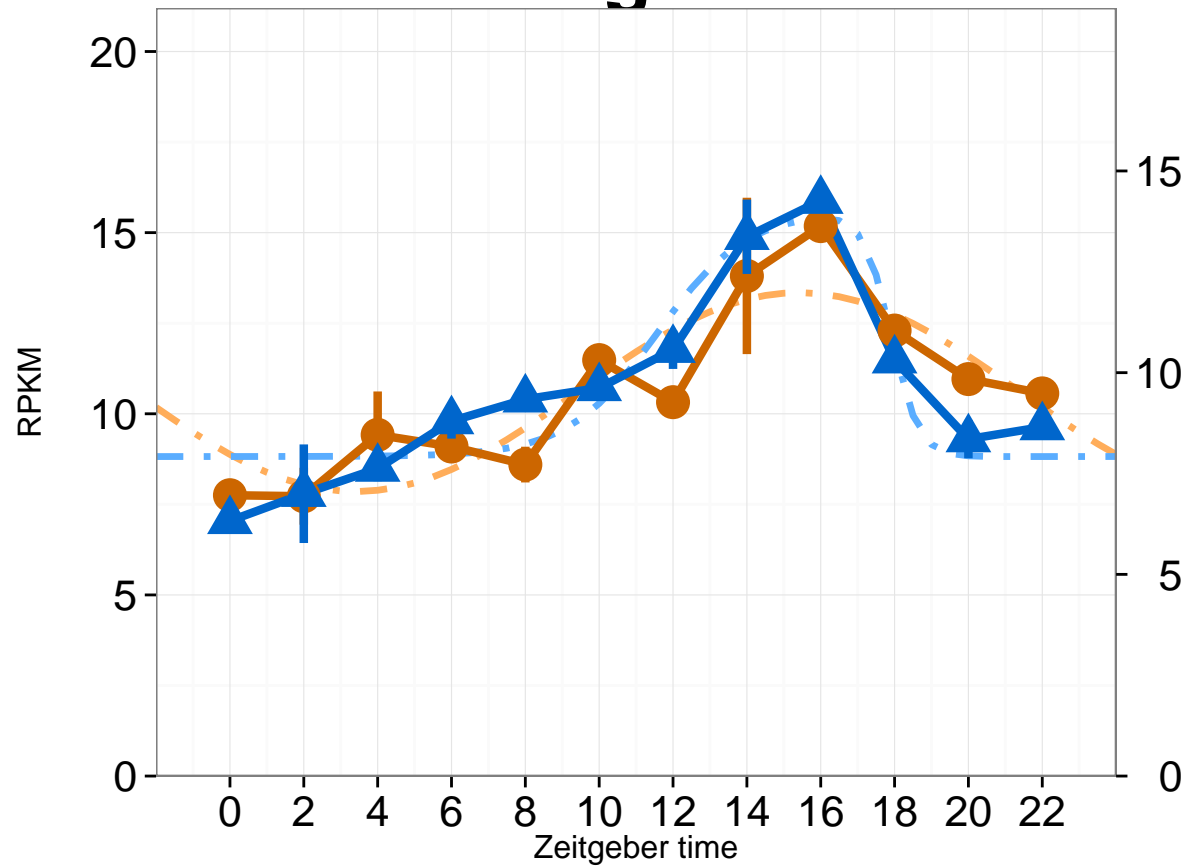

# Rasgef1b

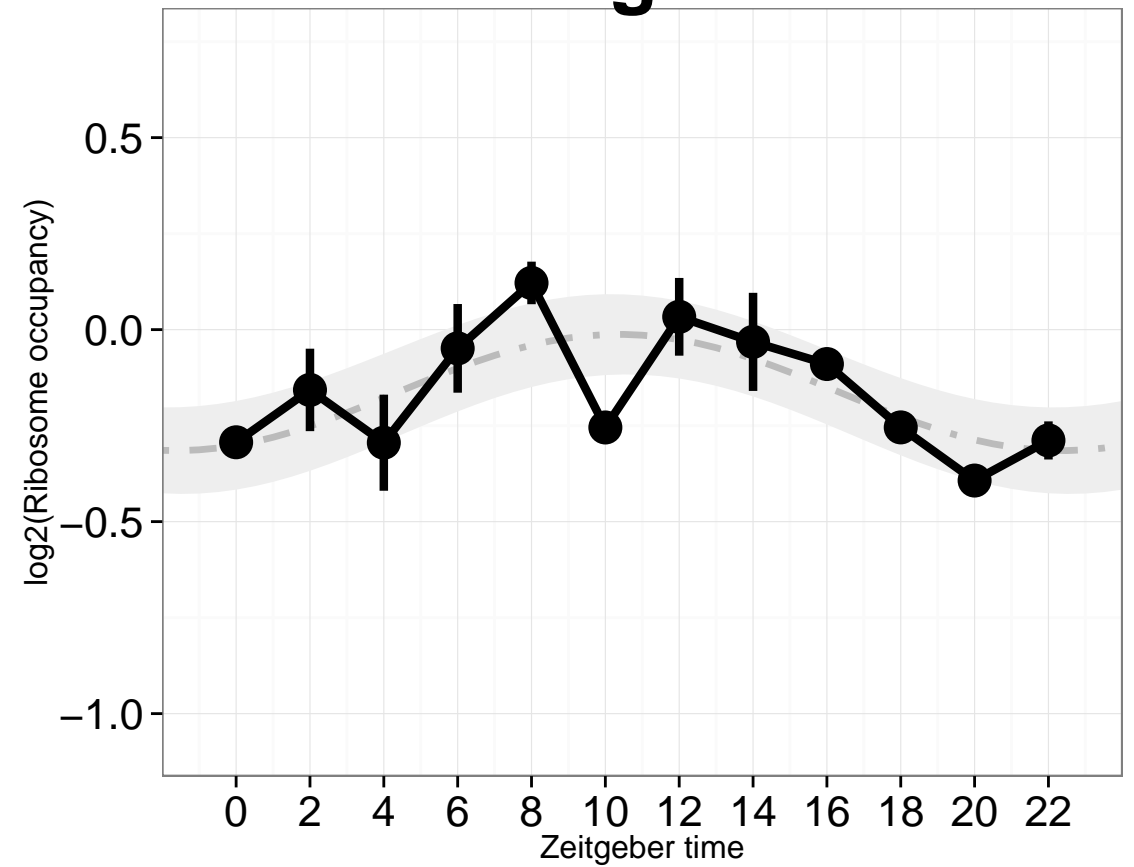

Supplement: Supplementary file 10993 [file 1]

# Slc12a1

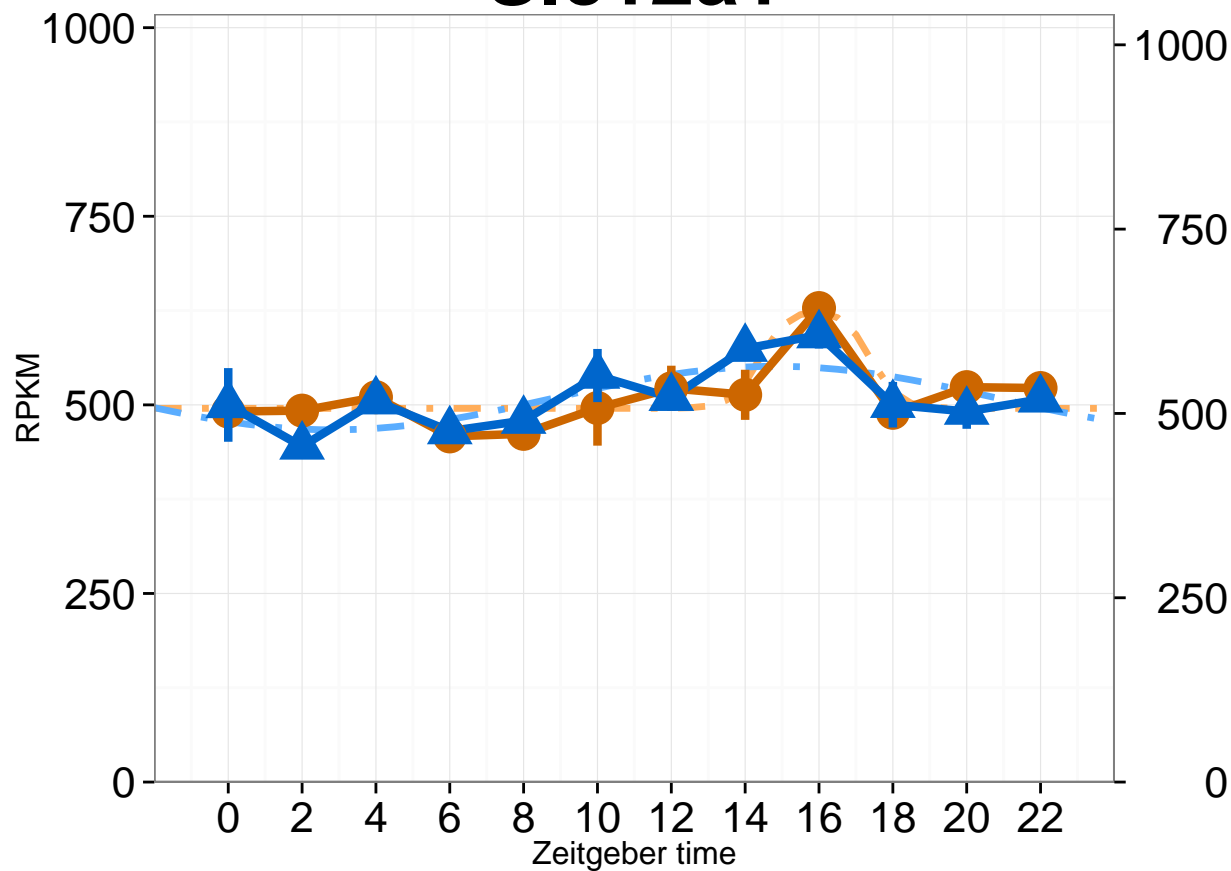

# Slc12a1

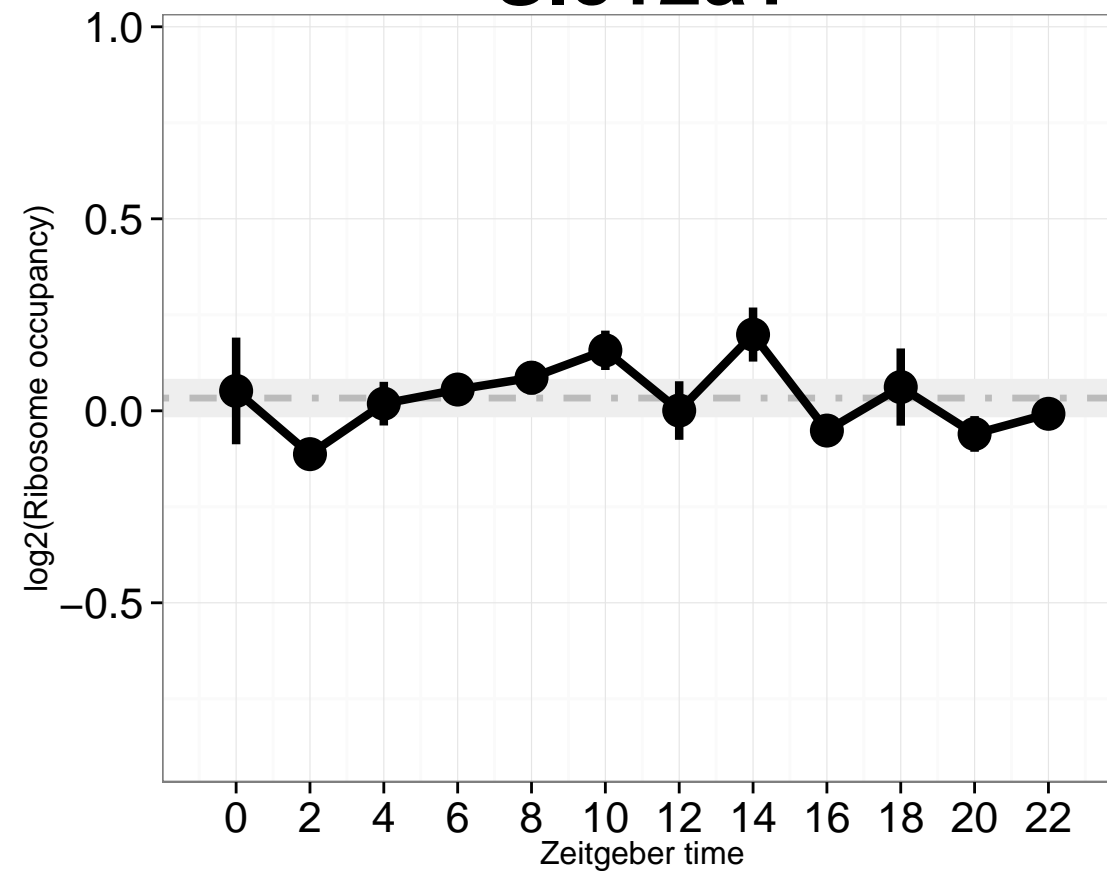

Supplement: Supplementary file 10994 [file 1]

# Trip11

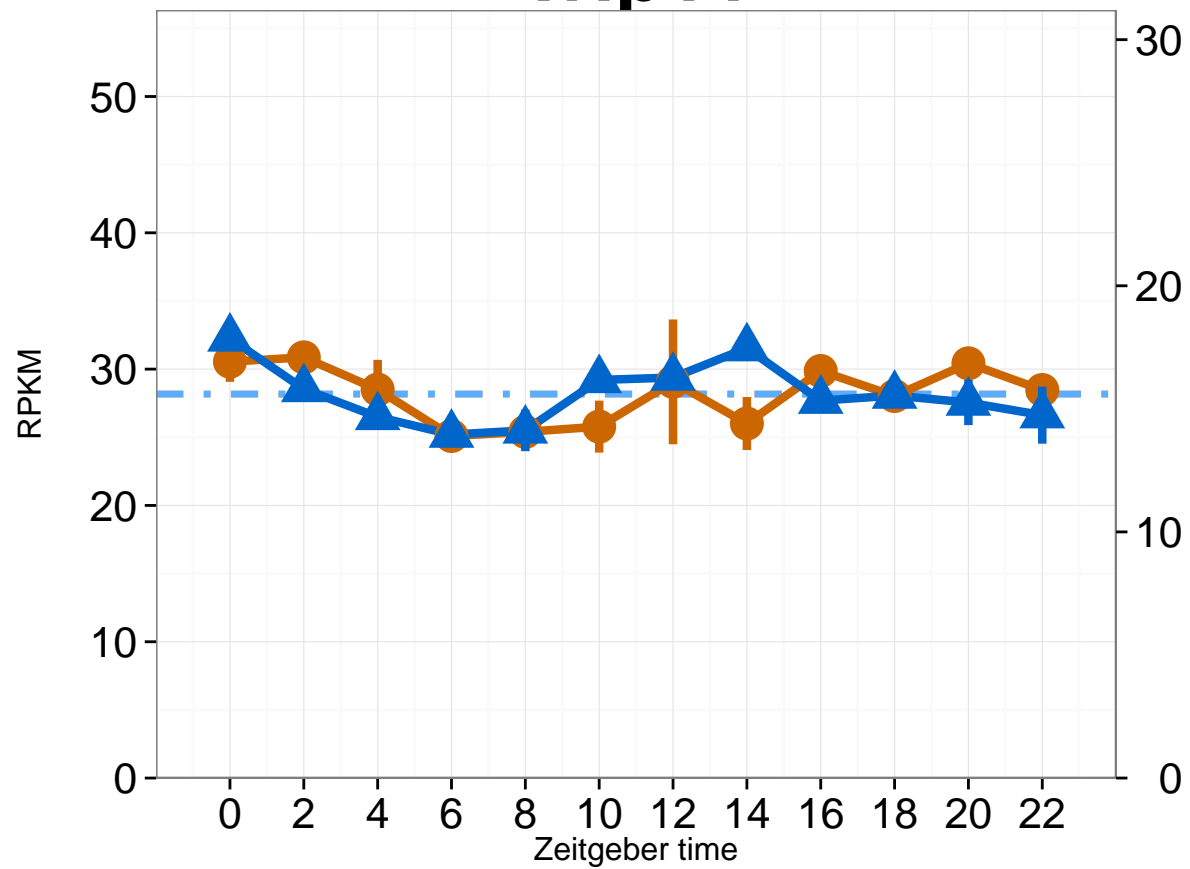

# Trip11

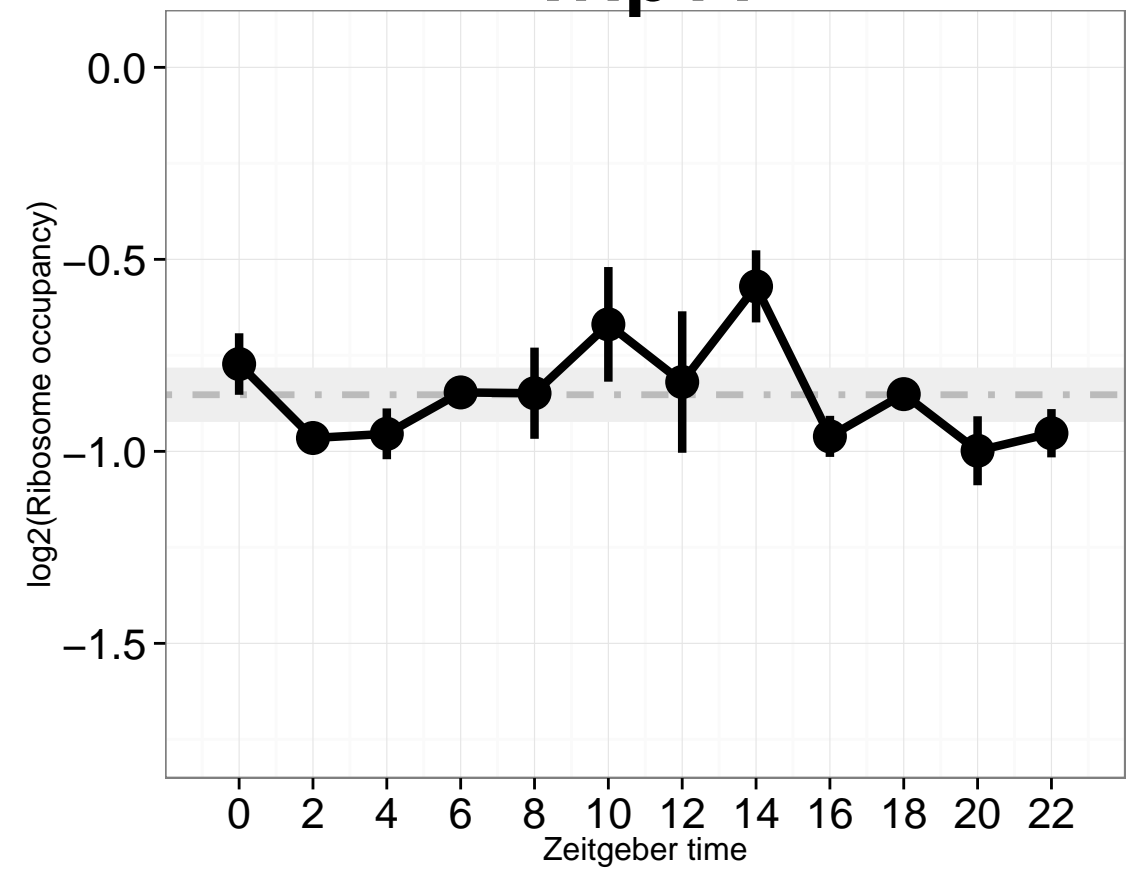

Supplement: Supplementary file 10995 [file 1]

# Cmtr1

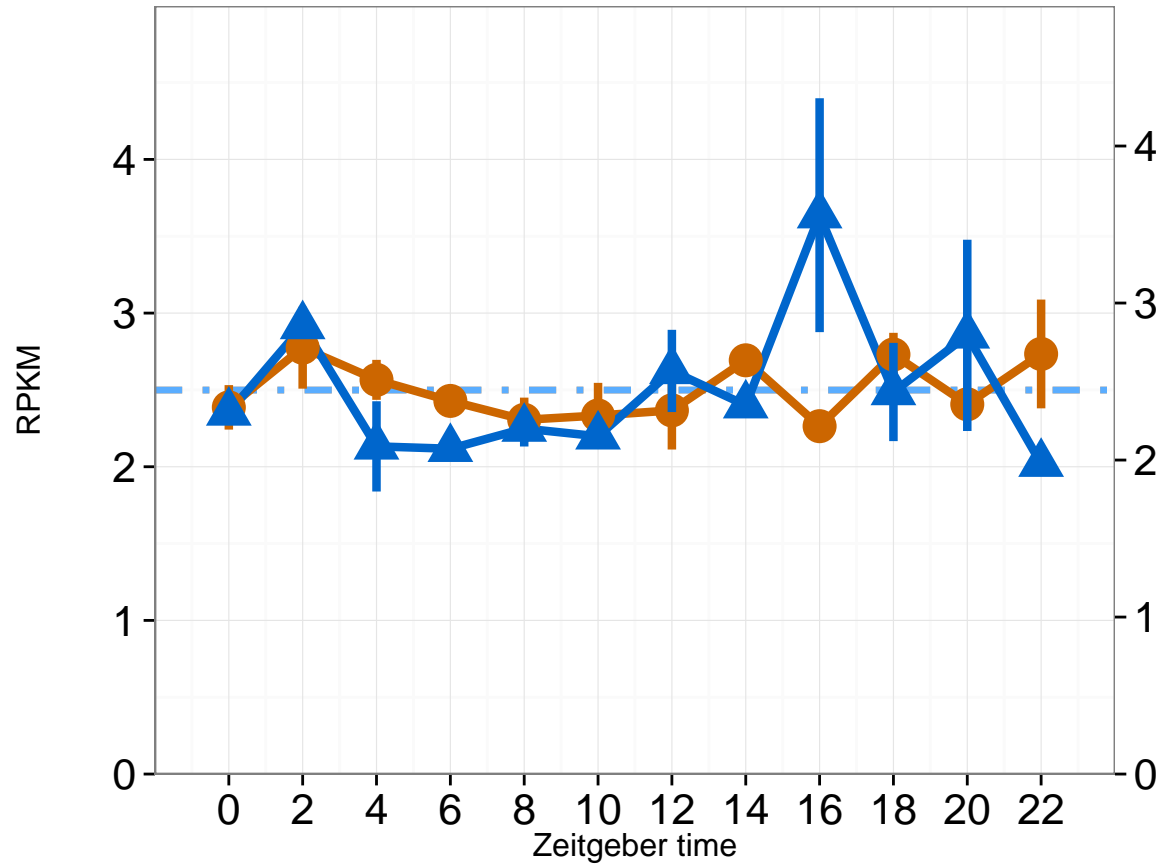

# Cmtr1

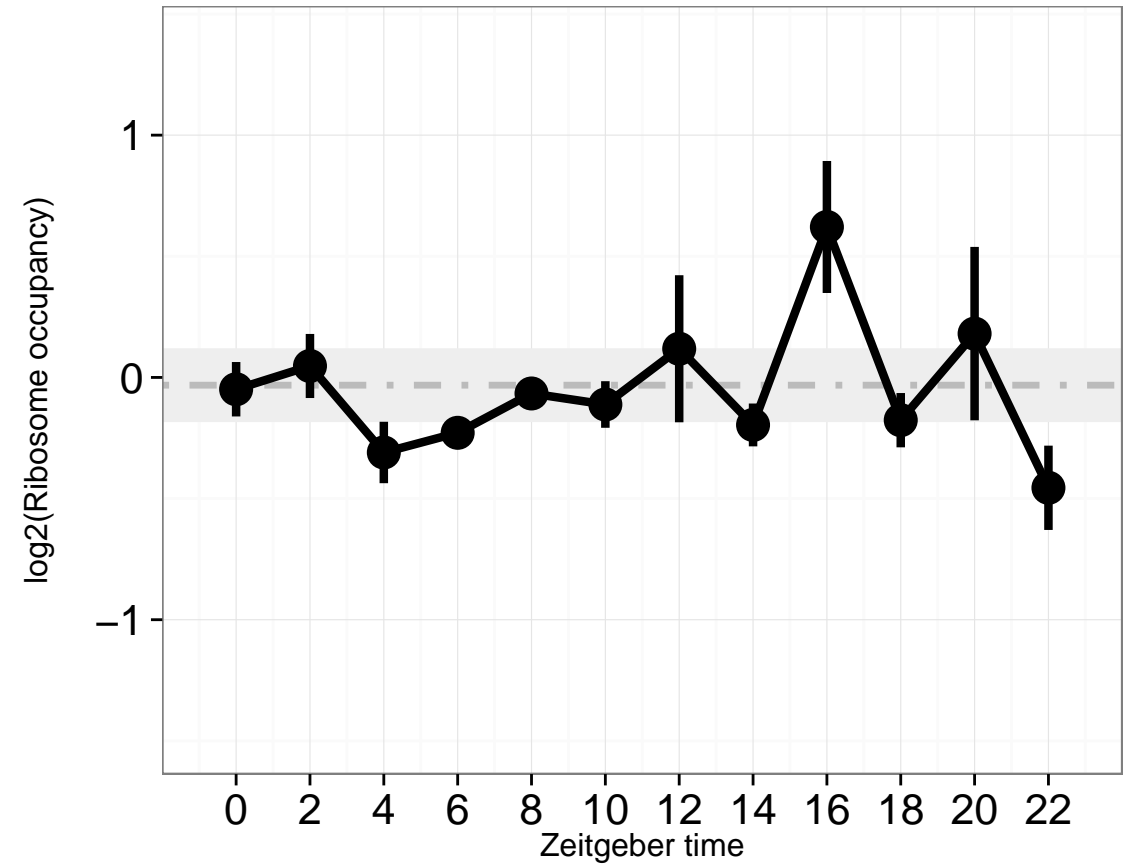

Supplement: Supplementary file 10996 [file 1]

## Serinc3

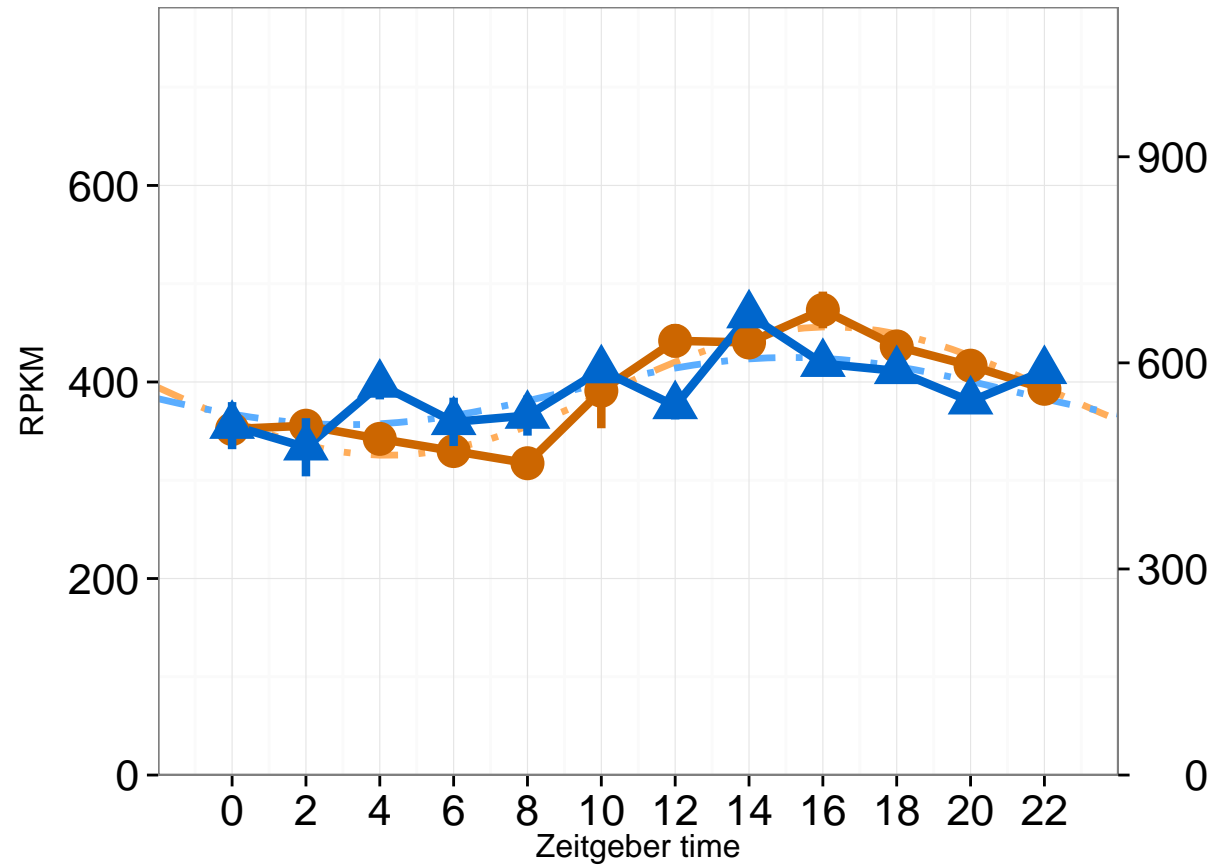

## Serinc3

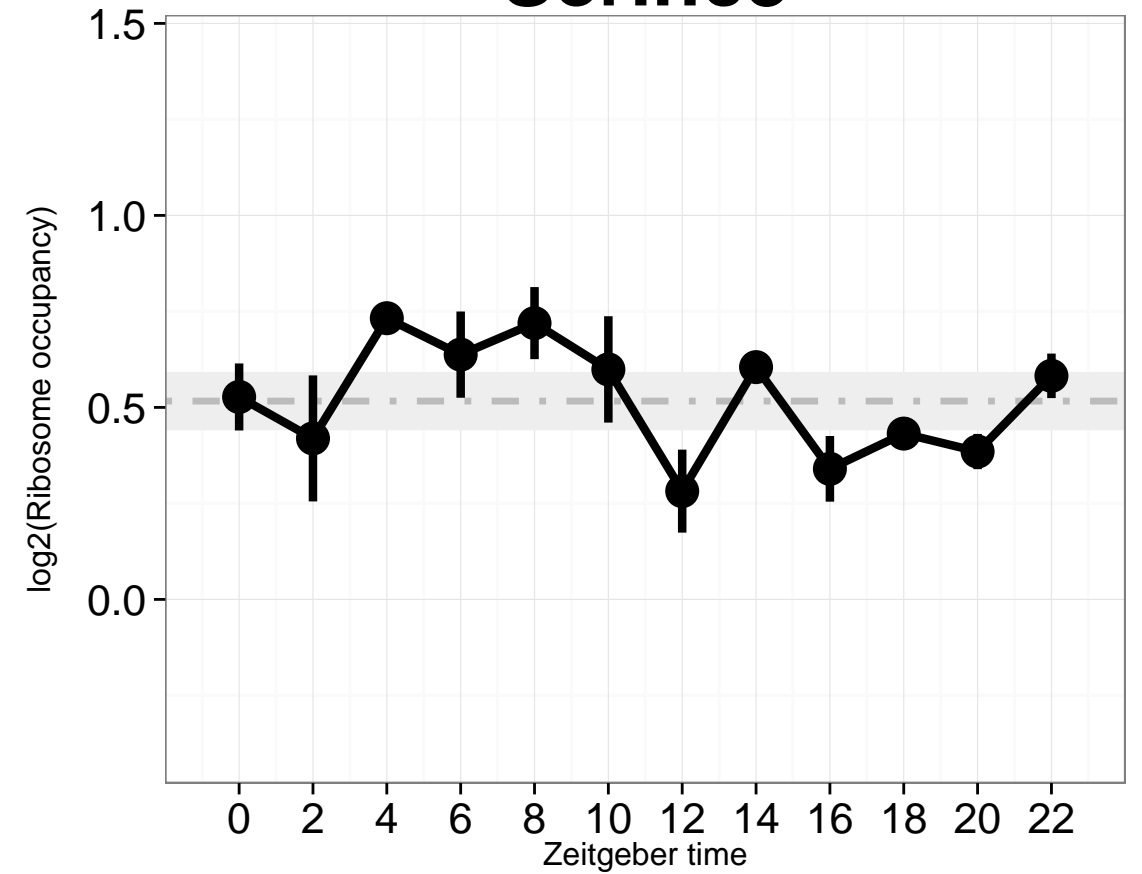

Supplement: Supplementary file 10997 [file 1]

# Tbc1d24

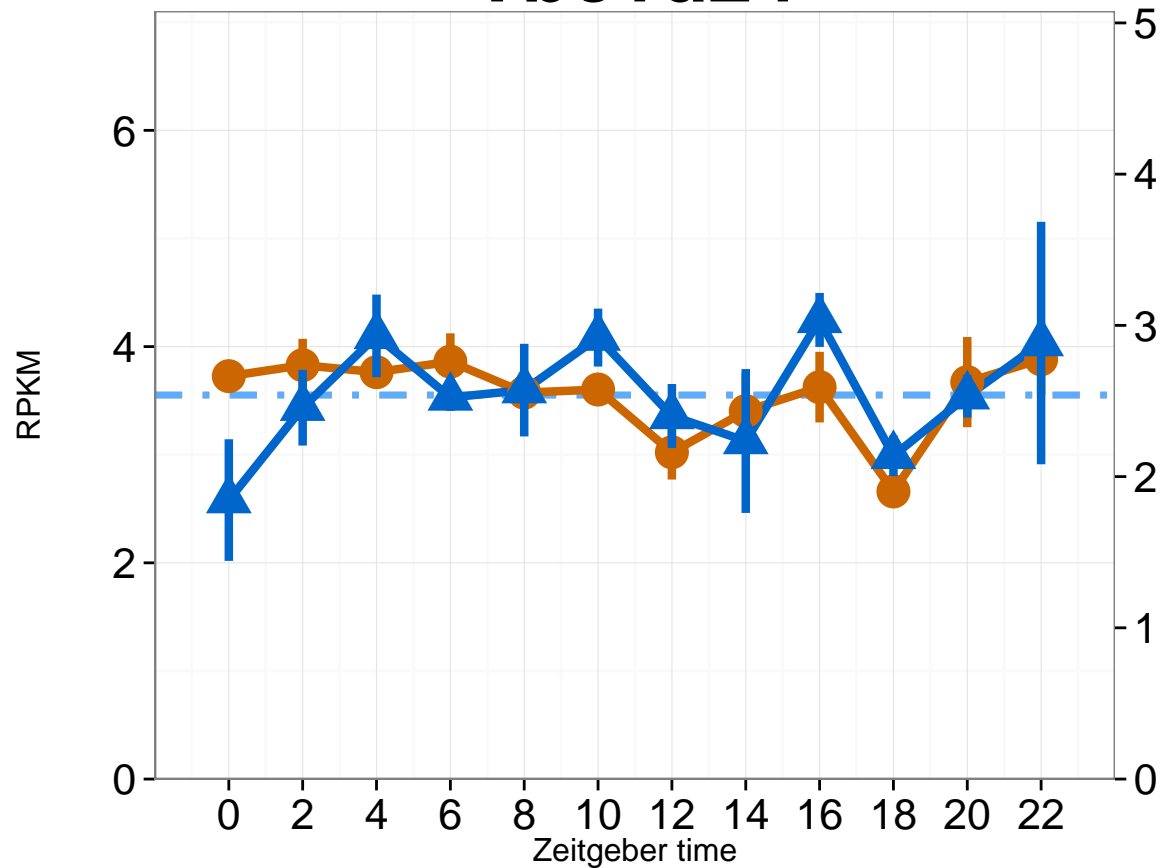

# Tbc1d24

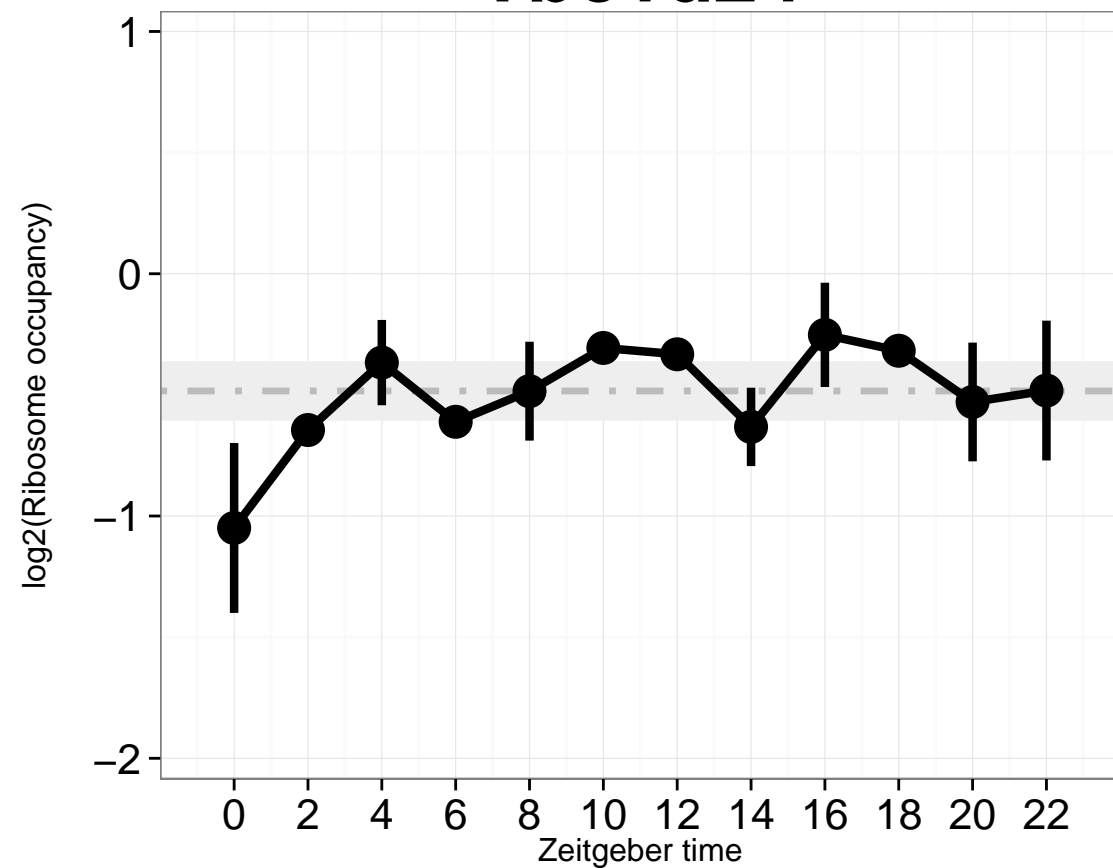

Supplement: Supplementary file 10998 [file 1]

## Stim2

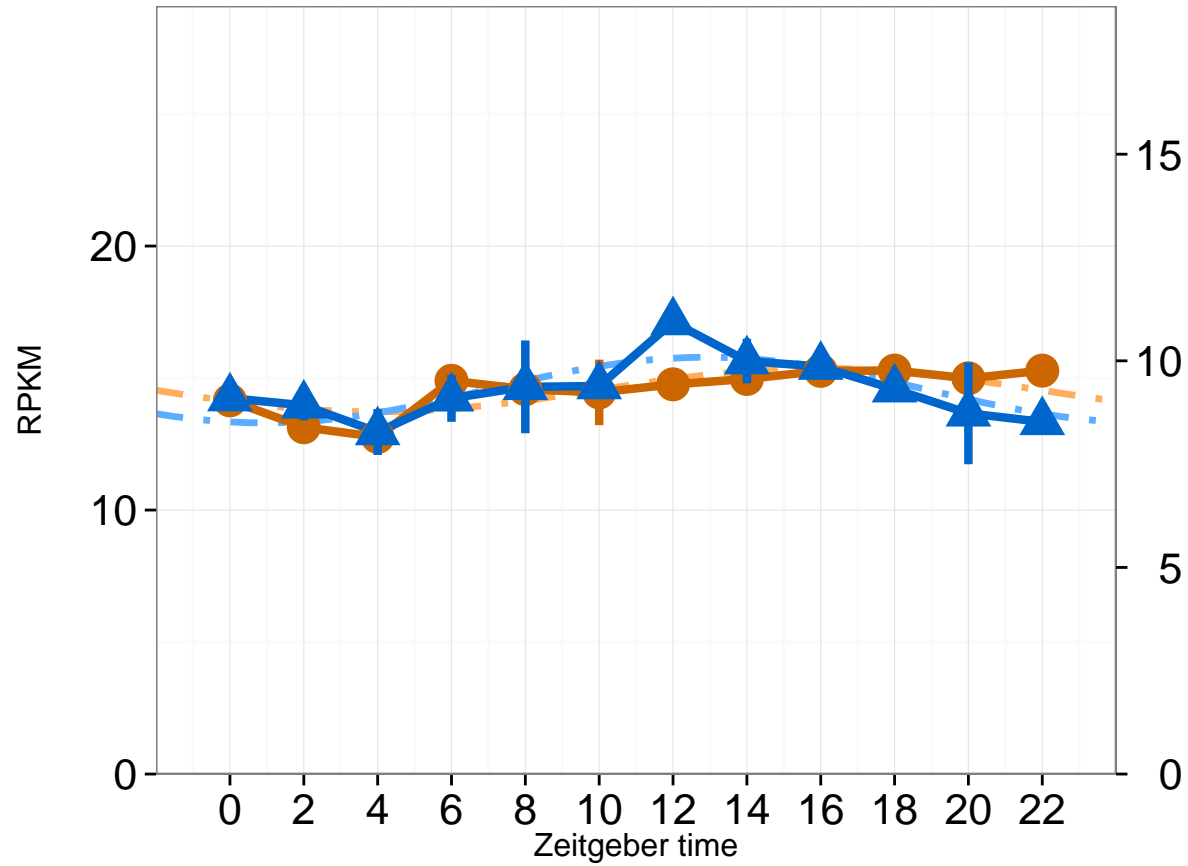

## Stim2

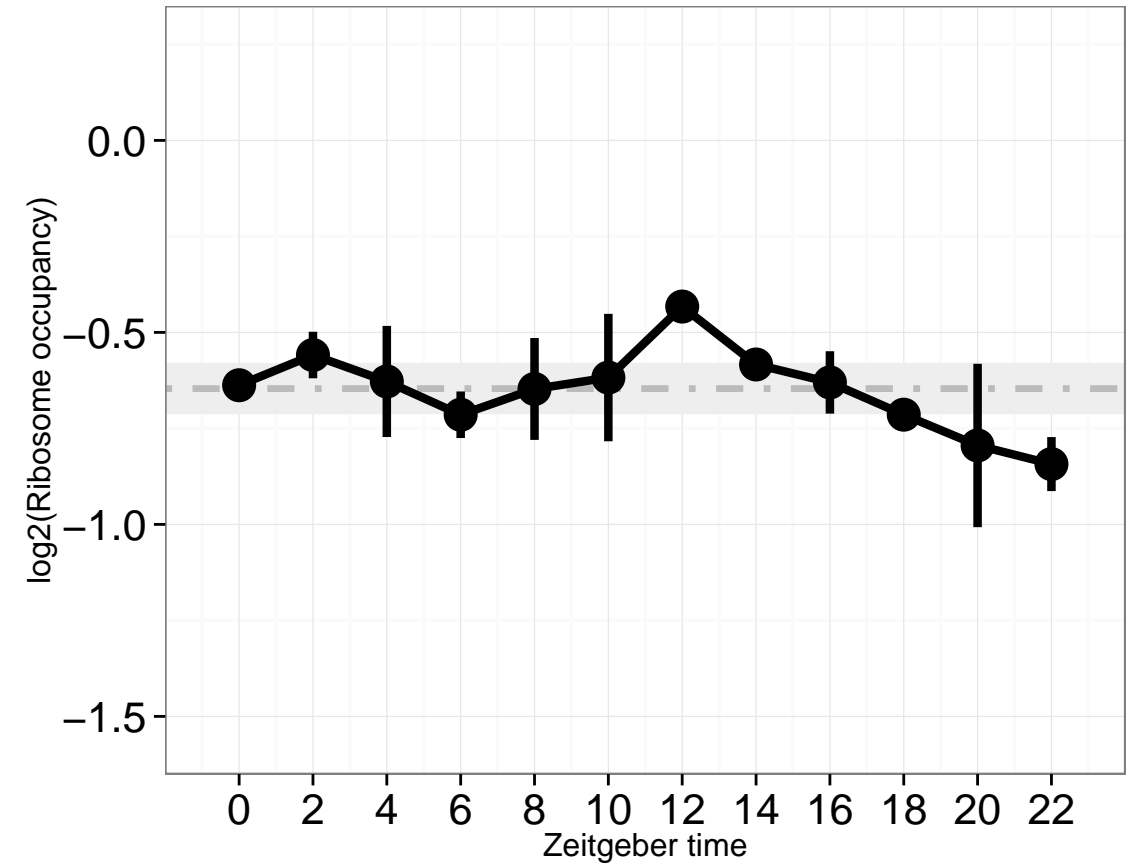

Supplement: Supplementary file 10999 [file 1]

# Tmco4

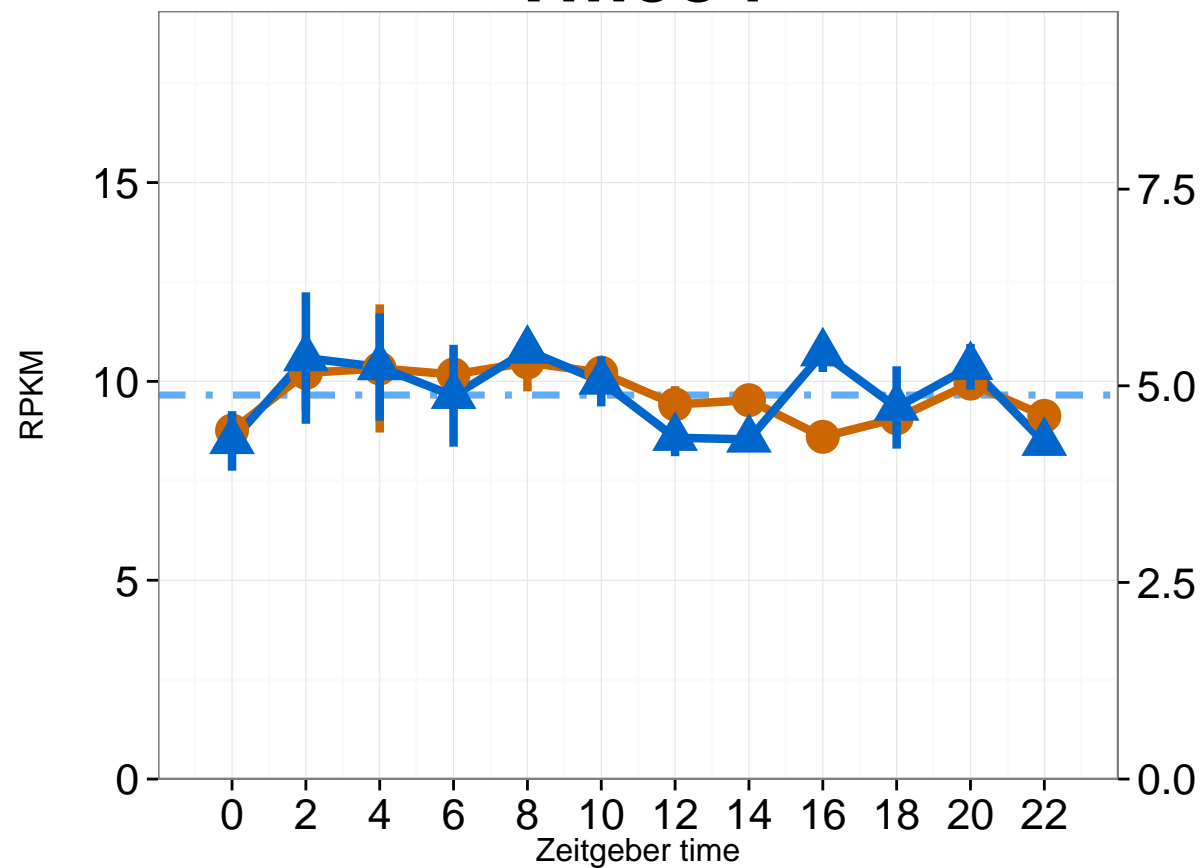

# Tmco4

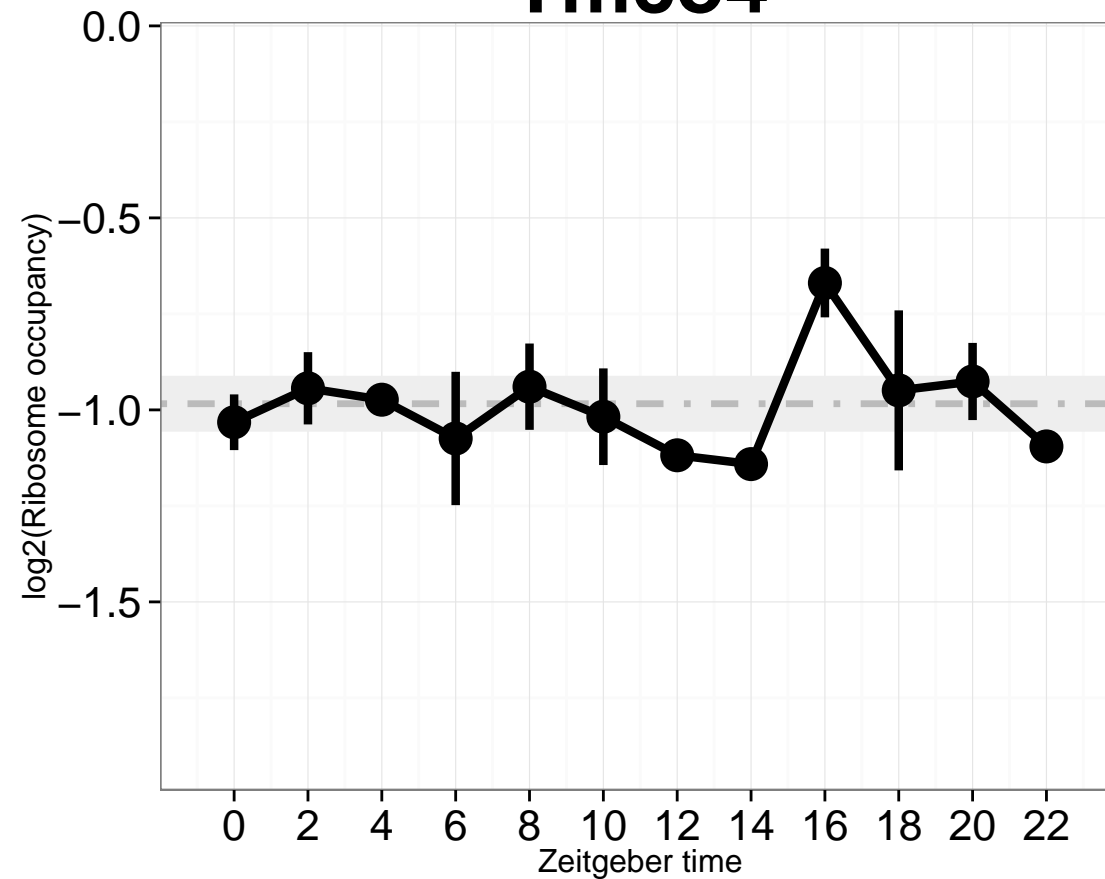

Supplement: Supplementary file 11000 [file 1]

# Brca1

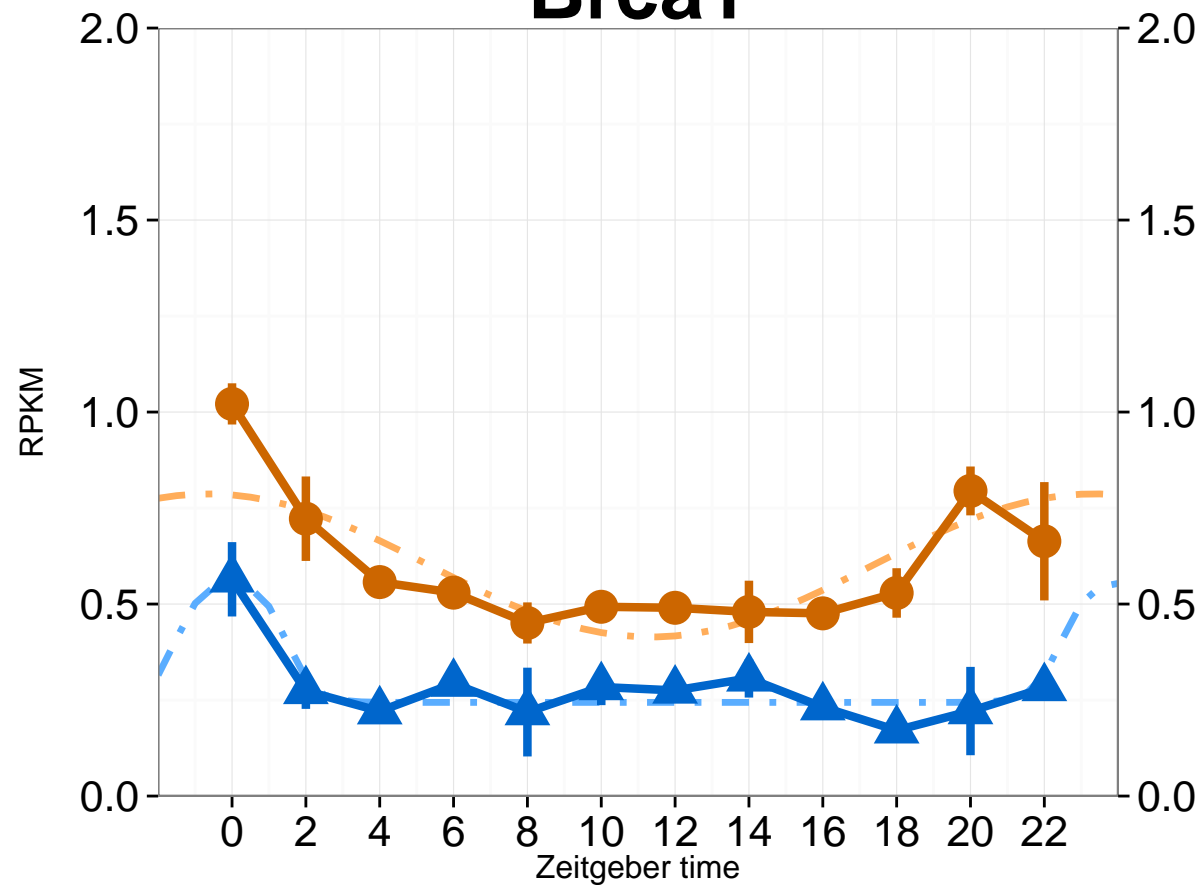

# Brca1

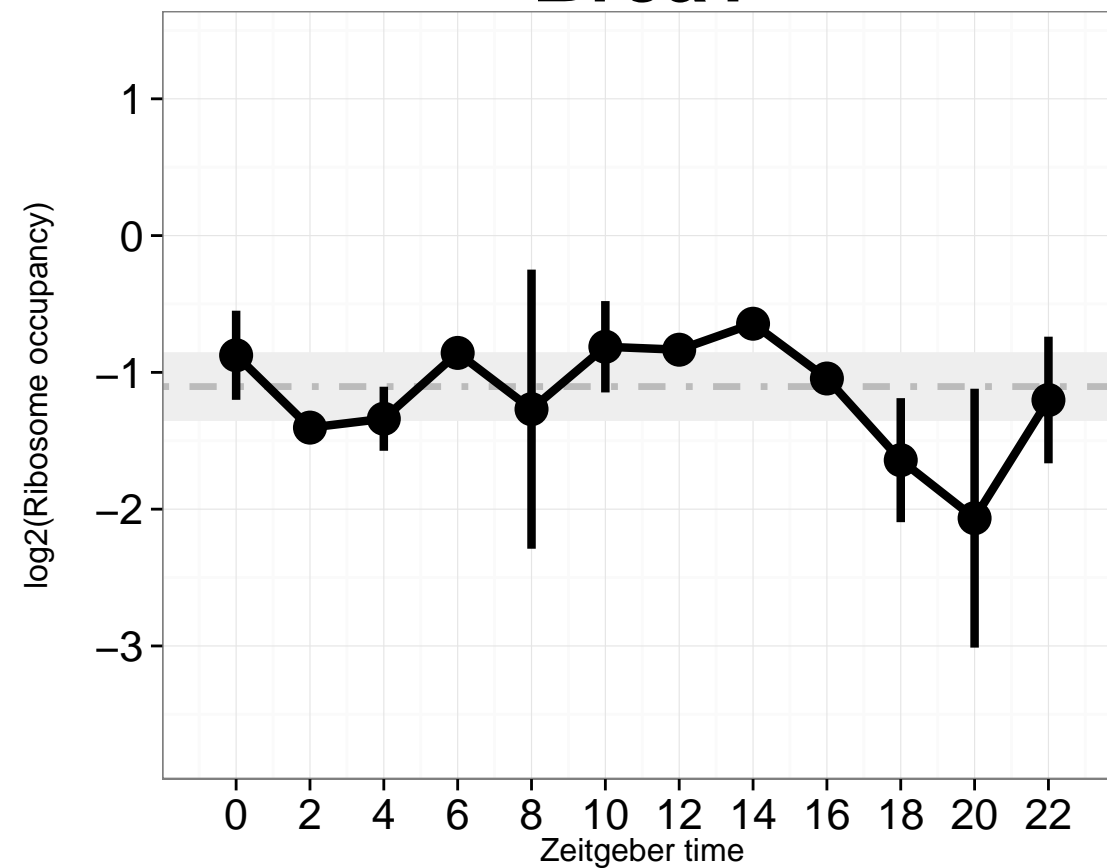

Supplement: Supplementary file 11001 [file 1]

# Rph3a

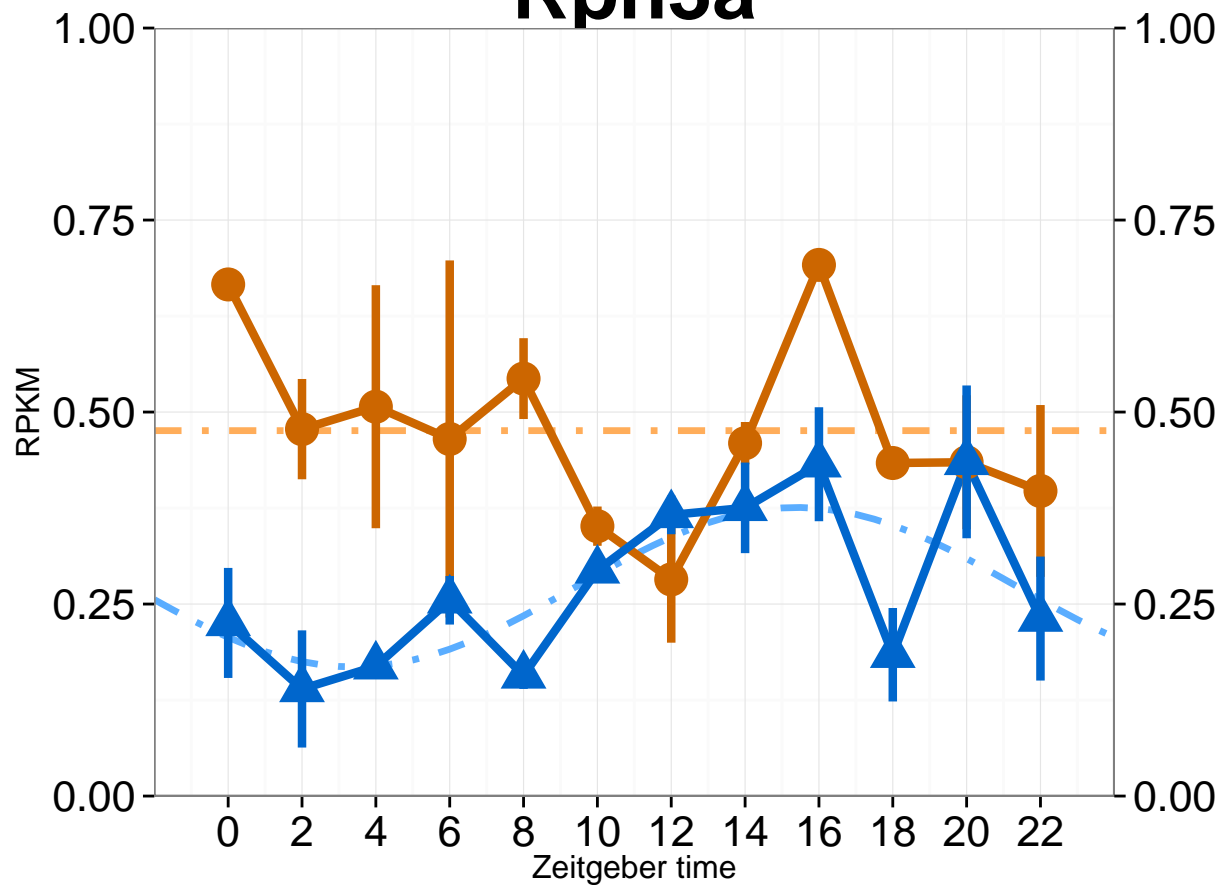

# Rph3a

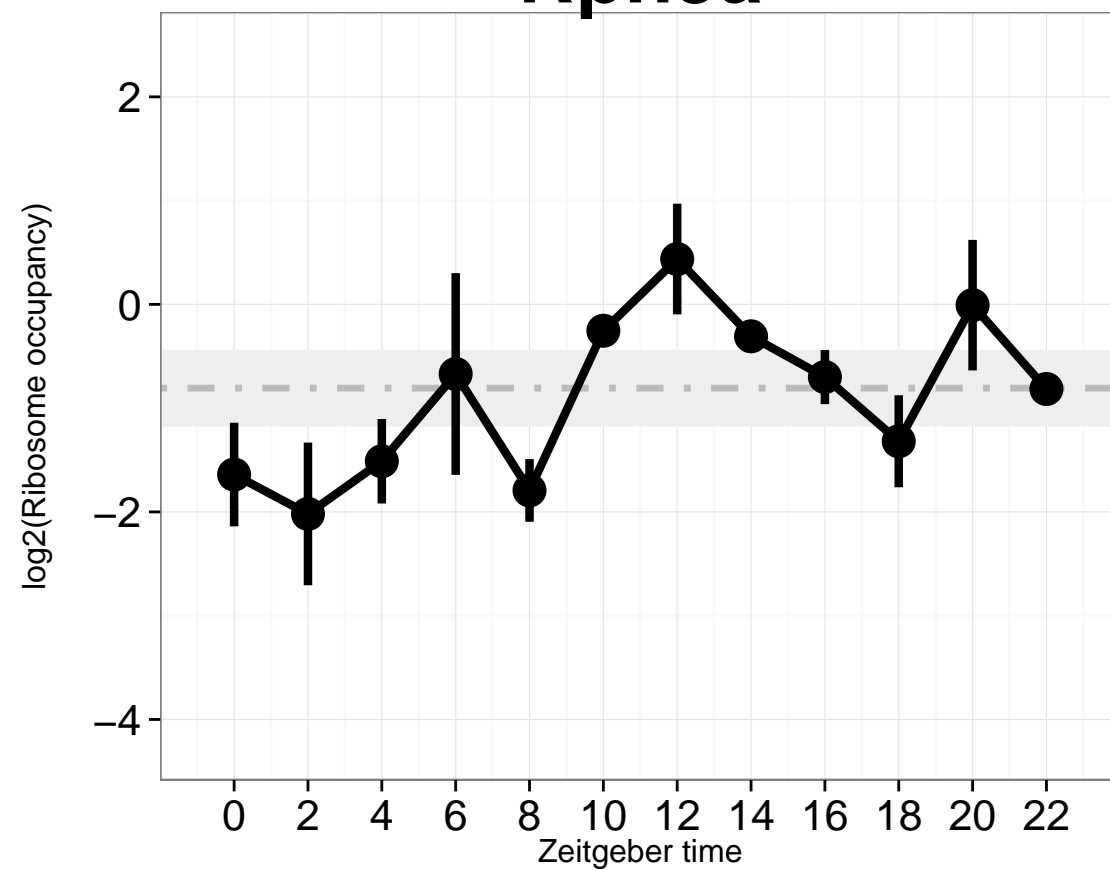

Supplement: Supplementary file 11002 [file 1]

## Slc44a4

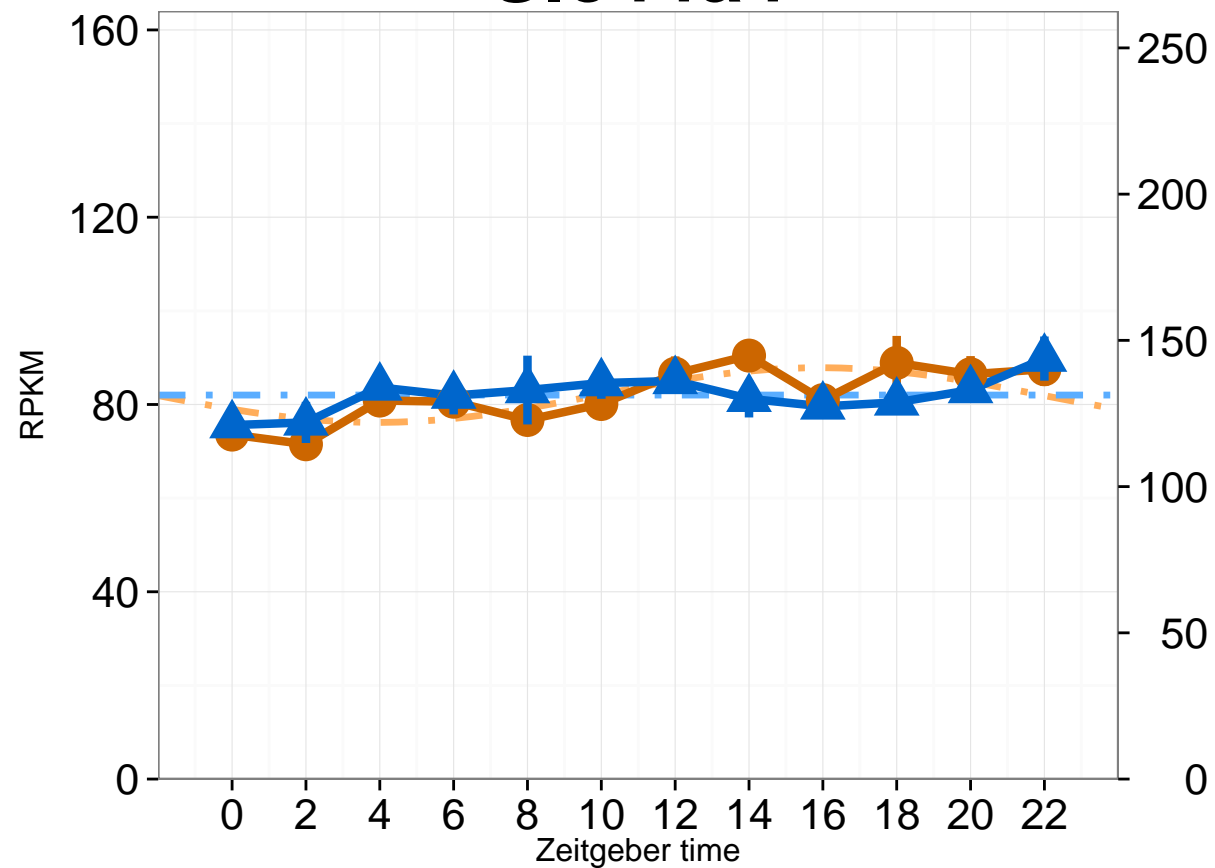

## Slc44a4

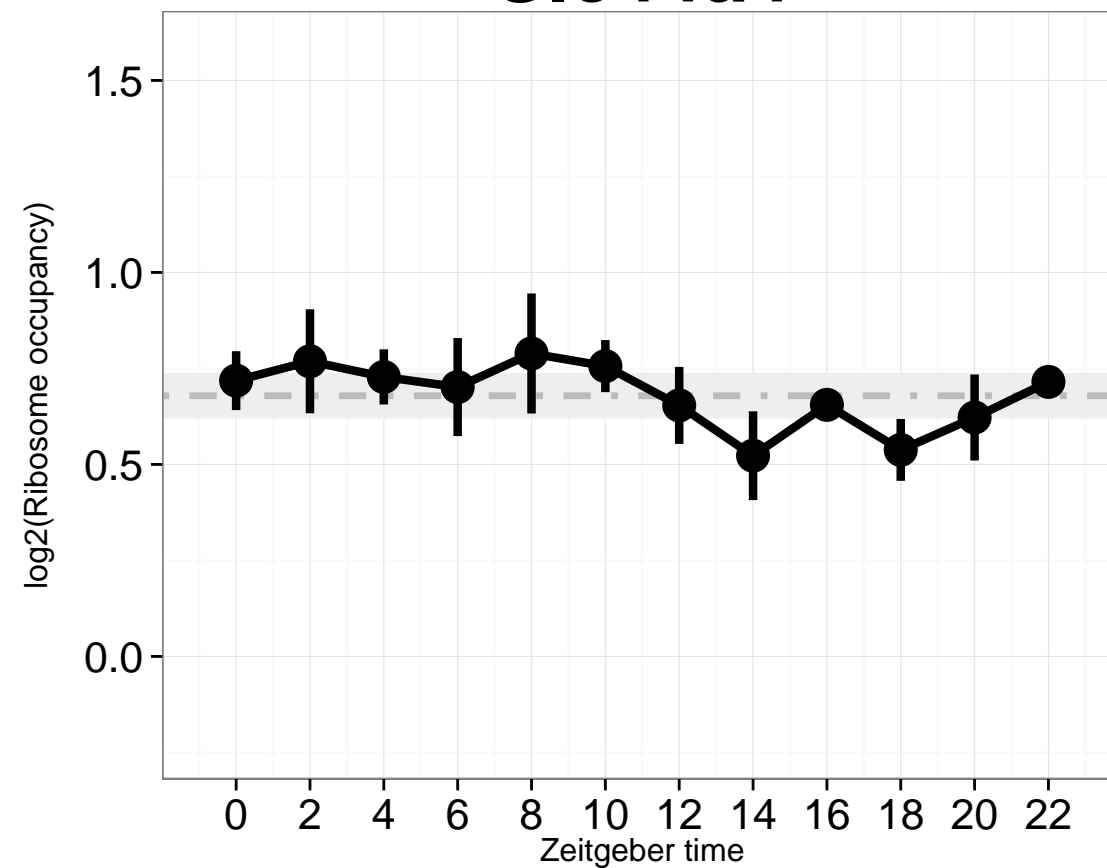

Supplement: Supplementary file 11003 [file 1]

# Zyg11b

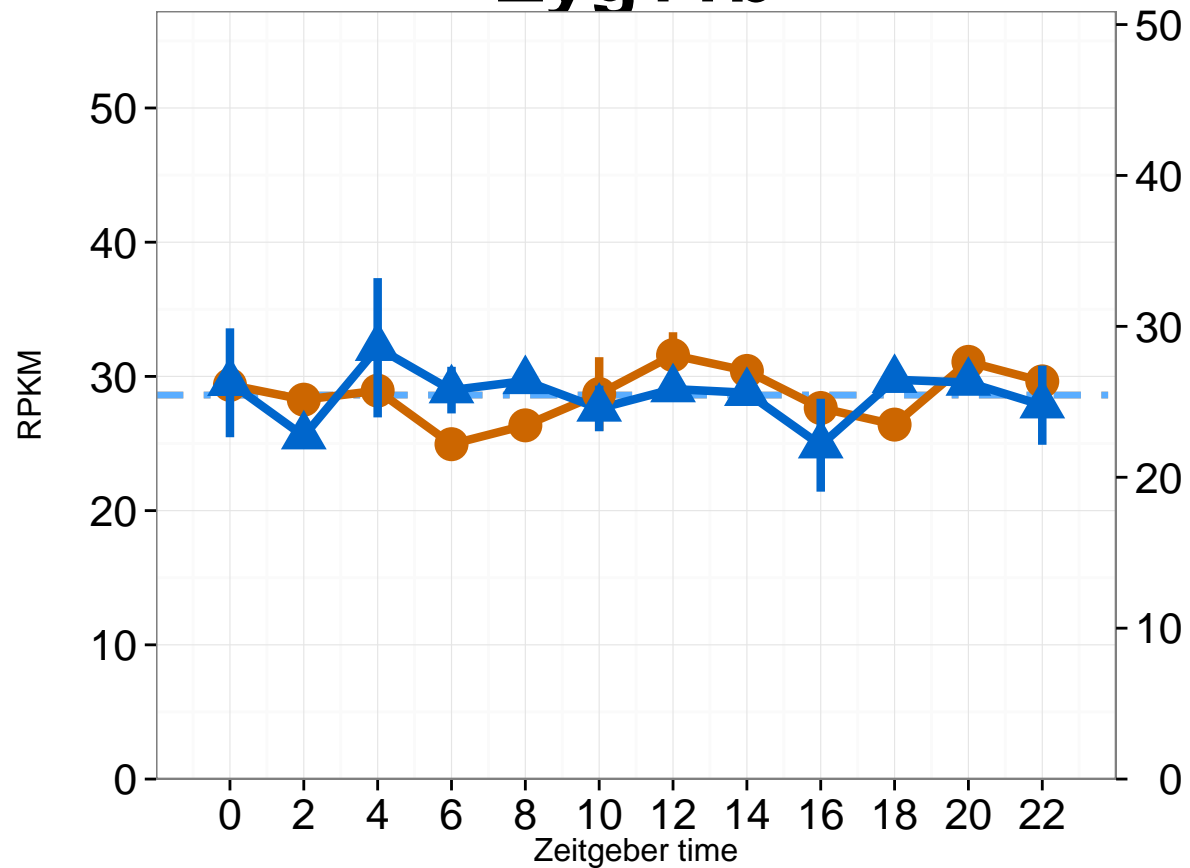

# Zyg11b

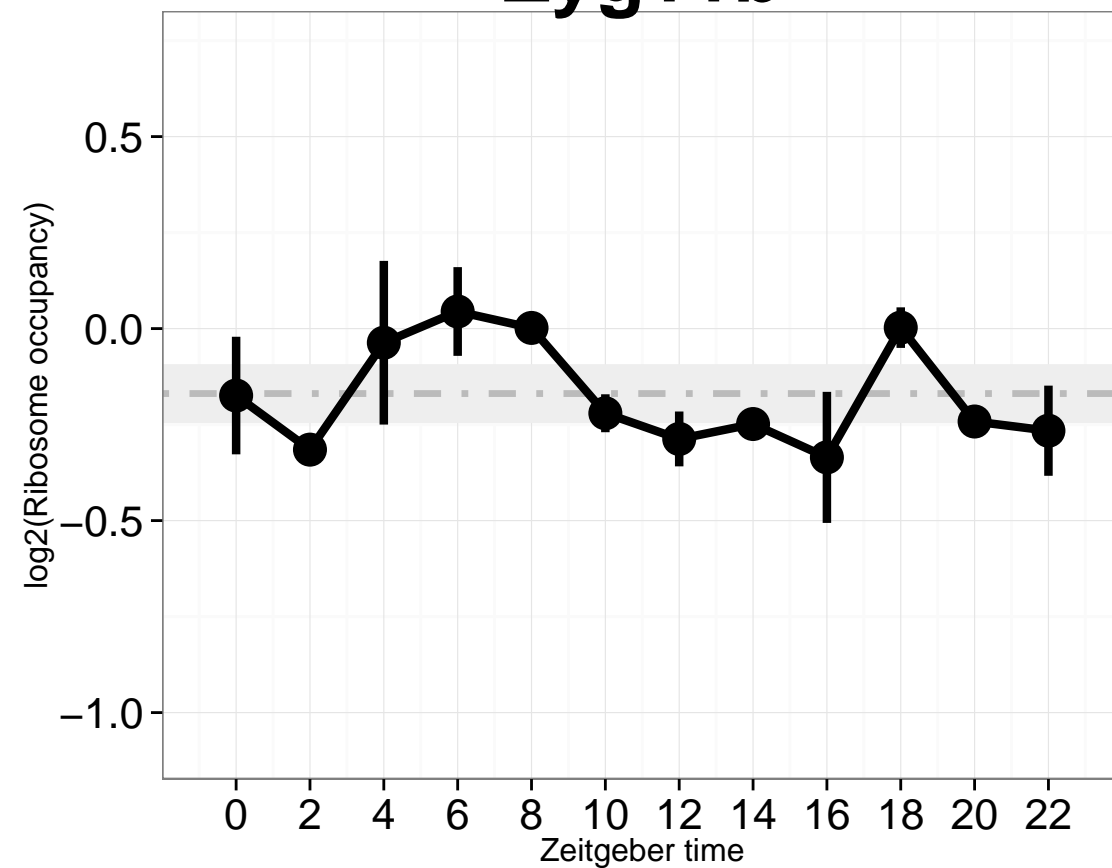

Supplement: Supplementary file 11004 [file 1]

## Cdk6

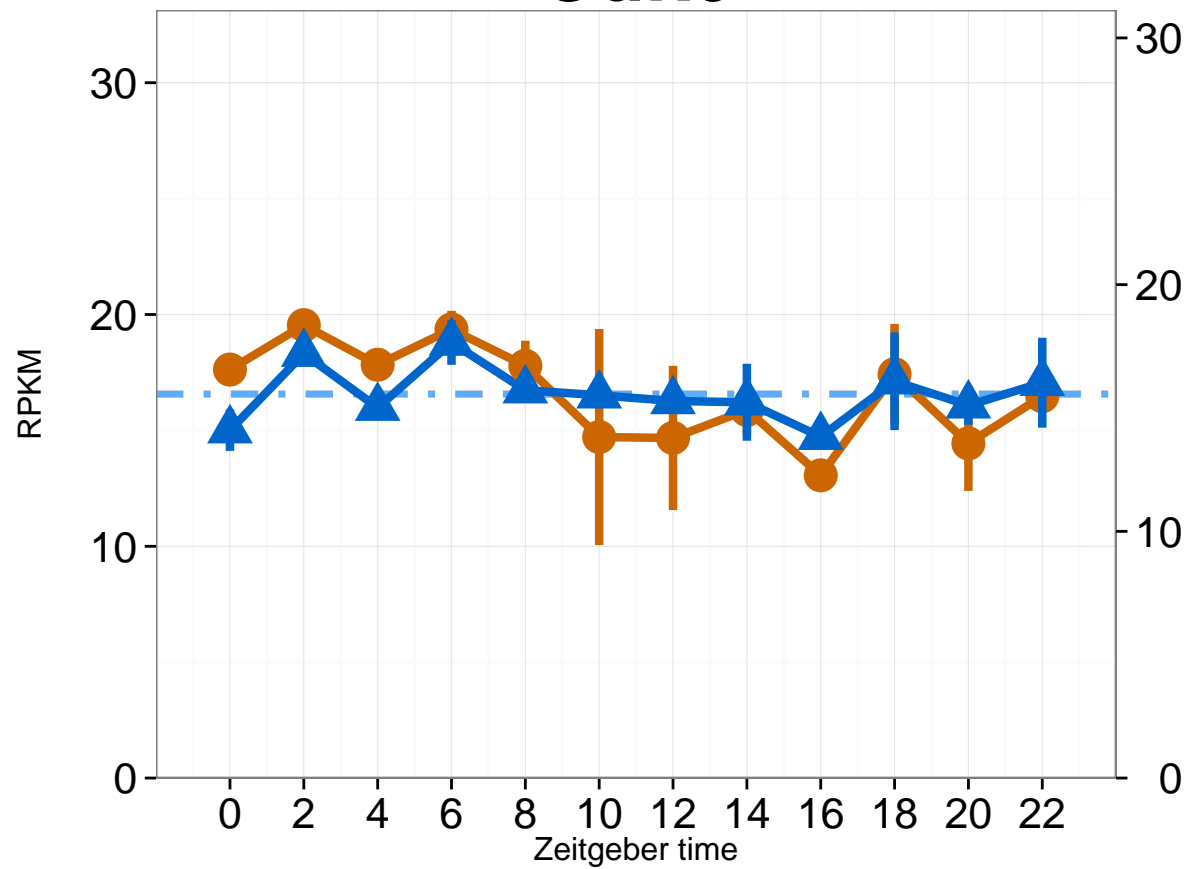

## Cdk6

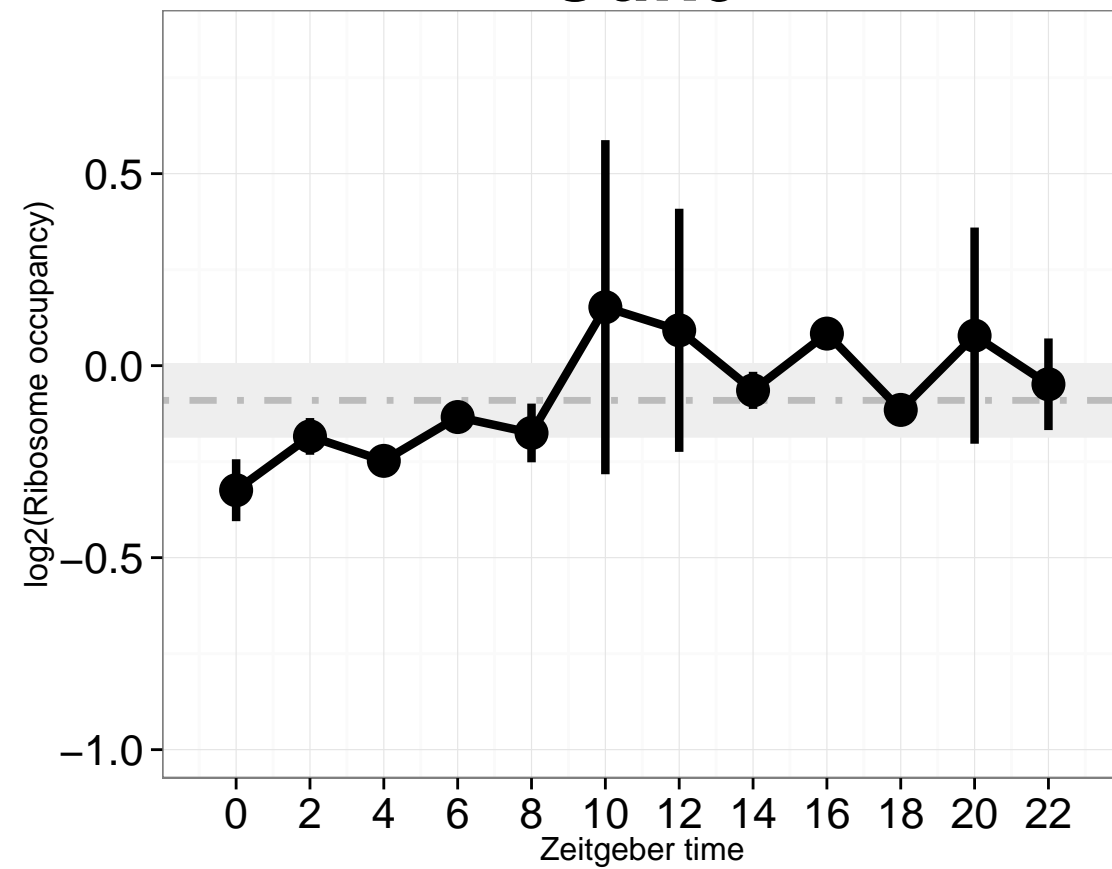

Supplement: Supplementary file 11005 [file 1]

# Egfl7

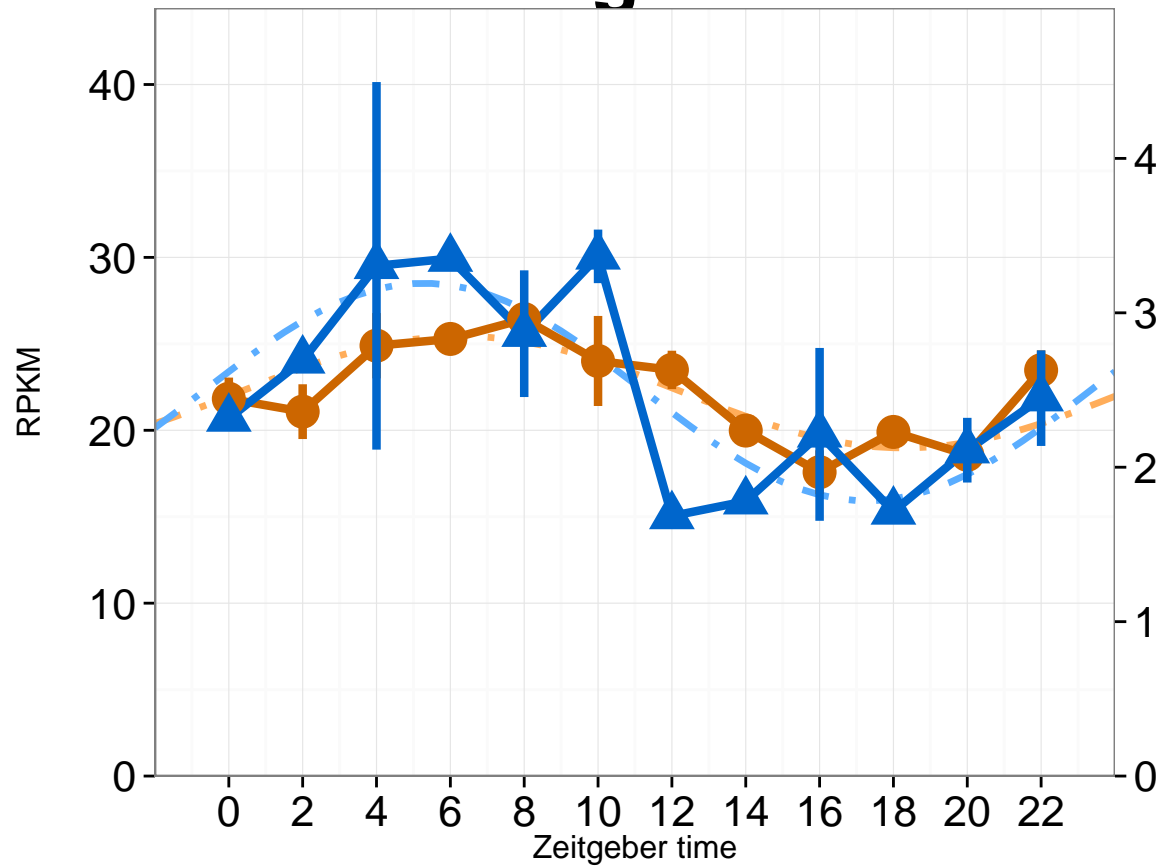

# Egfl7

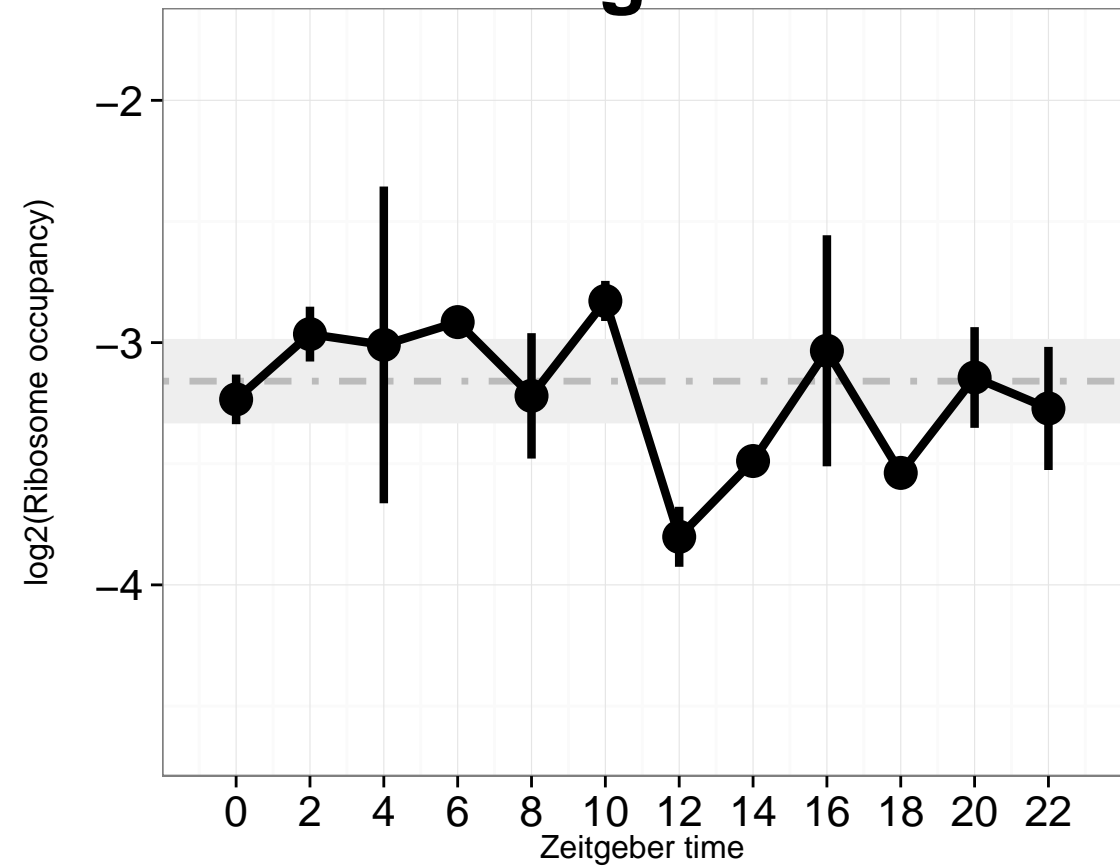

Supplement: Supplementary file 11006 [file 1]

# Pmepa1

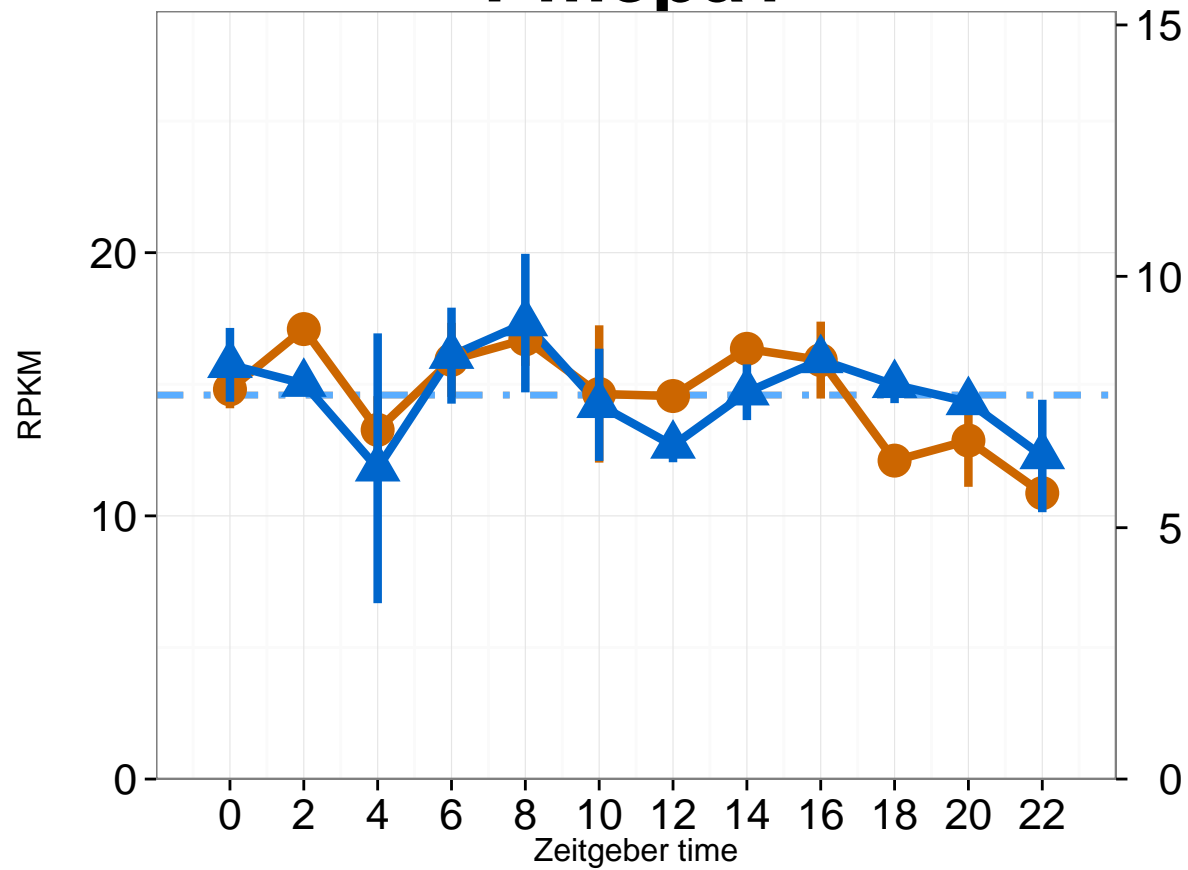

# Pmepa1

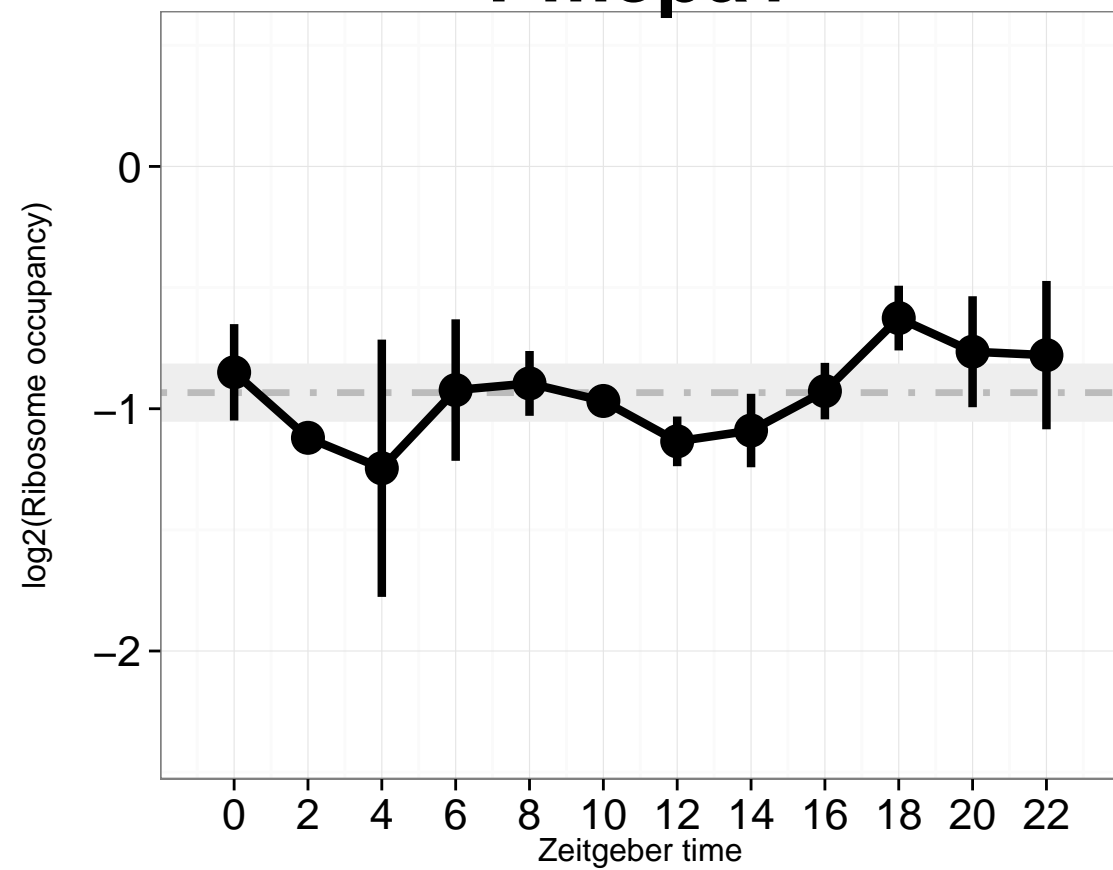

Supplement: Supplementary file 11007 [file 1]

# Slc35e3

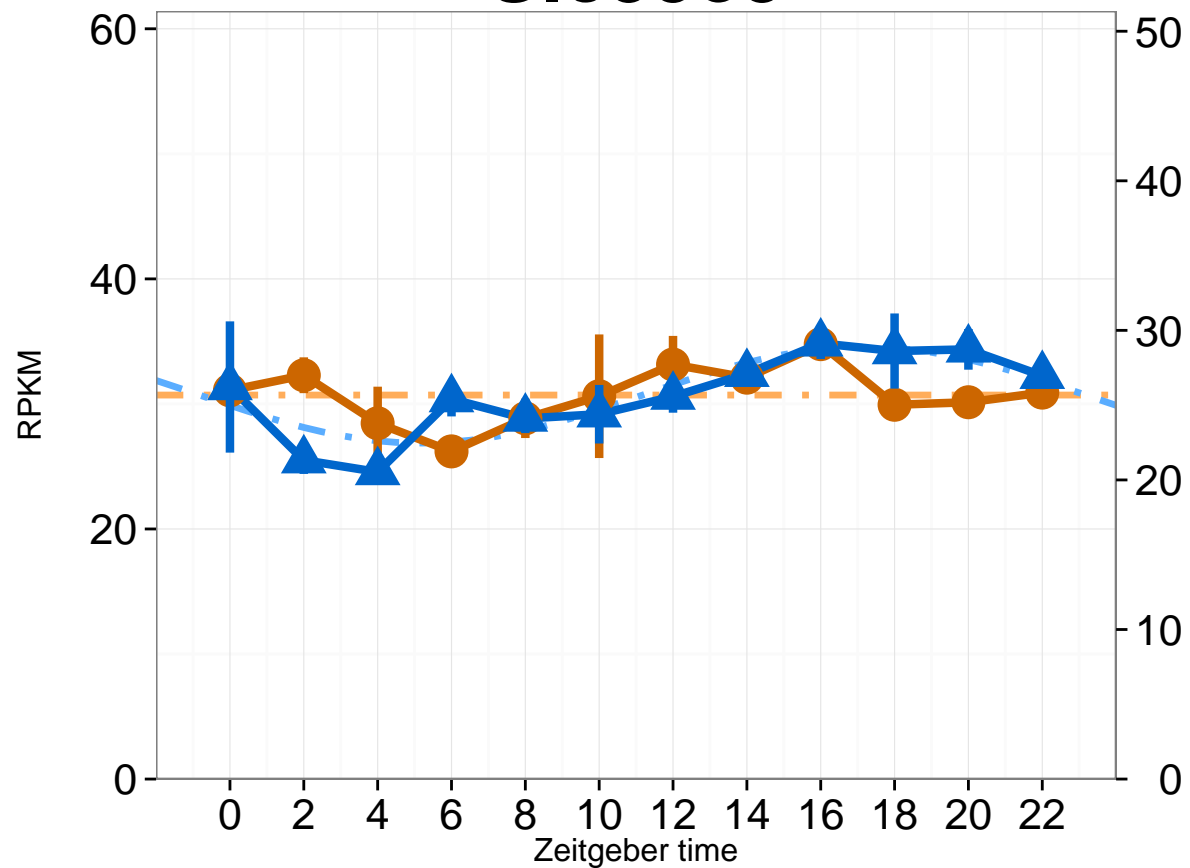

# Slc35e3

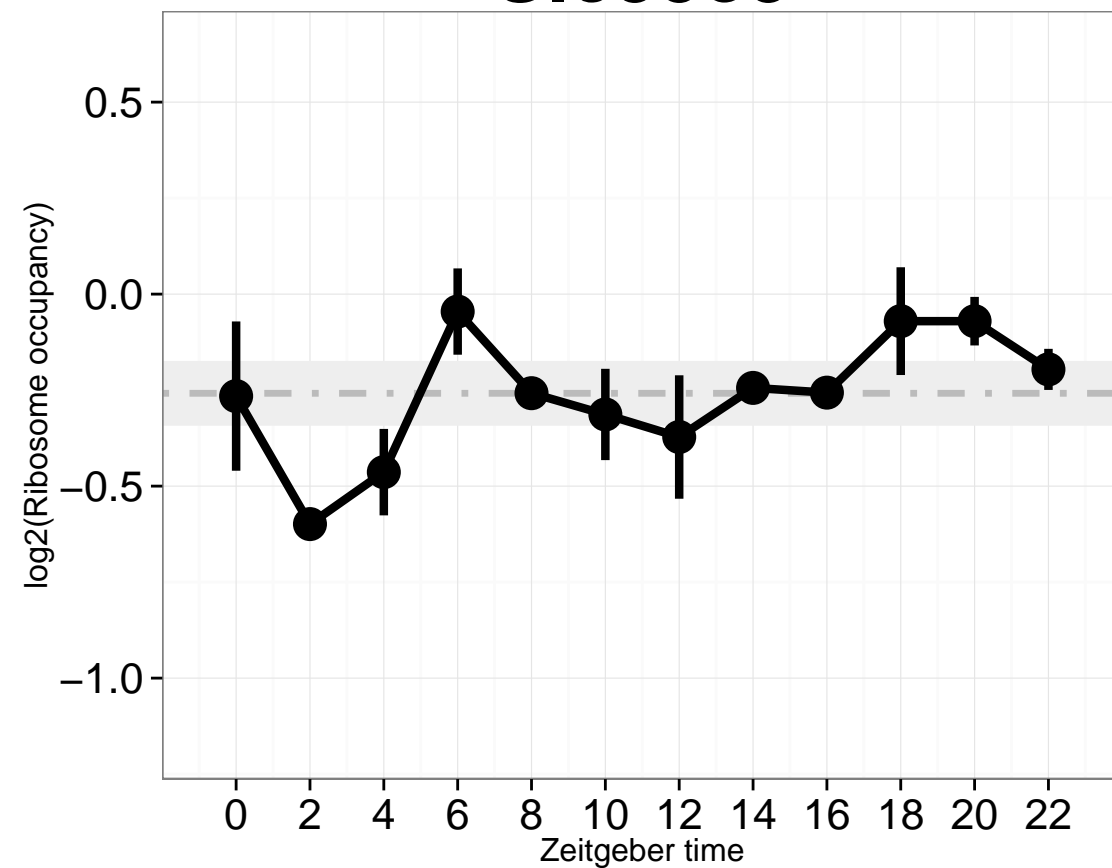

Supplement: Supplementary file 11008 [file 1]

## Itgav

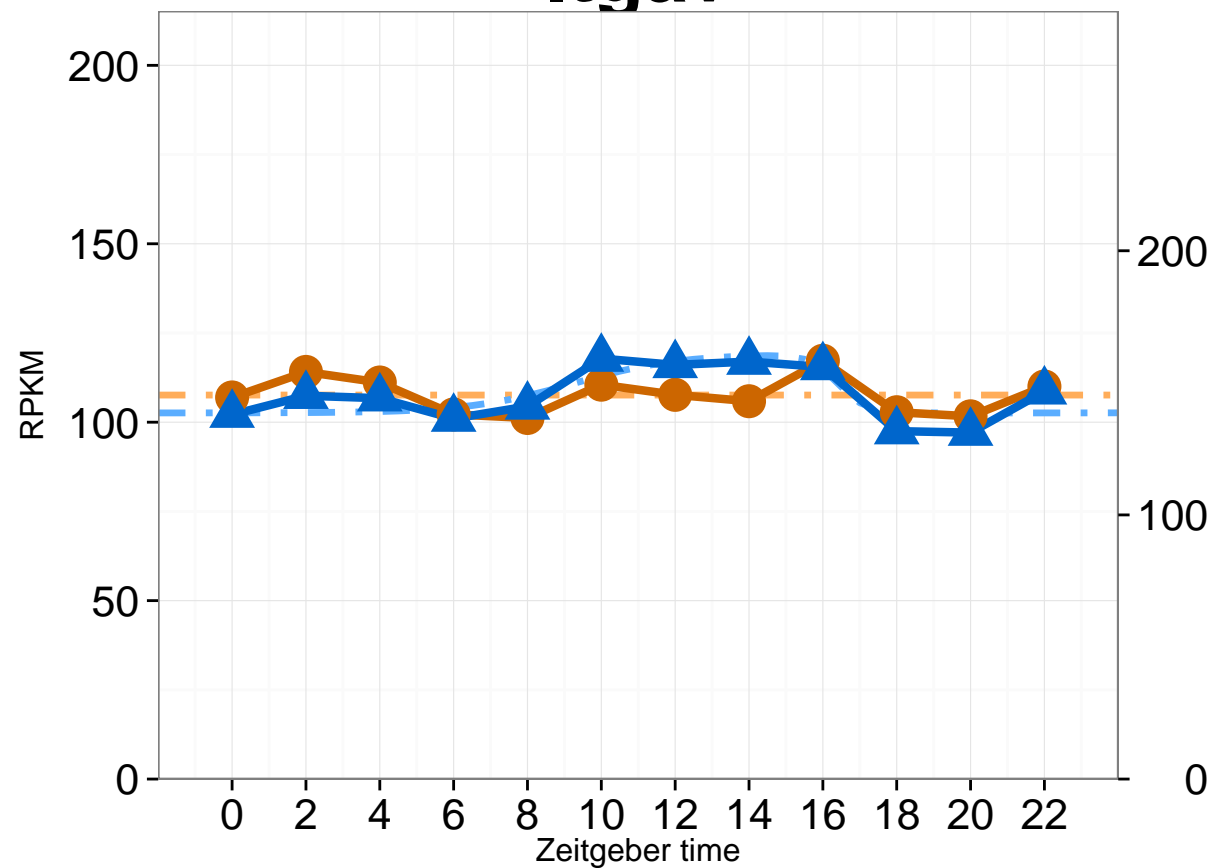

## Itgav

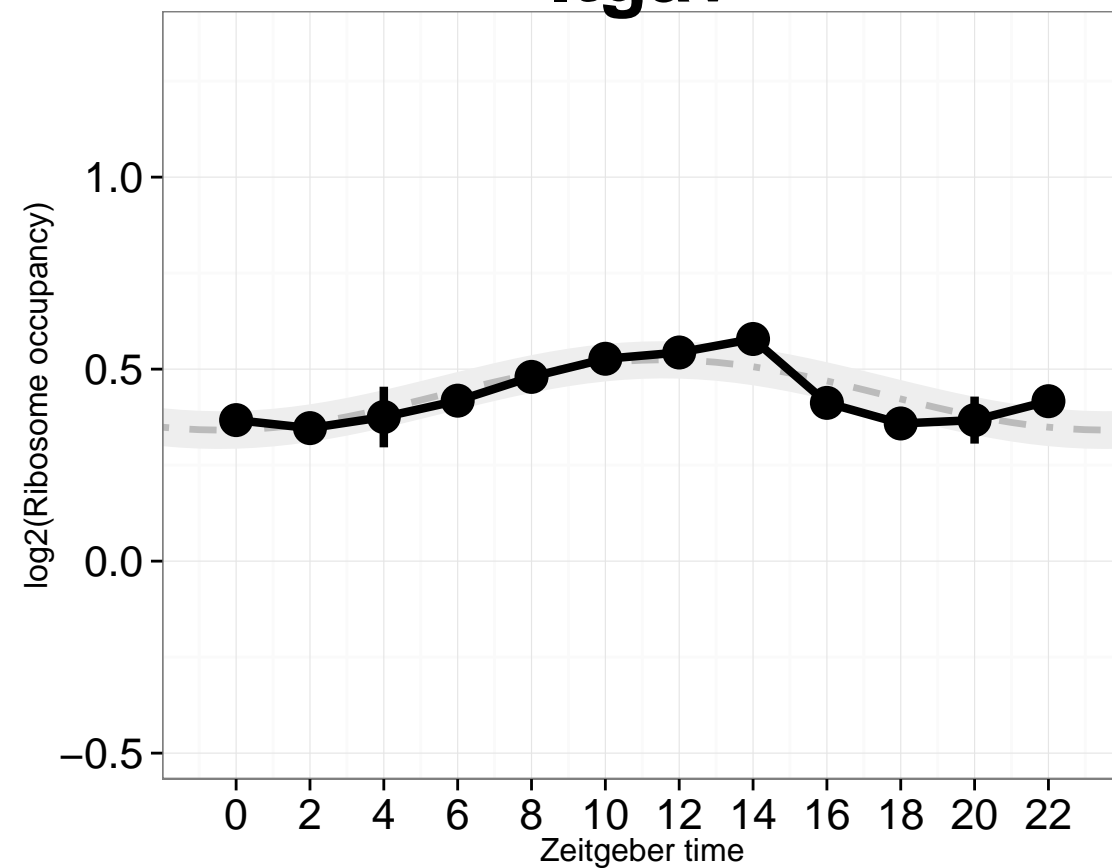

Supplement: Supplementary file 11009 [file 1]

## Zbed3

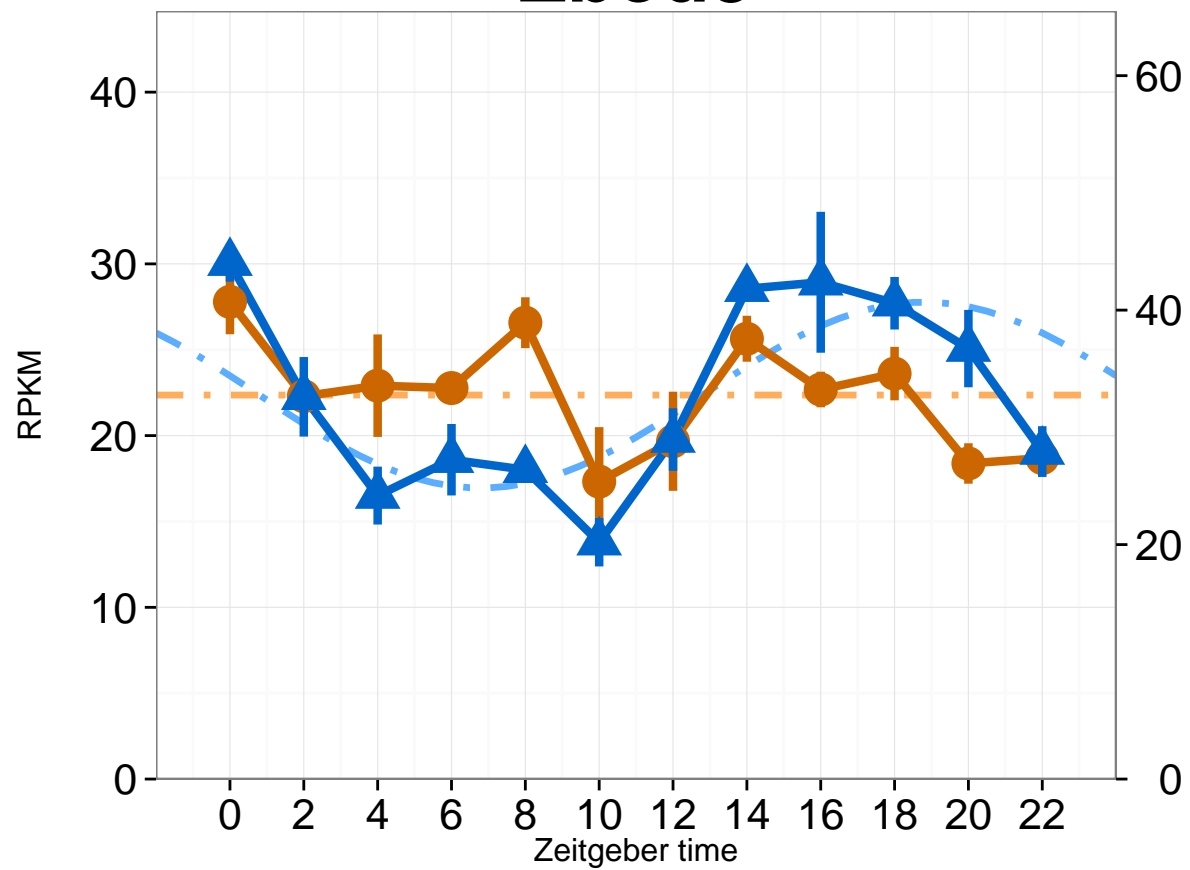

## Zbed3

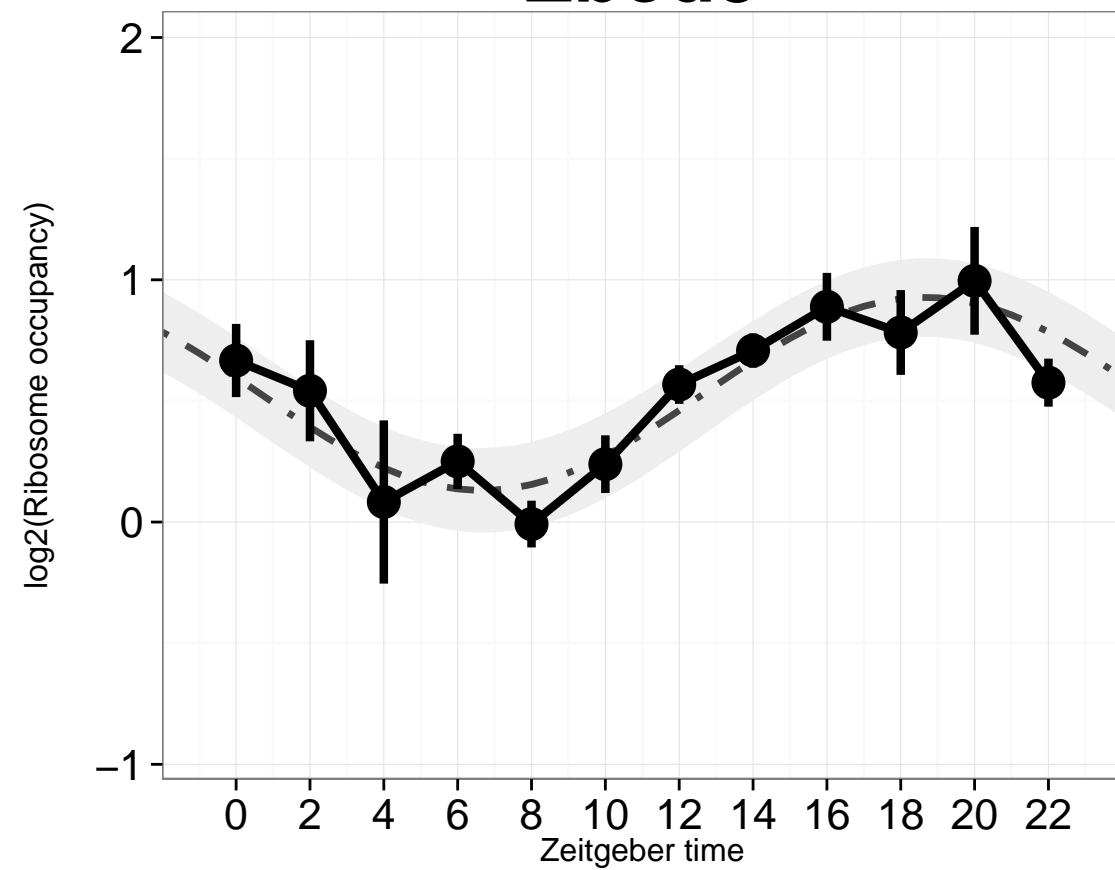

Supplement: Supplementary file 11010 [file 1]

## Pex19

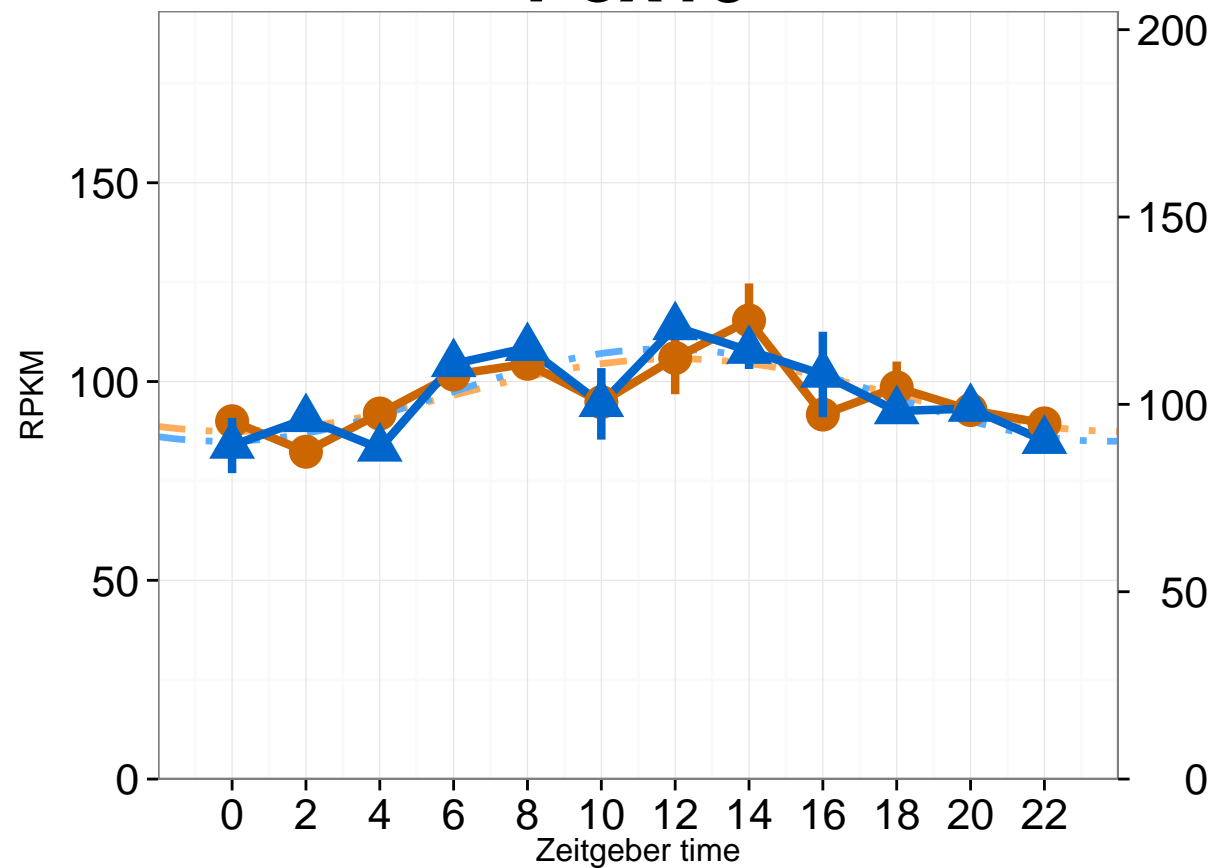

## Pex19

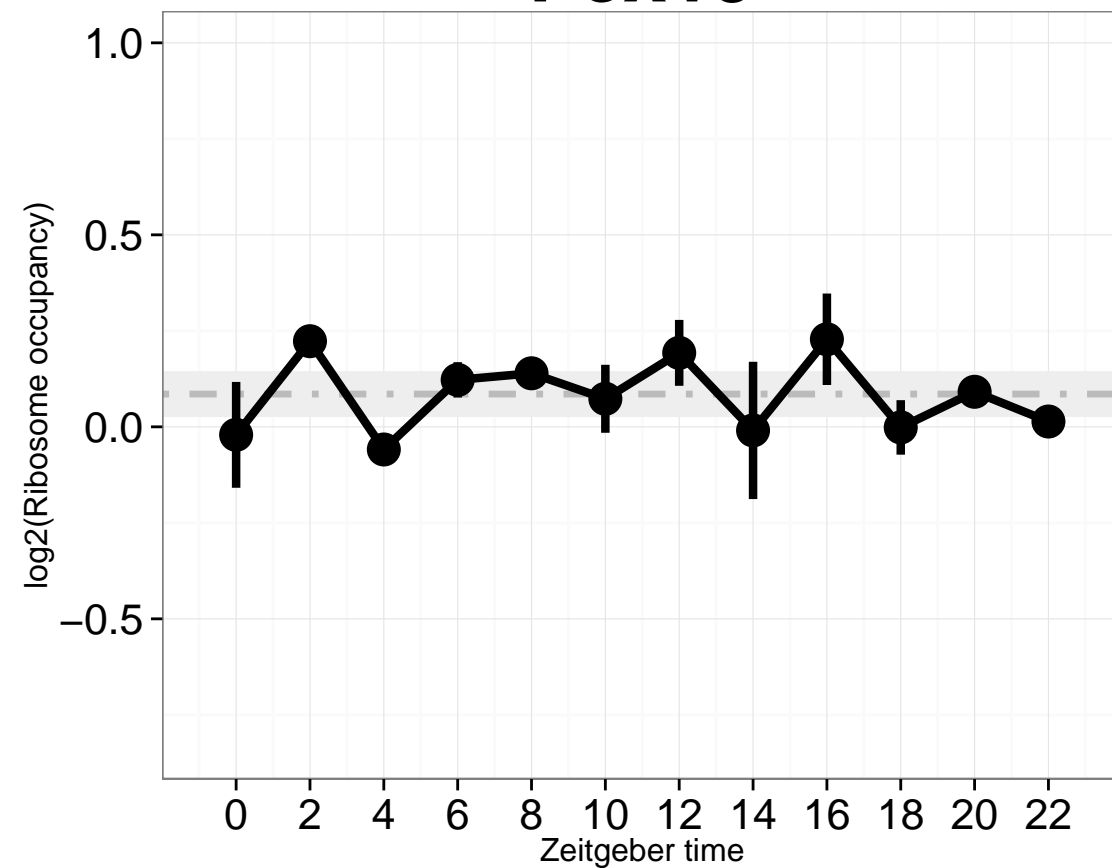

Supplement: Supplementary file 11011 [file 1]

# Ctr9

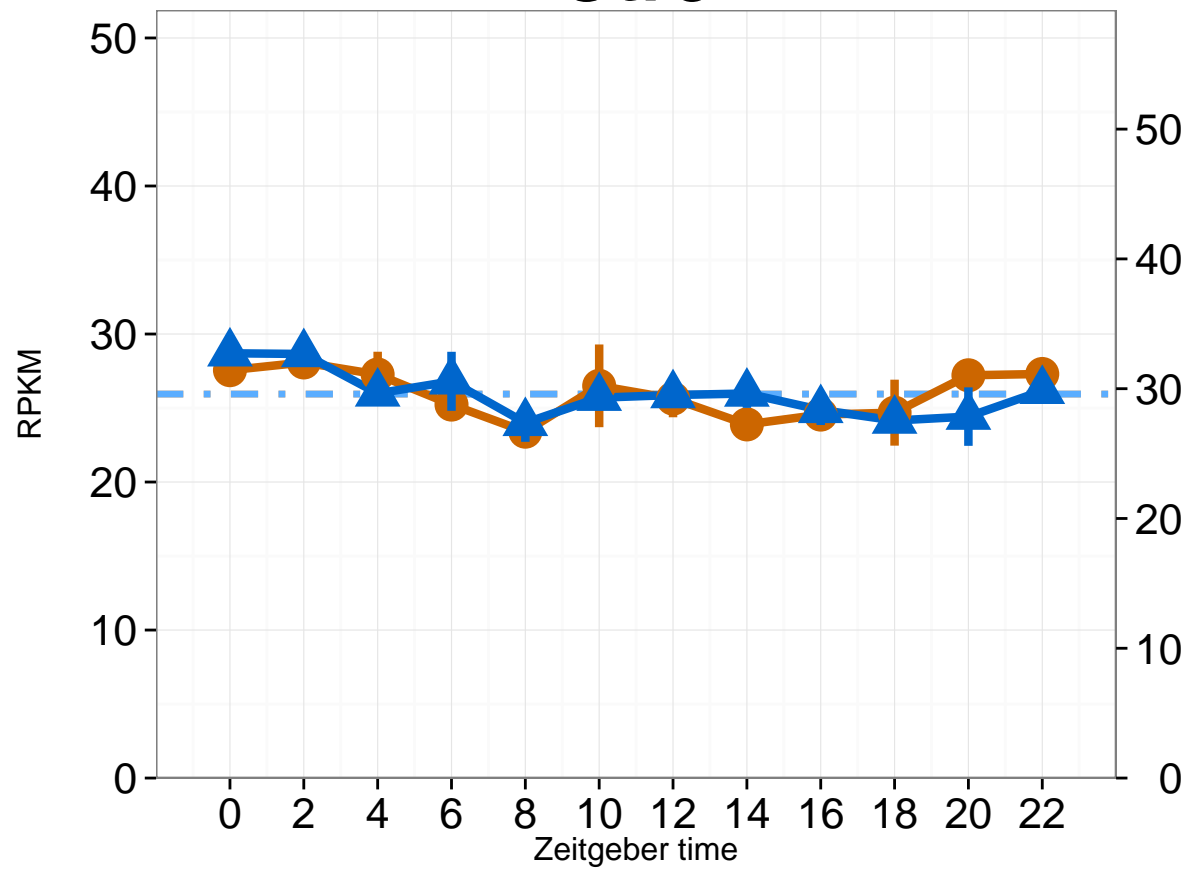

# Ctr9

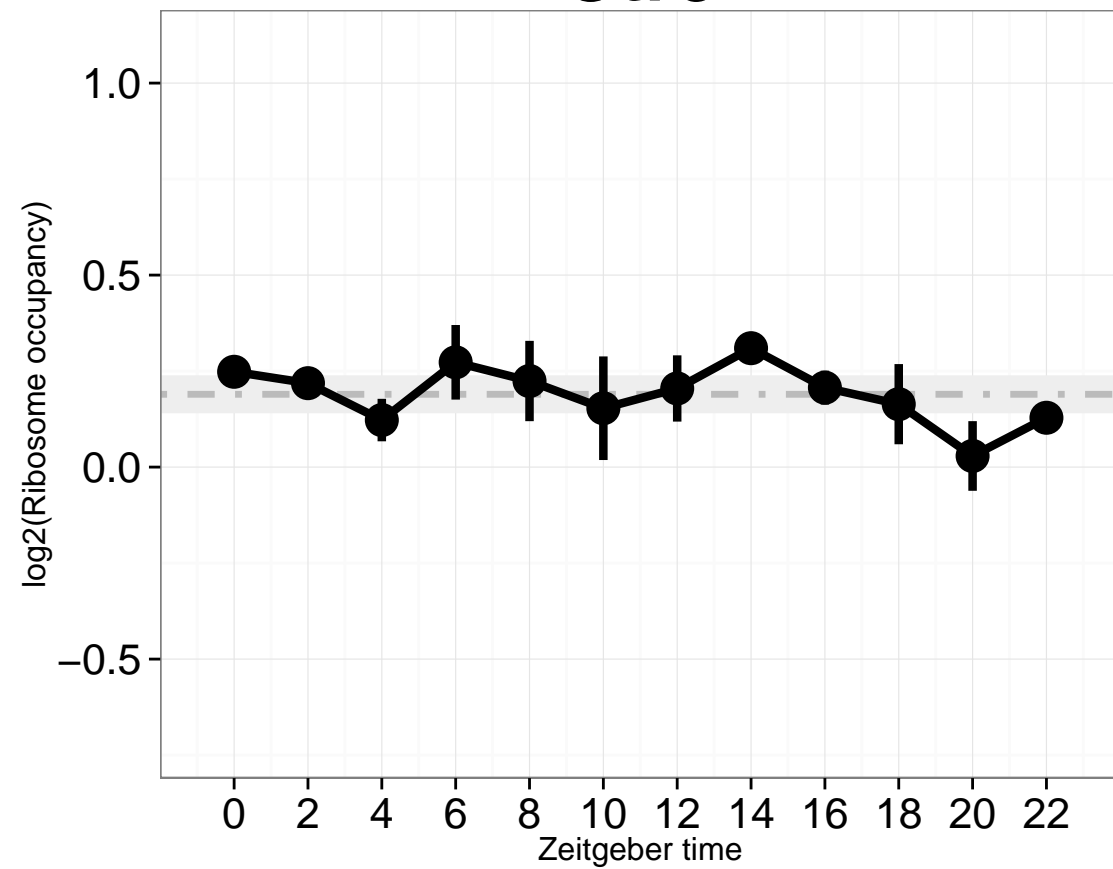

Supplement: Supplementary file 11012 [file 1]

## Pcdh9

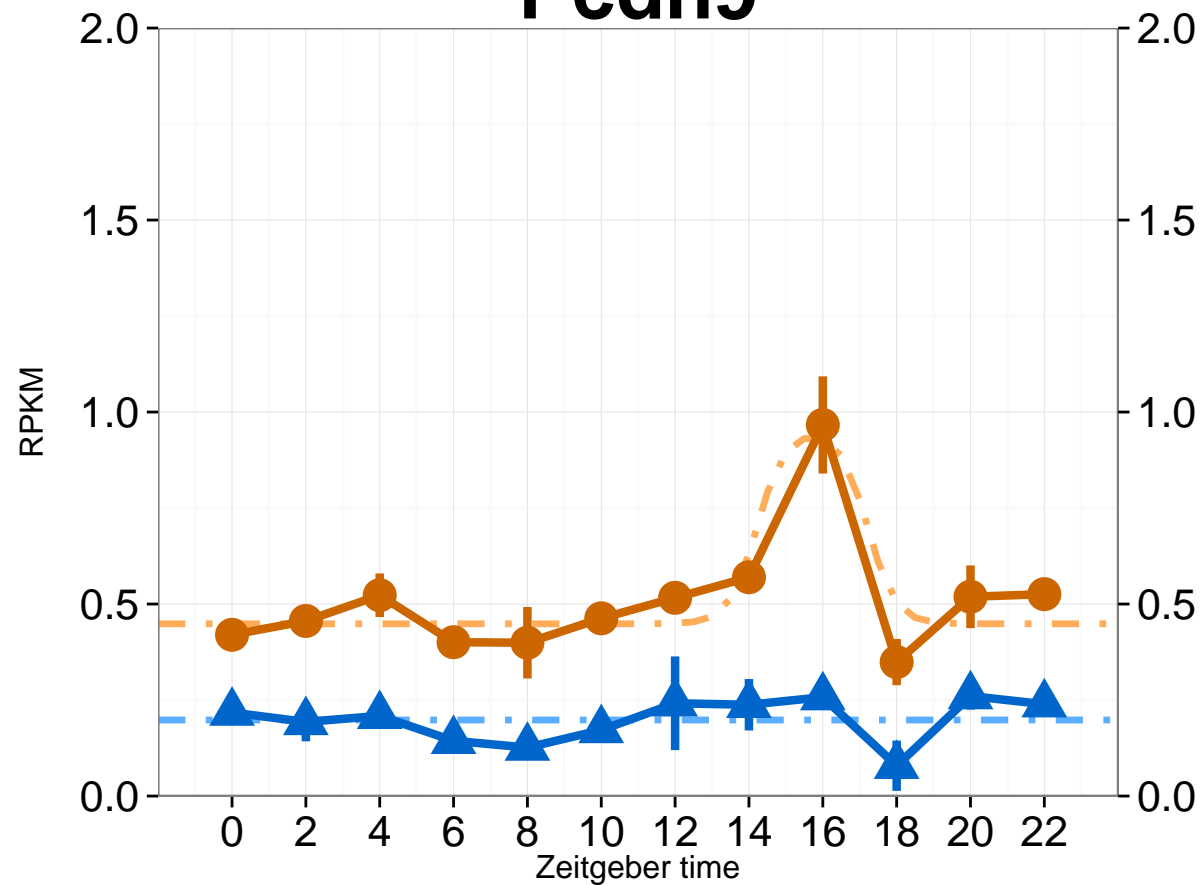

## Pcdh9

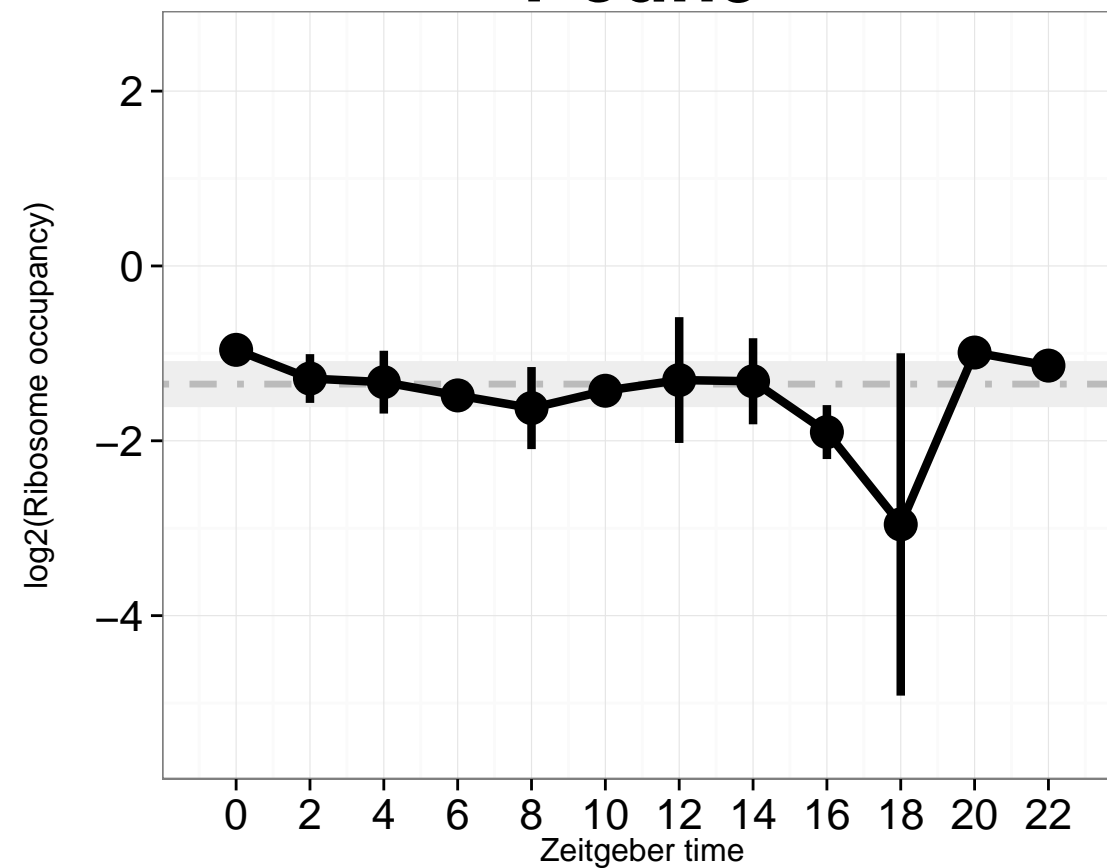

Supplement: Supplementary file 11013 [file 1]

# Tmem68

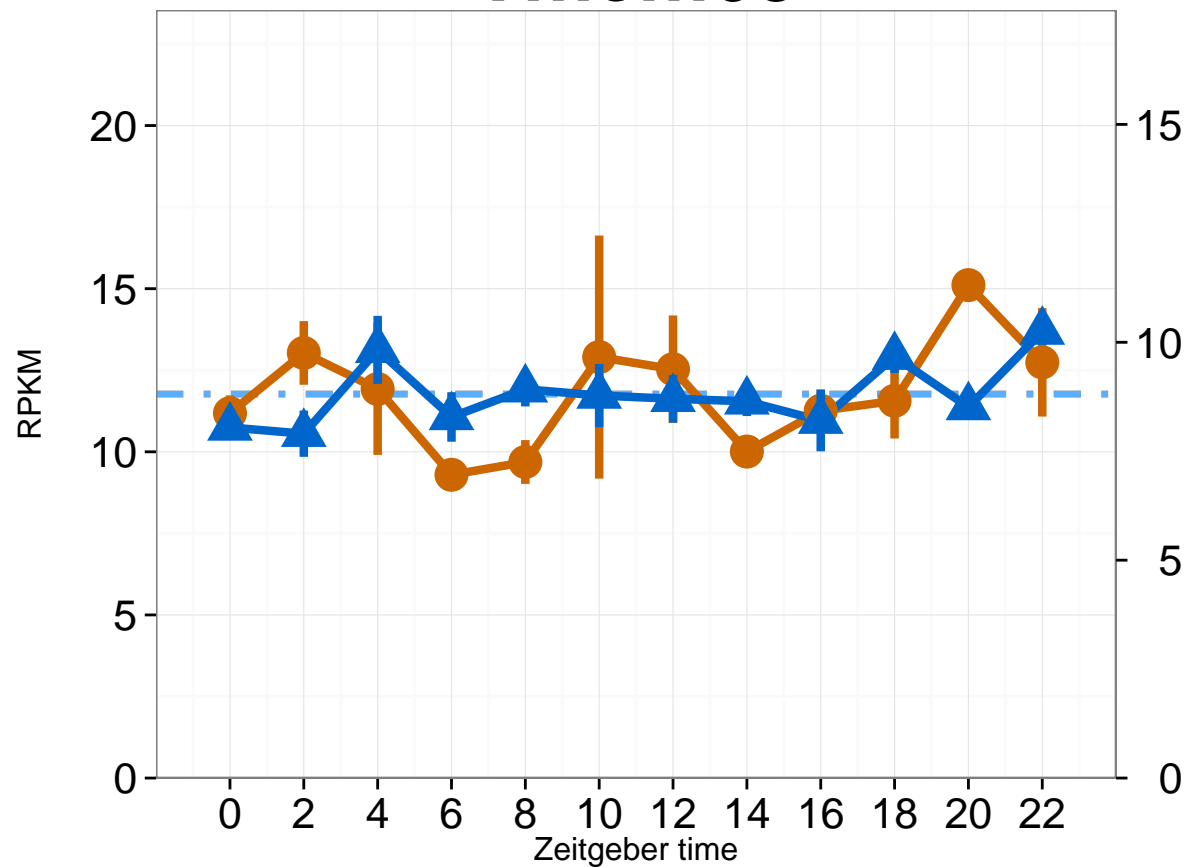

# Tmem68

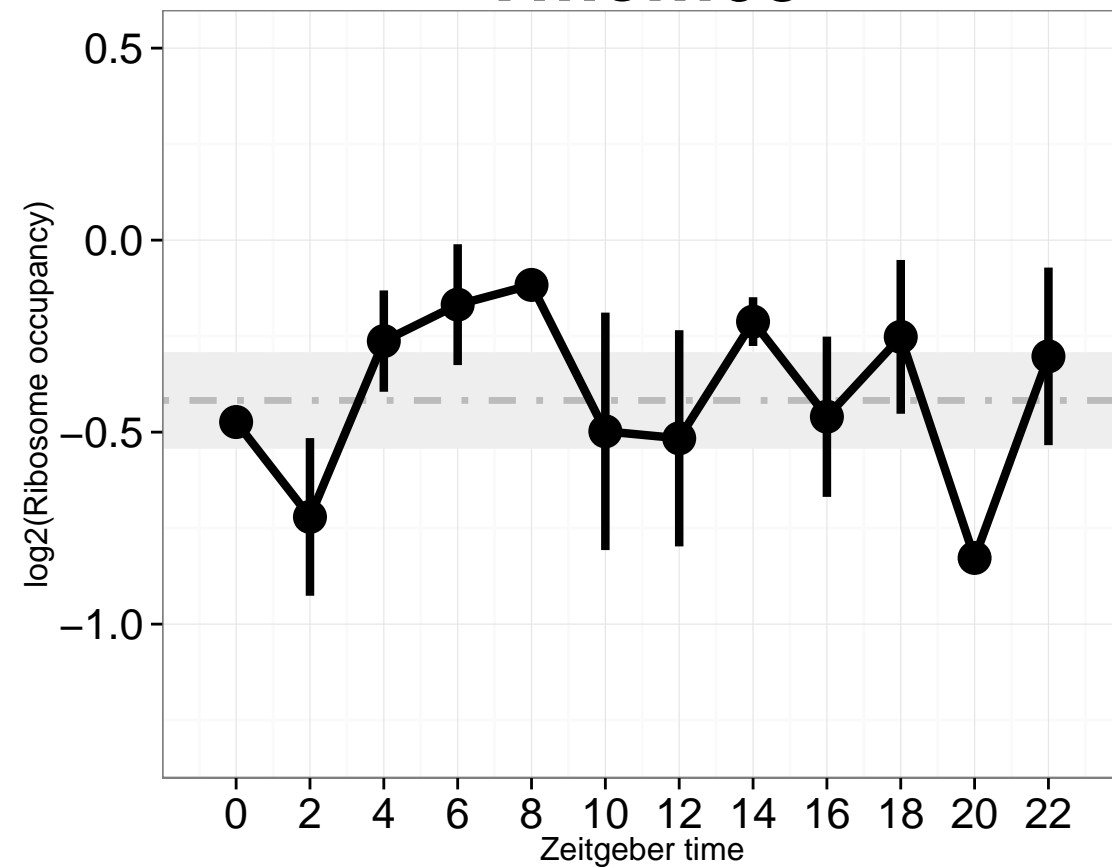

Supplement: Supplementary file 11014 [file 1]

## Rabgap1

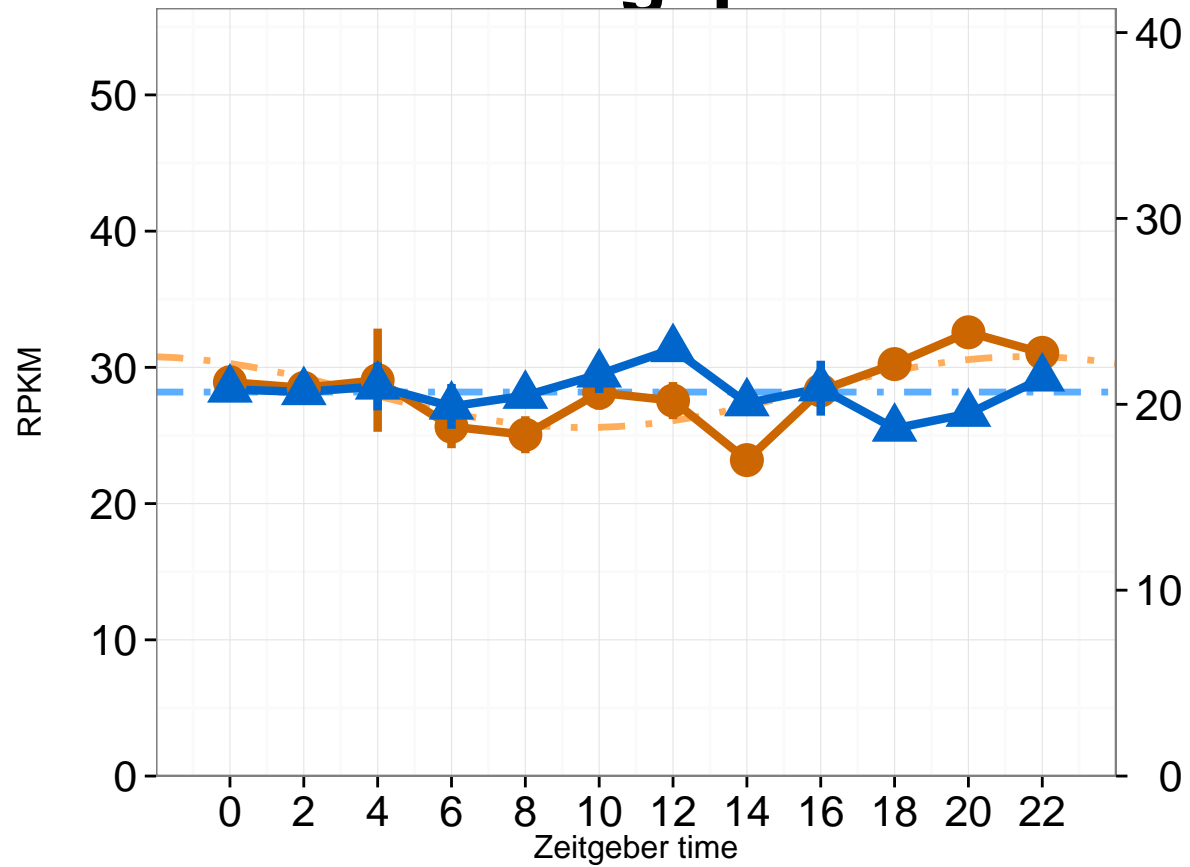

## Rabgap1

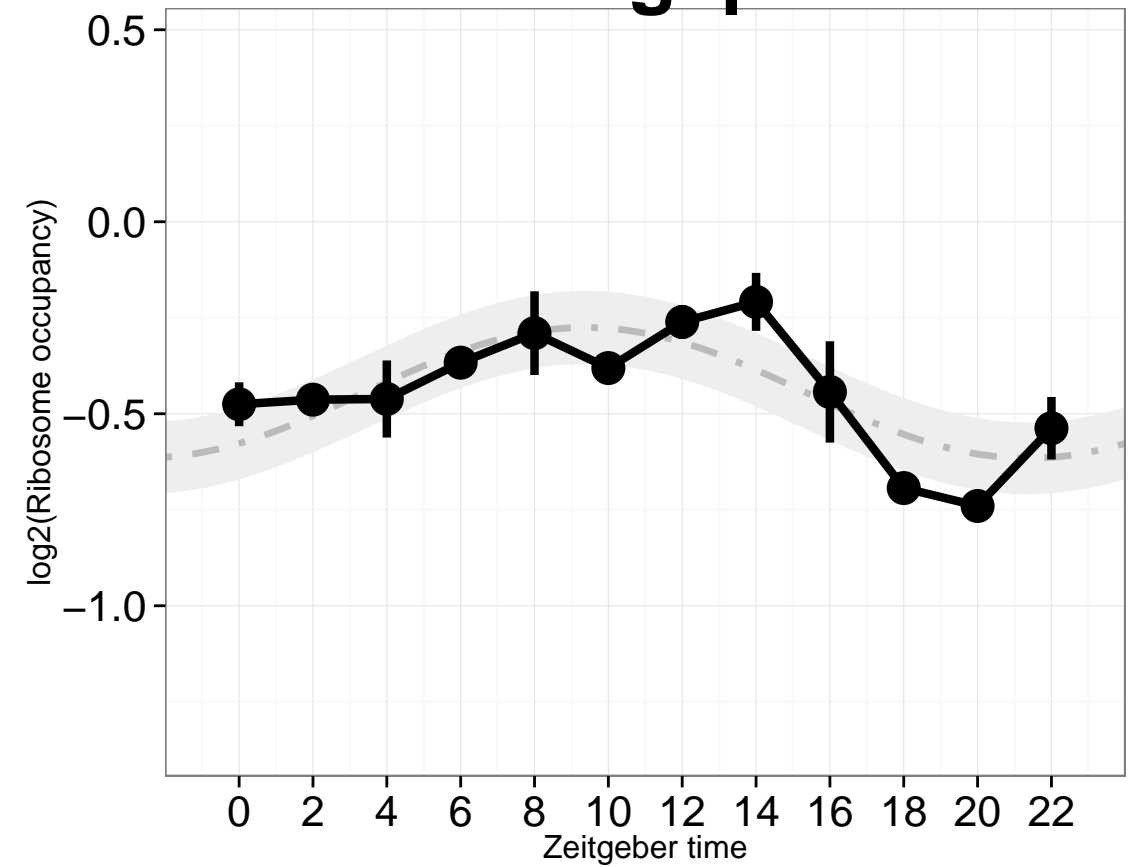

Supplement: Supplementary file 11015 [file 1]

## Thbs3

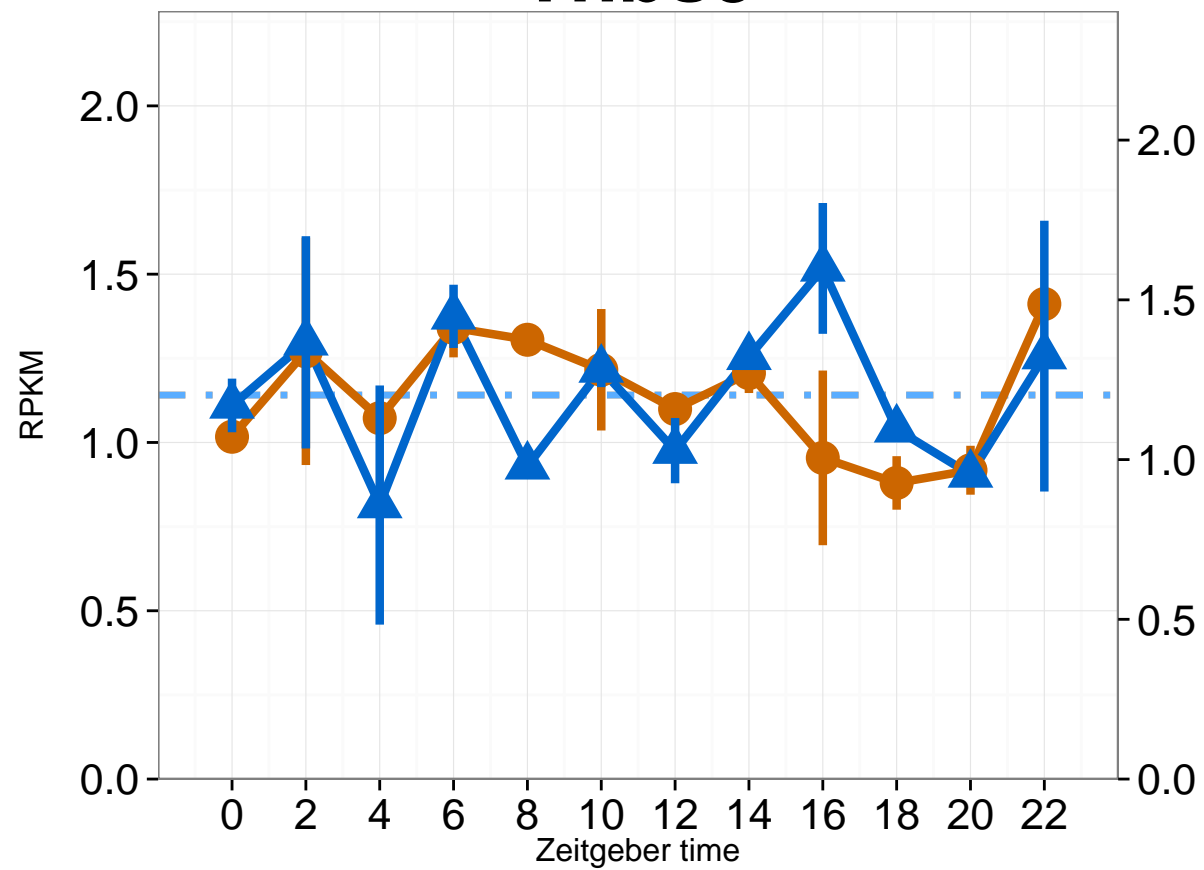

## Thbs3

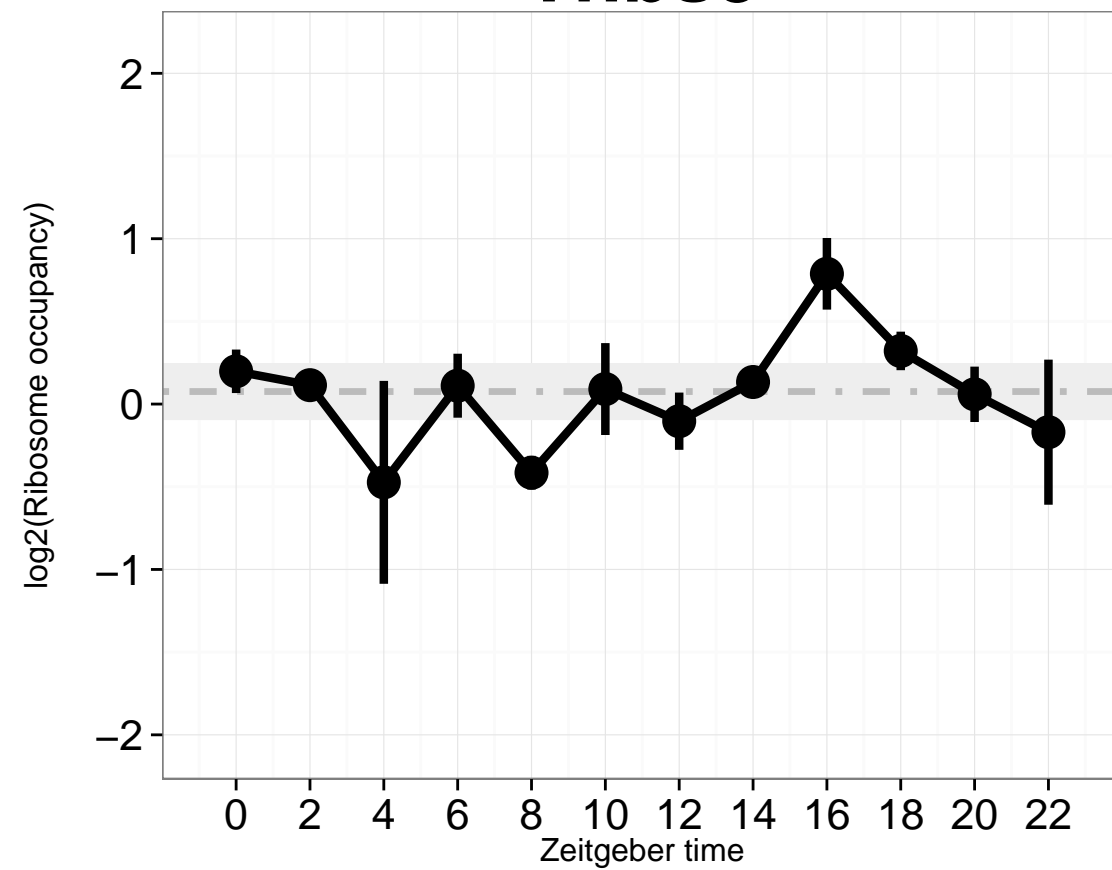

Supplement: Supplementary file 11016 [file 1]

## Ace

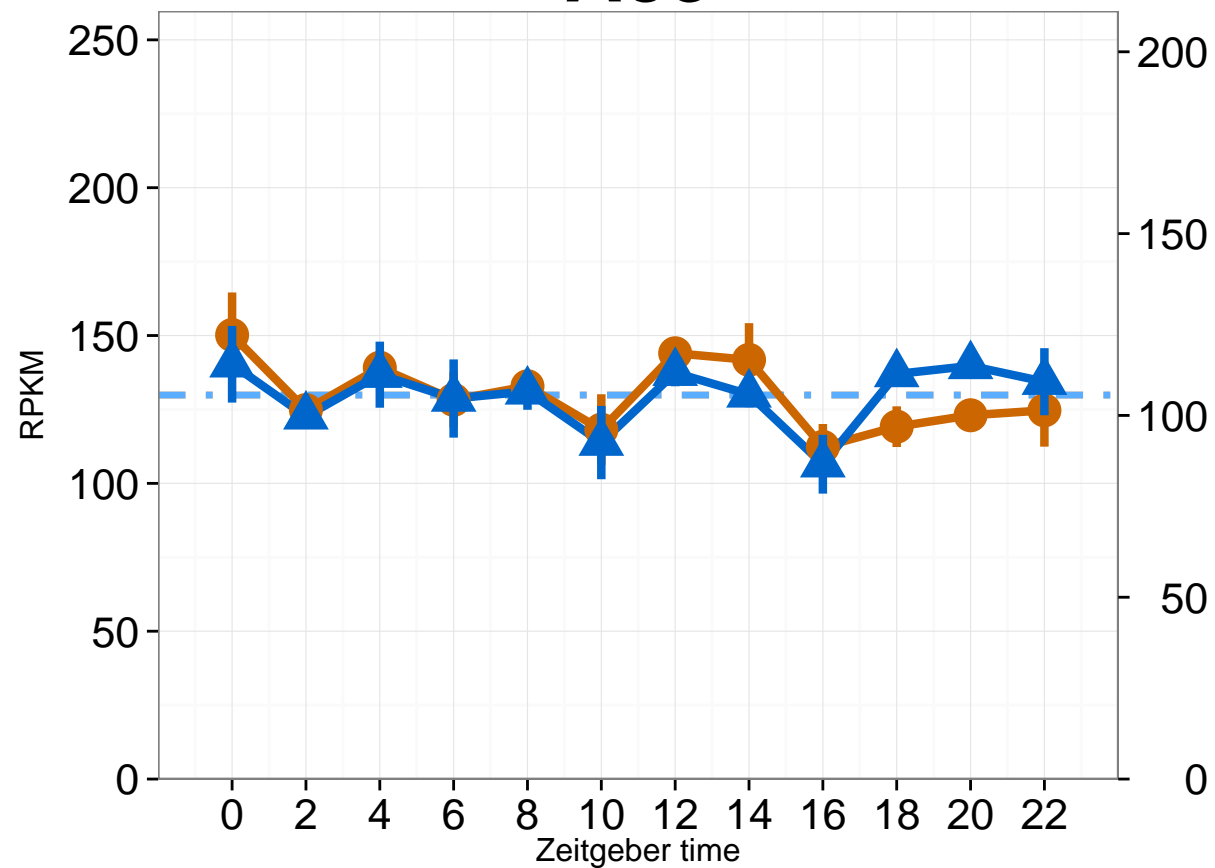

## Ace

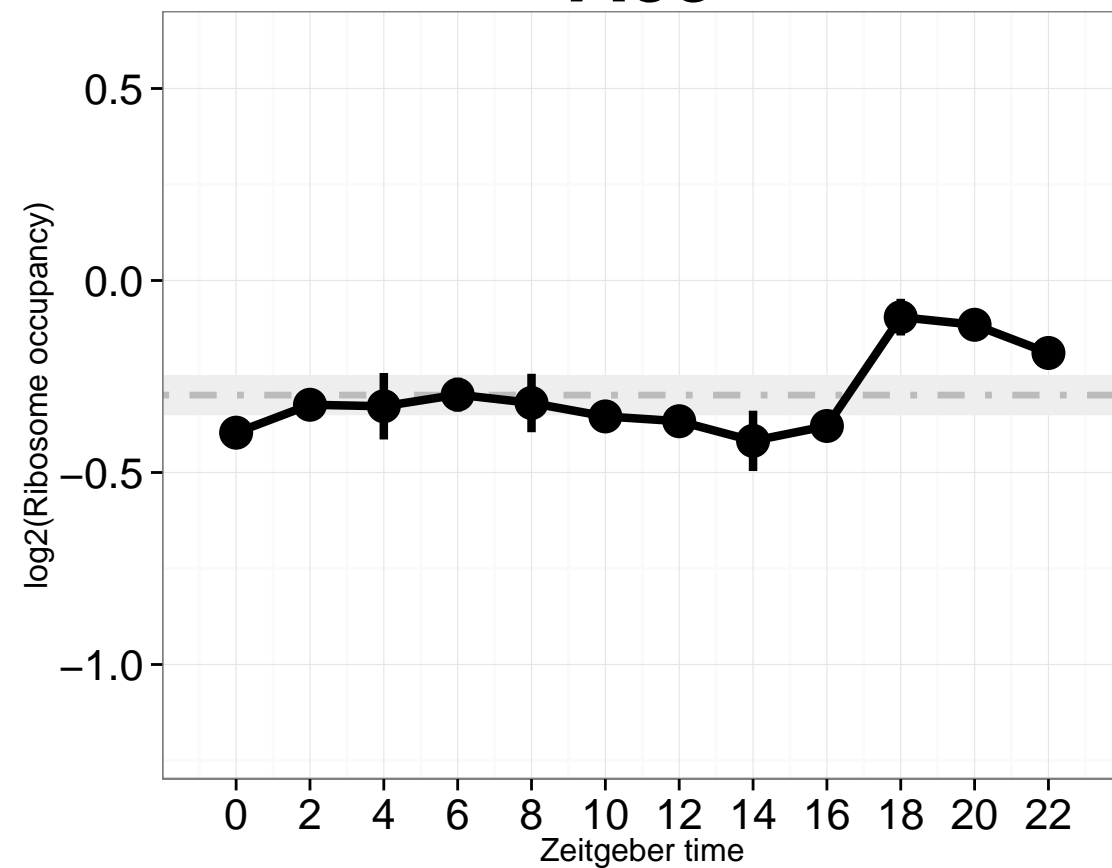

Supplement: Supplementary file 11017 [file 1]

## Cstb

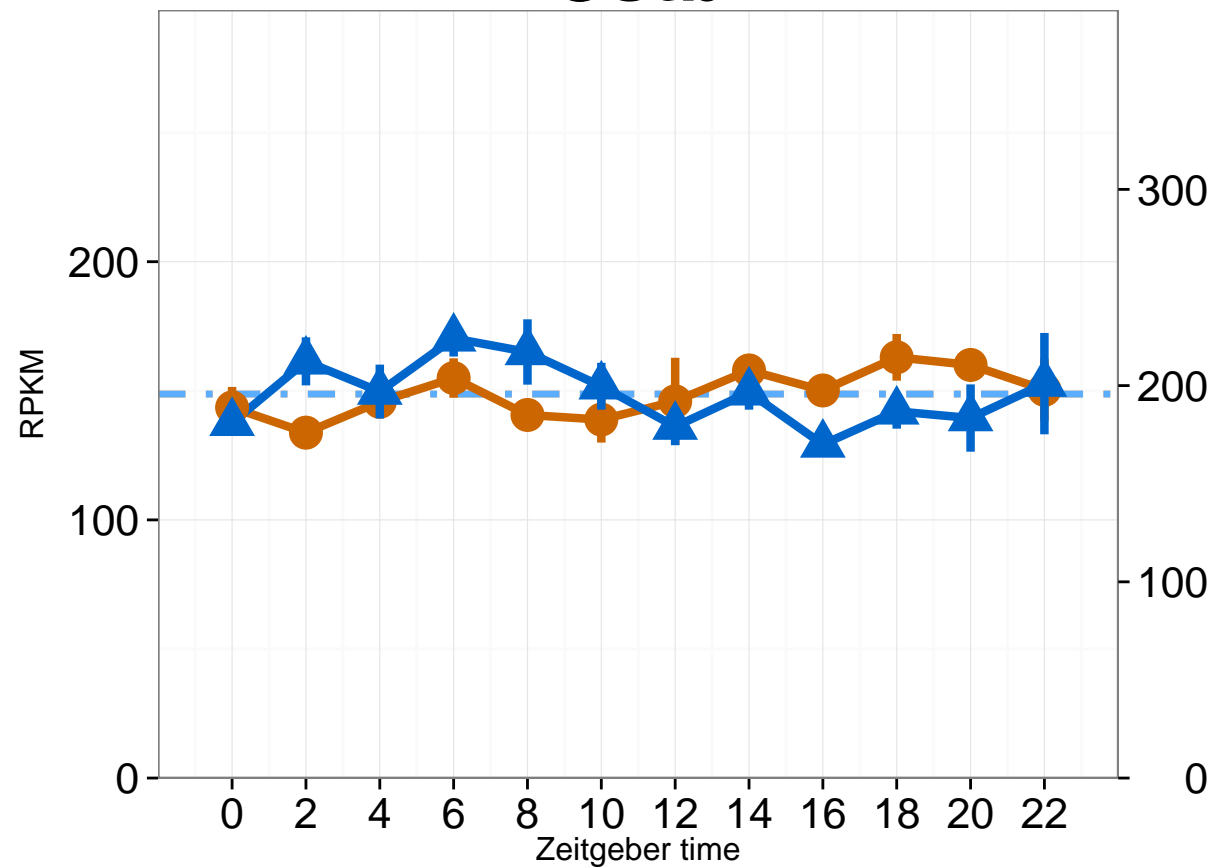

## Cstb

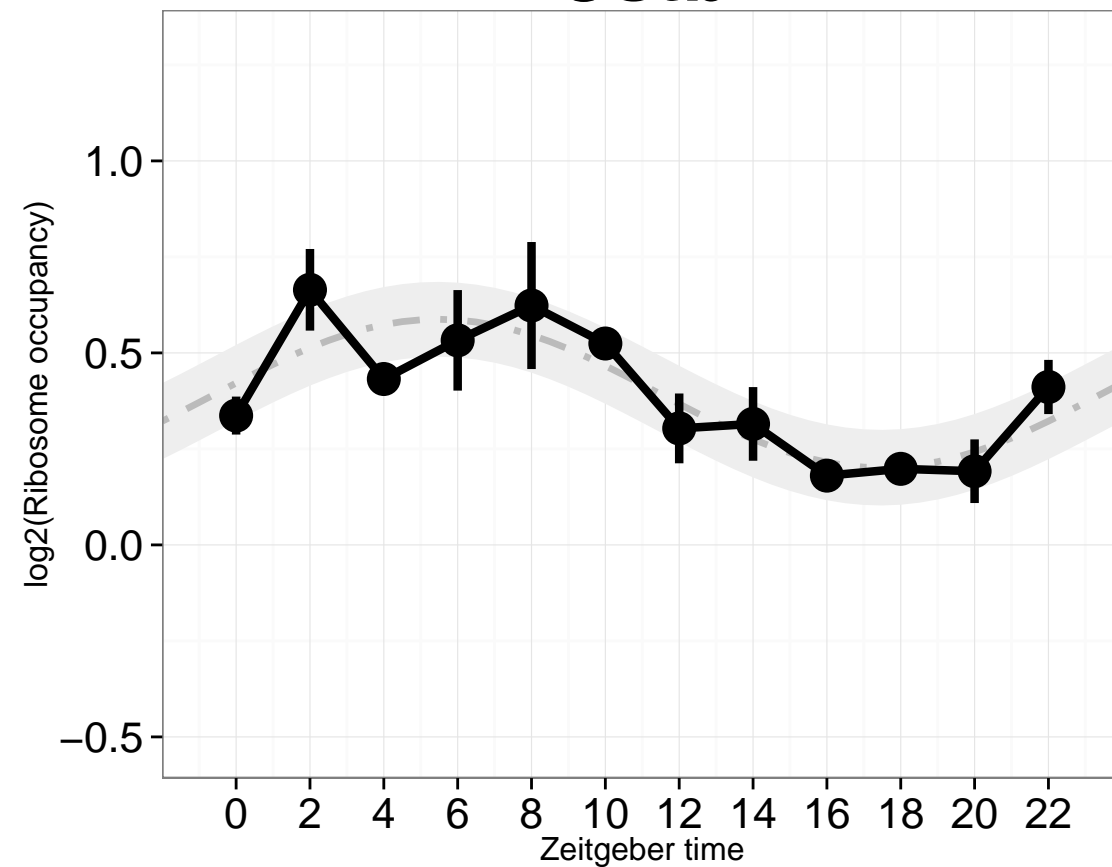

Supplement: Supplementary file 11018 [file 1]

## Pin1

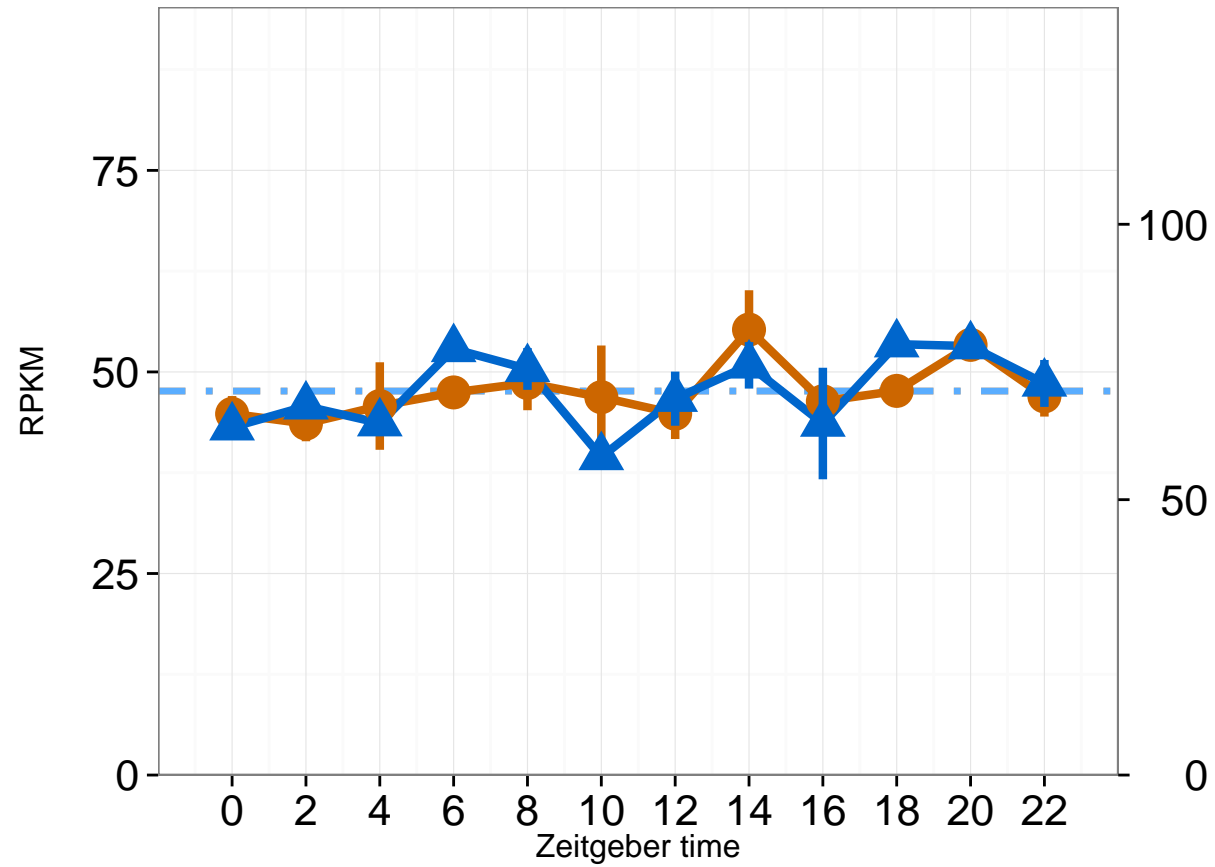

## Pin1

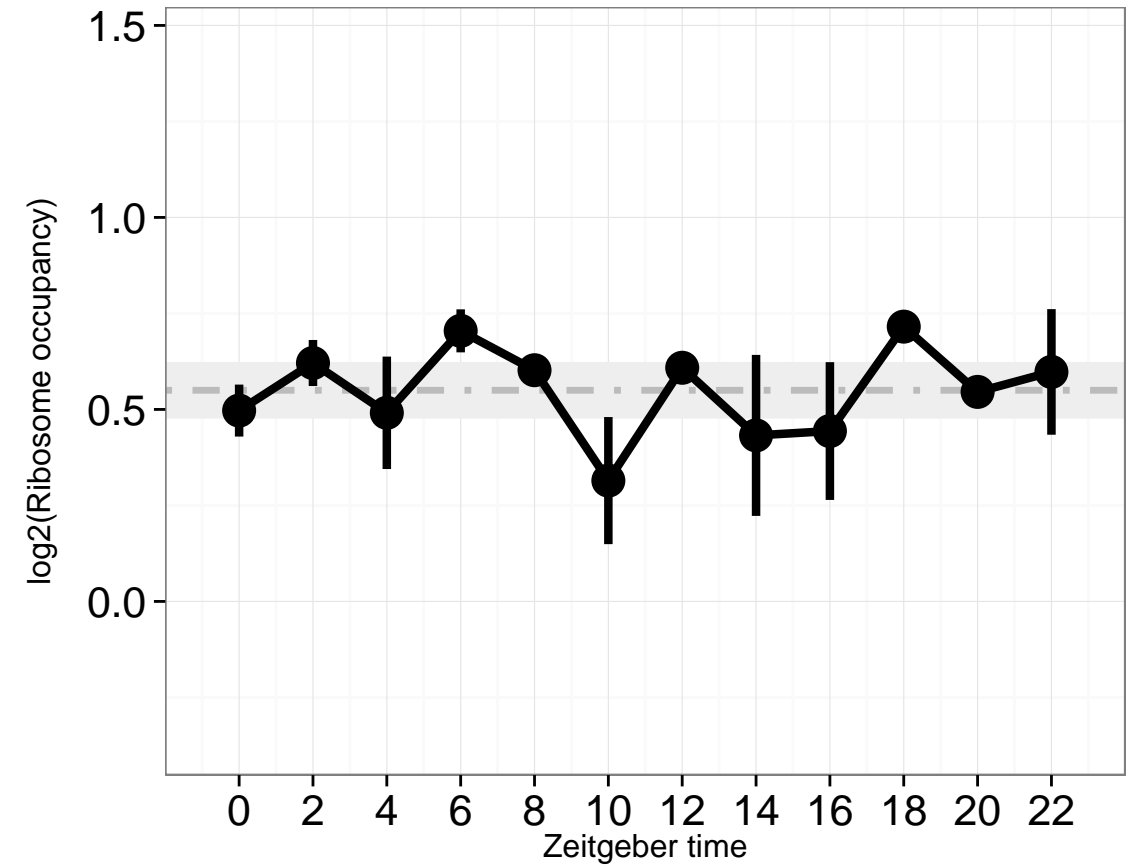

Supplement: Supplementary file 11019 [file 1]

# Rnf186

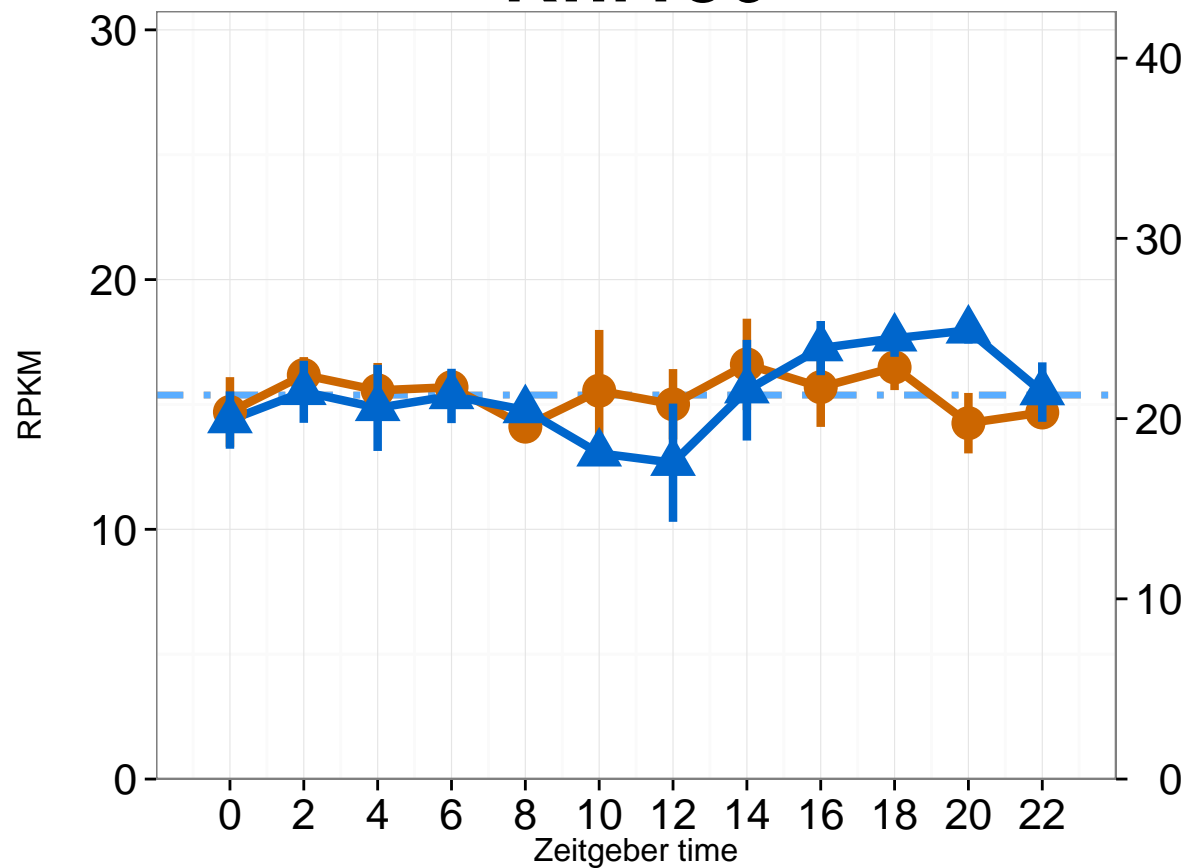

# Rnf186

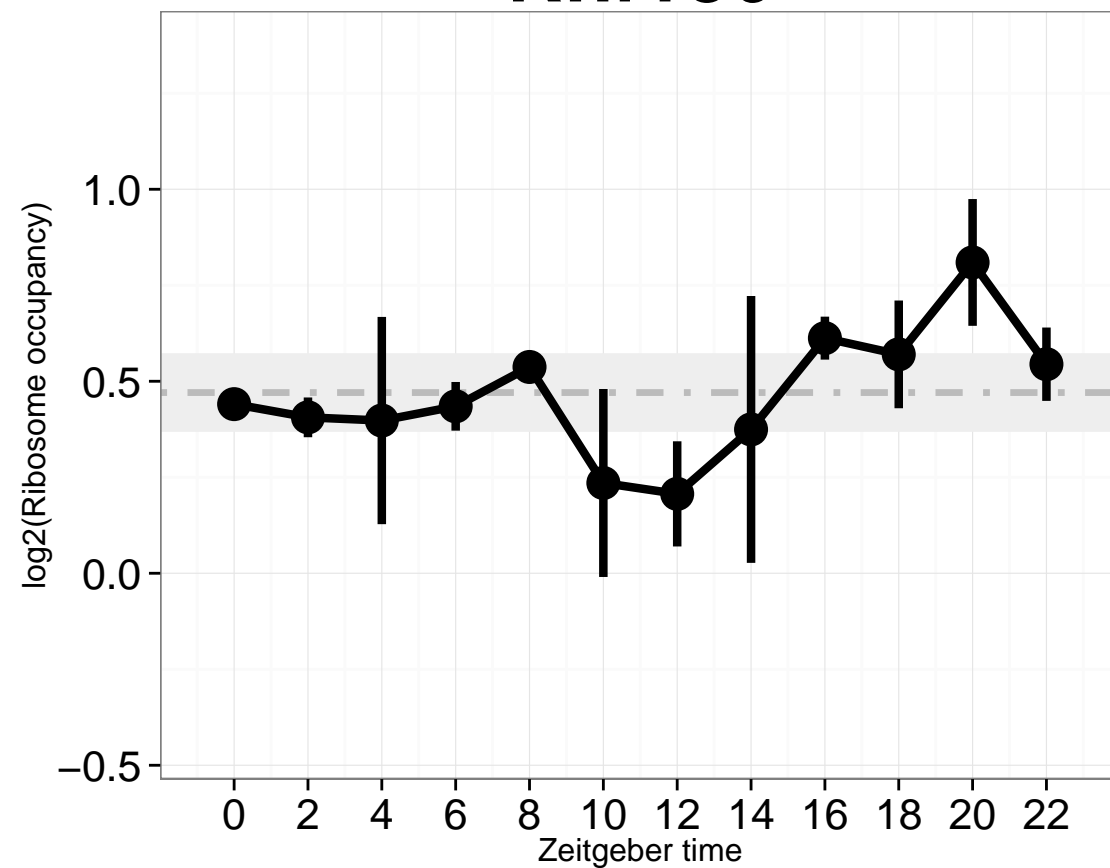

Supplement: Supplementary file 11020 [file 1]

# Mrs2

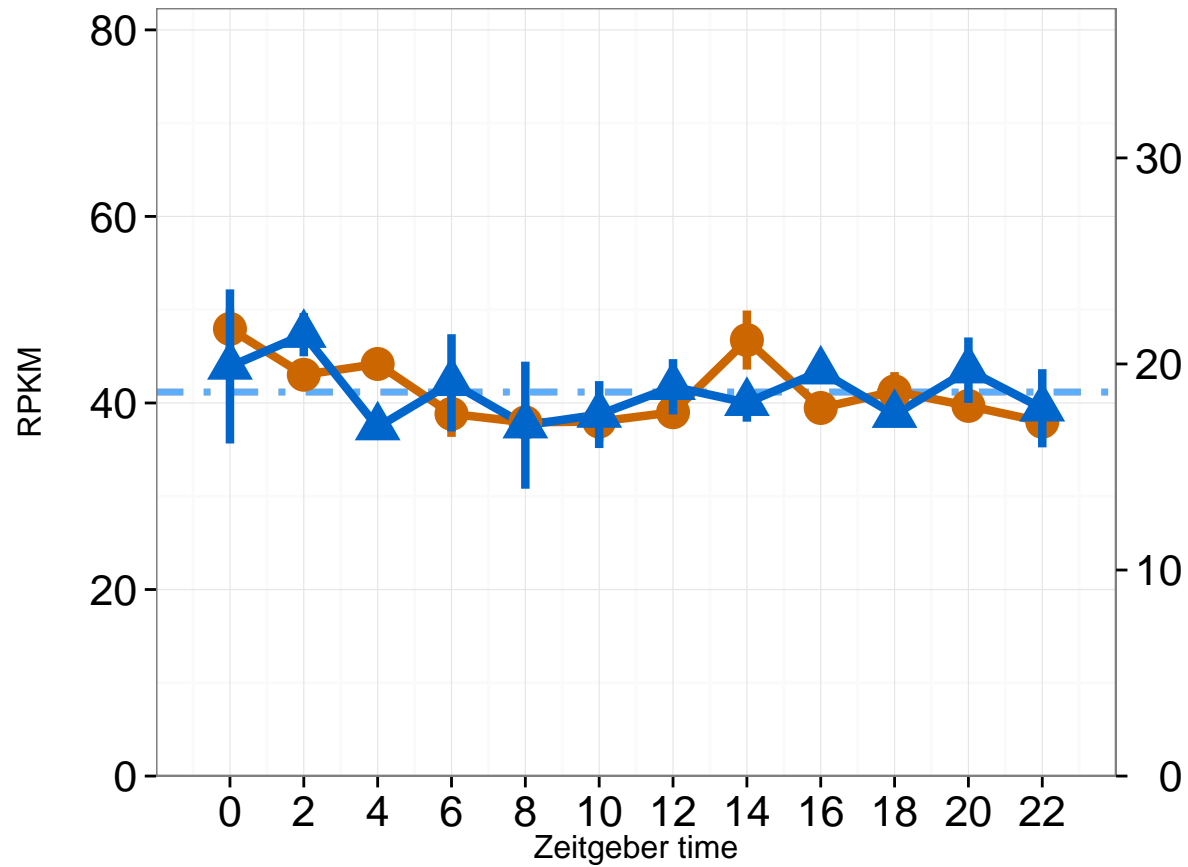

# Mrs2

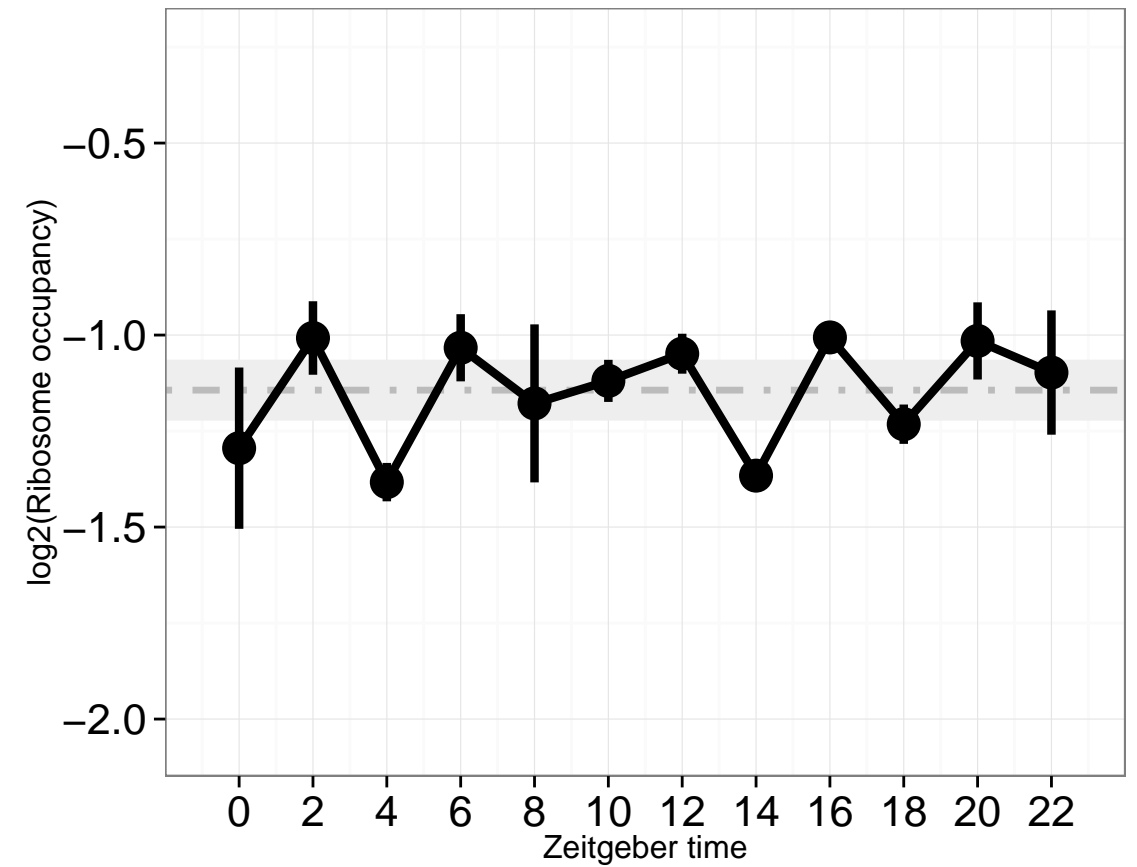

Supplement: Supplementary file 11021 [file 1]

## Adam1a

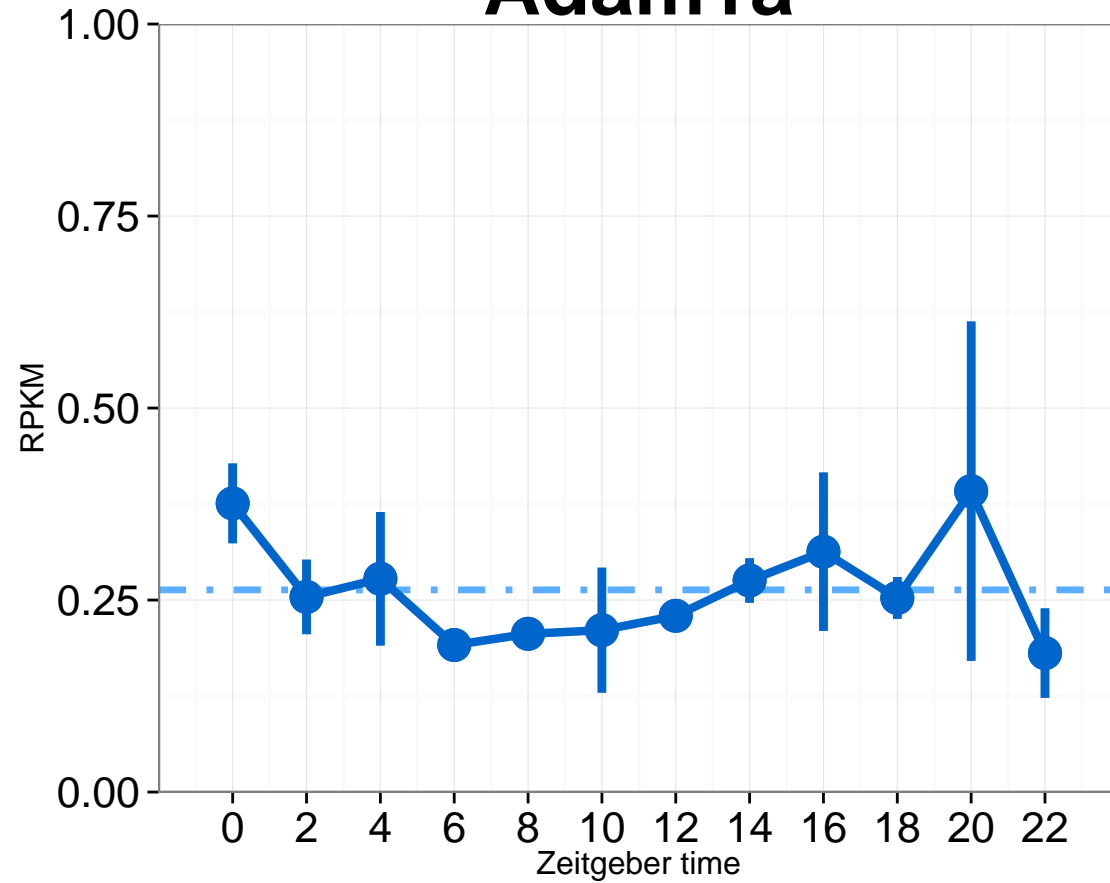

## Adam1a log2(Ribosome occupanc

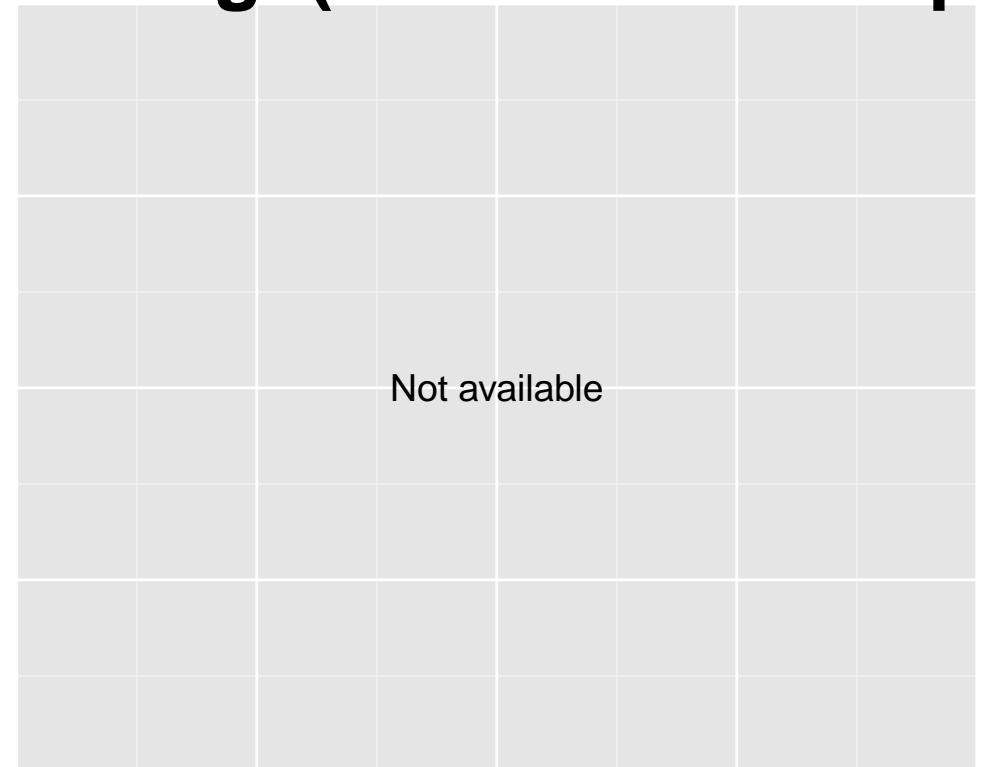

Supplement: Supplementary file 11022 [file 1]

## Trib2

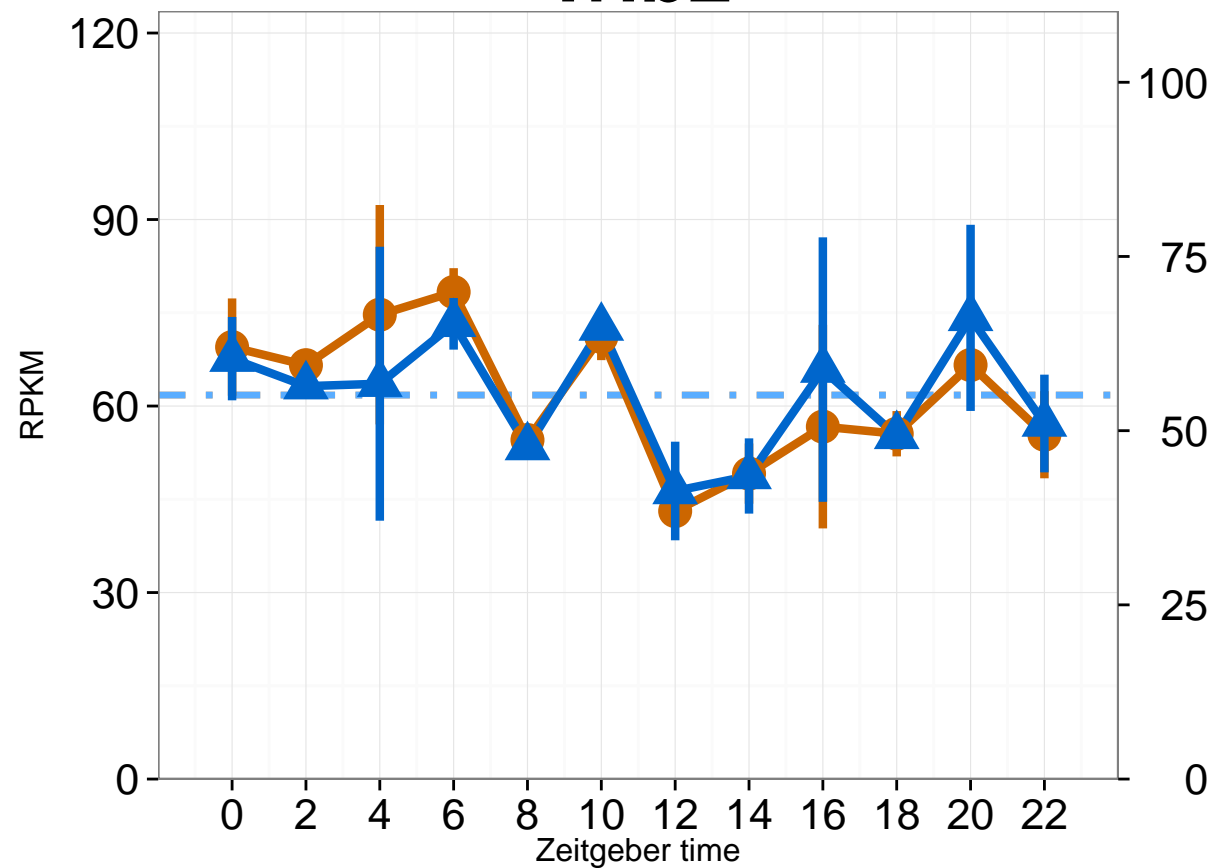

## Trib2

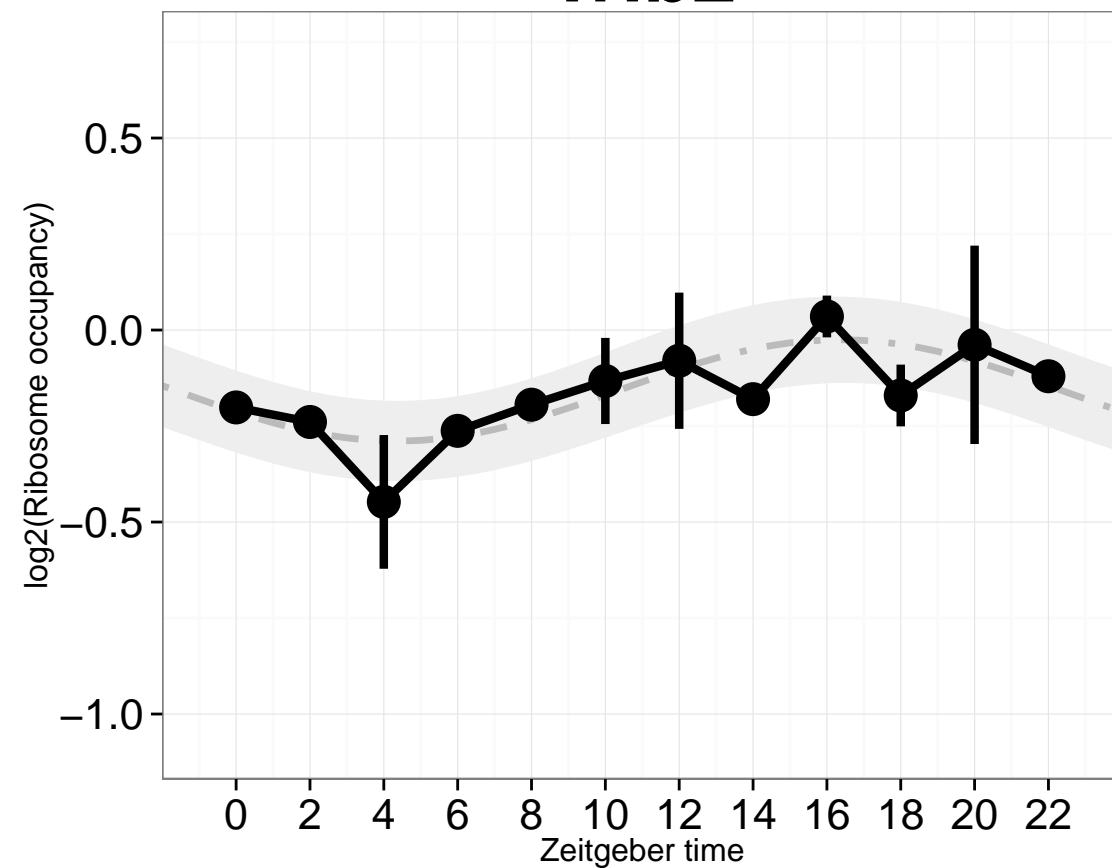

Supplement: Supplementary file 11023 [file 1]

# Phldb3

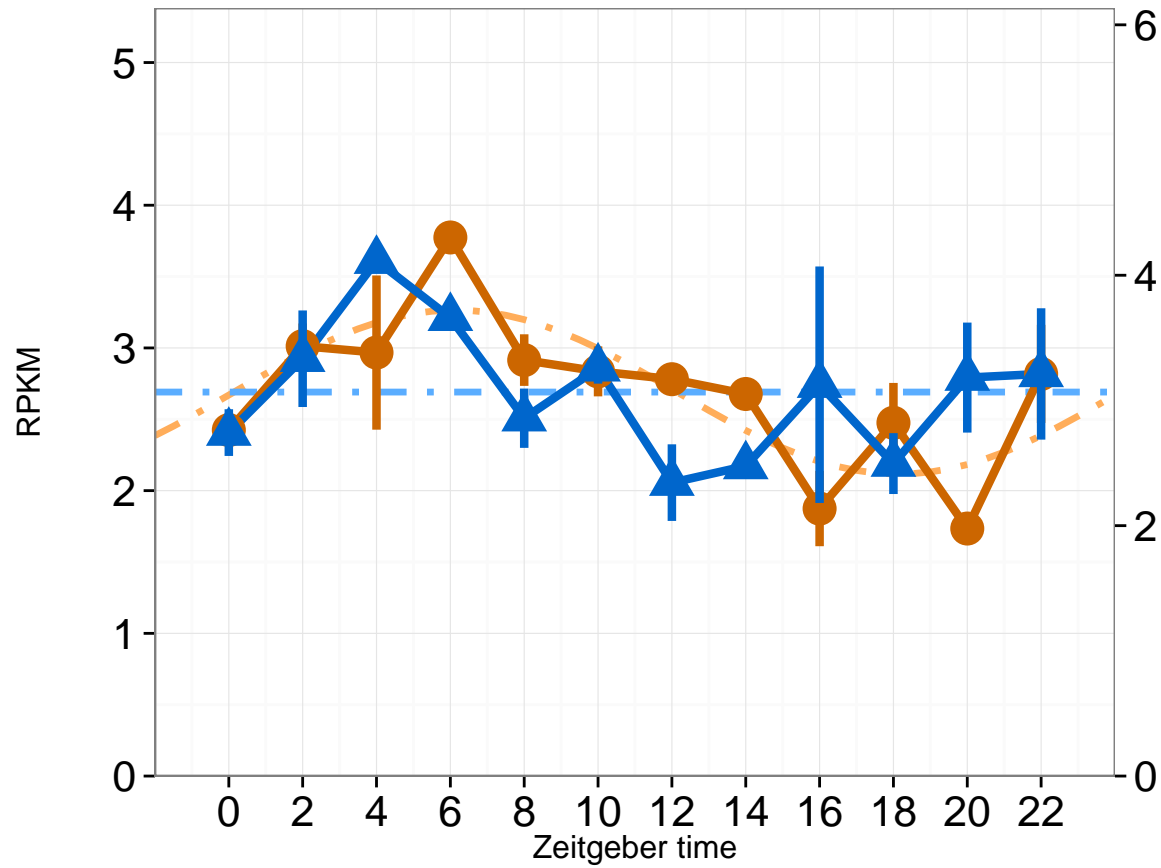

# Phldb3

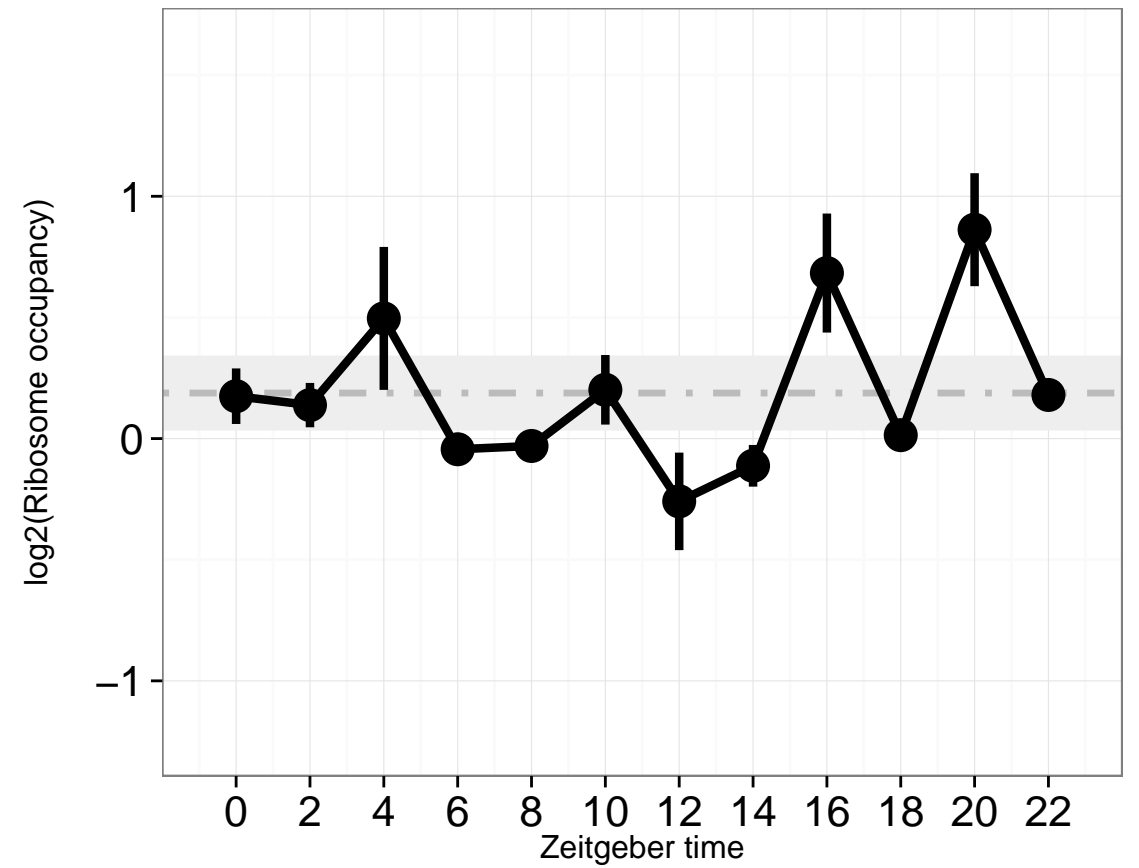

Supplement: Supplementary file 11024 [file 1]

# 1110007C09Rik

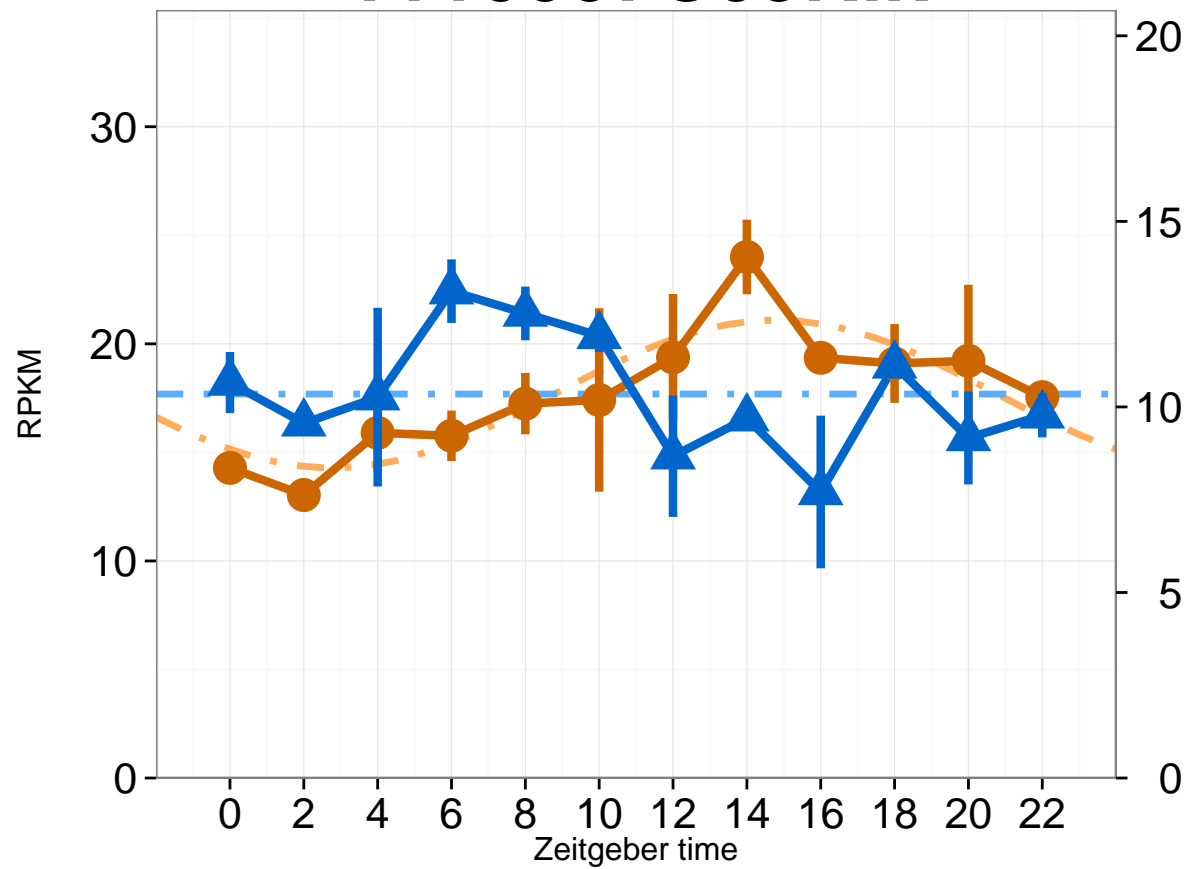

# 1110007C09Rik

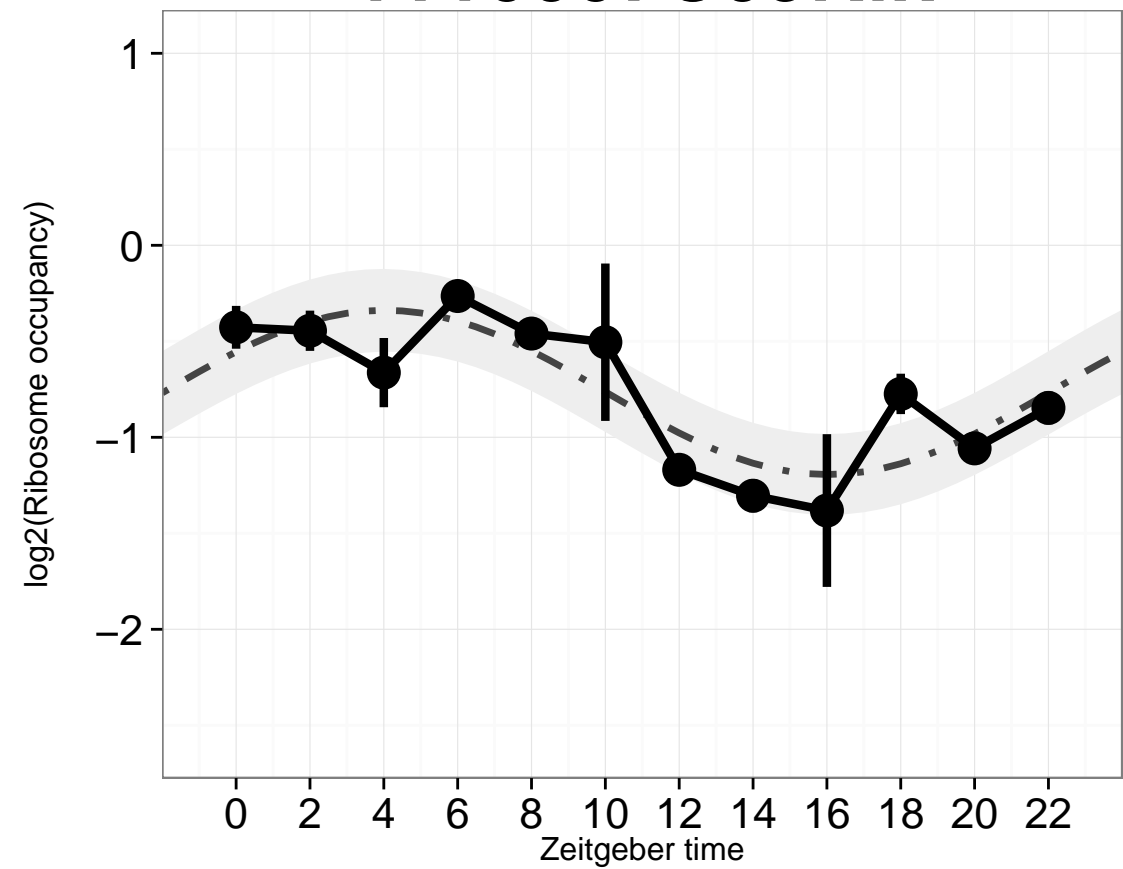

Supplement: Supplementary file 11025 [file 1]

## Dmrt2

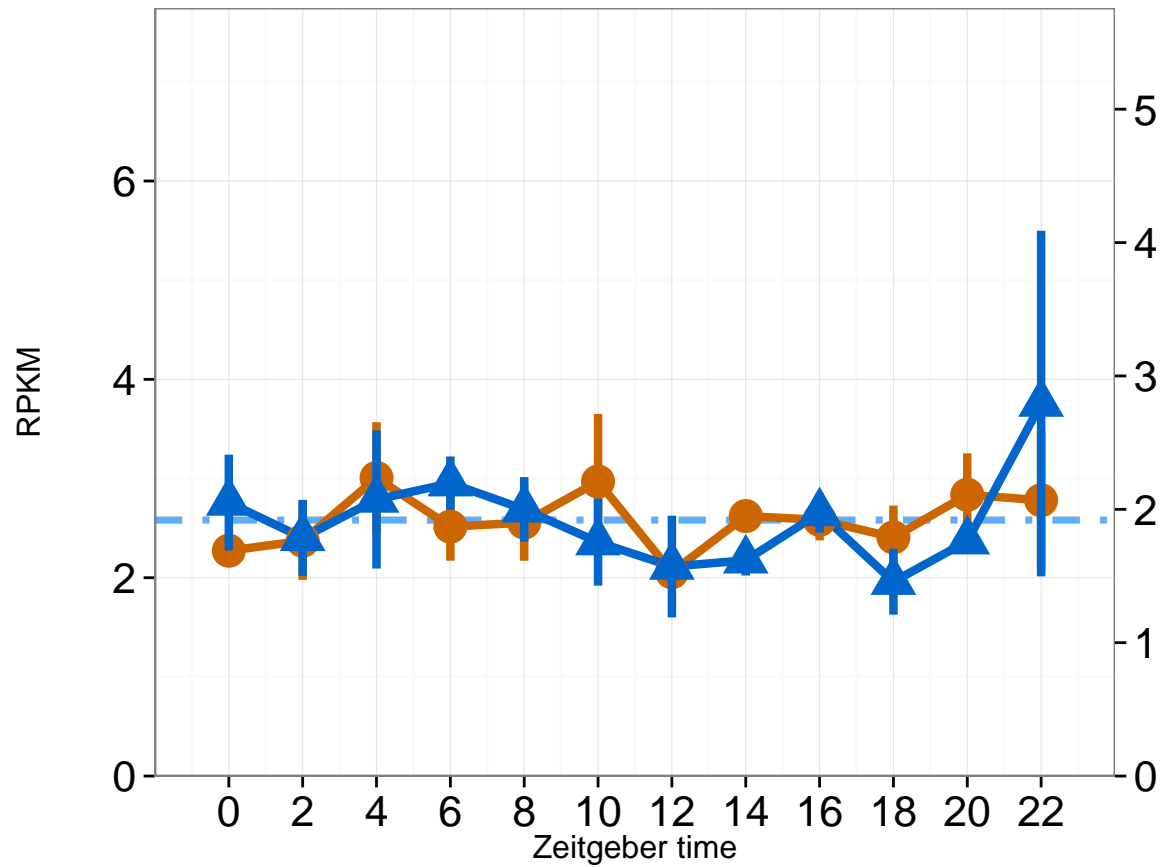

## Dmrt2

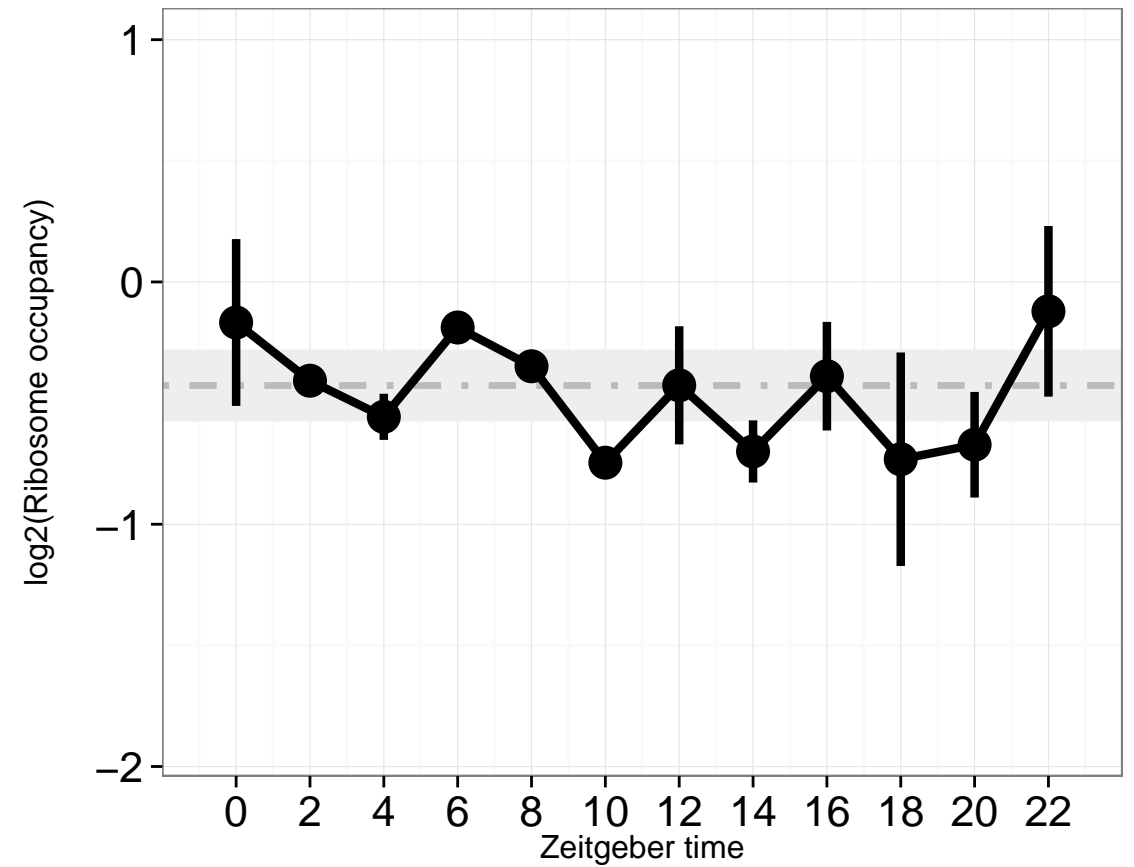

Supplement: Supplementary file 11026 [file 1]

# Car15

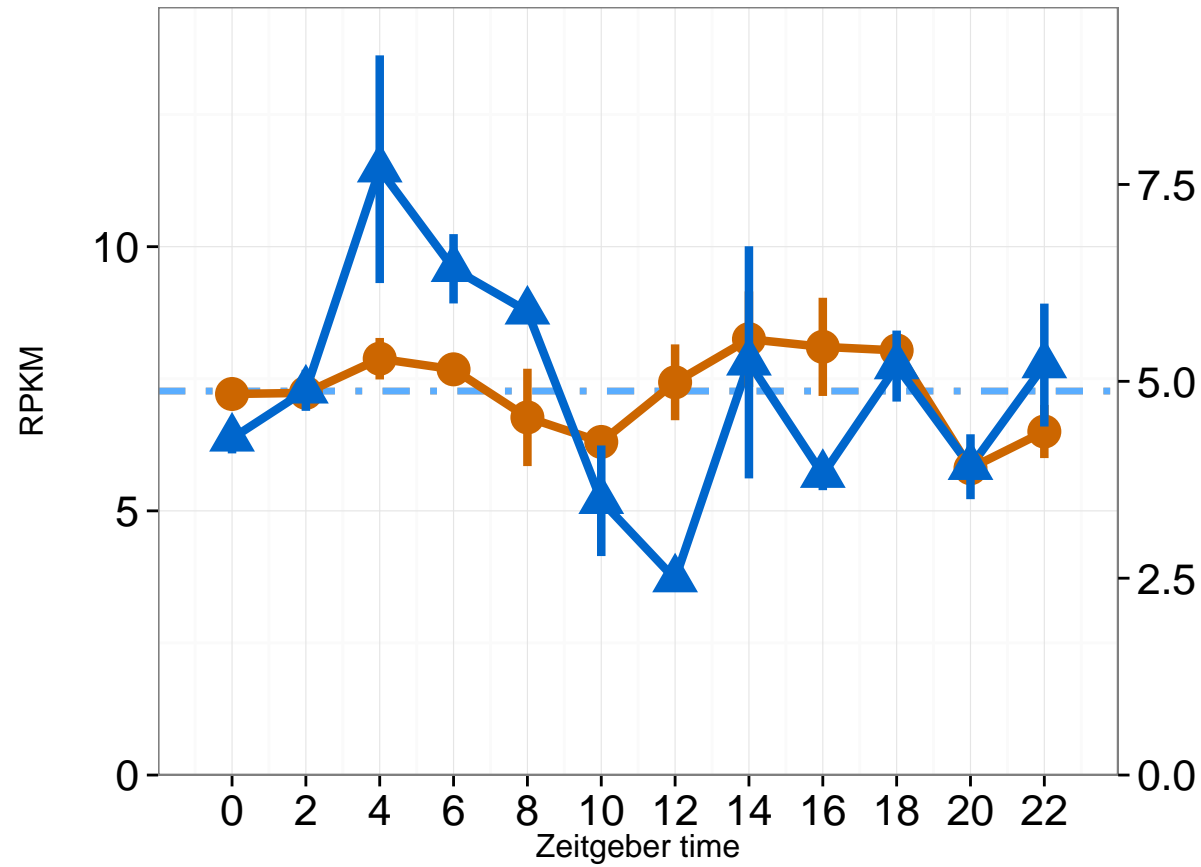

# Car15

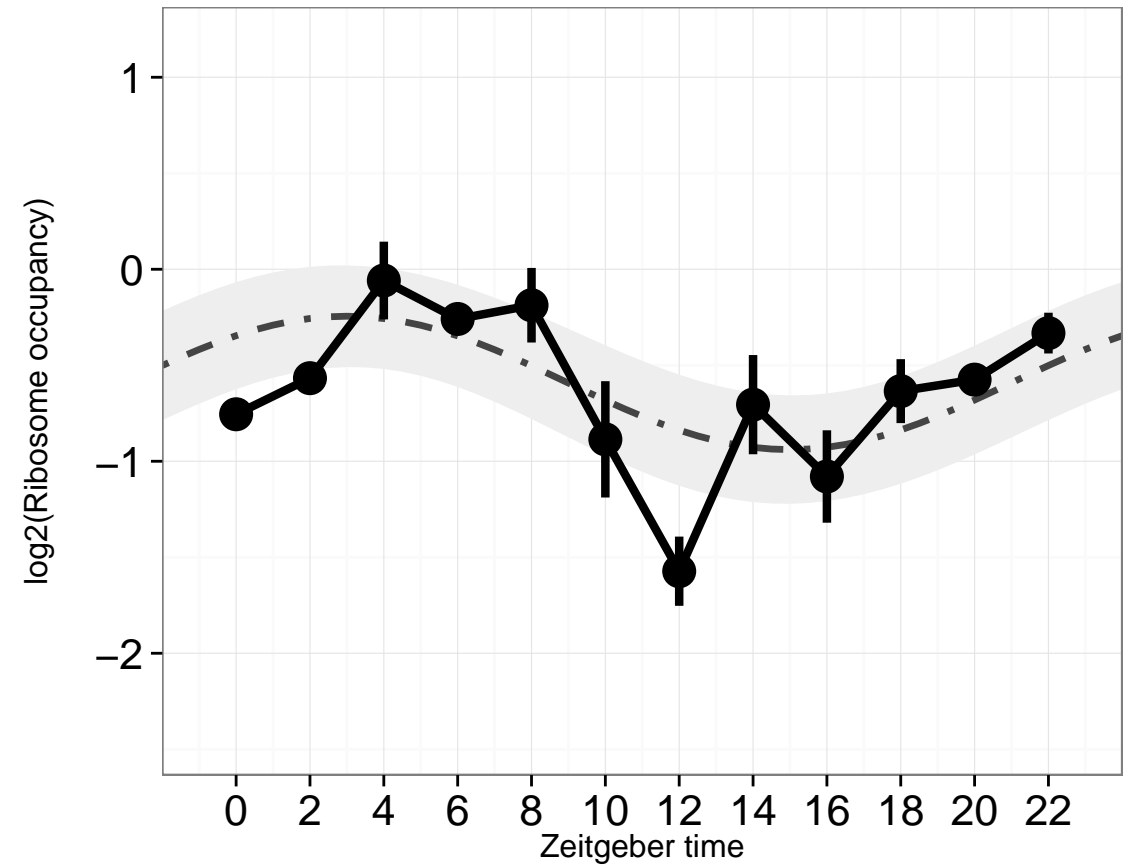

Supplement: Supplementary file 11027 [file 1]

# Anp32b

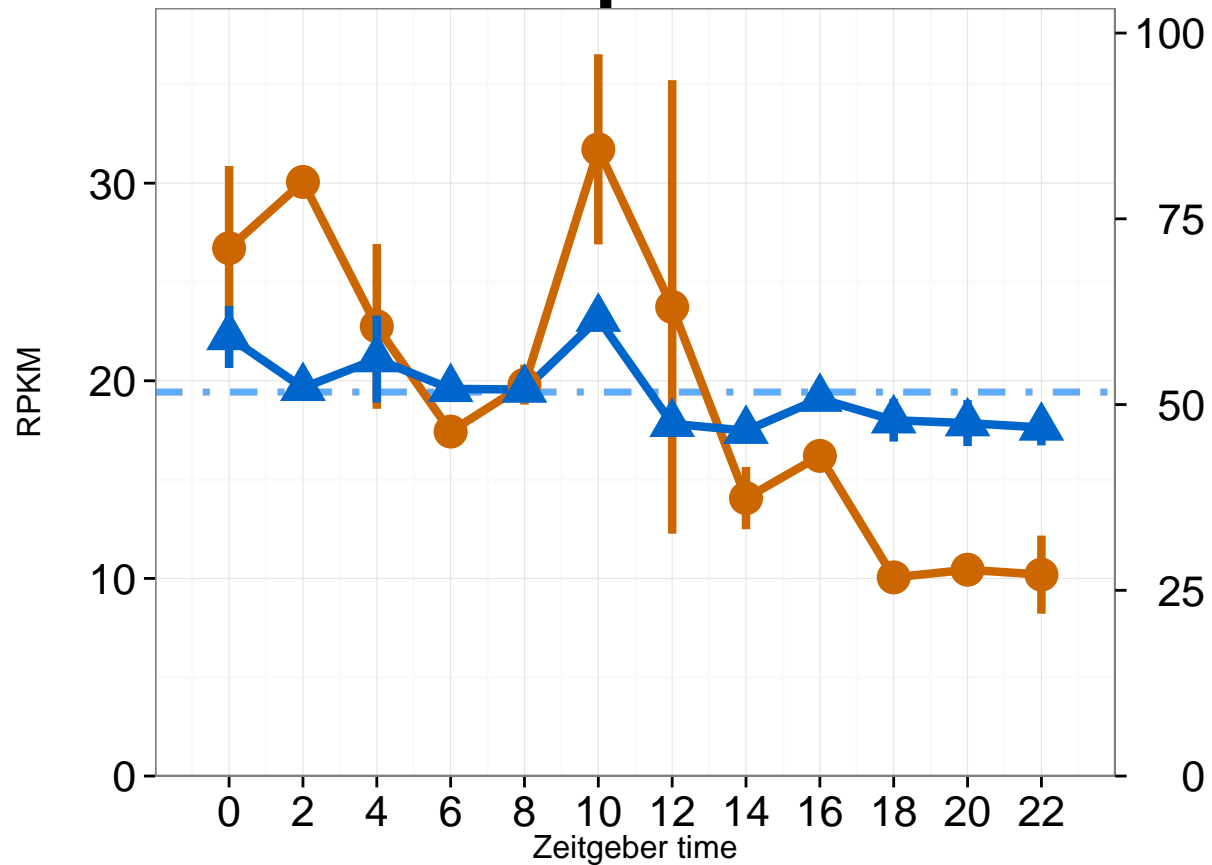

# Anp32b

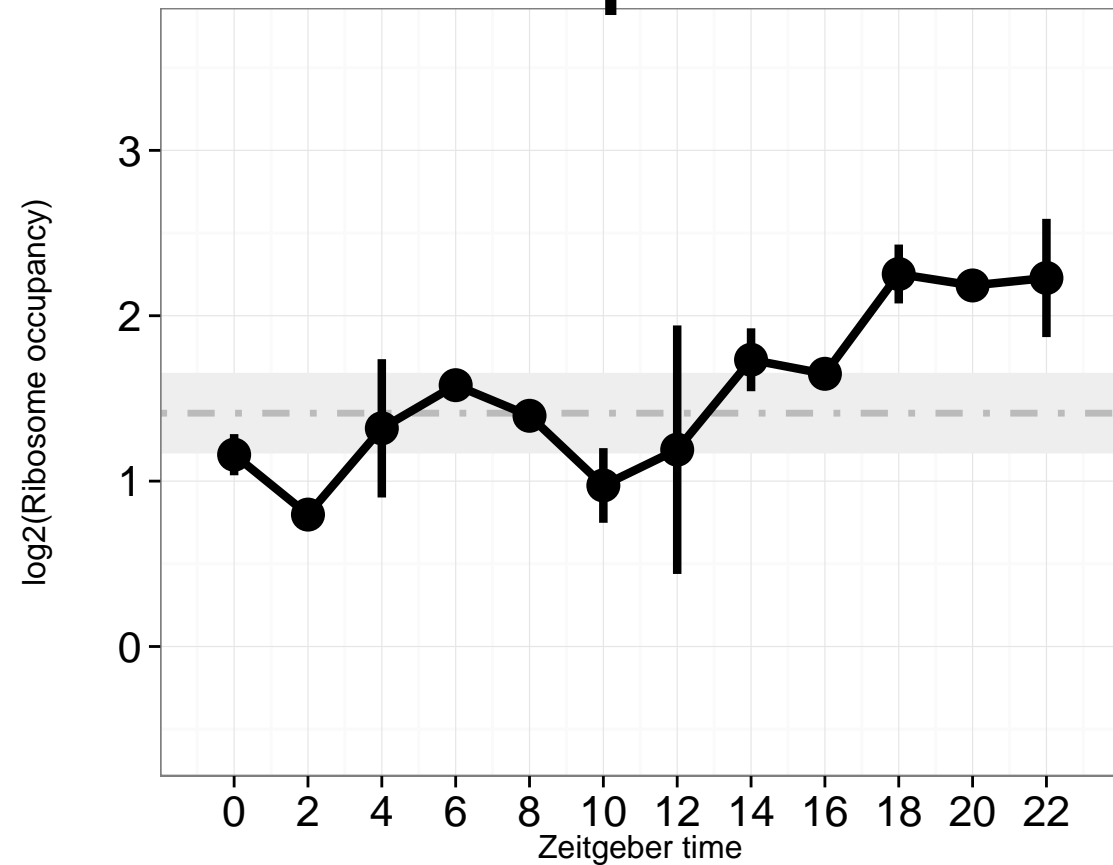

Supplement: Supplementary file 11028 [file 1]

## Pir

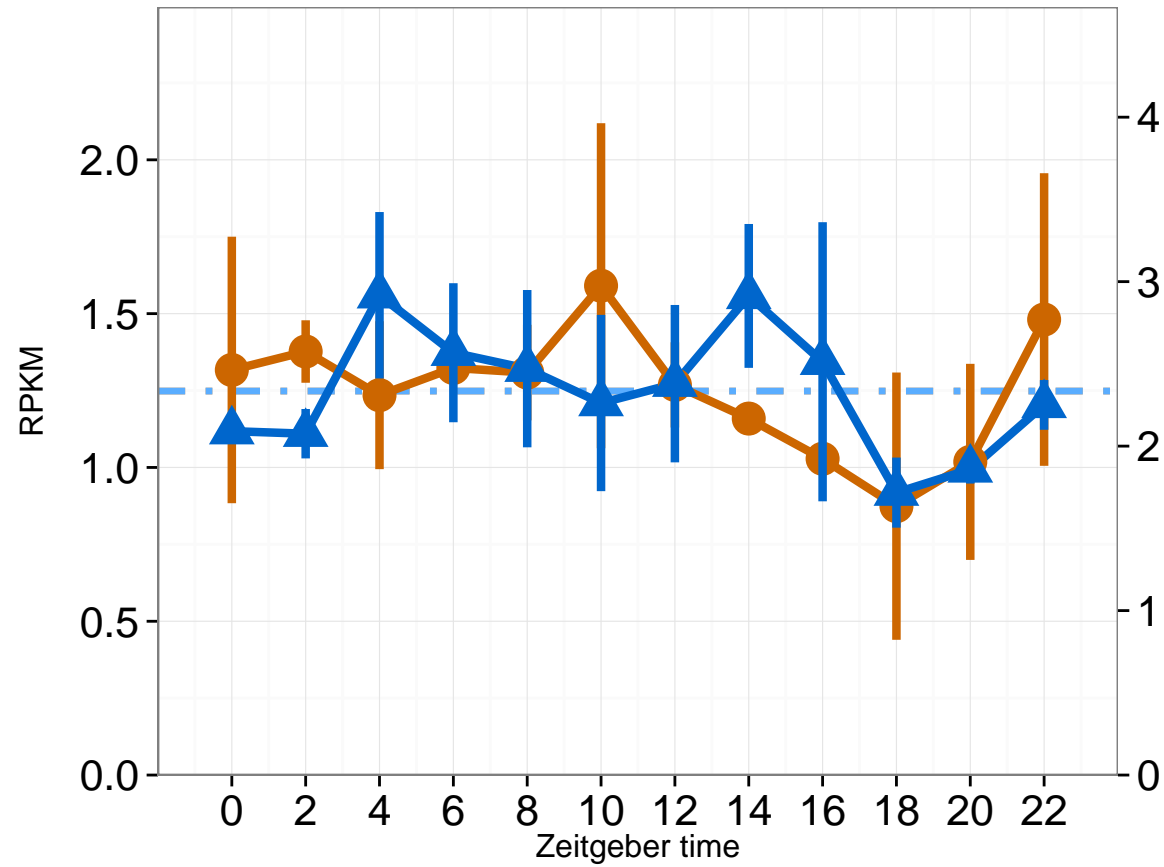

## Pir

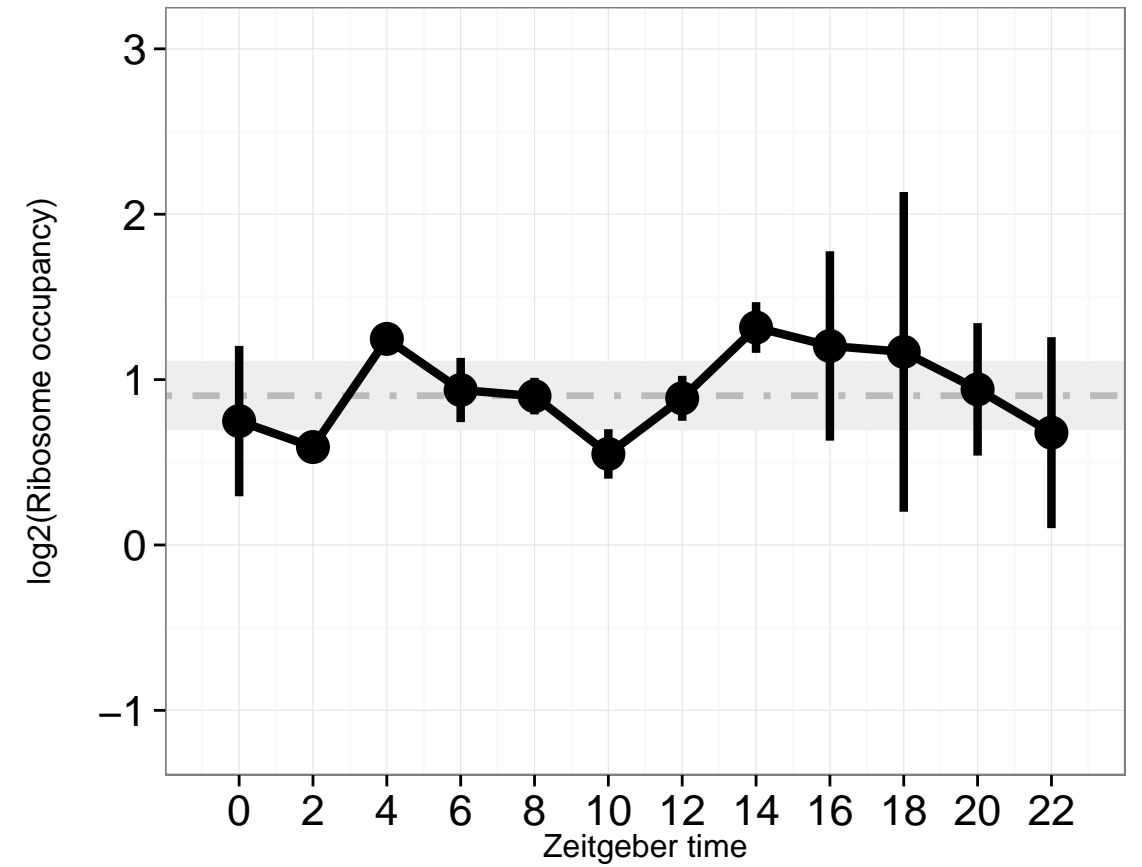

Supplement: Supplementary file 11029 [file 1]

# Sesn2

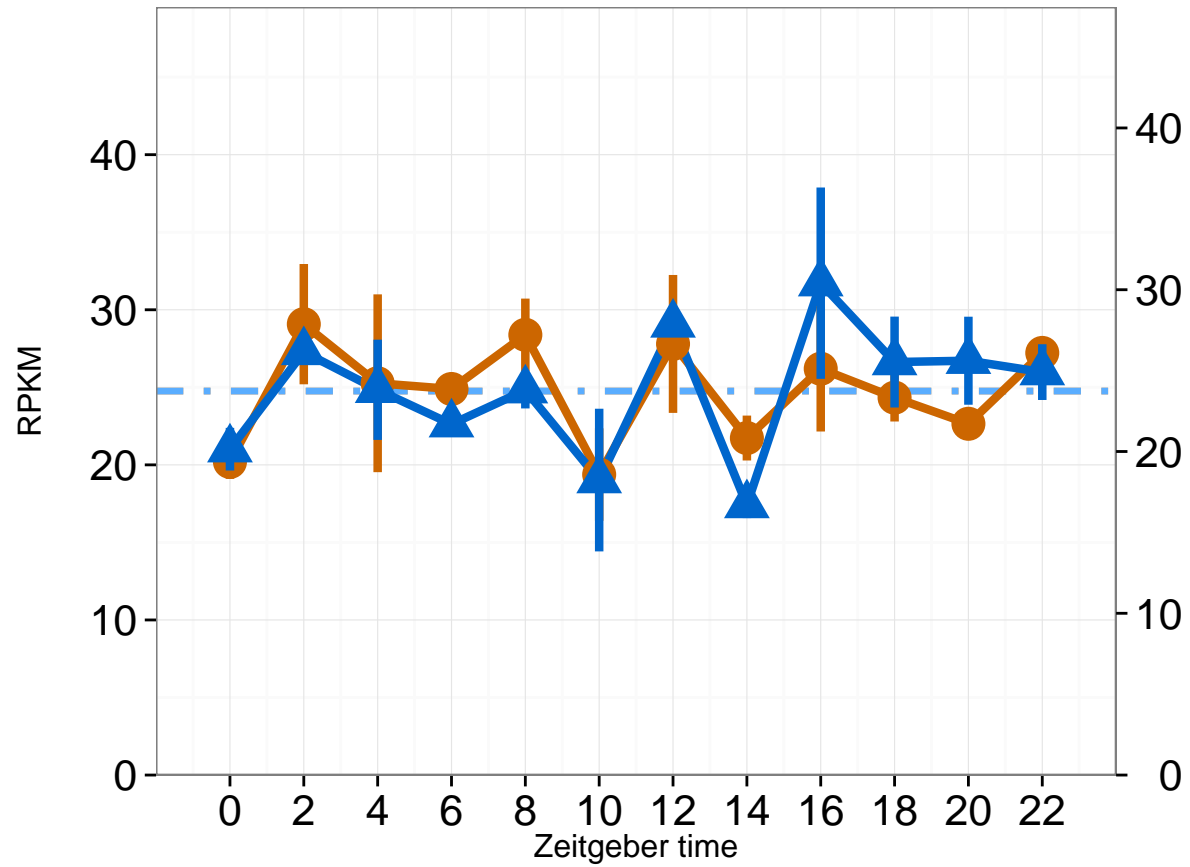

# Sesn2

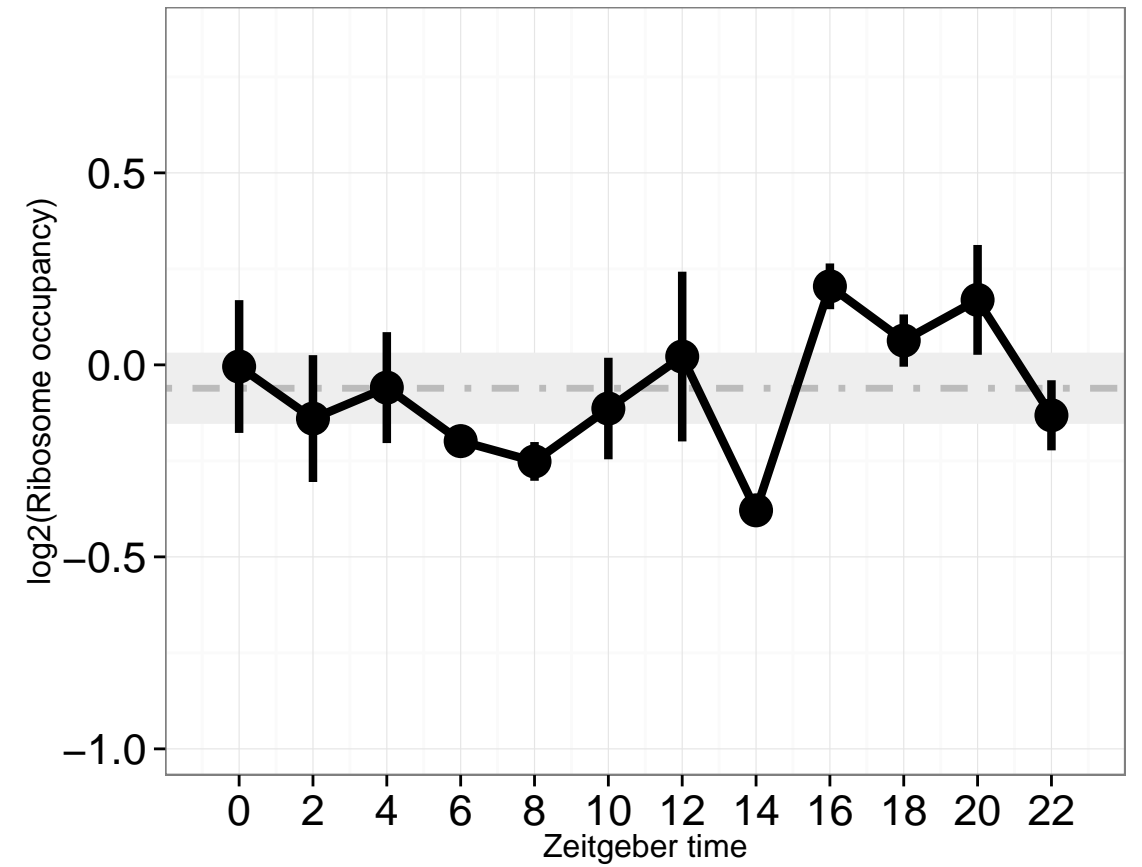

Supplement: Supplementary file 11030 [file 1]

## Dmtn

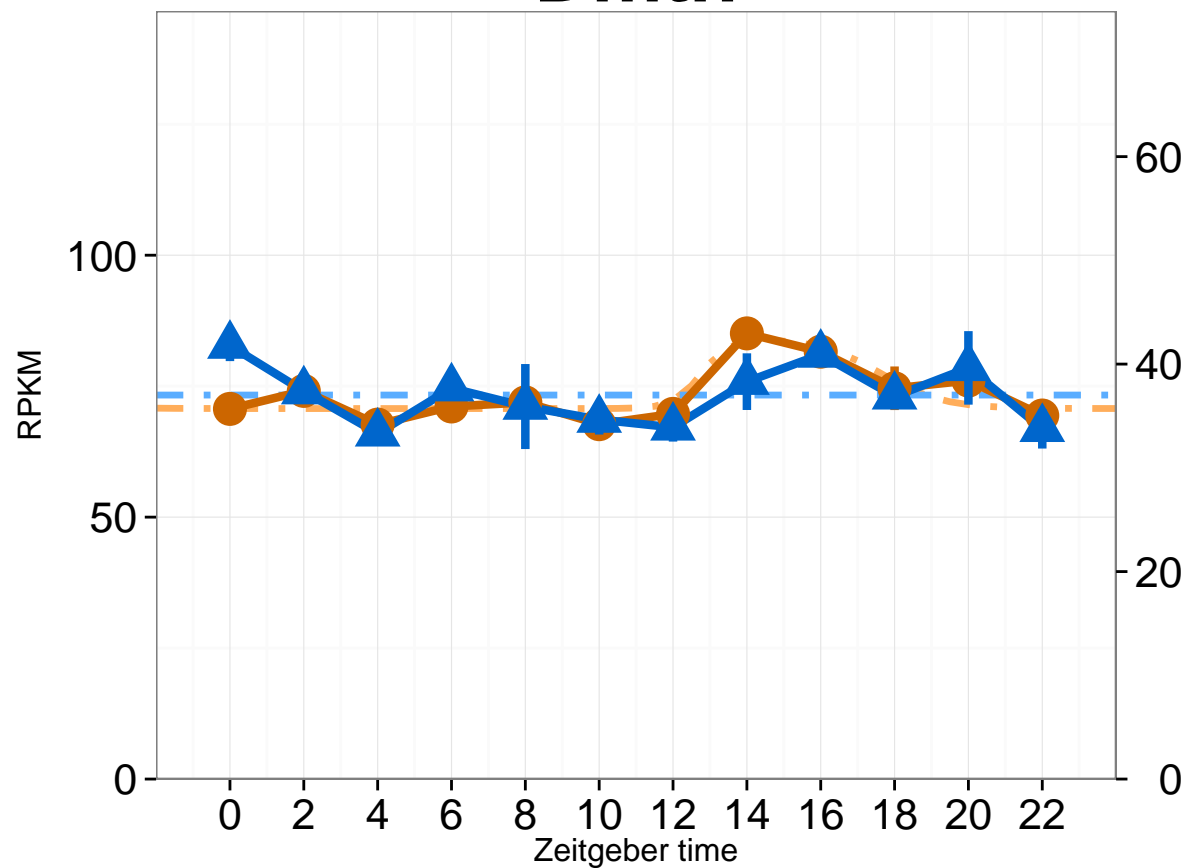

## Dmtn

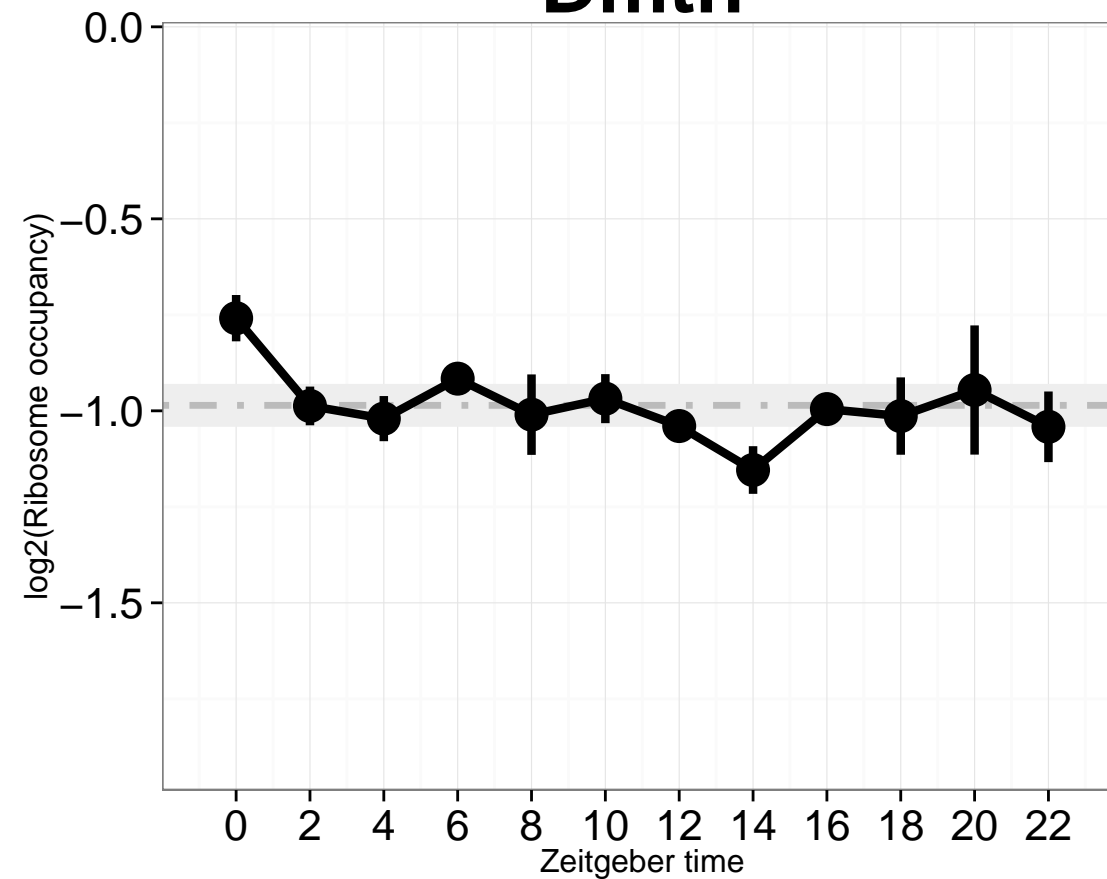

Supplement: Supplementary file 11031 [file 1]

## Cep57

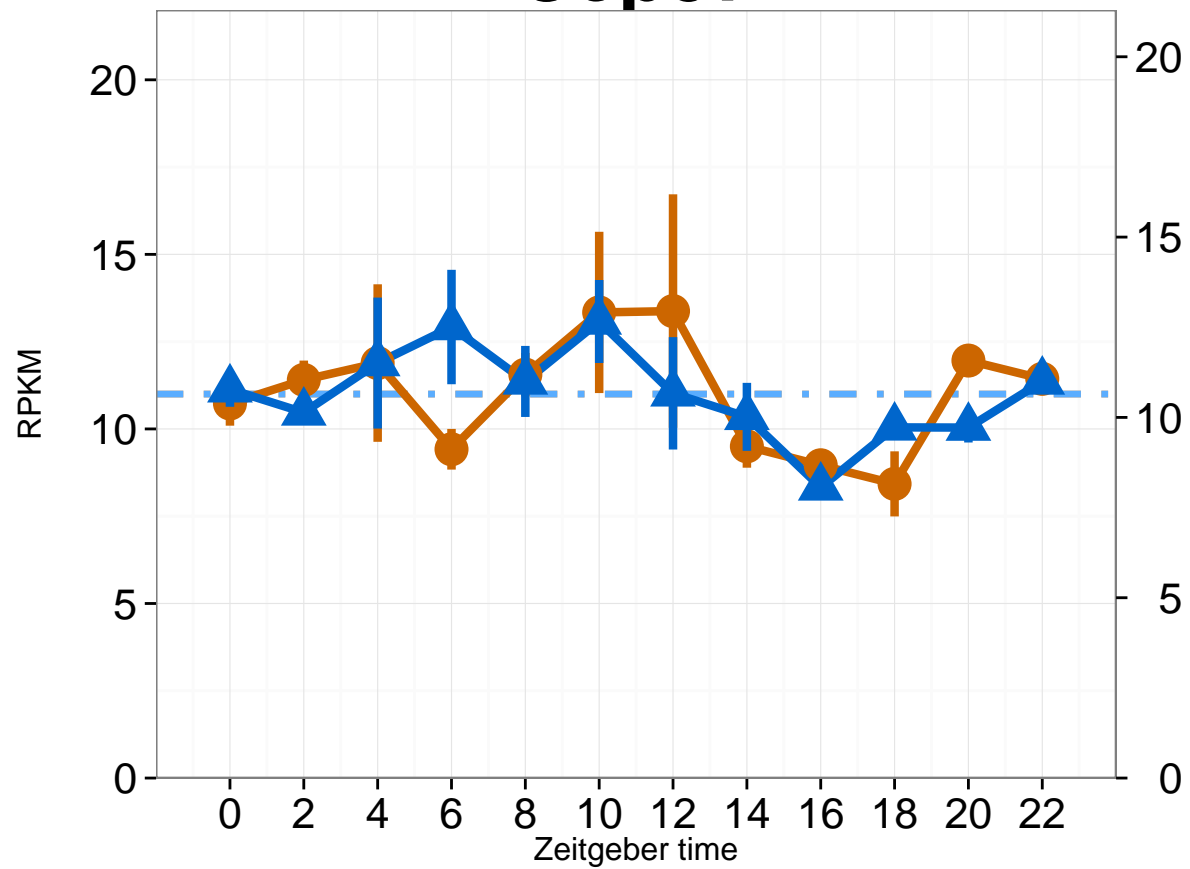

## Cep57

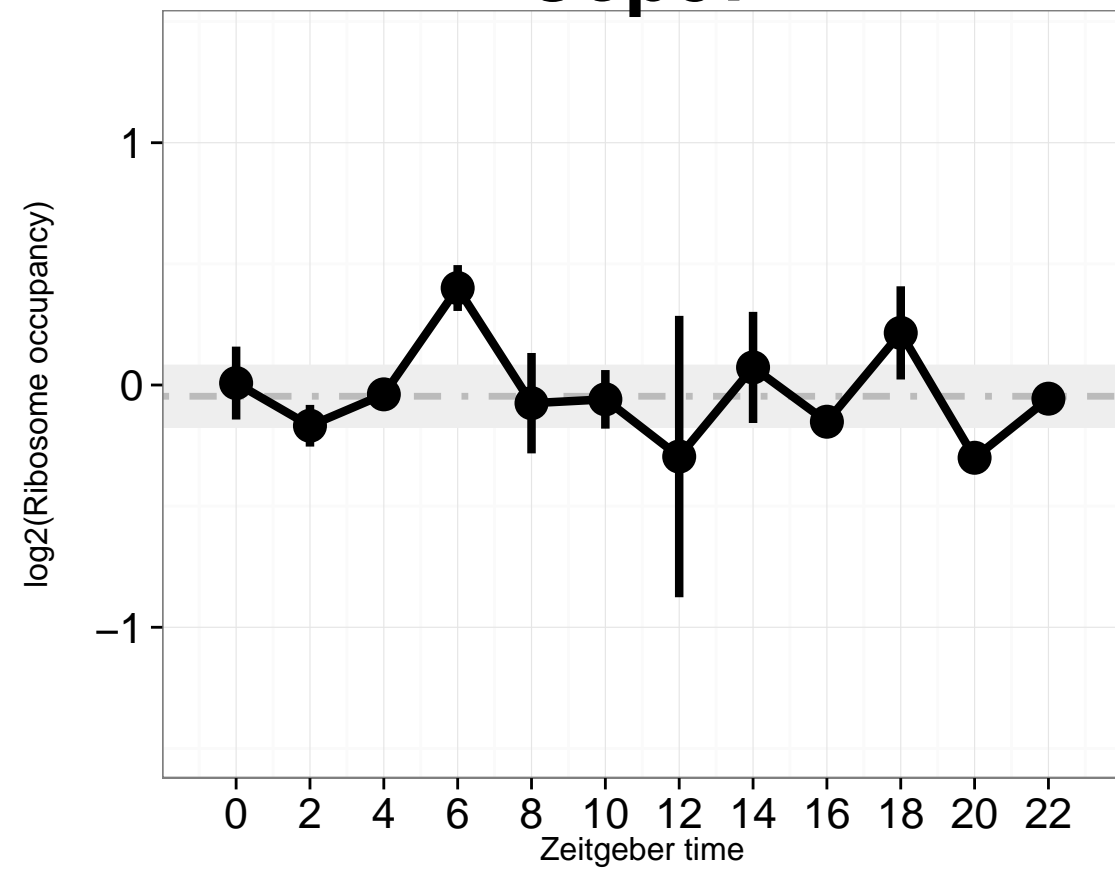

Supplement: Supplementary file 11032 [file 1]

## Dzip3

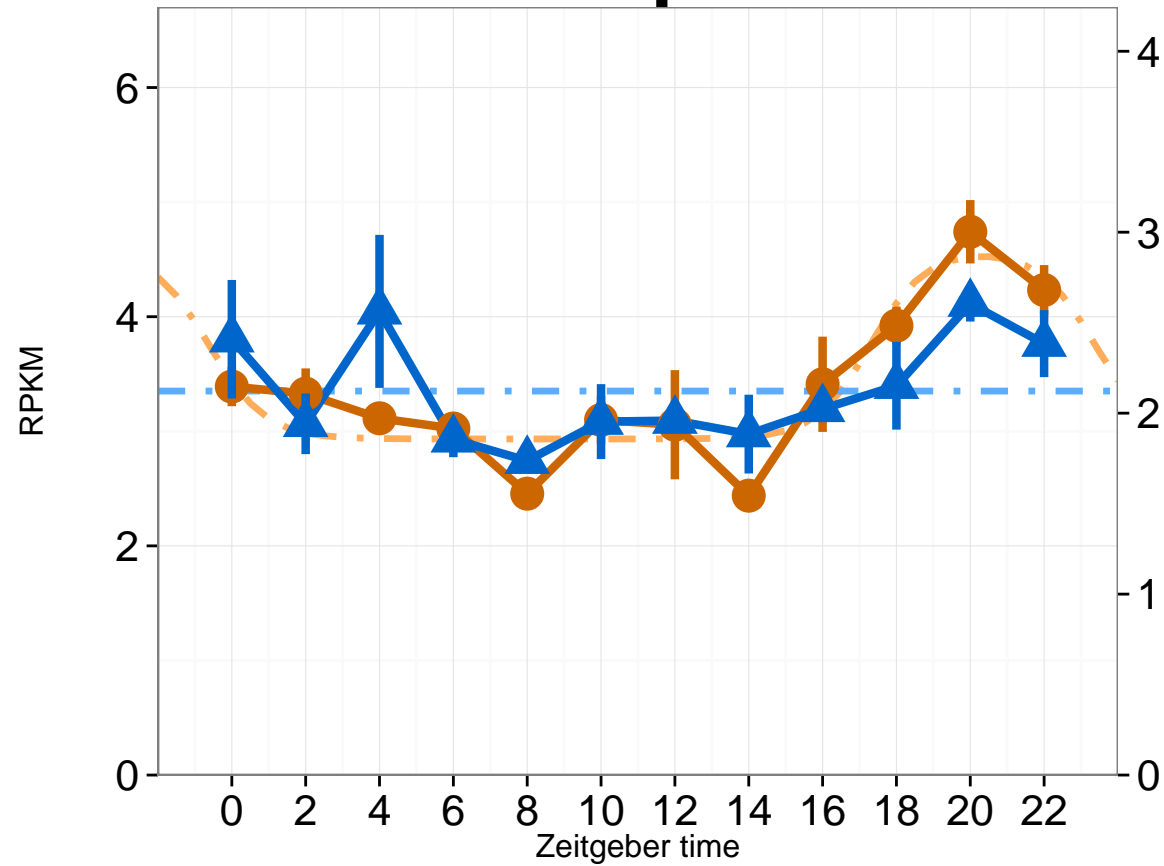

## Dzip3

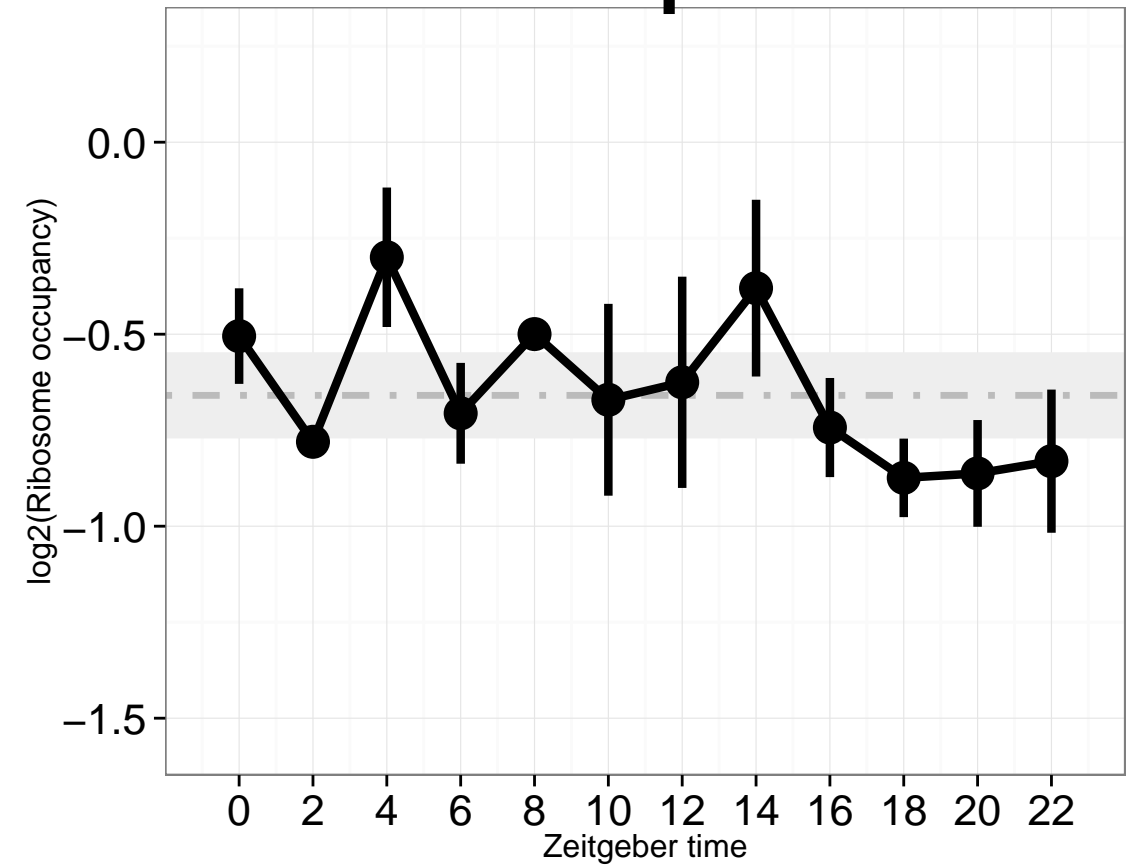

Supplement: Supplementary file 11033 [file 1]

## Emr4 TR

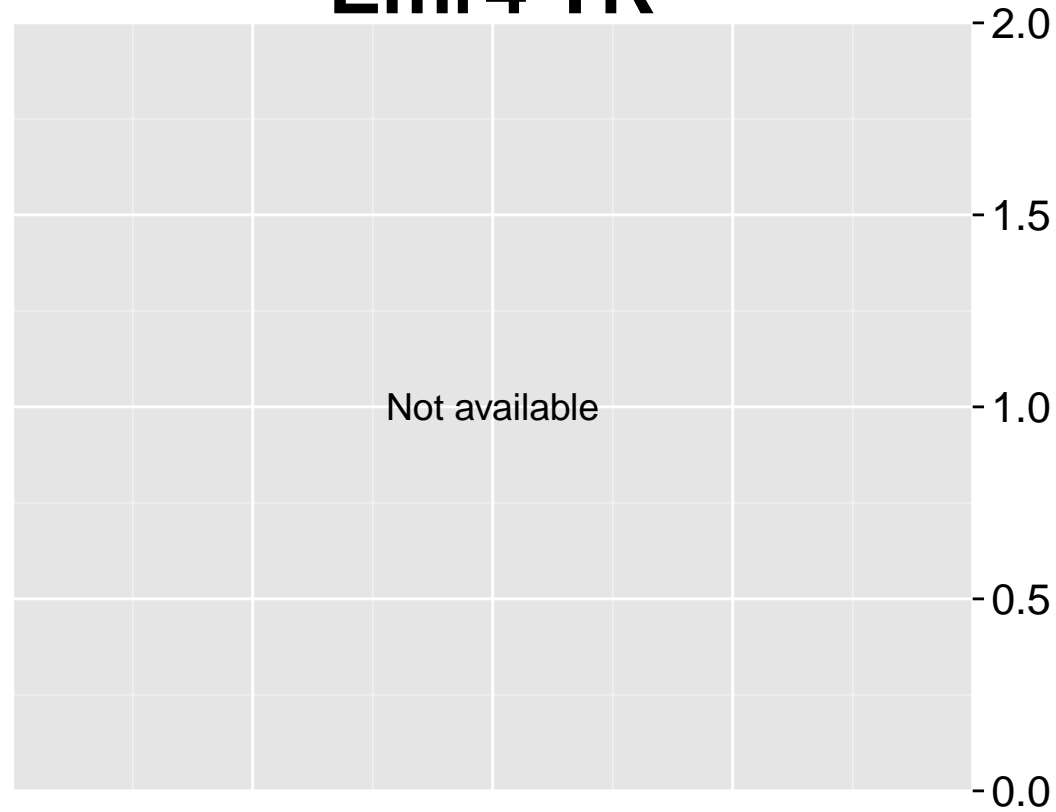

## Emr4 log<sub>2</sub>(Ribosome occupancy)

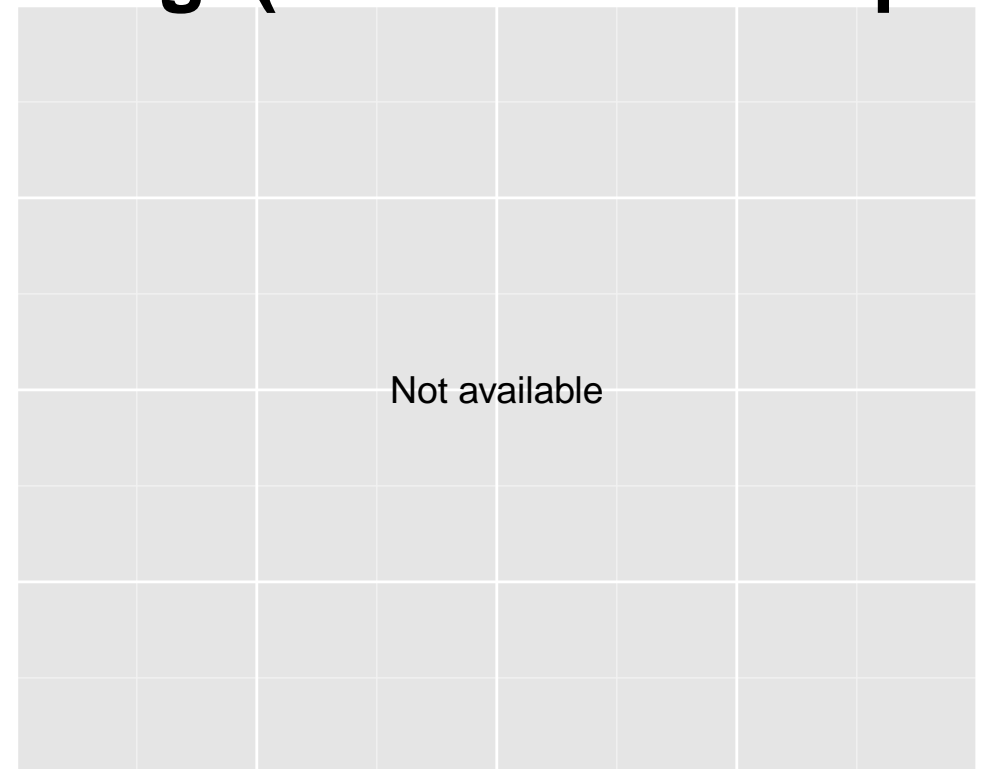

Supplement: Supplementary file 11034 [file 1]

# Itgb8

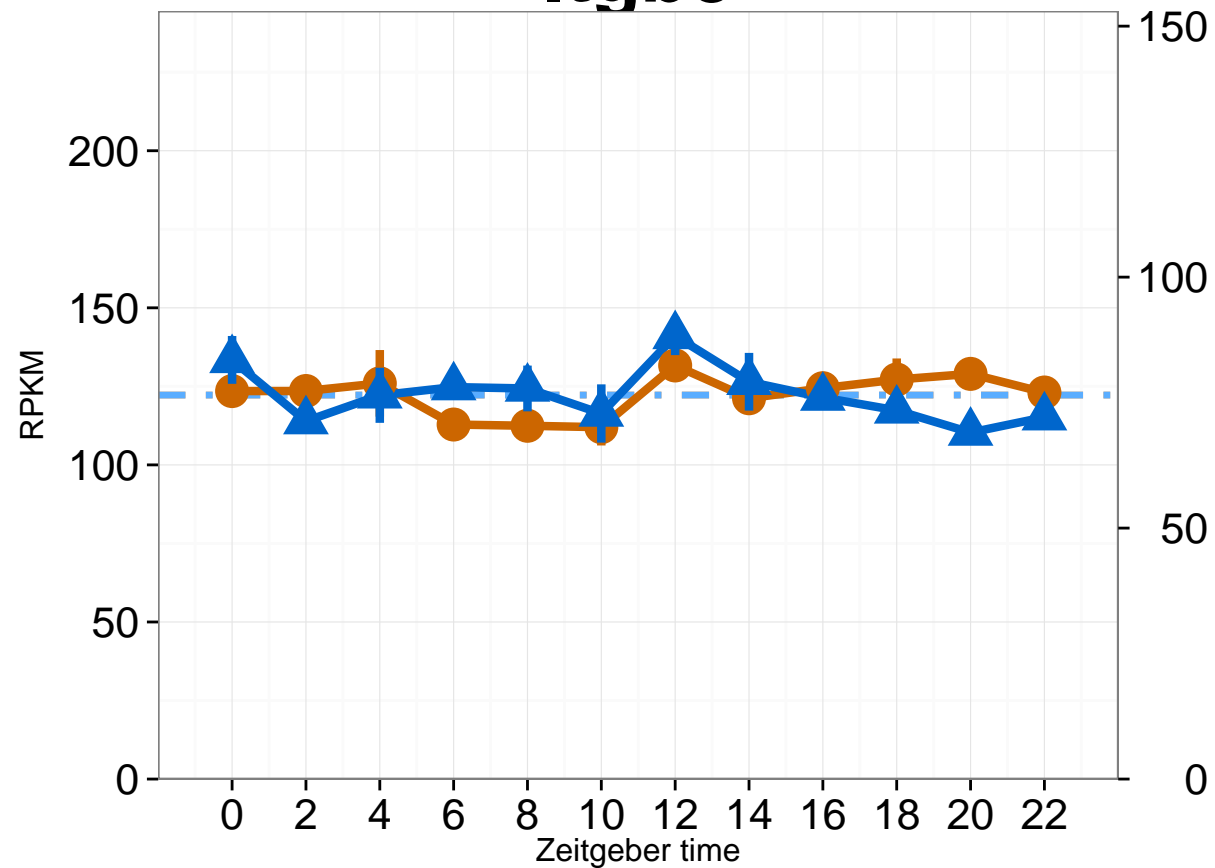

# Itgb8

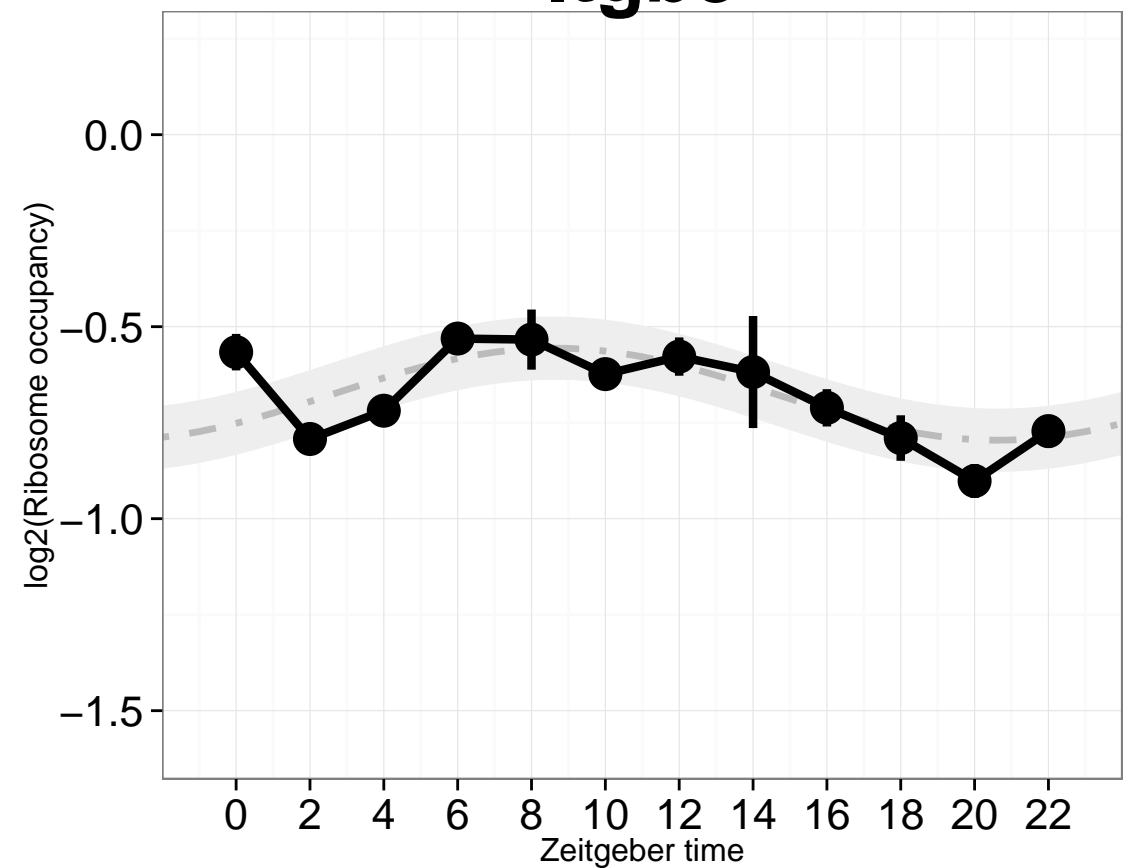

Supplement: Supplementary file 11035 [file 1]

## Naa25

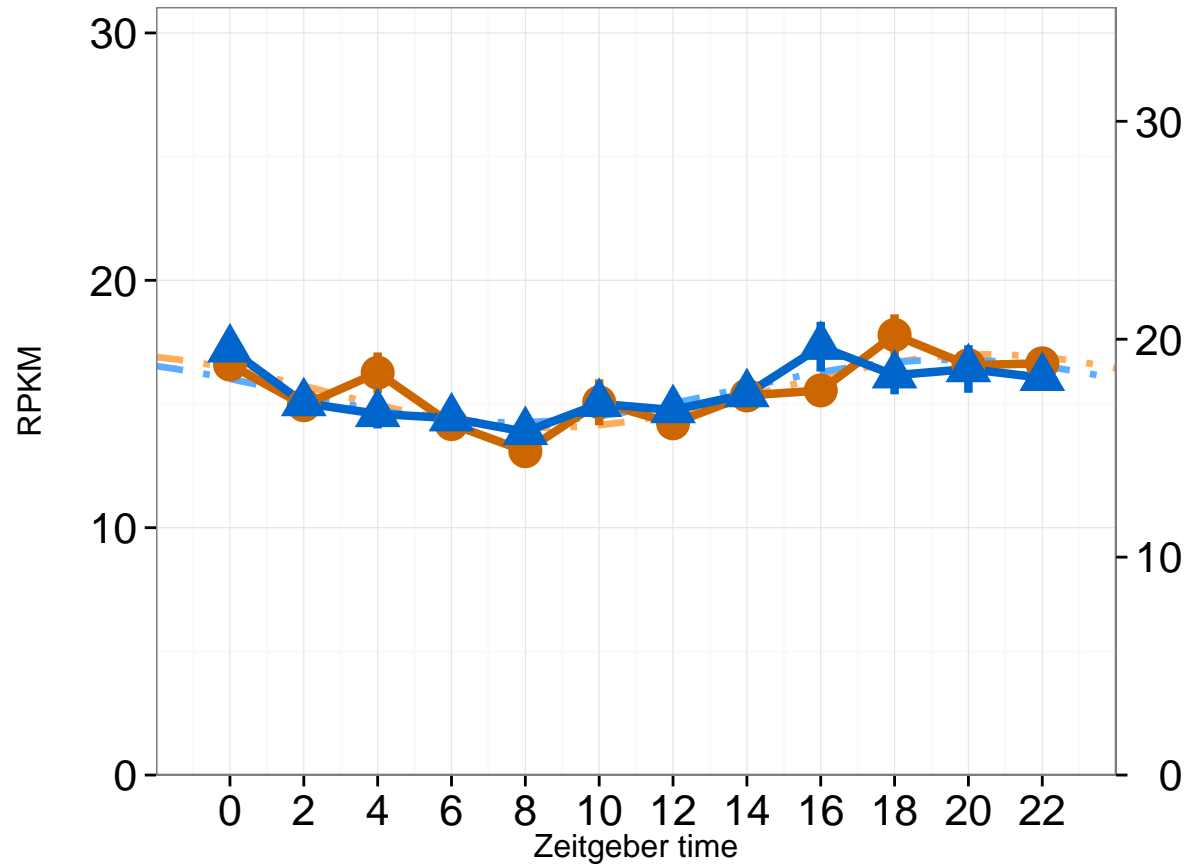

## Naa25

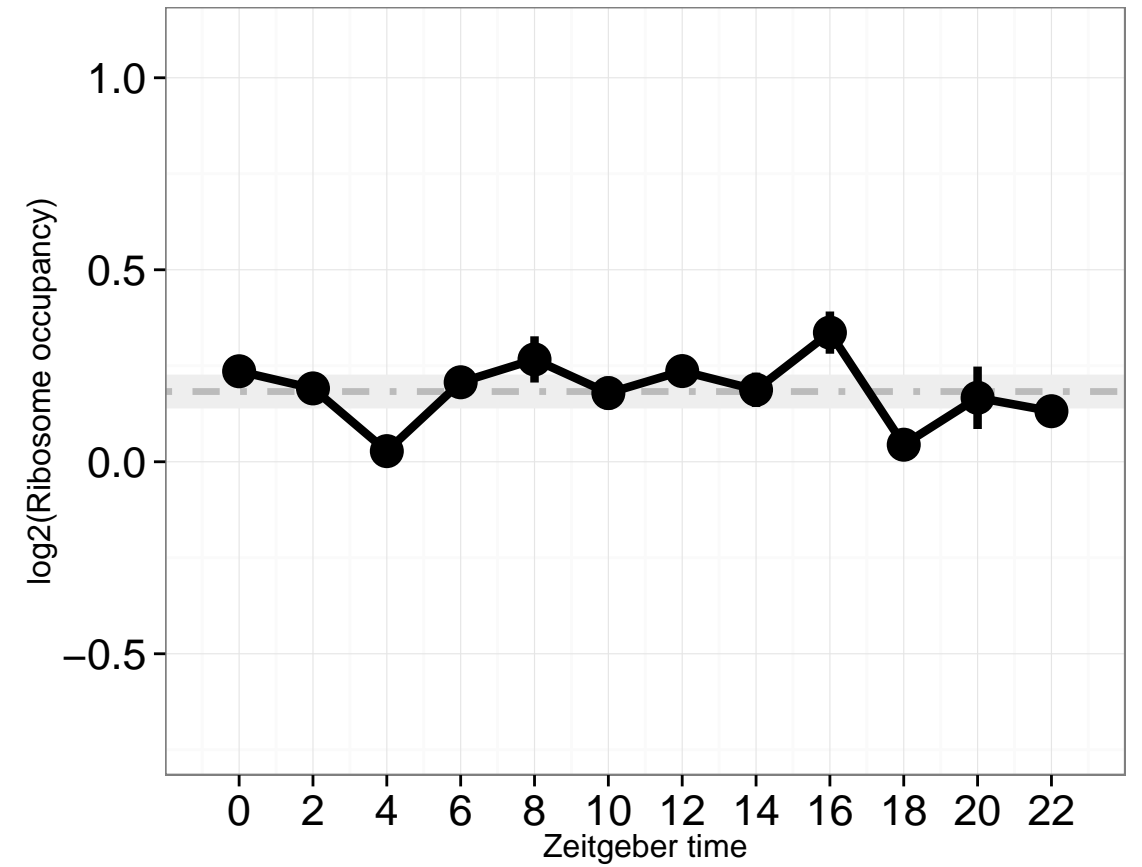

Supplement: Supplementary file 11036 [file 1]

# Pik3r1

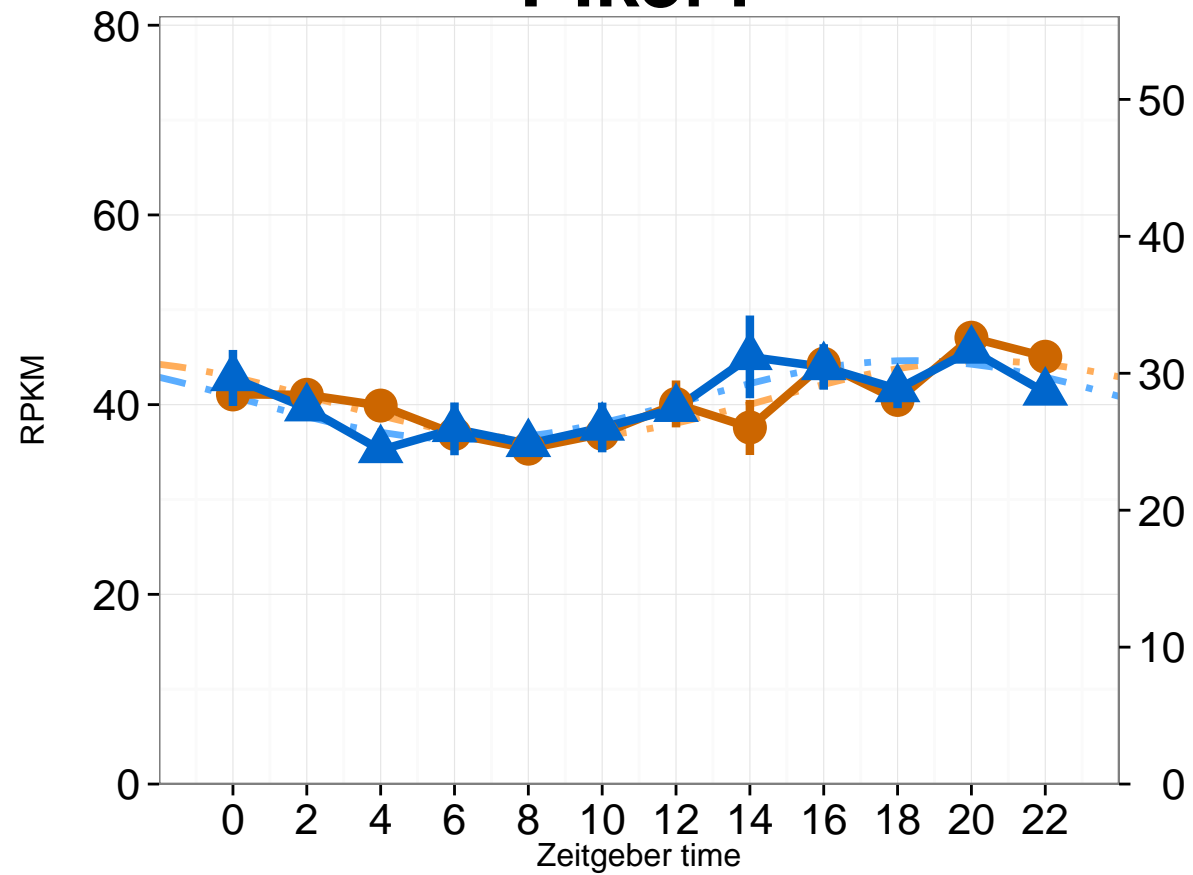

# Pik3r1

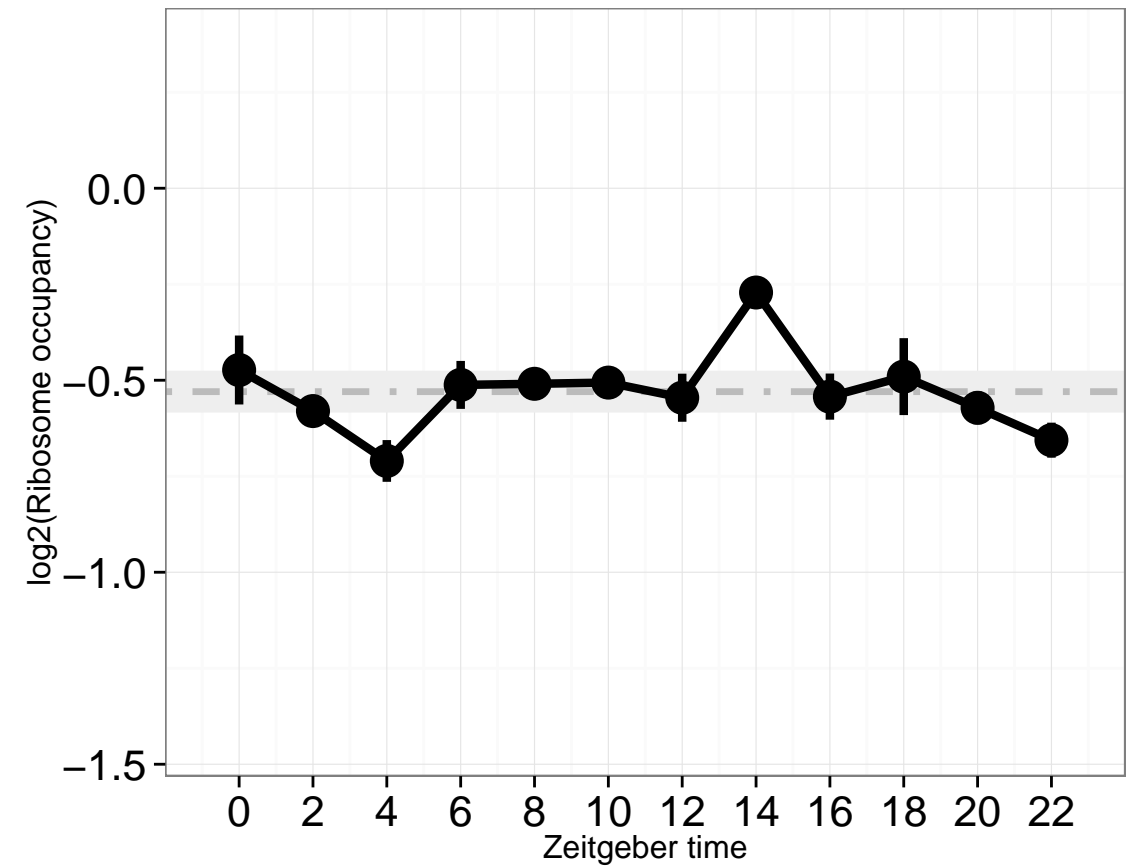

Supplement: Supplementary file 11037 [file 1]

# Mpv17I

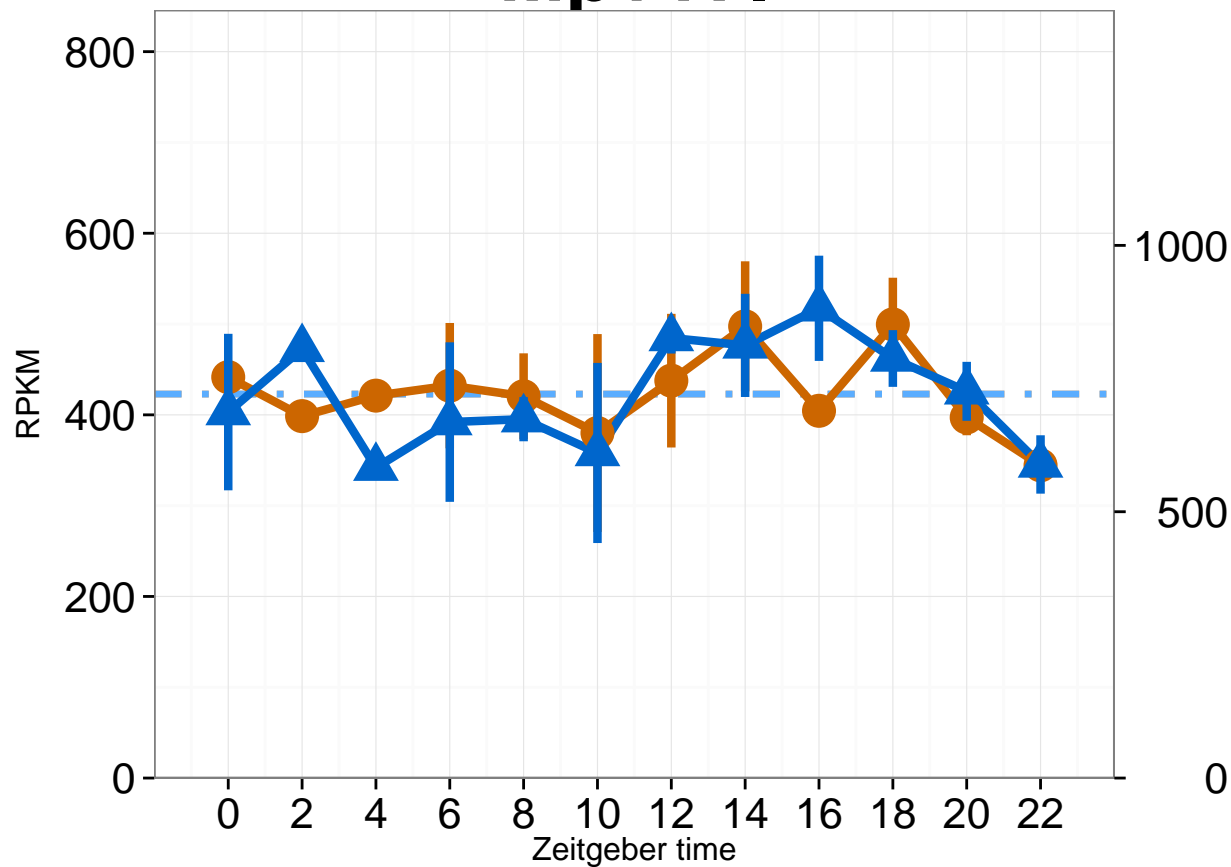

# Mpv17I

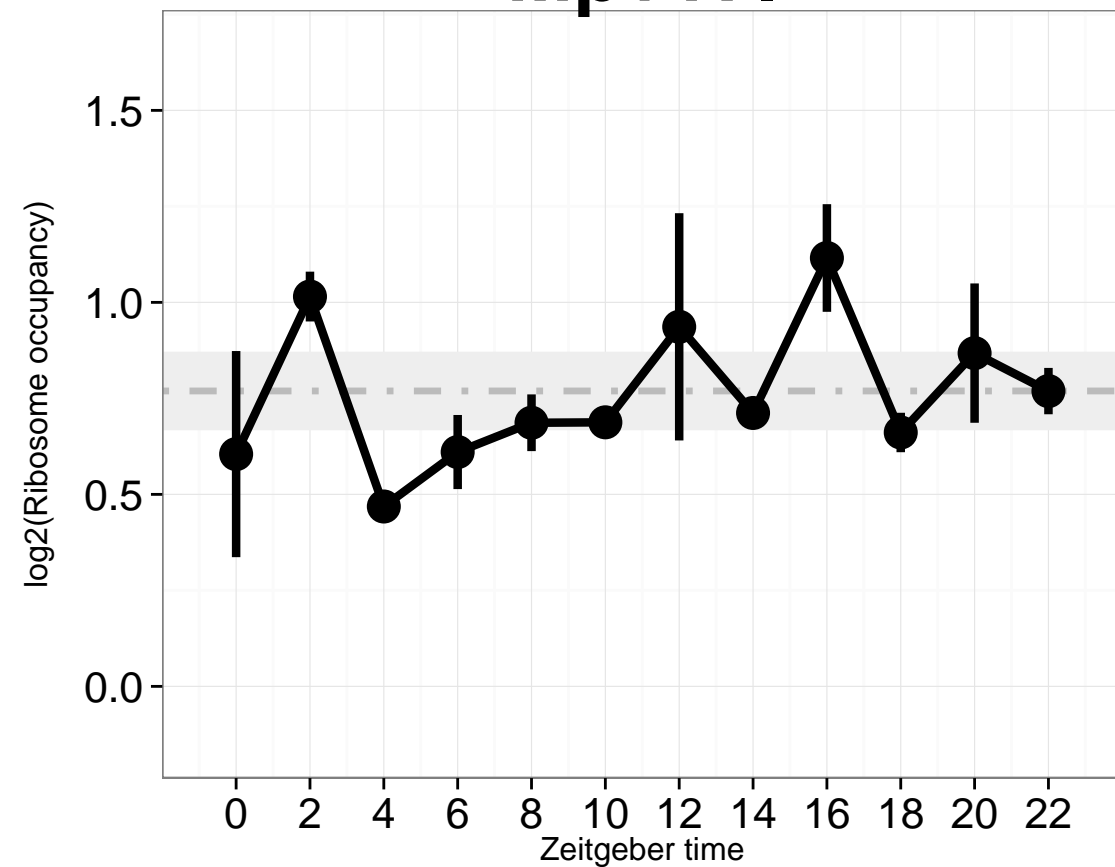

Supplement: Supplementary file 11038 [file 1]

# Mrps12

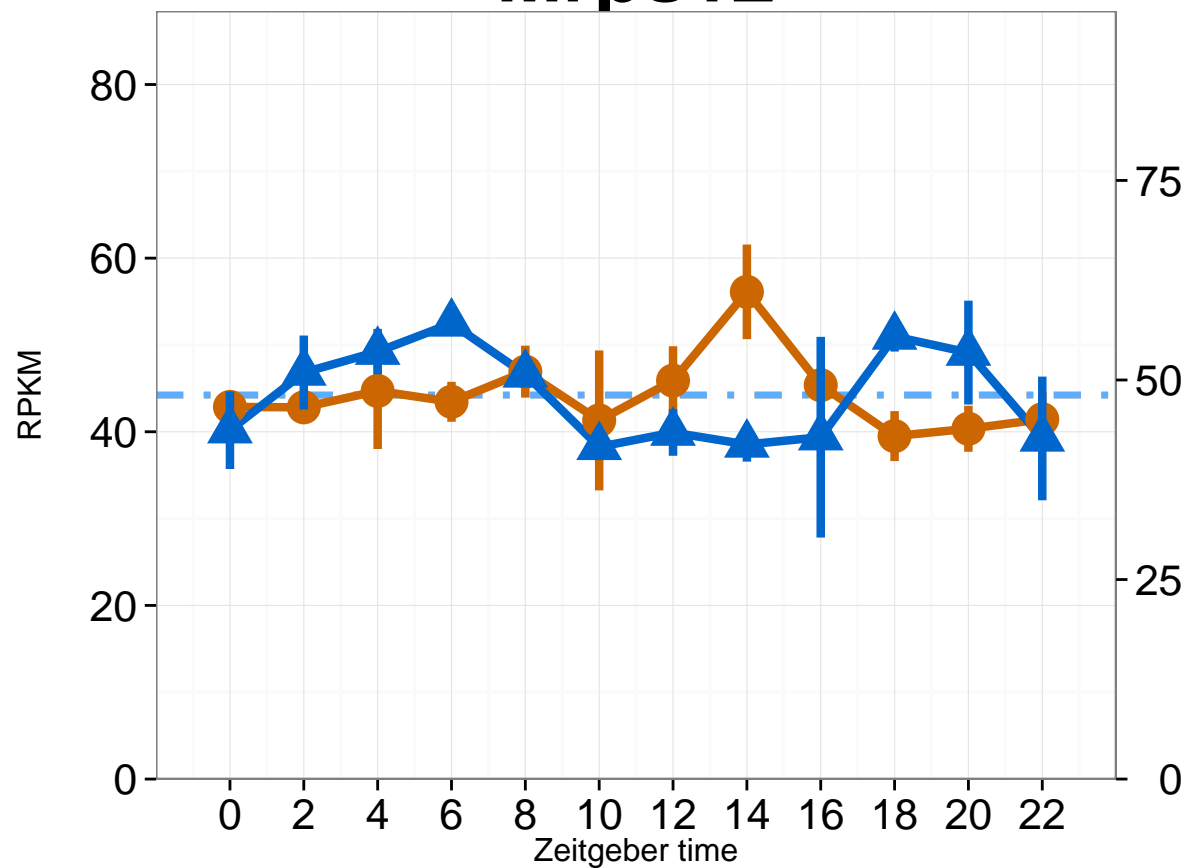

# Mrps12

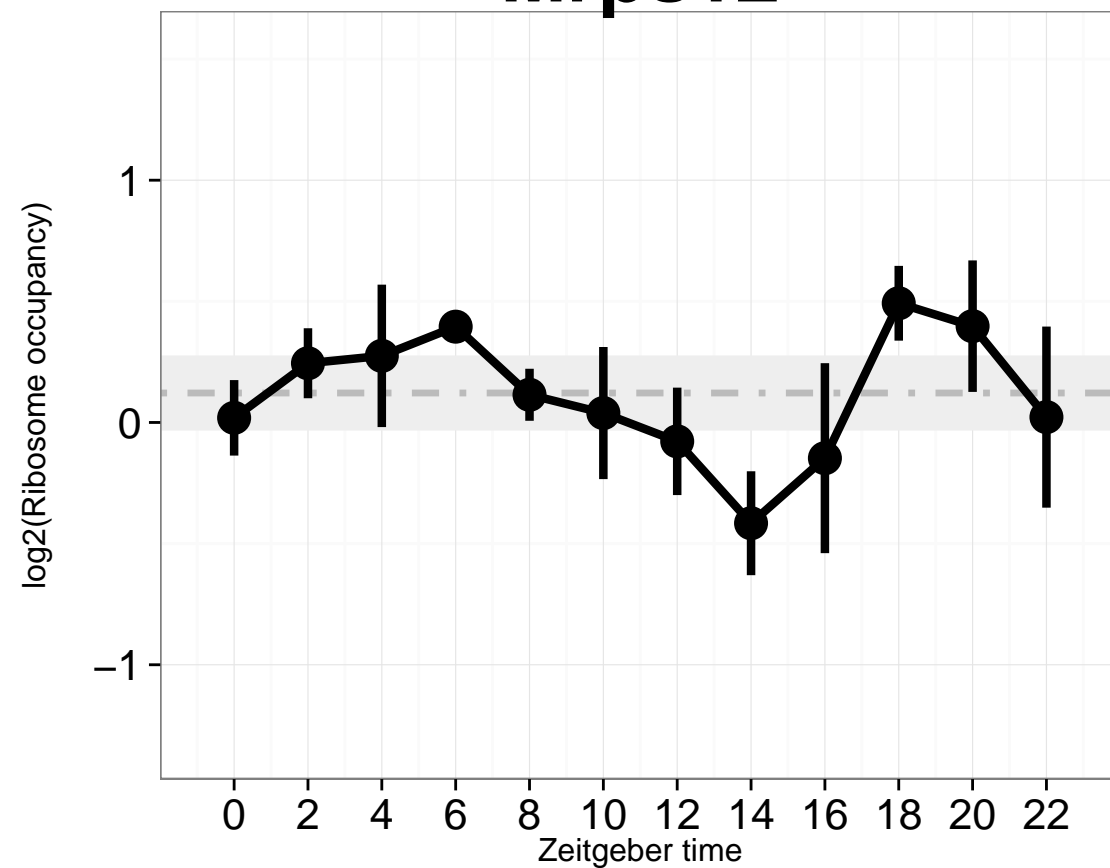

Supplement: Supplementary file 11039 [file 1]

# Trap1

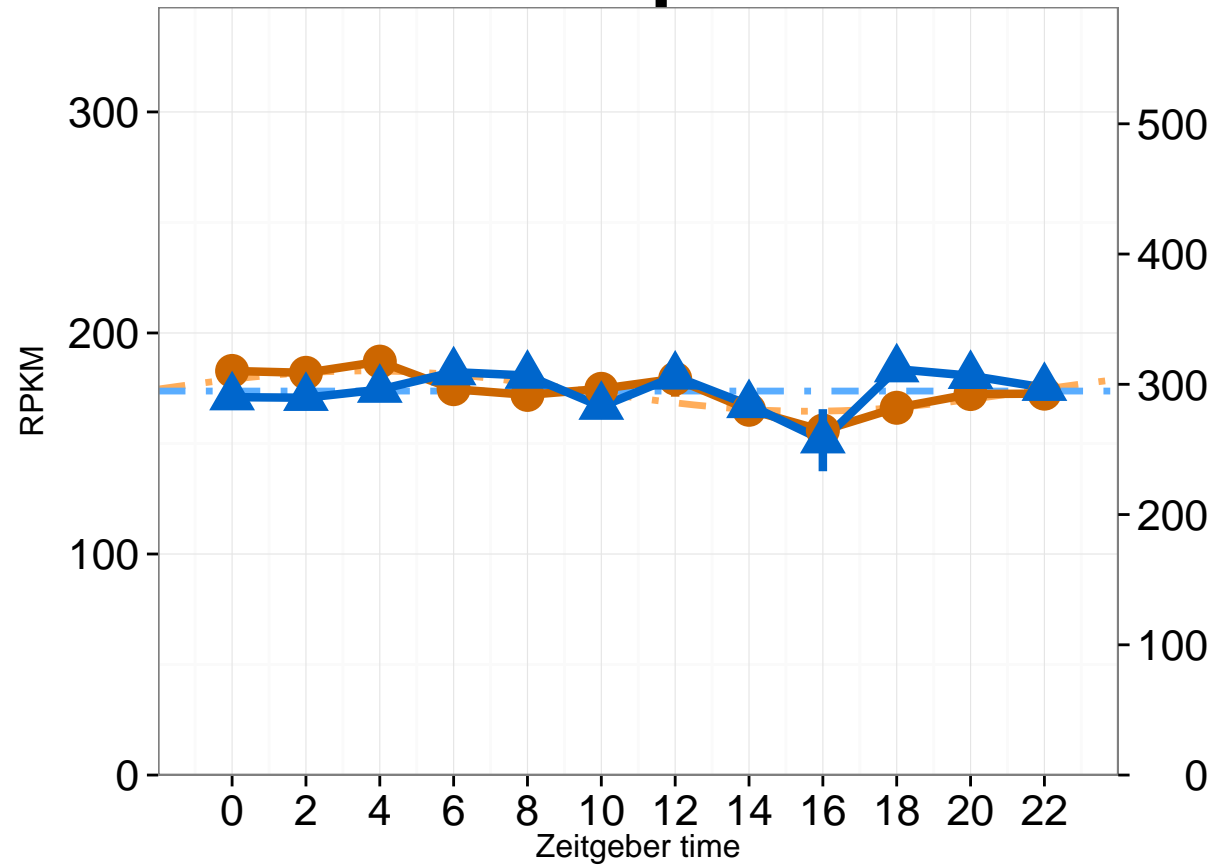

# Trap1

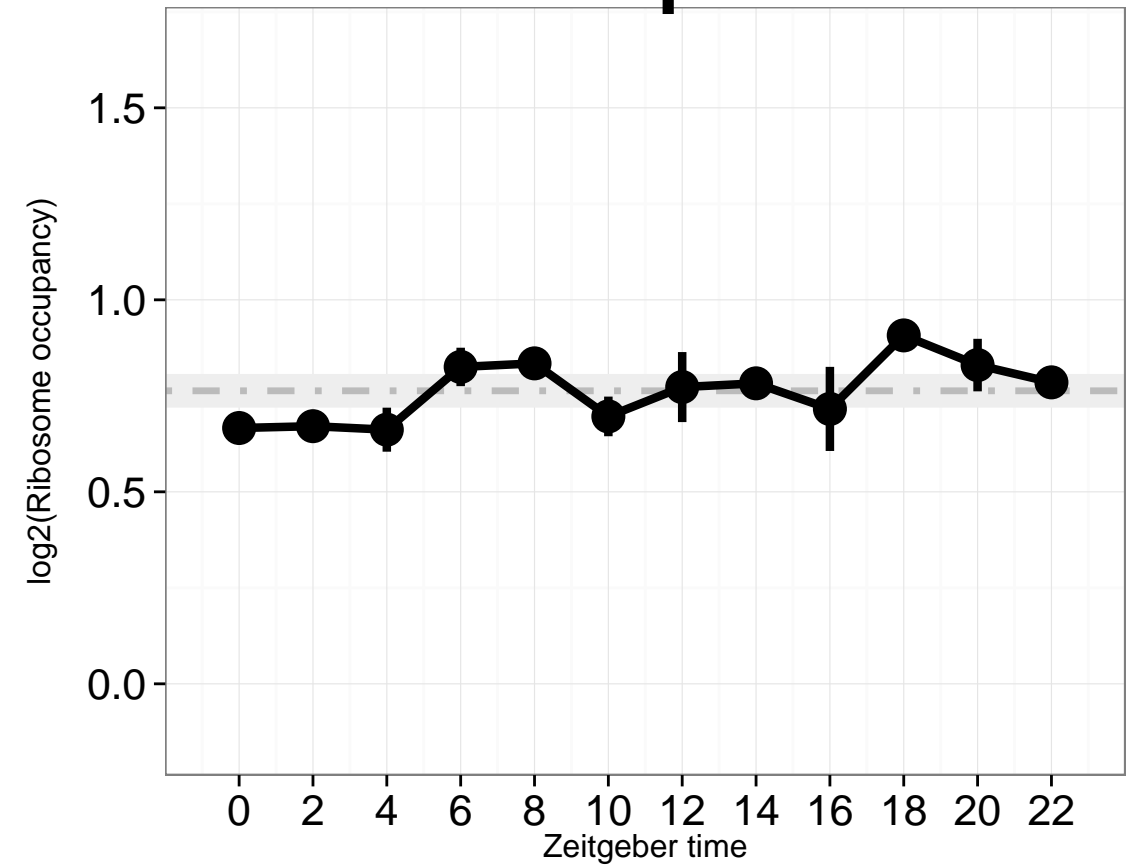

Supplement: Supplementary file 11040 [file 1]
