# Supplementary material (part 111 of 133)
Source: publisher figshare collection journal article supplement (https://springernature.figshare.com/articles/dataset/_/4903193)

## Gpr180

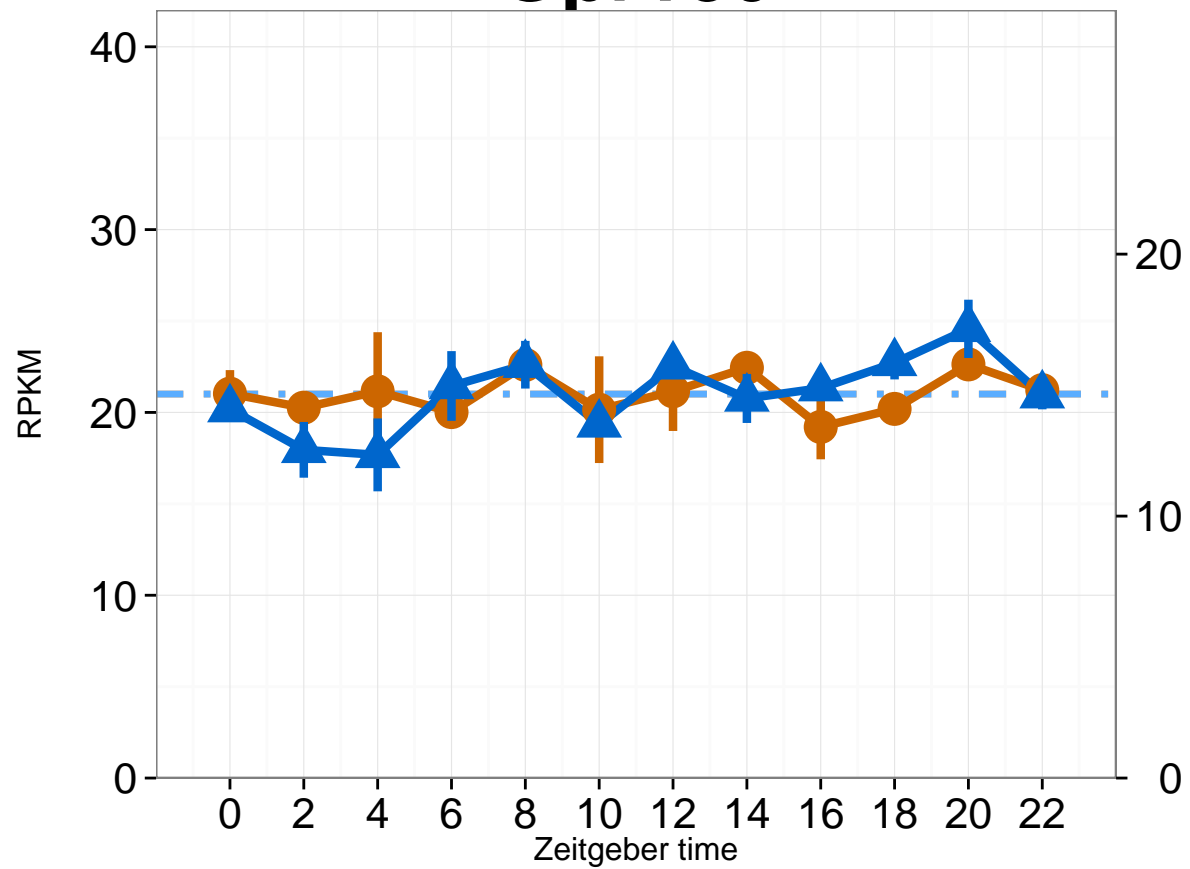

## Gpr180

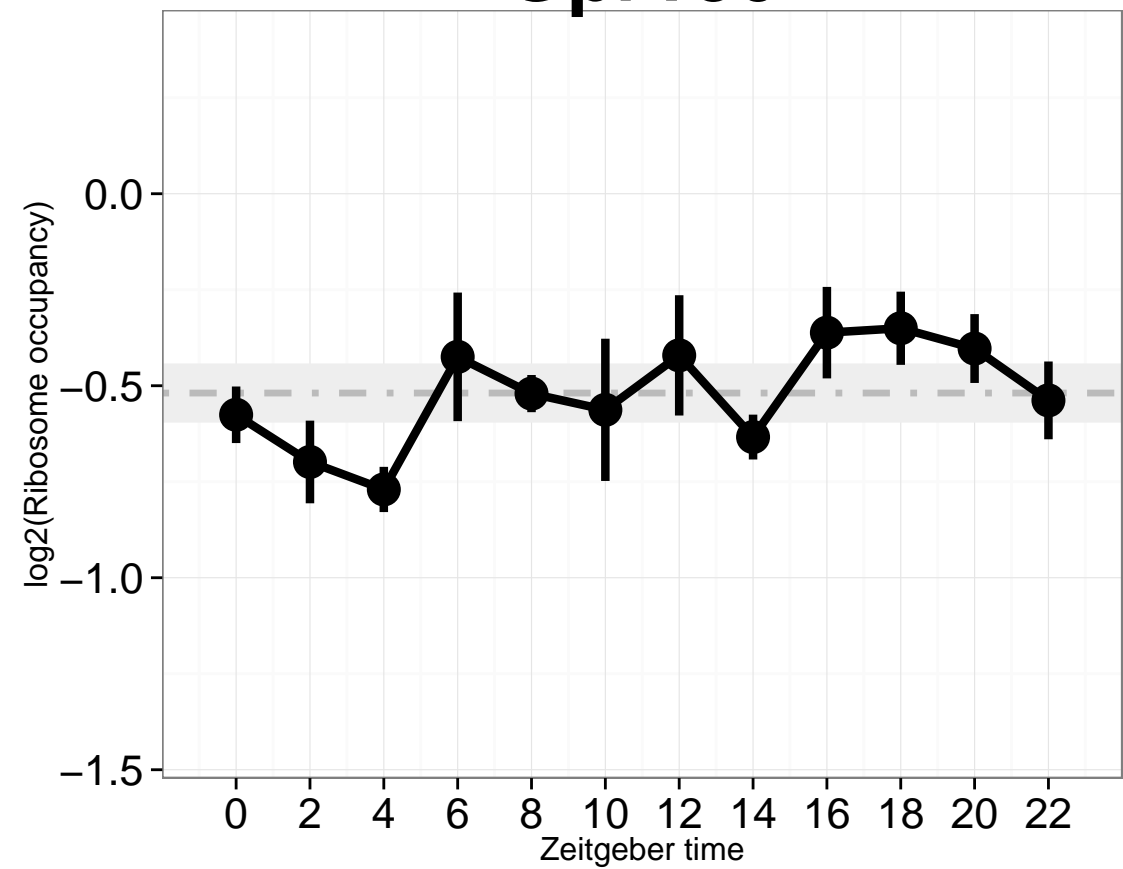

Supplement: Supplementary file 11041 [file 1]

# Pfkfb3

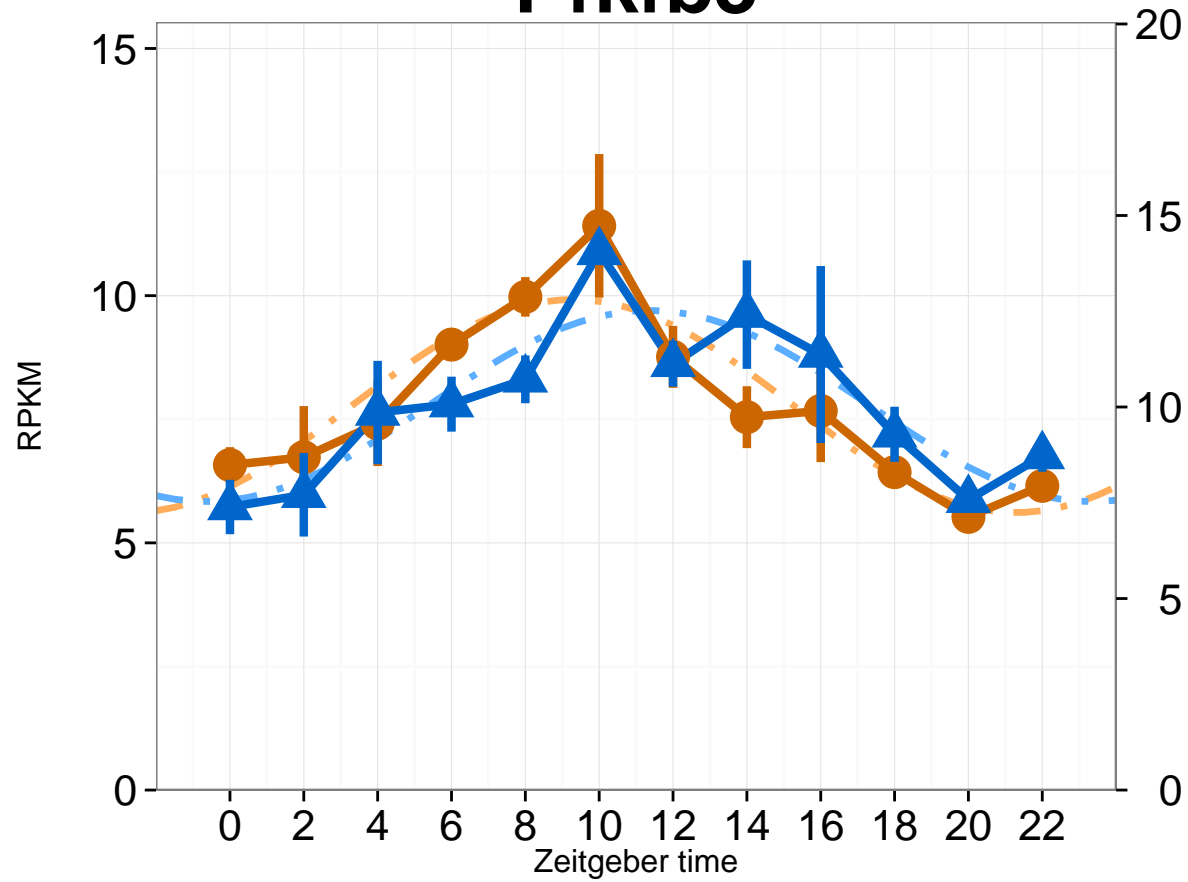

# Pfkfb3

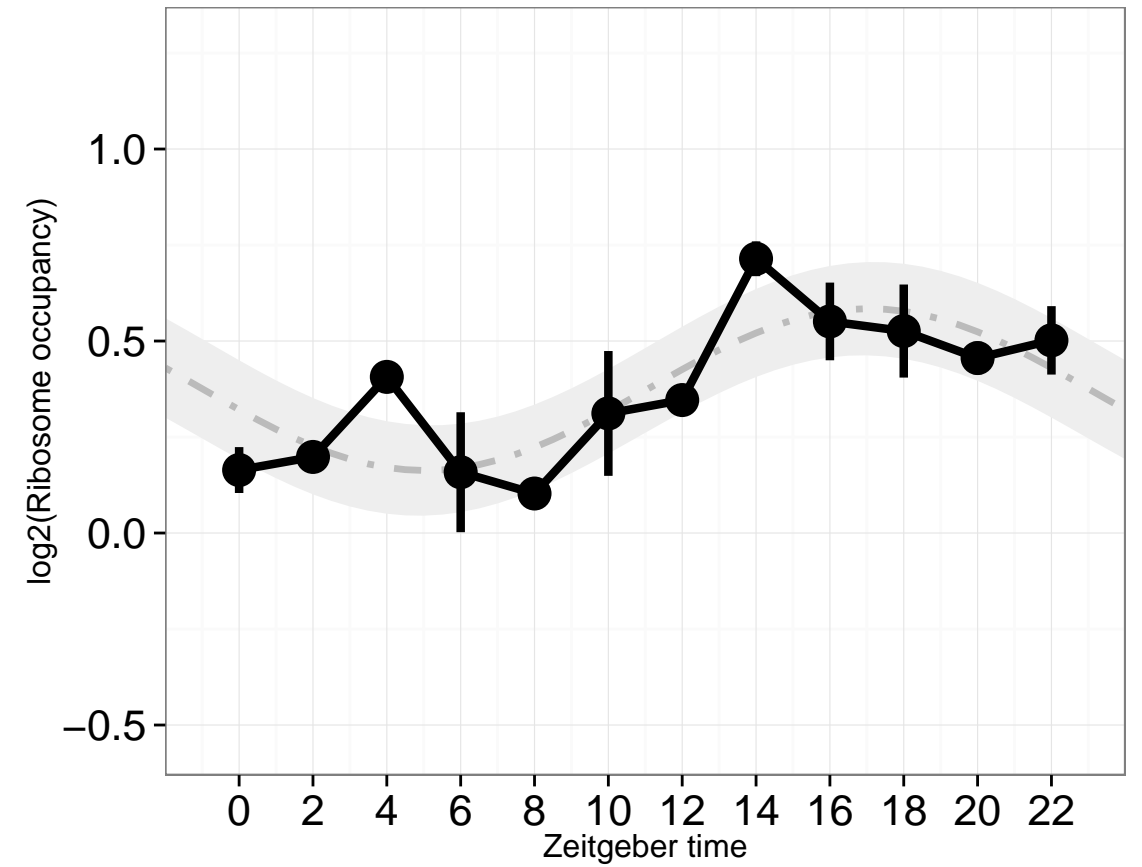

Supplement: Supplementary file 11042 [file 1]

**Cd79a TR**

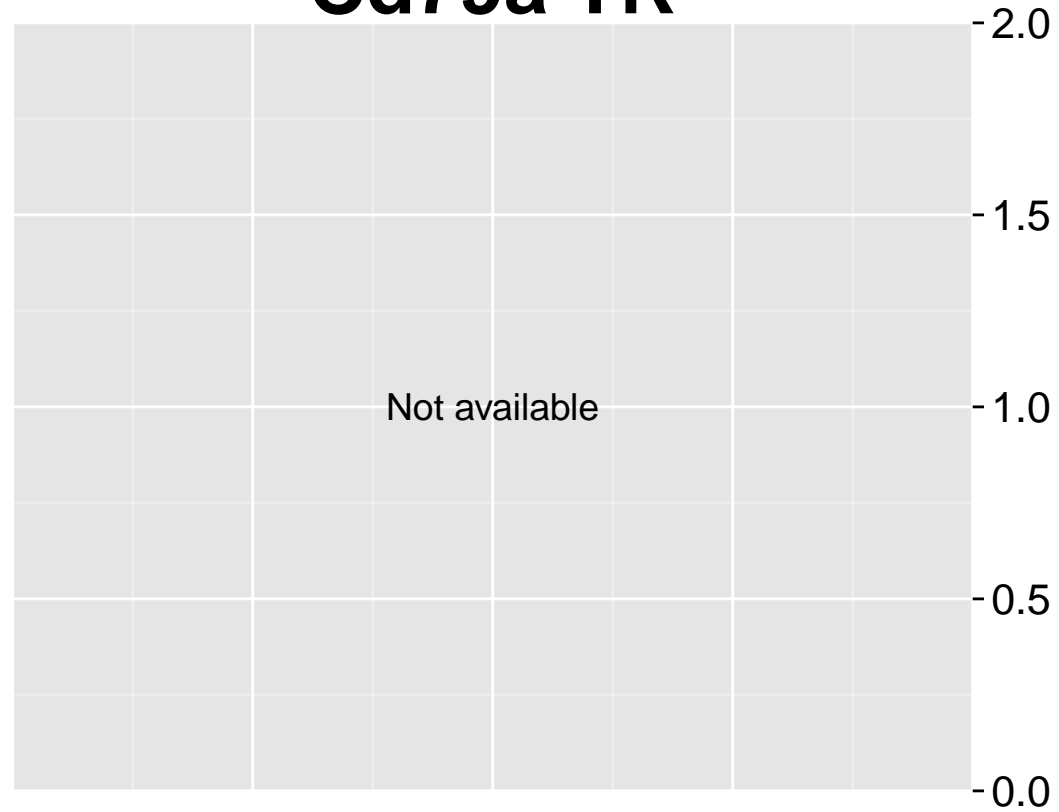

**Cd79a log2(Ribosome occupancy**

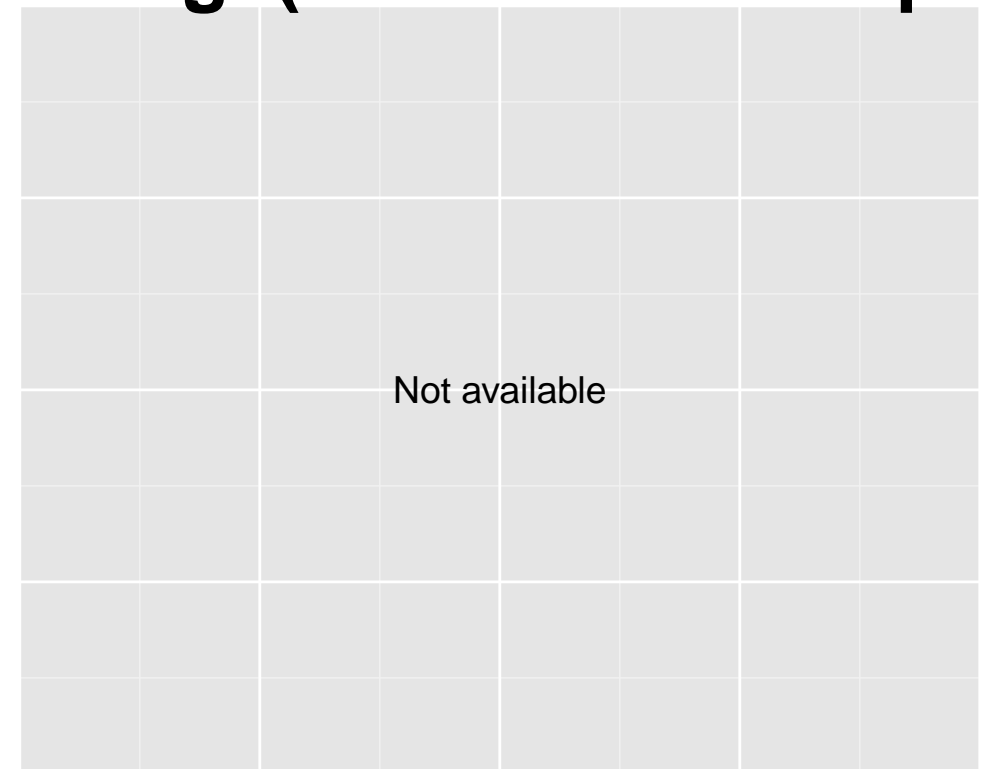

Supplement: Supplementary file 11043 [file 1]

# Ebna1bp2

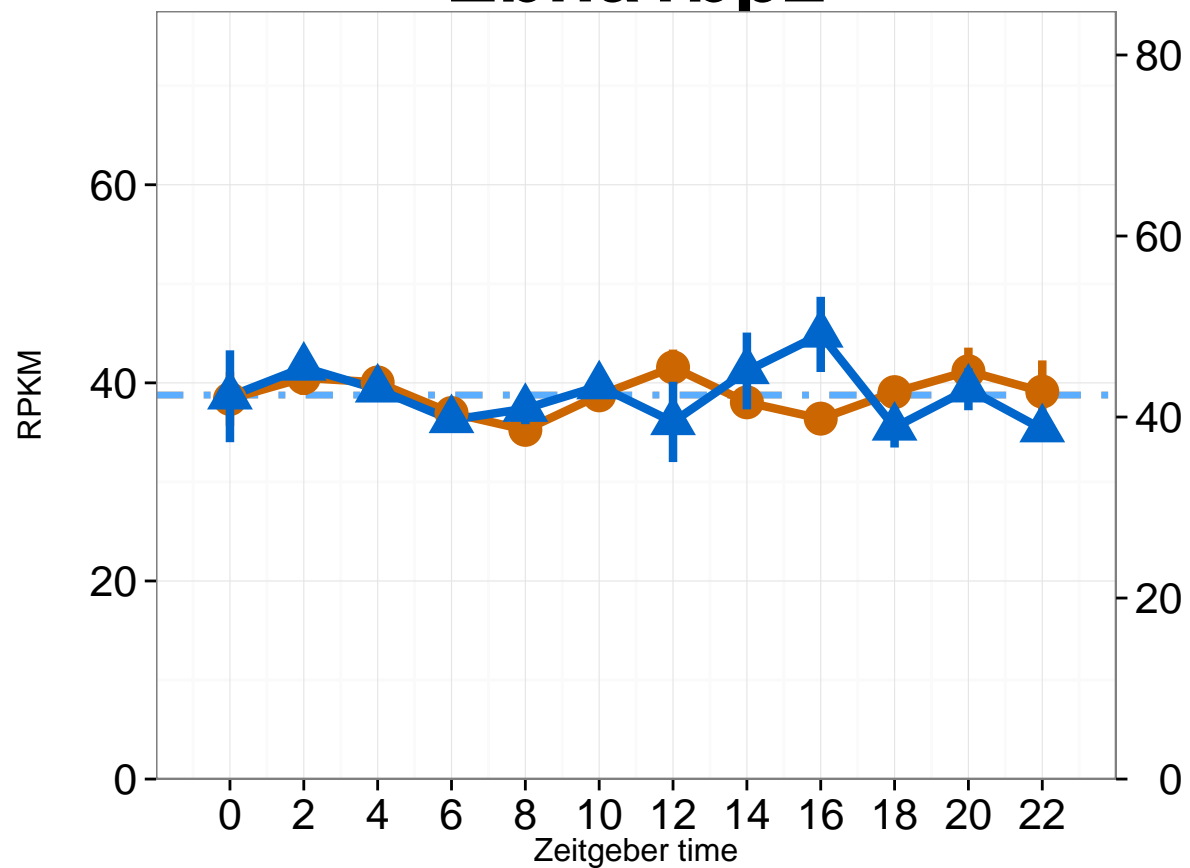

# Ebna1bp2

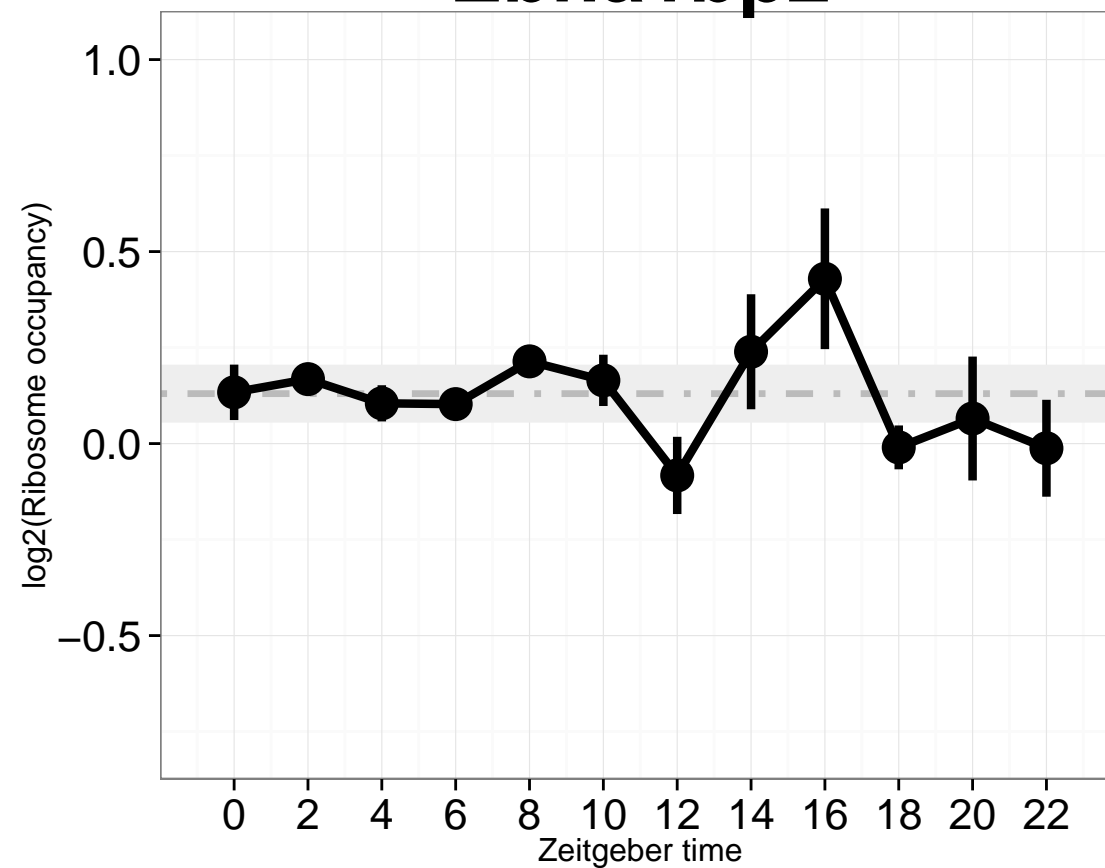

Supplement: Supplementary file 11044 [file 1]

## Entpd2

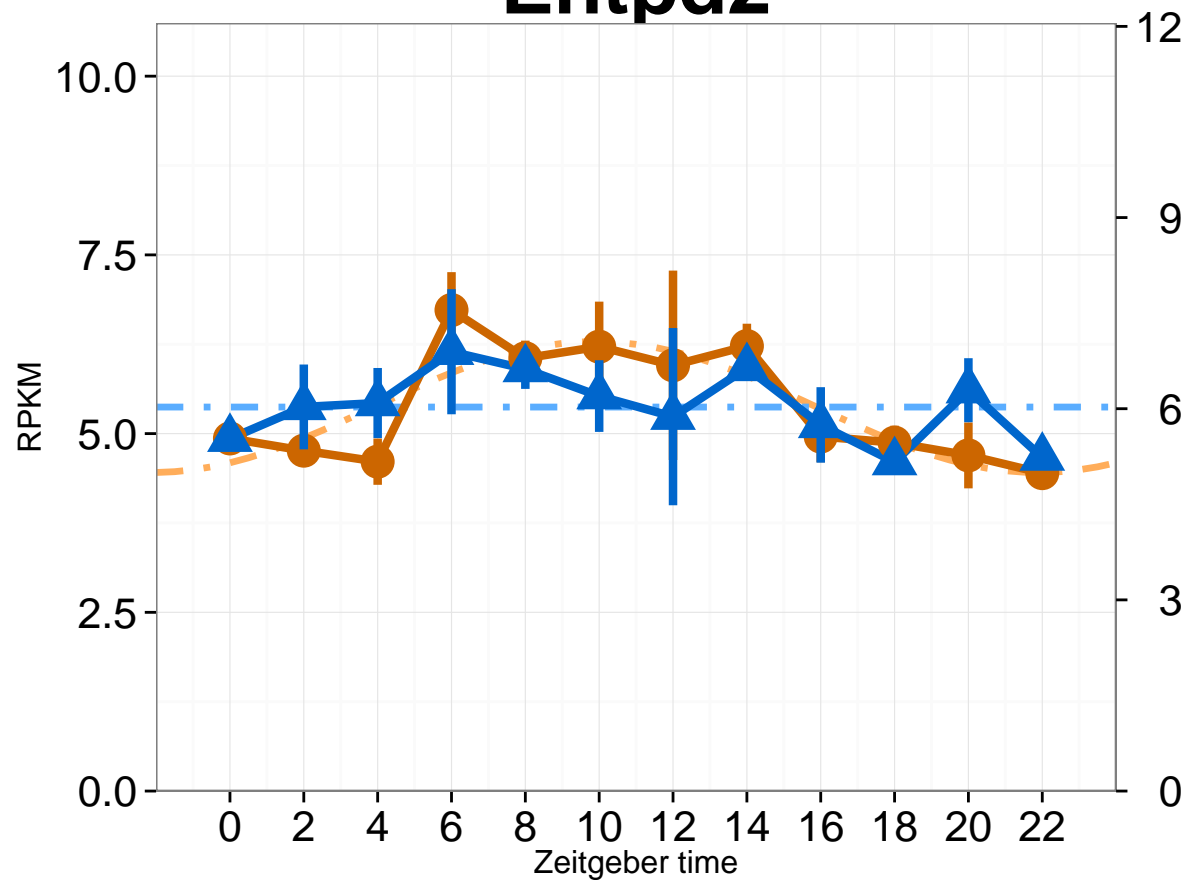

## Entpd2

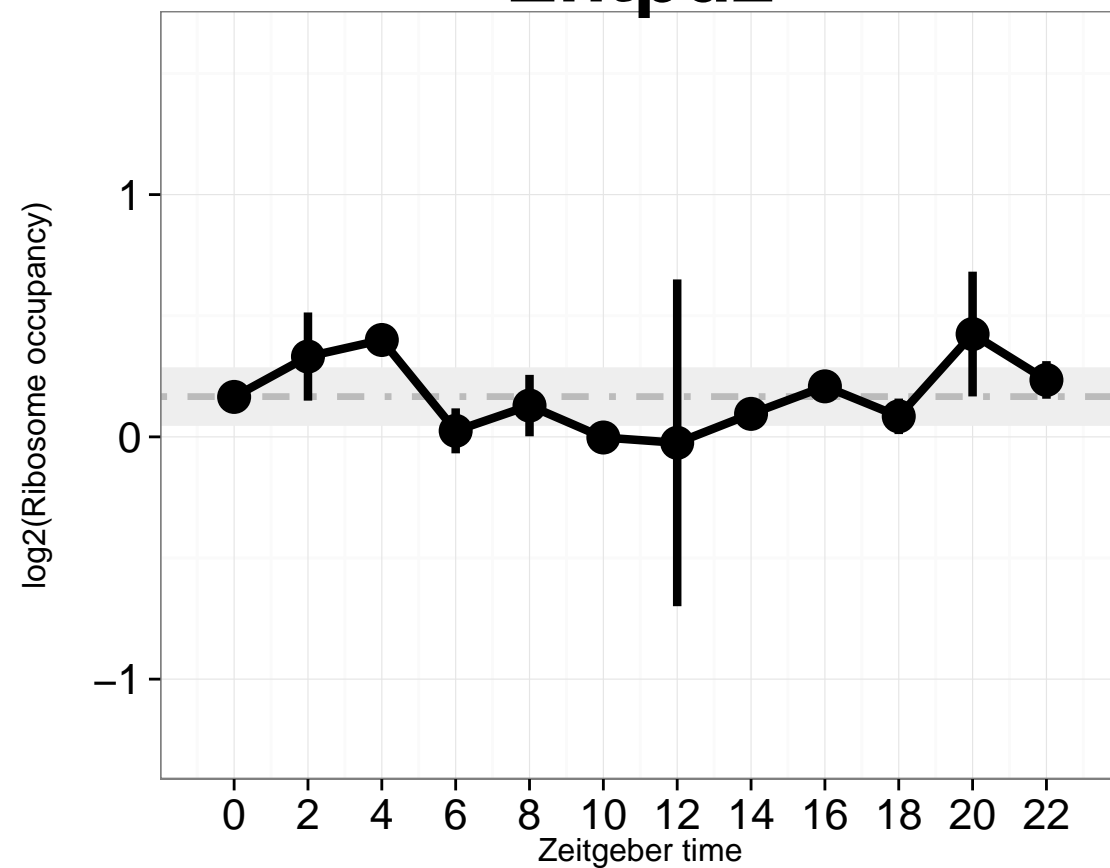

Supplement: Supplementary file 11045 [file 1]

## Eif5

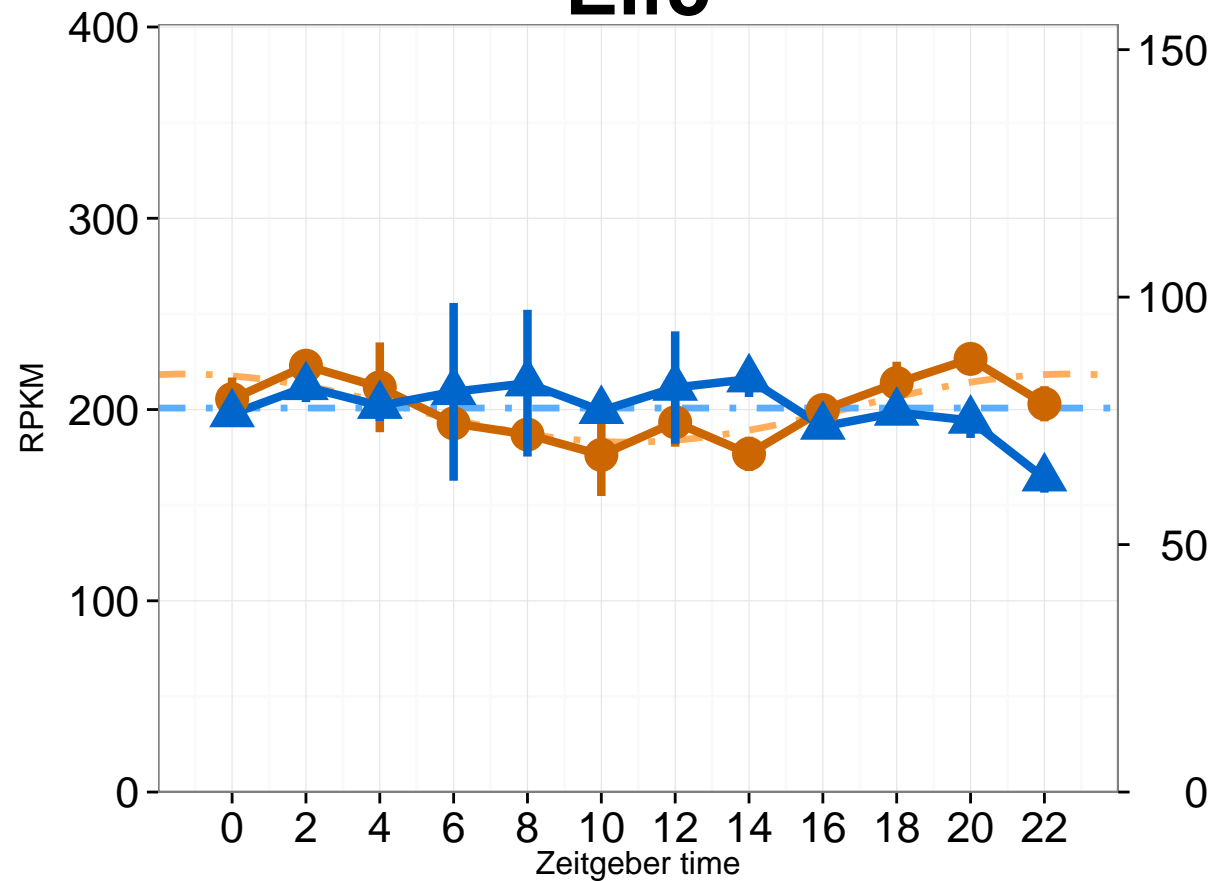

## Eif5

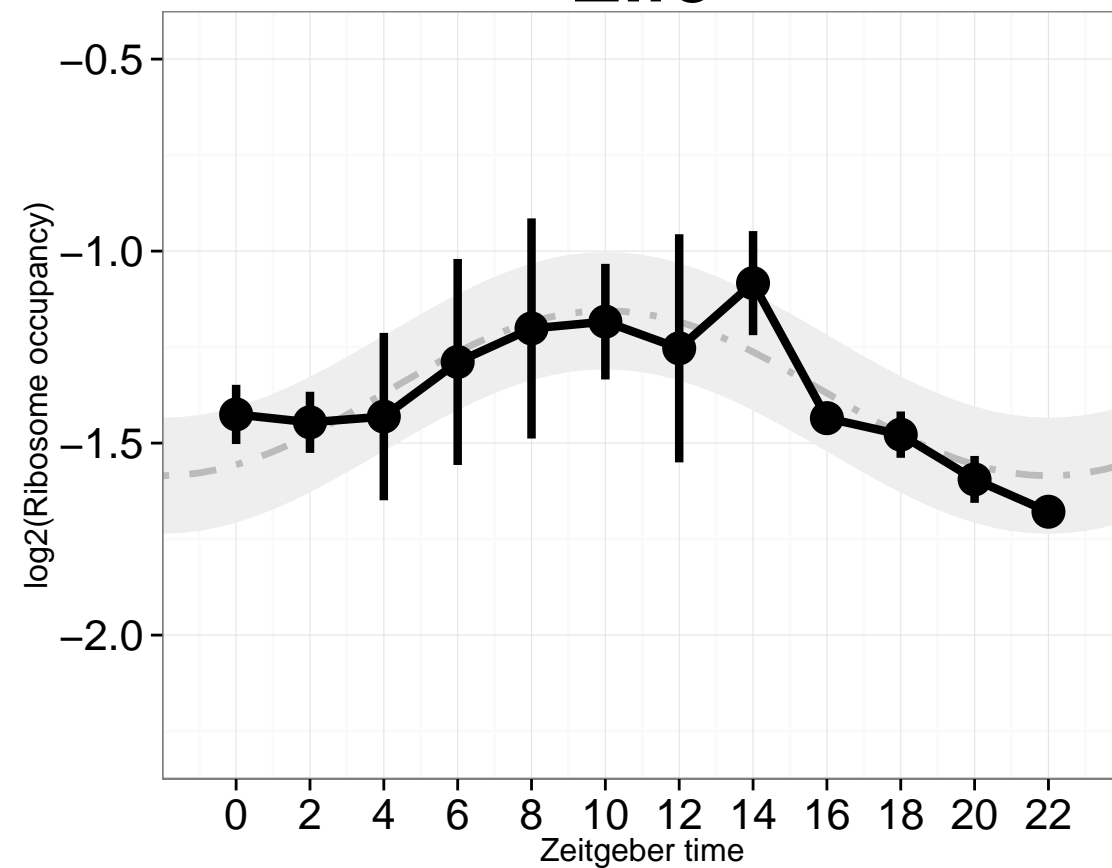

Supplement: Supplementary file 11046 [file 1]

## Slc25a24

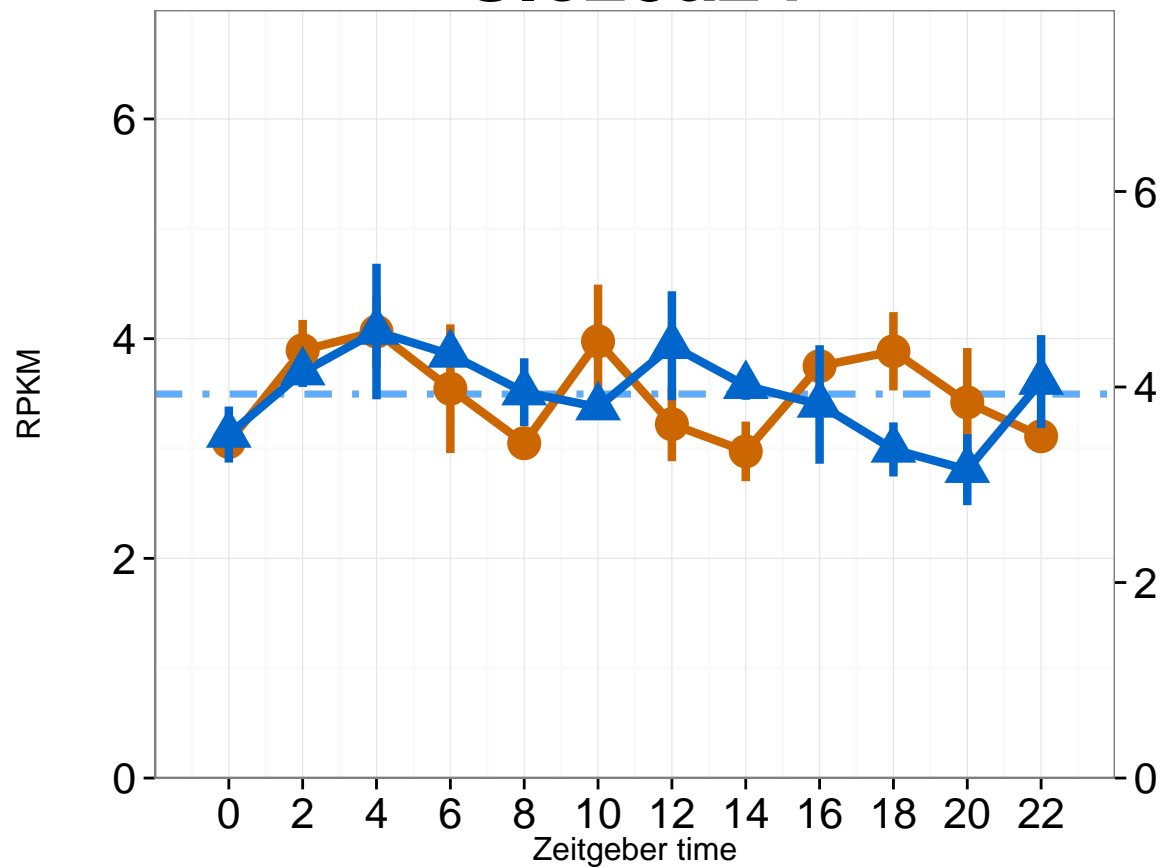

## Slc25a24

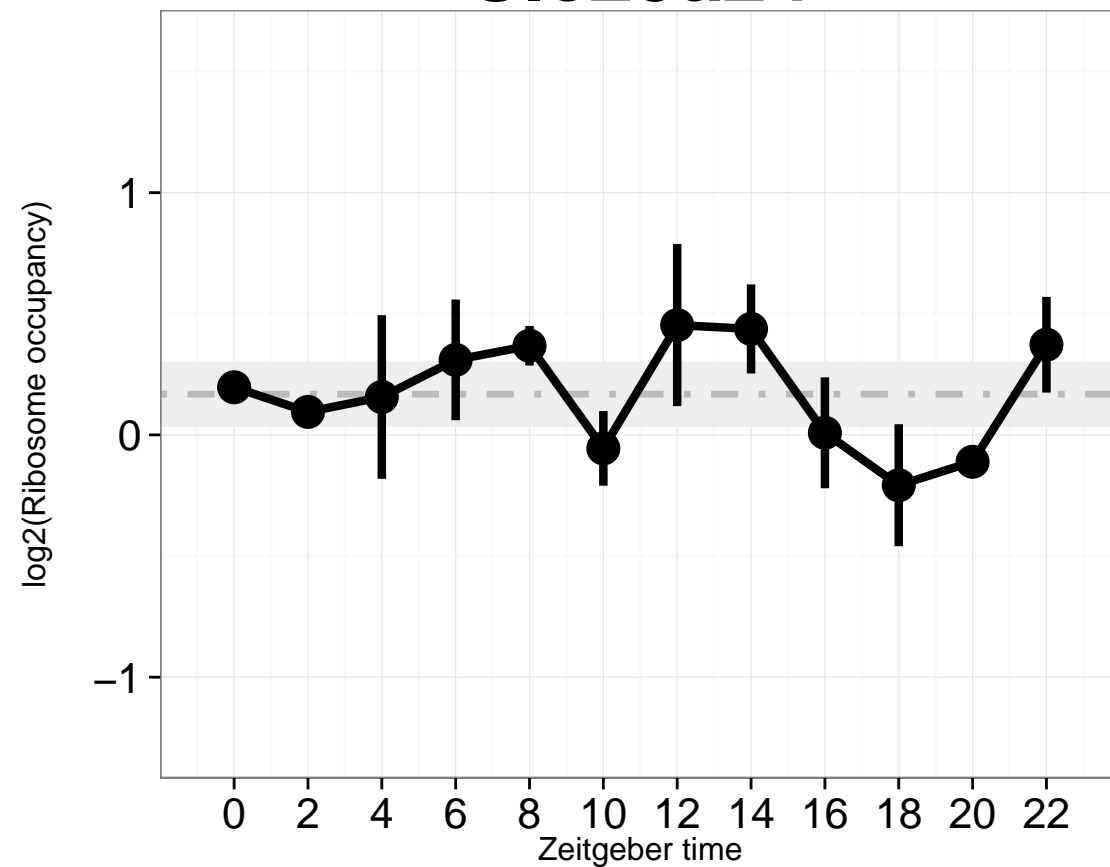

Supplement: Supplementary file 11047 [file 1]

# Zfyve21

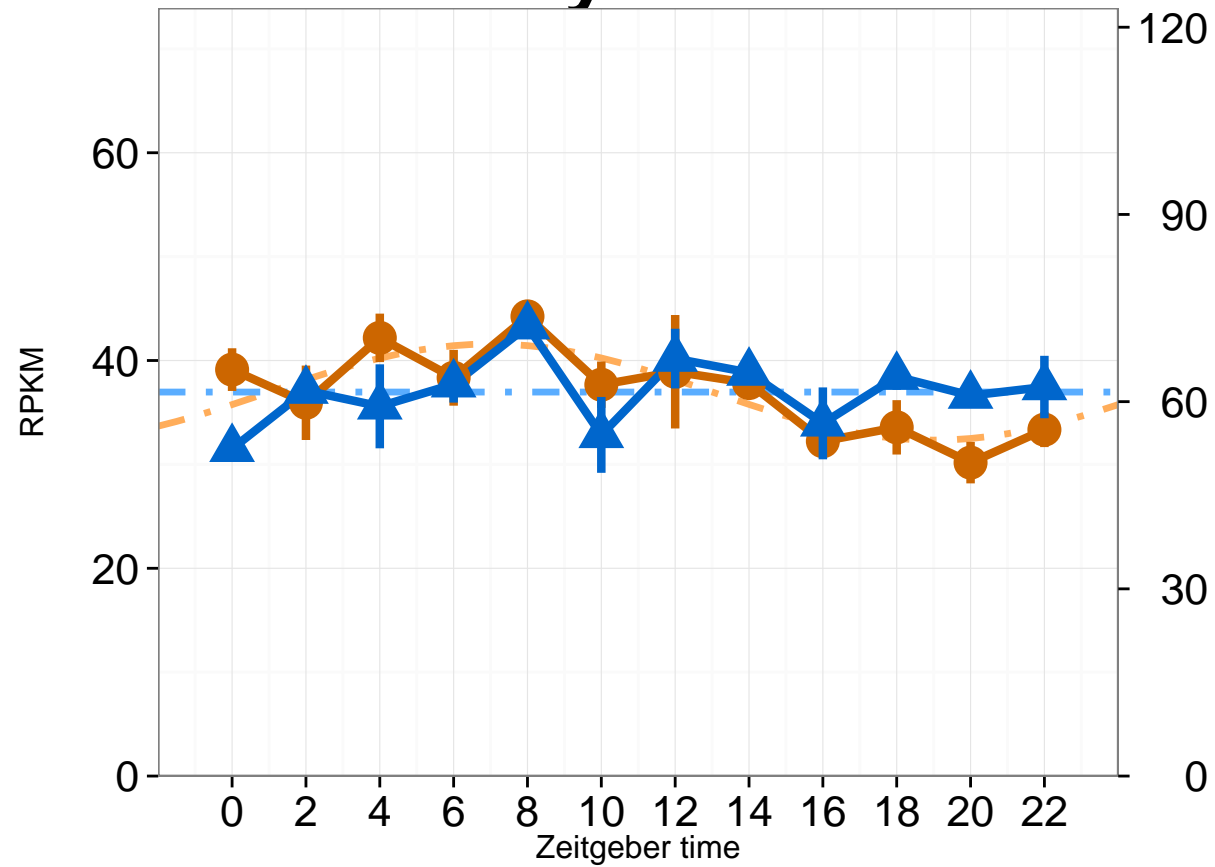

# Zfyve21

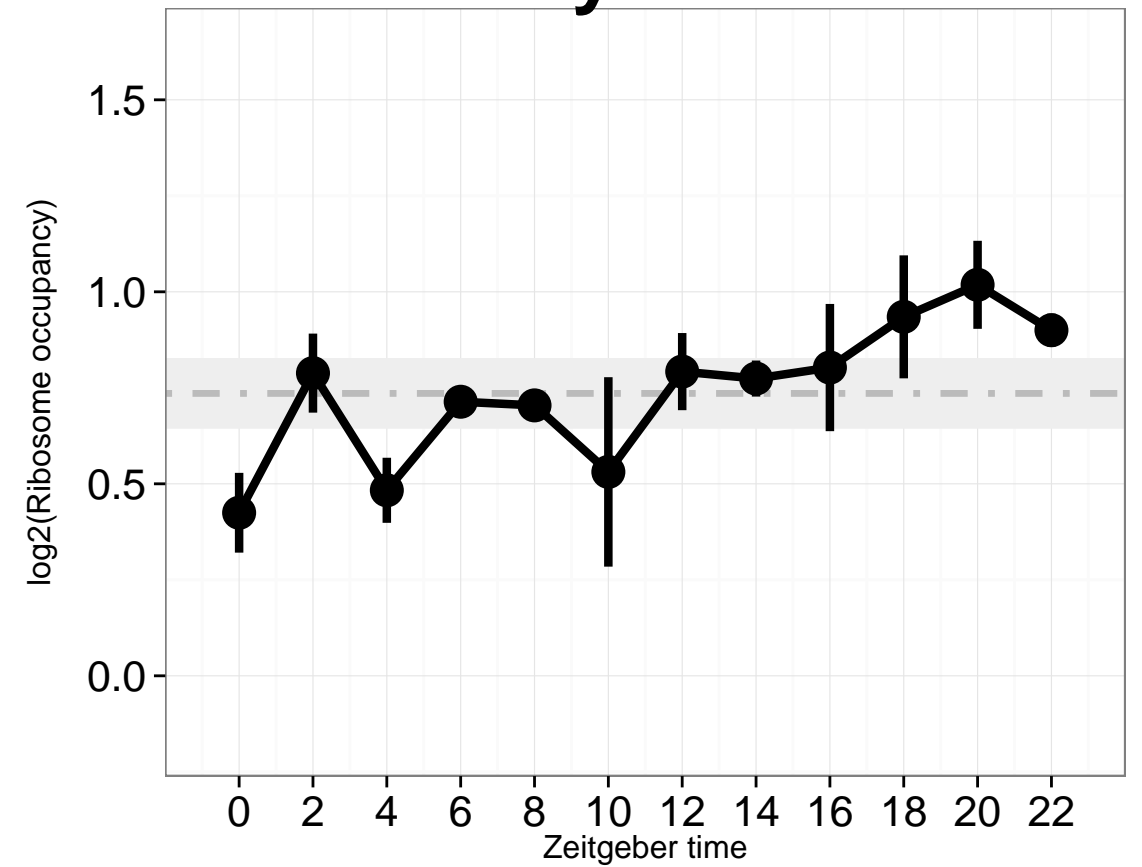

Supplement: Supplementary file 11048 [file 1]

## Rpe

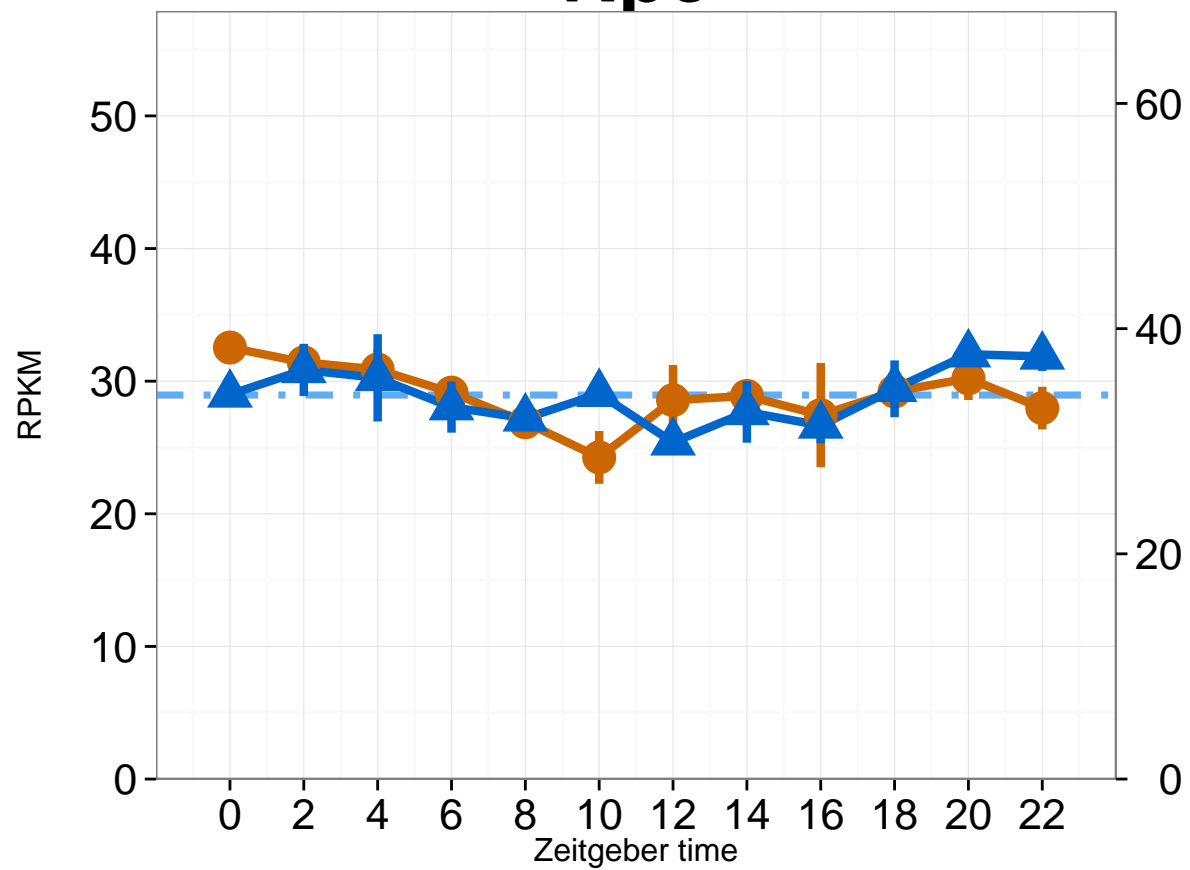

## Rpe

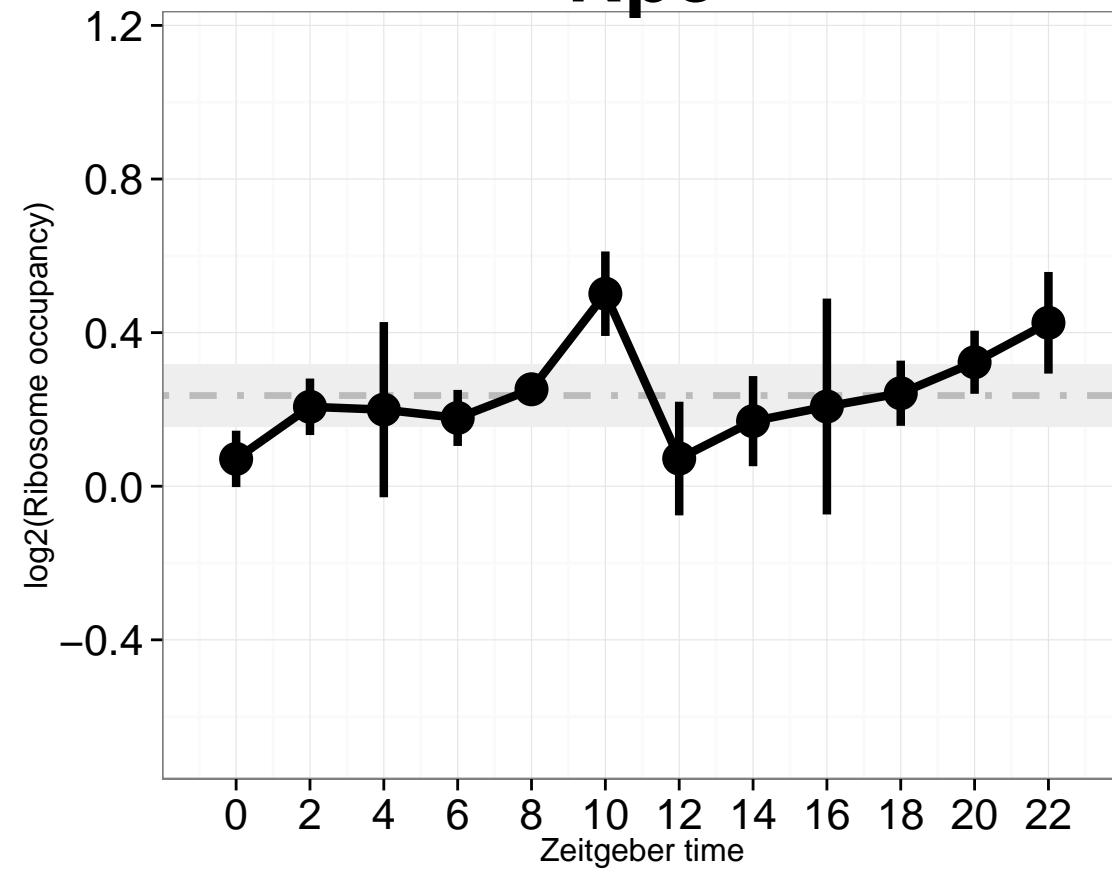

Supplement: Supplementary file 11049 [file 1]

Ctsw TR

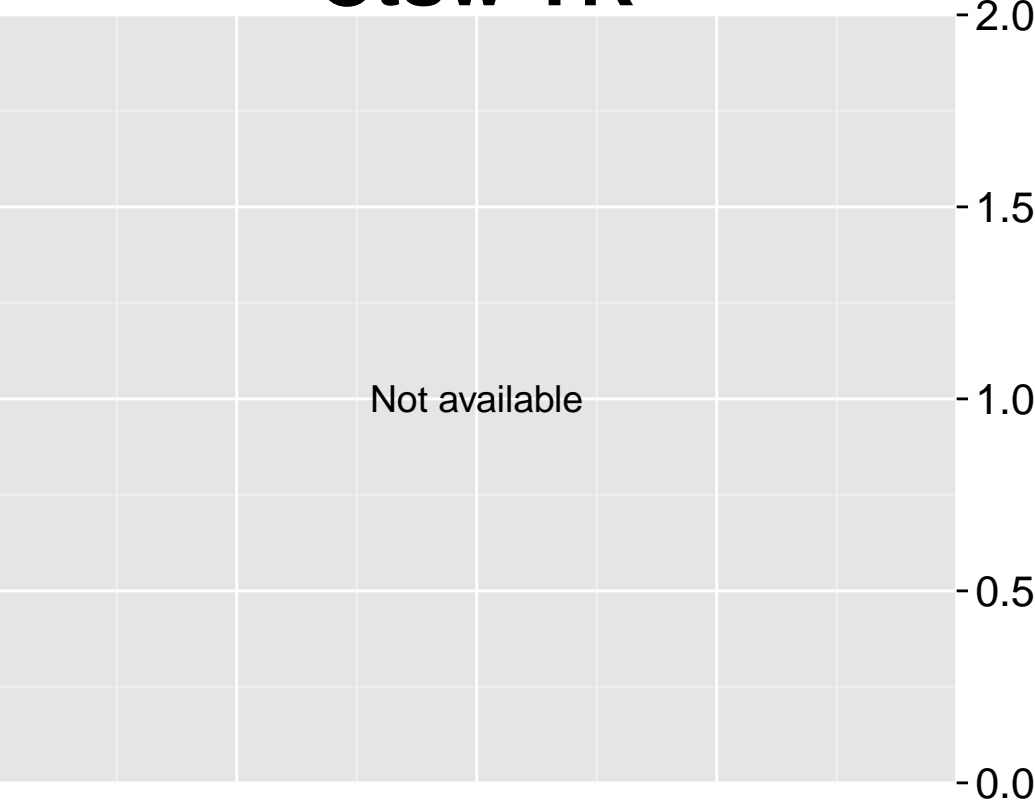

Ctsw log2(Ribosome occupancy)

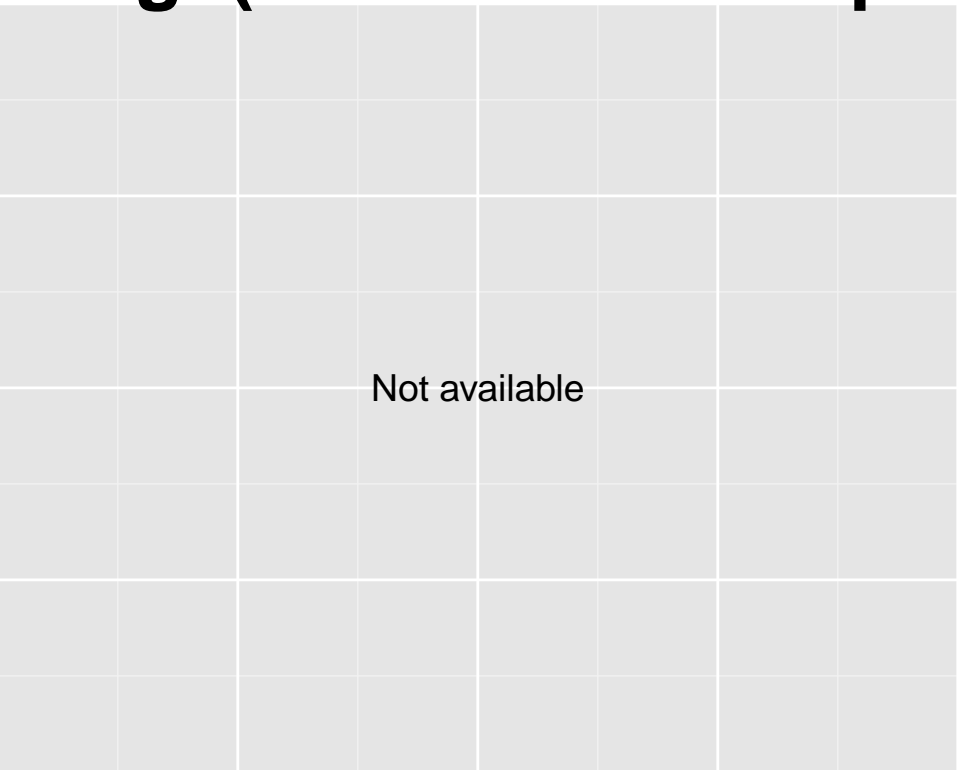

Supplement: Supplementary file 11050 [file 1]

# Stard3

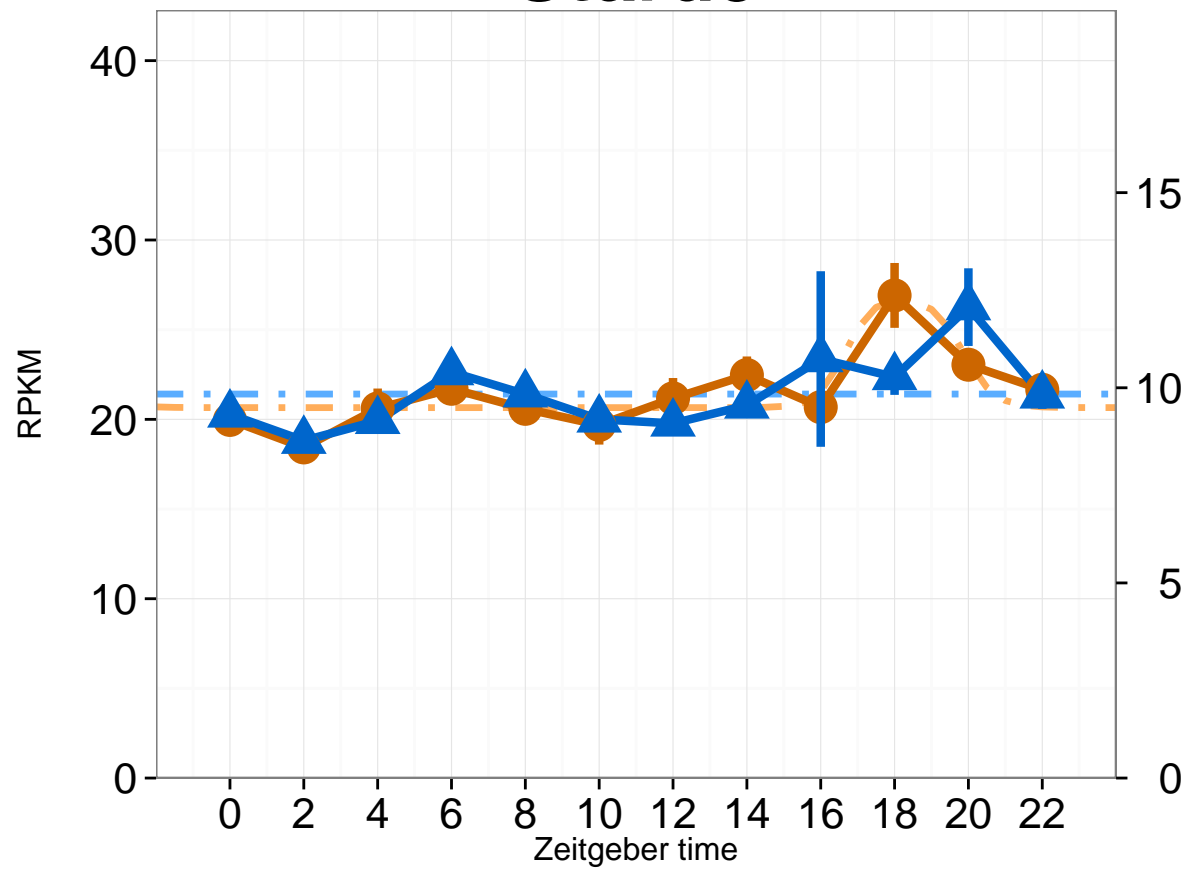

# Stard3

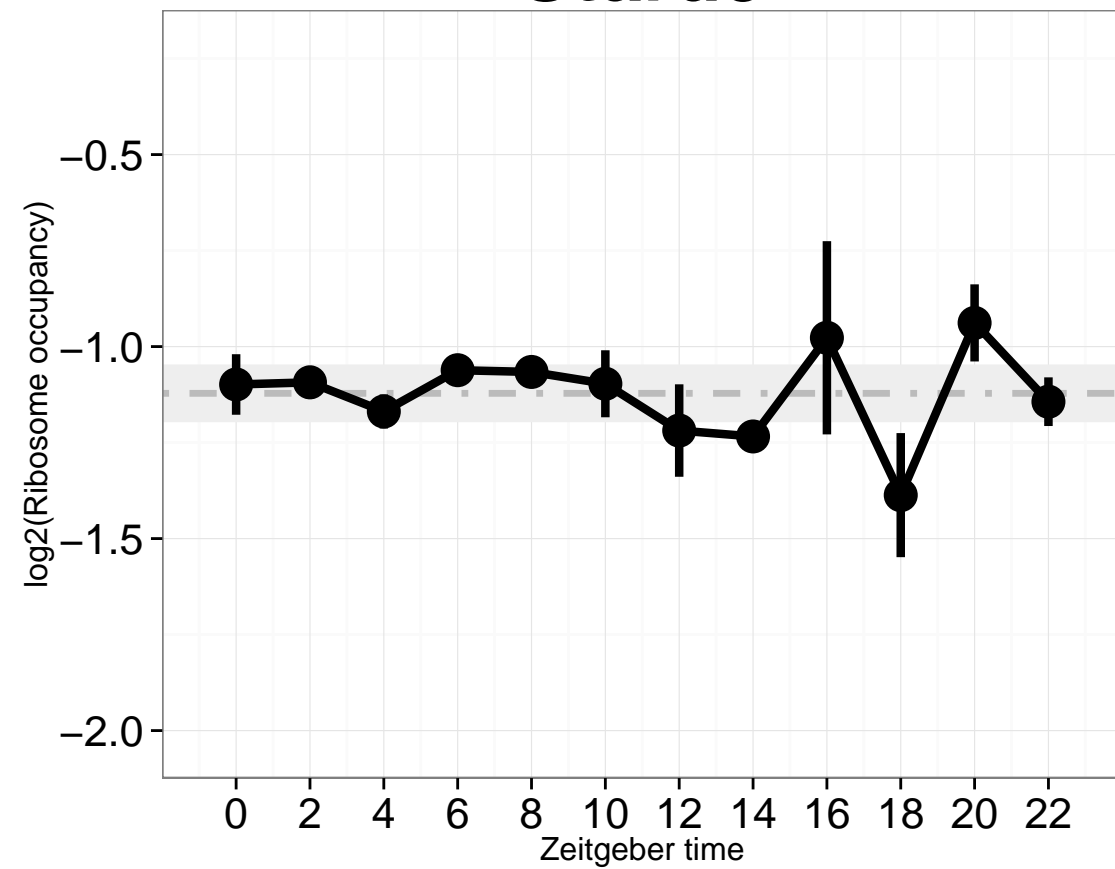

Supplement: Supplementary file 11051 [file 1]

## Plaur

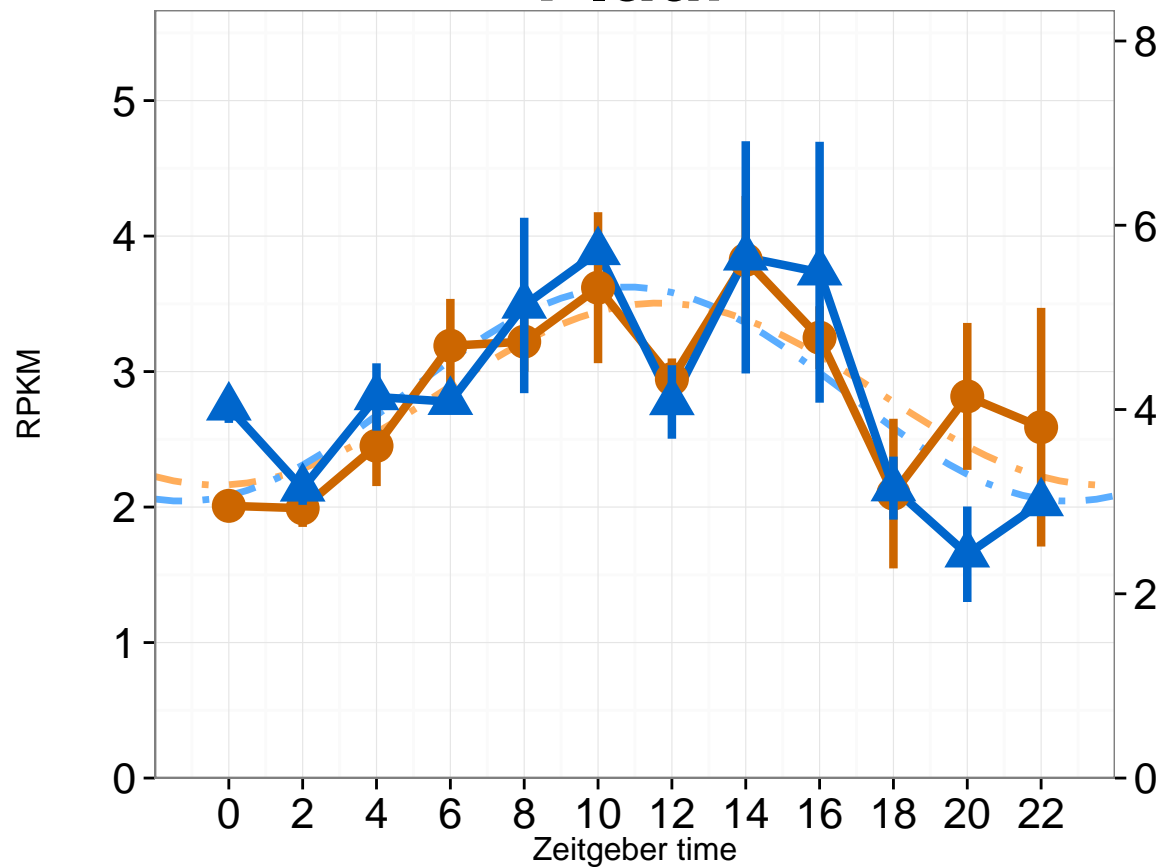

## Plaur

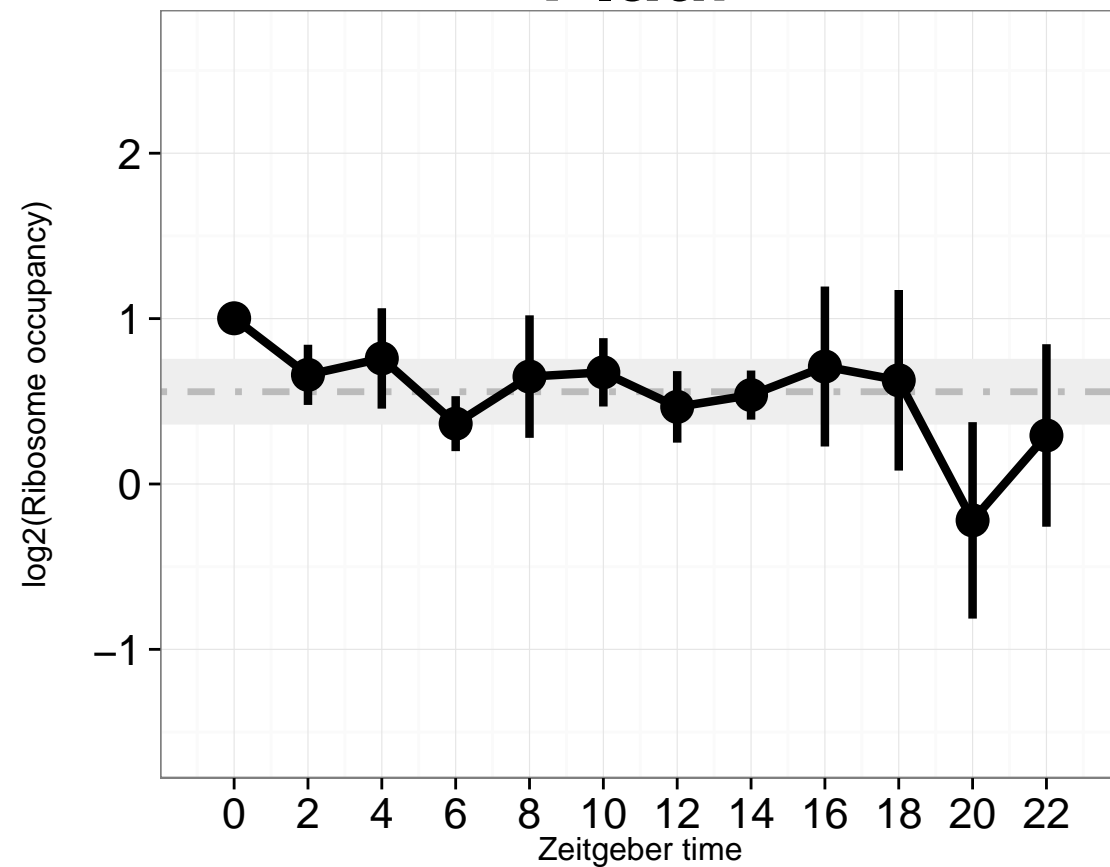

Supplement: Supplementary file 11052 [file 1]

# 1700021K19Rik

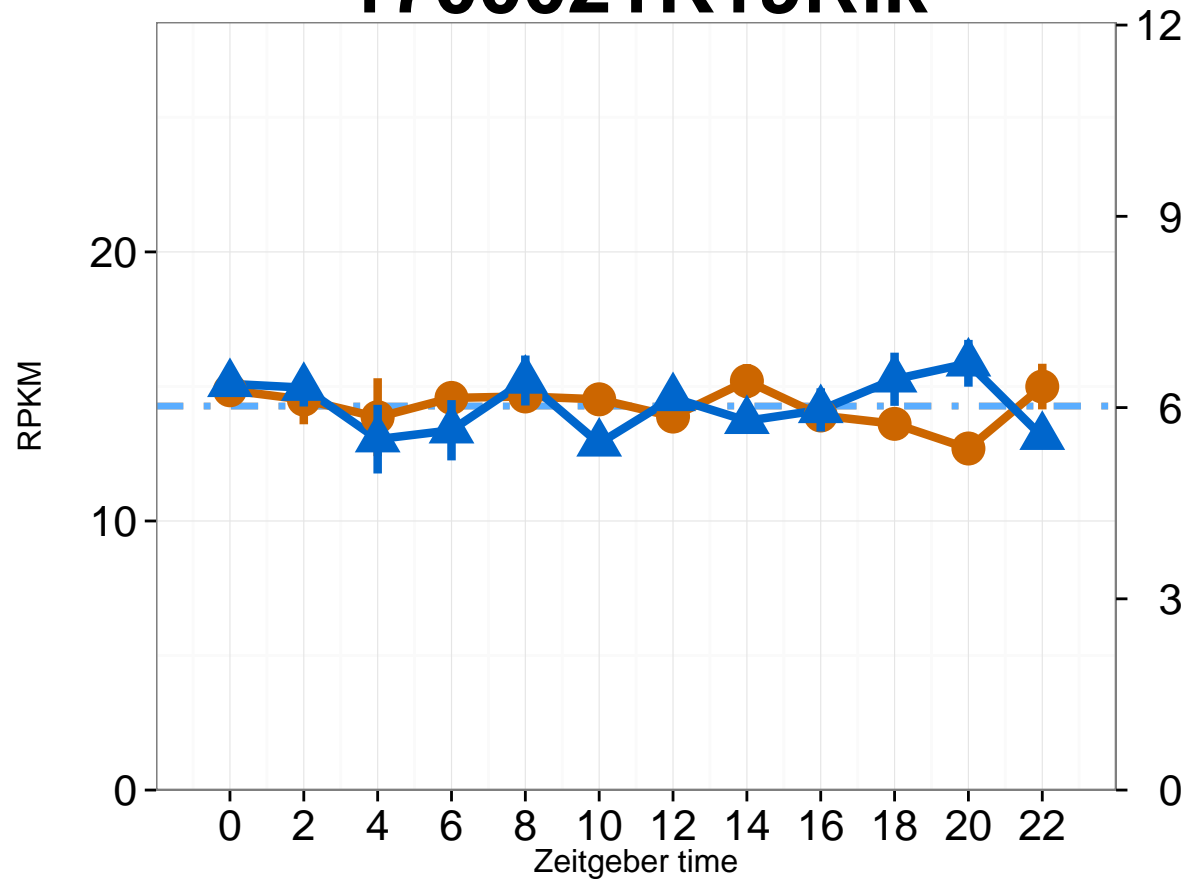

# 1700021K19Rik

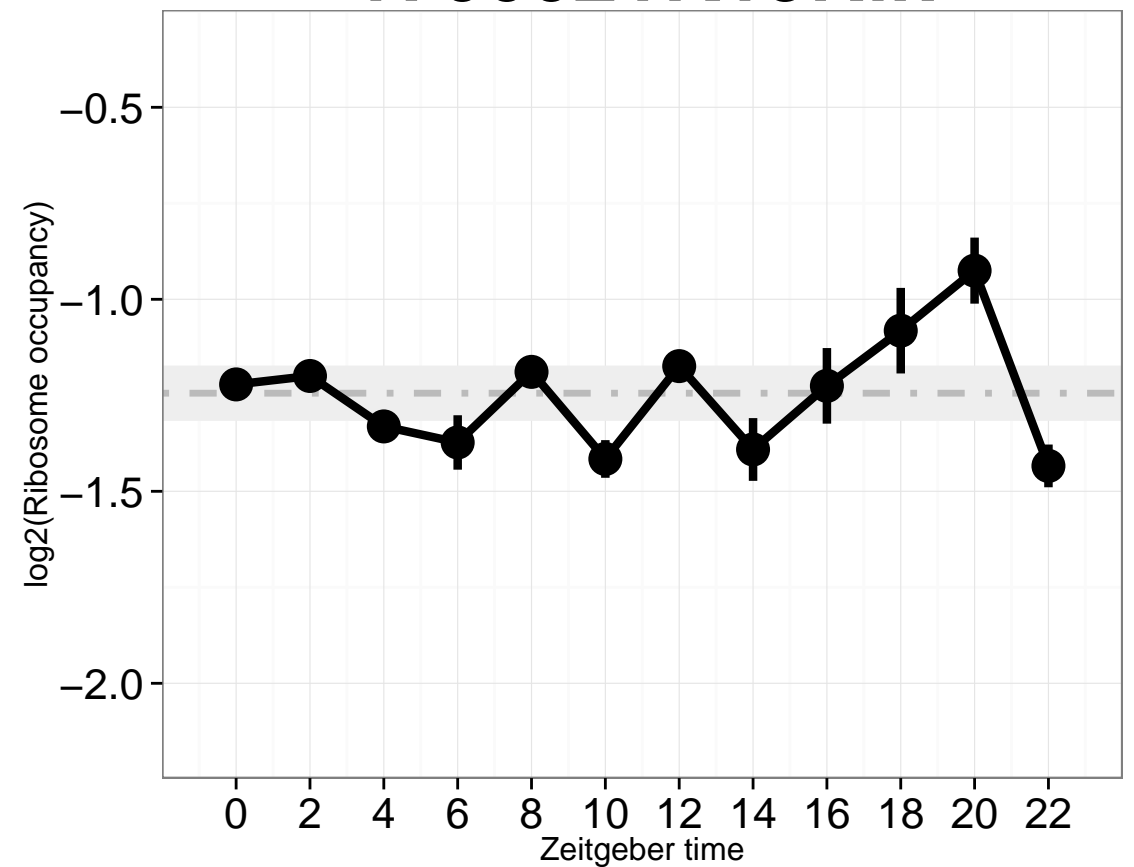

Supplement: Supplementary file 11053 [file 1]

# Ankrd13b

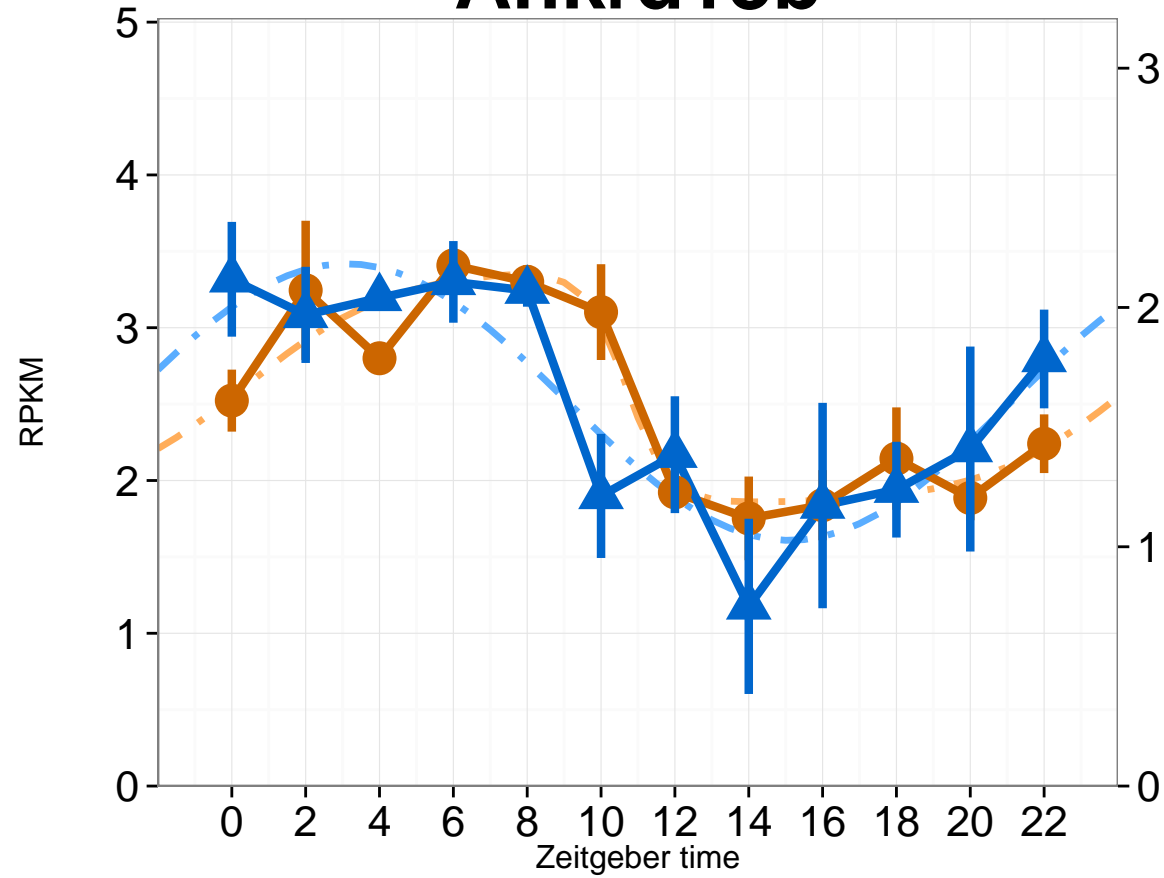

# Ankrd13b

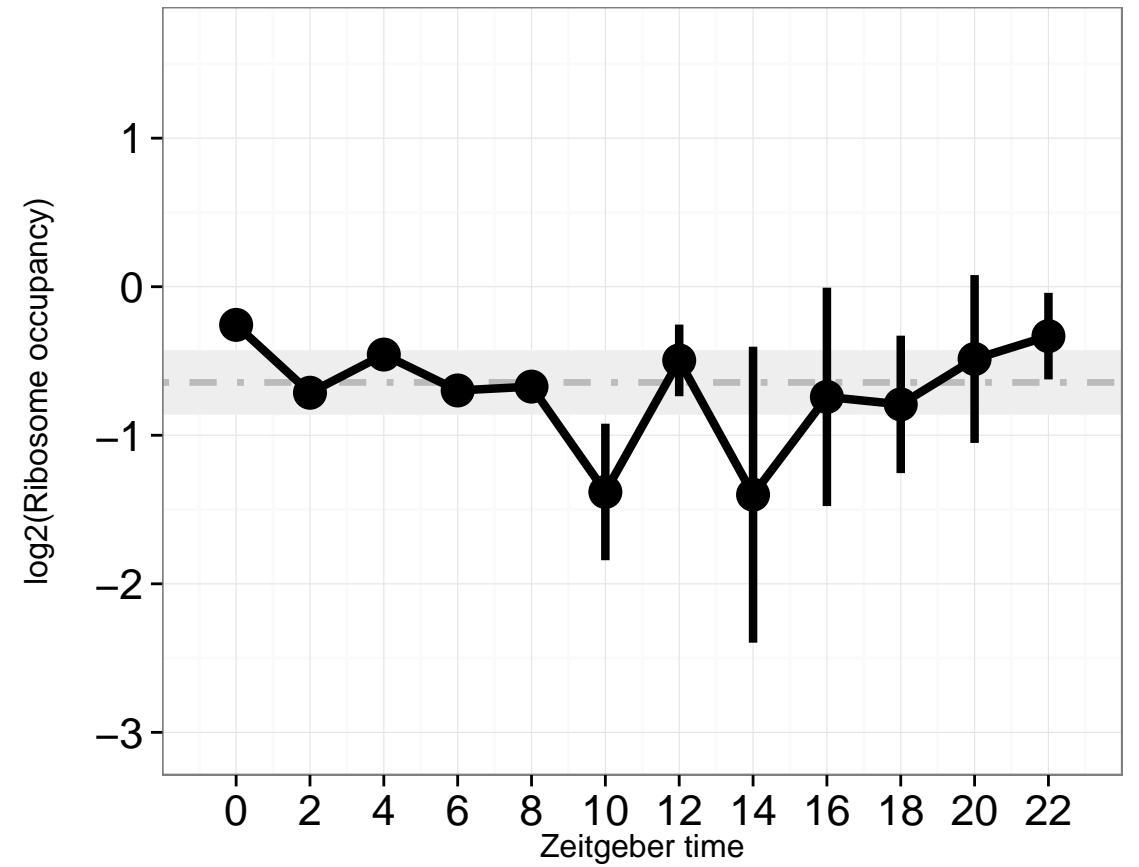

Supplement: Supplementary file 11054 [file 1]

## Ednra

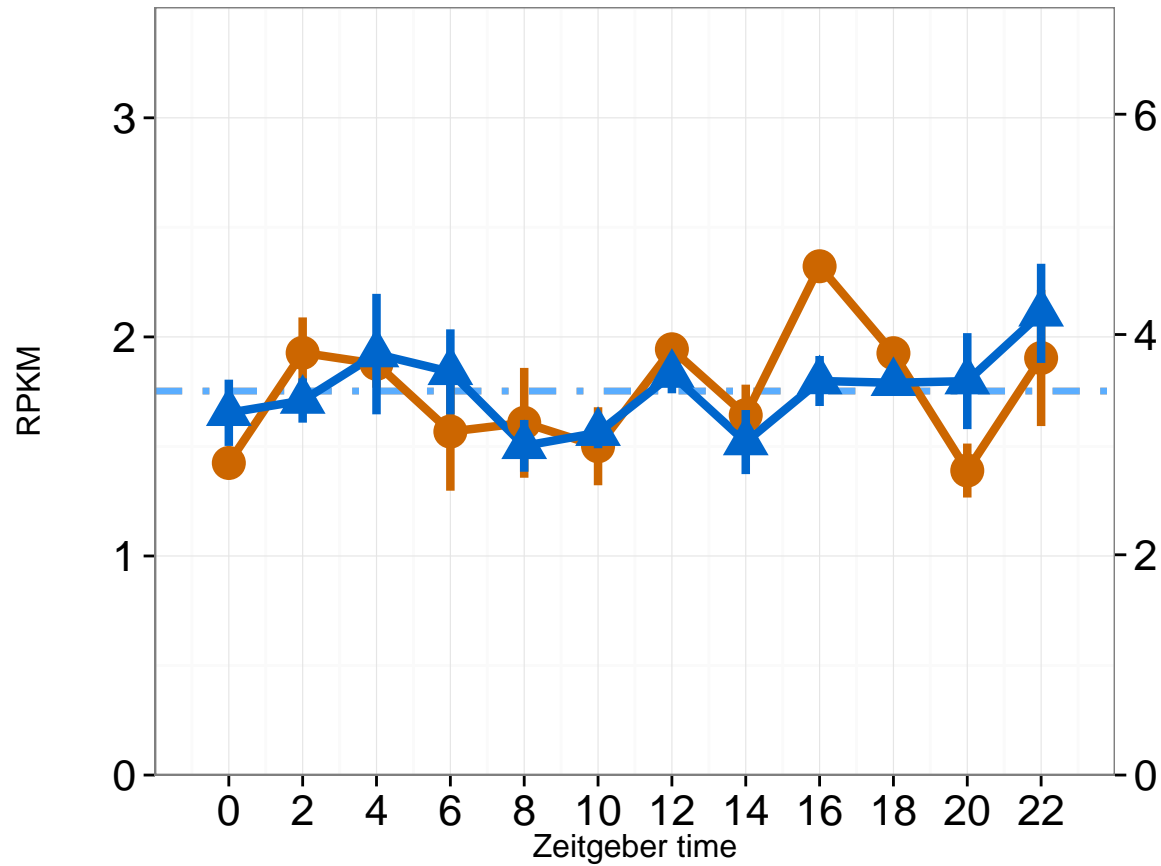

## Ednra

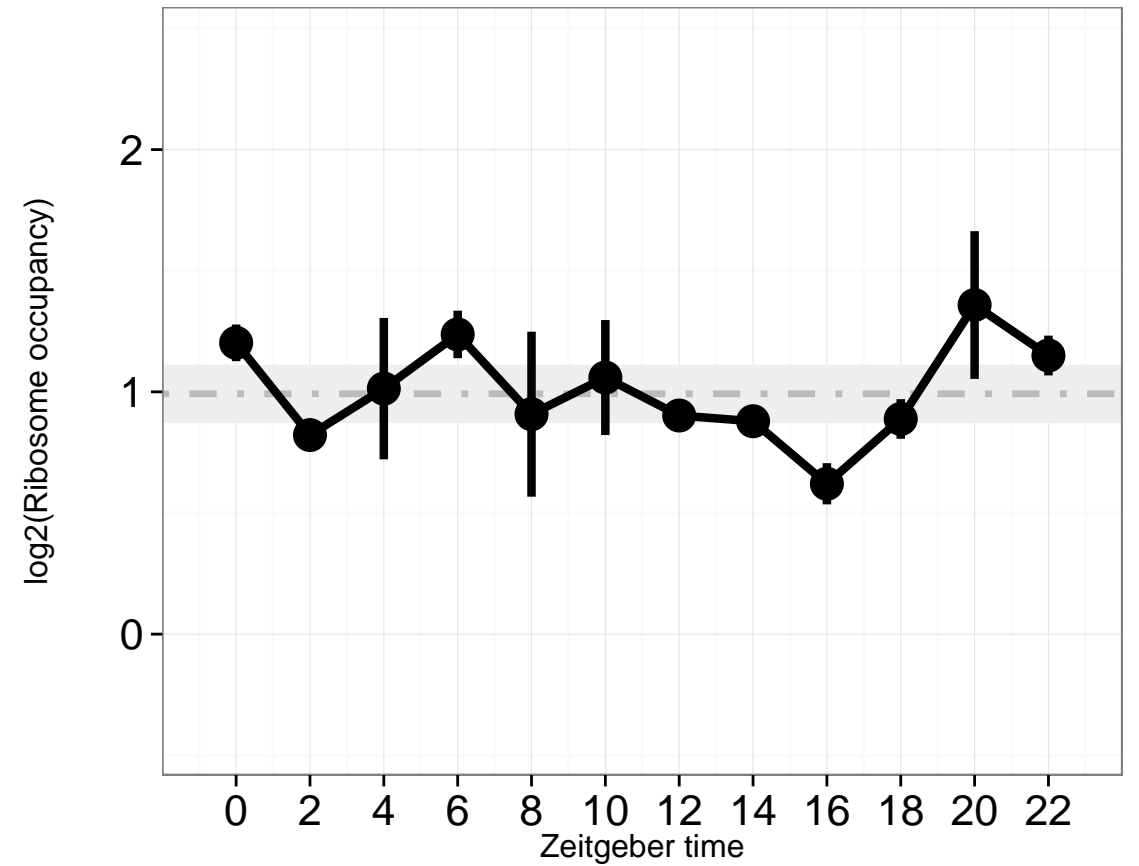

Supplement: Supplementary file 11055 [file 1]

## Odf2l

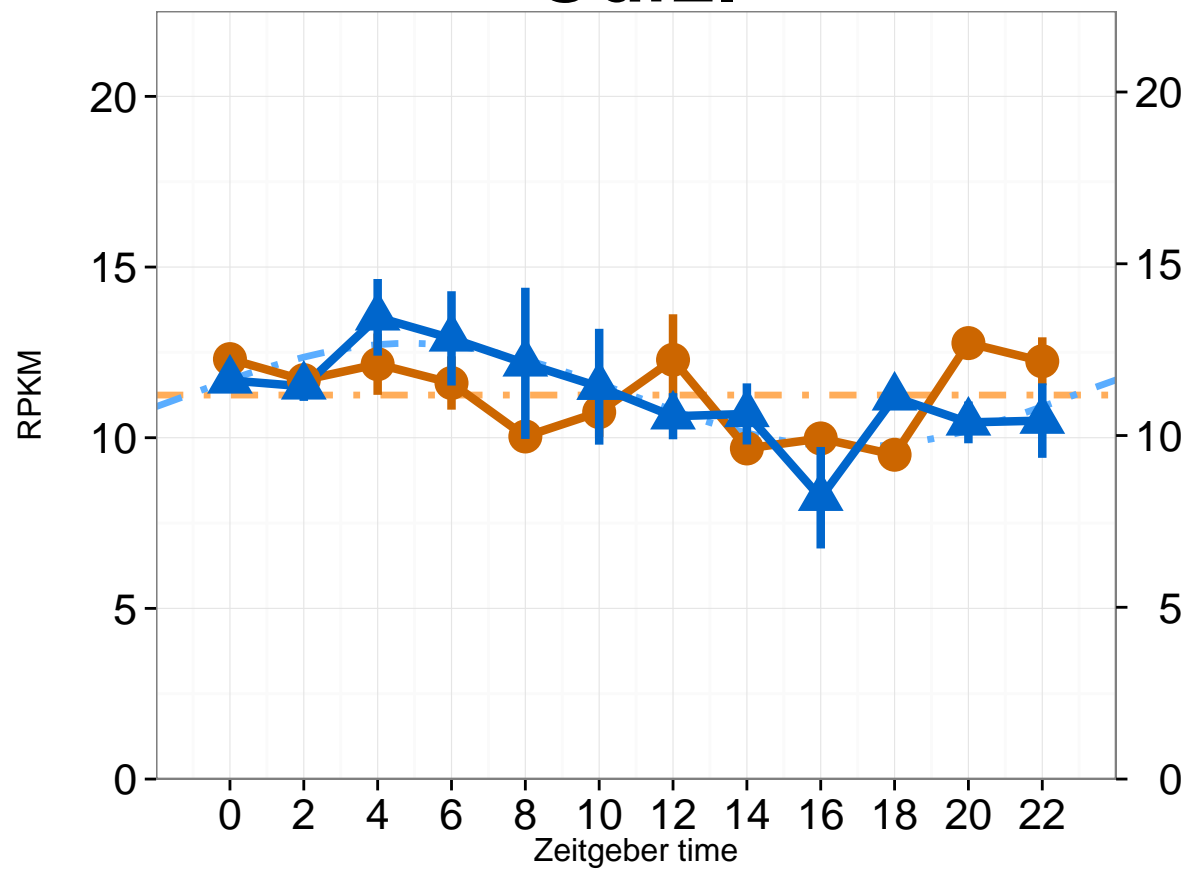

## Odf2l

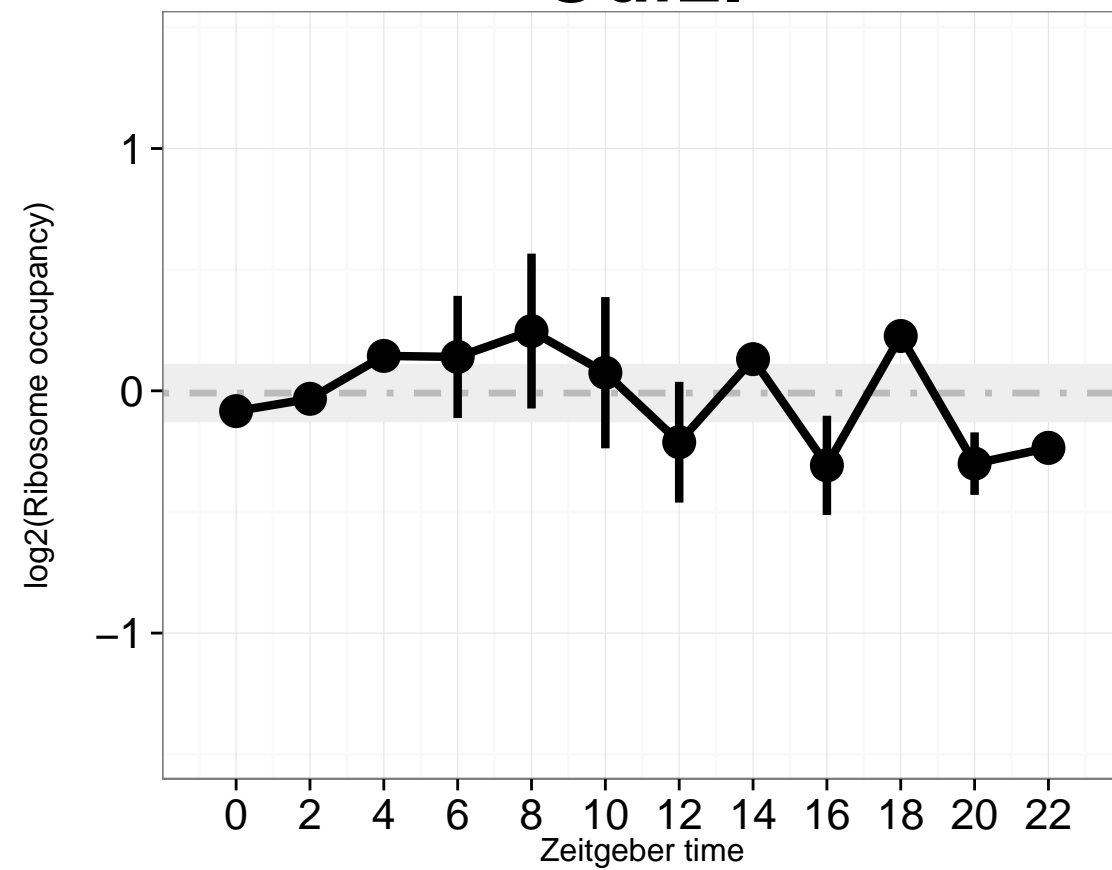

Supplement: Supplementary file 11056 [file 1]

## Hdac8

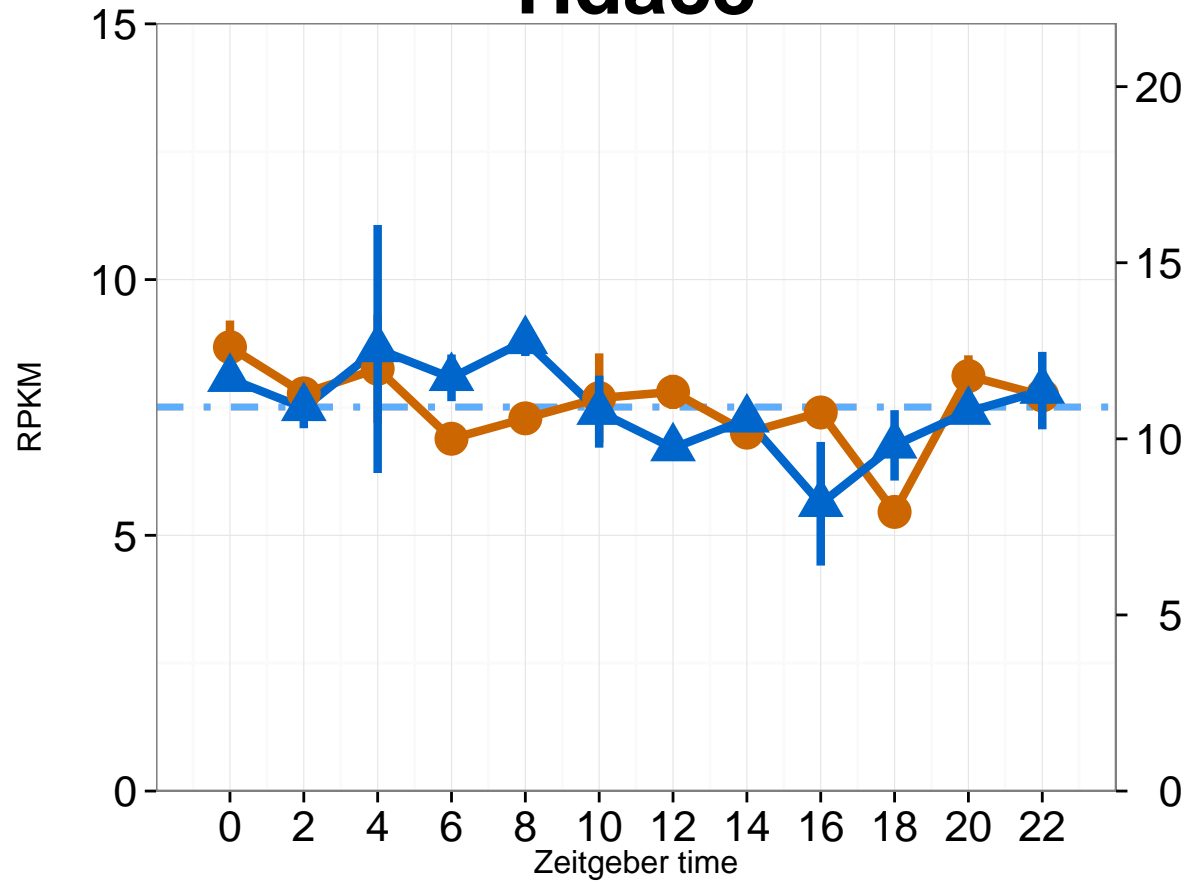

## Hdac8

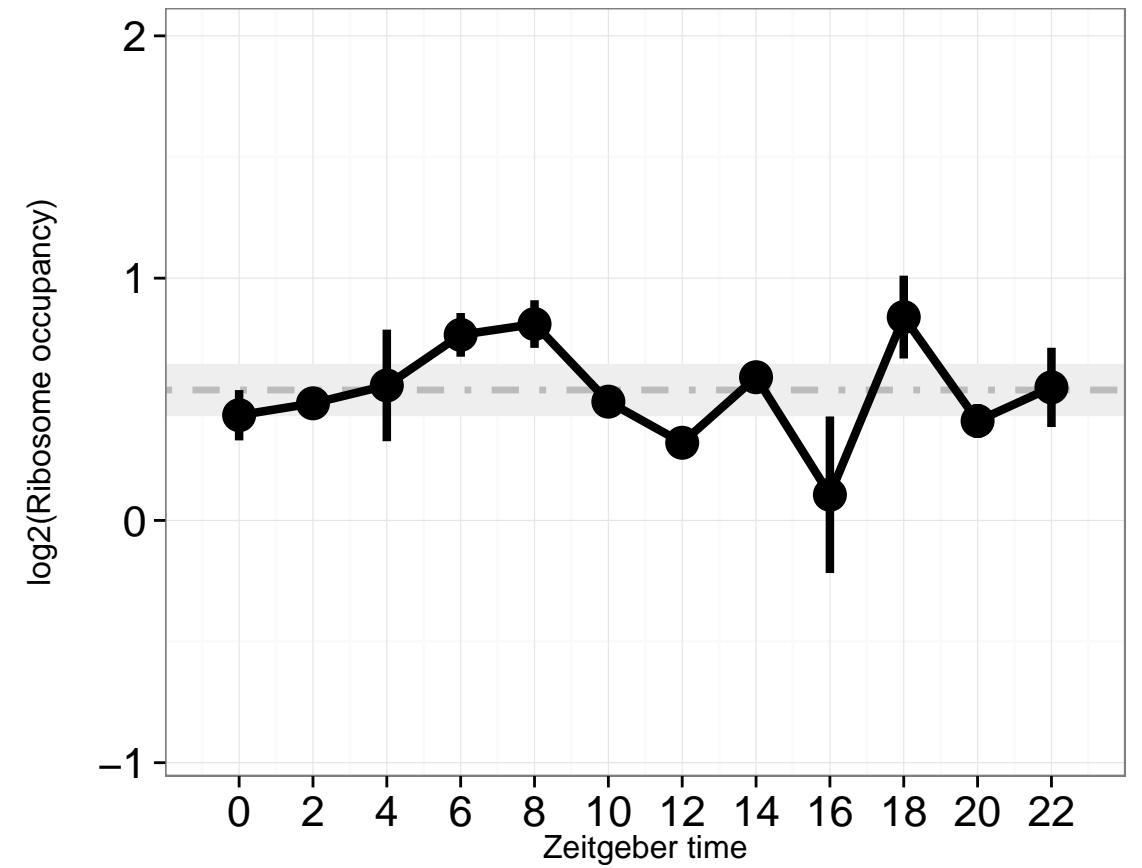

Supplement: Supplementary file 11057 [file 1]

## Napg

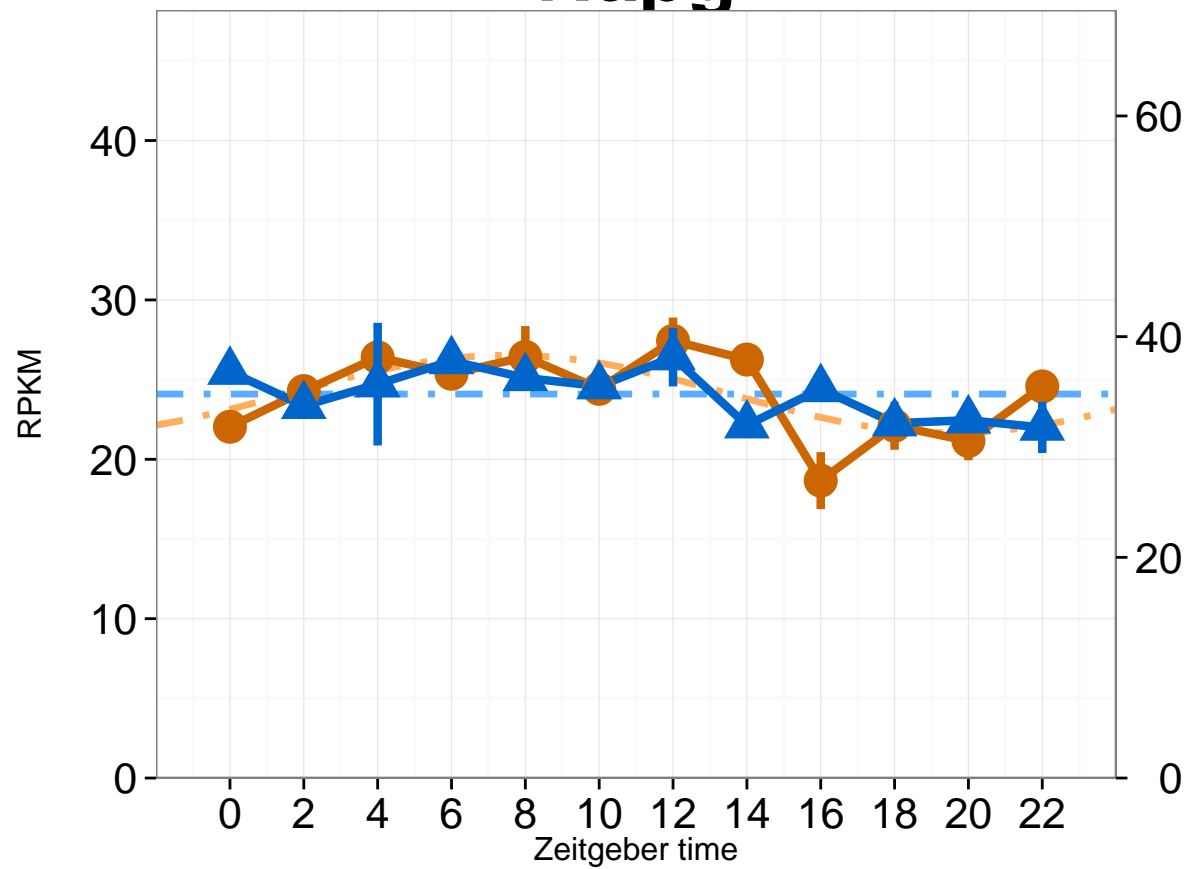

## Napg

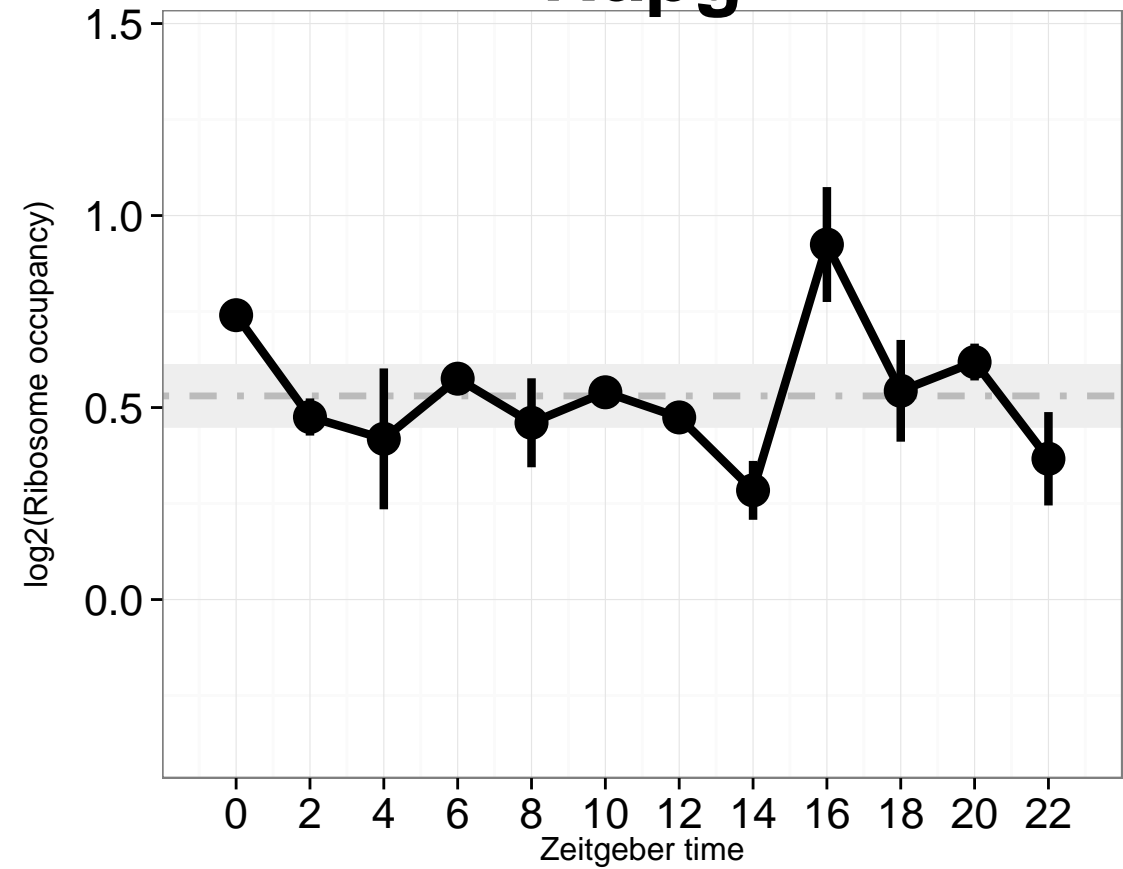

Supplement: Supplementary file 11059 [file 1]

# Patl1

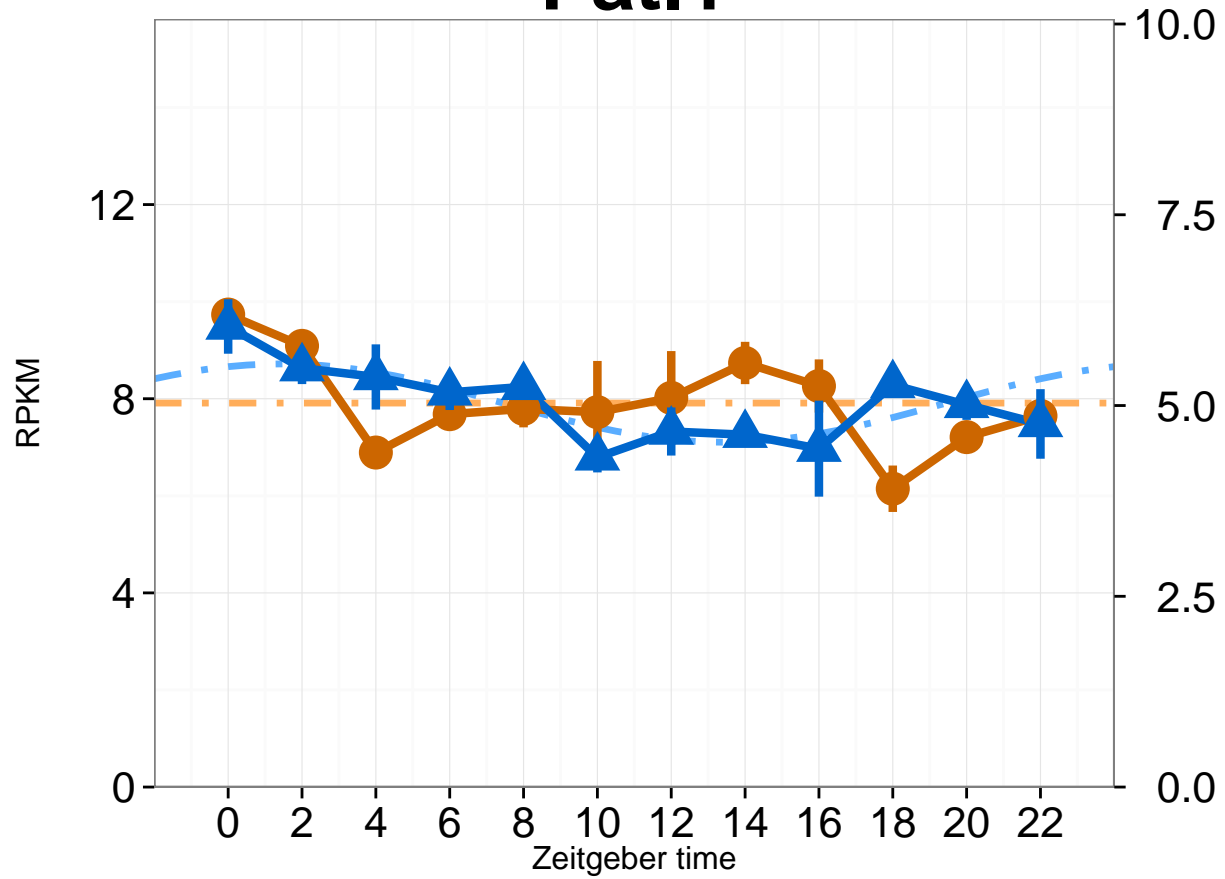

# Patl1

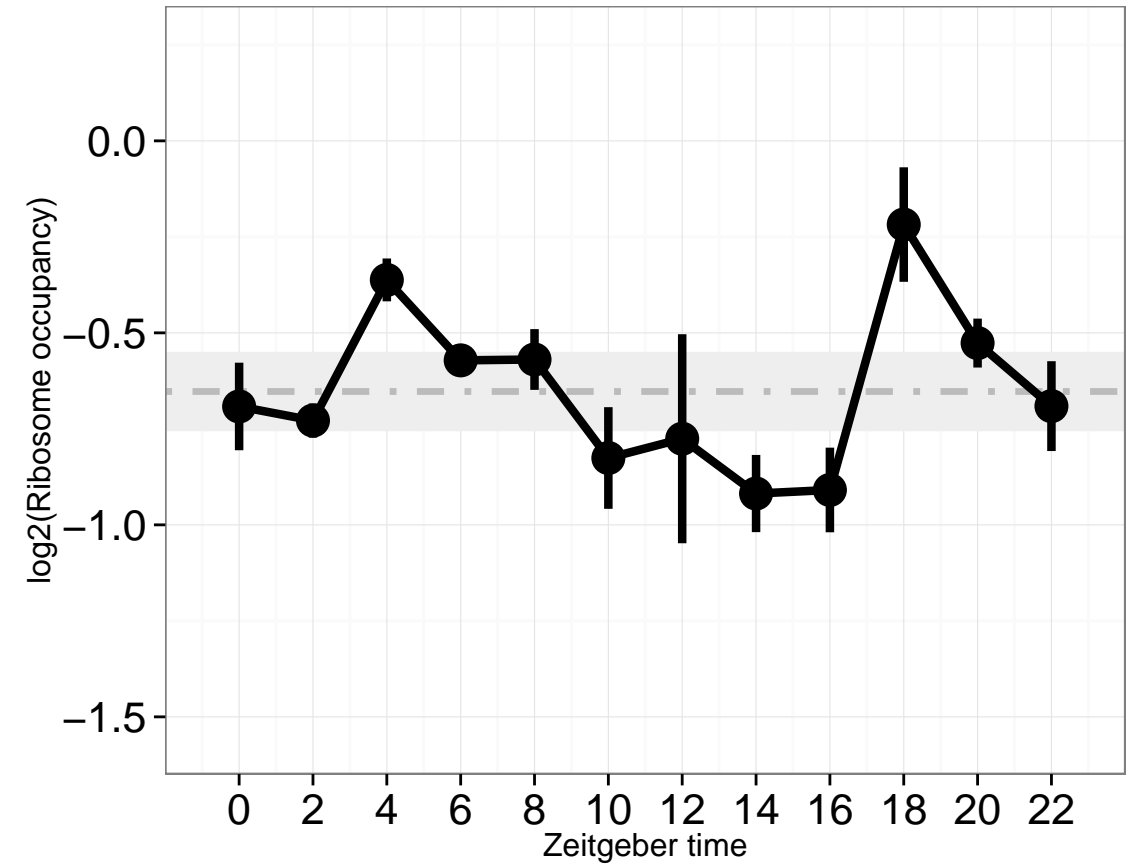

Supplement: Supplementary file 11060 [file 1]

# E130309F12Rik

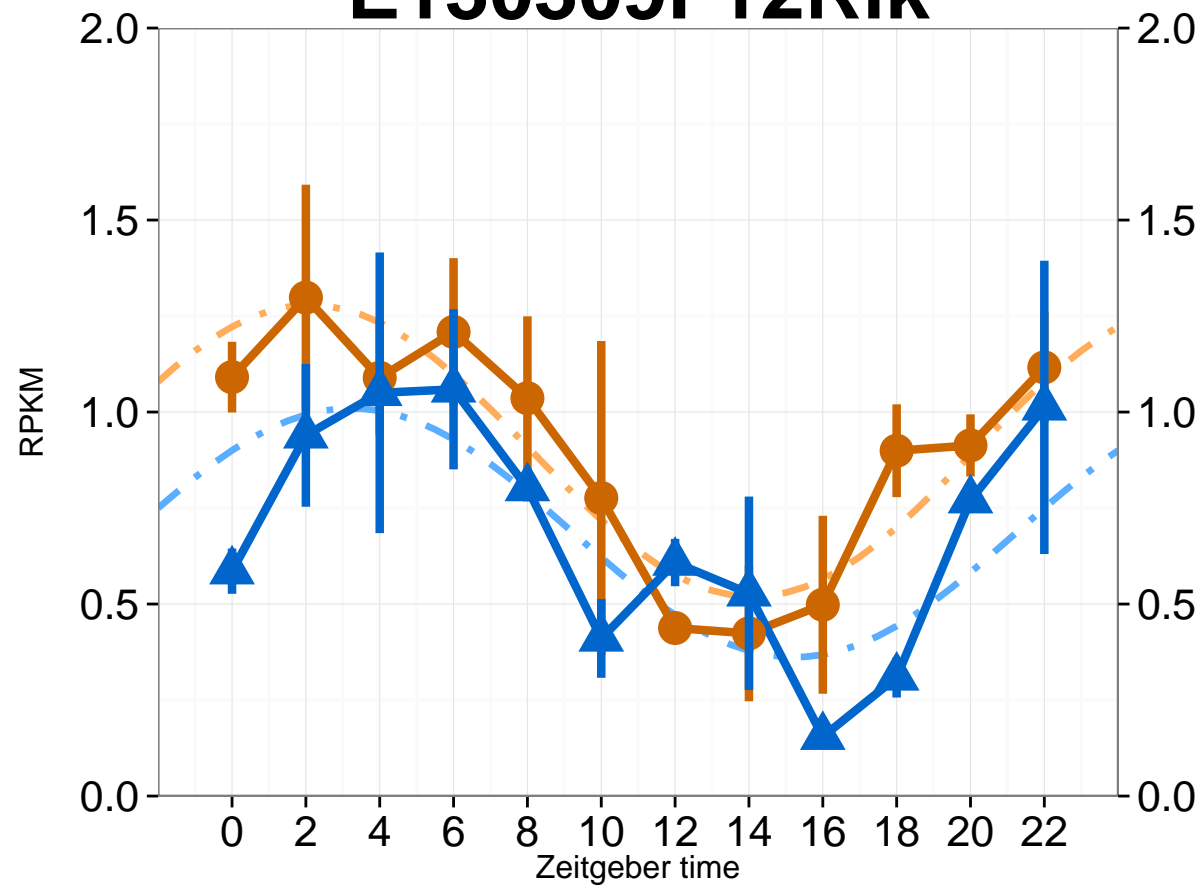

# E130309F12Rik

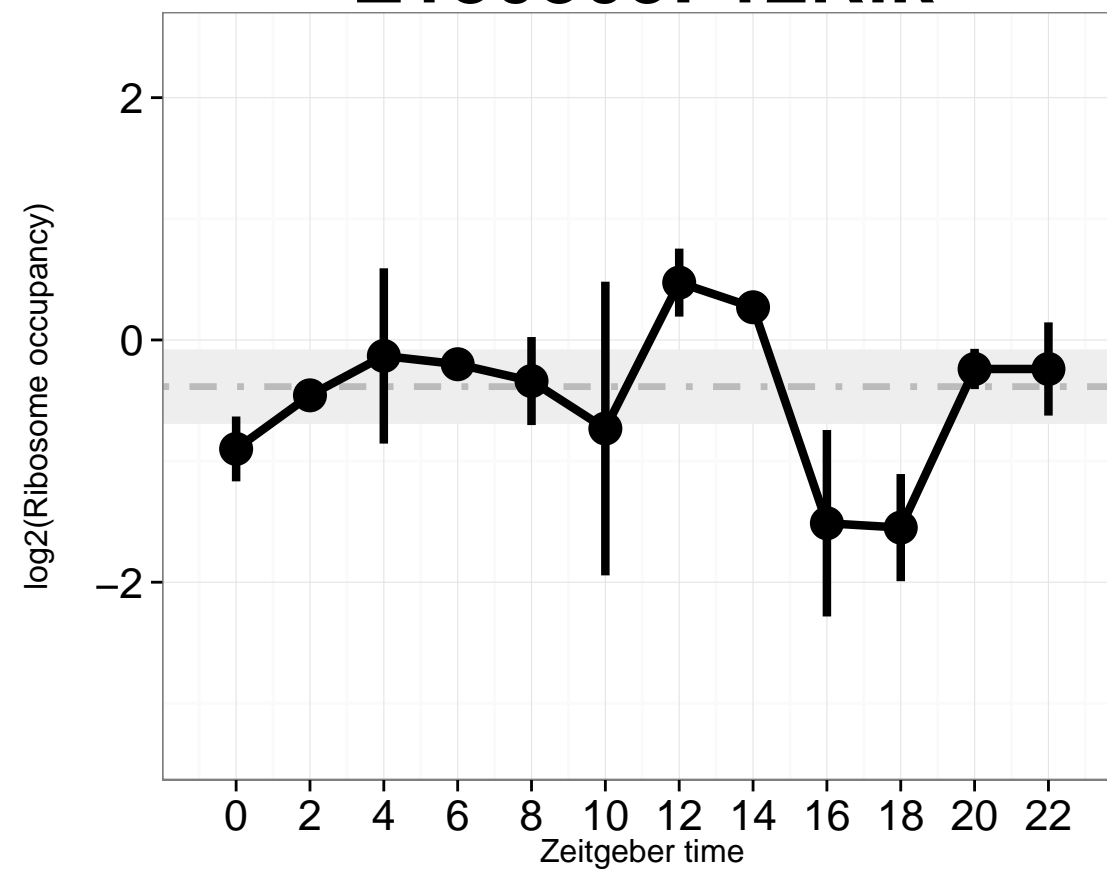

Supplement: Supplementary file 11061 [file 1]

## Tifa

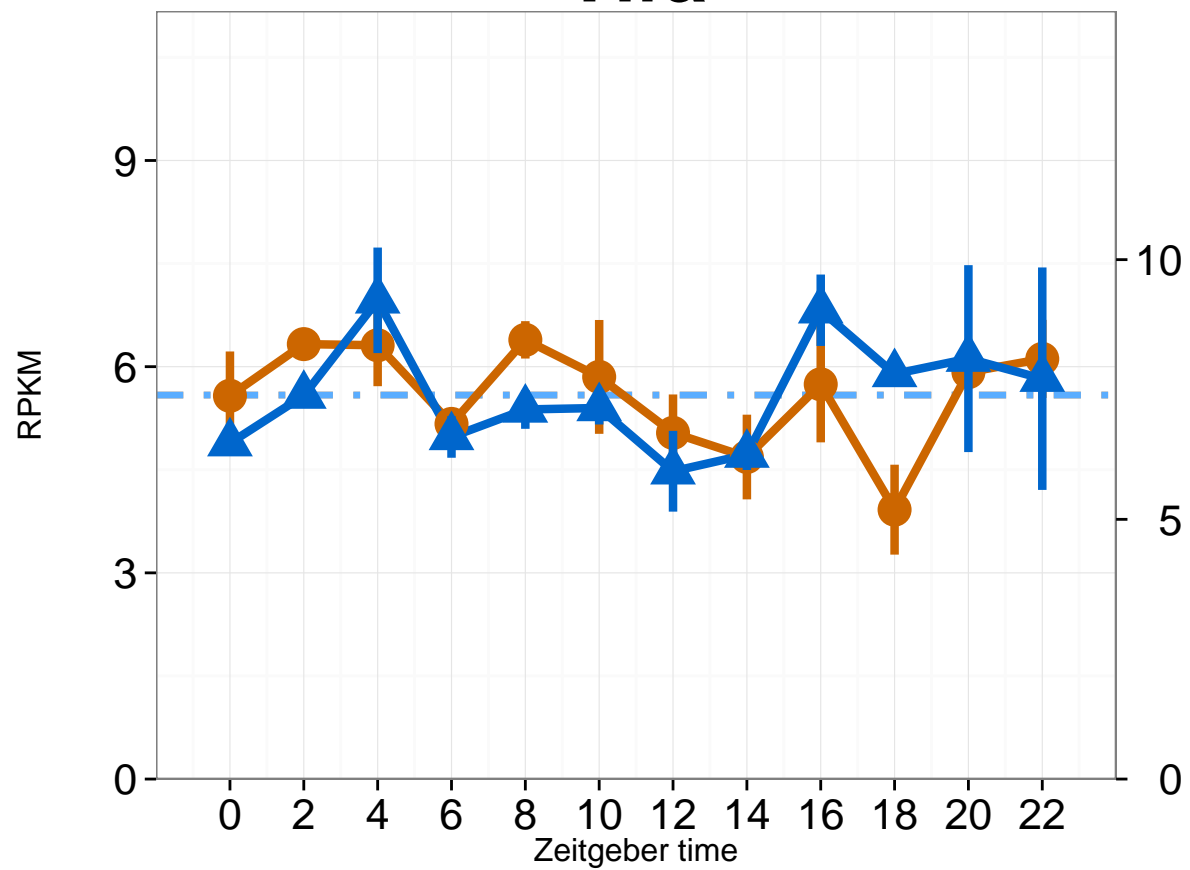

## Tifa

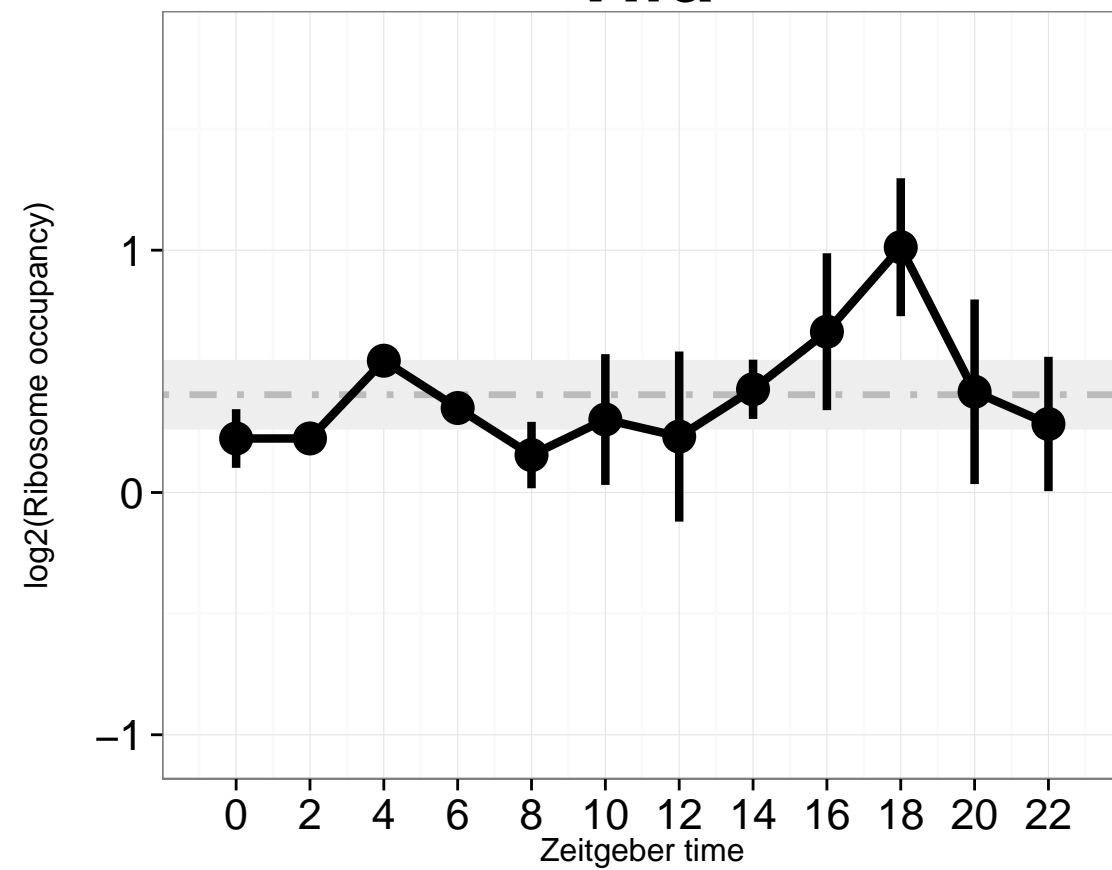

Supplement: Supplementary file 11062 [file 1]

## Kif3a

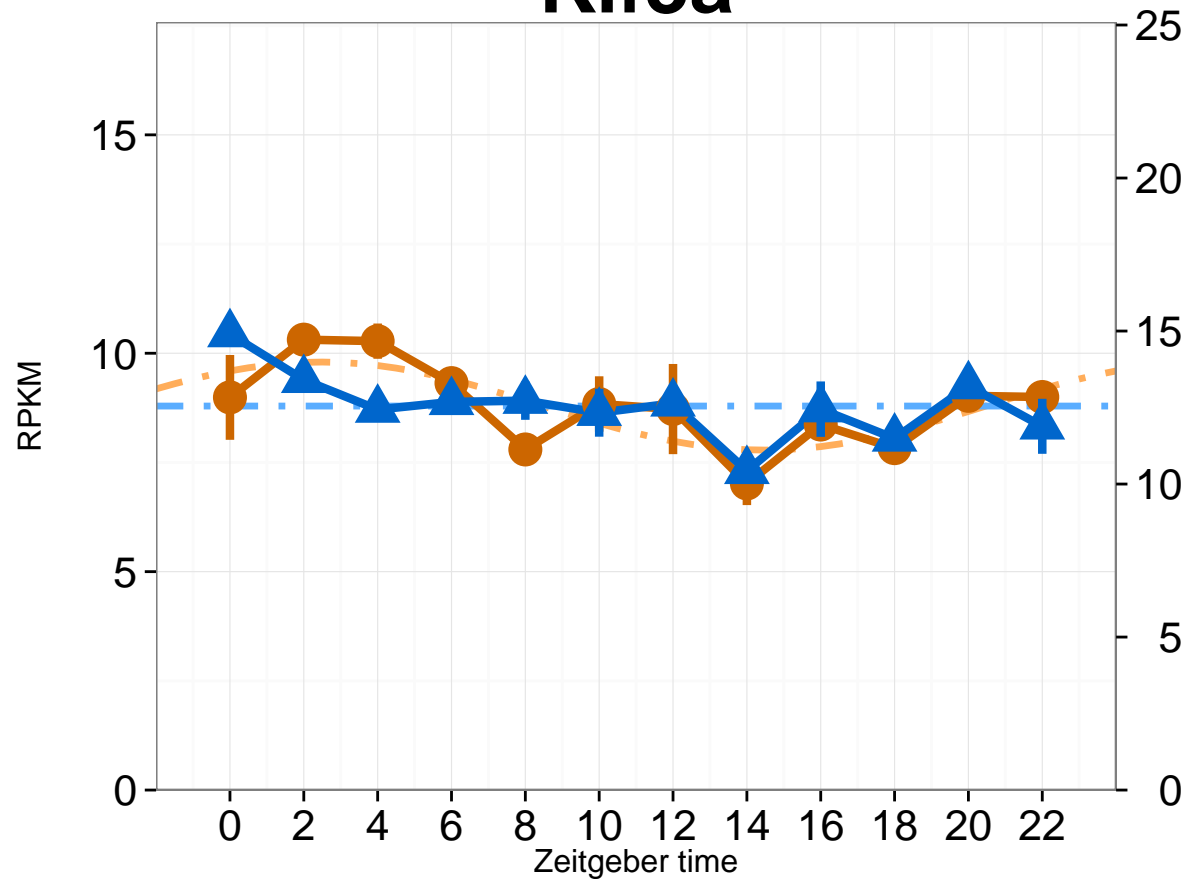

## Kif3a

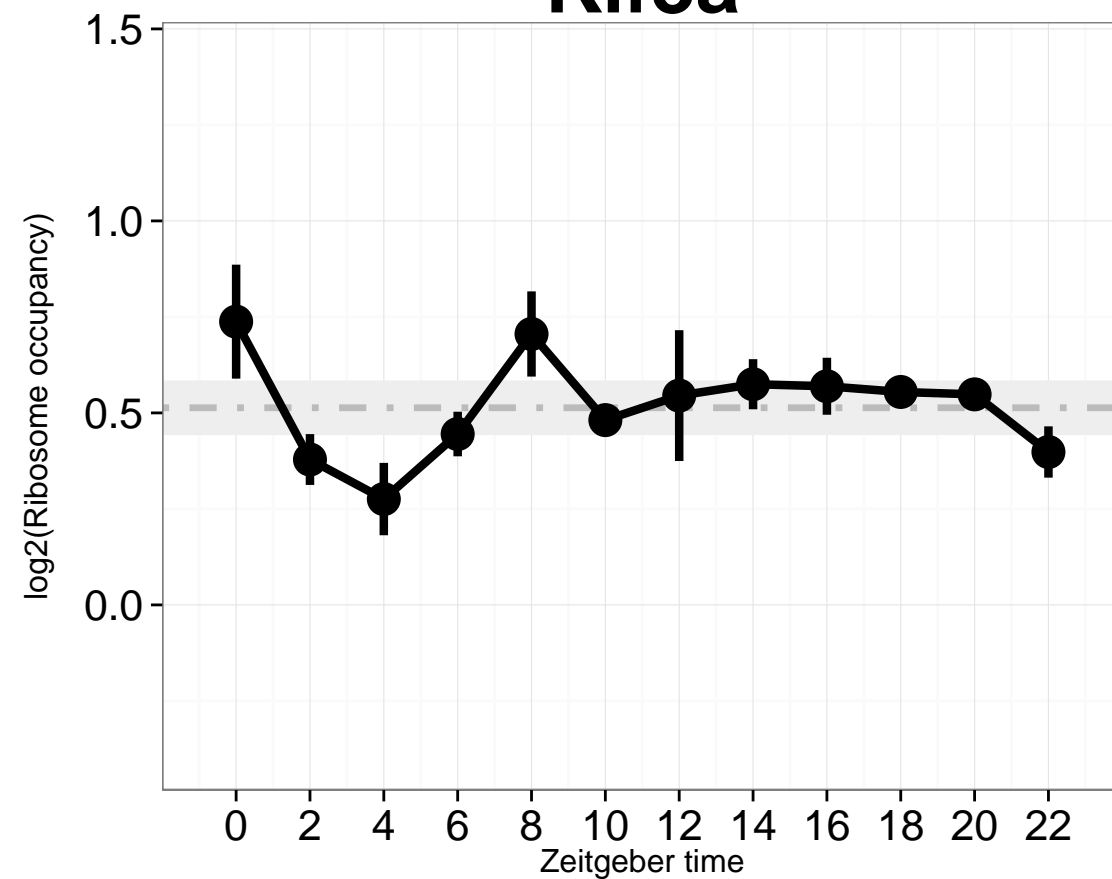

Supplement: Supplementary file 11063 [file 1]

## Ubr1

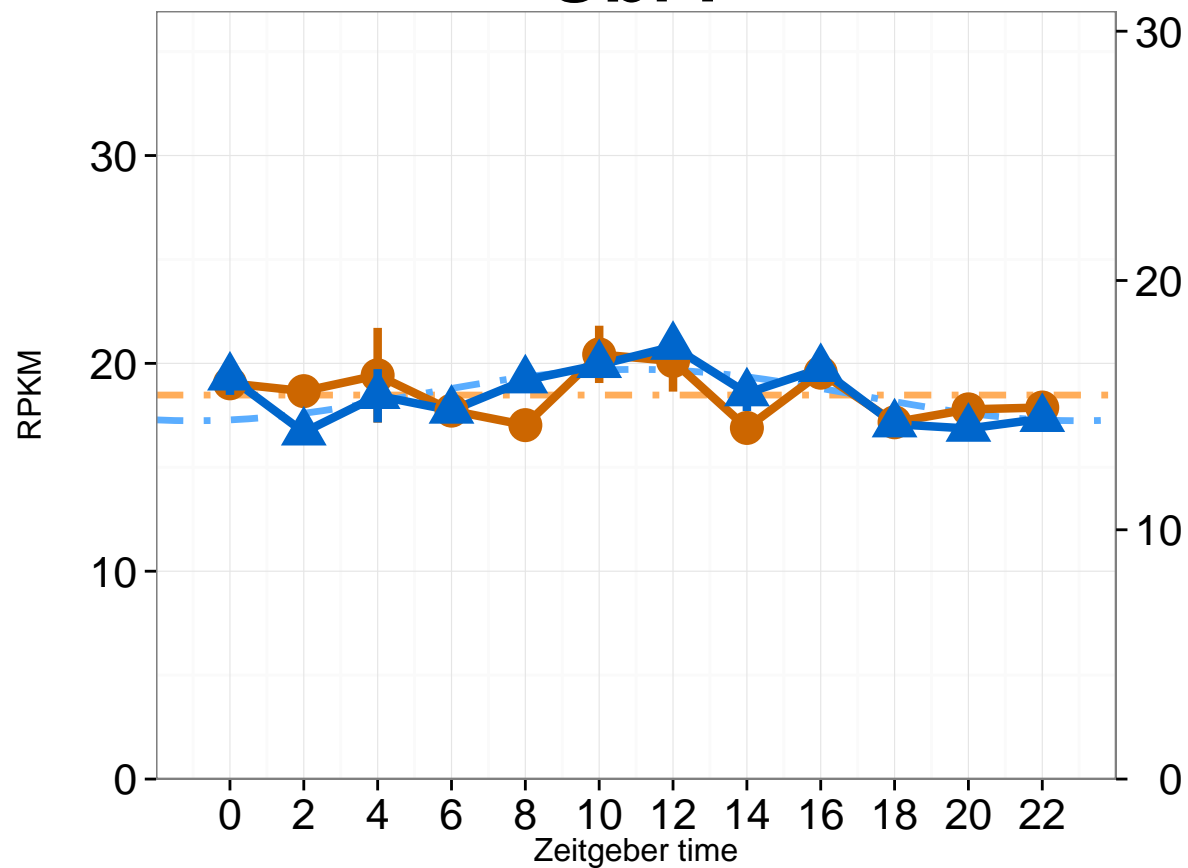

## Ubr1

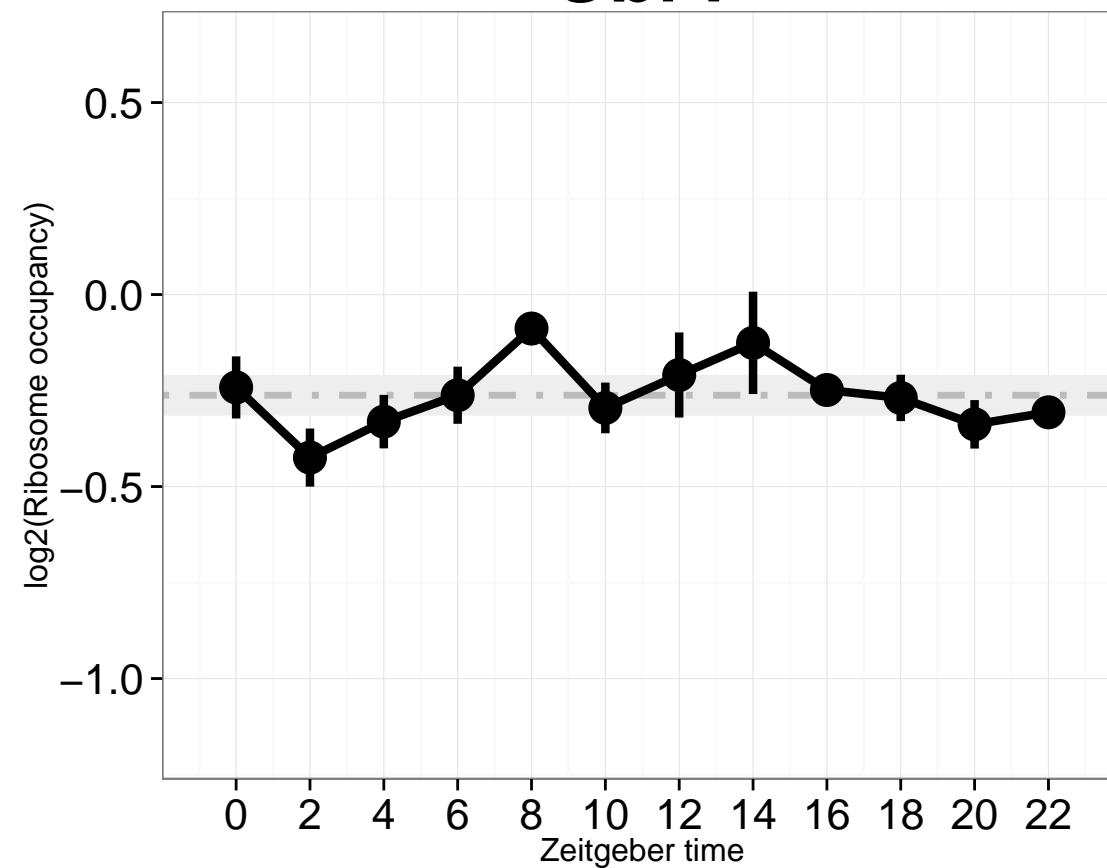

Supplement: Supplementary file 11064 [file 1]

## Lrp4

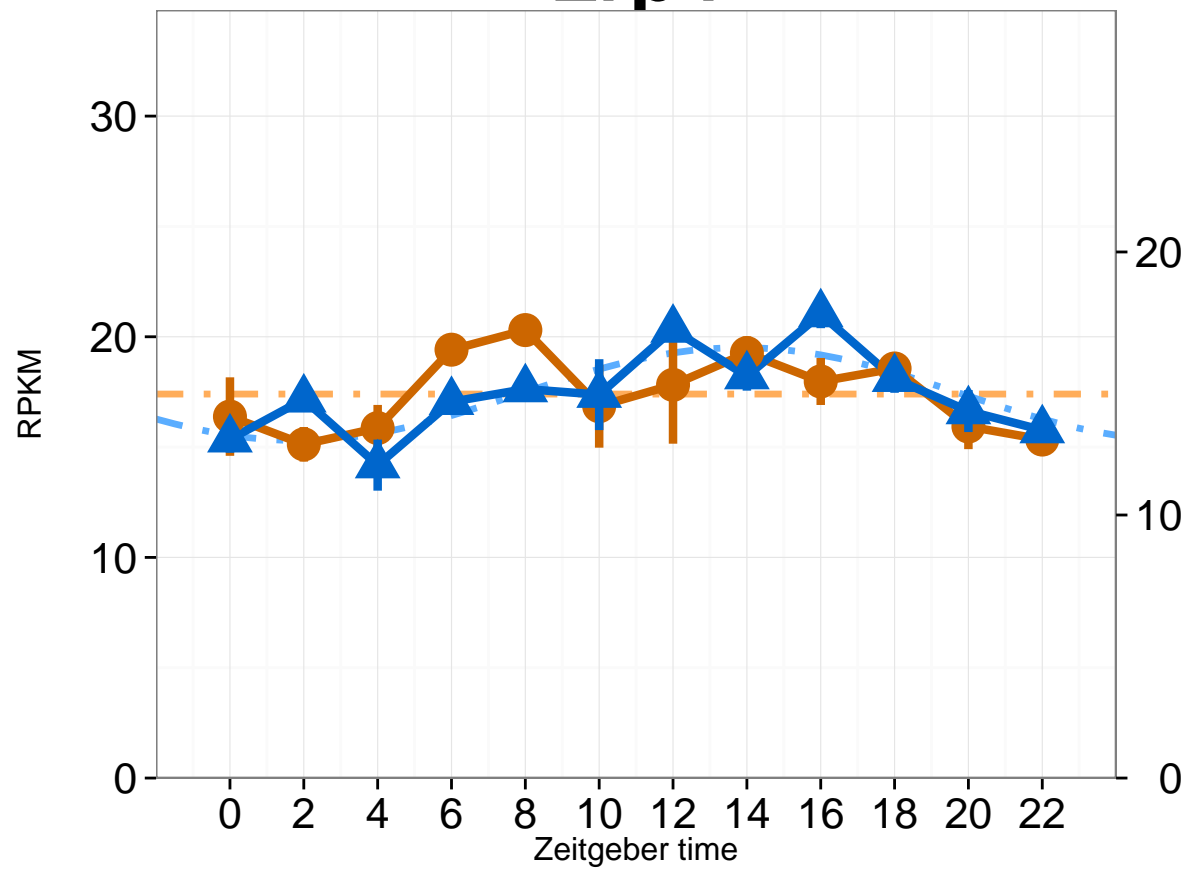

## Lrp4

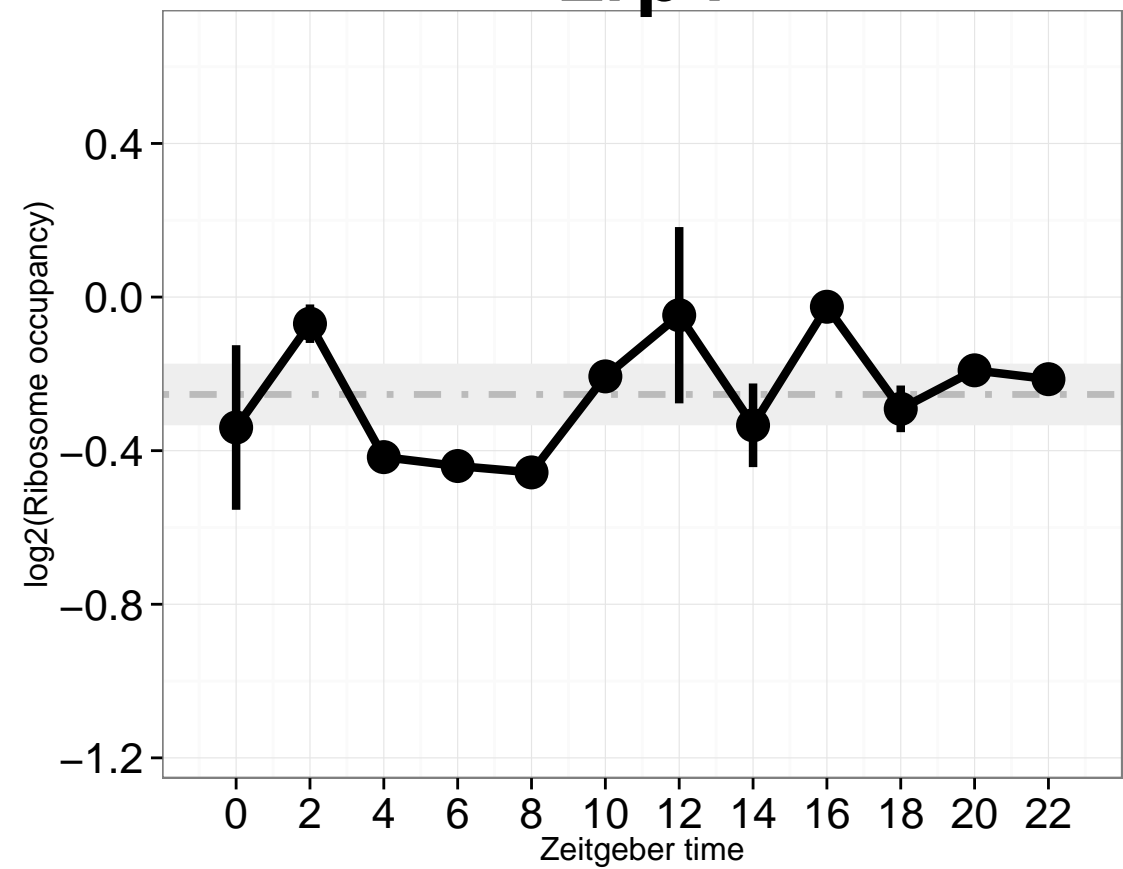

Supplement: Supplementary file 11065 [file 1]

## Znhit3

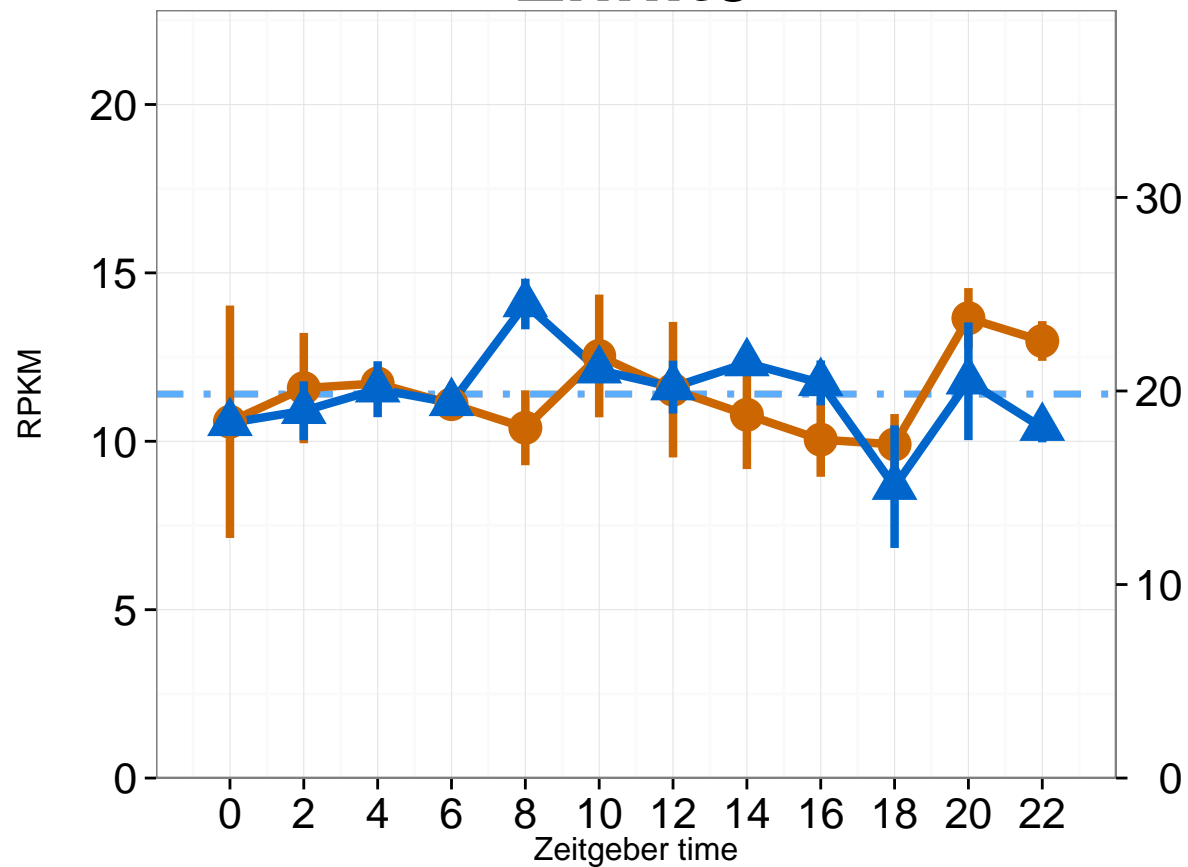

## Znhit3

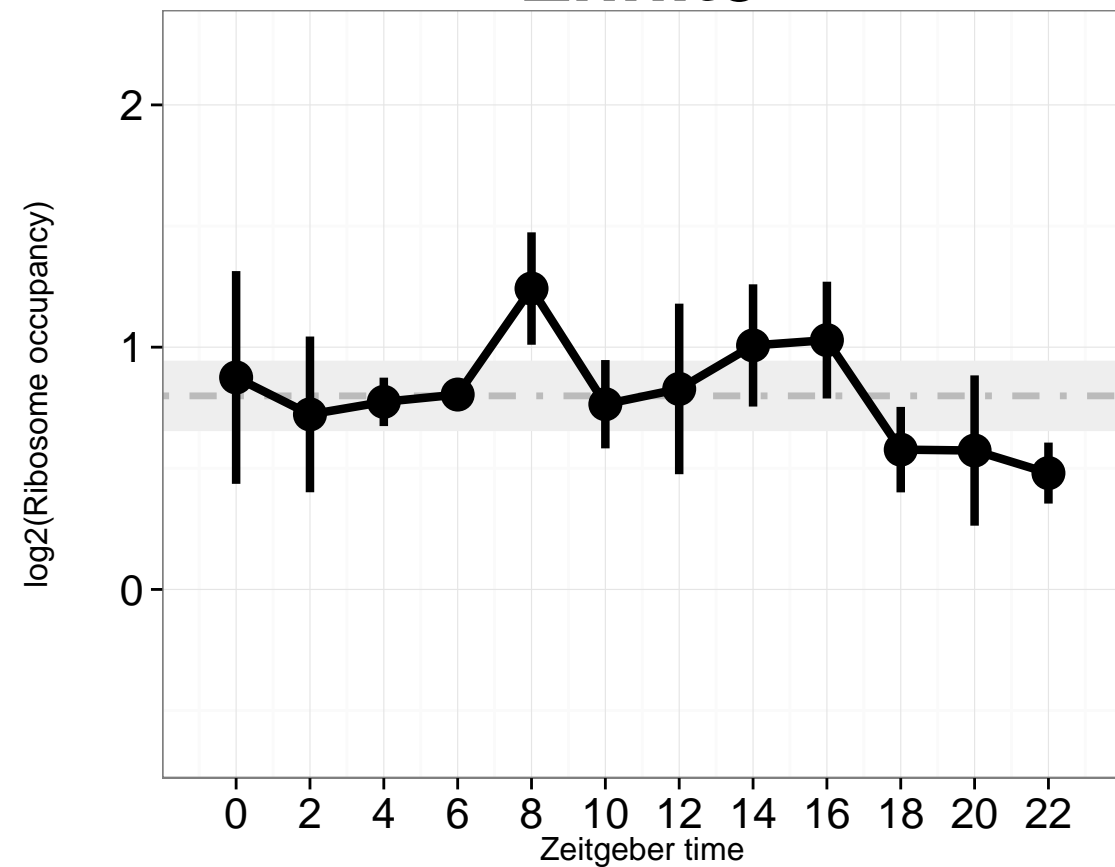

Supplement: Supplementary file 11066 [file 1]

# Ctbp2

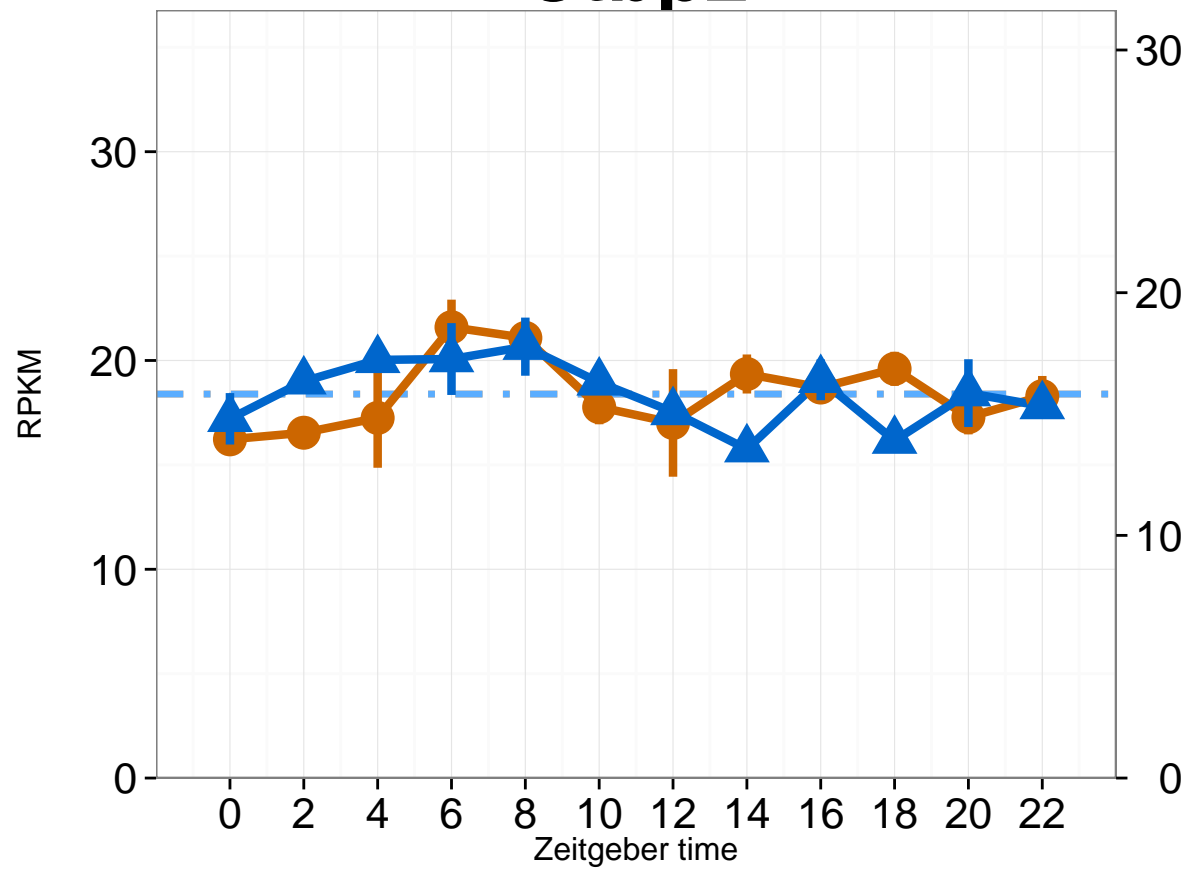

# Ctbp2

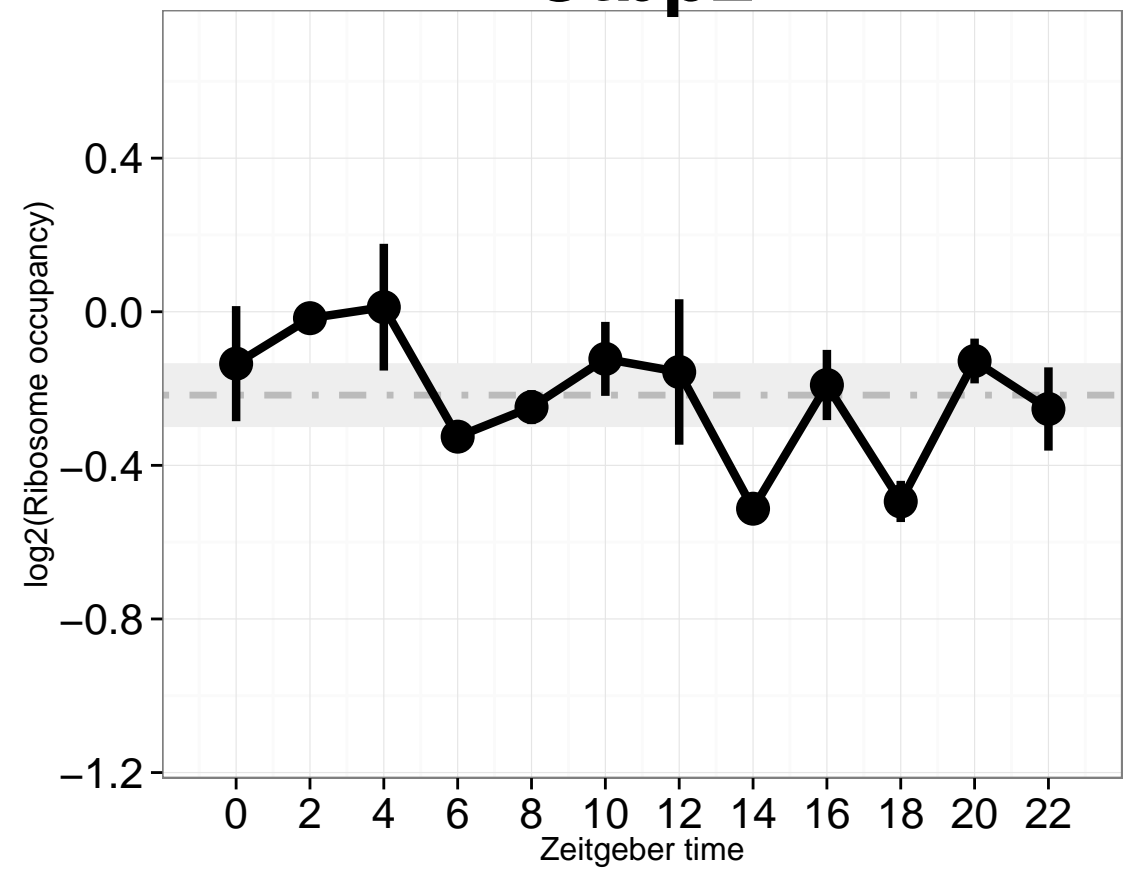

Supplement: Supplementary file 11067 [file 1]

## Tradd

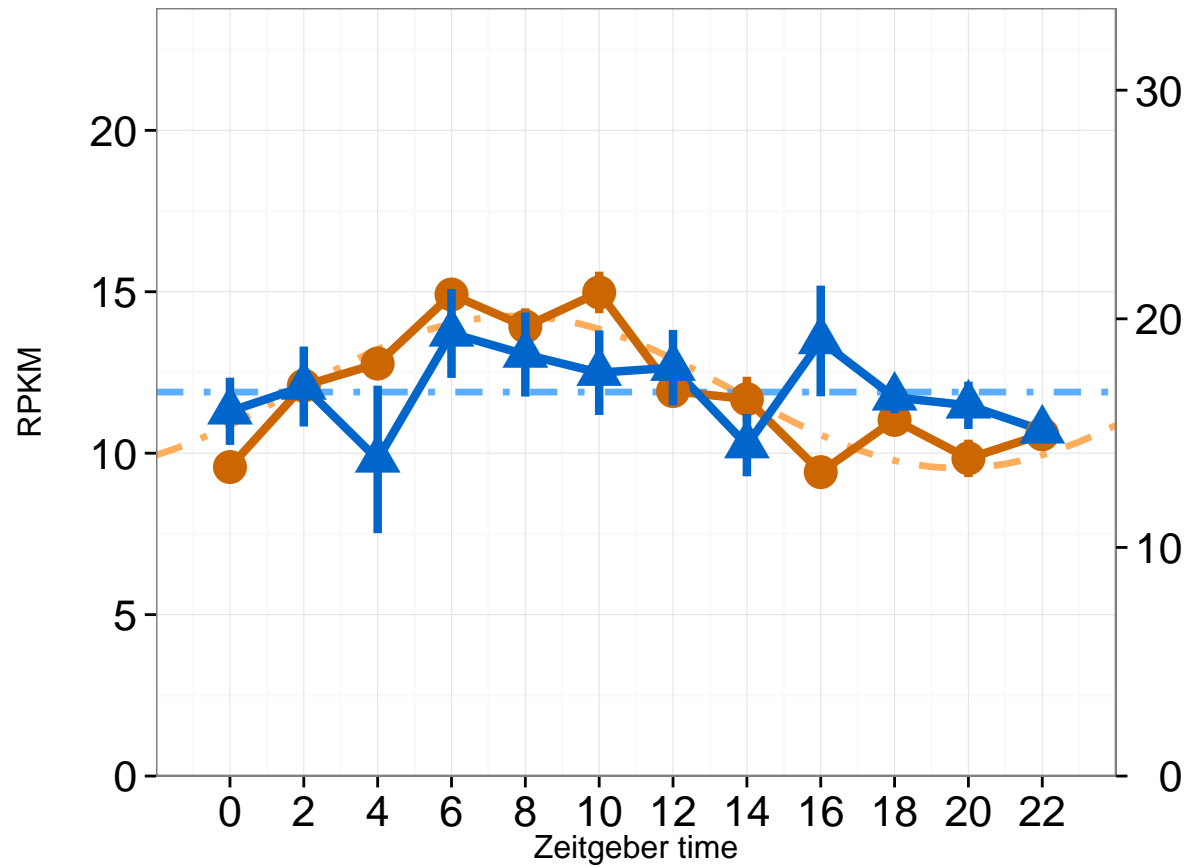

## Tradd

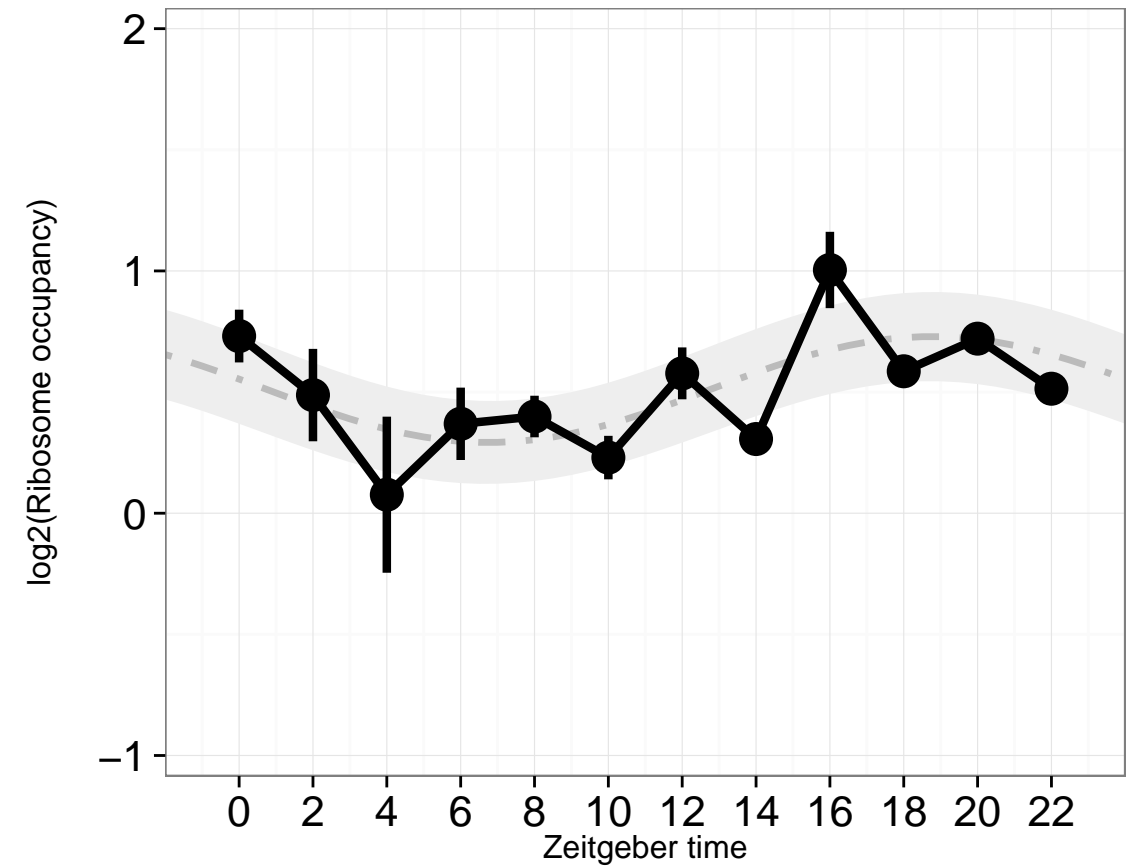

Supplement: Supplementary file 11068 [file 1]

# Mapkapk5

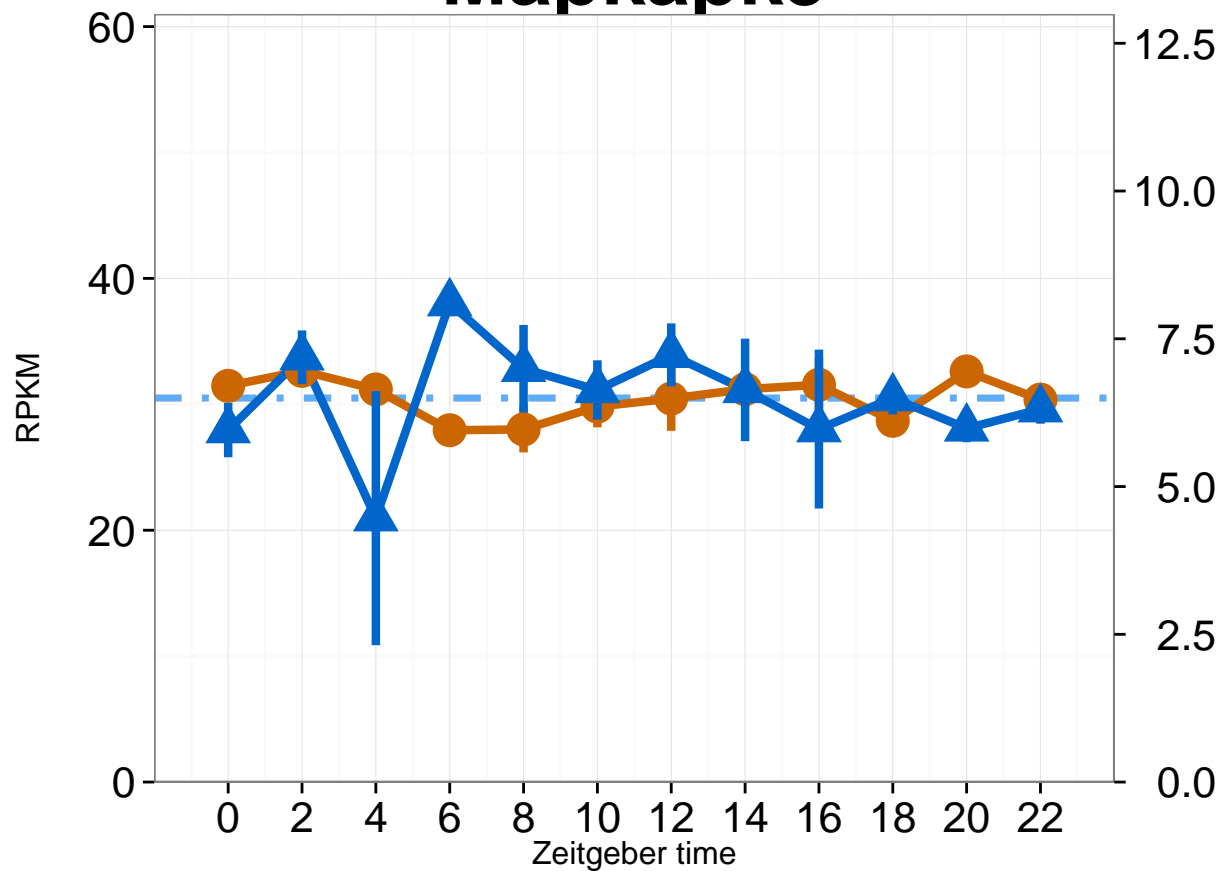

# Mapkapk5

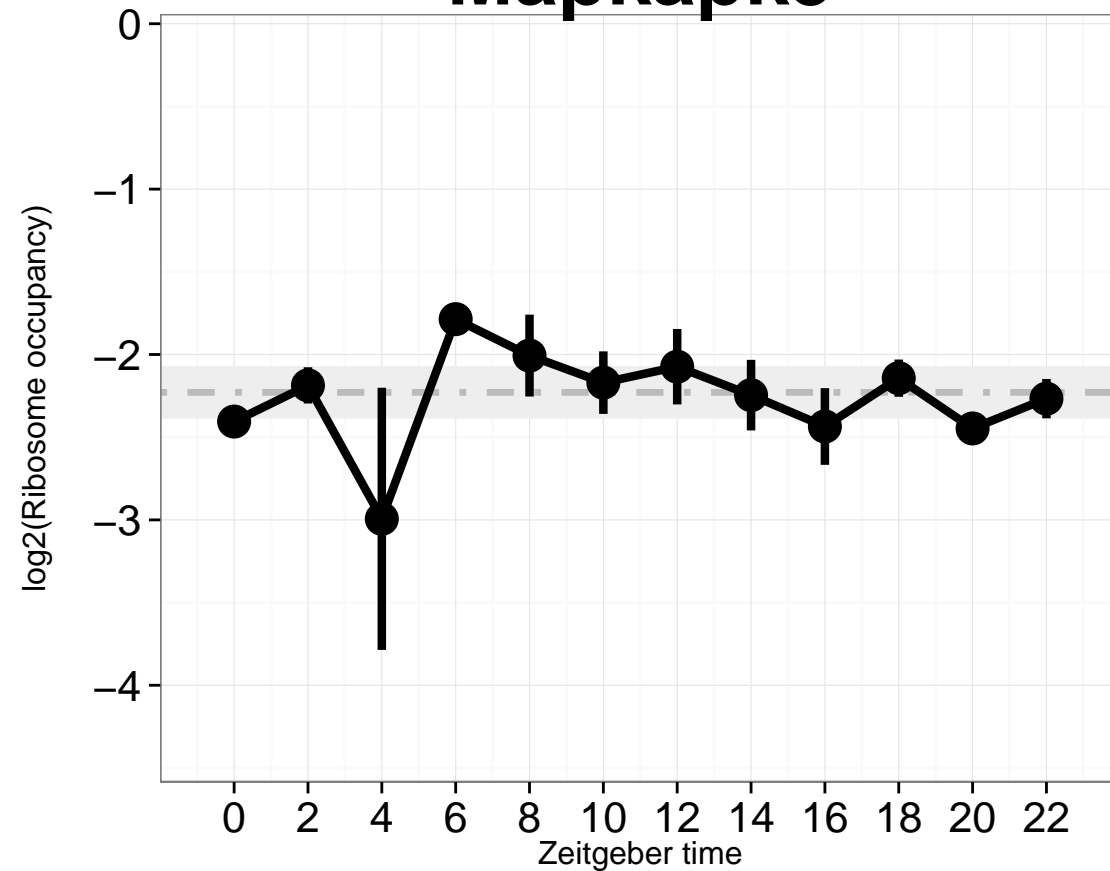

Supplement: Supplementary file 11069 [file 1]

# Zfp930

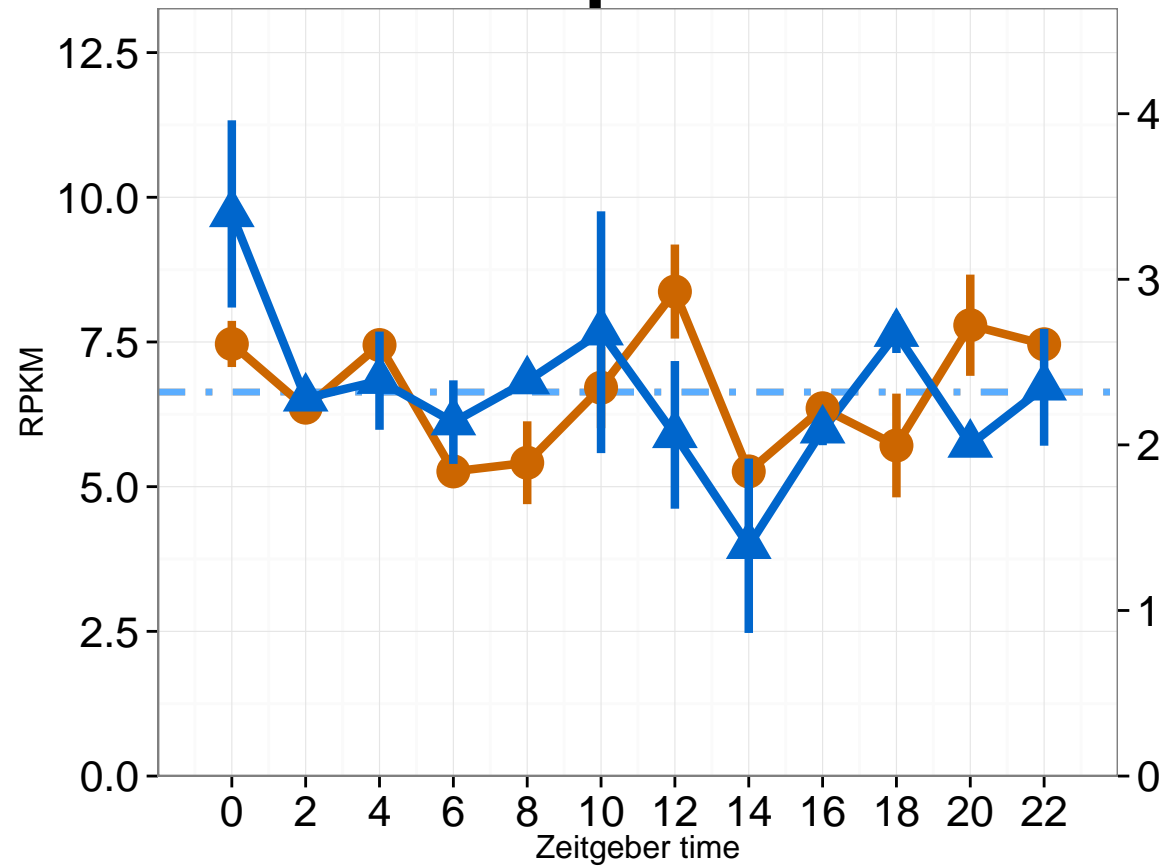

# Zfp930

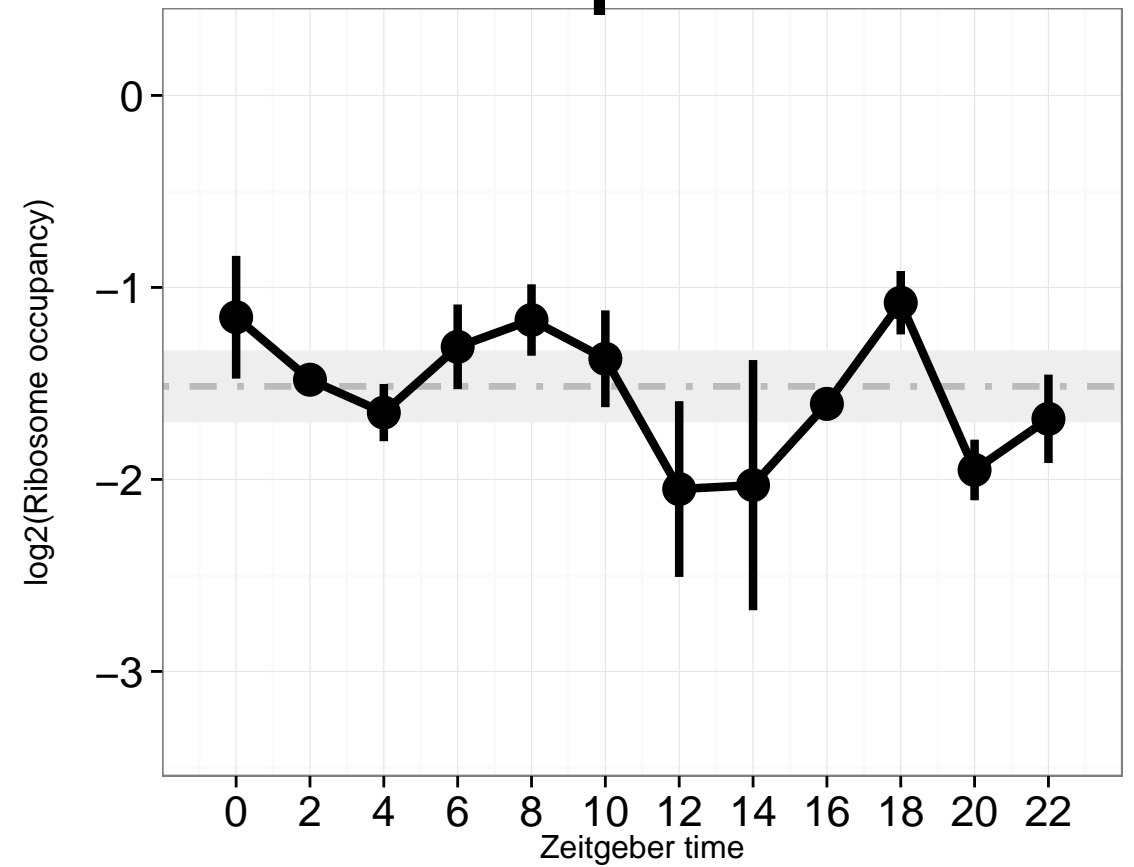

Supplement: Supplementary file 11070 [file 1]

## Uba7

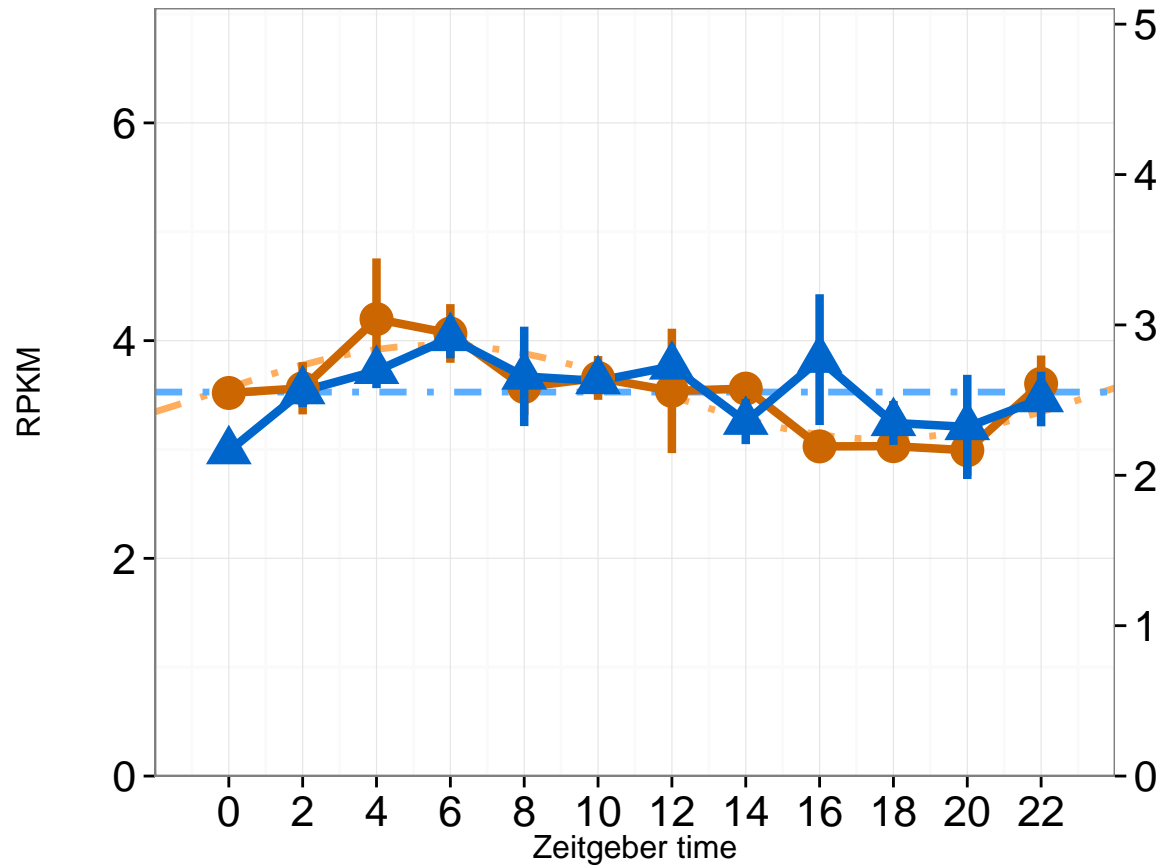

## Uba7

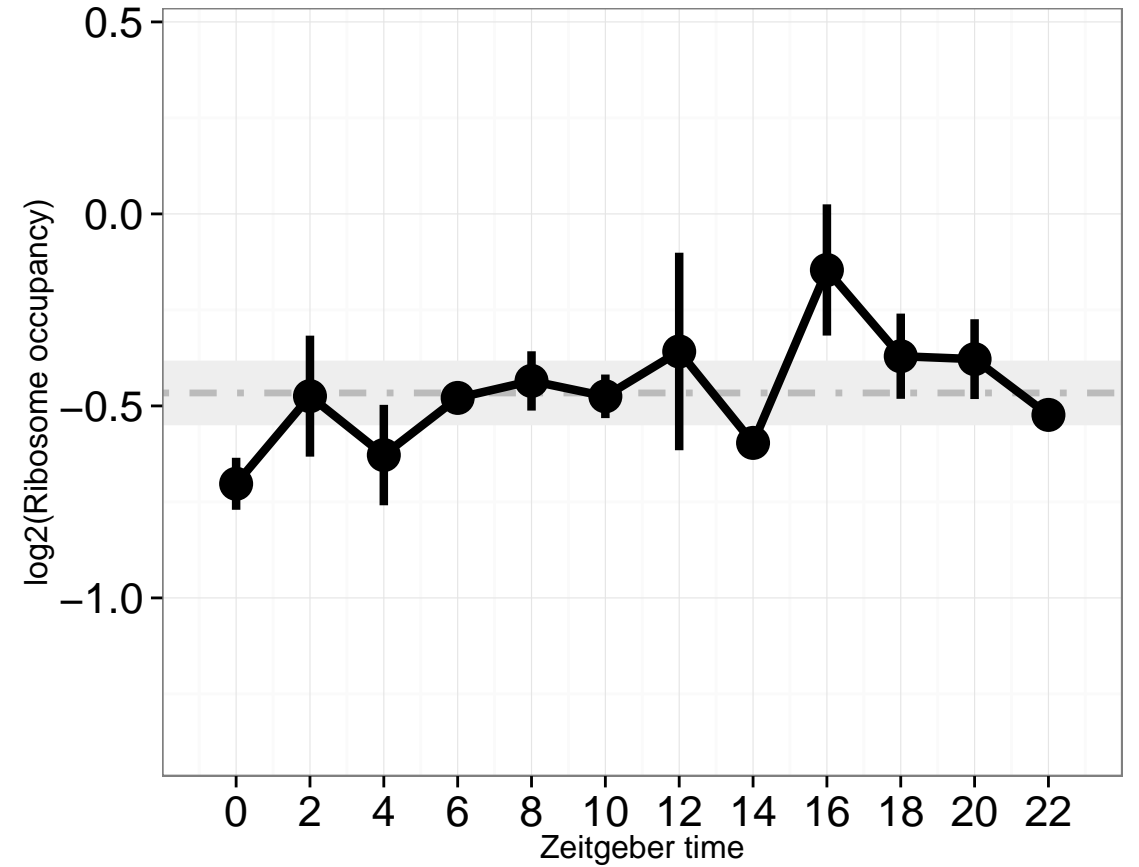

Supplement: Supplementary file 11071 [file 1]

# Mier3

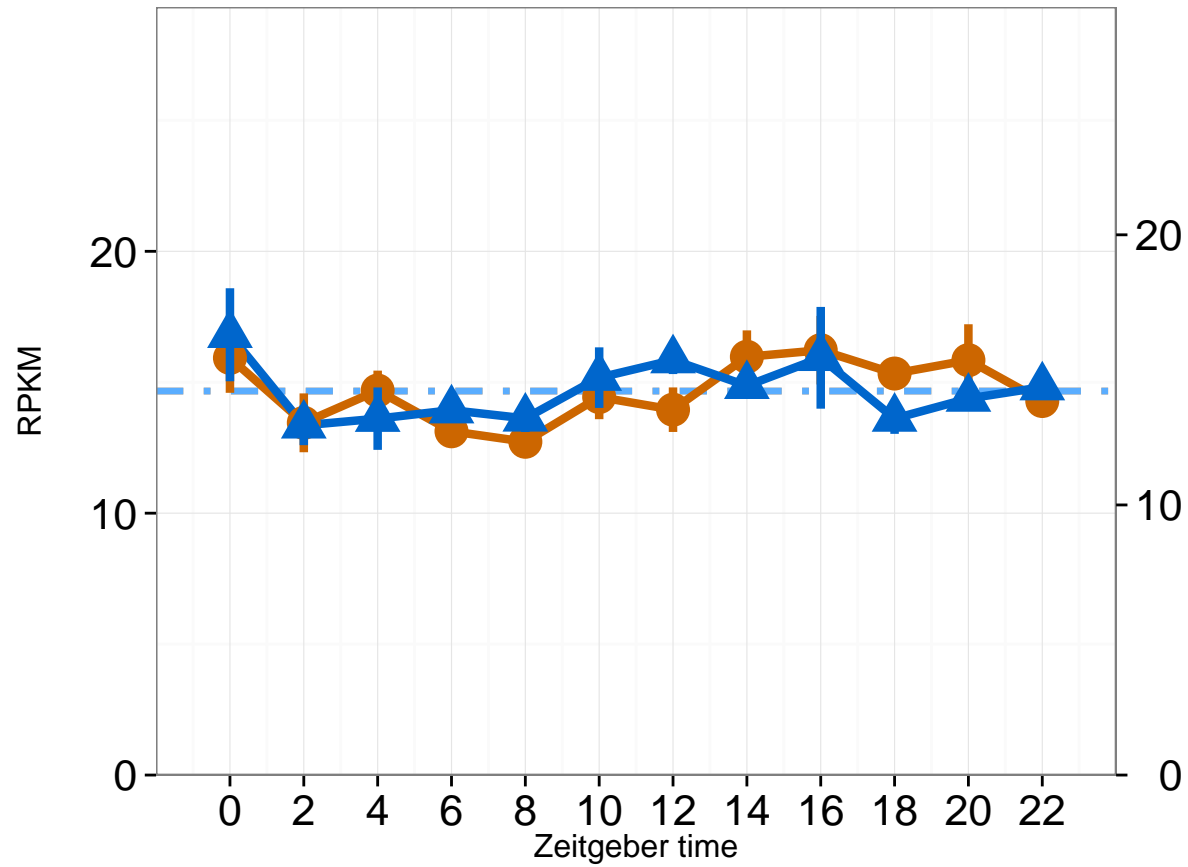

# Mier3

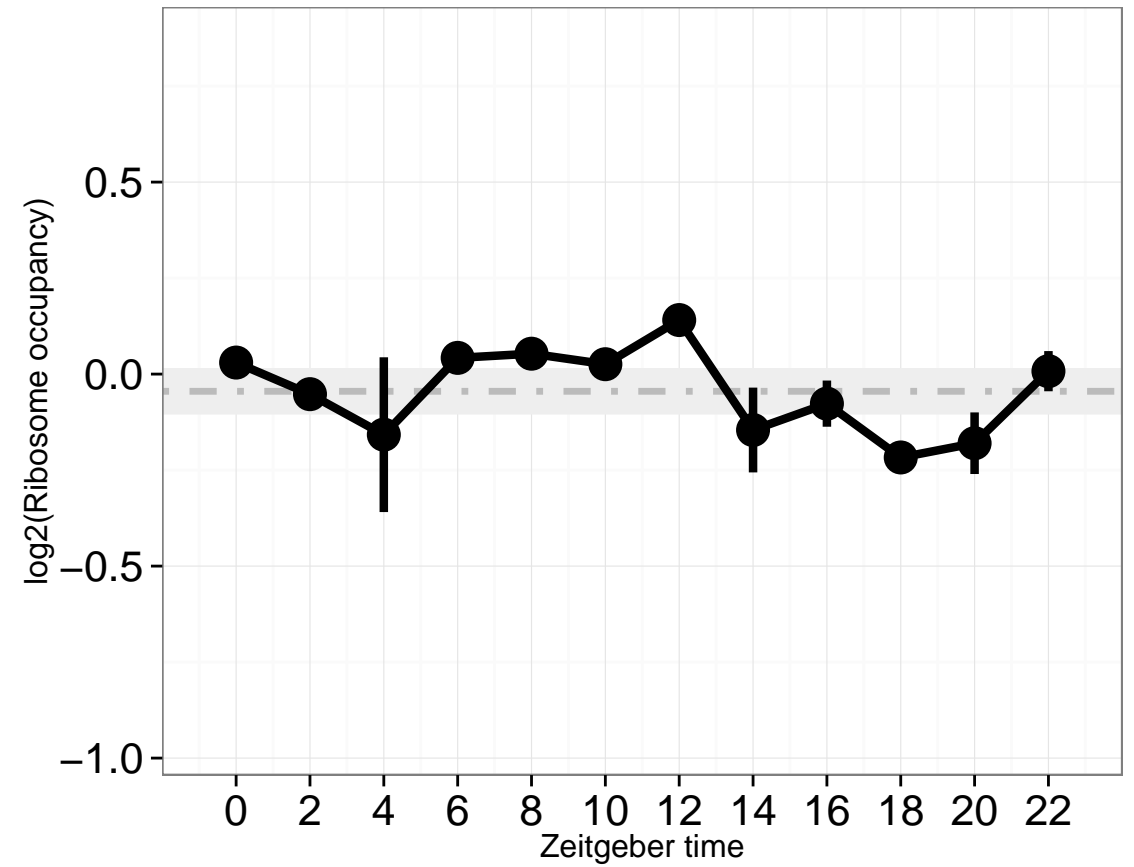

Supplement: Supplementary file 11072 [file 1]

# Clec11a

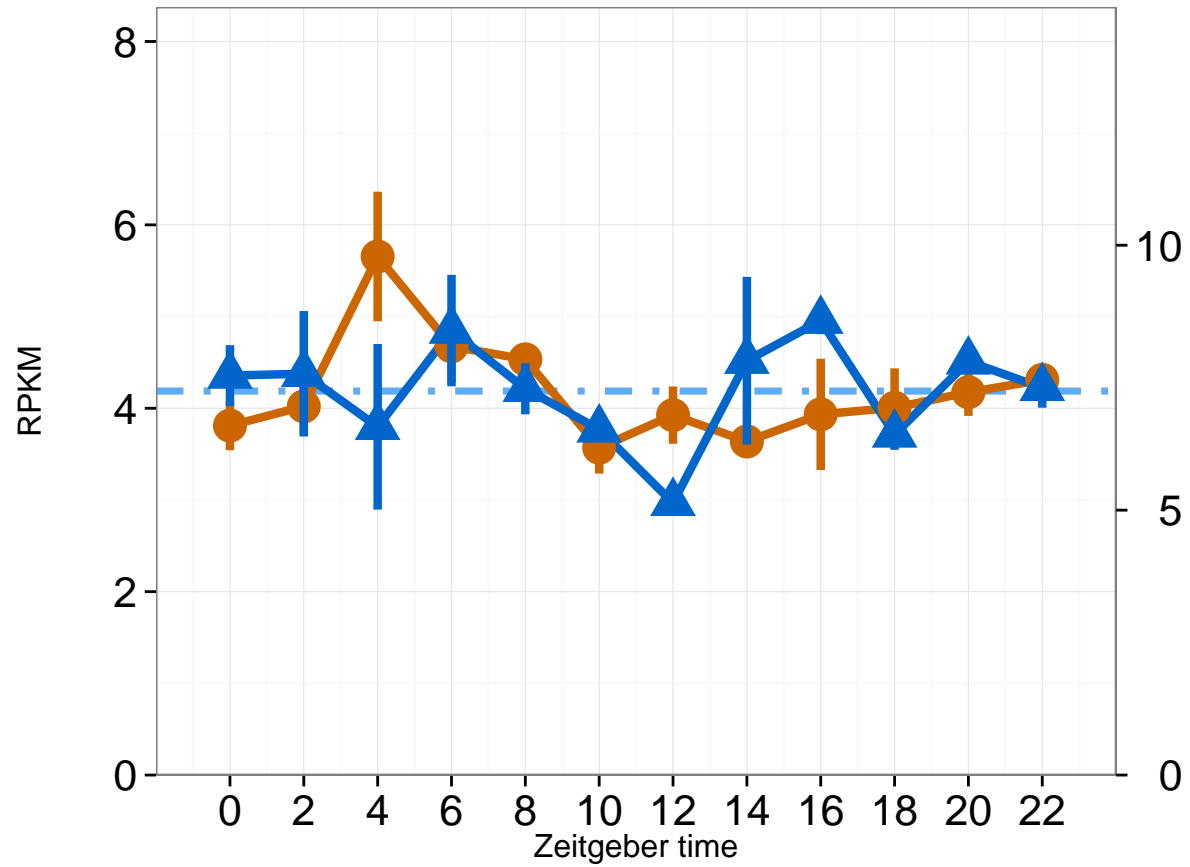

# Clec11a

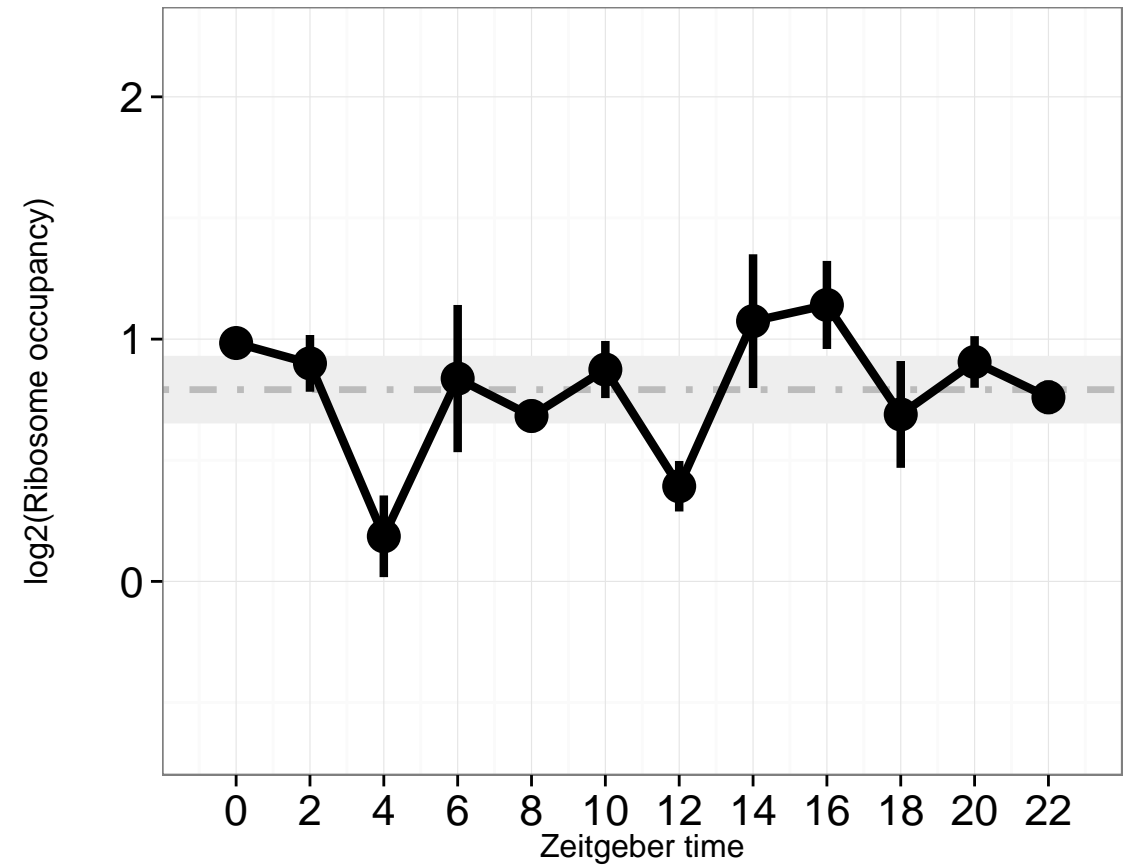

Supplement: Supplementary file 11073 [file 1]

# Taf4b

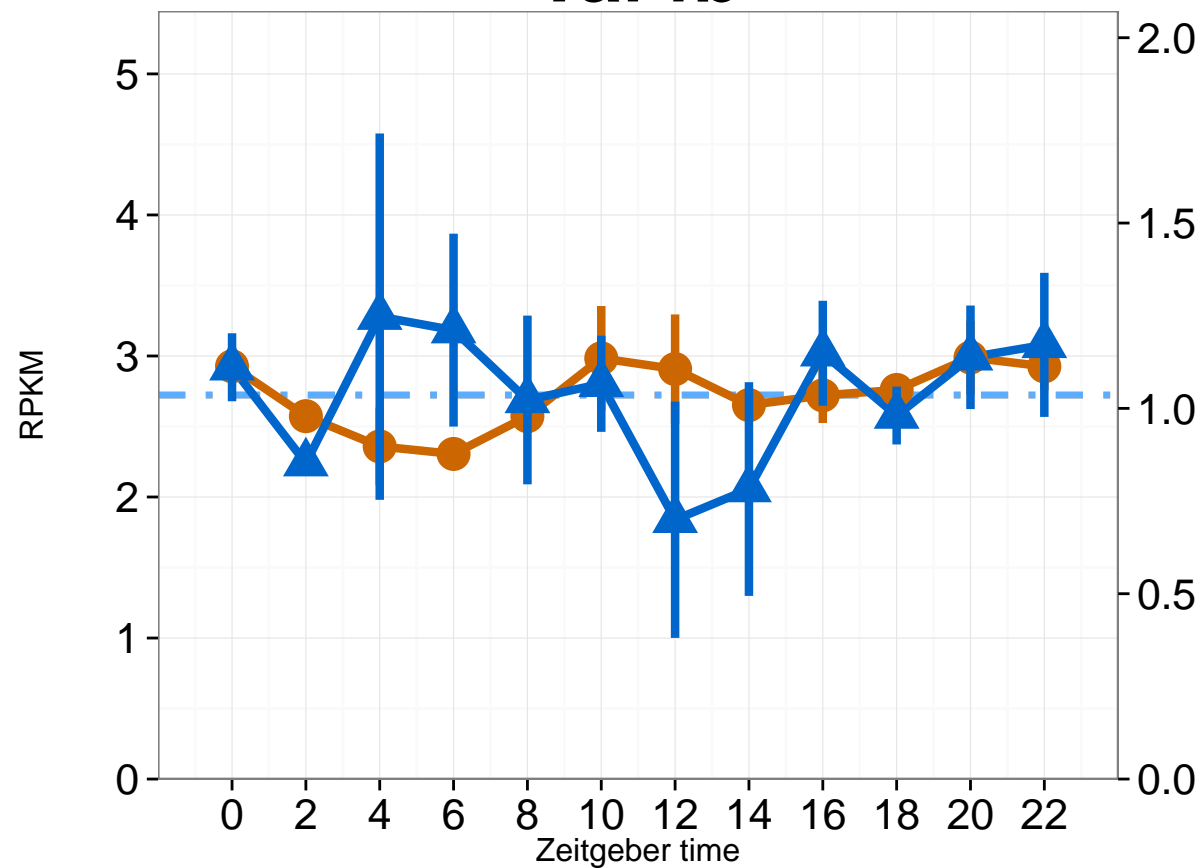

# Taf4b

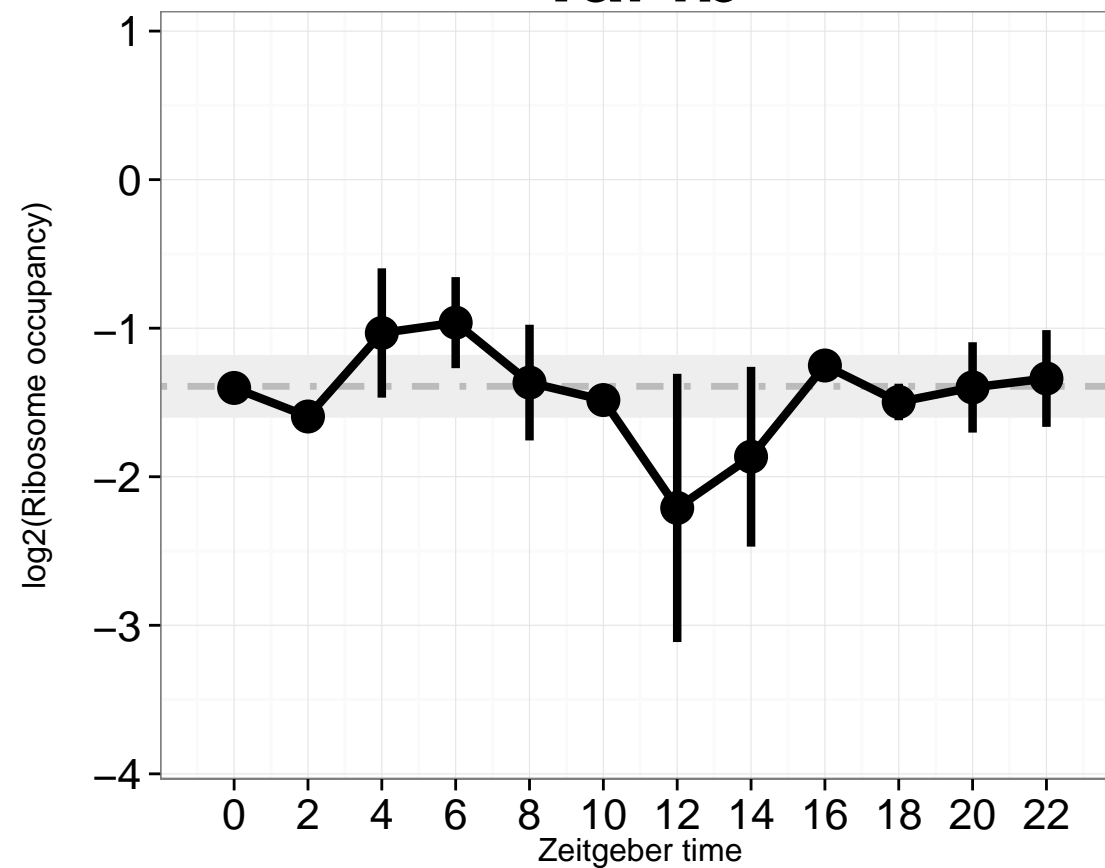

Supplement: Supplementary file 11074 [file 1]

## Pxk

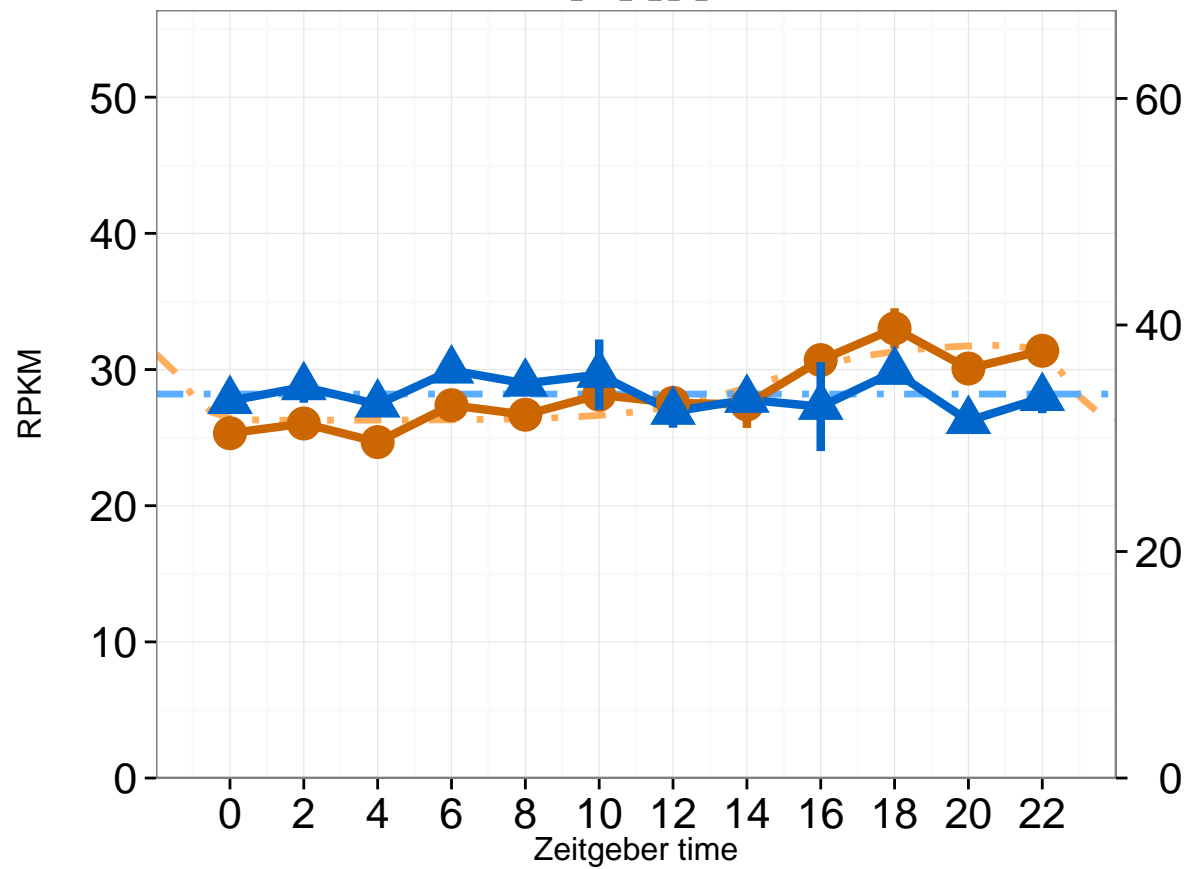

## Pxk

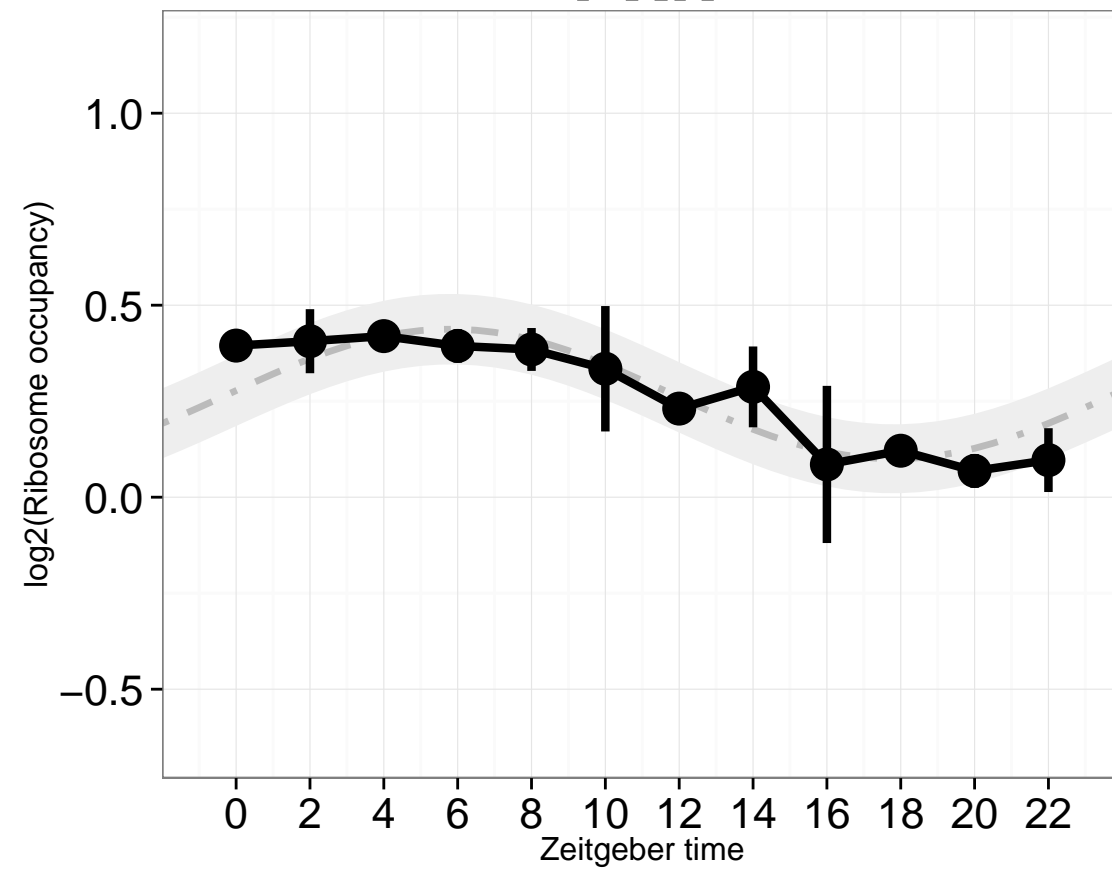

Supplement: Supplementary file 11075 [file 1]

# Nom1

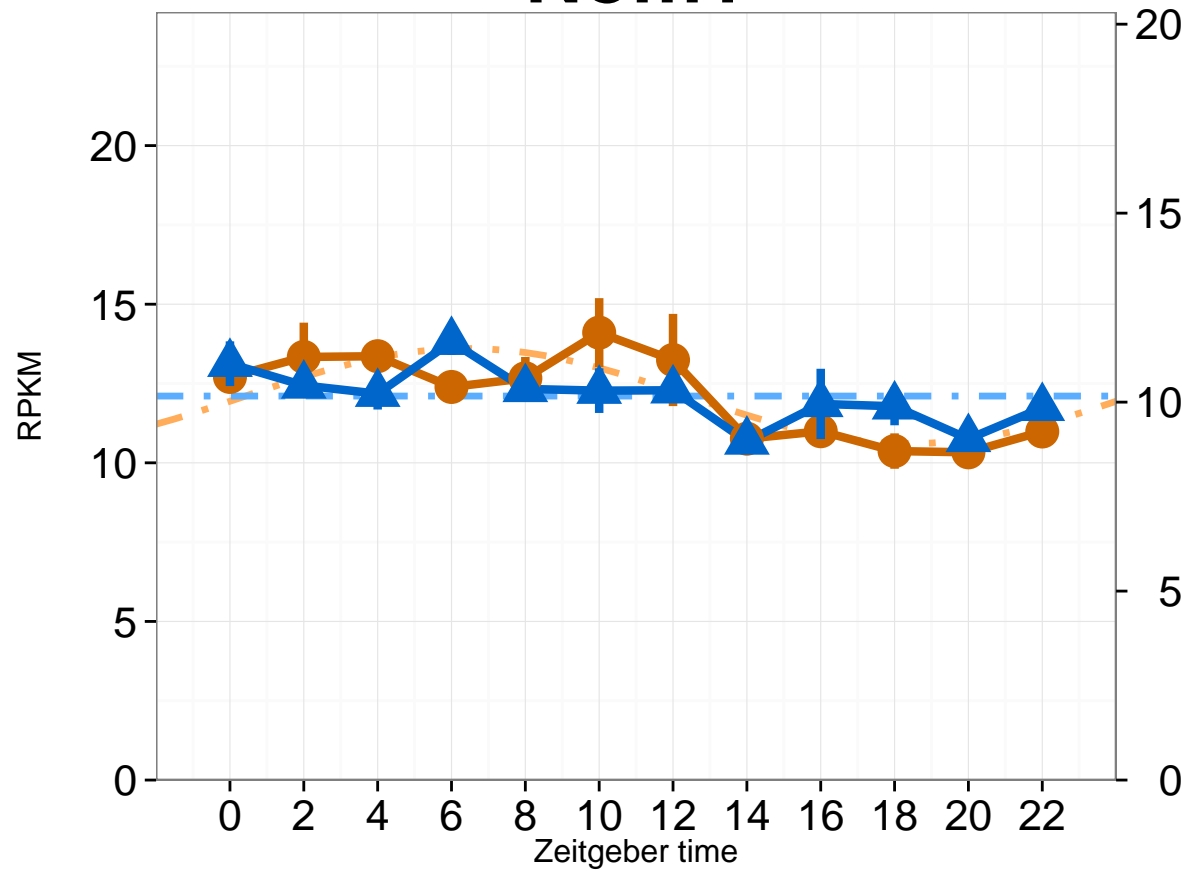

# Nom1

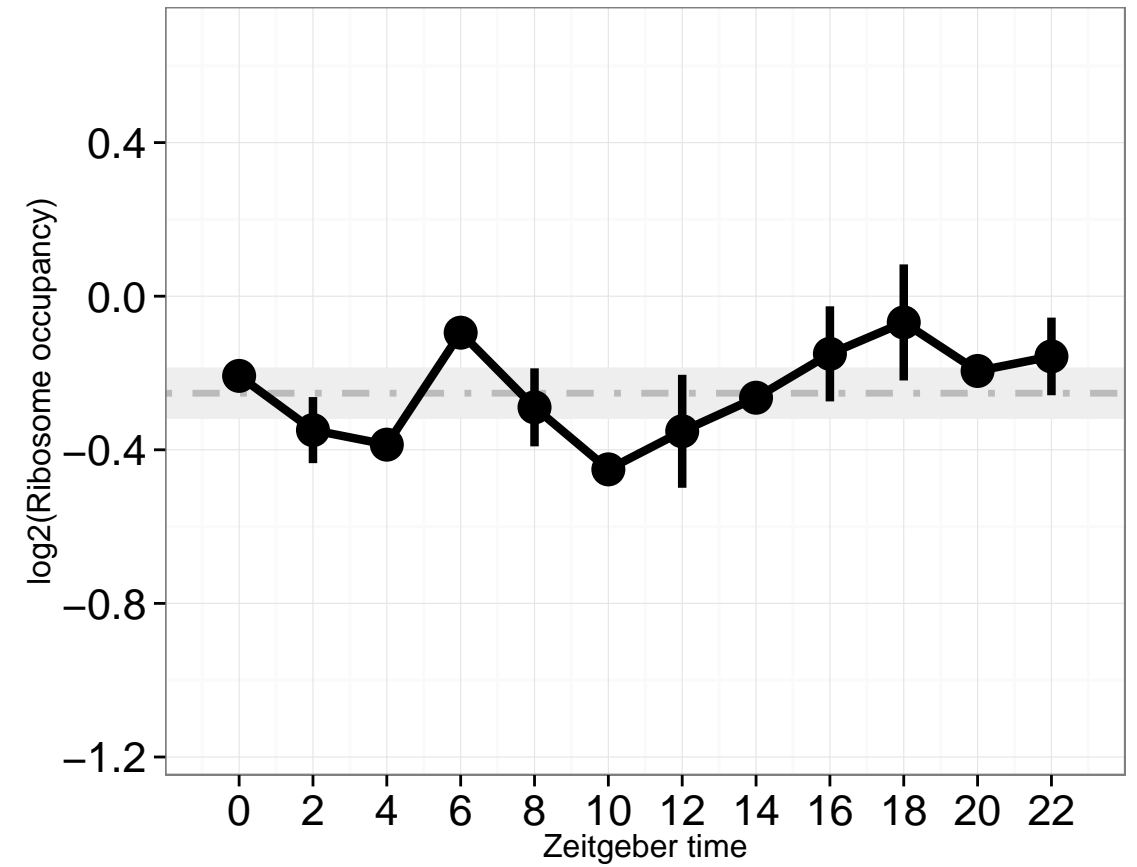

Supplement: Supplementary file 11076 [file 1]

# Alpl

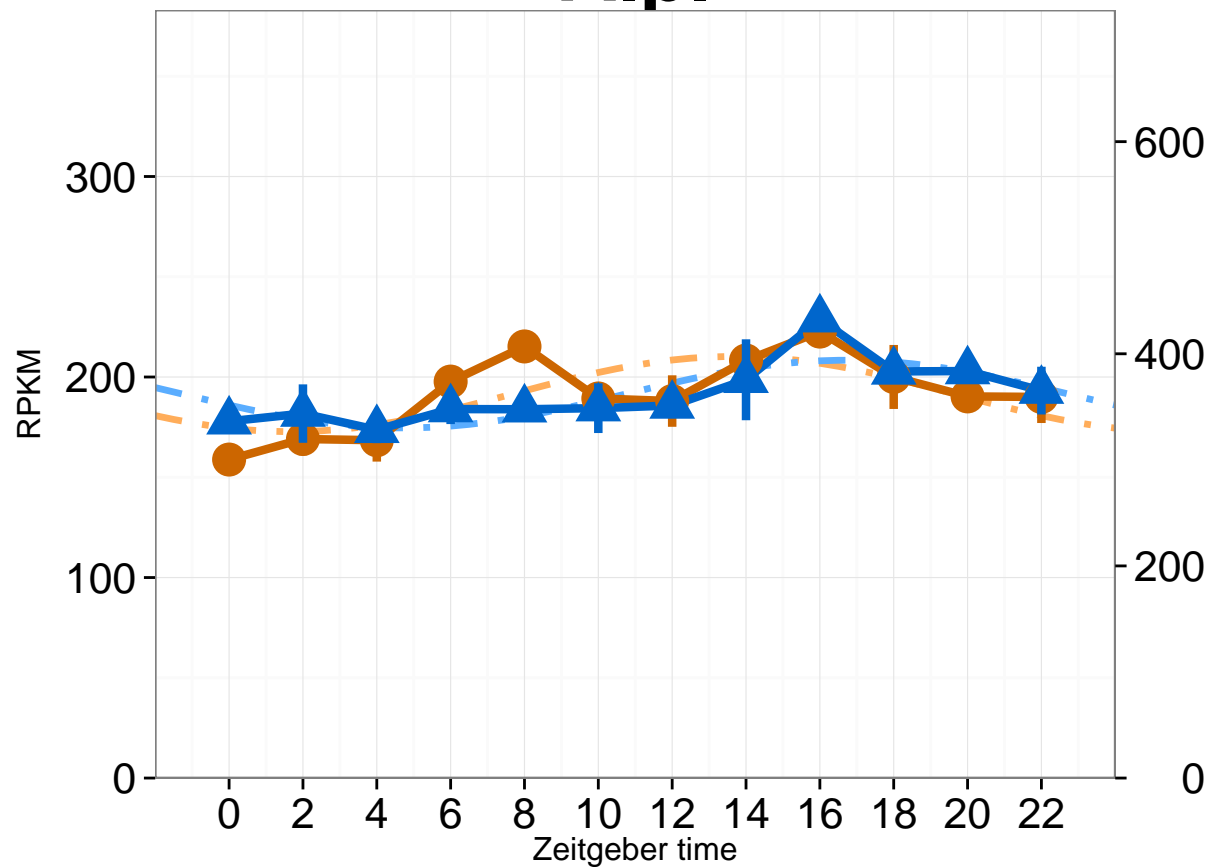

# Alpl

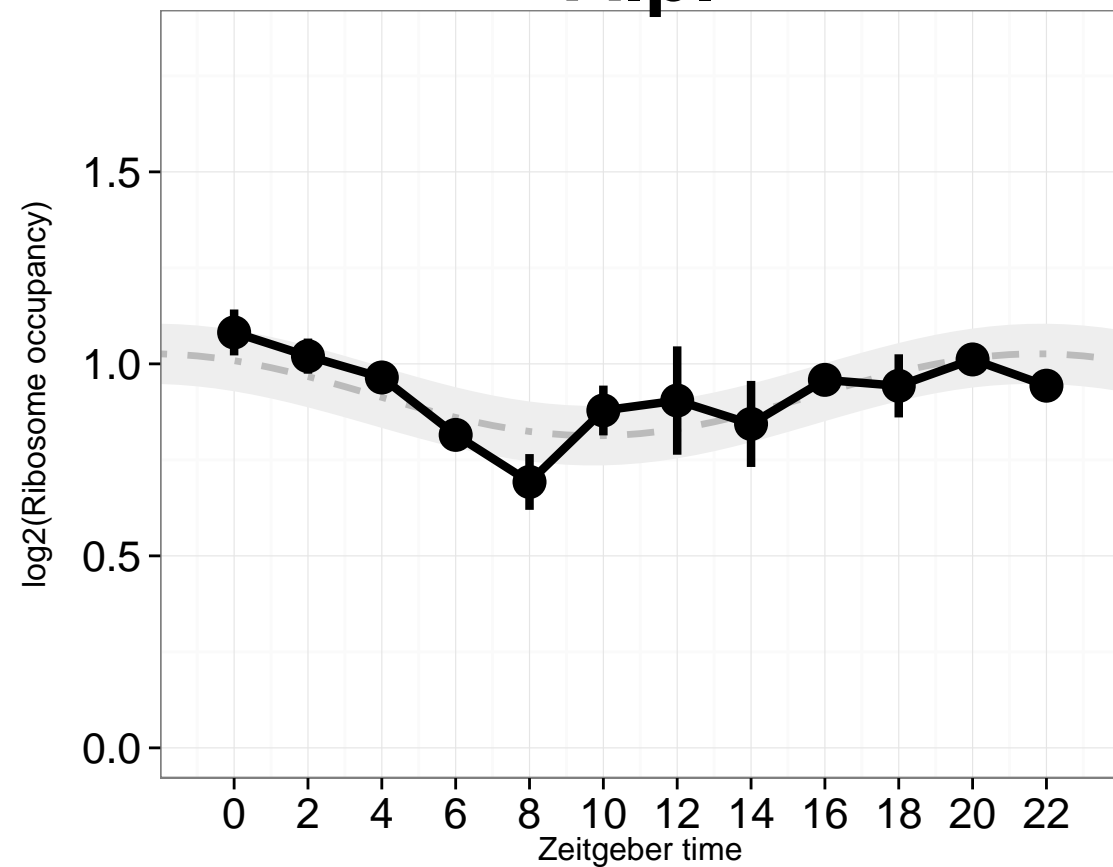

Supplement: Supplementary file 11077 [file 1]

## Tgfb $\beta$

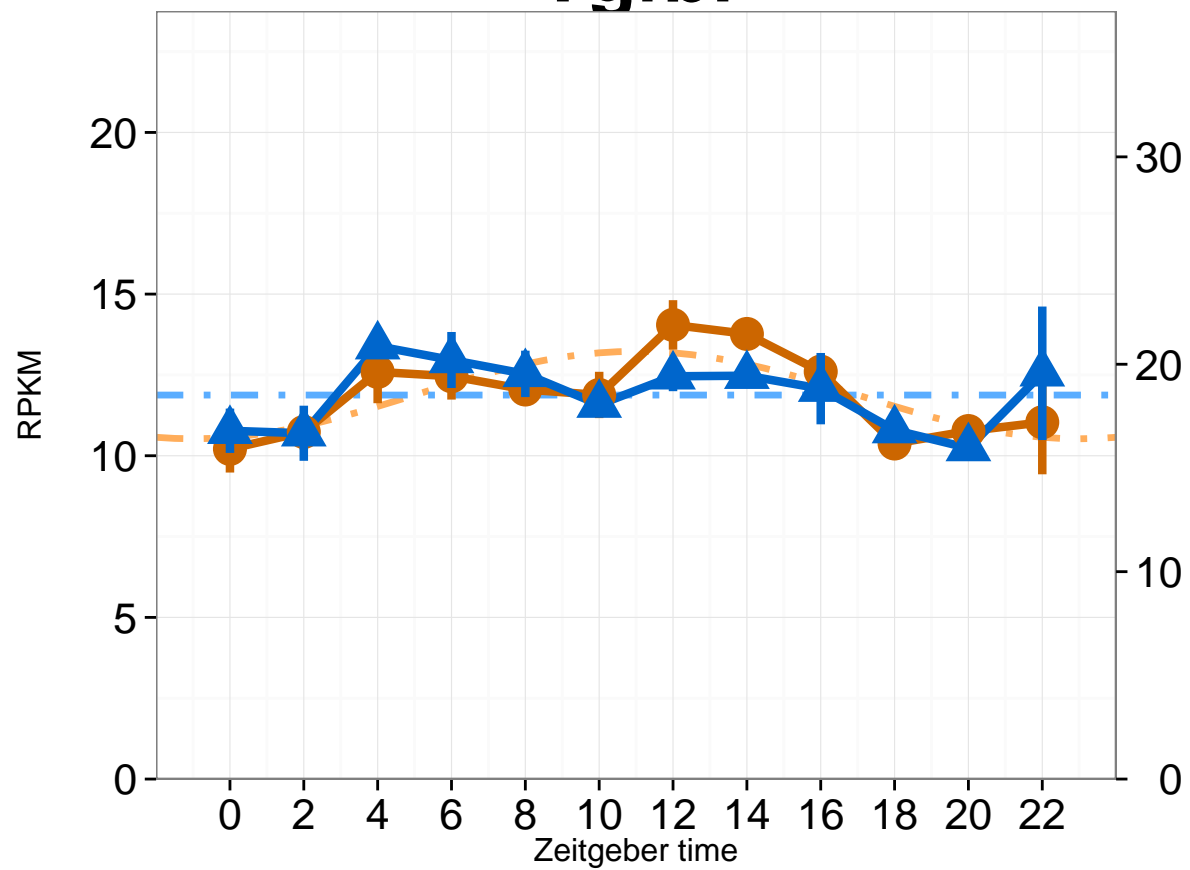

## Tgfb $\beta$

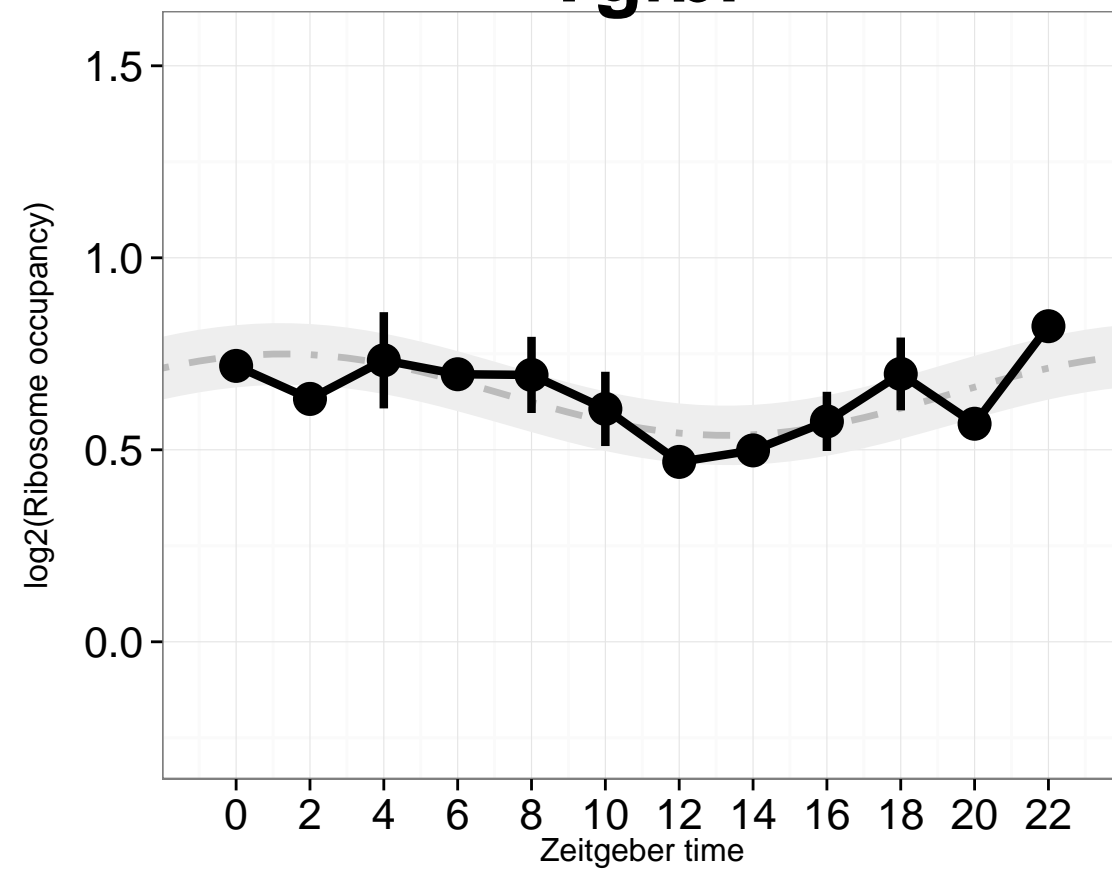

Supplement: Supplementary file 11078 [file 1]

# Cd300lh

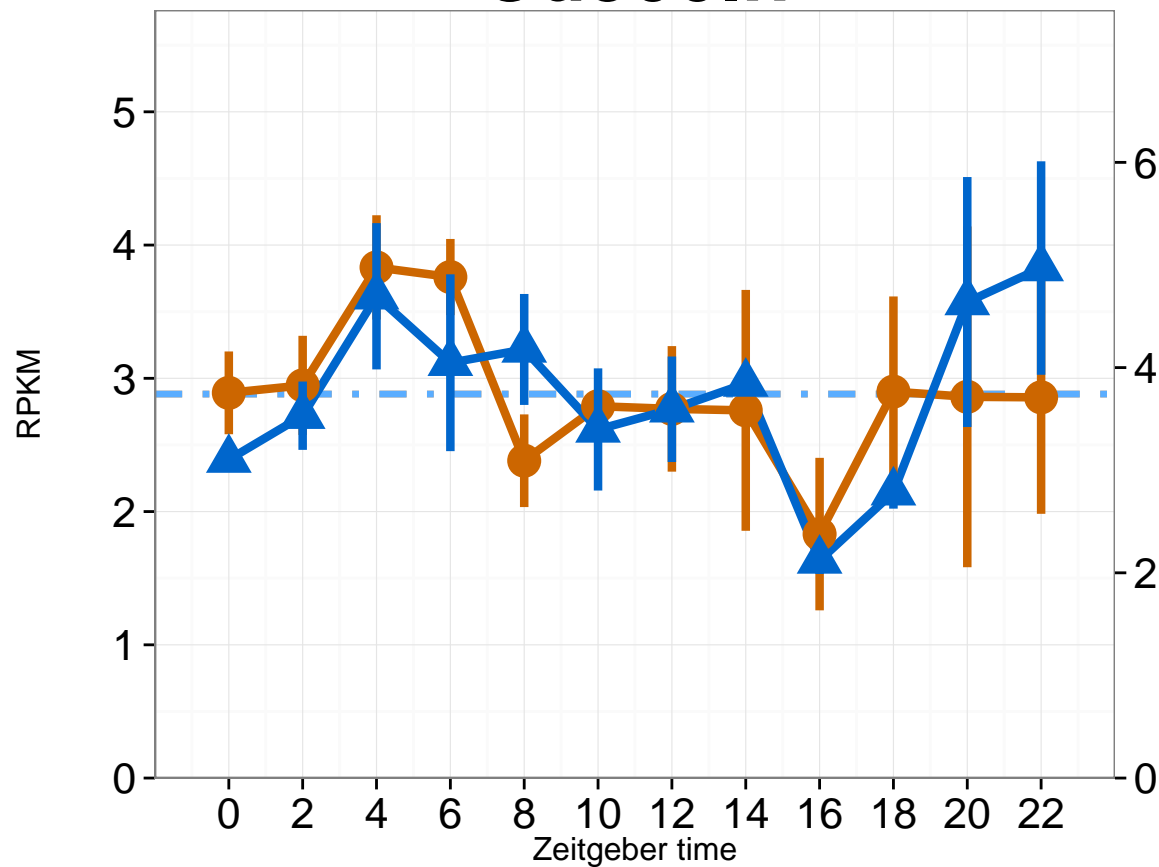

# Cd300lh

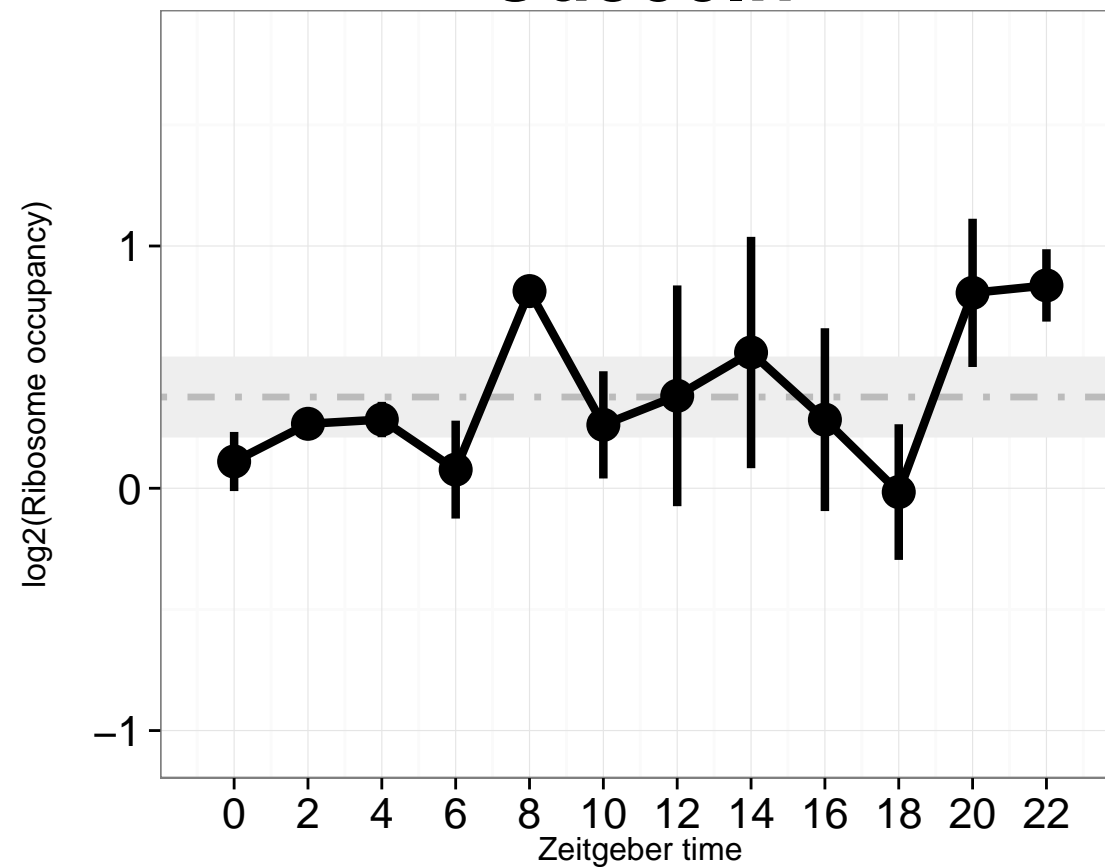

Supplement: Supplementary file 11079 [file 1]

## Ttc3

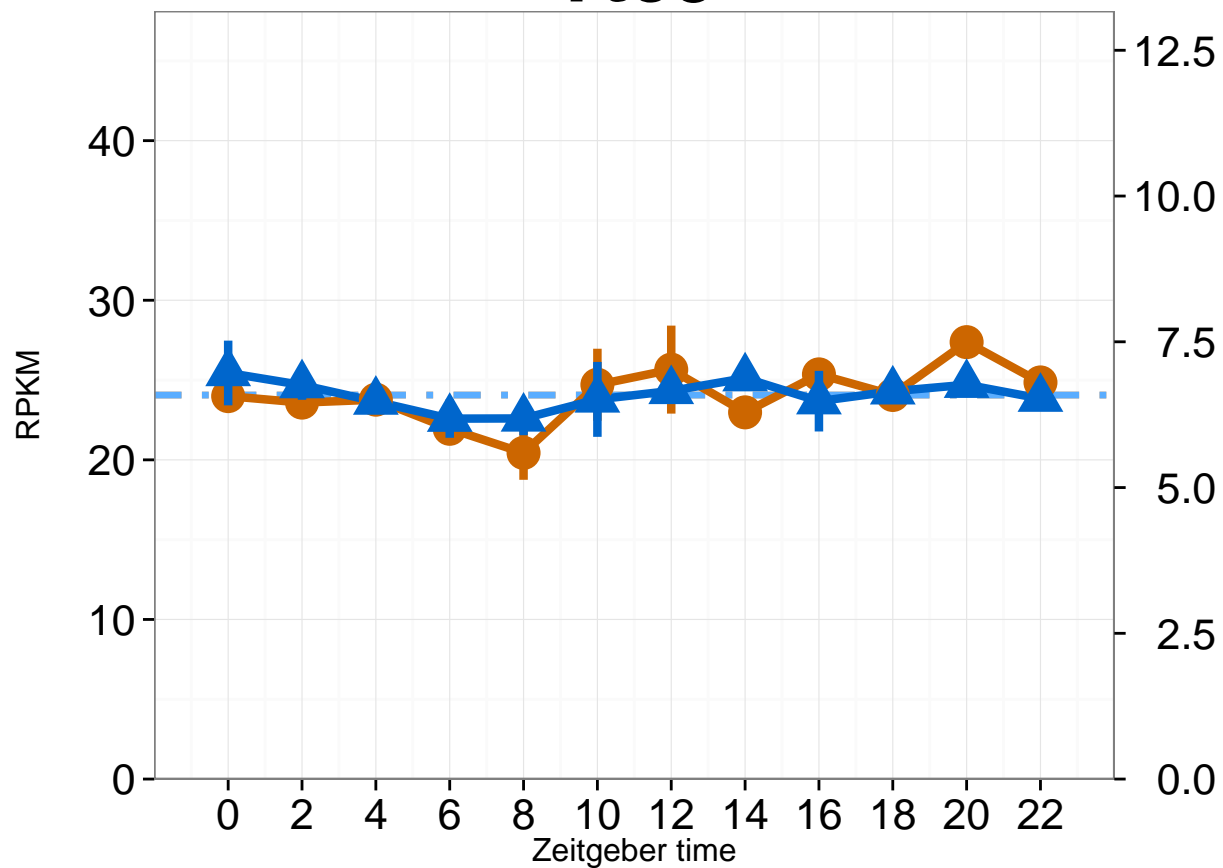

## Ttc3

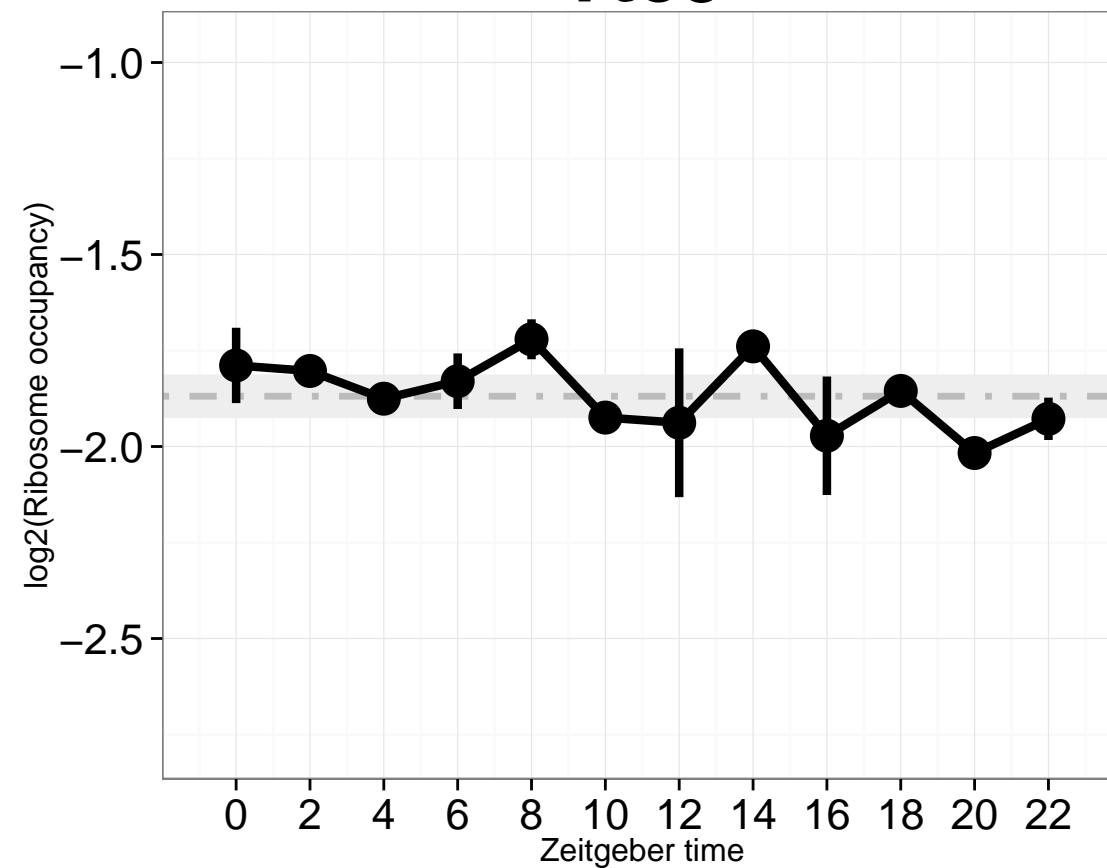

Supplement: Supplementary file 11080 [file 1]

# Tmem86b

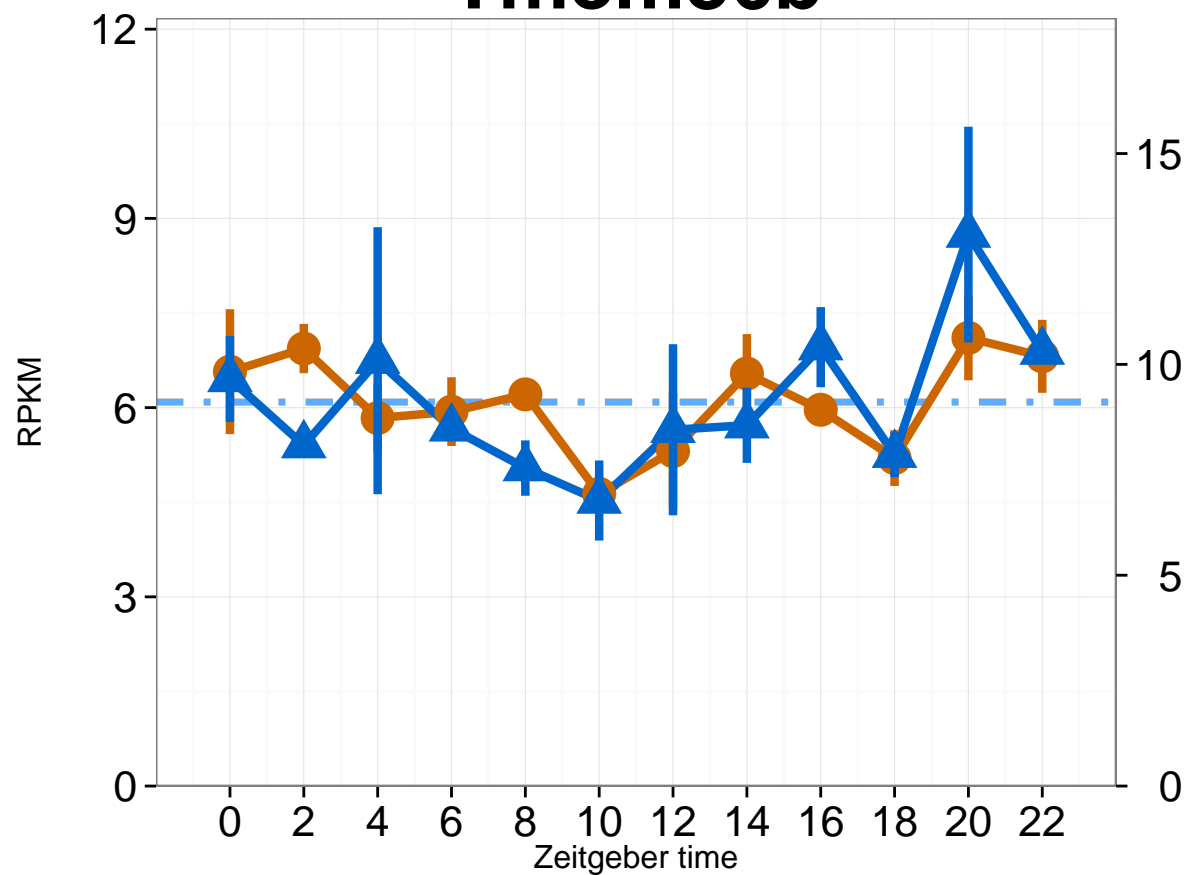

# Tmem86b

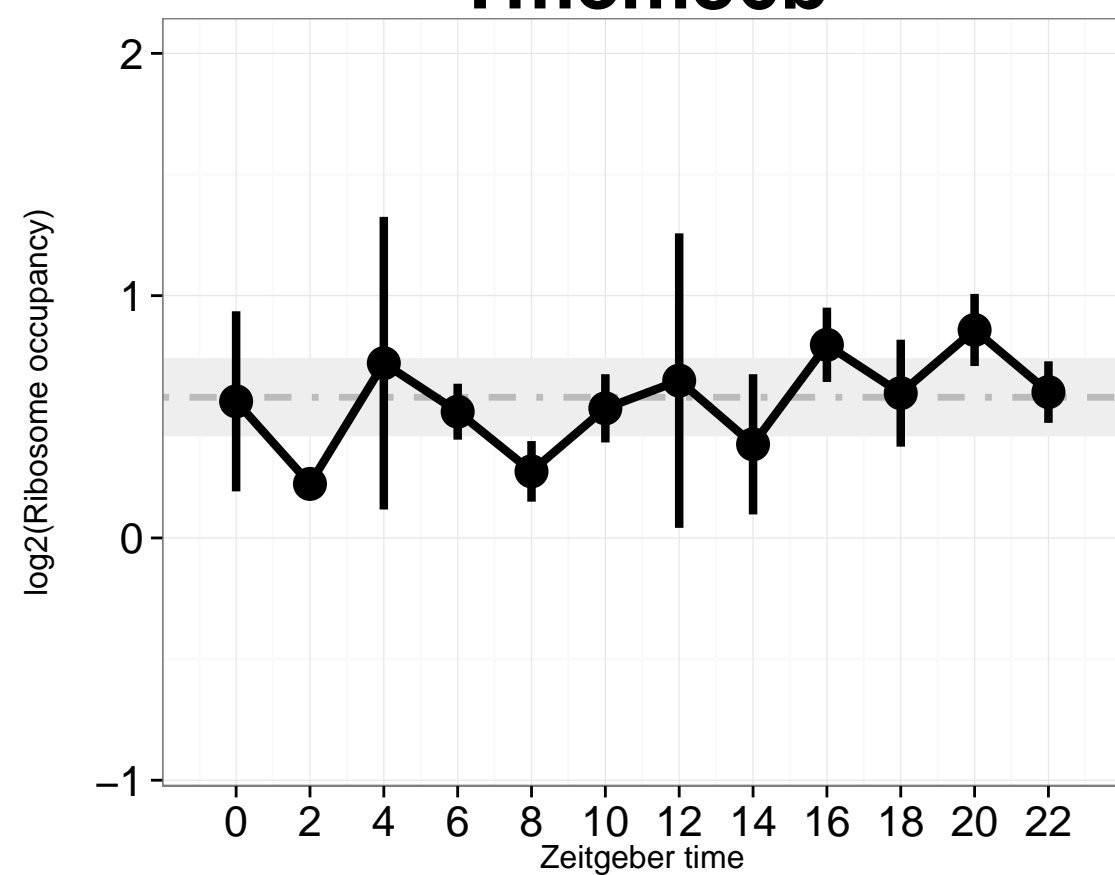

Supplement: Supplementary file 11081 [file 1]

## Necap1

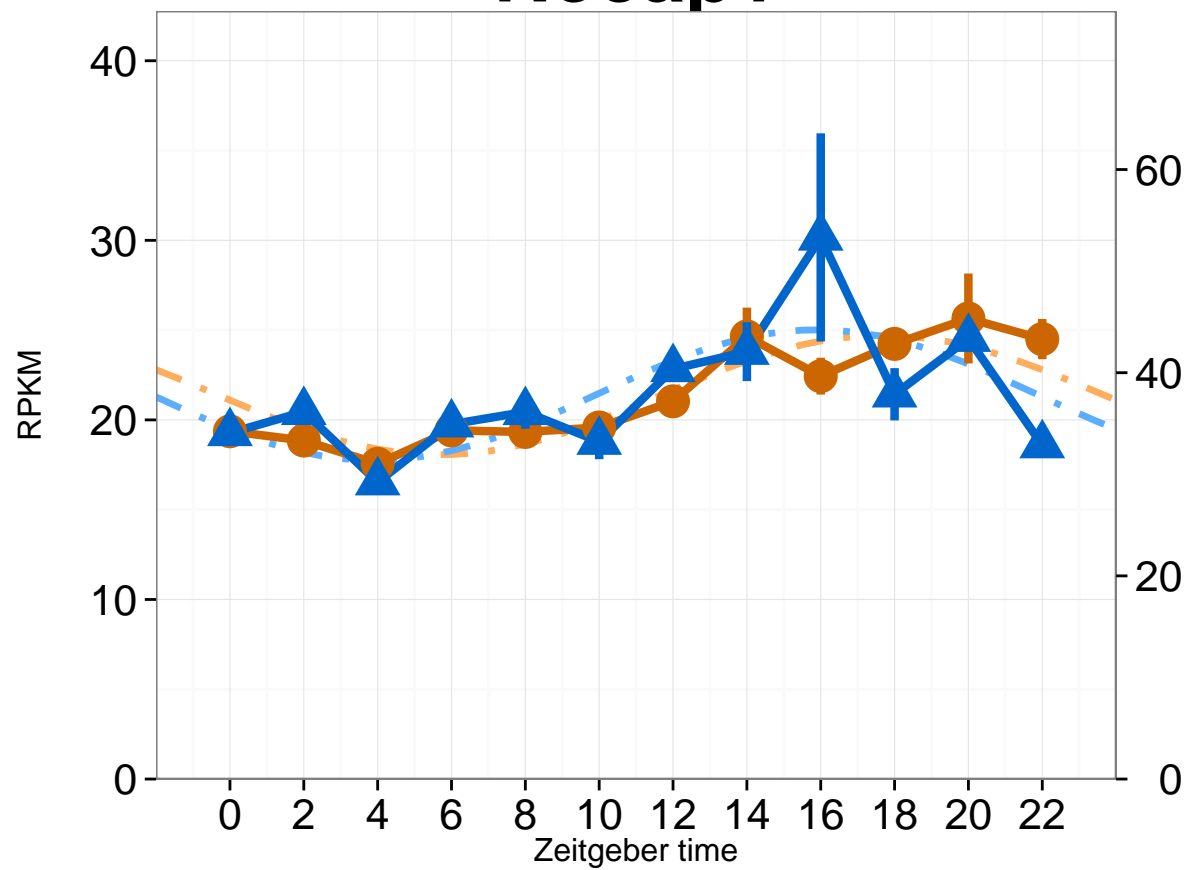

## Necap1

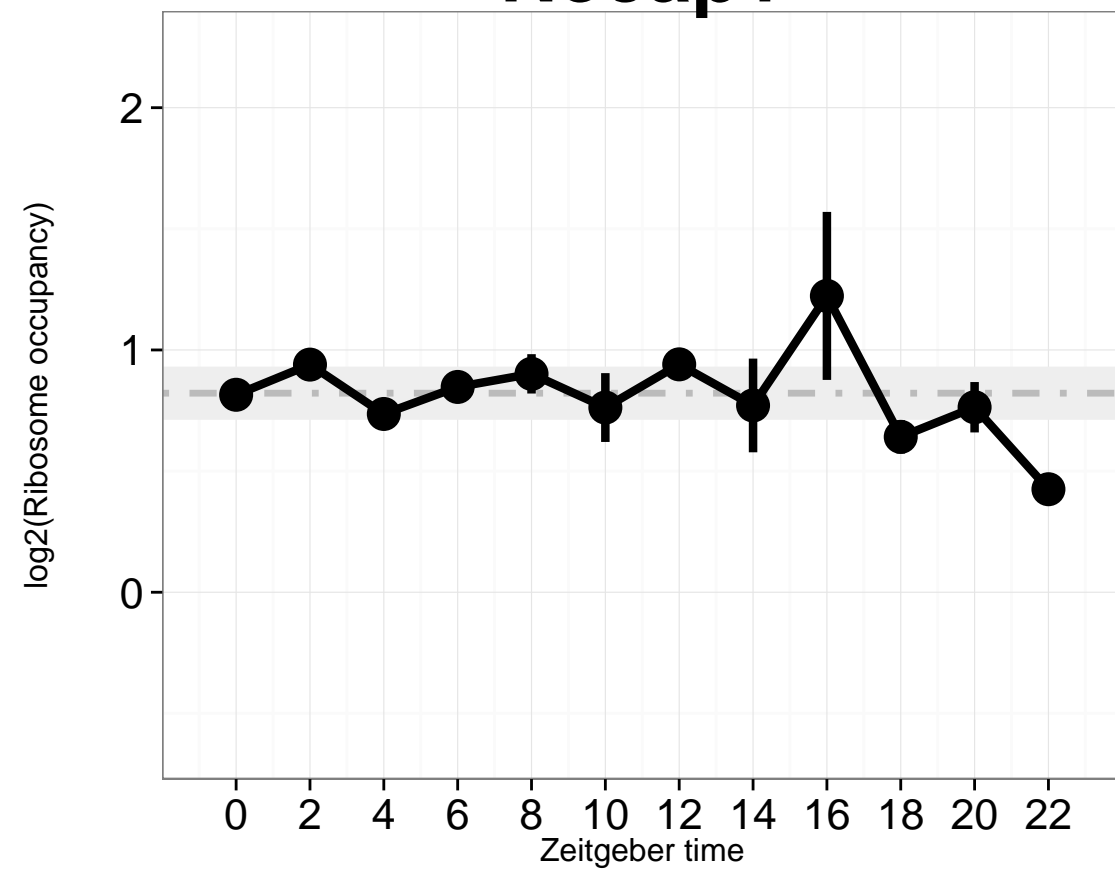

Supplement: Supplementary file 11082 [file 1]

# BC024978

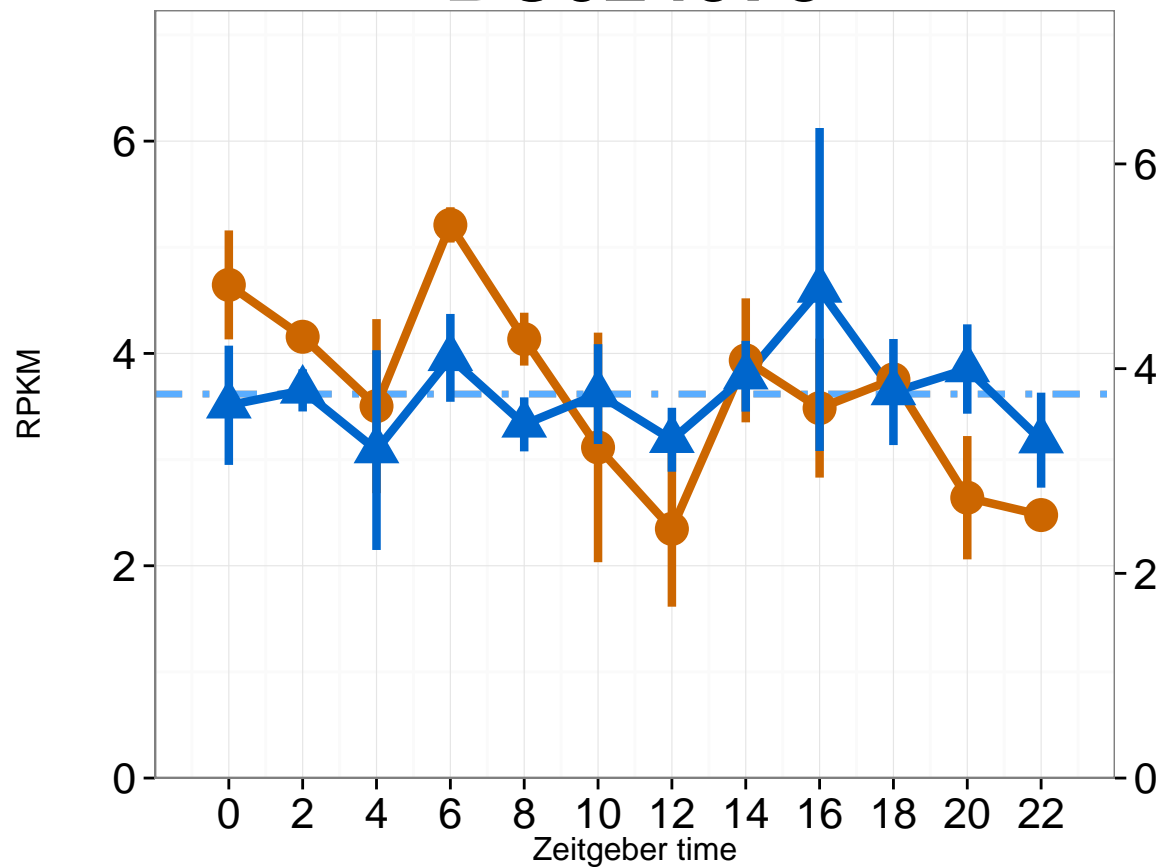

# BC024978

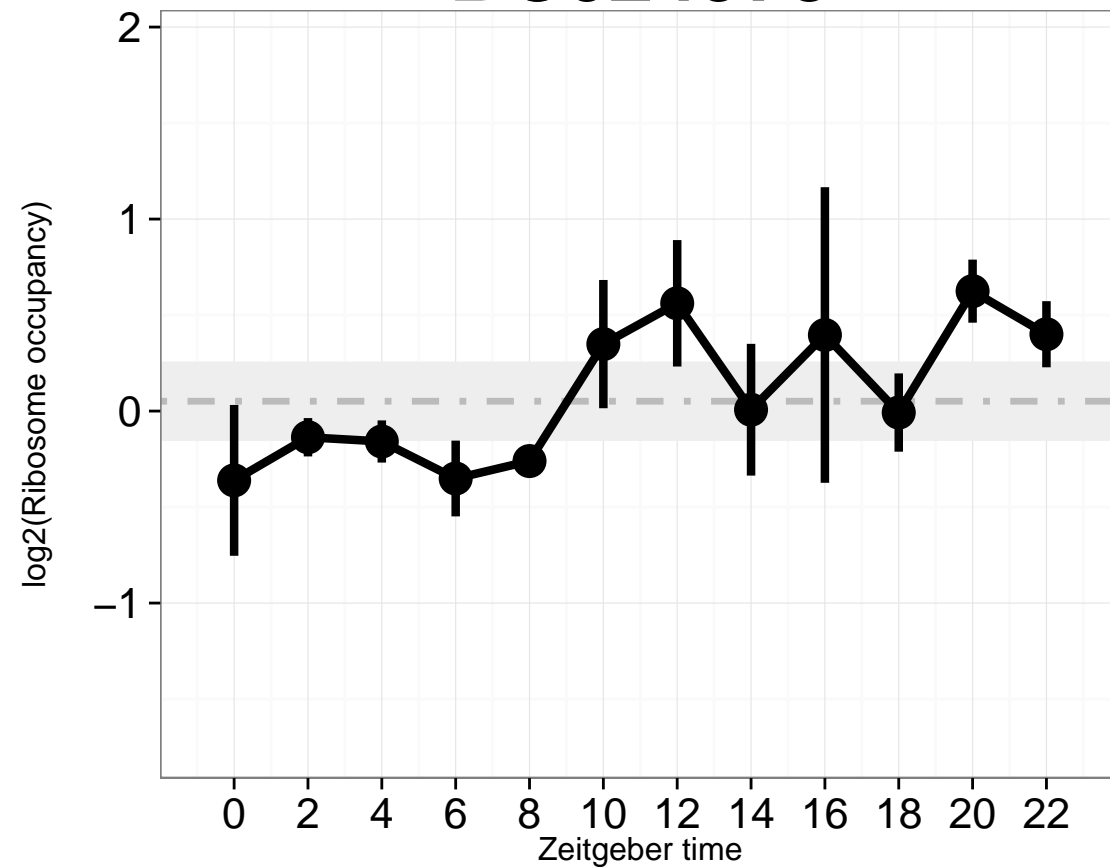

Supplement: Supplementary file 11083 [file 1]

# Nsun4

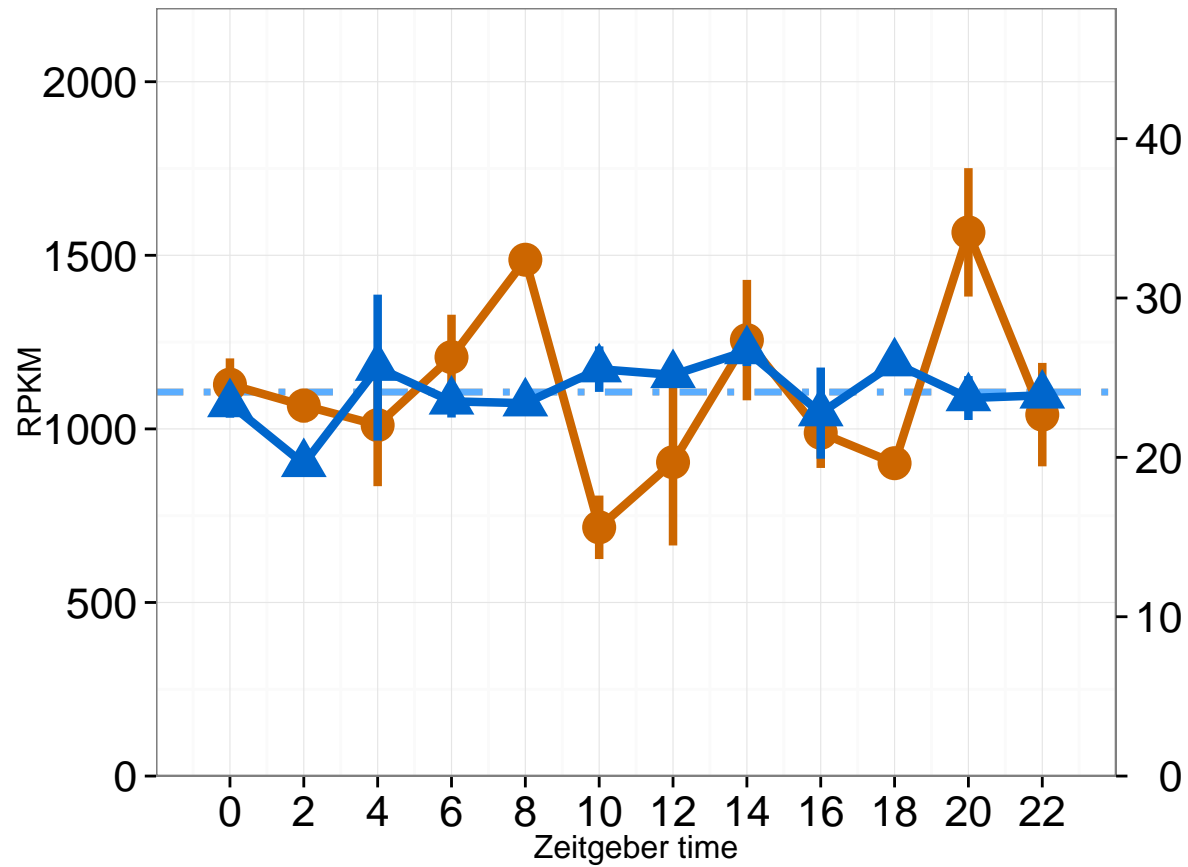

# Nsun4

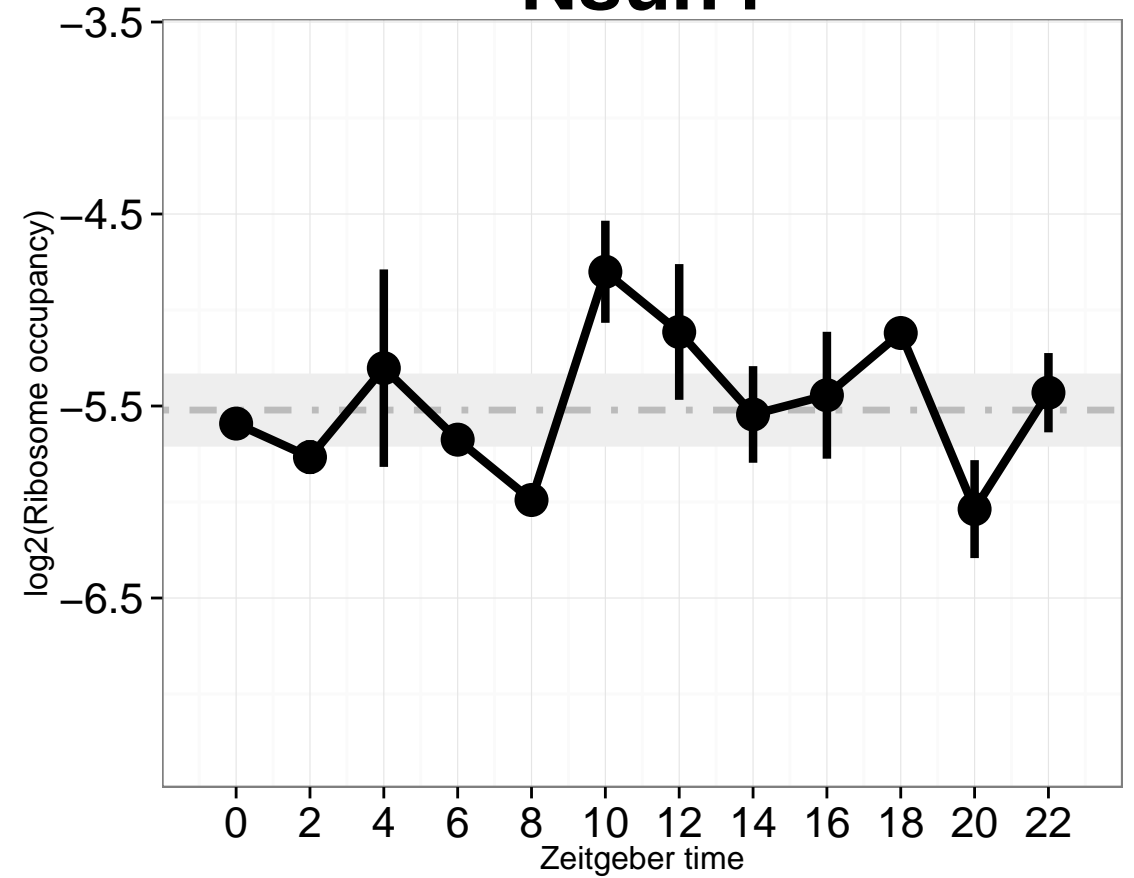

Supplement: Supplementary file 11084 [file 1]

## Tshz3

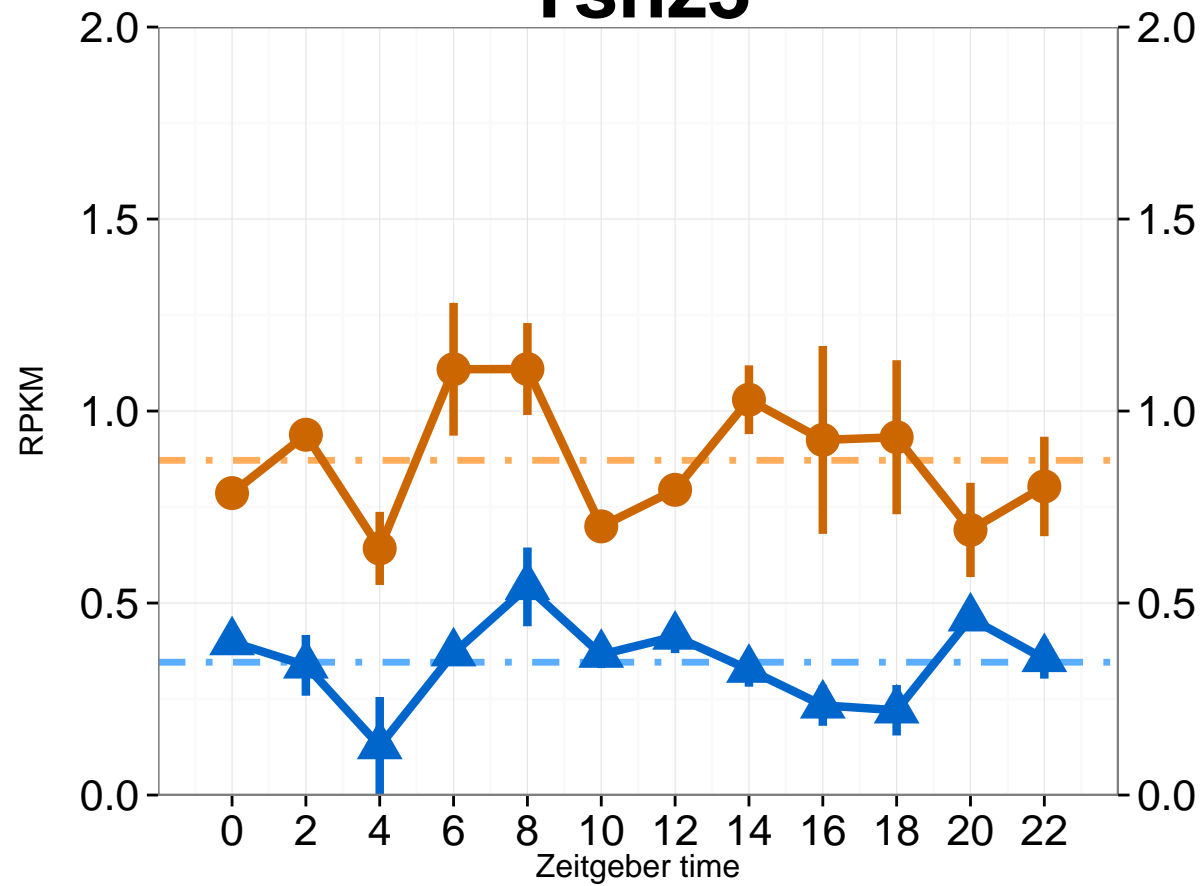

## Tshz3

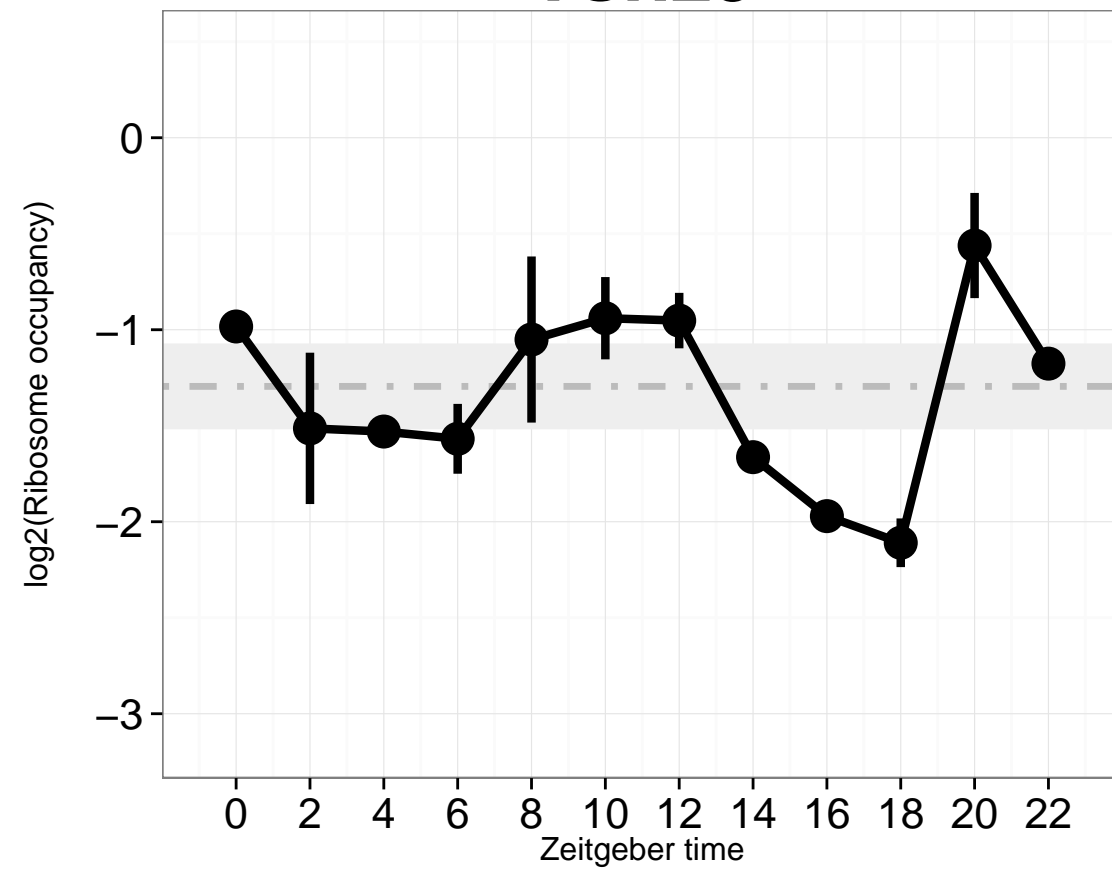

Supplement: Supplementary file 11085 [file 1]

# Rragc

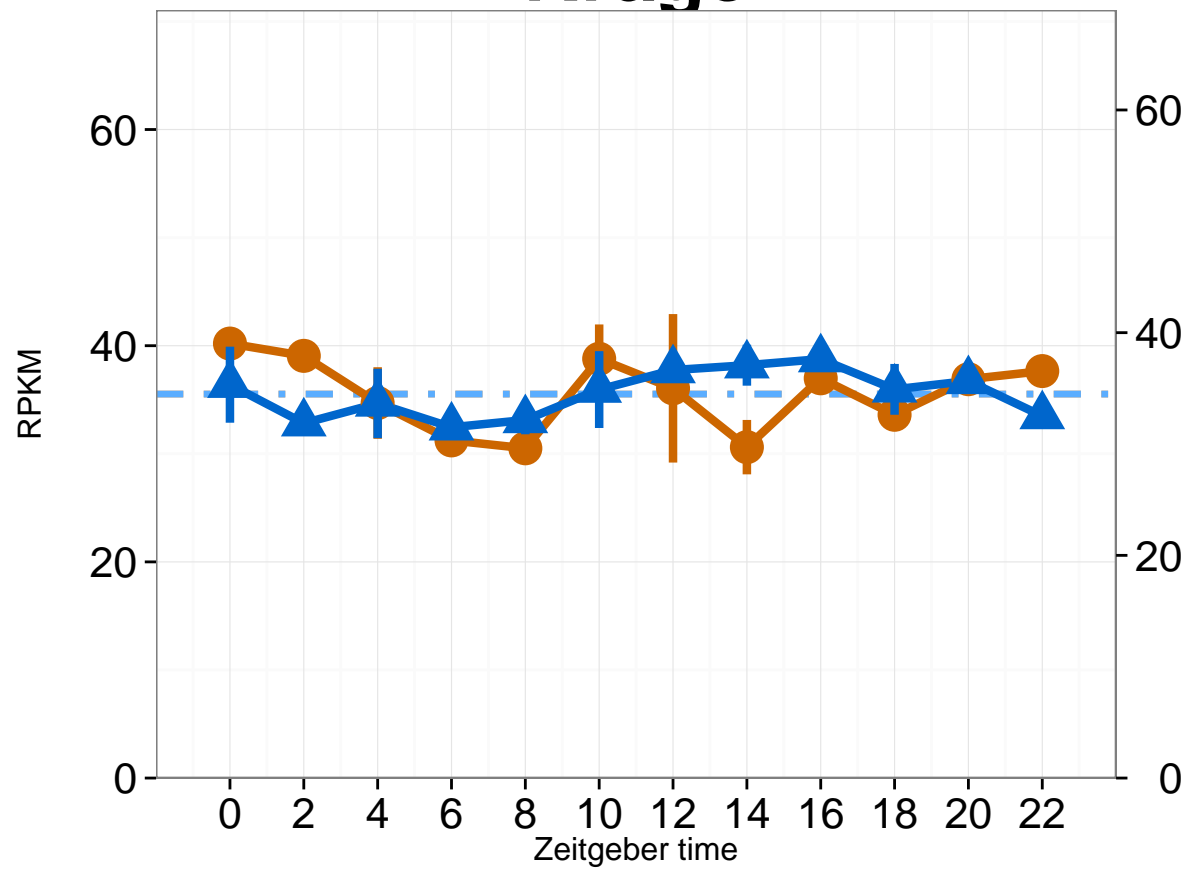

# Rragc

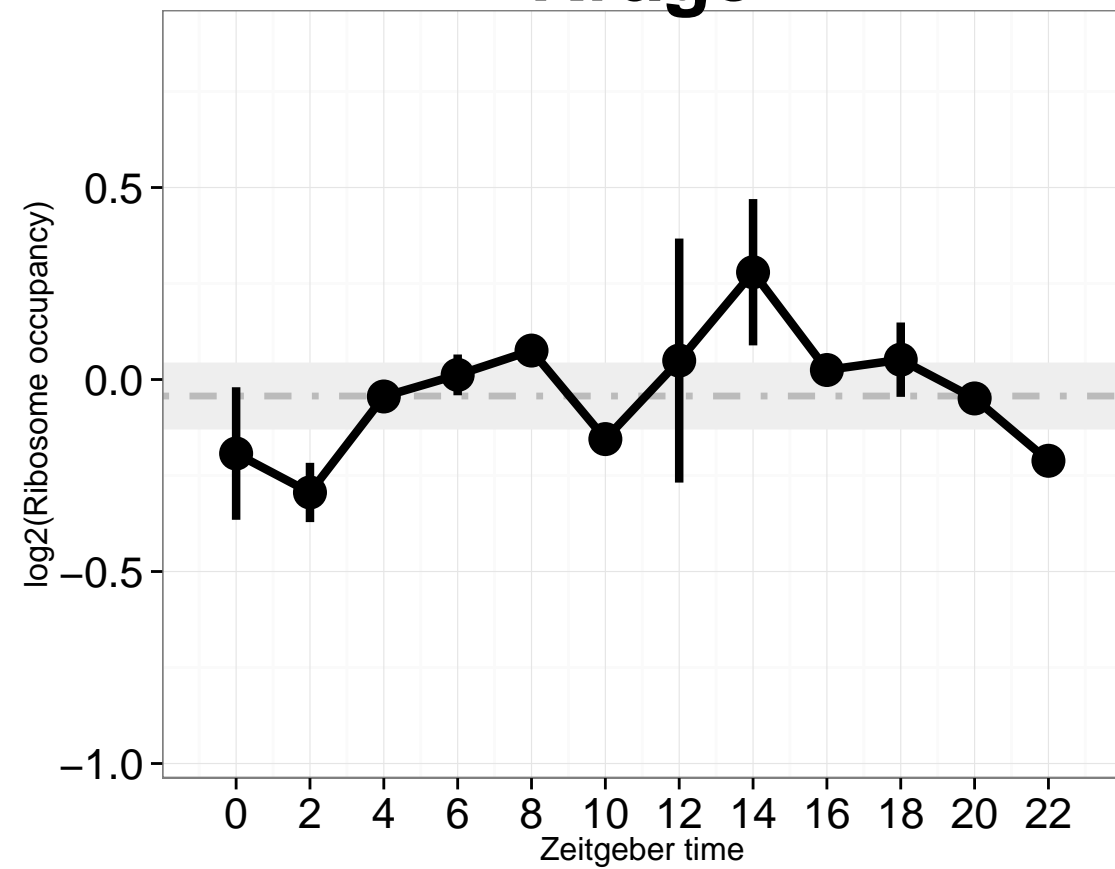

Supplement: Supplementary file 11086 [file 1]

# Enpp5

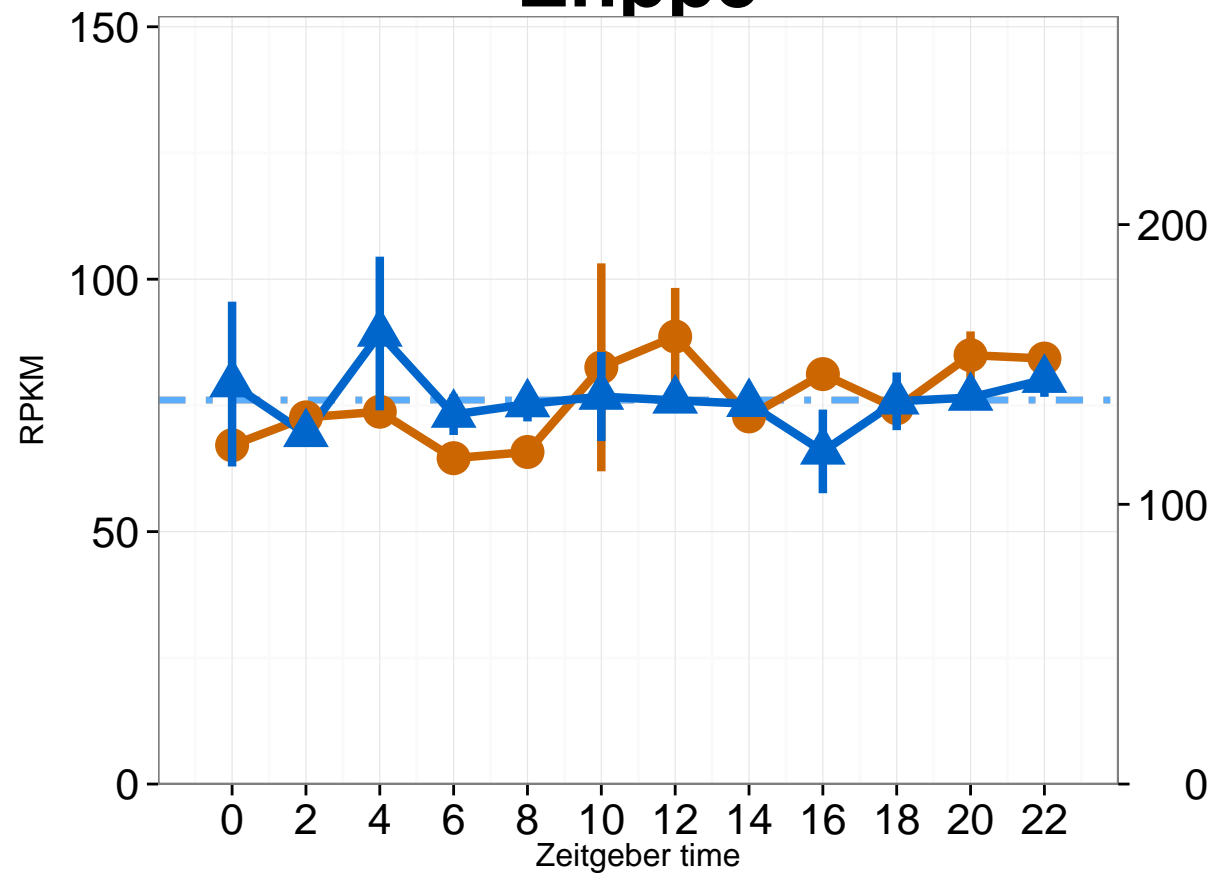

# Enpp5

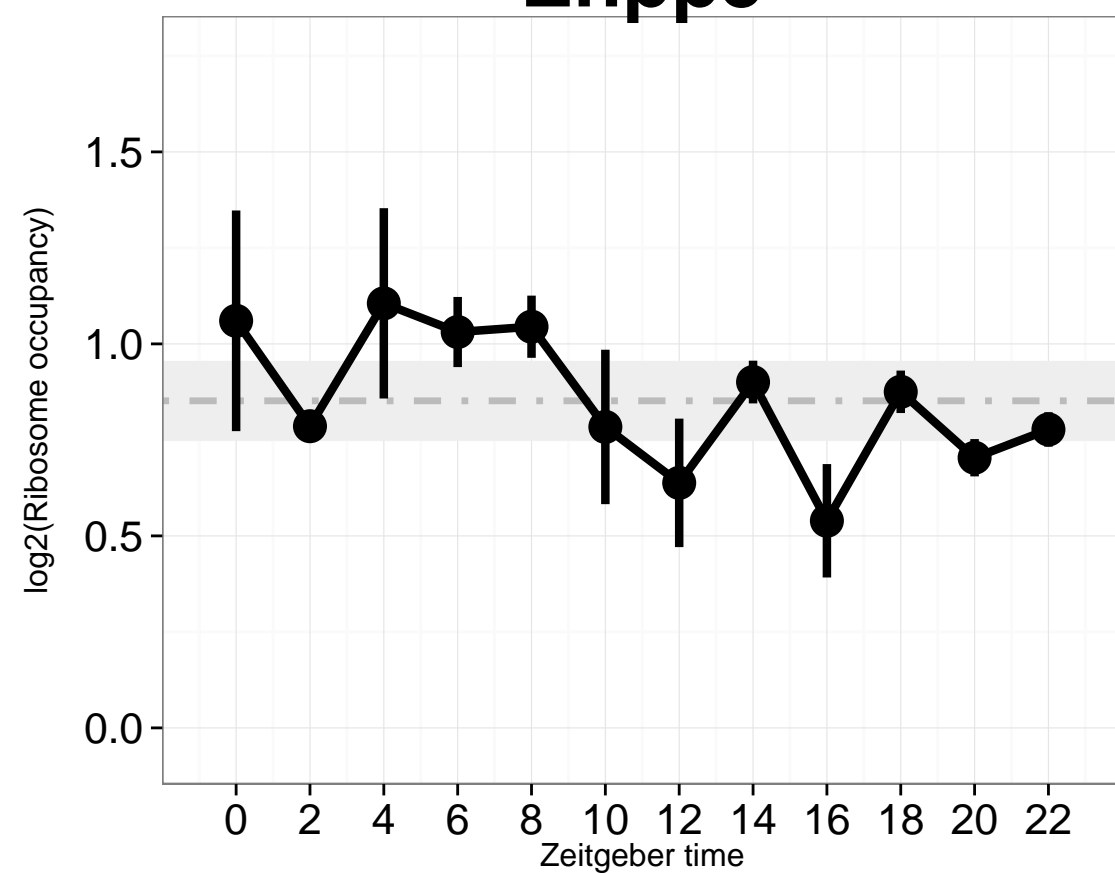

Supplement: Supplementary file 11087 [file 1]

## Fkbp4

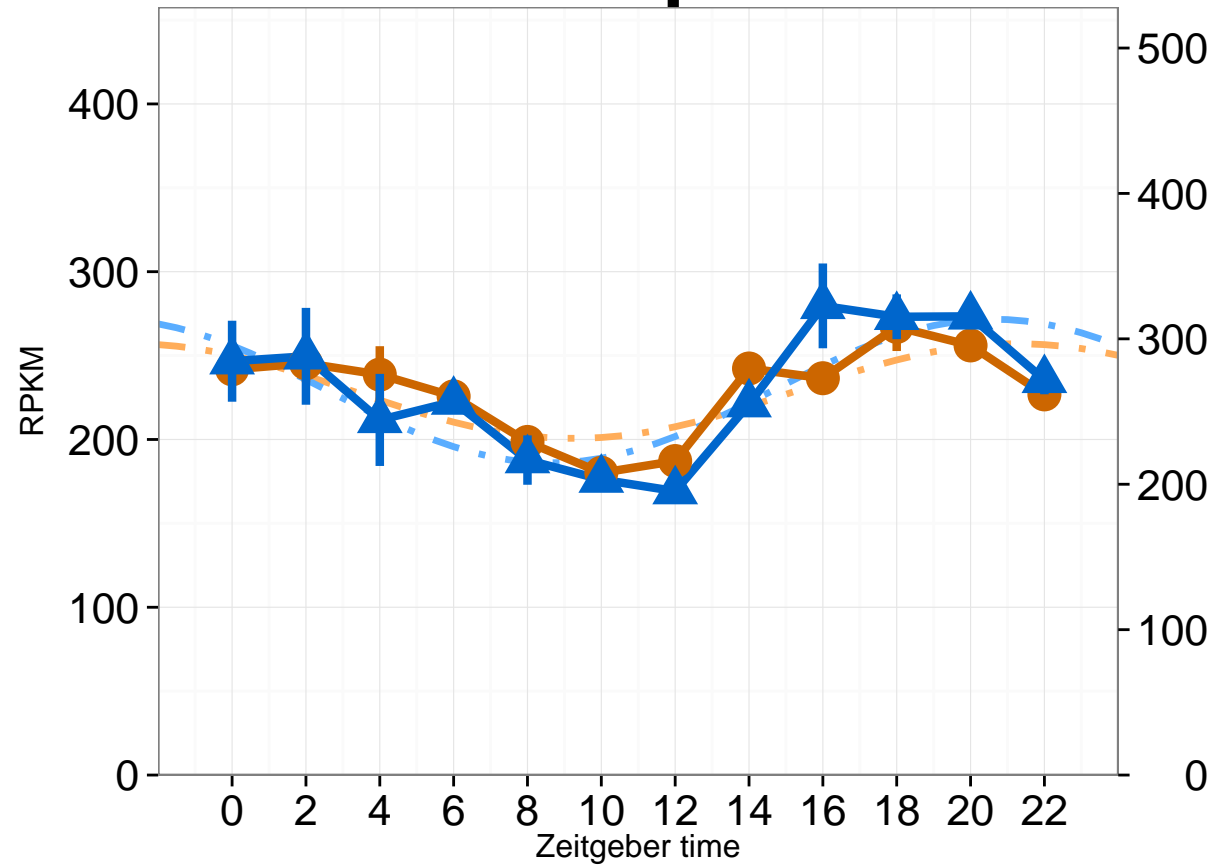

## Fkbp4

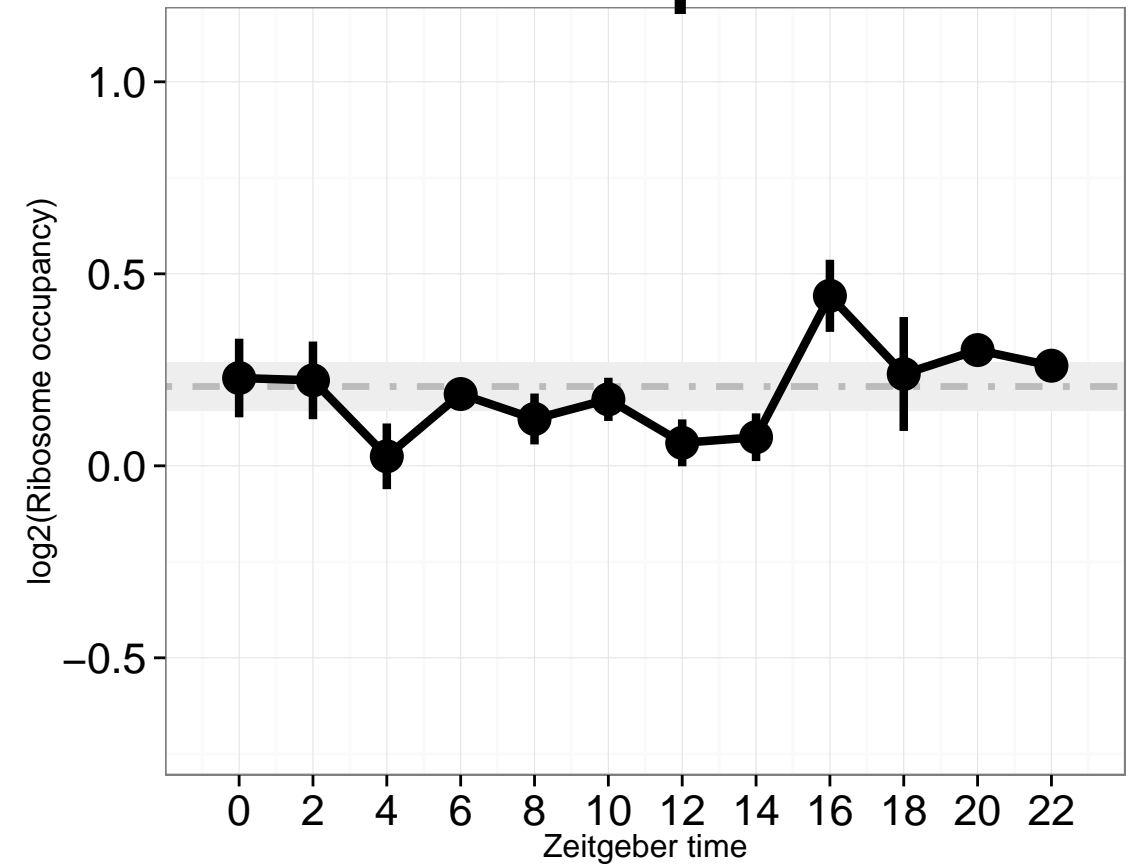

Supplement: Supplementary file 11088 [file 1]

# Fastkd5

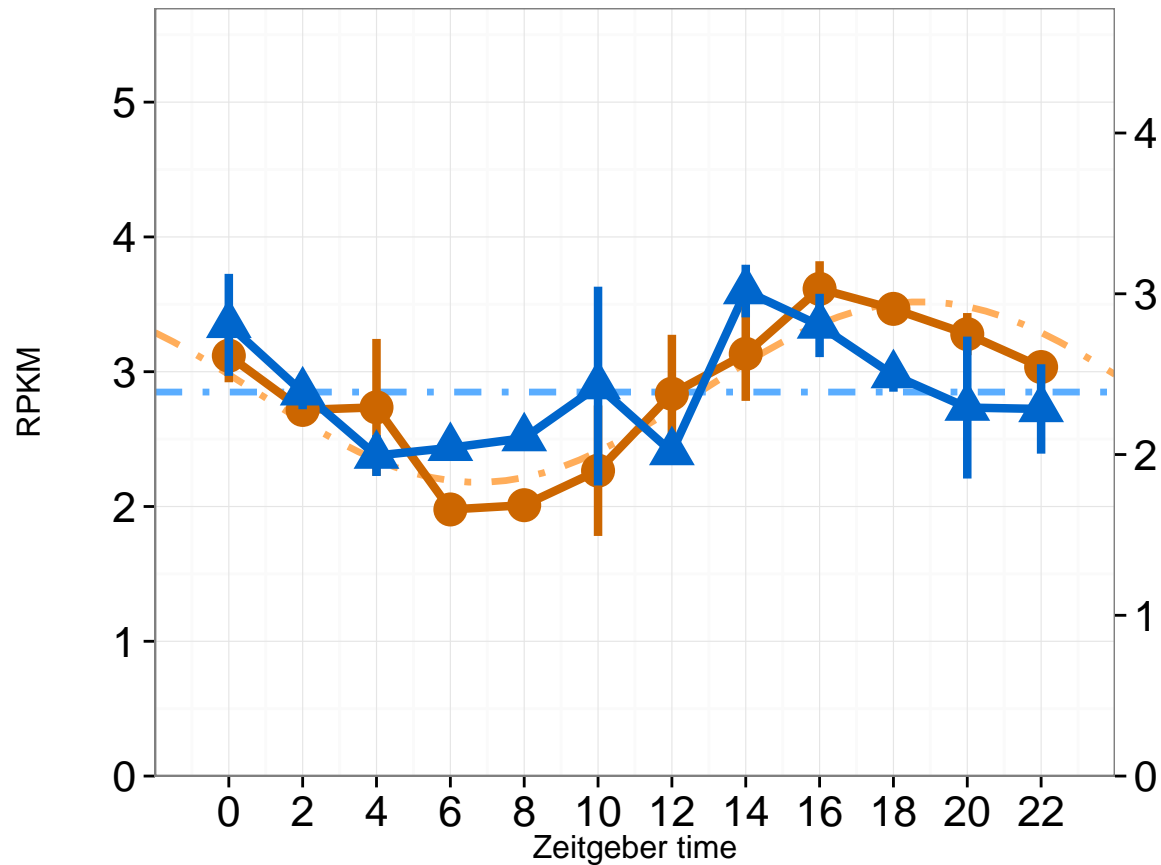

# Fastkd5

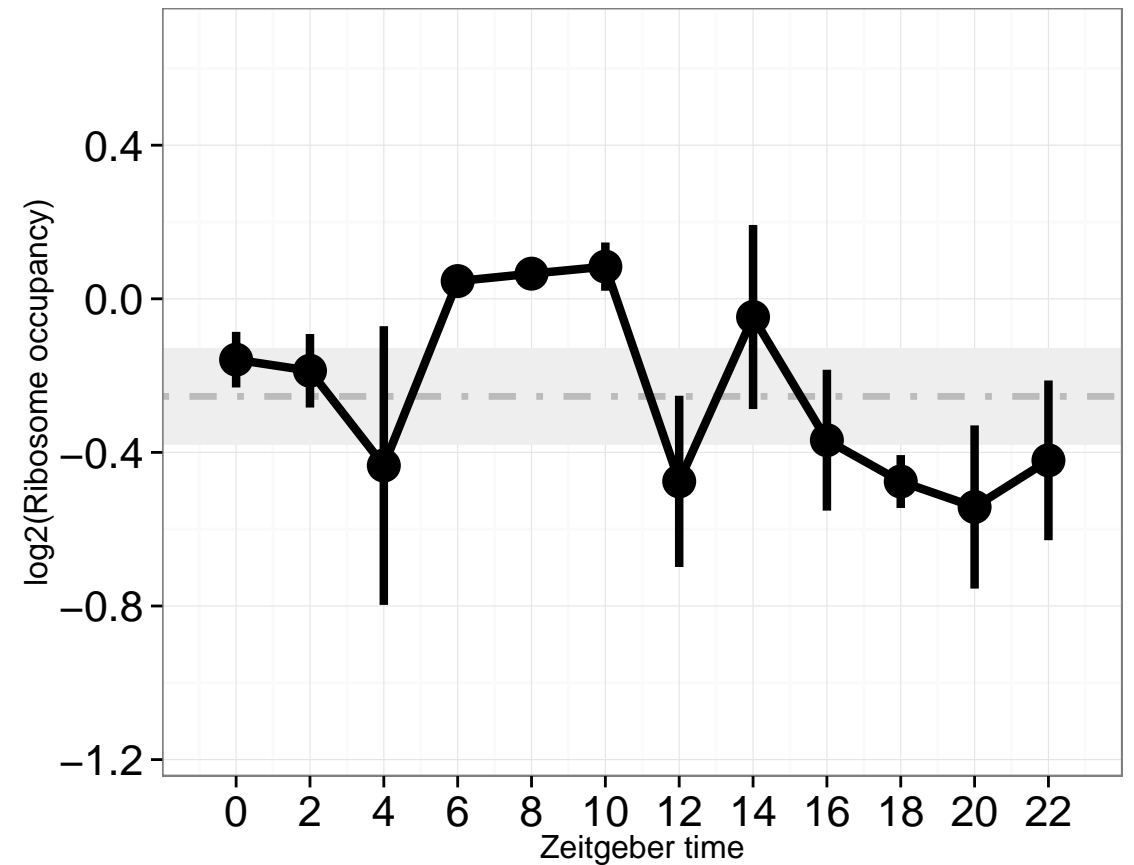

Supplement: Supplementary file 11089 [file 1]

# Rps6kb1

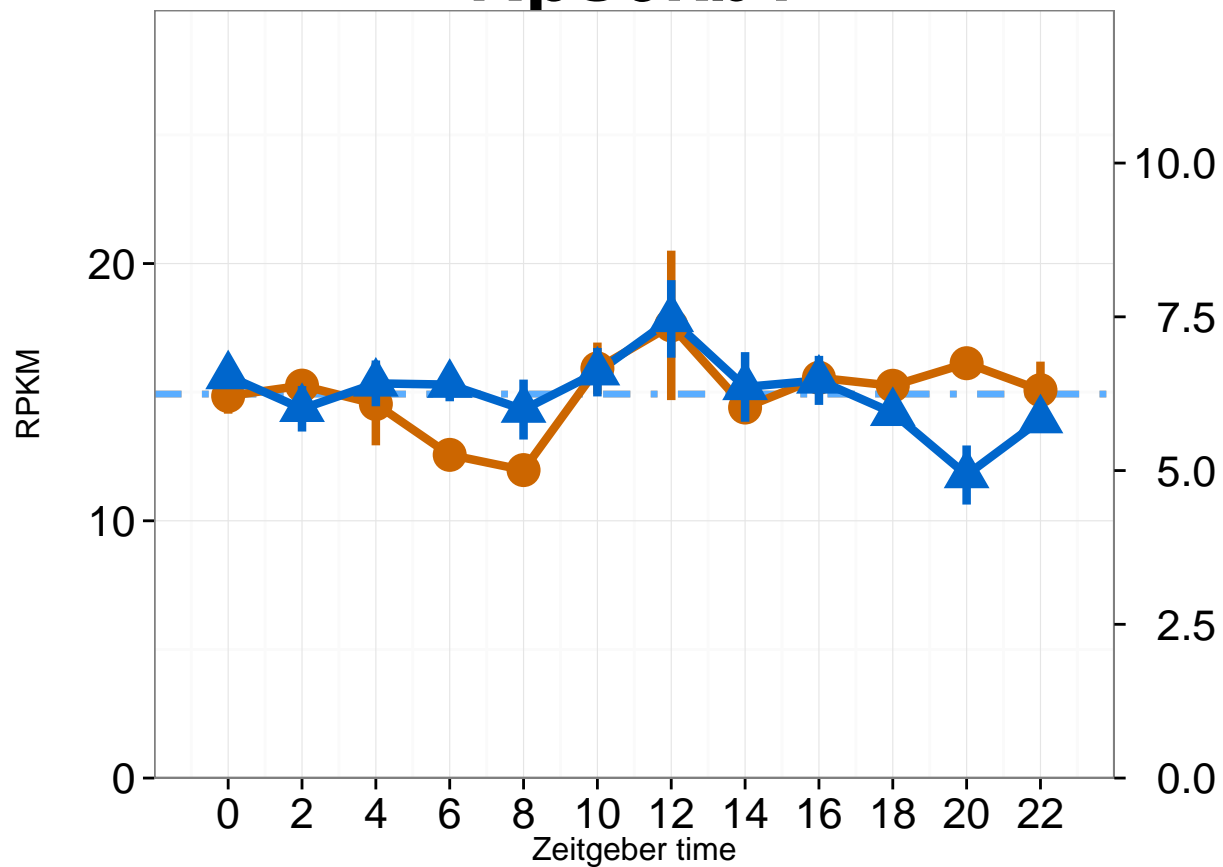

# Rps6kb1

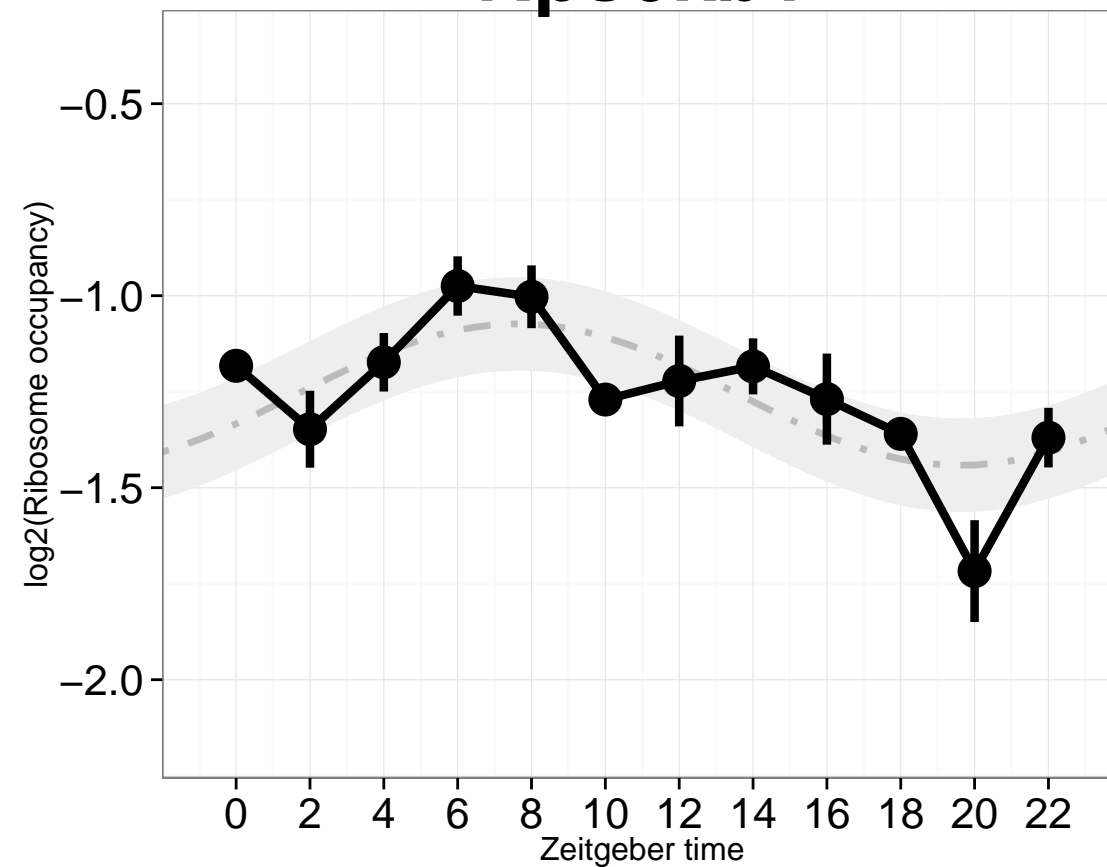

Supplement: Supplementary file 11090 [file 1]

# Mrpl51

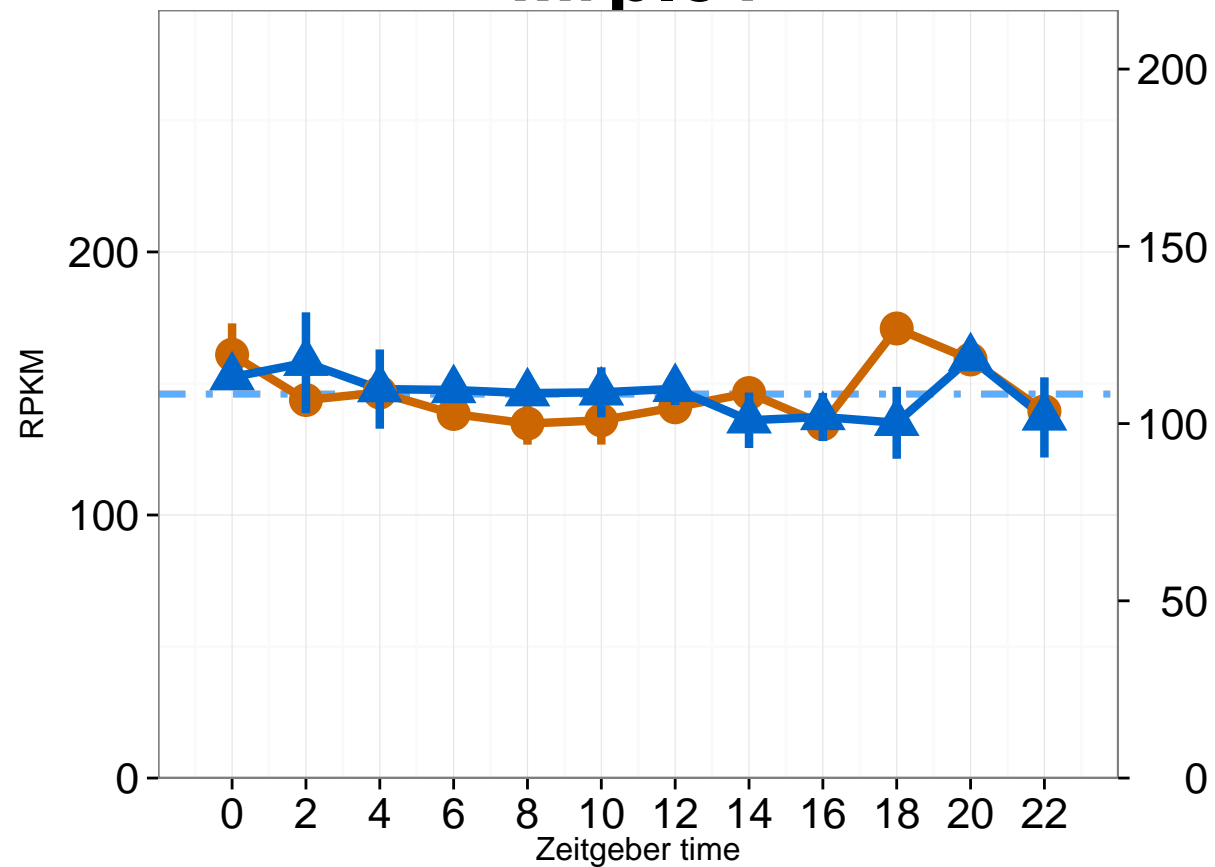

# Mrpl51

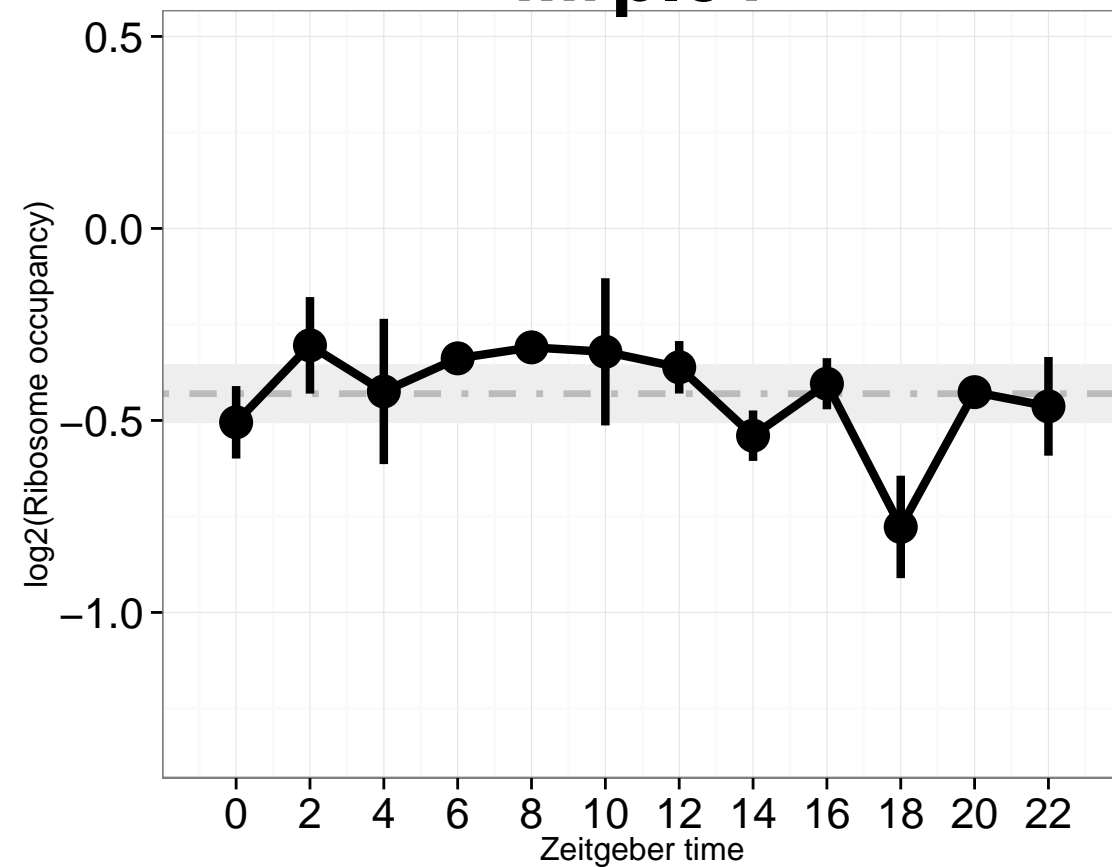

Supplement: Supplementary file 11091 [file 1]

## Iffo2

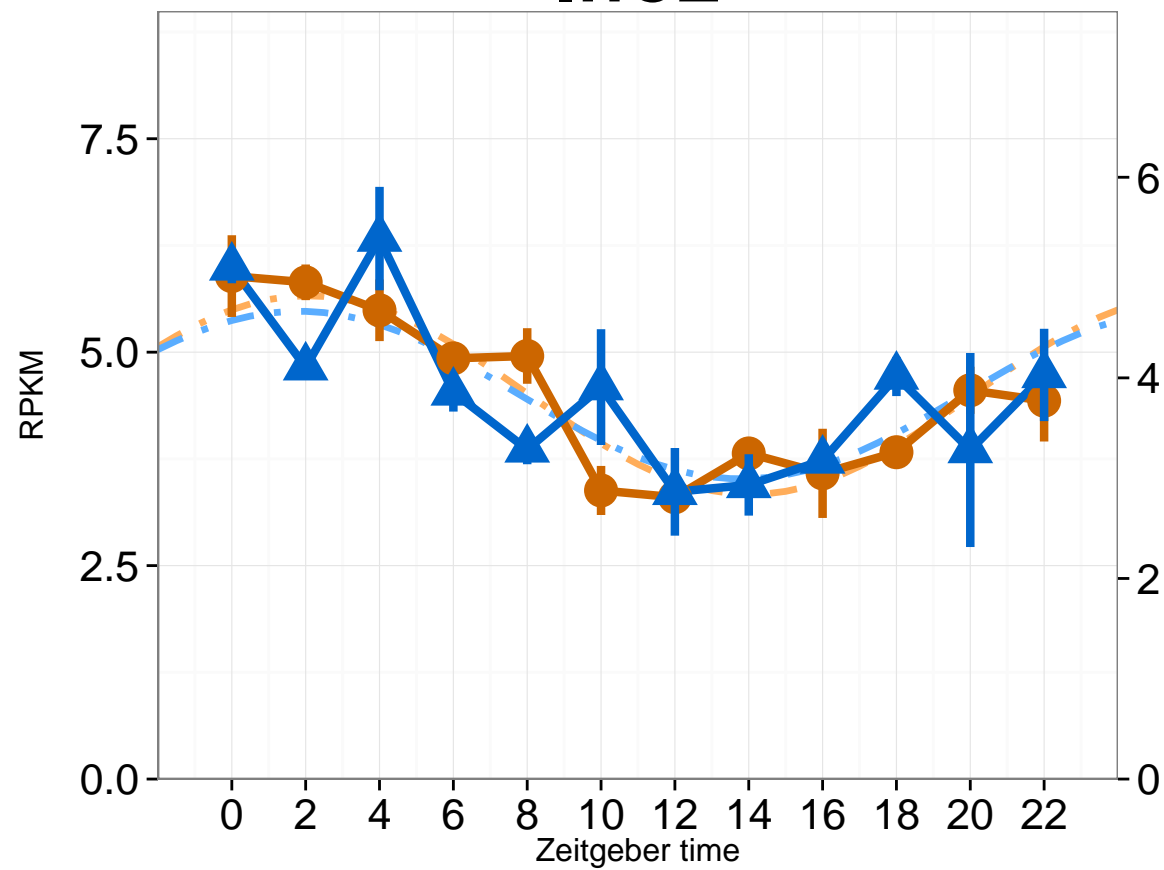

## Iffo2

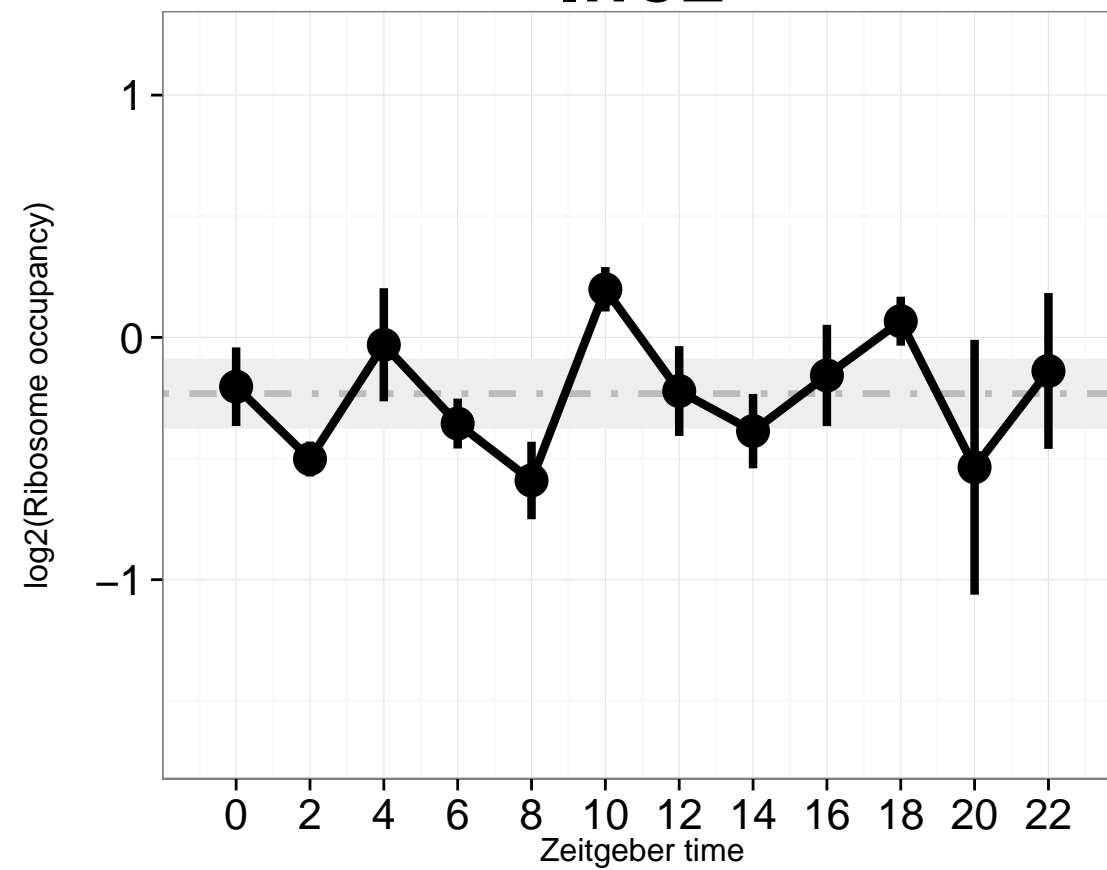

Supplement: Supplementary file 11092 [file 1]

## Mgmt

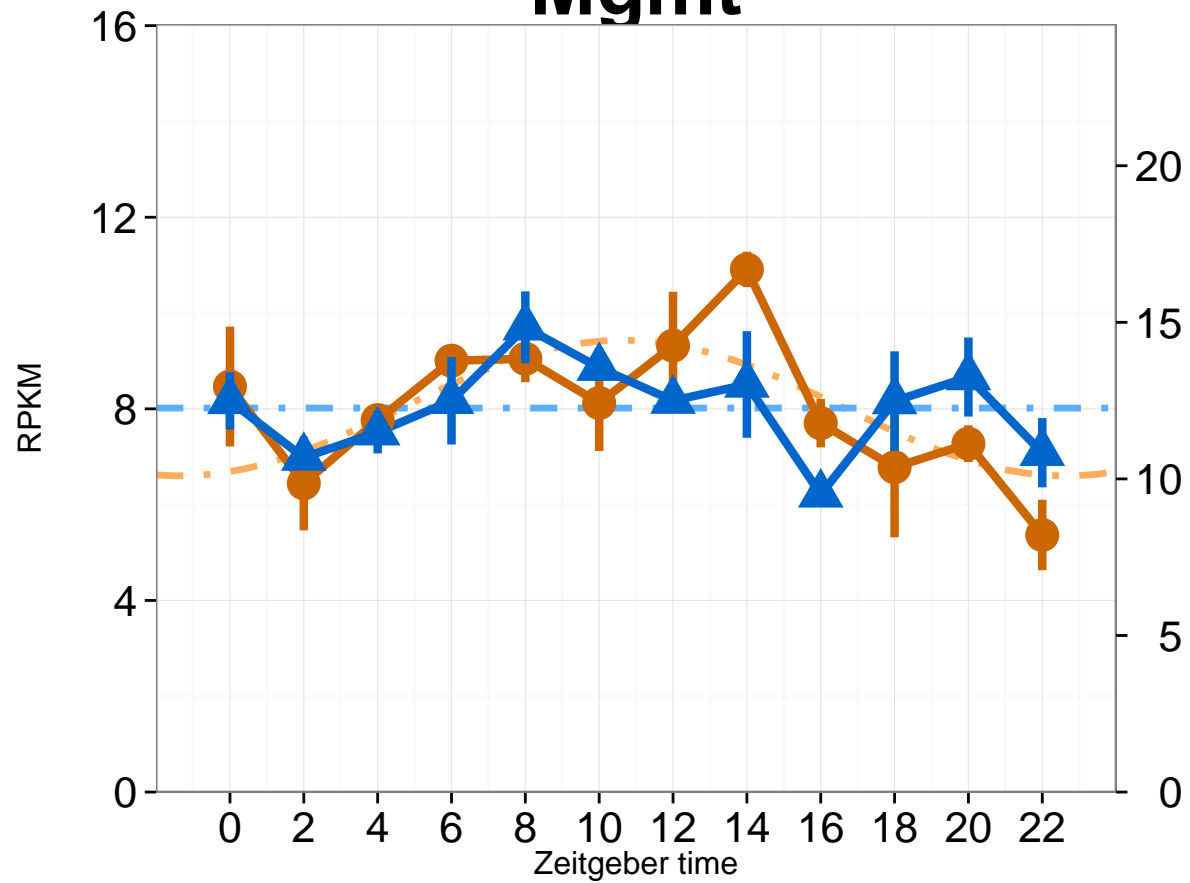

## Mgmt

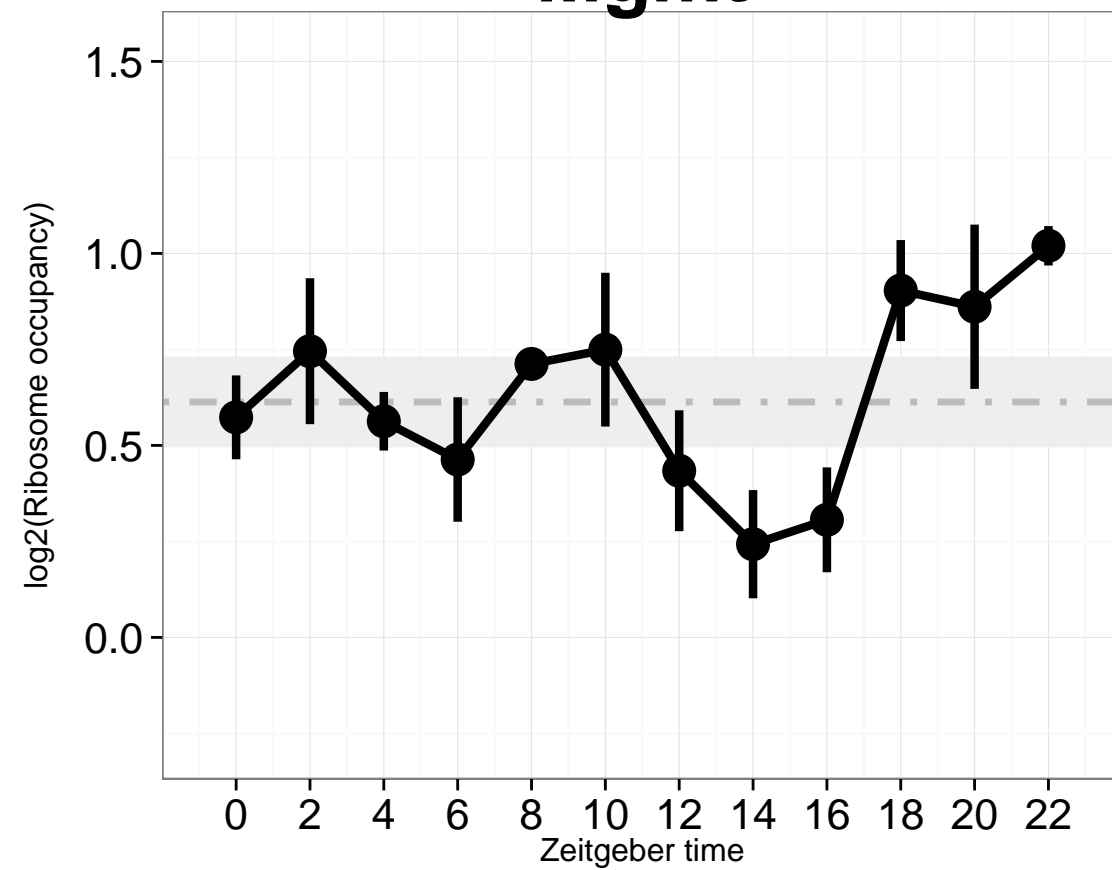

Supplement: Supplementary file 11093 [file 1]

# Tmem101

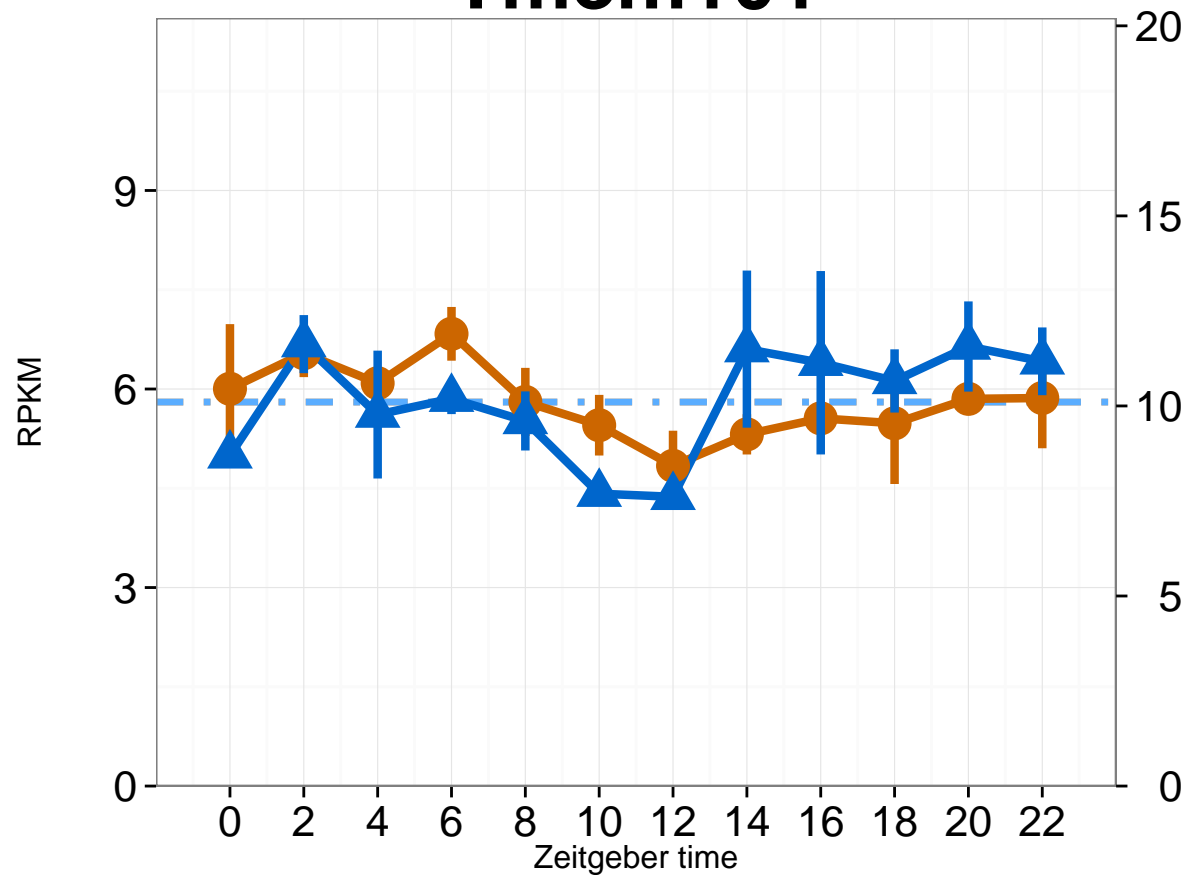

# Tmem101

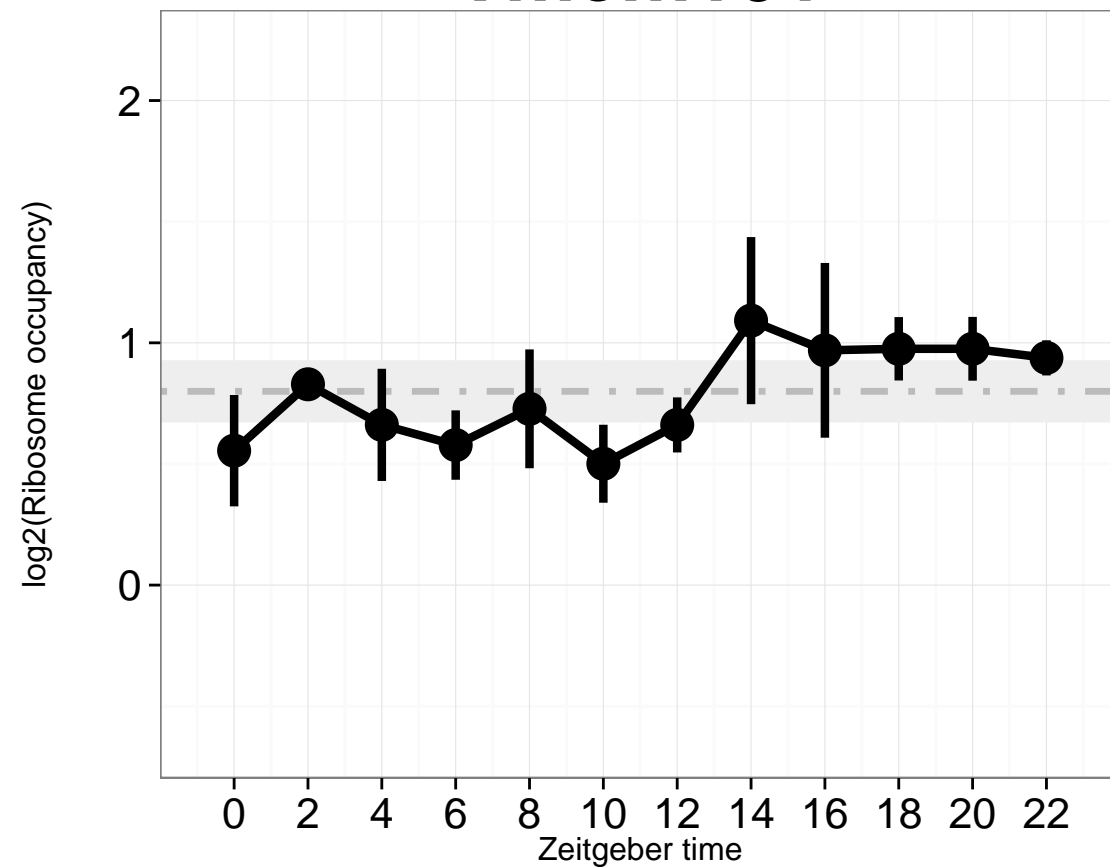

Supplement: Supplementary file 11094 [file 1]

## Dand5

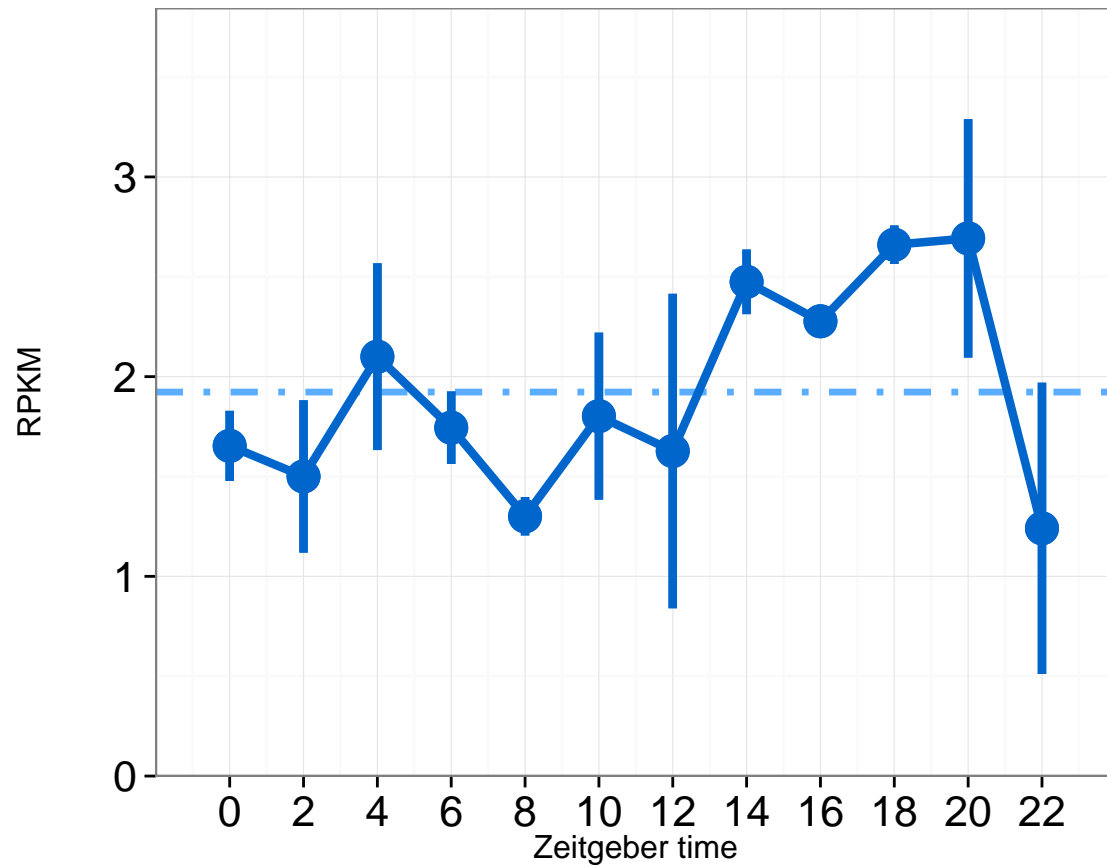

## Dand5 log2(Ribosome occupancy

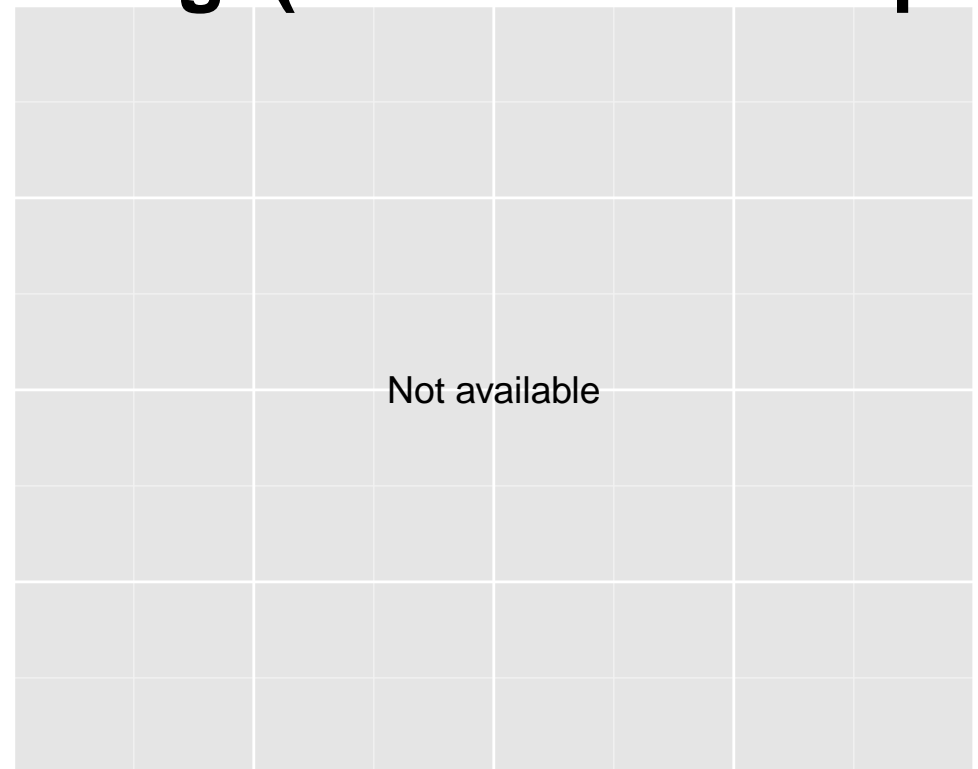

Supplement: Supplementary file 11095 [file 1]

# Ms4a6c

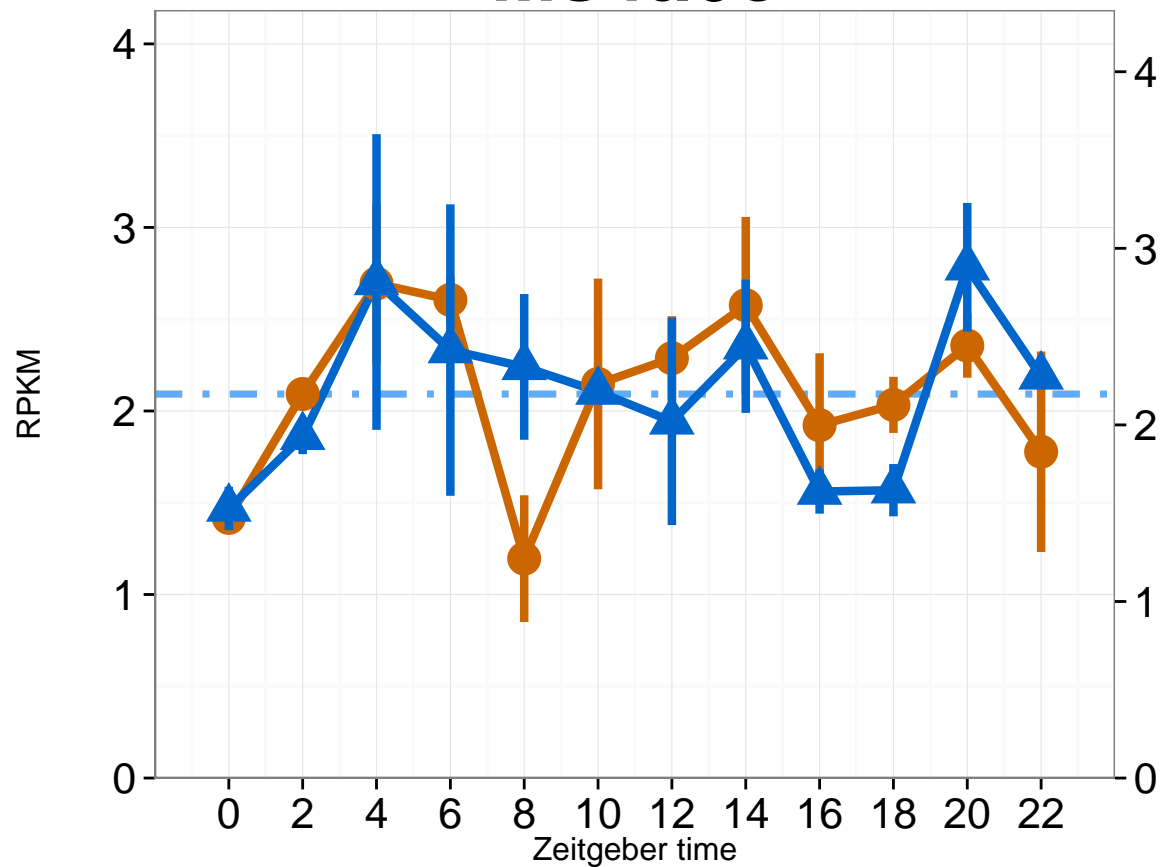

# Ms4a6c

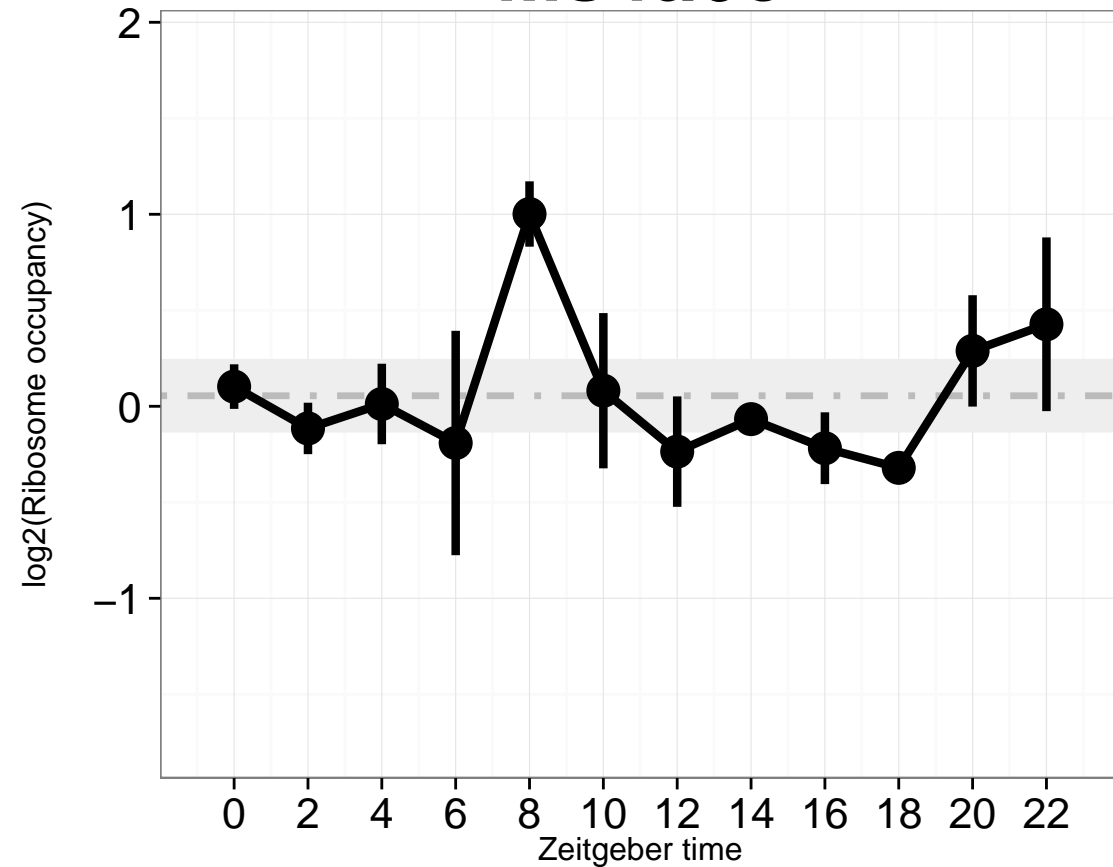

Supplement: Supplementary file 11096 [file 1]

# Cd2ap

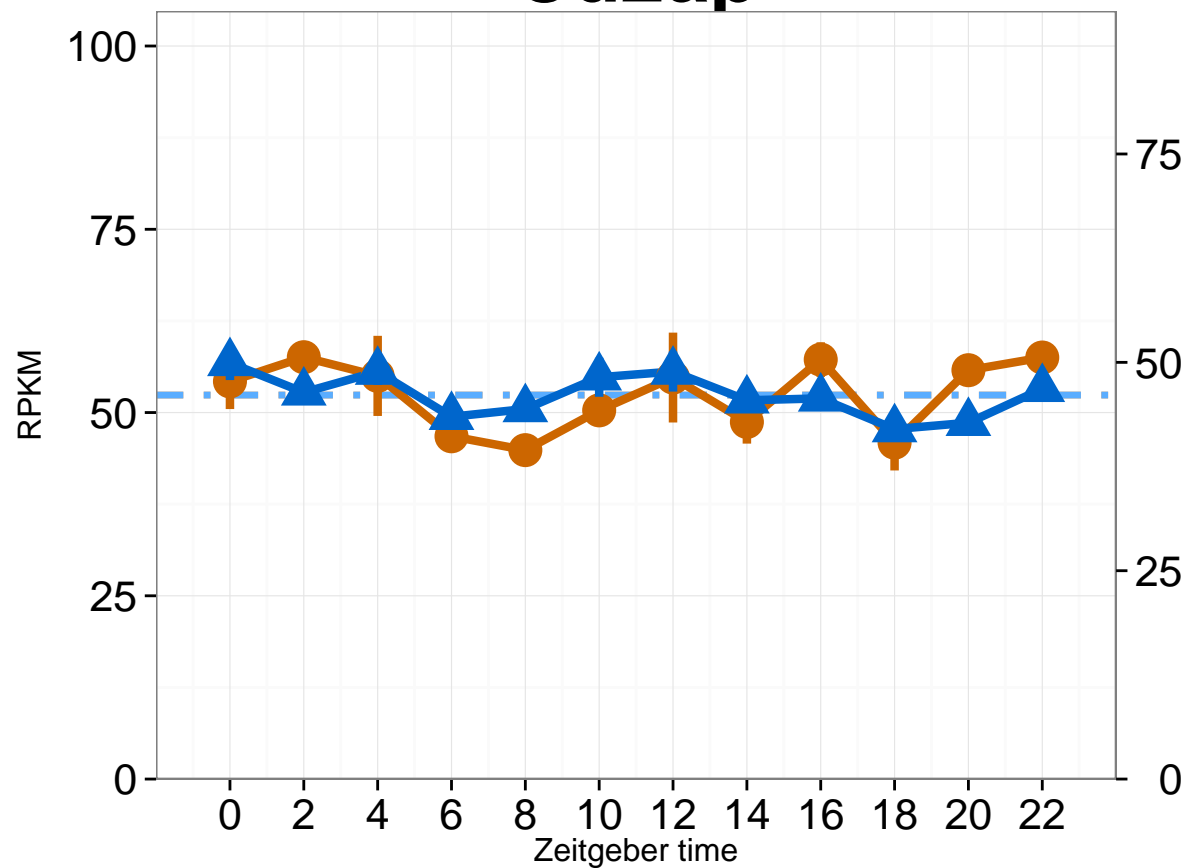

# Cd2ap

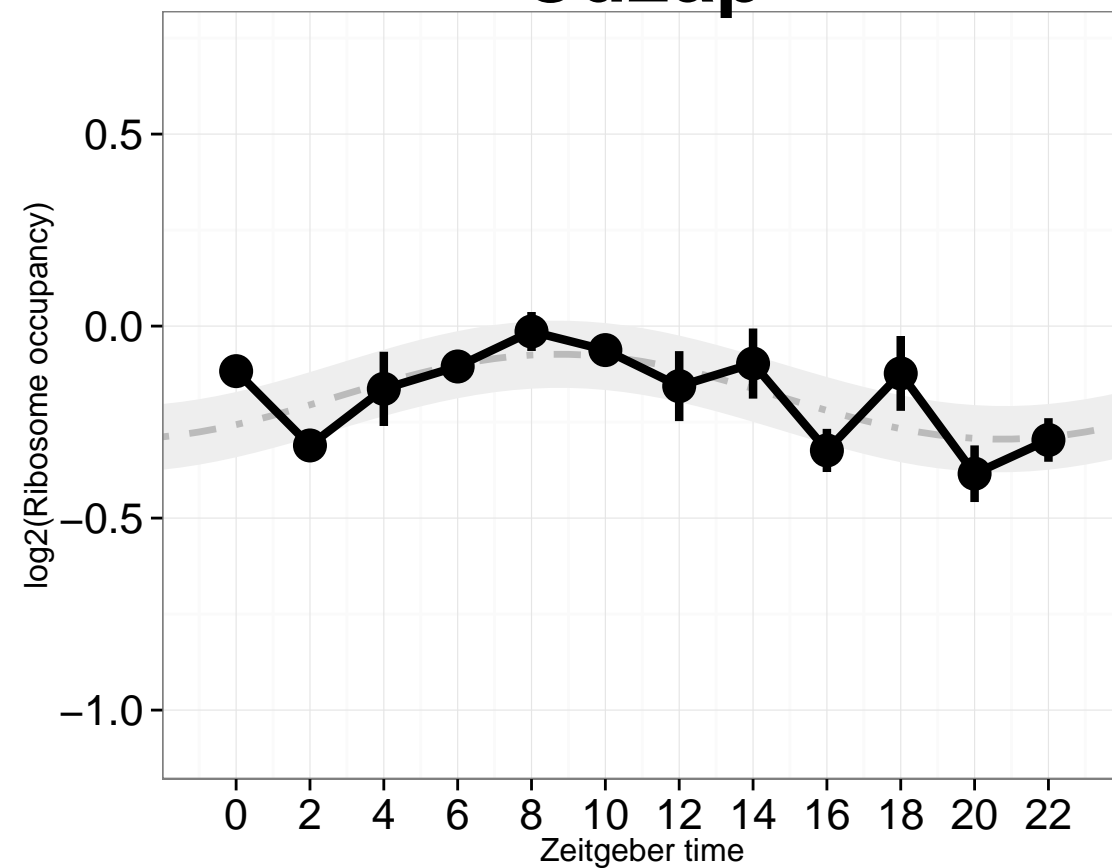

Supplement: Supplementary file 11097 [file 1]

## Sc4mol

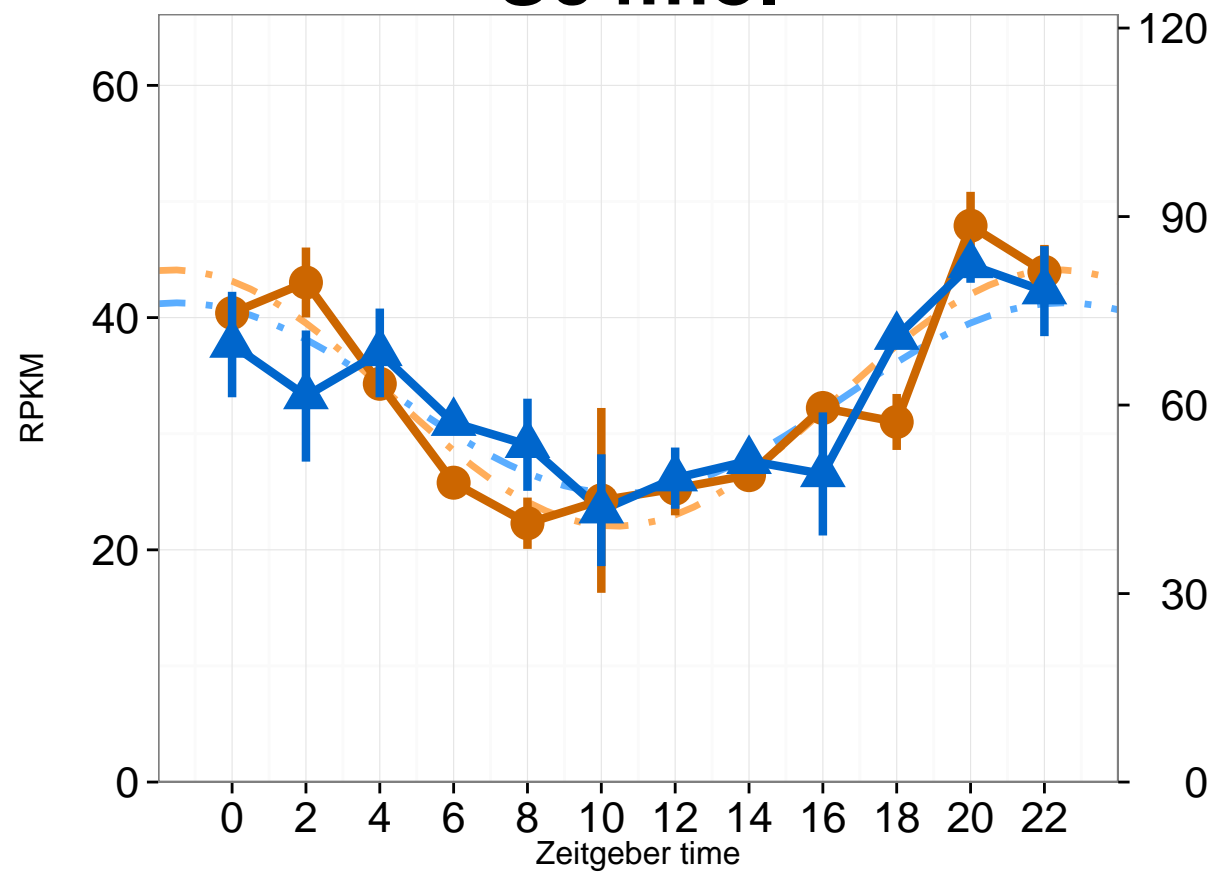

## Sc4mol

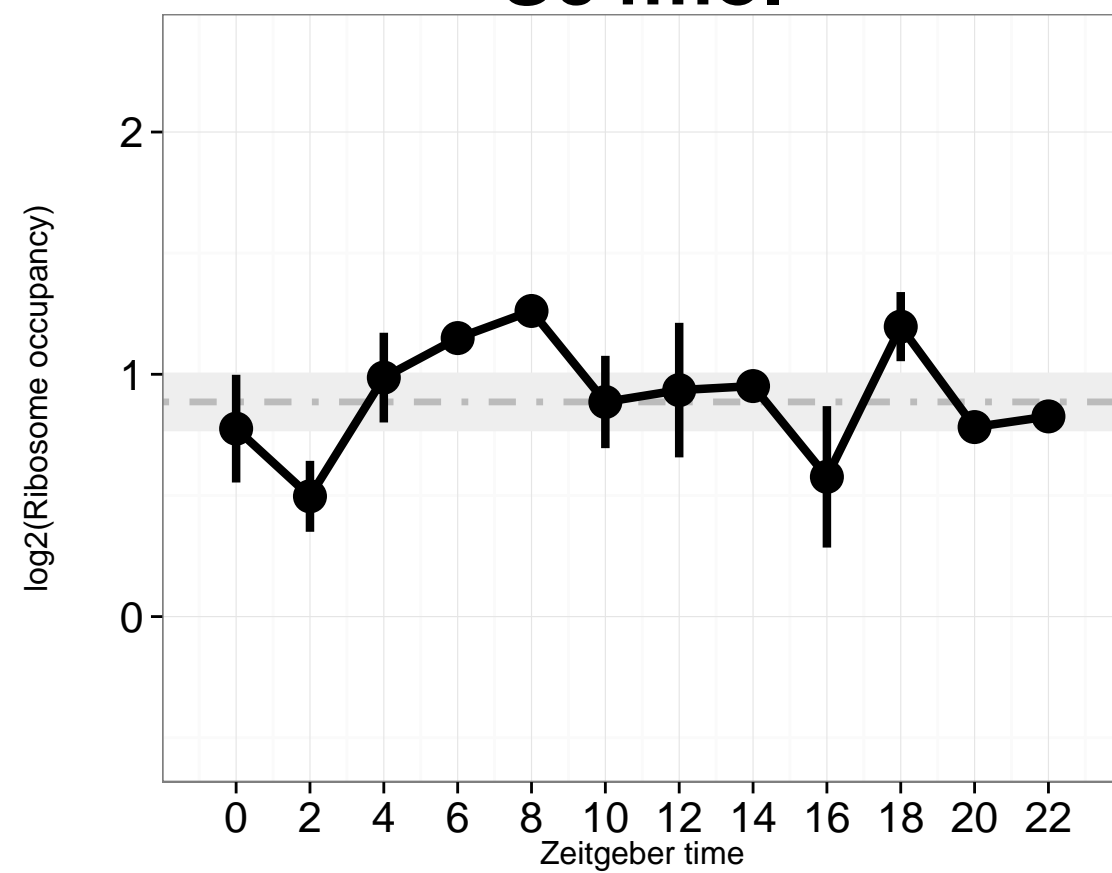

Supplement: Supplementary file 11098 [file 1]

# Tbc1d22b

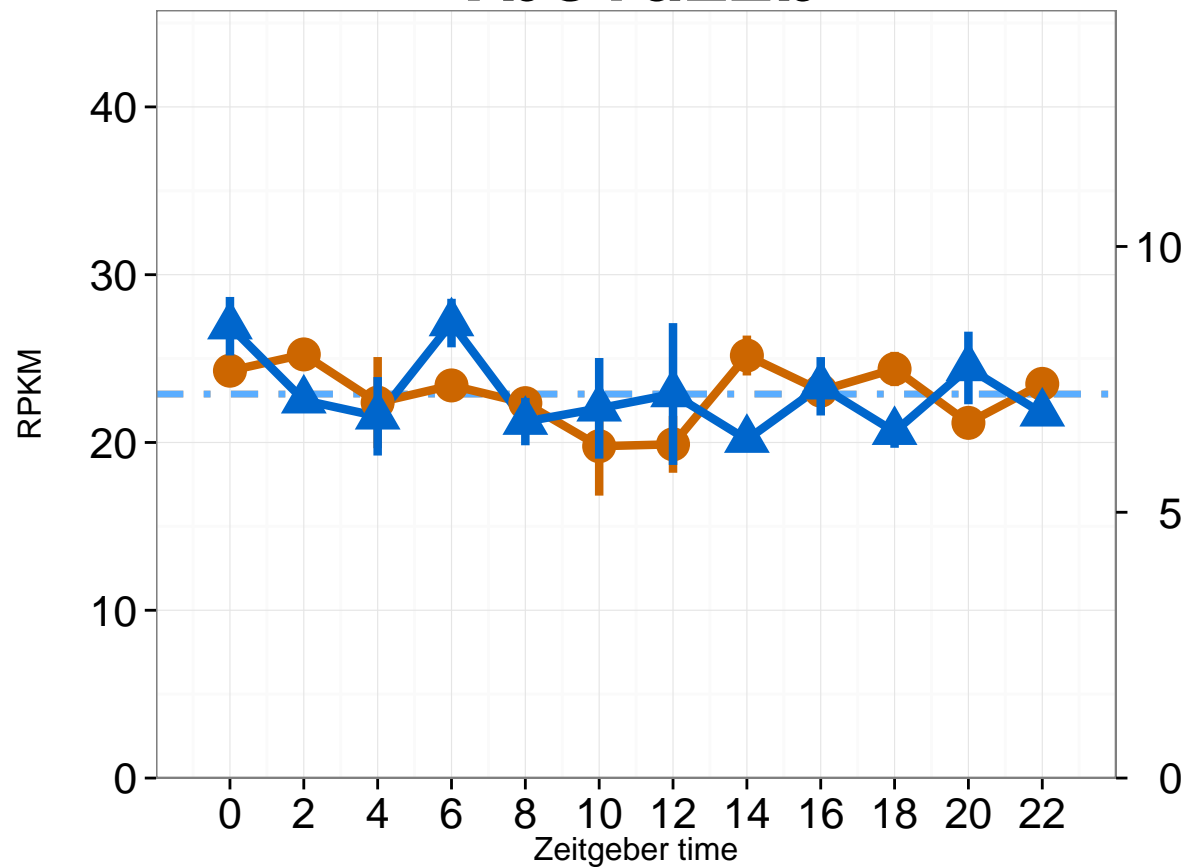

# Tbc1d22b

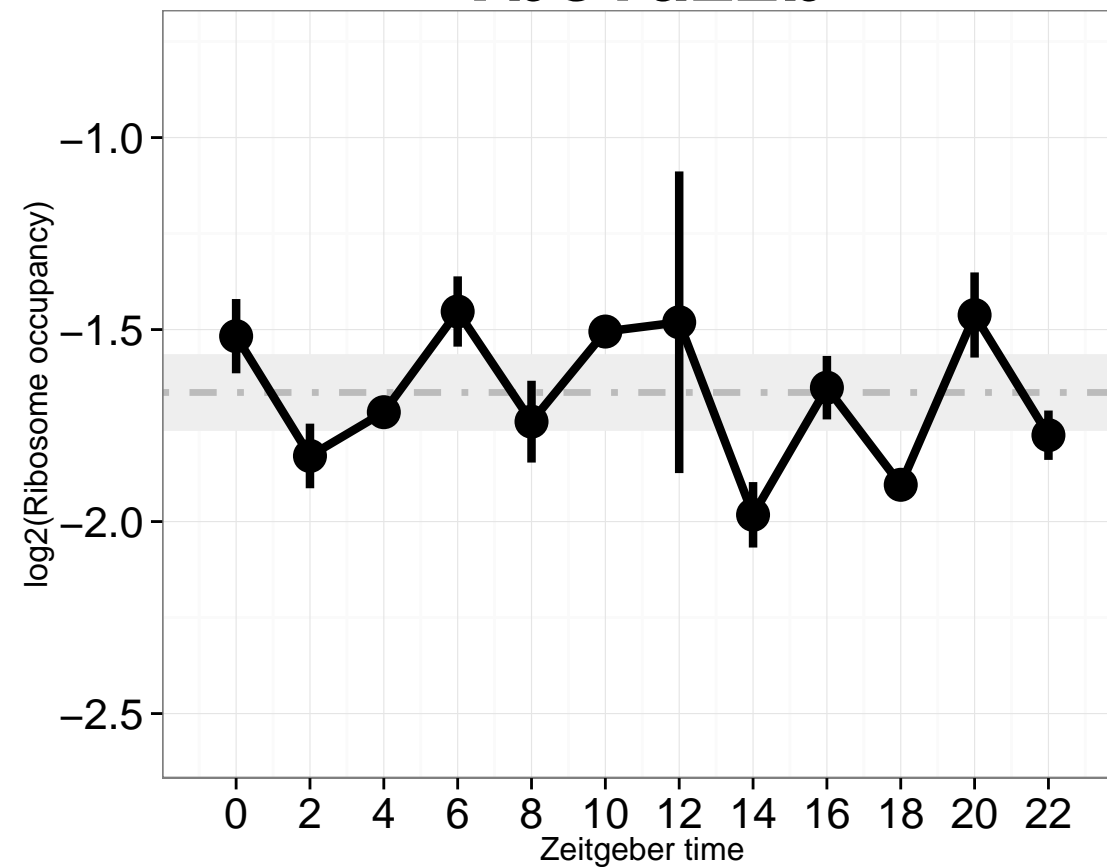

Supplement: Supplementary file 11099 [file 1]

# BC052040

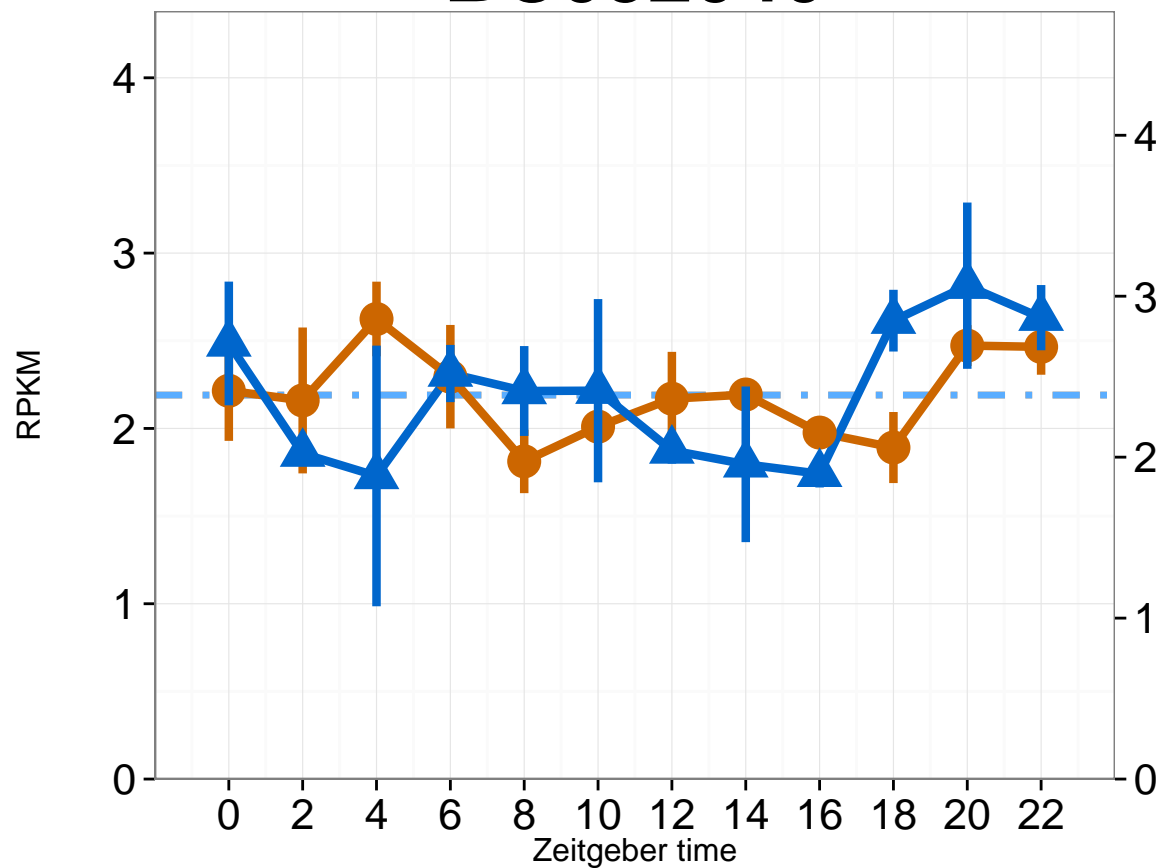

# BC052040

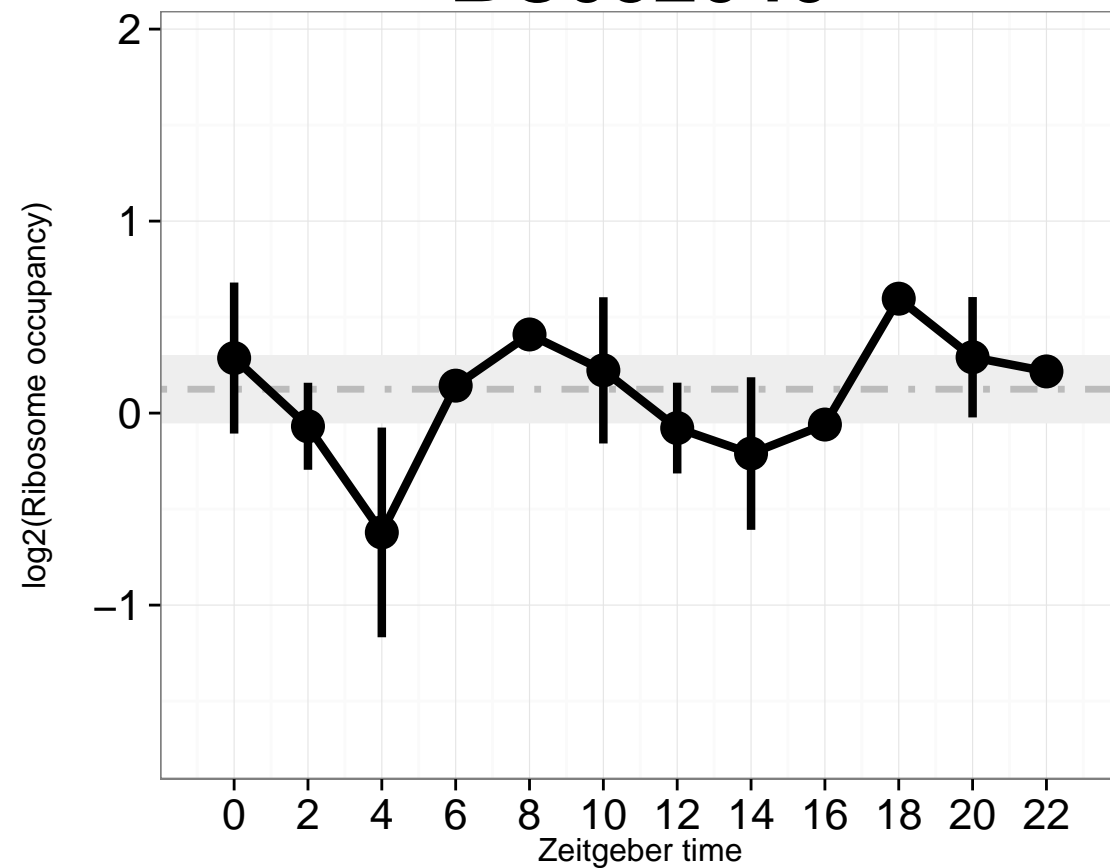

Supplement: Supplementary file 11100 [file 1]

## KIhI22

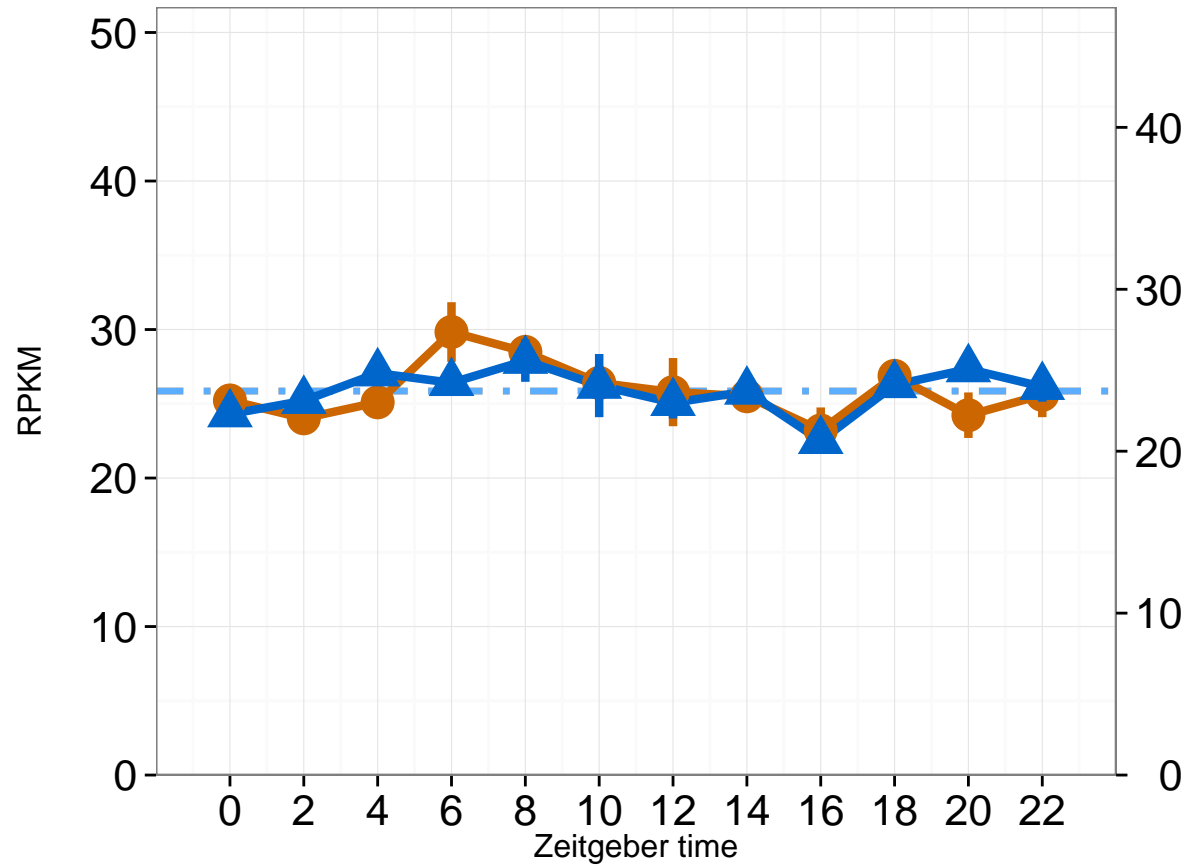

## KIhI22

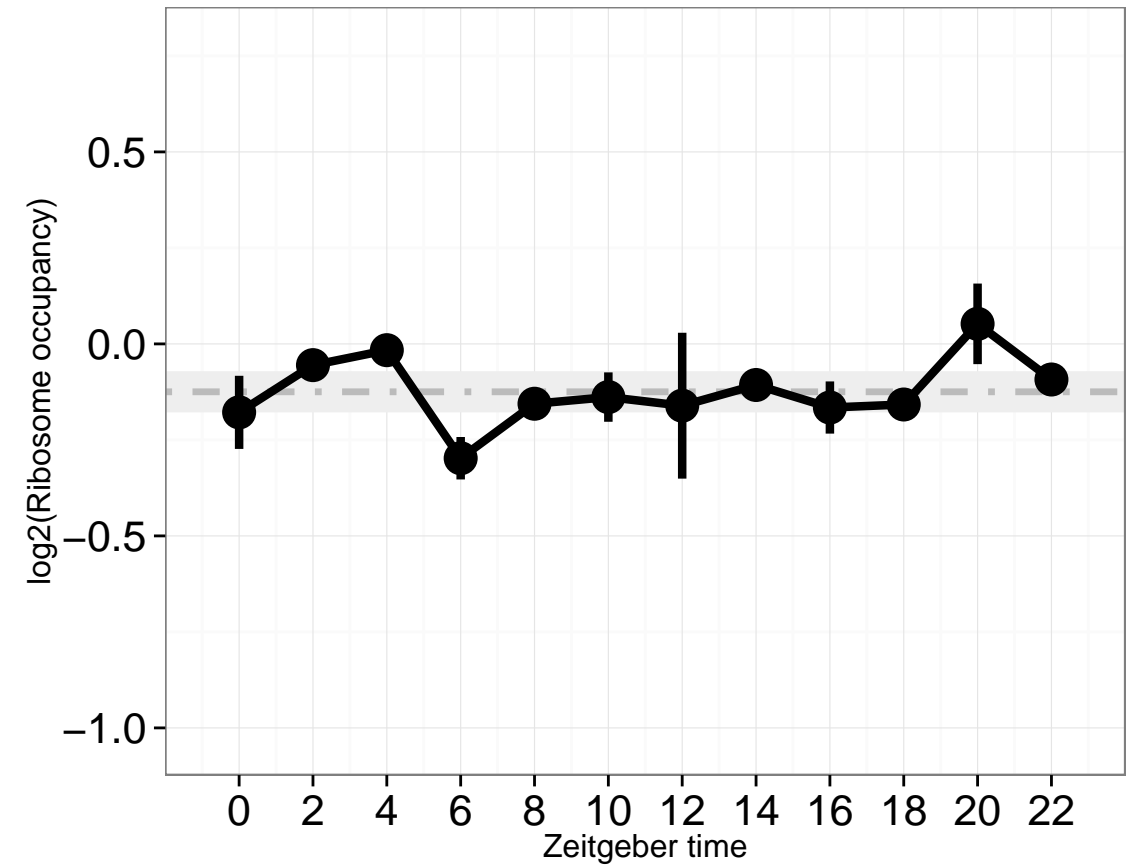

Supplement: Supplementary file 11101 [file 1]

## Rpp40

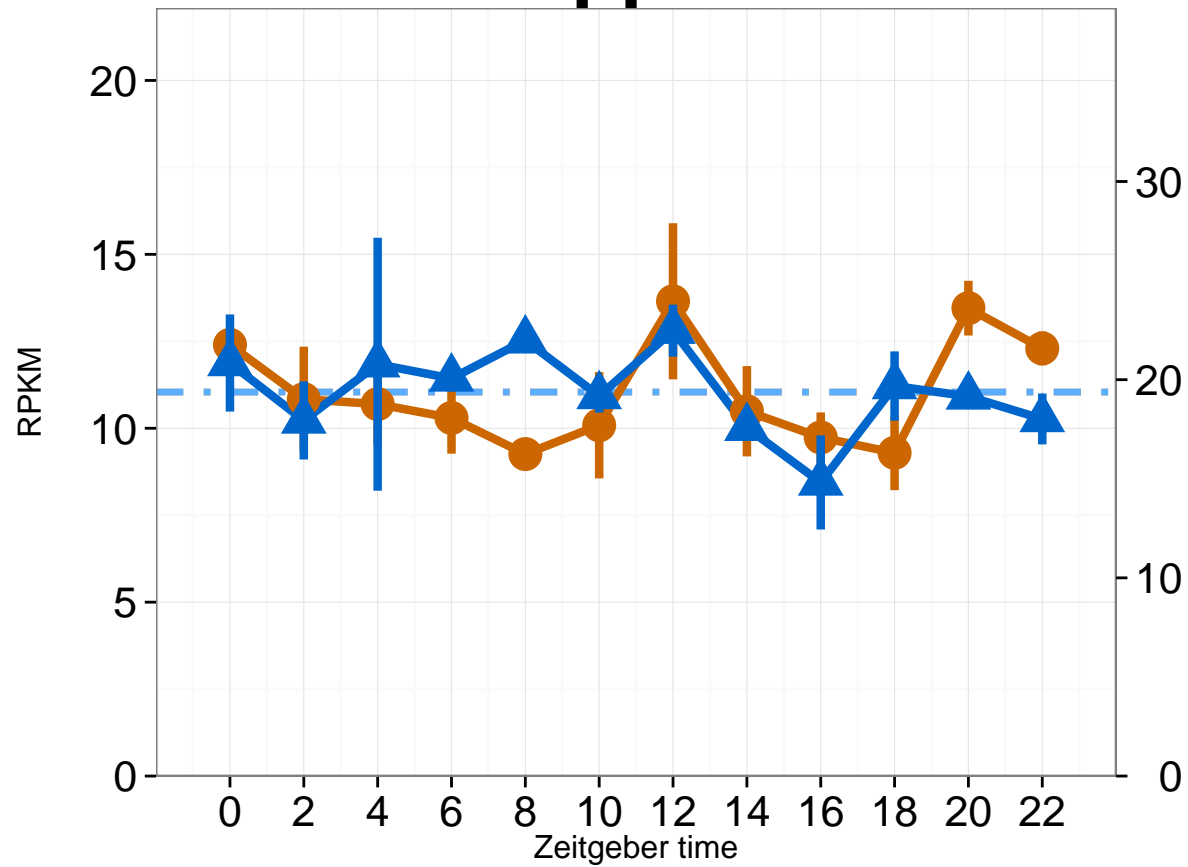

## Rpp40

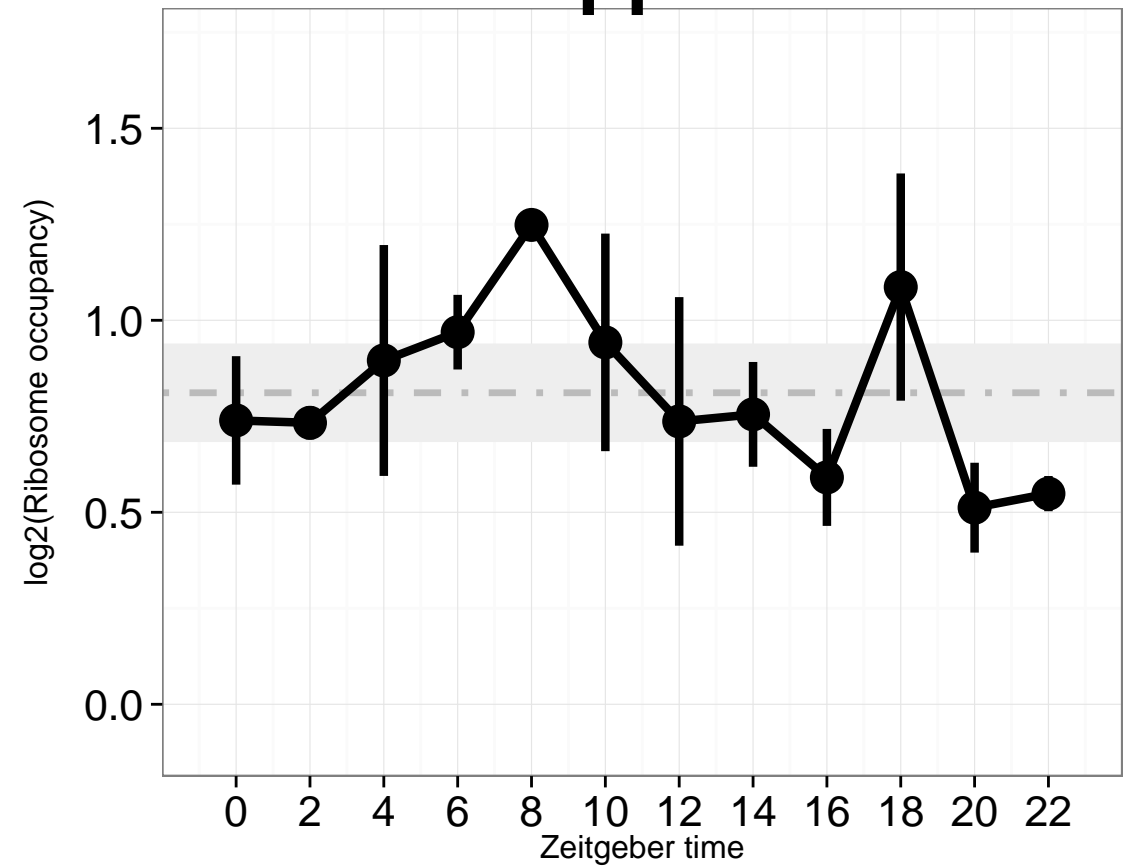

Supplement: Supplementary file 11102 [file 1]

## Acadsb

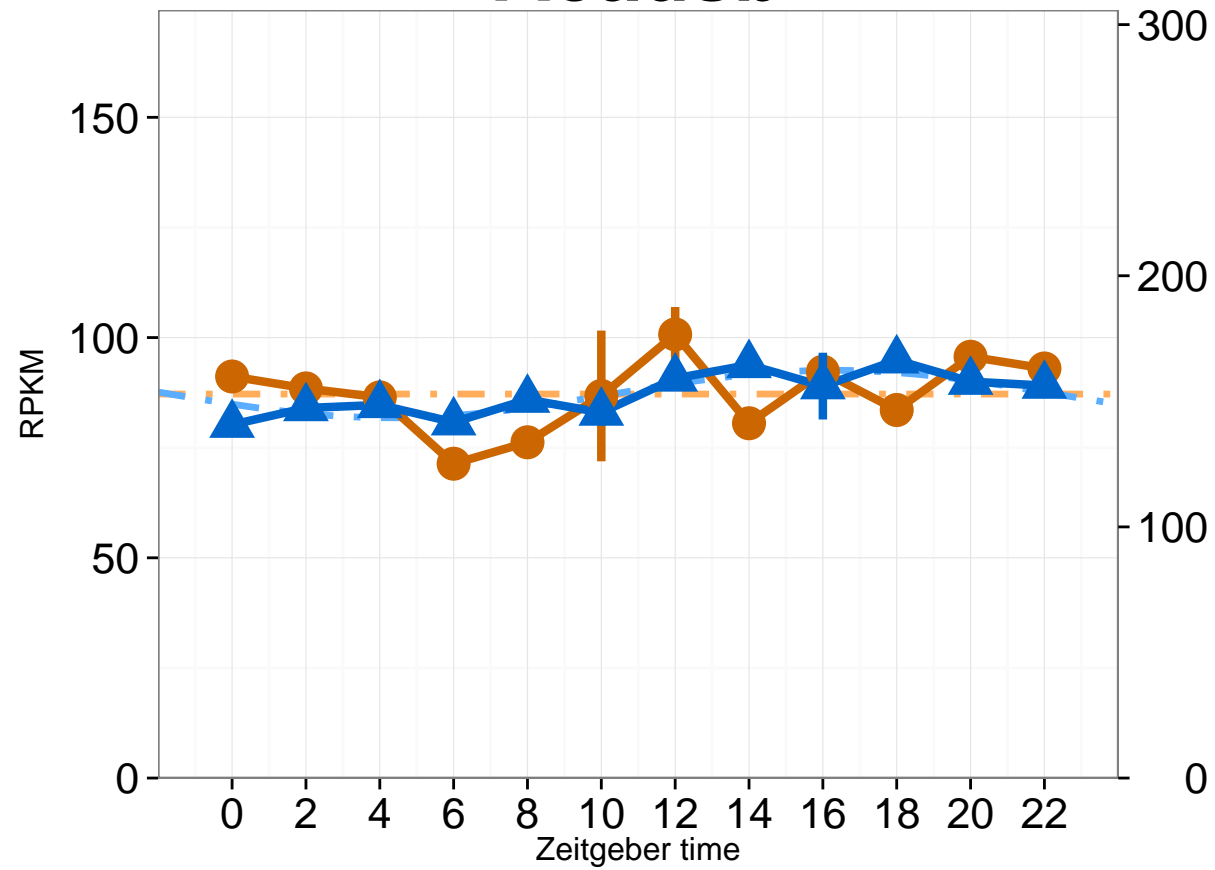

## Acadsb

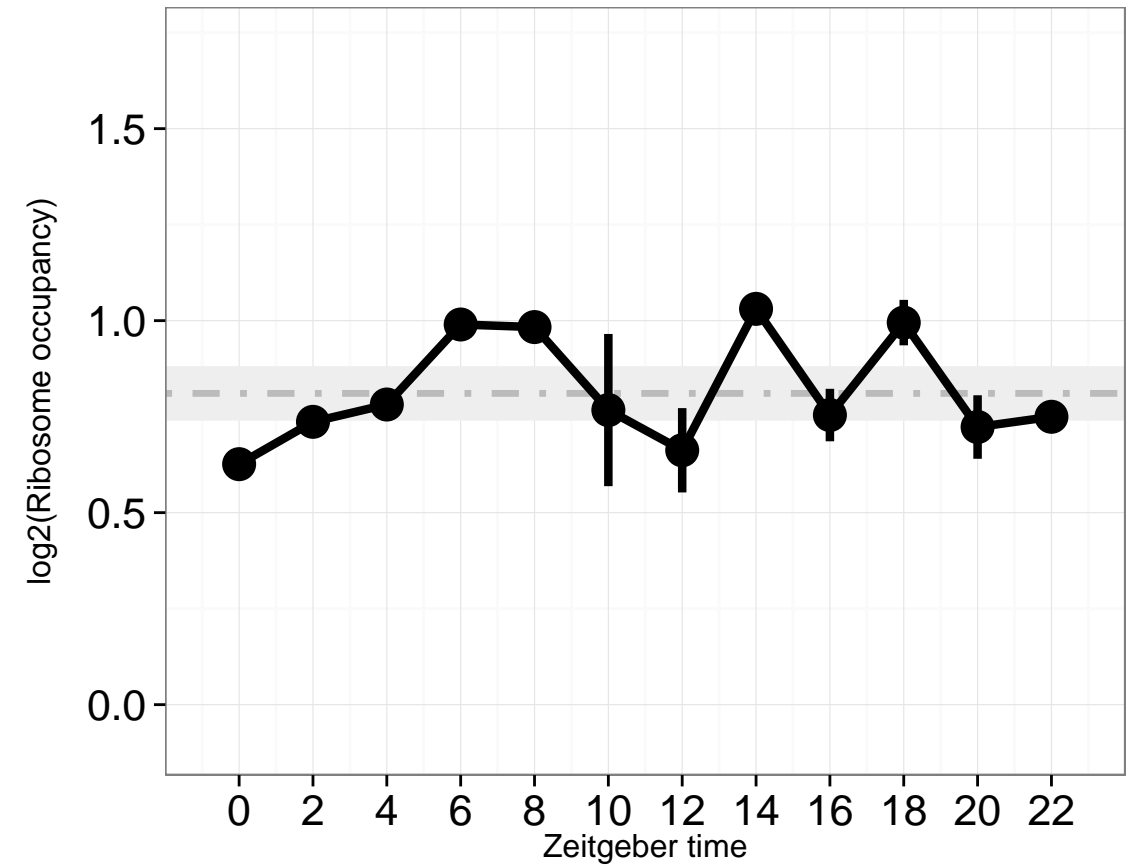

Supplement: Supplementary file 11103 [file 1]

## Cacybp

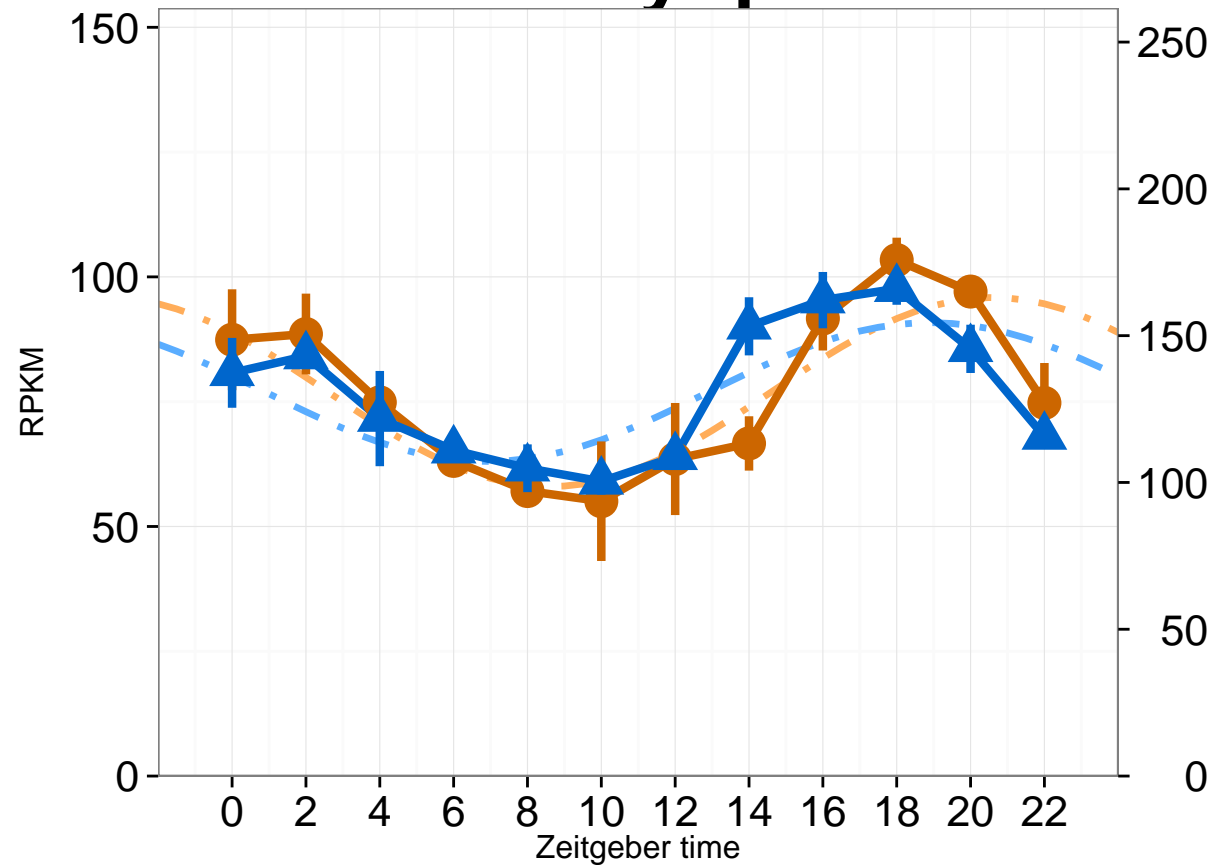

## Cacybp

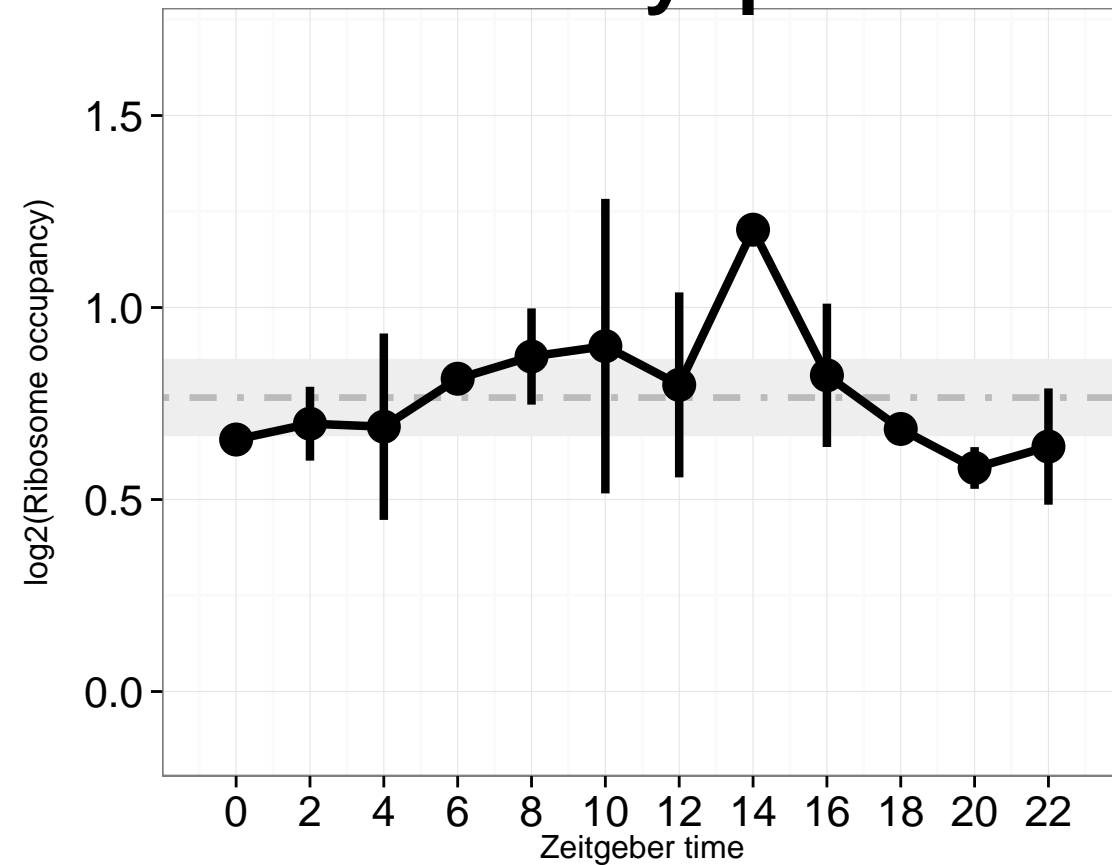

Supplement: Supplementary file 11104 [file 1]

## Hepacam2

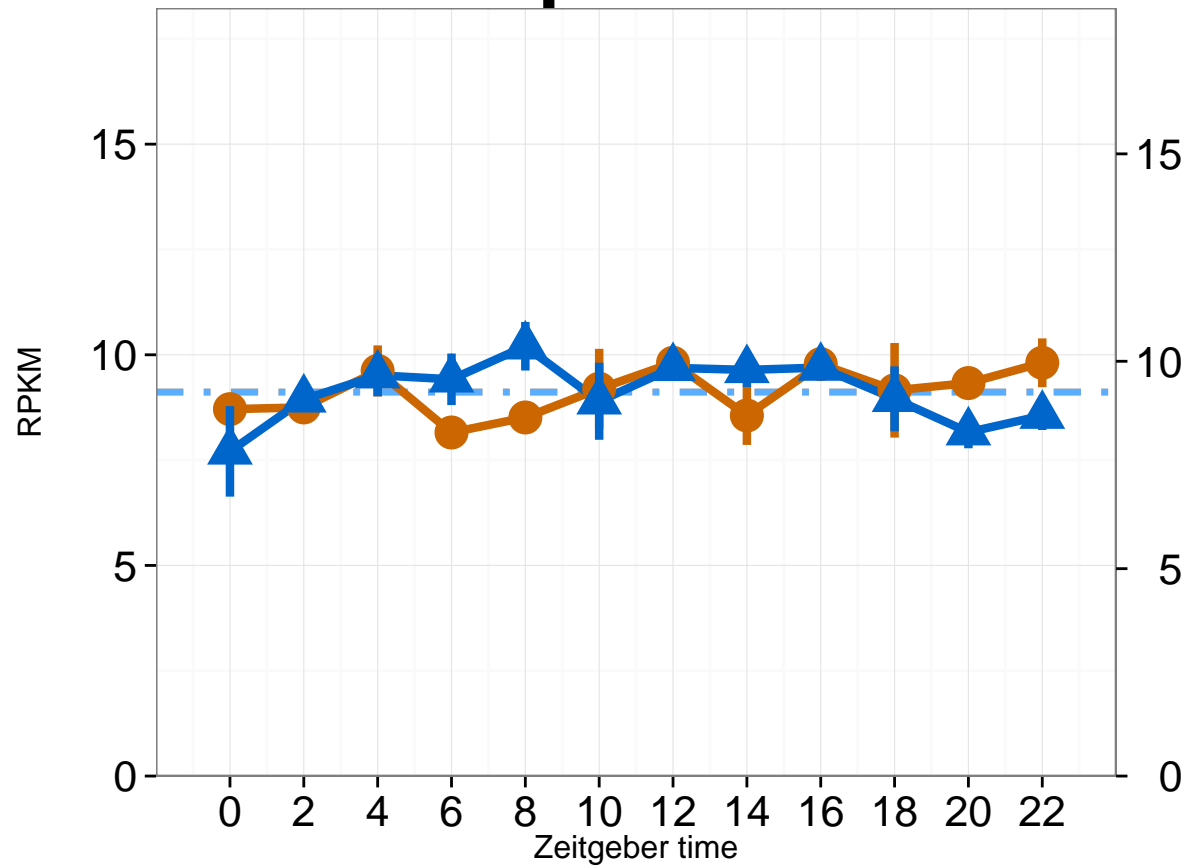

## Hepacam2

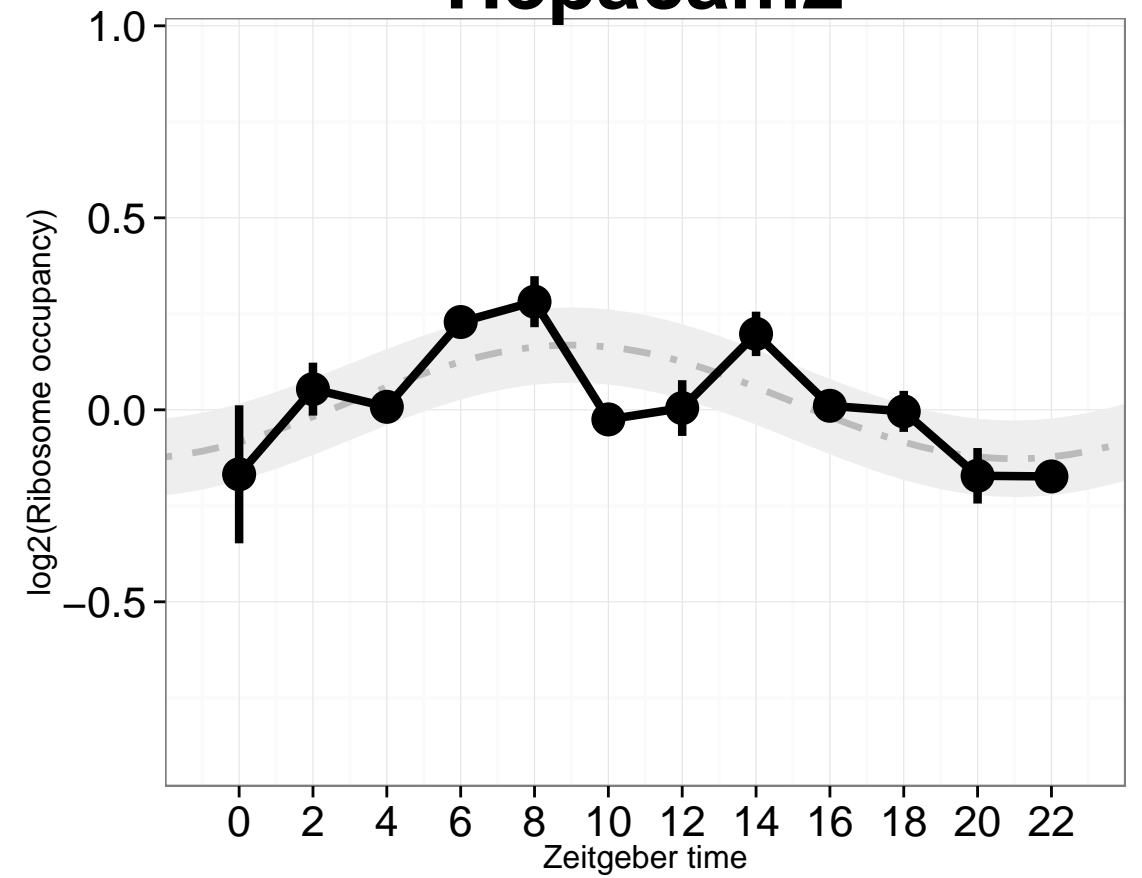

Supplement: Supplementary file 11105 [file 1]

# Fgd3

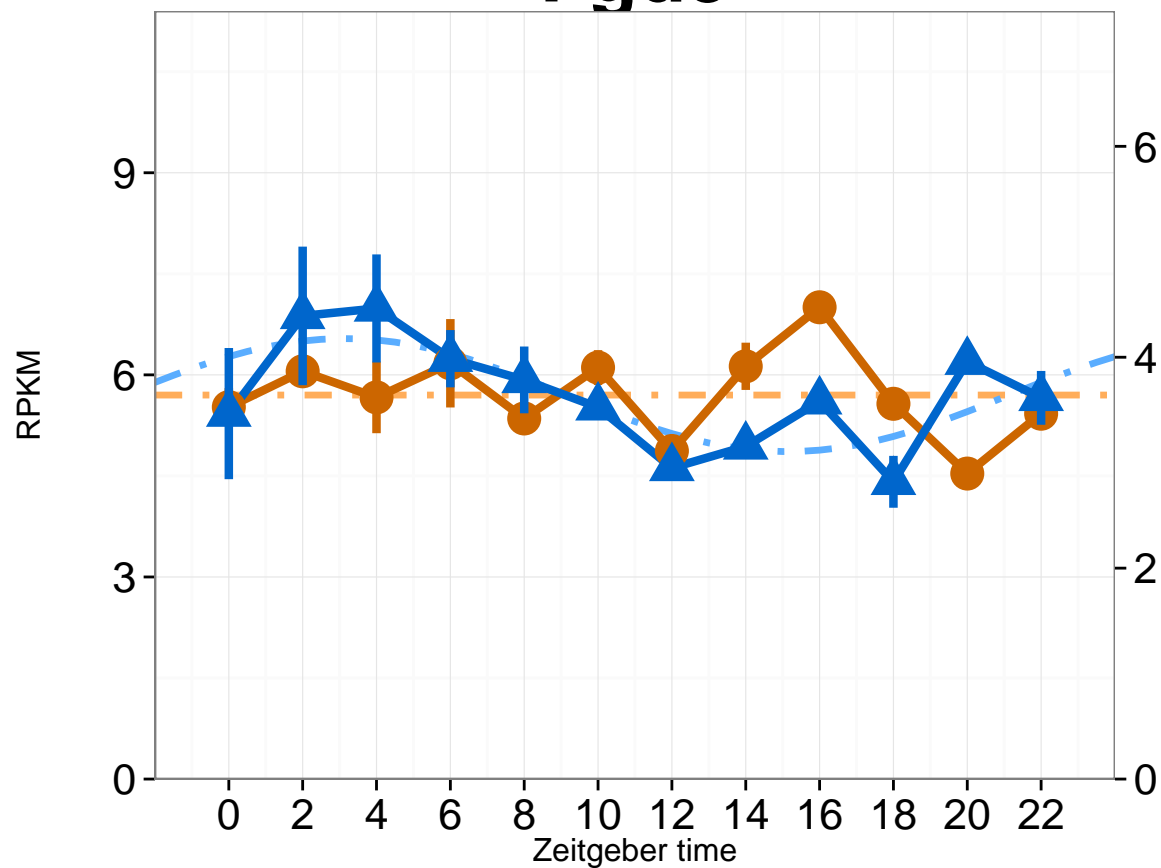

# Fgd3

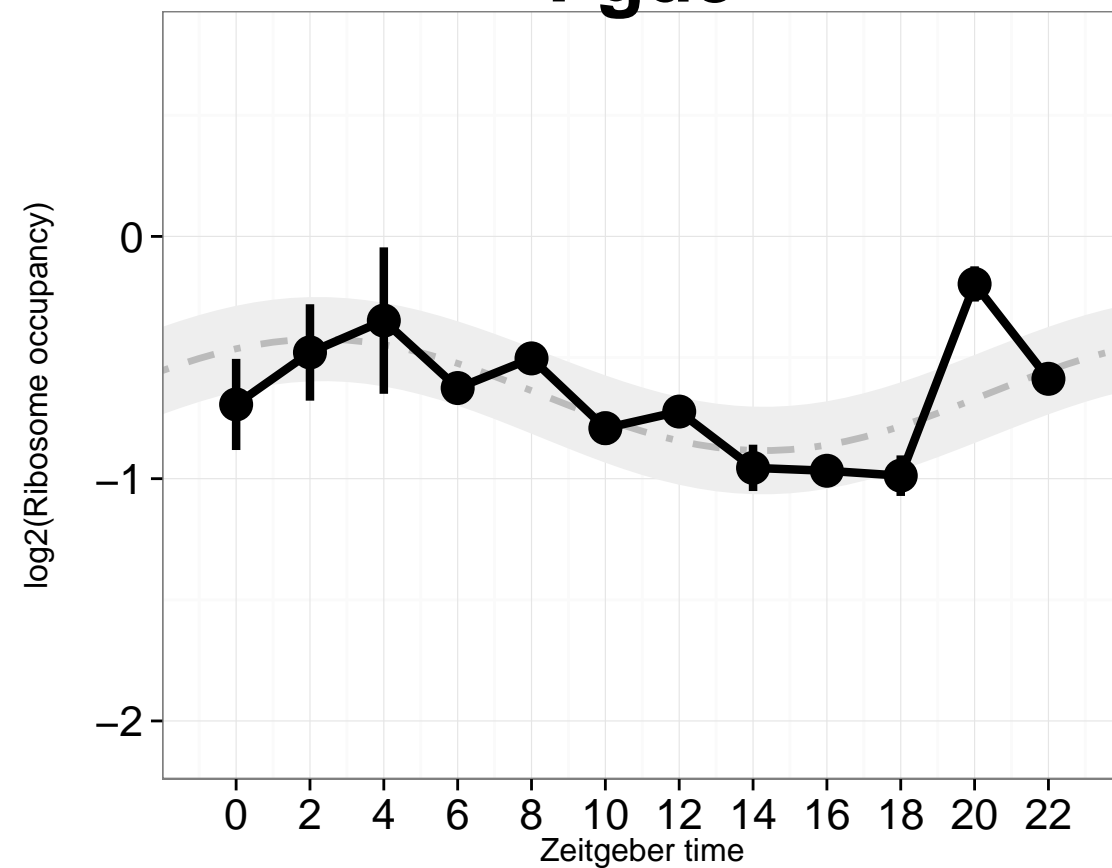

Supplement: Supplementary file 11106 [file 1]

## Faah

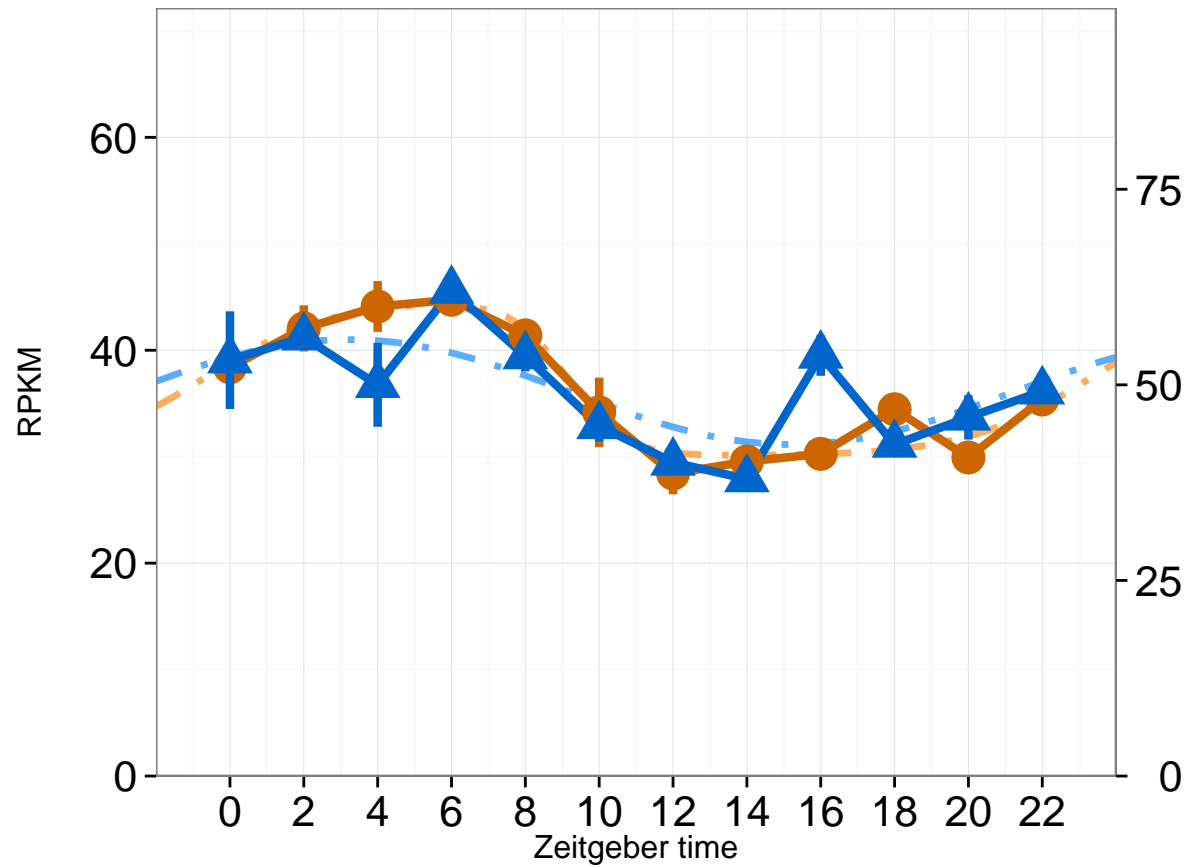

## Faah

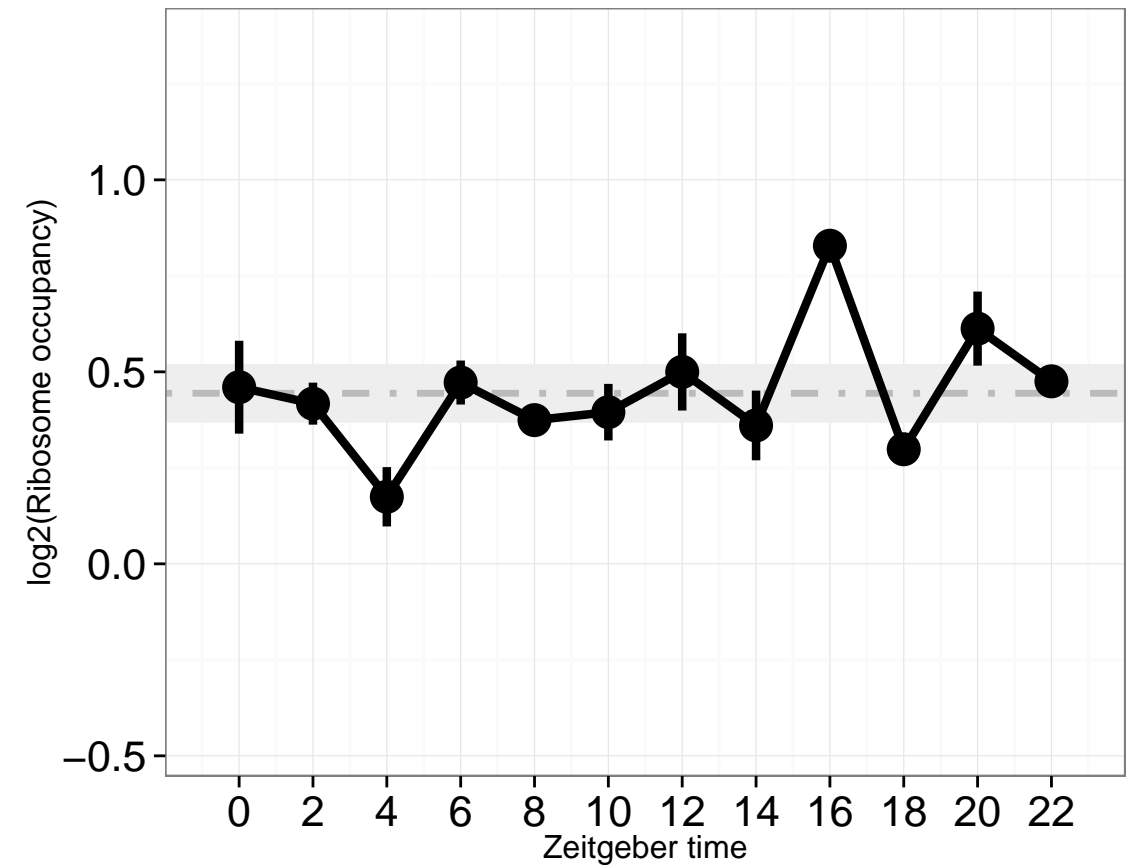

Supplement: Supplementary file 11107 [file 1]

# Tmem57

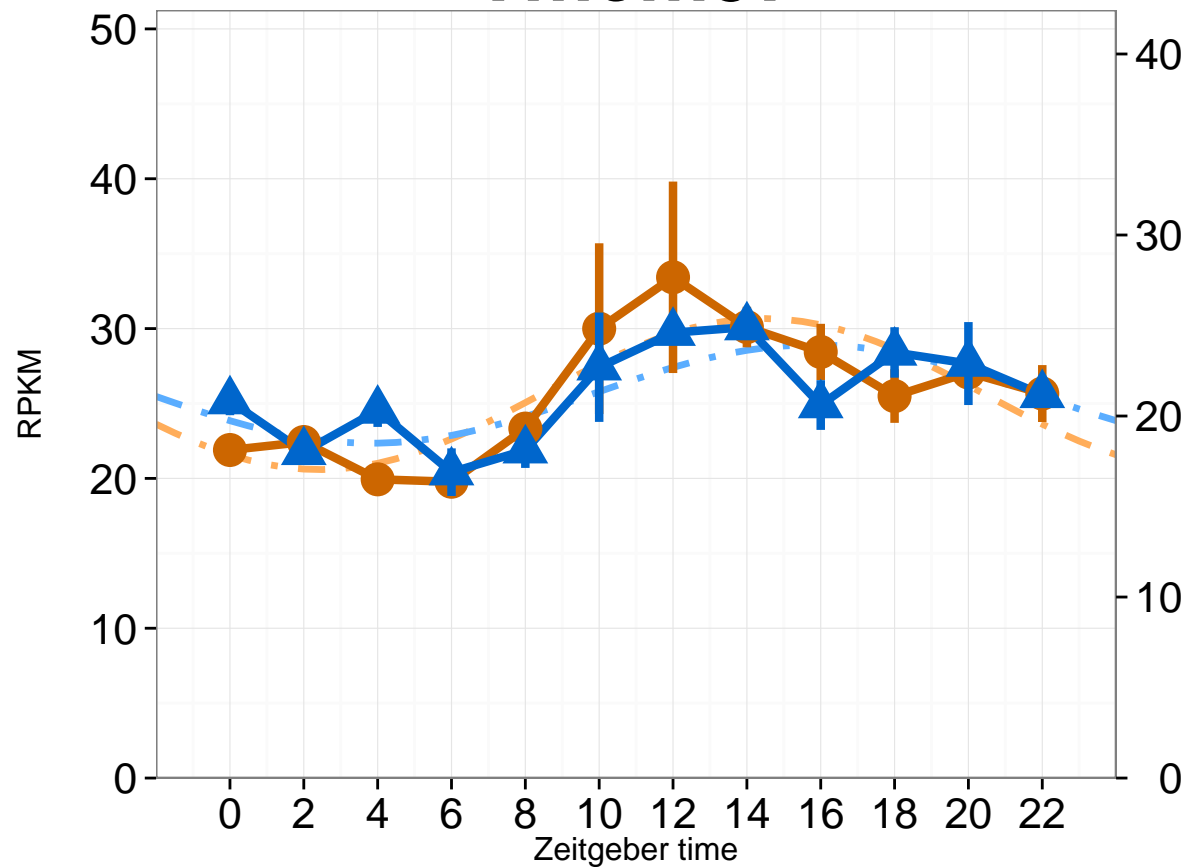

# Tmem57

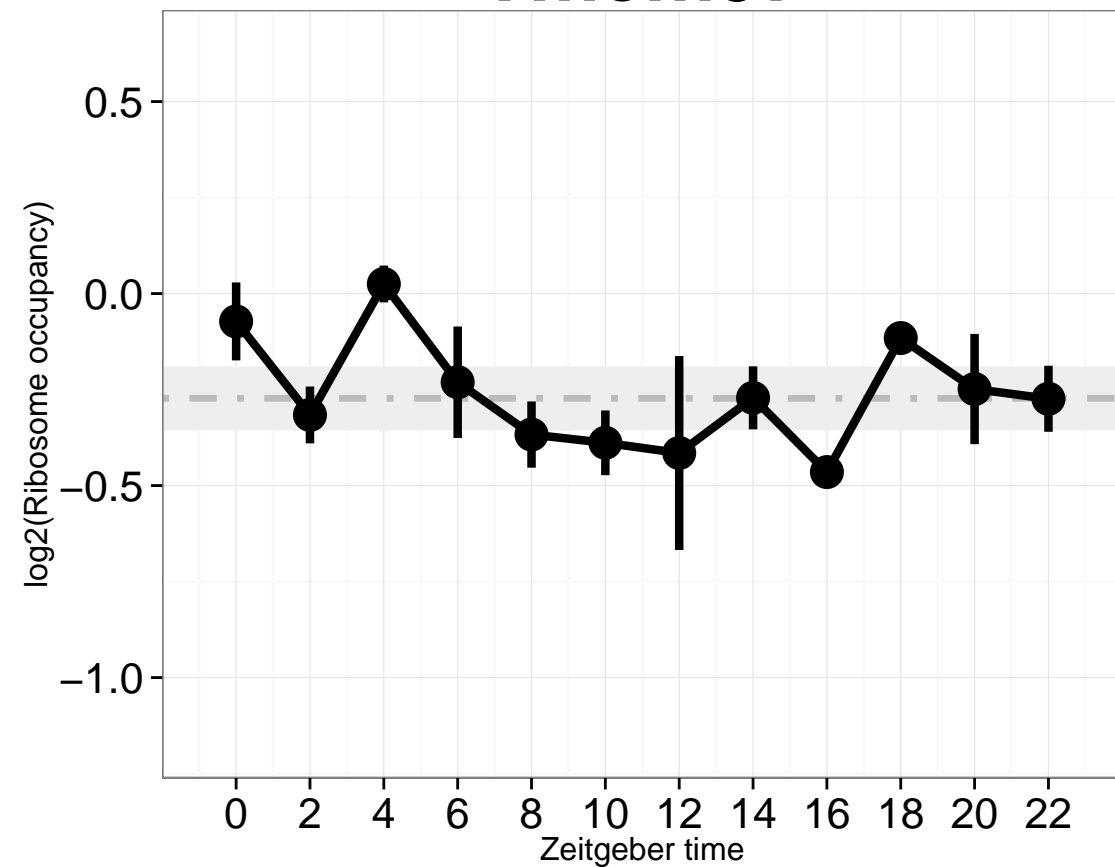

Supplement: Supplementary file 11108 [file 1]

# Susd1

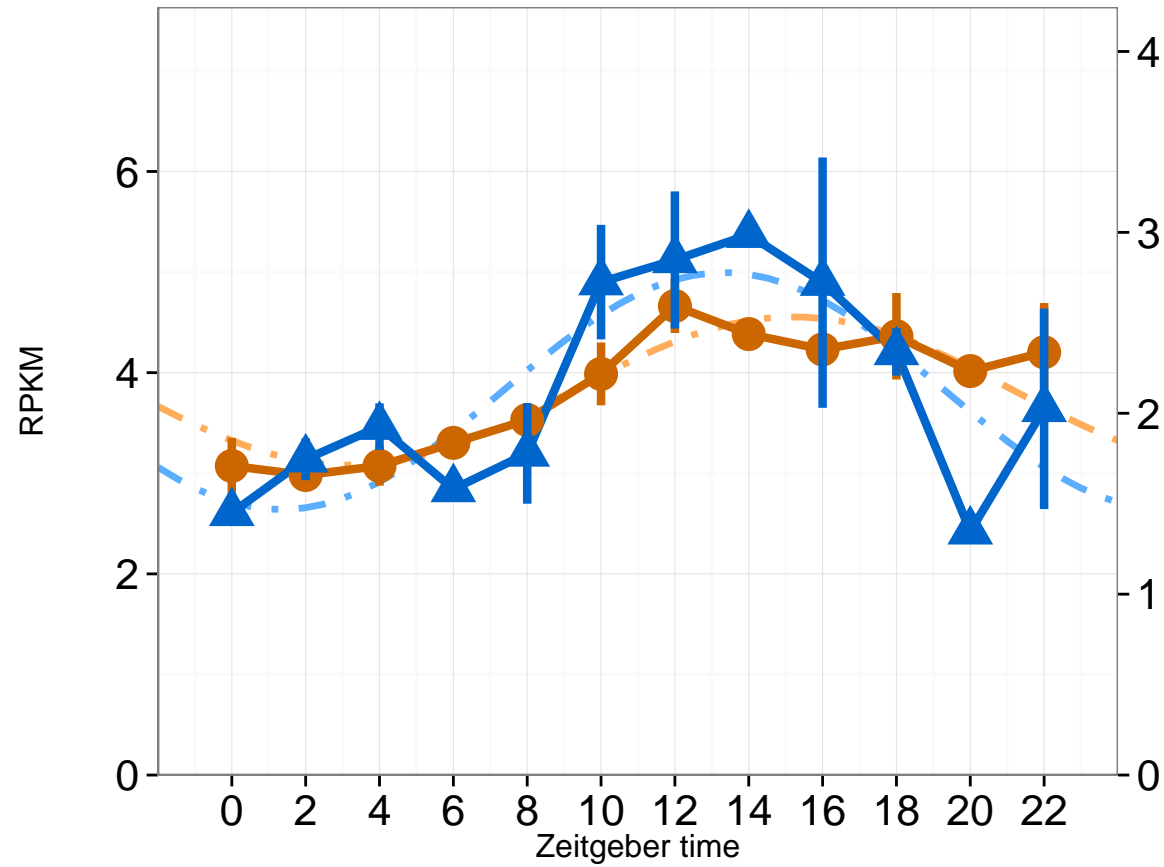

# Susd1

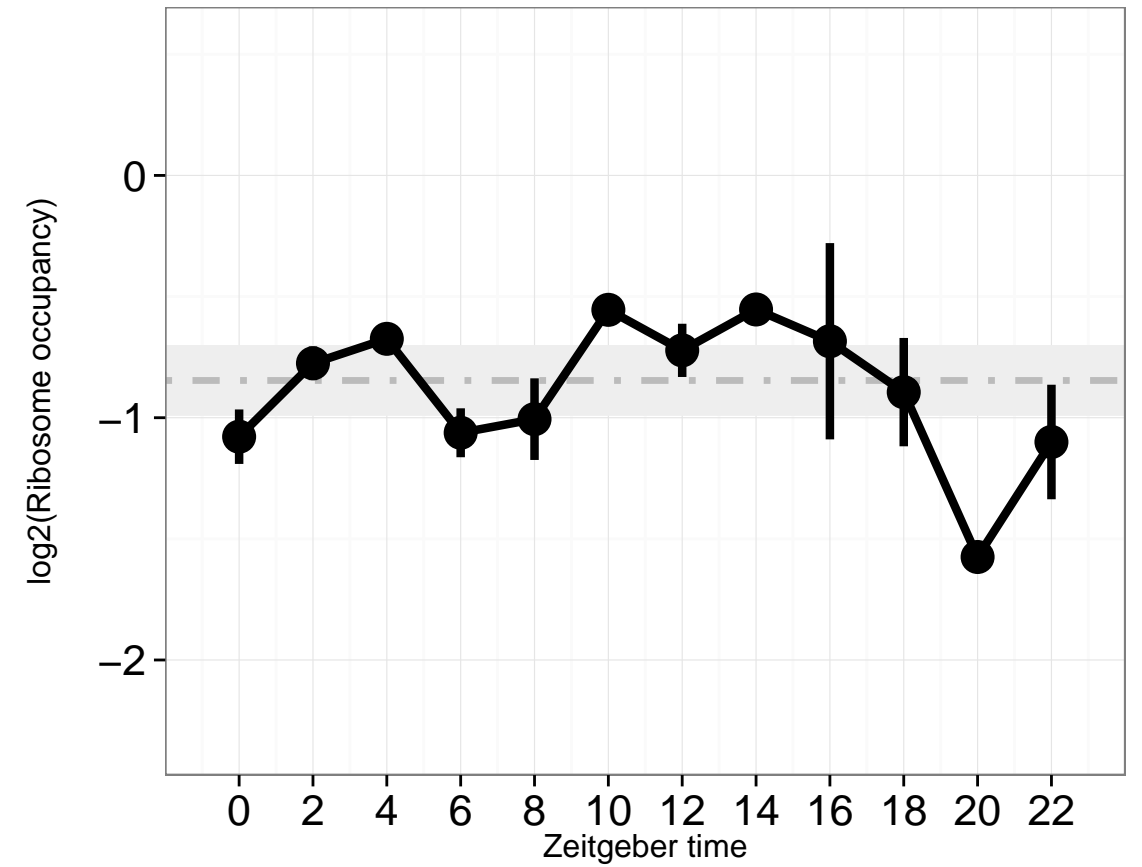

Supplement: Supplementary file 11109 [file 1]

# 3010026O09Rik

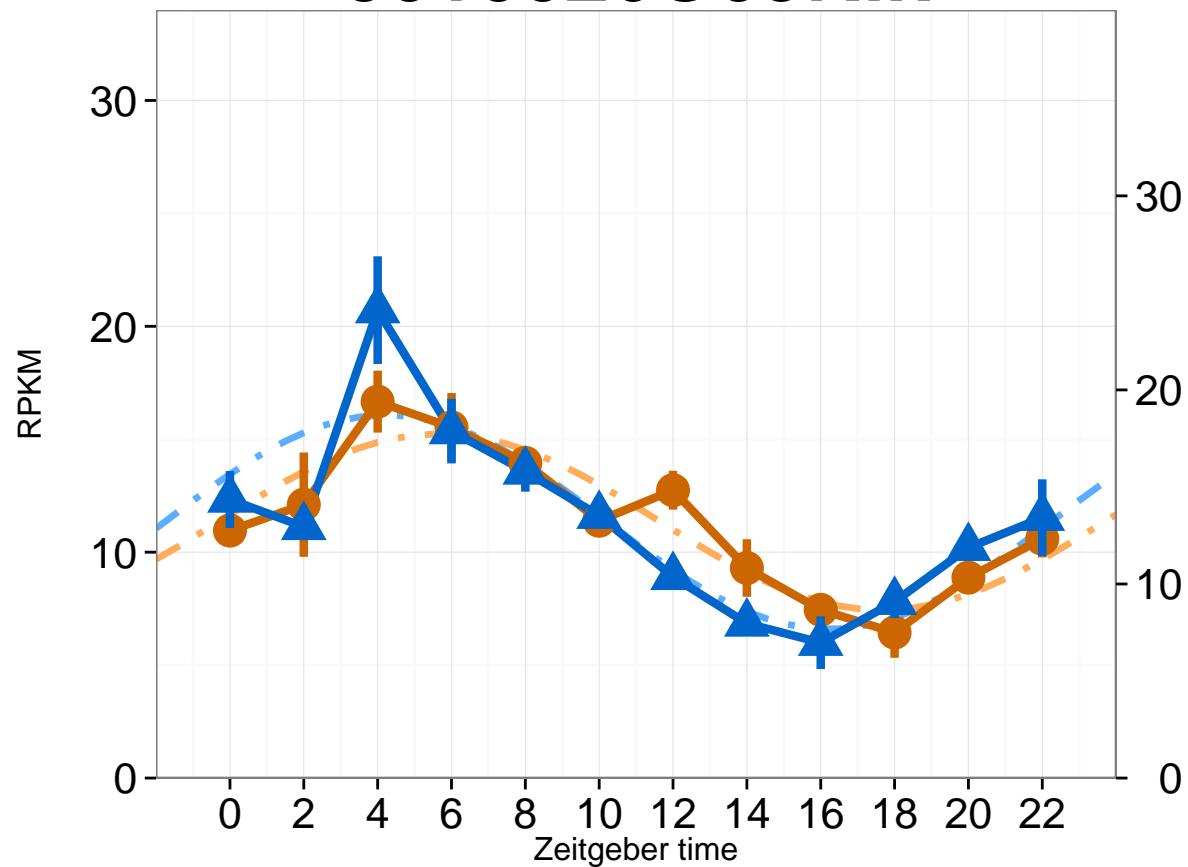

# 3010026O09Rik

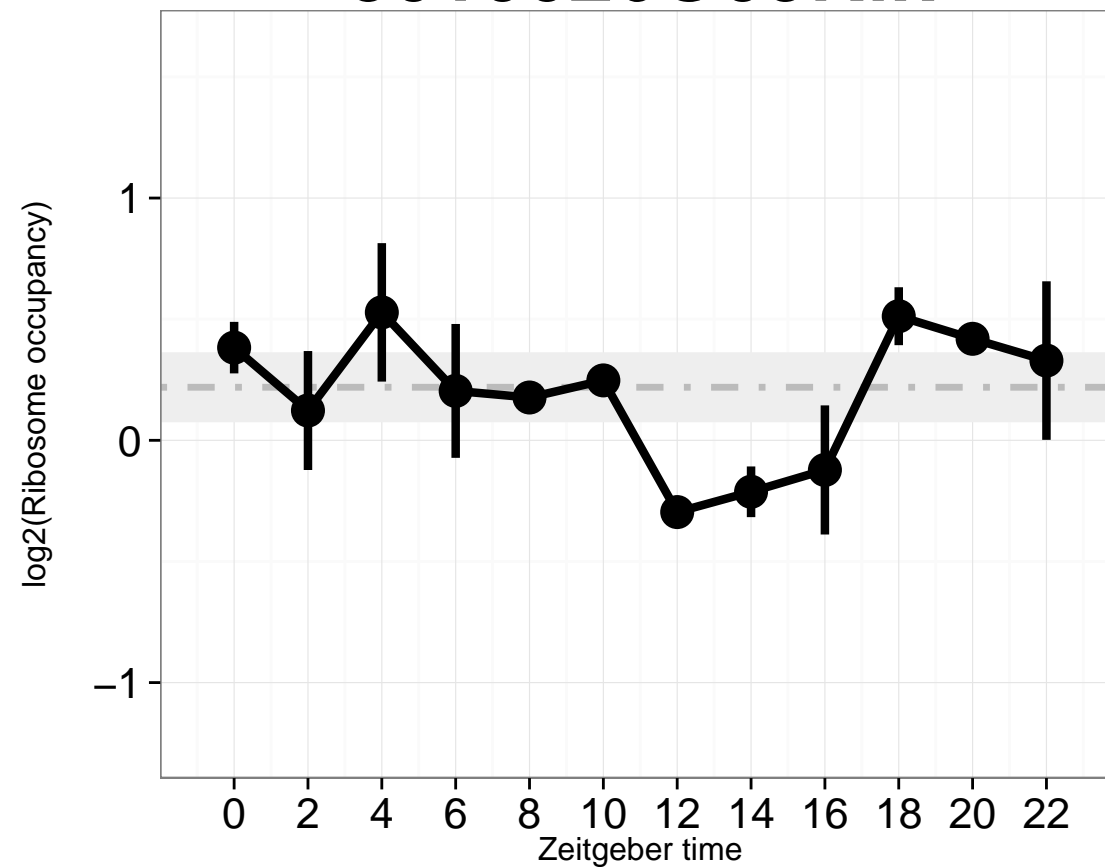

Supplement: Supplementary file 11110 [file 1]

# Hs1bp3

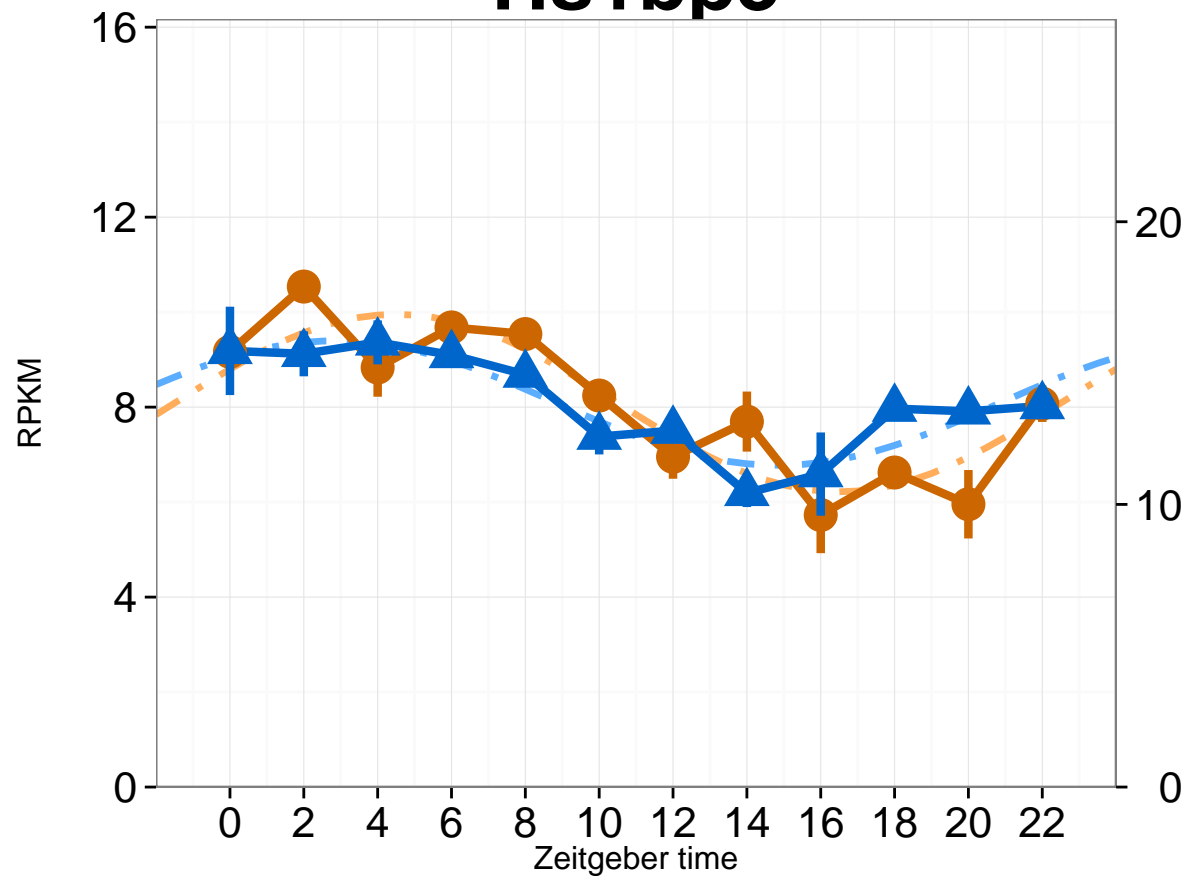

# Hs1bp3

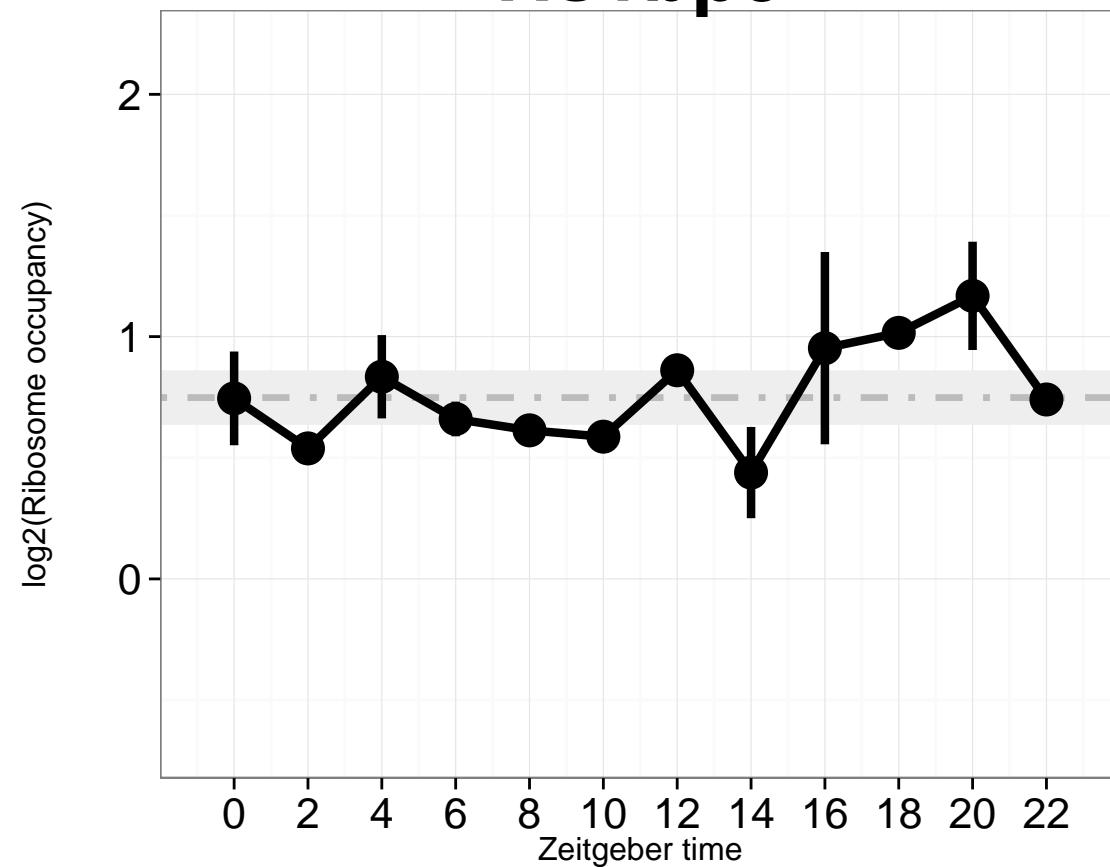

Supplement: Supplementary file 11111 [file 1]

## Cdc26

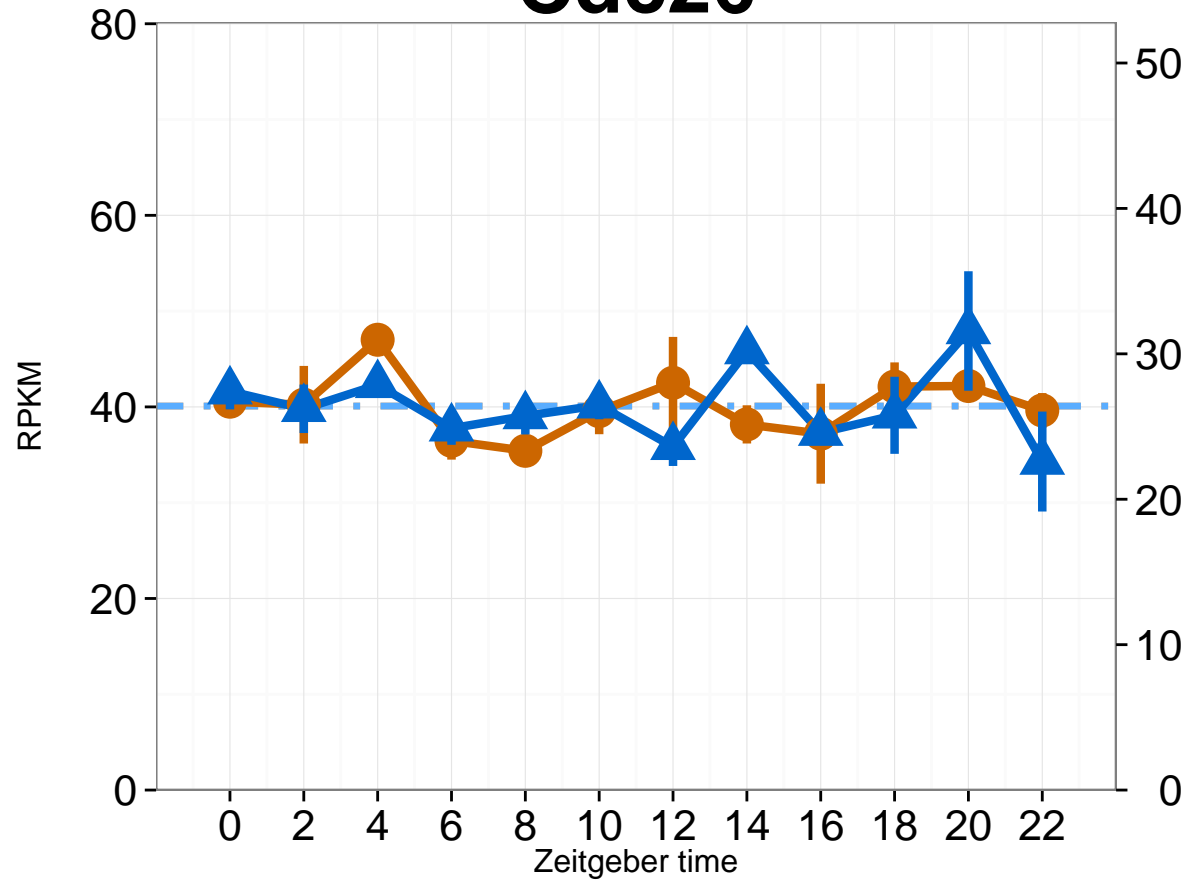

## Cdc26

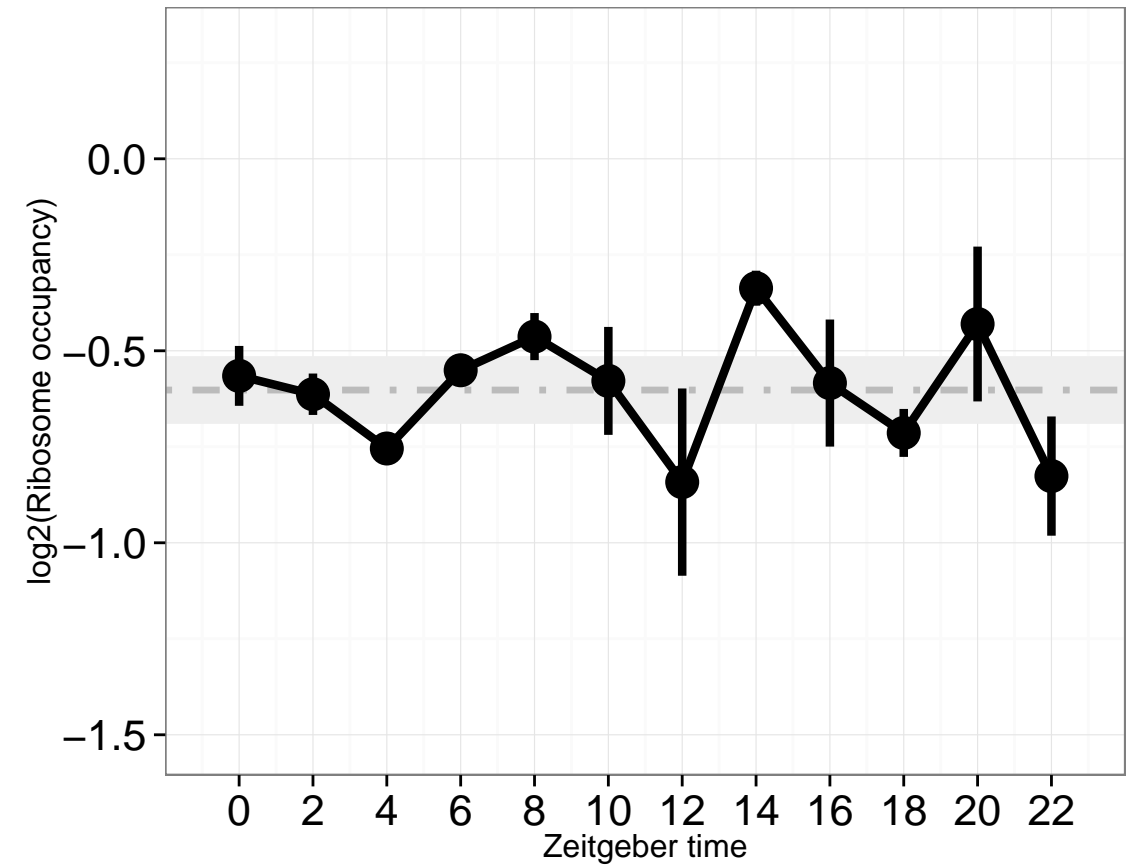

Supplement: Supplementary file 11112 [file 1]

## Myo5b

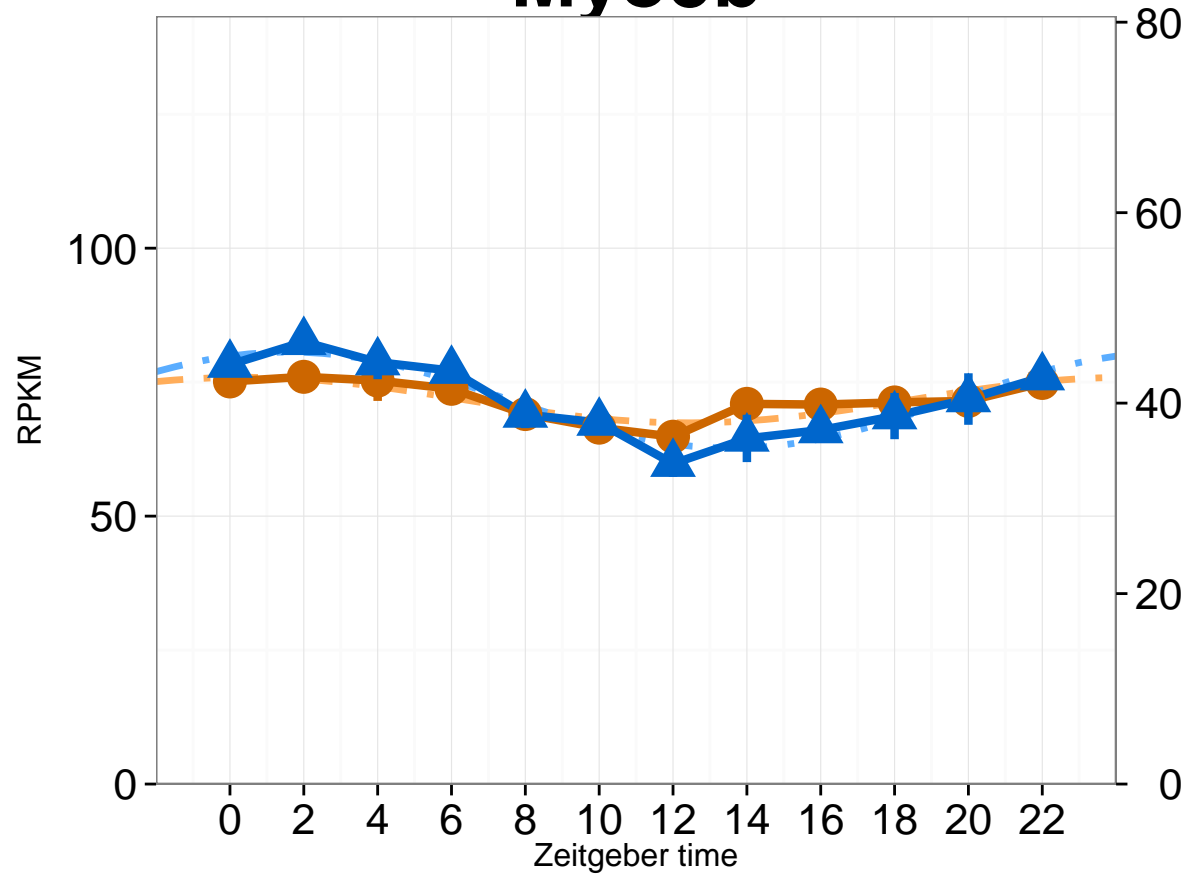

## Myo5b

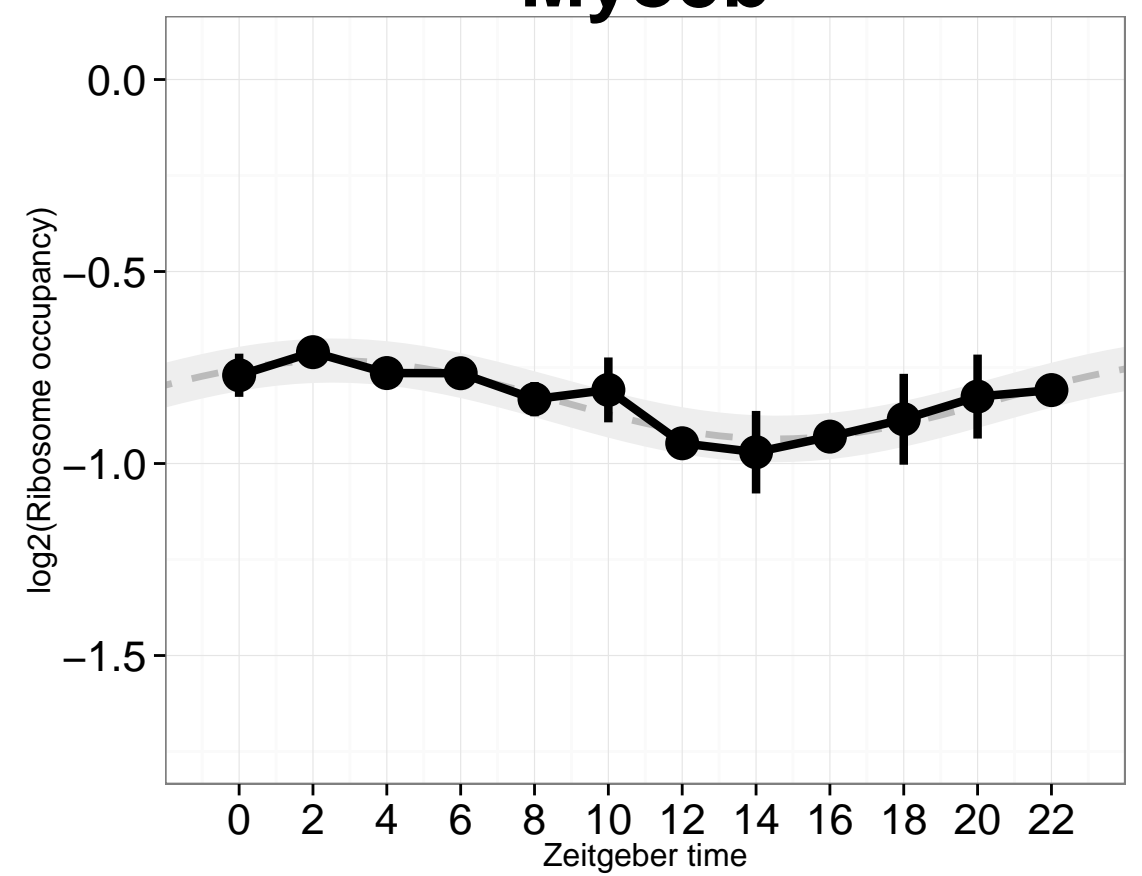

Supplement: Supplementary file 11113 [file 1]

# Zfp12

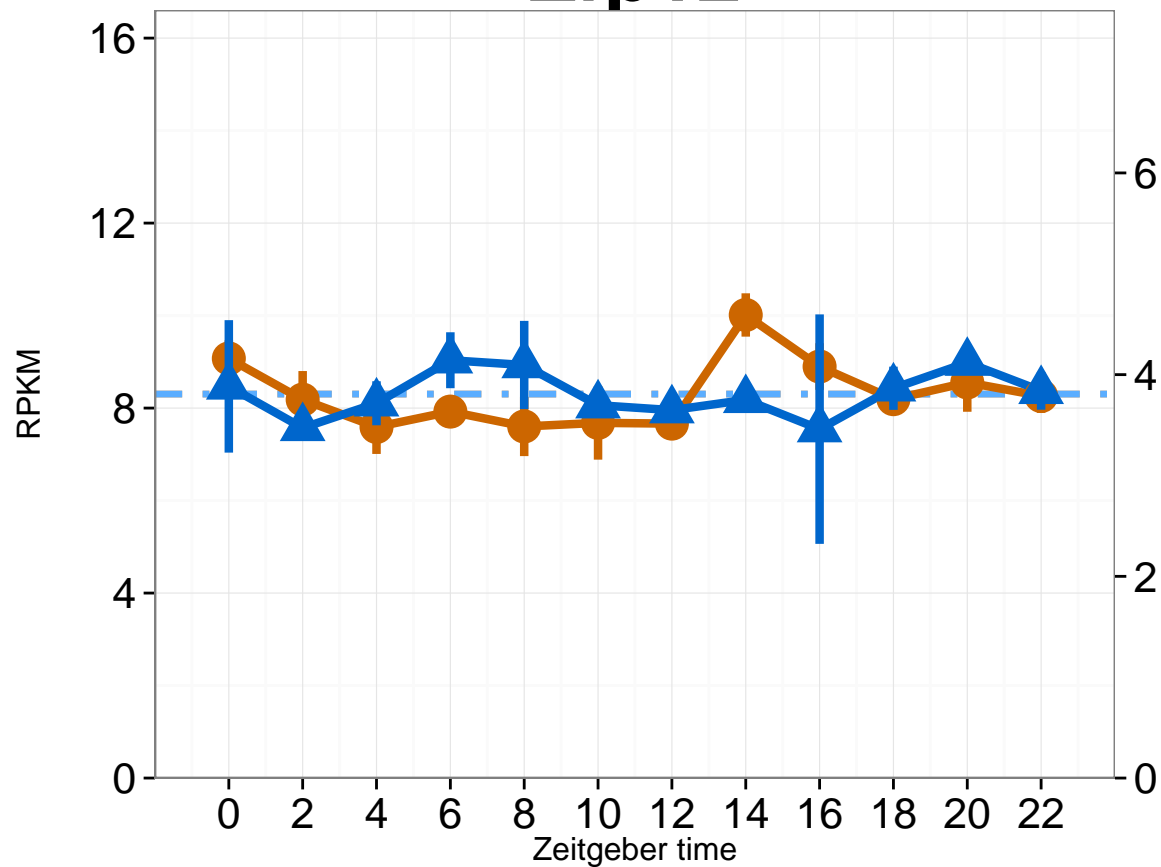

# Zfp12

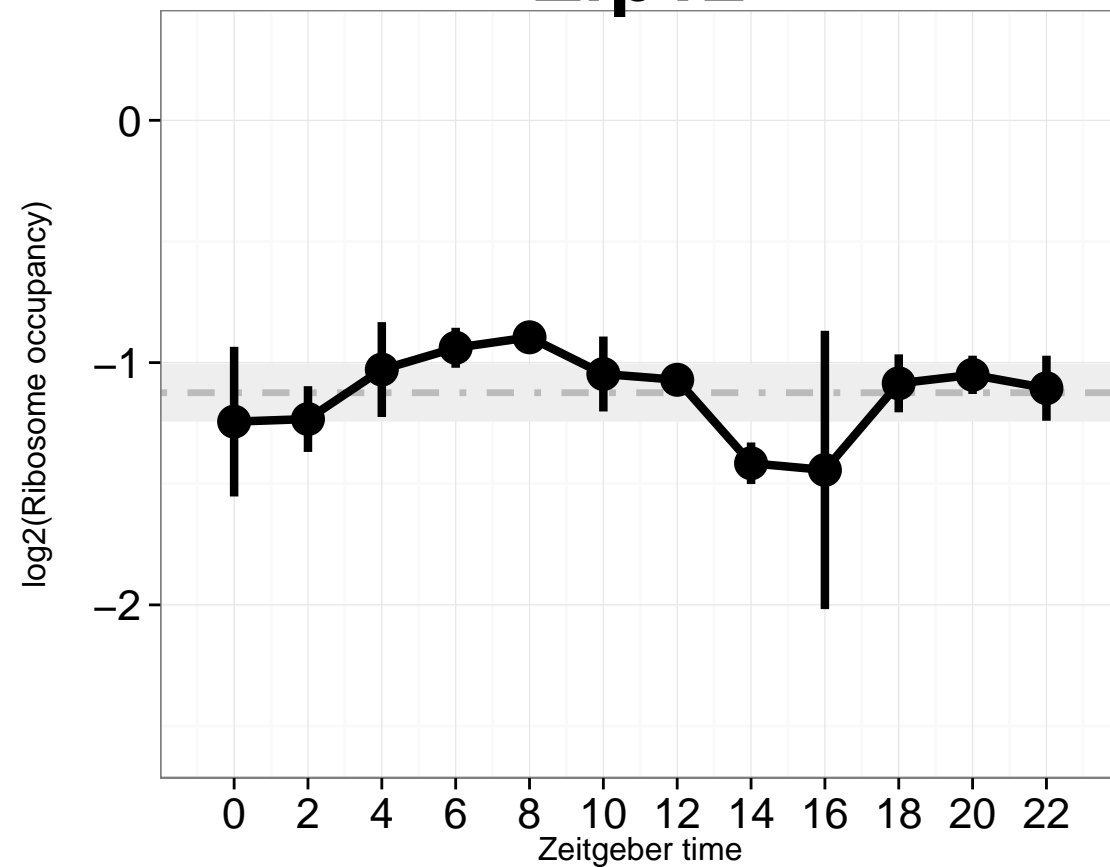

Supplement: Supplementary file 11114 [file 1]

# Ces1d

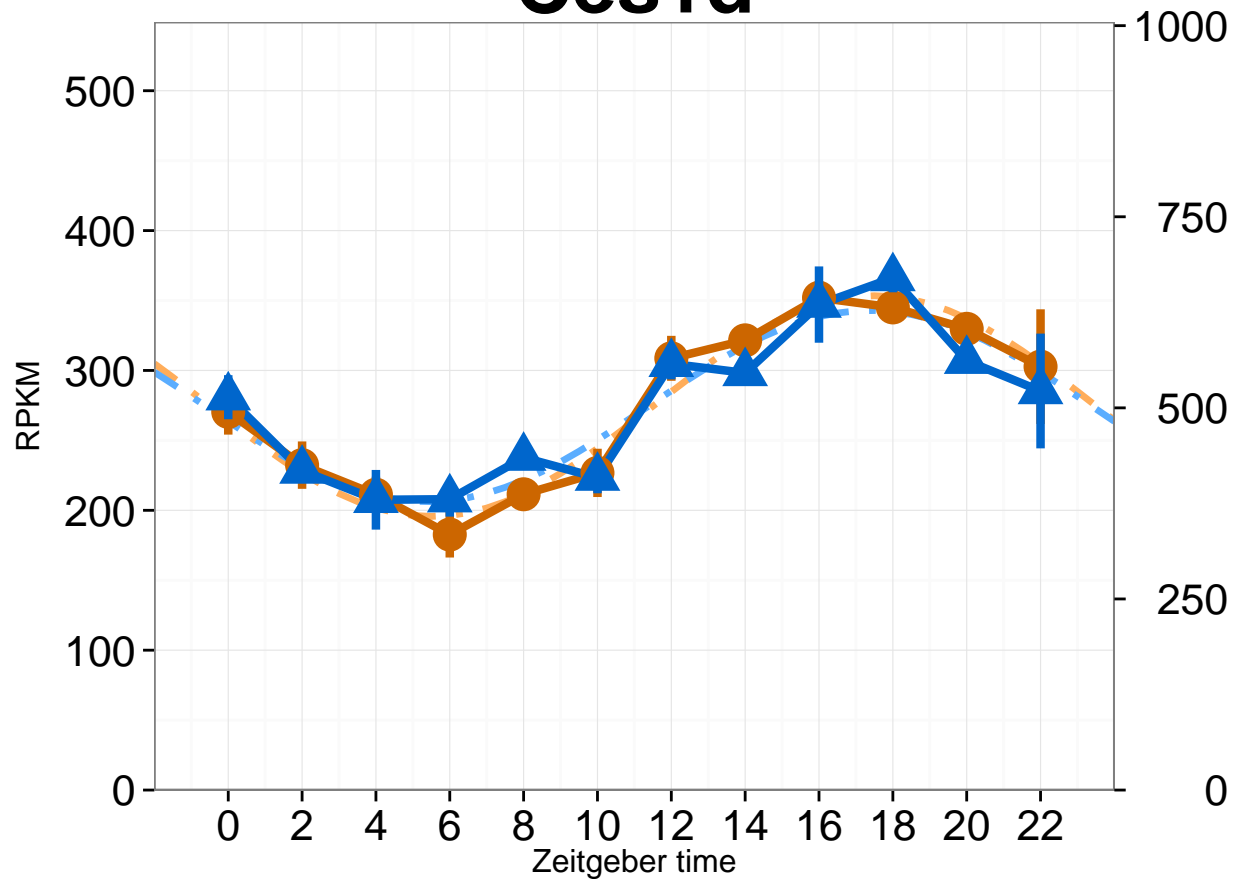

# Ces1d

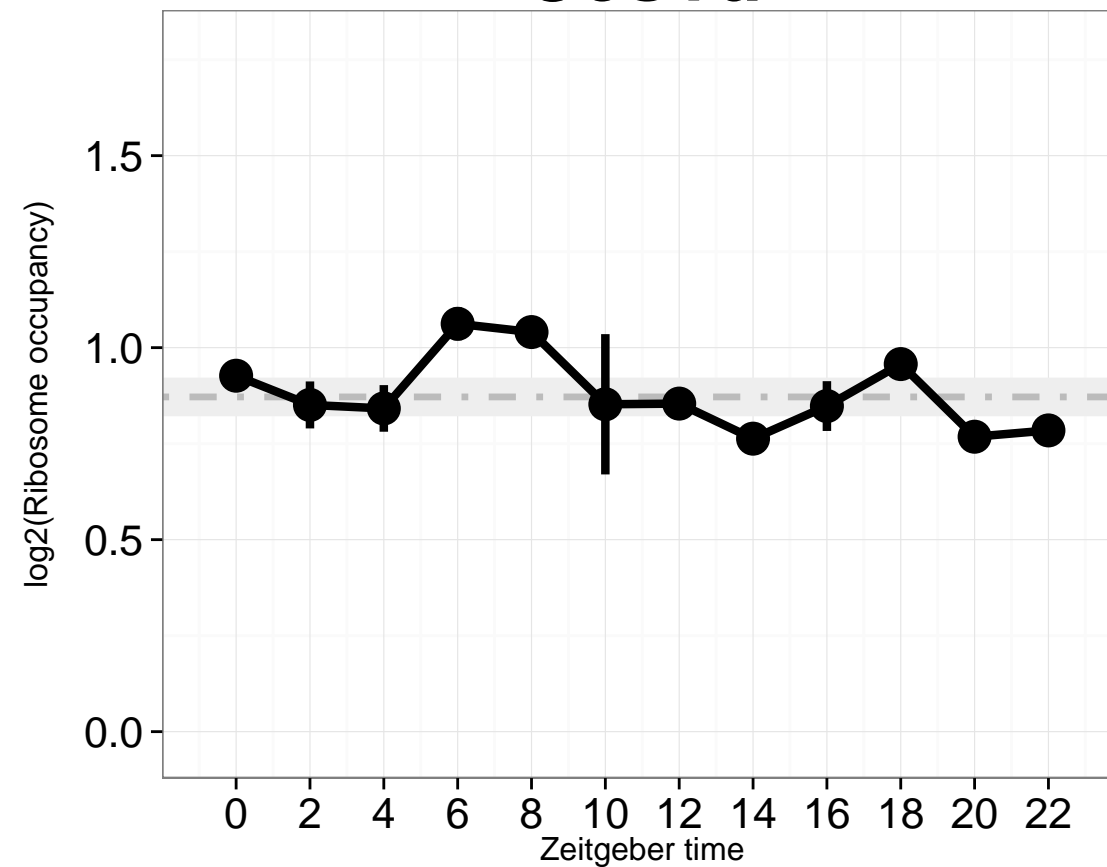

Supplement: Supplementary file 11115 [file 1]

# Zfp410

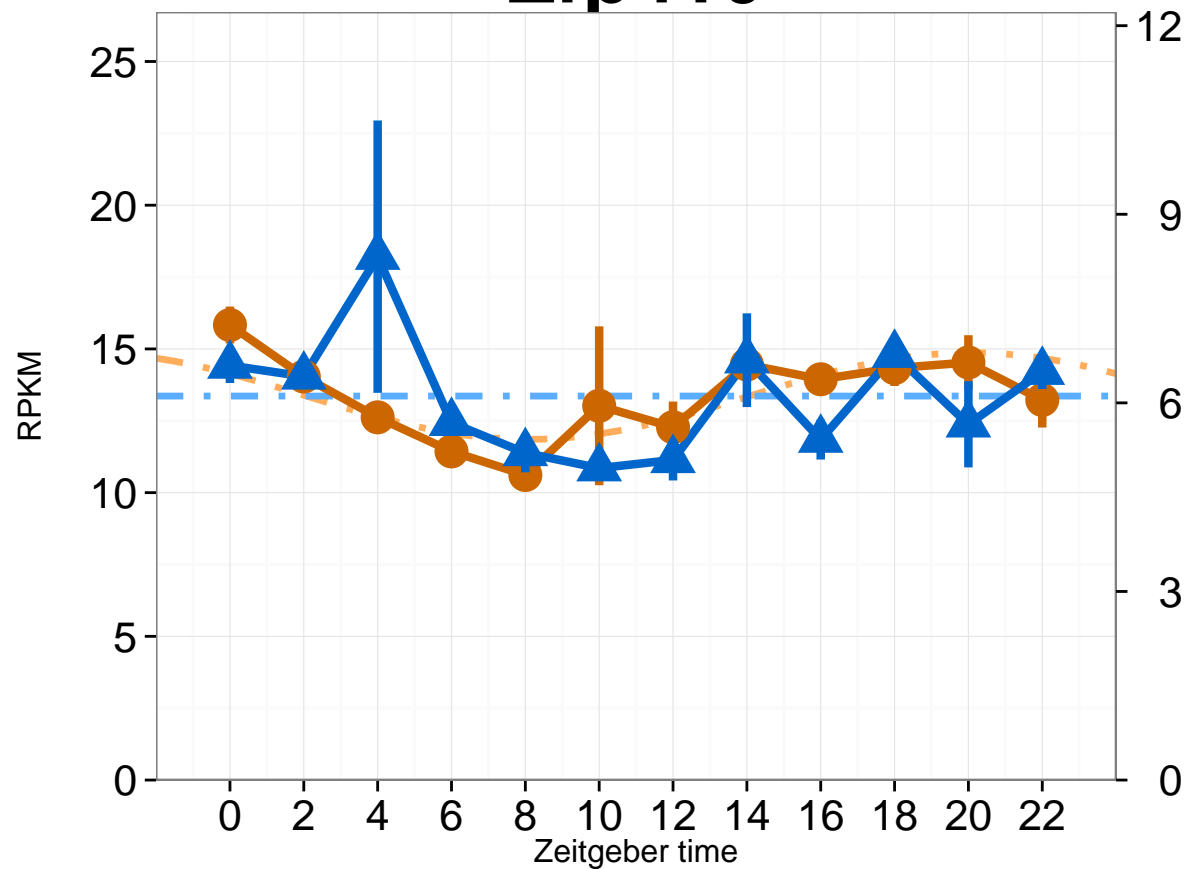

# Zfp410

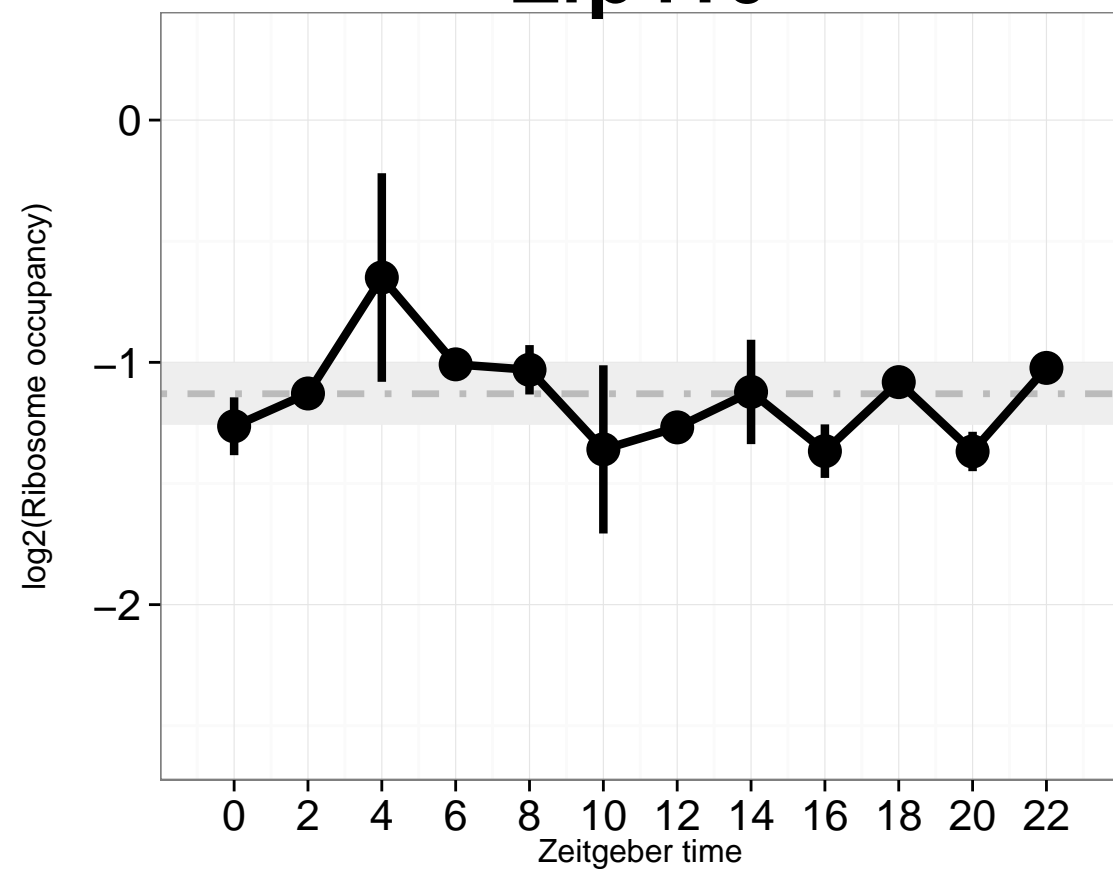

Supplement: Supplementary file 11116 [file 1]

# Cdc25a

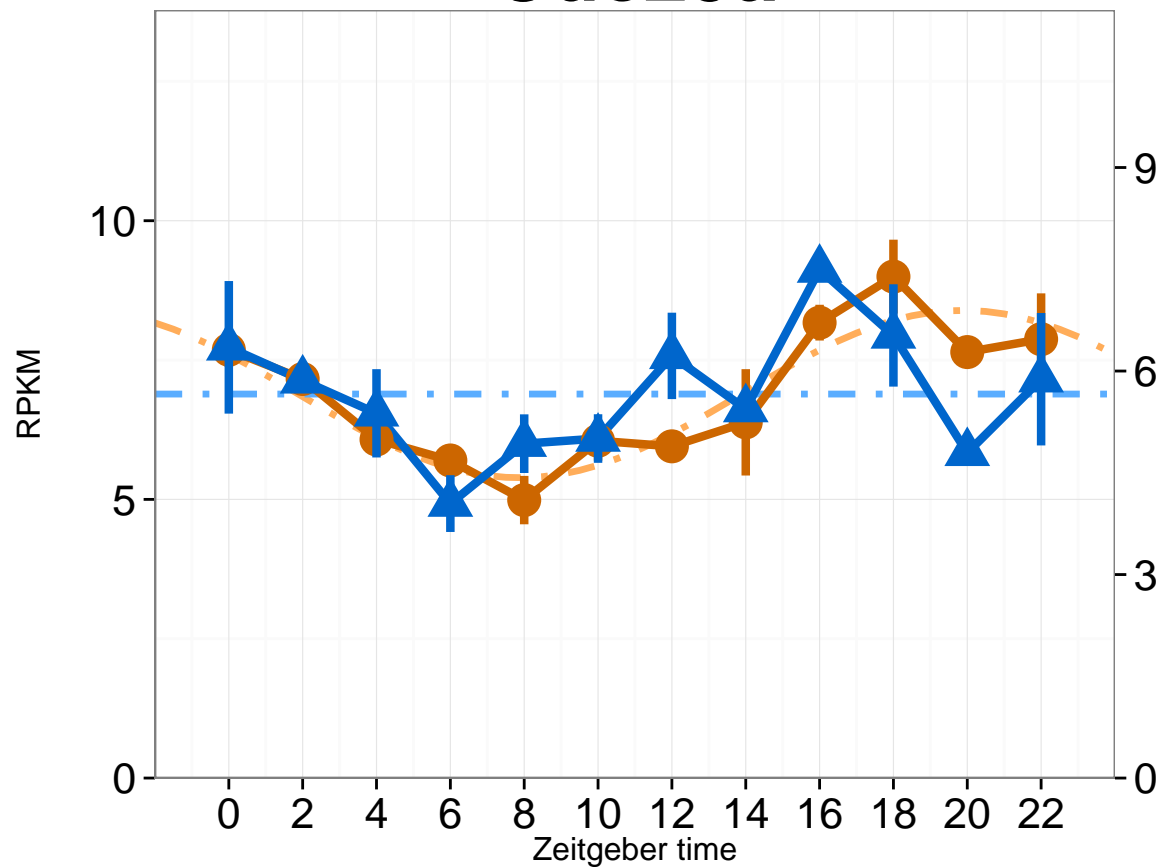

# Cdc25a

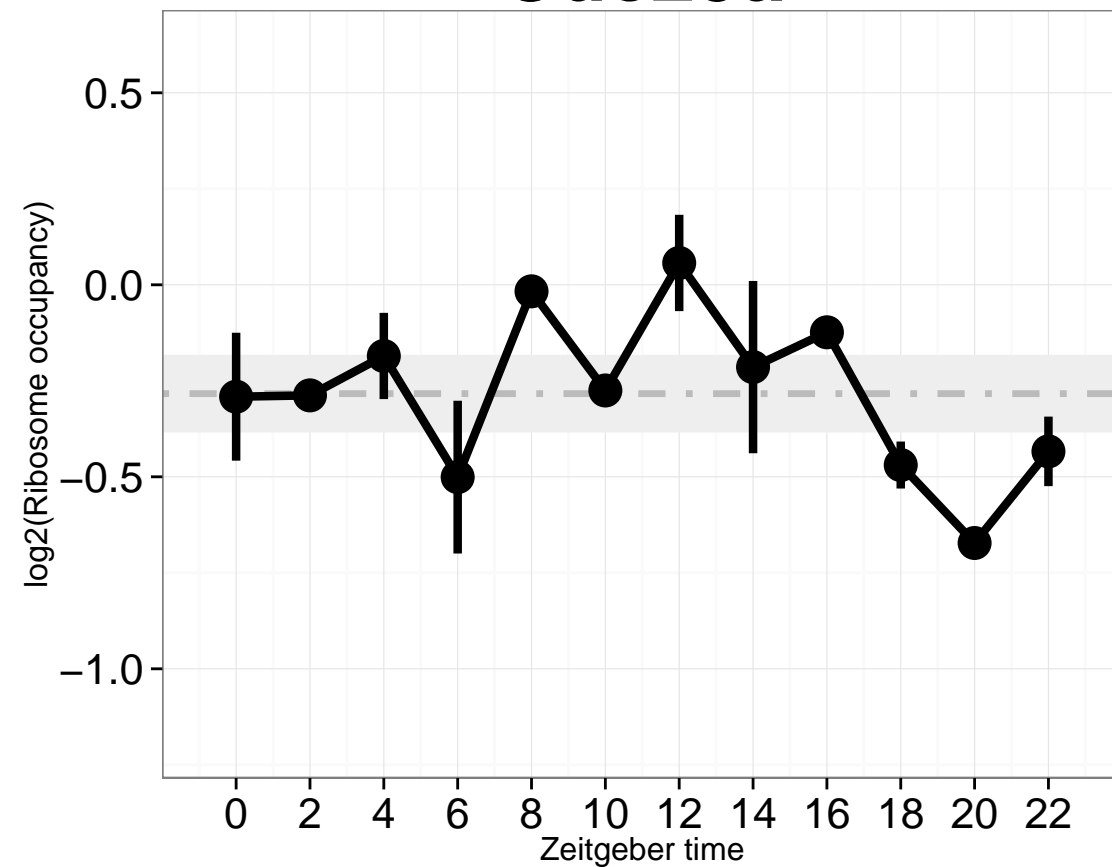

Supplement: Supplementary file 11117 [file 1]

# Ndufc1

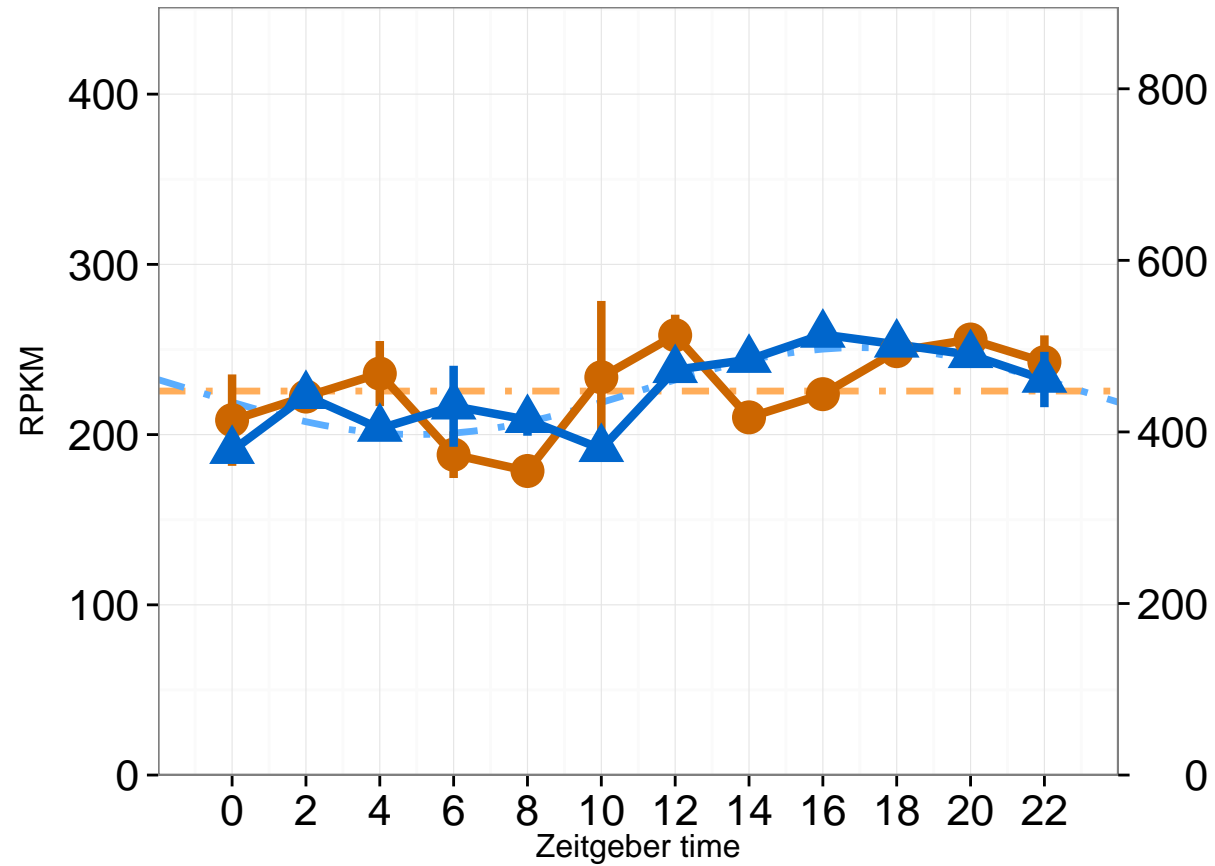

# Ndufc1

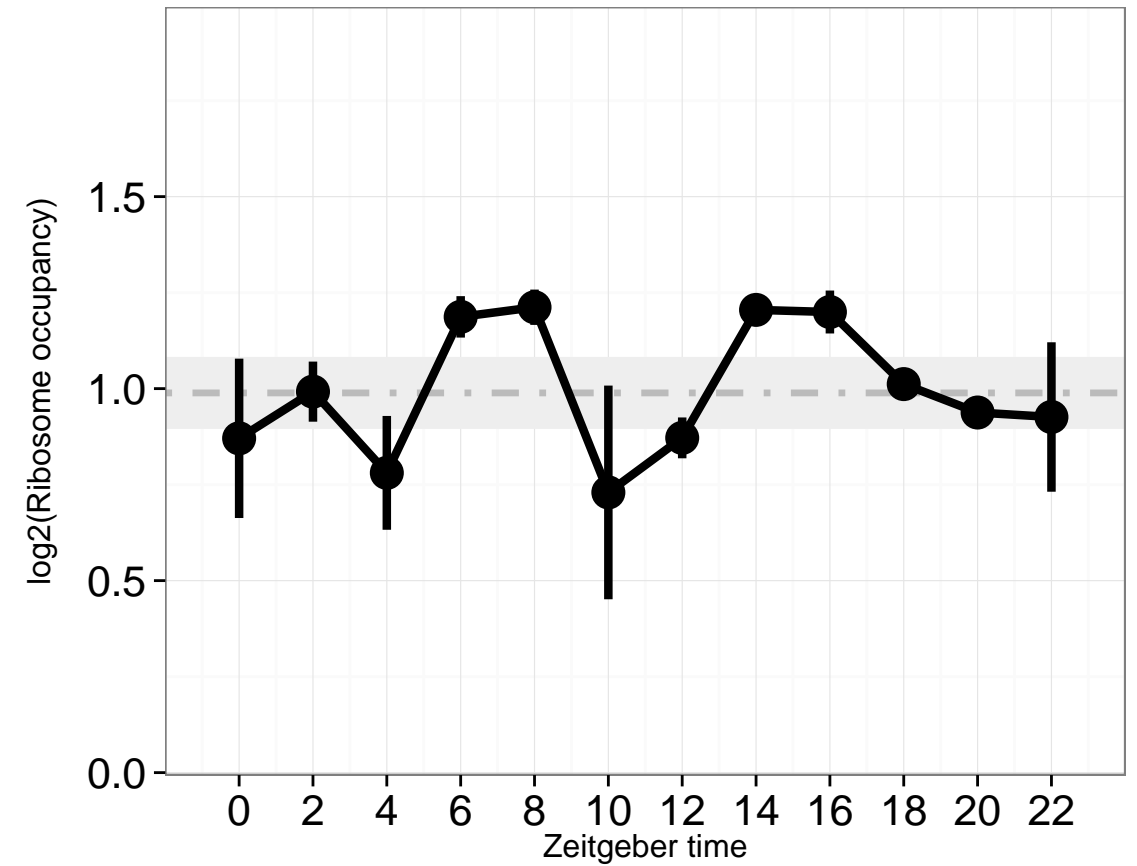

Supplement: Supplementary file 11118 [file 1]

# Dnajc11

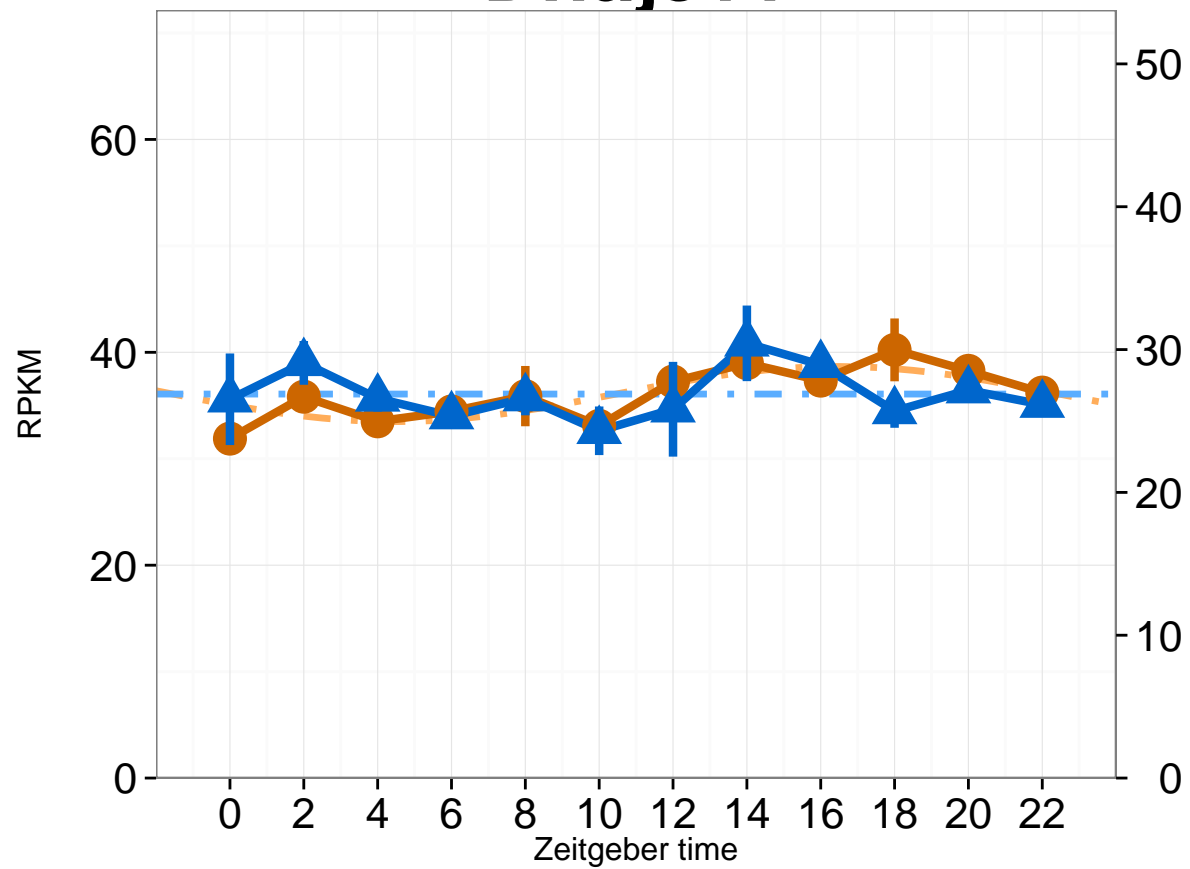

# Dnajc11

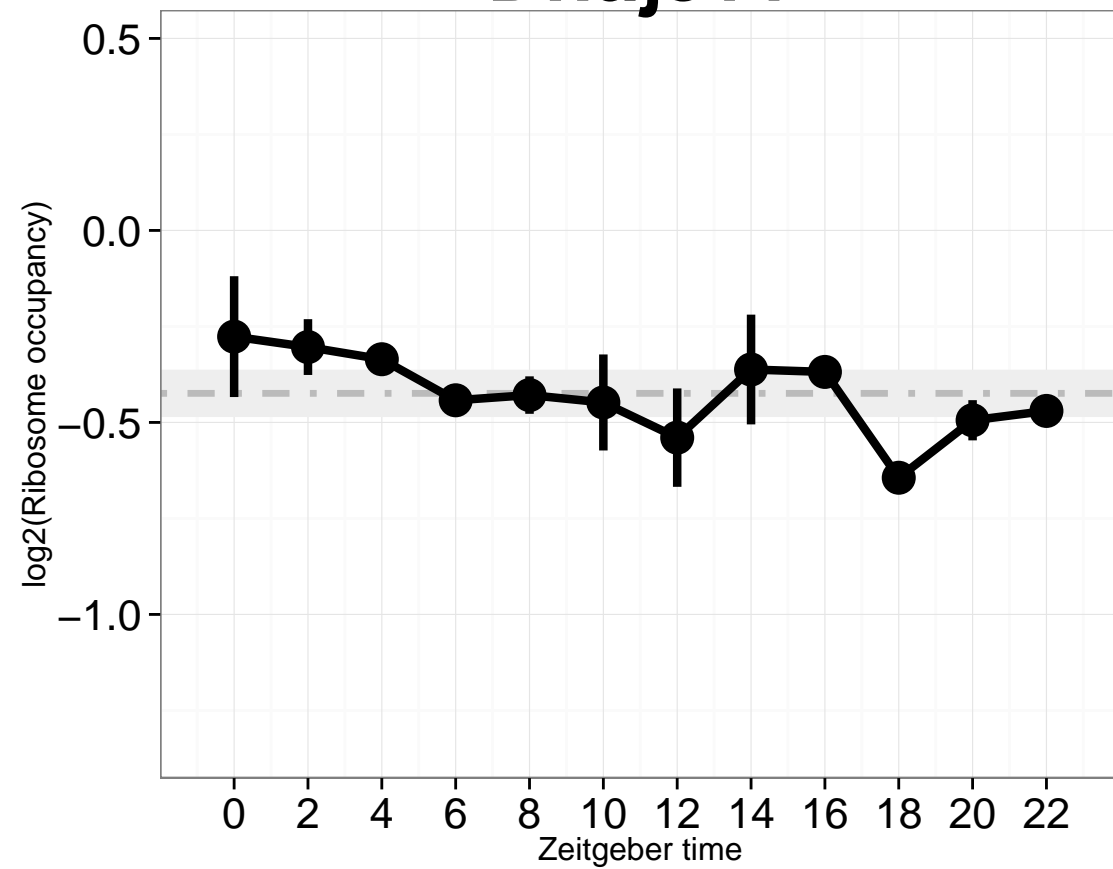

Supplement: Supplementary file 11119 [file 1]

# F13b

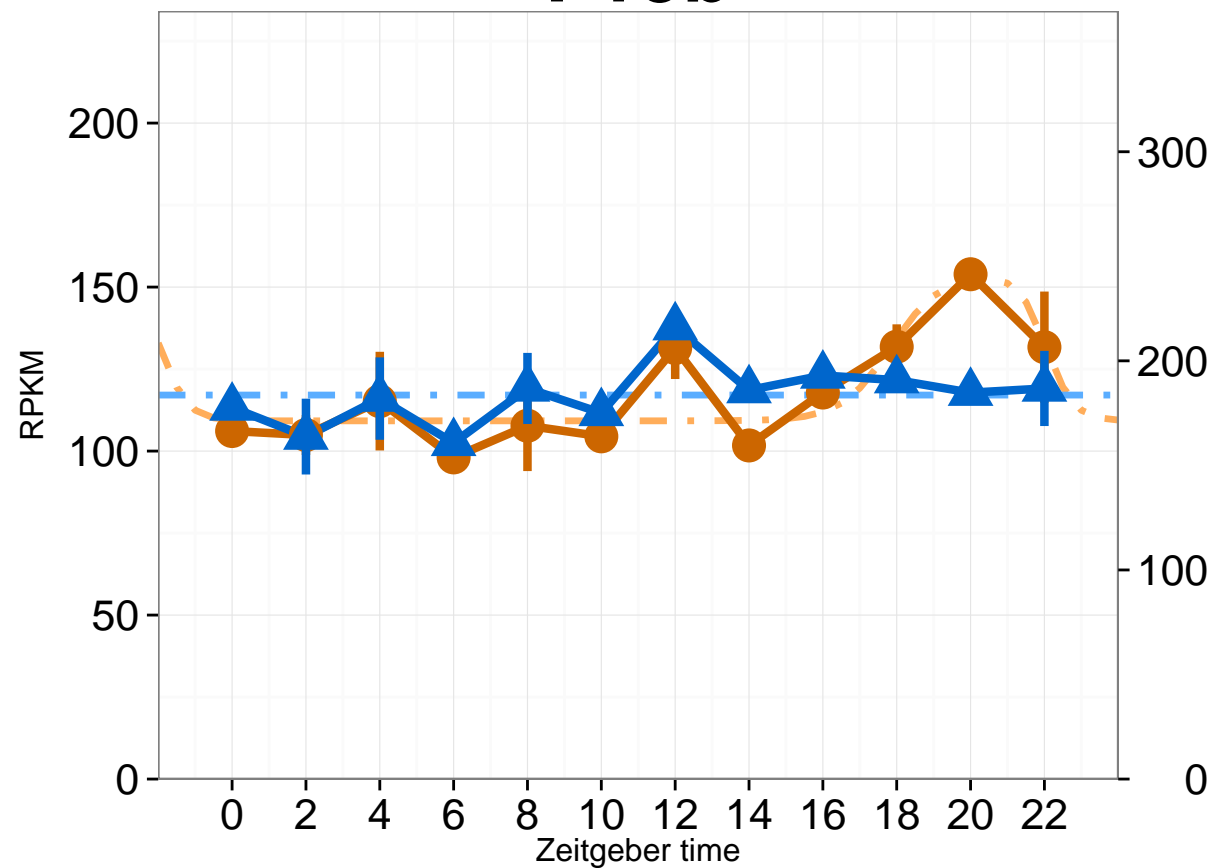

# F13b

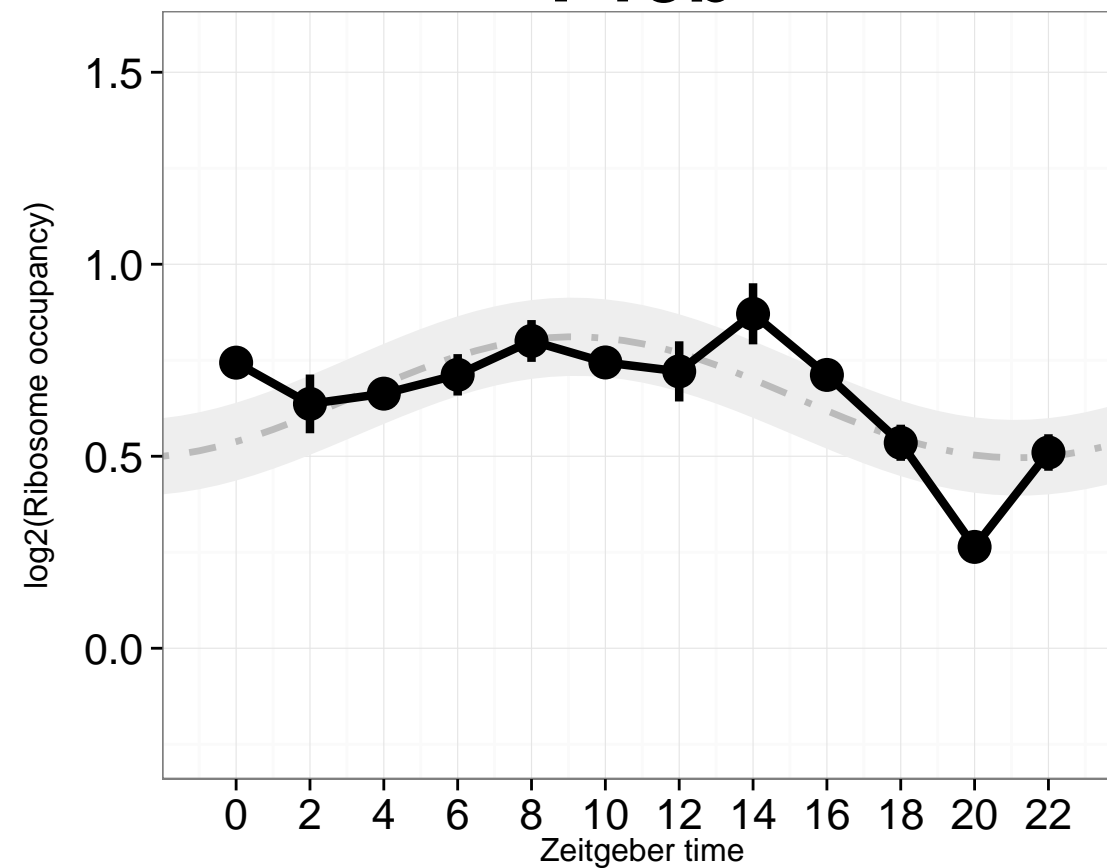

Supplement: Supplementary file 11120 [file 1]

# Lyplal1

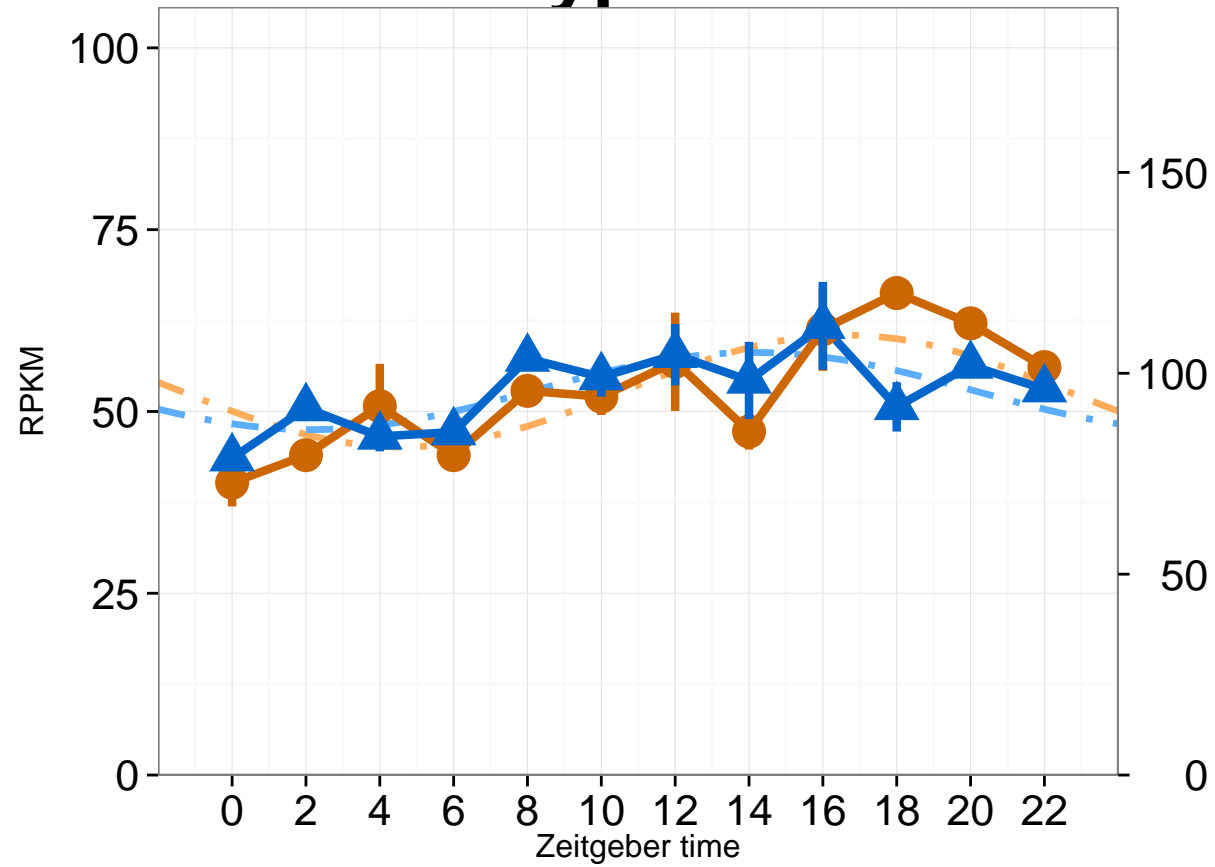

# Lyplal1

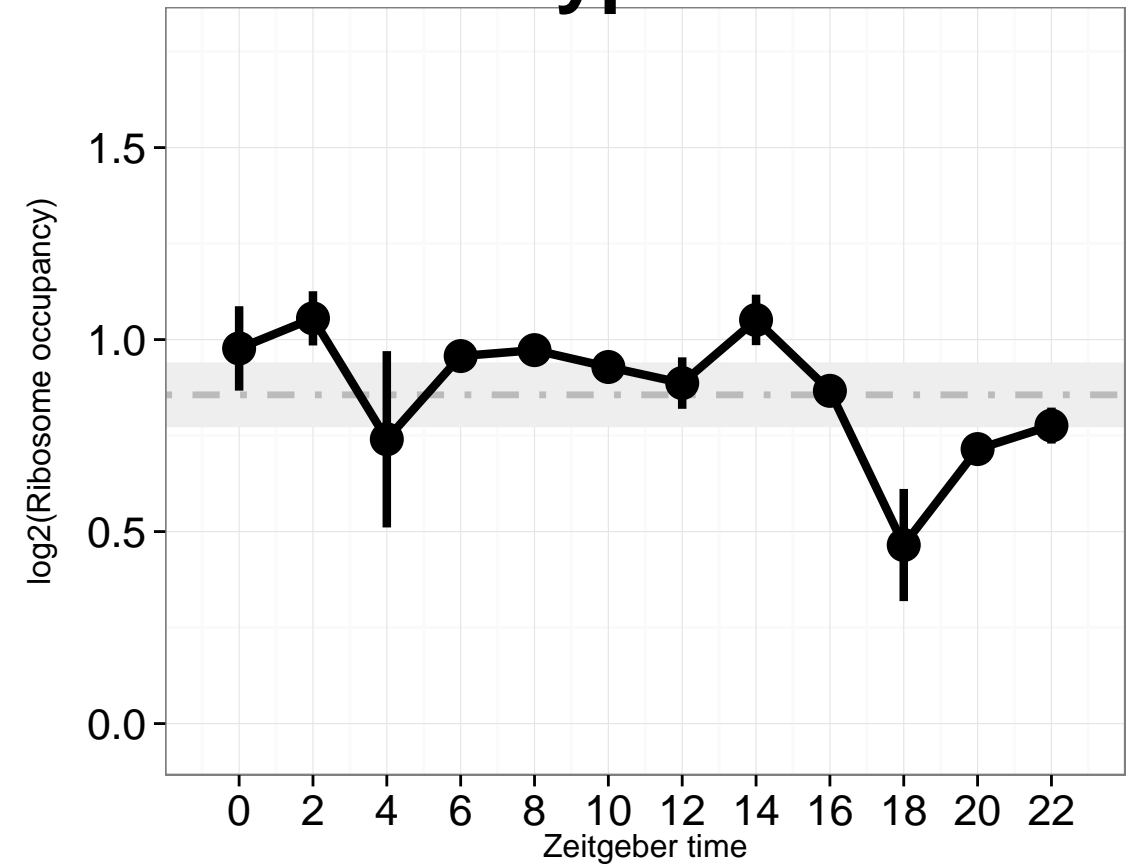

Supplement: Supplementary file 11121 [file 1]

## Vrk2

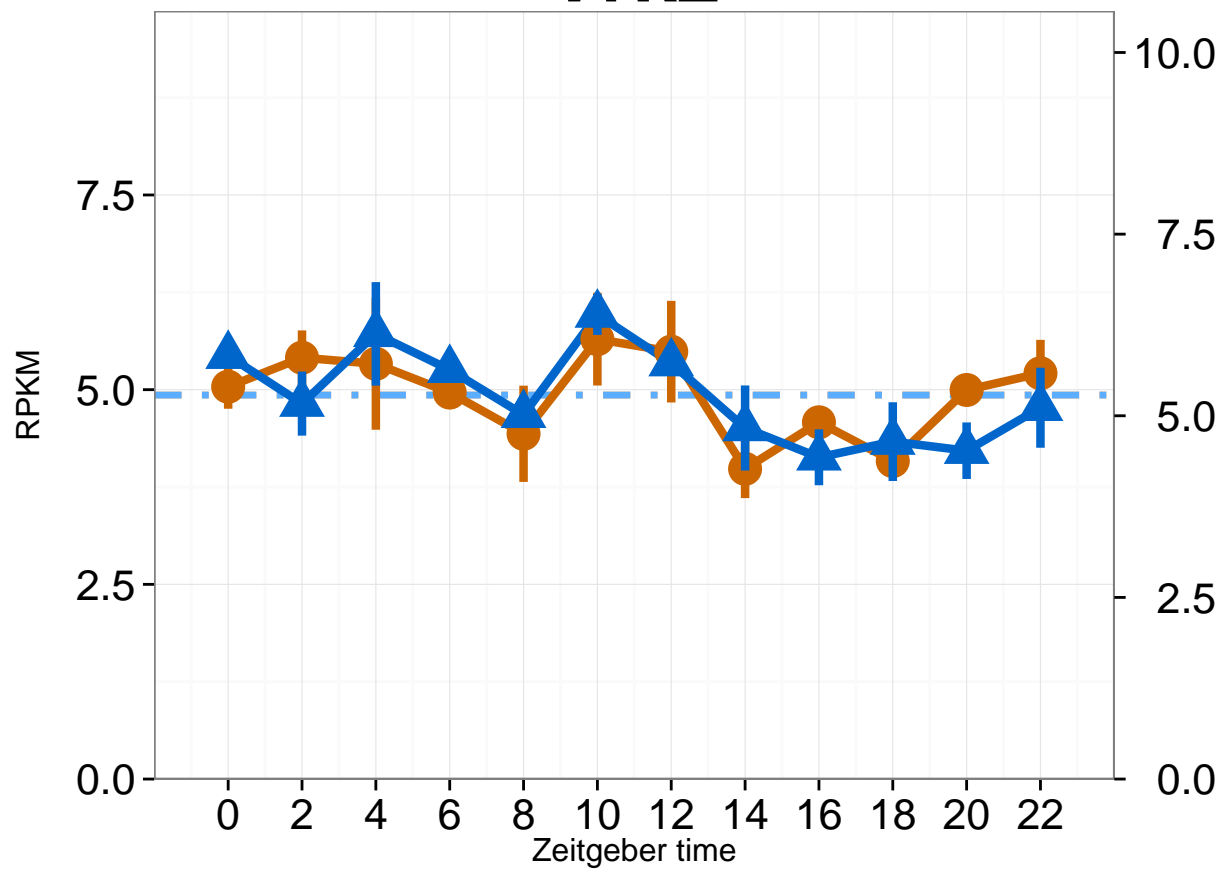

## Vrk2

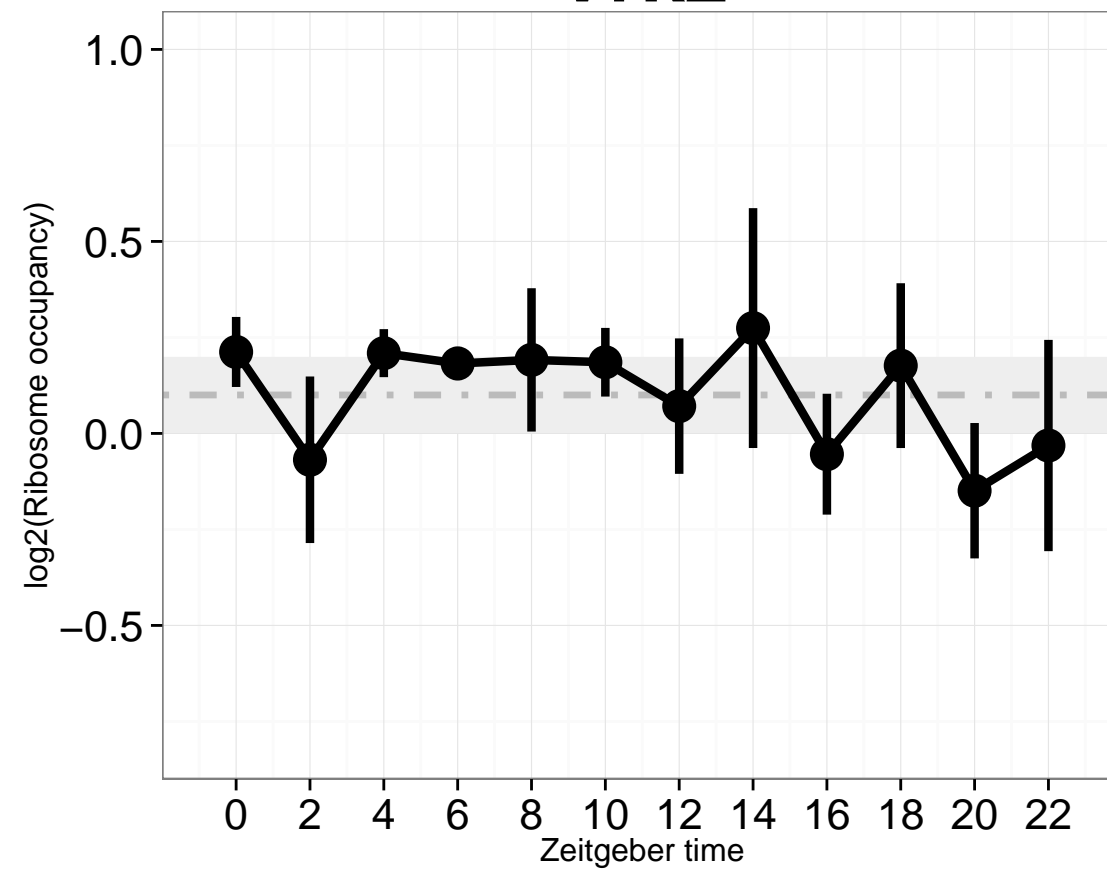

Supplement: Supplementary file 11122 [file 1]

## Acnat2

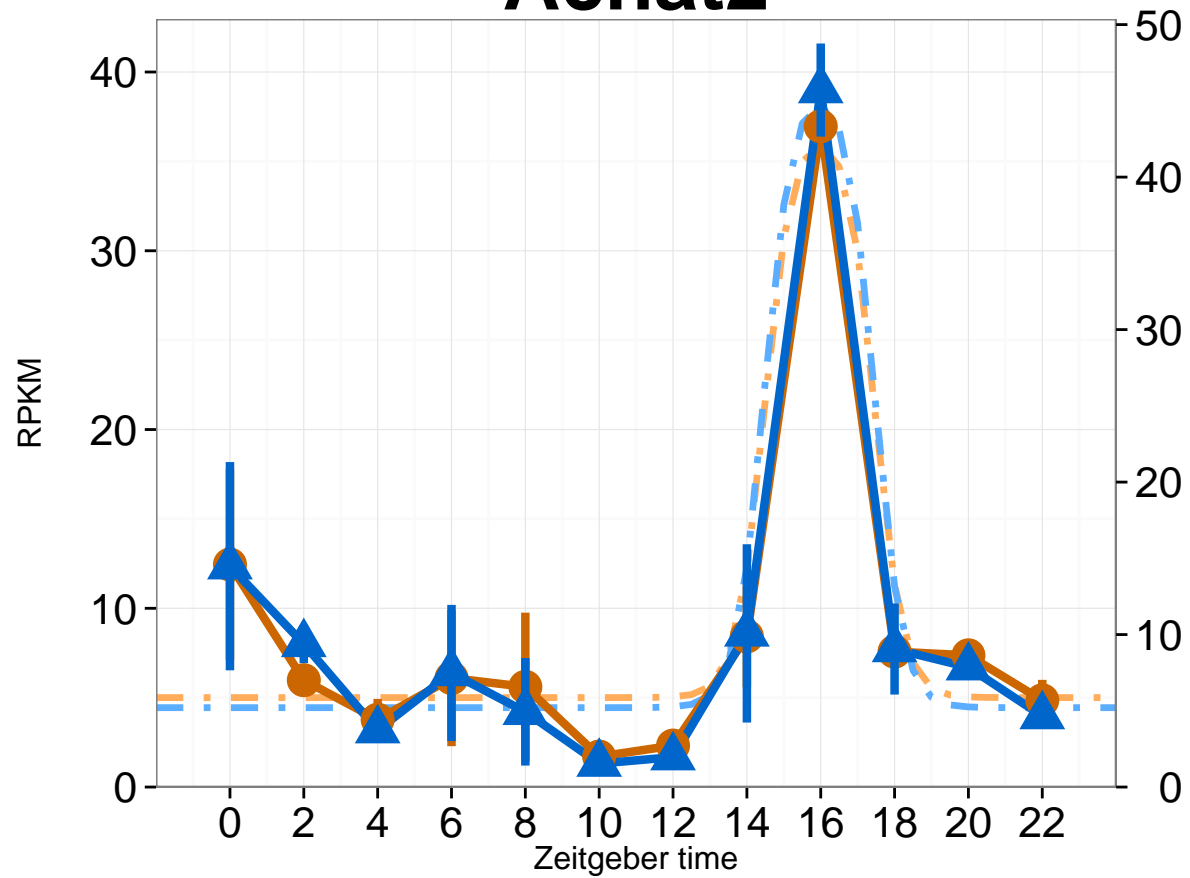

## Acnat2

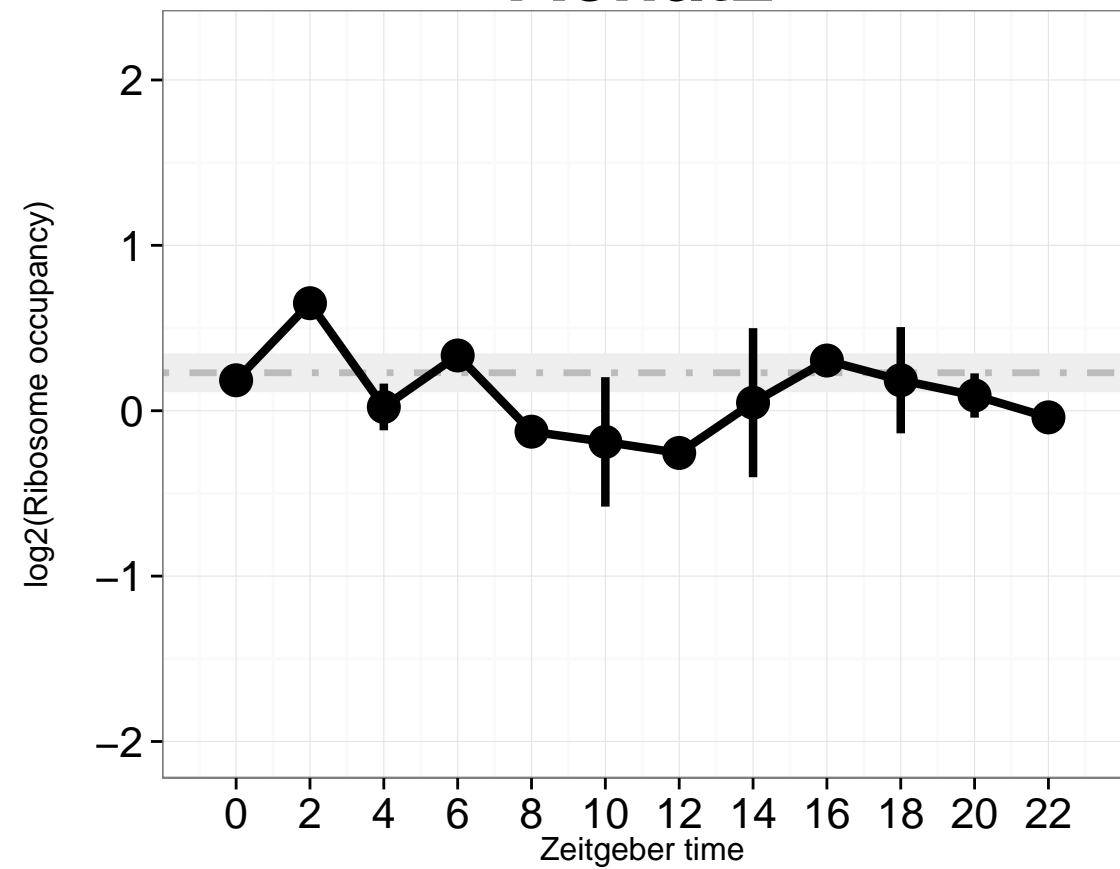

Supplement: Supplementary file 11123 [file 1]

# Psmb4

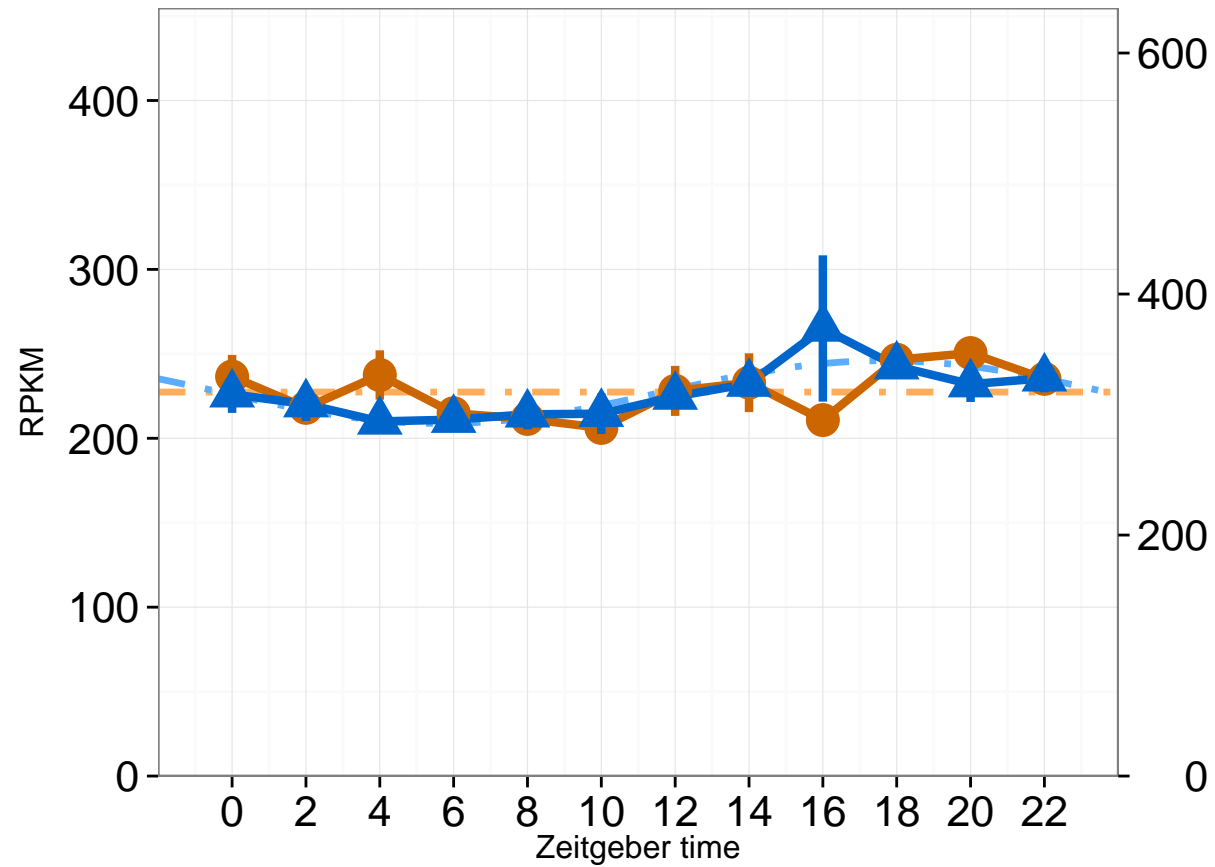

# Psmb4

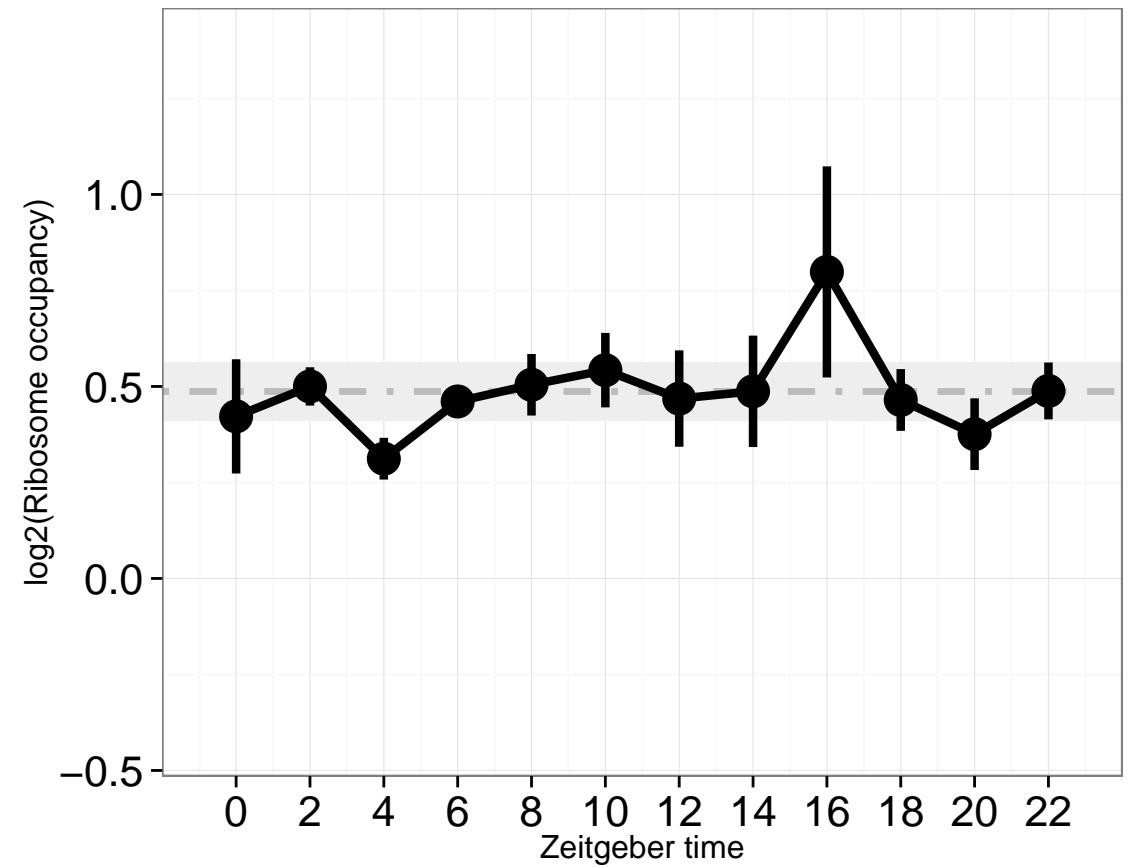

Supplement: Supplementary file 11124 [file 1]

## Smn1

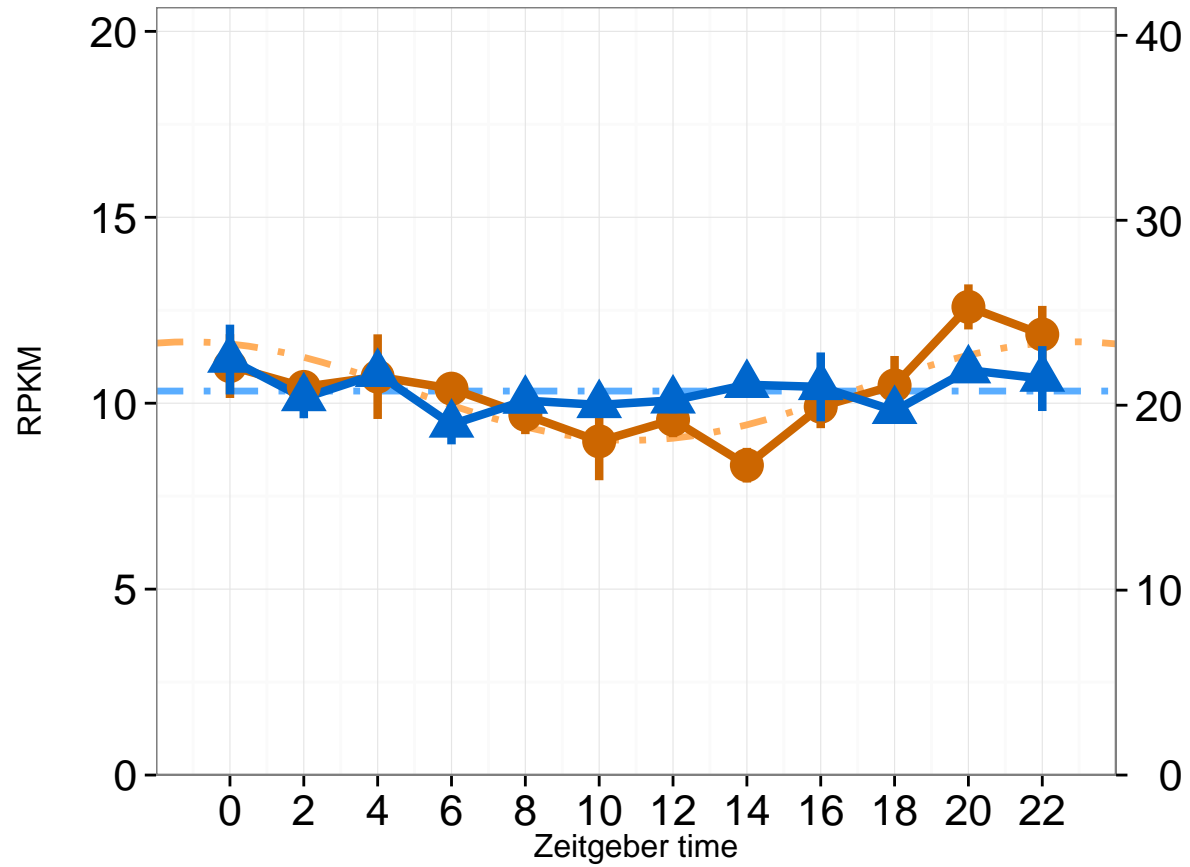

## Smn1

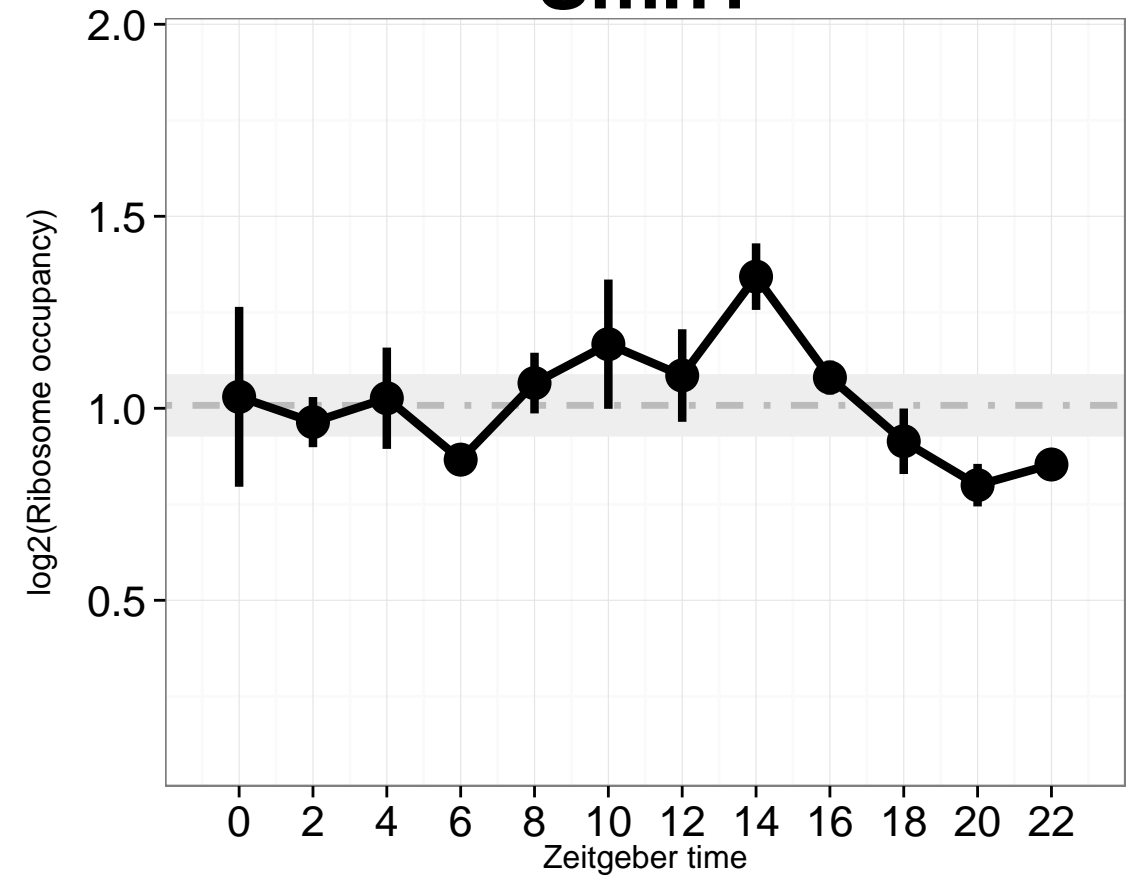

Supplement: Supplementary file 11125 [file 1]

# Tmed1

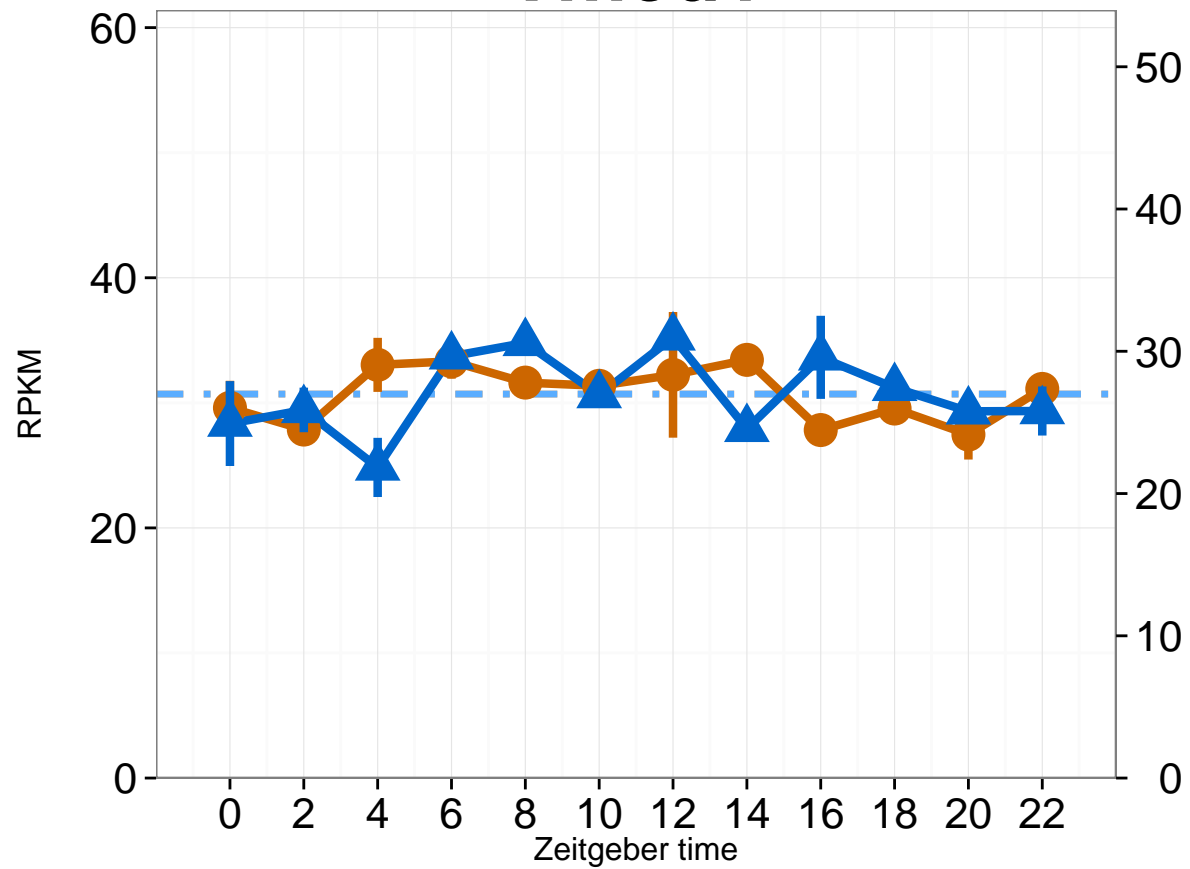

# Tmed1

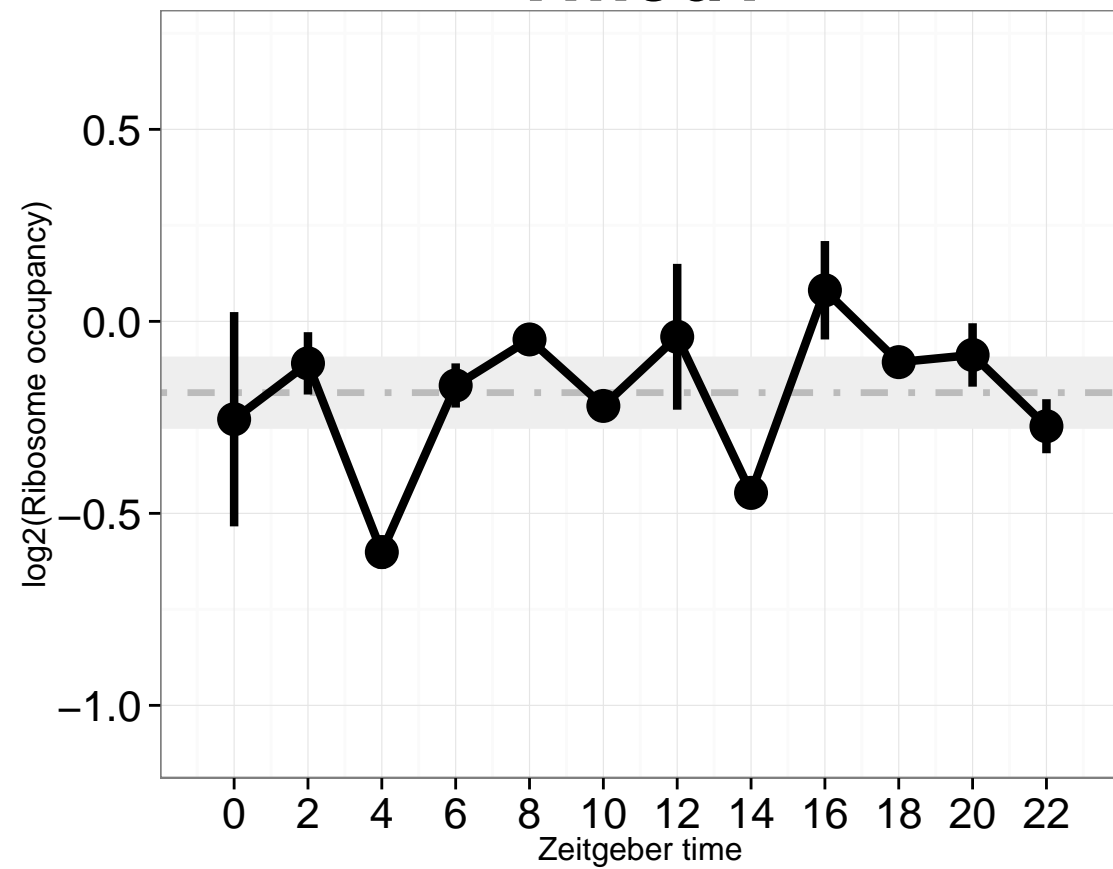

Supplement: Supplementary file 11126 [file 1]

# Cd300Id

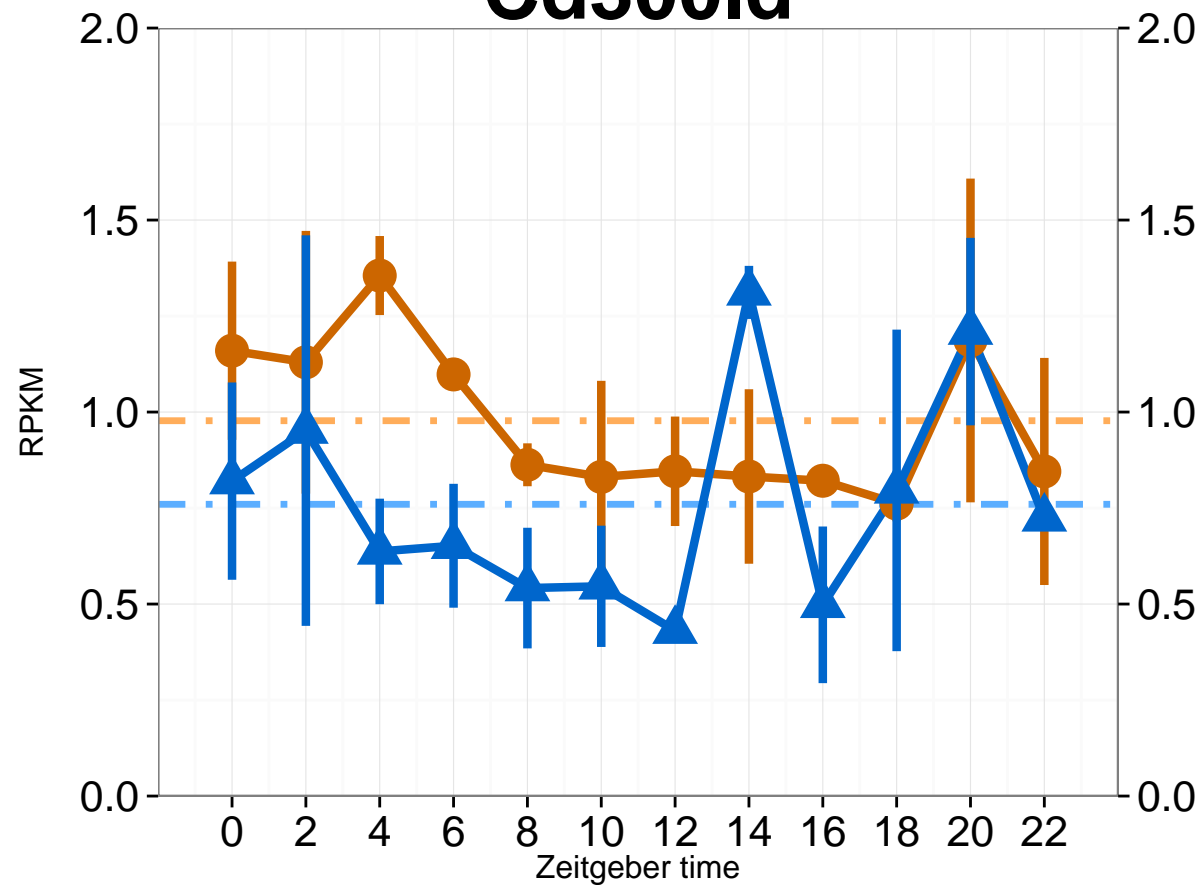

# Cd300Id

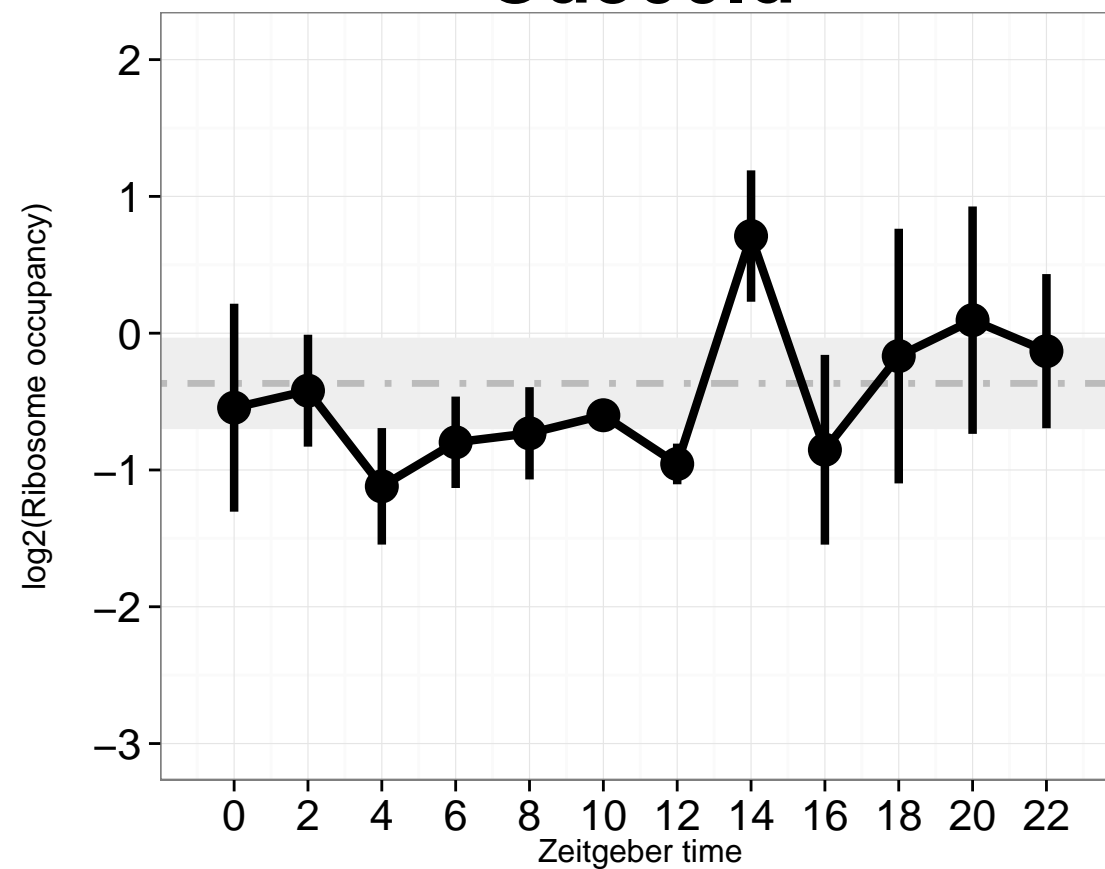

Supplement: Supplementary file 11127 [file 1]

## ErbB3

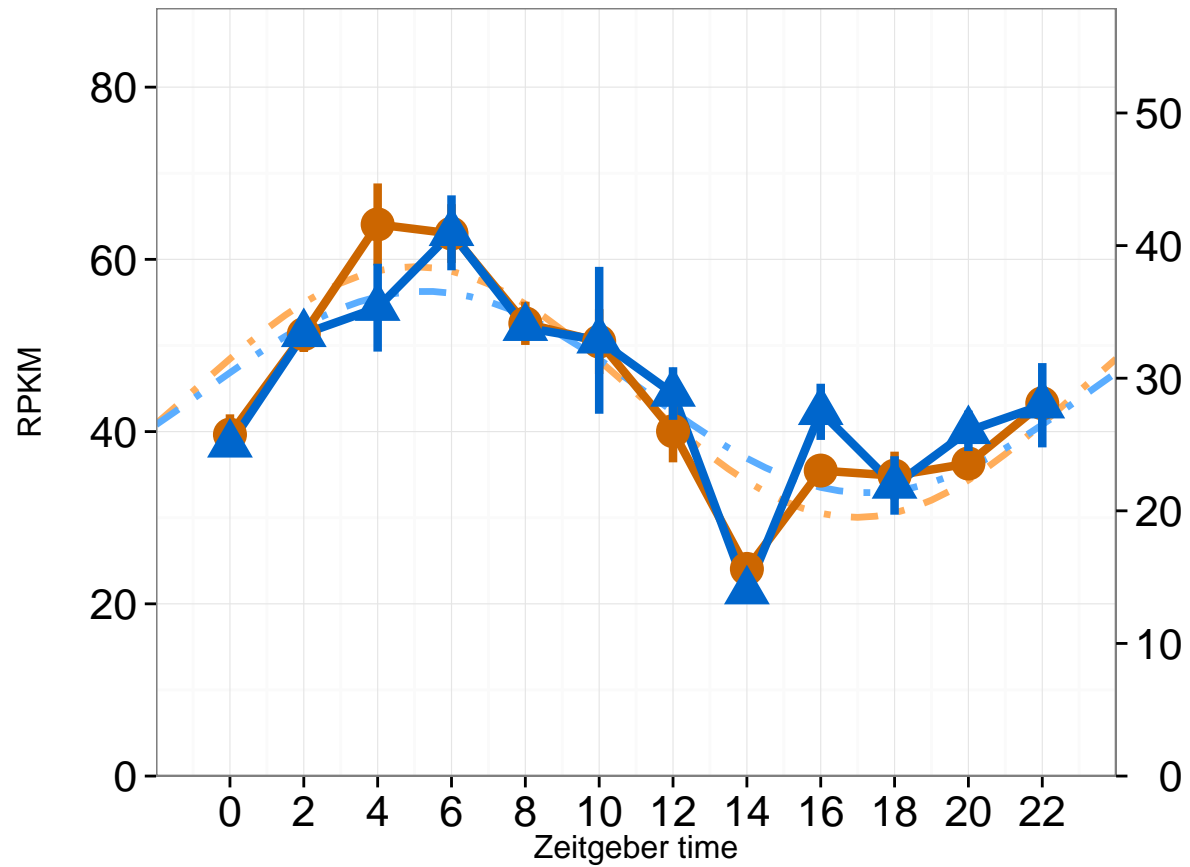

## ErbB3

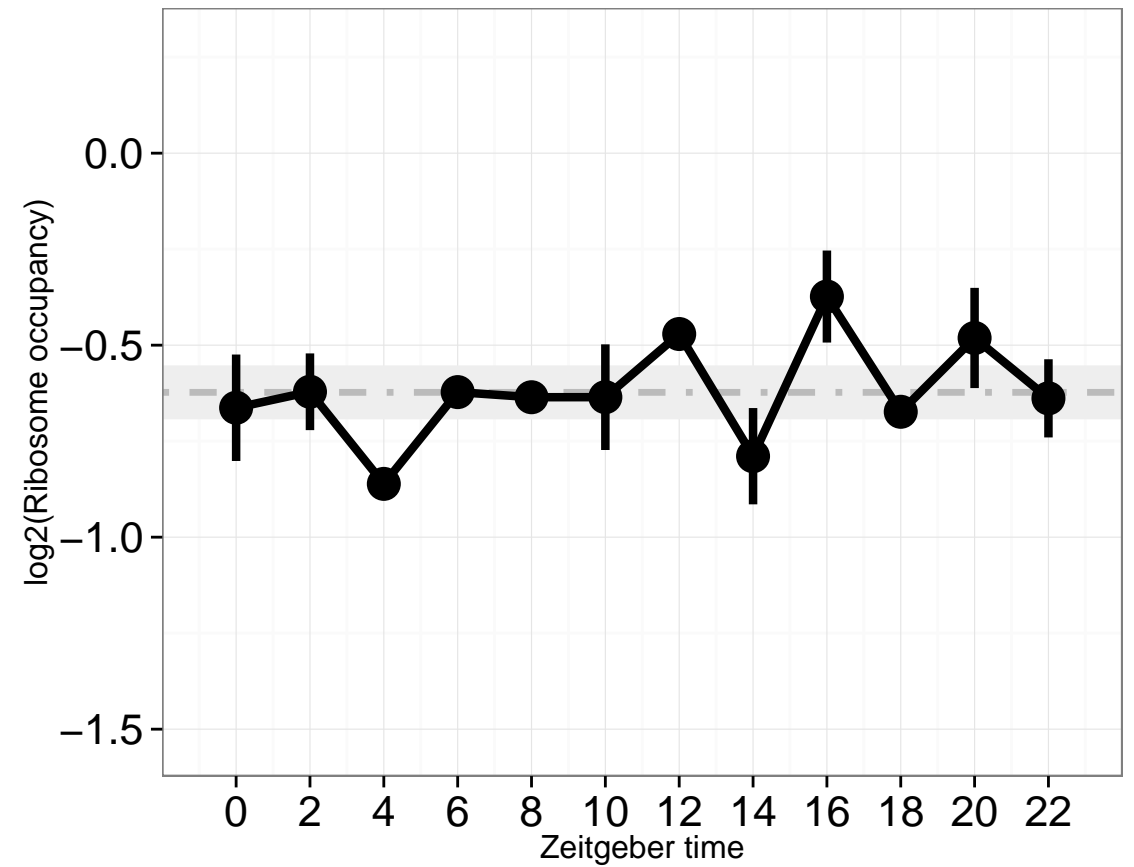

Supplement: Supplementary file 11128 [file 1]

# Fam212a

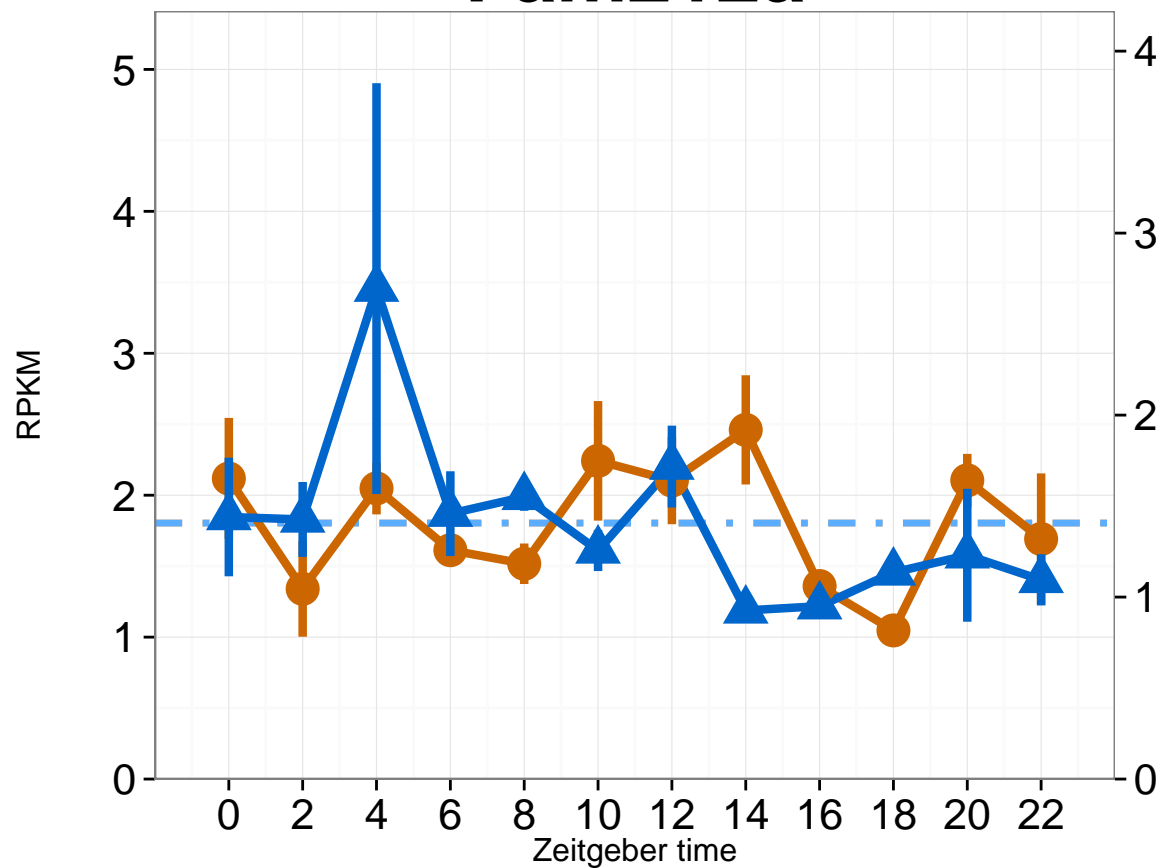

# Fam212a

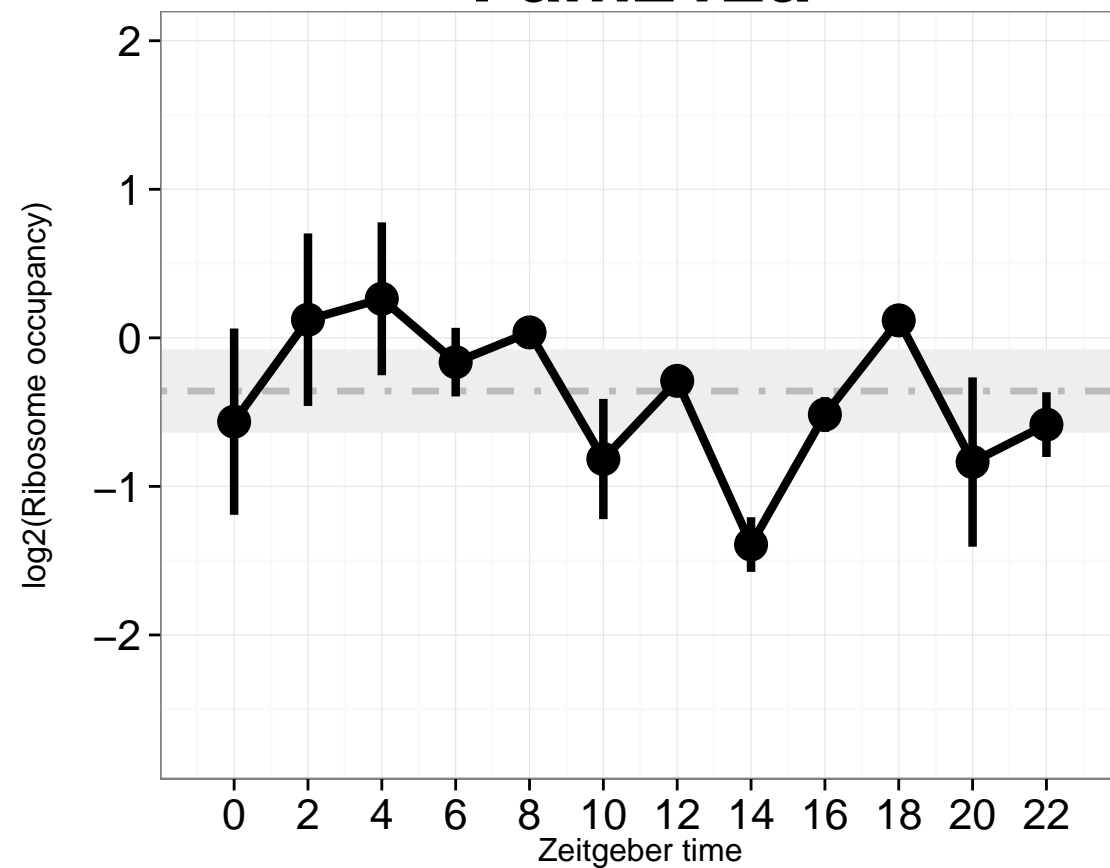

Supplement: Supplementary file 11129 [file 1]

# Pi4ka

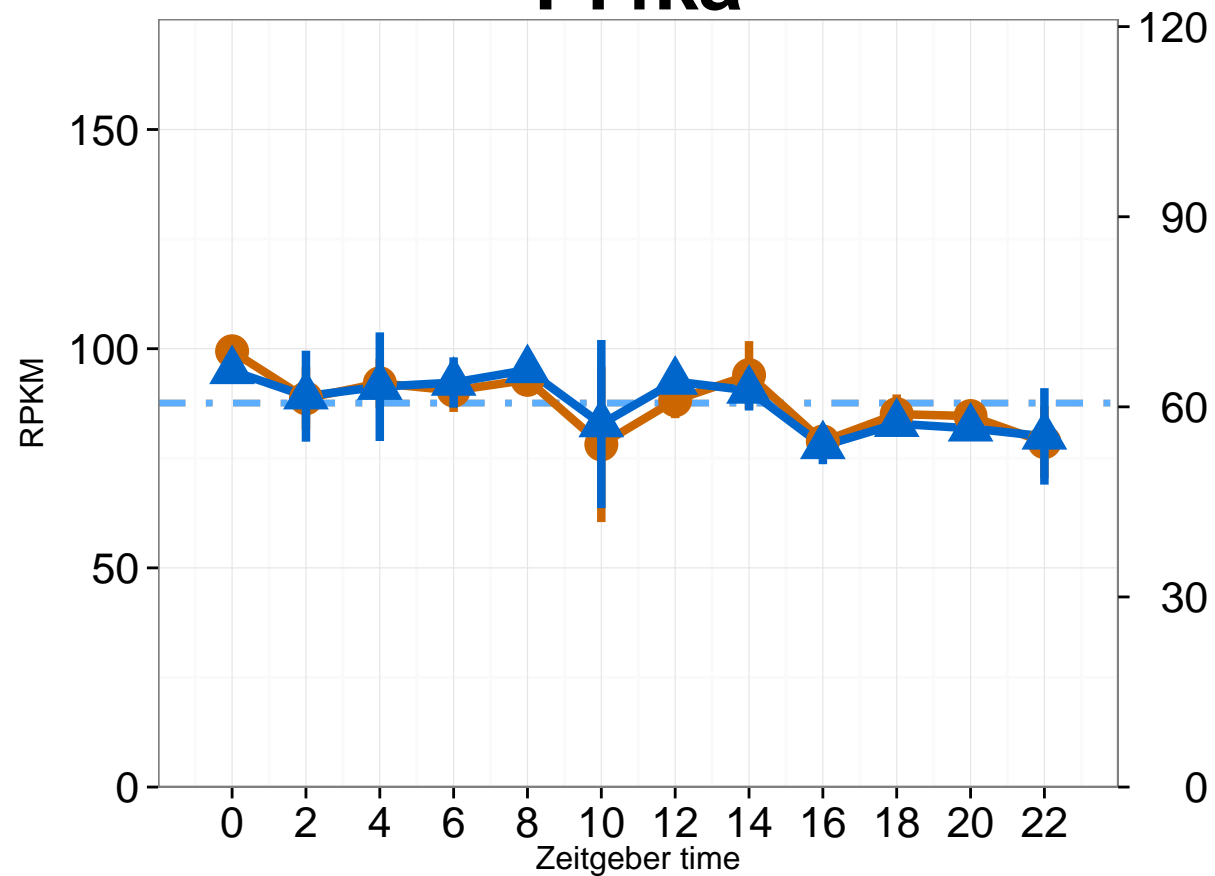

# Pi4ka

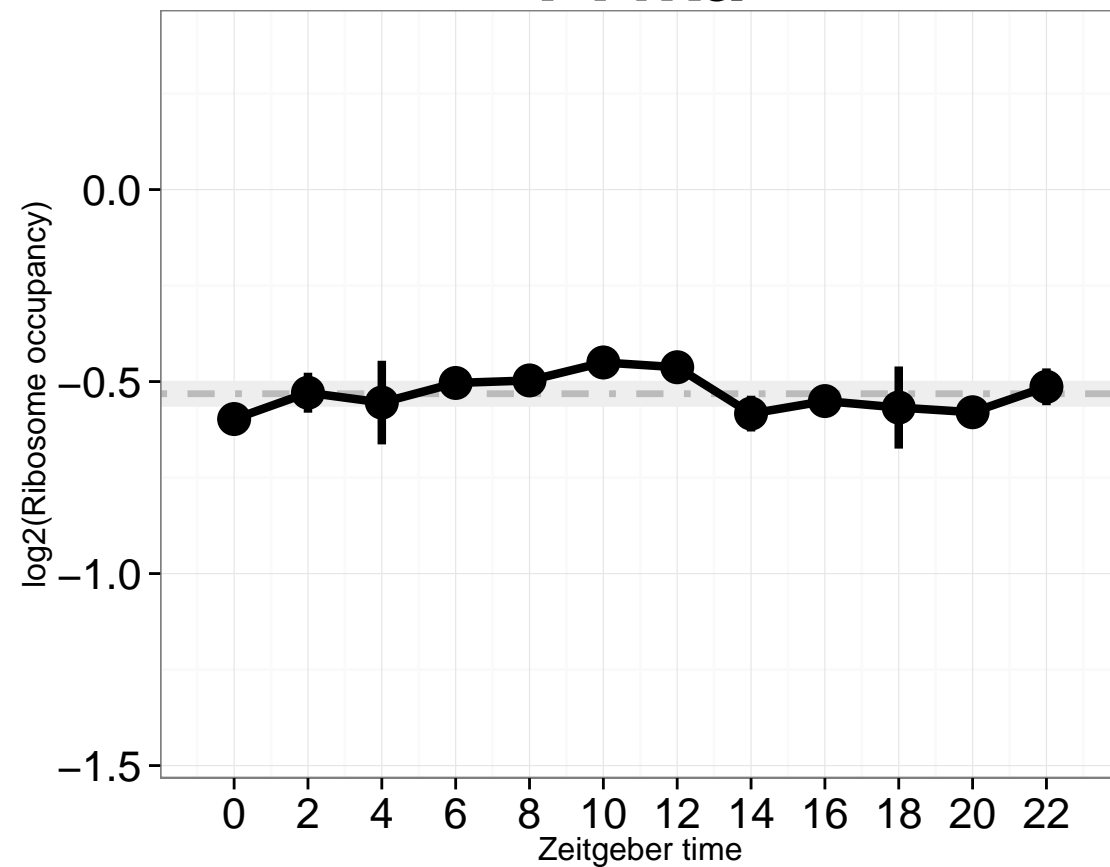

Supplement: Supplementary file 11130 [file 1]

# Sox4

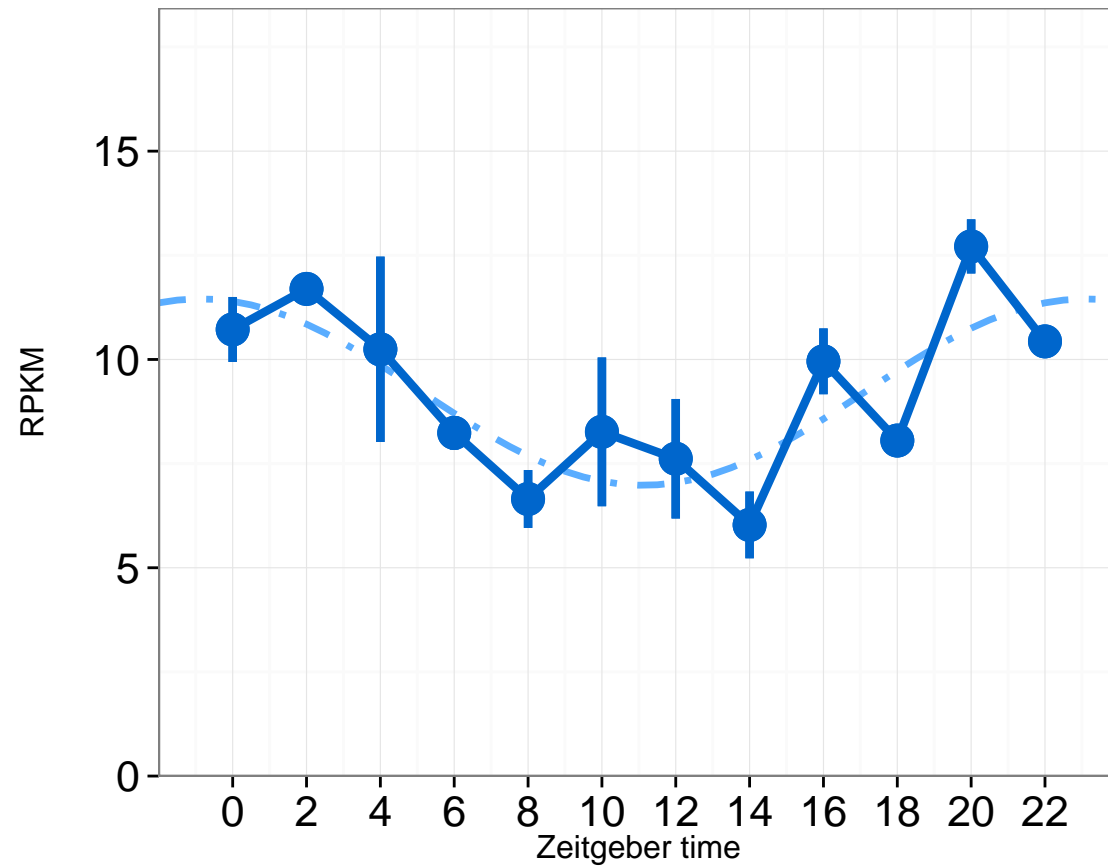

# Sox4 log2(Ribosome occupancy)

Supplement: Supplementary file 11131 [file 1]

## Napepld

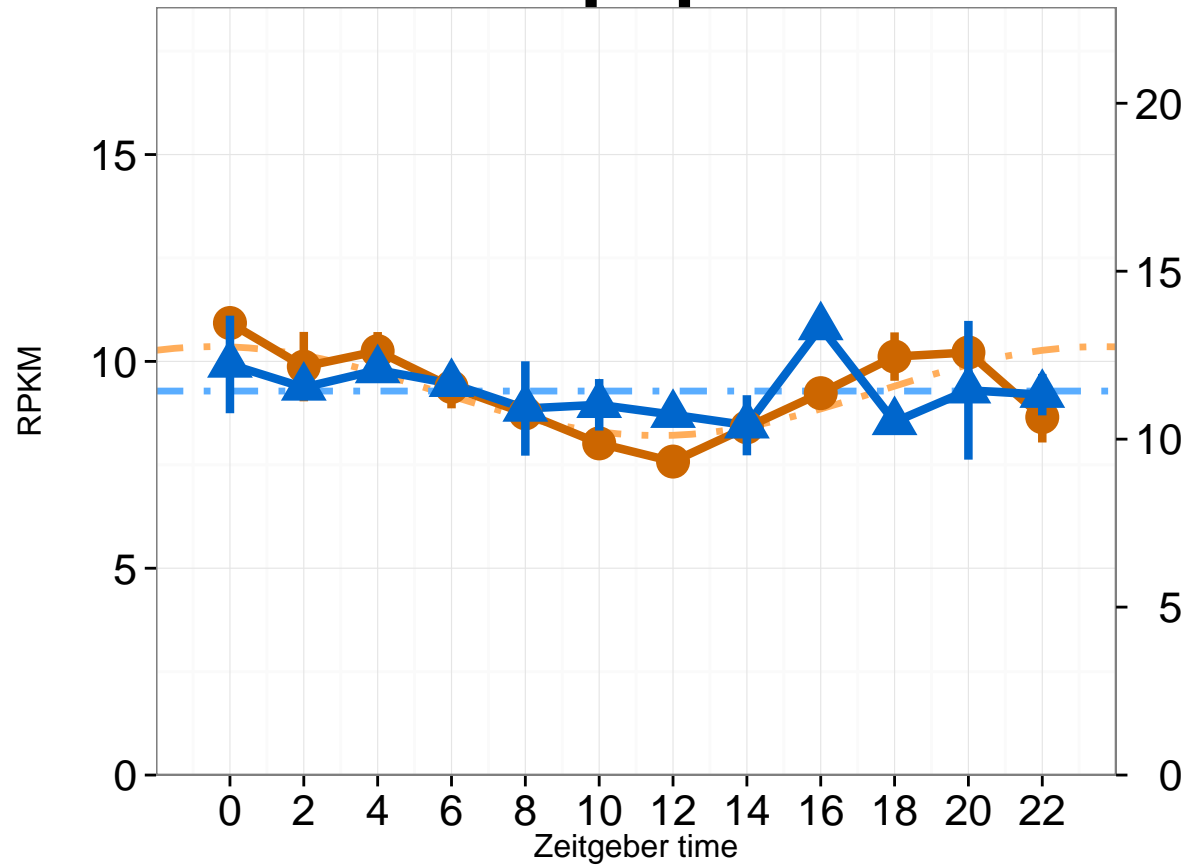

## Napepld

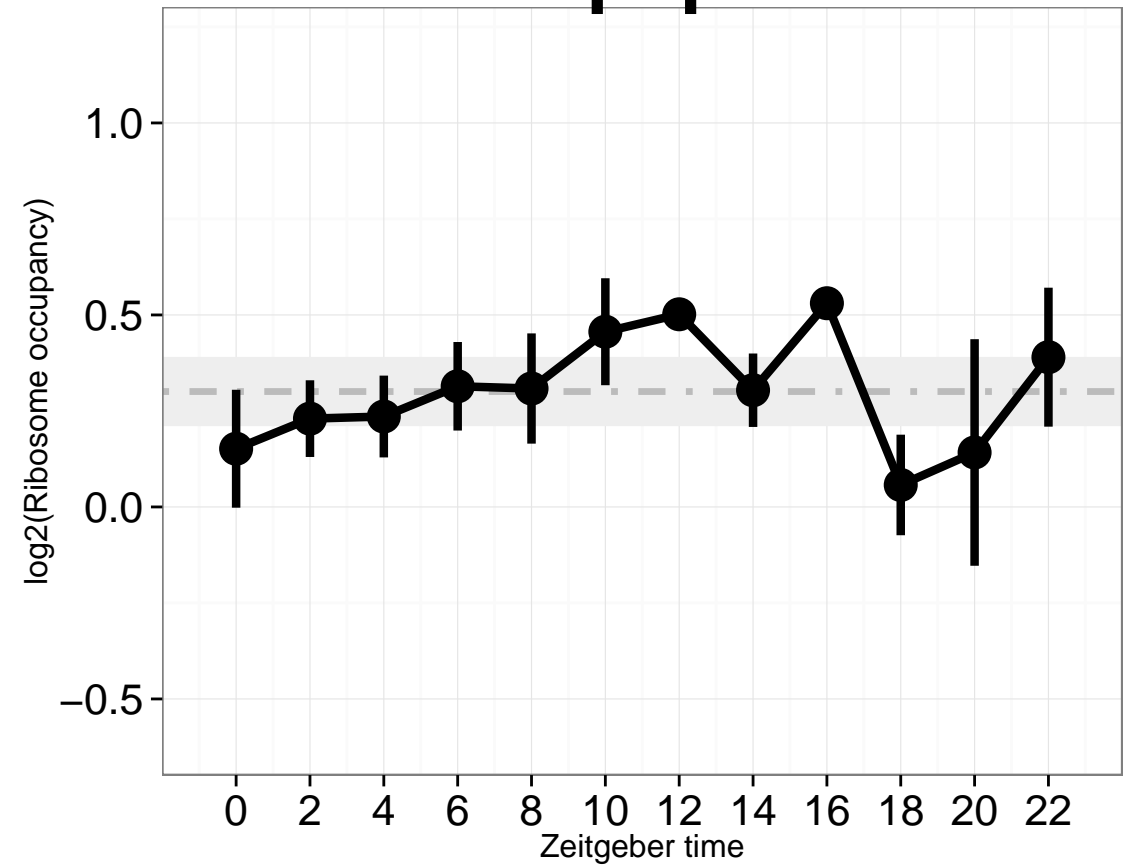

Supplement: Supplementary file 11132 [file 1]

## Nme1

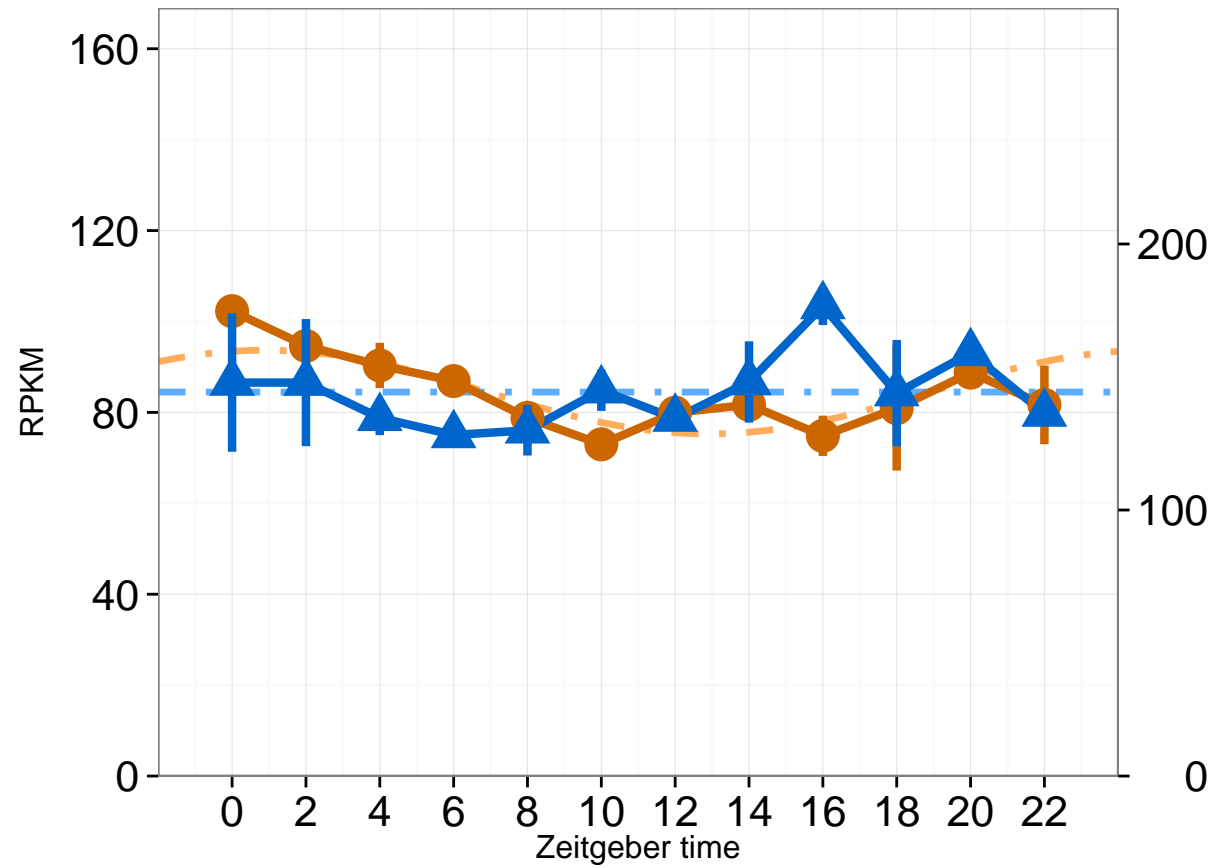

## Nme1

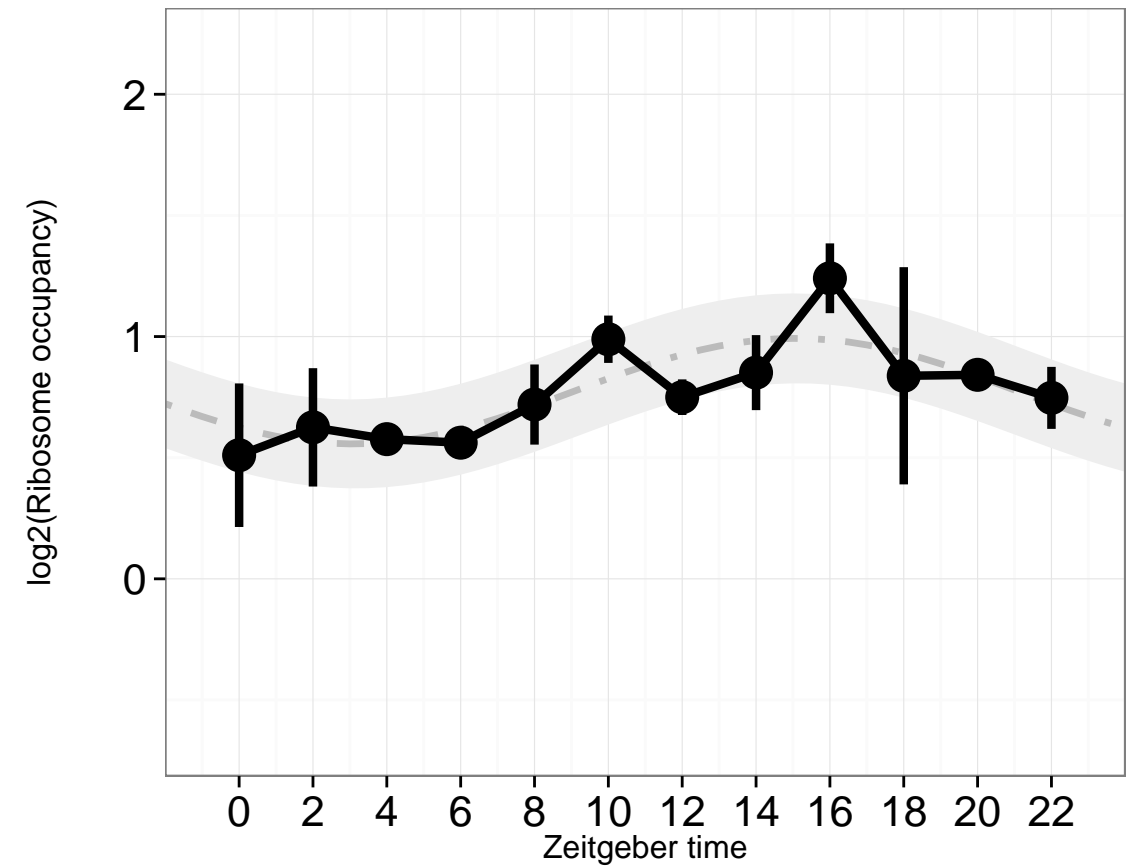

Supplement: Supplementary file 11133 [file 1]

# Mtf1

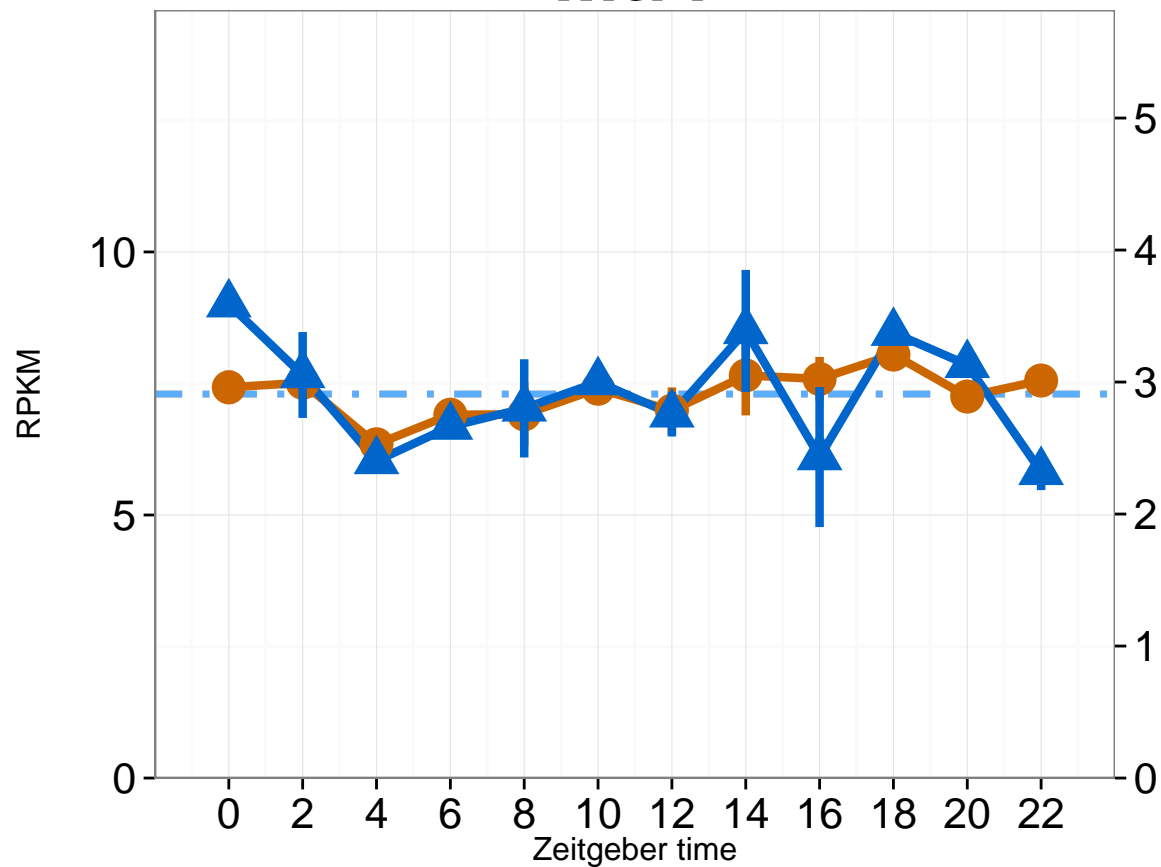

# Mtf1

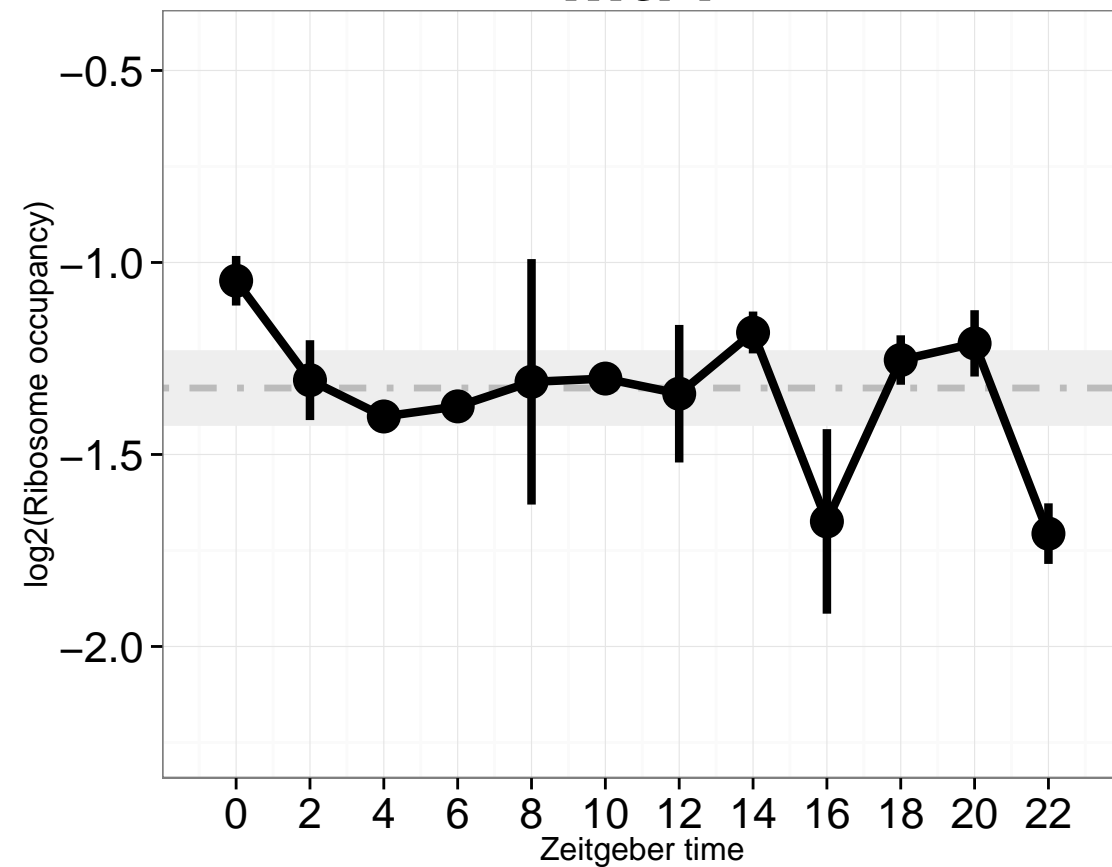

Supplement: Supplementary file 11134 [file 1]

# Tmem41a

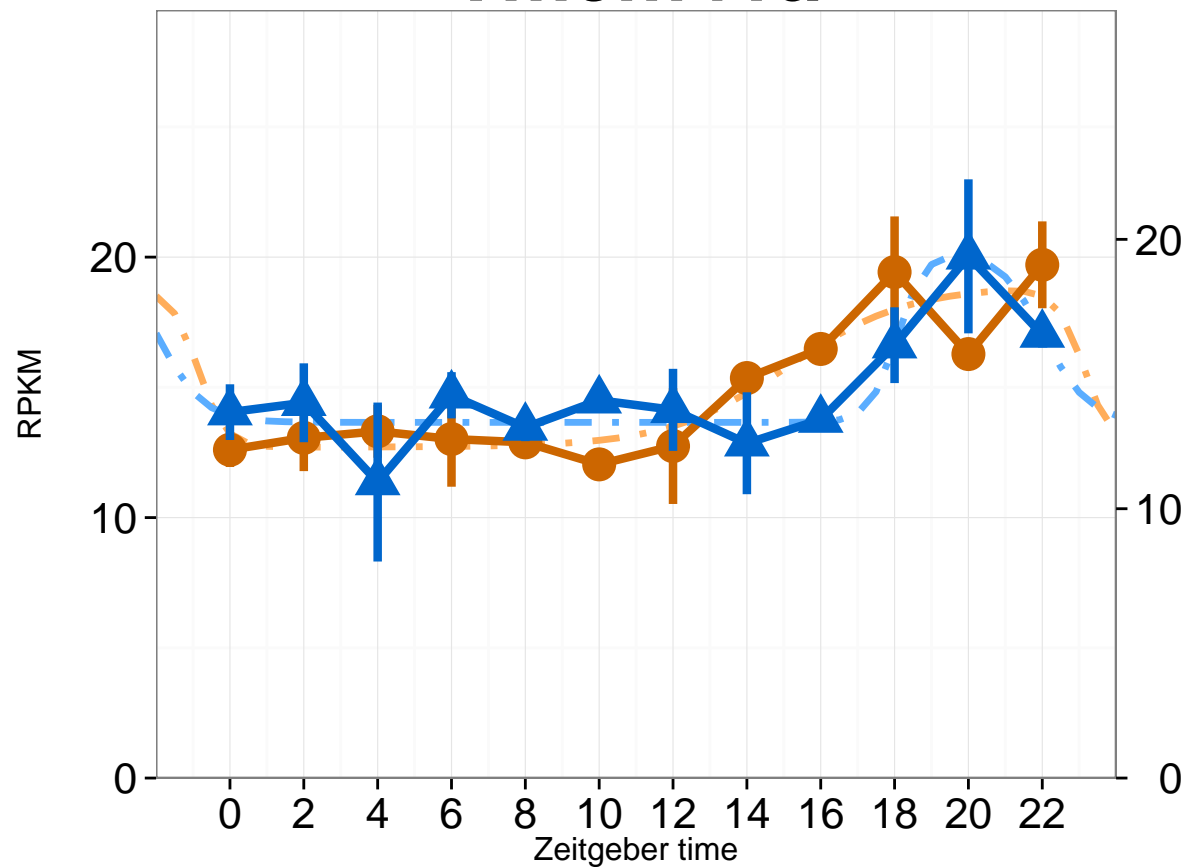

# Tmem41a

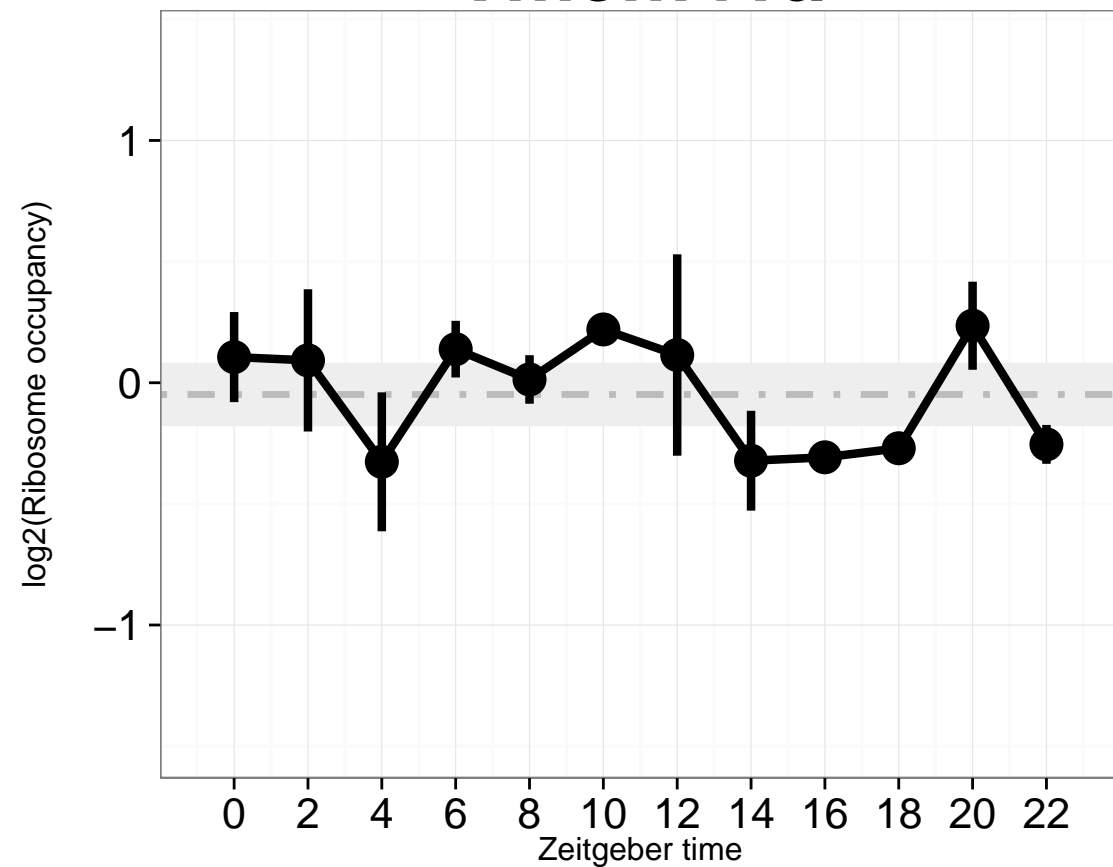

Supplement: Supplementary file 11135 [file 1]

# Fbxw17

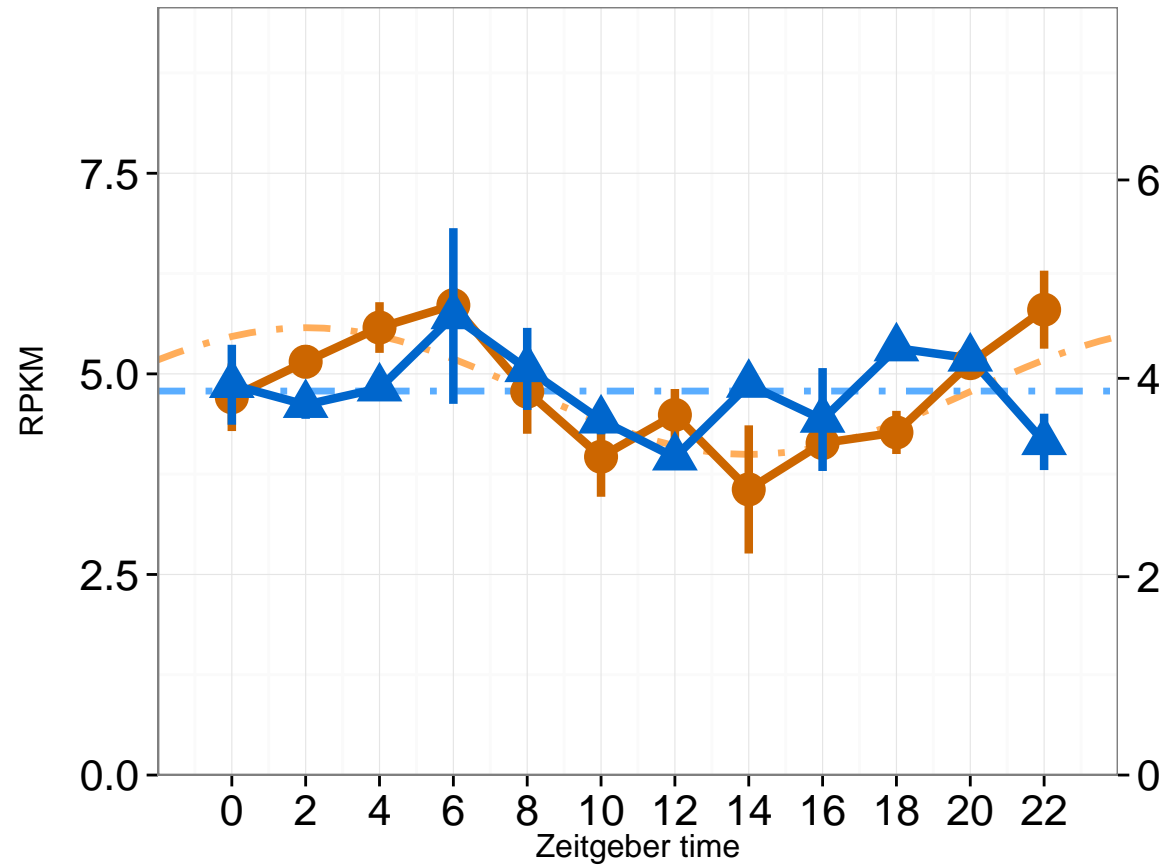

# Fbxw17

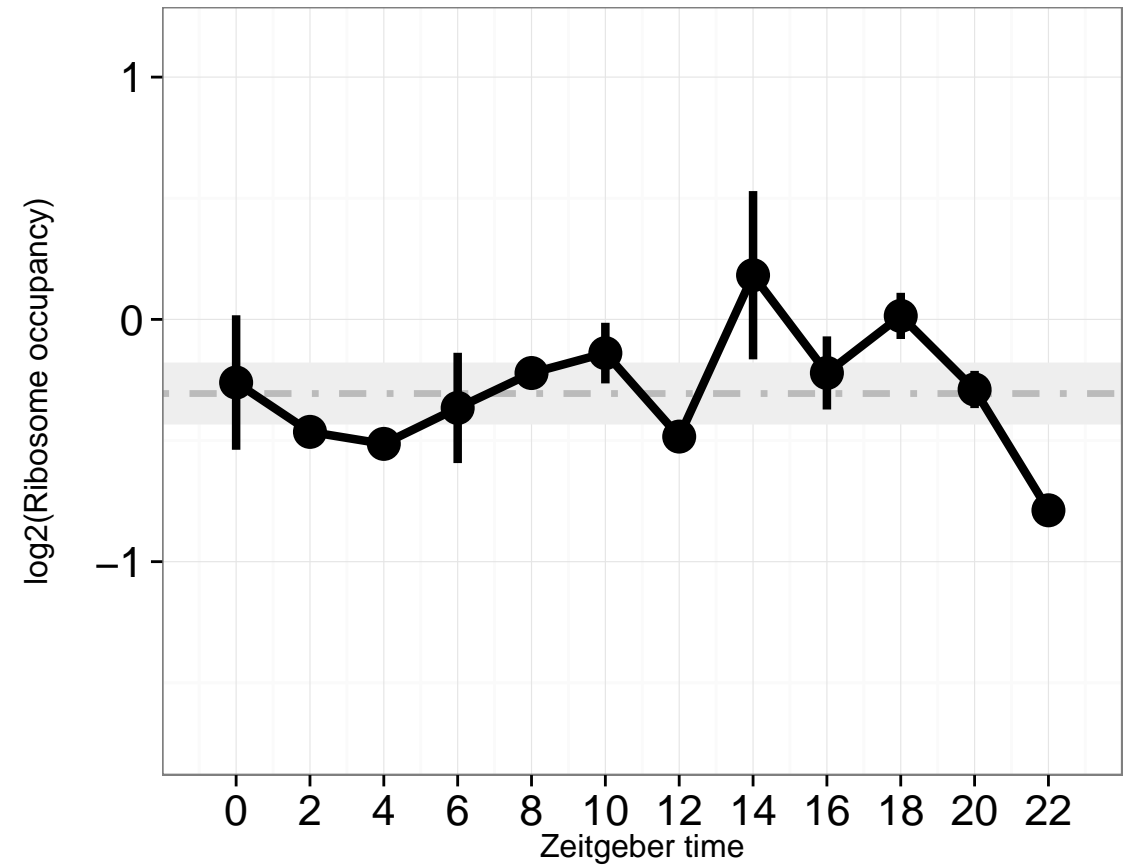

Supplement: Supplementary file 11136 [file 1]

## Mars2

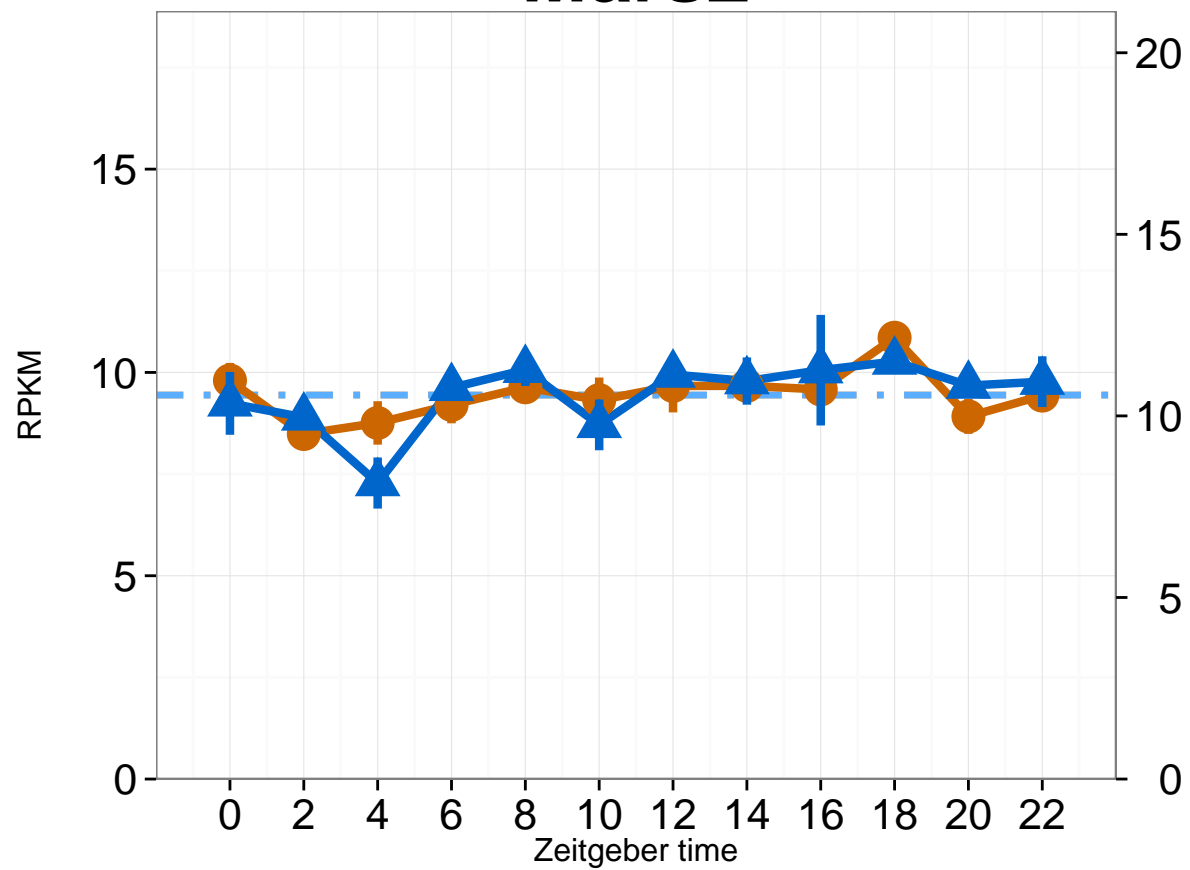

## Mars2

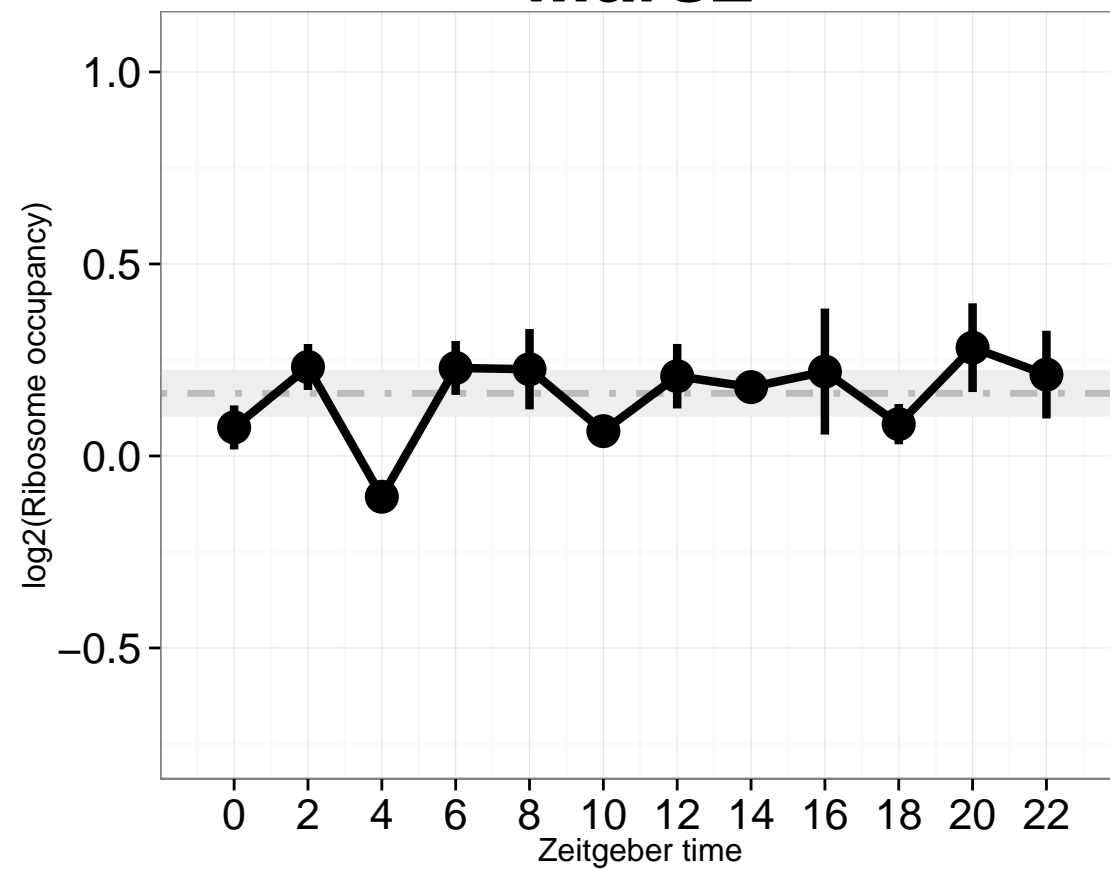

Supplement: Supplementary file 11137 [file 1]

# Vmp1

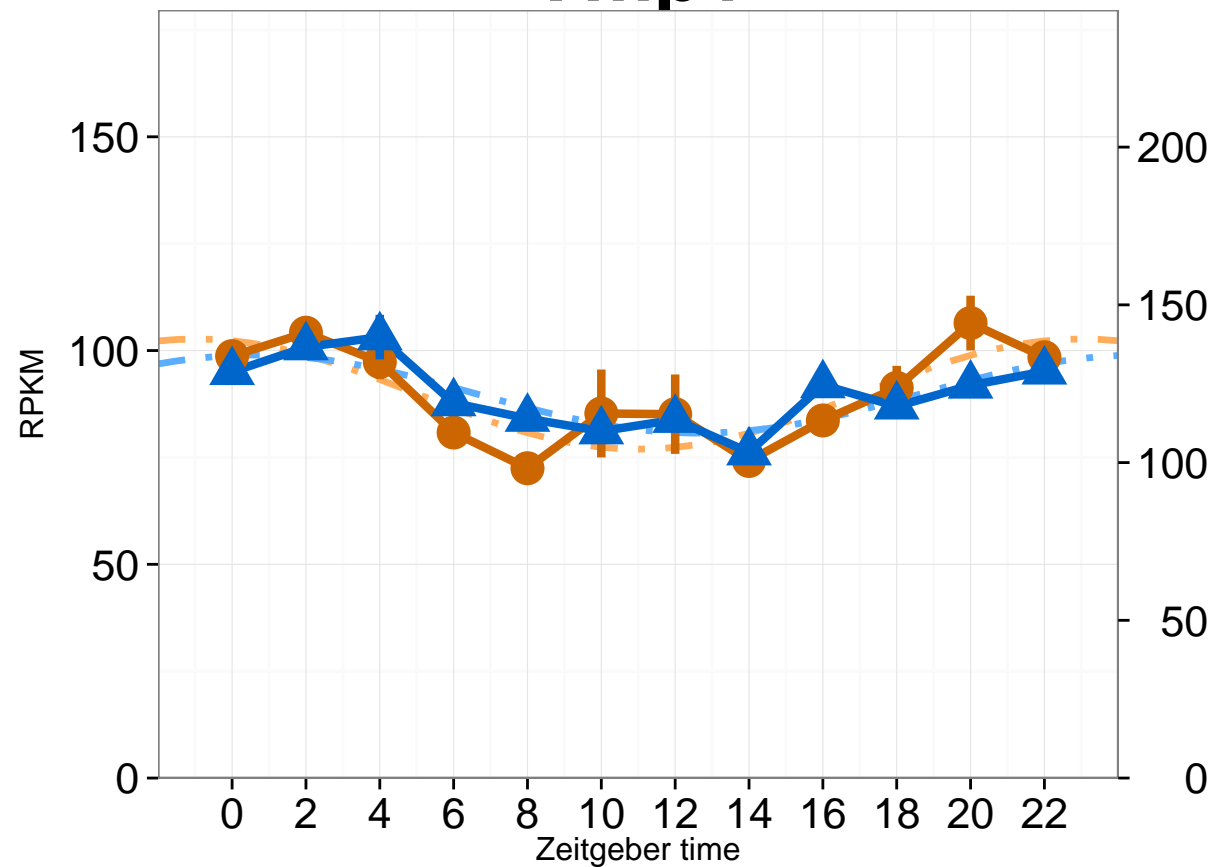

# Vmp1

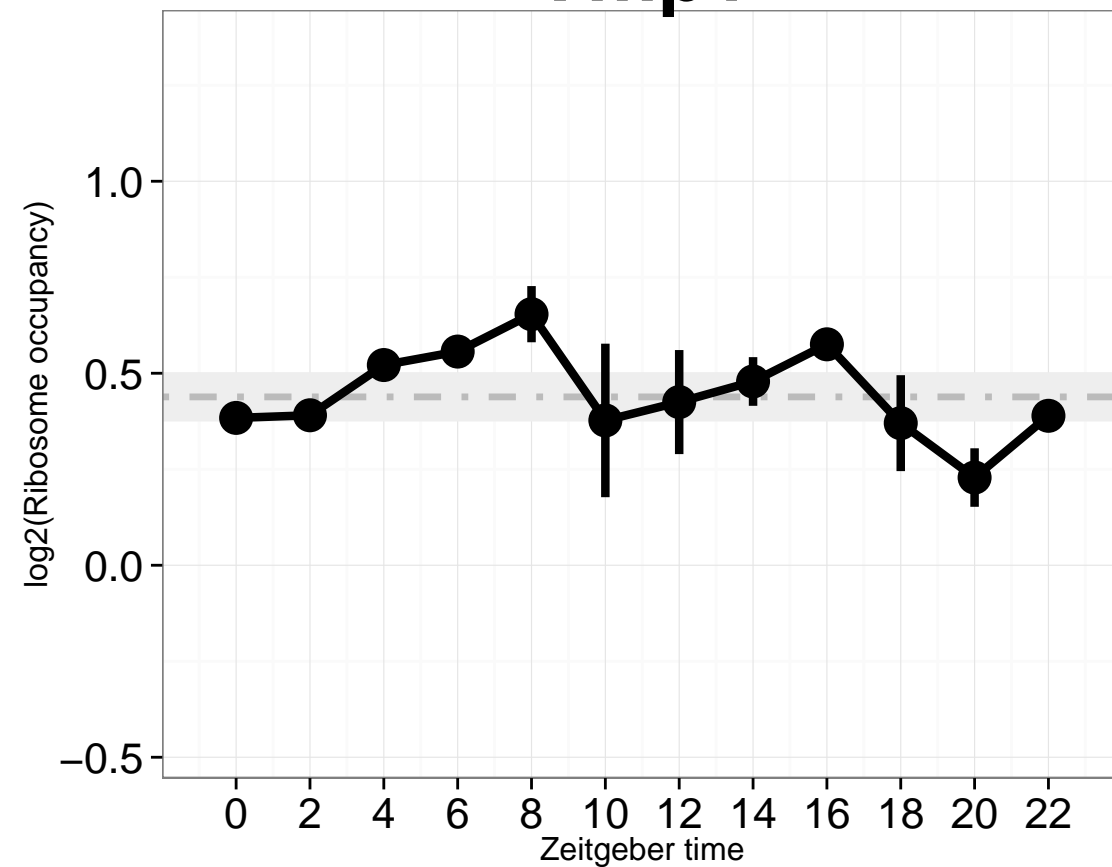

Supplement: Supplementary file 11138 [file 1]

# Hoxb5

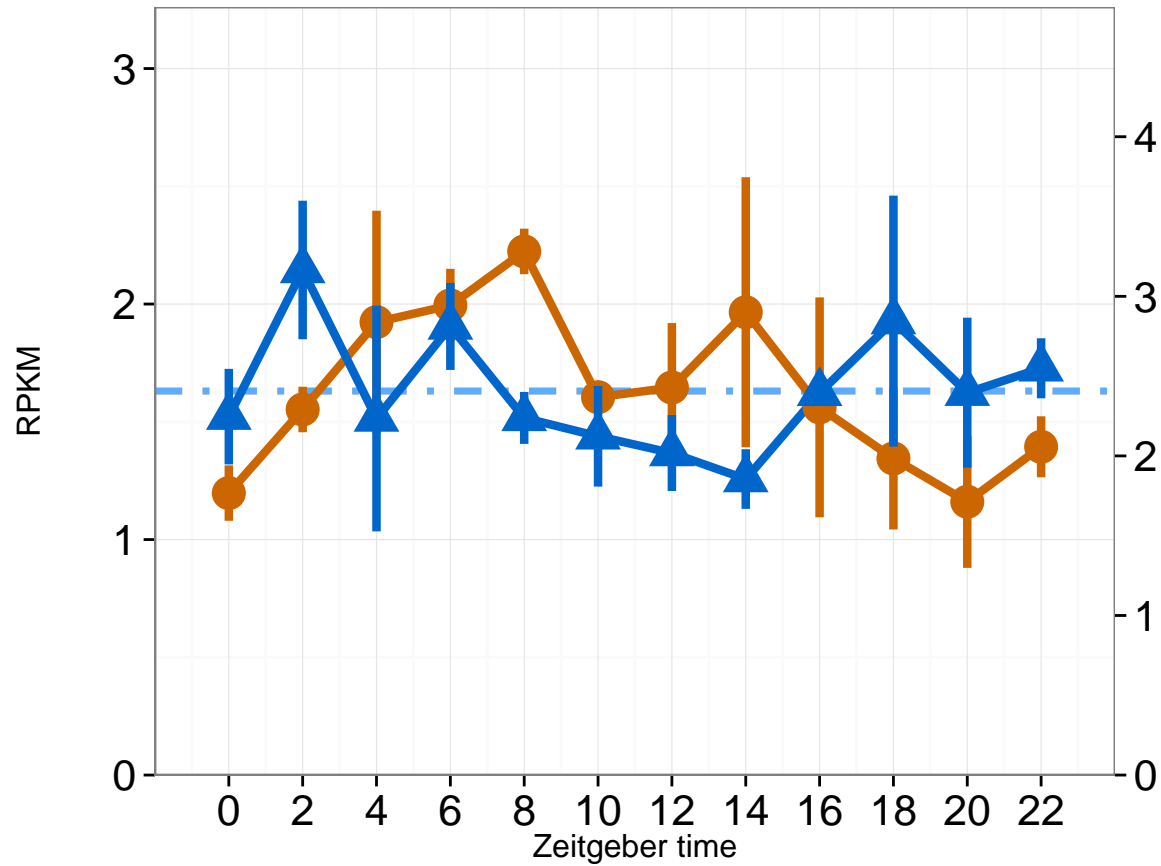

# Hoxb5

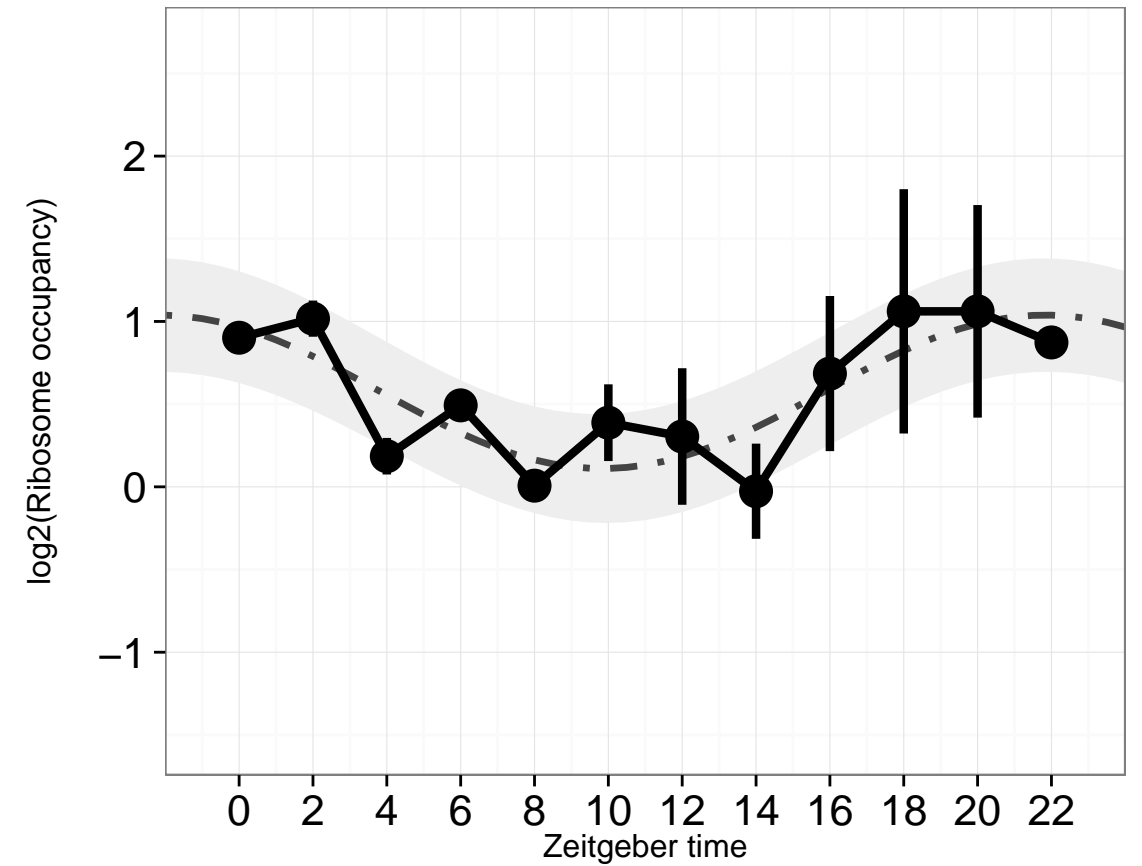

Supplement: Supplementary file 11139 [file 1]

## Nisch

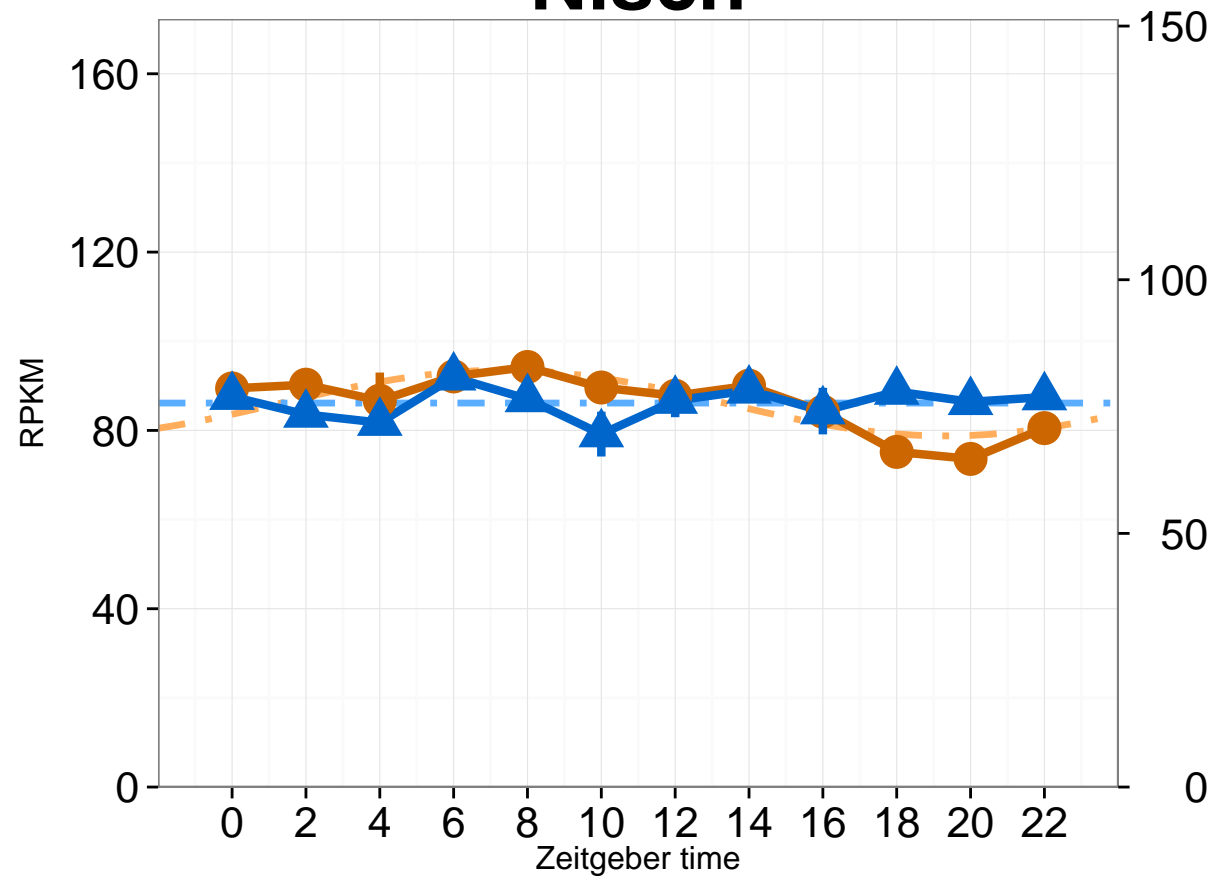

## Nisch

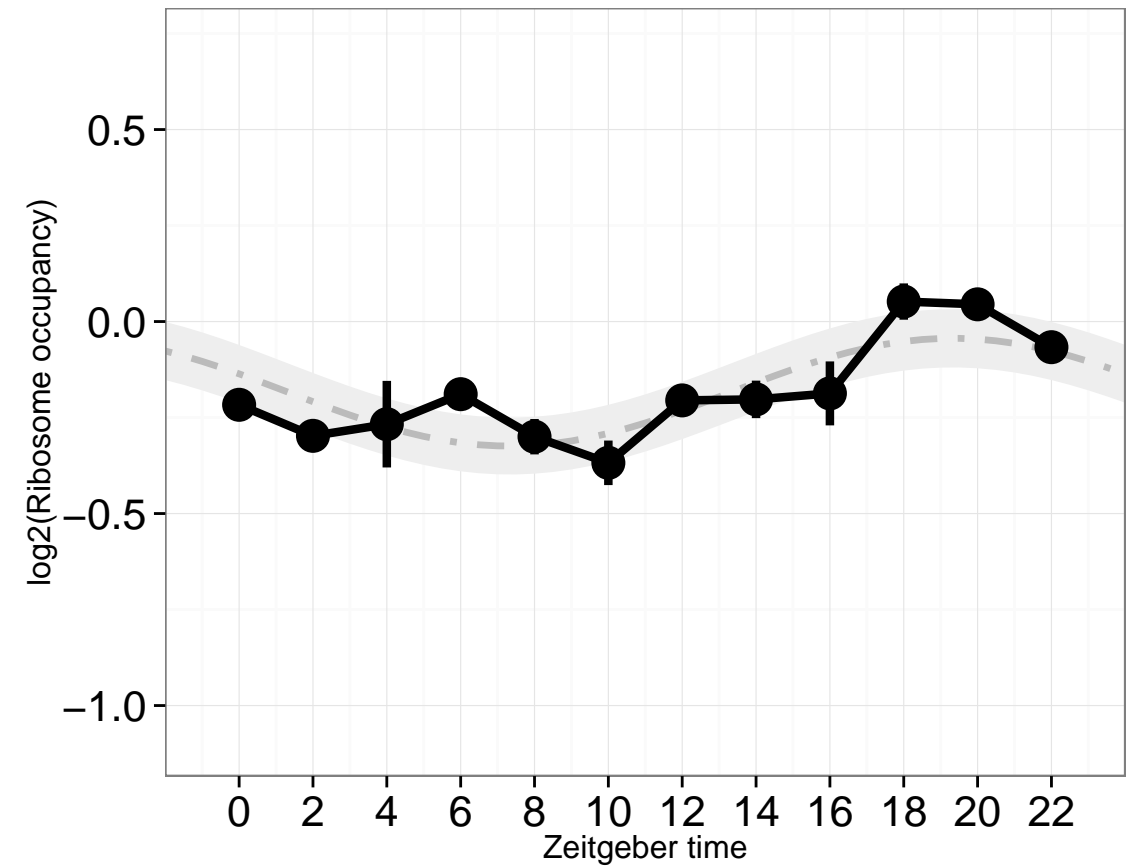

Supplement: Supplementary file 11140 [file 1]

# Ap1s3

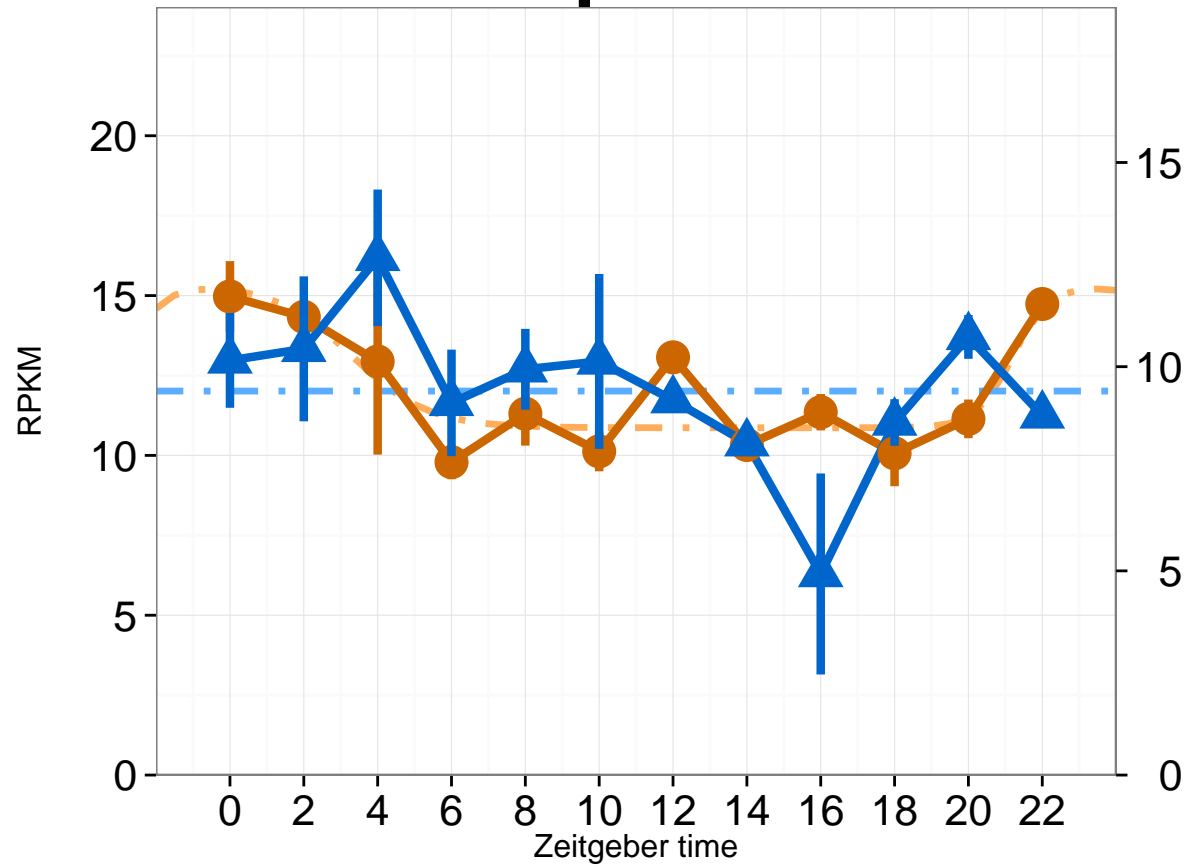

# Ap1s3

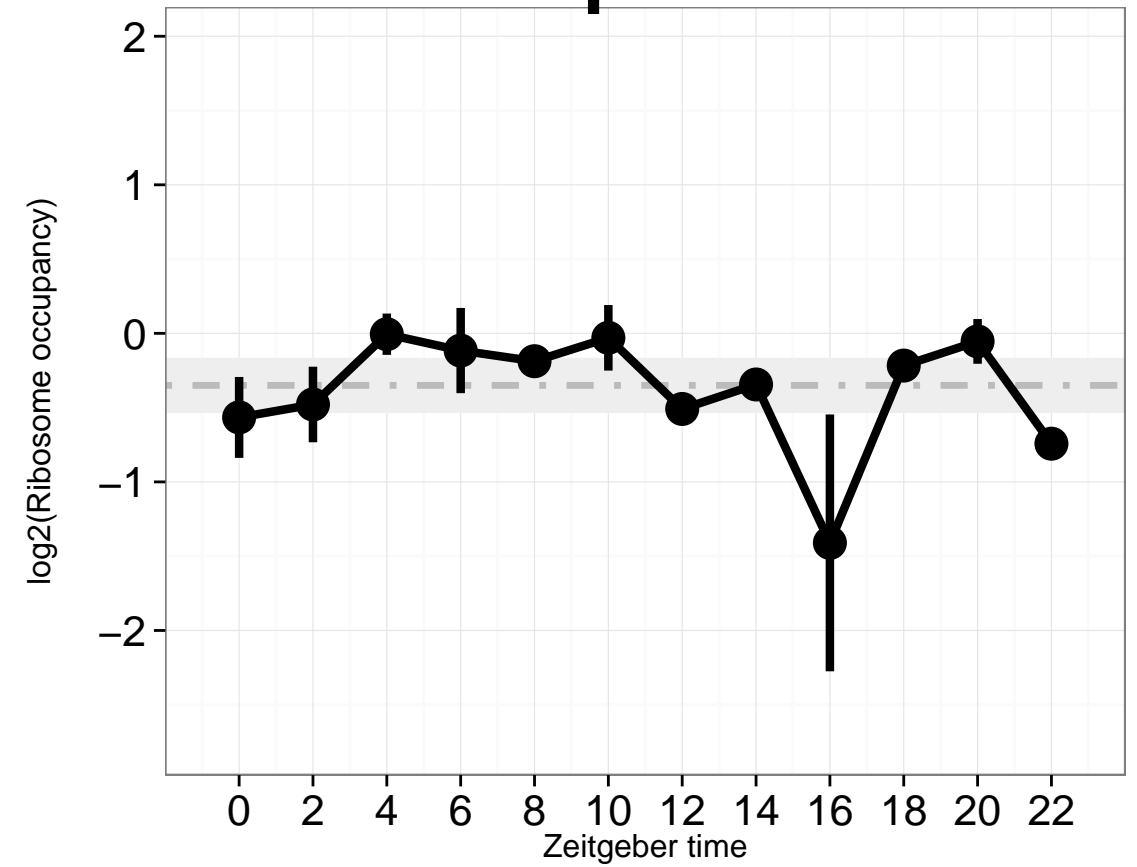

Supplement: Supplementary file 11141 [file 1]
