# Supplementary material (part 112 of 133)
Source: publisher figshare collection journal article supplement (https://springernature.figshare.com/articles/dataset/_/4903193)

## Ptgfr

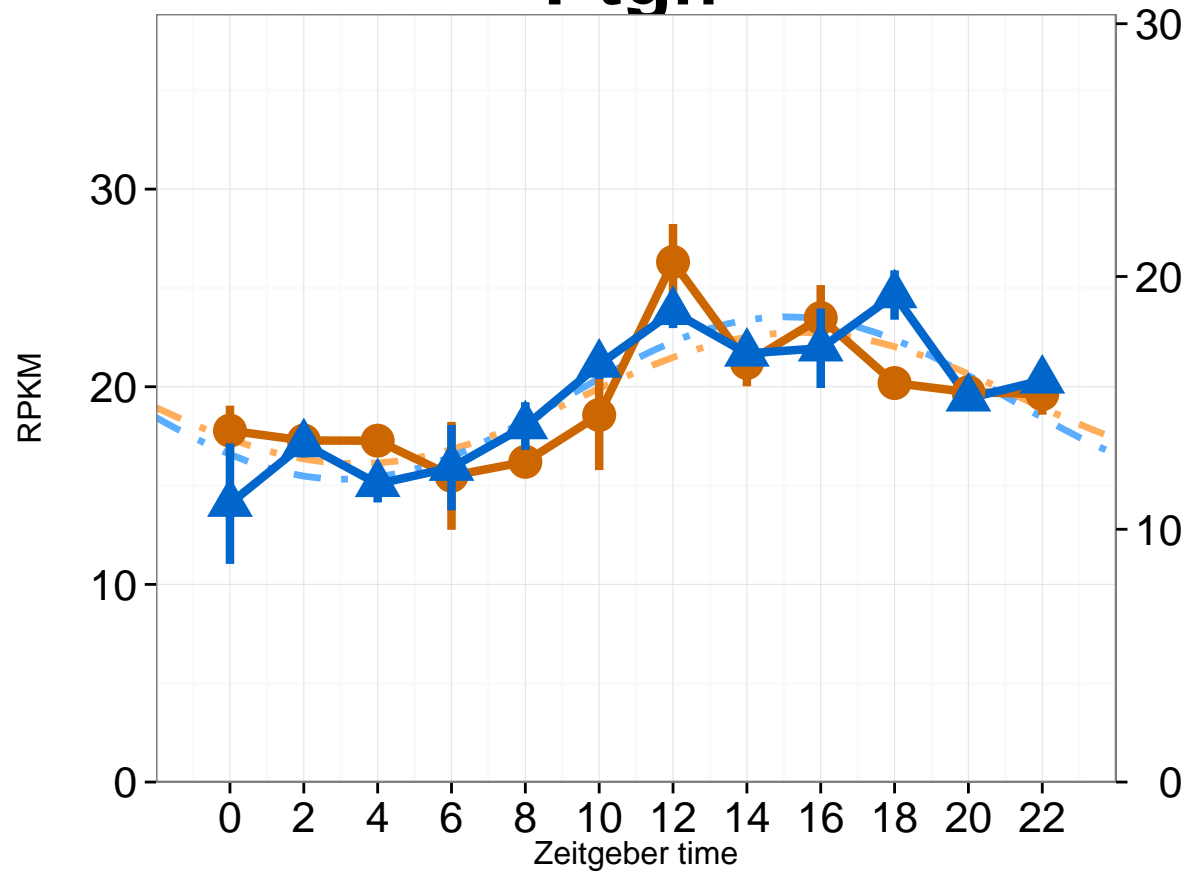

## Ptgfr

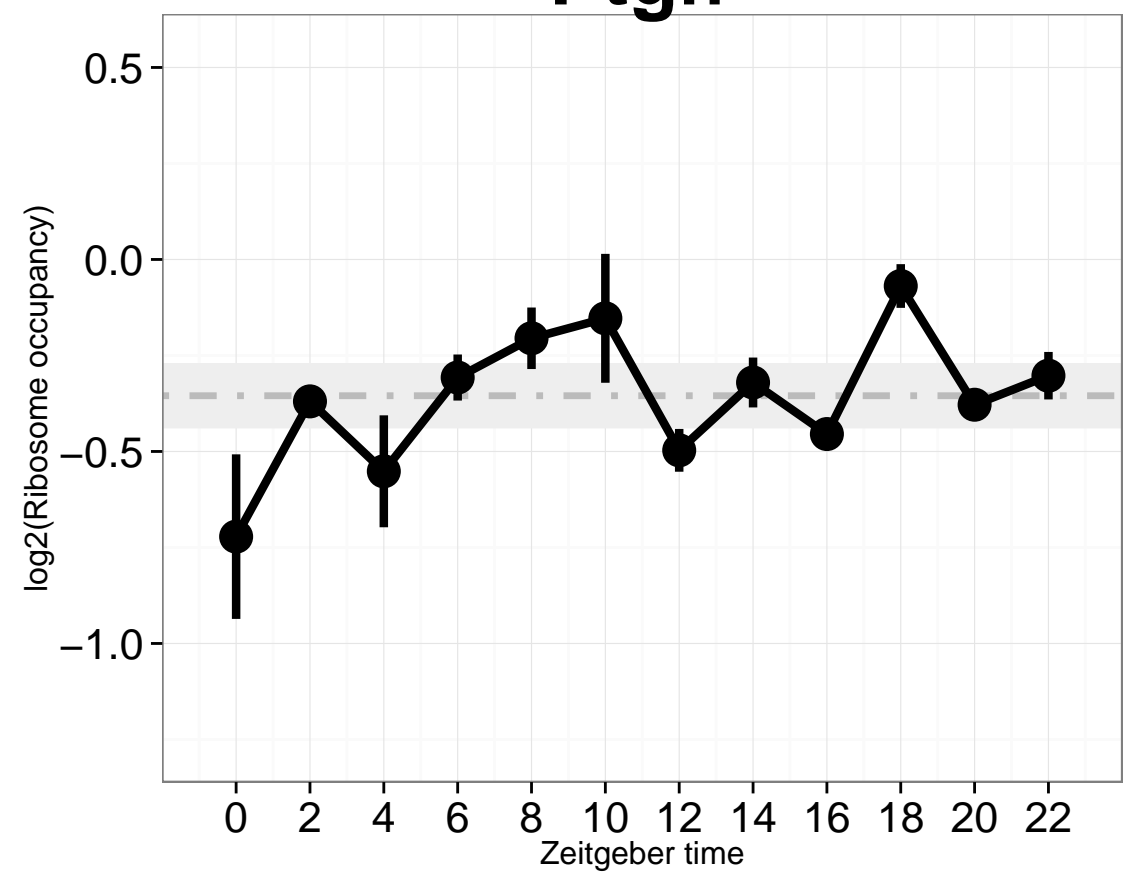

Supplement: Supplementary file 11142 [file 1]

# Wdr76

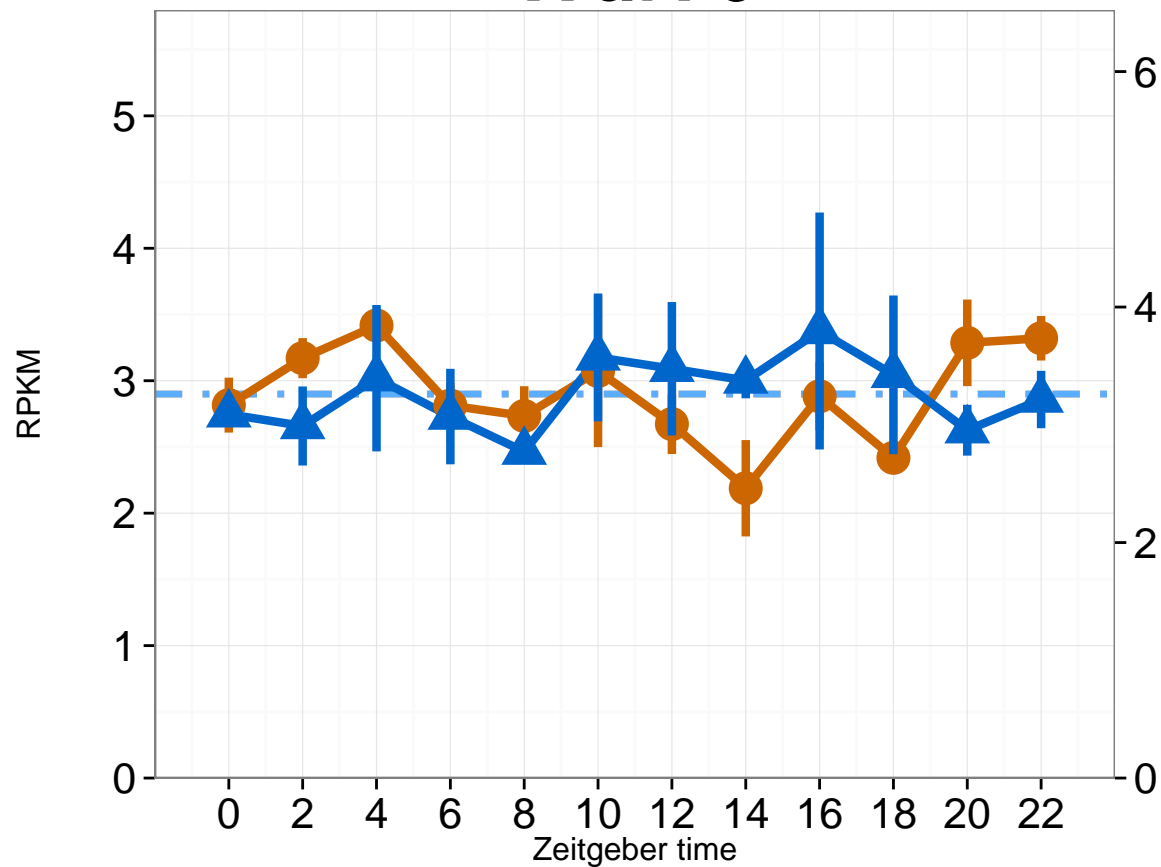

# Wdr76

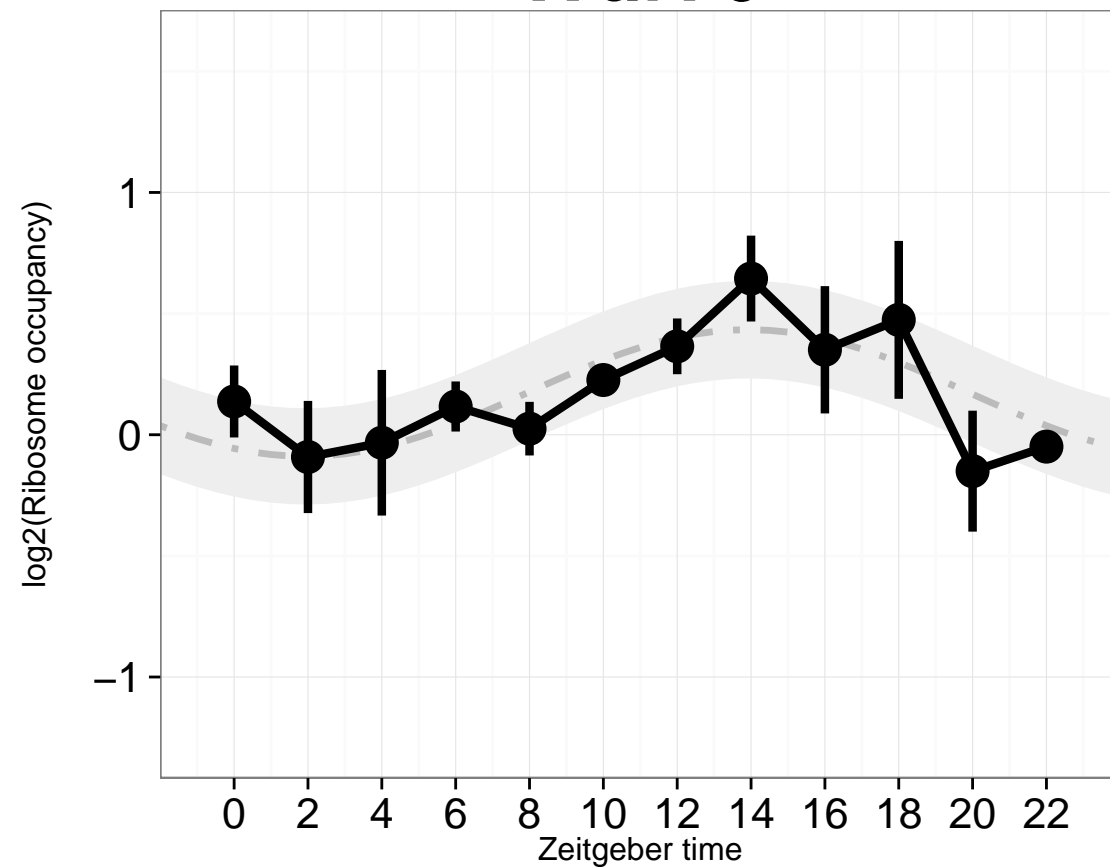

Supplement: Supplementary file 11143 [file 1]

# Gripap1

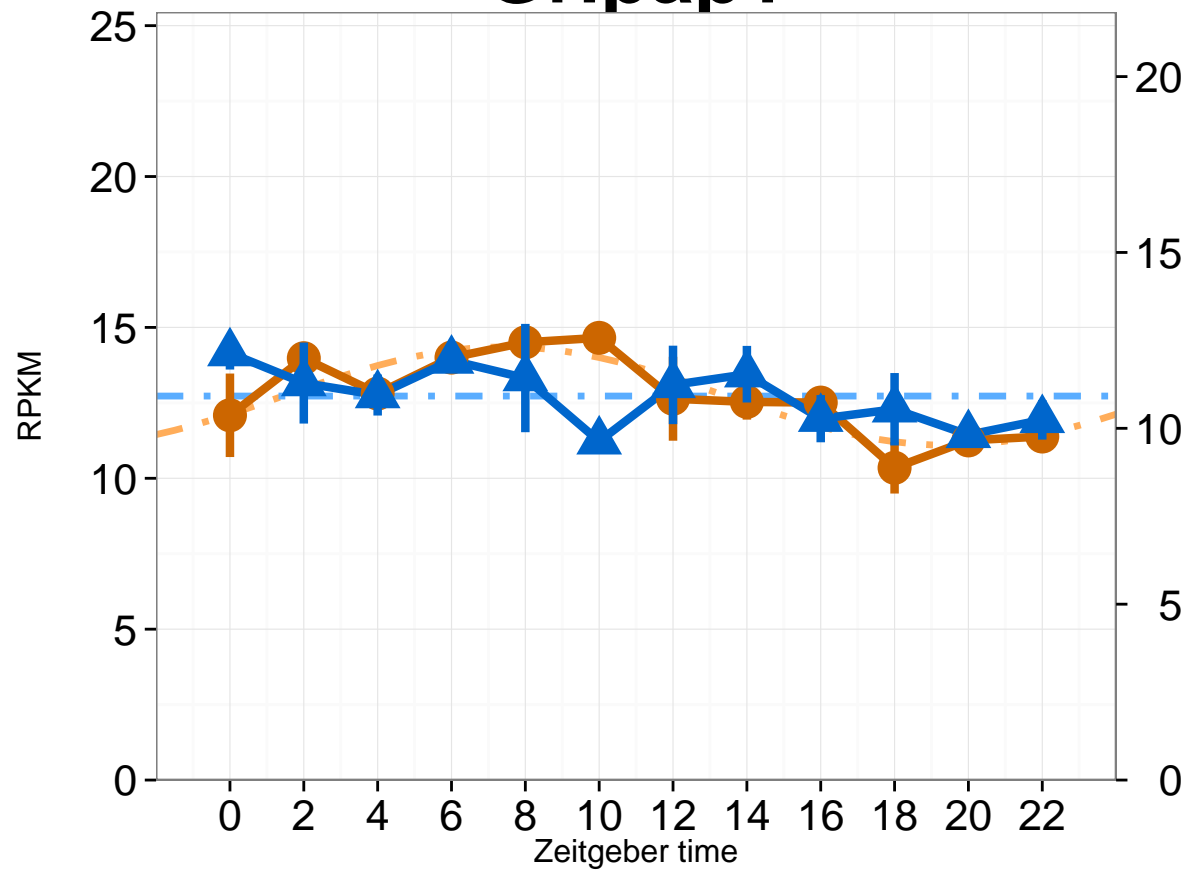

# Gripap1

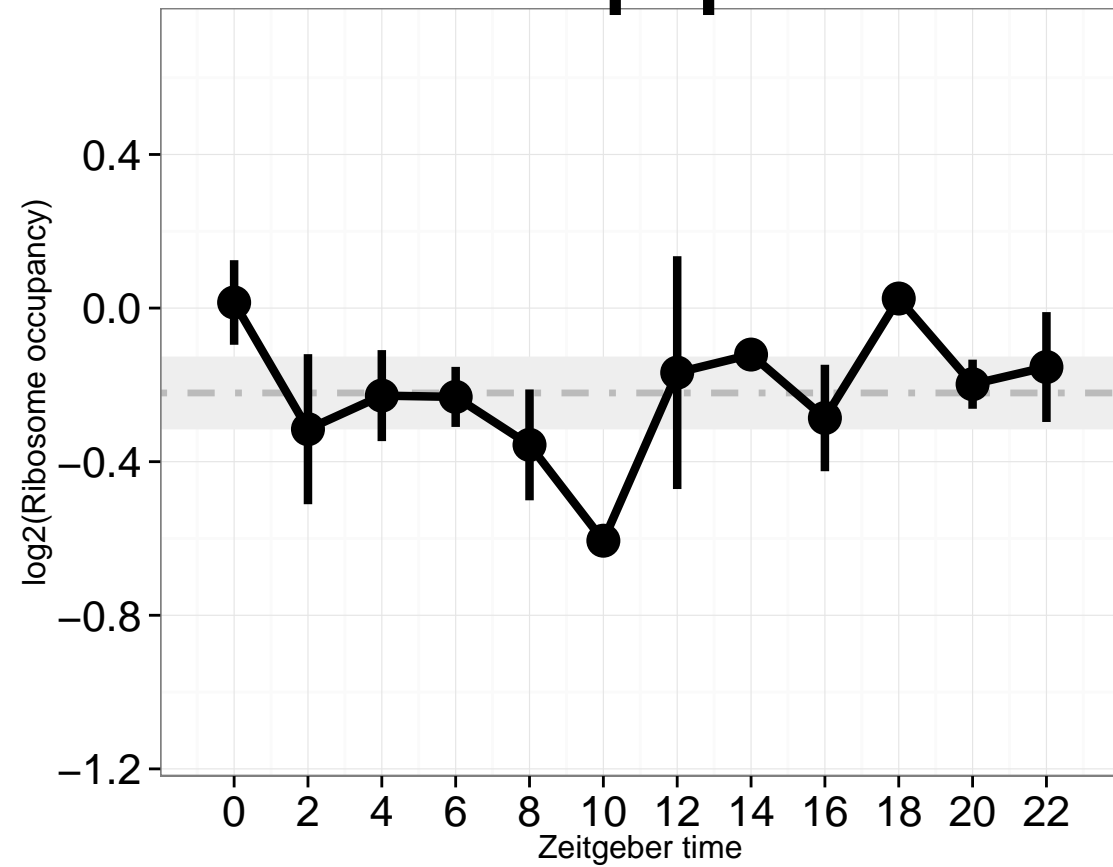

Supplement: Supplementary file 11144 [file 1]

# Rragb

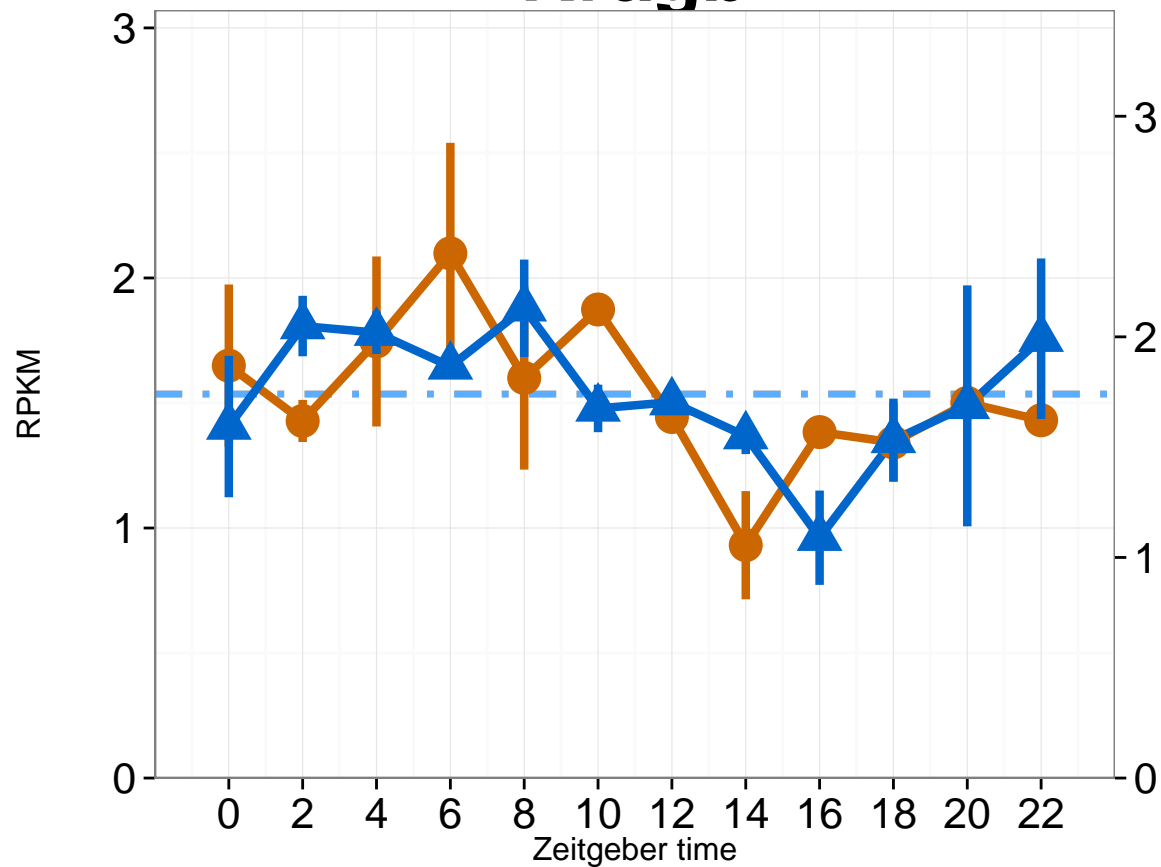

# Rragb

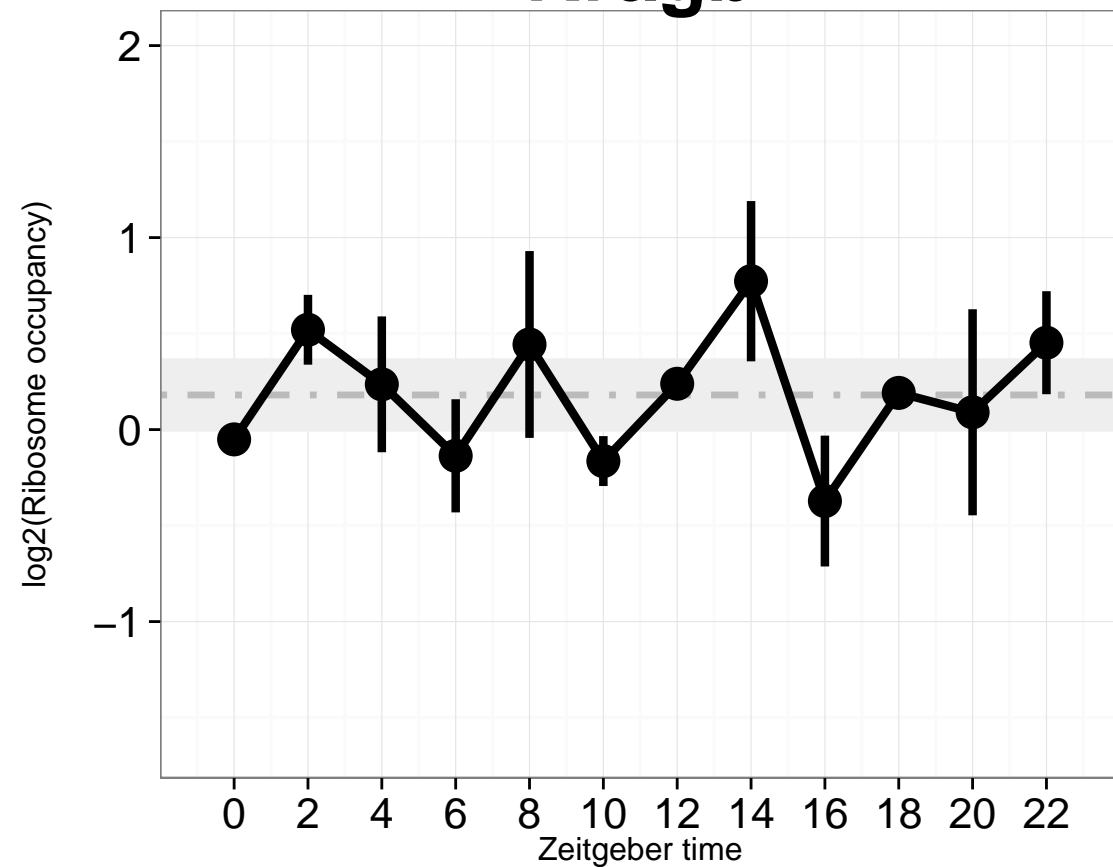

Supplement: Supplementary file 11145 [file 1]

# Vps37a

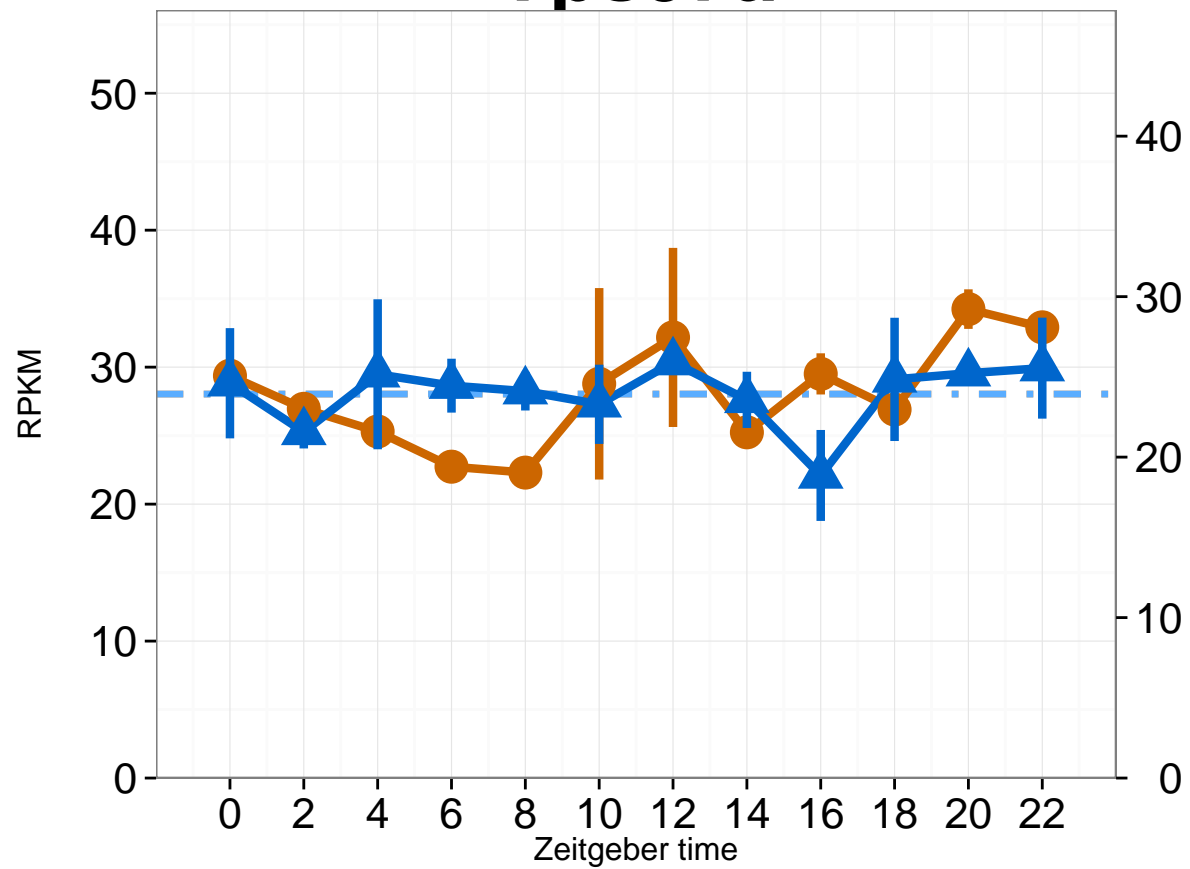

# Vps37a

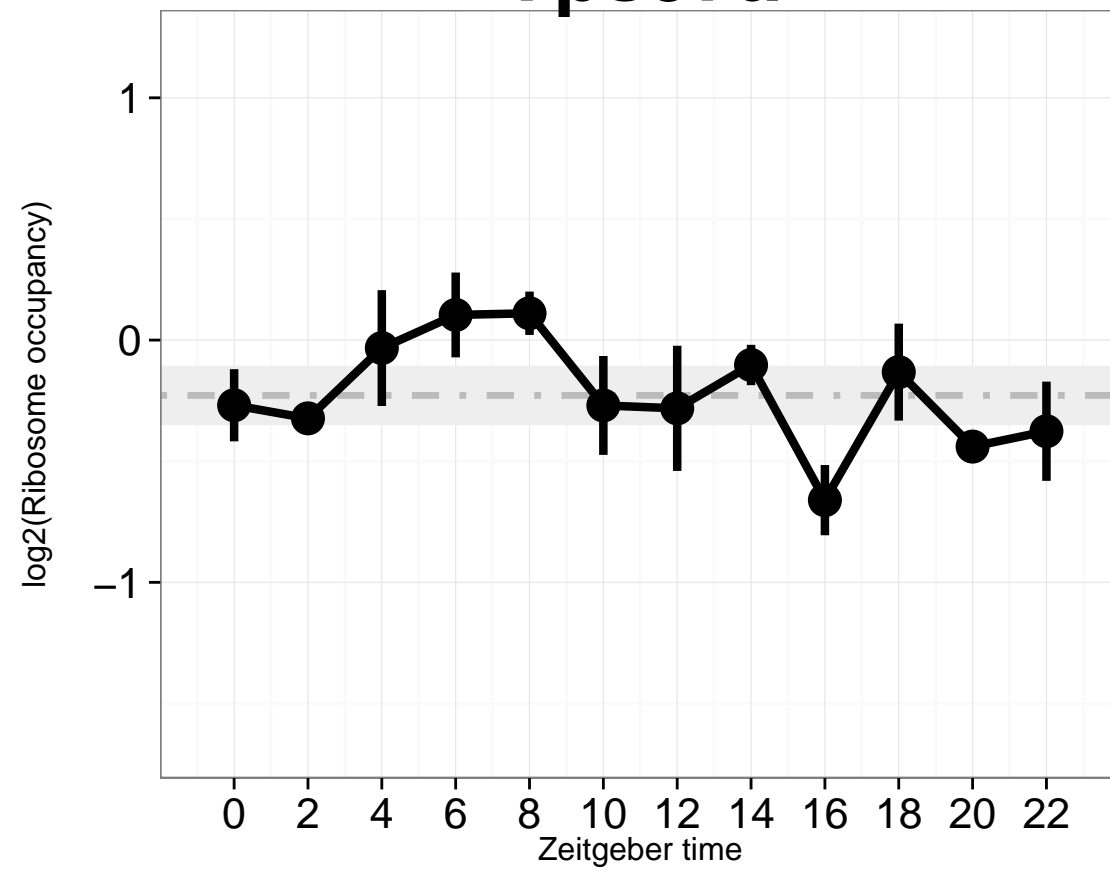

Supplement: Supplementary file 11146 [file 1]

## Clk1

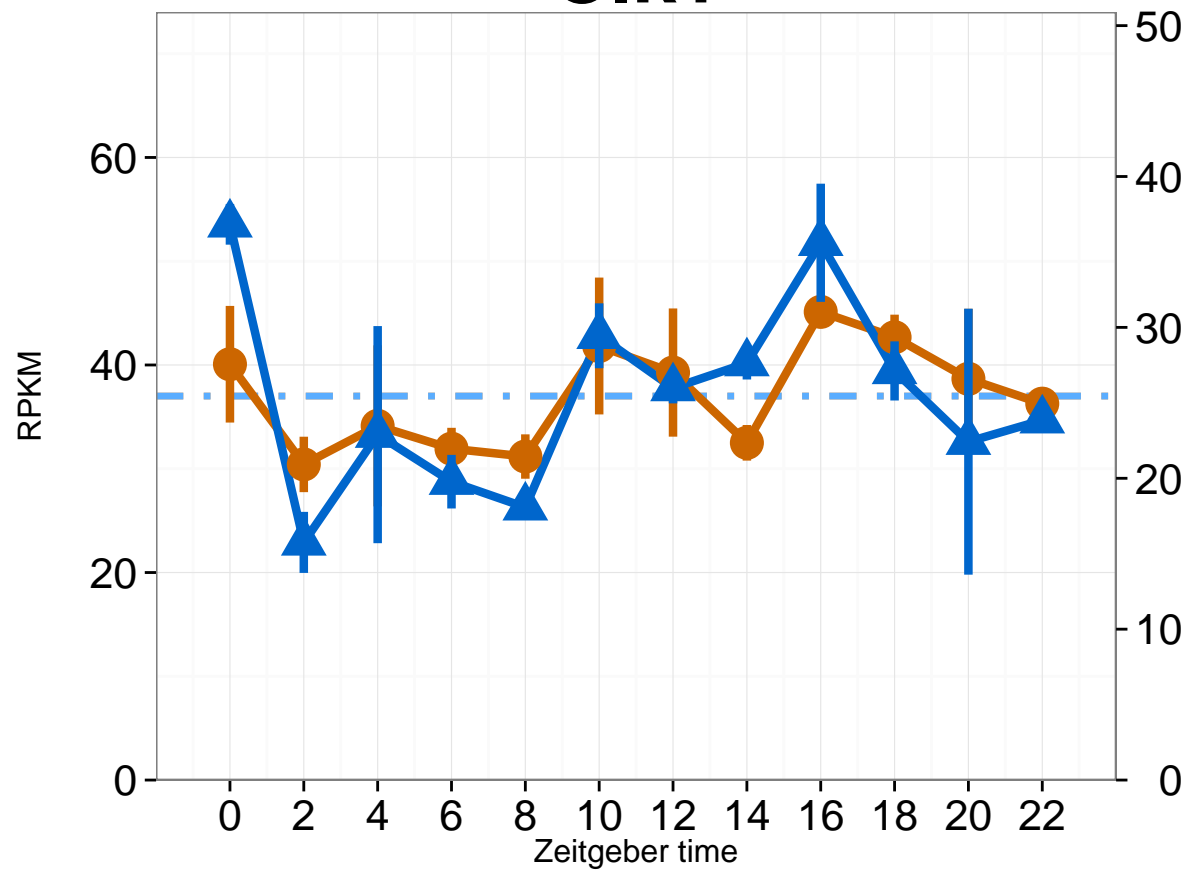

## Clk1

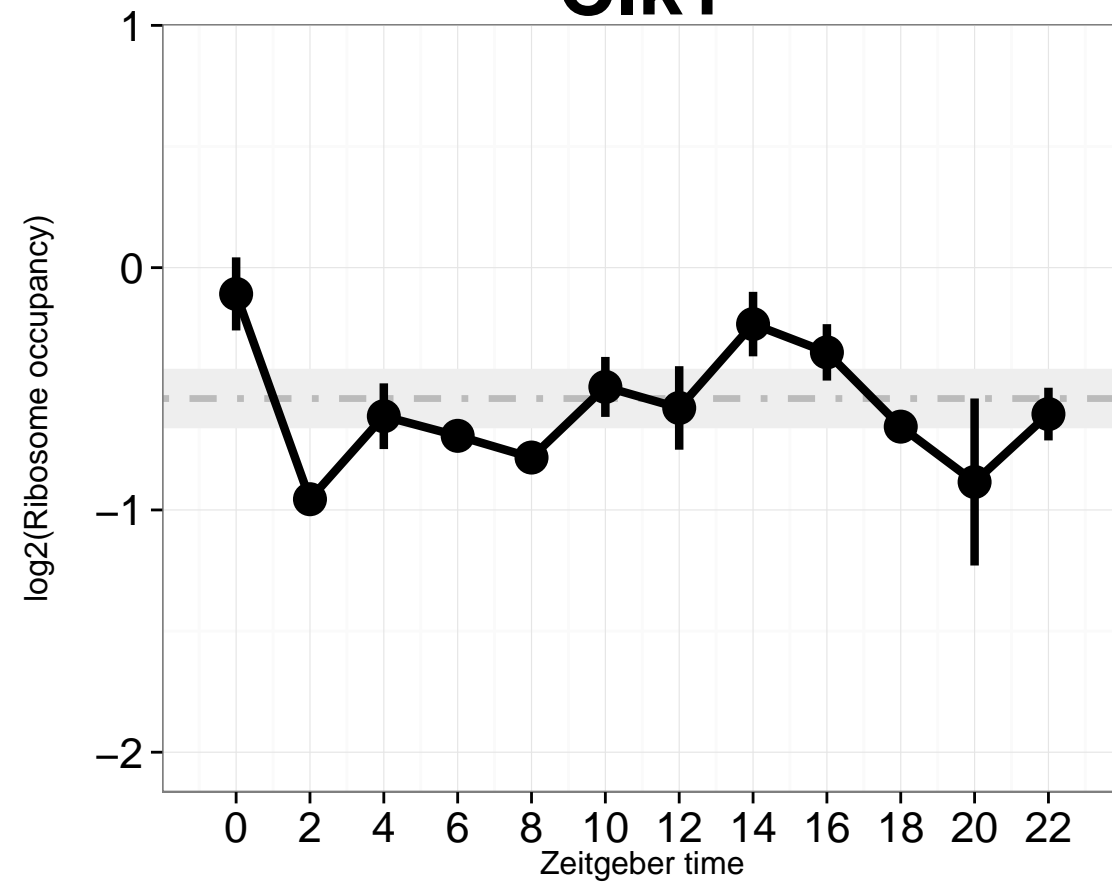

Supplement: Supplementary file 11147 [file 1]

## RinI

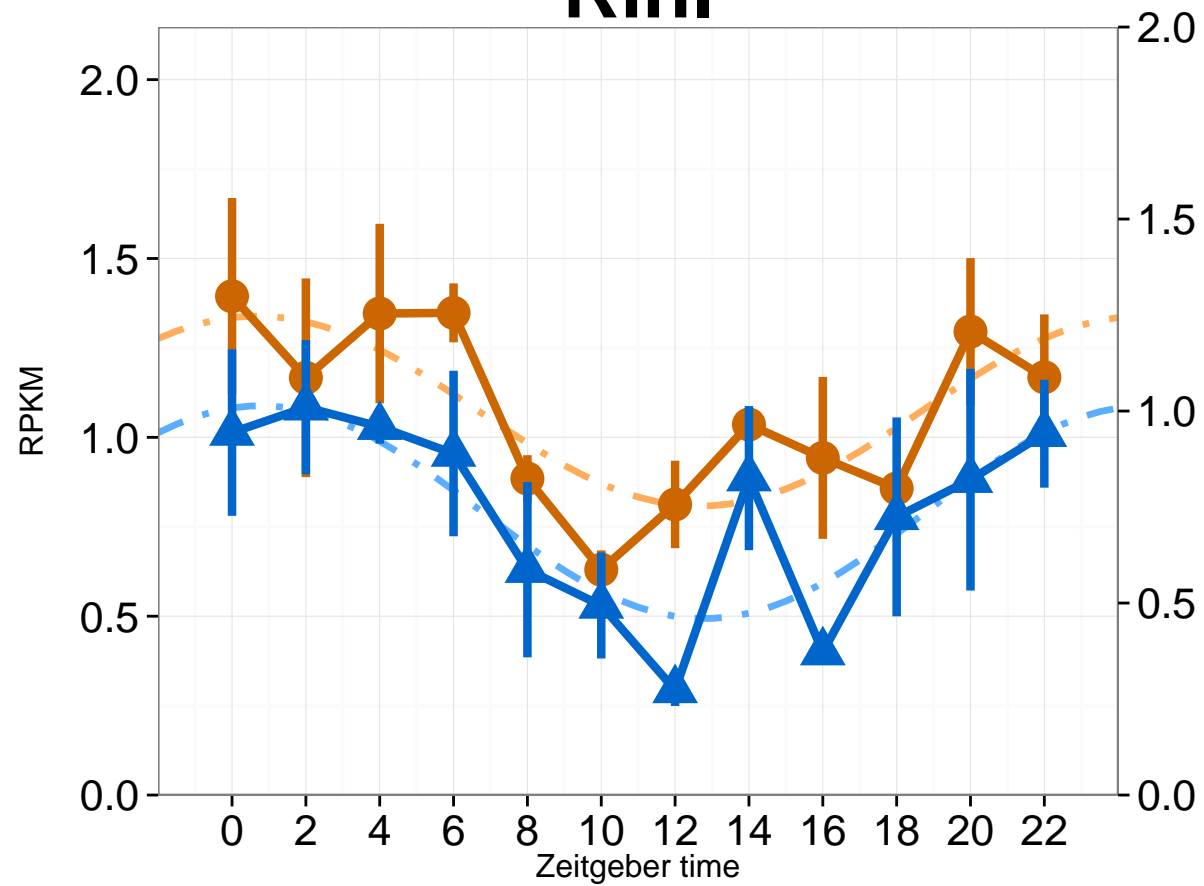

## RinI

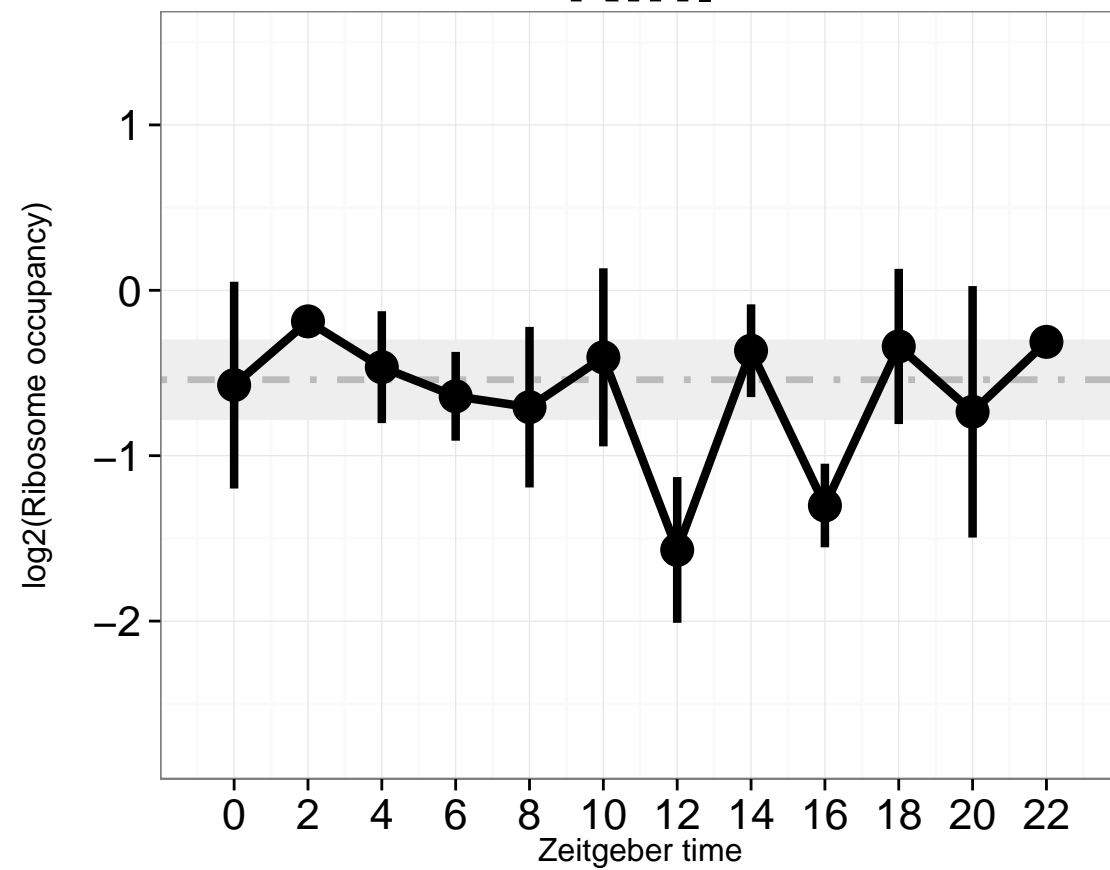

Supplement: Supplementary file 11148 [file 1]

# Ccnt1

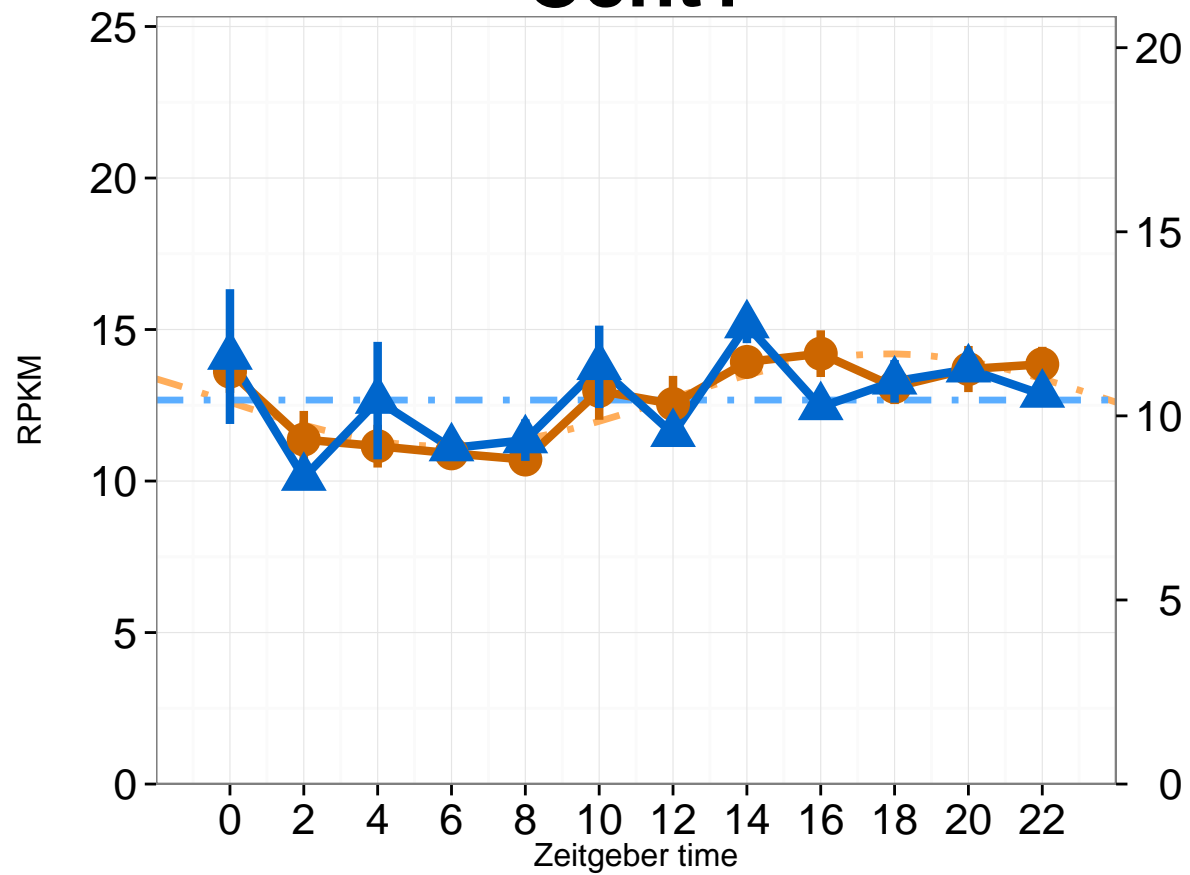

# Ccnt1

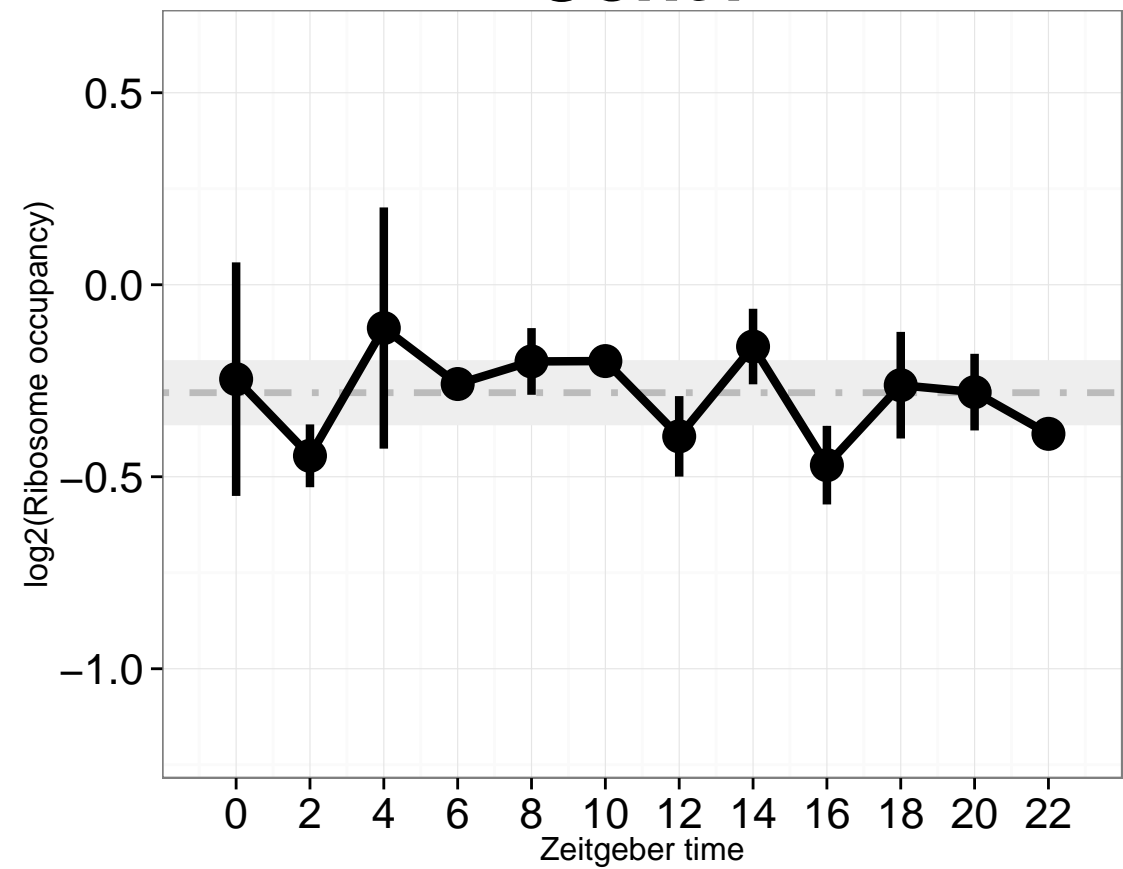

Supplement: Supplementary file 11149 [file 1]

# 1700021F05Rik

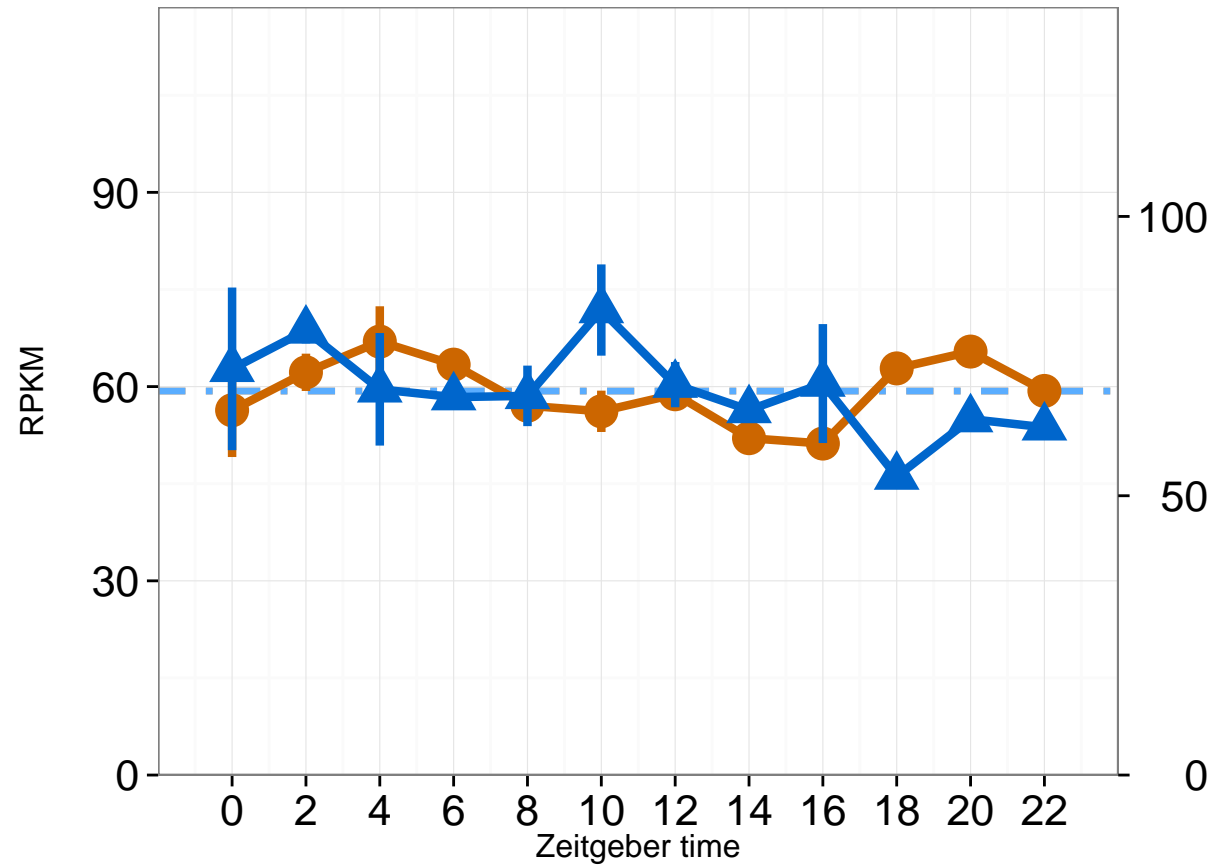

# 1700021F05Rik

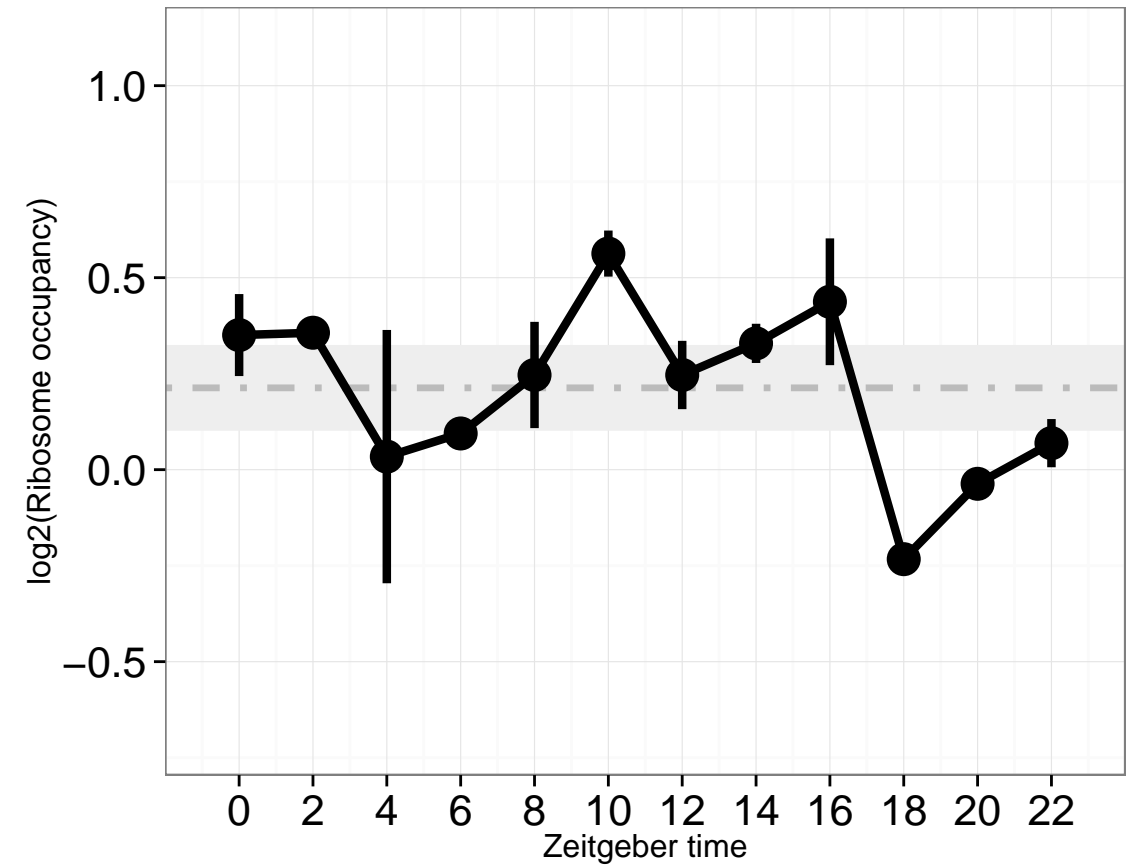

Supplement: Supplementary file 11150 [file 1]

# Homer1

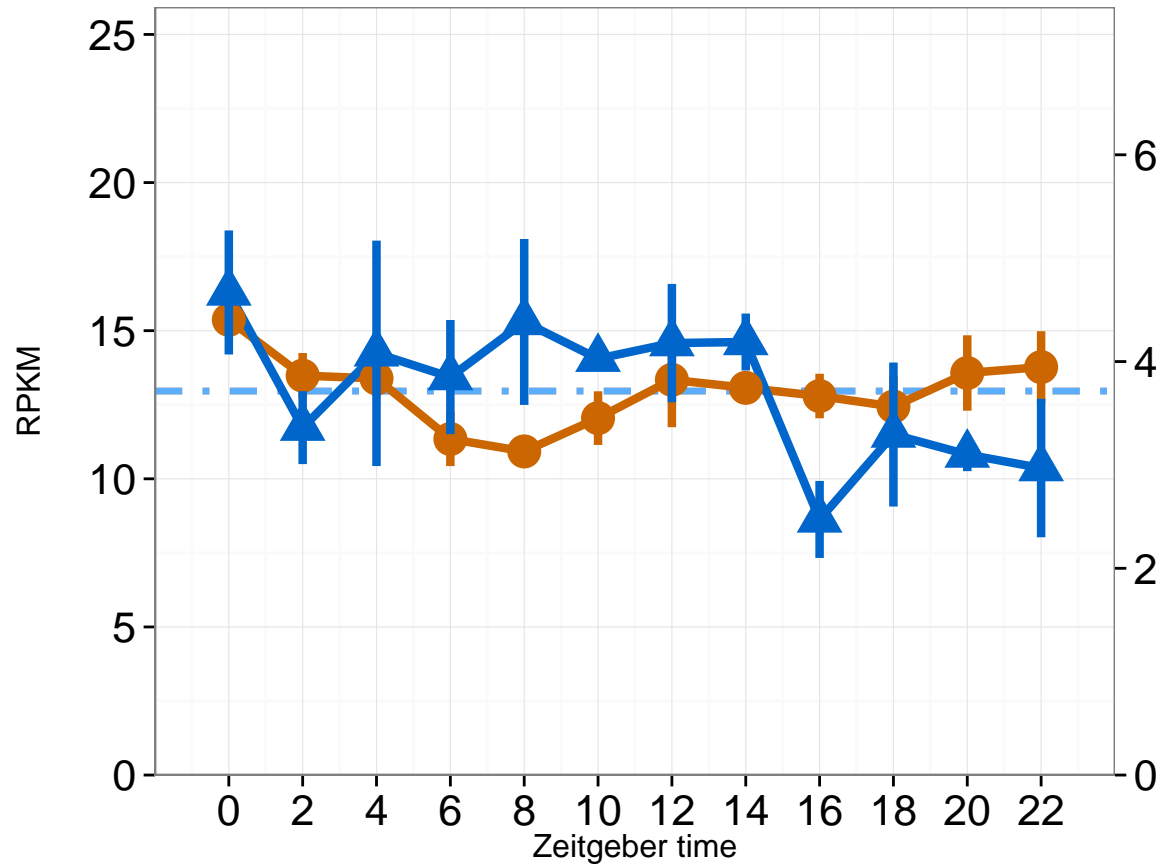

# Homer1

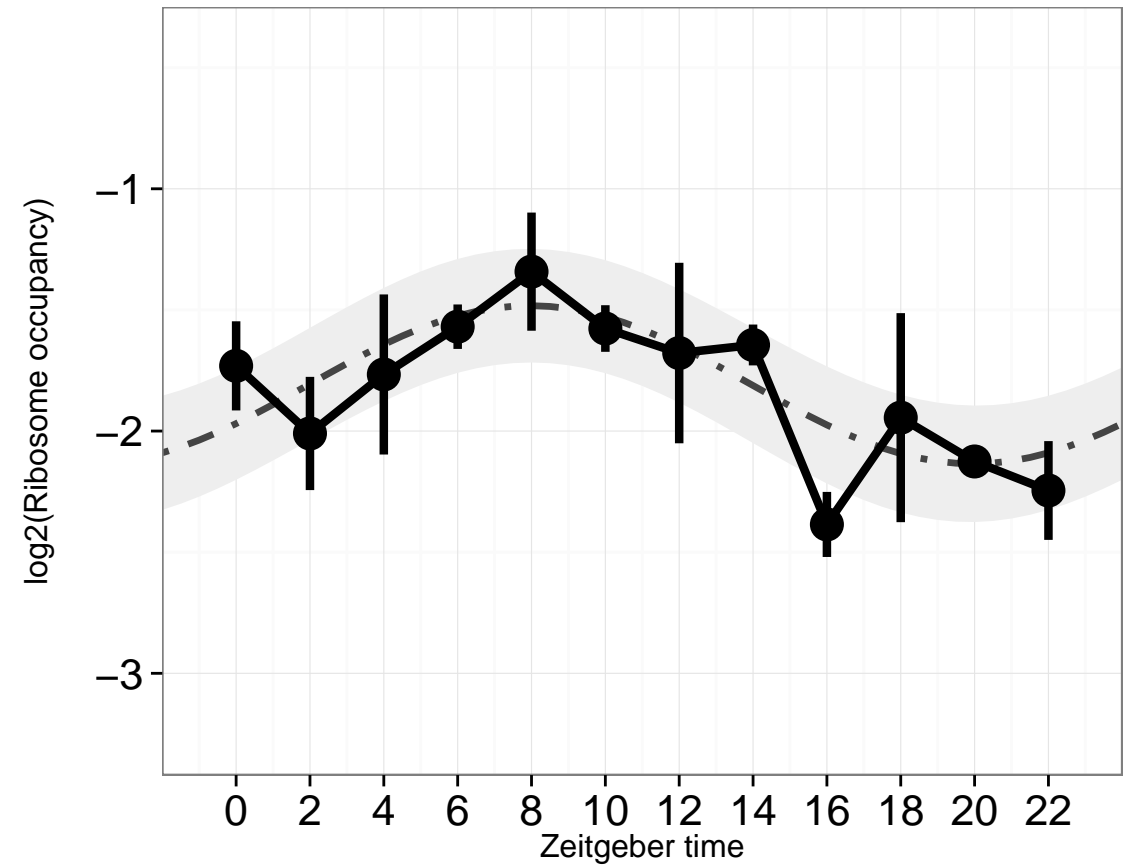

Supplement: Supplementary file 11151 [file 1]

## Slc25a47

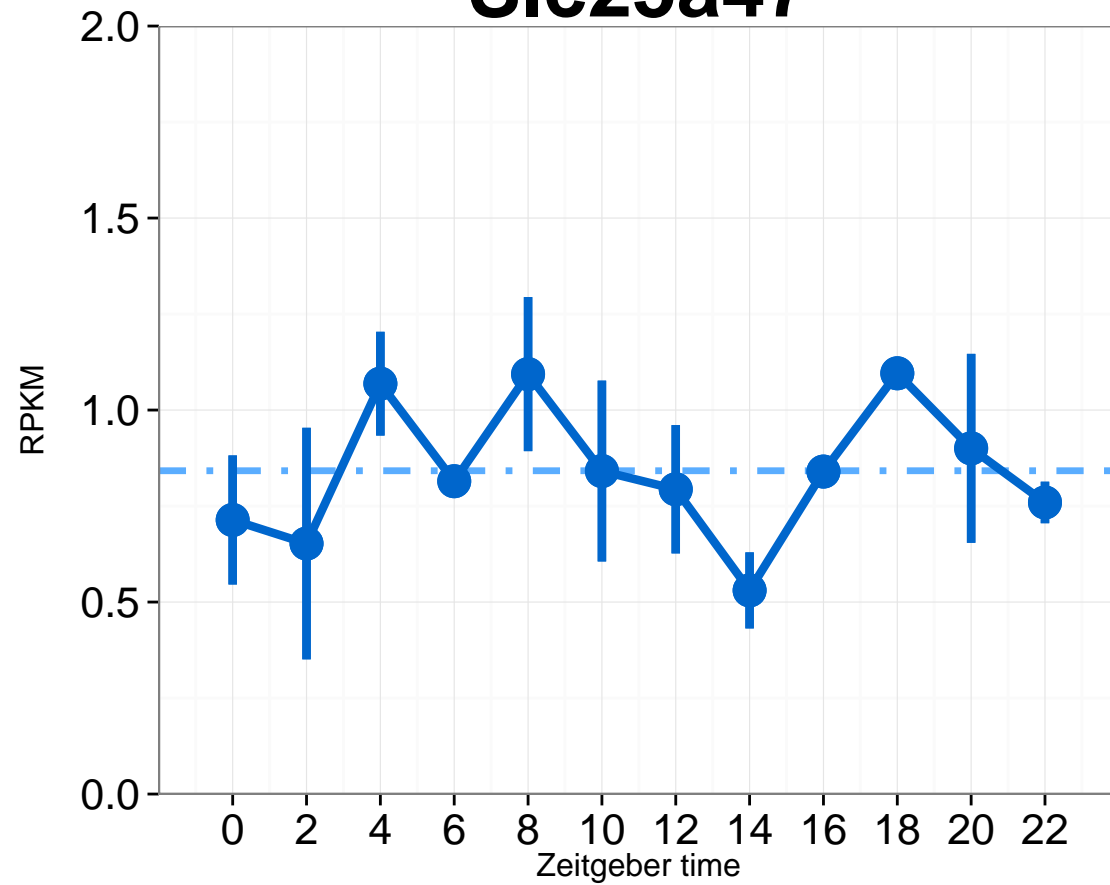

## Slc25a47 log2(Ribosome occupancy)

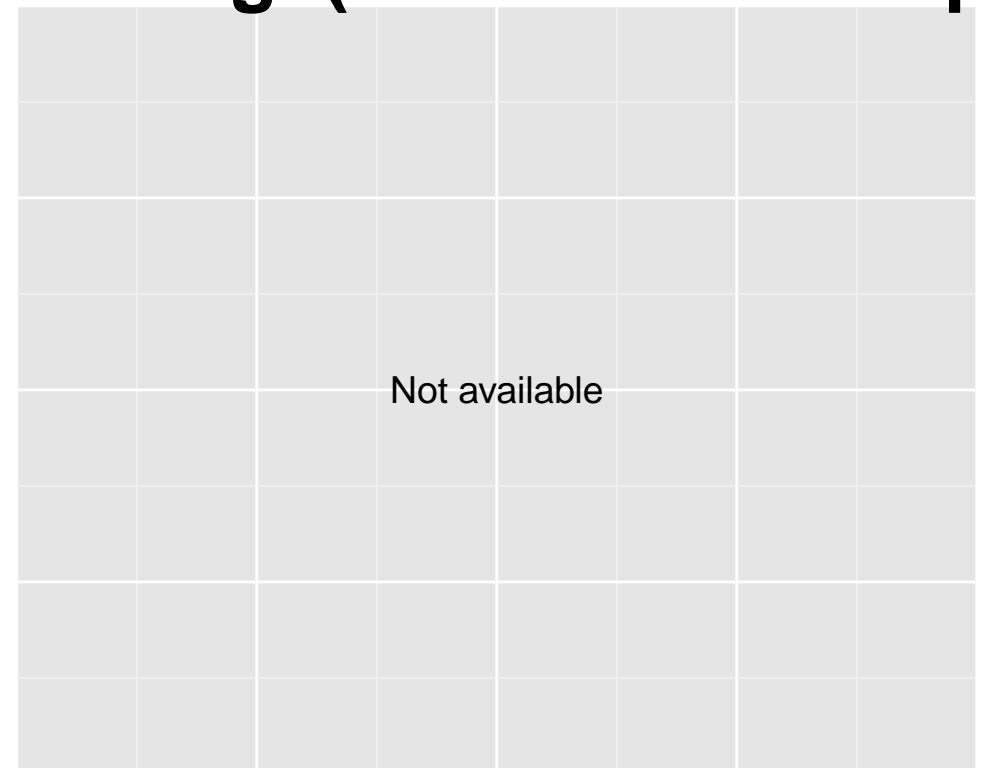

Supplement: Supplementary file 11152 [file 1]

## Hibch

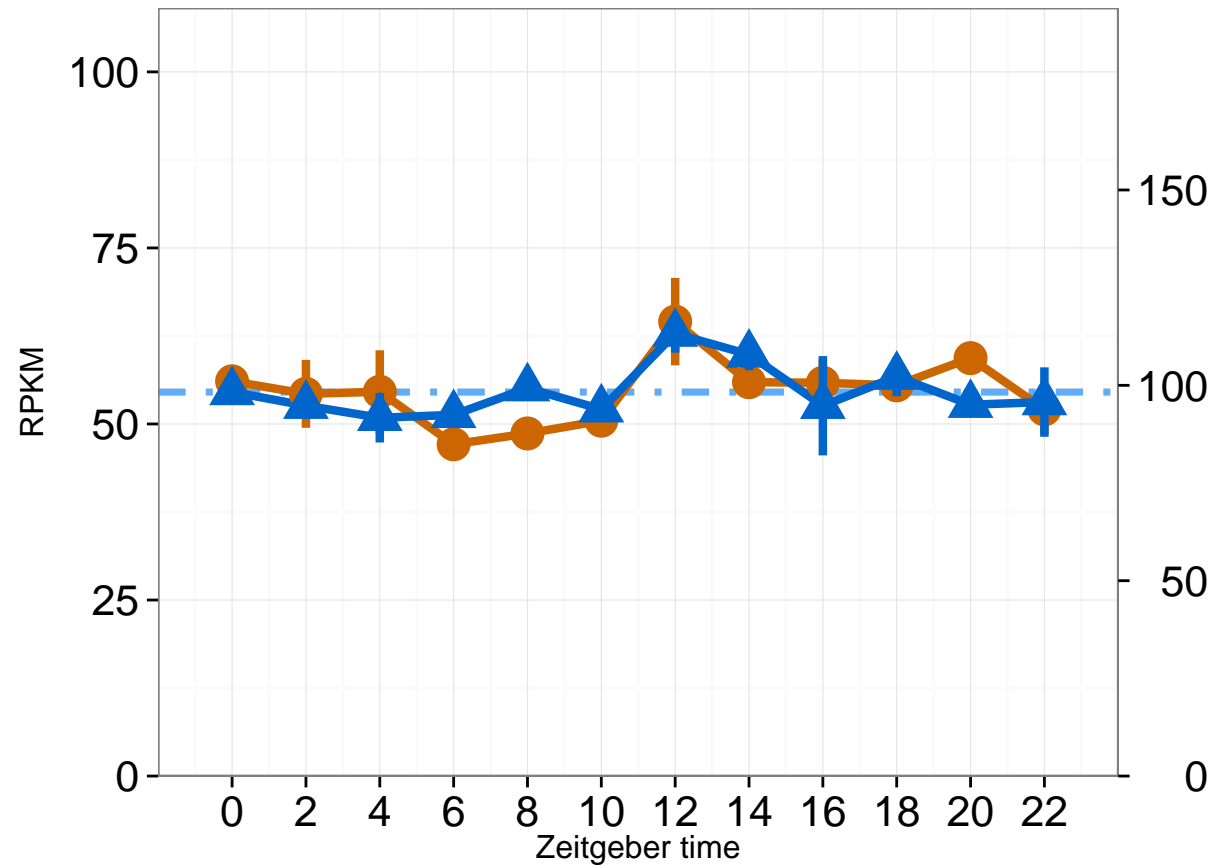

## Hibch

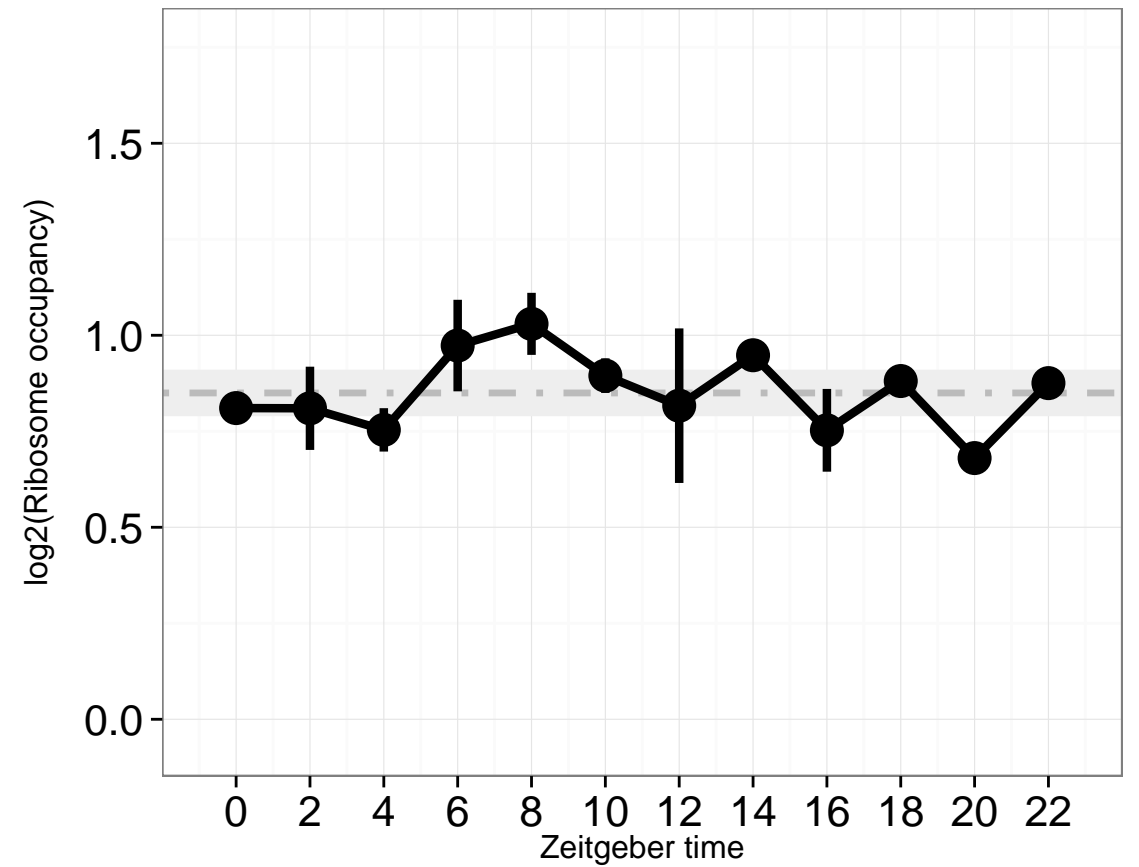

Supplement: Supplementary file 11153 [file 1]

# Slc3a2

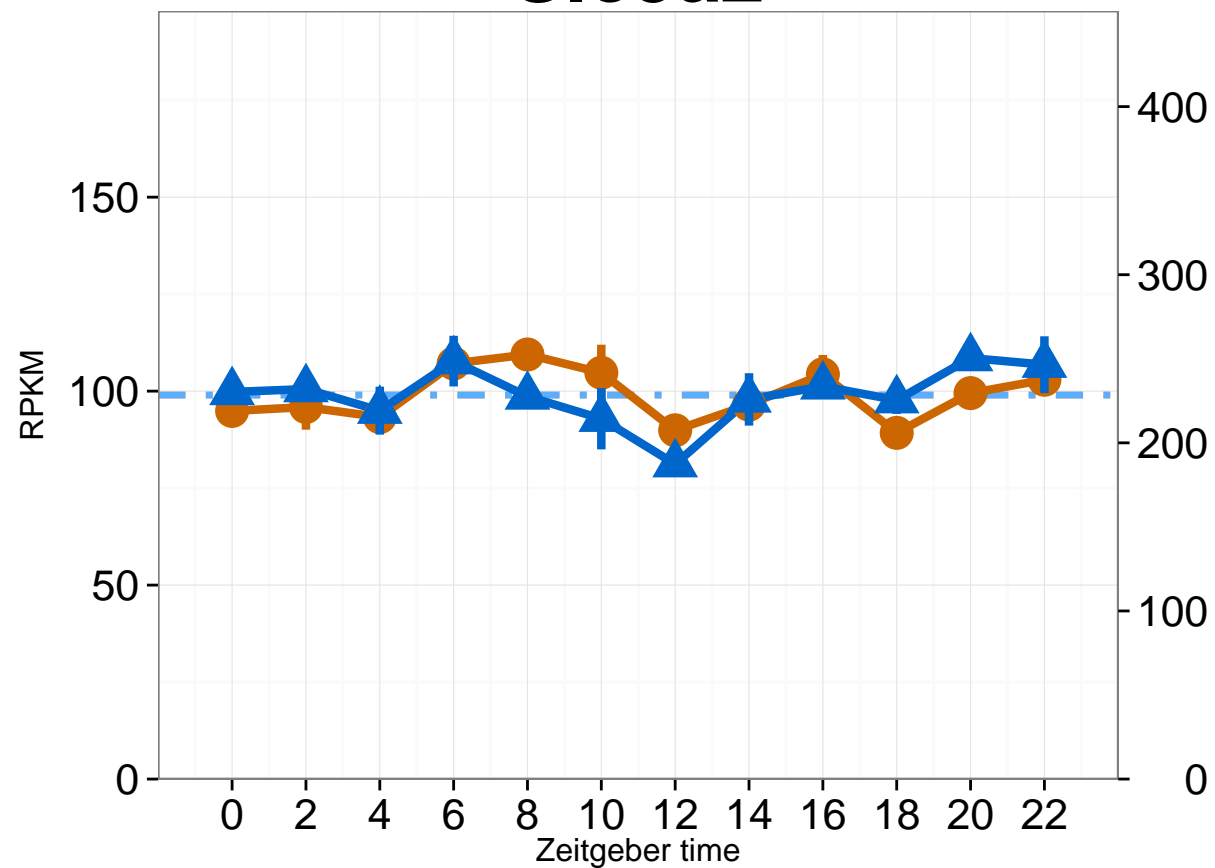

# Slc3a2

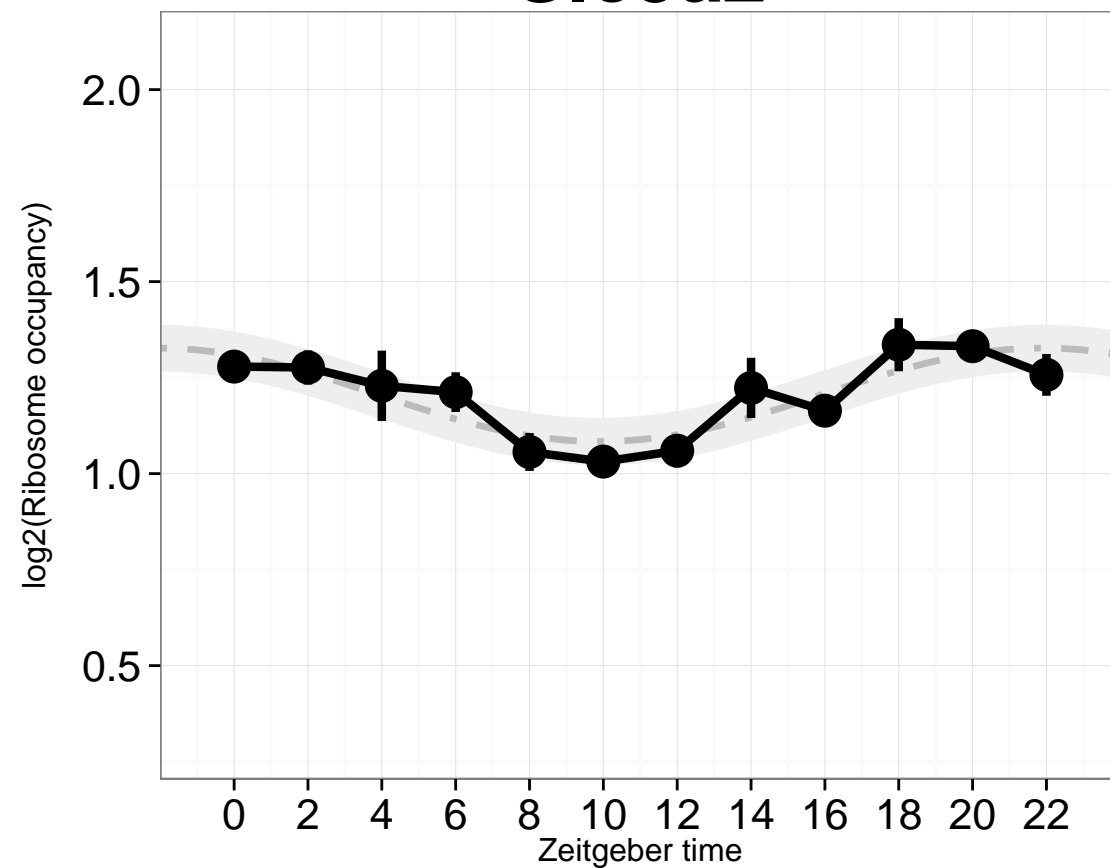

Supplement: Supplementary file 11154 [file 1]

# Fundc2

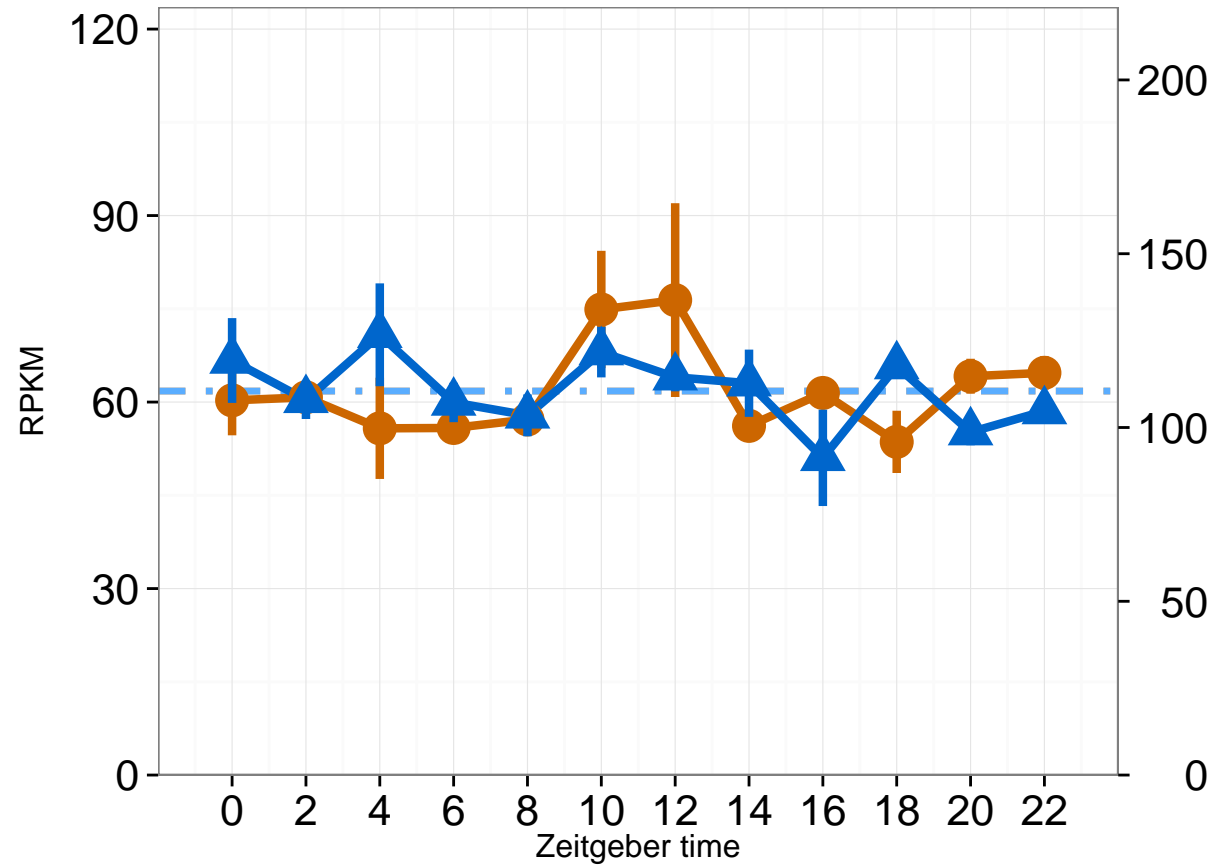

# Fundc2

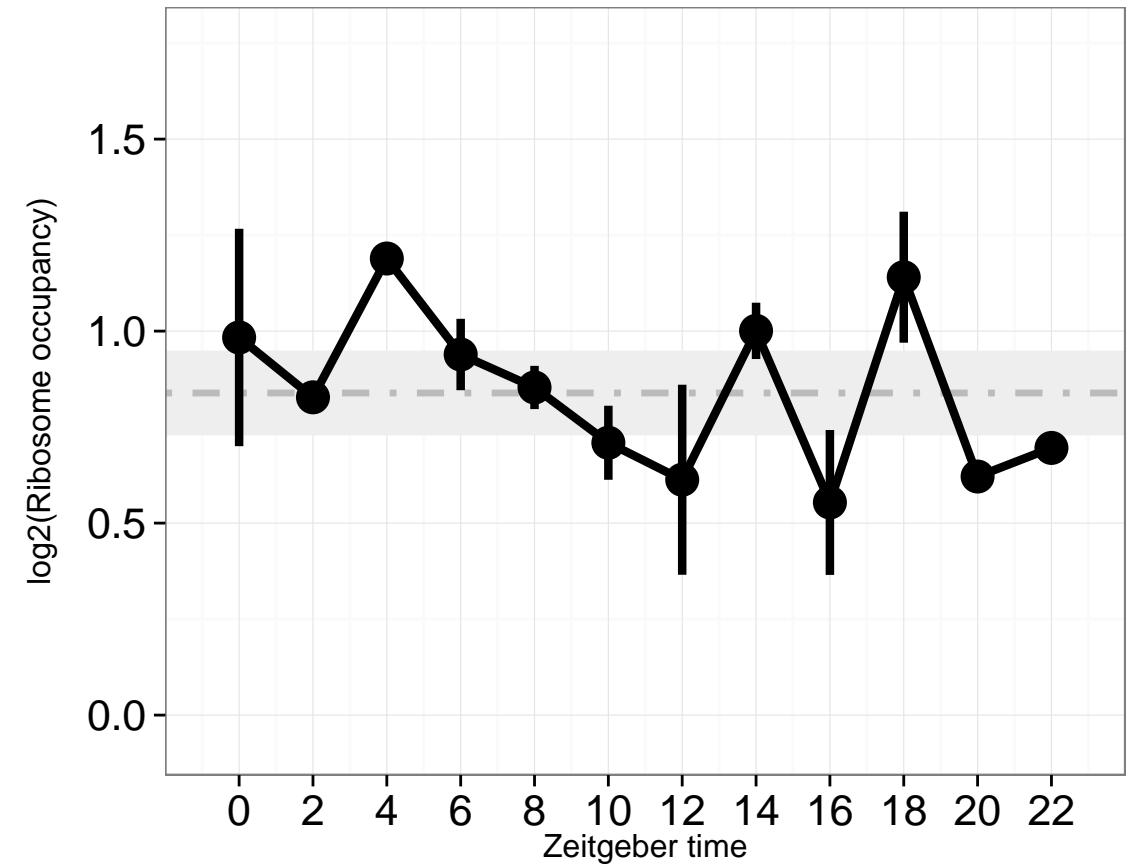

Supplement: Supplementary file 11155 [file 1]

## Olfml3

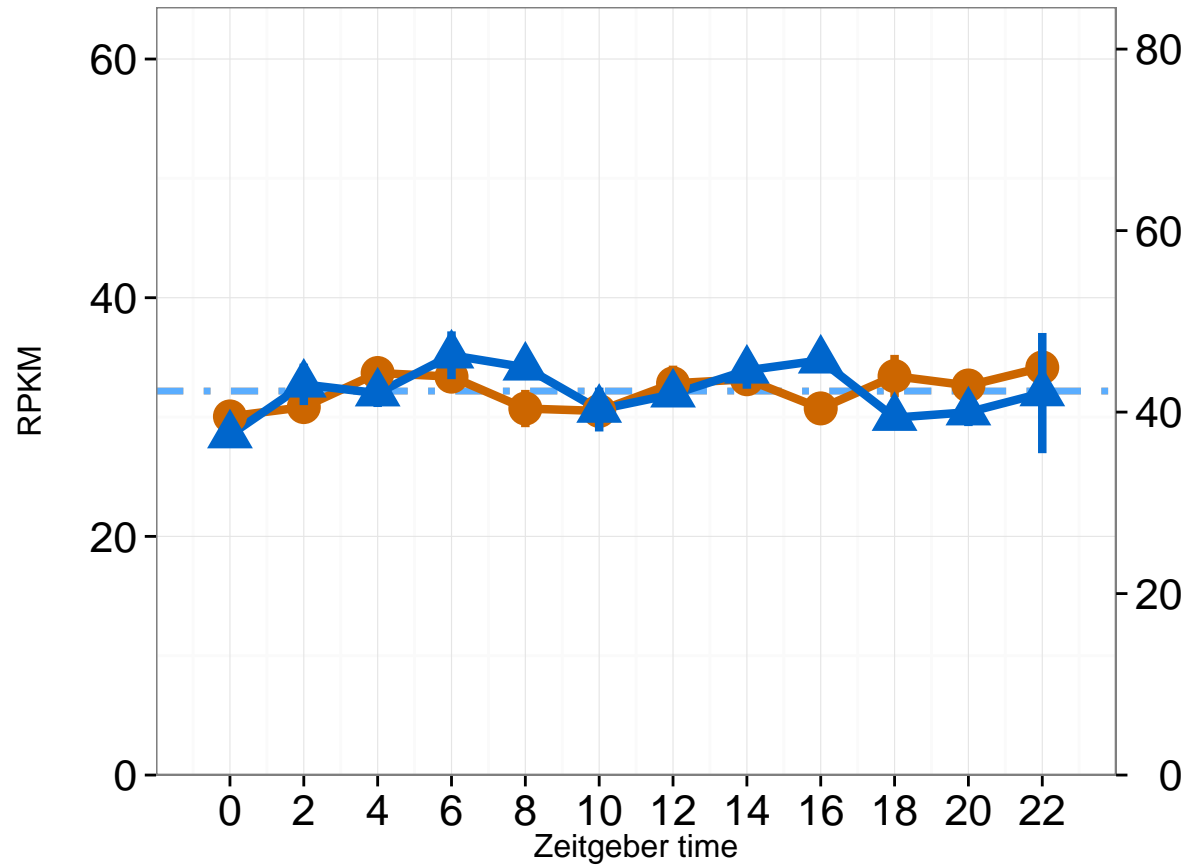

## Olfml3

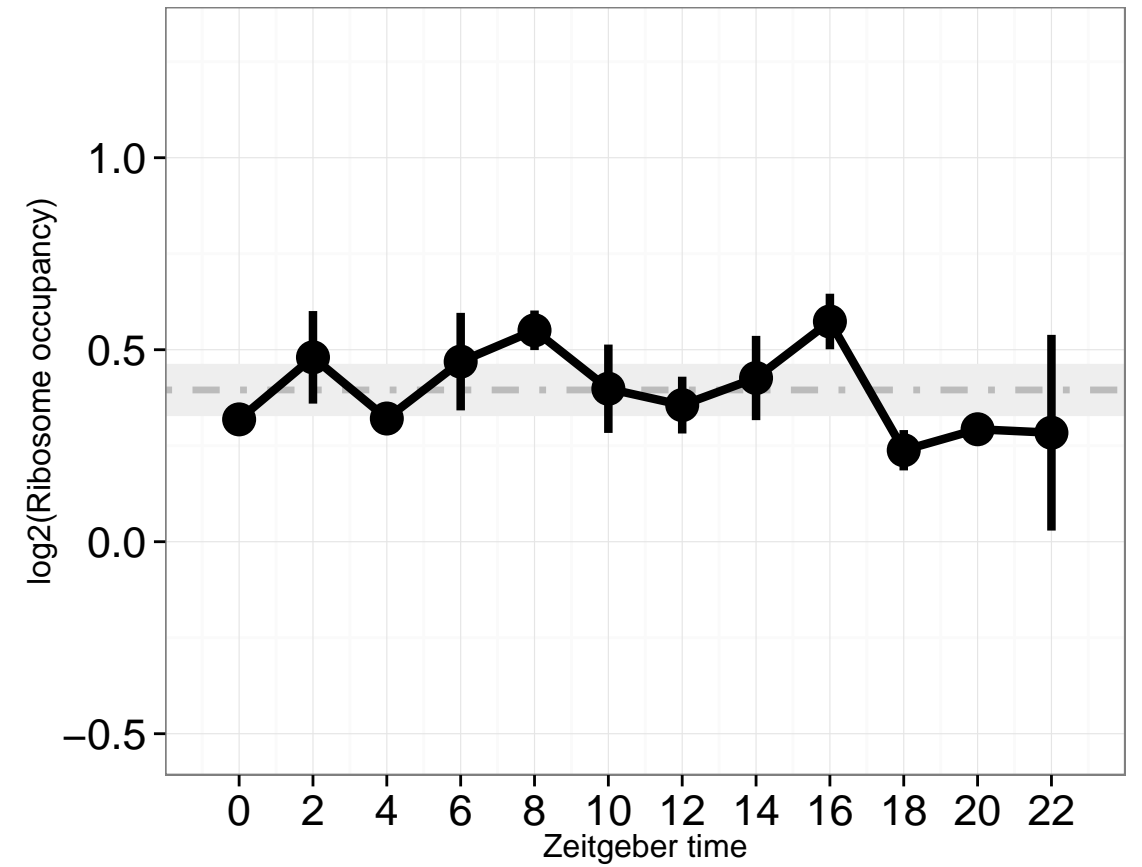

Supplement: Supplementary file 11156 [file 1]

## Mcf2l

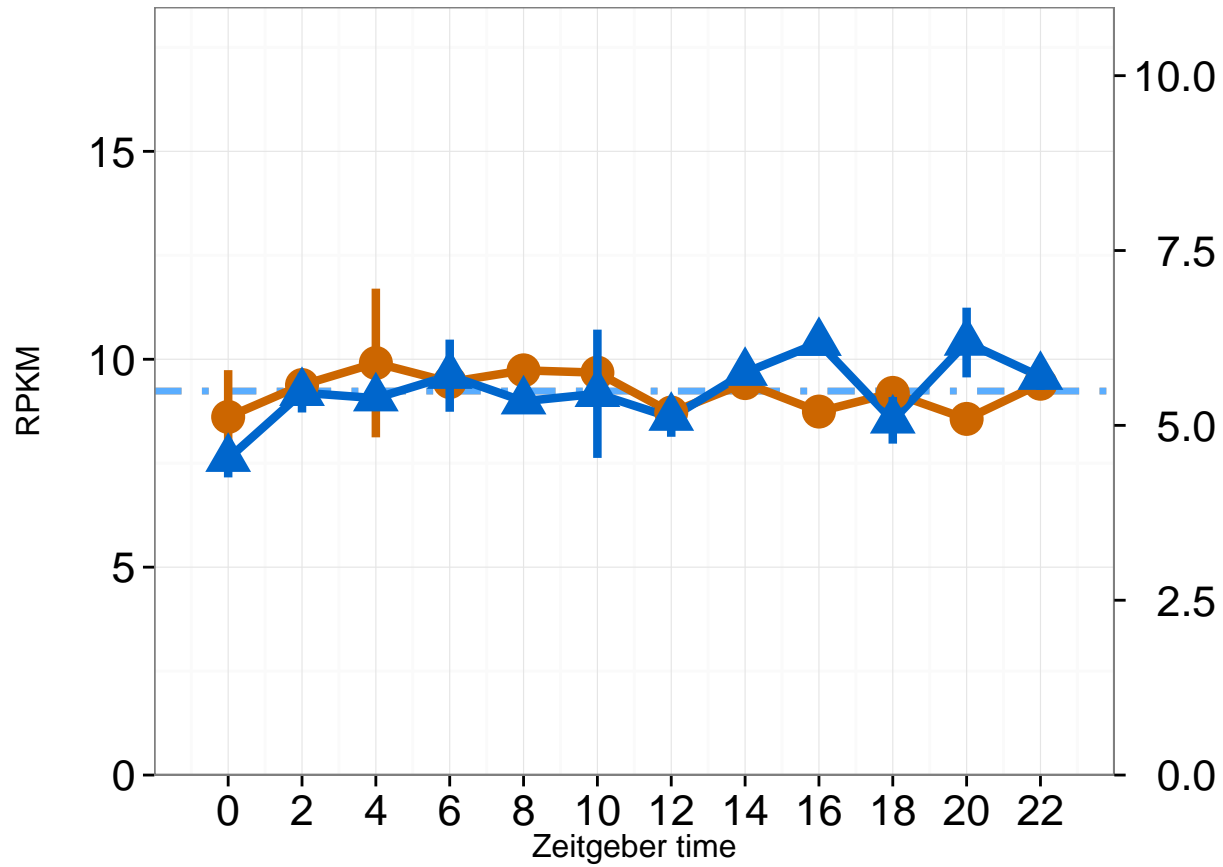

## Mcf2l

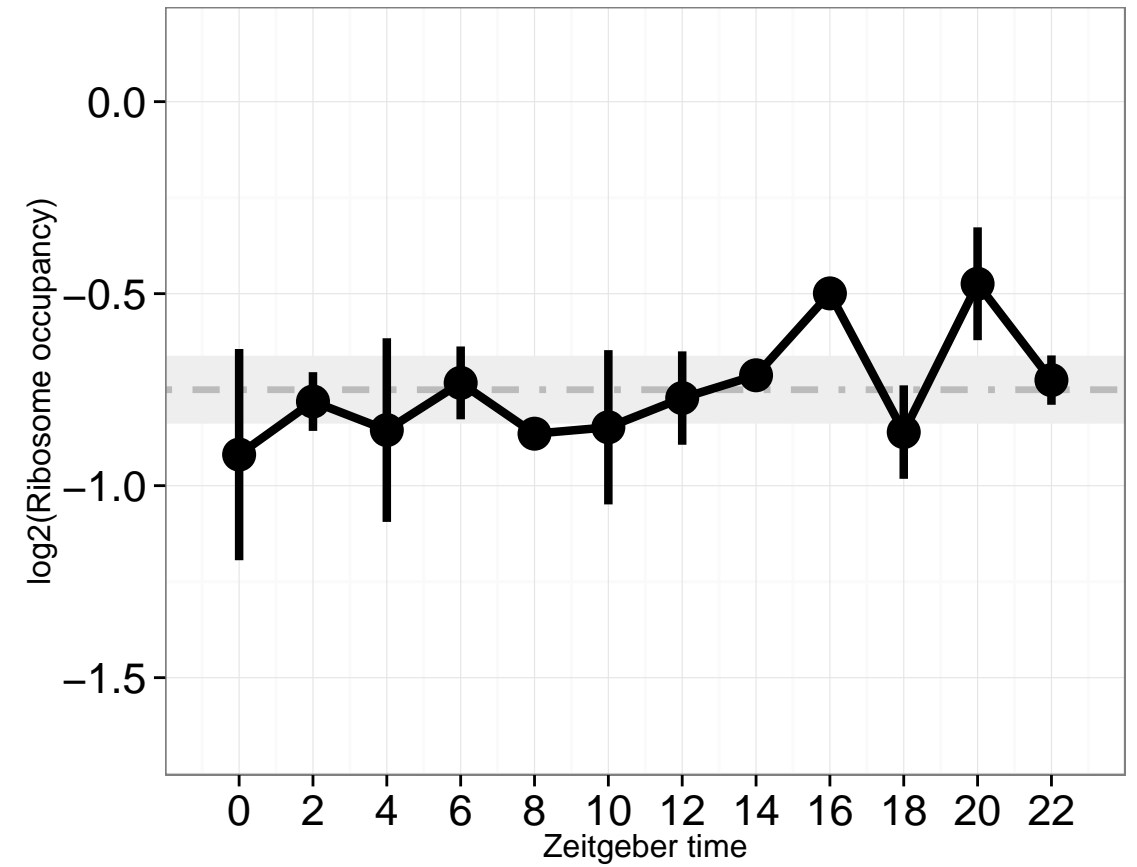

Supplement: Supplementary file 11157 [file 1]

# Arrdc3

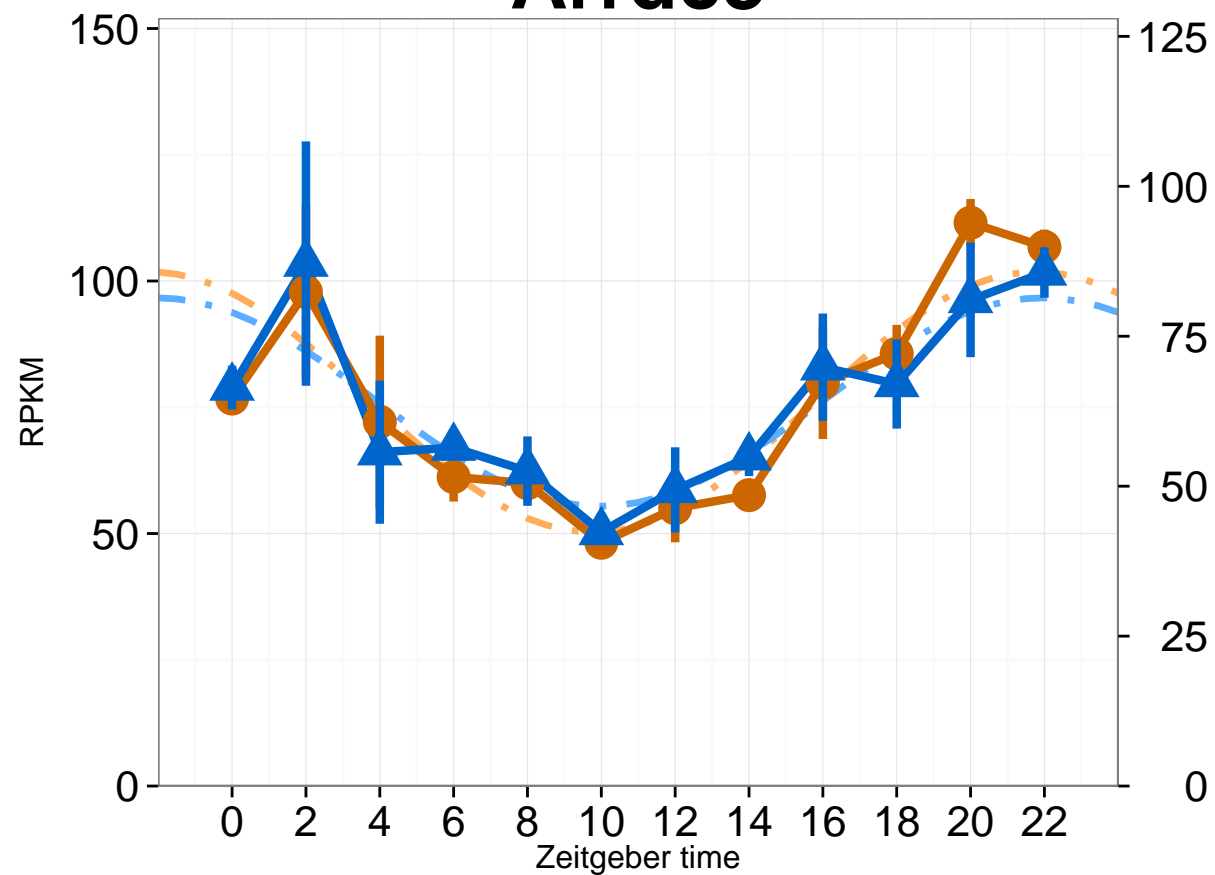

# Arrdc3

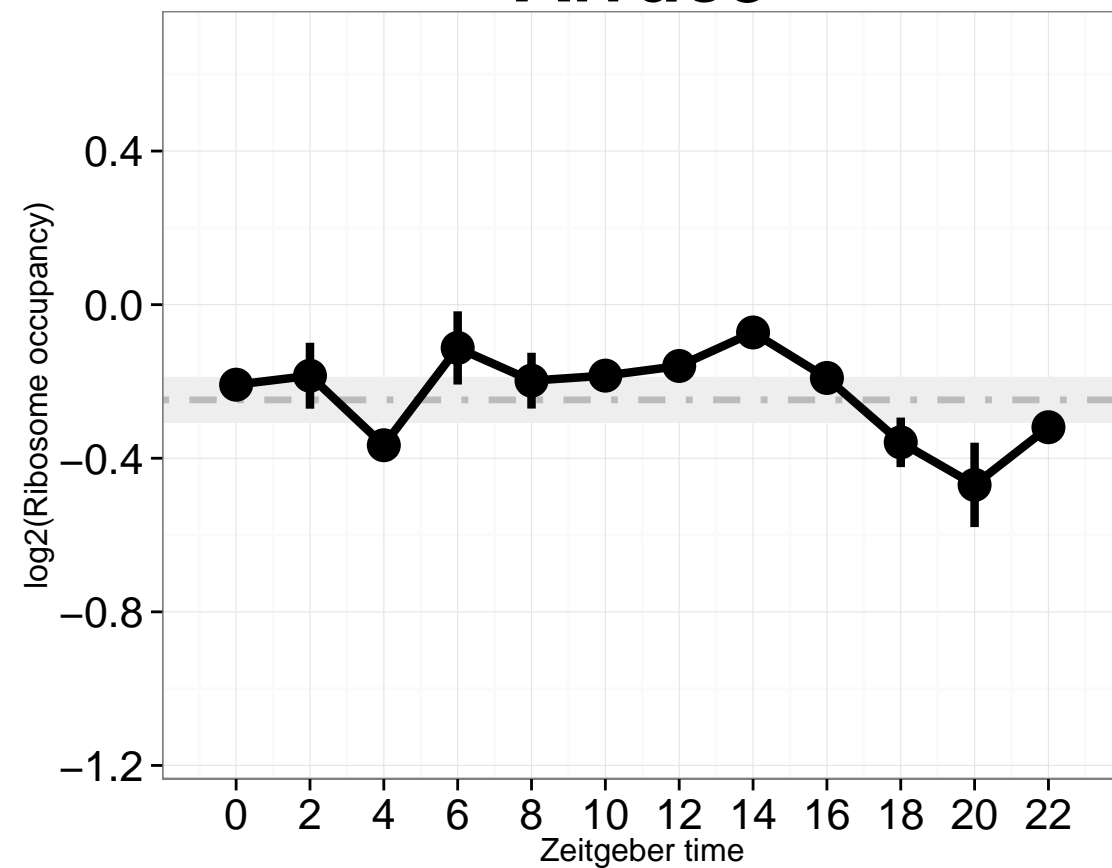

Supplement: Supplementary file 11158 [file 1]

## Rae1

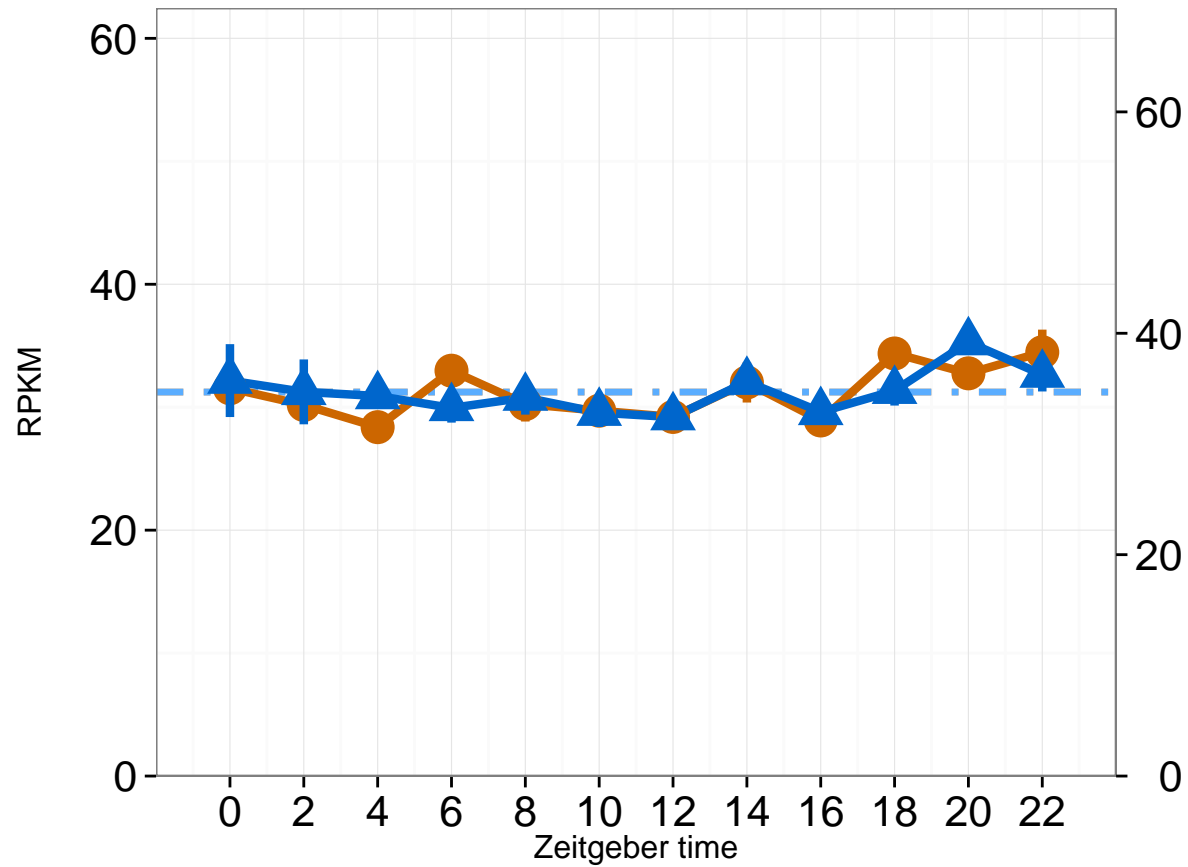

## Rae1

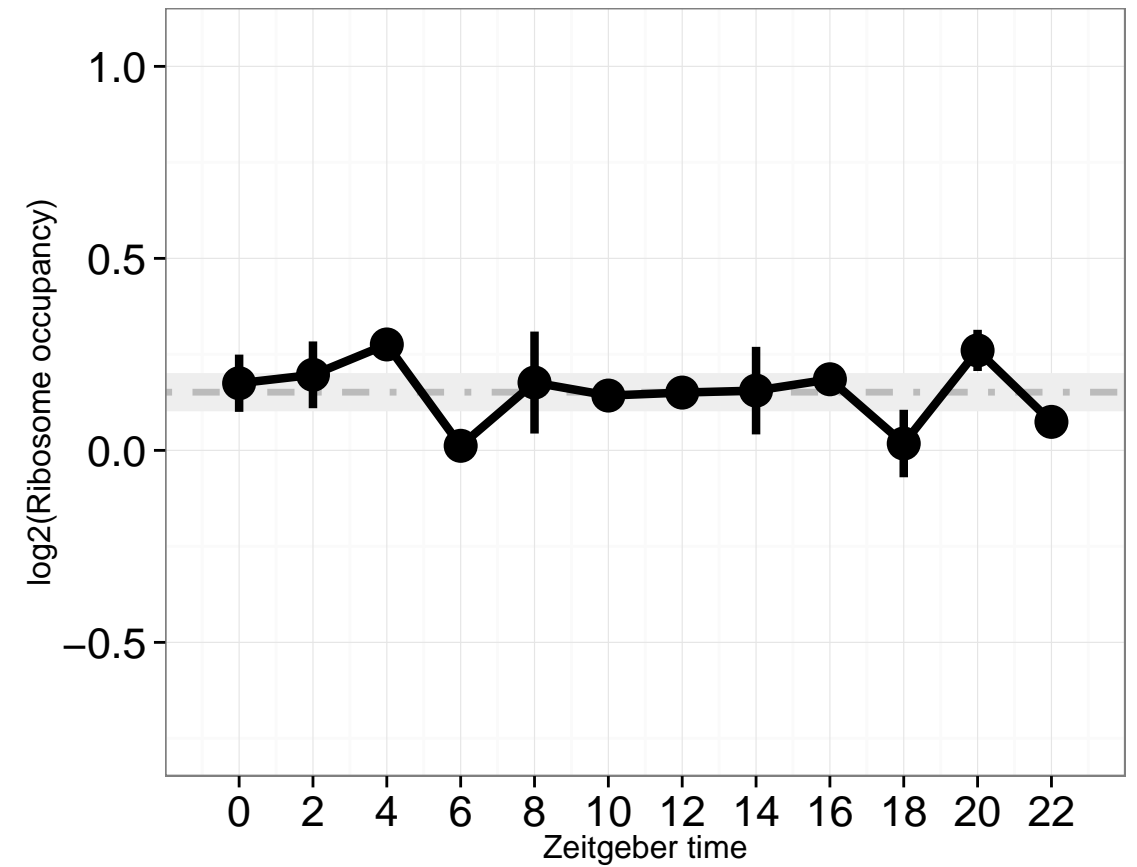

Supplement: Supplementary file 11159 [file 1]

## Vps28

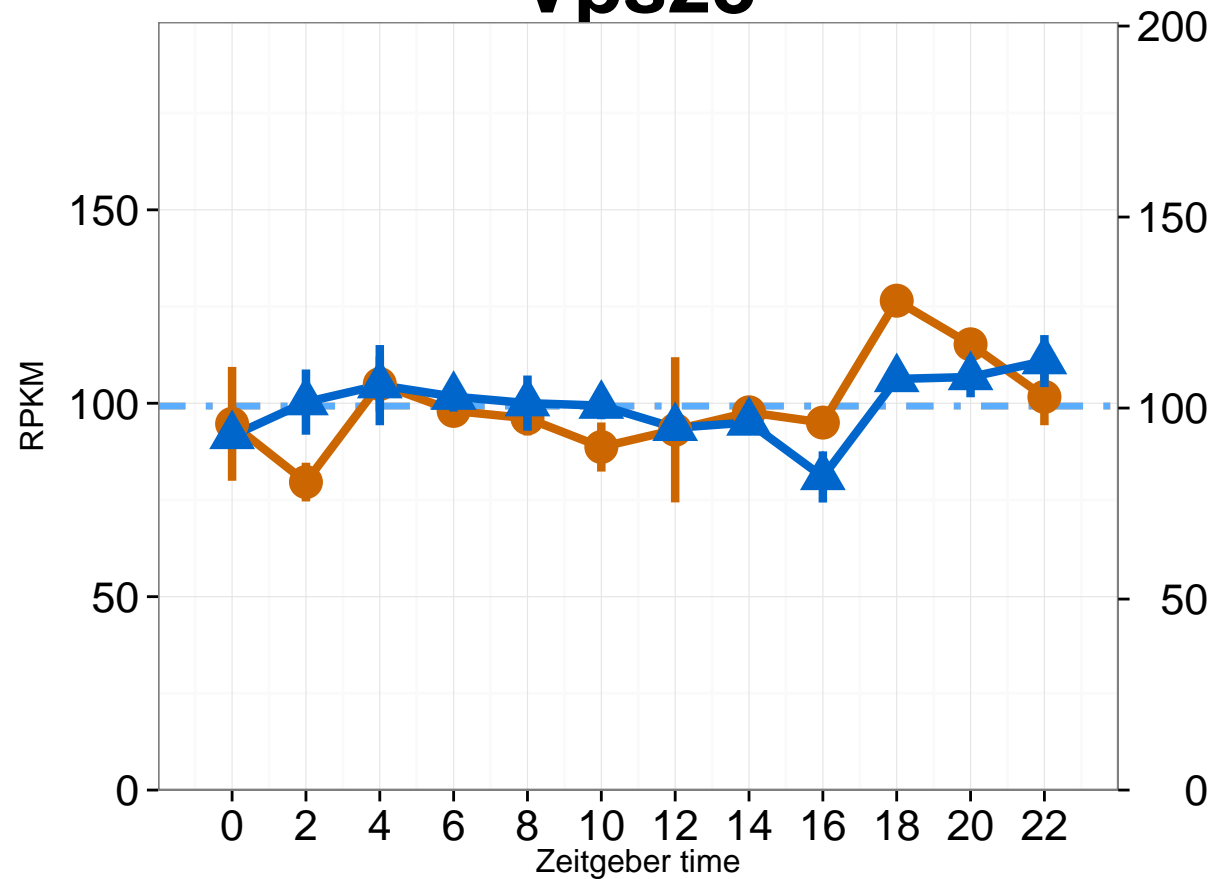

## Vps28

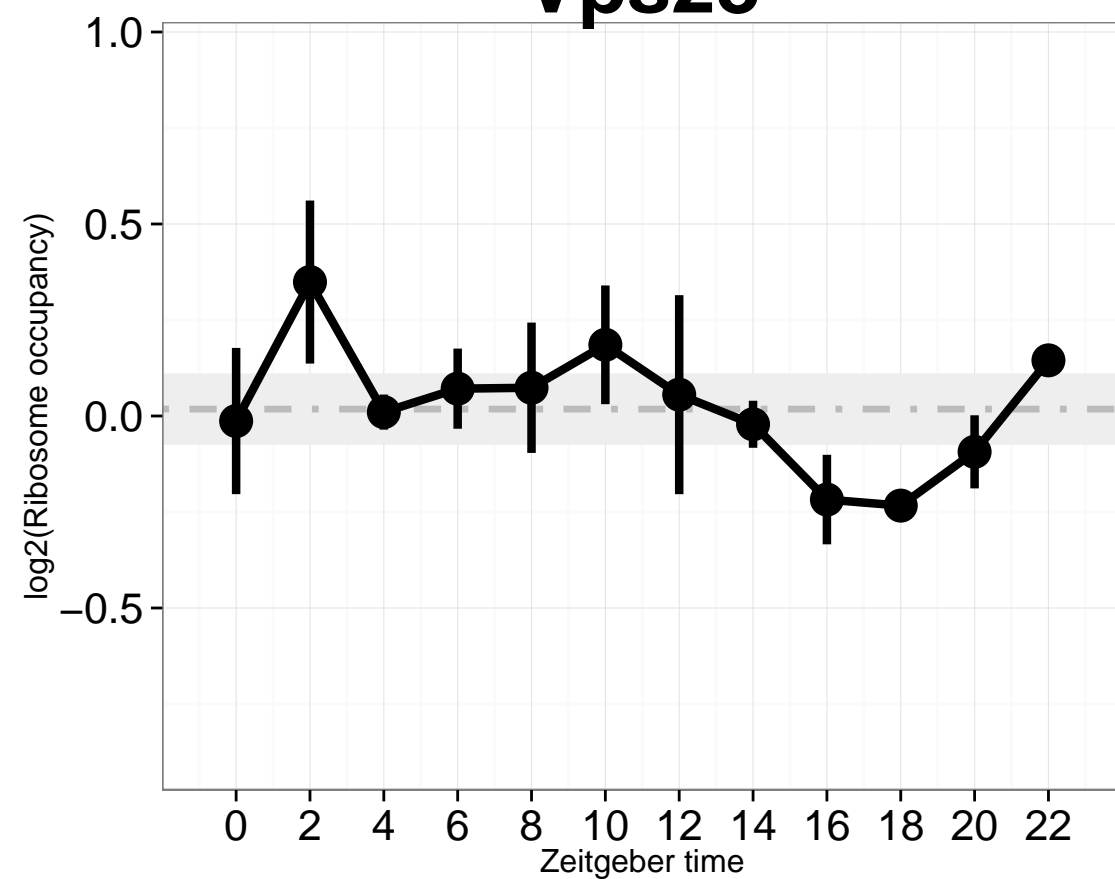

Supplement: Supplementary file 11160 [file 1]

## Mlec

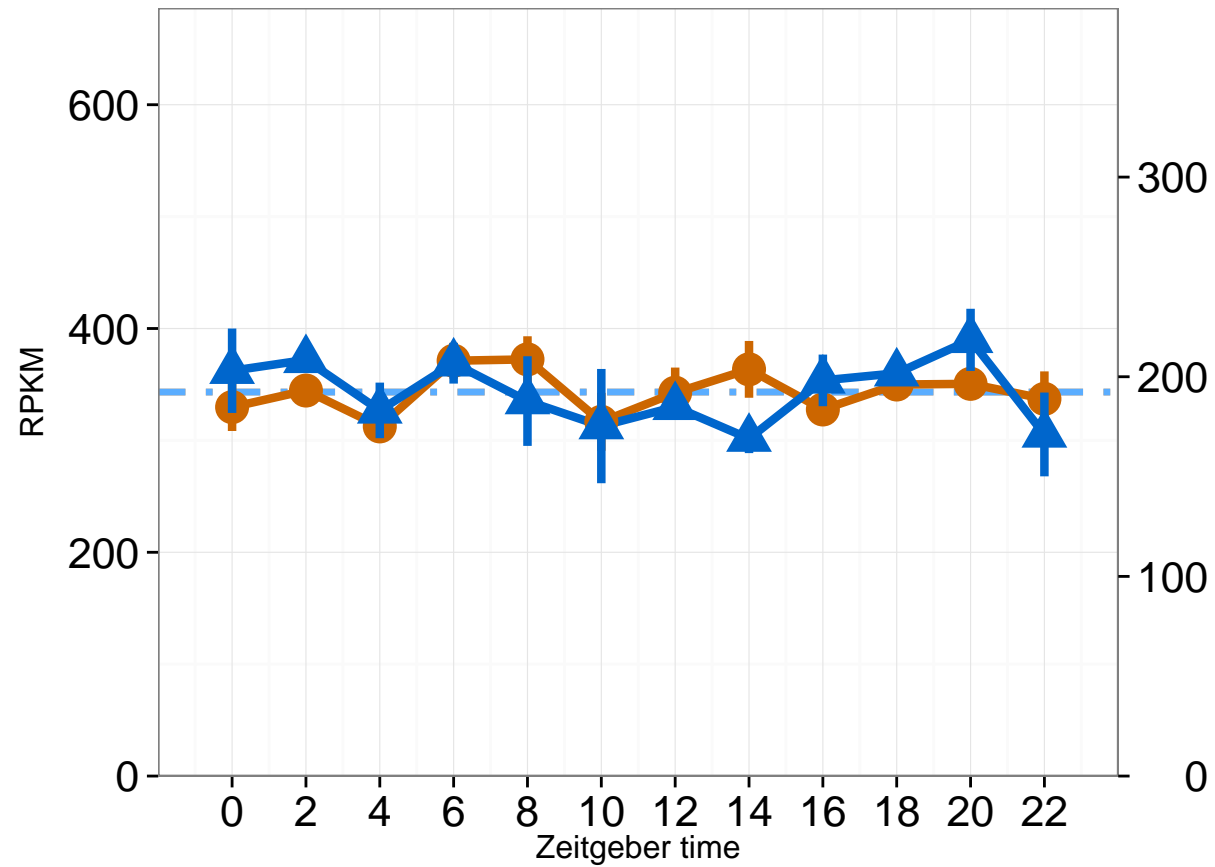

## Mlec

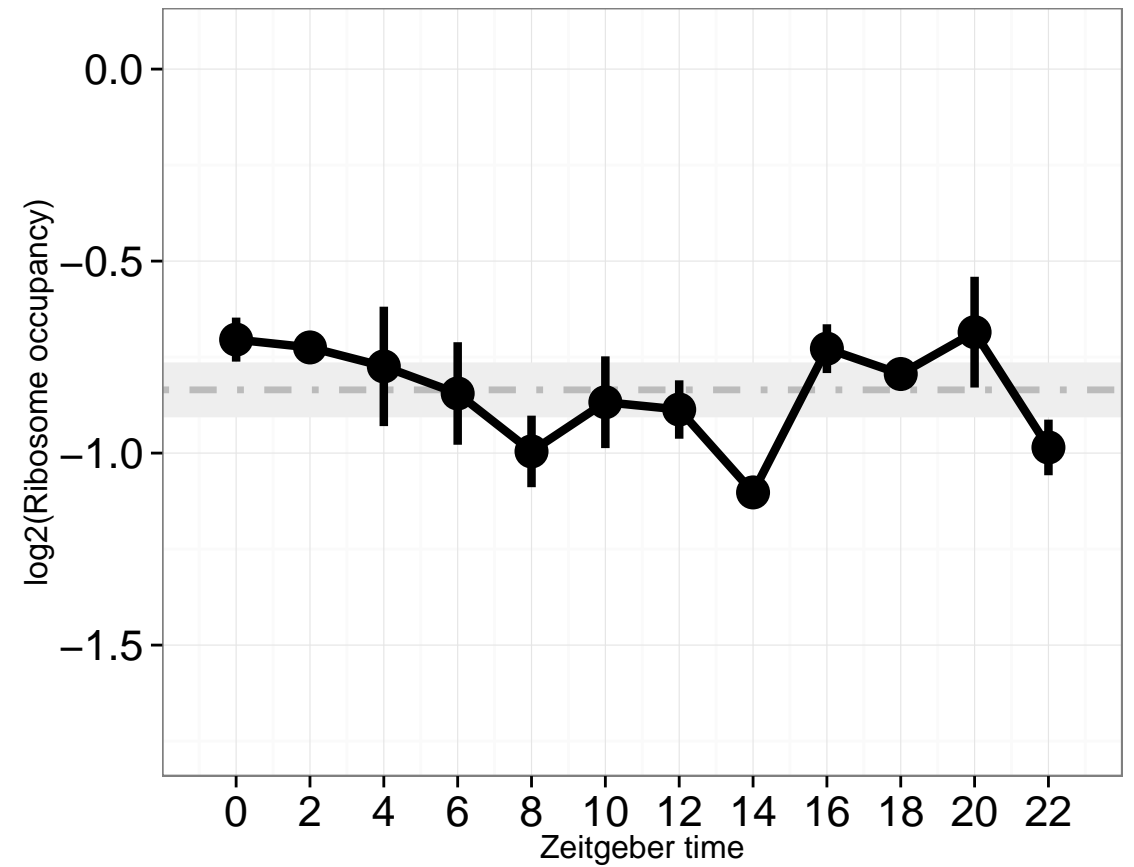

Supplement: Supplementary file 11161 [file 1]

# Lmod1

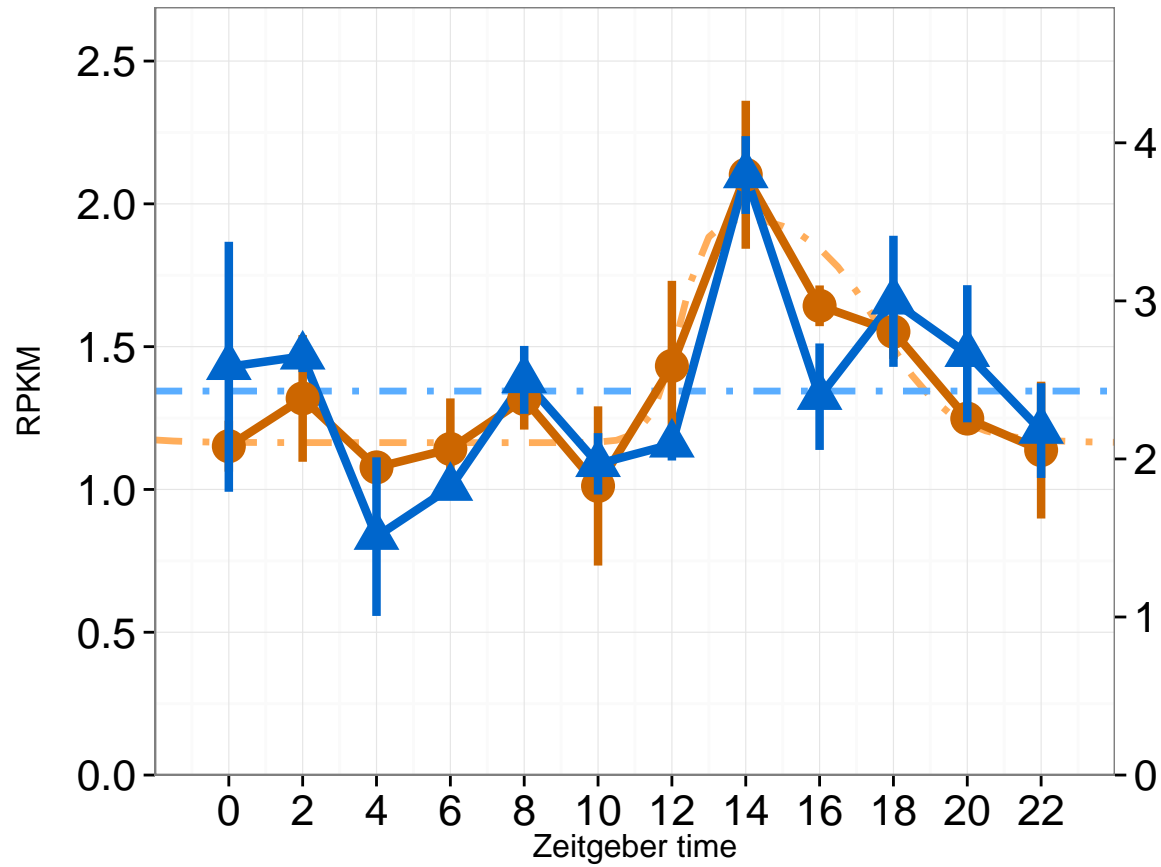

# Lmod1

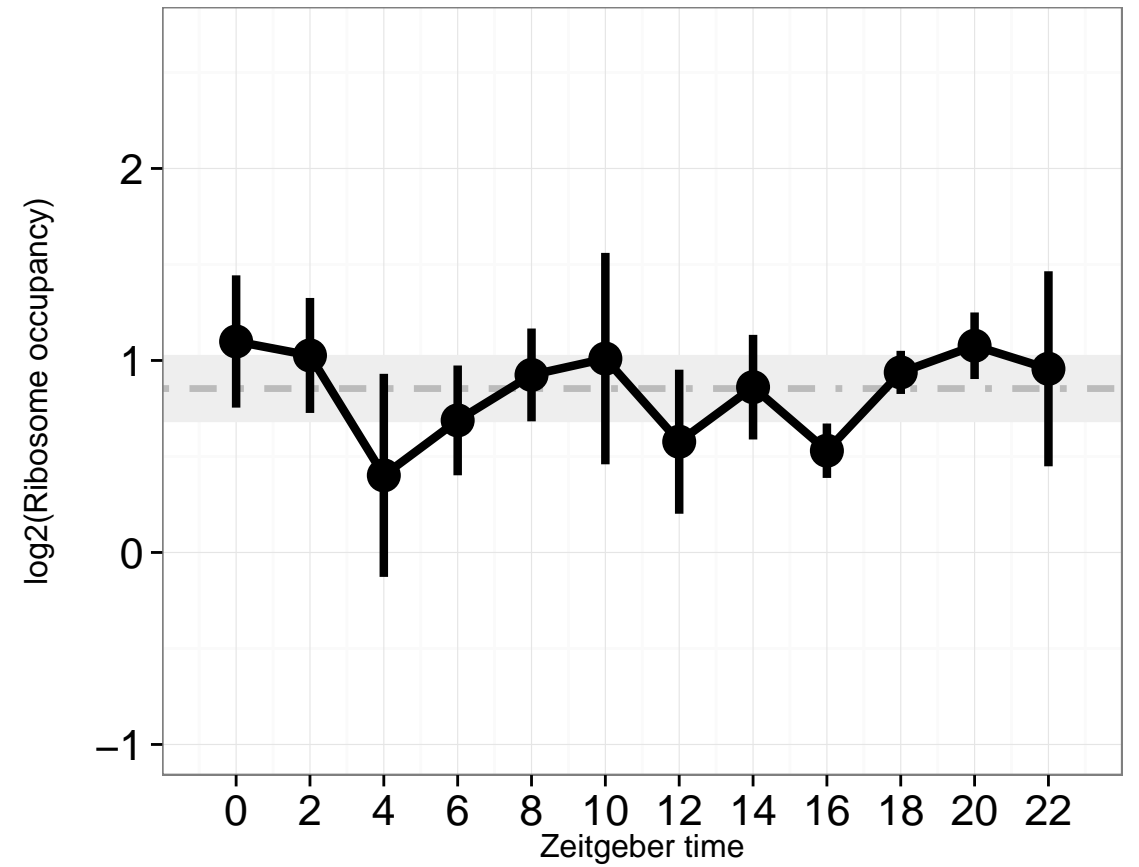

Supplement: Supplementary file 11162 [file 1]

## Rnf213

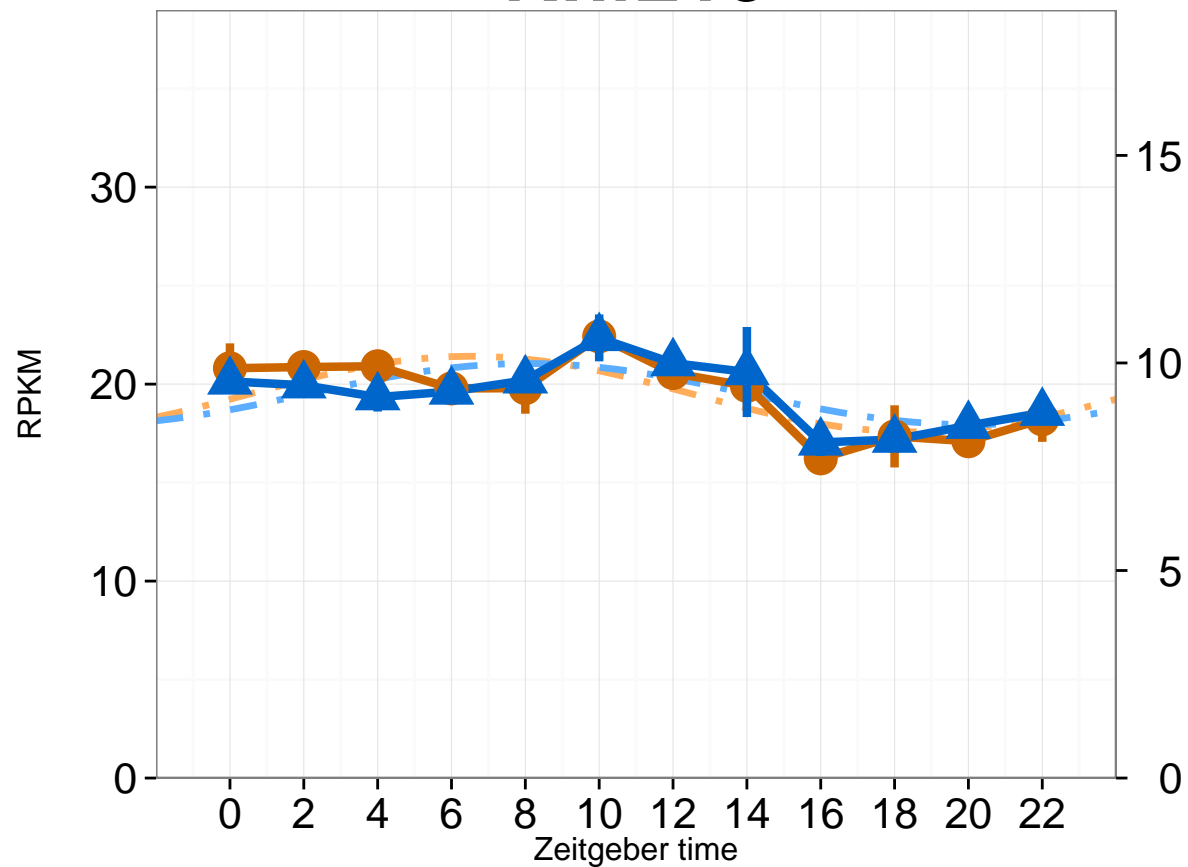

## Rnf213

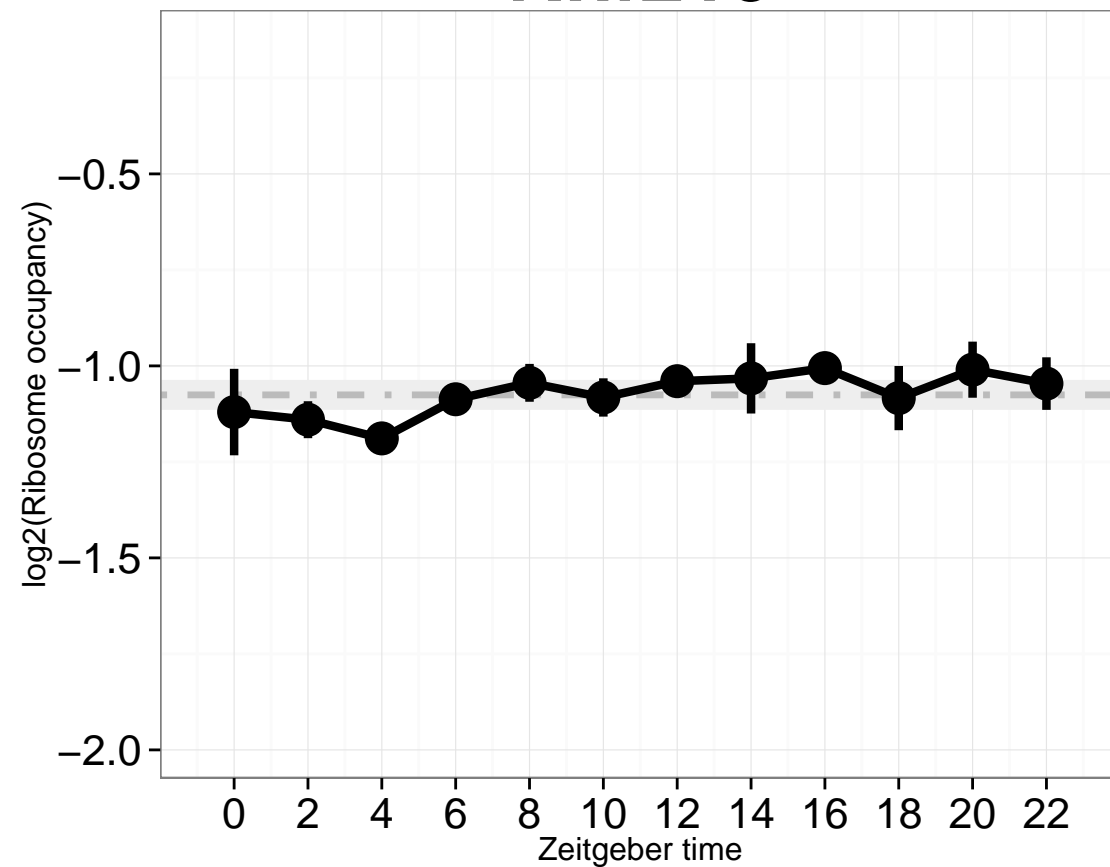

Supplement: Supplementary file 11163 [file 1]

# Lsm10

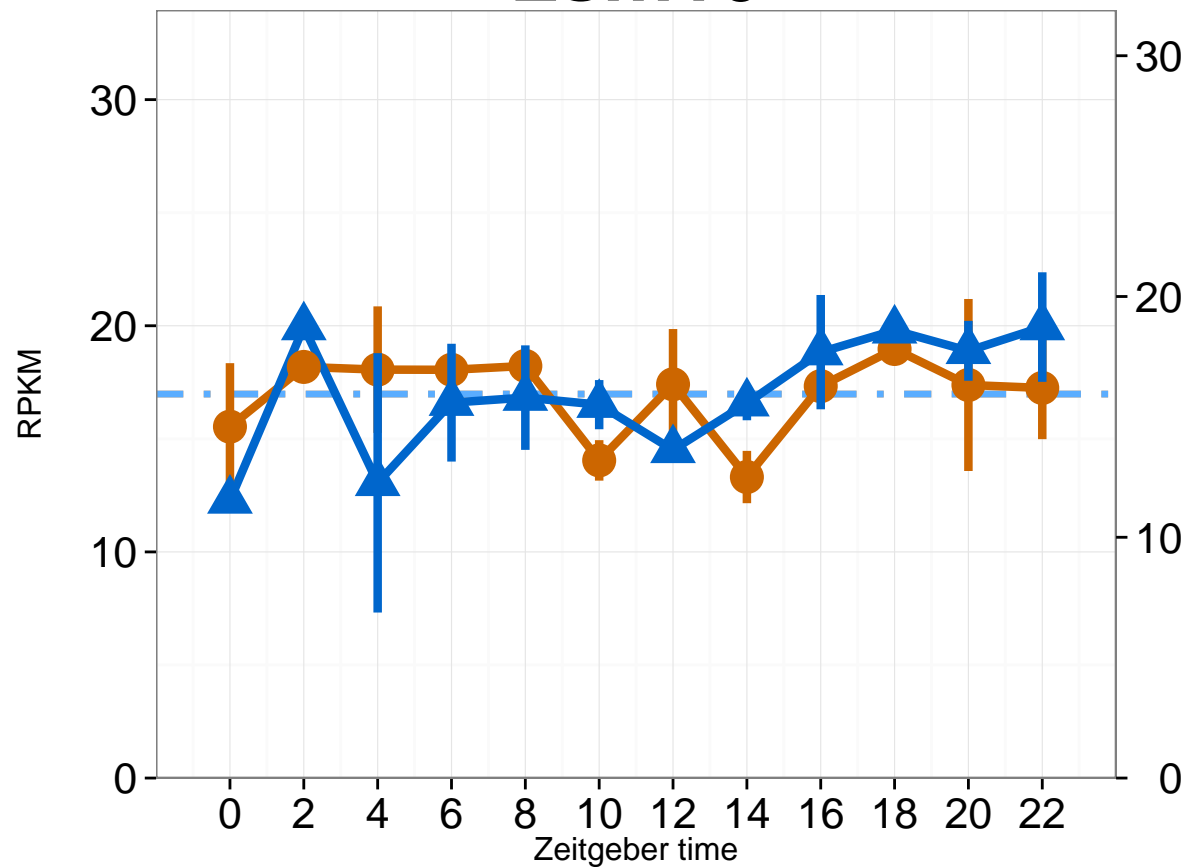

# Lsm10

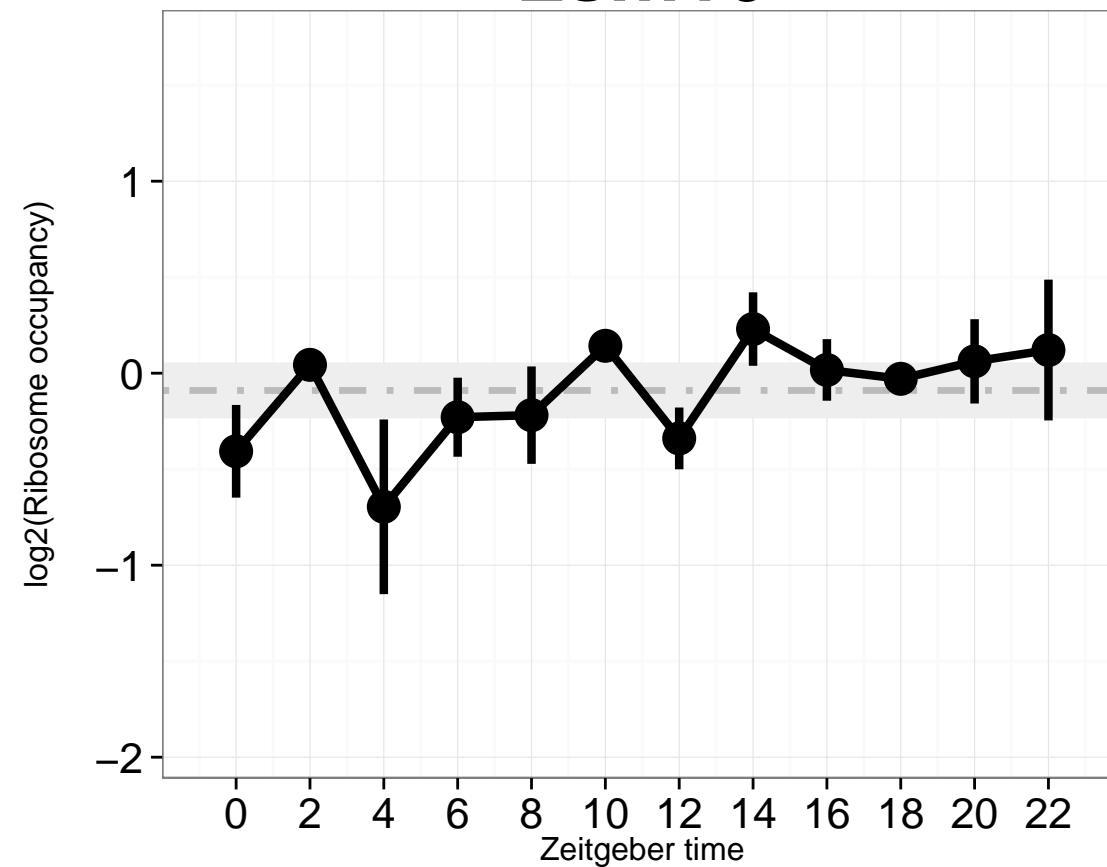

Supplement: Supplementary file 11164 [file 1]

## Prkrip1

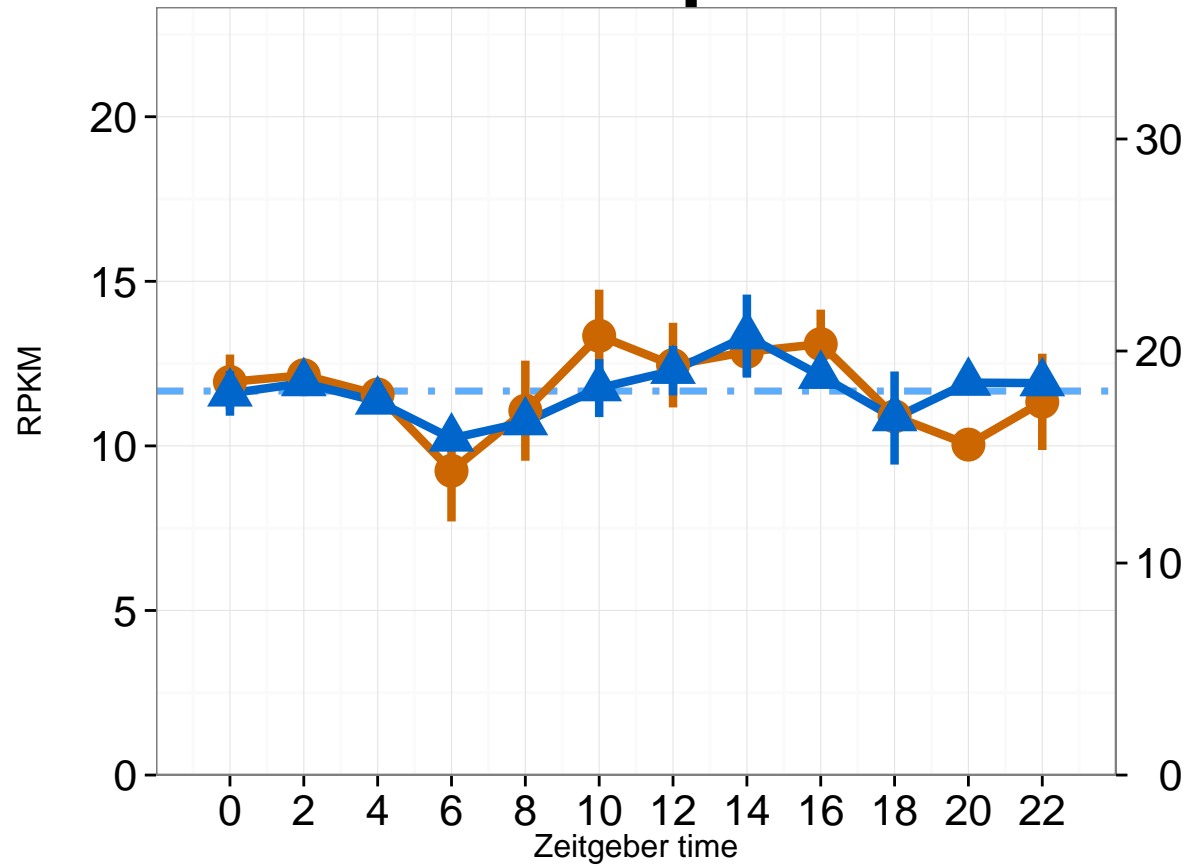

## Prkrip1

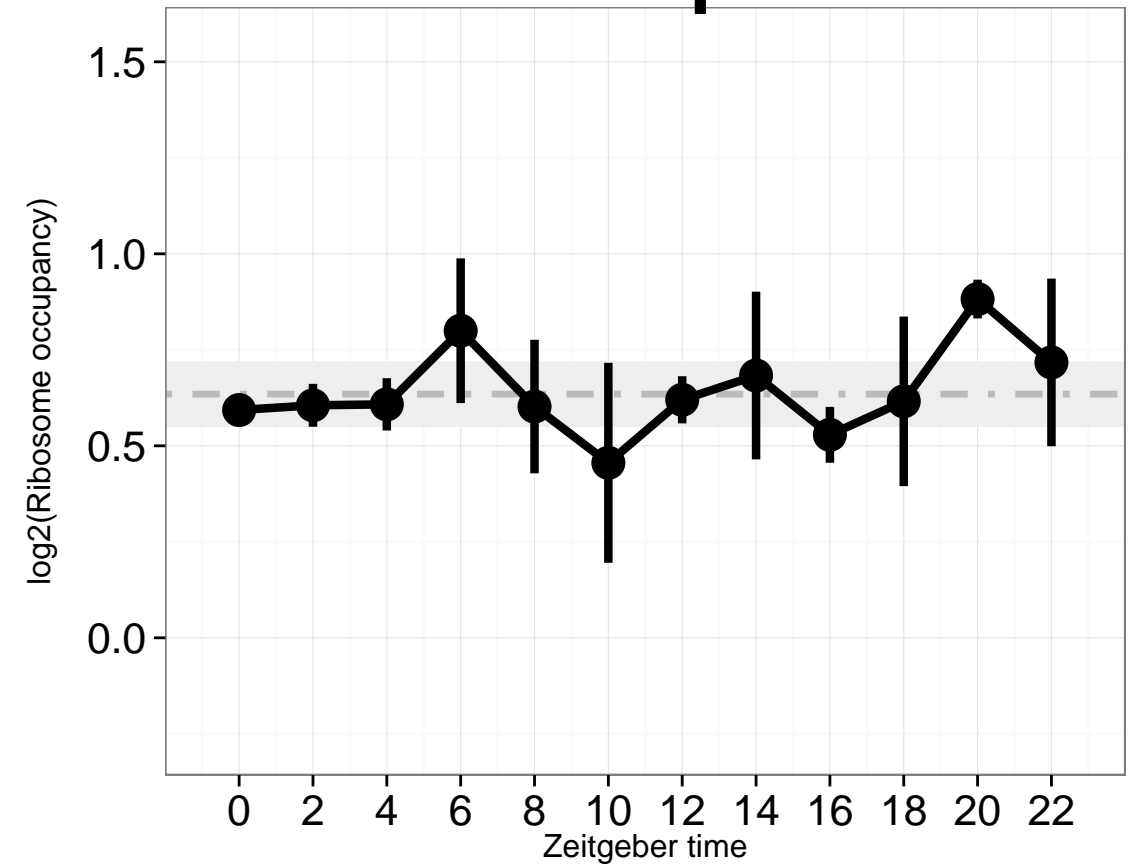

Supplement: Supplementary file 11166 [file 1]

## Tnks

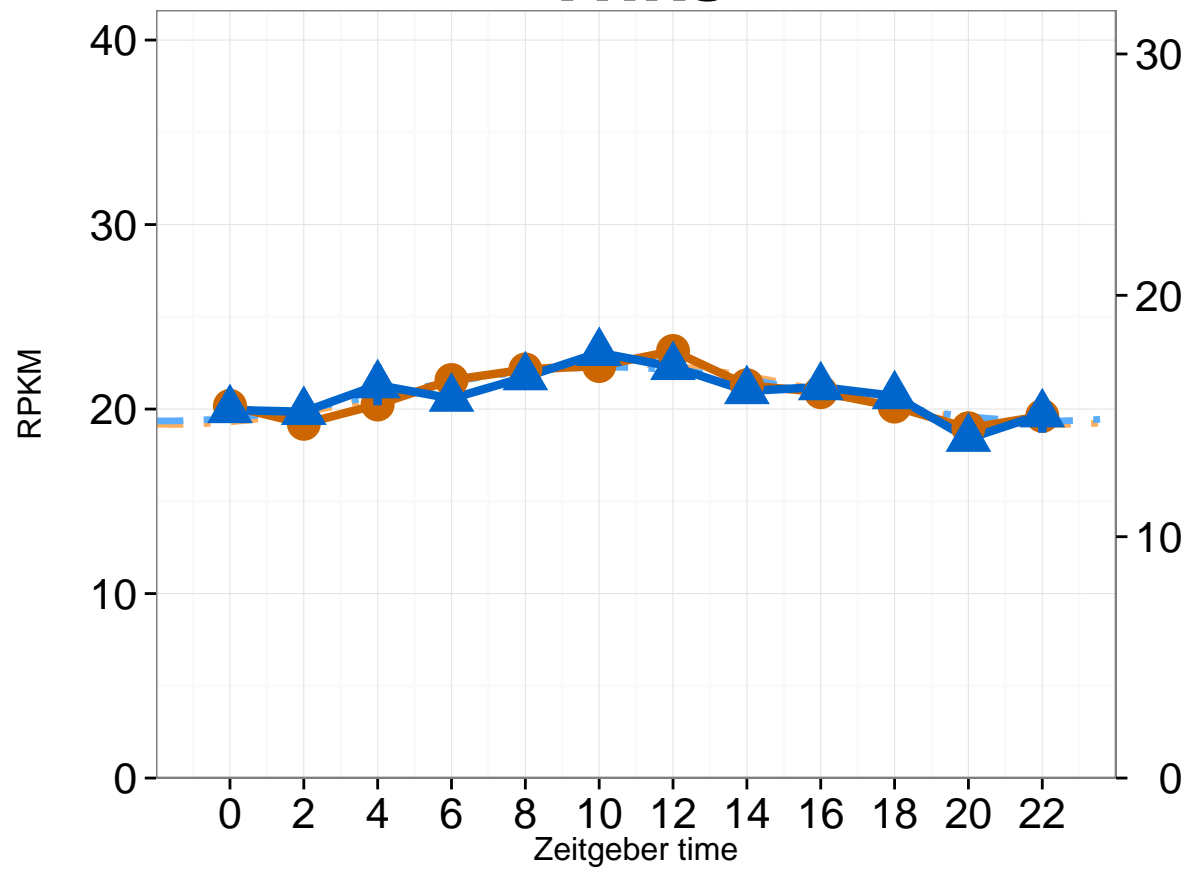

## Tnks

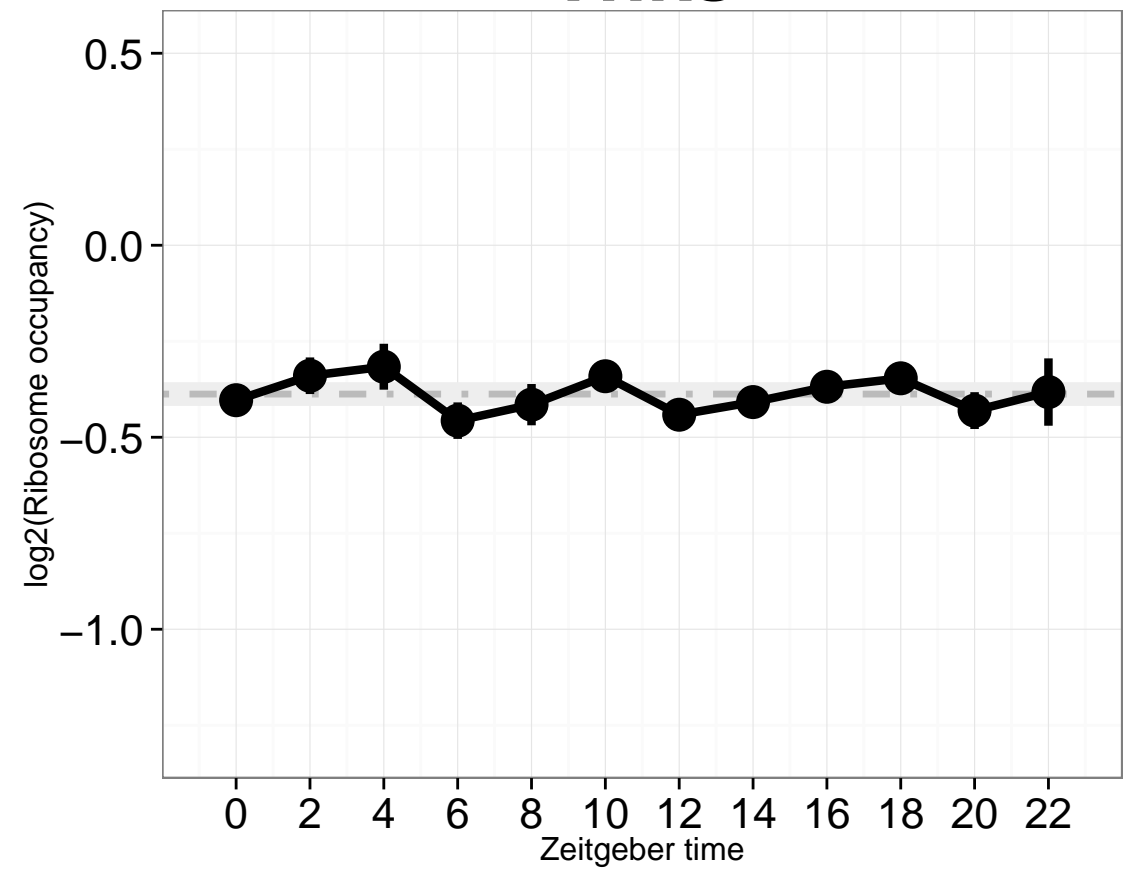

Supplement: Supplementary file 11167 [file 1]

## Tanc2

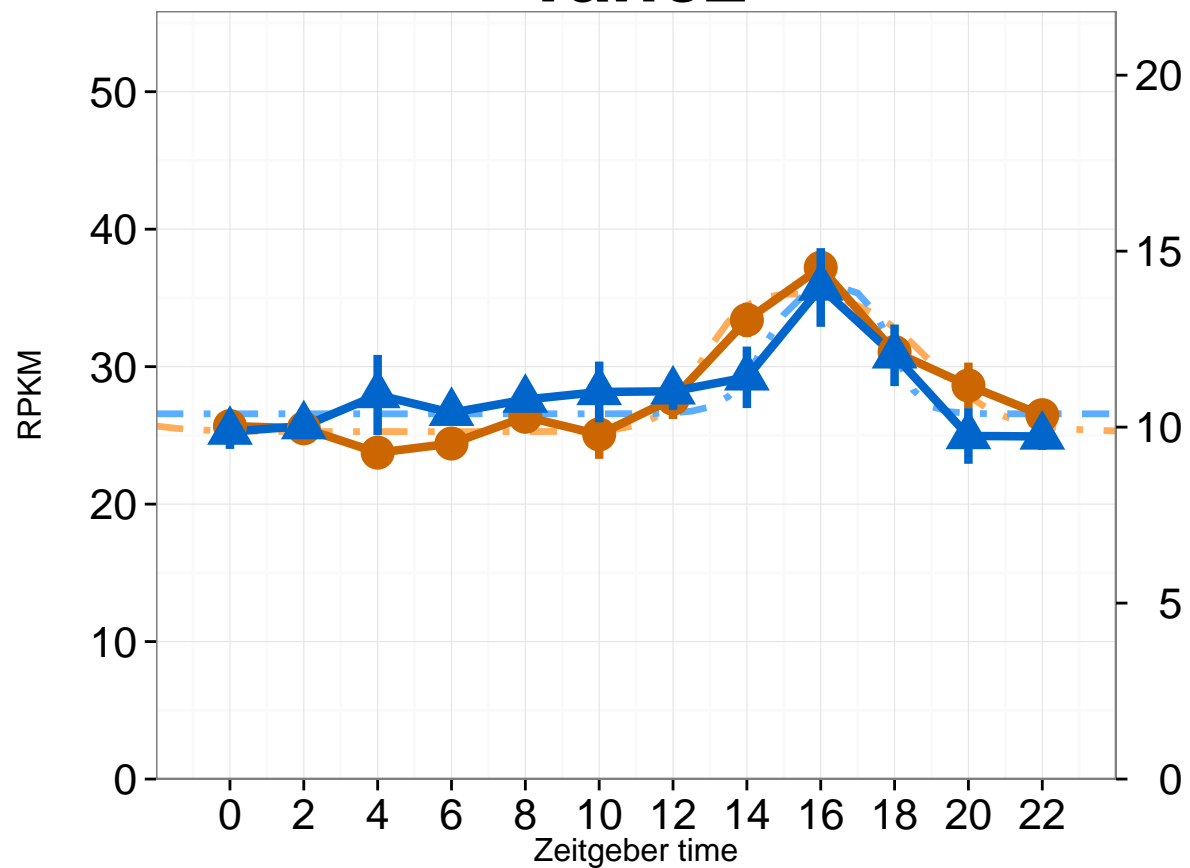

## Tanc2

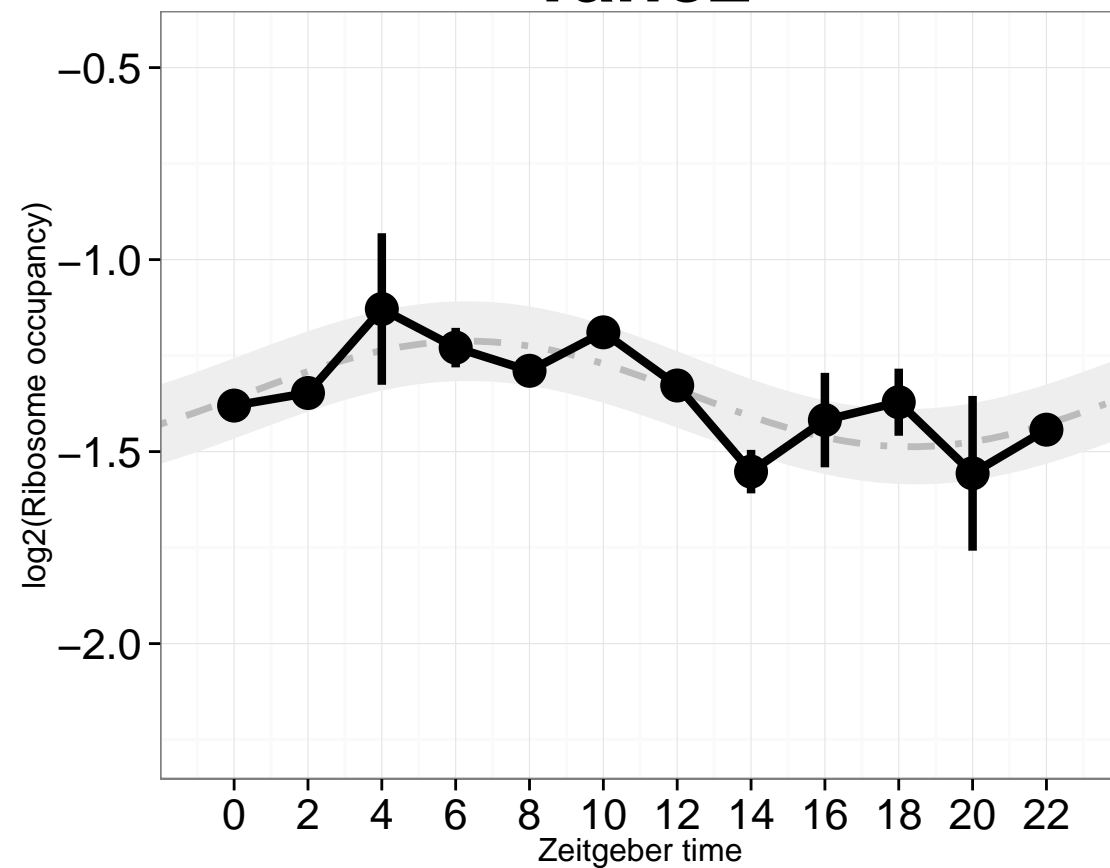

Supplement: Supplementary file 11168 [file 1]

# Mapk8

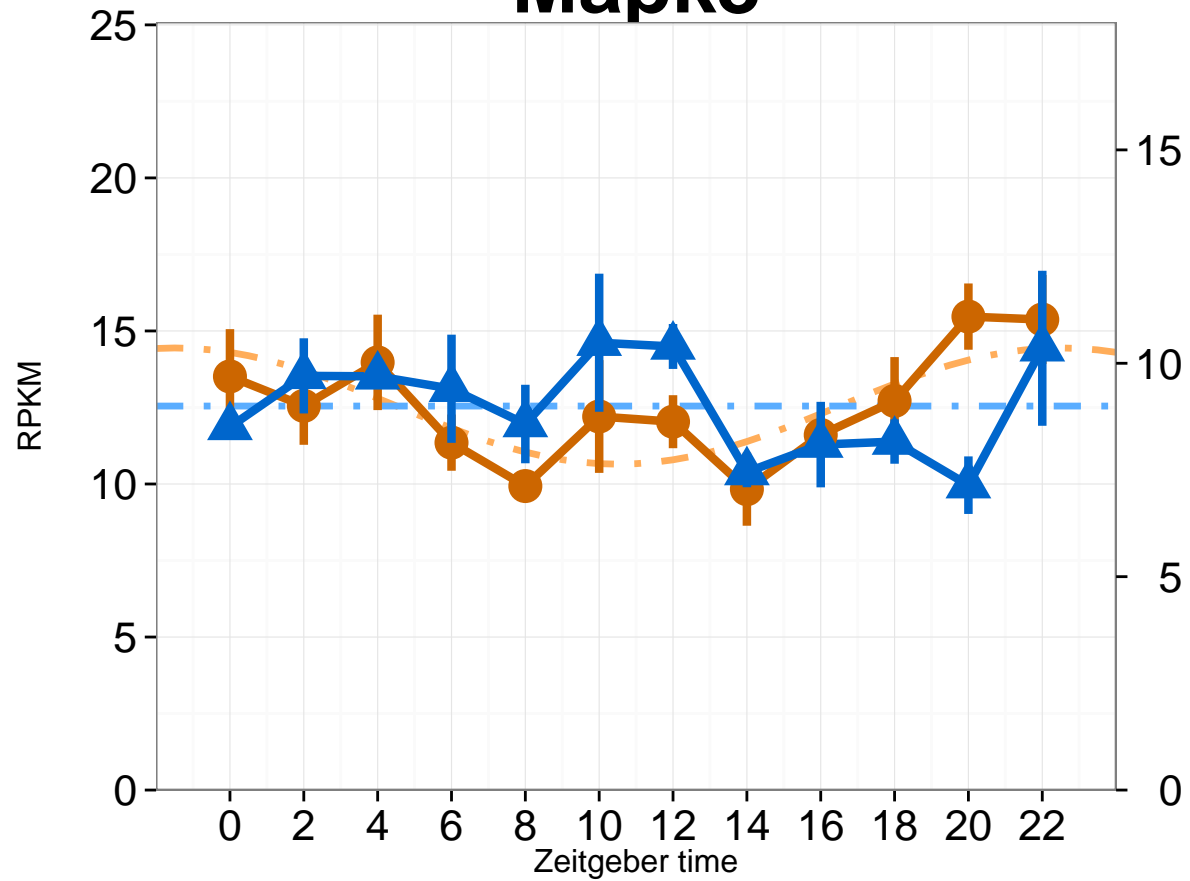

# Mapk8

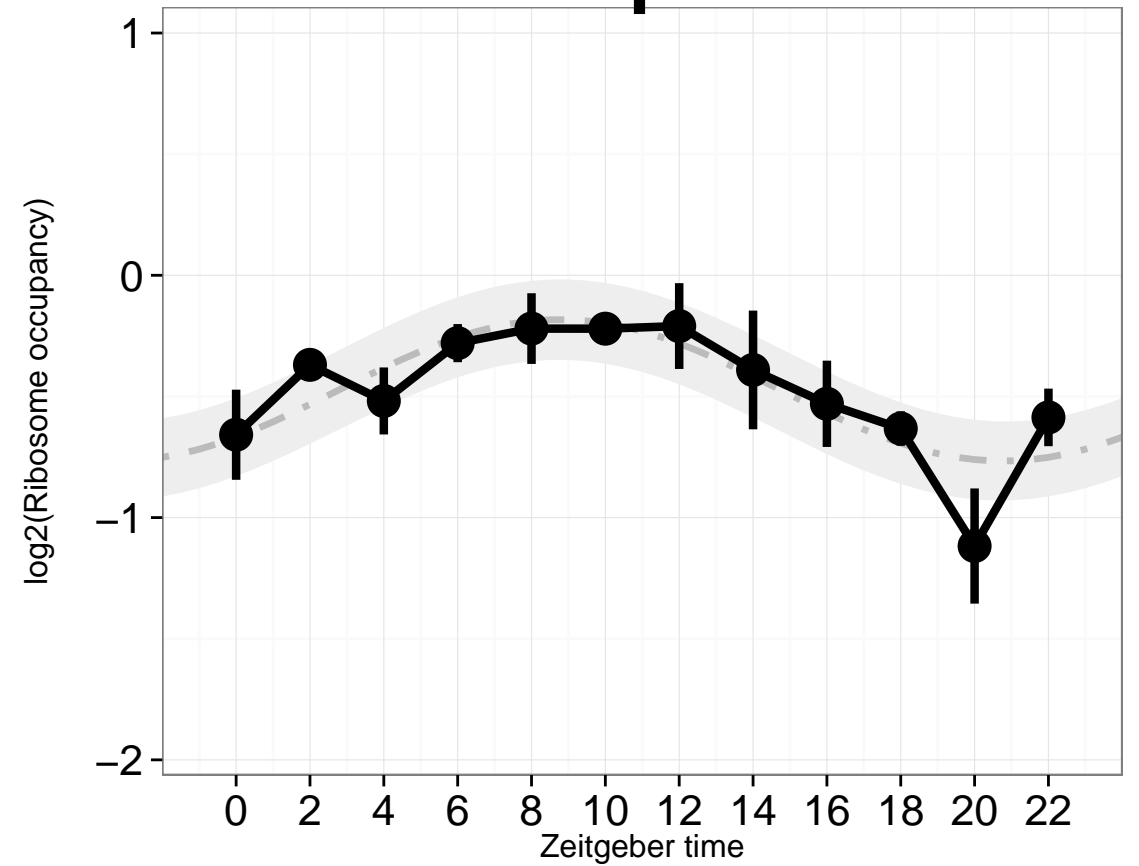

Supplement: Supplementary file 11169 [file 1]

# Cyp4a31

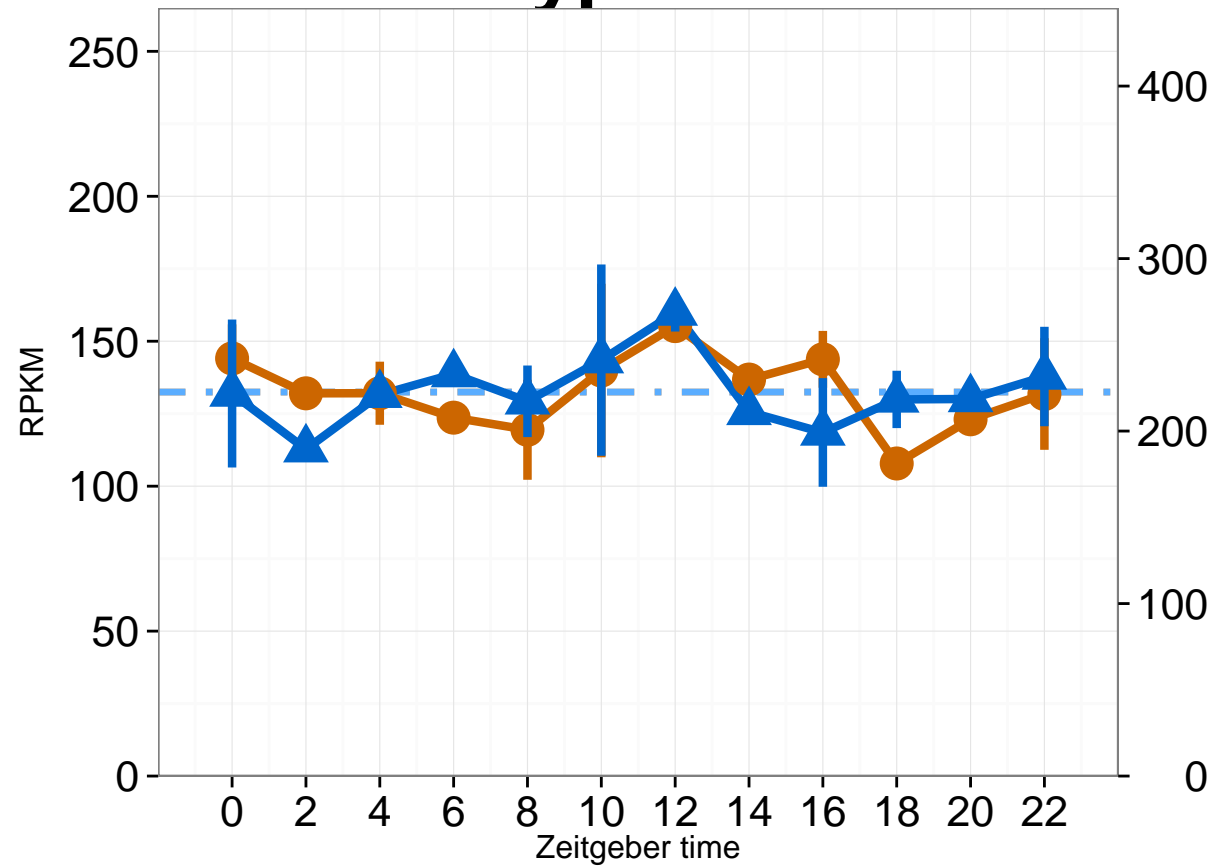

# Cyp4a31

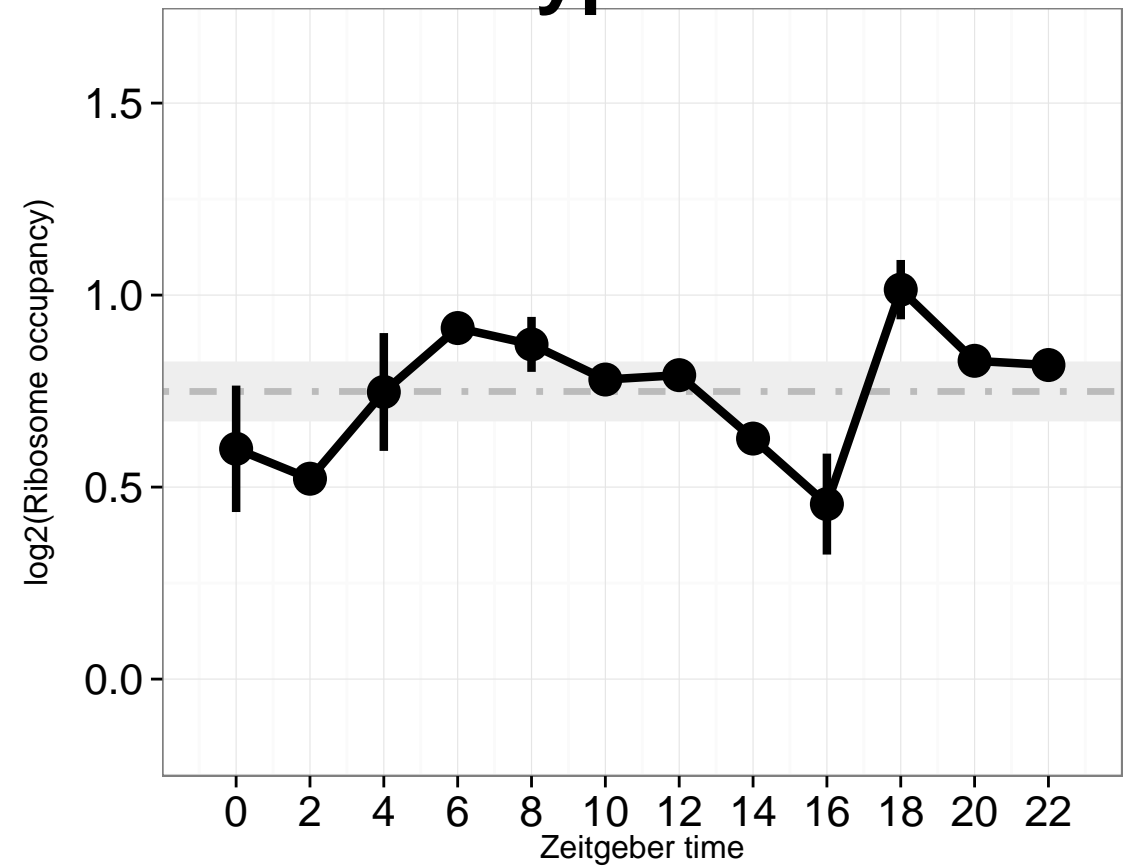

Supplement: Supplementary file 11170 [file 1]

## Rfc4

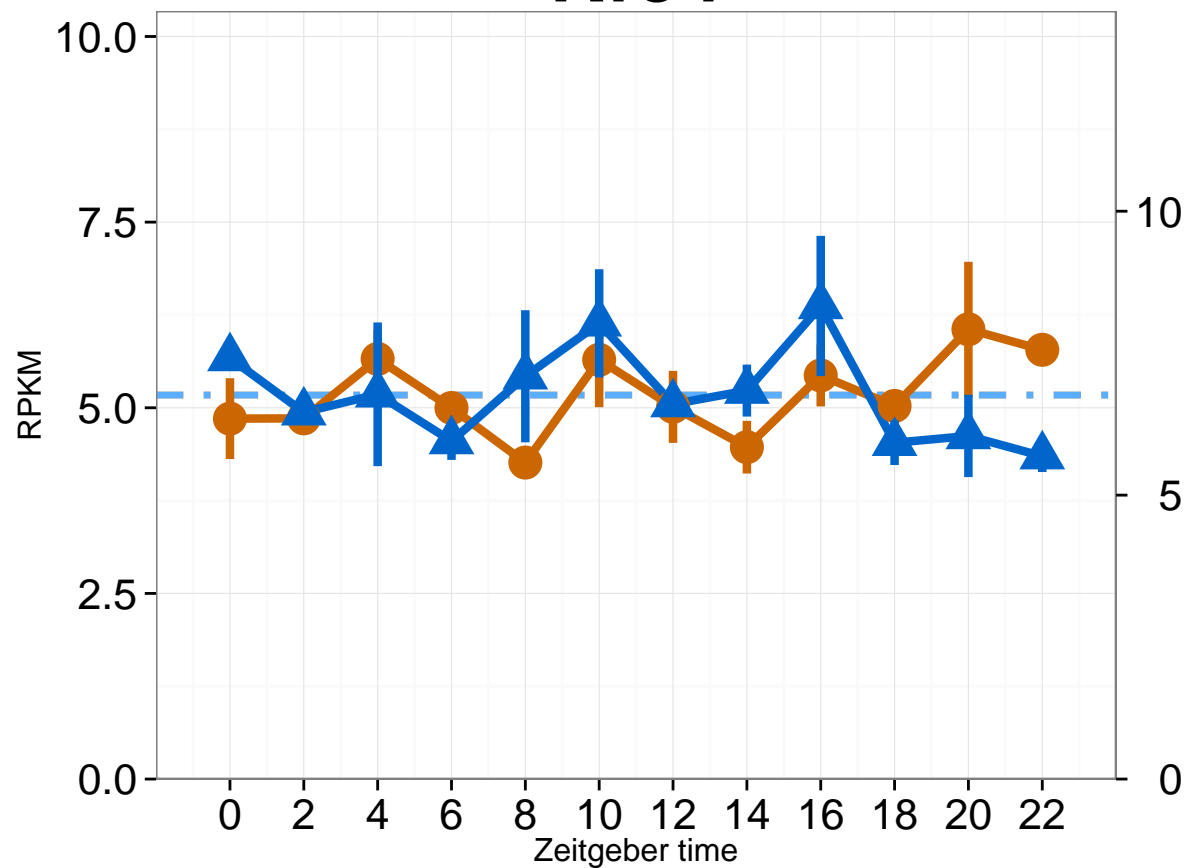

## Rfc4

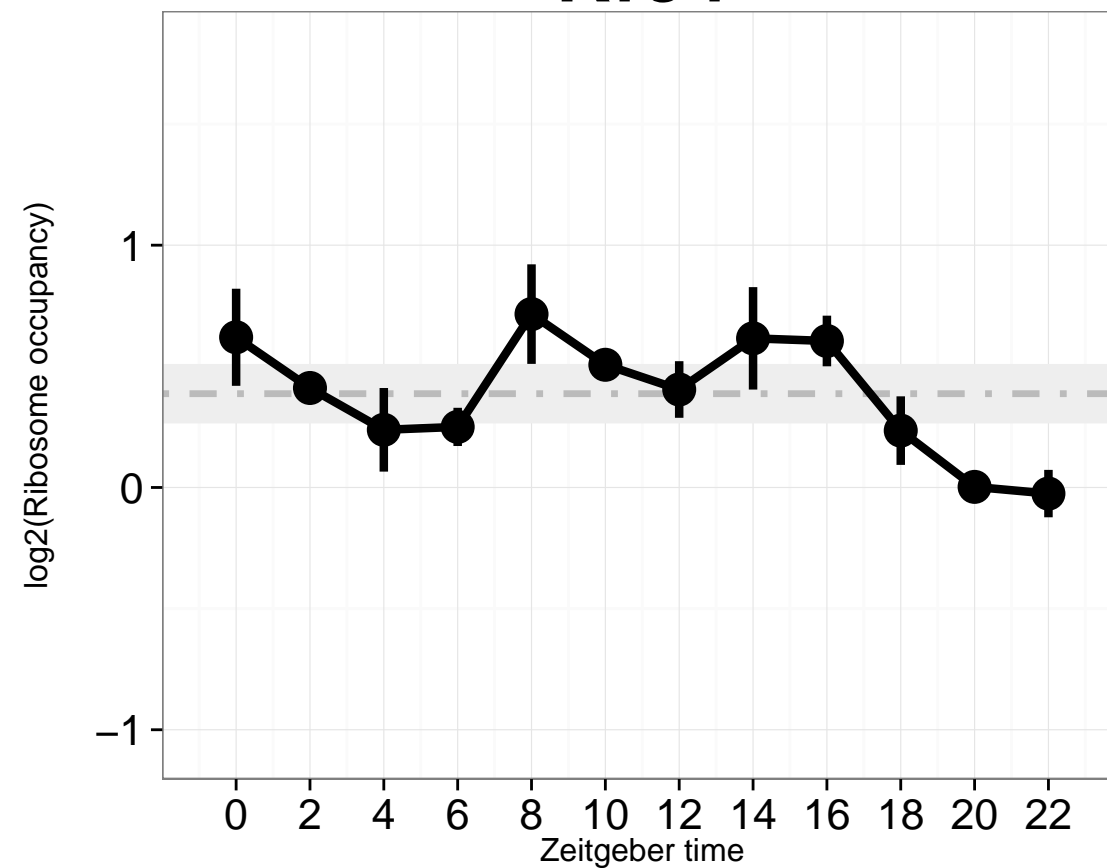

Supplement: Supplementary file 11171 [file 1]

## Gm10787

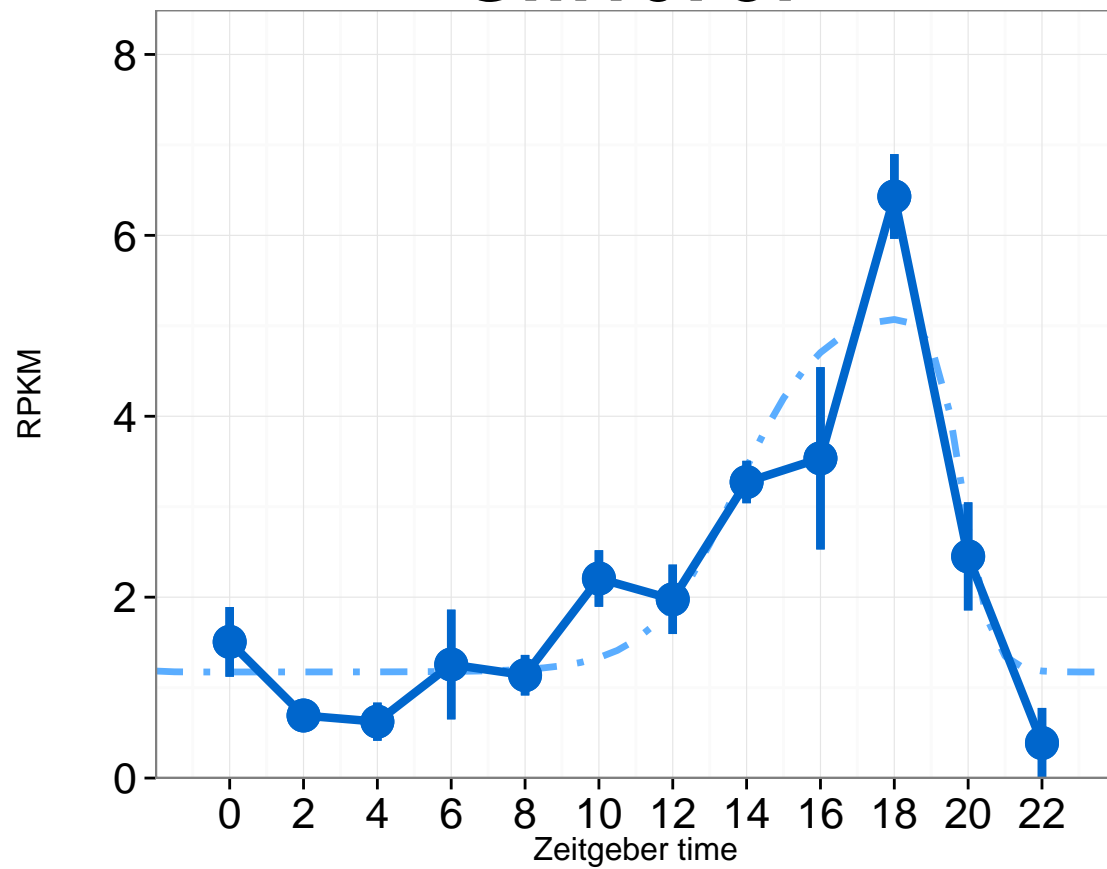

## Gm10787 log2(Ribosome occupanc

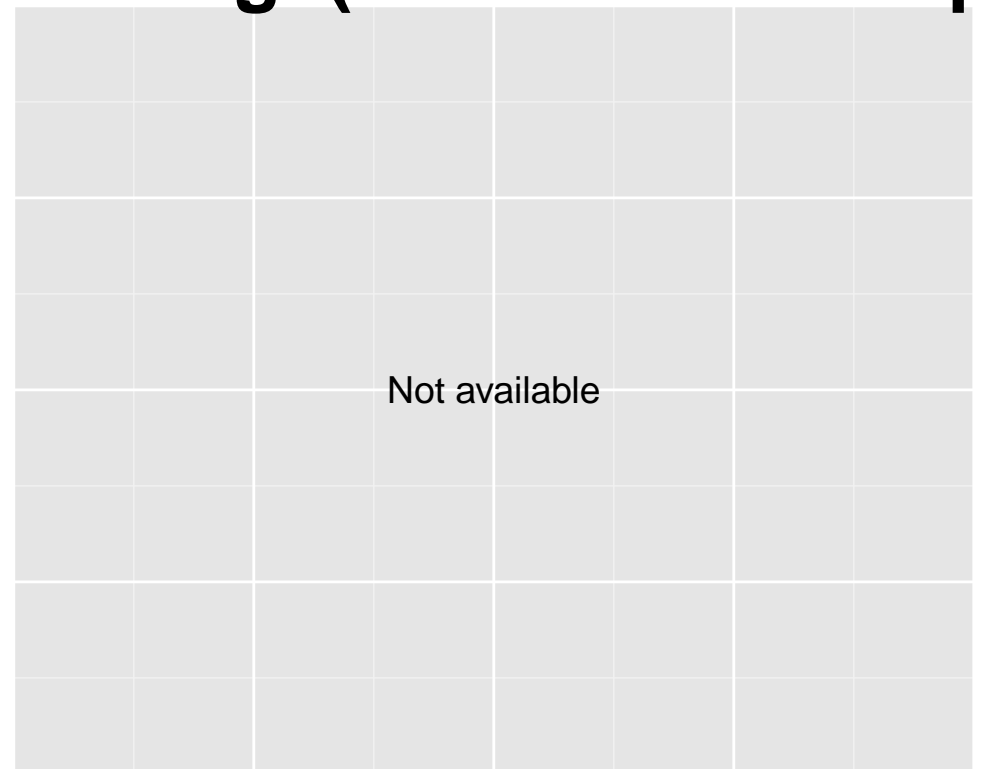

Supplement: Supplementary file 11172 [file 1]

# Hs3st3b1

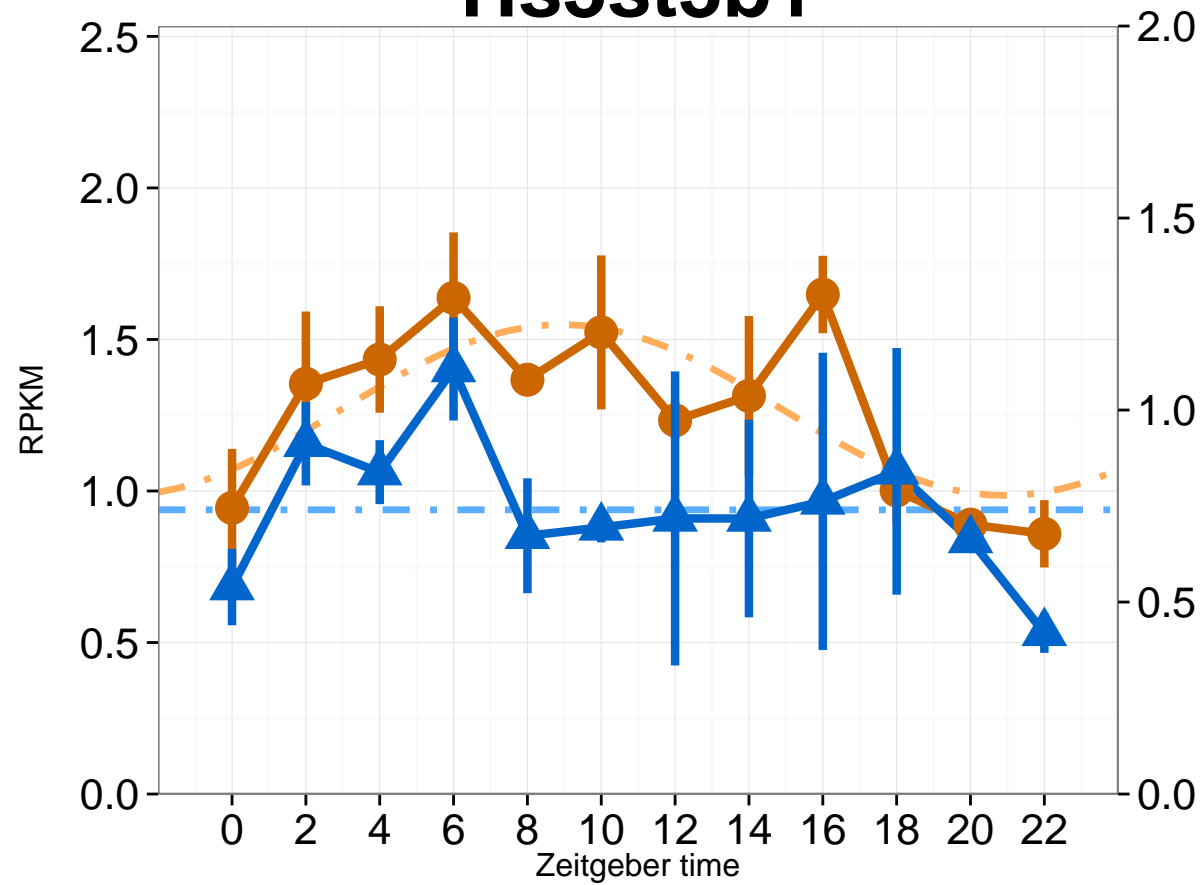

# Hs3st3b1

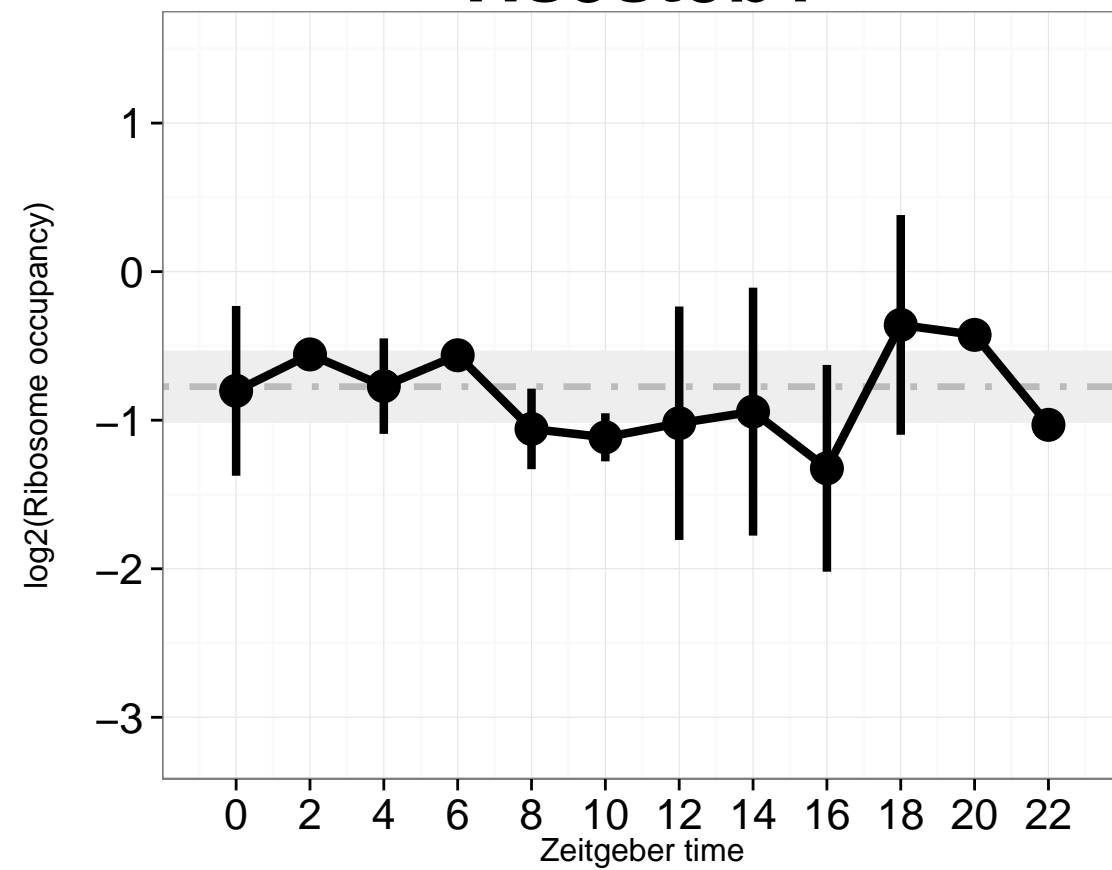

Supplement: Supplementary file 11173 [file 1]

## AtI3

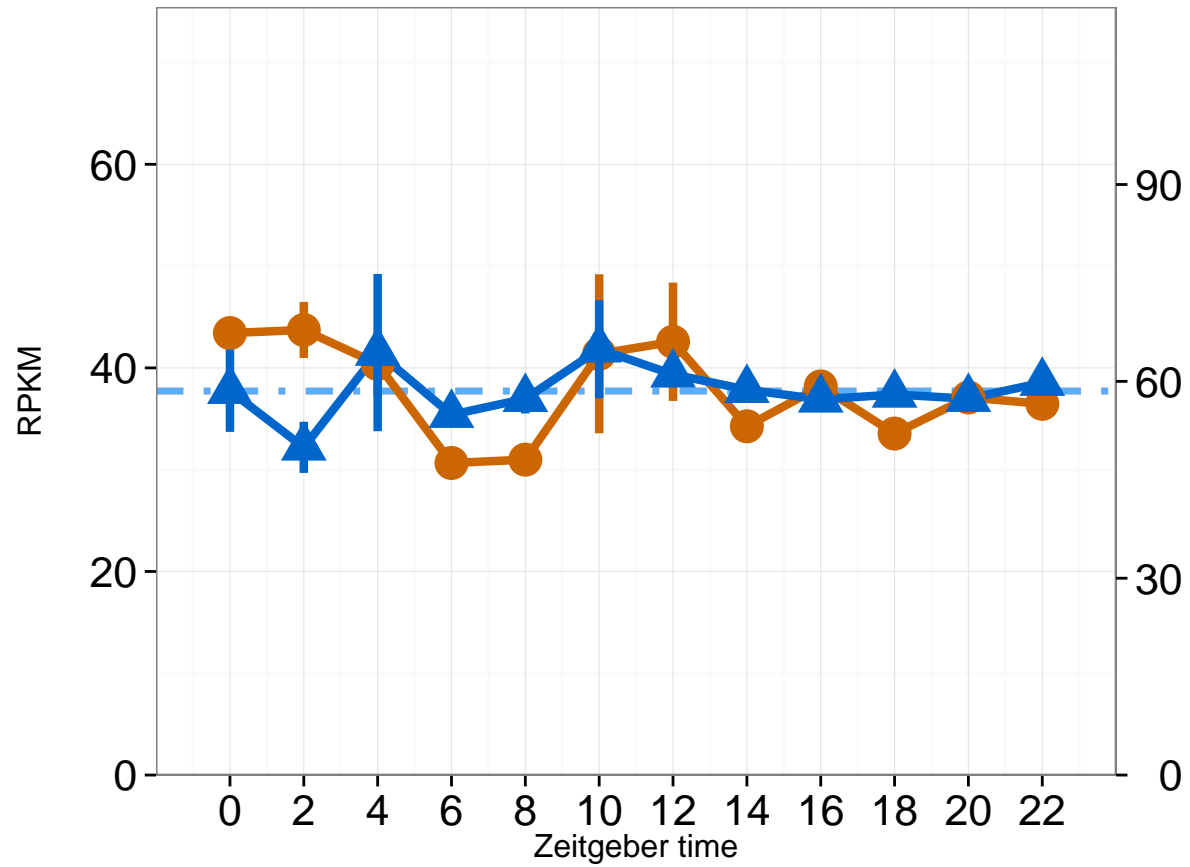

## AtI3

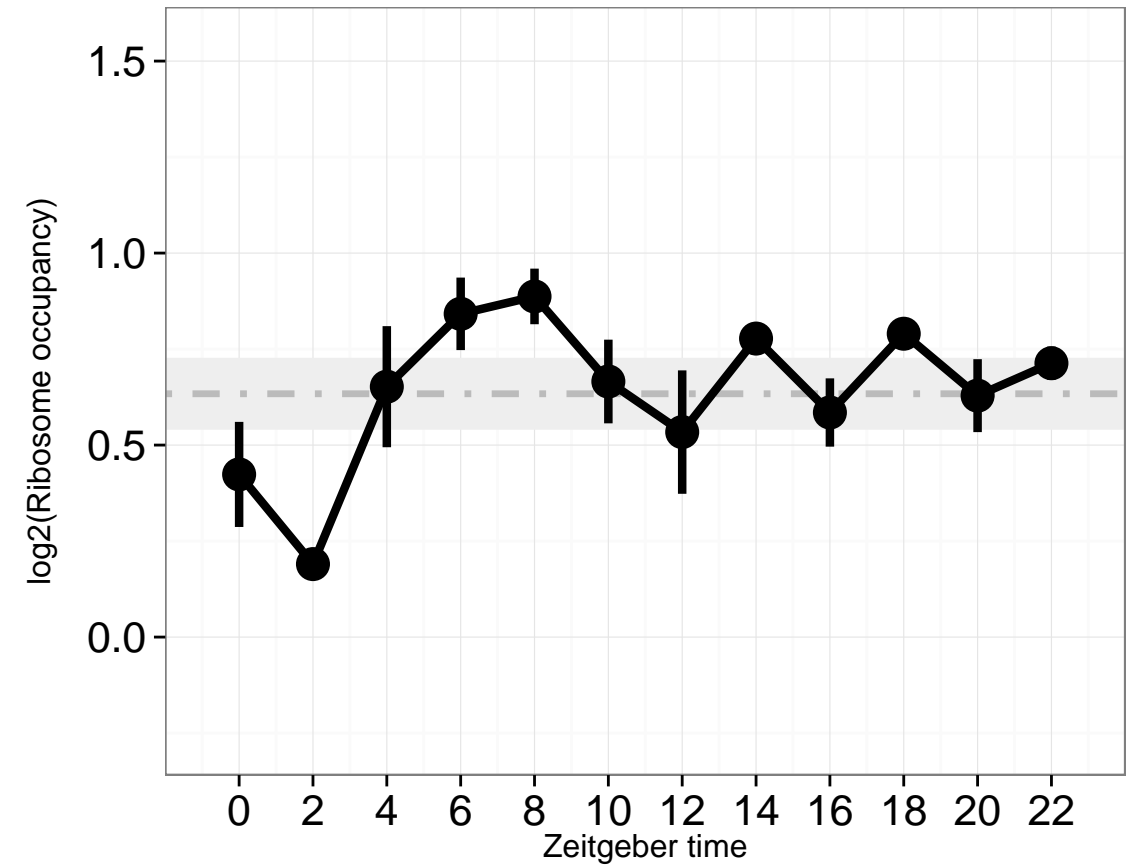

Supplement: Supplementary file 11174 [file 1]

**Fam78a**

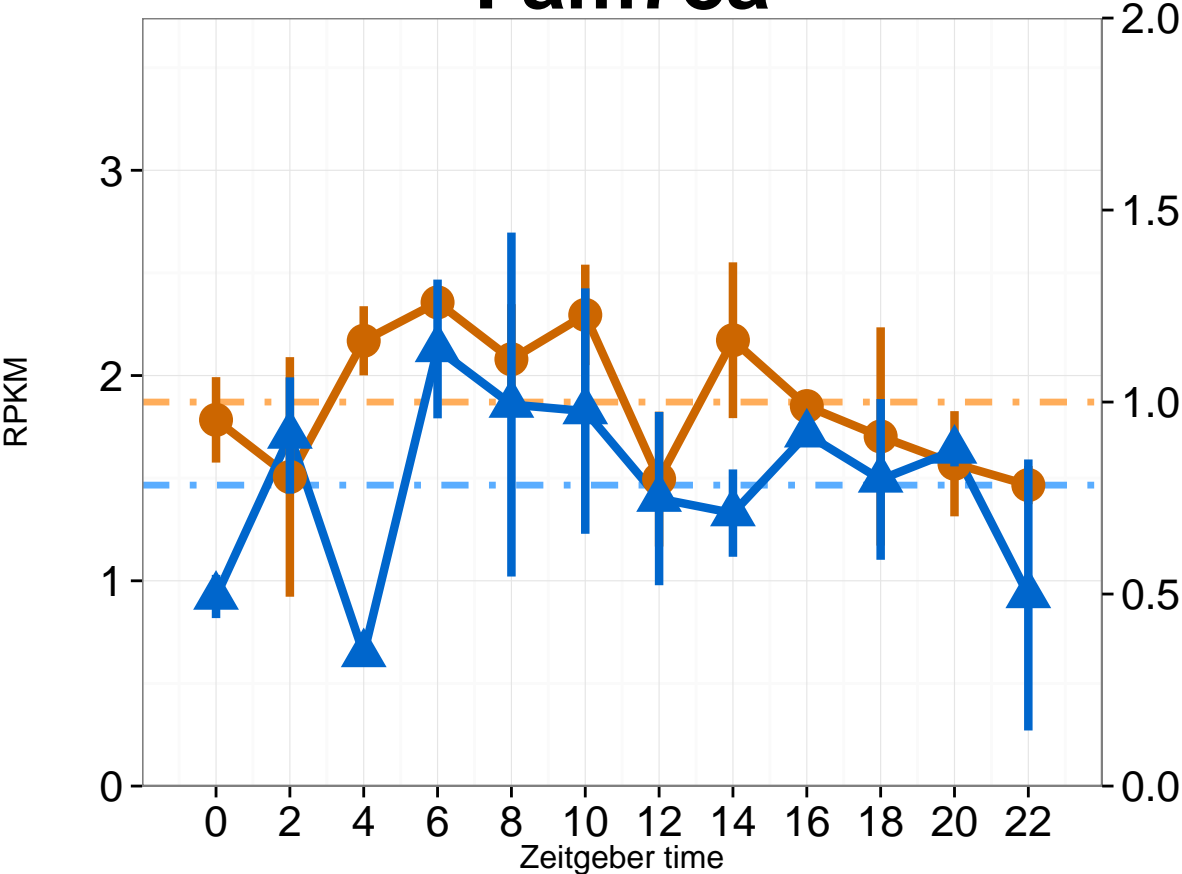

**Fam78a**

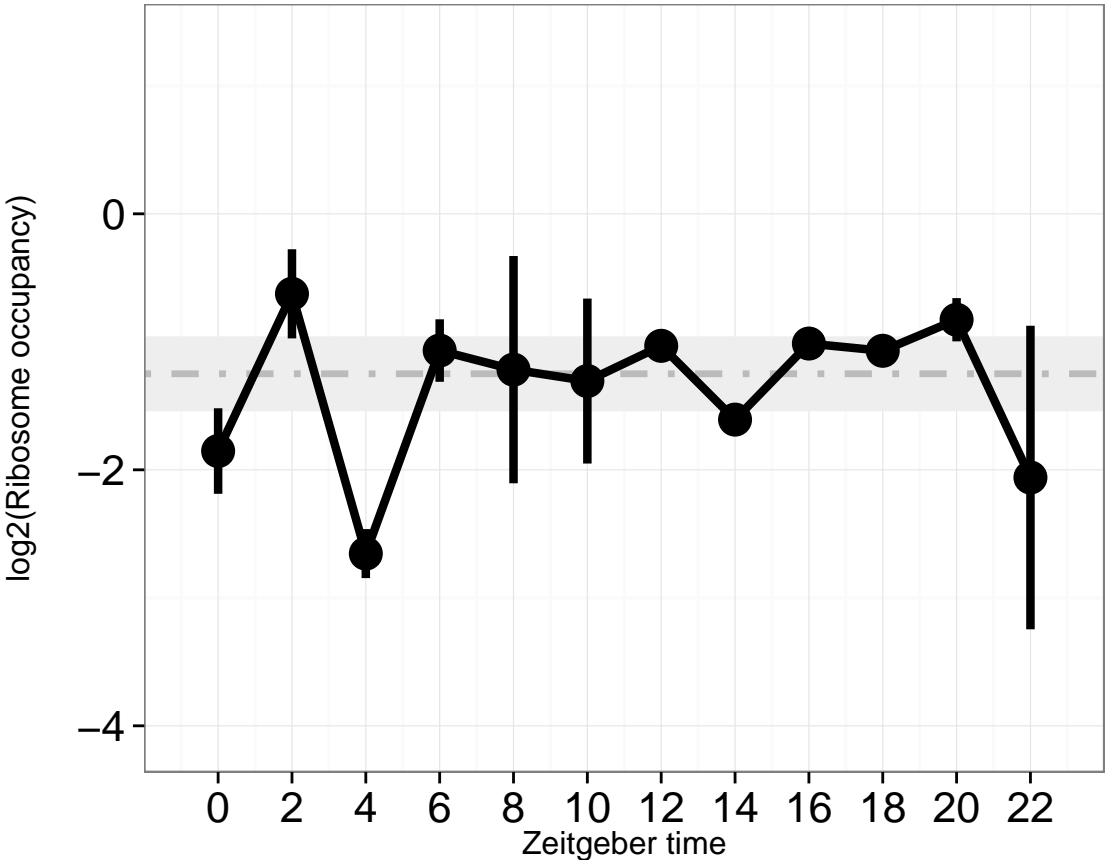

Supplement: Supplementary file 11175 [file 1]

## Loxl3

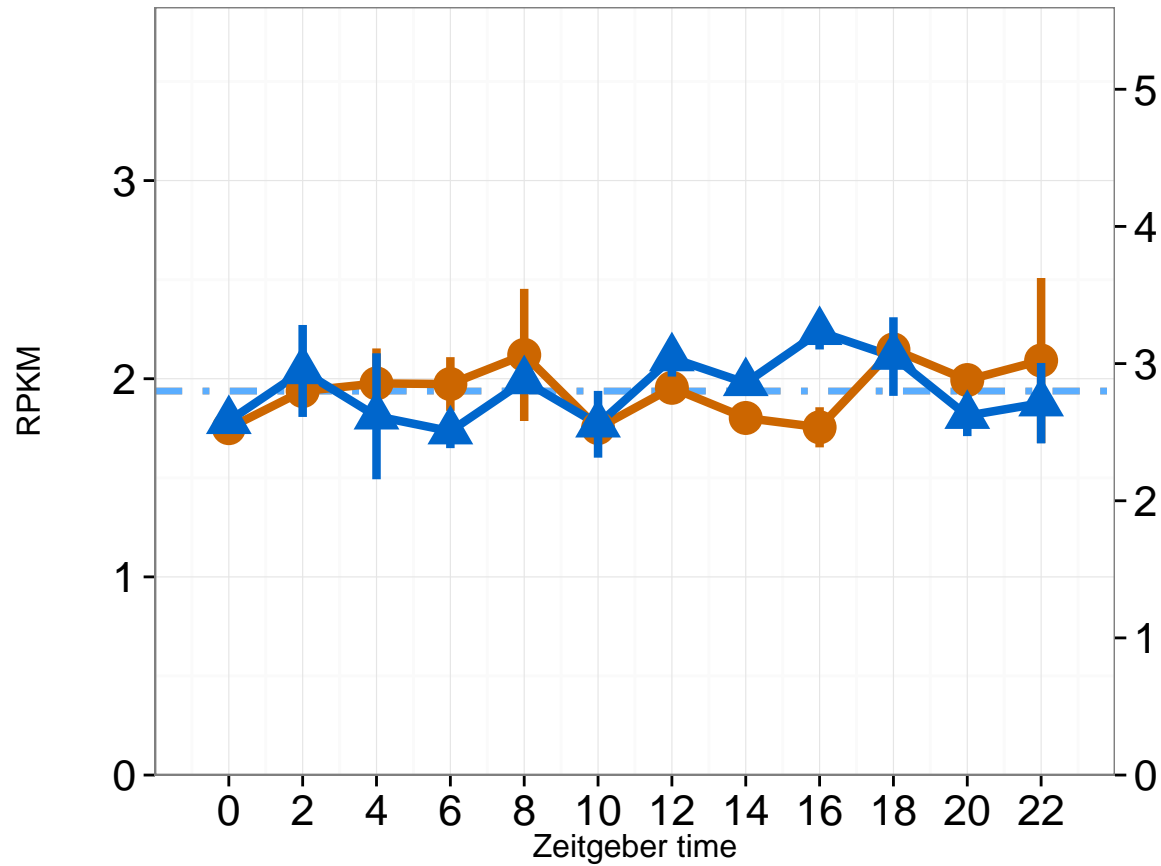

## Loxl3

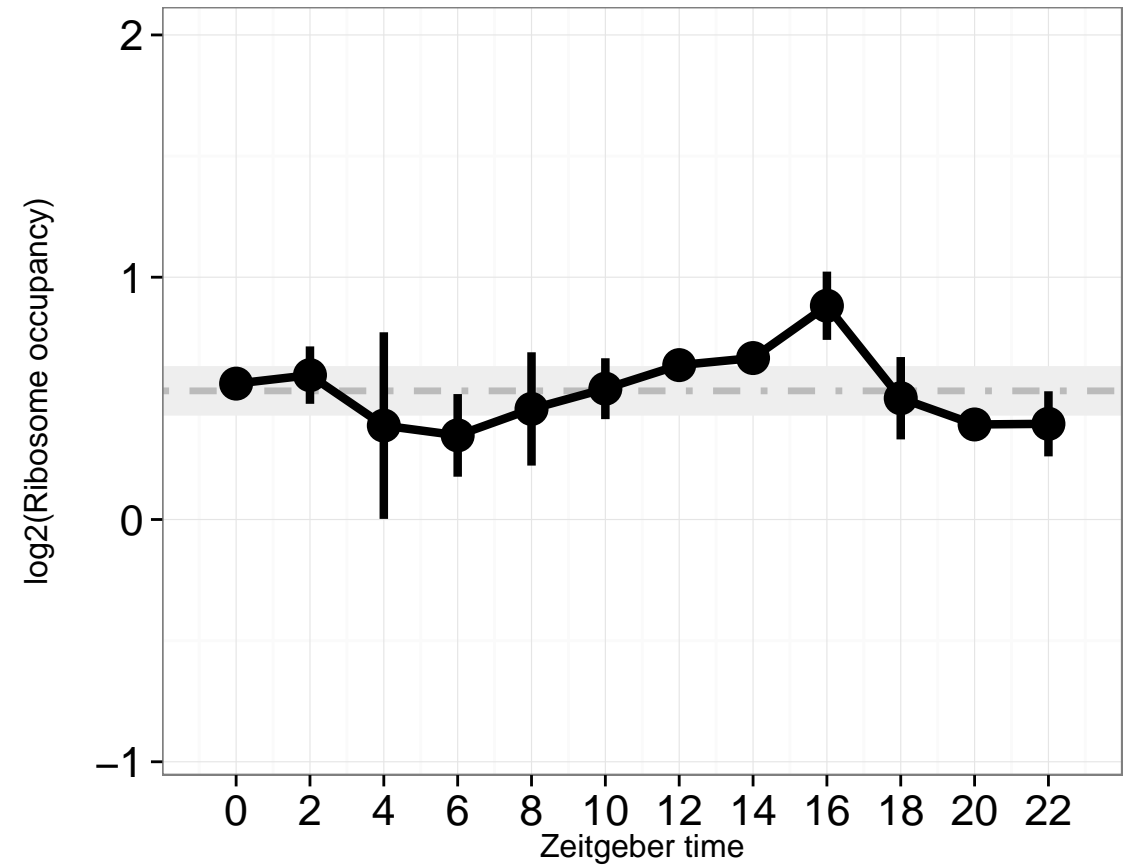

Supplement: Supplementary file 11176 [file 1]

# Nkrf

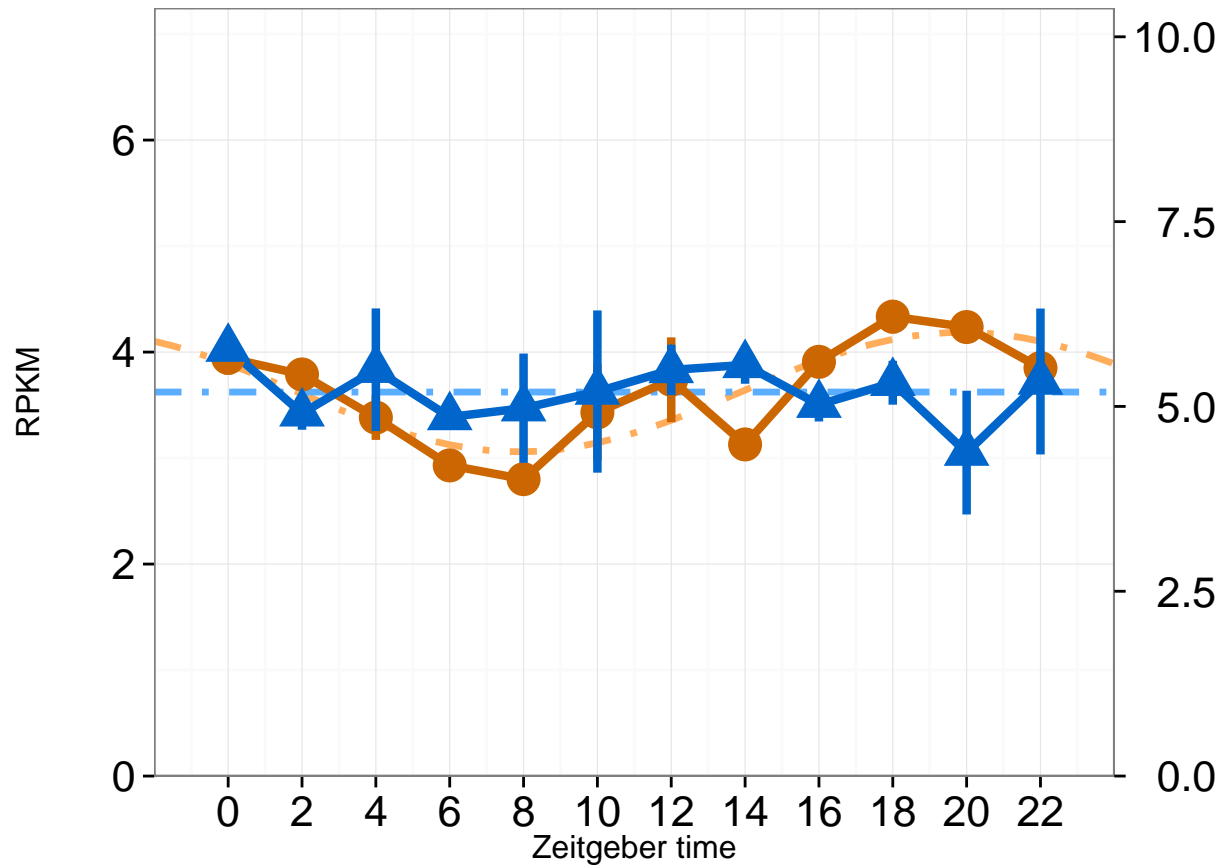

# Nkrf

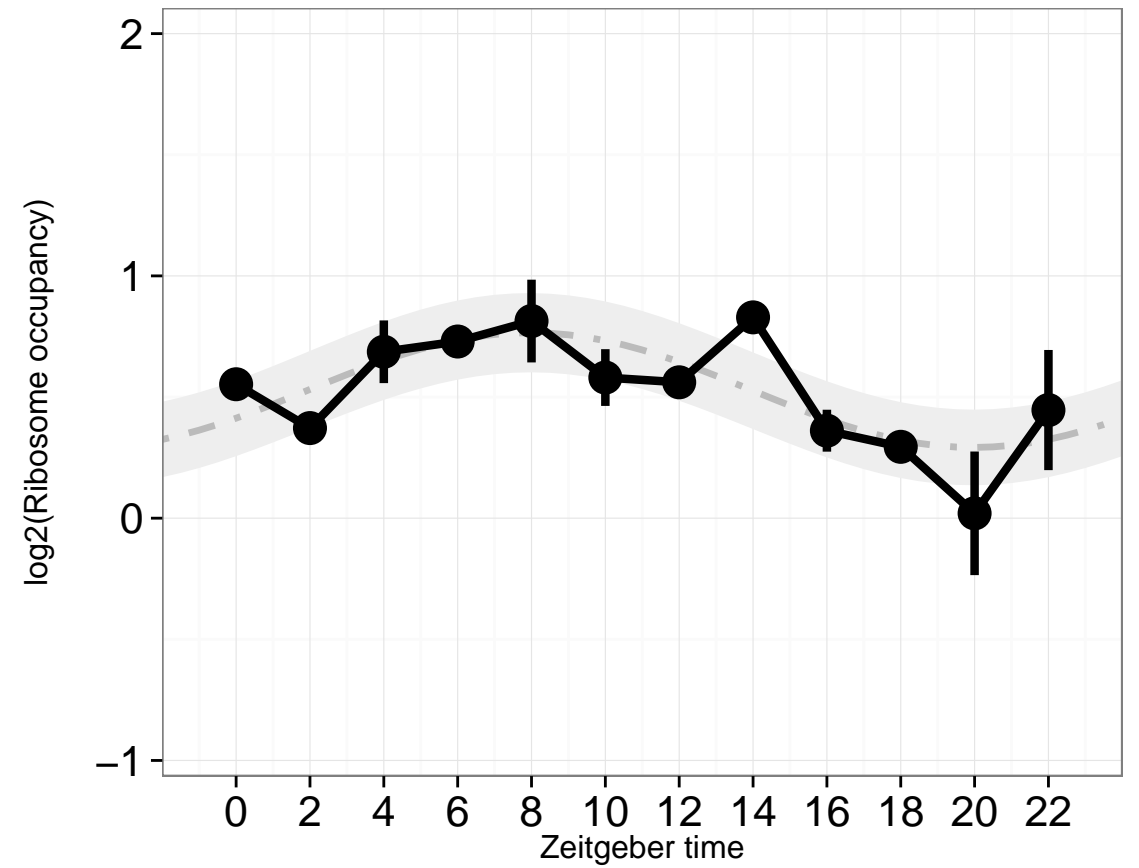

Supplement: Supplementary file 11177 [file 1]

## Rgn

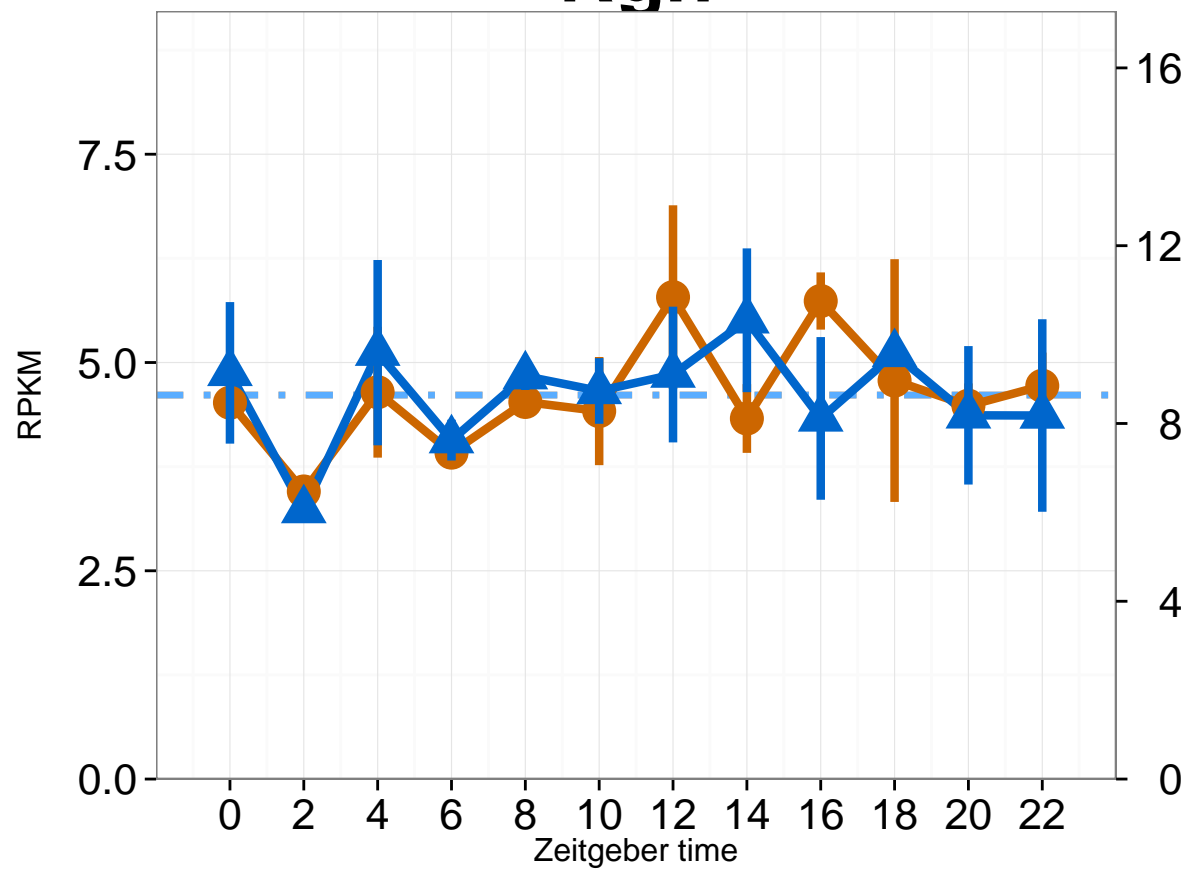

## Rgn

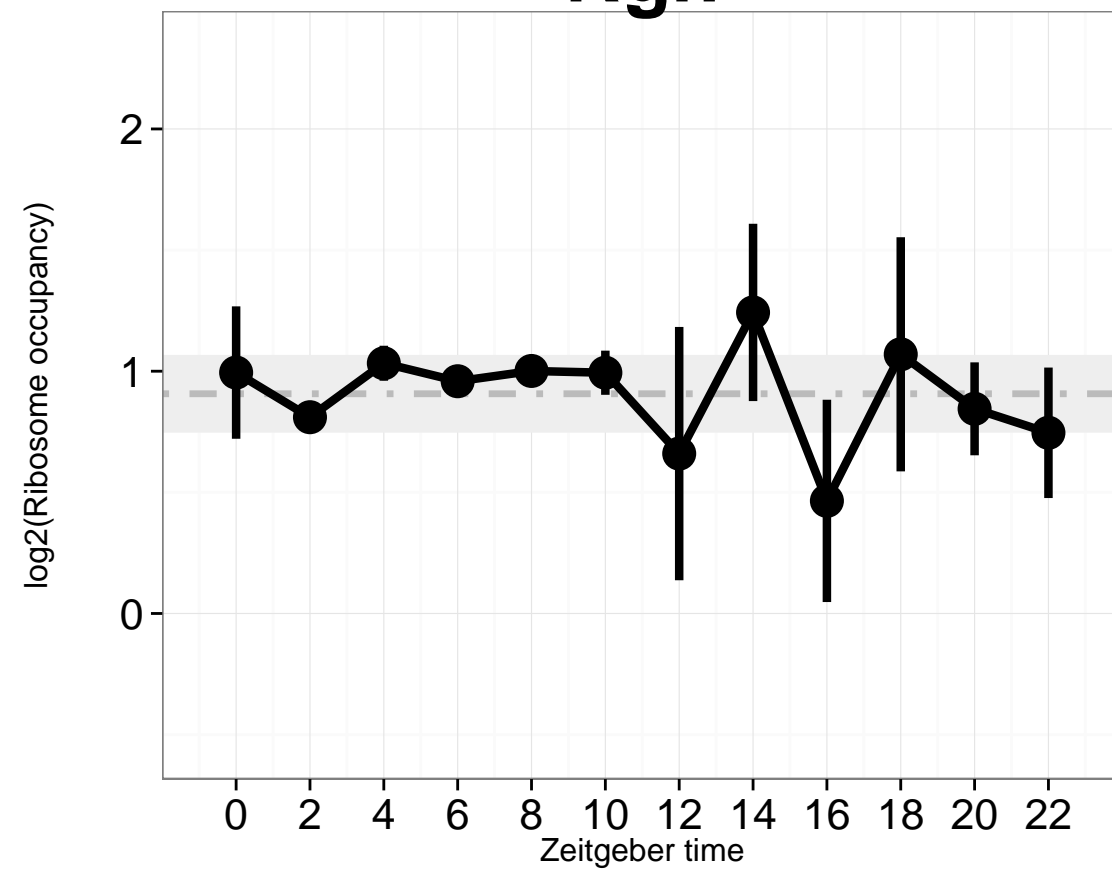

Supplement: Supplementary file 11178 [file 1]

# Ltn1

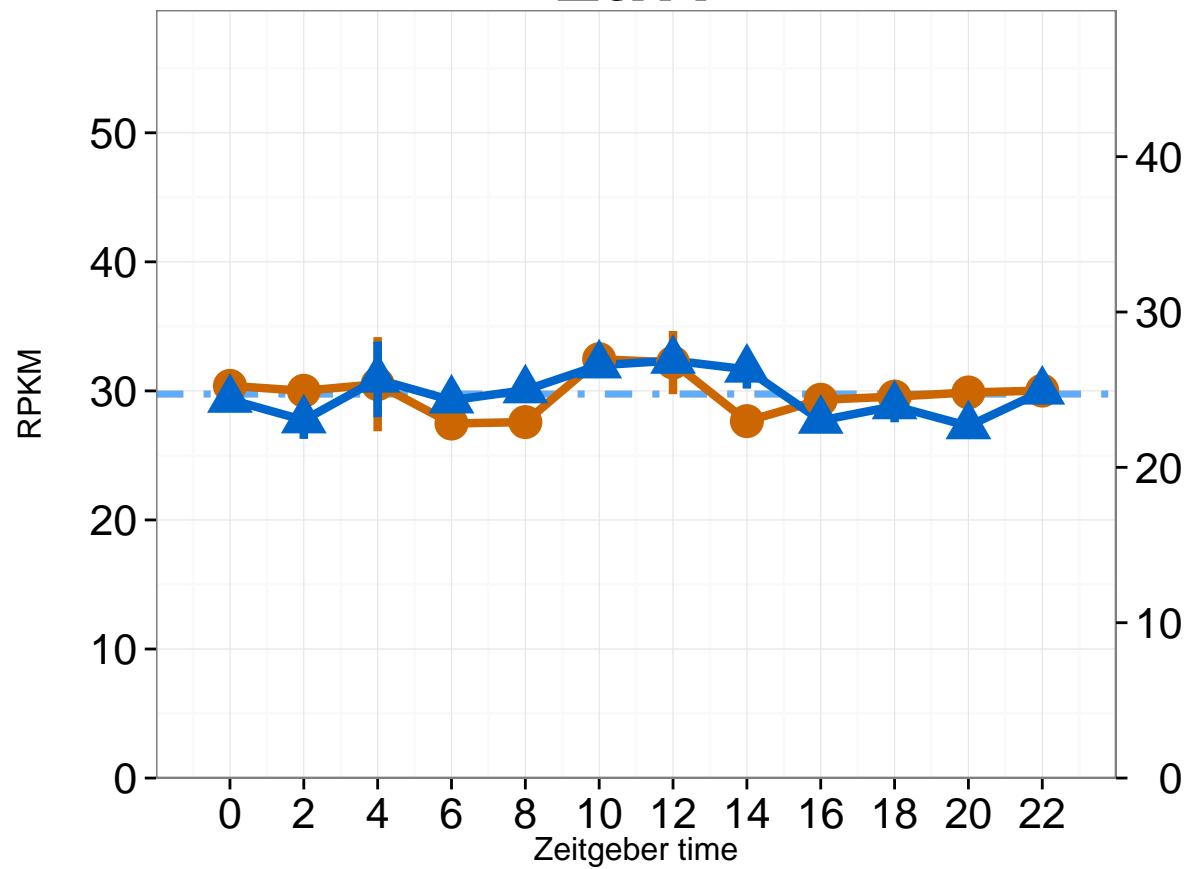

# Ltn1

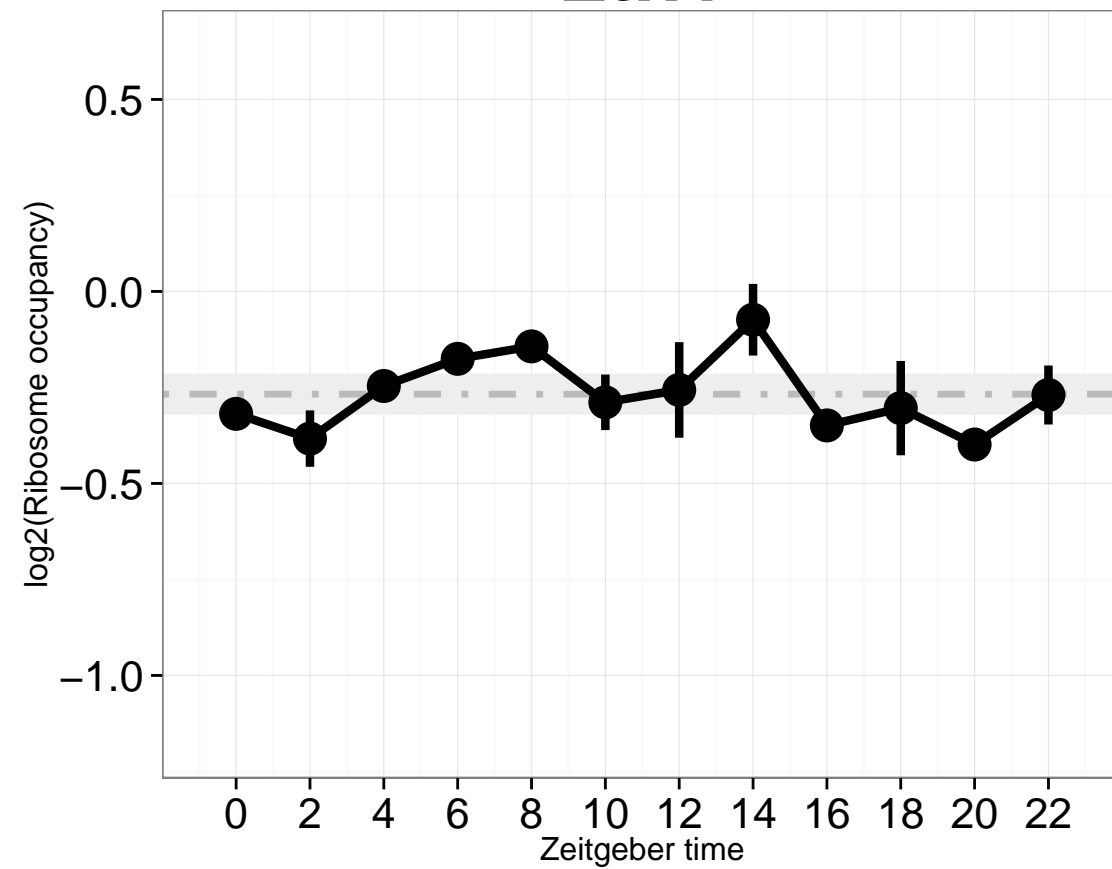

Supplement: Supplementary file 11179 [file 1]

## Pcid2

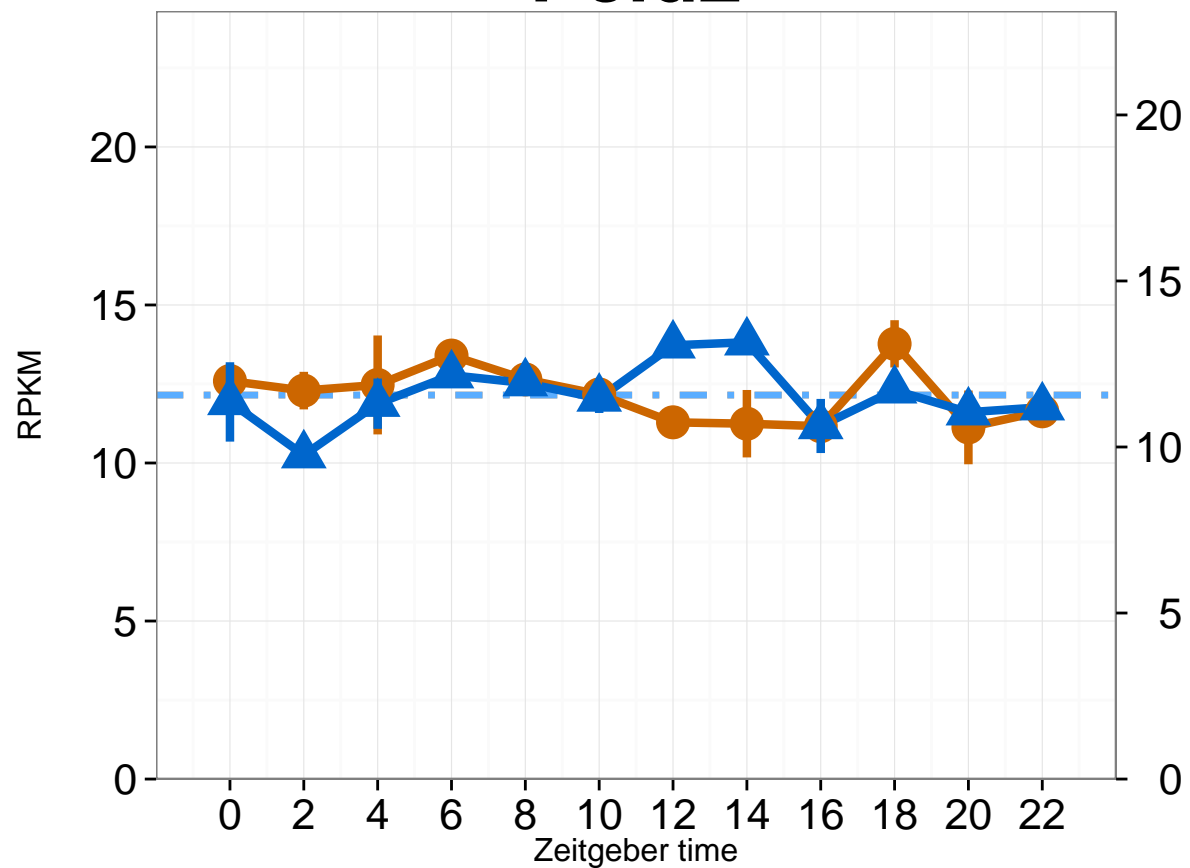

## Pcid2

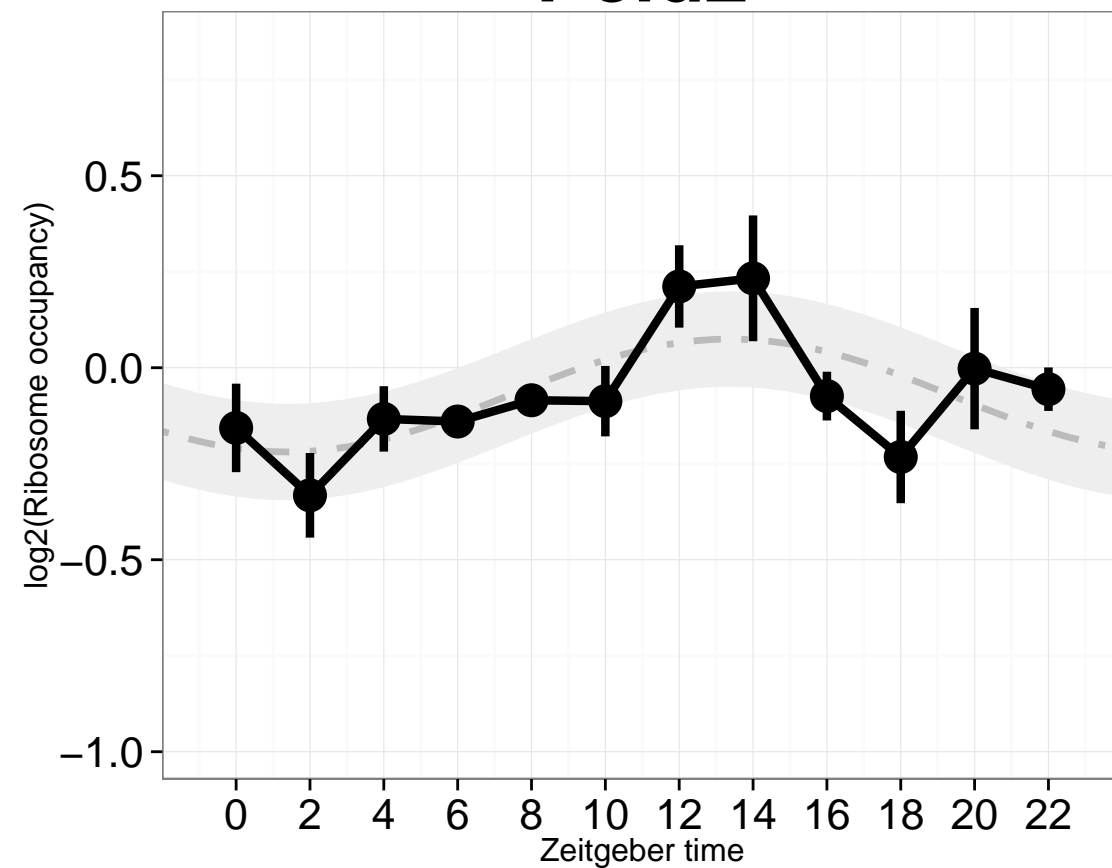

Supplement: Supplementary file 11180 [file 1]

# Trpm6

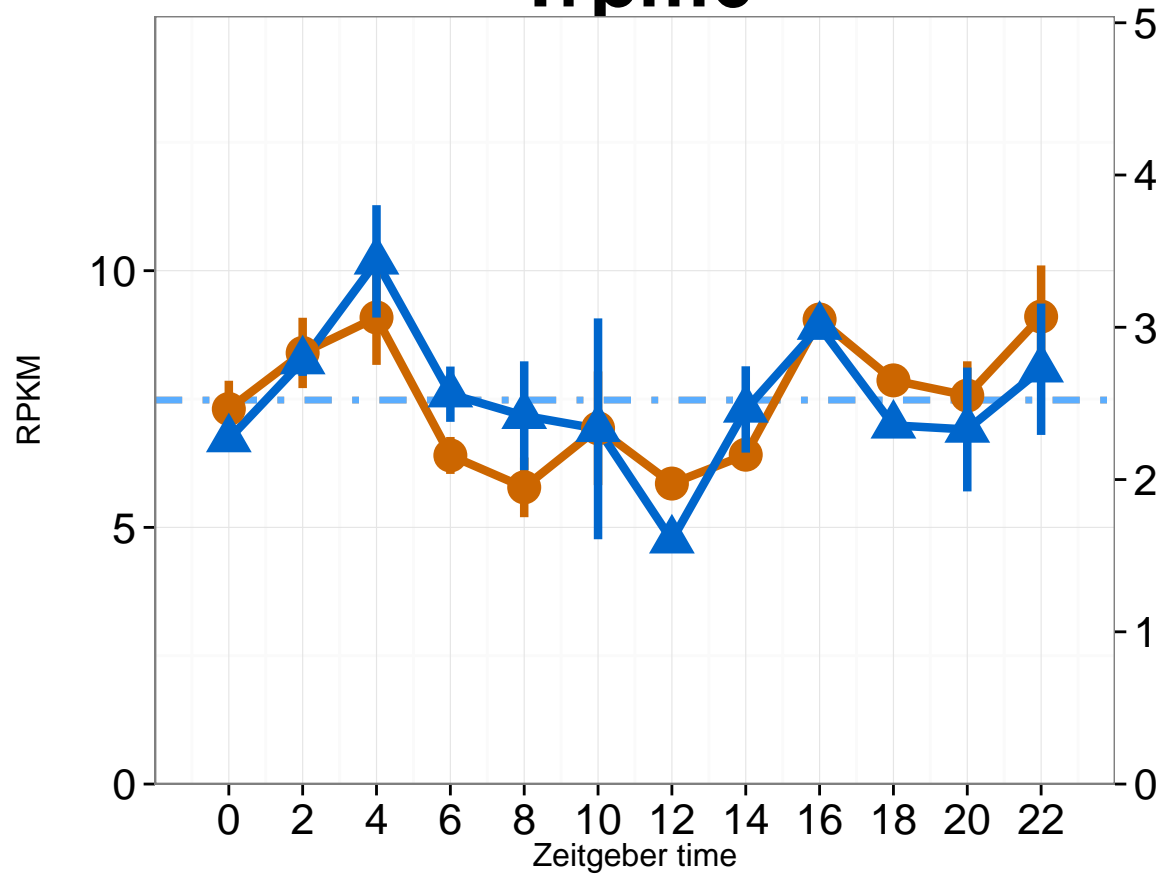

# Trpm6

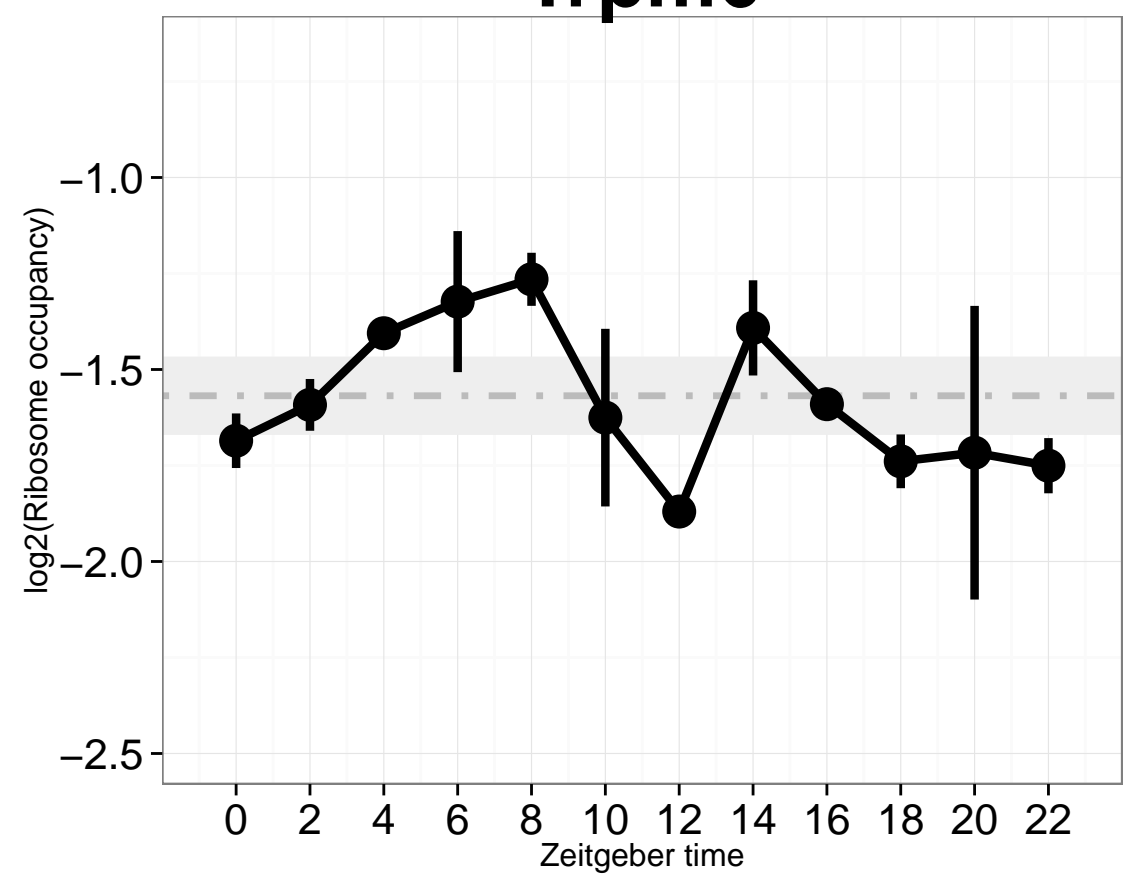

Supplement: Supplementary file 11181 [file 1]

## Wdr37

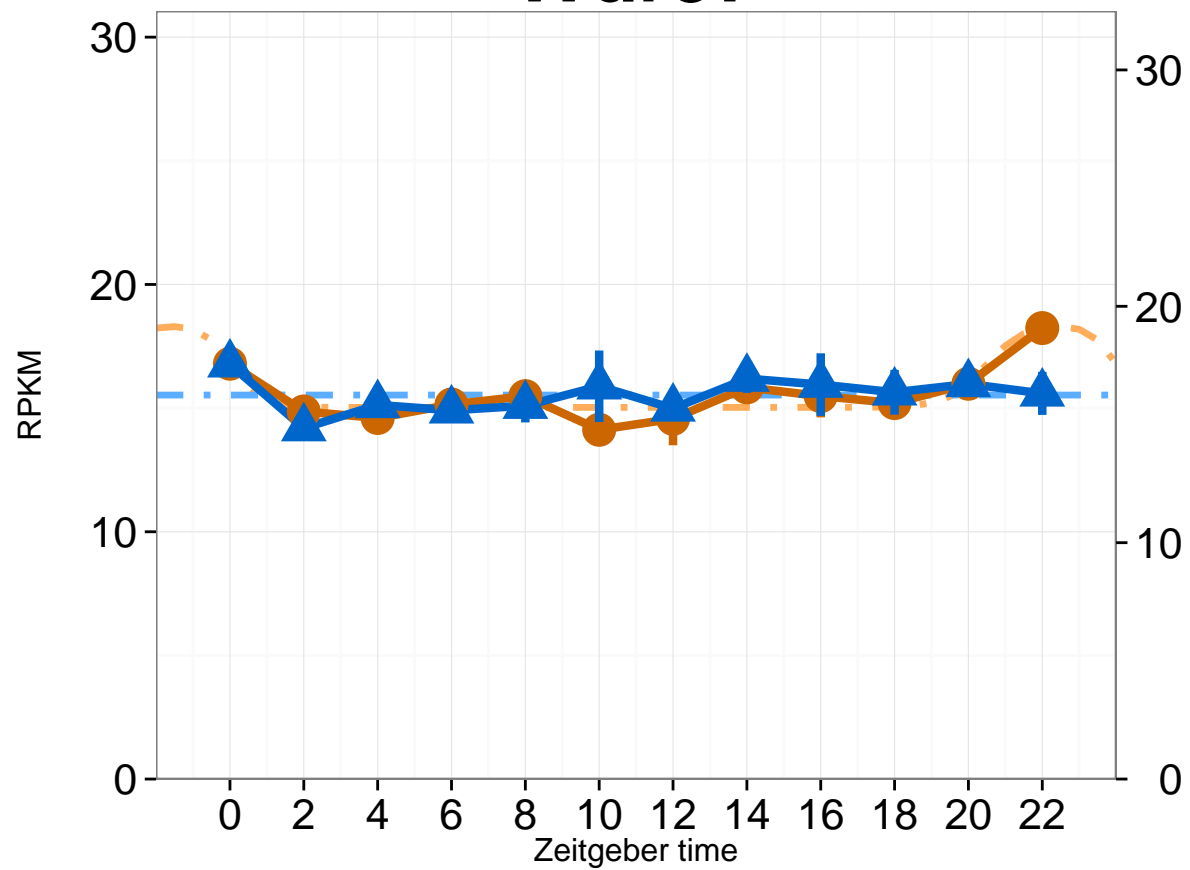

## Wdr37

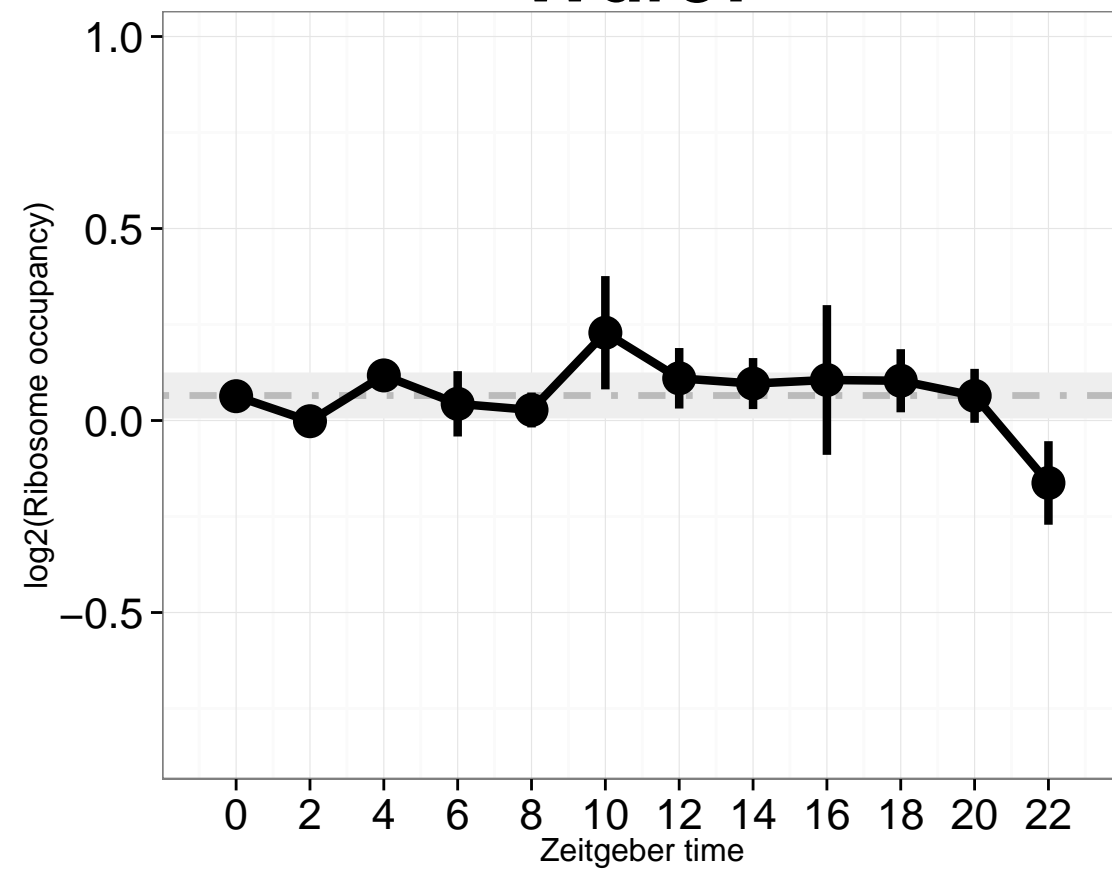

Supplement: Supplementary file 11182 [file 1]

## Prkrir

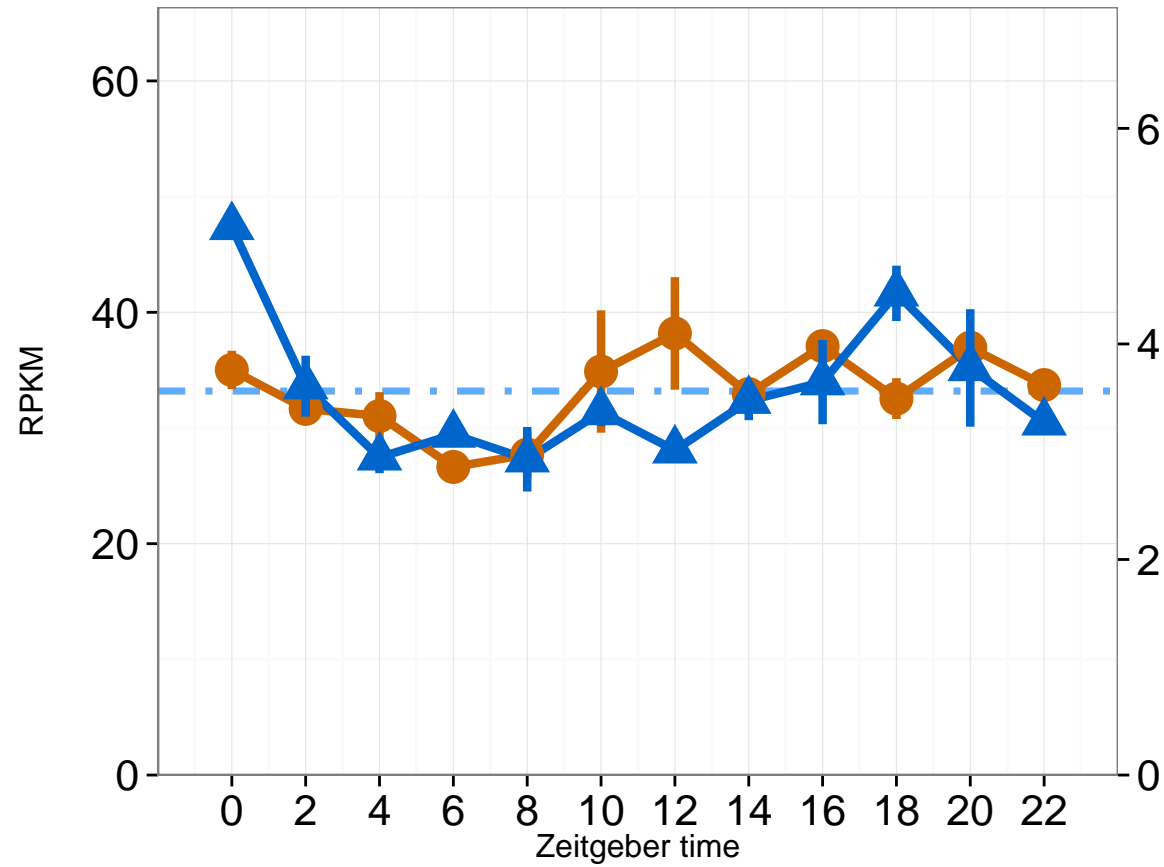

## Prkrir

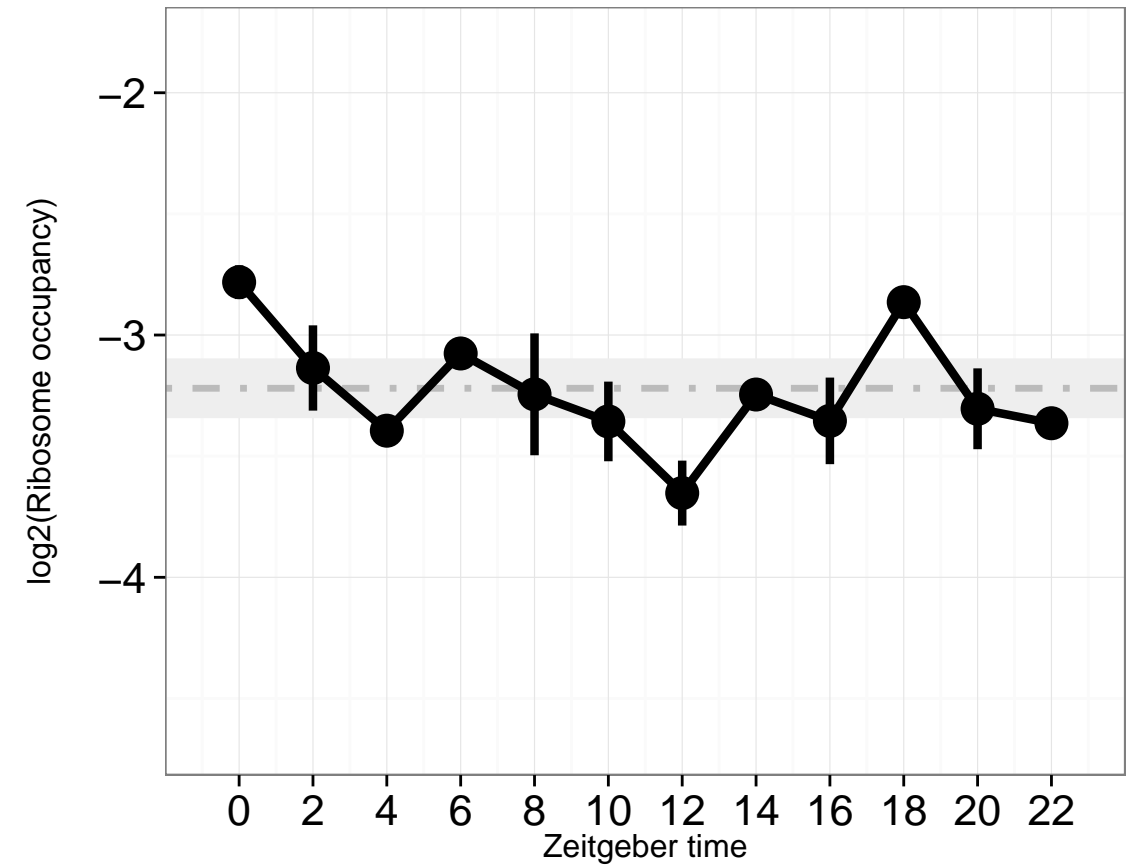

Supplement: Supplementary file 11183 [file 1]

## 2700049A03Rik

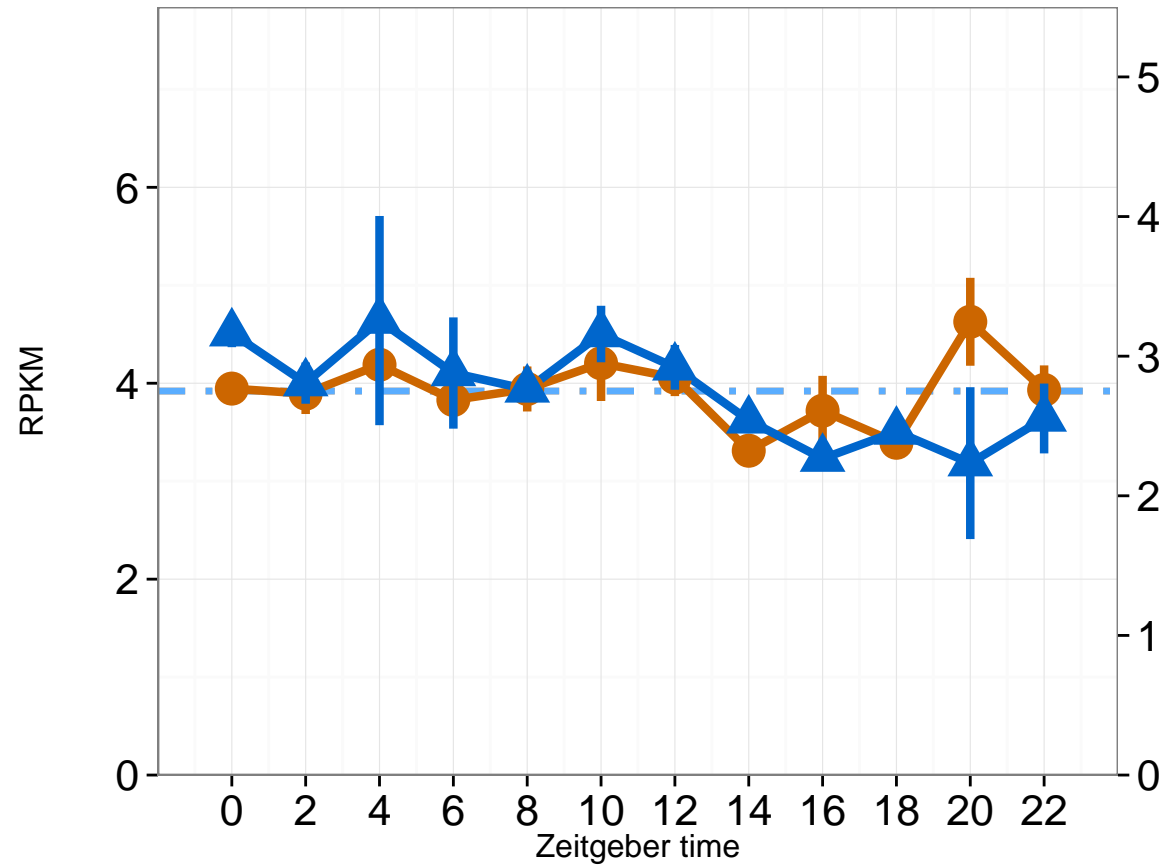

## 2700049A03Rik

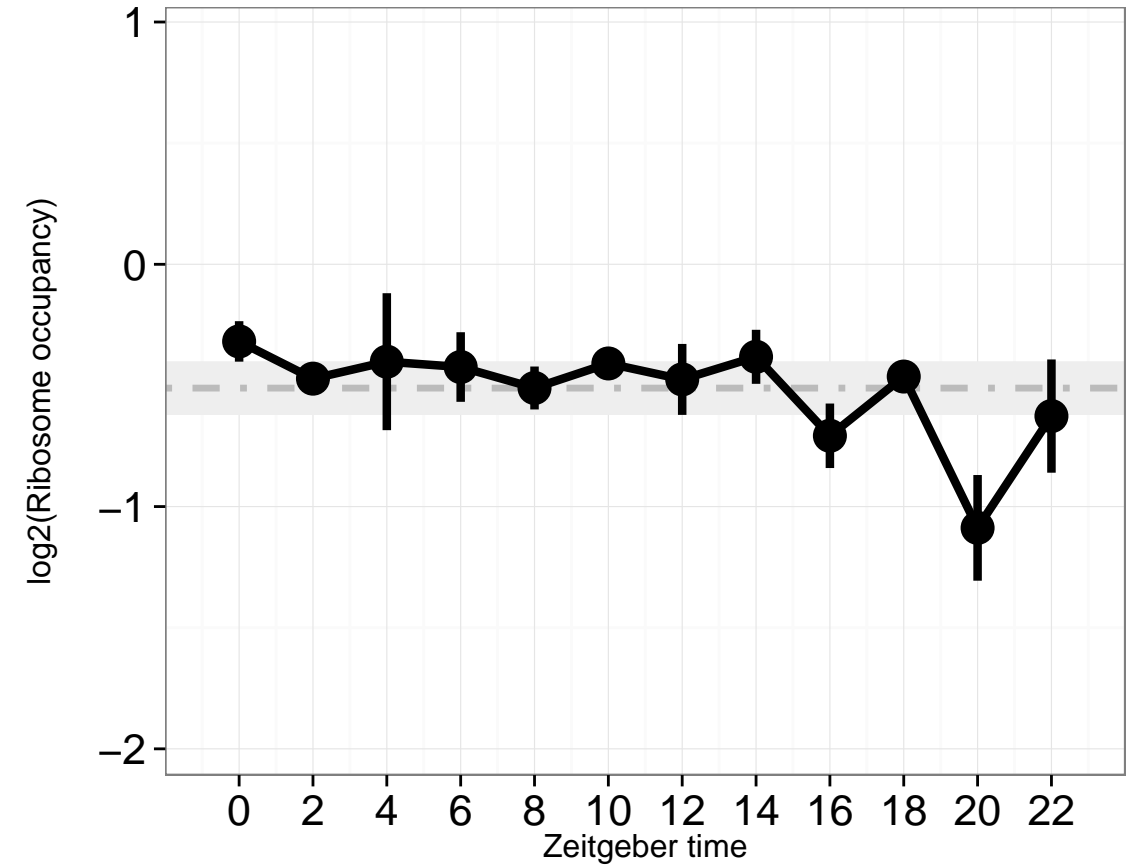

Supplement: Supplementary file 11184 [file 1]

# Tnfsf13b

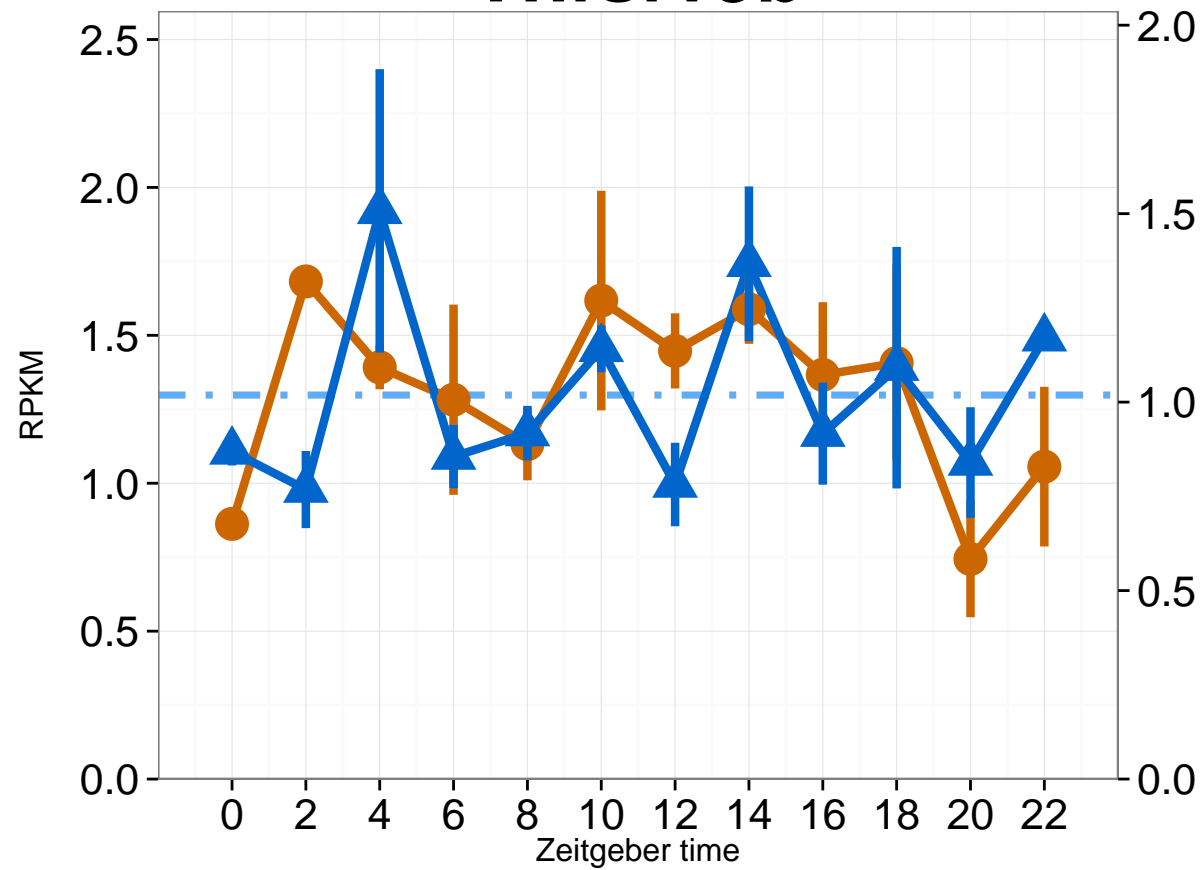

# Tnfsf13b

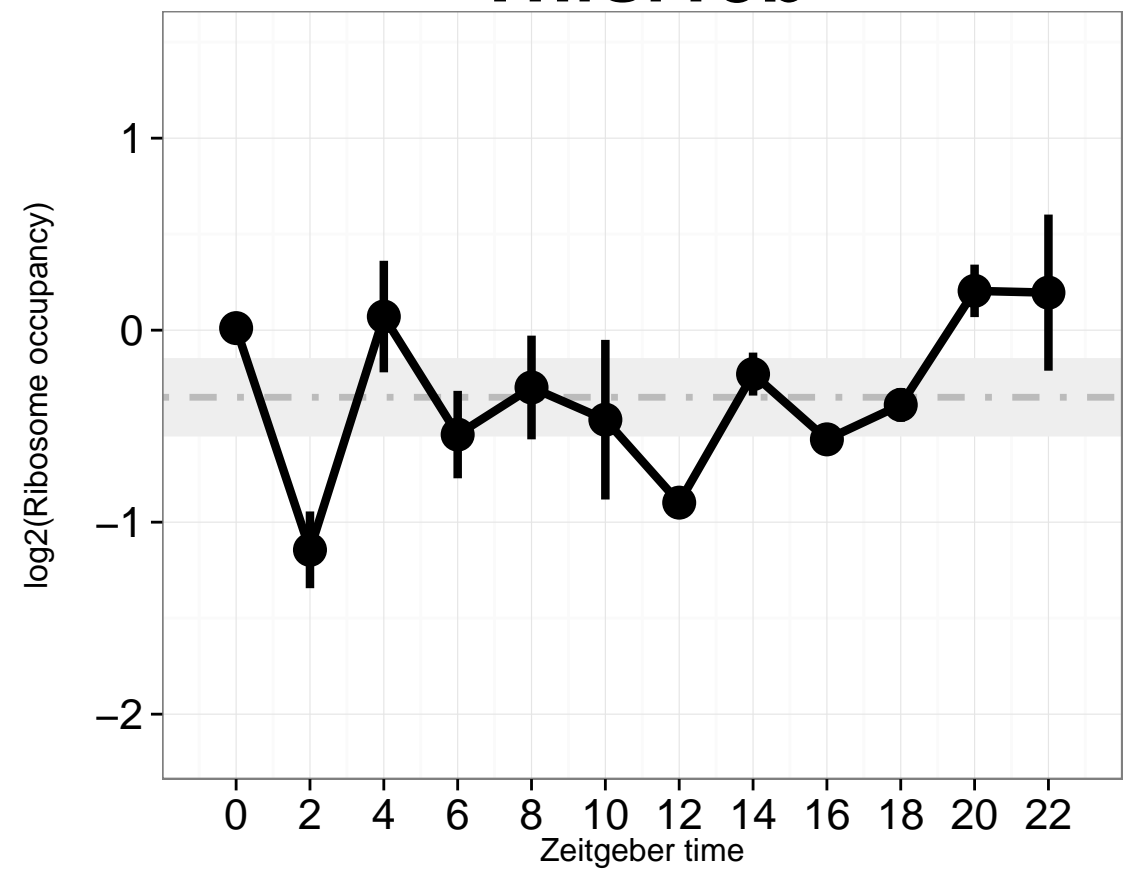

Supplement: Supplementary file 11185 [file 1]

## Ccdc32

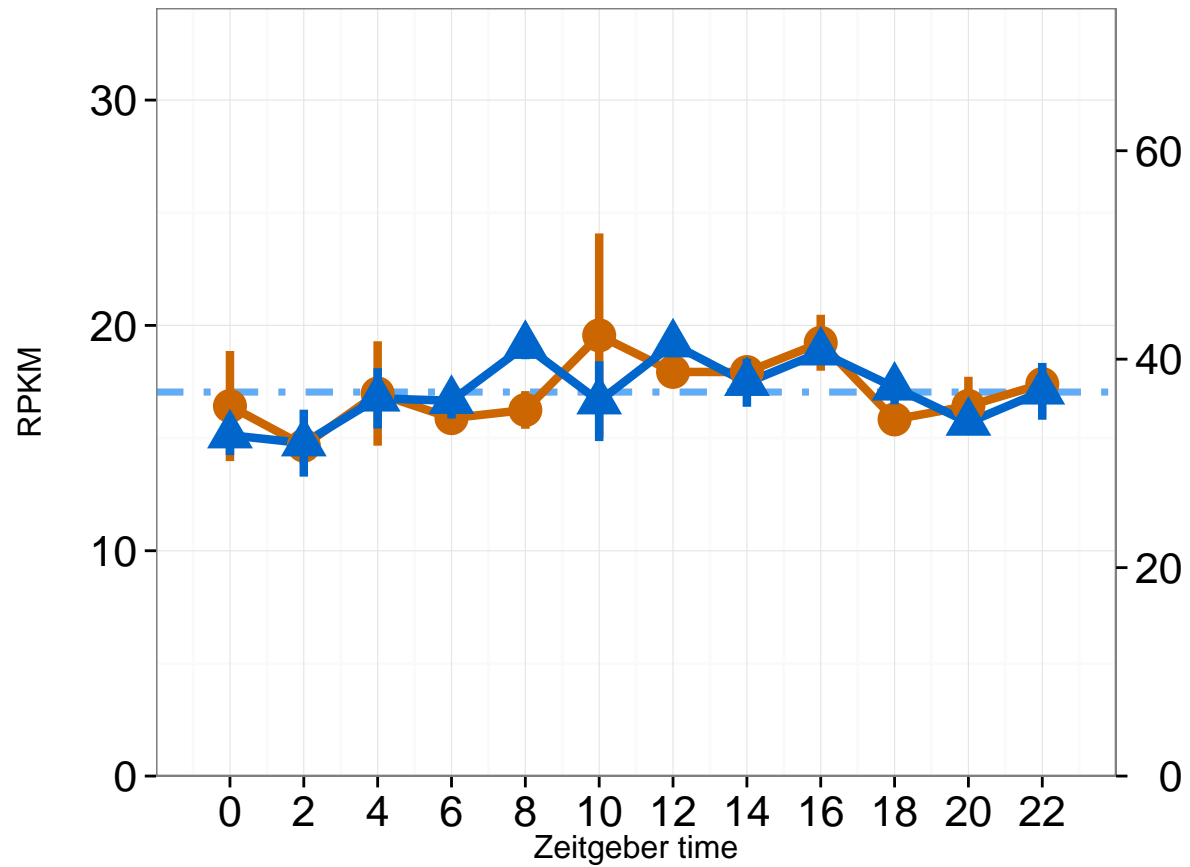

## Ccdc32

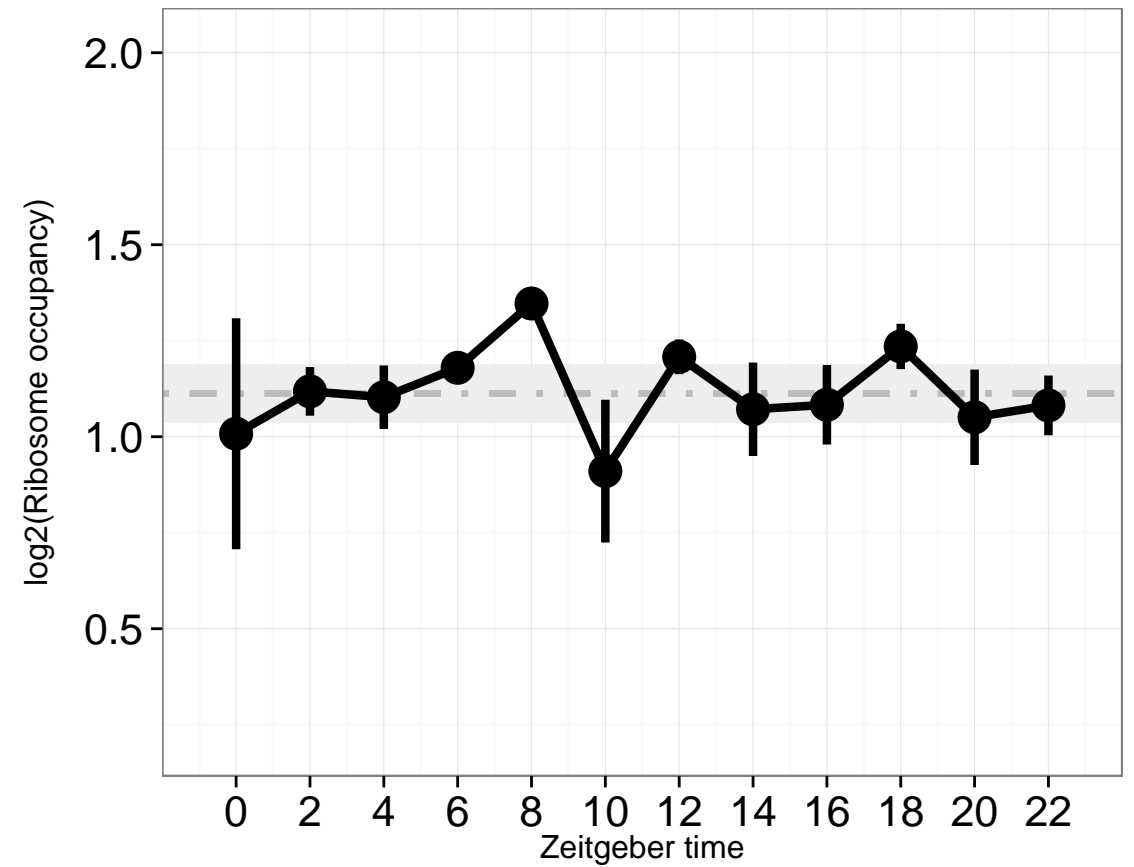

Supplement: Supplementary file 11186 [file 1]

## Gdi2

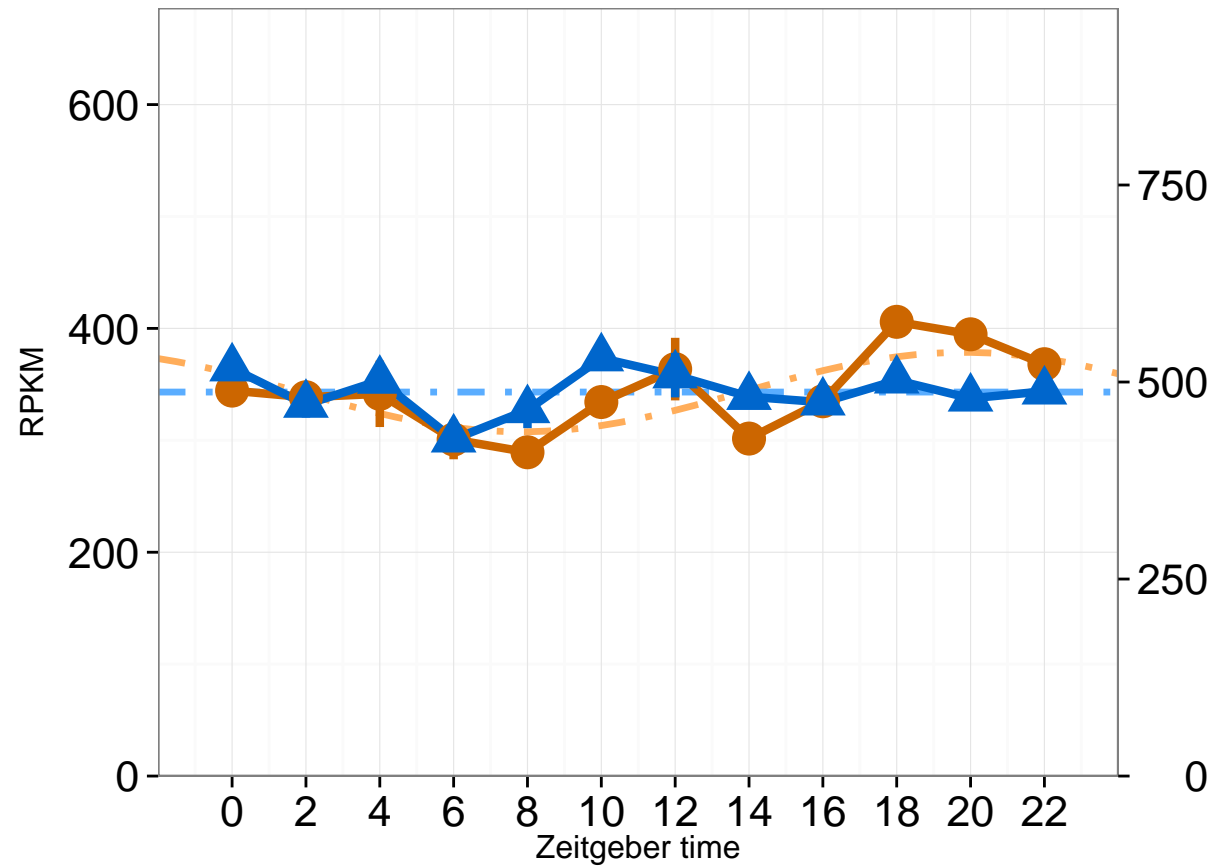

## Gdi2

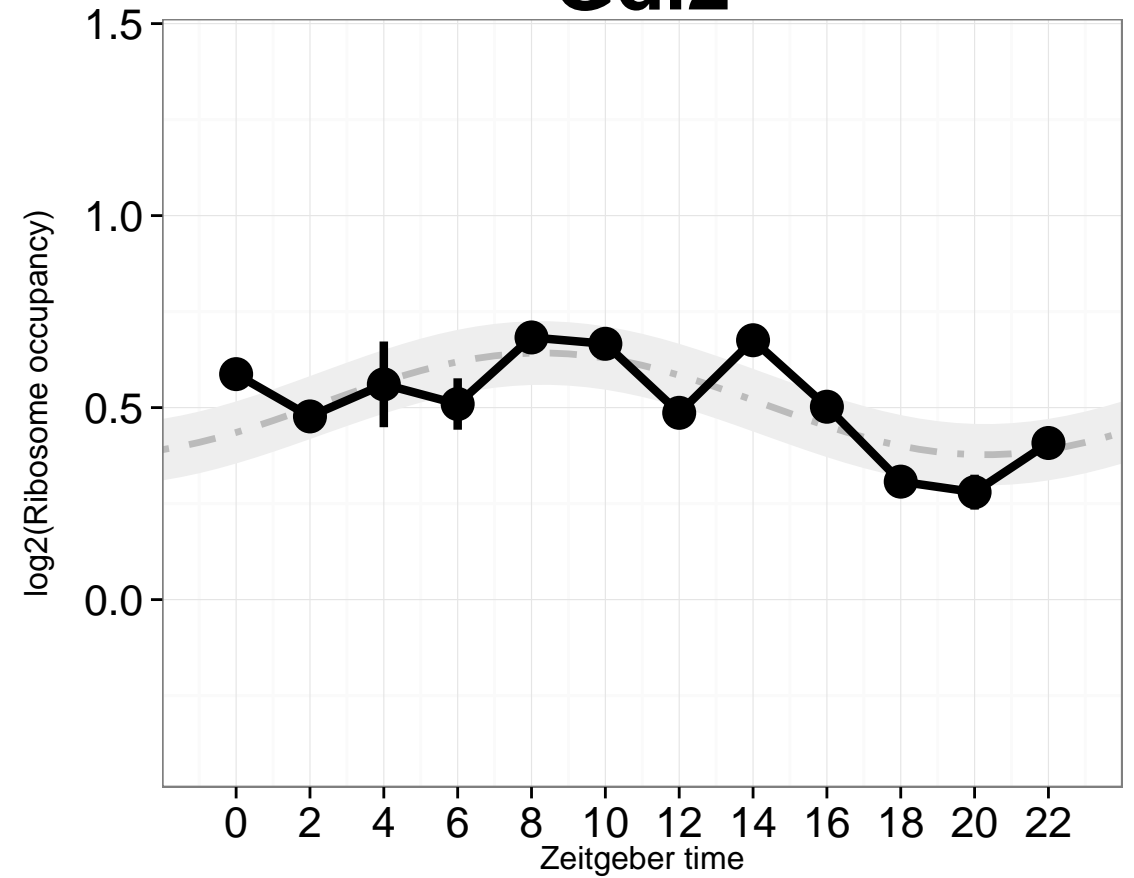

Supplement: Supplementary file 11187 [file 1]

# Rnf113a1

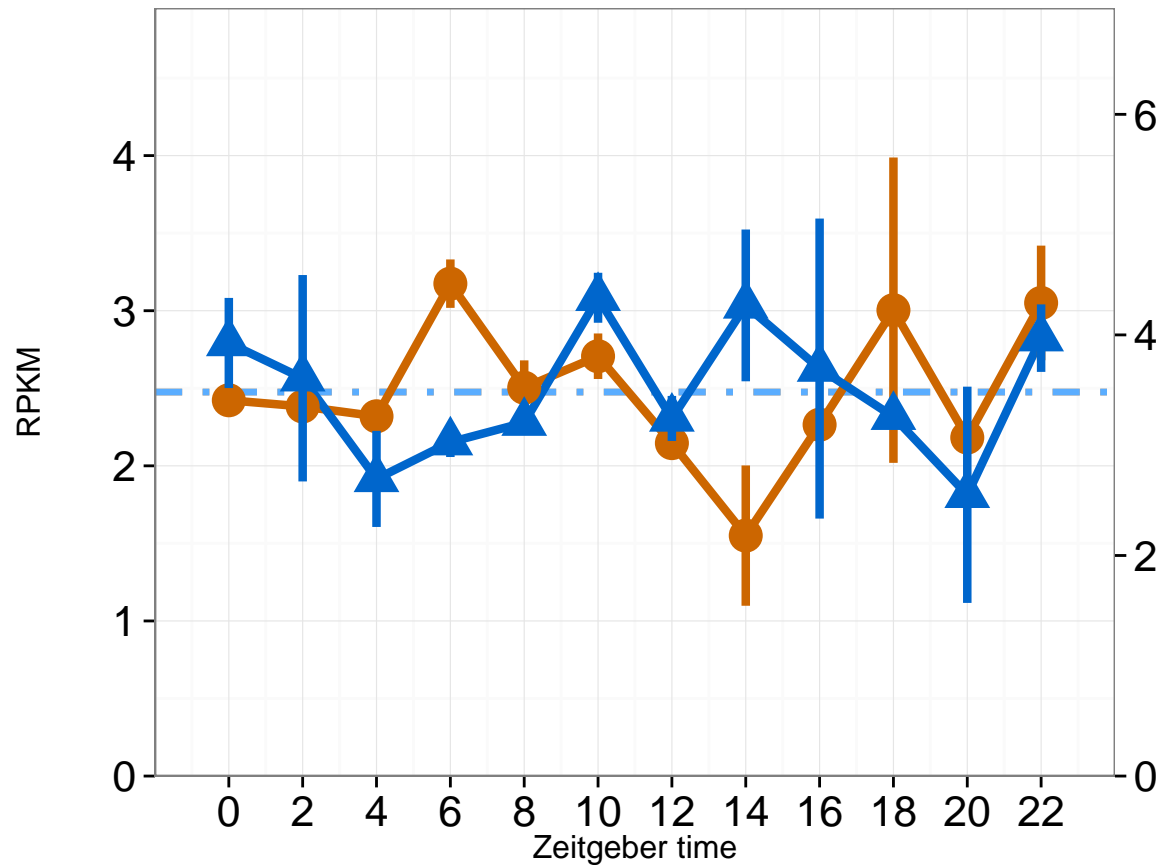

# Rnf113a1

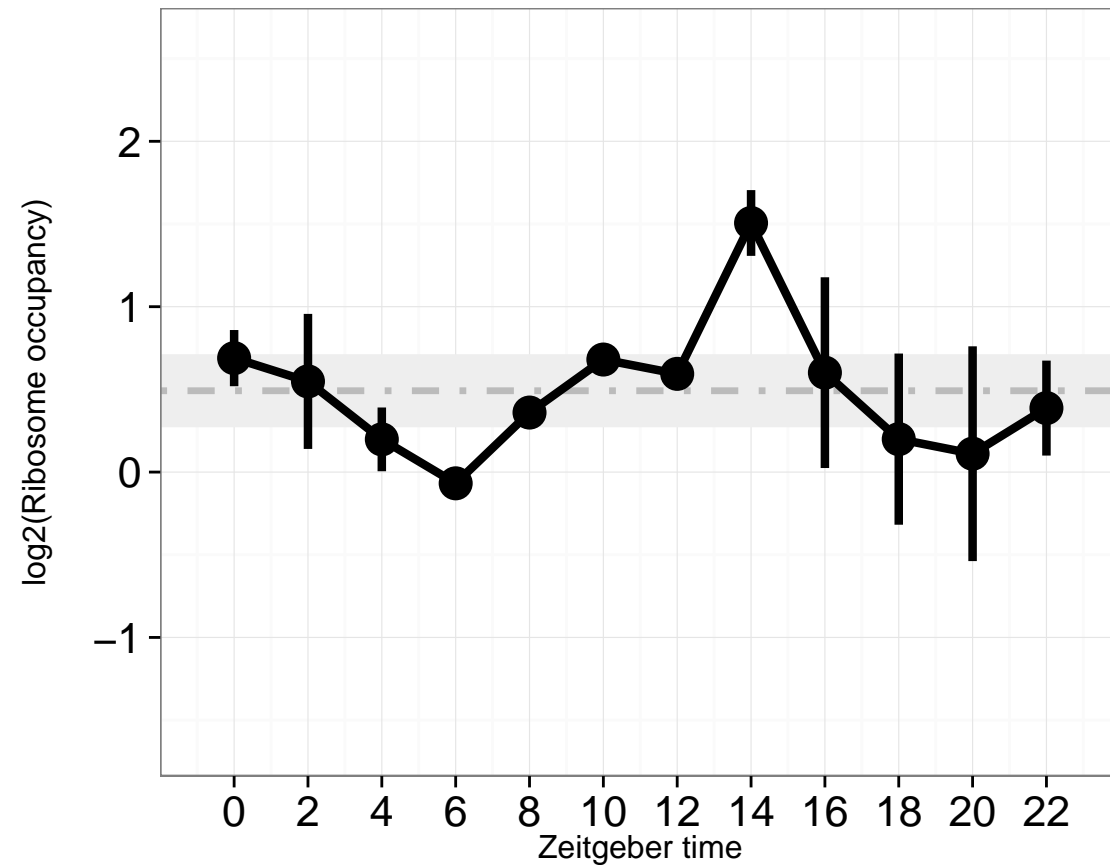

Supplement: Supplementary file 11188 [file 1]

# B2m

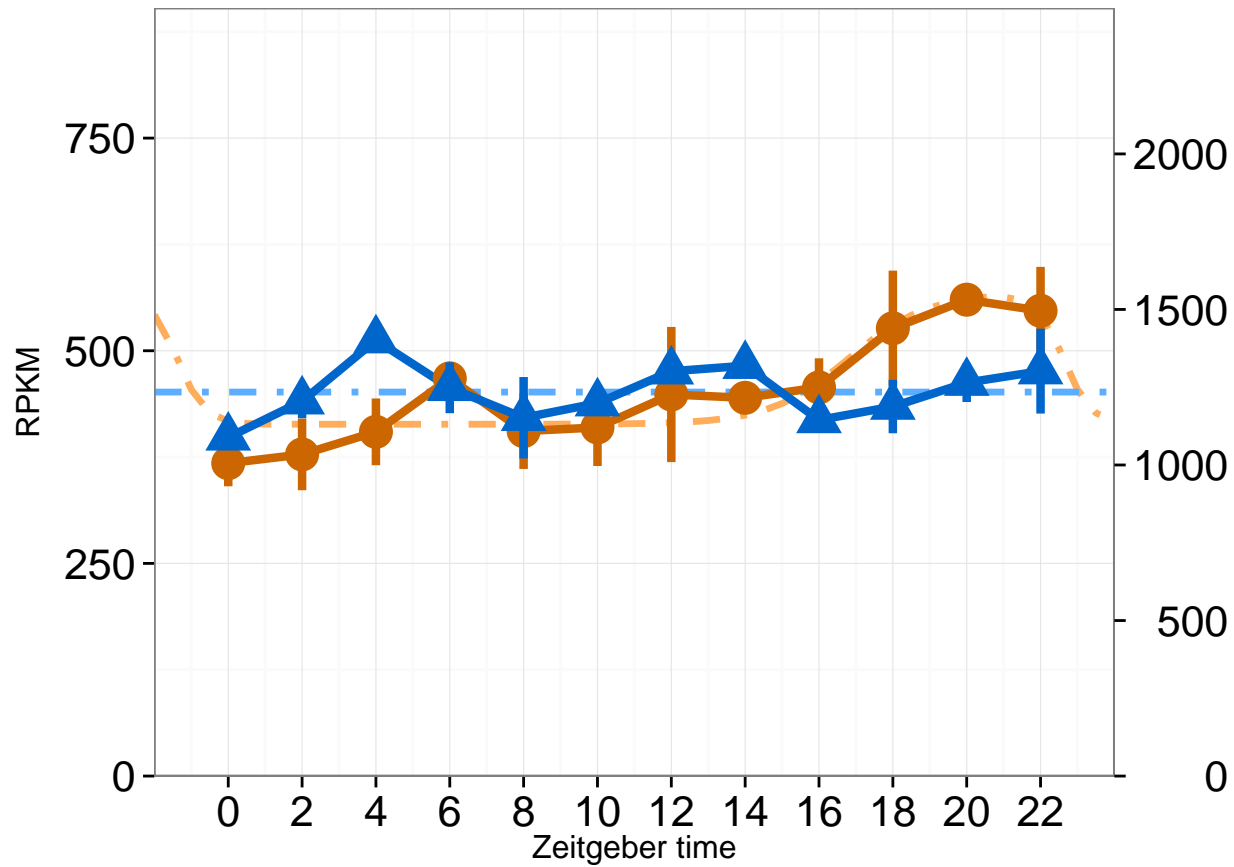

# B2m

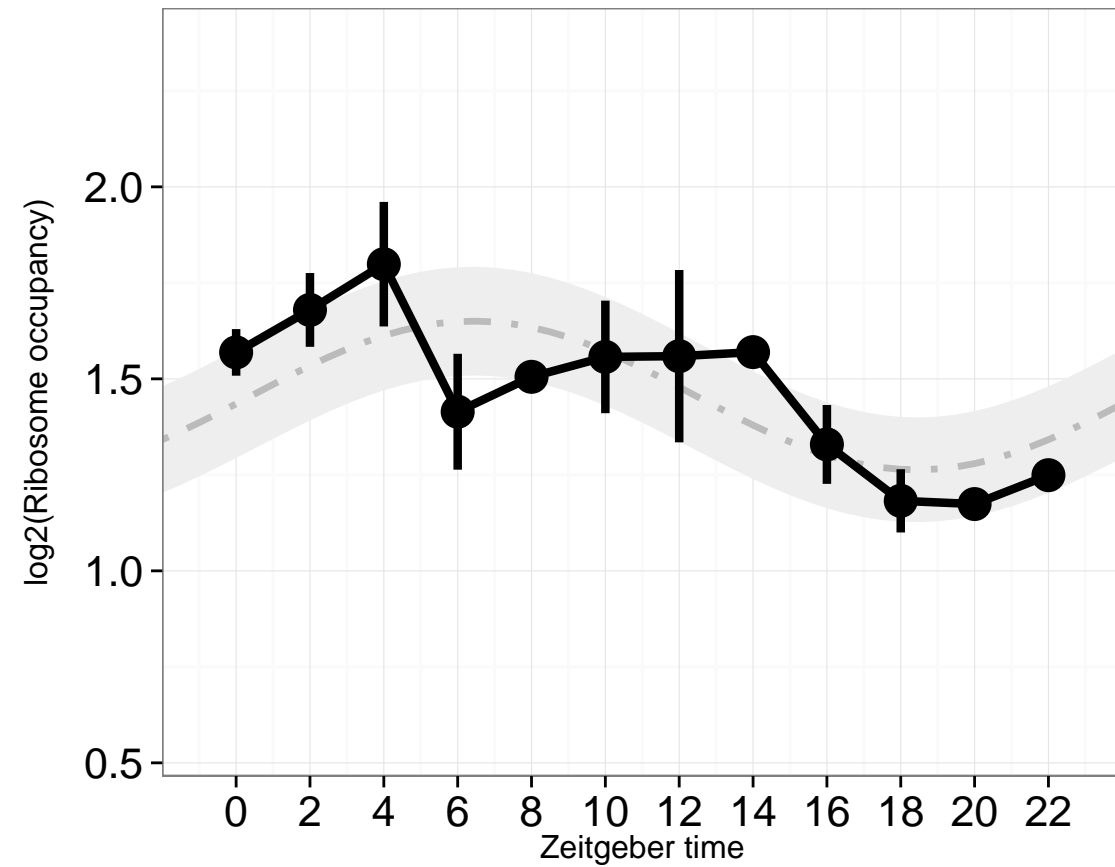

Supplement: Supplementary file 11189 [file 1]

# Rbm47

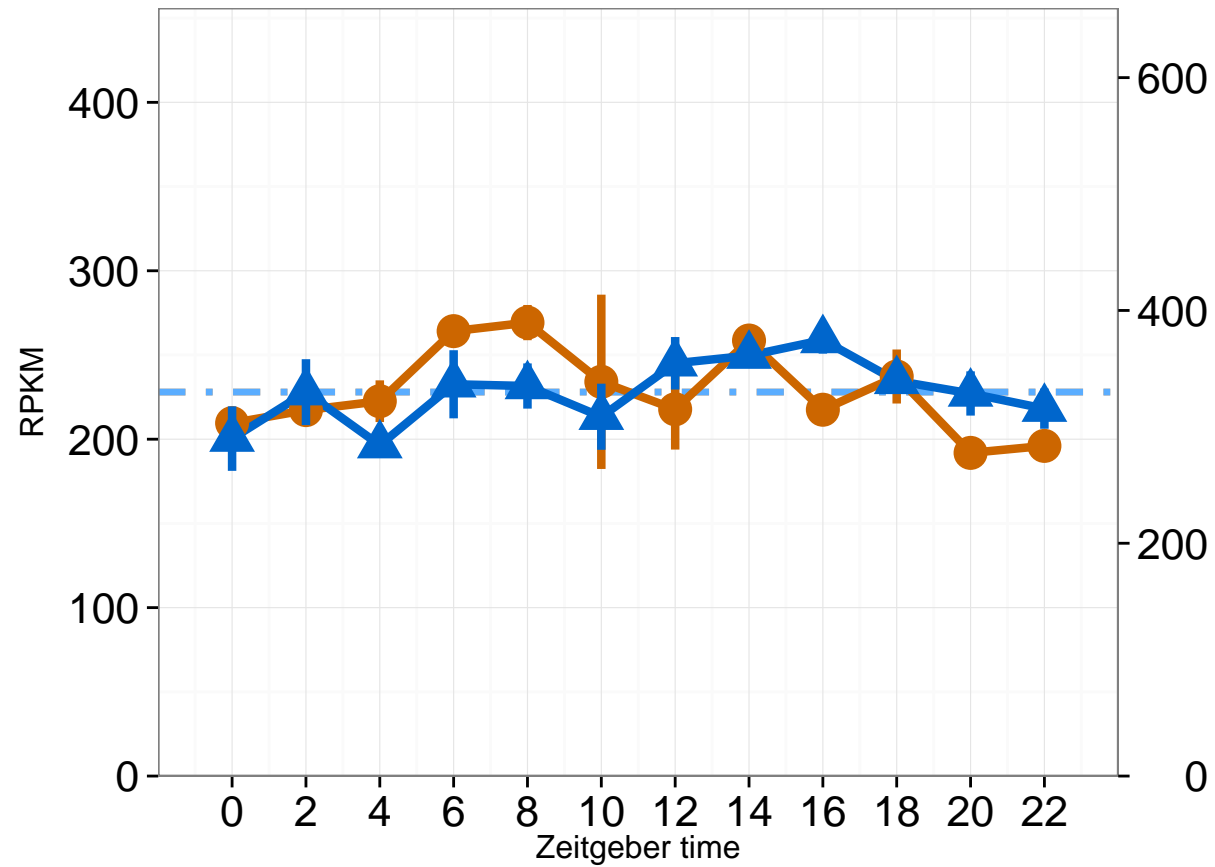

# Rbm47

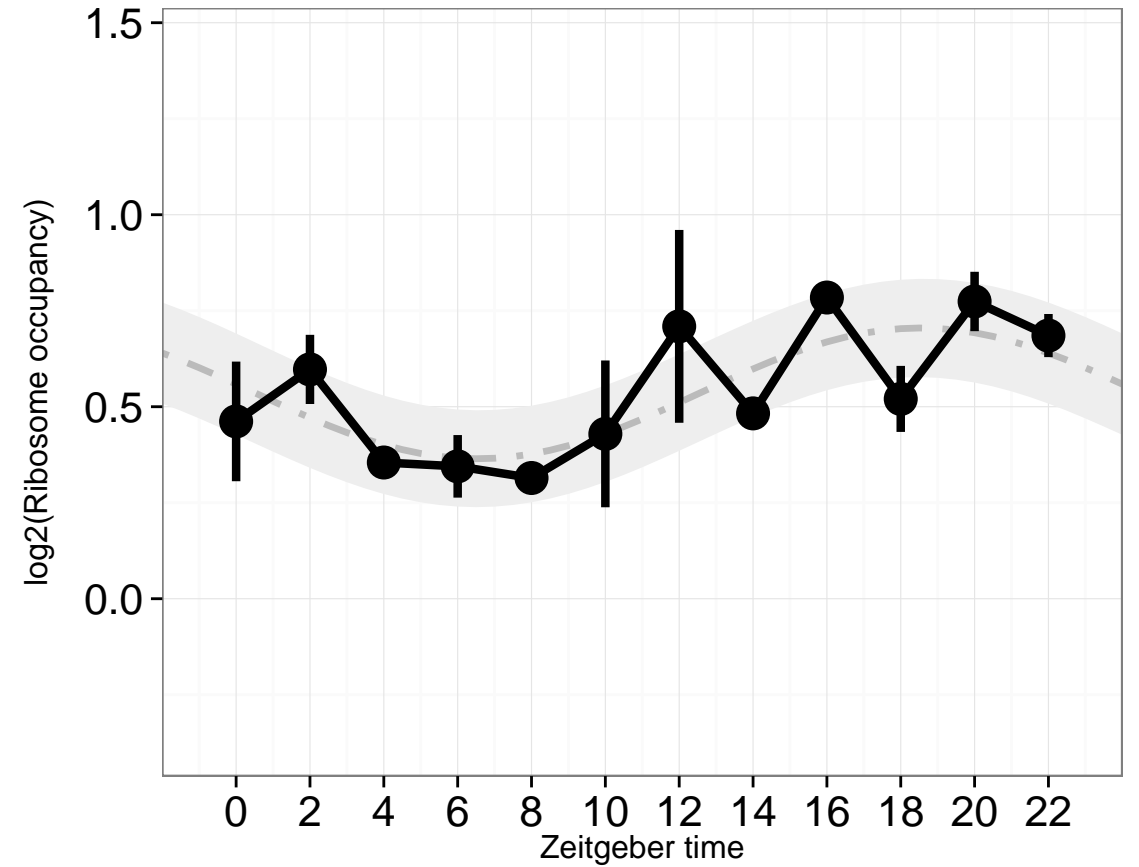

Supplement: Supplementary file 11190 [file 1]

## Derl3

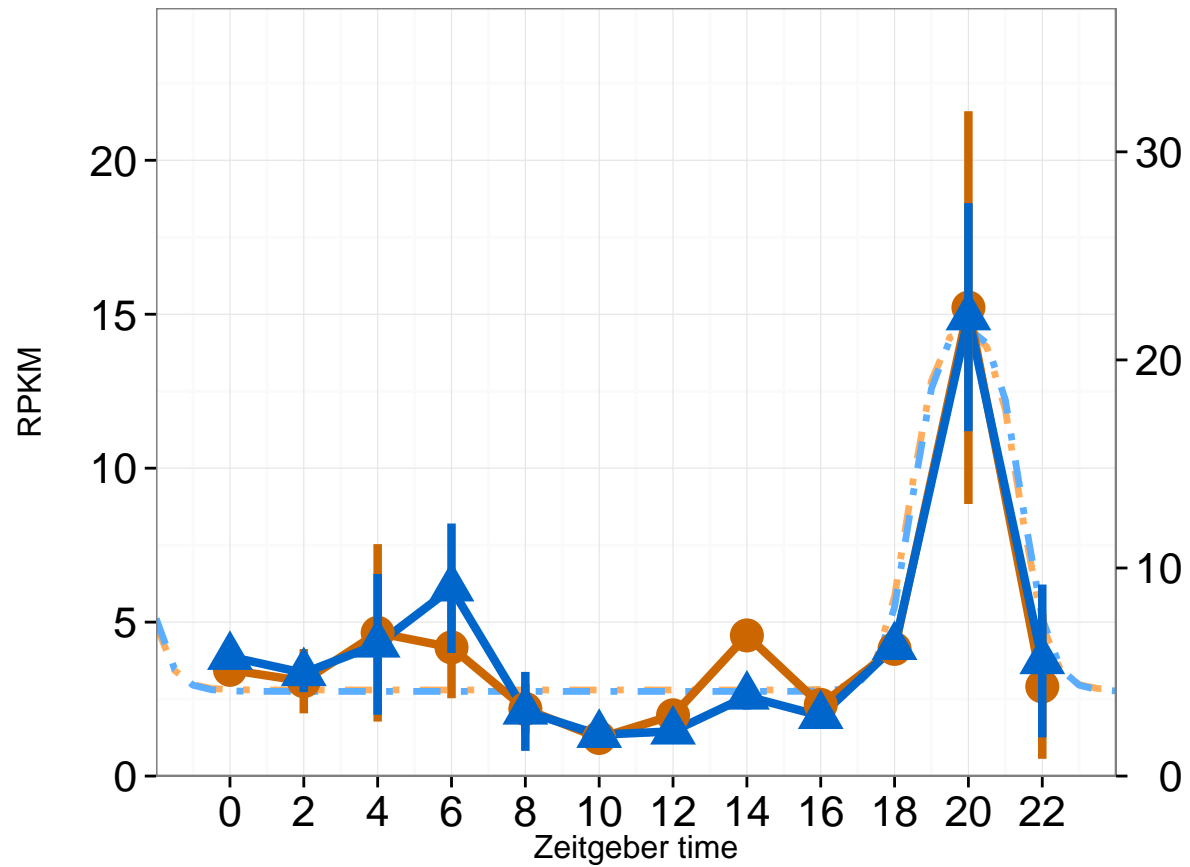

## Derl3

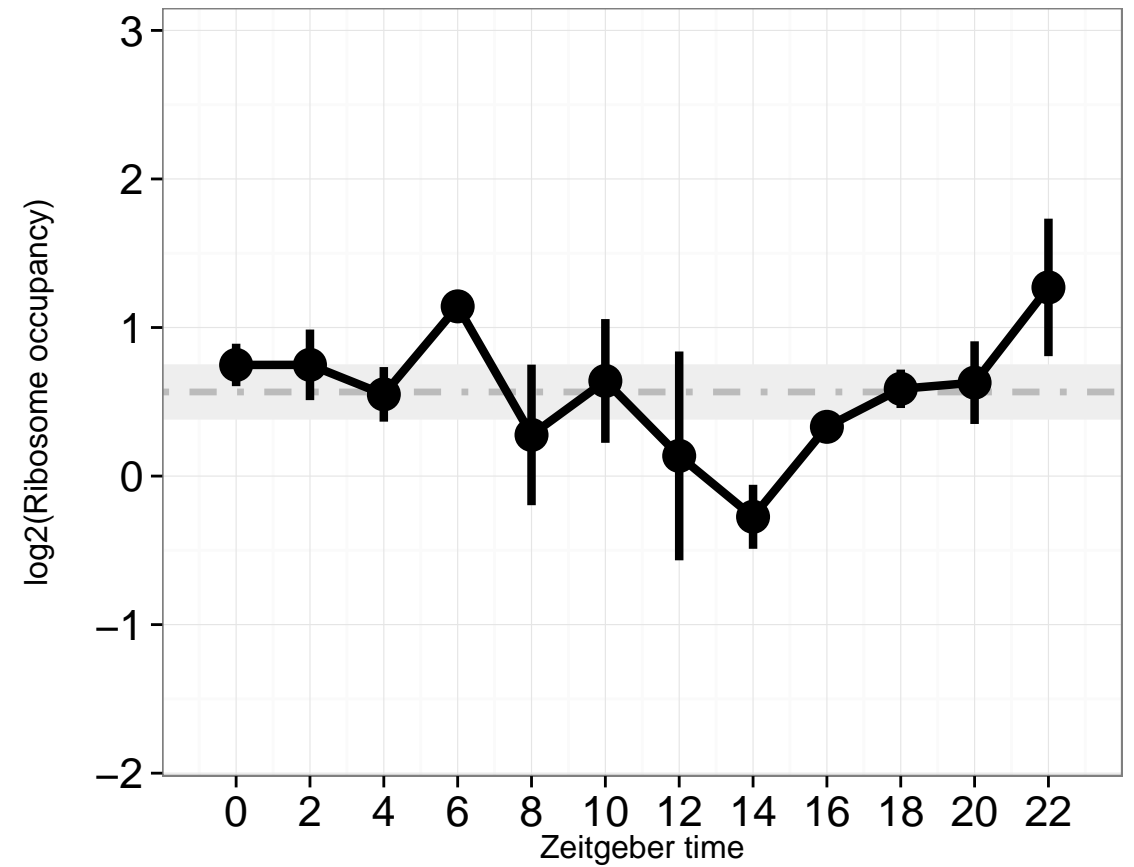

Supplement: Supplementary file 11191 [file 1]

## Sema7a

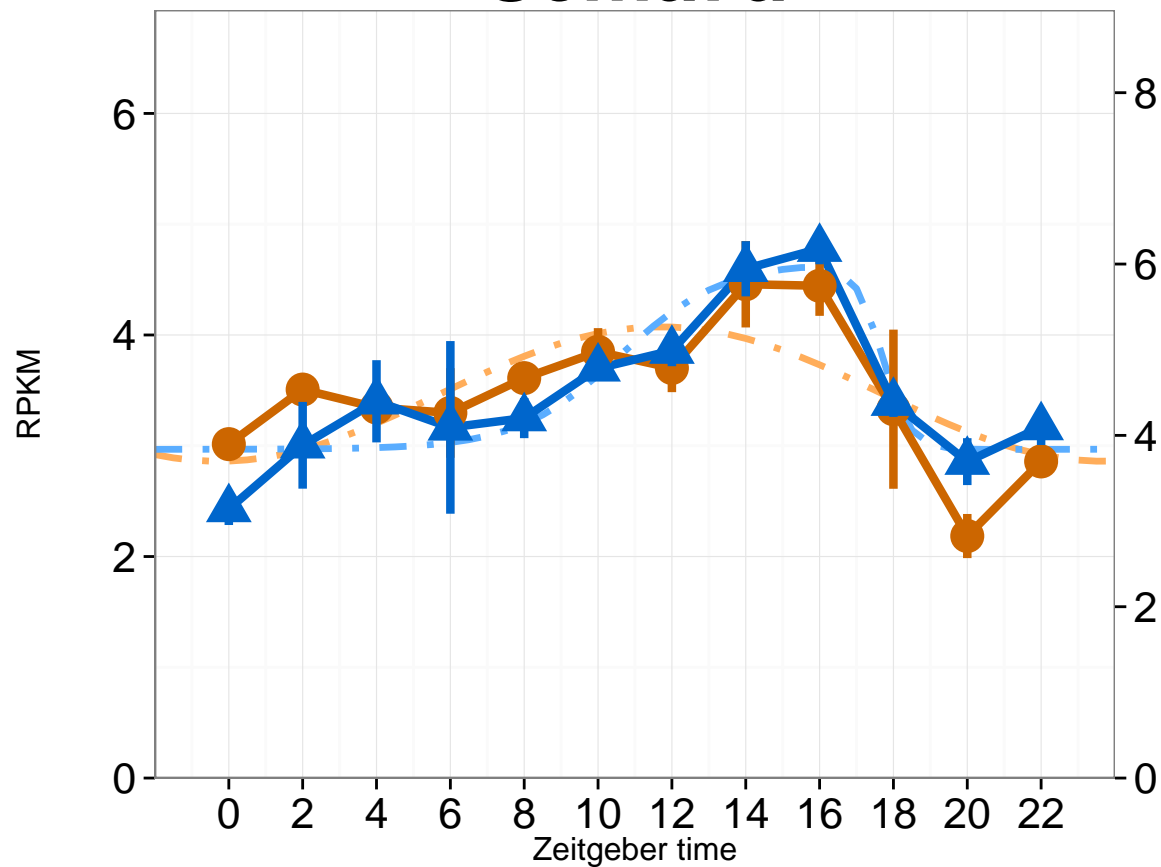

## Sema7a

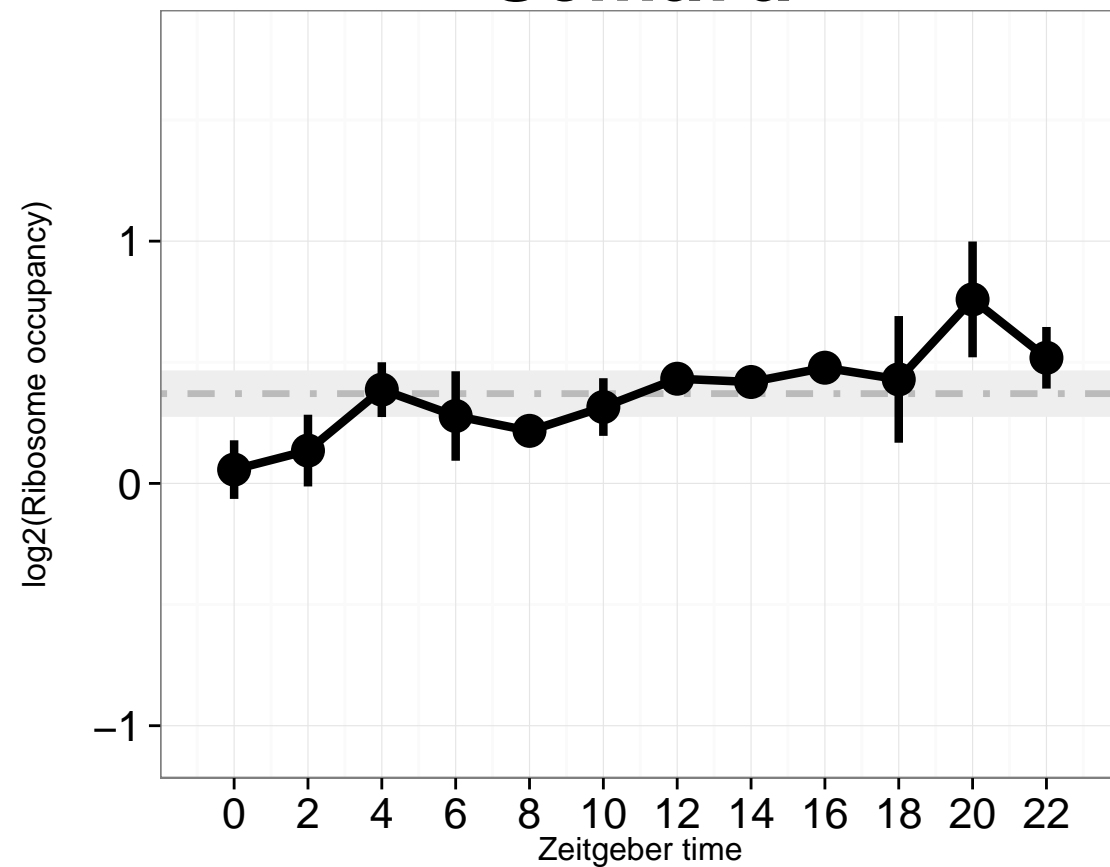

Supplement: Supplementary file 11192 [file 1]

## Mpzi3

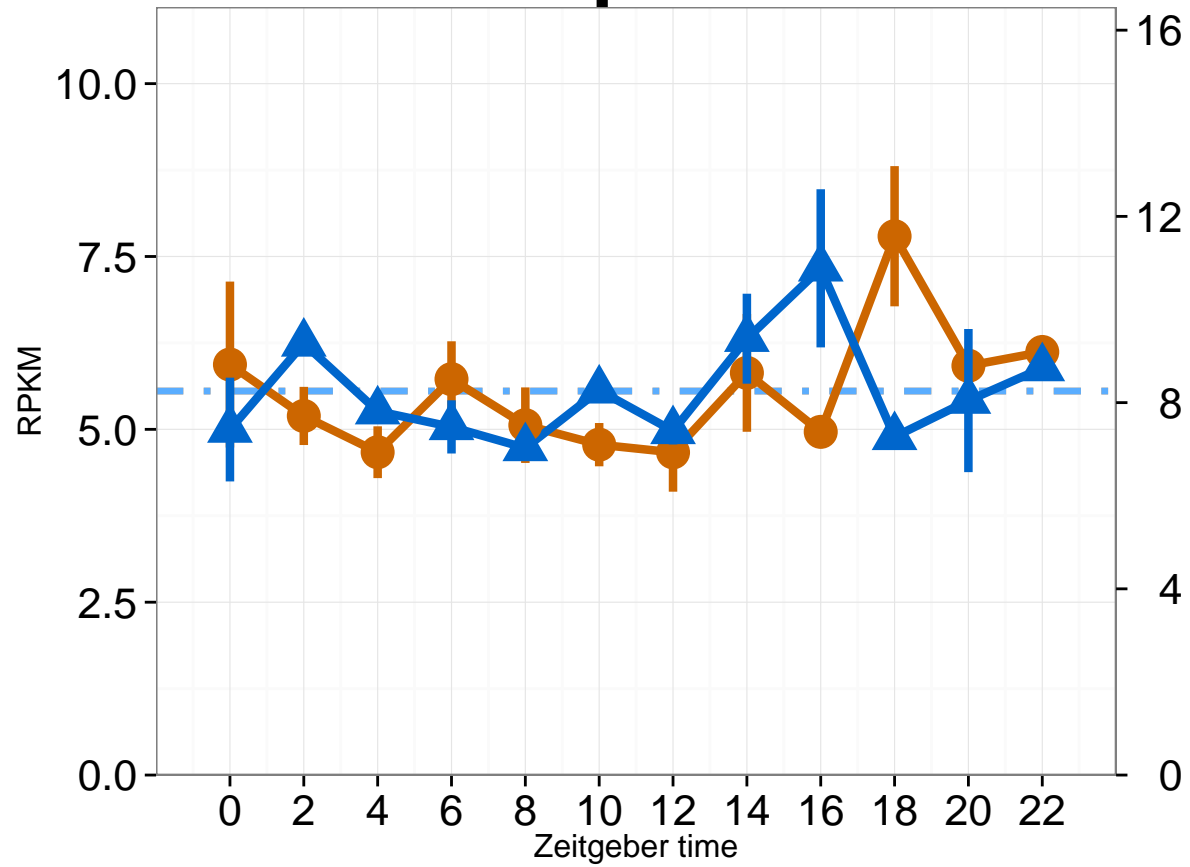

## Mpzi3

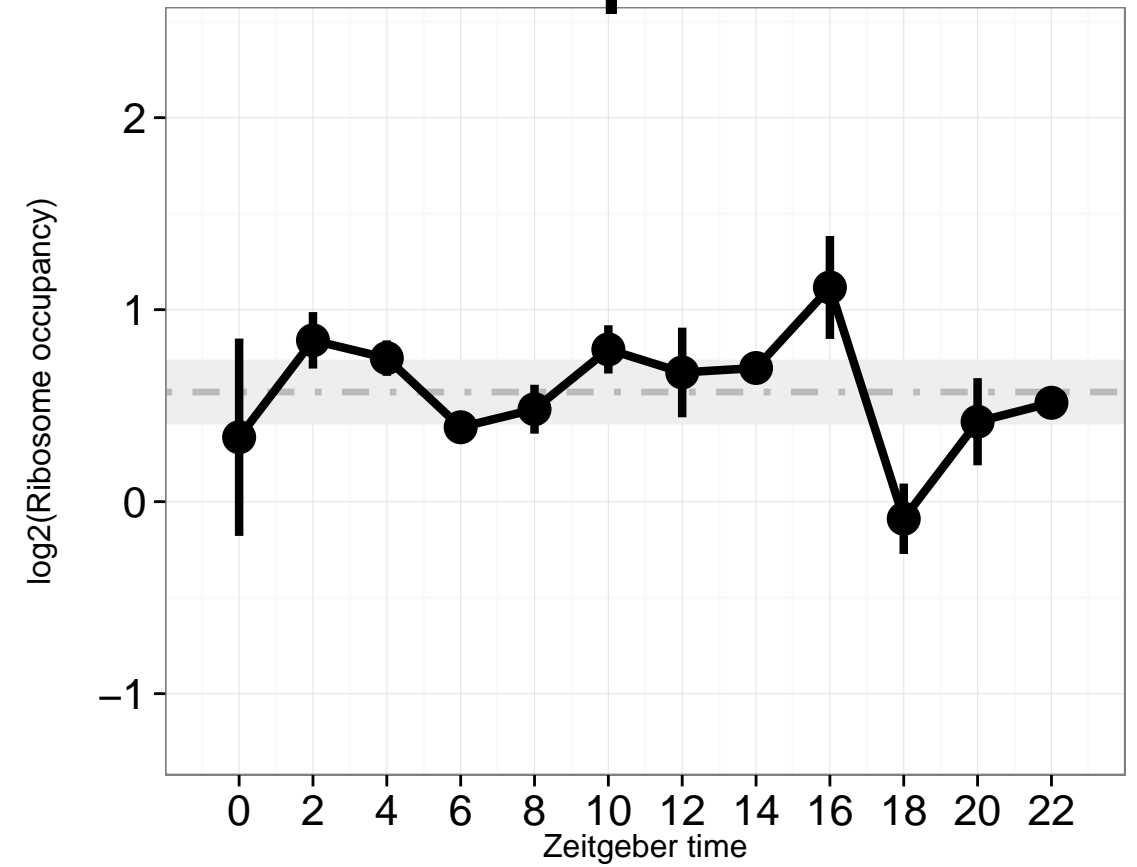

Supplement: Supplementary file 11193 [file 1]

# Psmb9

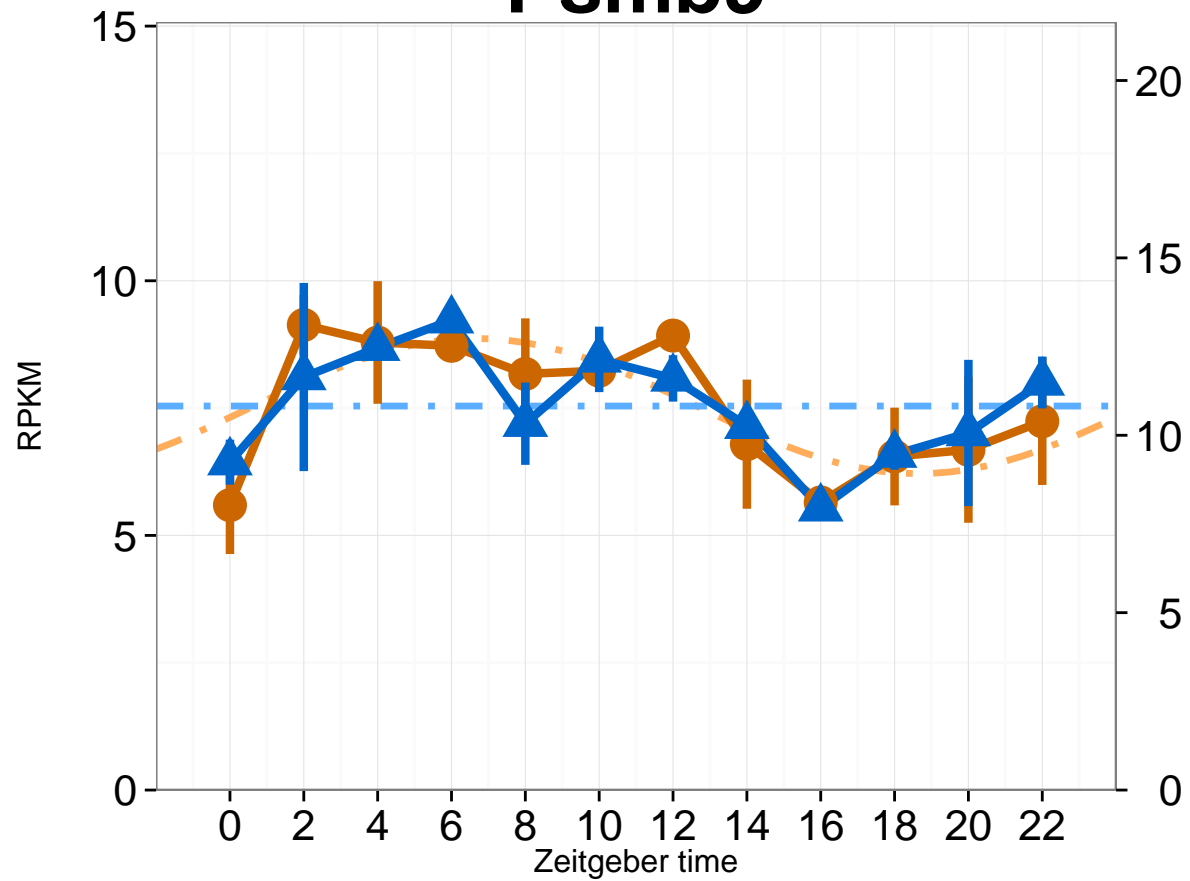

# Psmb9

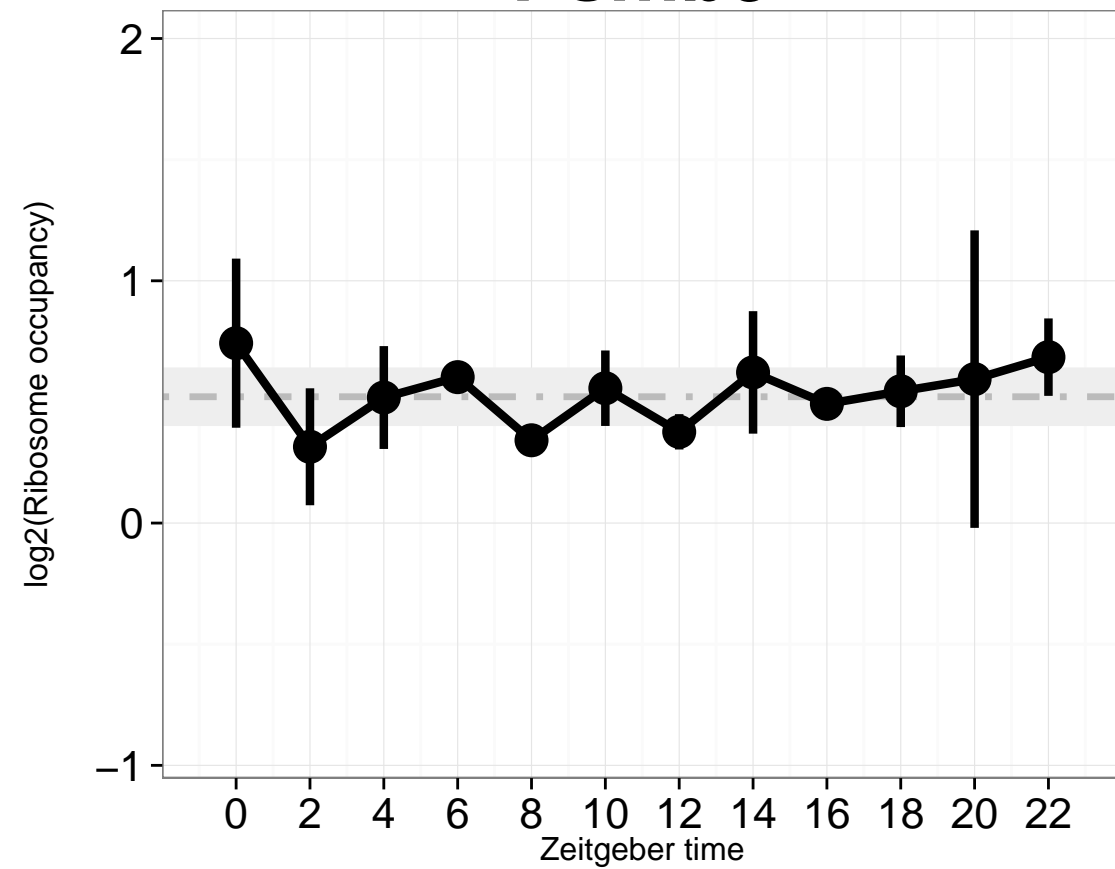

Supplement: Supplementary file 11194 [file 1]

## Tyms

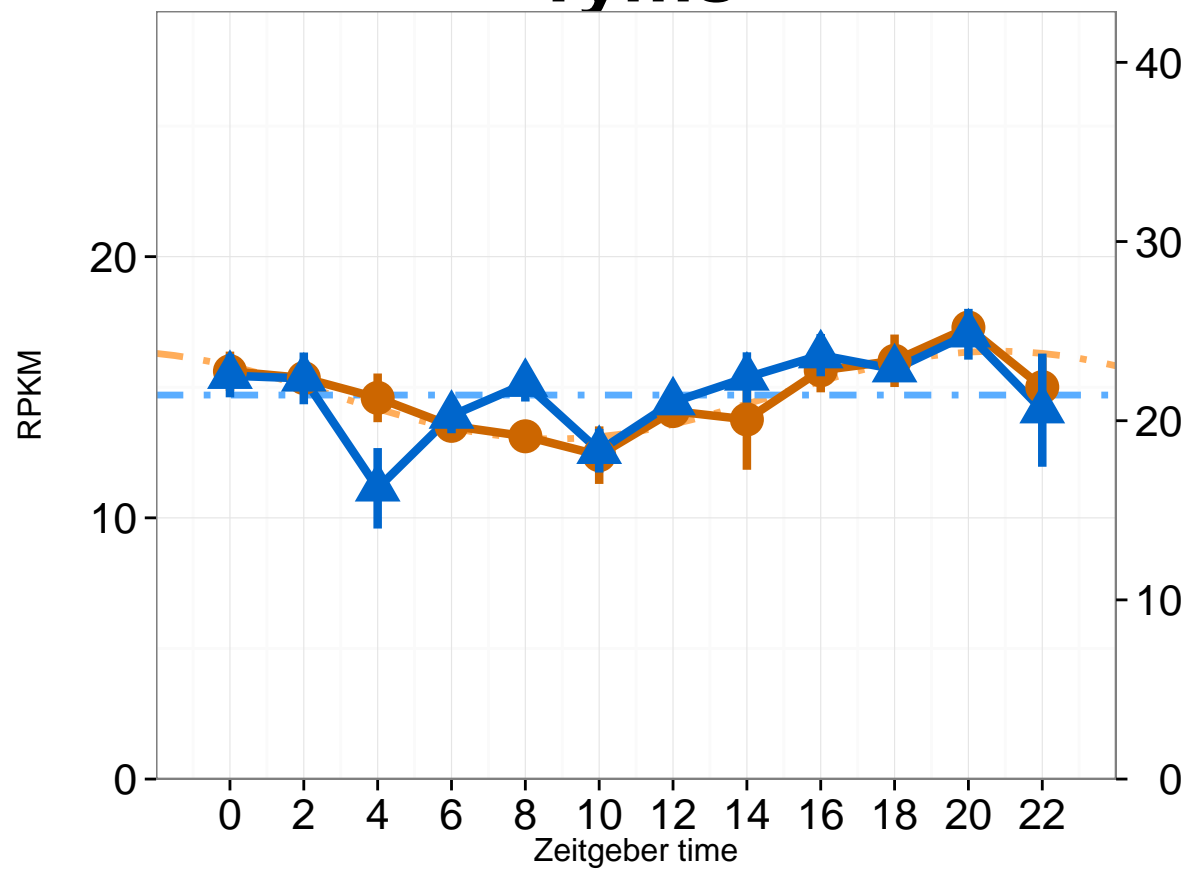

## Tyms

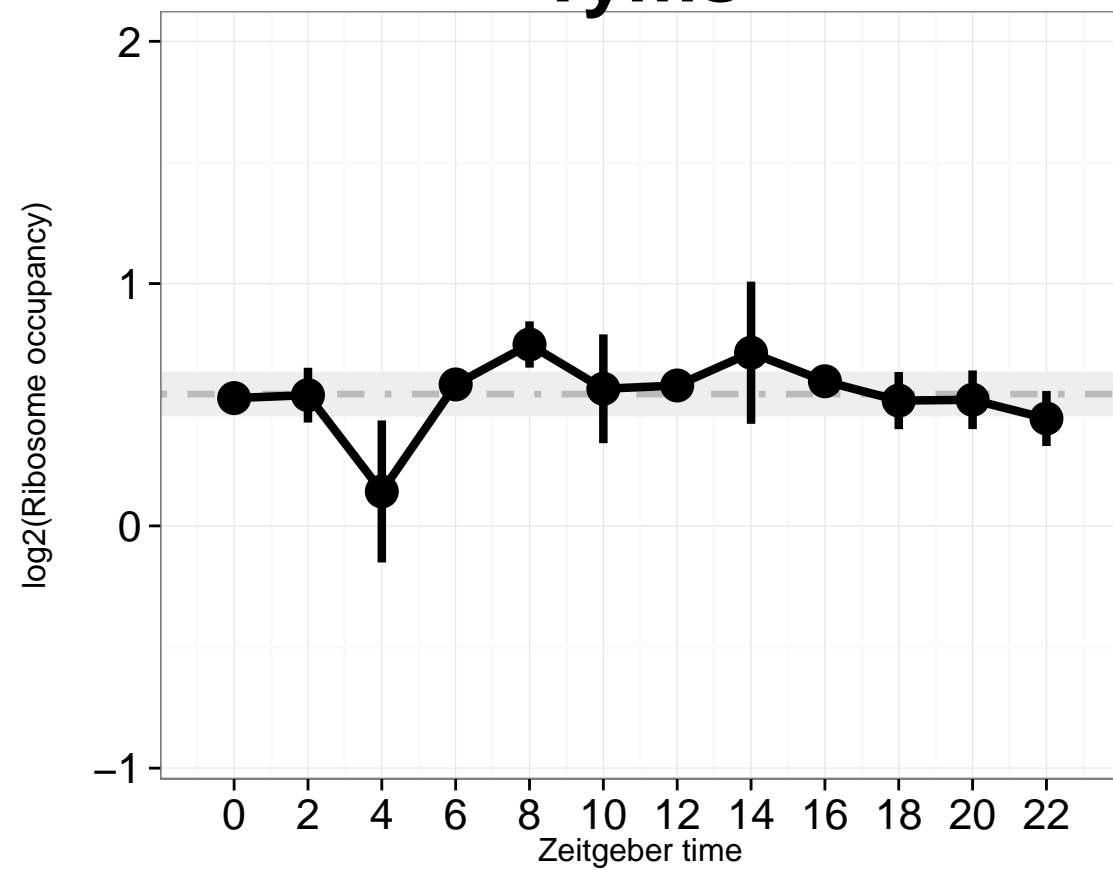

Supplement: Supplementary file 11195 [file 1]

# Nfatc4

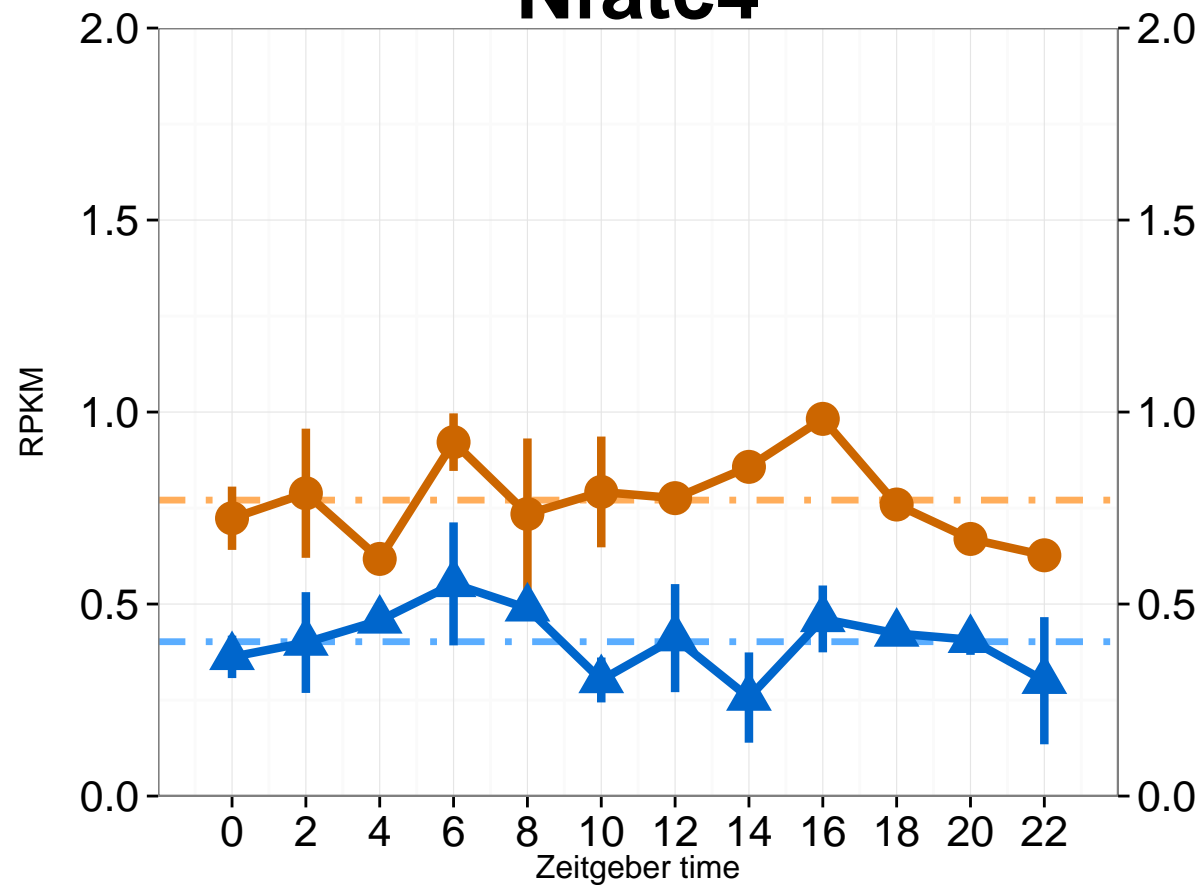

# Nfatc4

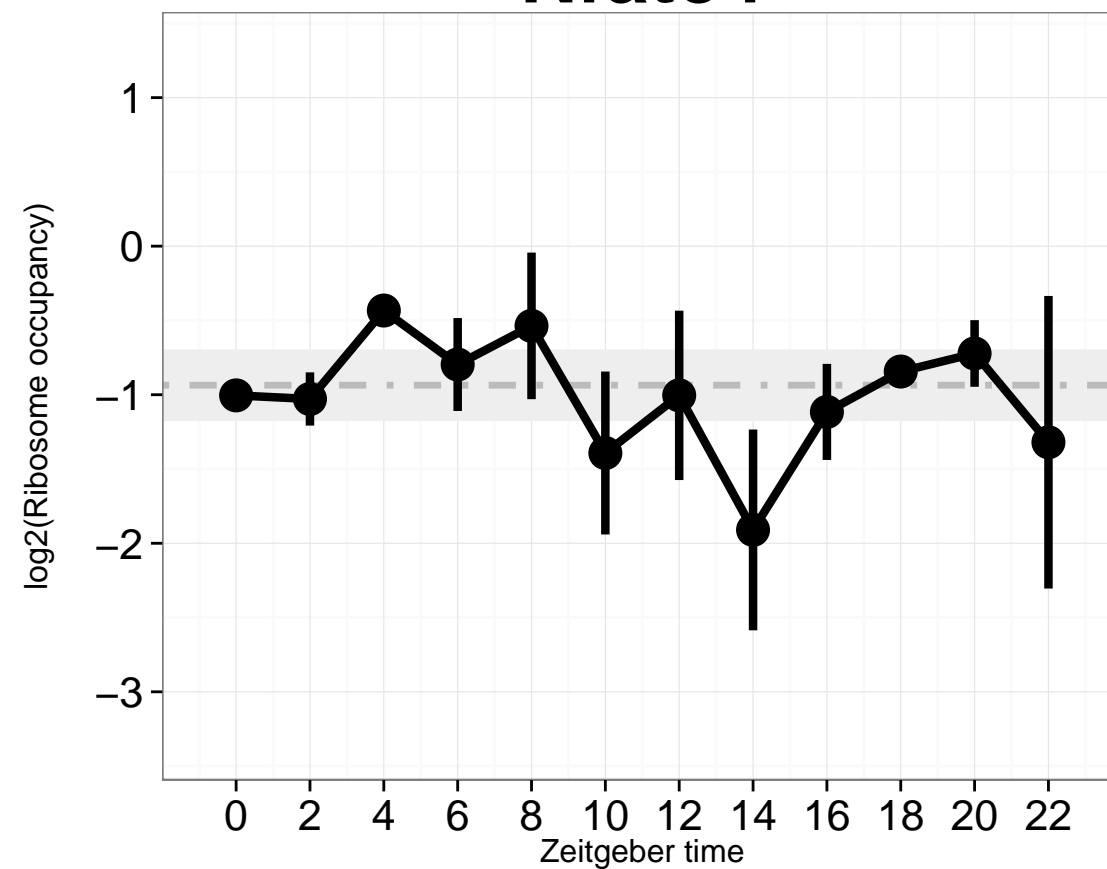

Supplement: Supplementary file 11196 [file 1]

## Nudt19

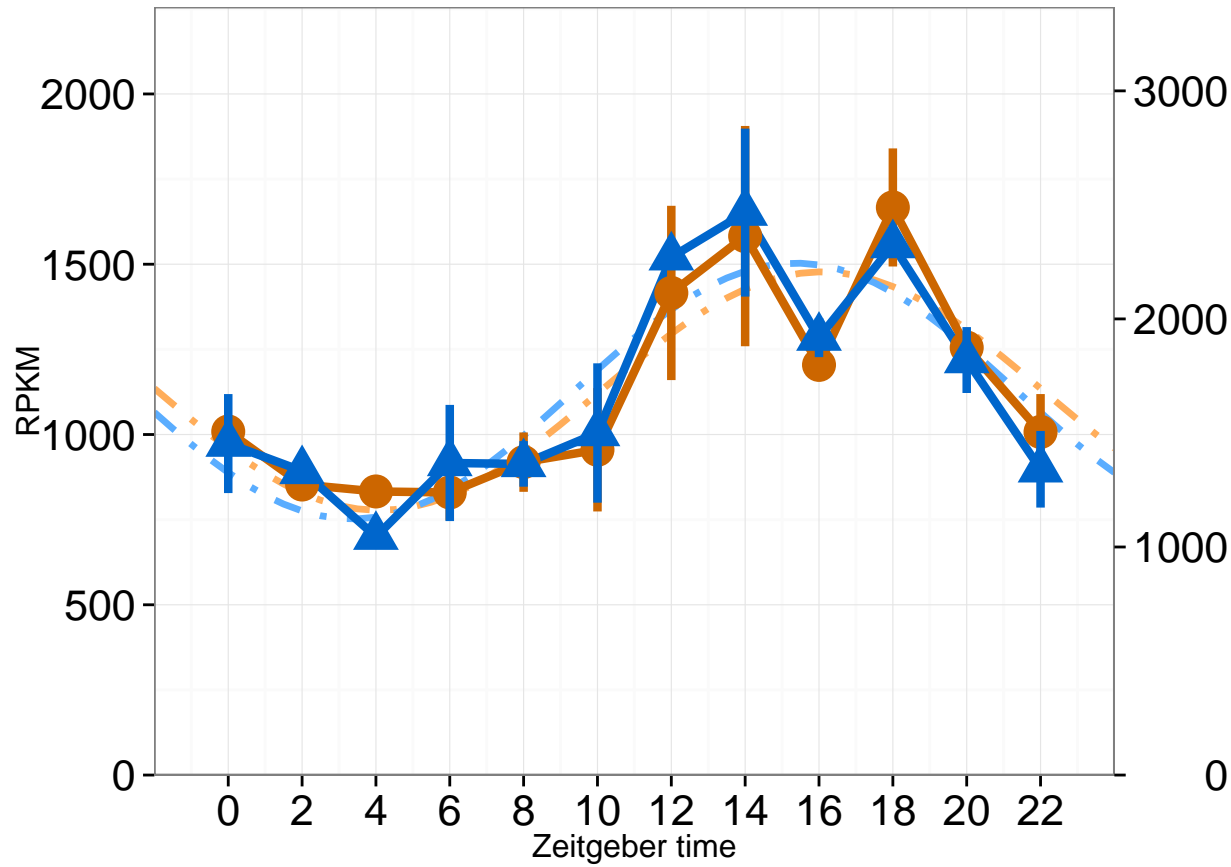

## Nudt19

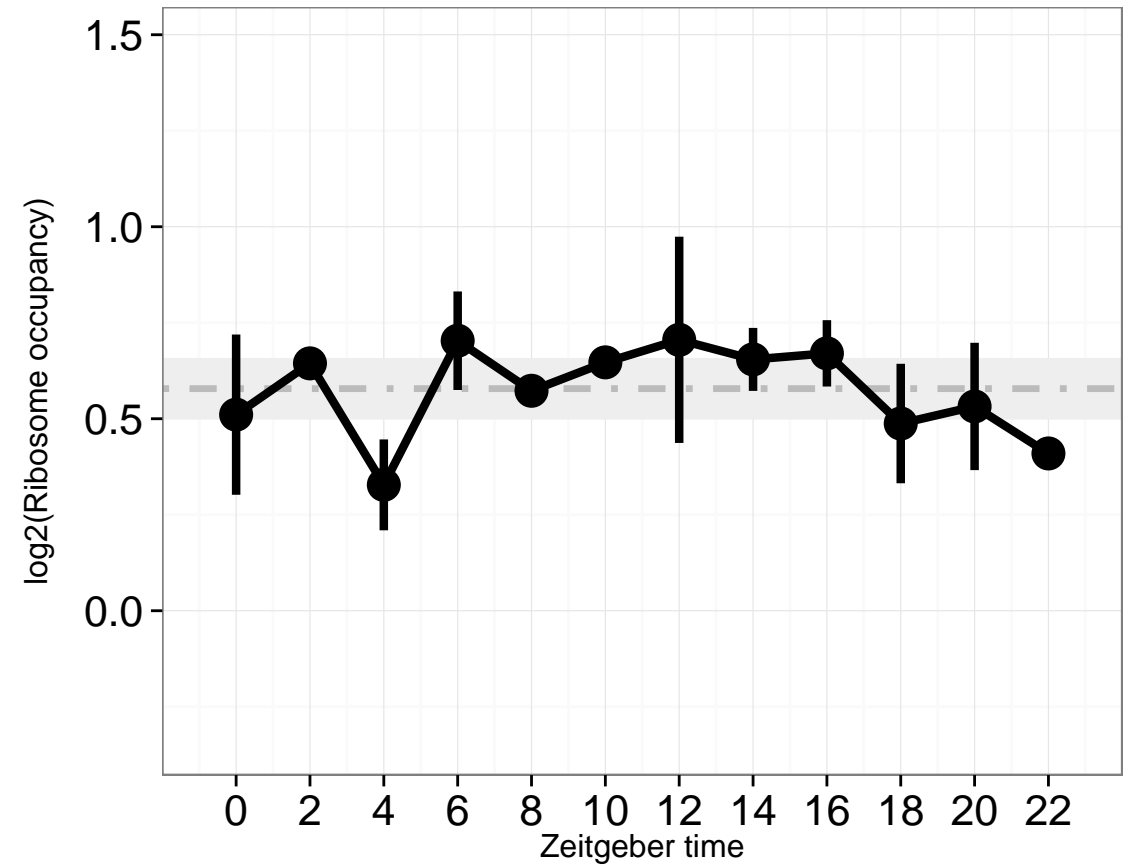

Supplement: Supplementary file 11197 [file 1]

# Psme4

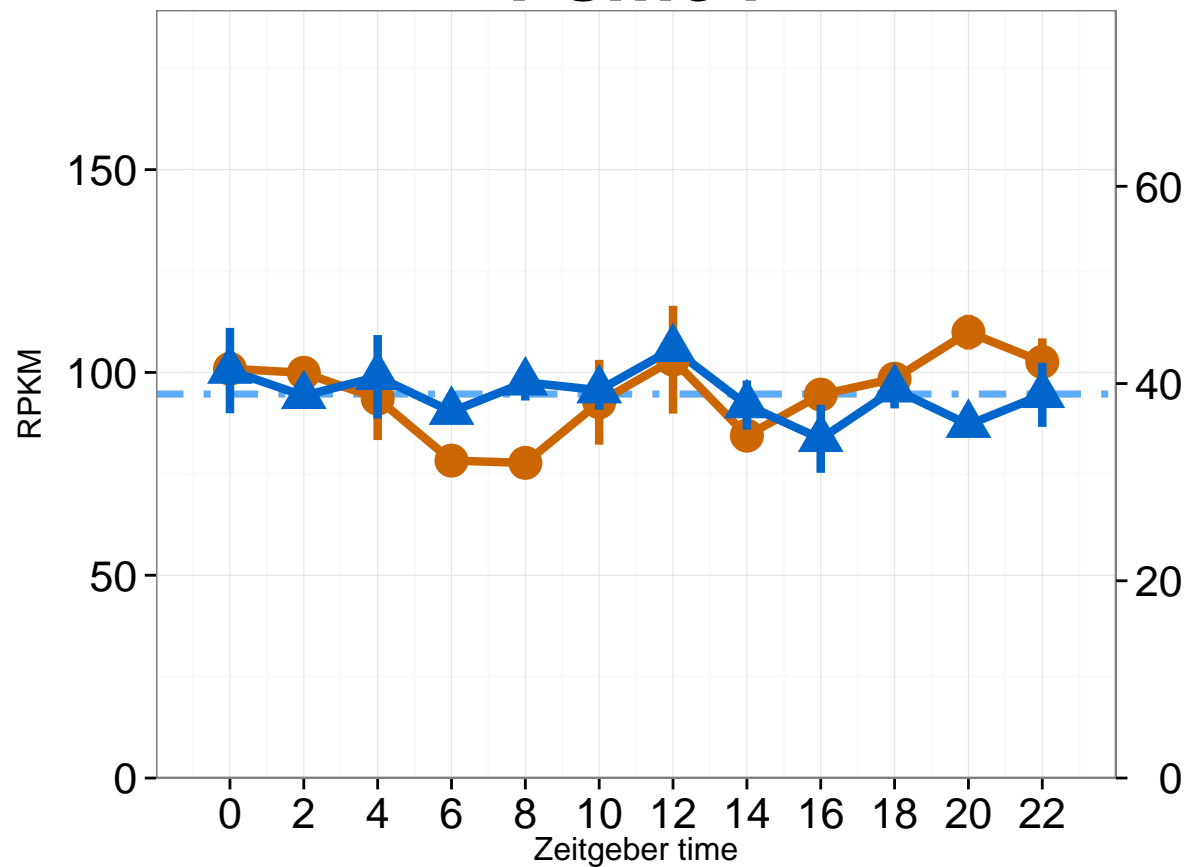

# Psme4

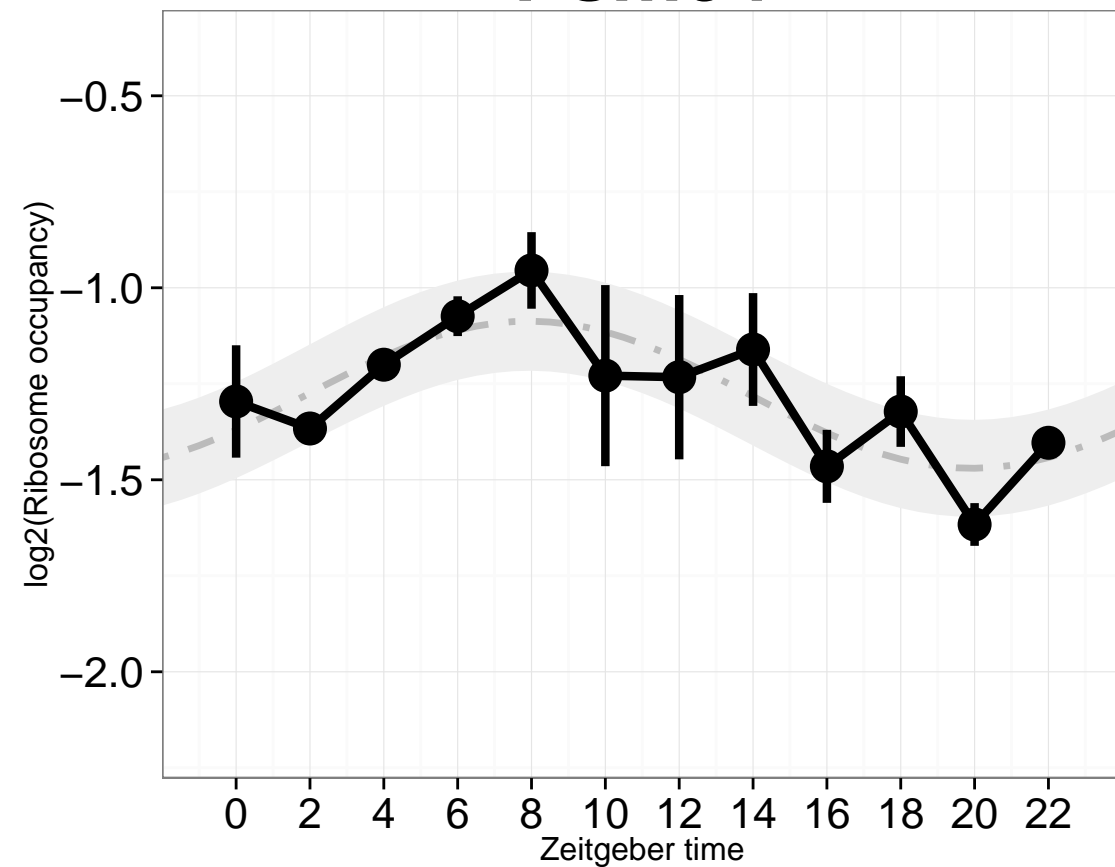

Supplement: Supplementary file 11198 [file 1]

## Inhbb

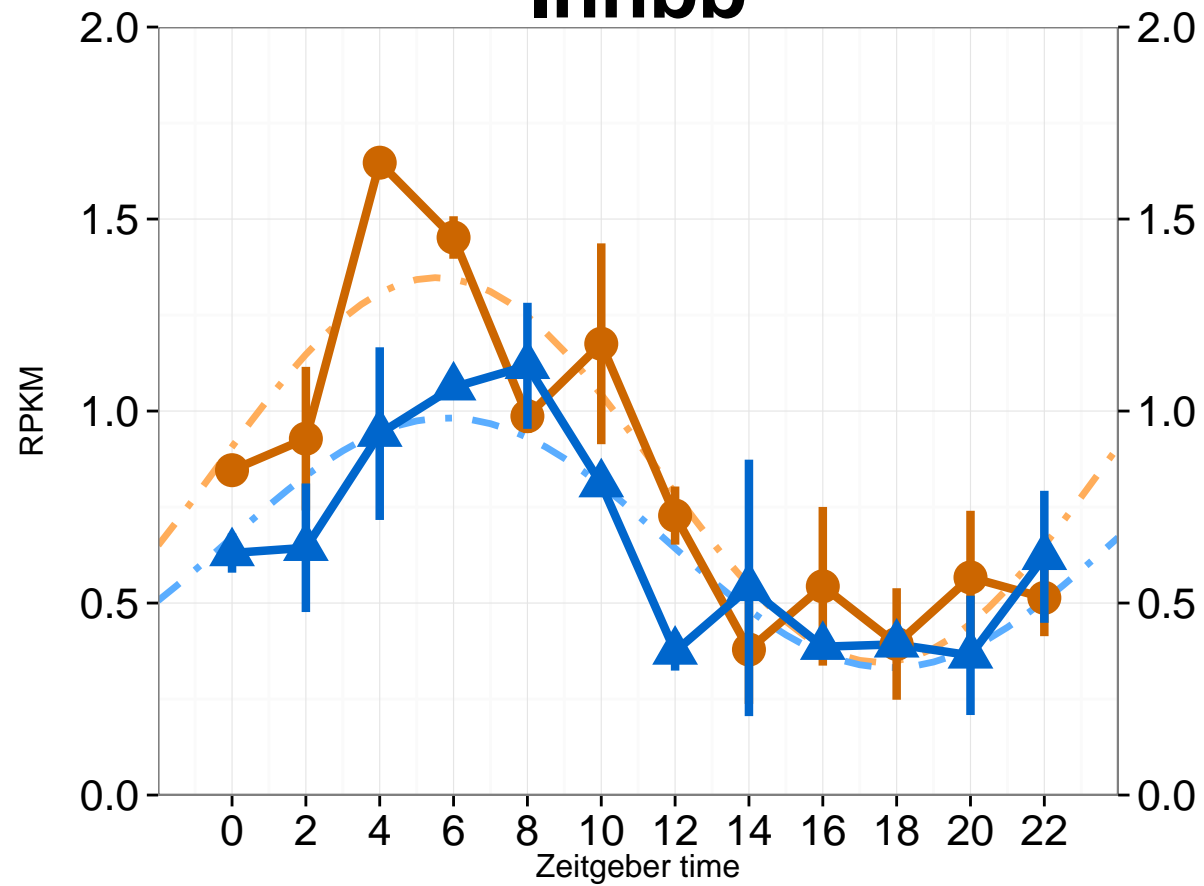

## Inhbb

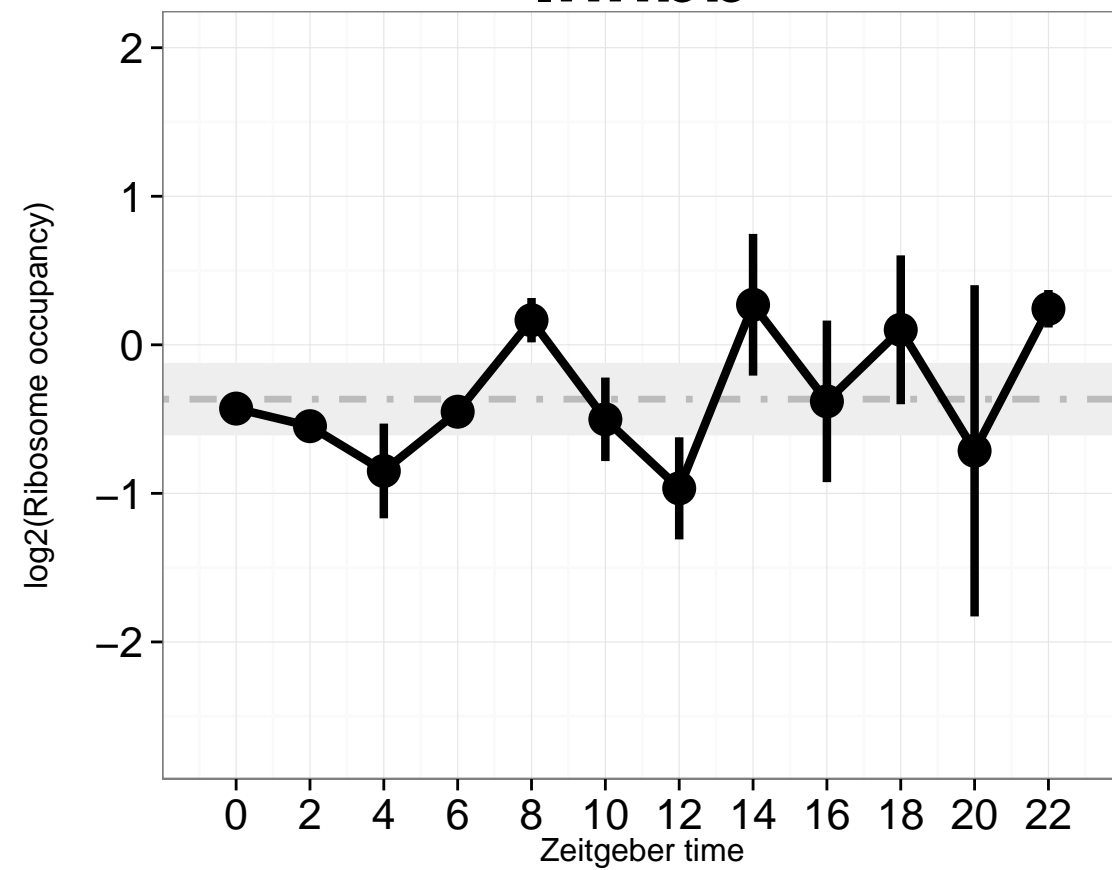

Supplement: Supplementary file 11199 [file 1]

# Grap

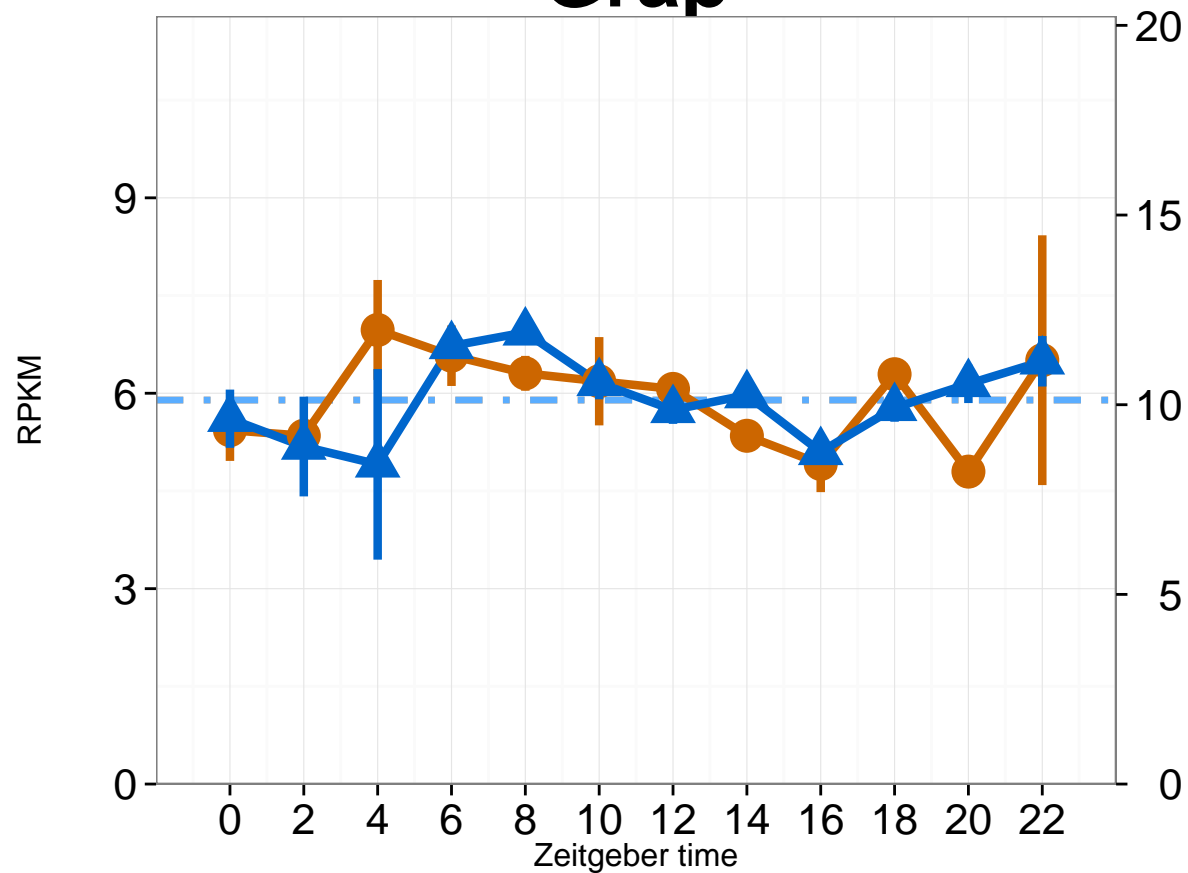

# Grap

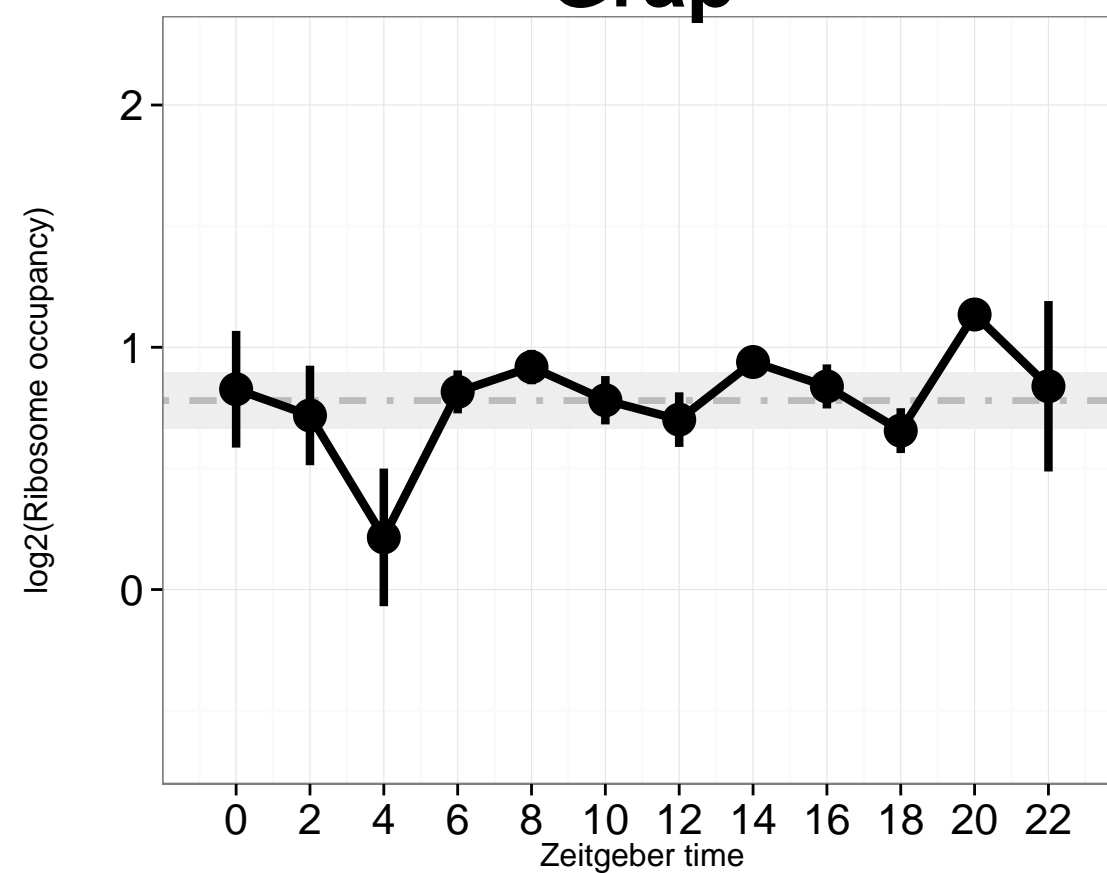

Supplement: Supplementary file 11200 [file 1]

# Ighmbp2

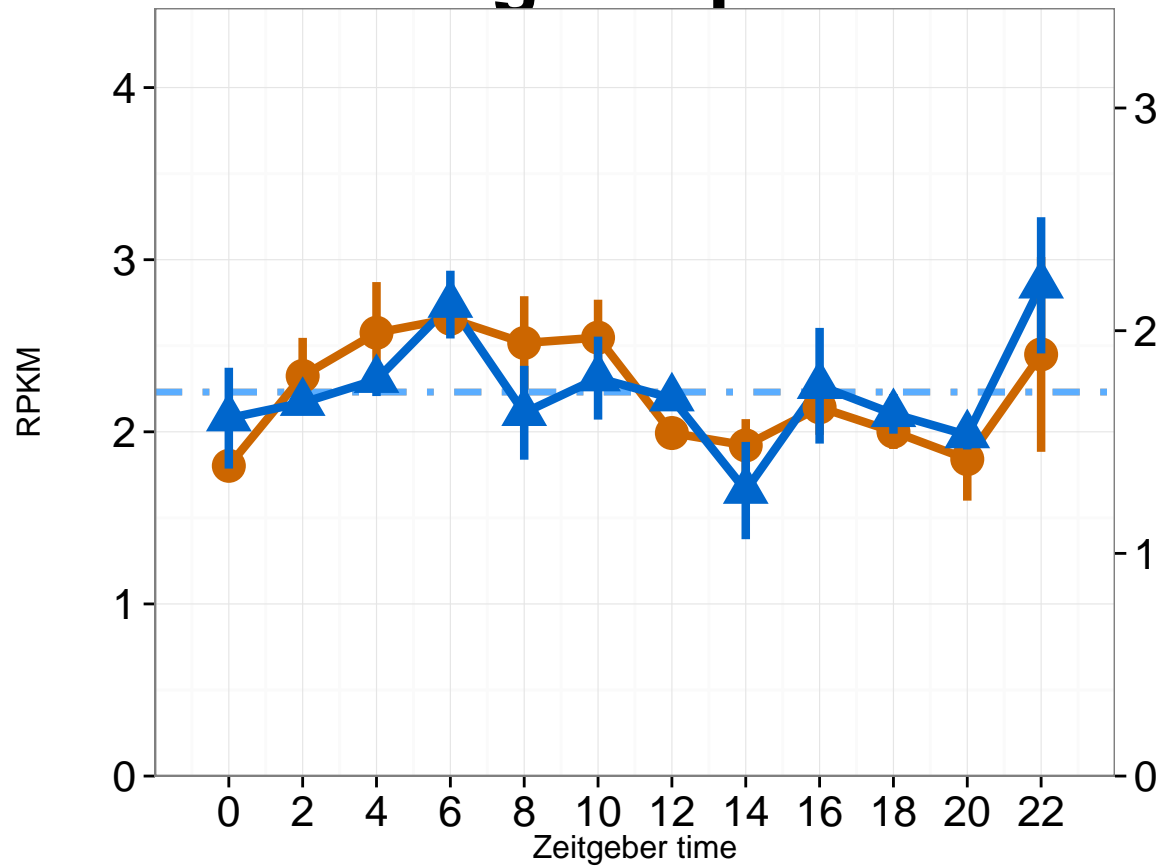

# Ighmbp2

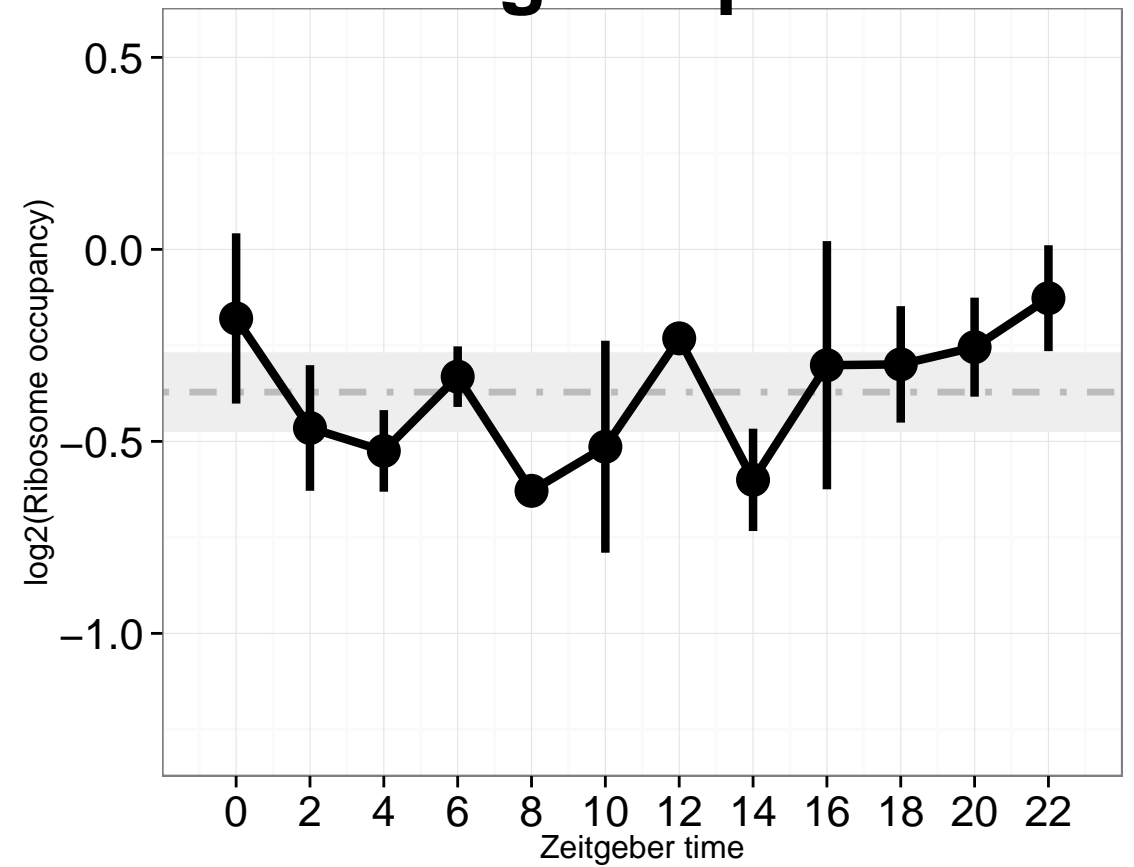

Supplement: Supplementary file 11201 [file 1]

# Tmem18

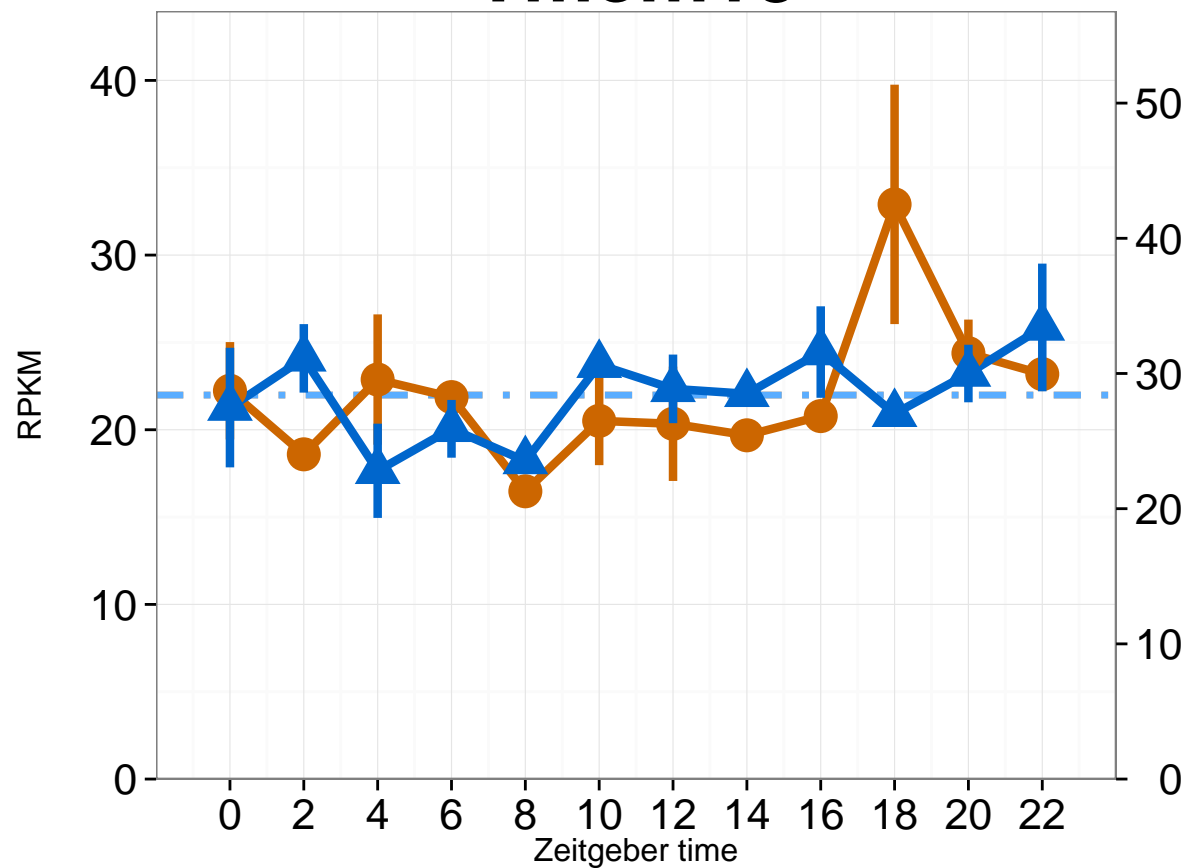

# Tmem18

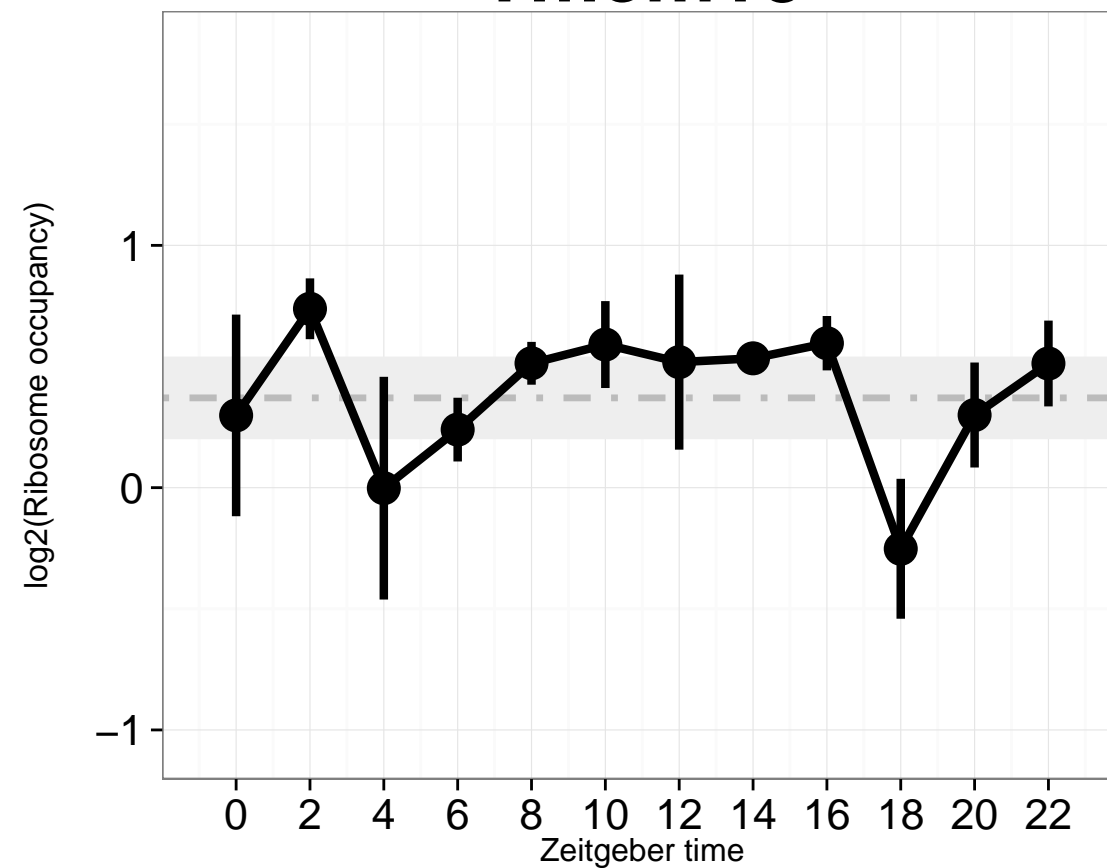

Supplement: Supplementary file 11202 [file 1]

## Cd82

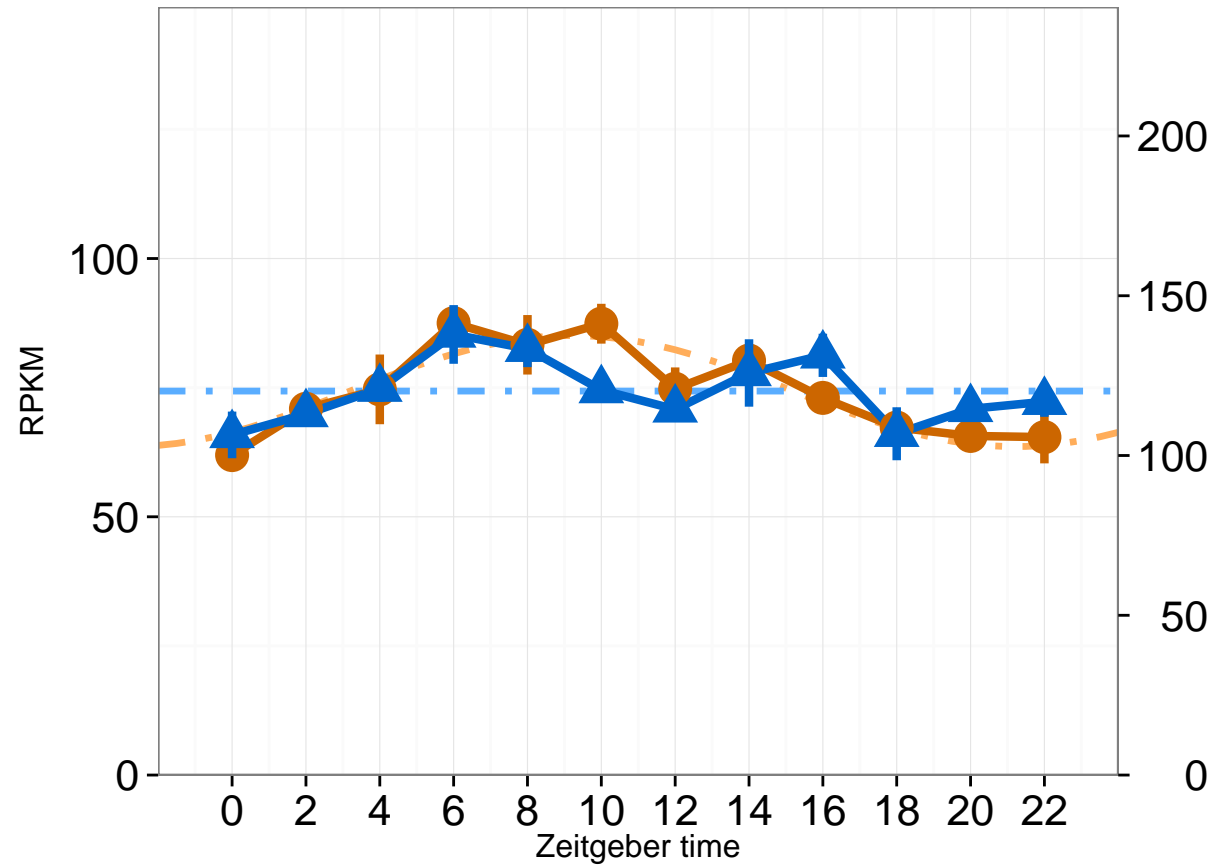

## Cd82

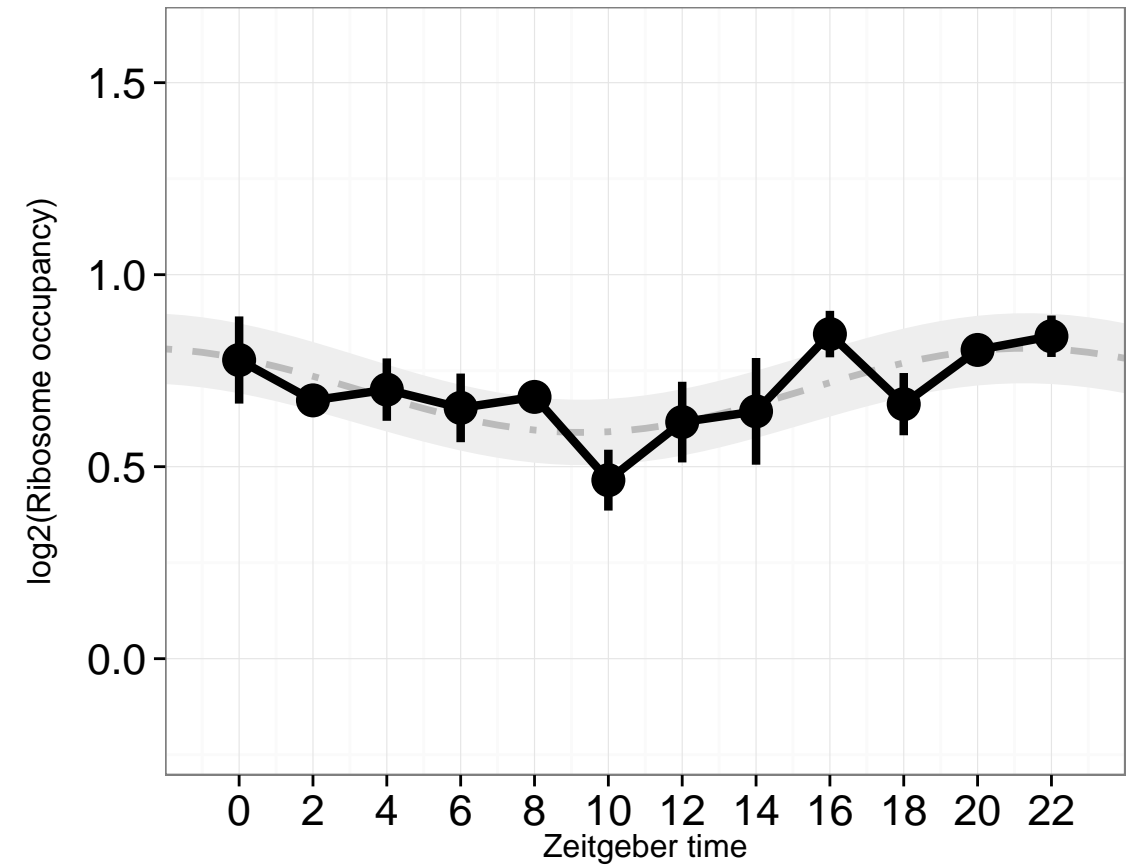

Supplement: Supplementary file 11203 [file 1]

## Syk

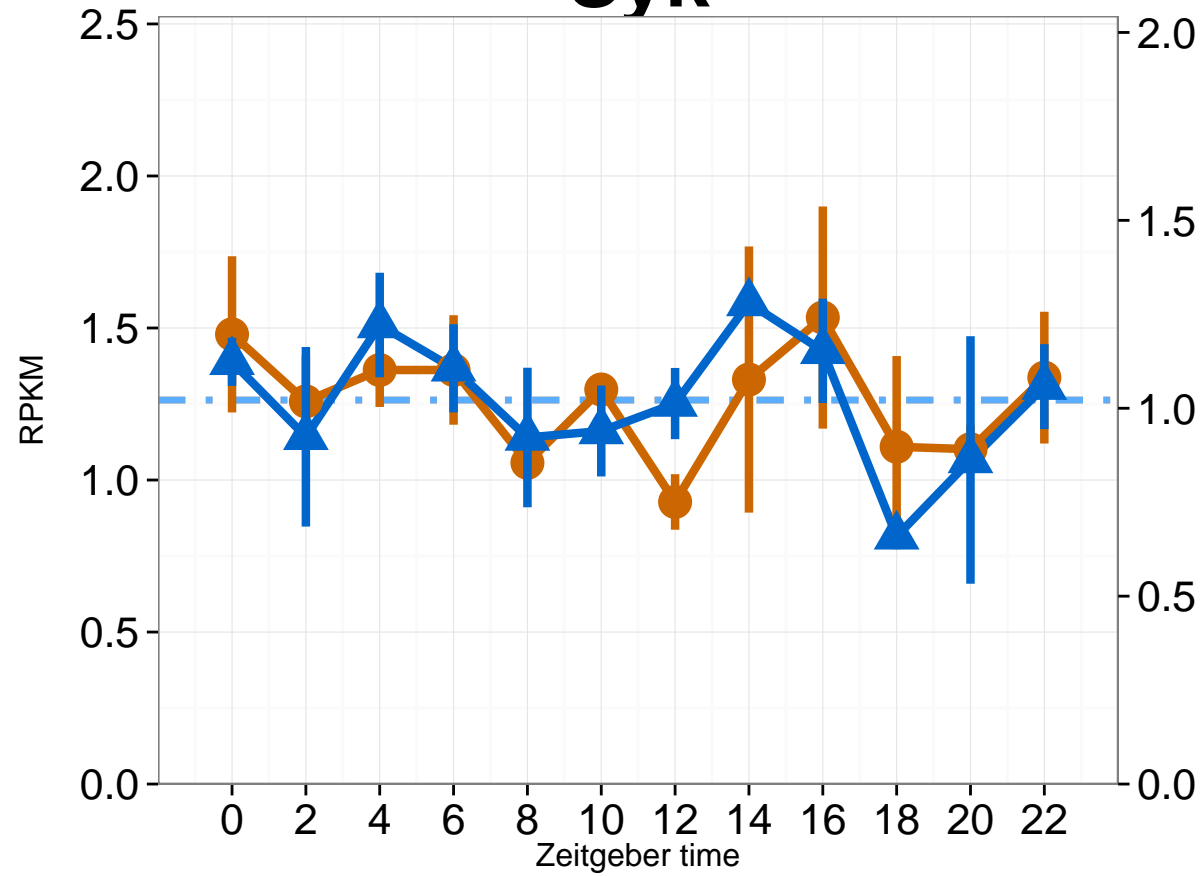

## Syk

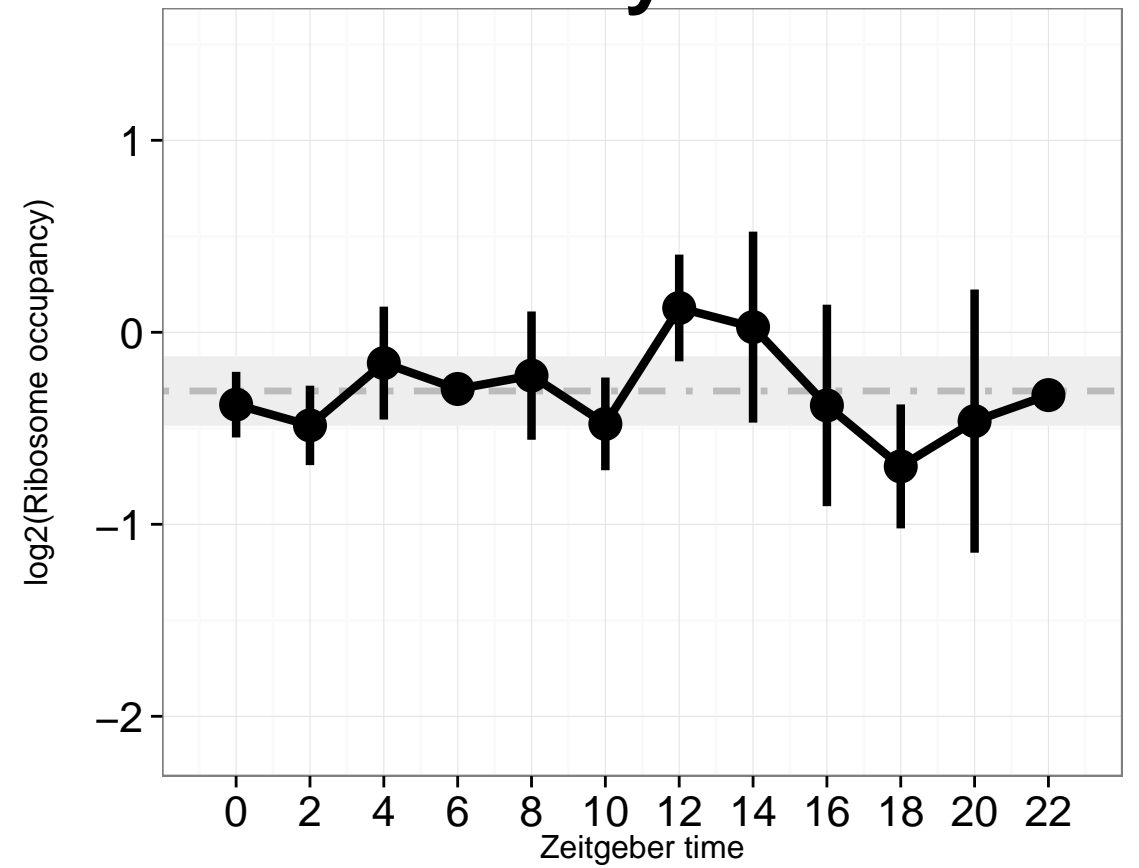

Supplement: Supplementary file 11204 [file 1]

# Thsd7a

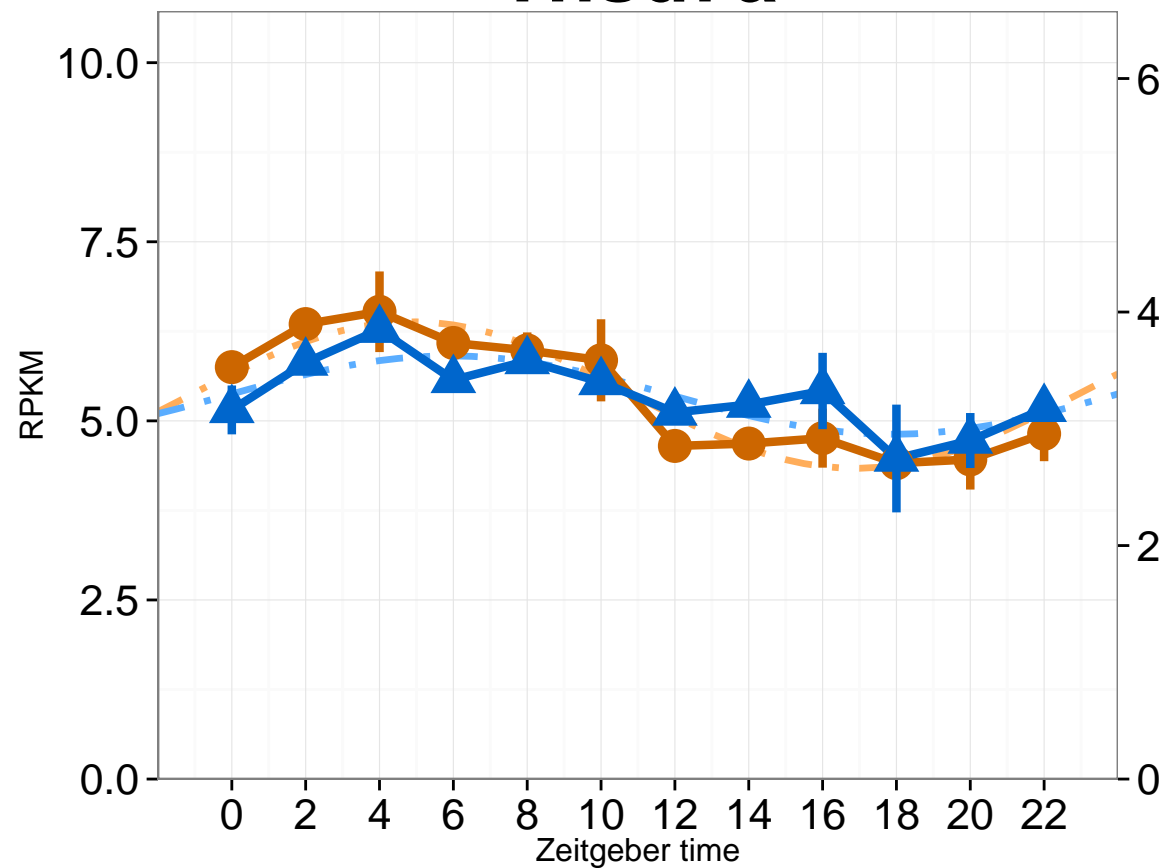

# Thsd7a

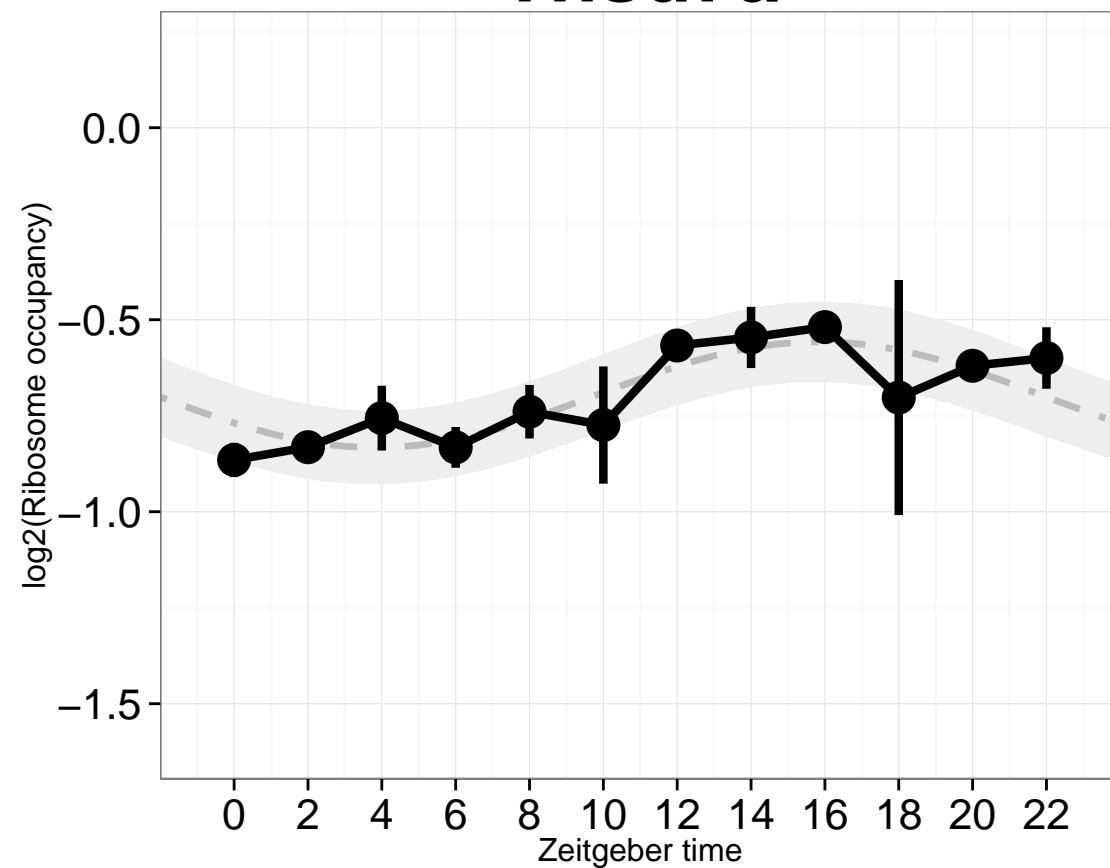

Supplement: Supplementary file 11205 [file 1]

## Rnf187

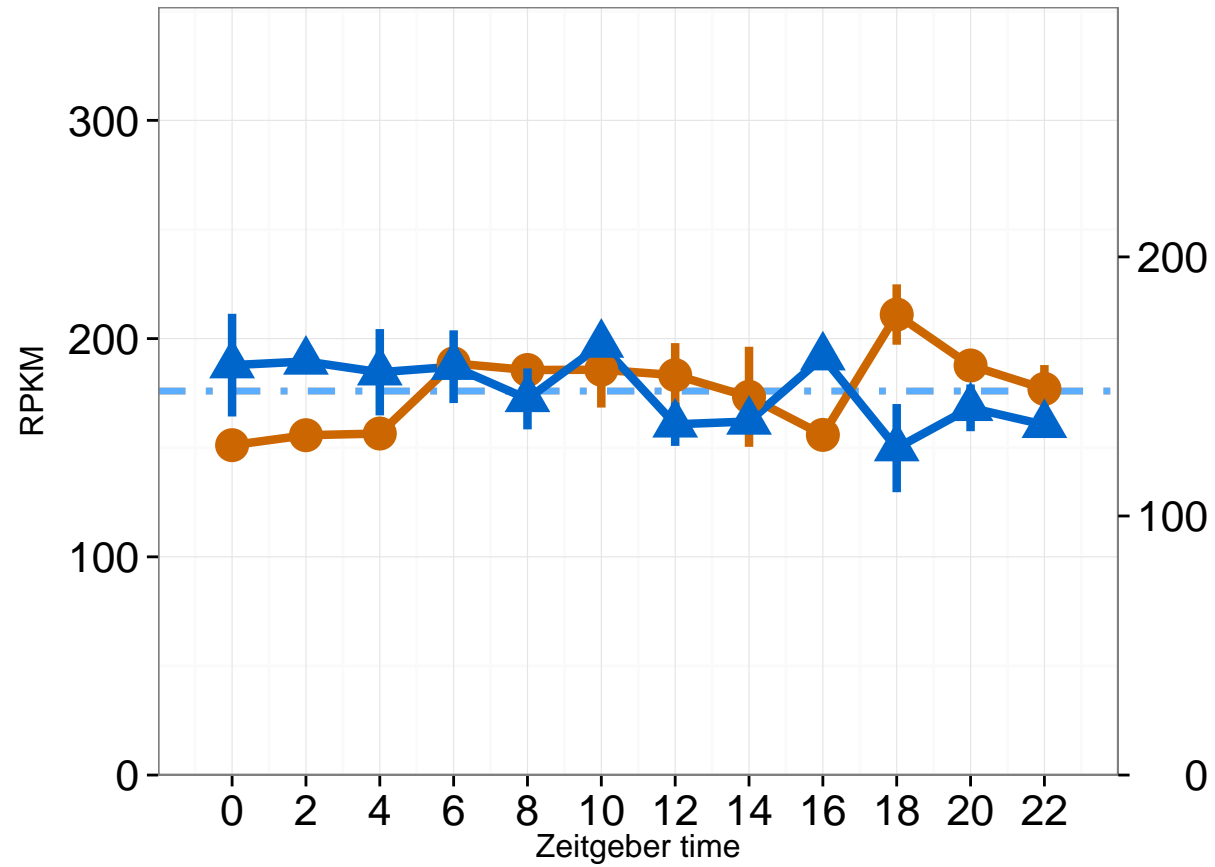

## Rnf187

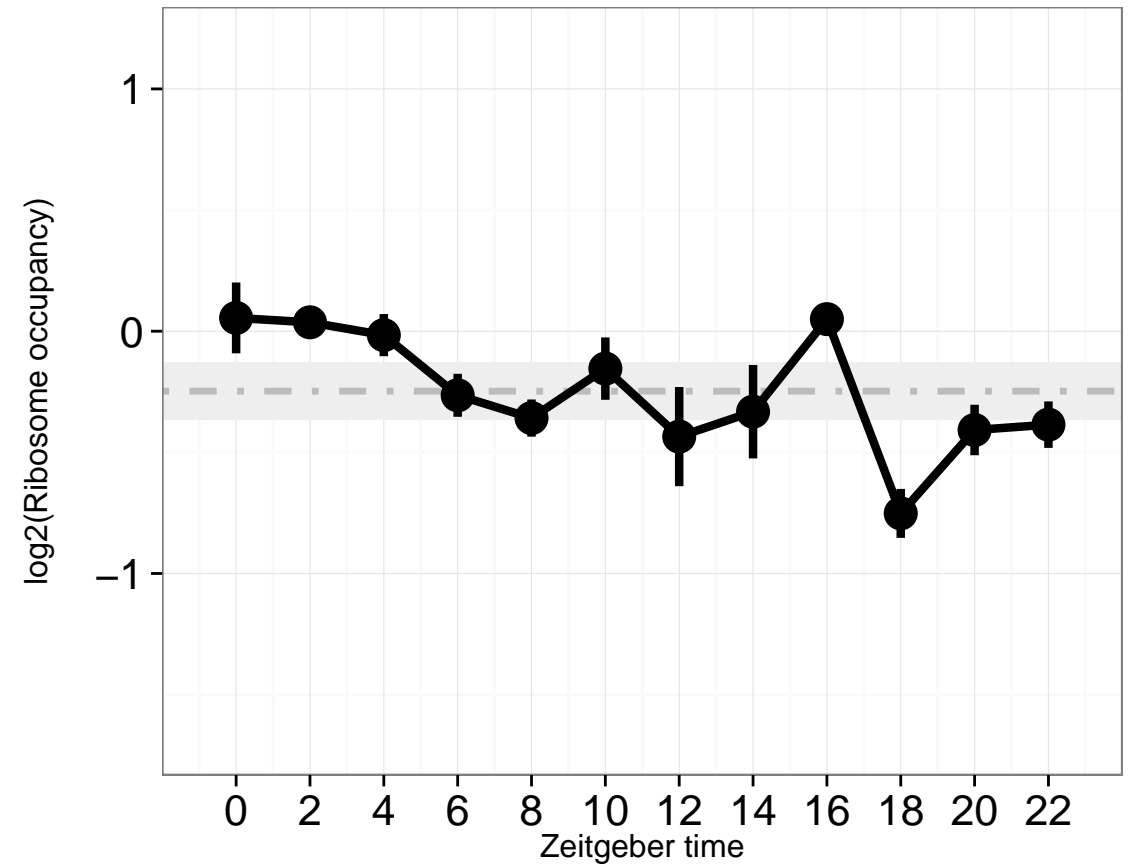

Supplement: Supplementary file 11206 [file 1]

# Spg20

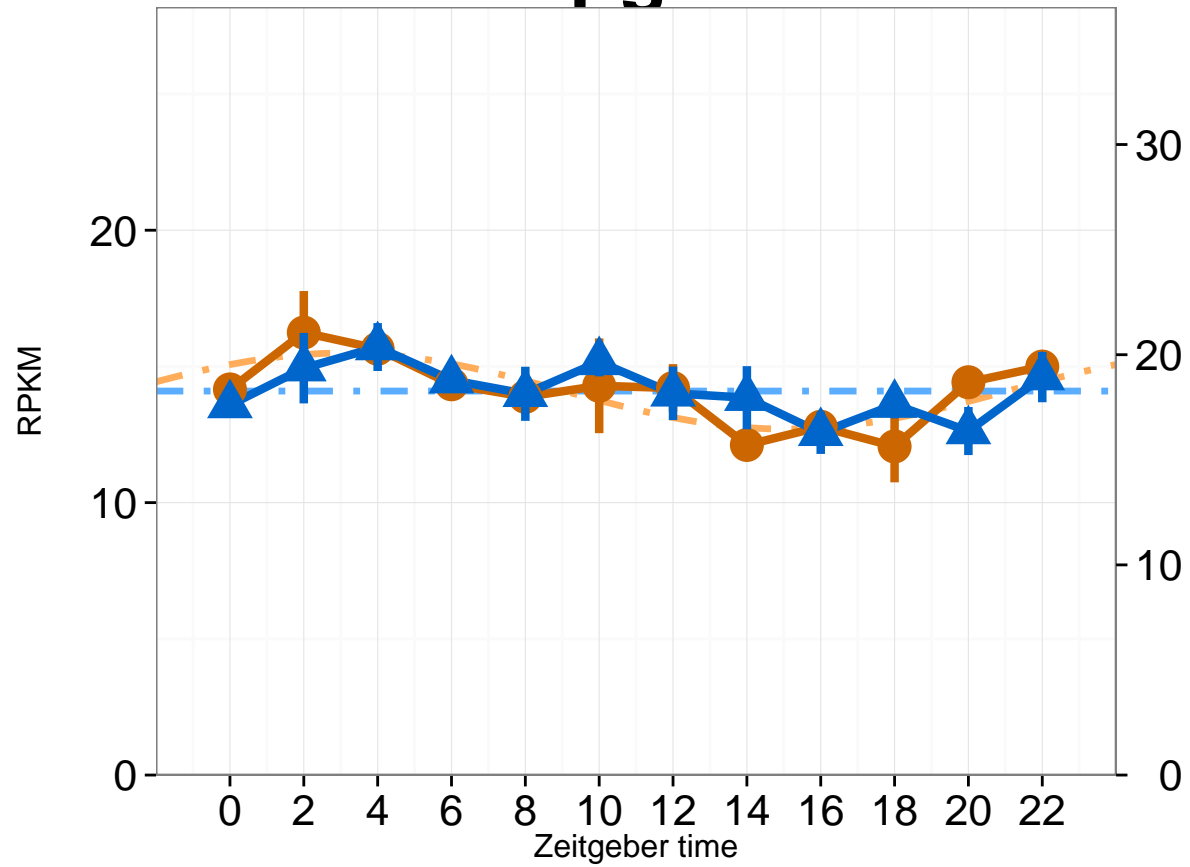

# Spg20

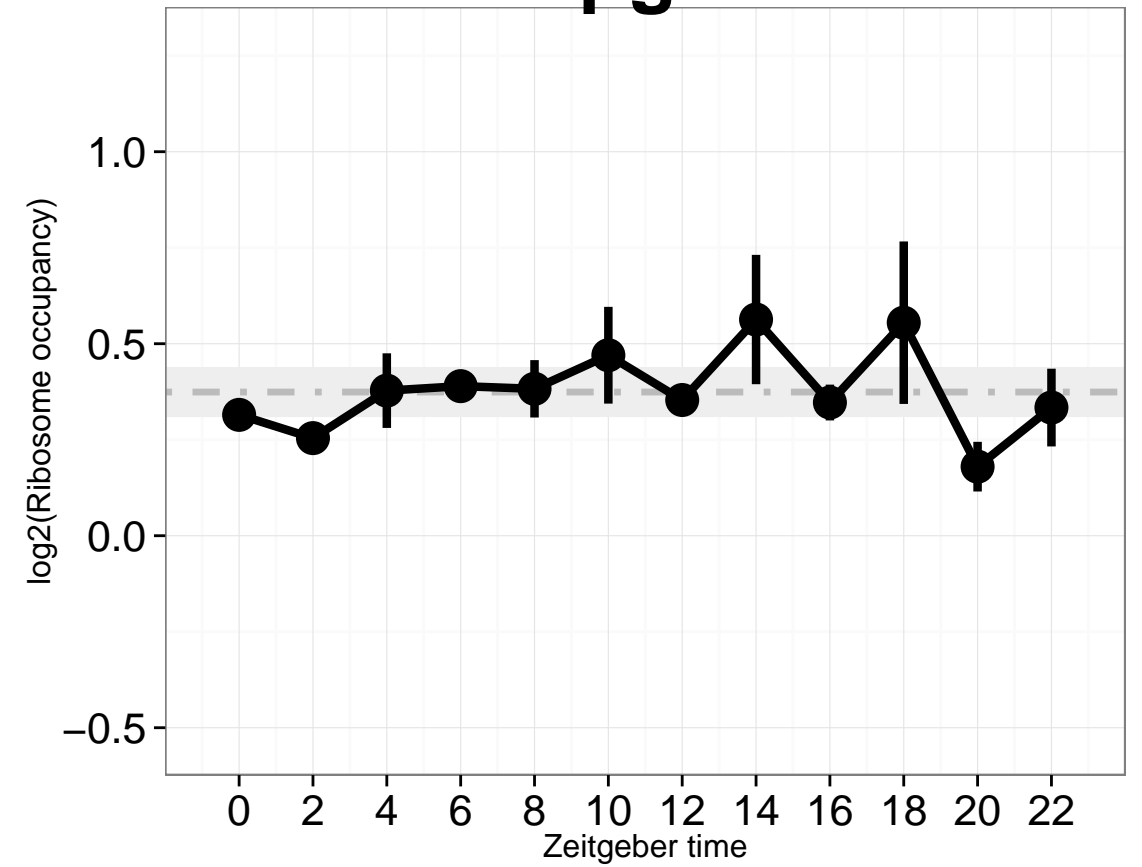

Supplement: Supplementary file 11207 [file 1]

# Taco1

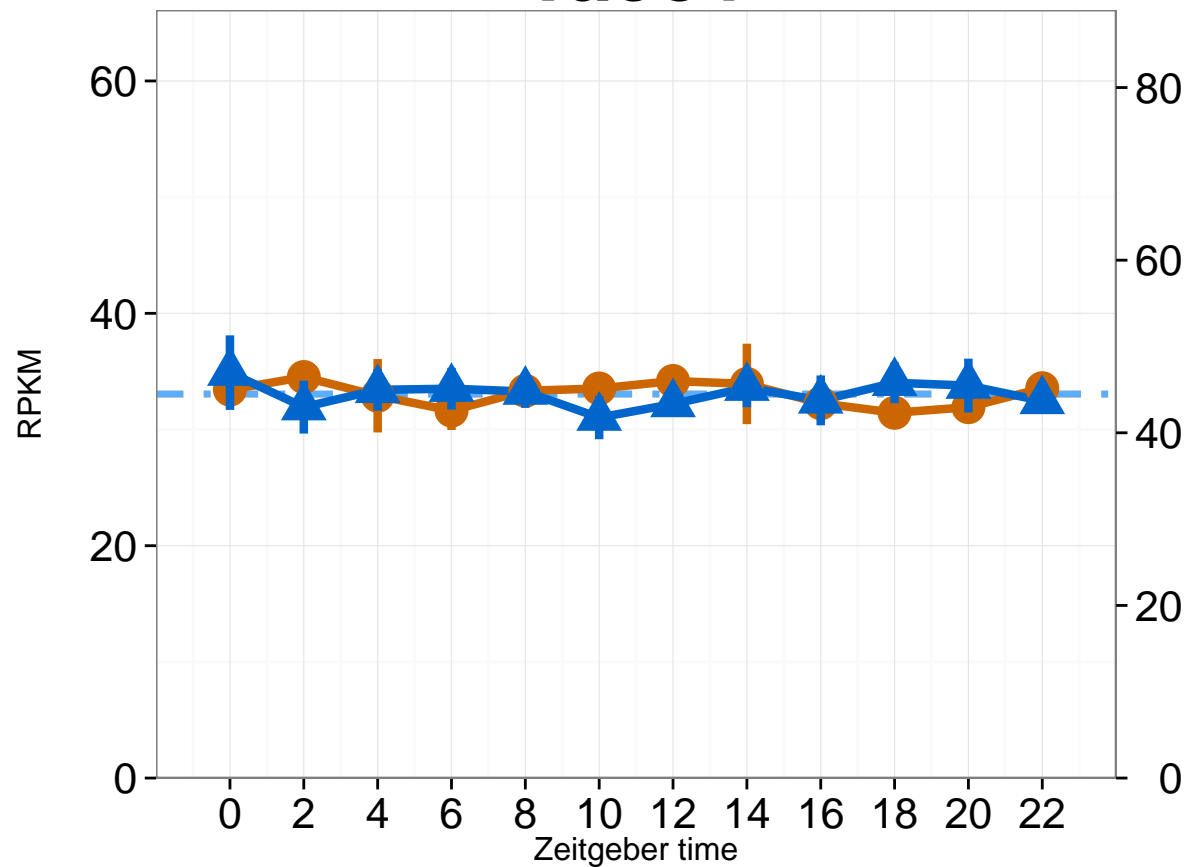

# Taco1

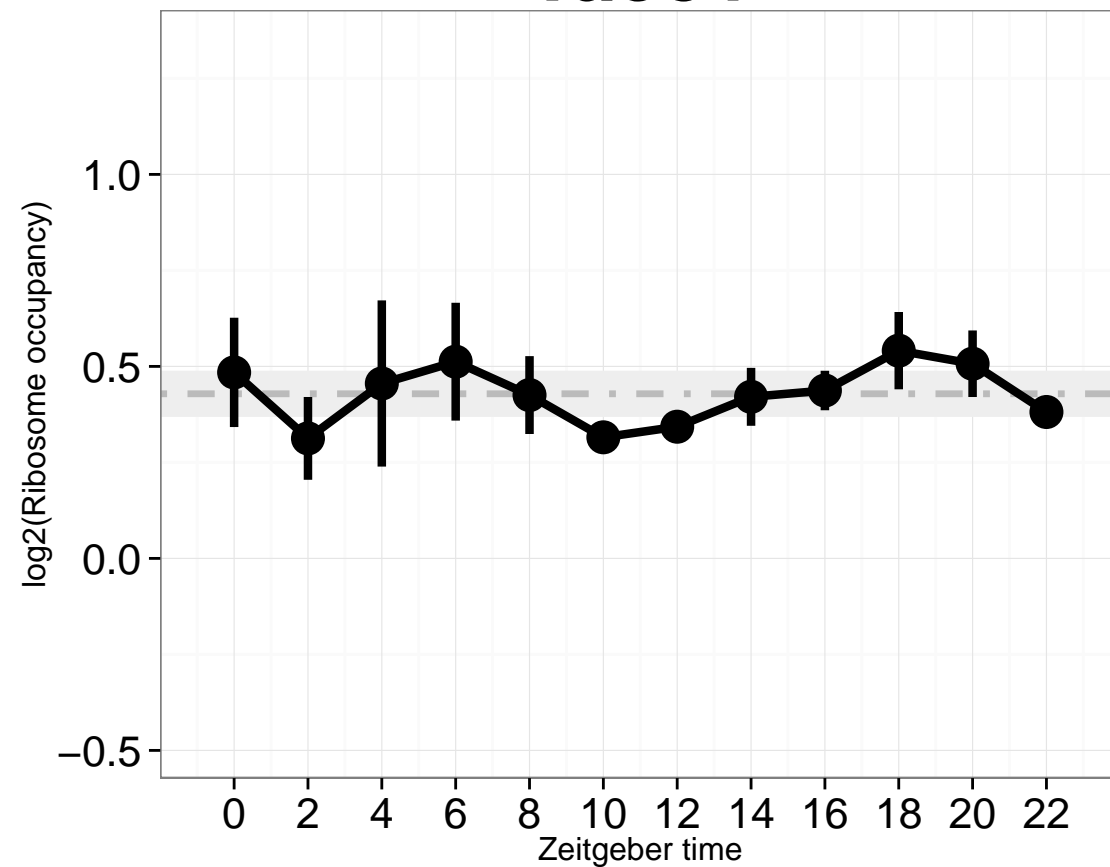

Supplement: Supplementary file 11208 [file 1]

# Ifngr2

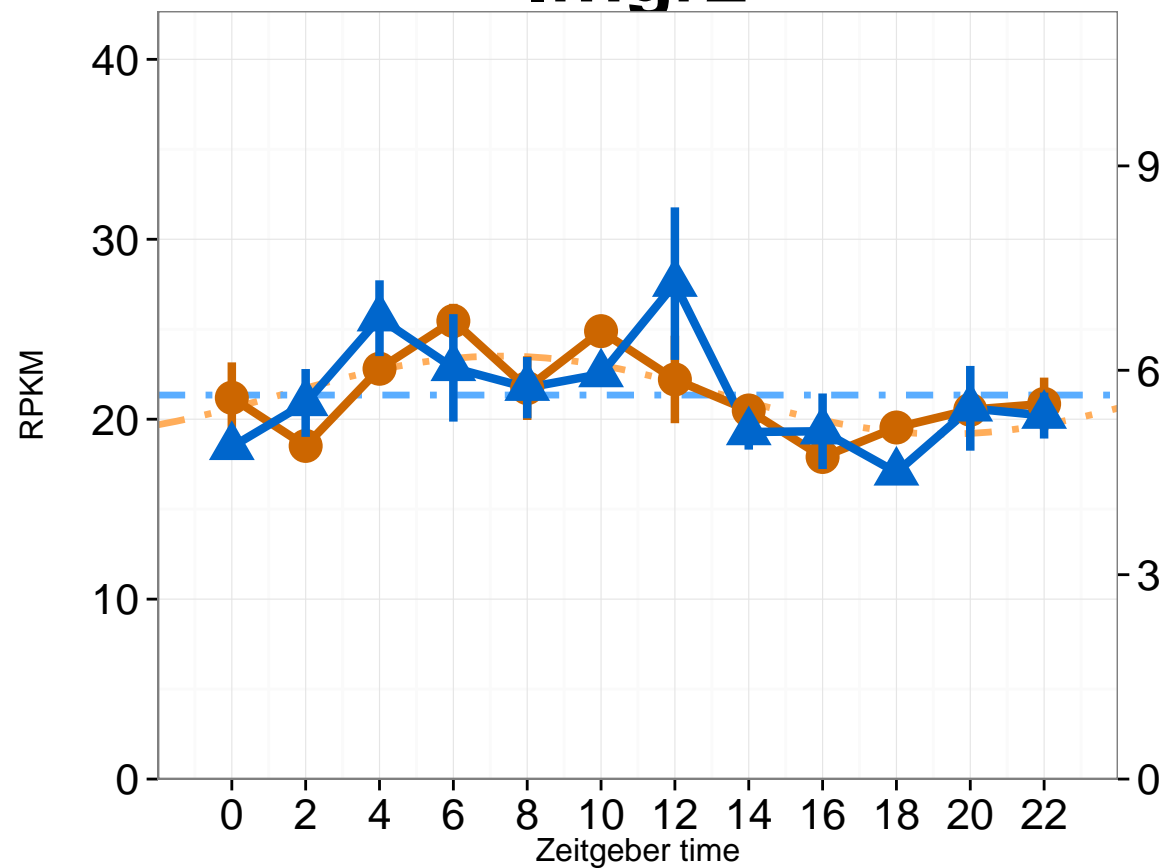

# Ifngr2

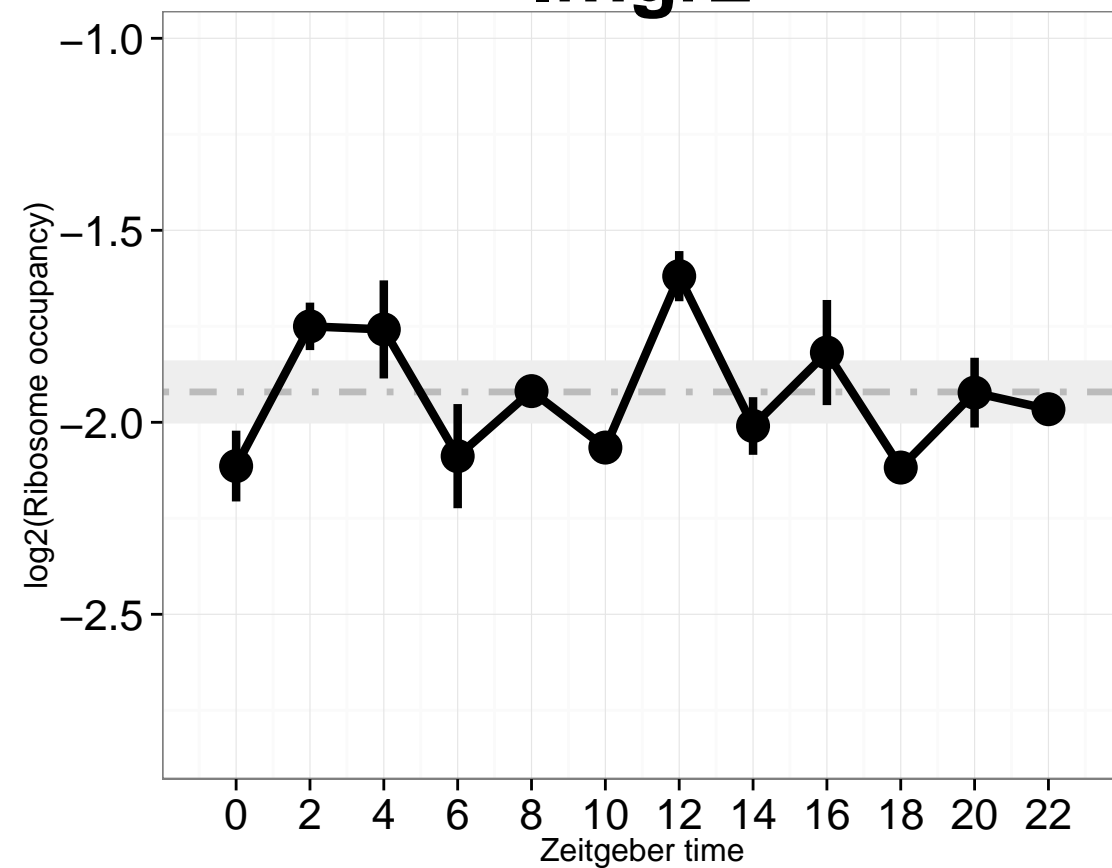

Supplement: Supplementary file 11209 [file 1]

# Hmgn5

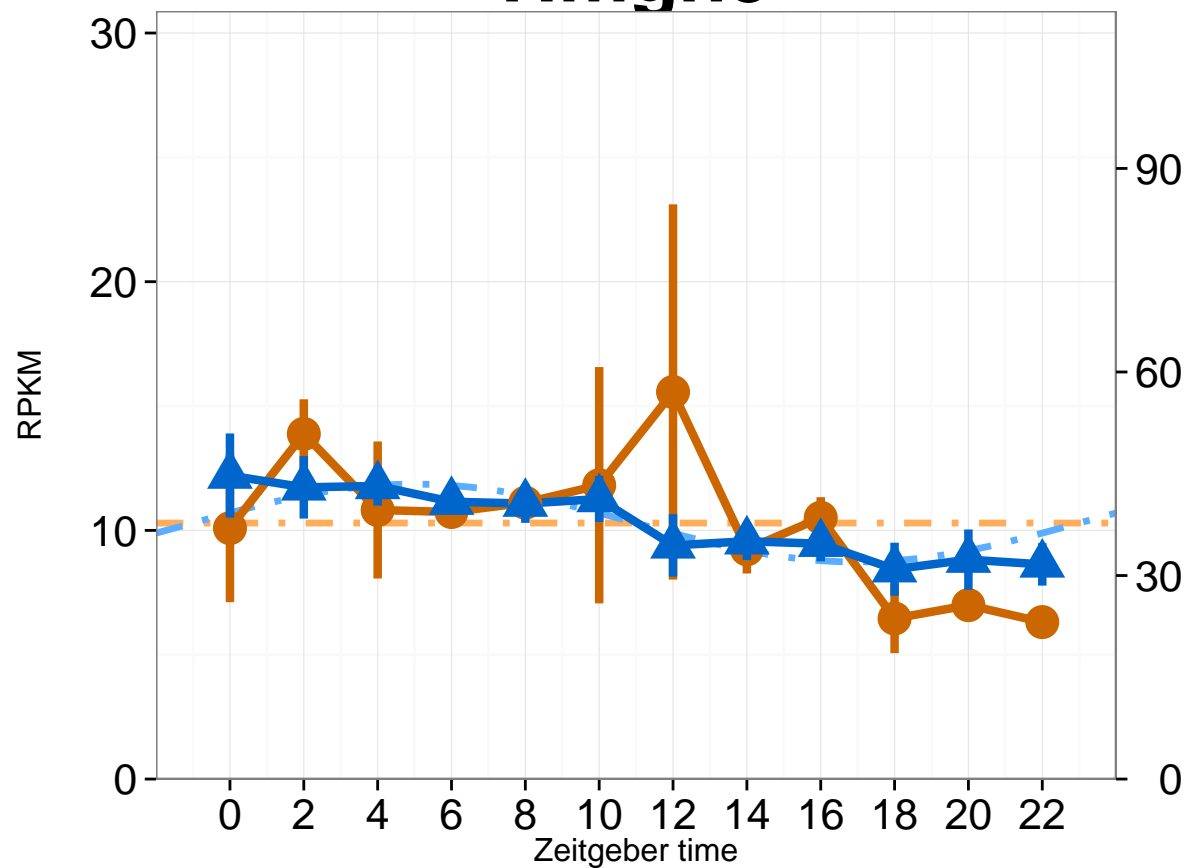

# Hmgn5

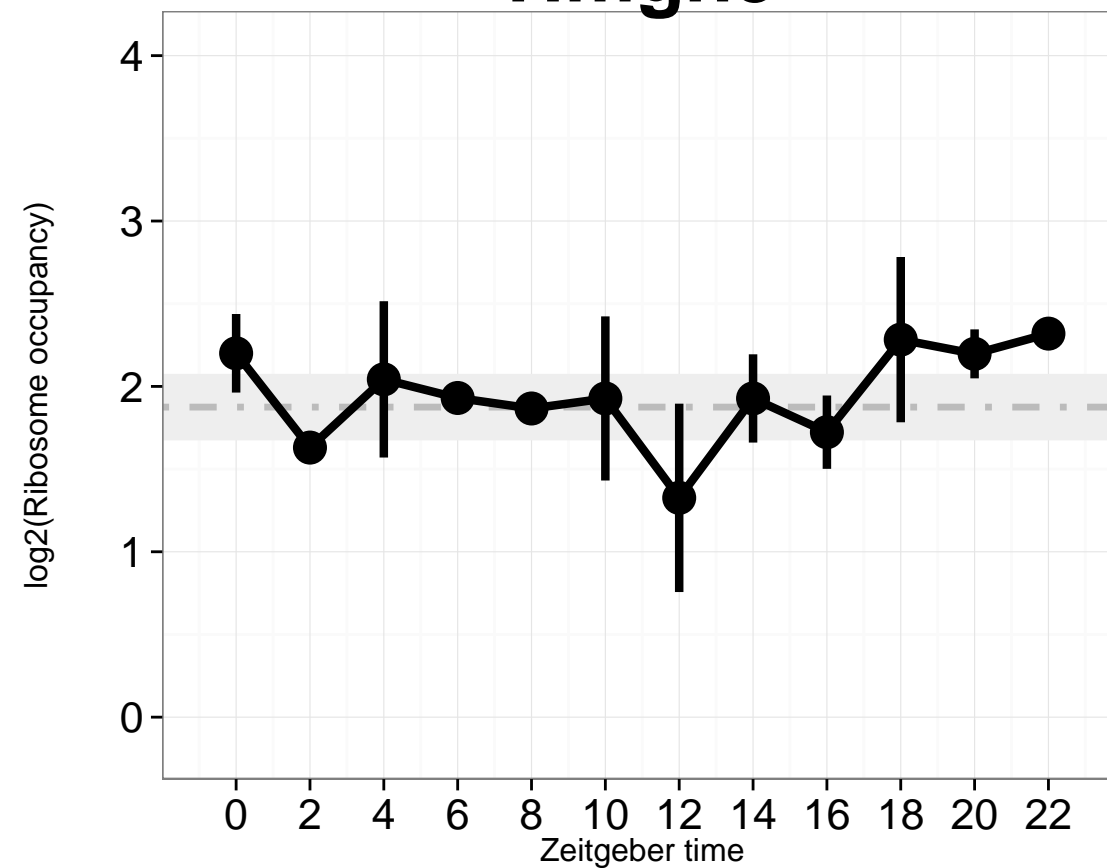

Supplement: Supplementary file 11210 [file 1]

## Srrd

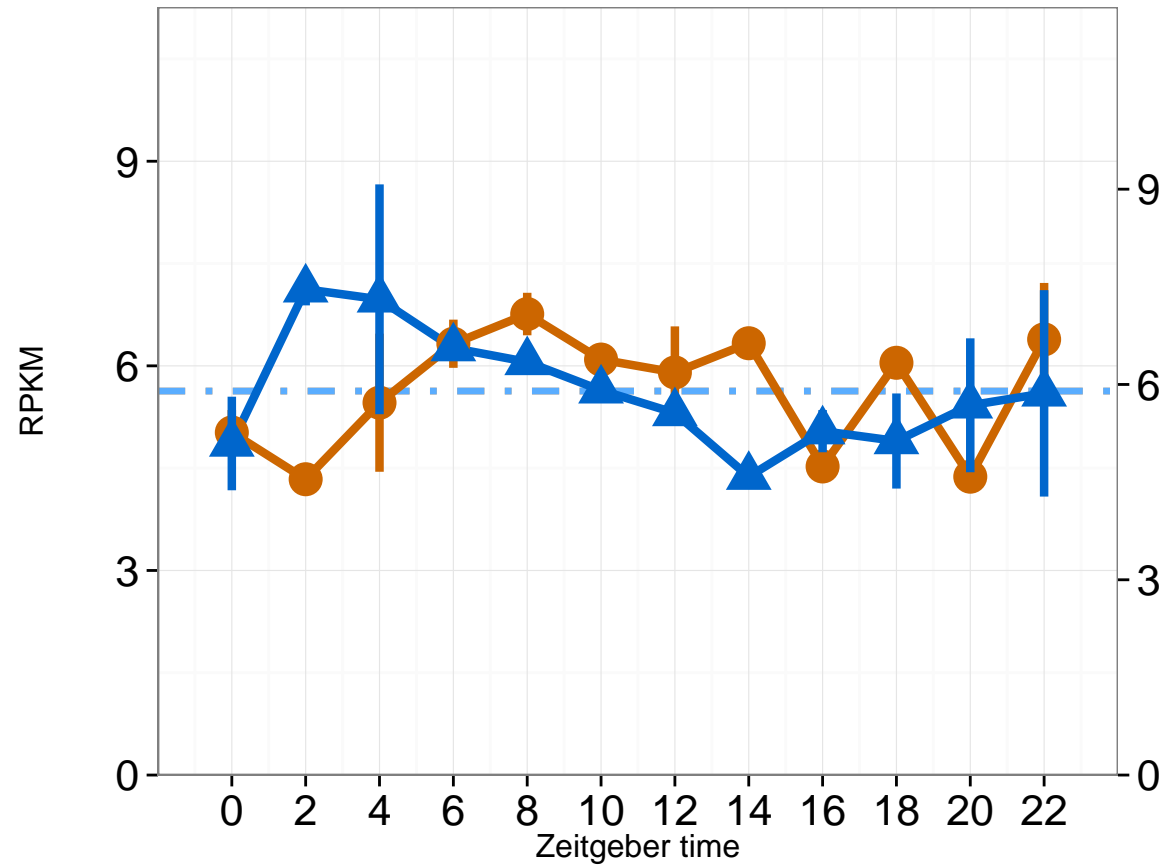

## Srrd

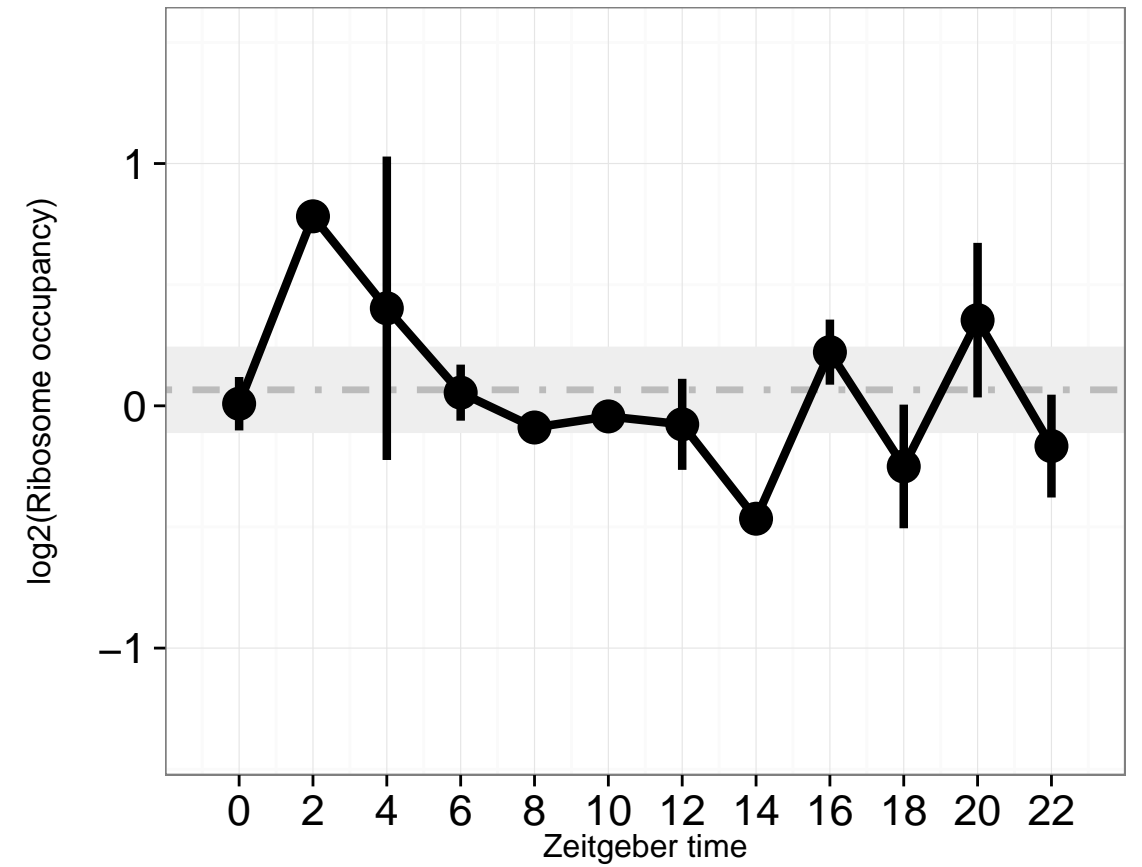

Supplement: Supplementary file 11211 [file 1]

# Abhd14b

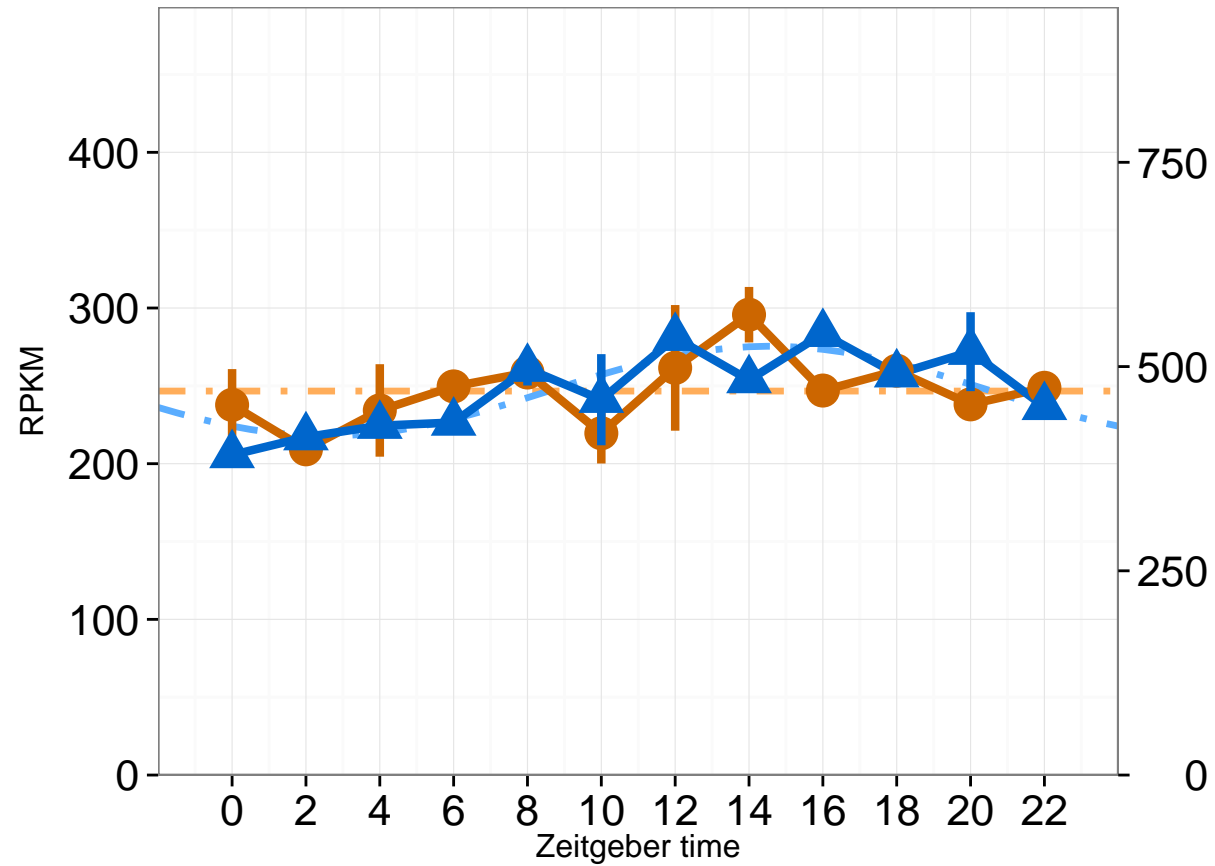

# Abhd14b

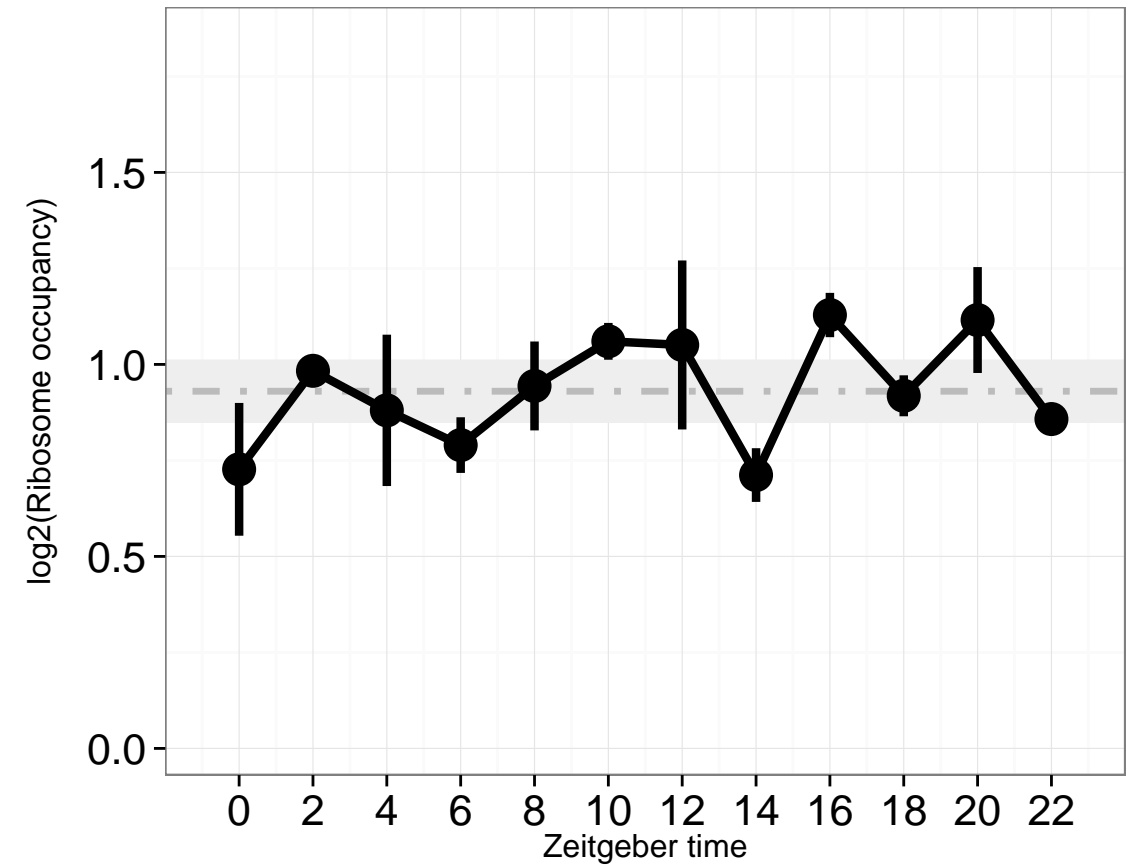

Supplement: Supplementary file 11212 [file 1]

## Ttc27

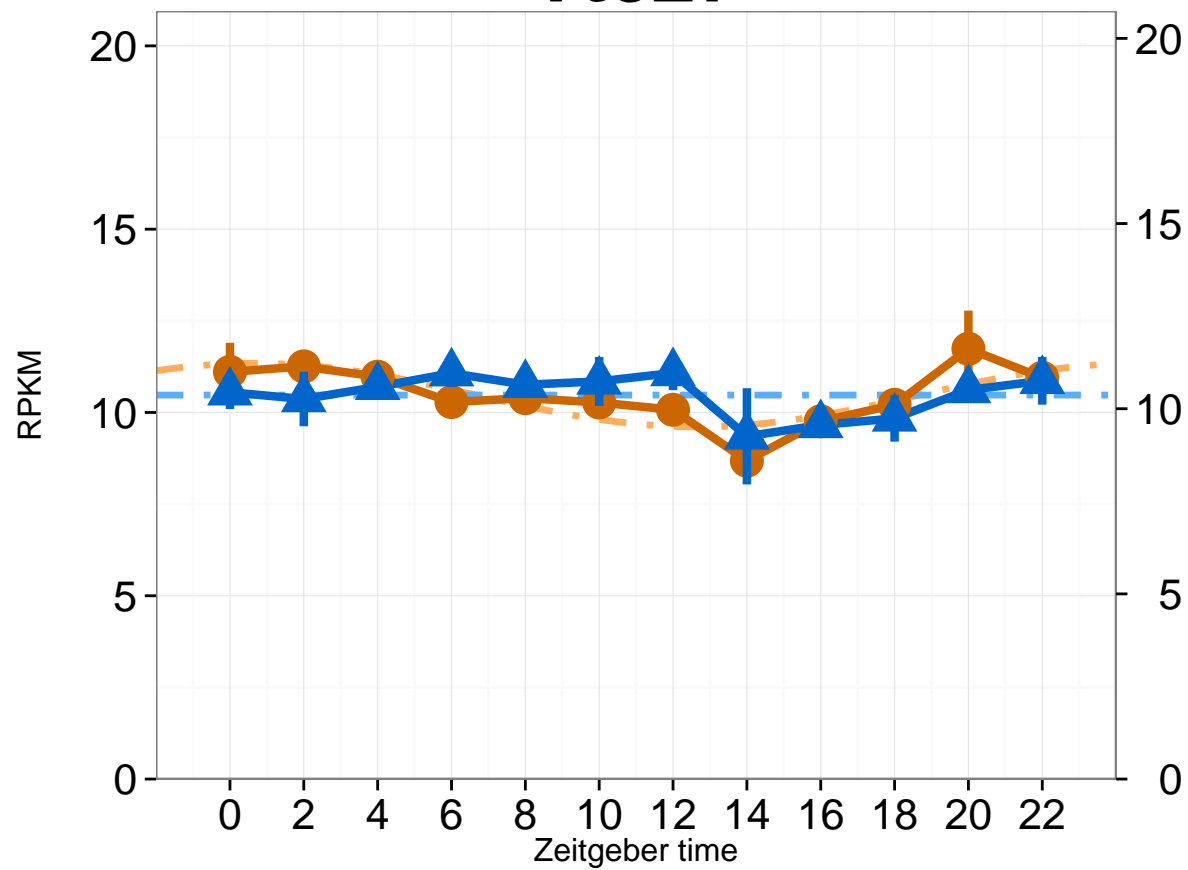

## Ttc27

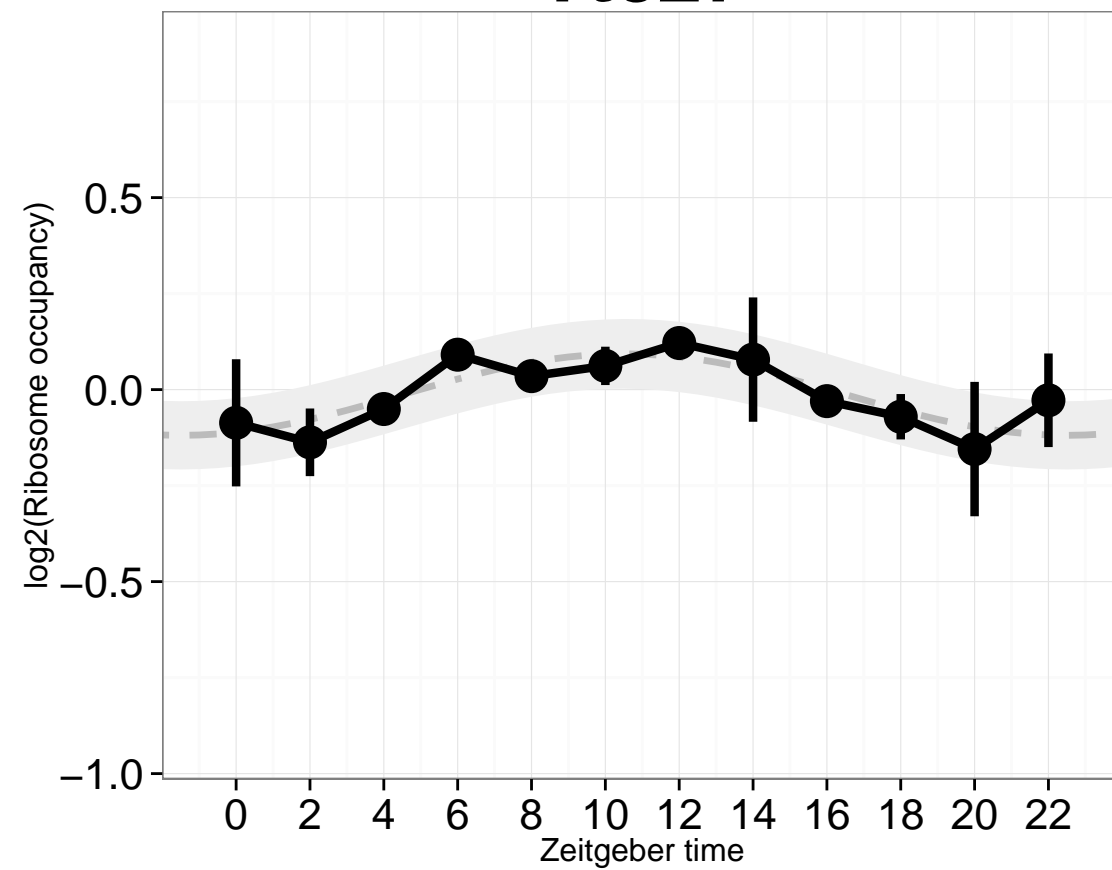

Supplement: Supplementary file 11213 [file 1]

## Kcnq1

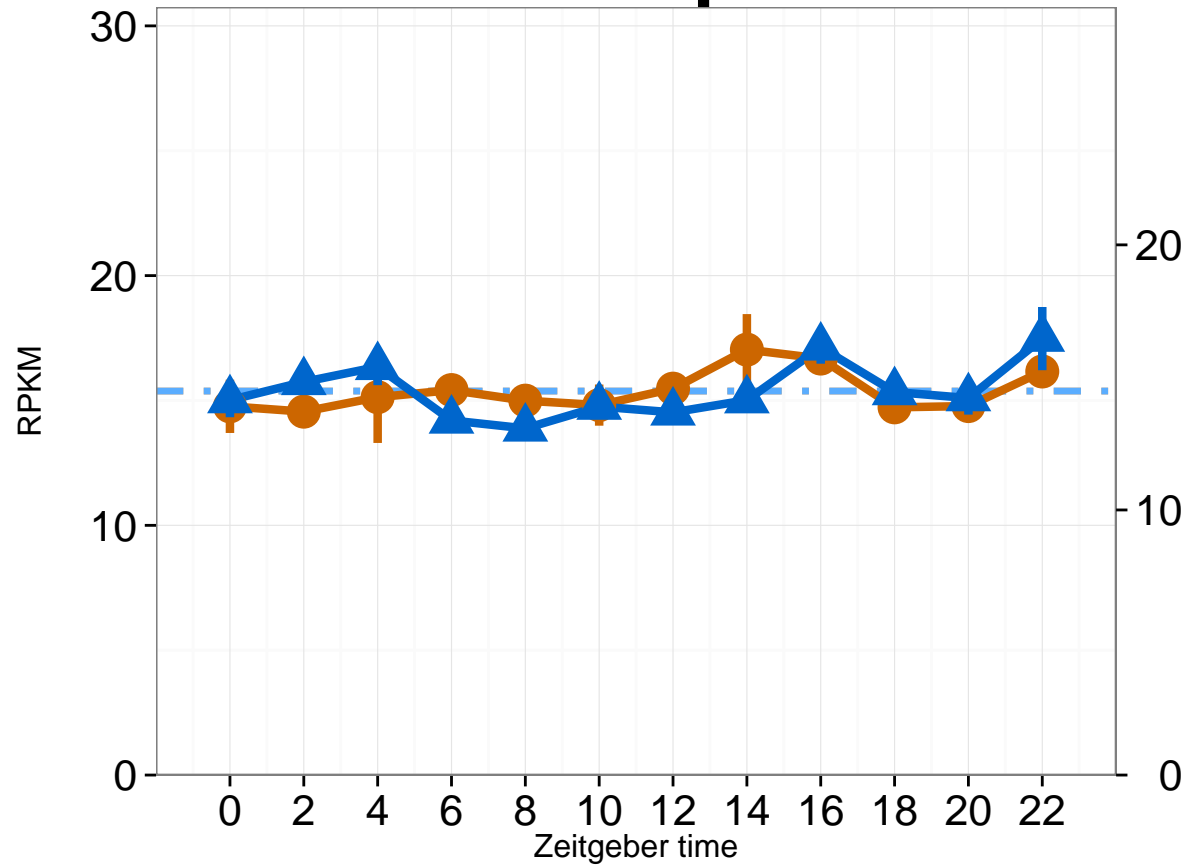

## Kcnq1

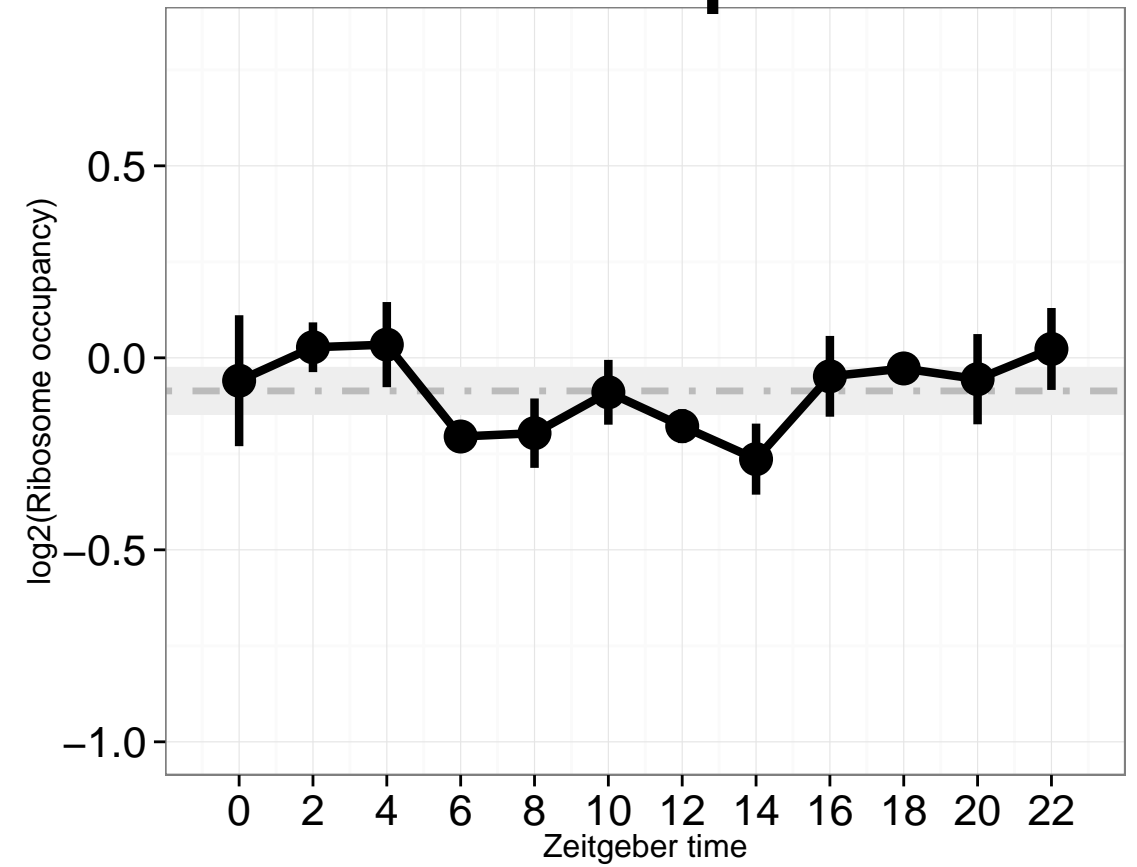

Supplement: Supplementary file 11214 [file 1]

## Pex14

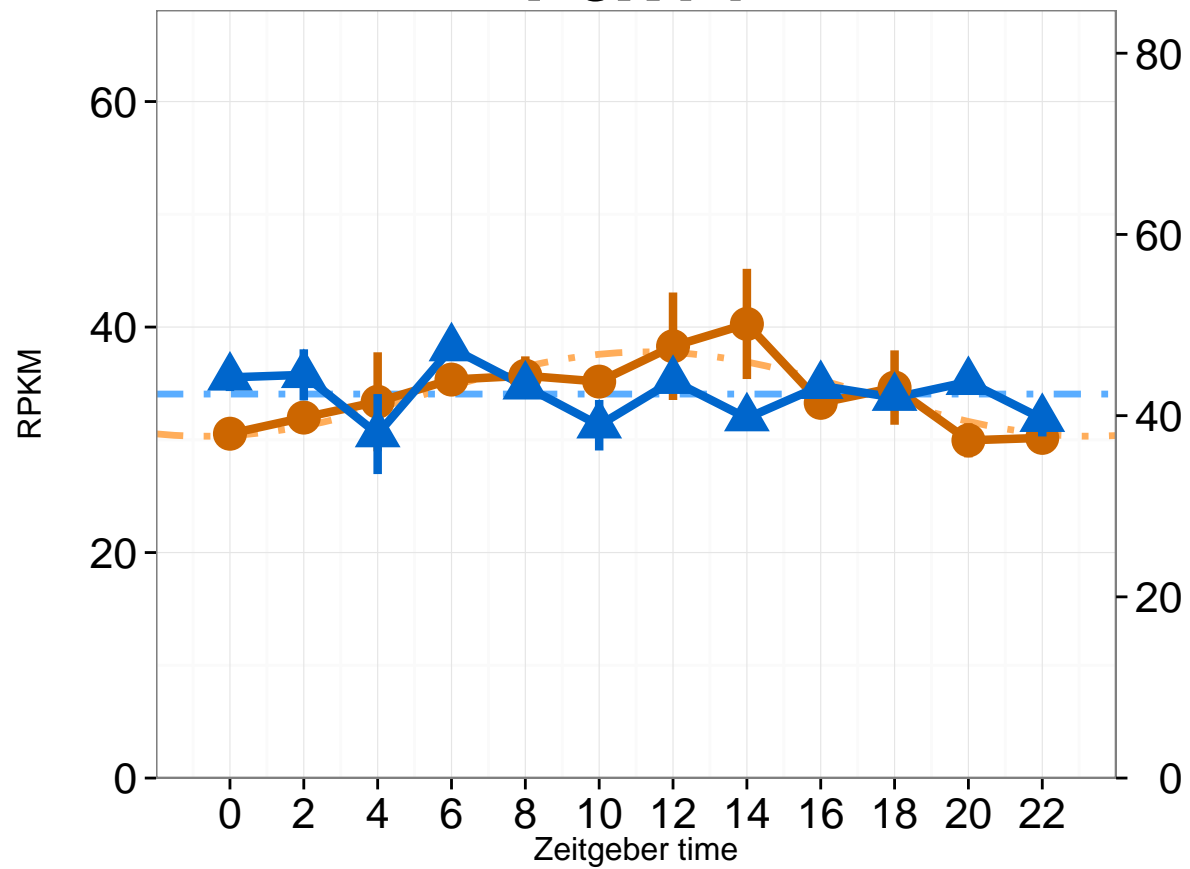

## Pex14

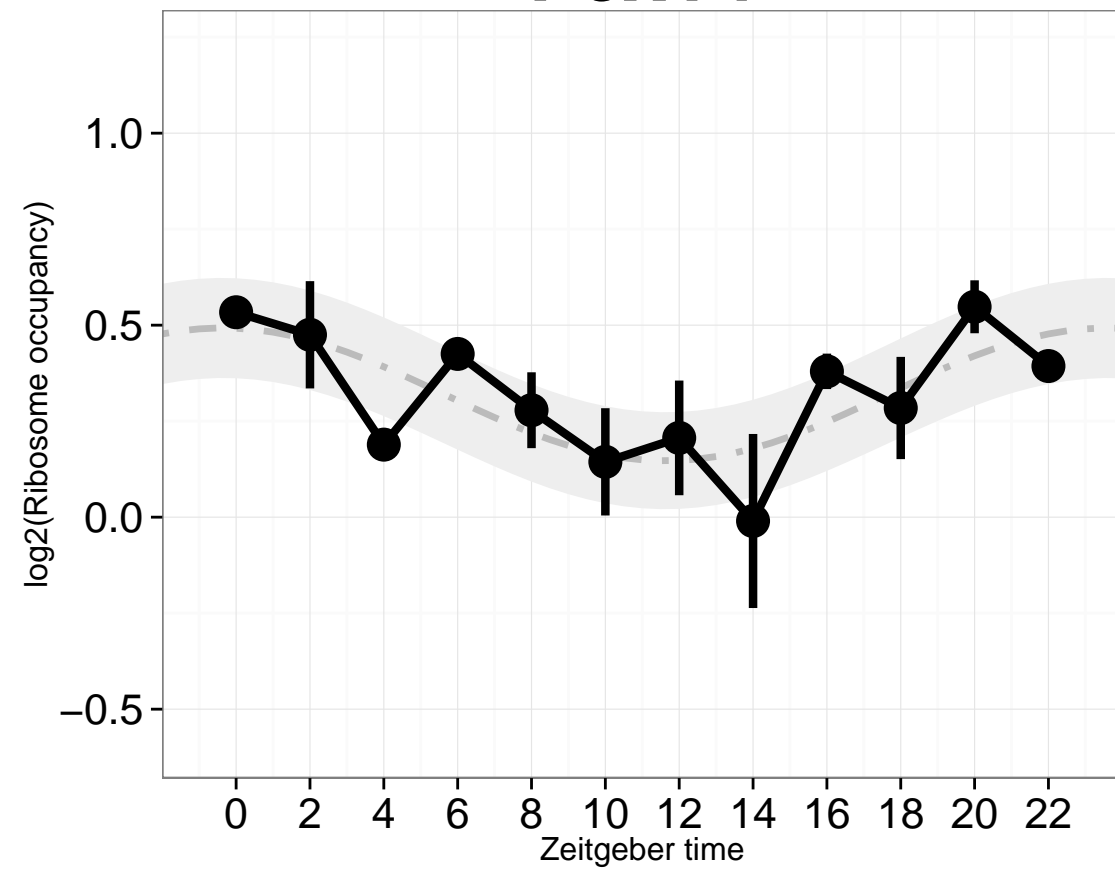

Supplement: Supplementary file 11215 [file 1]

# Tnpo2

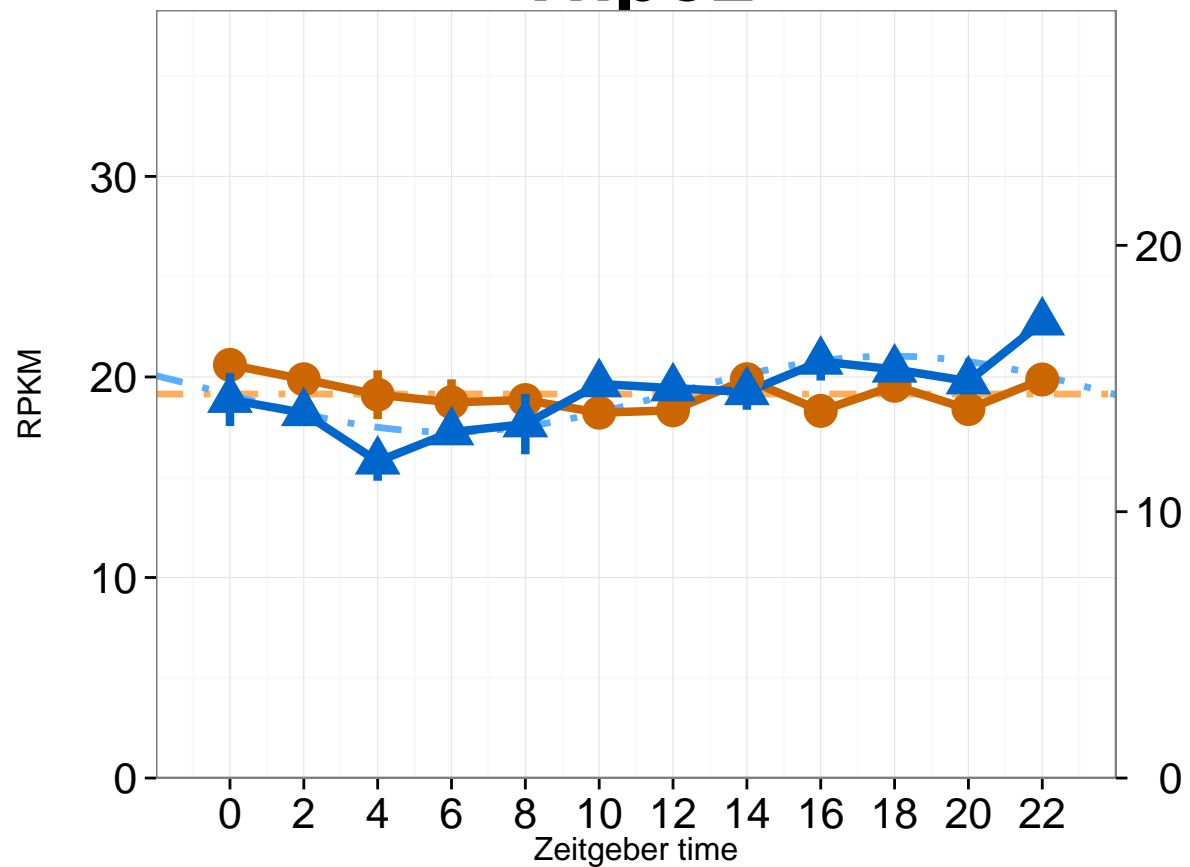

# Tnpo2

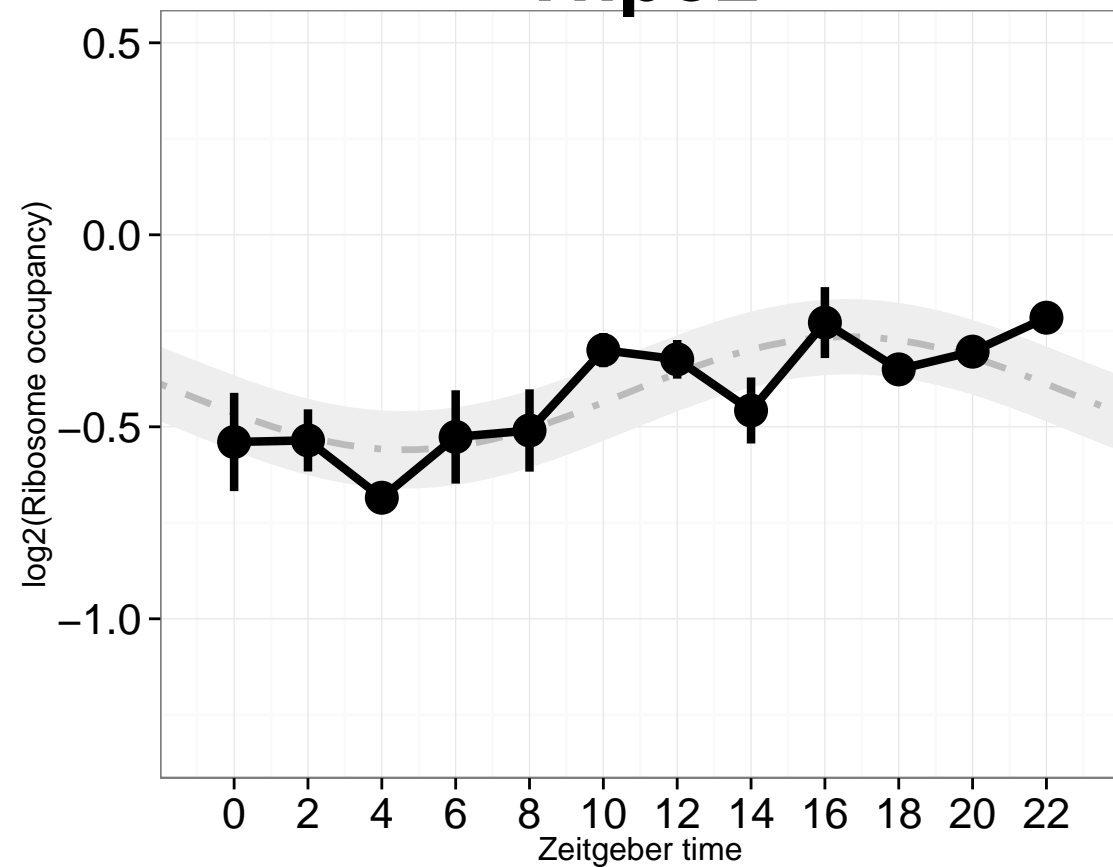

Supplement: Supplementary file 11216 [file 1]

## Cdc34

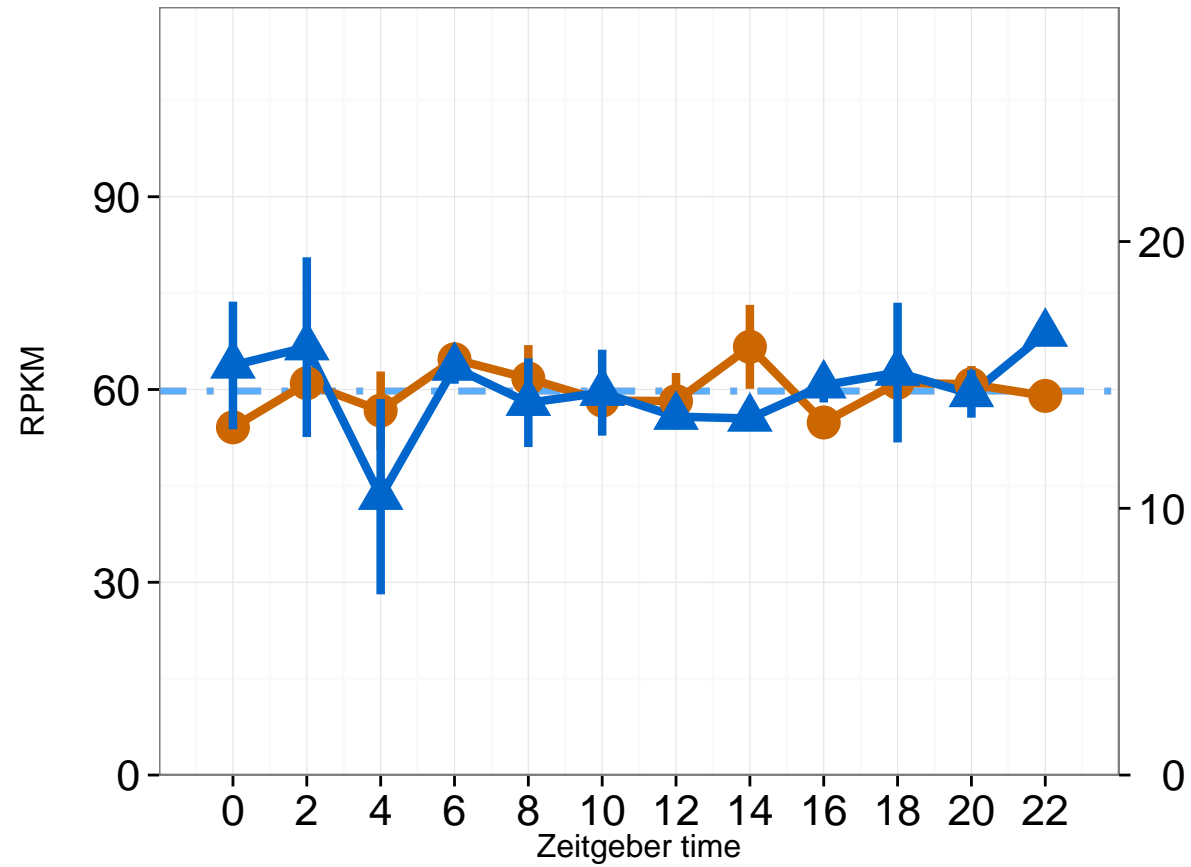

## Cdc34

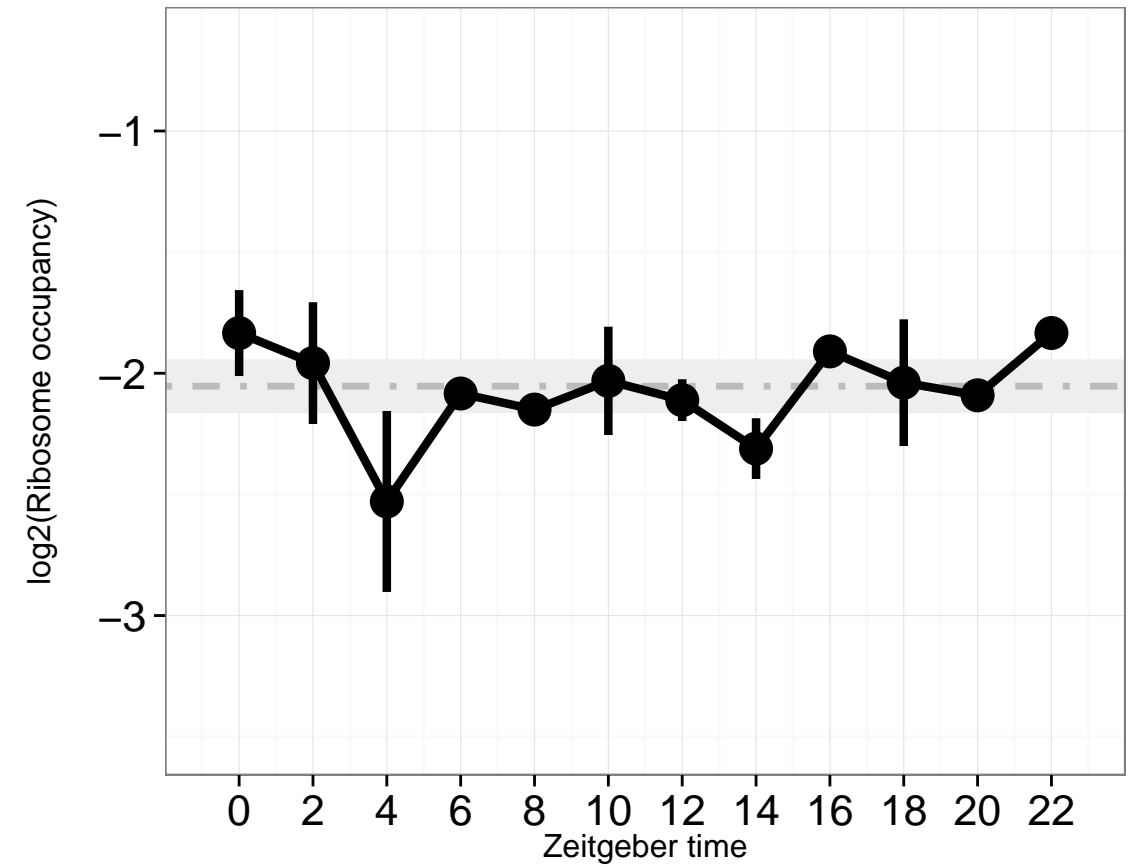

Supplement: Supplementary file 11217 [file 1]

## Crebbp

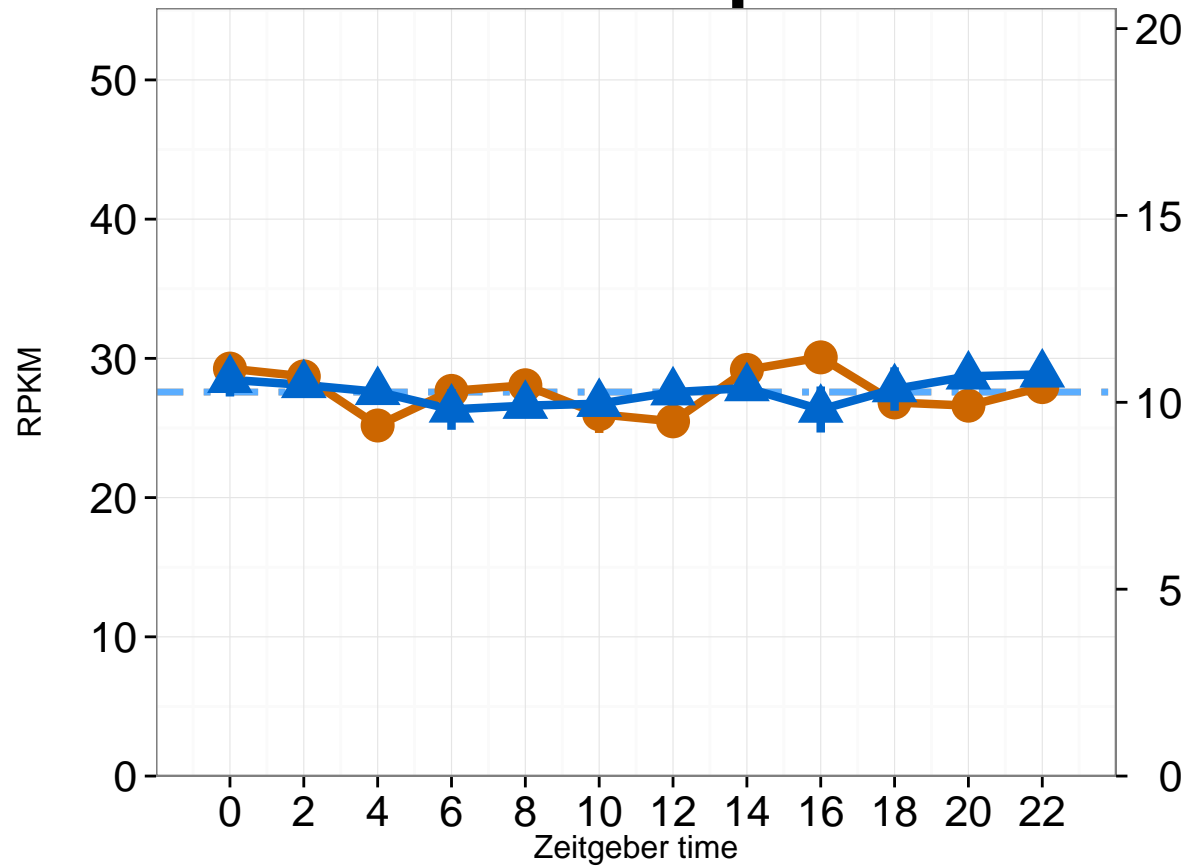

## Crebbp

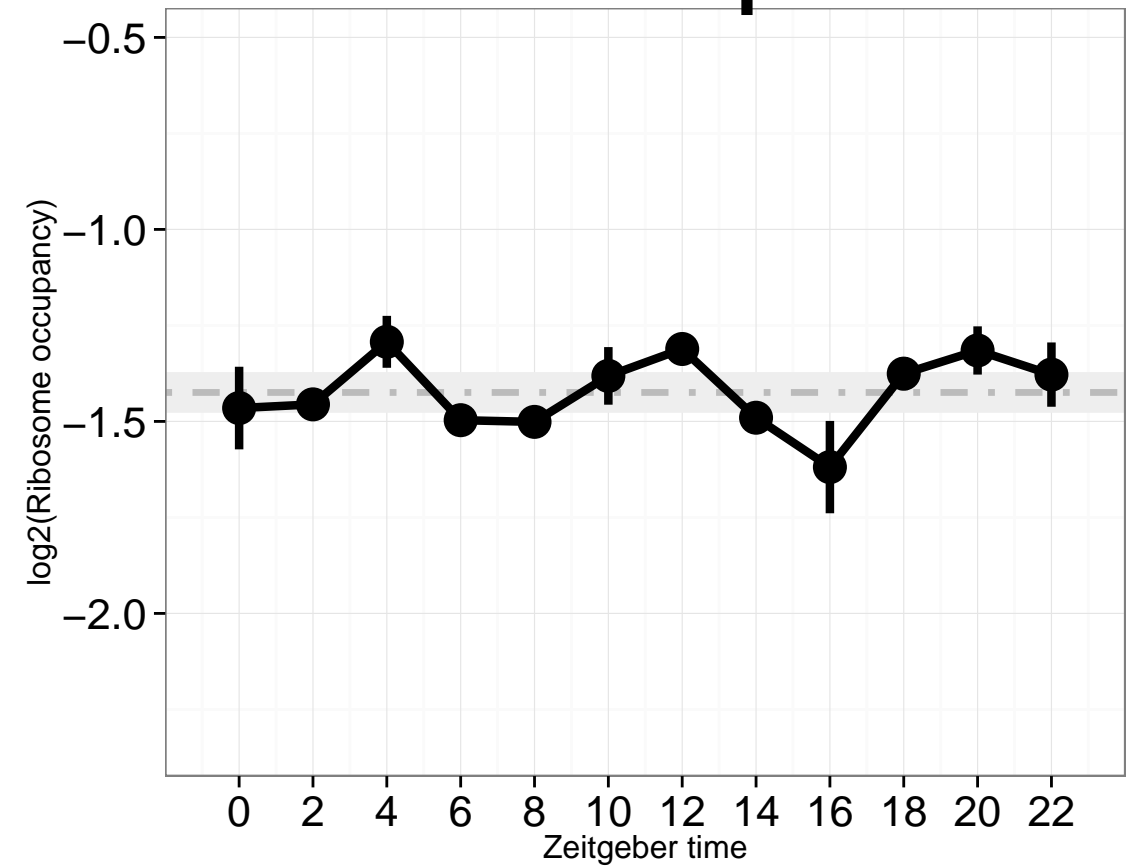

Supplement: Supplementary file 11218 [file 1]

## TxInb

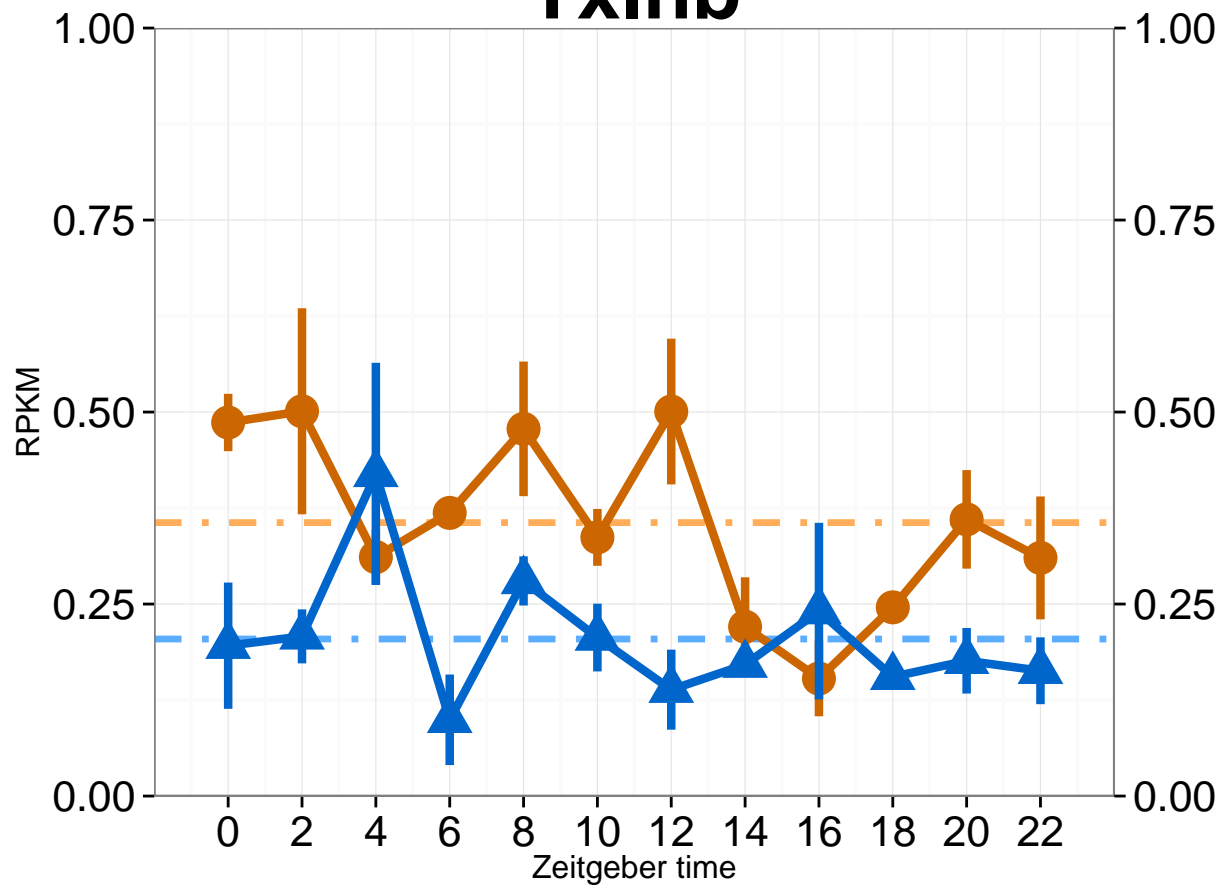

## TxInb

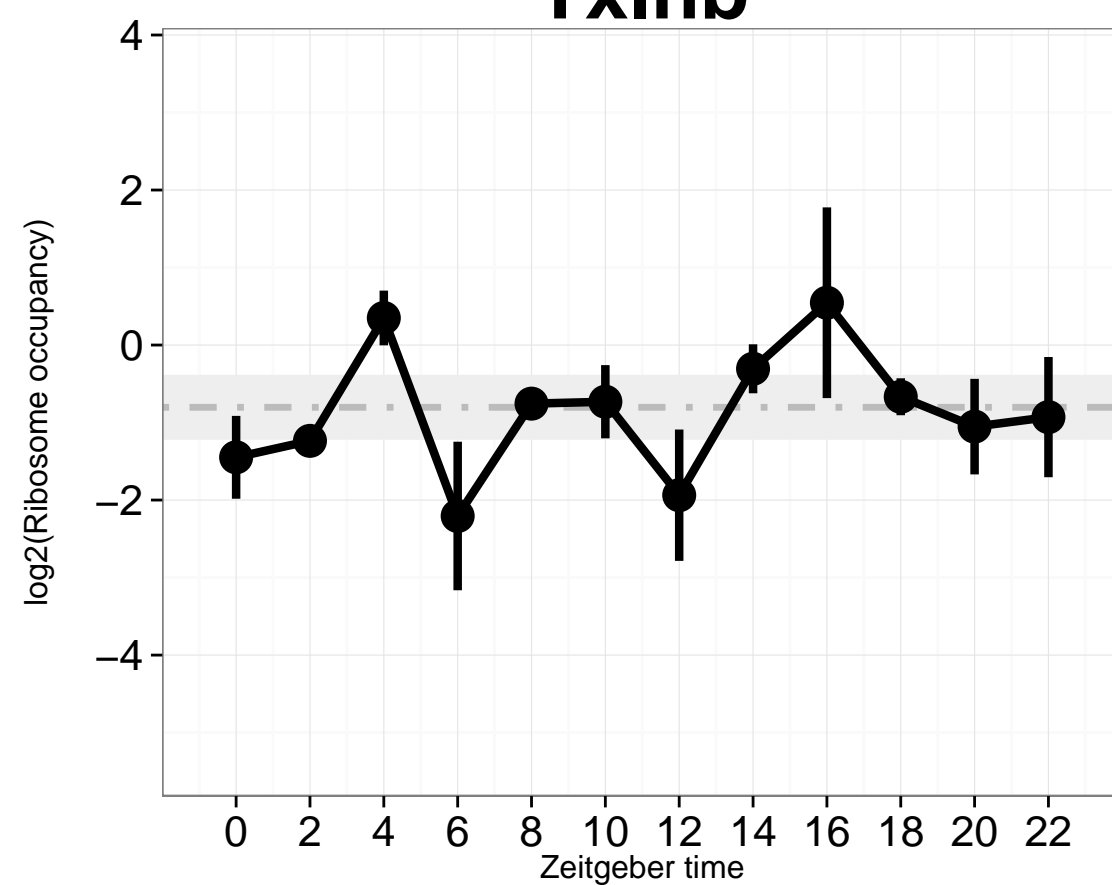

Supplement: Supplementary file 11219 [file 1]

# Zfp58

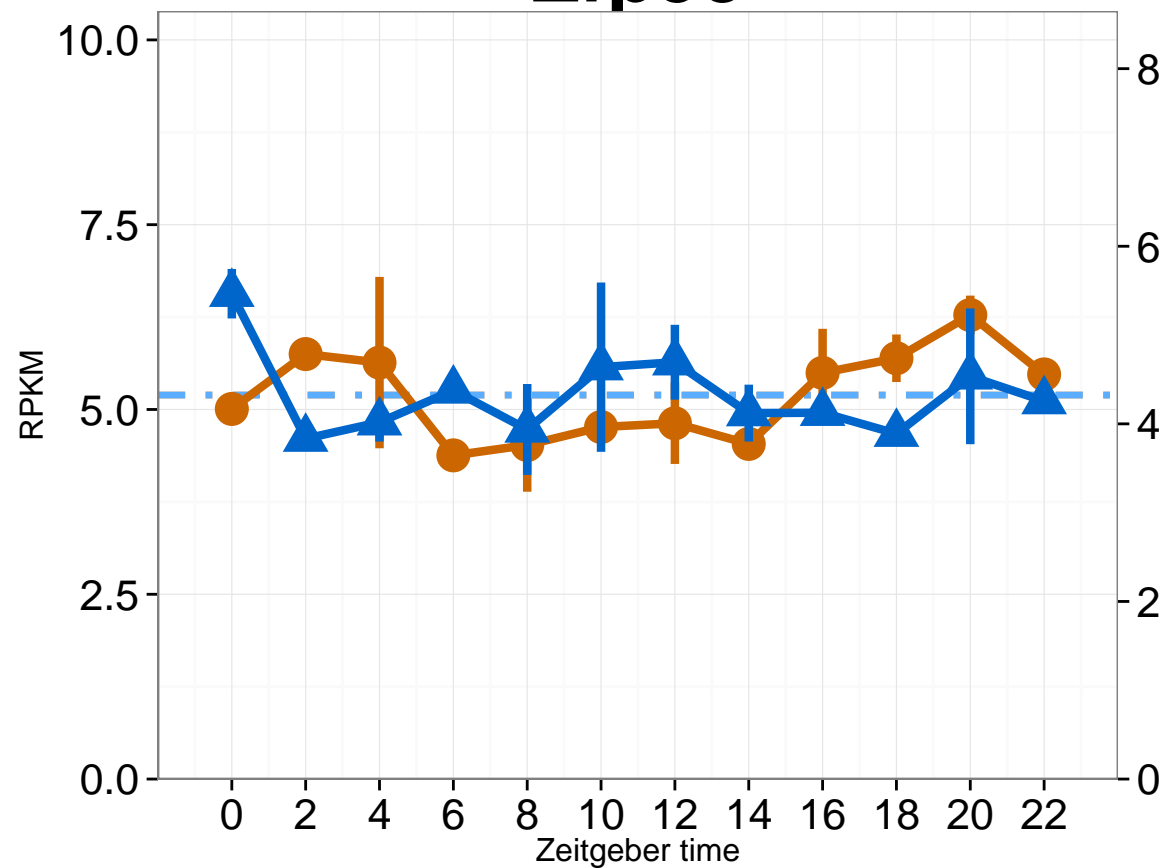

# Zfp58

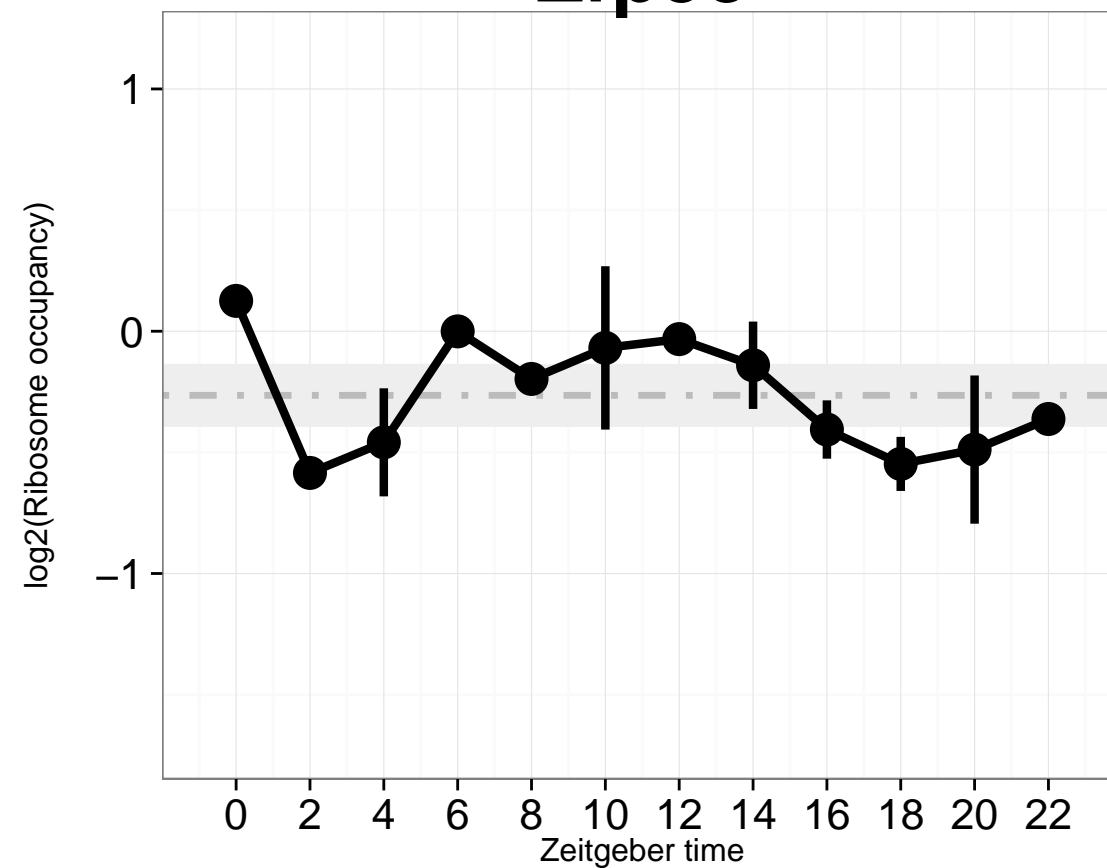

Supplement: Supplementary file 11220 [file 1]

# Cdk5rap1

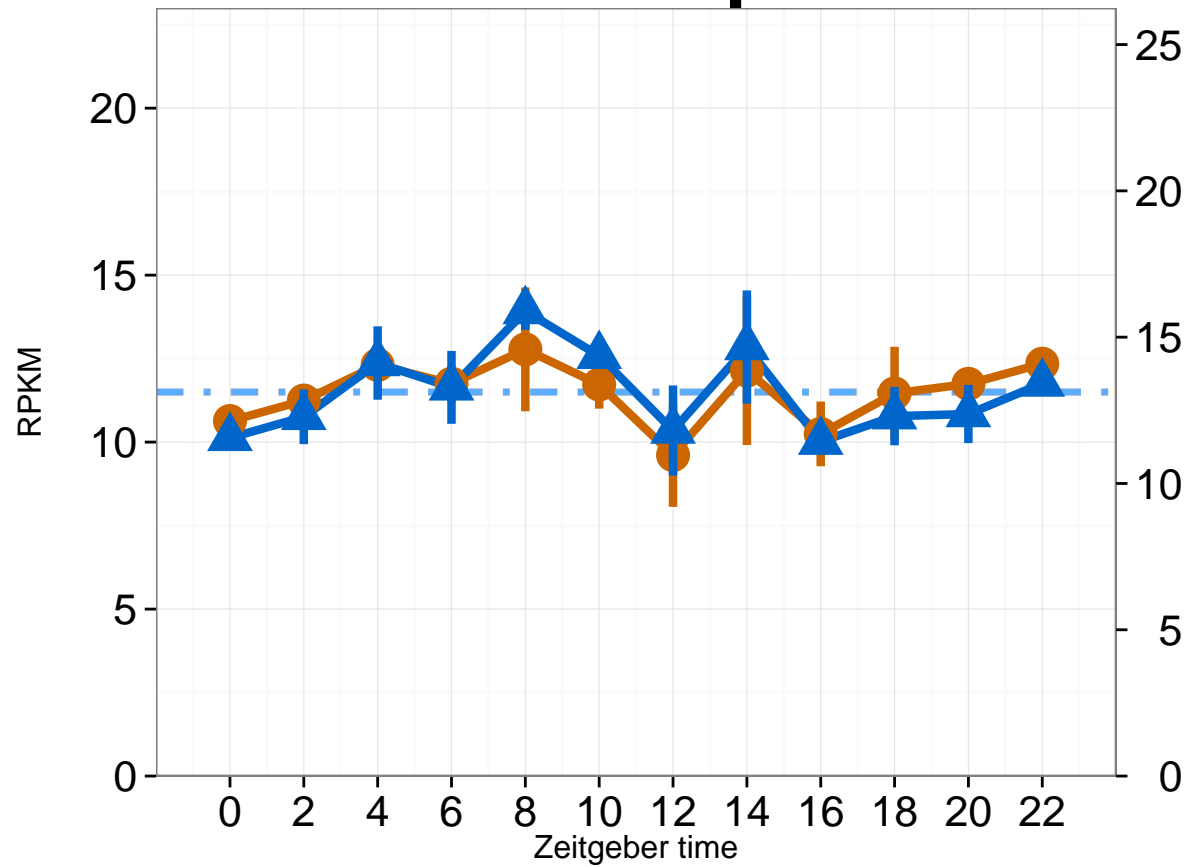

# Cdk5rap1

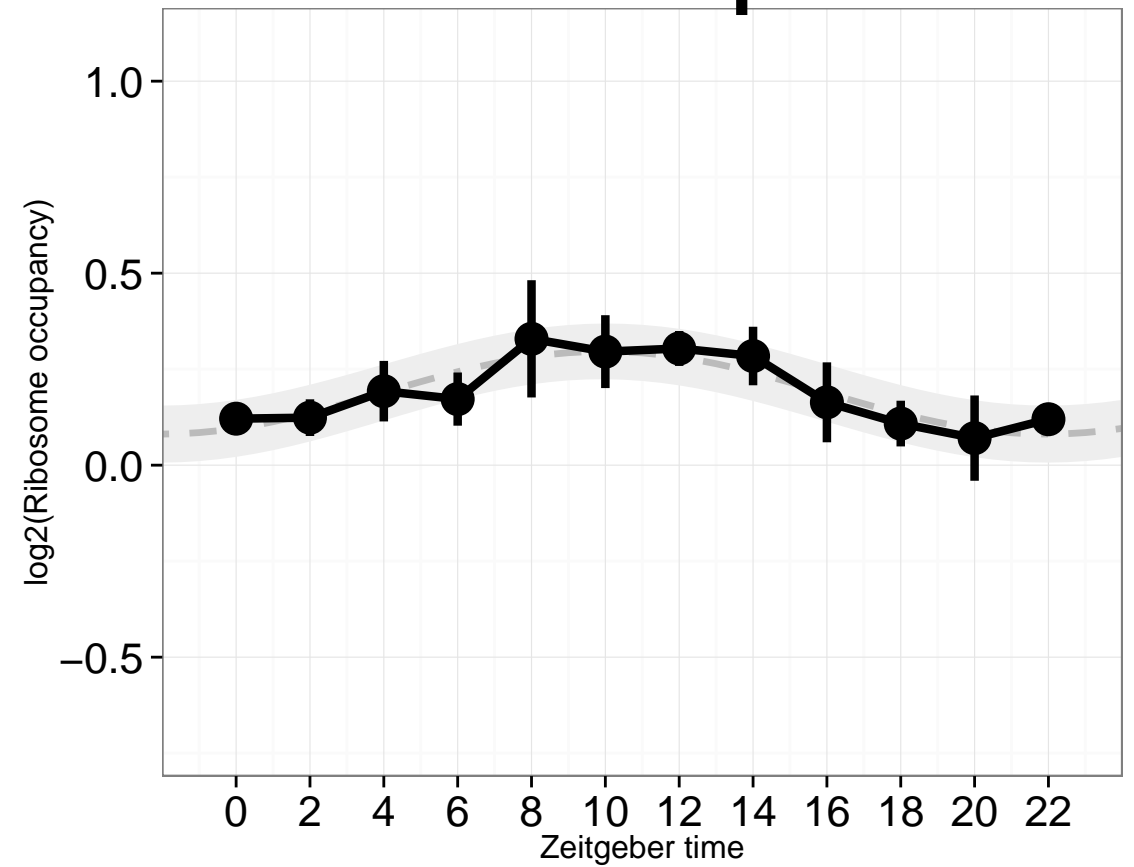

Supplement: Supplementary file 11221 [file 1]

# 2610305D13Rik

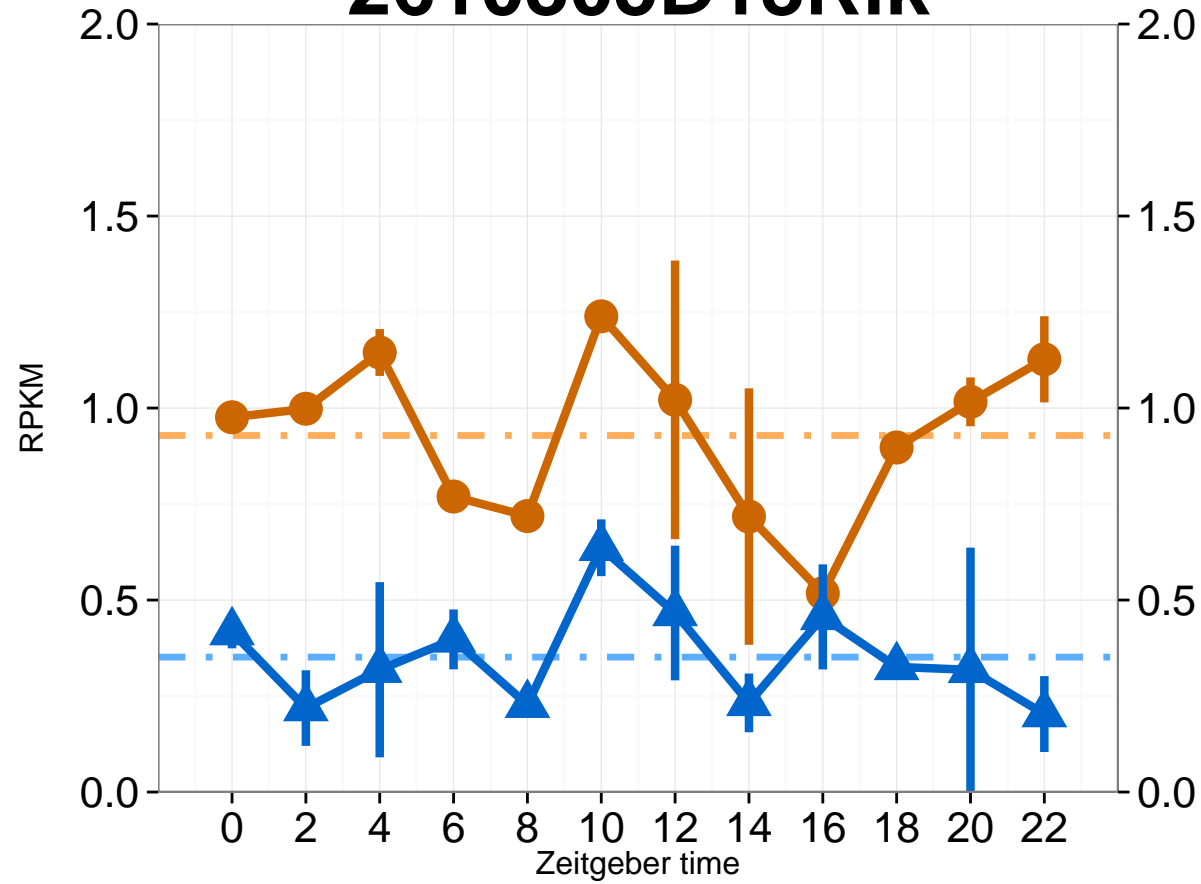

# 2610305D13Rik

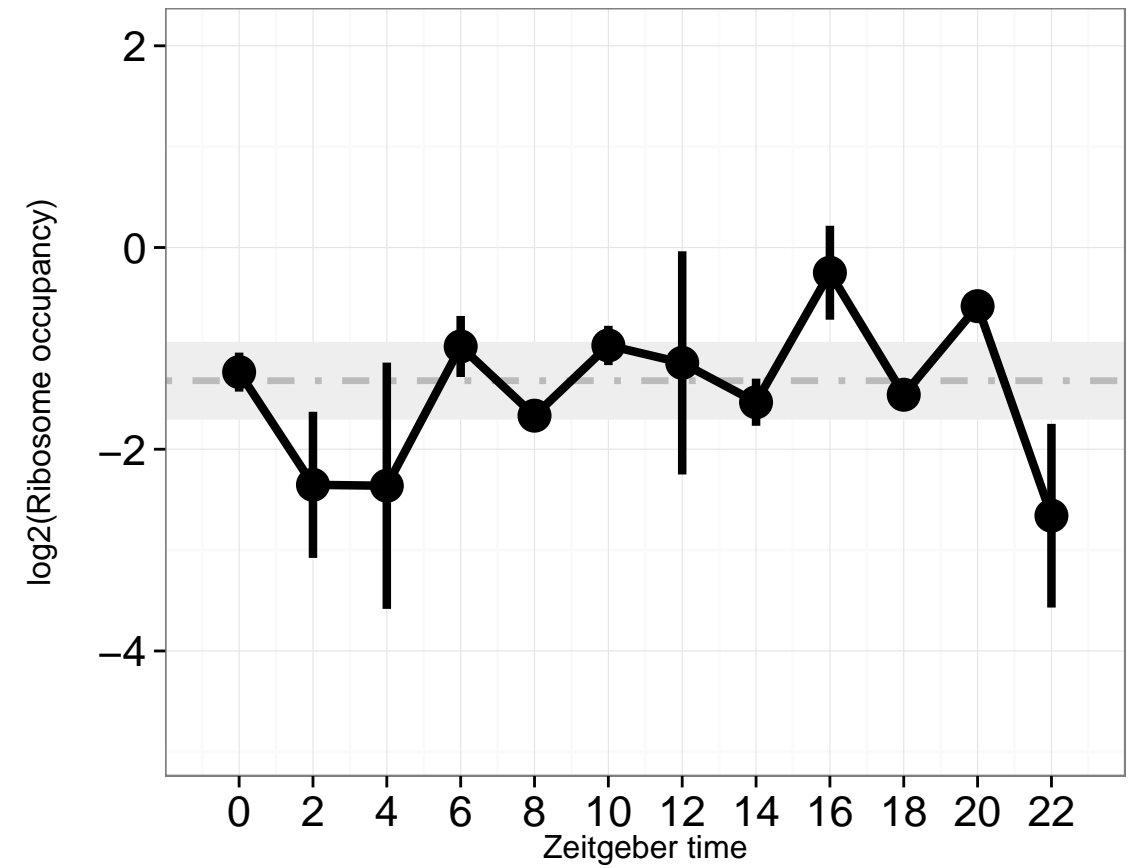

Supplement: Supplementary file 11222 [file 1]

## Nmt2

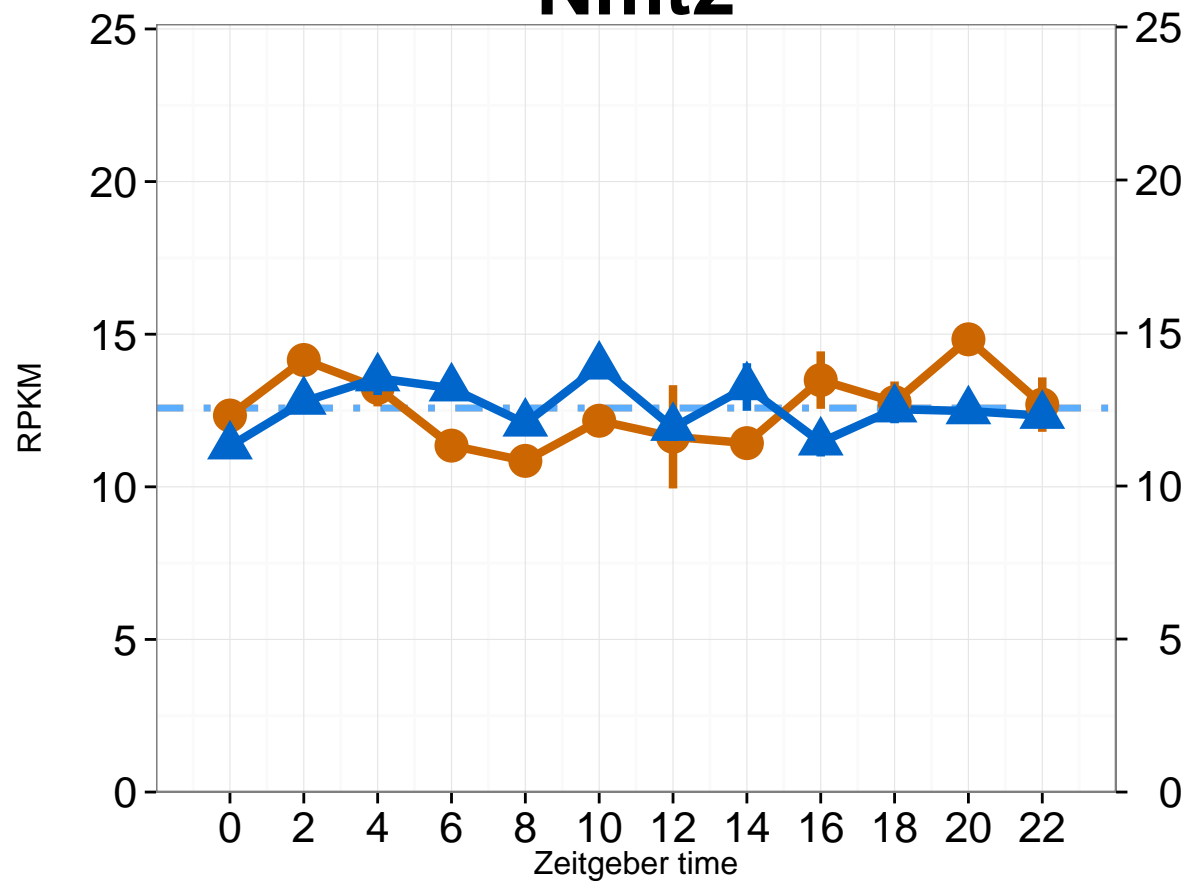

## Nmt2

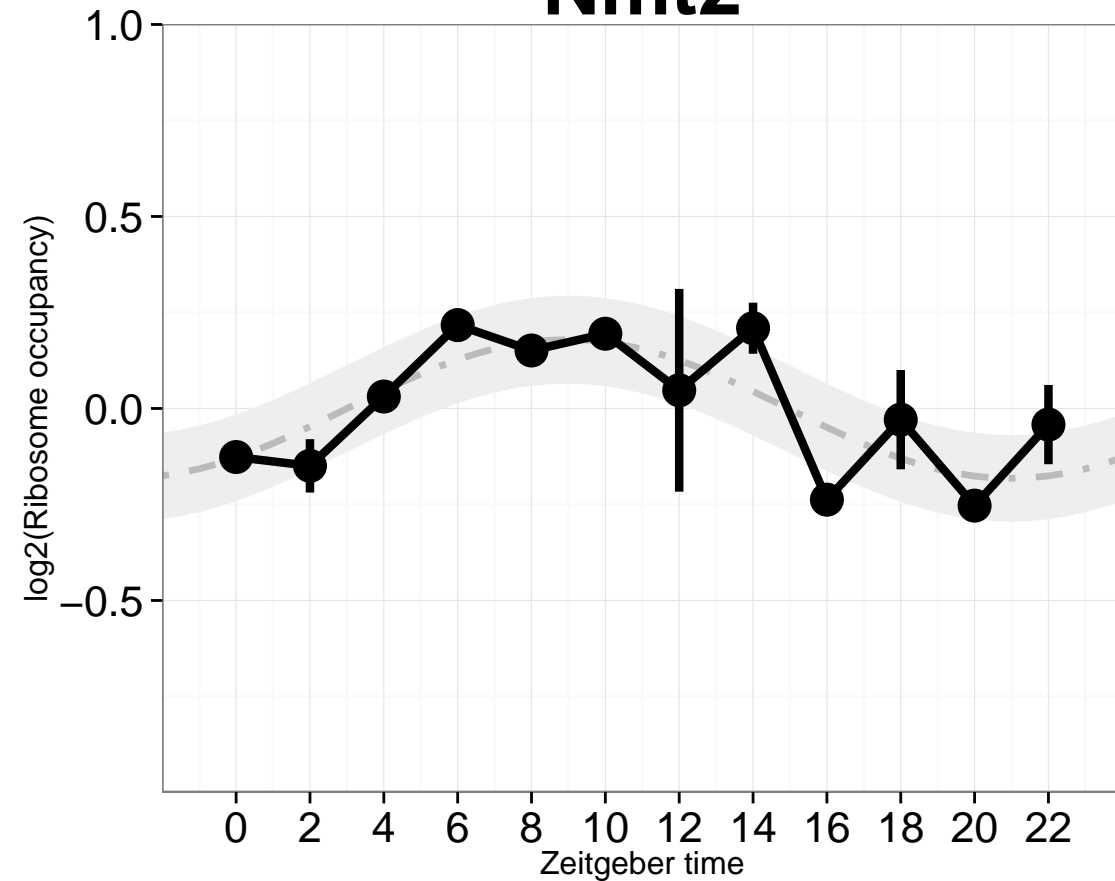

Supplement: Supplementary file 11223 [file 1]

# Polr3gl

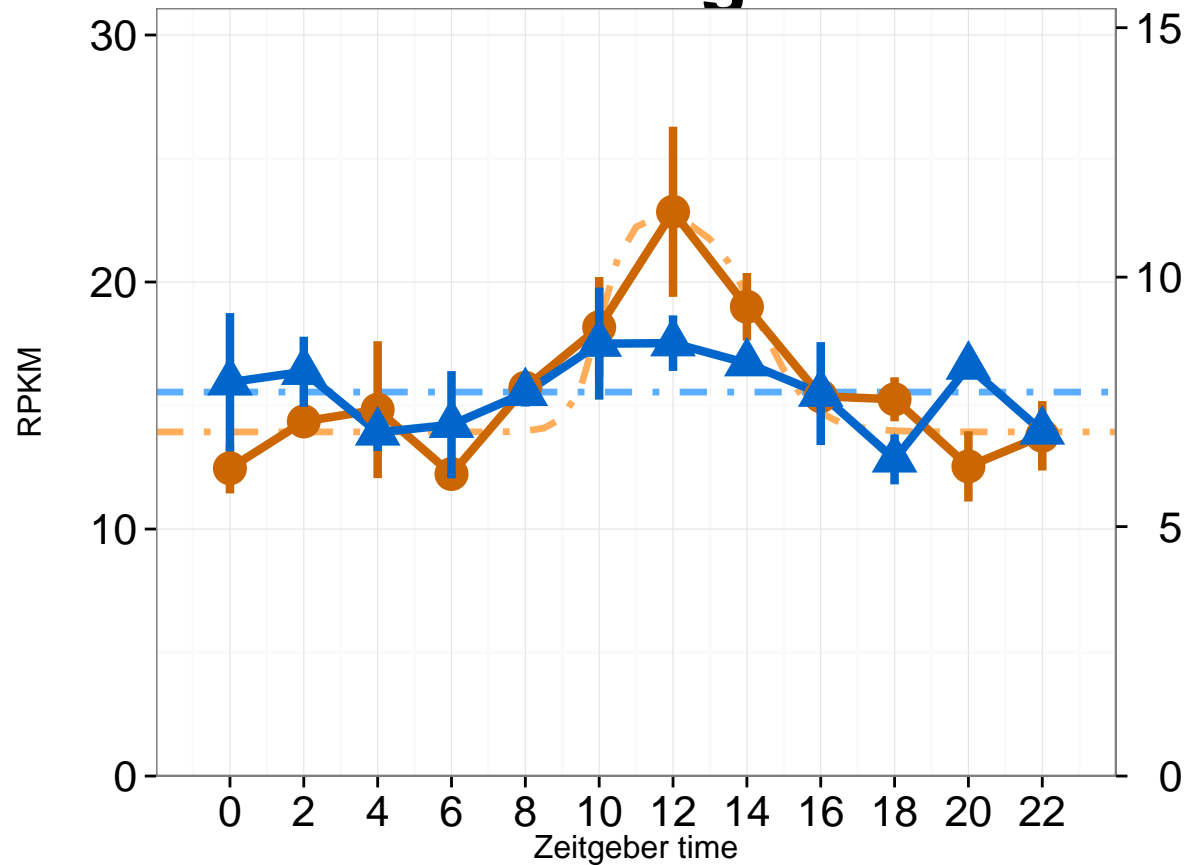

# Polr3gl

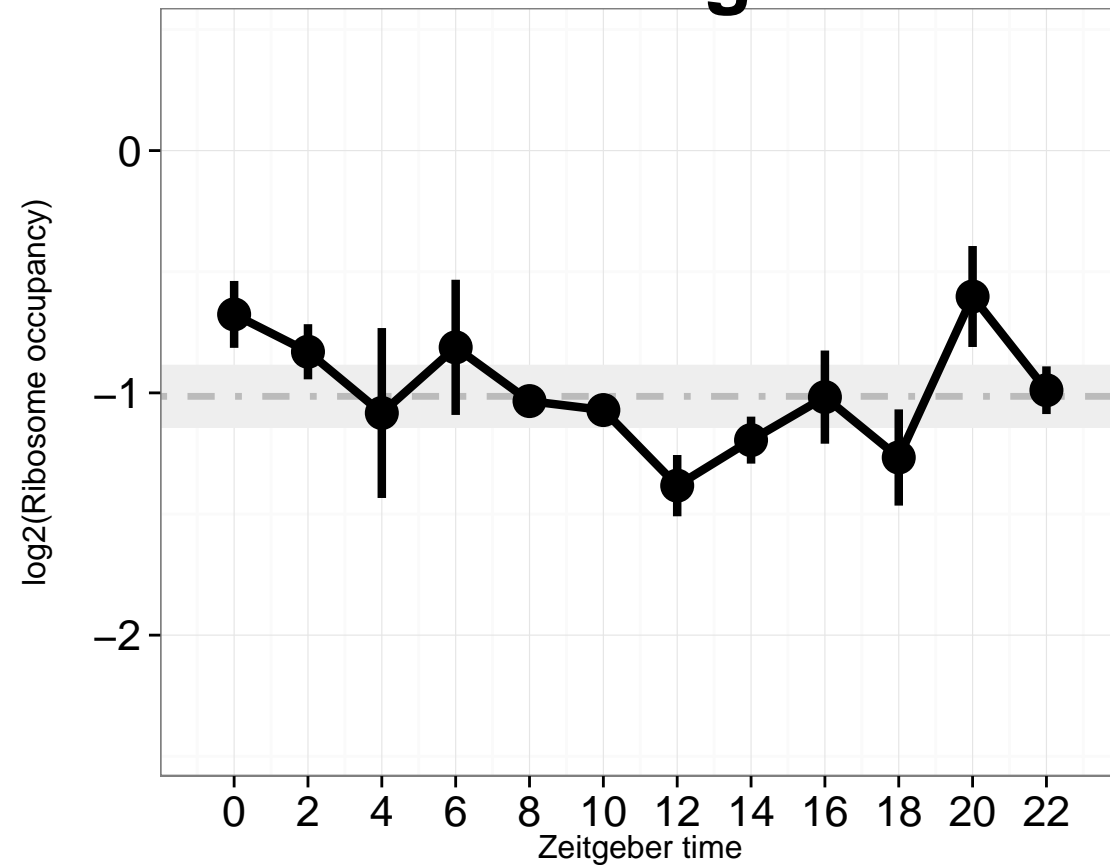

Supplement: Supplementary file 11224 [file 1]

## Med15

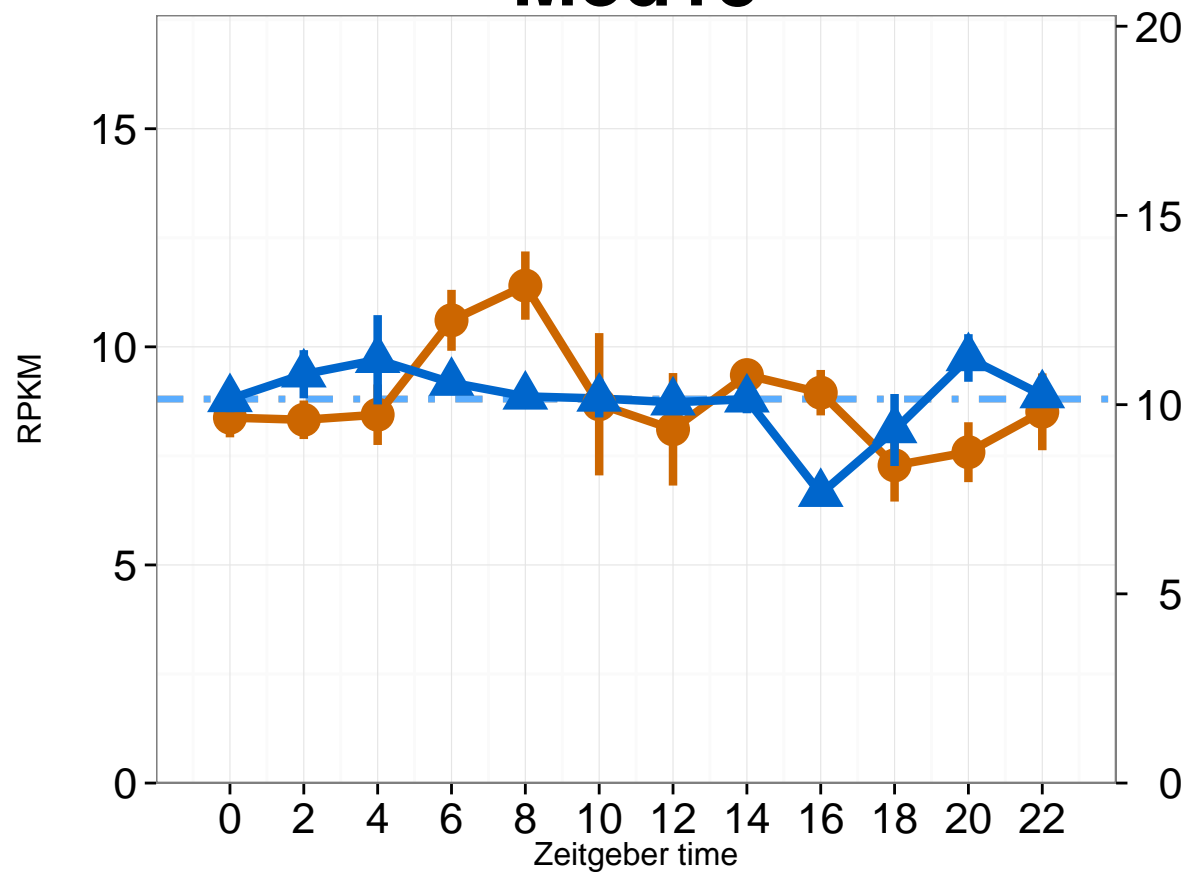

## Med15

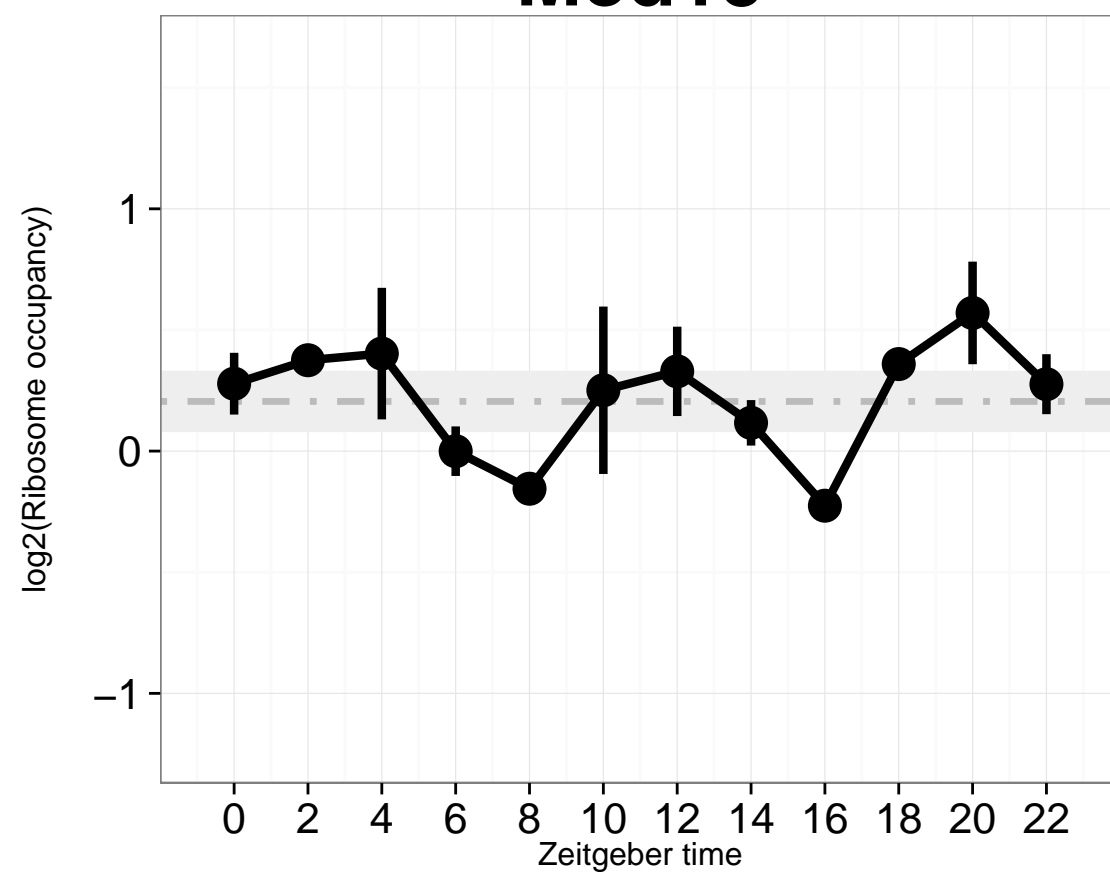

Supplement: Supplementary file 11225 [file 1]

# Zfp189

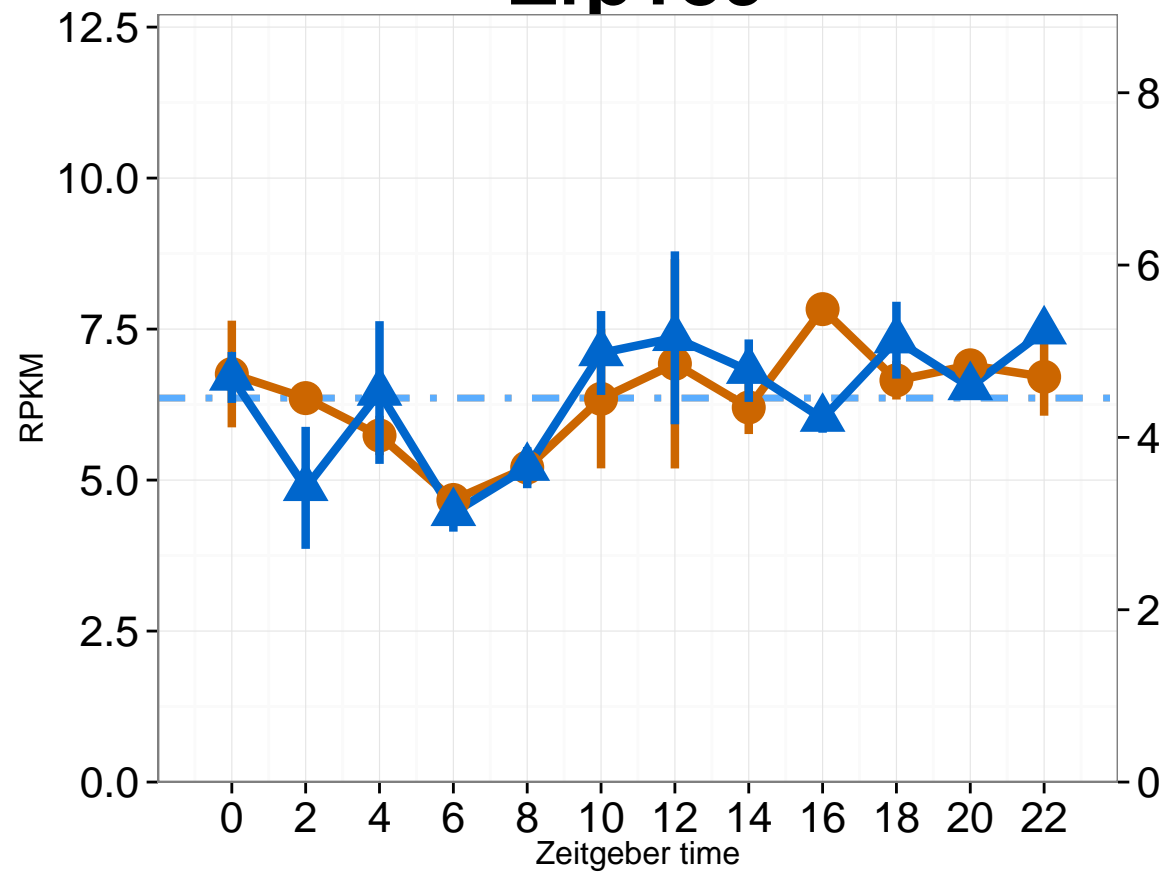

# Zfp189

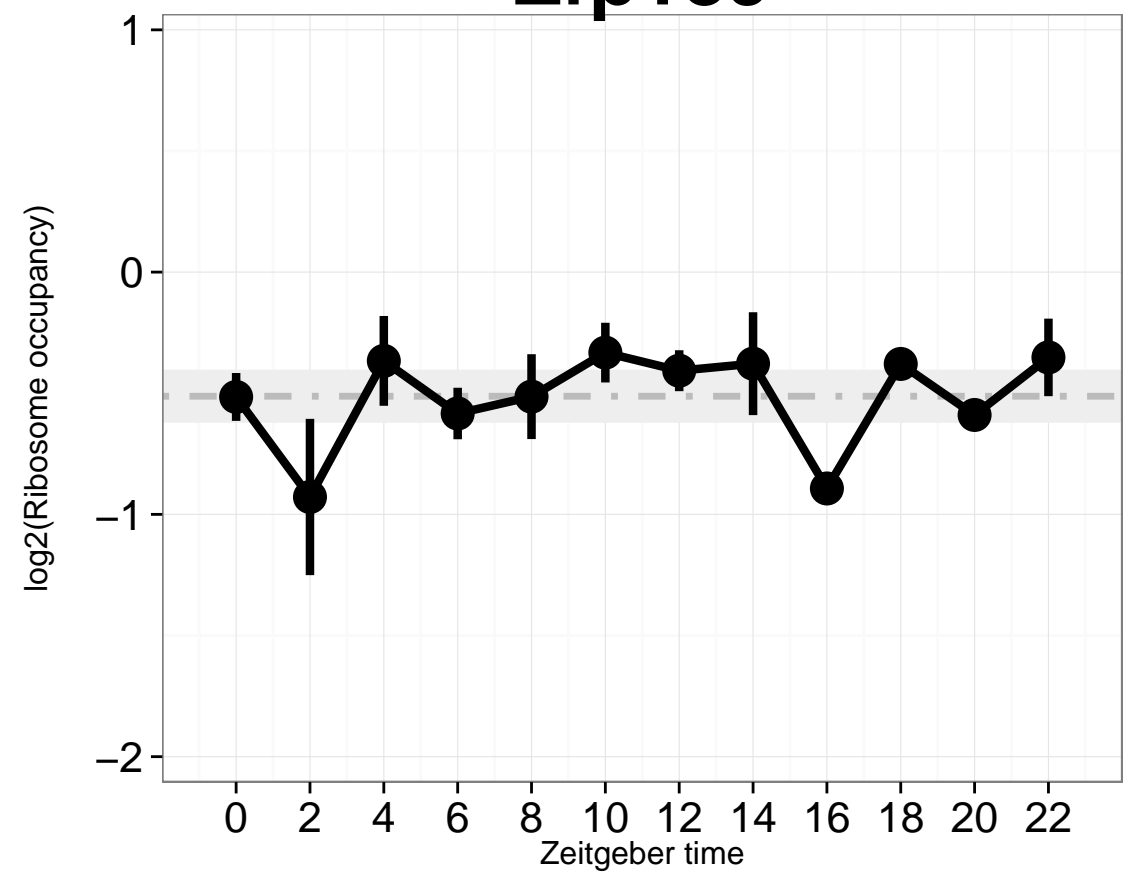

Supplement: Supplementary file 11226 [file 1]

# Tmem245

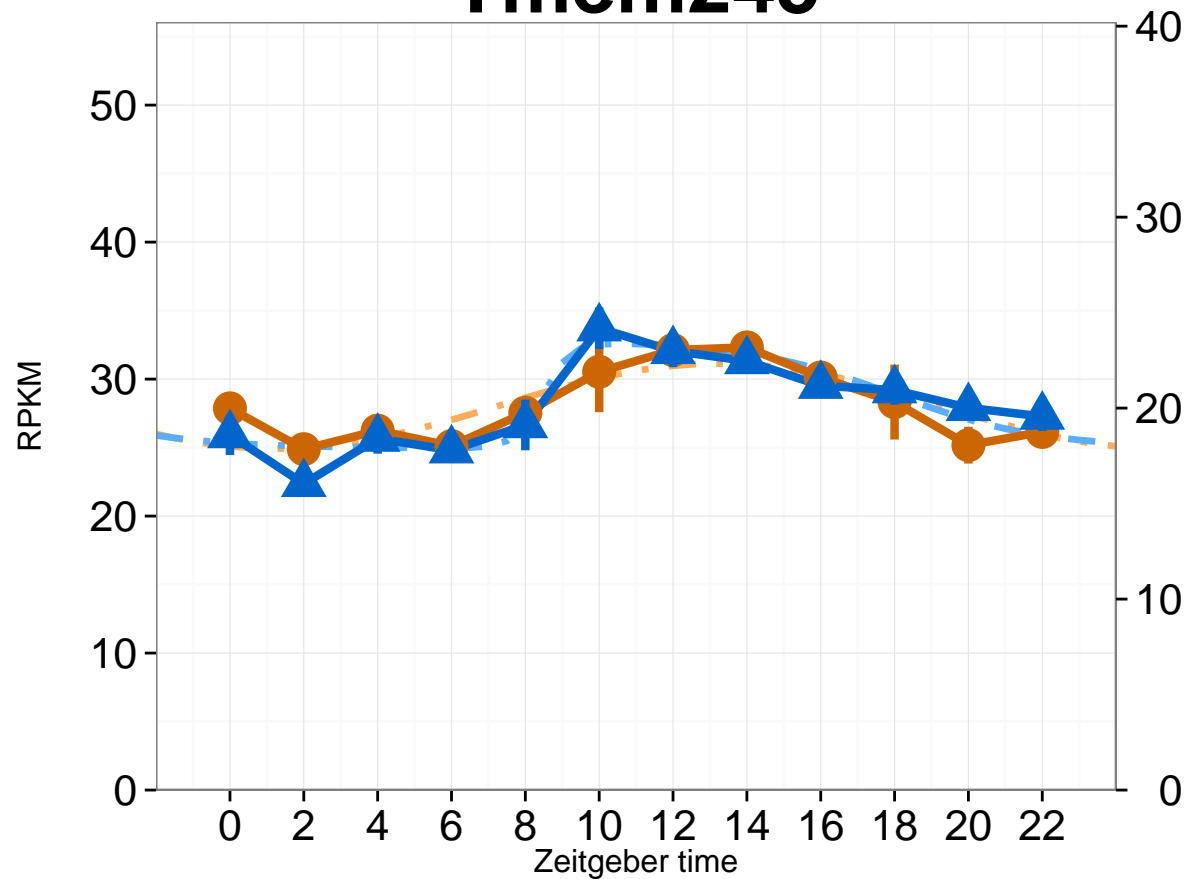

# Tmem245

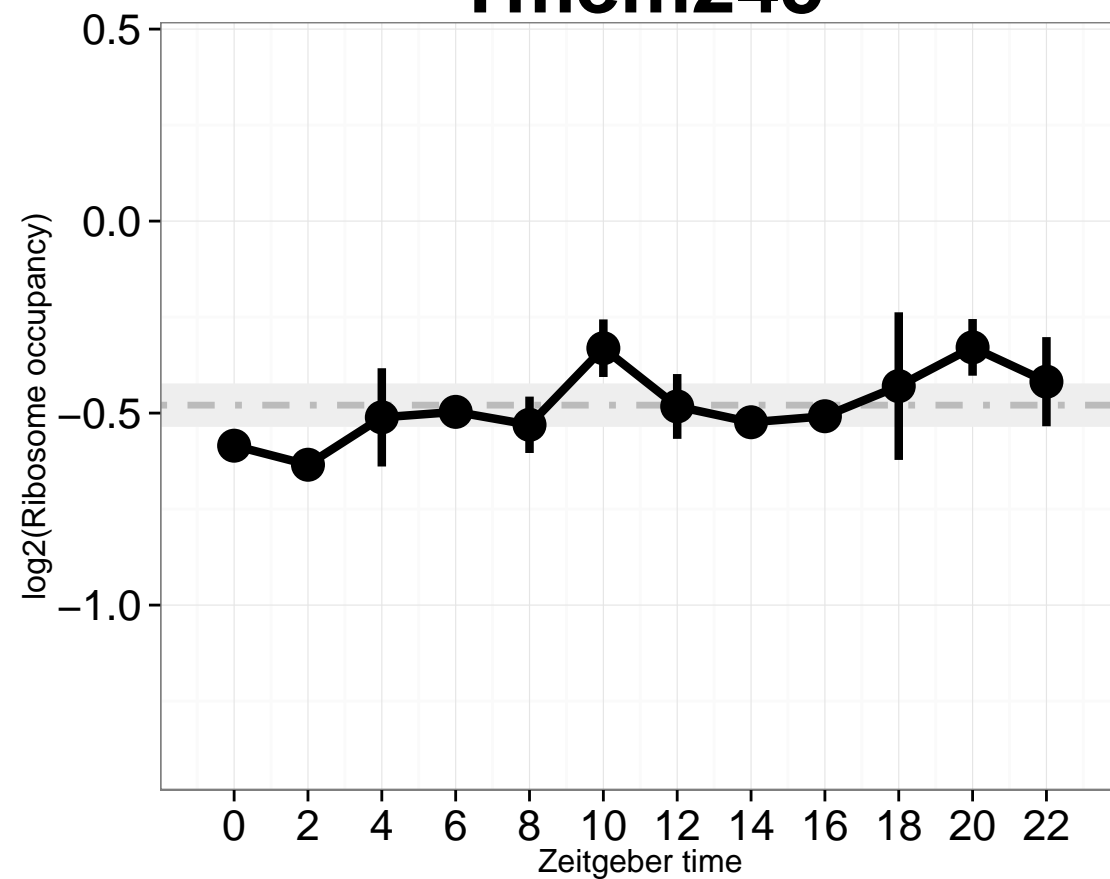

Supplement: Supplementary file 11227 [file 1]

## Spn

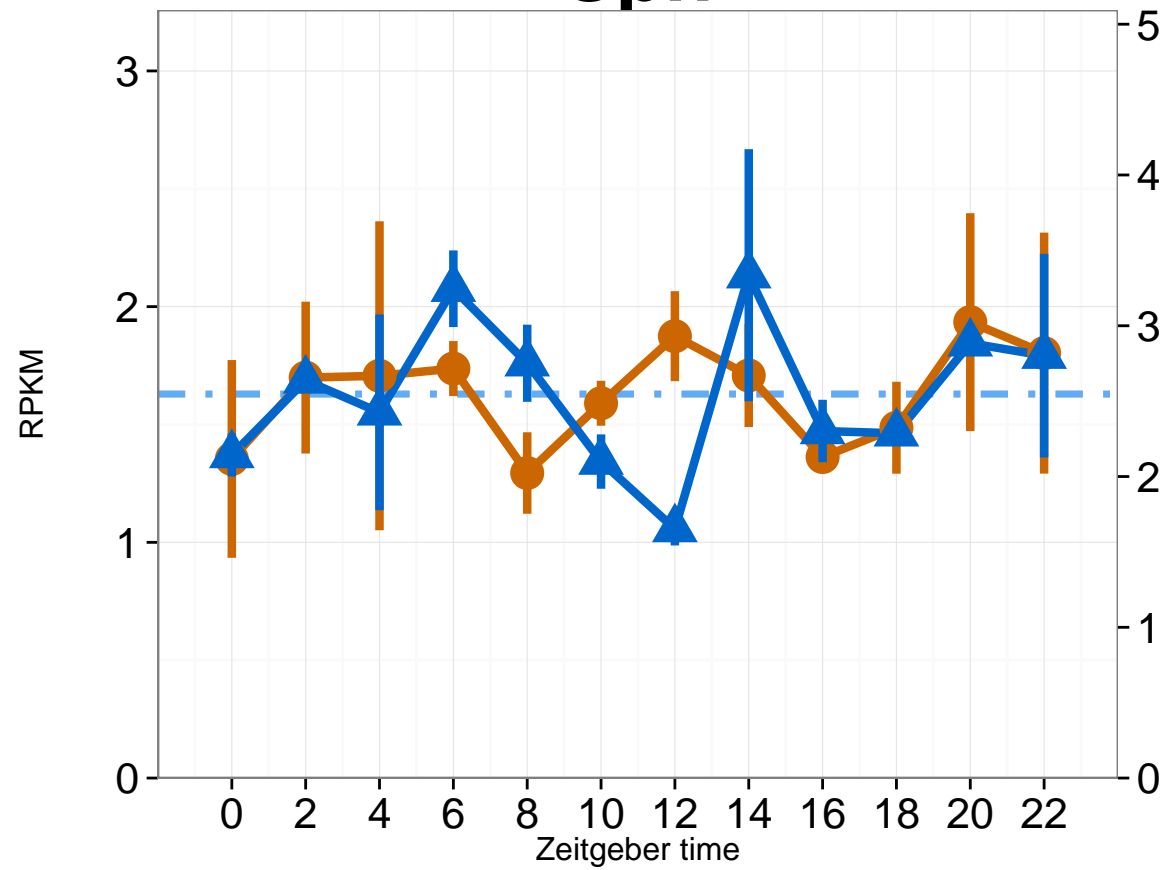

## Spn

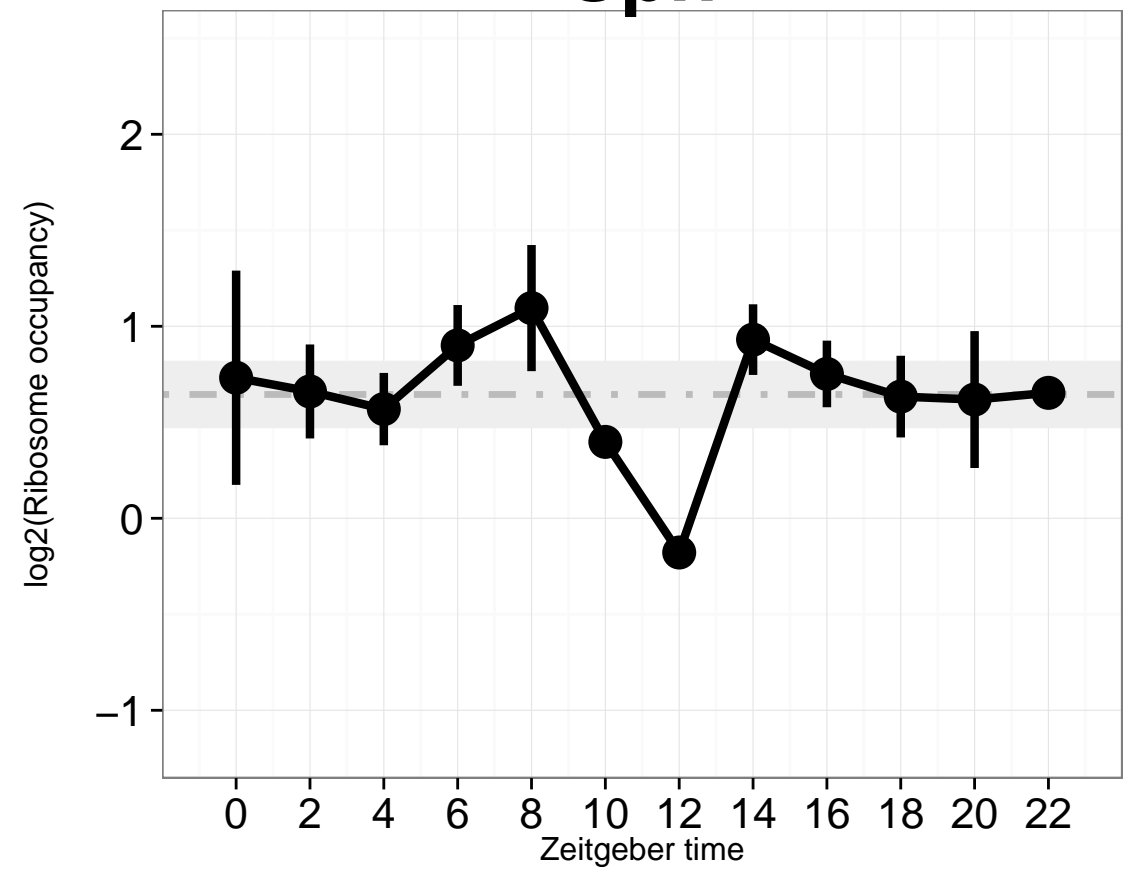

Supplement: Supplementary file 11228 [file 1]

# Ugp2

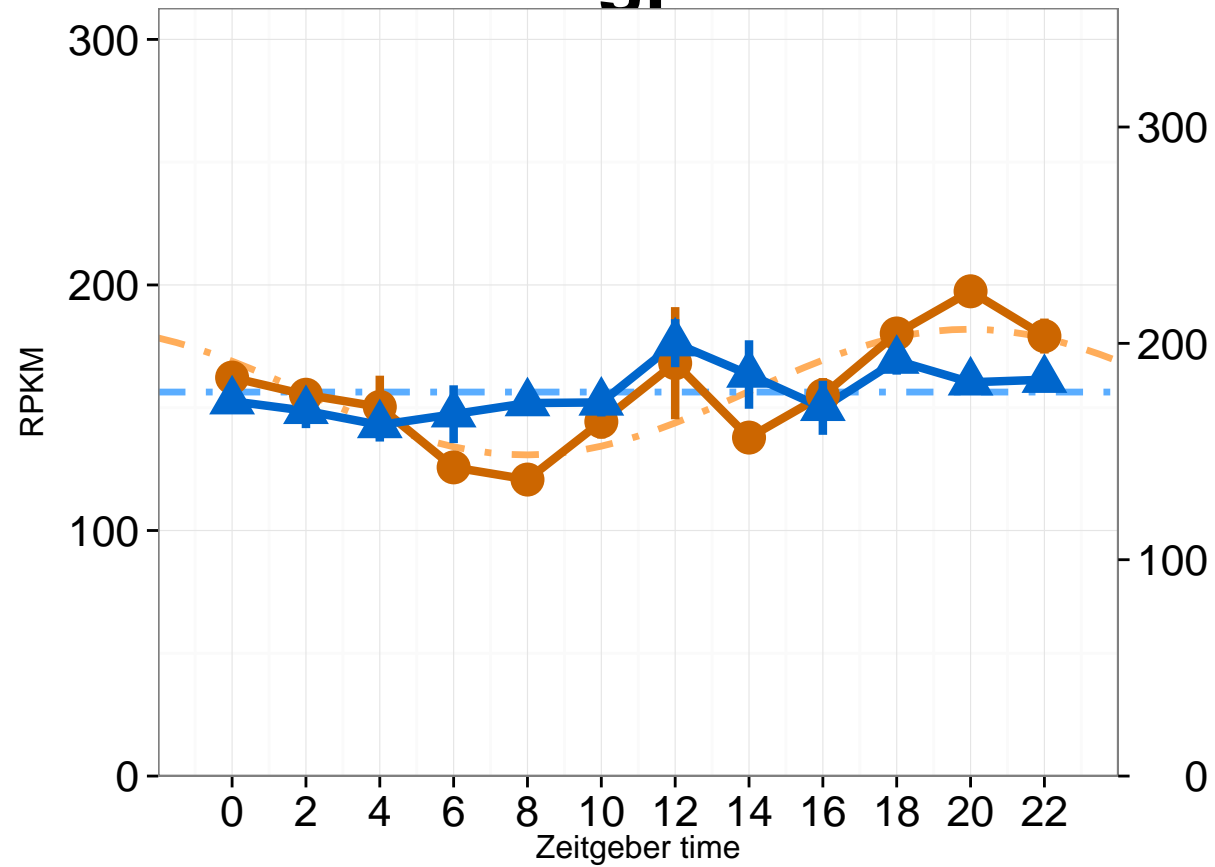

# Ugp2

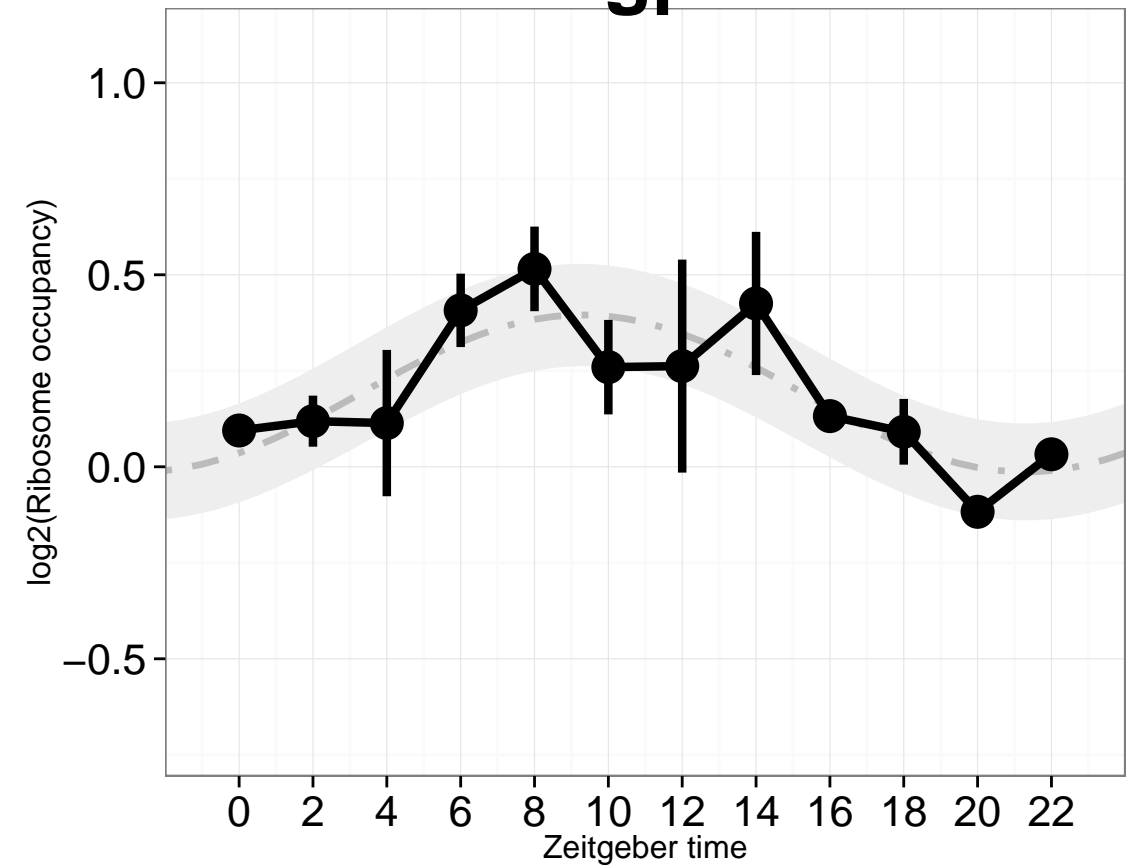

Supplement: Supplementary file 11229 [file 1]

## Rergl

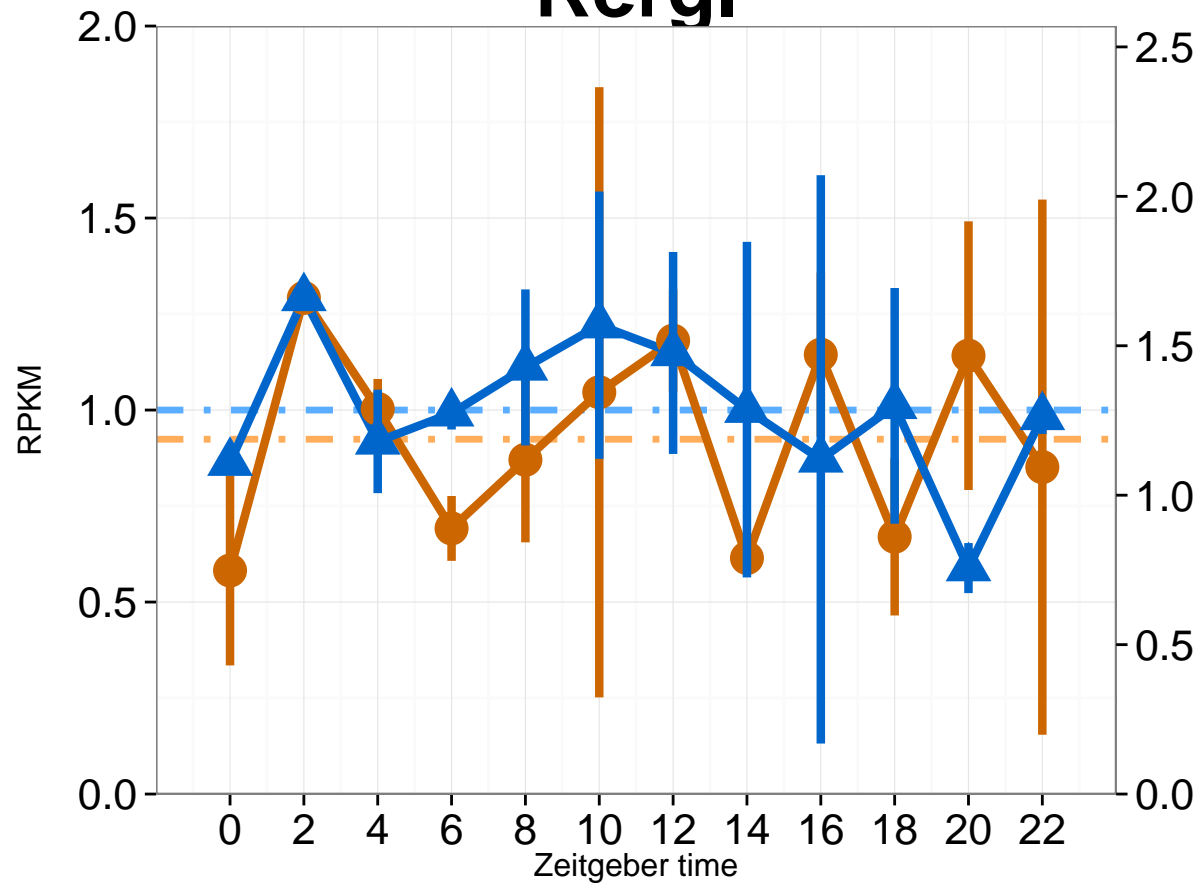

## Rergl

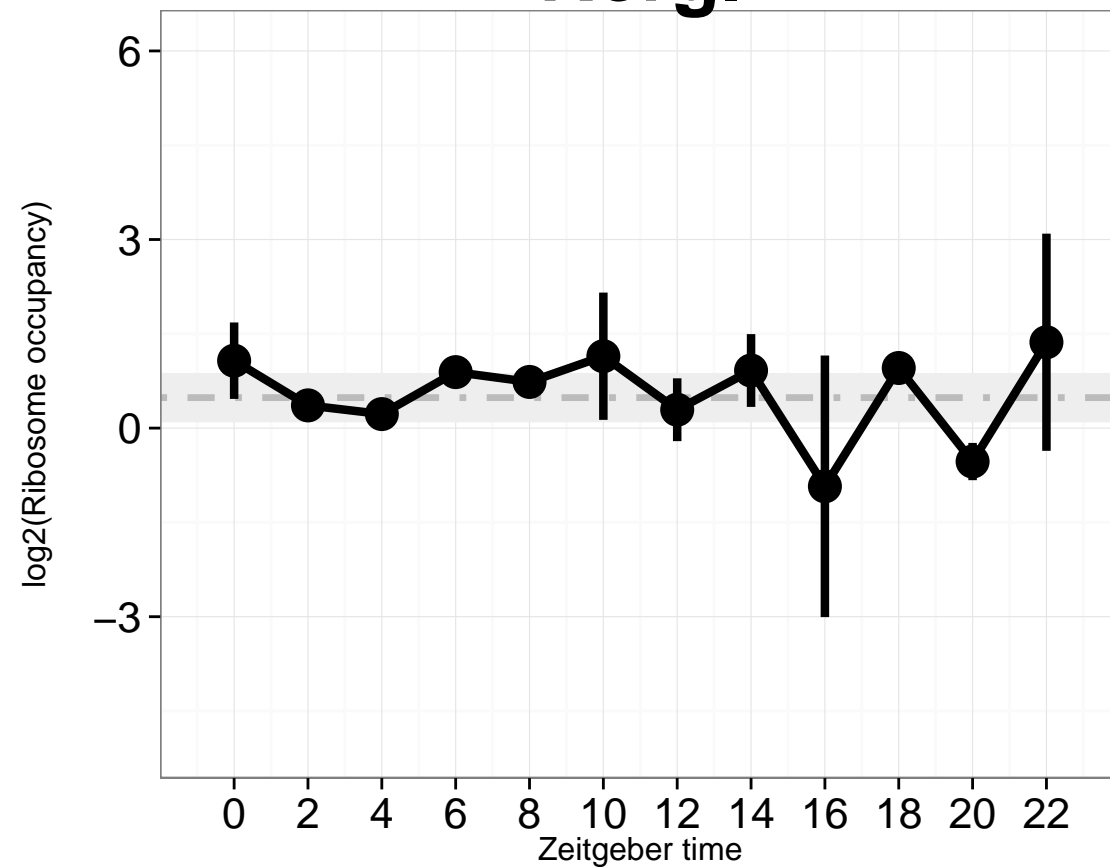

Supplement: Supplementary file 11230 [file 1]

## Parl

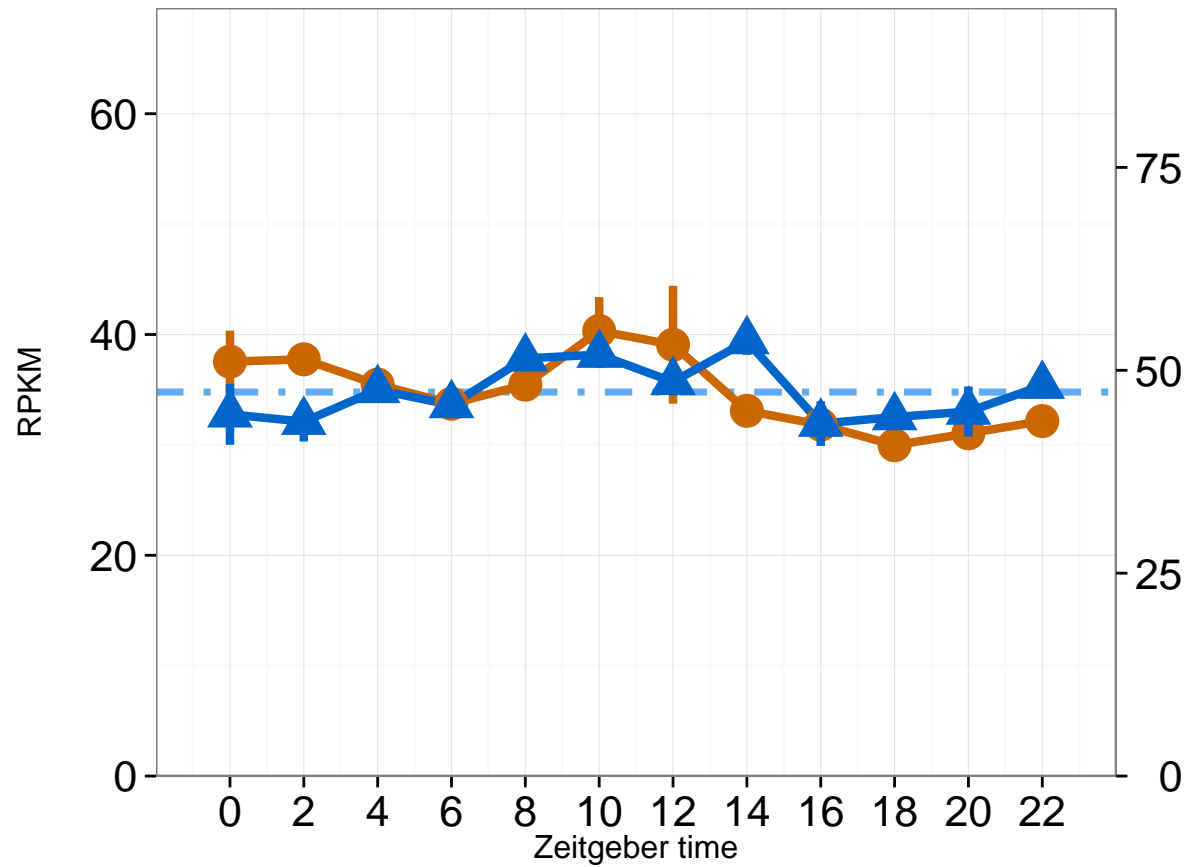

## Parl

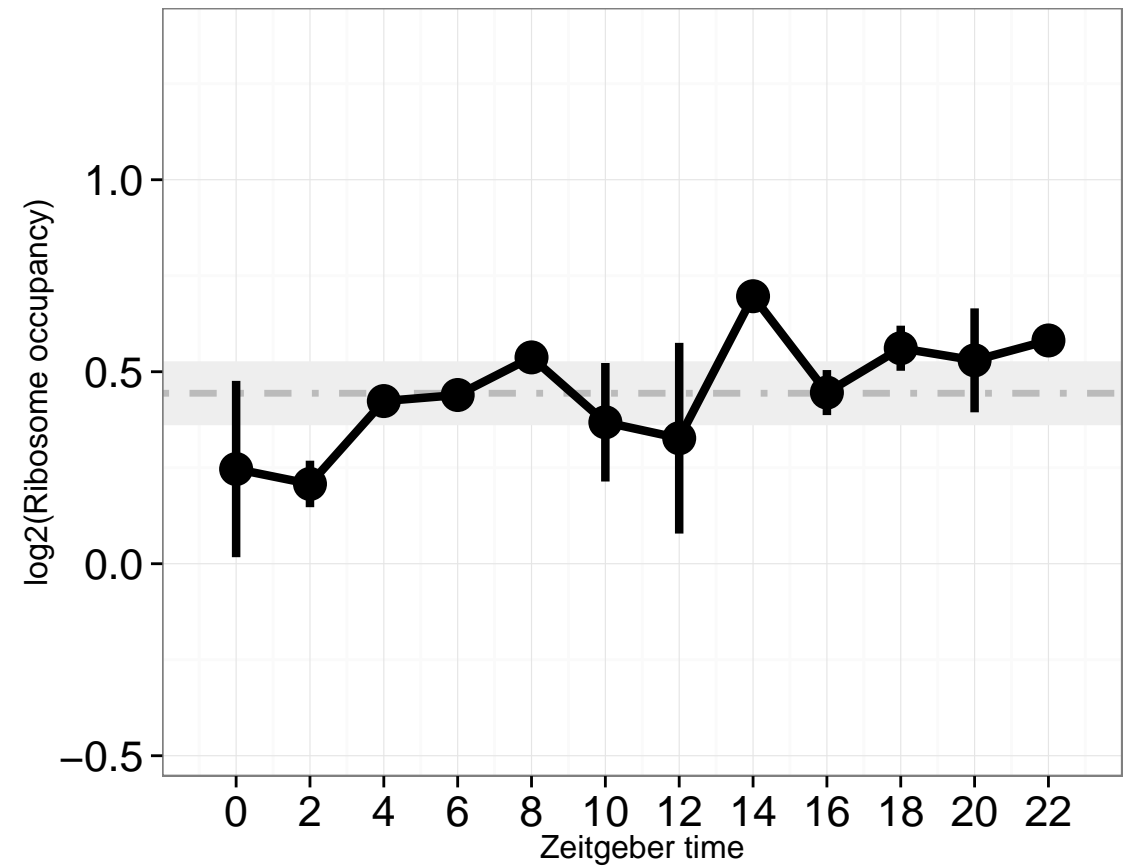

Supplement: Supplementary file 11231 [file 1]

# Gbp9

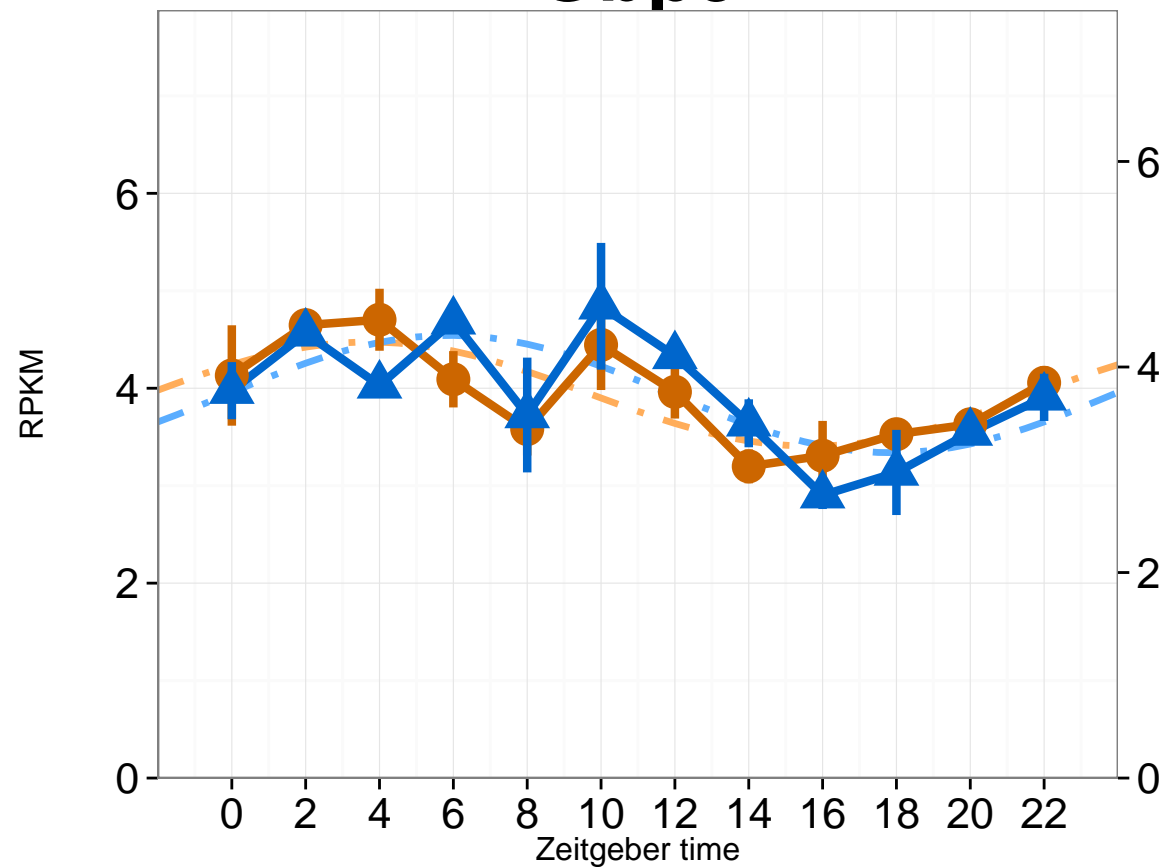

# Gbp9

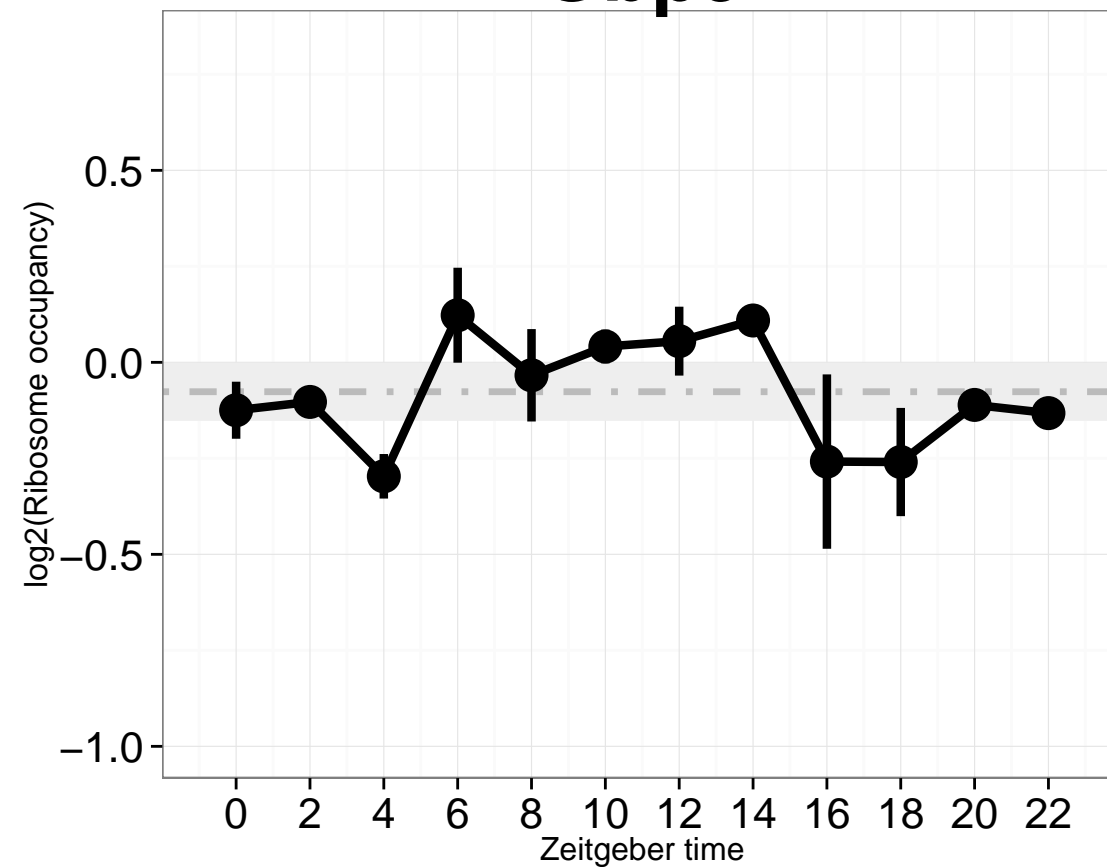

Supplement: Supplementary file 11232 [file 1]

# Wwtr1

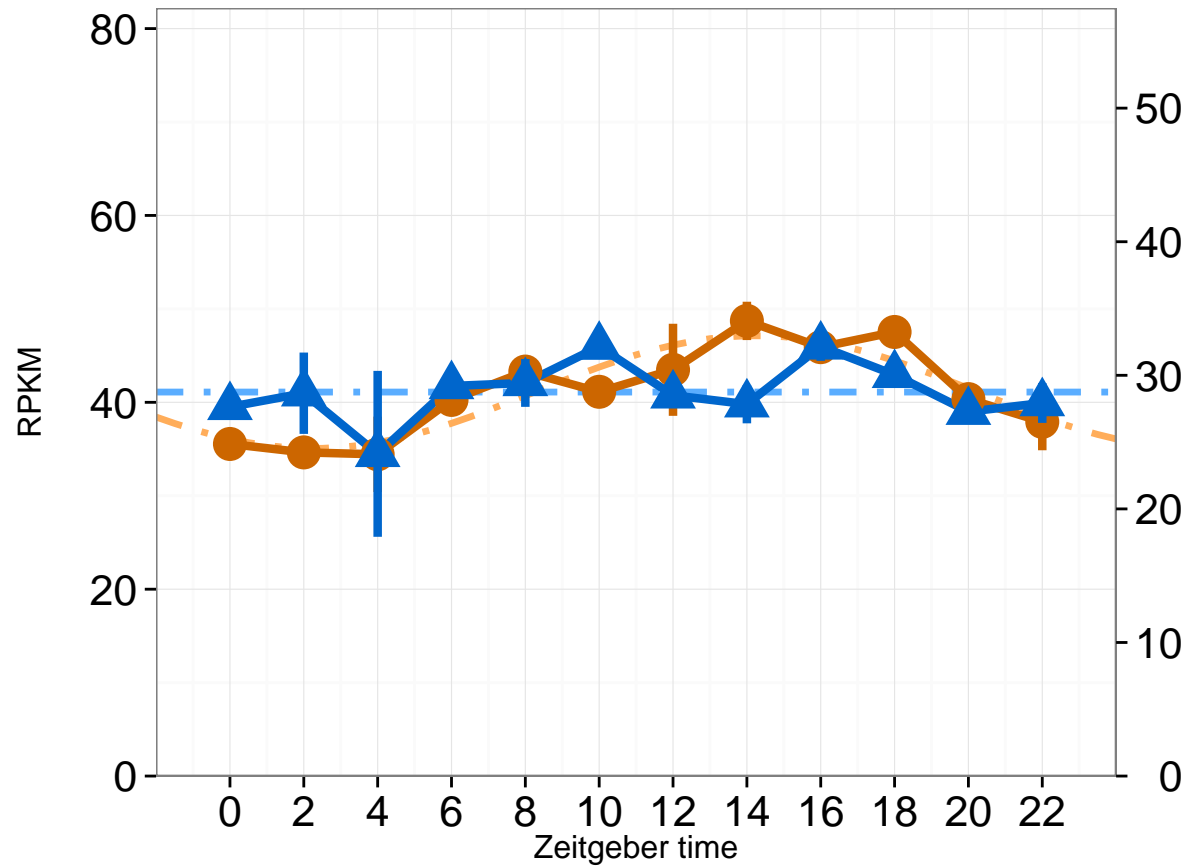

# Wwtr1

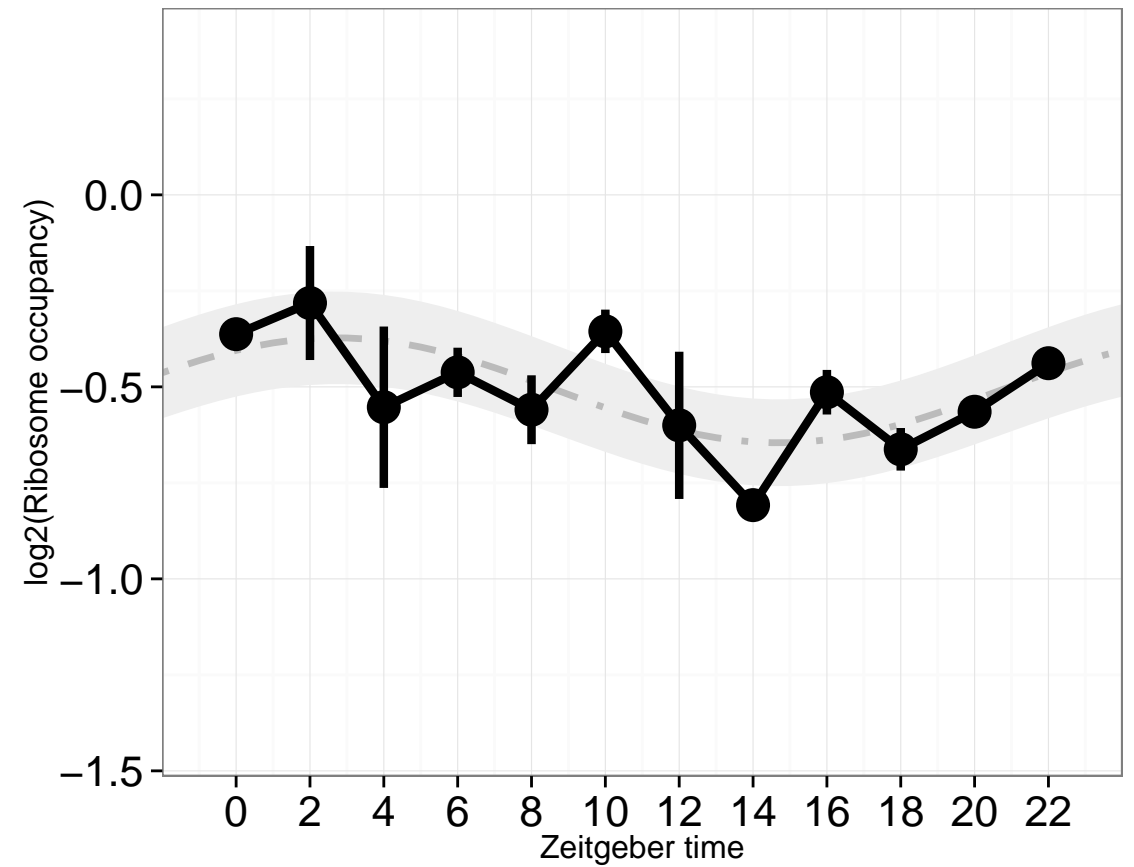

Supplement: Supplementary file 11233 [file 1]

## Ptgds

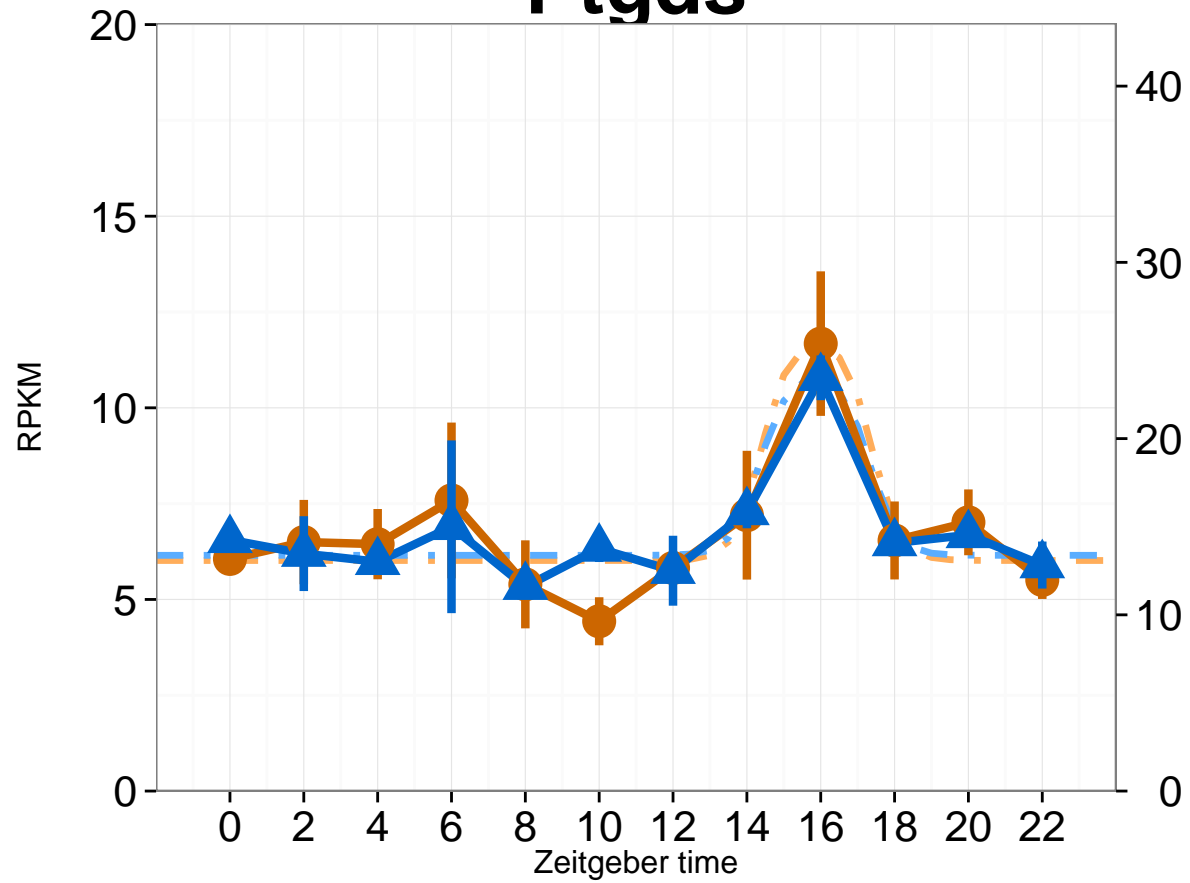

## Ptgds

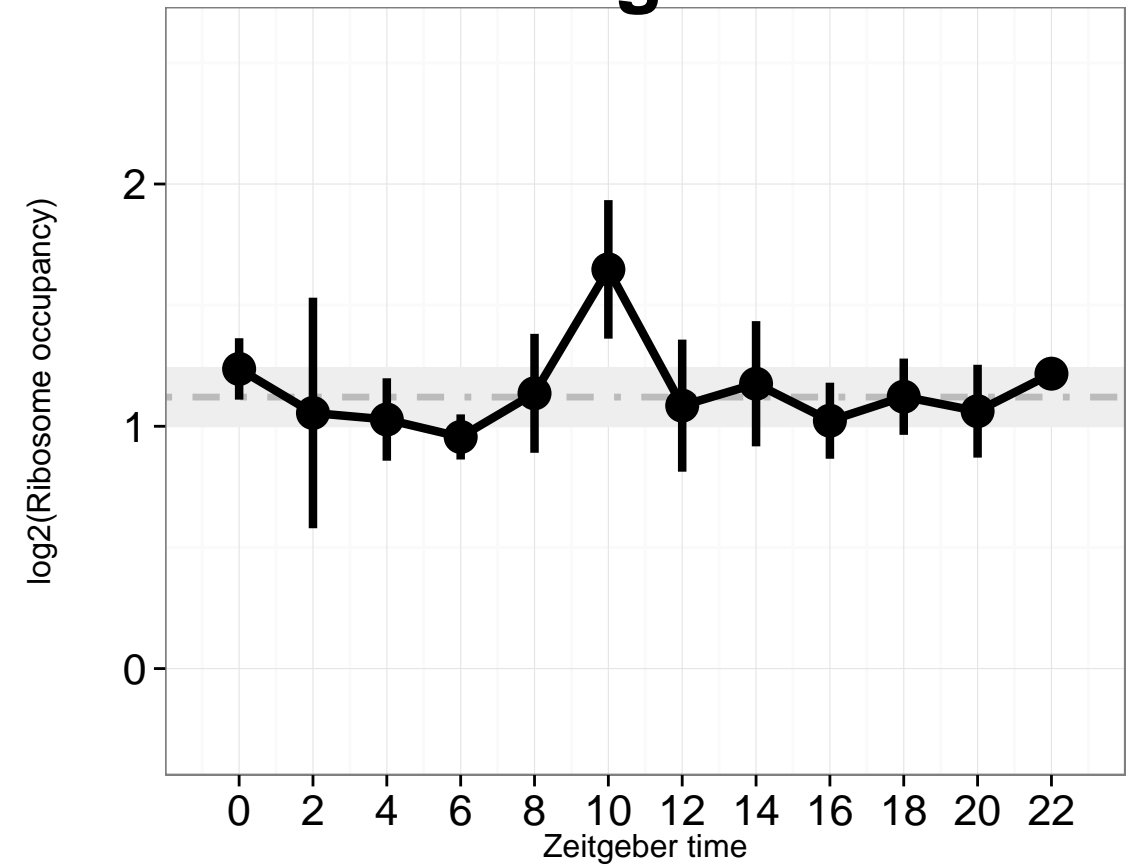

Supplement: Supplementary file 11234 [file 1]

# Ppp3cc

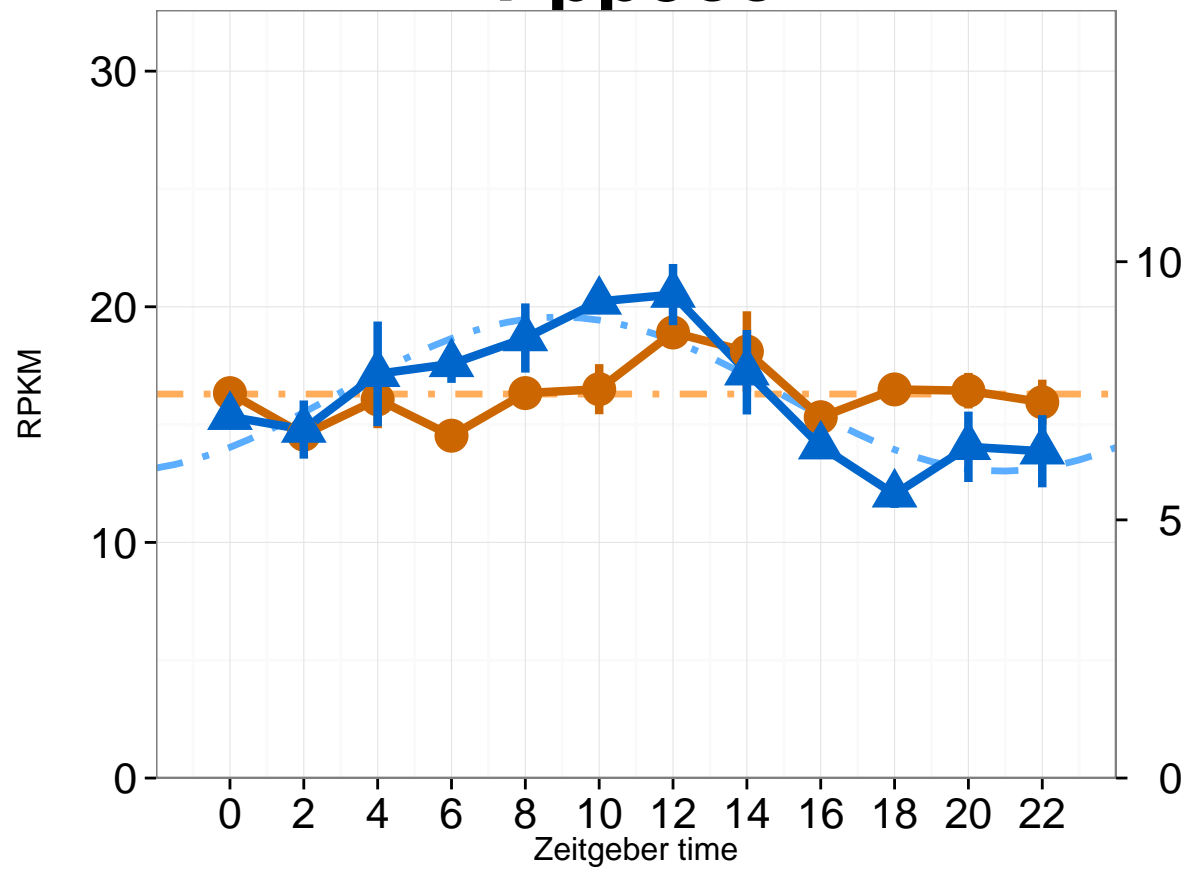

# Ppp3cc

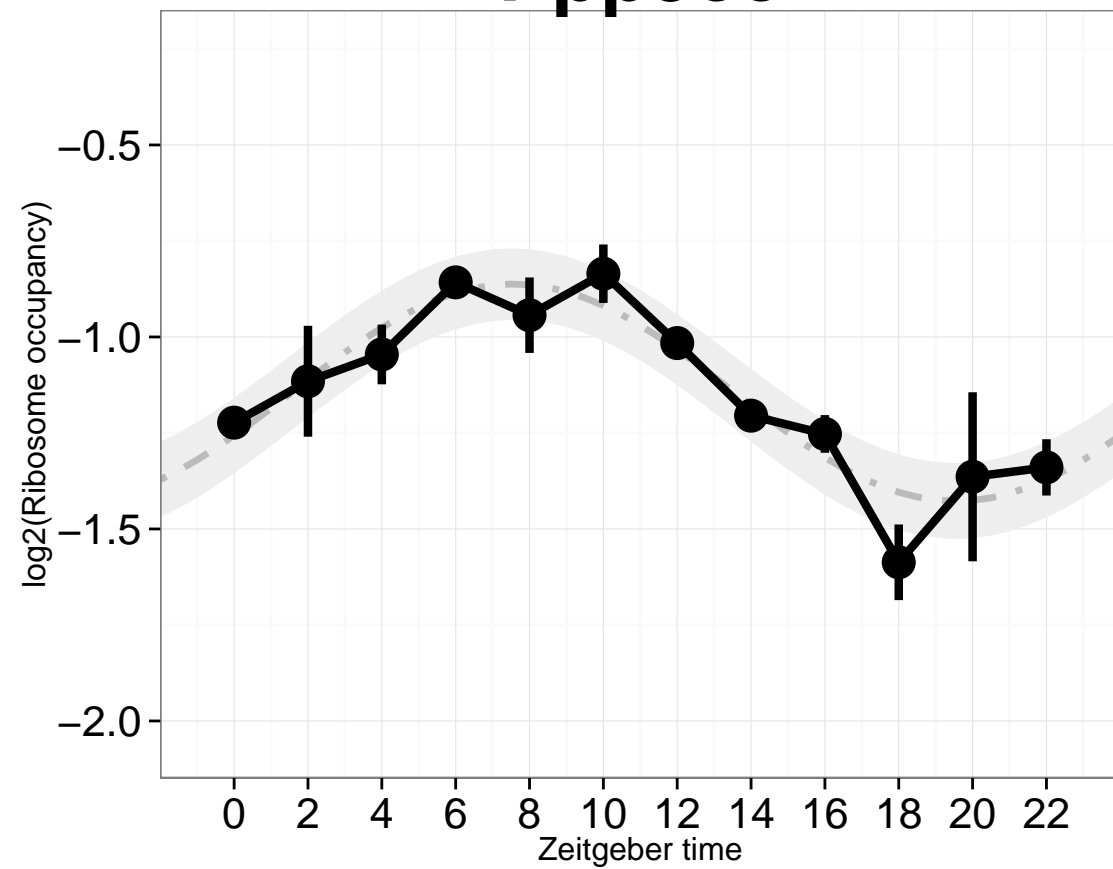

Supplement: Supplementary file 11235 [file 1]

## Ezh1

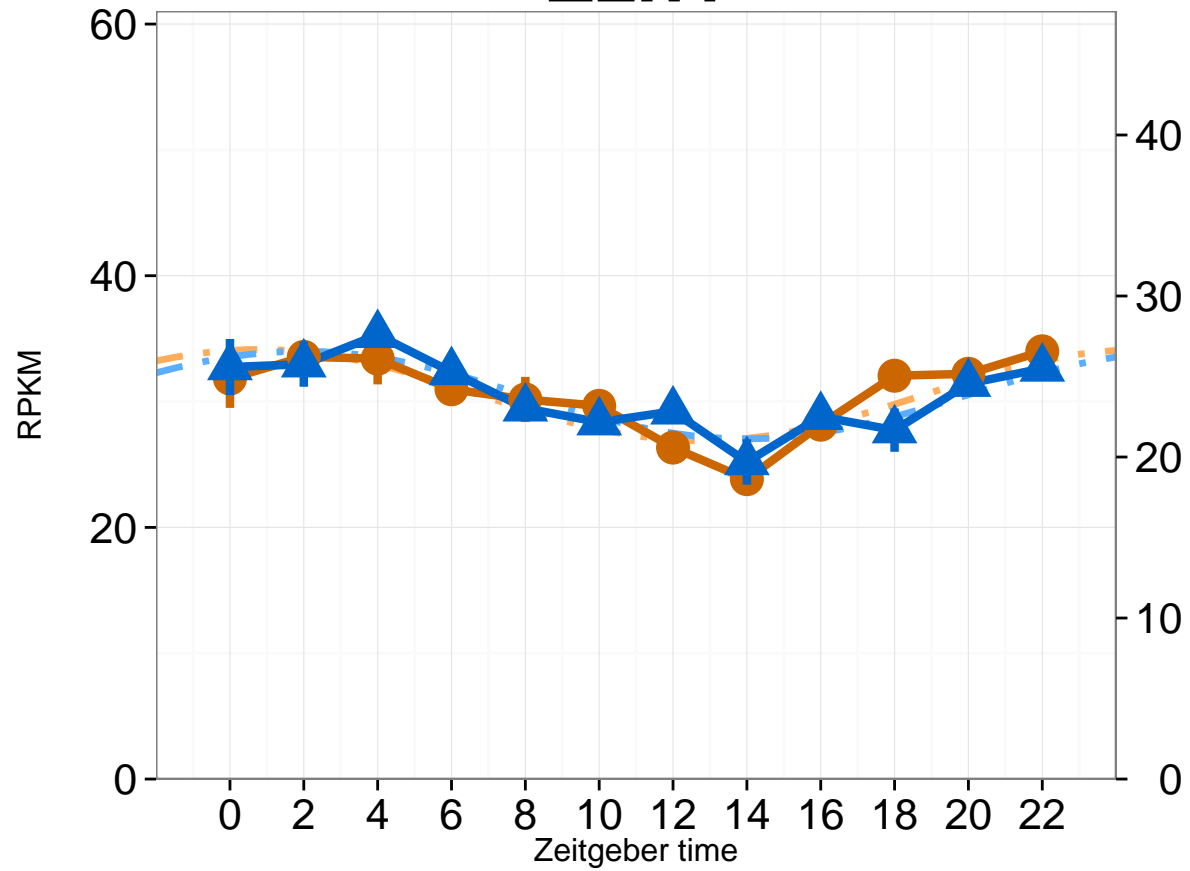

## Ezh1

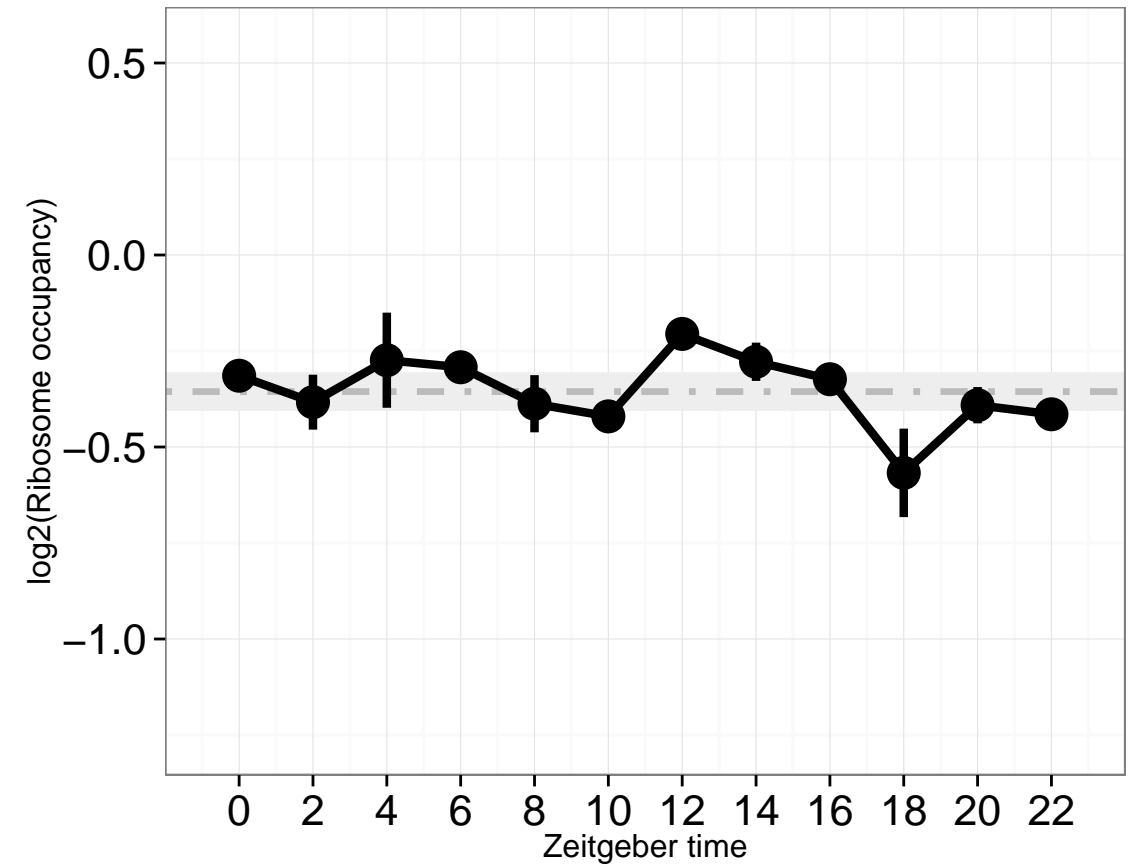

Supplement: Supplementary file 11236 [file 1]

## Ndufb2

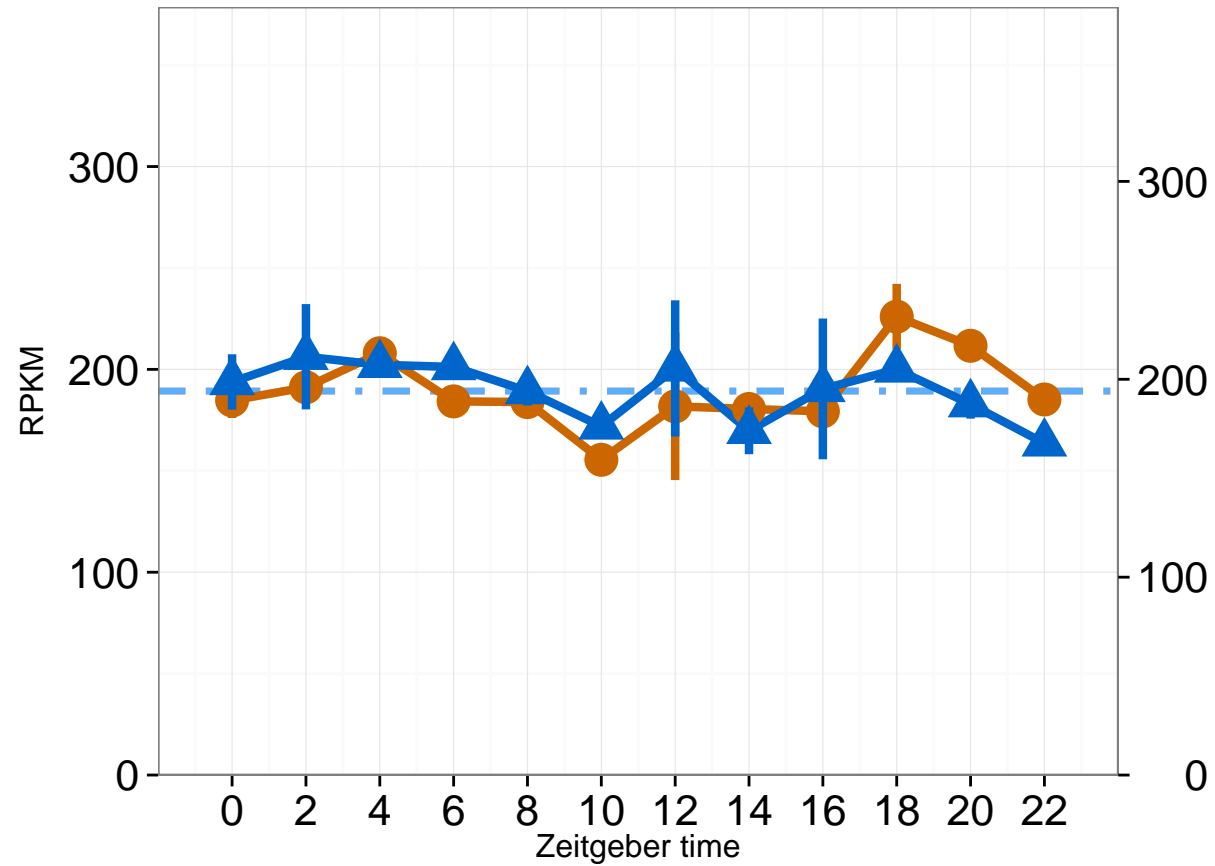

## Ndufb2

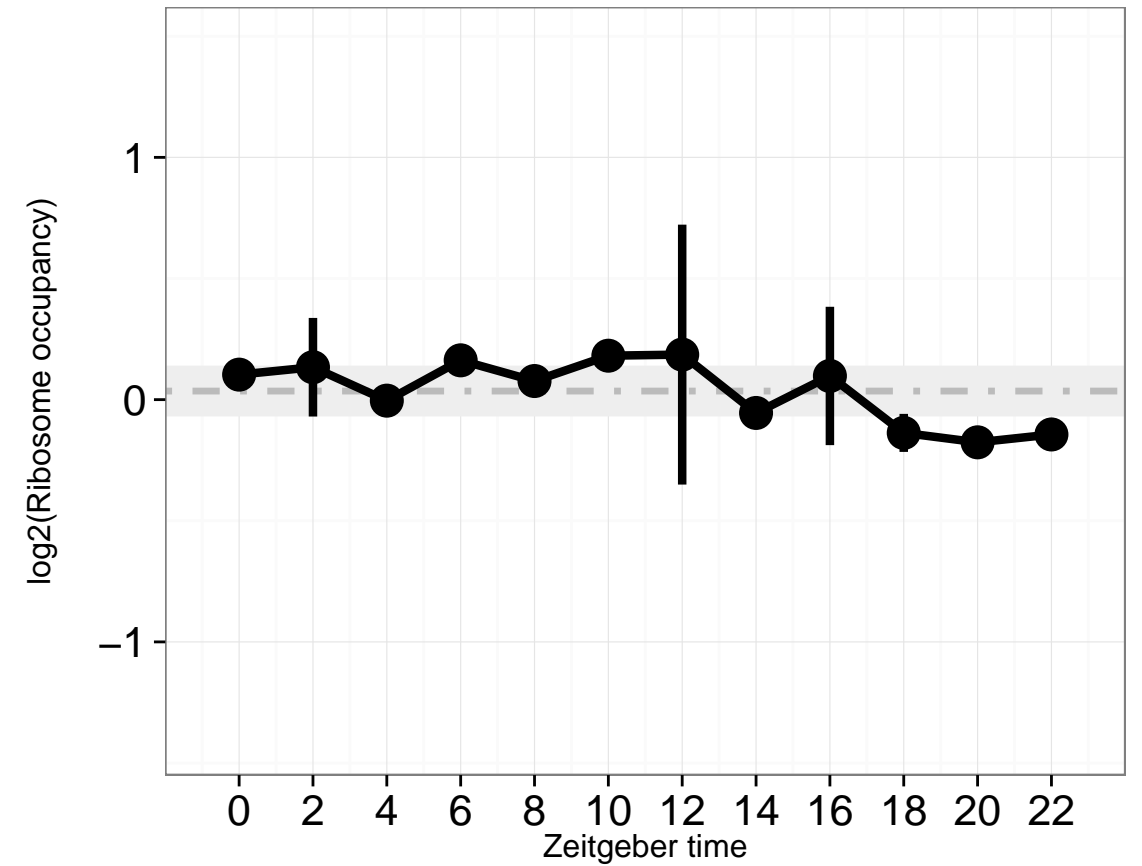

Supplement: Supplementary file 11237 [file 1]

## Zcchc17

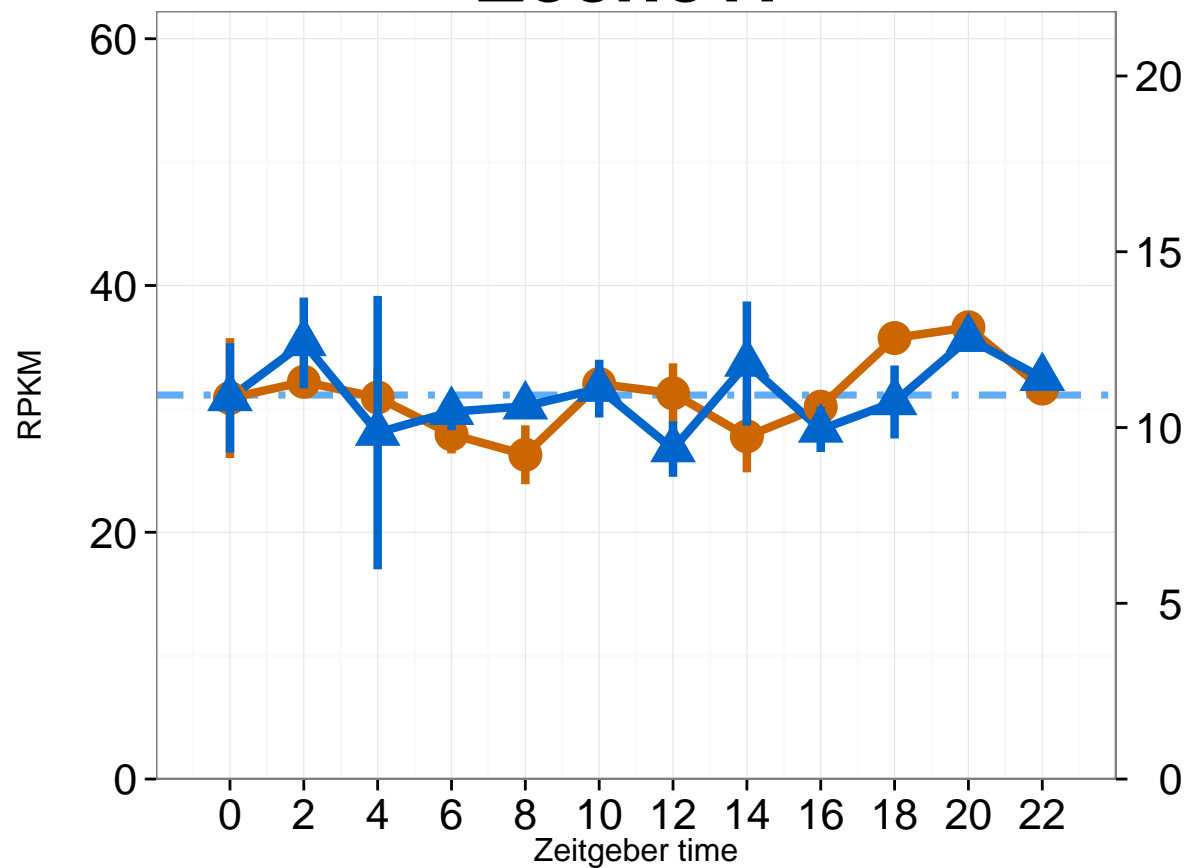

## Zcchc17

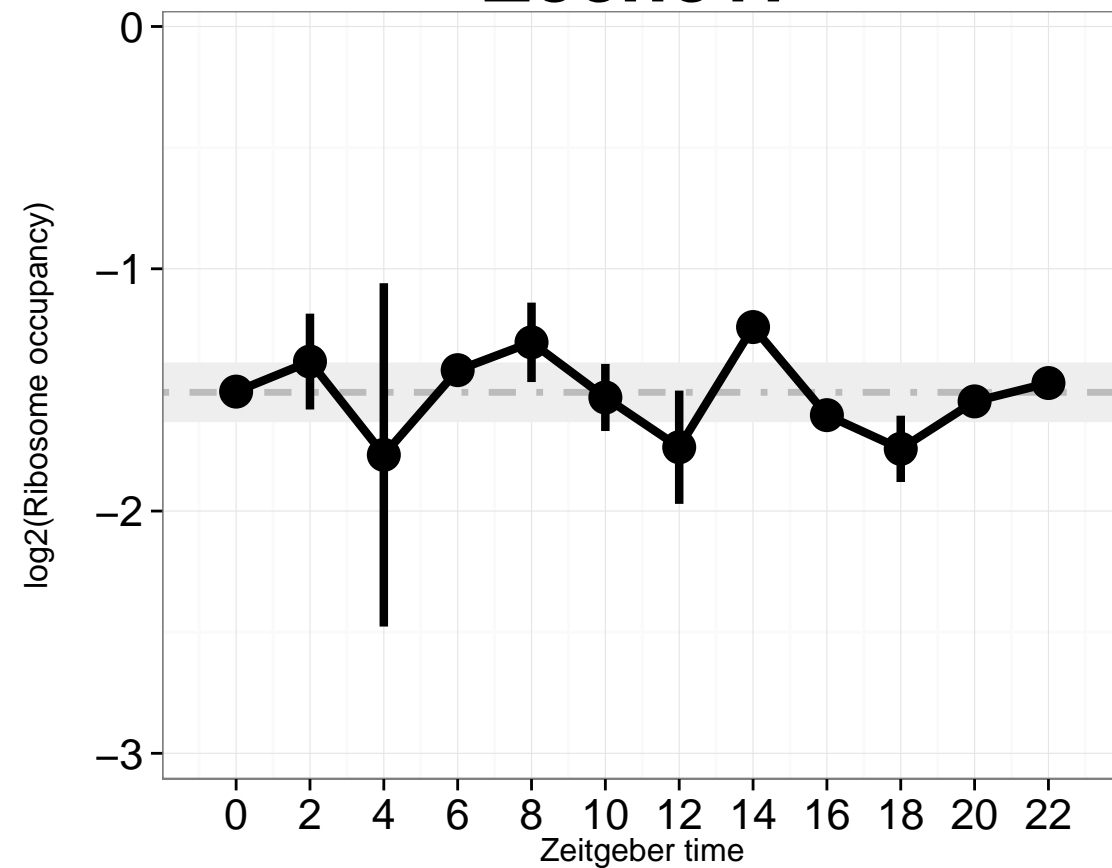

Supplement: Supplementary file 11238 [file 1]

# Rap1b

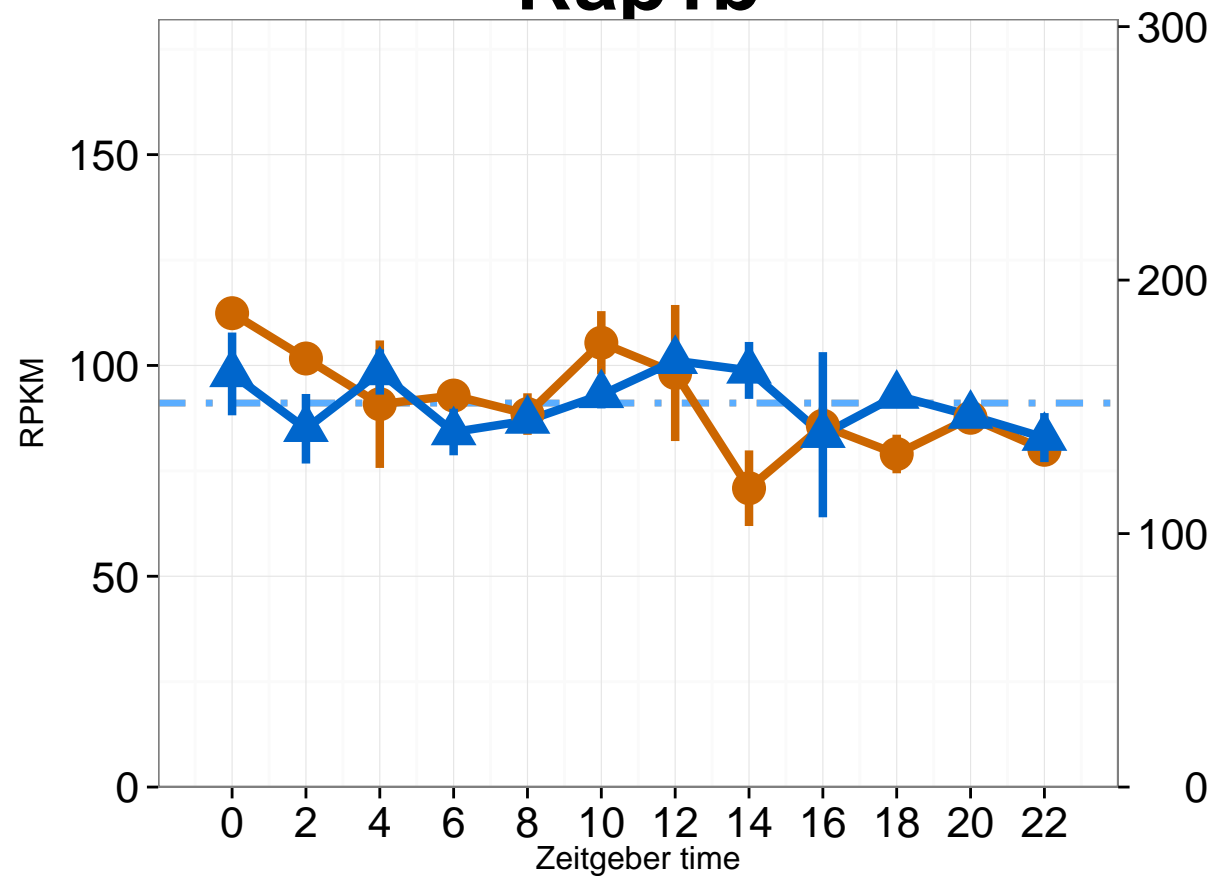

# Rap1b

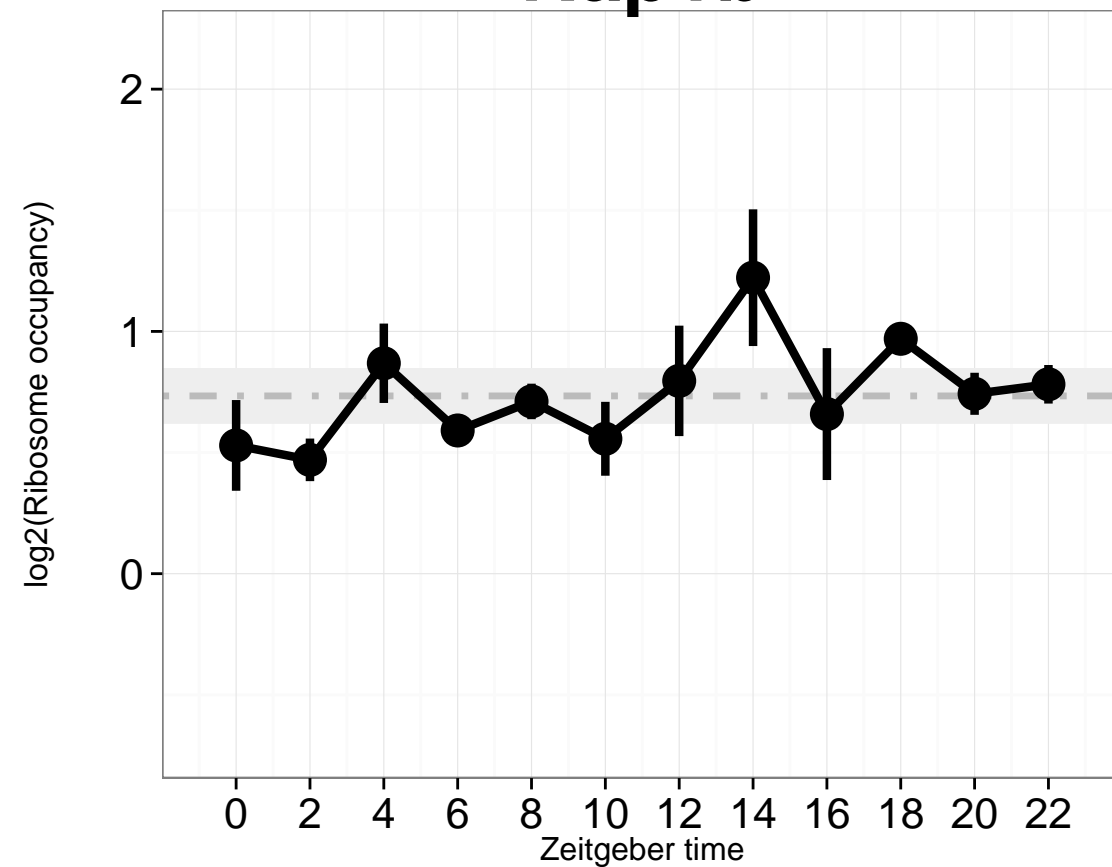

Supplement: Supplementary file 11239 [file 1]

# Pop1

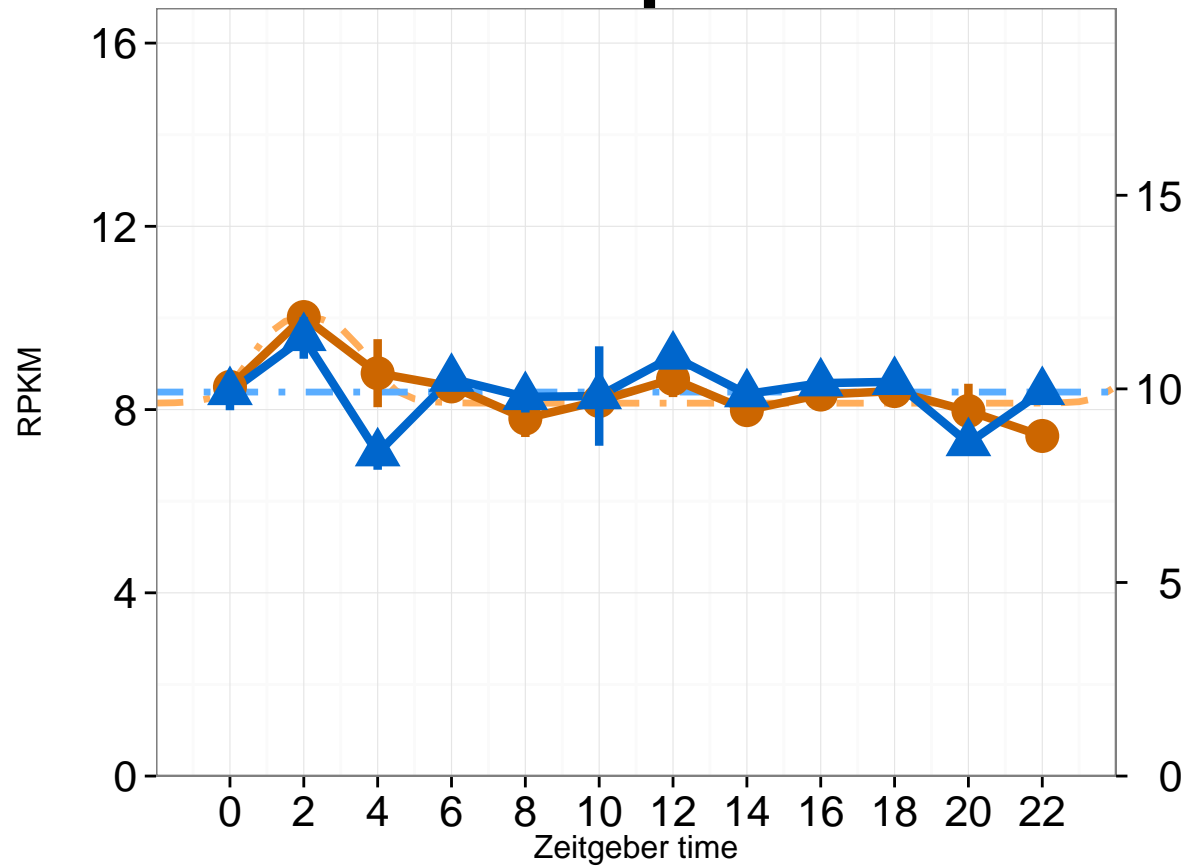

# Pop1

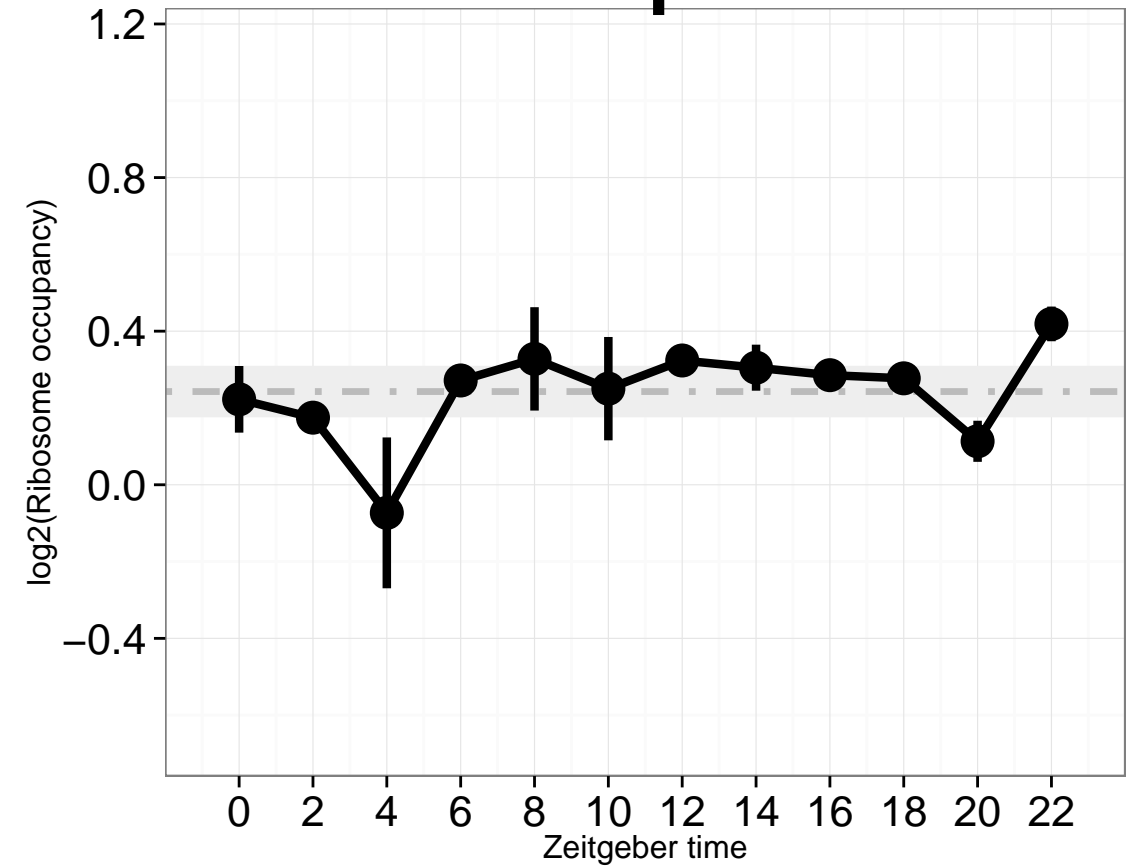

Supplement: Supplementary file 11240 [file 1]

## Gjb2

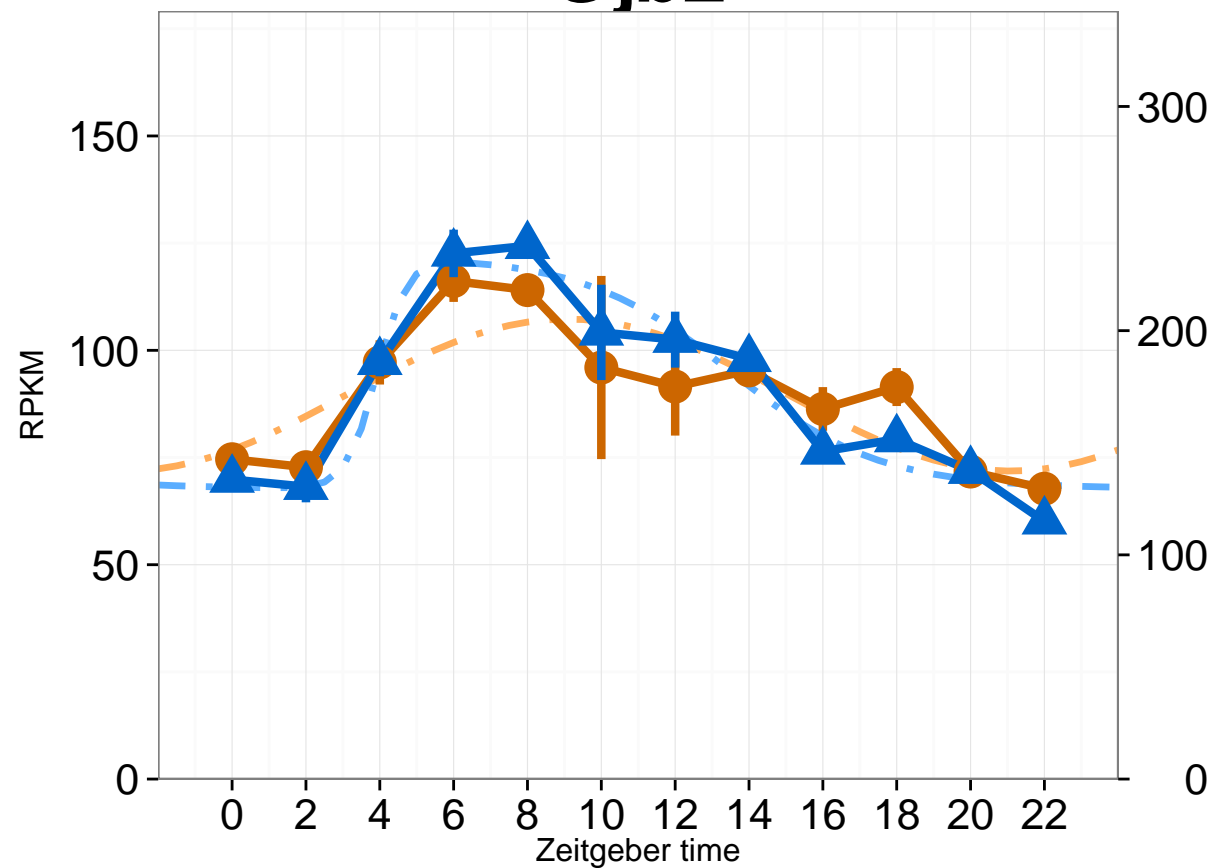

## Gjb2

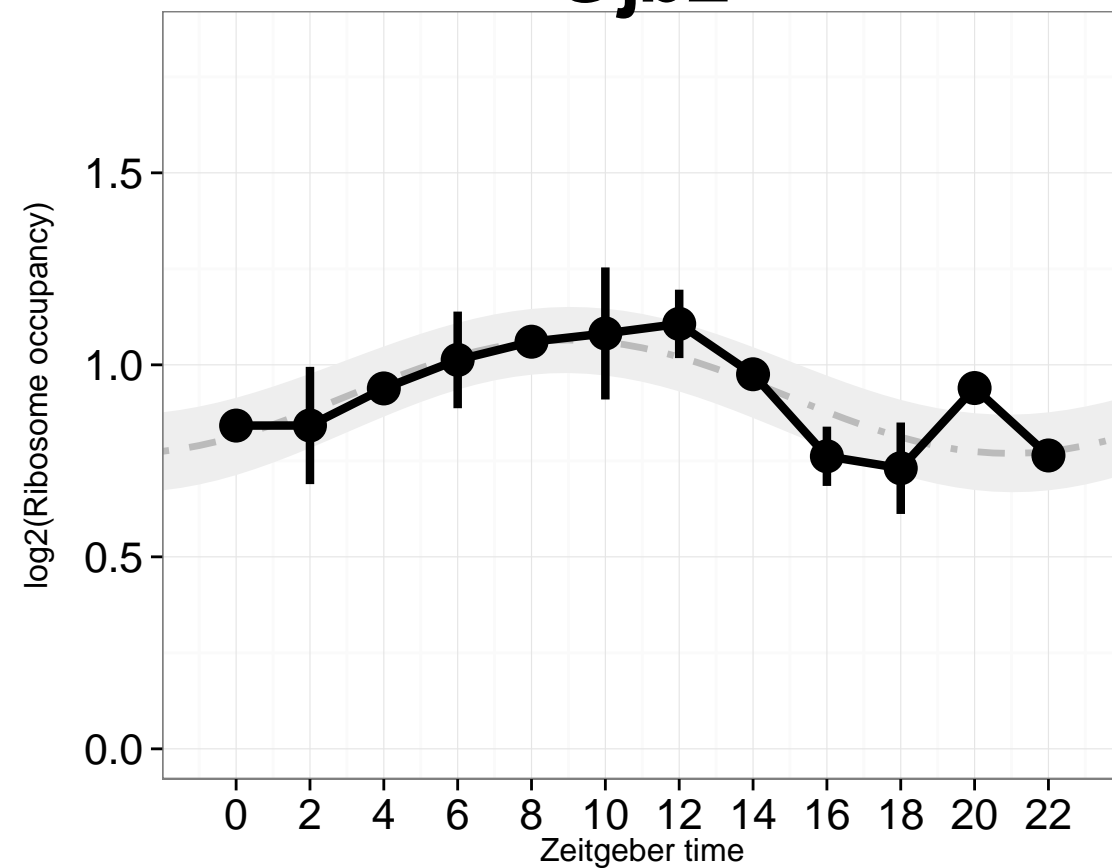

Supplement: Supplementary file 11241 [file 1]

# Rhot1

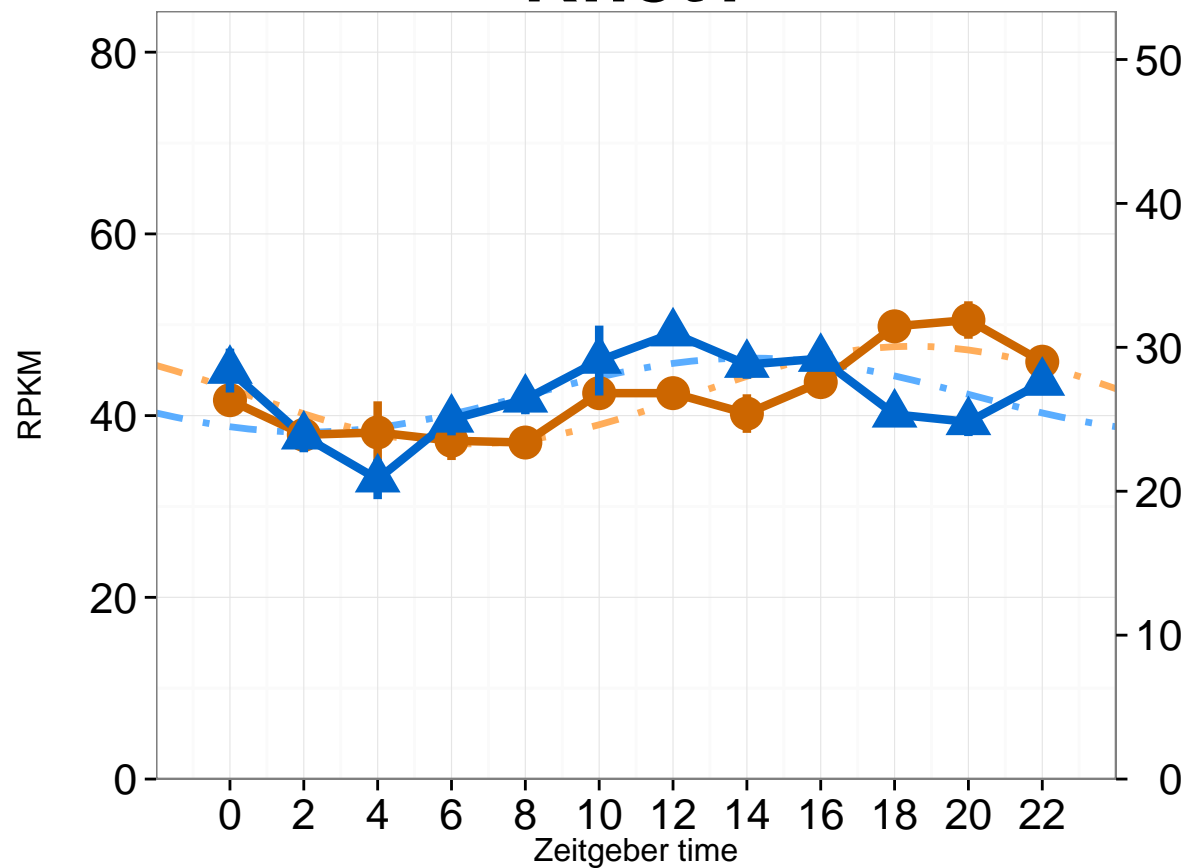

# Rhot1

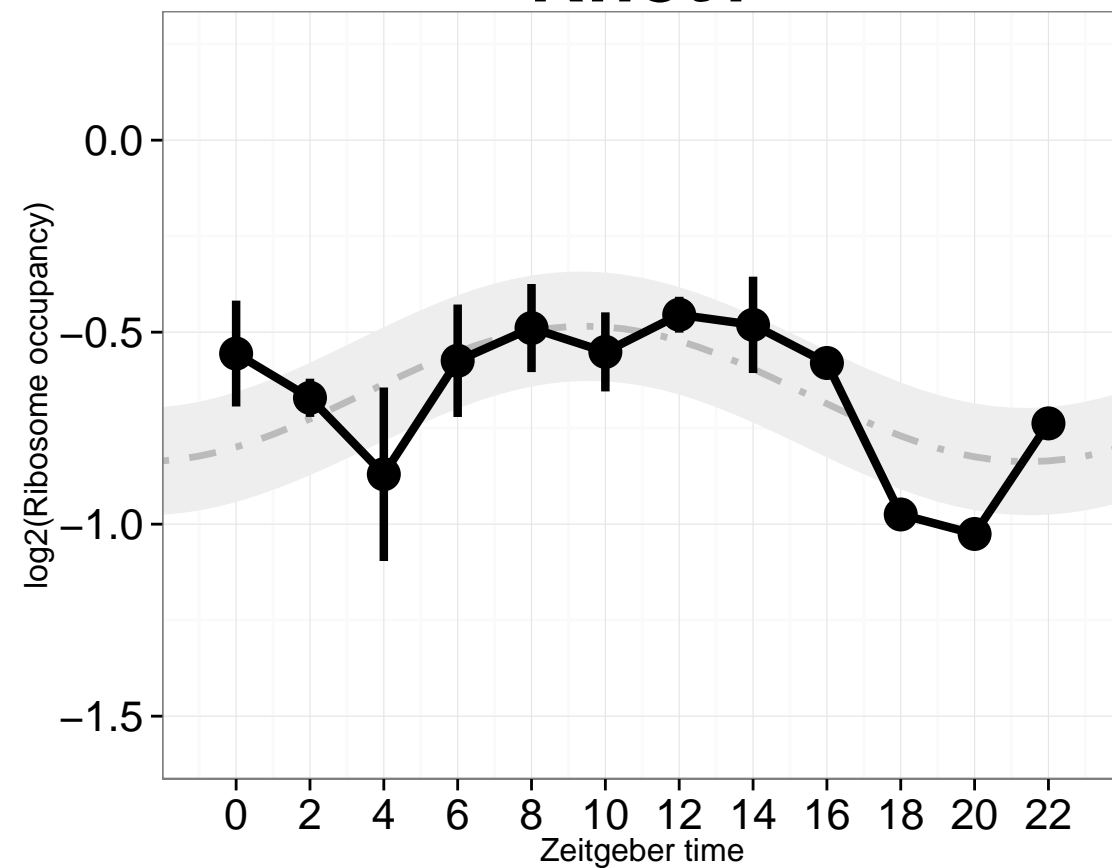

Supplement: Supplementary file 11242 [file 1]
