# Supplementary material (part 113 of 133)
Source: publisher figshare collection journal article supplement (https://springernature.figshare.com/articles/dataset/_/4903193)

## Ddb2

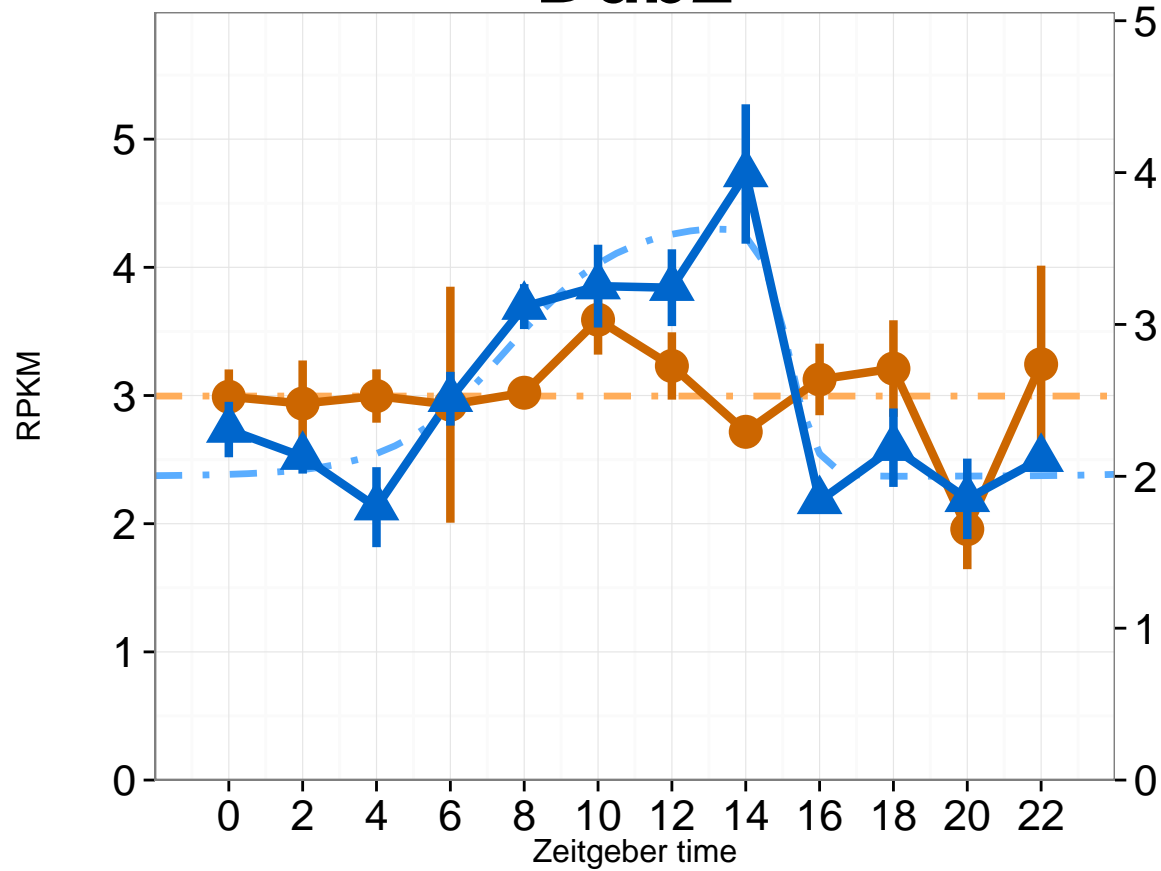

## Ddb2

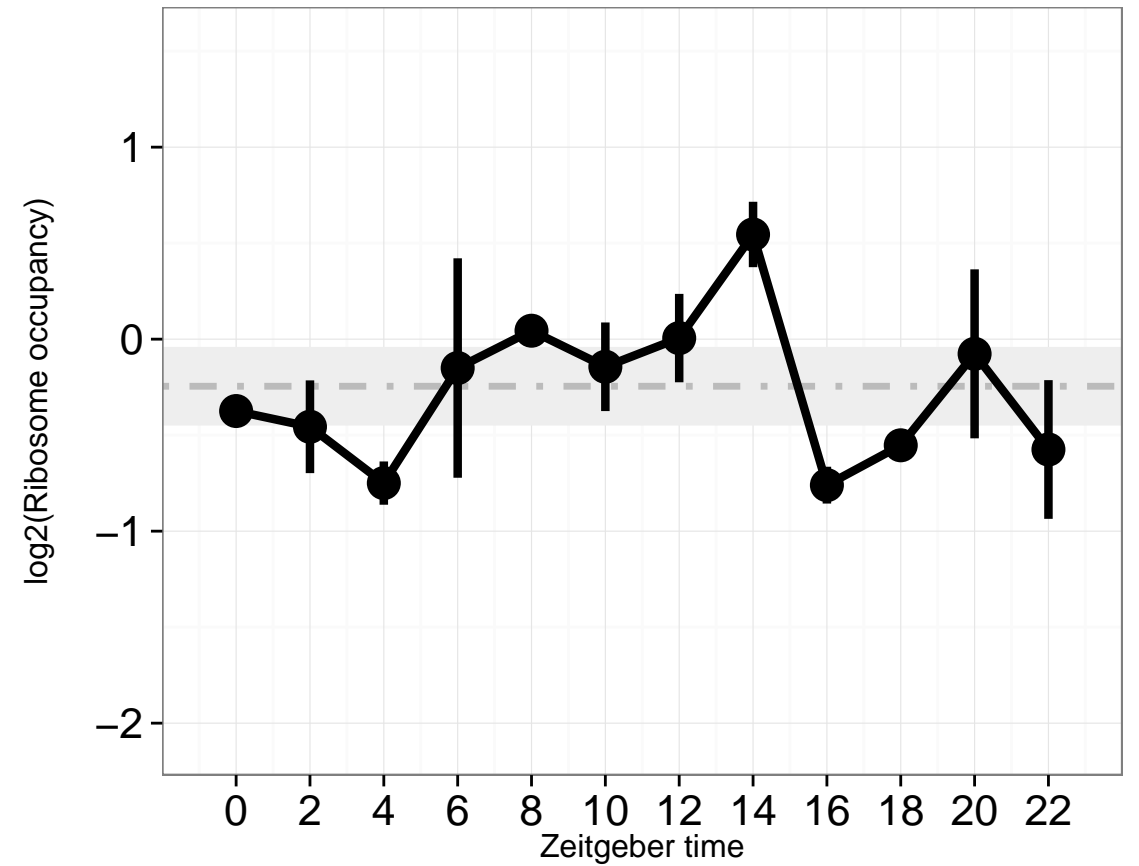

Supplement: Supplementary file 11243 [file 1]

# Fbxo47

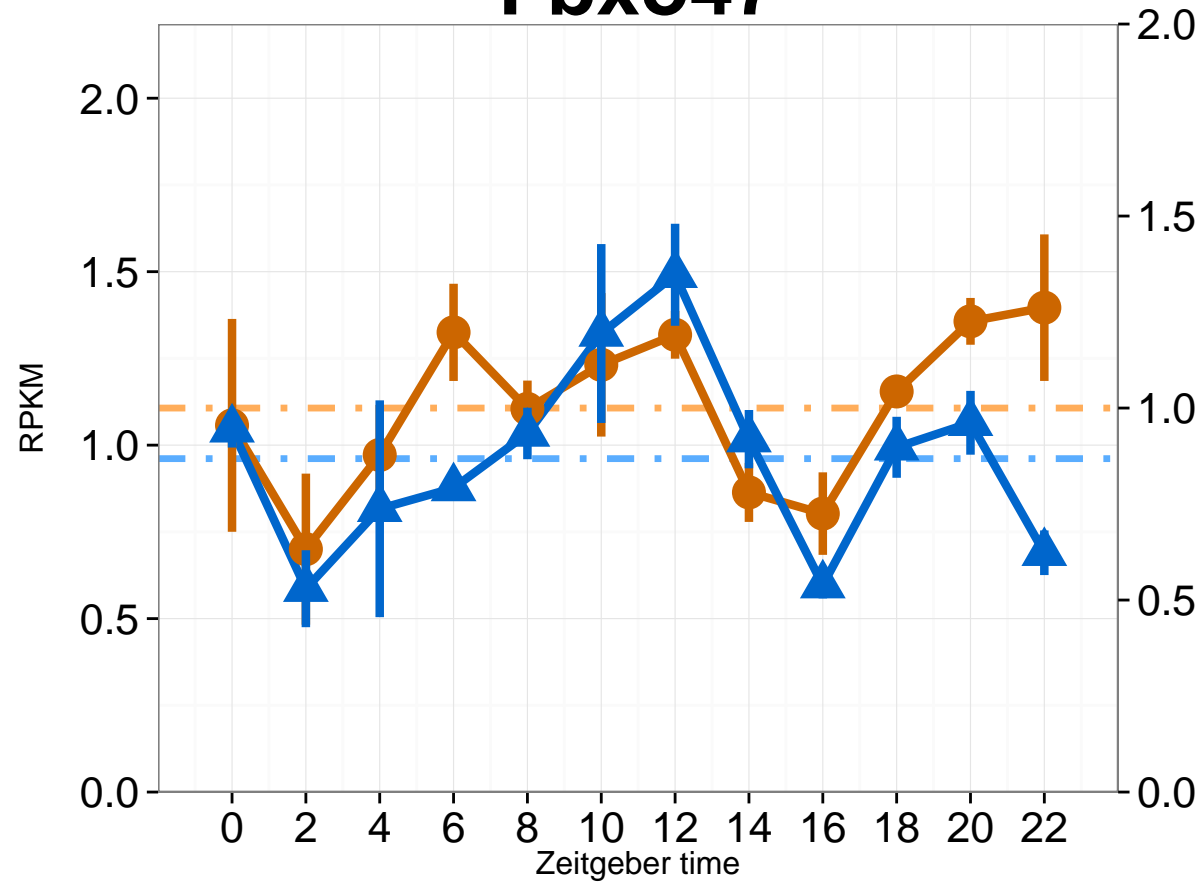

# Fbxo47

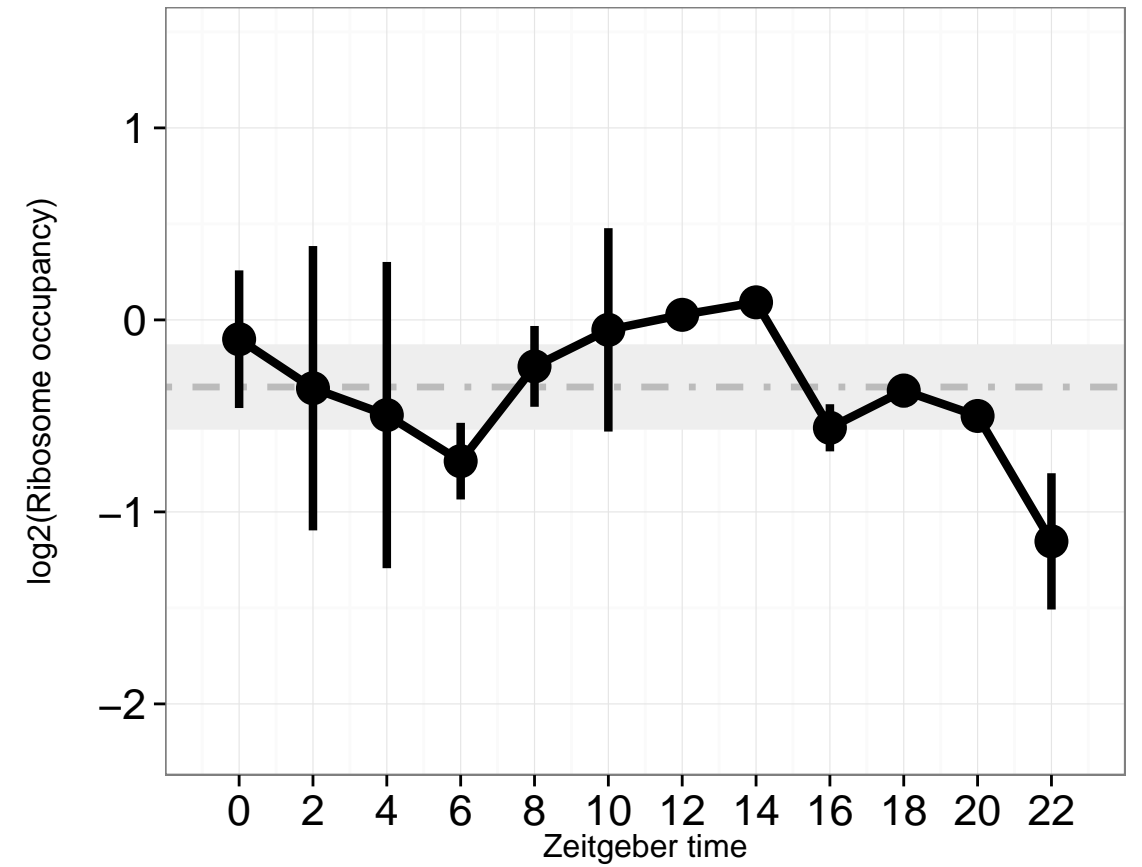

Supplement: Supplementary file 11244 [file 1]

# Ccdc17

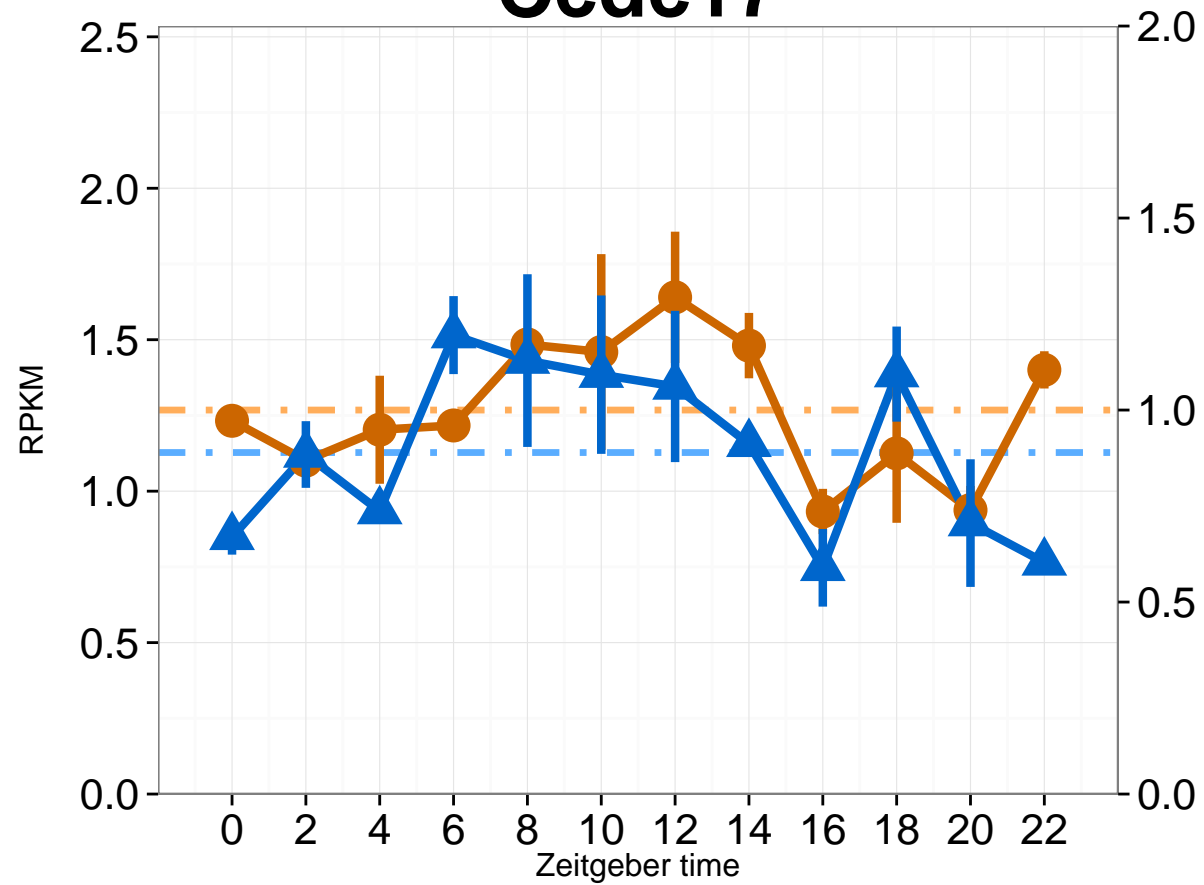

# Ccdc17

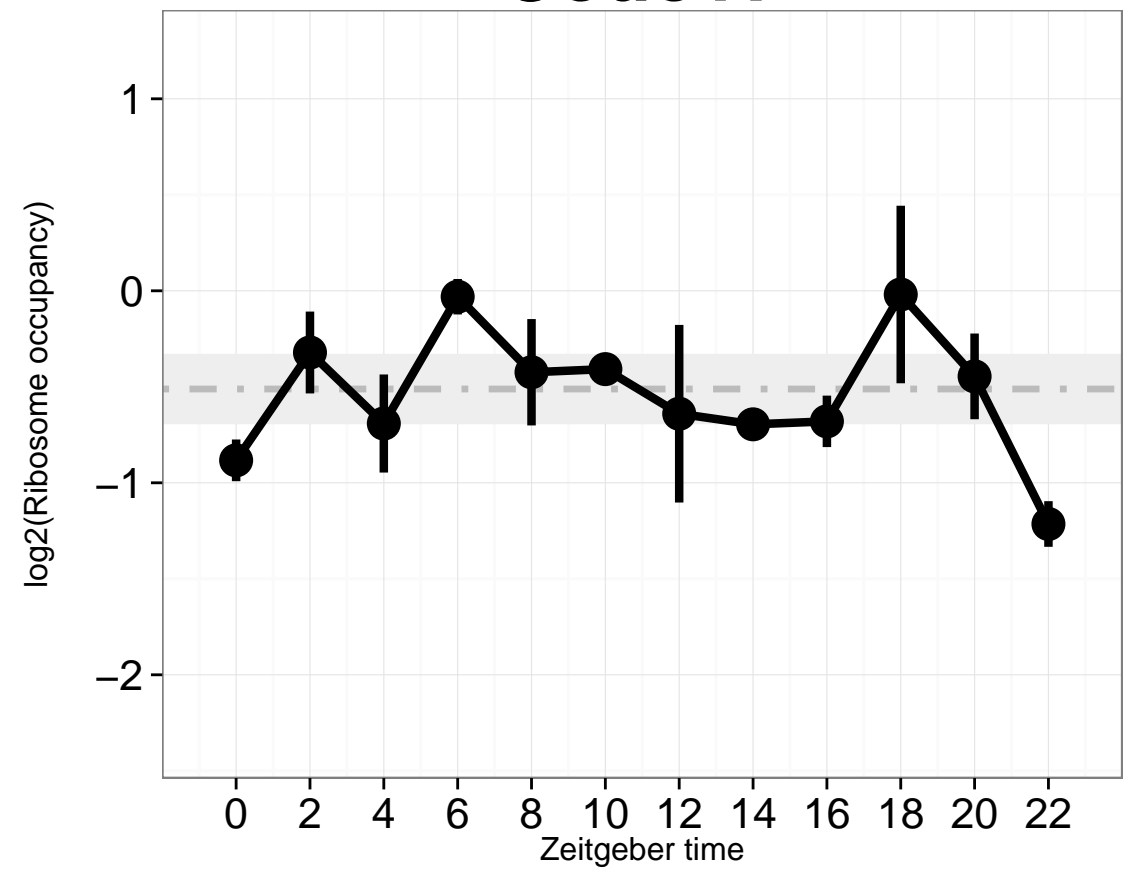

Supplement: Supplementary file 11245 [file 1]

# Rab11fip2

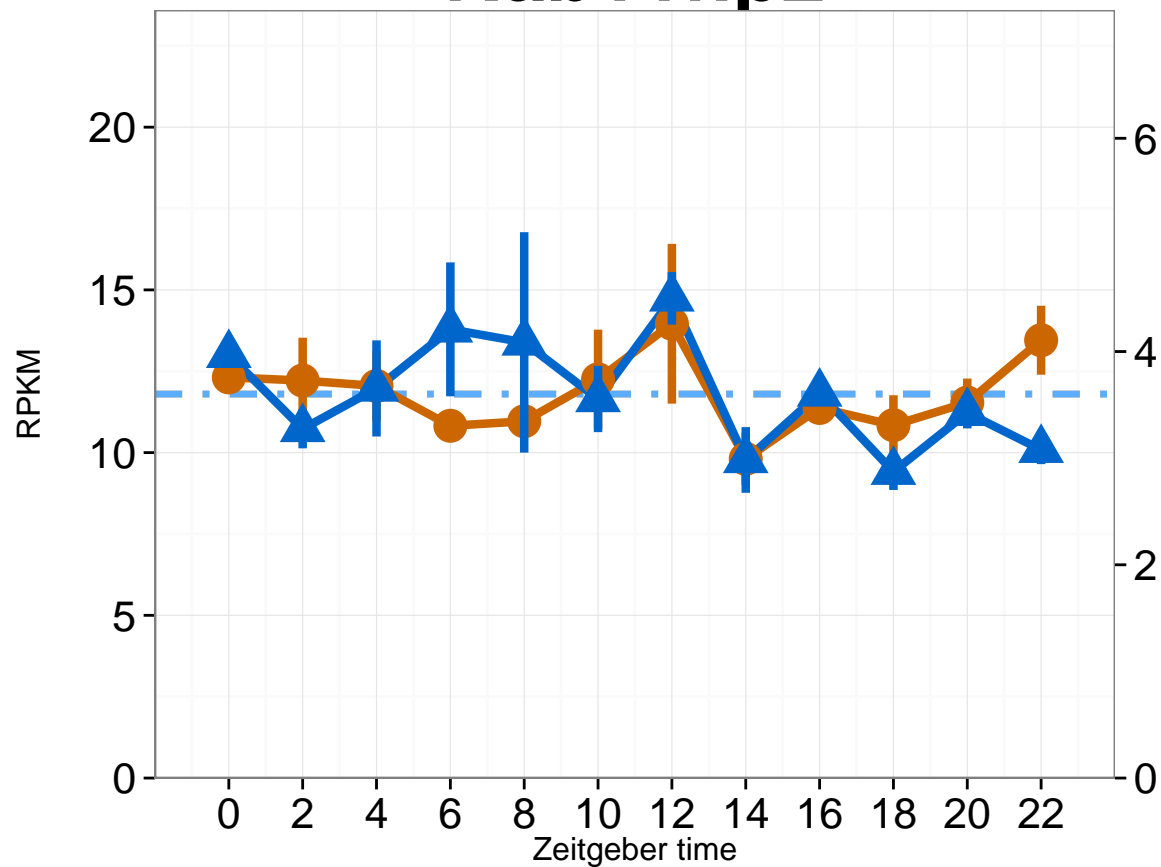

# Rab11fip2

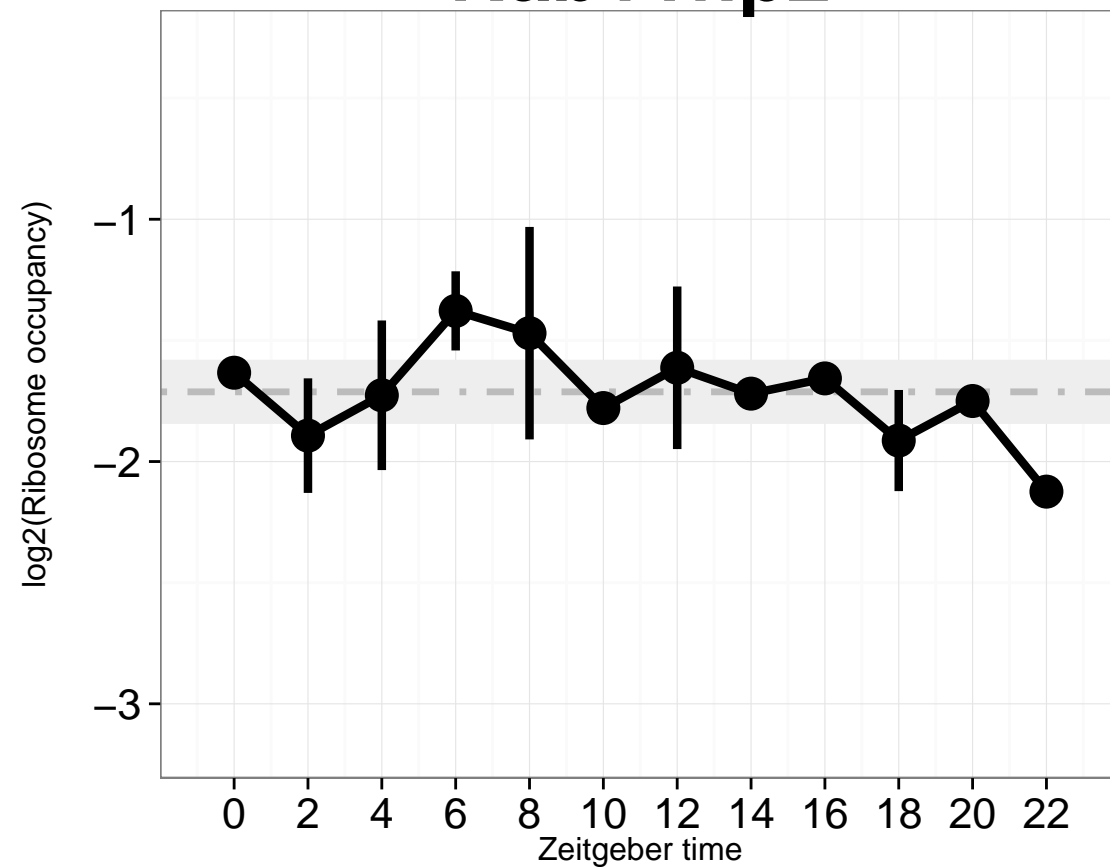

Supplement: Supplementary file 11246 [file 1]

## Jmjd8

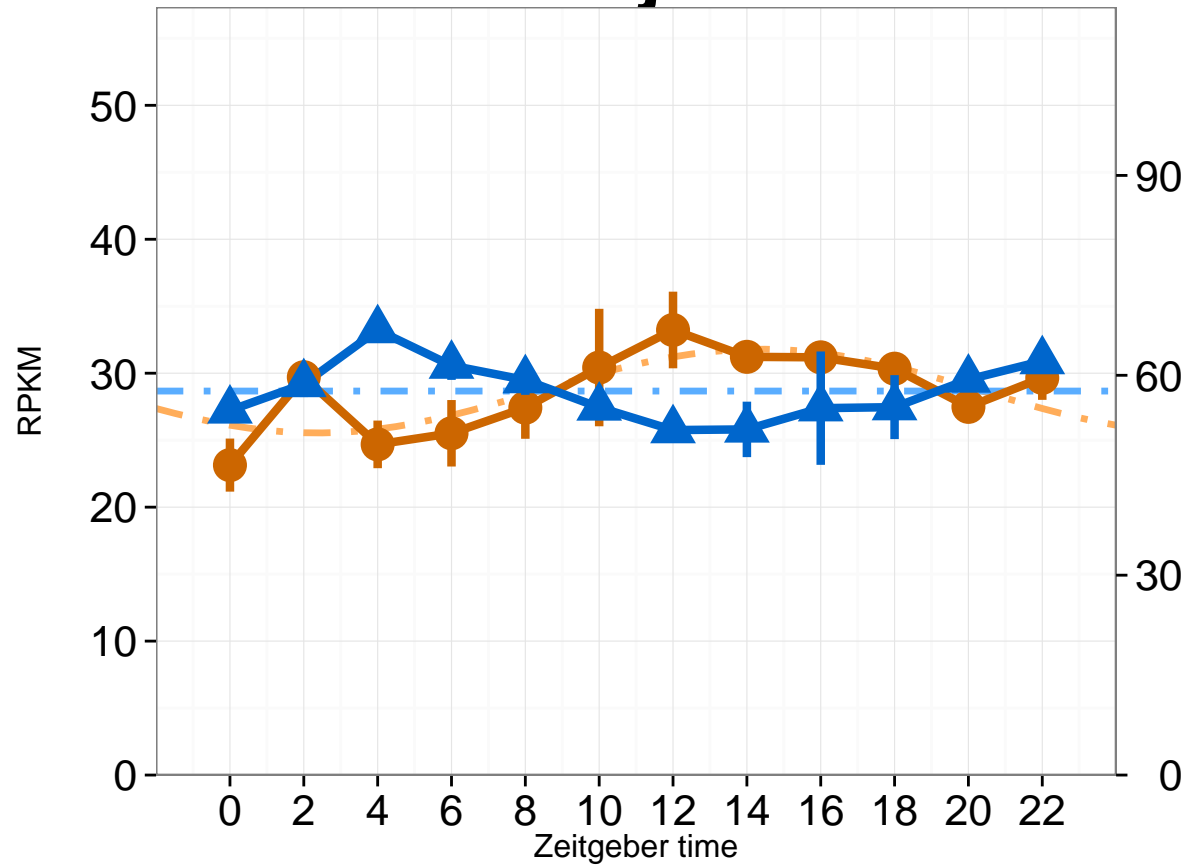

## Jmjd8

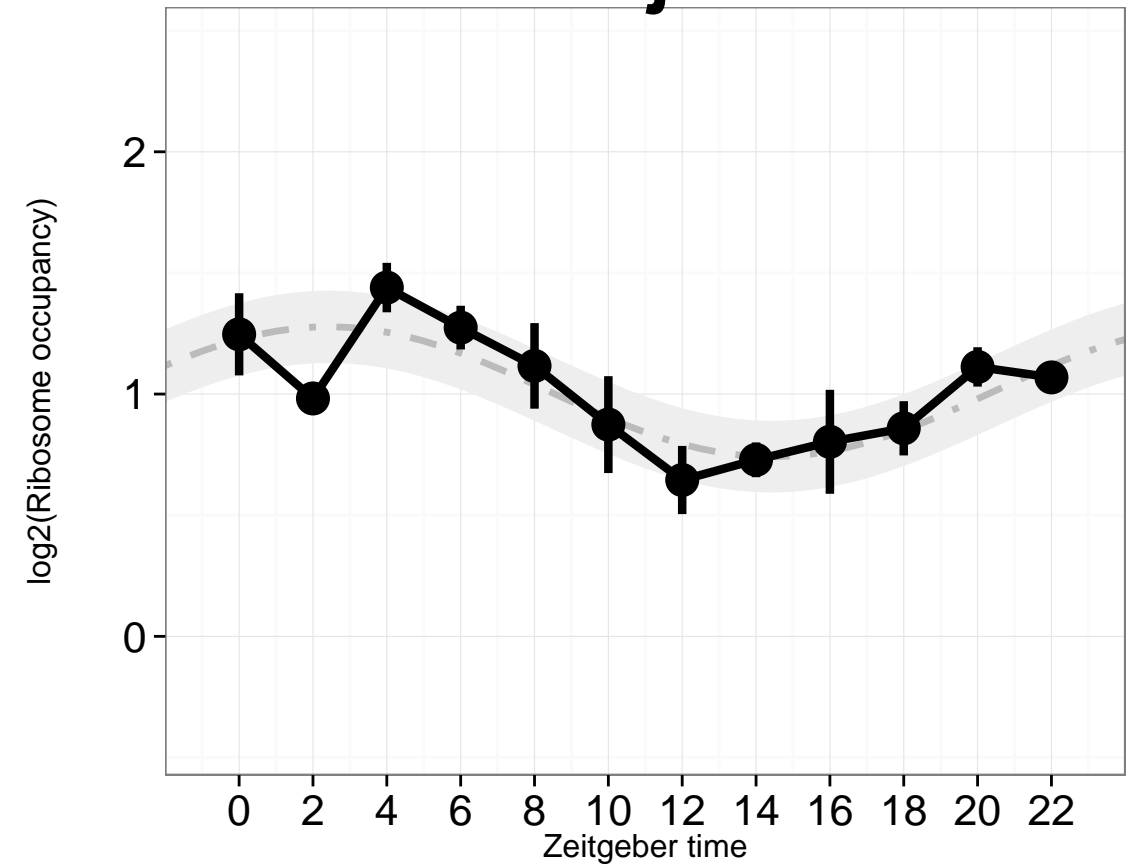

Supplement: Supplementary file 11247 [file 1]

# Ugt2b34

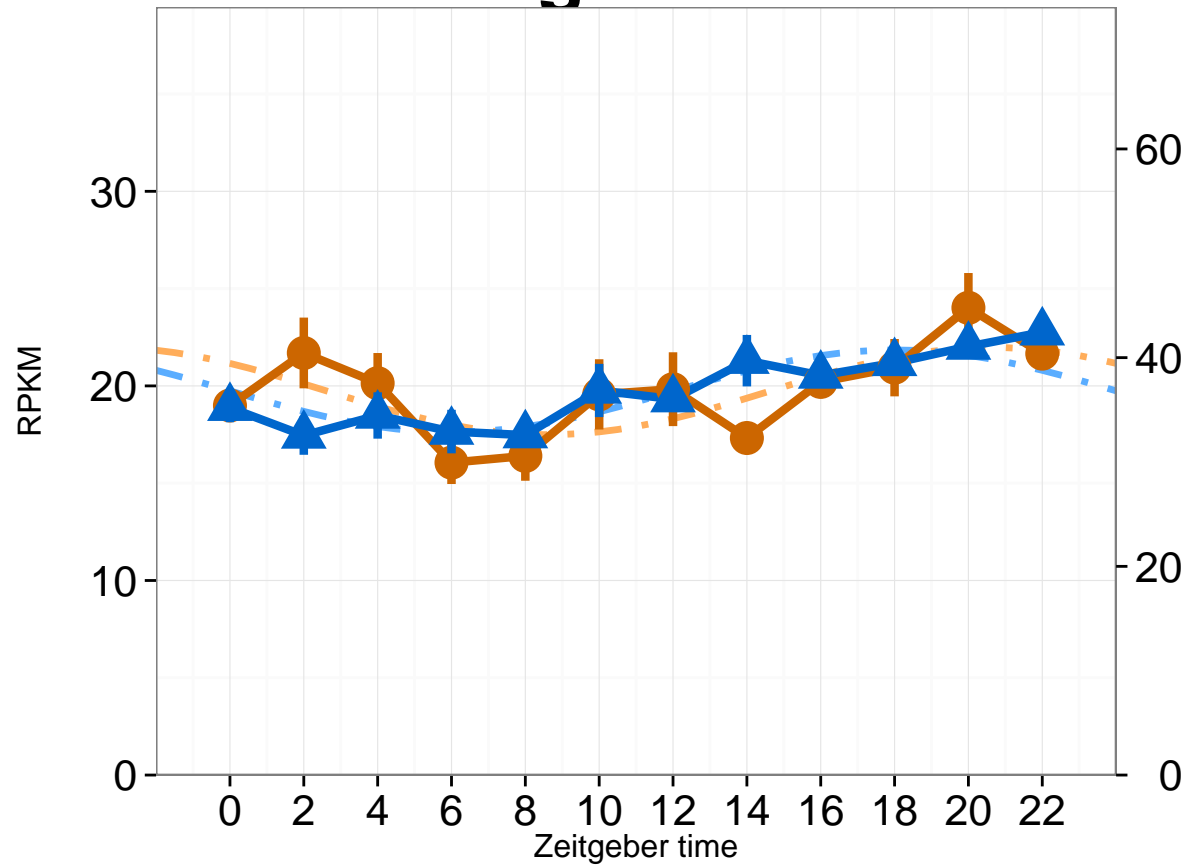

# Ugt2b34

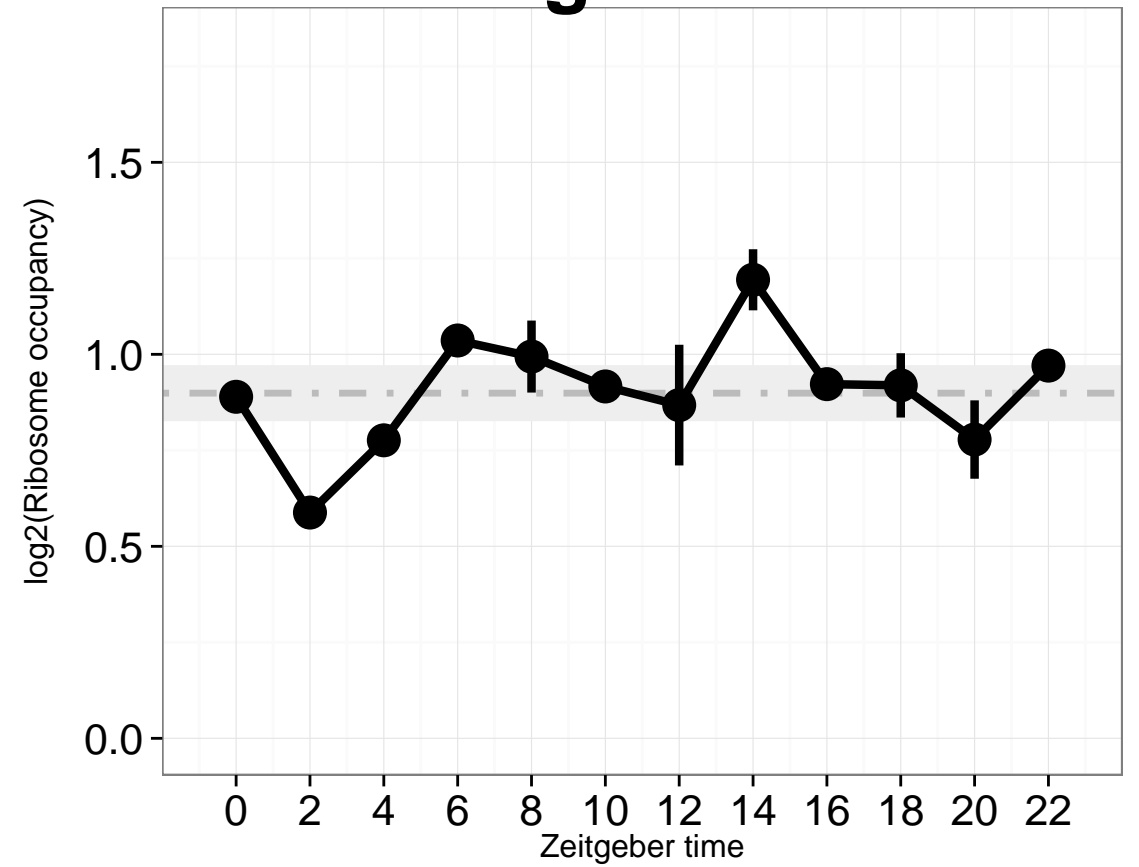

Supplement: Supplementary file 11248 [file 1]

## Rad51c

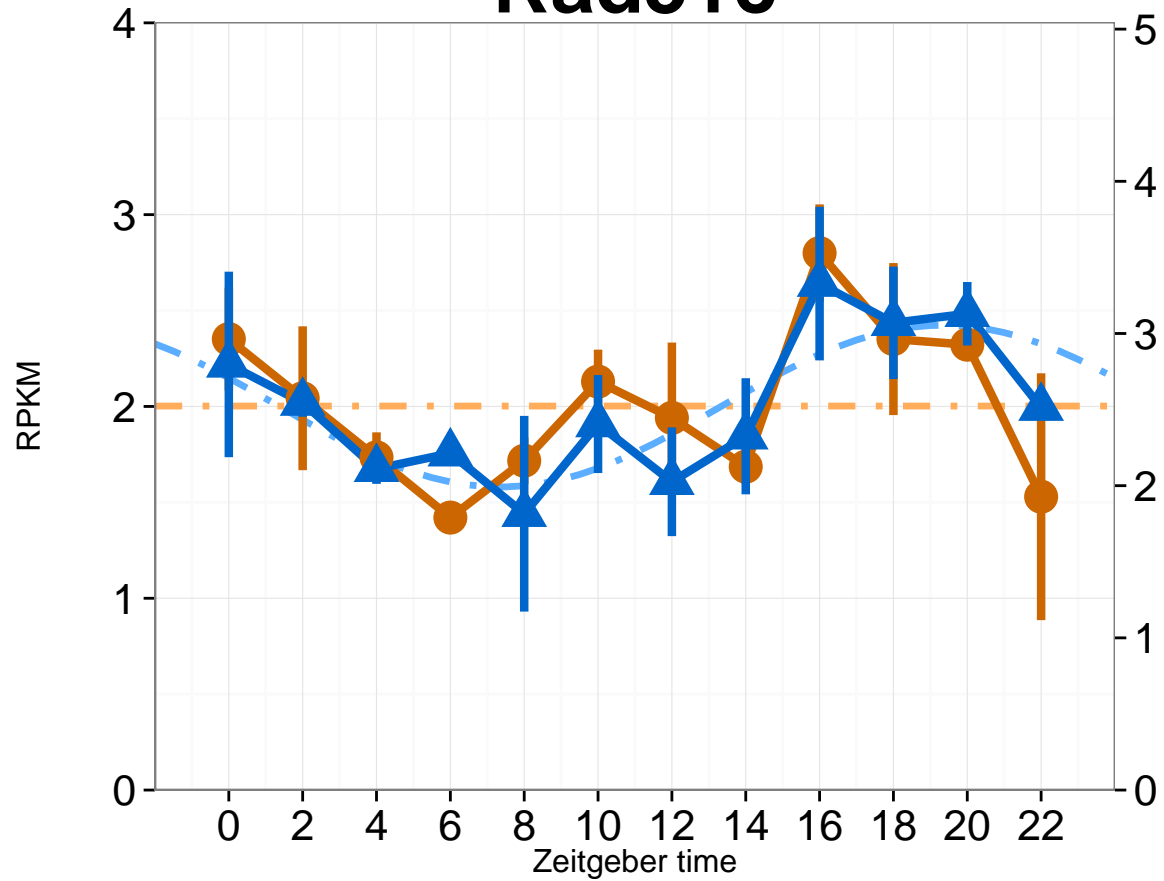

## Rad51c

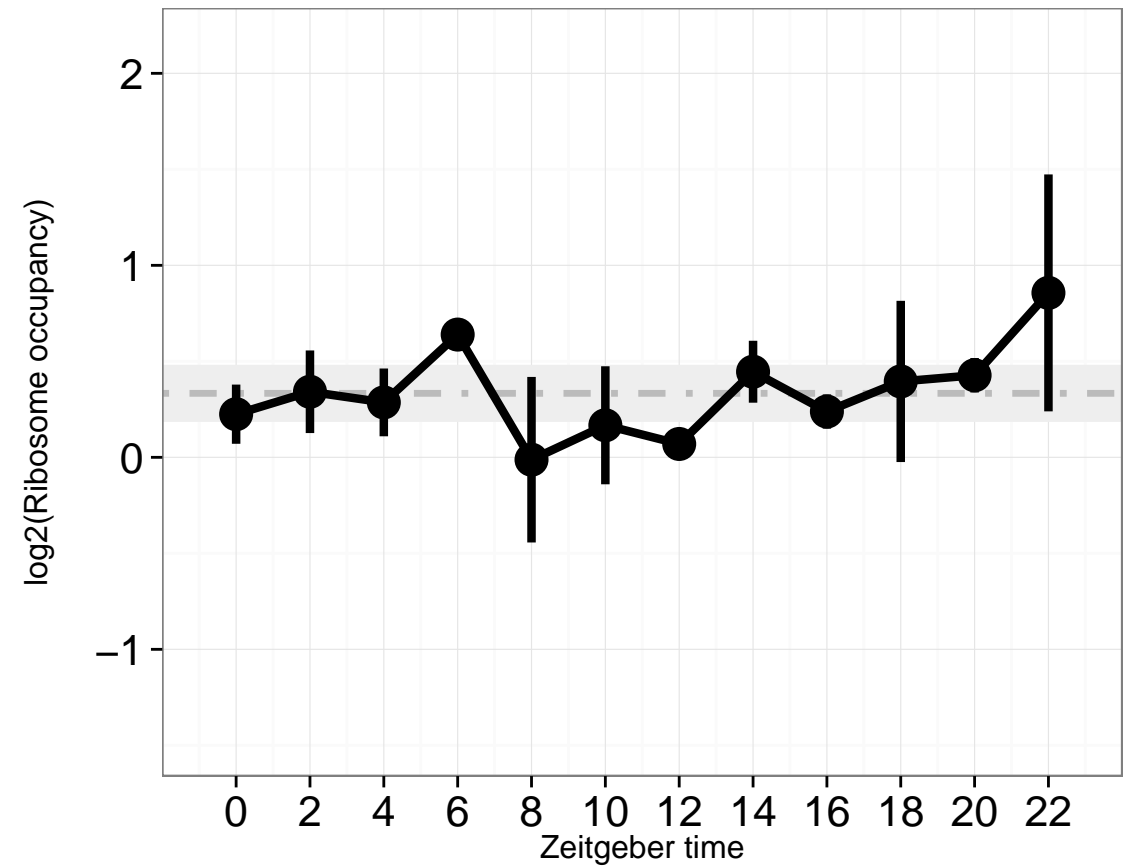

Supplement: Supplementary file 11249 [file 1]

## Egln3

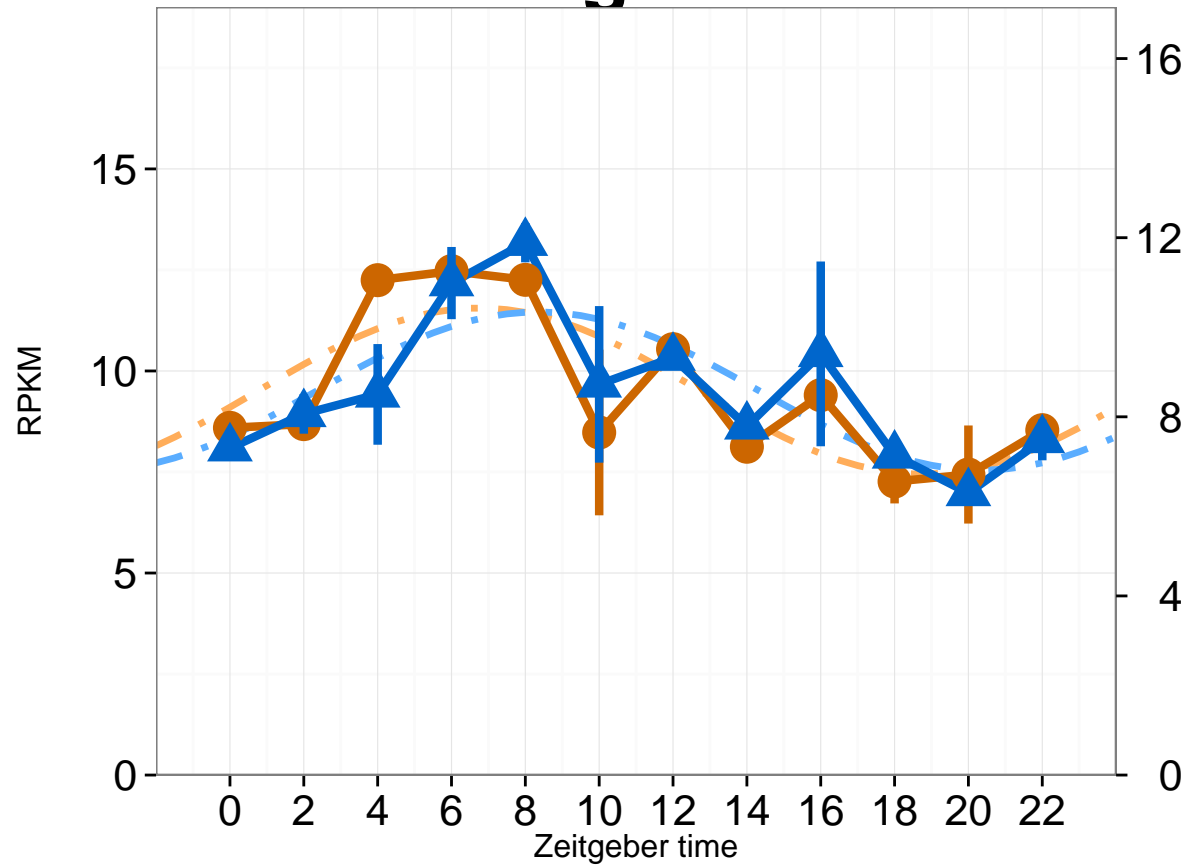

## Egln3

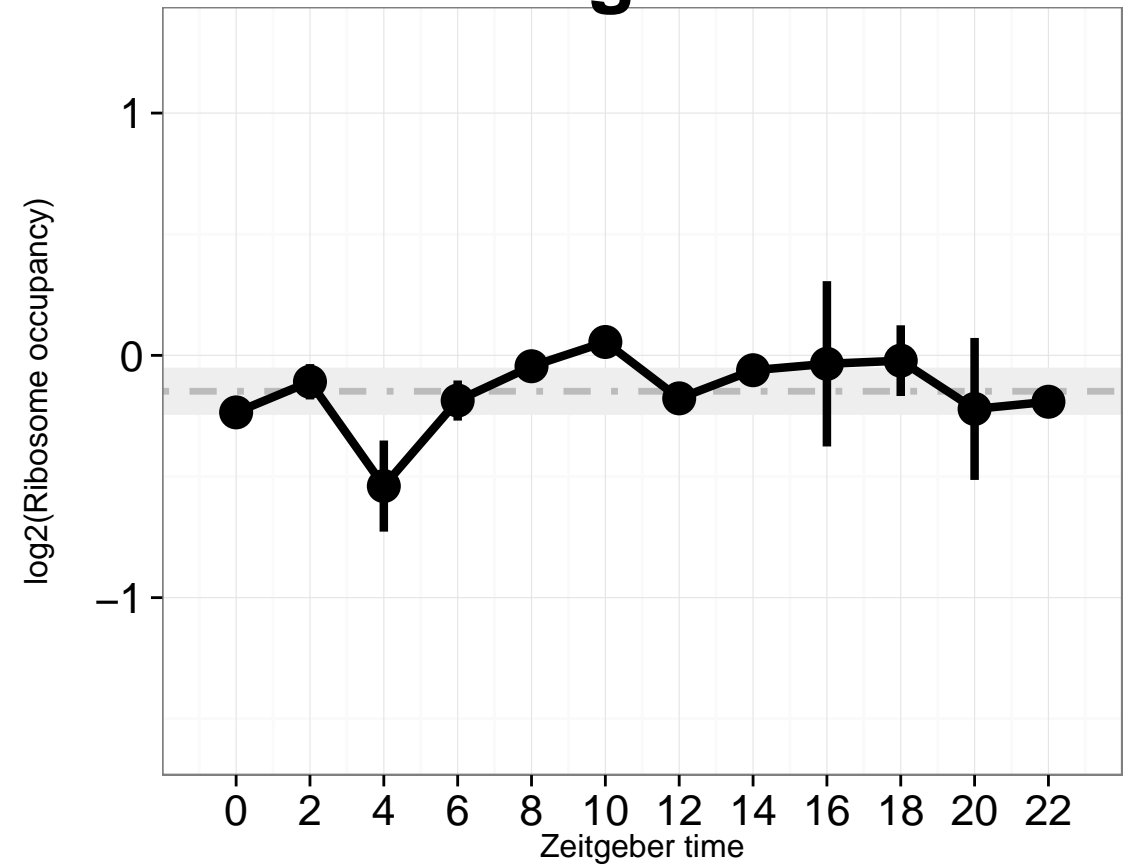

Supplement: Supplementary file 11250 [file 1]

## Dennd6a

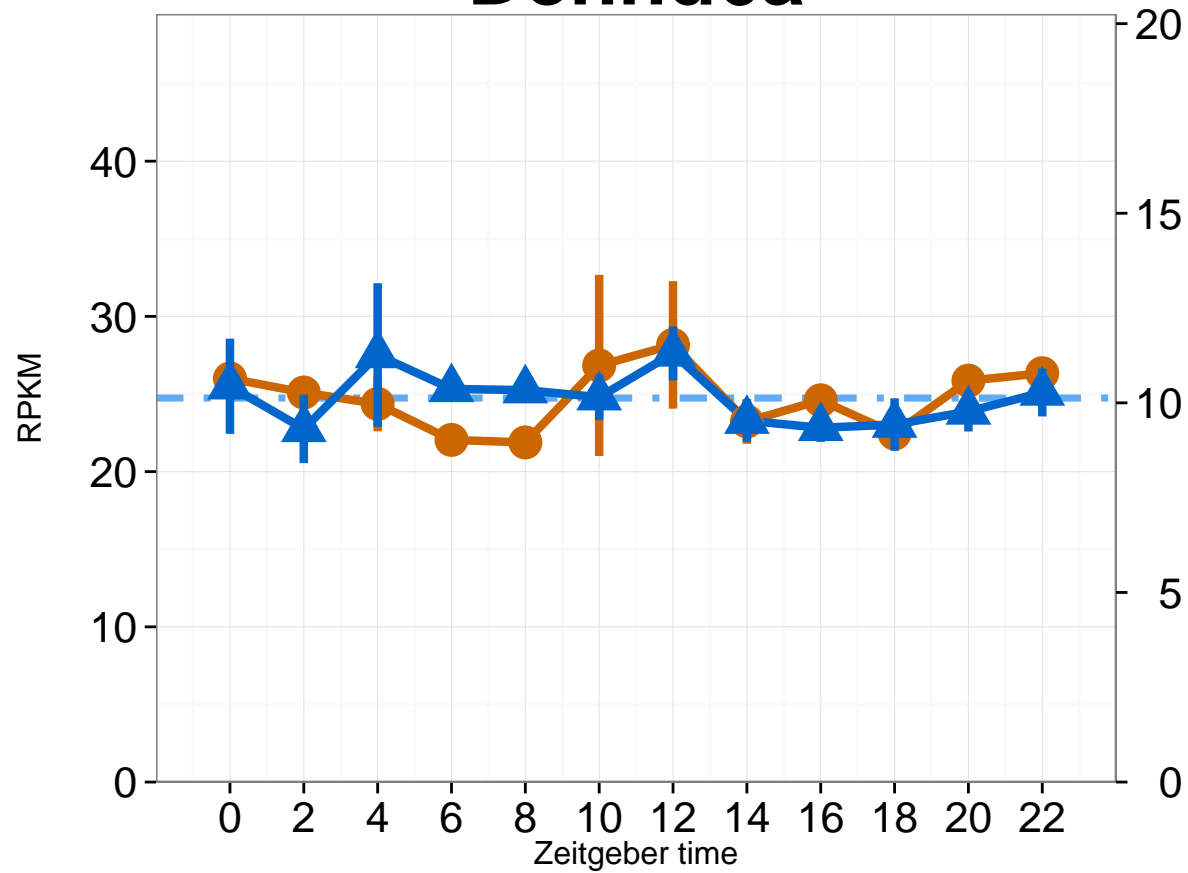

## Dennd6a

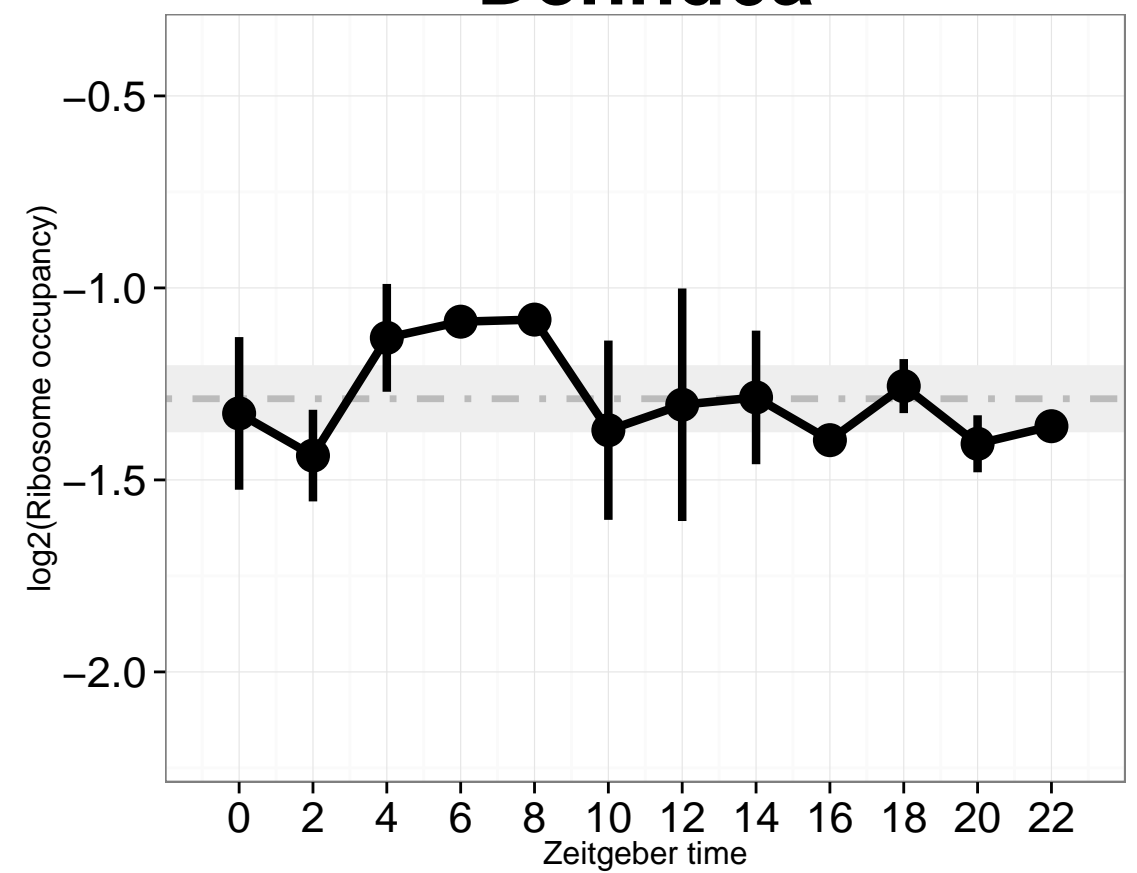

Supplement: Supplementary file 11251 [file 1]

# Trim59

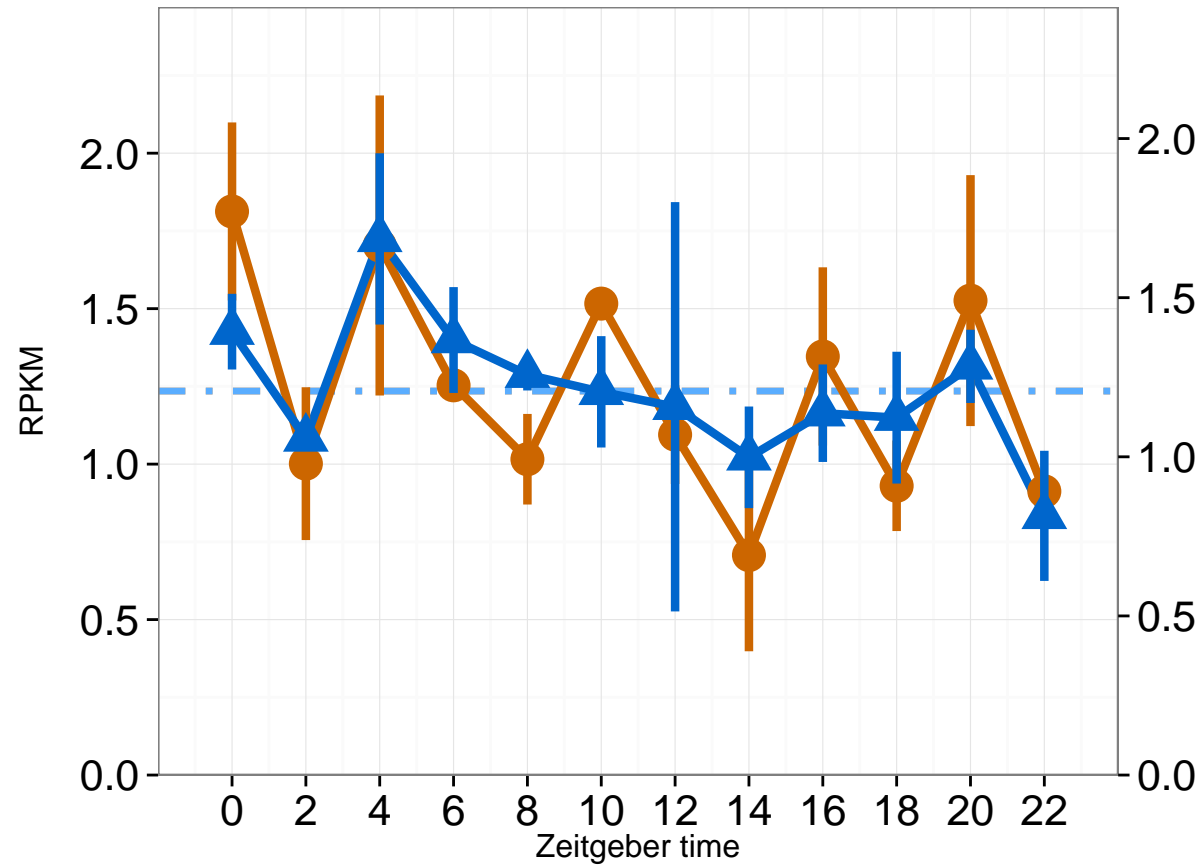

# Trim59

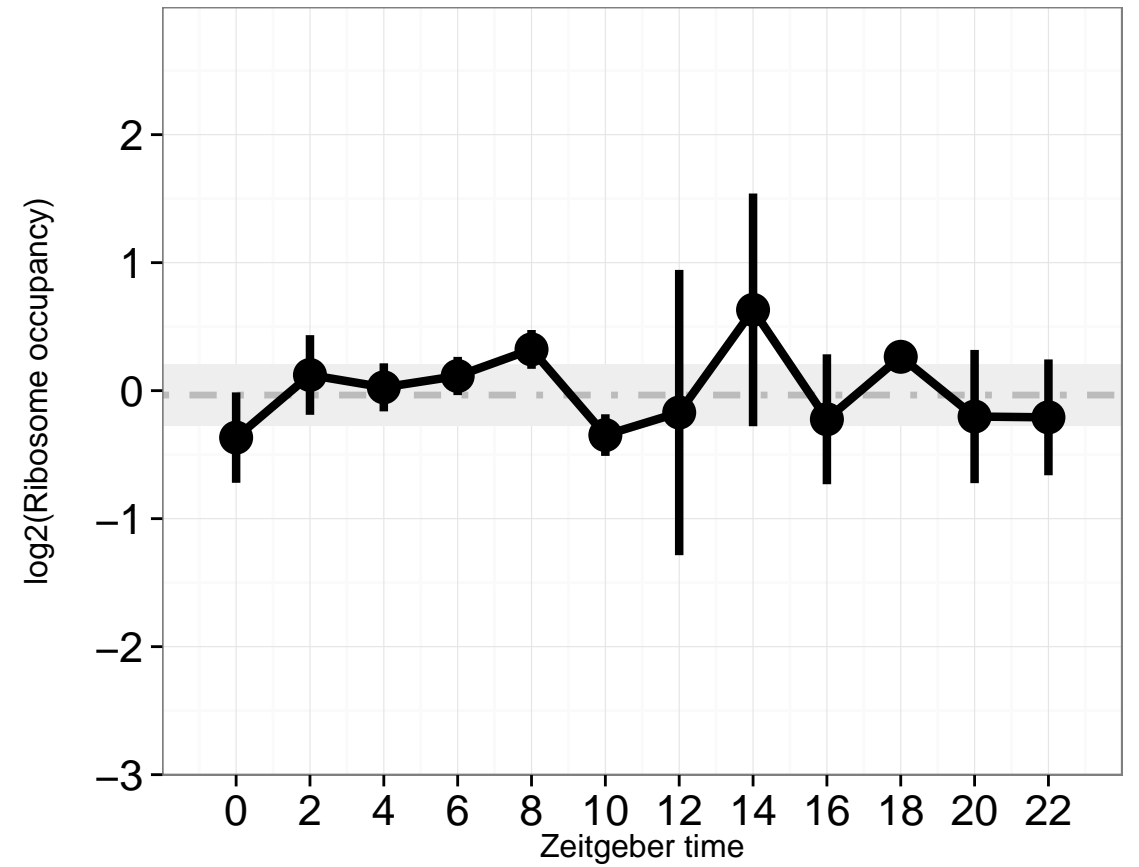

Supplement: Supplementary file 11252 [file 1]

## Creb3

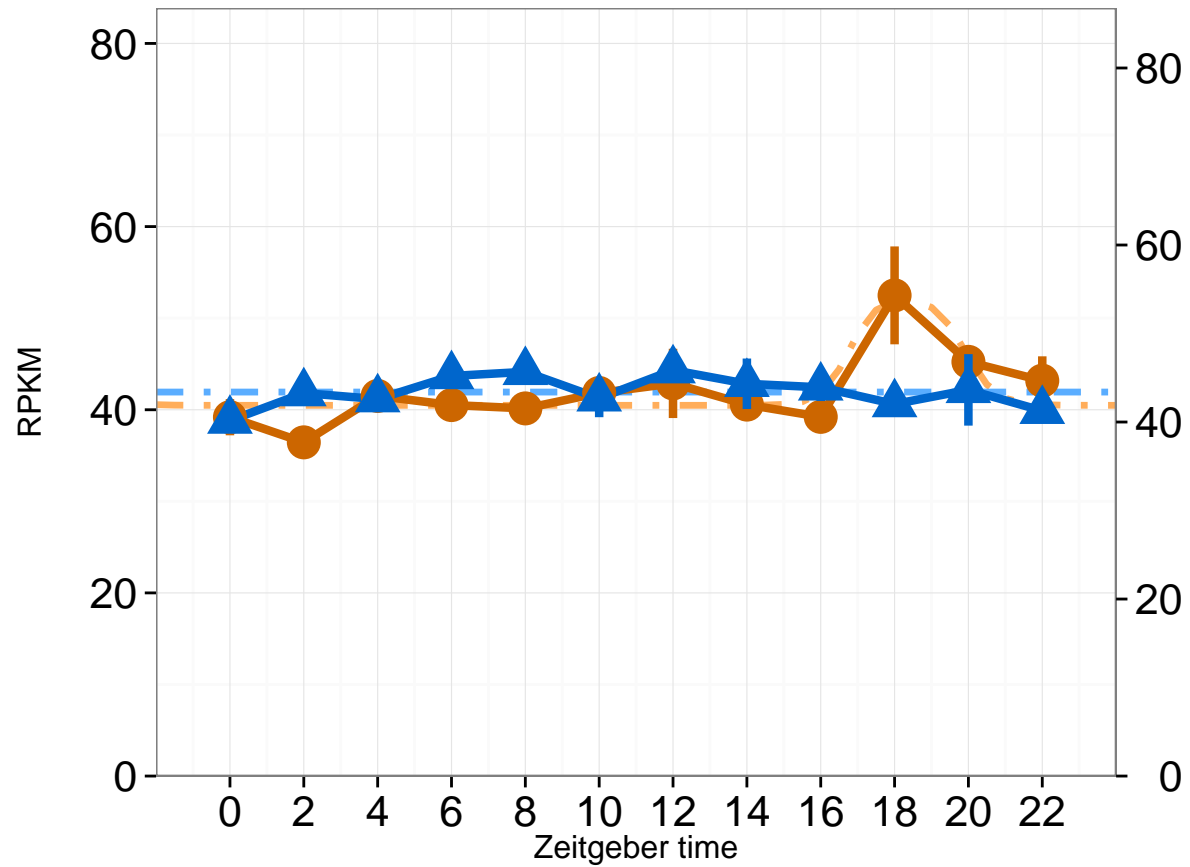

## Creb3

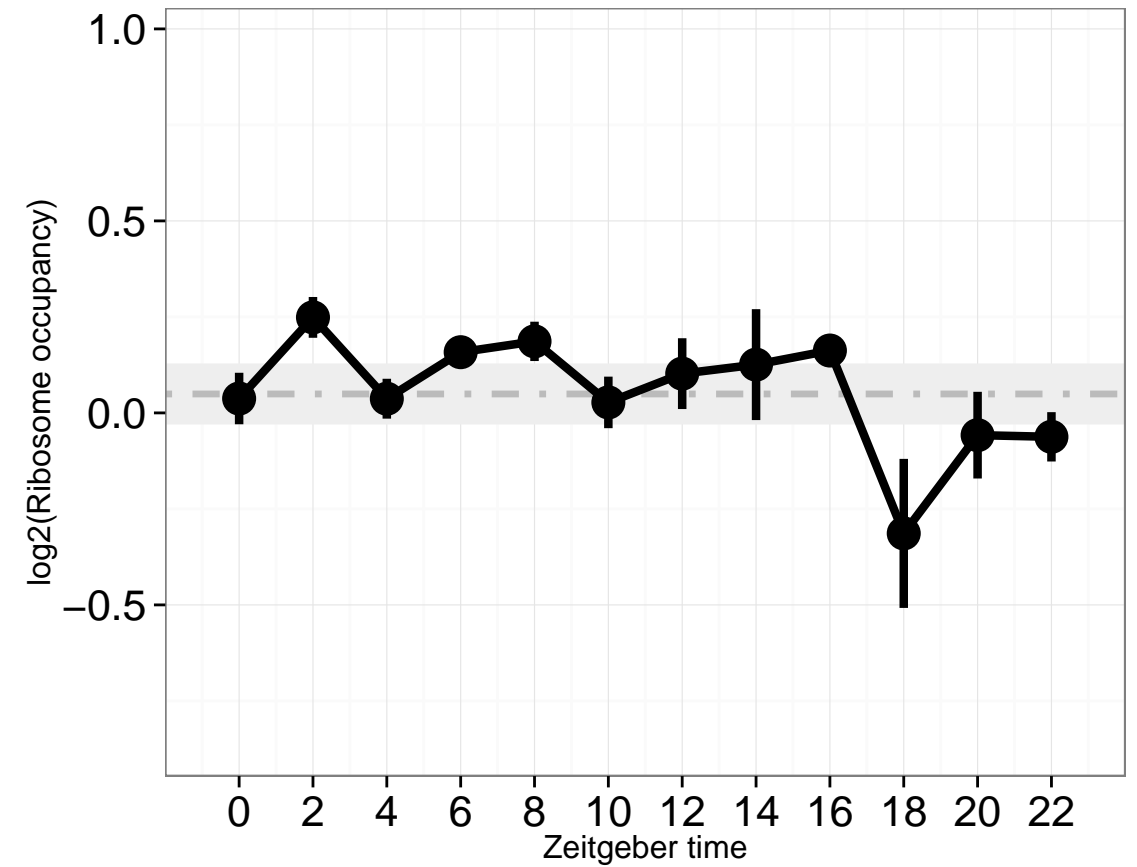

Supplement: Supplementary file 11253 [file 1]

## Nyap1

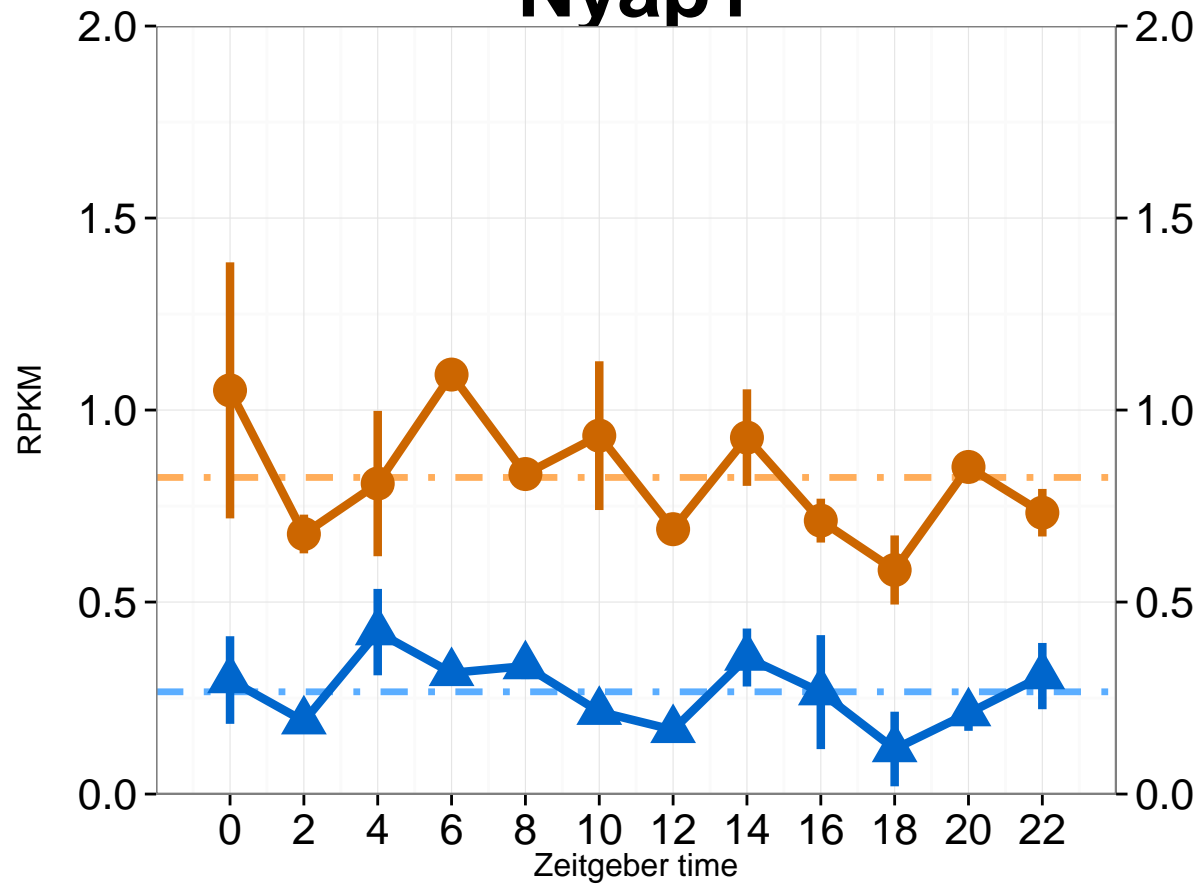

## Nyap1

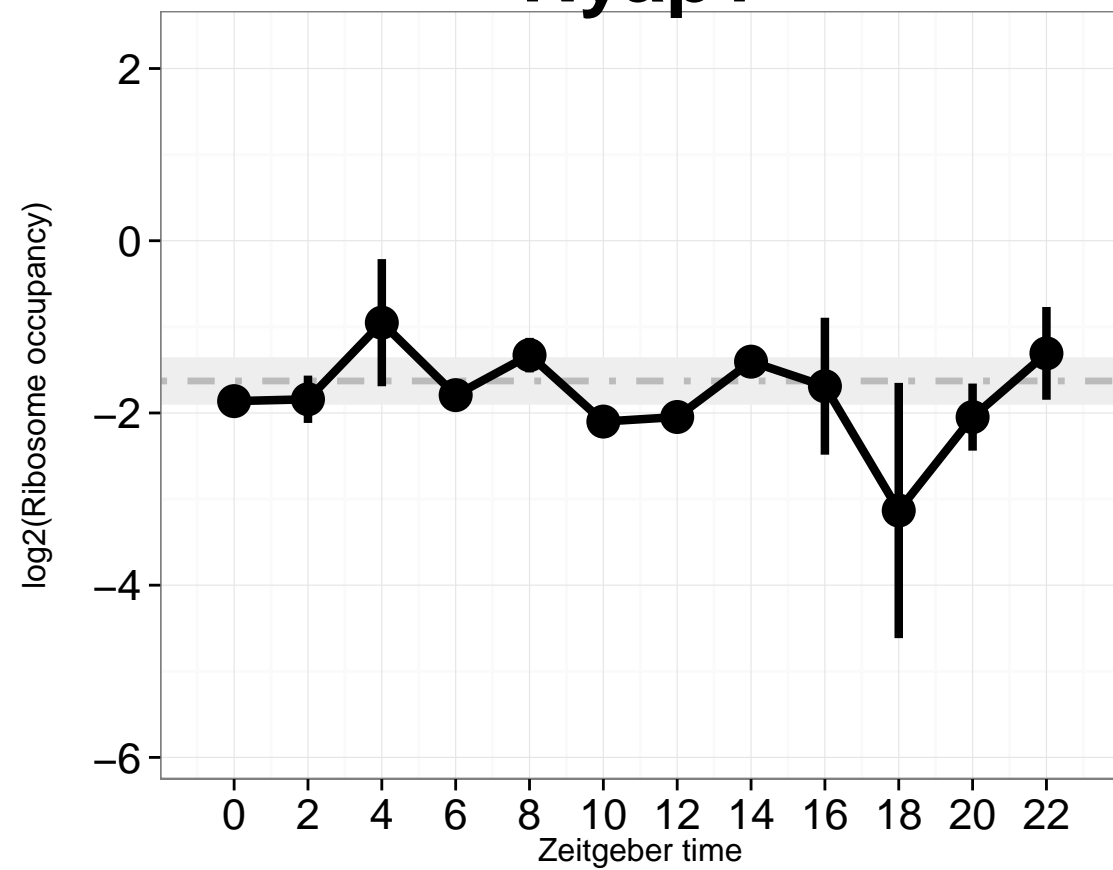

Supplement: Supplementary file 11254 [file 1]

# Tmem170b

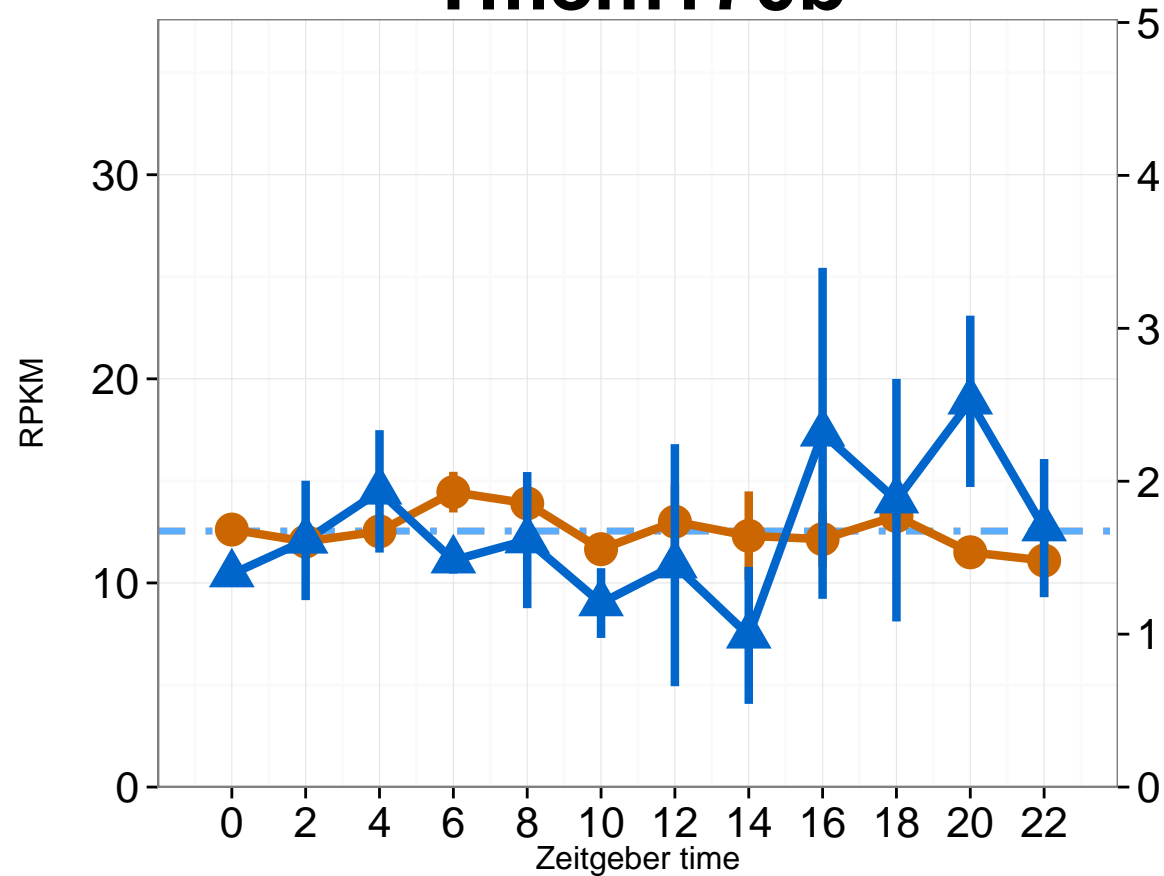

# Tmem170b

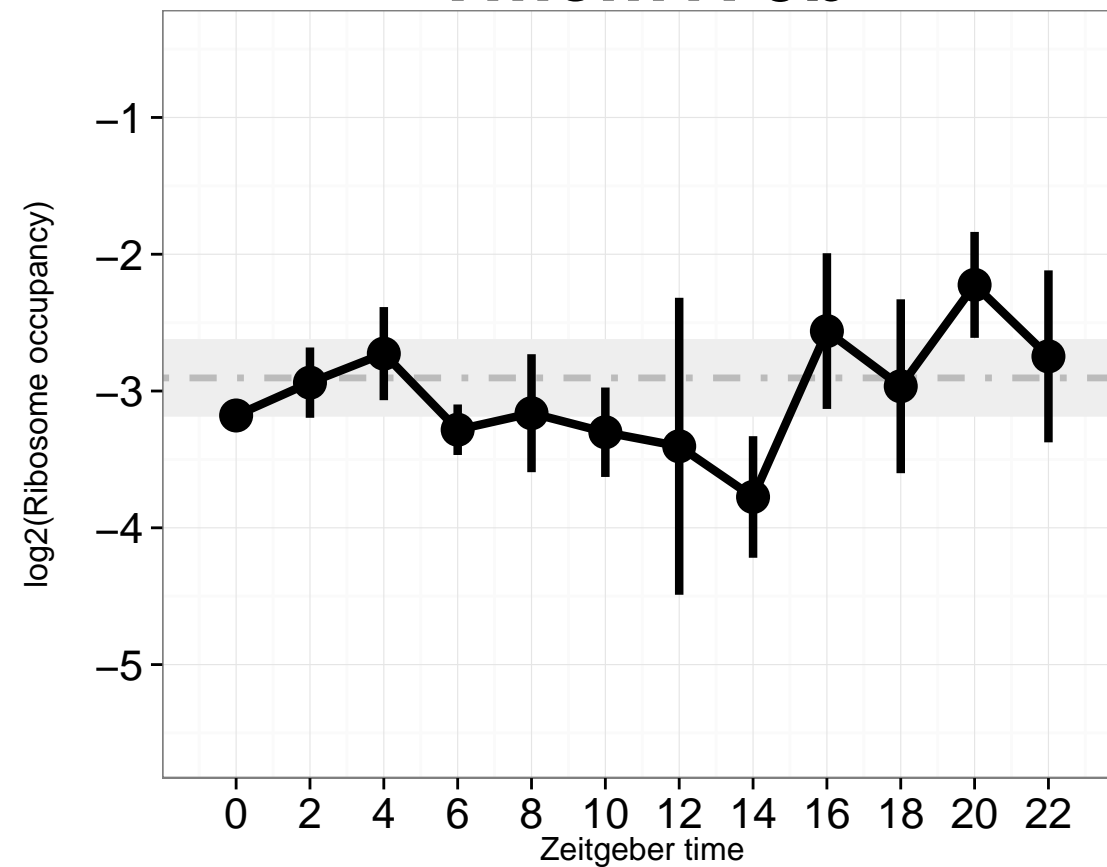

Supplement: Supplementary file 11255 [file 1]

# Abhd17a

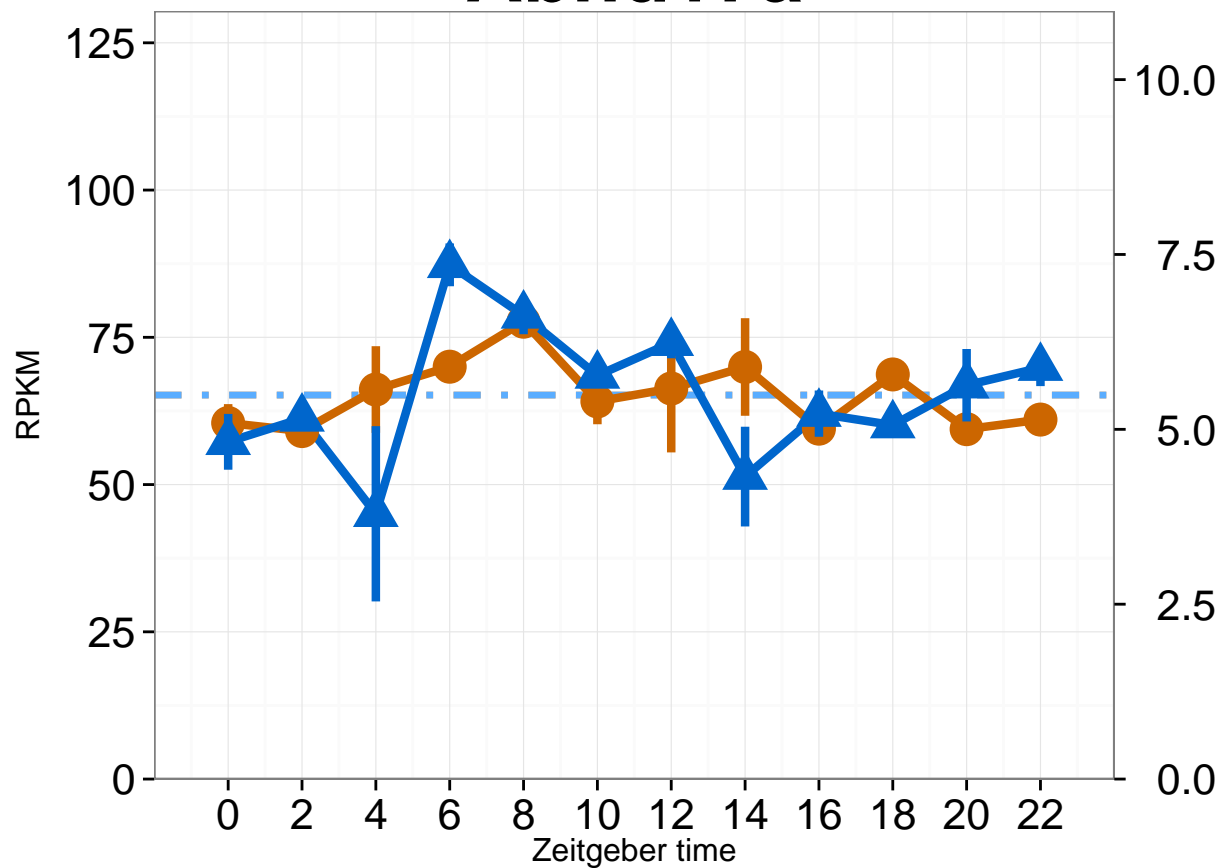

# Abhd17a

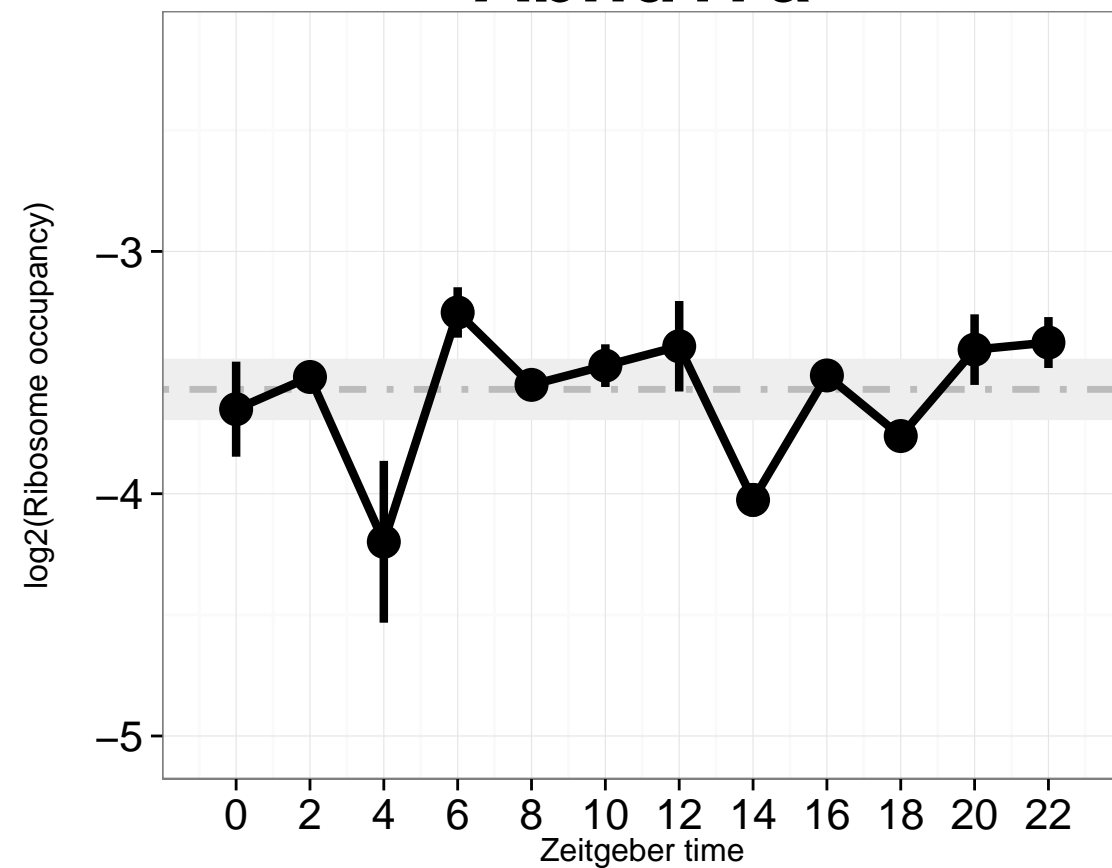

Supplement: Supplementary file 11256 [file 1]

## Ccdc15

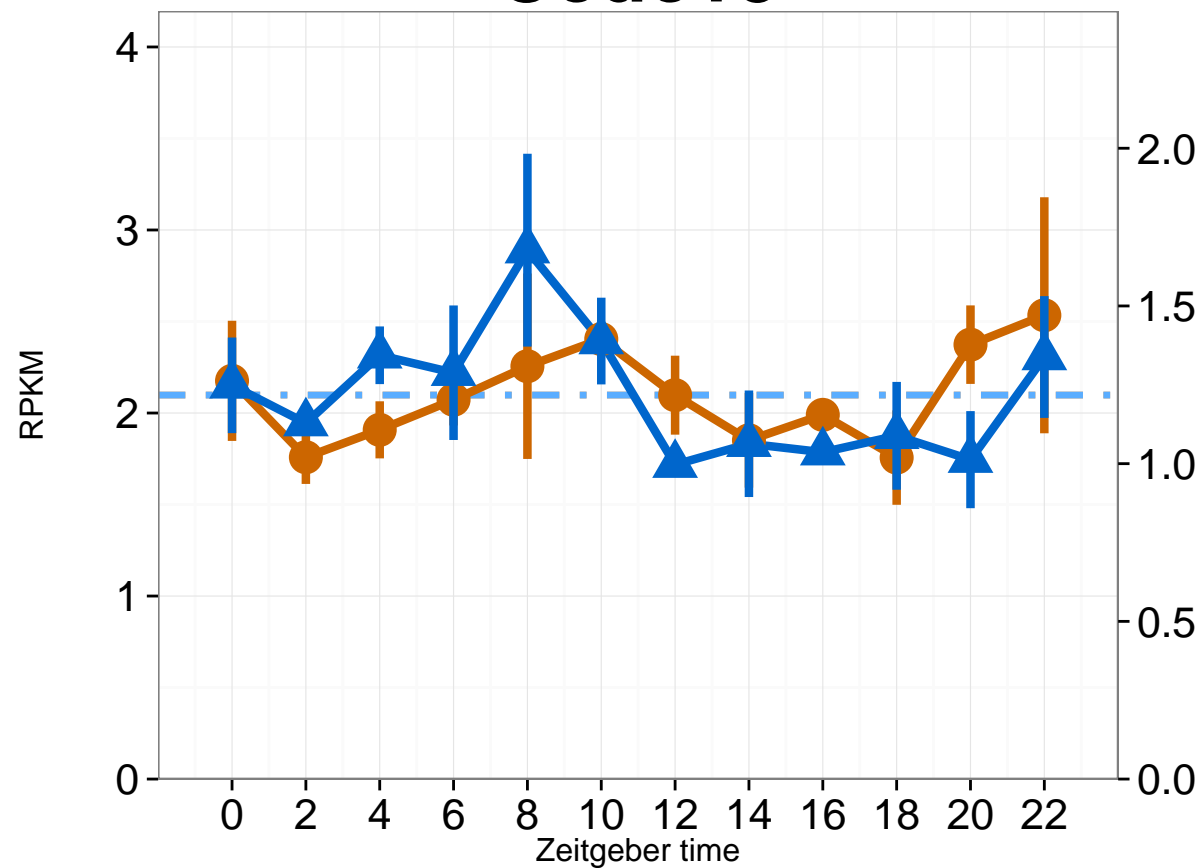

## Ccdc15

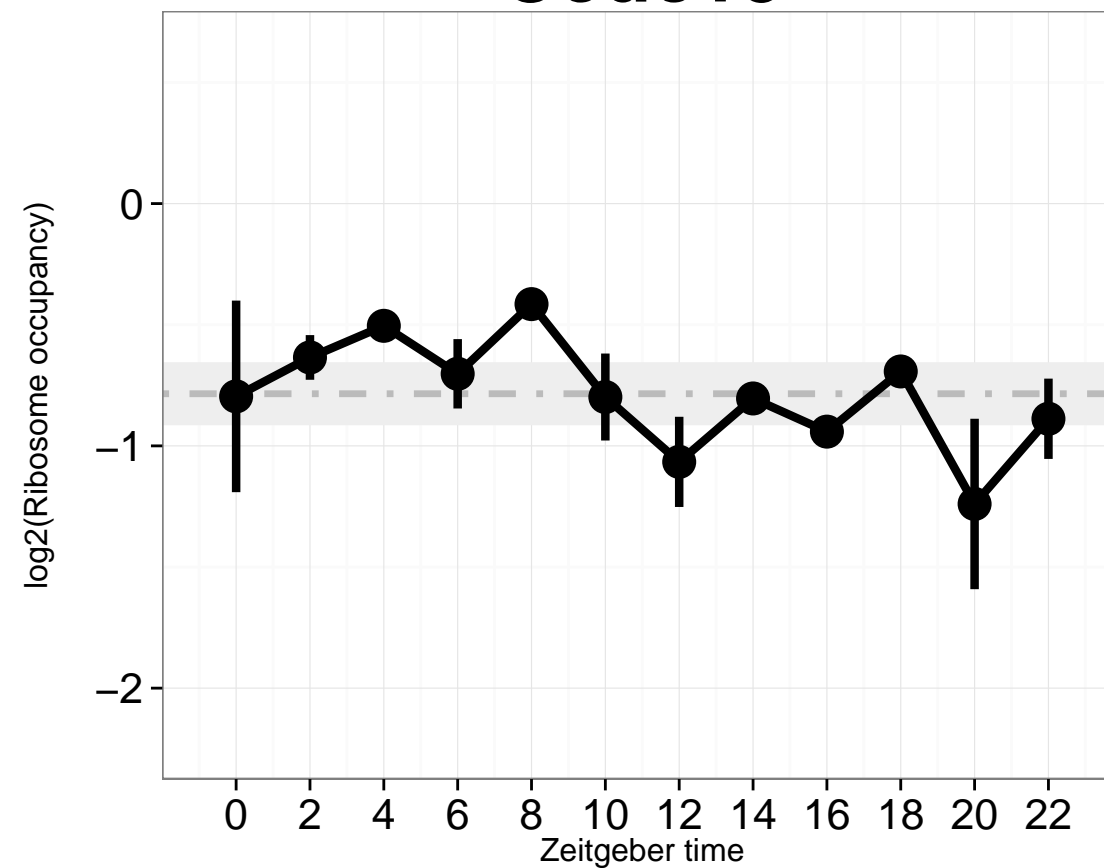

Supplement: Supplementary file 11257 [file 1]

# Sec22c

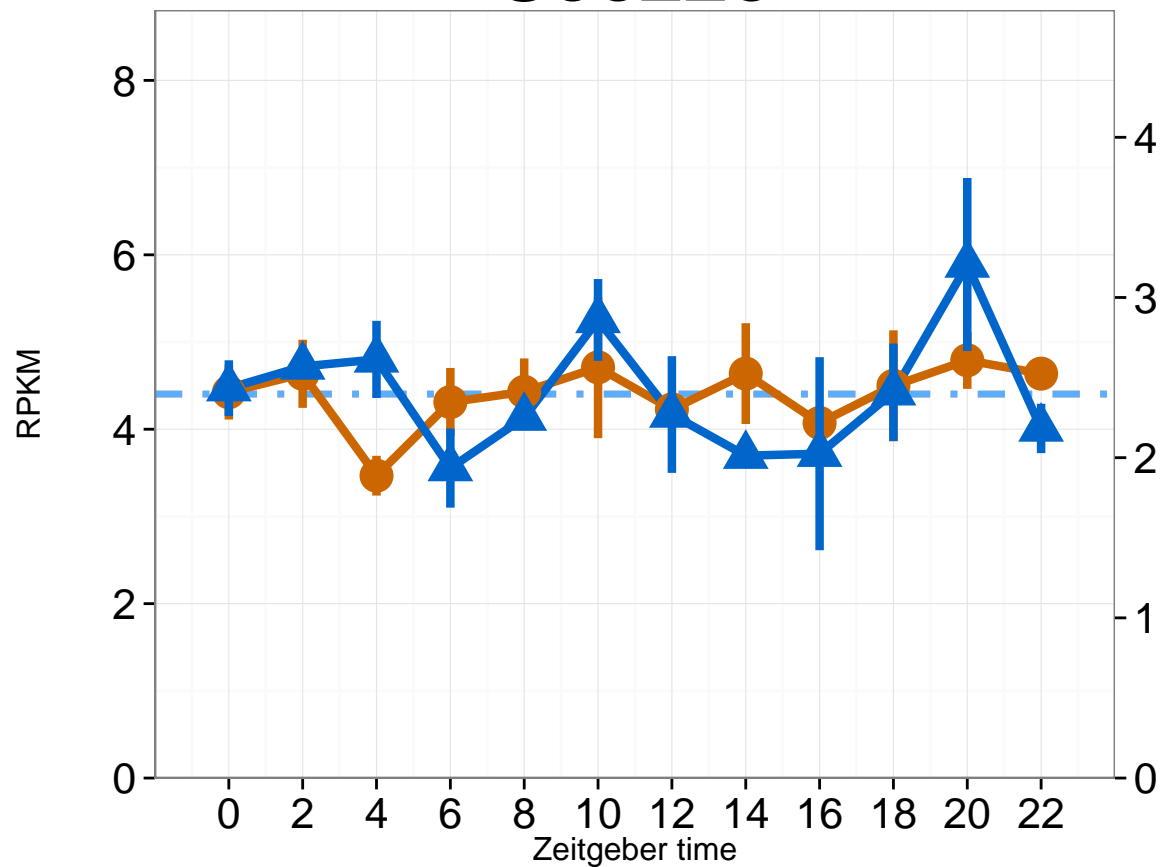

# Sec22c

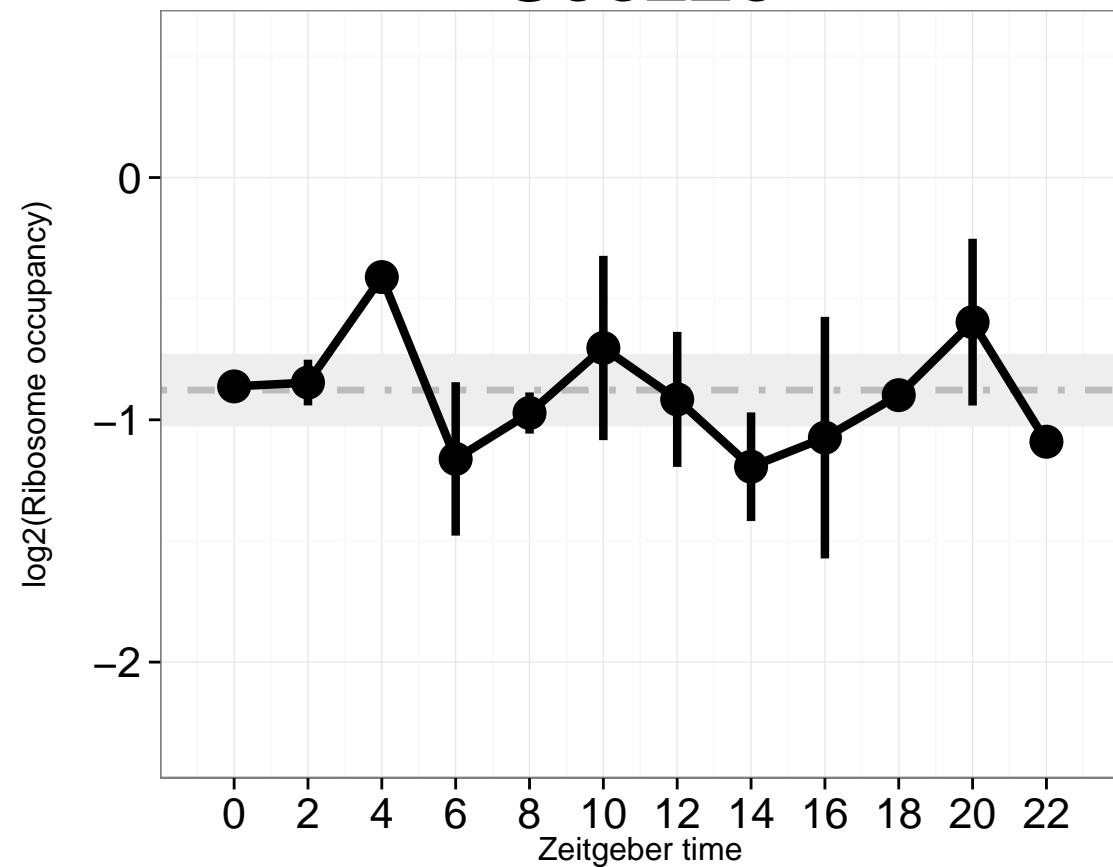

Supplement: Supplementary file 11258 [file 1]

## Taf2

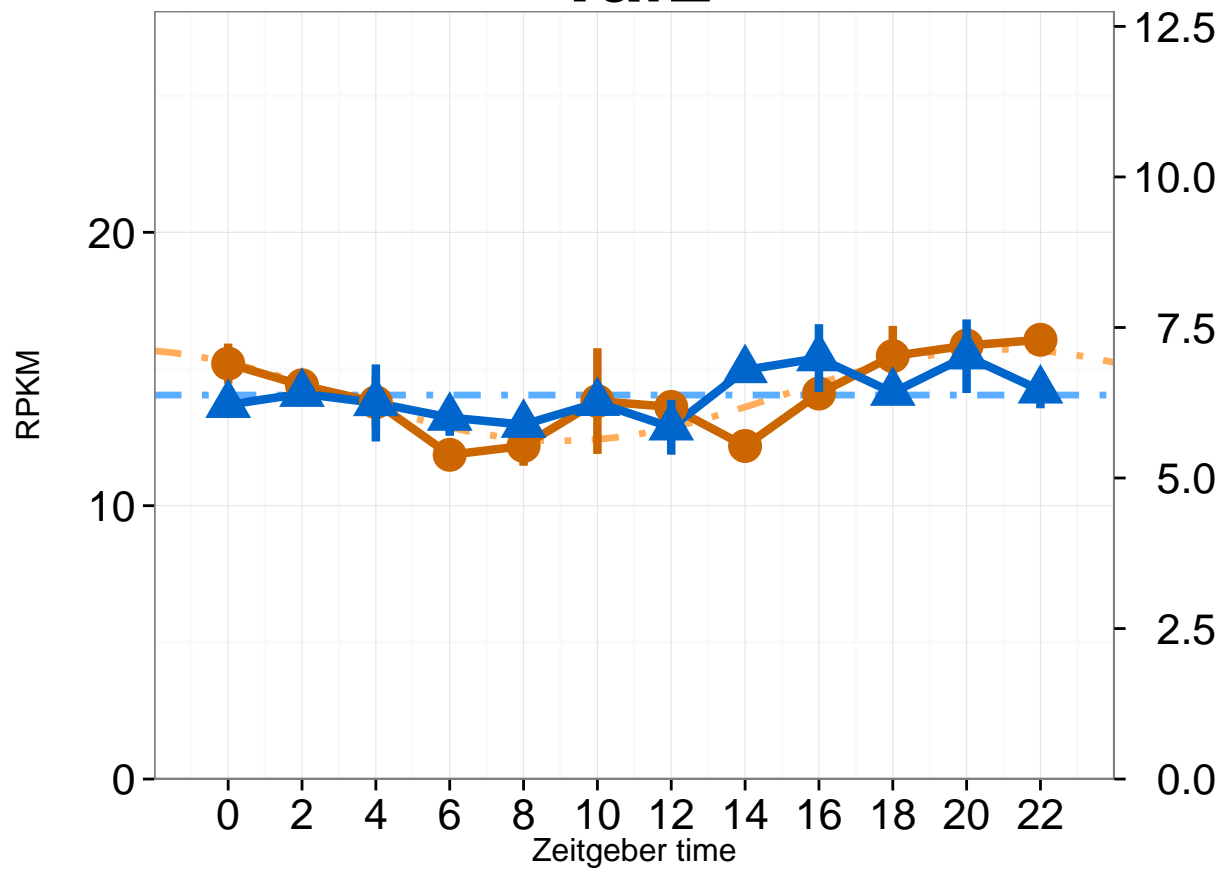

## Taf2

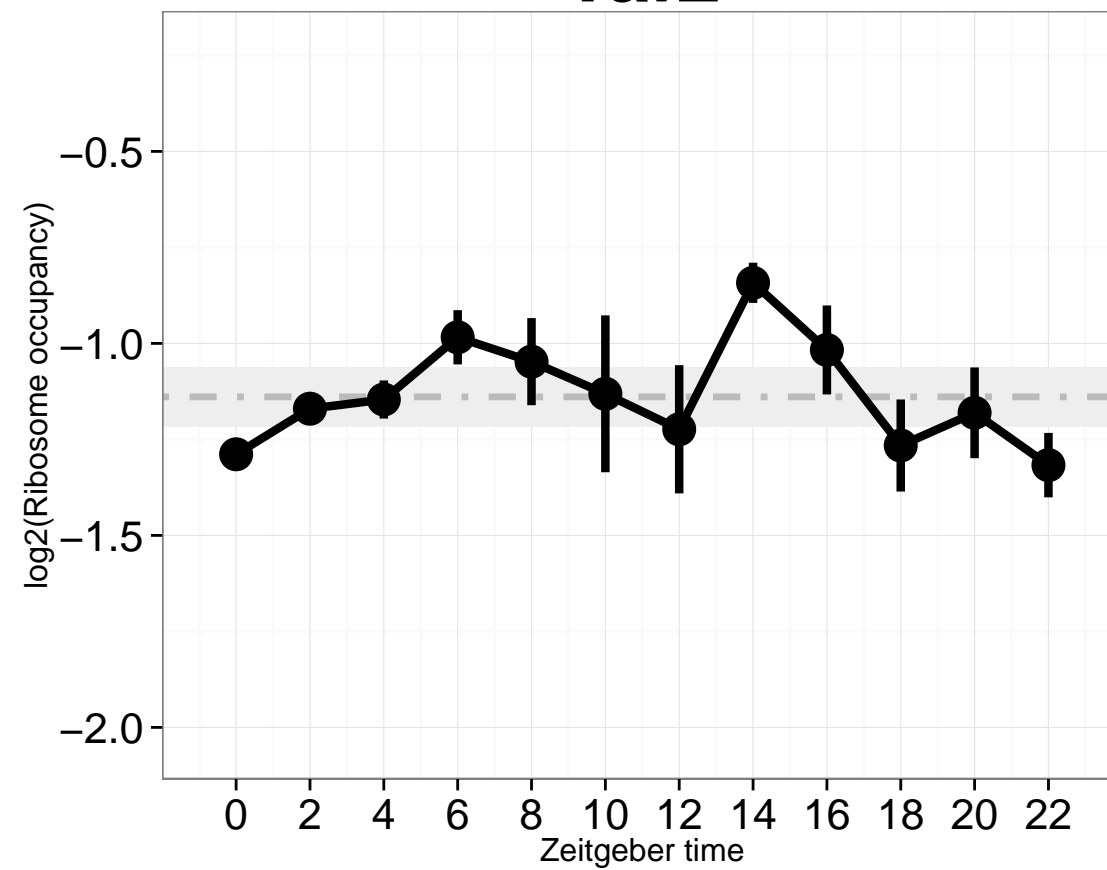

Supplement: Supplementary file 11259 [file 1]

# Map3k6

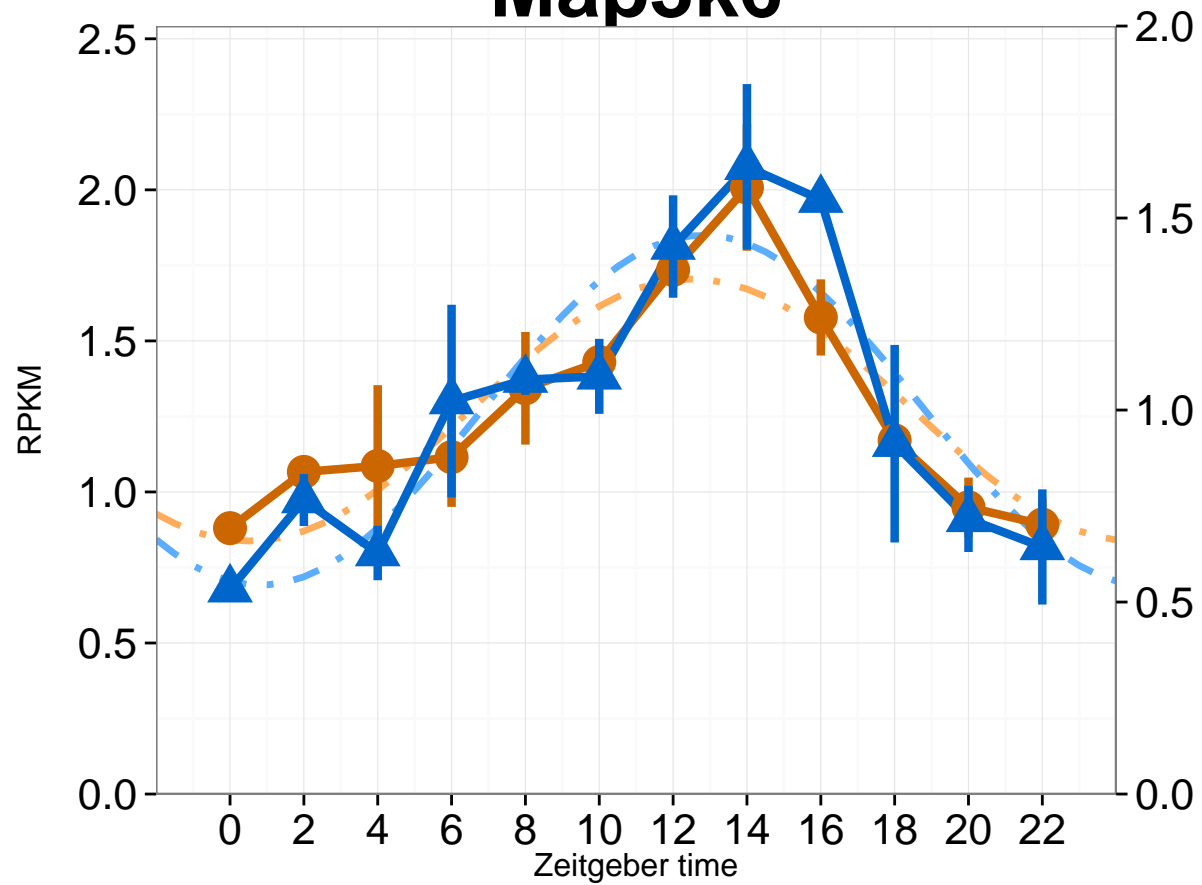

# Map3k6

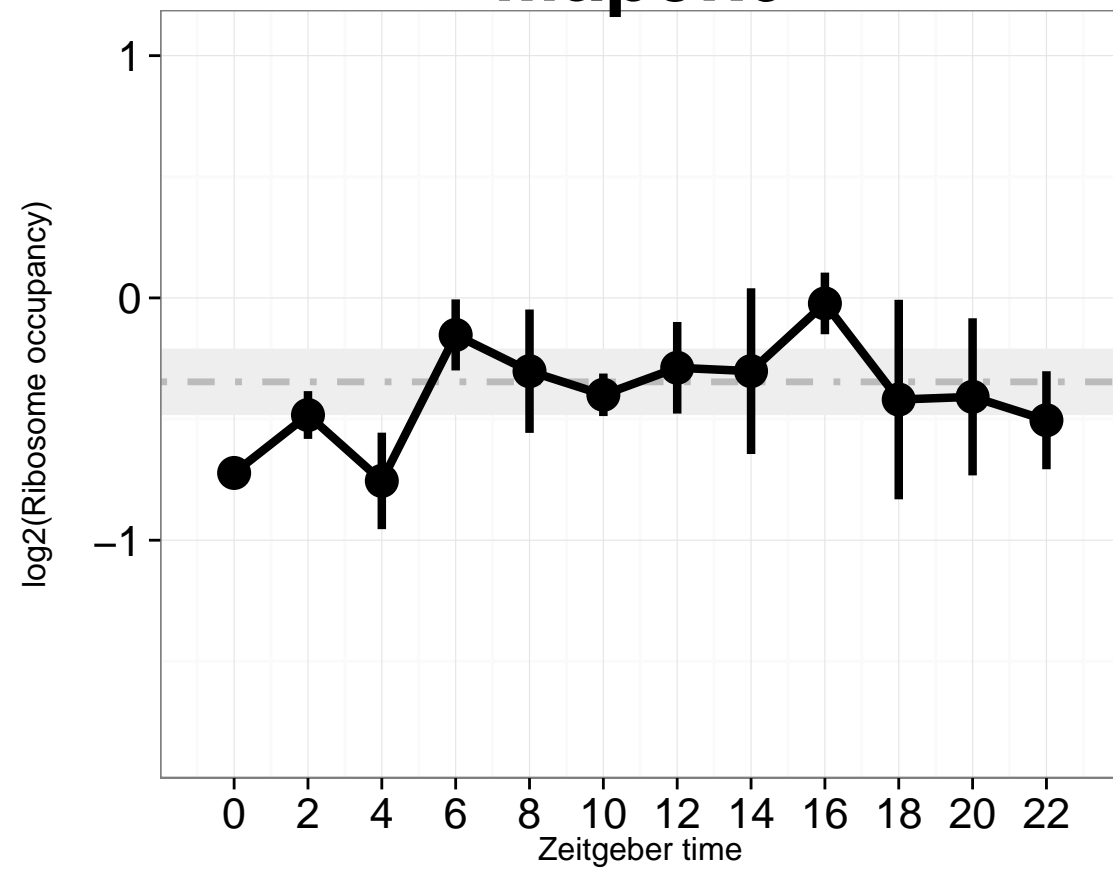

Supplement: Supplementary file 11260 [file 1]

## Wwox

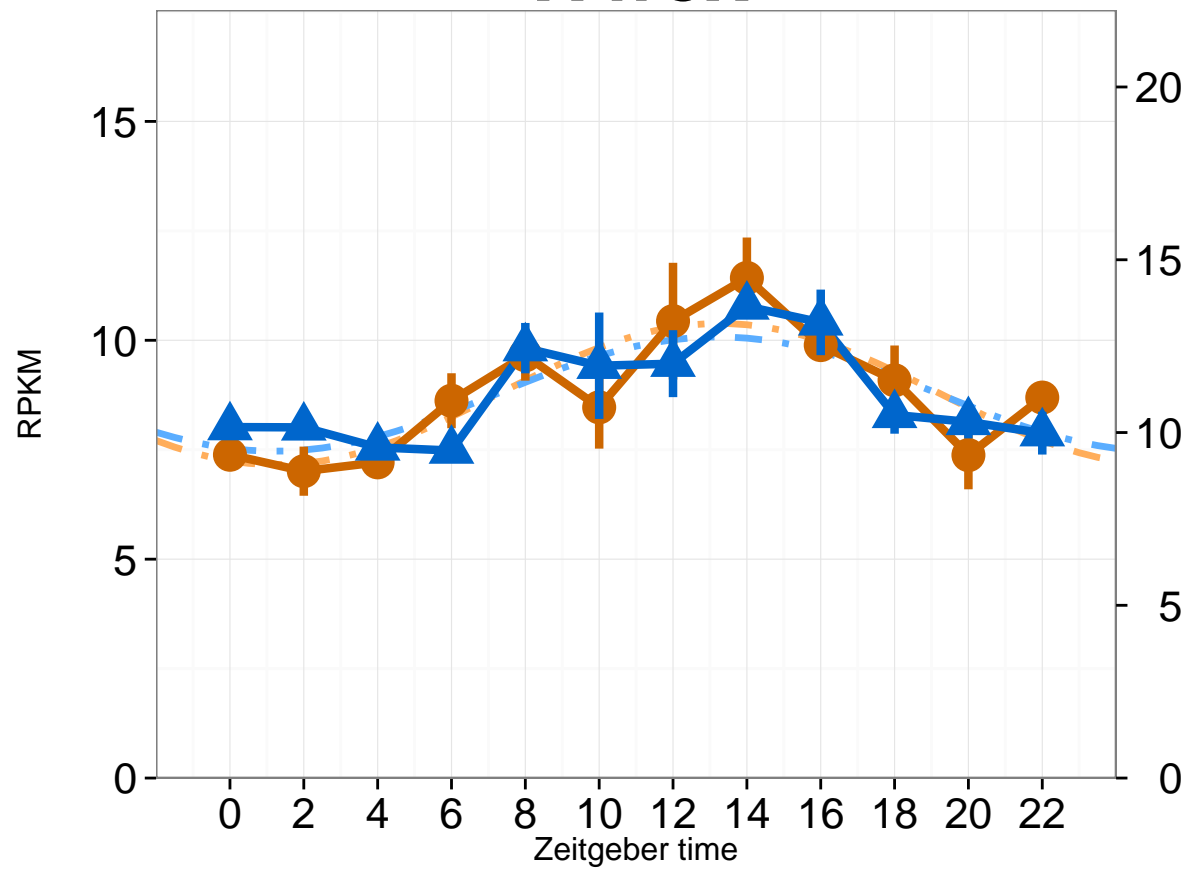

## Wwox

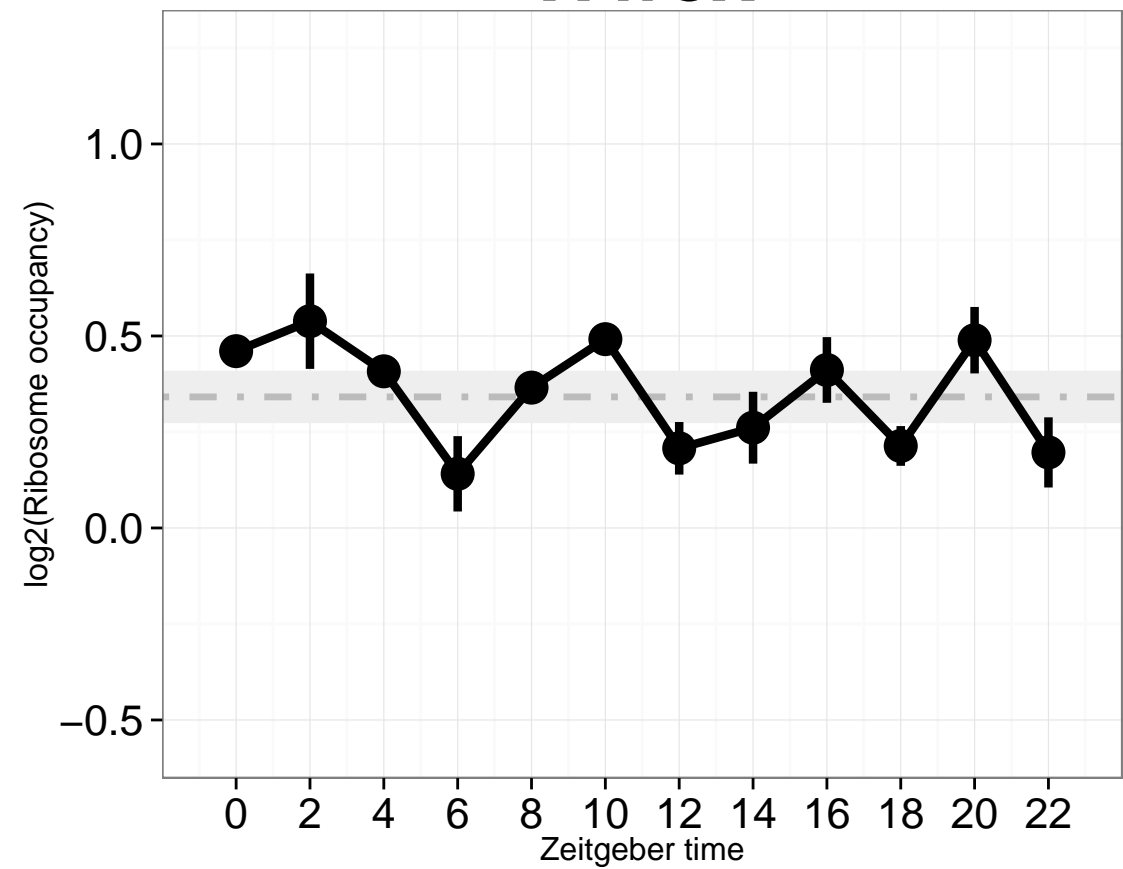

Supplement: Supplementary file 11261 [file 1]

# Psmd13

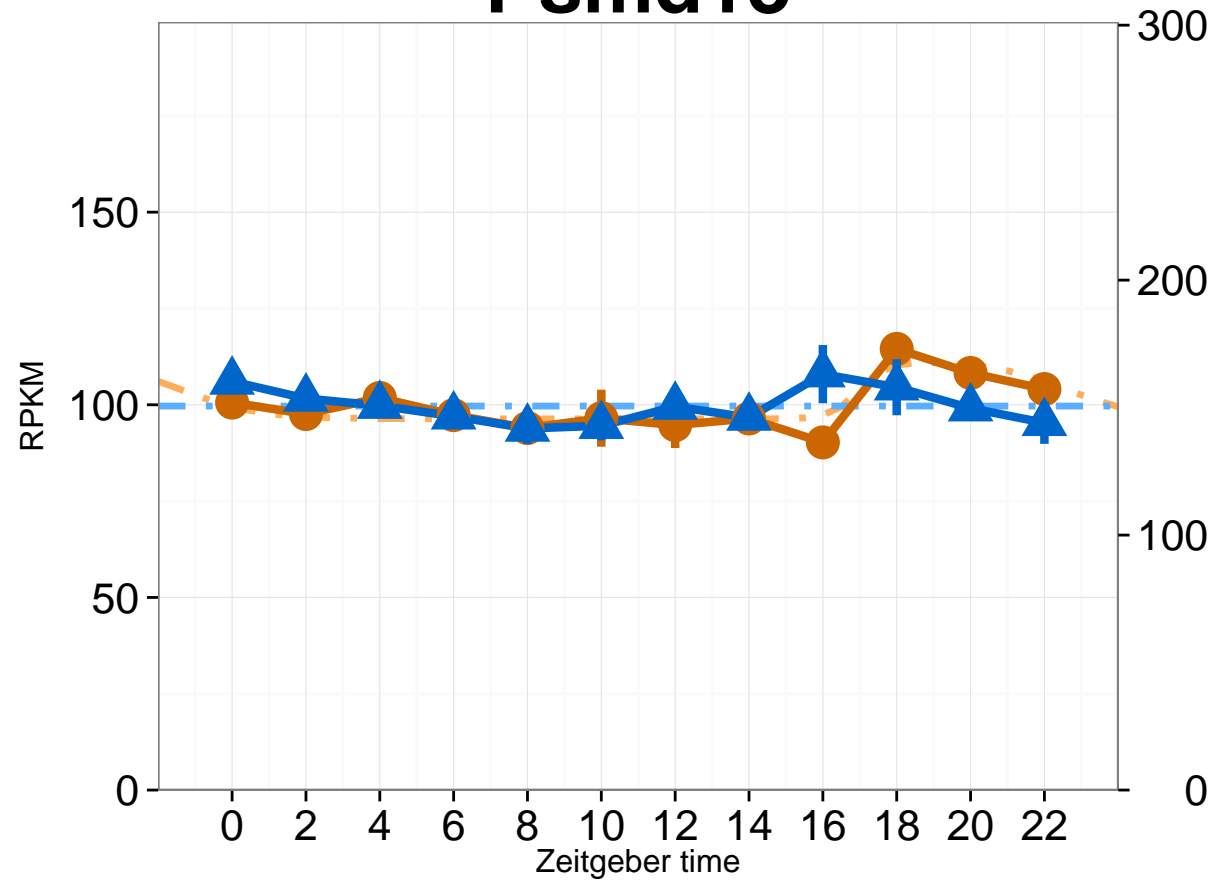

# Psmd13

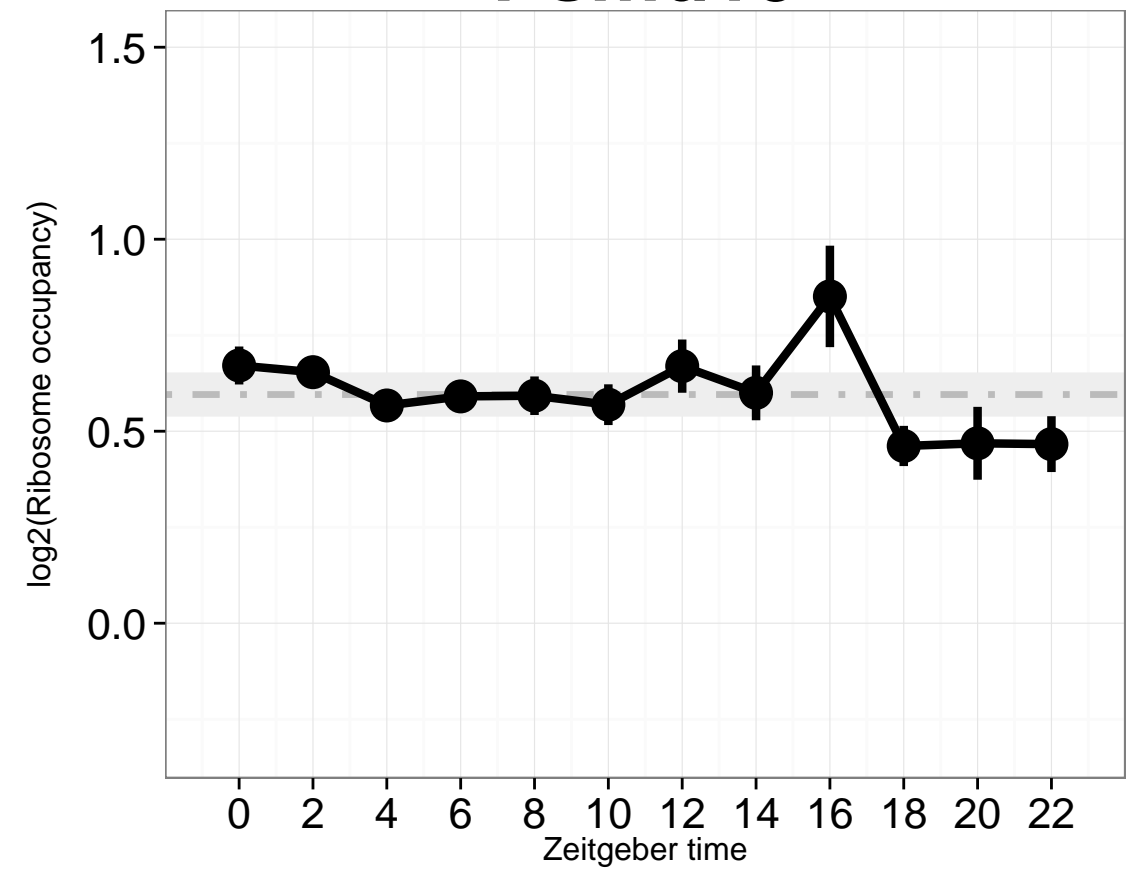

Supplement: Supplementary file 11262 [file 1]

# Mmp19

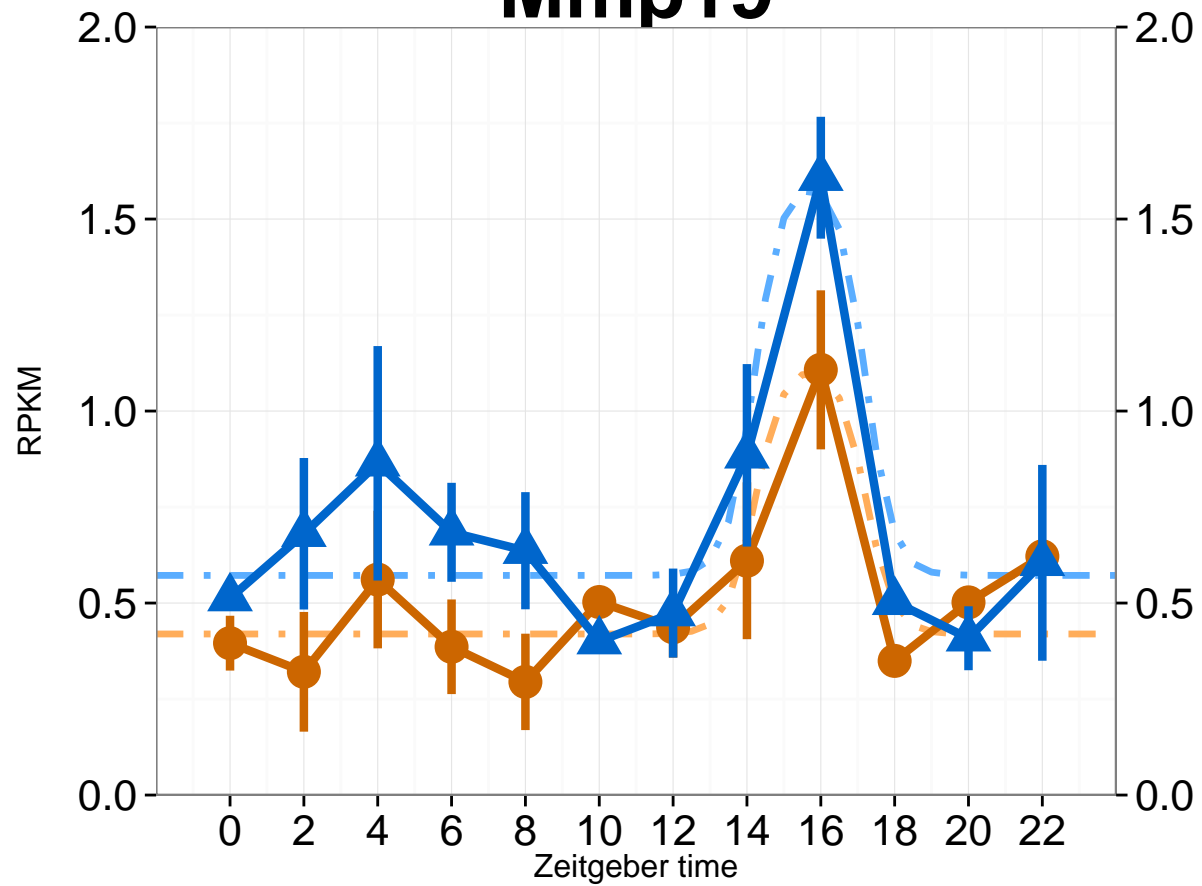

# Mmp19

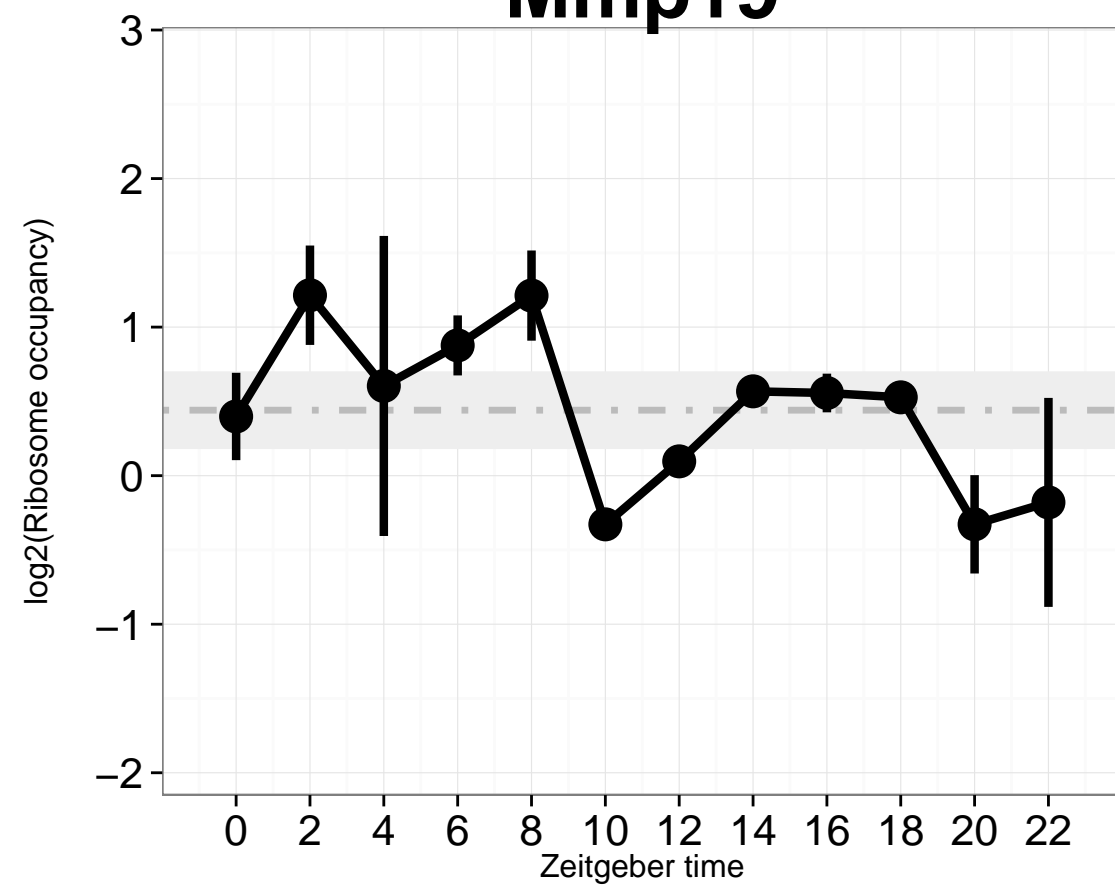

Supplement: Supplementary file 11263 [file 1]

# Zfp790

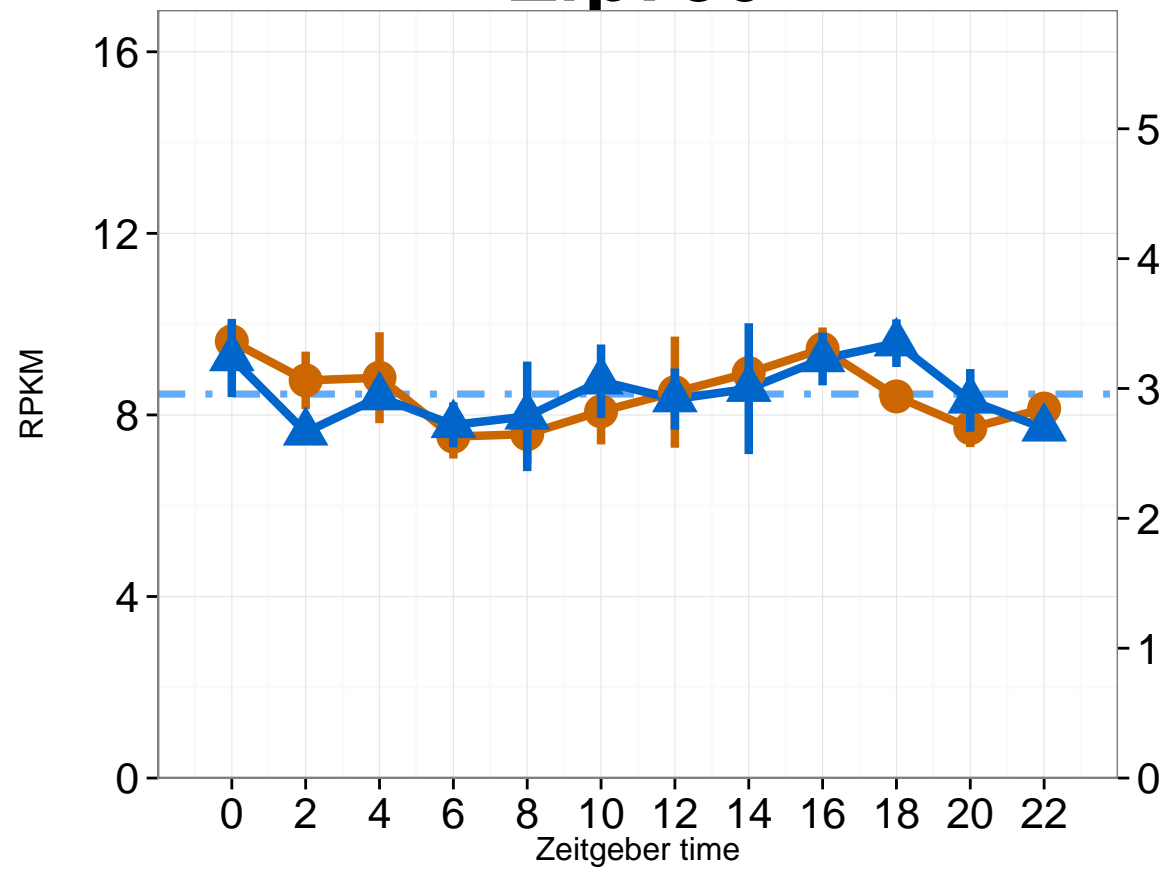

# Zfp790

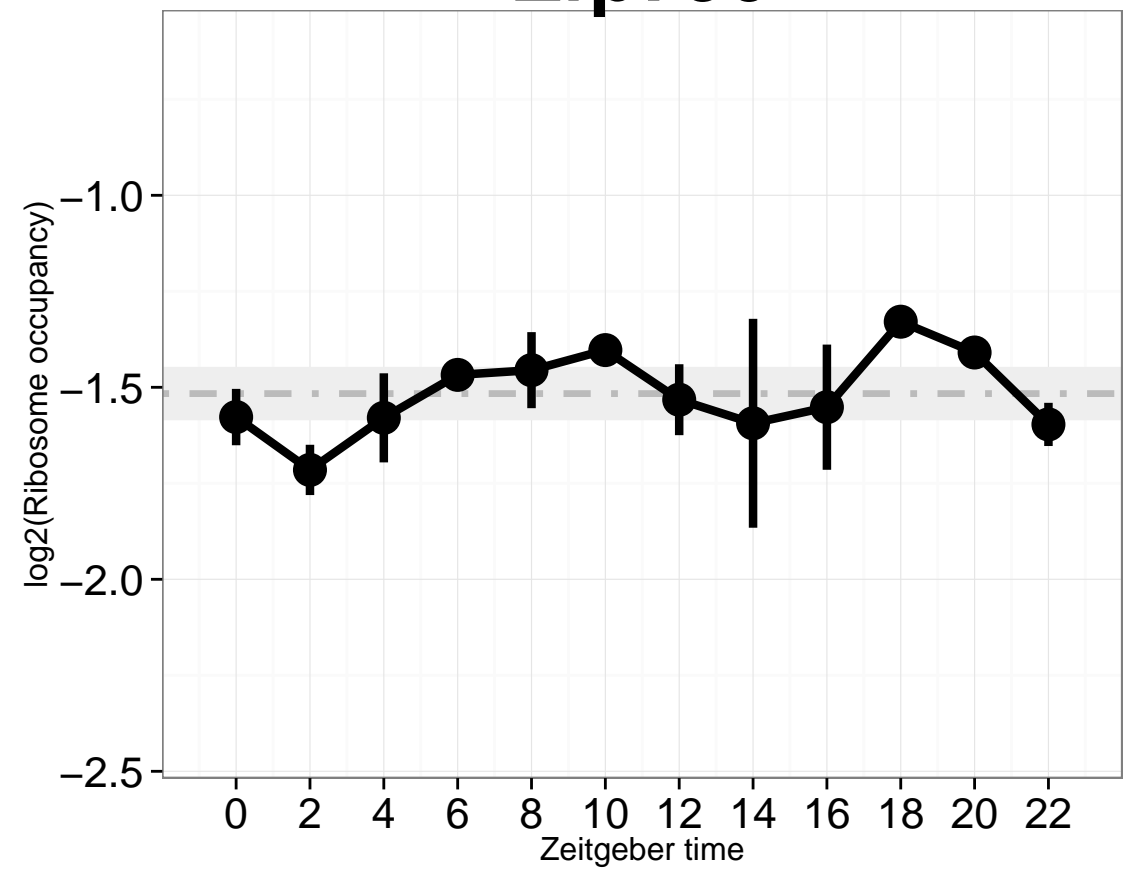

Supplement: Supplementary file 11264 [file 1]

## Ufl1

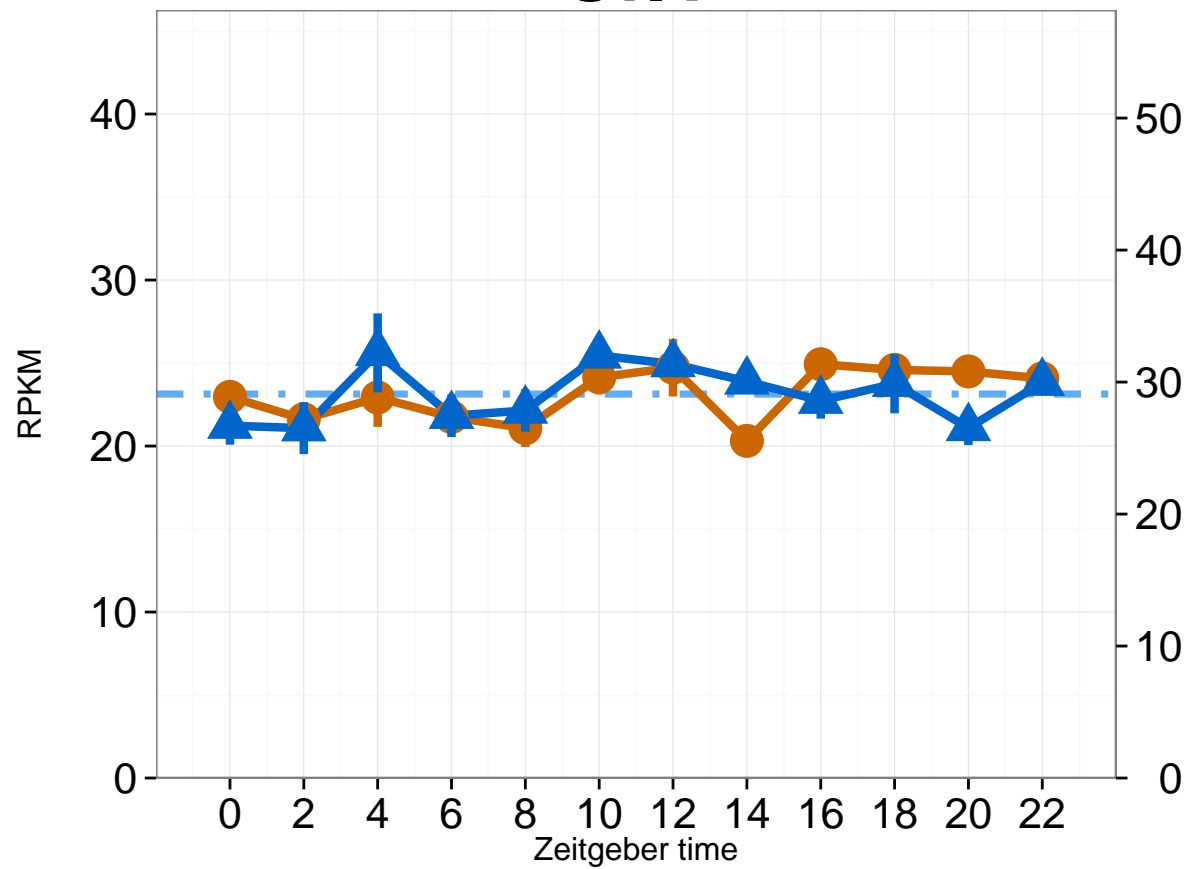

## Ufl1

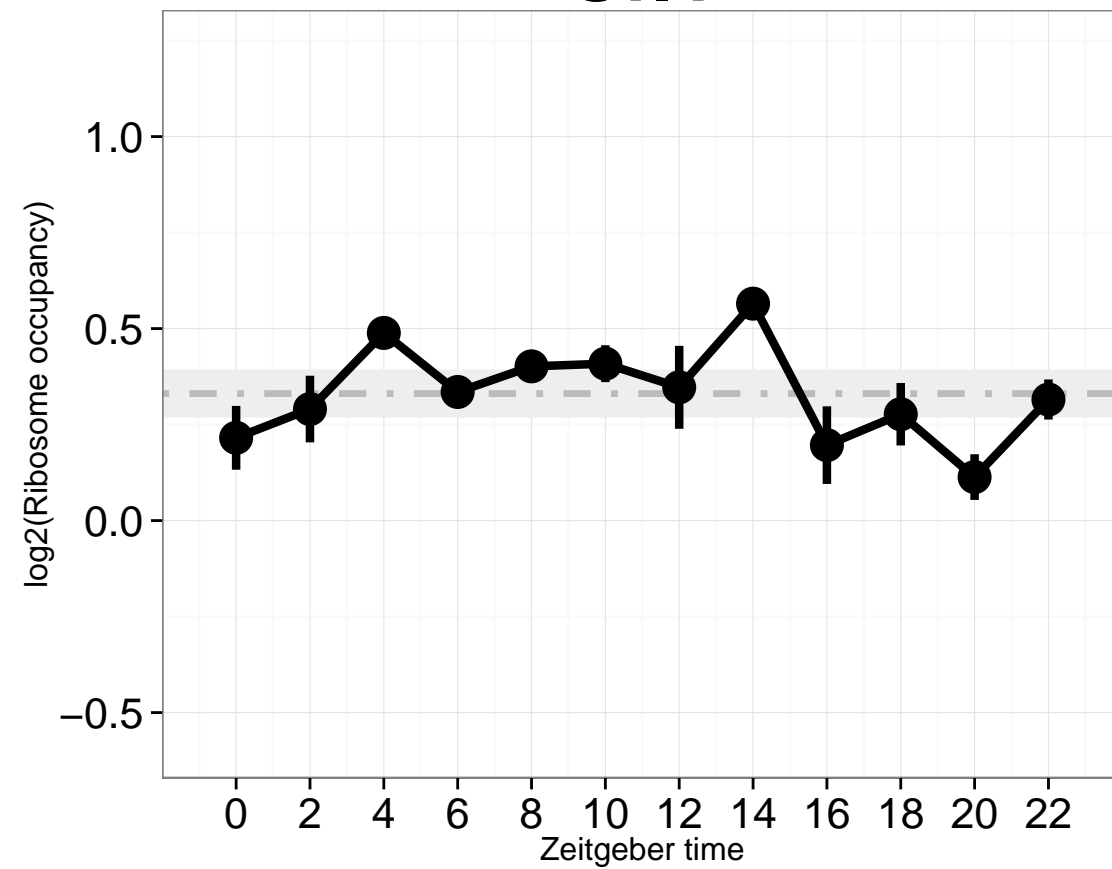

Supplement: Supplementary file 11265 [file 1]

# D19Bwg1357e

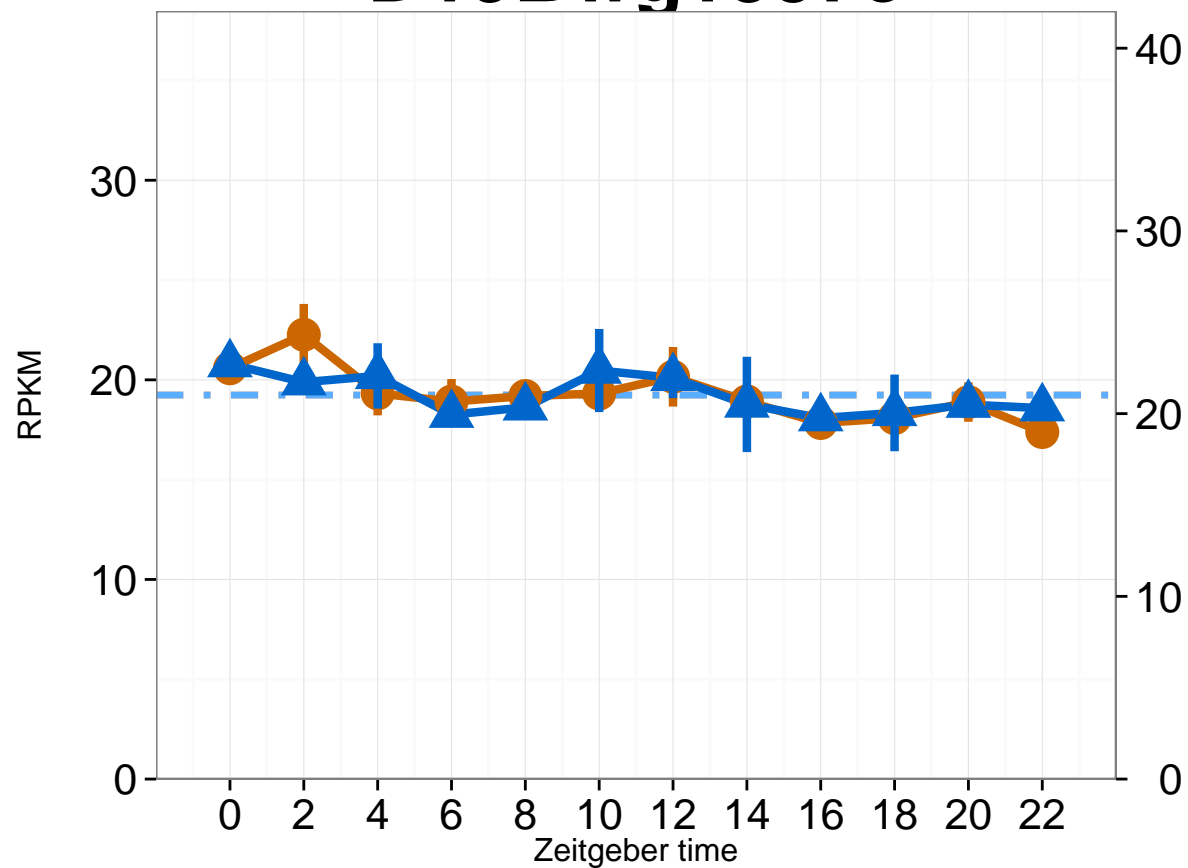

# D19Bwg1357e

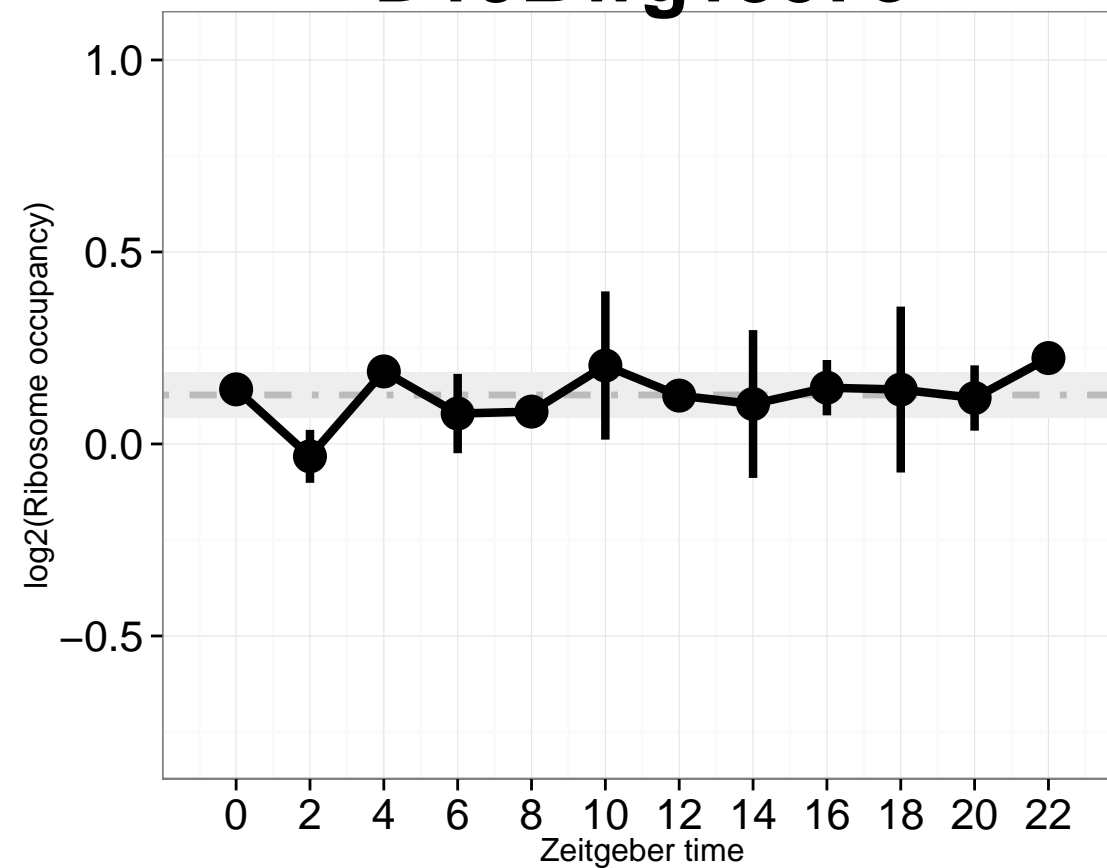

Supplement: Supplementary file 11266 [file 1]

# Prps1

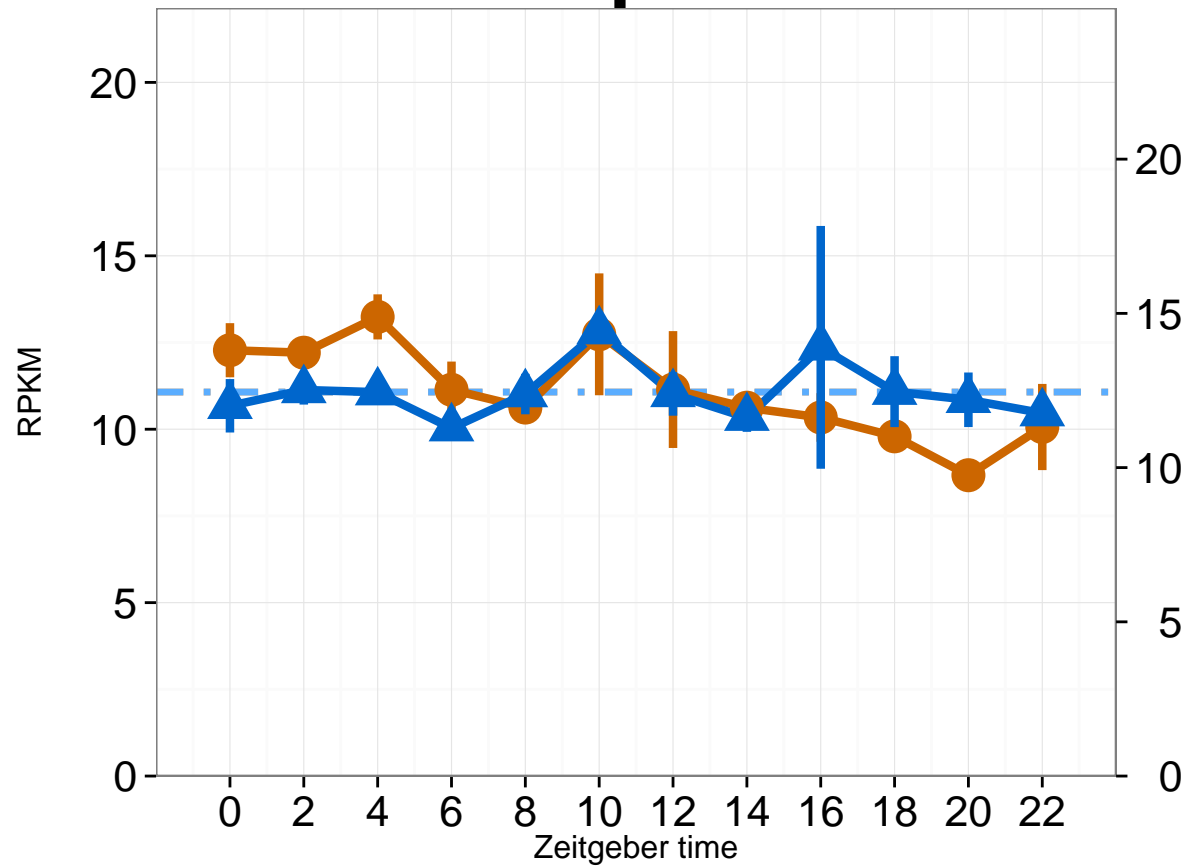

# Prps1

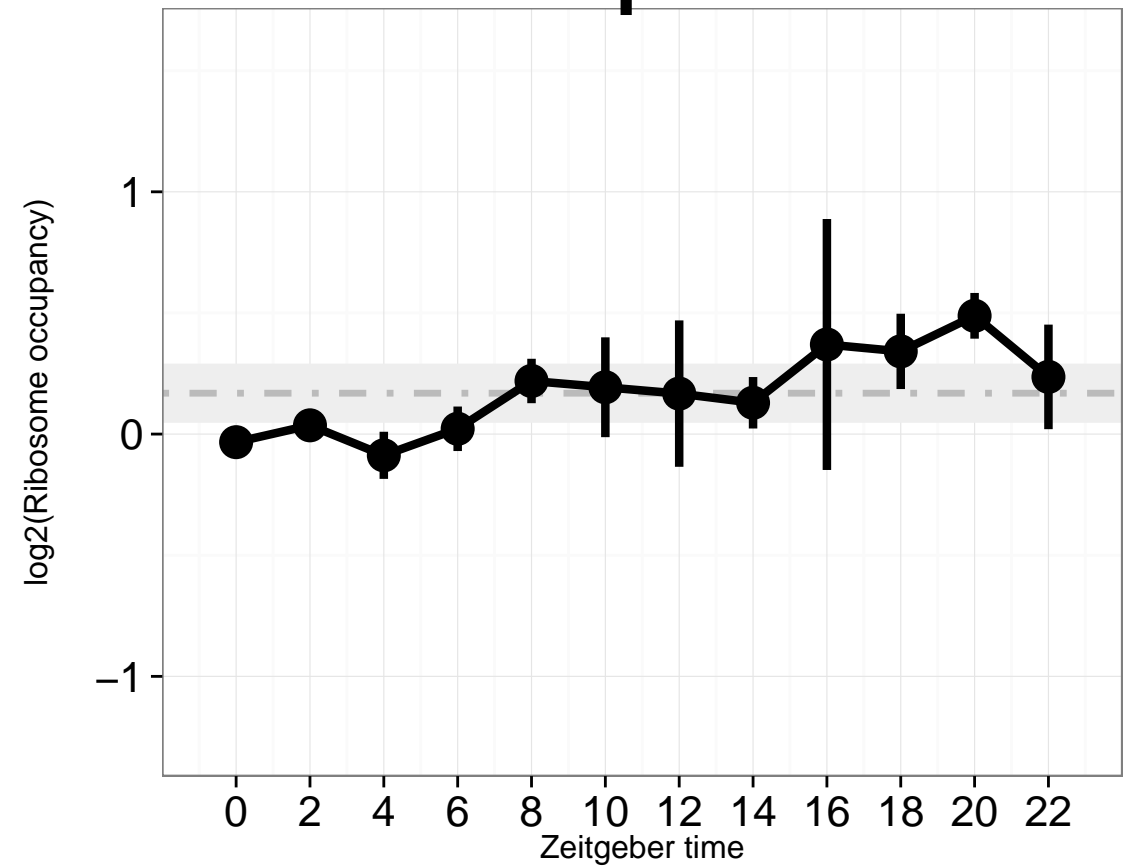

Supplement: Supplementary file 11267 [file 1]

## Lrrc10b

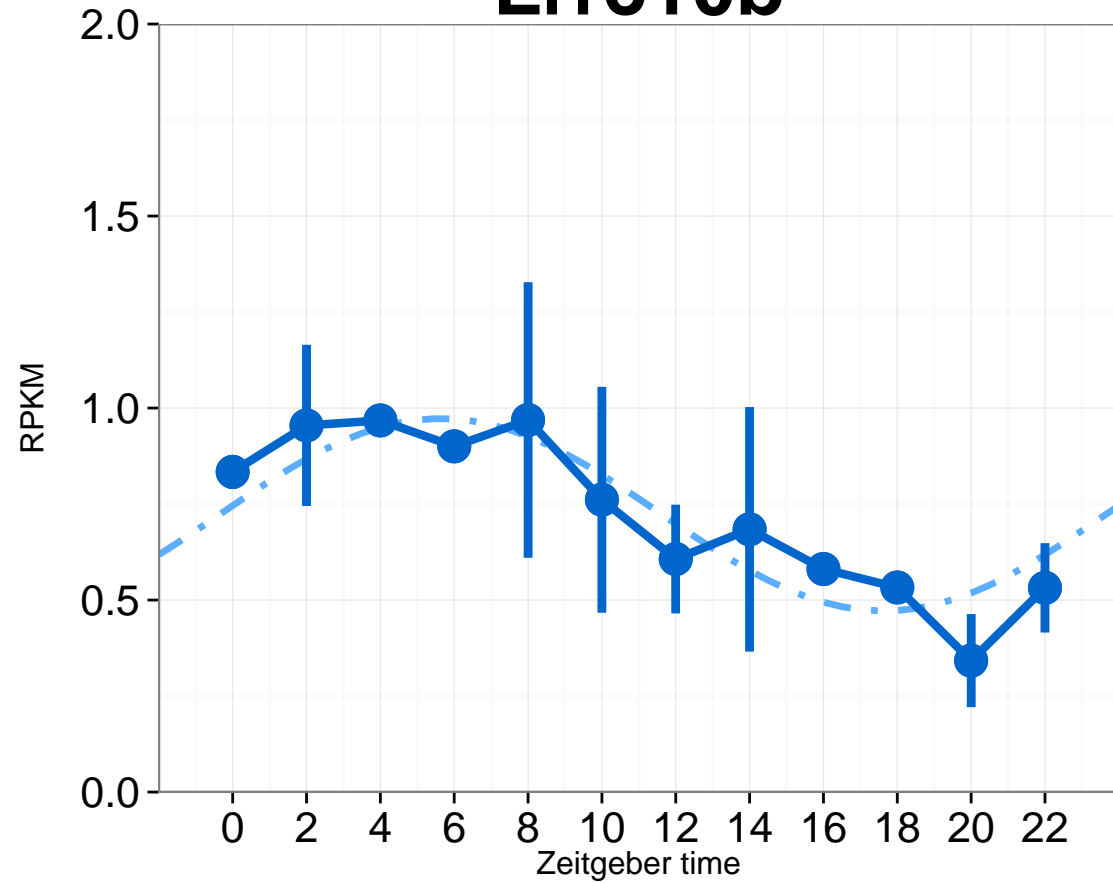

## Lrrc10b log2(Ribosome occupancy)

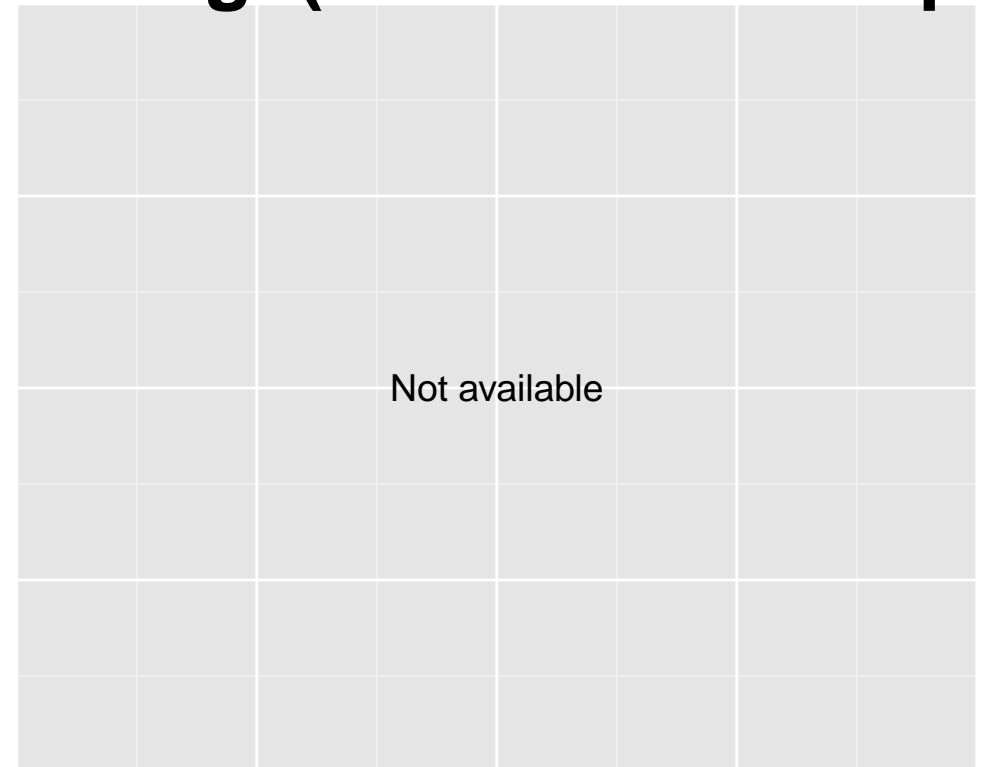

Supplement: Supplementary file 11268 [file 1]

# Tspan1

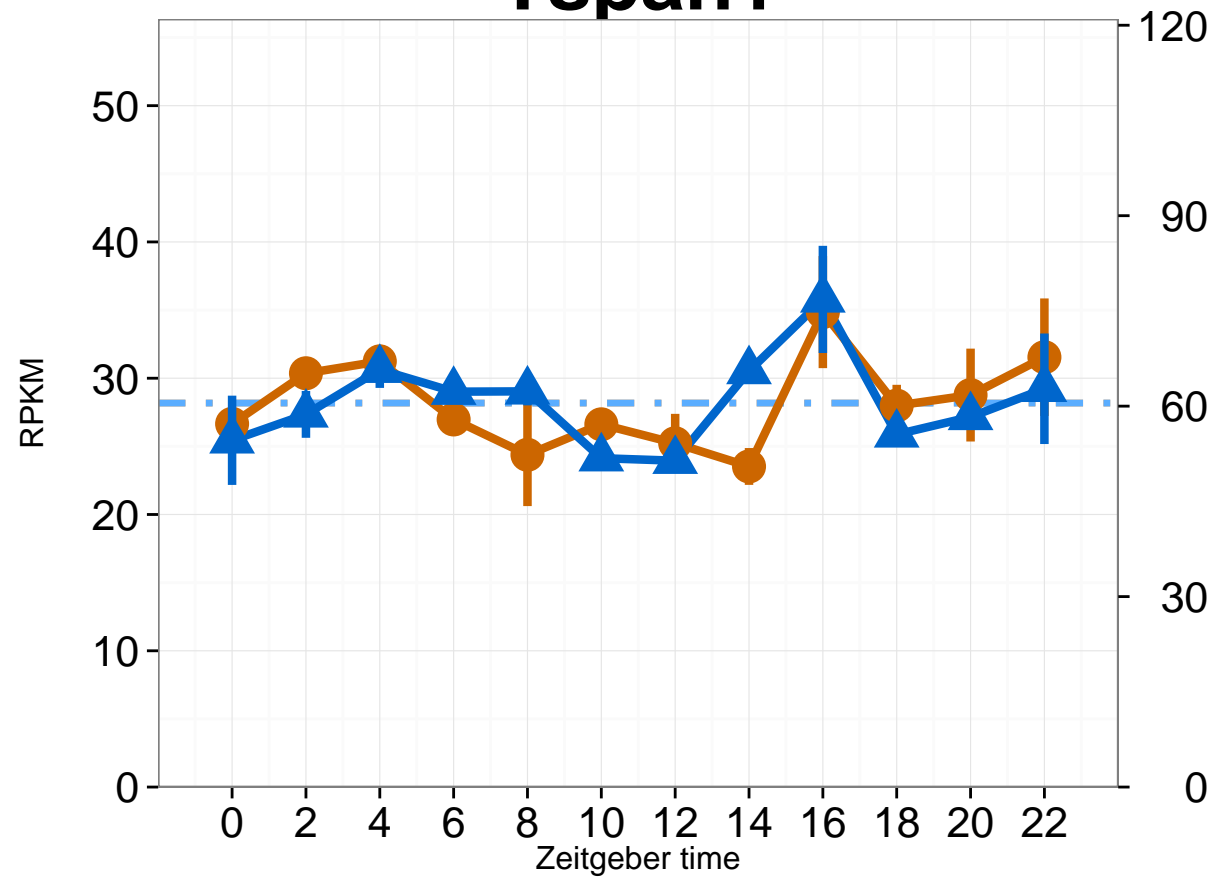

# Tspan1

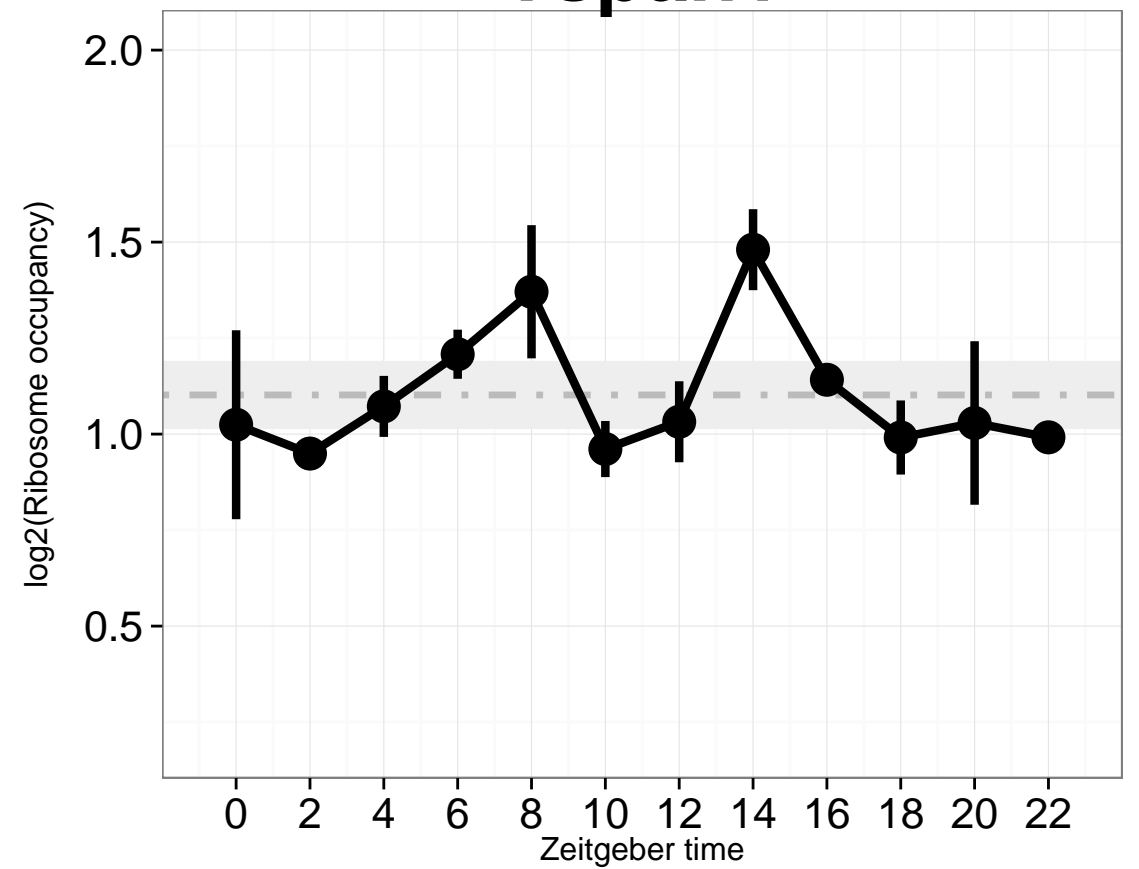

Supplement: Supplementary file 11269 [file 1]

## Polr2f

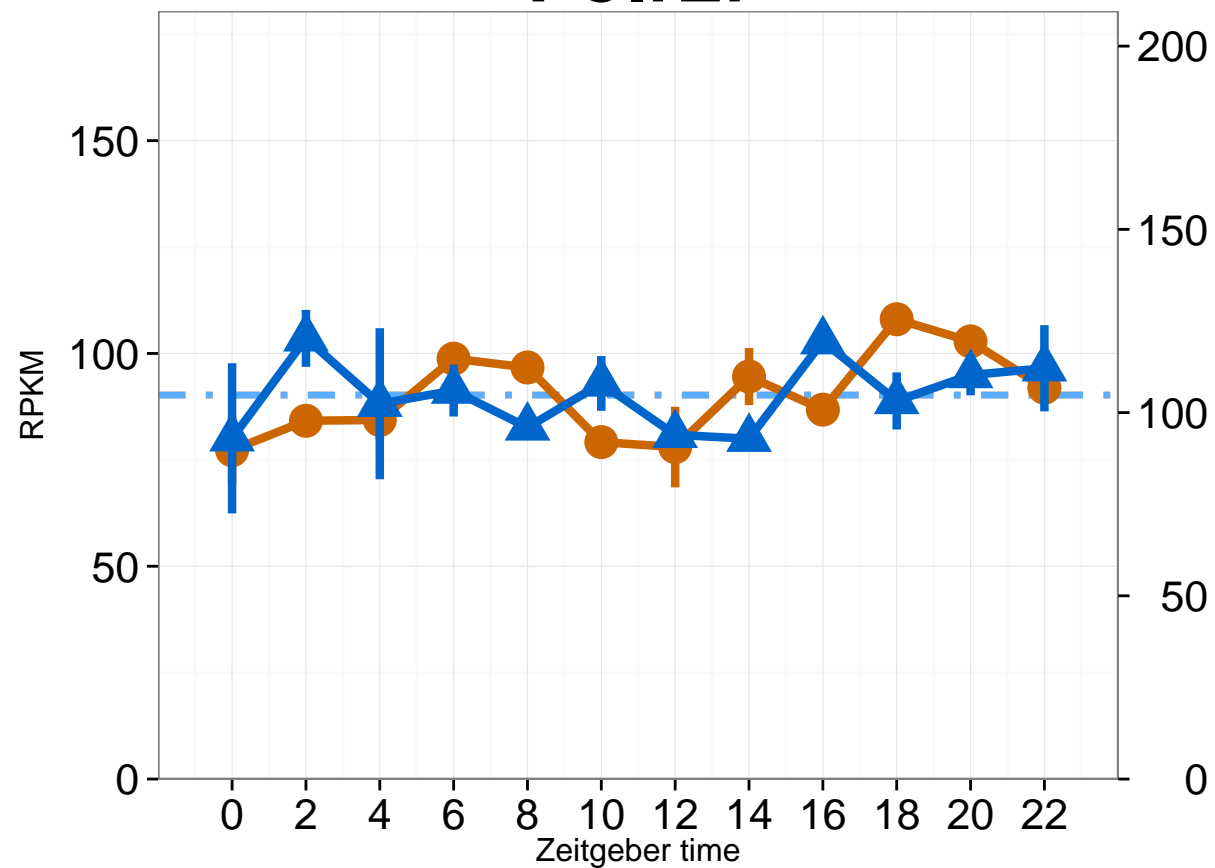

## Polr2f

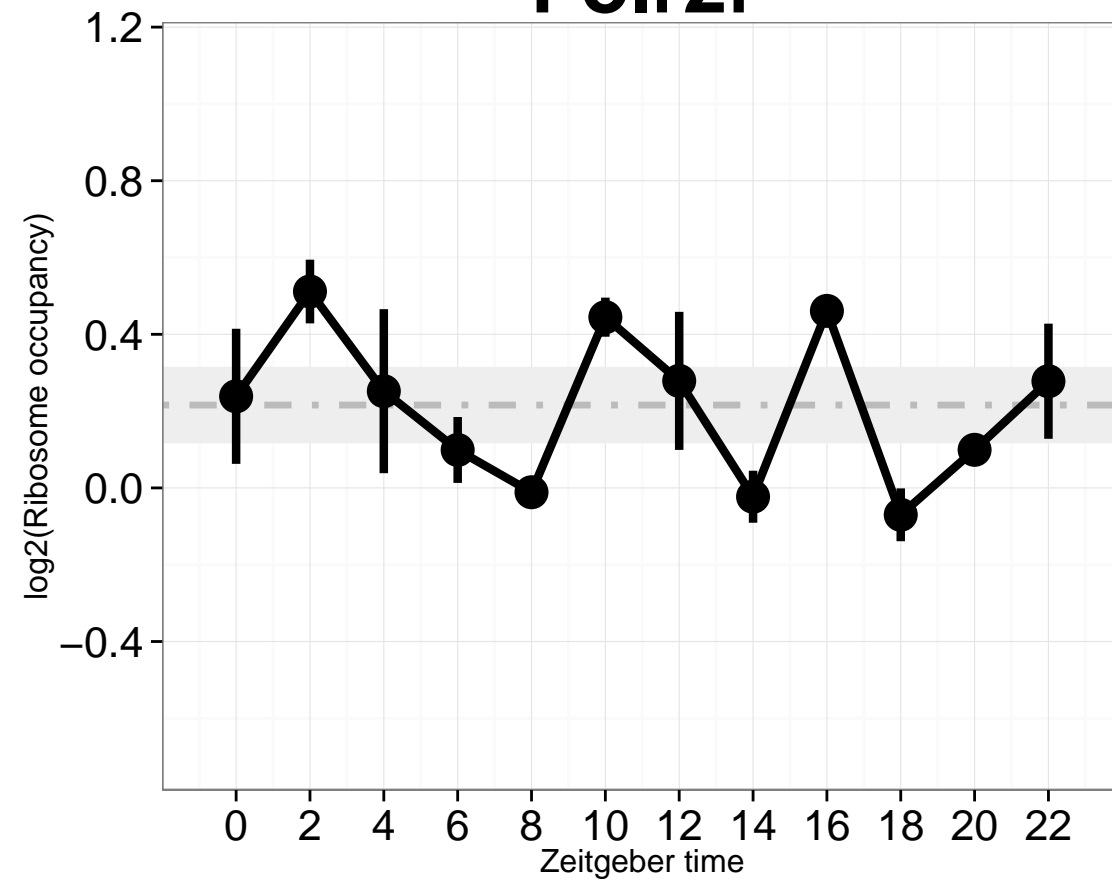

Supplement: Supplementary file 11270 [file 1]

# Ptch1

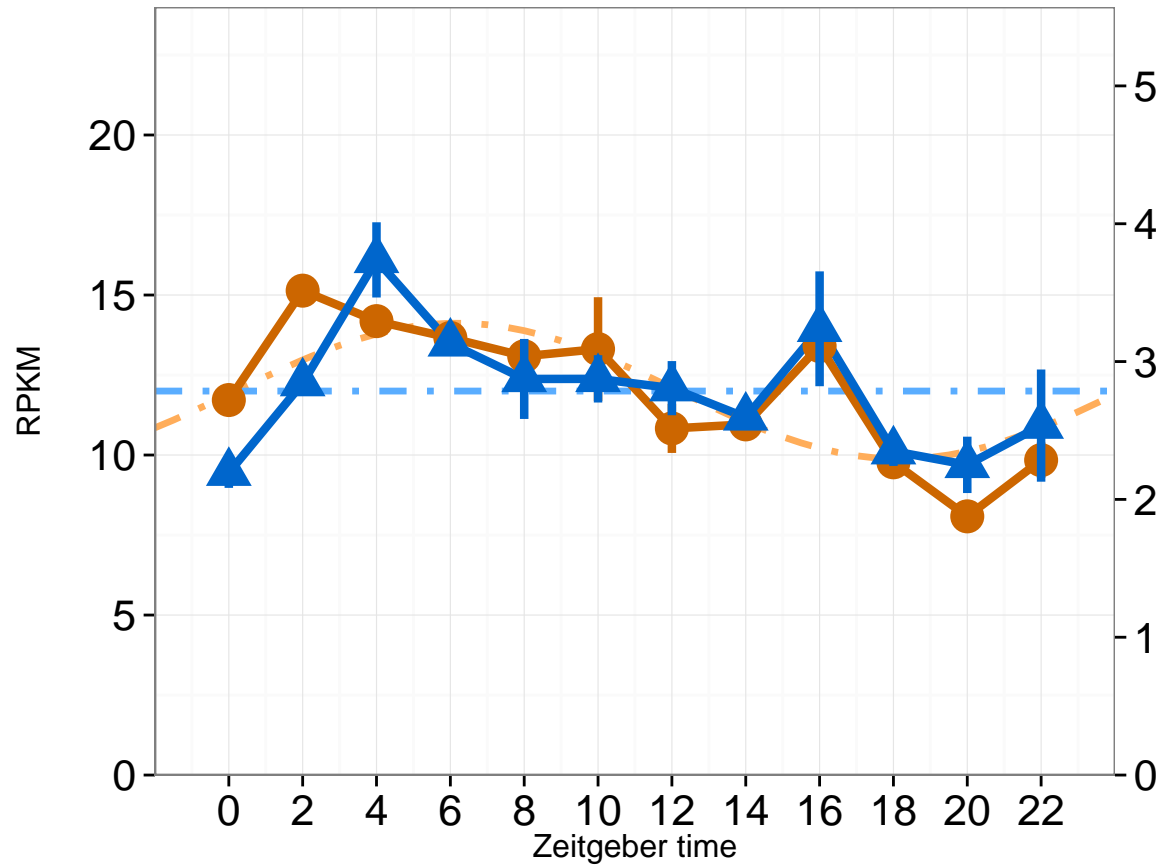

# Ptch1

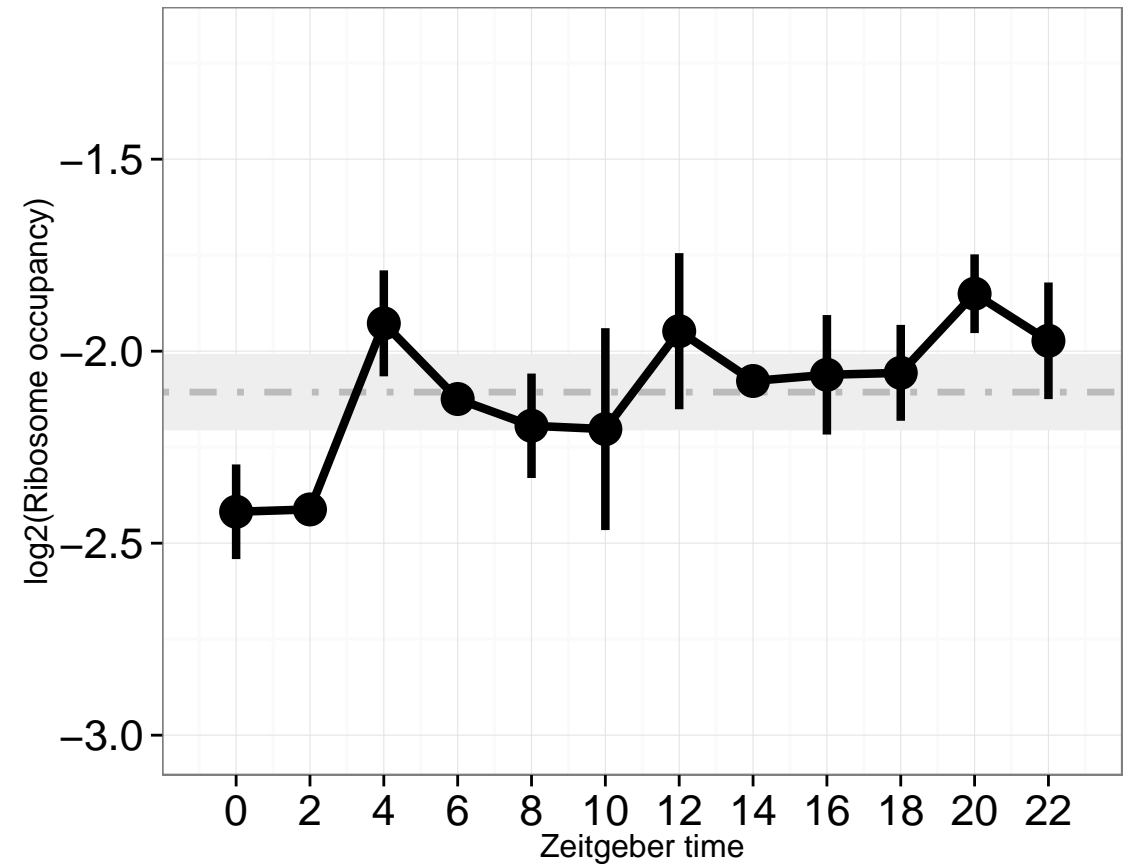

Supplement: Supplementary file 11271 [file 1]

## Chchd2

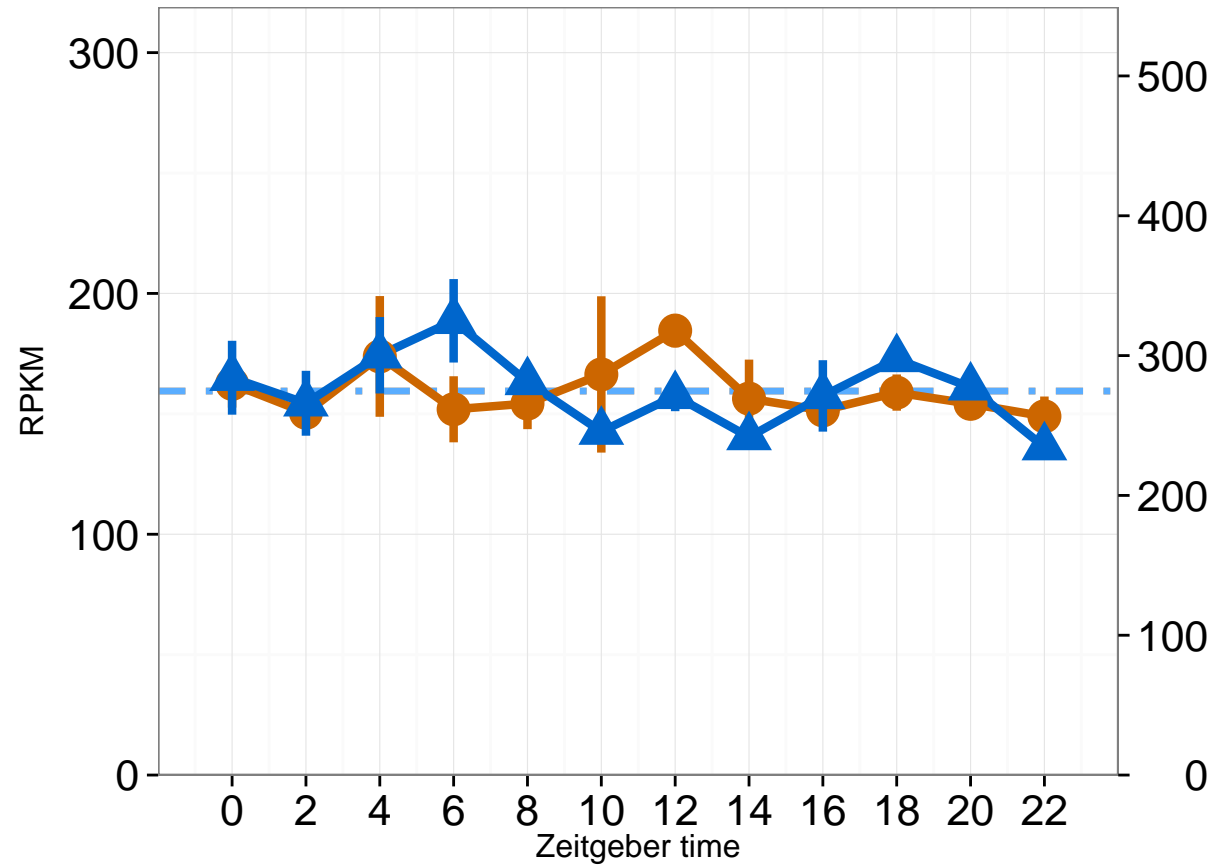

## Chchd2

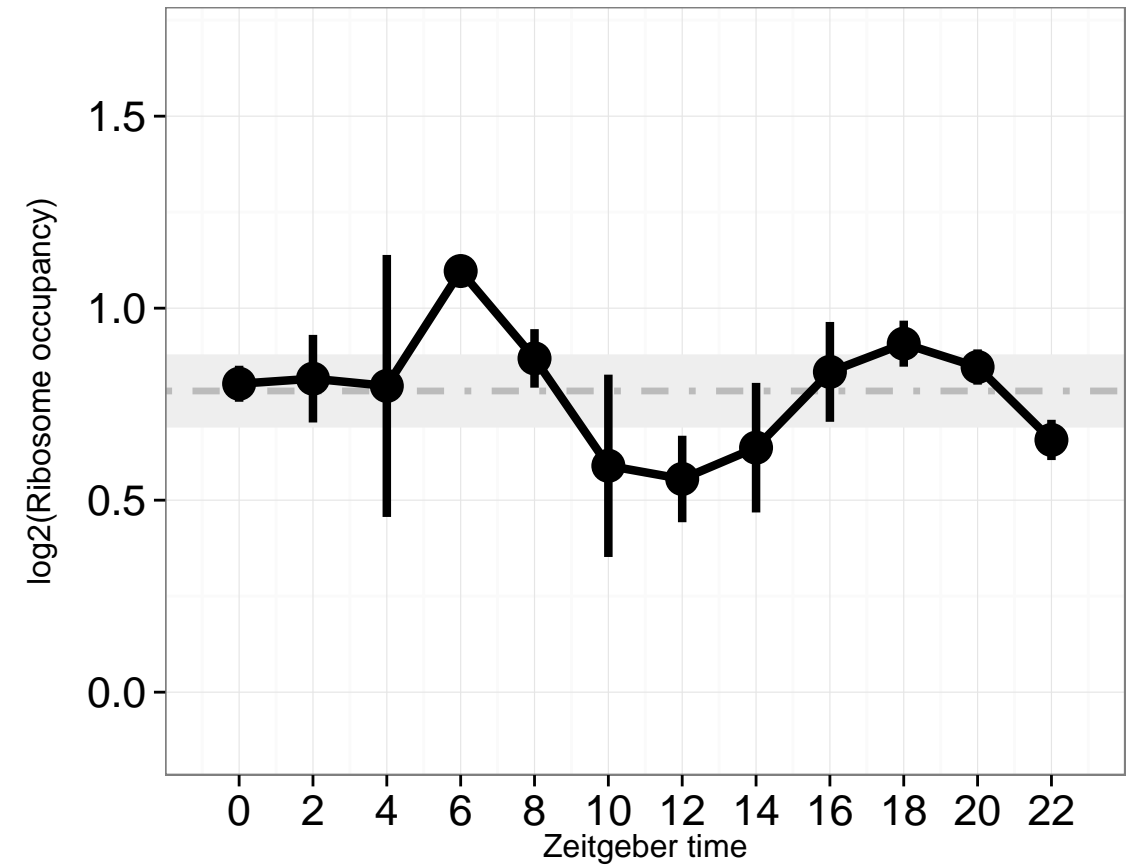

Supplement: Supplementary file 11272 [file 1]

## Ccdc157

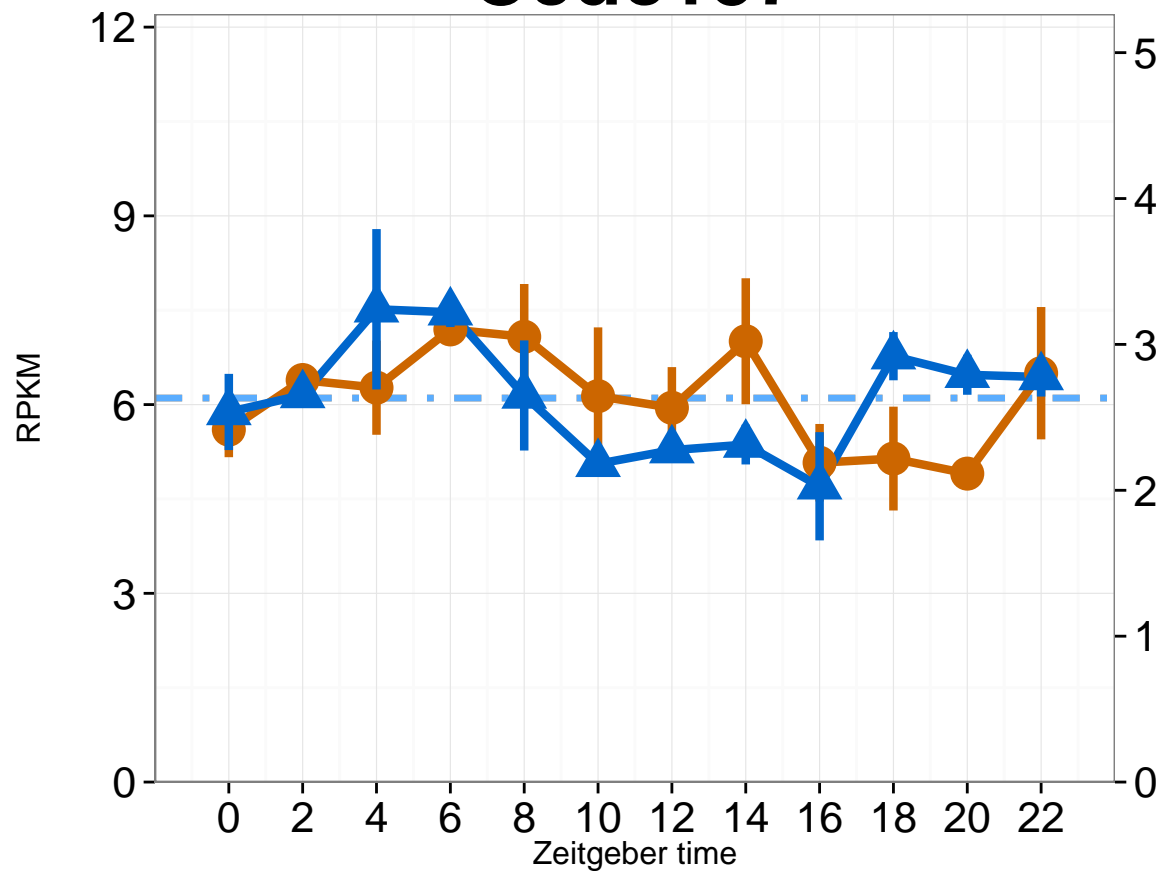

## Ccdc157

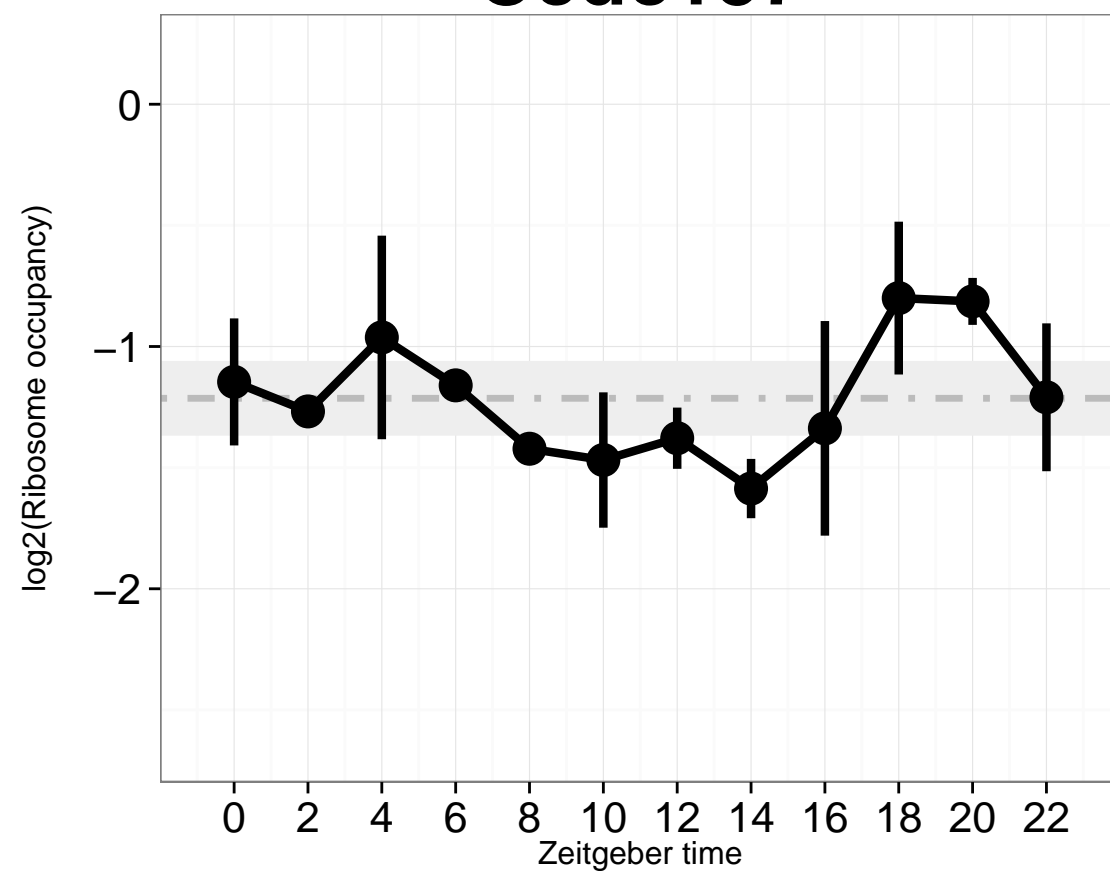

Supplement: Supplementary file 11273 [file 1]

# Rpl7I1

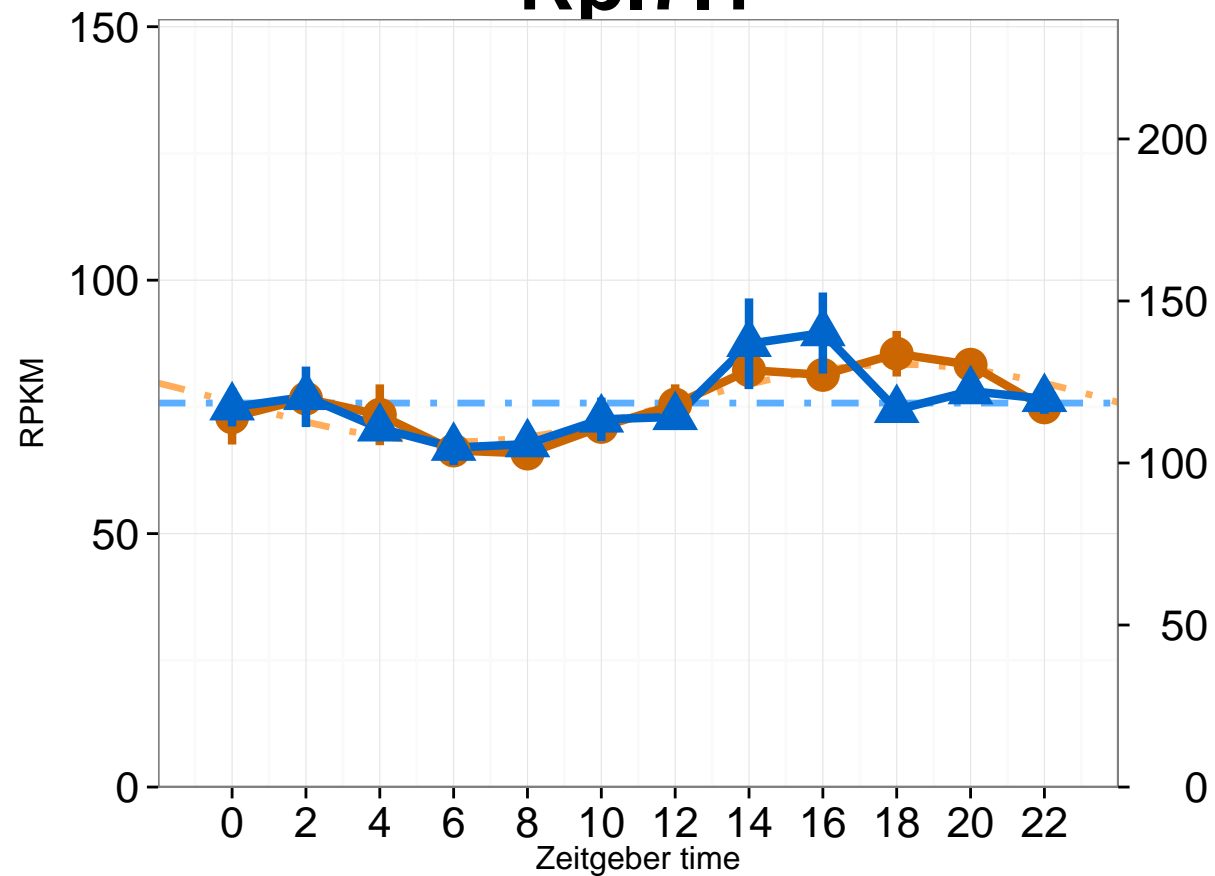

# Rpl7I1

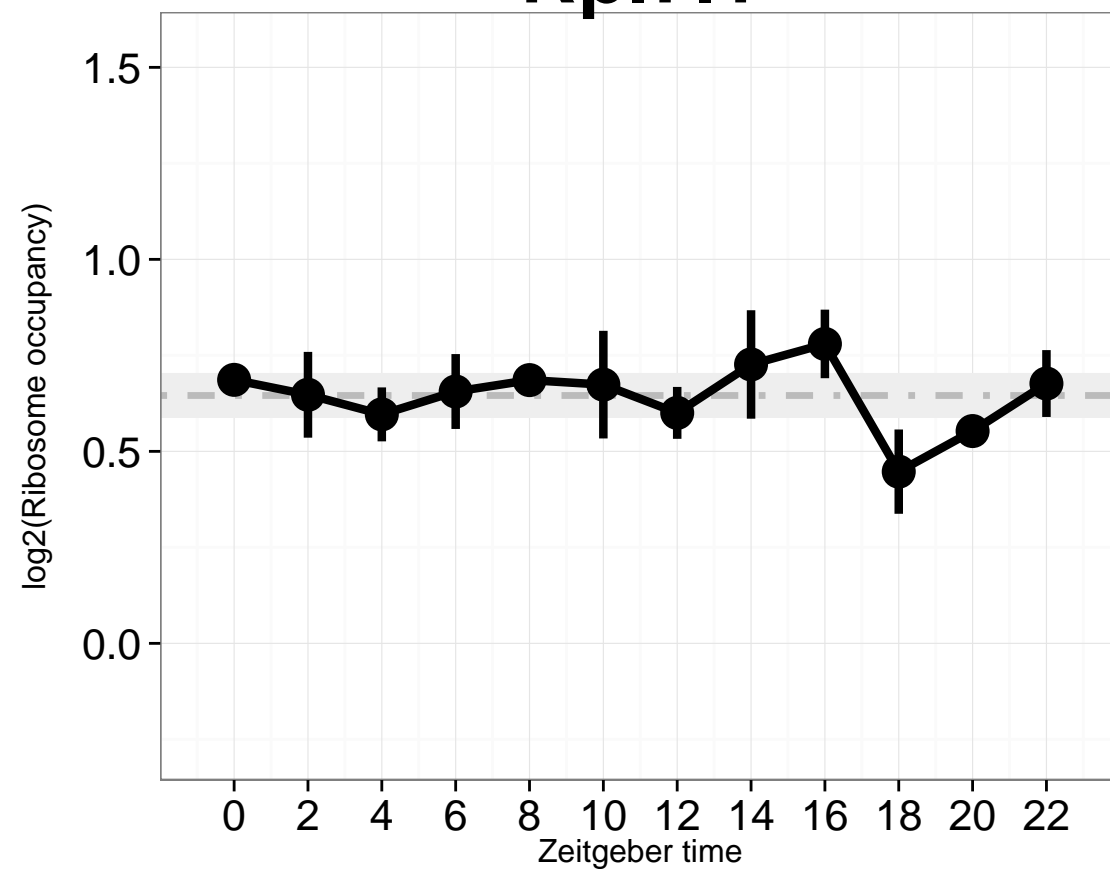

Supplement: Supplementary file 11274 [file 1]

# Pik3r6

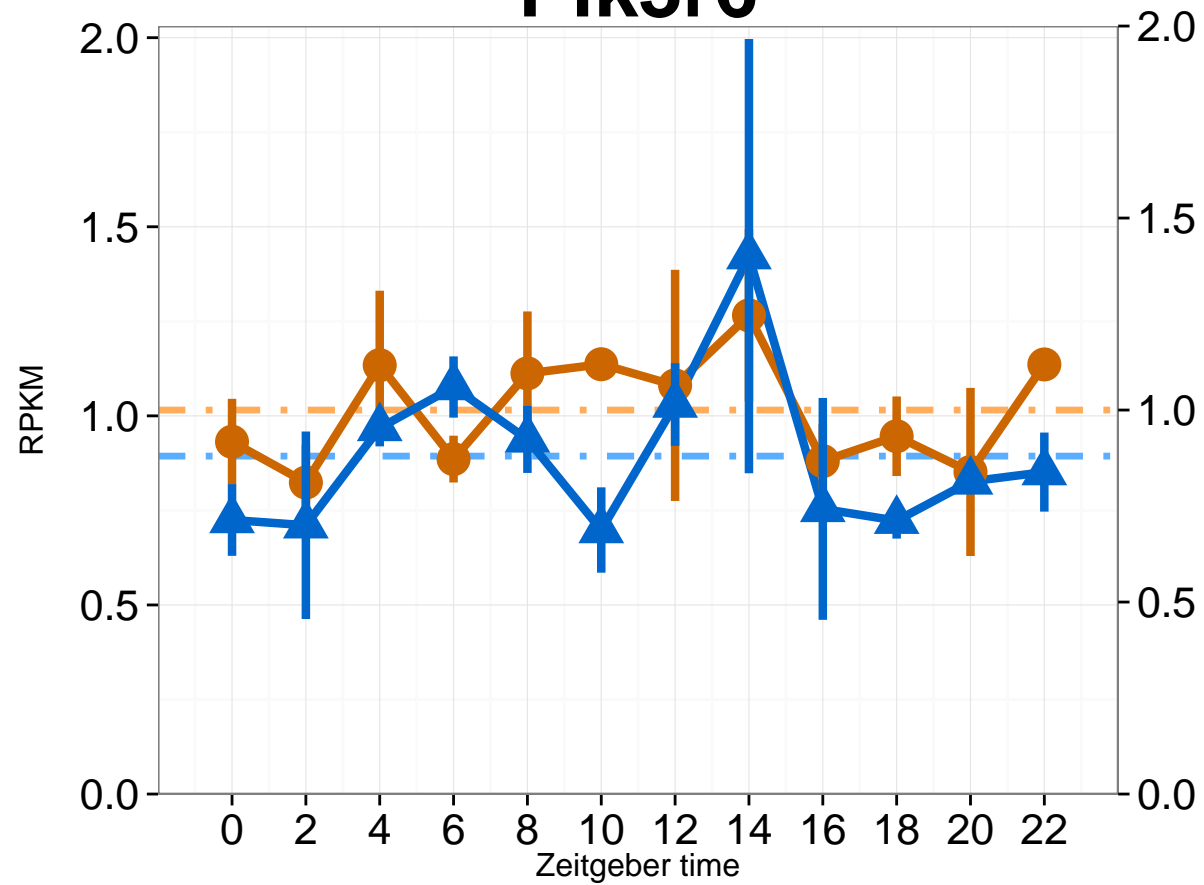

# Pik3r6

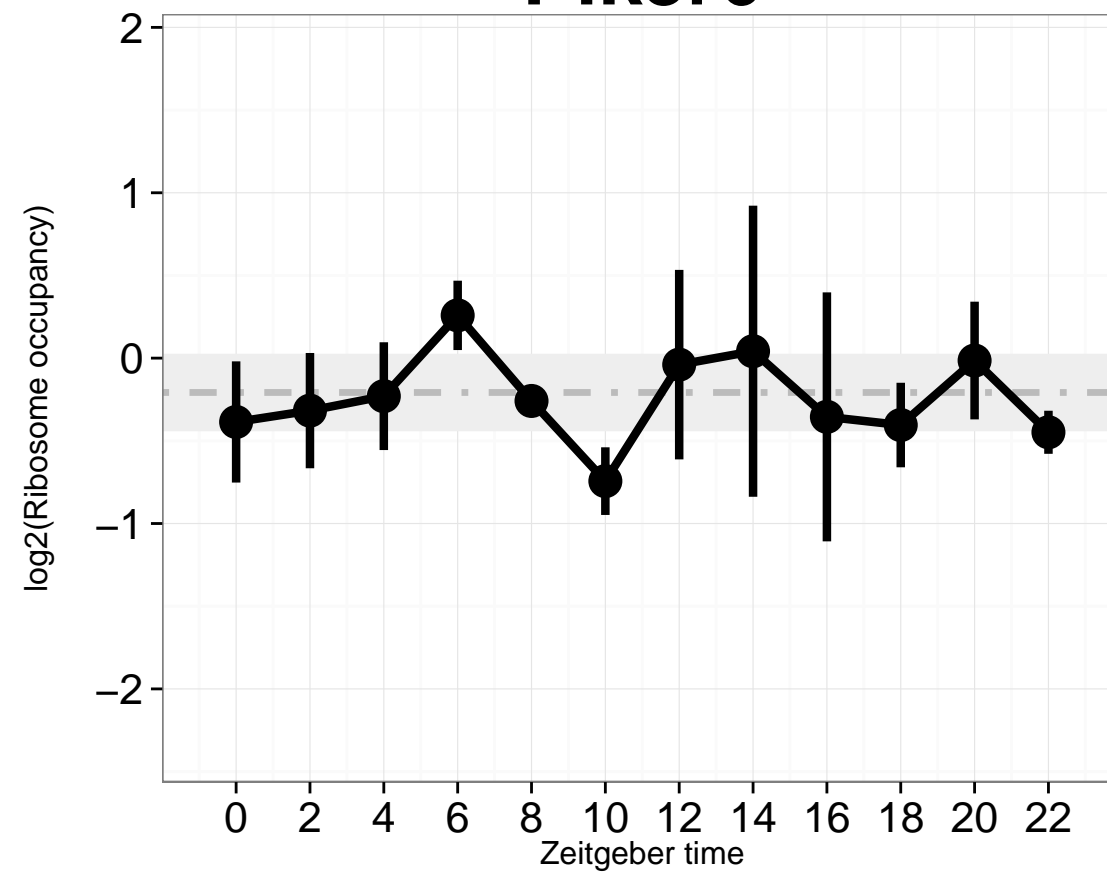

Supplement: Supplementary file 11275 [file 1]

## Htra3

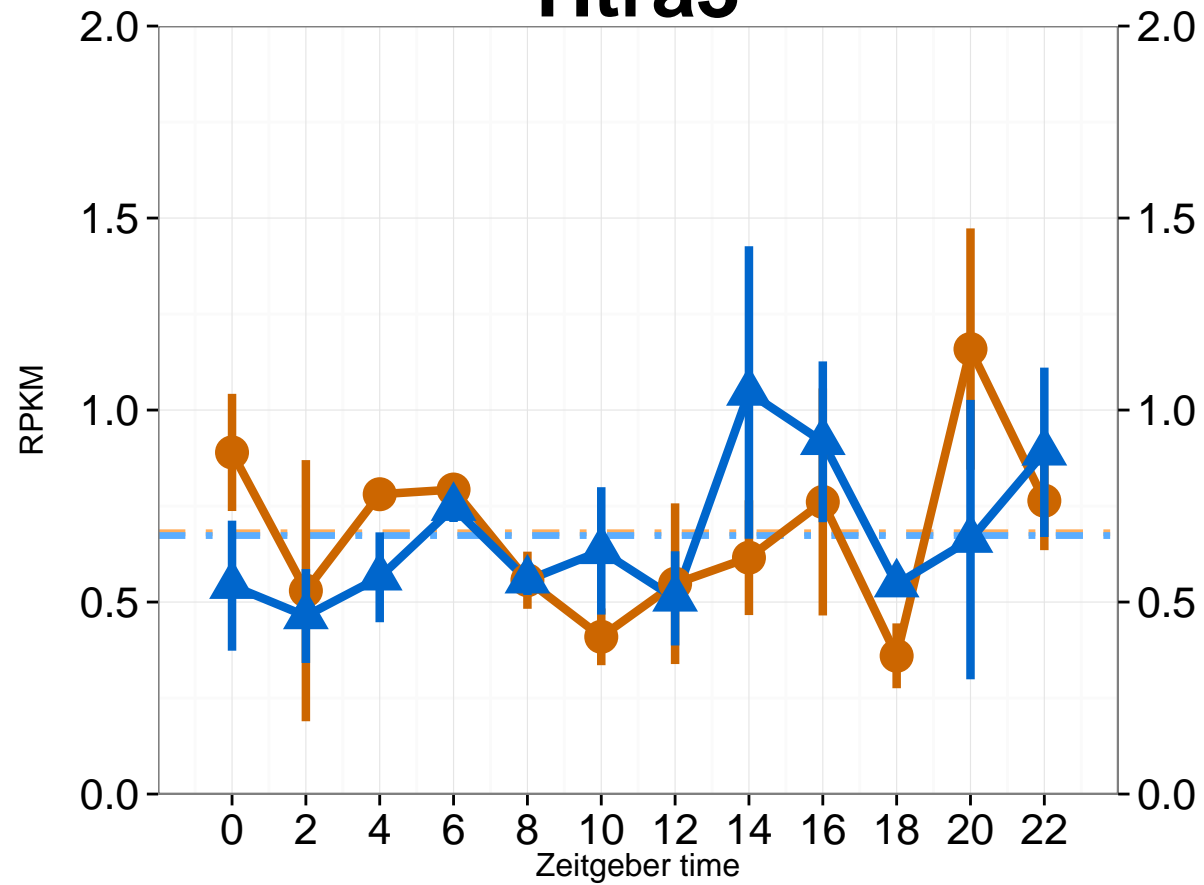

## Htra3

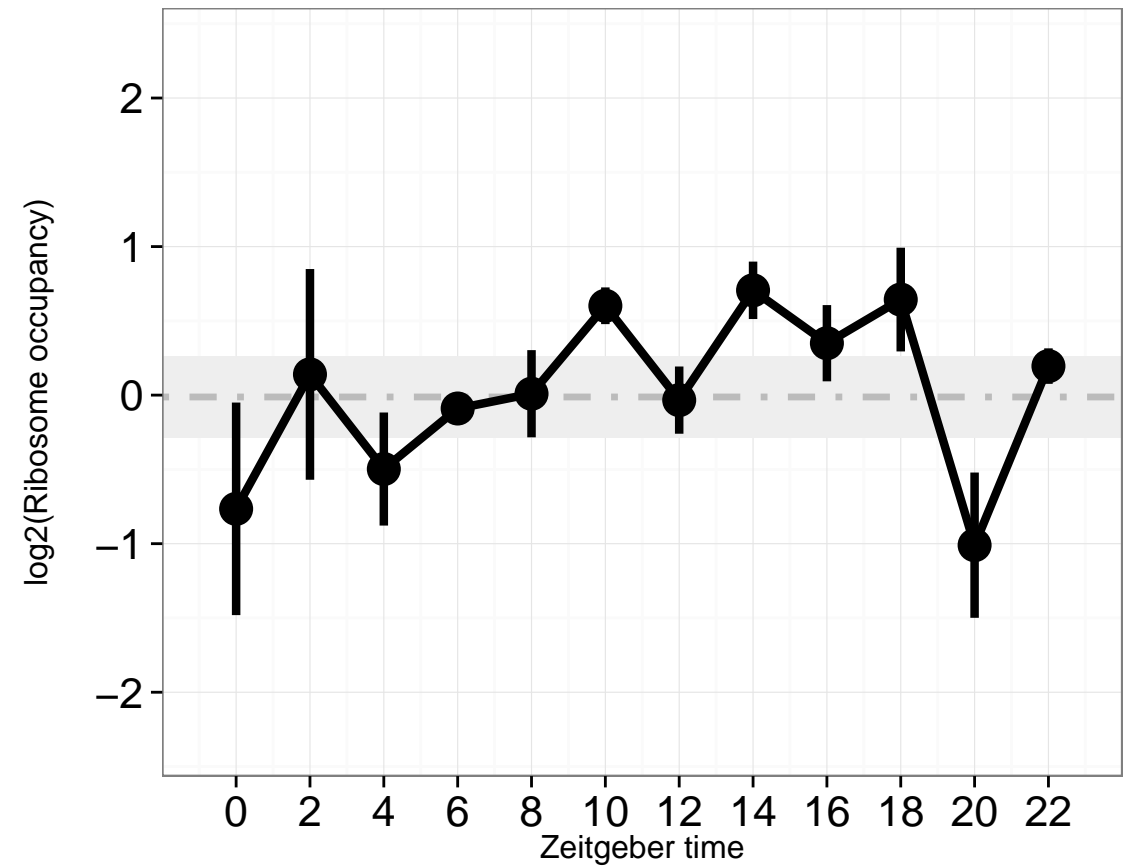

Supplement: Supplementary file 11276 [file 1]

## Mnt

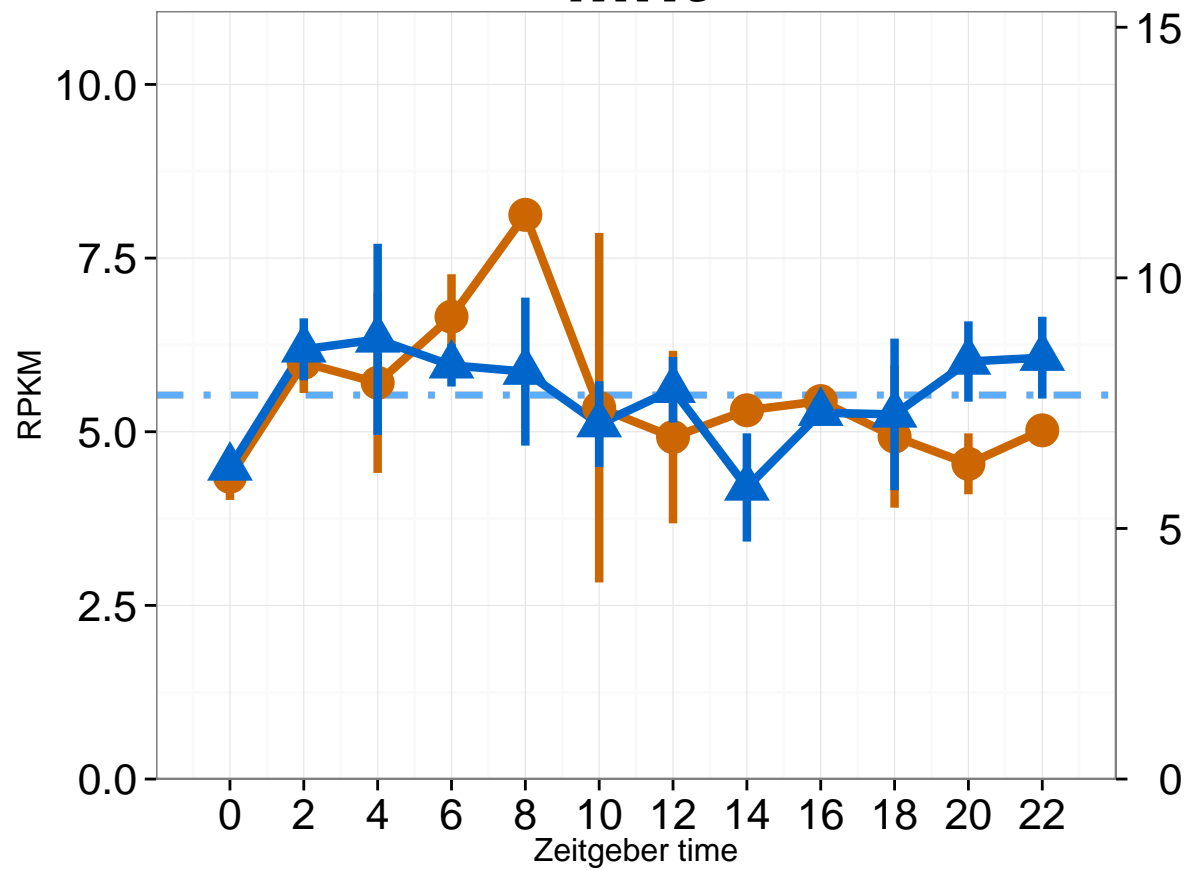

## Mnt

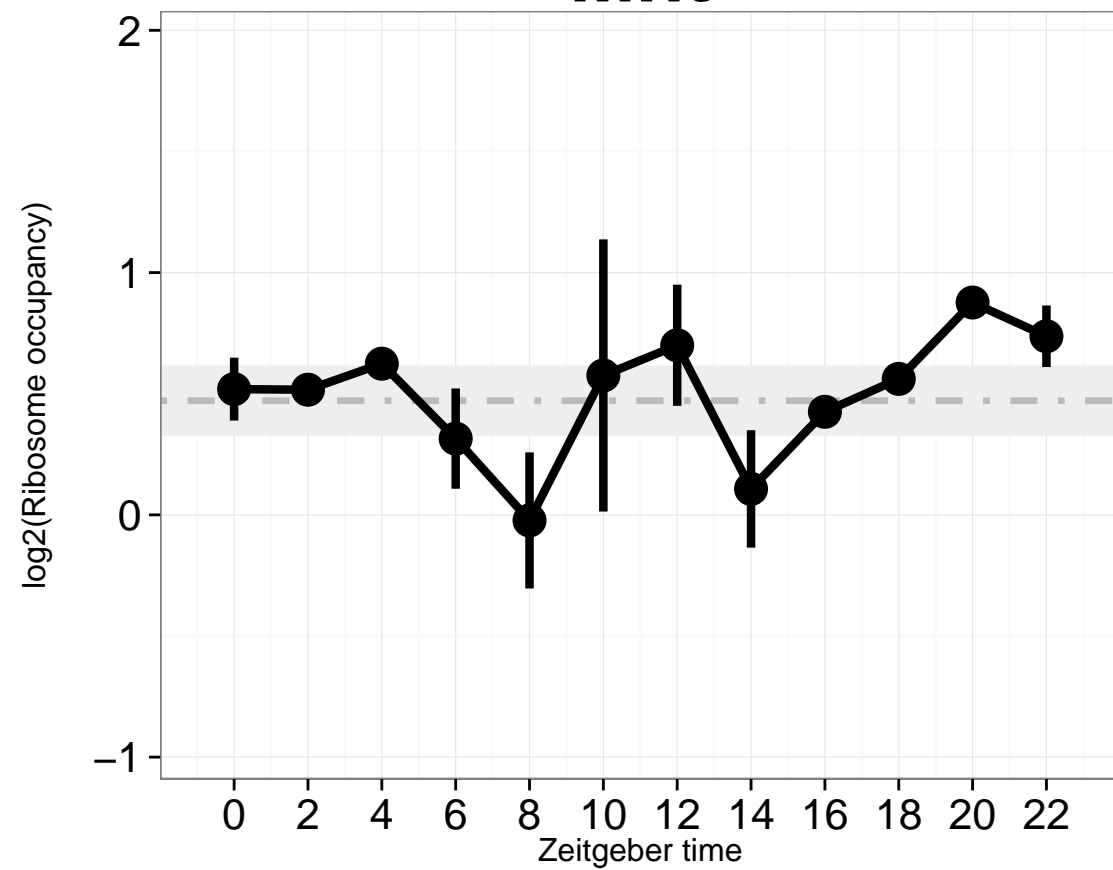

Supplement: Supplementary file 11277 [file 1]

## Pigf

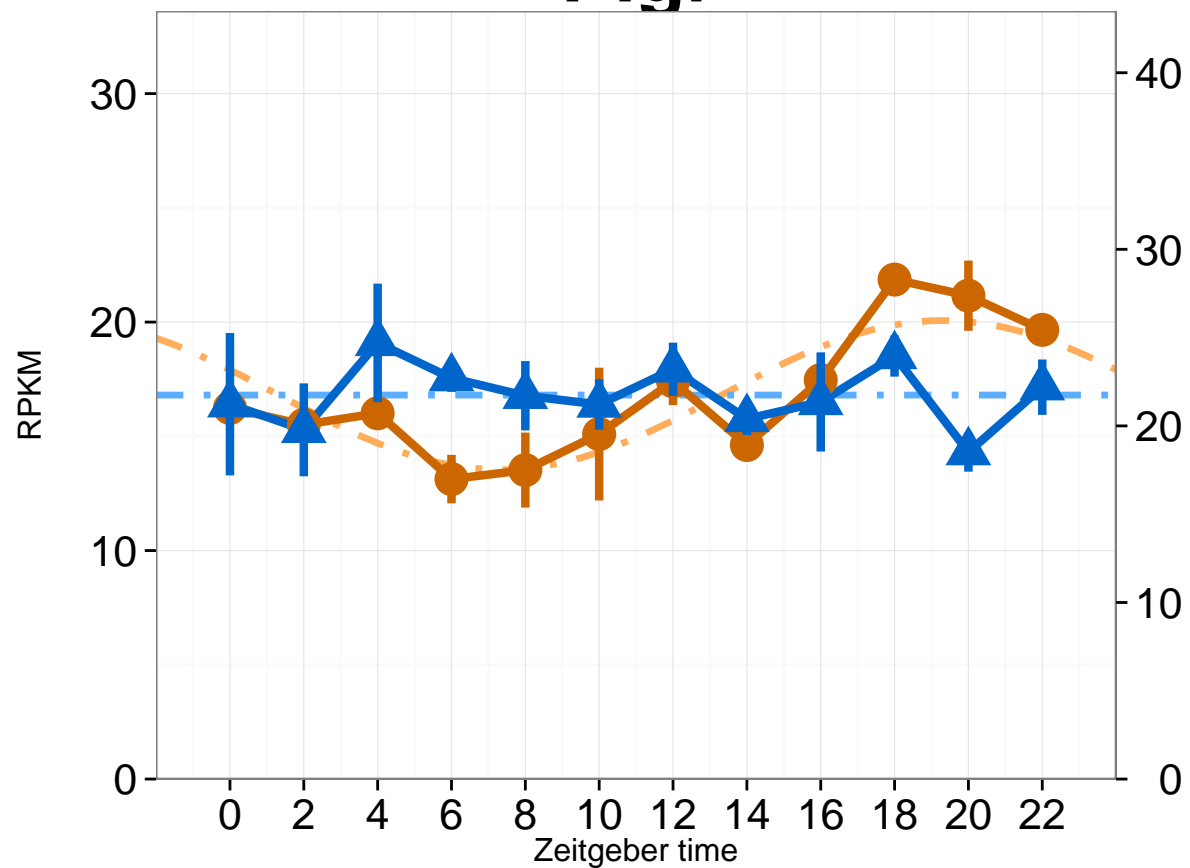

## Pigf

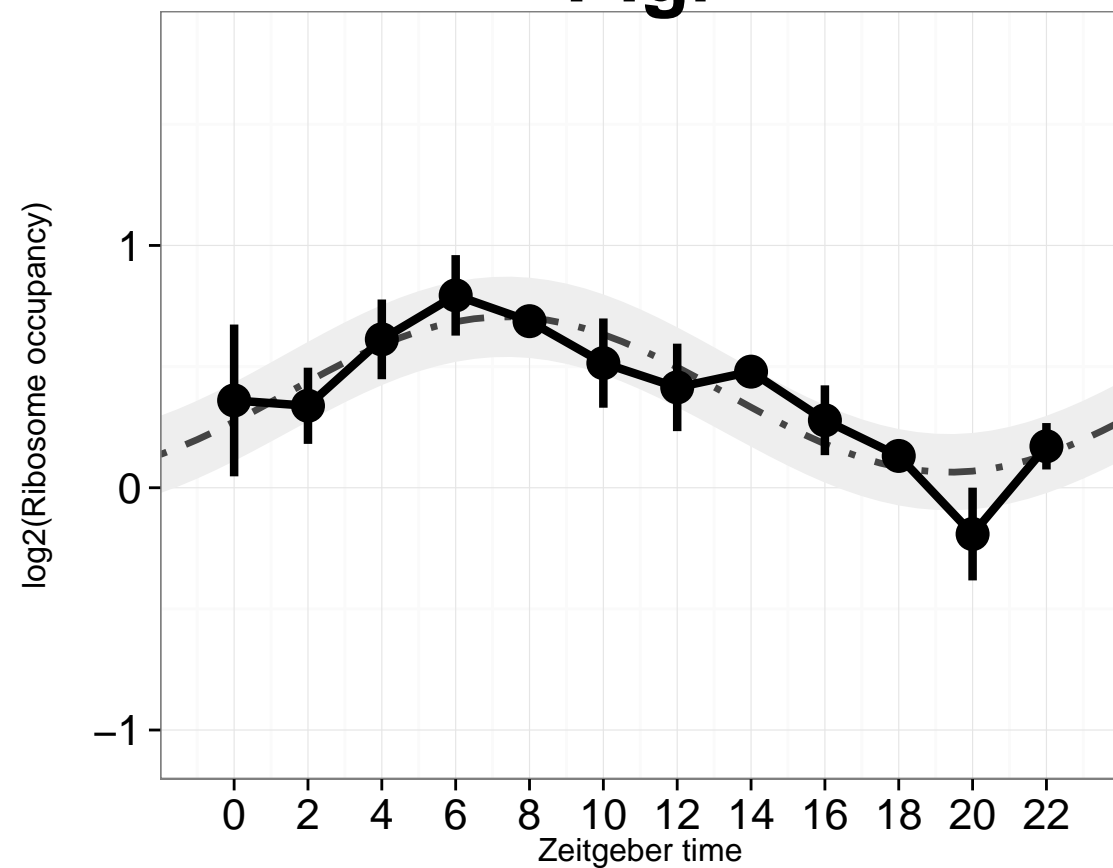

Supplement: Supplementary file 11278 [file 1]

## Cdk9

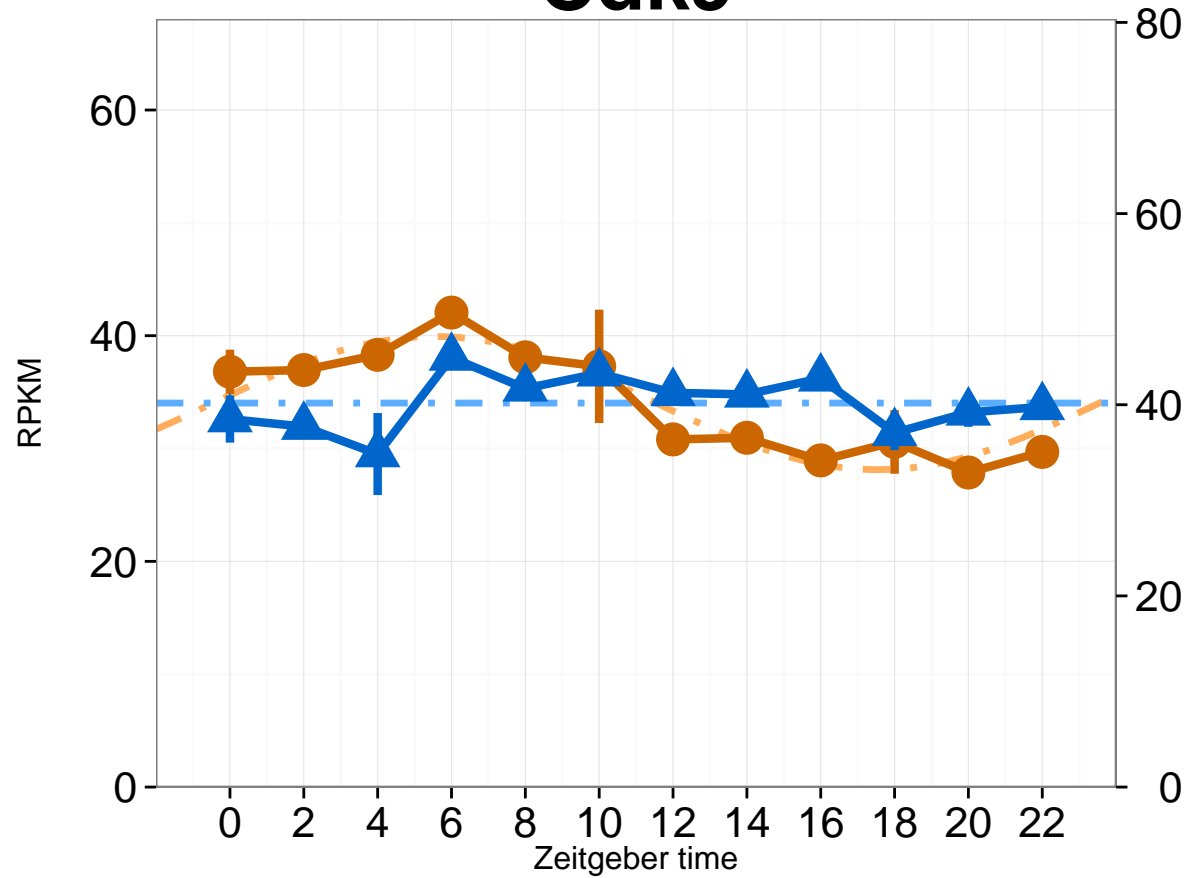

## Cdk9

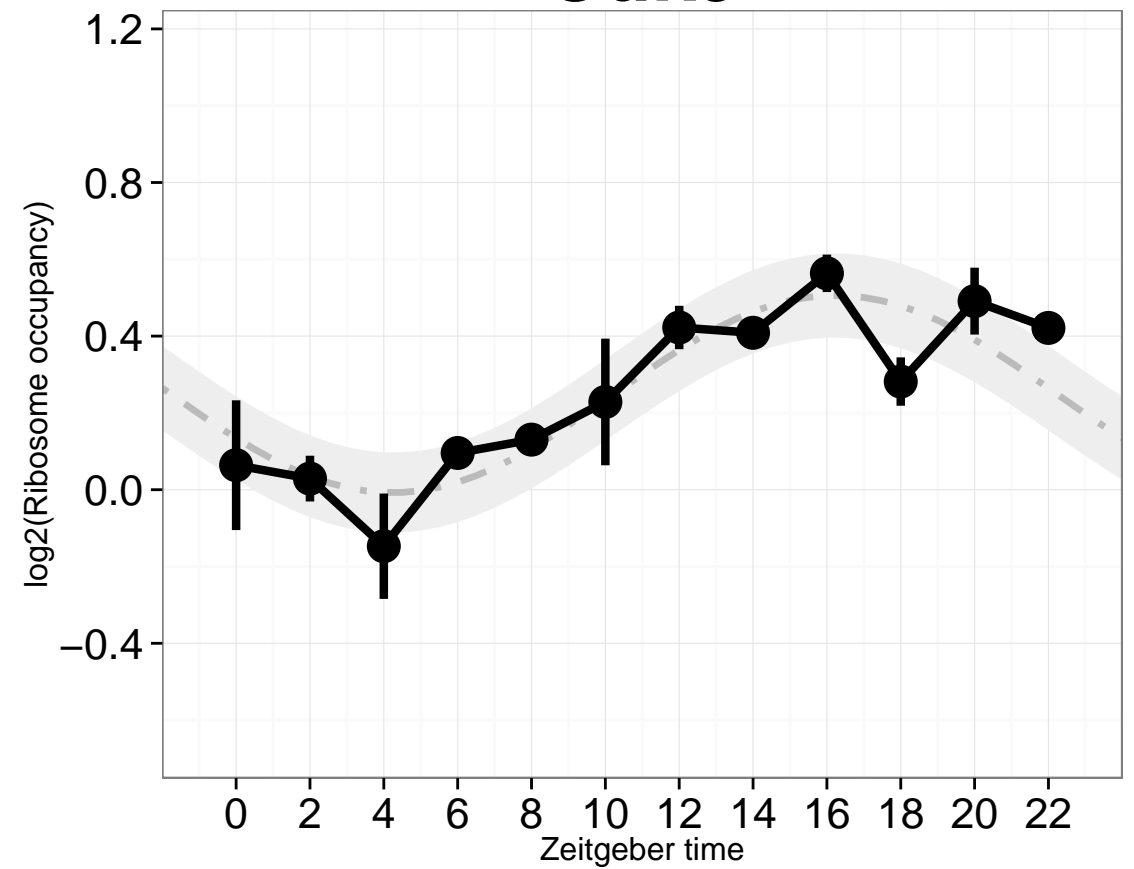

Supplement: Supplementary file 11279 [file 1]

## TtII4

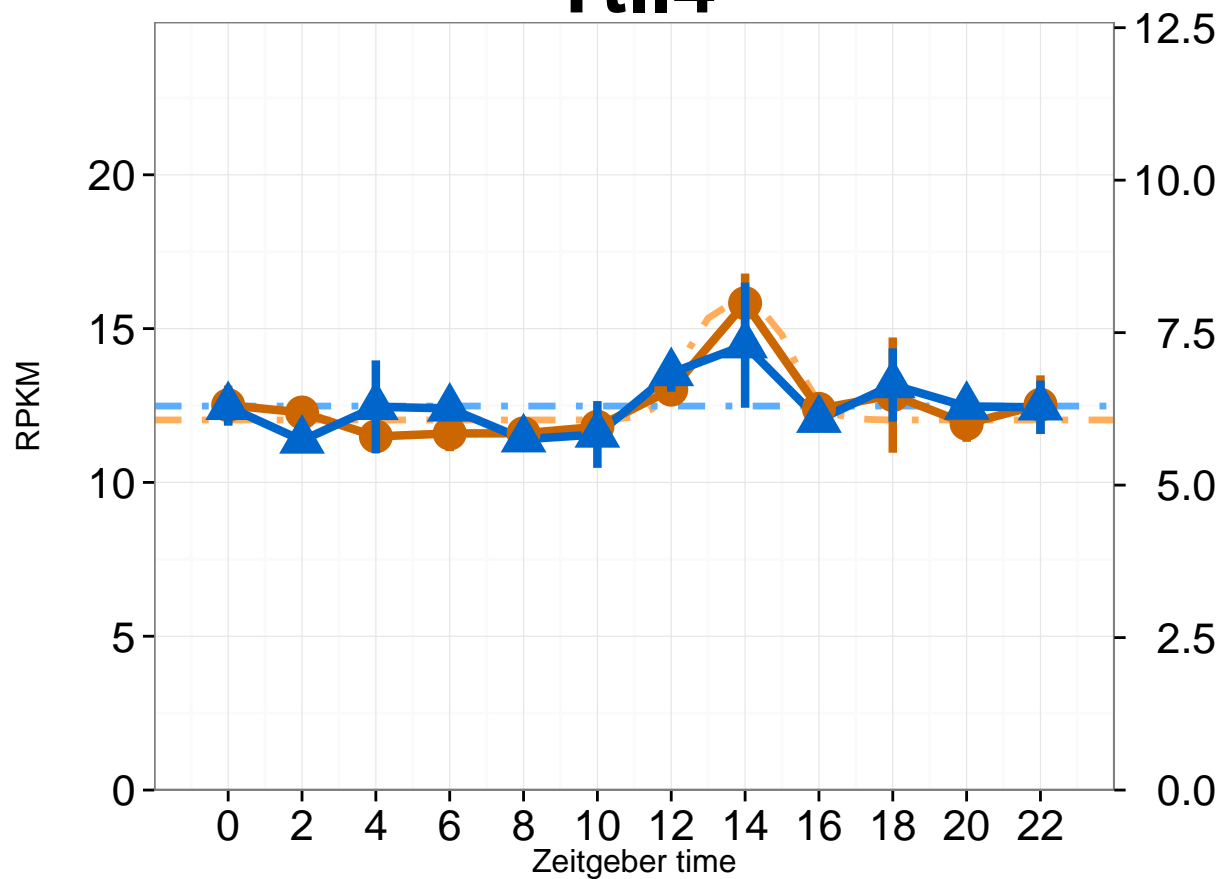

## TtII4

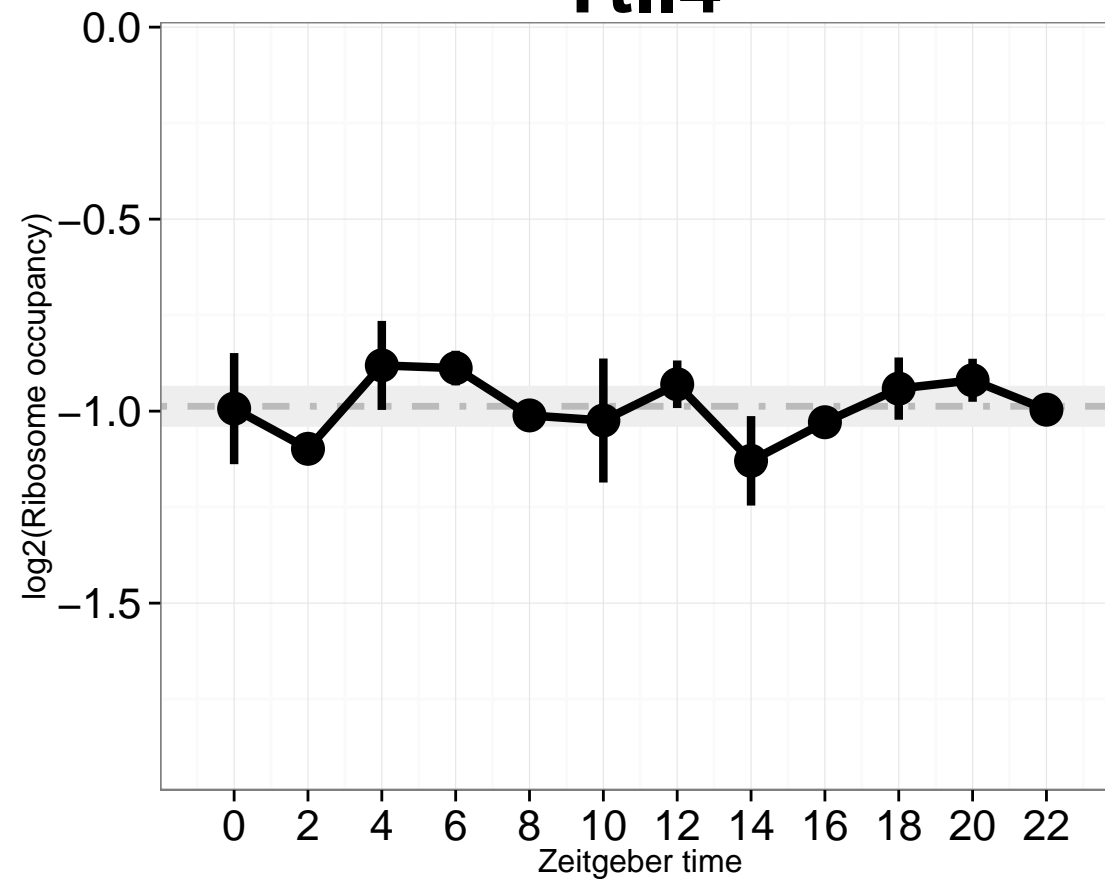

Supplement: Supplementary file 11280 [file 1]

## Kdm6b

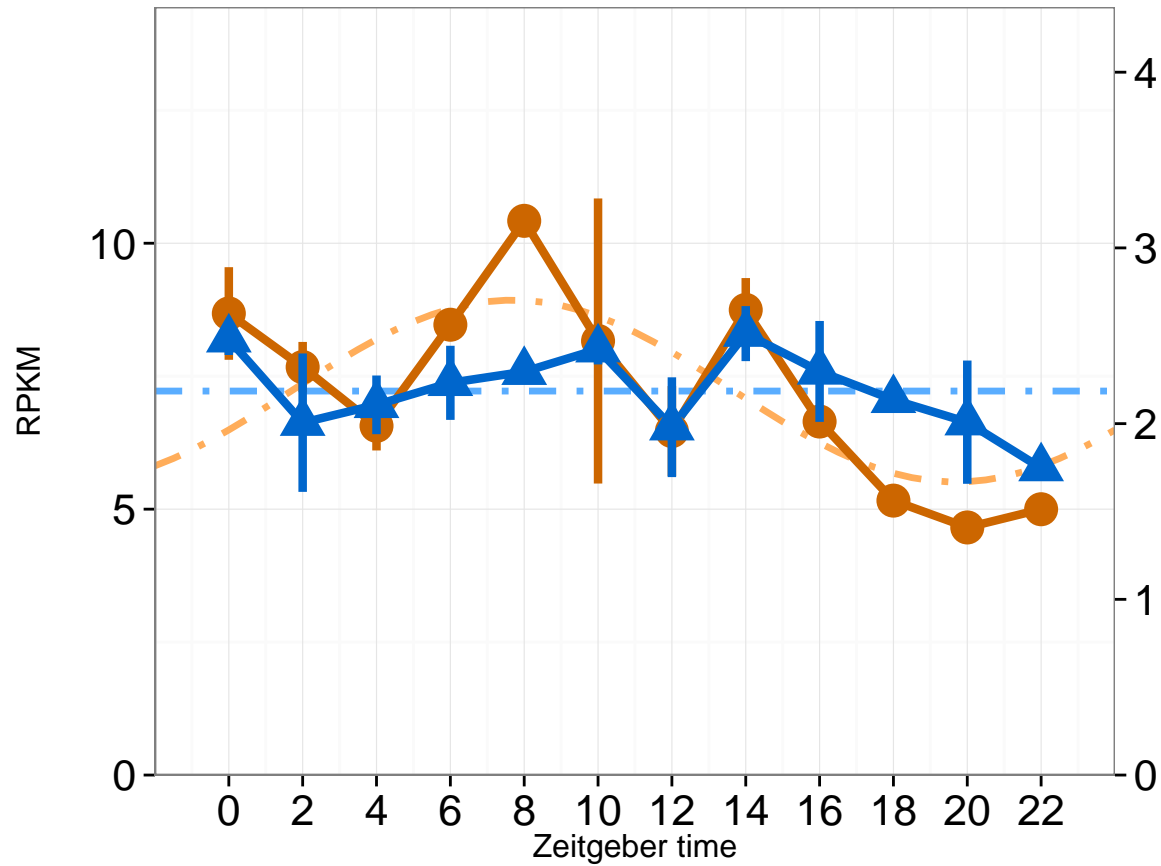

## Kdm6b

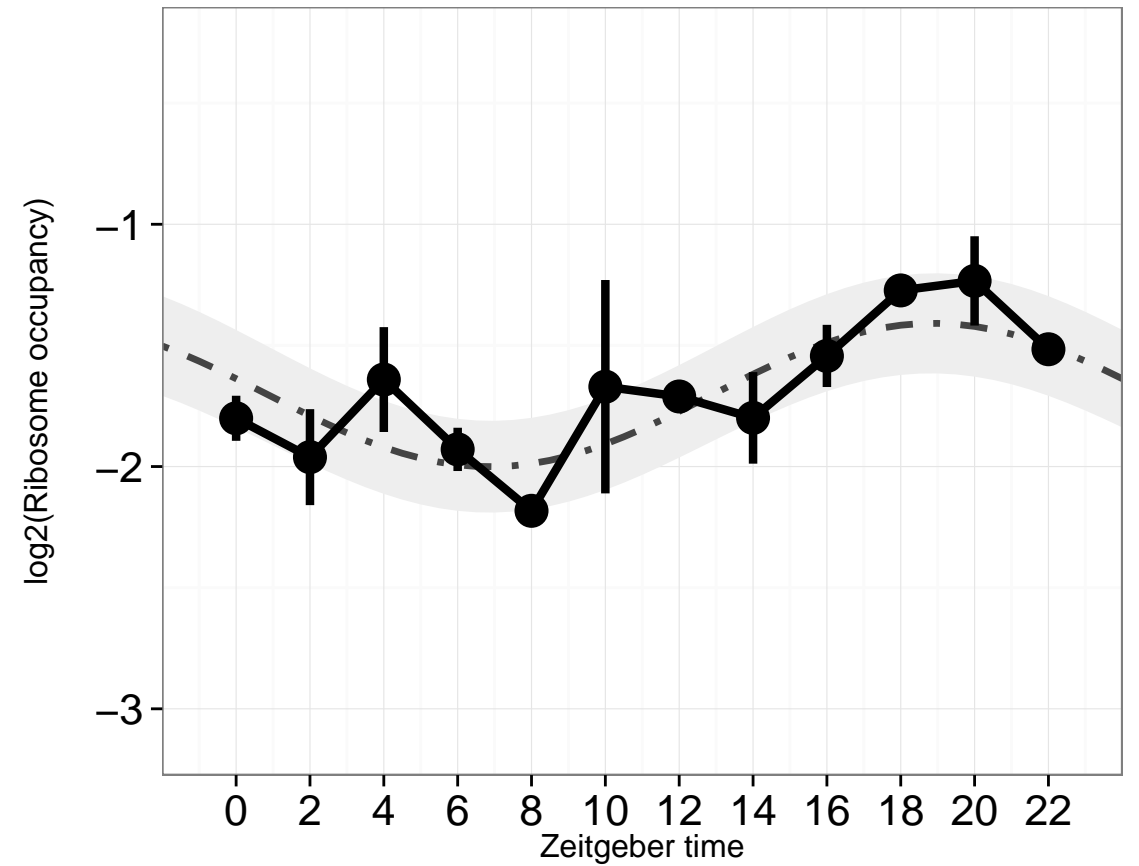

Supplement: Supplementary file 11281 [file 1]

## Serpinf1

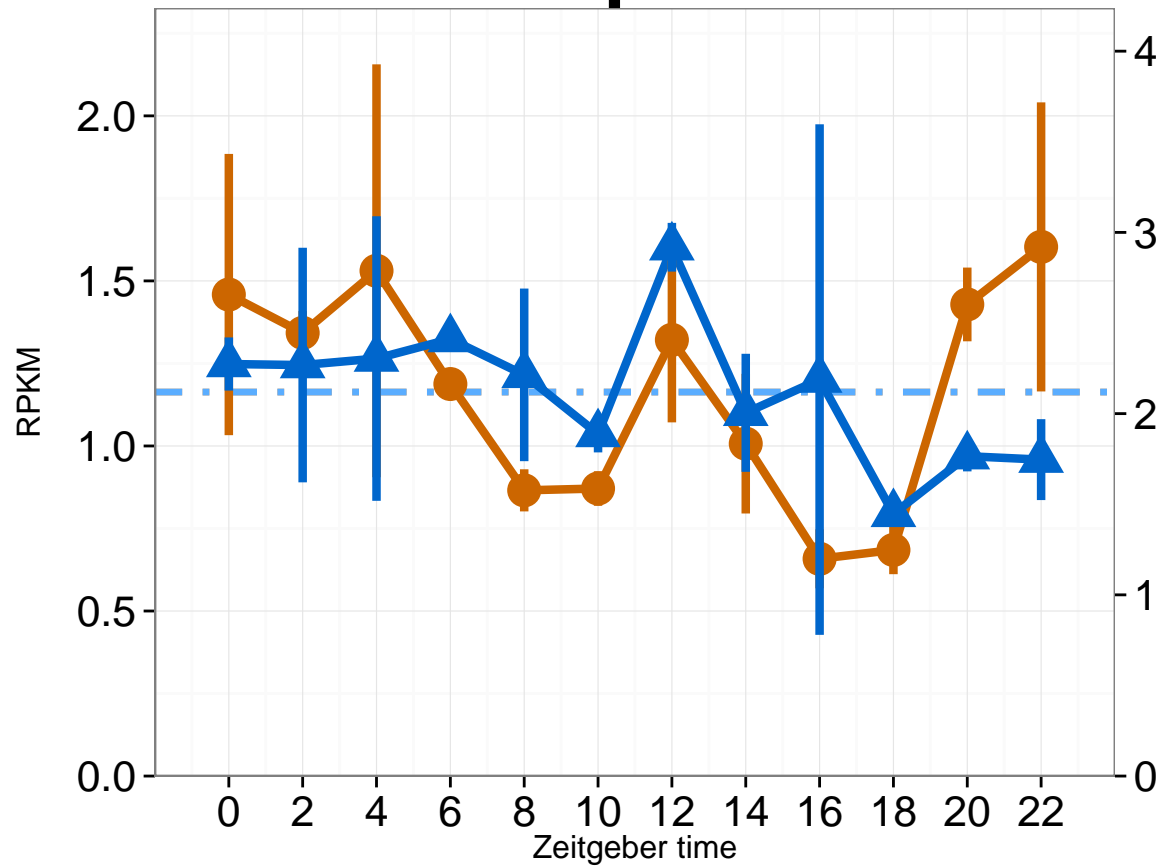

## Serpinf1

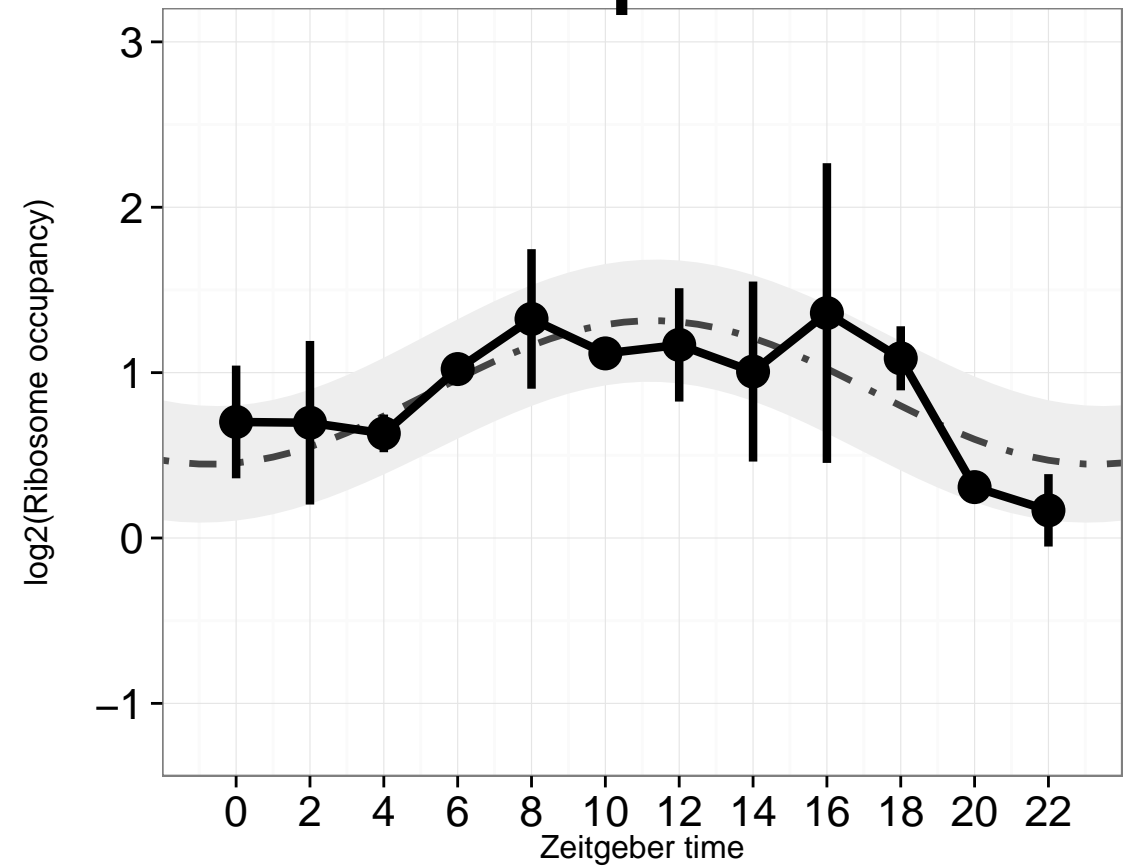

Supplement: Supplementary file 11282 [file 1]

## Nlrc4

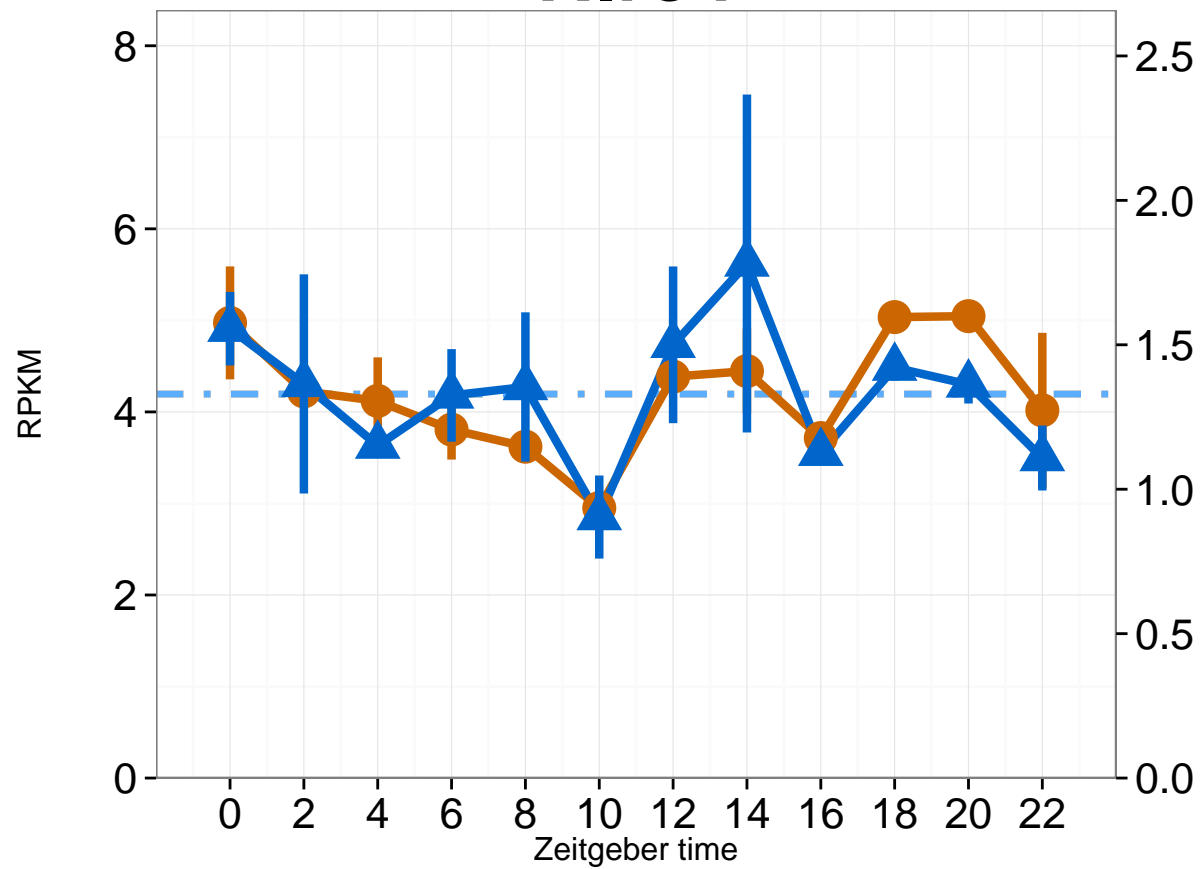

## Nlrc4

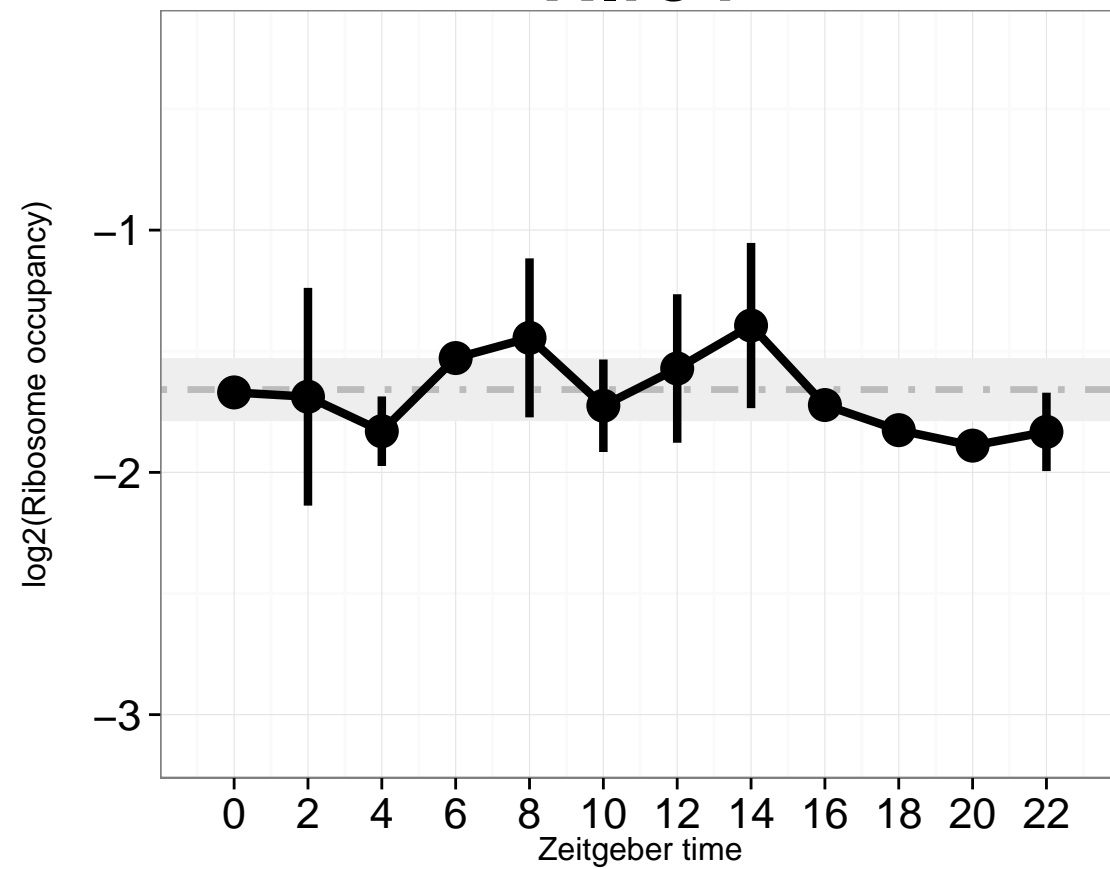

Supplement: Supplementary file 11283 [file 1]

## Bicd1

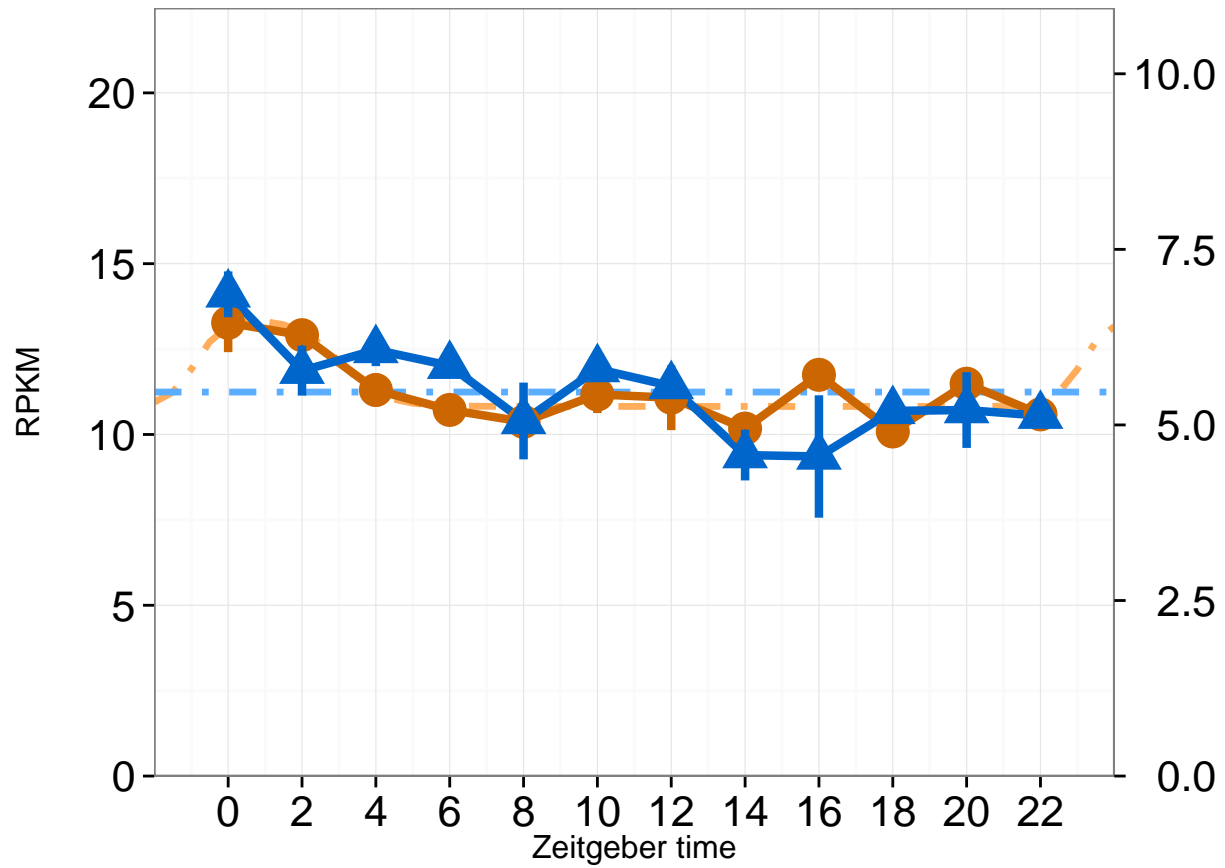

## Bicd1

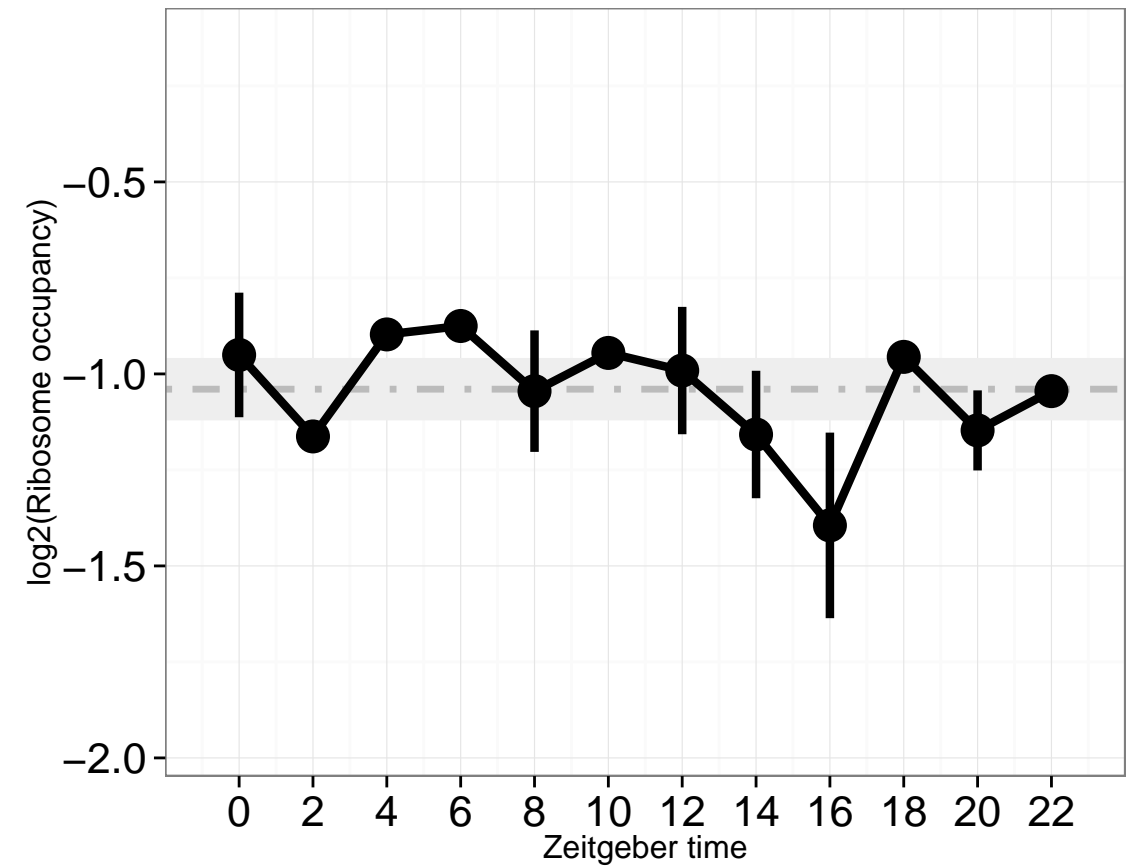

Supplement: Supplementary file 11284 [file 1]

# Ces2h

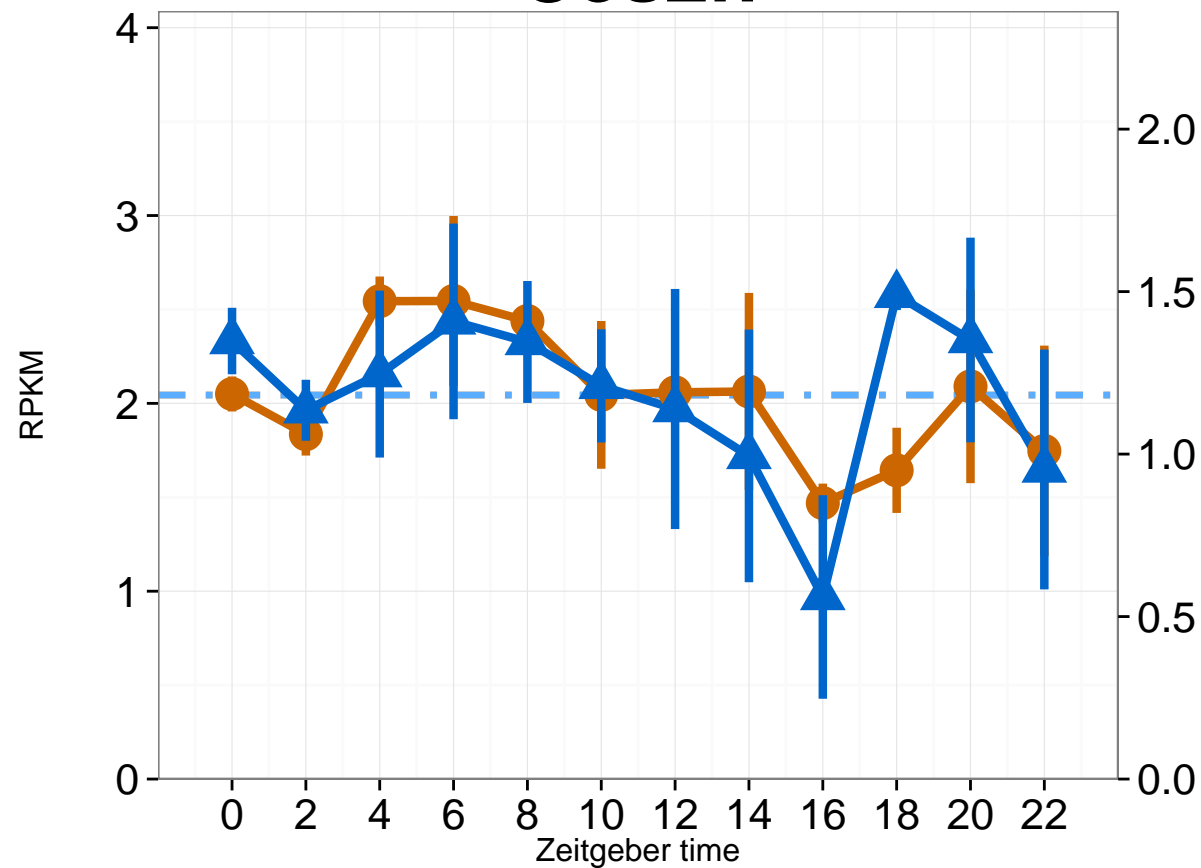

# Ces2h

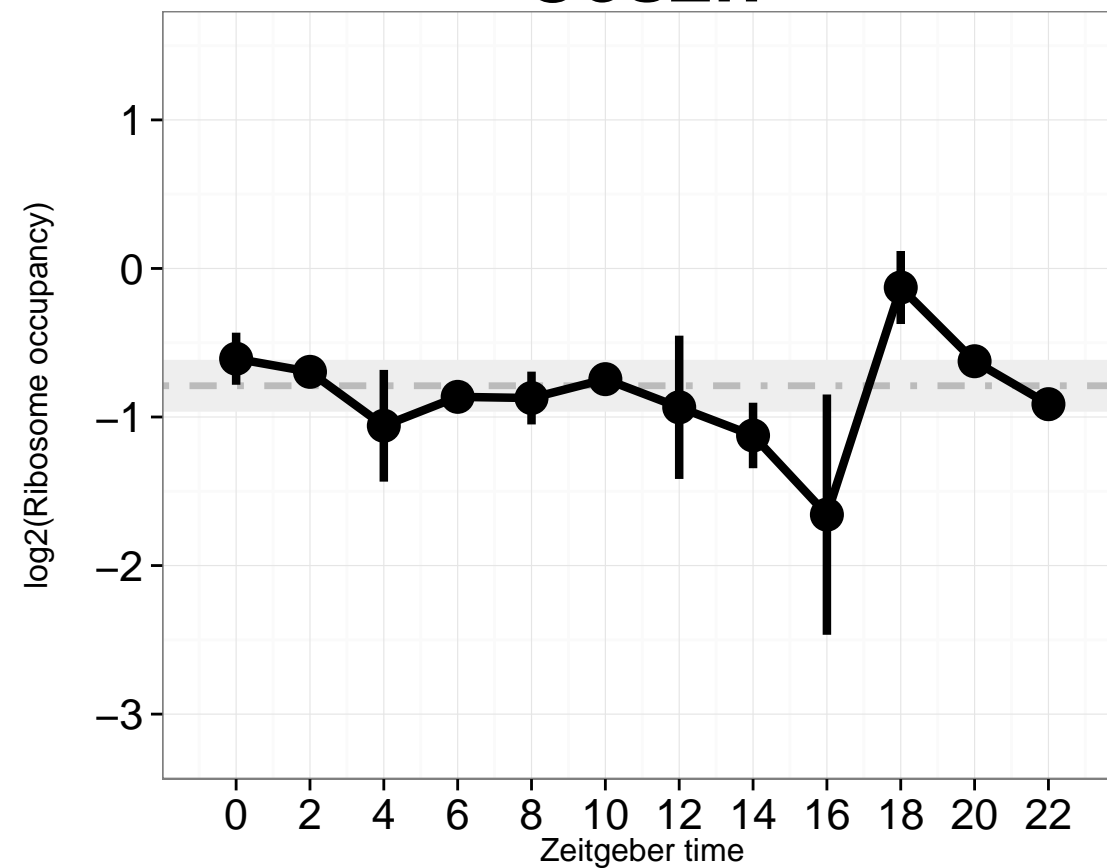

Supplement: Supplementary file 11285 [file 1]

# Mier1

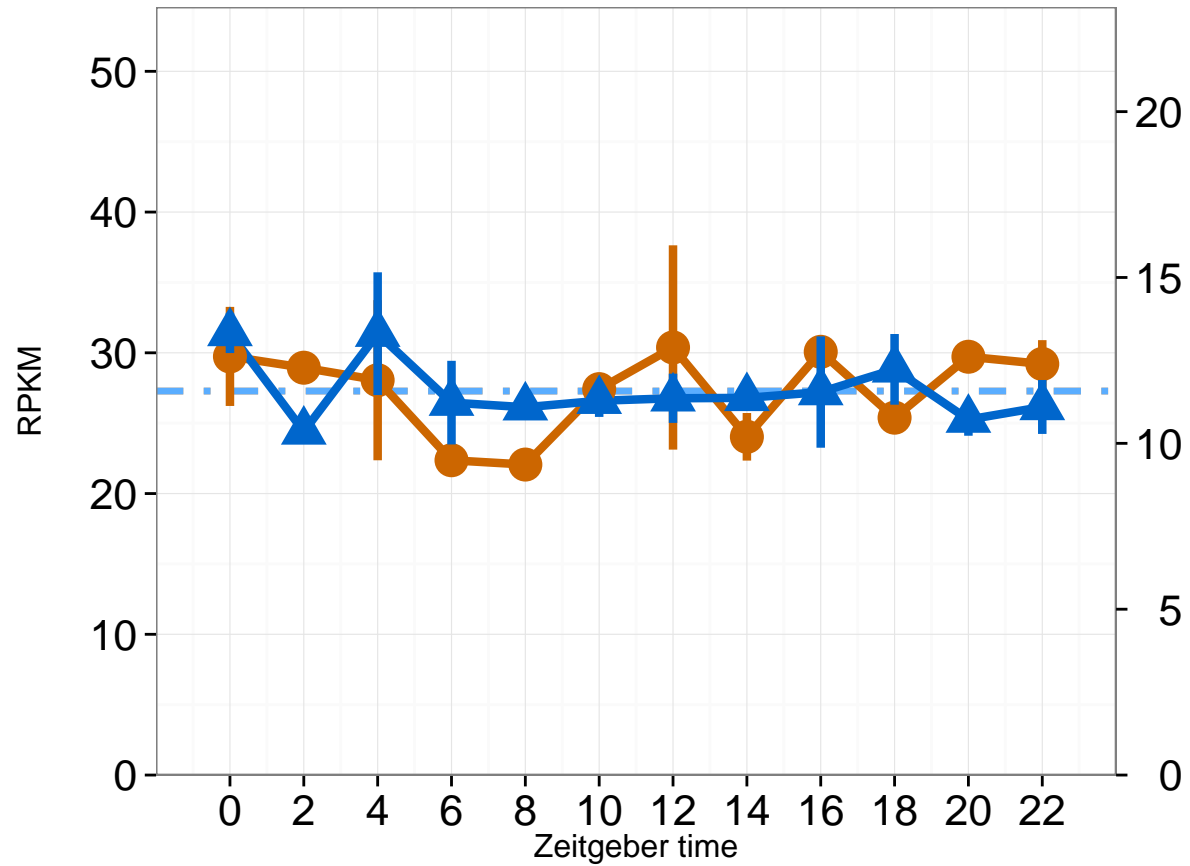

# Mier1

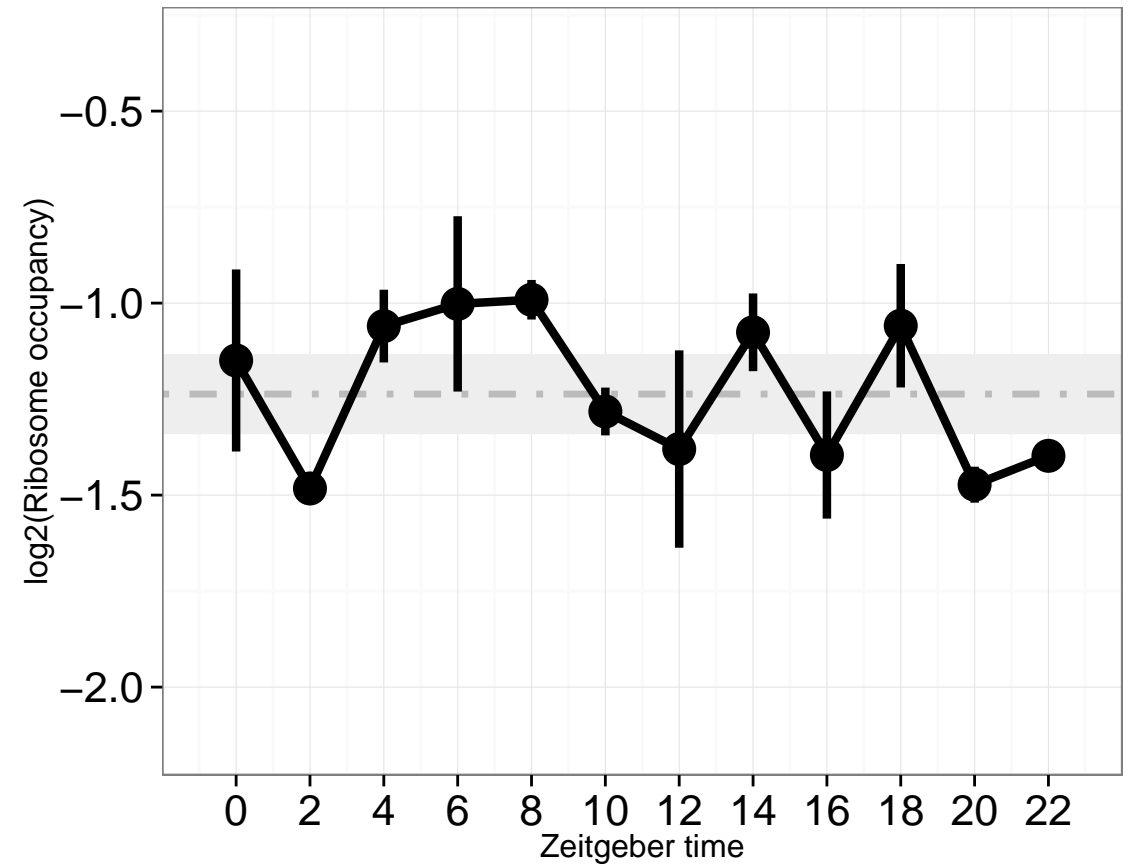

Supplement: Supplementary file 11286 [file 1]

## Slc6a19

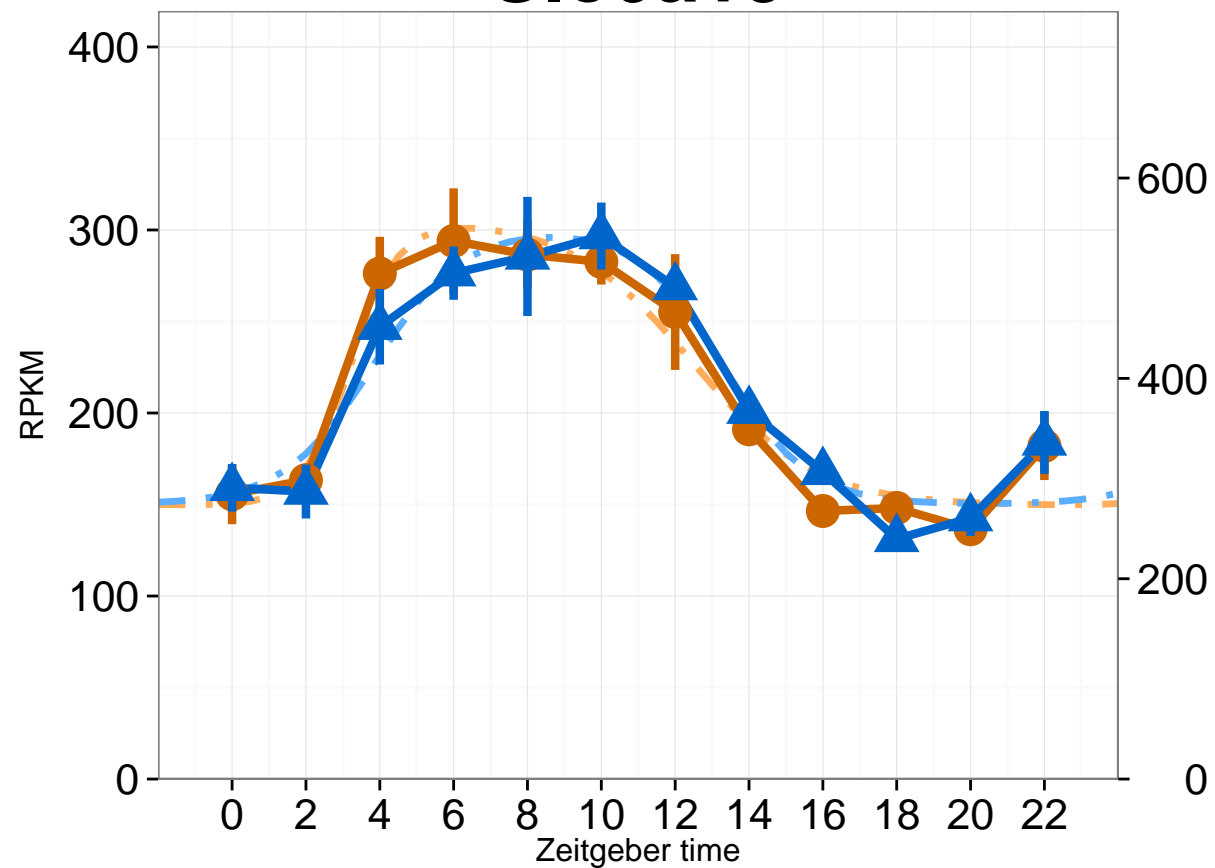

## Slc6a19

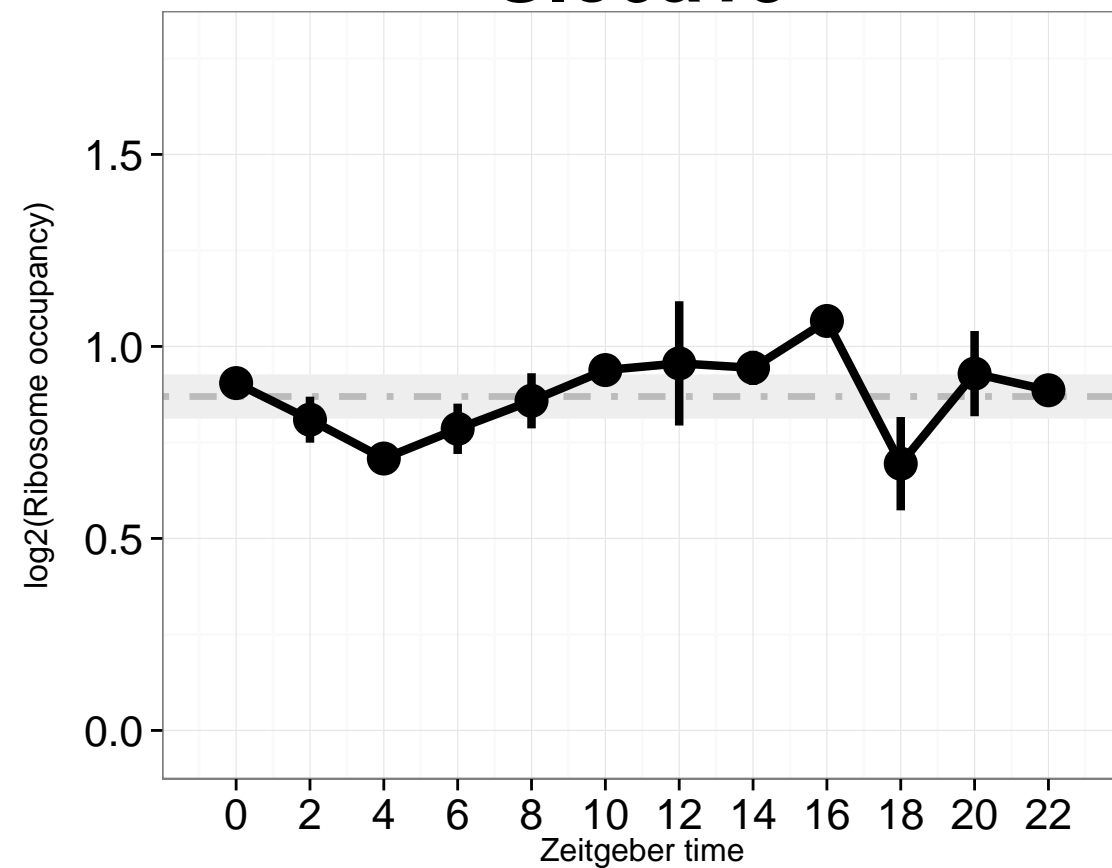

Supplement: Supplementary file 11287 [file 1]

## Bcar3

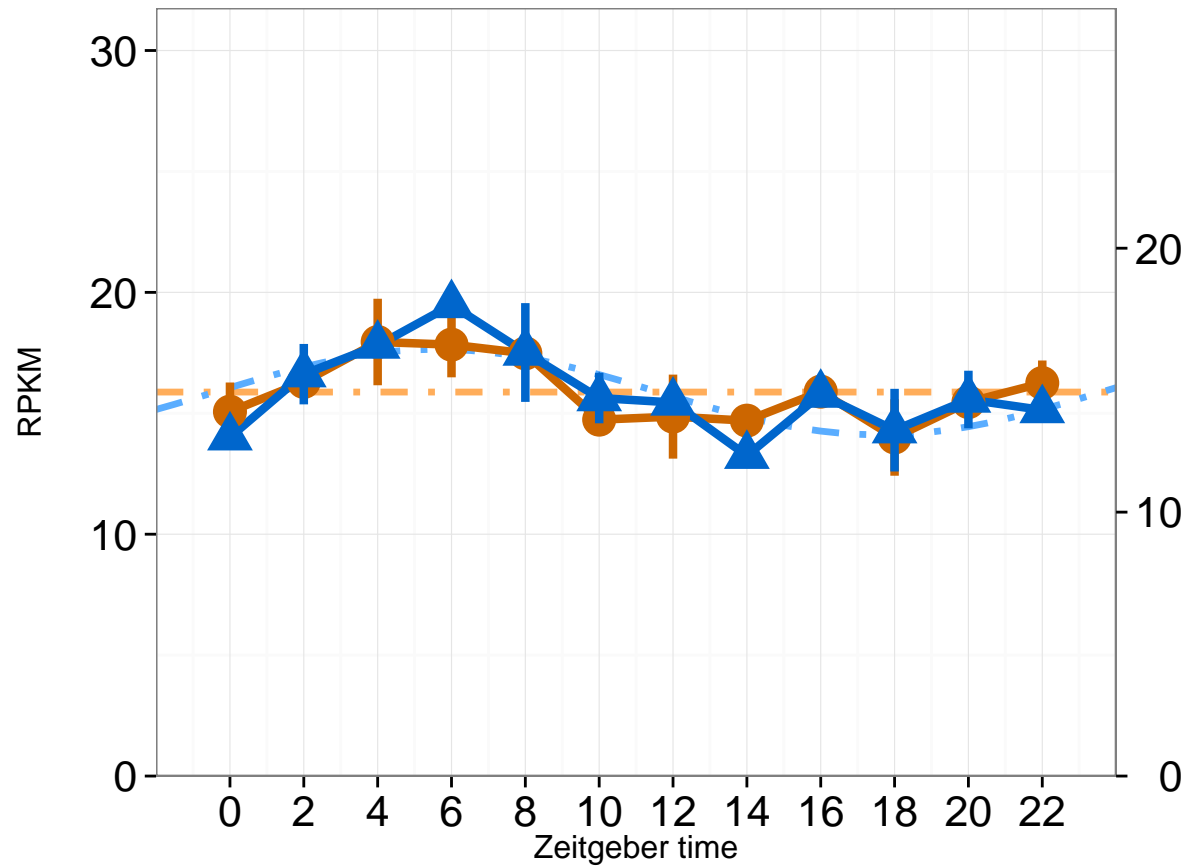

## Bcar3

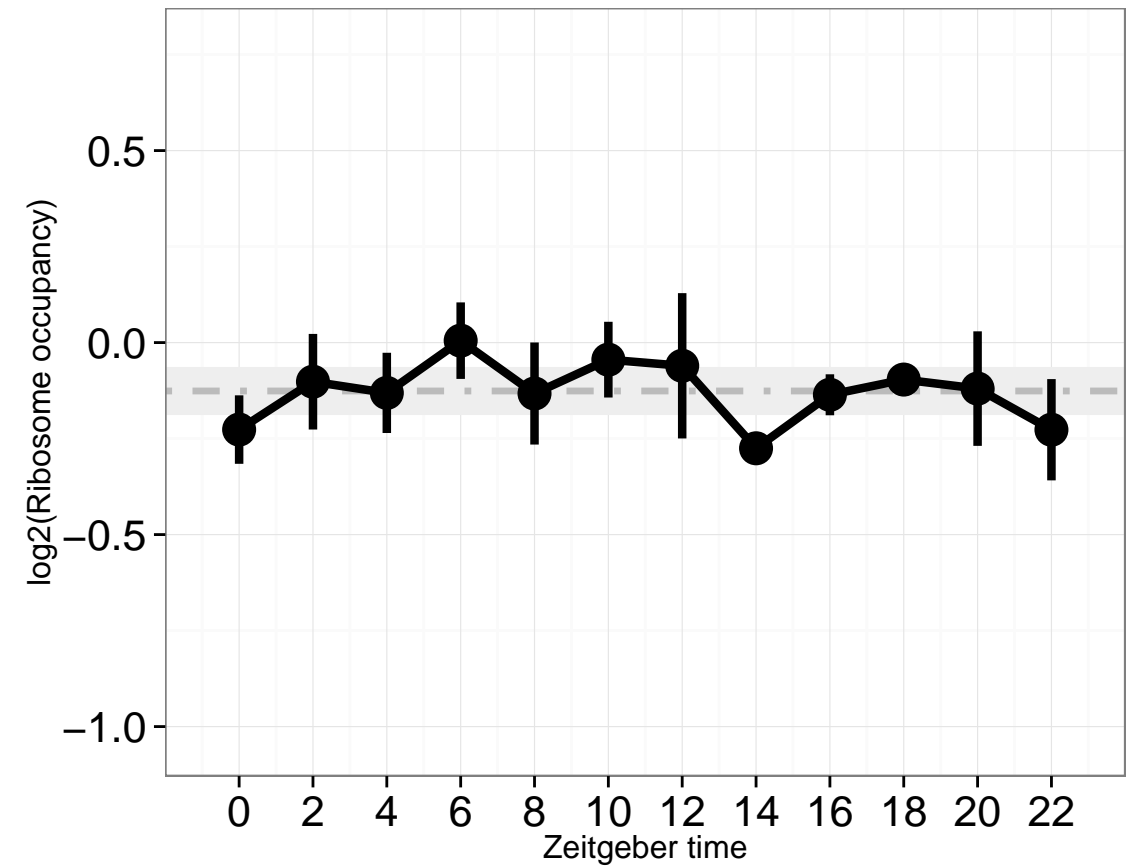

Supplement: Supplementary file 11288 [file 1]

## Vamp2

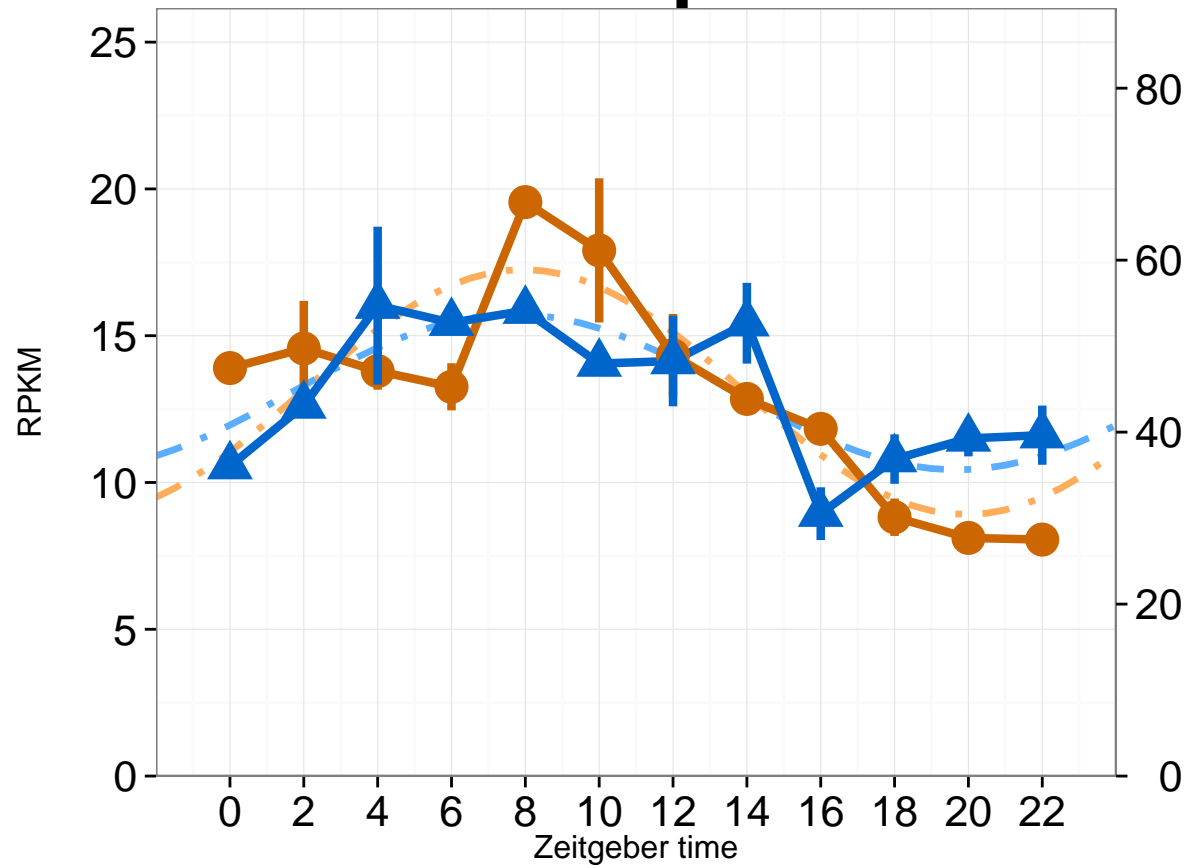

## Vamp2

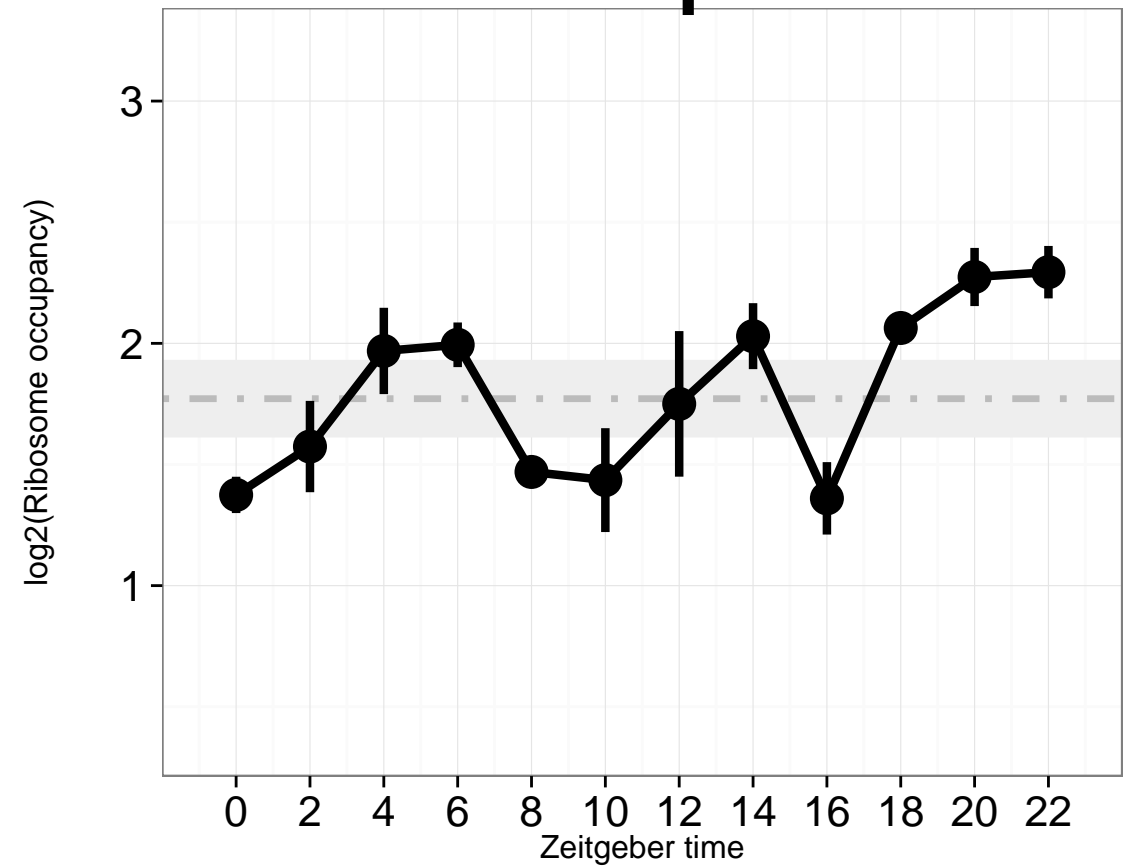

Supplement: Supplementary file 11289 [file 1]

## Ring1

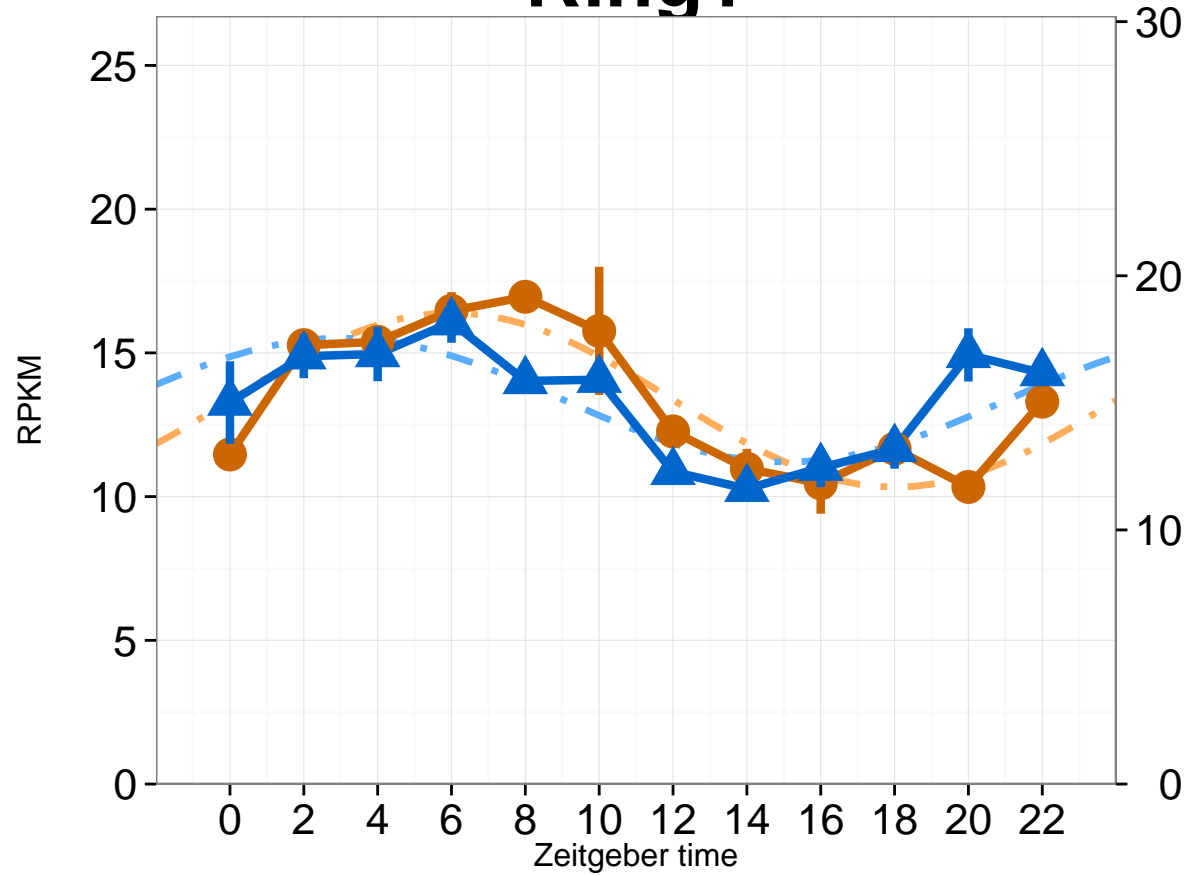

## Ring1

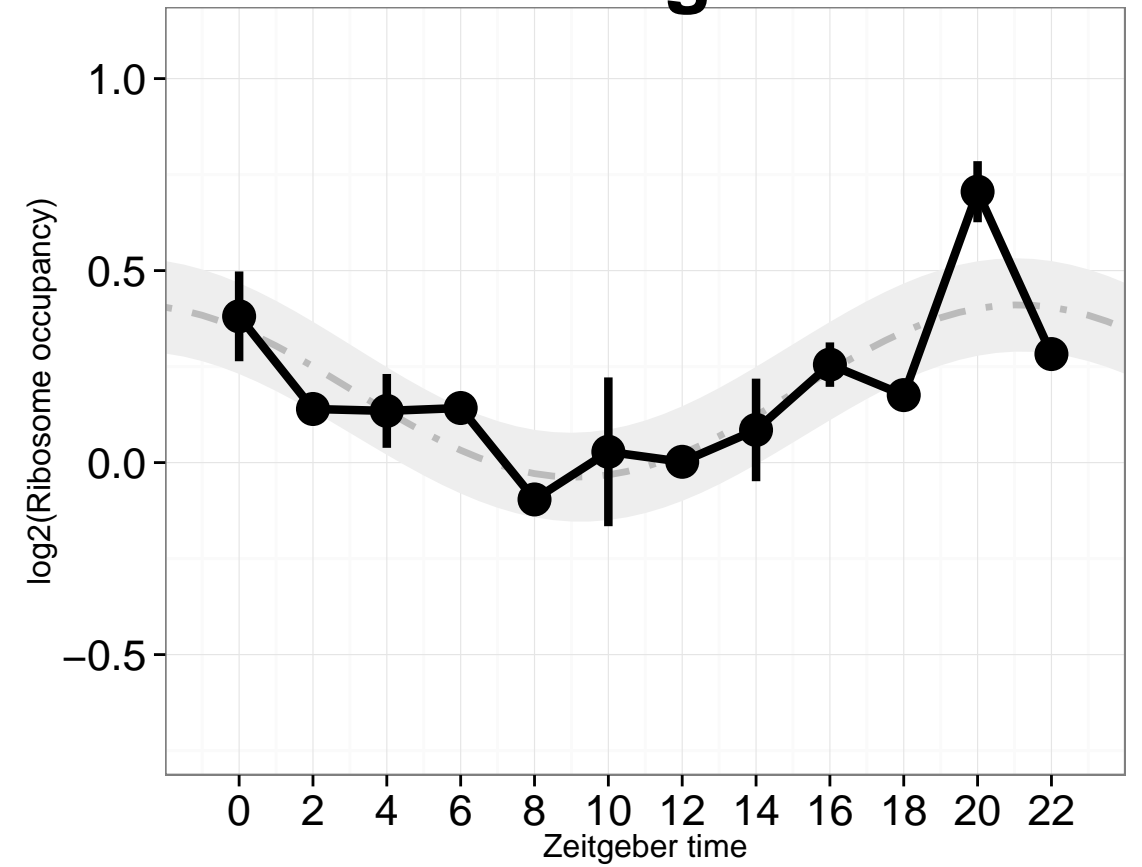

Supplement: Supplementary file 11290 [file 1]

# Rpl18a

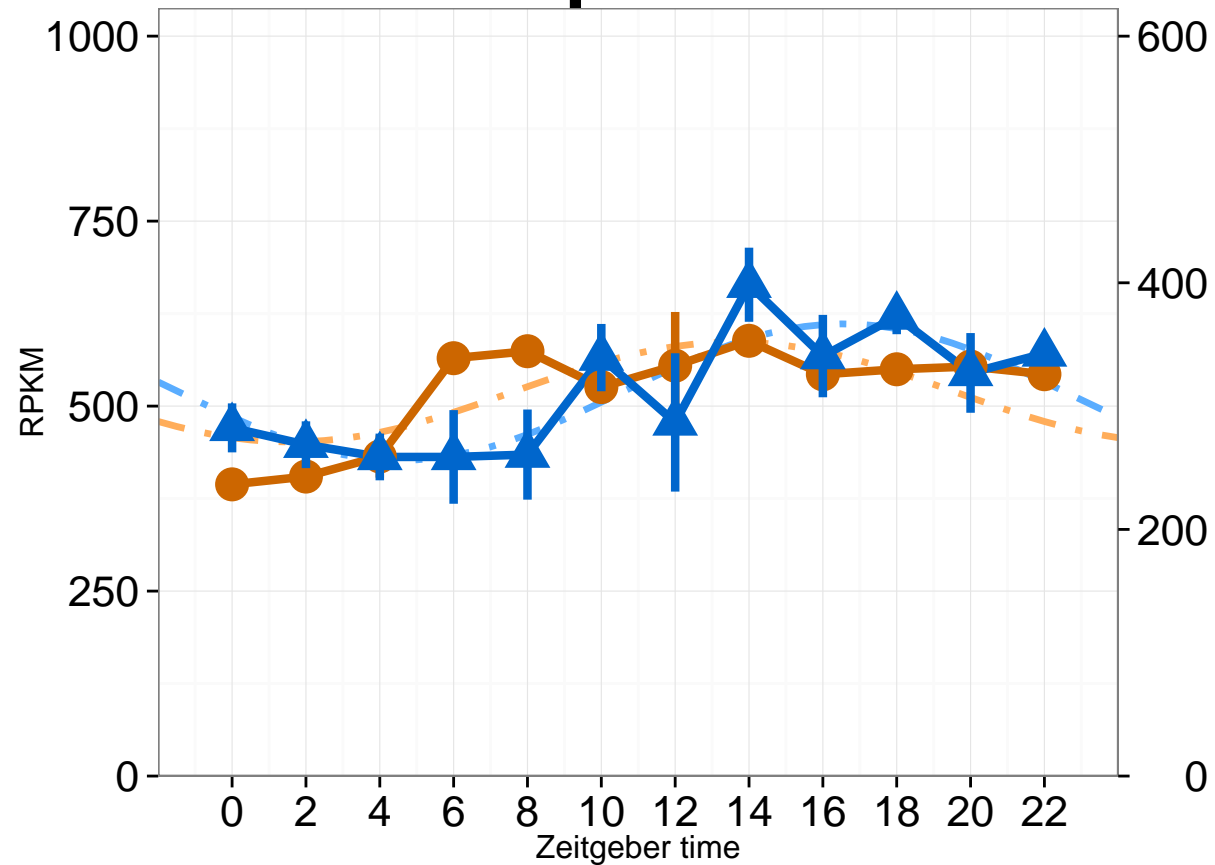

# Rpl18a

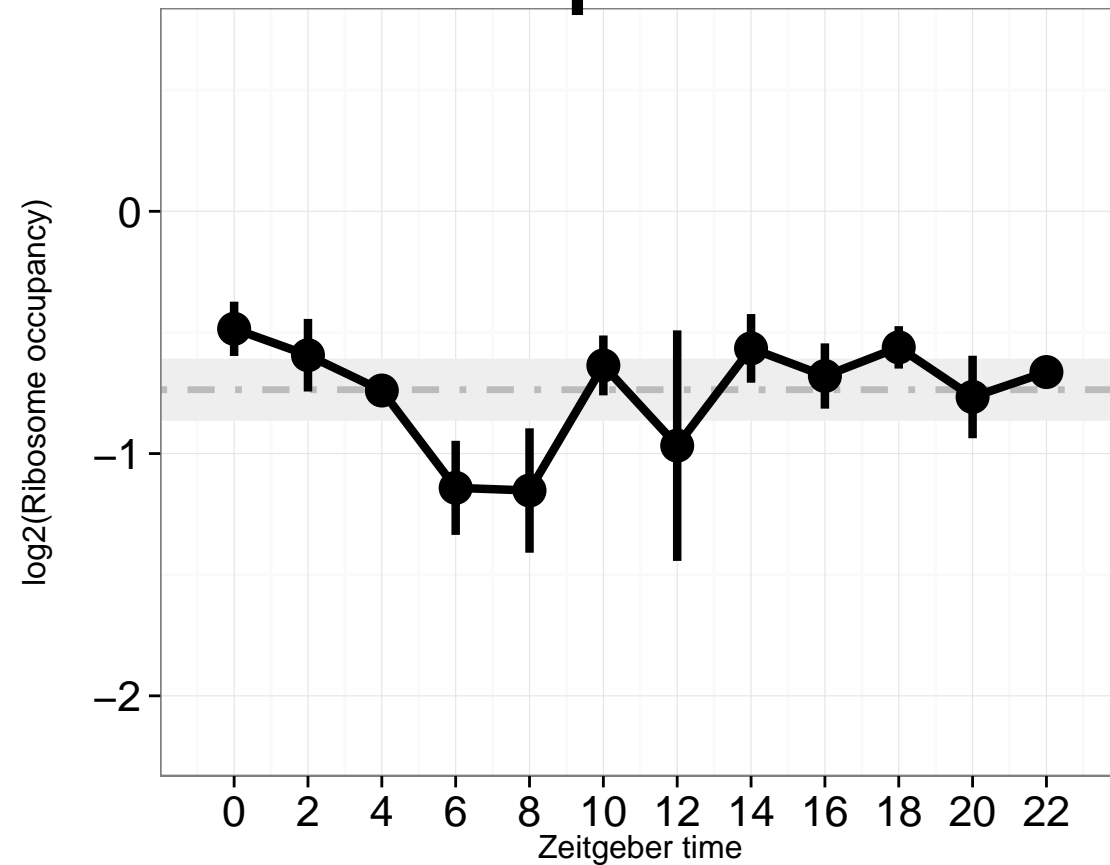

Supplement: Supplementary file 11291 [file 1]

## Brd2

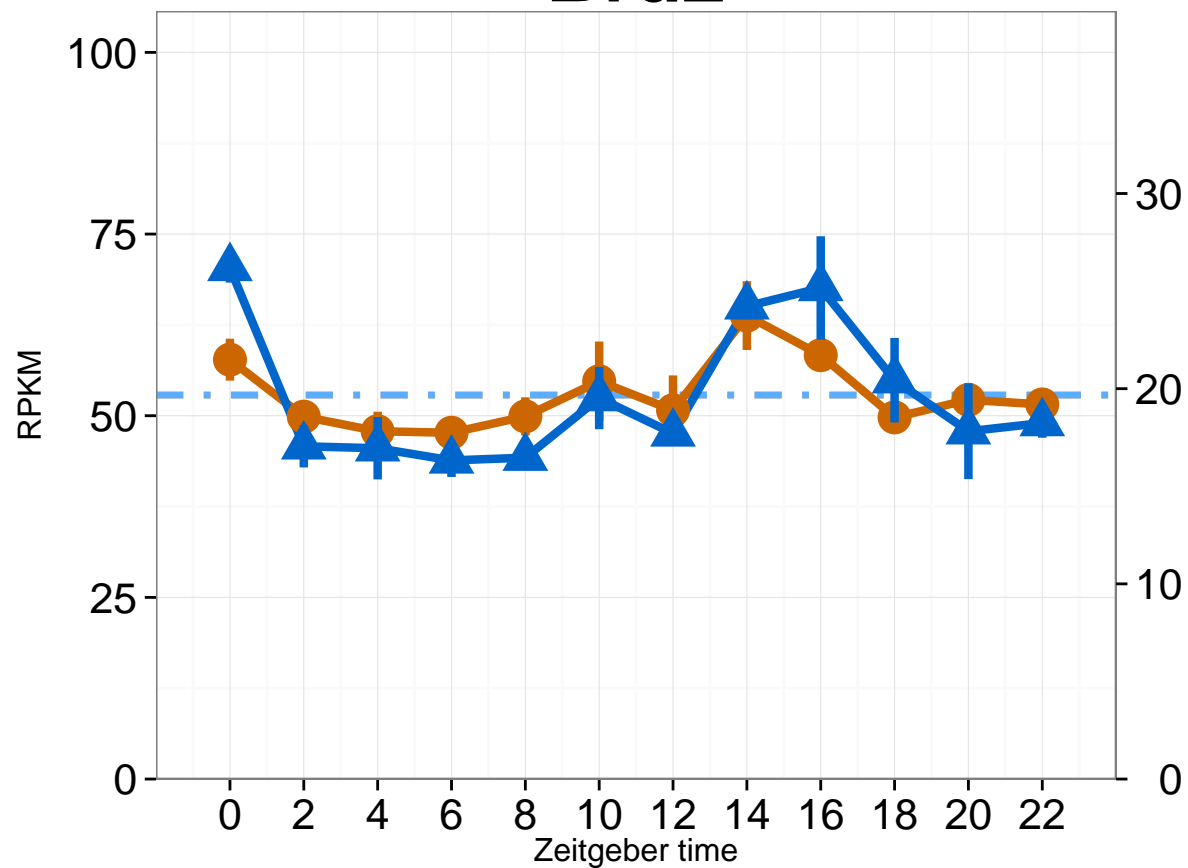

## Brd2

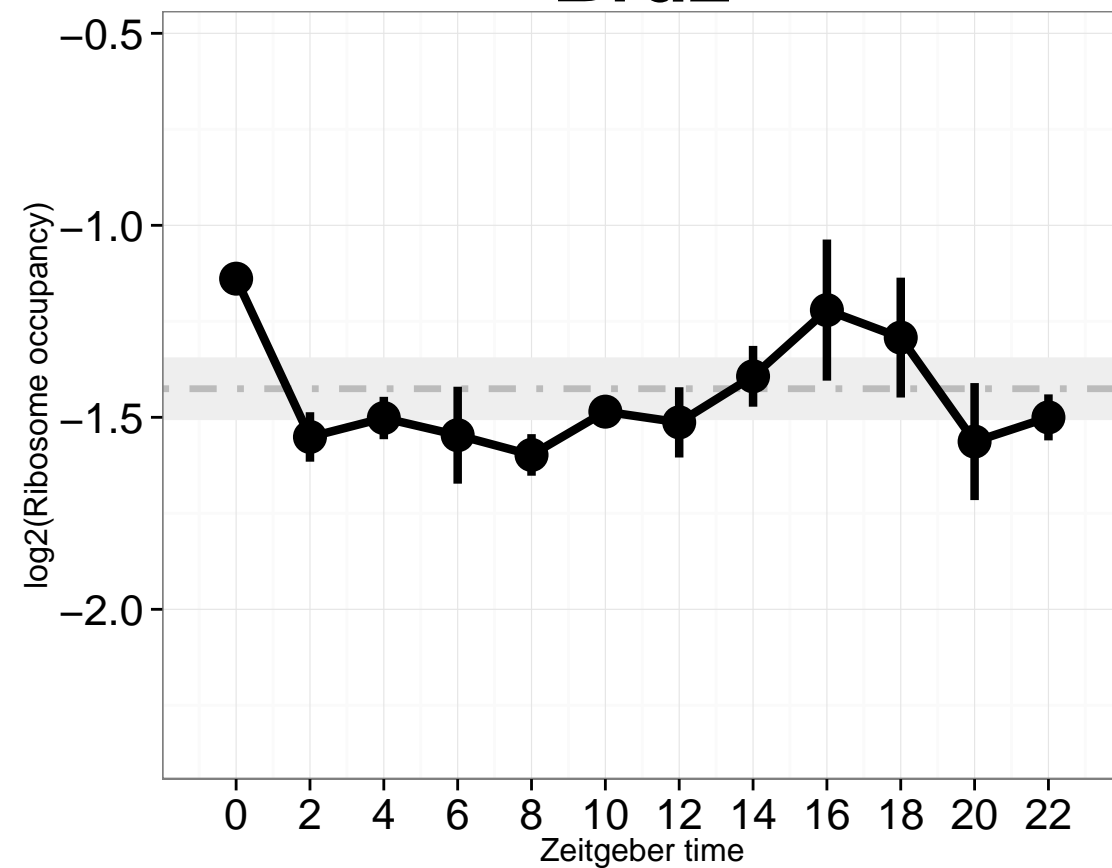

Supplement: Supplementary file 11292 [file 1]

## Otud5

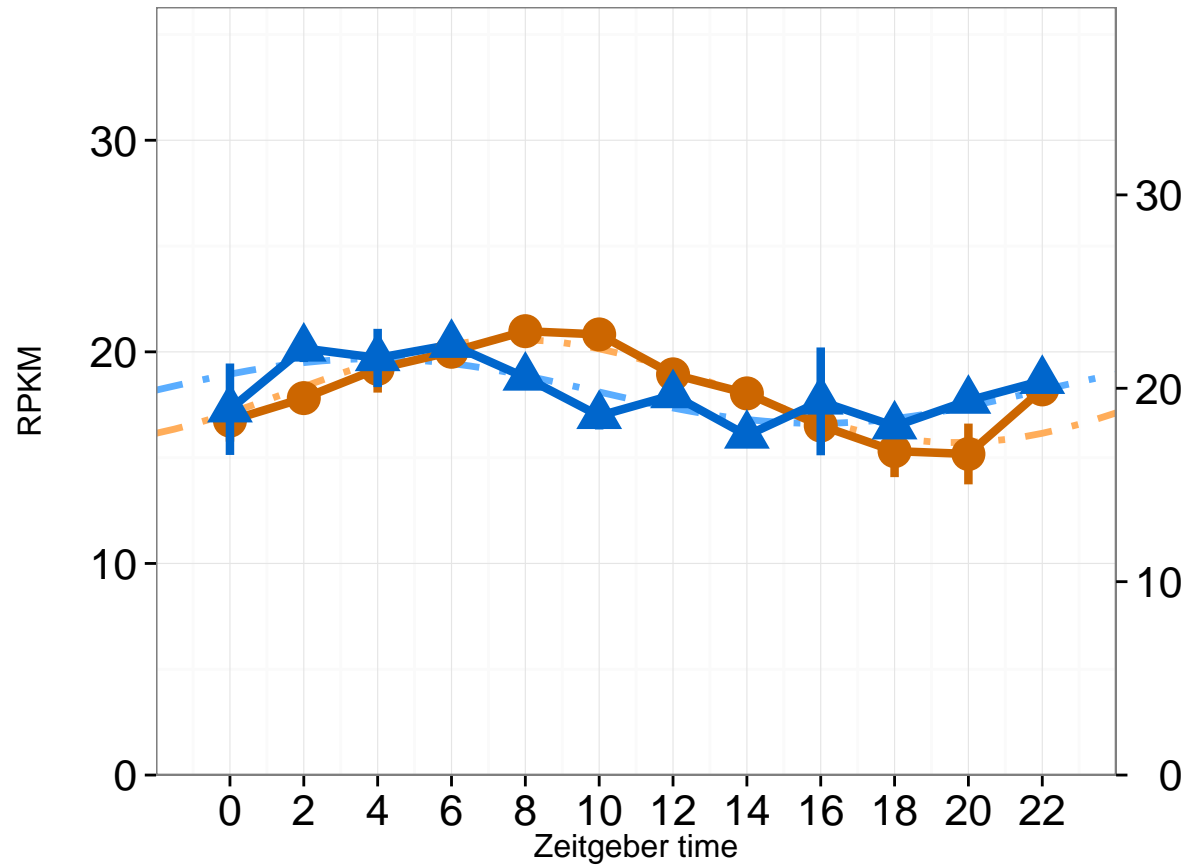

## Otud5

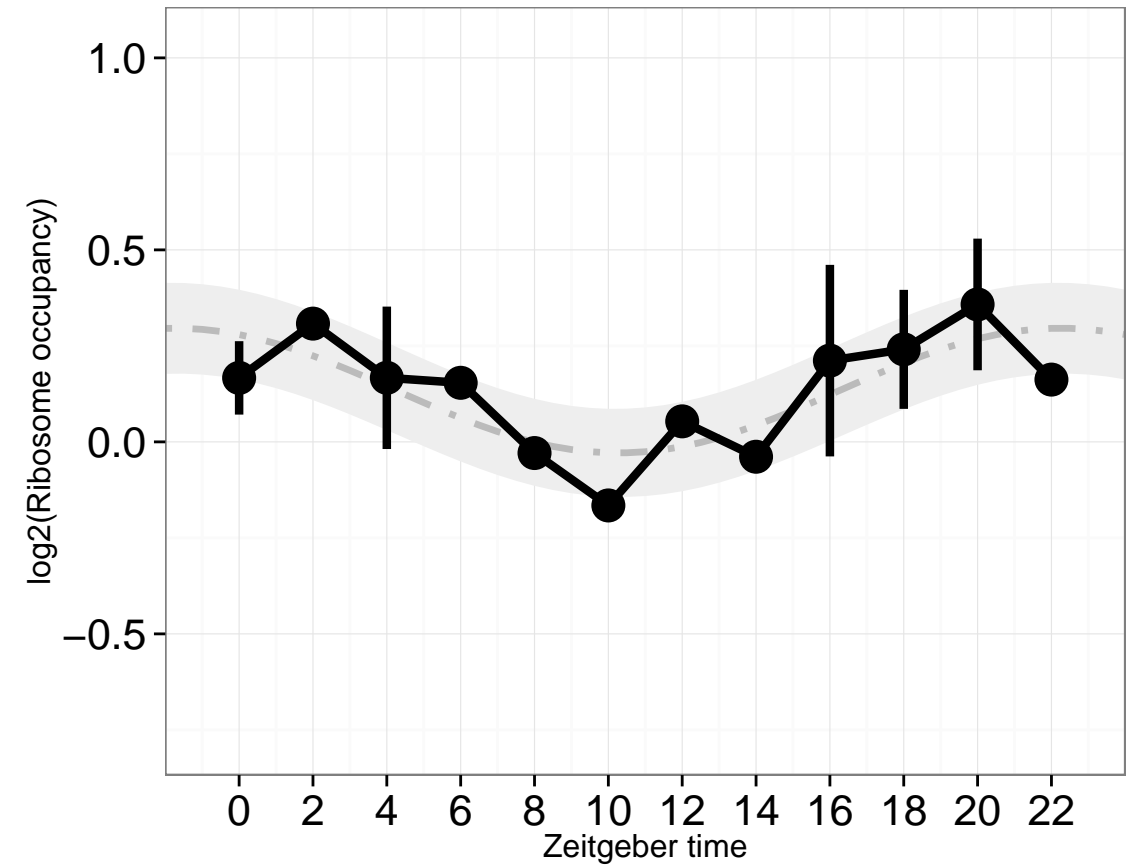

Supplement: Supplementary file 11293 [file 1]

## Ube4b

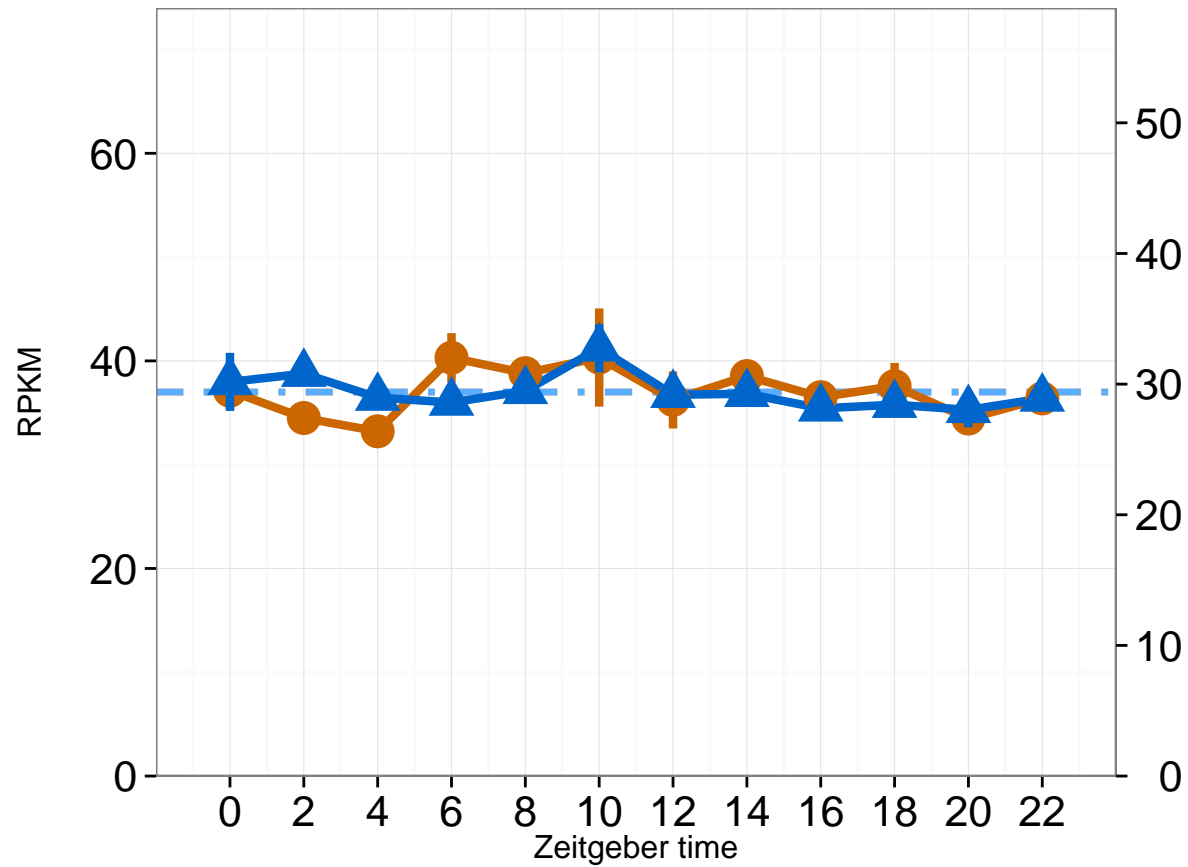

## Ube4b

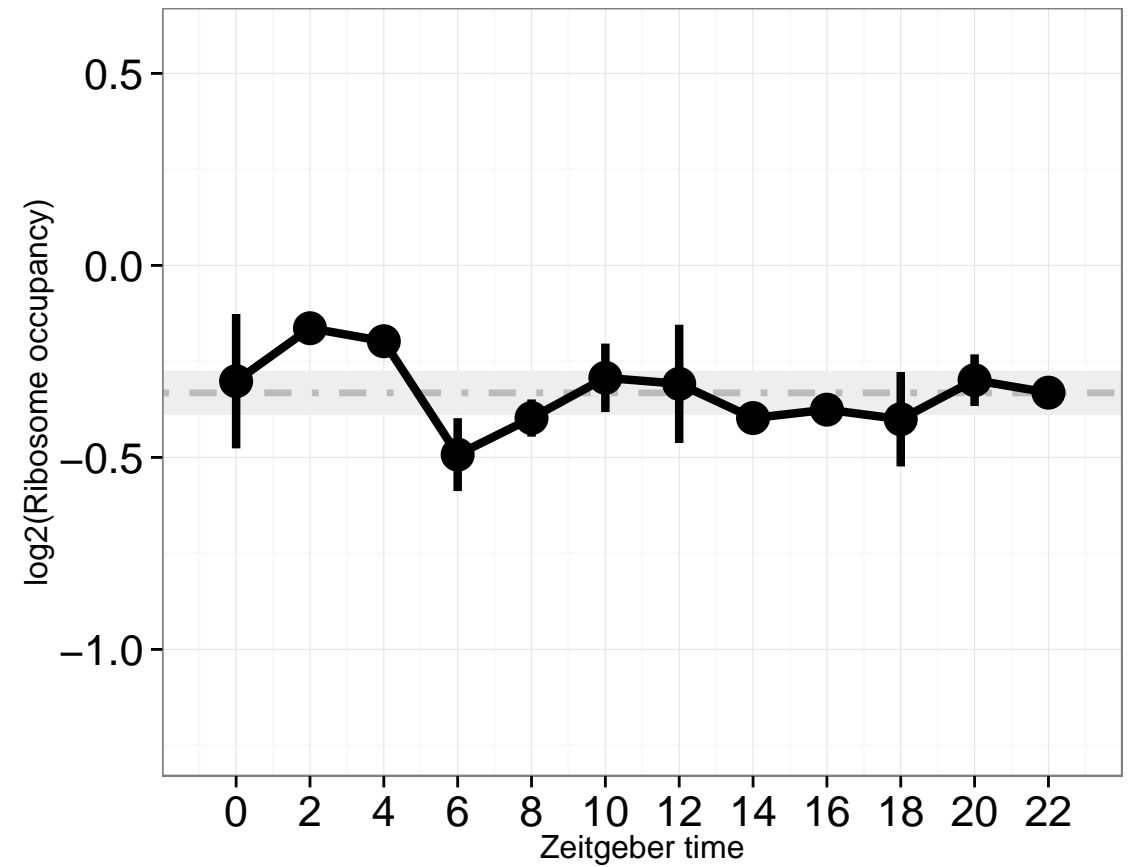

Supplement: Supplementary file 11294 [file 1]

## Wdr81

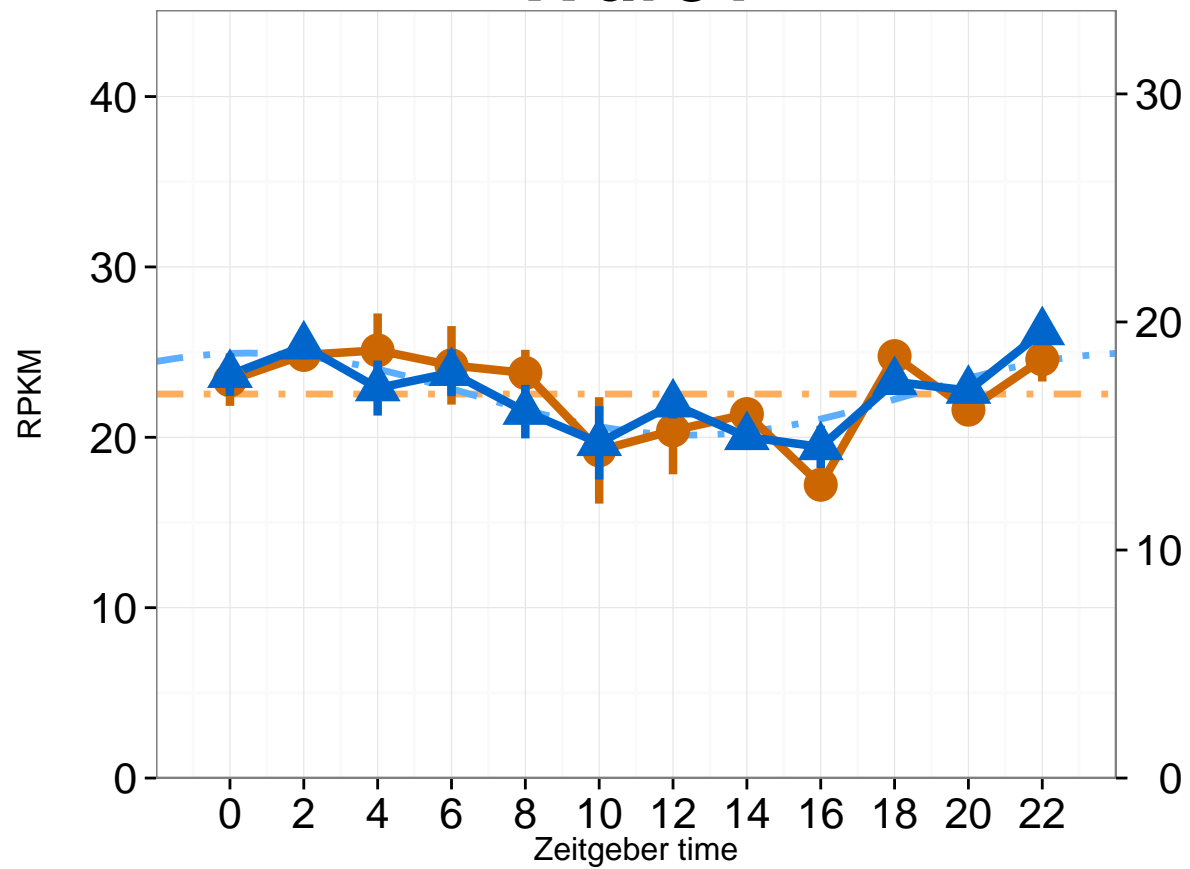

## Wdr81

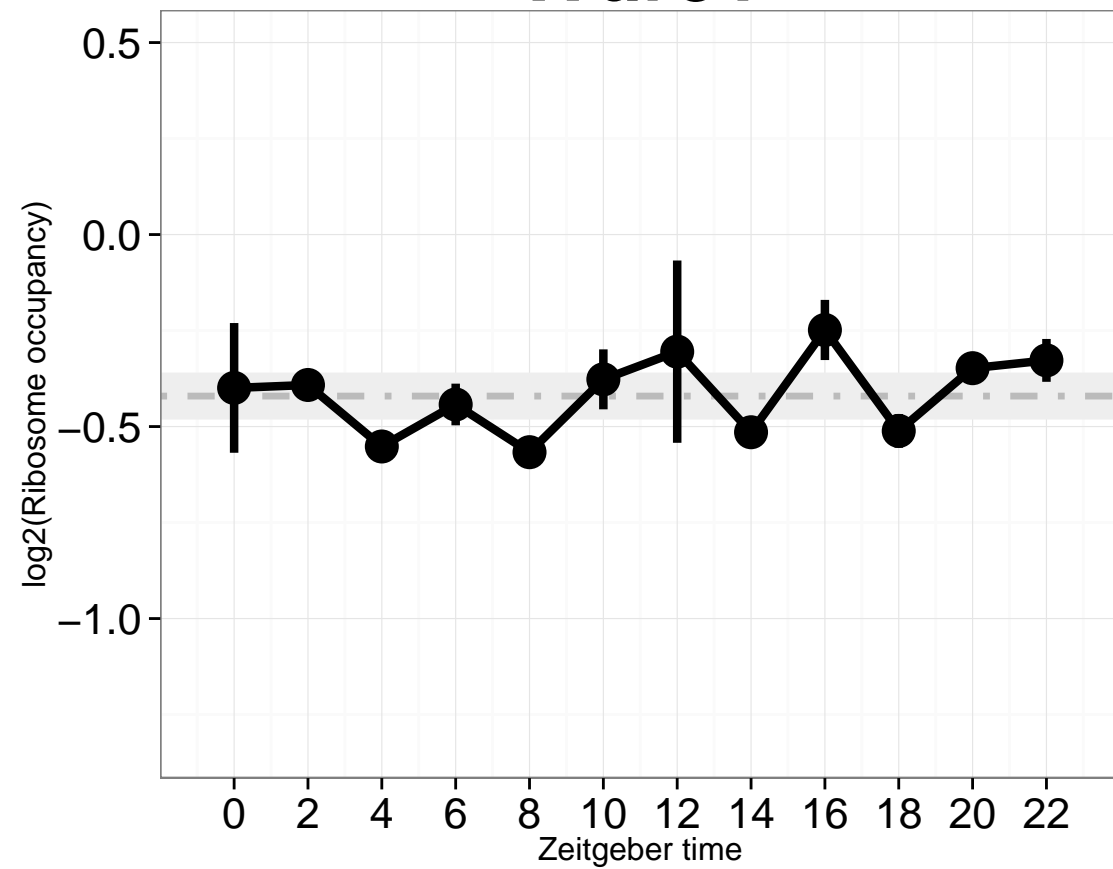

Supplement: Supplementary file 11295 [file 1]

# Orc2

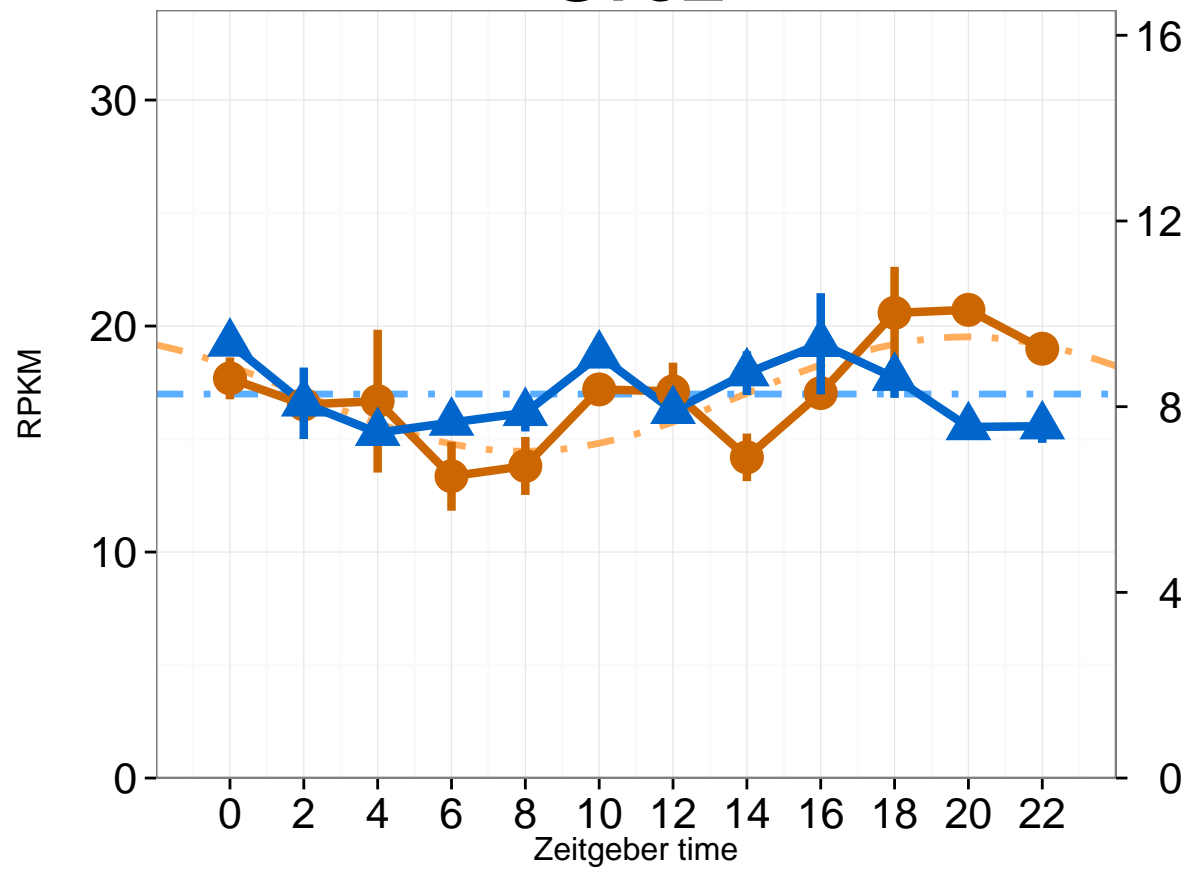

# Orc2

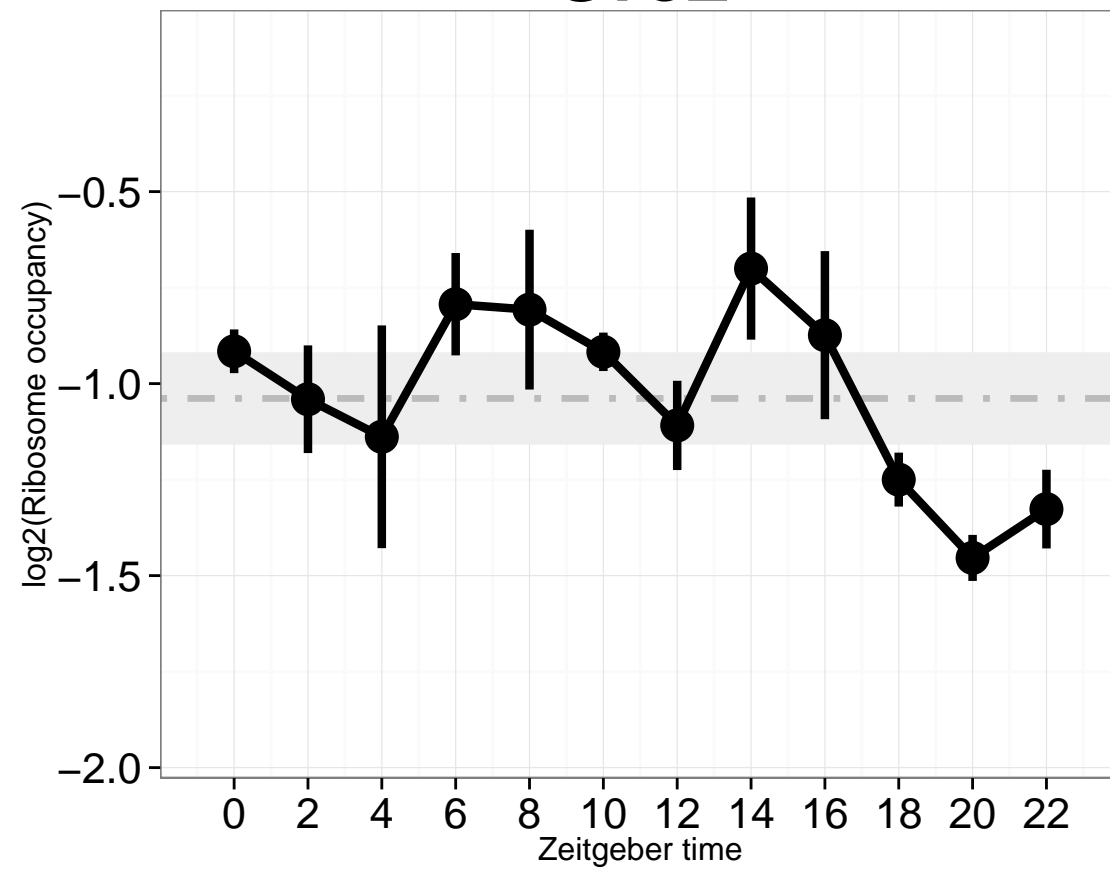

Supplement: Supplementary file 11296 [file 1]

# Nrbp1

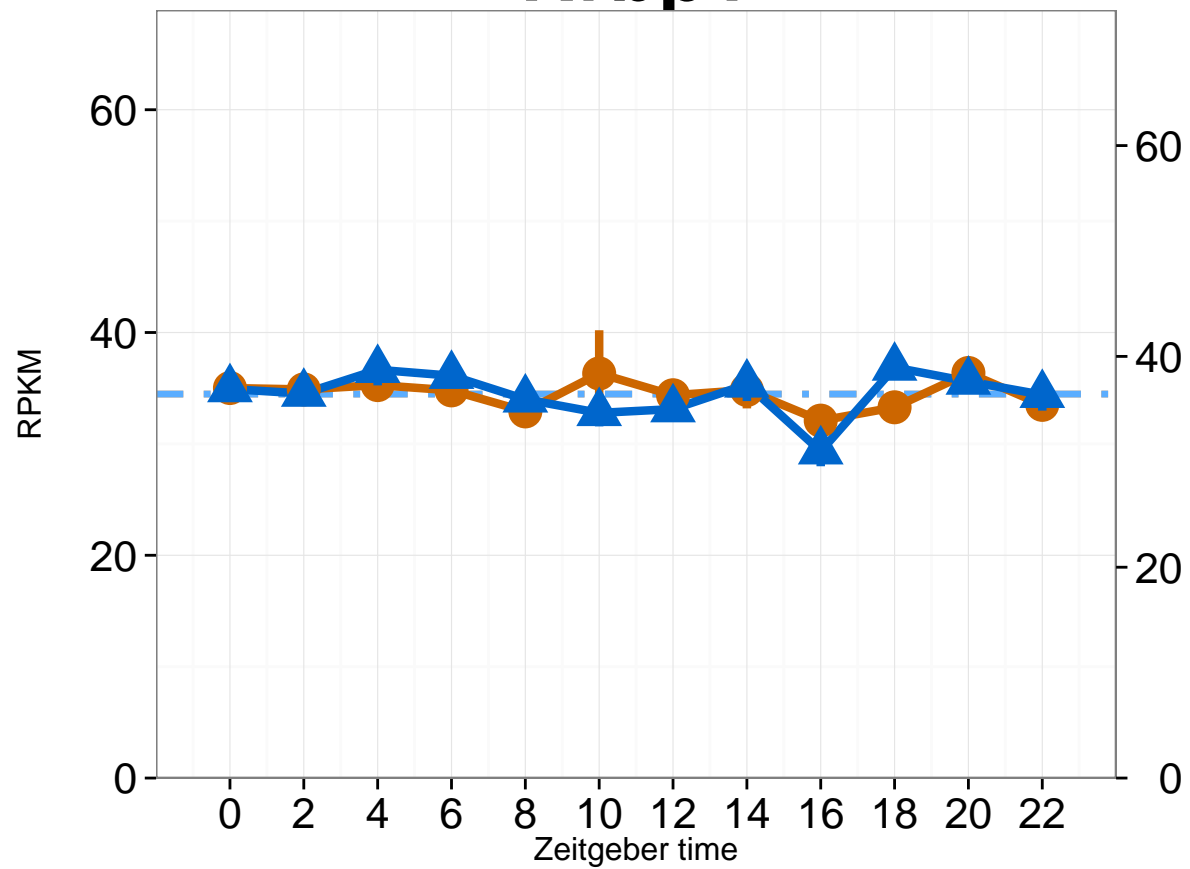

# Nrbp1

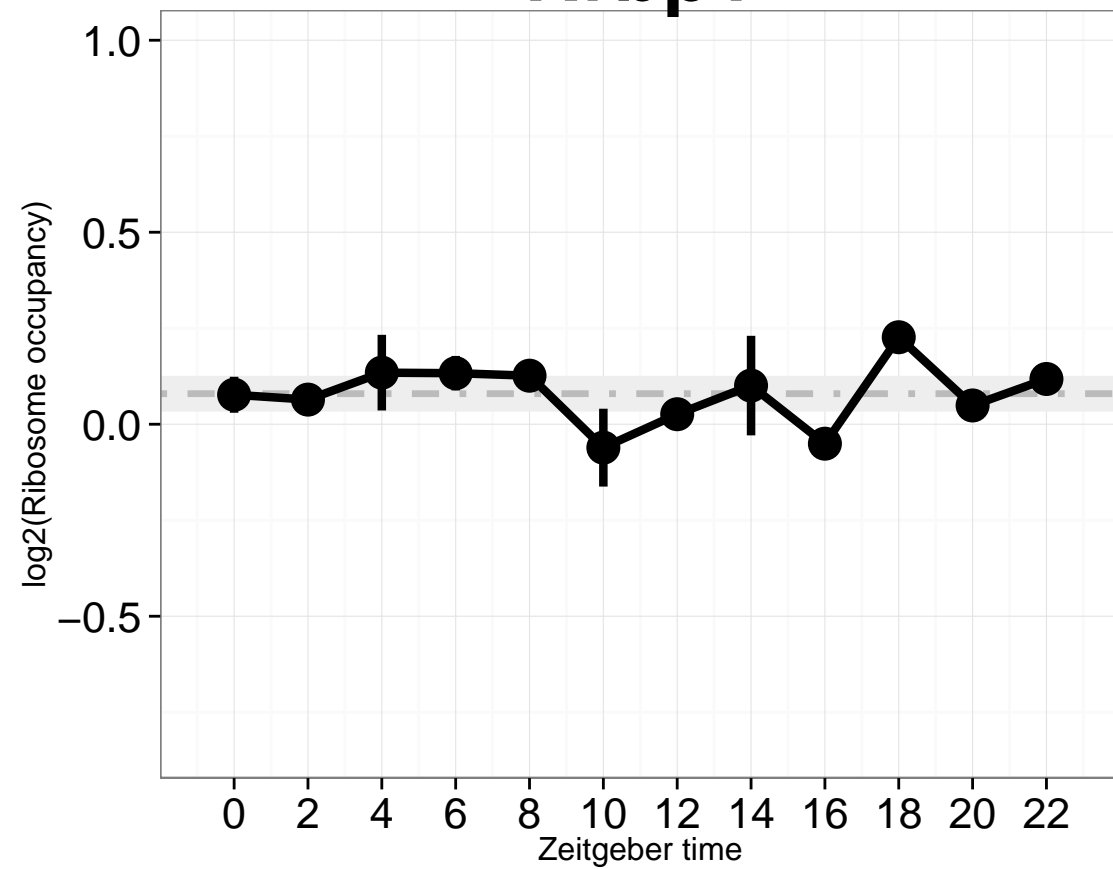

Supplement: Supplementary file 11297 [file 1]

## Rps9

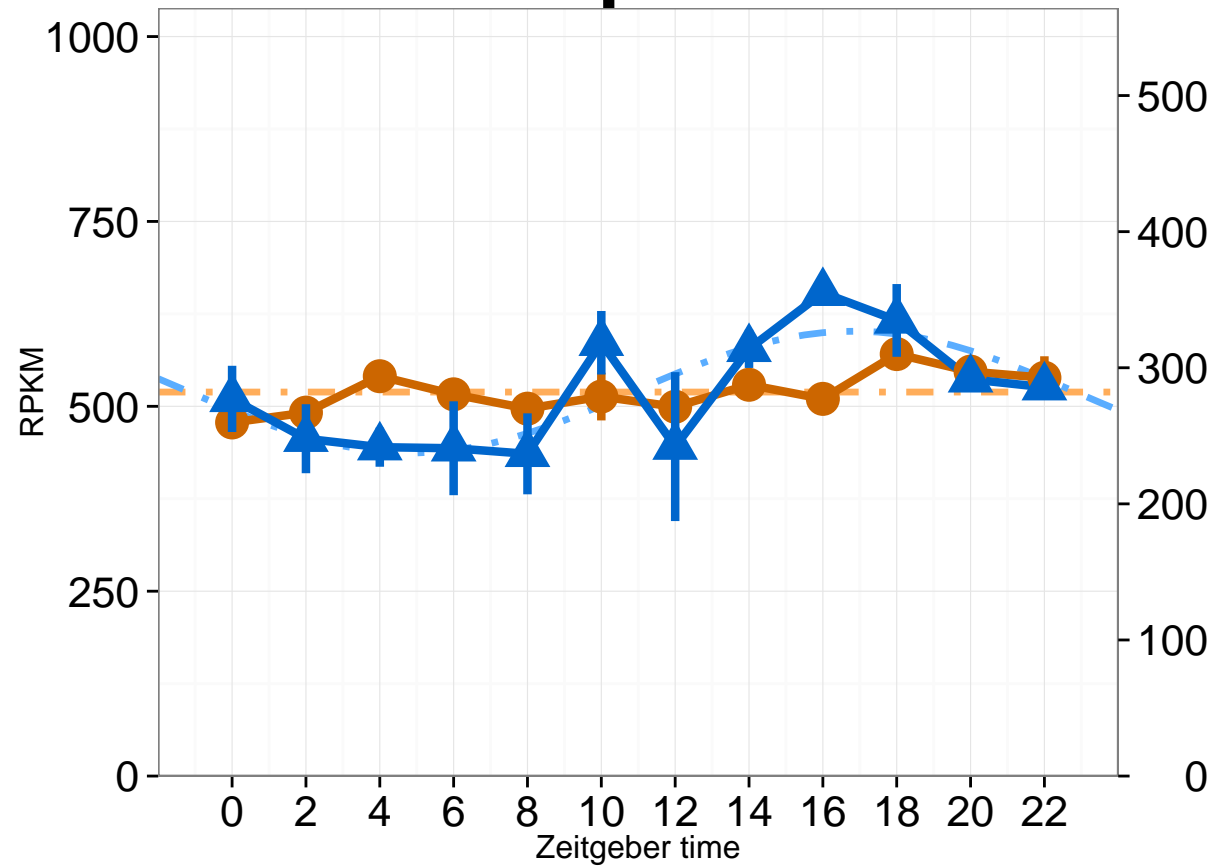

## Rps9

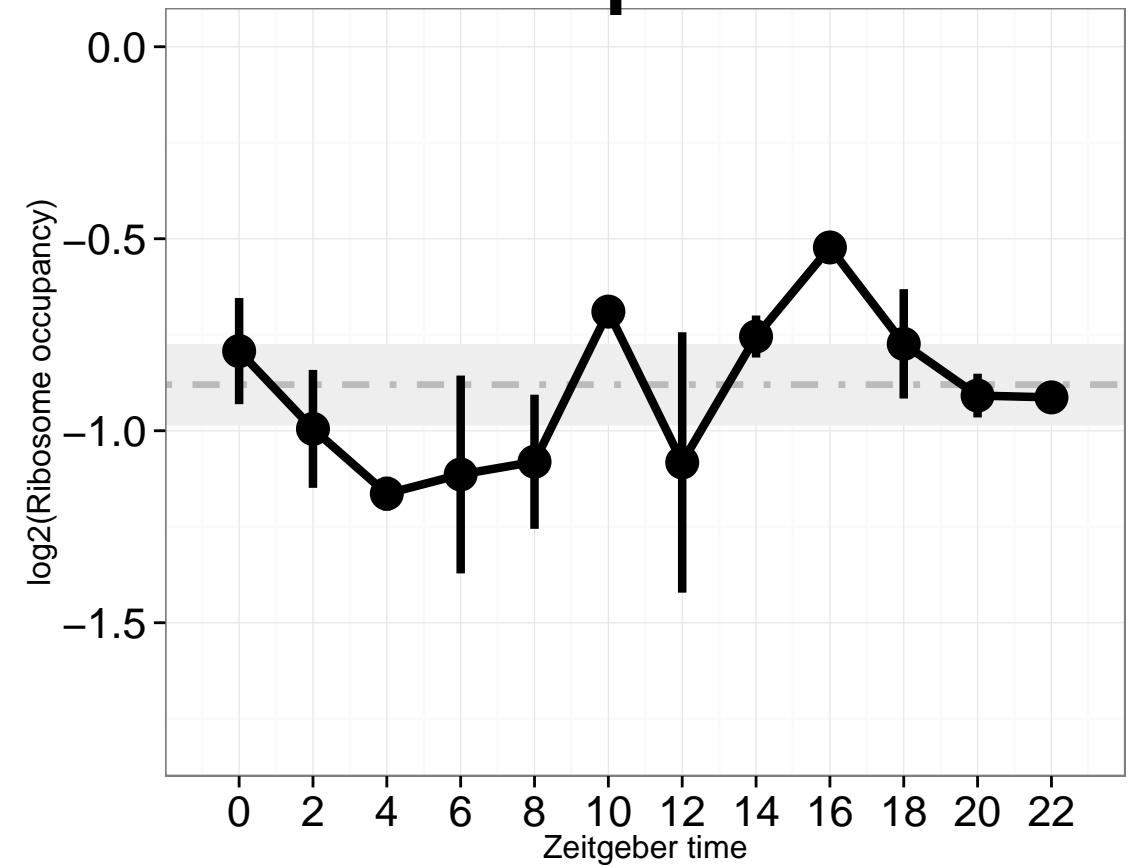

Supplement: Supplementary file 11298 [file 1]

# Pdzrn4

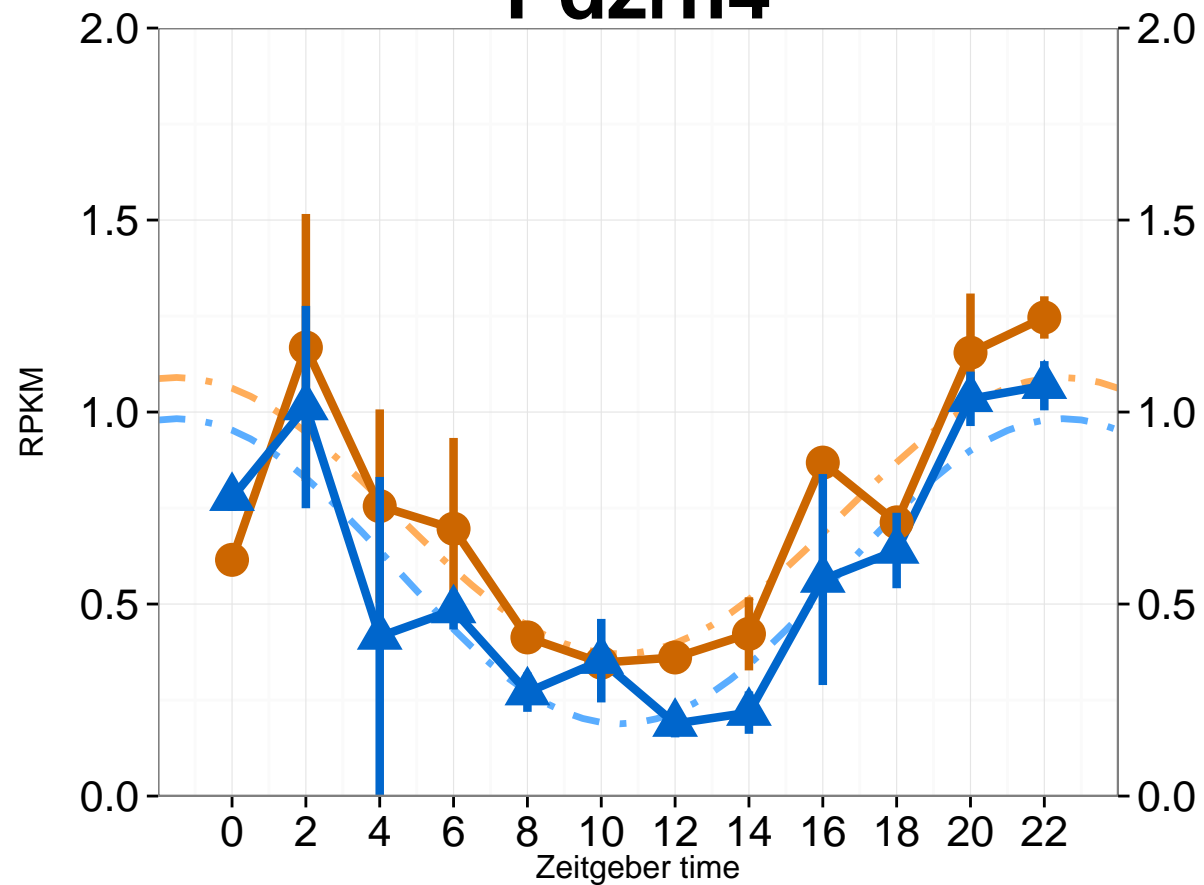

# Pdzrn4

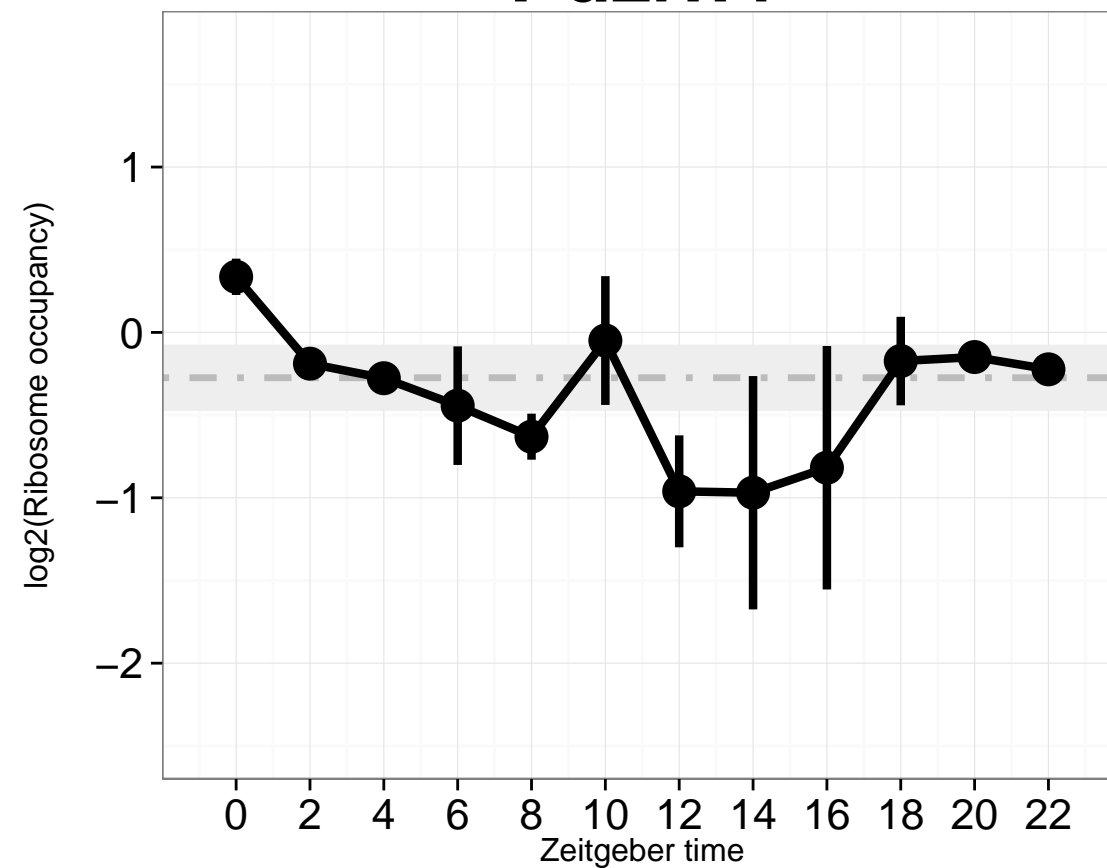

Supplement: Supplementary file 11299 [file 1]

# Bmpr1a

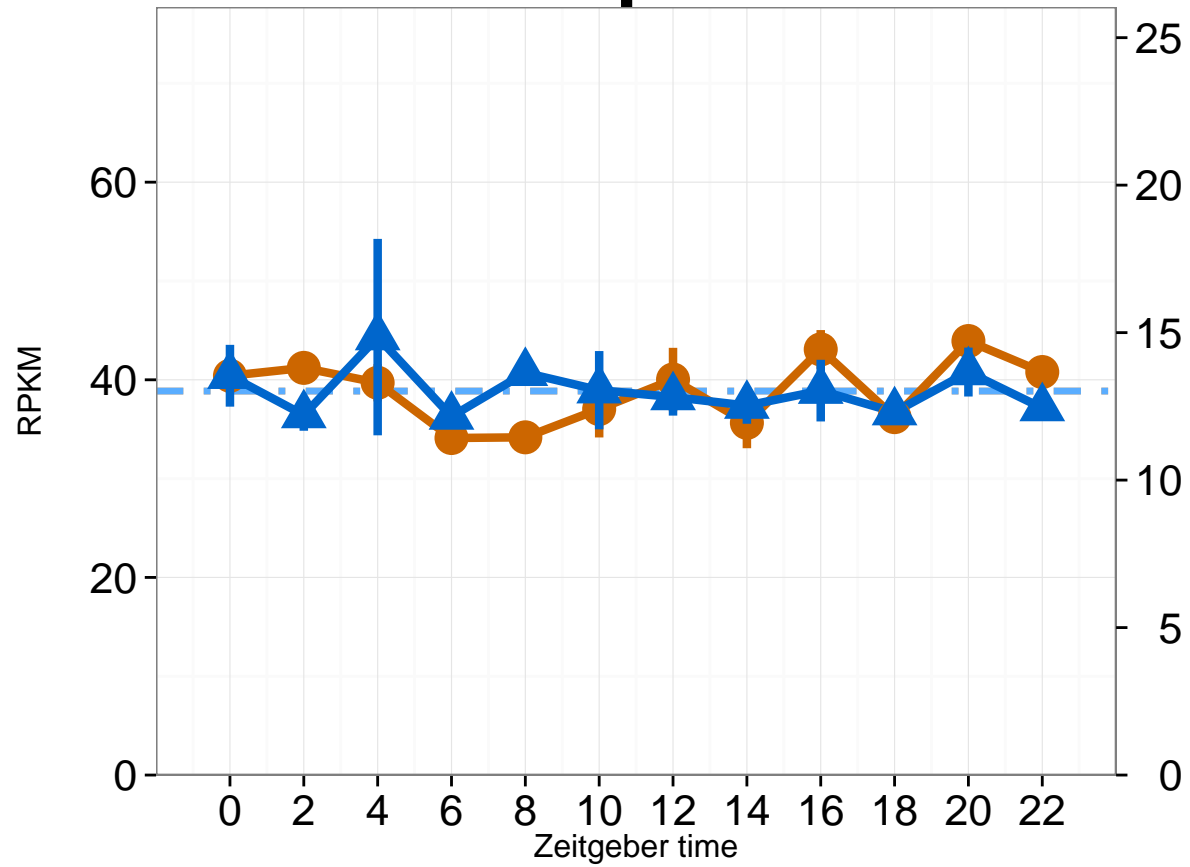

# Bmpr1a

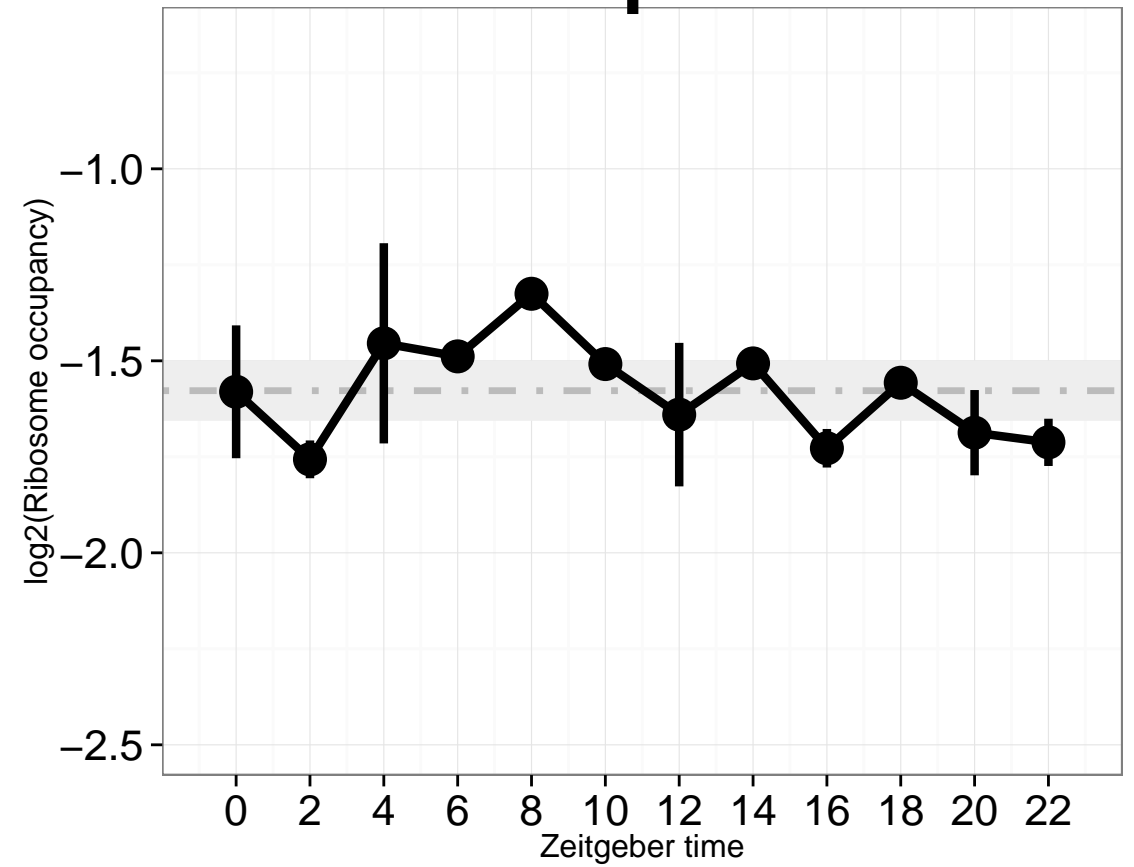

Supplement: Supplementary file 11300 [file 1]

# Tmem186

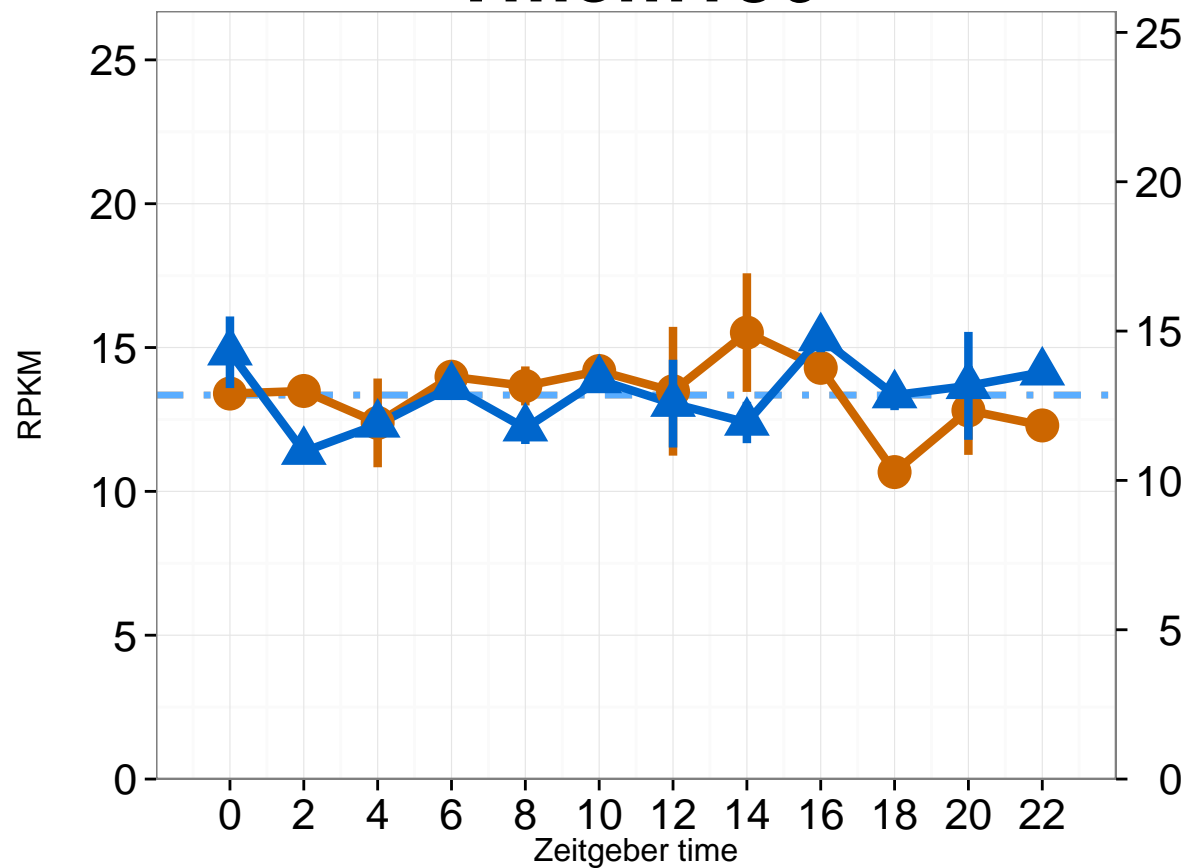

# Tmem186

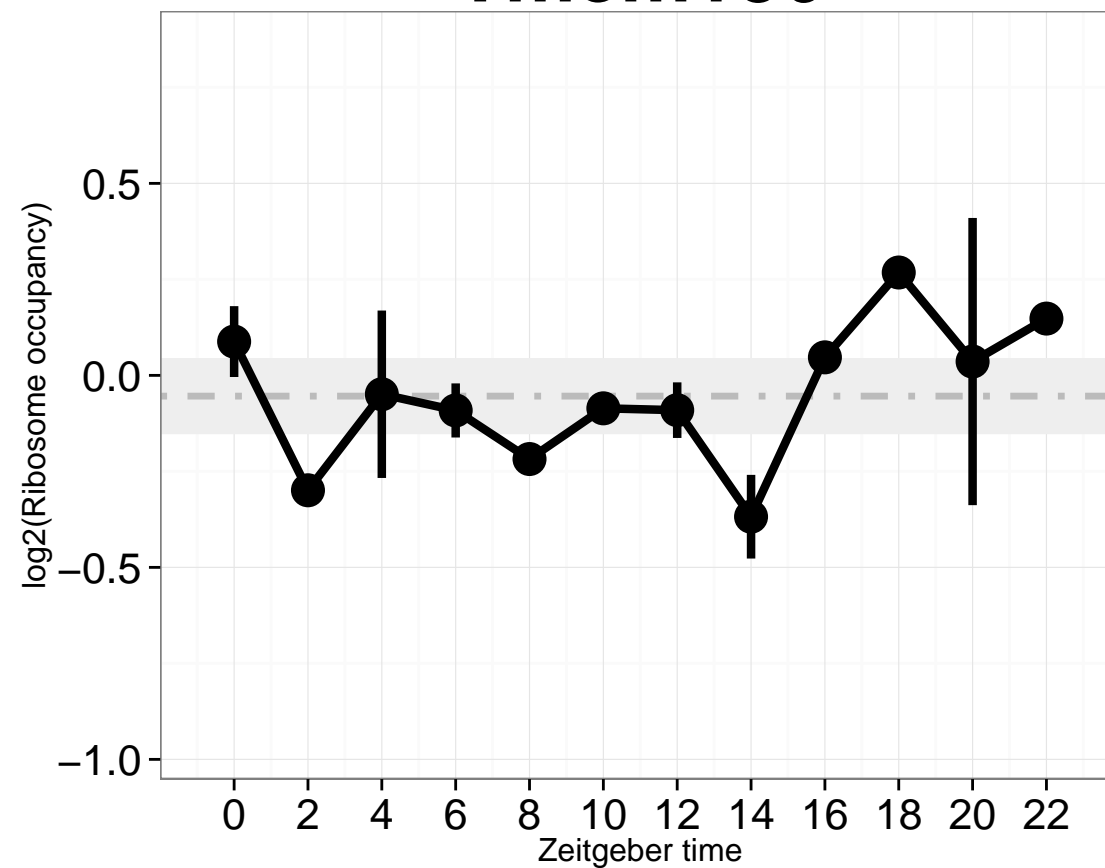

Supplement: Supplementary file 11301 [file 1]

## Cebpa

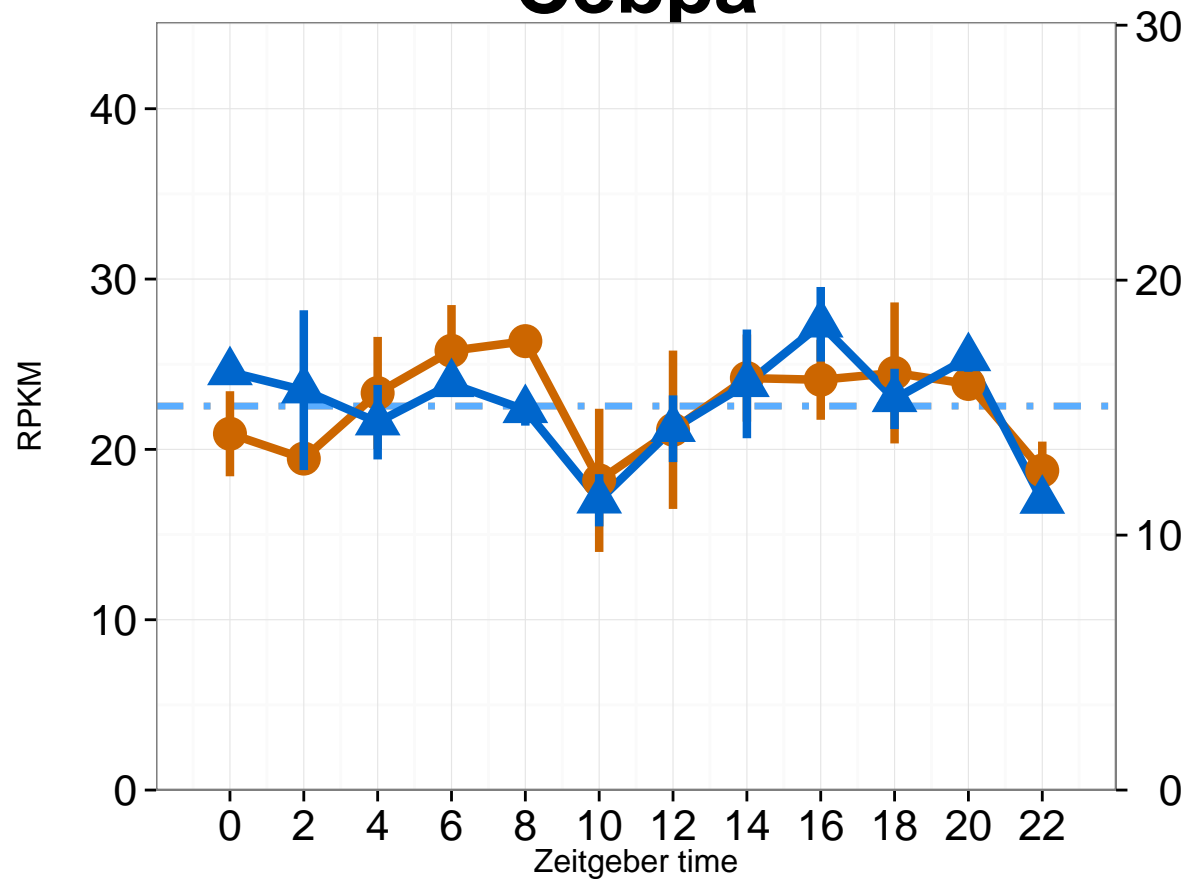

## Cebpa

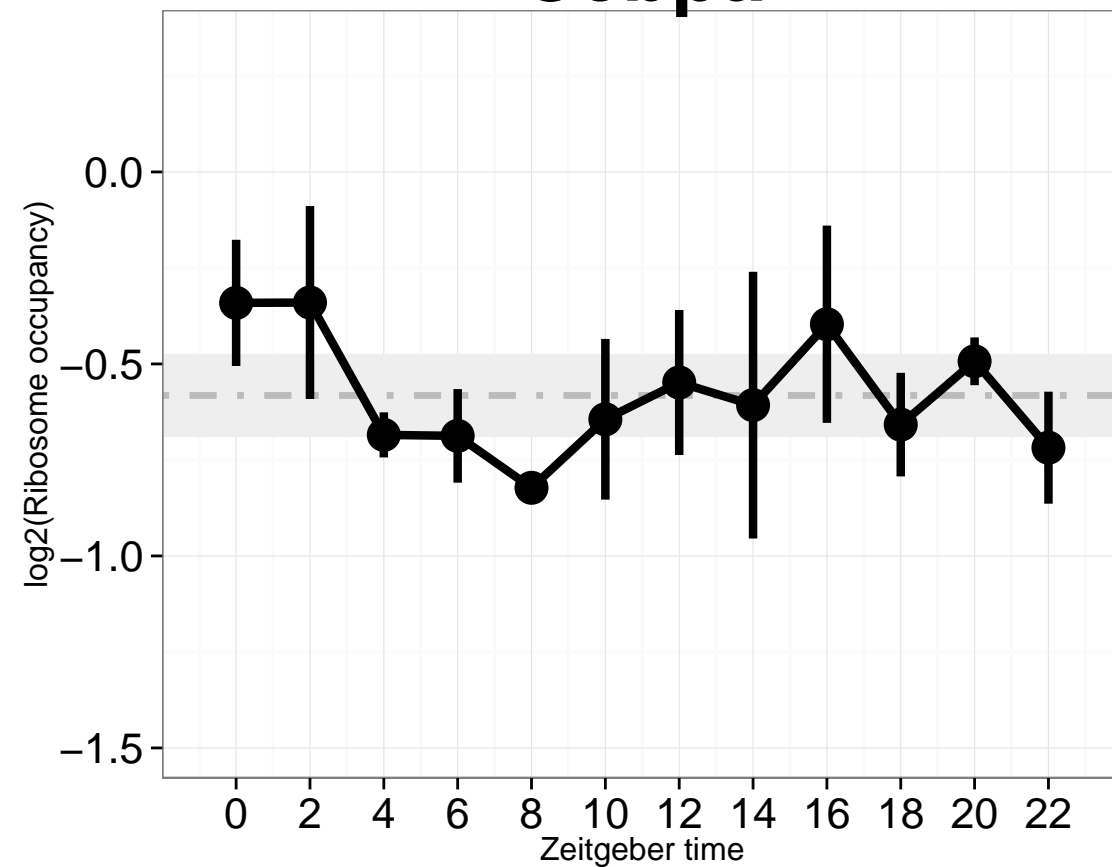

Supplement: Supplementary file 11302 [file 1]

# B3galt4

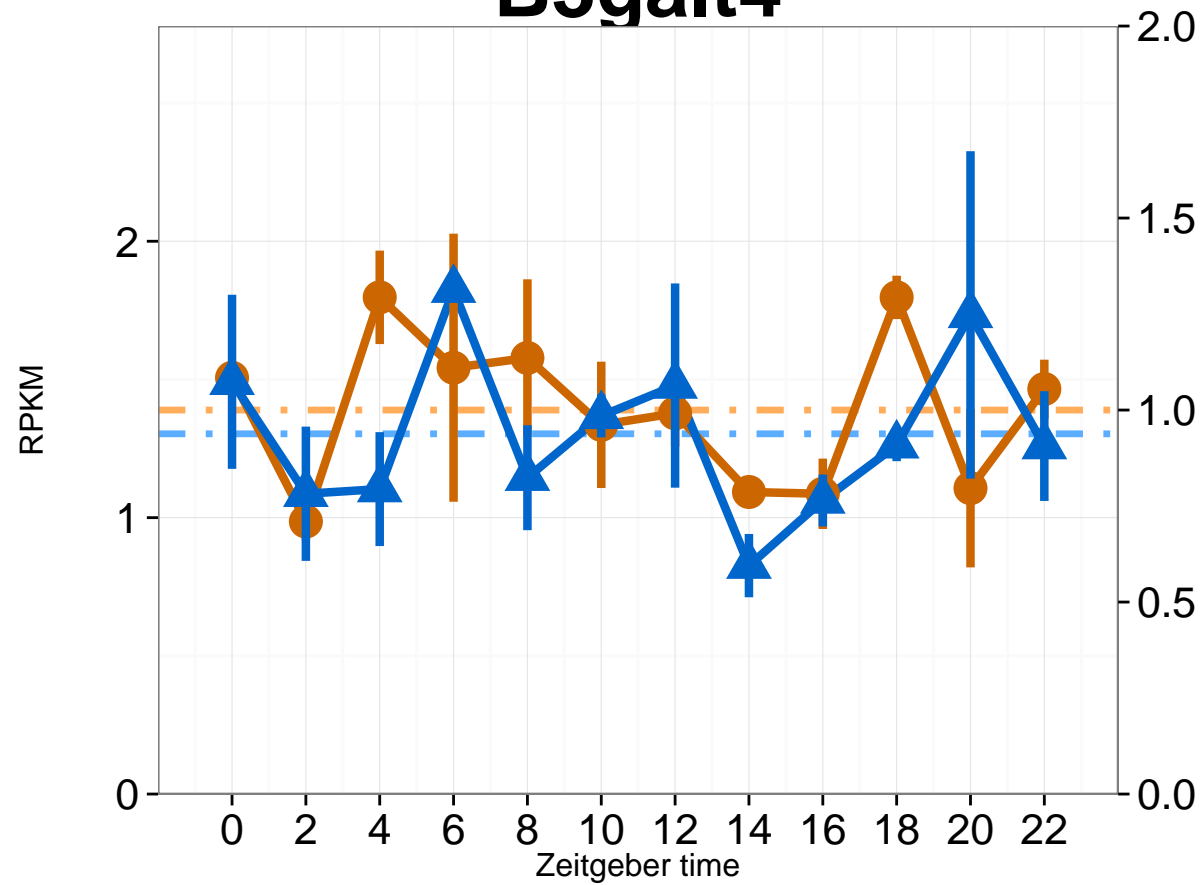

# B3galt4

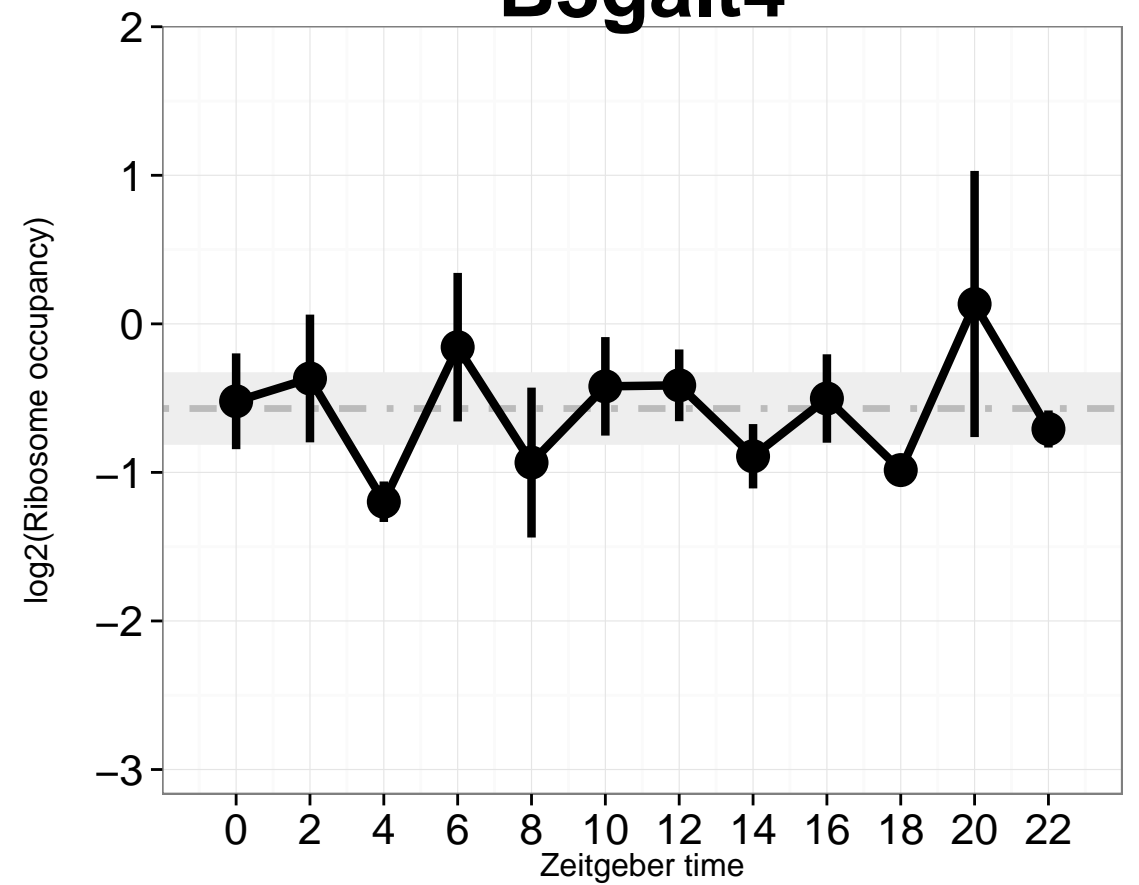

Supplement: Supplementary file 11303 [file 1]

## Psmc5

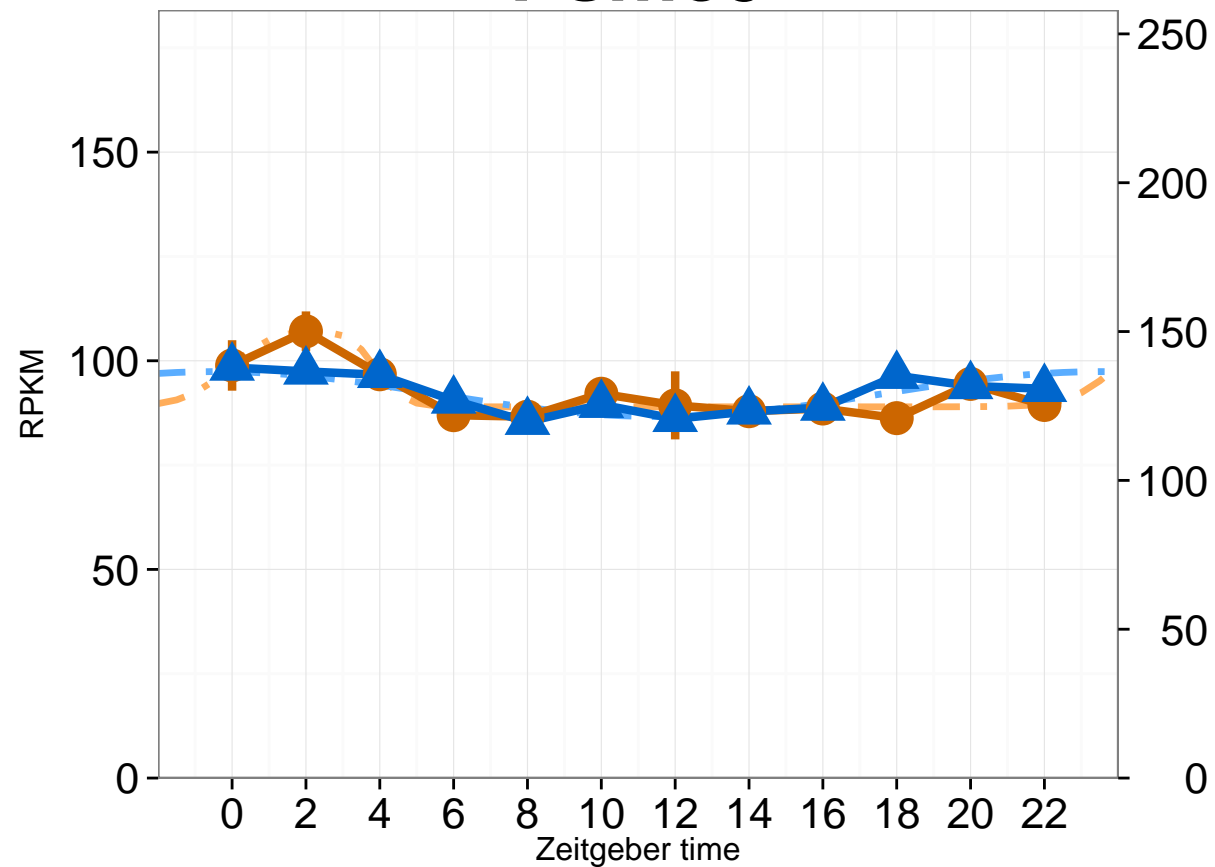

## Psmc5

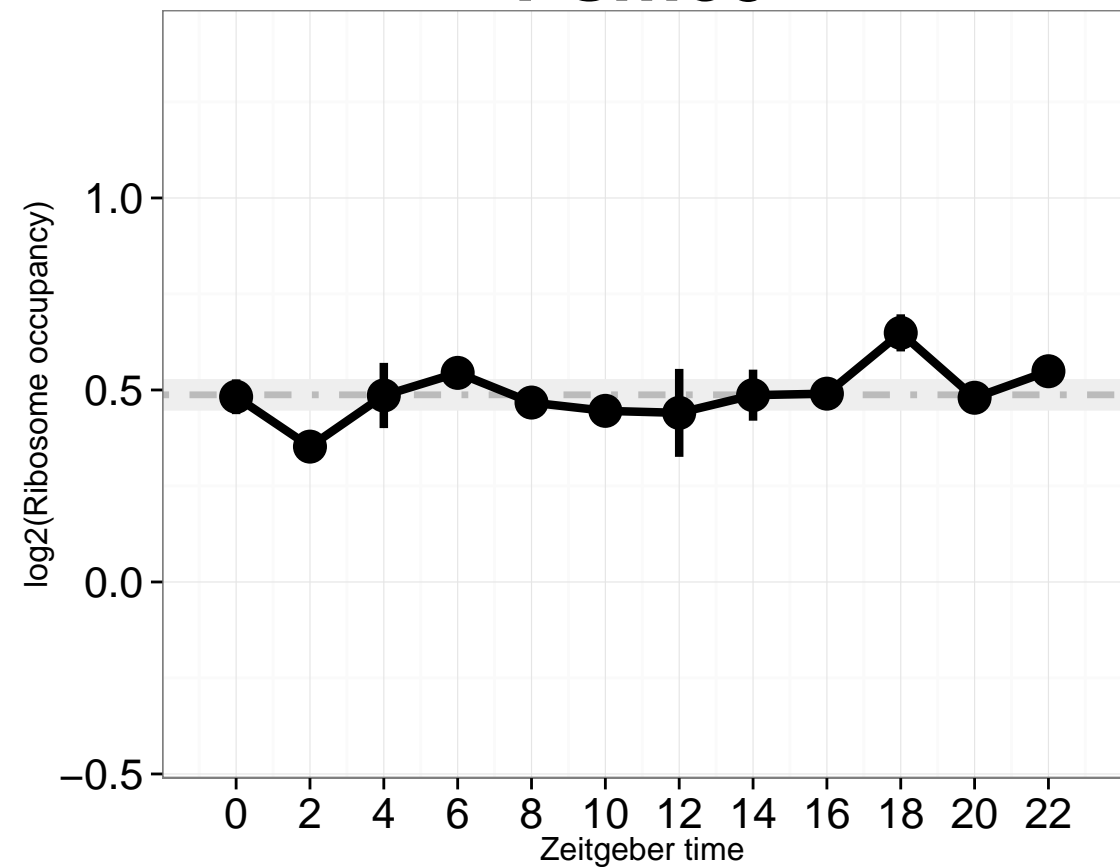

Supplement: Supplementary file 11304 [file 1]

## Tk1

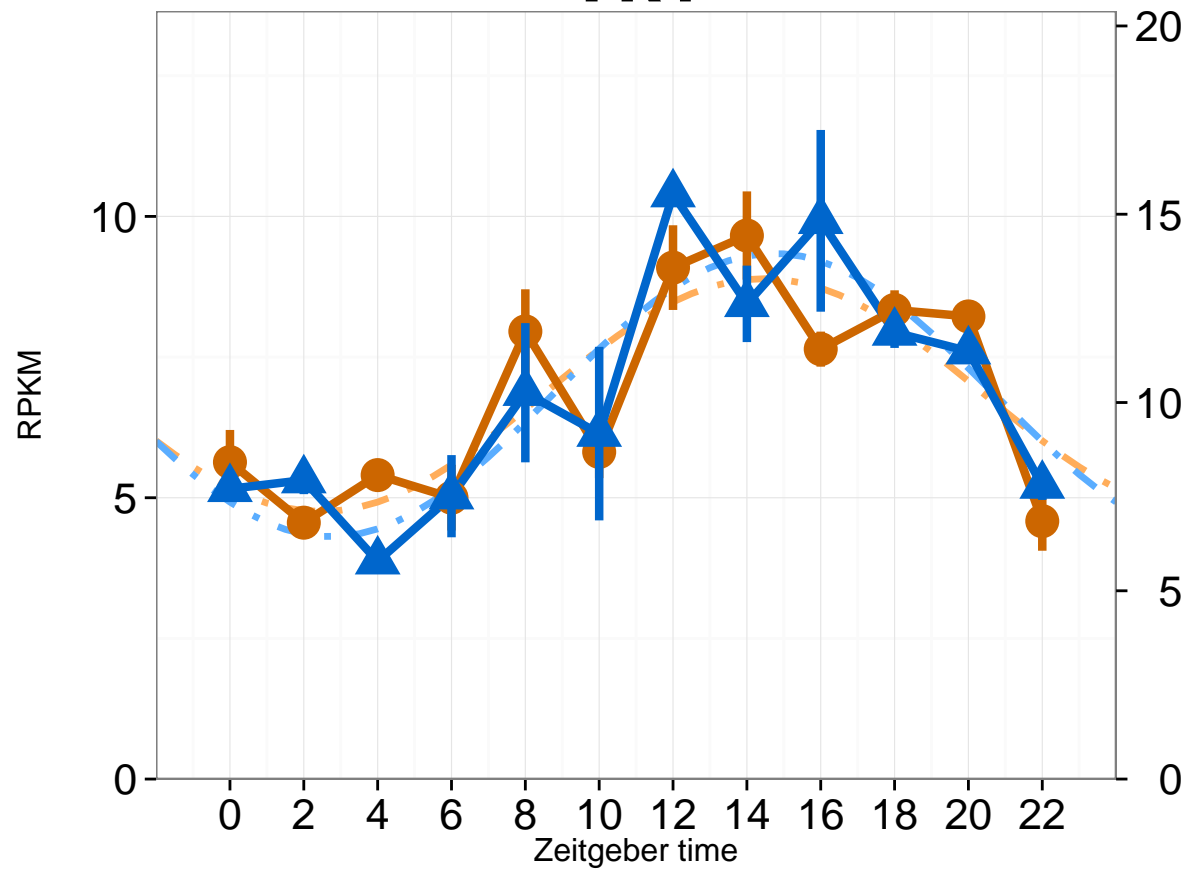

## Tk1

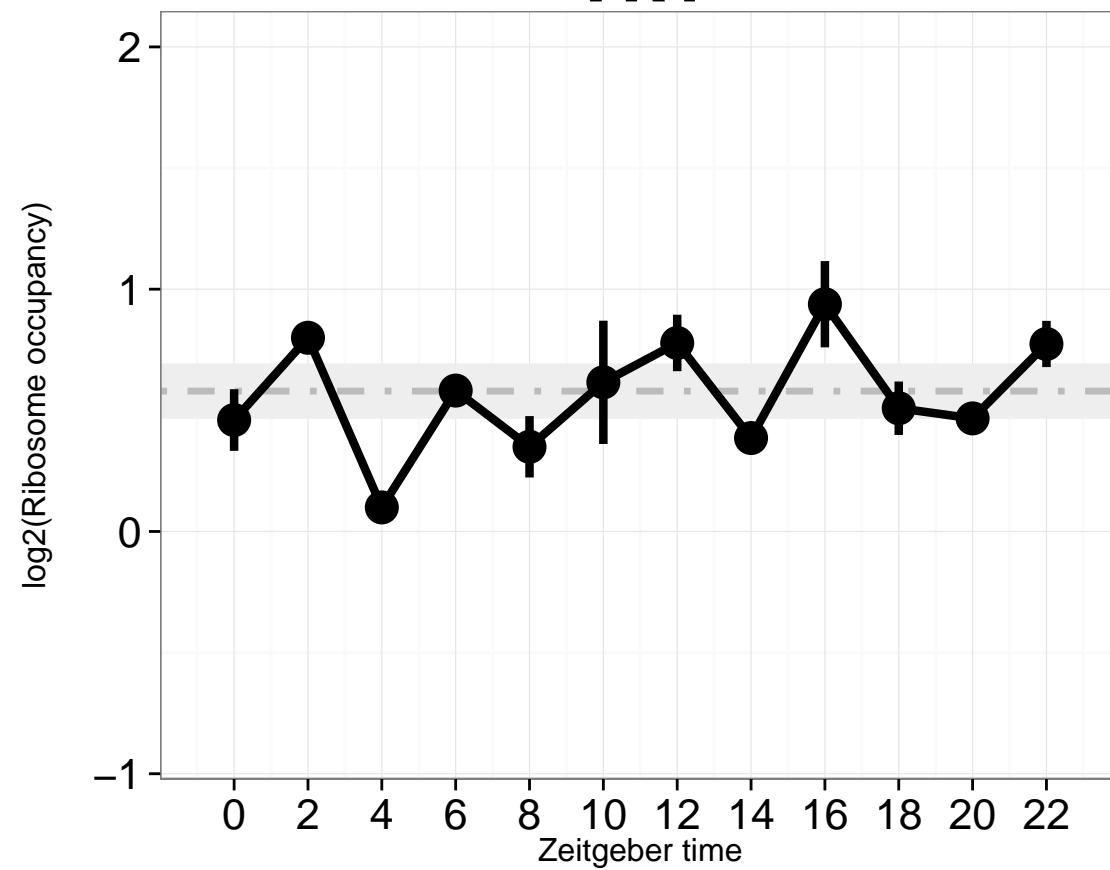

Supplement: Supplementary file 11305 [file 1]

# Cdkn1b

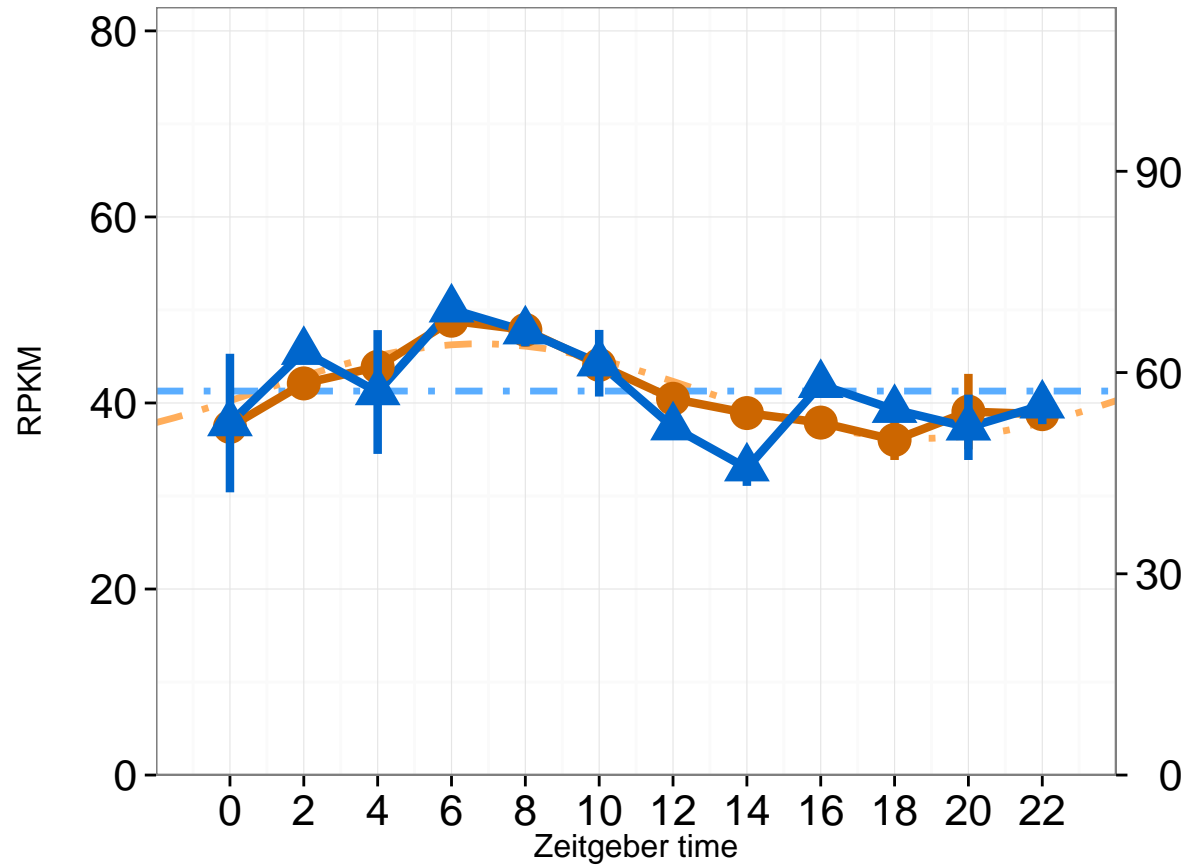

# Cdkn1b

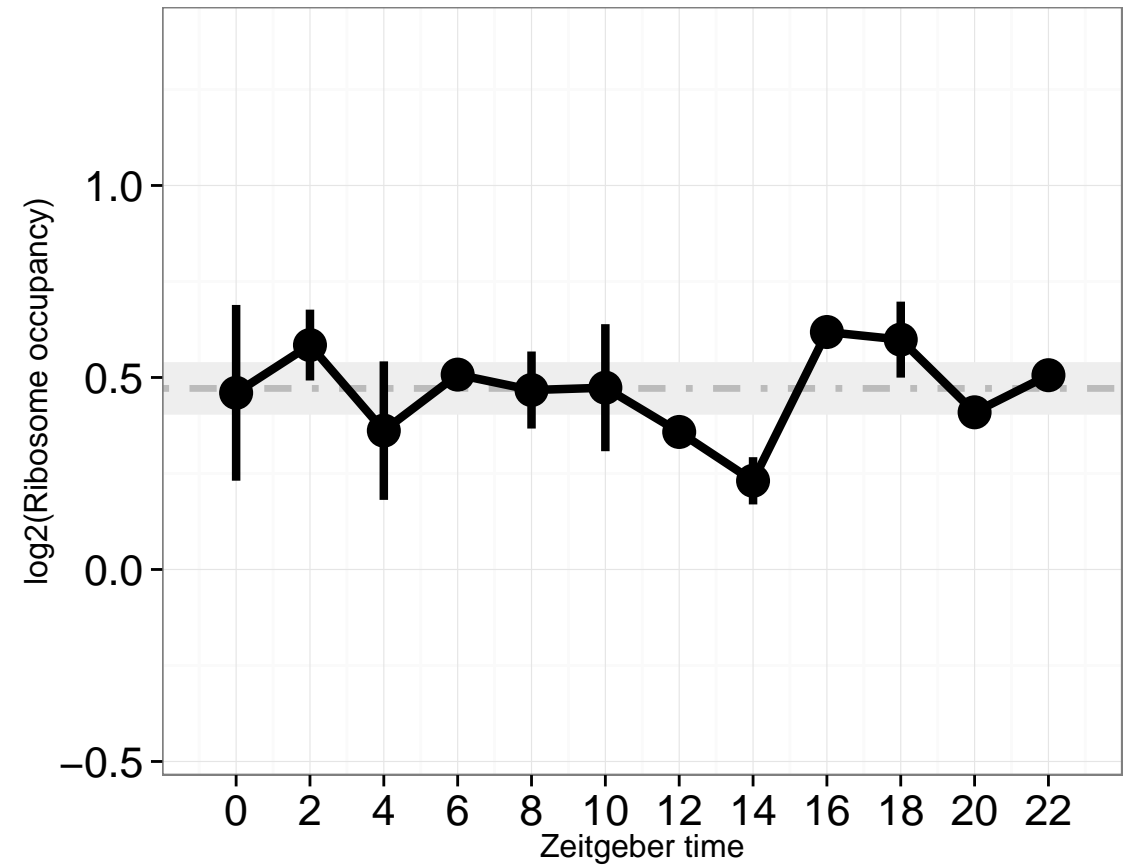

Supplement: Supplementary file 11306 [file 1]

## lppk

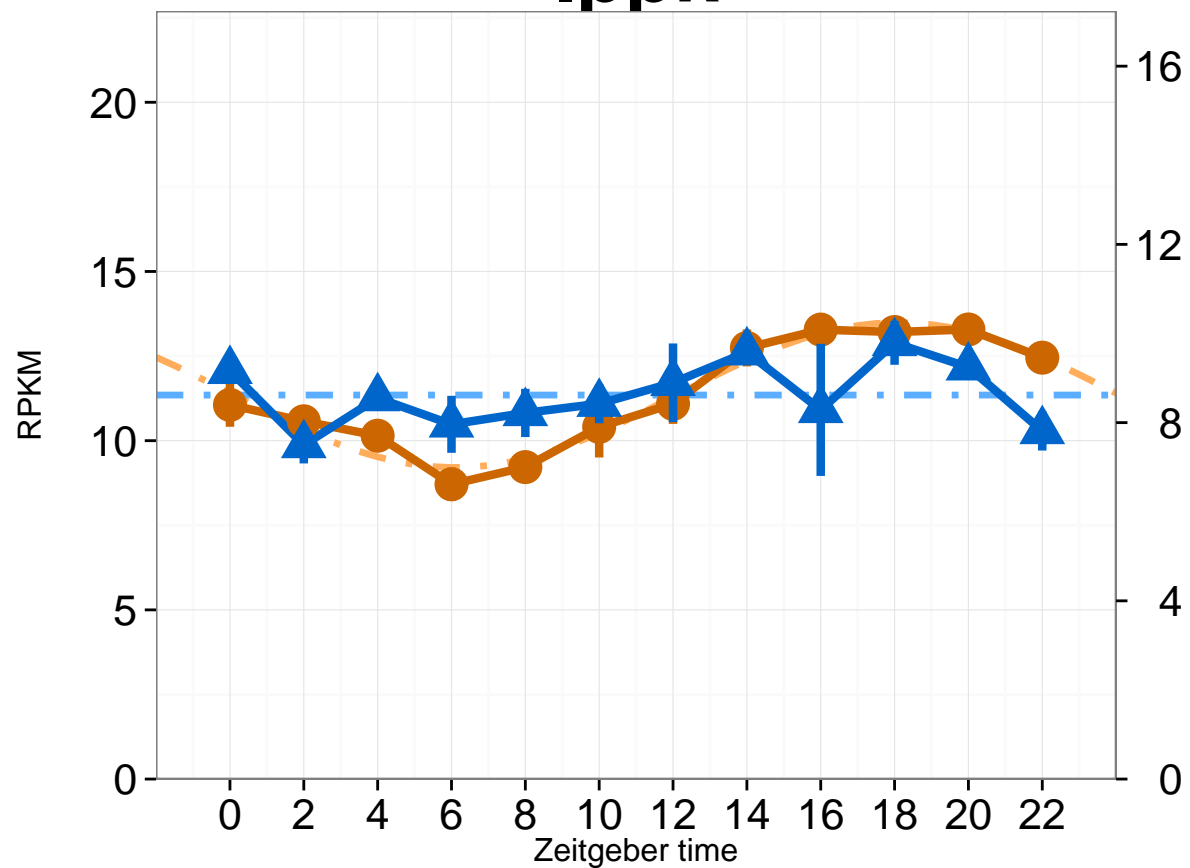

## lppk

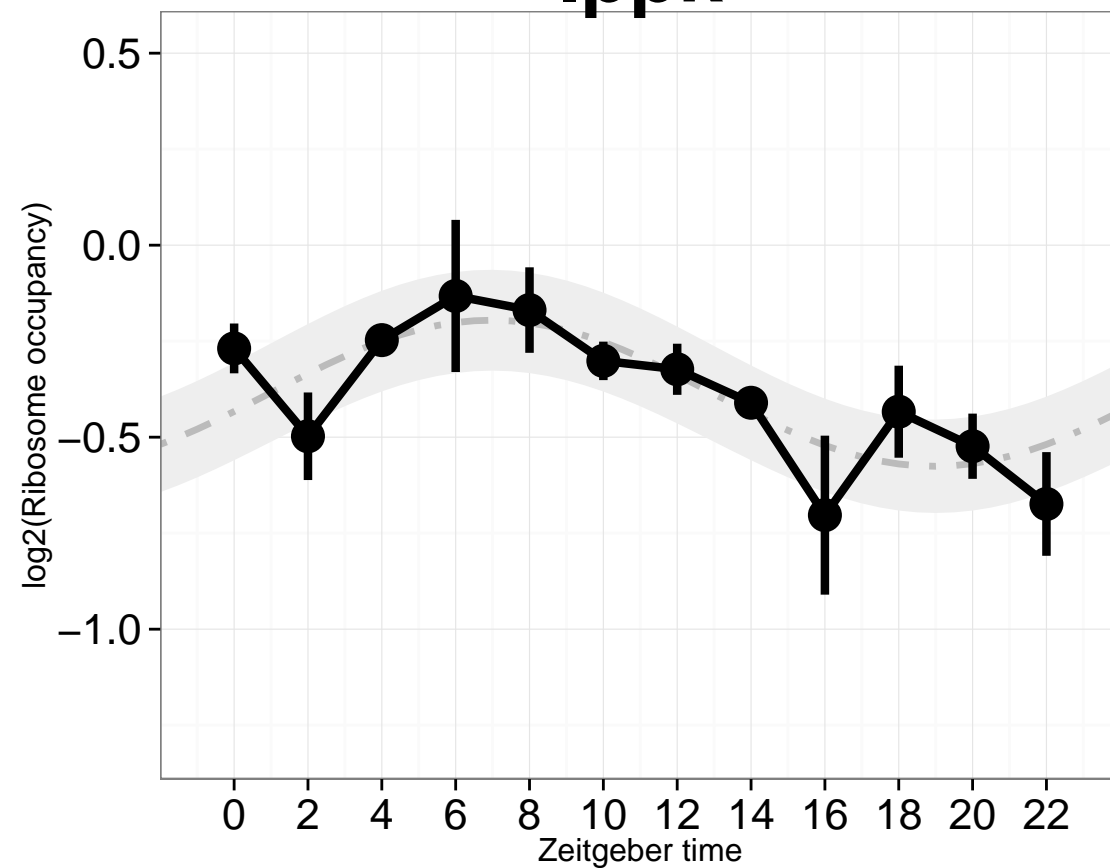

Supplement: Supplementary file 11307 [file 1]

## Bod1

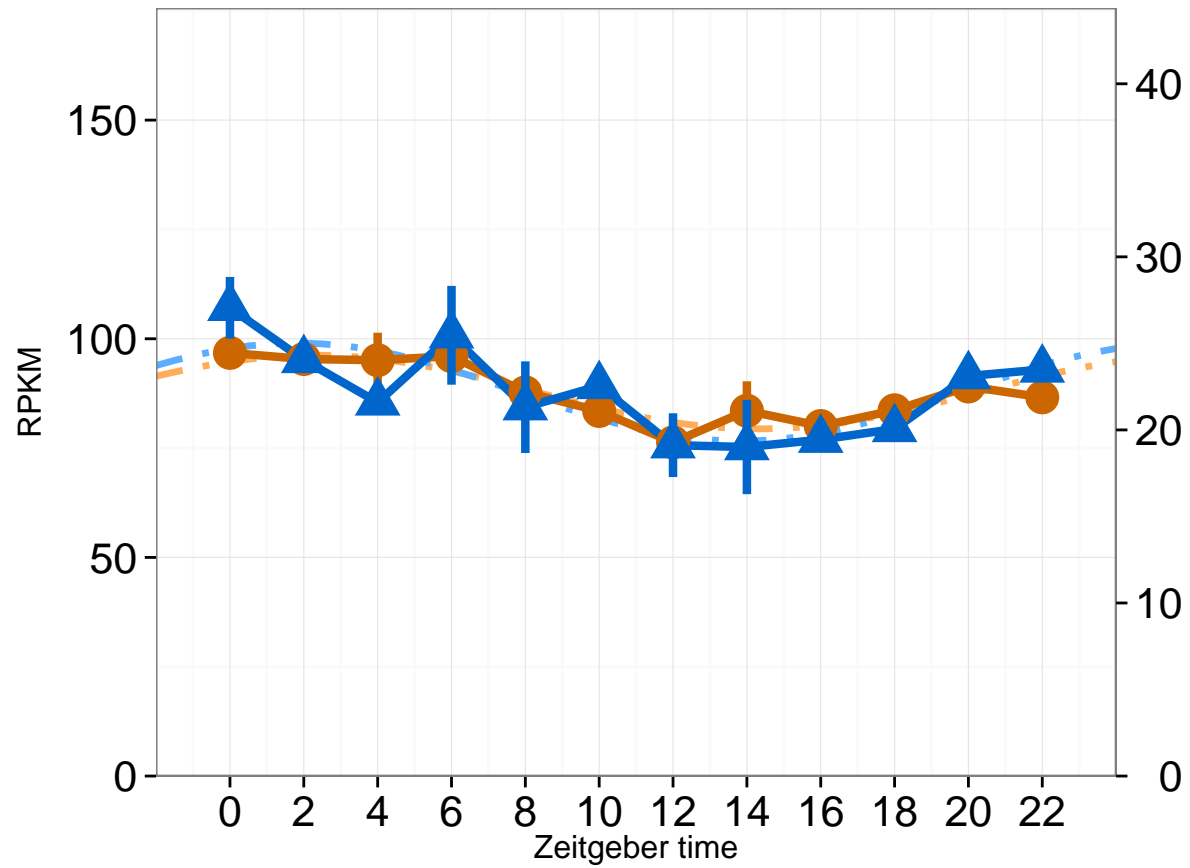

## Bod1

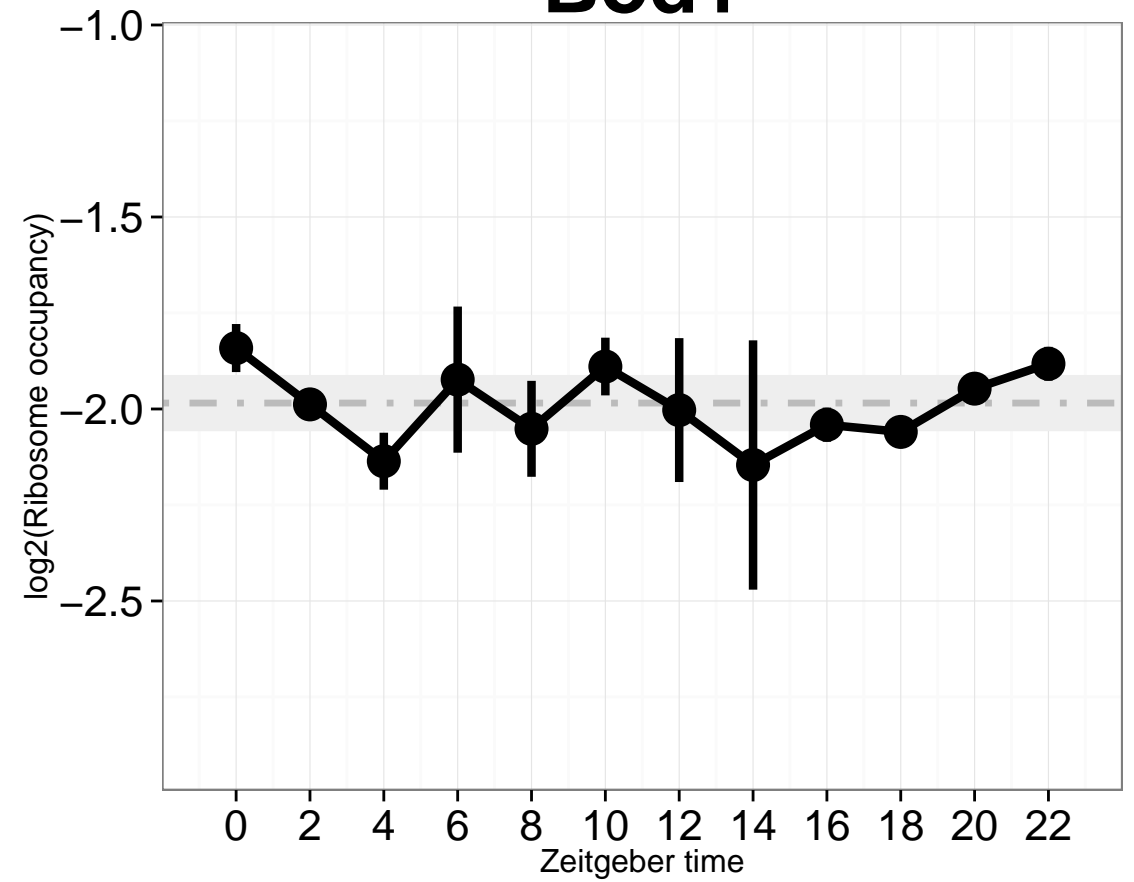

Supplement: Supplementary file 11308 [file 1]

# Map2k2

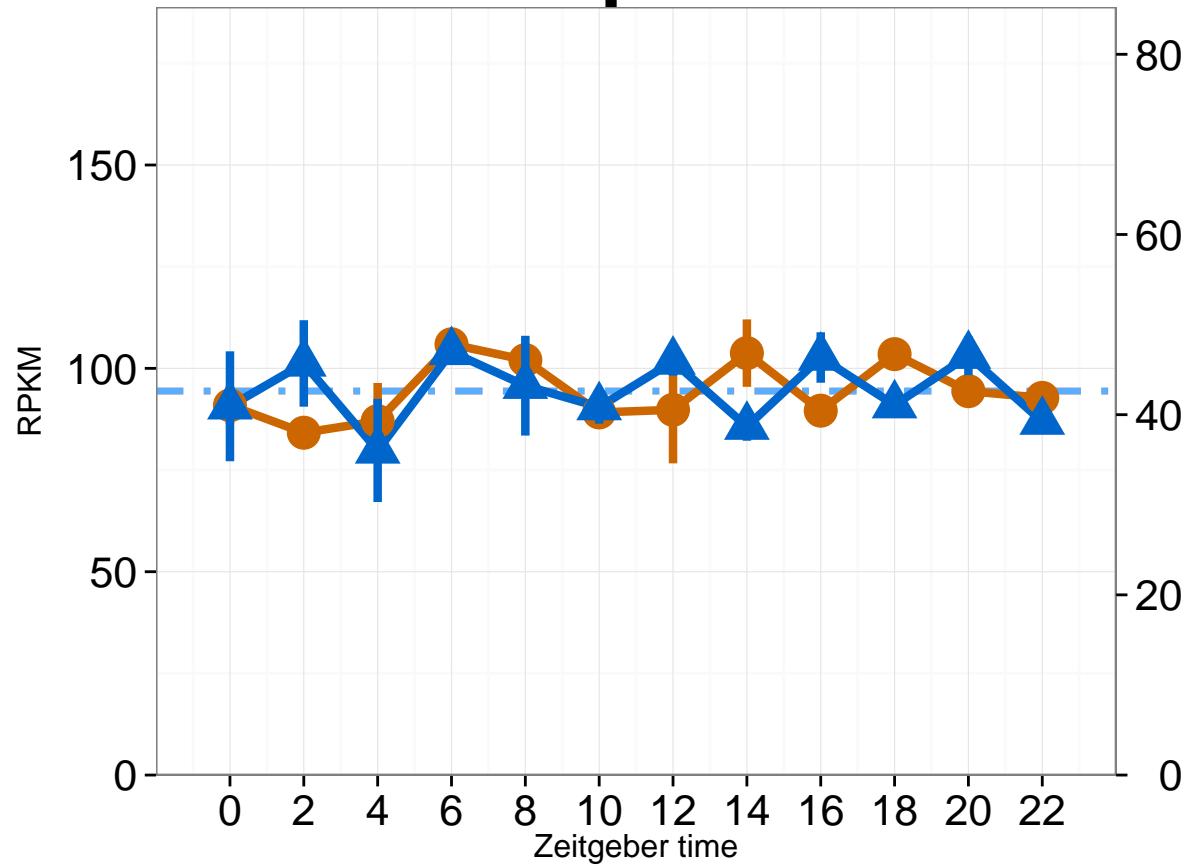

# Map2k2

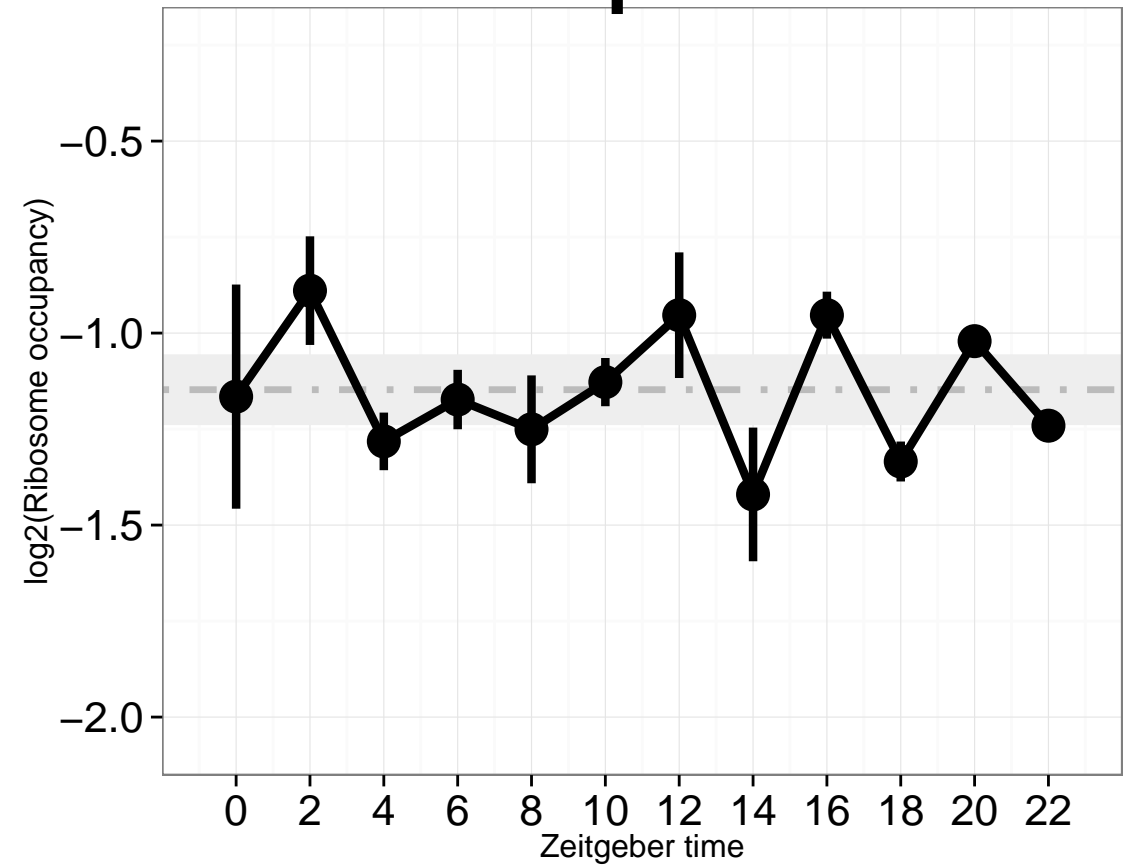

Supplement: Supplementary file 11309 [file 1]

# Acp1

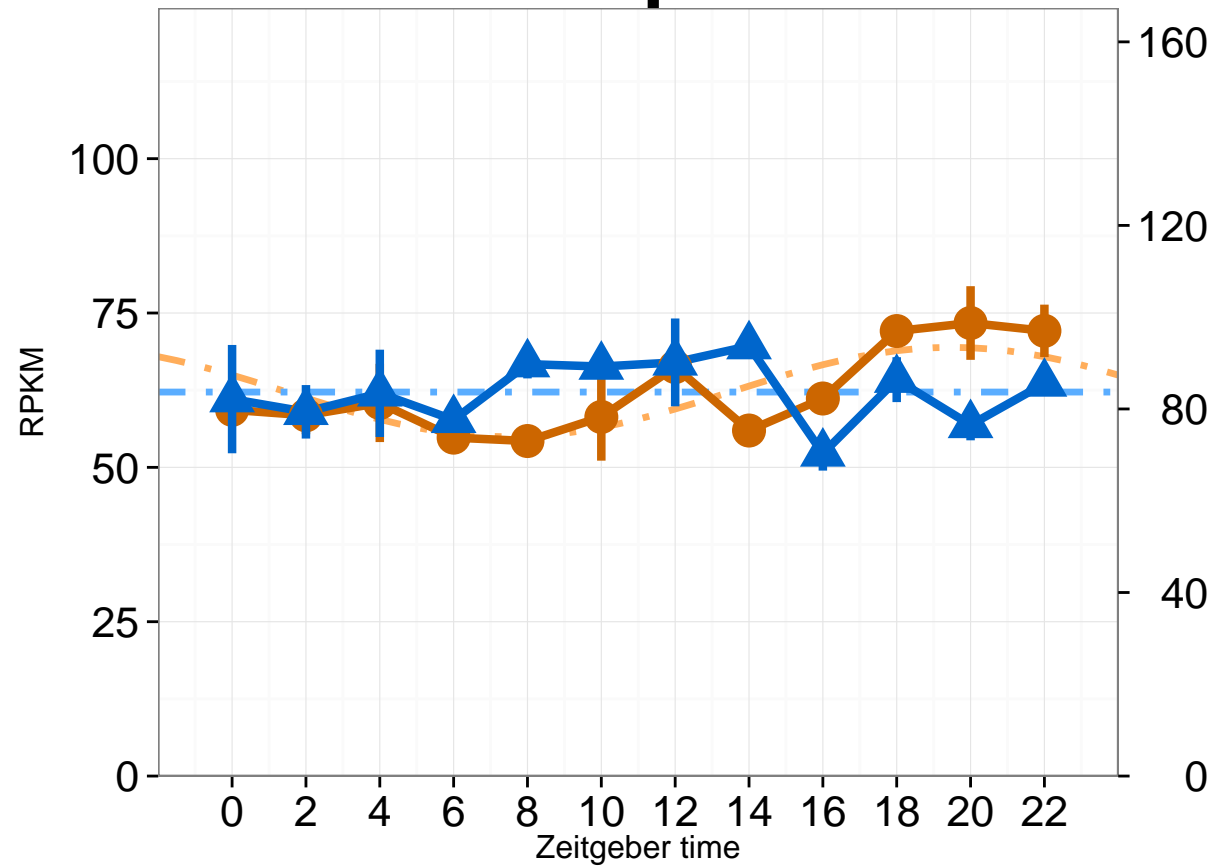

# Acp1

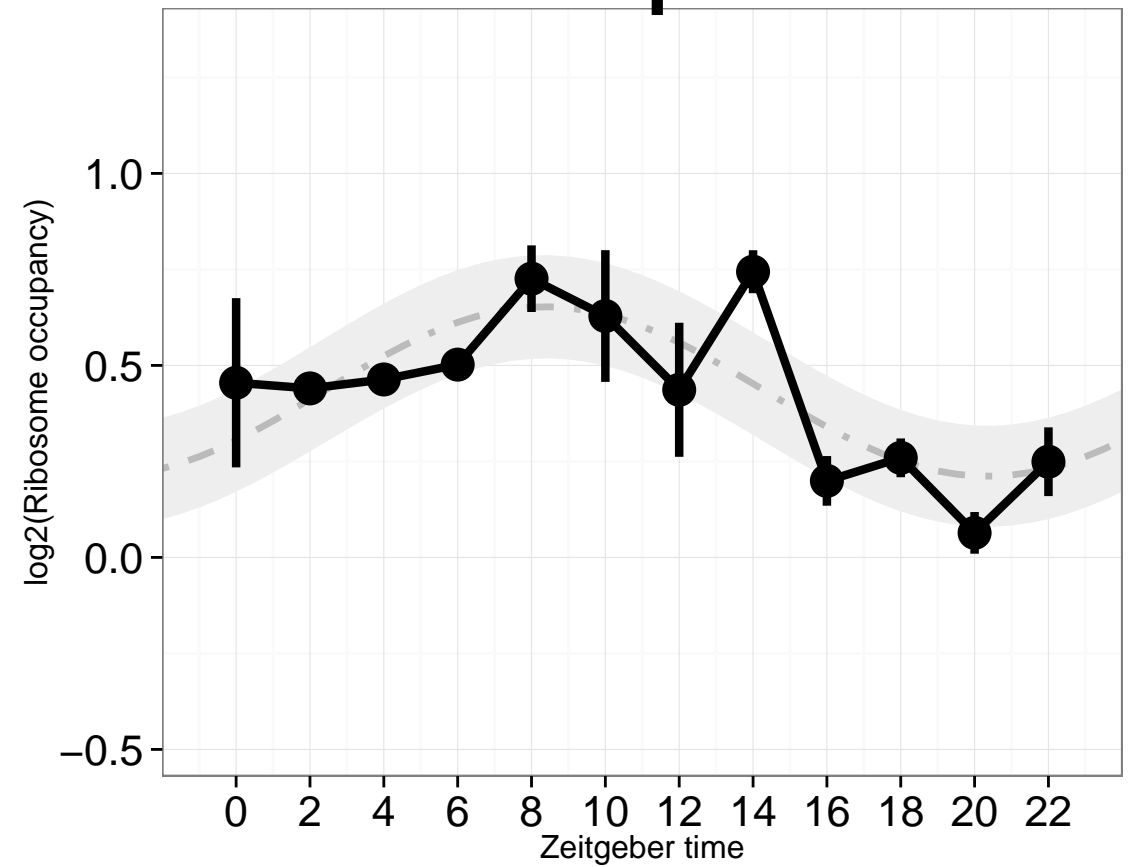

Supplement: Supplementary file 11310 [file 1]

## Ythdf3

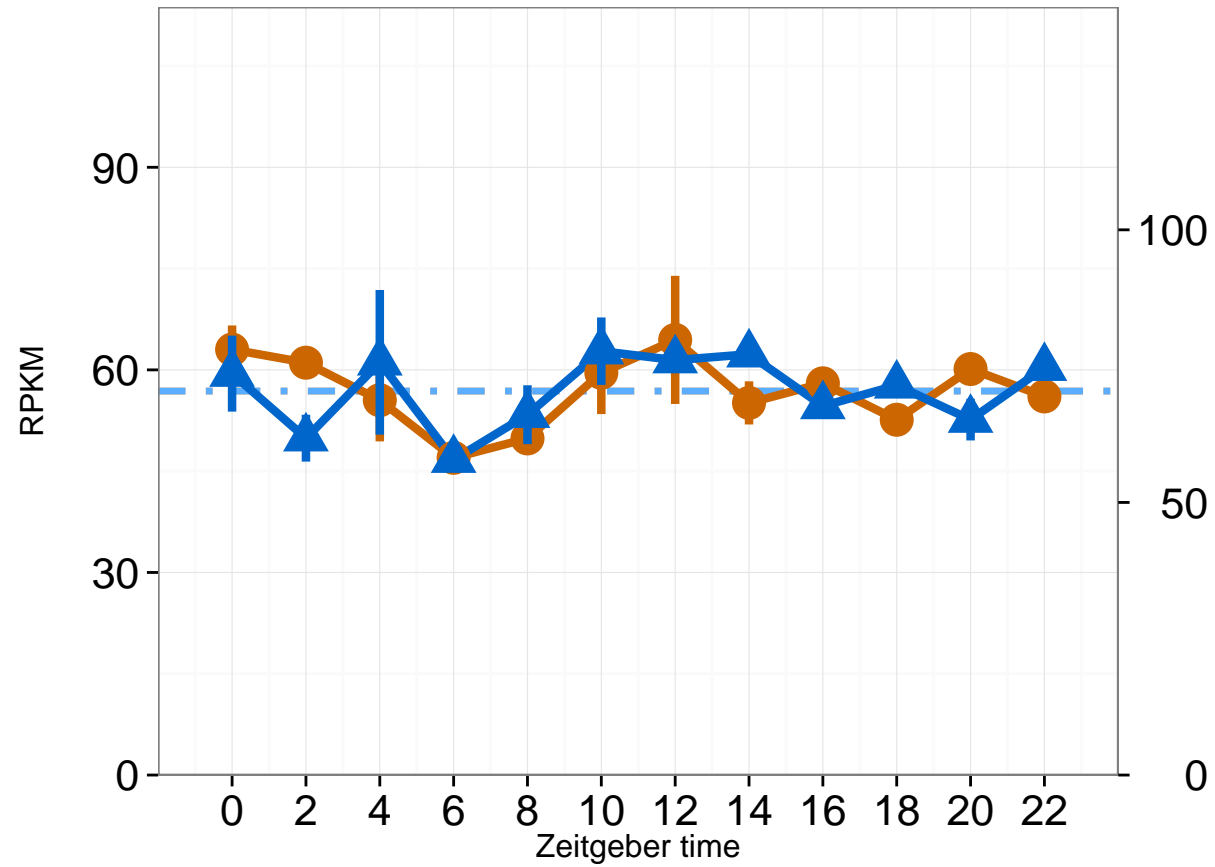

## Ythdf3

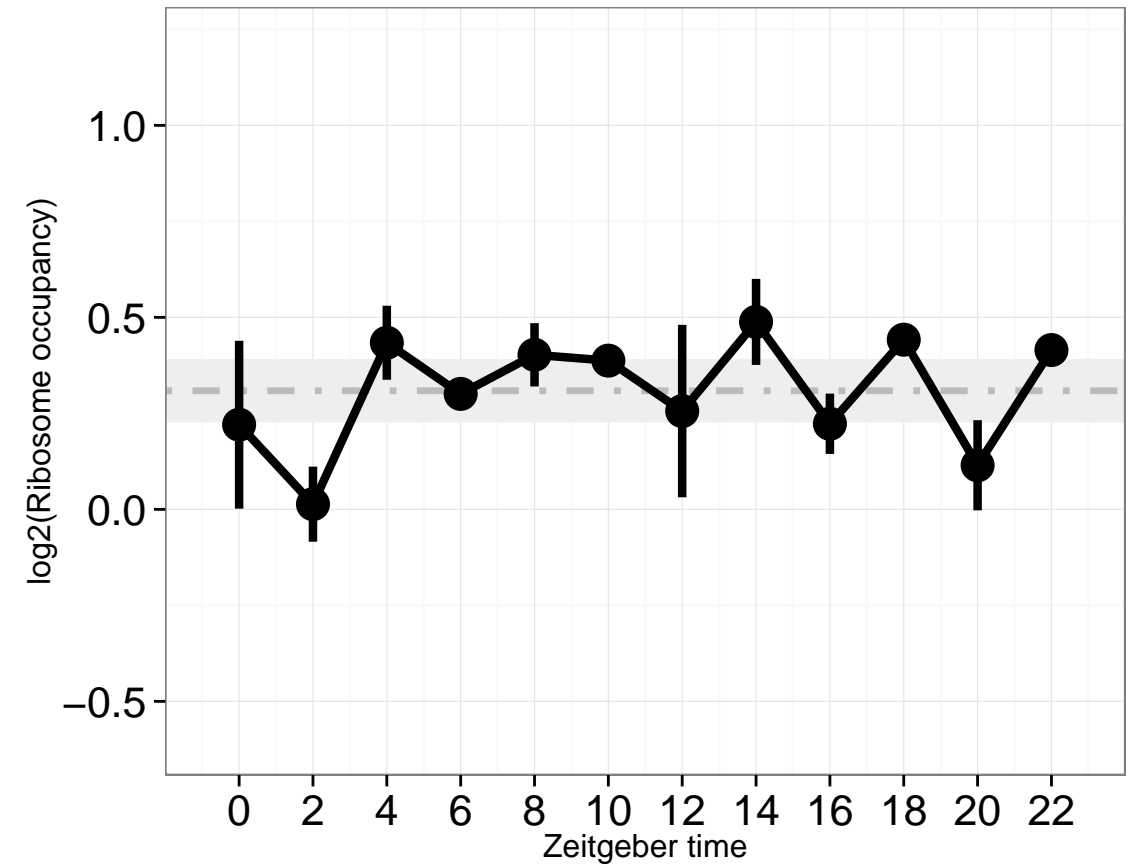

Supplement: Supplementary file 11311 [file 1]

## Tpd52l2

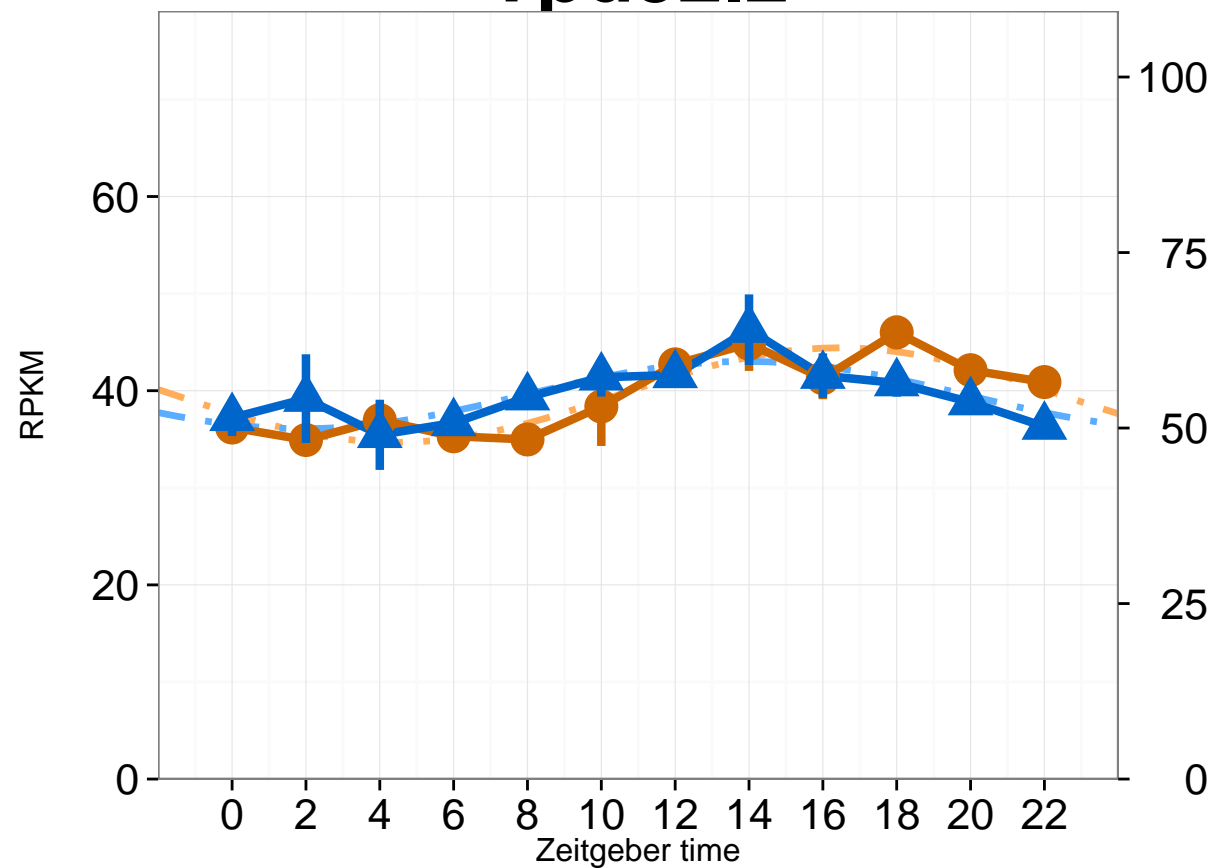

## Tpd52l2

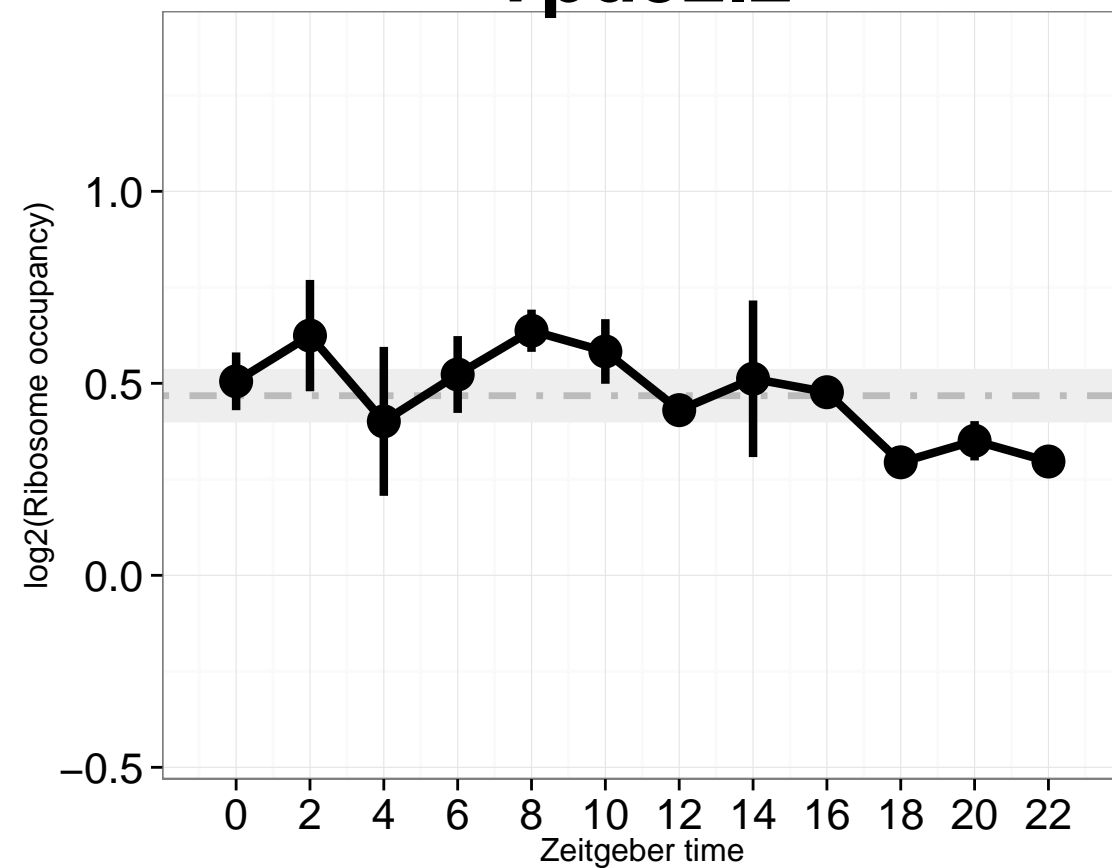

Supplement: Supplementary file 11312 [file 1]

## Katna1

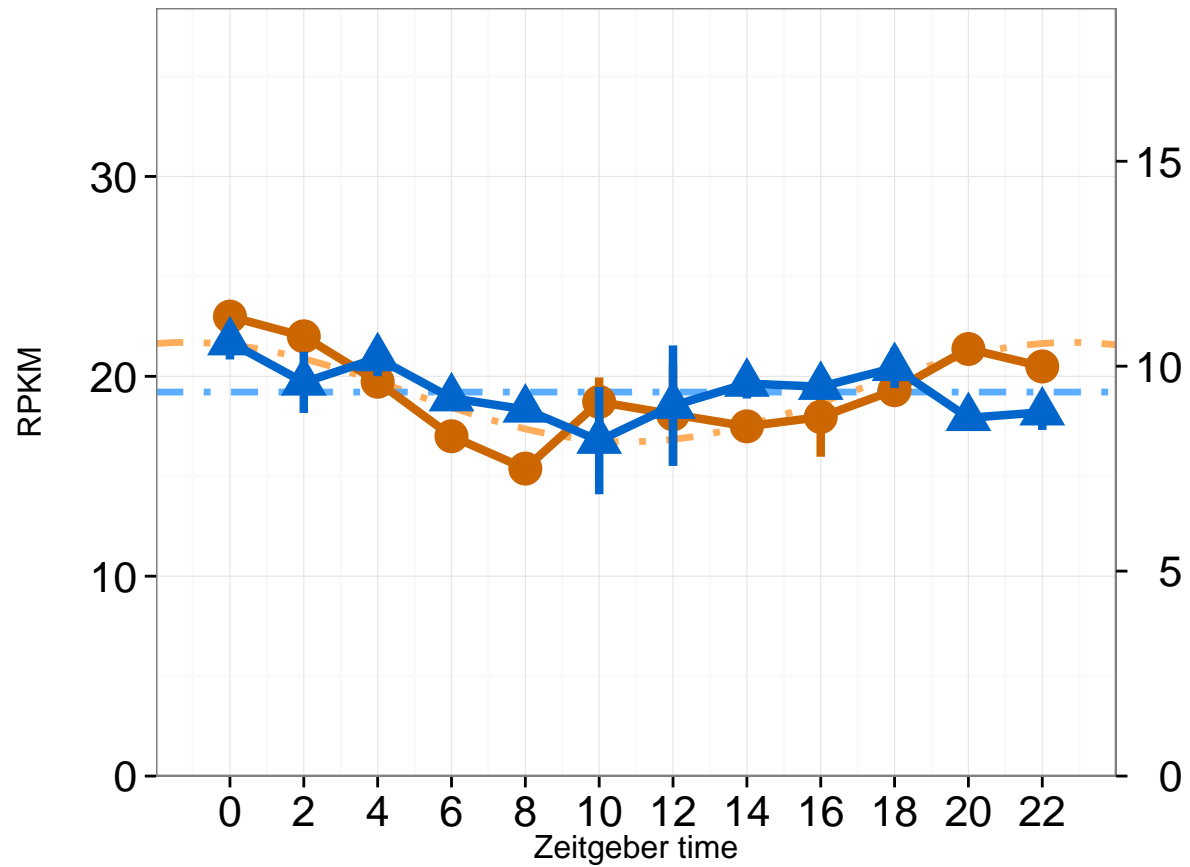

## Katna1

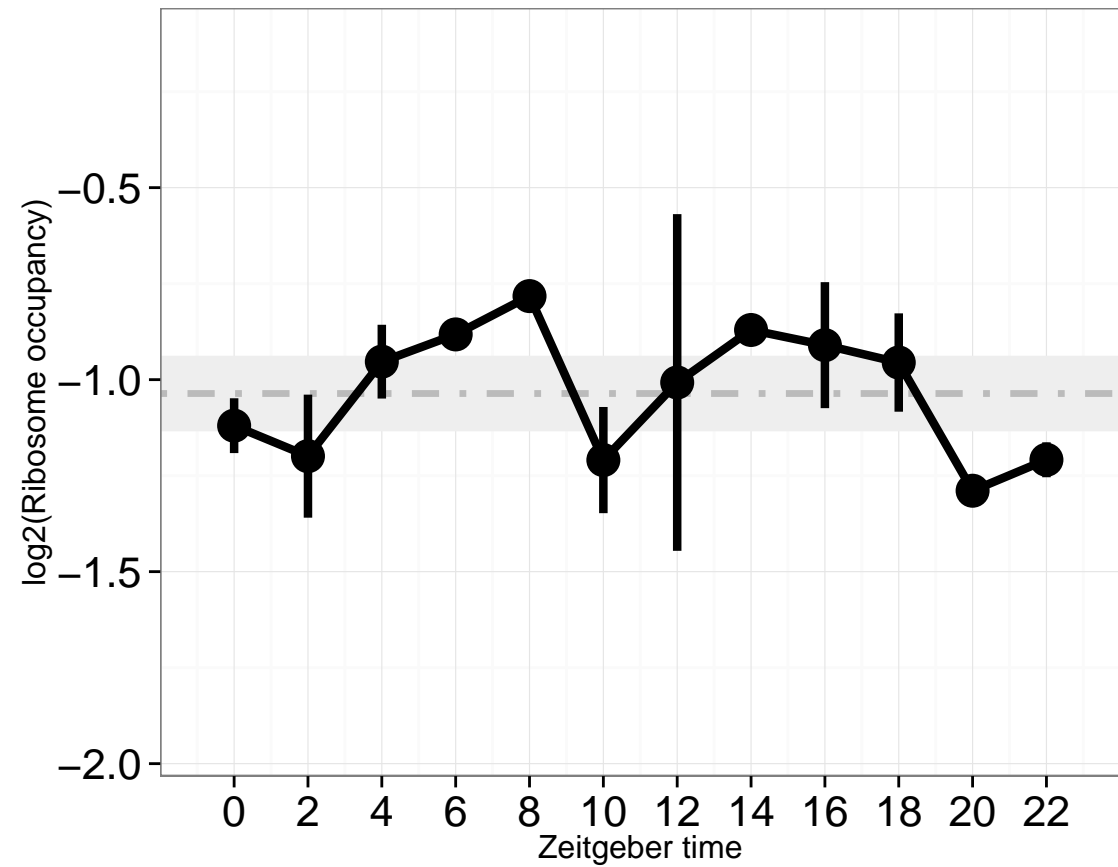

Supplement: Supplementary file 11313 [file 1]

## Zfp101

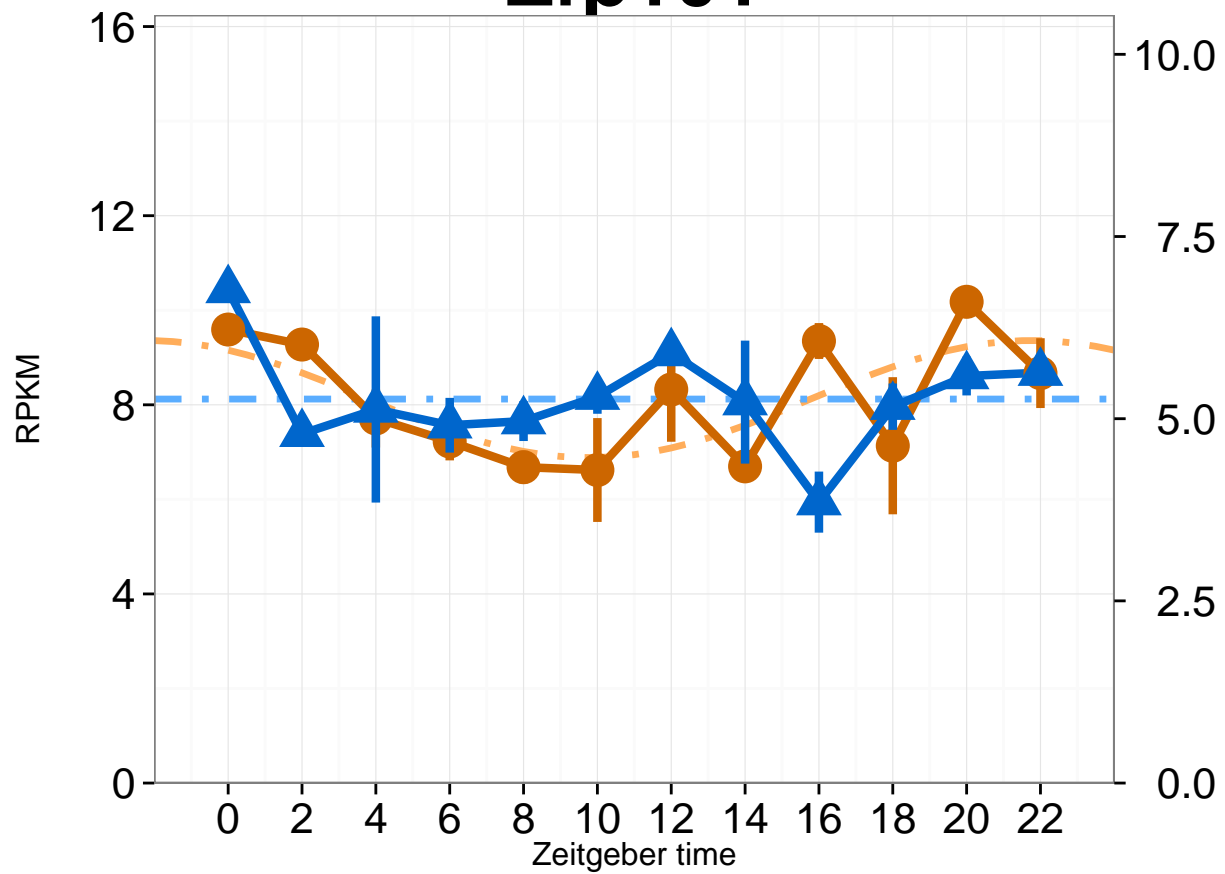

## Zfp101

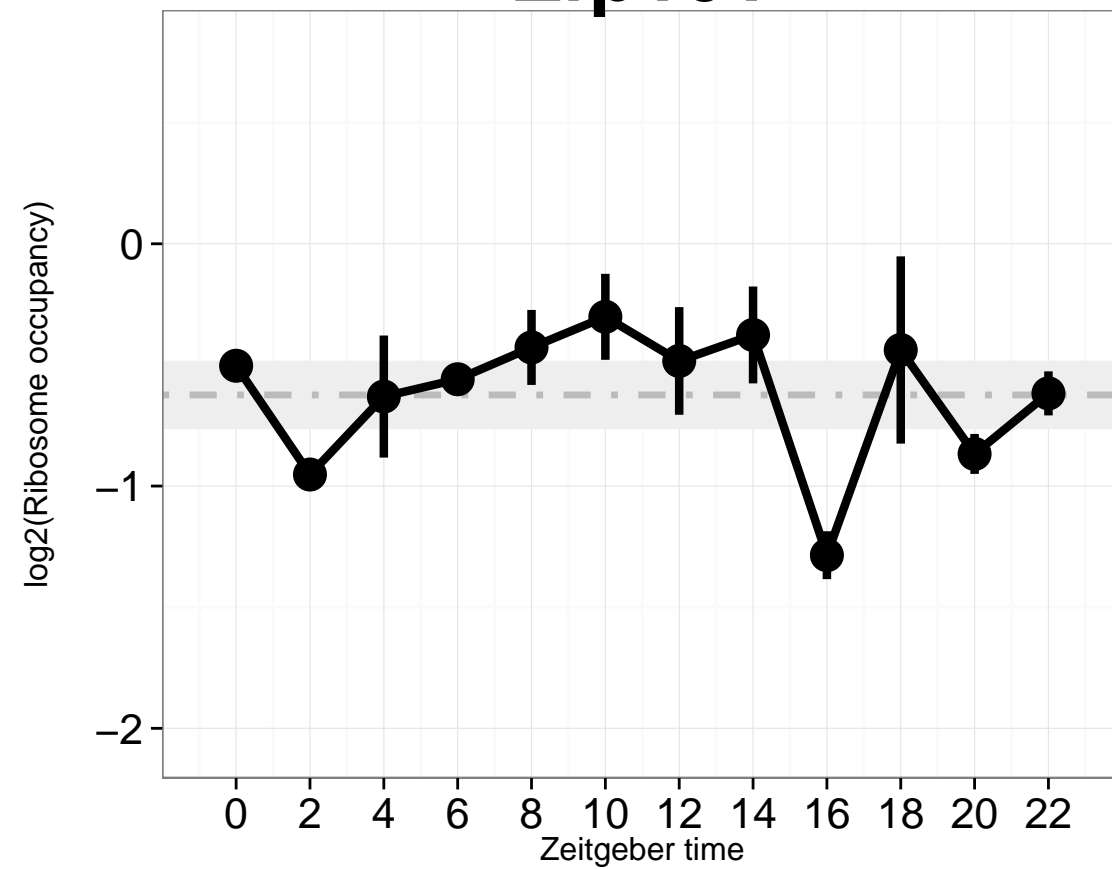

Supplement: Supplementary file 11314 [file 1]

# Tubb6

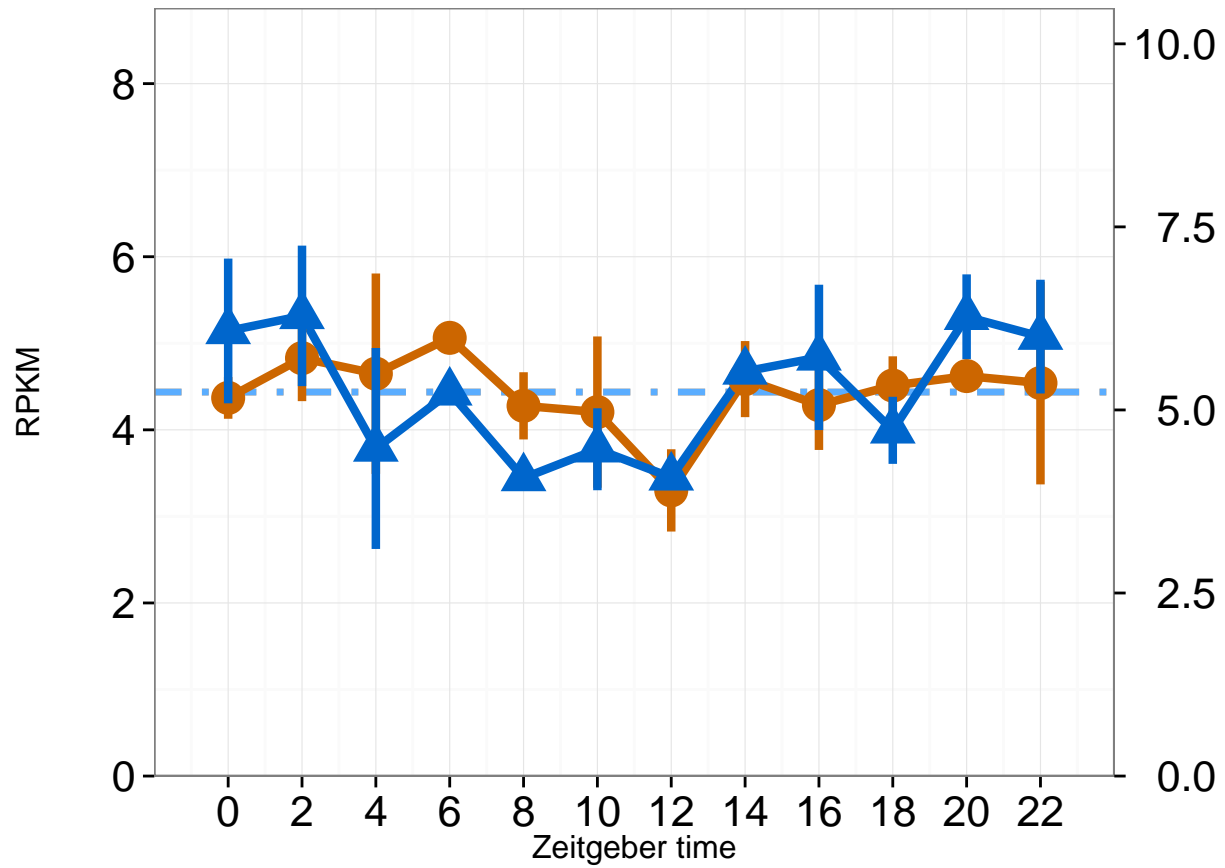

# Tubb6

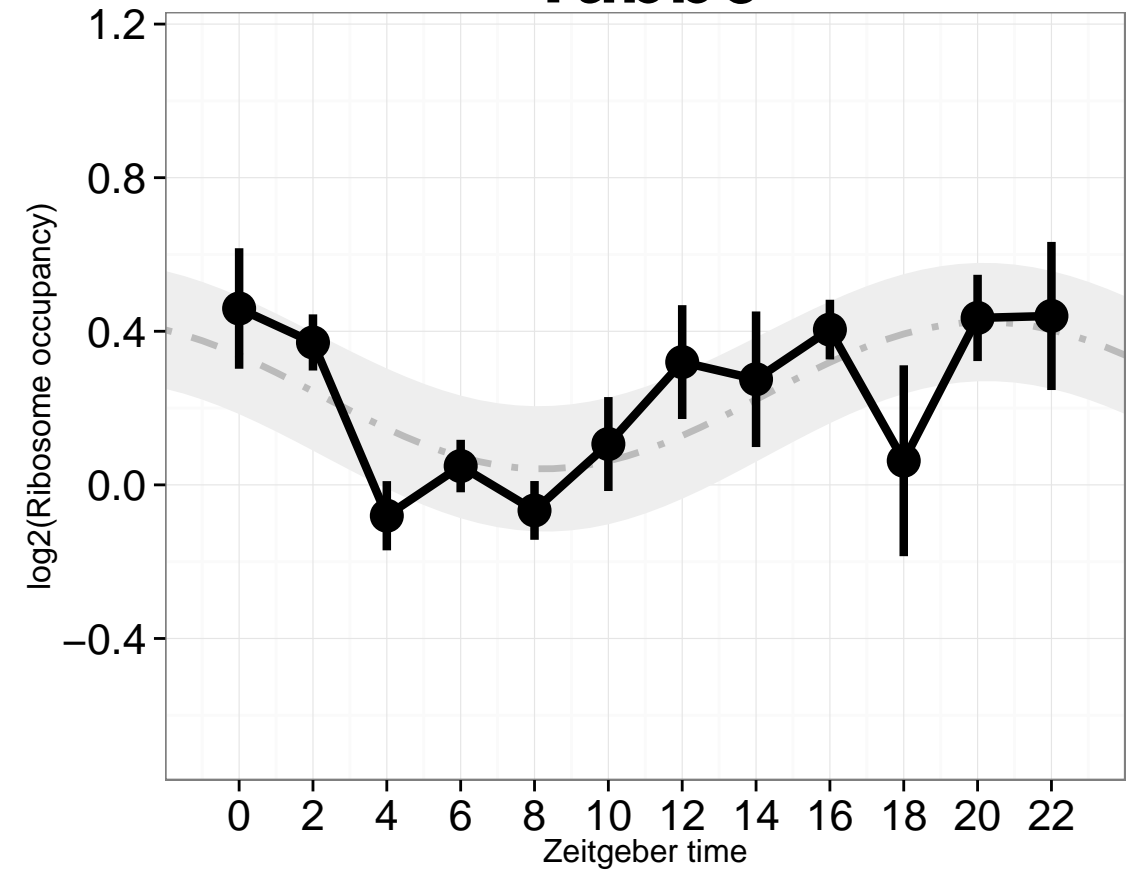

Supplement: Supplementary file 11315 [file 1]

# Mt2

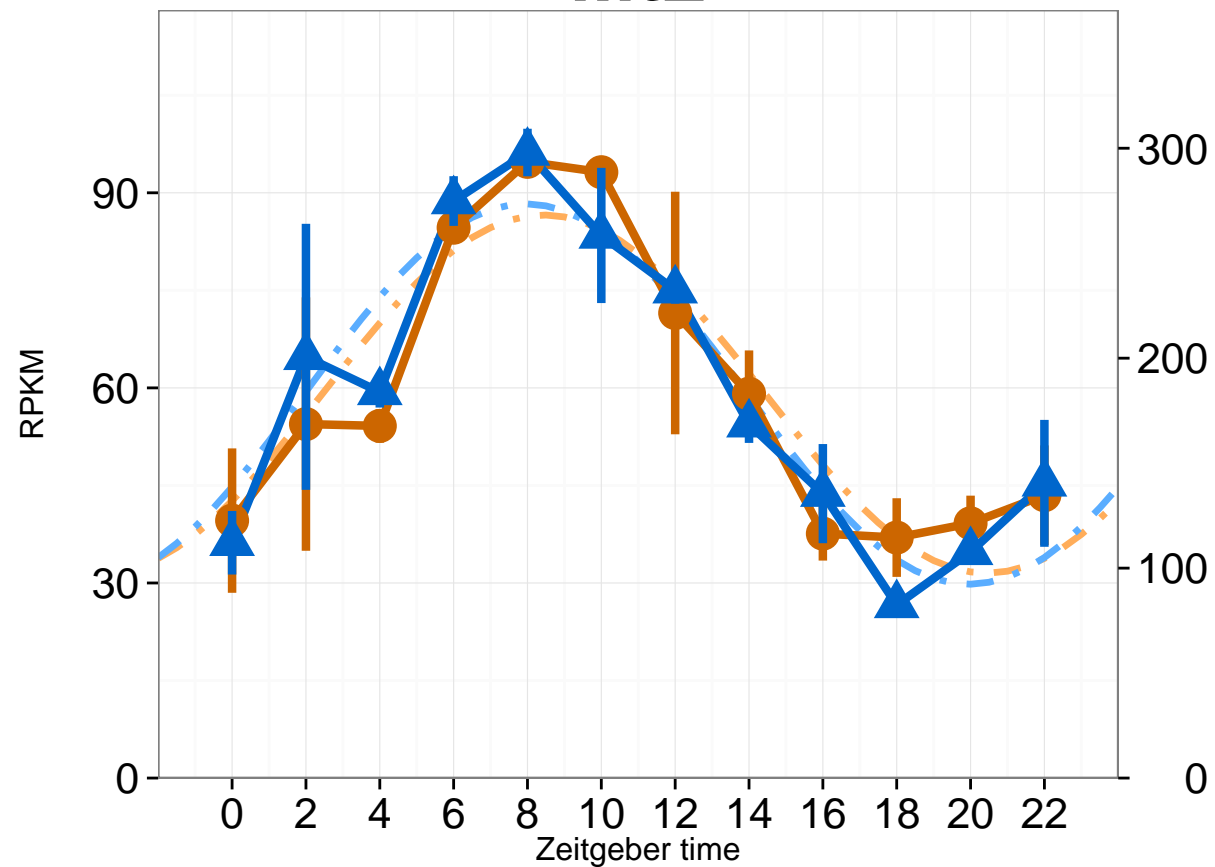

# Mt2

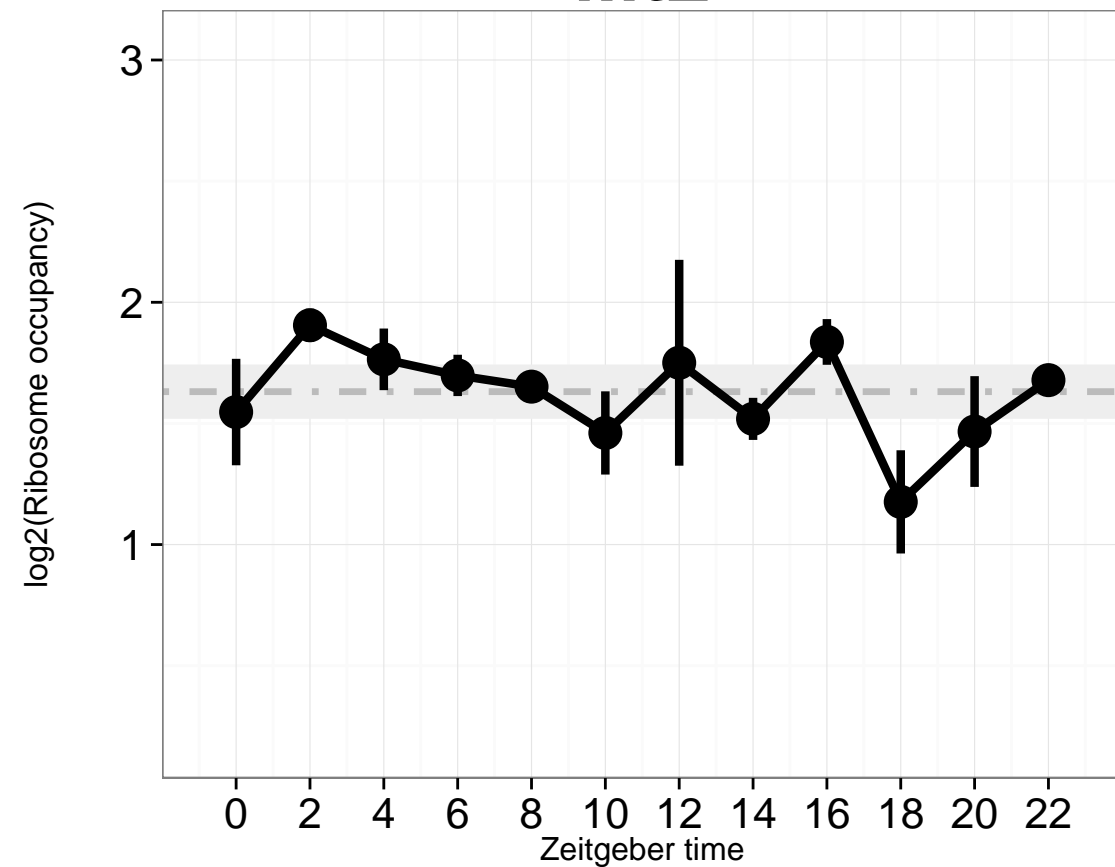

Supplement: Supplementary file 11316 [file 1]

# Tfpi2

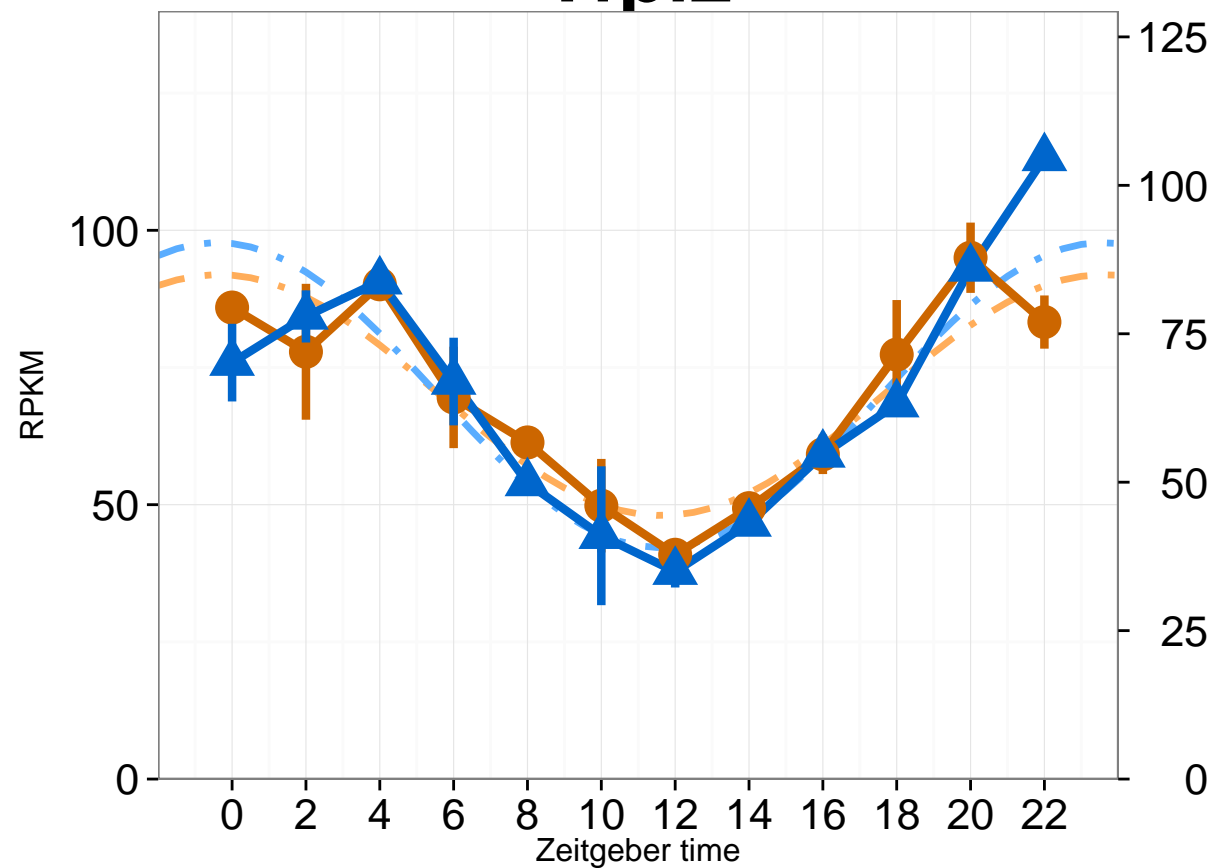

# Tfpi2

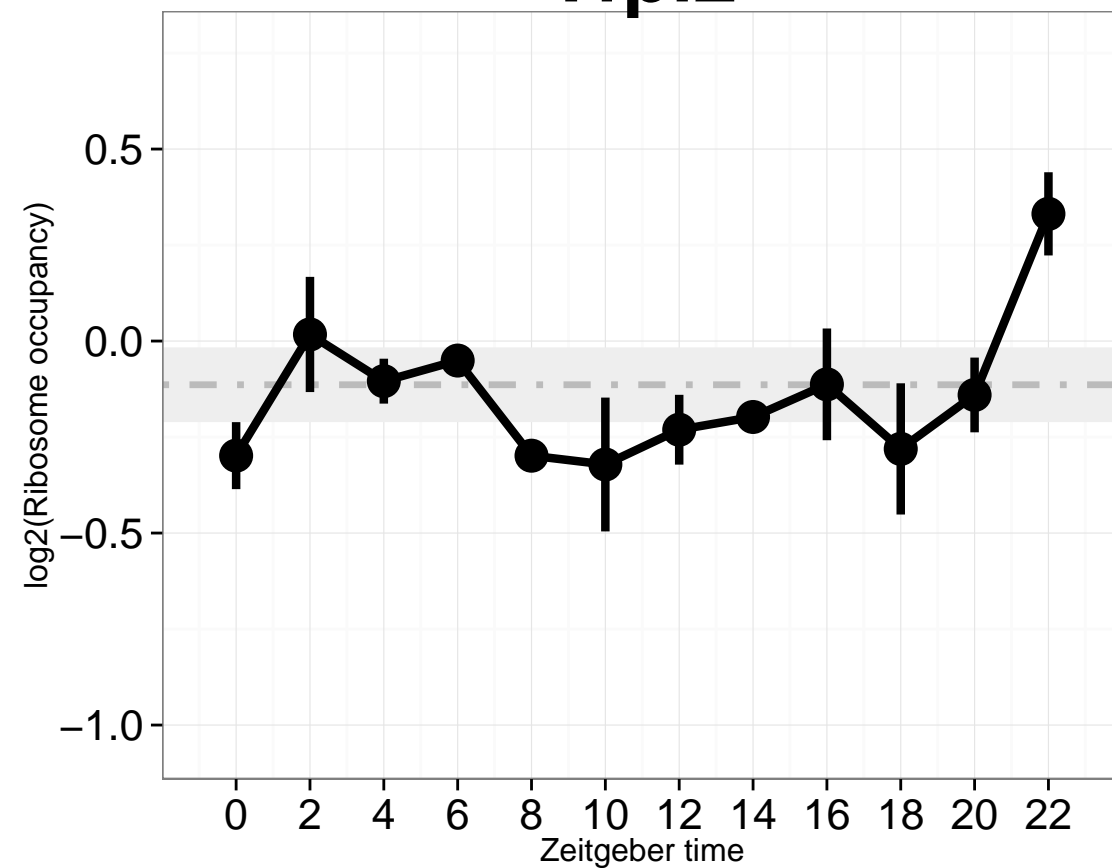

Supplement: Supplementary file 11317 [file 1]

# Glt8d1

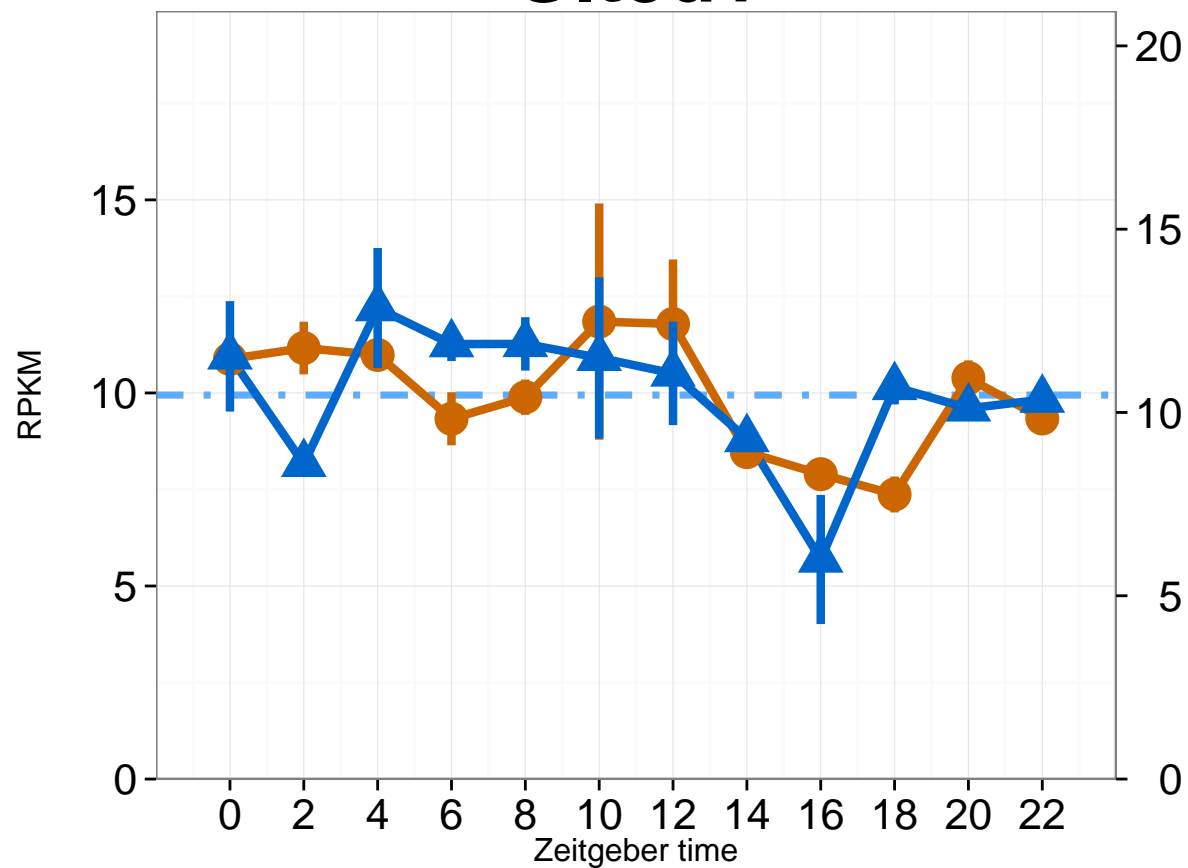

# Glt8d1

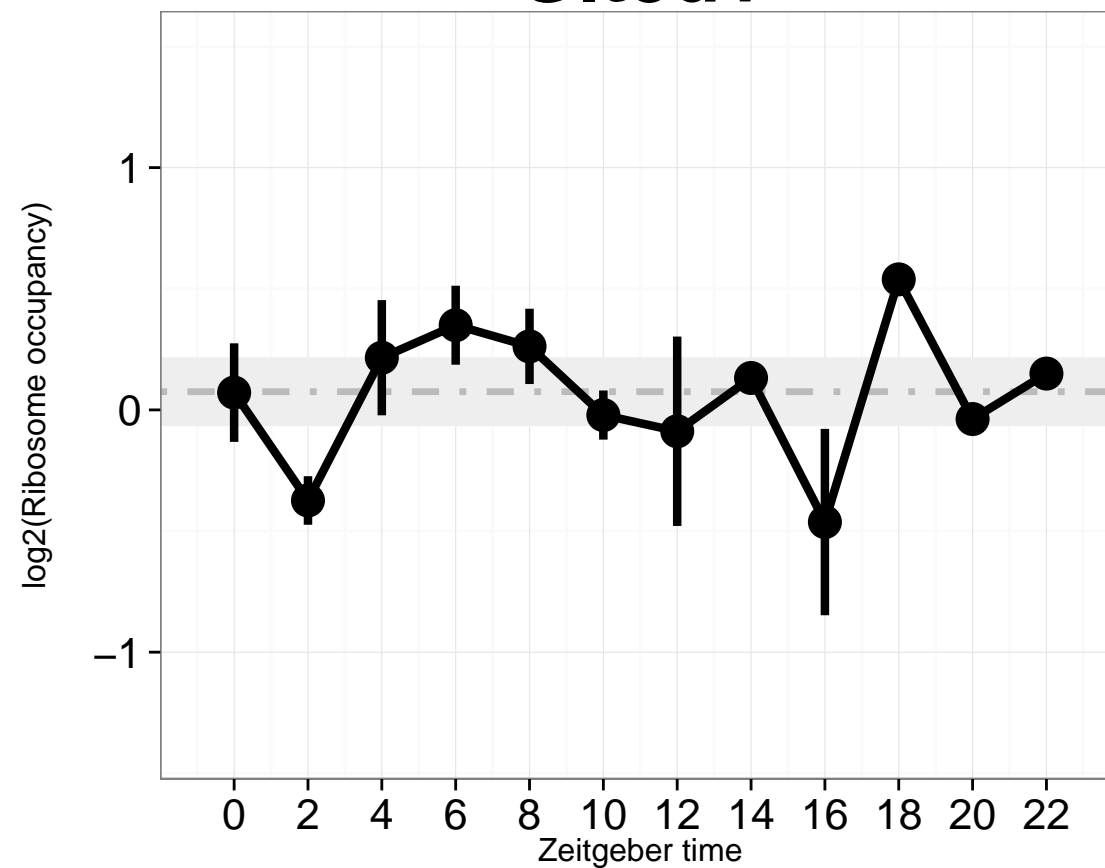

Supplement: Supplementary file 11318 [file 1]

## Erg

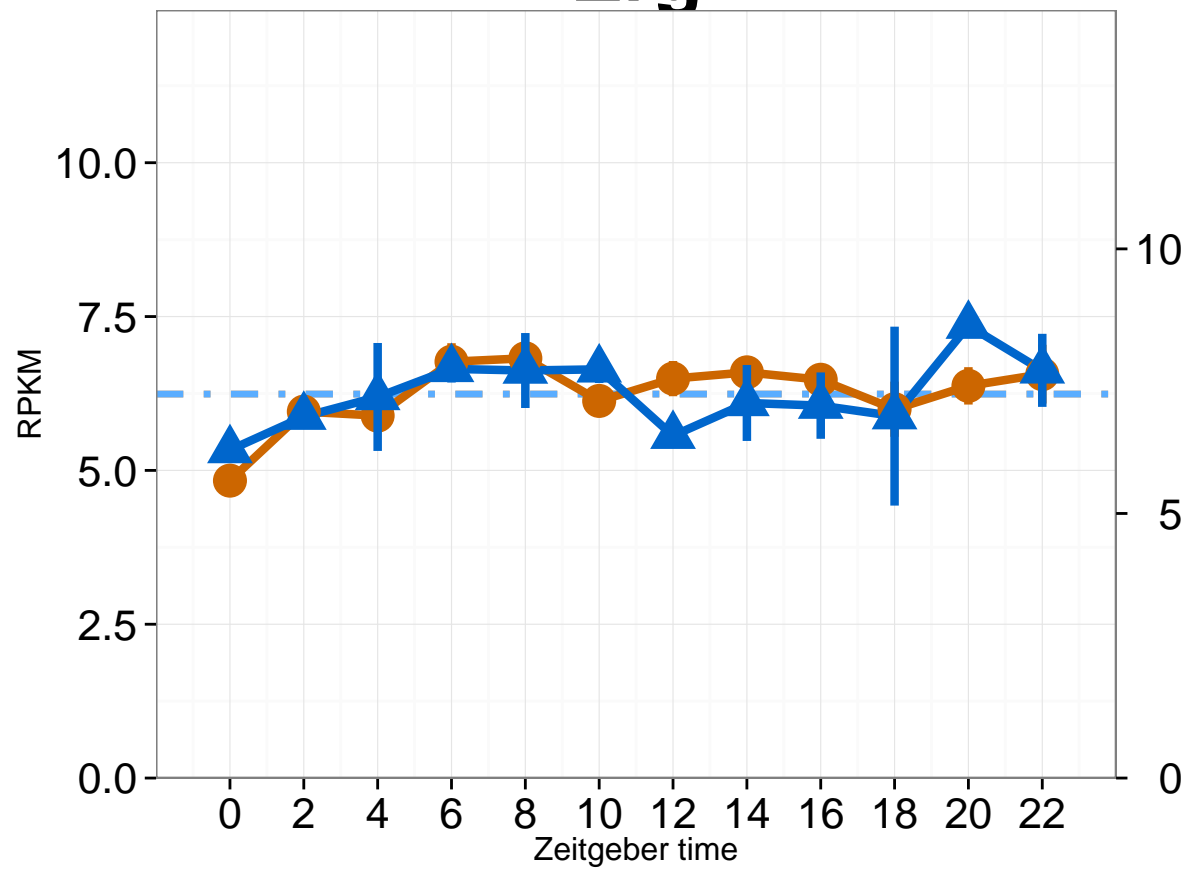

## Erg

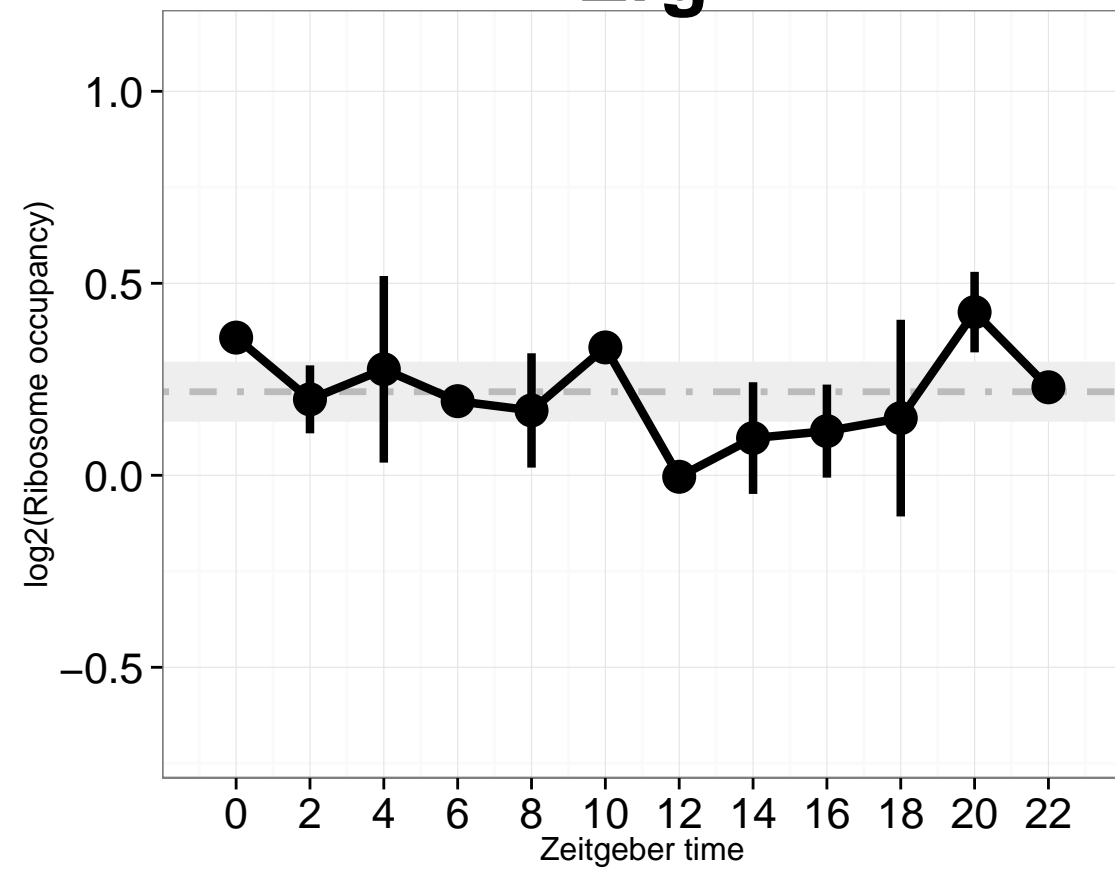

Supplement: Supplementary file 11319 [file 1]

# Oas1a

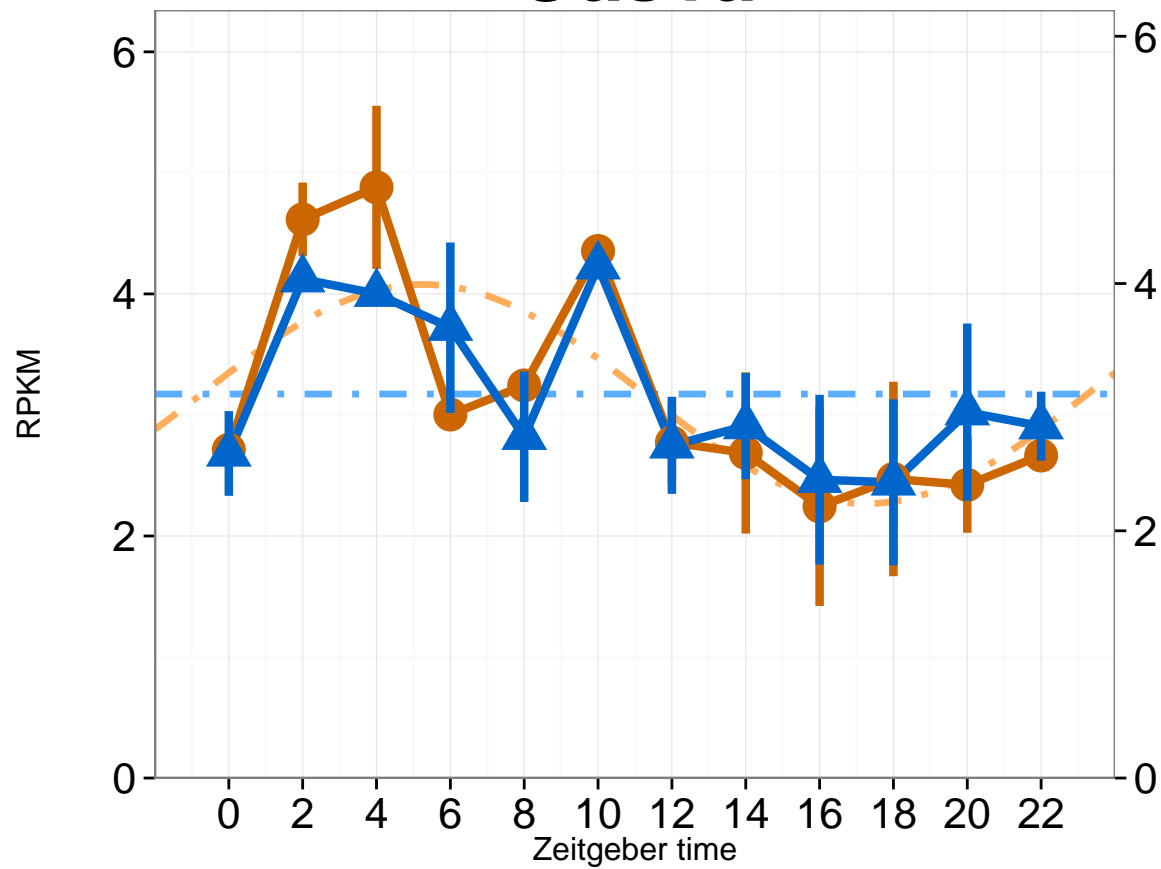

# Oas1a

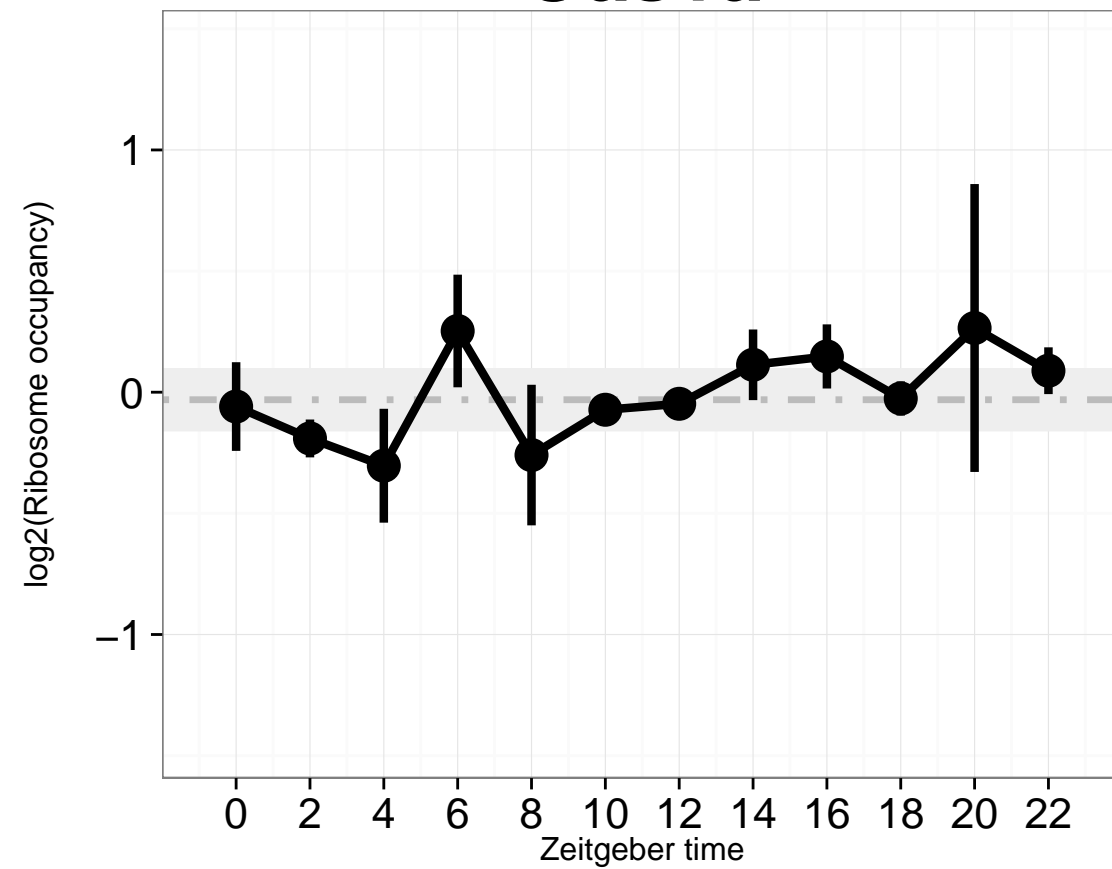

Supplement: Supplementary file 11320 [file 1]

## C230052I12Rik

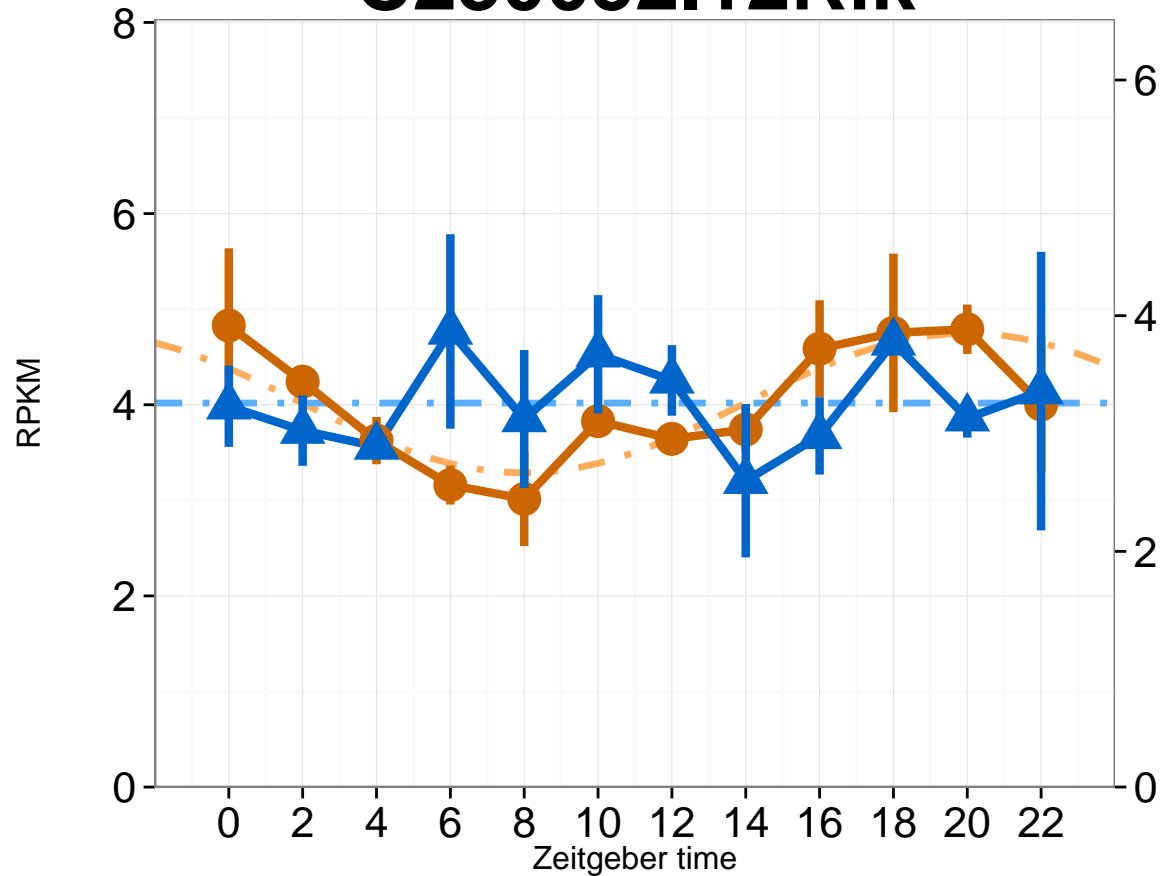

## C230052I12Rik

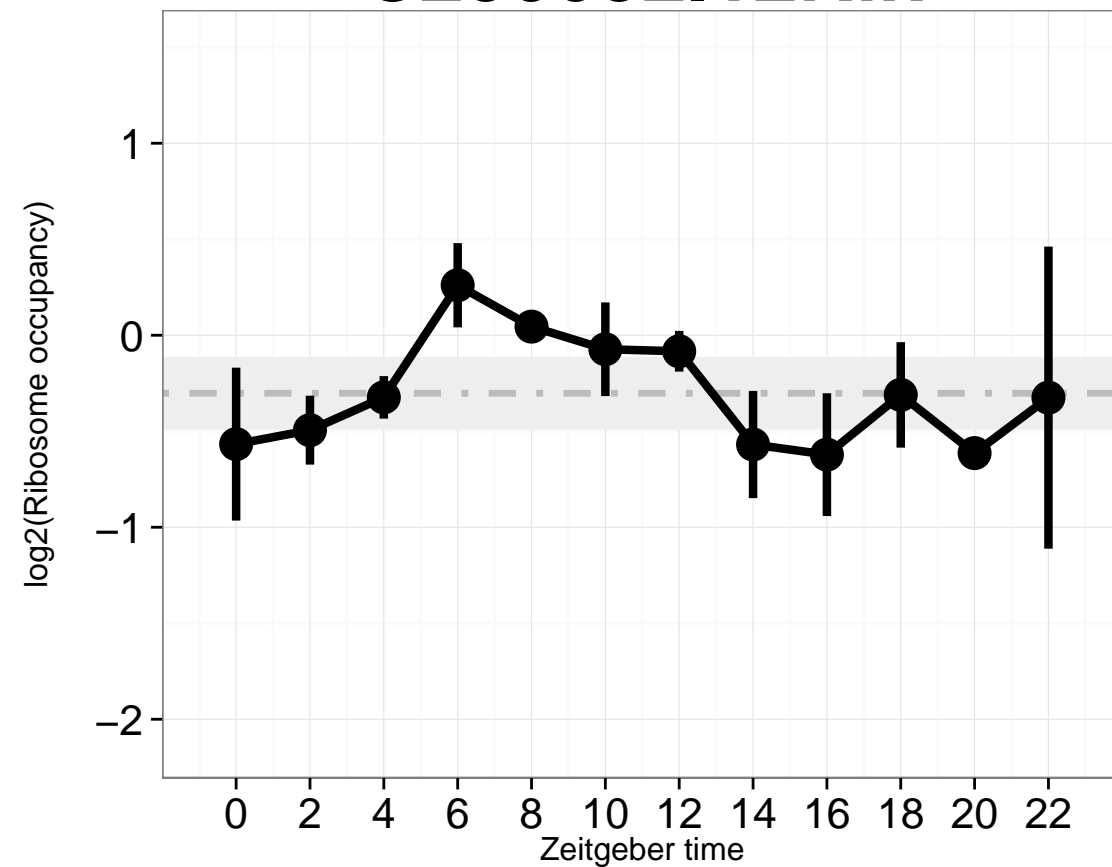

Supplement: Supplementary file 11321 [file 1]

## Hcfc1

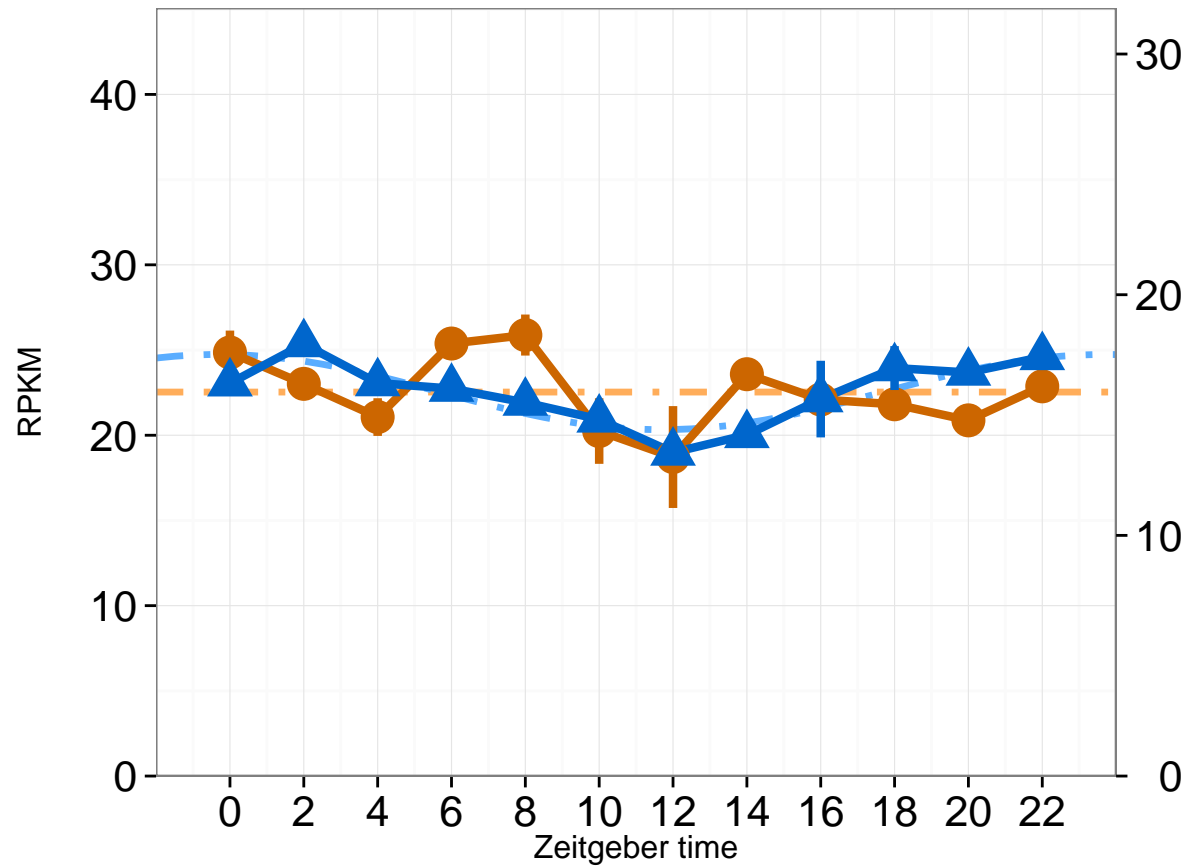

## Hcfc1

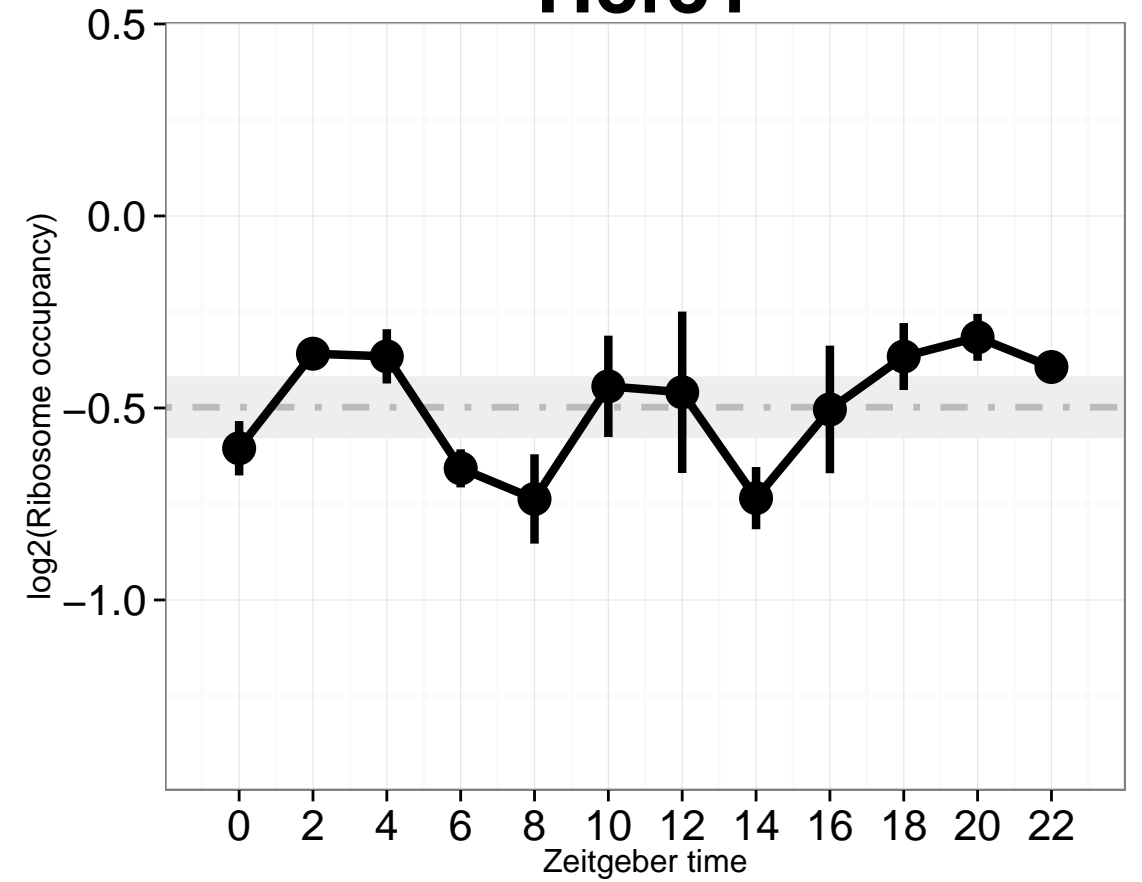

Supplement: Supplementary file 11322 [file 1]

# AF251705

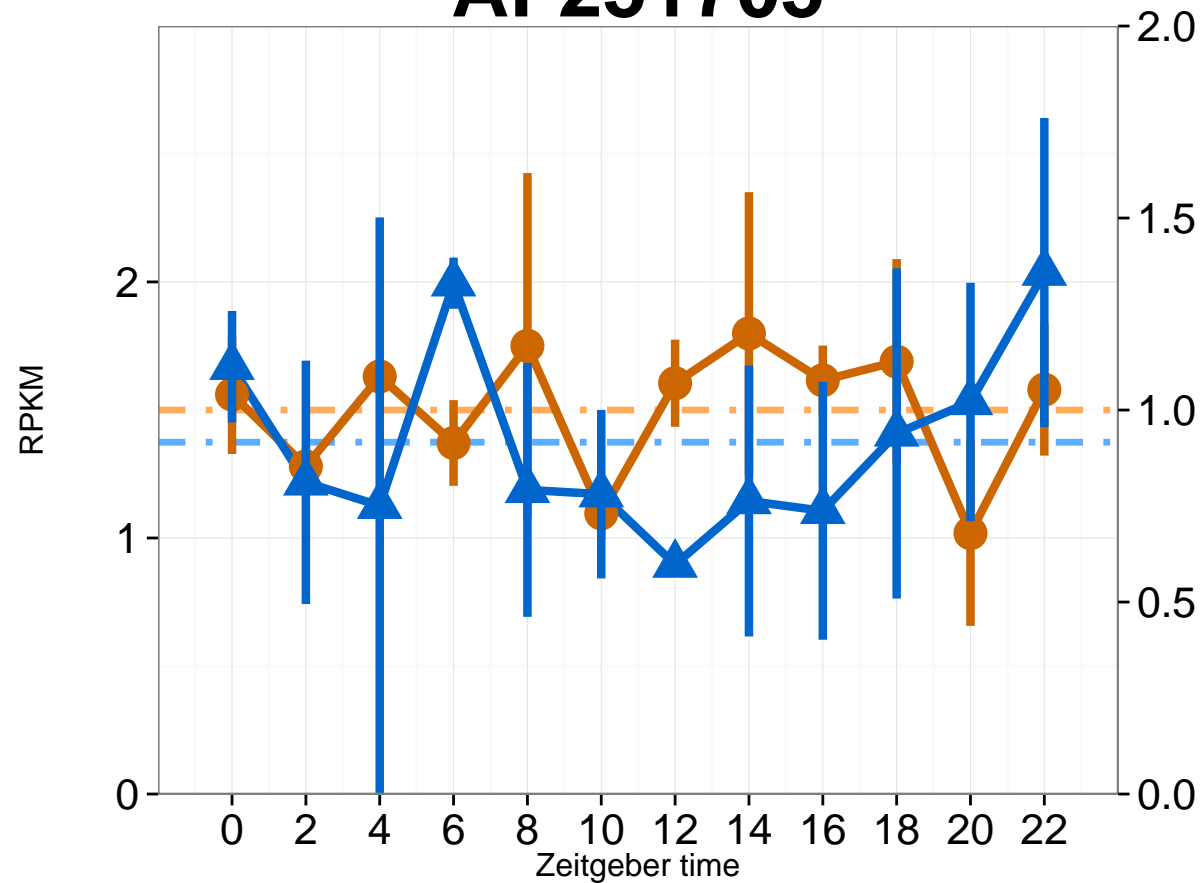

# AF251705

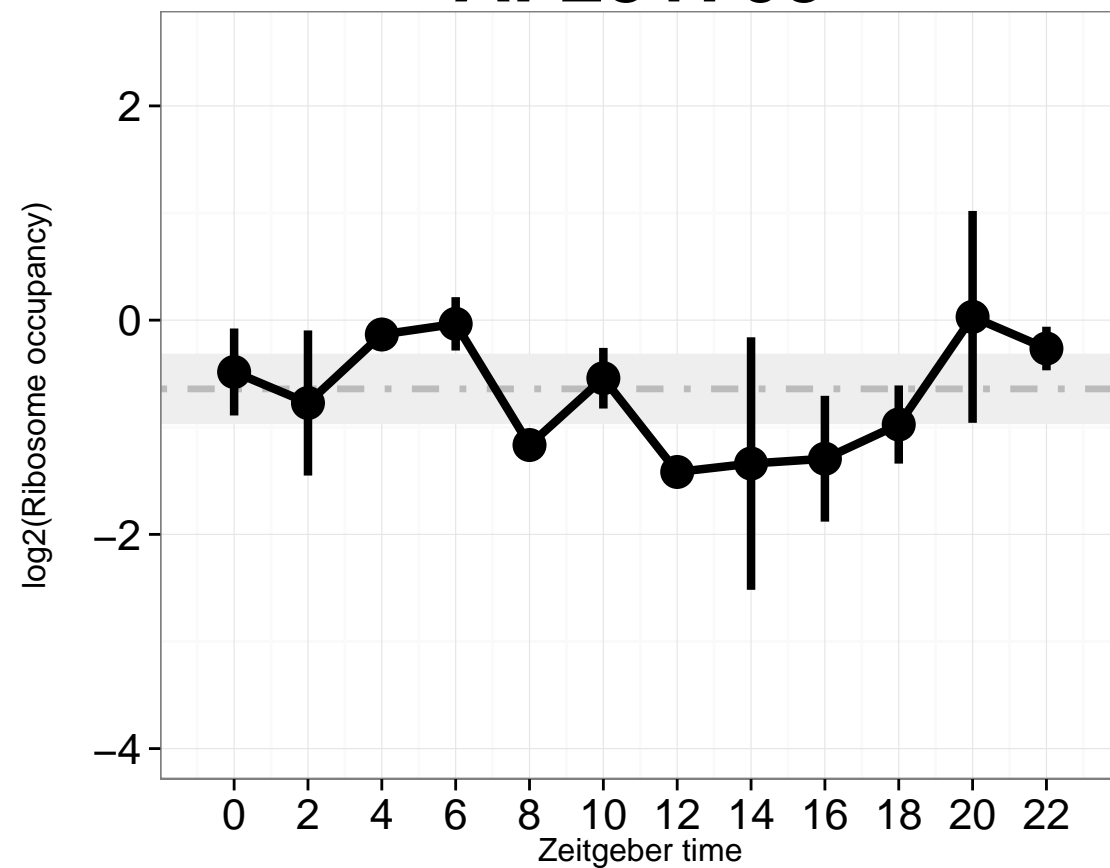

Supplement: Supplementary file 11323 [file 1]

# Tbca

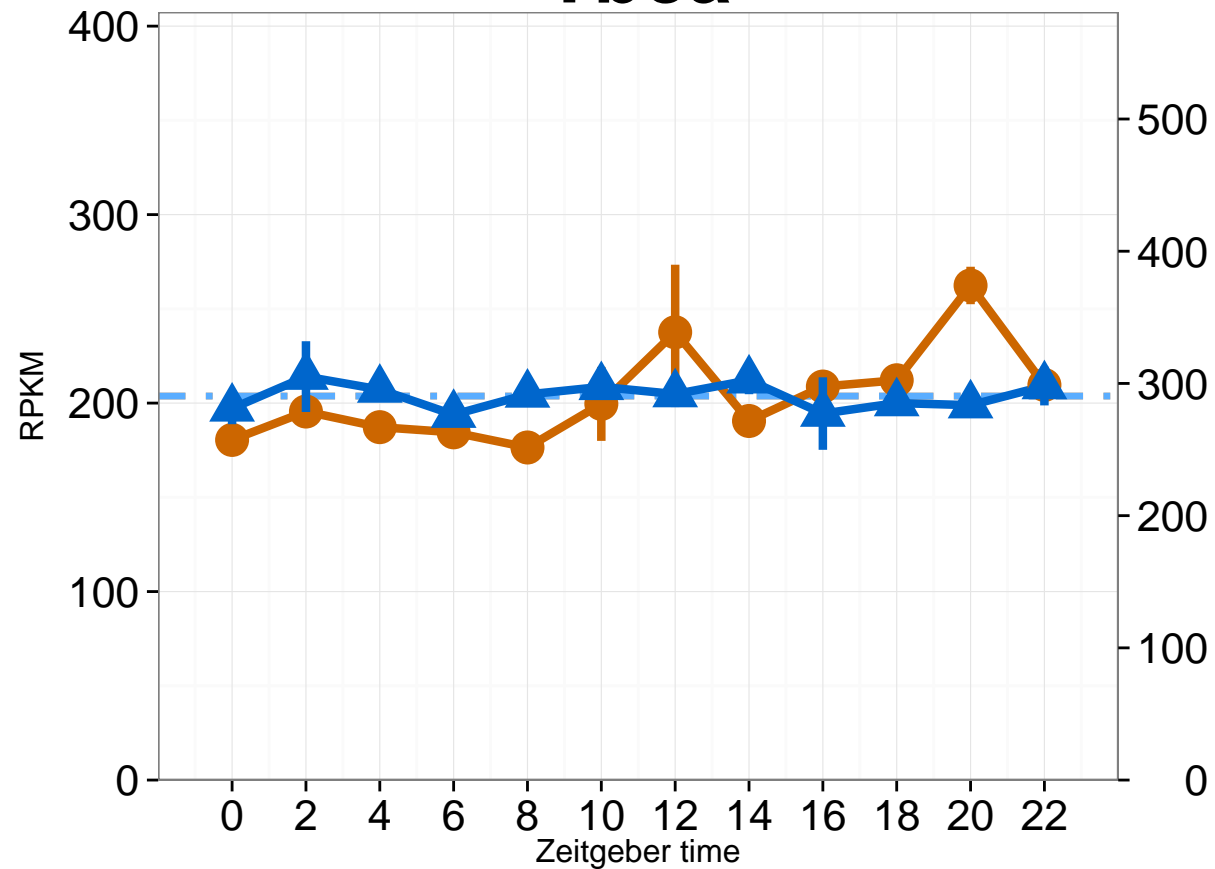

# Tbca

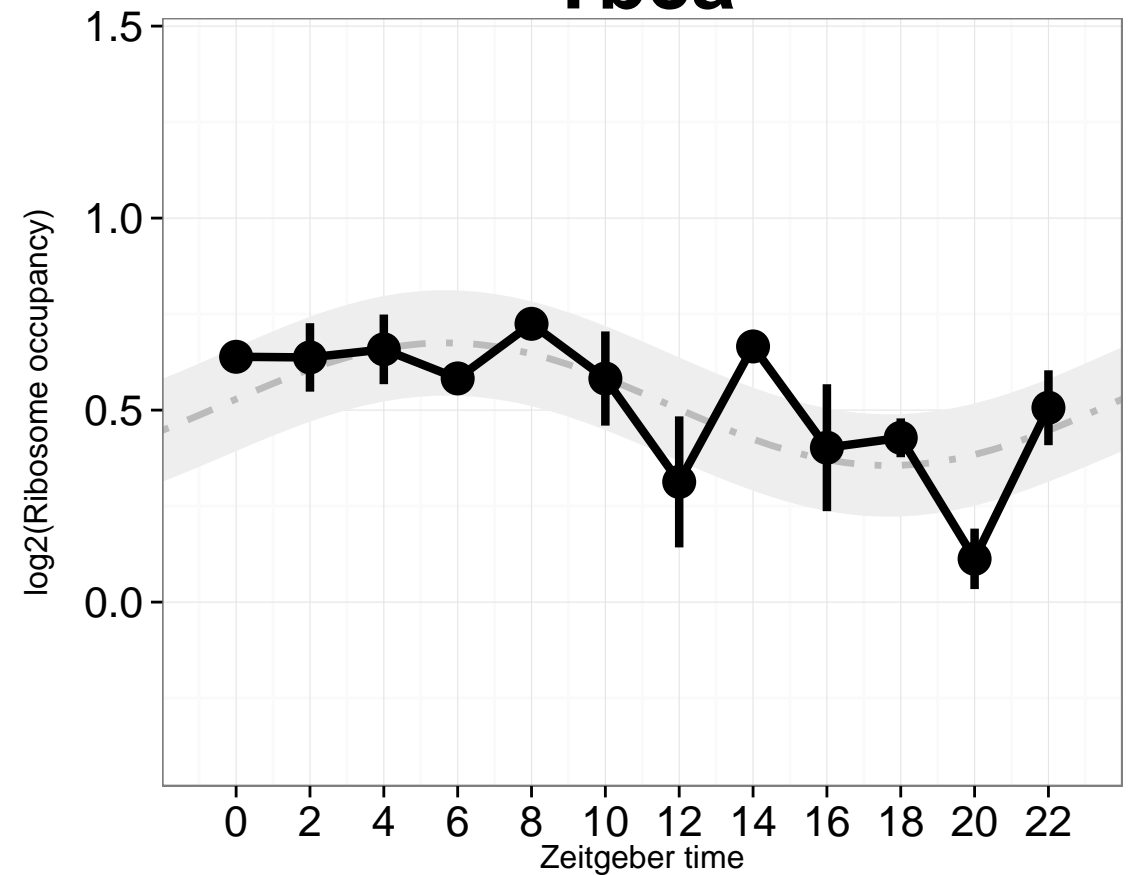

Supplement: Supplementary file 11324 [file 1]

## Pi4kb

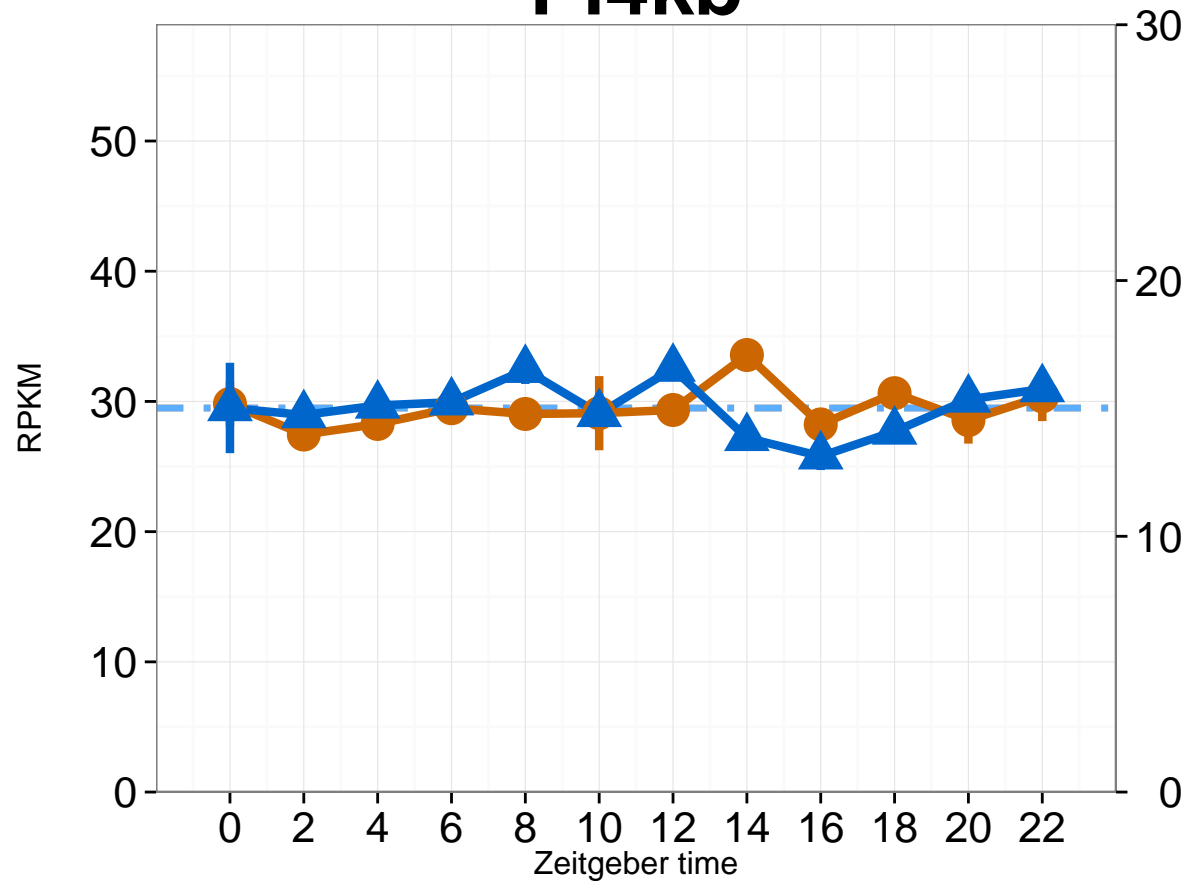

## Pi4kb

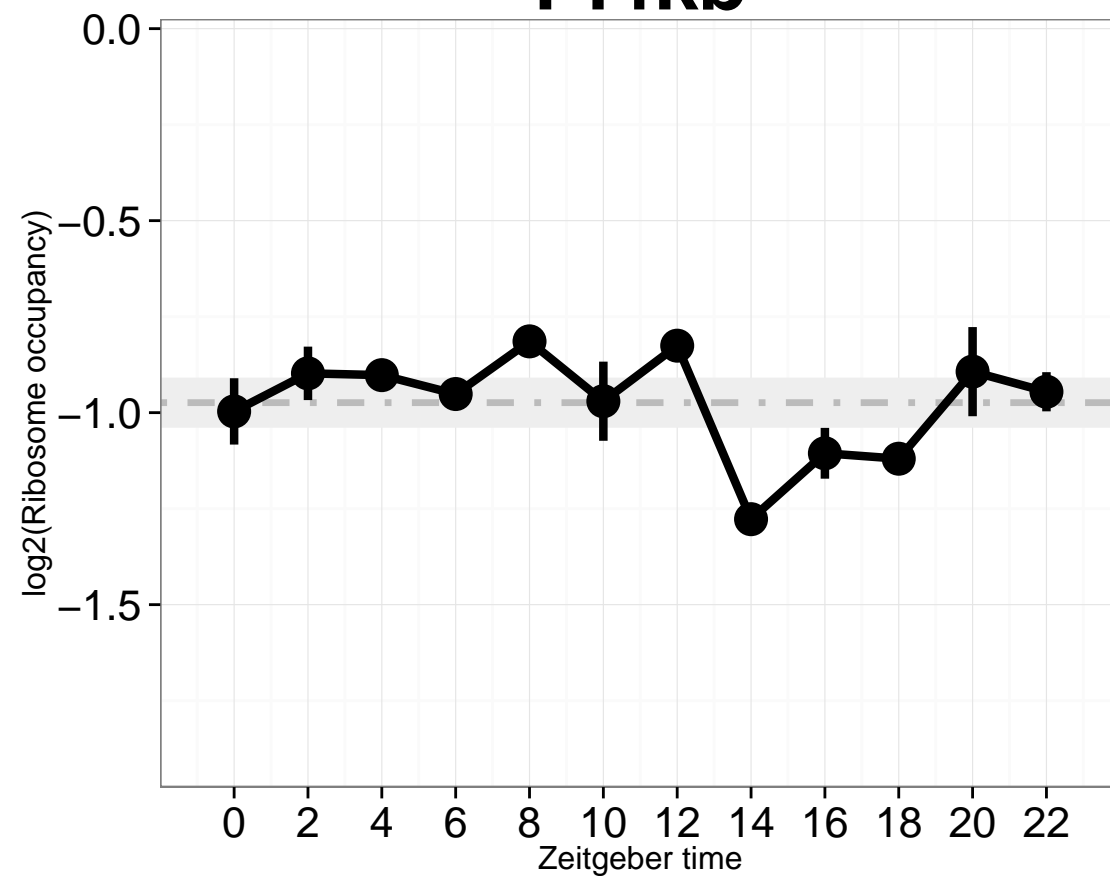

Supplement: Supplementary file 11325 [file 1]

## Zfp3

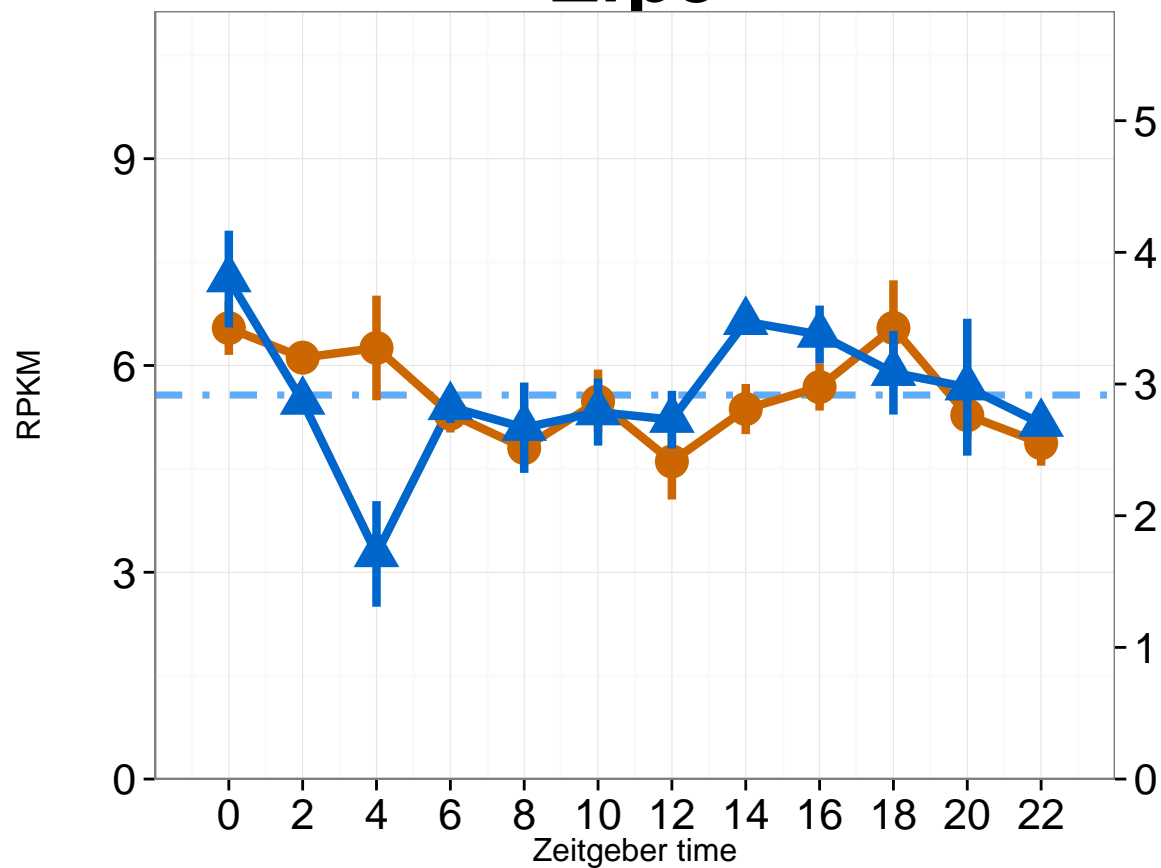

## Zfp3

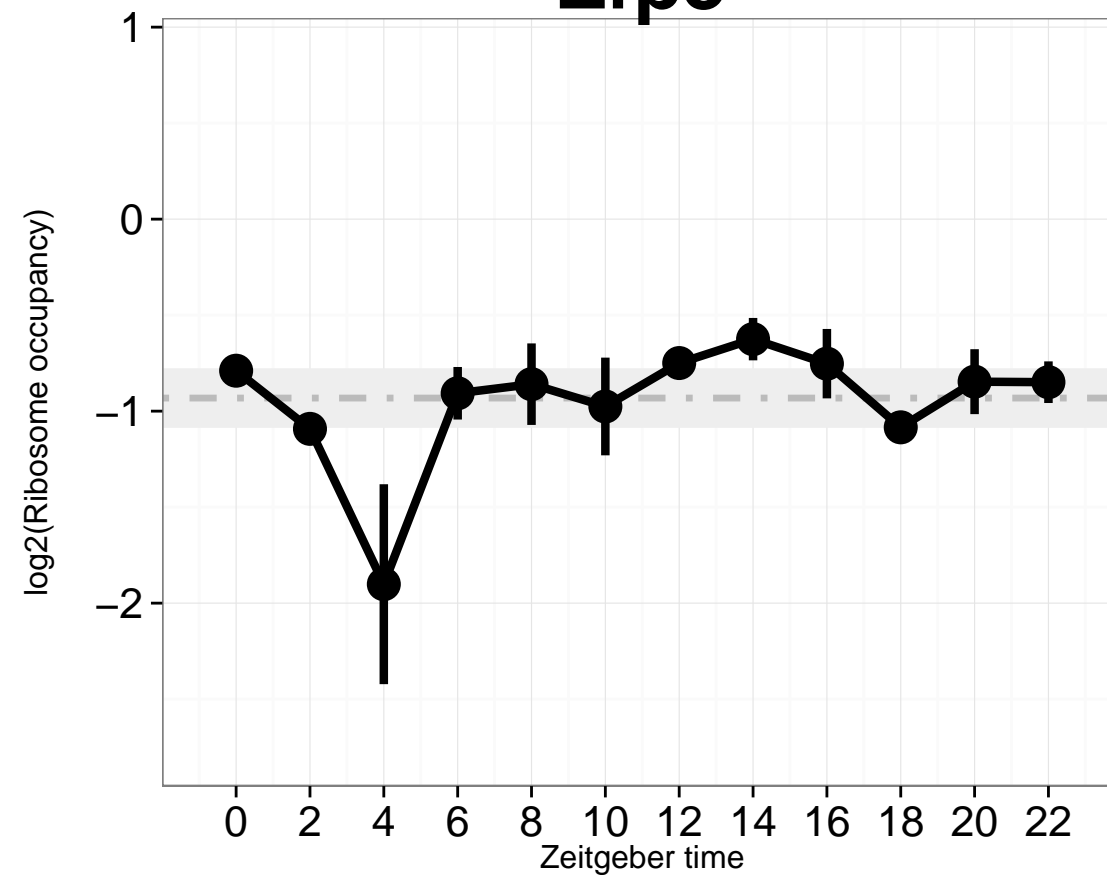

Supplement: Supplementary file 11326 [file 1]

# Bpgm

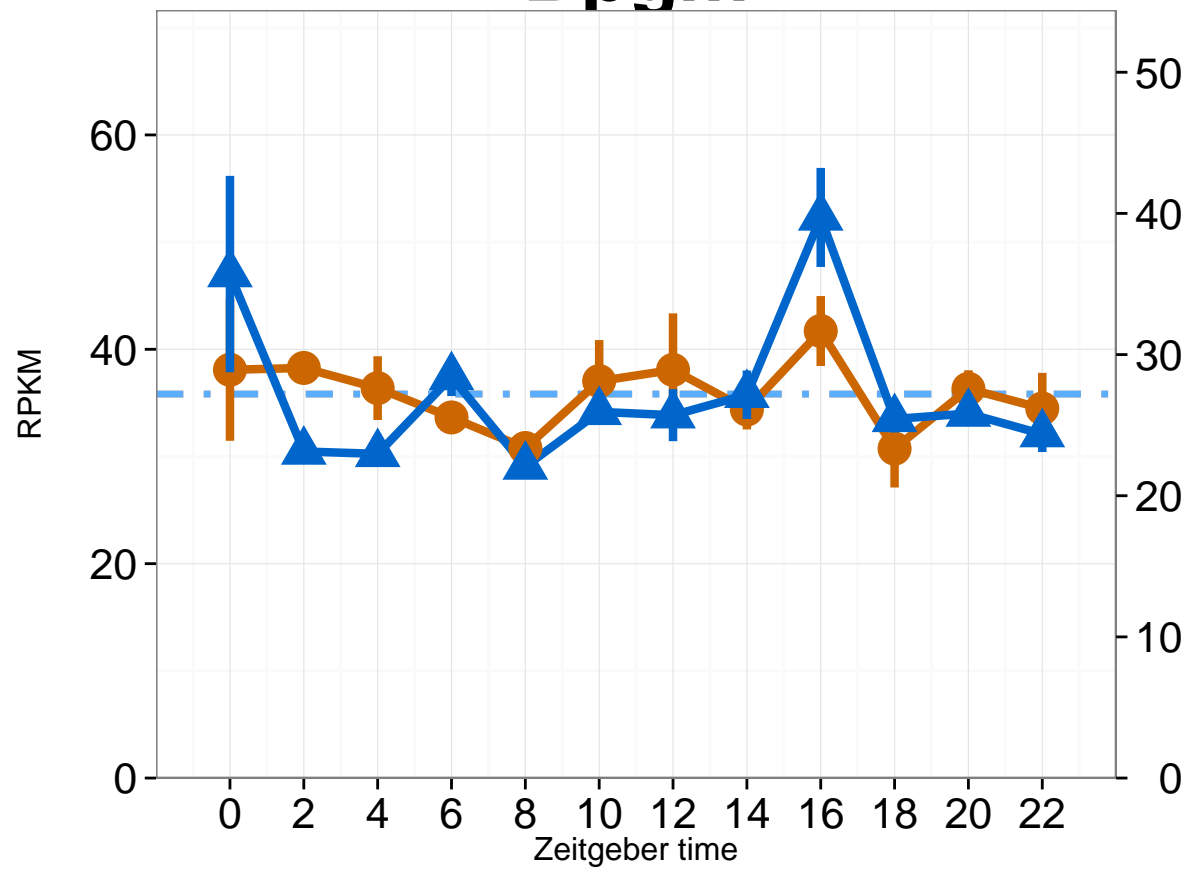

# Bpgm

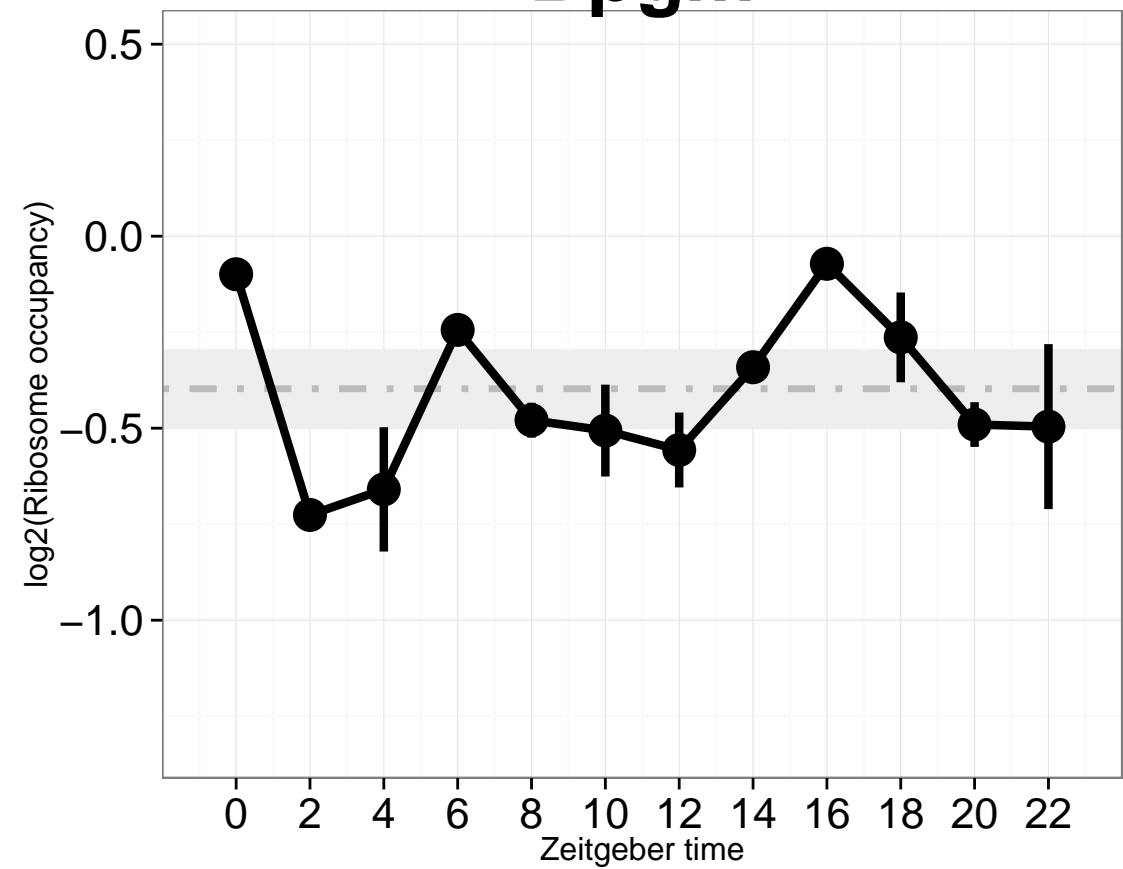

Supplement: Supplementary file 11327 [file 1]

# Rfxap

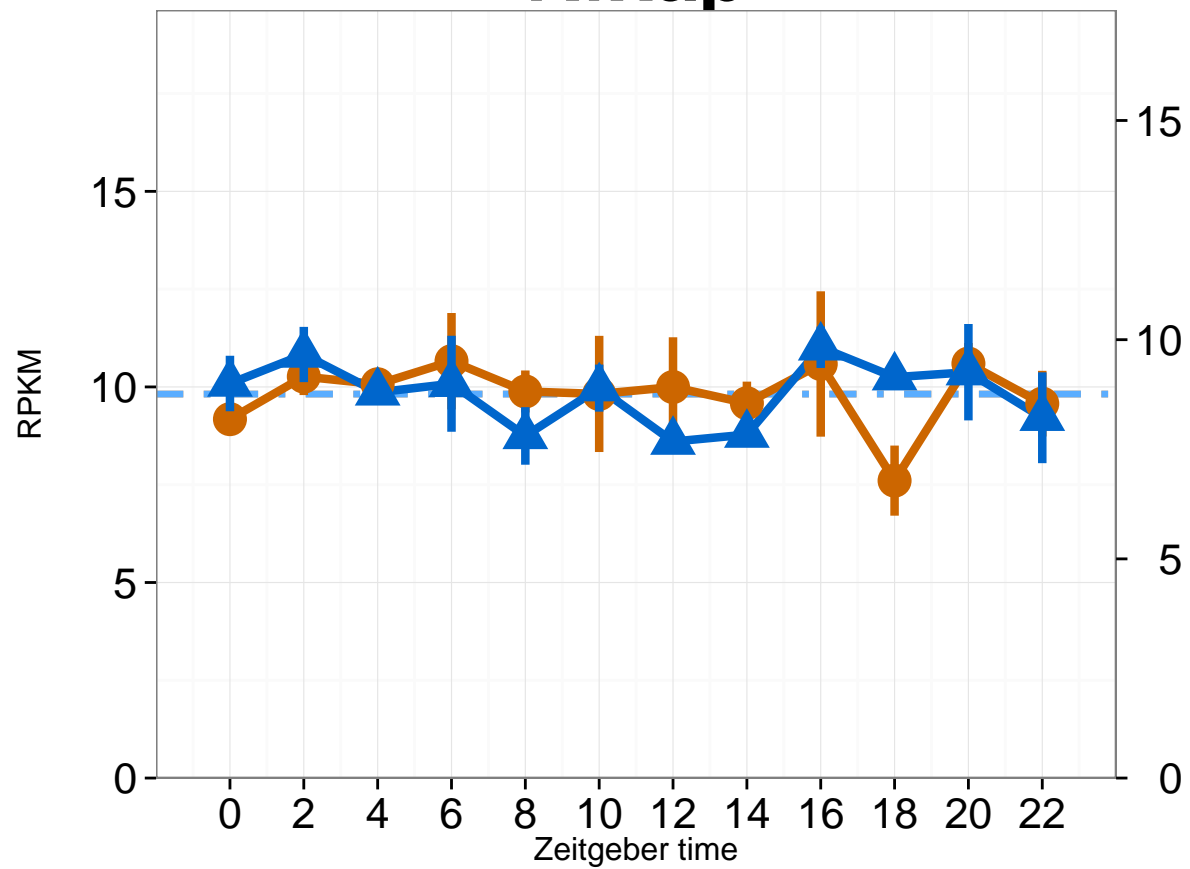

# Rfxap

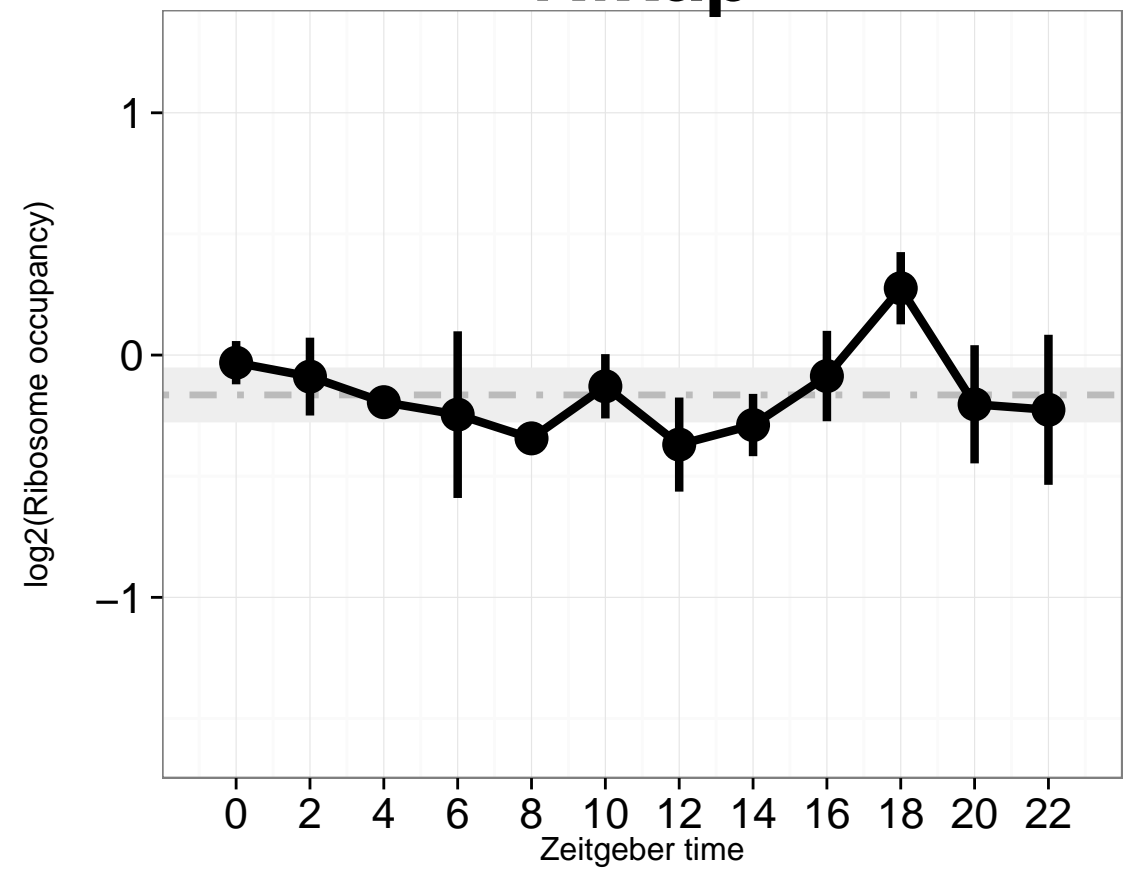

Supplement: Supplementary file 11328 [file 1]

## Scarb1

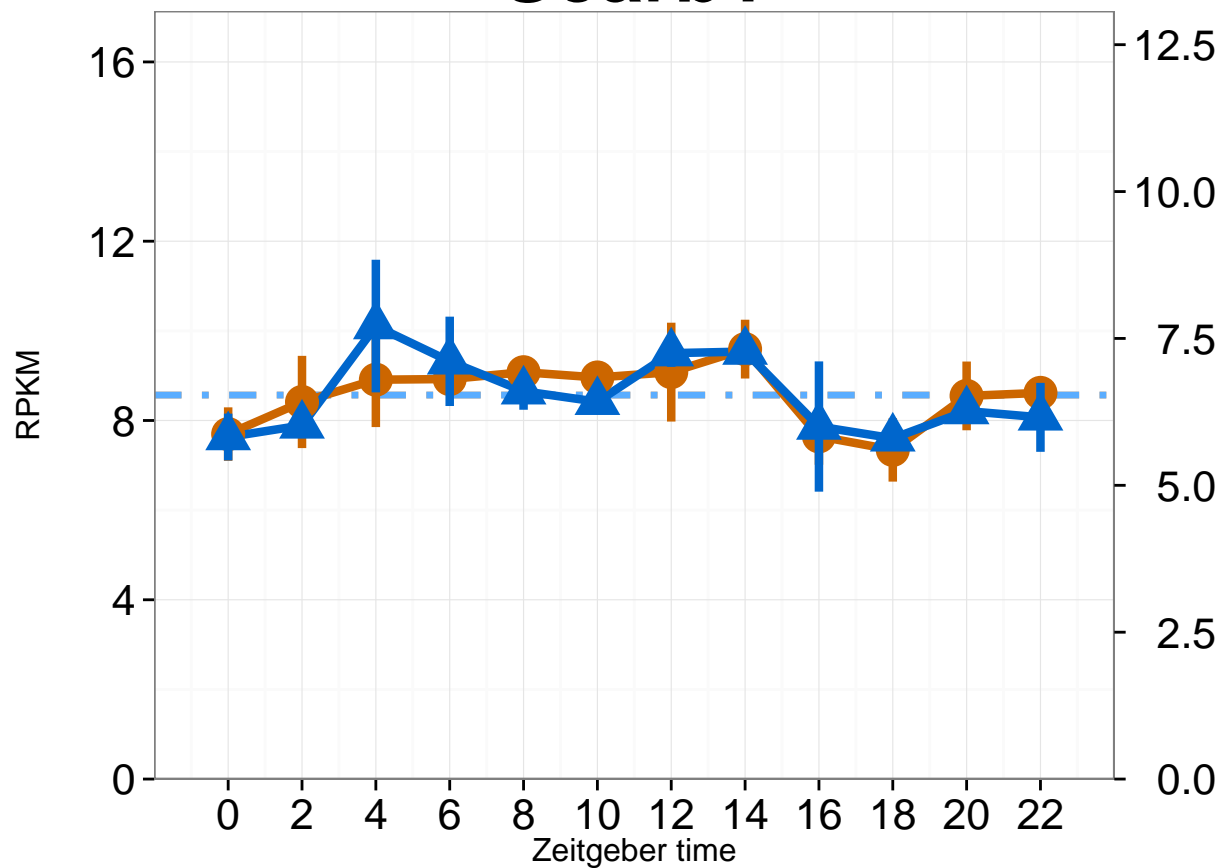

## Scarb1

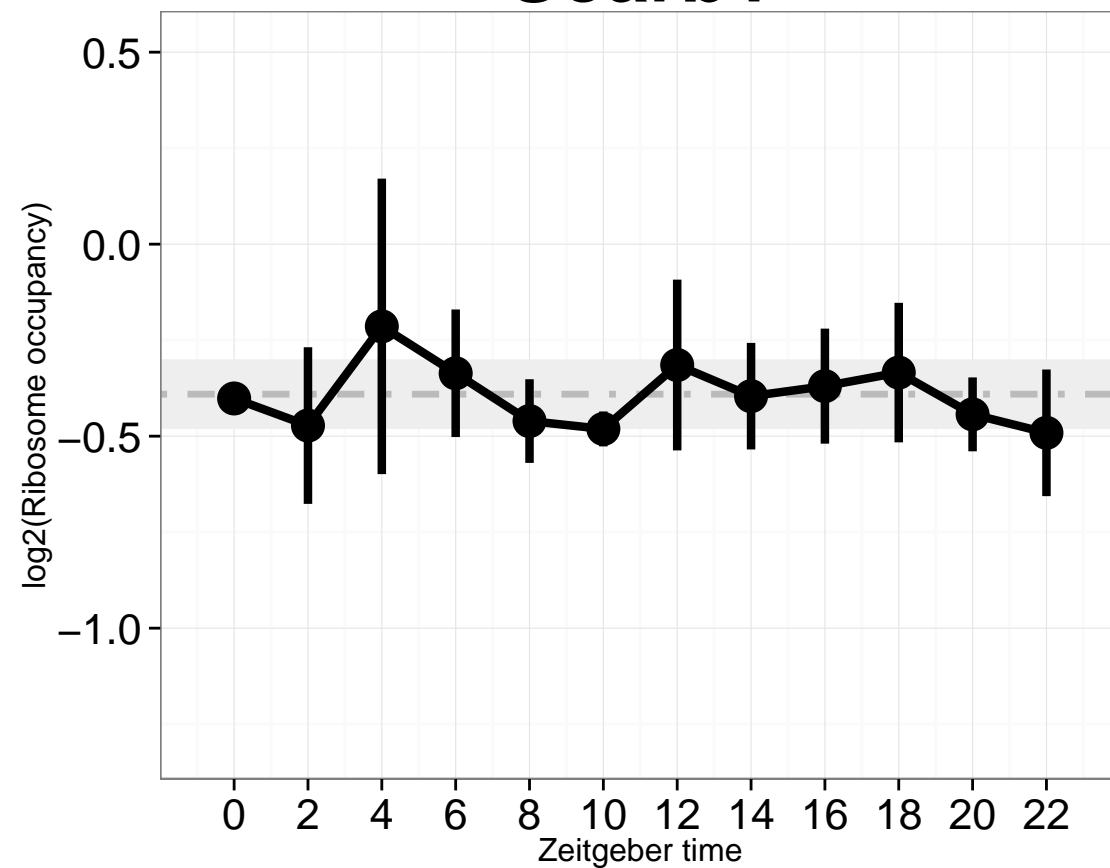

Supplement: Supplementary file 11329 [file 1]

# Ndufs5

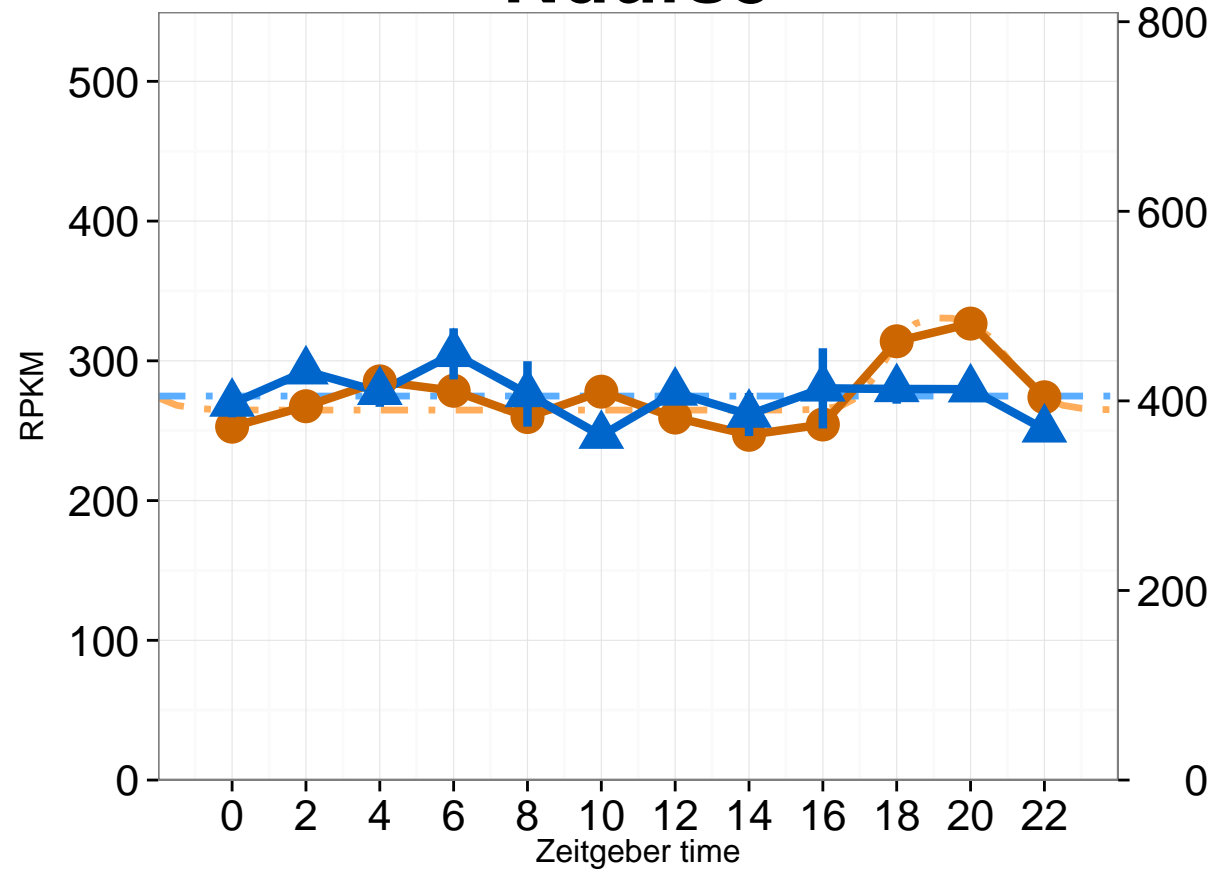

# Ndufs5

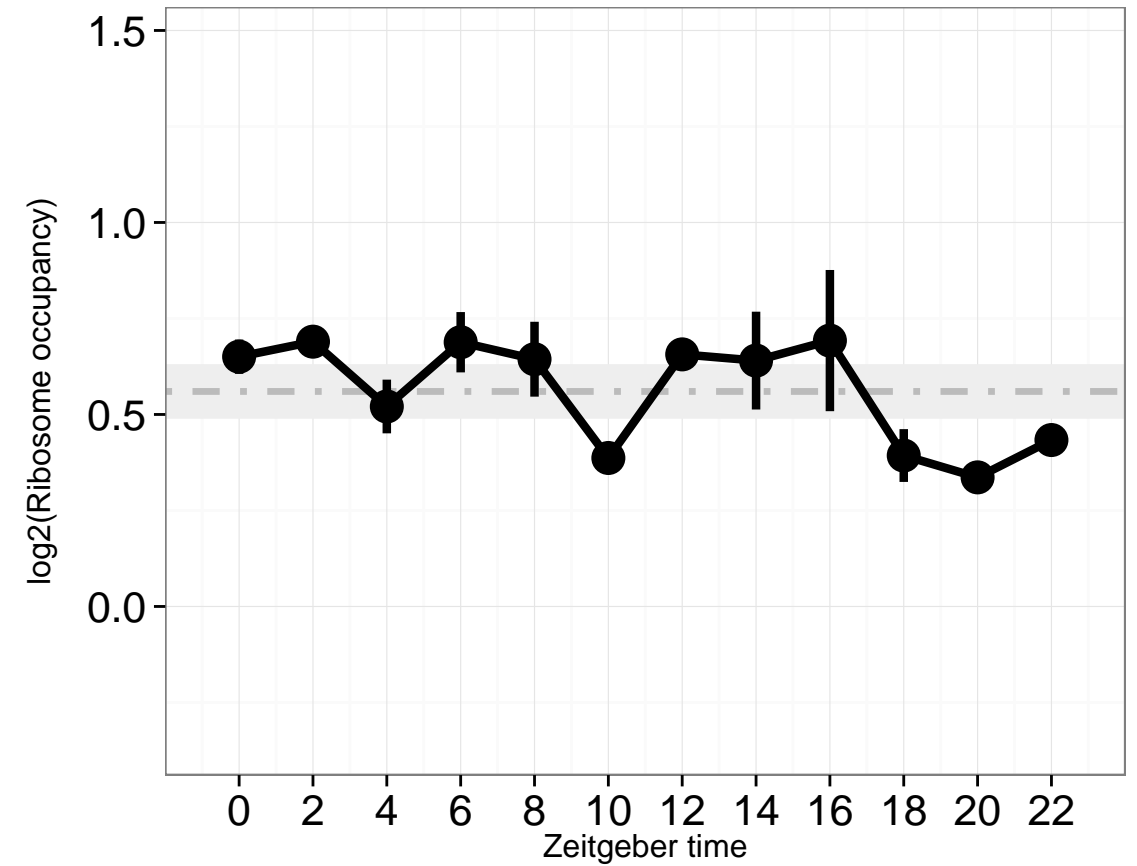

Supplement: Supplementary file 11330 [file 1]

## Exosc8

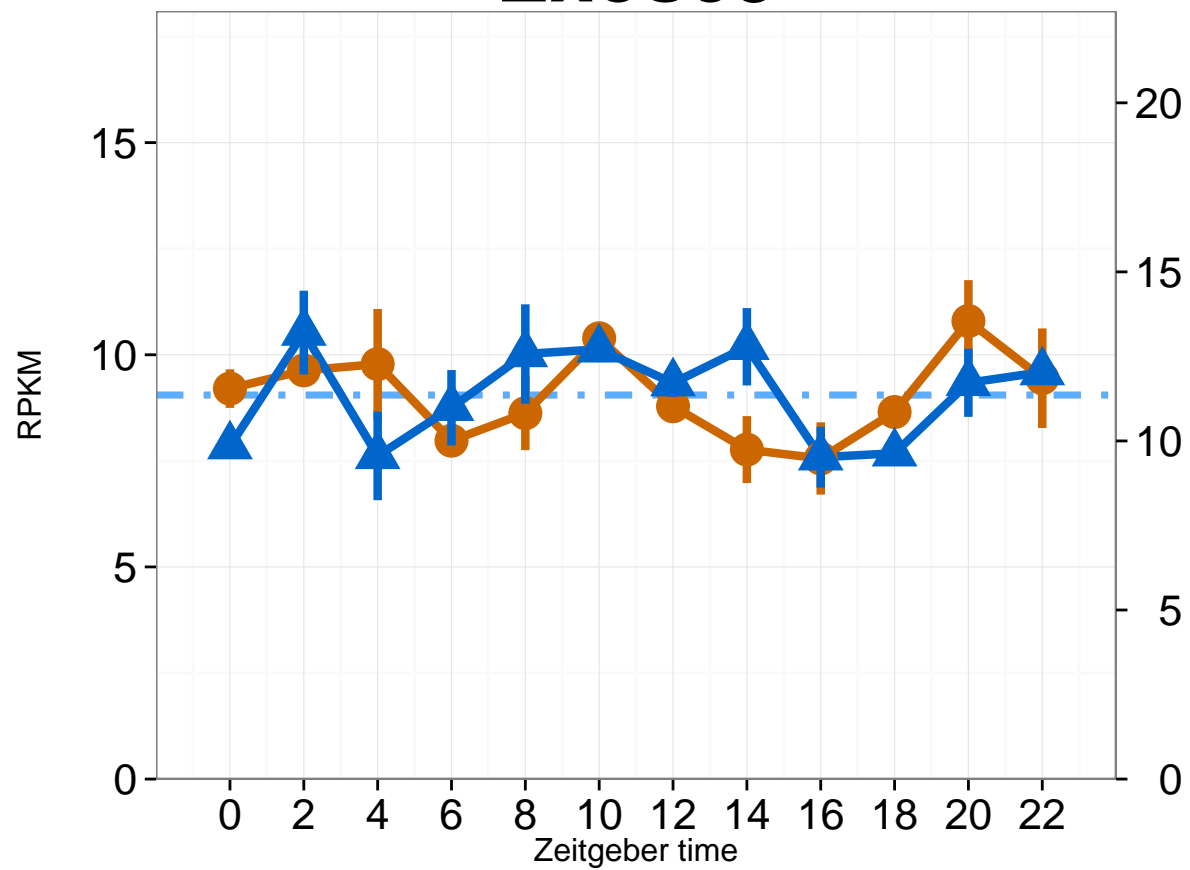

## Exosc8

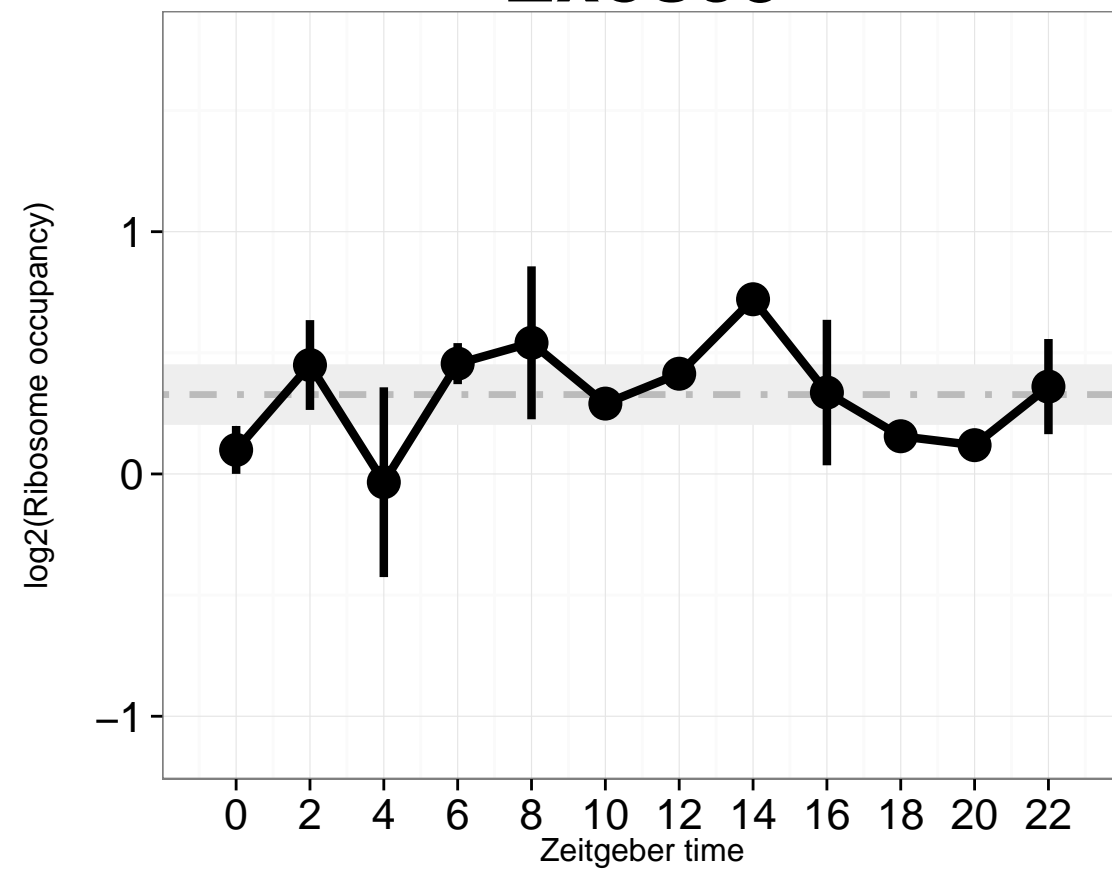

Supplement: Supplementary file 11331 [file 1]

## Spata2

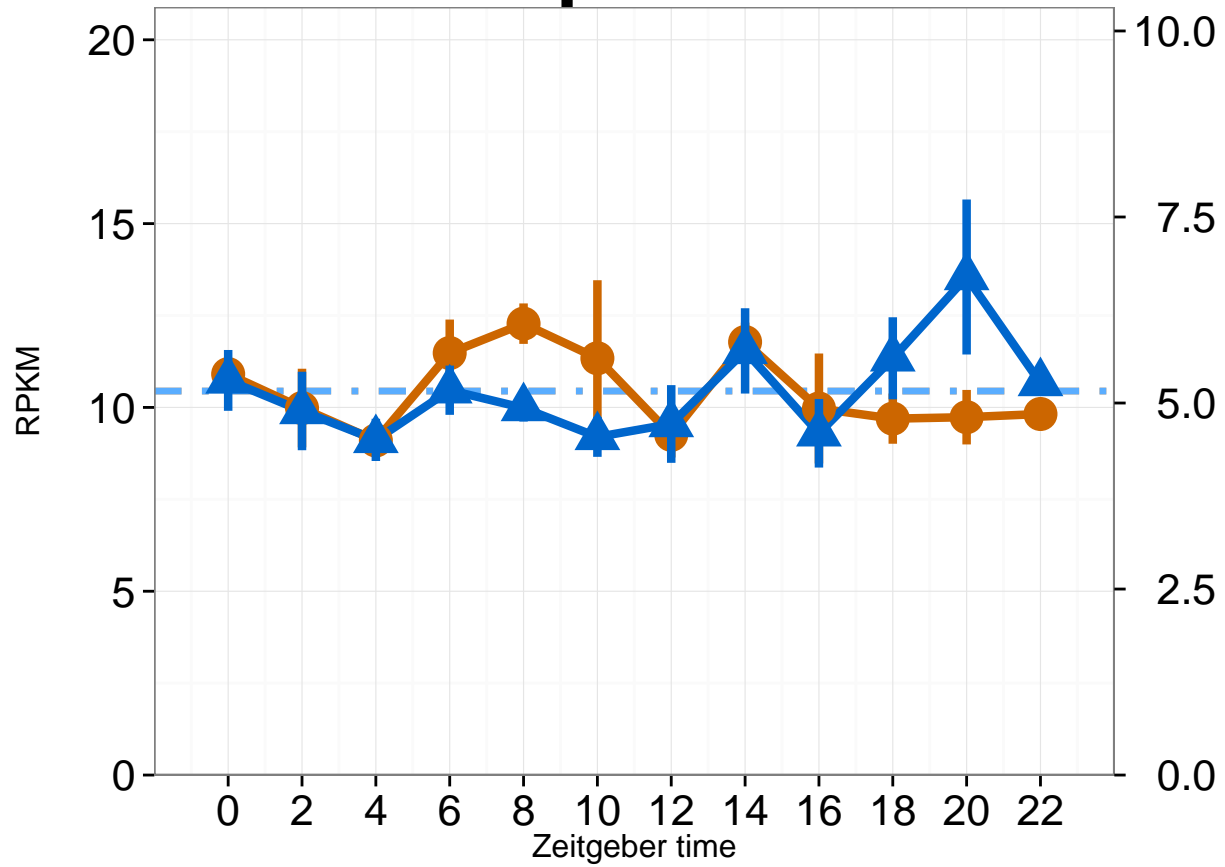

## Spata2

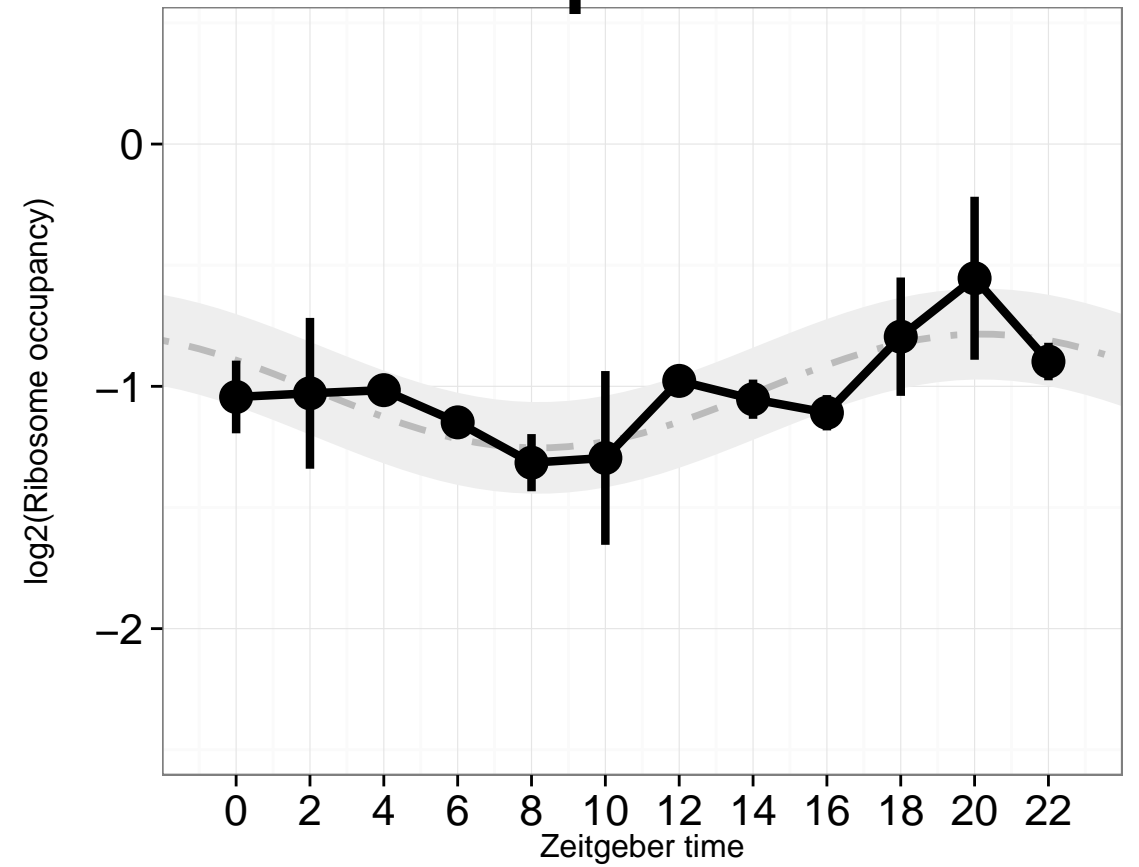

Supplement: Supplementary file 11332 [file 1]

## Pomk

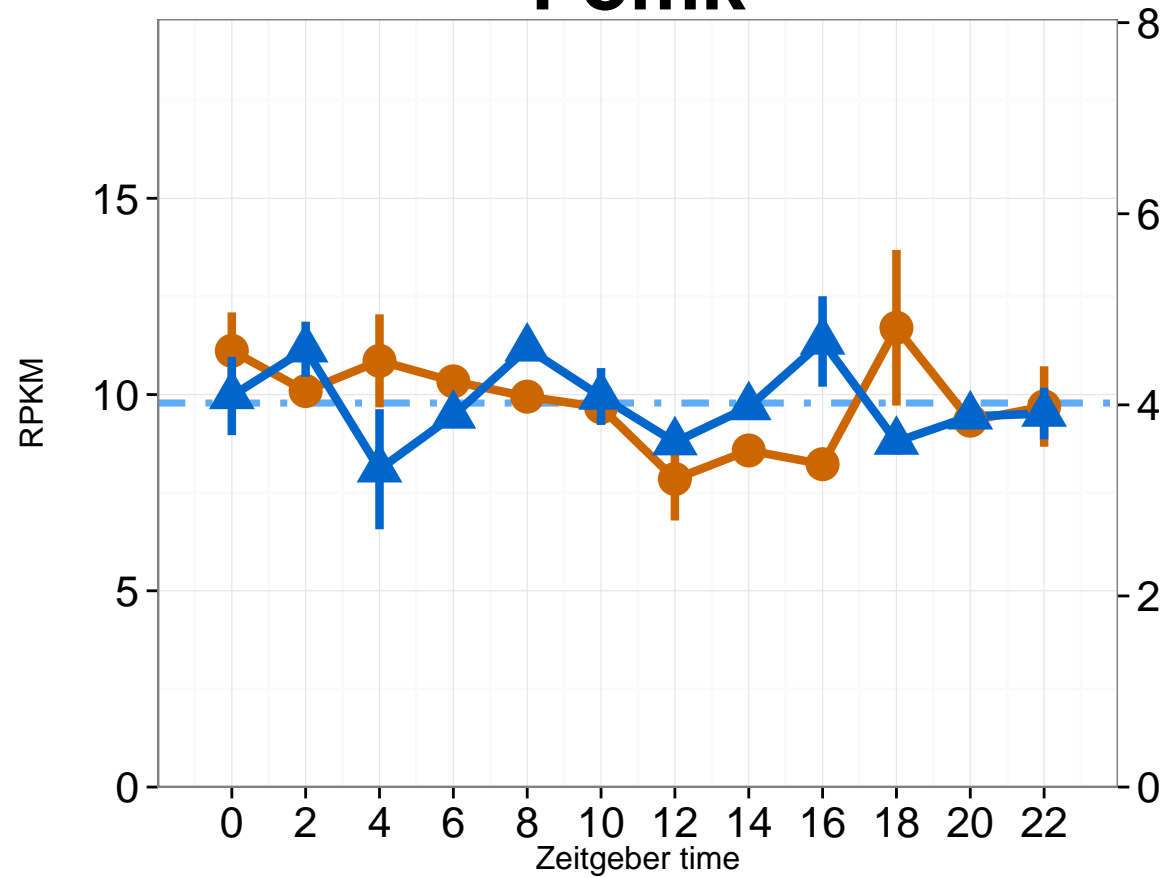

## Pomk

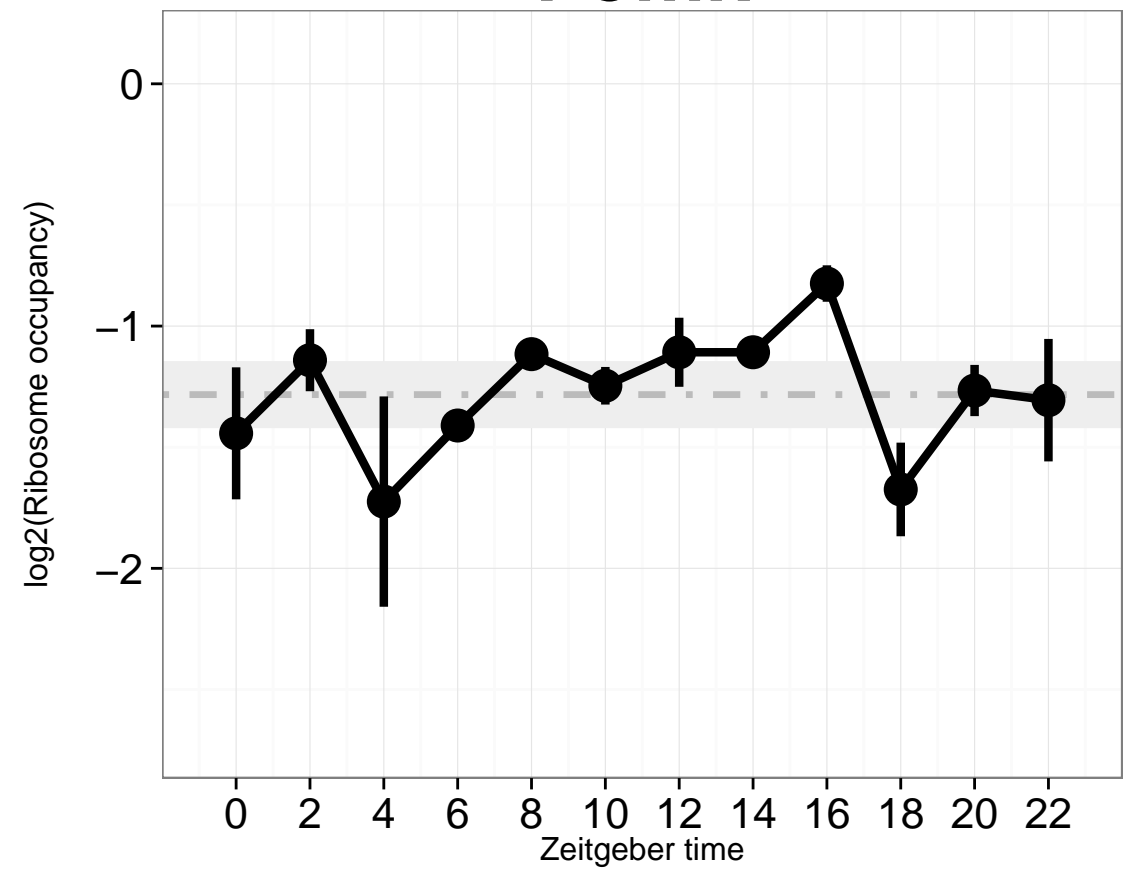

Supplement: Supplementary file 11333 [file 1]

## Arel1

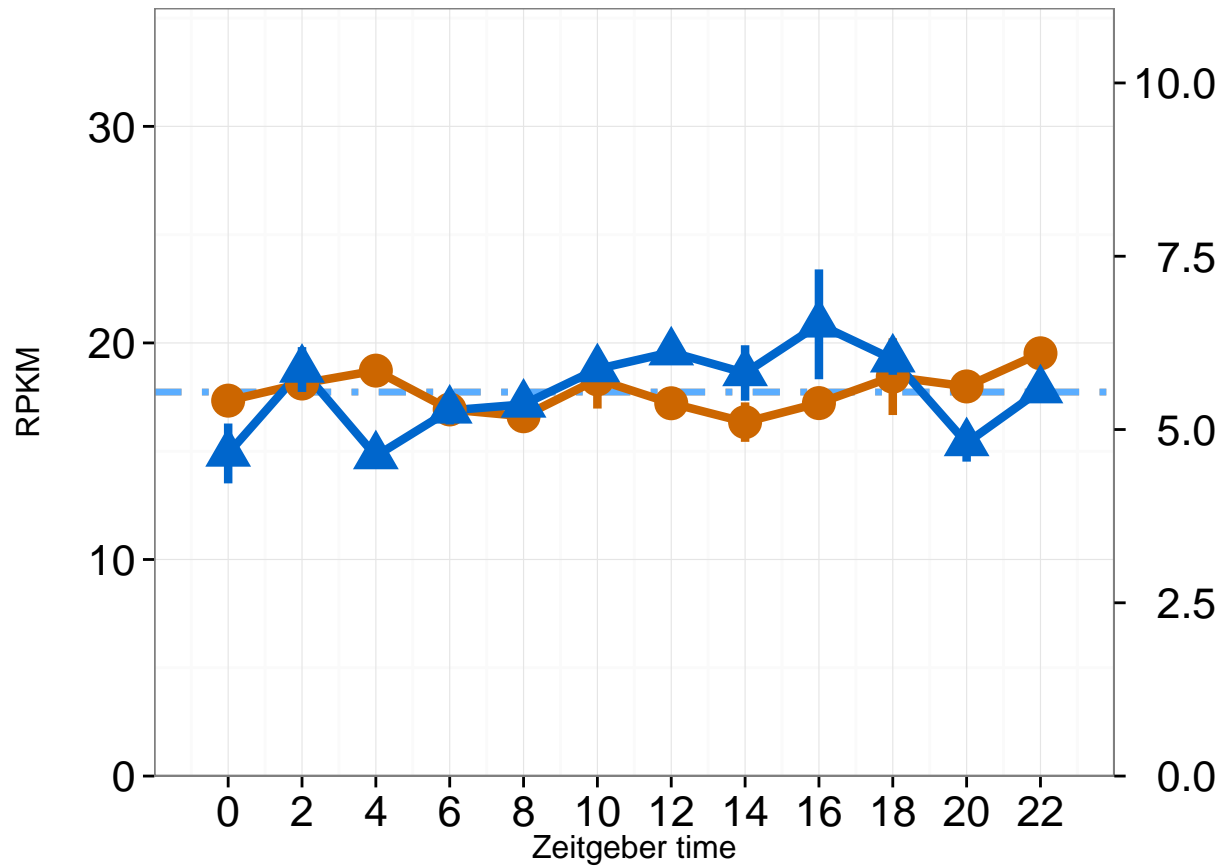

## Arel1

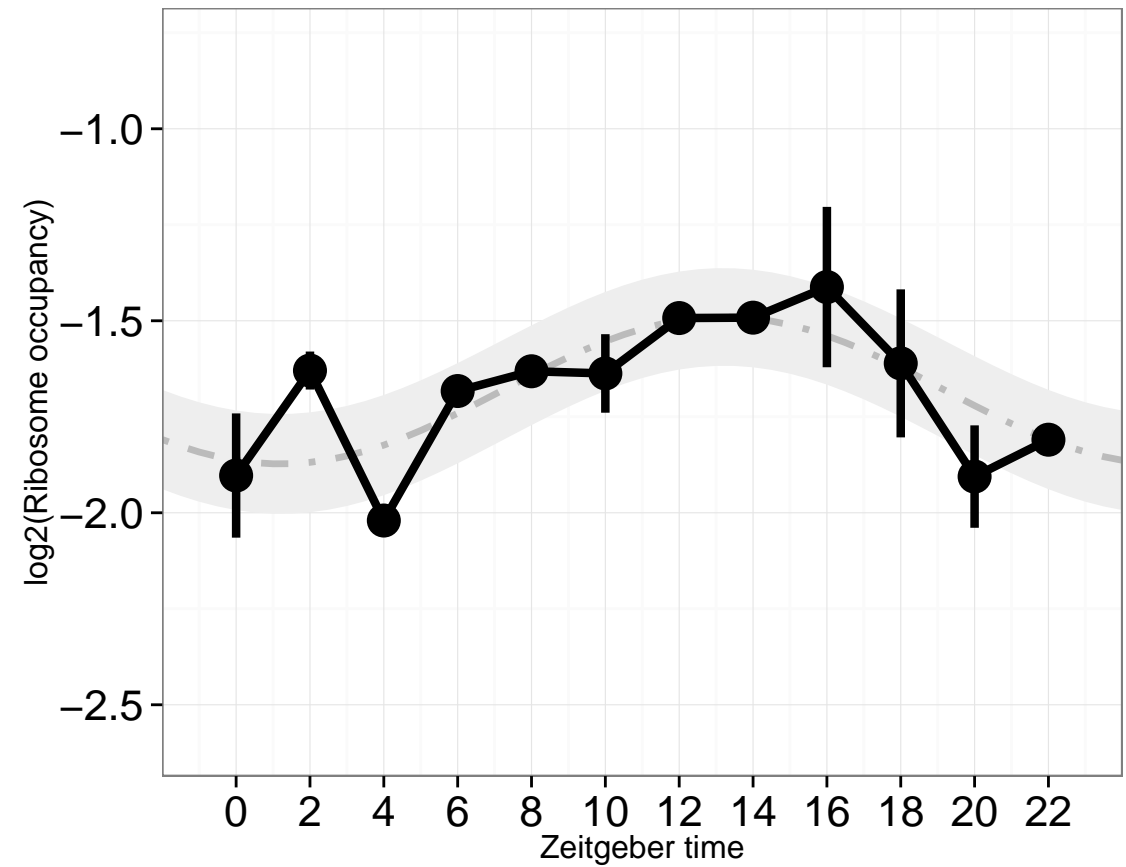

Supplement: Supplementary file 11334 [file 1]

**Ccl8 TR**

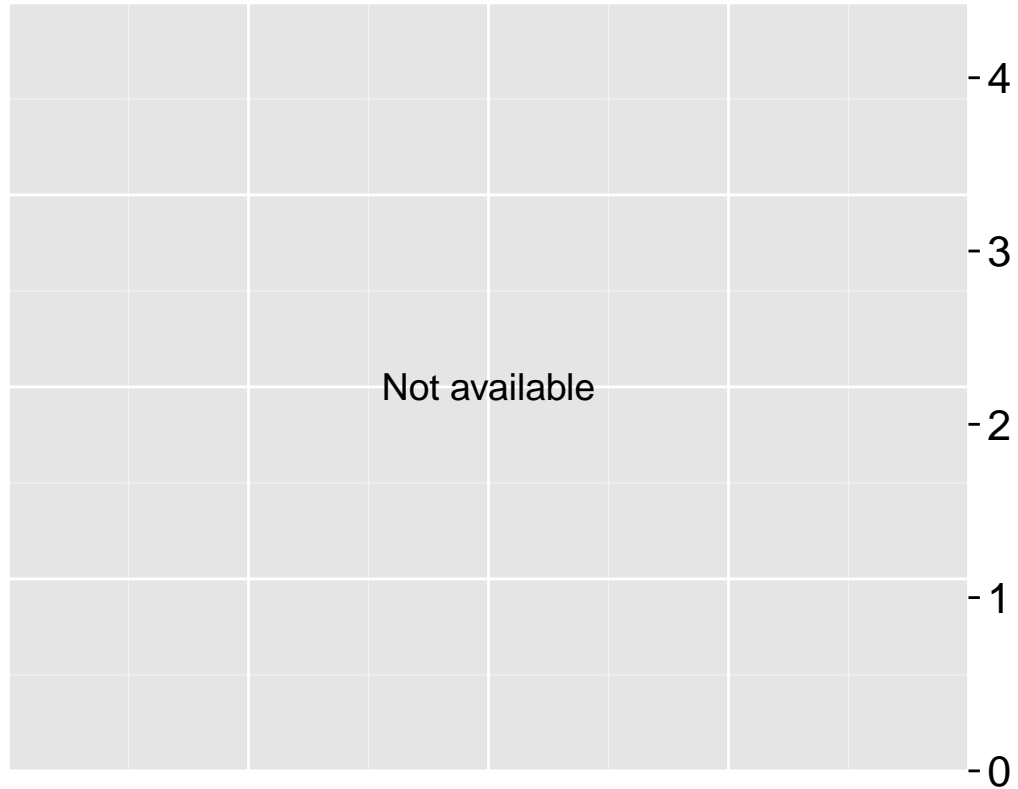

**Ccl8 log2(Ribosome occupancy)**

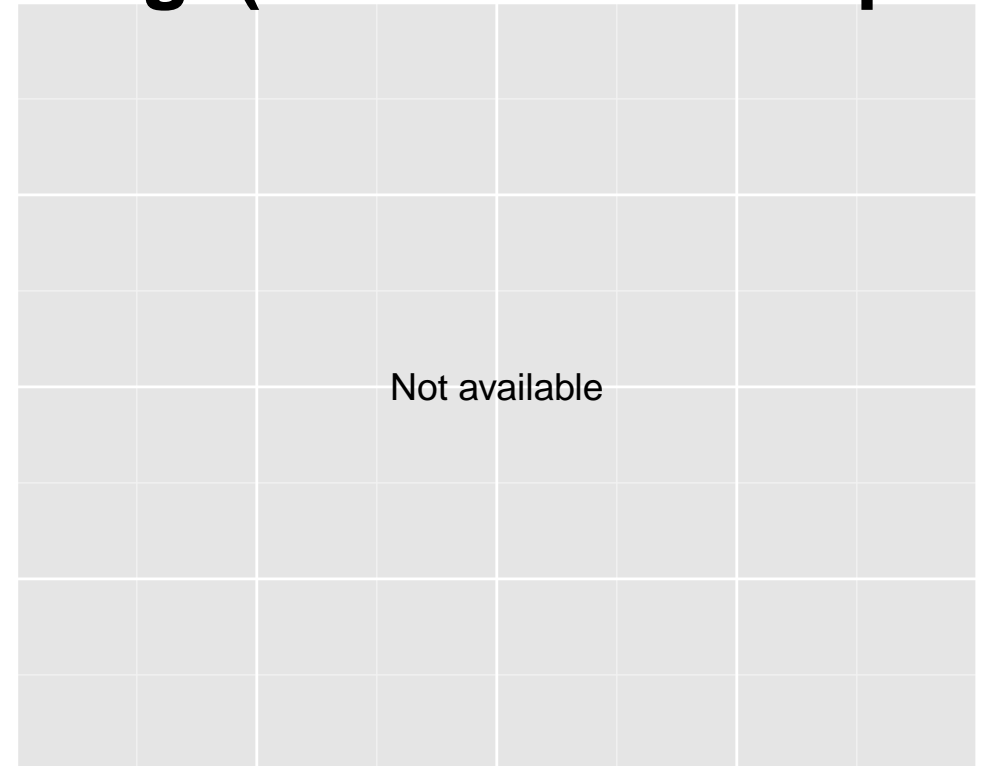

Supplement: Supplementary file 11335 [file 1]

# Parp2

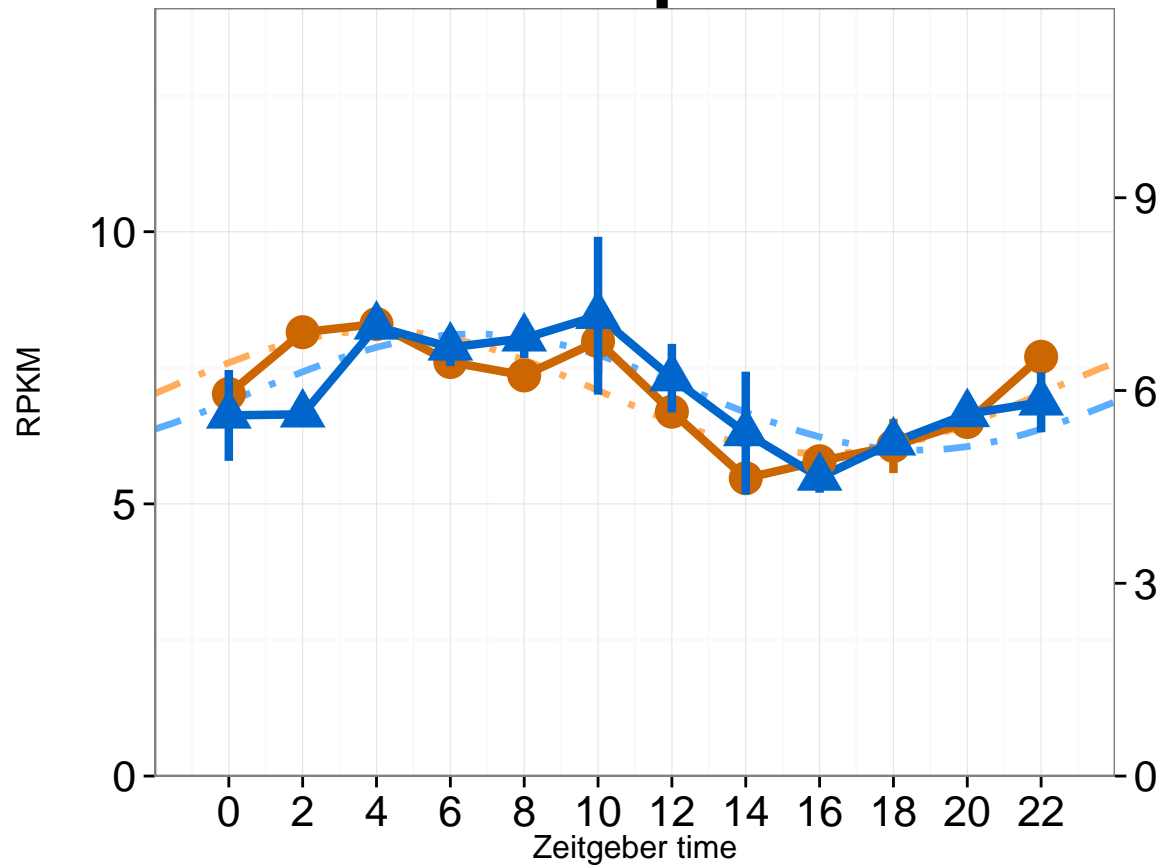

# Parp2

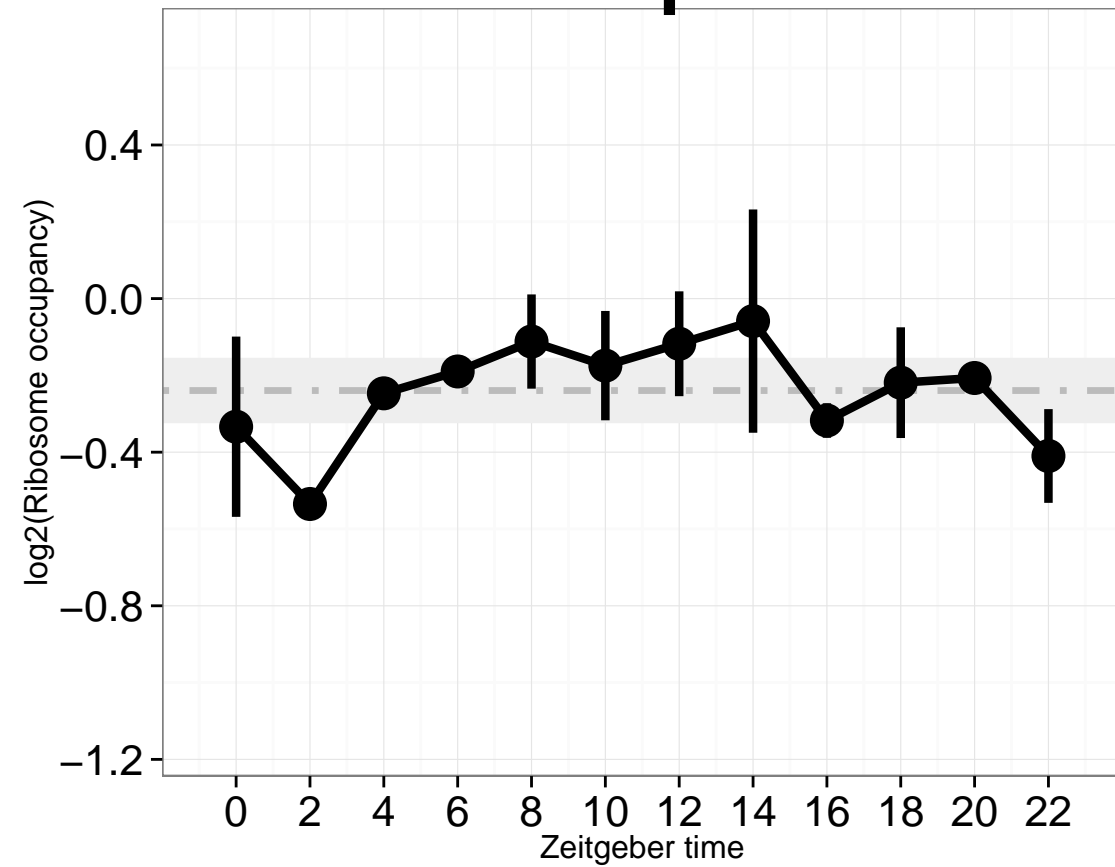

Supplement: Supplementary file 11336 [file 1]

## Mak16

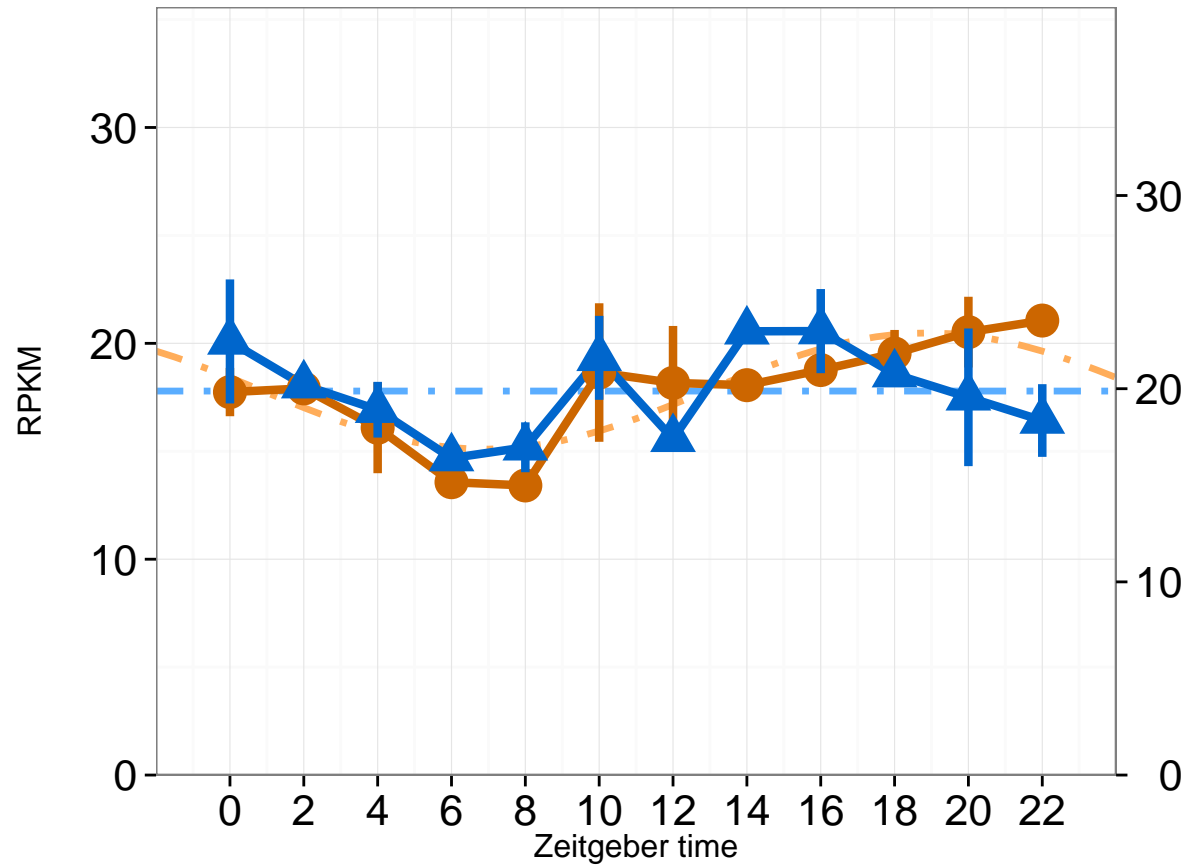

## Mak16

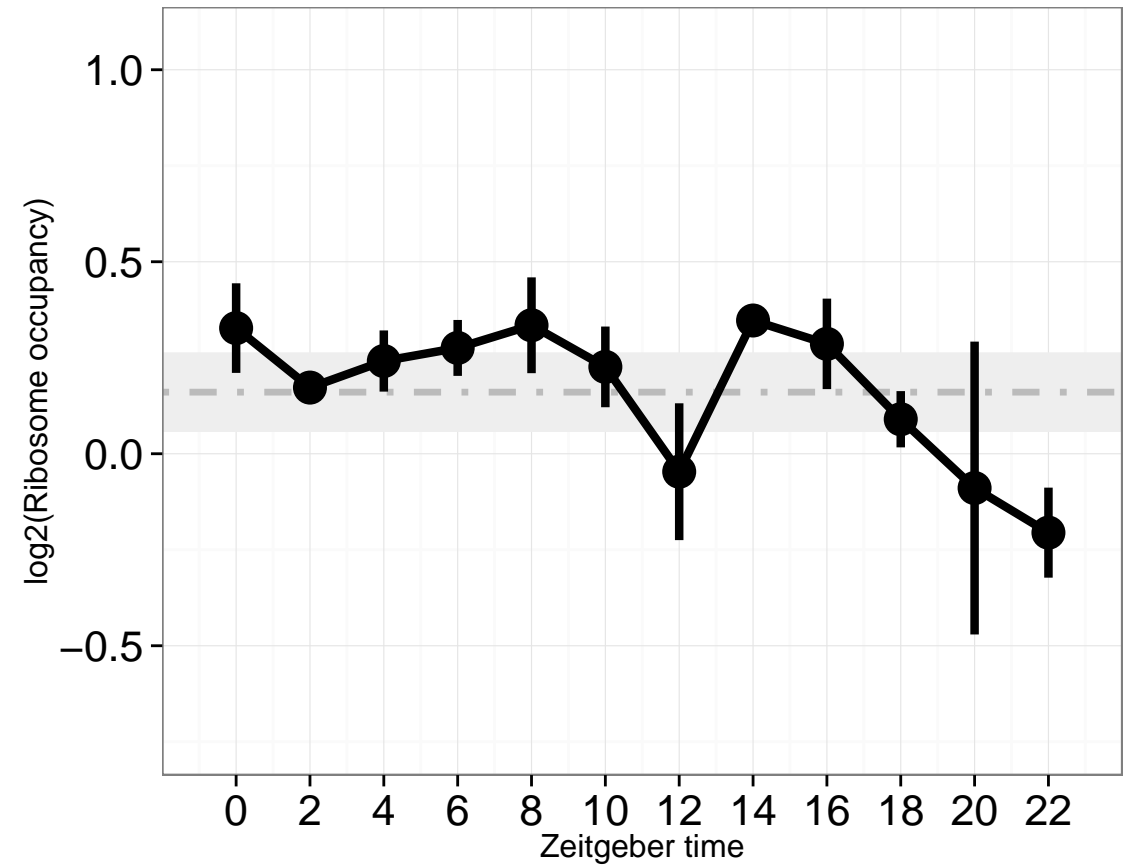

Supplement: Supplementary file 11337 [file 1]

## Casp2

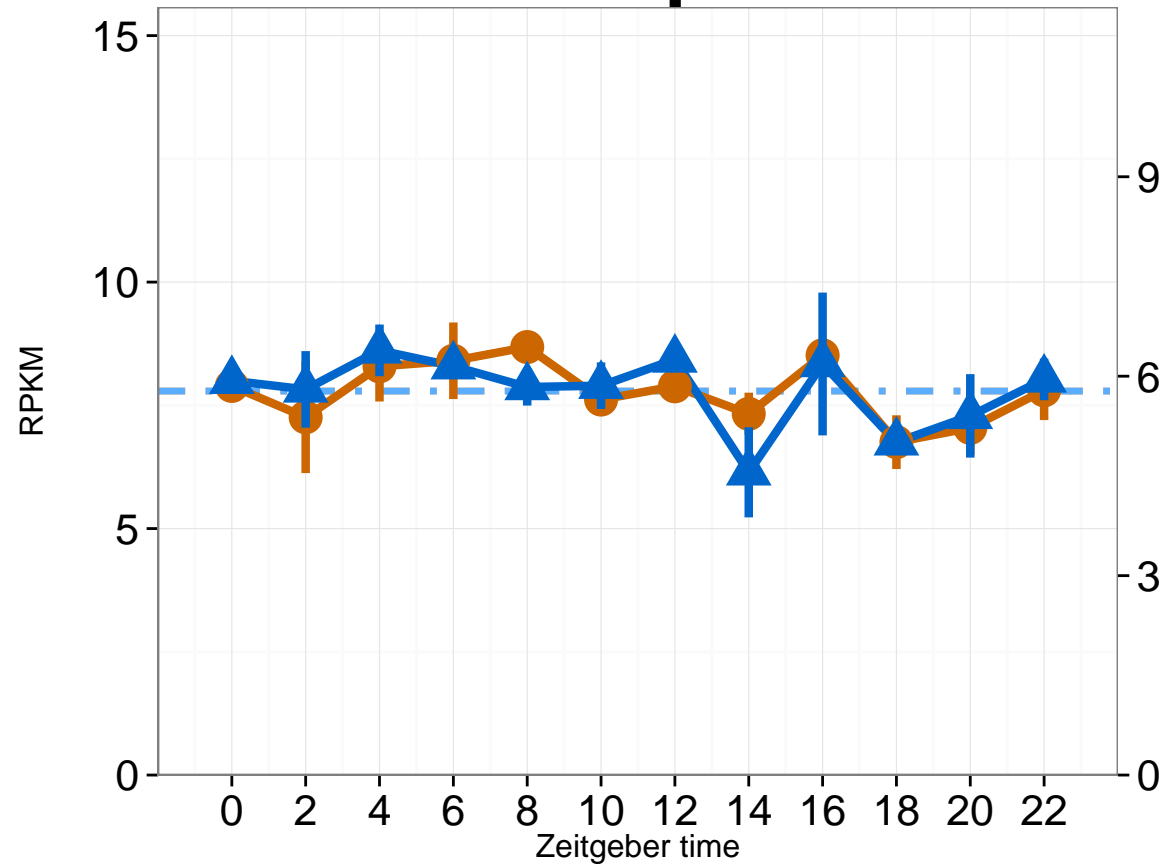

## Casp2

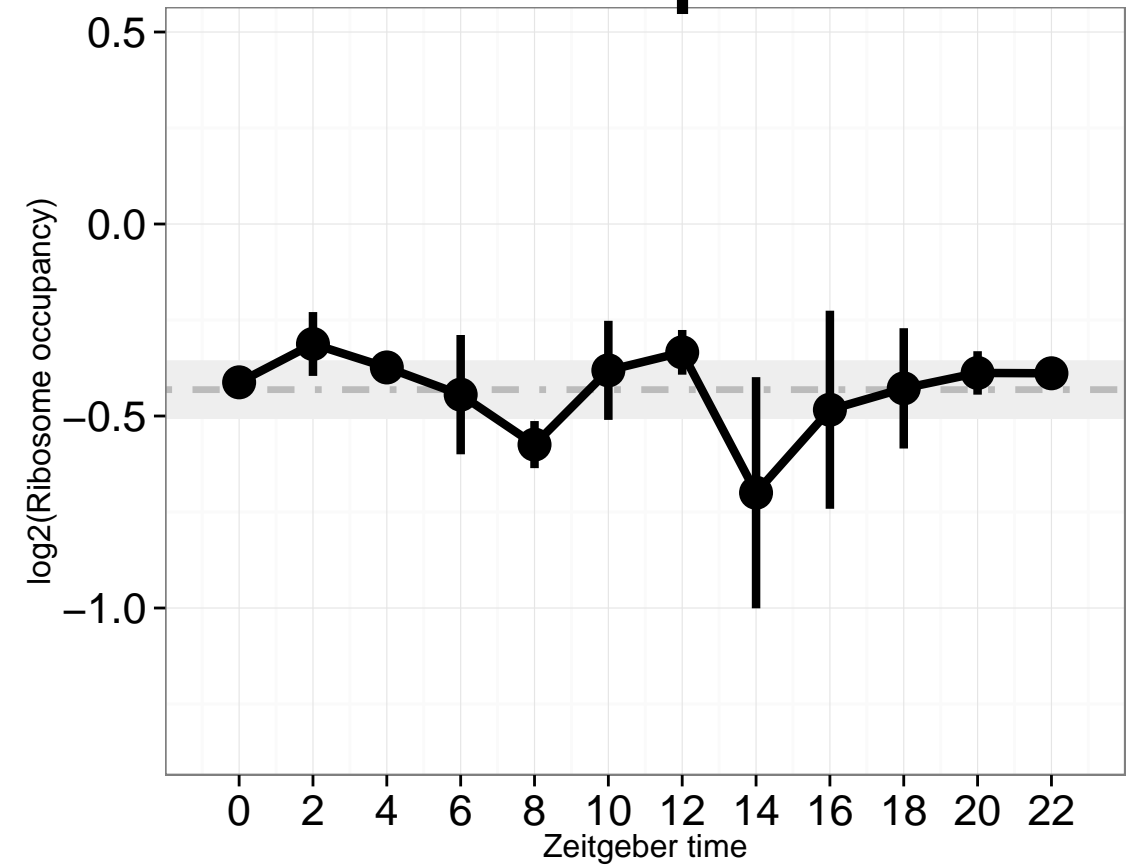

Supplement: Supplementary file 11338 [file 1]

# Cyb5r1

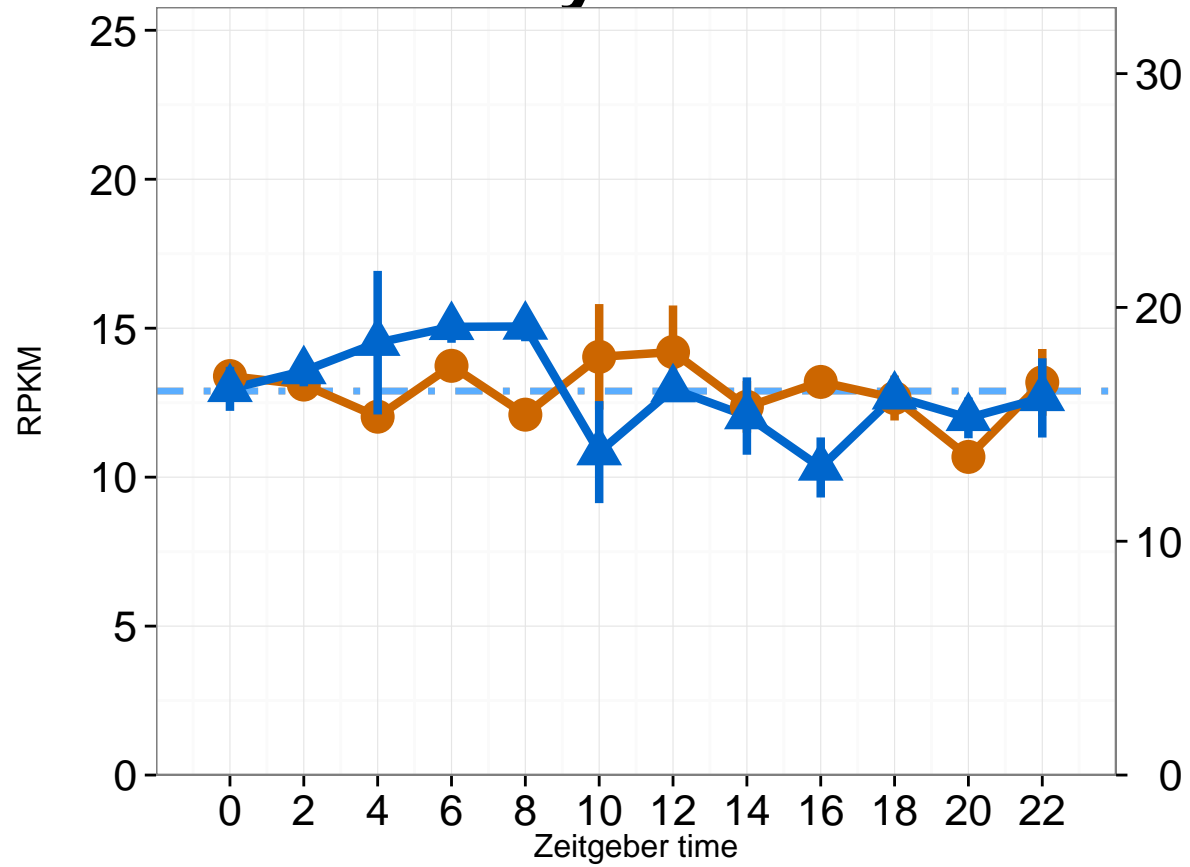

# Cyb5r1

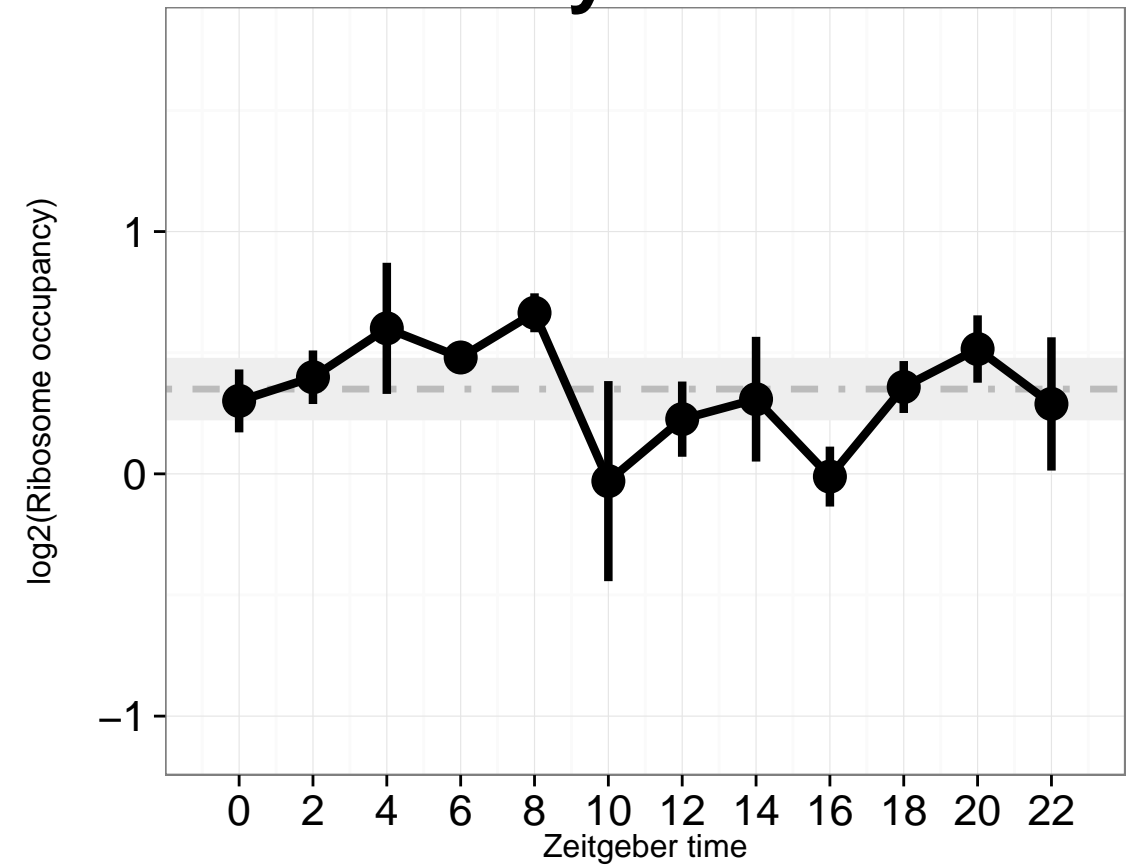

Supplement: Supplementary file 11339 [file 1]

# Coa6

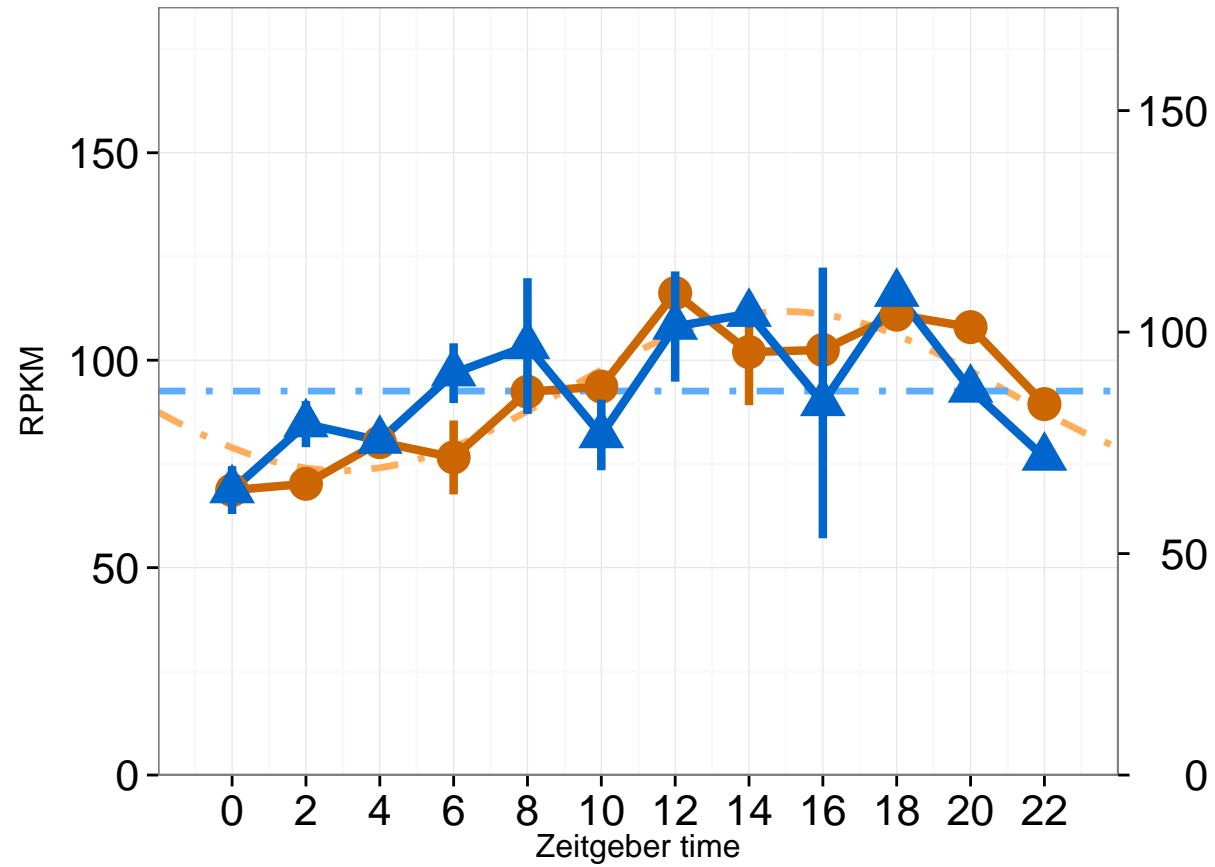

# Coa6

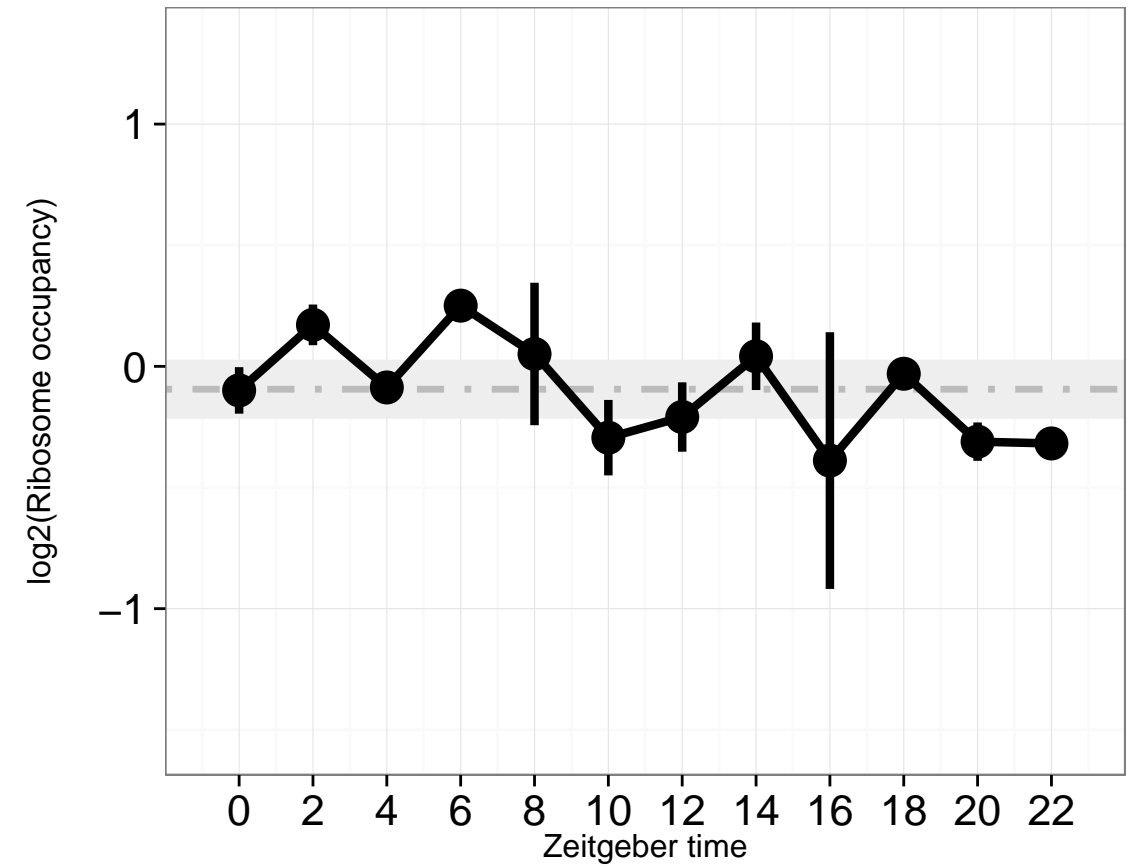

Supplement: Supplementary file 11340 [file 1]

# Galnt12

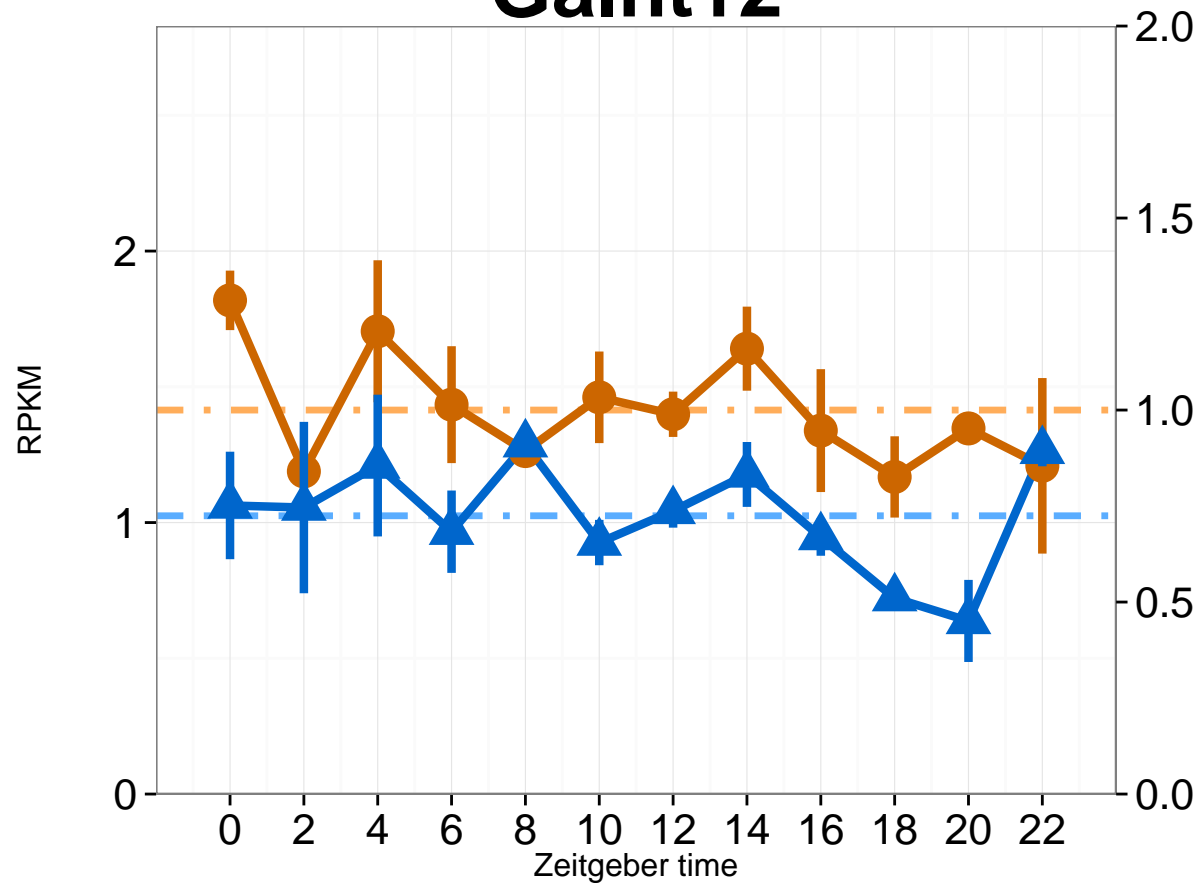

# Galnt12

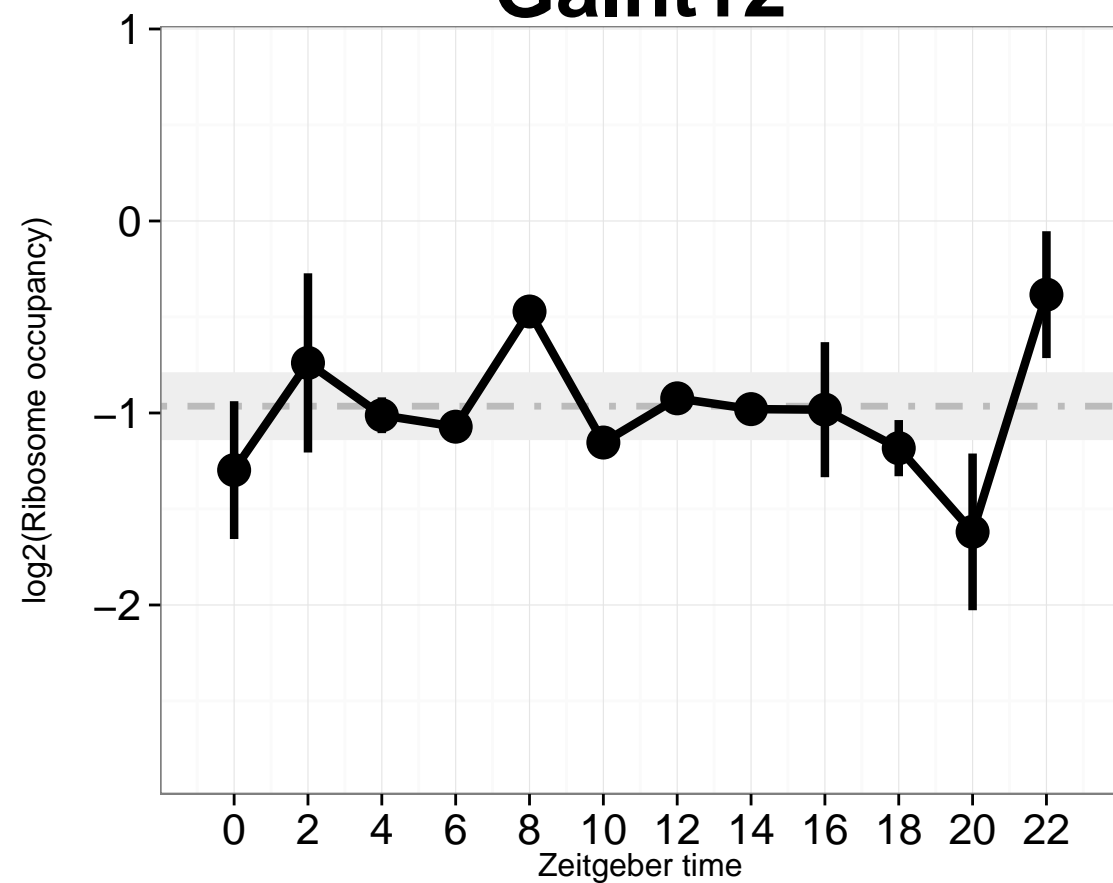

Supplement: Supplementary file 11341 [file 1]

## Pcmdt2

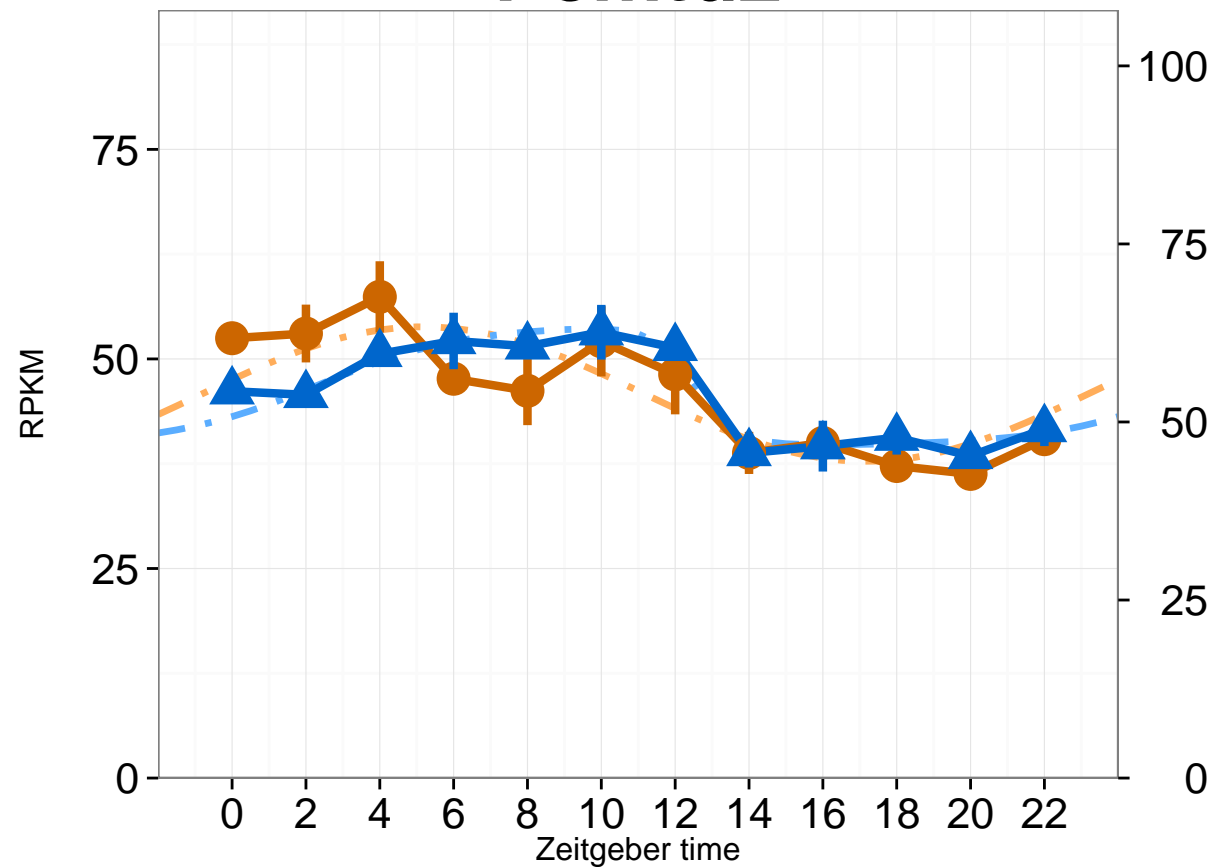

## Pcmdt2

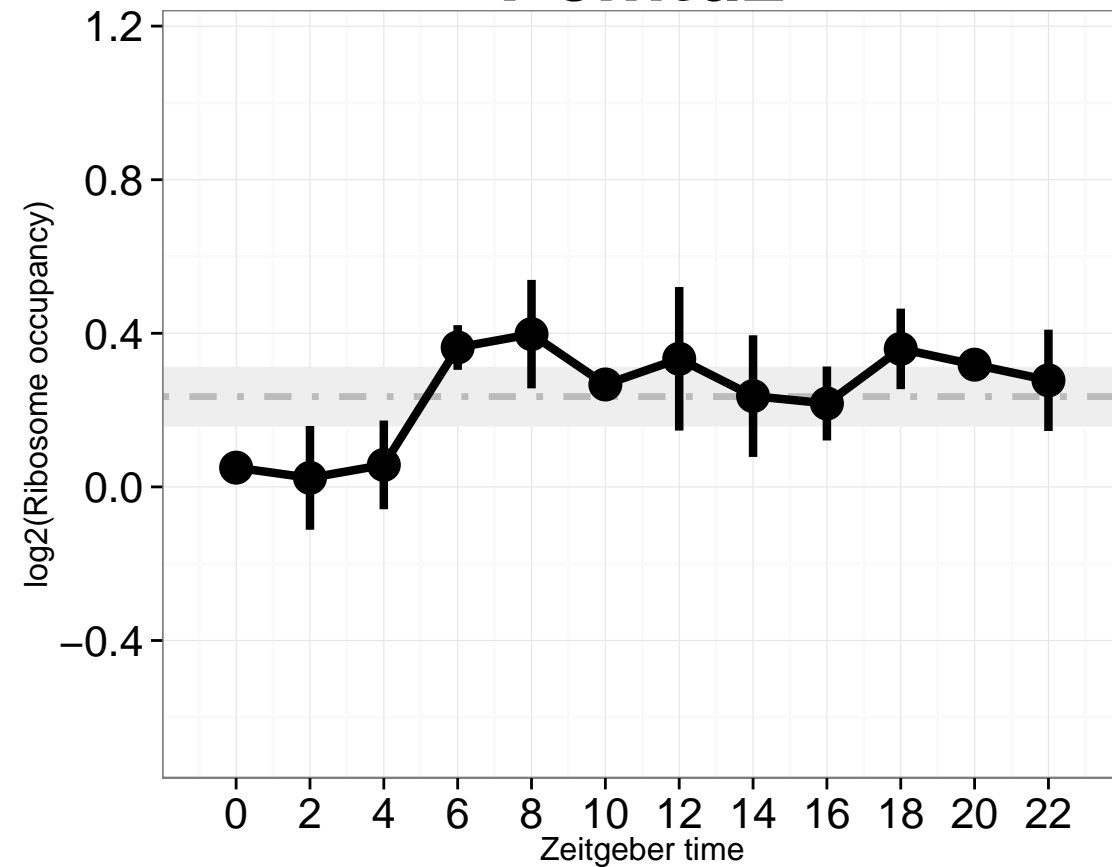

Supplement: Supplementary file 11342 [file 1]
