# Supplementary material (part 114 of 133)
Source: publisher figshare collection journal article supplement (https://springernature.figshare.com/articles/dataset/_/4903193)

# Zc3h8

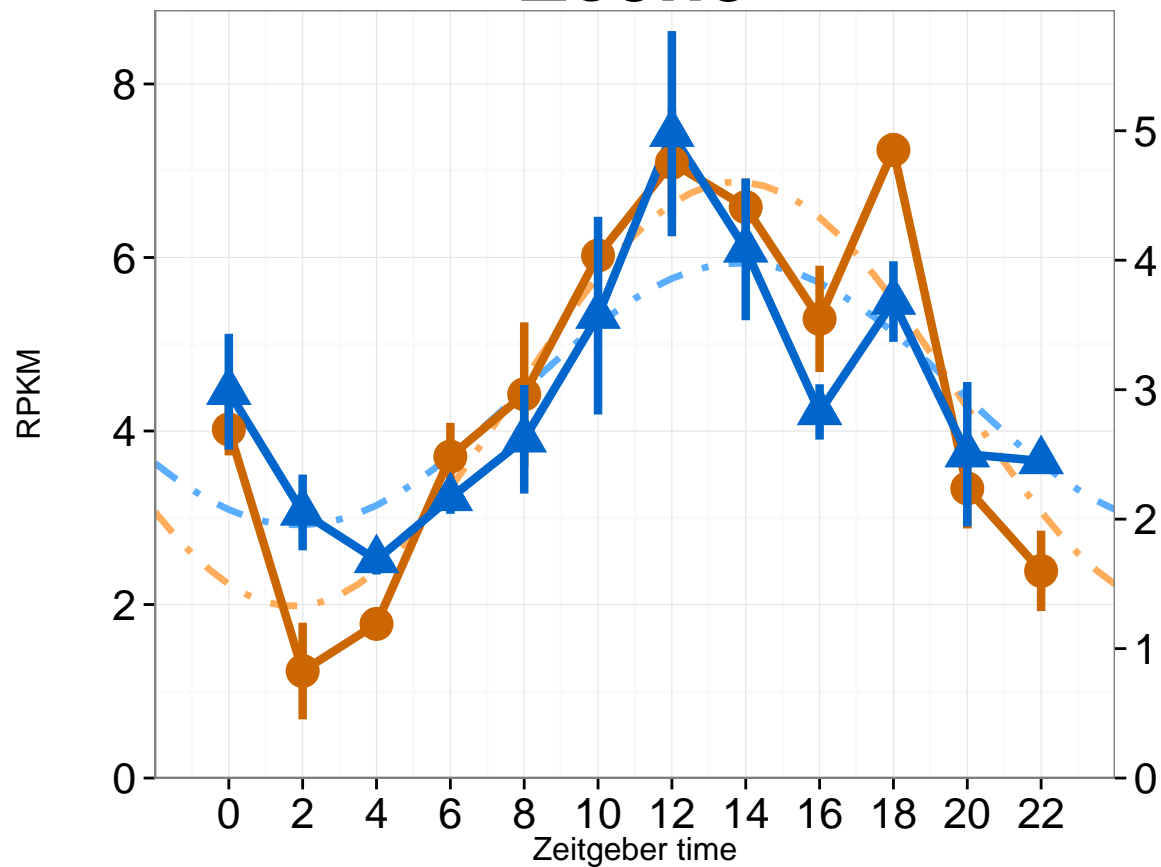

# Zc3h8

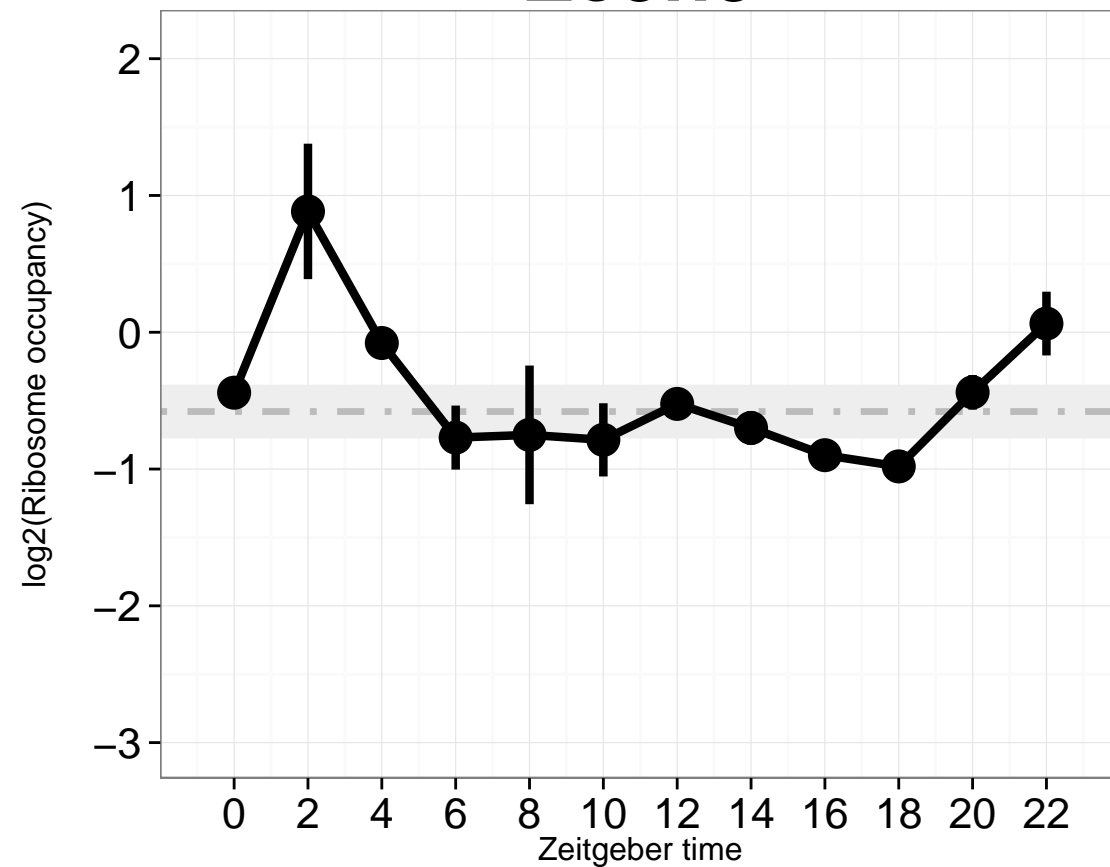

Supplement: Supplementary file 11343 [file 1]

## Cldn3

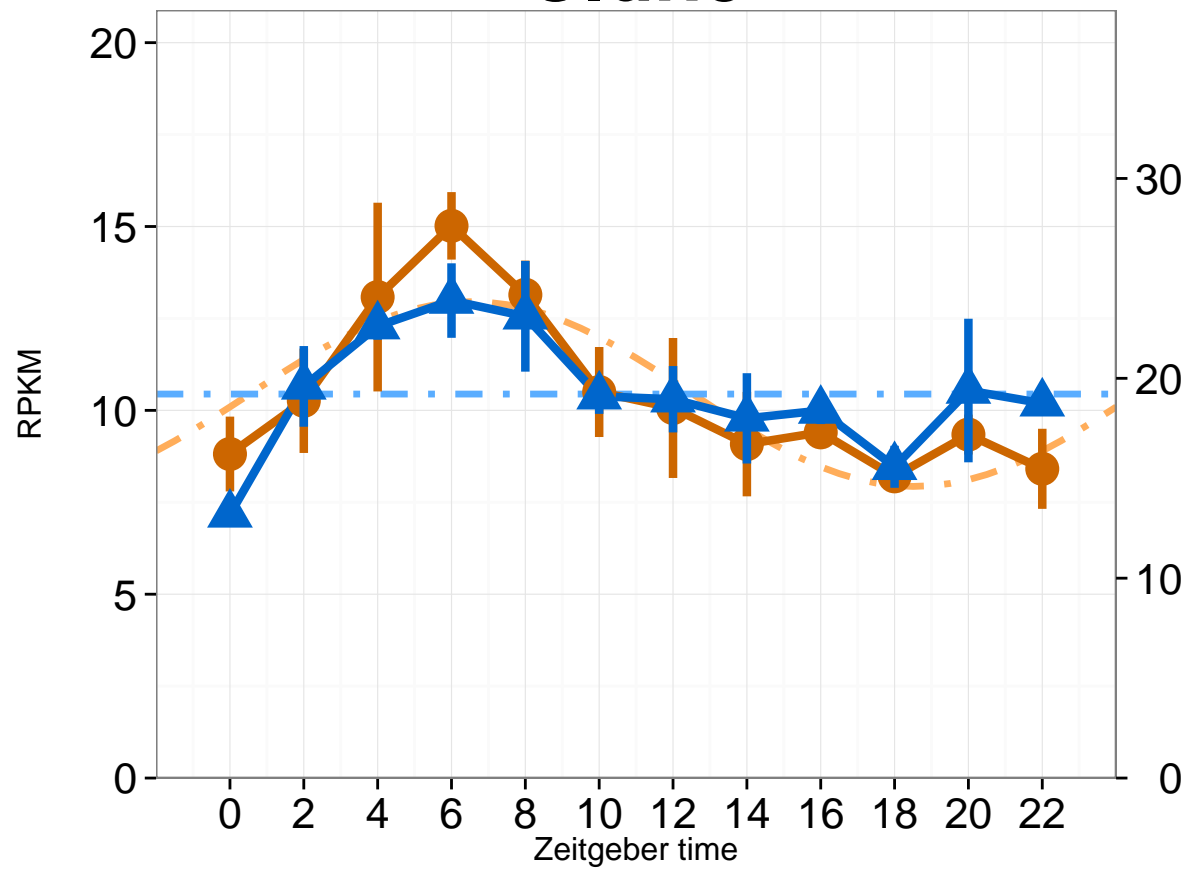

## Cldn3

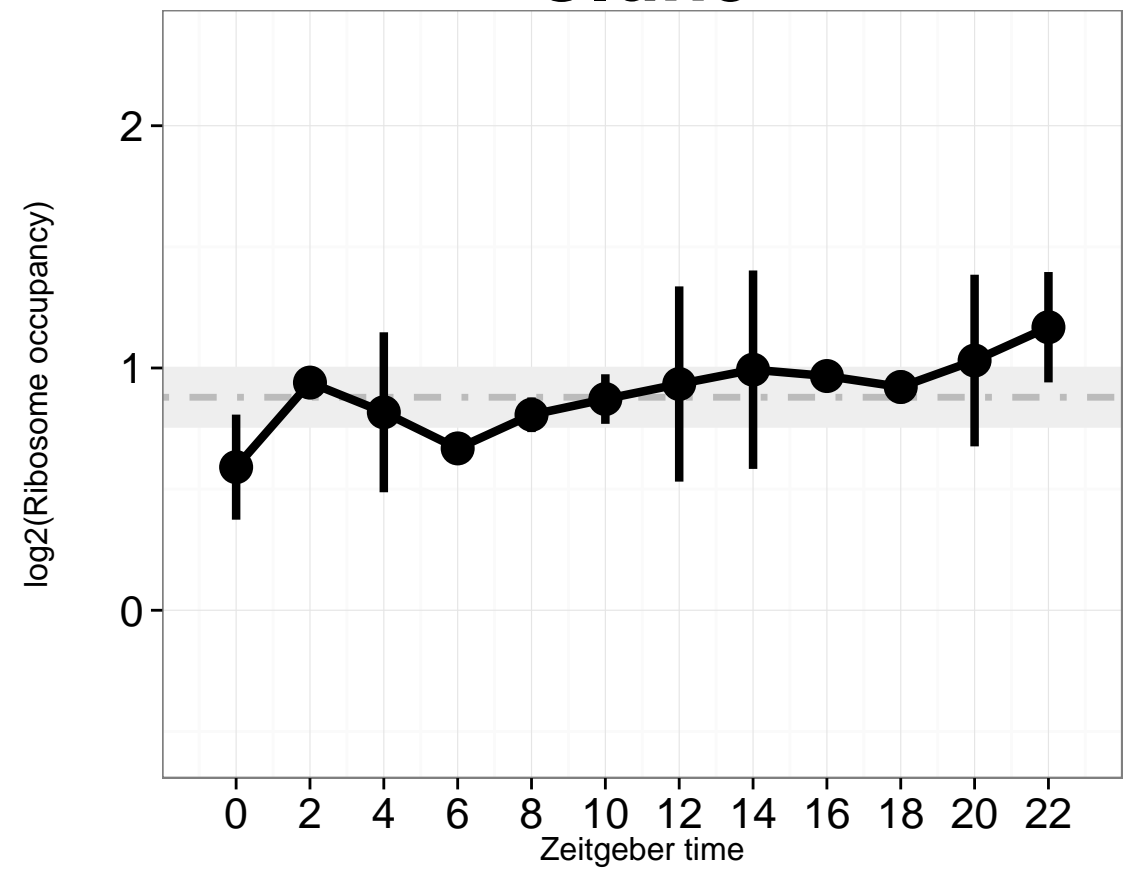

Supplement: Supplementary file 11344 [file 1]

## Nfatc1

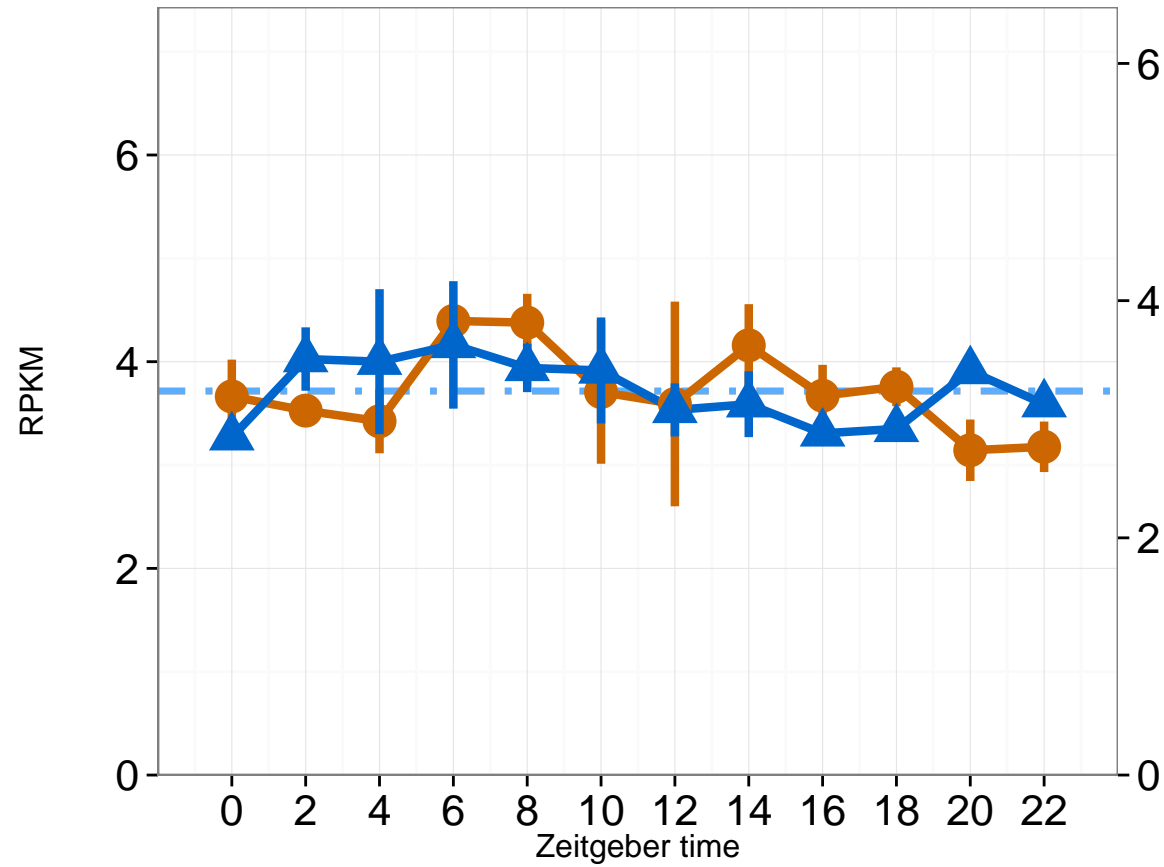

## Nfatc1

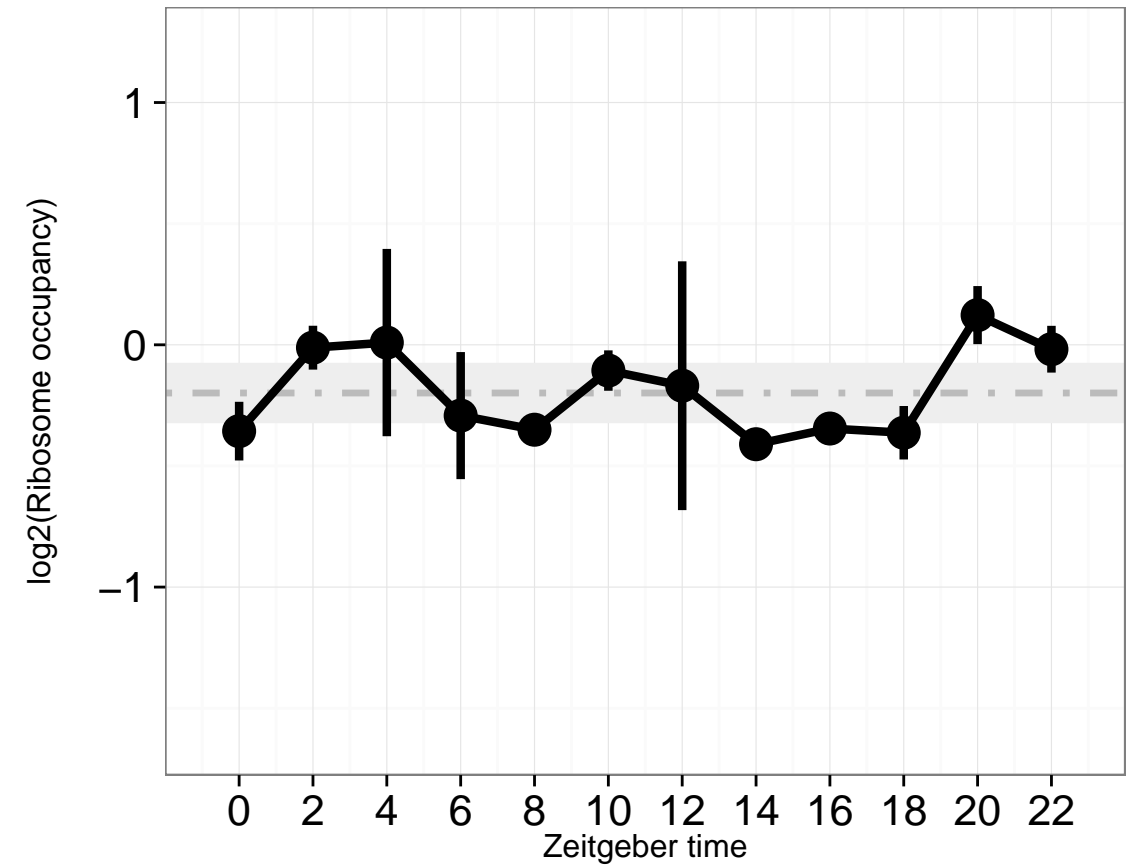

Supplement: Supplementary file 11345 [file 1]

## Eif2a

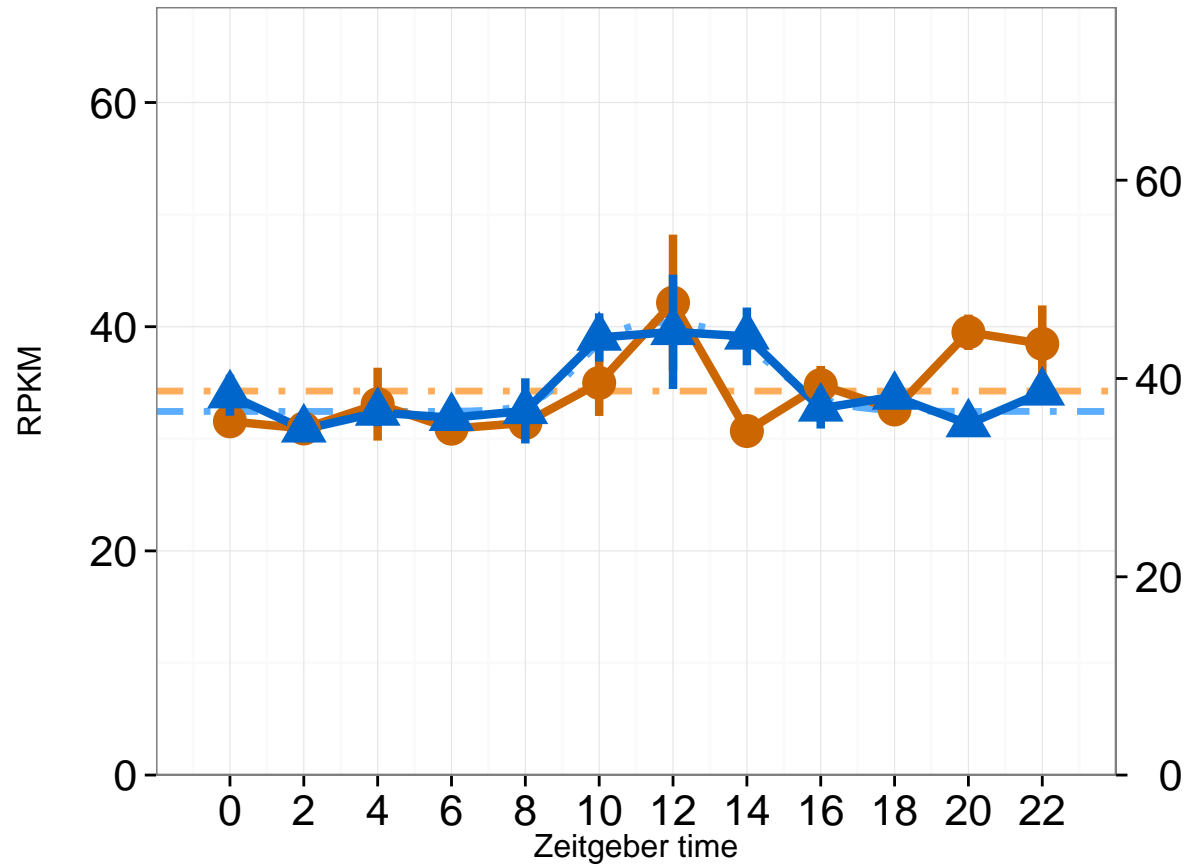

## Eif2a

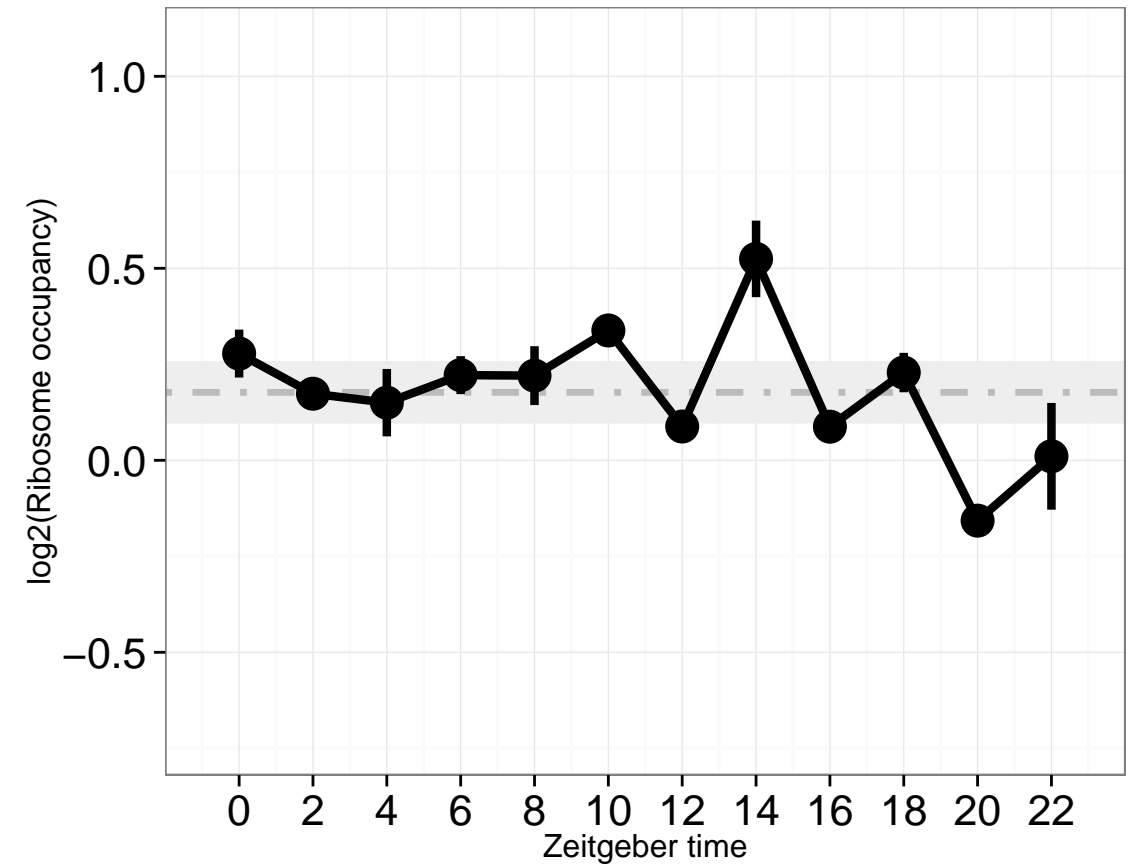

Supplement: Supplementary file 11346 [file 1]

## Socs7

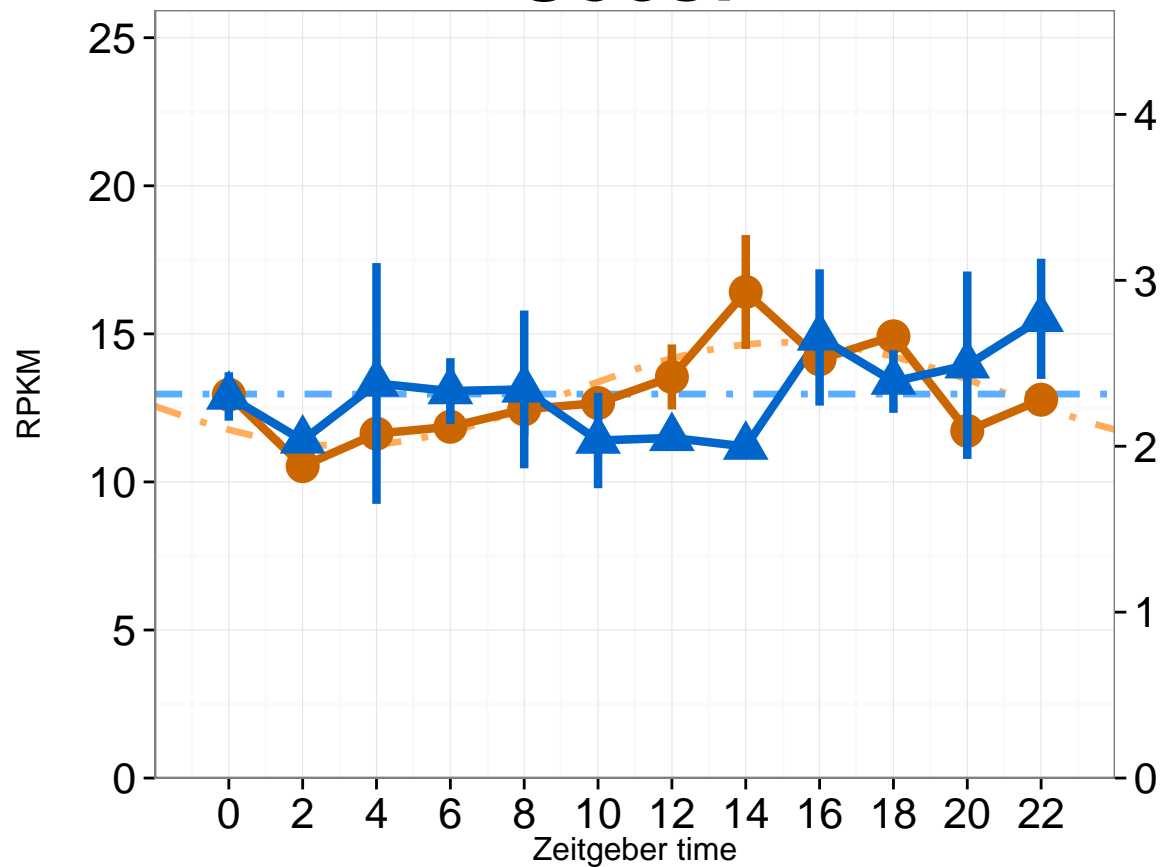

## Socs7

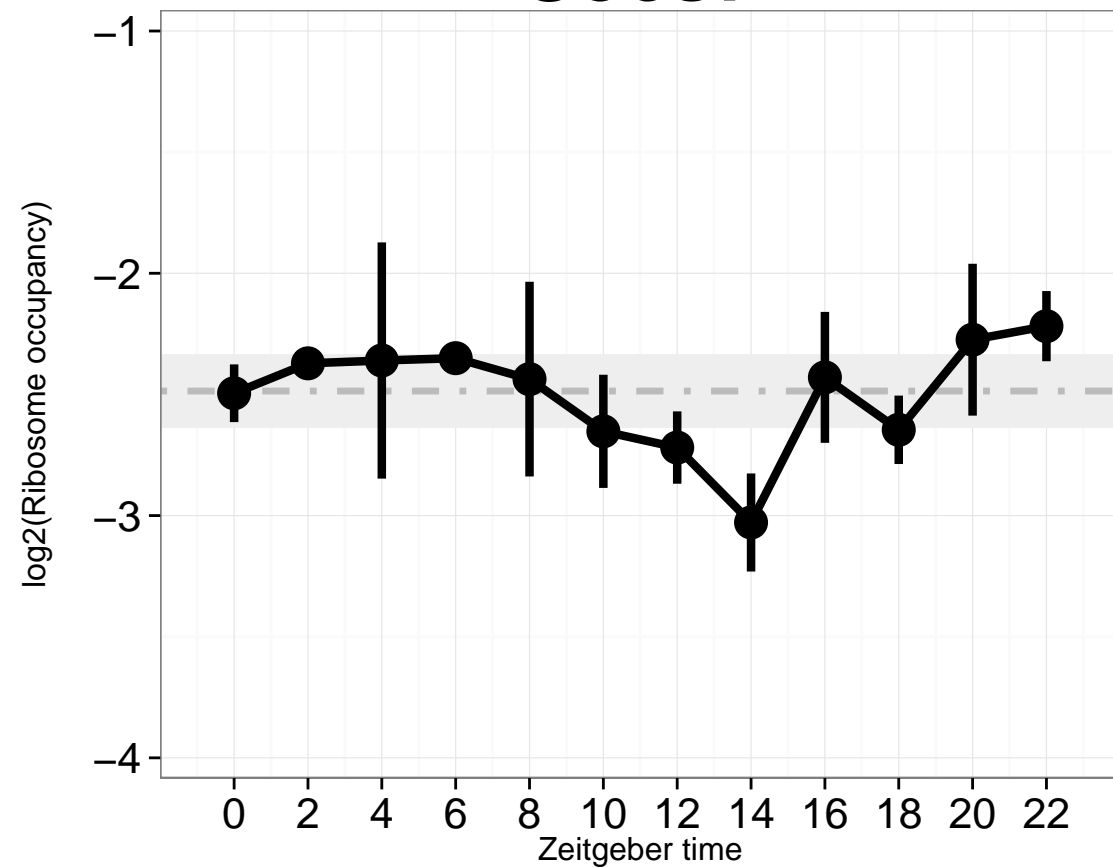

Supplement: Supplementary file 11347 [file 1]

# Zfp787

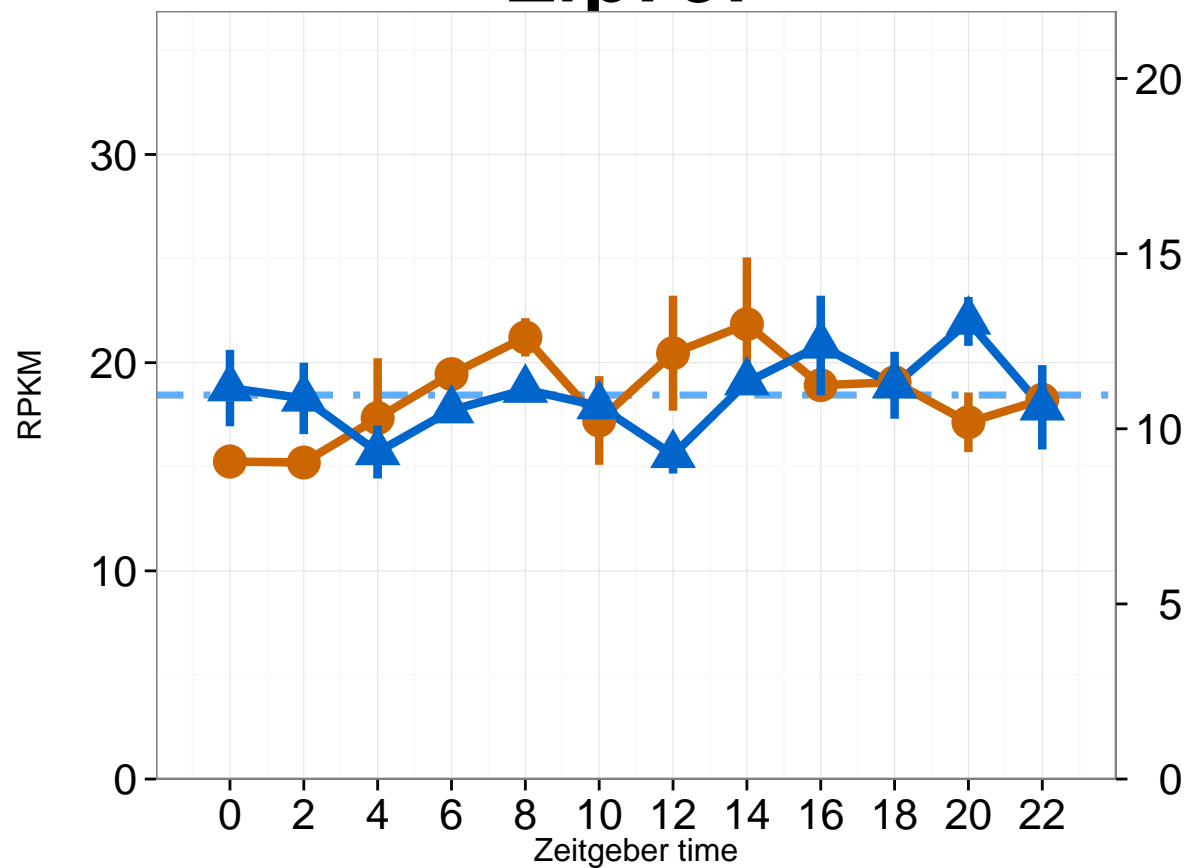

# Zfp787

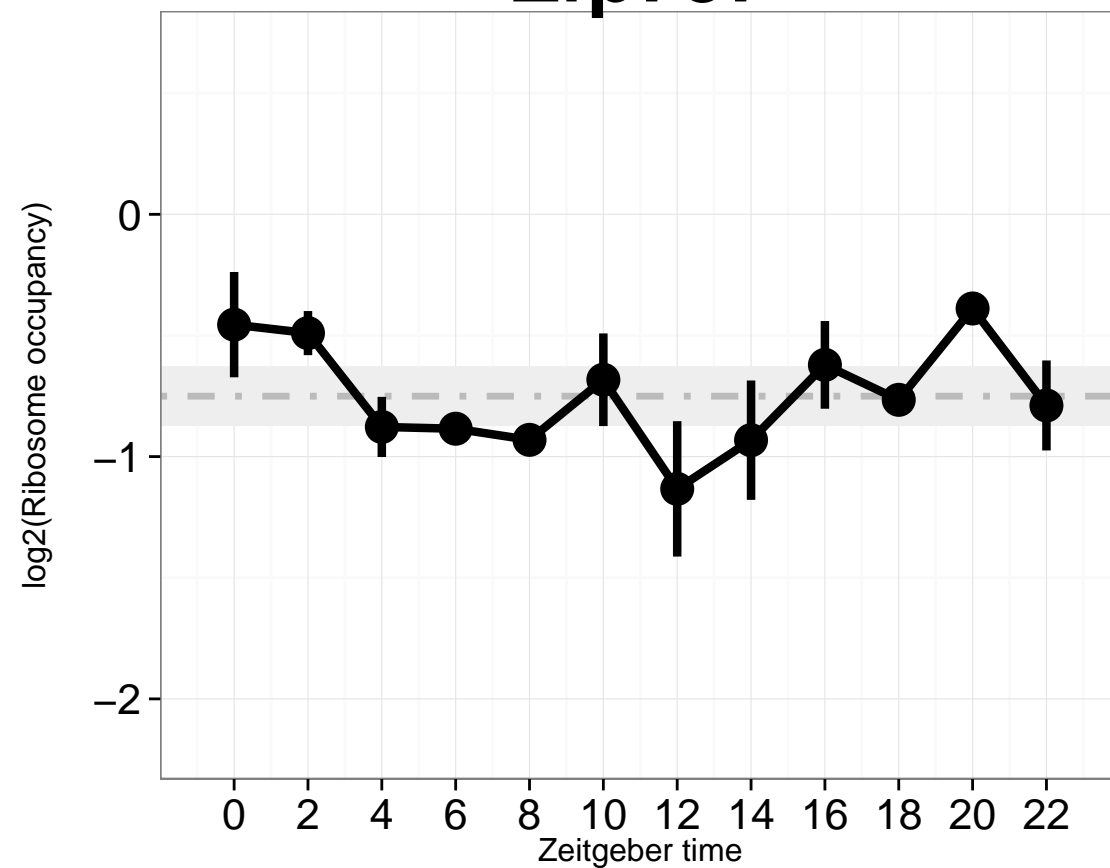

Supplement: Supplementary file 11348 [file 1]

## Epb4.1

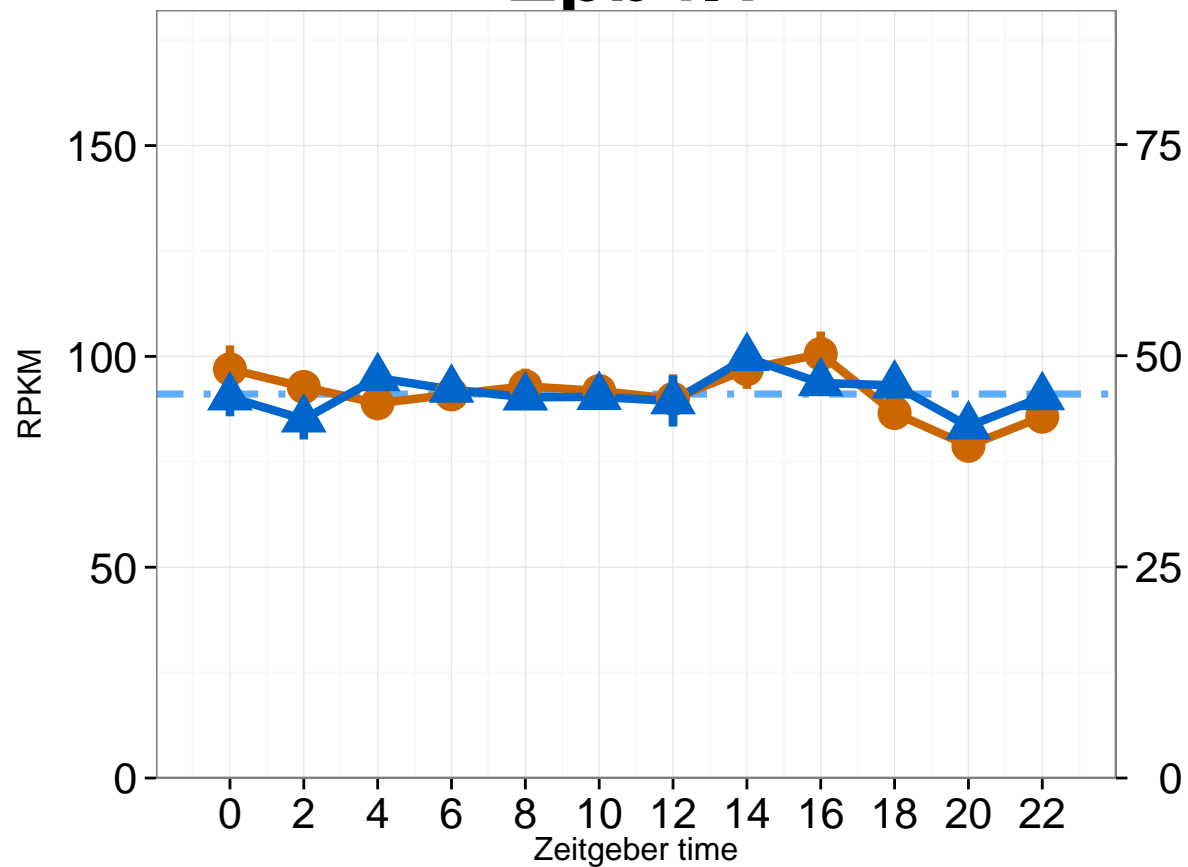

## Epb4.1

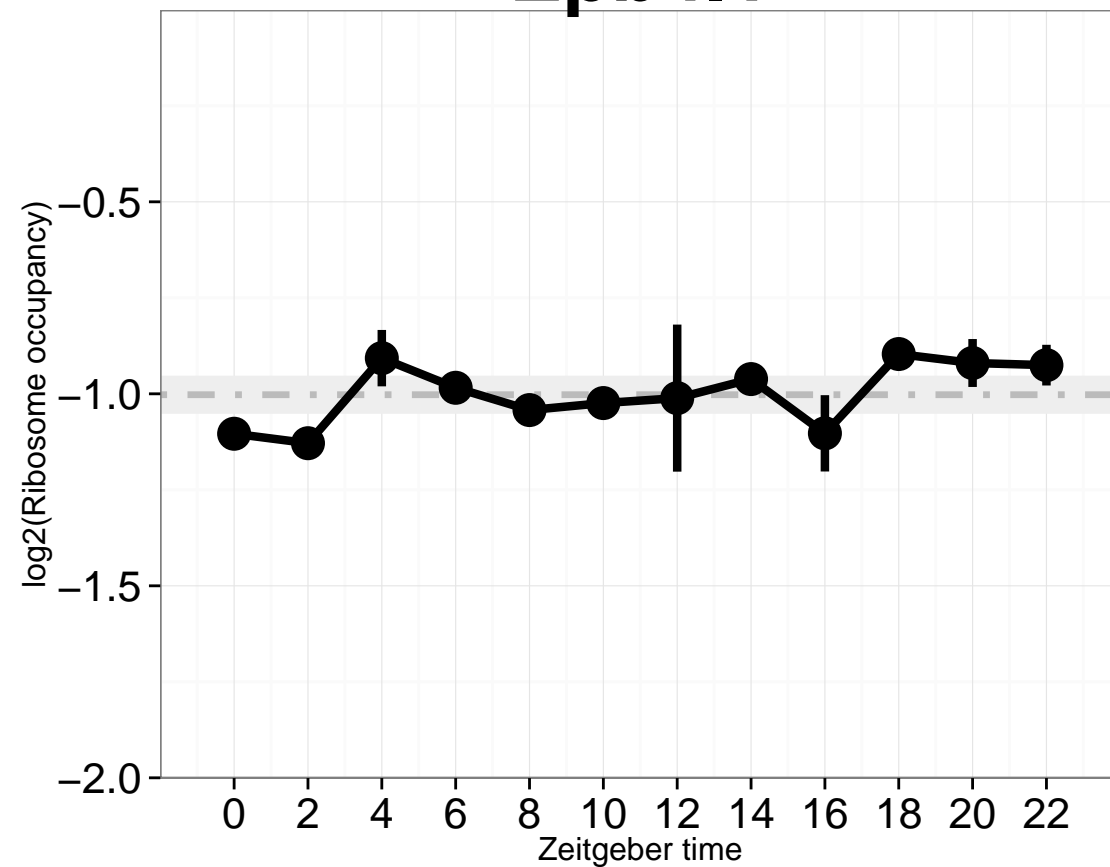

Supplement: Supplementary file 11349 [file 1]

## Vdac2

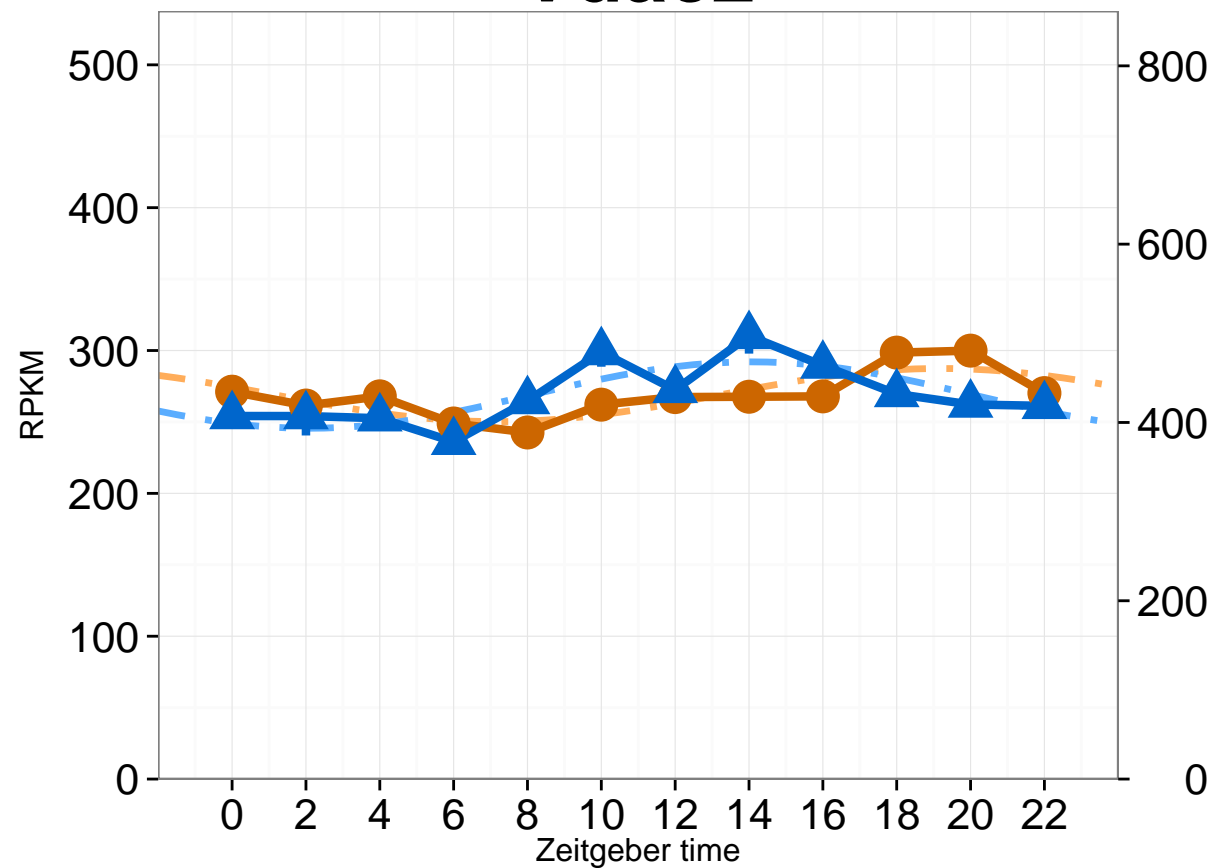

## Vdac2

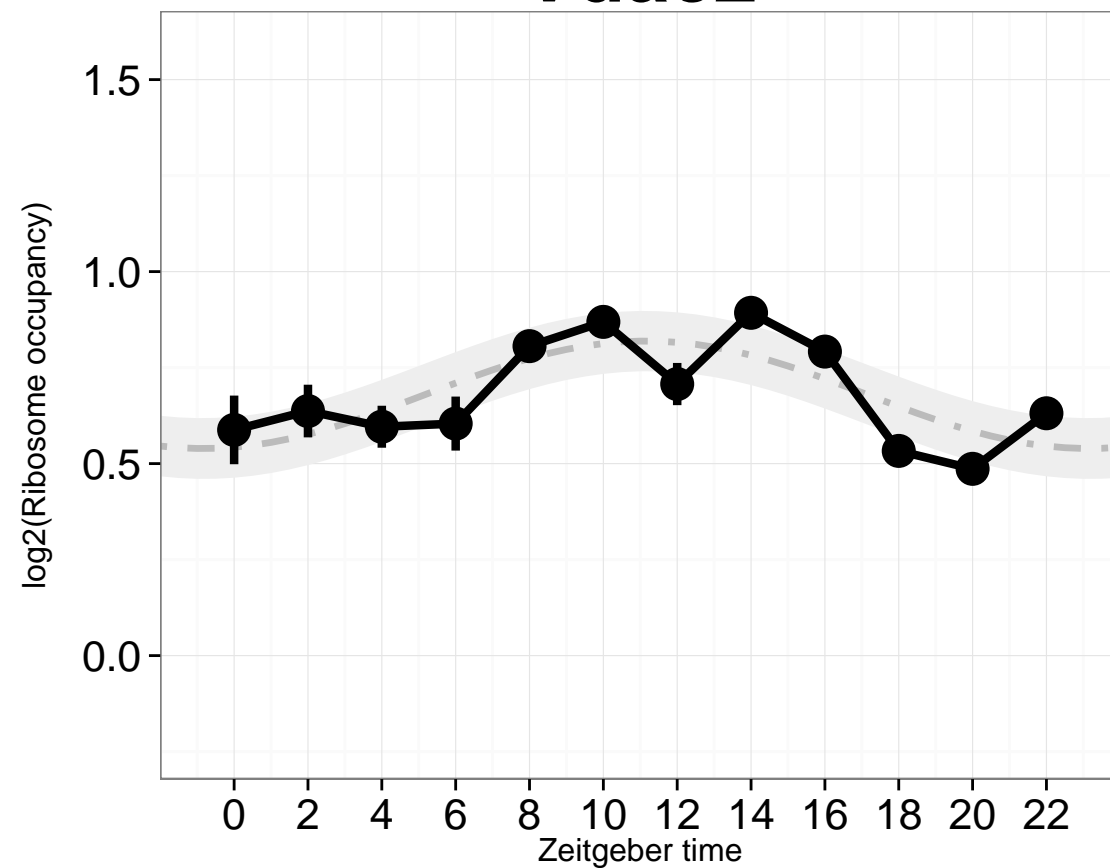

Supplement: Supplementary file 11350 [file 1]

## Gpbp1

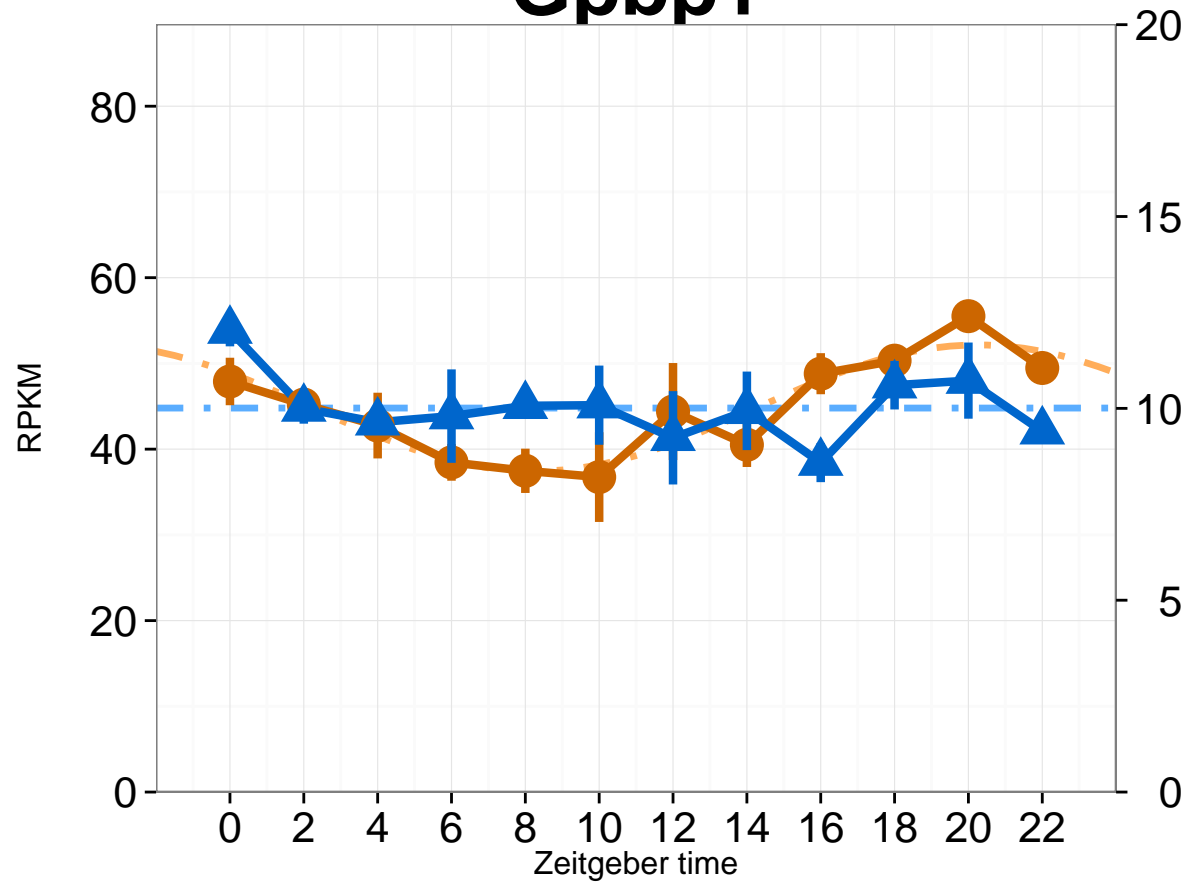

## Gpbp1

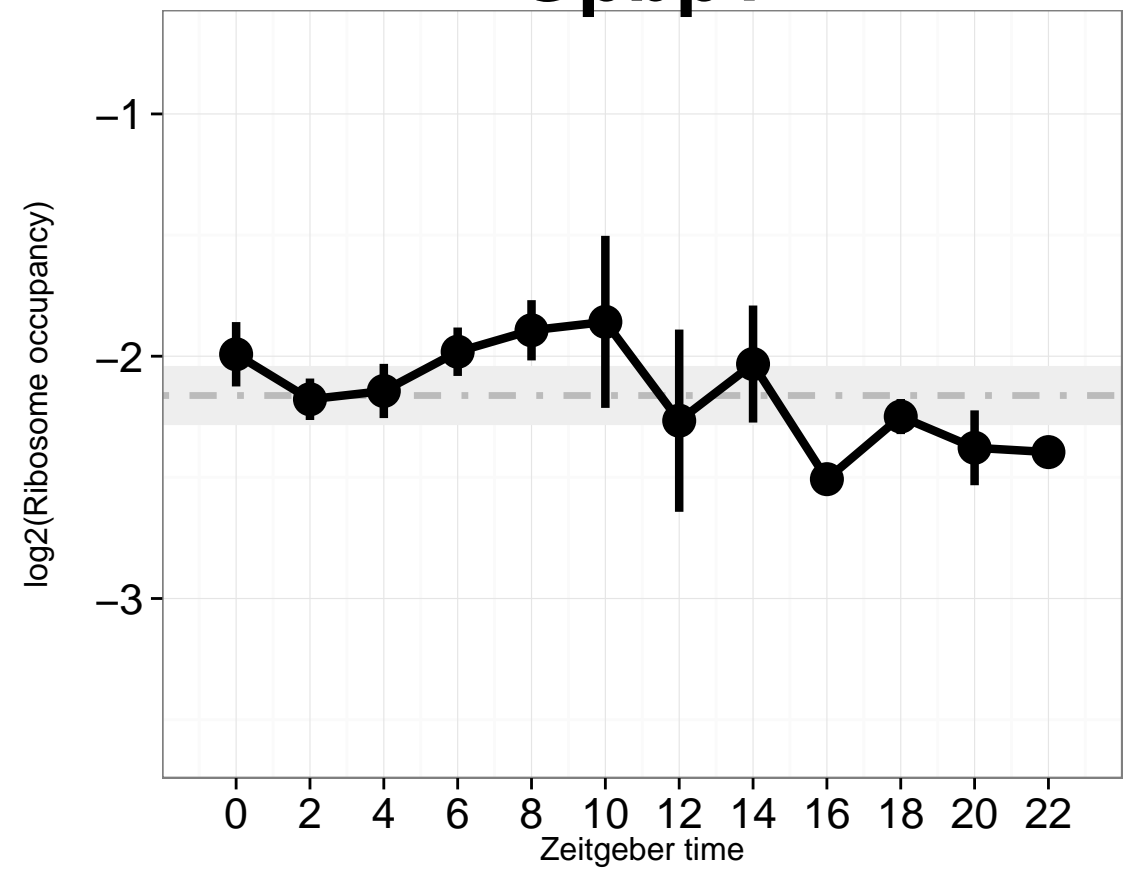

Supplement: Supplementary file 11351 [file 1]

## Hsf2

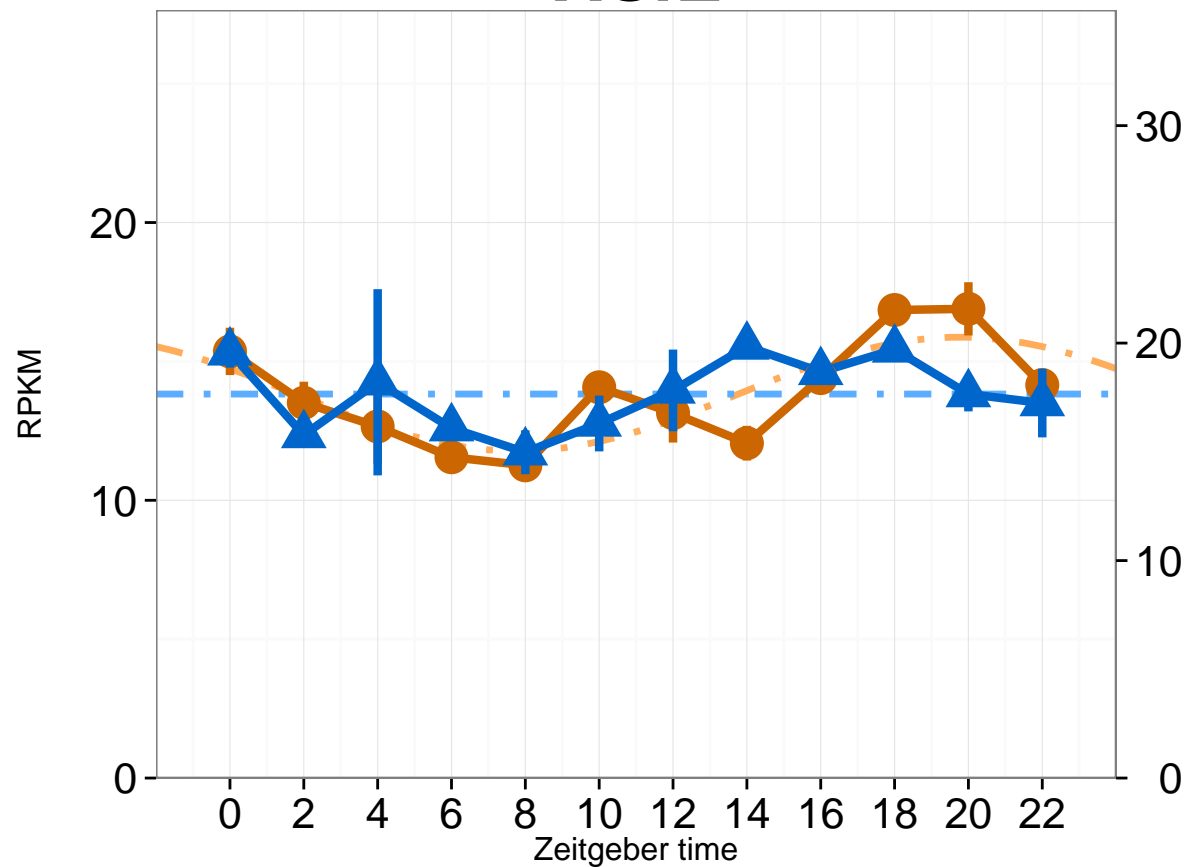

## Hsf2

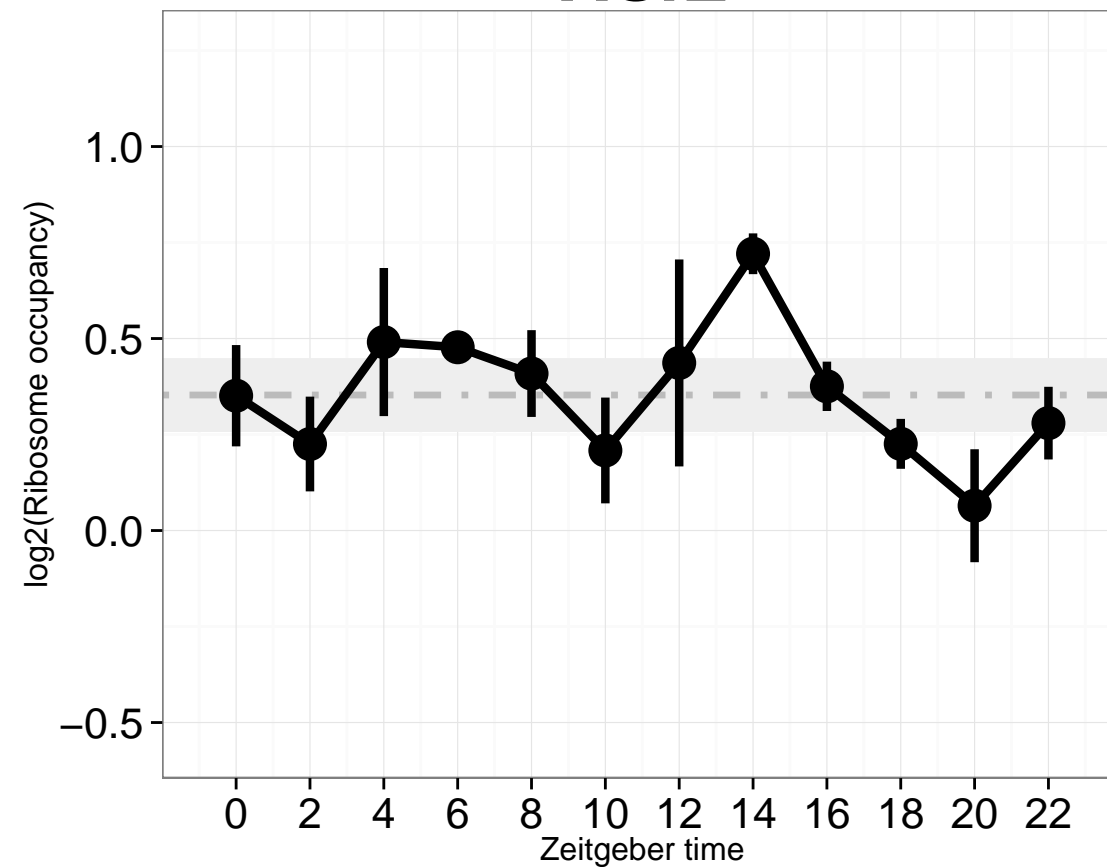

Supplement: Supplementary file 11352 [file 1]

**Plg**

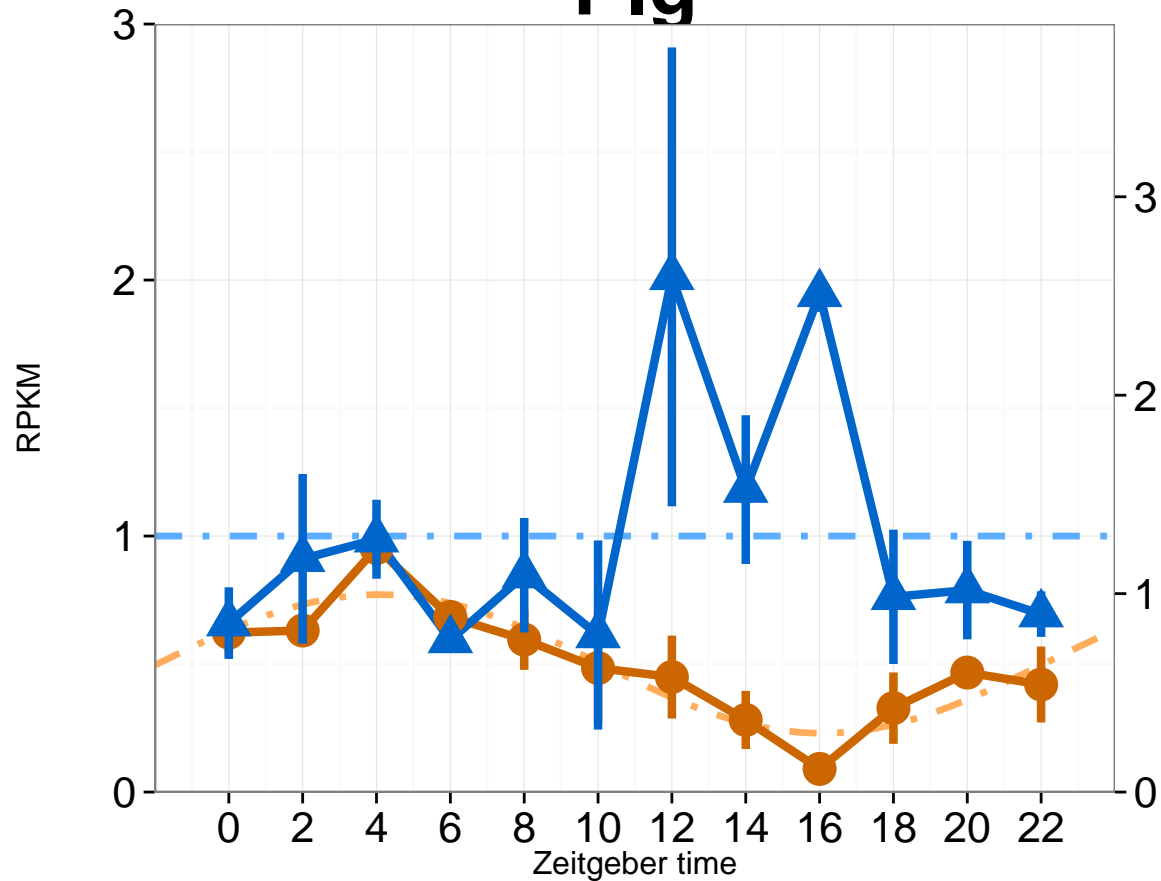

**Plg**

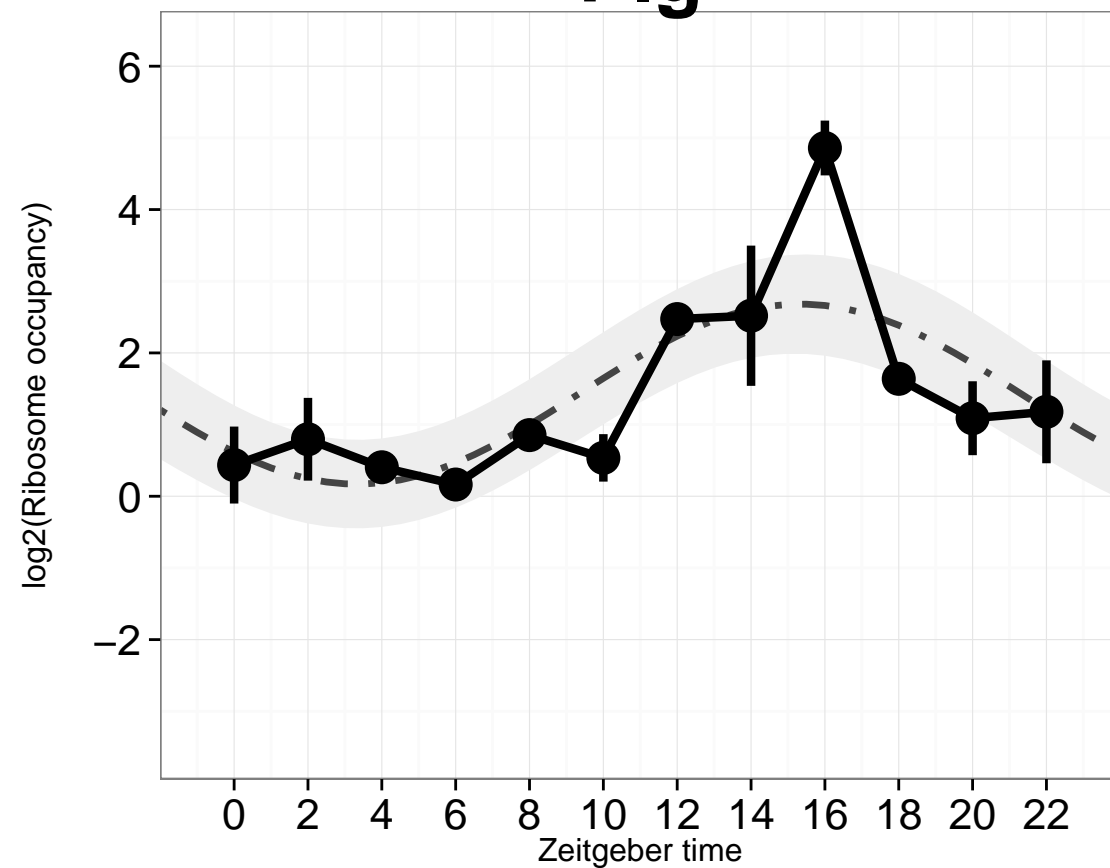

Supplement: Supplementary file 11353 [file 1]

# Hipk1

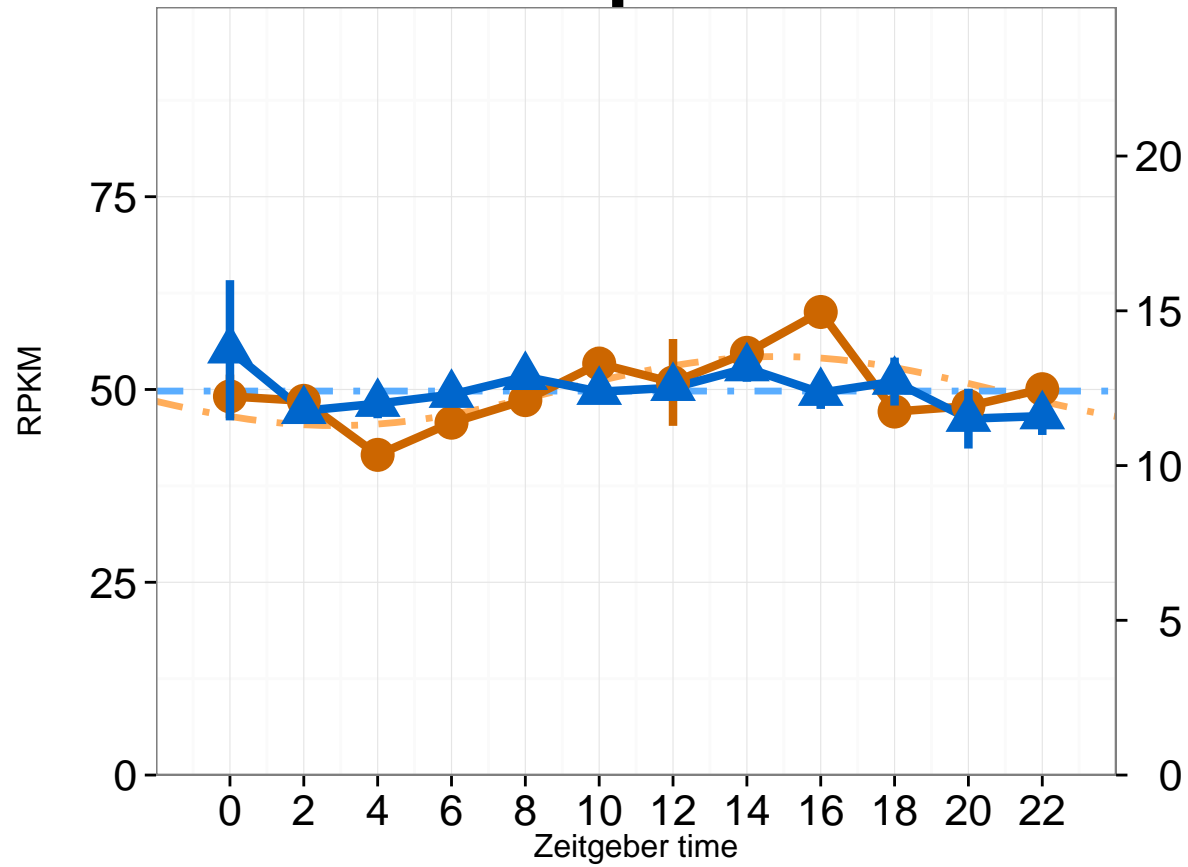

# Hipk1

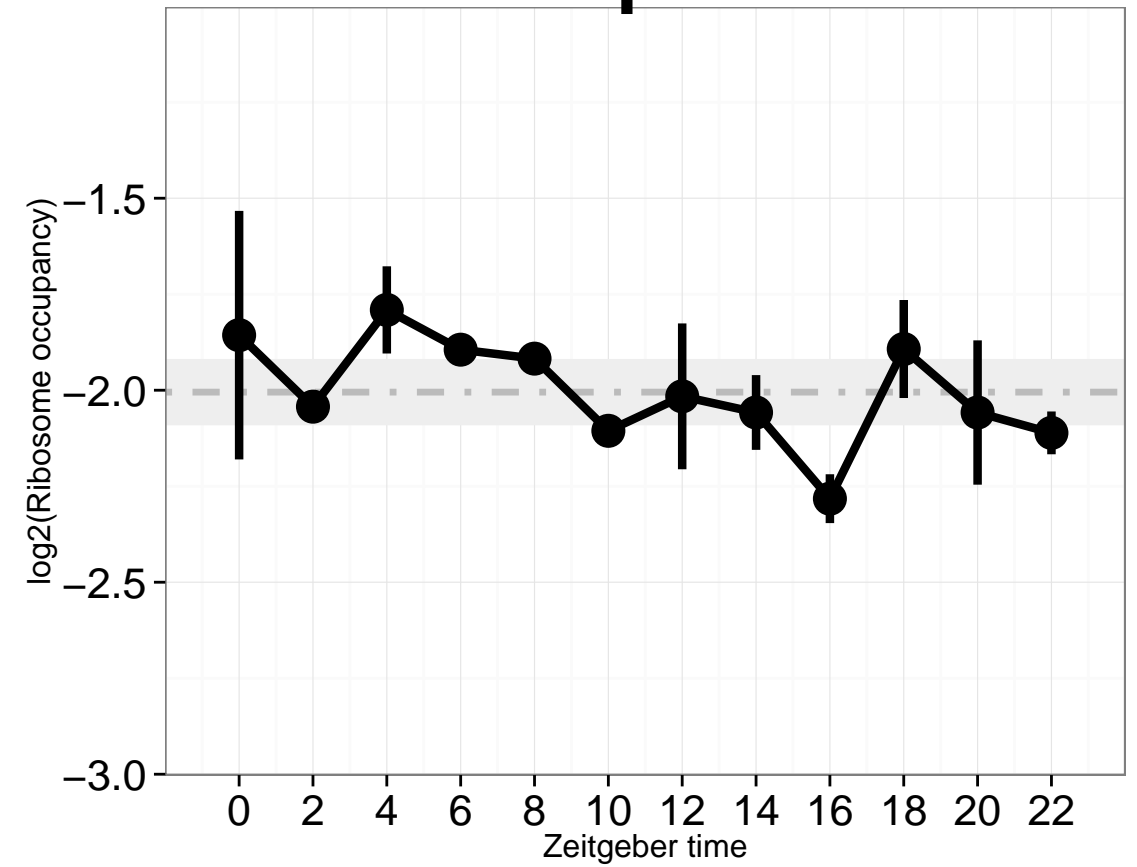

Supplement: Supplementary file 11354 [file 1]

## Grb14

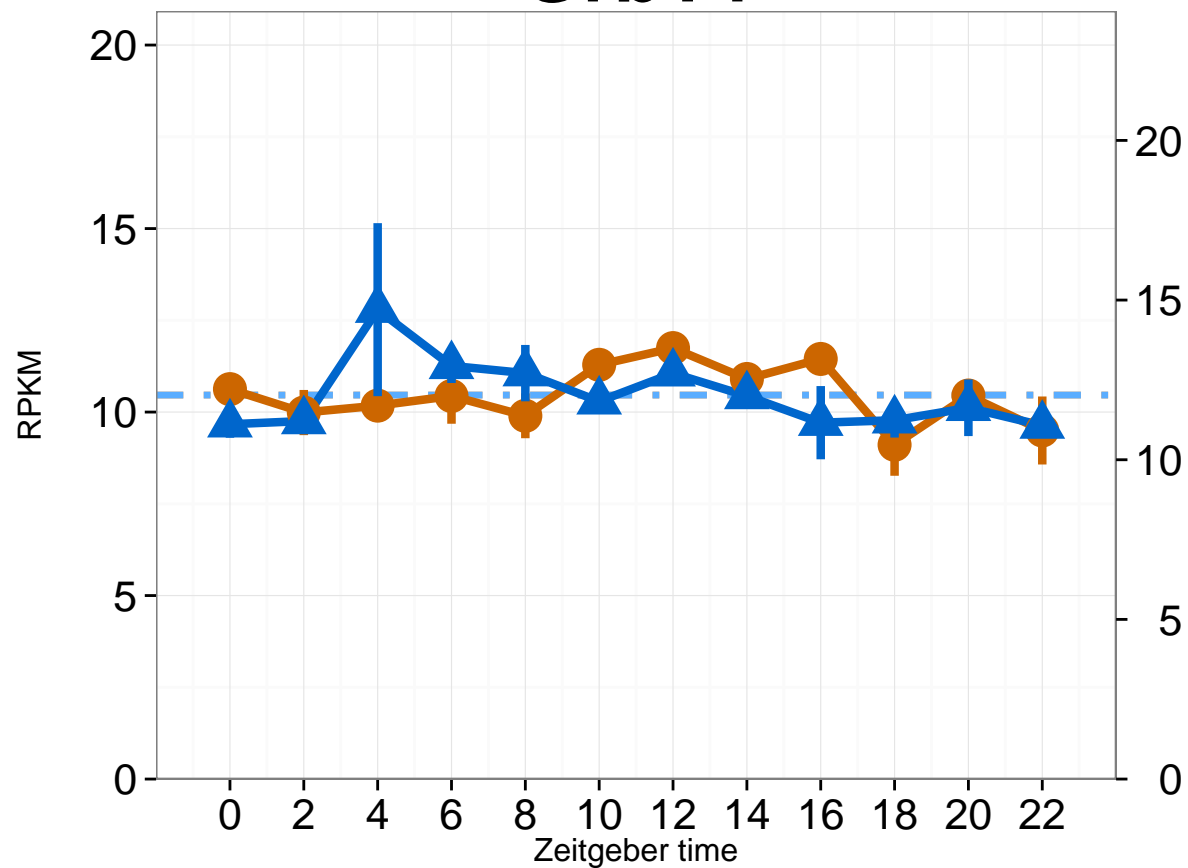

## Grb14

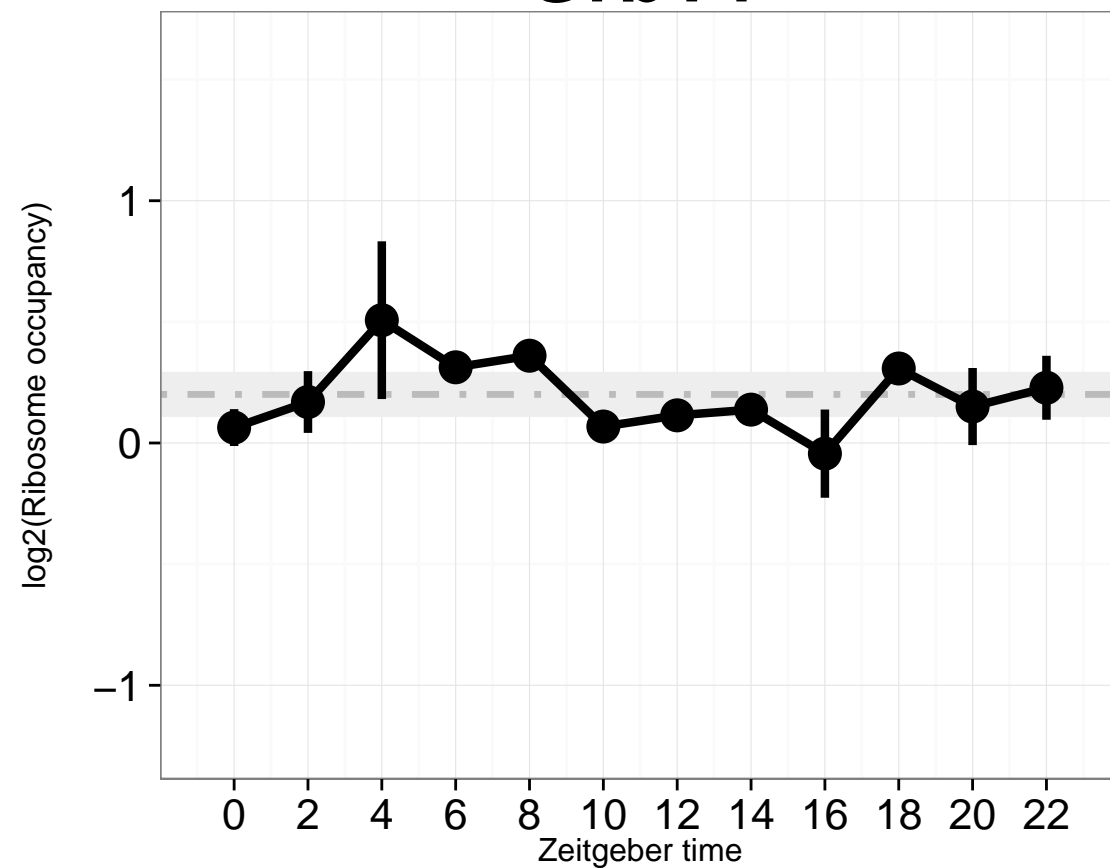

Supplement: Supplementary file 11355 [file 1]

# St3gal5

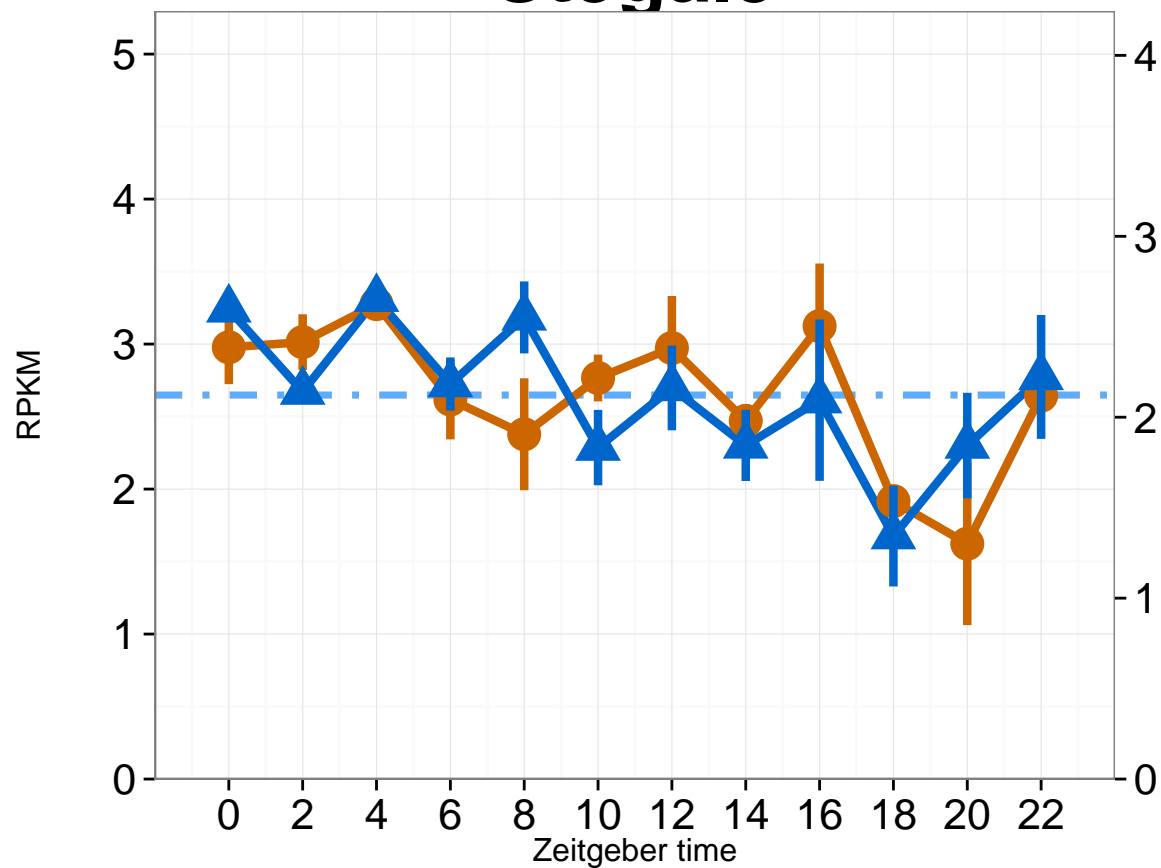

# St3gal5

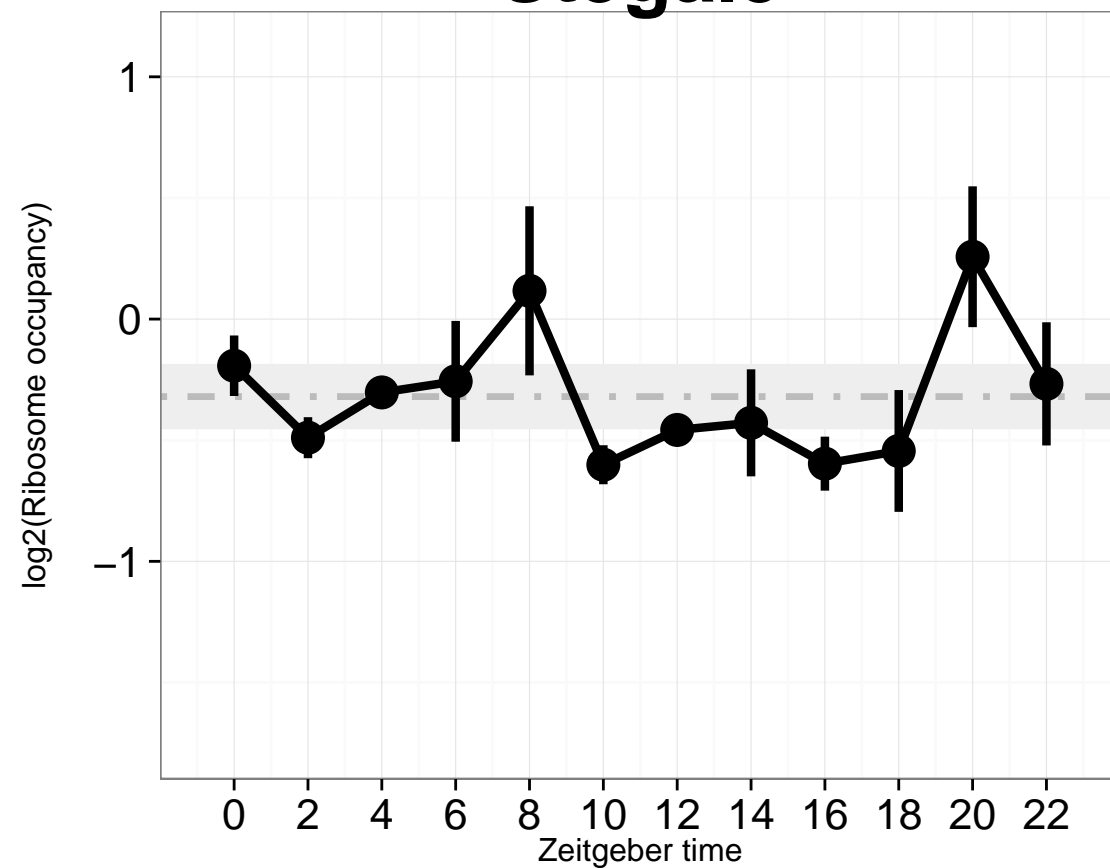

Supplement: Supplementary file 11356 [file 1]

# Parp6

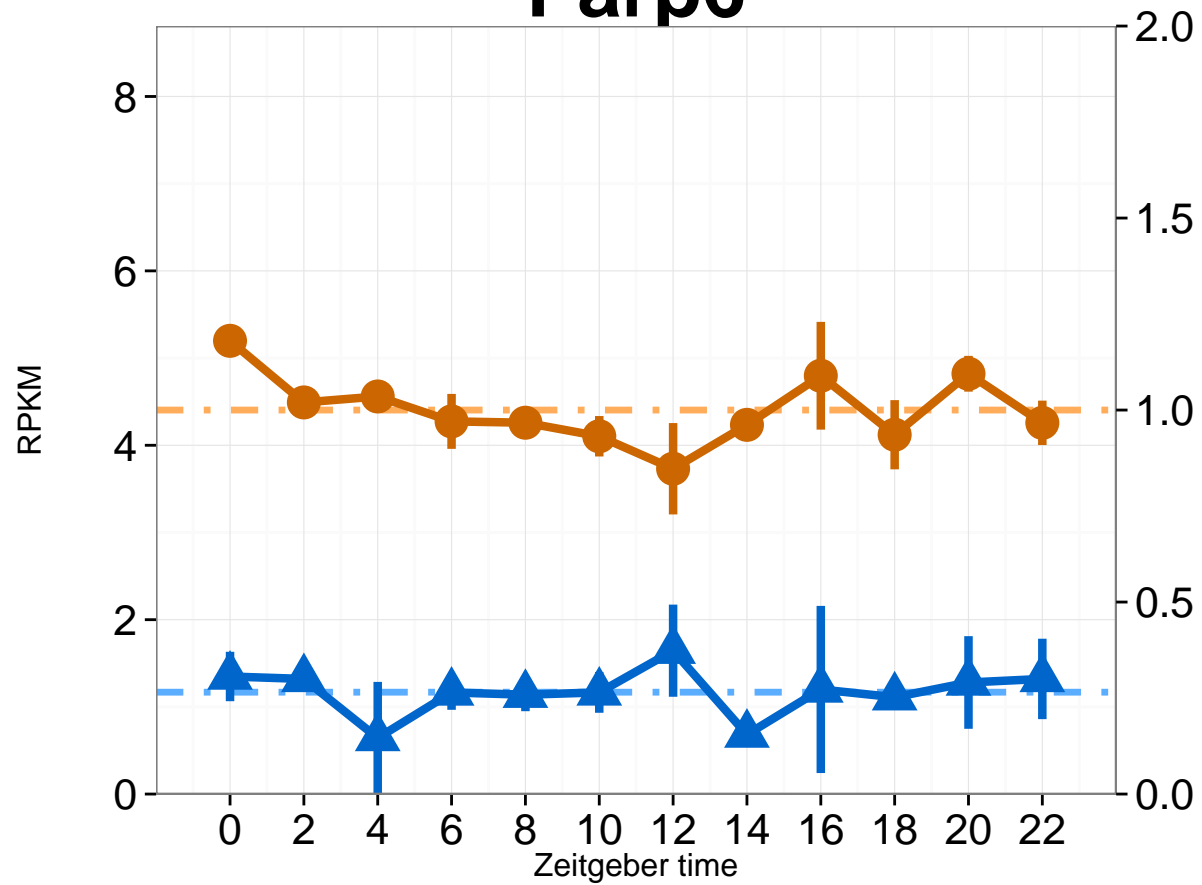

# Parp6

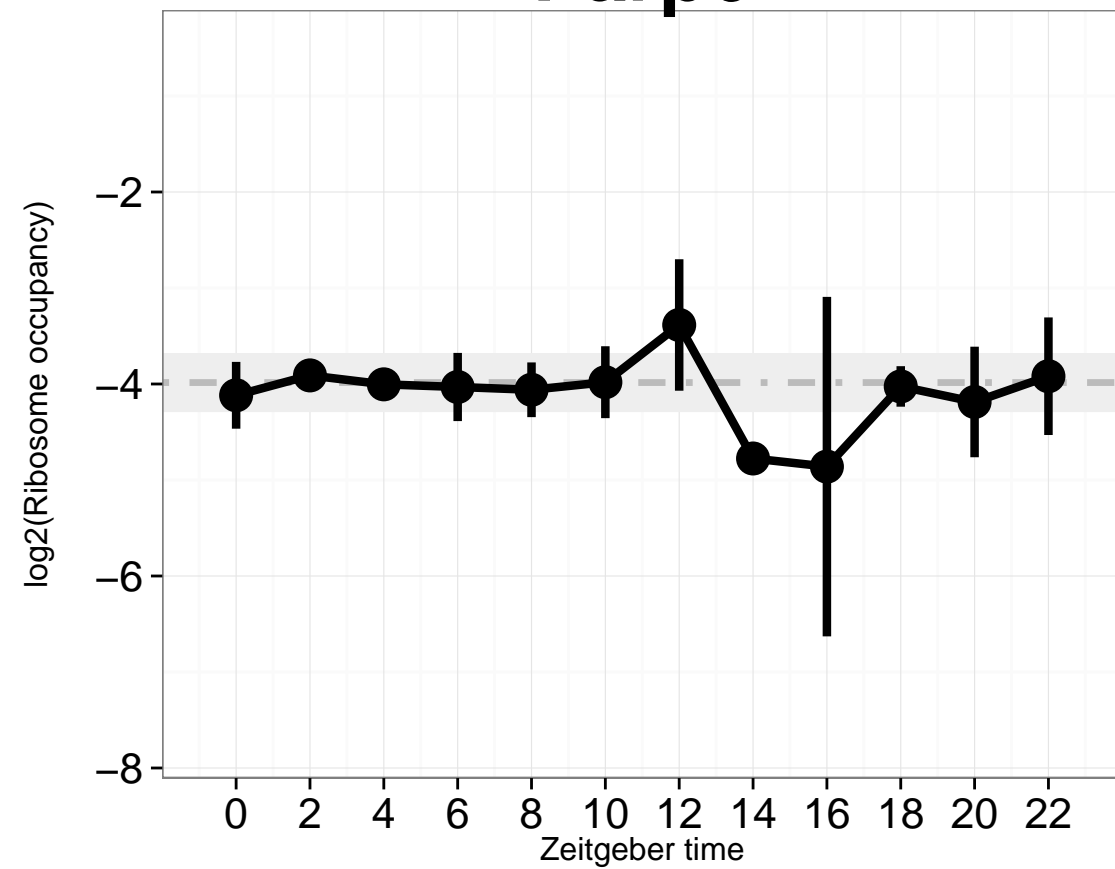

Supplement: Supplementary file 11357 [file 1]

# Taldo1

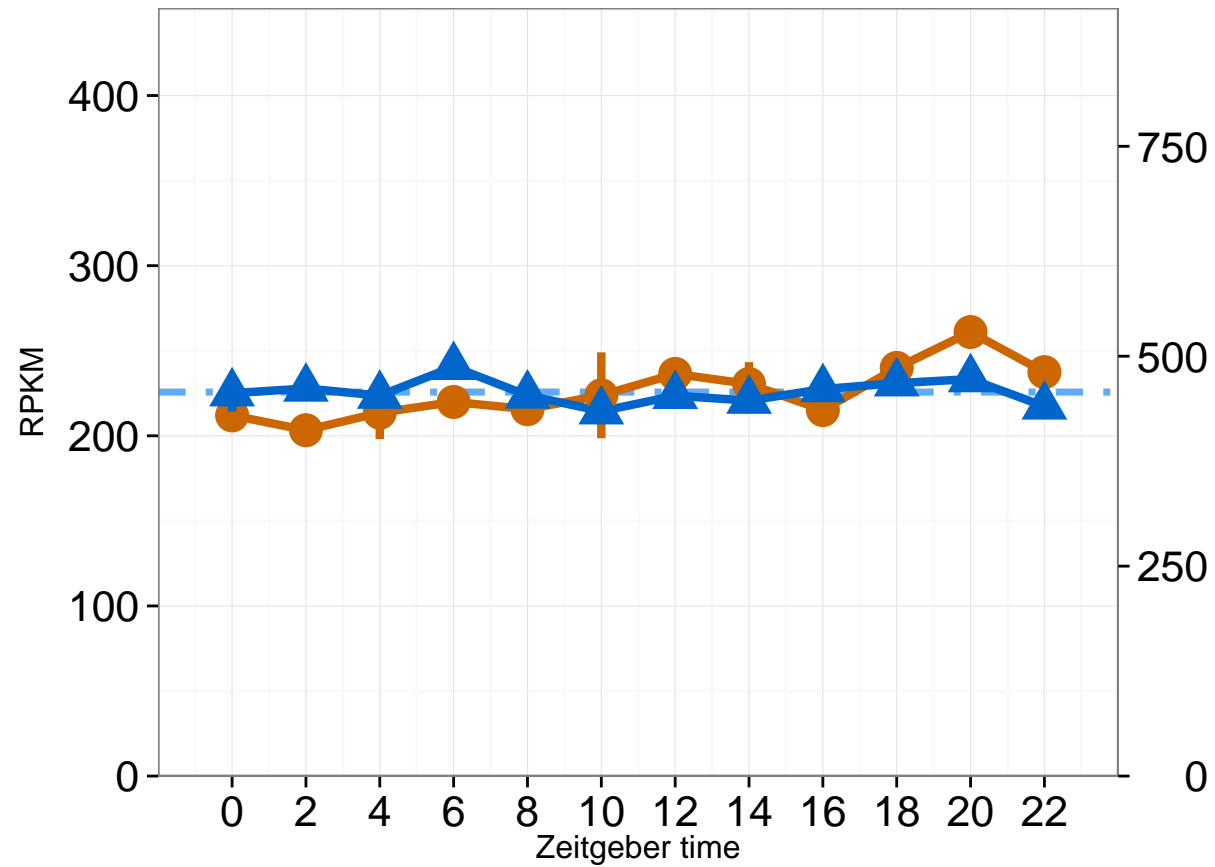

# Taldo1

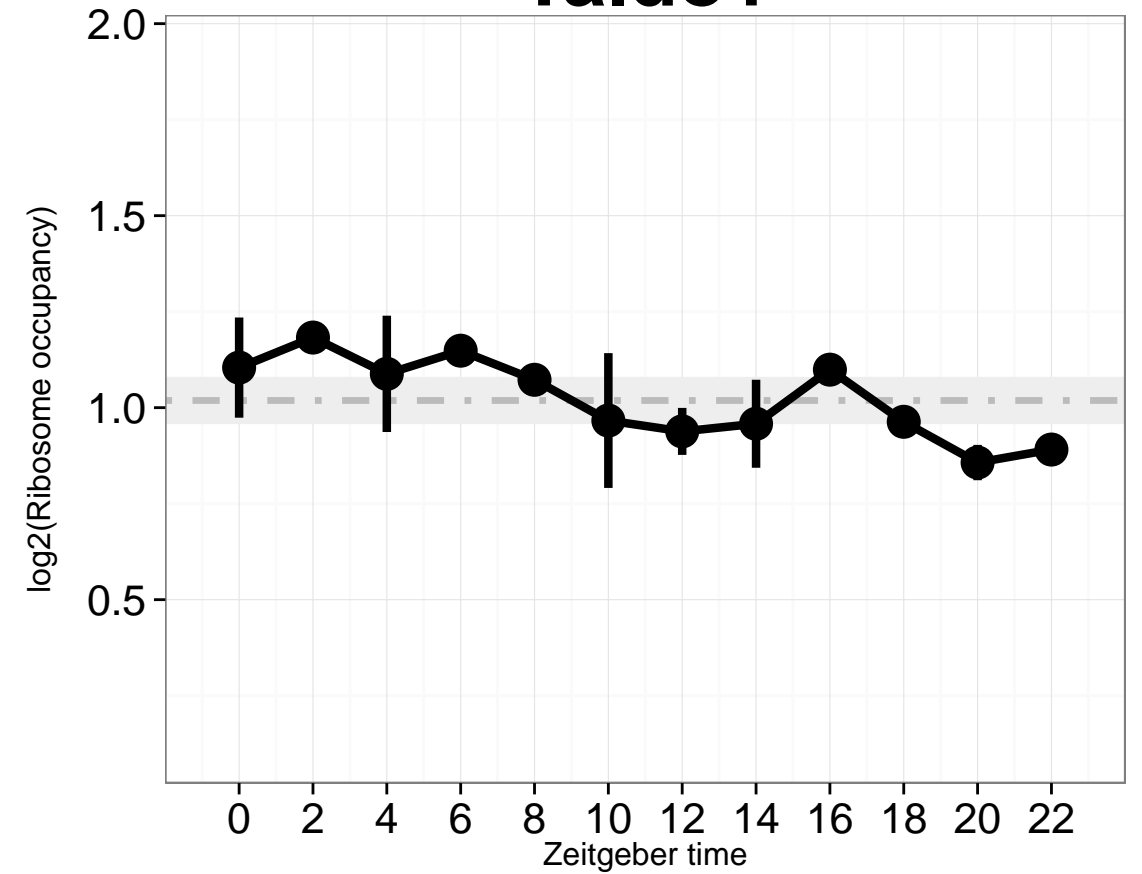

Supplement: Supplementary file 11358 [file 1]

# Mrps22

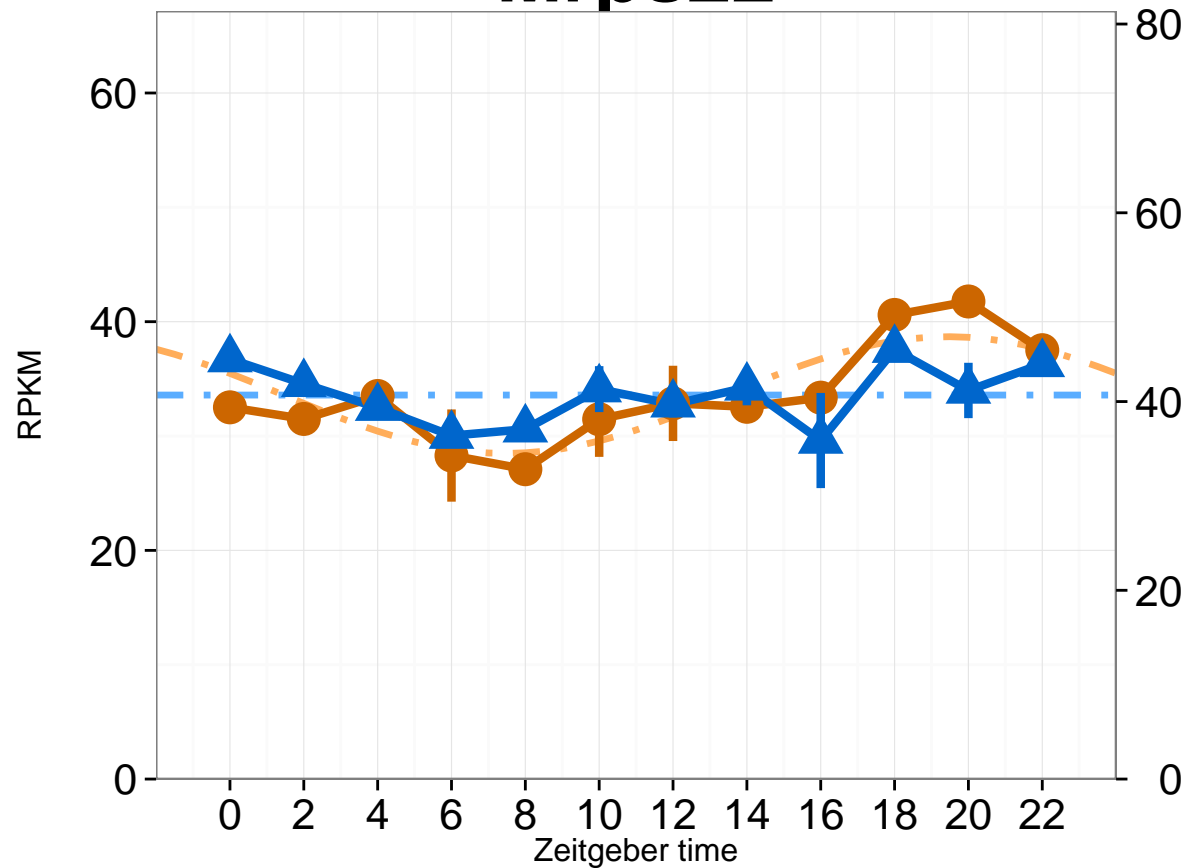

# Mrps22

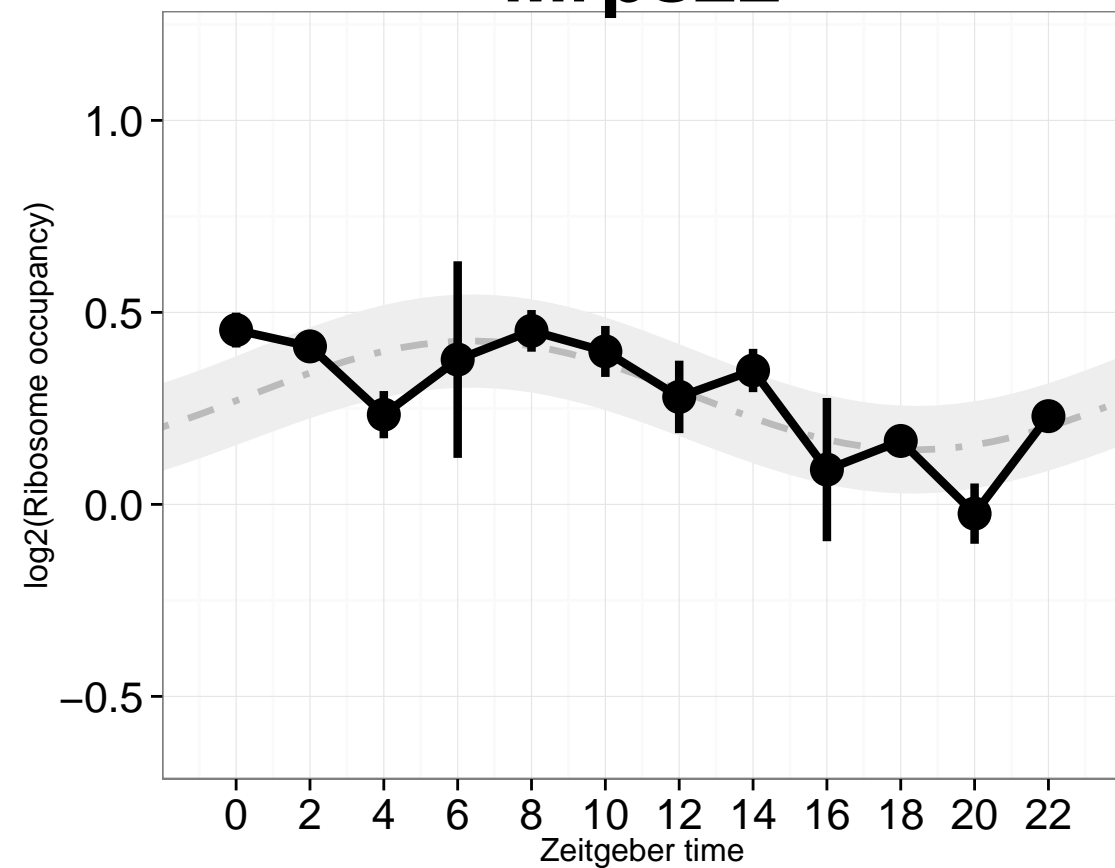

Supplement: Supplementary file 11359 [file 1]

# Rpl39

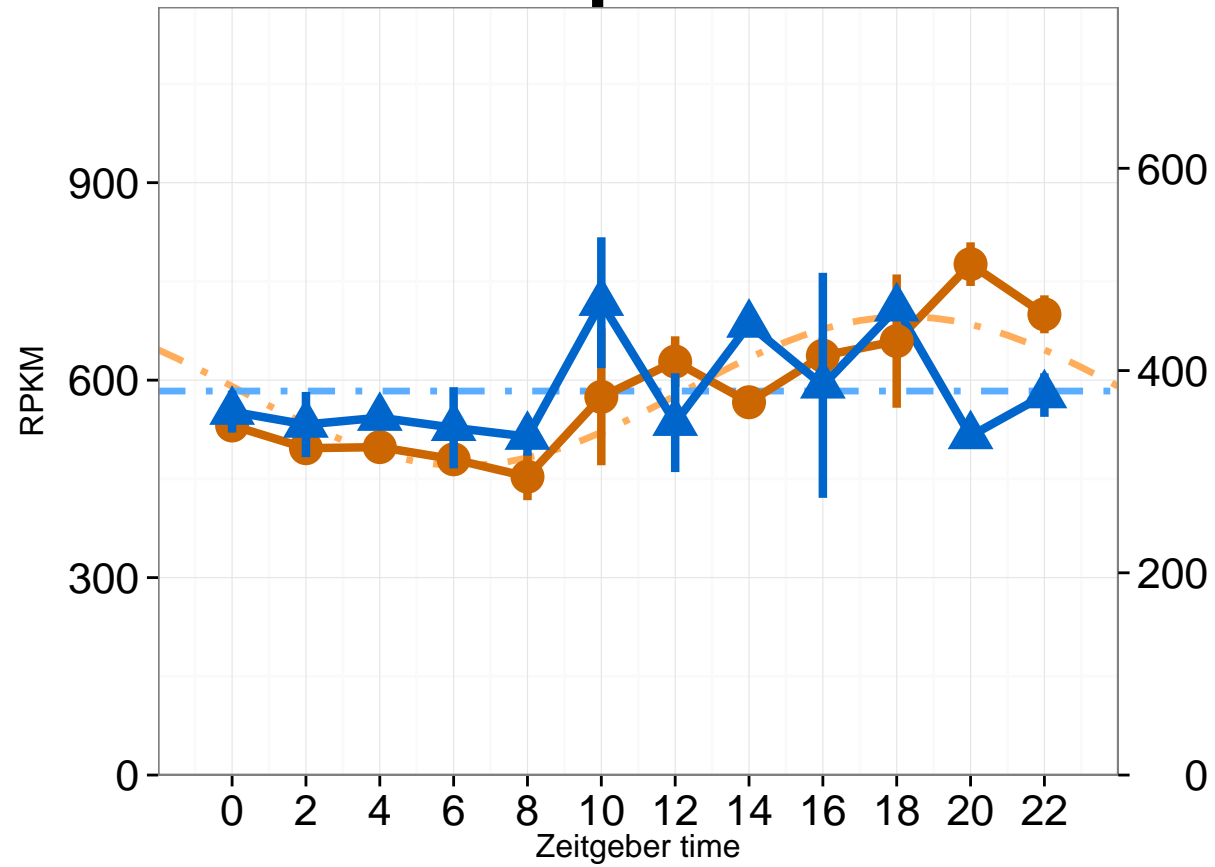

# Rpl39

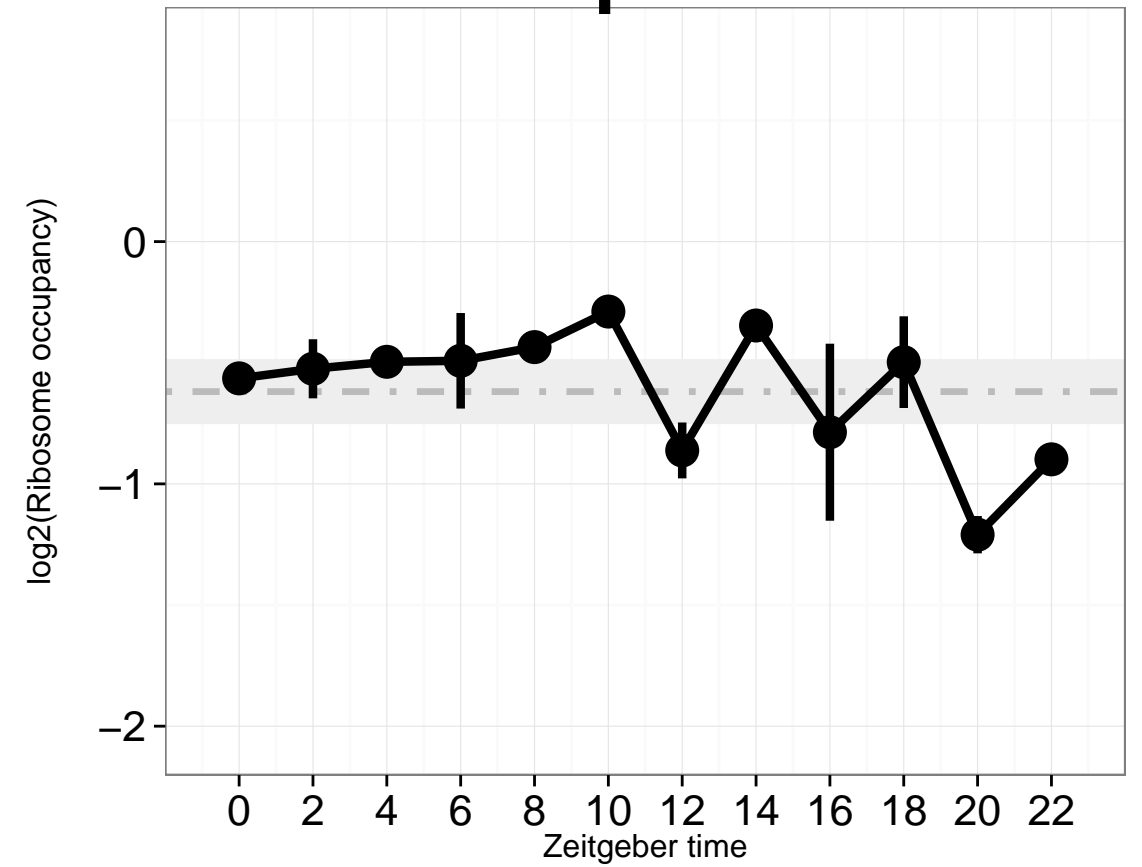

Supplement: Supplementary file 11360 [file 1]

# Inpp5e

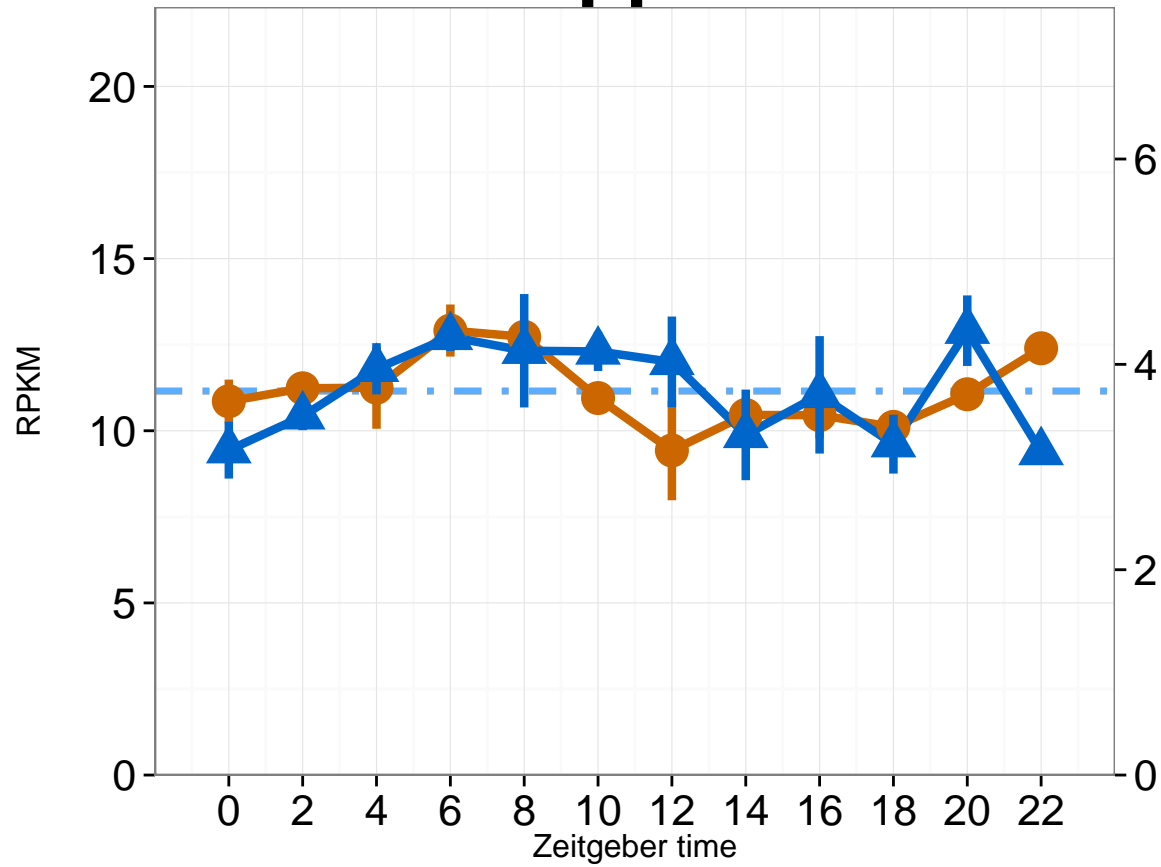

# Inpp5e

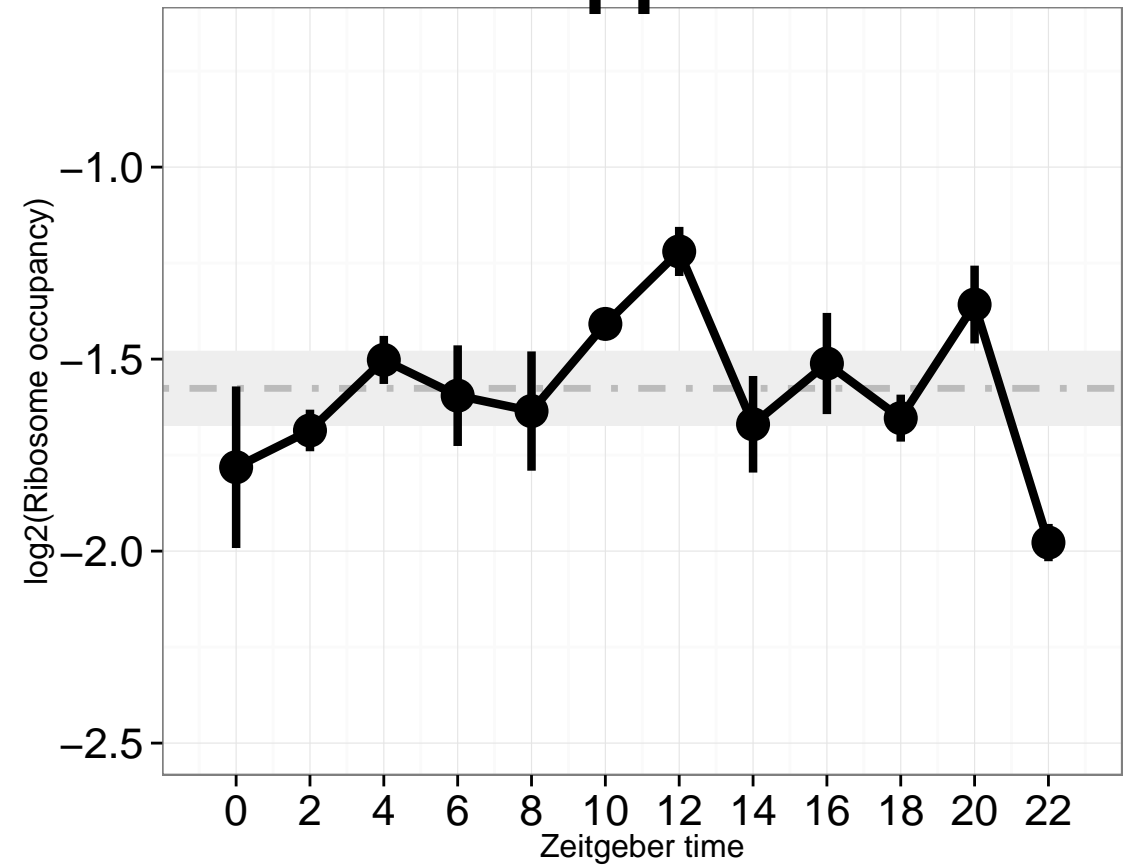

Supplement: Supplementary file 11361 [file 1]

# Spc25

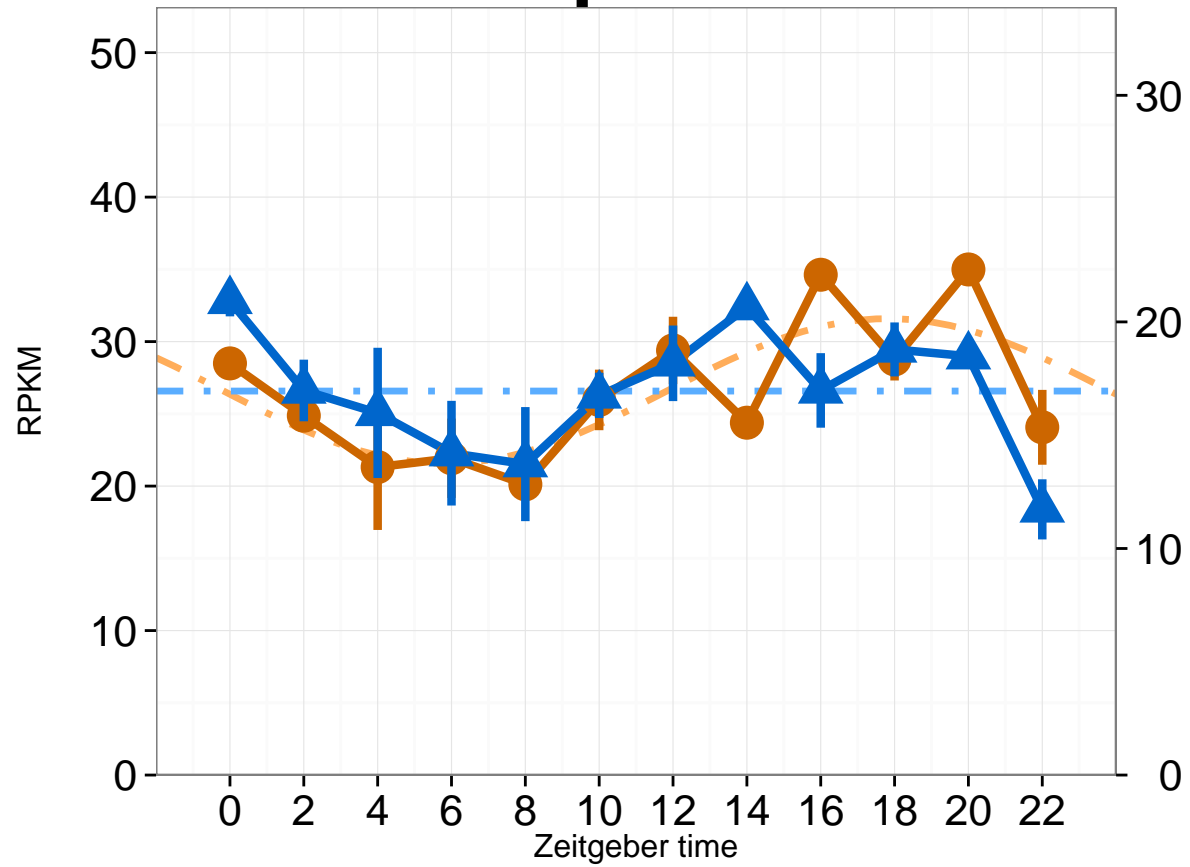

# Spc25

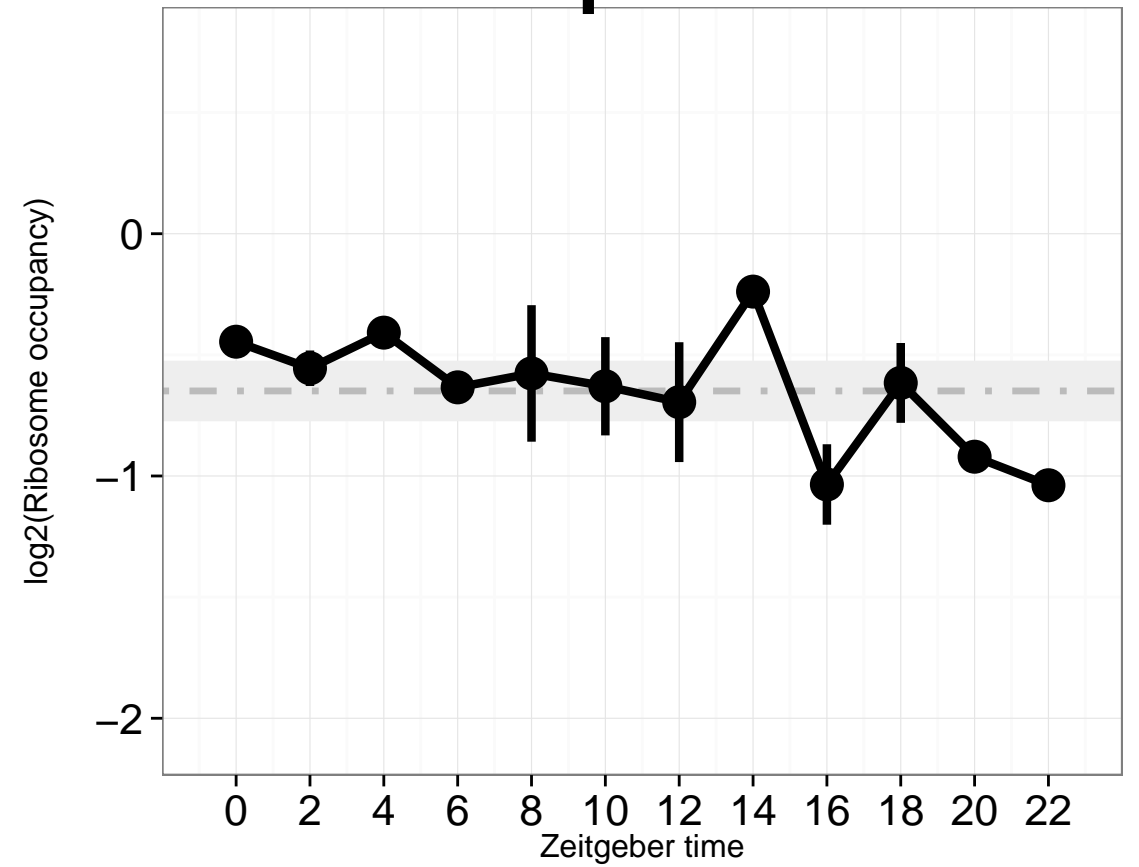

Supplement: Supplementary file 11362 [file 1]

# Eif4h

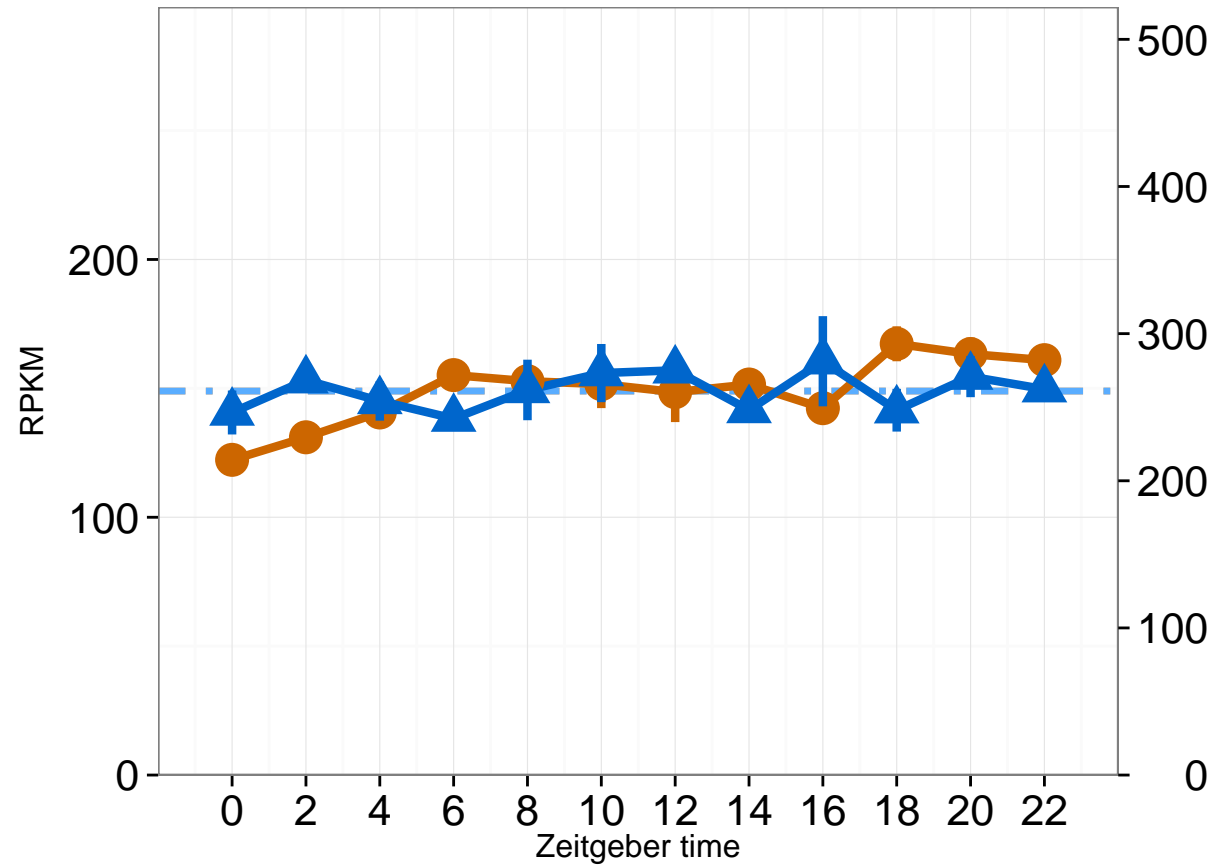

# Eif4h

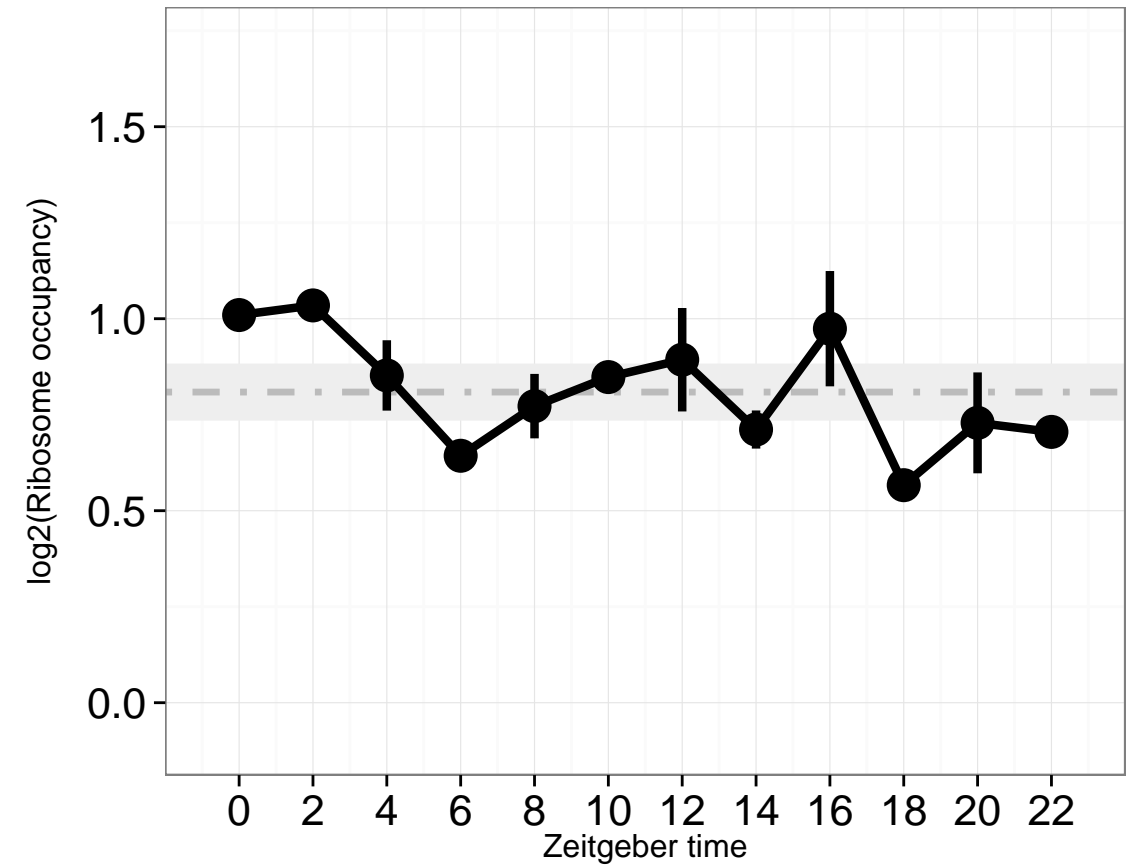

Supplement: Supplementary file 11363 [file 1]

mt-Nd6

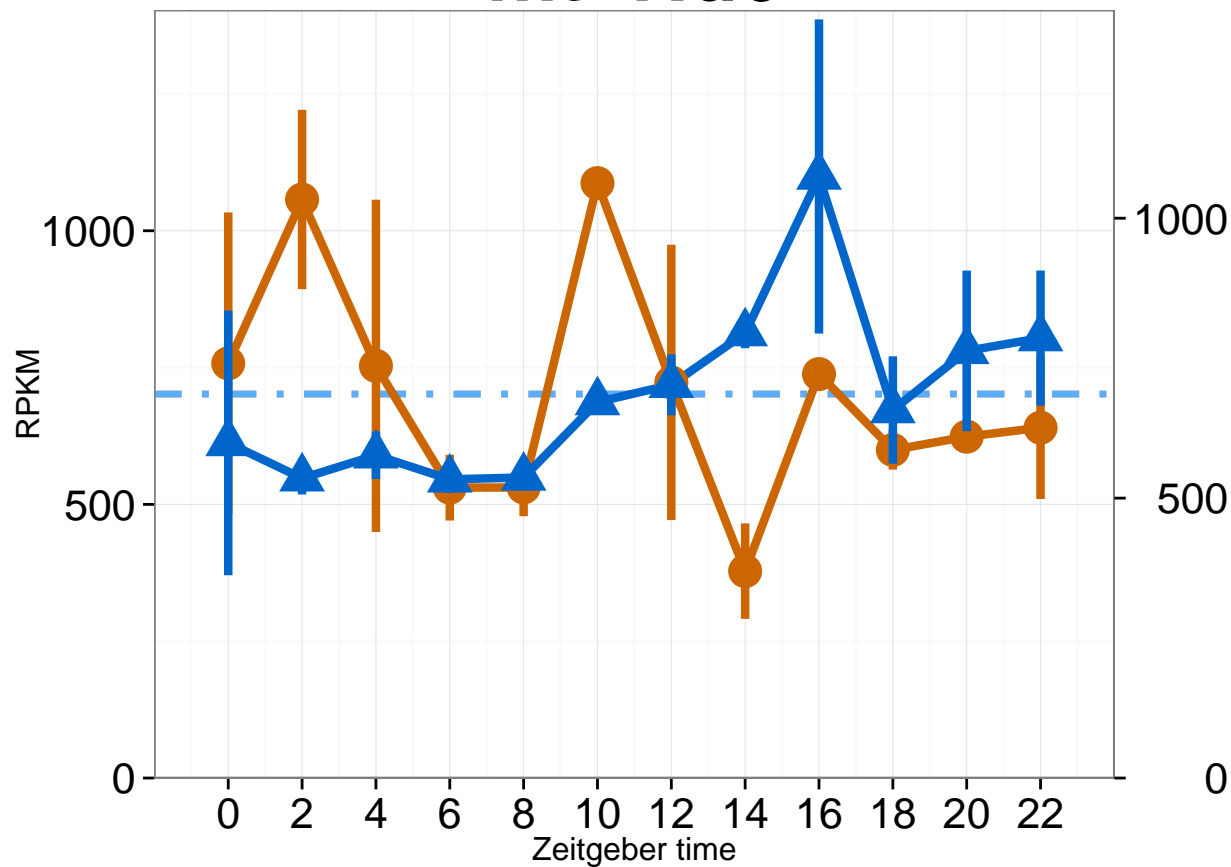

mt-Nd6

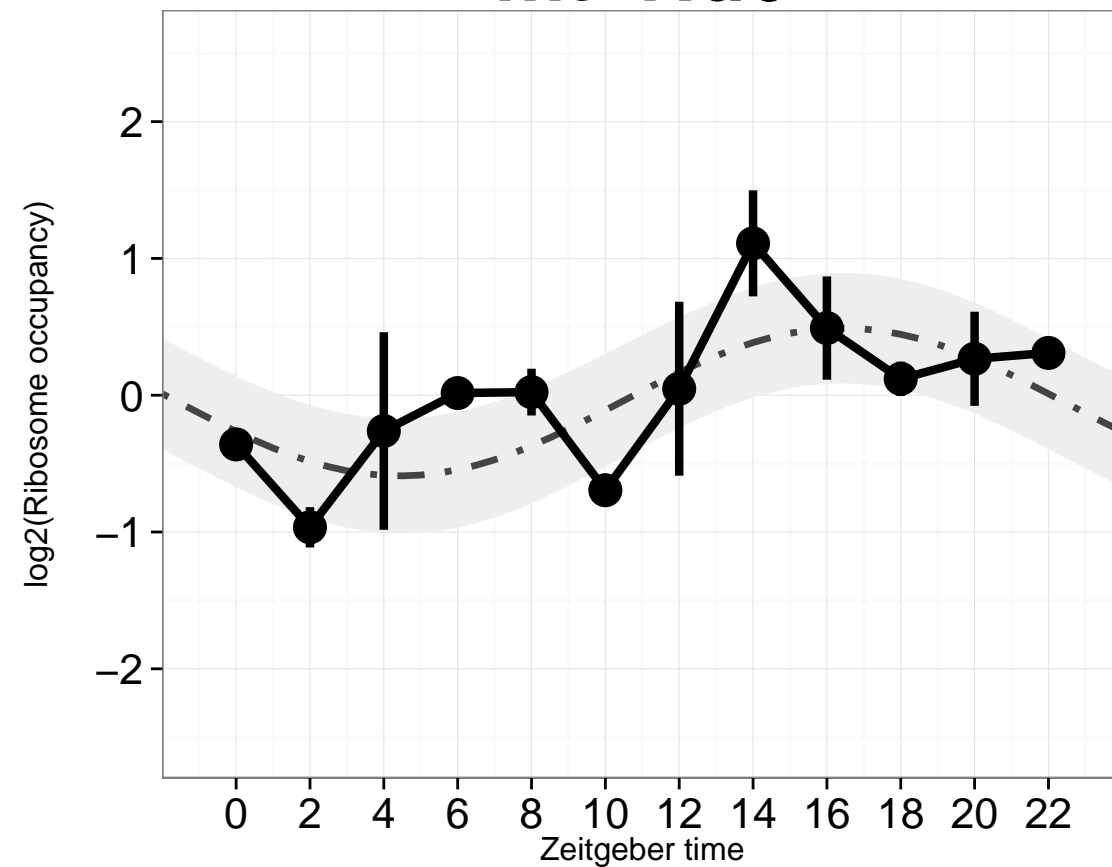

Supplement: Supplementary file 11364 [file 1]

## Cys1

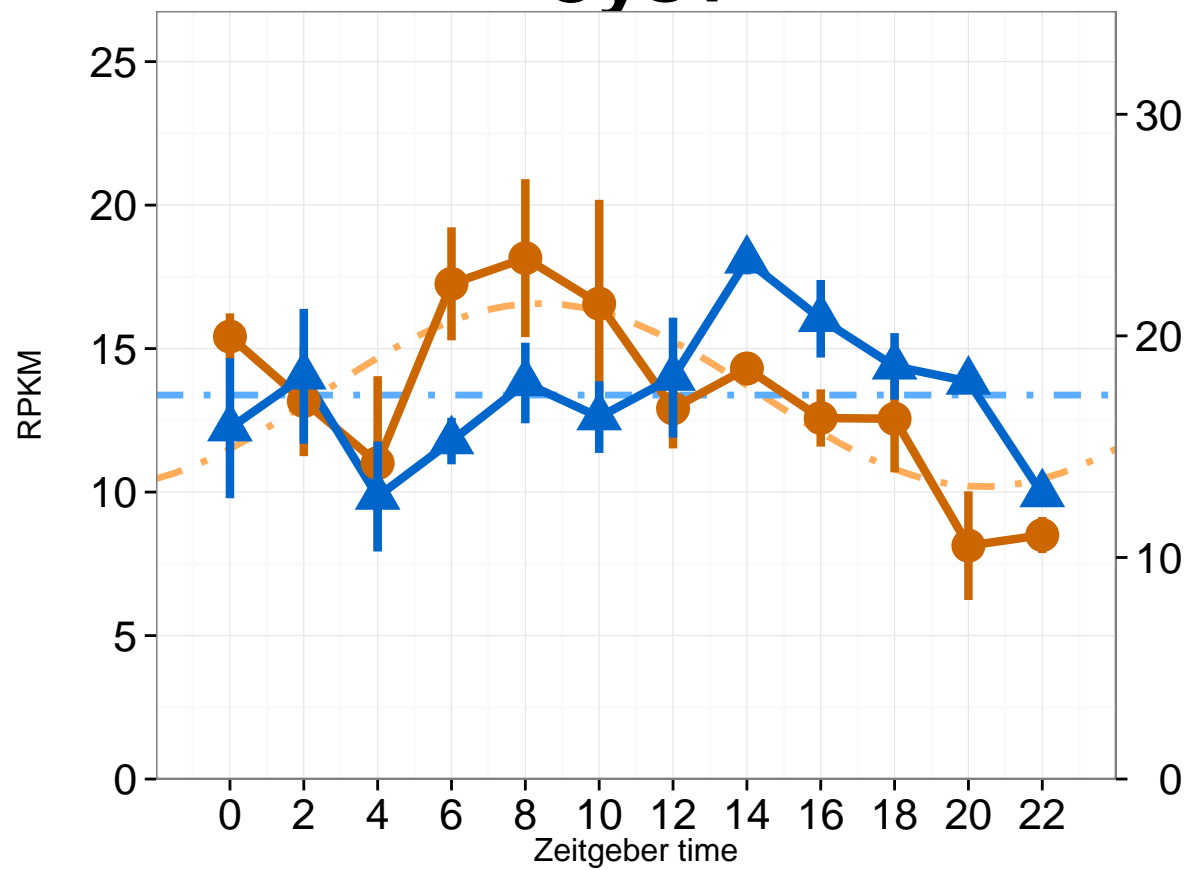

## Cys1

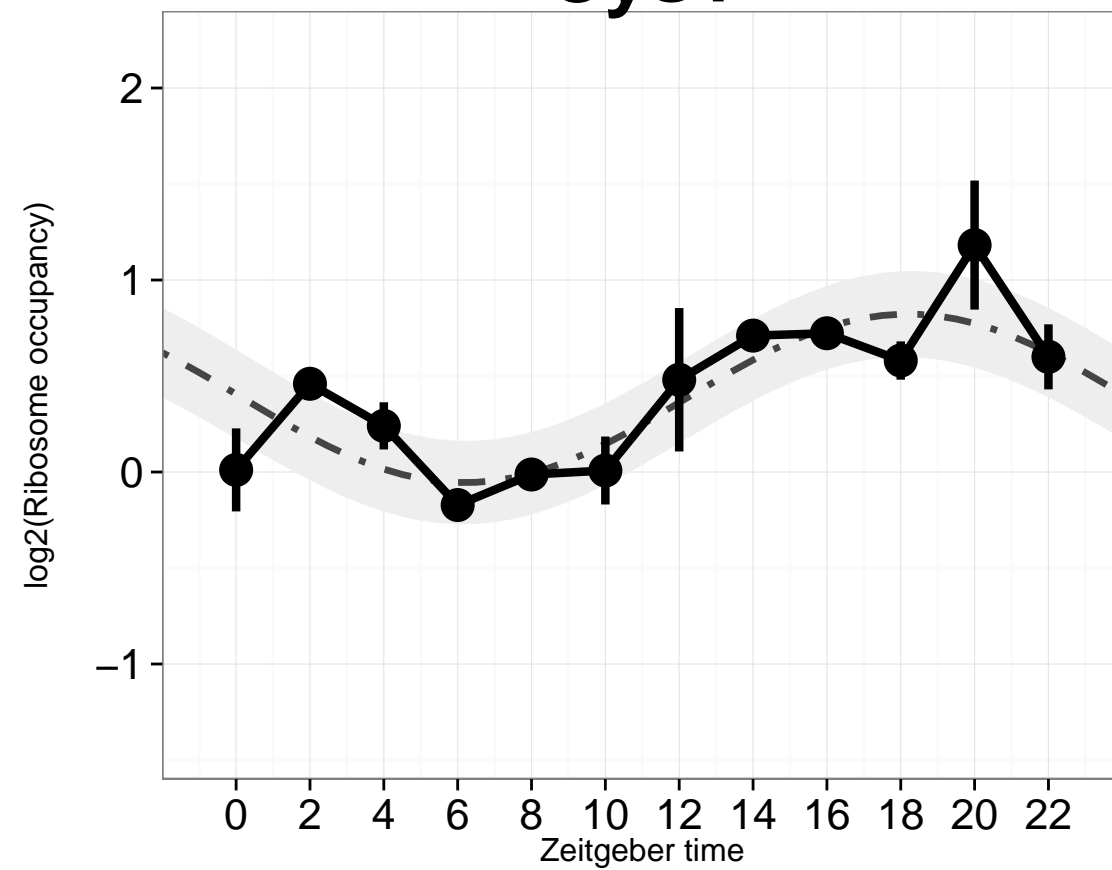

Supplement: Supplementary file 11365 [file 1]

## Agbl2

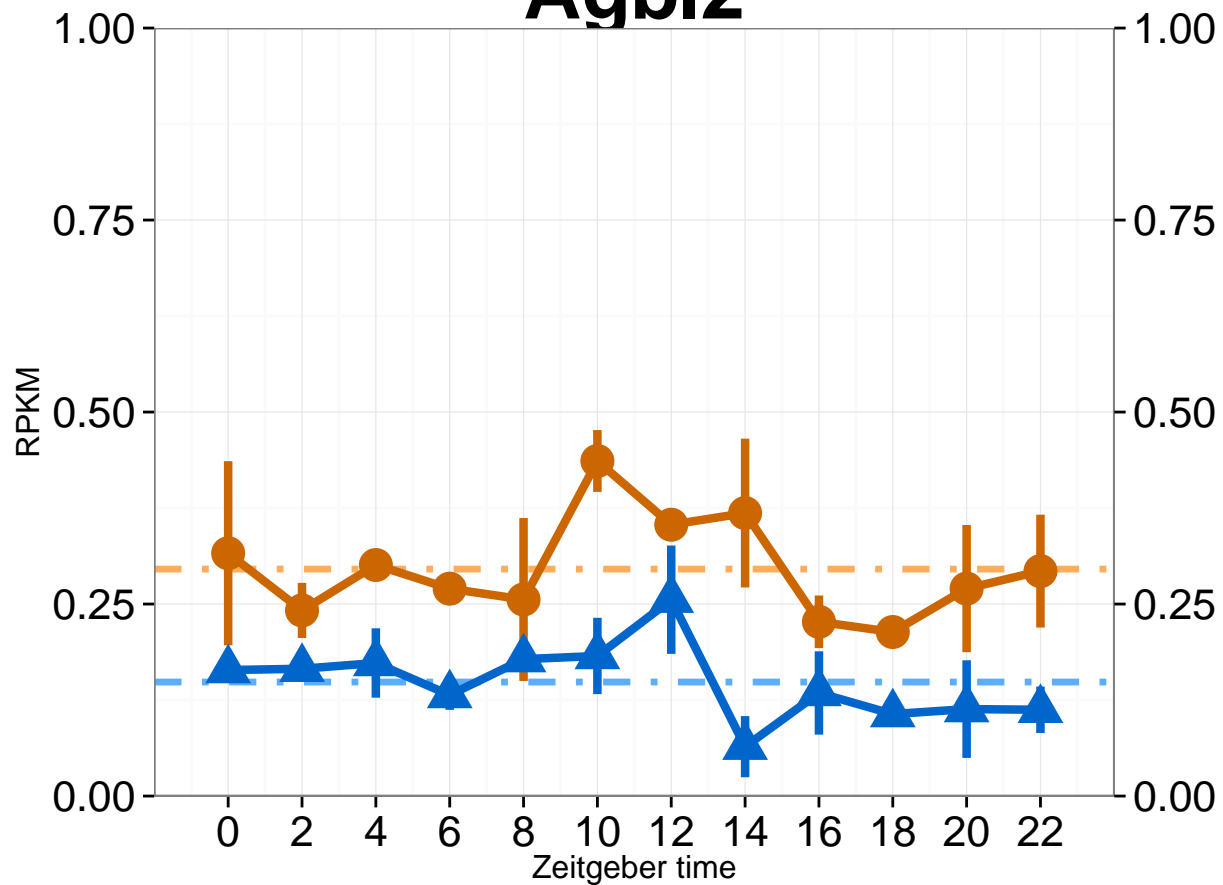

## Agbl2

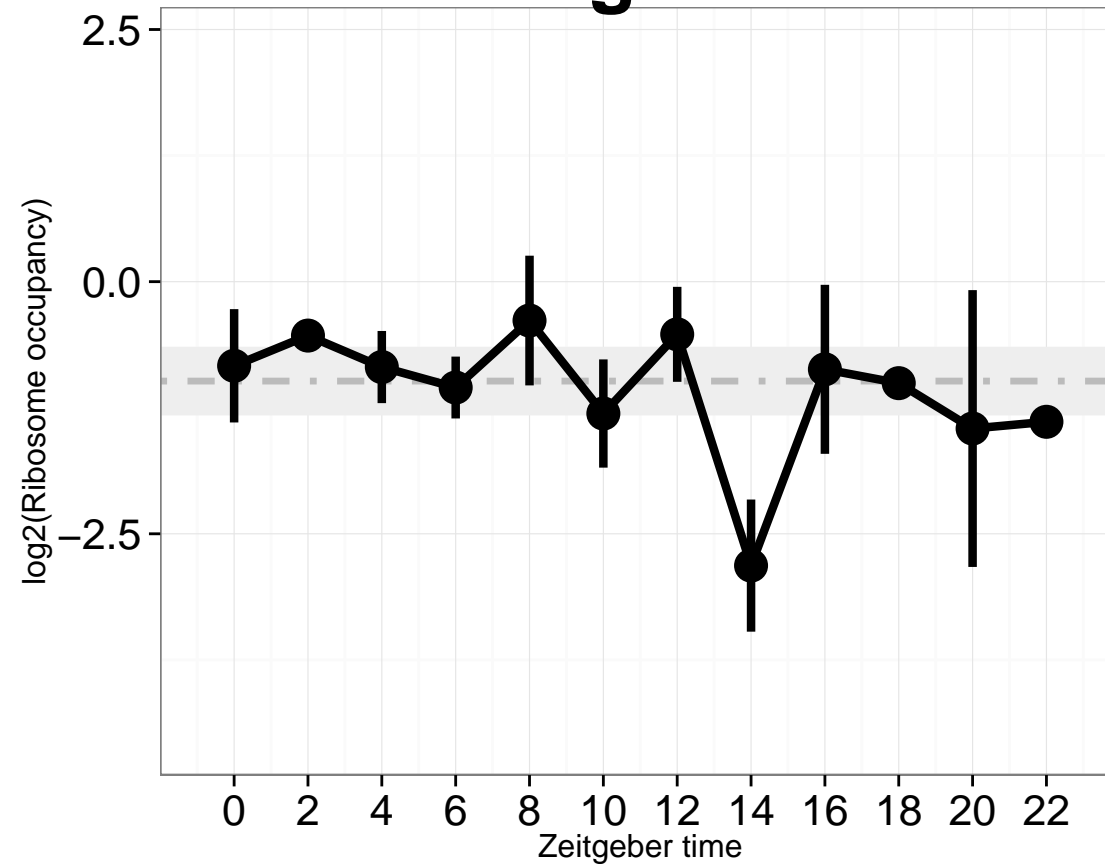

Supplement: Supplementary file 11366 [file 1]

# Zpld1

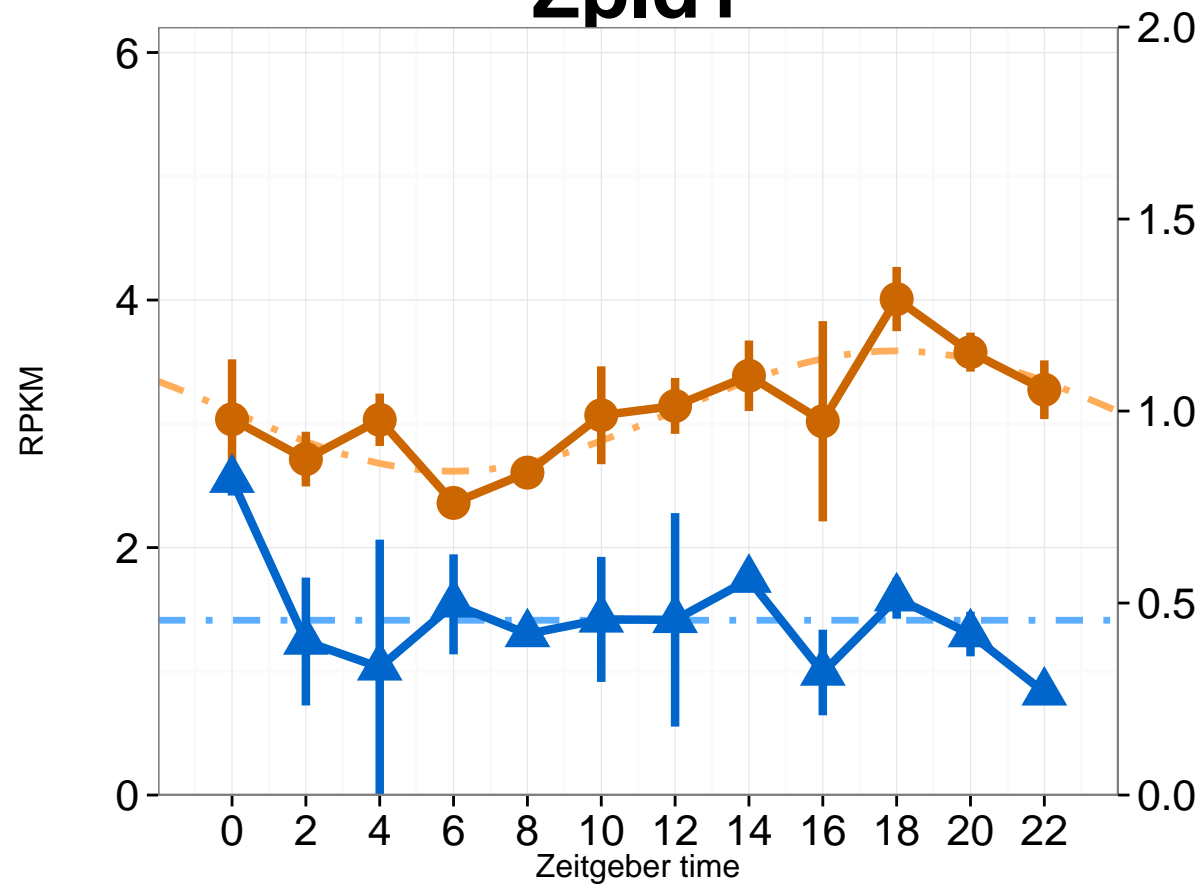

# Zpld1

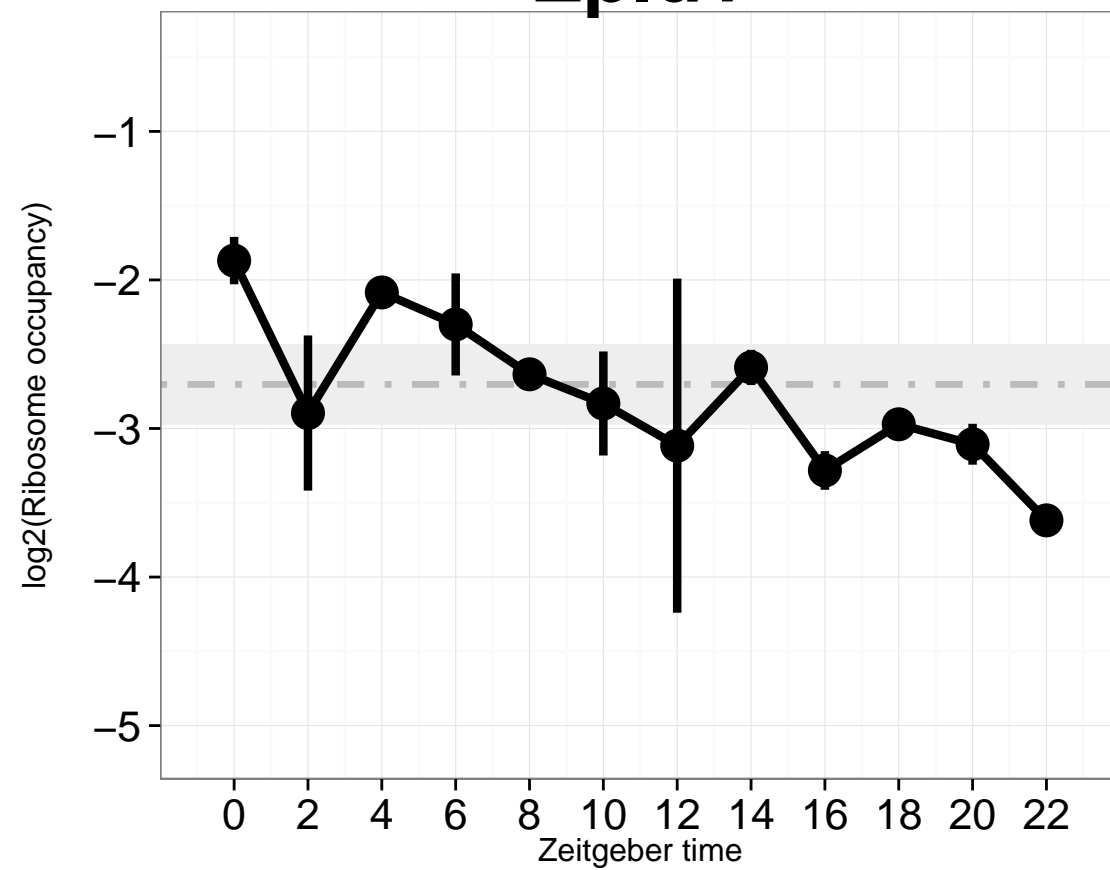

Supplement: Supplementary file 11367 [file 1]

# Mt1

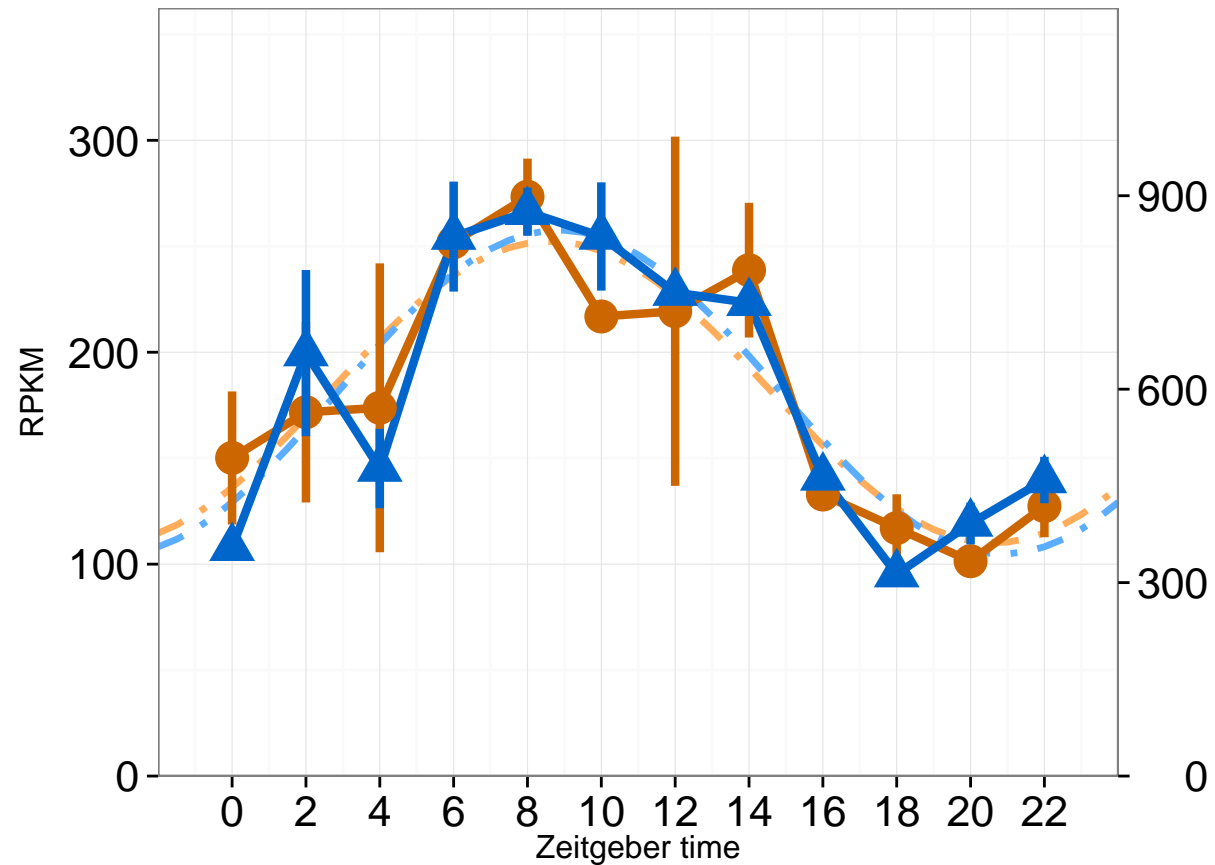

# Mt1

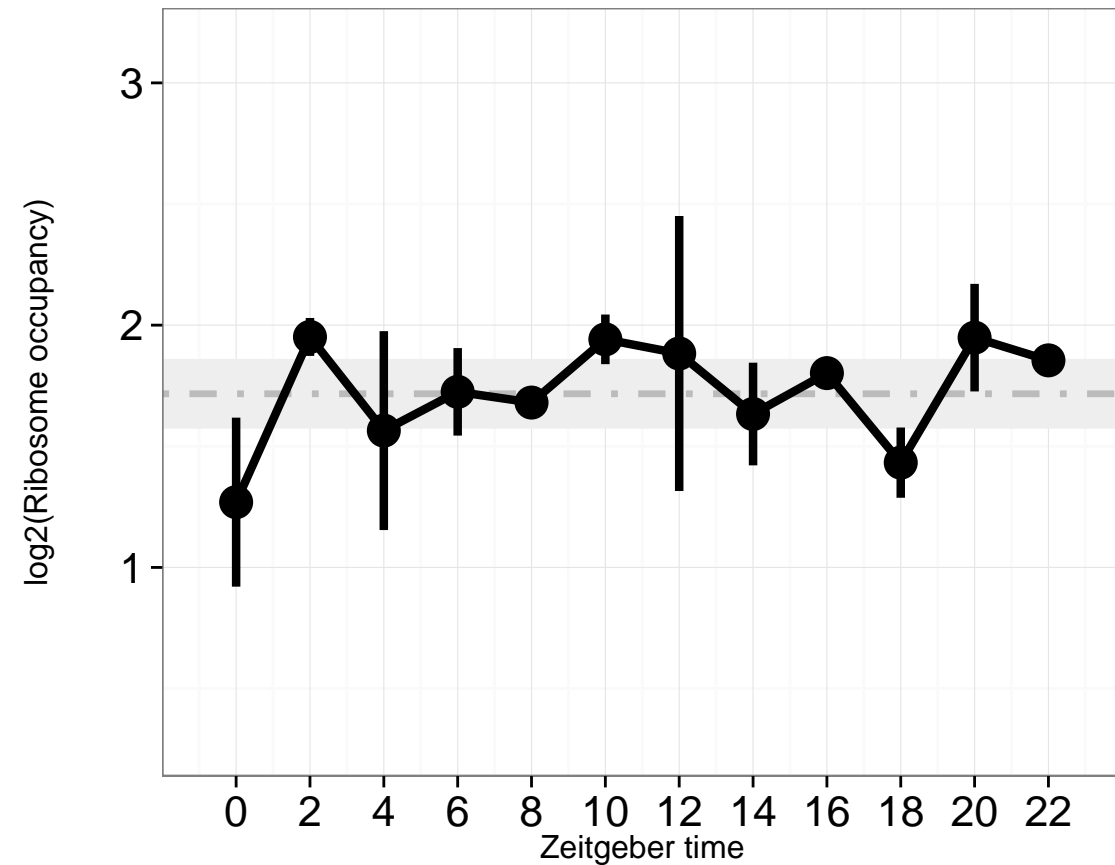

Supplement: Supplementary file 11368 [file 1]

# Map3k6

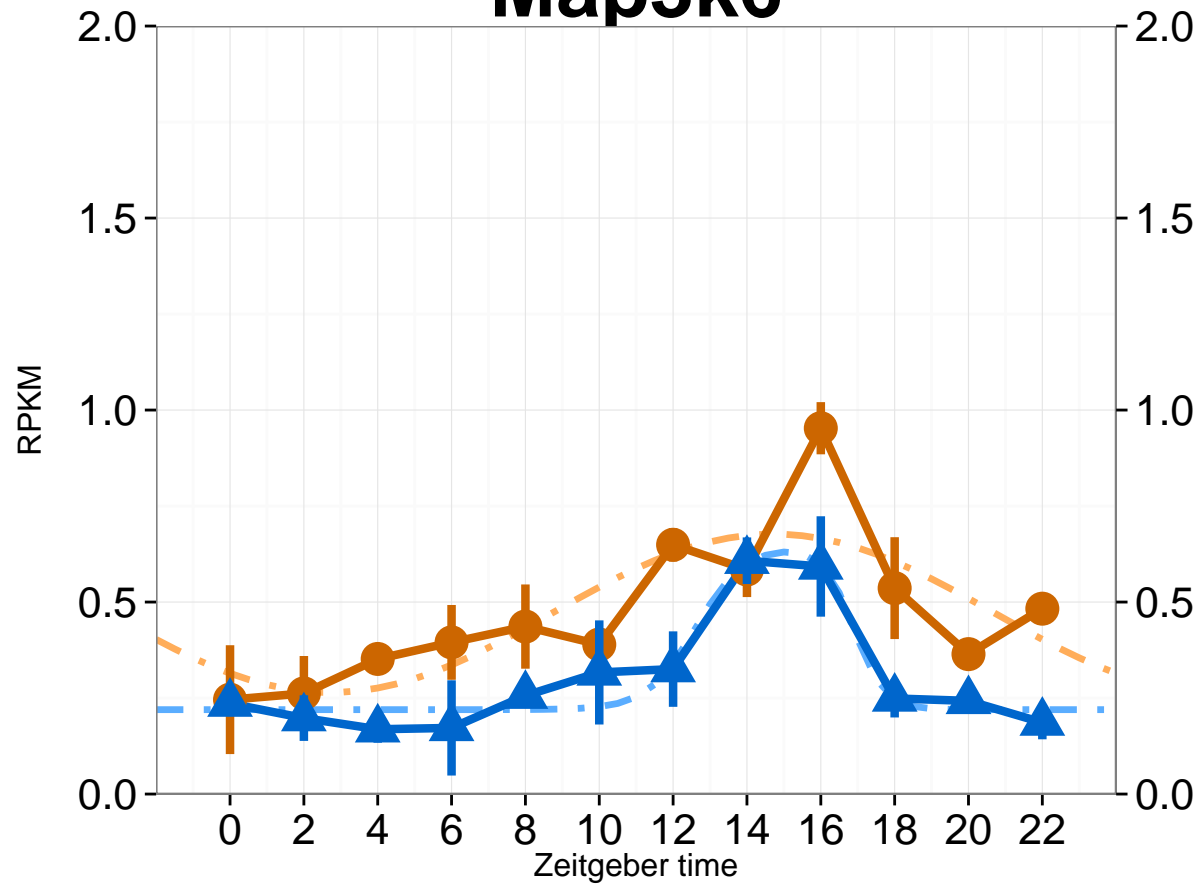

# Map3k6

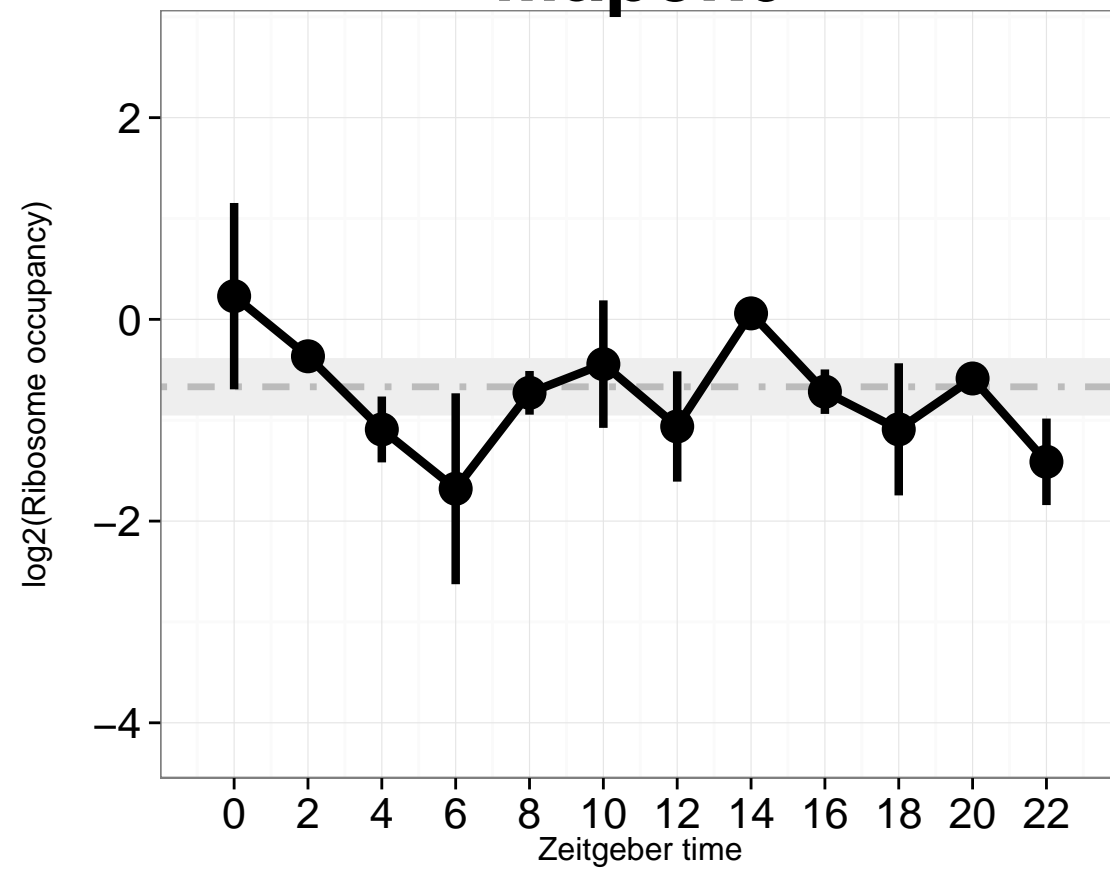

Supplement: Supplementary file 11369 [file 1]

# Mgat5

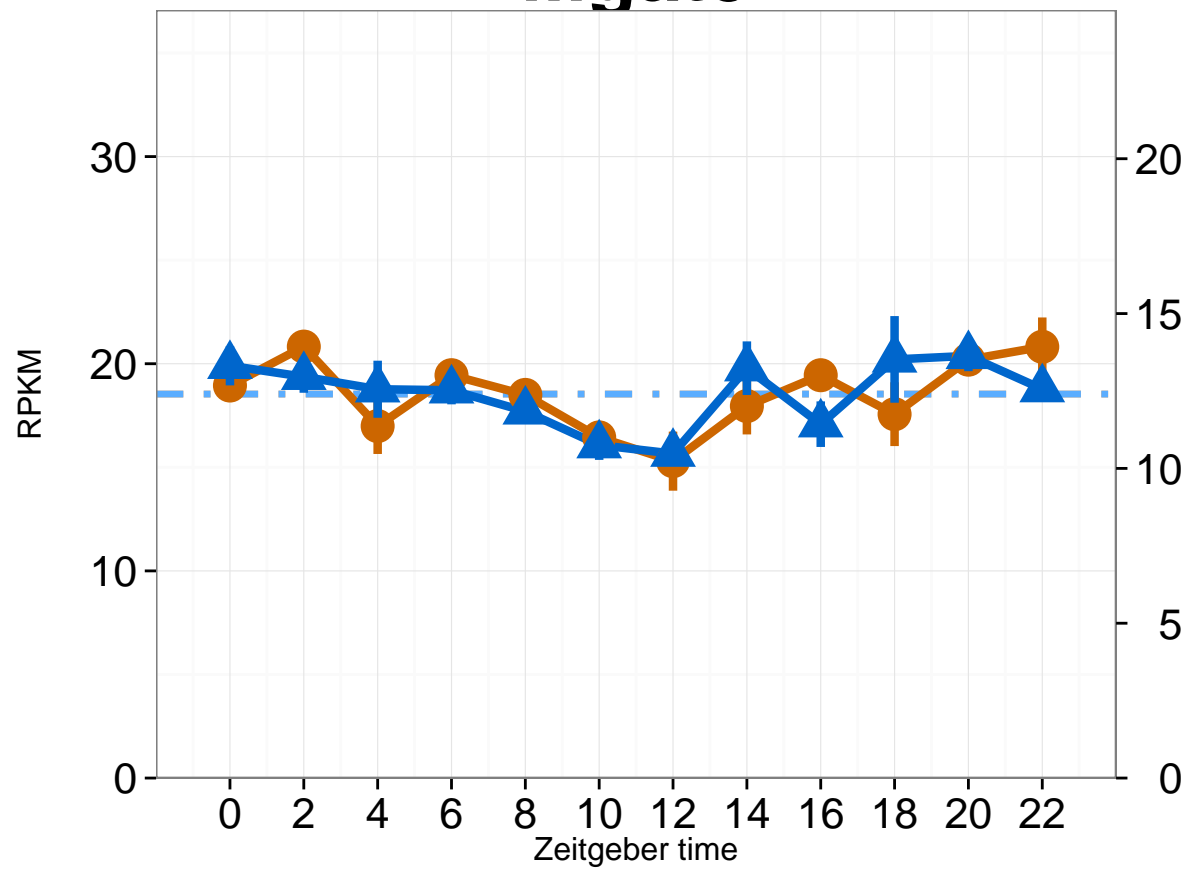

# Mgat5

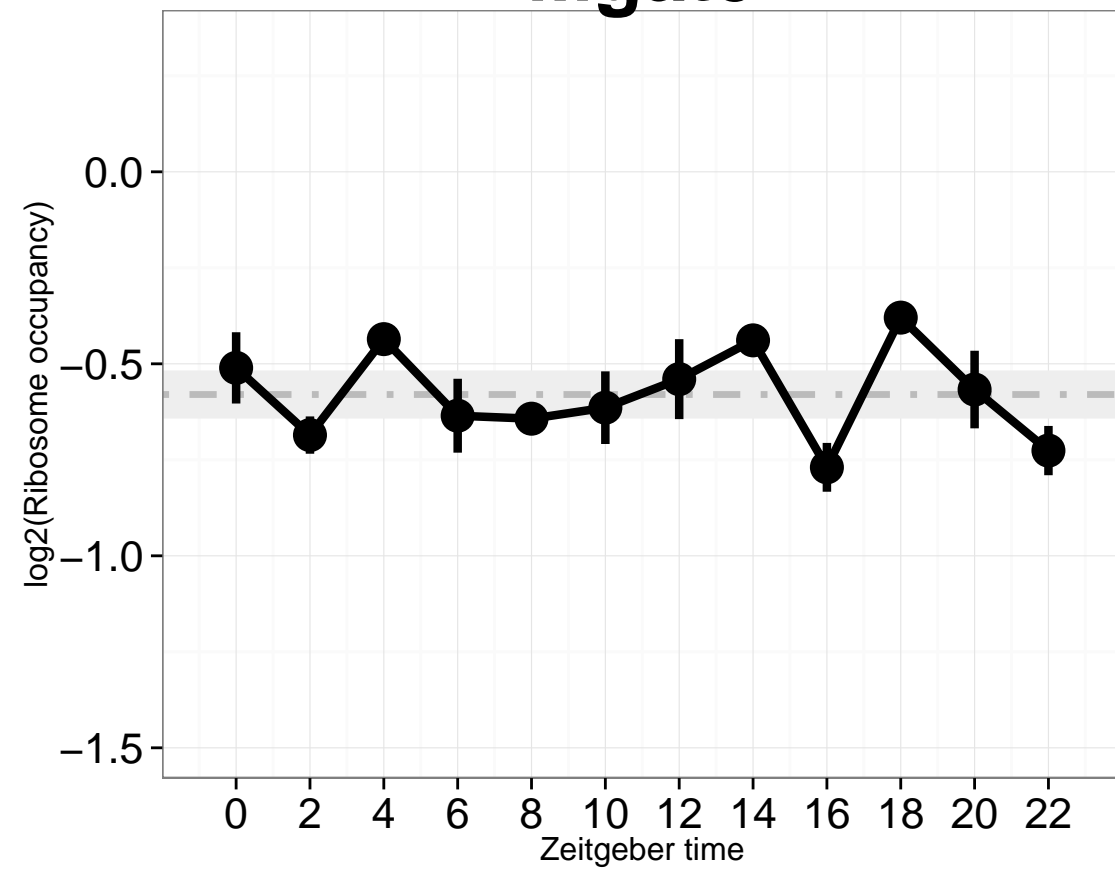

Supplement: Supplementary file 11370 [file 1]

# Tmod1

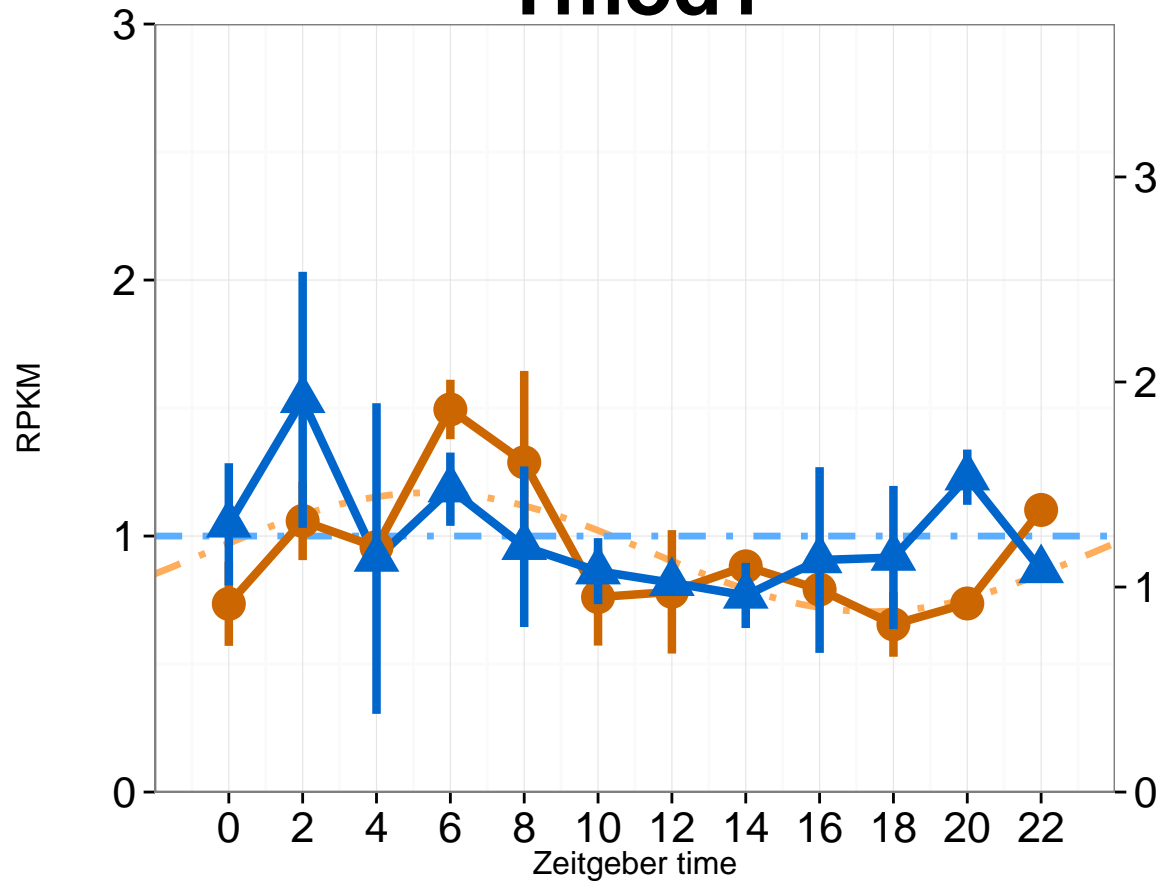

# Tmod1

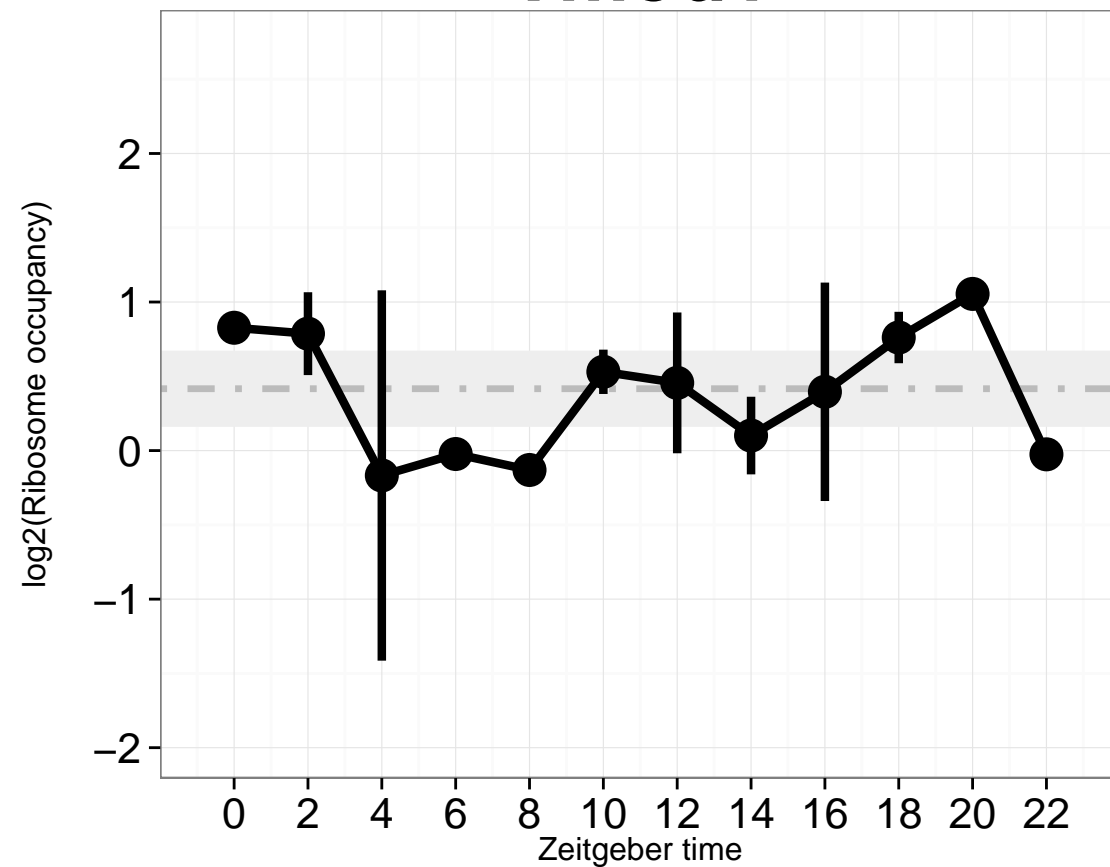

Supplement: Supplementary file 11371 [file 1]

## Ankrd39

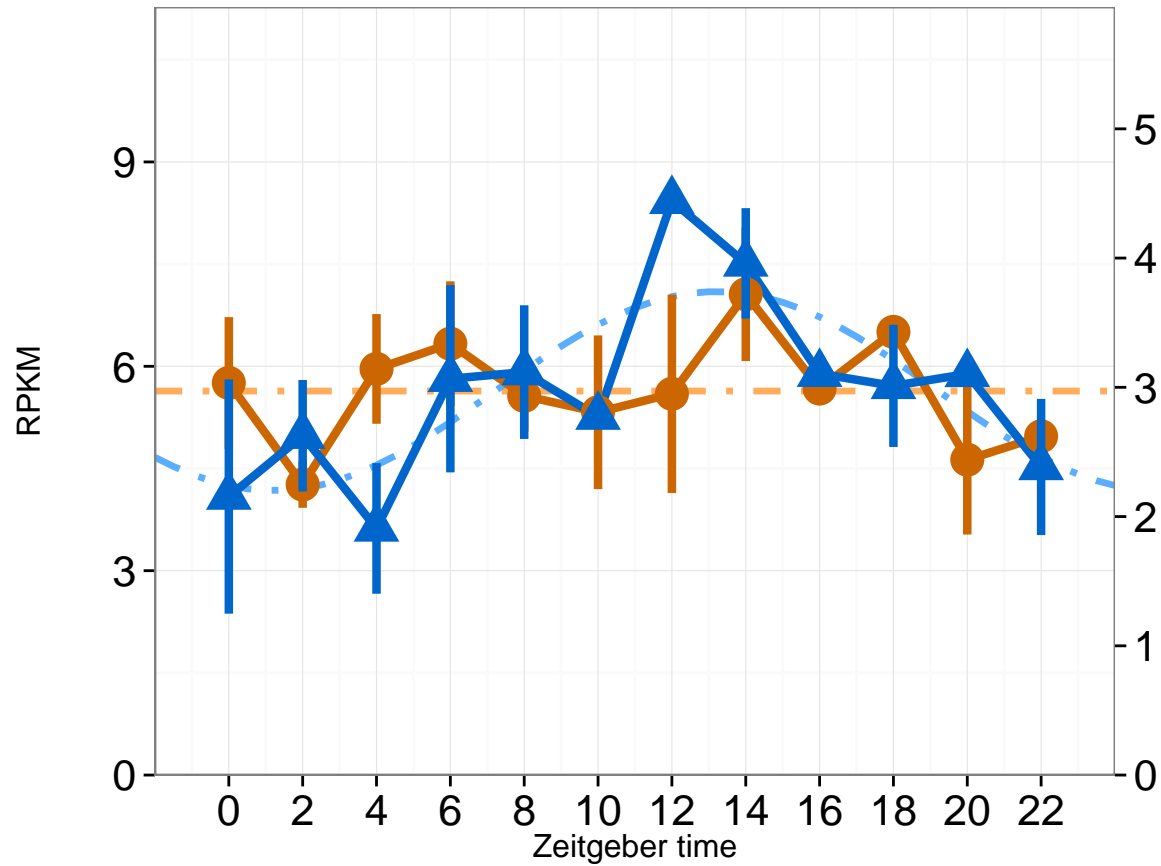

## Ankrd39

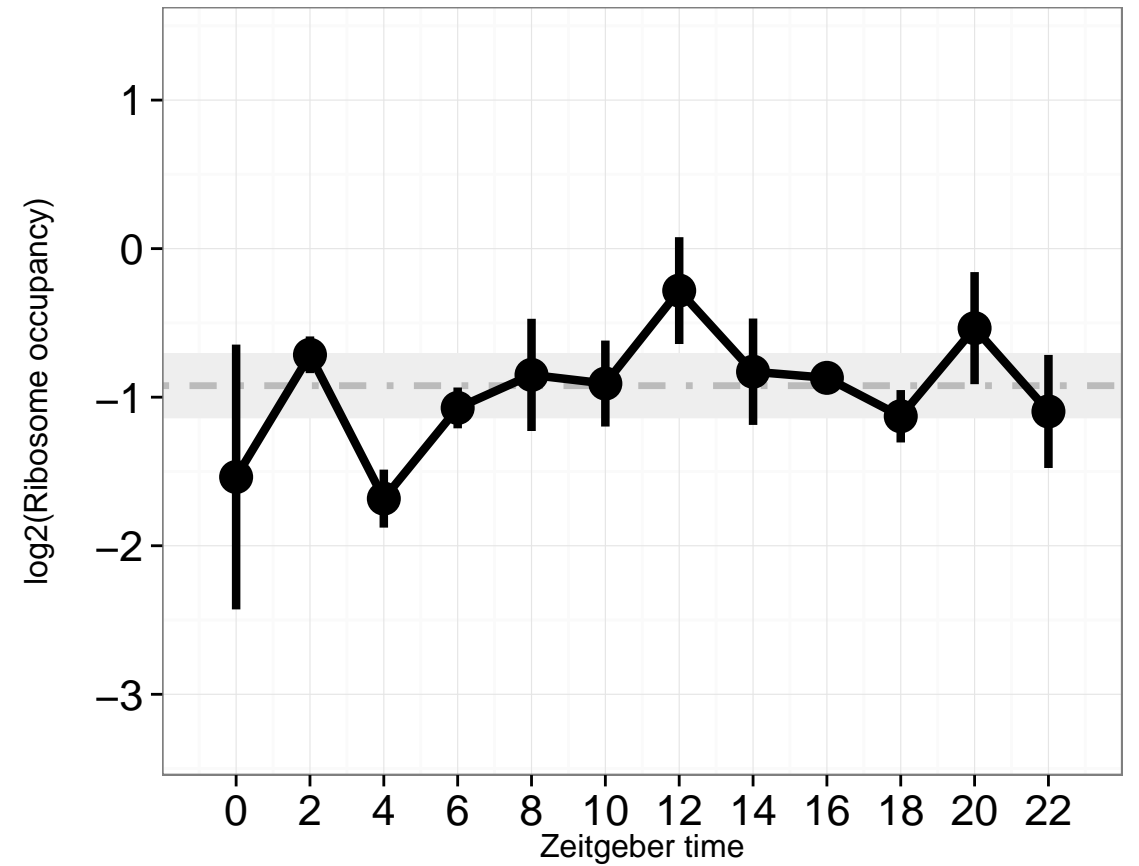

Supplement: Supplementary file 11372 [file 1]

**Bhlhe22 TR**

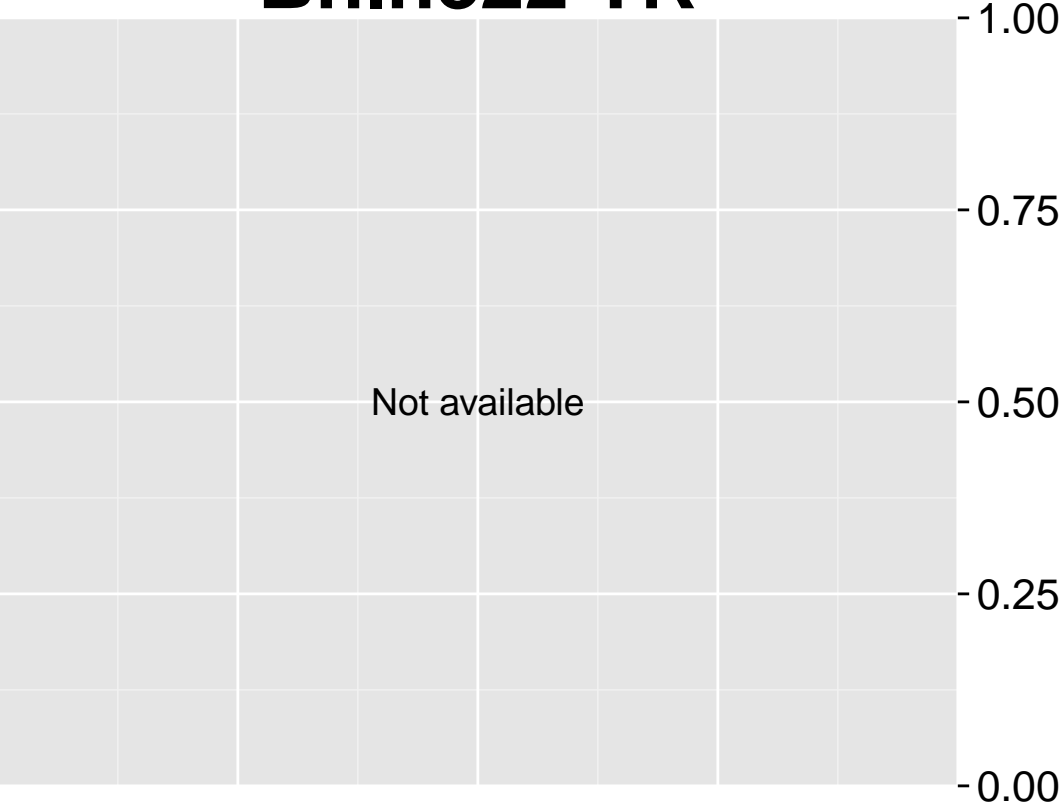

**Bhlhe22 log2(Ribosome occupanc**

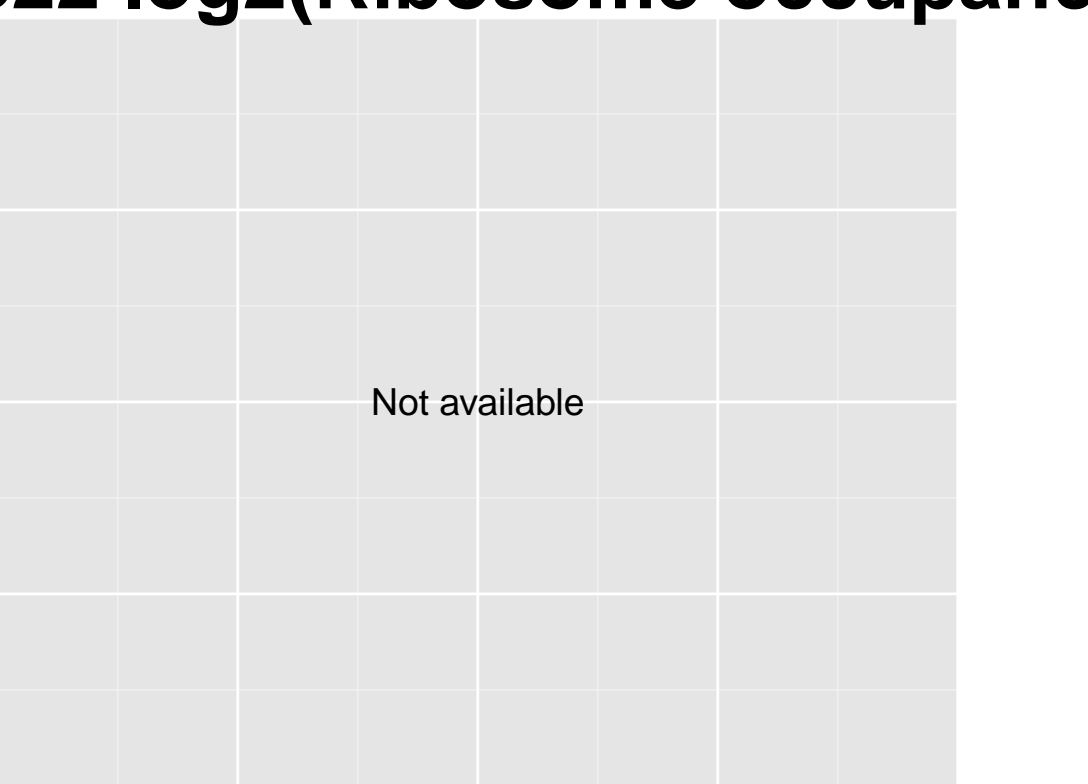

Supplement: Supplementary file 11373 [file 1]

## Champ1

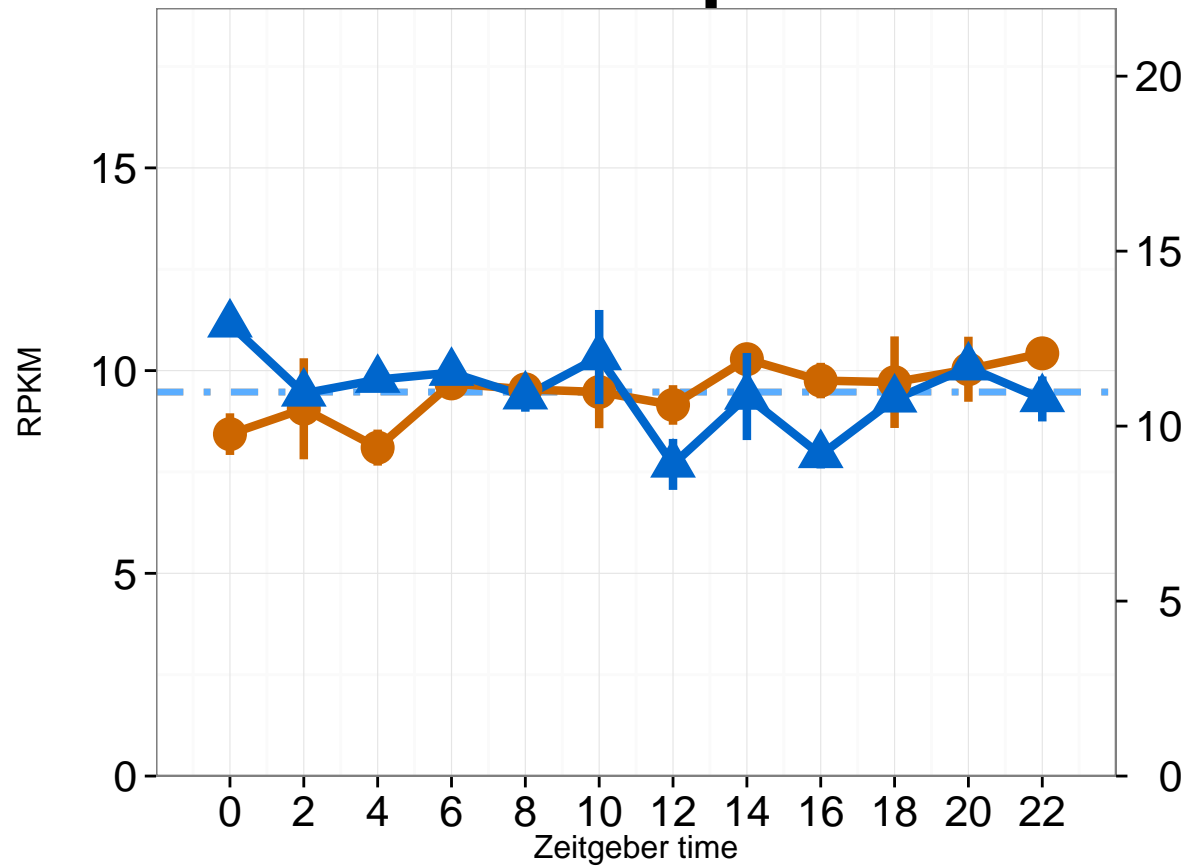

## Champ1

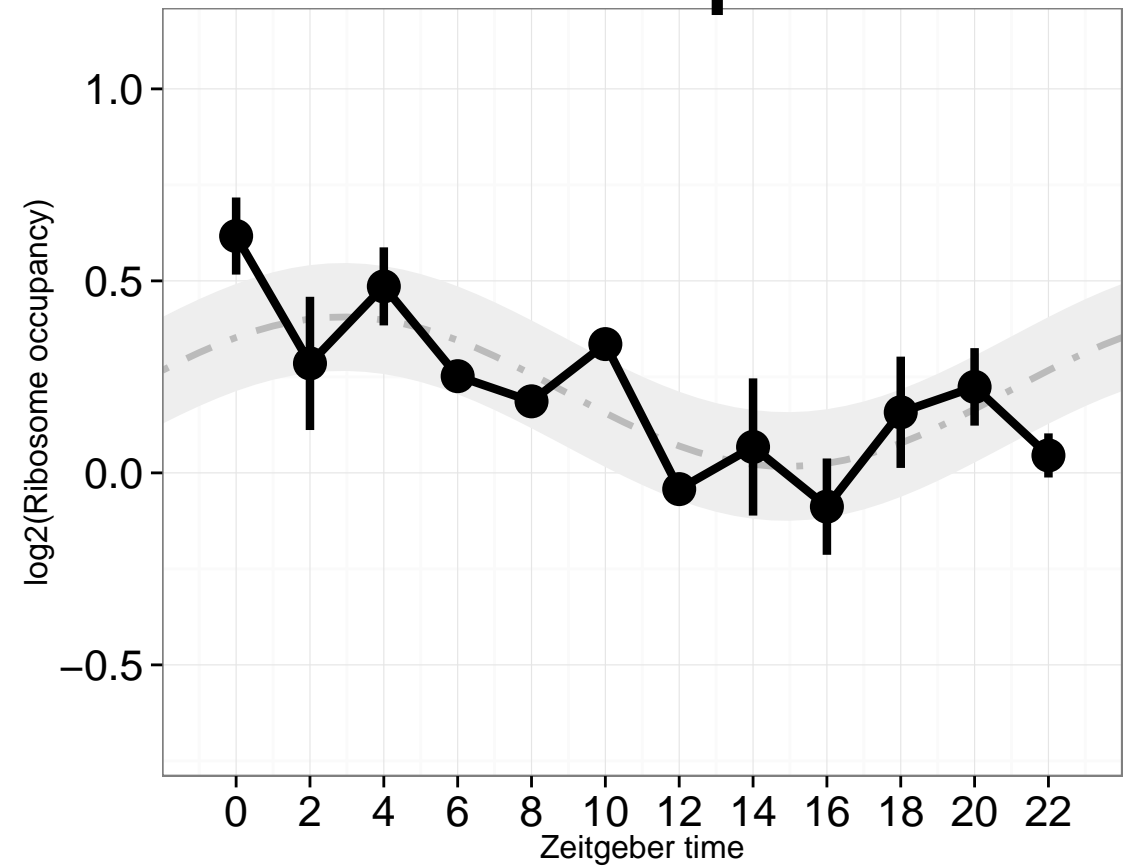

Supplement: Supplementary file 11374 [file 1]

# Tprkb

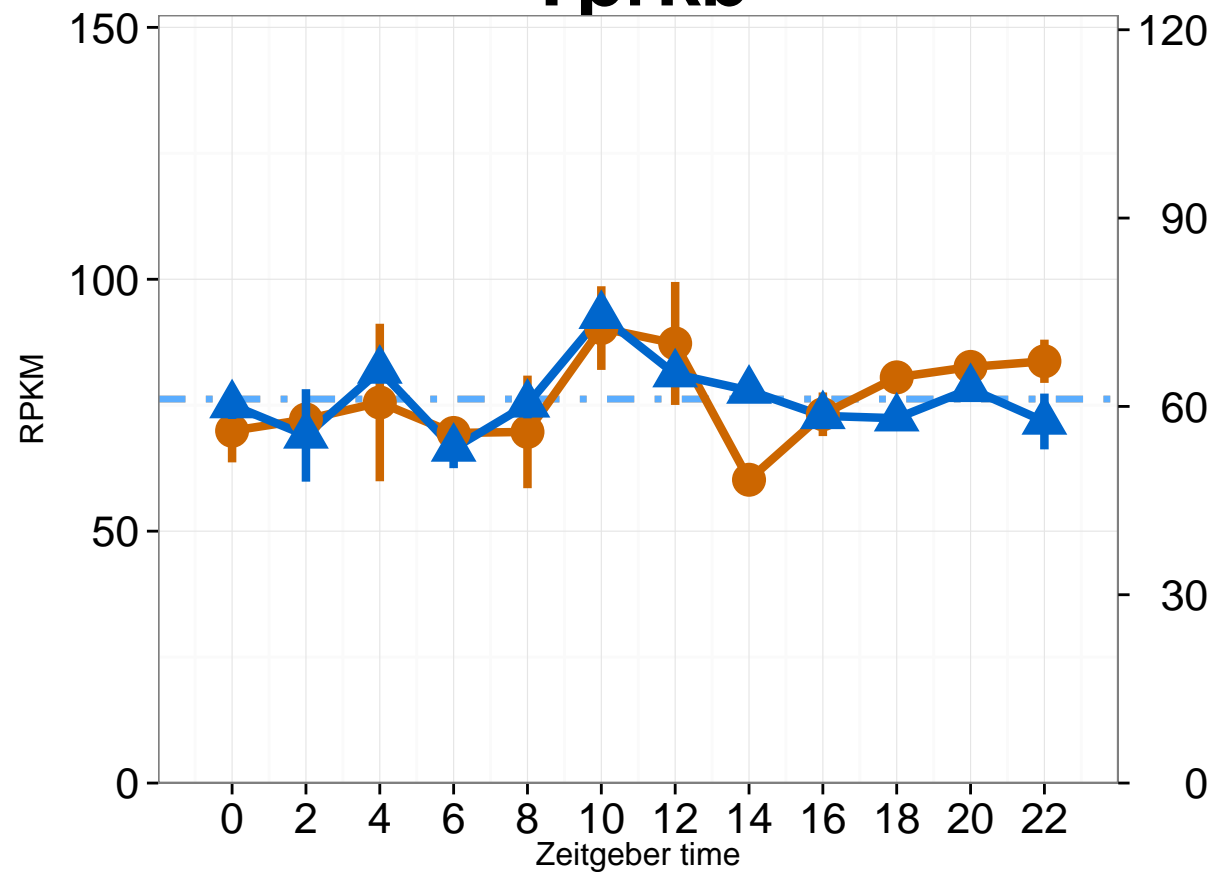

# Tprkb

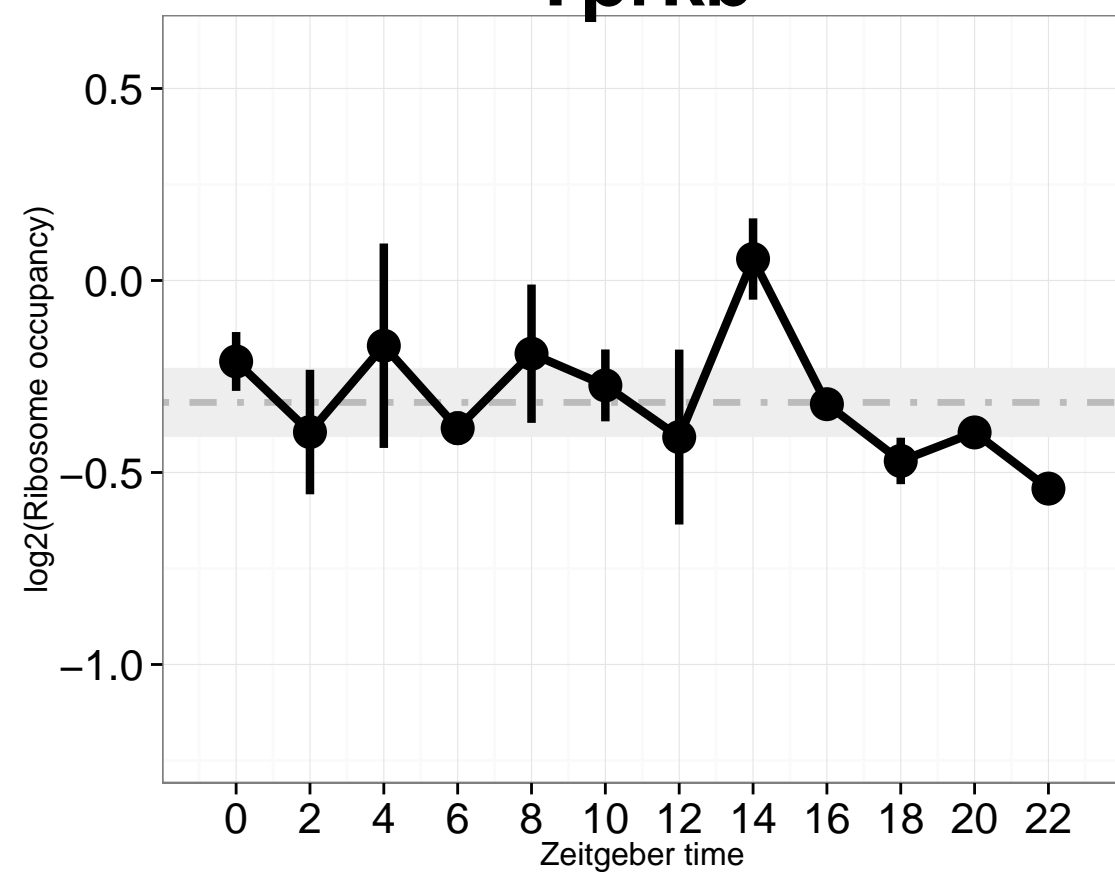

Supplement: Supplementary file 11375 [file 1]

# Bend7

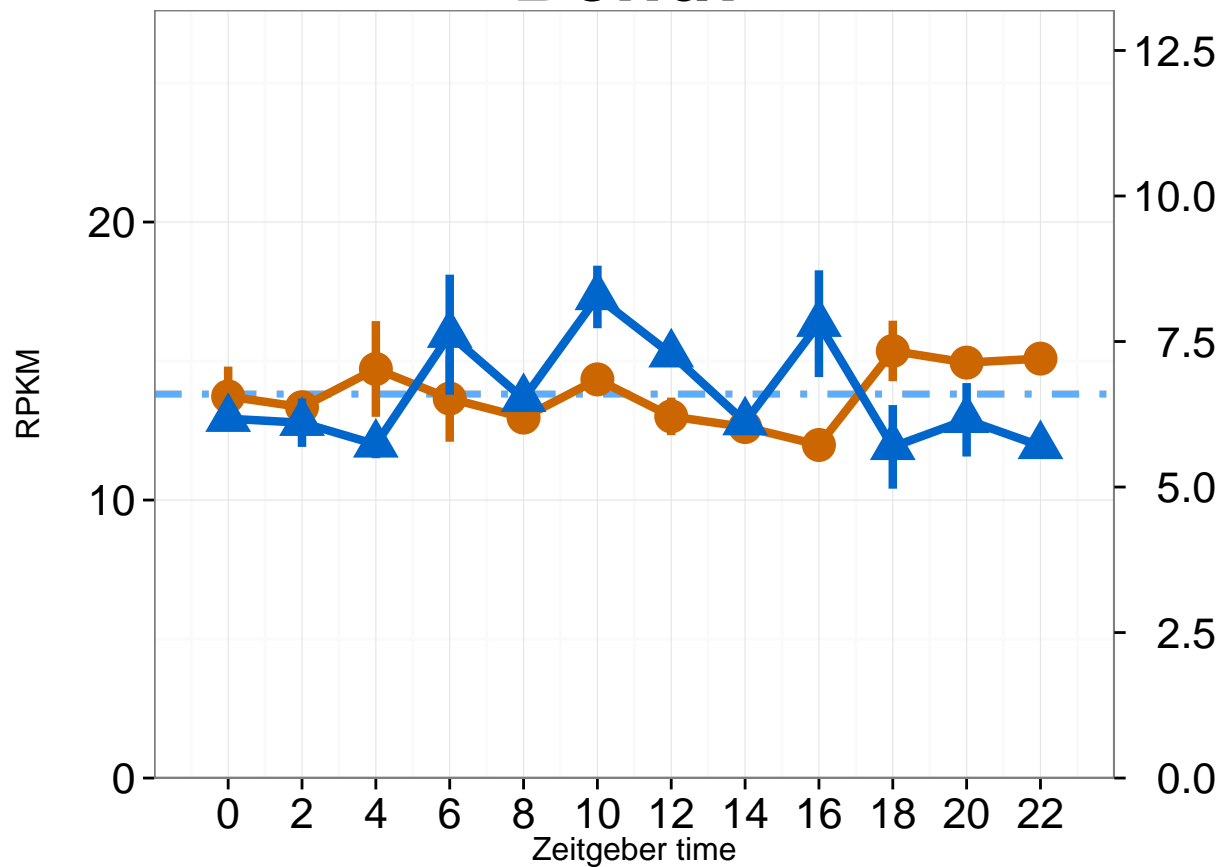

# Bend7

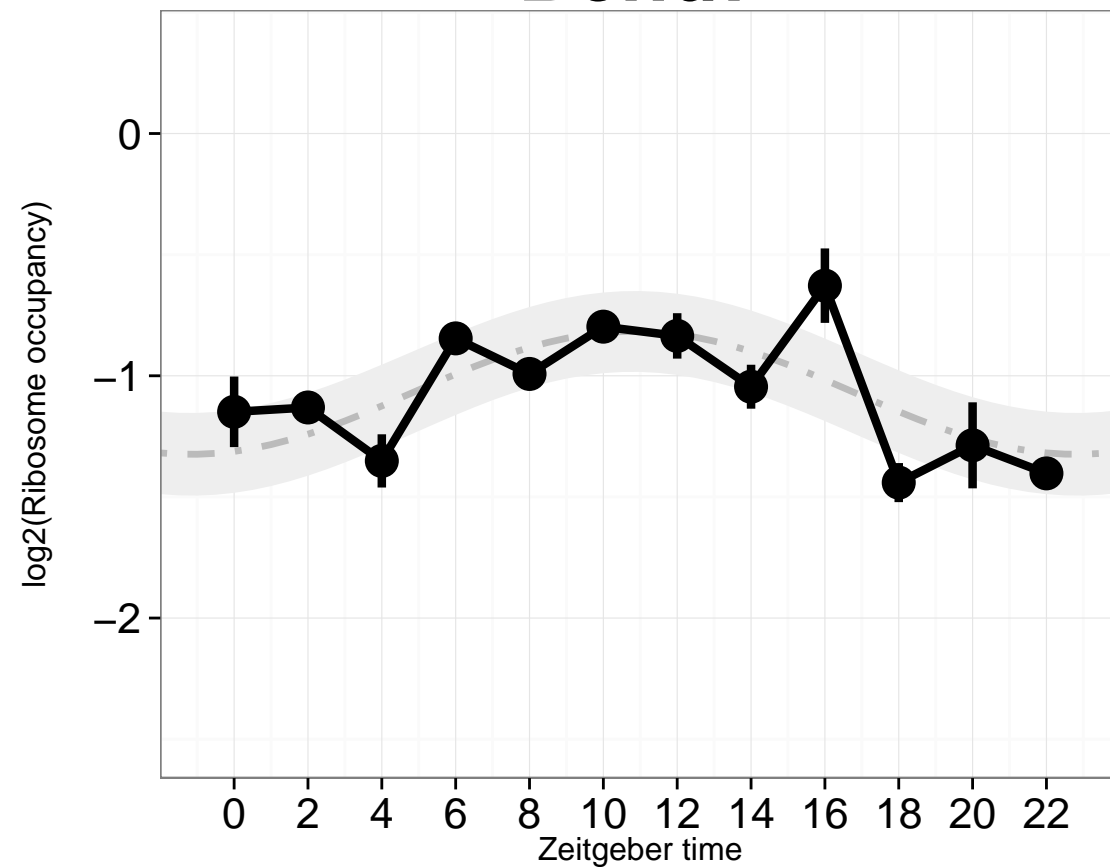

Supplement: Supplementary file 11376 [file 1]

## Usb1

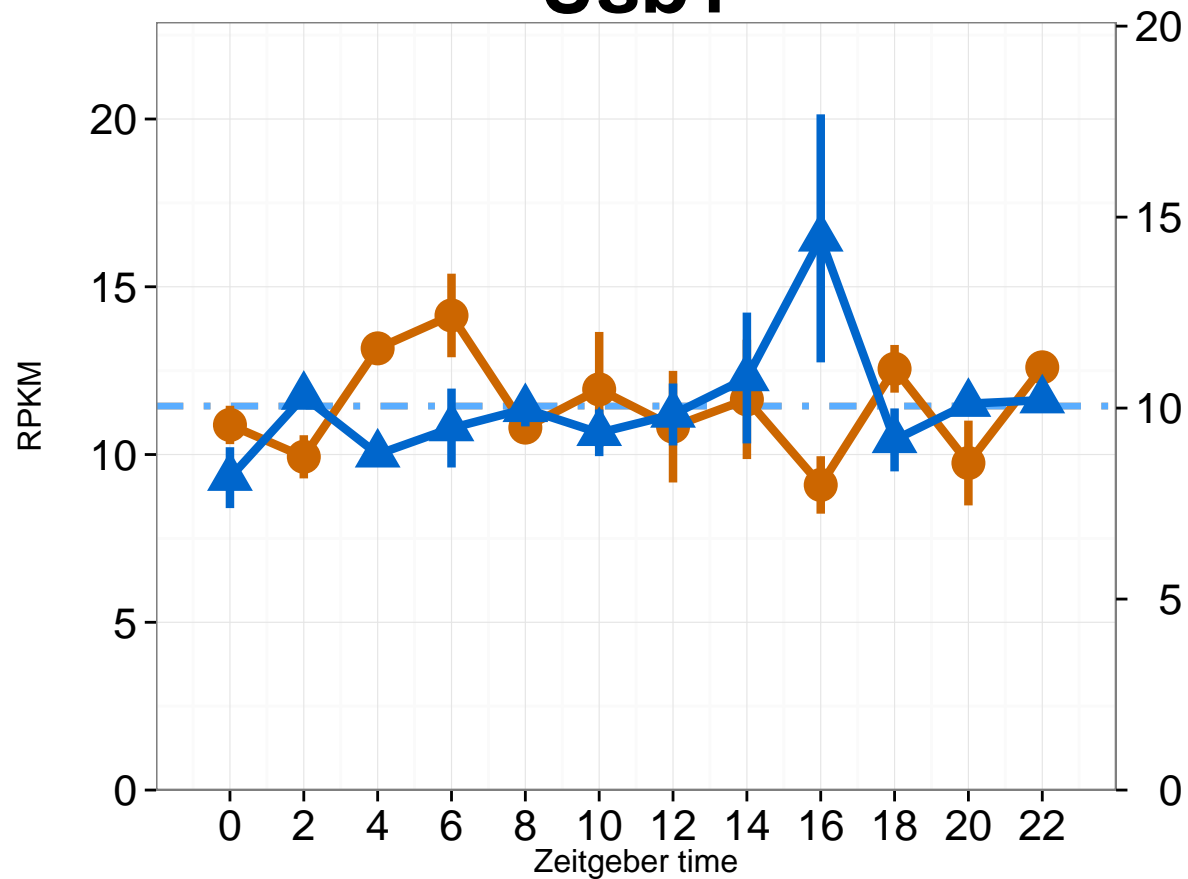

## Usb1

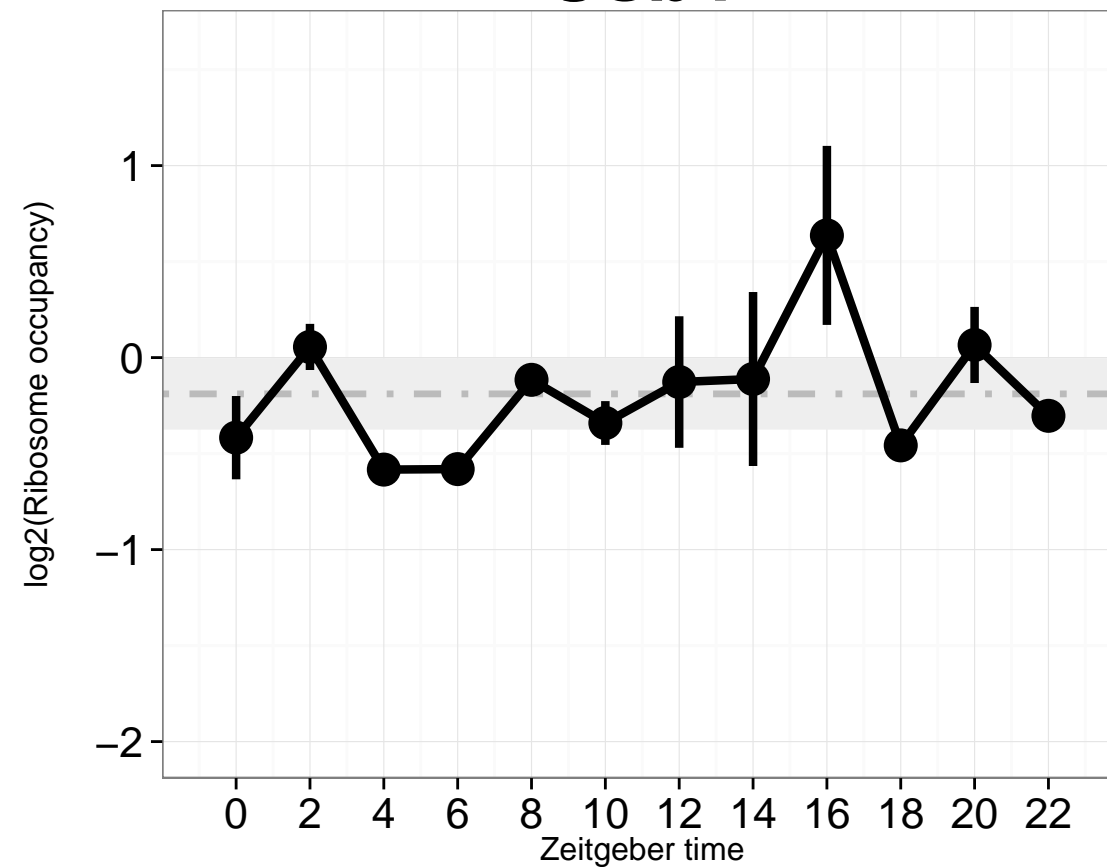

Supplement: Supplementary file 11377 [file 1]

# Aup1

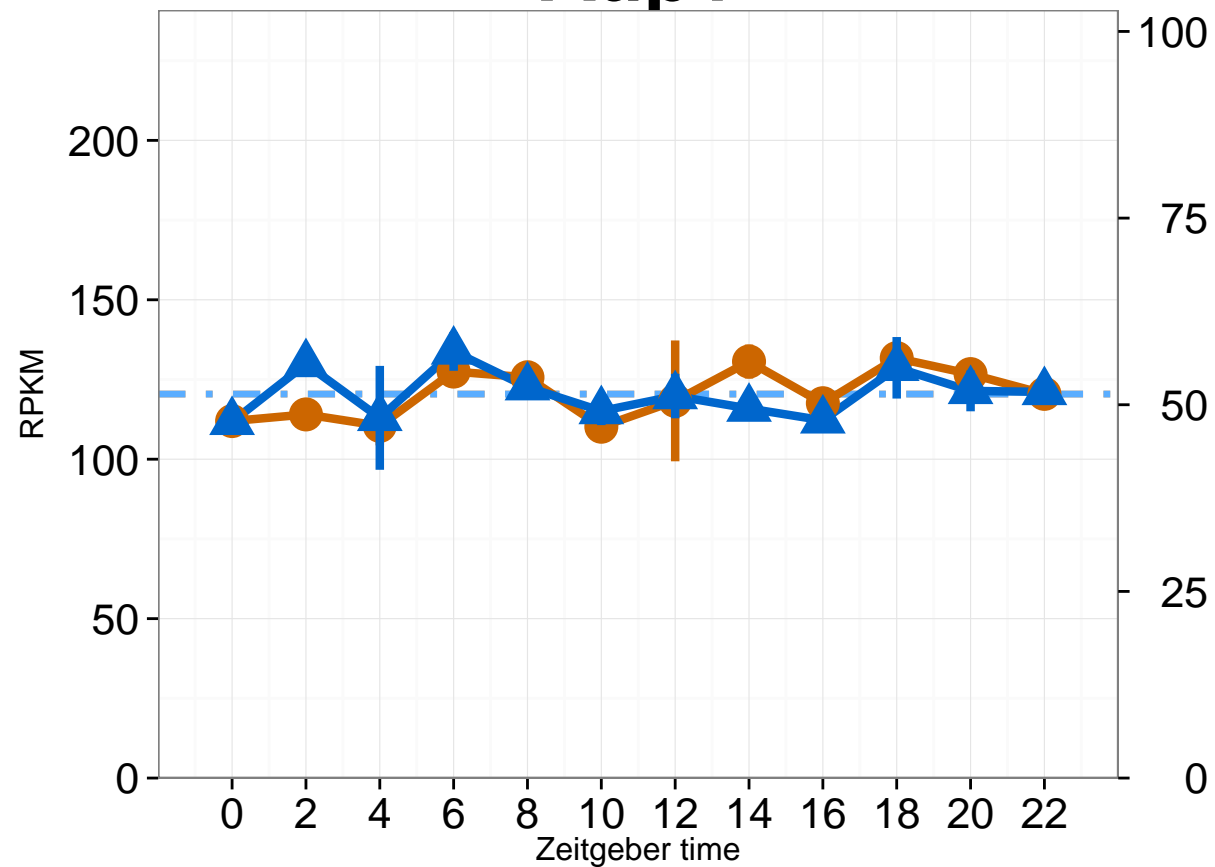

# Aup1

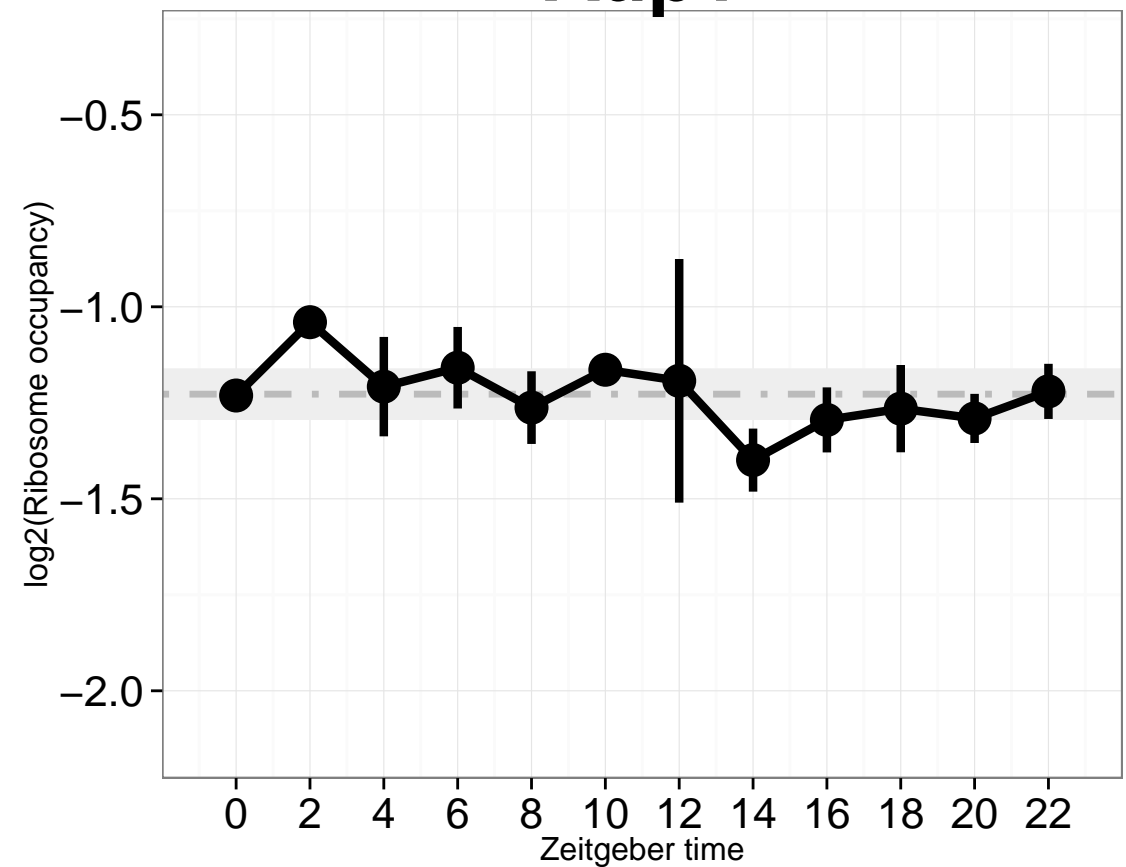

Supplement: Supplementary file 11378 [file 1]

# Card10

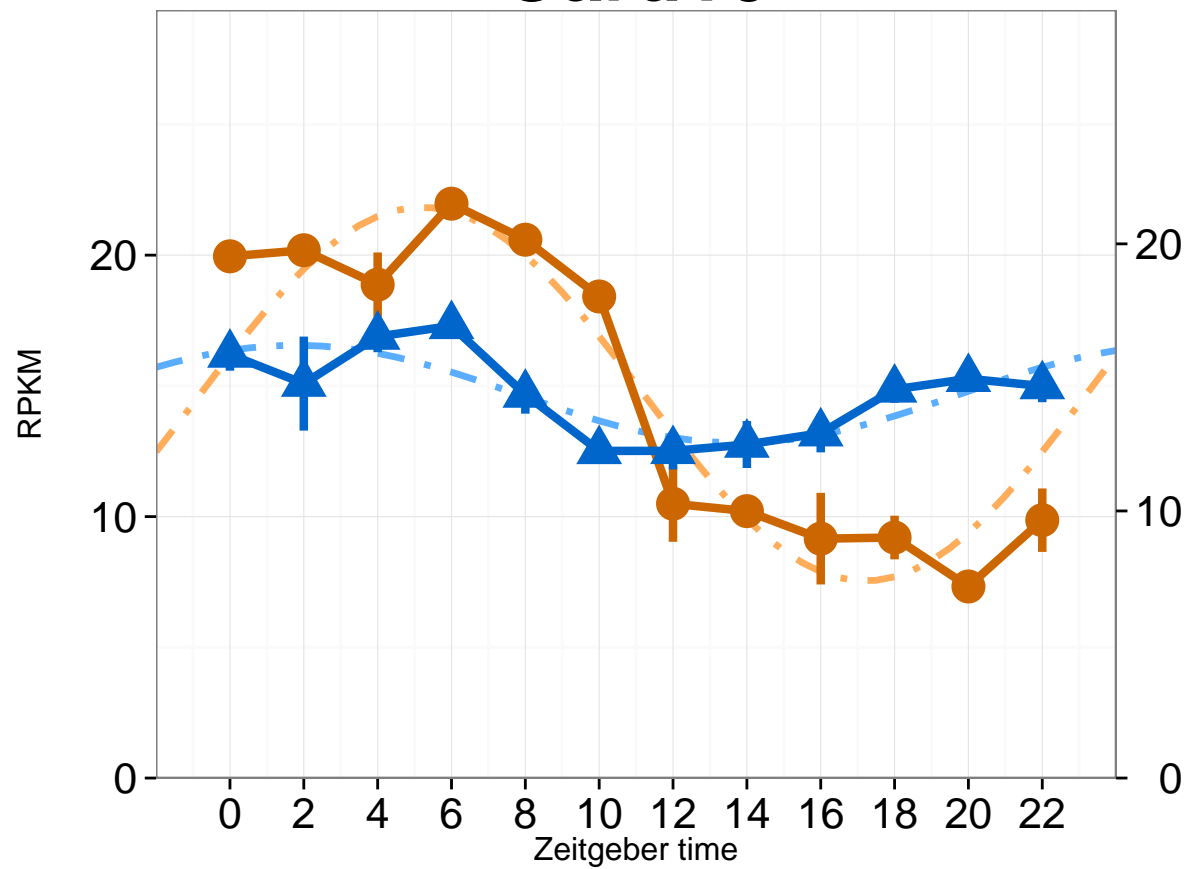

# Card10

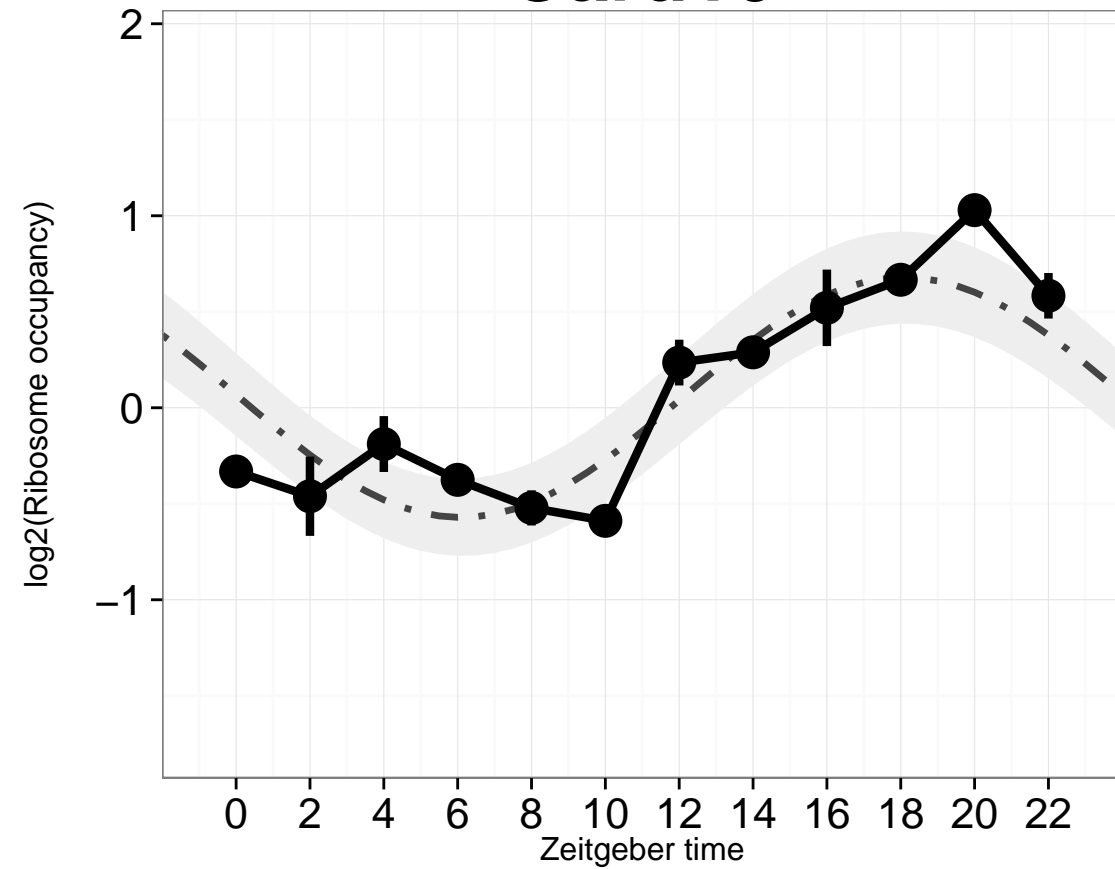

Supplement: Supplementary file 11379 [file 1]

## Scai

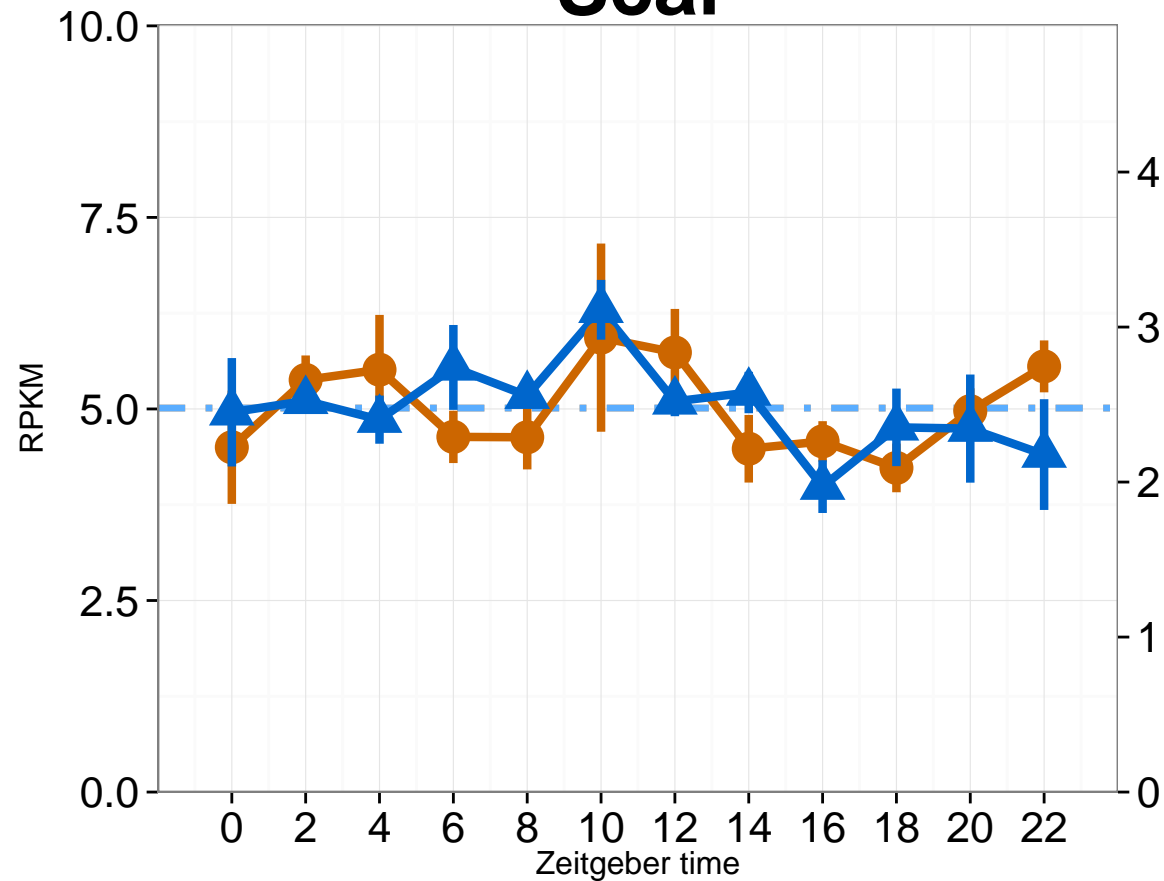

## Scai

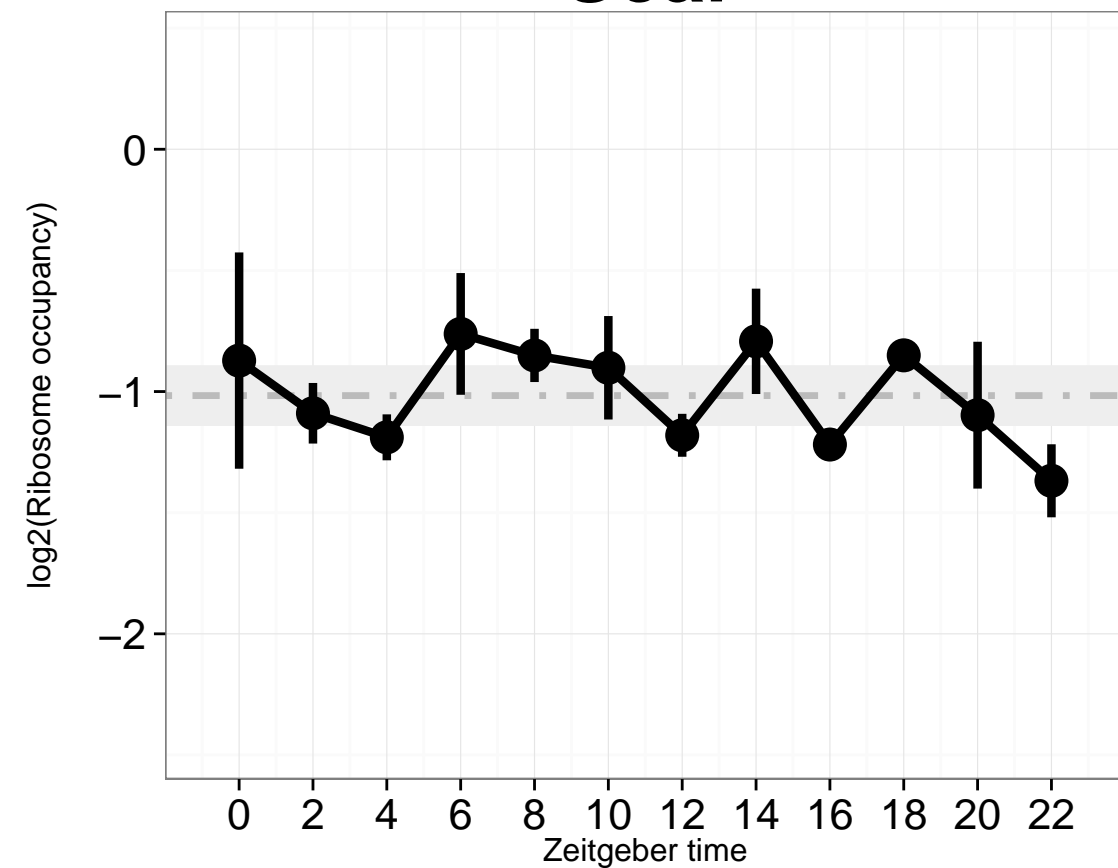

Supplement: Supplementary file 11380 [file 1]

## Ano8

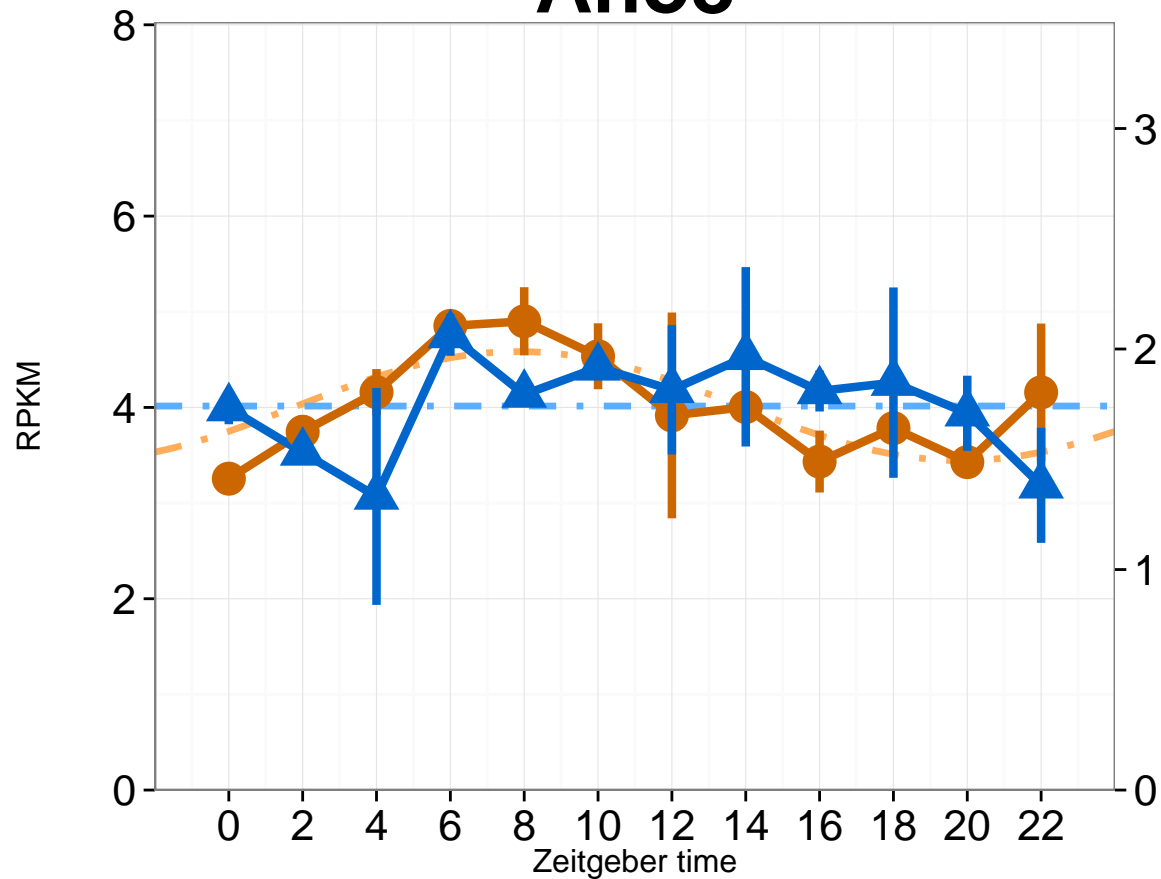

## Ano8

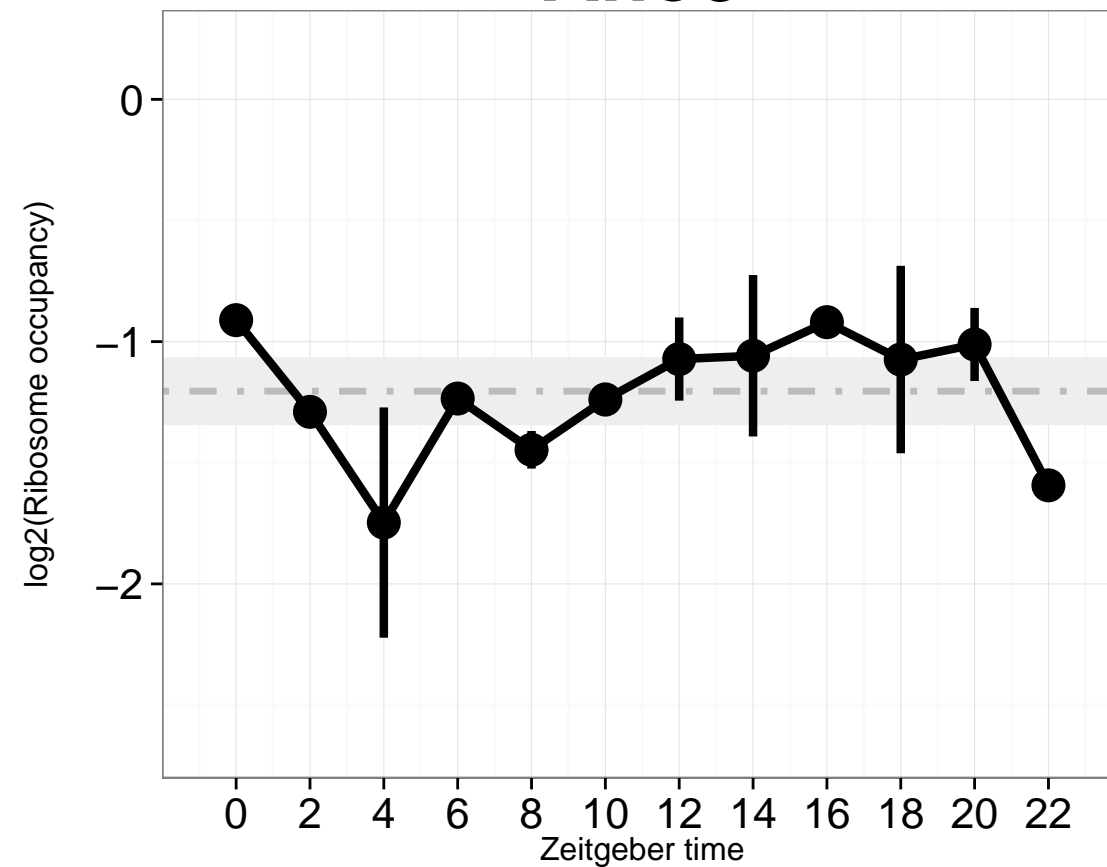

Supplement: Supplementary file 11381 [file 1]

## Slc22a30

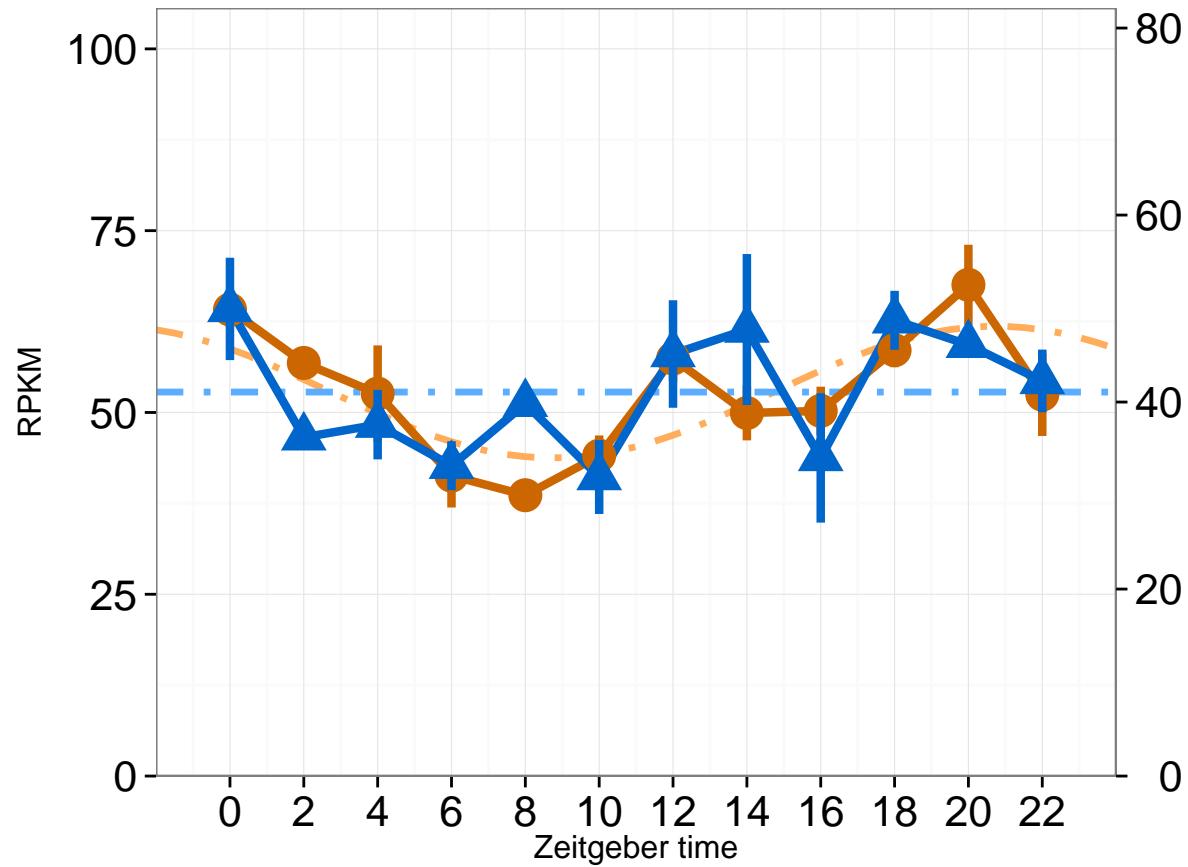

## Slc22a30

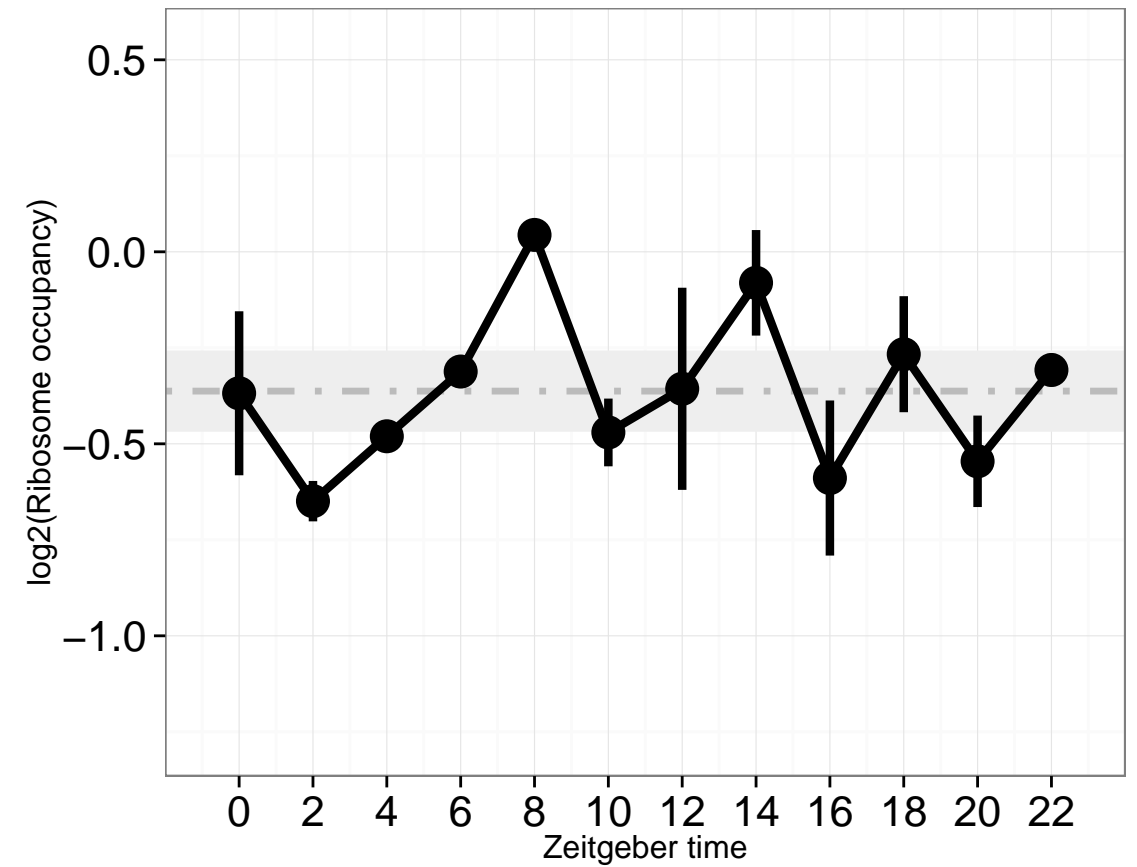

Supplement: Supplementary file 11382 [file 1]

# Qrs1

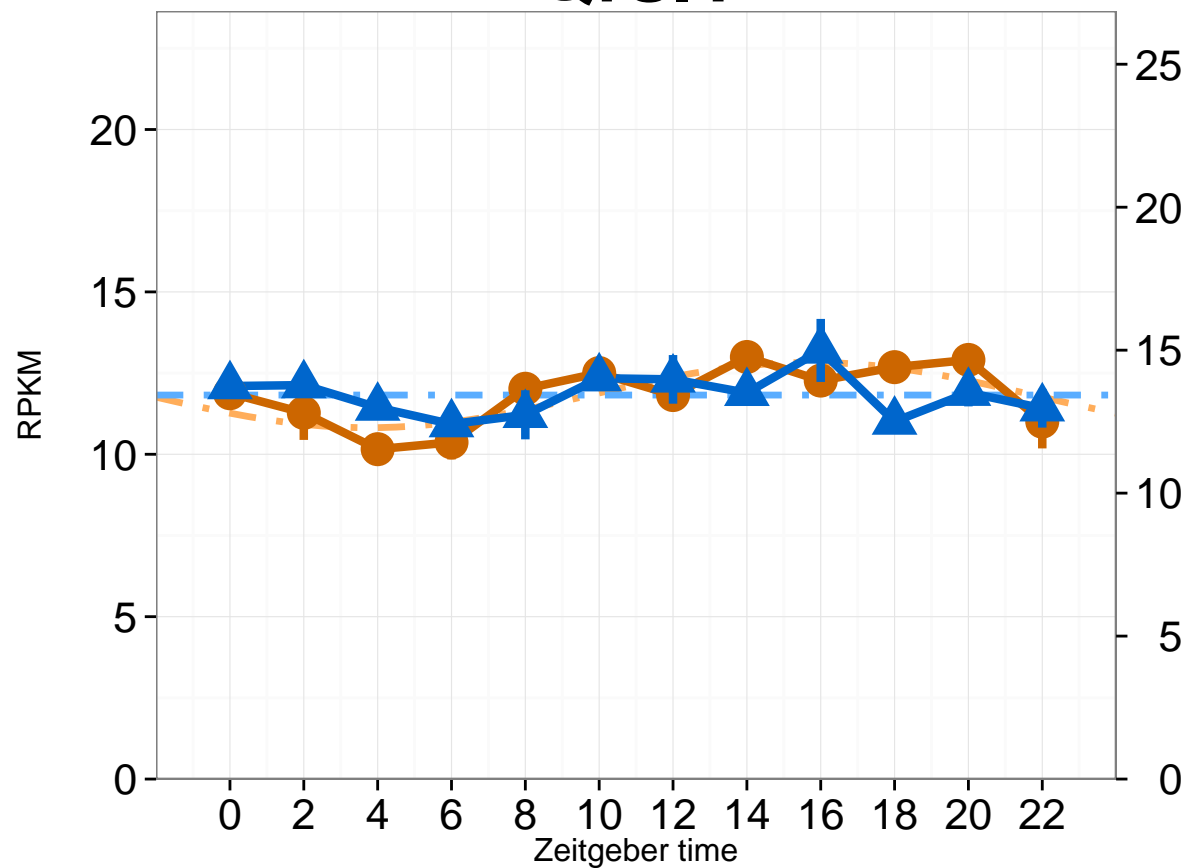

# Qrs1

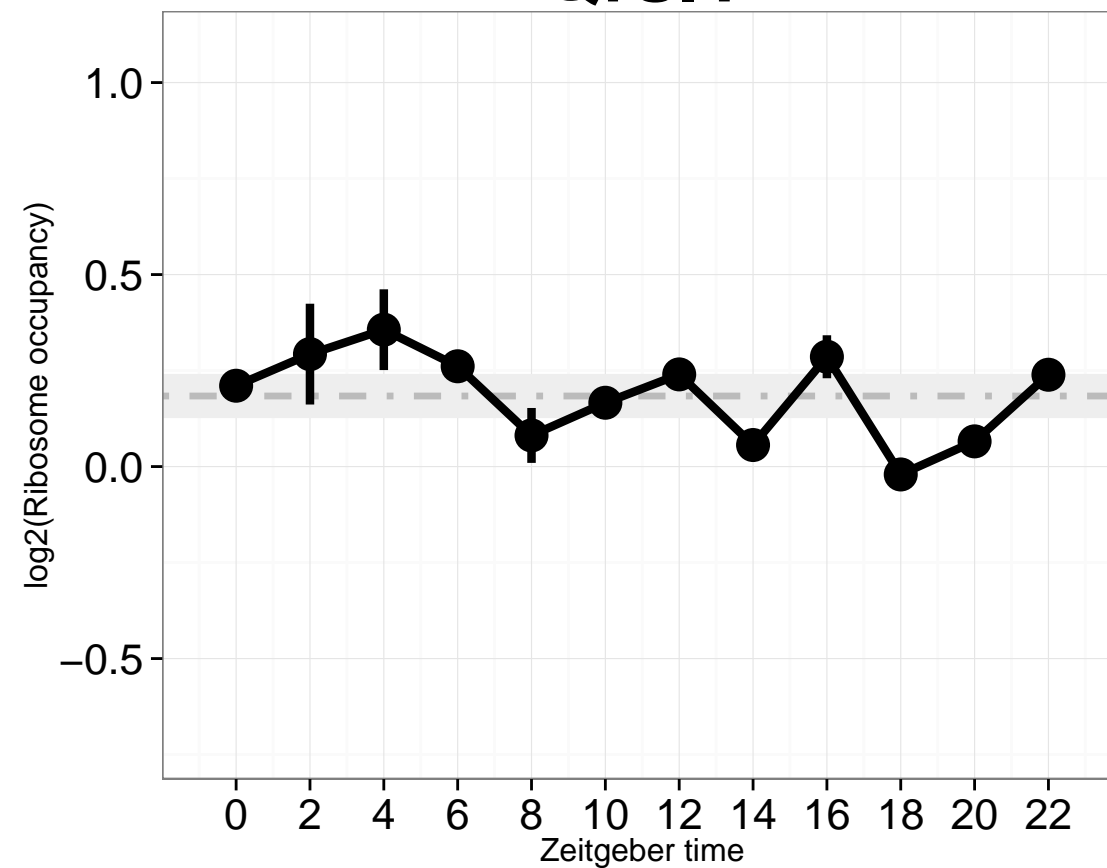

Supplement: Supplementary file 11383 [file 1]

# Tspan15

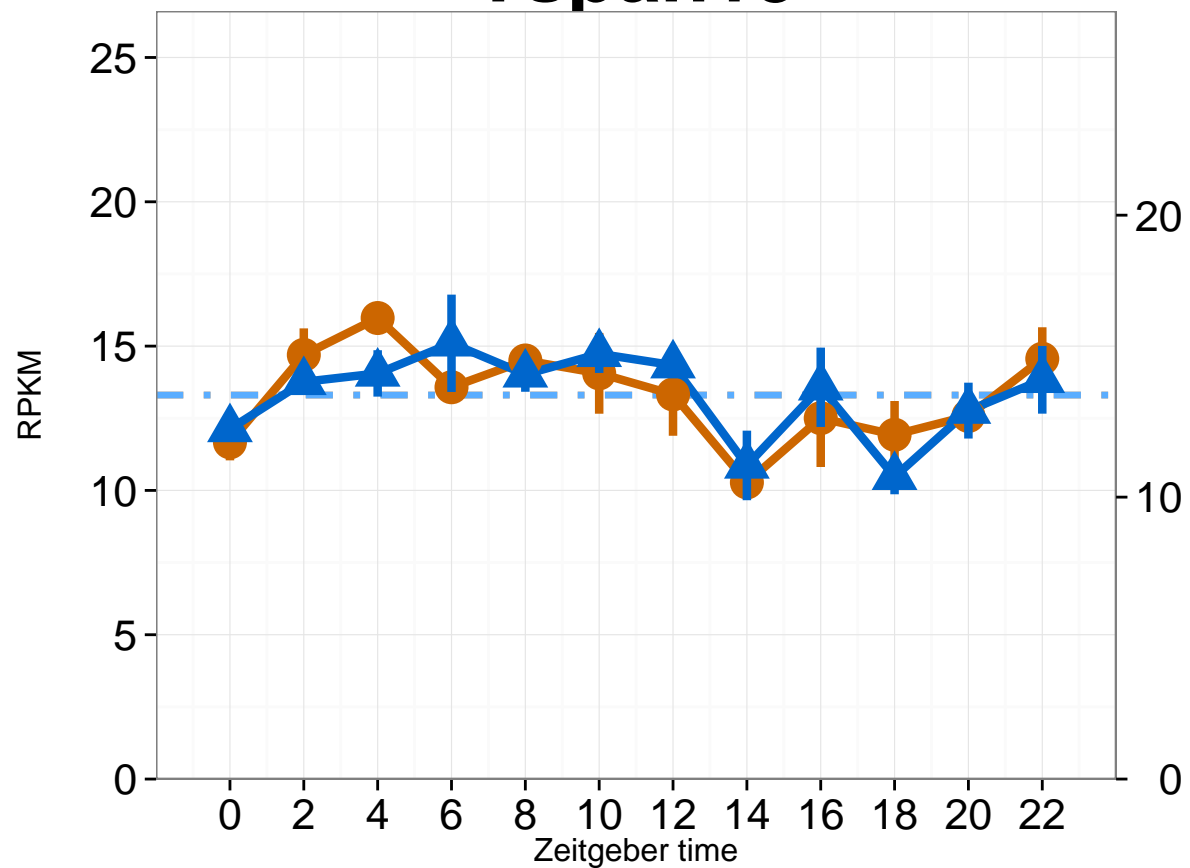

# Tspan15

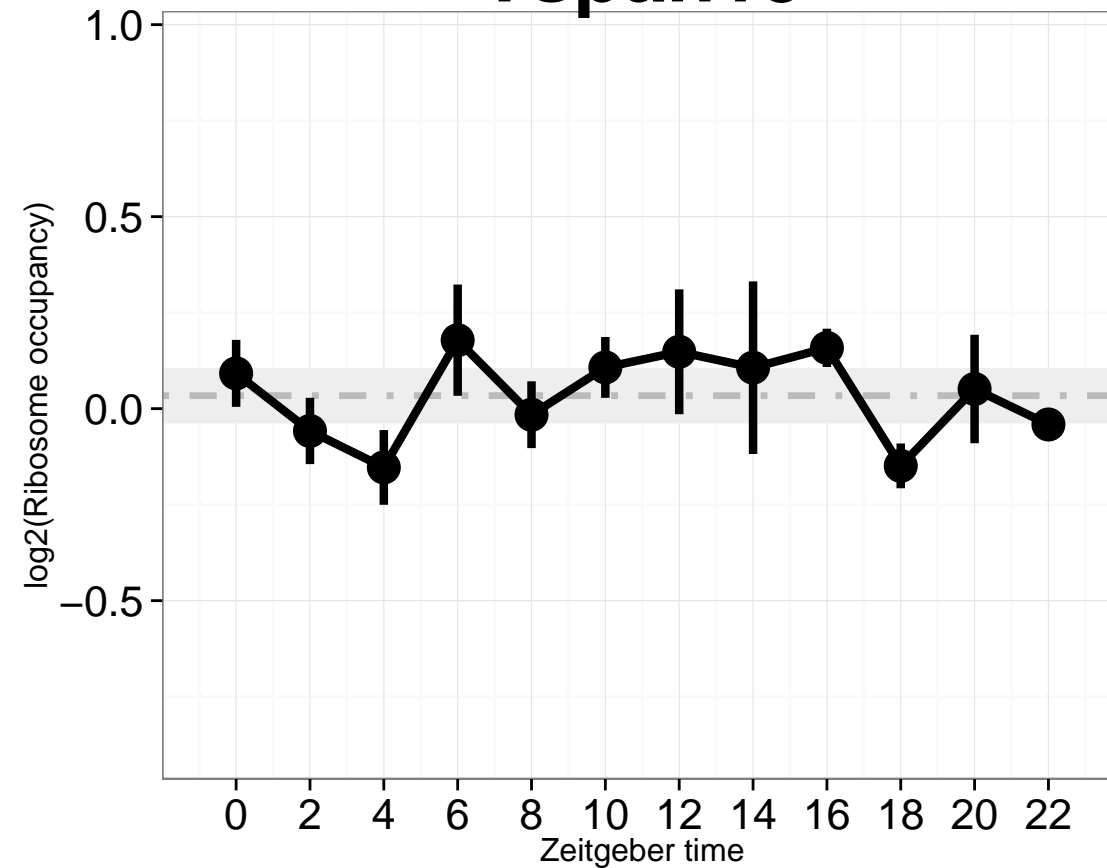

Supplement: Supplementary file 11384 [file 1]

## Rdh13

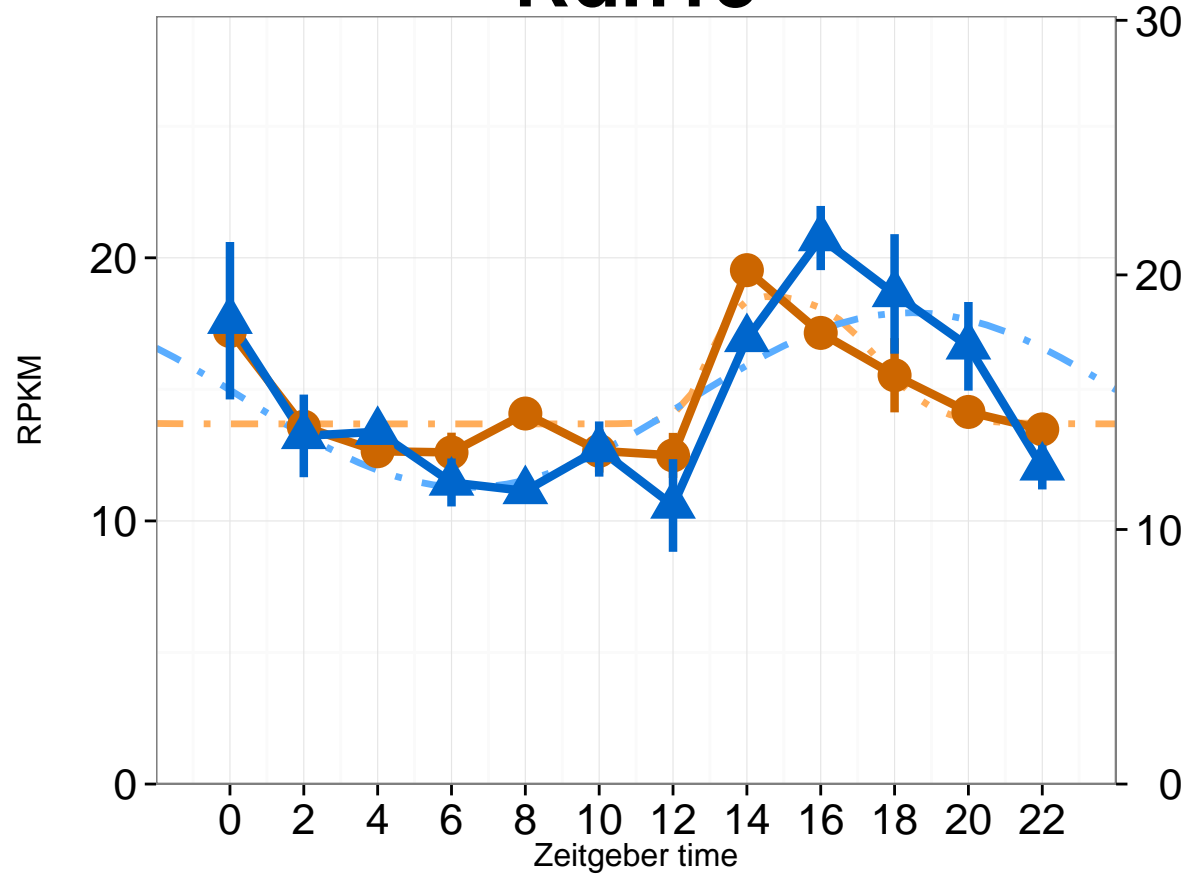

## Rdh13

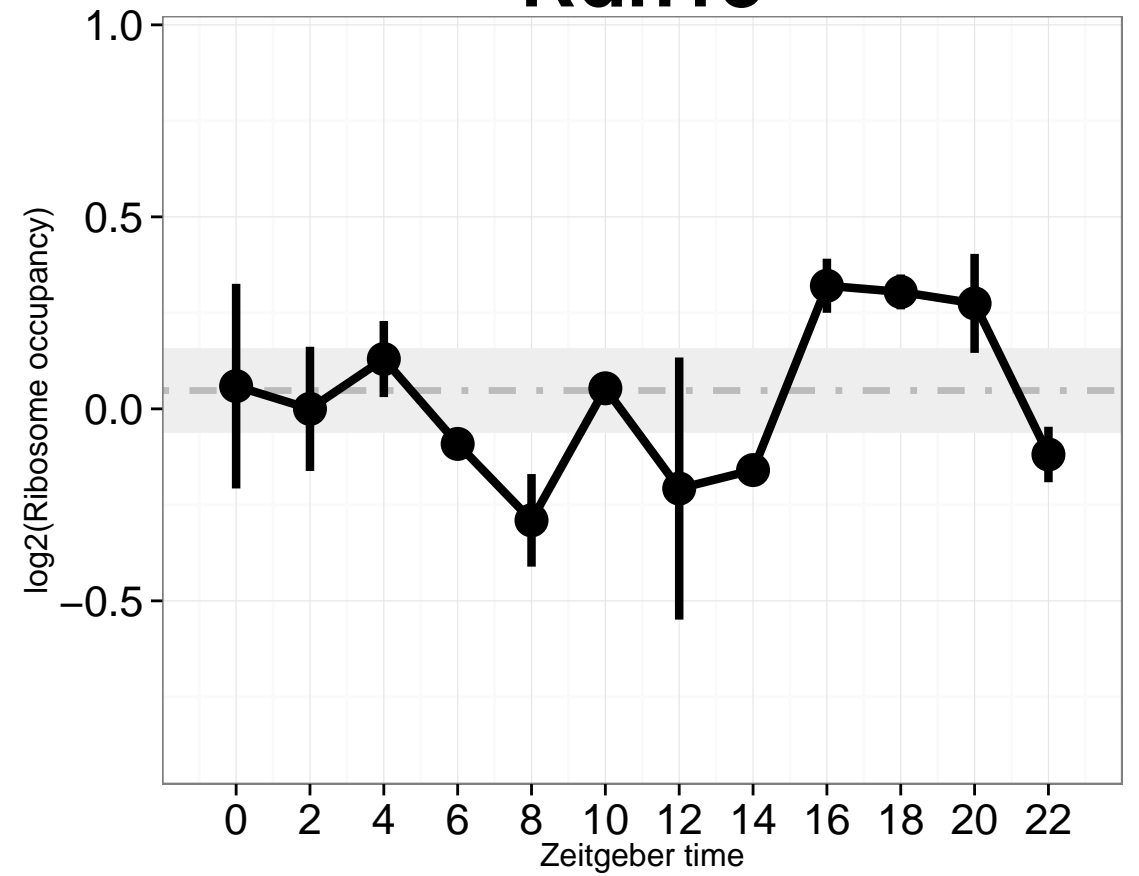

Supplement: Supplementary file 11385 [file 1]

# Mast2

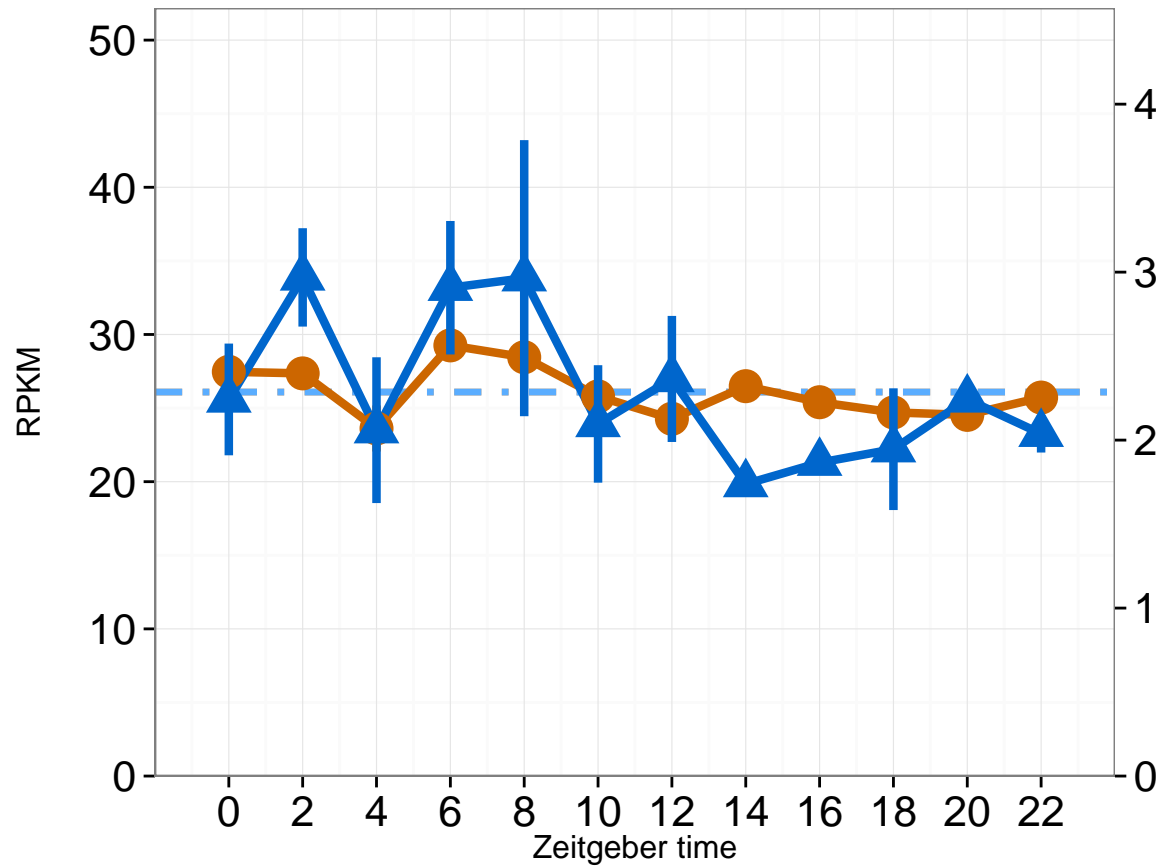

# Mast2

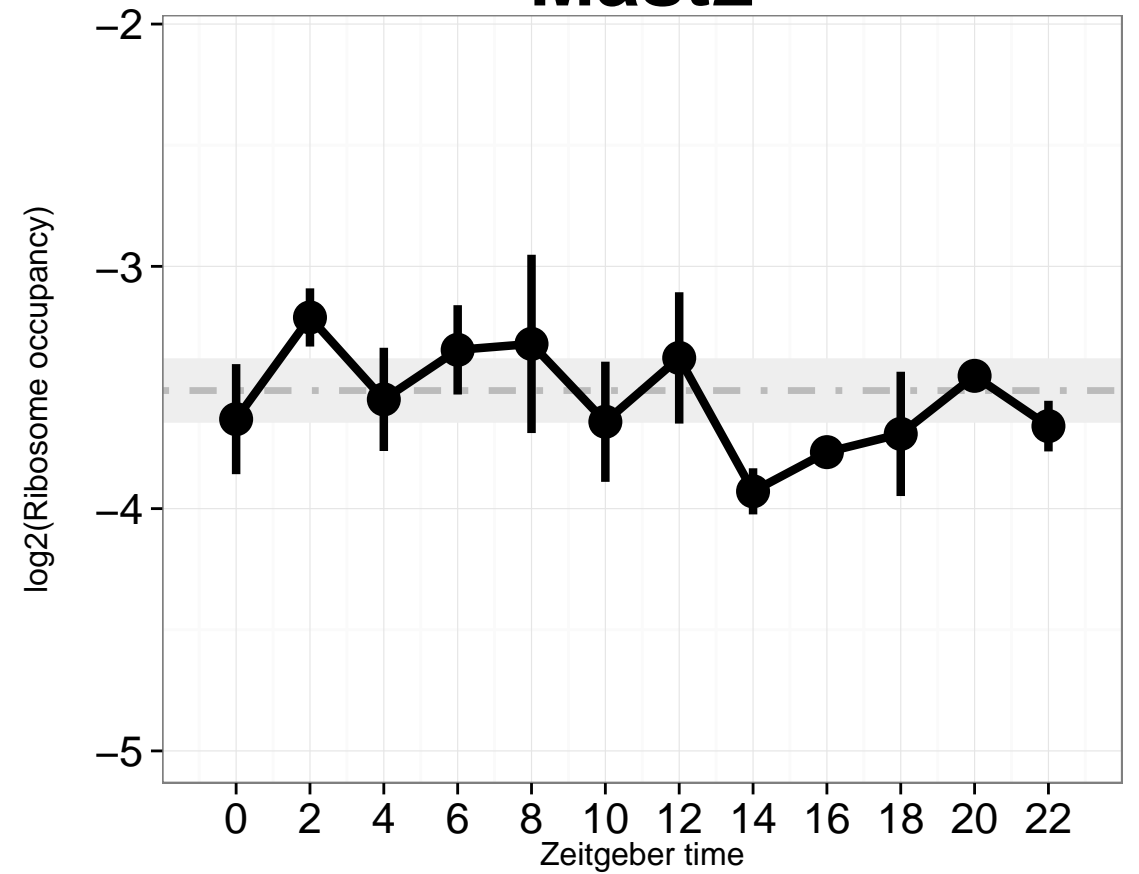

Supplement: Supplementary file 11386 [file 1]

# Tvp23b

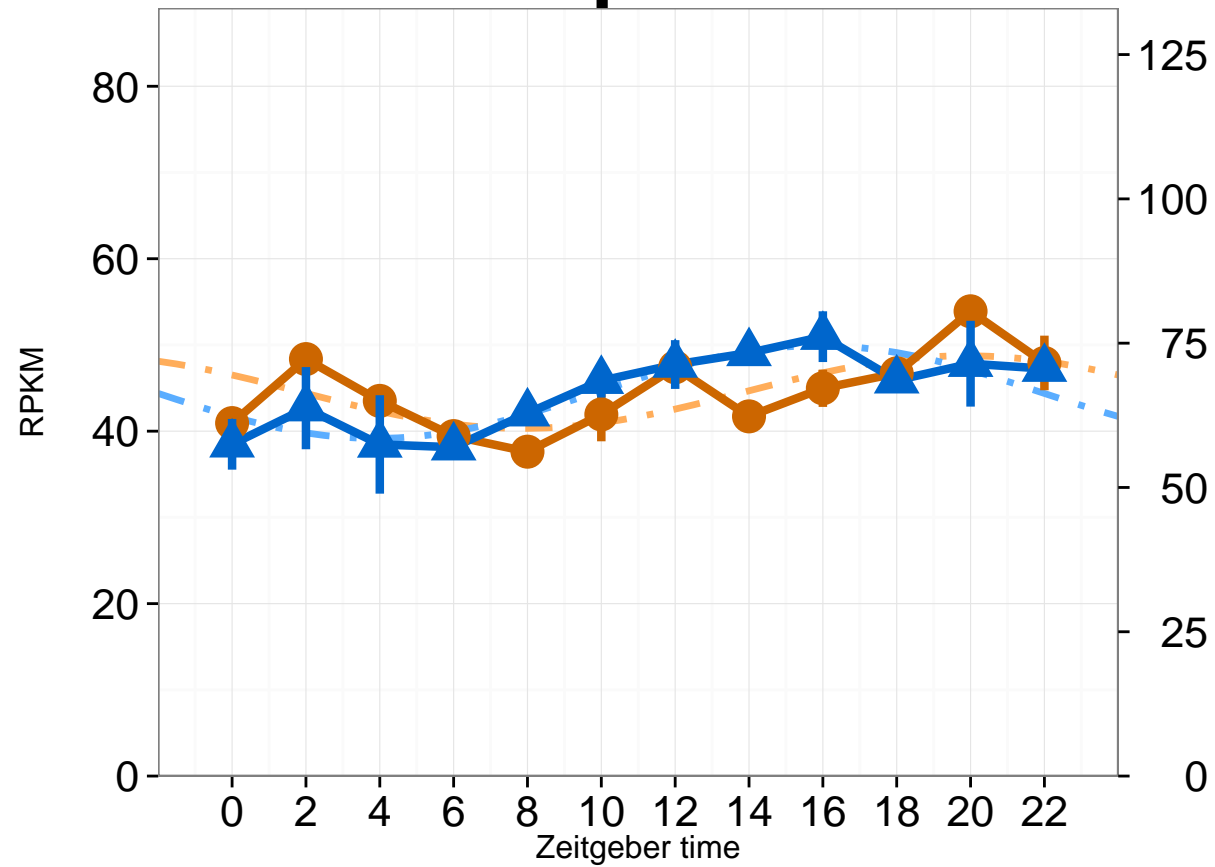

# Tvp23b

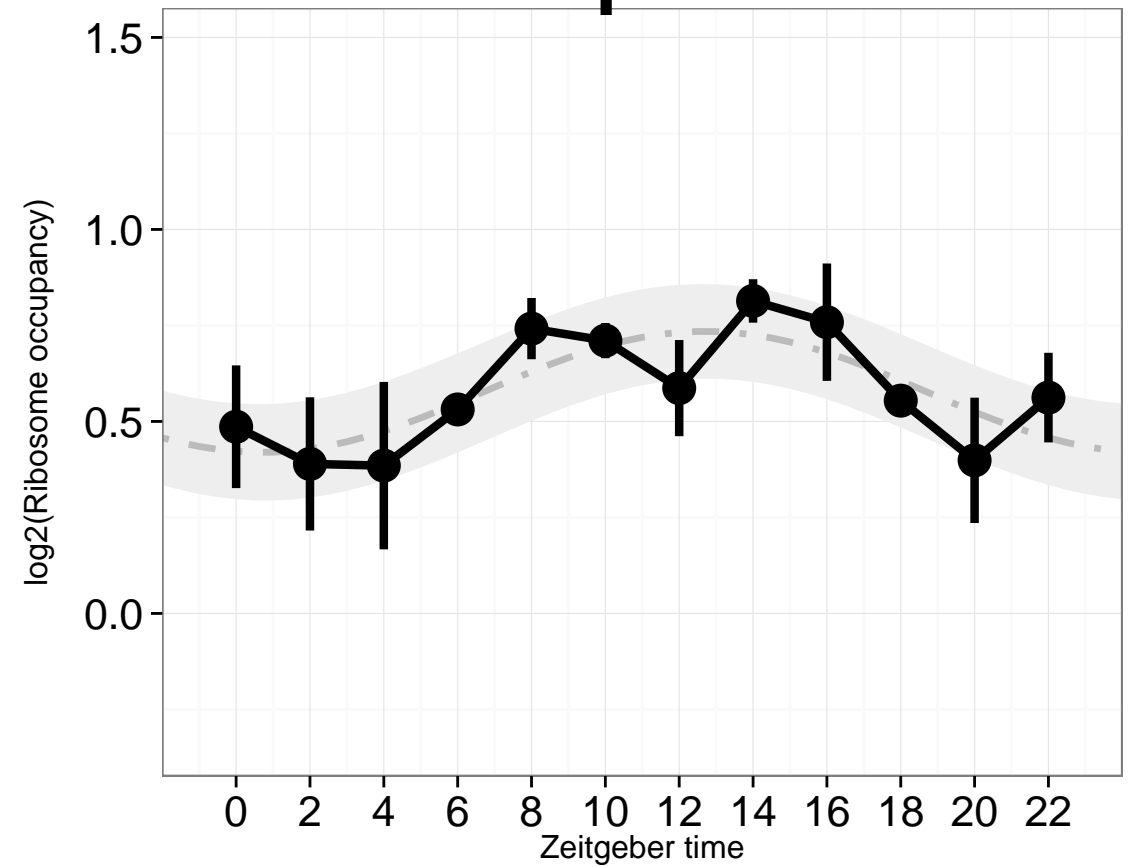

Supplement: Supplementary file 11387 [file 1]

## Vps13c

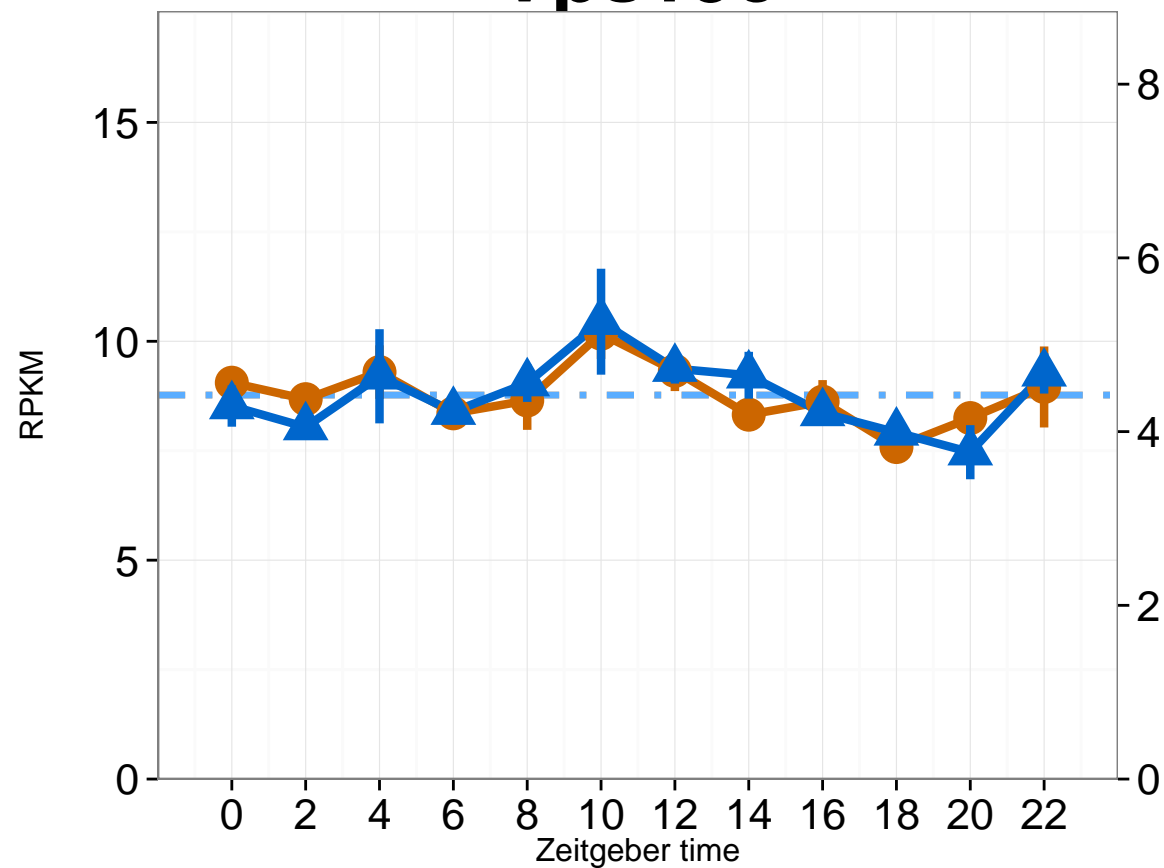

## Vps13c

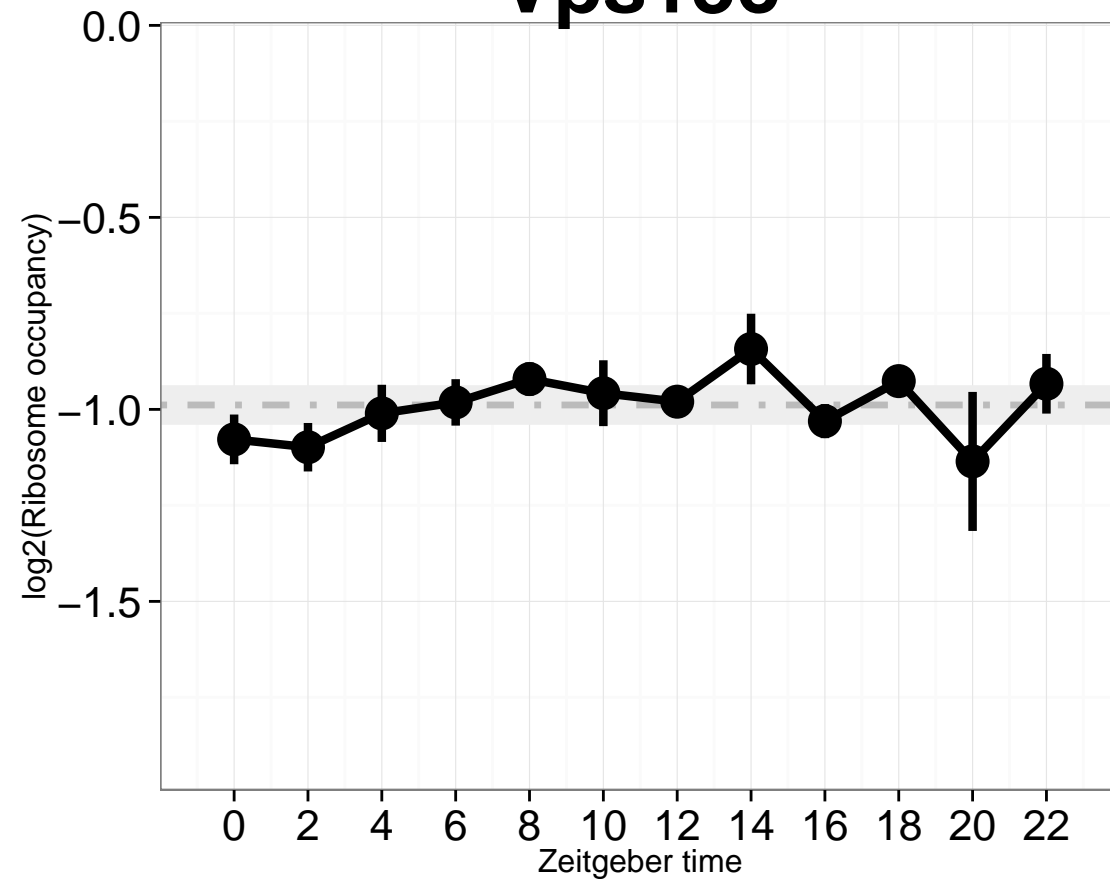

Supplement: Supplementary file 11388 [file 1]

## Kif16b

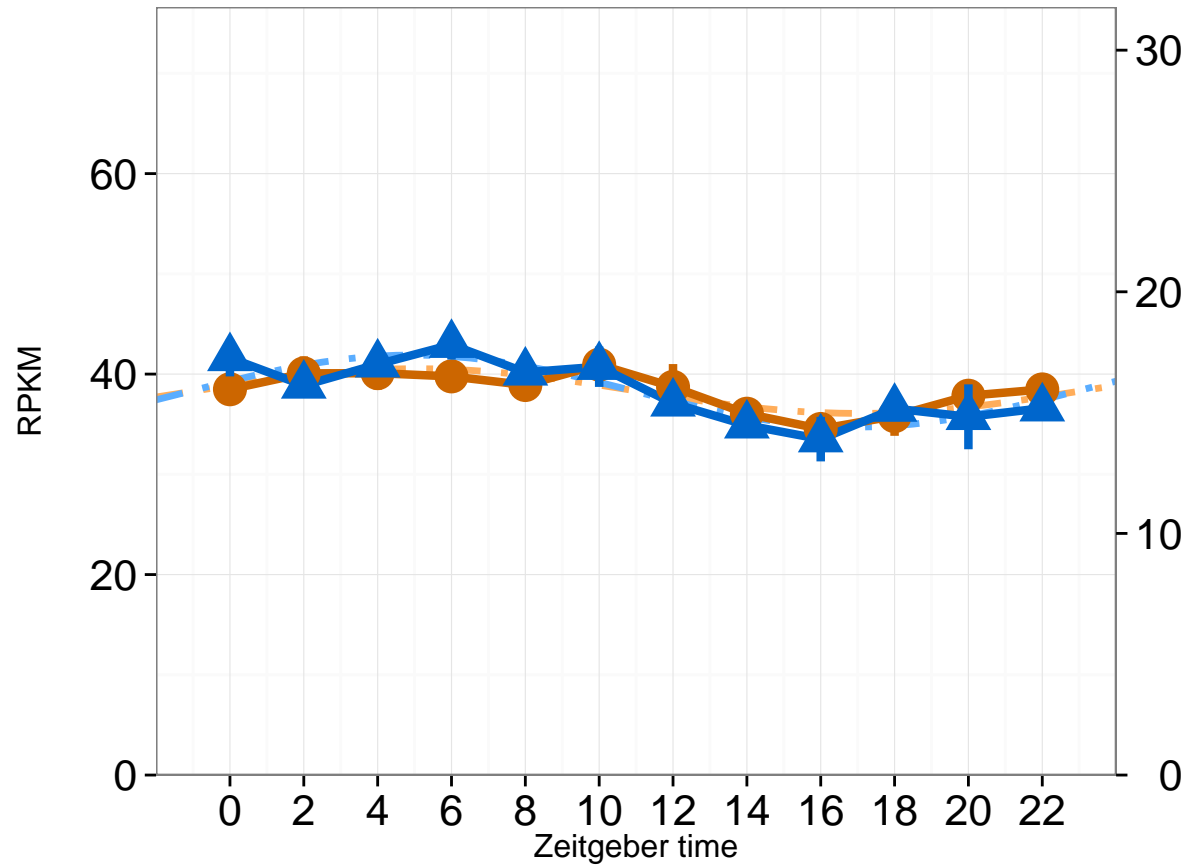

## Kif16b

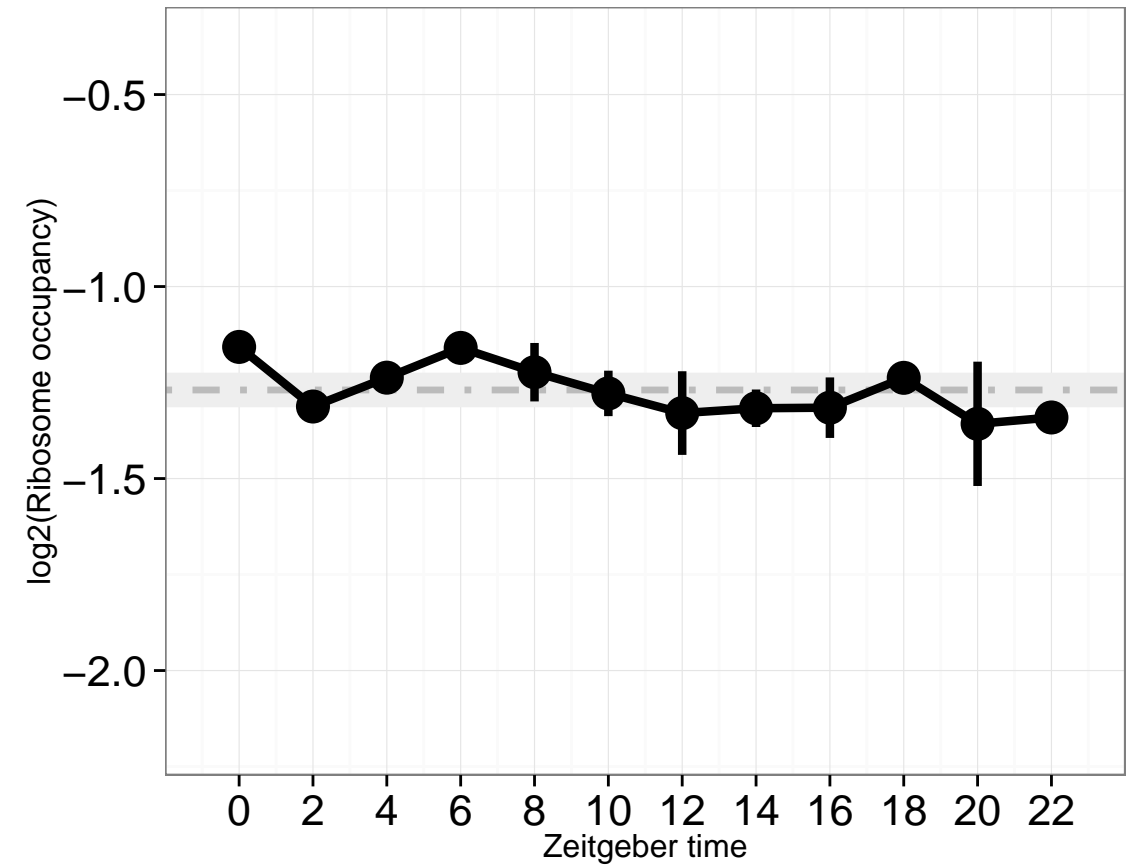

Supplement: Supplementary file 11389 [file 1]

# 1700109H08Rik

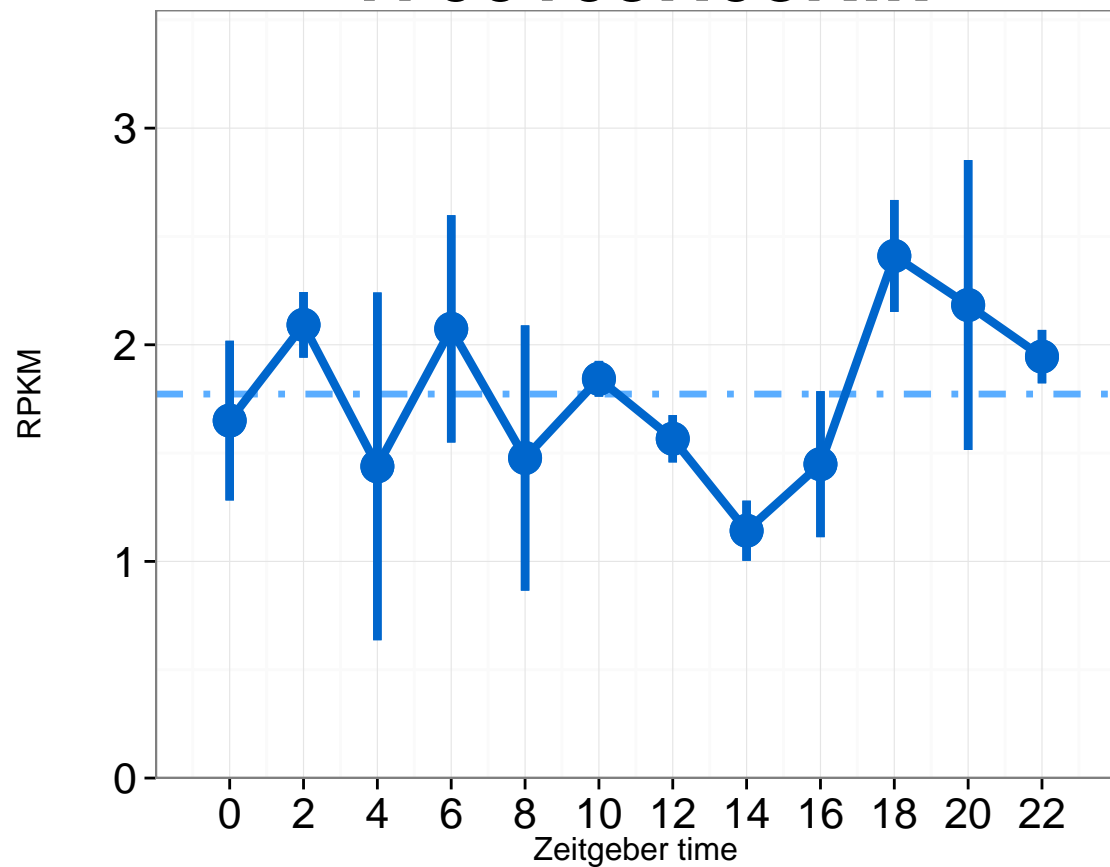

# 1700109H08Rik log2(Ribosome occup

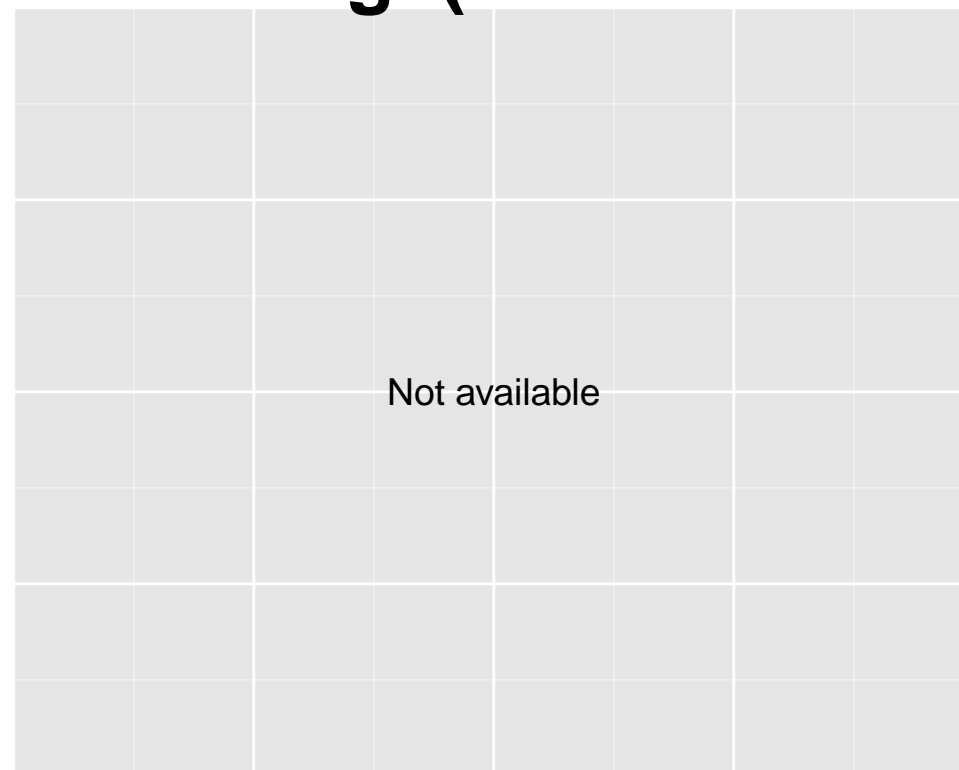

Supplement: Supplementary file 11390 [file 1]

## Aff1

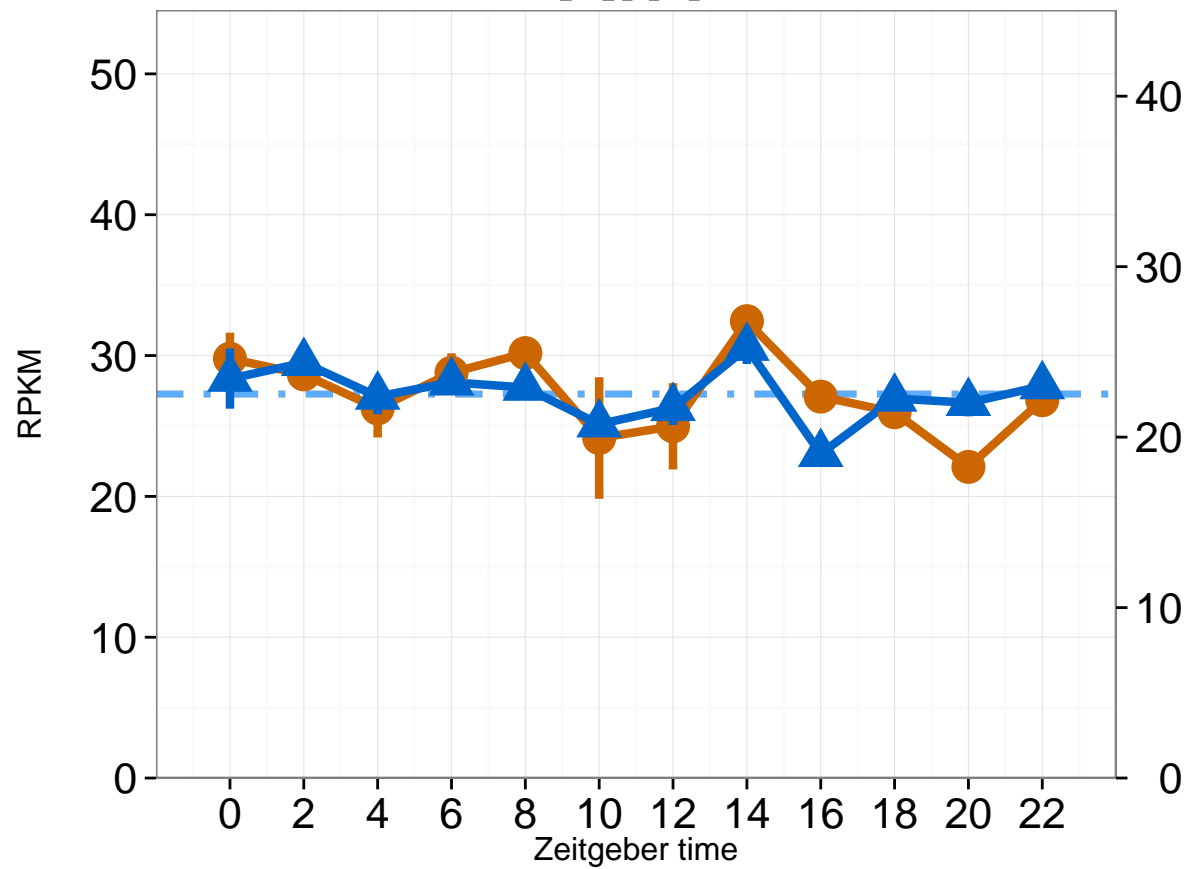

## Aff1

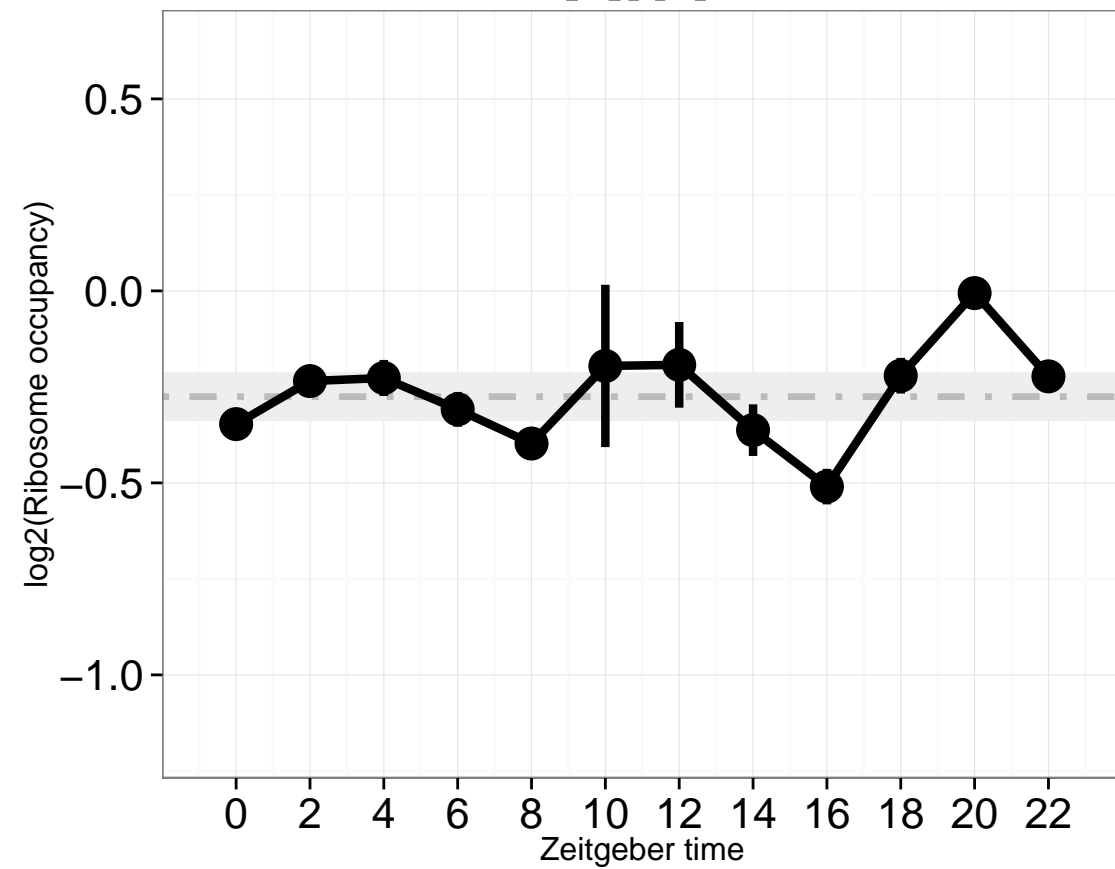

Supplement: Supplementary file 11391 [file 1]

# Lrrc20

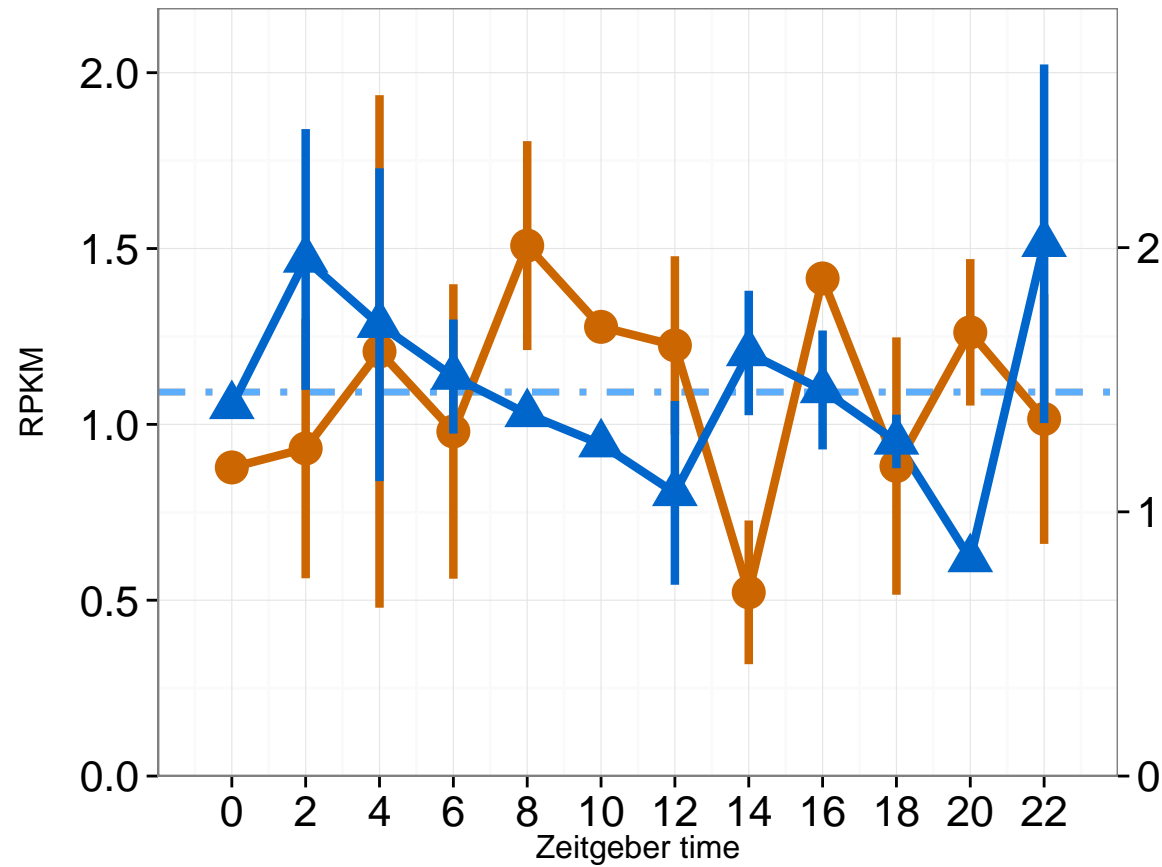

# Lrrc20

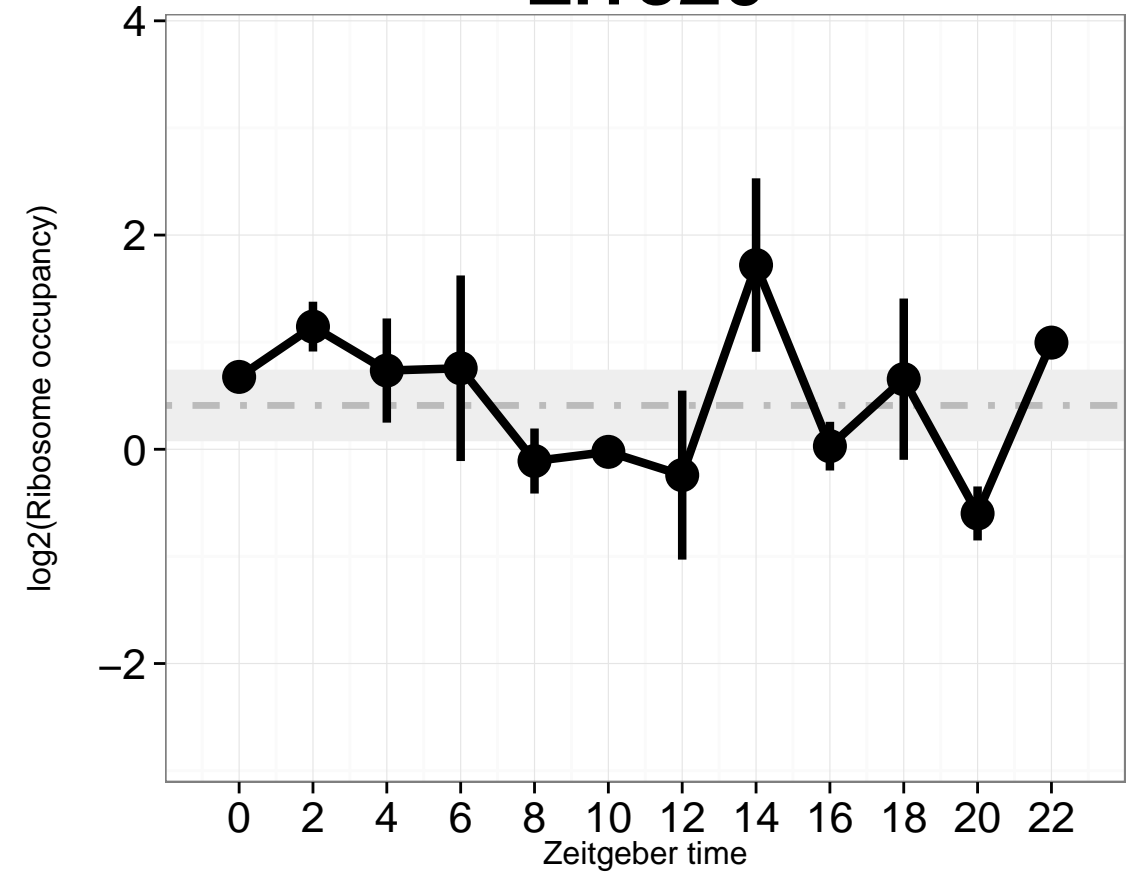

Supplement: Supplementary file 11392 [file 1]

## Hsd3b7

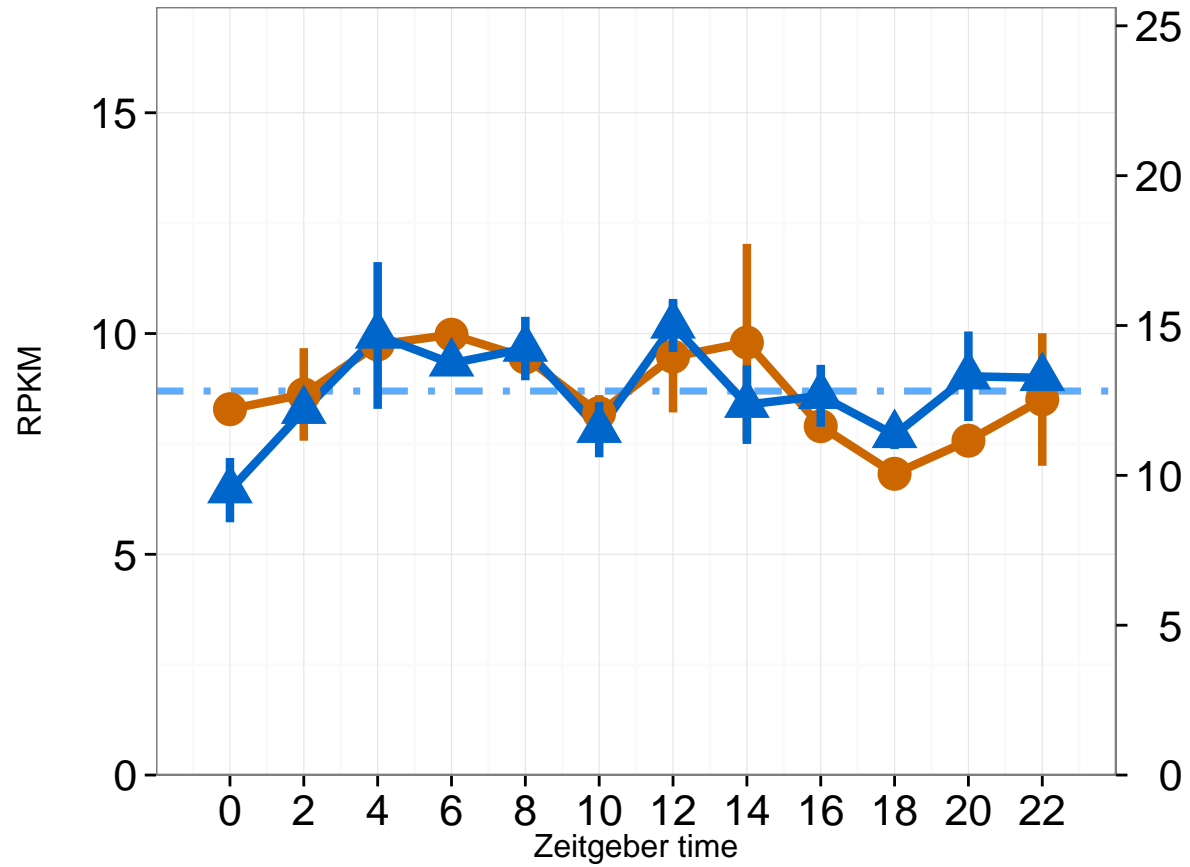

## Hsd3b7

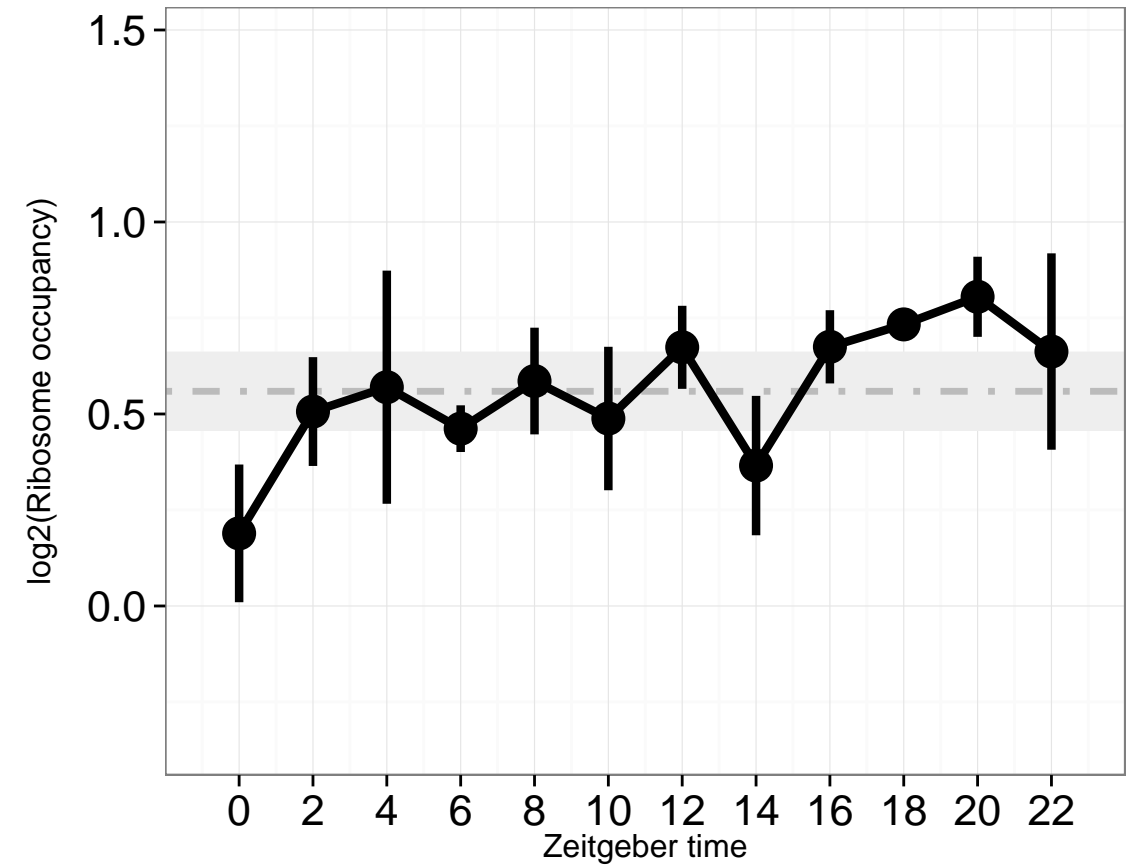

Supplement: Supplementary file 11393 [file 1]

## Ndn

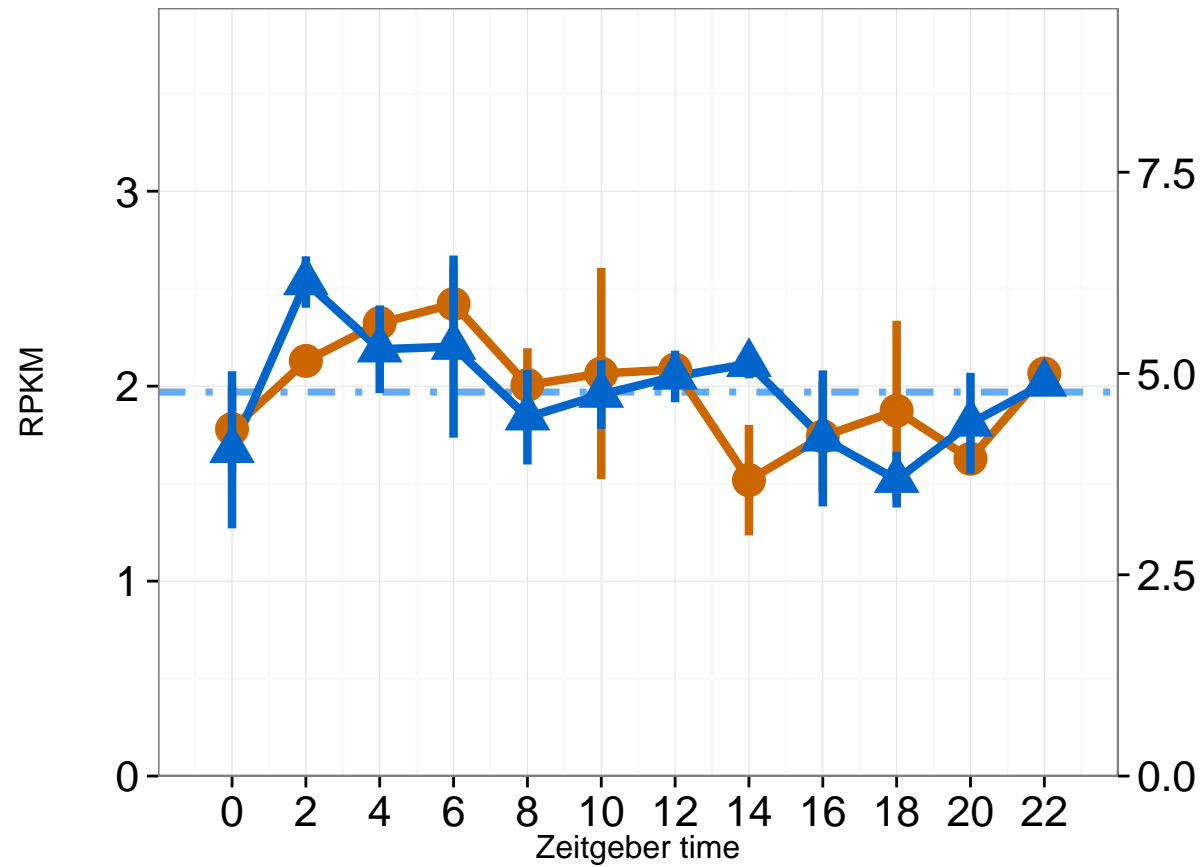

## Ndn

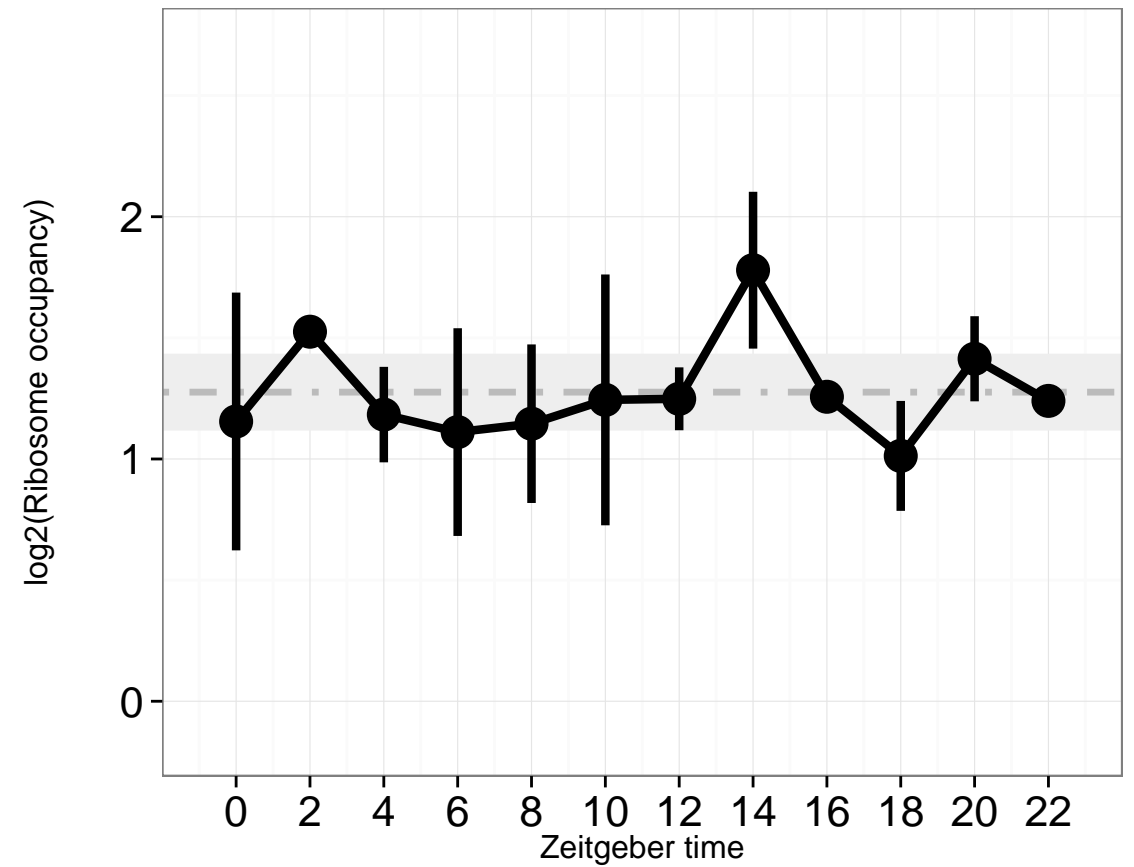

Supplement: Supplementary file 11394 [file 1]

**9630033F20Rik**

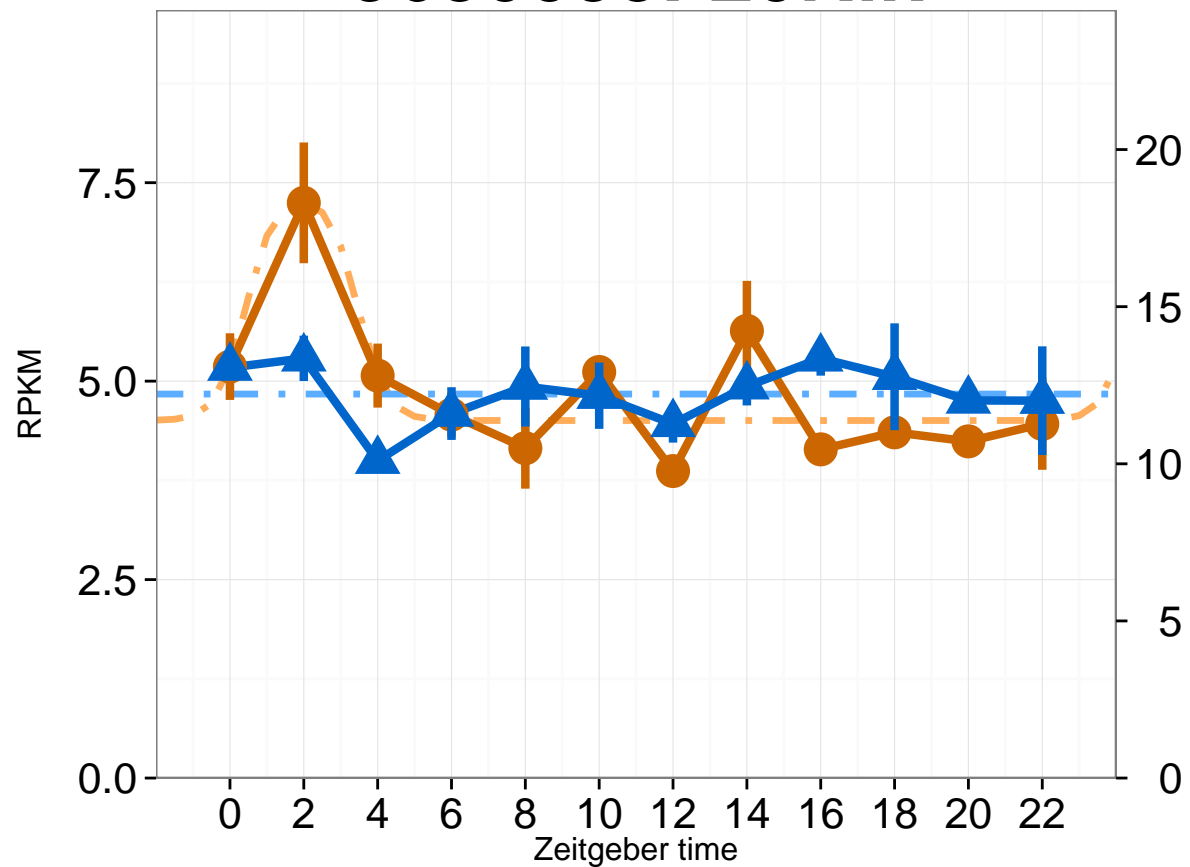

**9630033F20Rik**

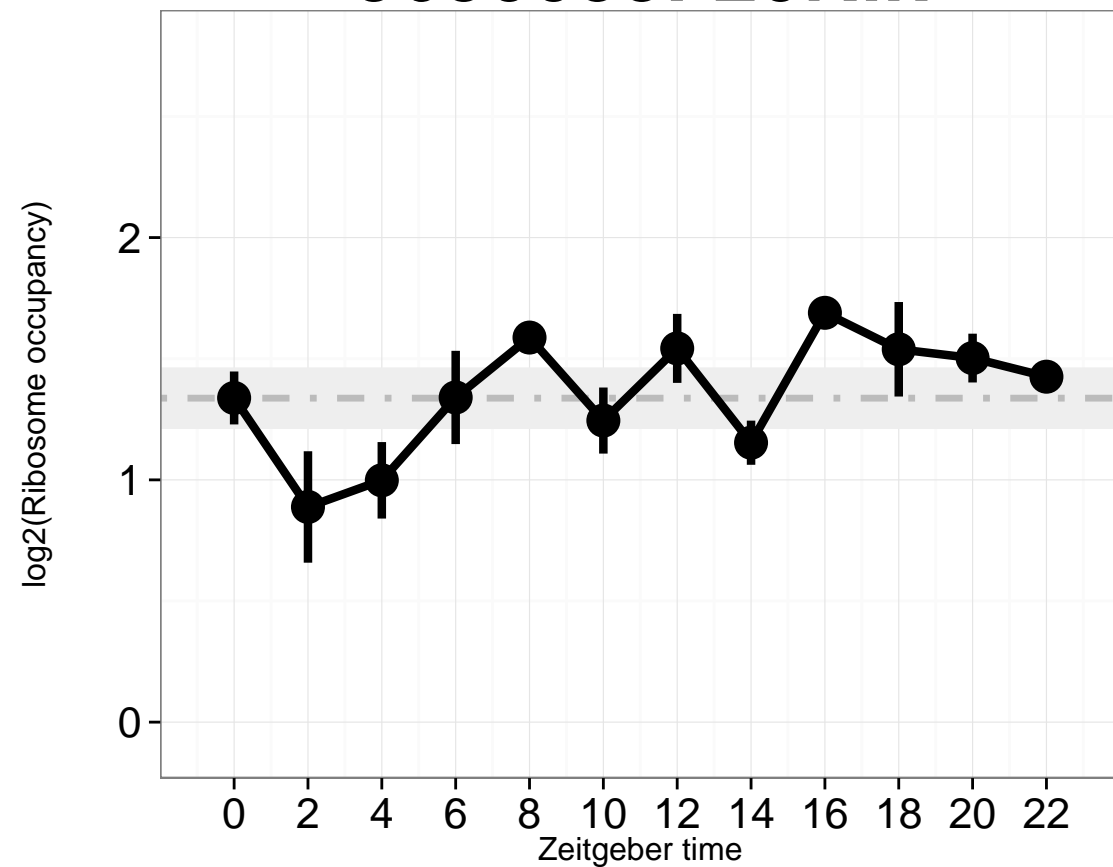

Supplement: Supplementary file 11395 [file 1]

# Sostdc1

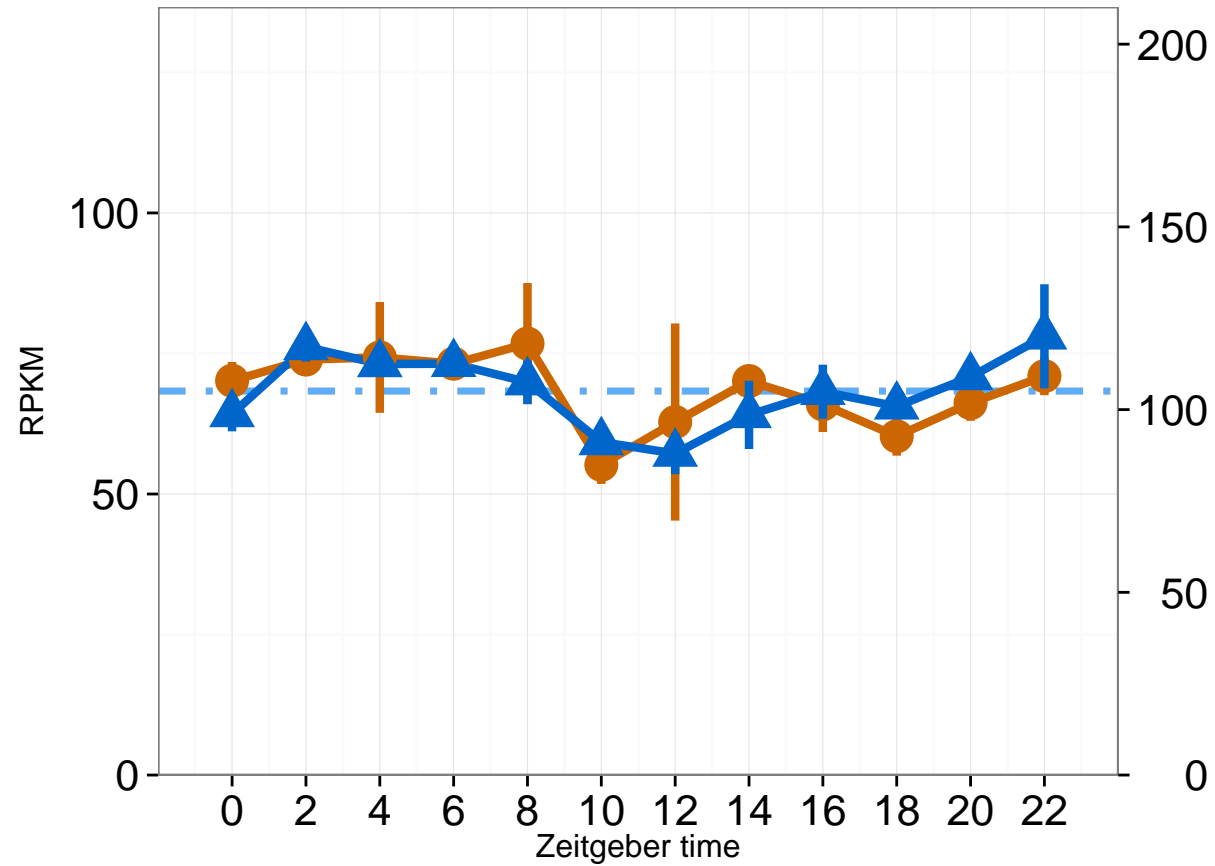

# Sostdc1

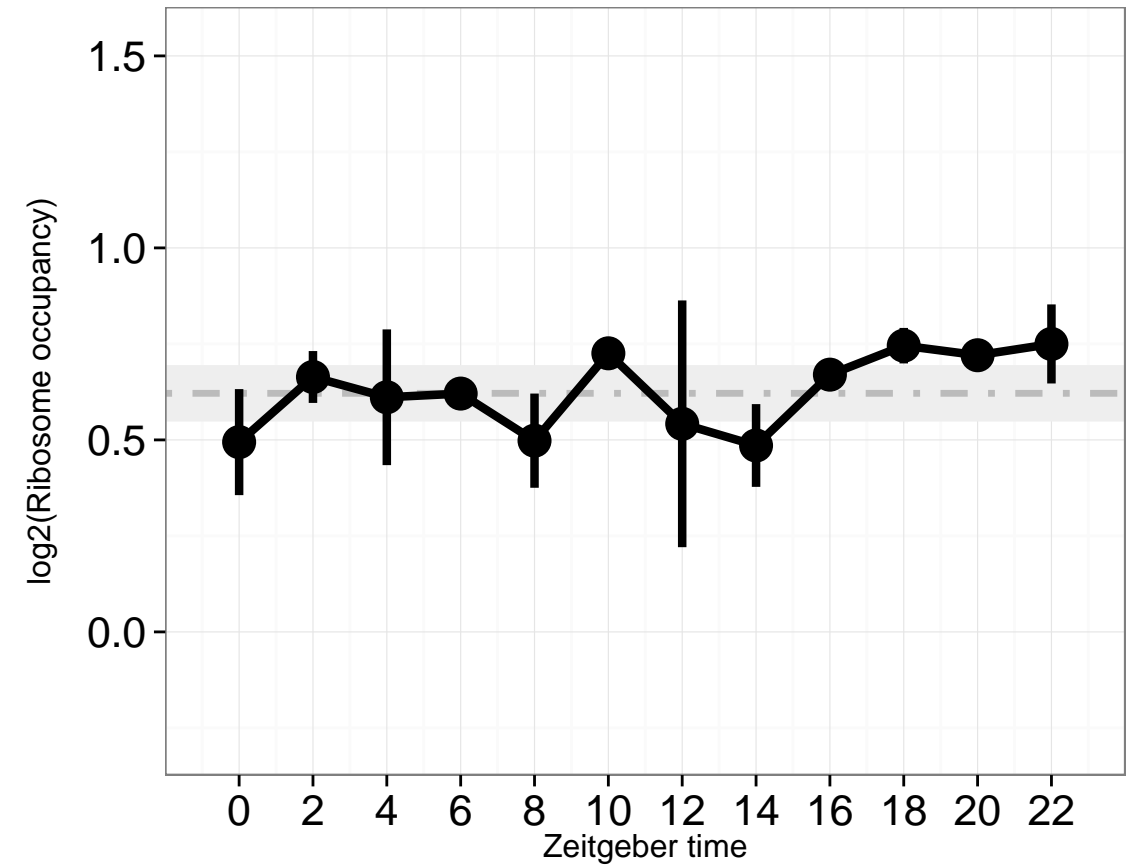

Supplement: Supplementary file 11396 [file 1]

## Akap7

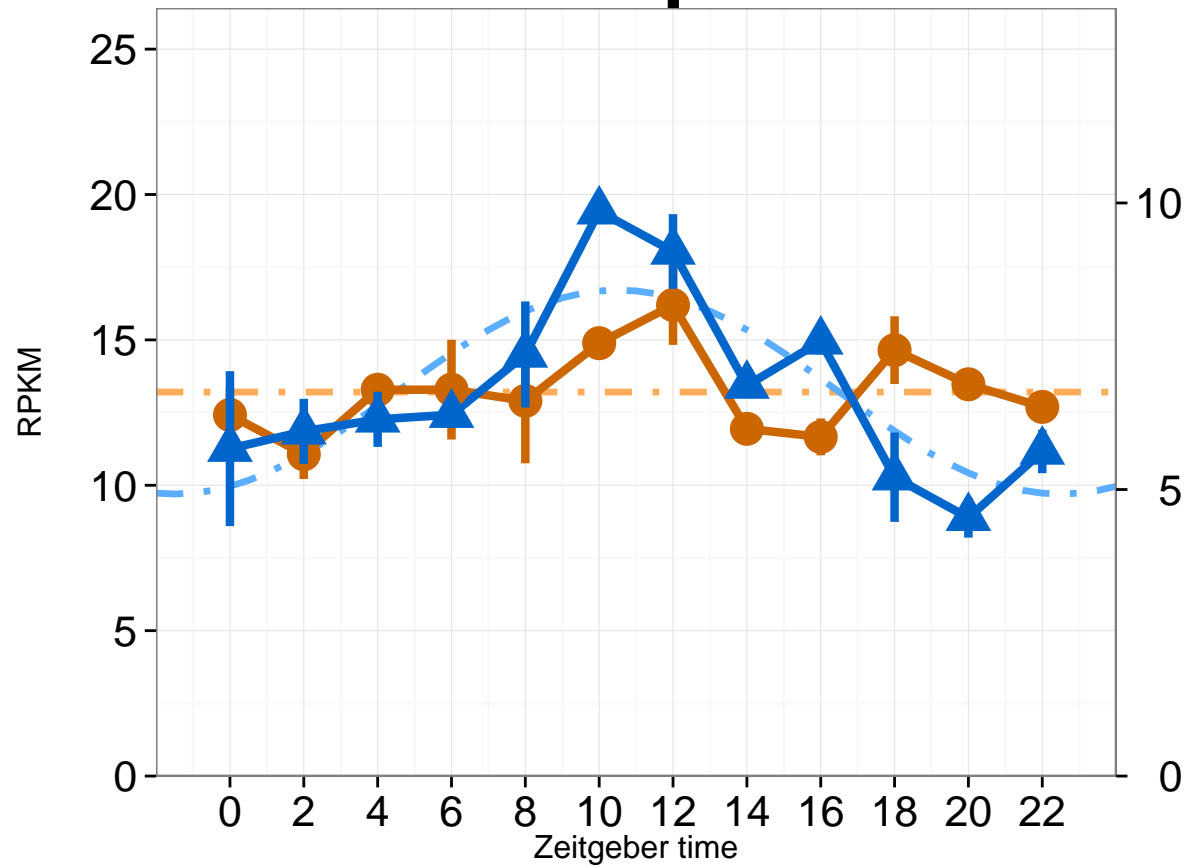

## Akap7

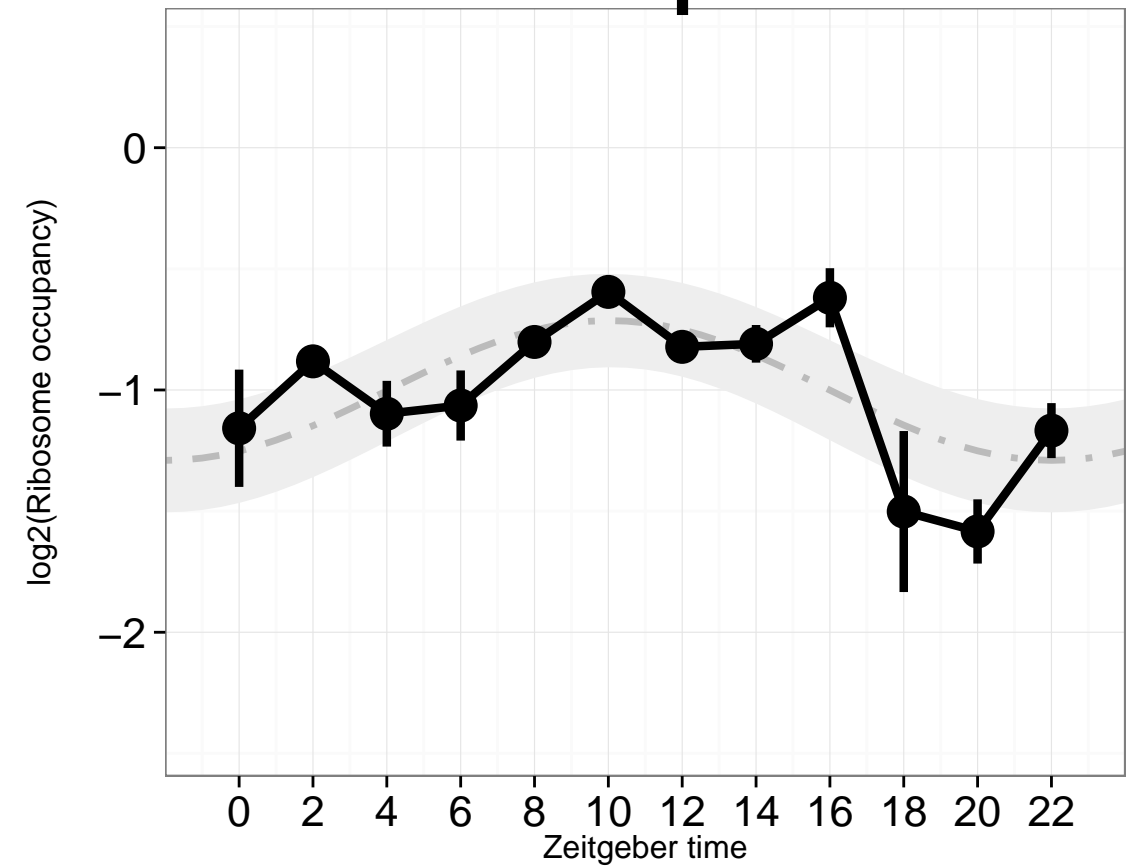

Supplement: Supplementary file 11397 [file 1]

# Tmc7

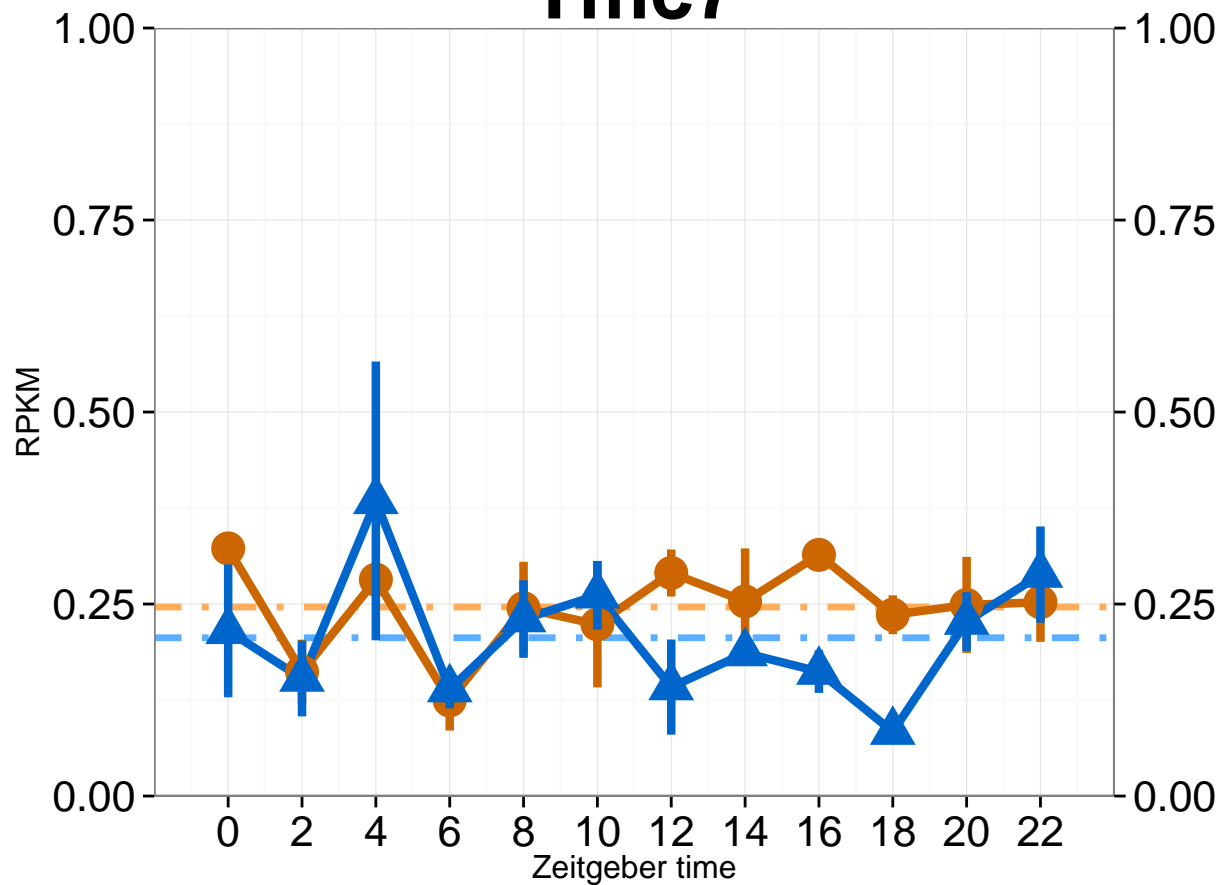

# Tmc7

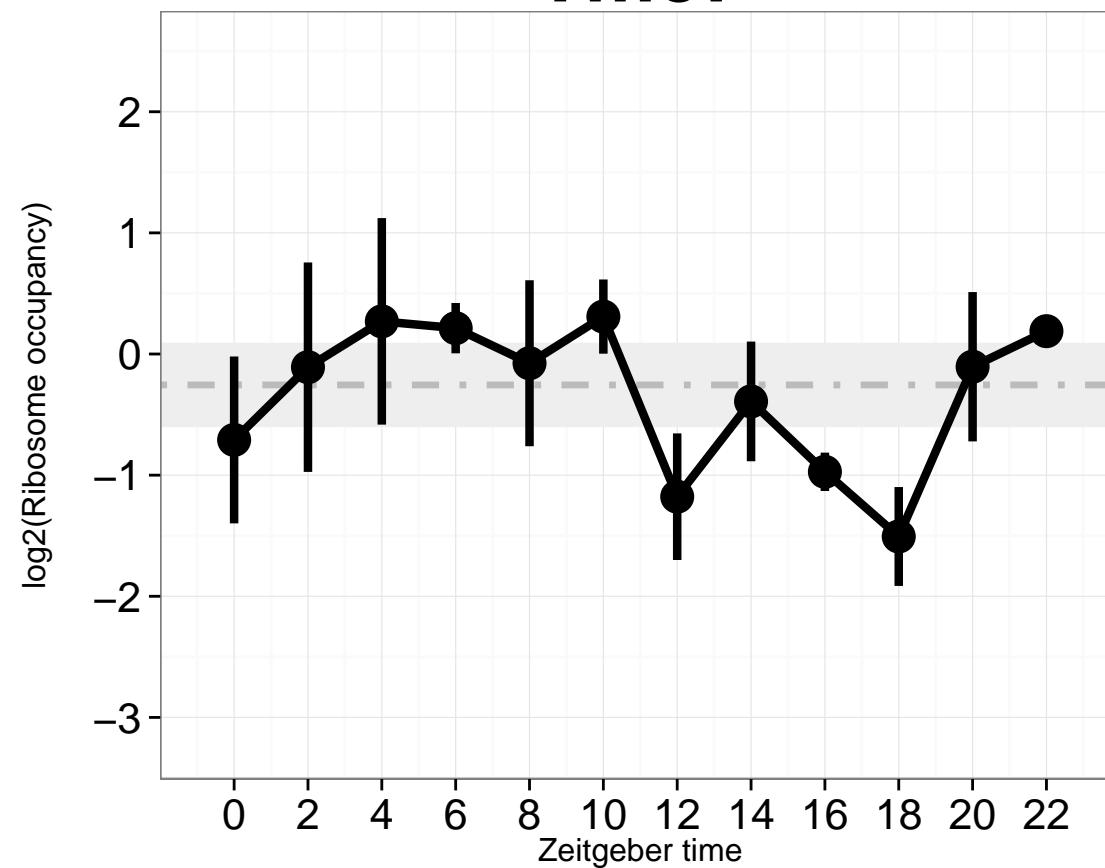

Supplement: Supplementary file 11398 [file 1]

## Ablim3

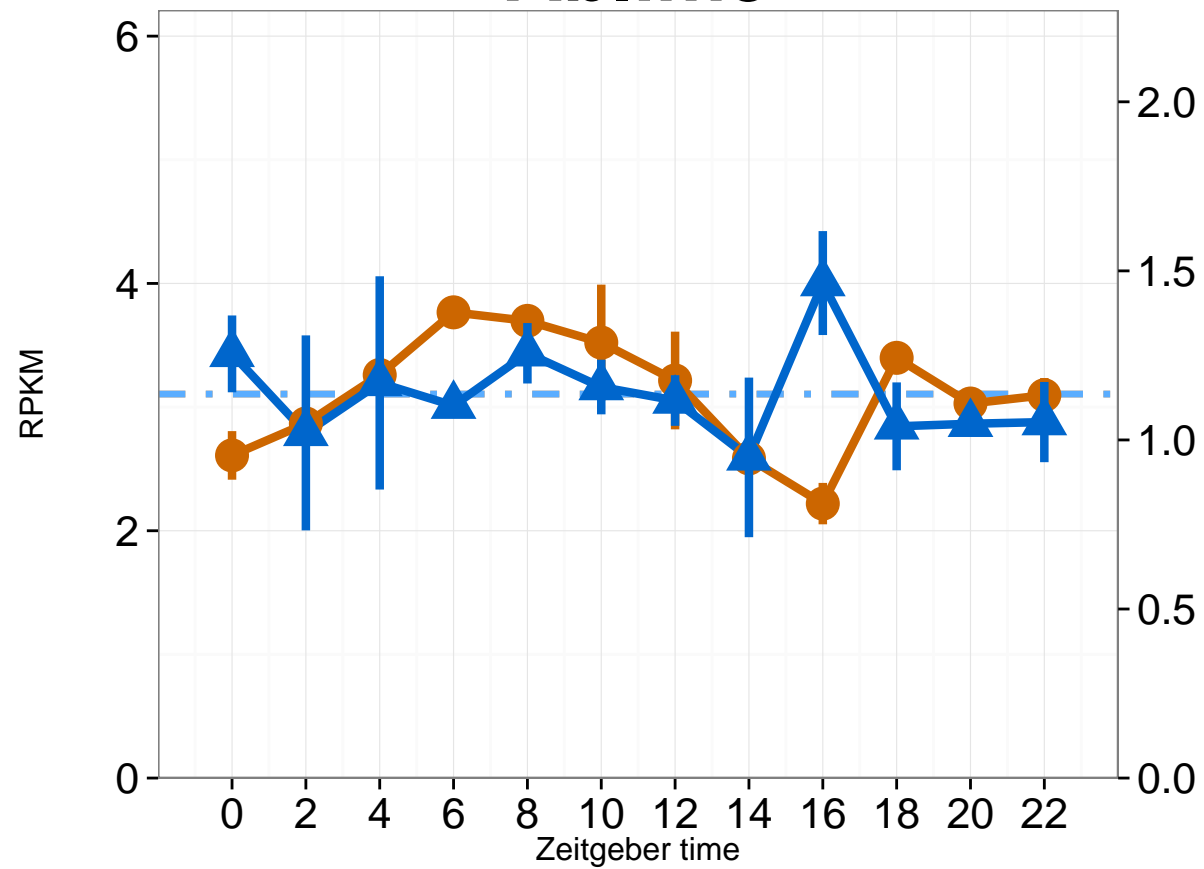

## Ablim3

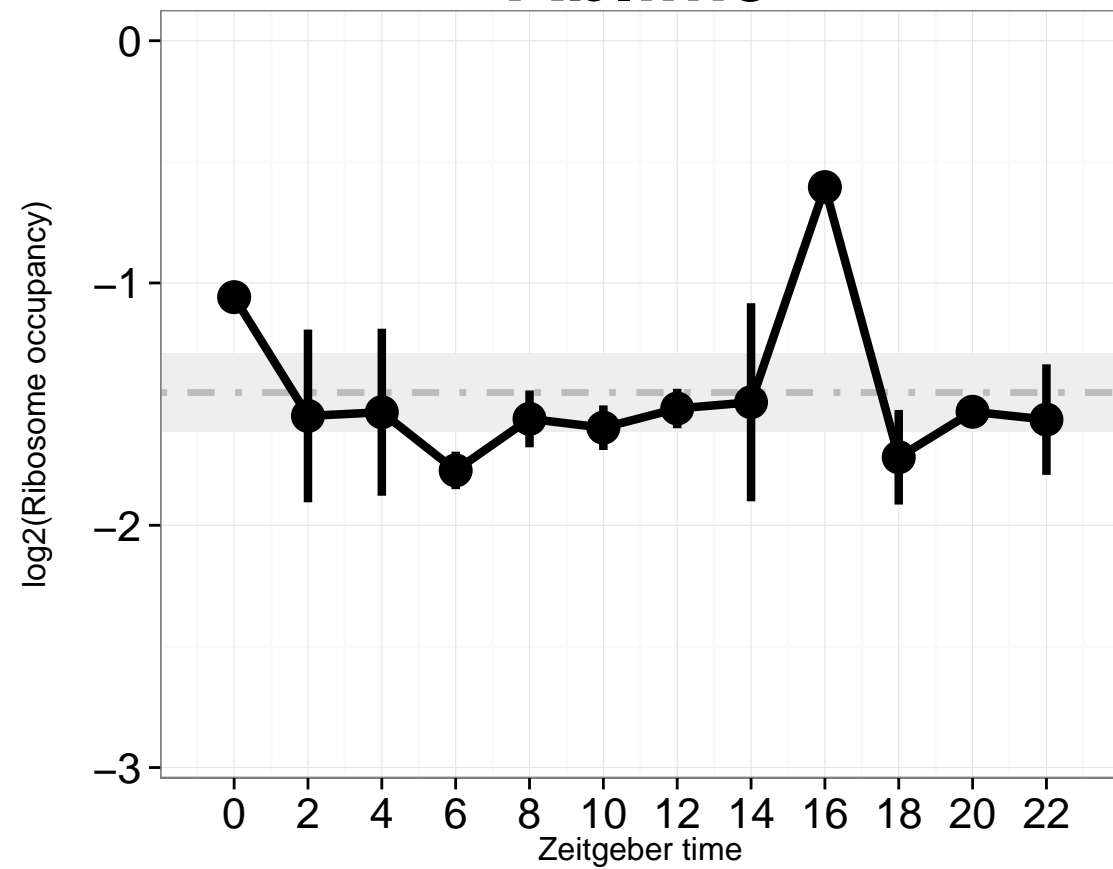

Supplement: Supplementary file 11399 [file 1]

# Ap4b1

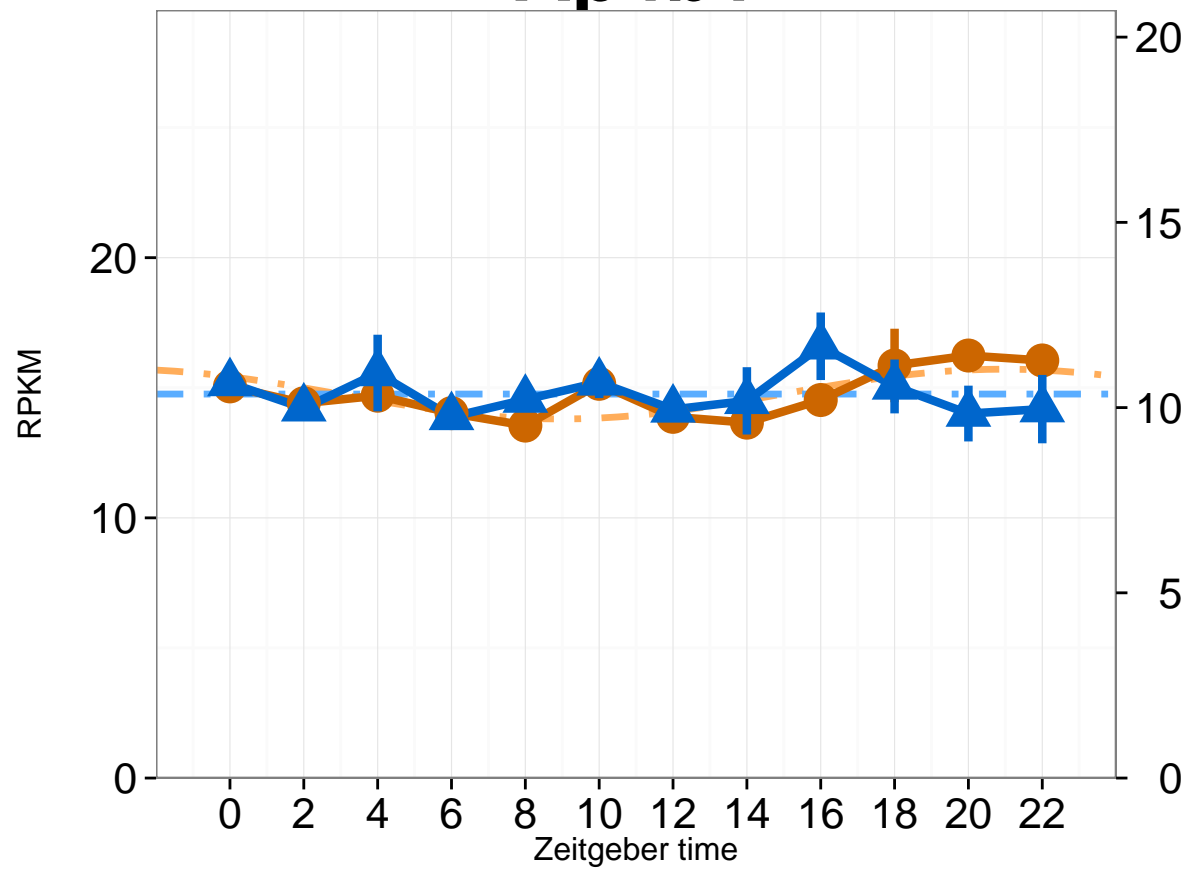

# Ap4b1

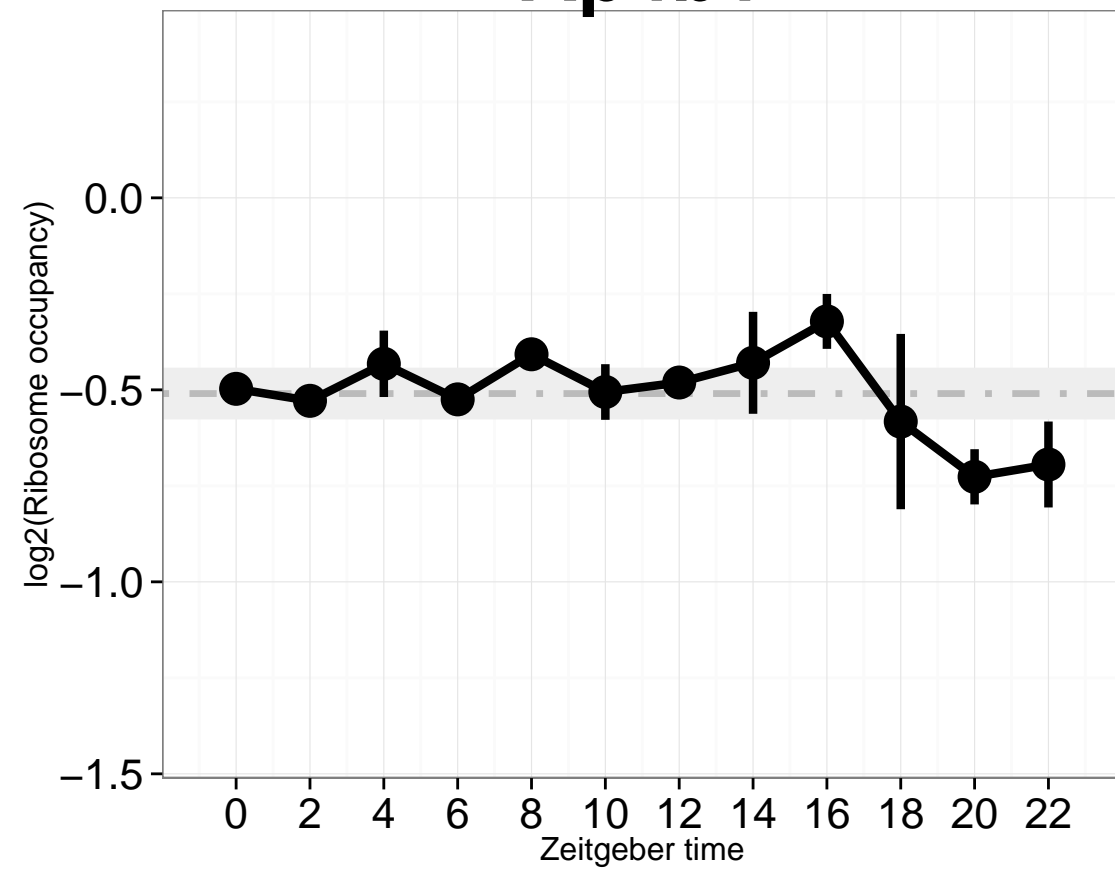

Supplement: Supplementary file 11400 [file 1]

## Fbxl5

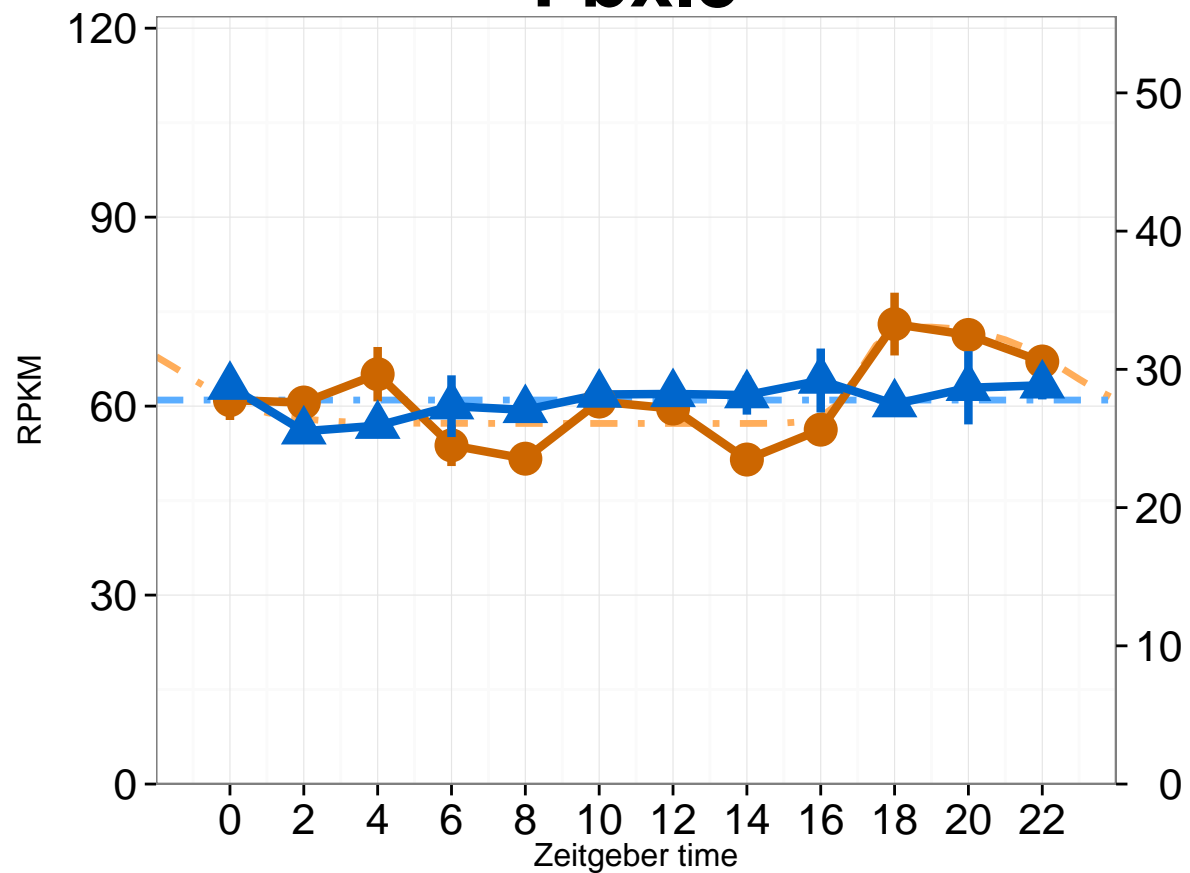

## Fbxl5

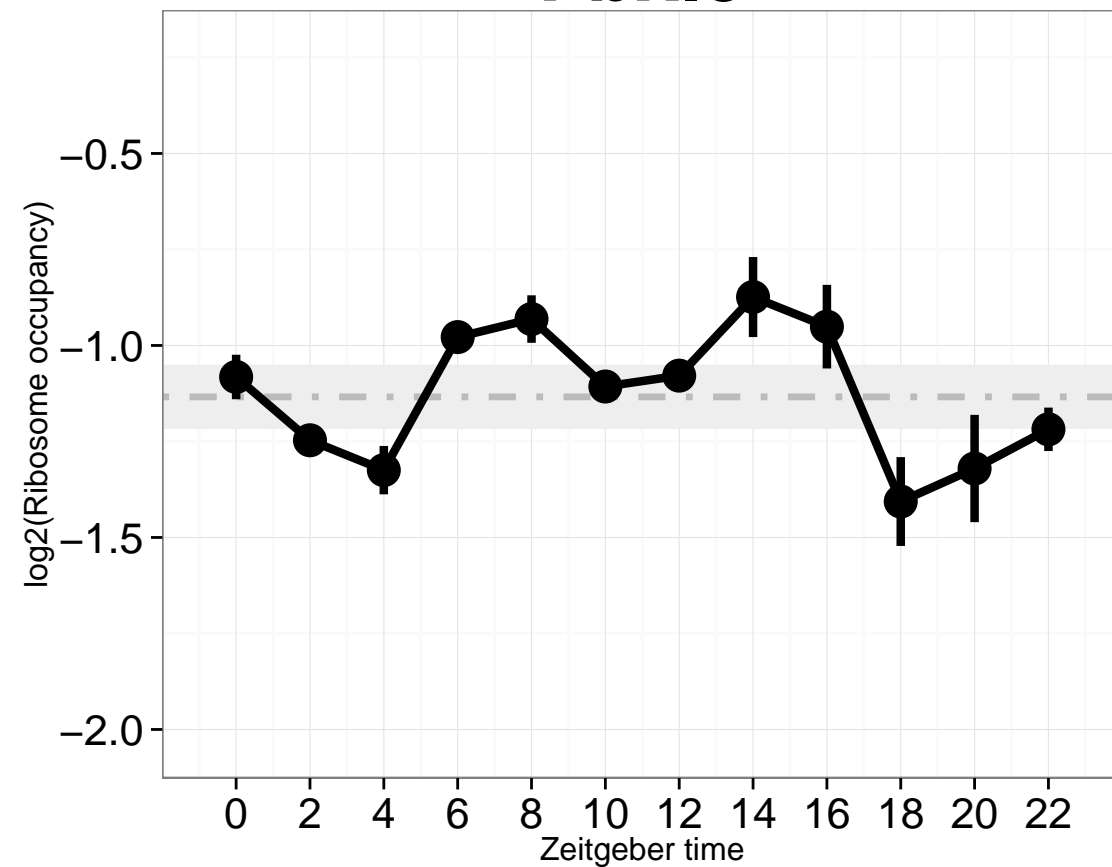

Supplement: Supplementary file 11401 [file 1]

# Ppp2r3c

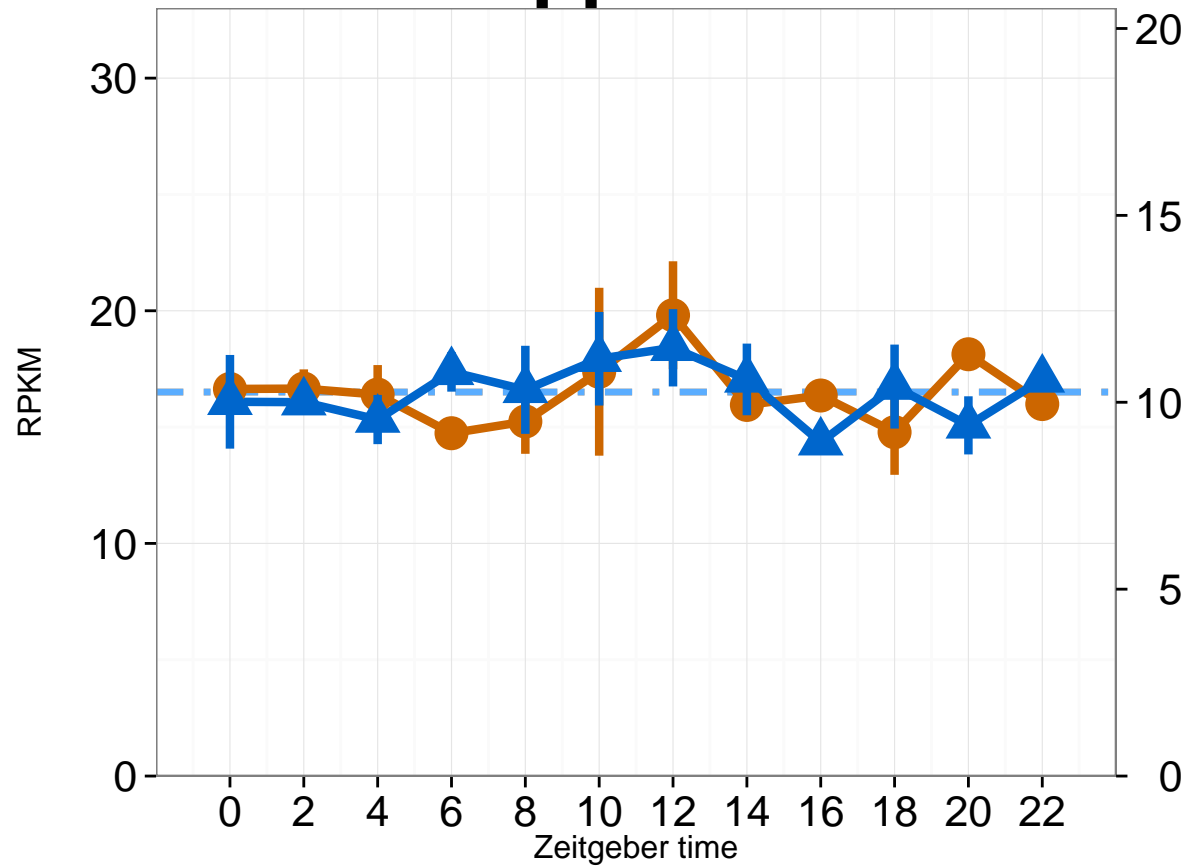

# Ppp2r3c

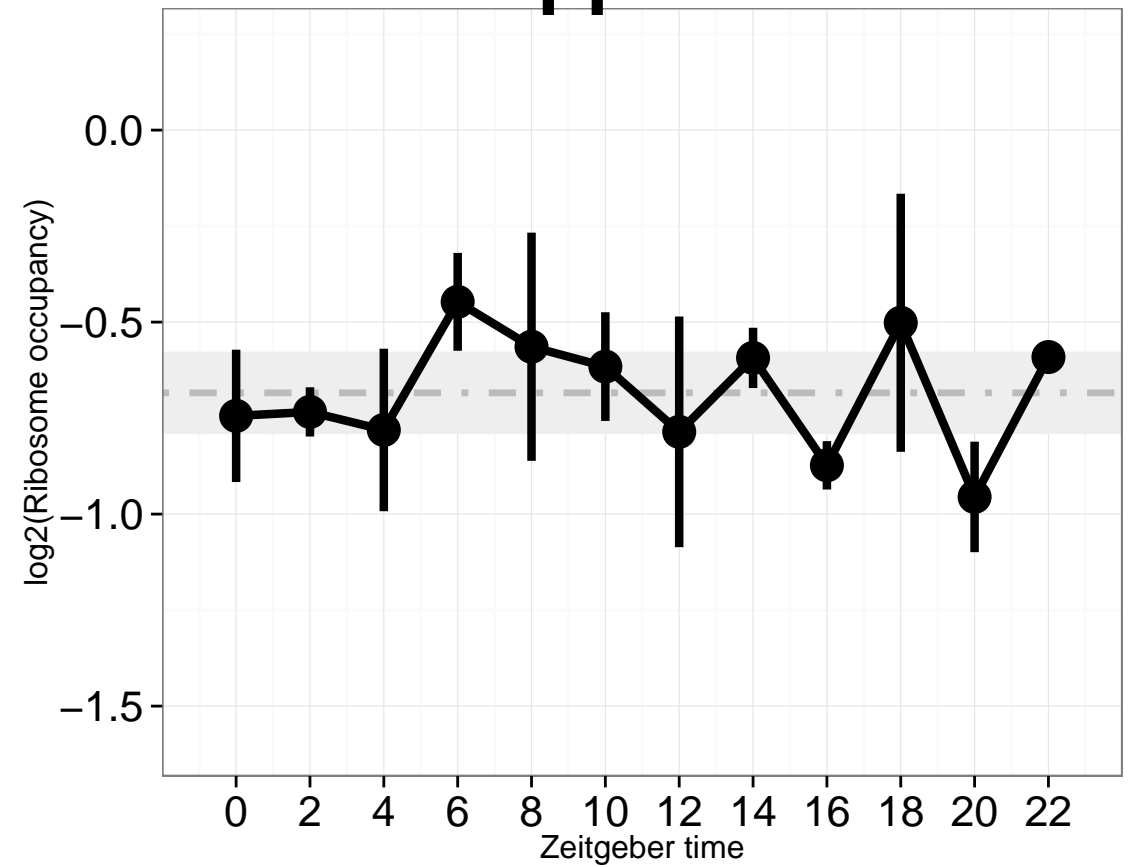

Supplement: Supplementary file 11402 [file 1]

## Cdk11b

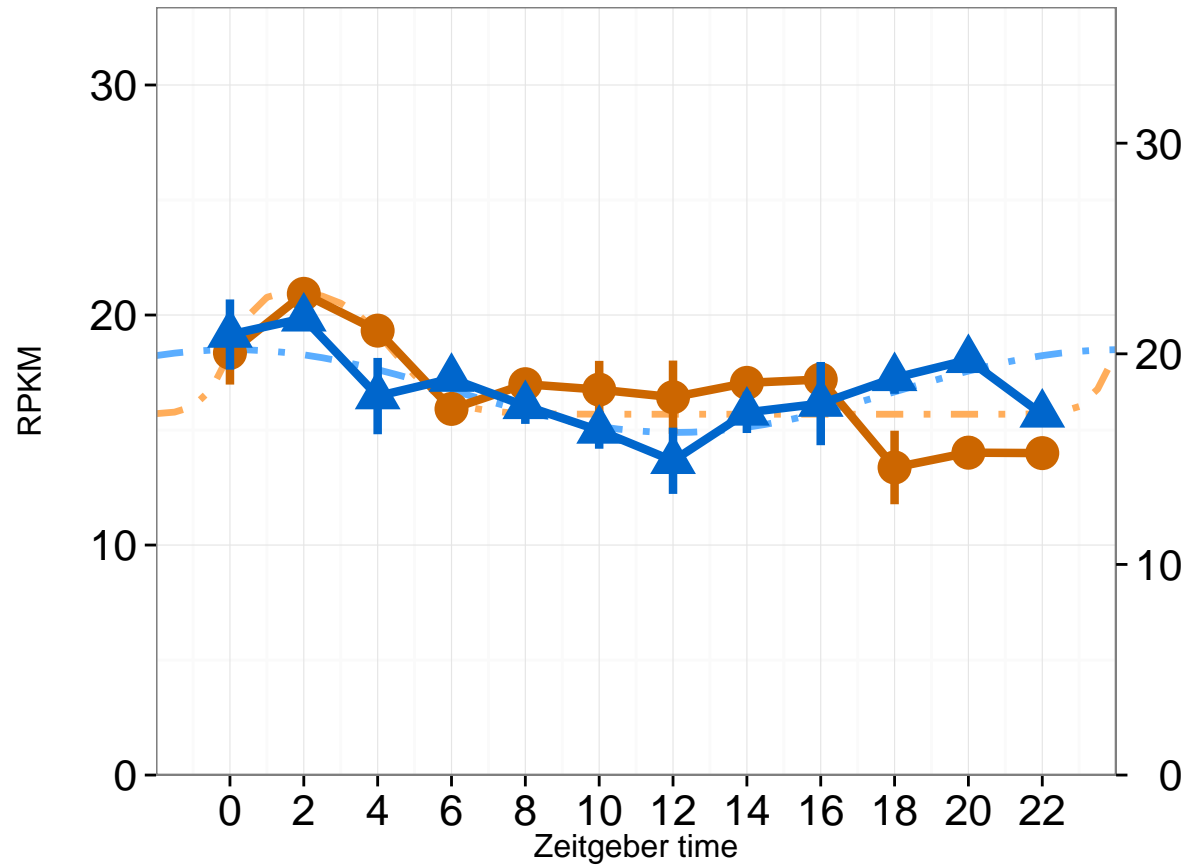

## Cdk11b

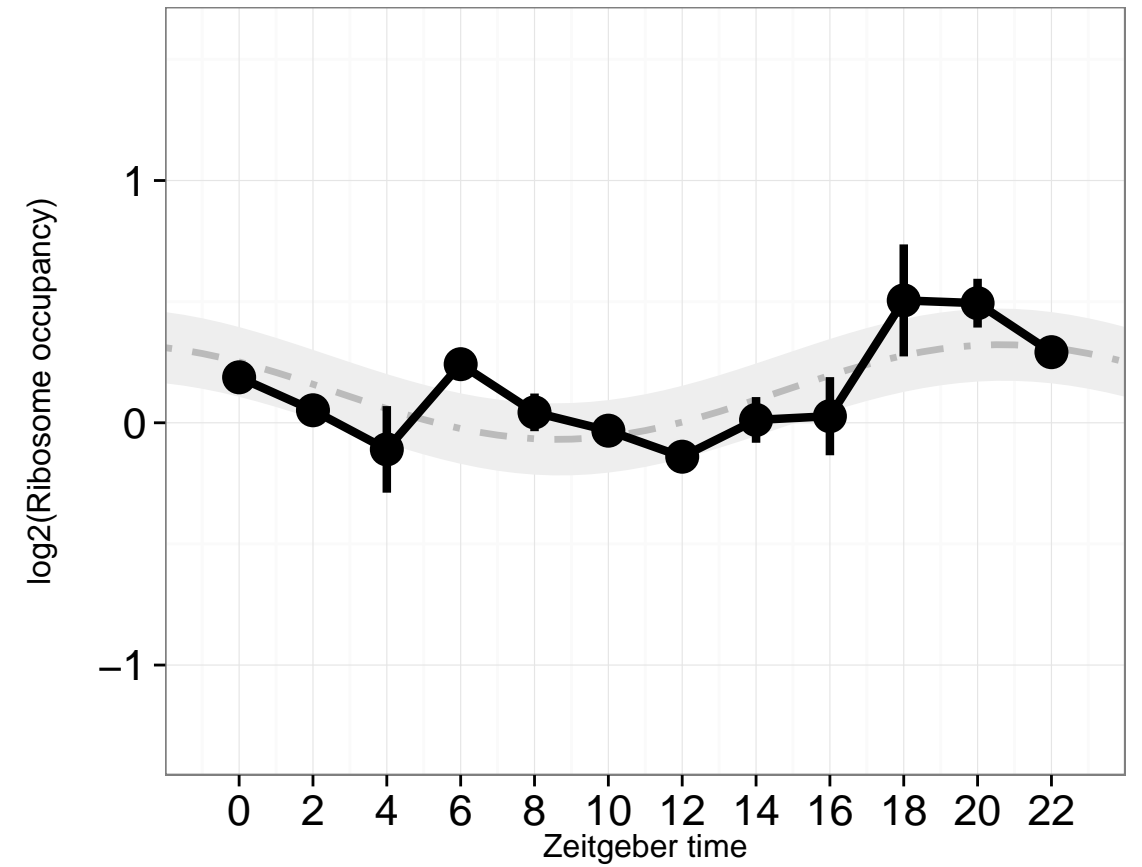

Supplement: Supplementary file 11403 [file 1]

## Exosc3

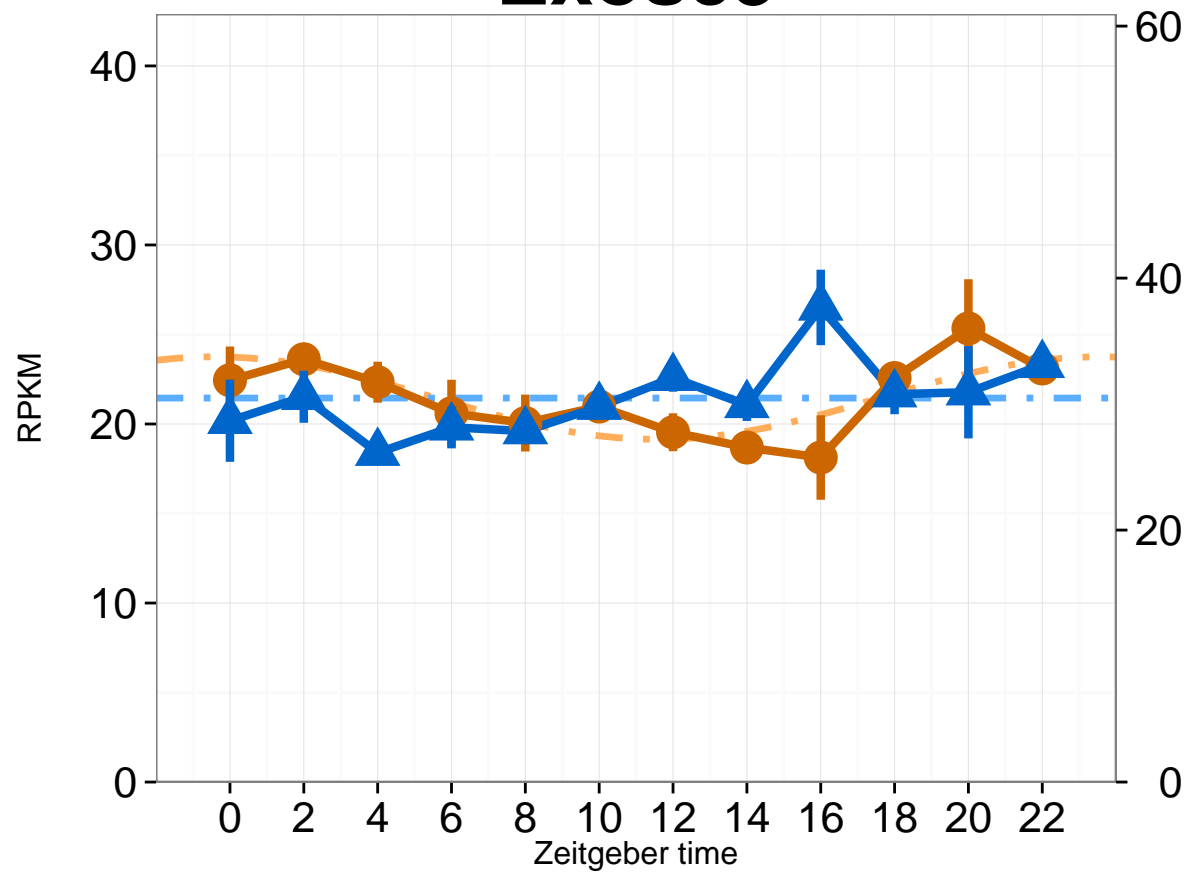

## Exosc3

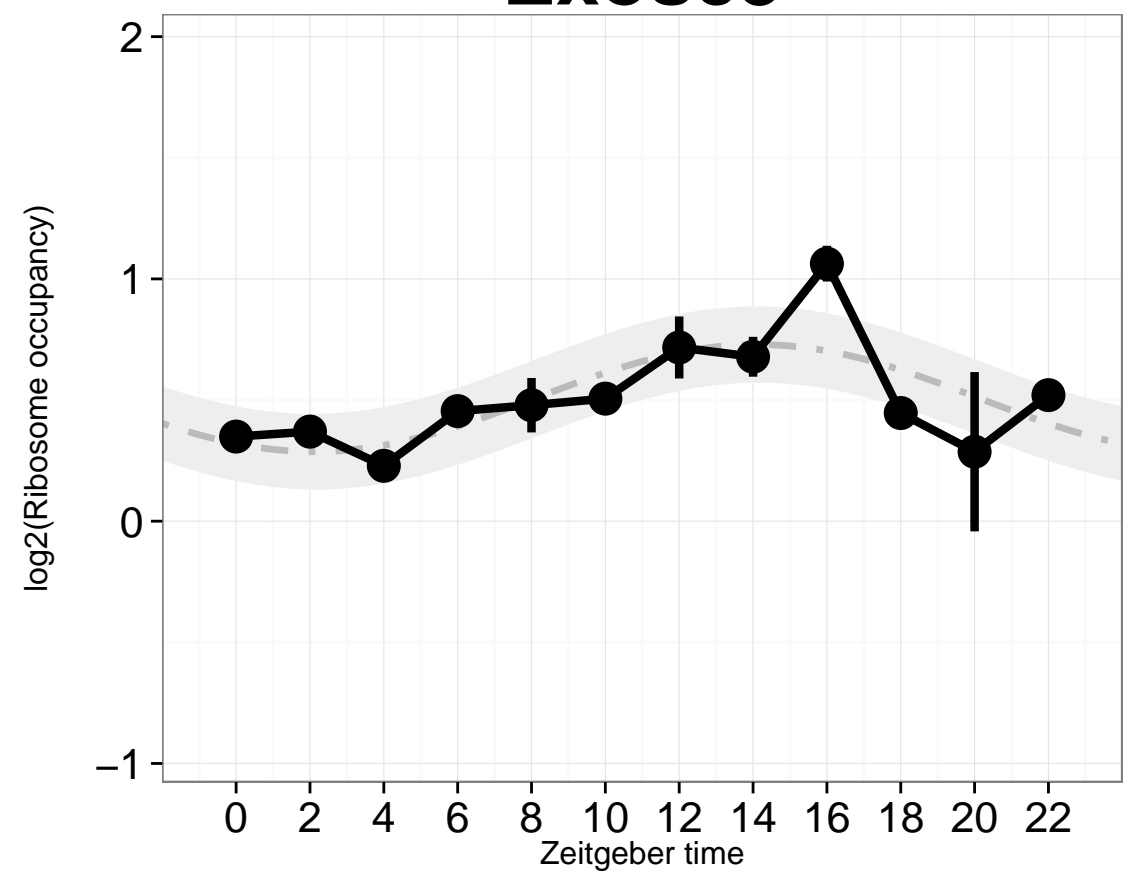

Supplement: Supplementary file 11404 [file 1]

## Ddx49

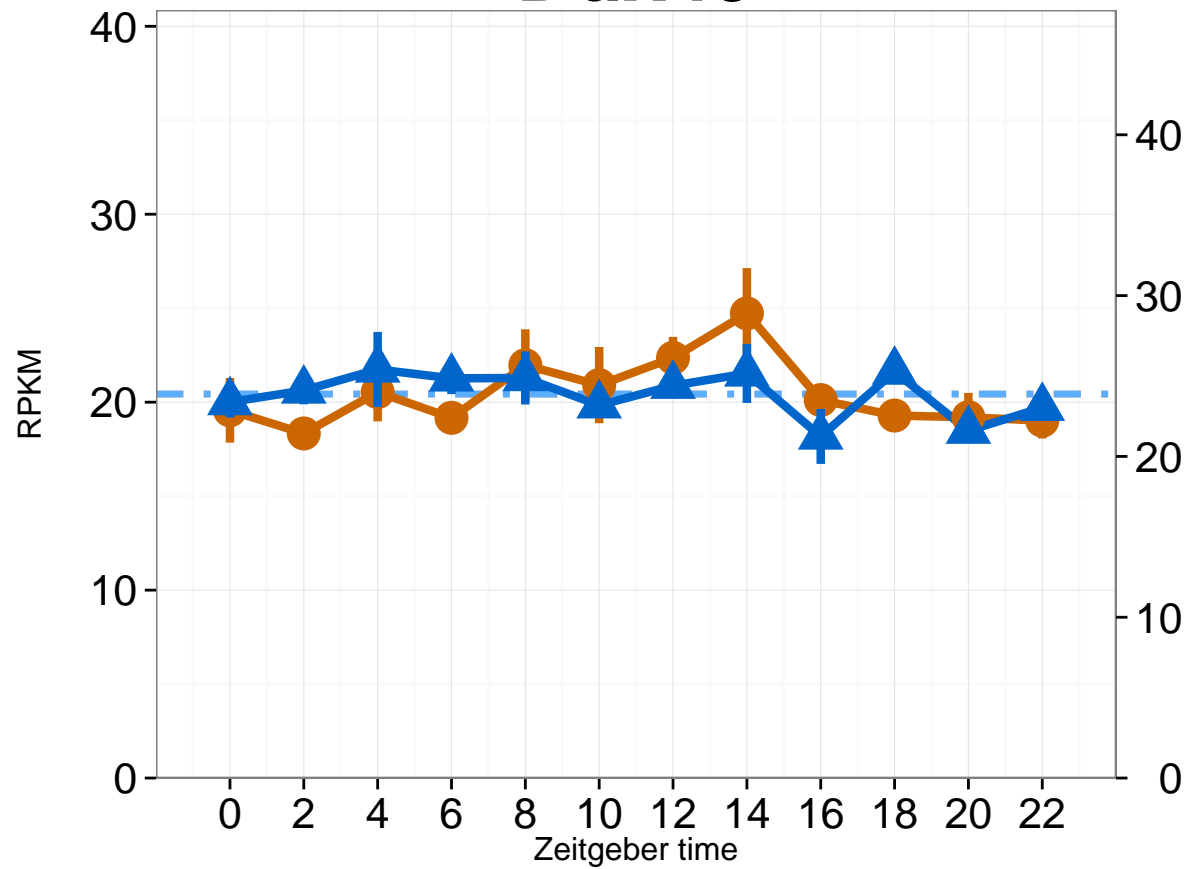

## Ddx49

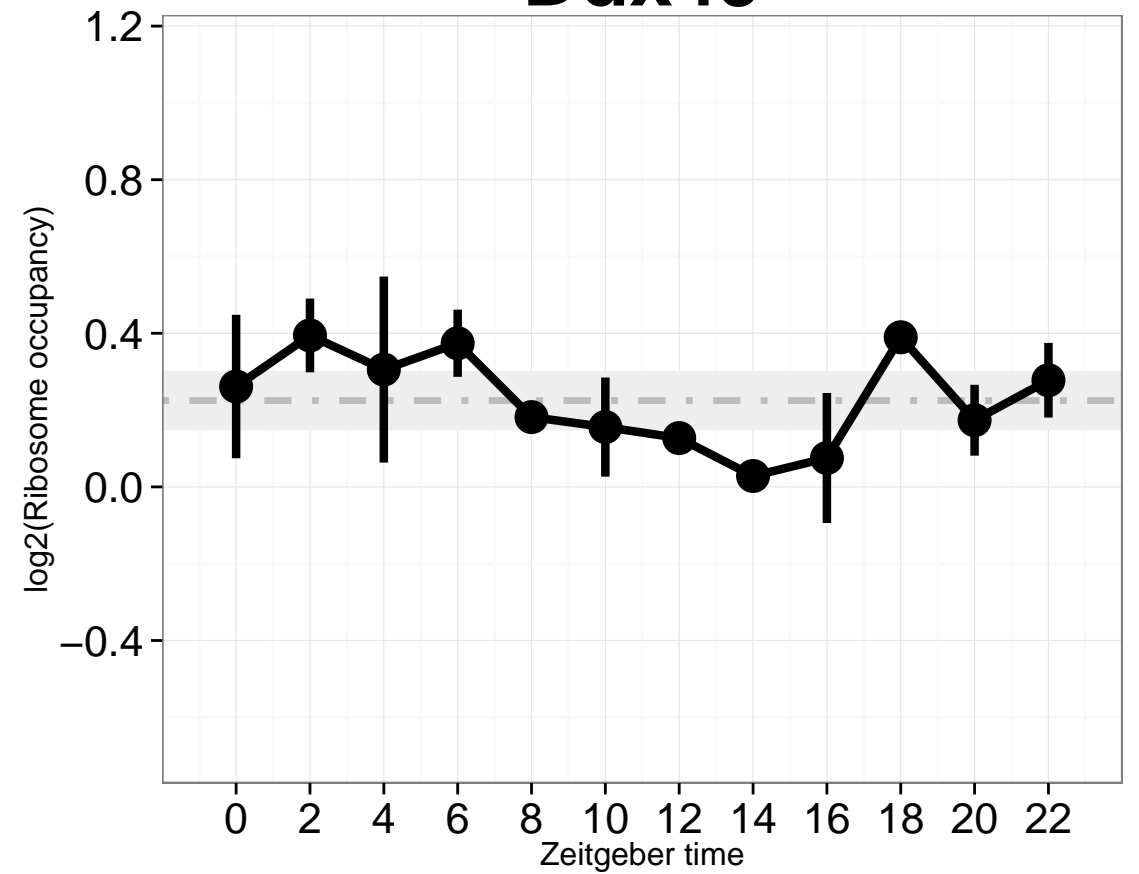

Supplement: Supplementary file 11405 [file 1]

# Pold3

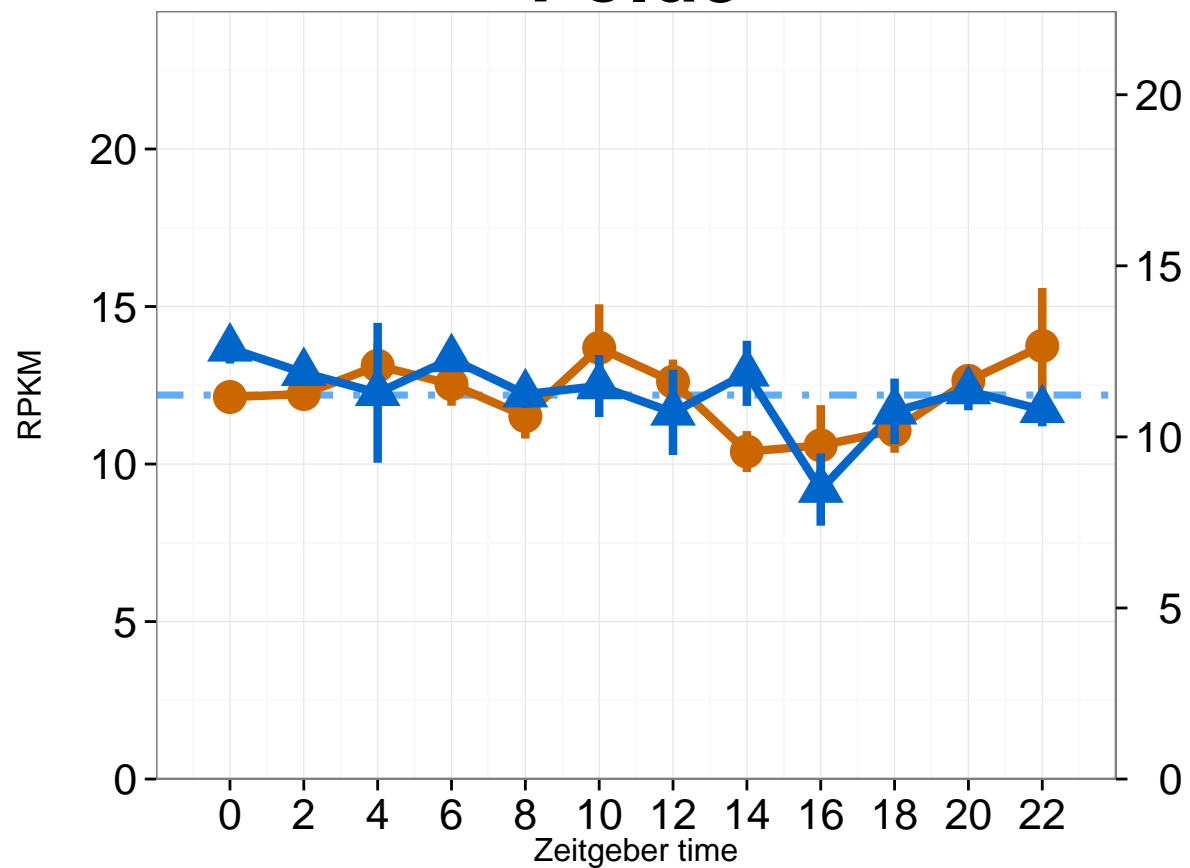

# Pold3

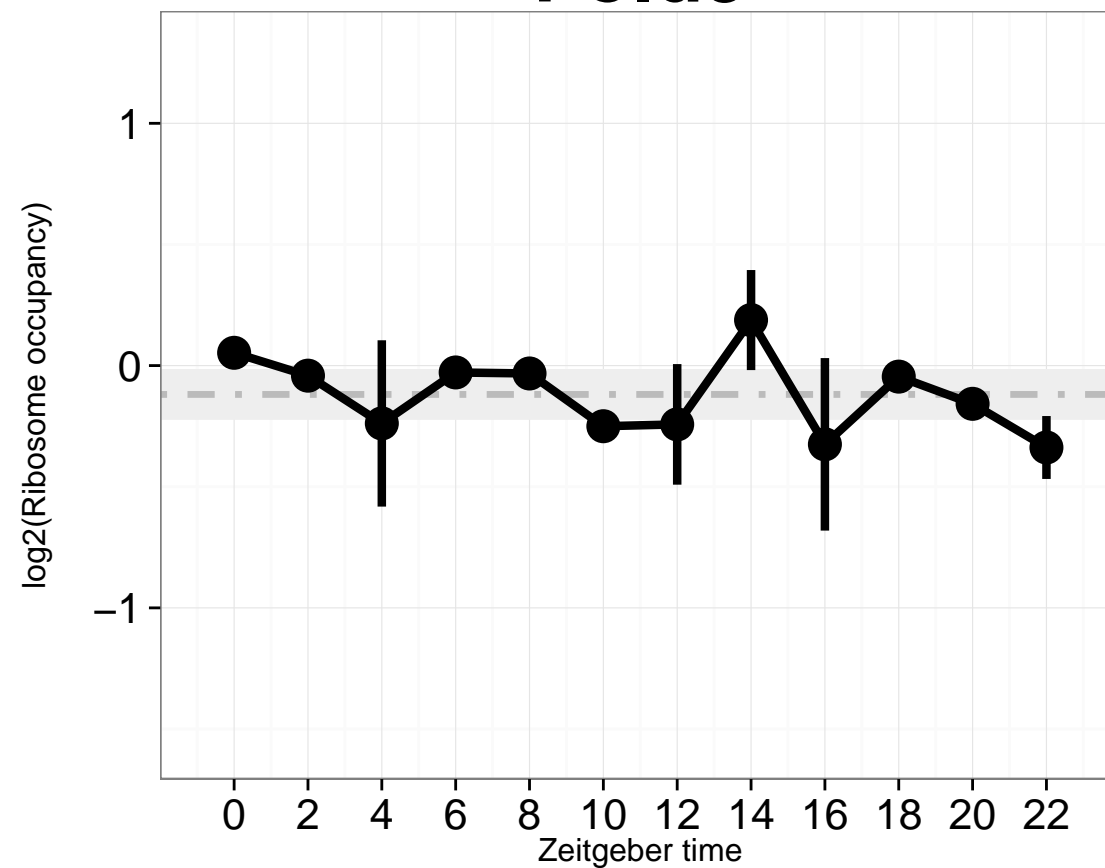

Supplement: Supplementary file 11406 [file 1]

## Ino80d

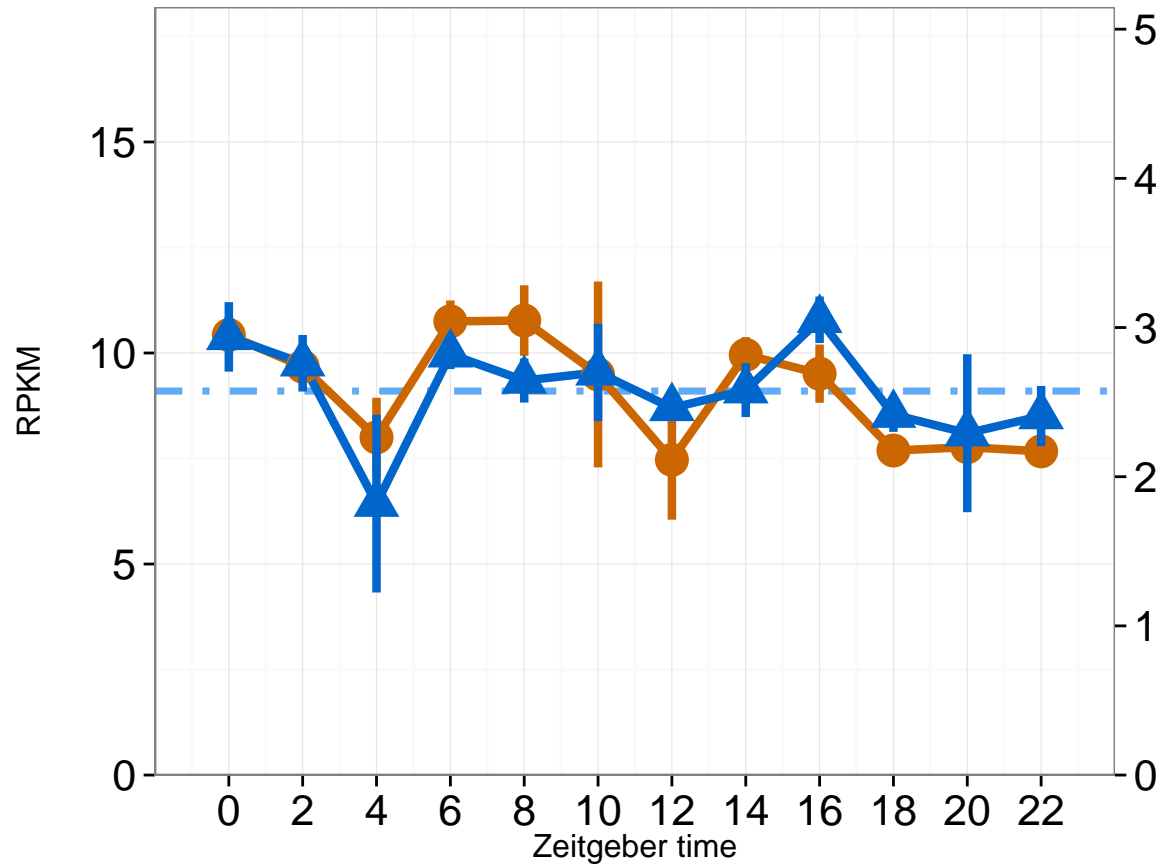

## Ino80d

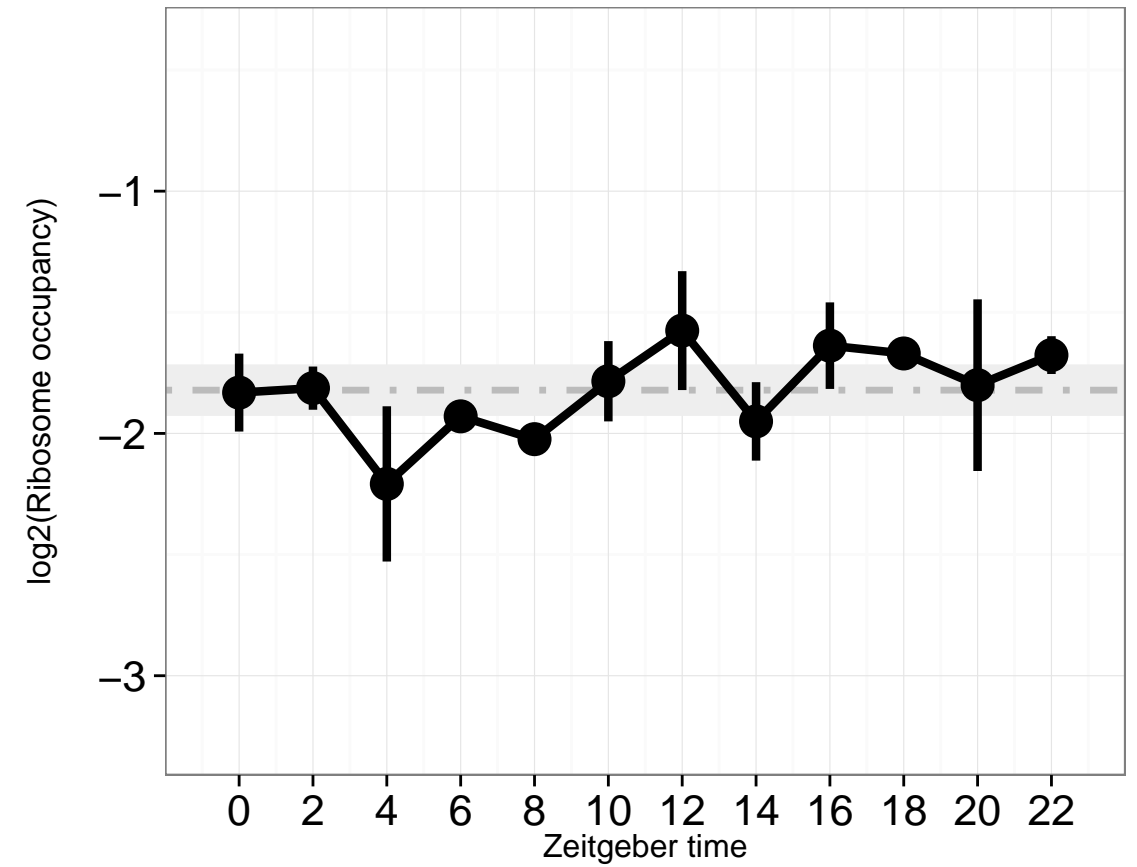

Supplement: Supplementary file 11407 [file 1]

# Szrd1

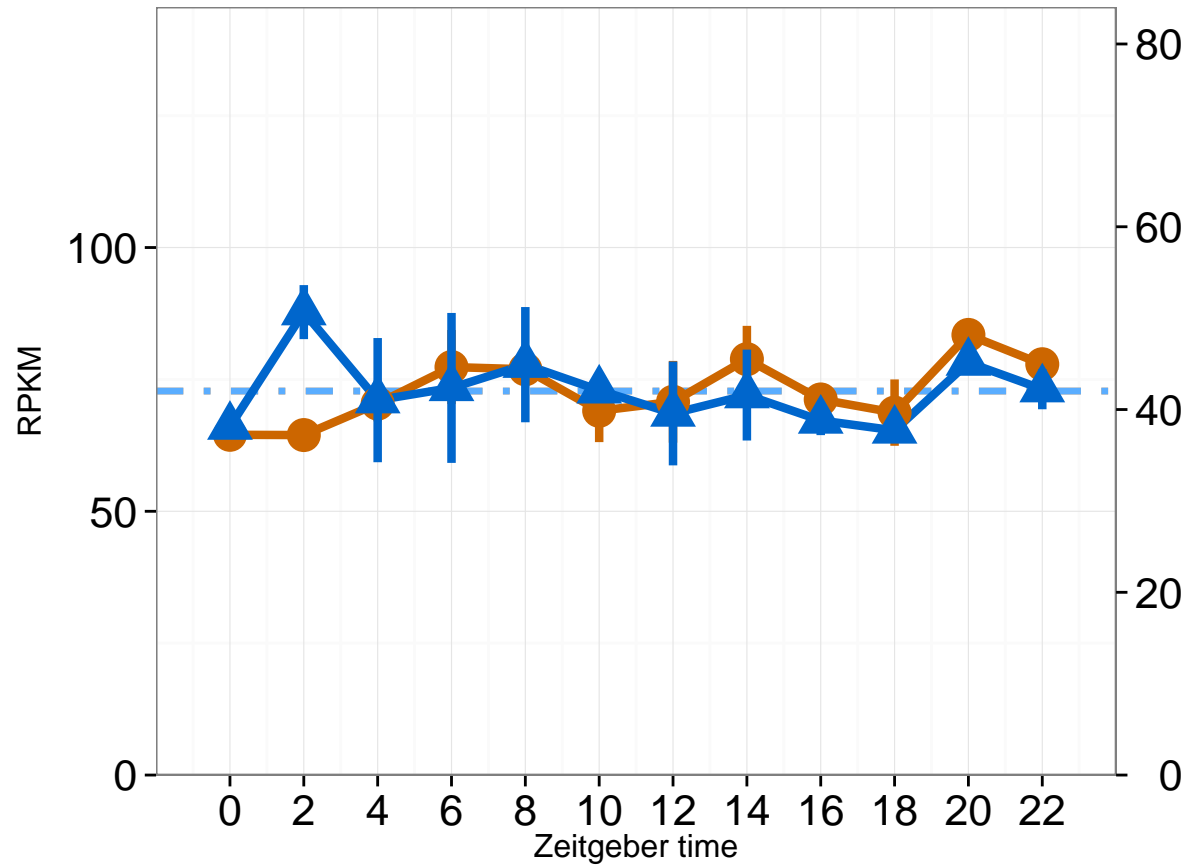

# Szrd1

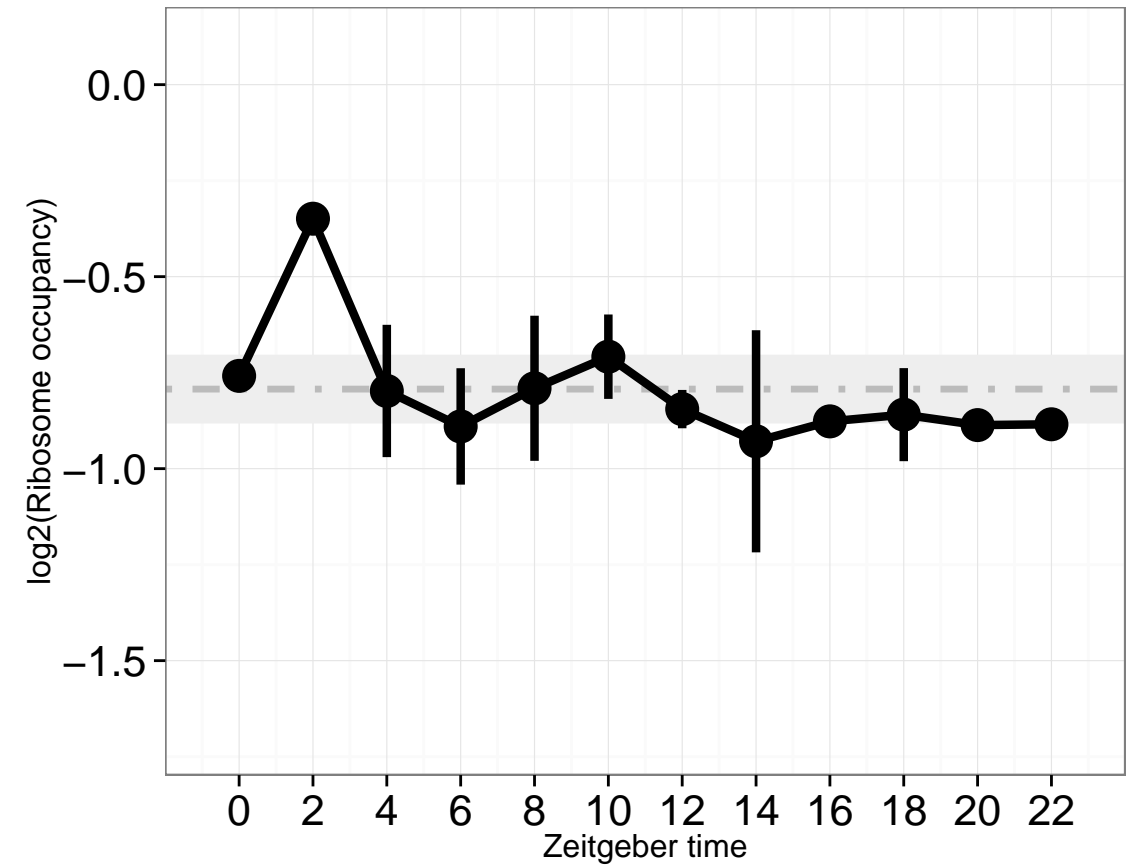

Supplement: Supplementary file 11408 [file 1]

# Ptpn23

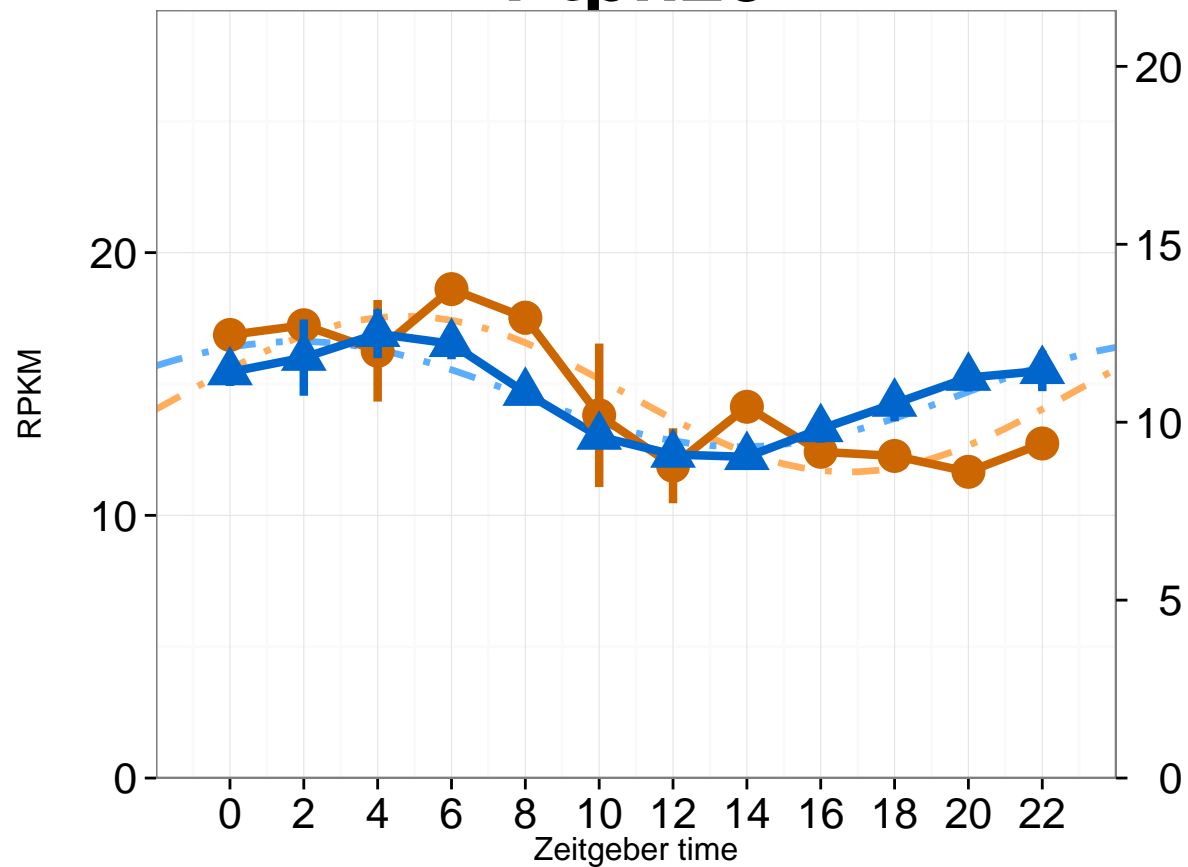

# Ptpn23

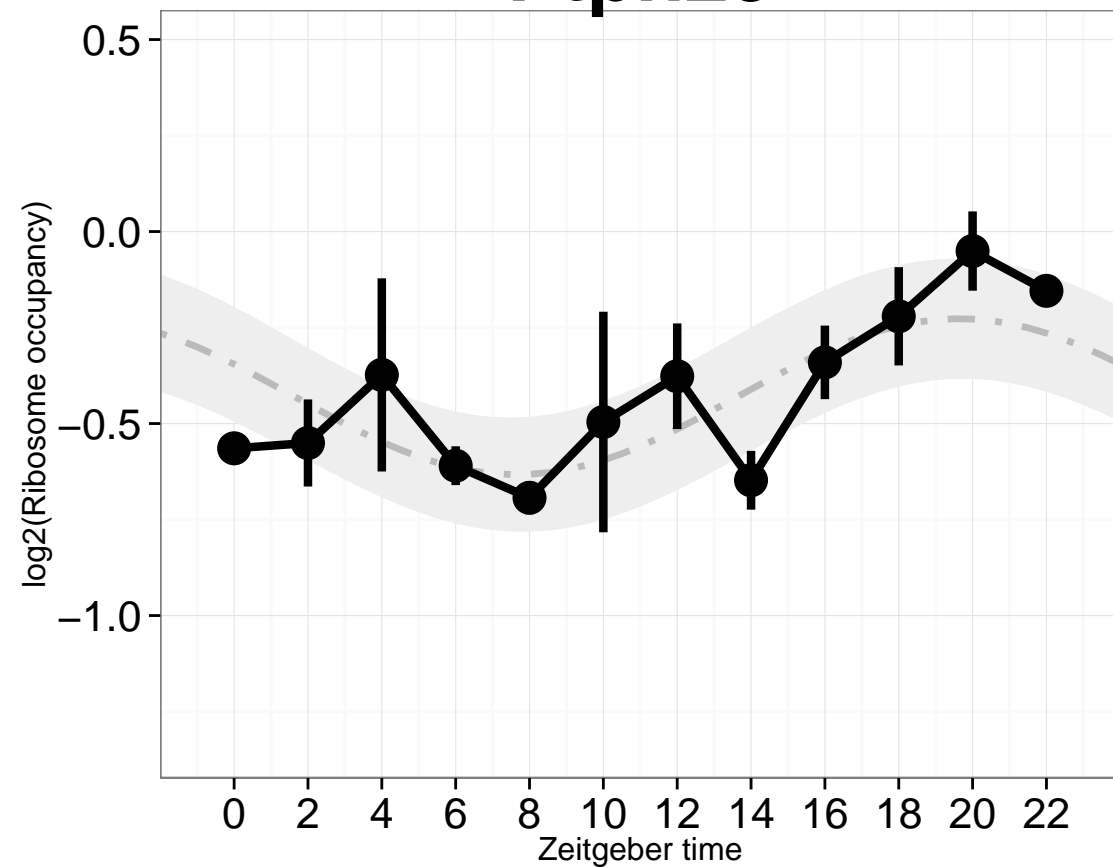

Supplement: Supplementary file 11409 [file 1]

# Trp63

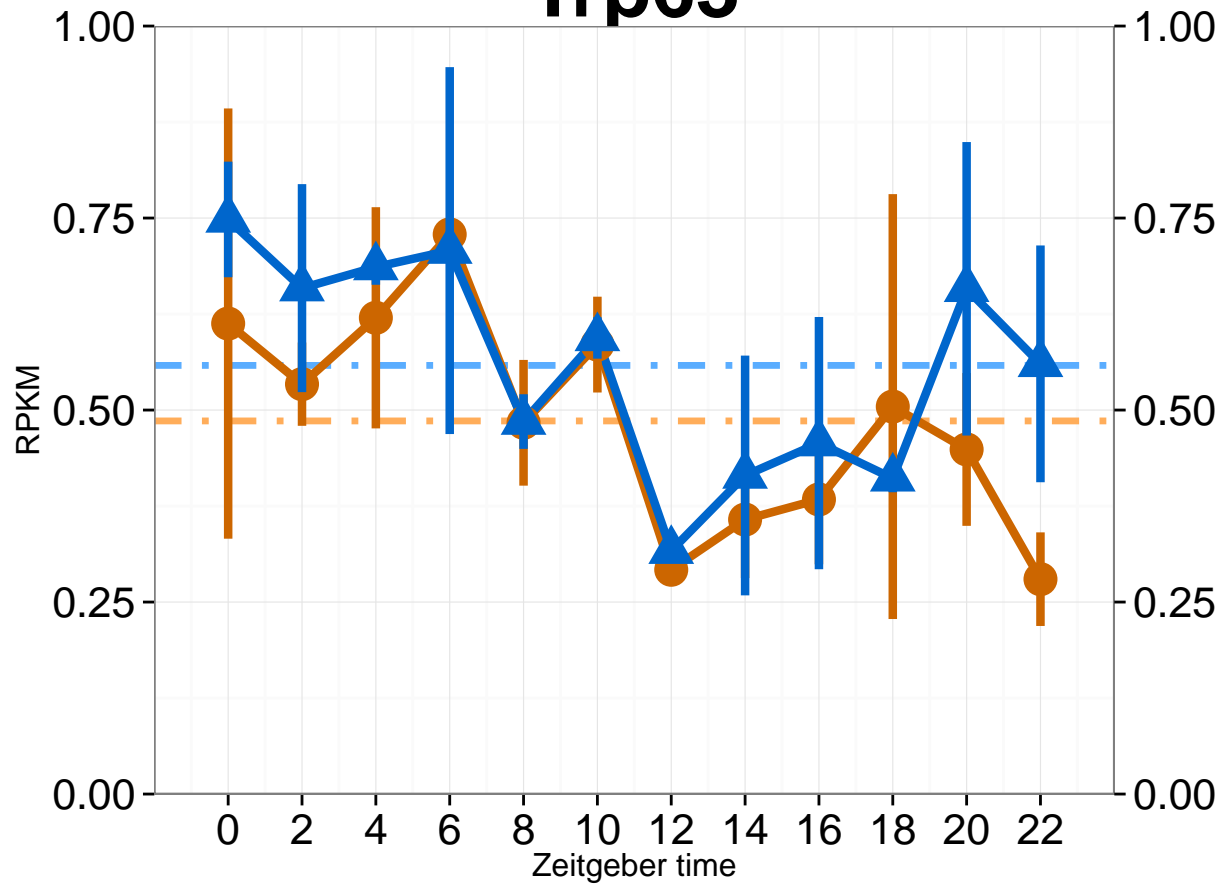

# Trp63

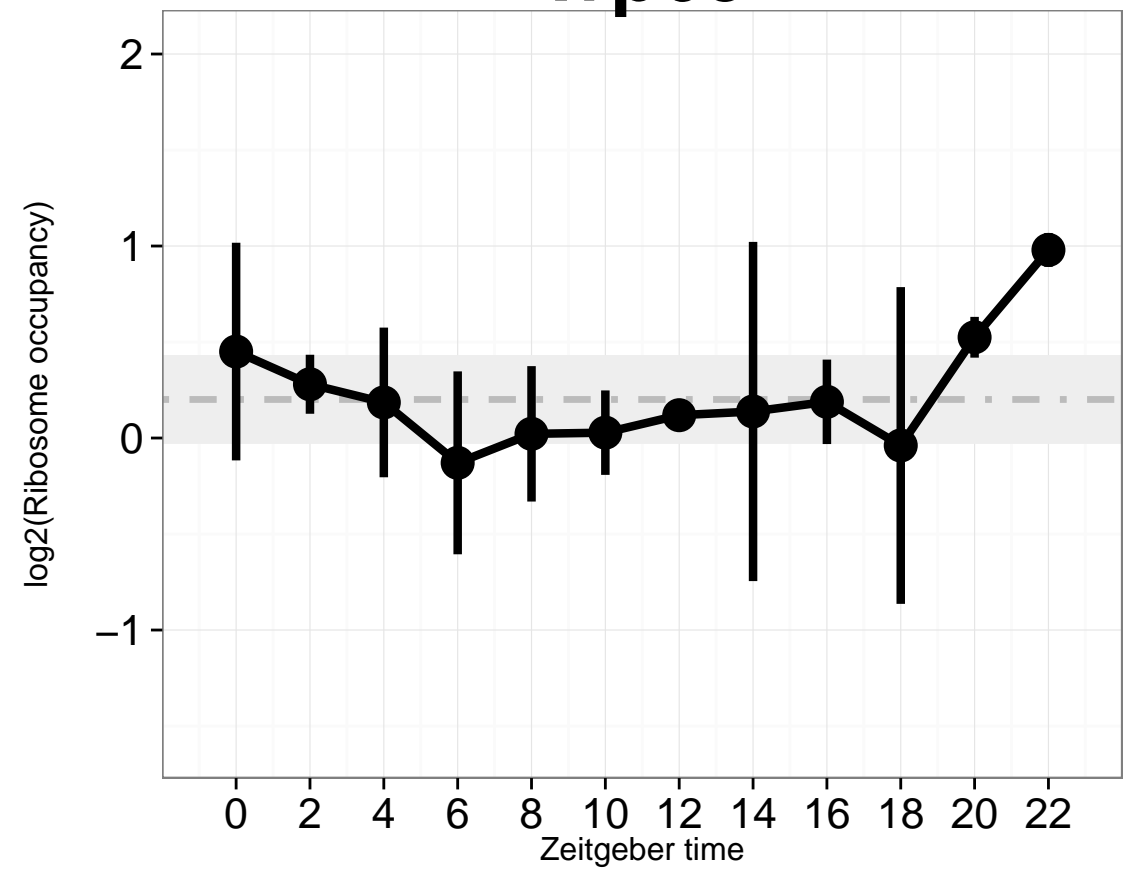

Supplement: Supplementary file 11410 [file 1]

# Acsm3

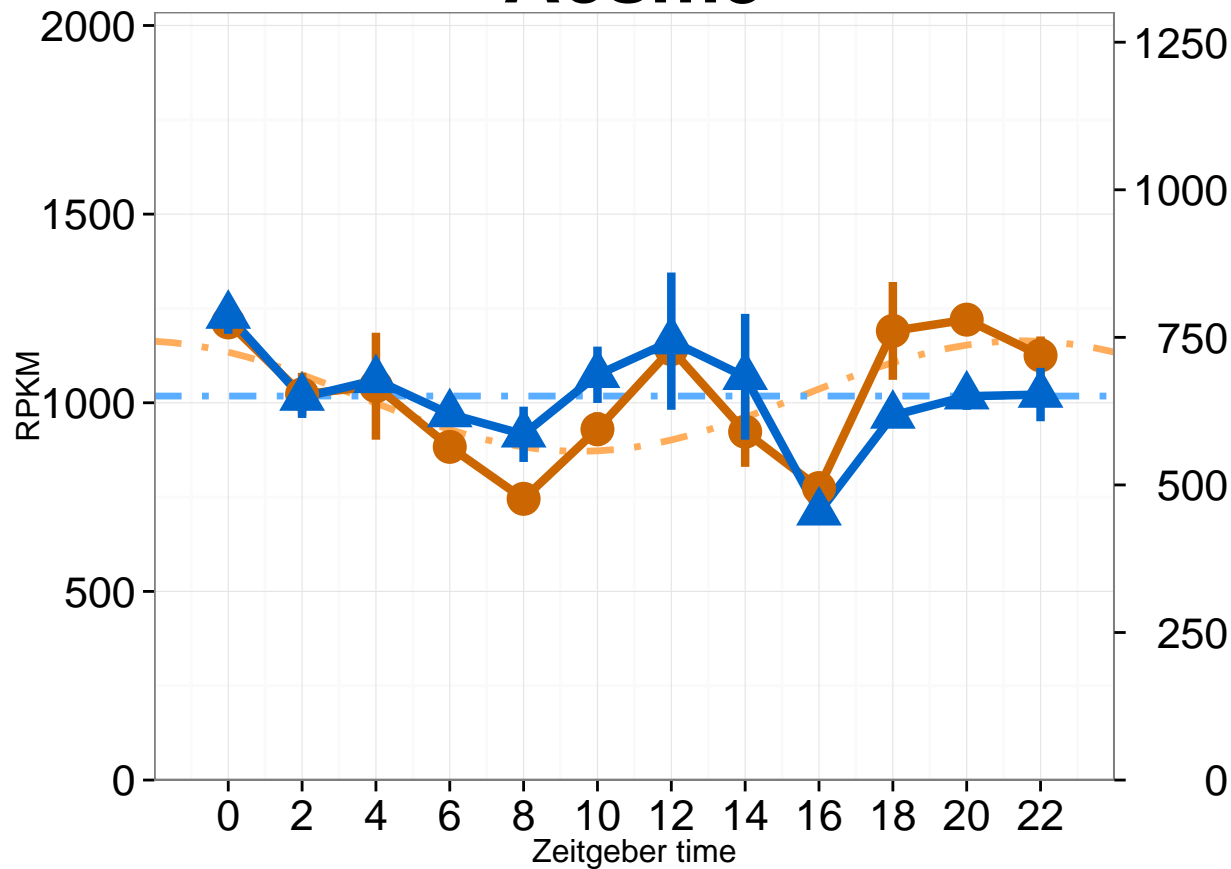

# Acsm3

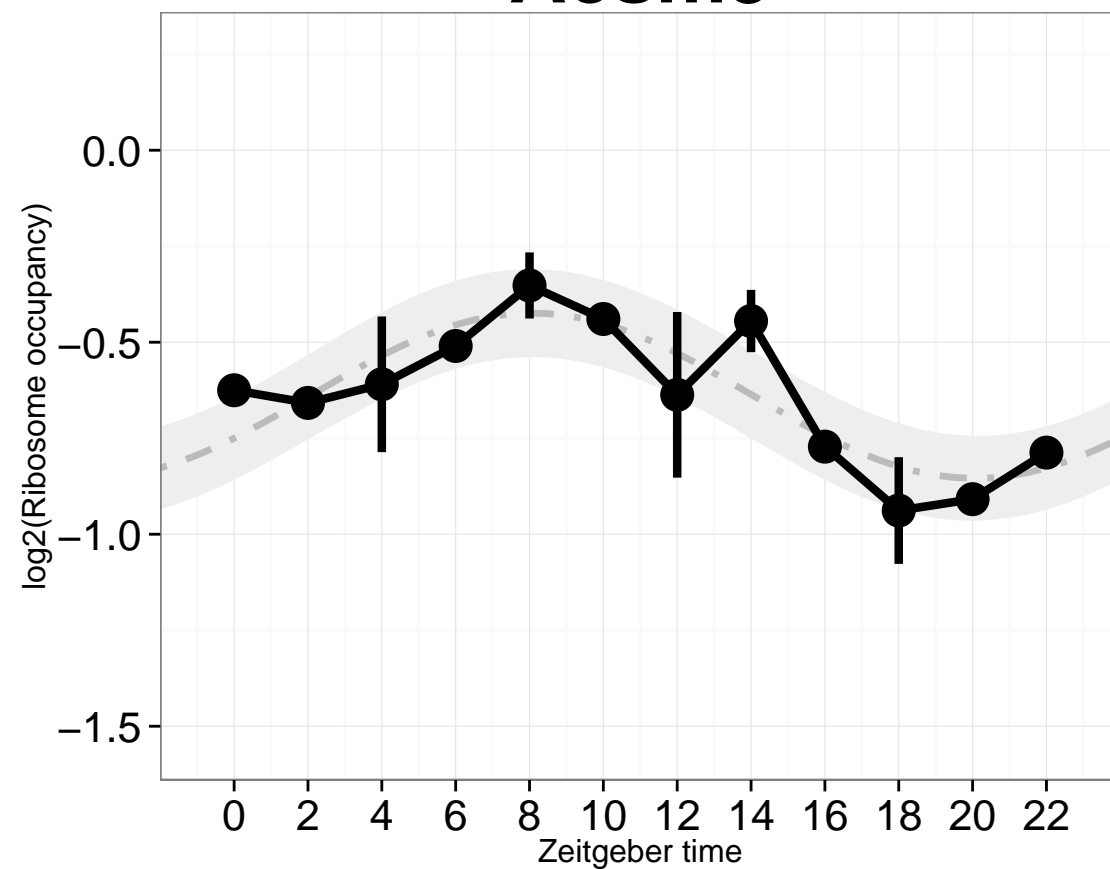

Supplement: Supplementary file 11411 [file 1]

## 2610018G03Rik

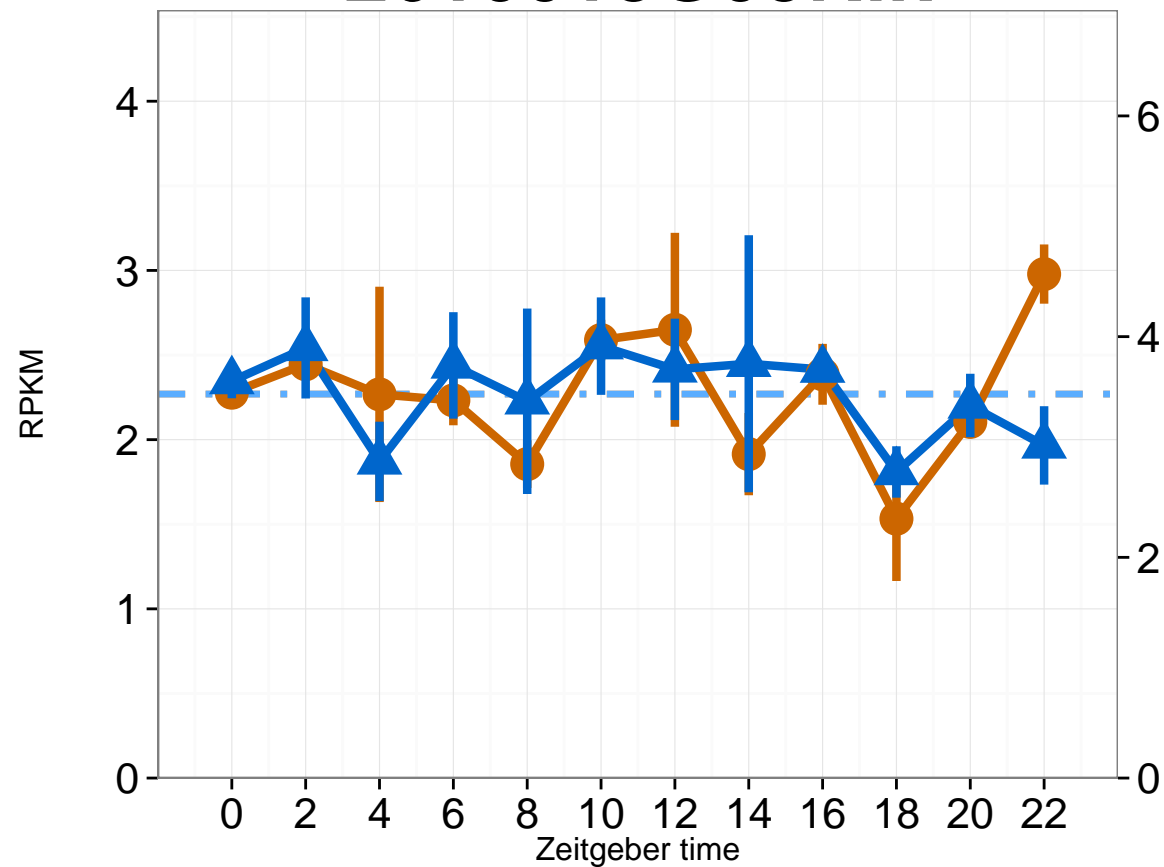

## 2610018G03Rik

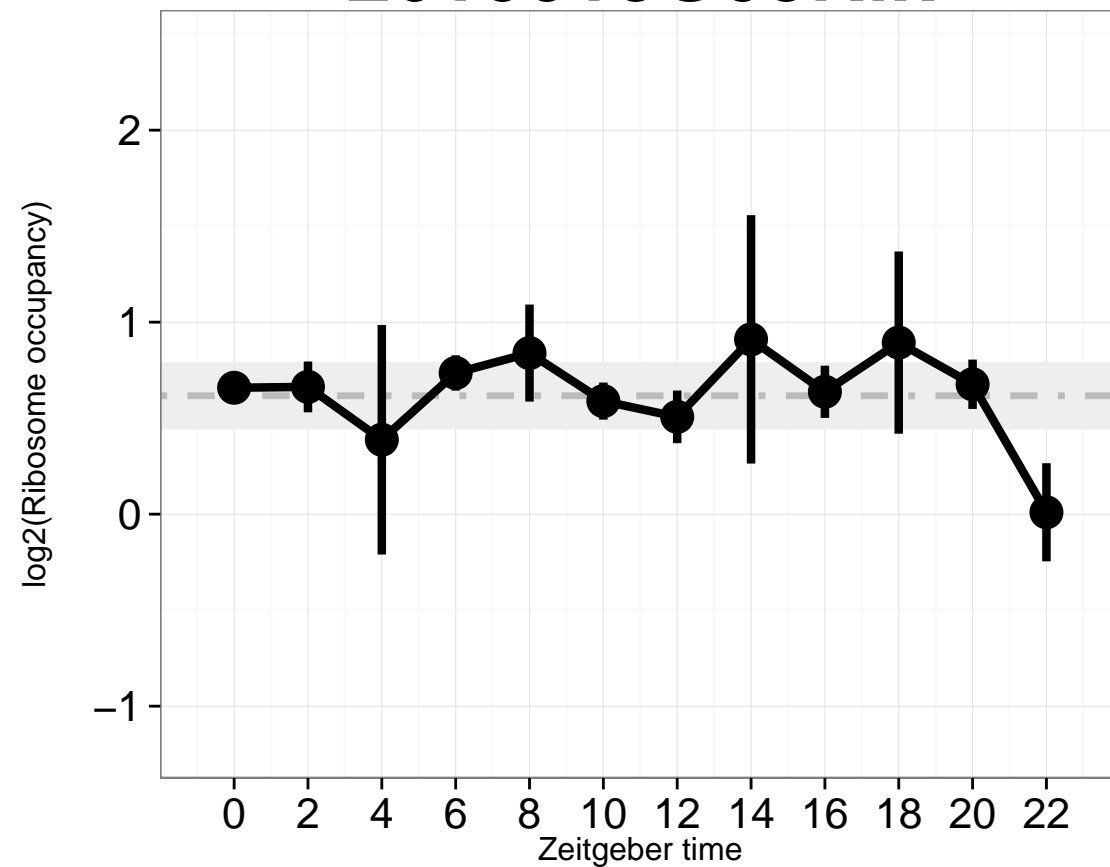

Supplement: Supplementary file 11412 [file 1]

## Mcat

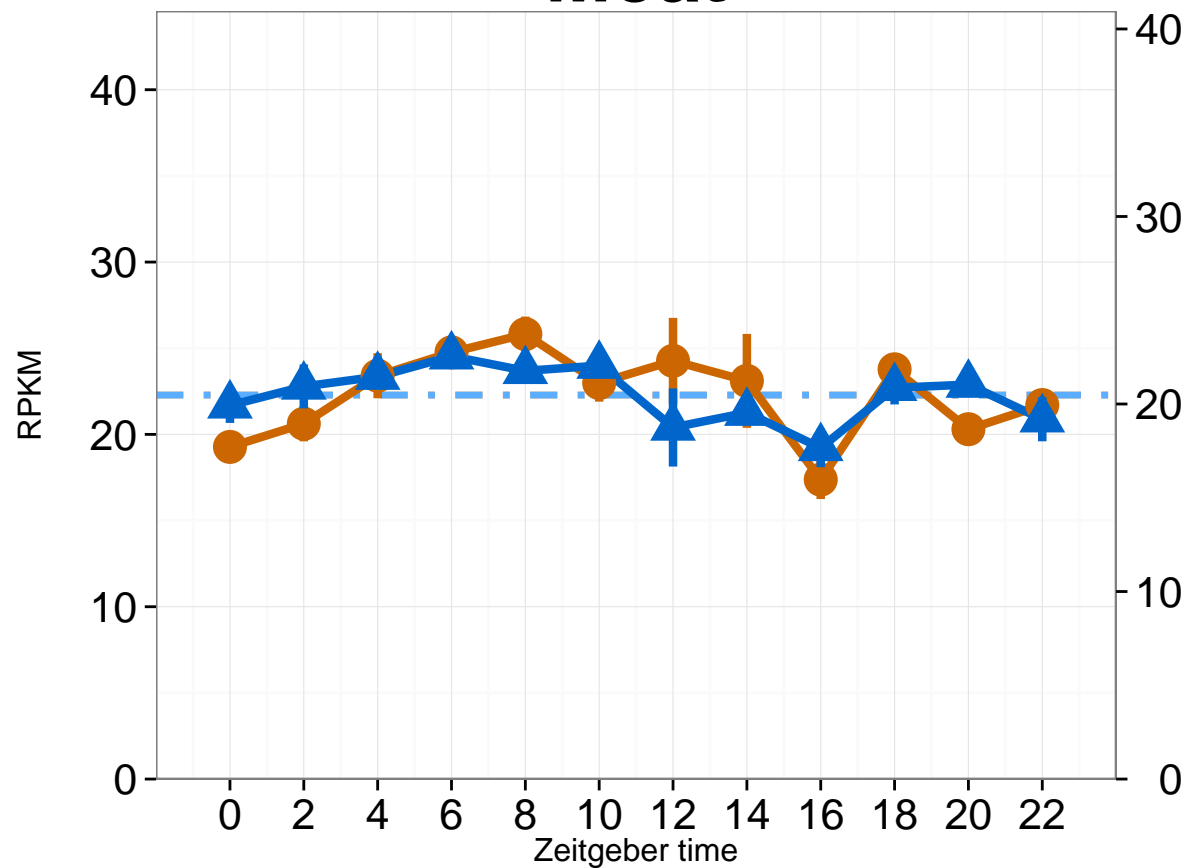

## Mcat

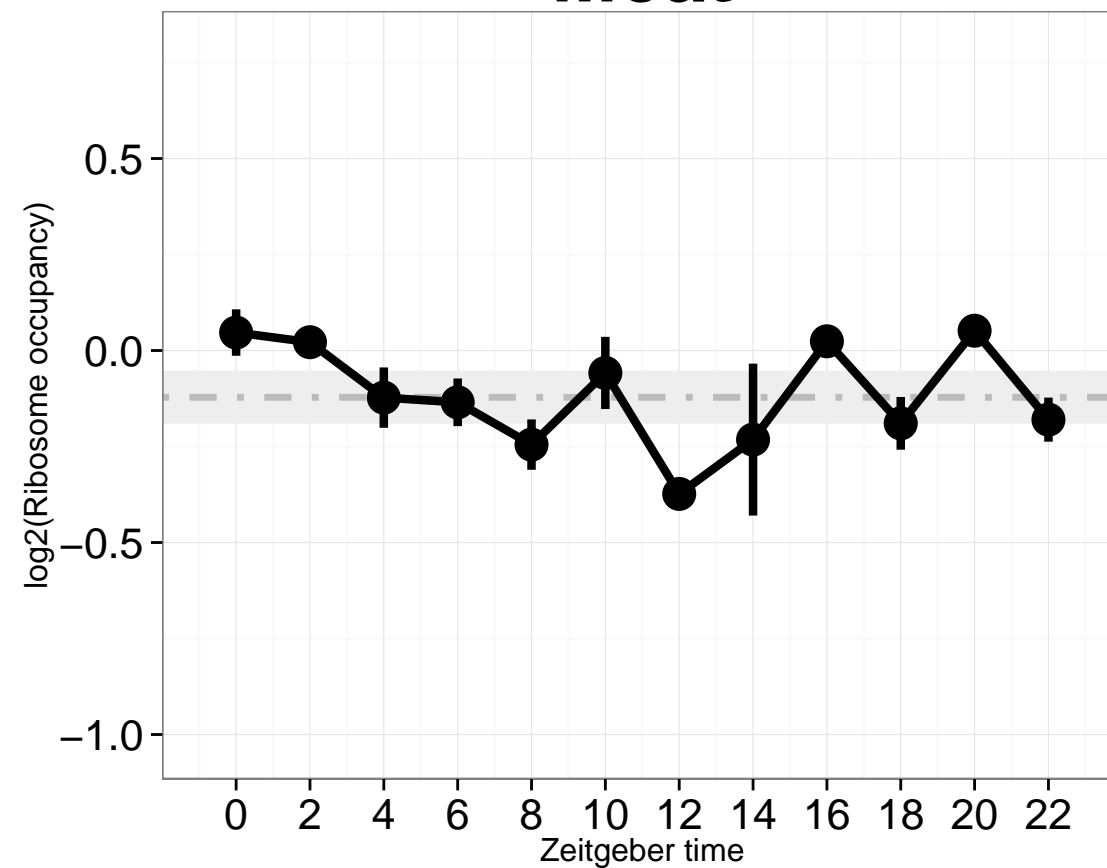

Supplement: Supplementary file 11413 [file 1]

## Nipal3

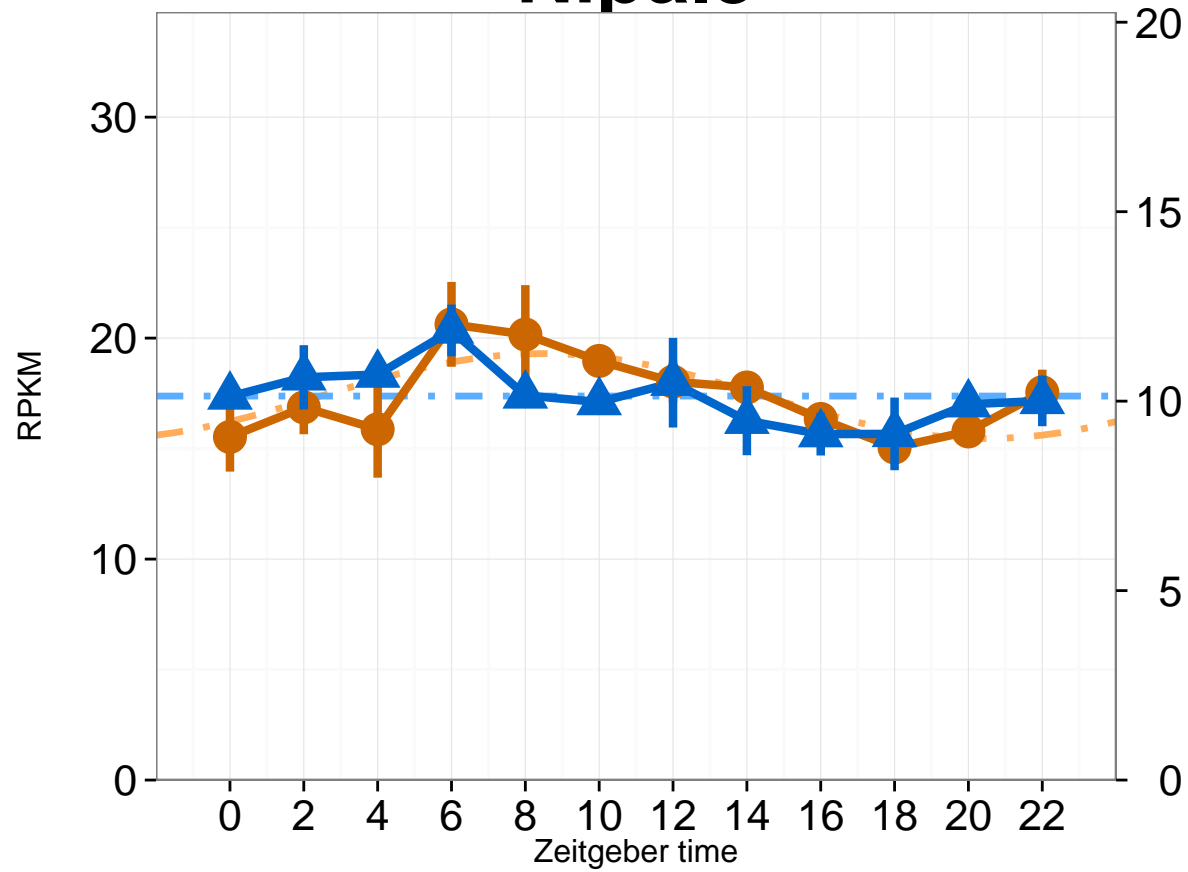

## Nipal3

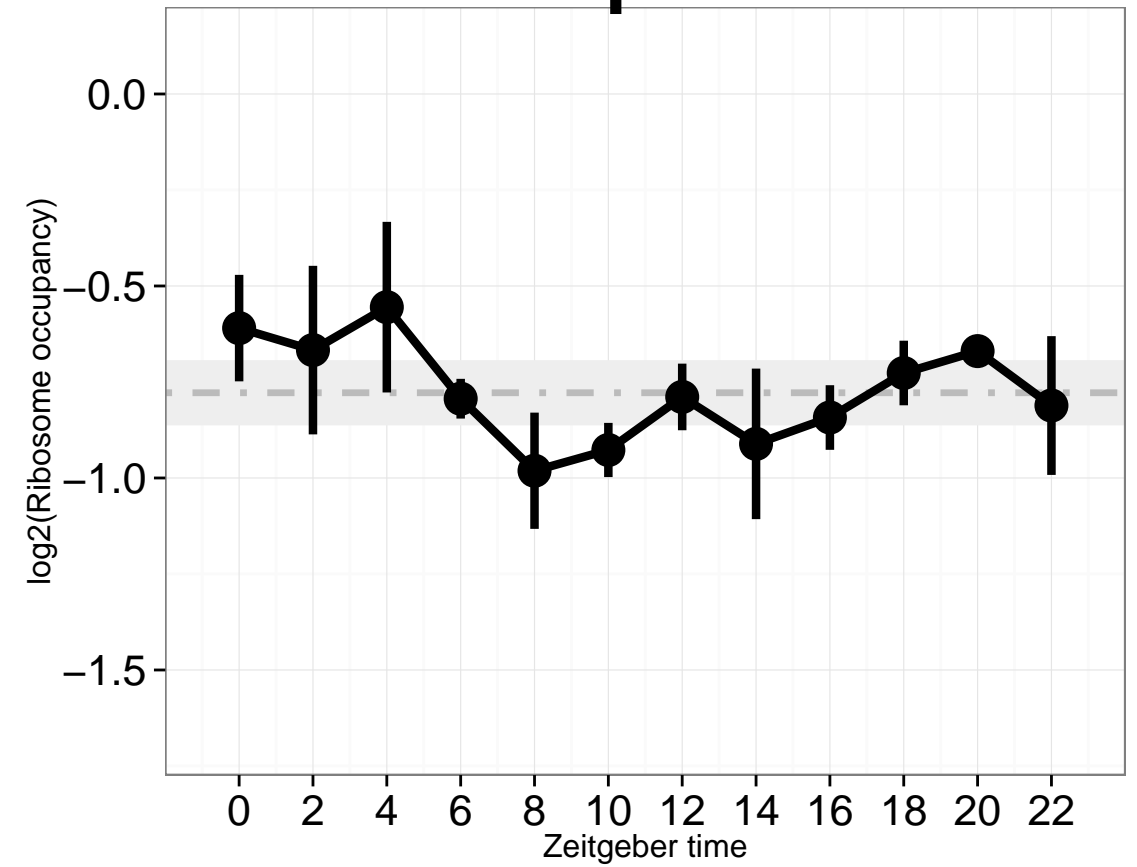

Supplement: Supplementary file 11414 [file 1]

## Ghitm

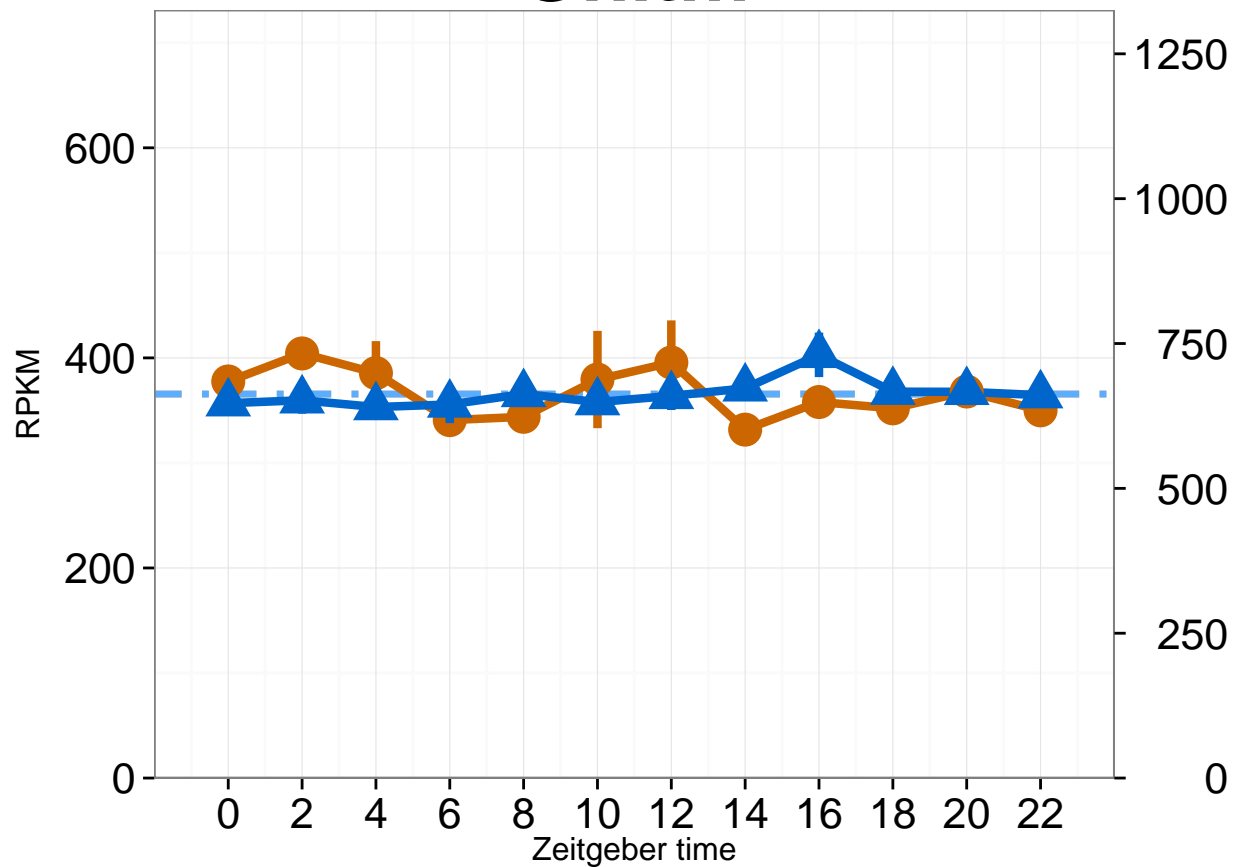

## Ghitm

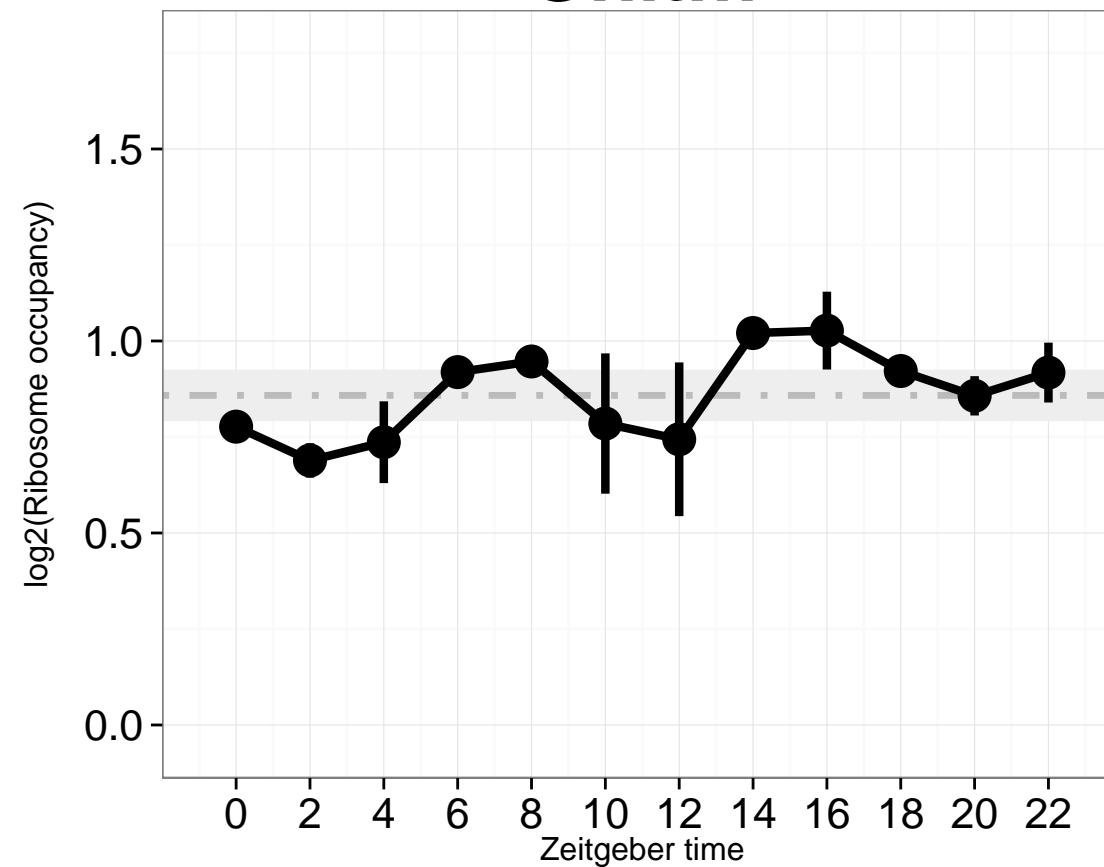

Supplement: Supplementary file 11415 [file 1]

## Ndutfaf7

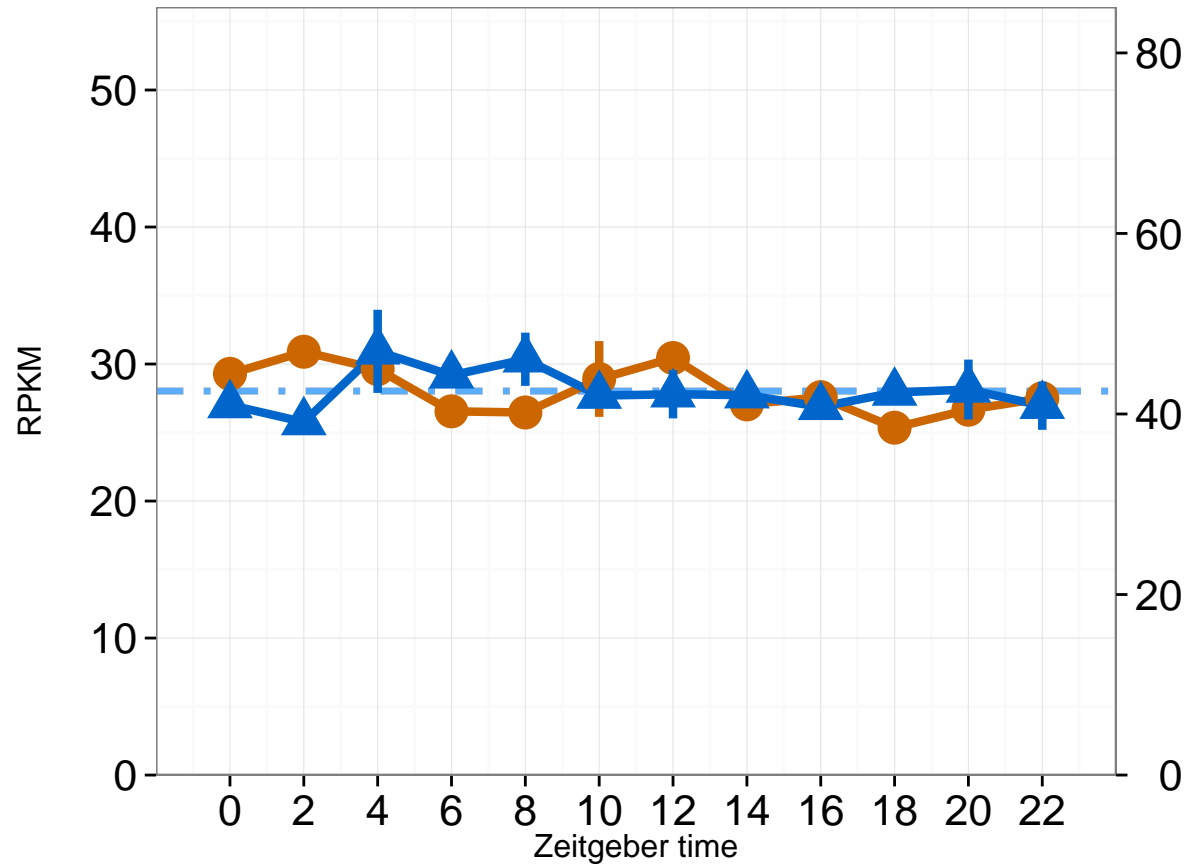

## Ndutfaf7

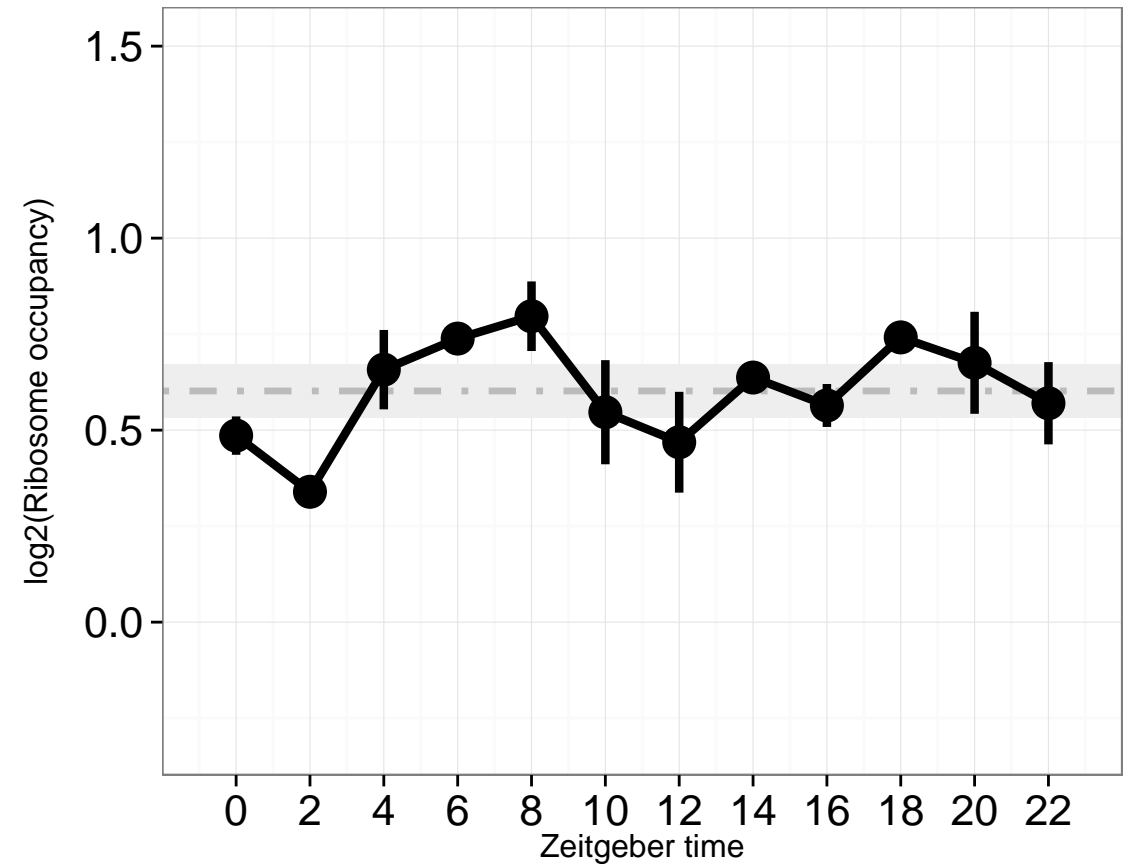

Supplement: Supplementary file 11416 [file 1]

## Ftsj3

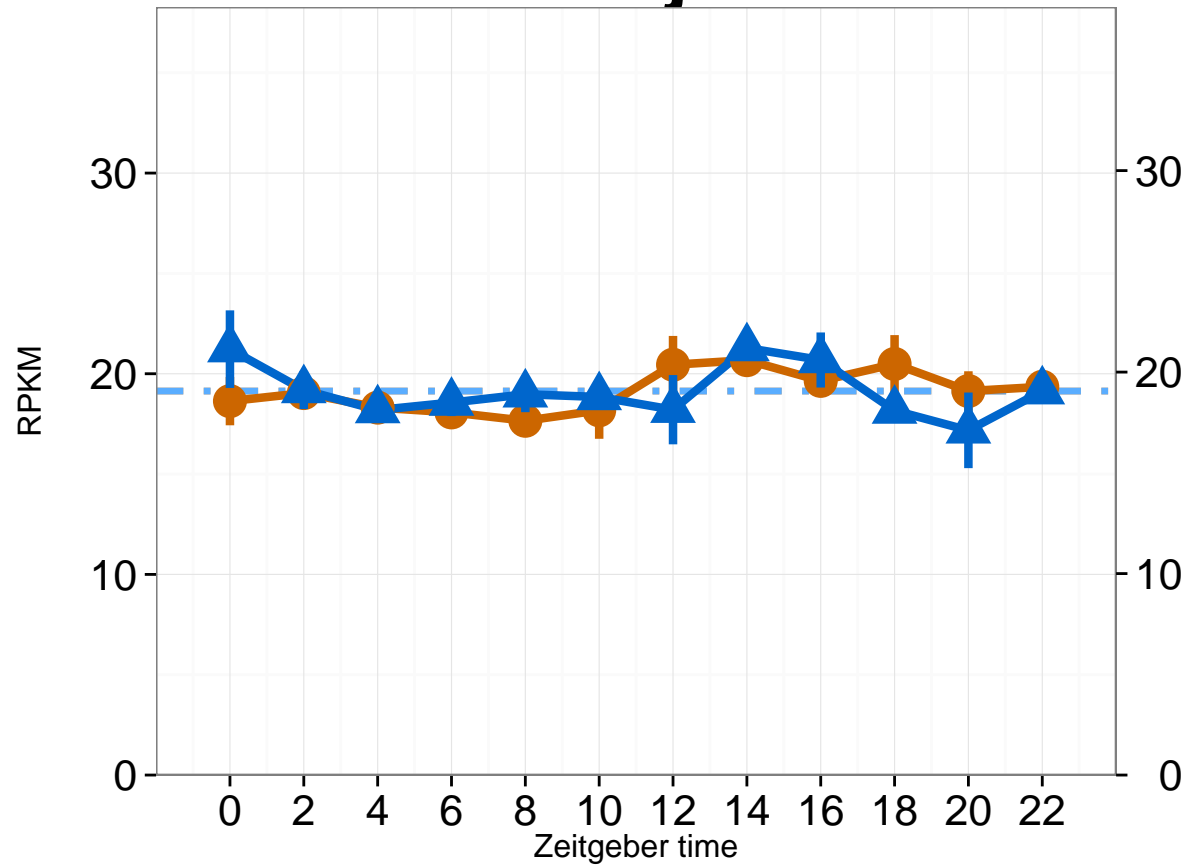

## Ftsj3

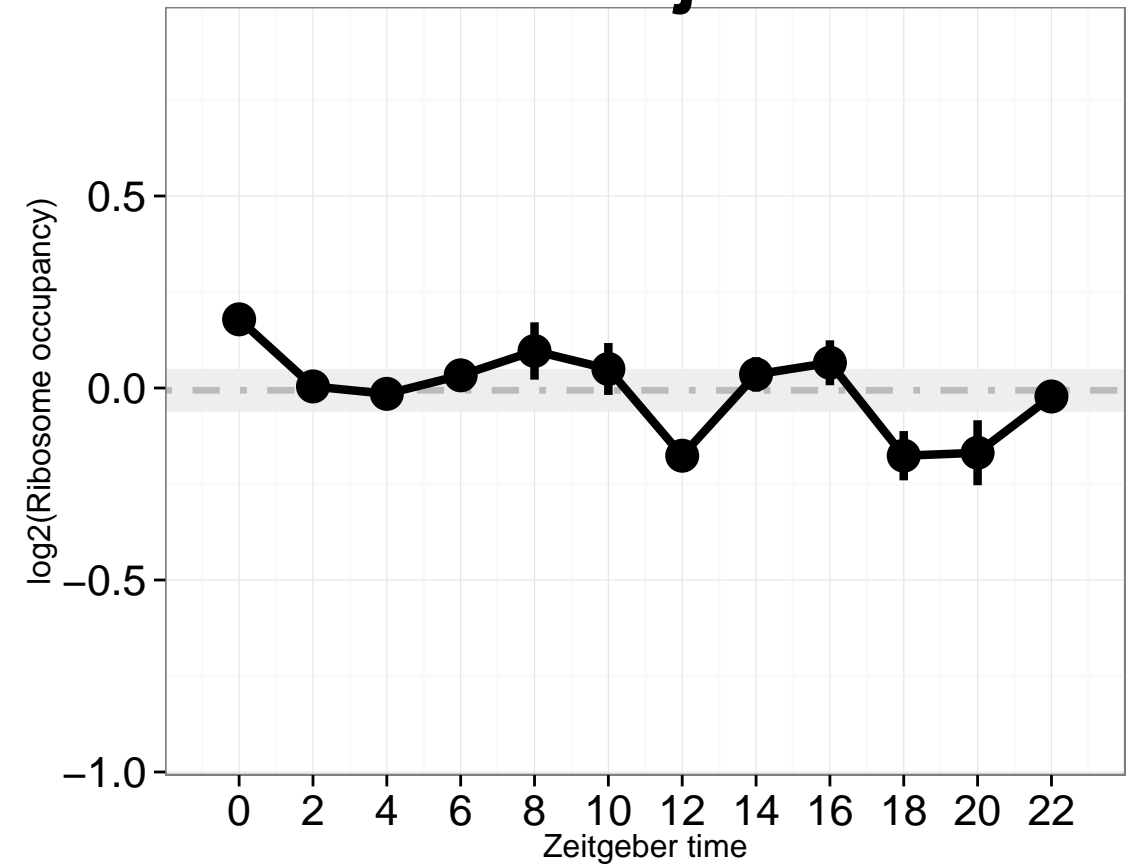

Supplement: Supplementary file 11417 [file 1]

# Zfp454

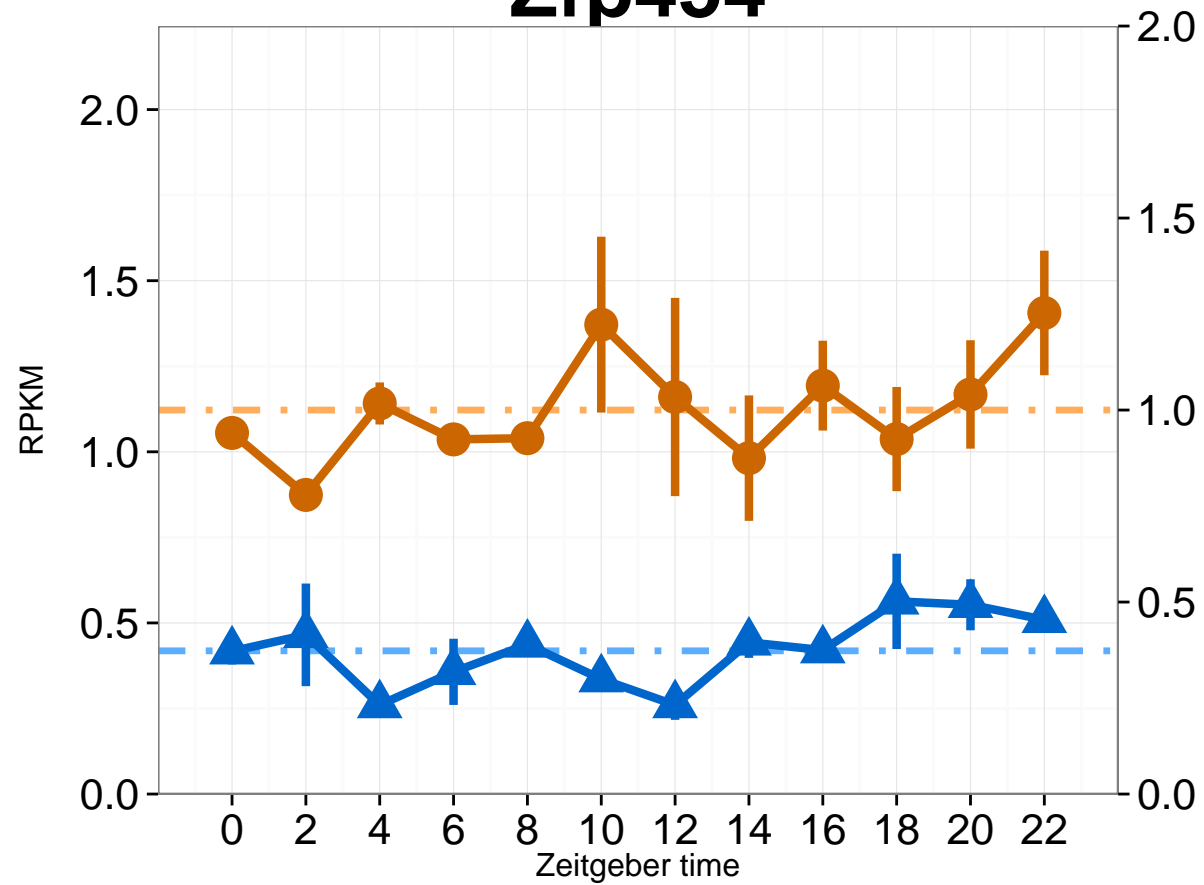

# Zfp454

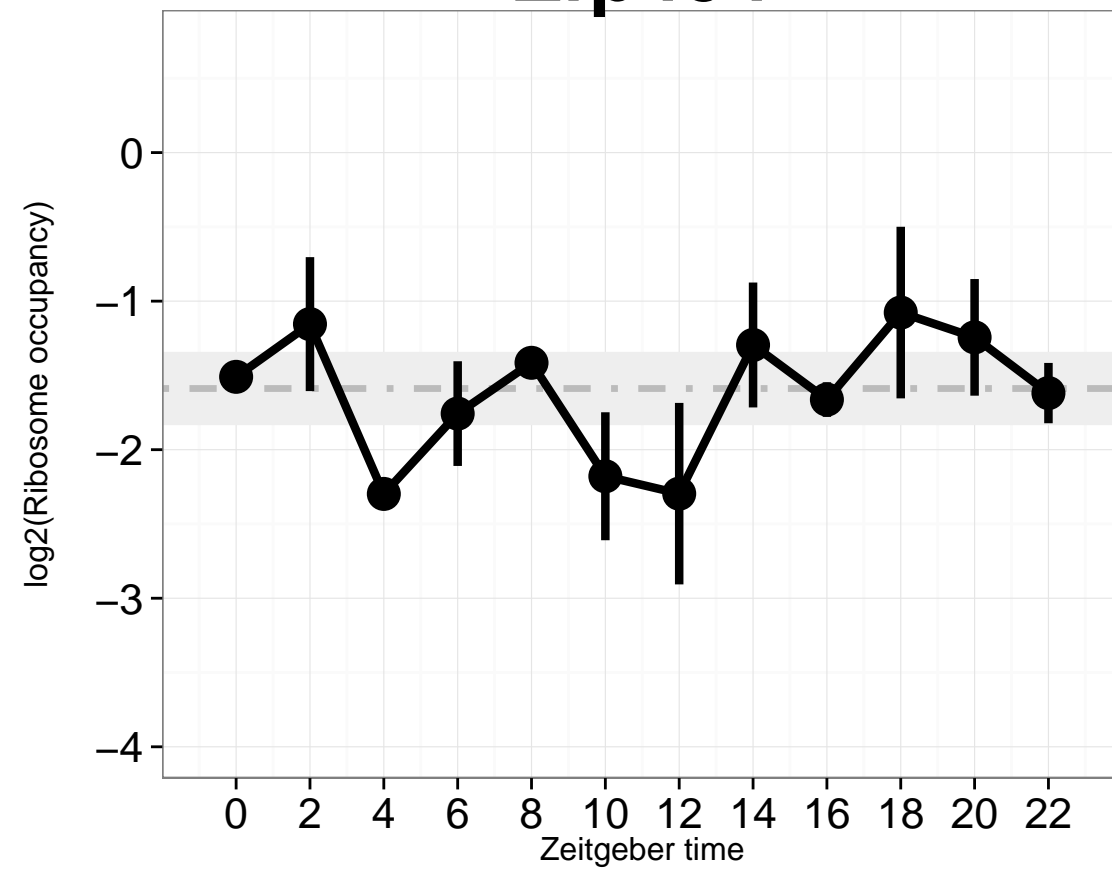

Supplement: Supplementary file 11418 [file 1]

# Parp9

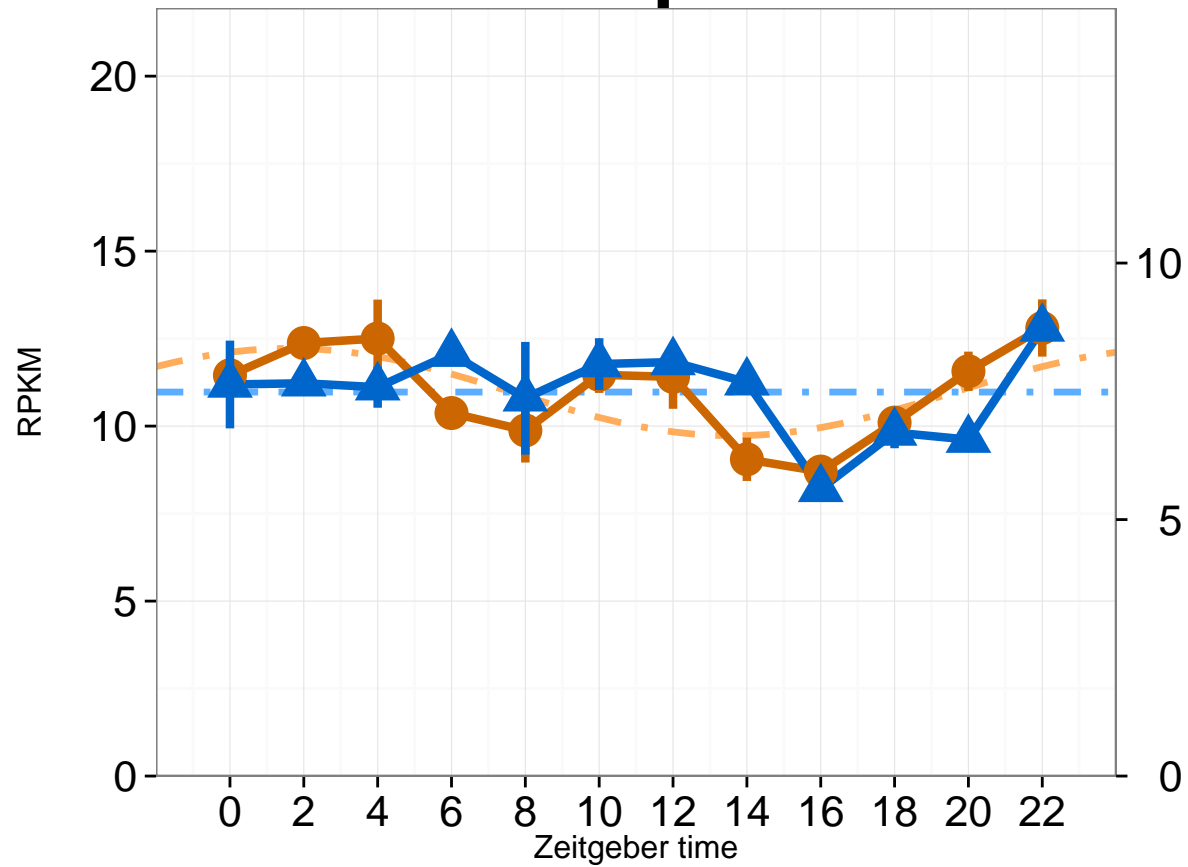

# Parp9

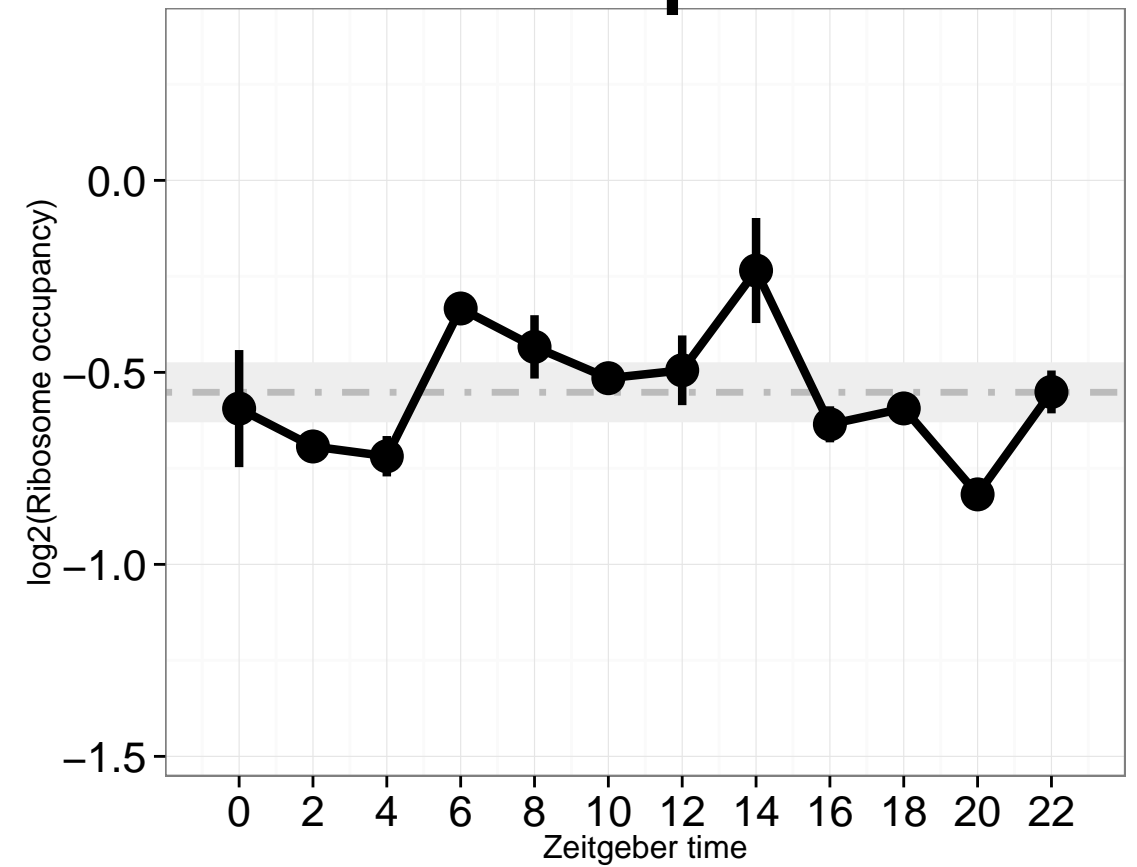

Supplement: Supplementary file 11419 [file 1]

# Tmem194

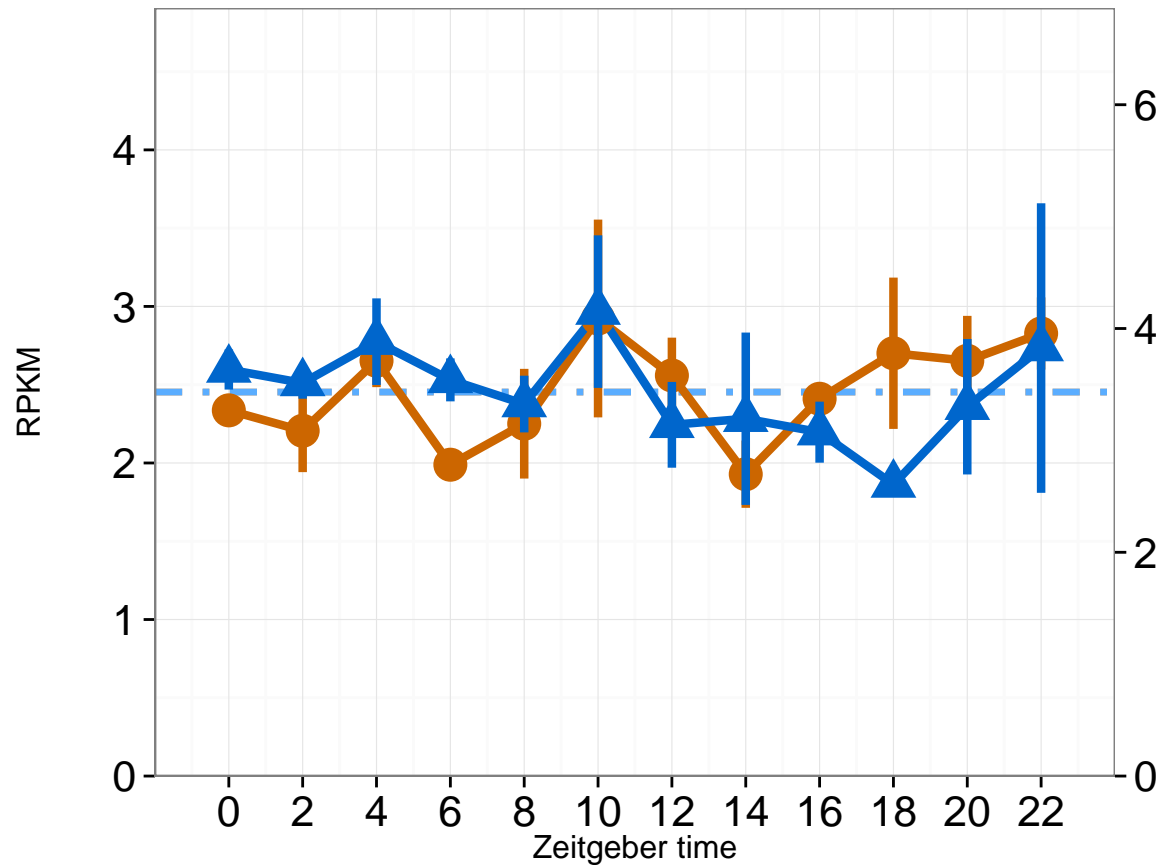

# Tmem194

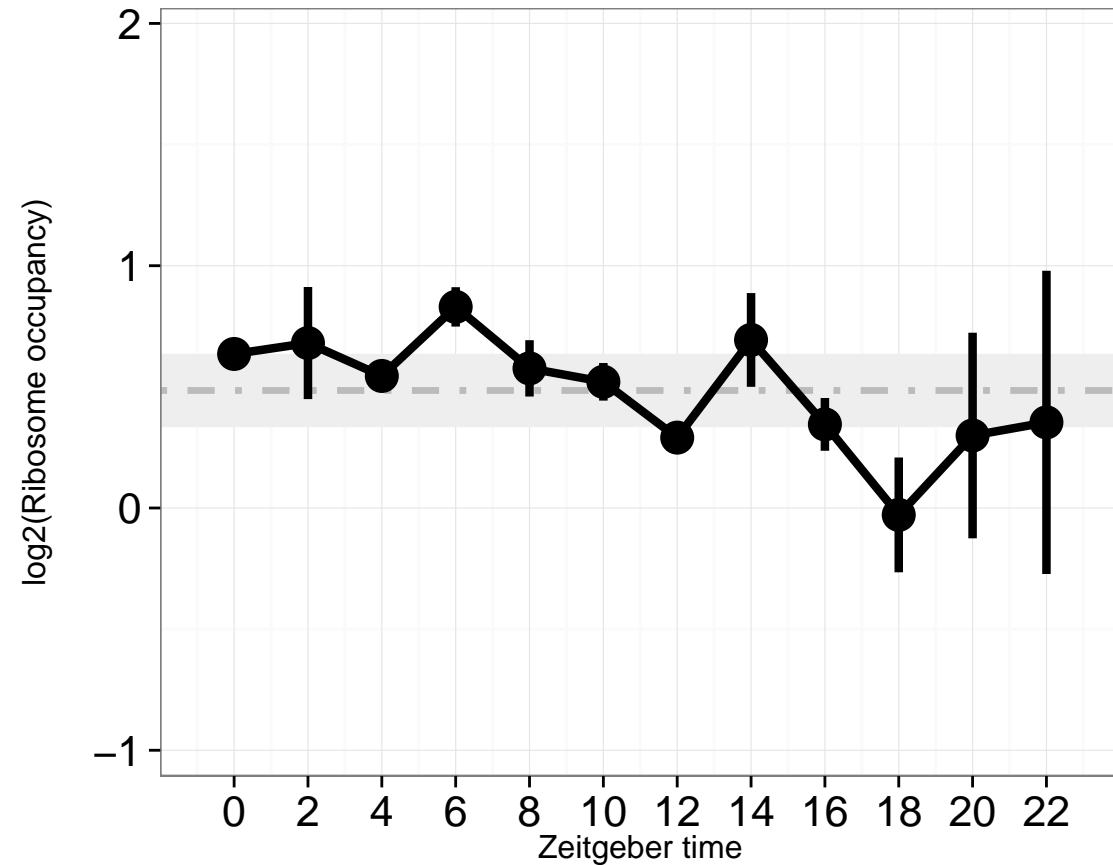

Supplement: Supplementary file 11420 [file 1]

# Det1

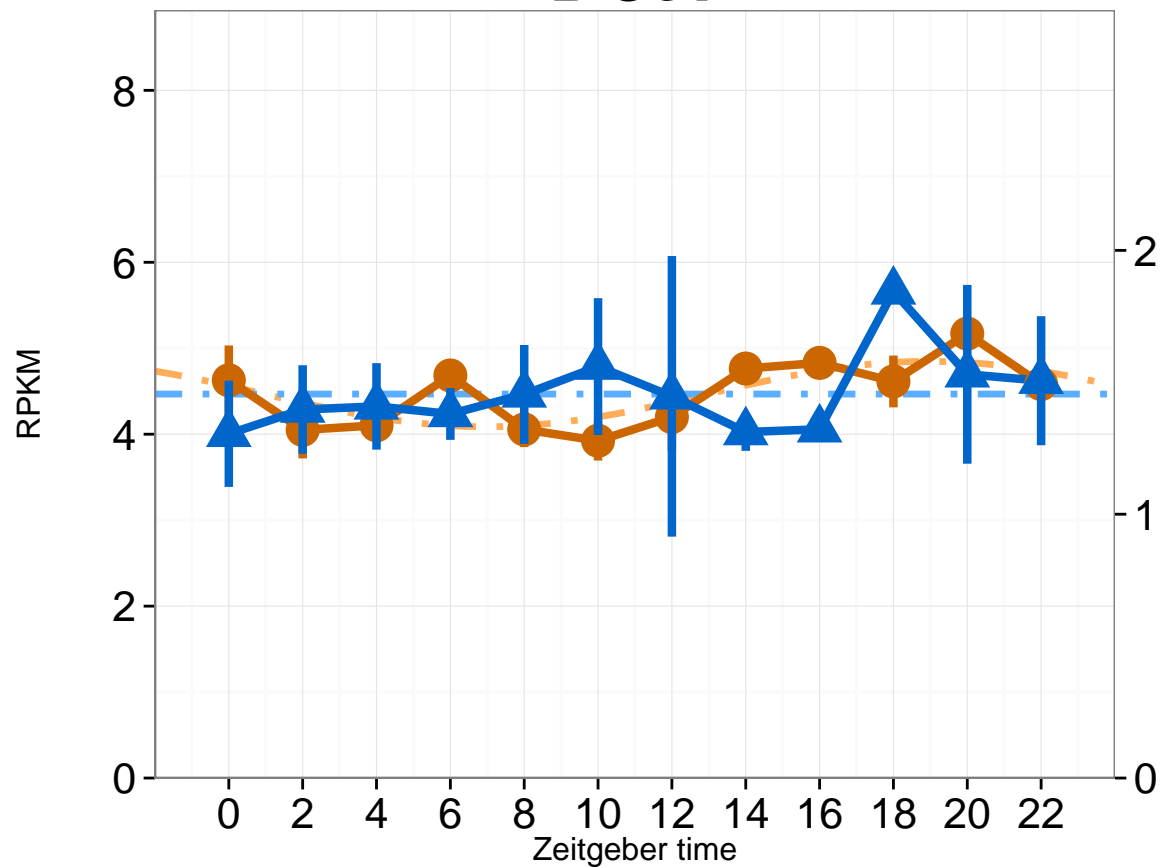

# Det1

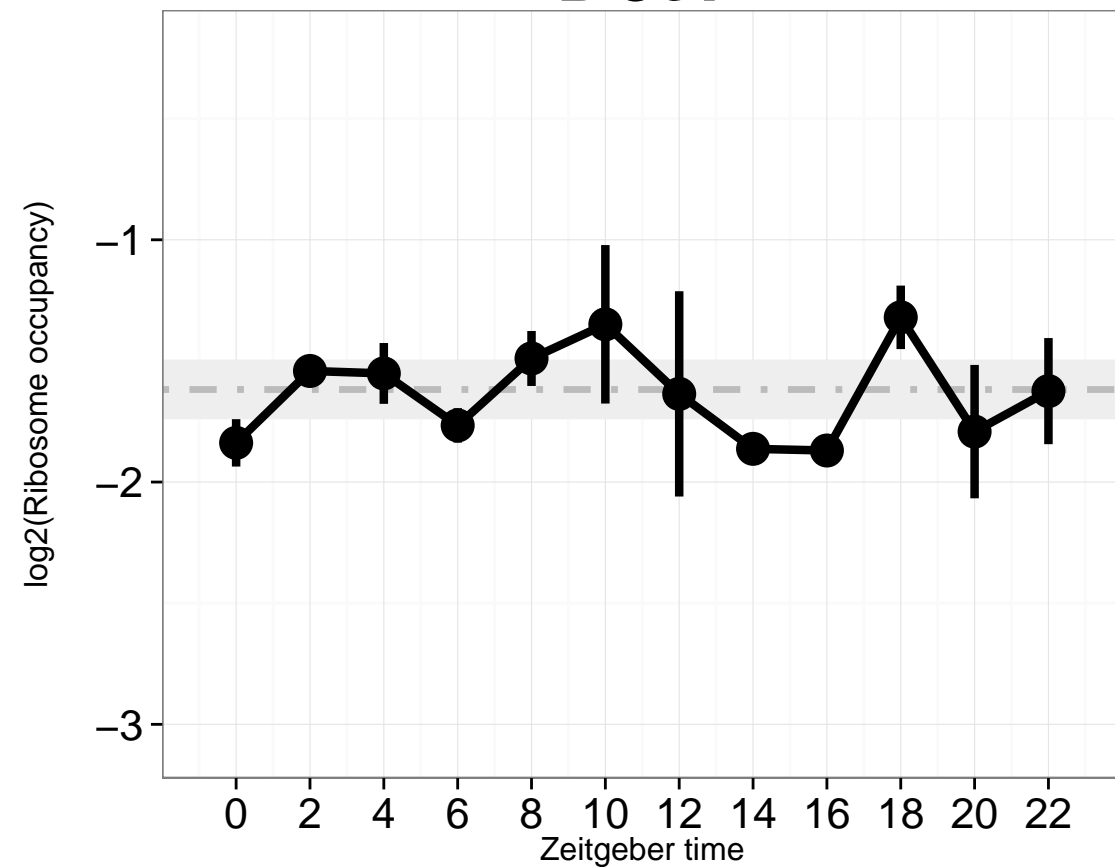

Supplement: Supplementary file 11421 [file 1]

# 9930021J03Rik

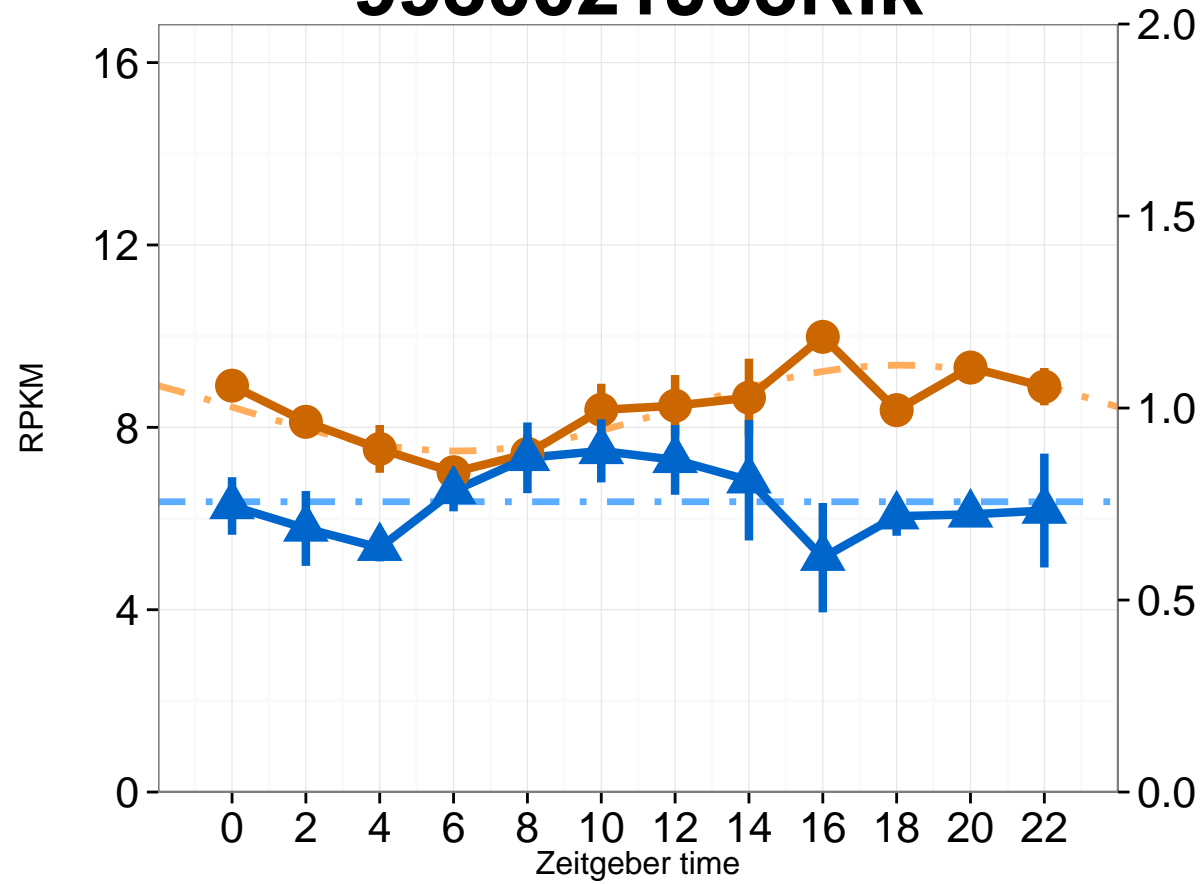

# 9930021J03Rik

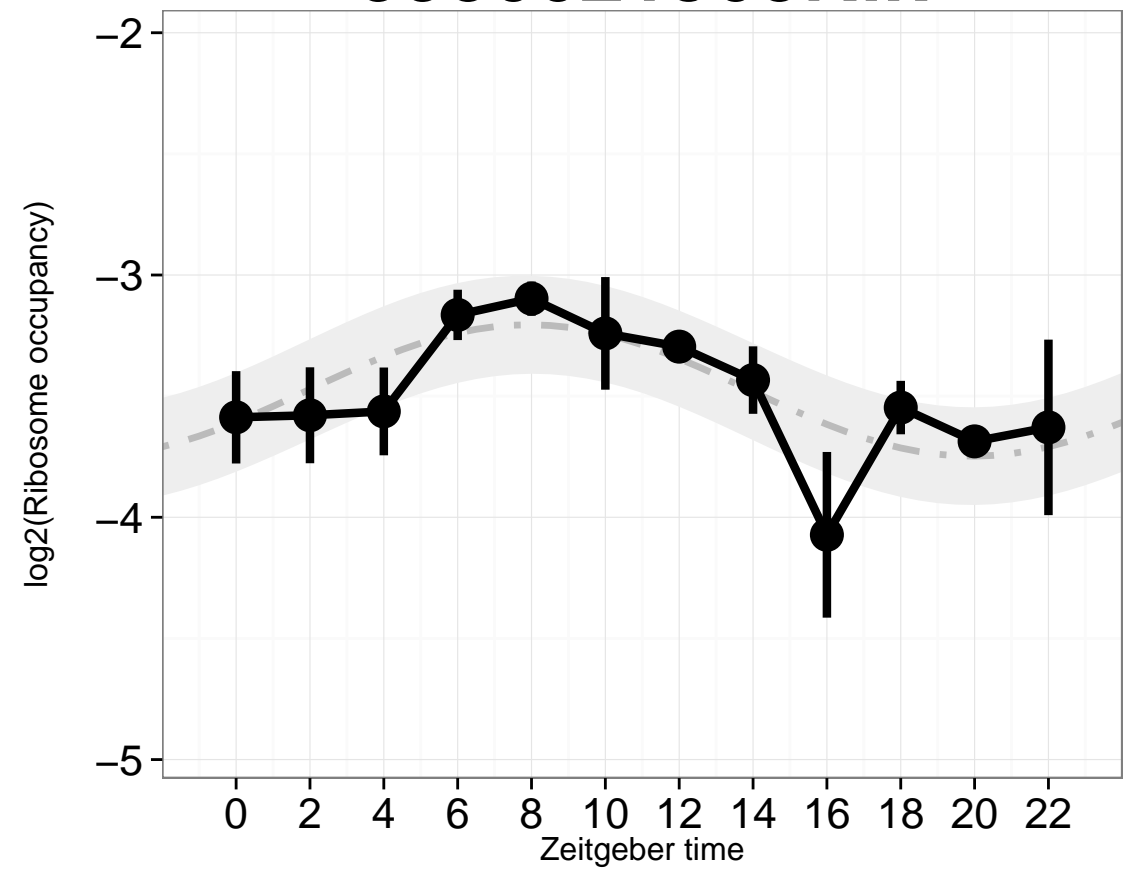

Supplement: Supplementary file 11422 [file 1]

# Rttn

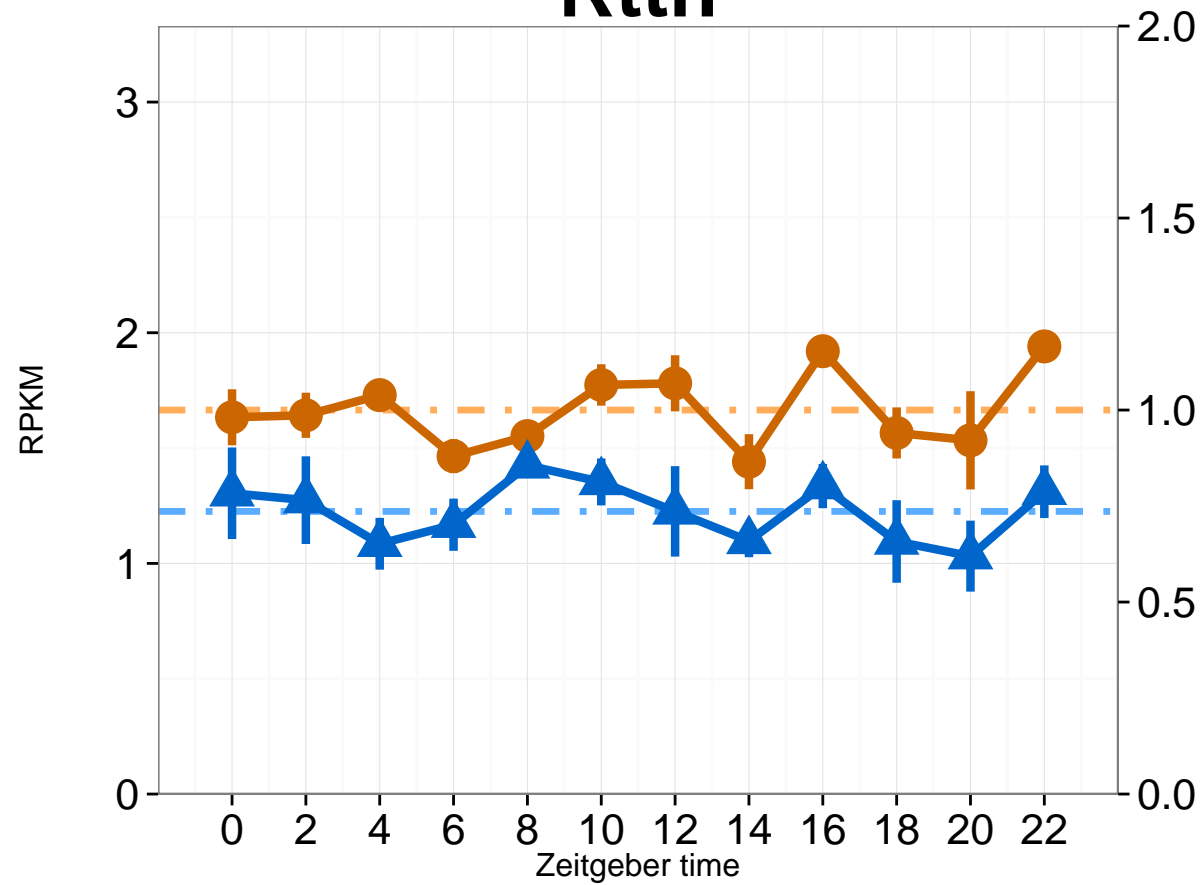

# Rttn

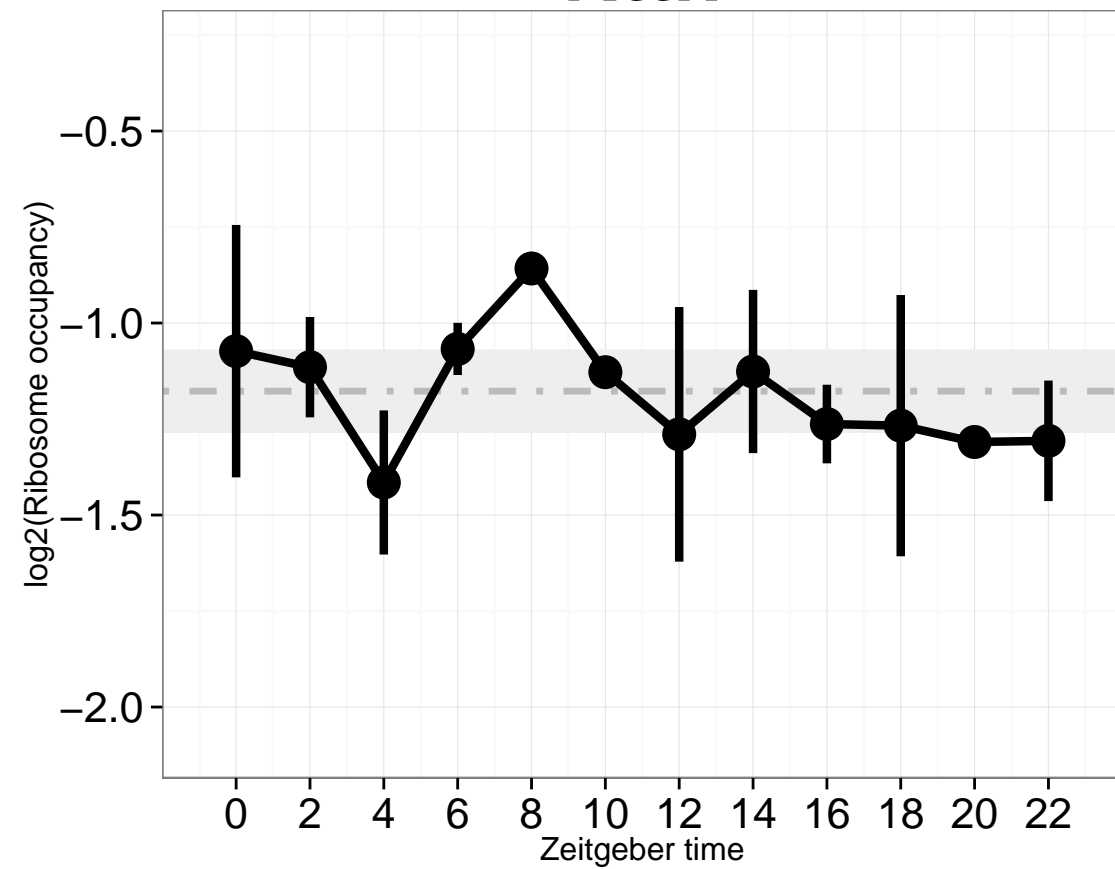

Supplement: Supplementary file 11423 [file 1]

# Abcb8

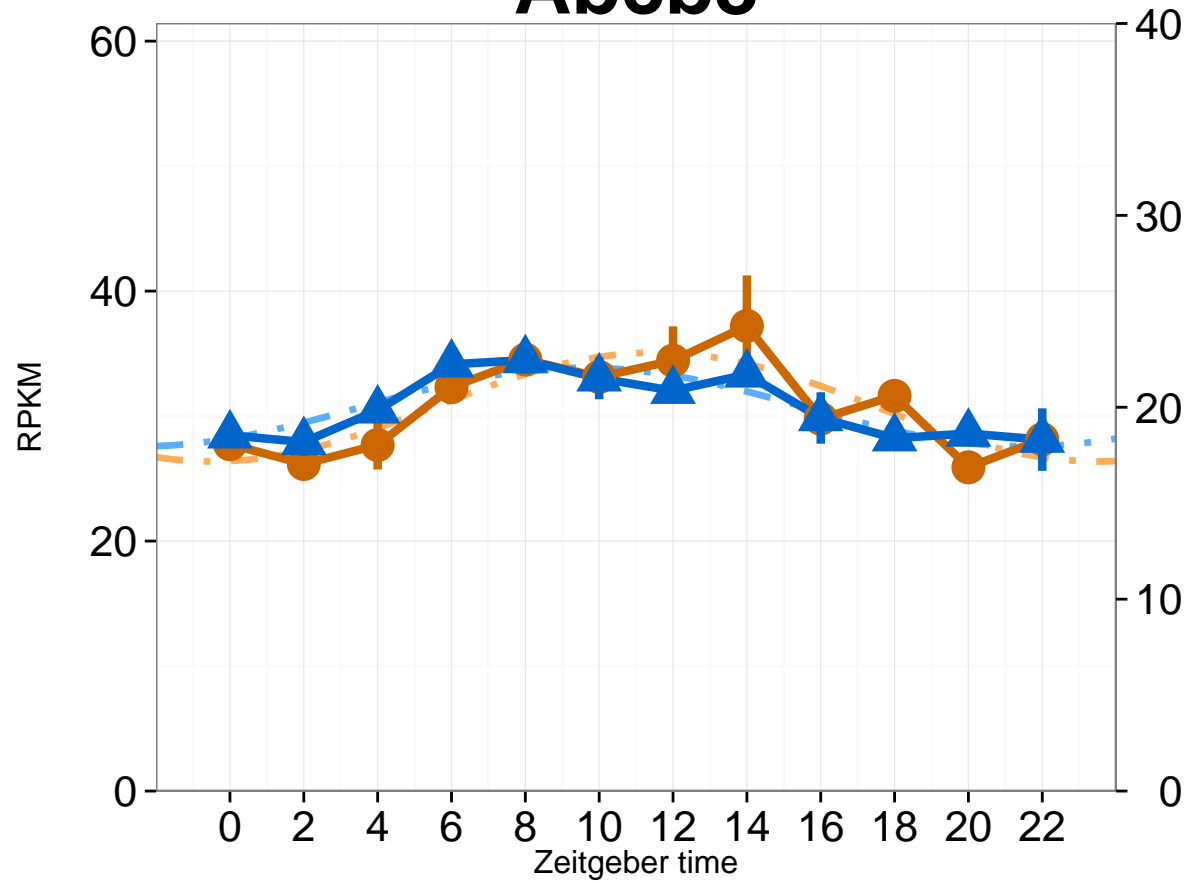

# Abcb8

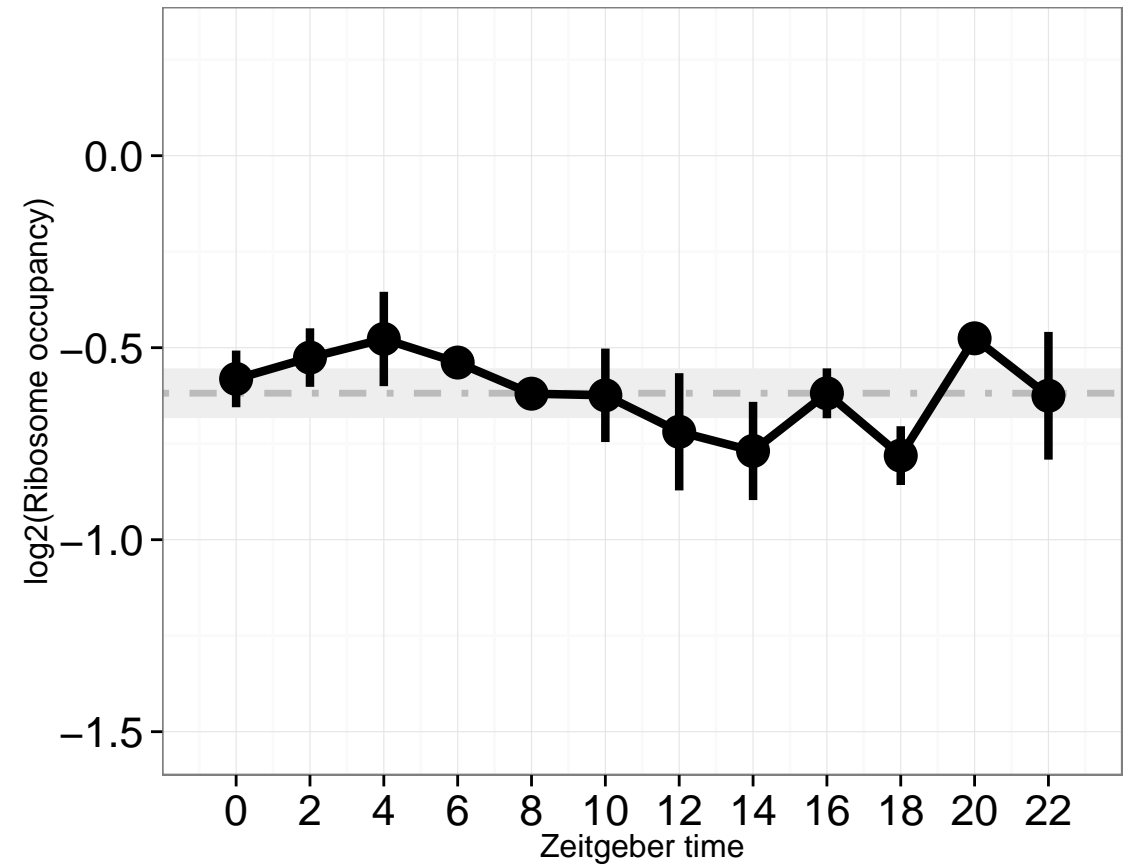

Supplement: Supplementary file 11424 [file 1]

# Grem2

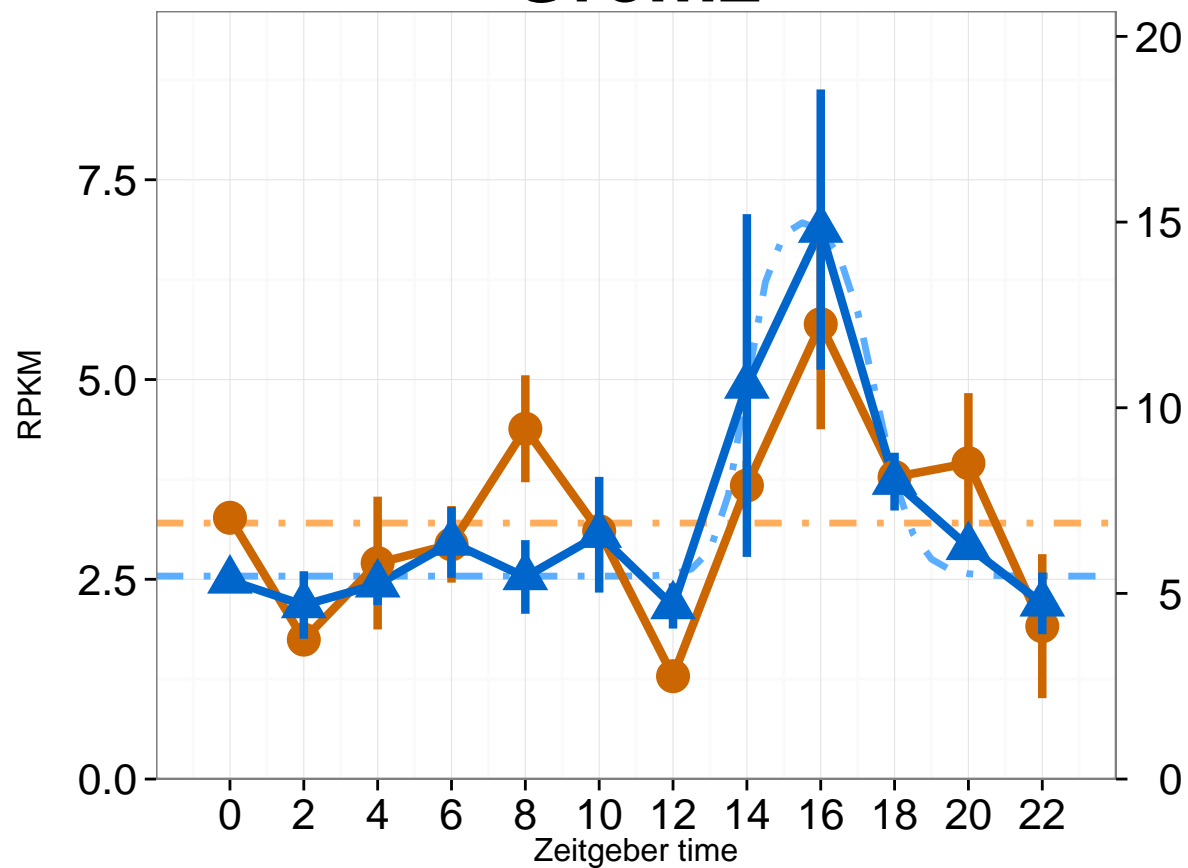

# Grem2

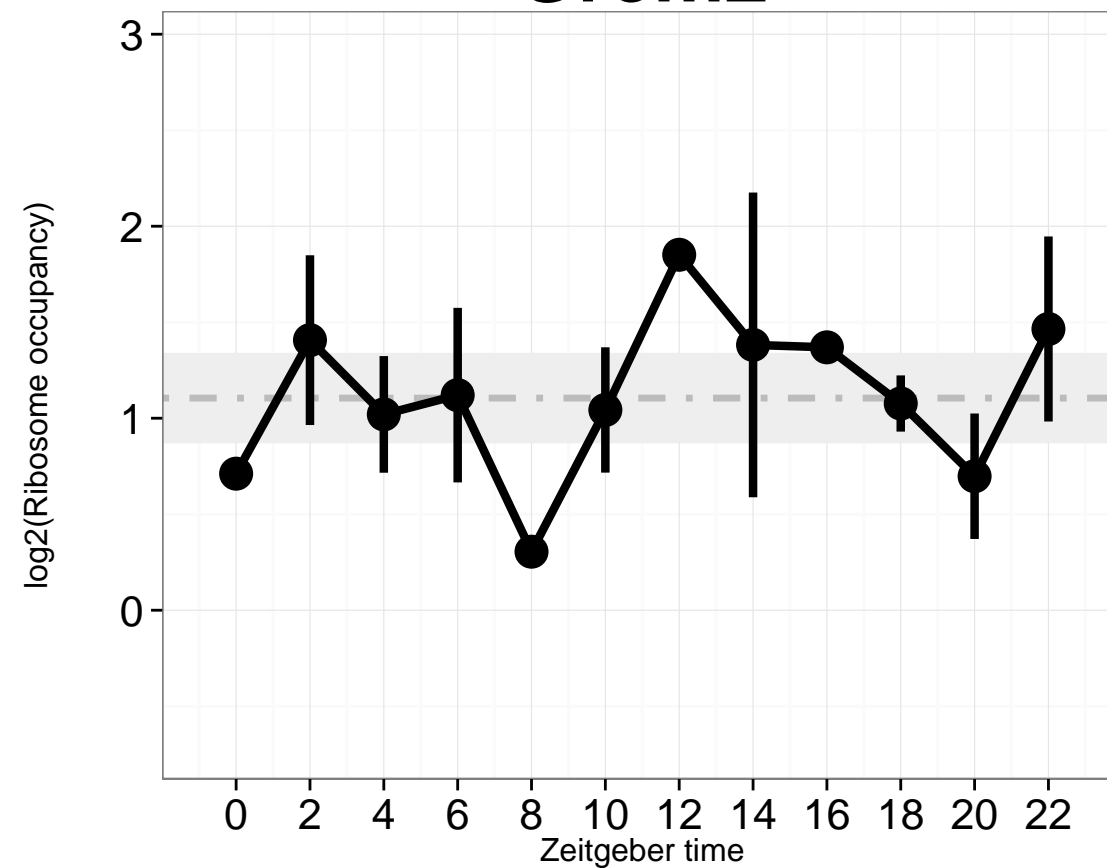

Supplement: Supplementary file 11425 [file 1]

## Limch1

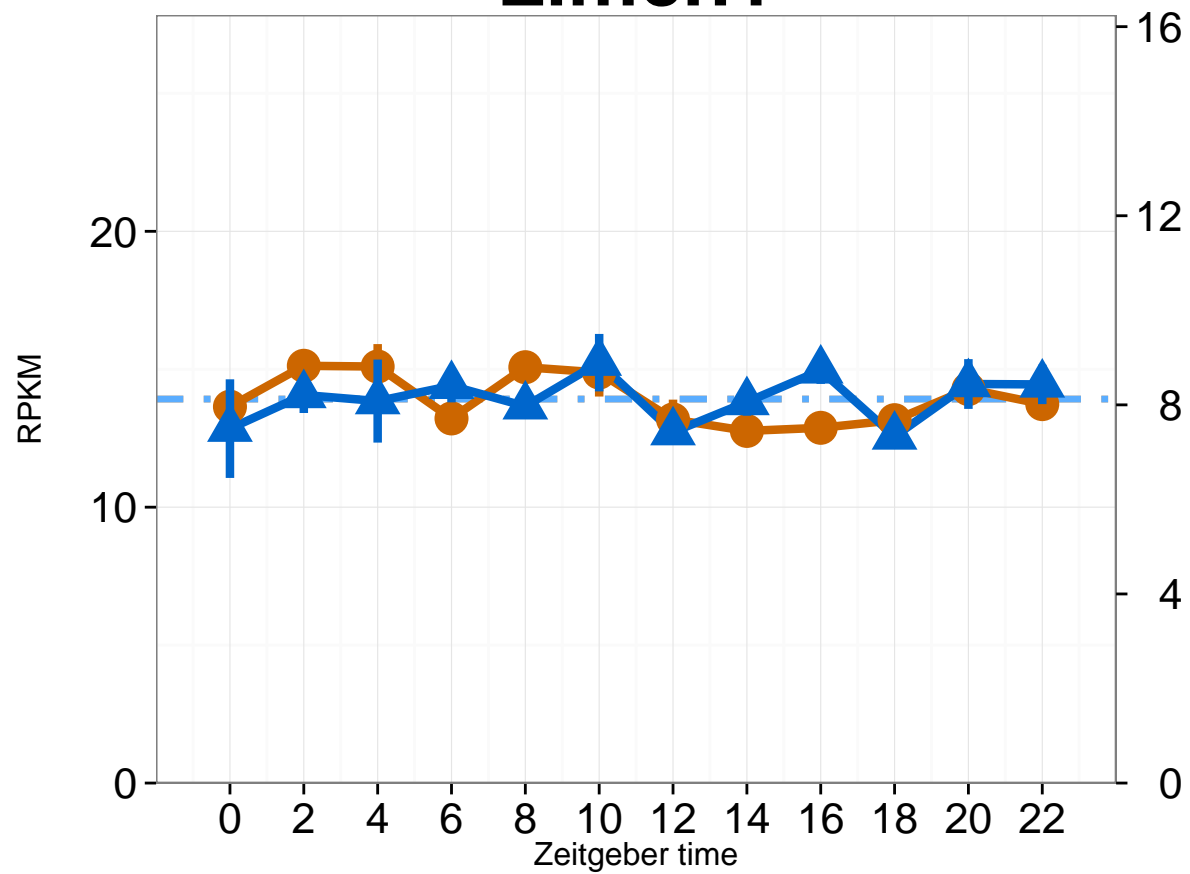

## Limch1

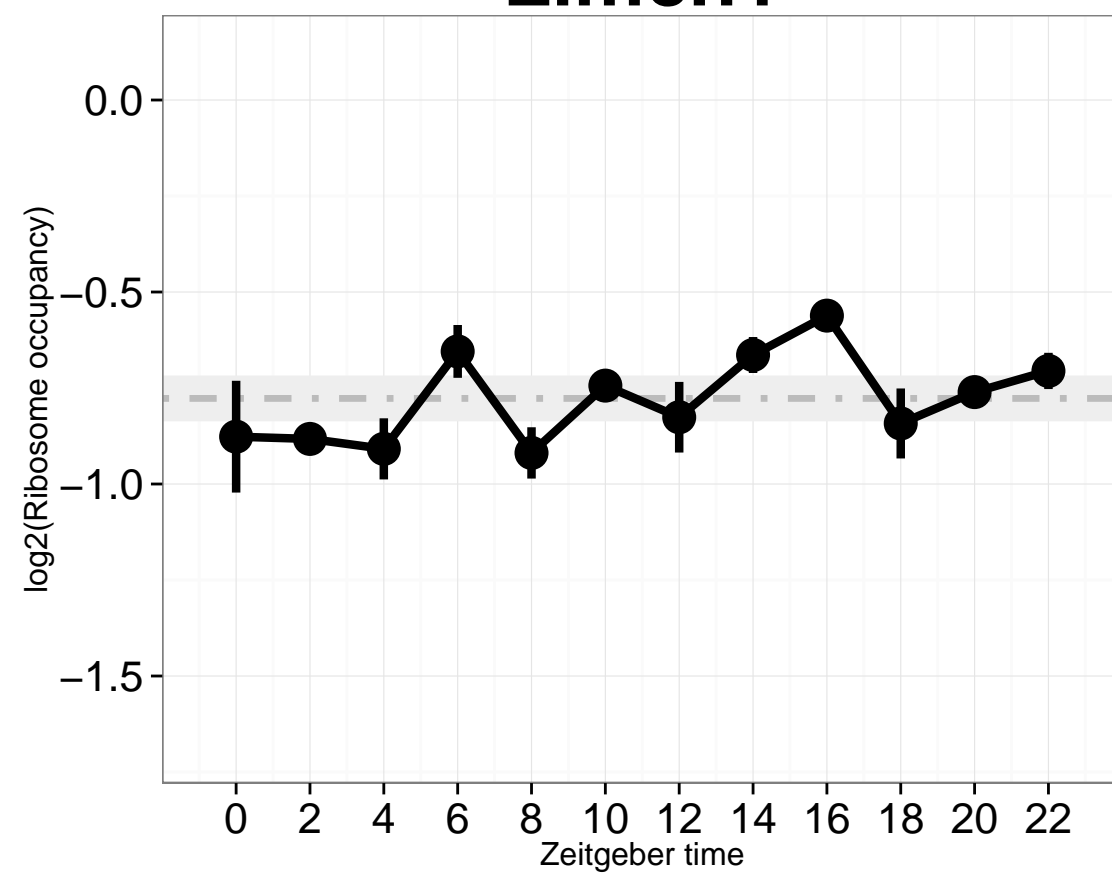

Supplement: Supplementary file 11426 [file 1]

# Git1

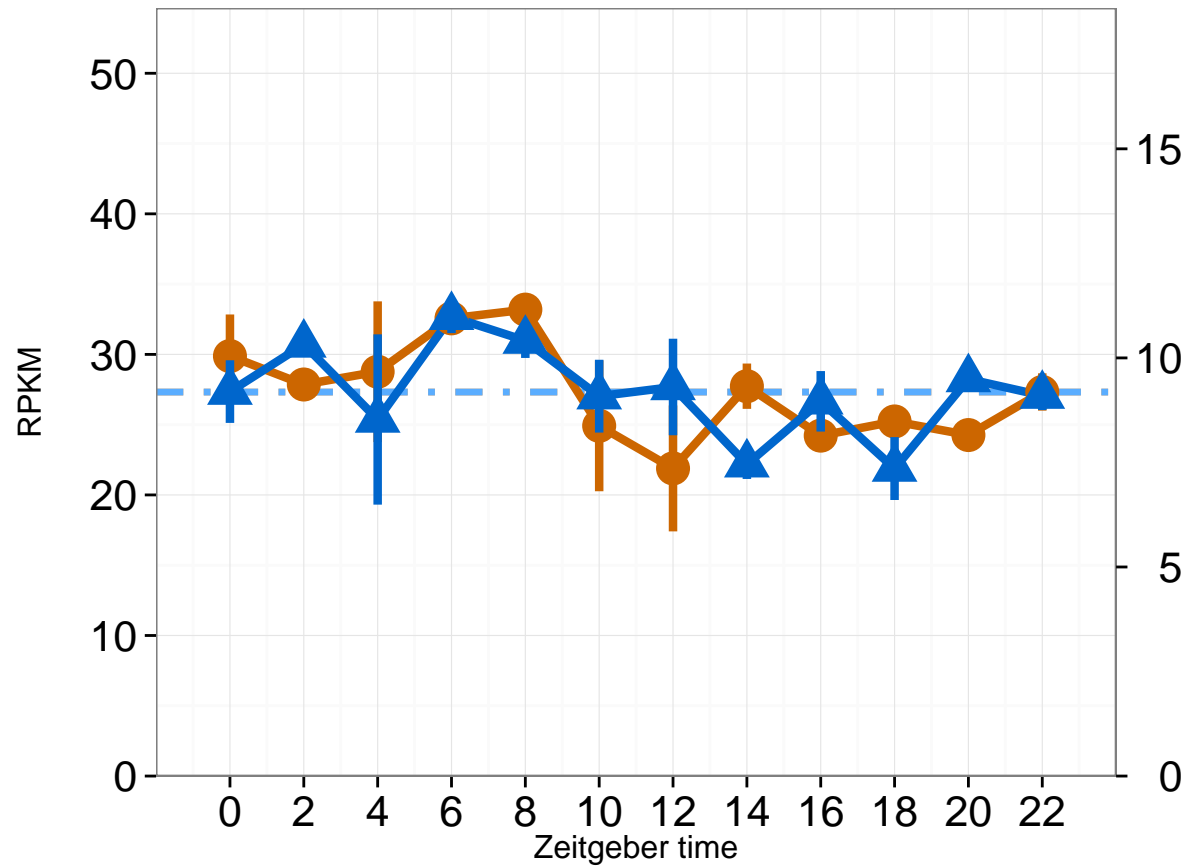

# Git1

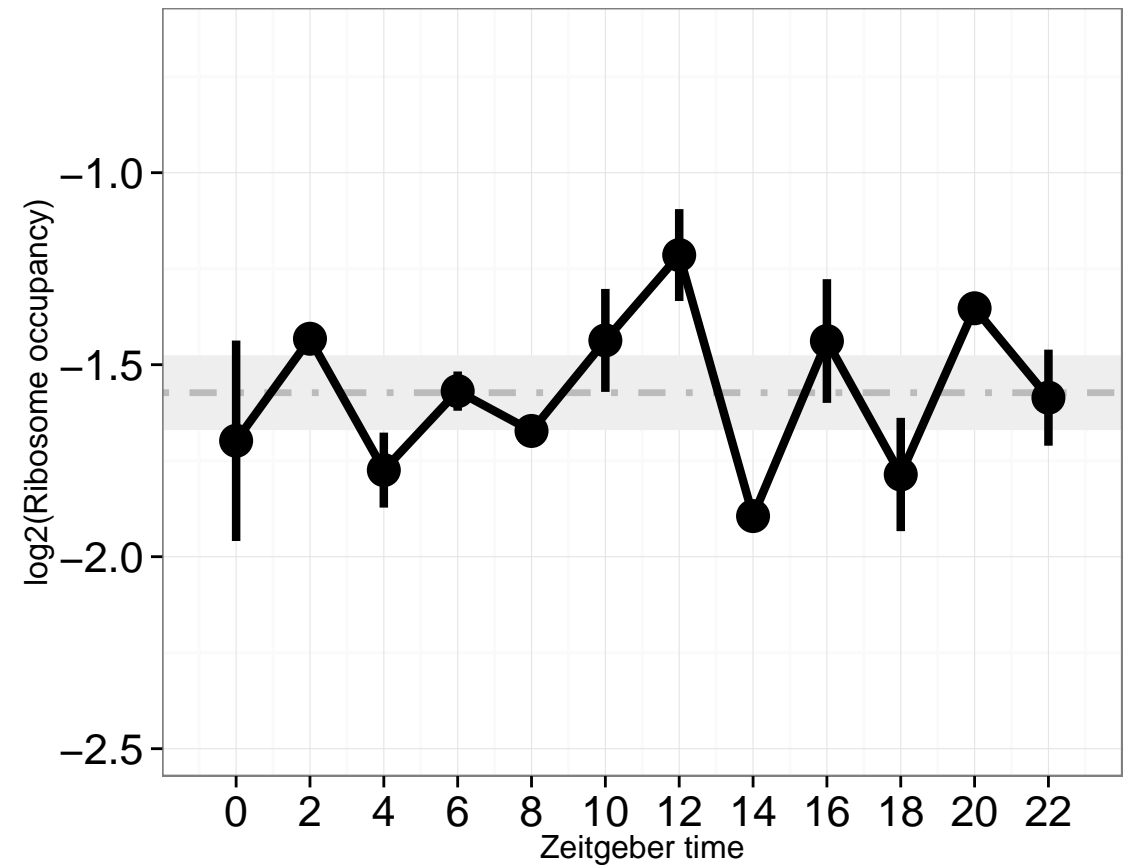

Supplement: Supplementary file 11427 [file 1]

# Zfp958

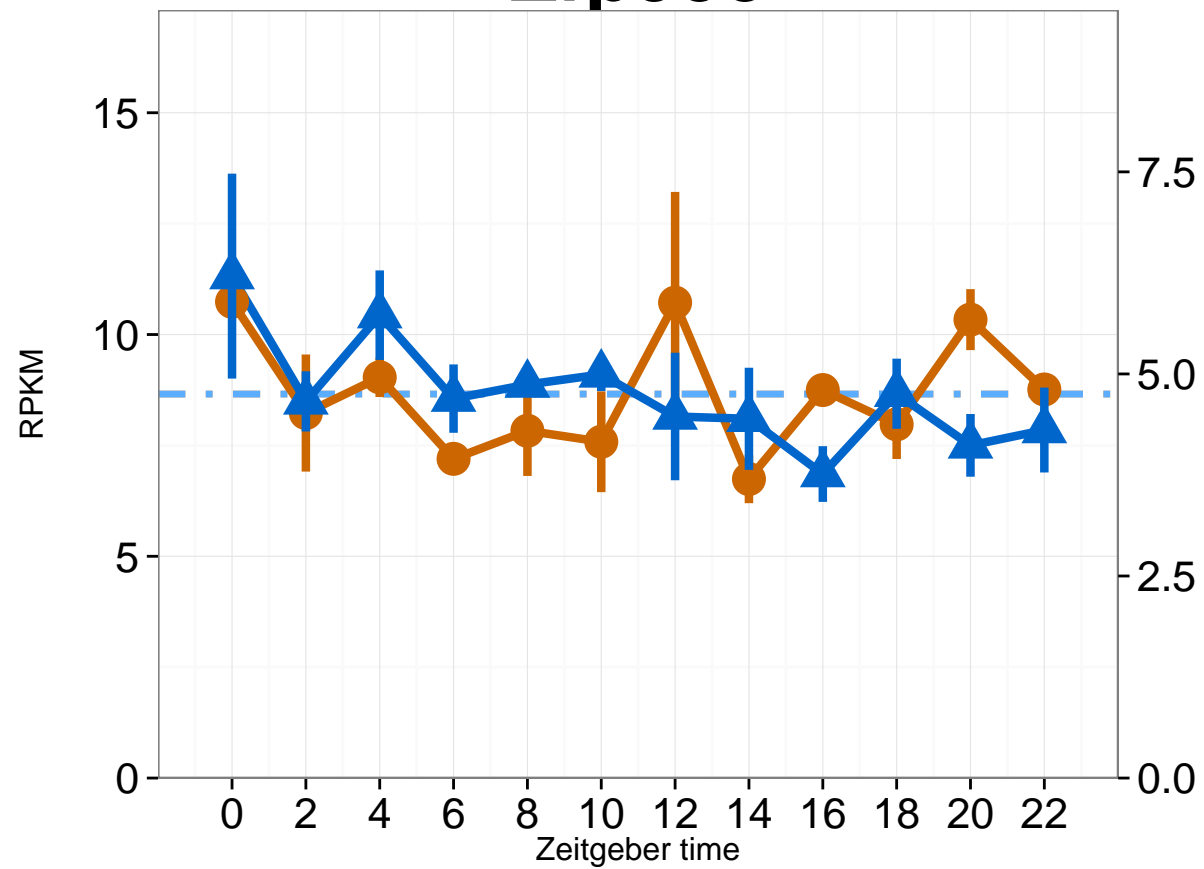

# Zfp958

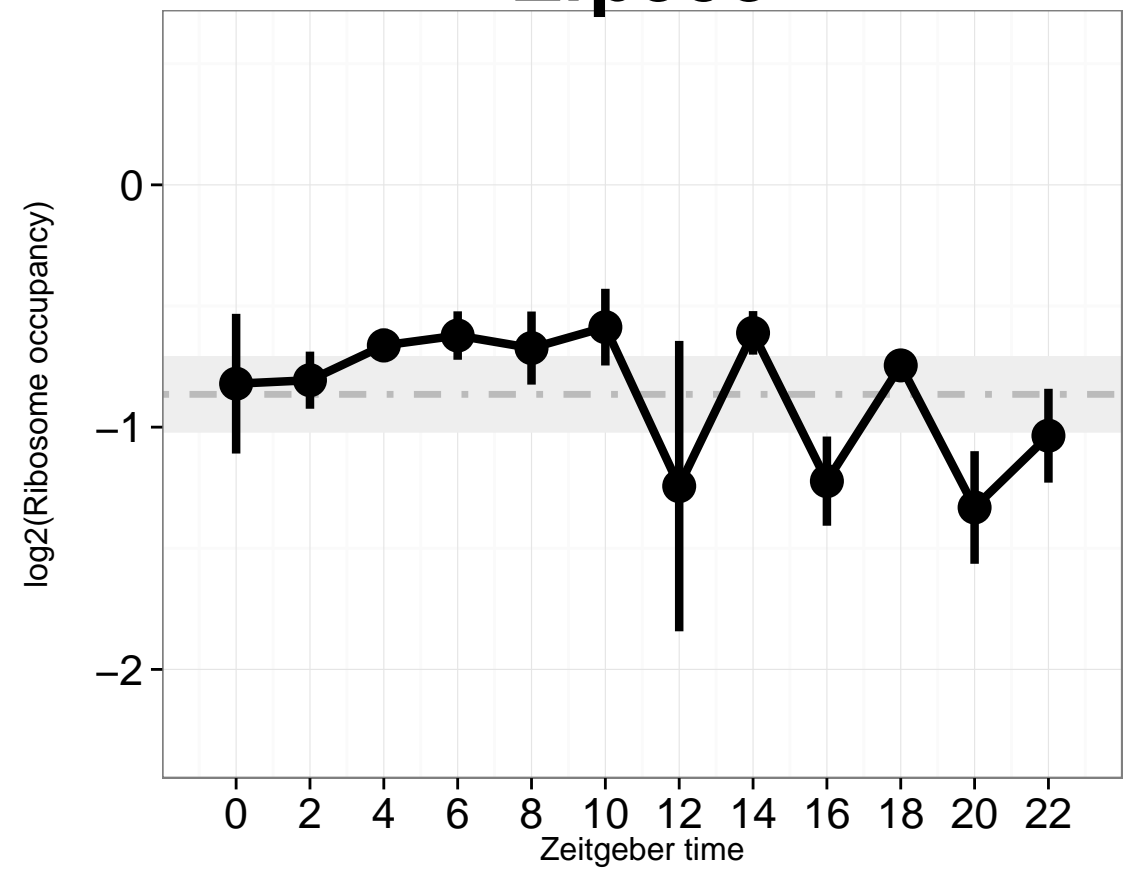

Supplement: Supplementary file 11428 [file 1]

# Twsg1

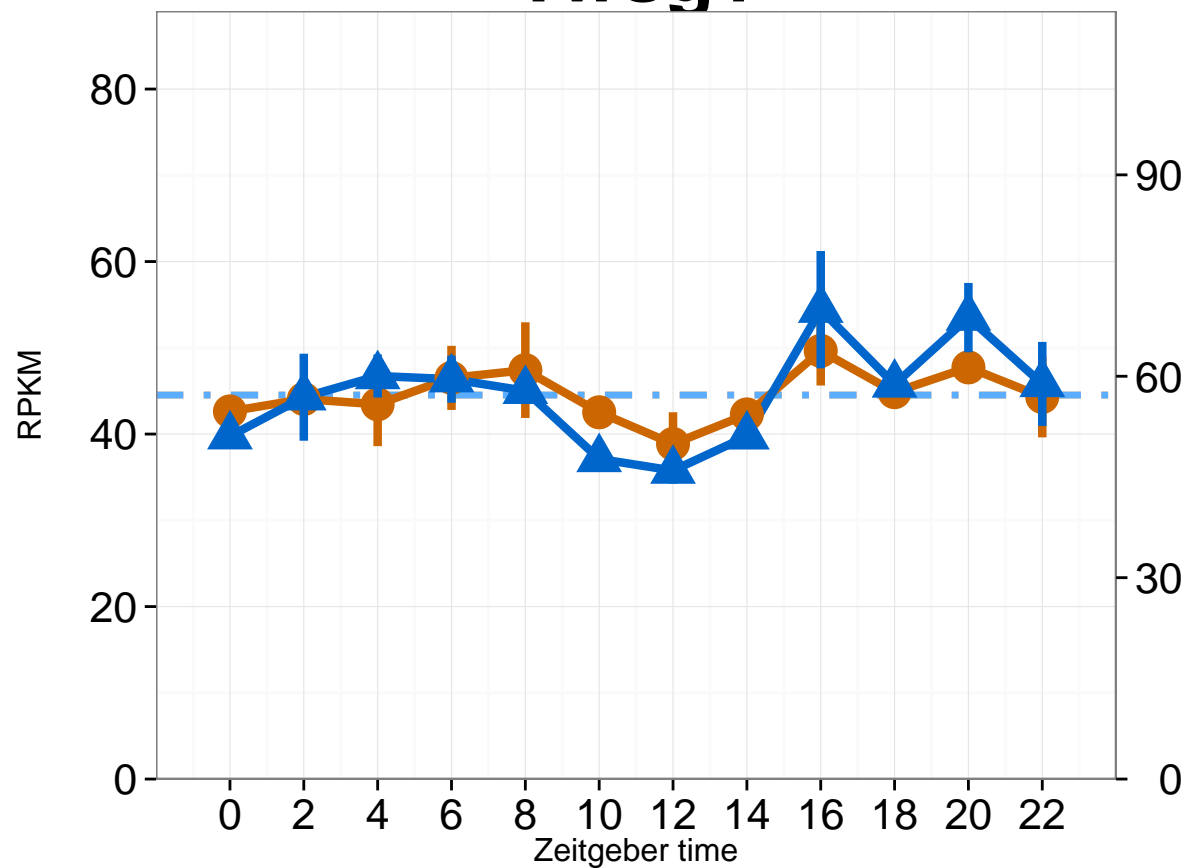

# Twsg1

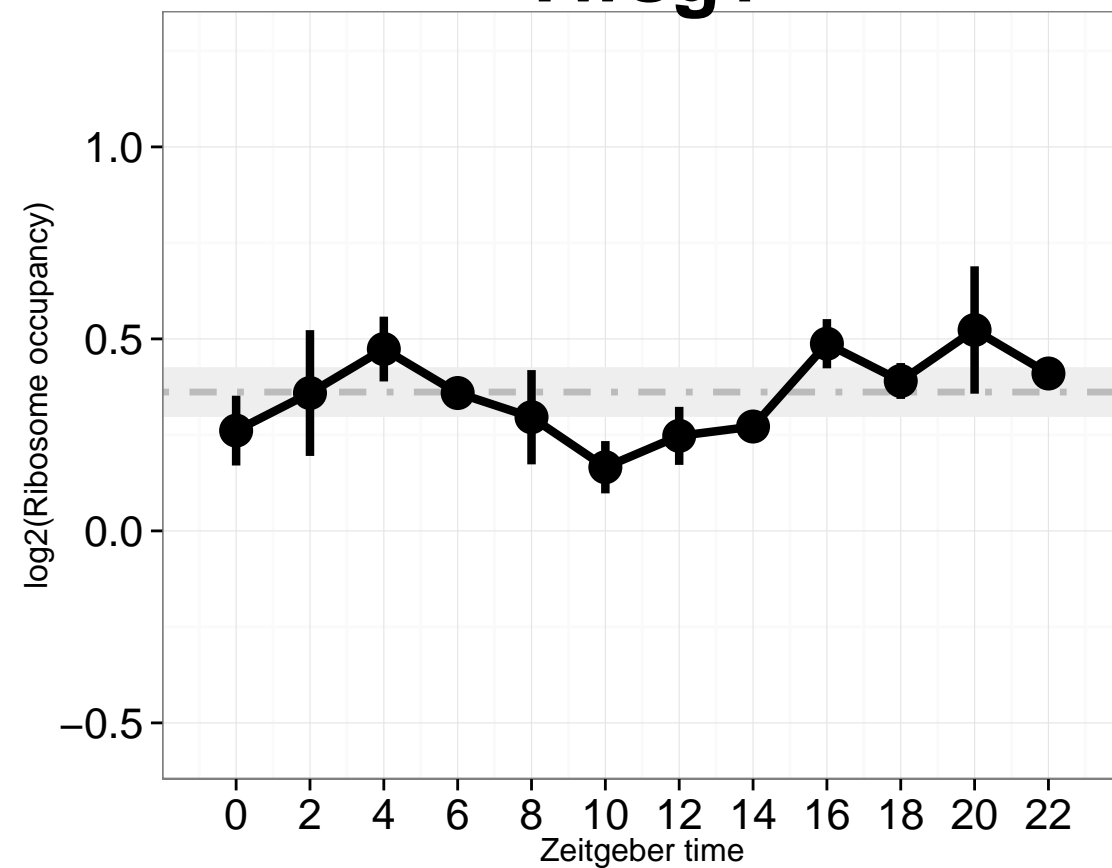

Supplement: Supplementary file 11429 [file 1]

# Rangap1

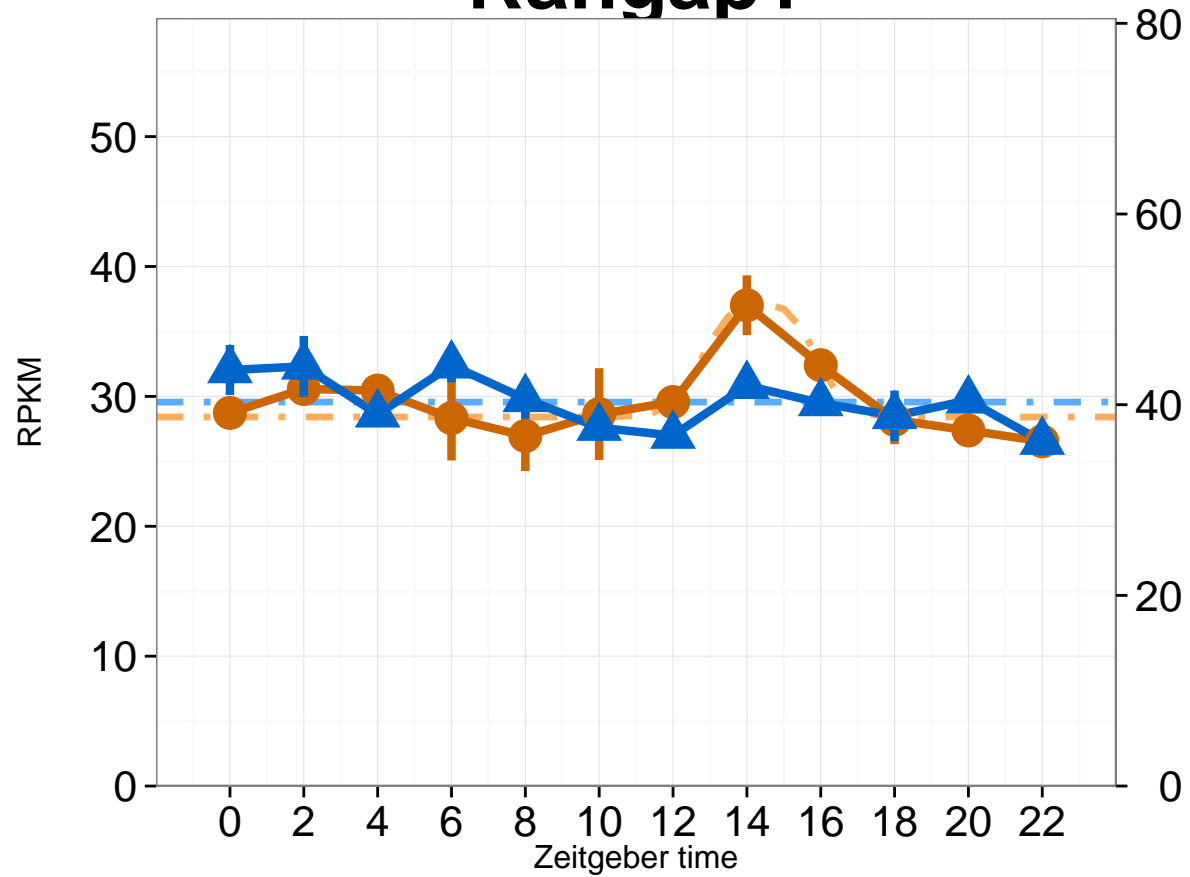

# Rangap1

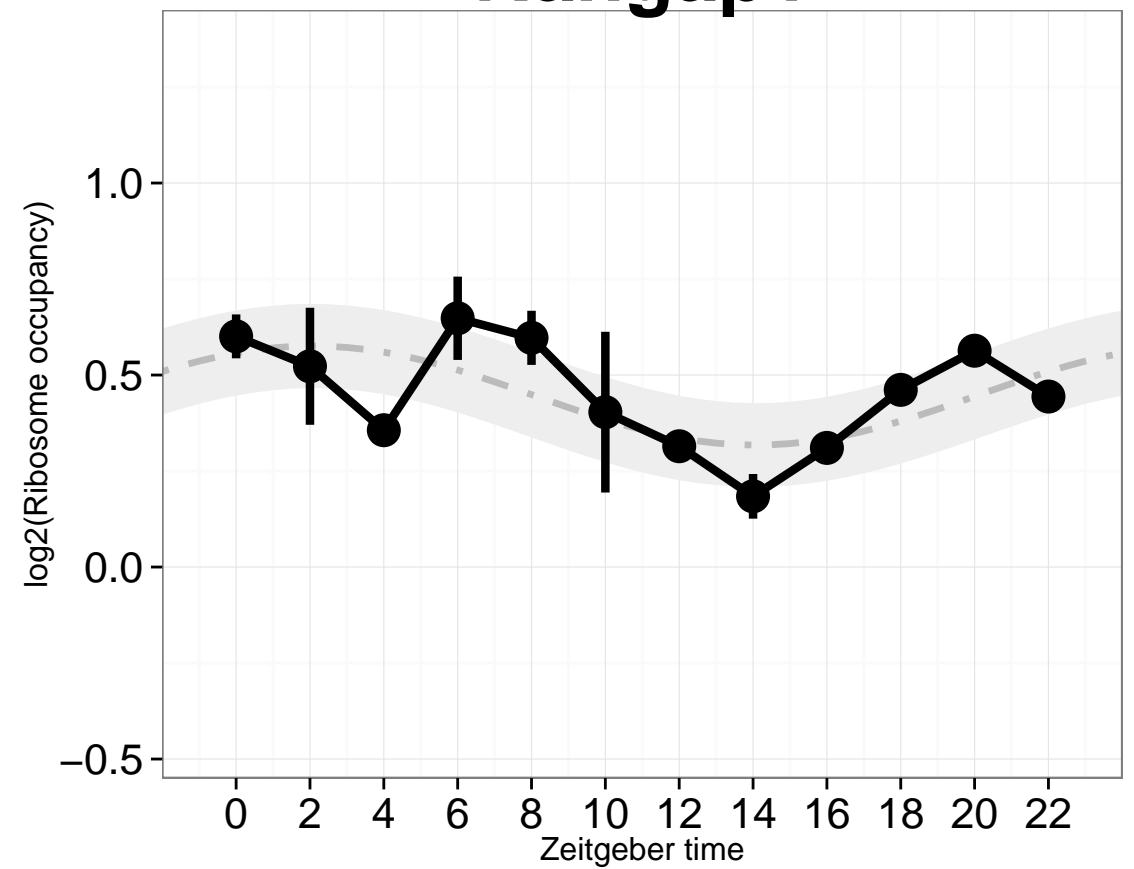

Supplement: Supplementary file 11430 [file 1]

# Usp40

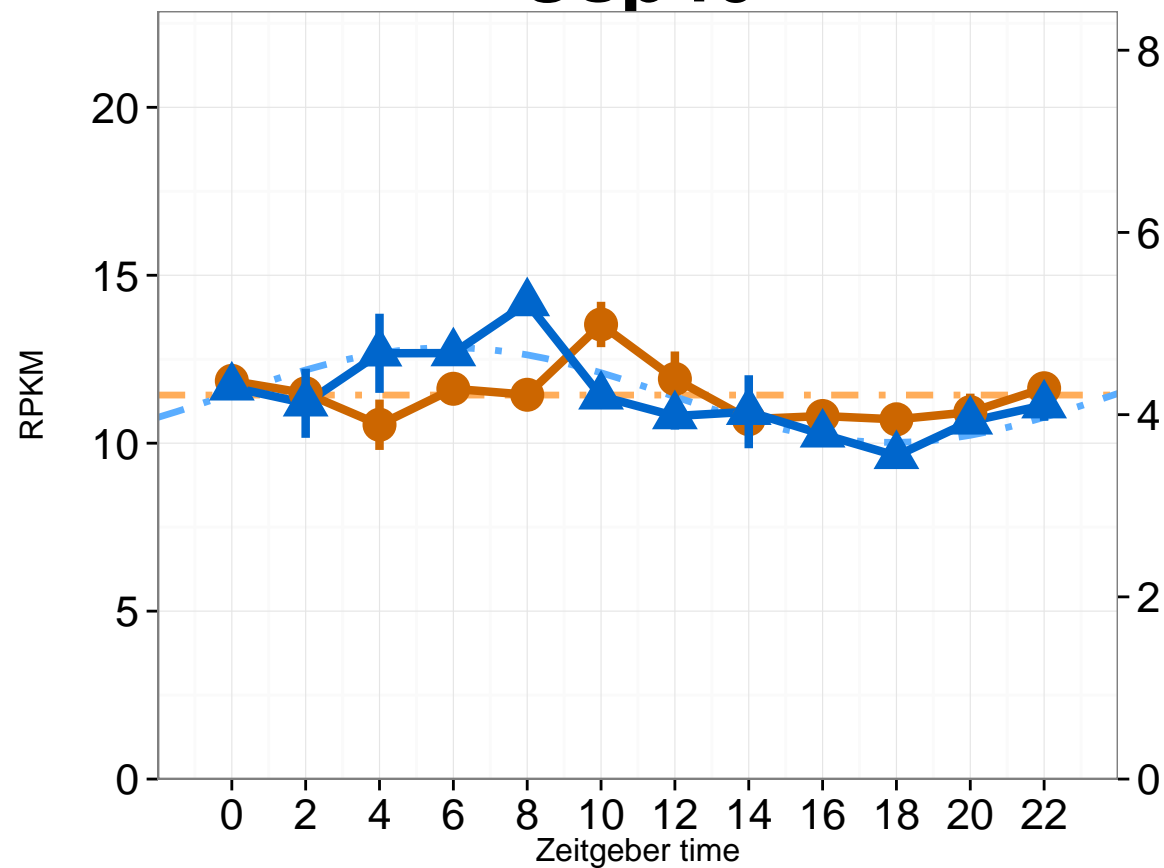

# Usp40

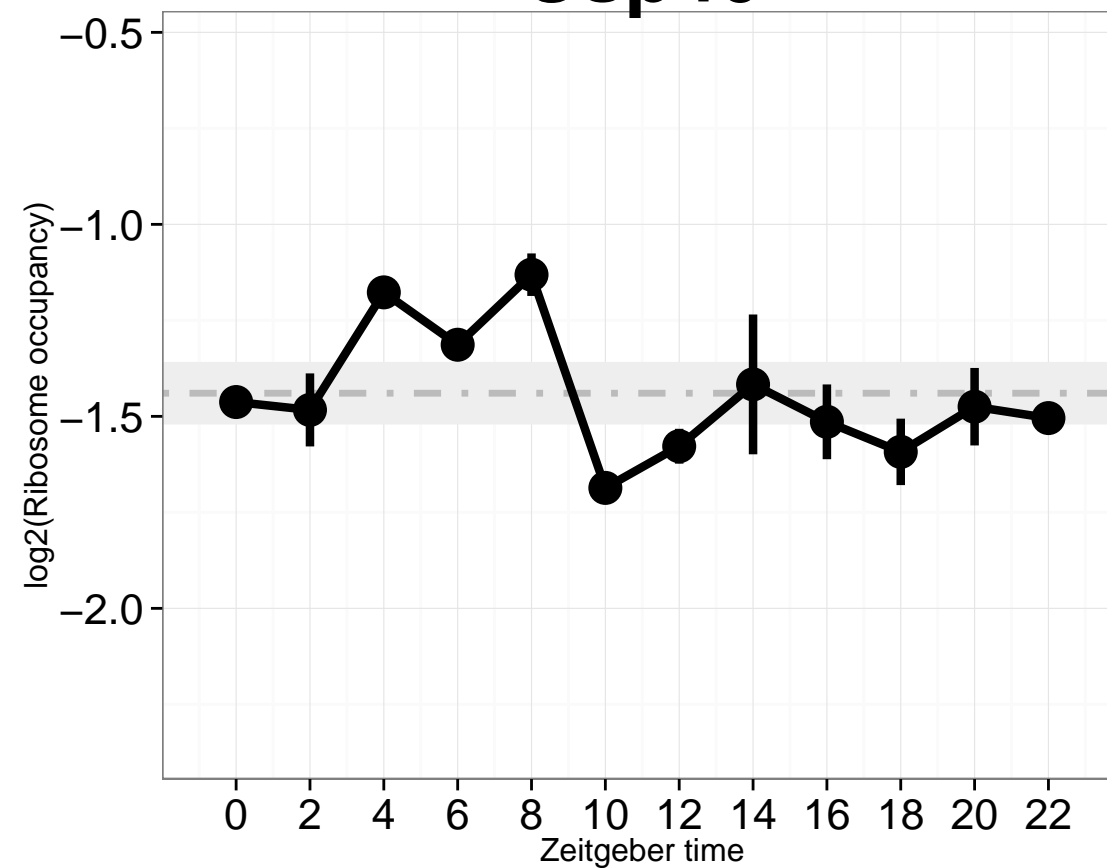

Supplement: Supplementary file 11431 [file 1]

# Fam96a

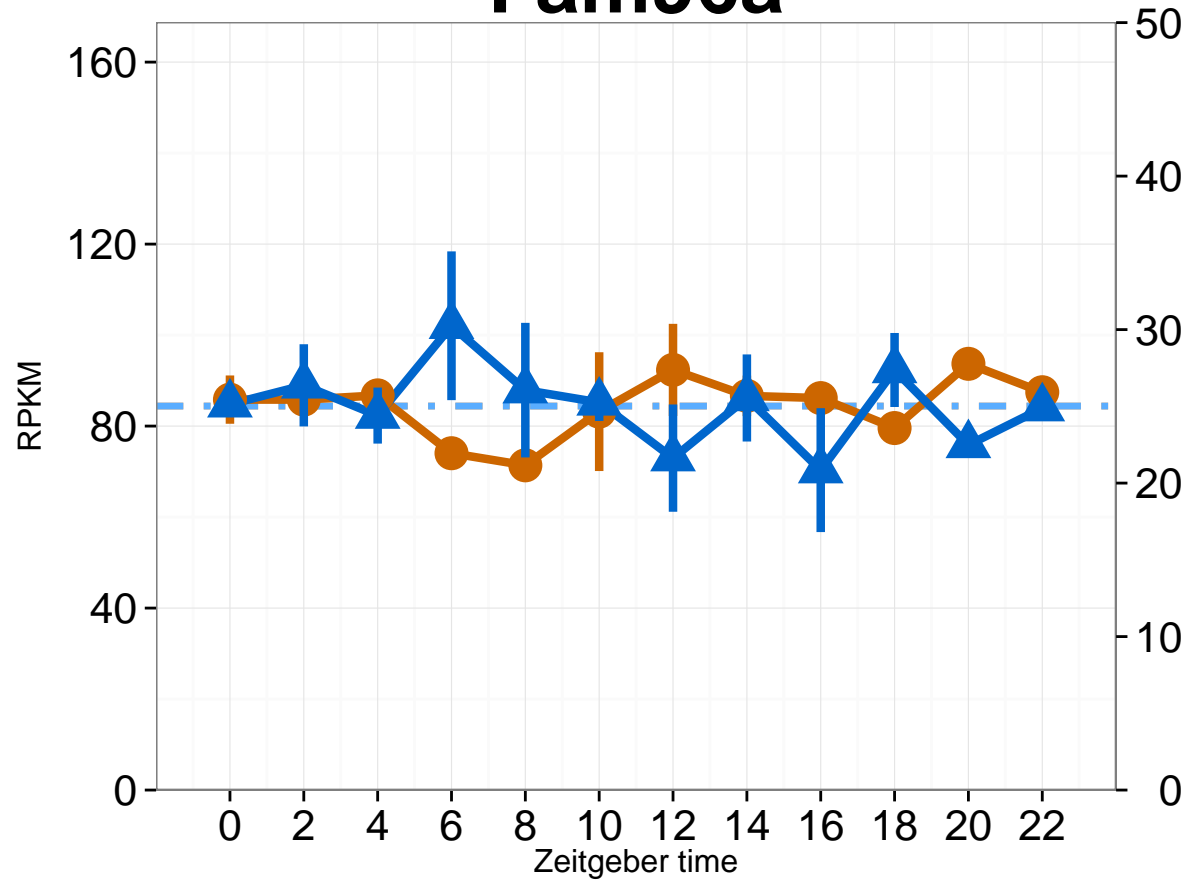

# Fam96a

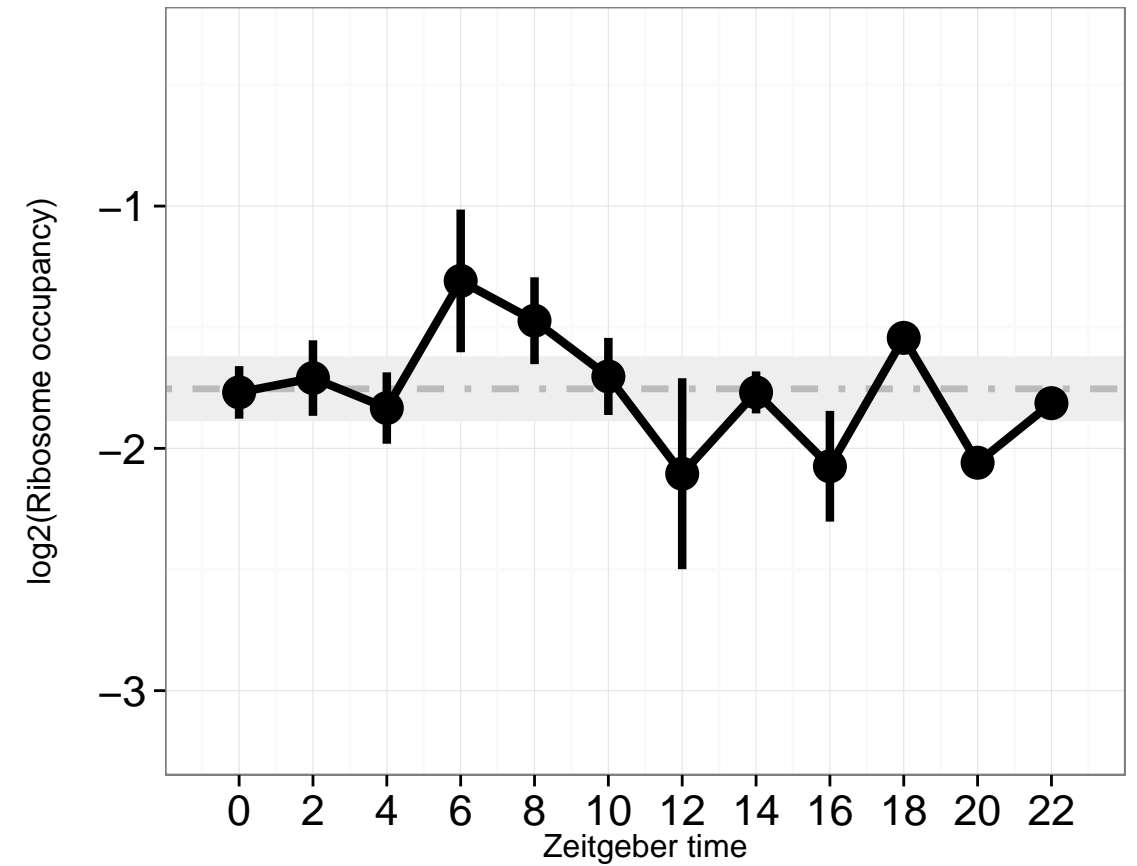

Supplement: Supplementary file 11432 [file 1]

## Slc12a2

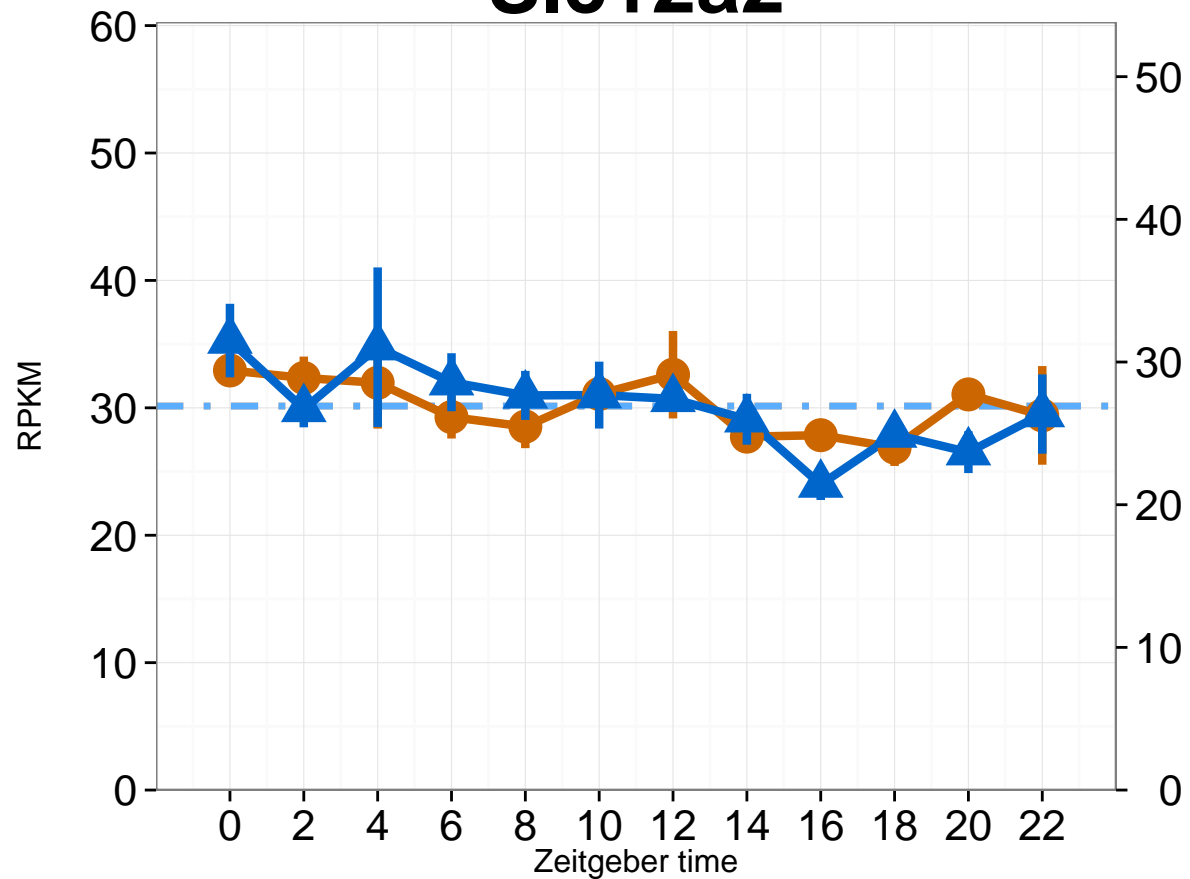

## Slc12a2

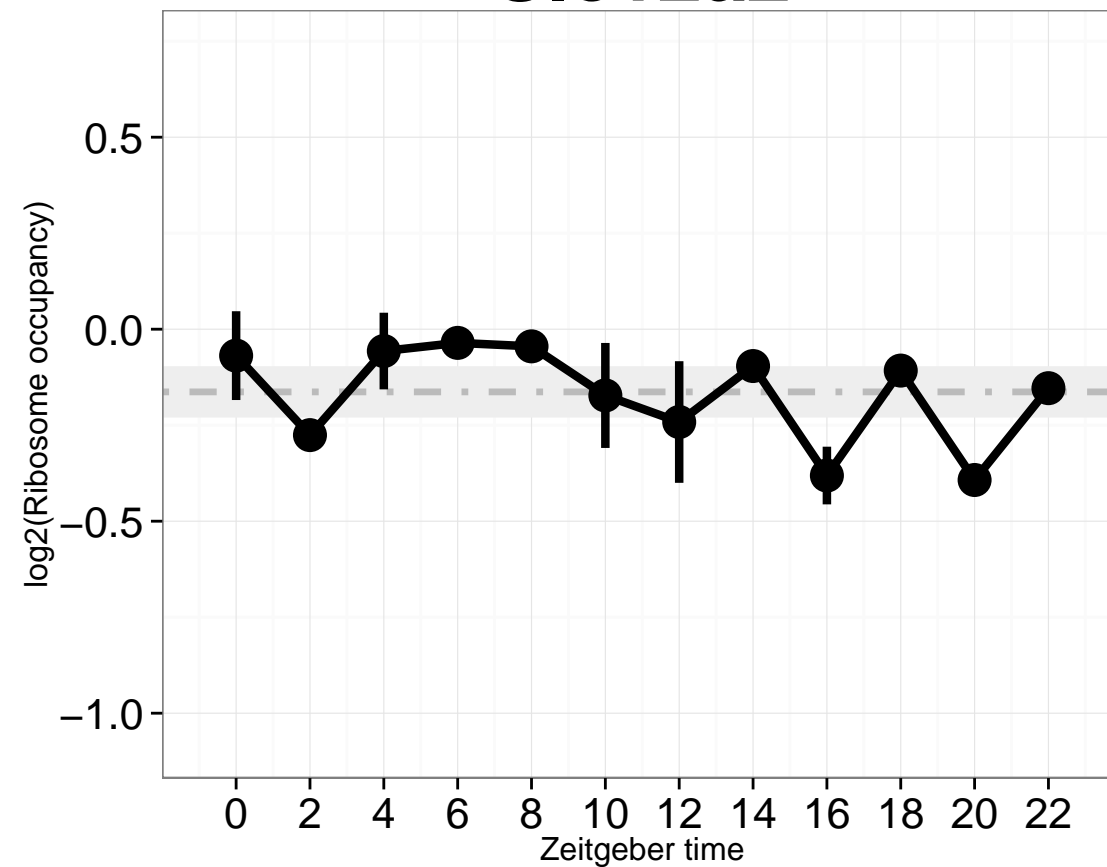

Supplement: Supplementary file 11433 [file 1]

## Usp28

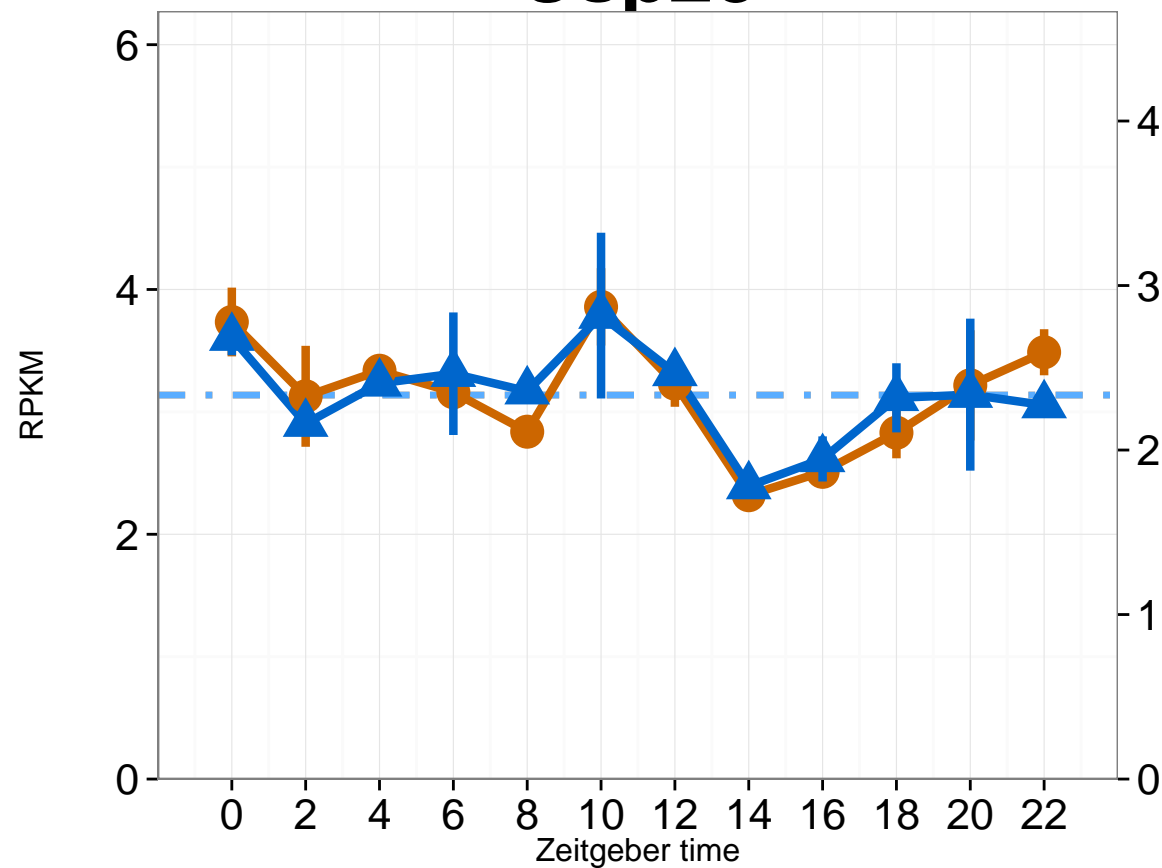

## Usp28

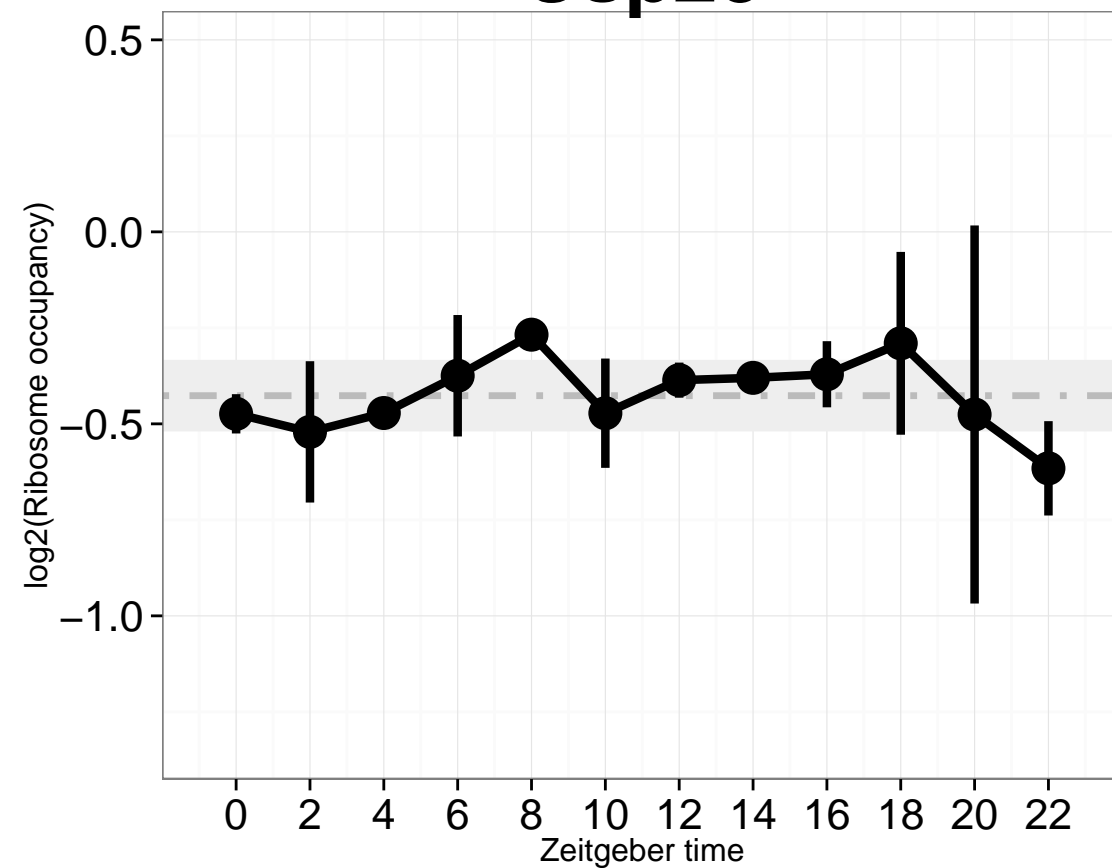

Supplement: Supplementary file 11434 [file 1]

## Med21

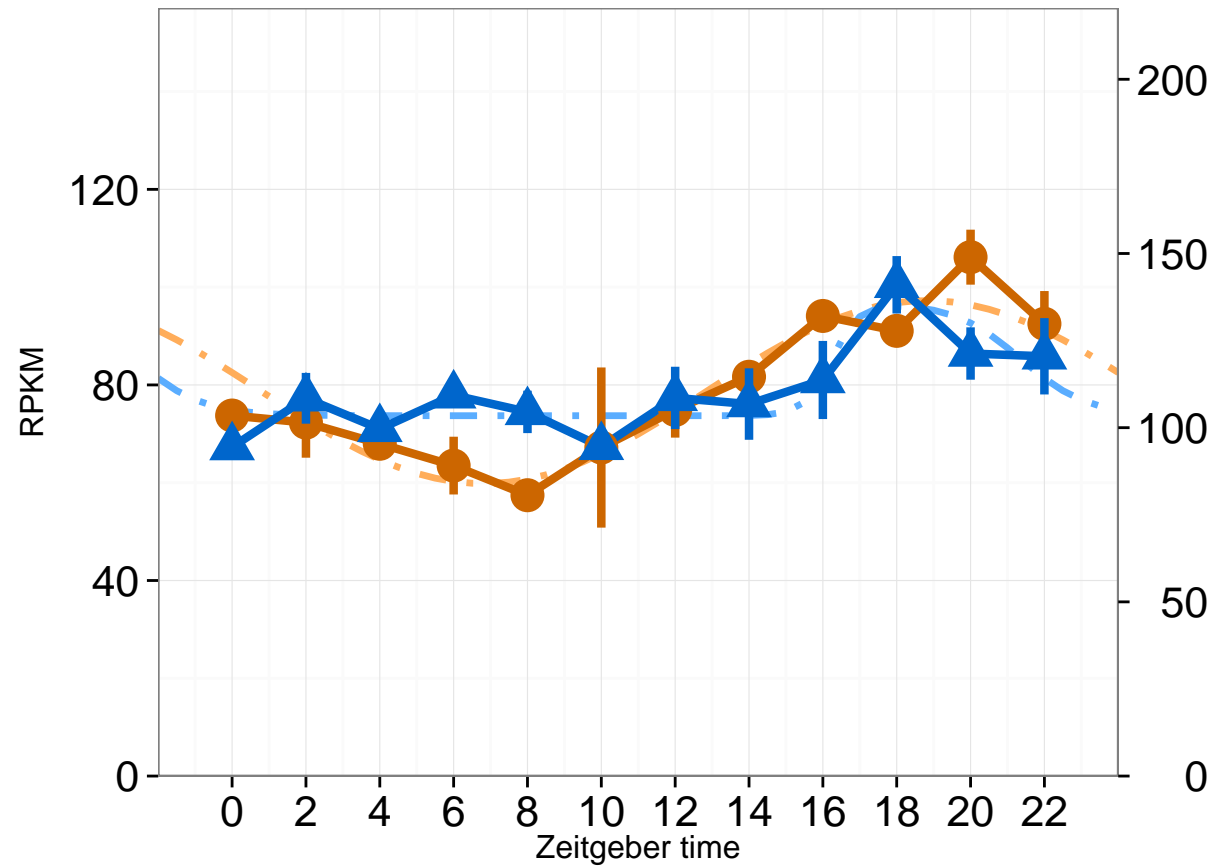

## Med21

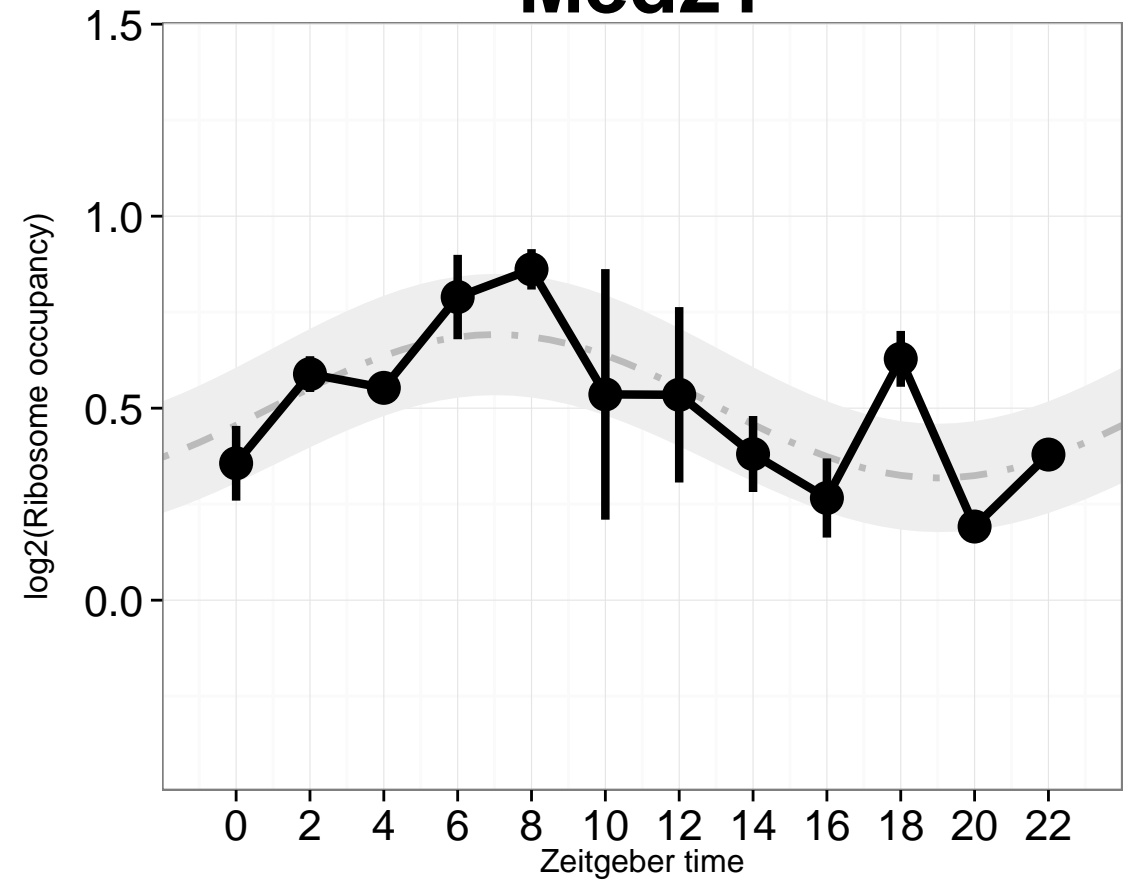

Supplement: Supplementary file 11435 [file 1]

# Slc16a9

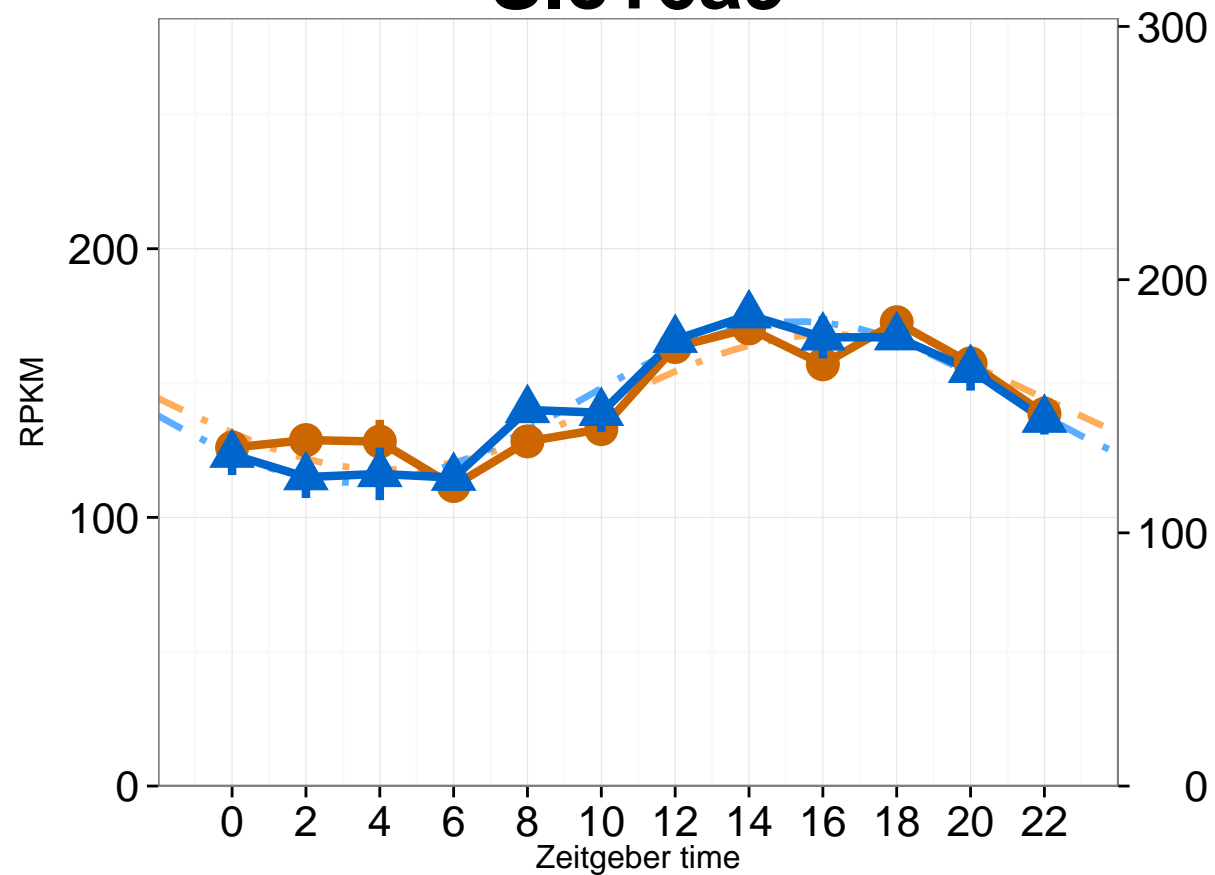

# Slc16a9

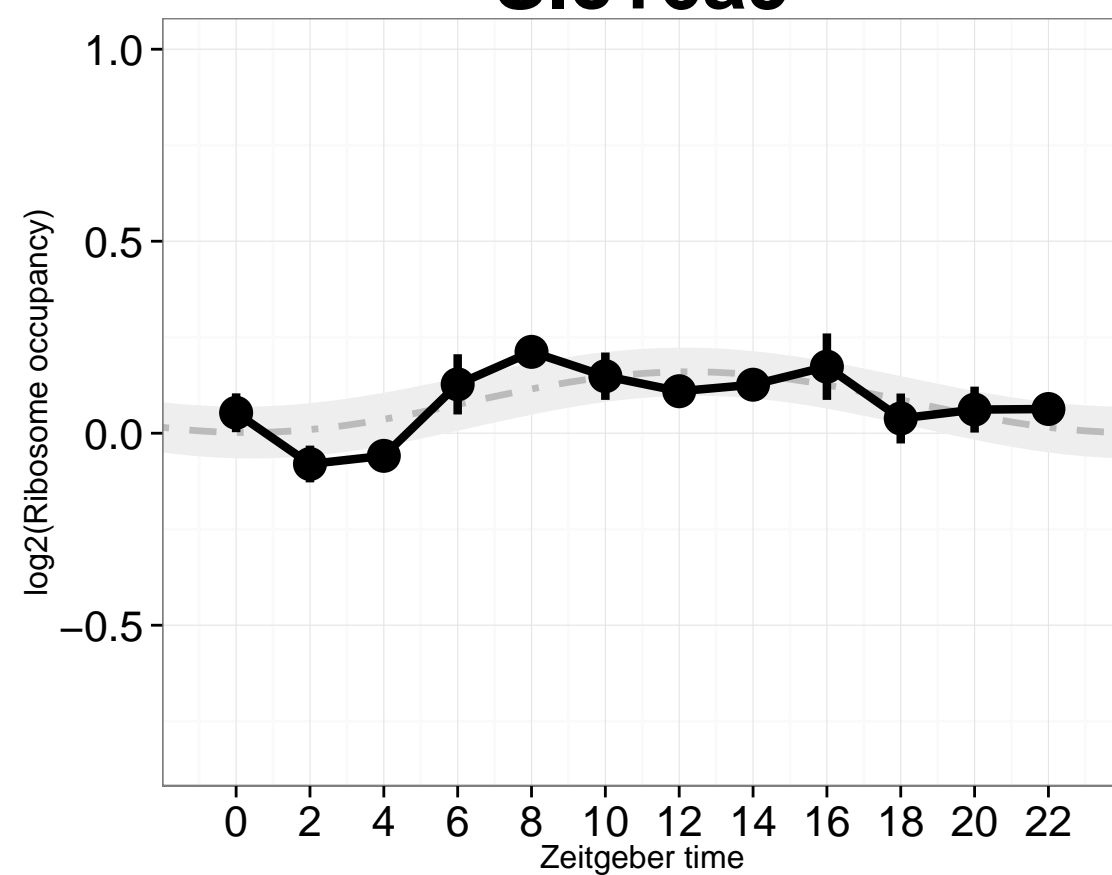

Supplement: Supplementary file 11436 [file 1]

## Prkar1a

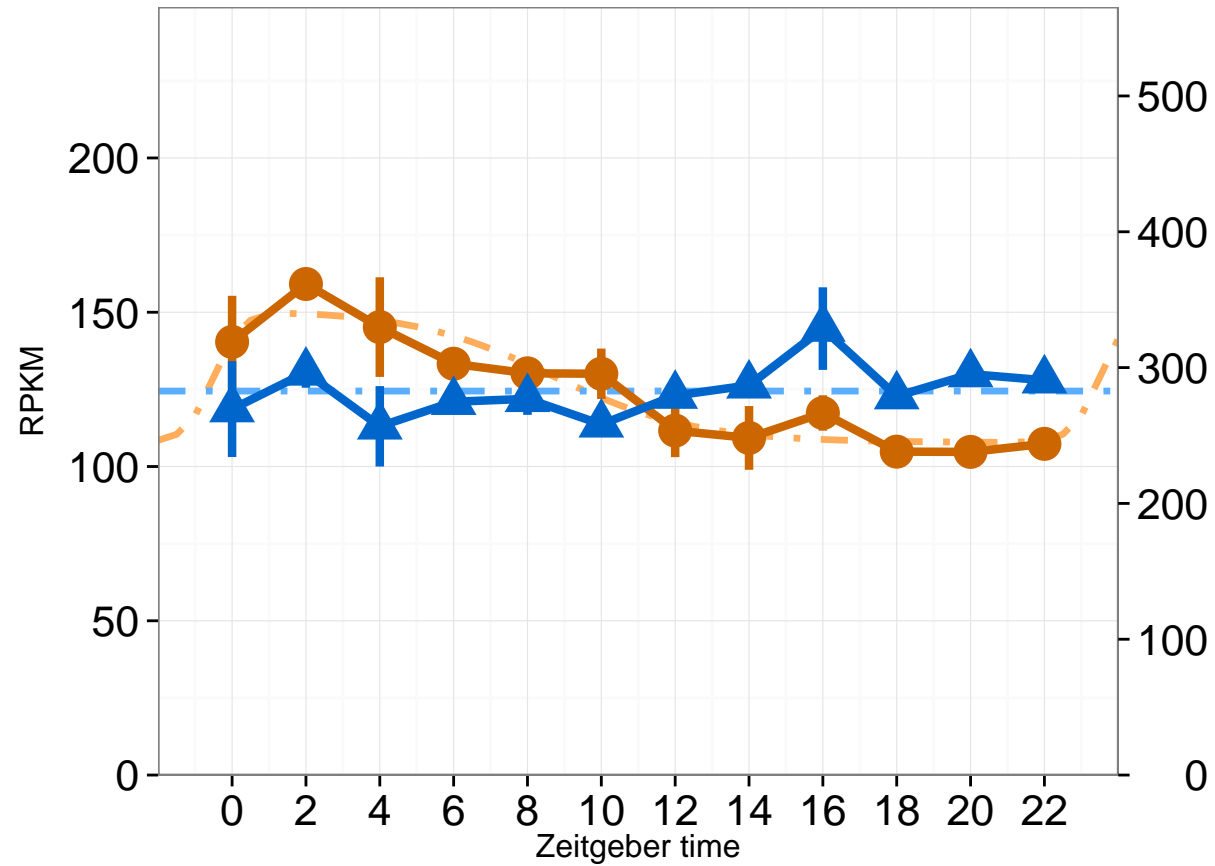

## Prkar1a

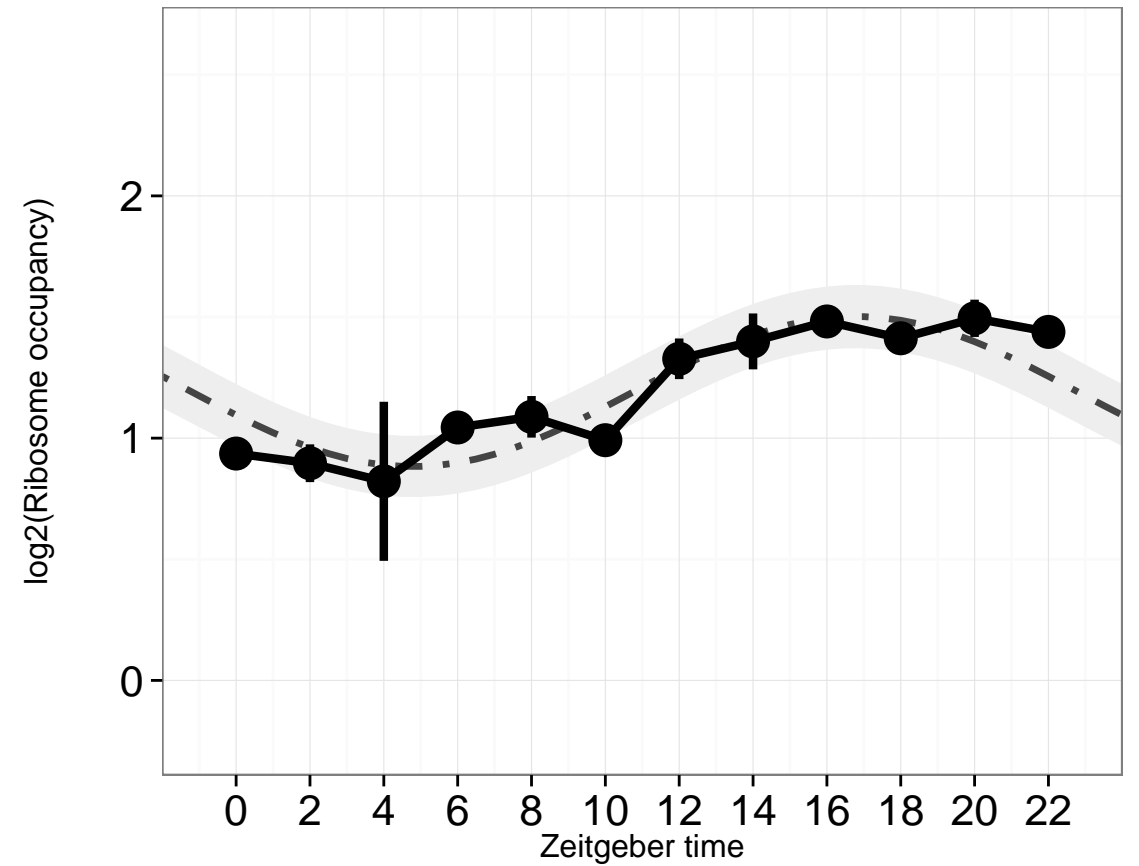

Supplement: Supplementary file 11437 [file 1]

# Atp5h

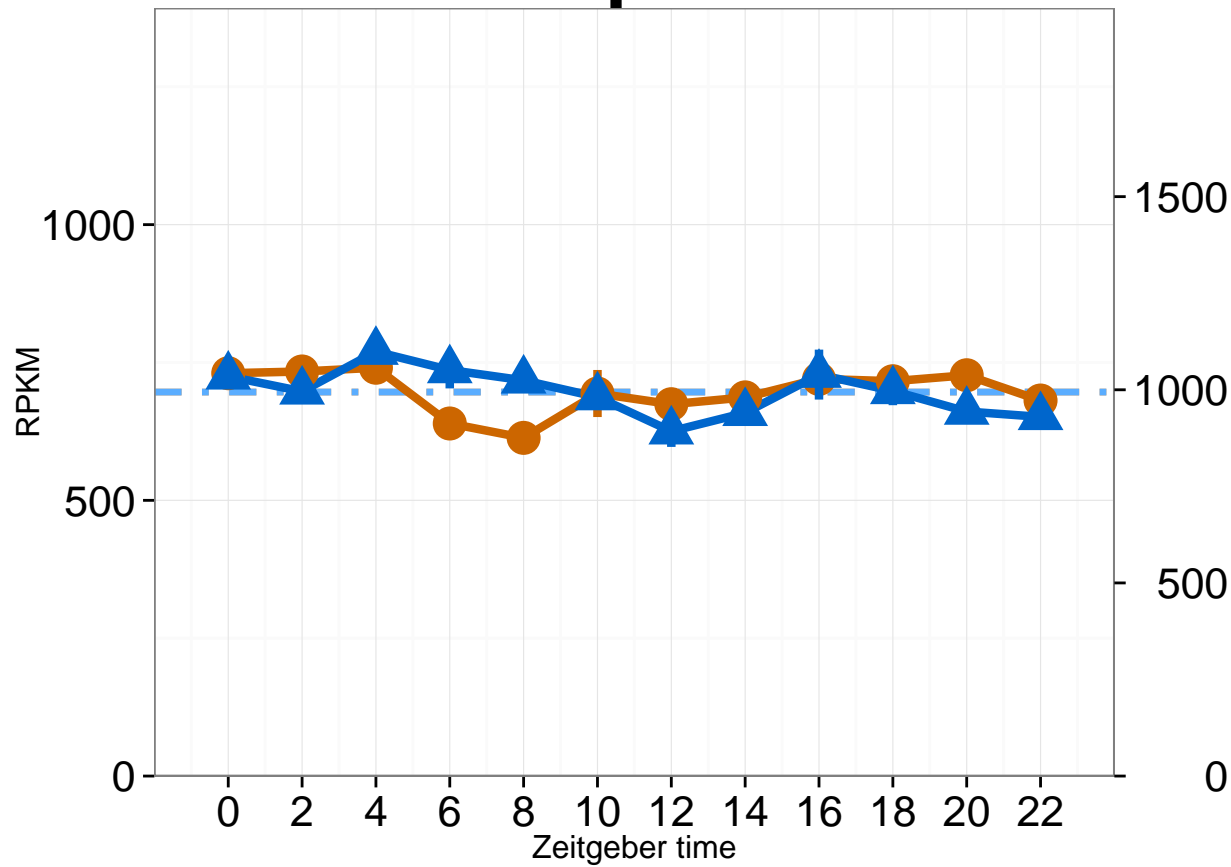

# Atp5h

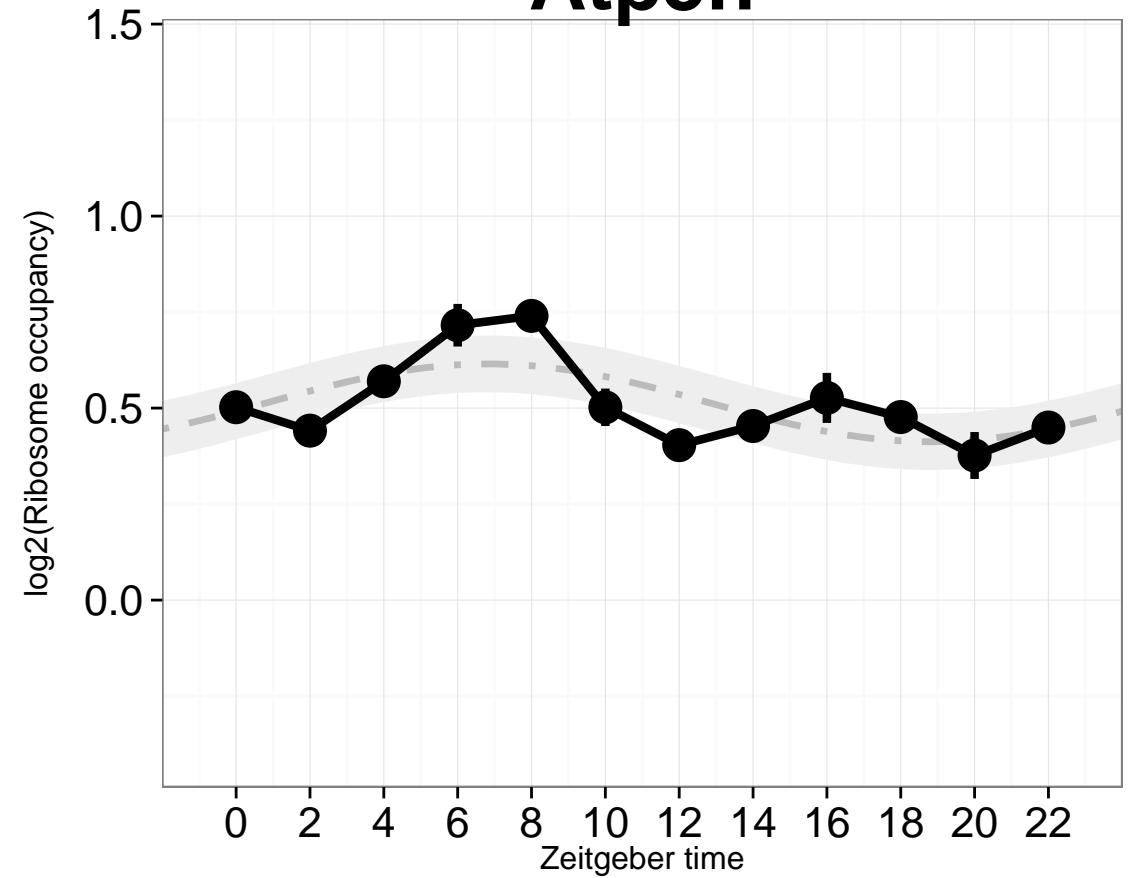

Supplement: Supplementary file 11438 [file 1]

# 4930523C07Rik

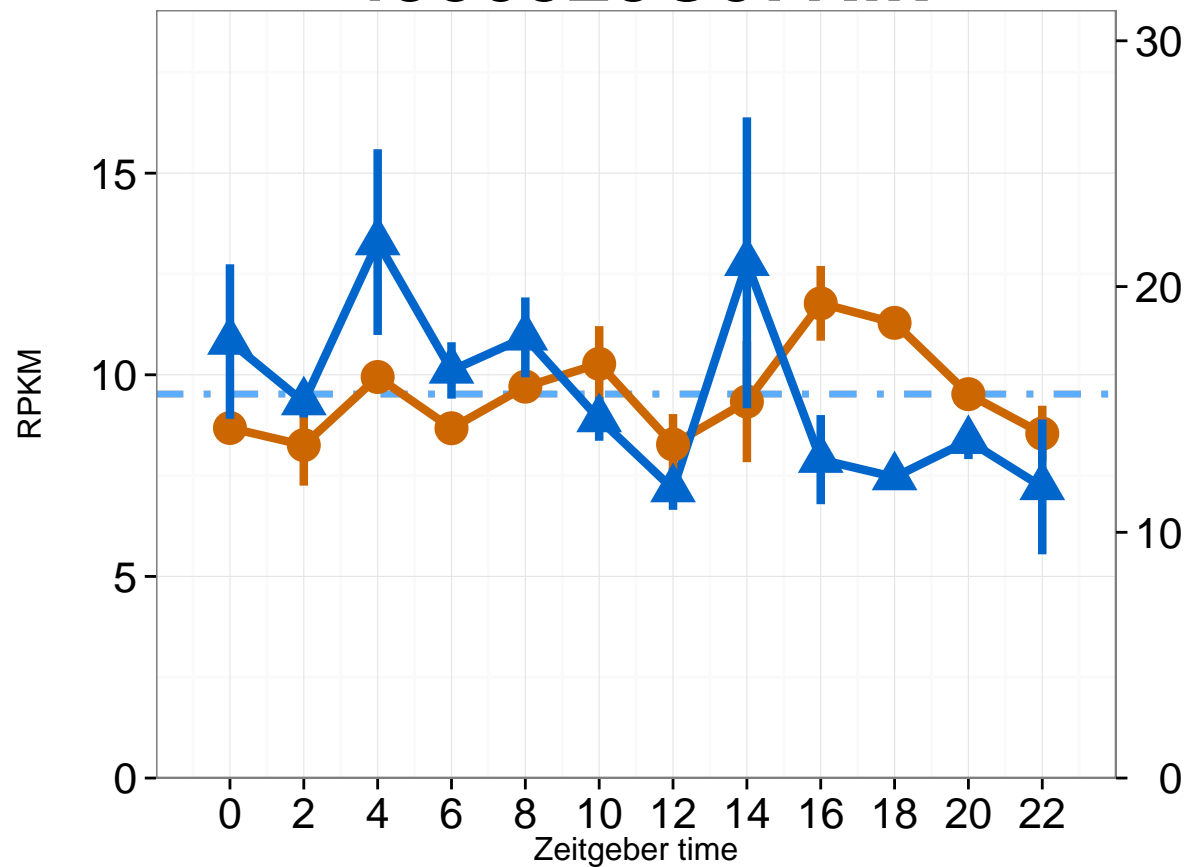

# 4930523C07Rik

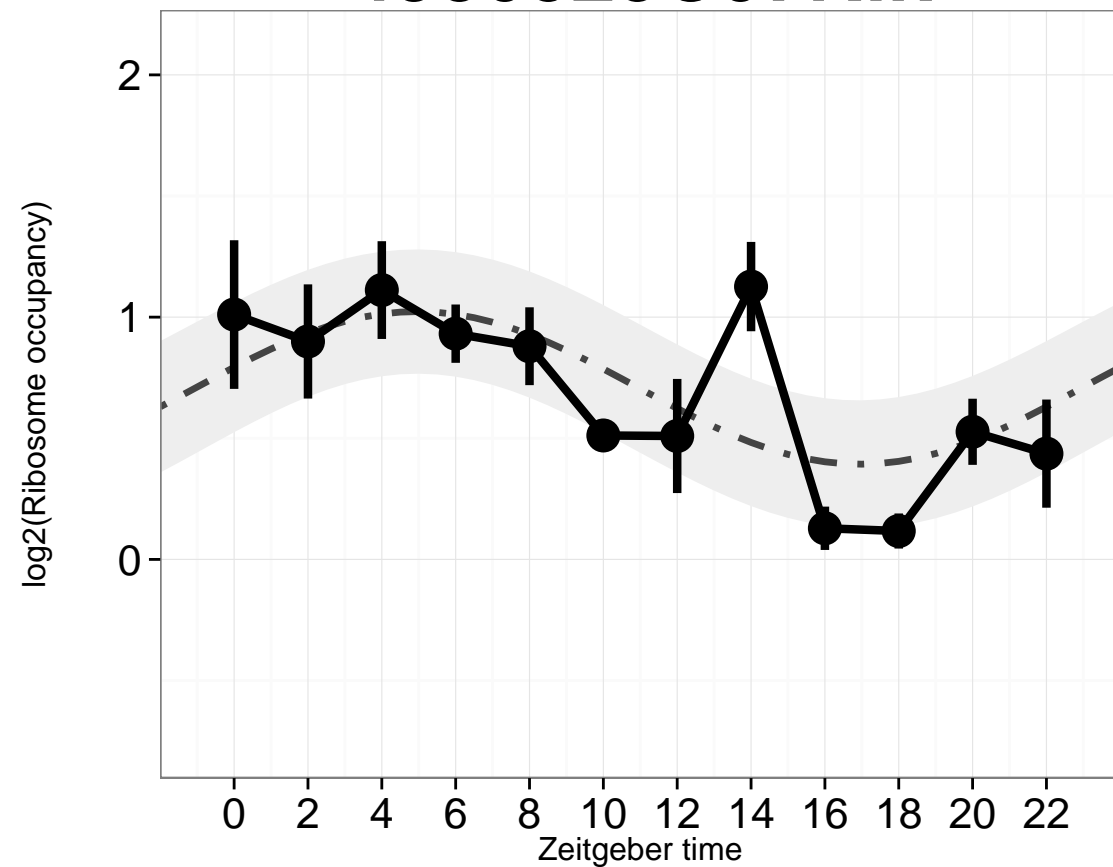

Supplement: Supplementary file 11439 [file 1]

## SiI1

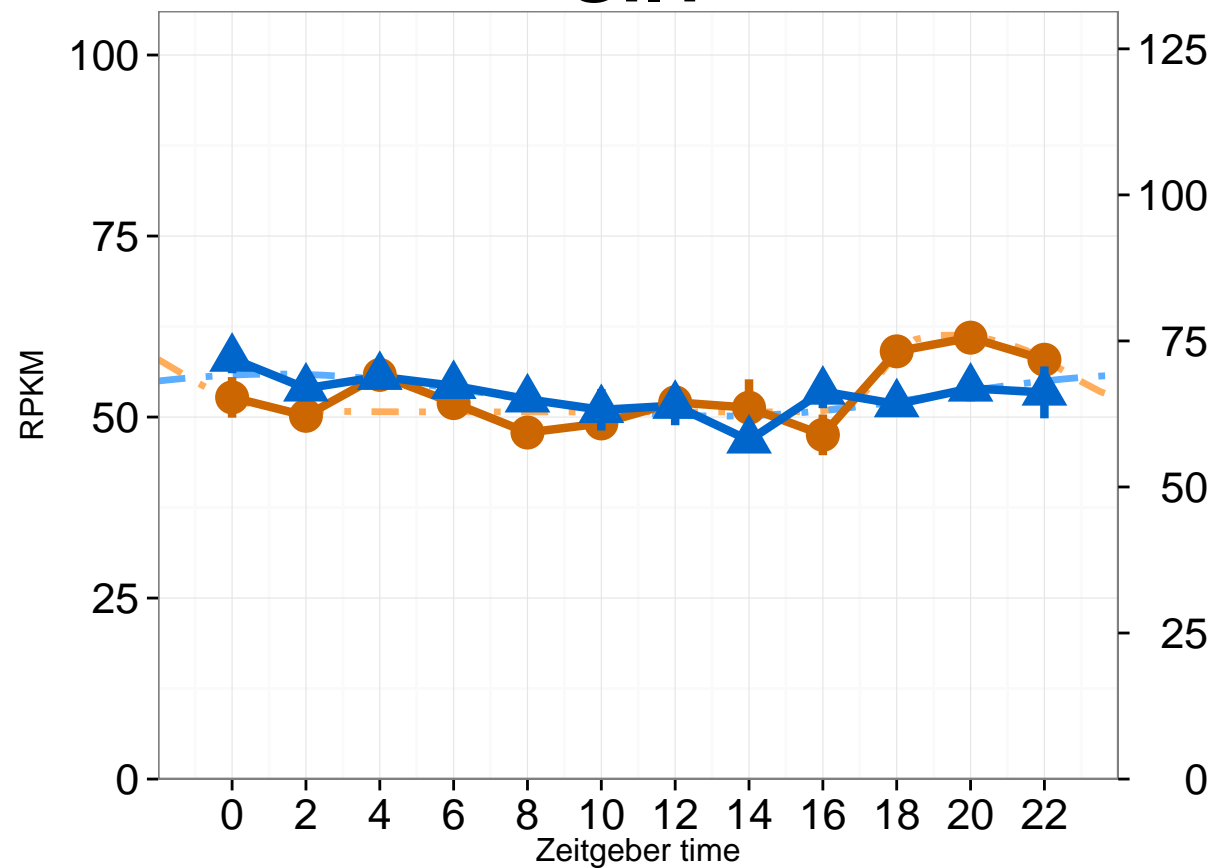

## SiI1

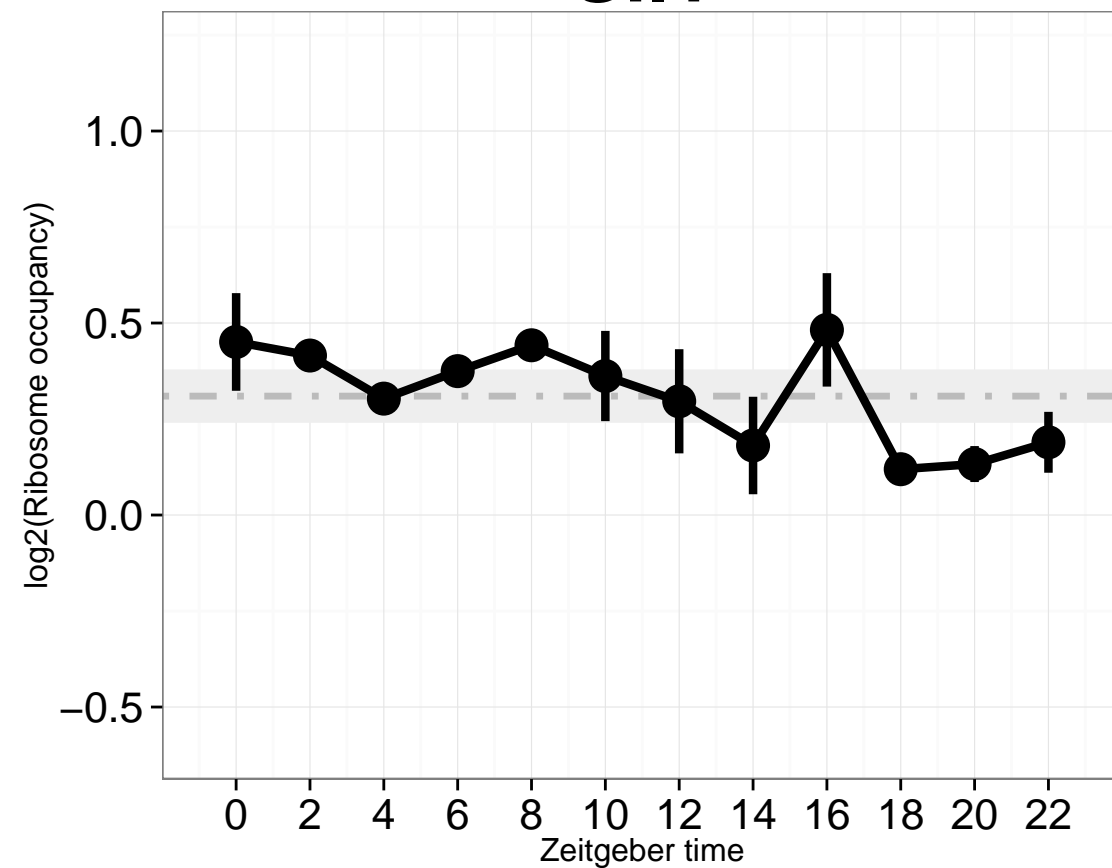

Supplement: Supplementary file 11440 [file 1]

## Amd1

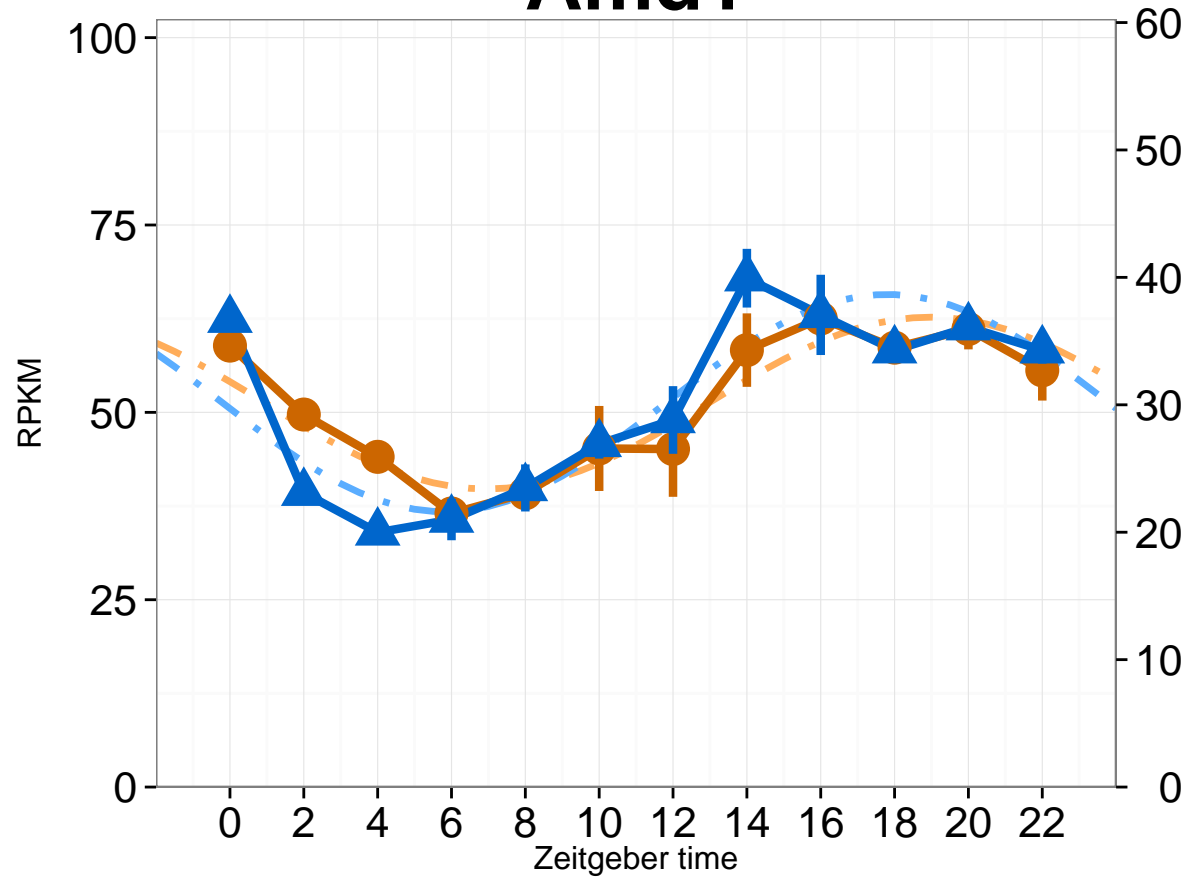

## Amd1

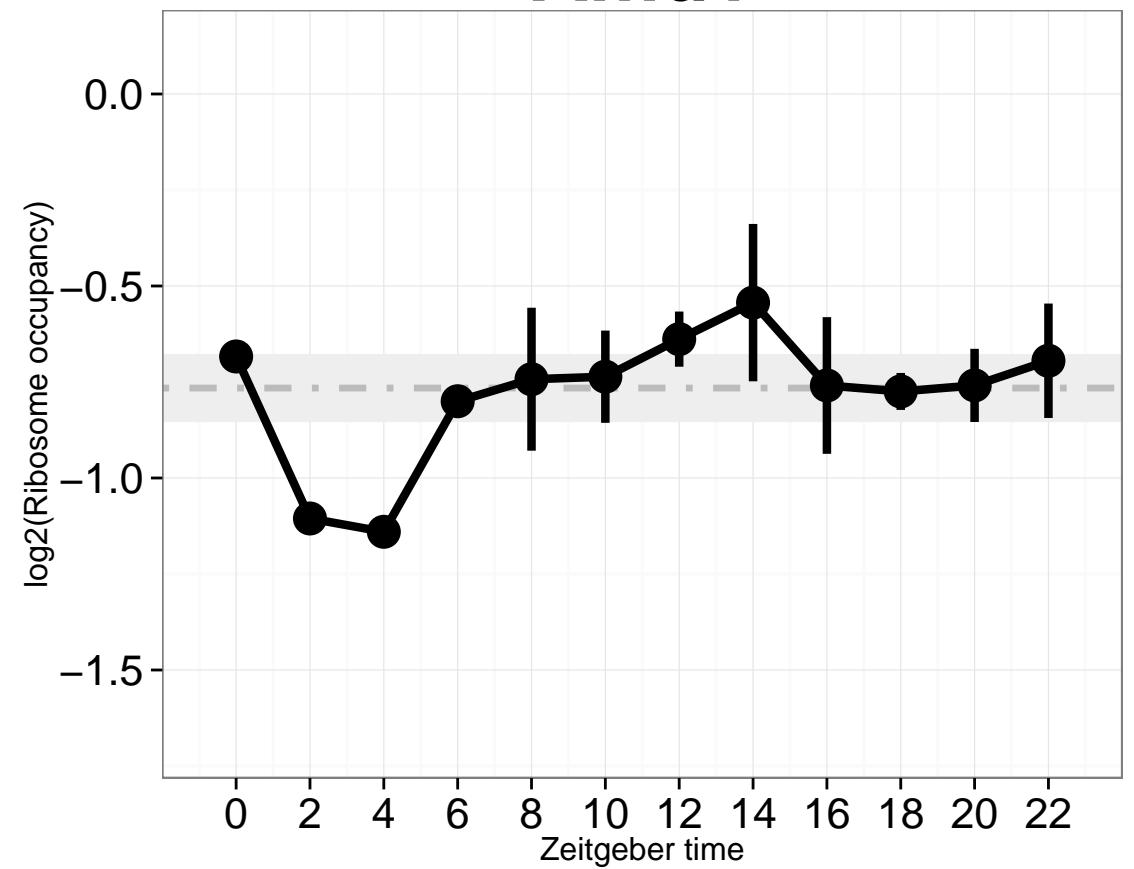

Supplement: Supplementary file 11441 [file 1]

# Ptp4a2

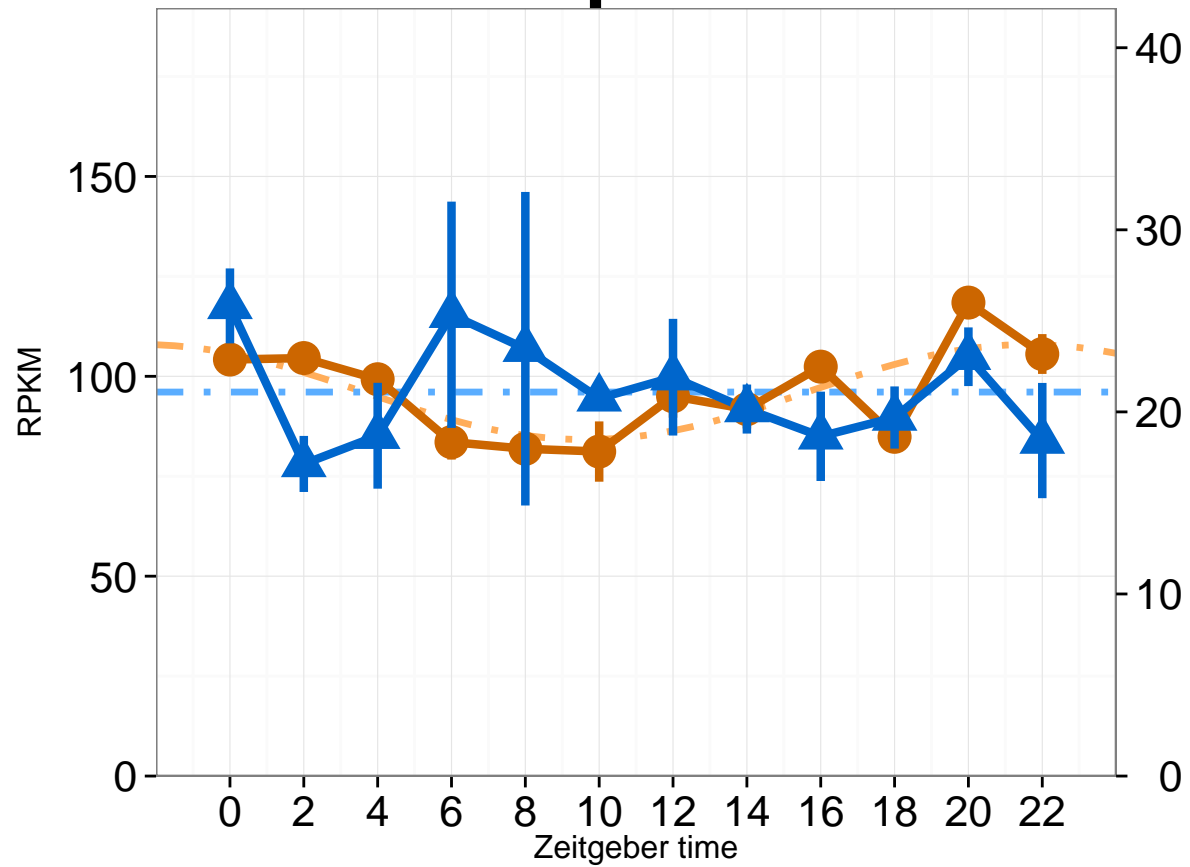

# Ptp4a2

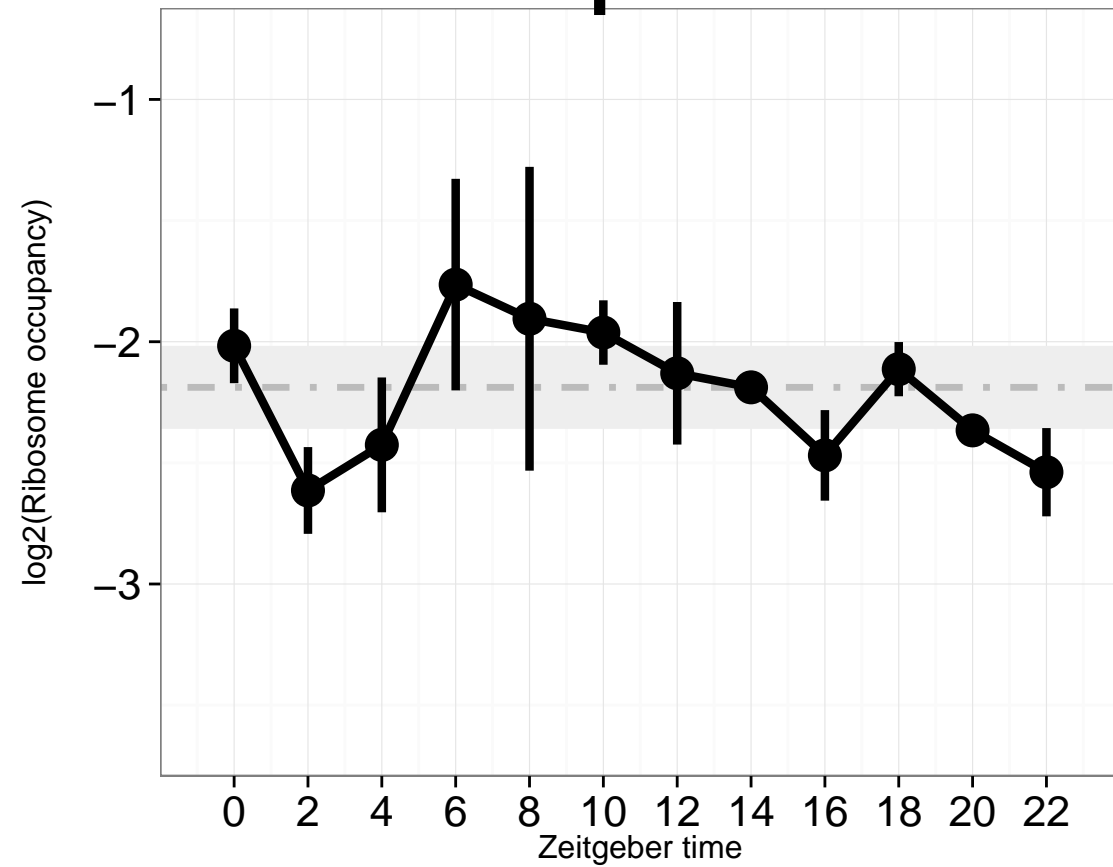

Supplement: Supplementary file 11442 [file 1]
