# Supplementary material (part 115 of 133)
Source: publisher figshare collection journal article supplement (https://springernature.figshare.com/articles/dataset/_/4903193)

# Itga2

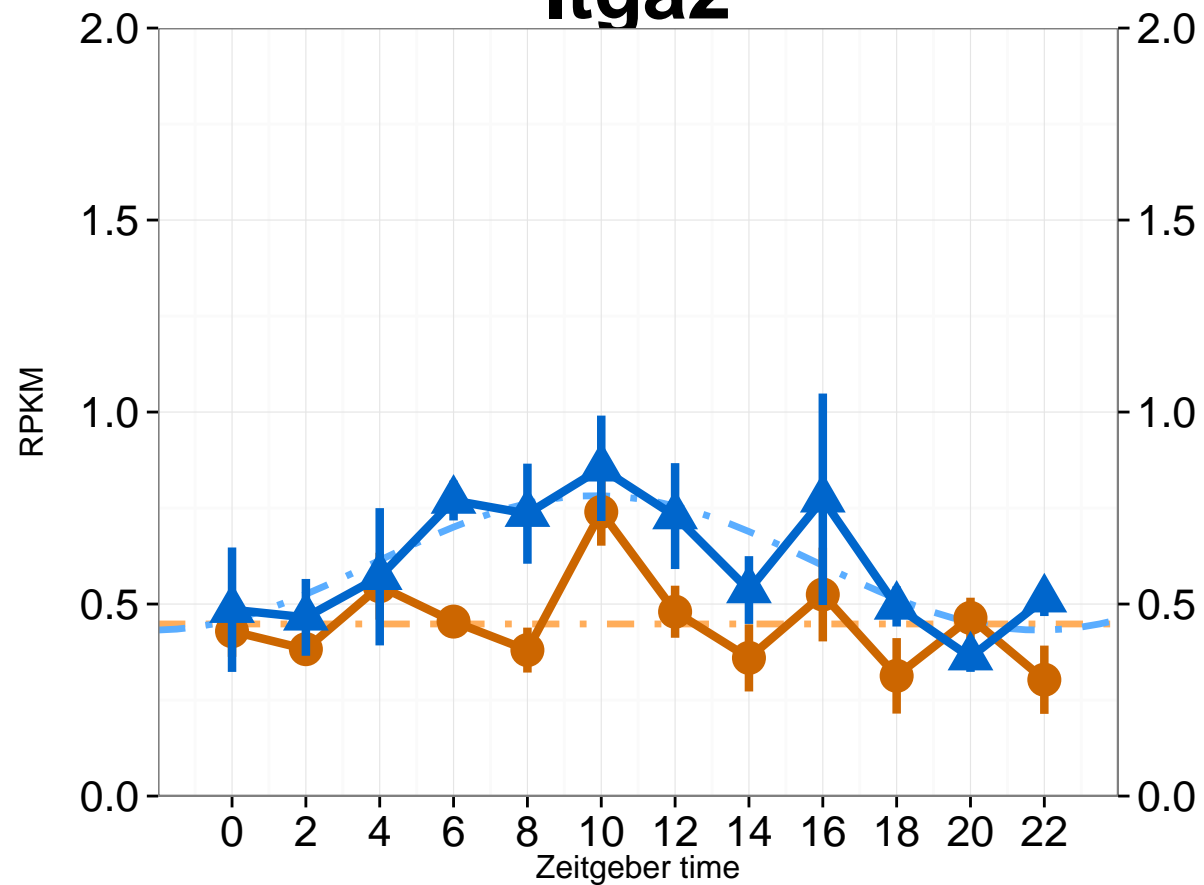

# Itga2

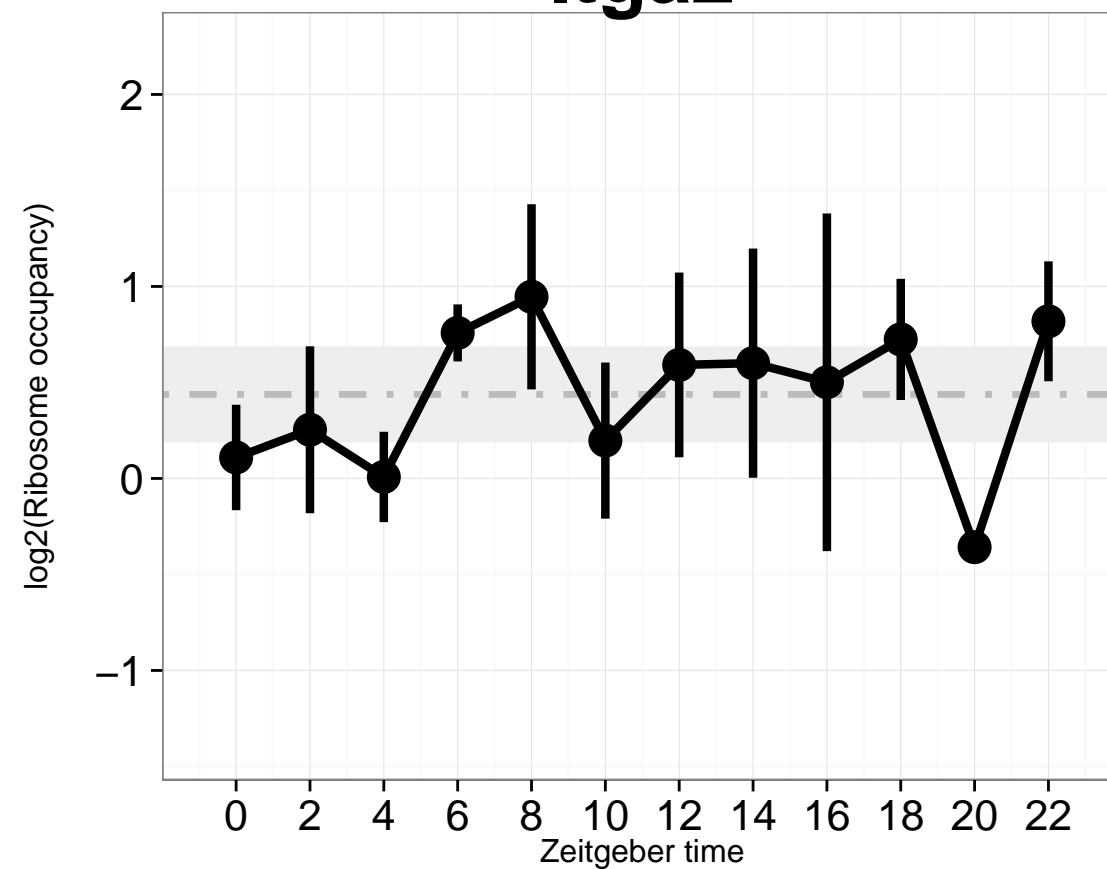

Supplement: Supplementary file 11443 [file 1]

## Tlr11

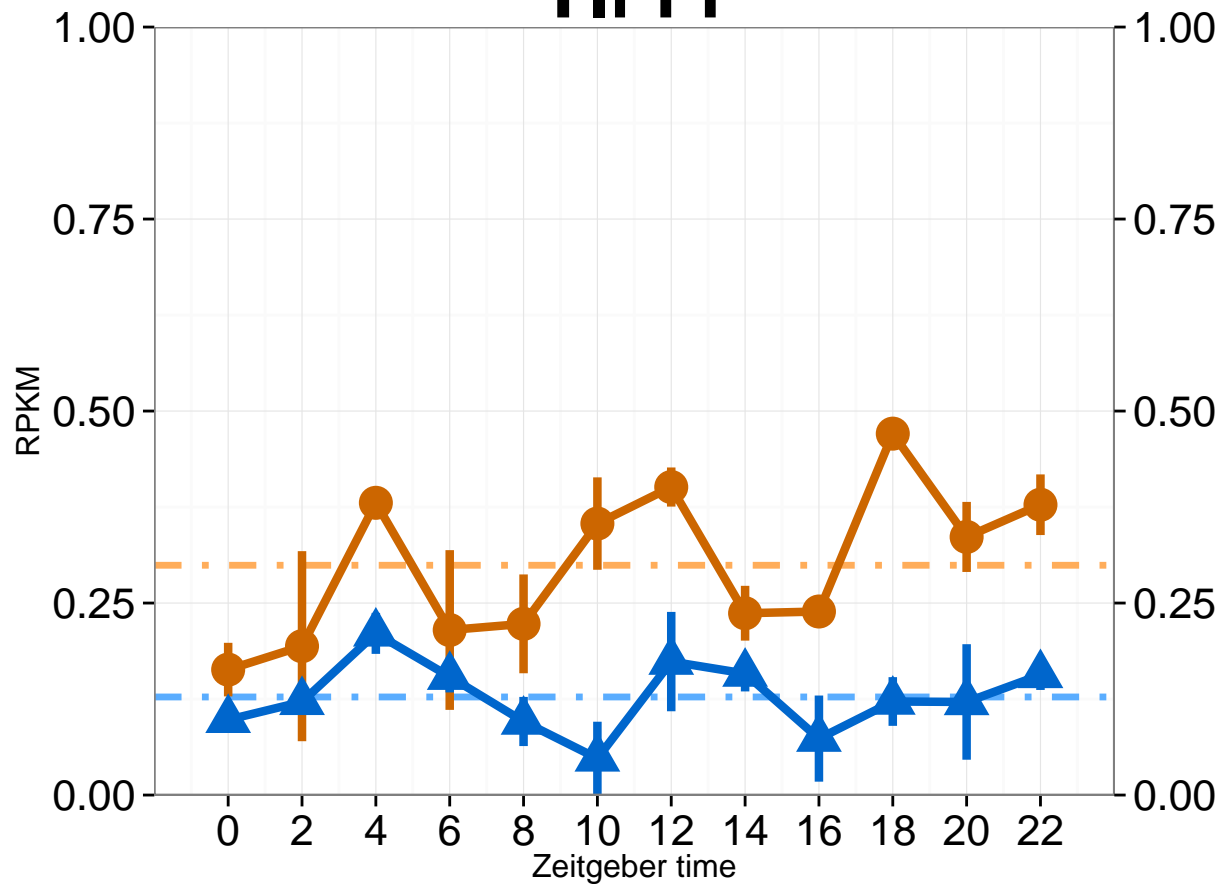

## Tlr11

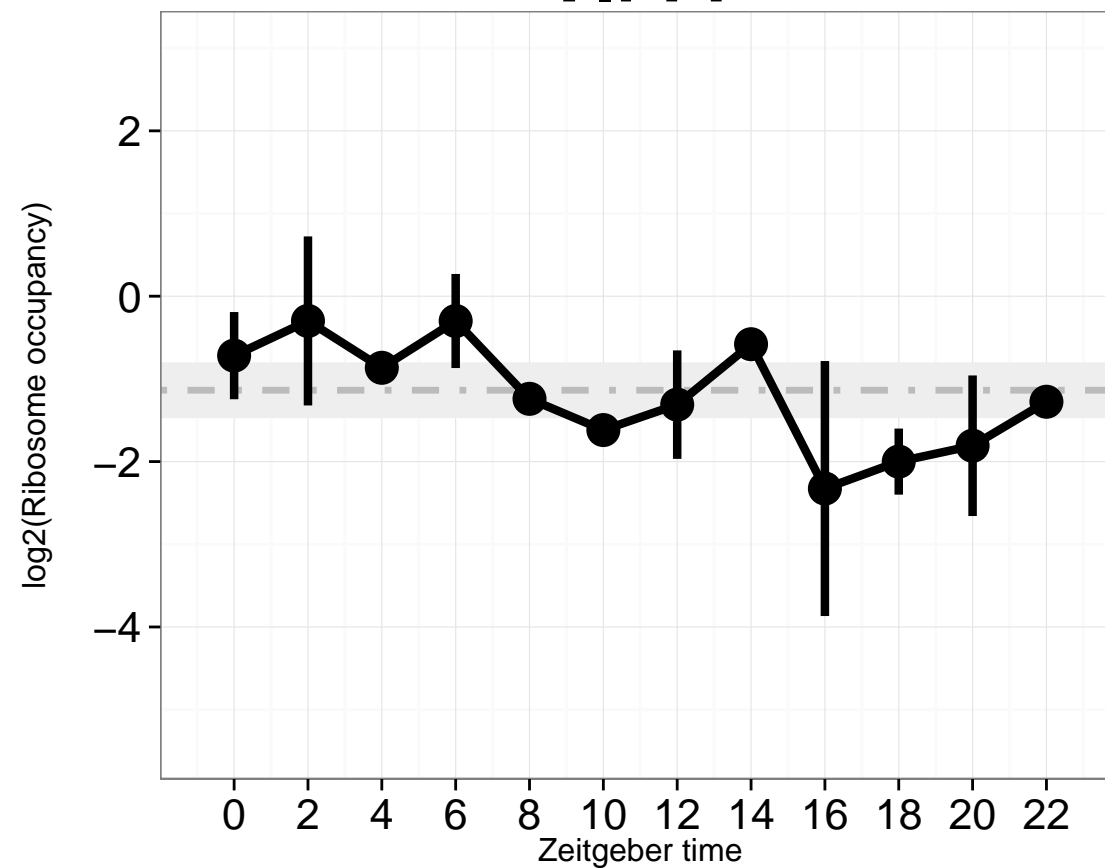

Supplement: Supplementary file 11444 [file 1]

# Phka1

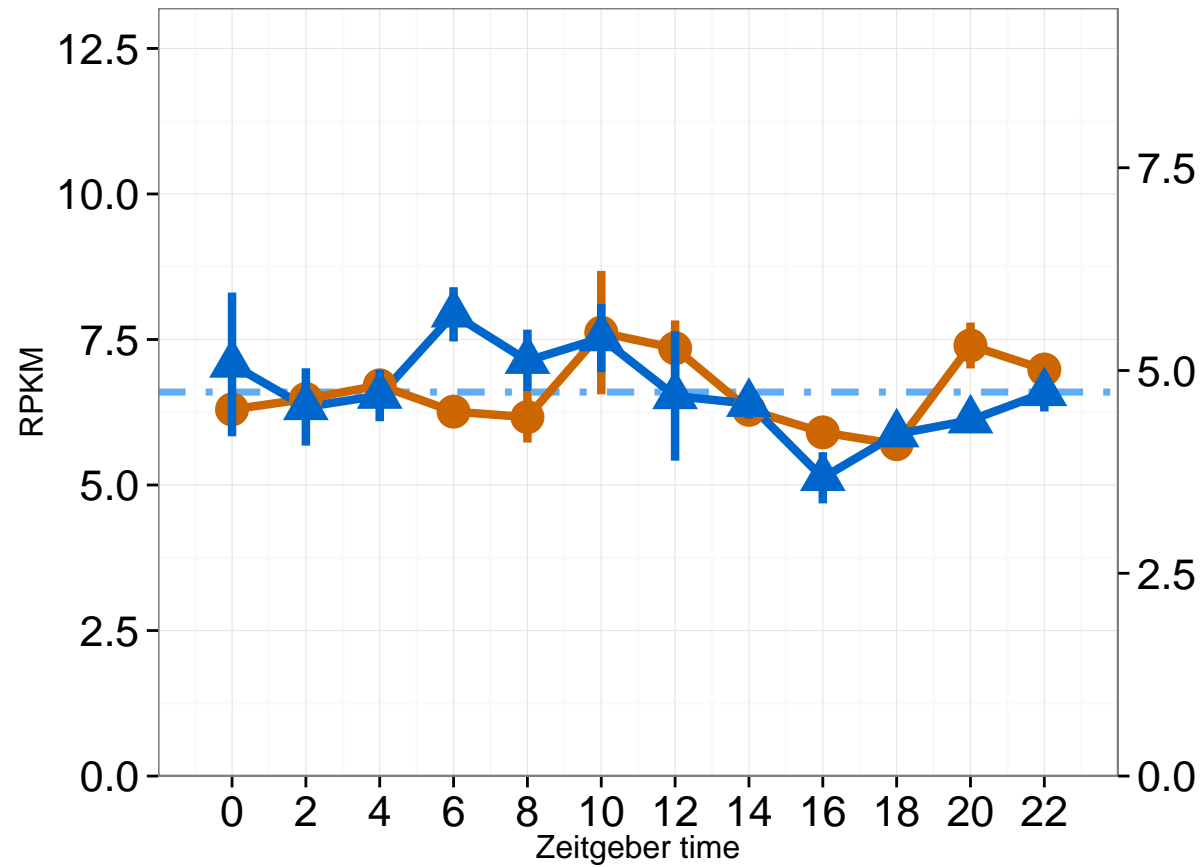

# Phka1

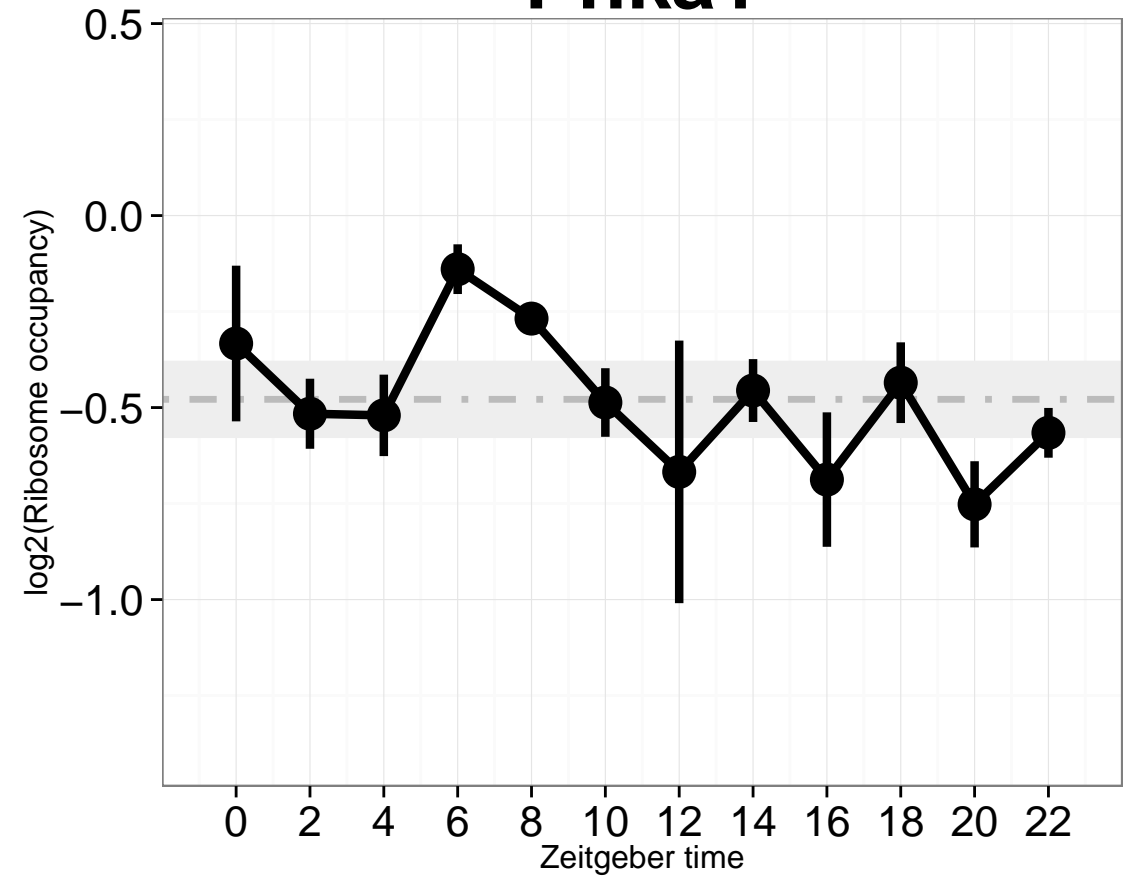

Supplement: Supplementary file 11445 [file 1]

# Ptgs1

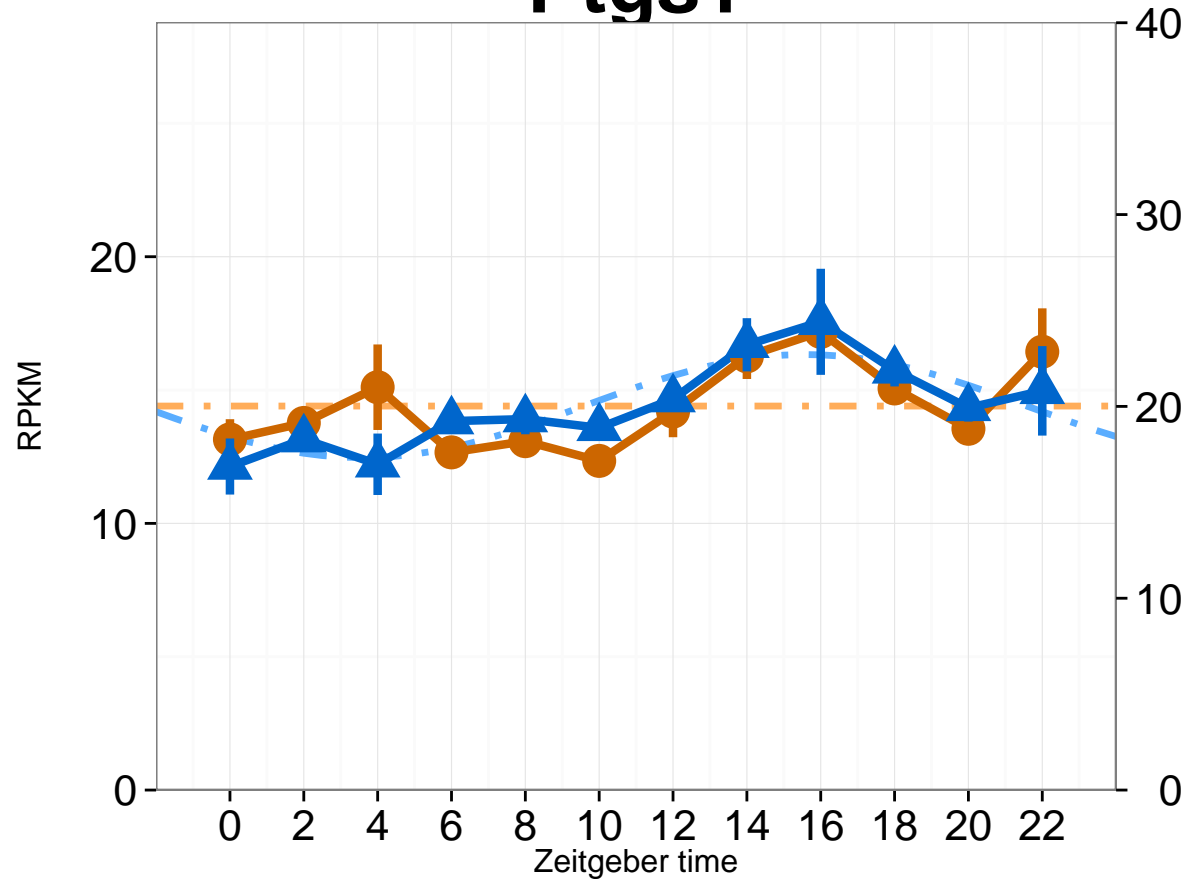

# Ptgs1

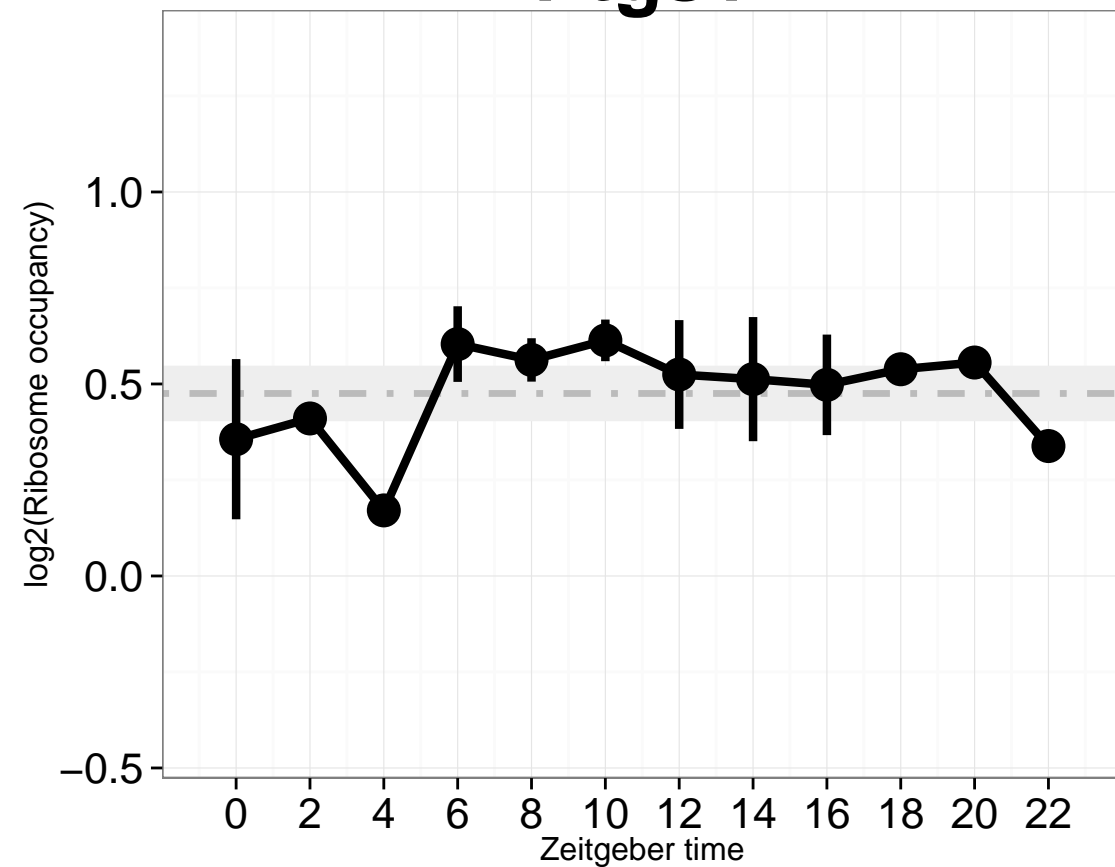

Supplement: Supplementary file 11446 [file 1]

## Ddah1

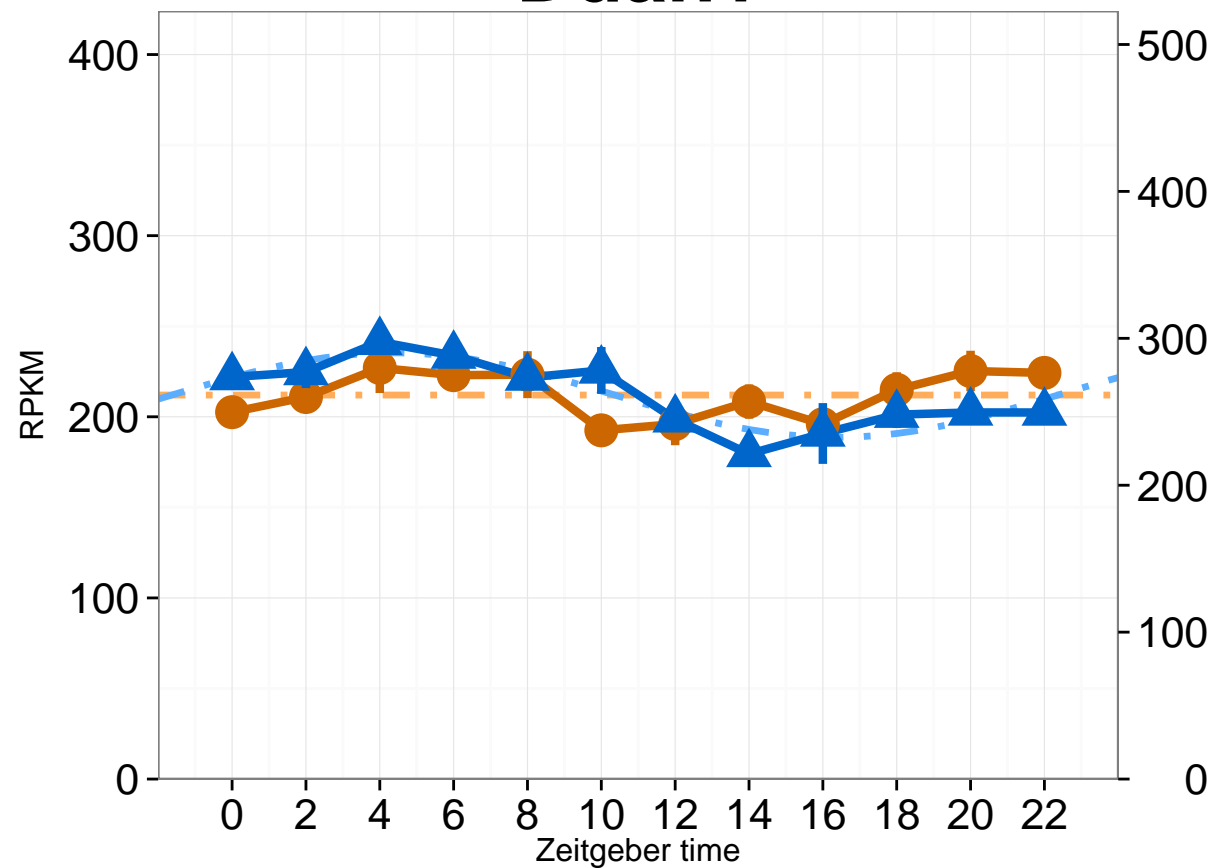

## Ddah1

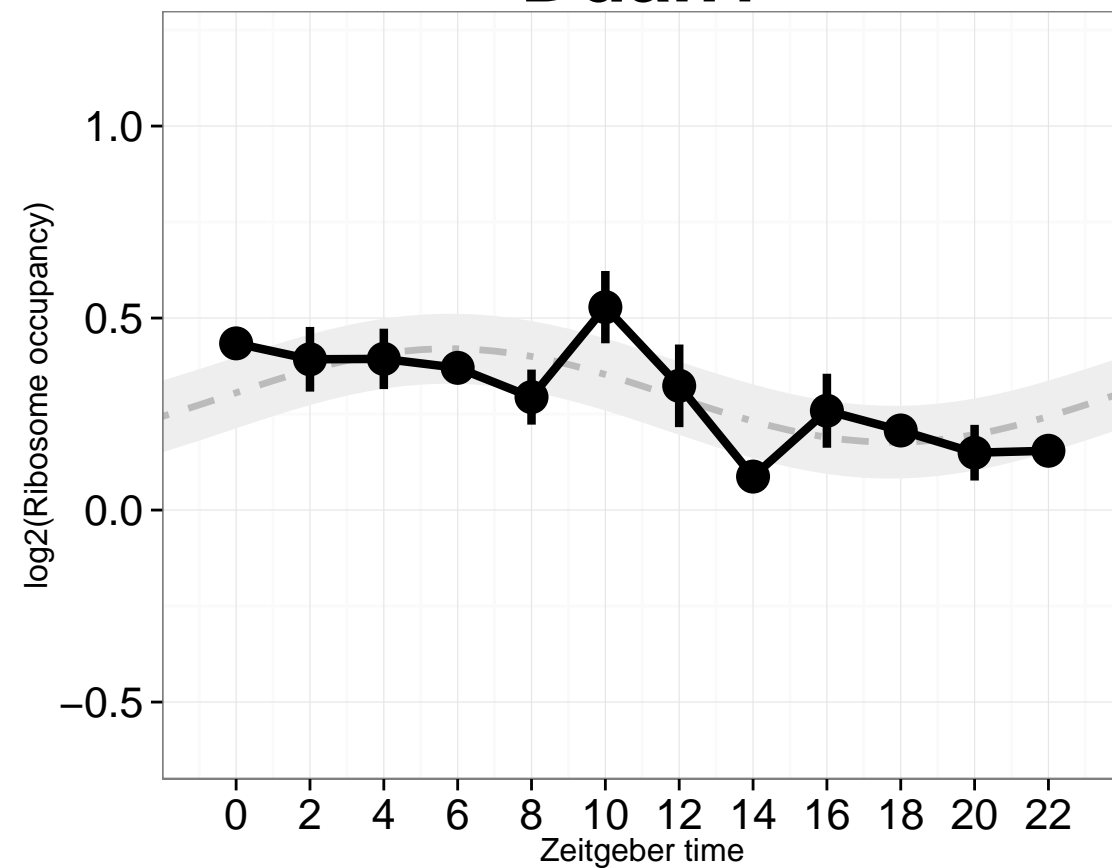

Supplement: Supplementary file 11447 [file 1]

# Tmem9b

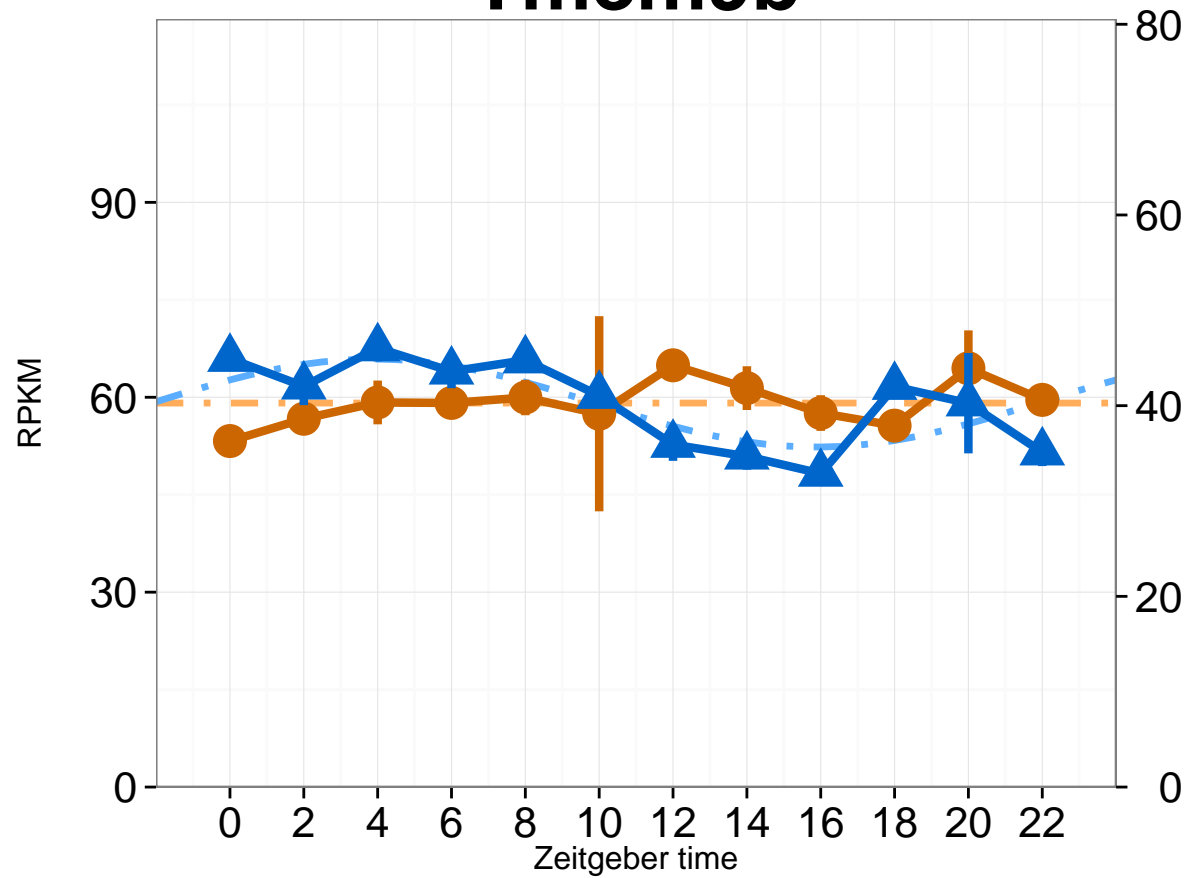

# Tmem9b

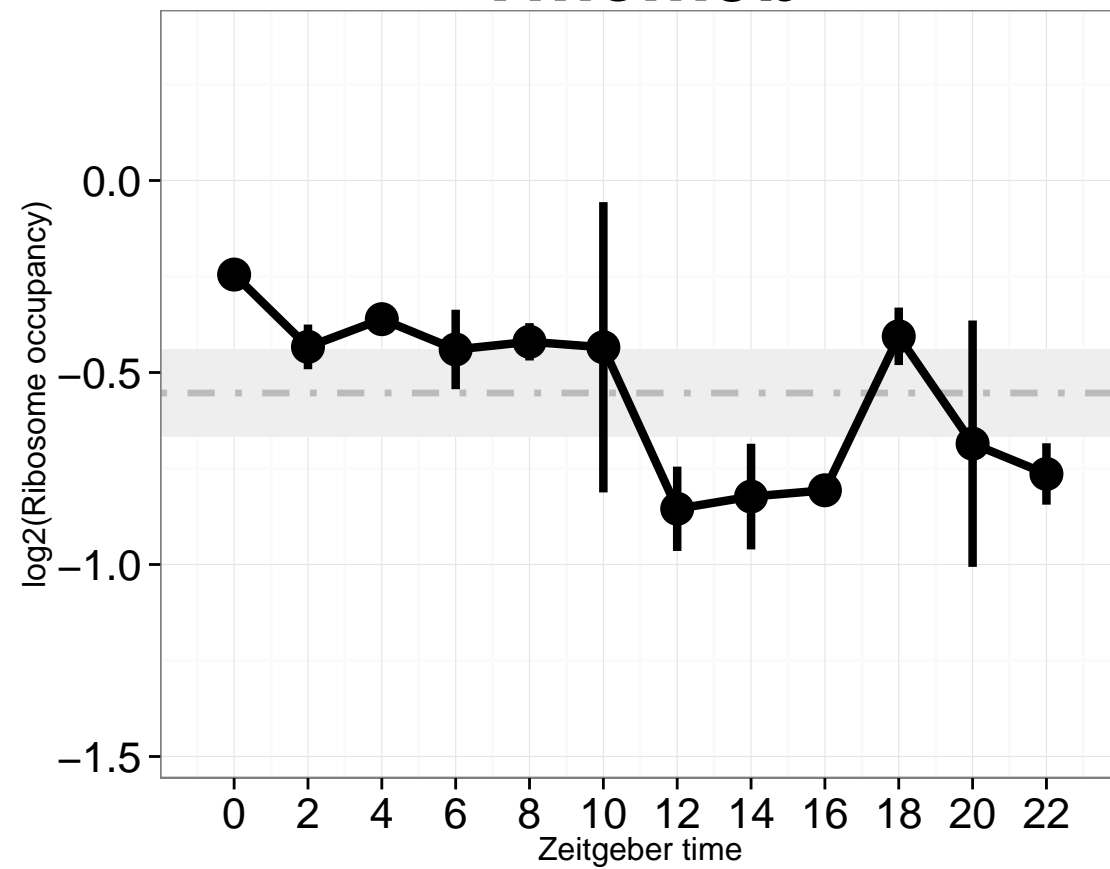

Supplement: Supplementary file 11448 [file 1]

## Nrap

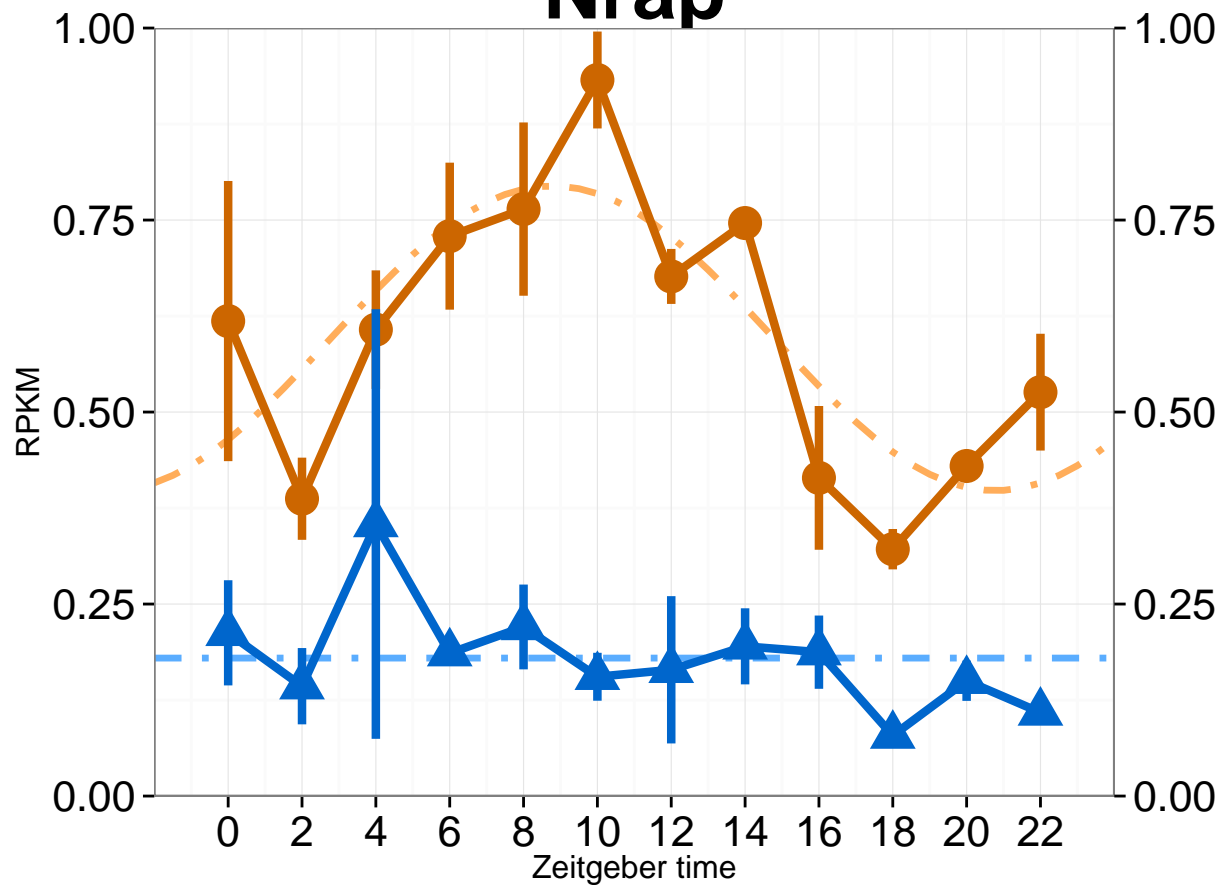

## Nrap

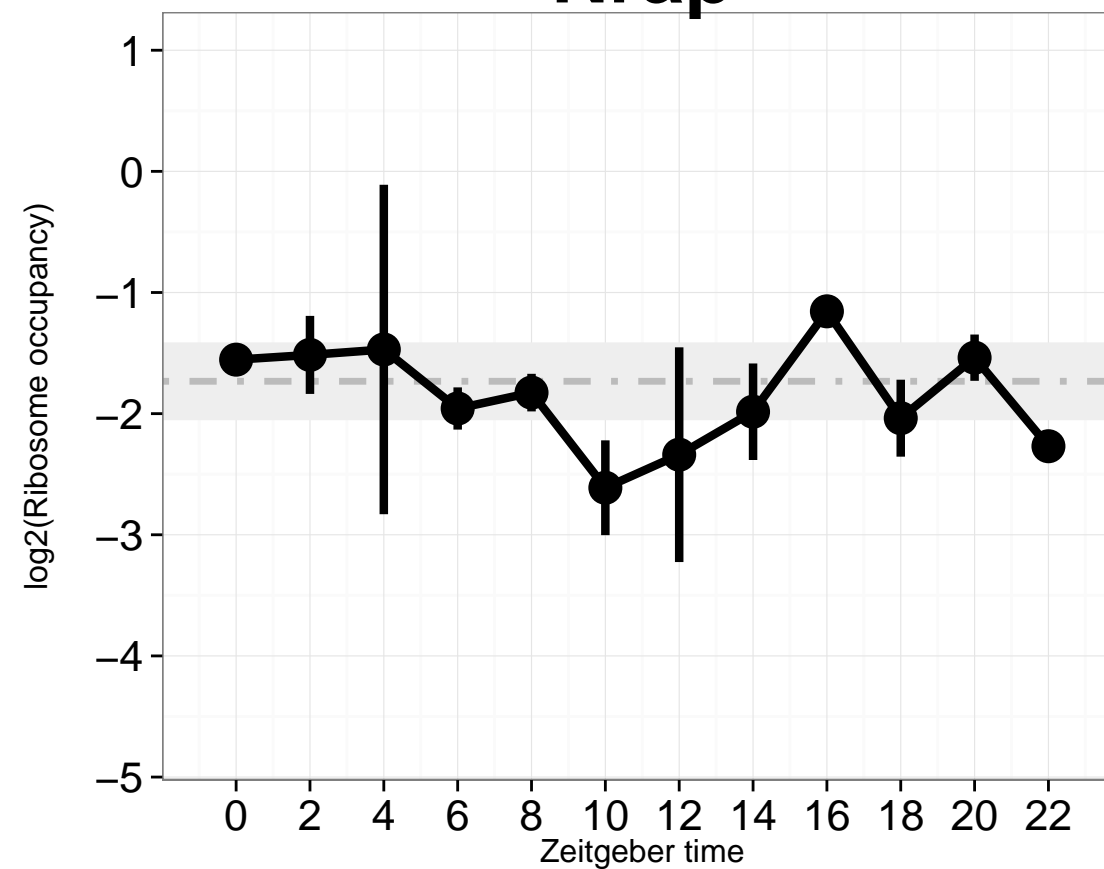

Supplement: Supplementary file 11449 [file 1]

## Cbx3

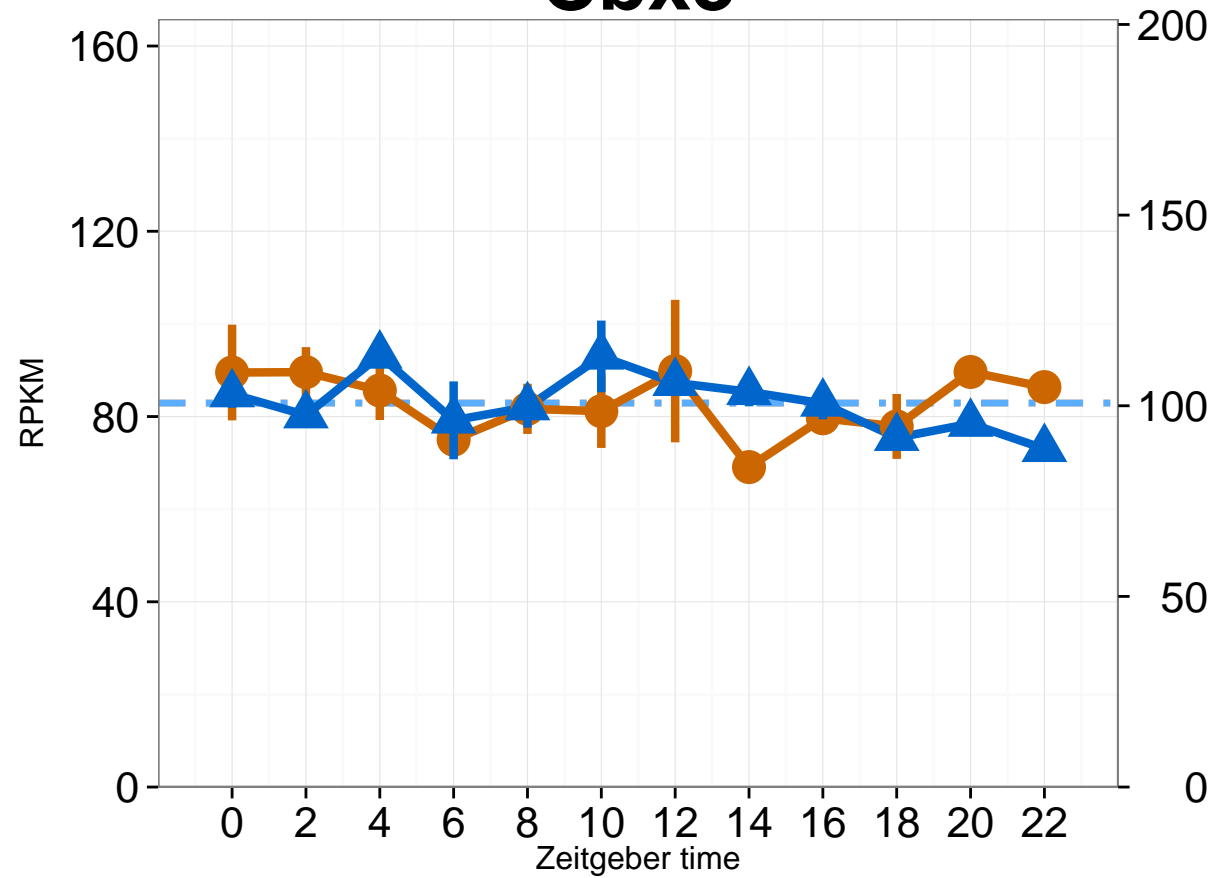

## Cbx3

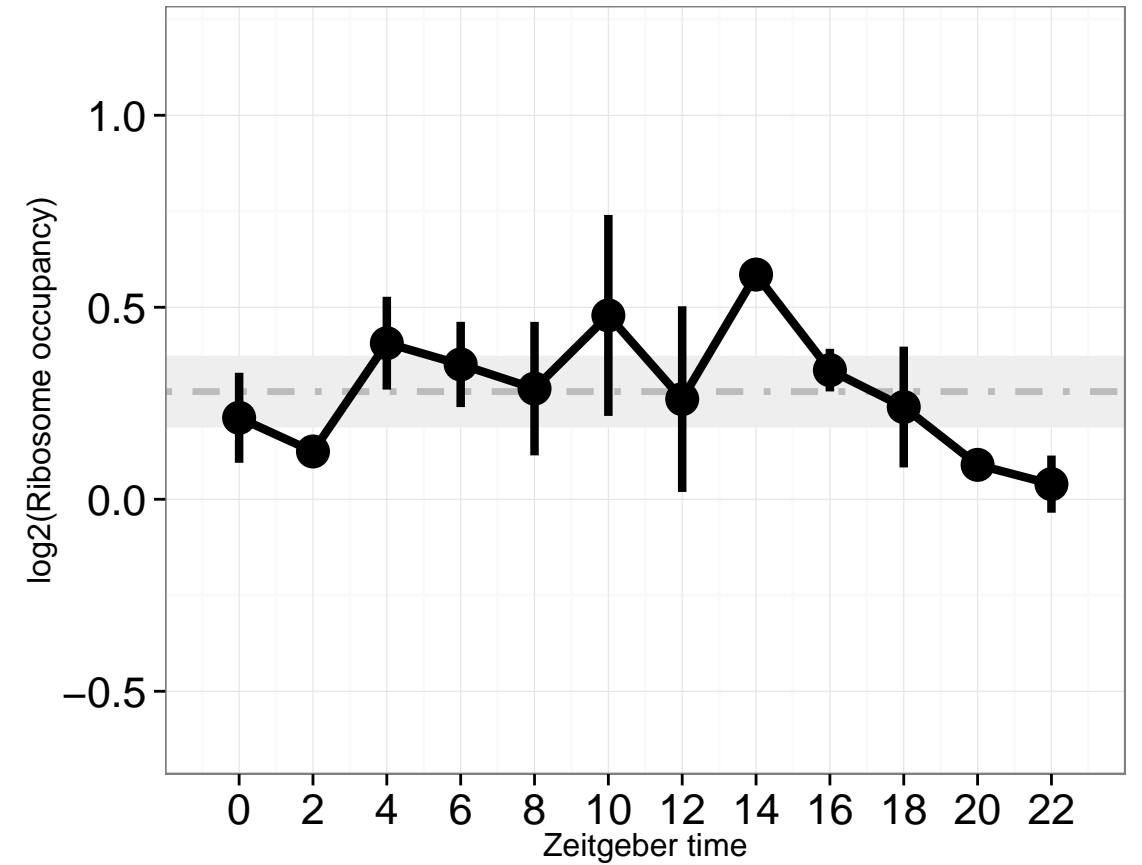

Supplement: Supplementary file 11450 [file 1]

# Ass1

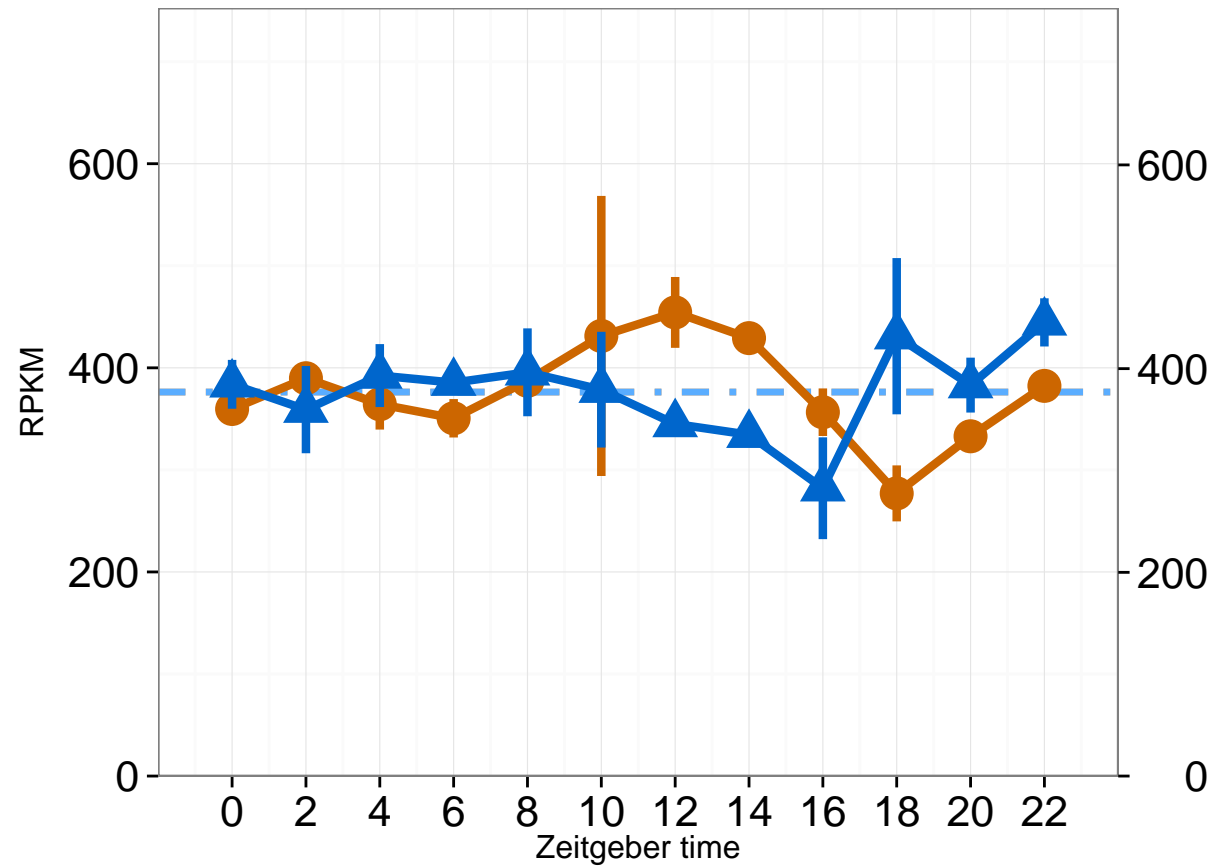

# Ass1

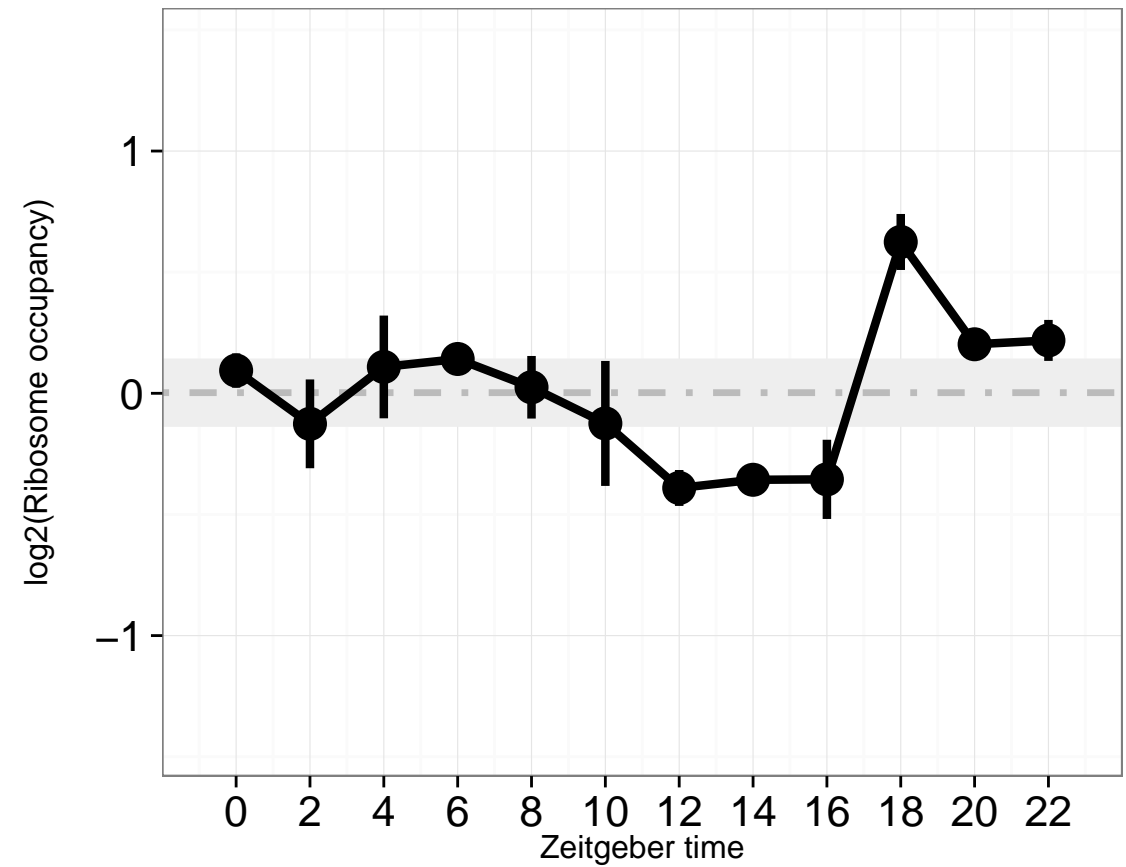

Supplement: Supplementary file 11451 [file 1]

## Gpr124

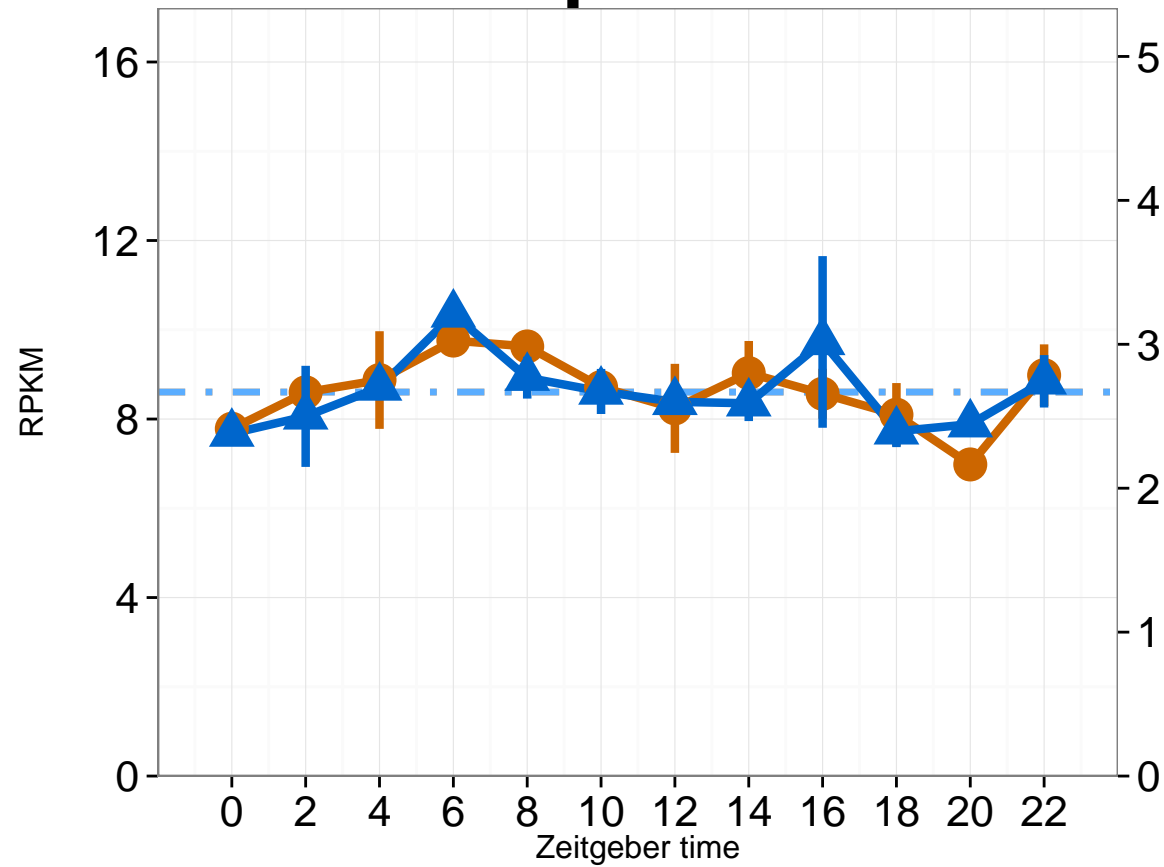

## Gpr124

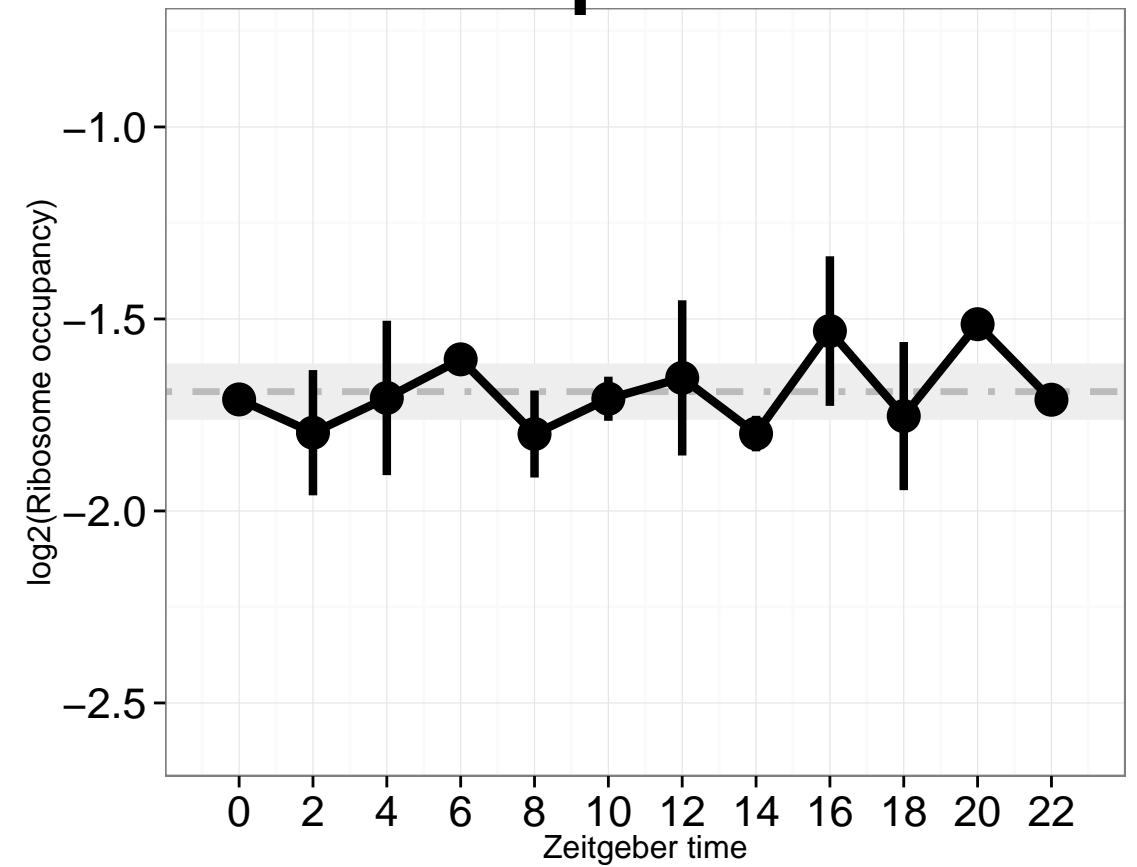

Supplement: Supplementary file 11452 [file 1]

# Csrnp1

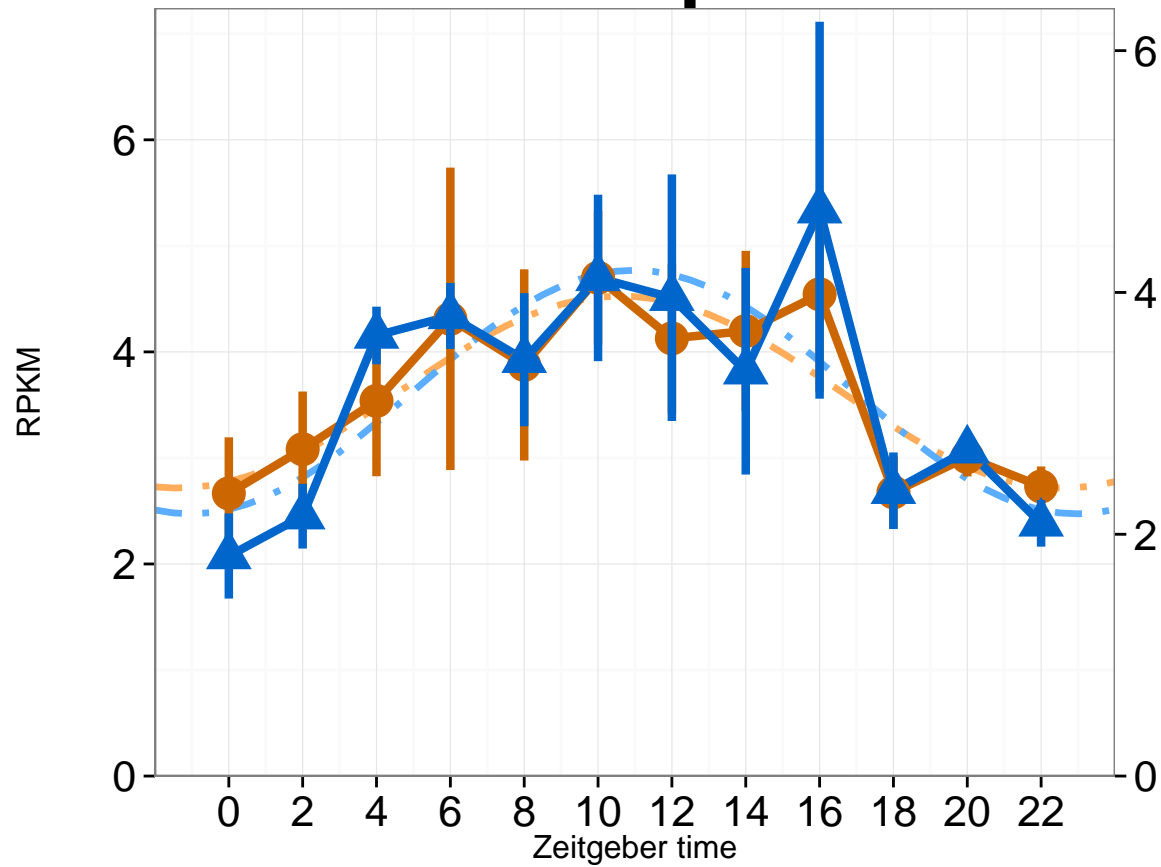

# Csrnp1

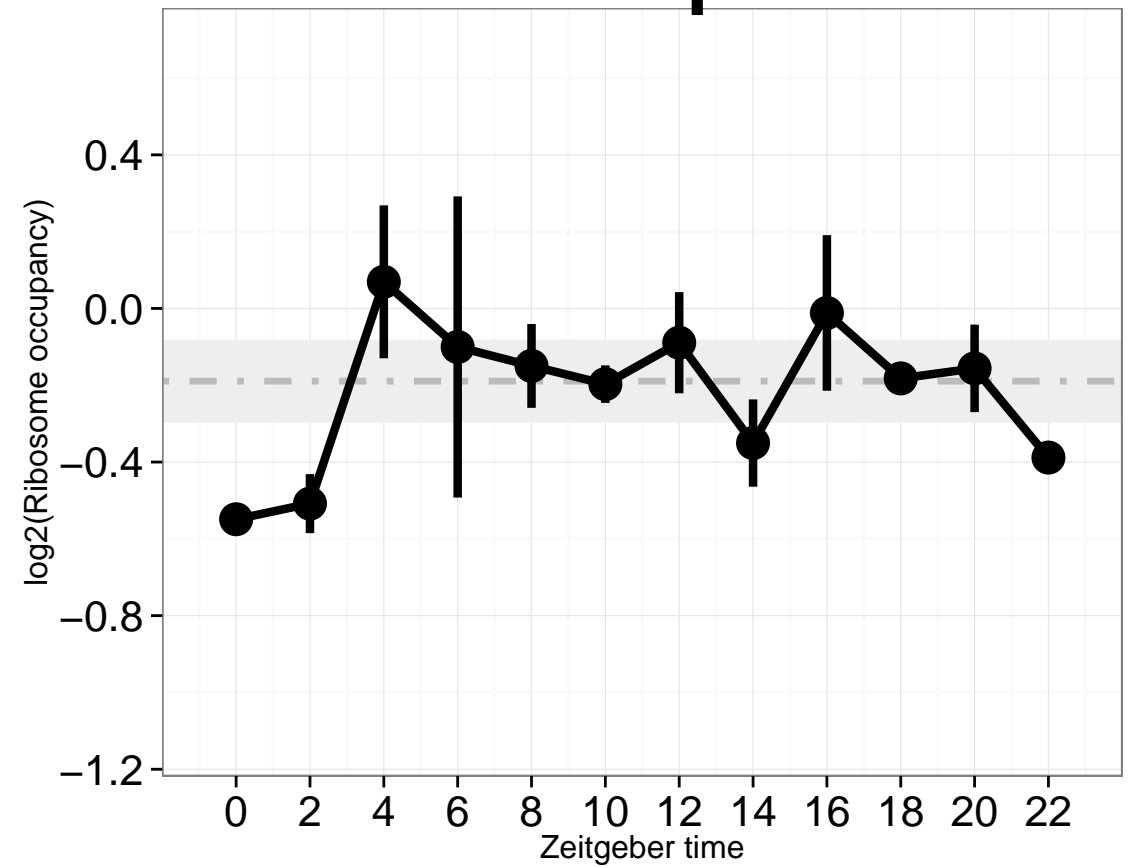

Supplement: Supplementary file 11453 [file 1]

## ErbB2

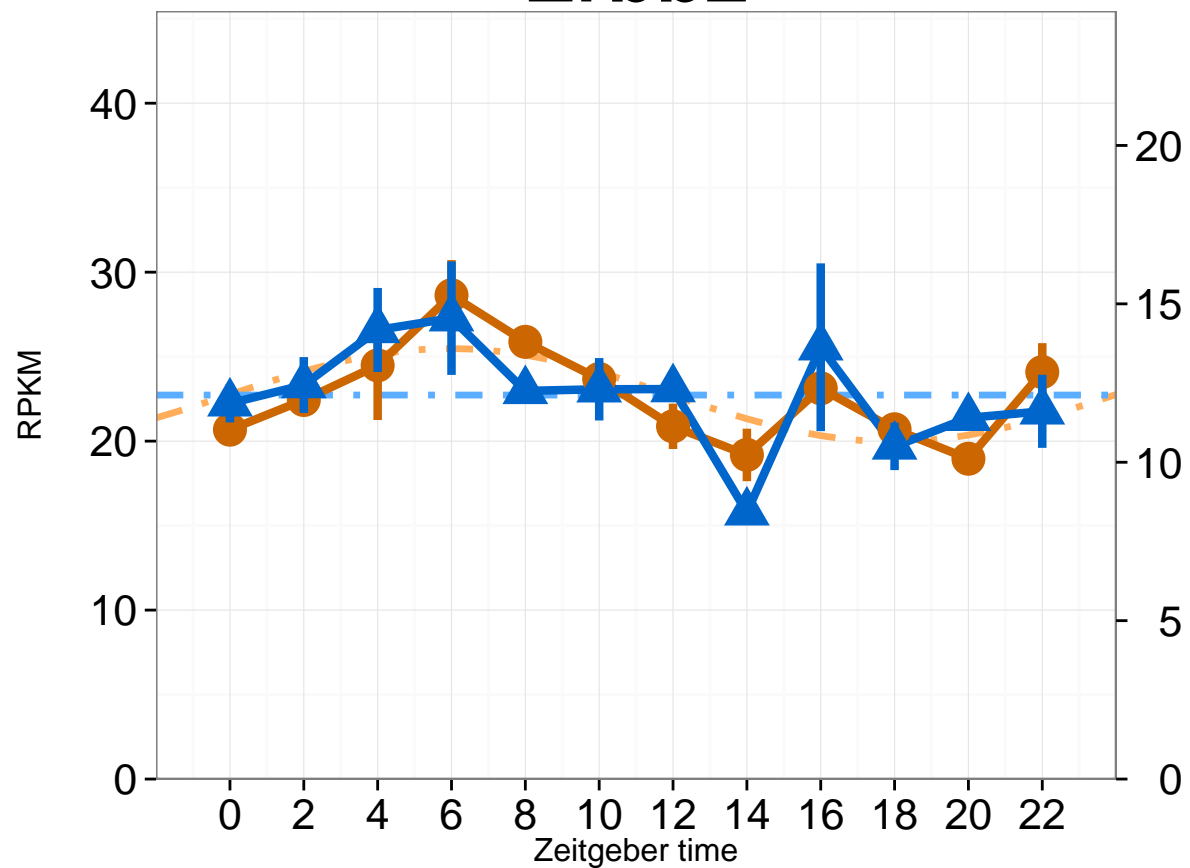

## ErbB2

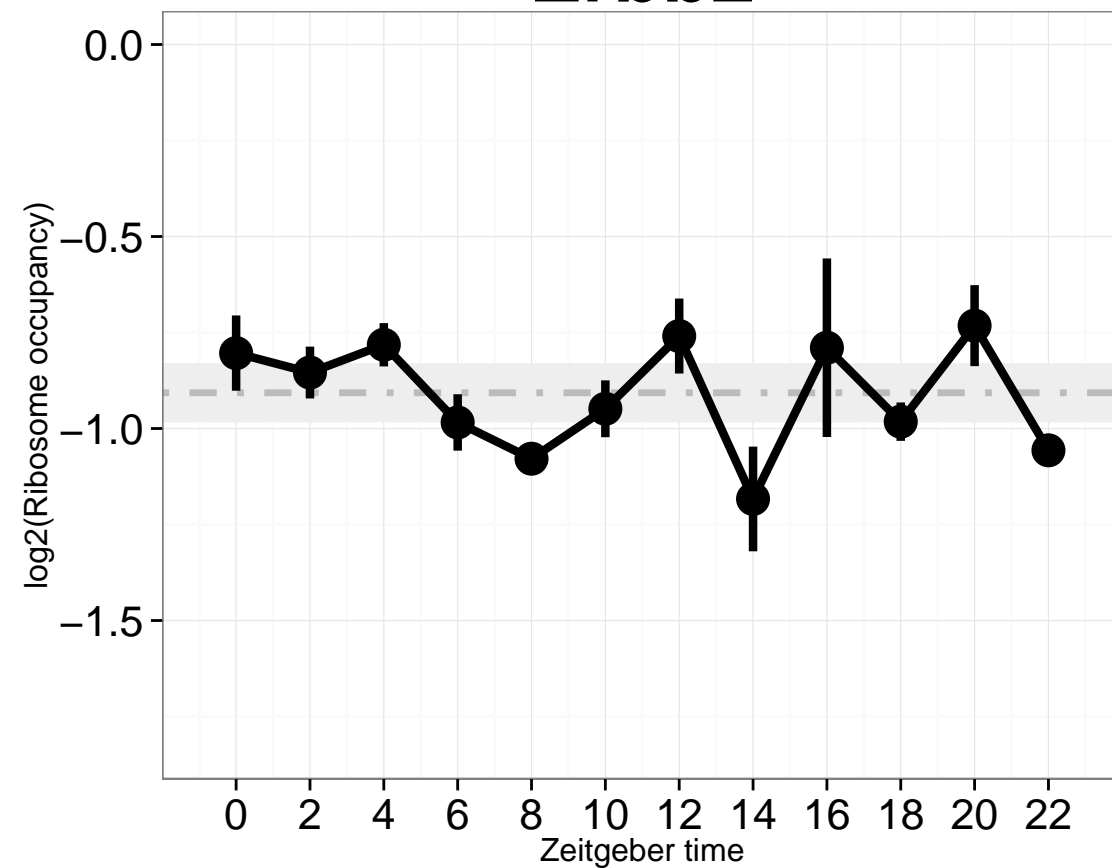

Supplement: Supplementary file 11454 [file 1]

## 2610015P09Rik

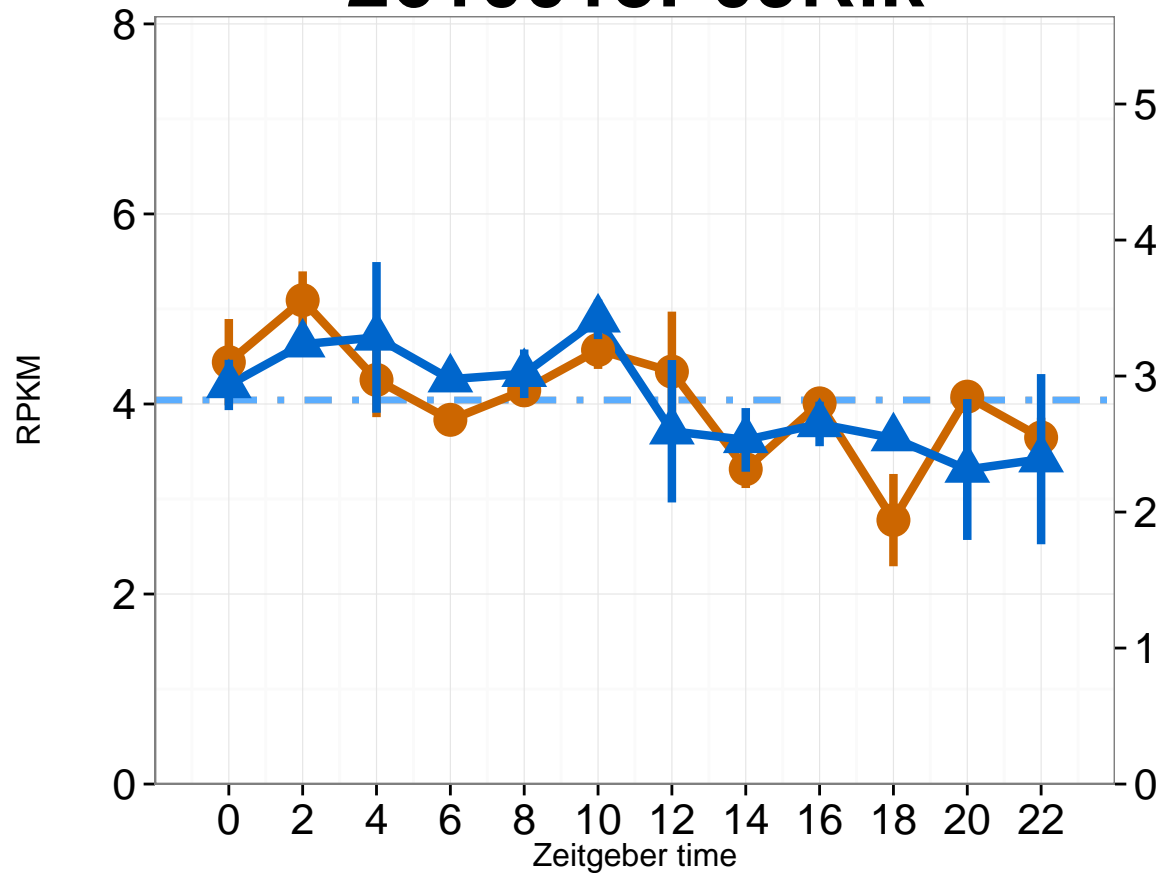

## 2610015P09Rik

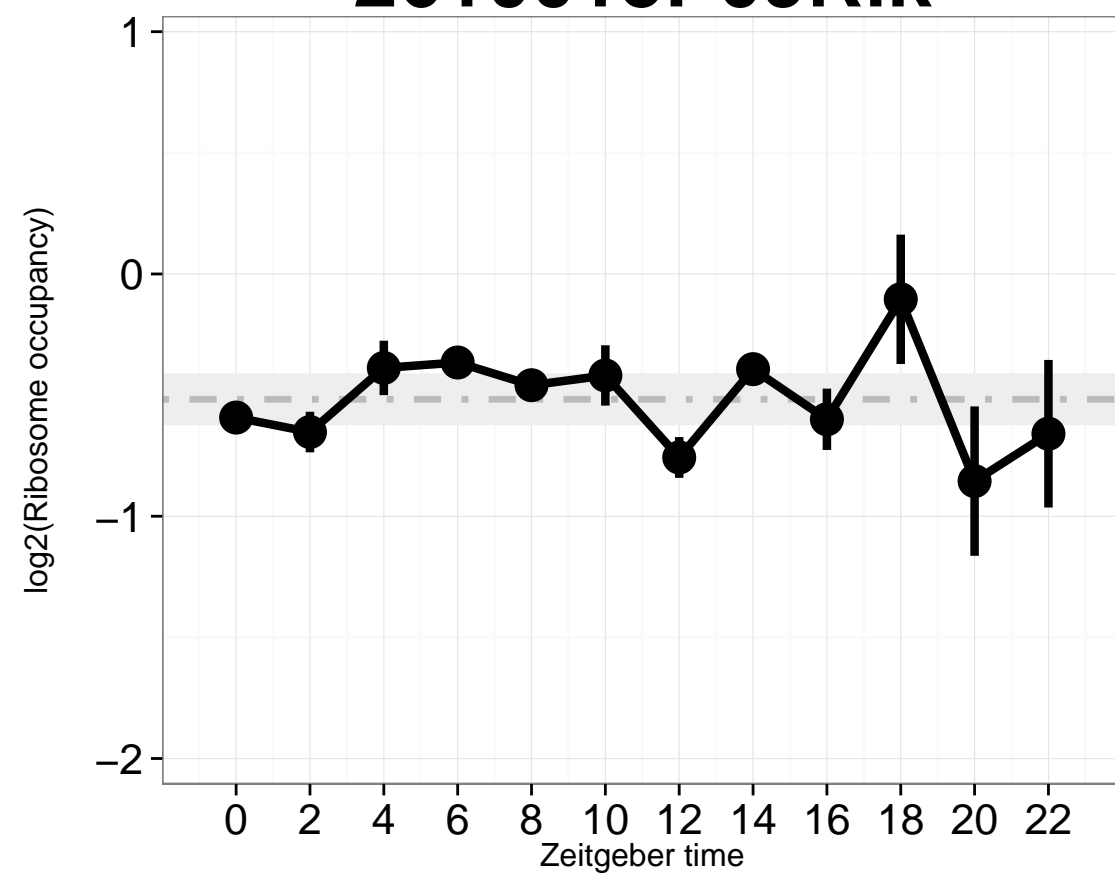

Supplement: Supplementary file 11455 [file 1]

# Tor1a

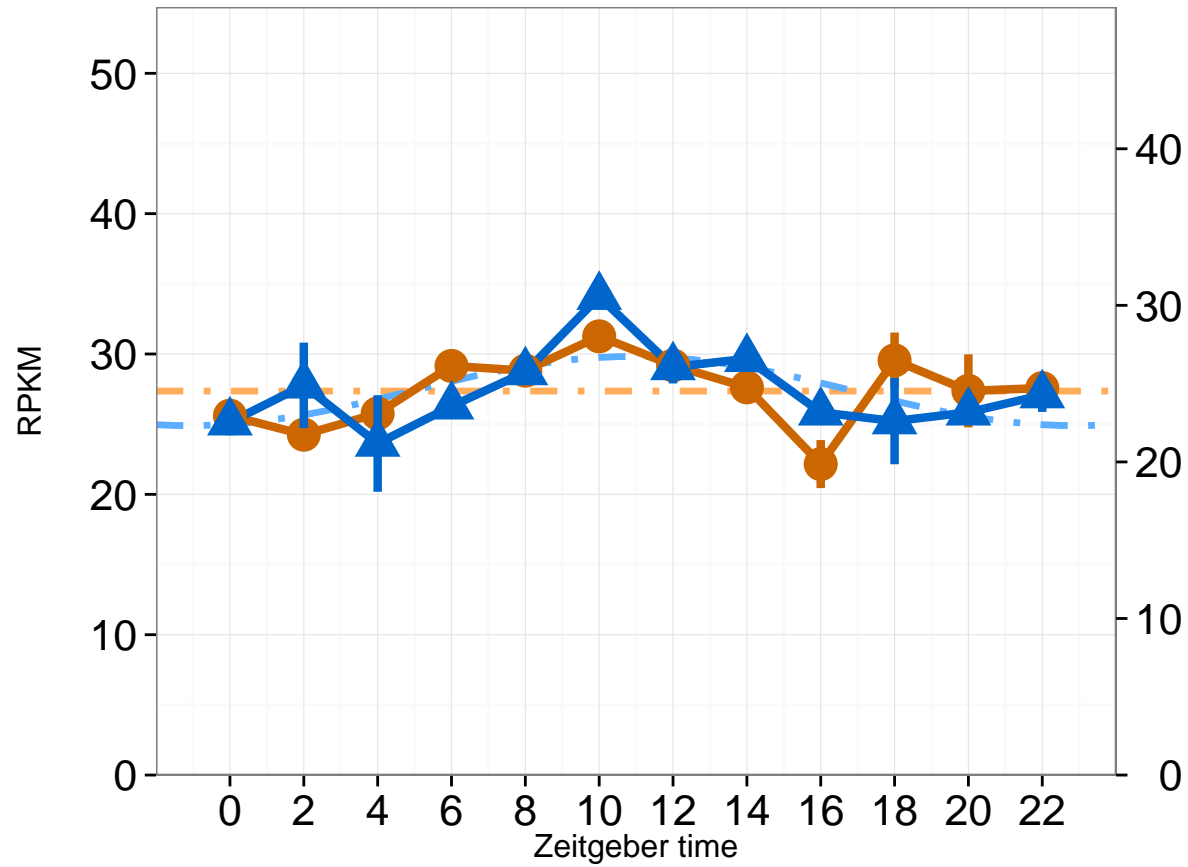

# Tor1a

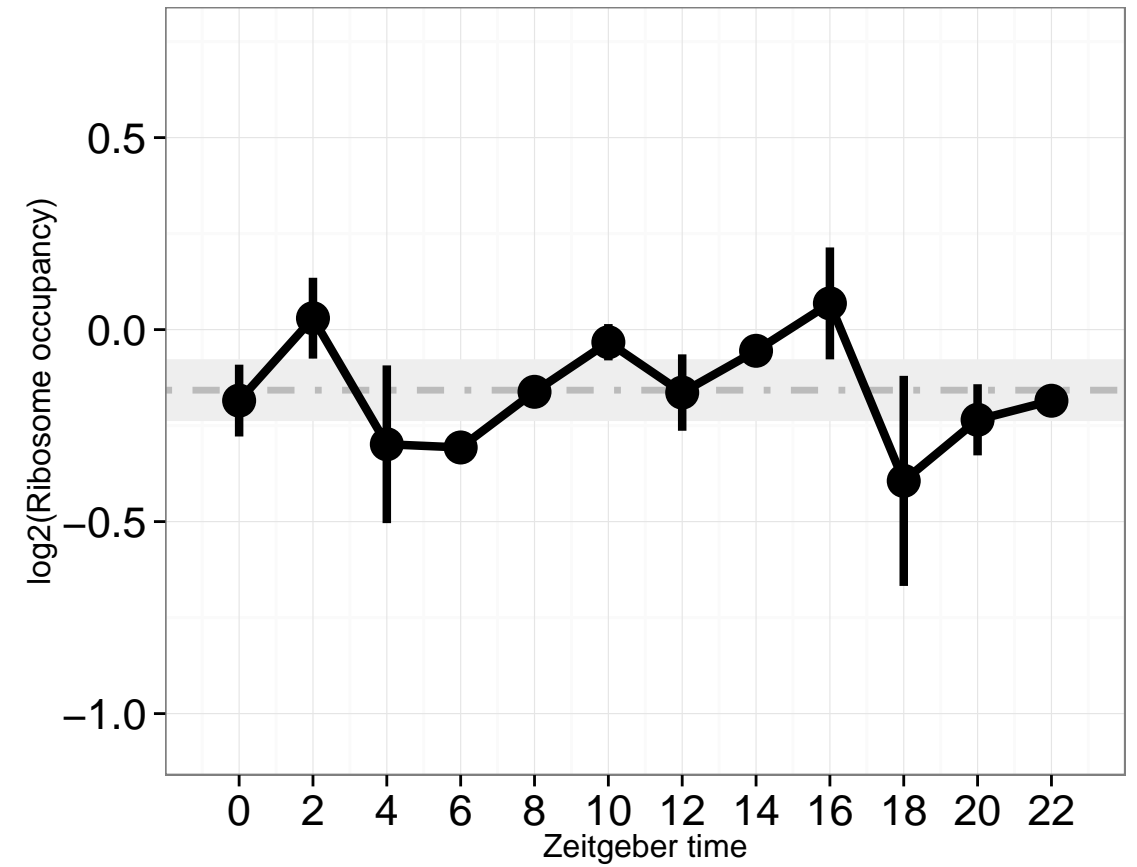

Supplement: Supplementary file 11456 [file 1]

## Cds2

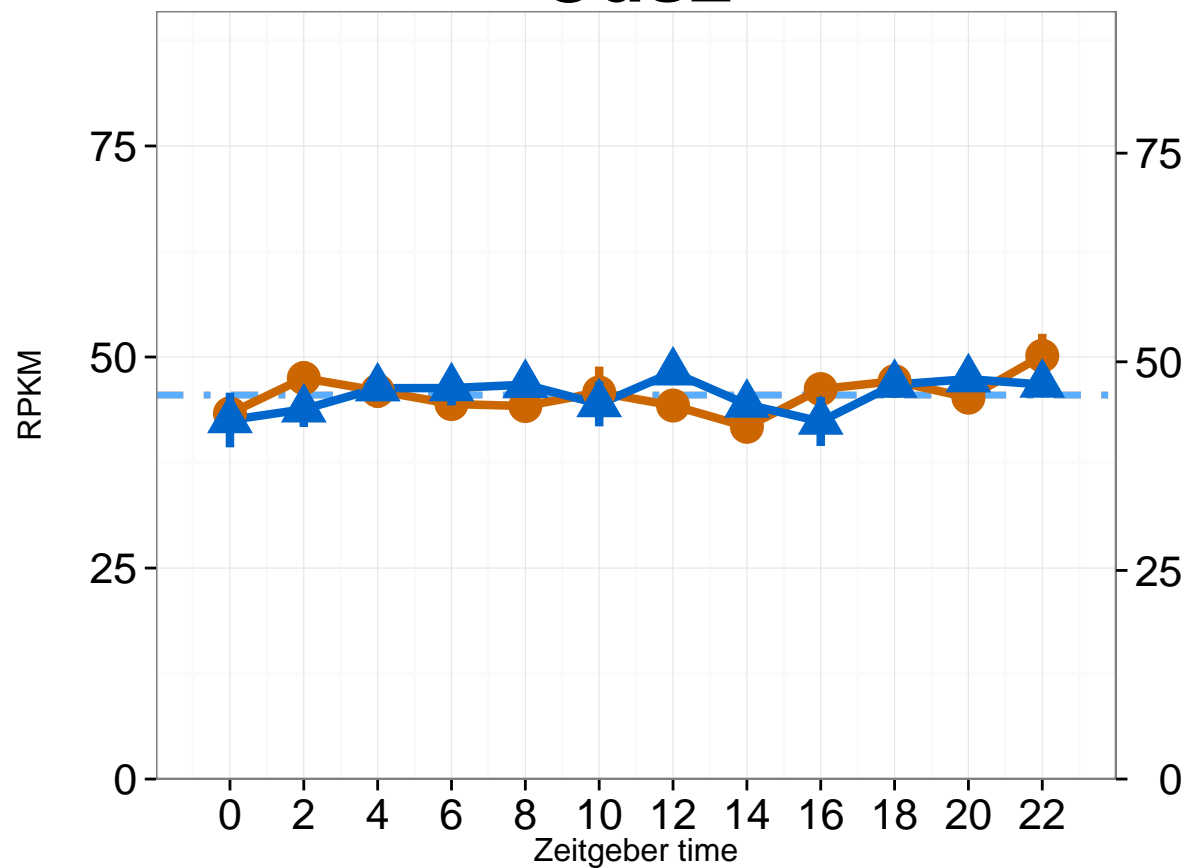

## Cds2

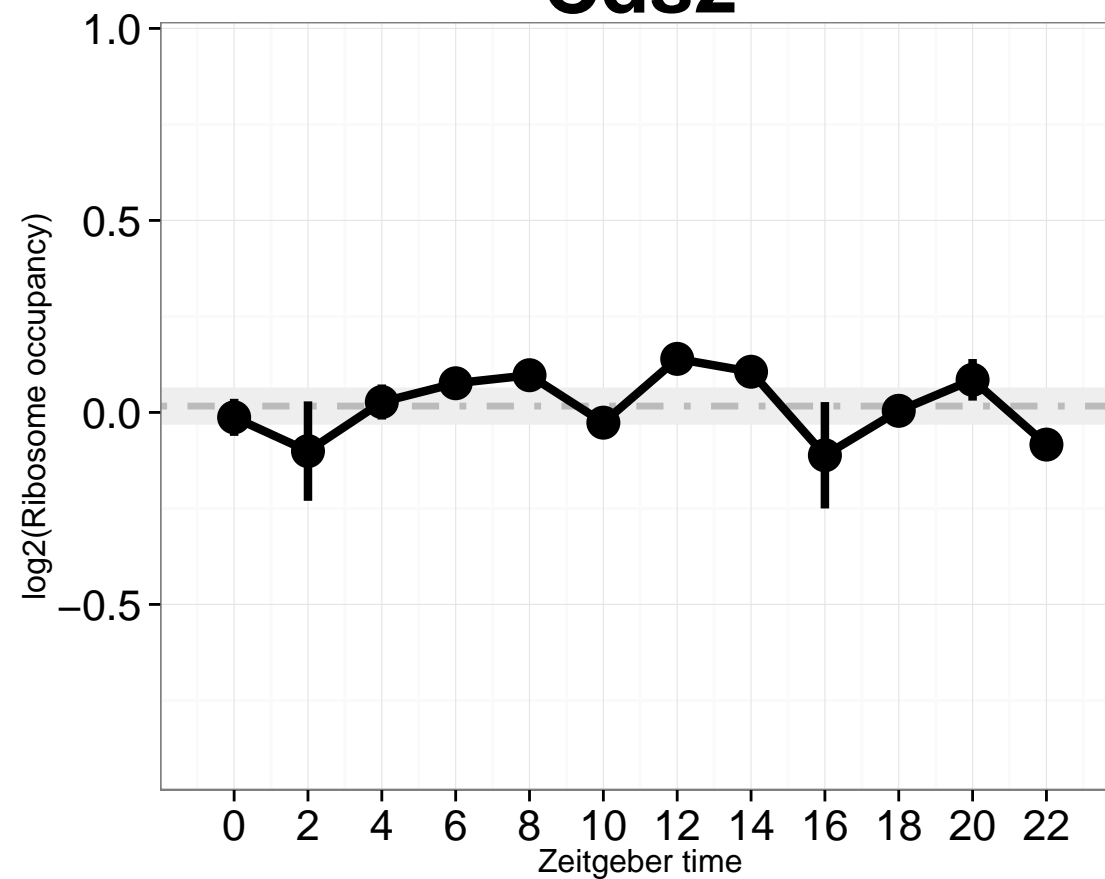

Supplement: Supplementary file 11457 [file 1]

## Fbxo9

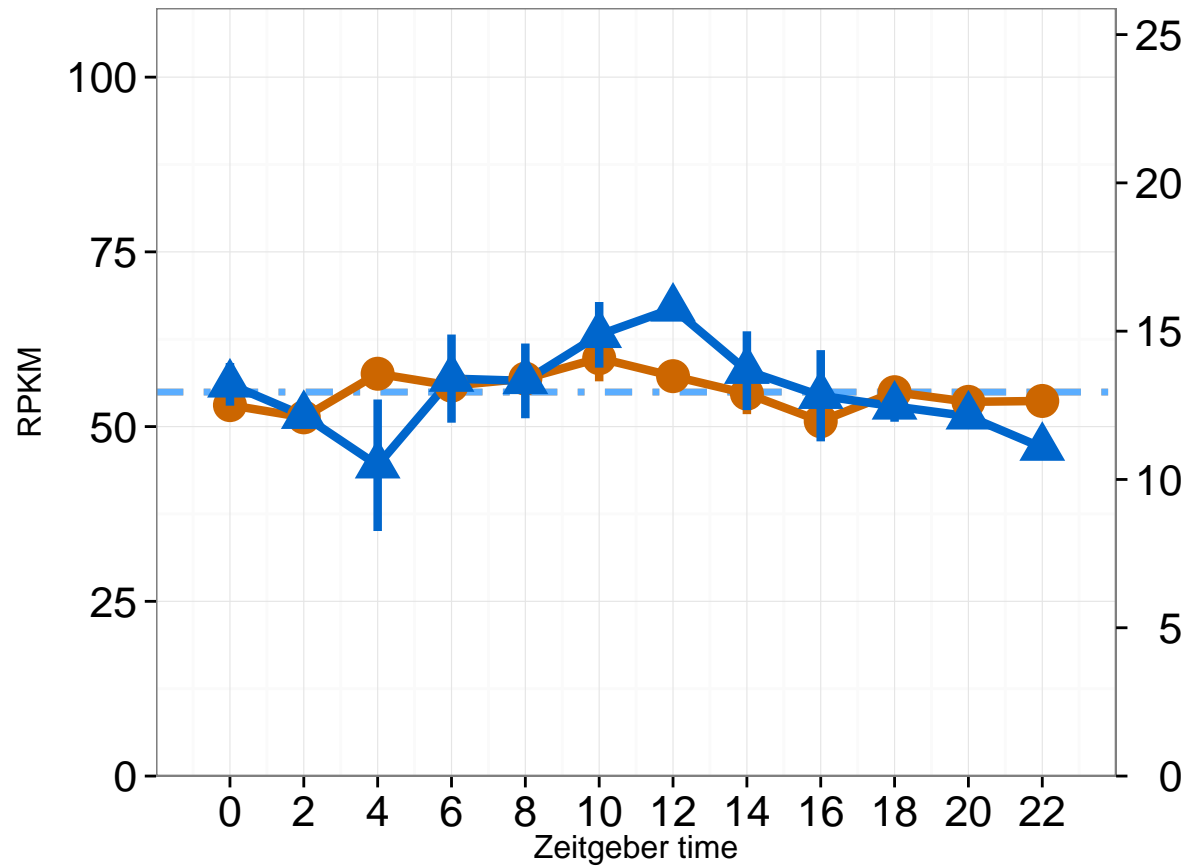

## Fbxo9

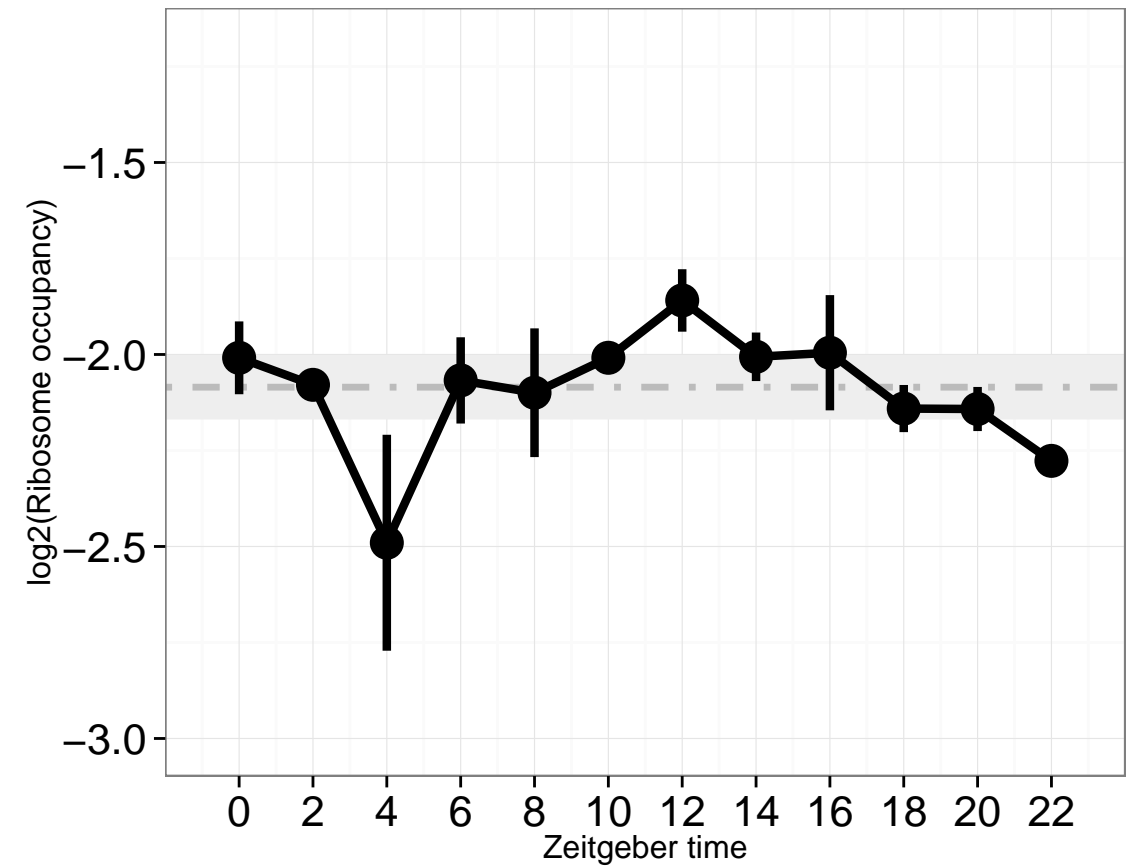

Supplement: Supplementary file 11458 [file 1]

## Wdr5

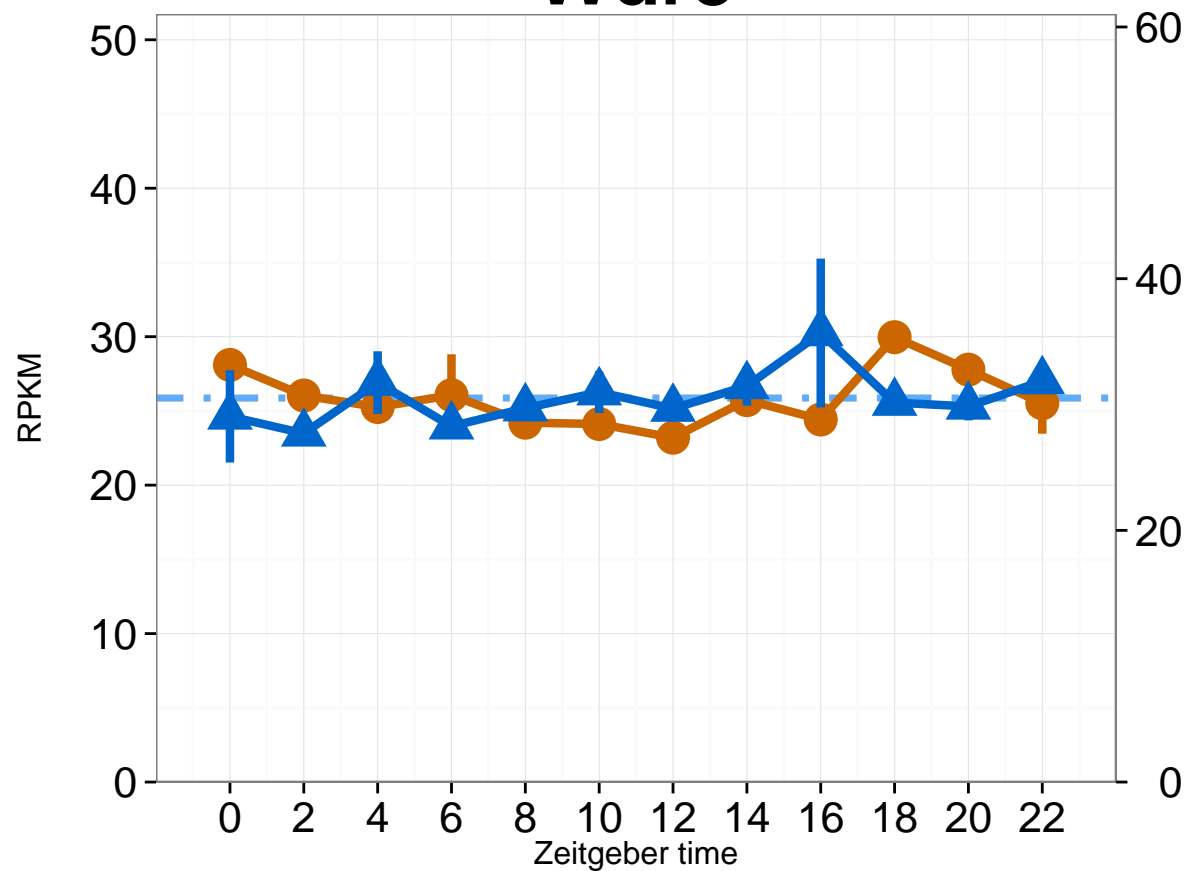

## Wdr5

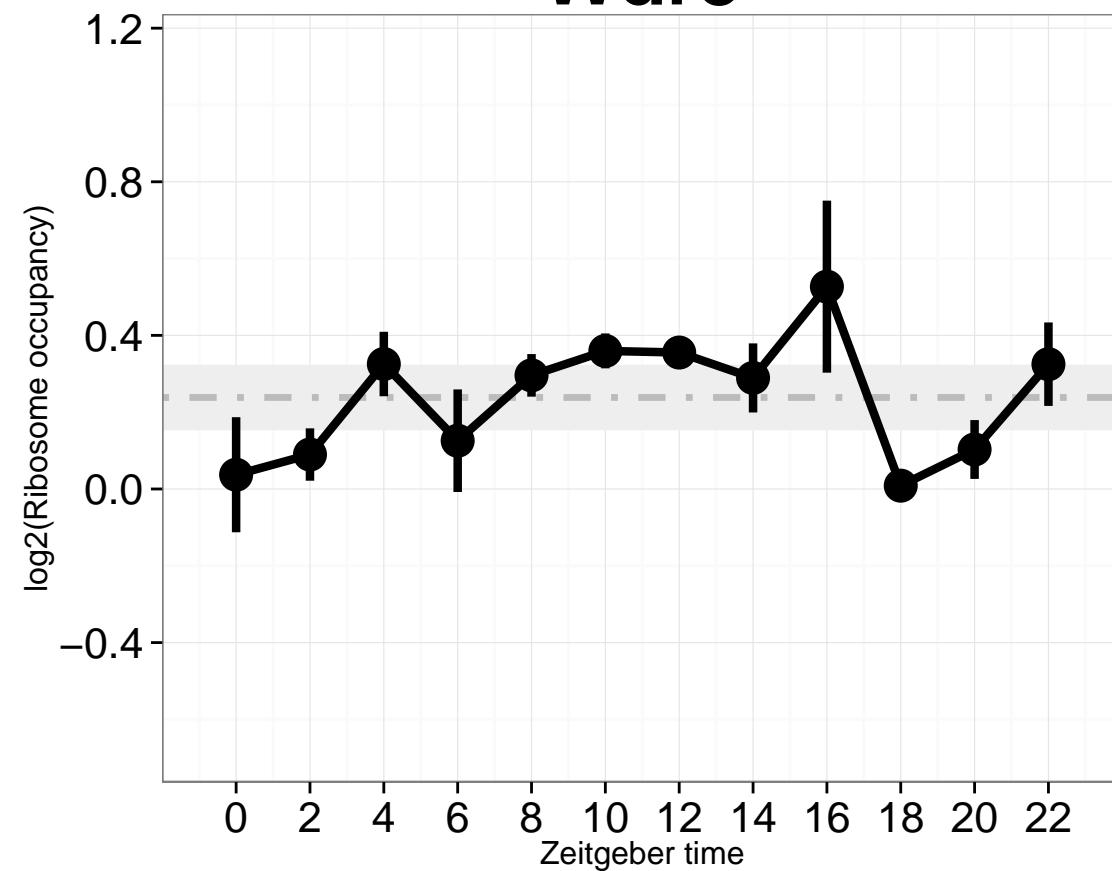

Supplement: Supplementary file 11459 [file 1]

# Zfp707

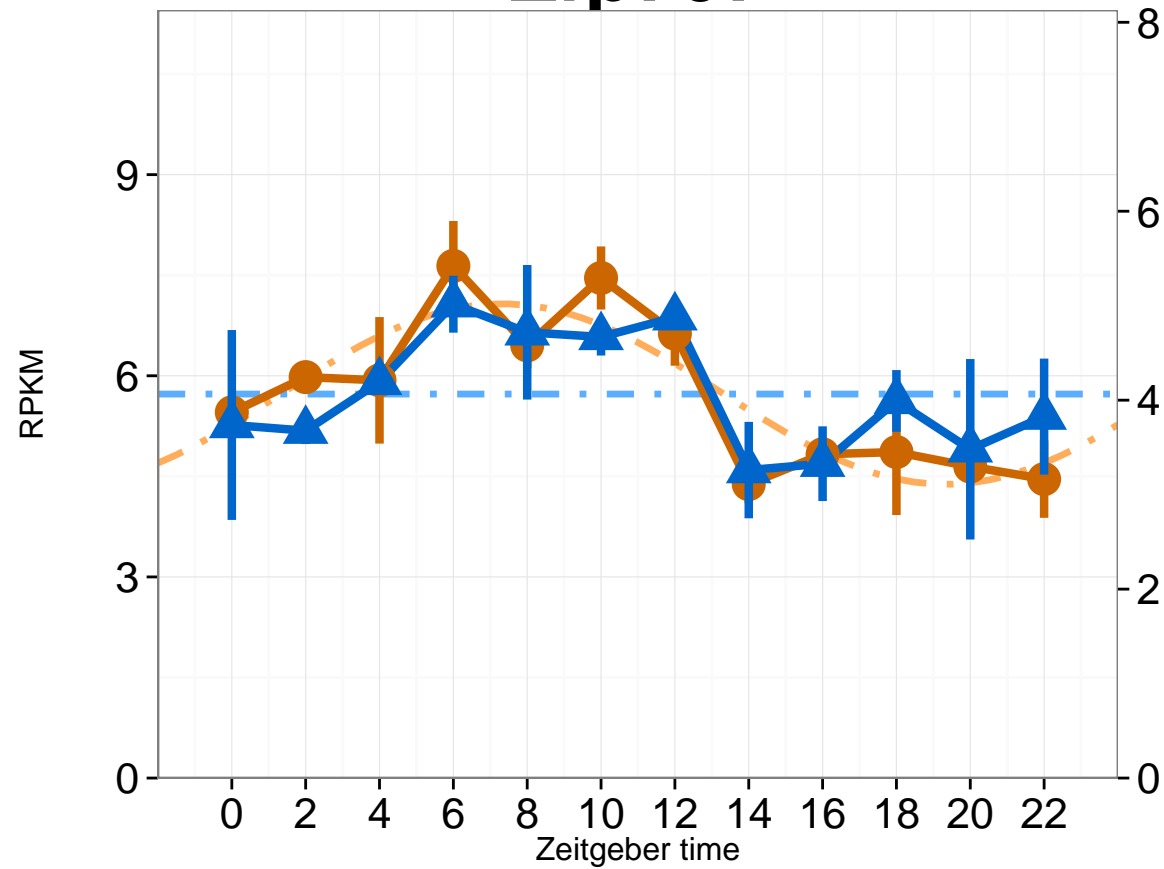

# Zfp707

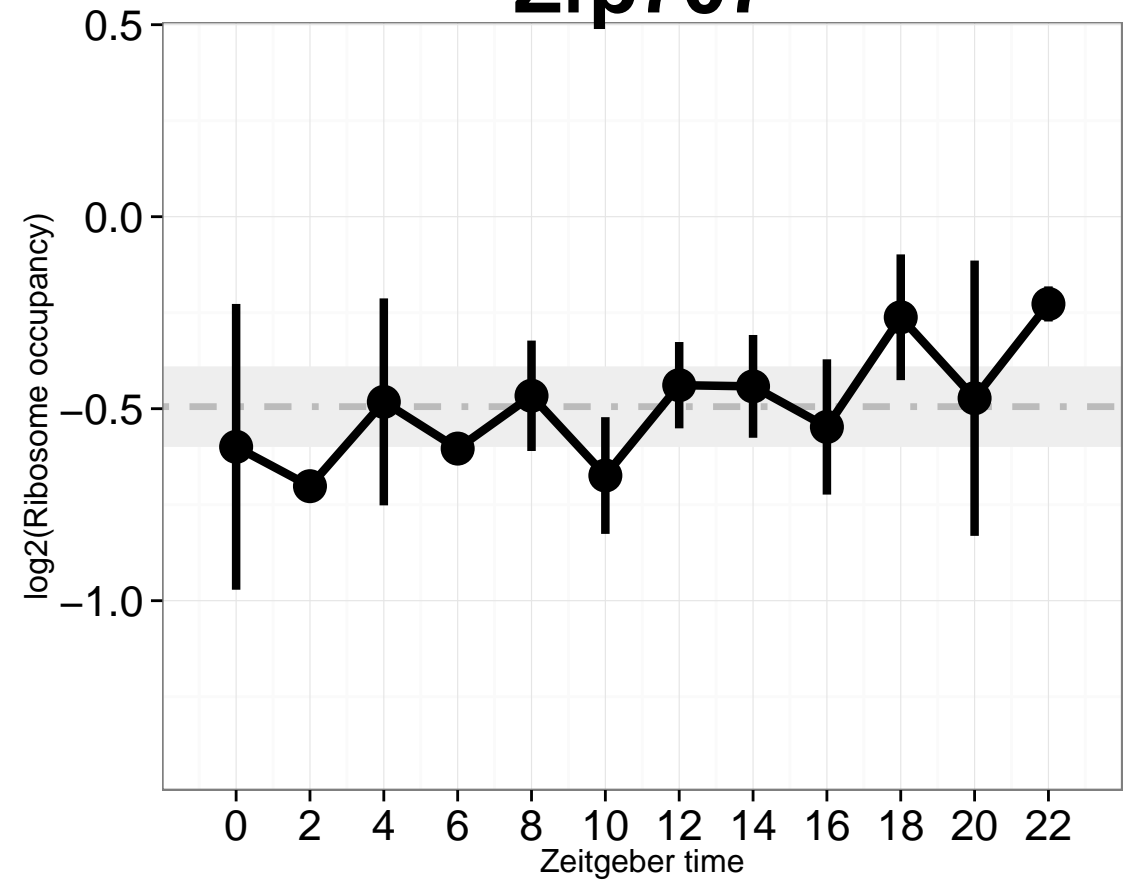

Supplement: Supplementary file 11460 [file 1]

# Fam219a

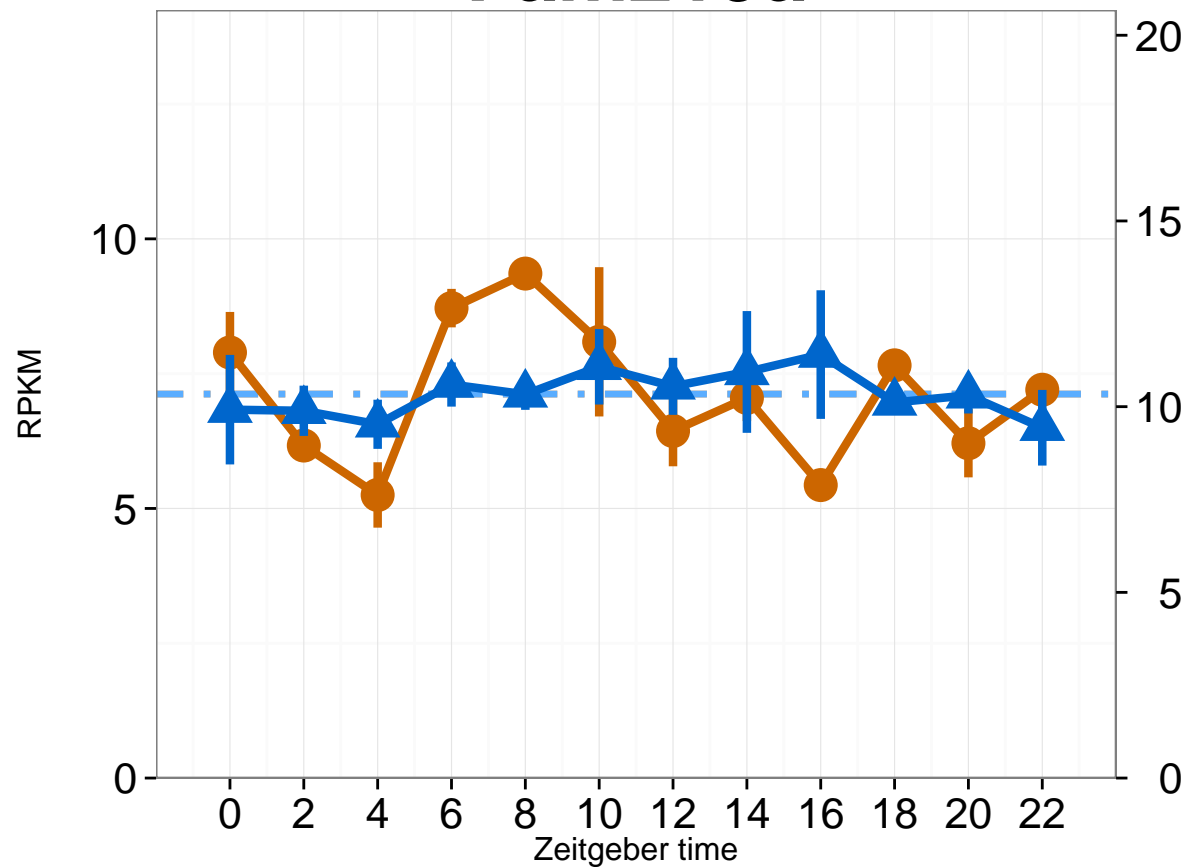

# Fam219a

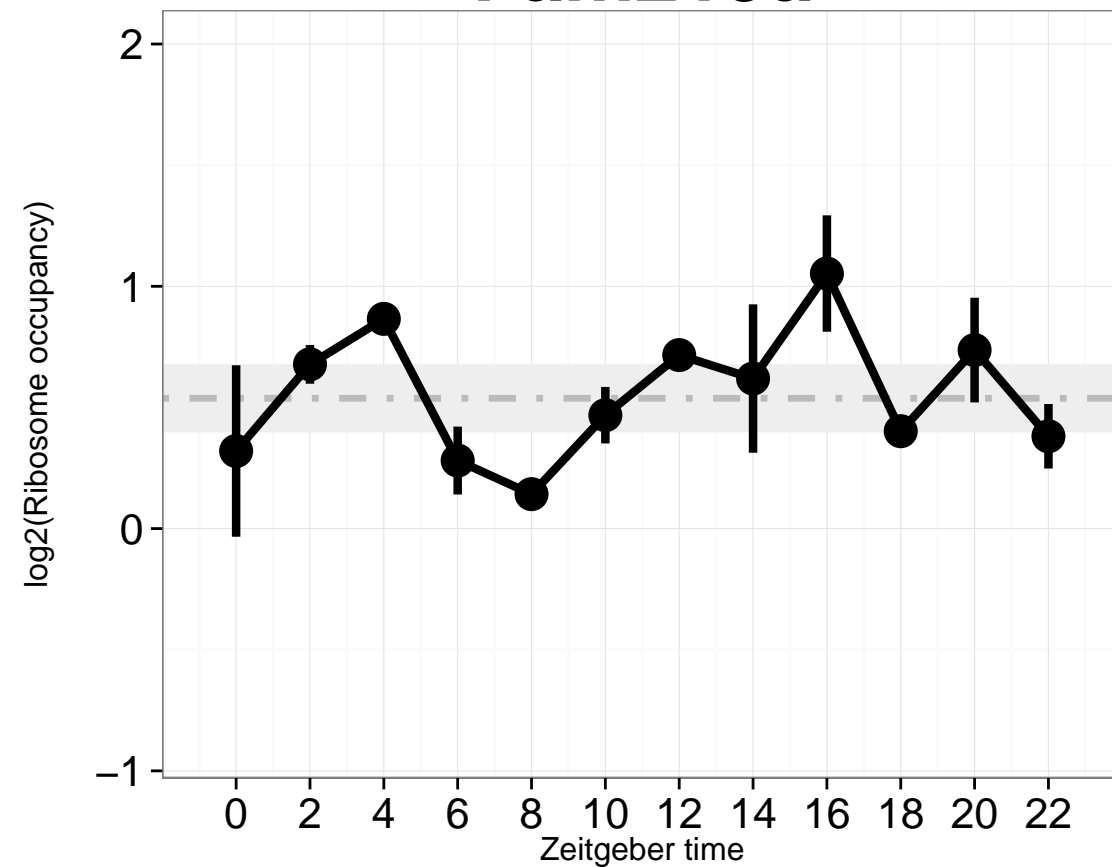

Supplement: Supplementary file 11461 [file 1]

# Luc7l

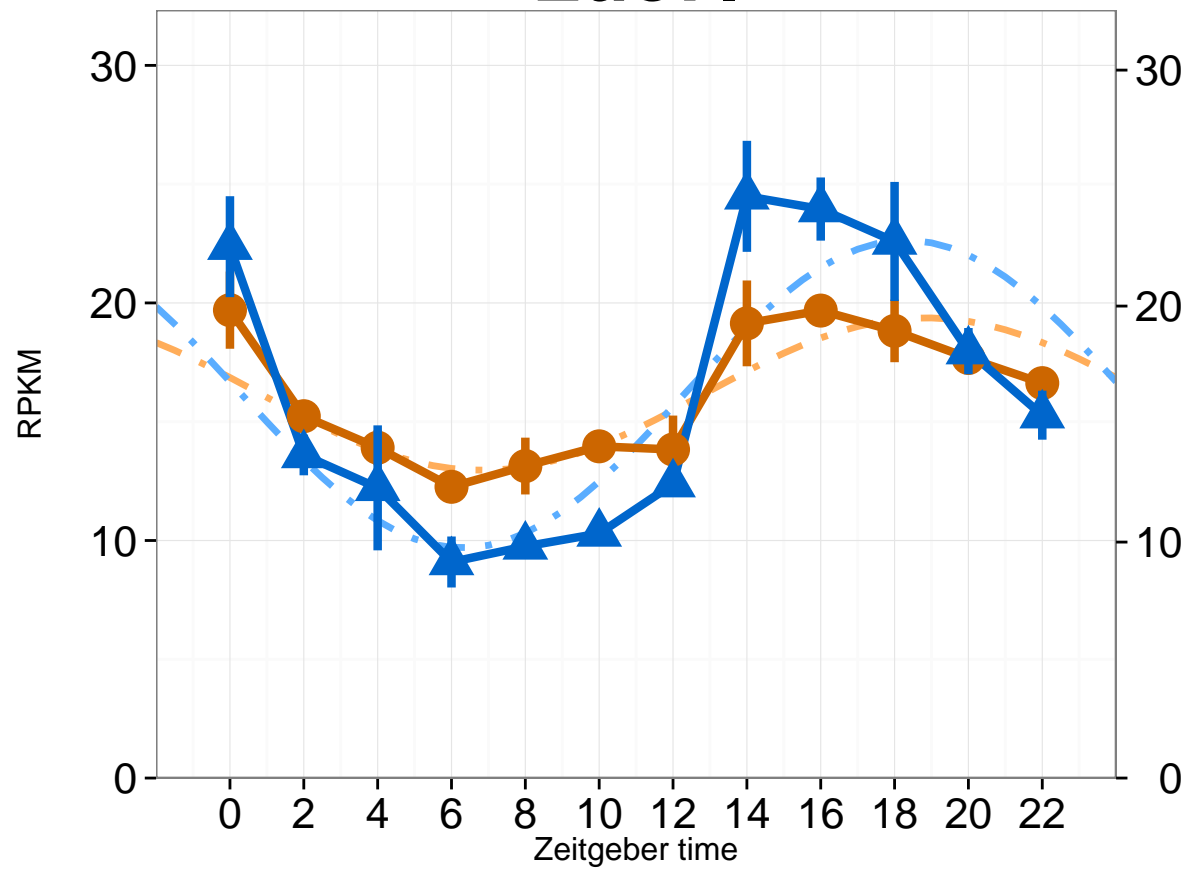

# Luc7l

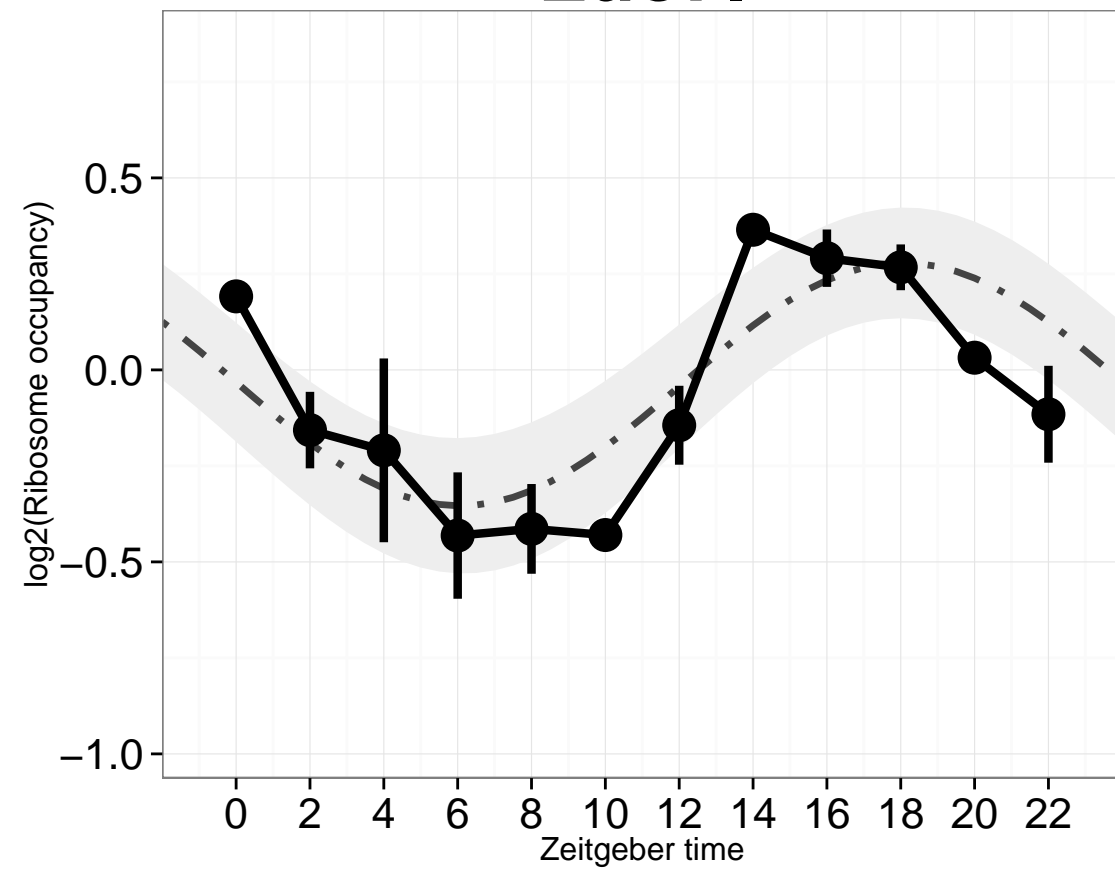

Supplement: Supplementary file 11462 [file 1]

# Arid3b

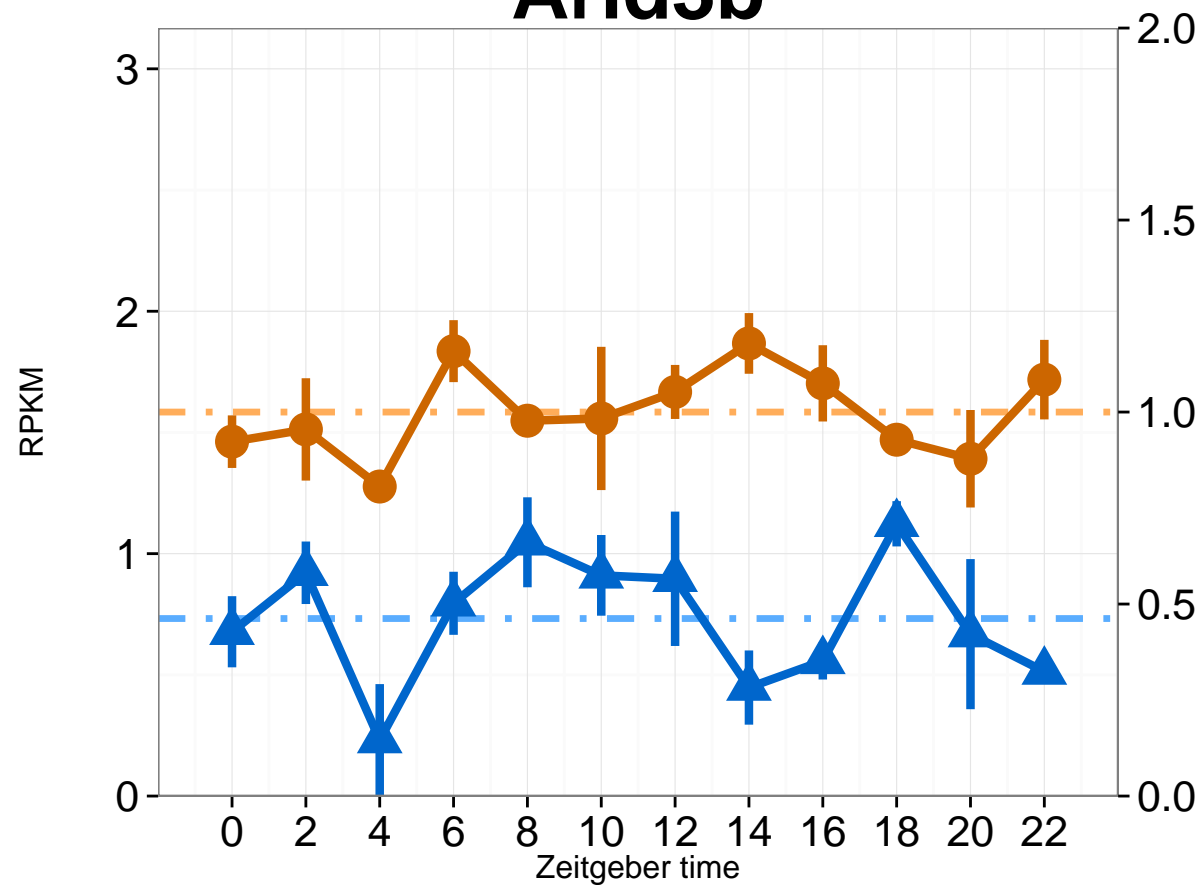

# Arid3b

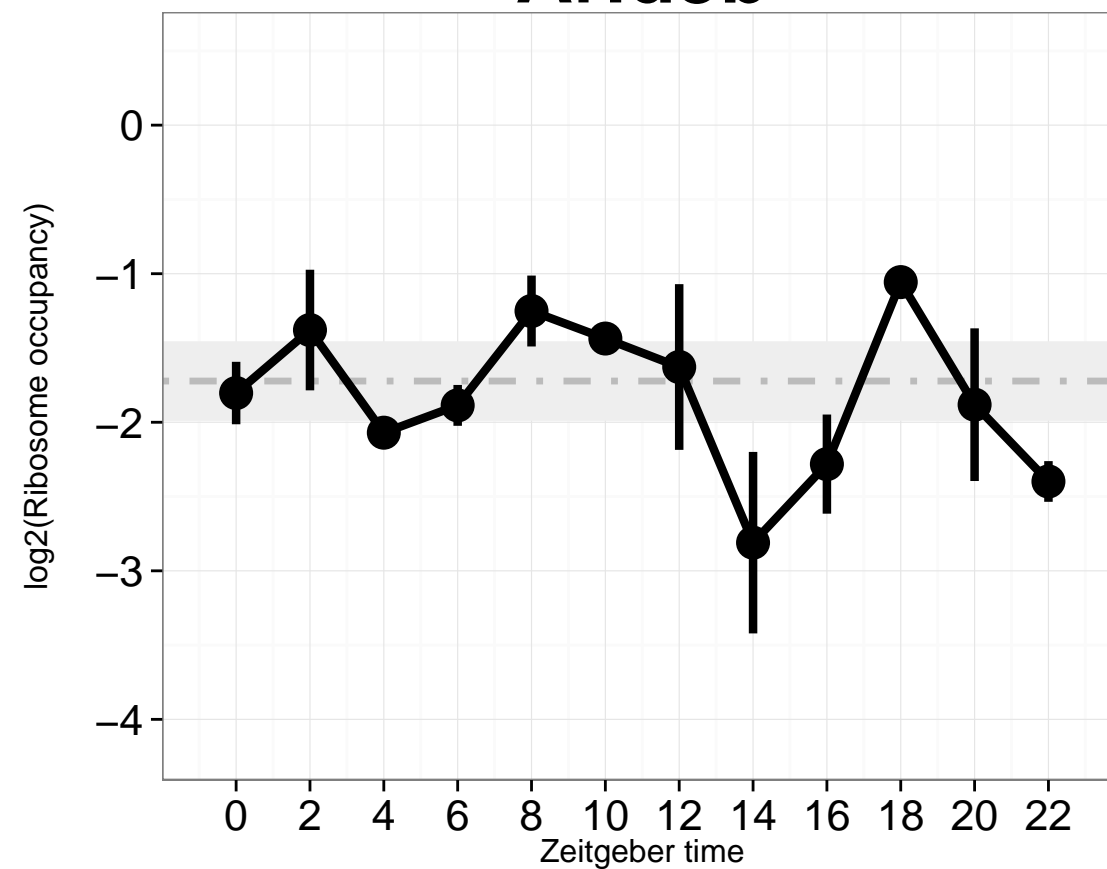

Supplement: Supplementary file 11463 [file 1]

# Dram2

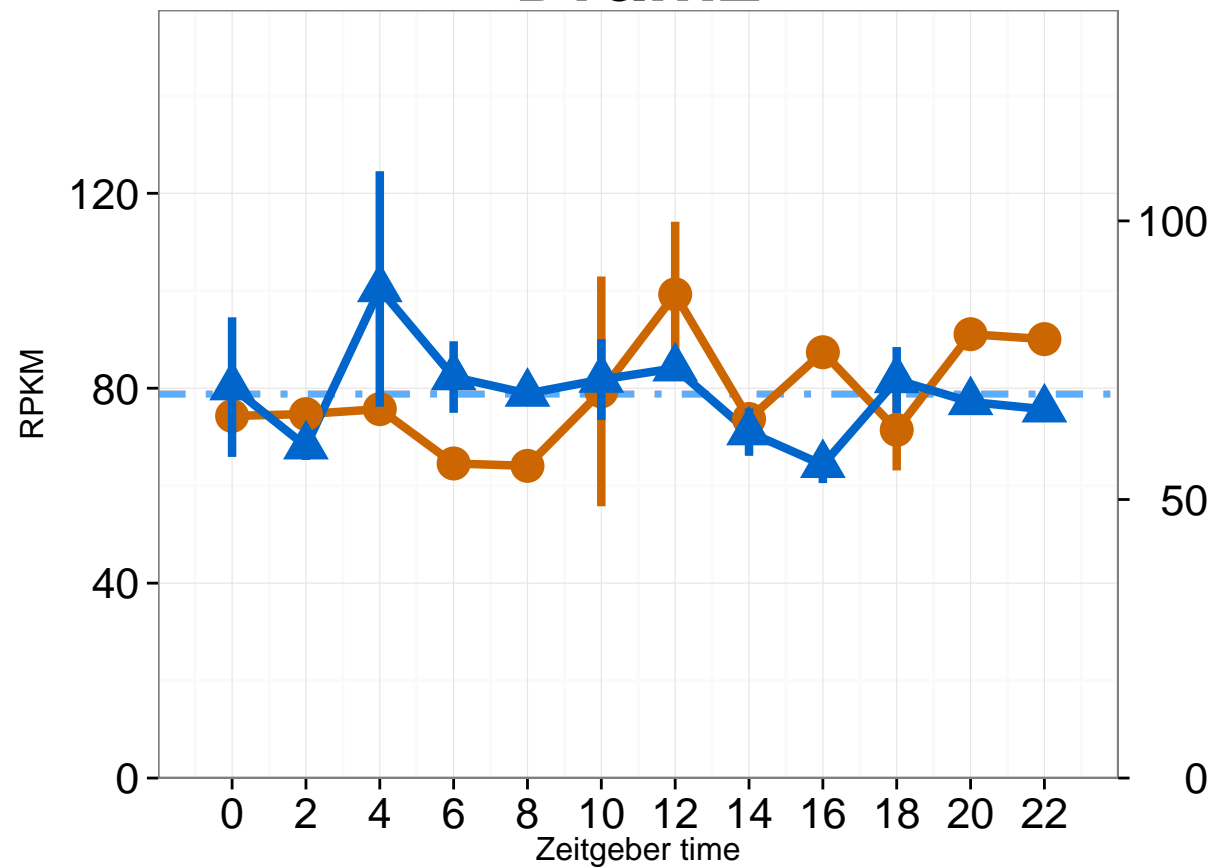

# Dram2

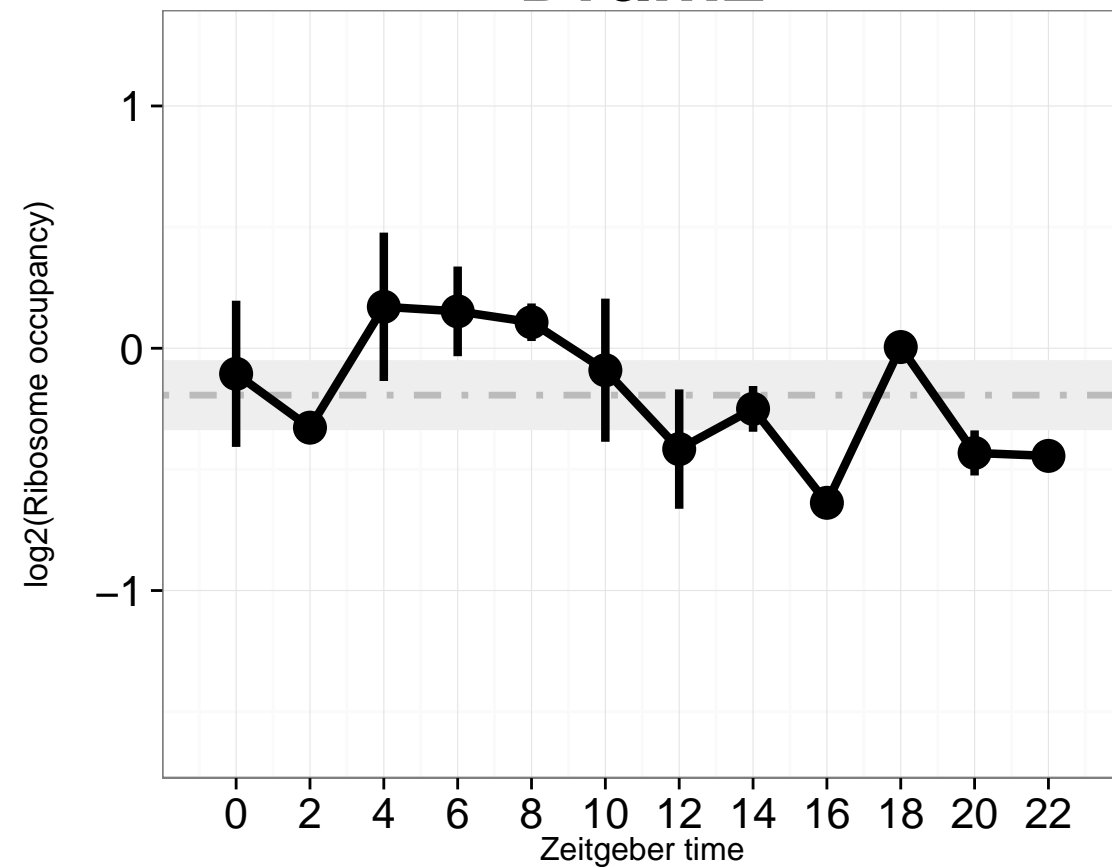

Supplement: Supplementary file 11464 [file 1]

# Zswim1

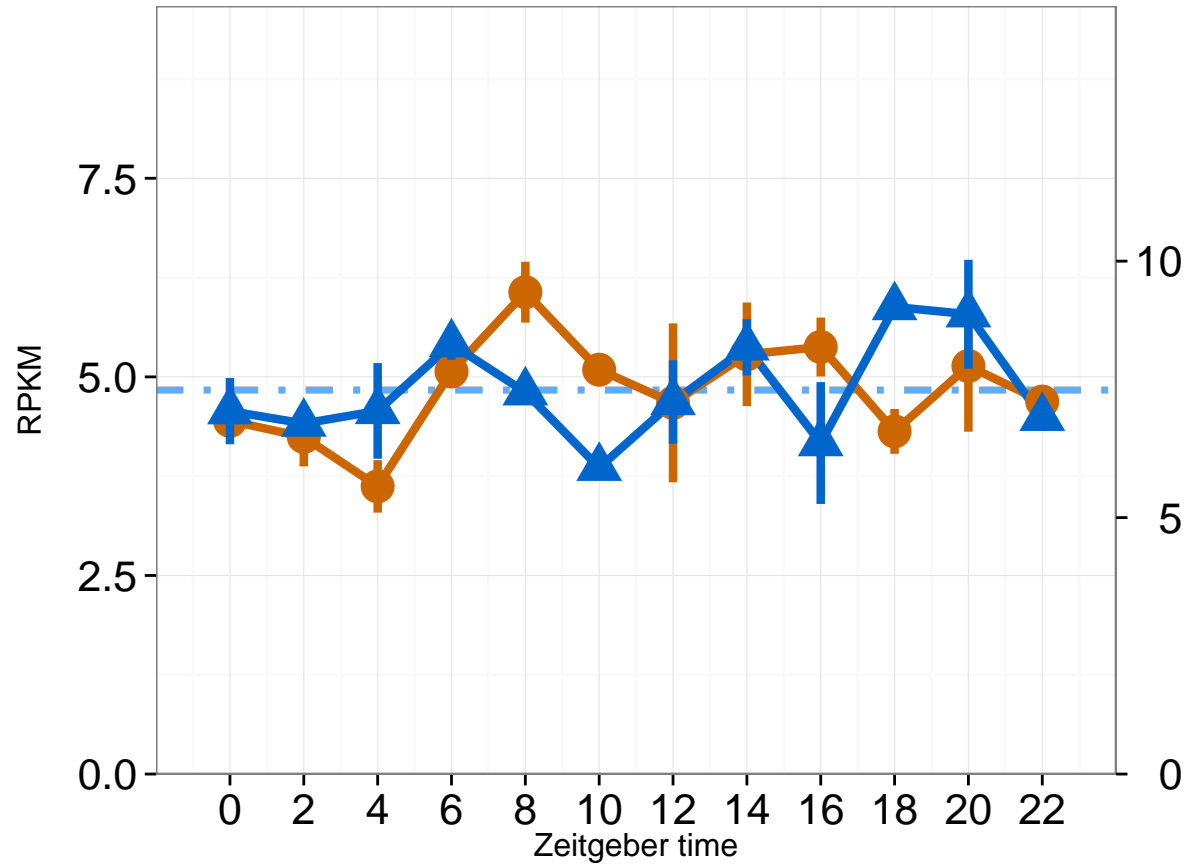

# Zswim1

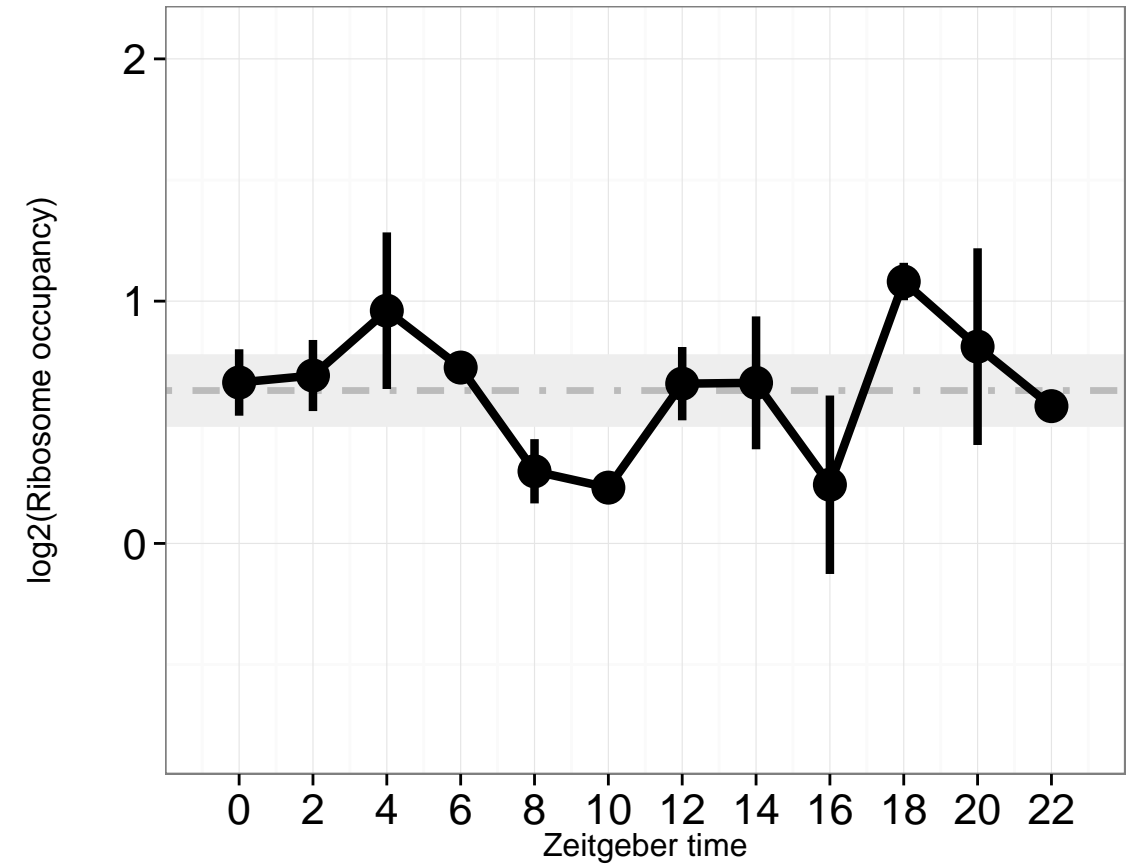

Supplement: Supplementary file 11465 [file 1]

## Eci2

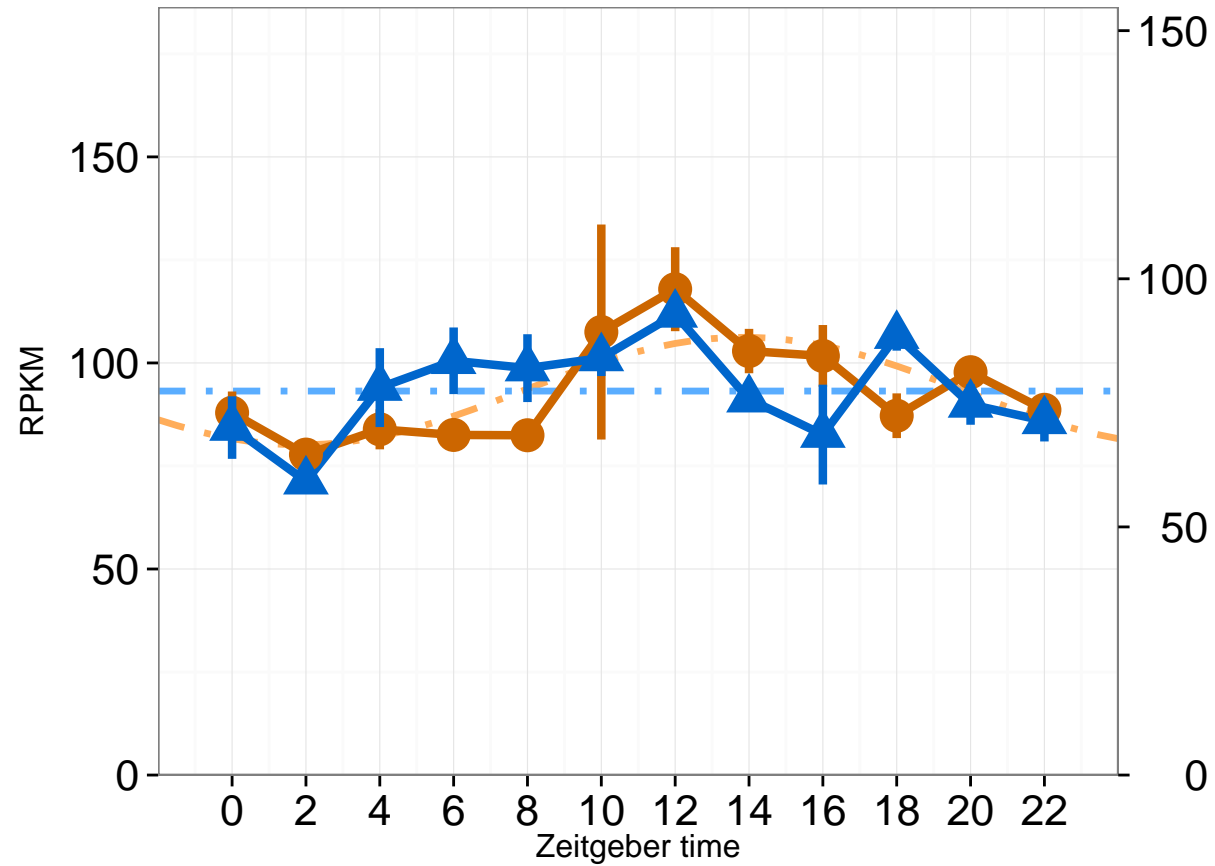

## Eci2

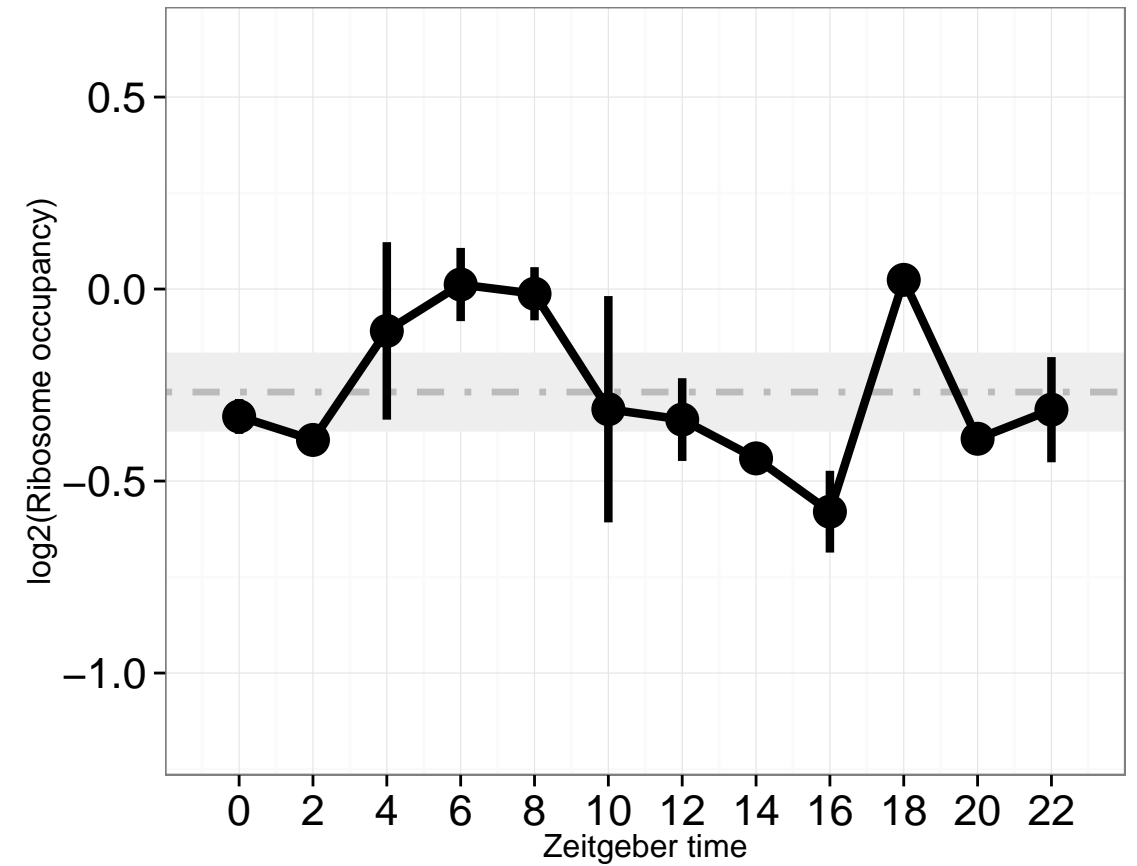

Supplement: Supplementary file 11466 [file 1]

# Trim34a

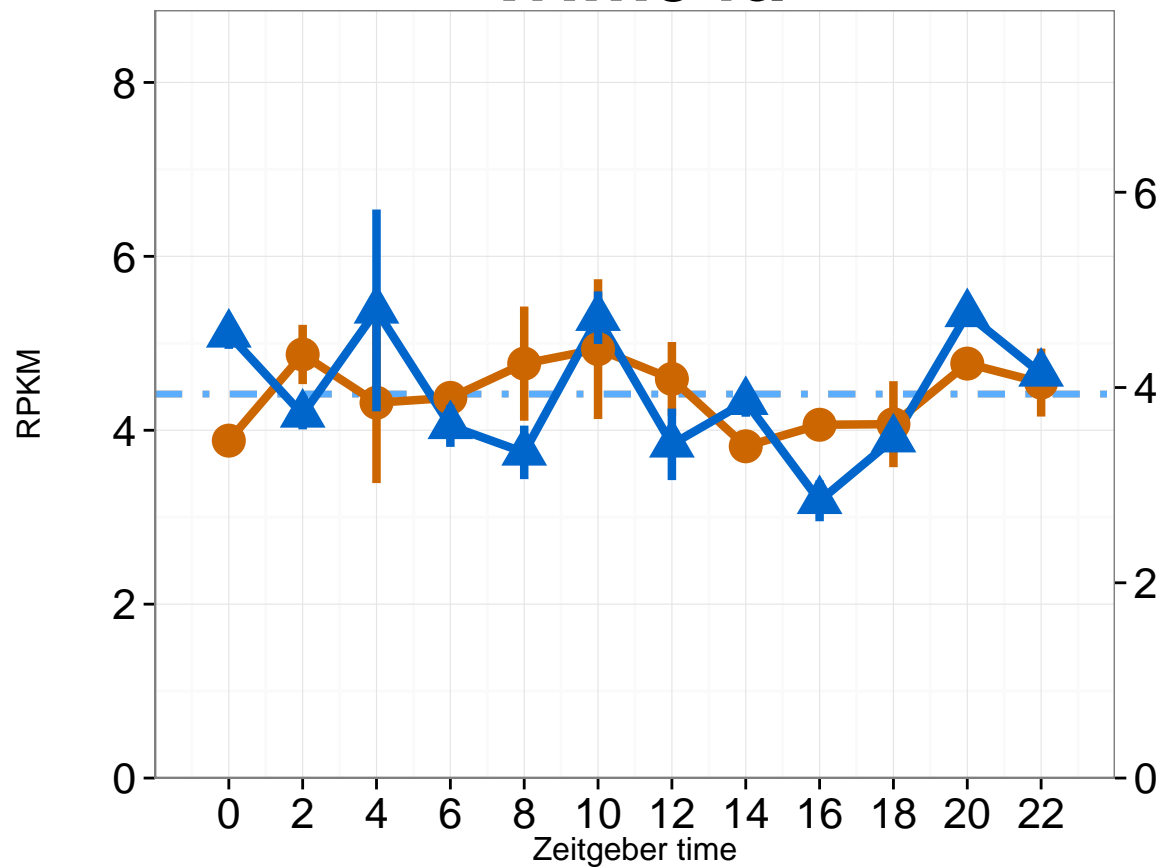

# Trim34a

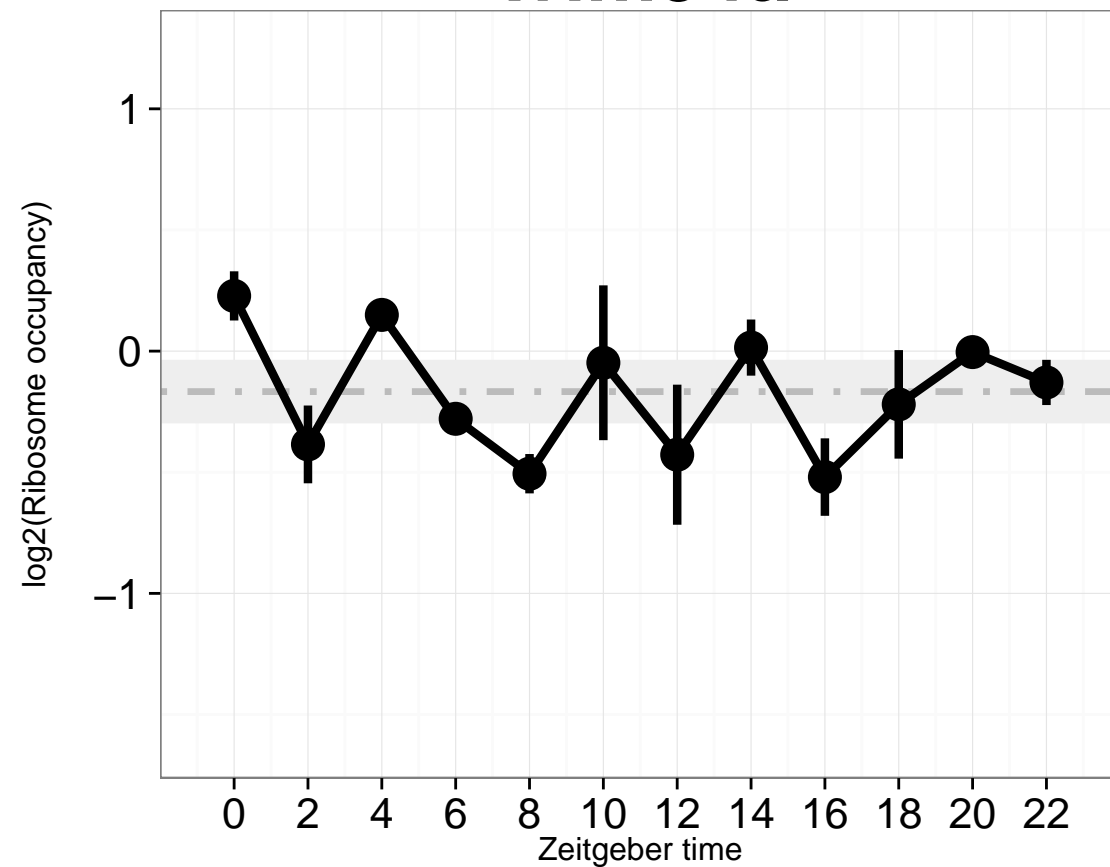

Supplement: Supplementary file 11467 [file 1]

## Zbtb6

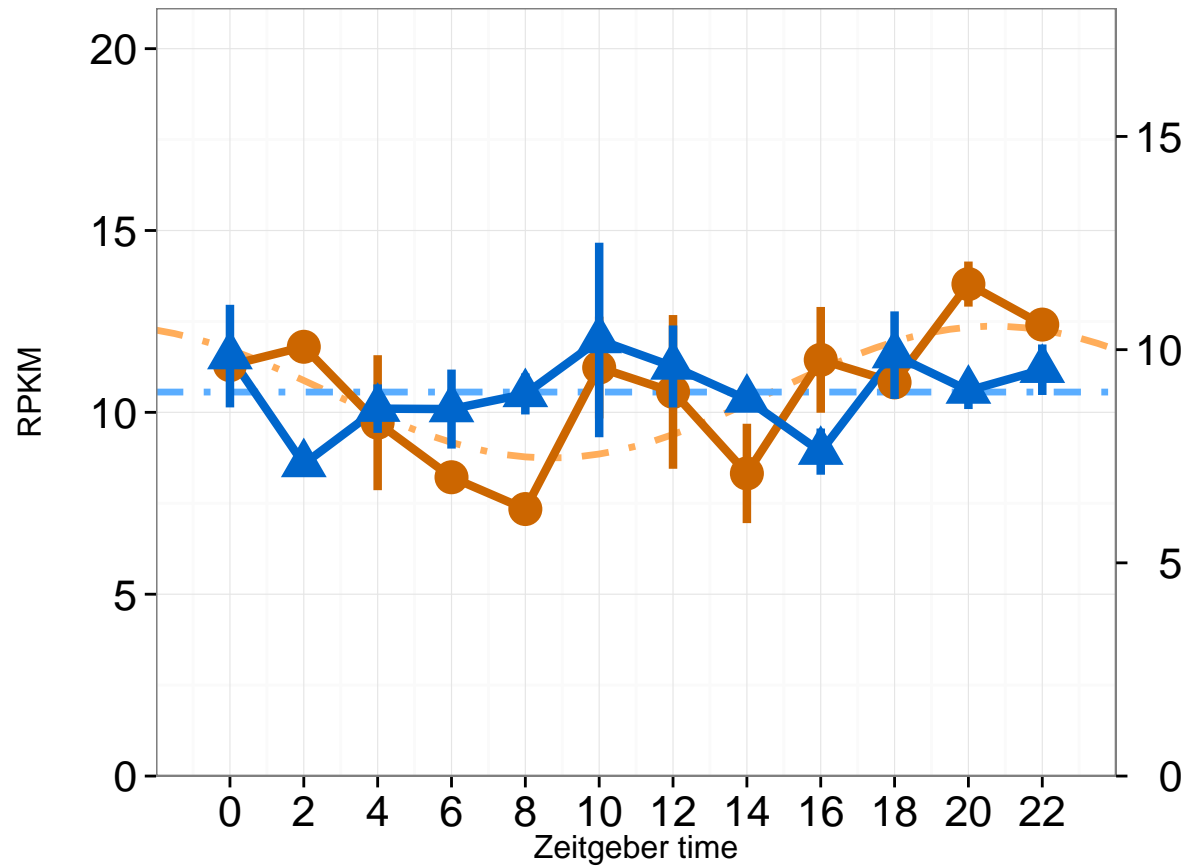

## Zbtb6

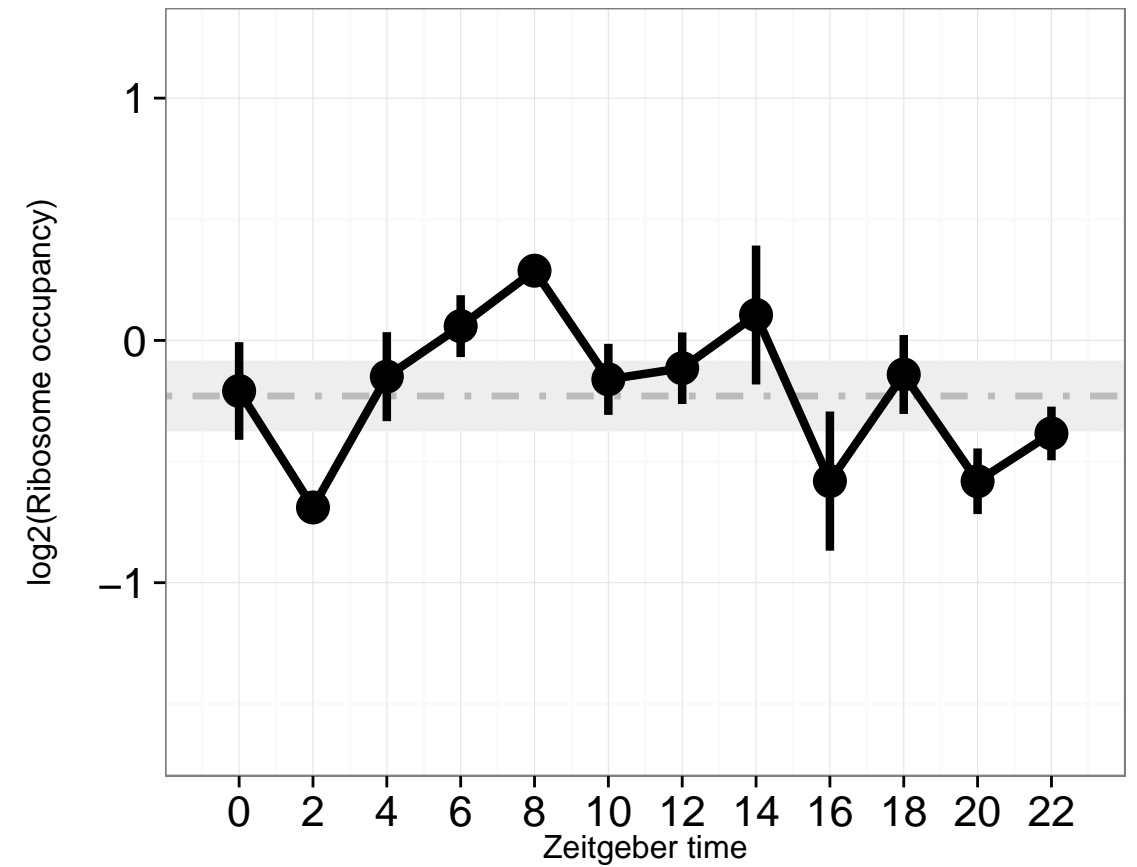

Supplement: Supplementary file 11468 [file 1]

## Sun3

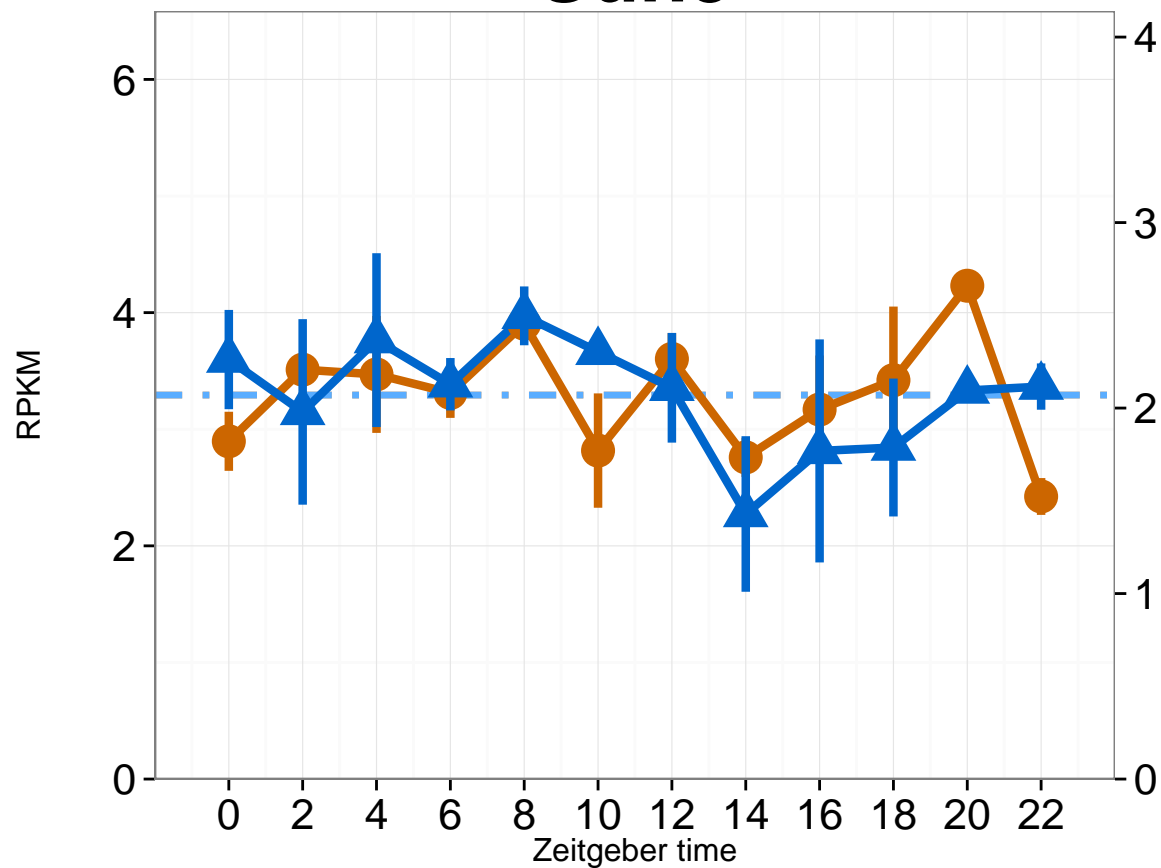

## Sun3

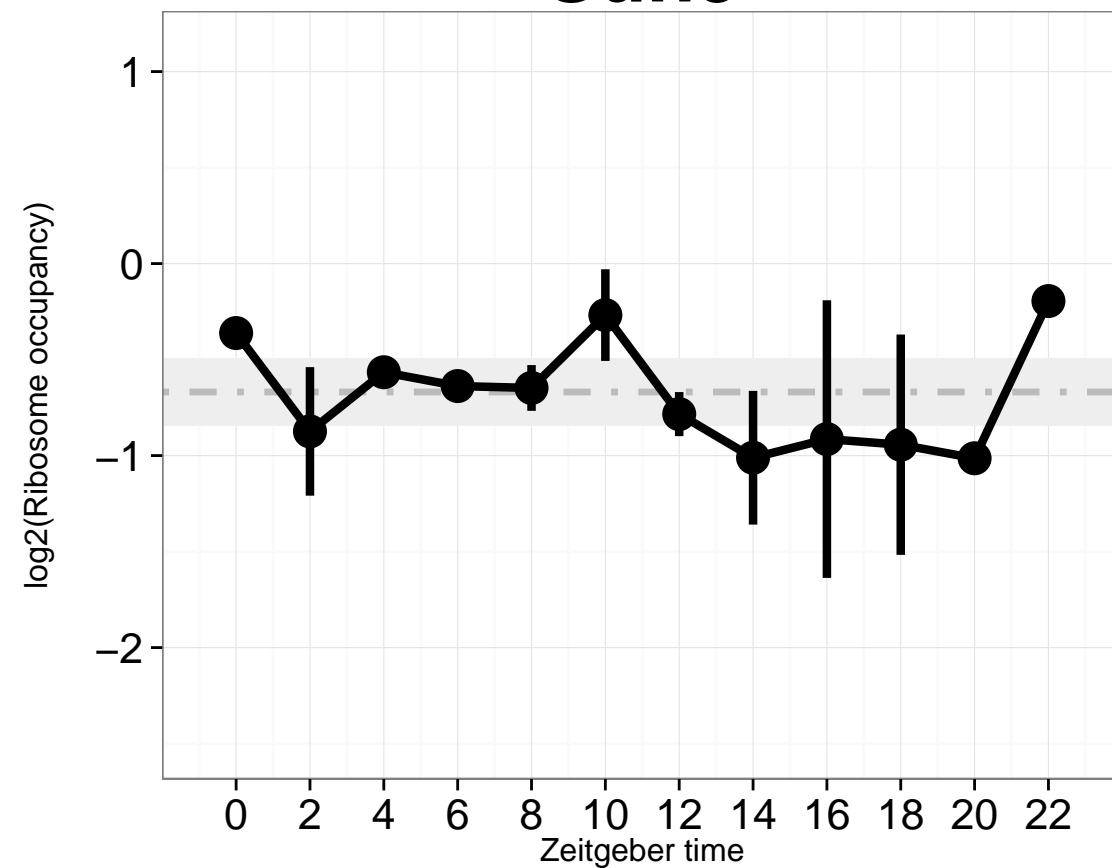

Supplement: Supplementary file 11469 [file 1]

## Gdf15

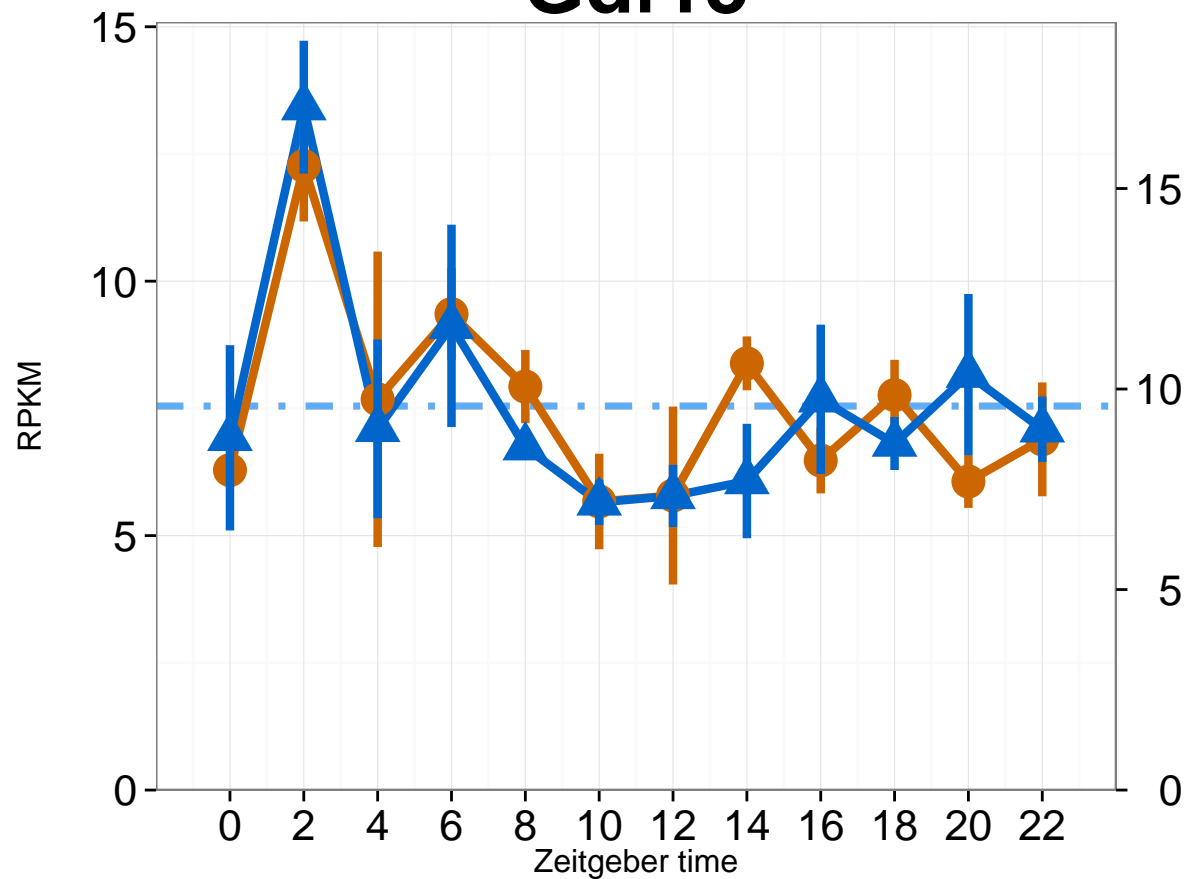

## Gdf15

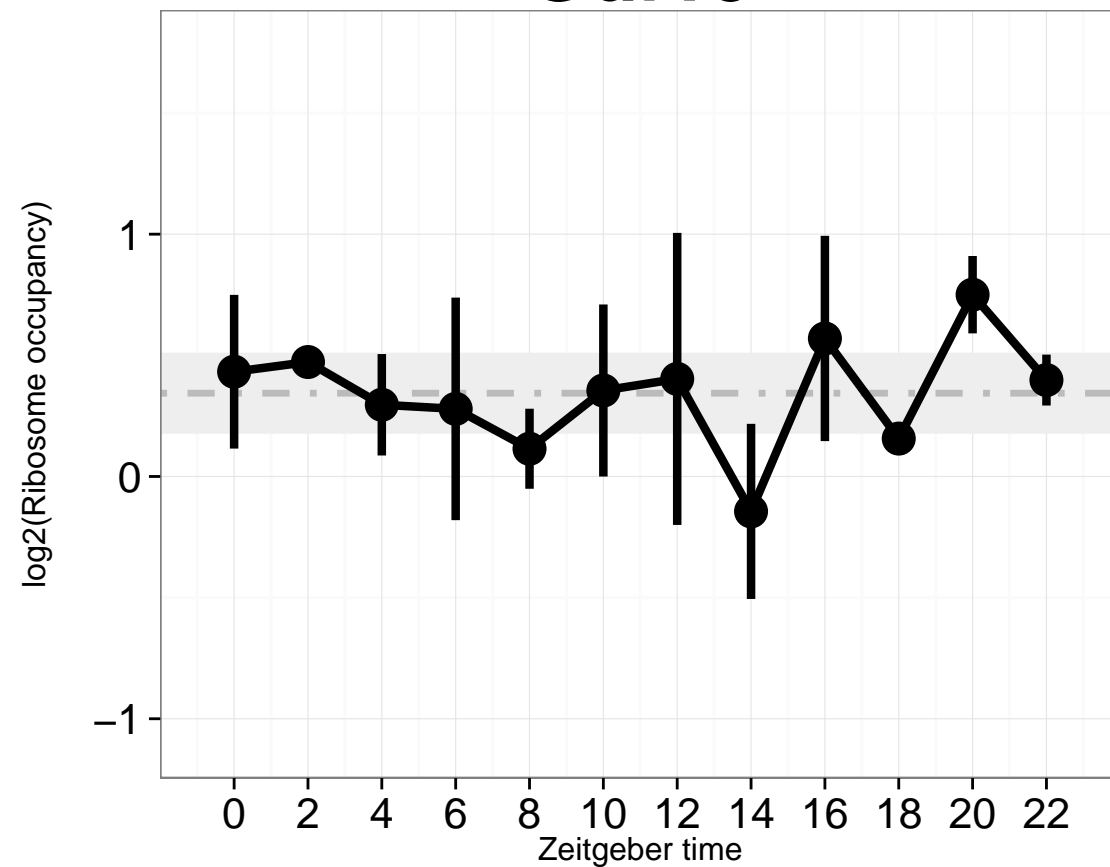

Supplement: Supplementary file 11470 [file 1]

## Stx8

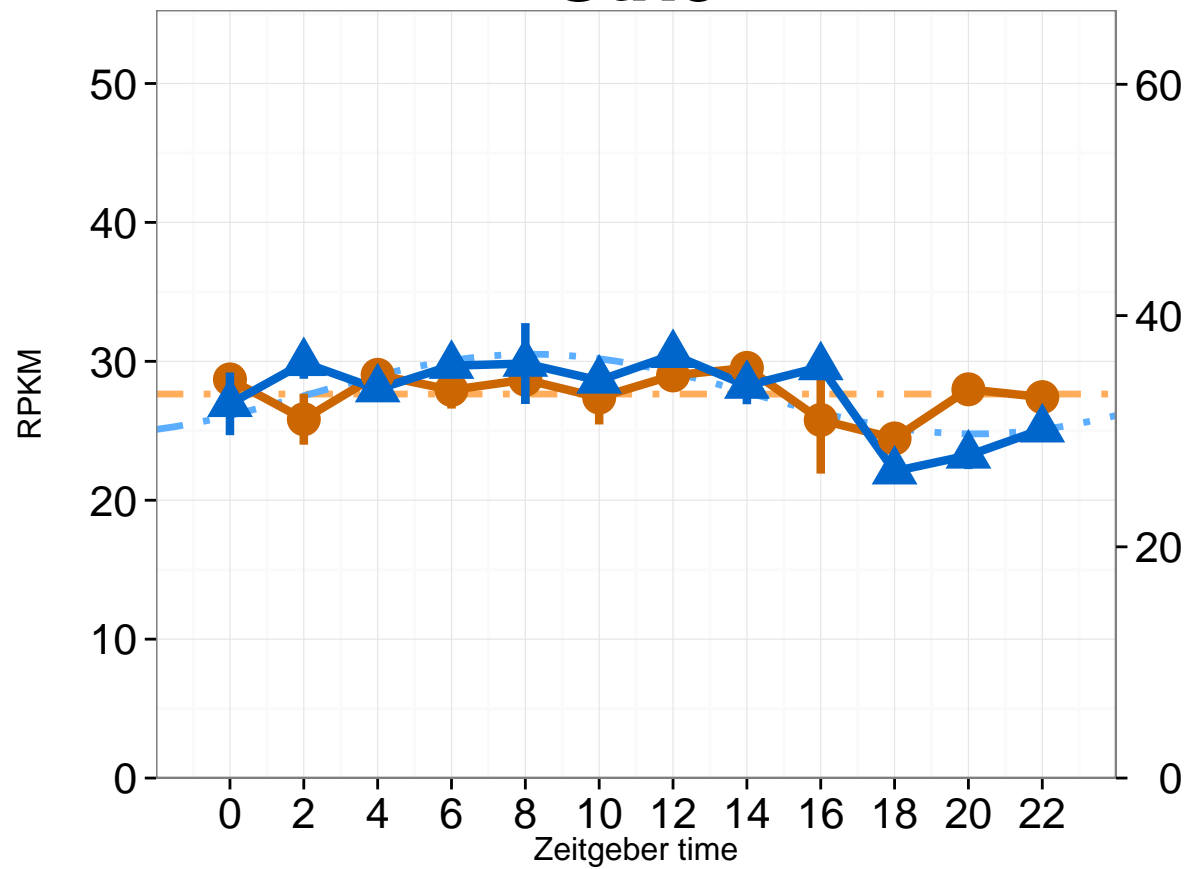

## Stx8

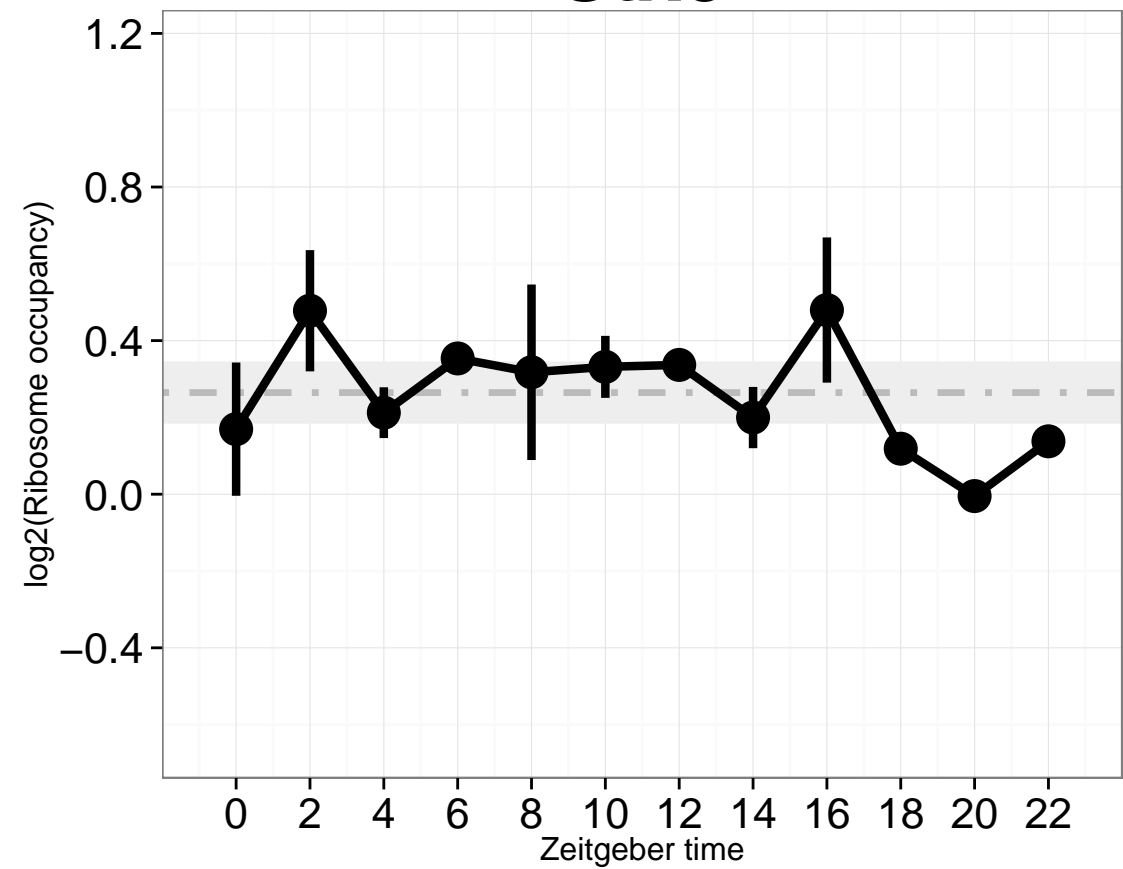

Supplement: Supplementary file 11471 [file 1]

## Eif4e3

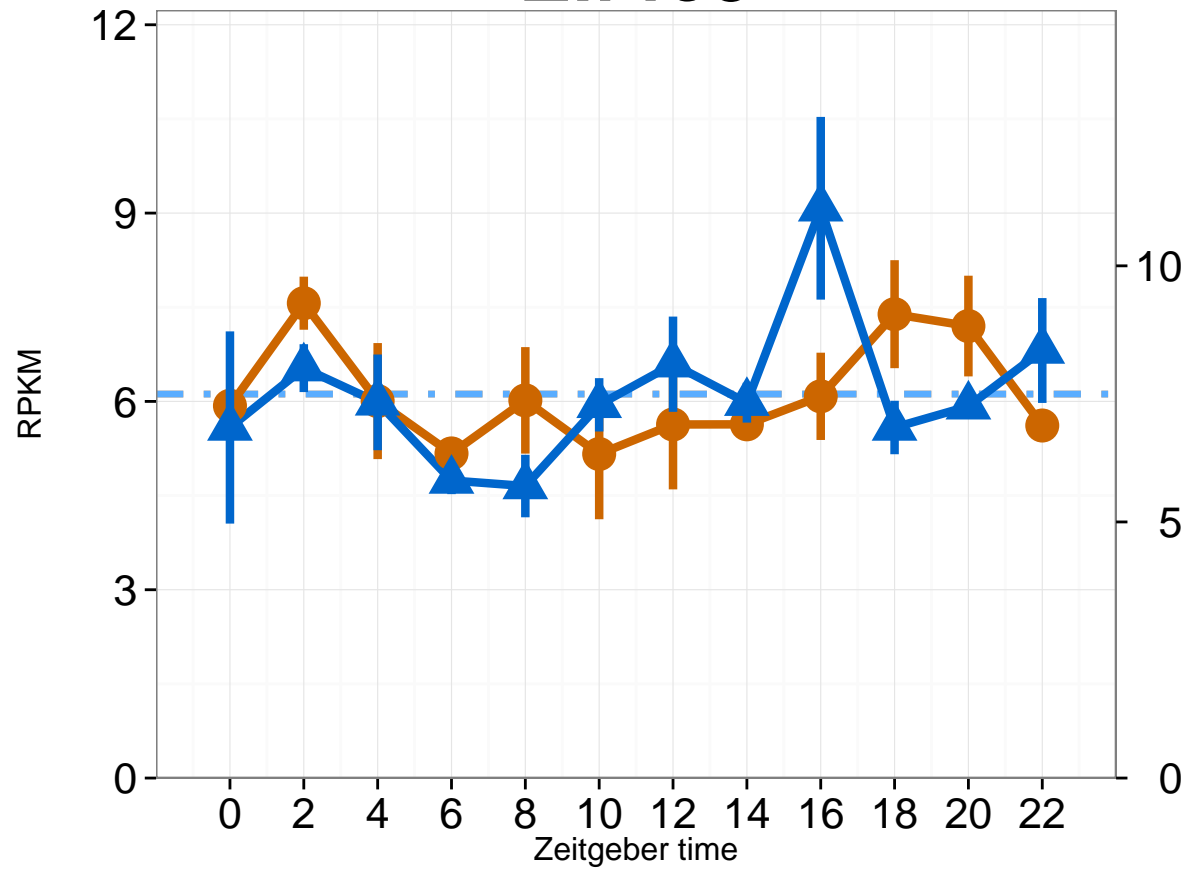

## Eif4e3

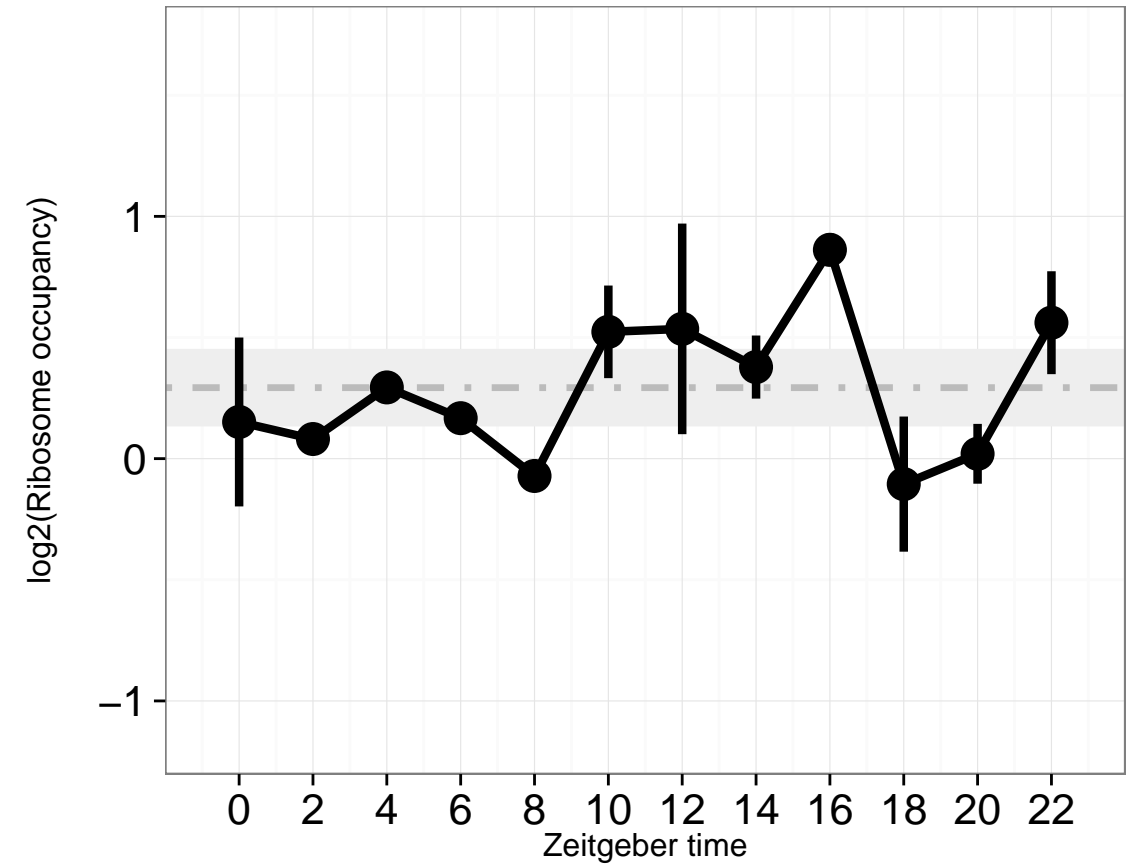

Supplement: Supplementary file 11472 [file 1]

## Ushbp1

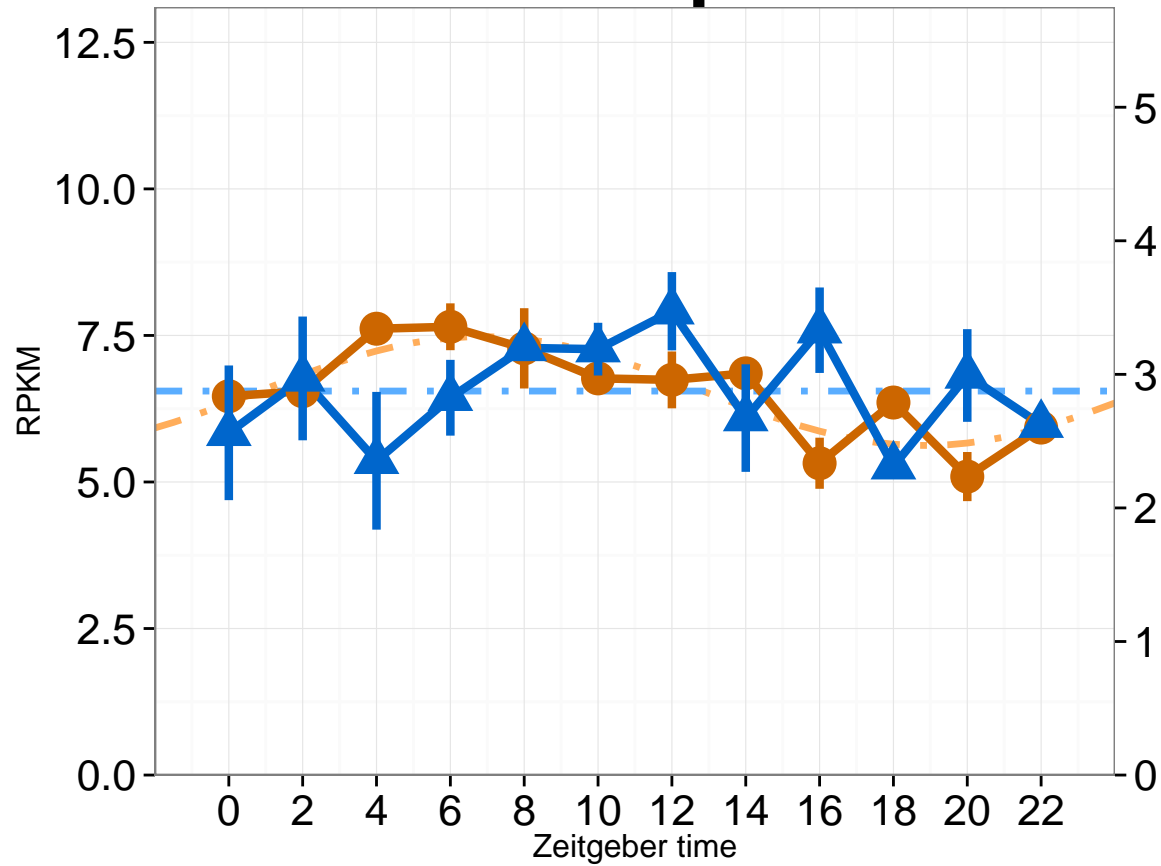

## Ushbp1

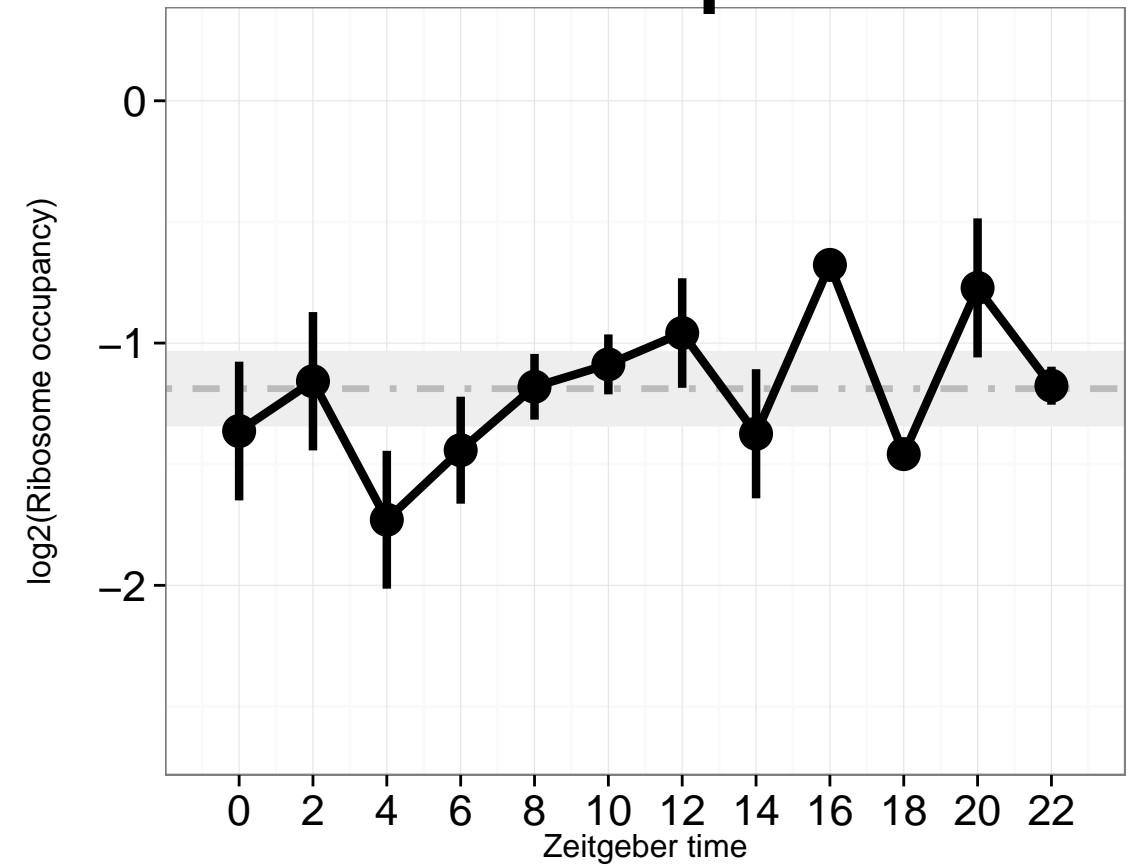

Supplement: Supplementary file 11473 [file 1]

# Adamts3

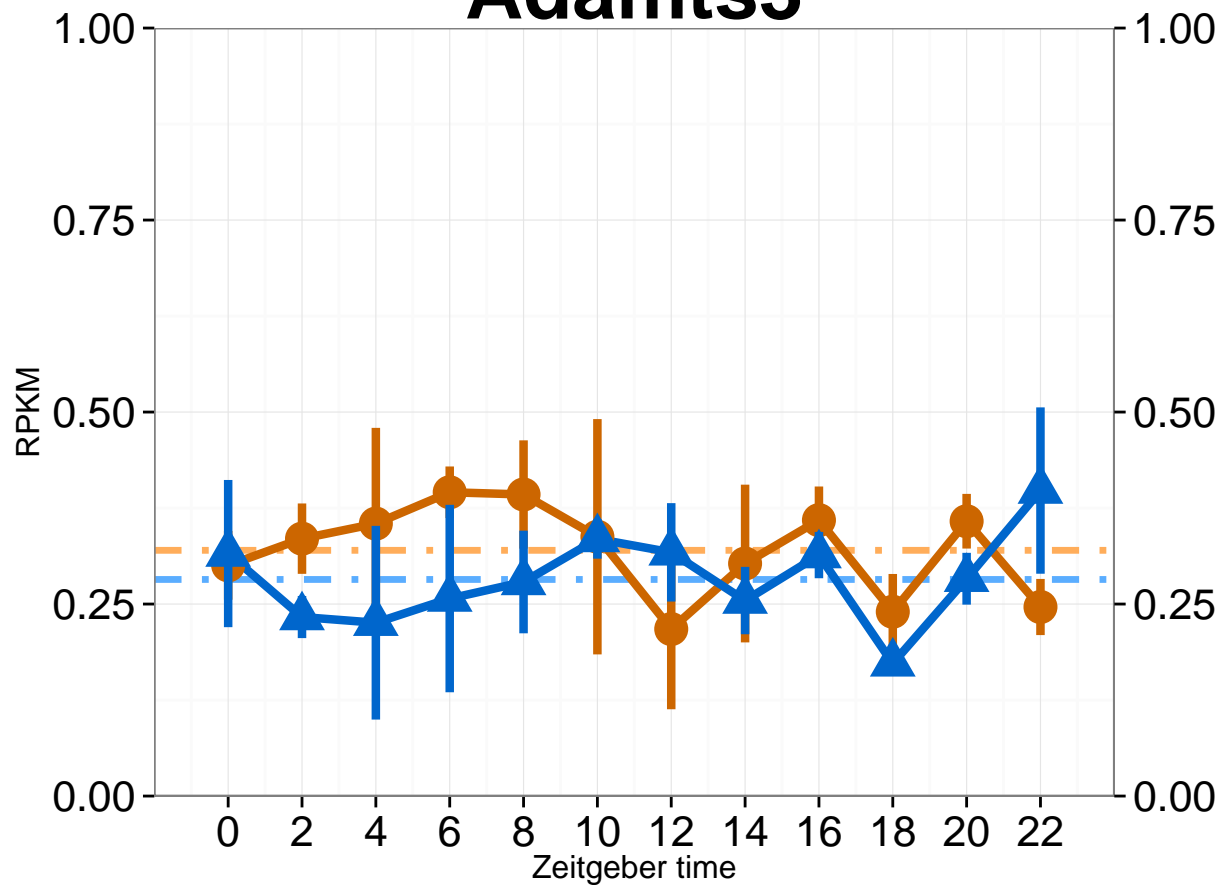

# Adamts3

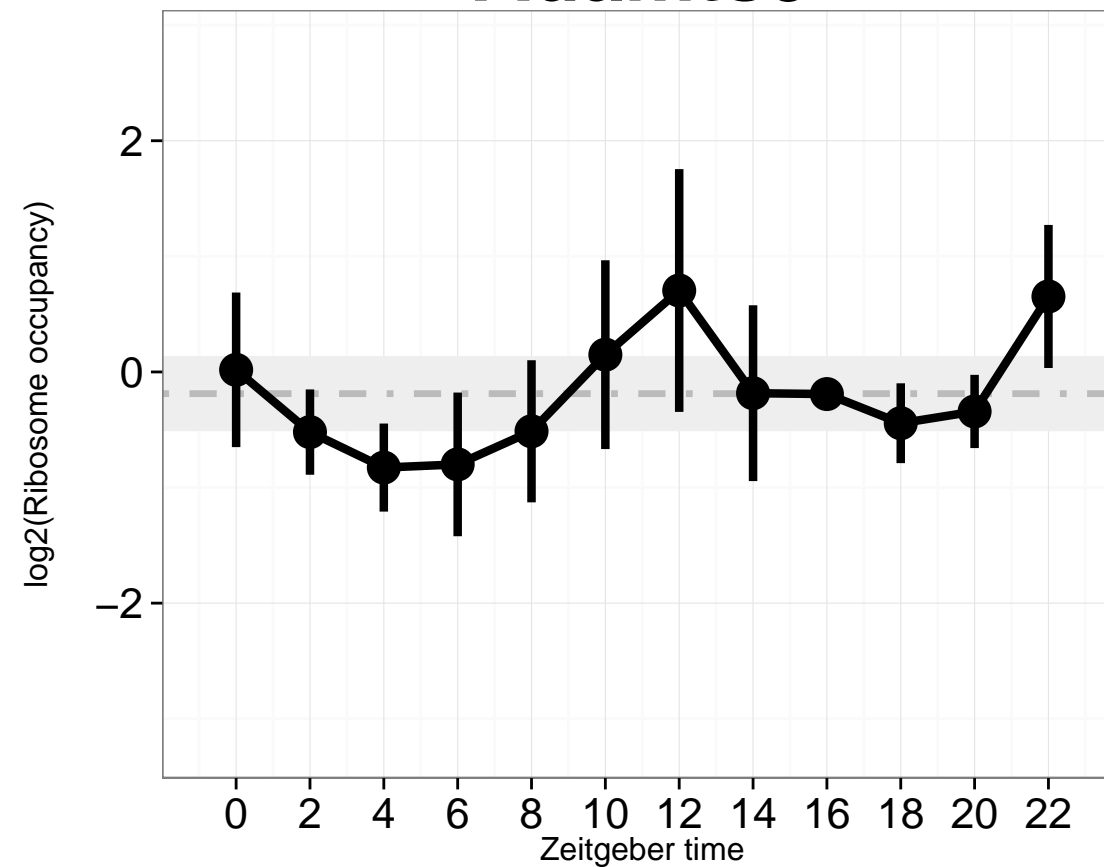

Supplement: Supplementary file 11474 [file 1]

# Fam60a

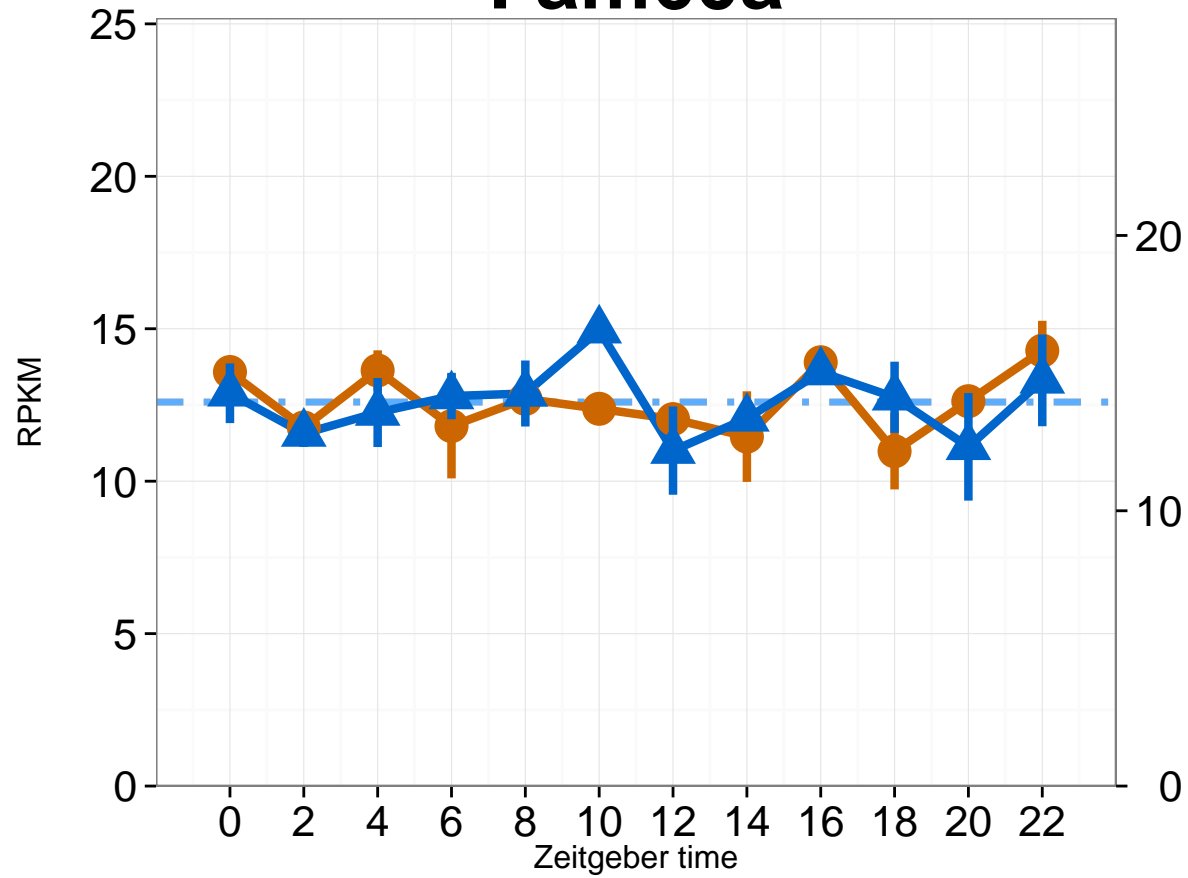

# Fam60a

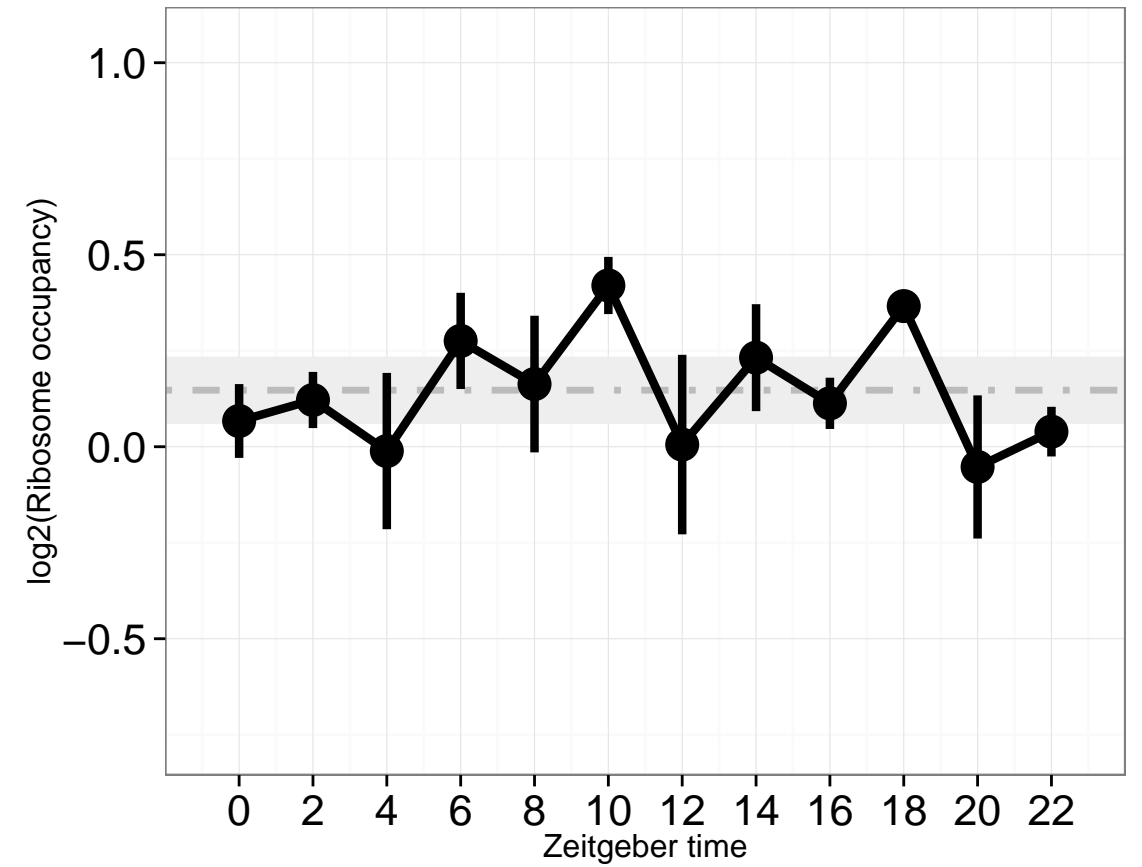

Supplement: Supplementary file 11475 [file 1]

# Nkapl

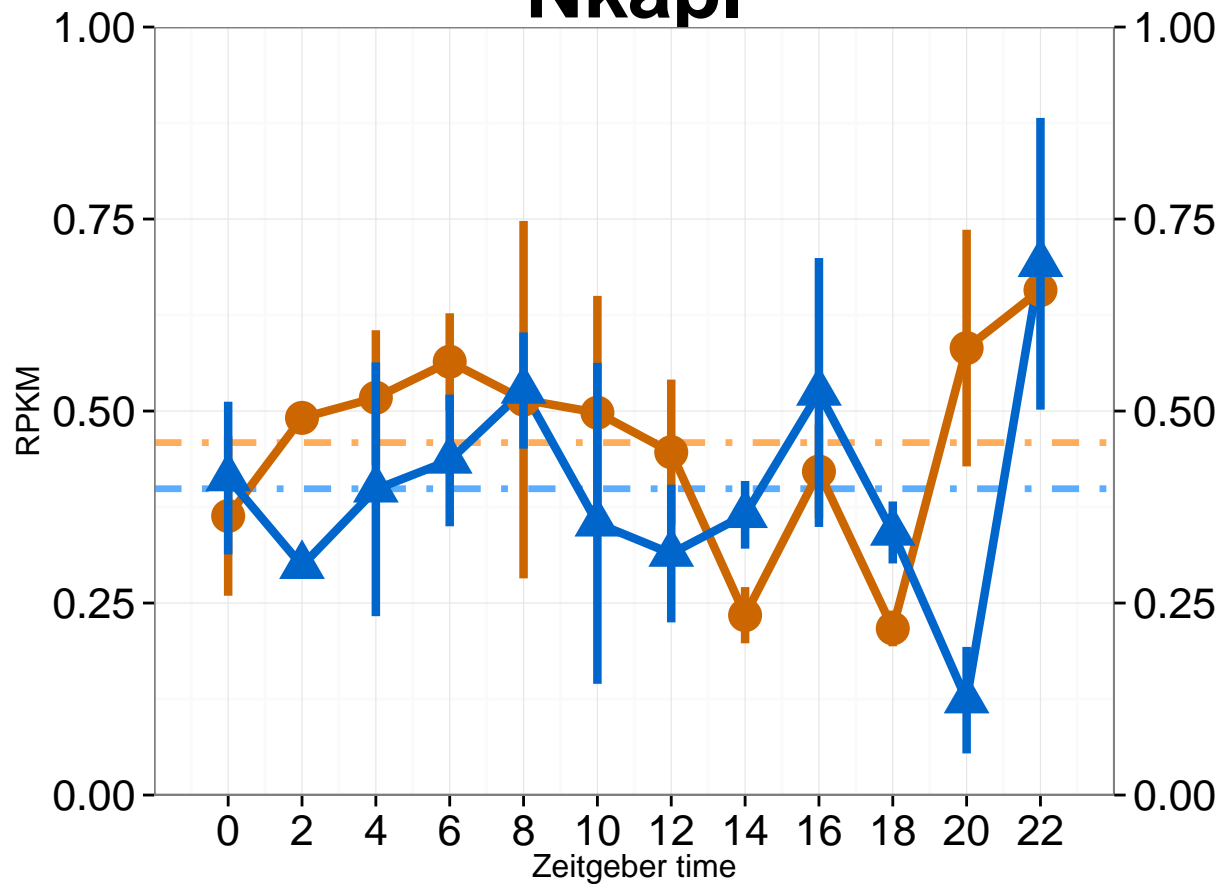

# Nkapl

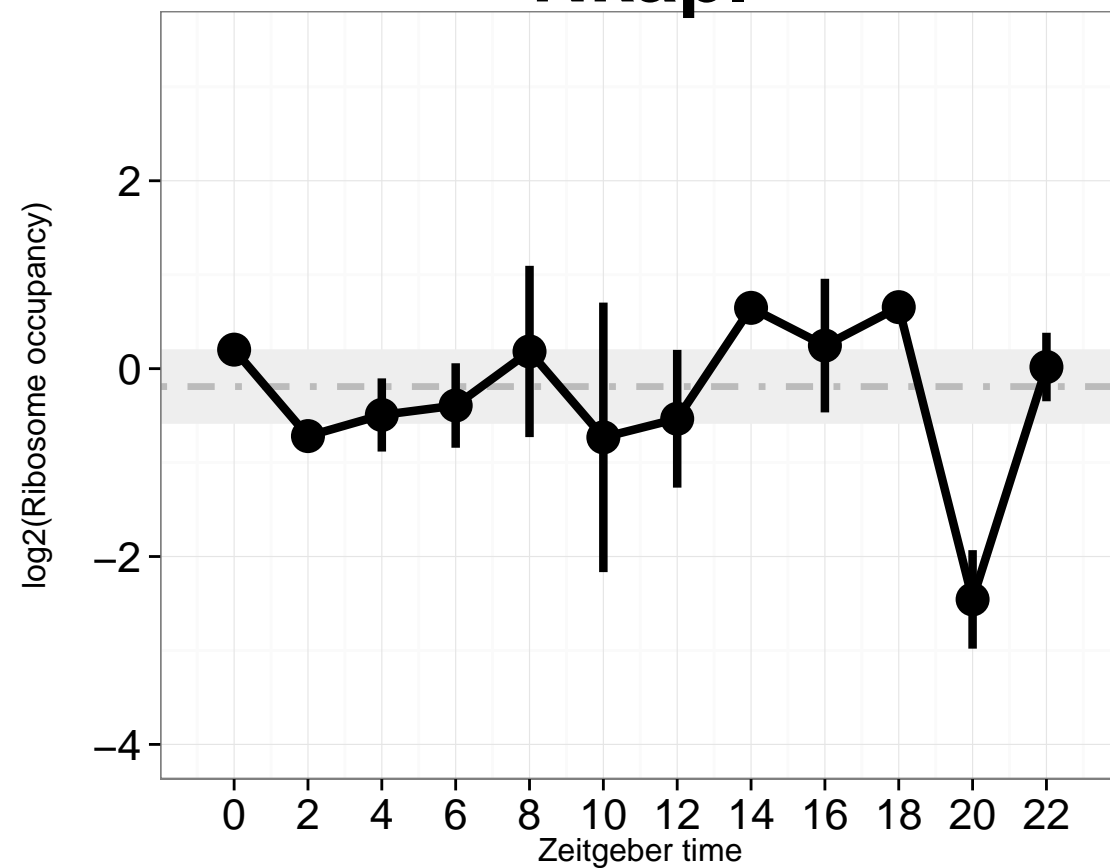

Supplement: Supplementary file 11476 [file 1]

## Sp2

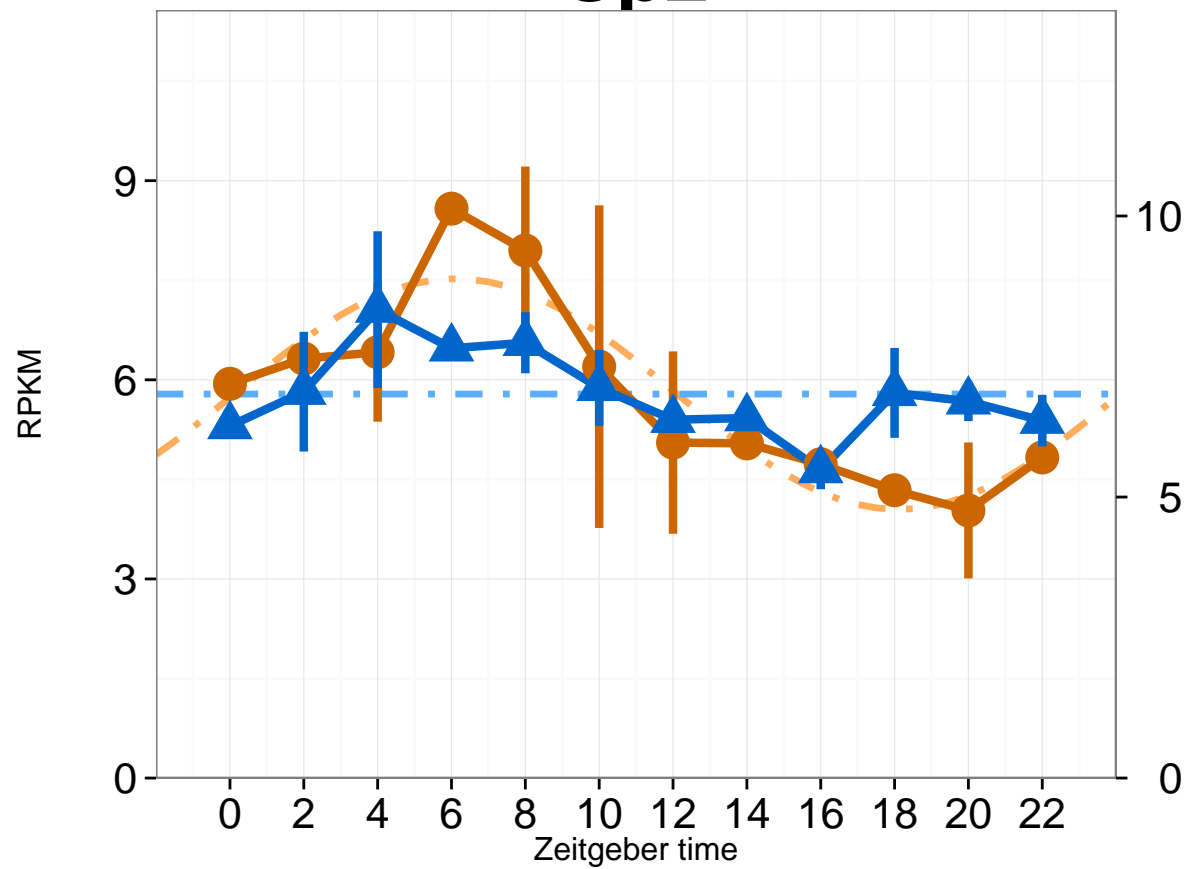

## Sp2

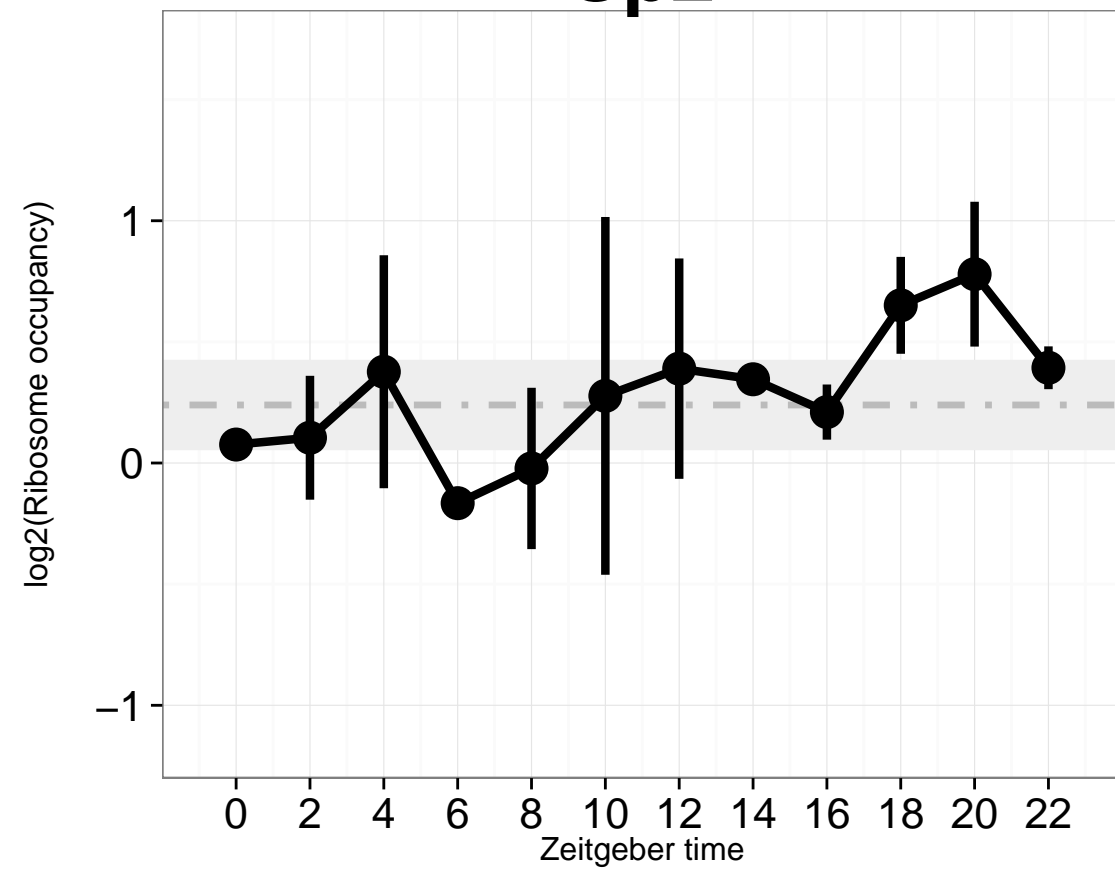

Supplement: Supplementary file 11477 [file 1]

## Wee1

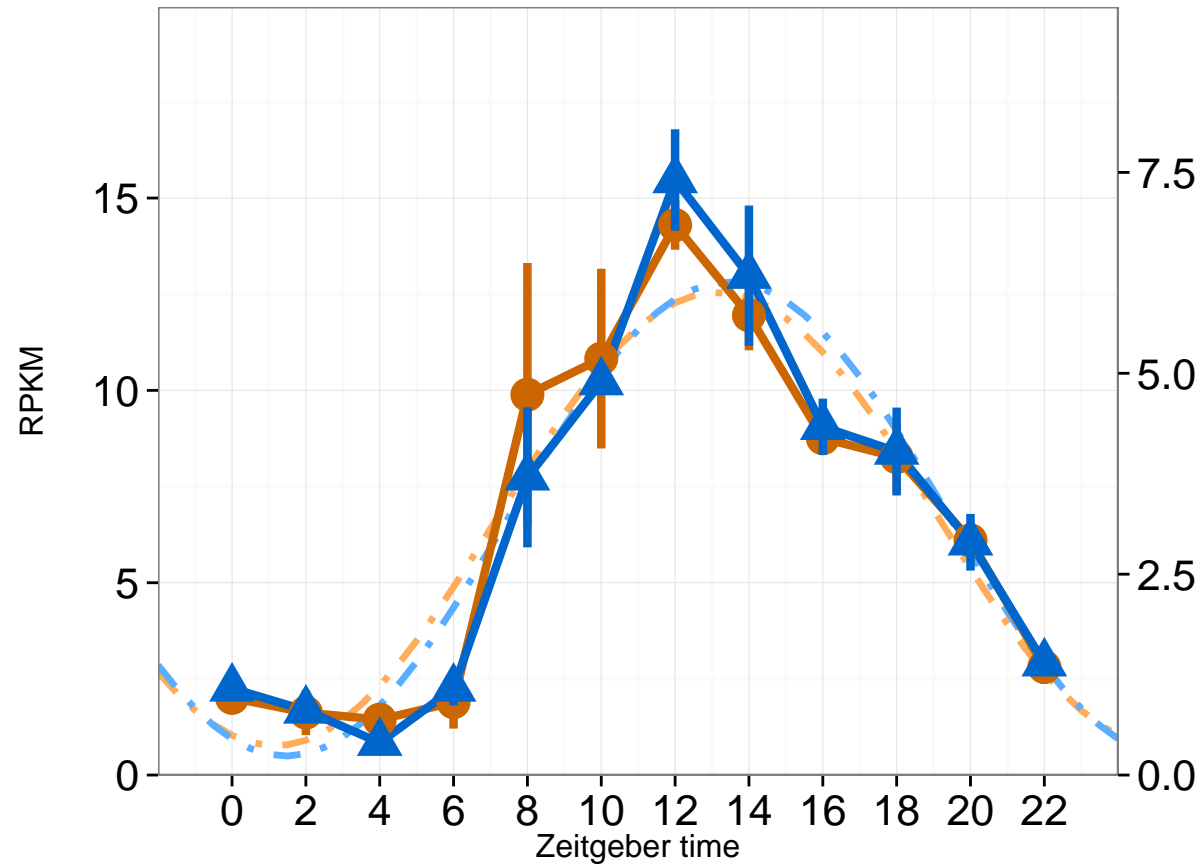

## Wee1

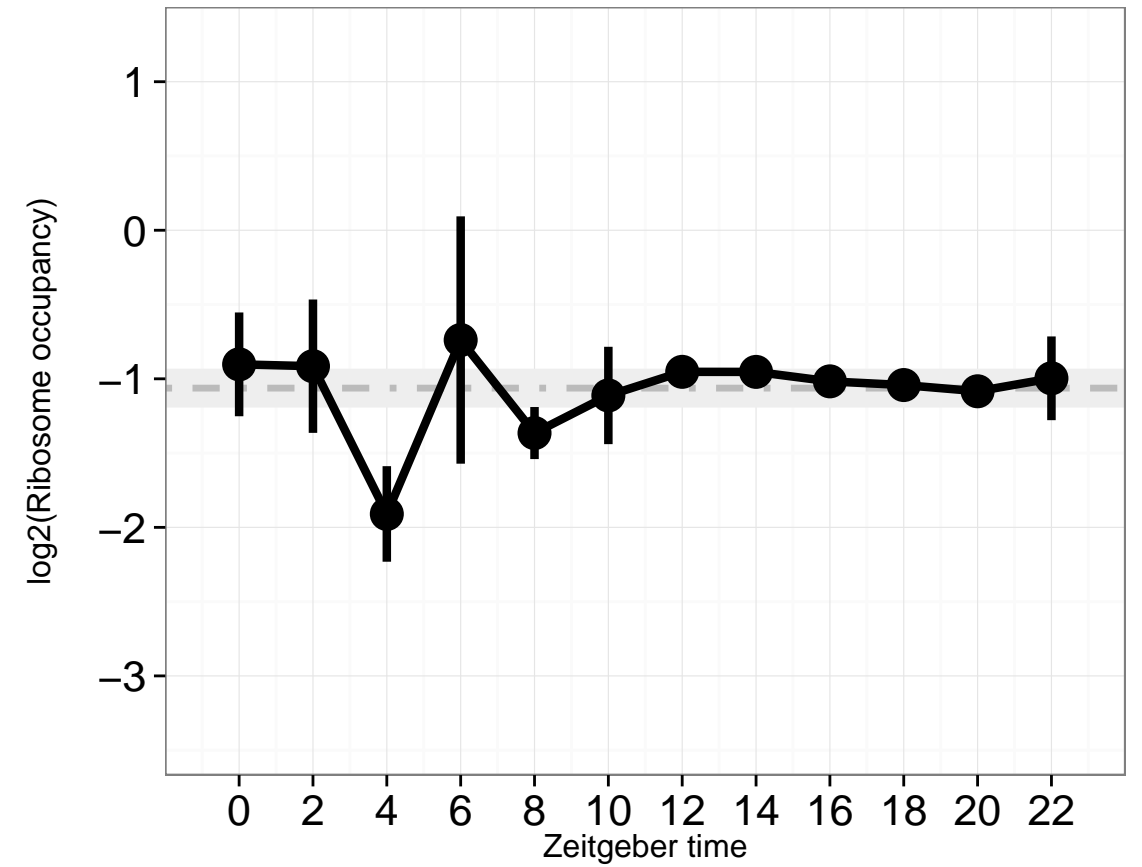

Supplement: Supplementary file 11478 [file 1]

## Tcn2

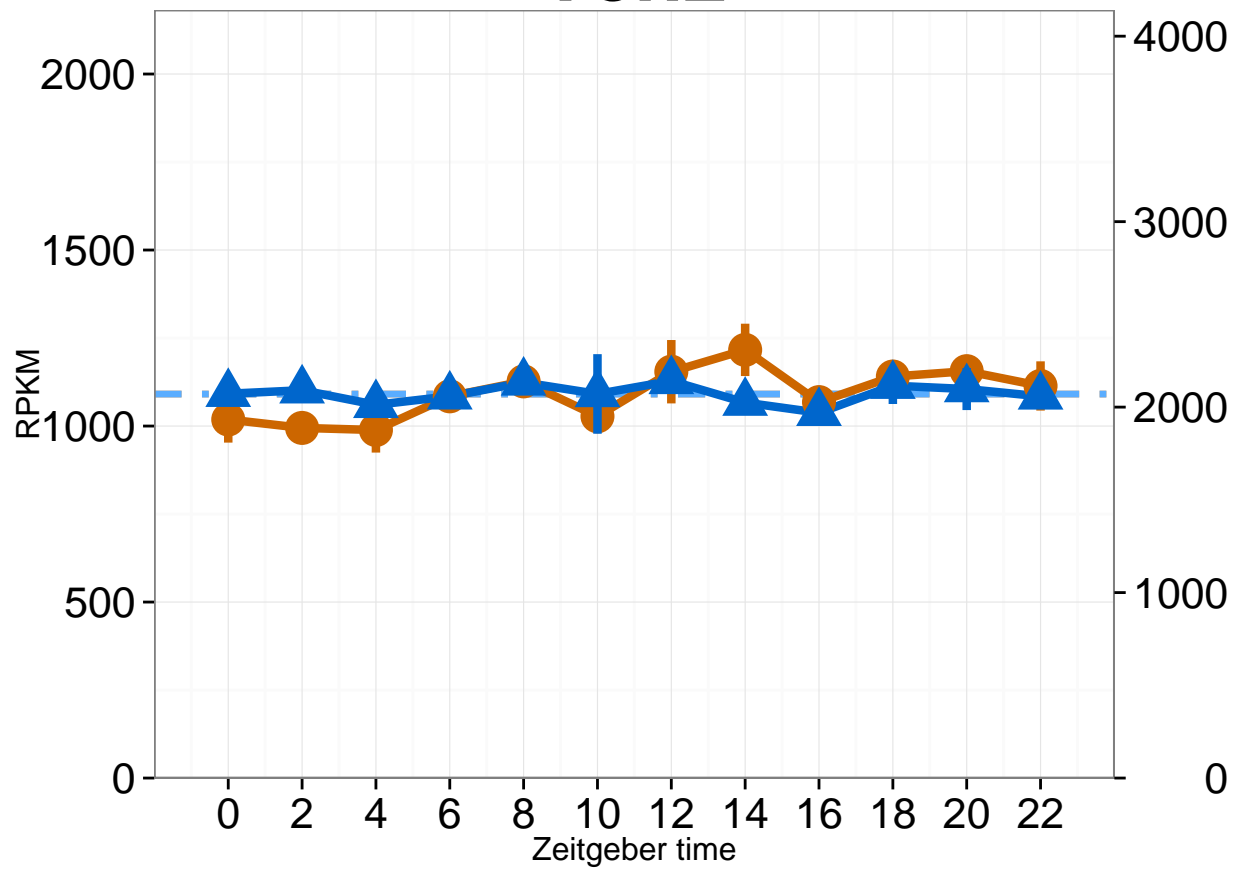

## Tcn2

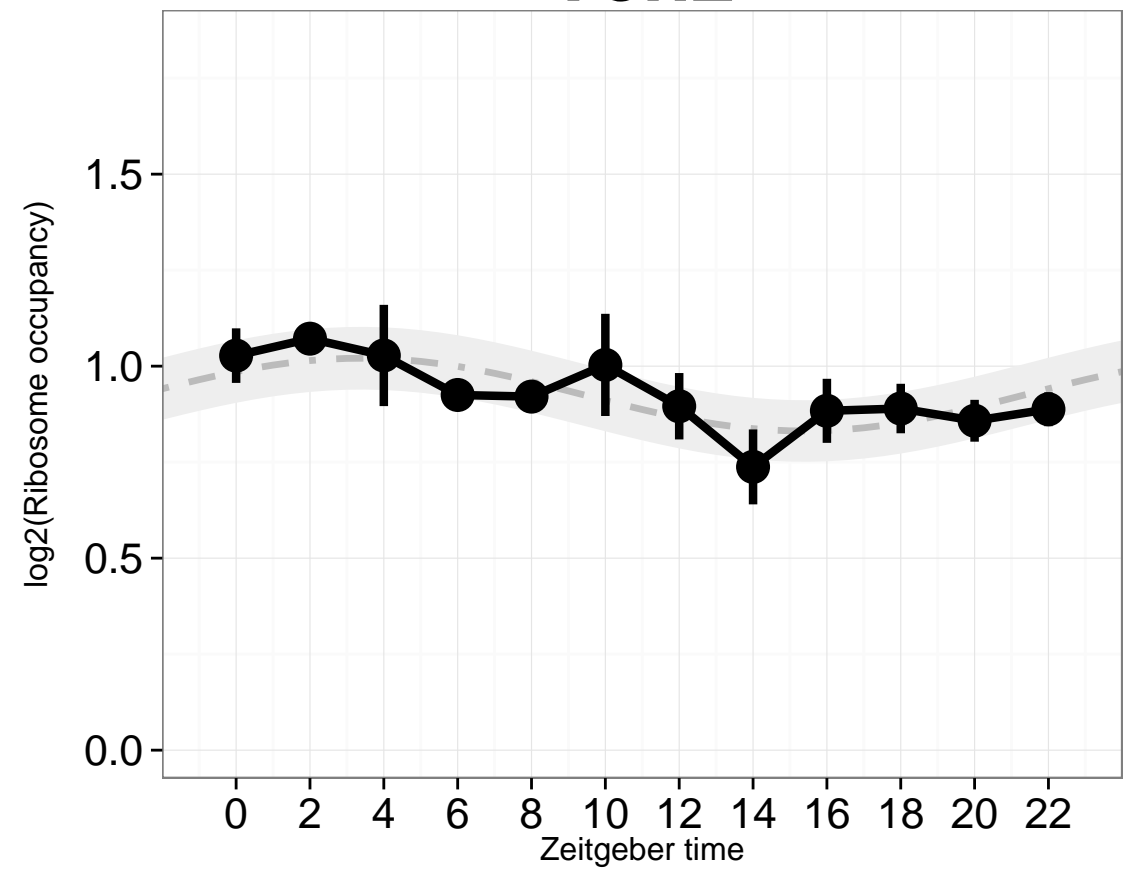

Supplement: Supplementary file 11479 [file 1]

# Rasa4

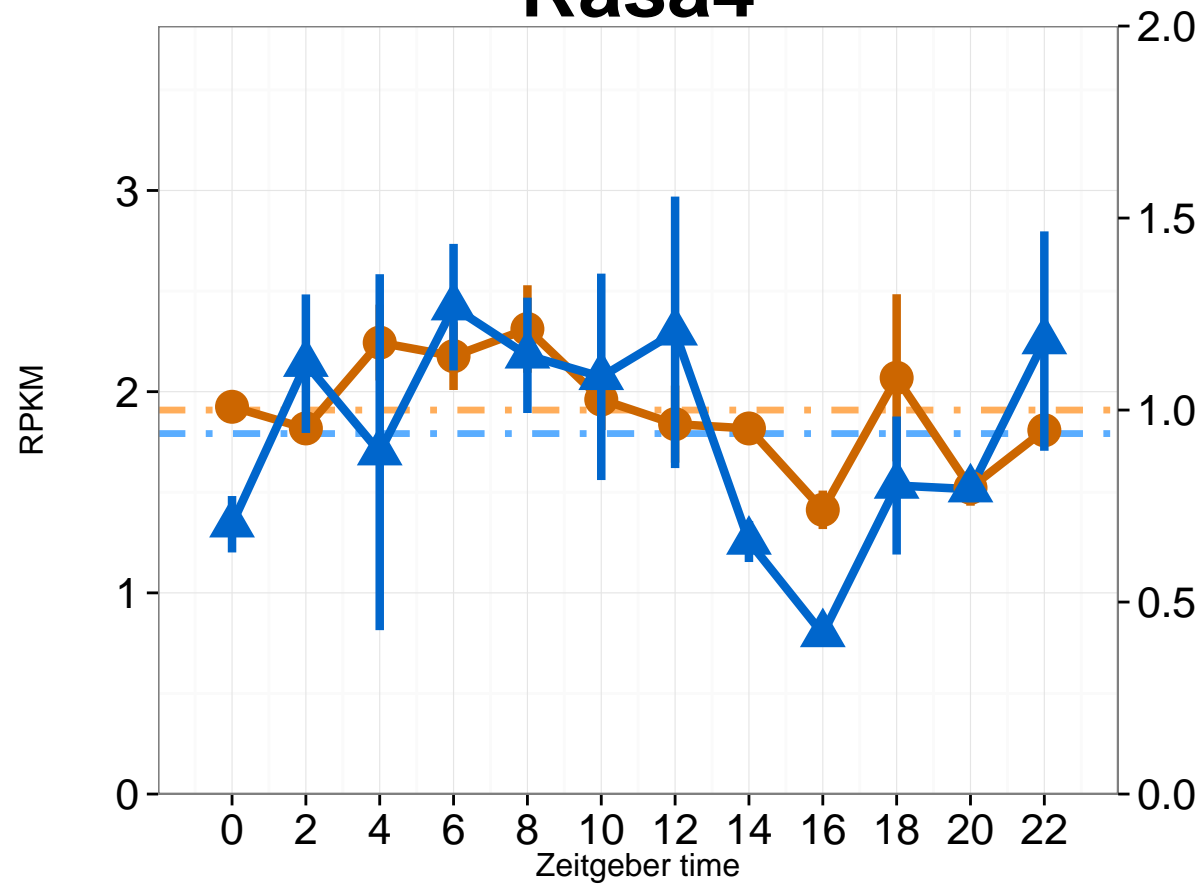

# Rasa4

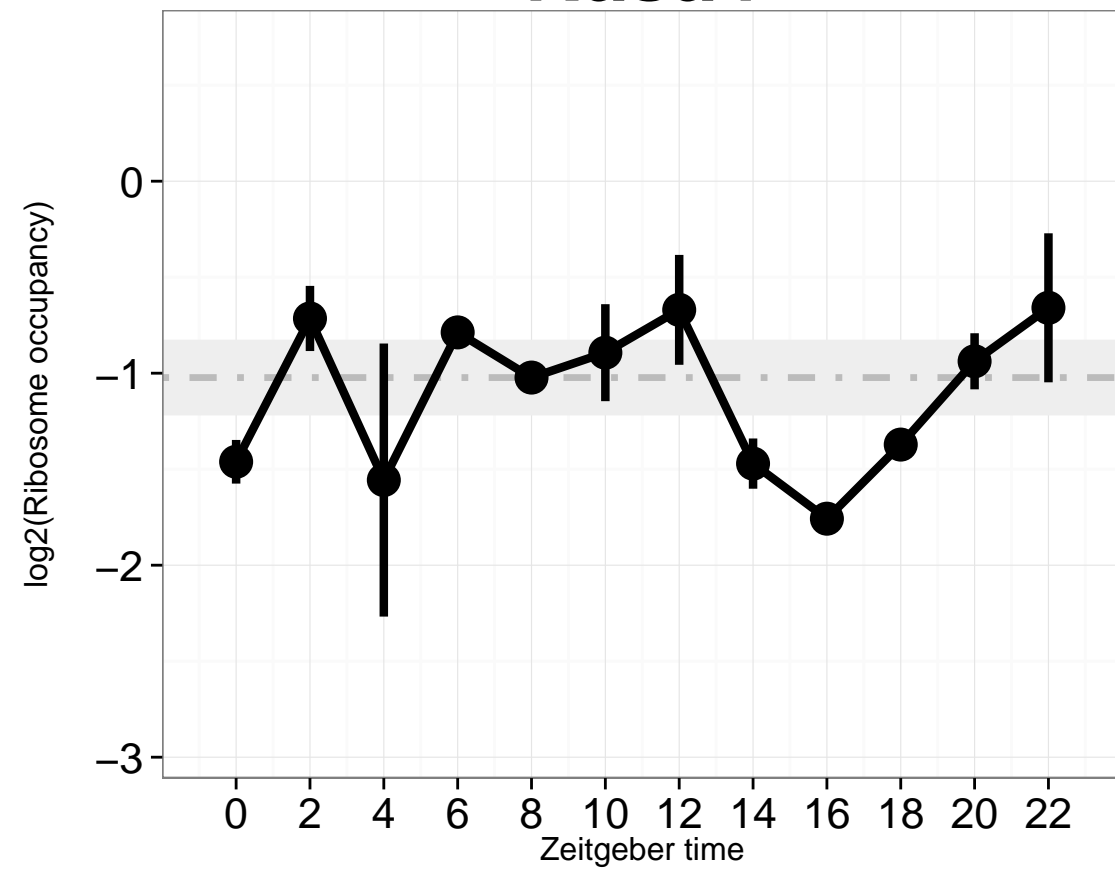

Supplement: Supplementary file 11480 [file 1]

# Capza2

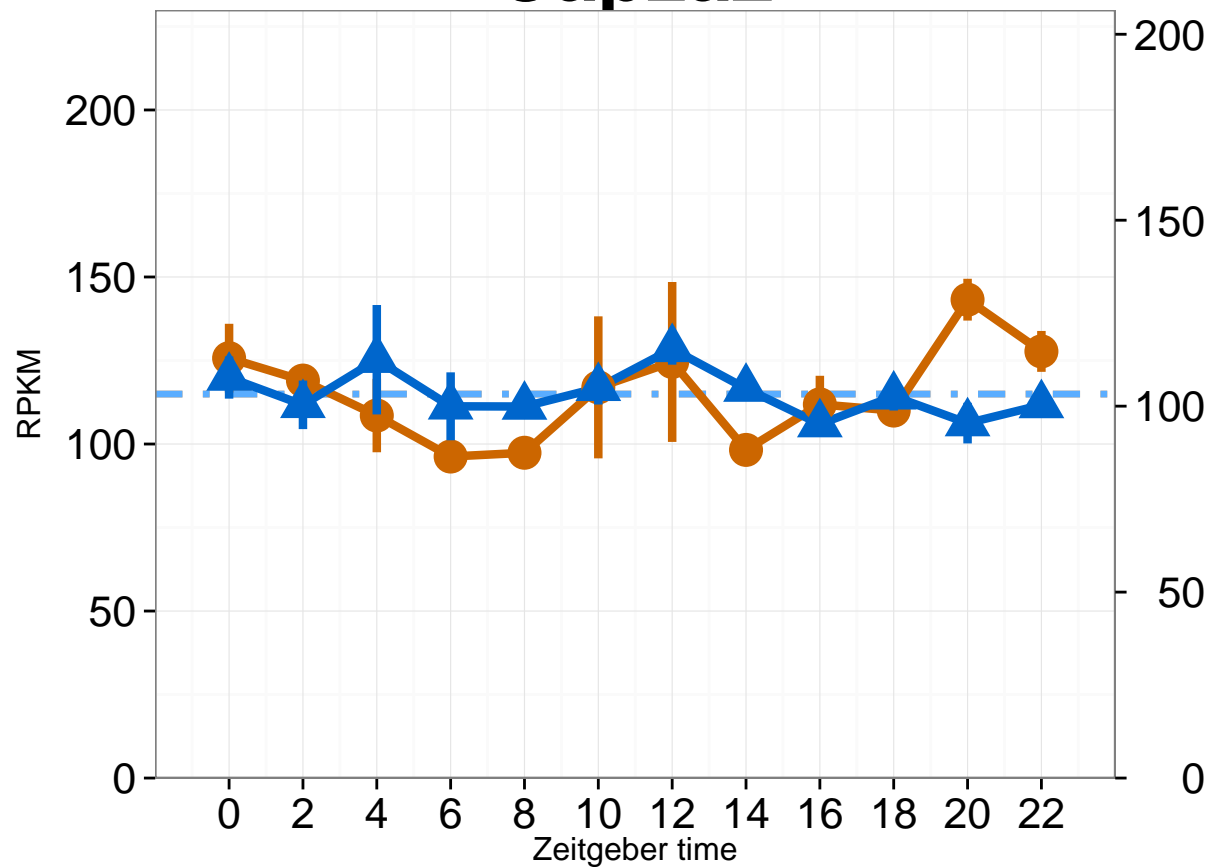

# Capza2

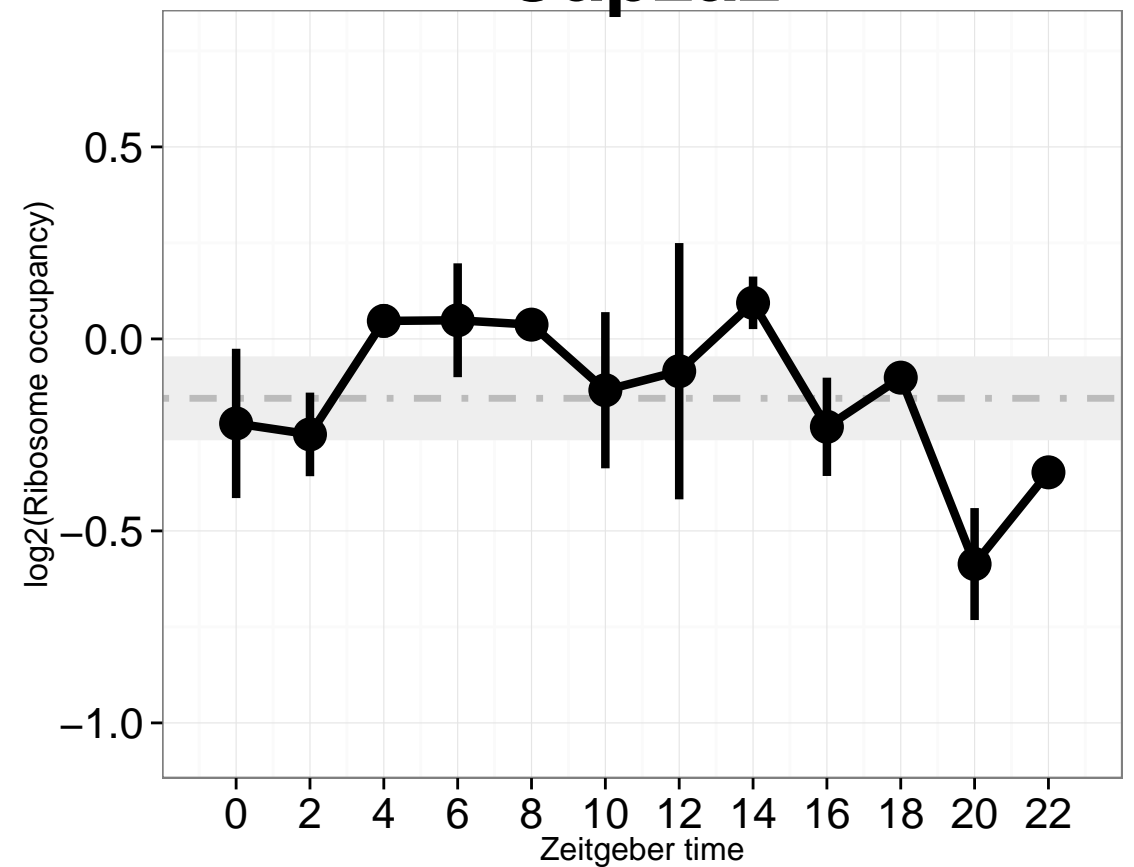

Supplement: Supplementary file 11481 [file 1]

## Gmnds

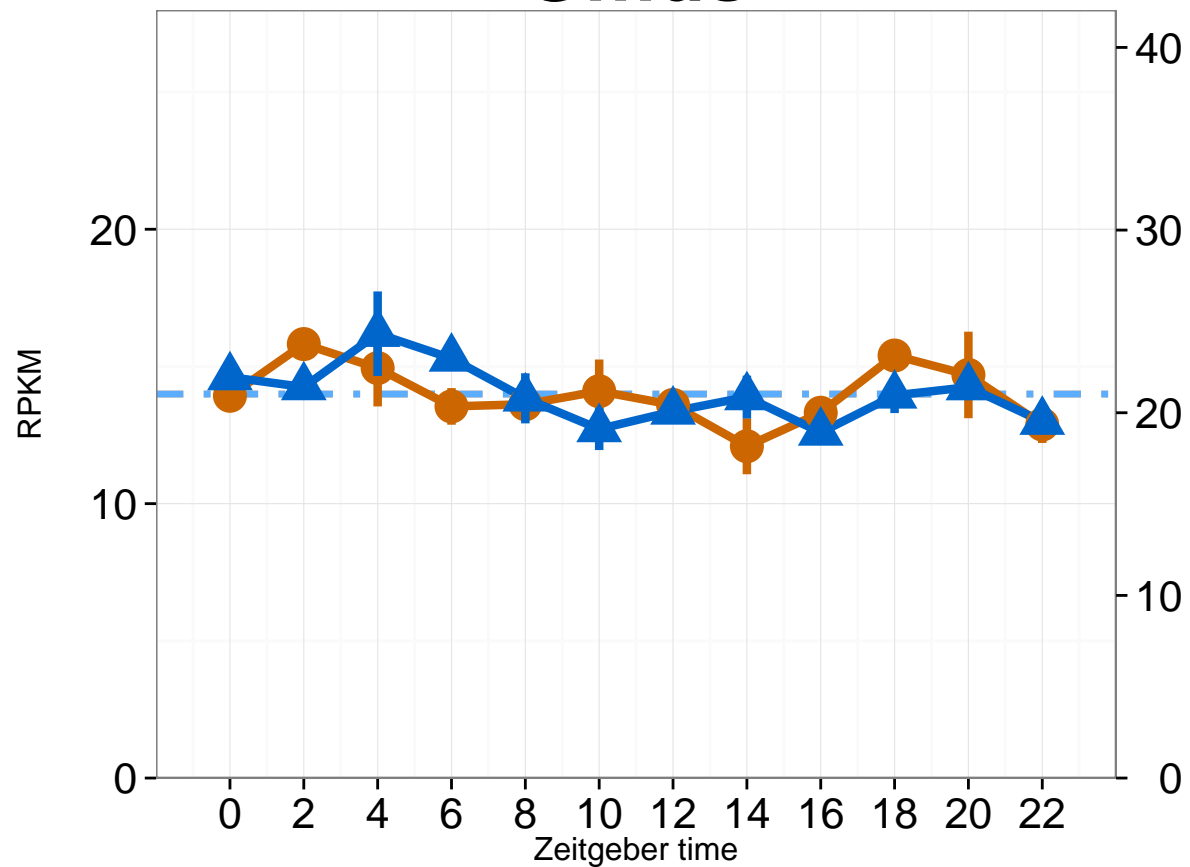

## Gmnds

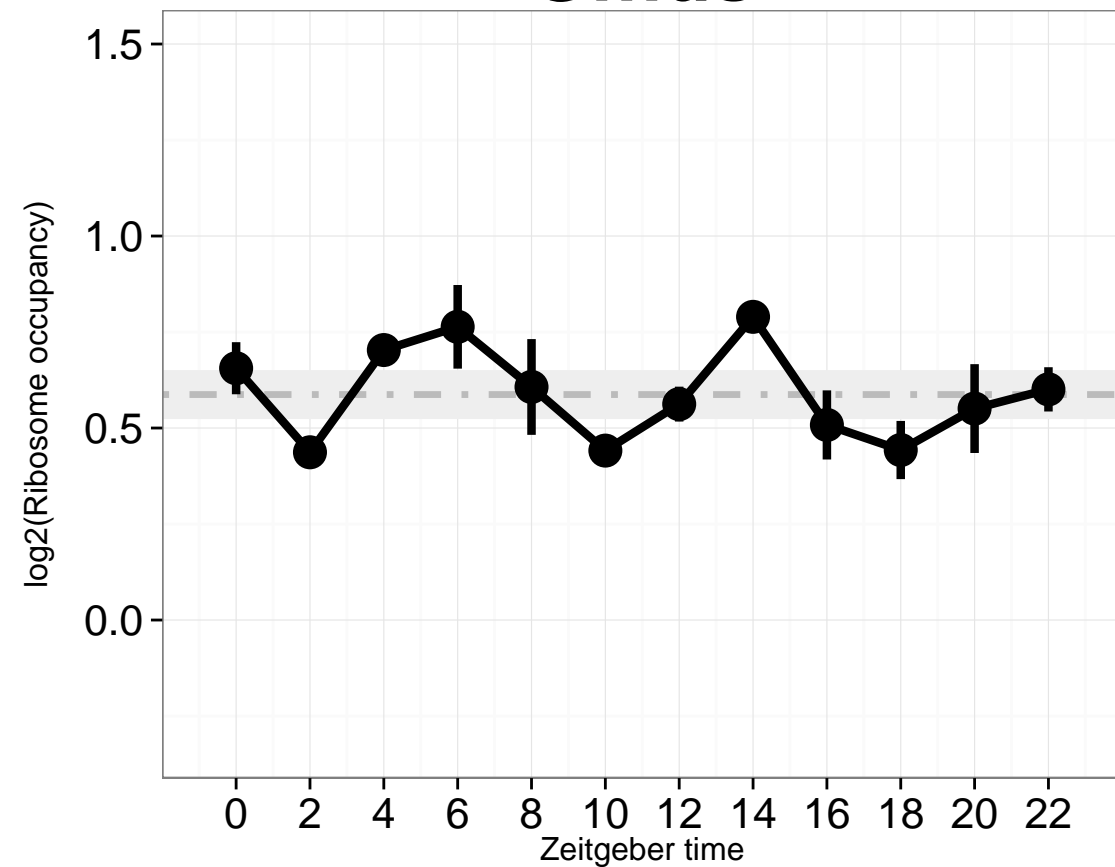

Supplement: Supplementary file 11482 [file 1]

# Plekhb1

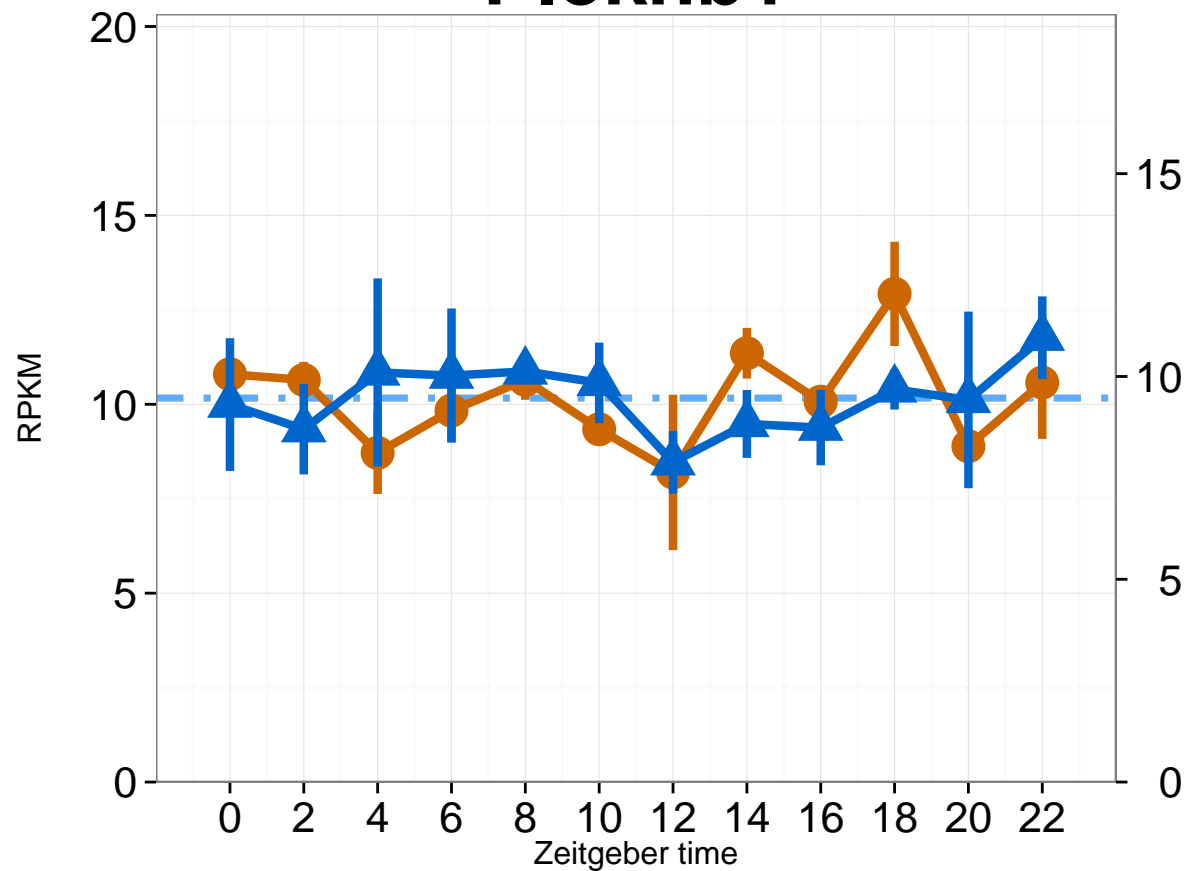

# Plekhb1

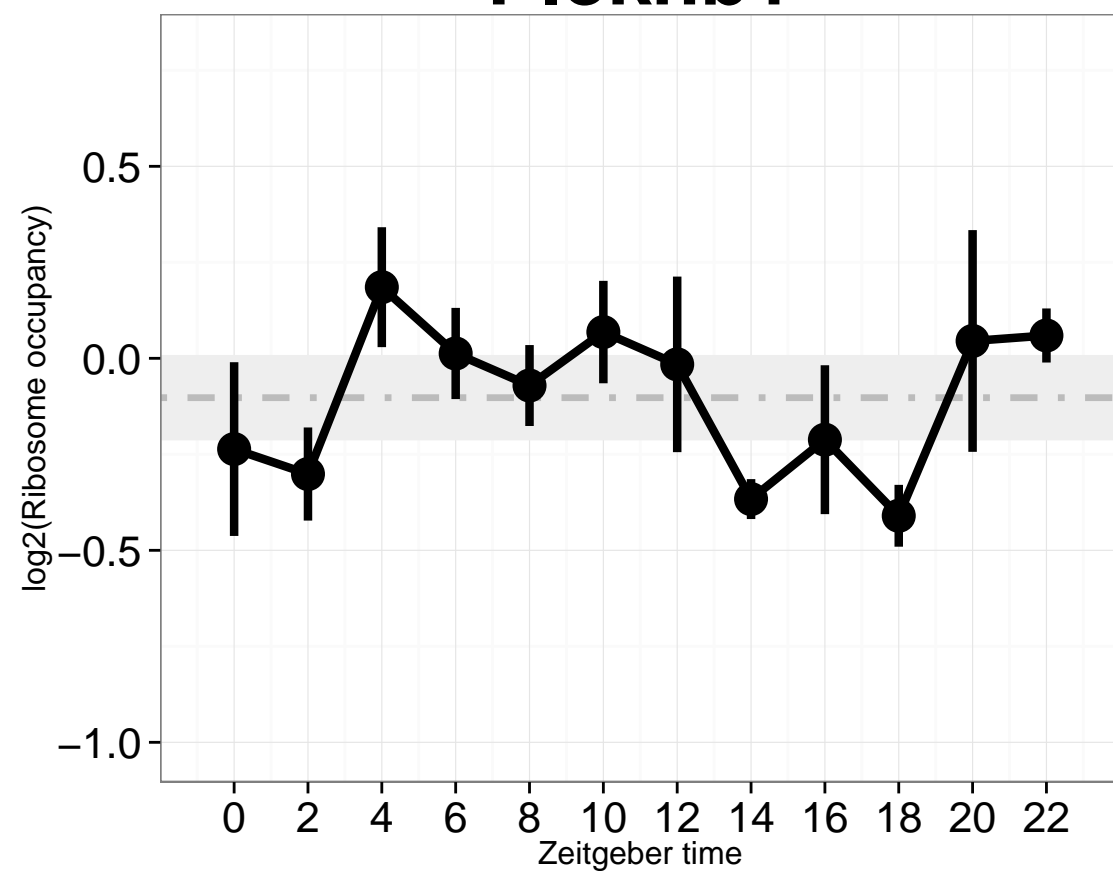

Supplement: Supplementary file 11483 [file 1]

## Cxcl16

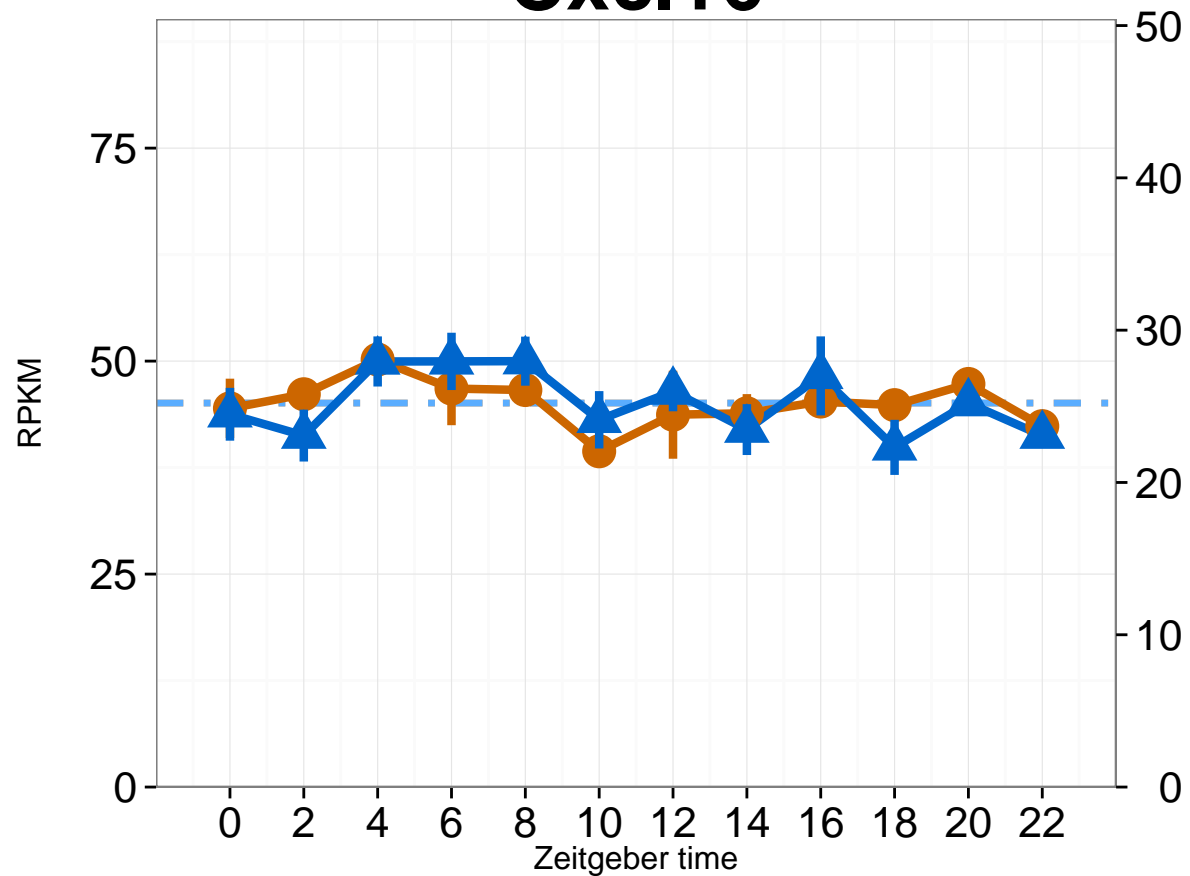

## Cxcl16

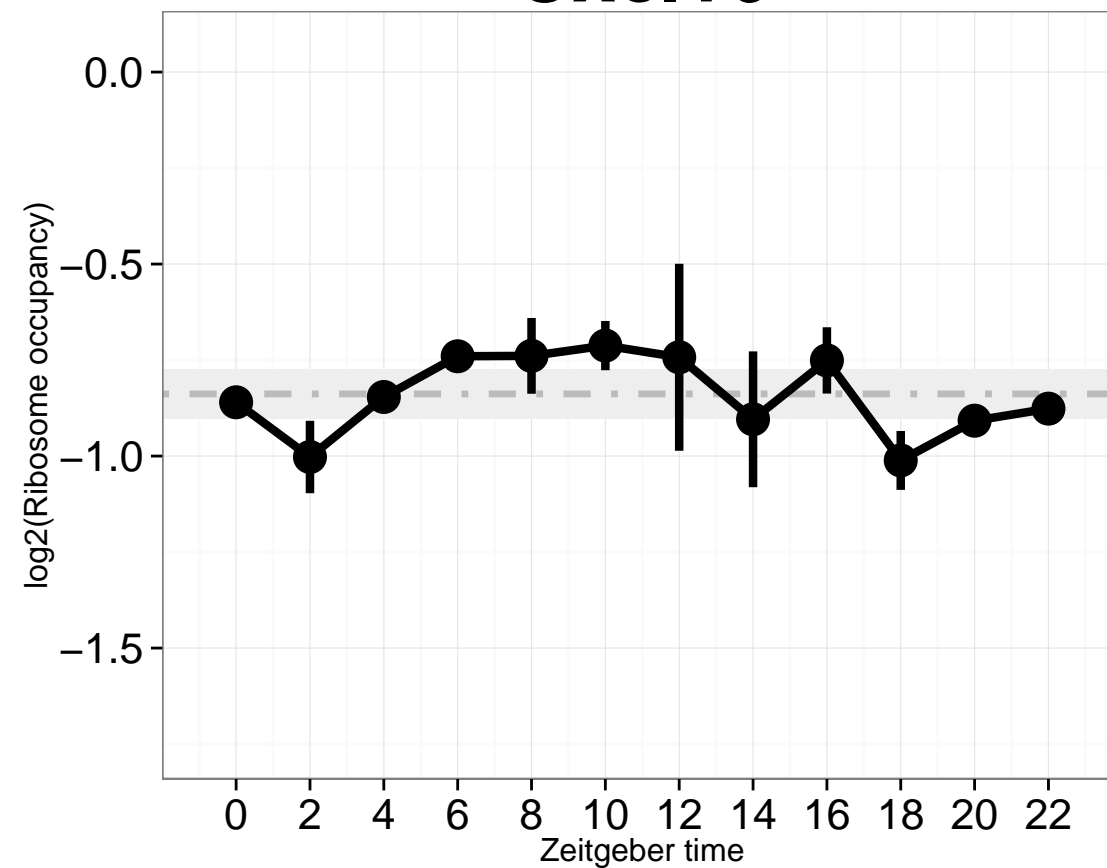

Supplement: Supplementary file 11484 [file 1]

## AW209491

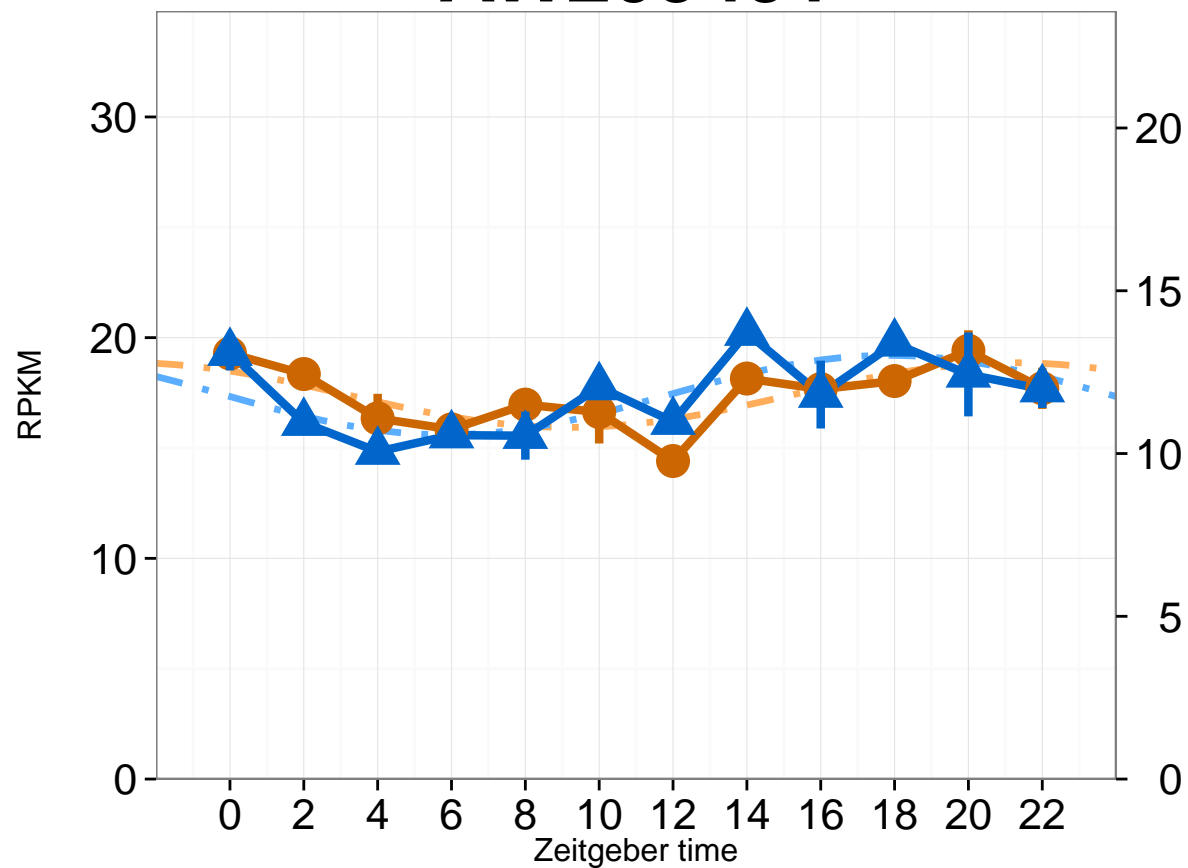

## AW209491

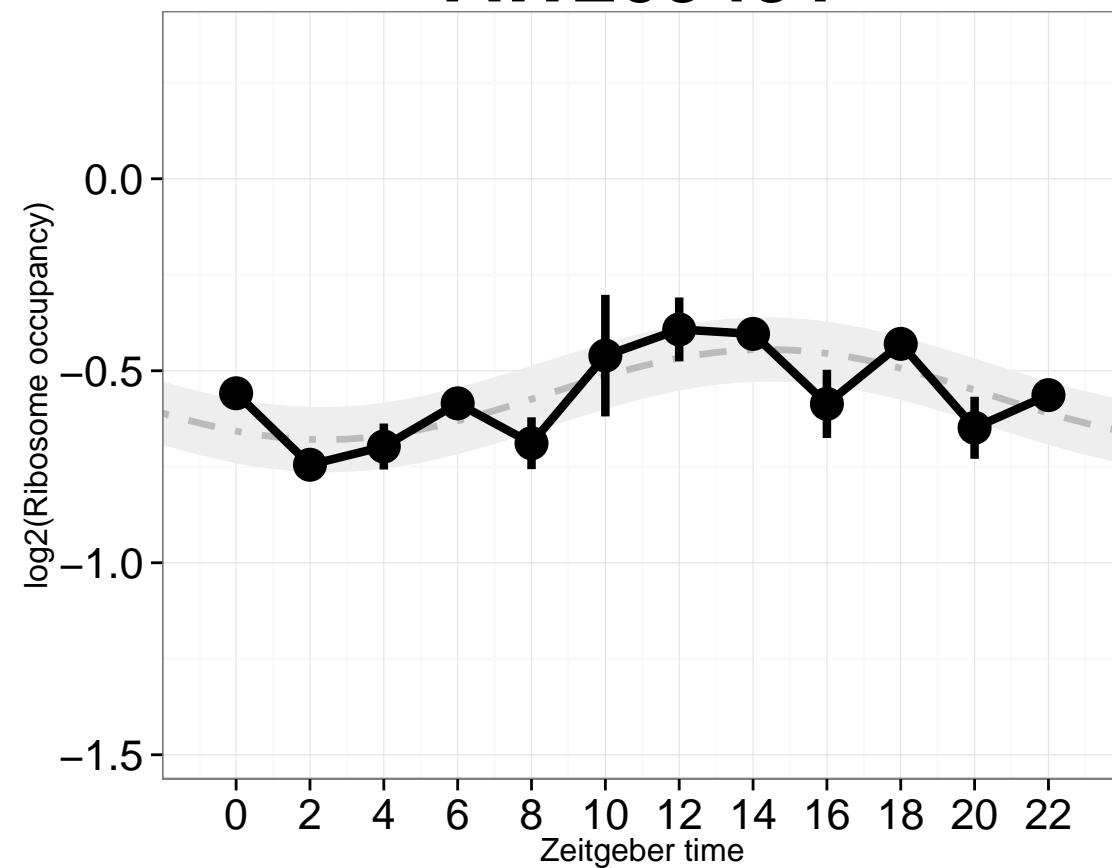

Supplement: Supplementary file 11485 [file 1]

## Cideb

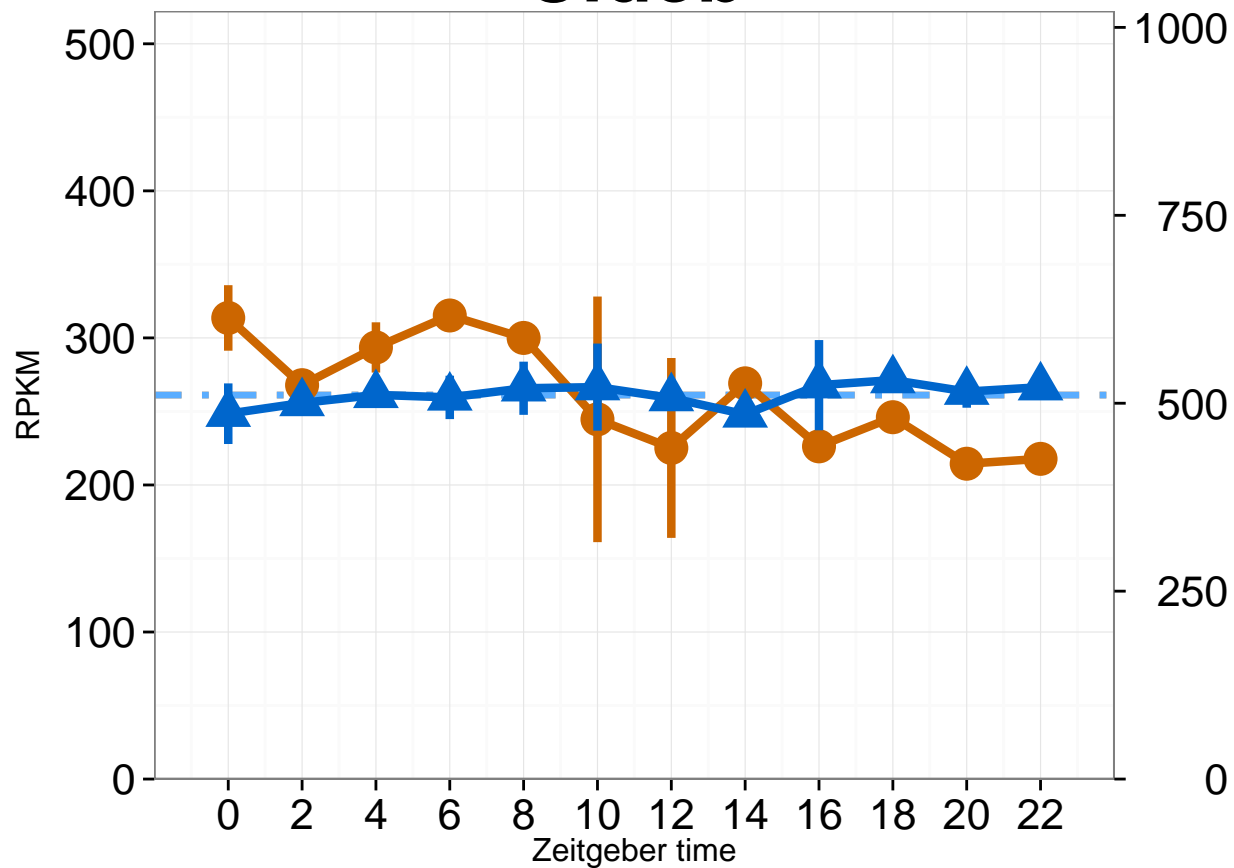

## Cideb

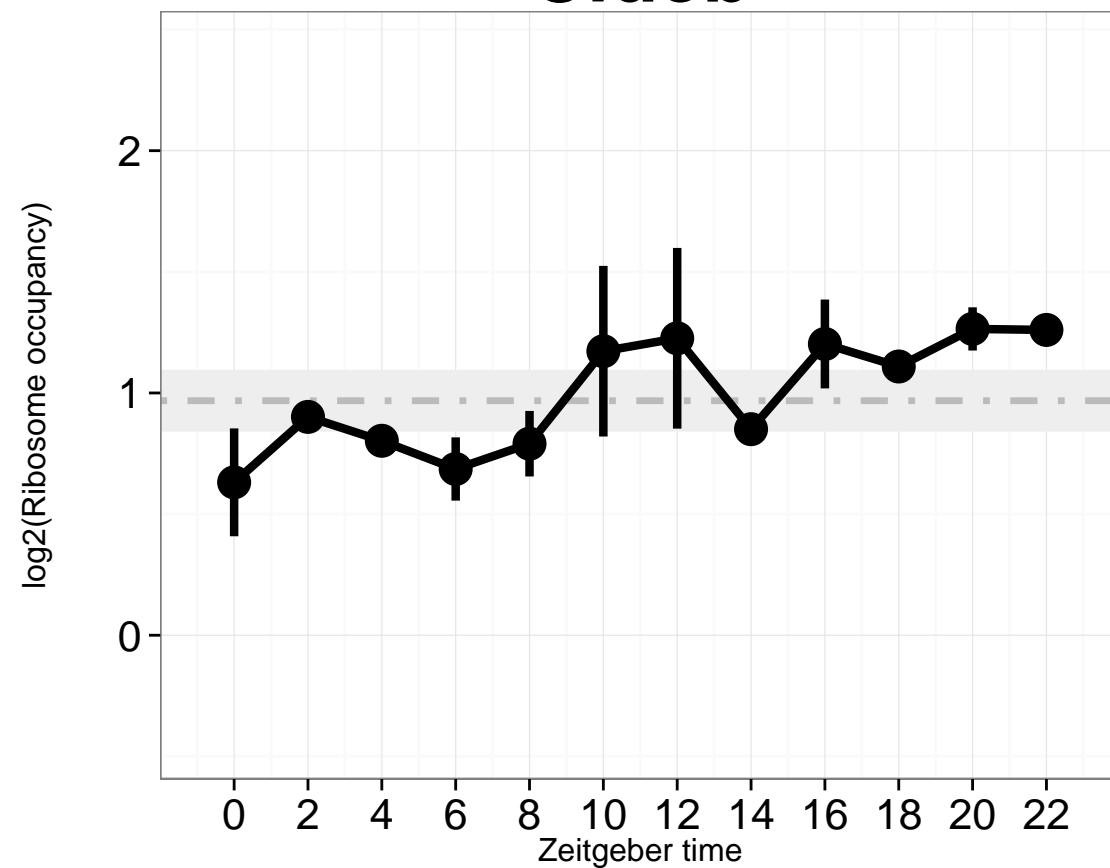

Supplement: Supplementary file 11486 [file 1]

# Ddx17

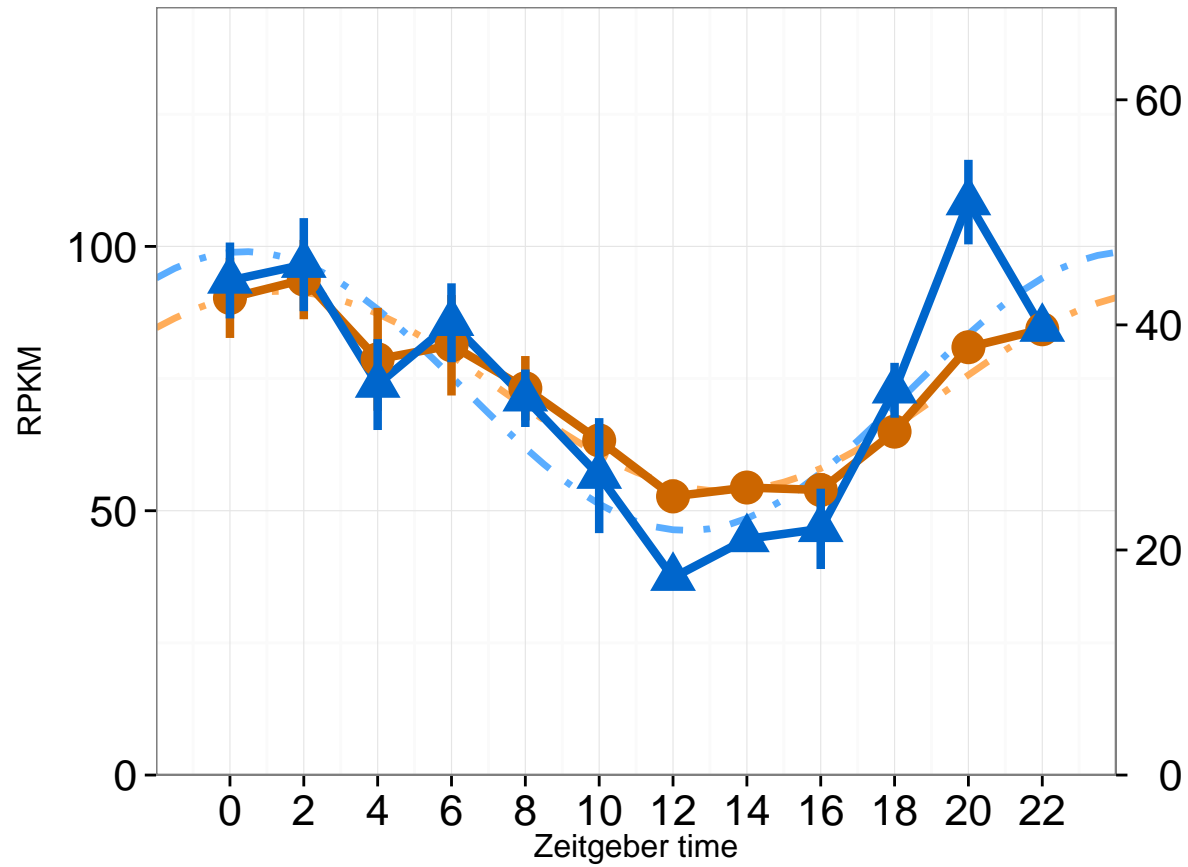

# Ddx17

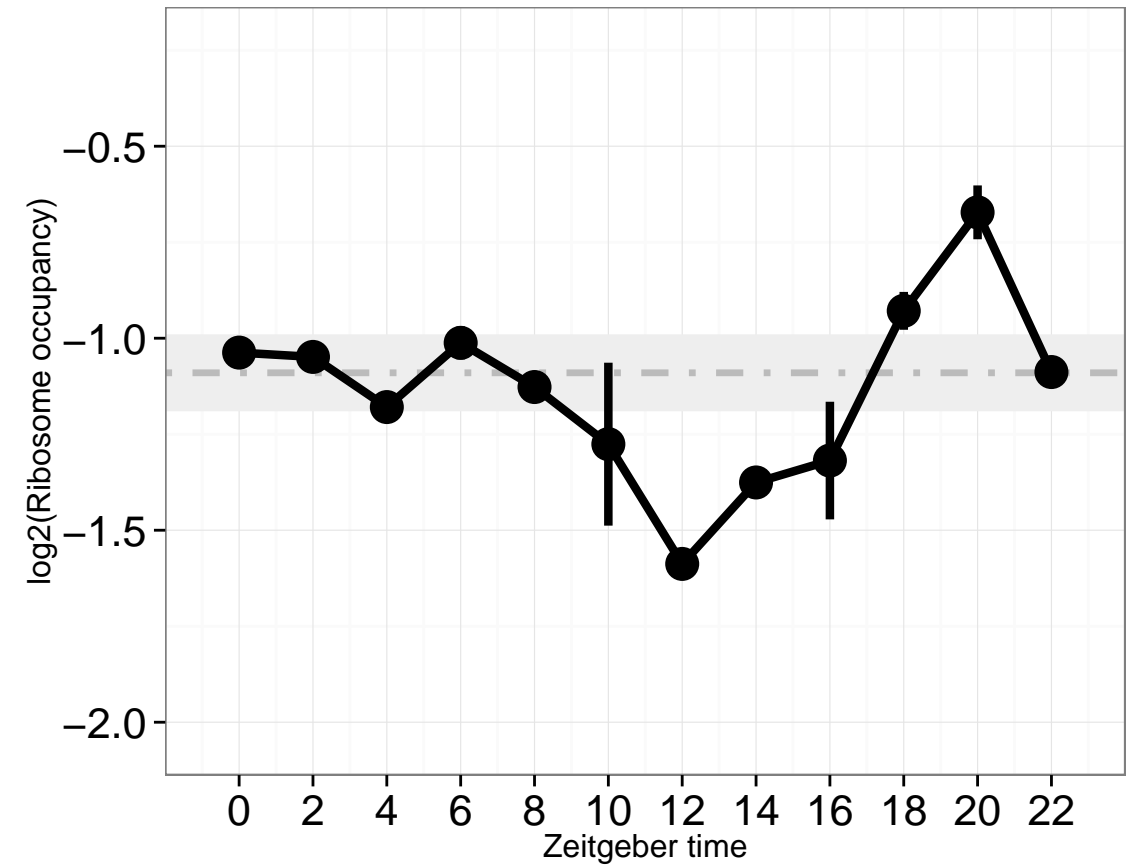

Supplement: Supplementary file 11487 [file 1]

## Tha1

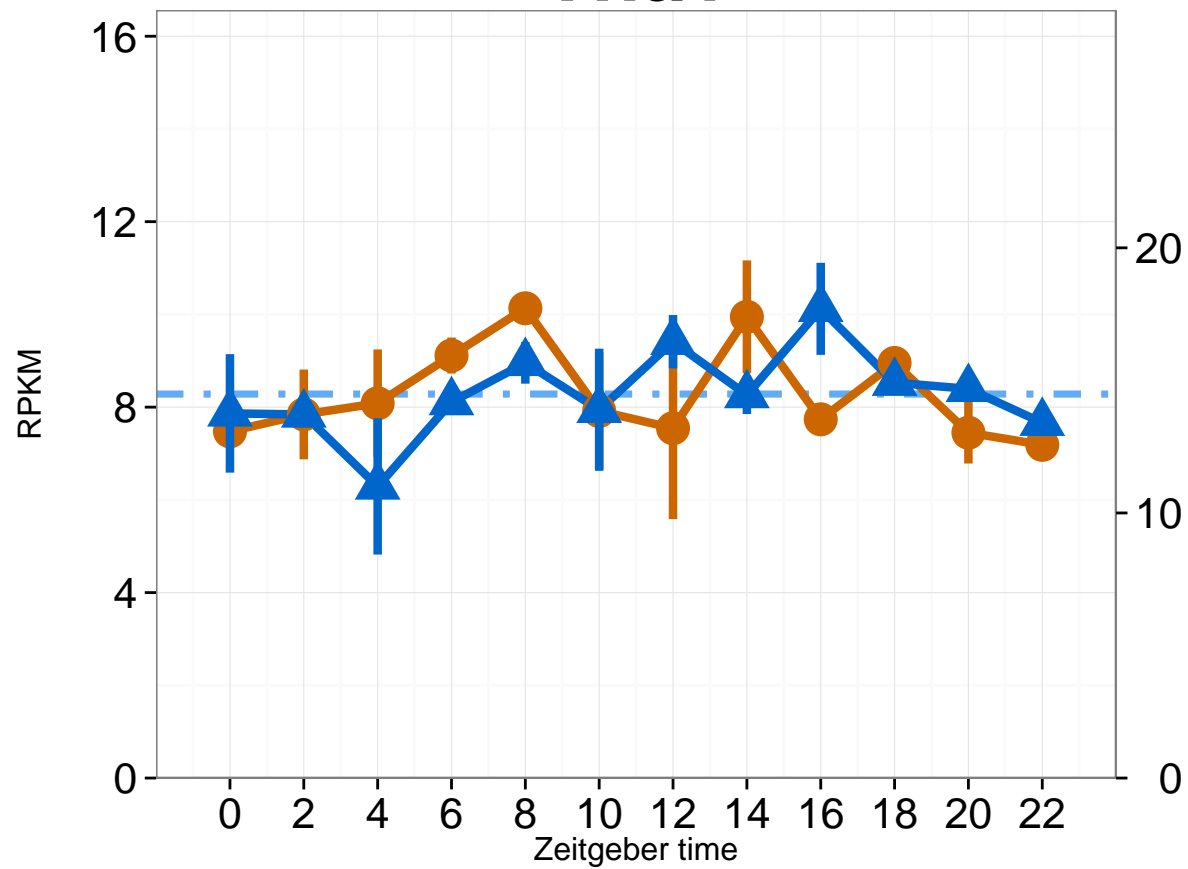

## Tha1

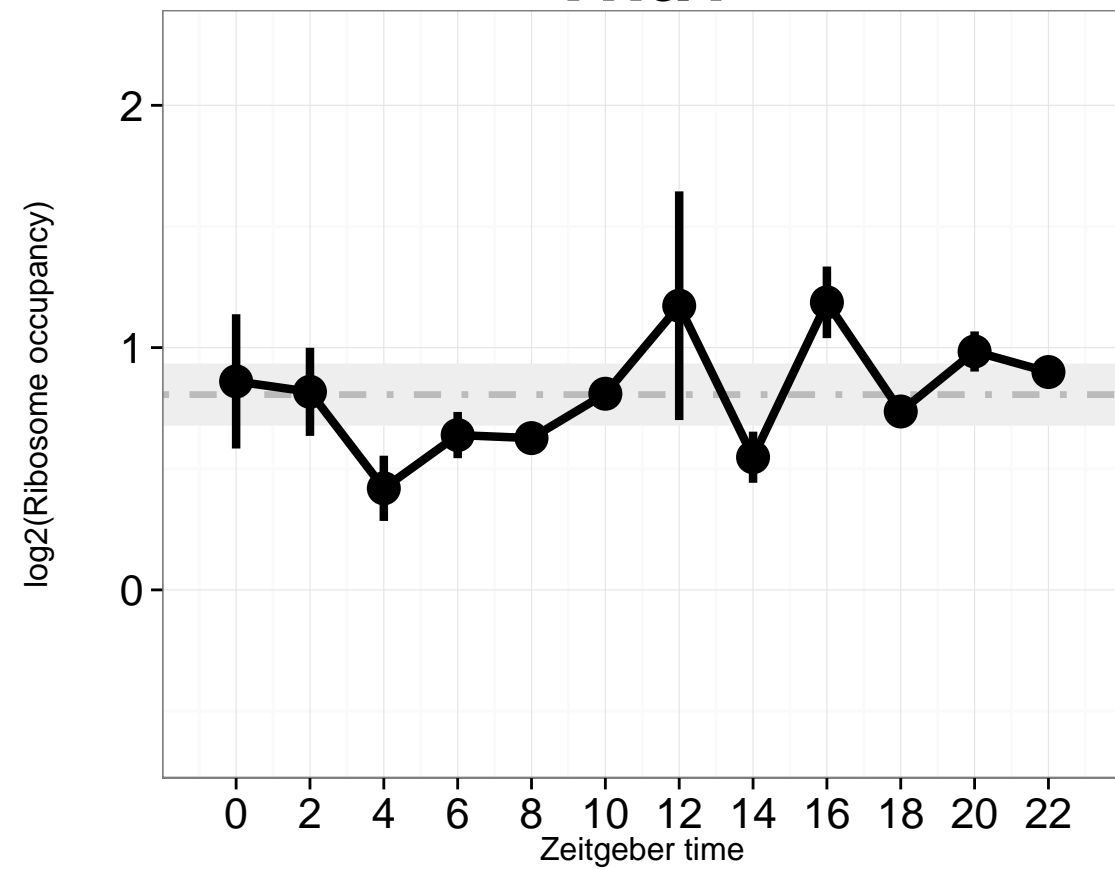

Supplement: Supplementary file 11488 [file 1]

## Mbd4

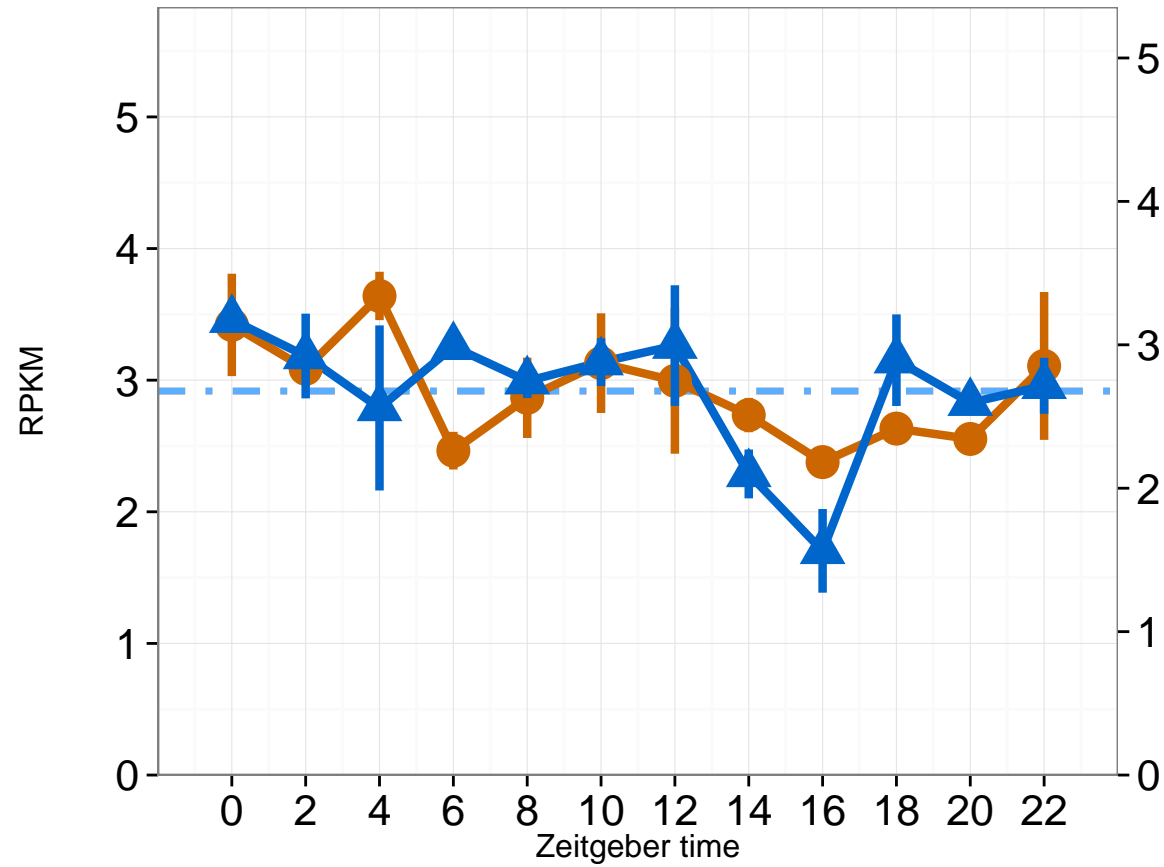

## Mbd4

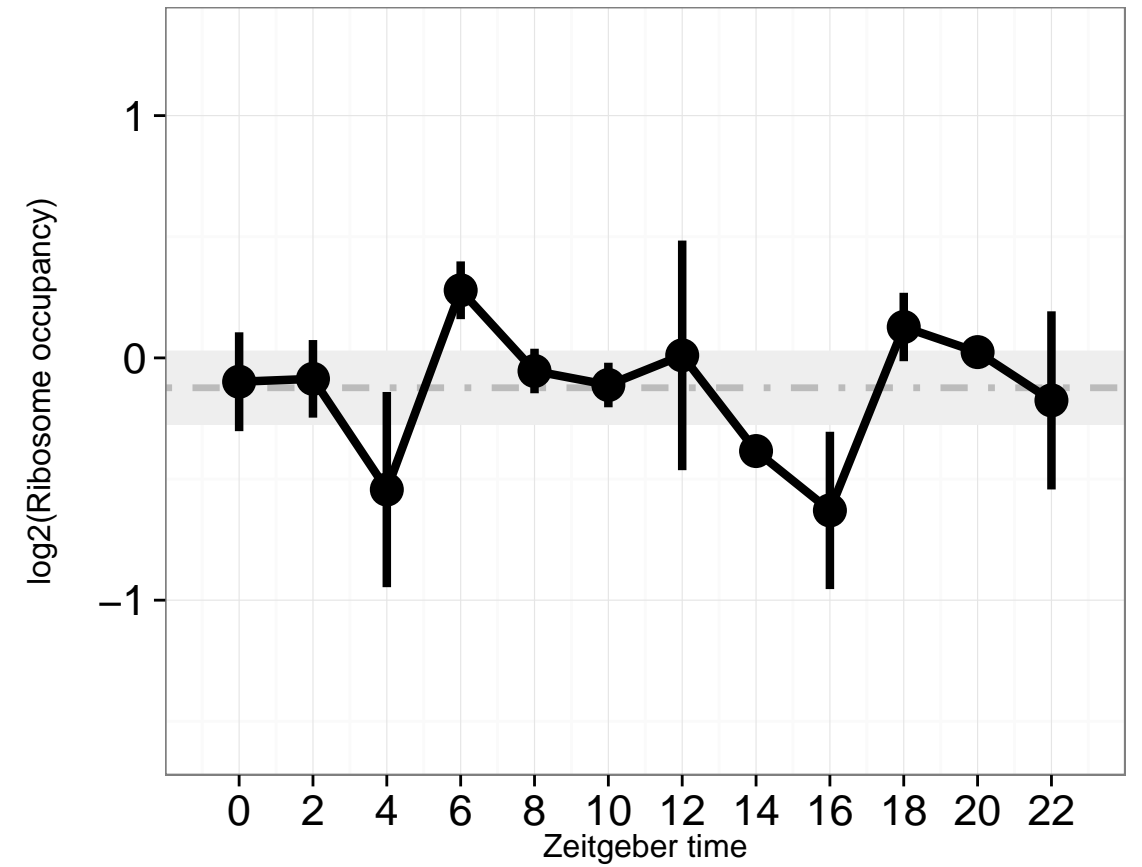

Supplement: Supplementary file 11489 [file 1]

# Sh3bgrl

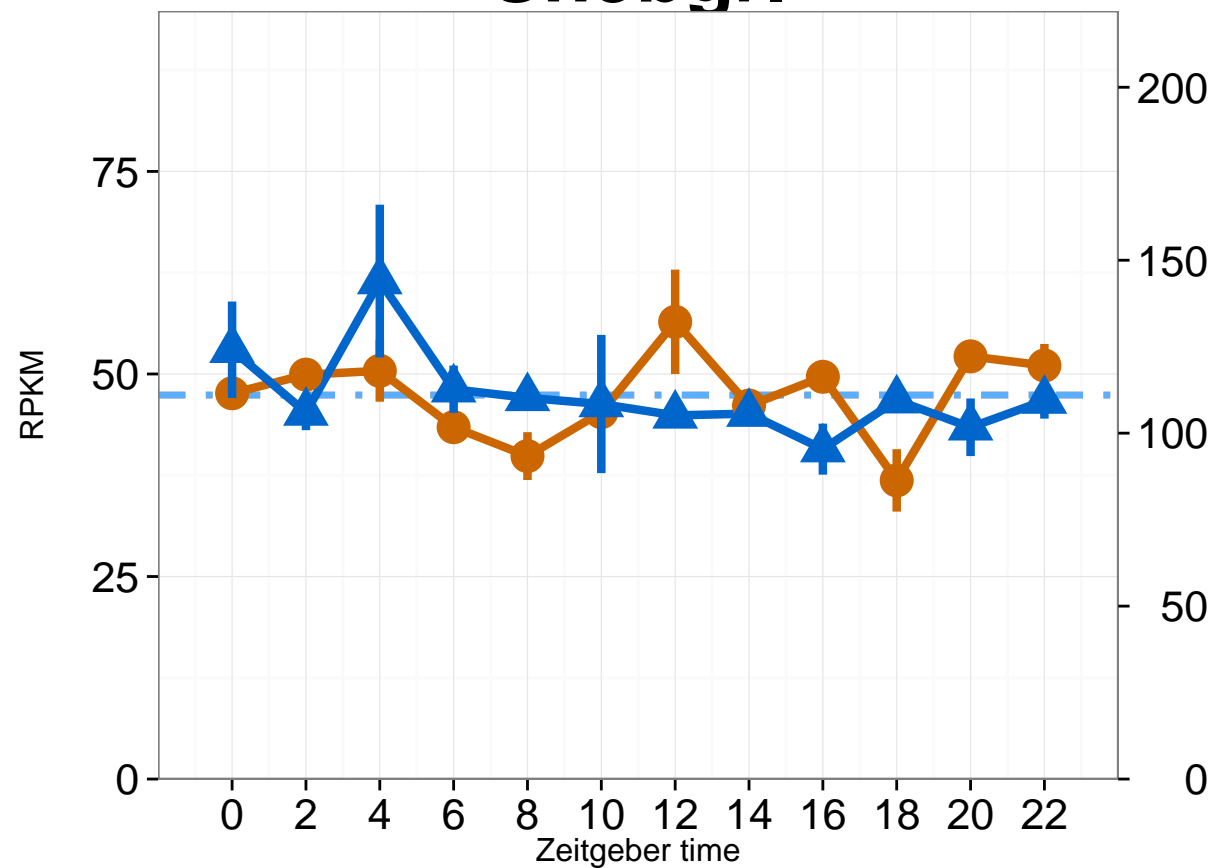

# Sh3bgrl

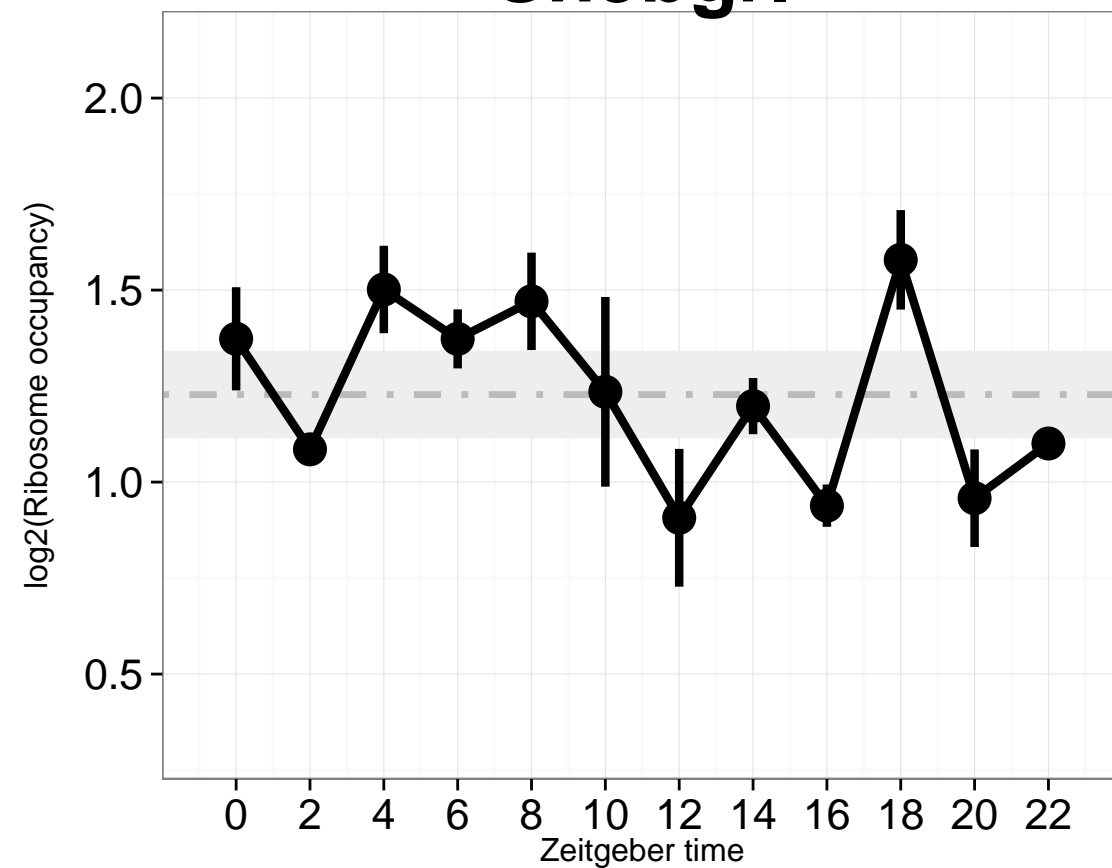

Supplement: Supplementary file 11490 [file 1]

# Ciapin1

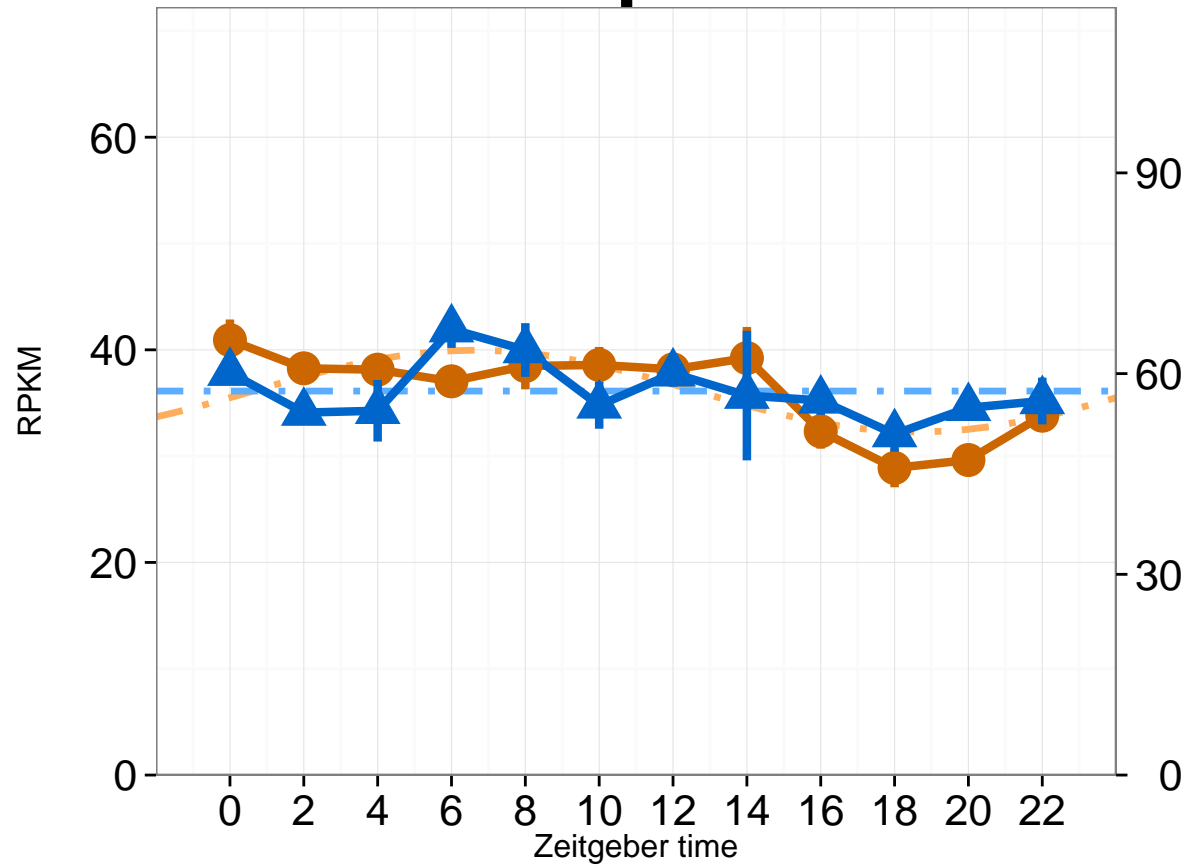

# Ciapin1

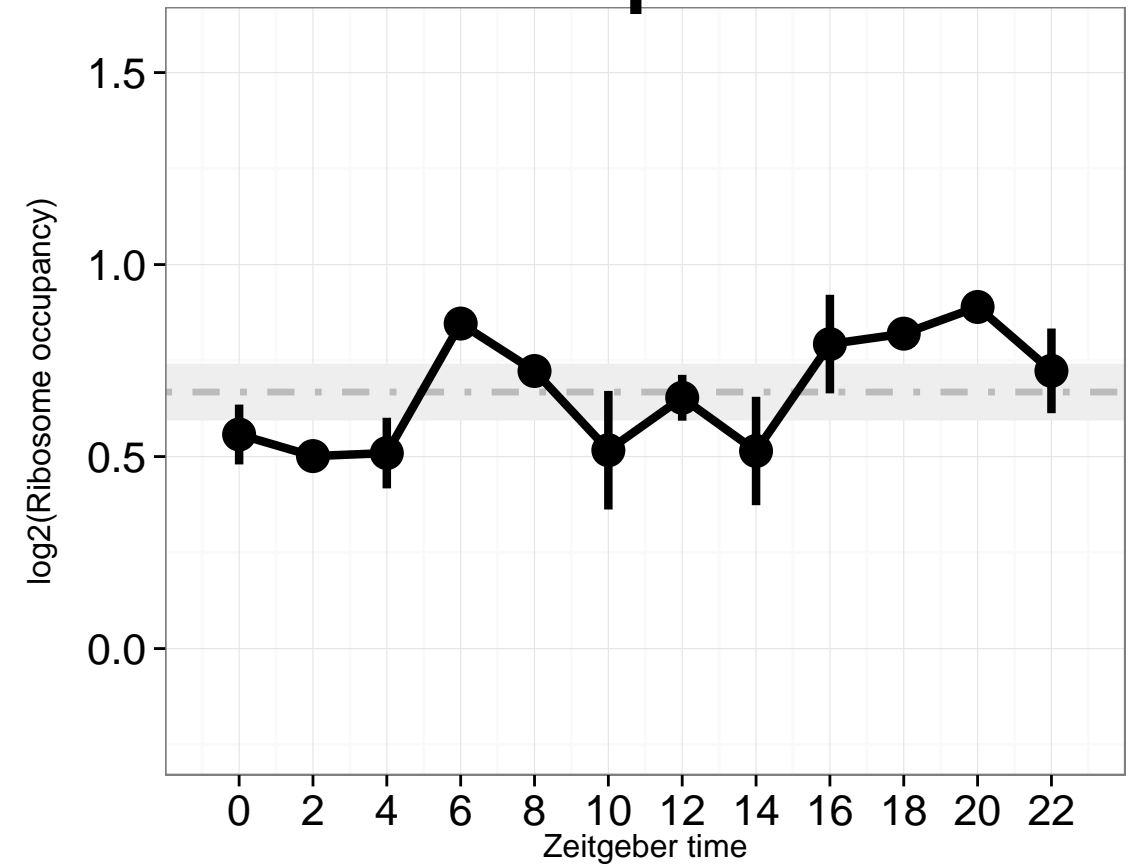

Supplement: Supplementary file 11491 [file 1]

# Nhlrc1

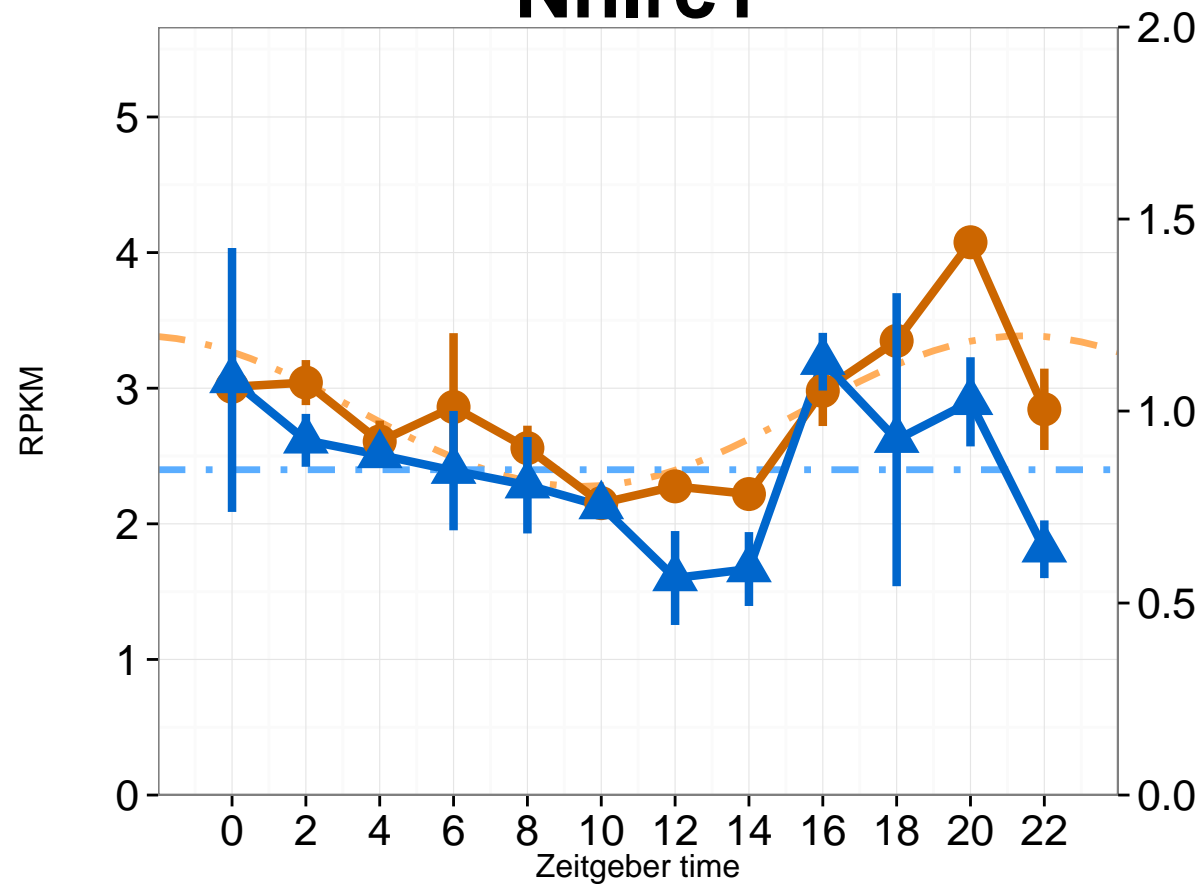

# Nhlrc1

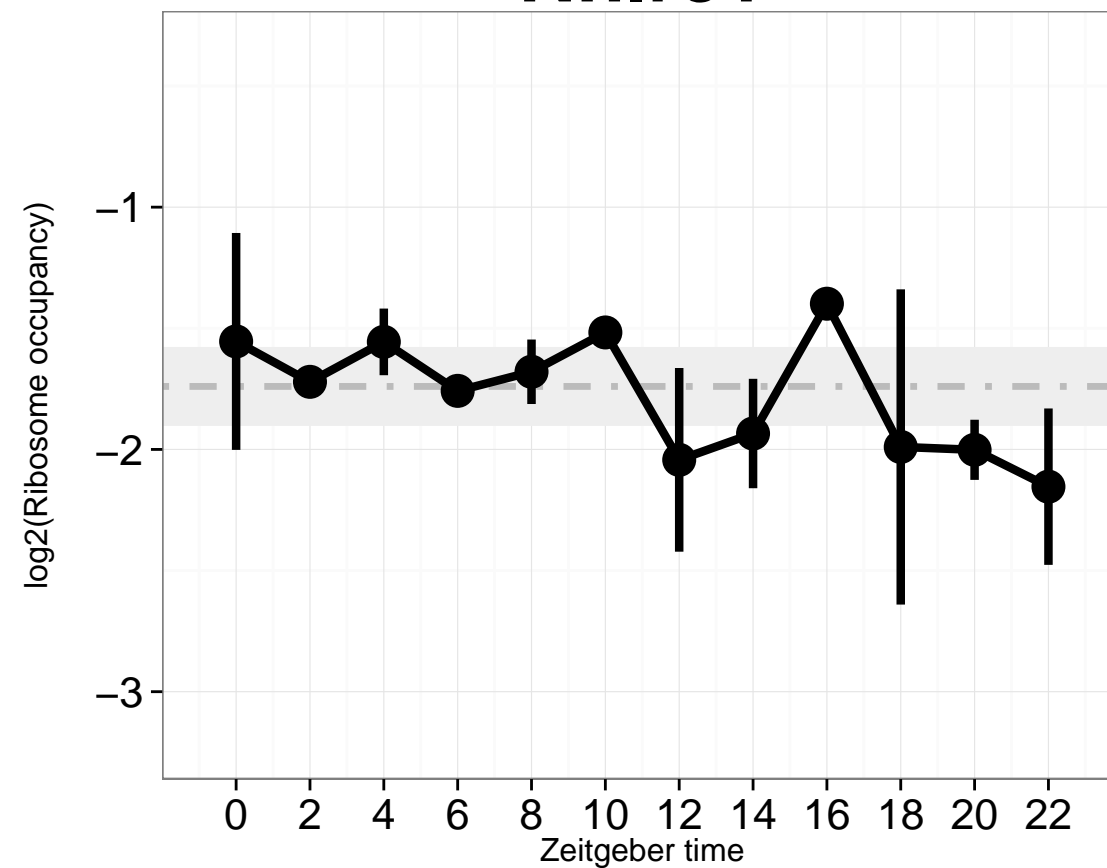

Supplement: Supplementary file 11492 [file 1]

## 4933411K20Rik

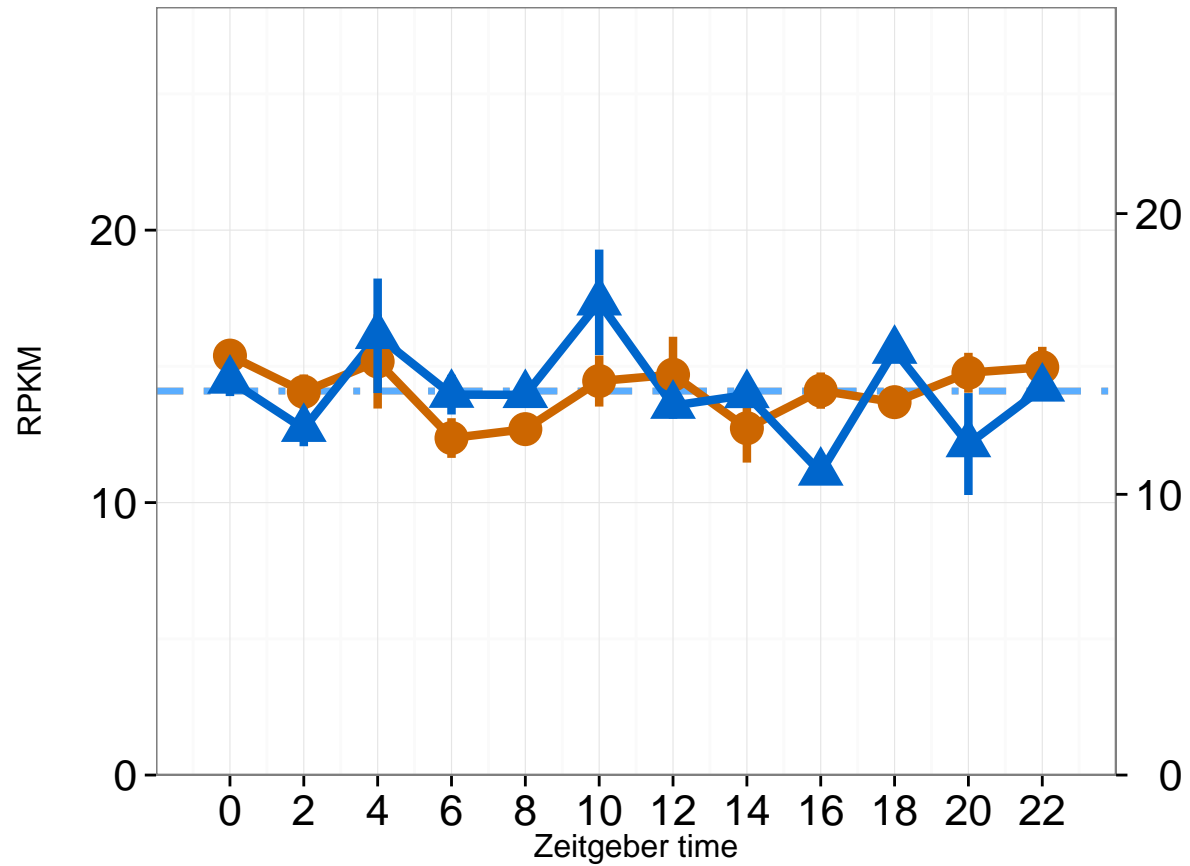

## 4933411K20Rik

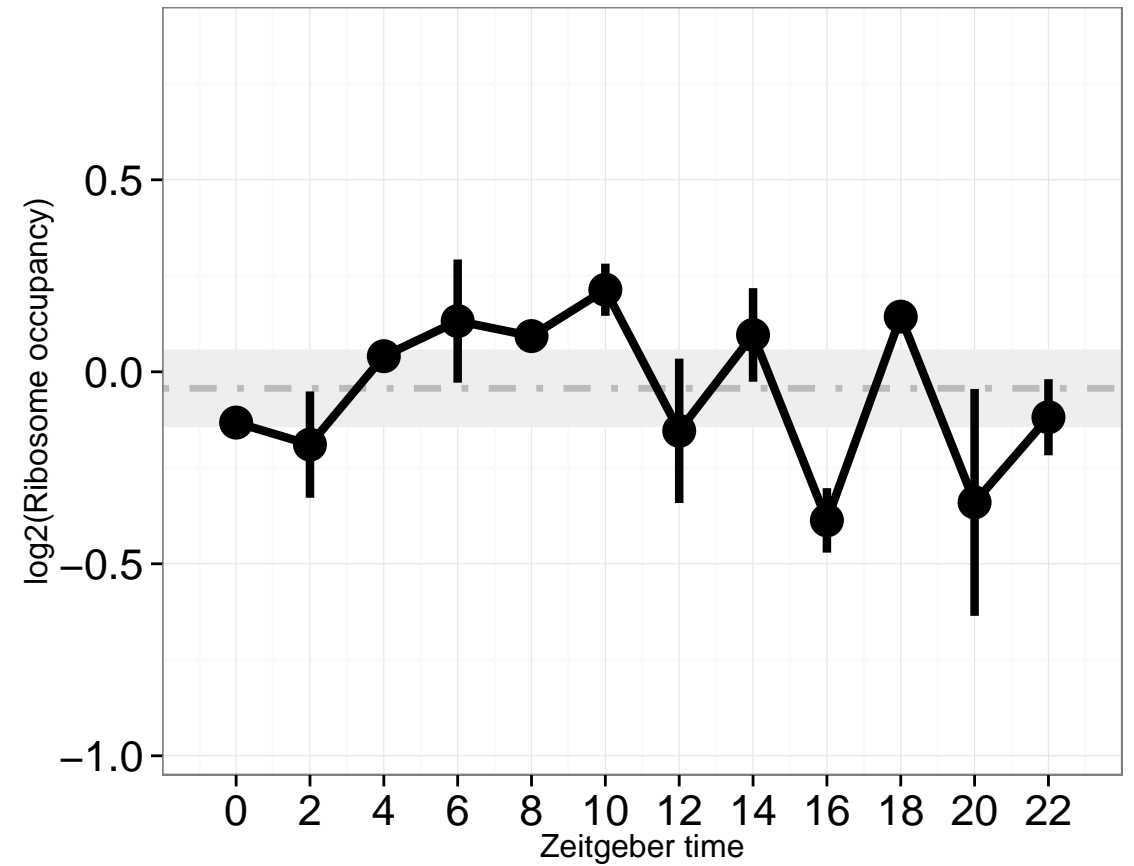

Supplement: Supplementary file 11493 [file 1]

# Atp5l

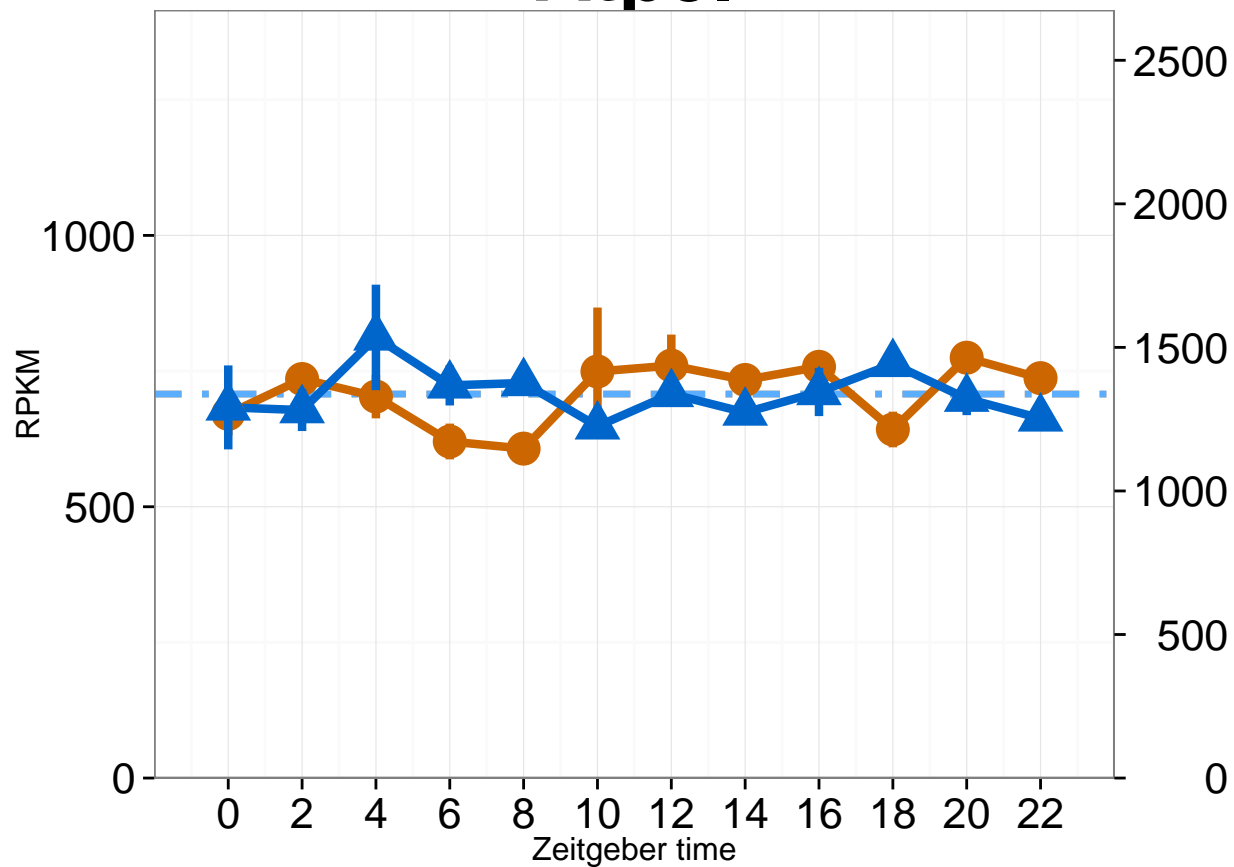

# Atp5l

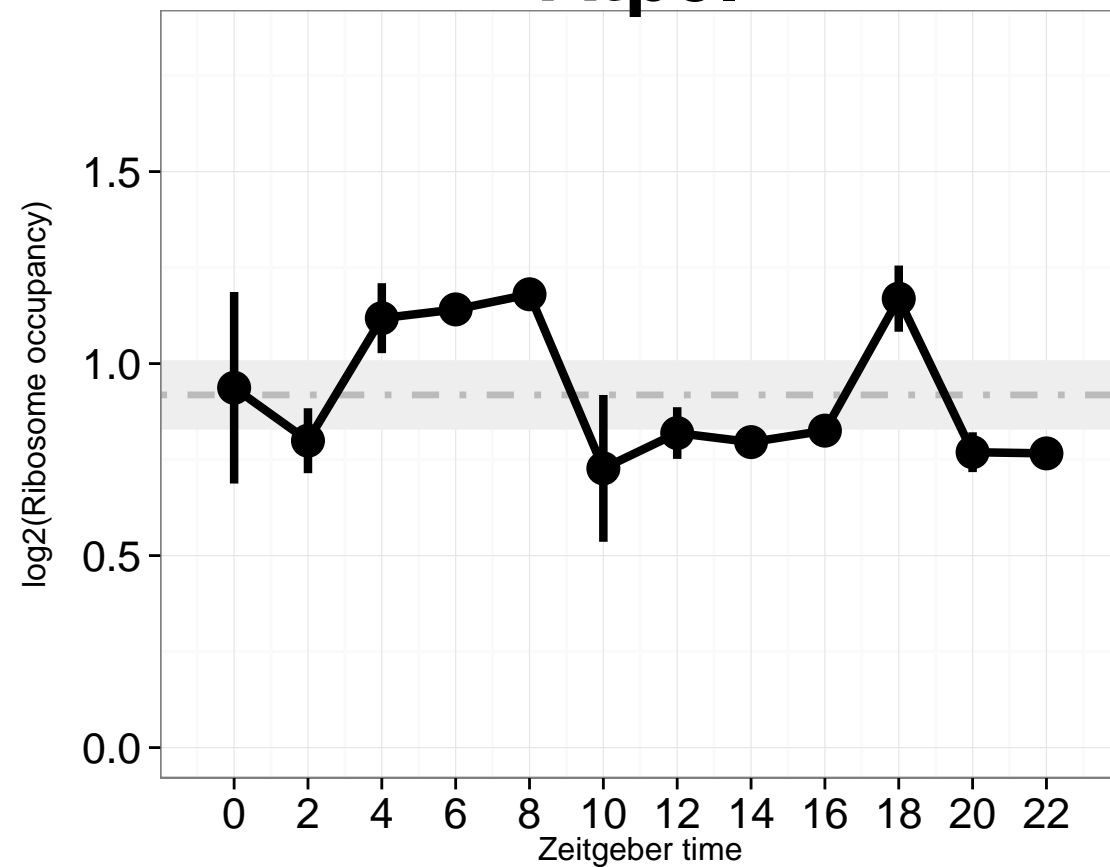

Supplement: Supplementary file 11494 [file 1]

## Large

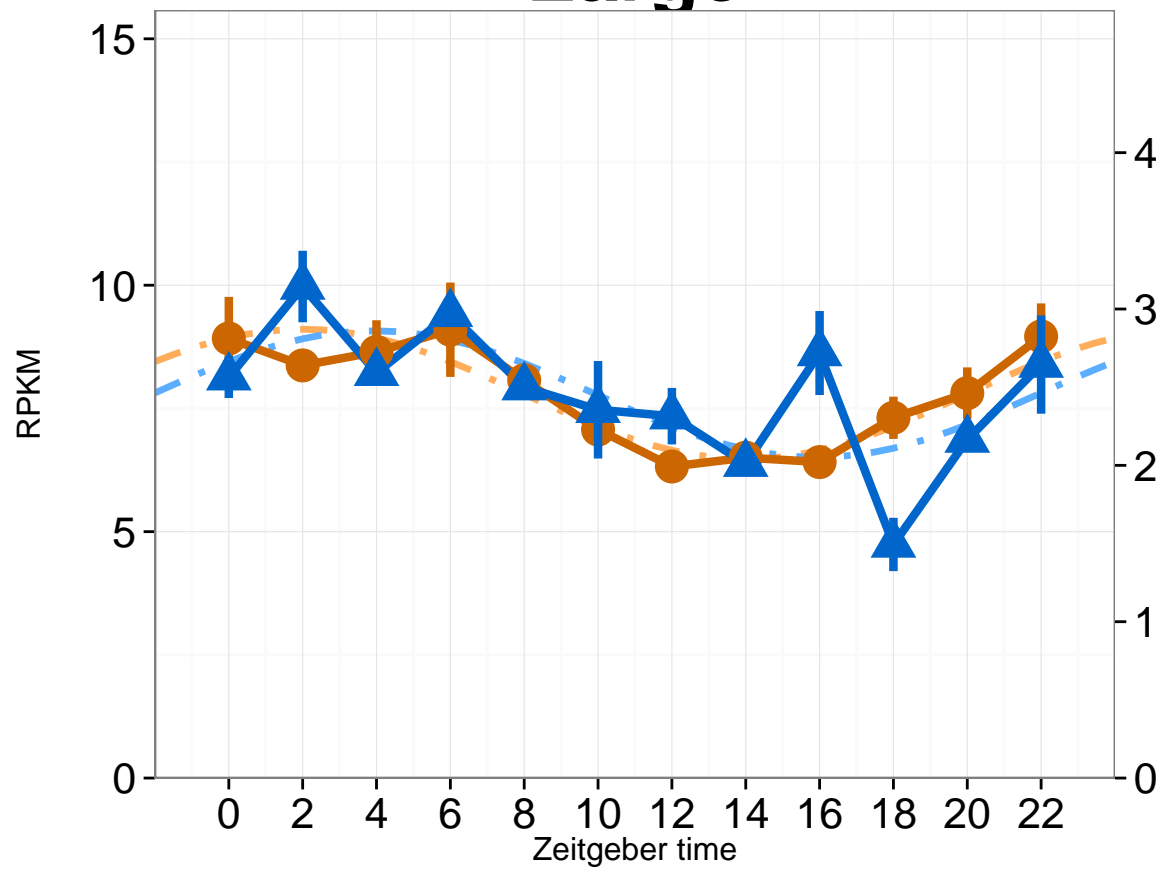

## Large

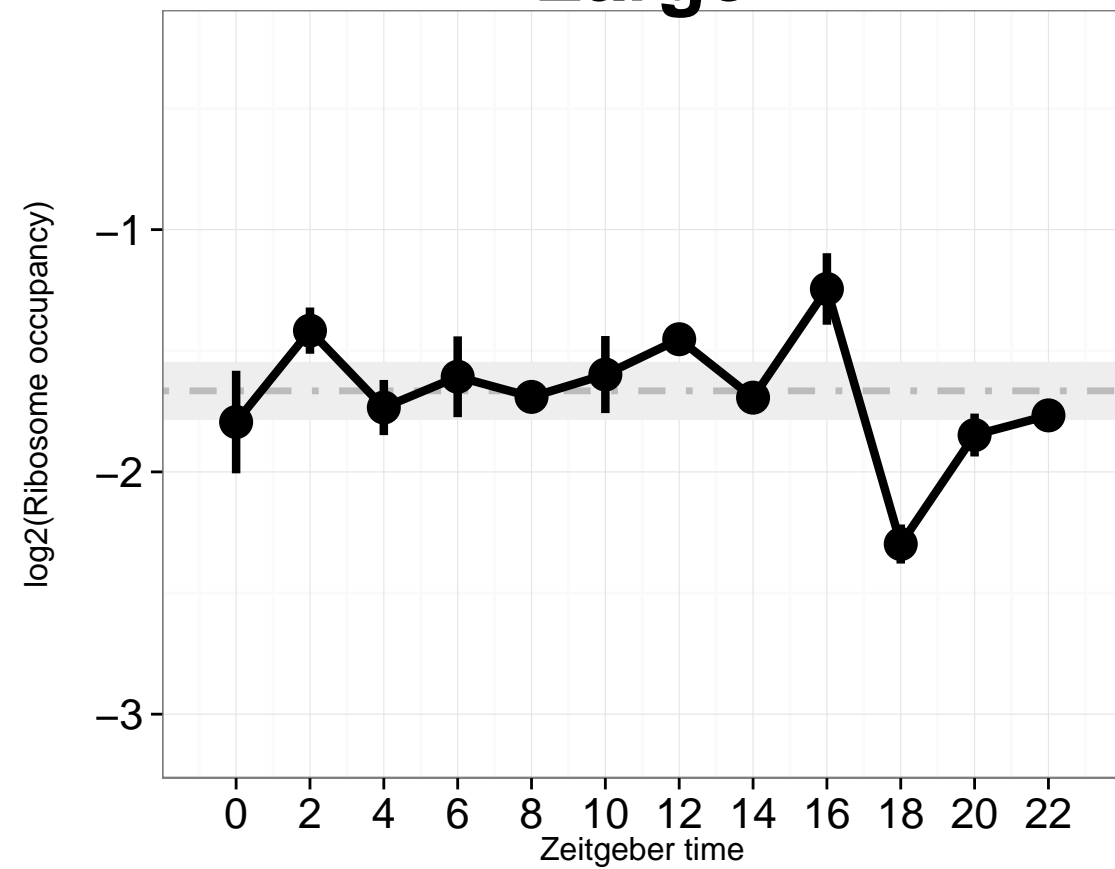

Supplement: Supplementary file 11495 [file 1]

**Dld**

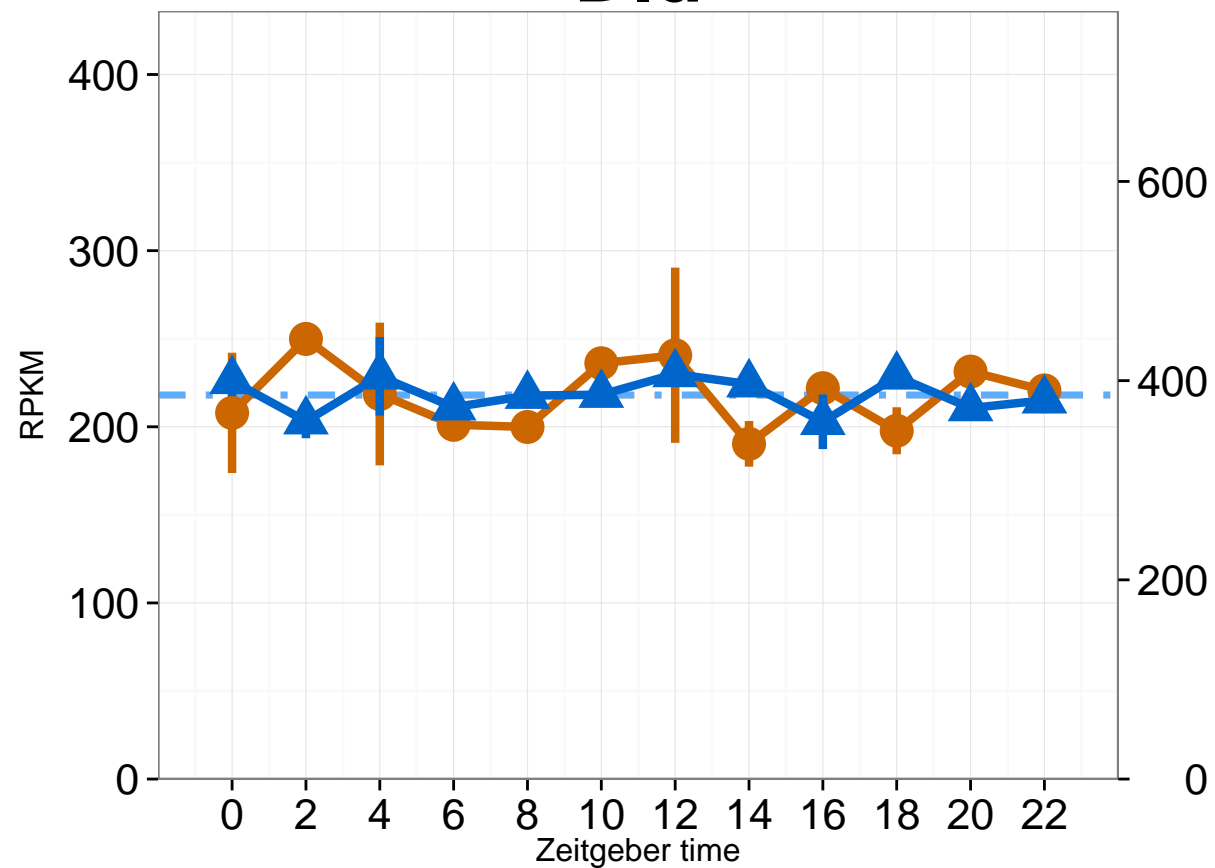

**Dld**

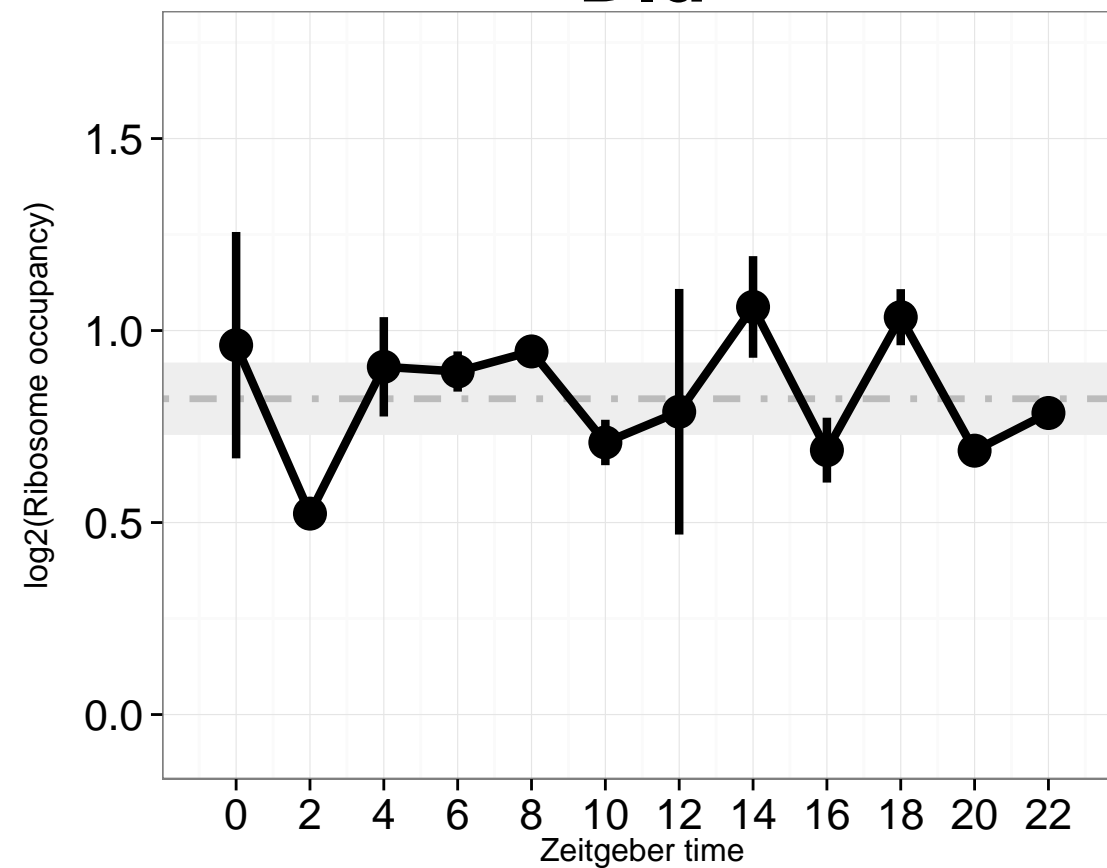

Supplement: Supplementary file 11496 [file 1]

## Dhrs4

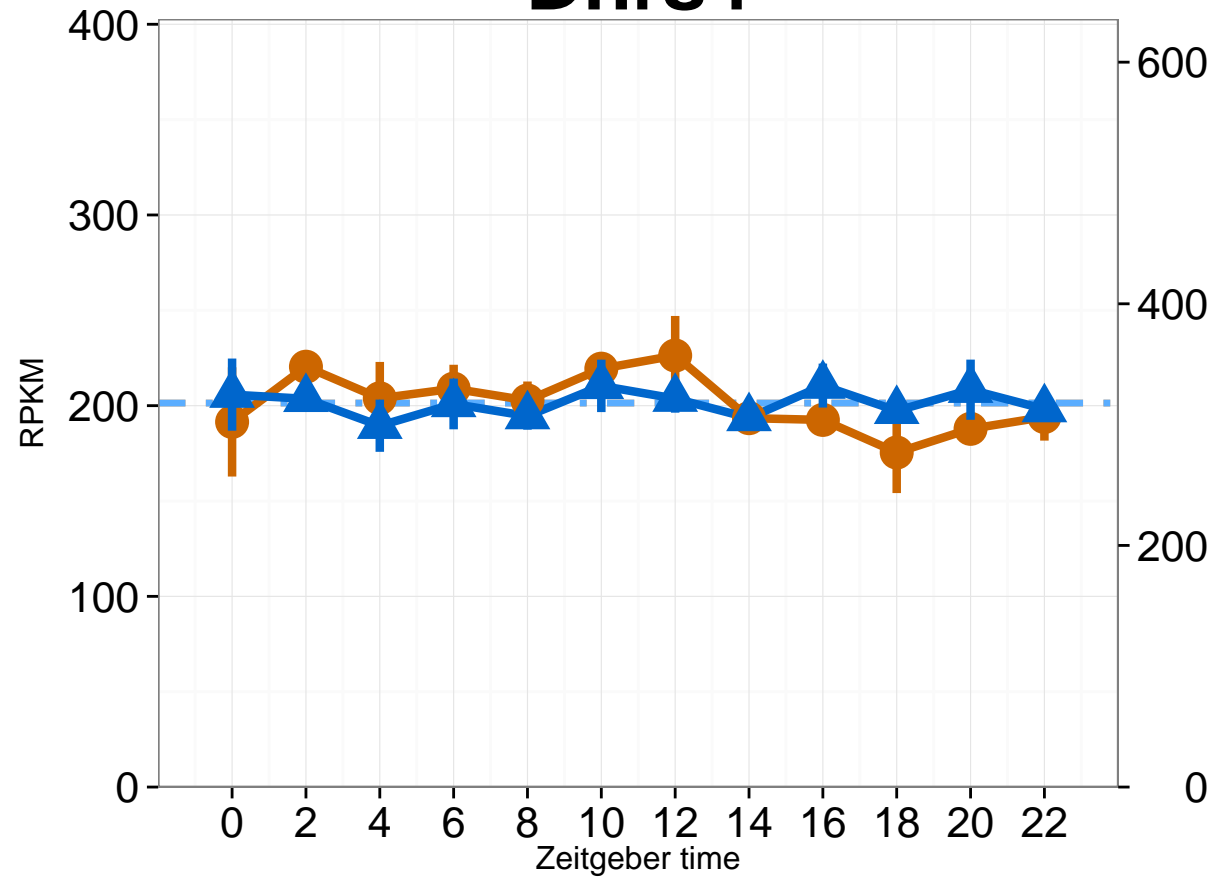

## Dhrs4

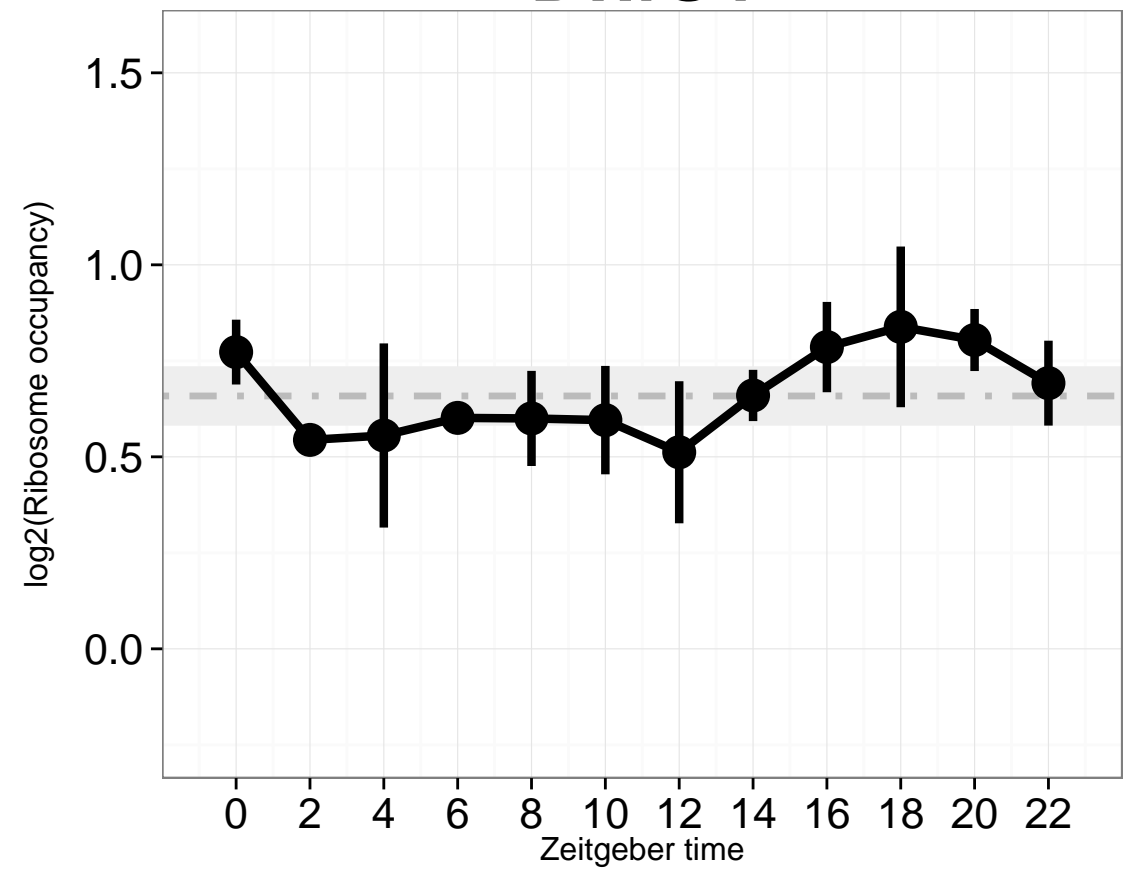

Supplement: Supplementary file 11497 [file 1]

## Ascc3

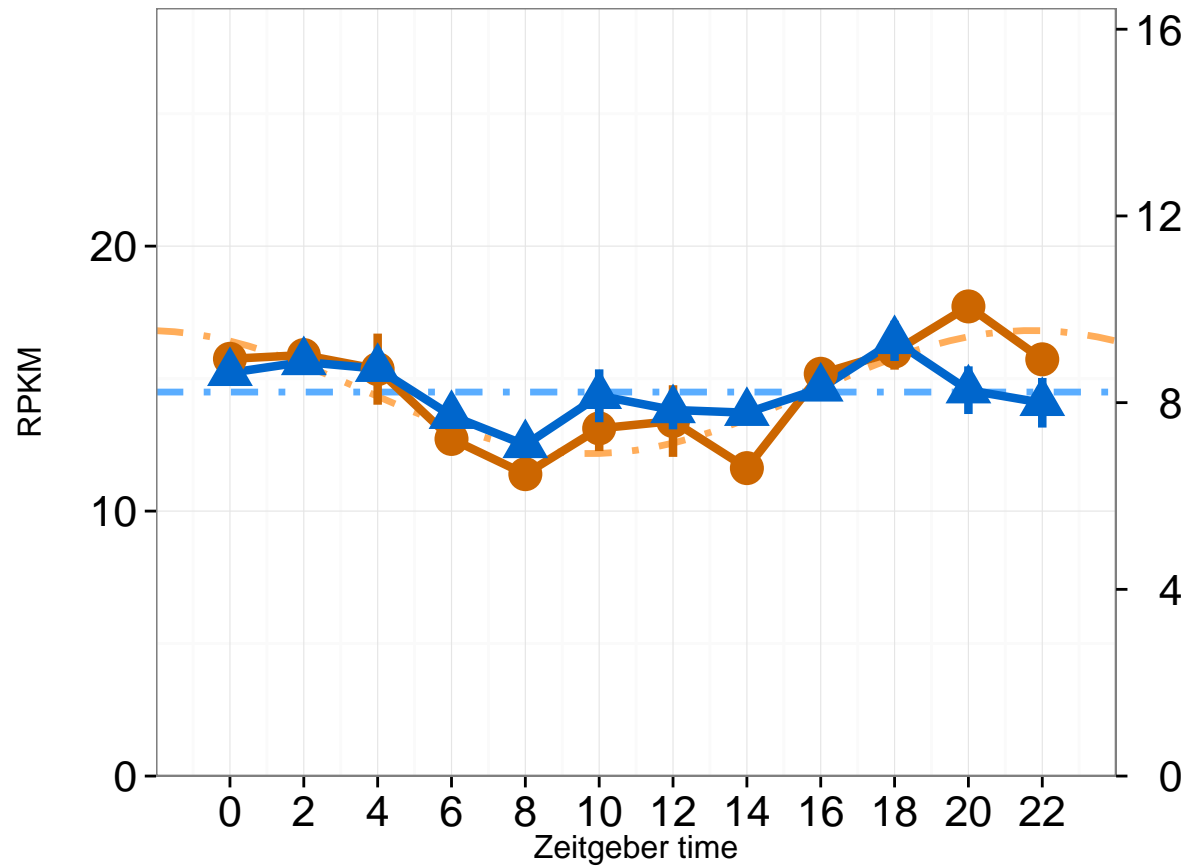

## Ascc3

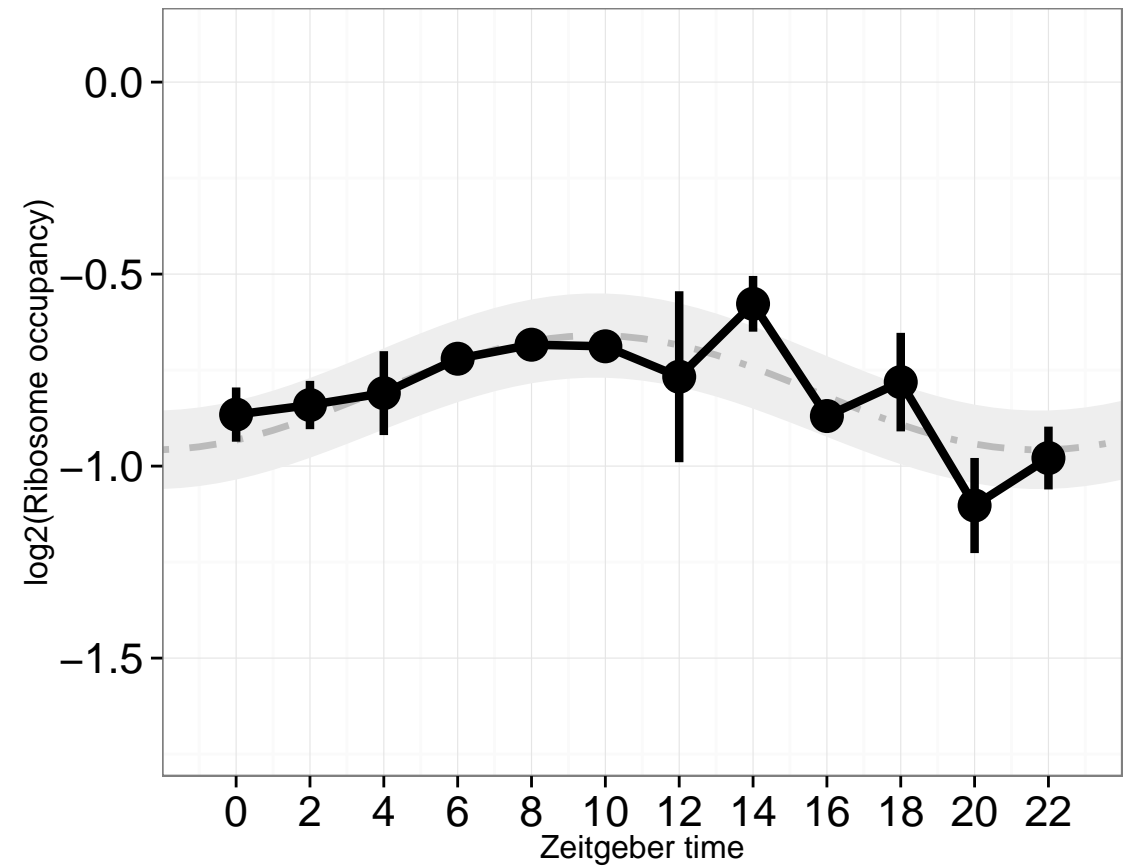

Supplement: Supplementary file 11498 [file 1]

## Rab35

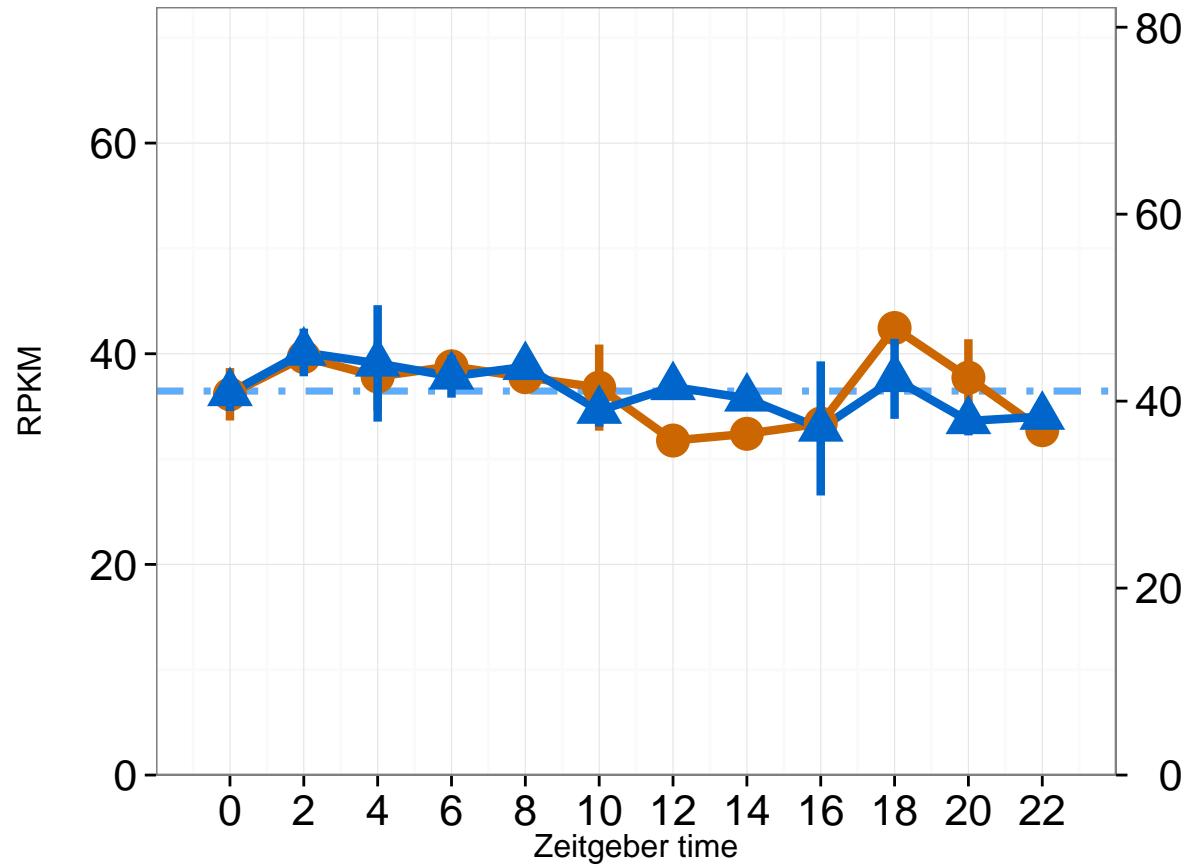

## Rab35

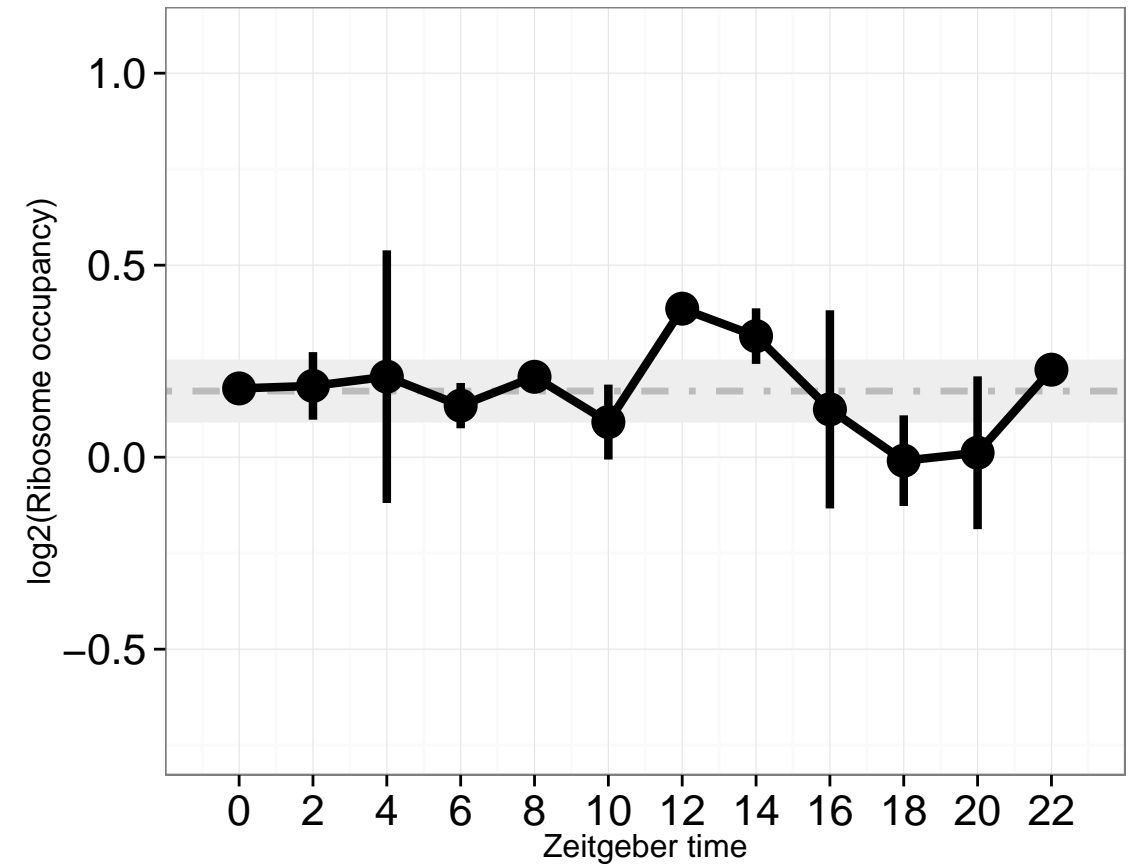

Supplement: Supplementary file 11499 [file 1]

**Fam89a TR**

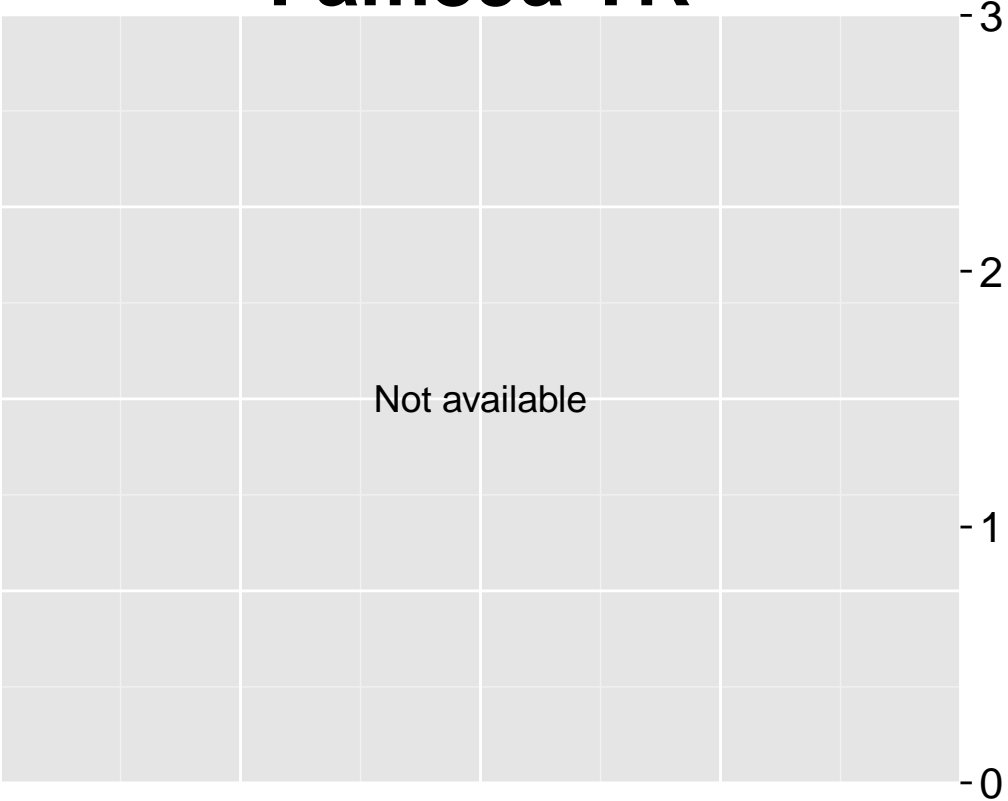

**Fam89a log2(Ribosome occupancy**

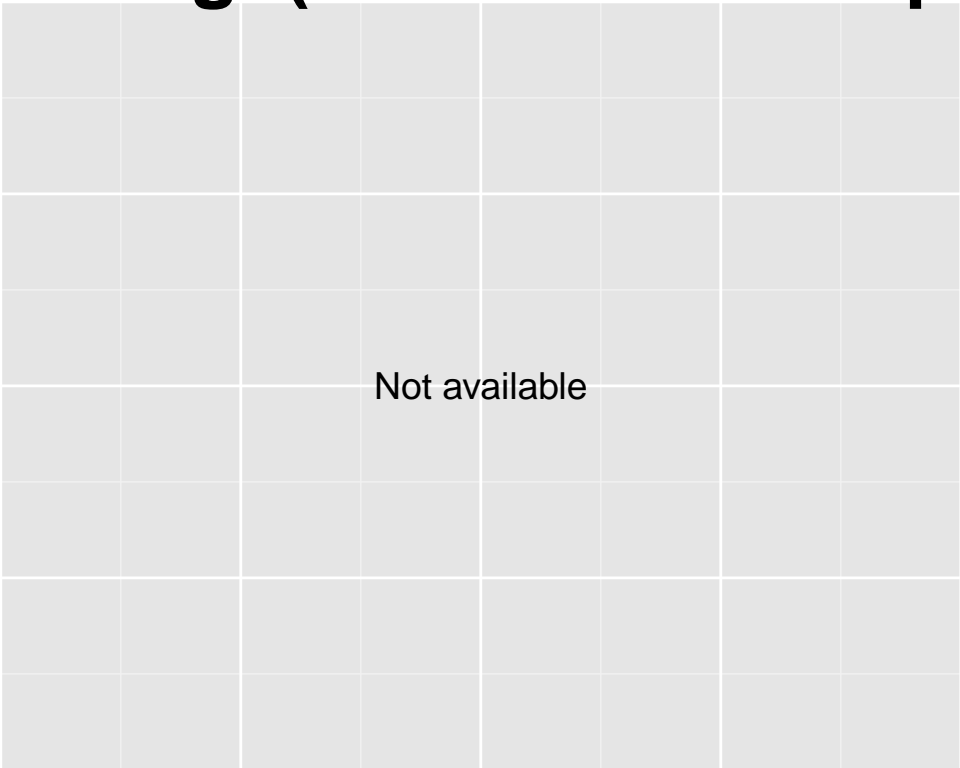

Supplement: Supplementary file 11500 [file 1]

**Dnajc24**

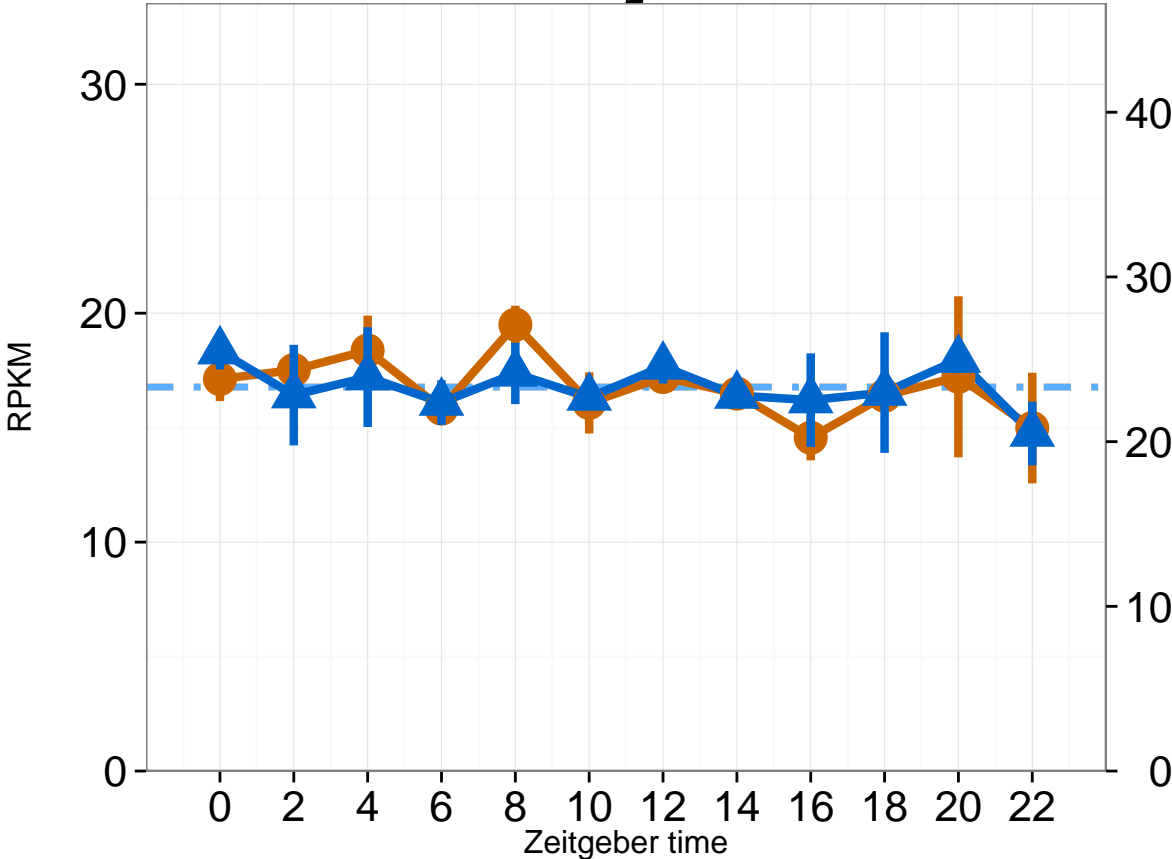

**Dnajc24**

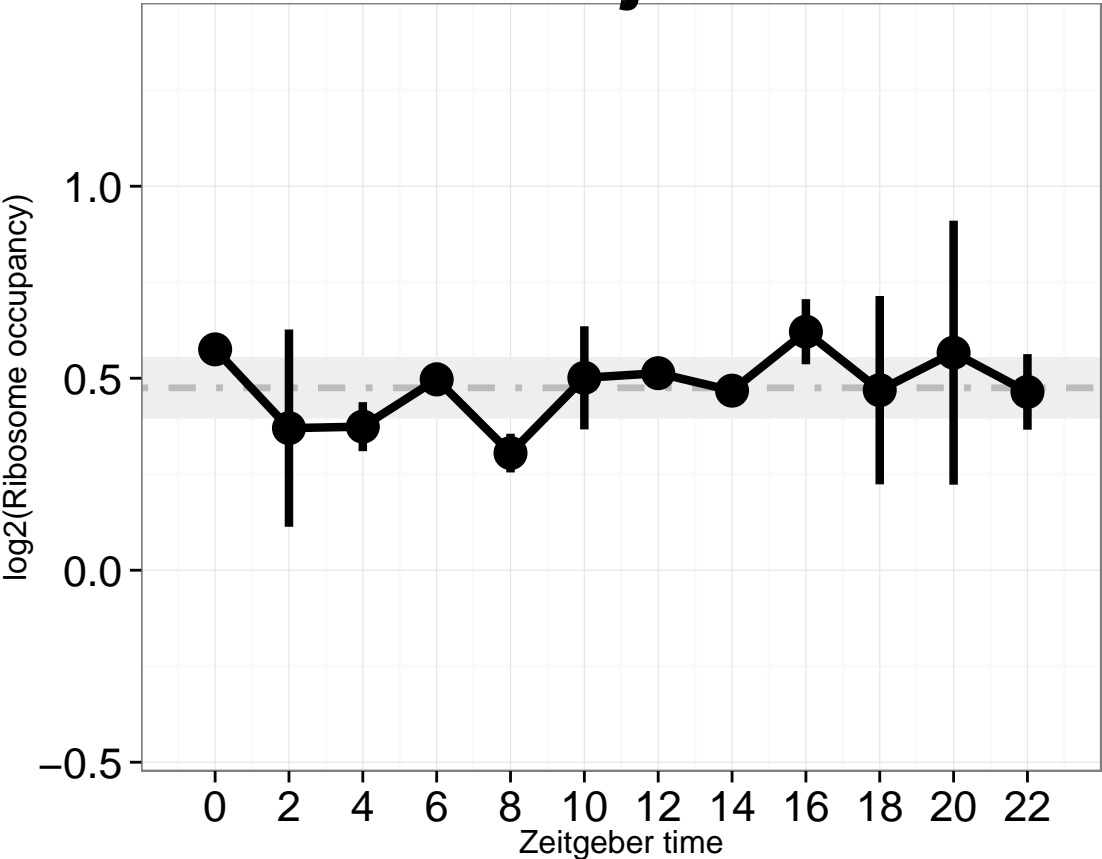

Supplement: Supplementary file 11501 [file 1]

# Max

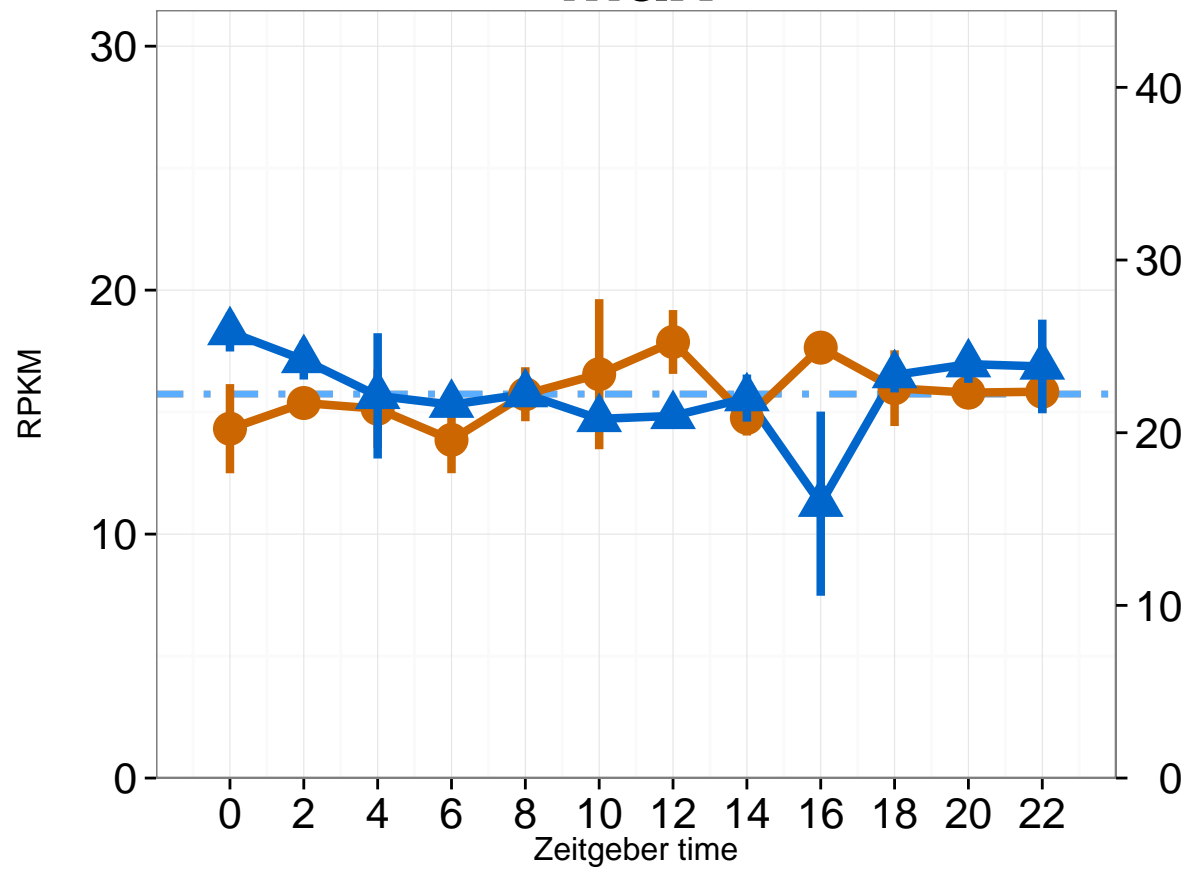

# Max

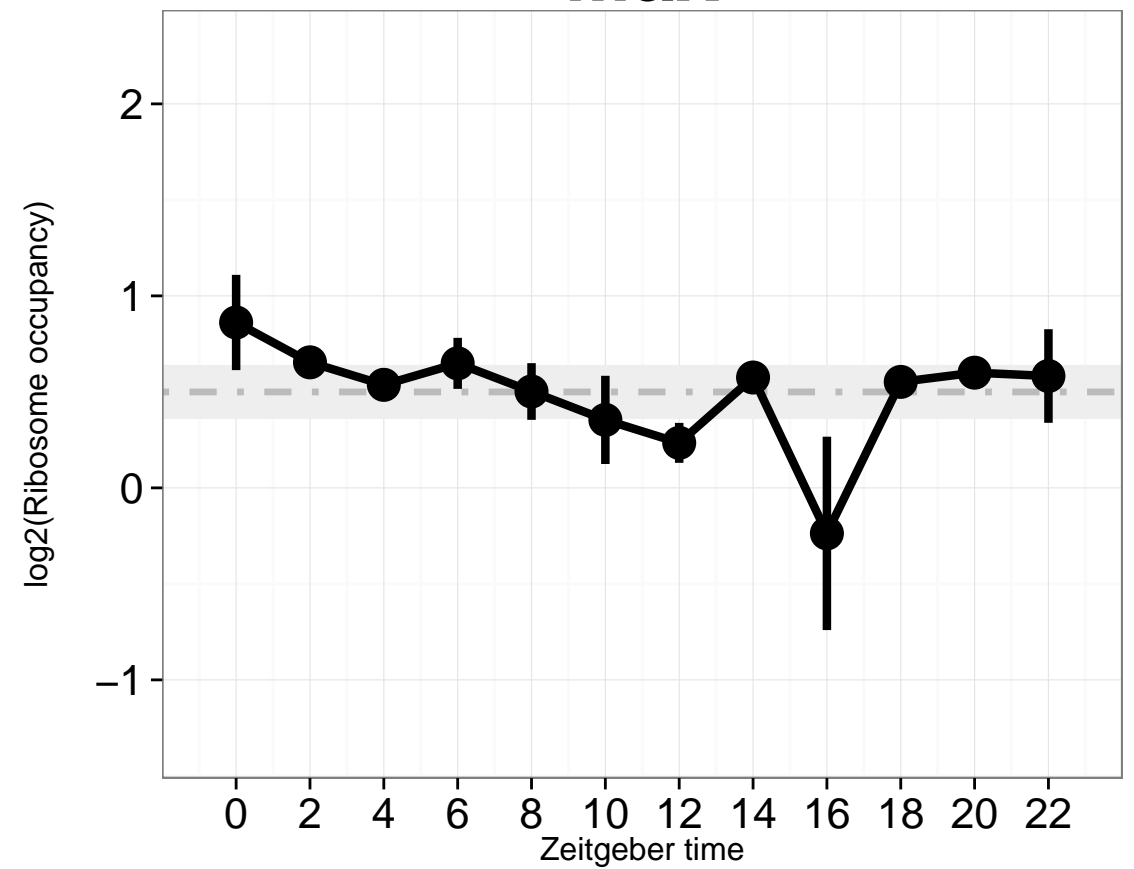

Supplement: Supplementary file 11502 [file 1]

# Sec31a

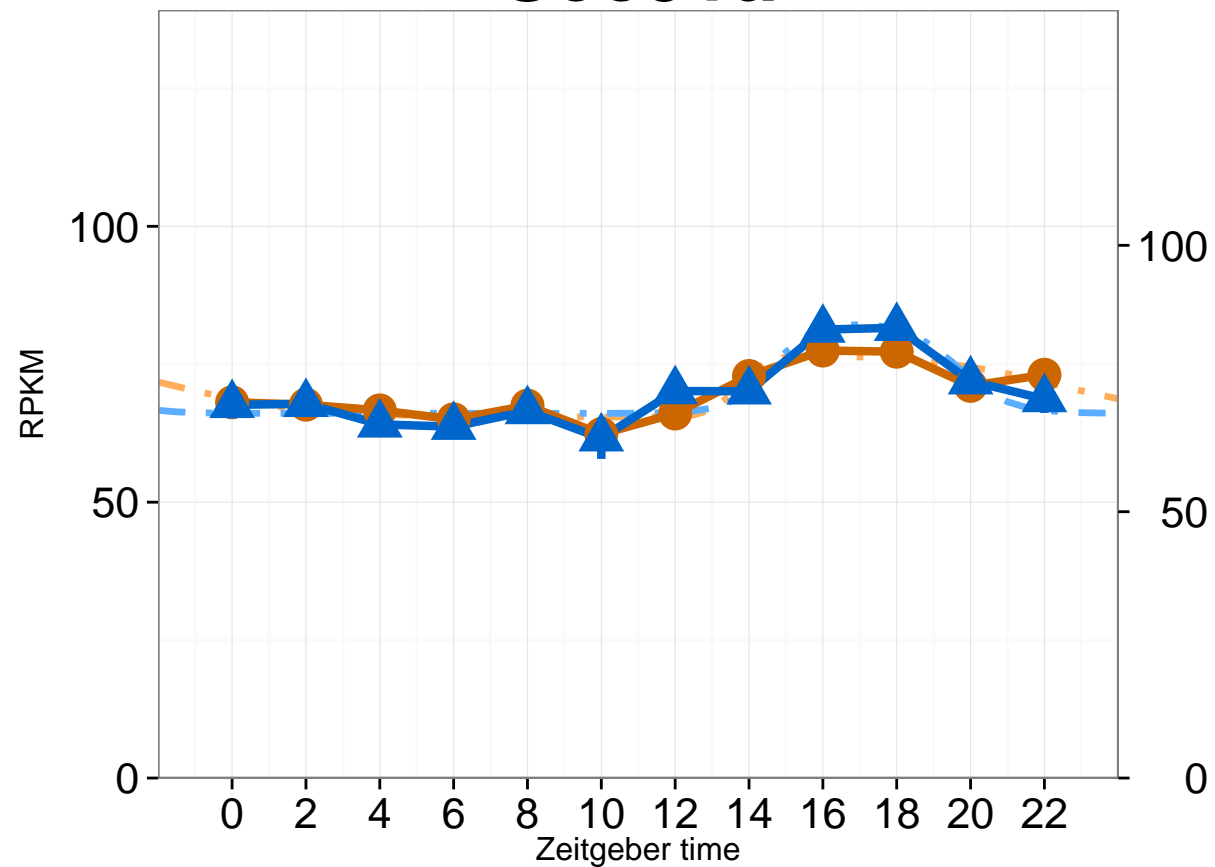

# Sec31a

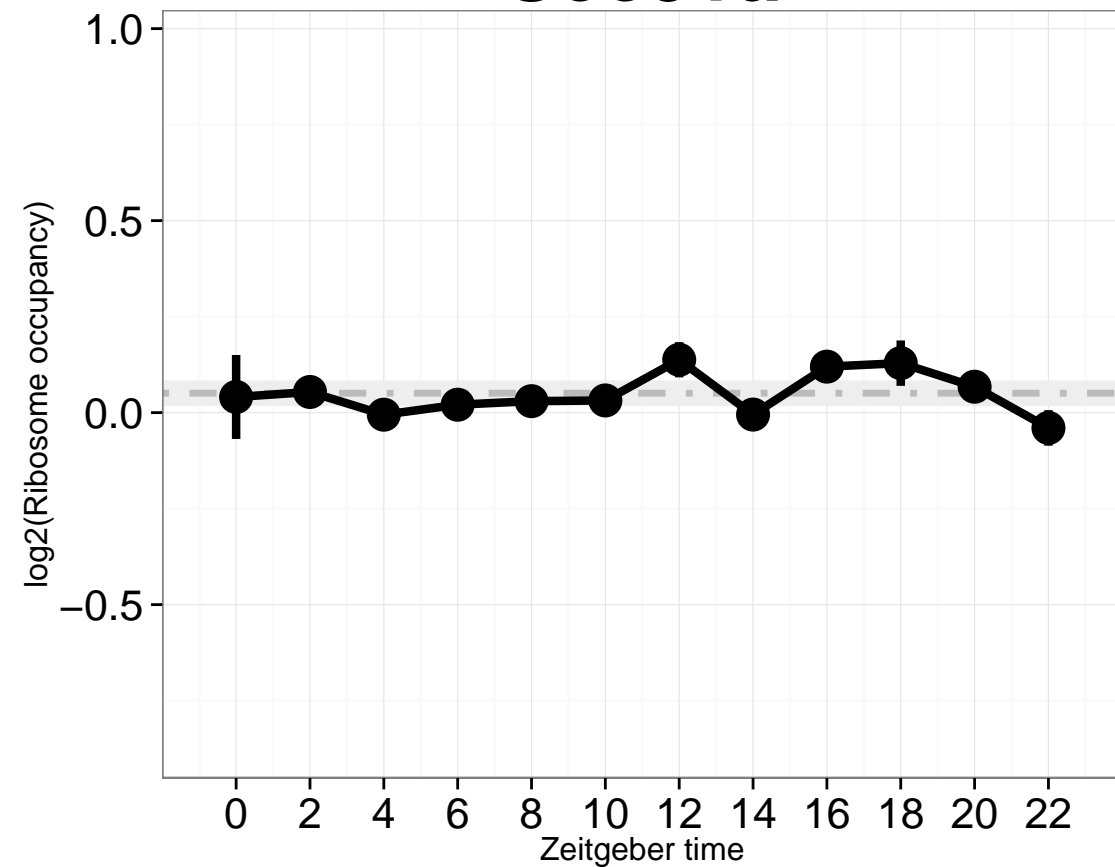

Supplement: Supplementary file 11503 [file 1]

**Timp1 TR**

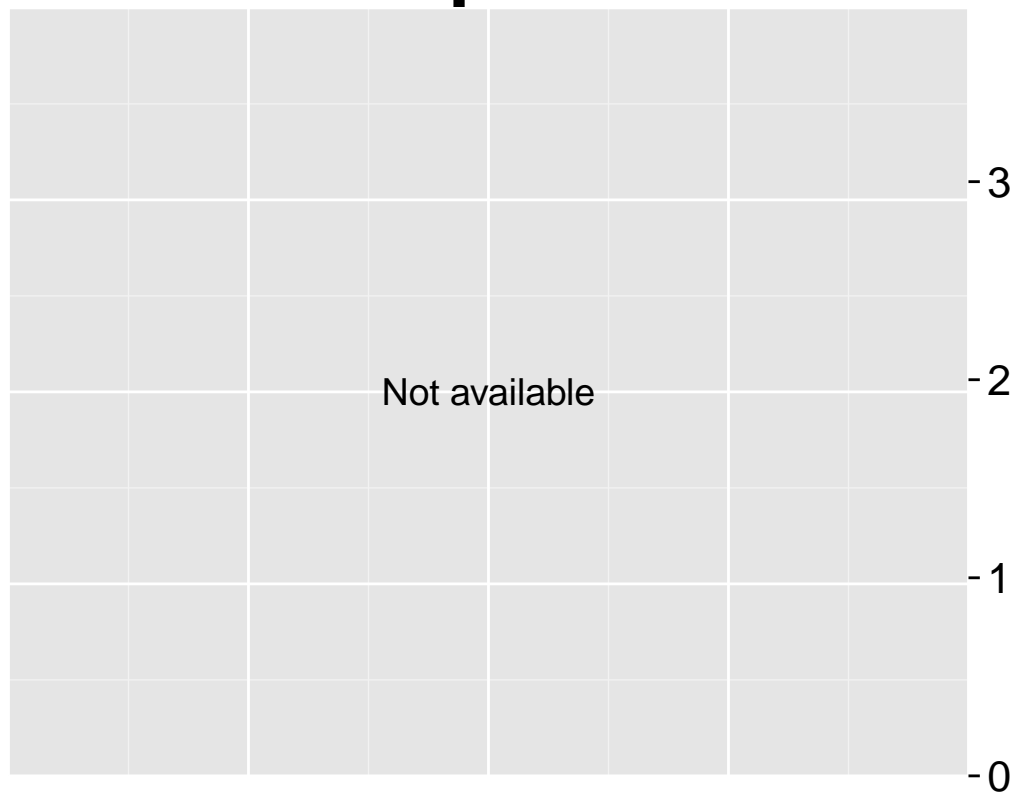

**Timp1 log2(Ribosome occupancy**

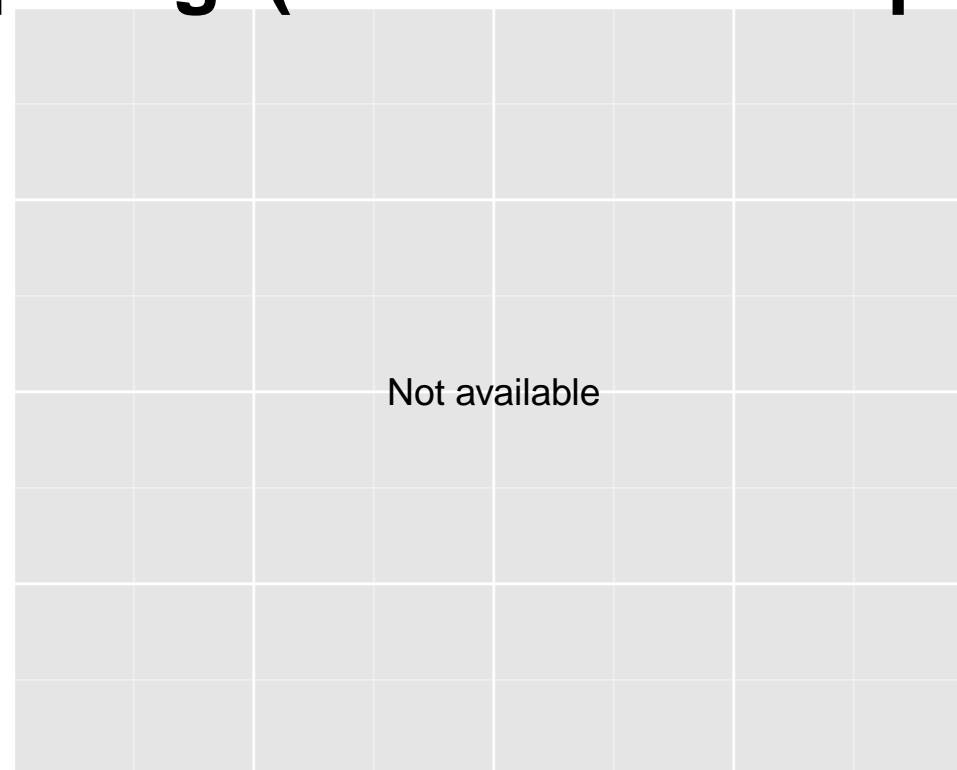

Supplement: Supplementary file 11504 [file 1]

## Pcbp4

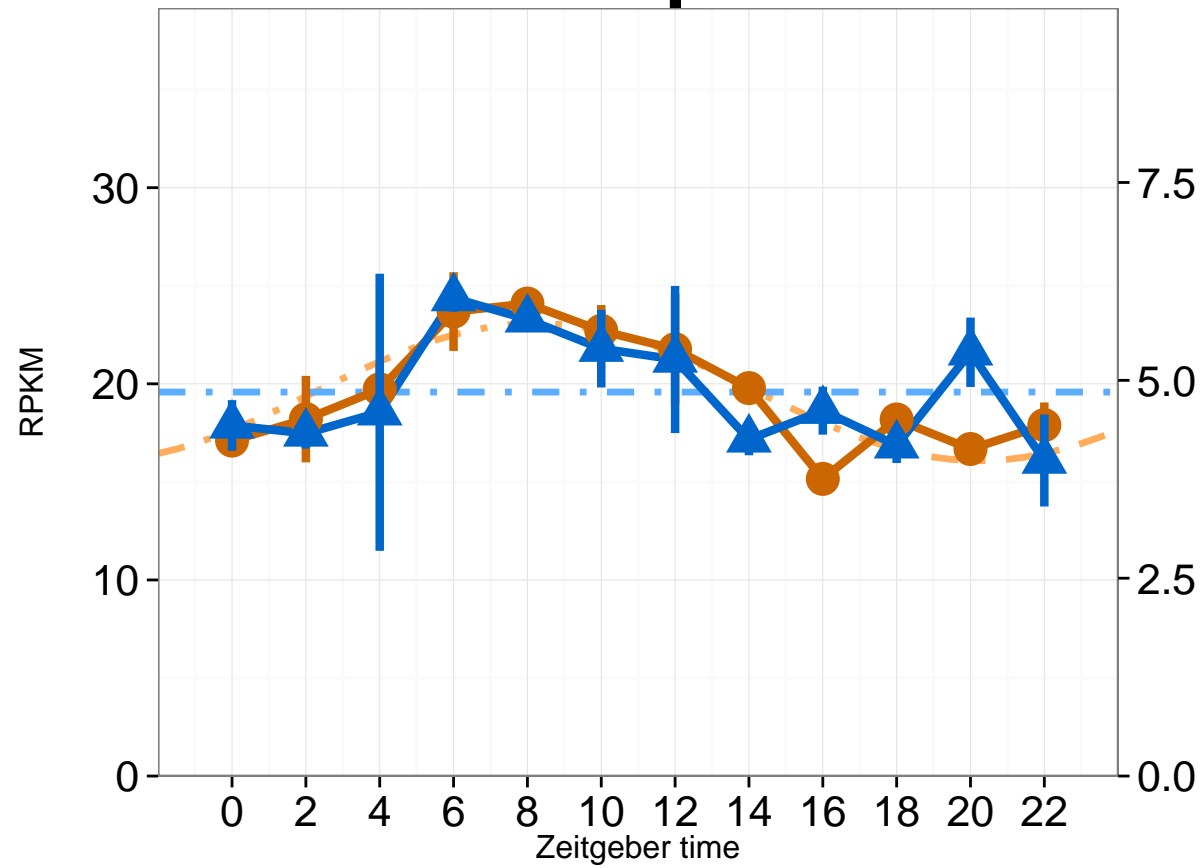

## Pcbp4

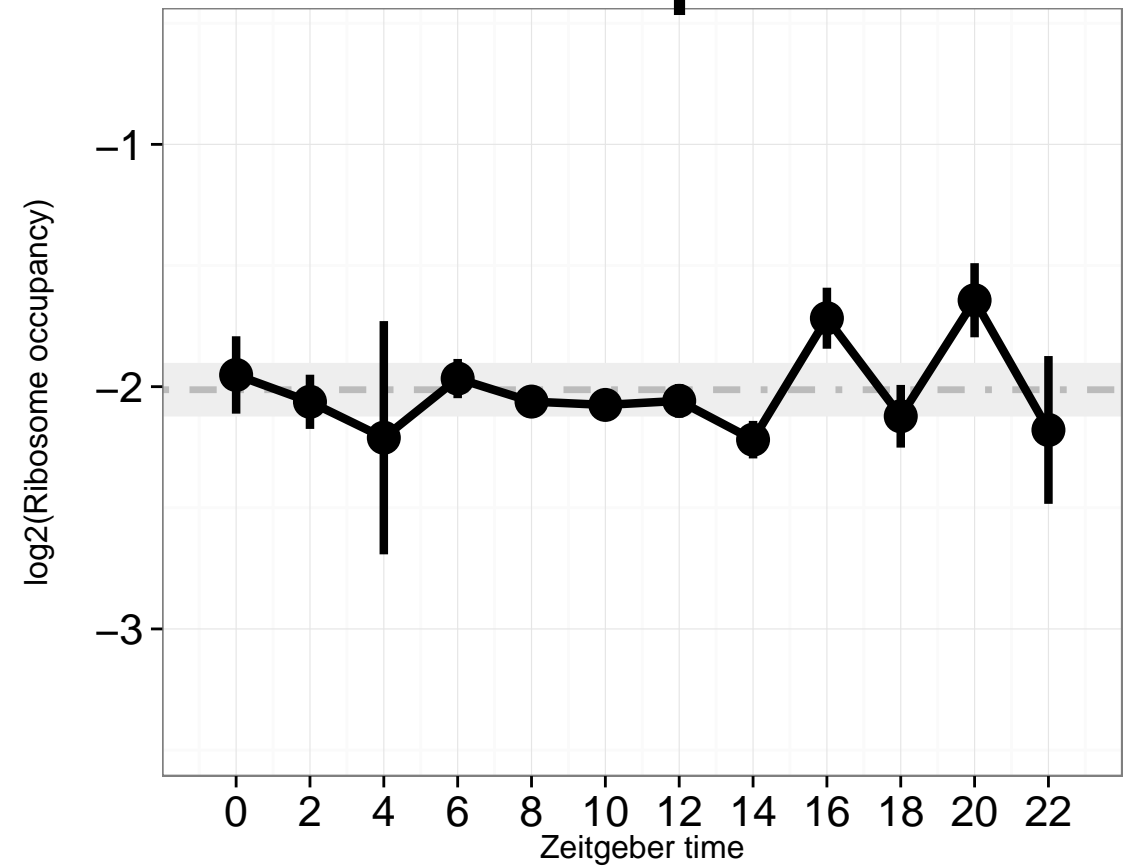

Supplement: Supplementary file 11505 [file 1]

# Sult1a1

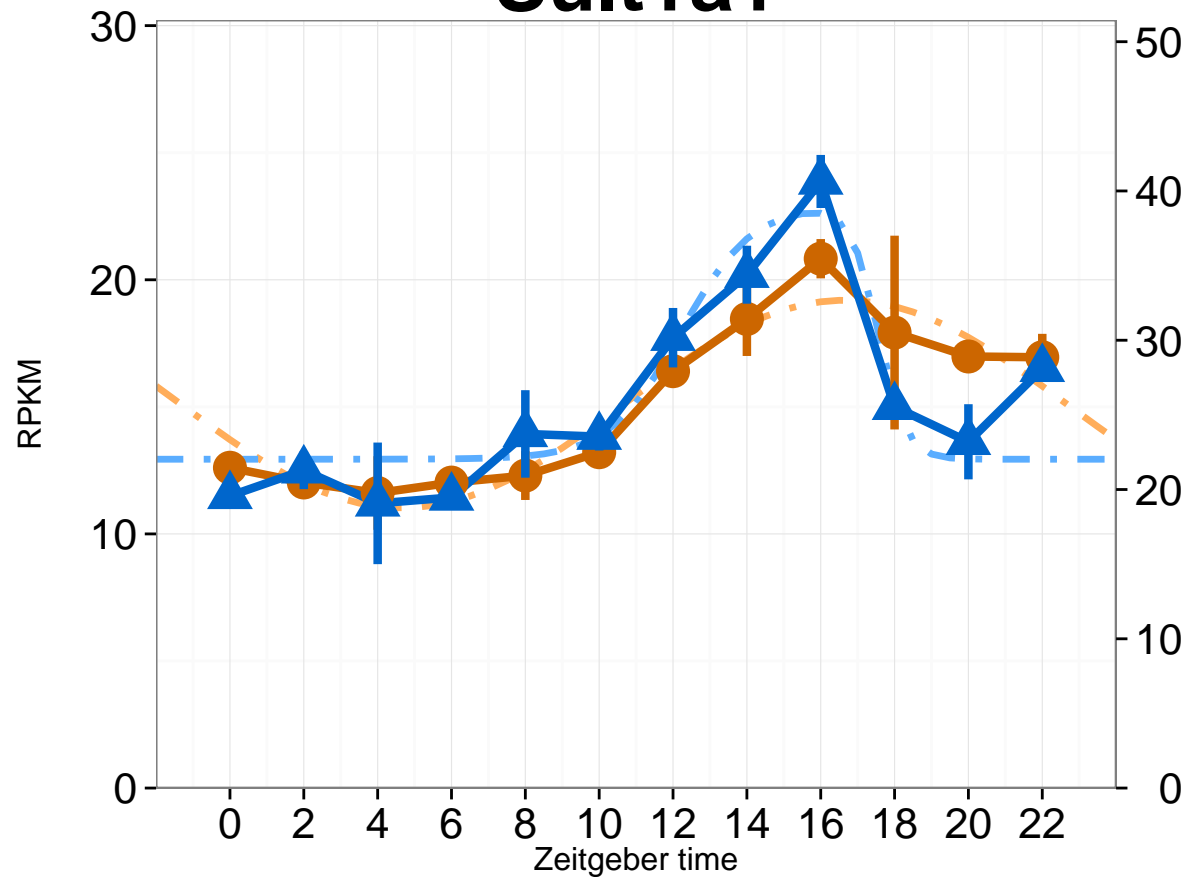

# Sult1a1

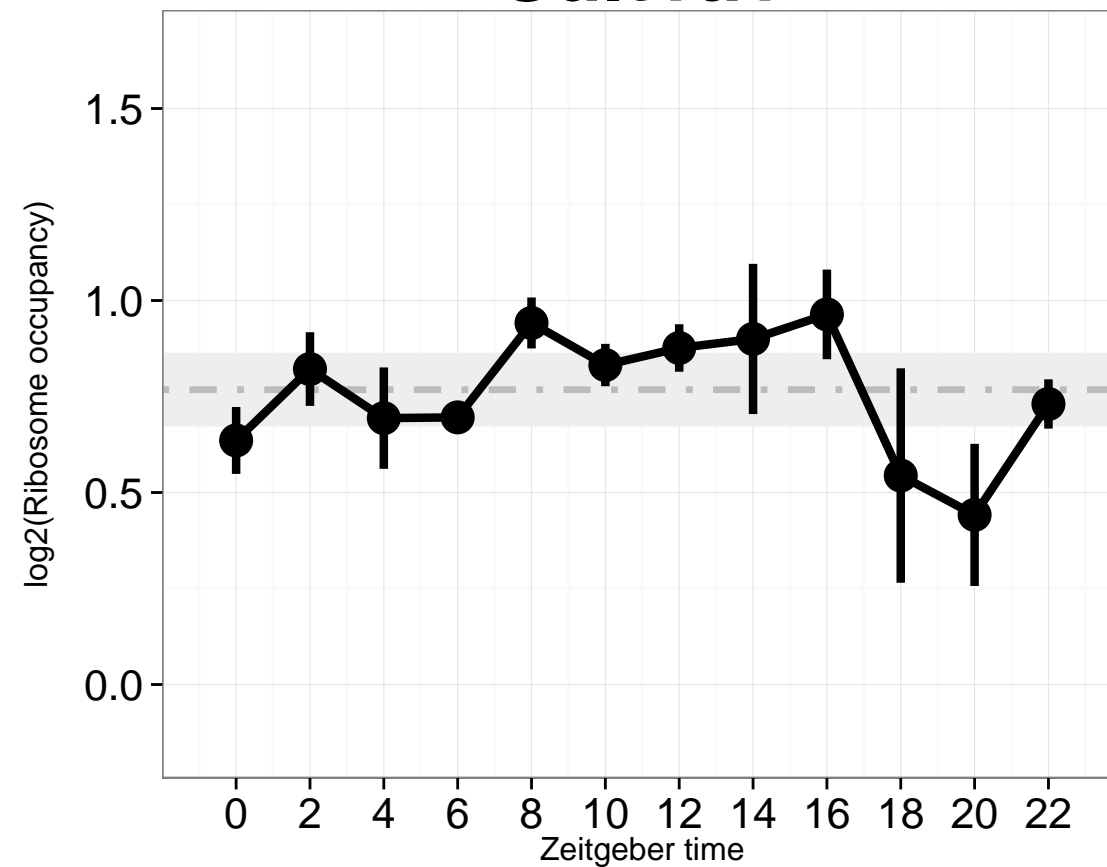

Supplement: Supplementary file 11506 [file 1]

## Usp11

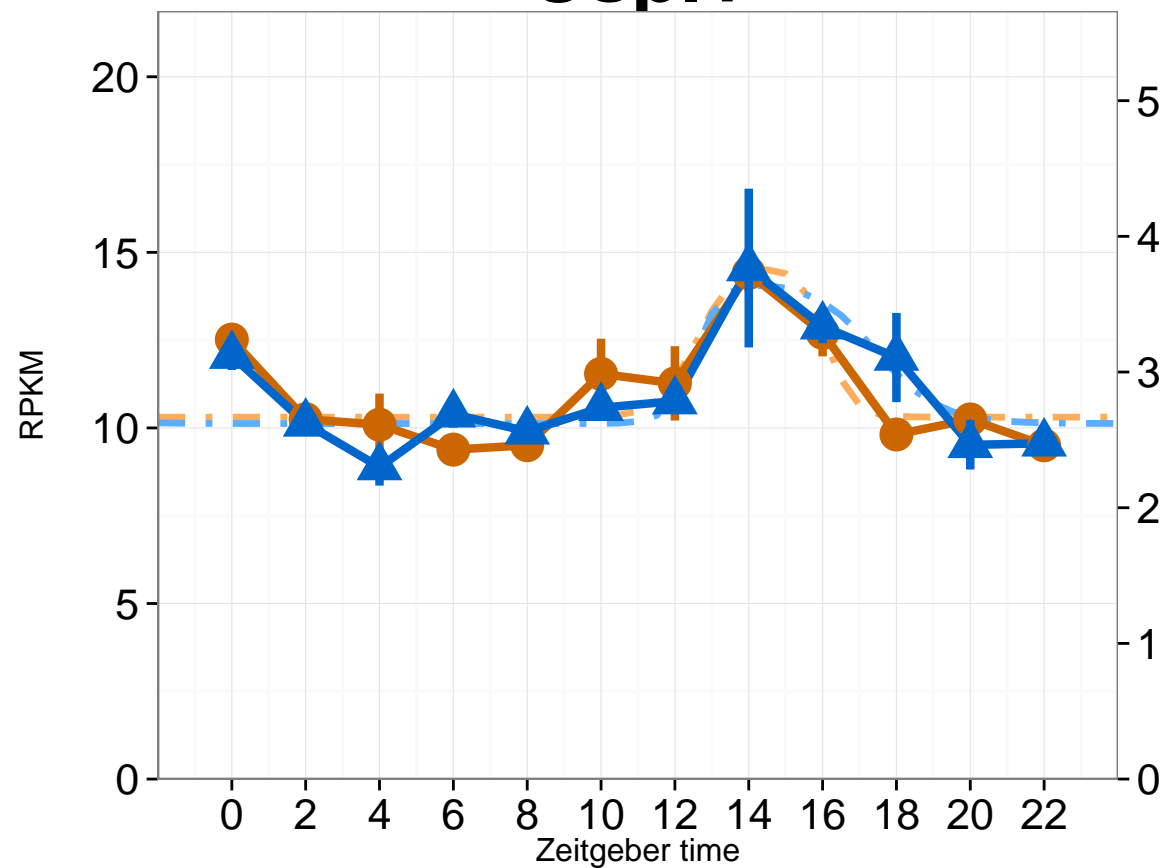

## Usp11

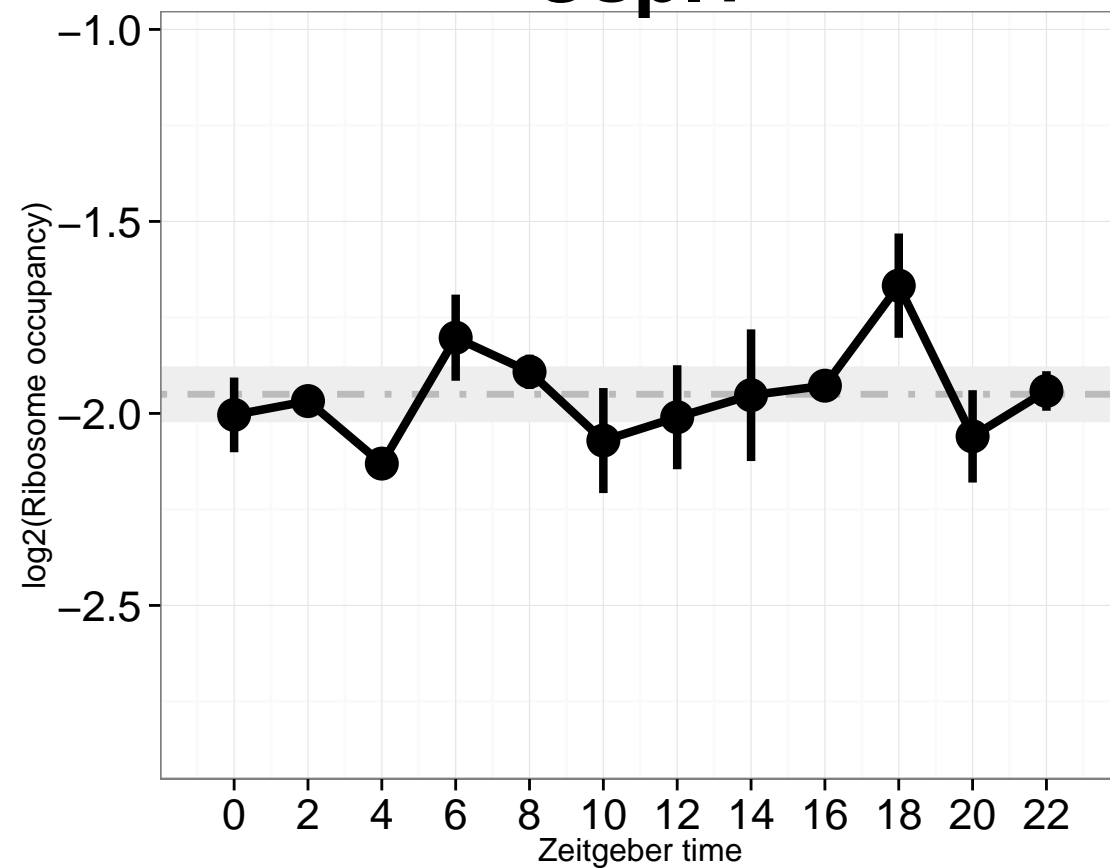

Supplement: Supplementary file 11507 [file 1]

# Adra1b

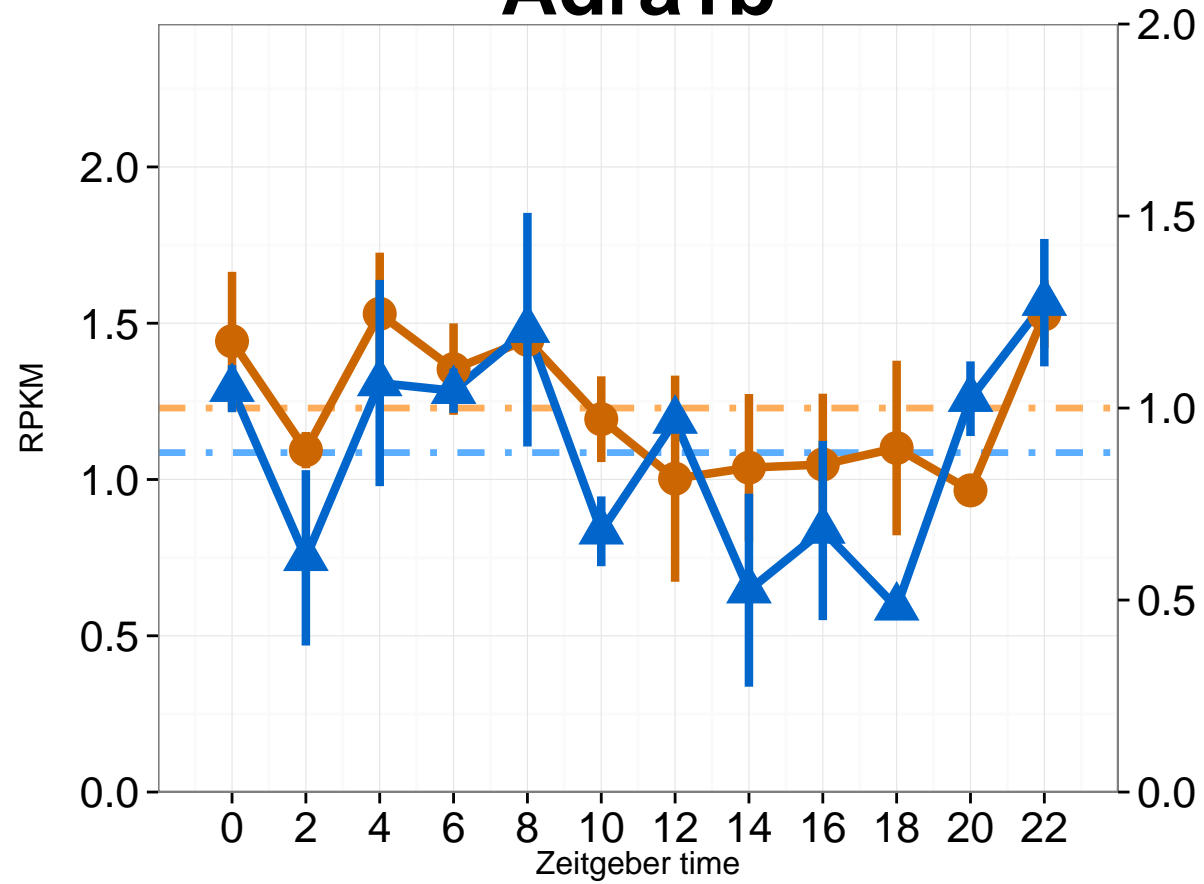

# Adra1b

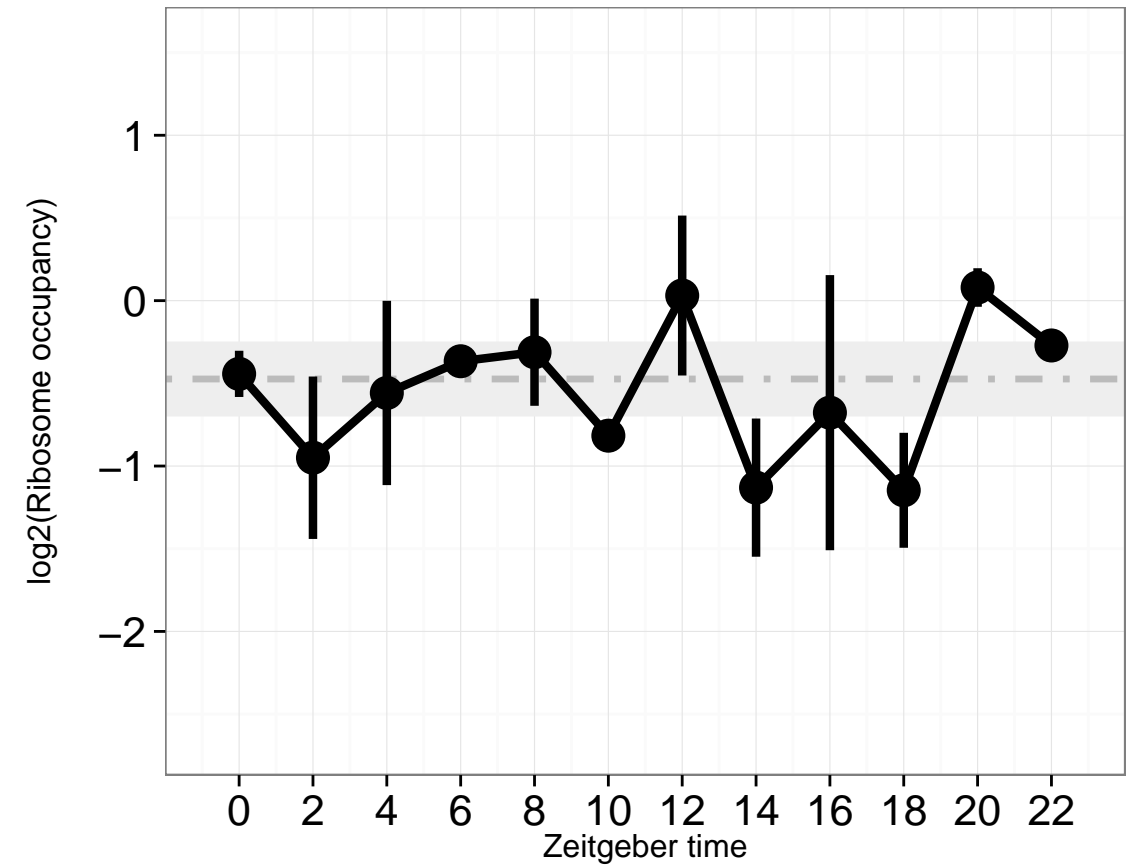

Supplement: Supplementary file 11508 [file 1]

## Ttc5

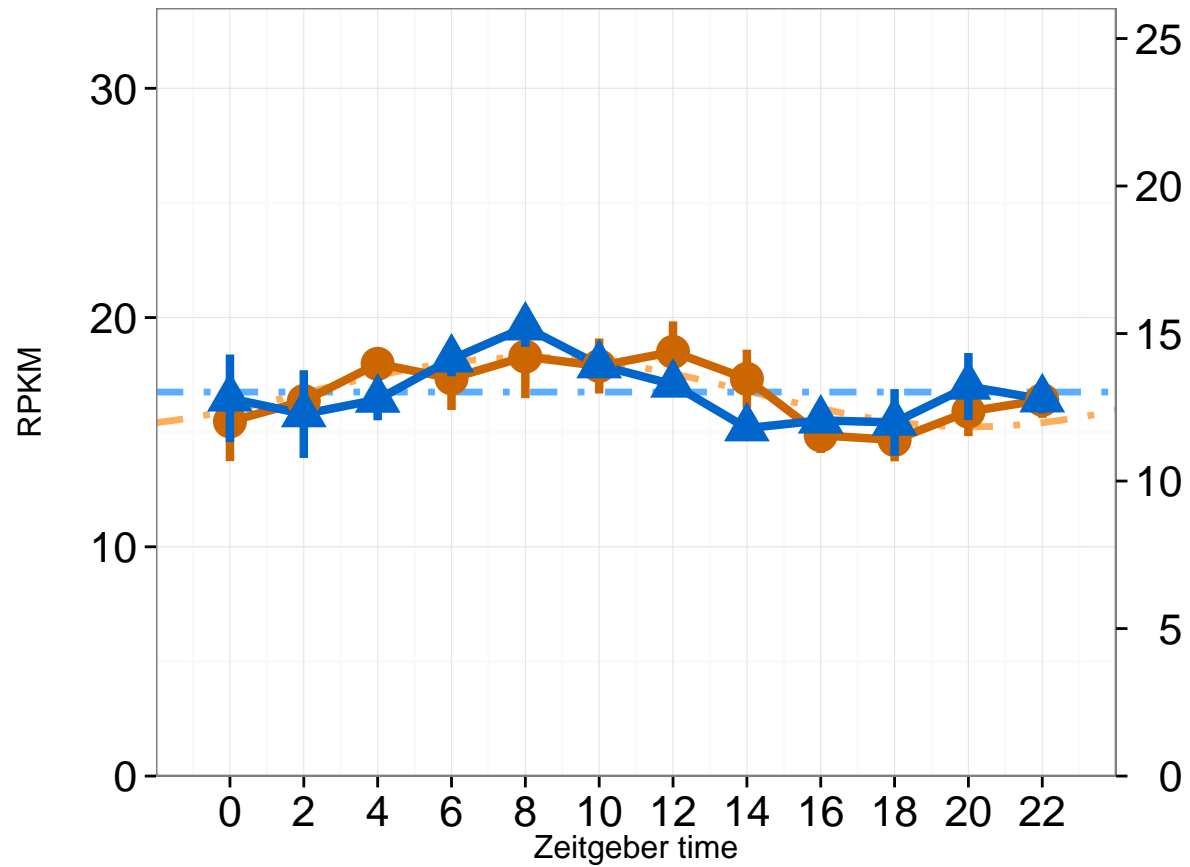

## Ttc5

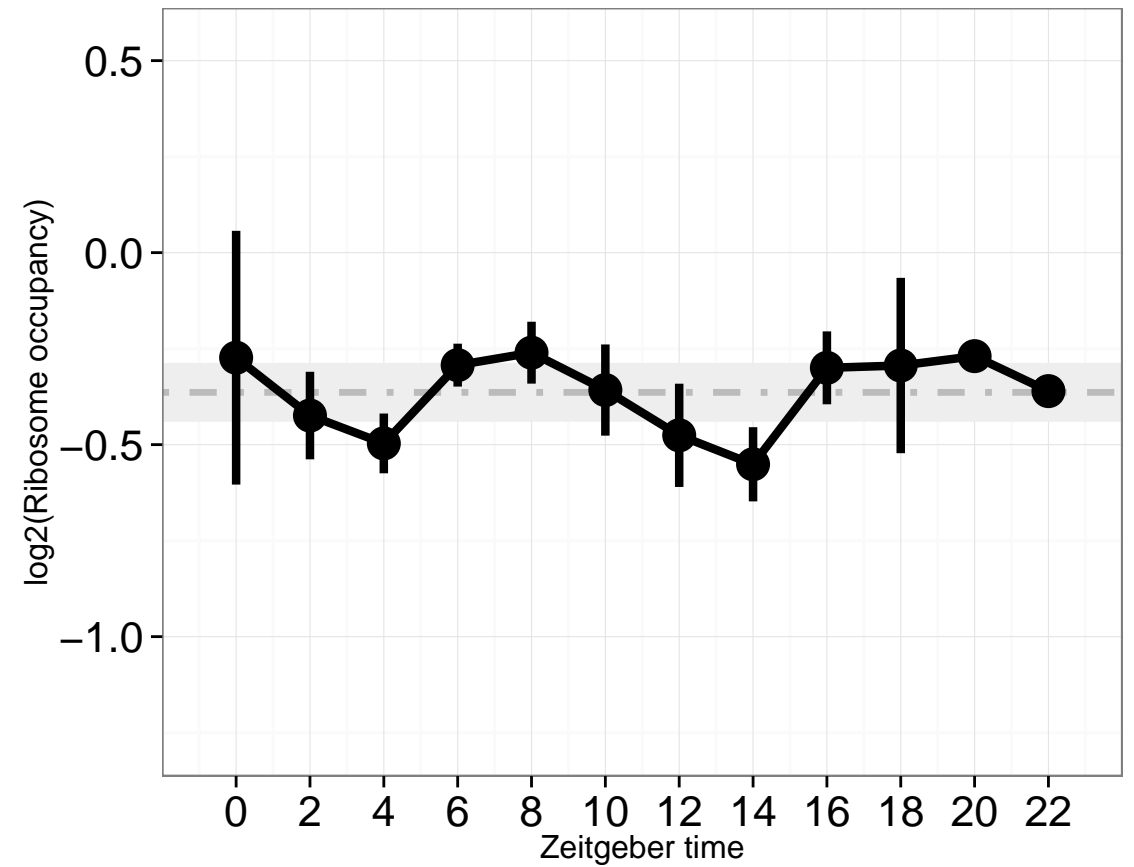

Supplement: Supplementary file 11509 [file 1]

# Trmt5

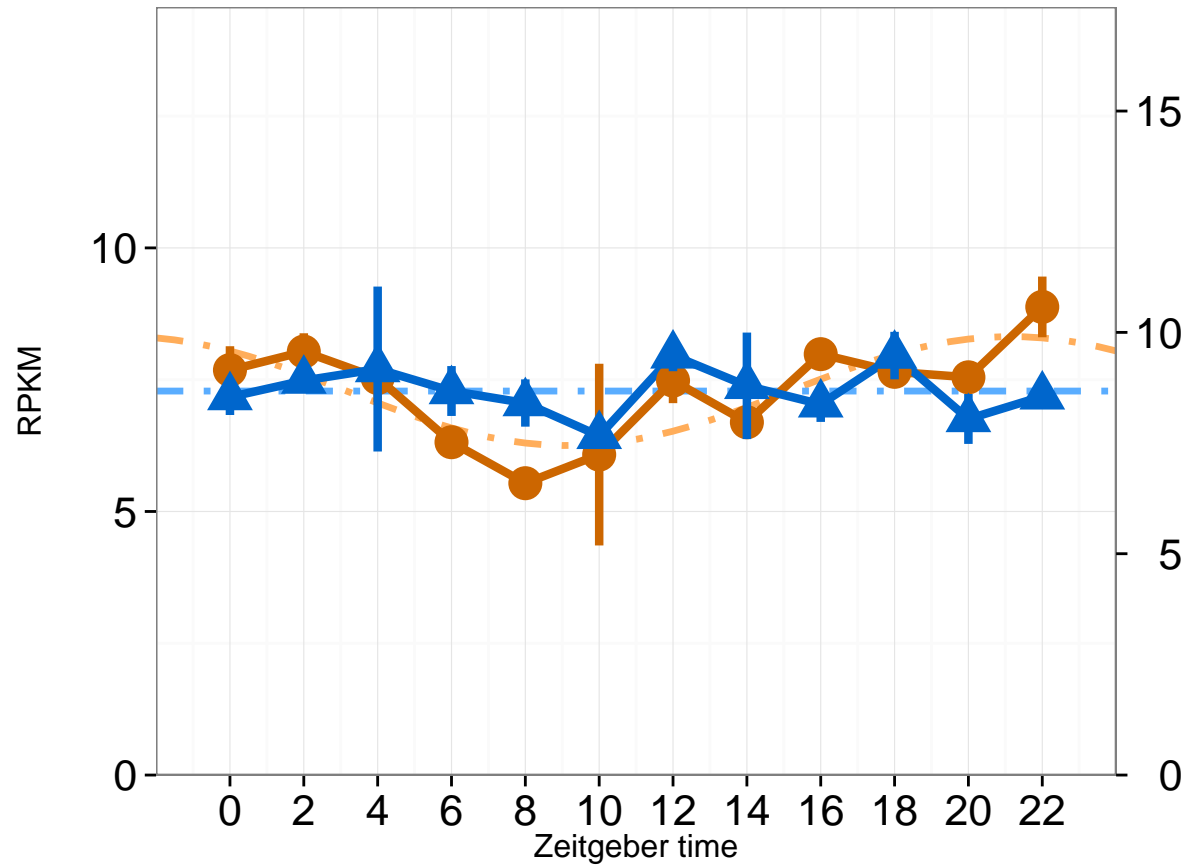

# Trmt5

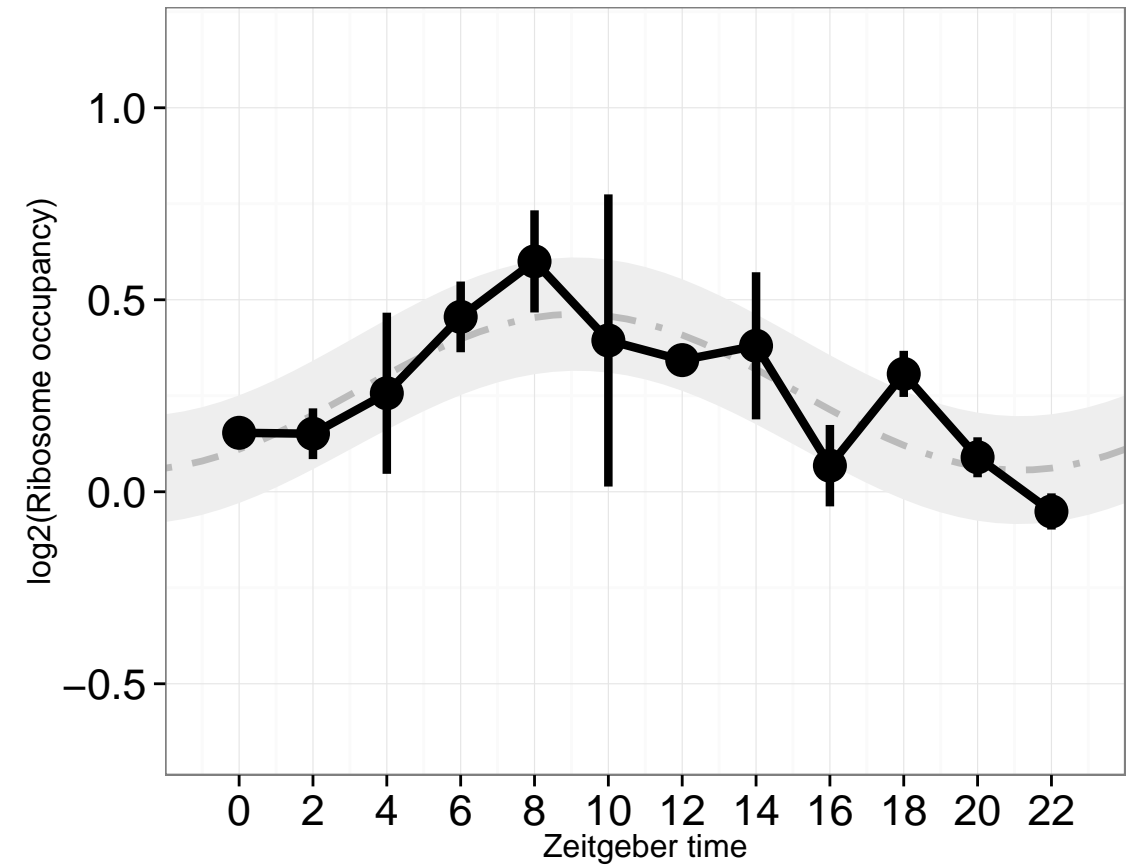

Supplement: Supplementary file 11510 [file 1]

## Ddx27

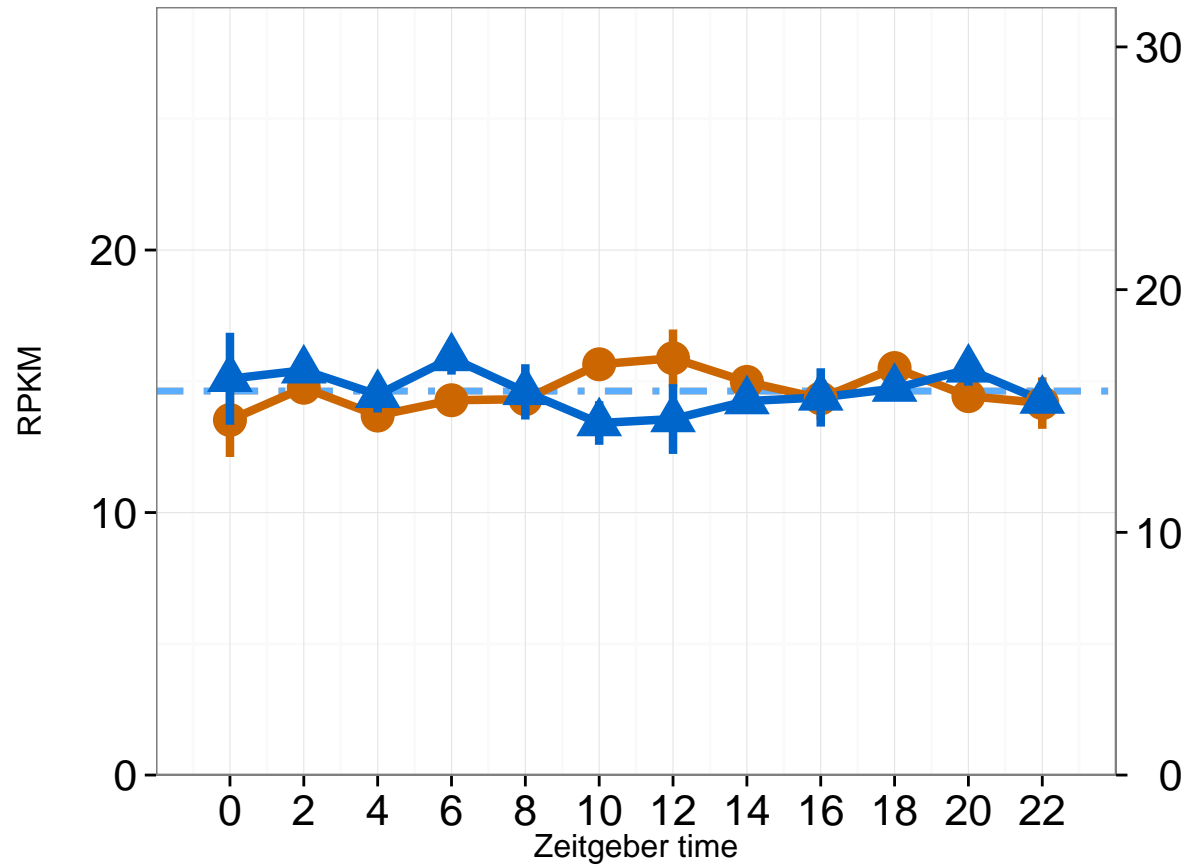

## Ddx27

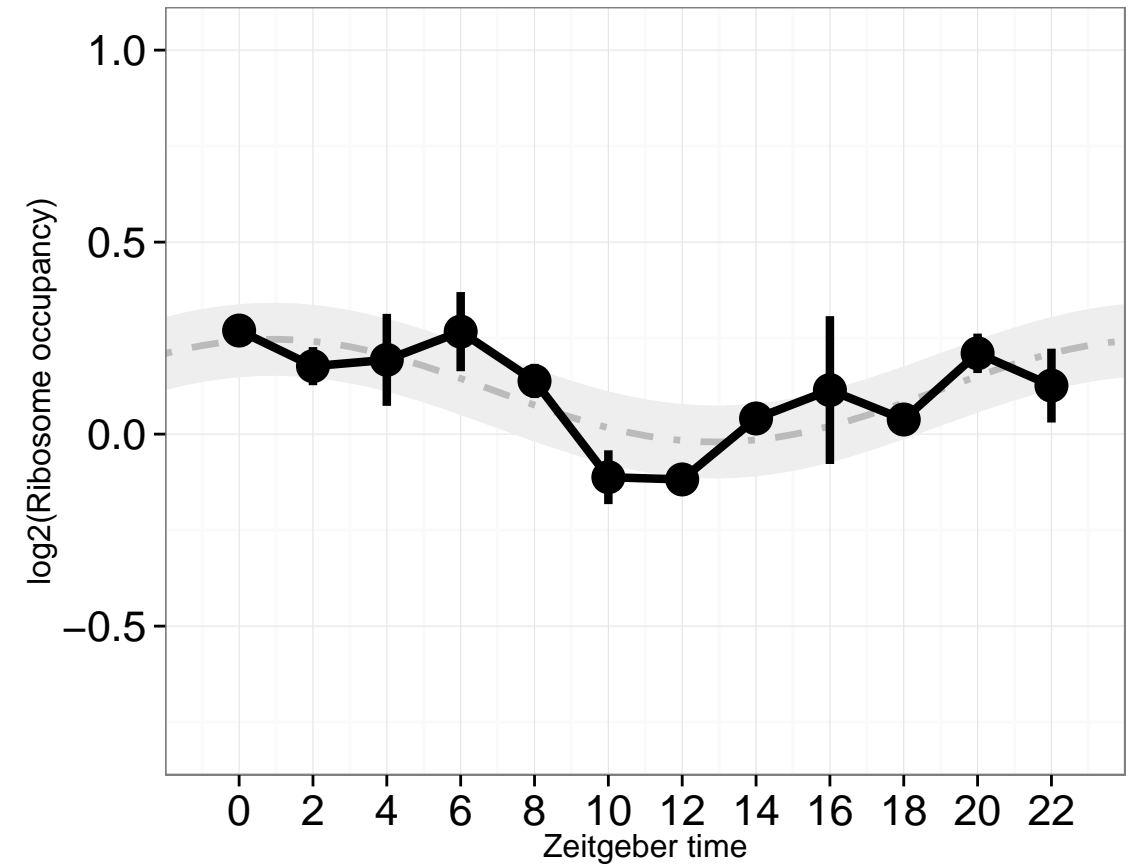

Supplement: Supplementary file 11511 [file 1]

## Sin3a

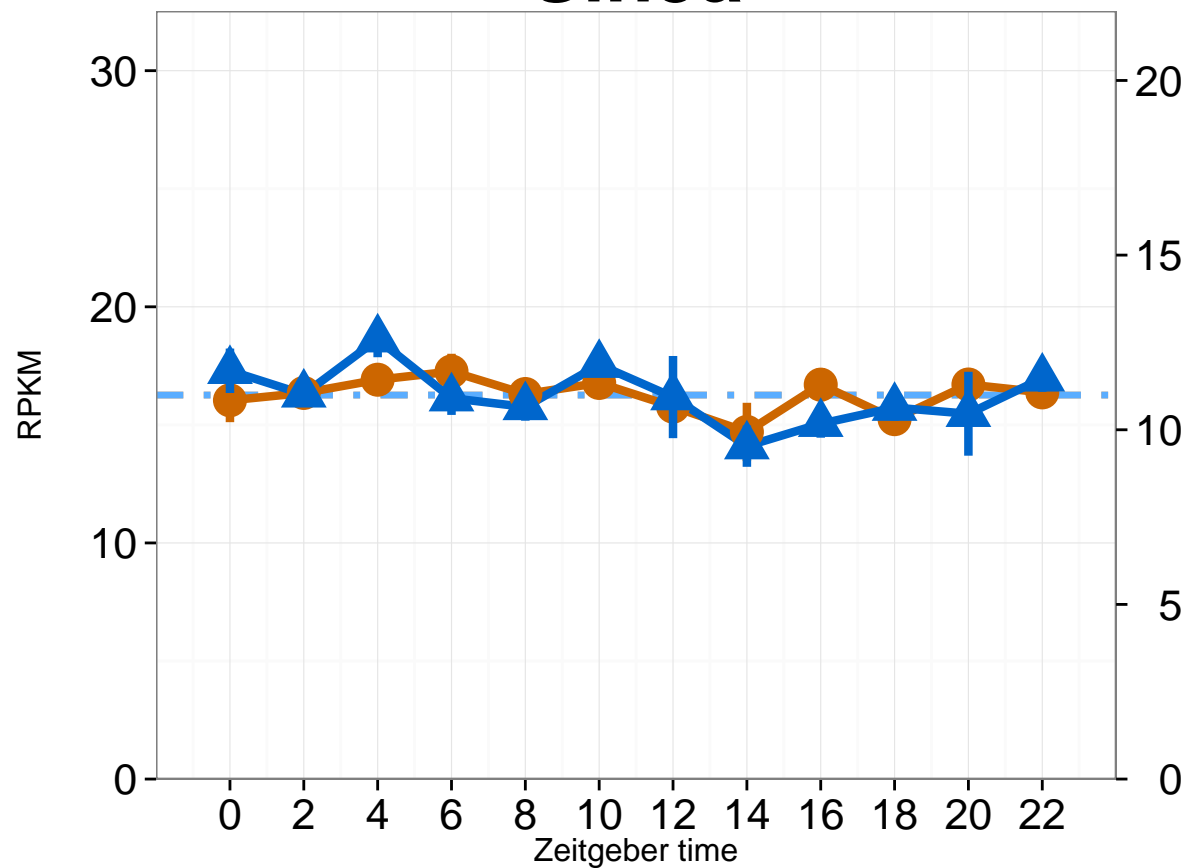

## Sin3a

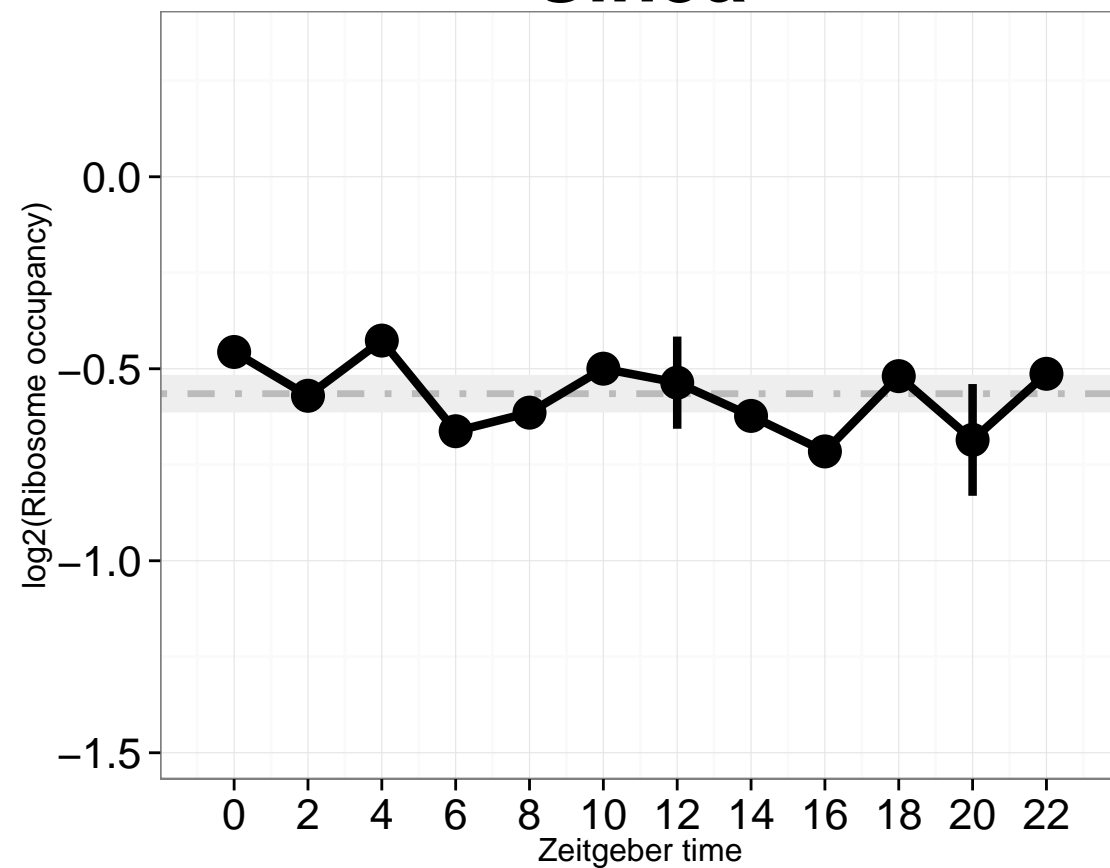

Supplement: Supplementary file 11512 [file 1]

## Slc35f5

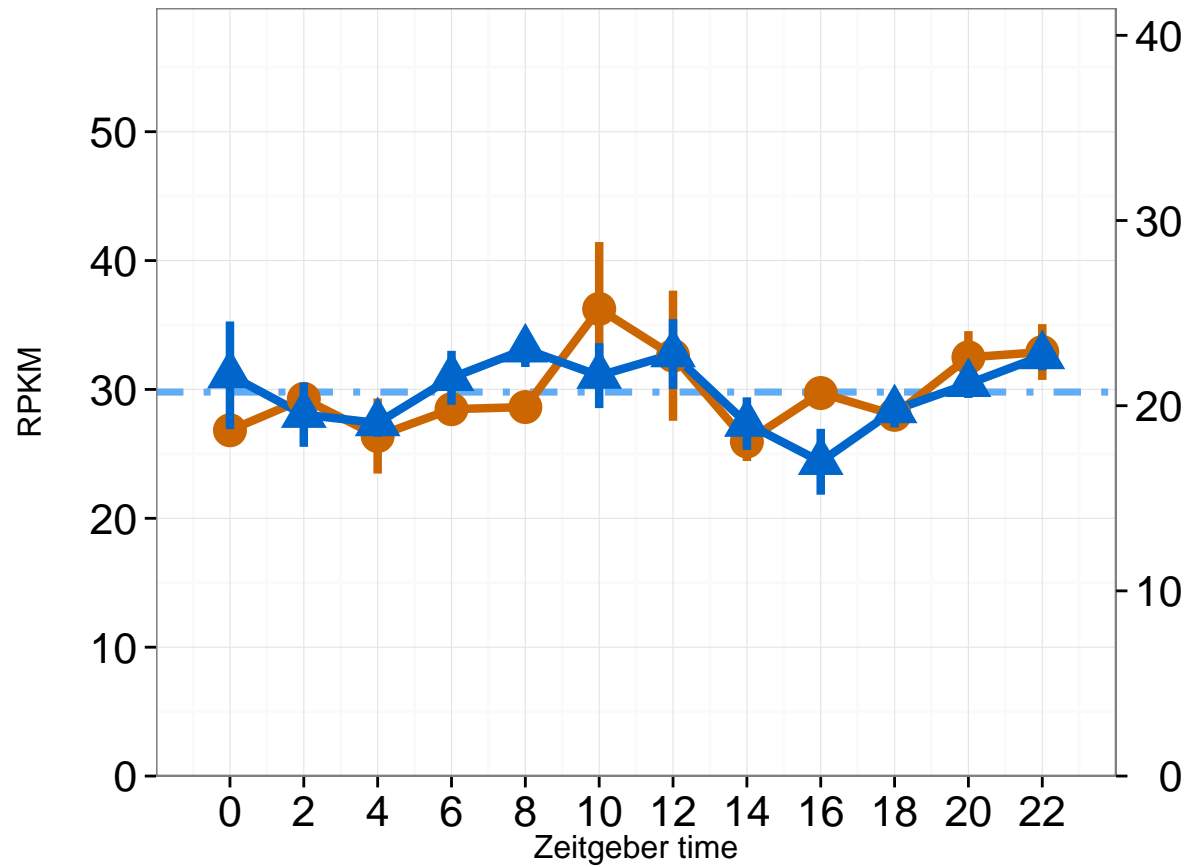

## Slc35f5

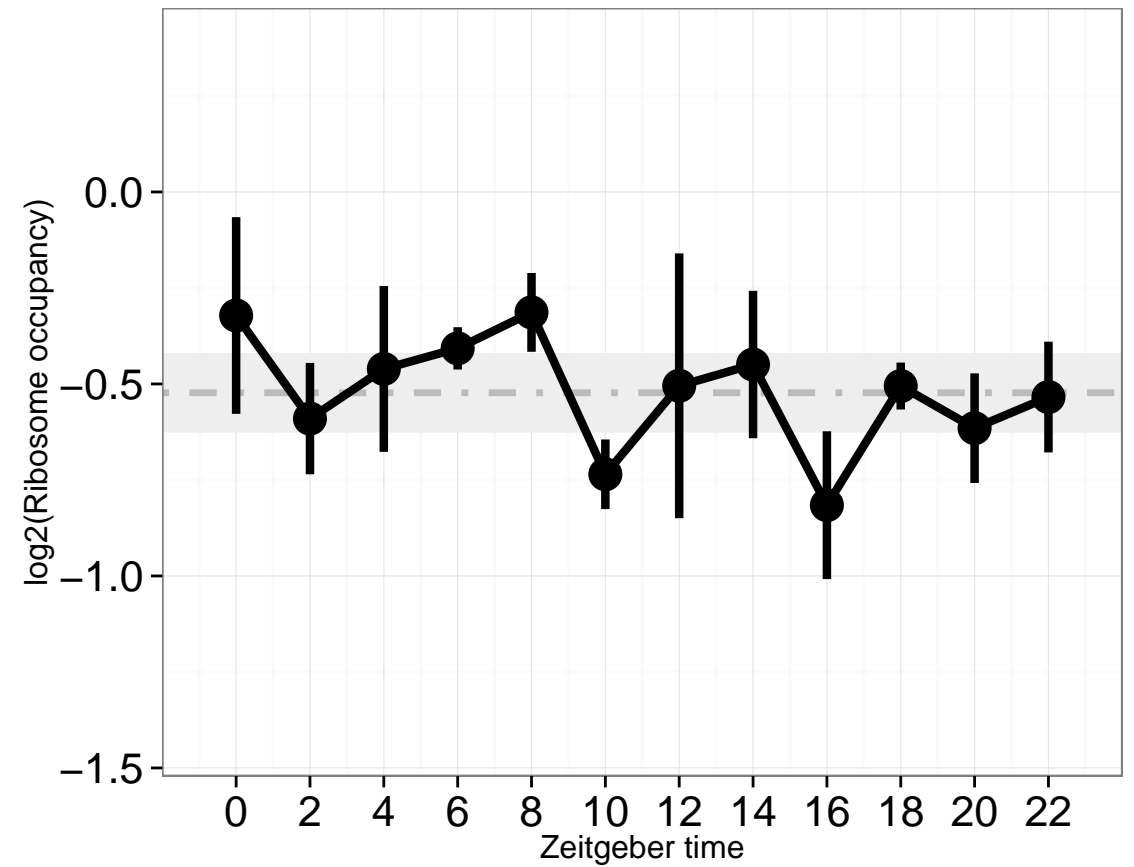

Supplement: Supplementary file 11513 [file 1]

# Maged1

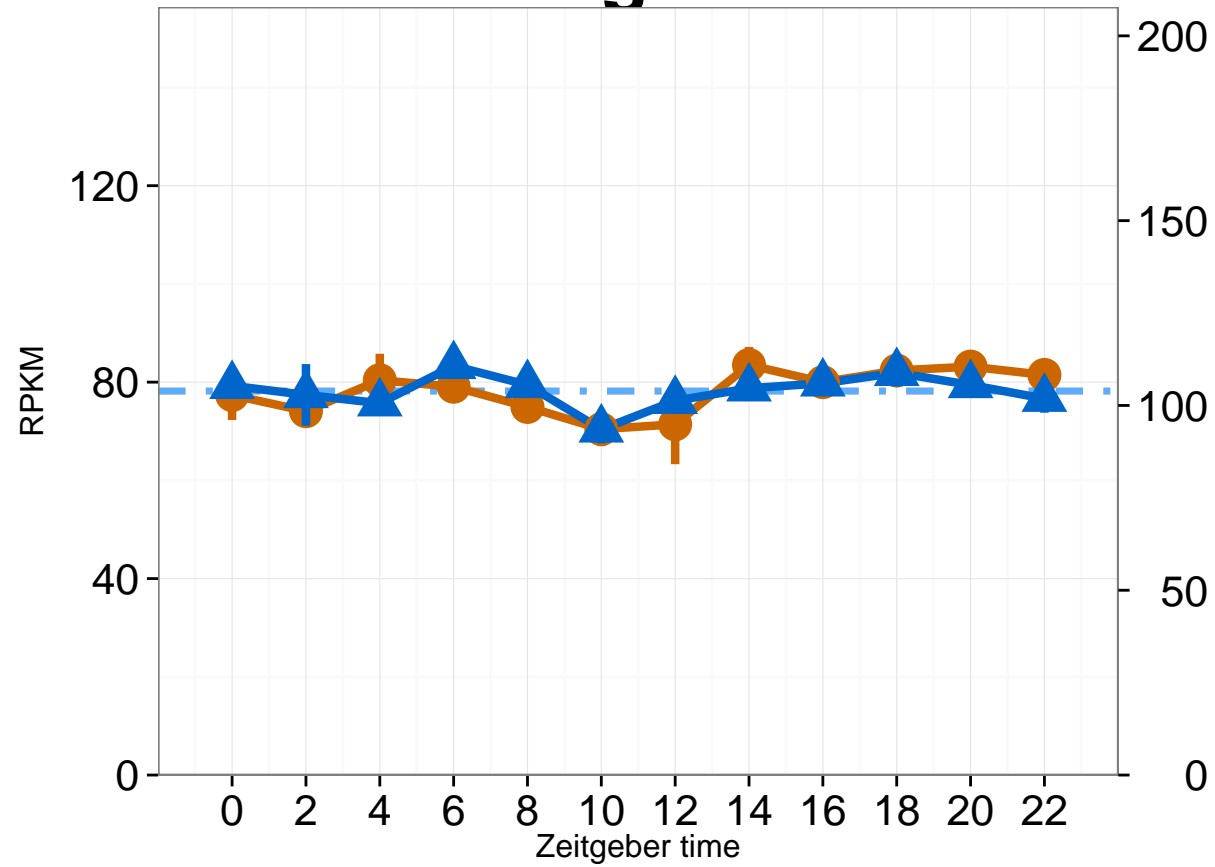

# Maged1

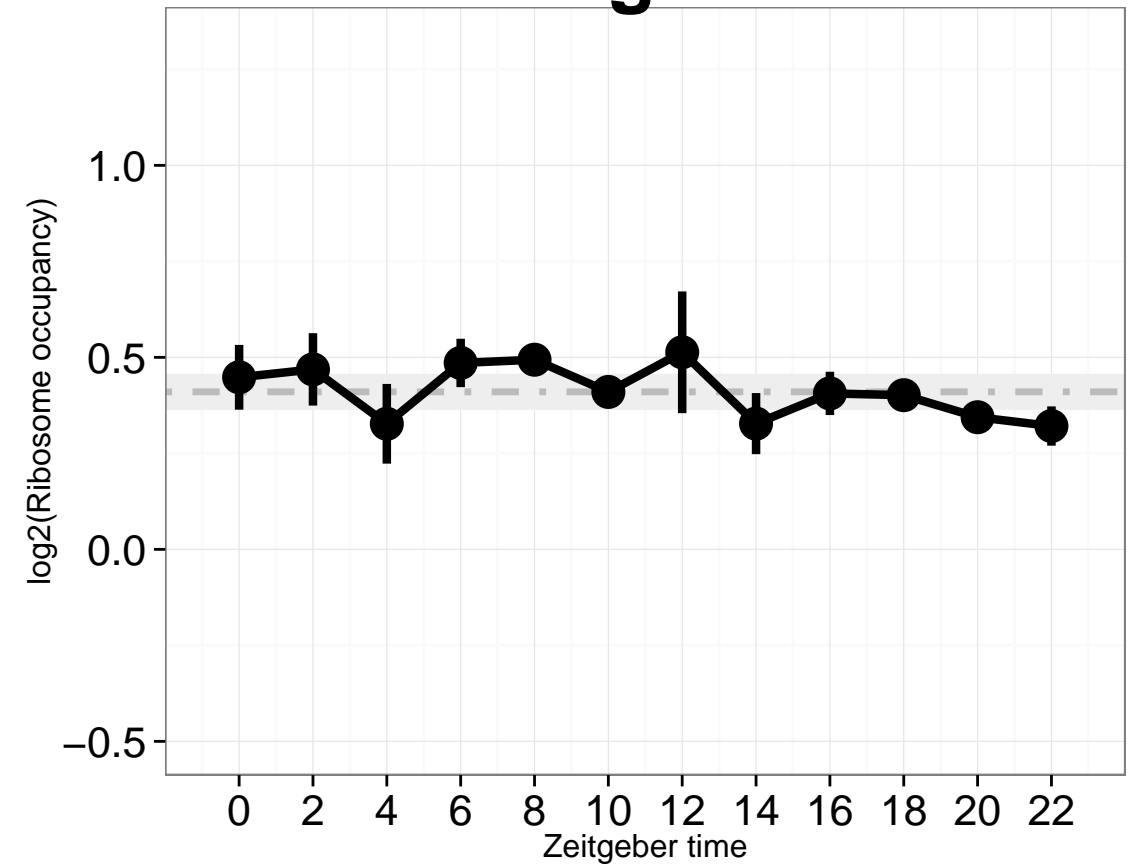

Supplement: Supplementary file 11514 [file 1]

# Ccdc55

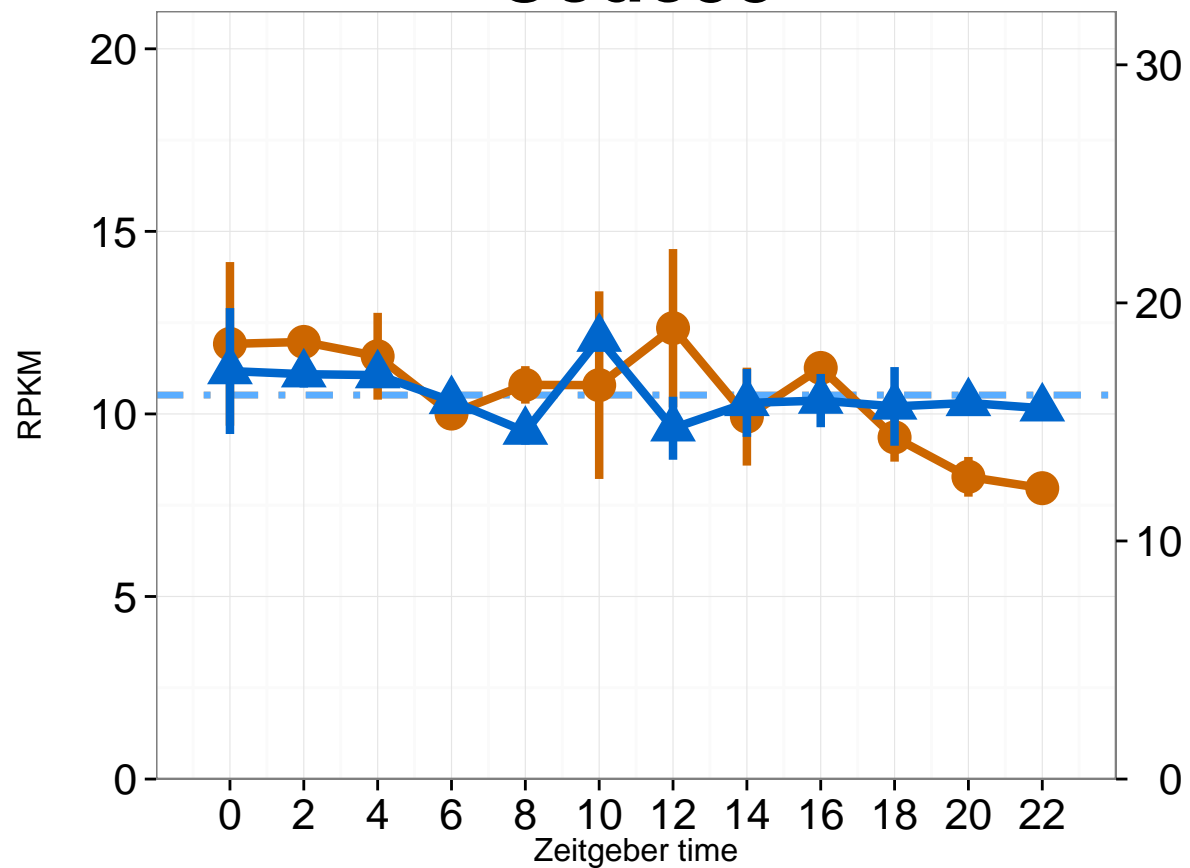

# Ccdc55

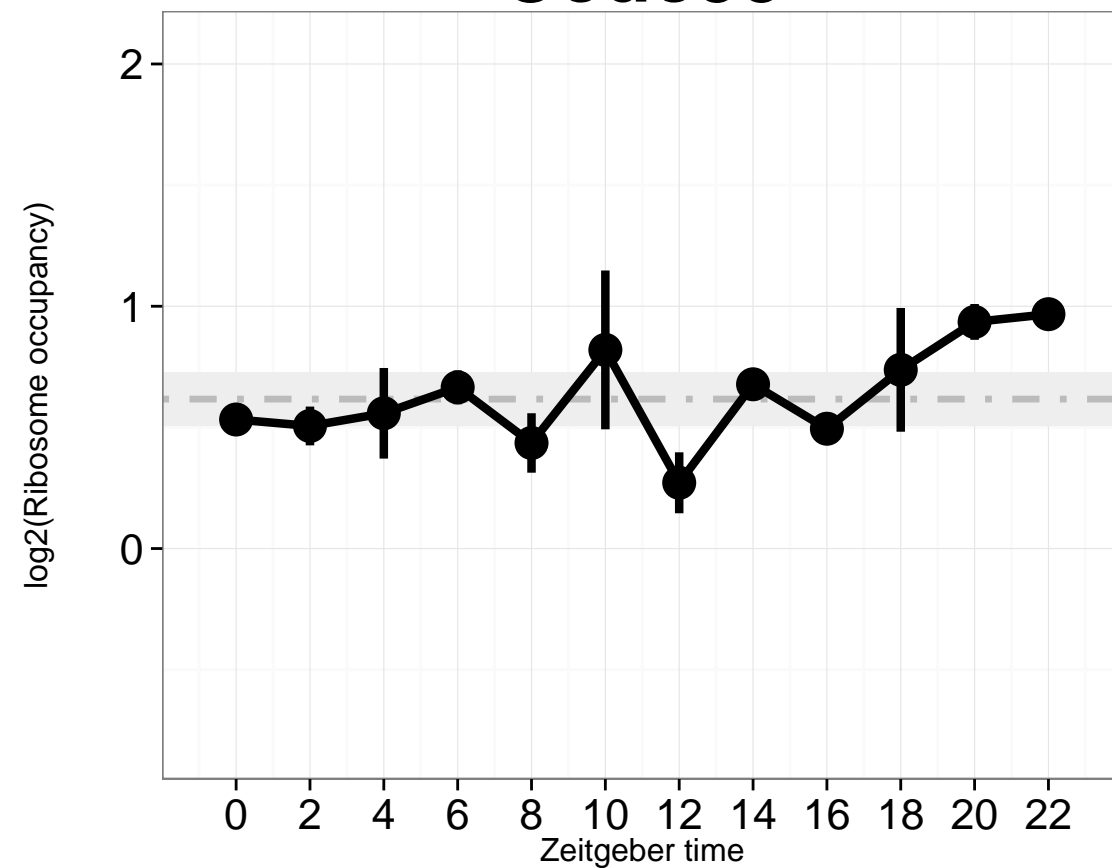

Supplement: Supplementary file 11515 [file 1]

## Rbm45

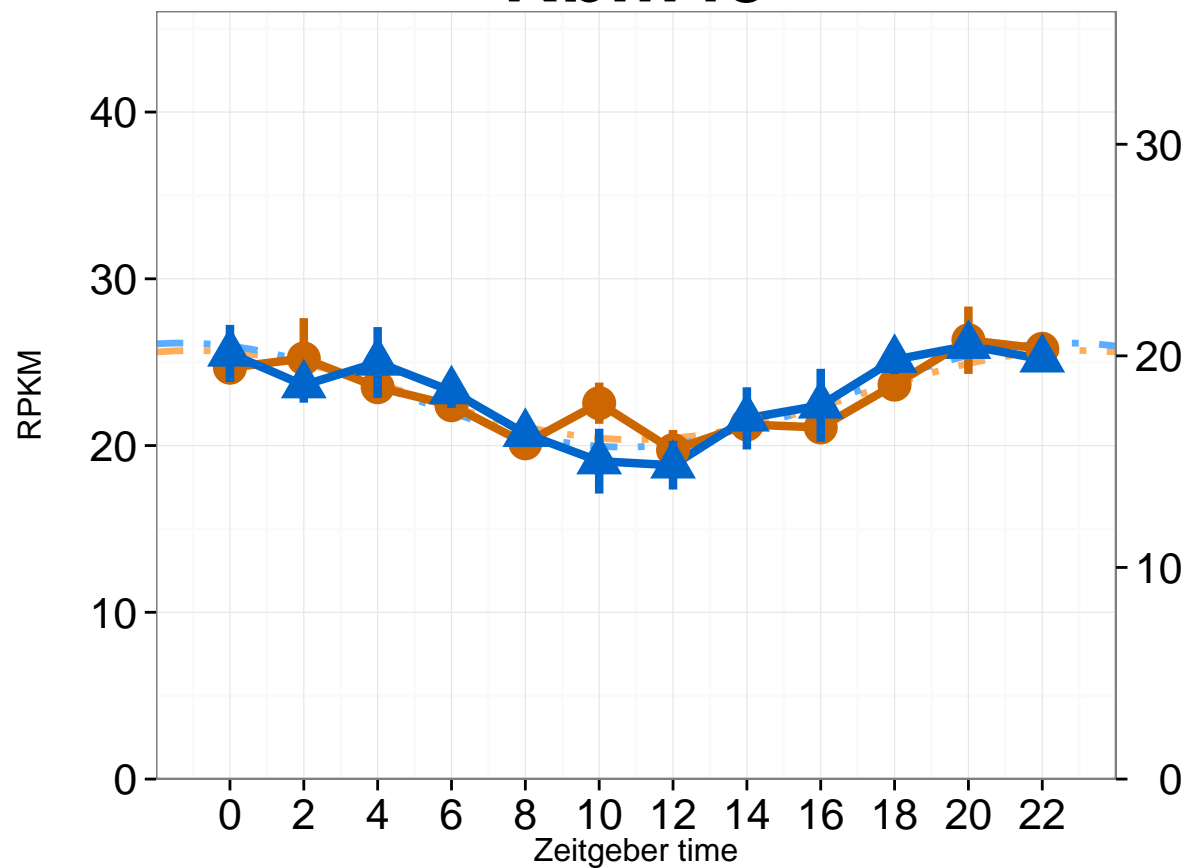

## Rbm45

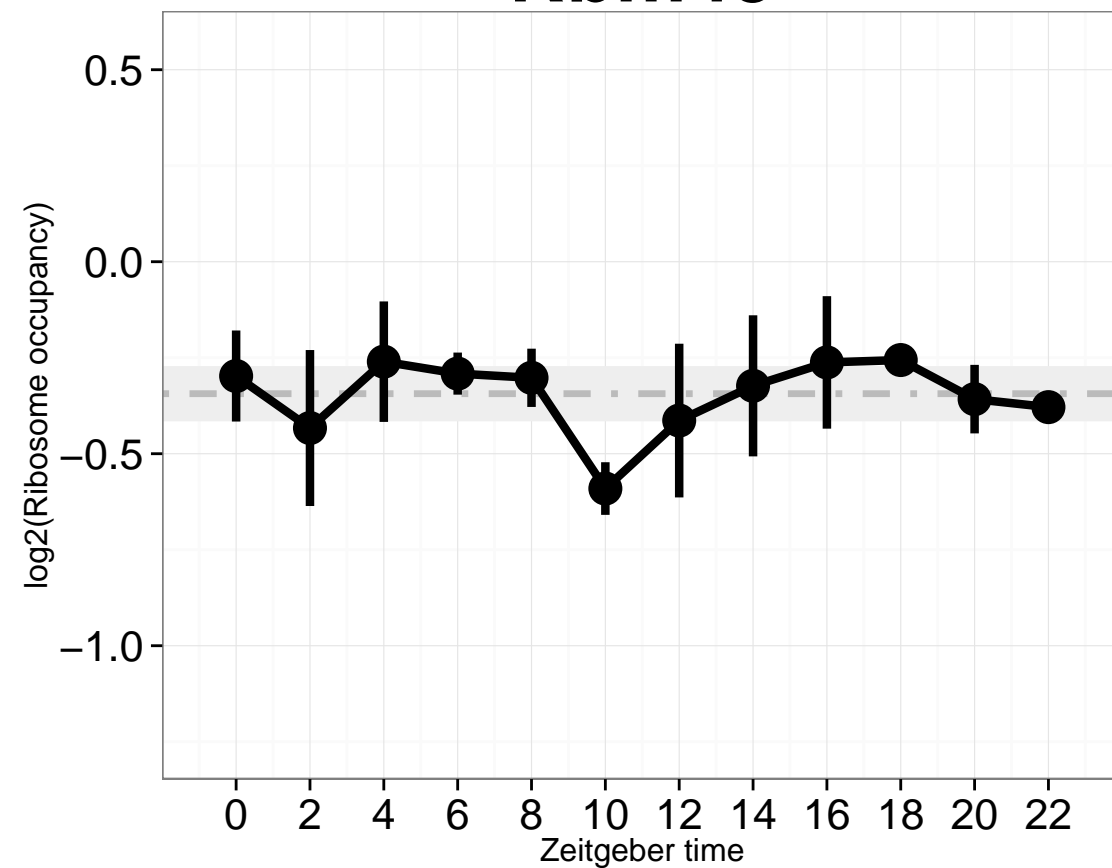

Supplement: Supplementary file 11516 [file 1]

# C330027C09Rik

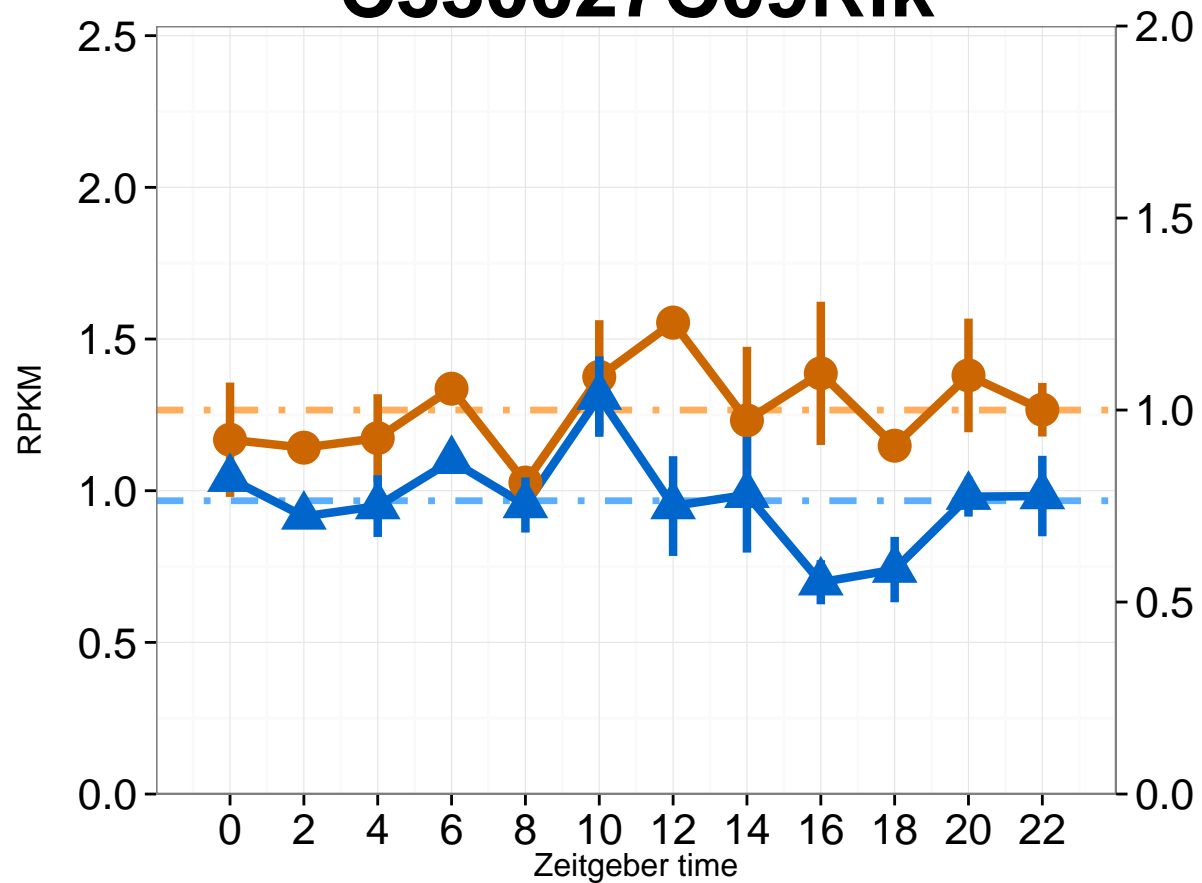

# C330027C09Rik

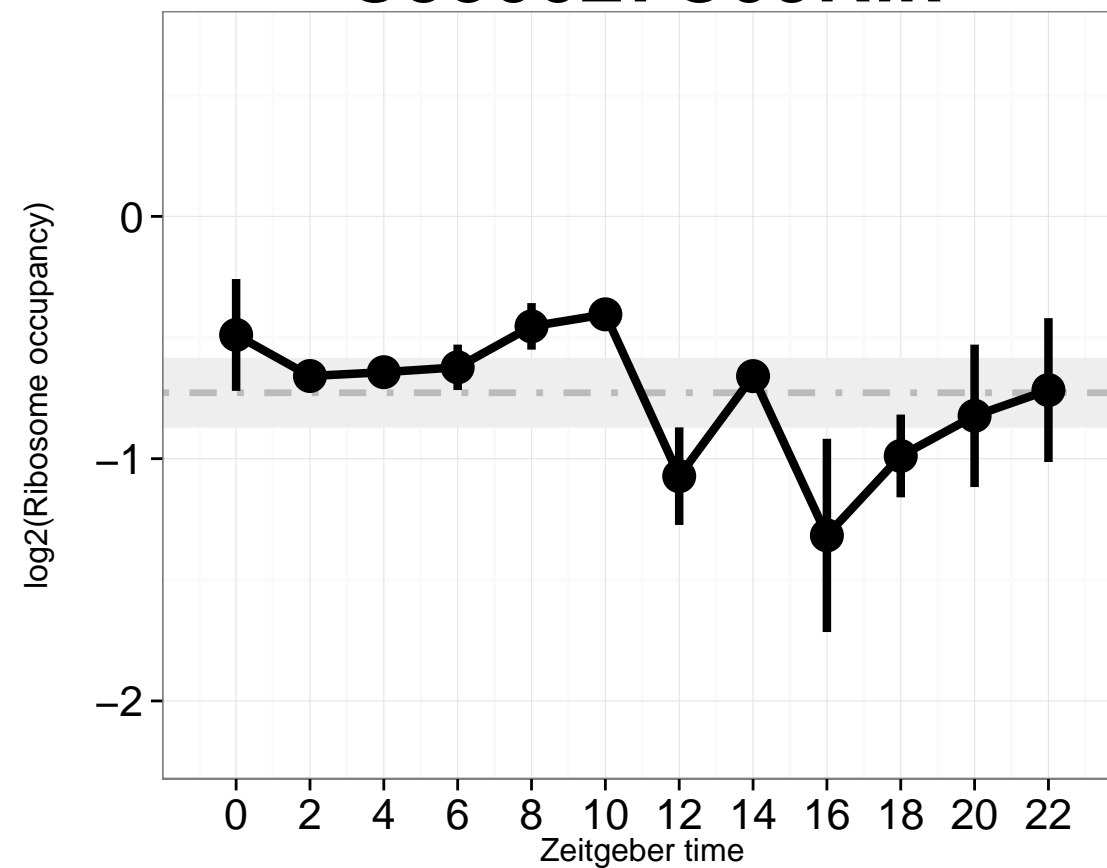

Supplement: Supplementary file 11517 [file 1]

## Fzd2

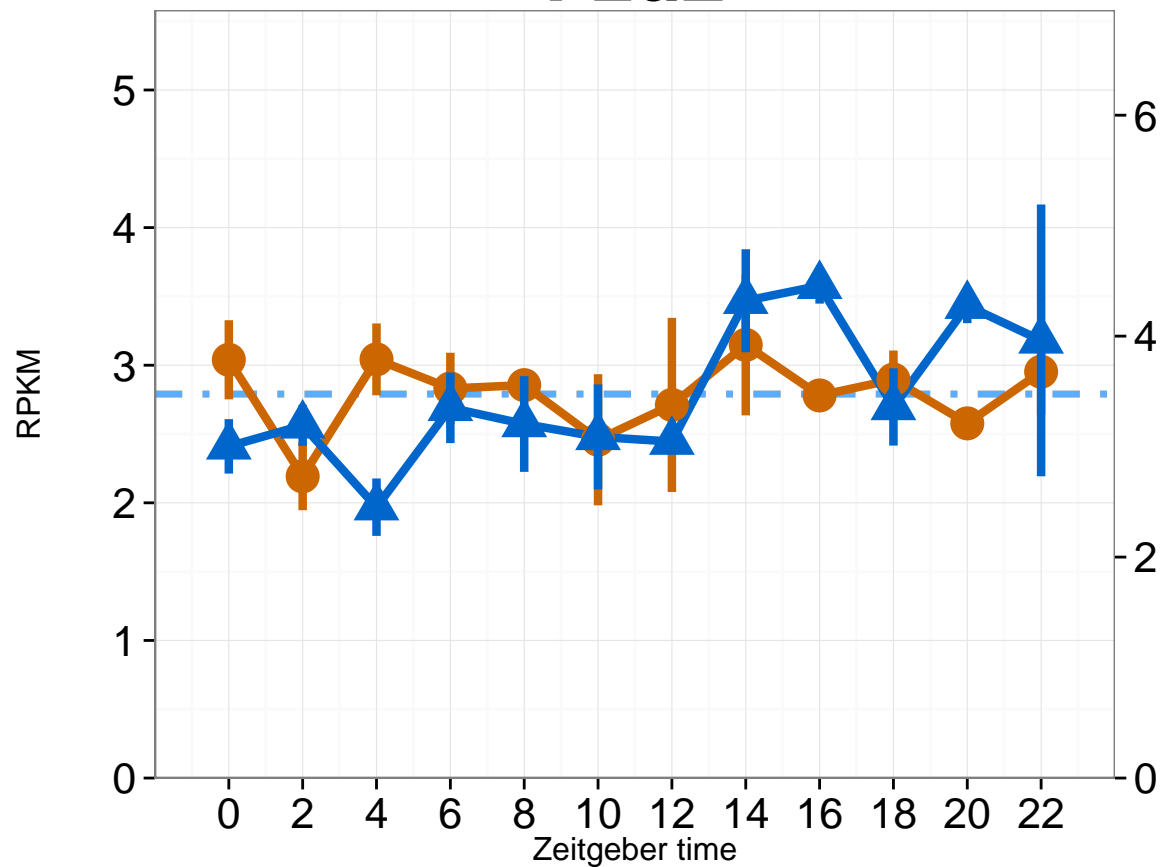

## Fzd2

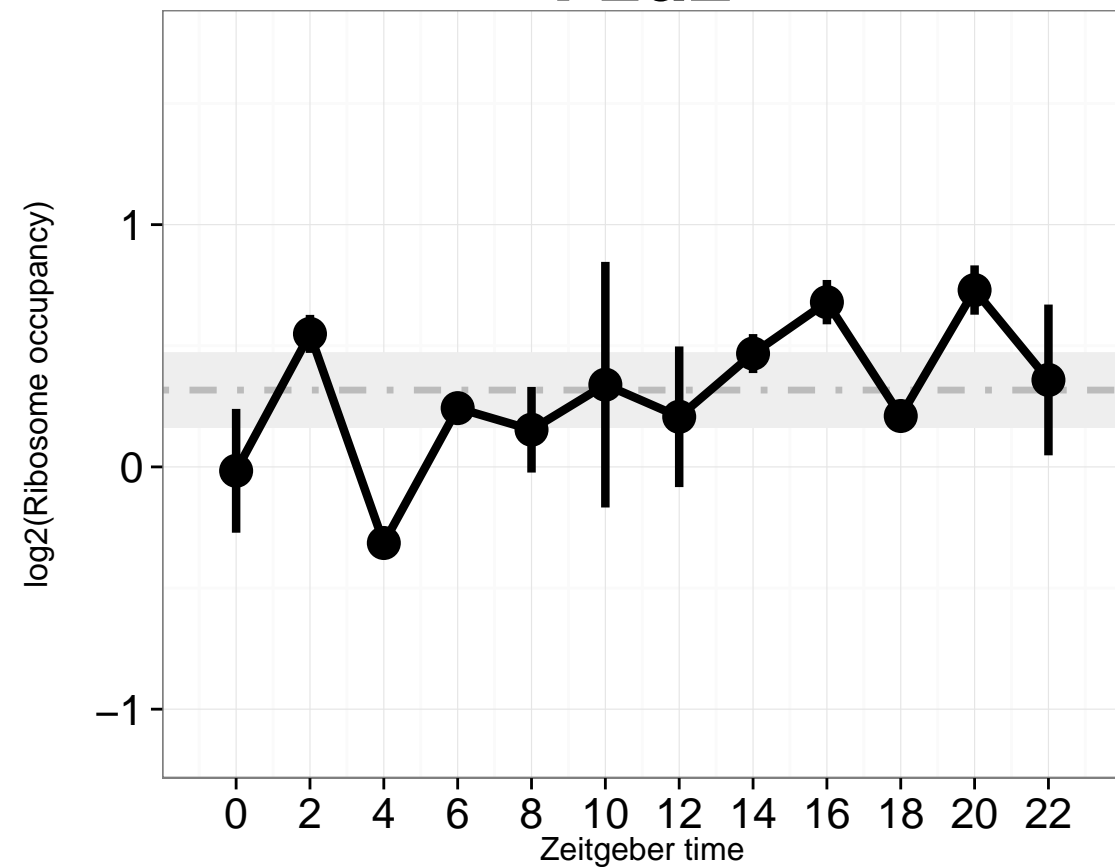

Supplement: Supplementary file 11518 [file 1]

# Rpl19

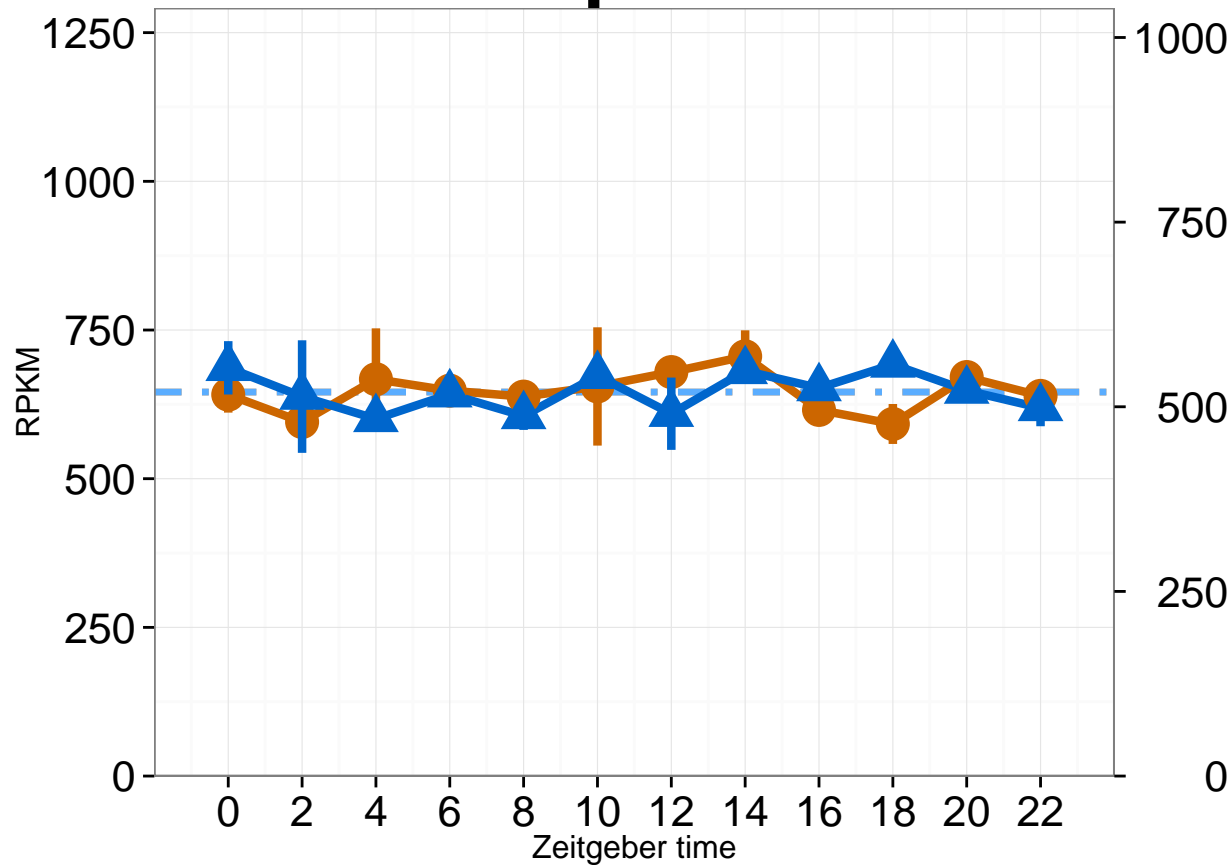

# Rpl19

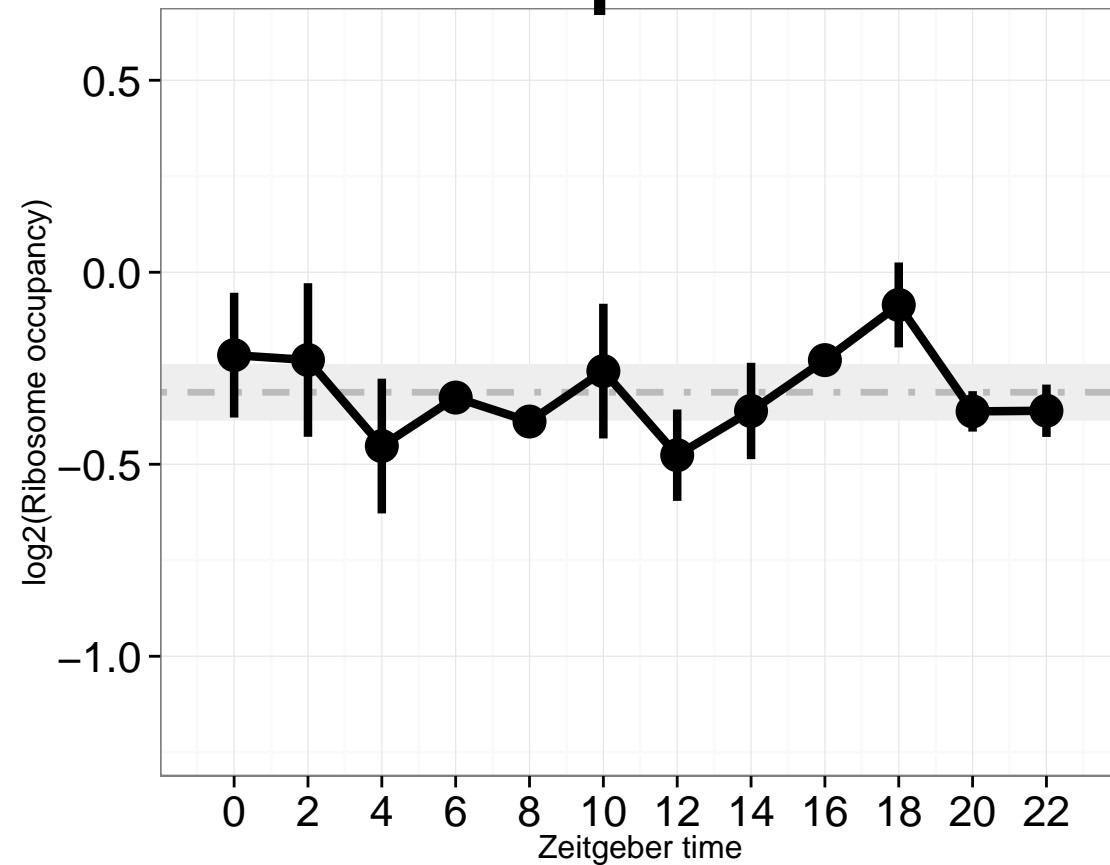

Supplement: Supplementary file 11519 [file 1]

## Ppib

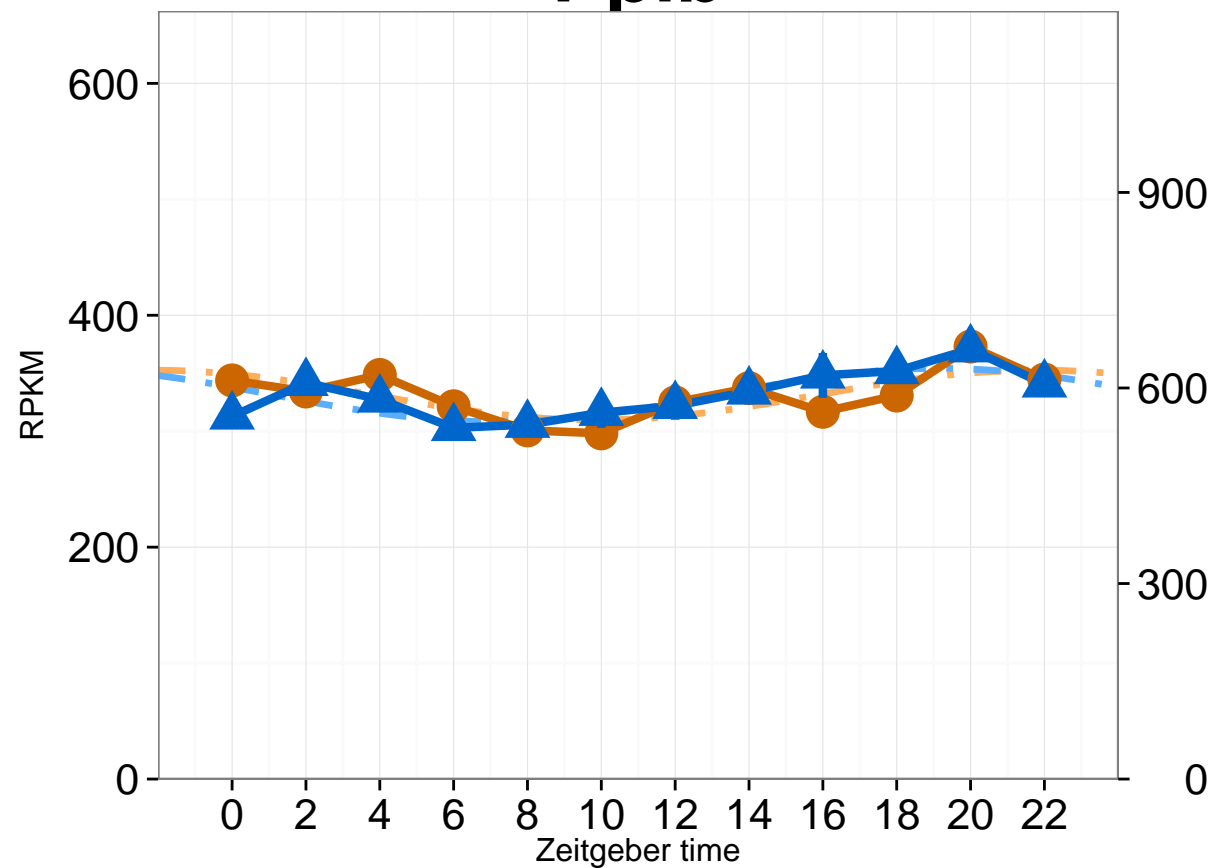

## Ppib

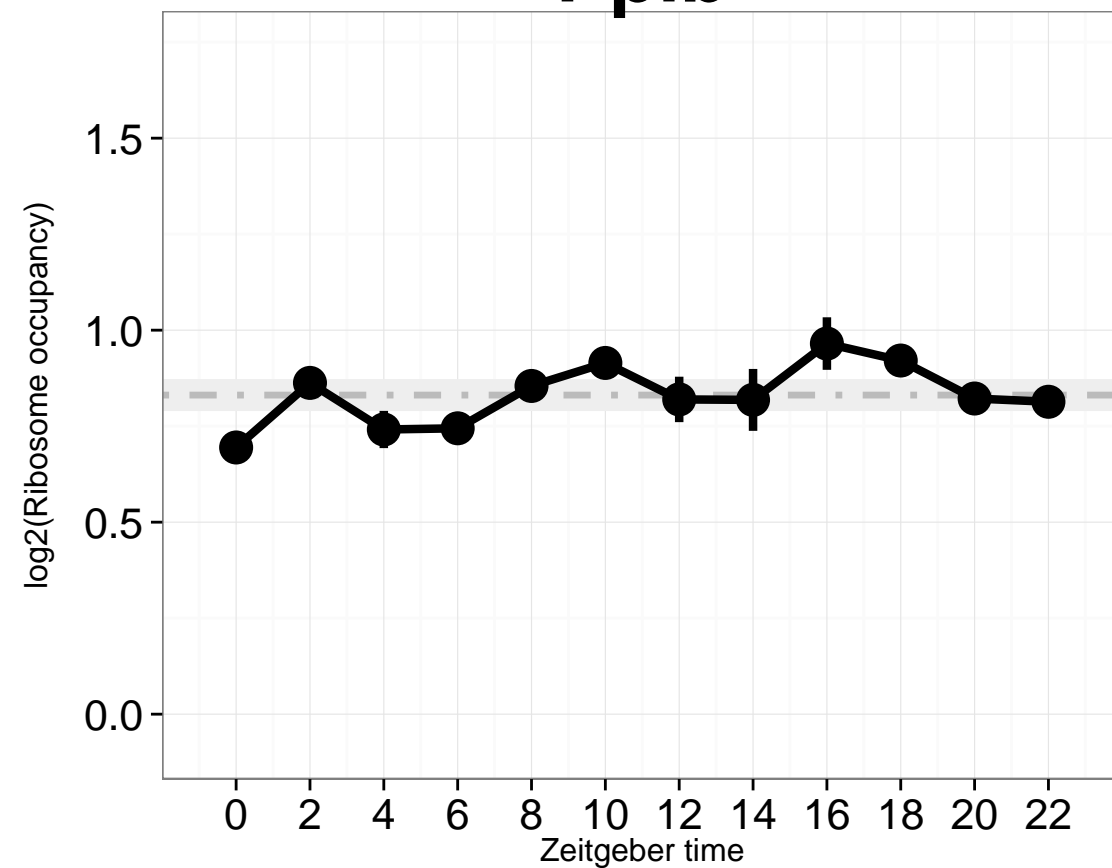

Supplement: Supplementary file 11520 [file 1]

## Tdrd5

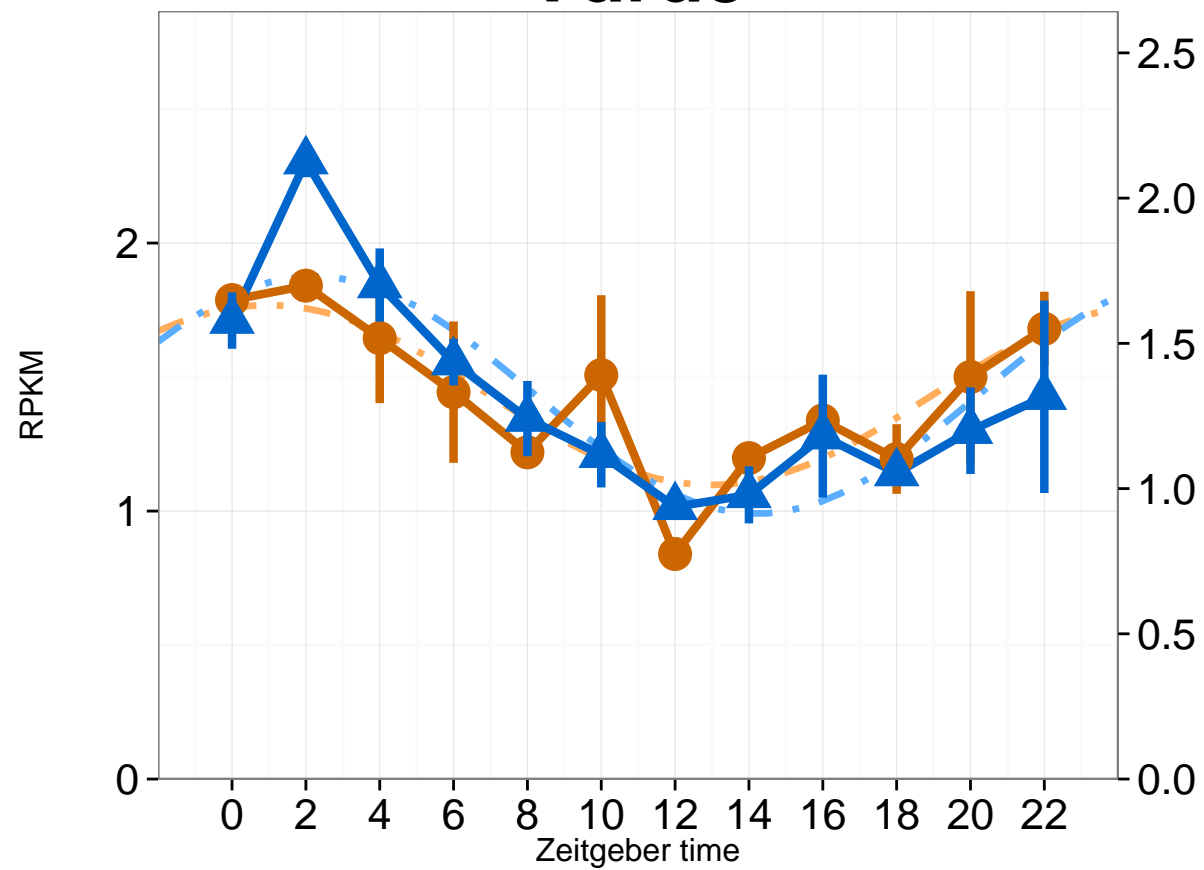

## Tdrd5

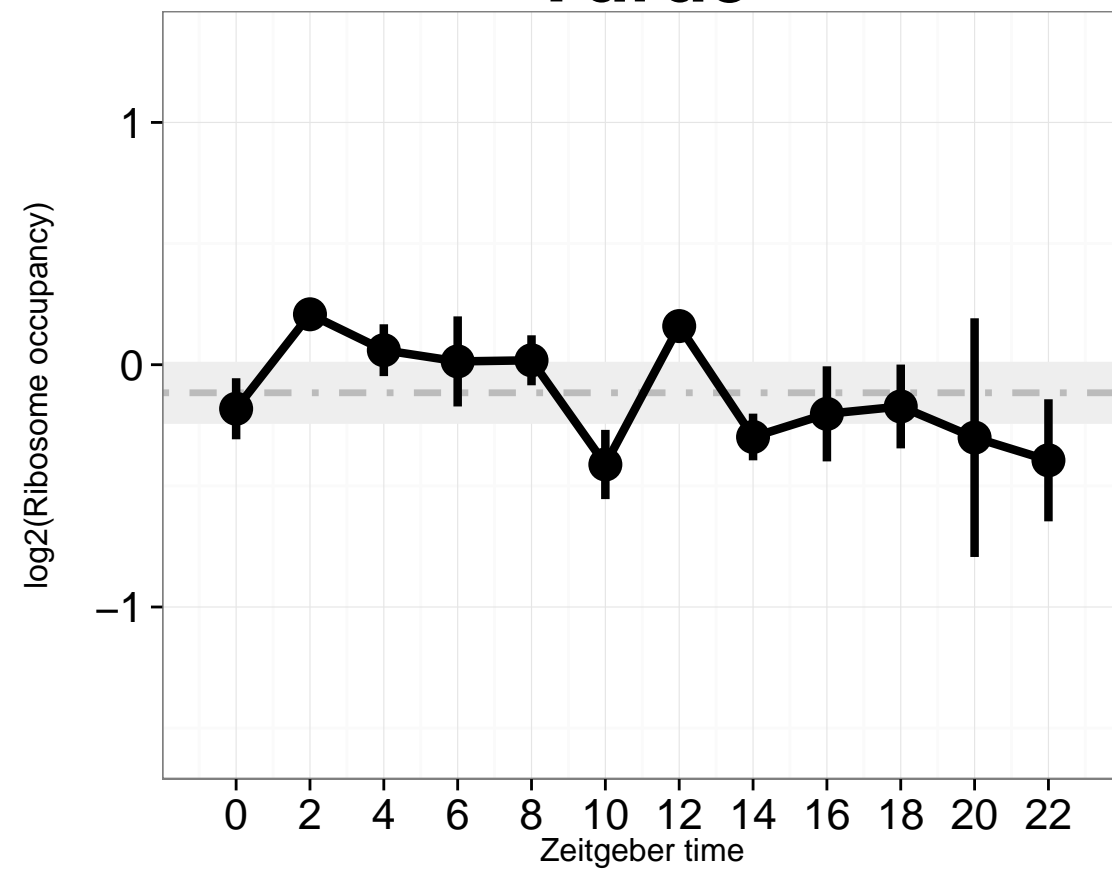

Supplement: Supplementary file 11521 [file 1]

# Slc14a2

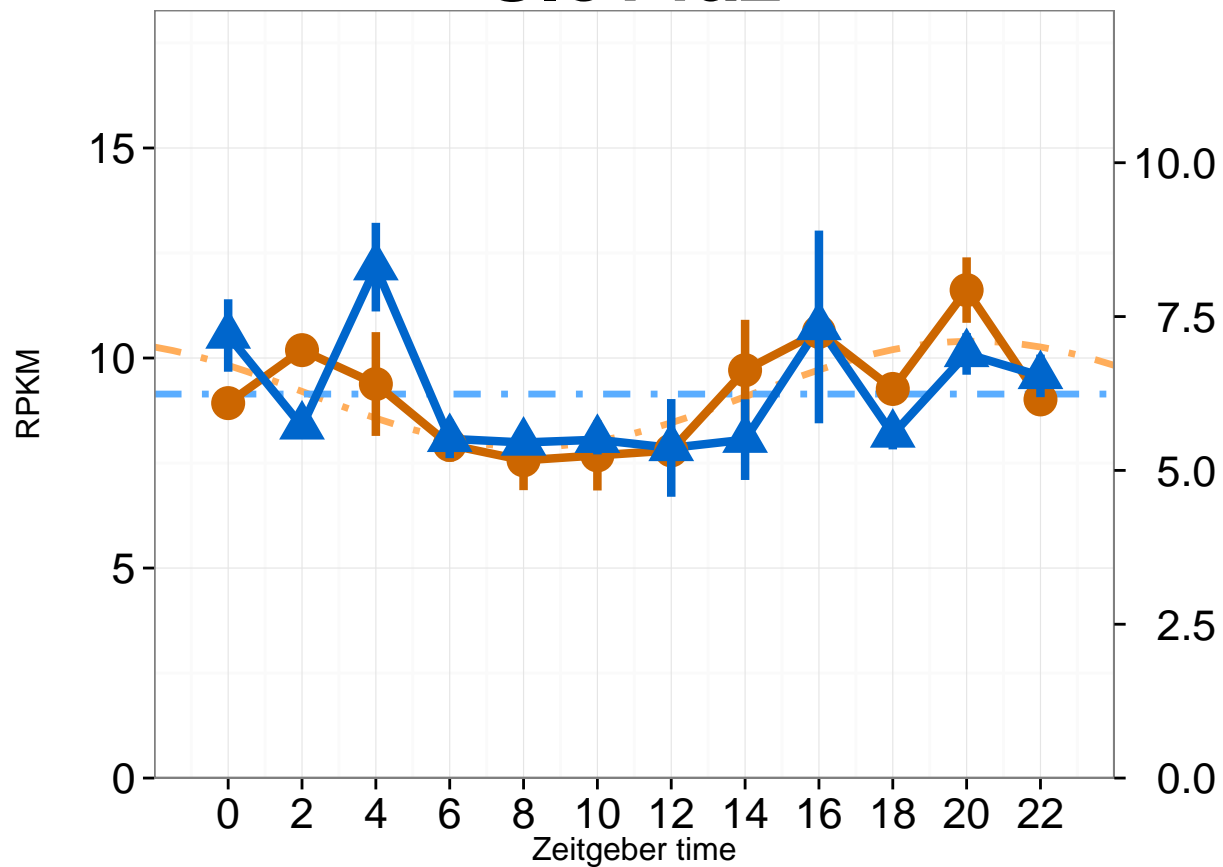

# Slc14a2

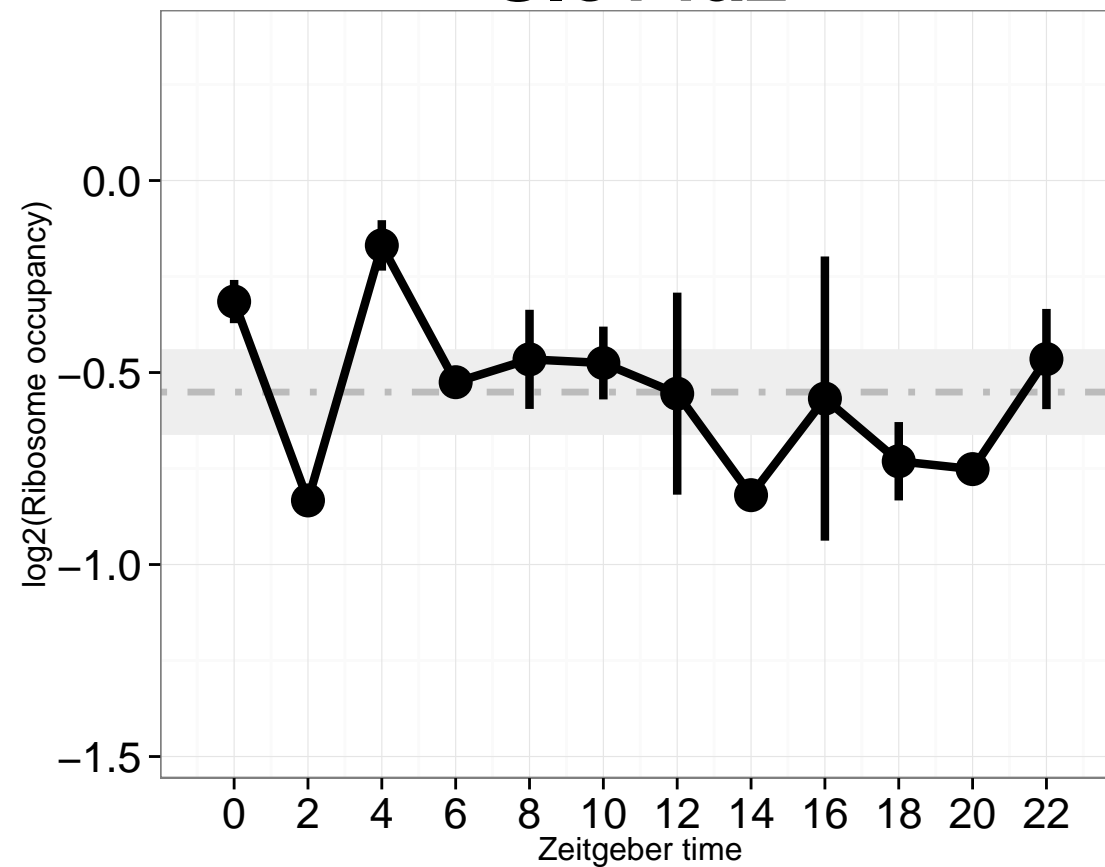

Supplement: Supplementary file 11522 [file 1]

# Park7

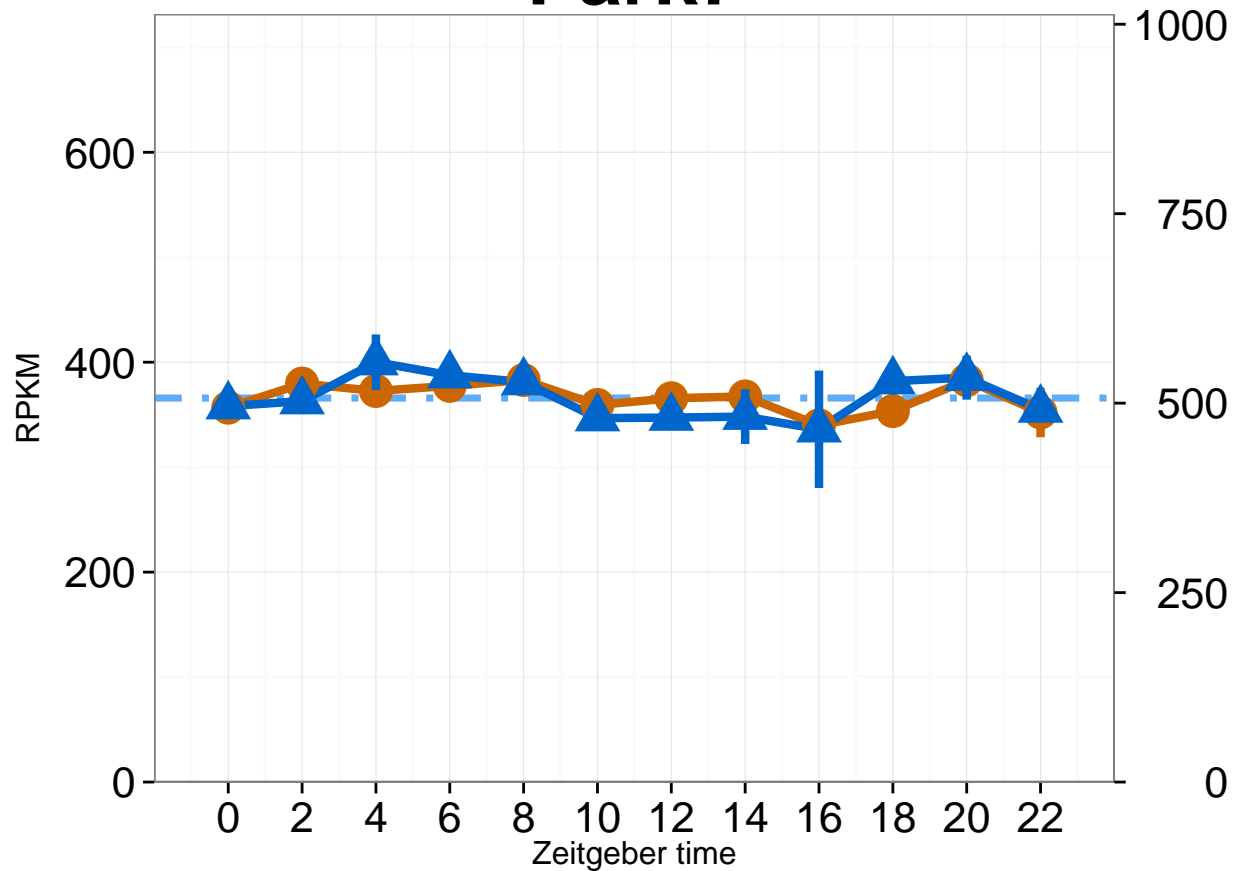

# Park7

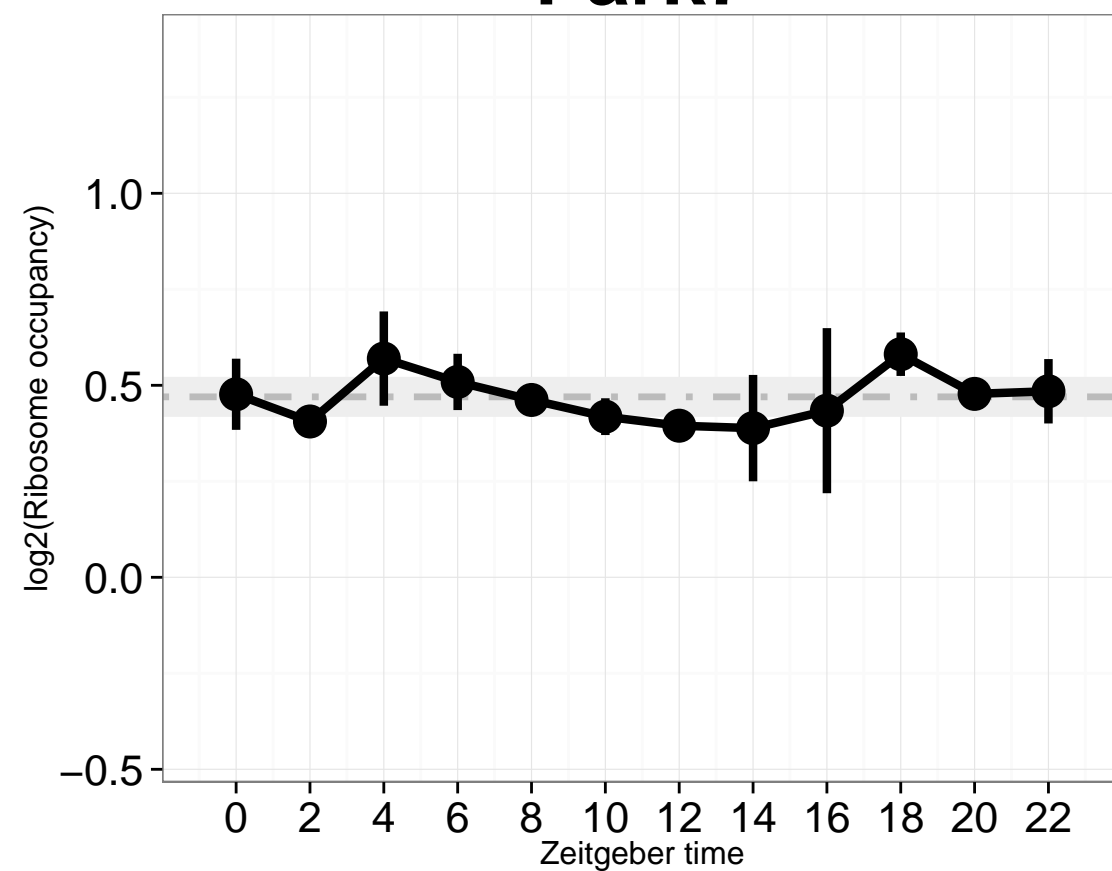

Supplement: Supplementary file 11523 [file 1]

## Gcnt1

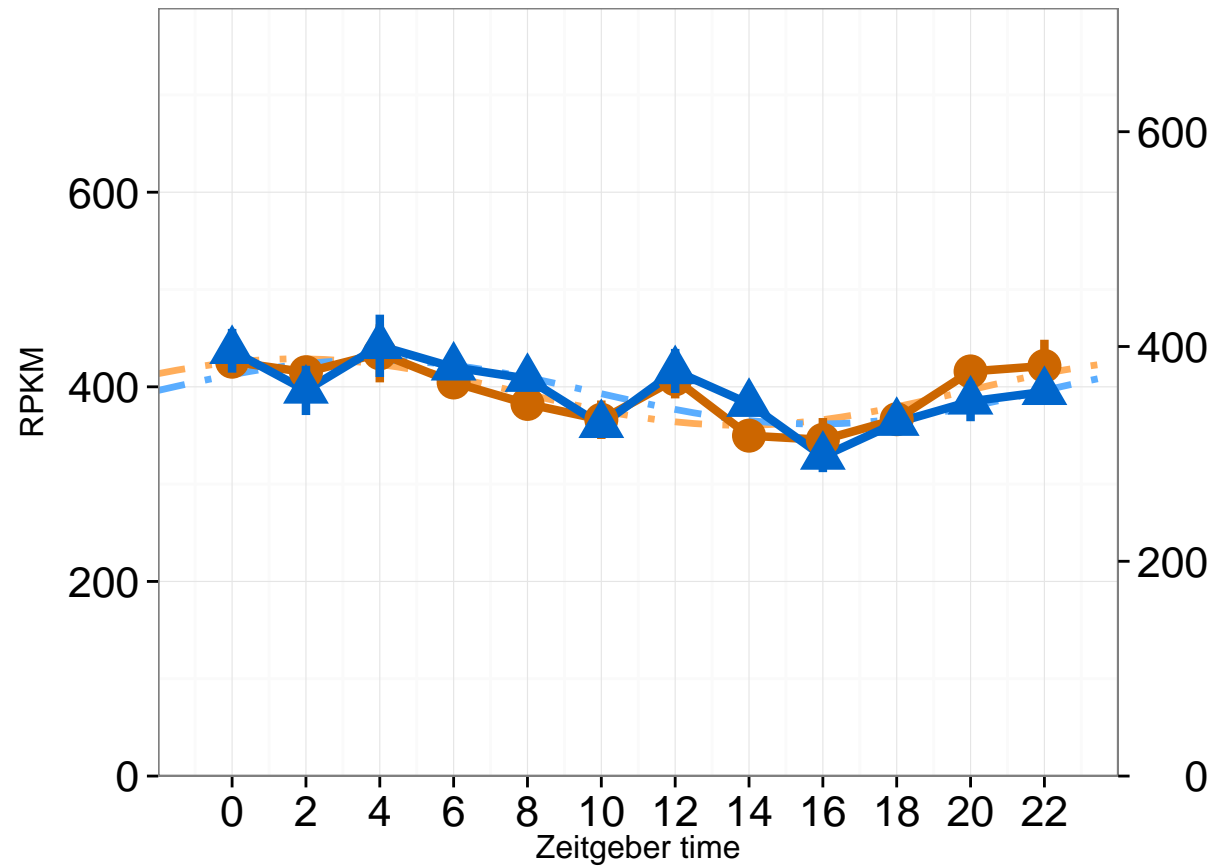

## Gcnt1

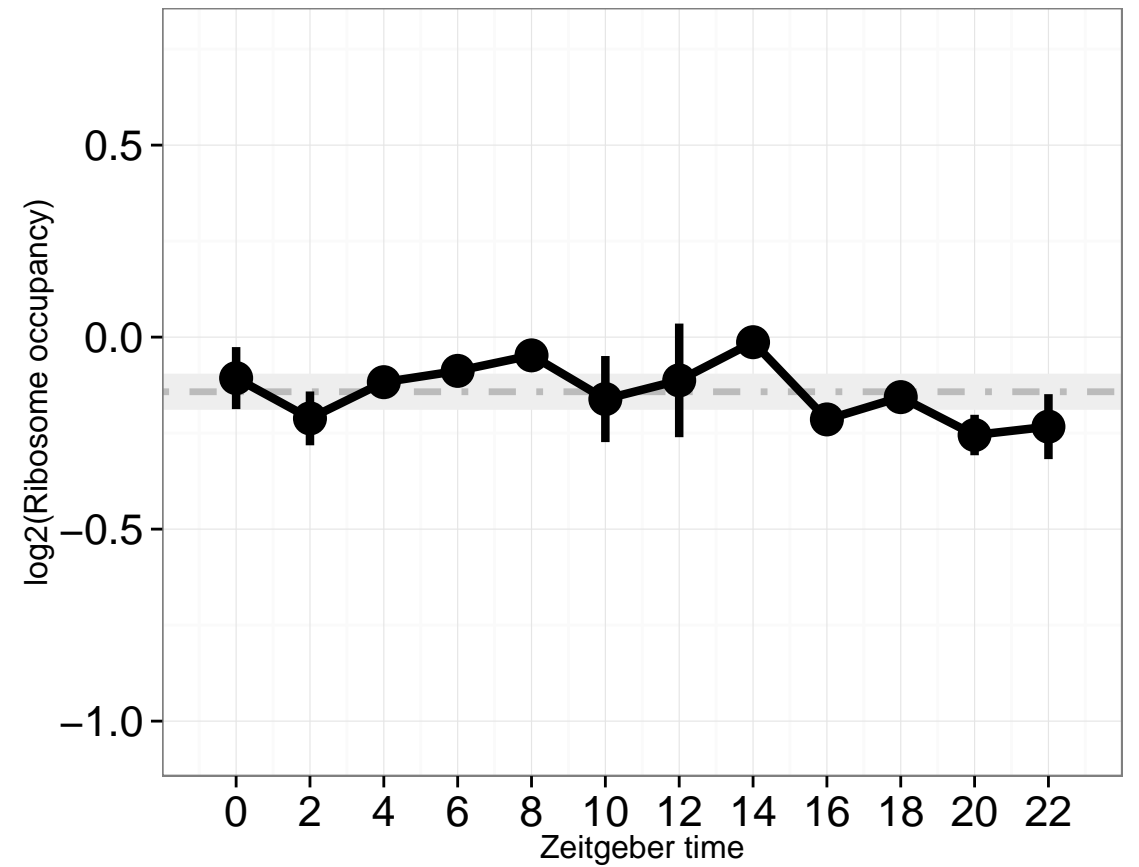

Supplement: Supplementary file 11524 [file 1]

# Zfp760

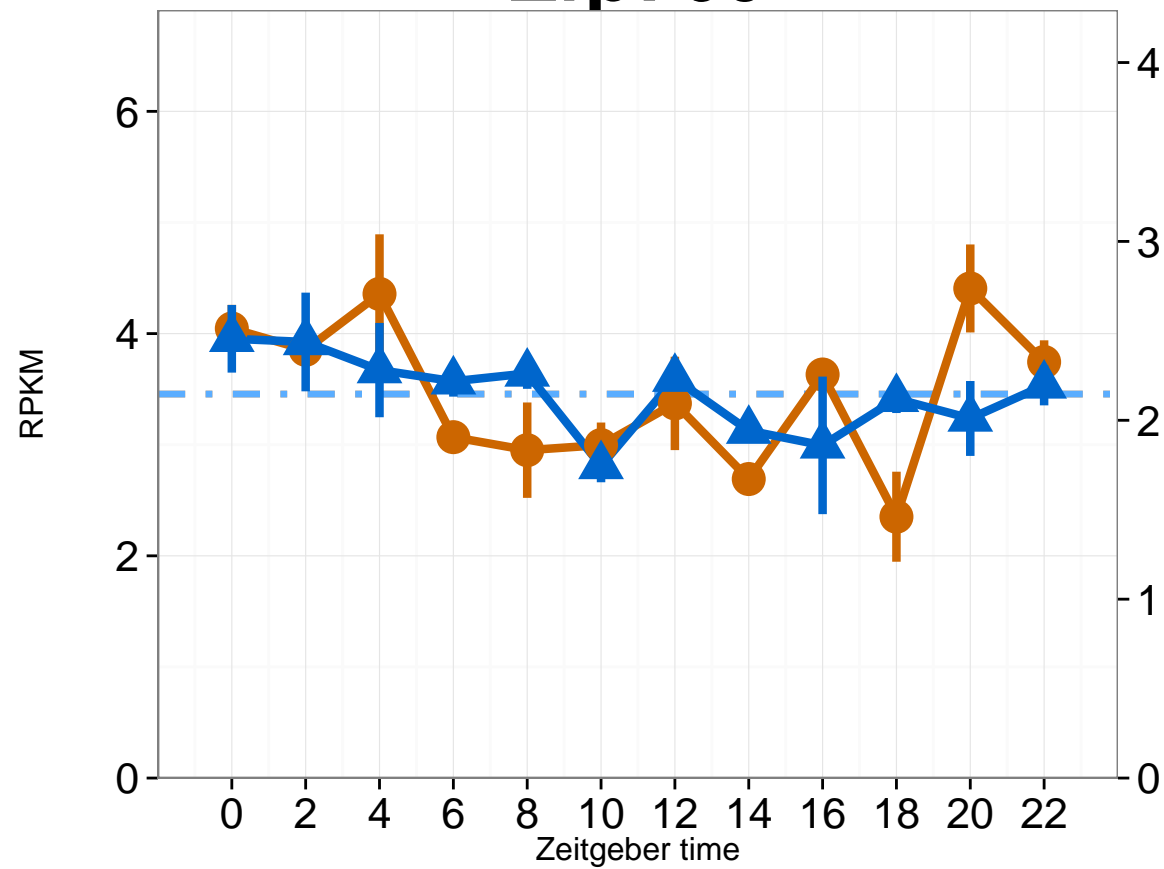

# Zfp760

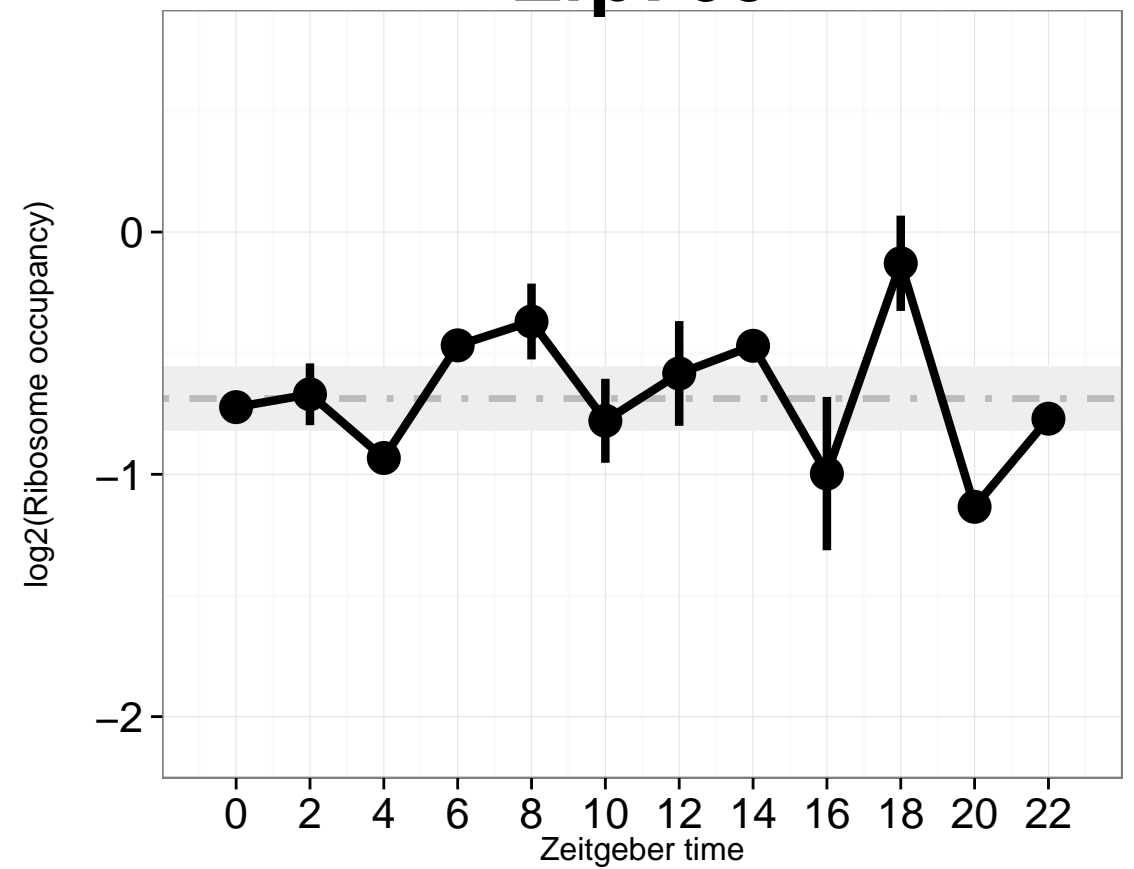

Supplement: Supplementary file 11525 [file 1]

## Ubqln4

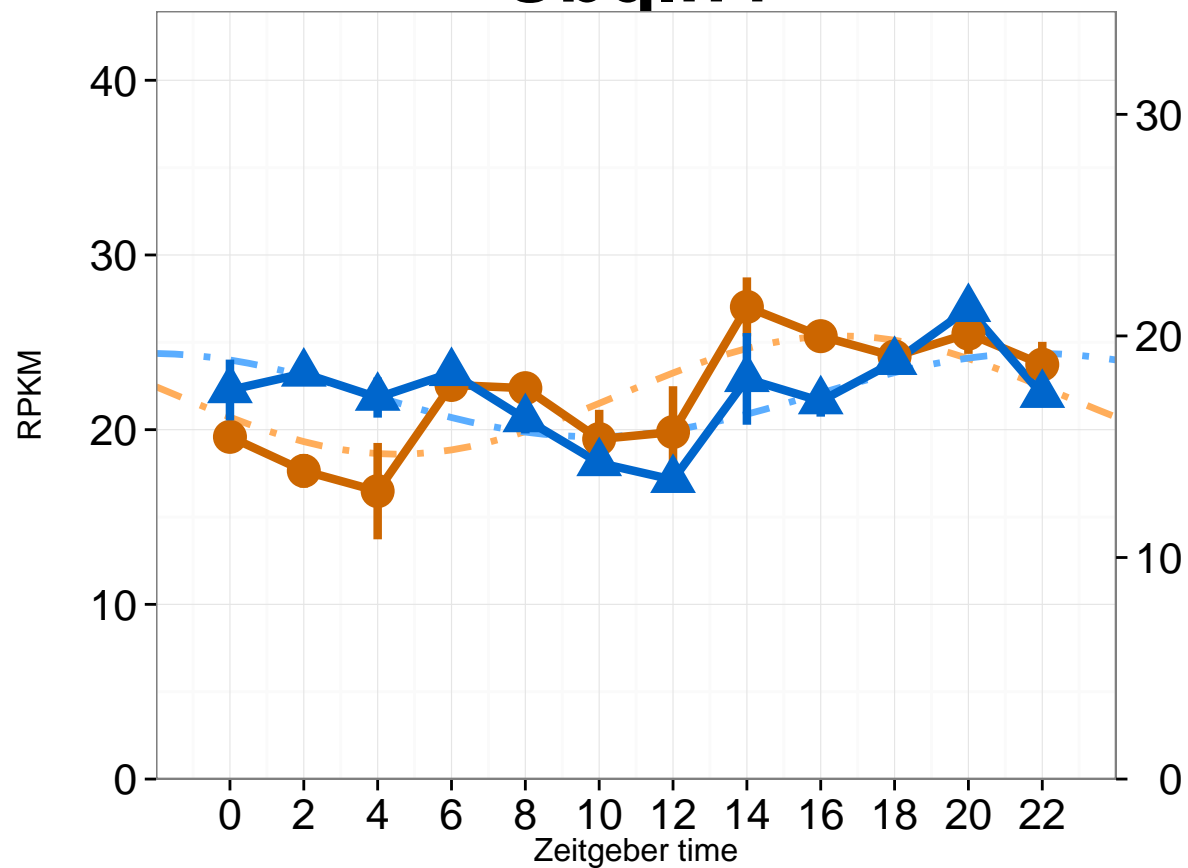

## Ubqln4

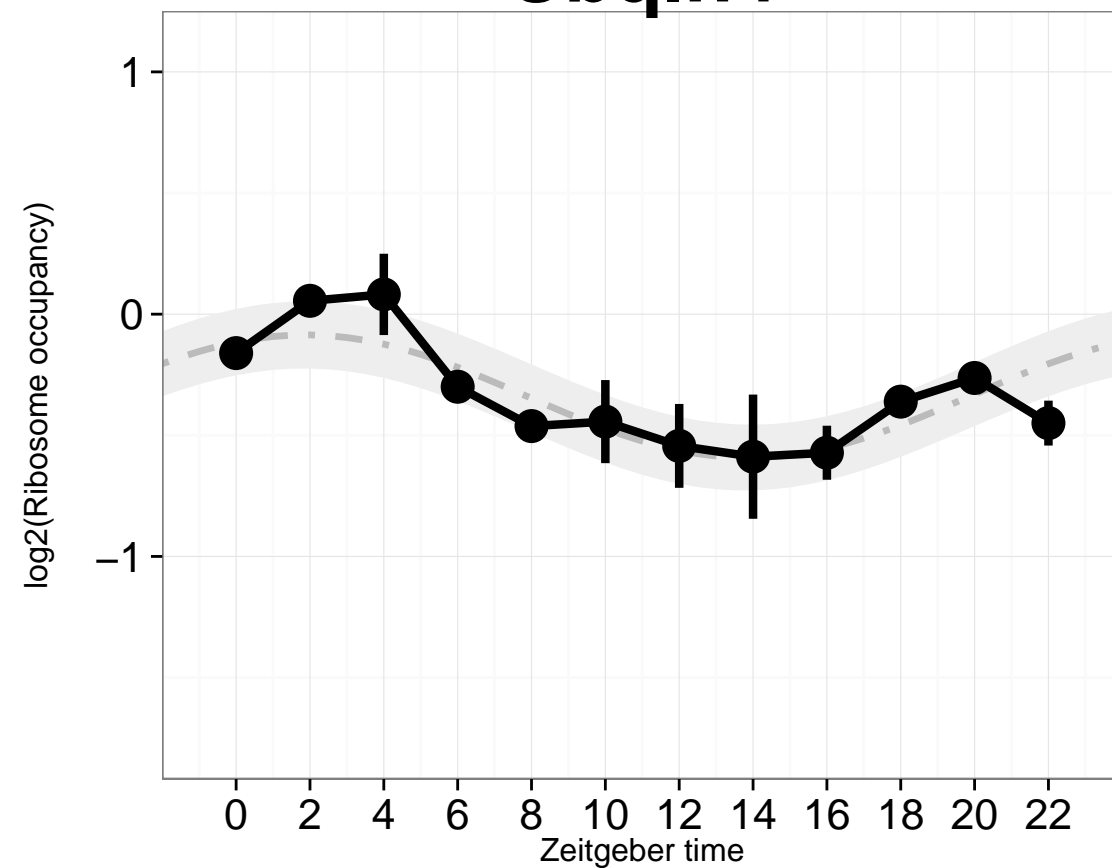

Supplement: Supplementary file 11526 [file 1]

## Hsd17b12

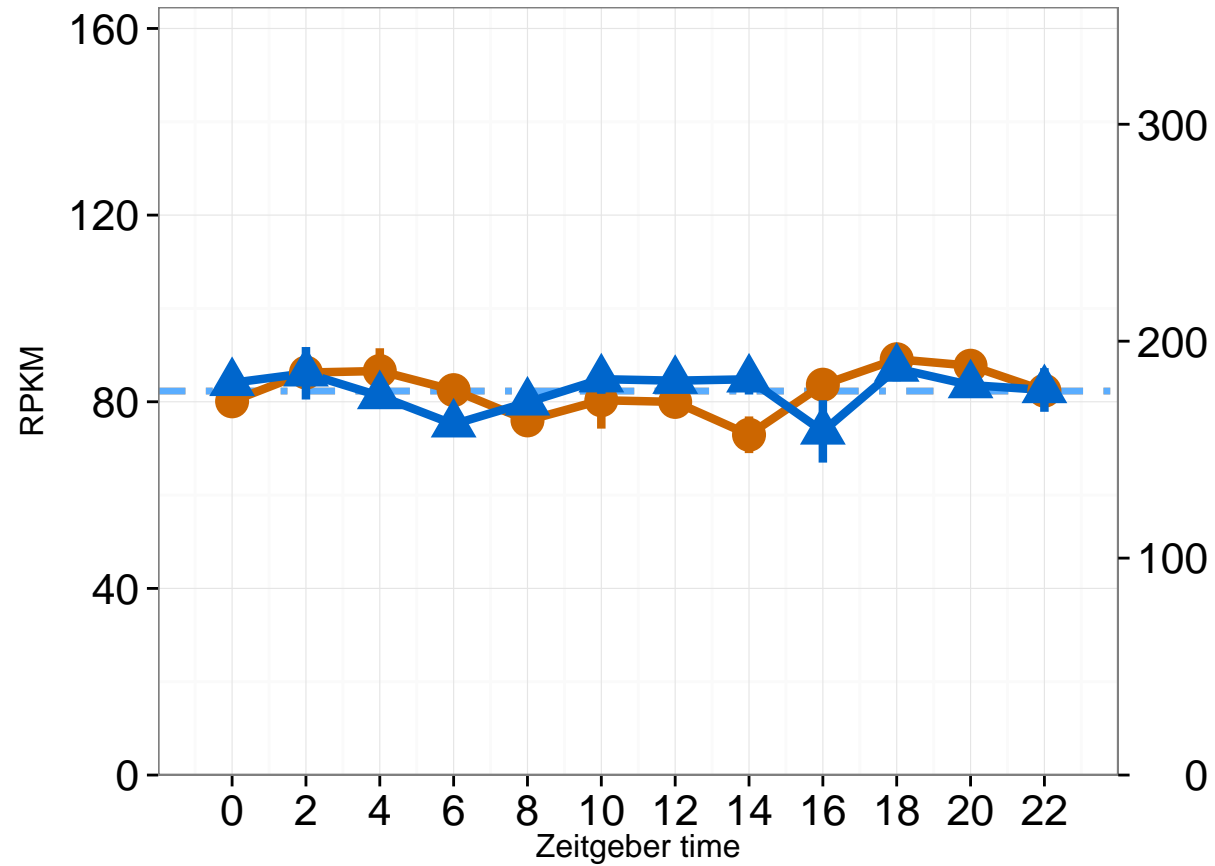

## Hsd17b12

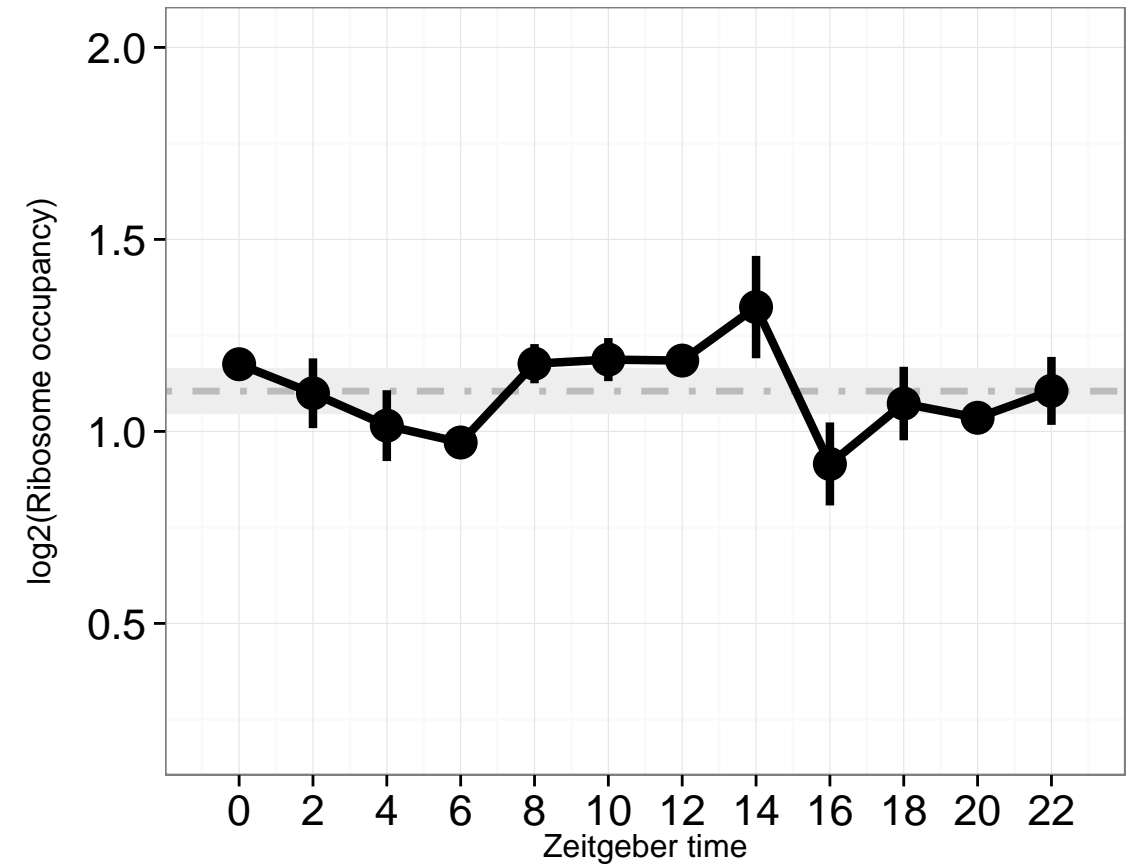

Supplement: Supplementary file 11527 [file 1]

## Ankfy1

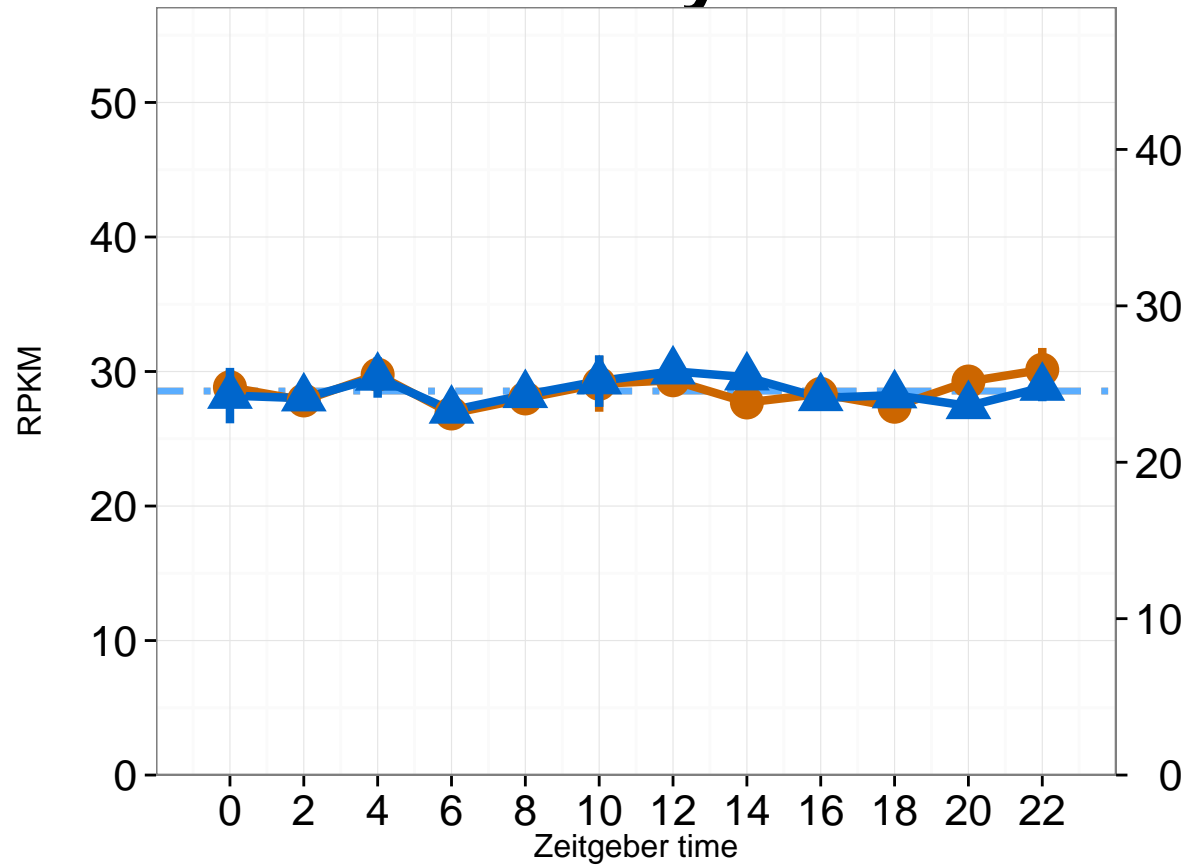

## Ankfy1

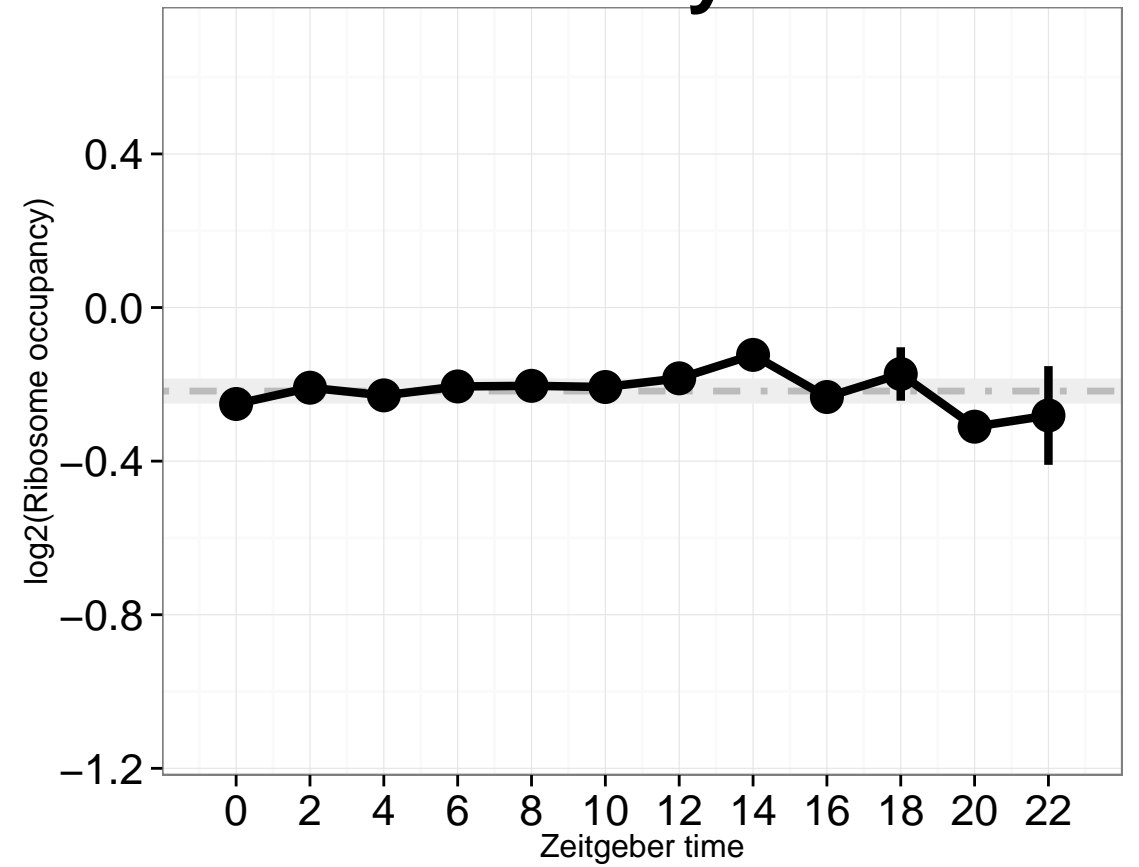

Supplement: Supplementary file 11528 [file 1]

# Guca2b

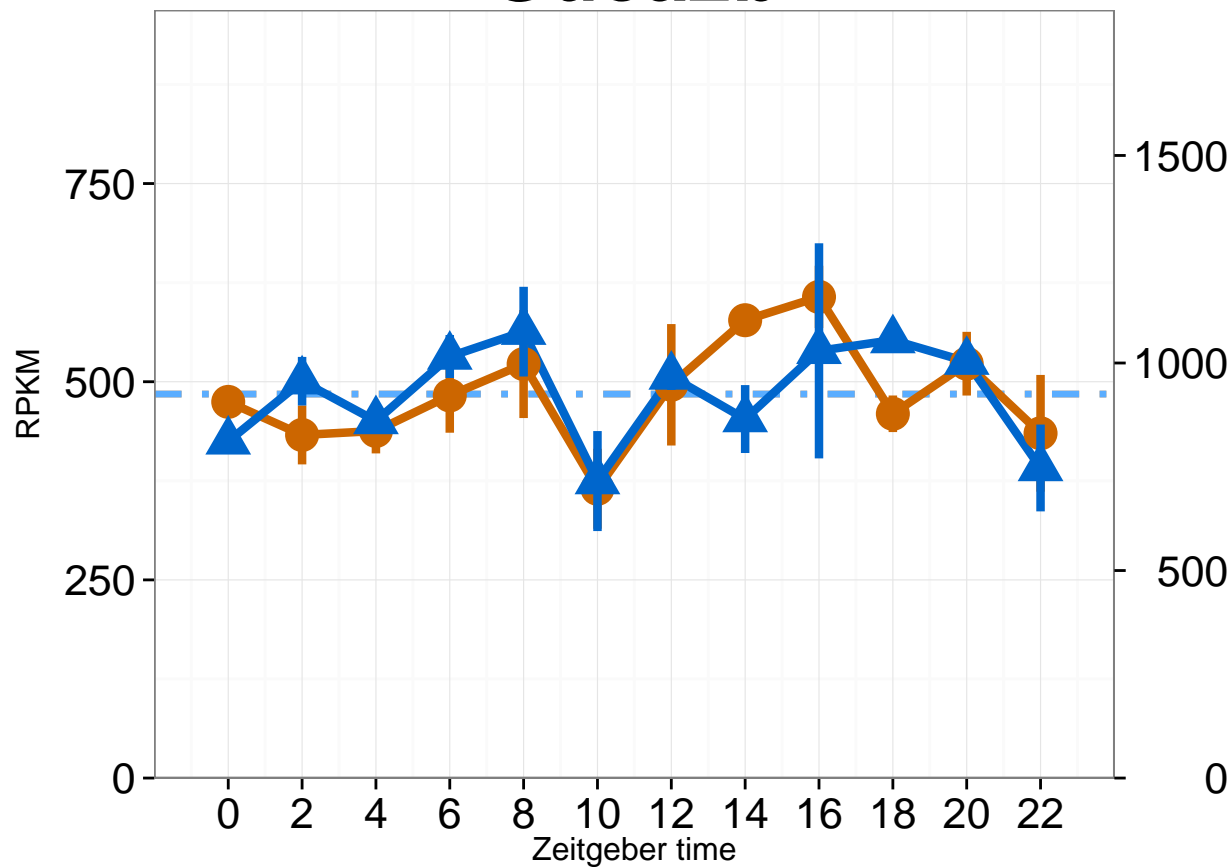

# Guca2b

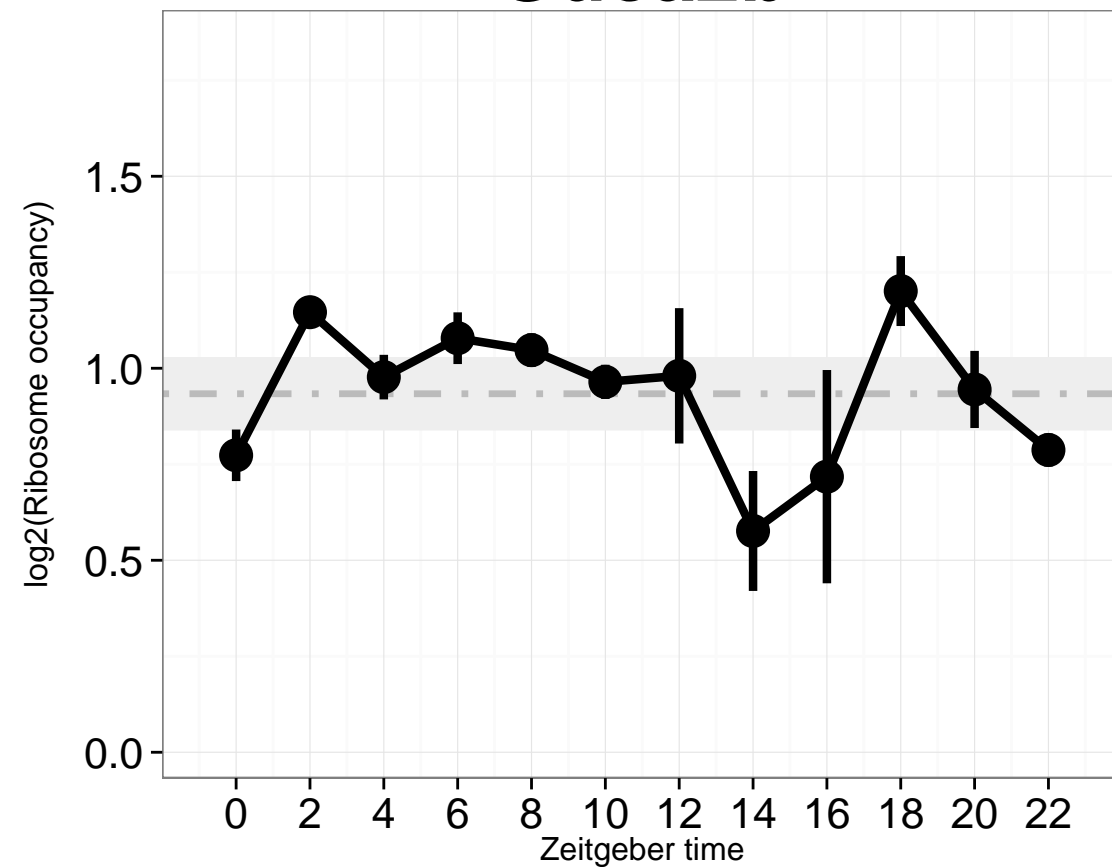

Supplement: Supplementary file 11529 [file 1]

# Ehbp1l1

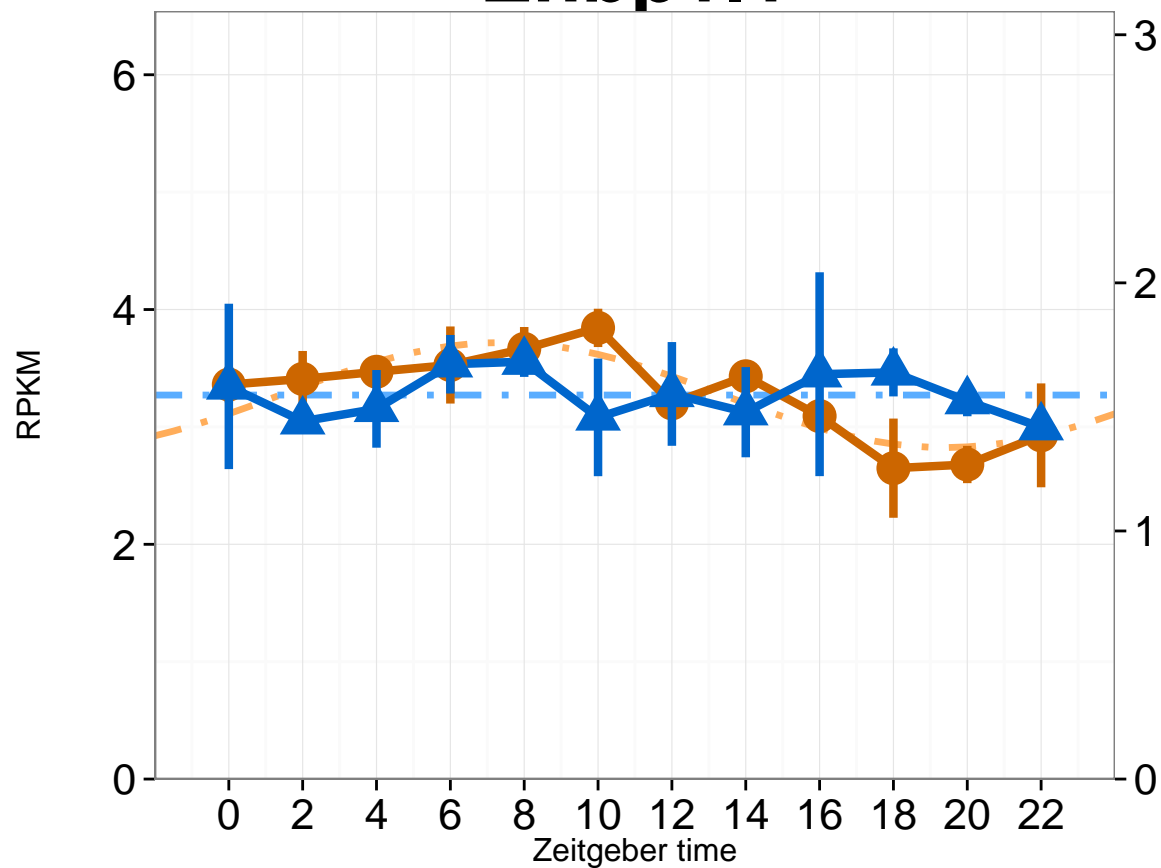

# Ehbp1l1

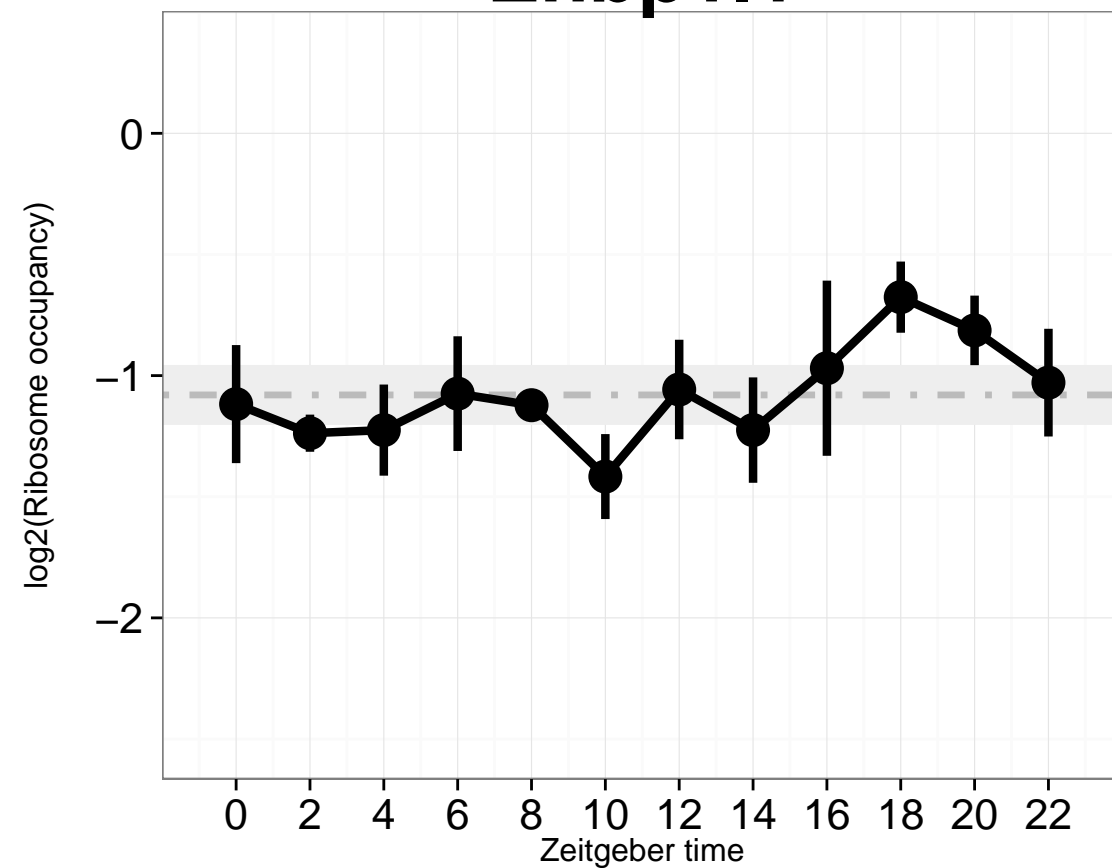

Supplement: Supplementary file 11530 [file 1]

# Cd109

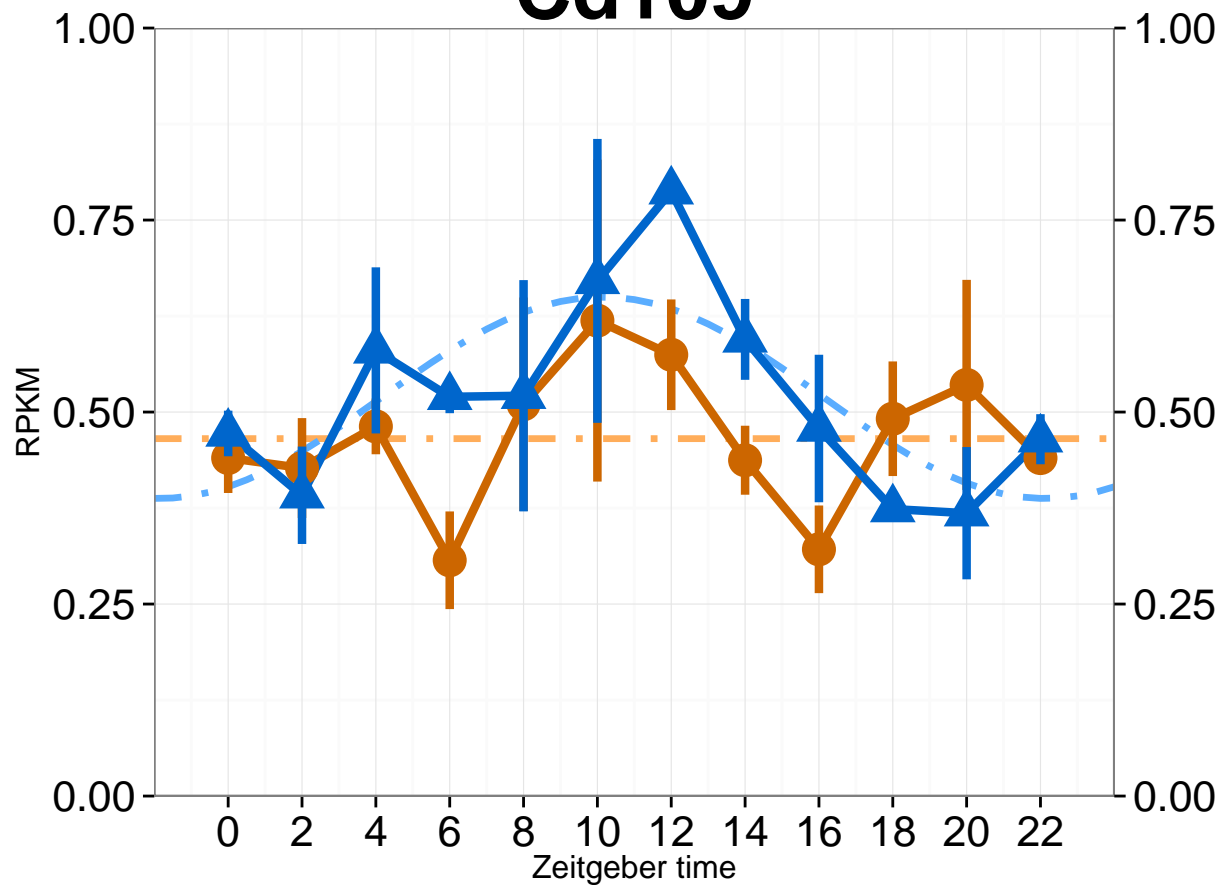

# Cd109

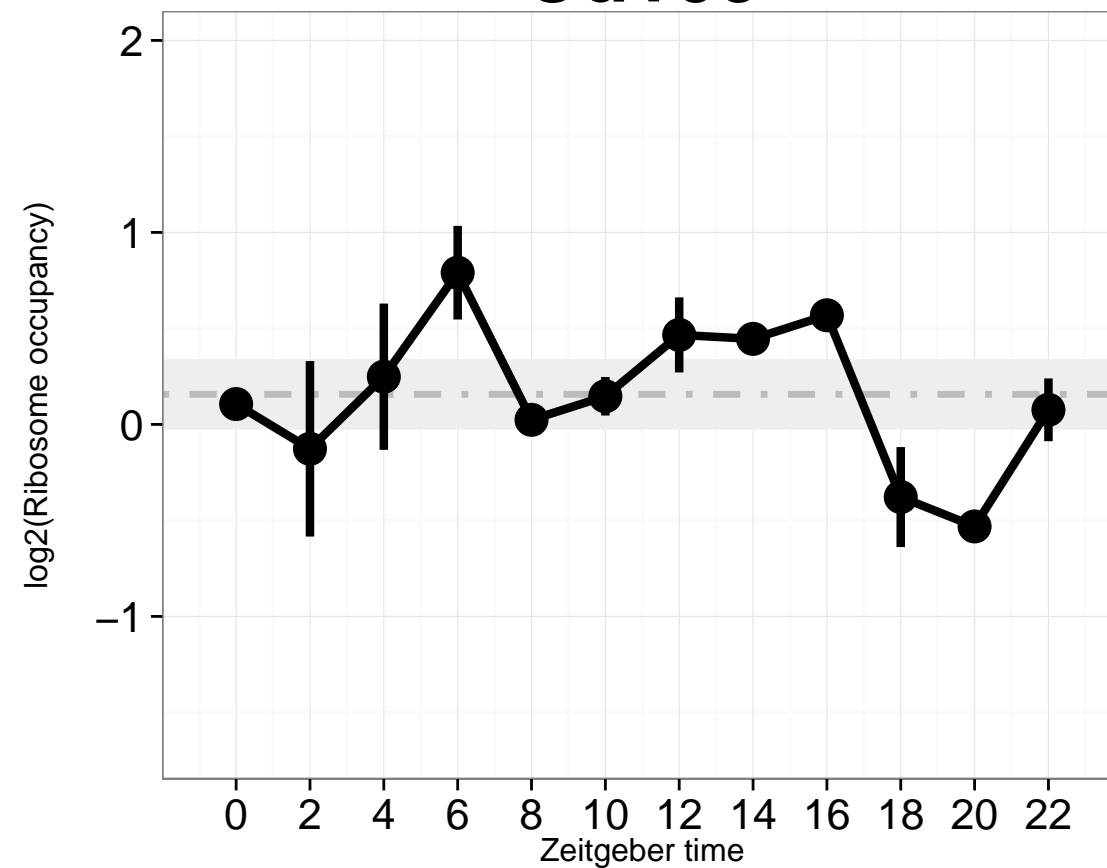

Supplement: Supplementary file 11531 [file 1]

# Atg10

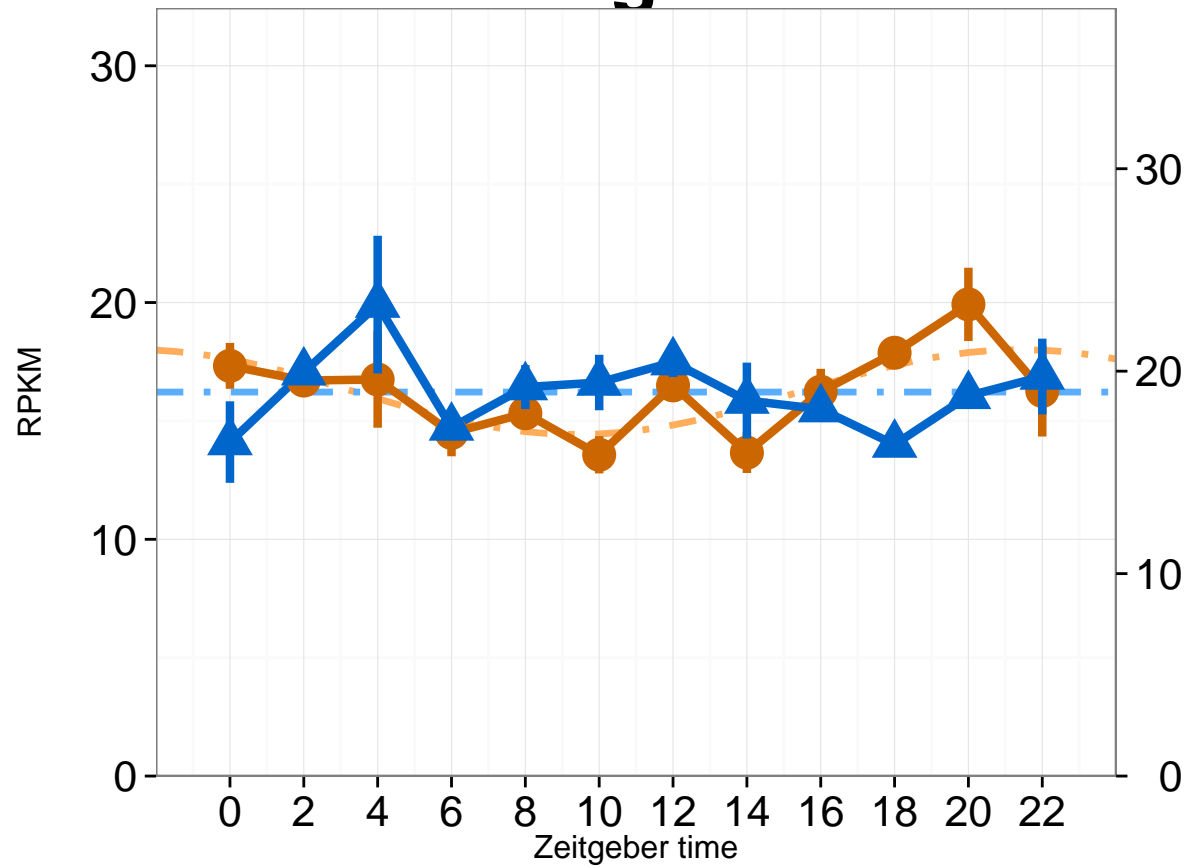

# Atg10

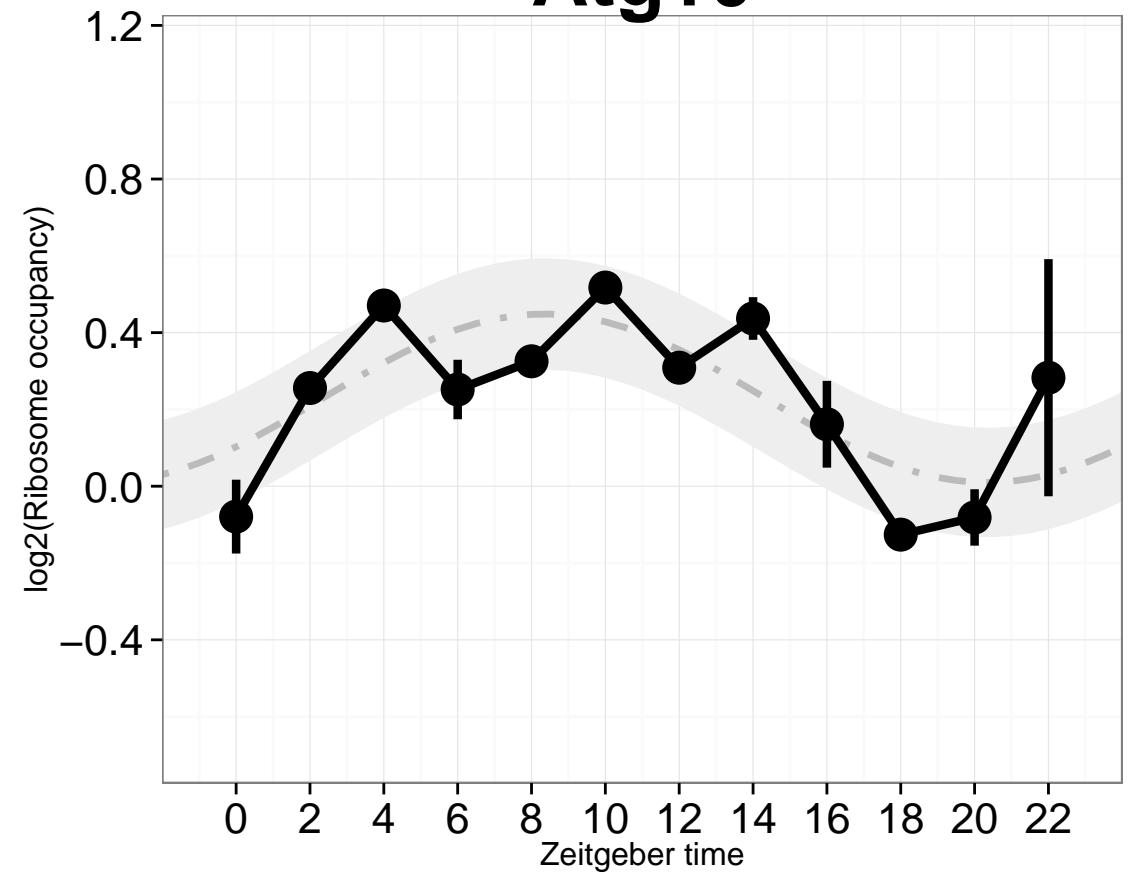

Supplement: Supplementary file 11532 [file 1]

# Ggt7

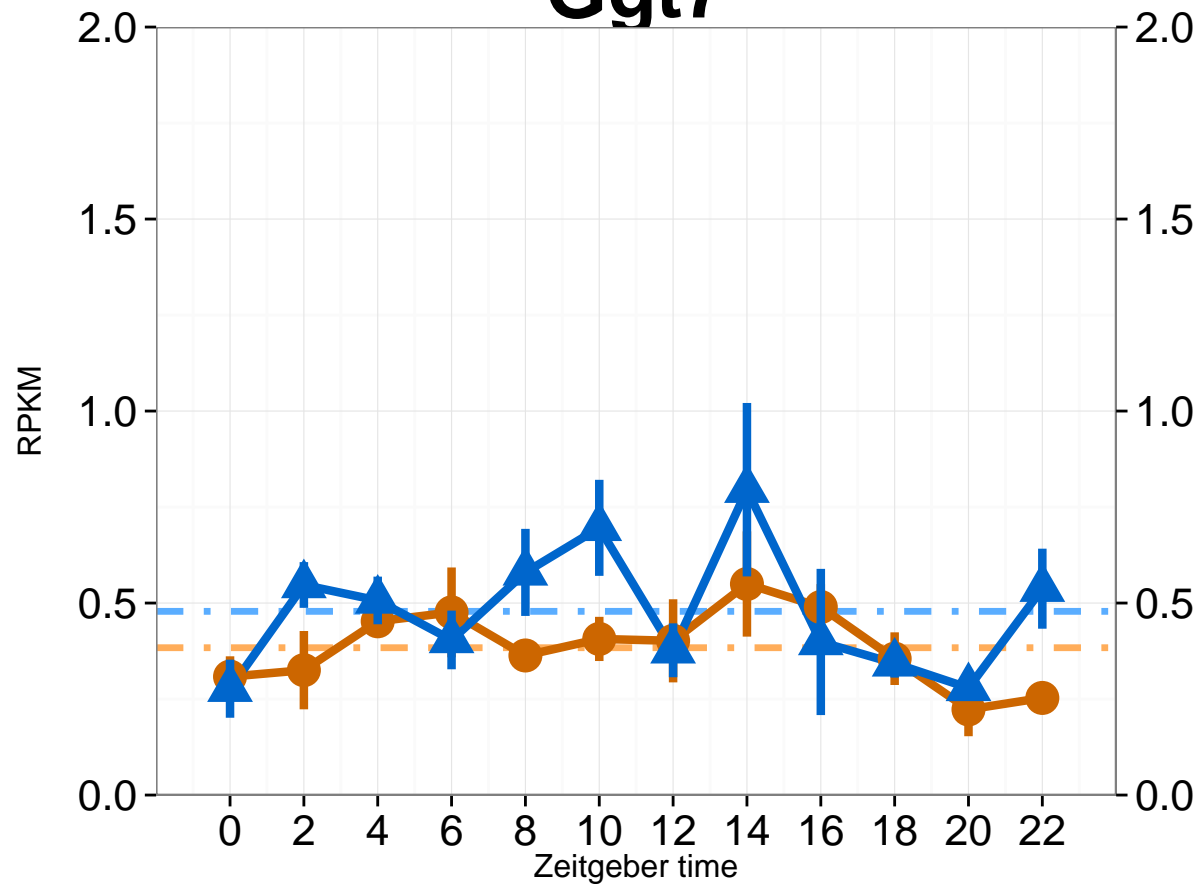

# Ggt7

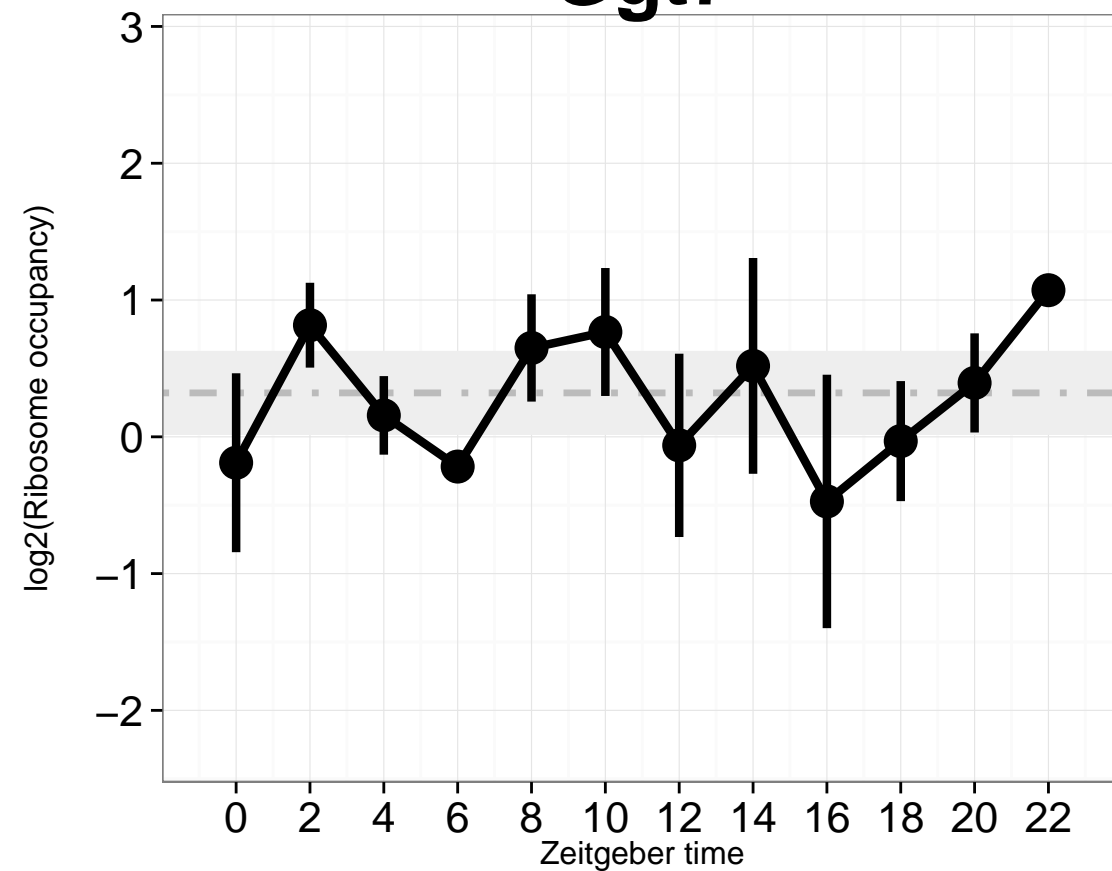

Supplement: Supplementary file 11533 [file 1]

## Adck1

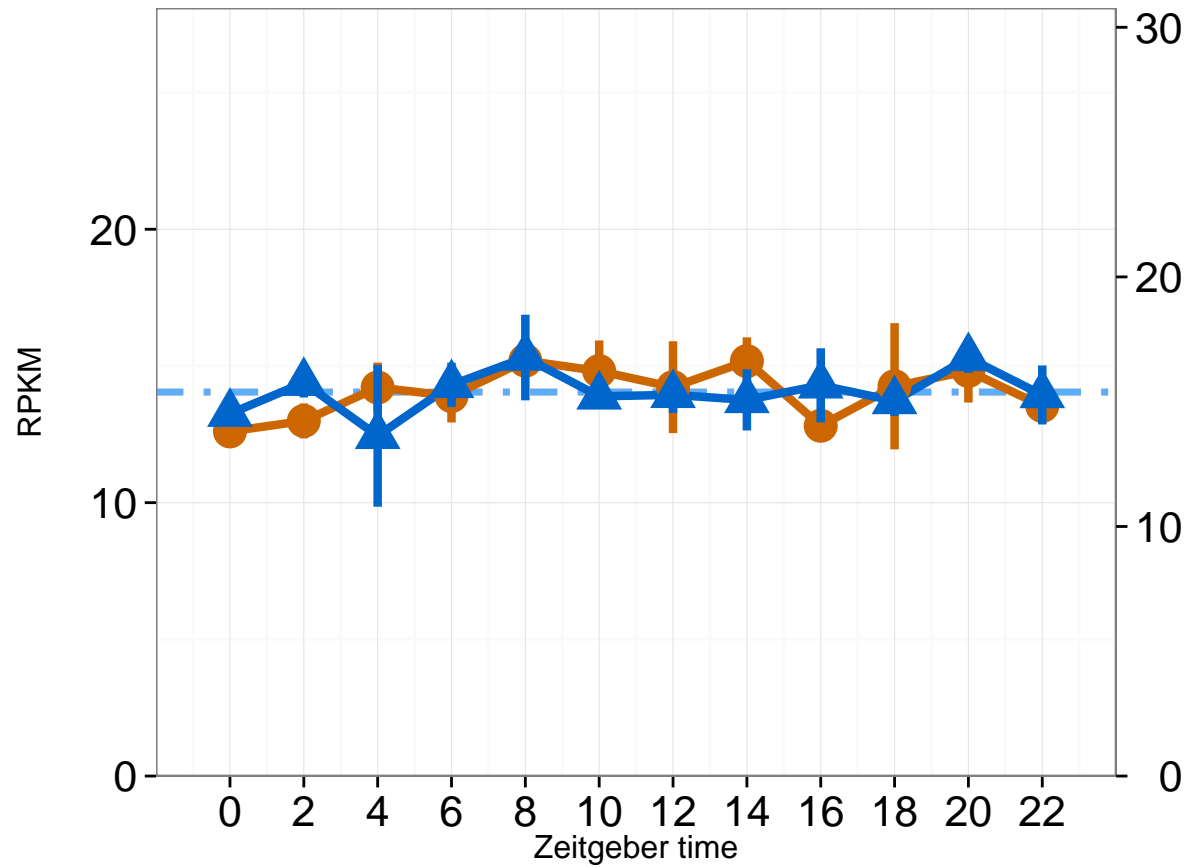

## Adck1

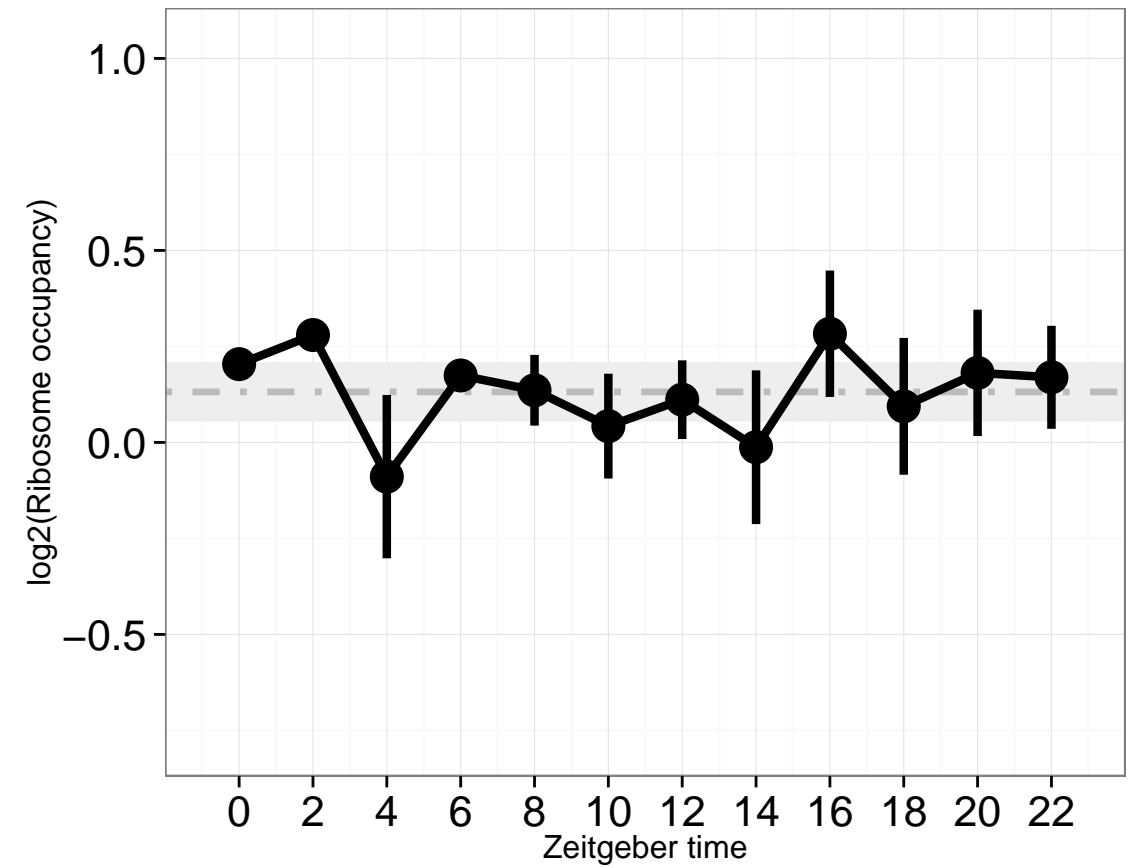

Supplement: Supplementary file 11534 [file 1]

## Mcm10

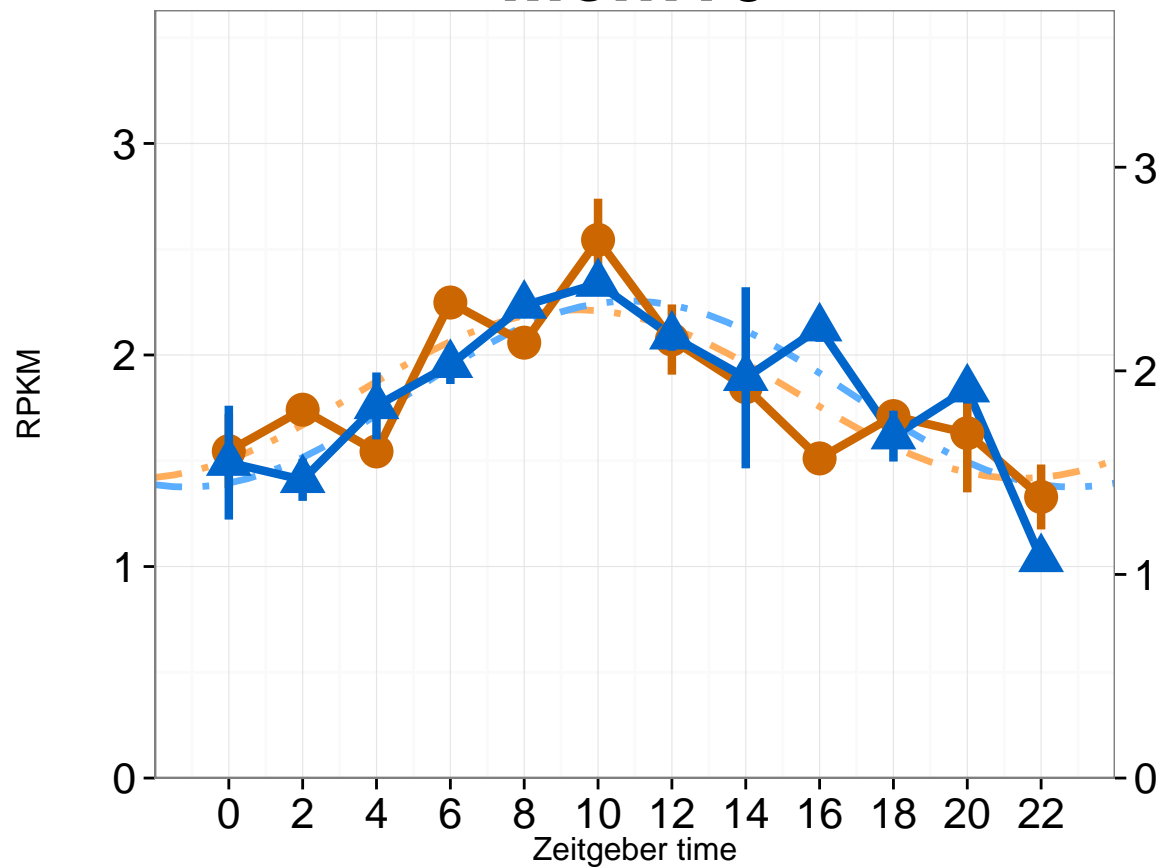

## Mcm10

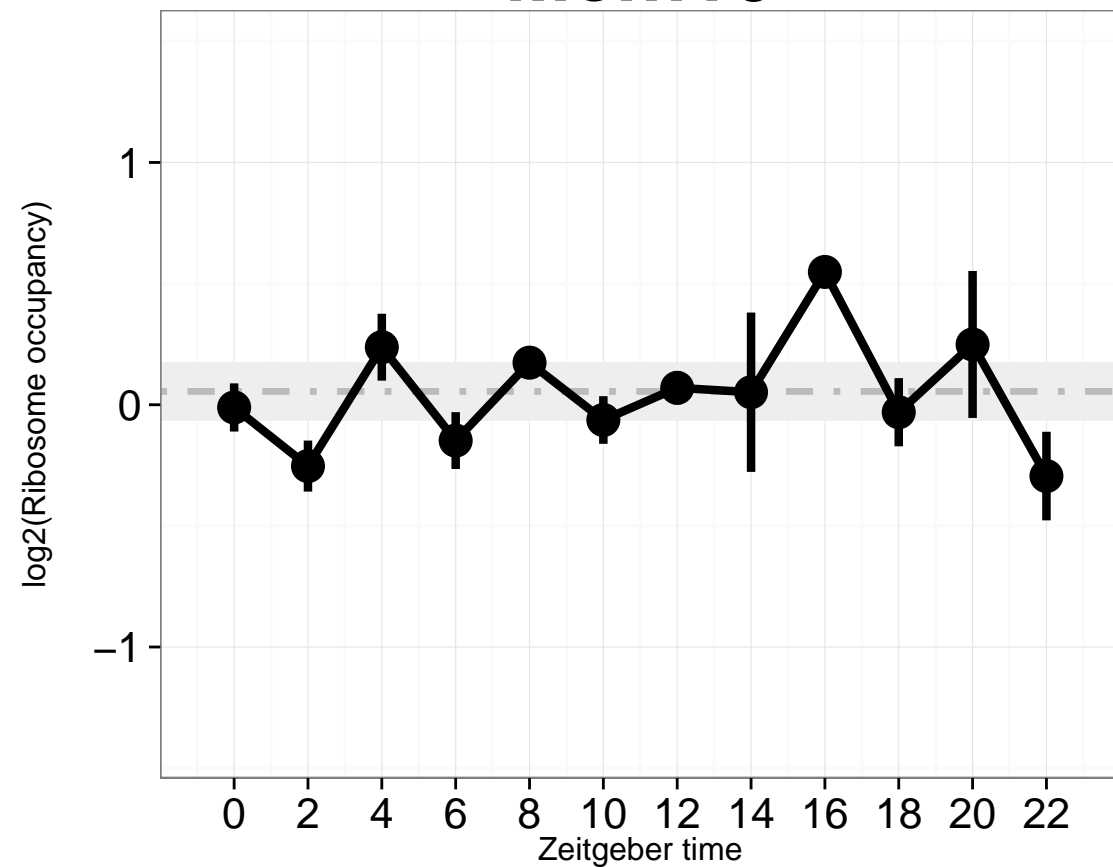

Supplement: Supplementary file 11535 [file 1]

## Acadvl

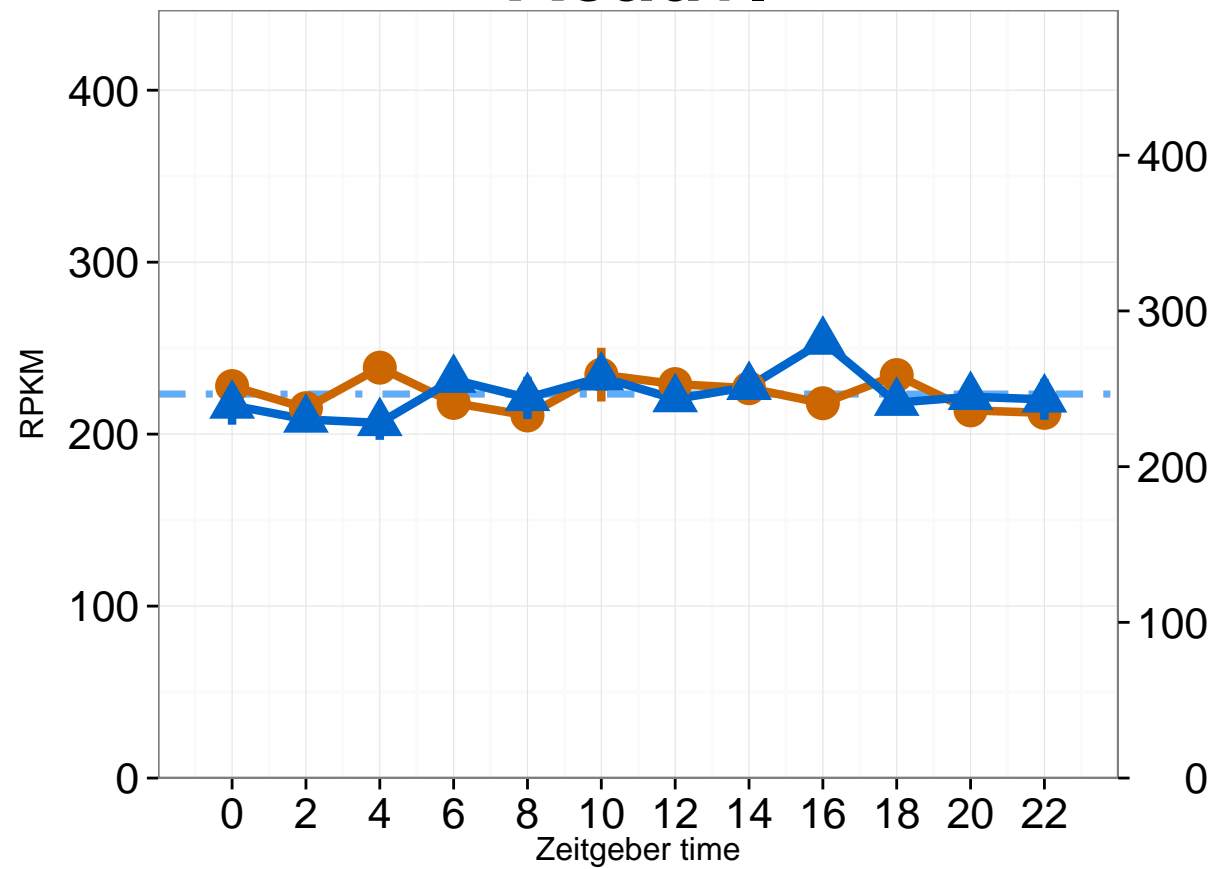

## Acadvl

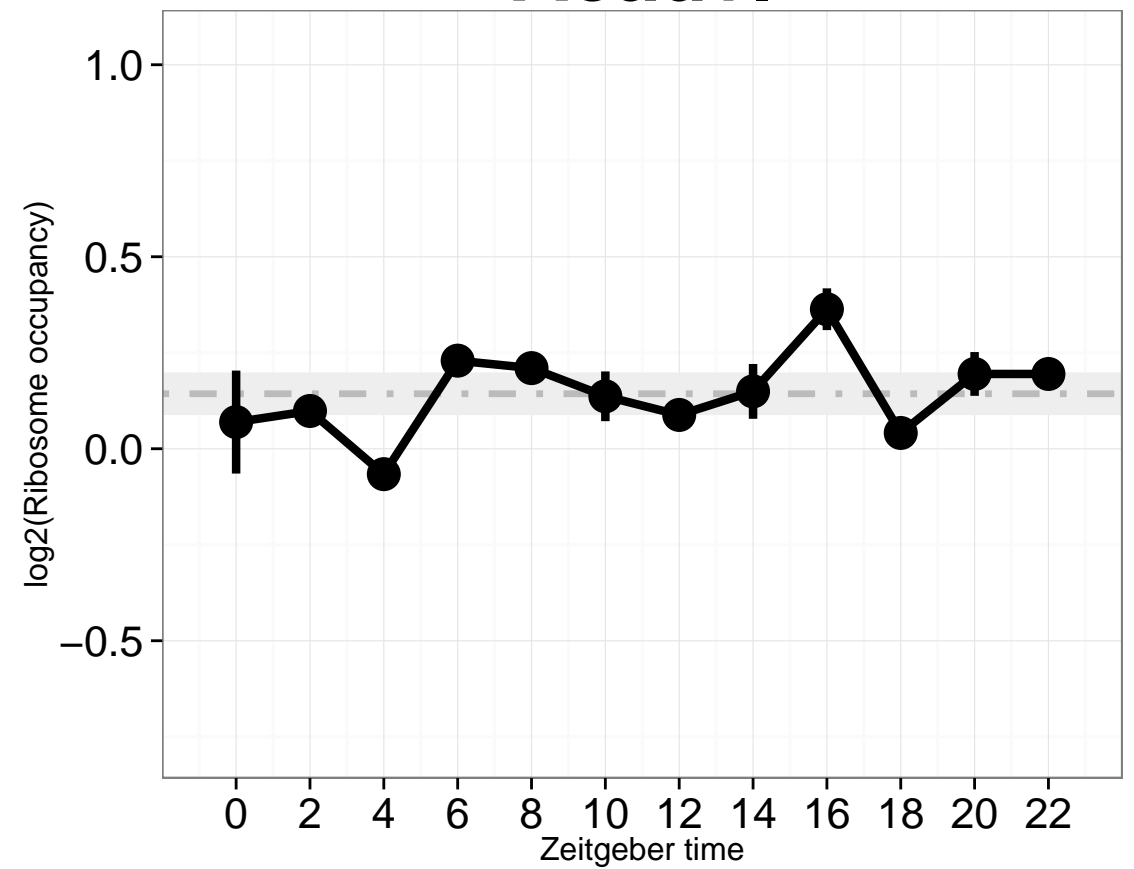

Supplement: Supplementary file 11536 [file 1]

## Kynu

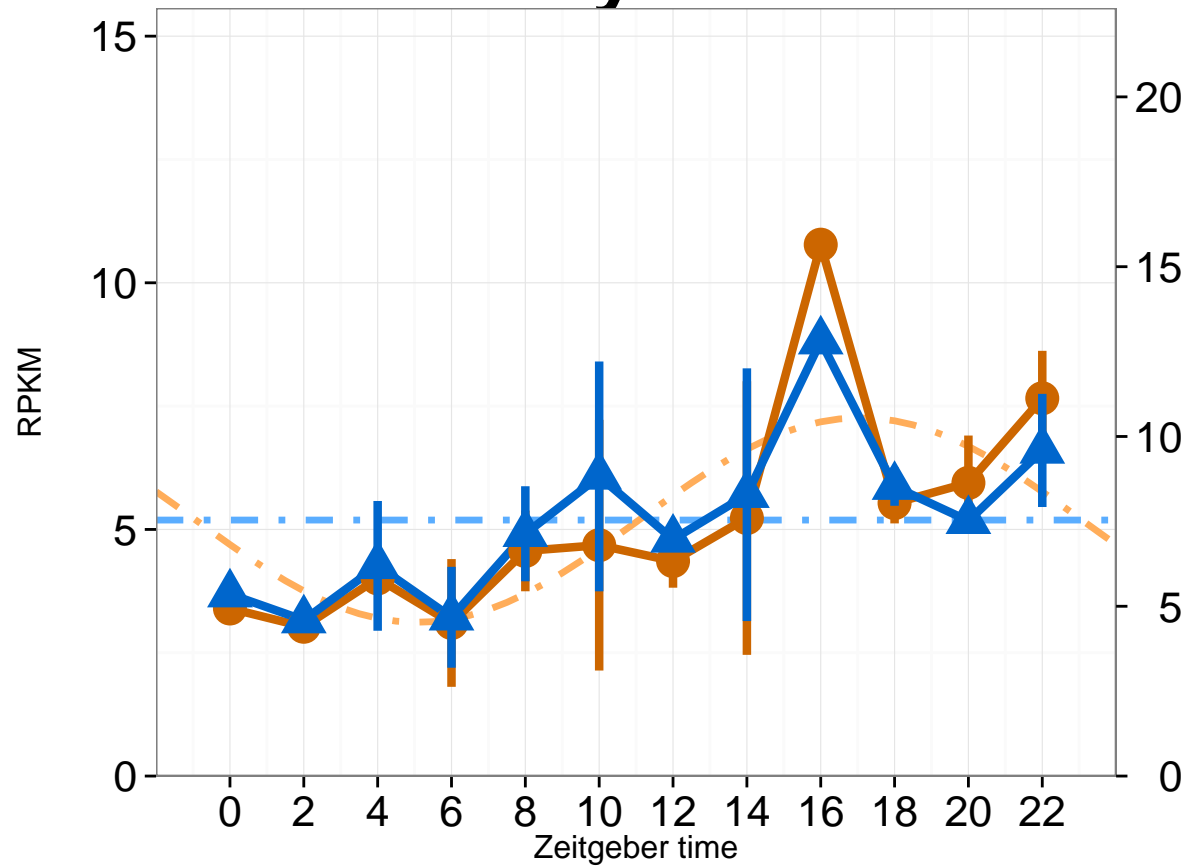

## Kynu

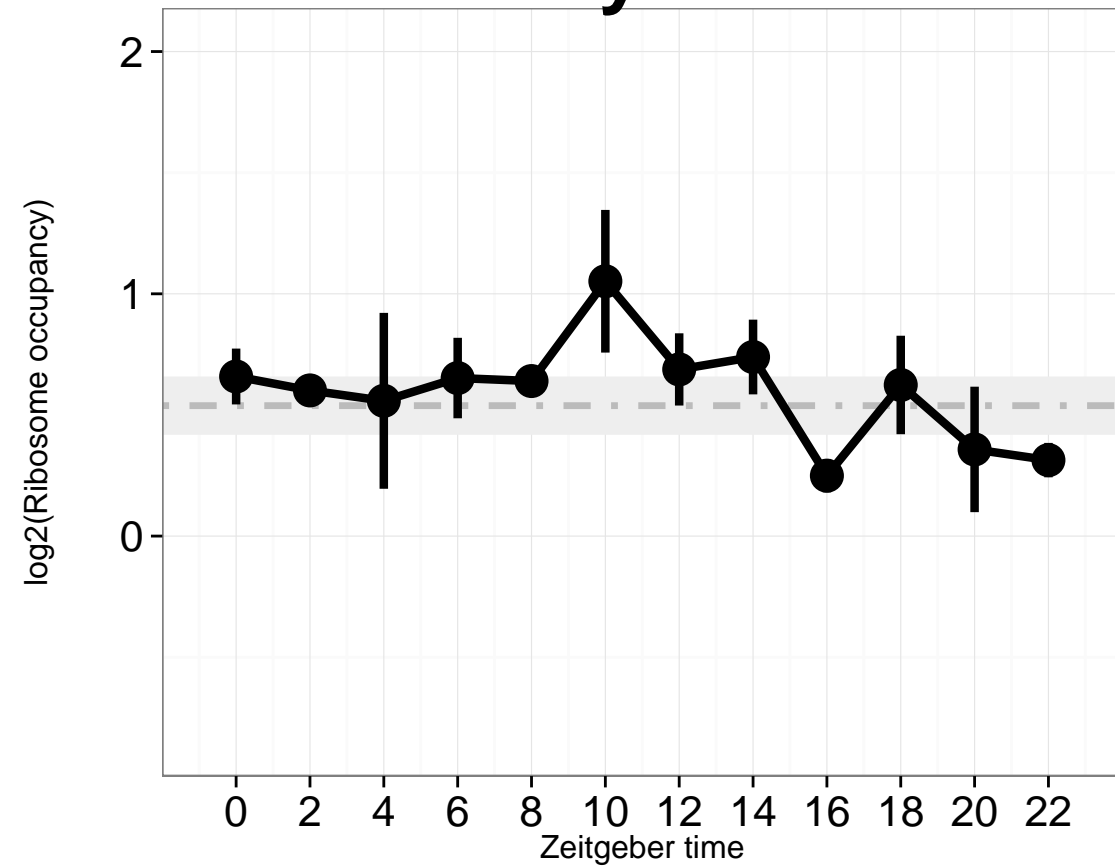

Supplement: Supplementary file 11537 [file 1]

# Tfb1m

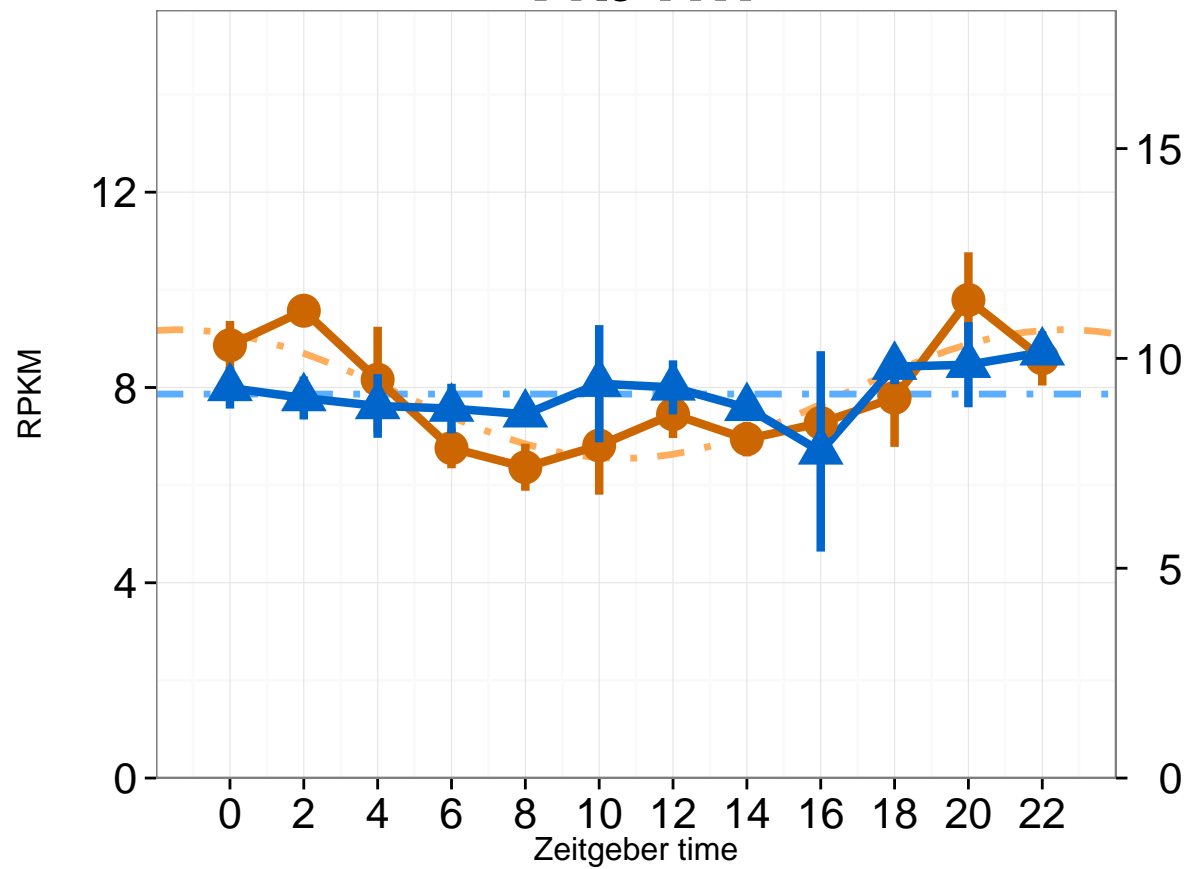

# Tfb1m

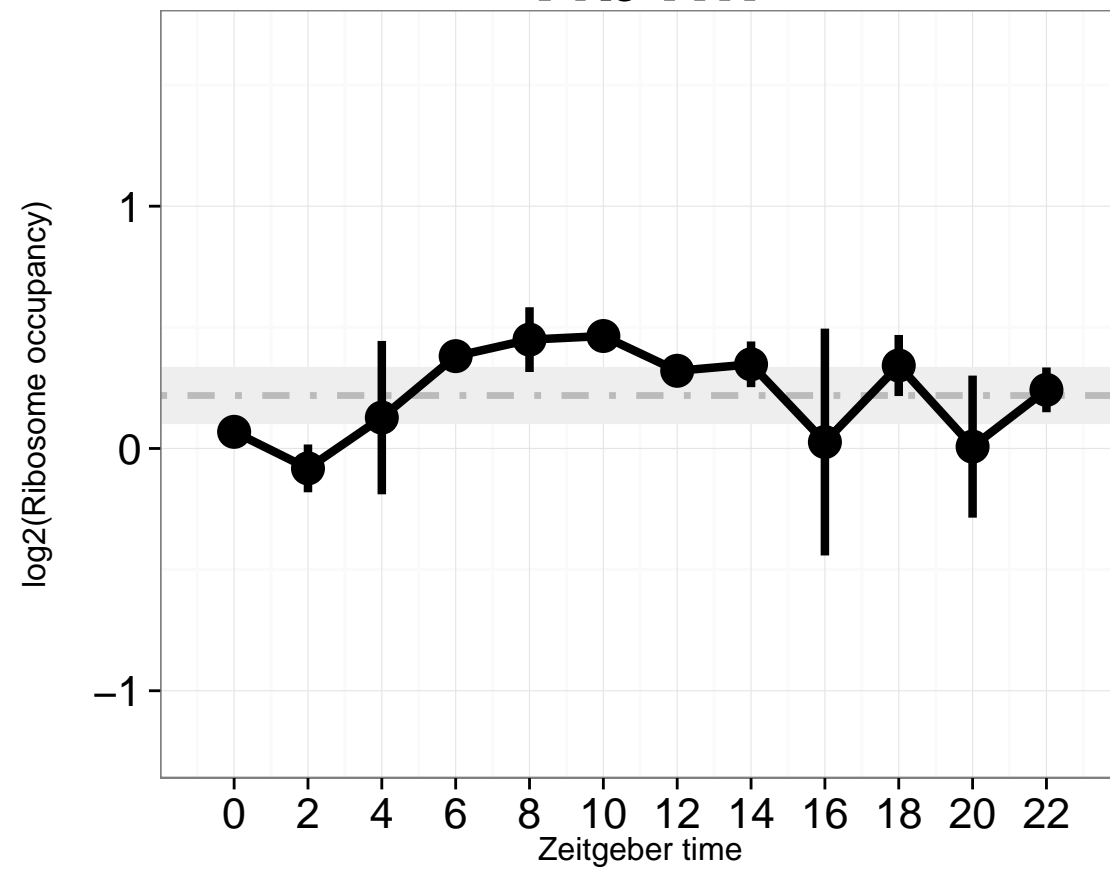

Supplement: Supplementary file 11538 [file 1]

# Hoxc8

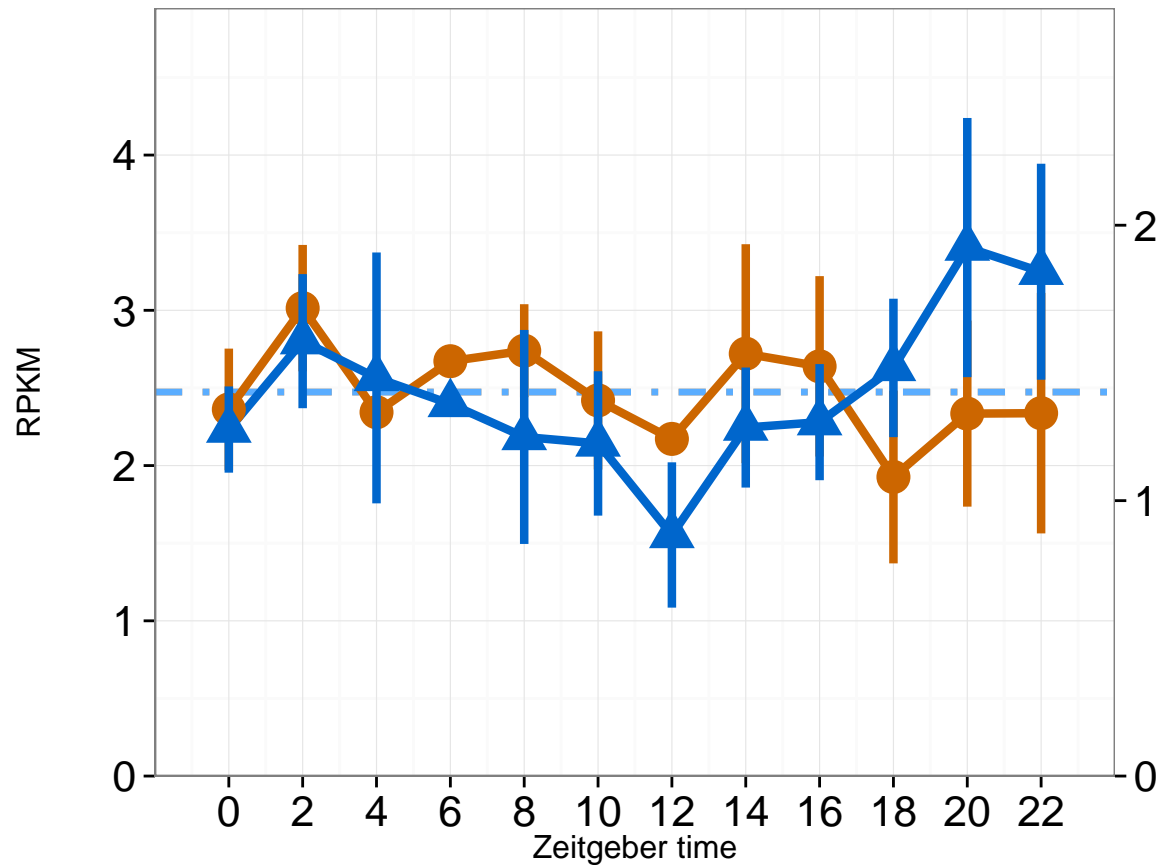

# Hoxc8

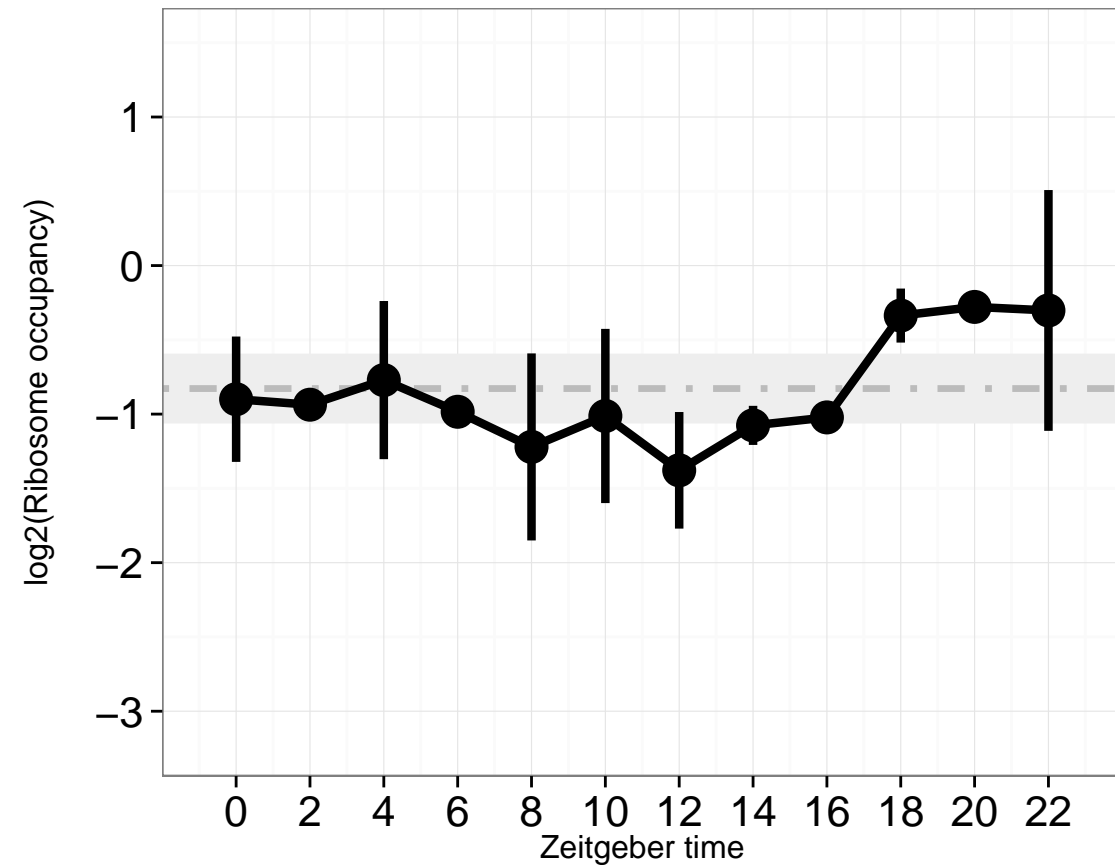

Supplement: Supplementary file 11539 [file 1]

## Flrt3

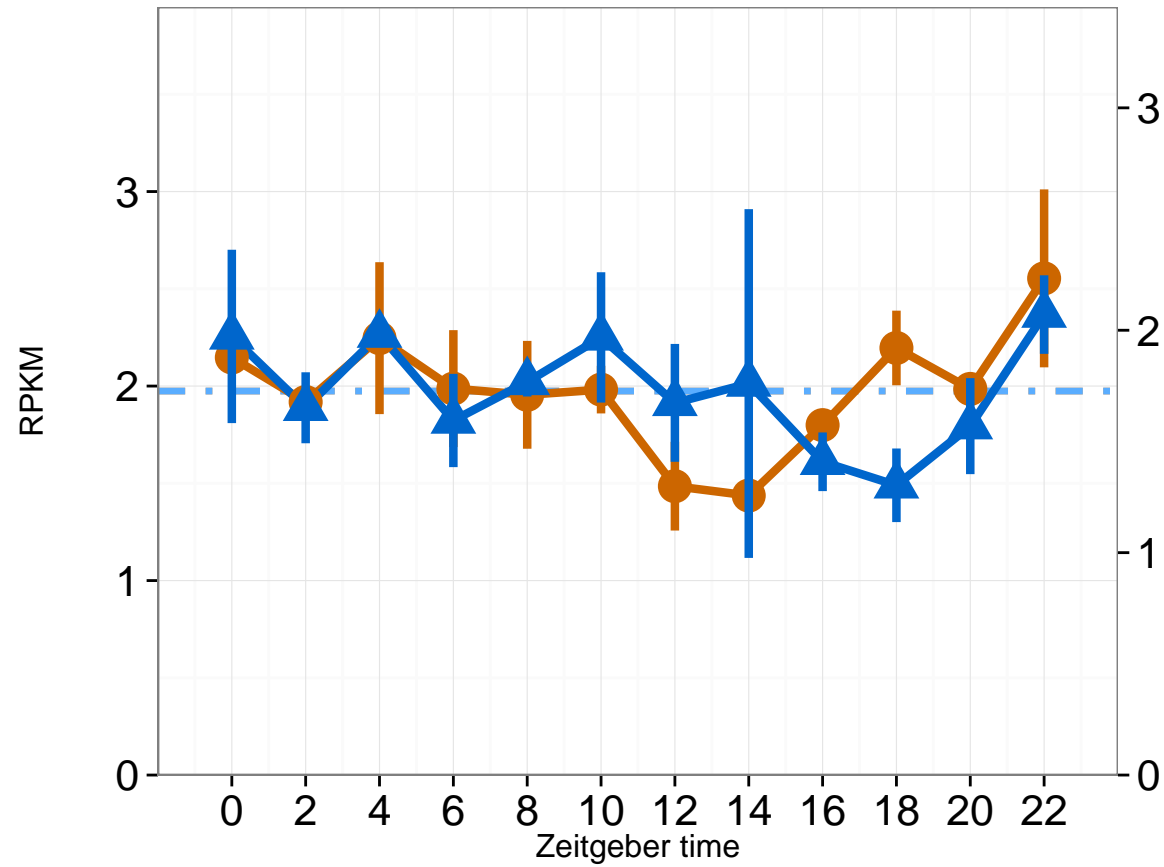

## Flrt3

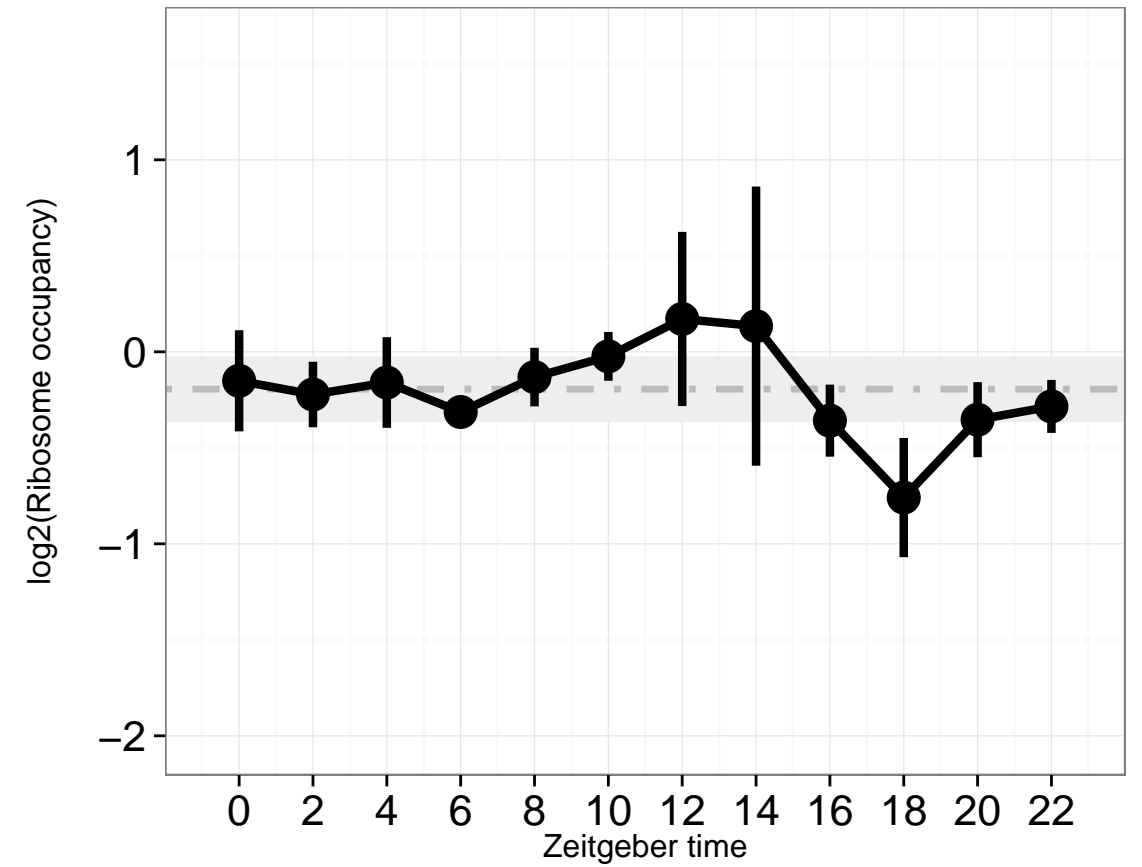

Supplement: Supplementary file 11540 [file 1]

# Zfp629

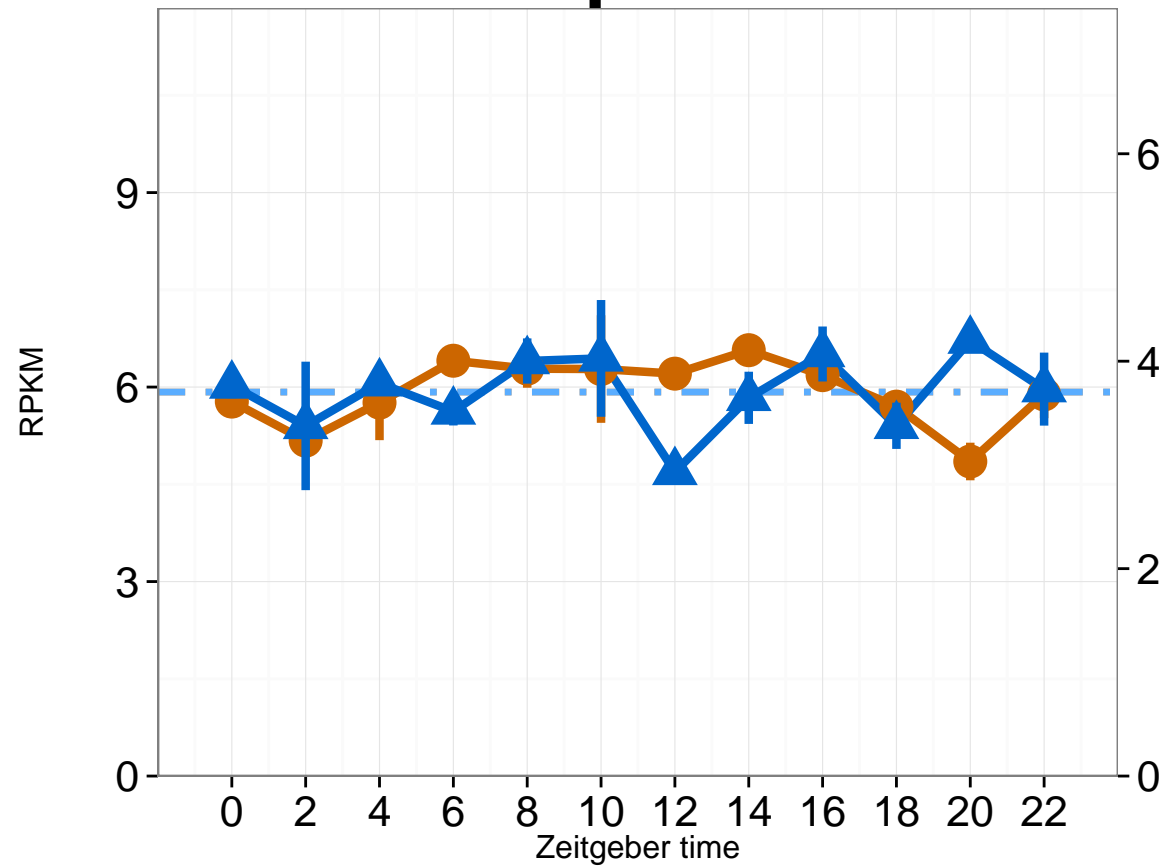

# Zfp629

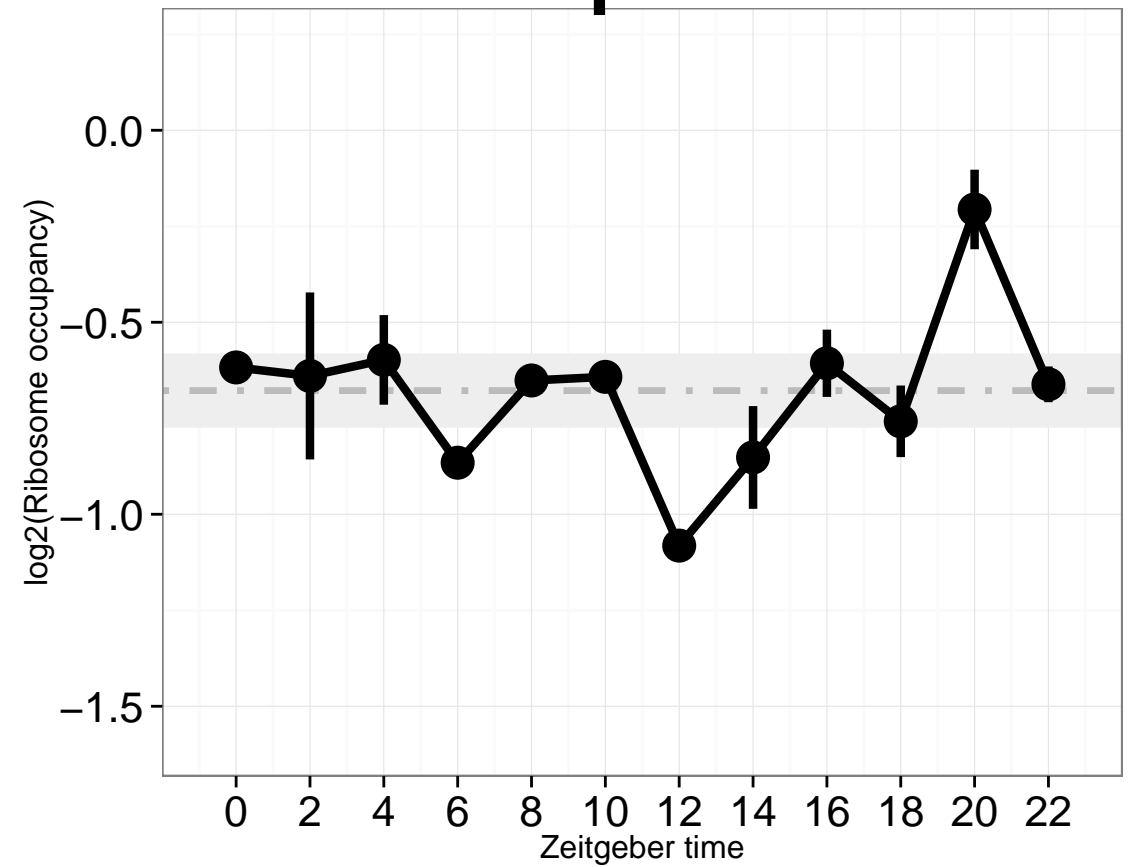

Supplement: Supplementary file 11541 [file 1]

## Nbn

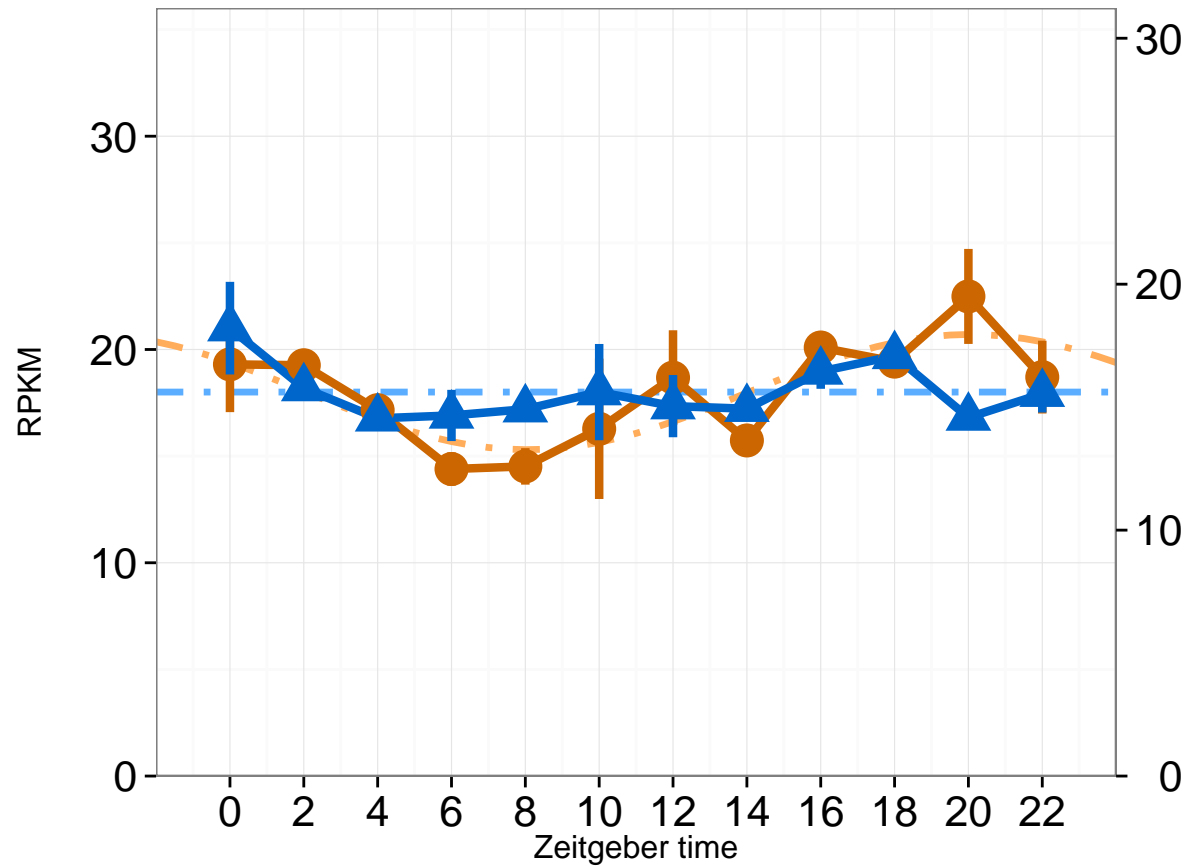

## Nbn

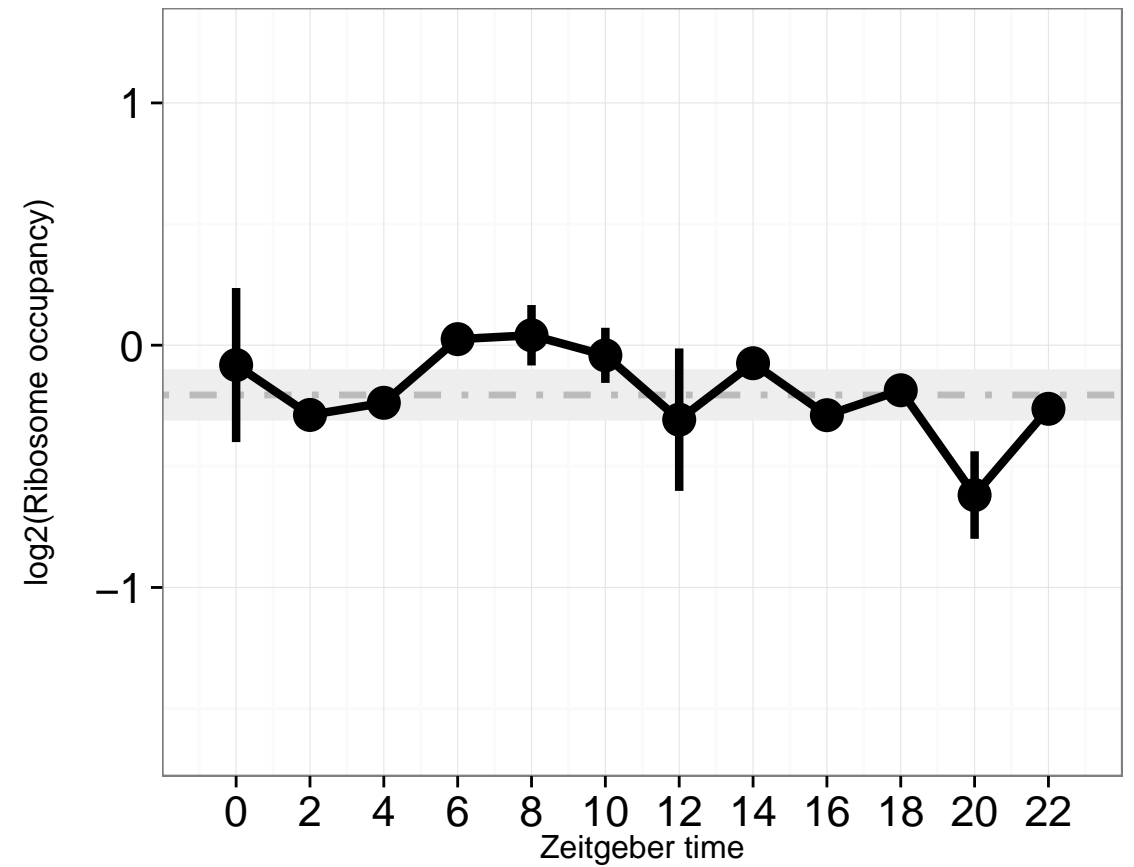

Supplement: Supplementary file 11542 [file 1]
