# Supplementary material (part 116 of 133)
Source: publisher figshare collection journal article supplement (https://springernature.figshare.com/articles/dataset/_/4903193)

# Foxd1

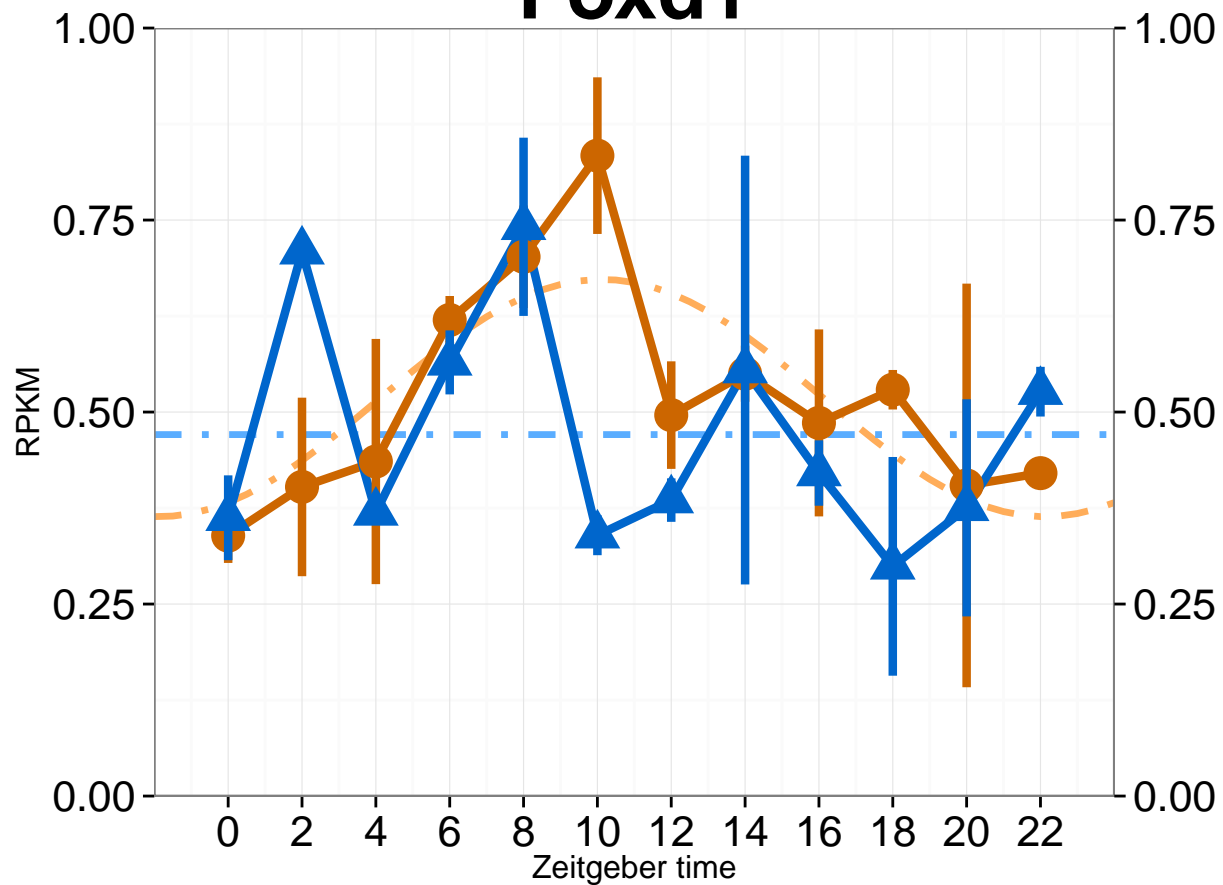

# Foxd1

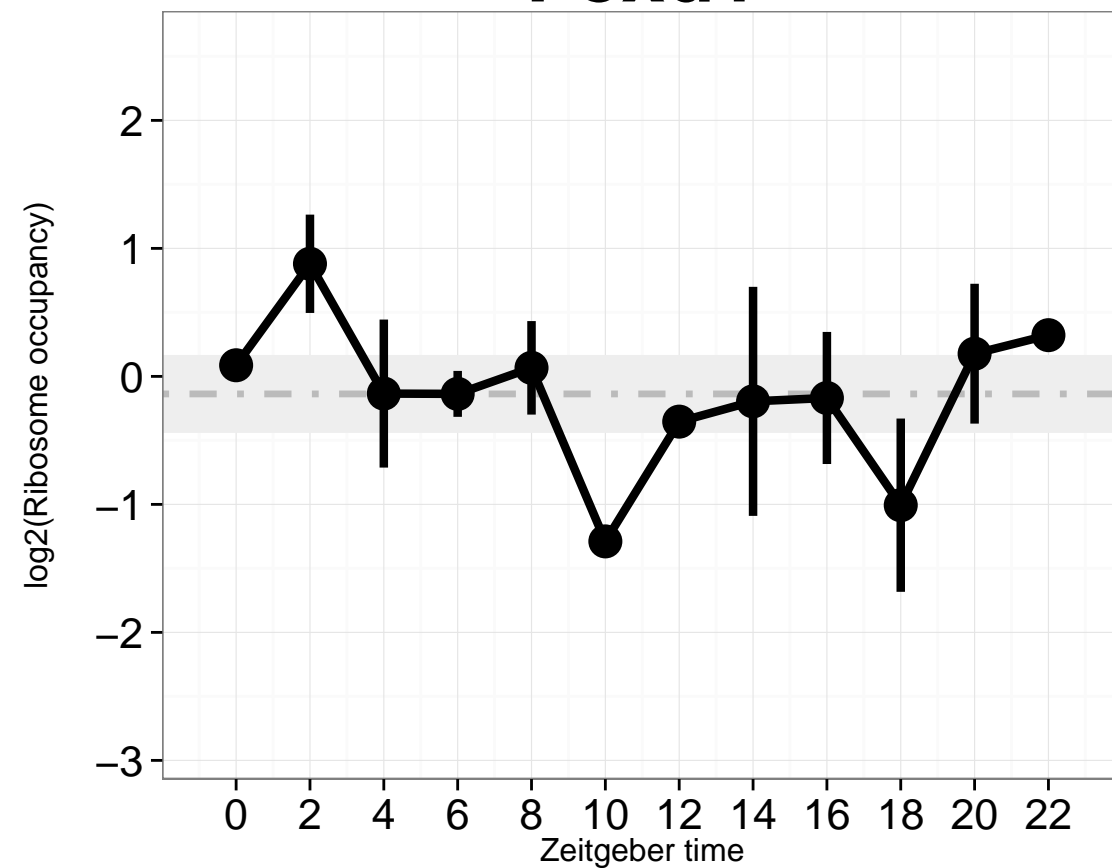

Supplement: Supplementary file 11543 [file 1]

# Trim7

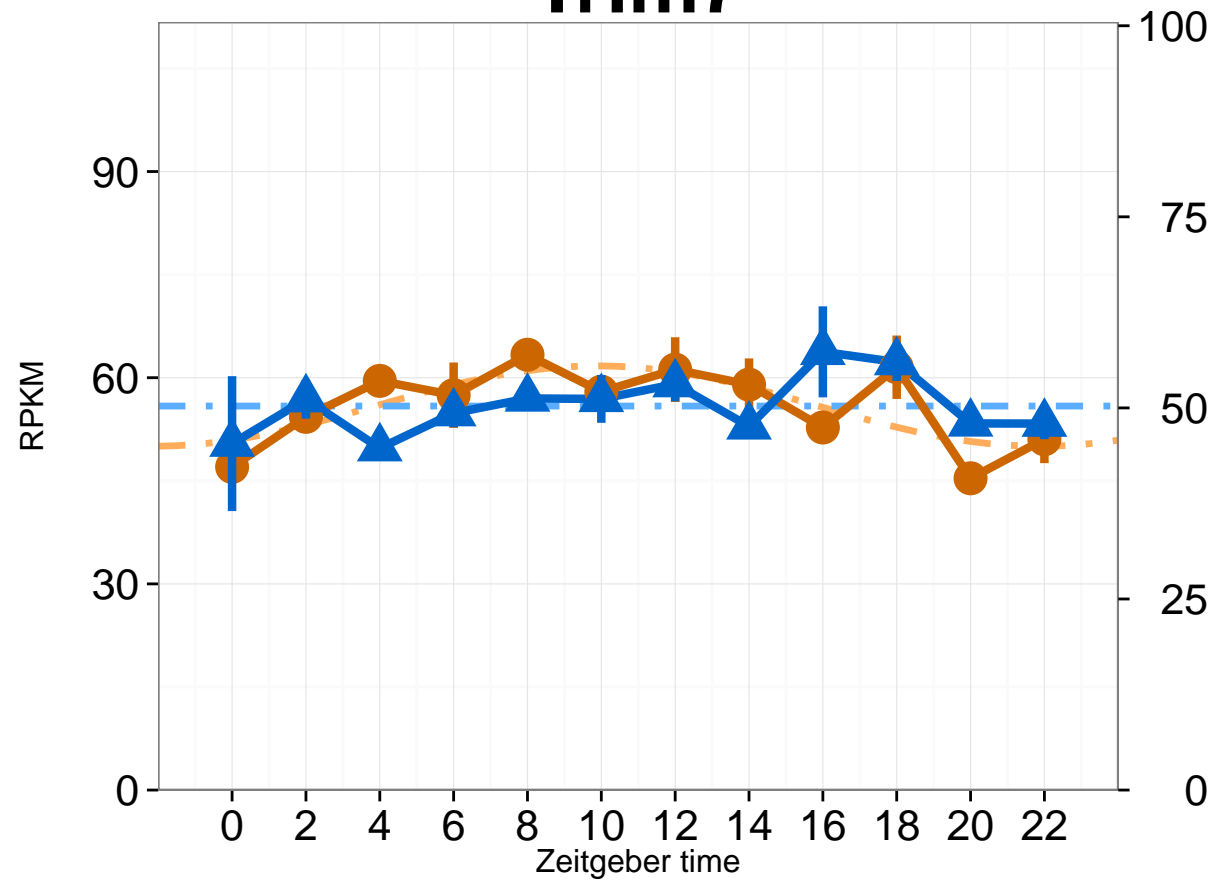

# Trim7

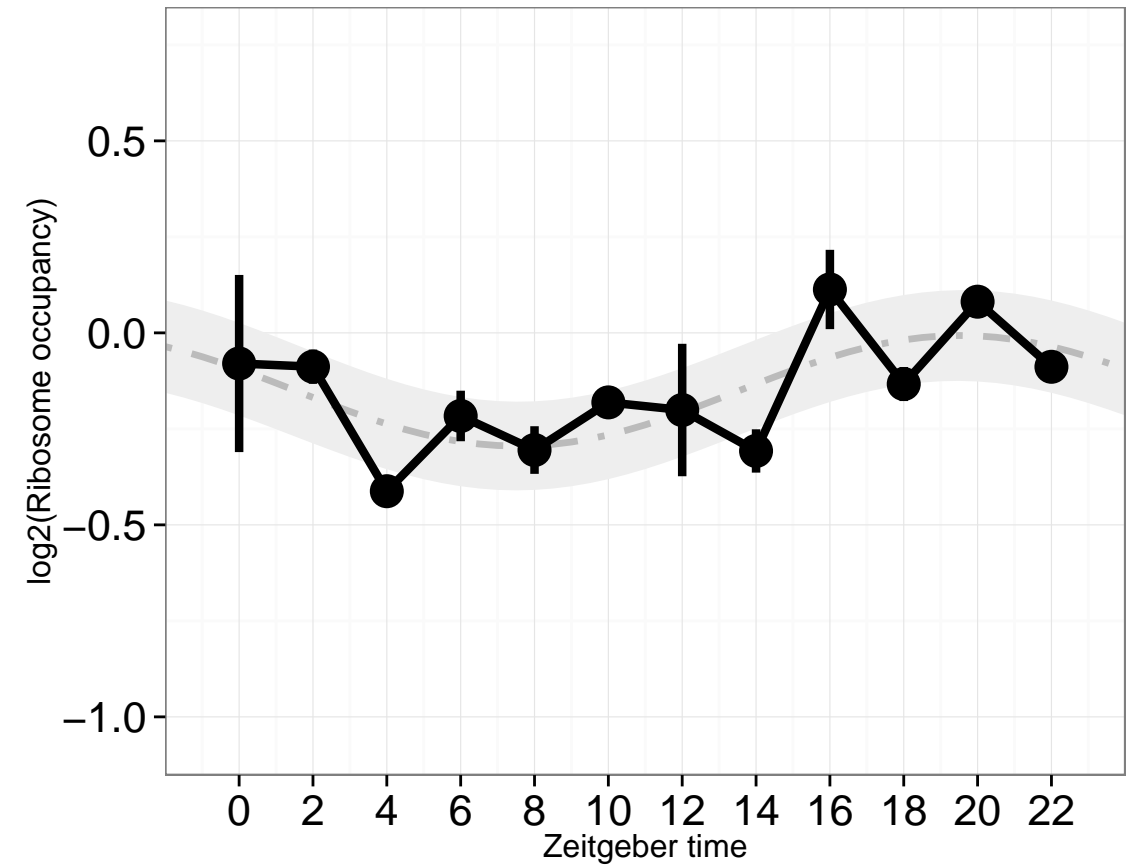

Supplement: Supplementary file 11544 [file 1]

## Nnmt

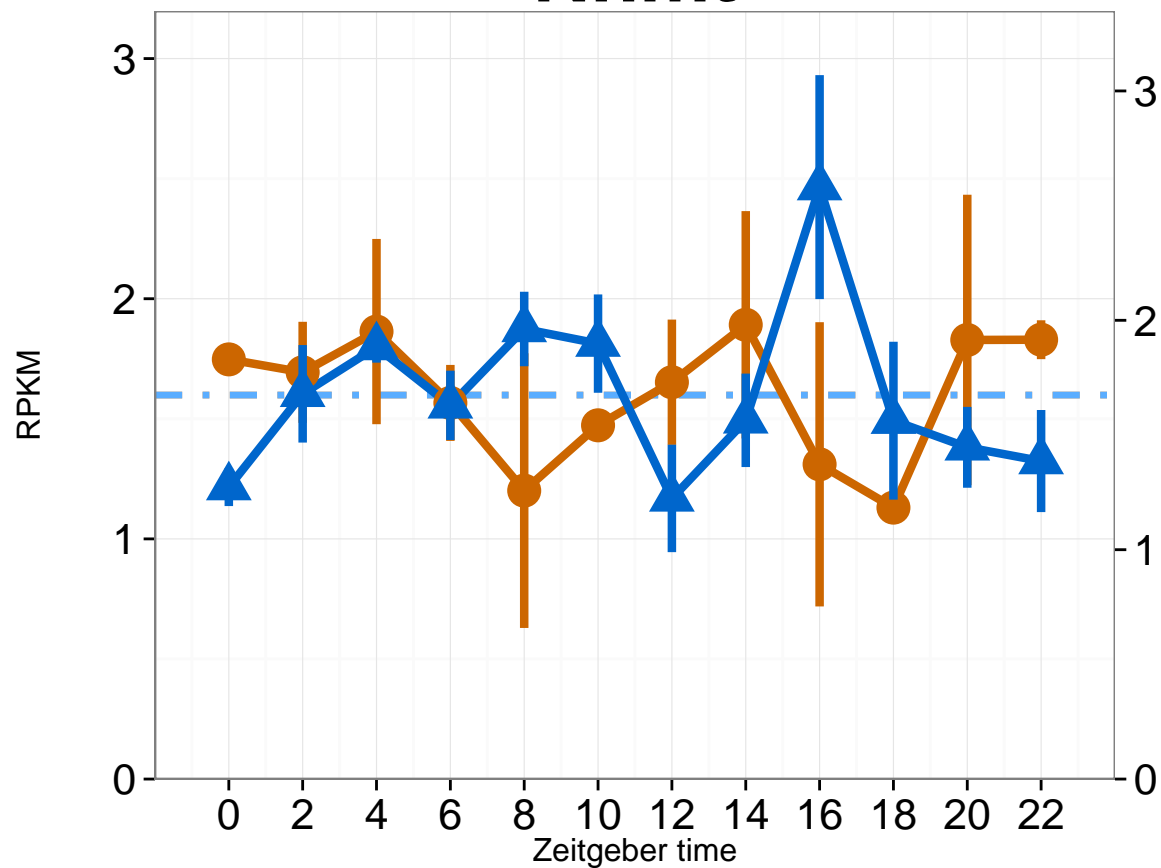

## Nnmt

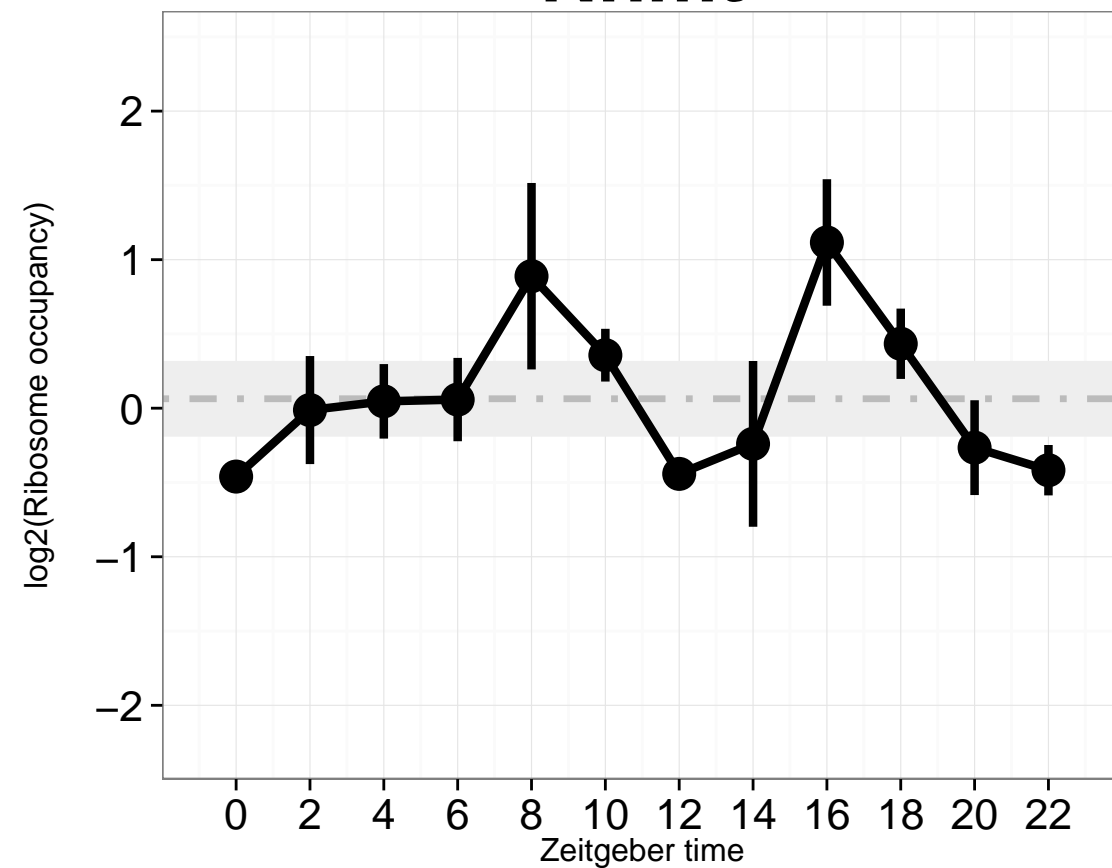

Supplement: Supplementary file 11545 [file 1]

# Fastkd1

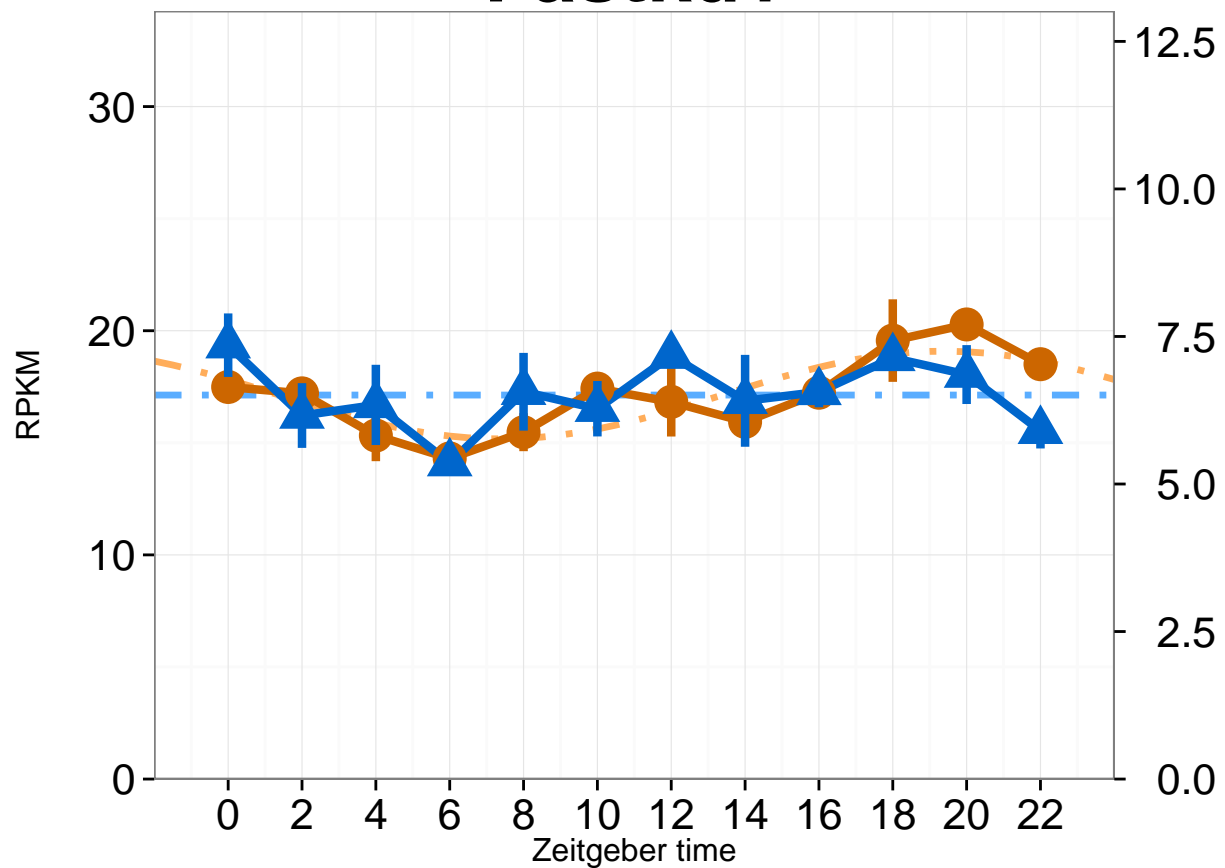

# Fastkd1

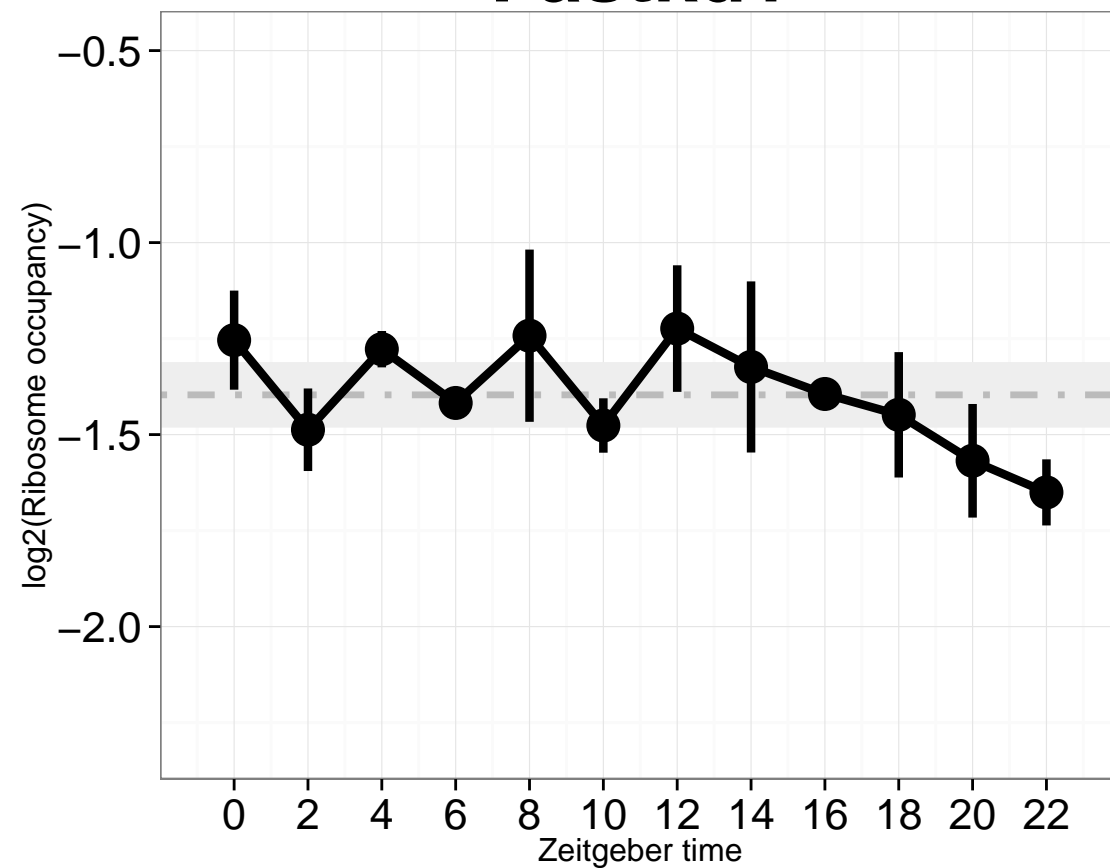

Supplement: Supplementary file 11546 [file 1]

# Lrrc28

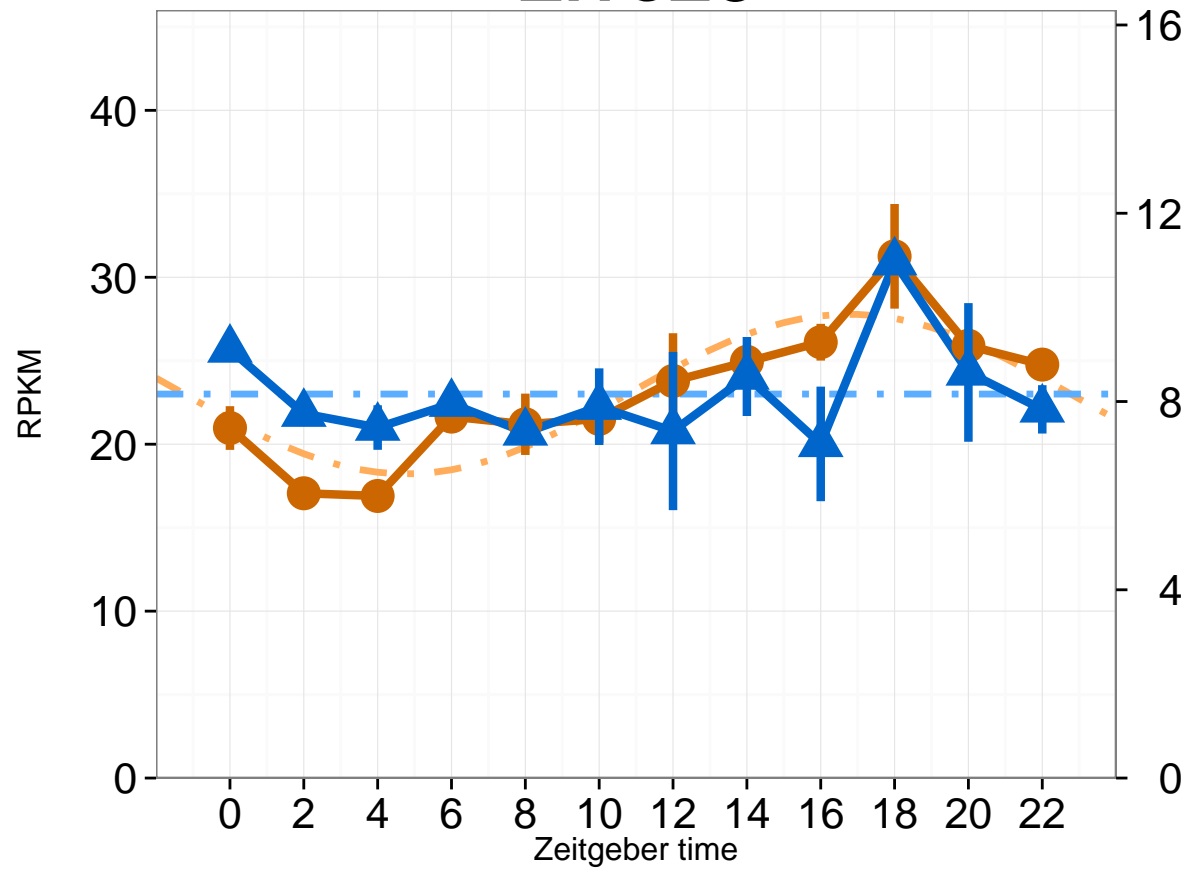

# Lrrc28

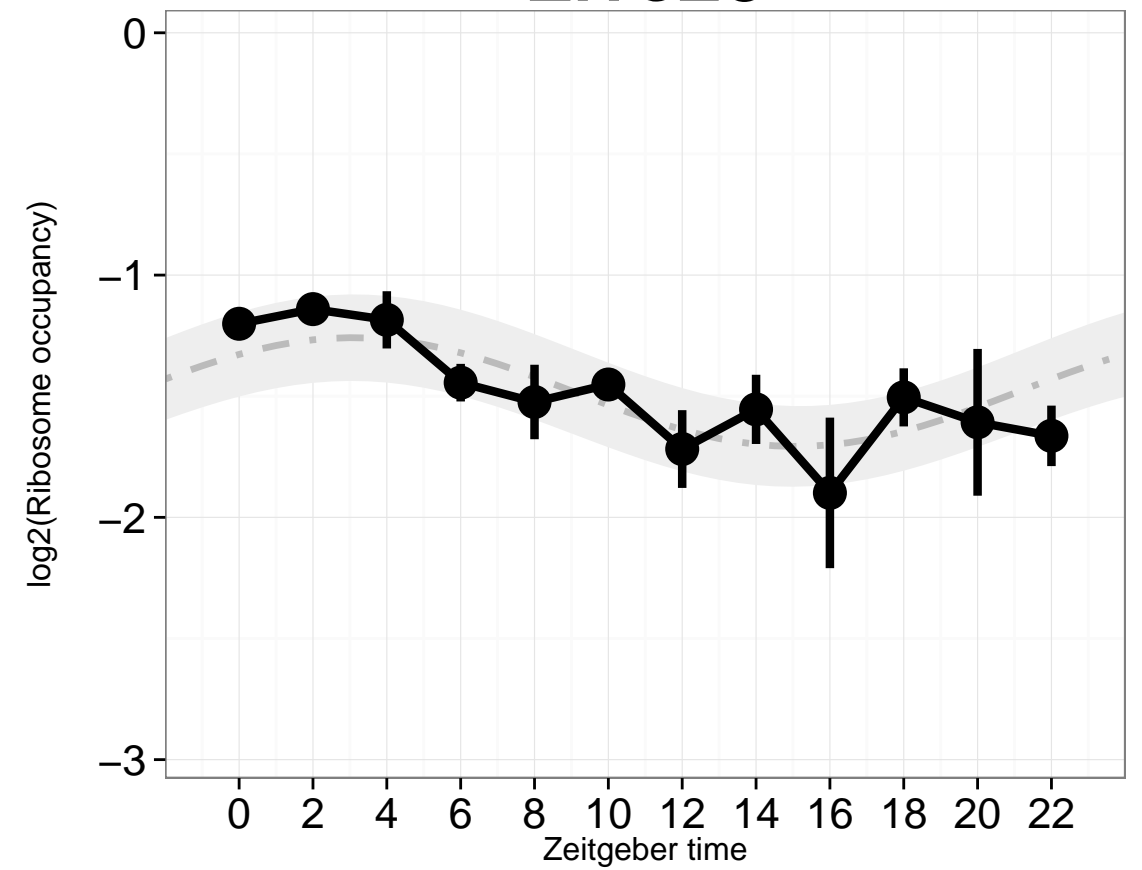

Supplement: Supplementary file 11547 [file 1]

# Tmem176b

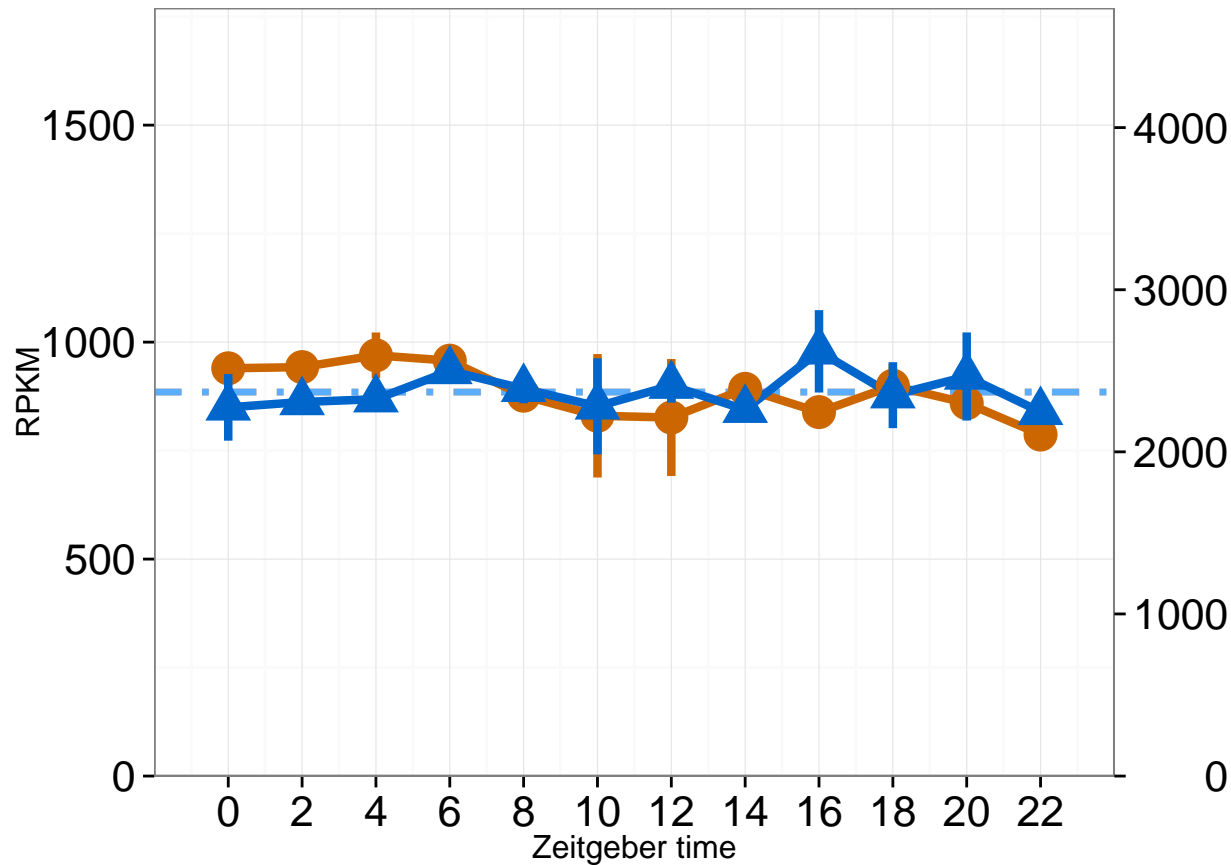

# Tmem176b

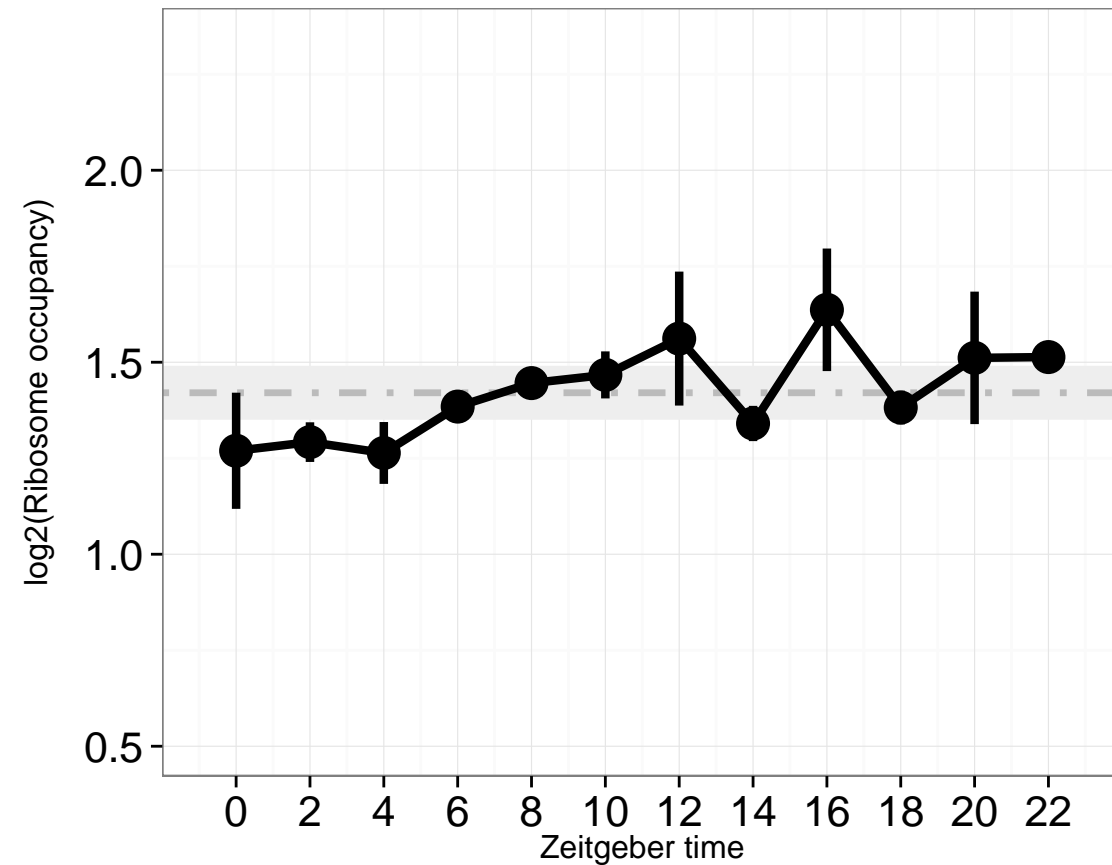

Supplement: Supplementary file 11548 [file 1]

## Ebpl

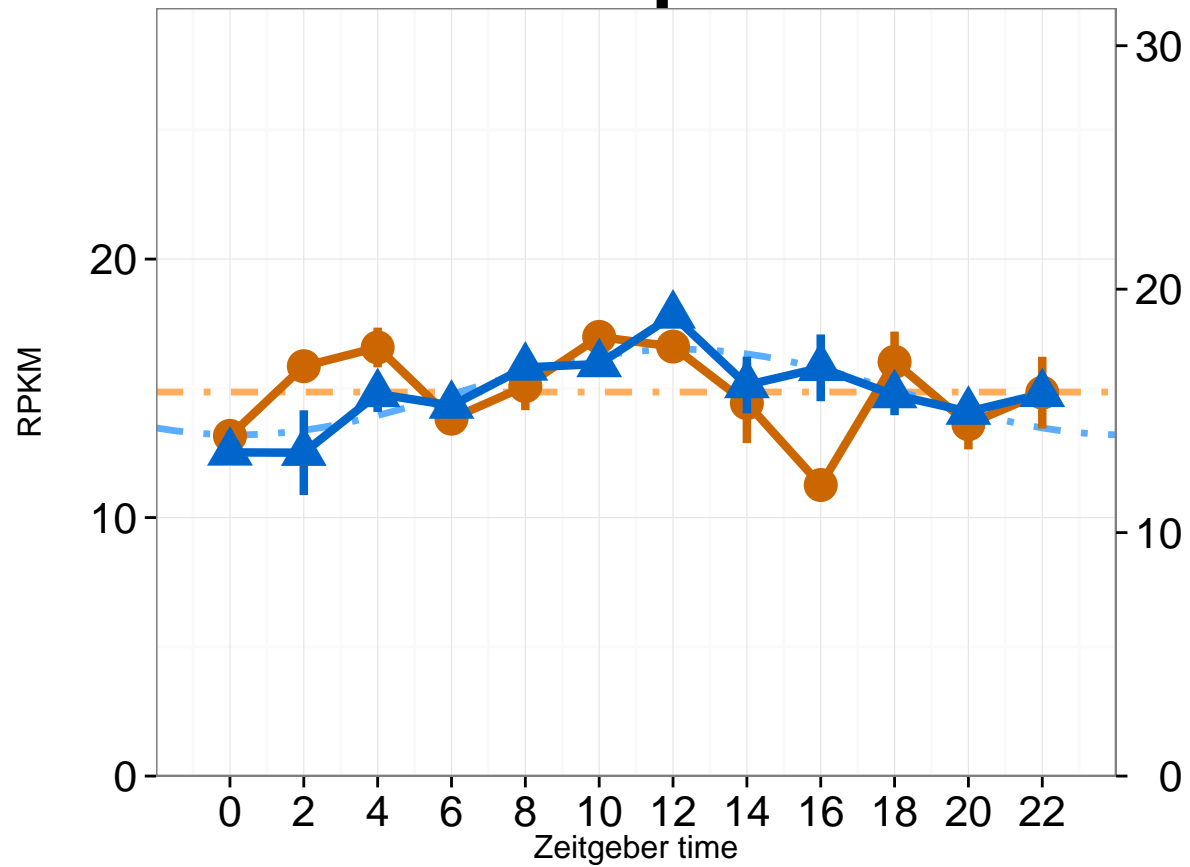

## Ebpl

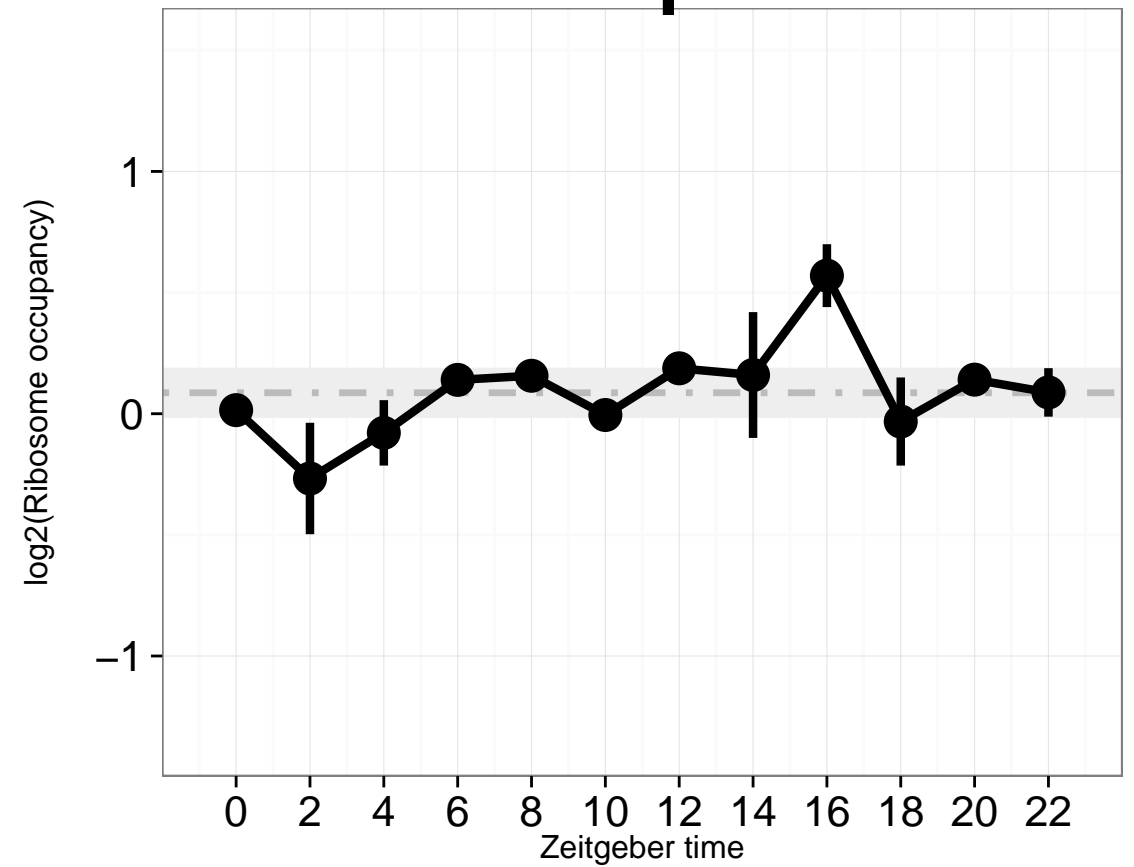

Supplement: Supplementary file 11549 [file 1]

# Bmp2

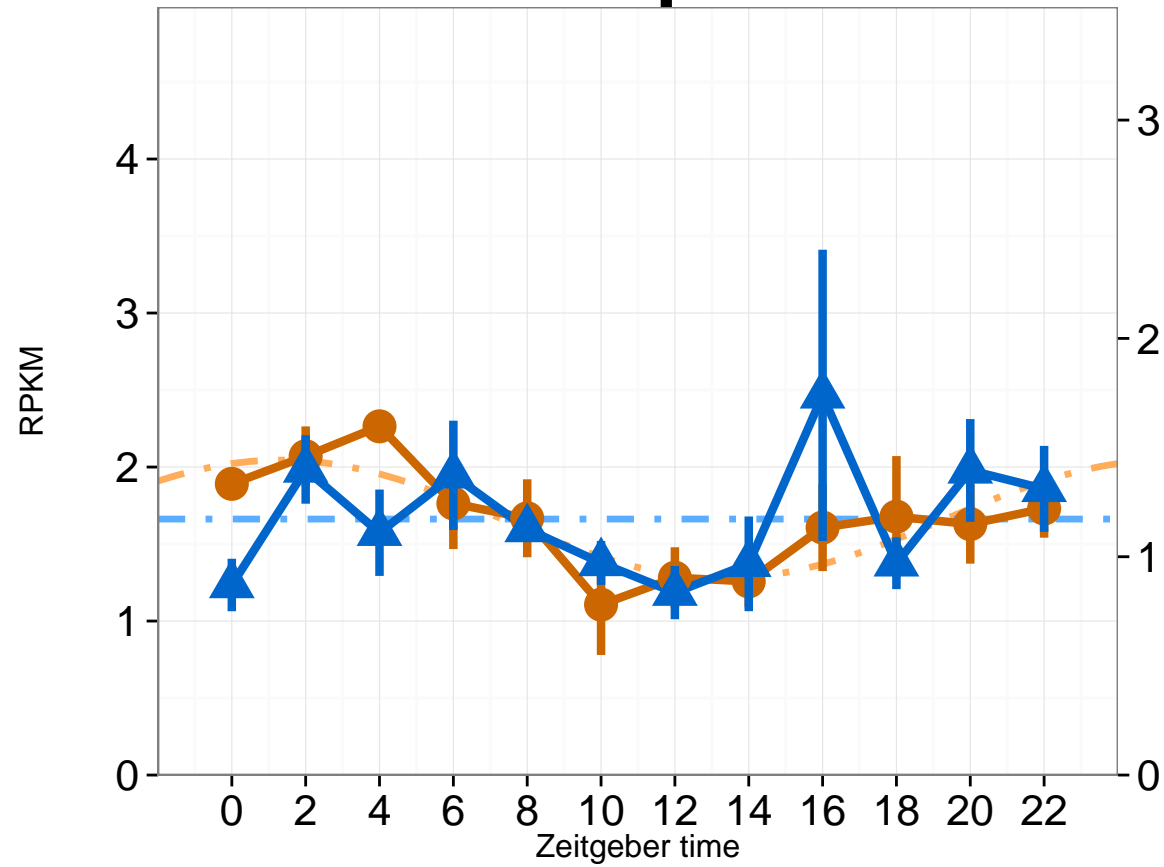

# Bmp2

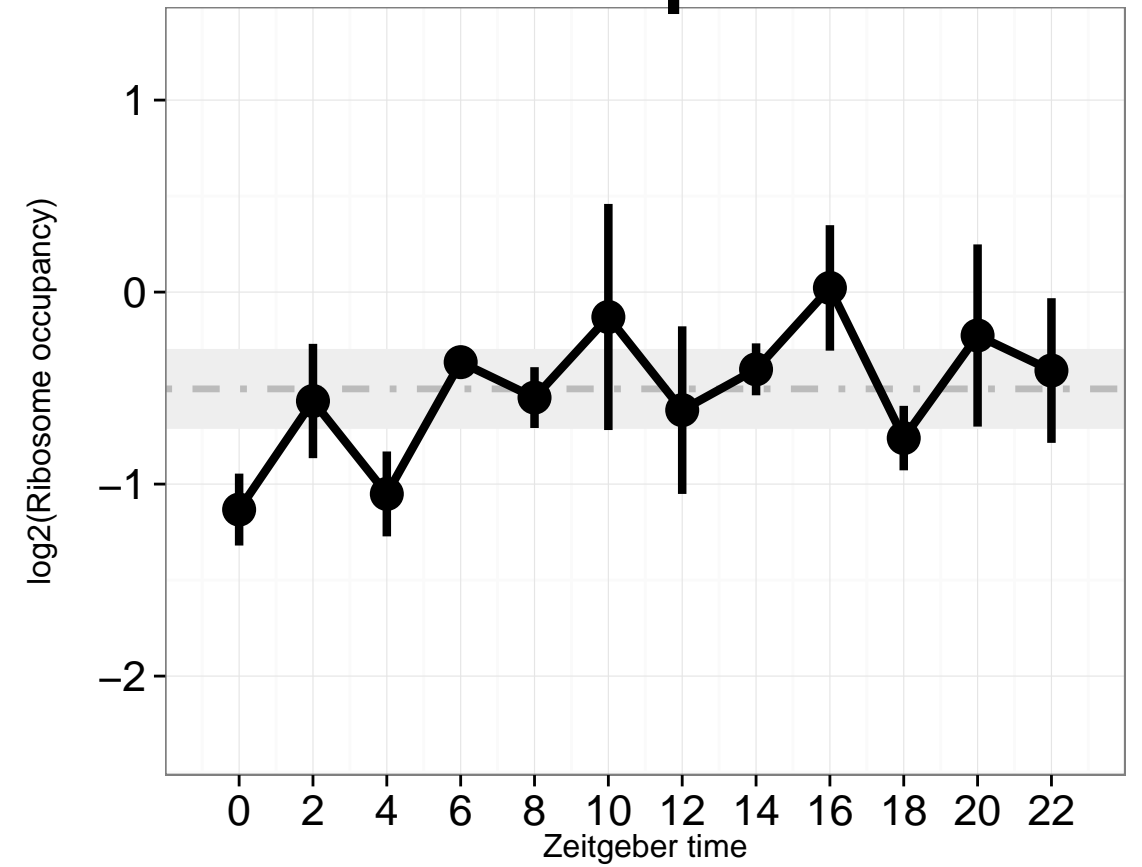

Supplement: Supplementary file 11550 [file 1]

# Tbl3

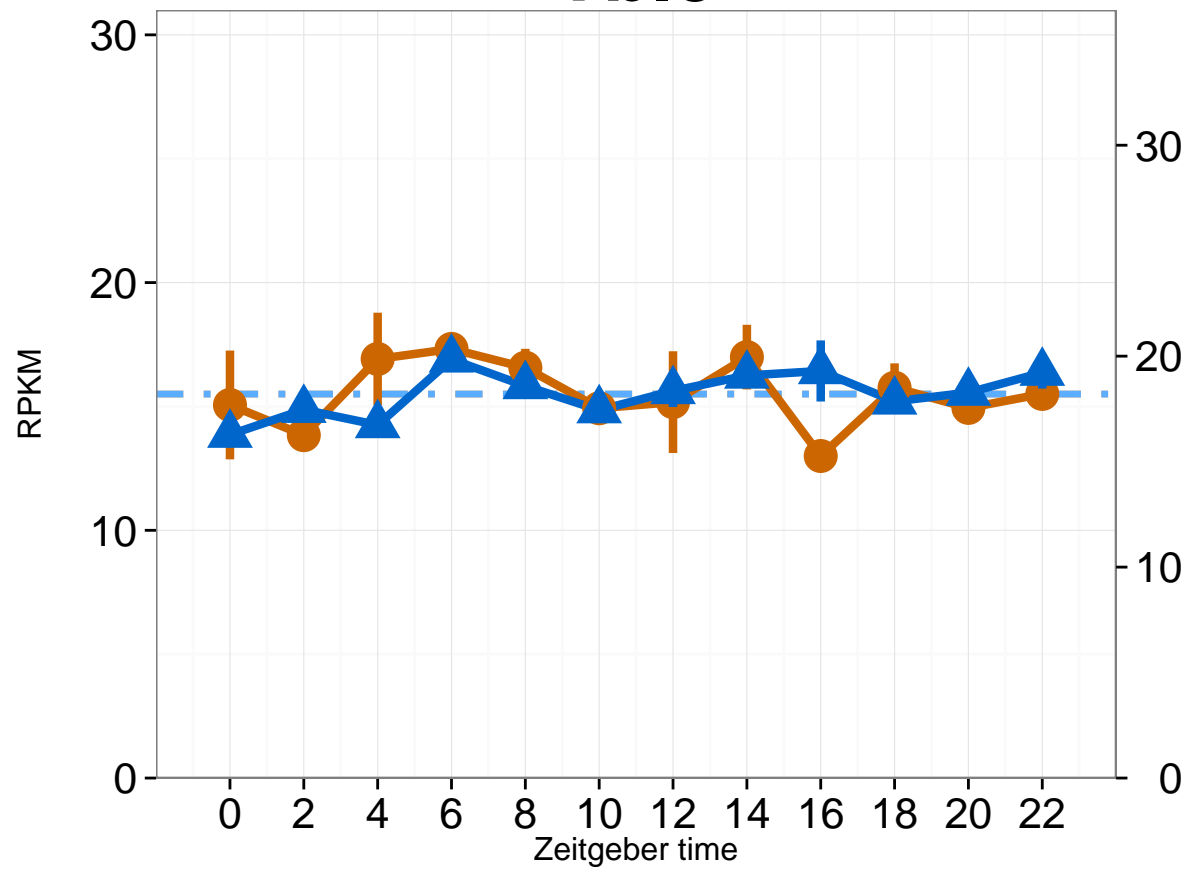

# Tbl3

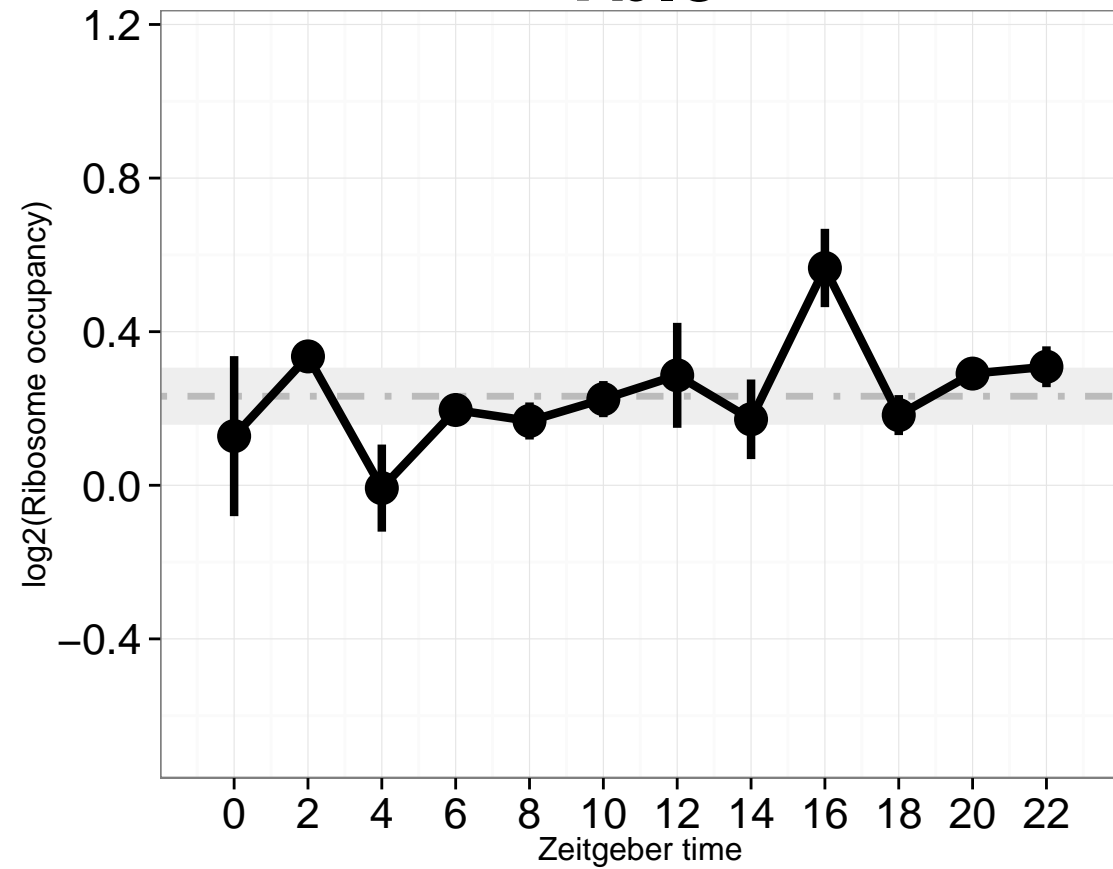

Supplement: Supplementary file 11551 [file 1]

## Endov

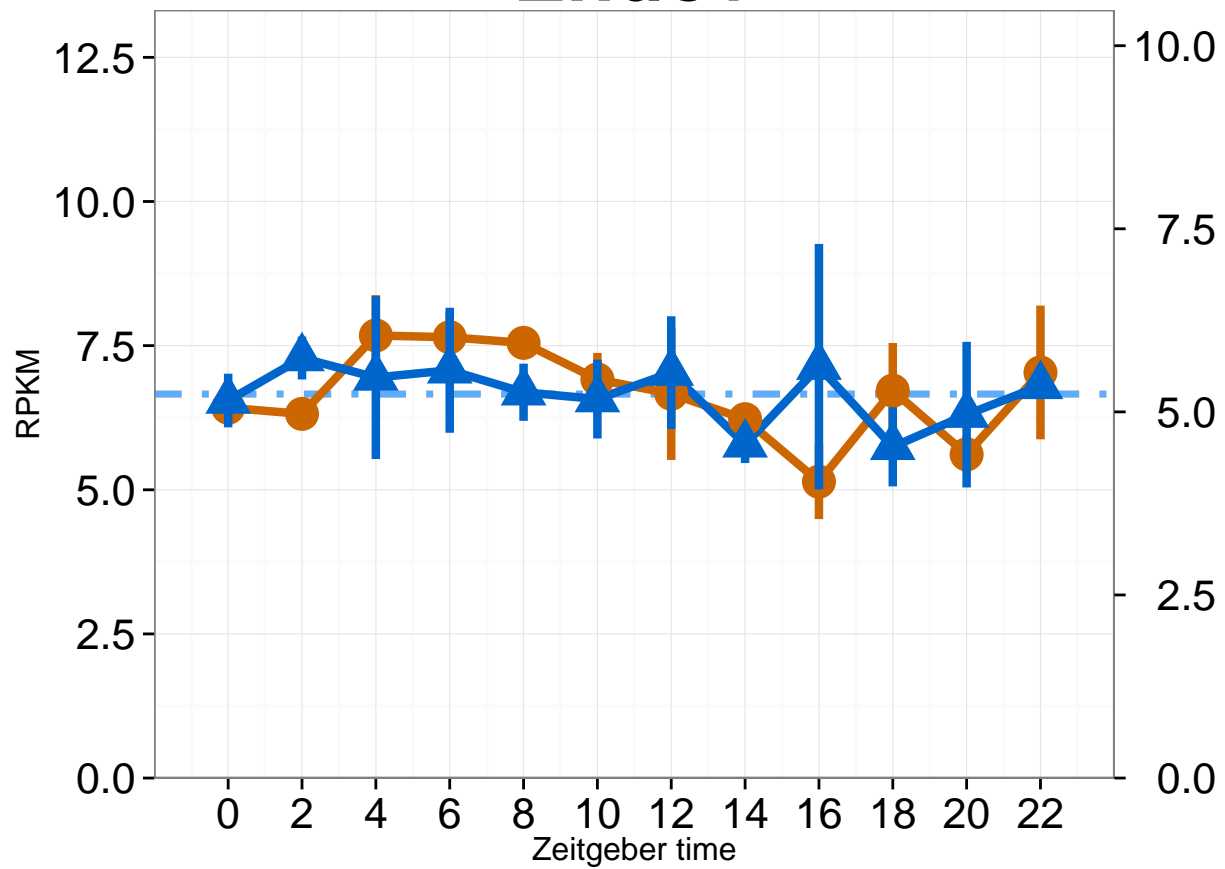

## Endov

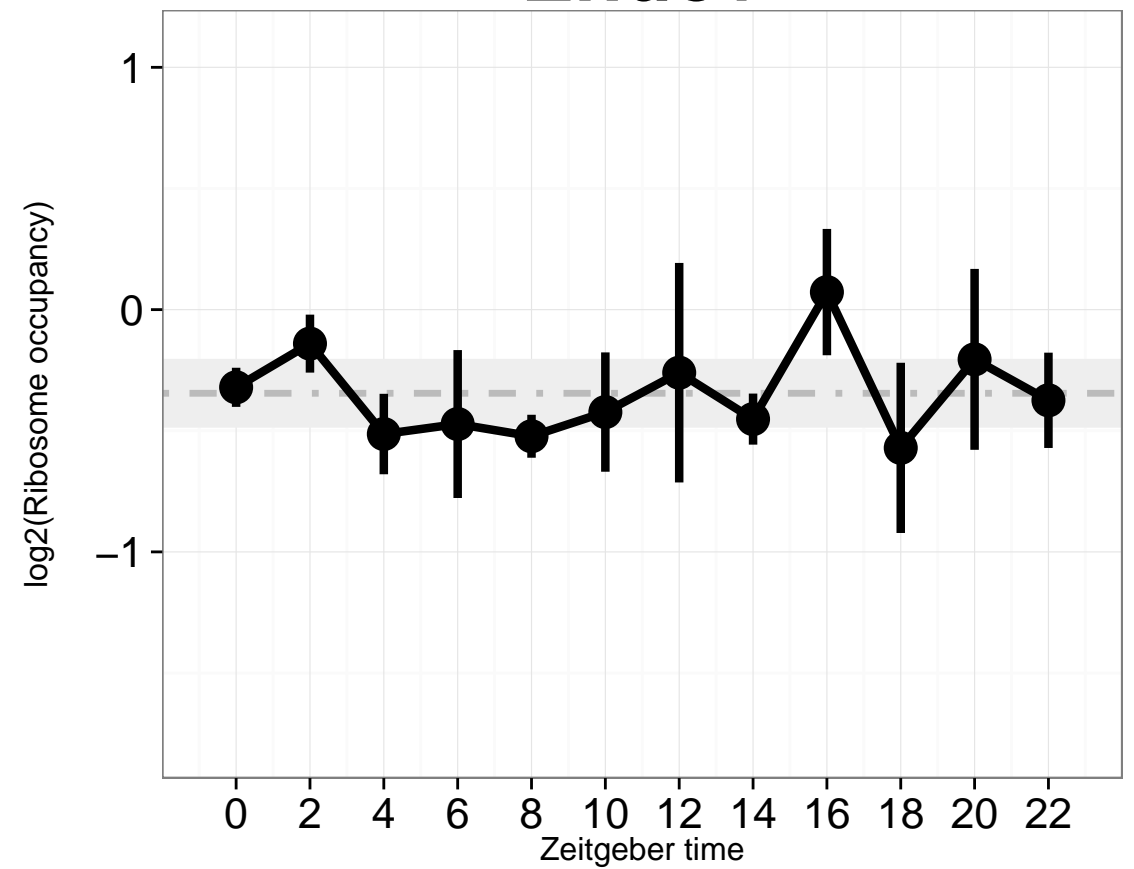

Supplement: Supplementary file 11552 [file 1]

# Tmem174

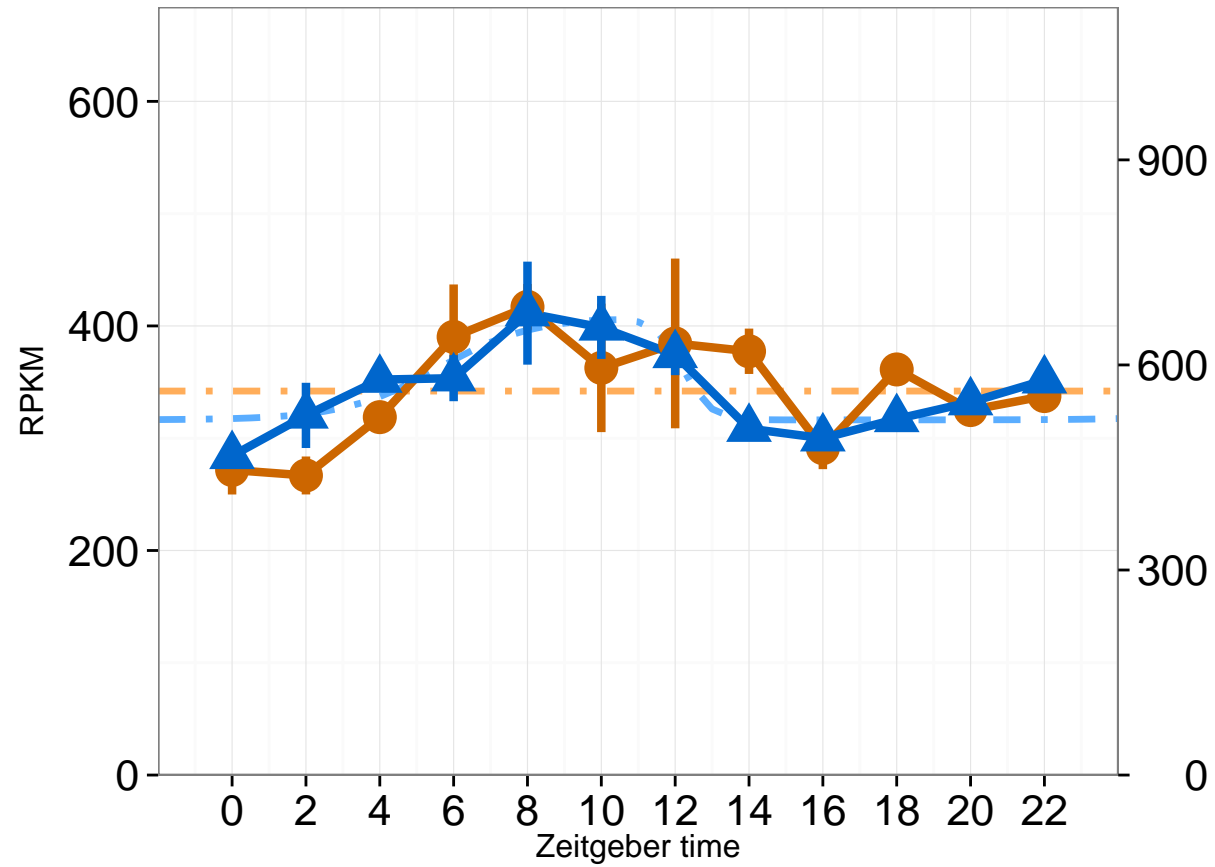

# Tmem174

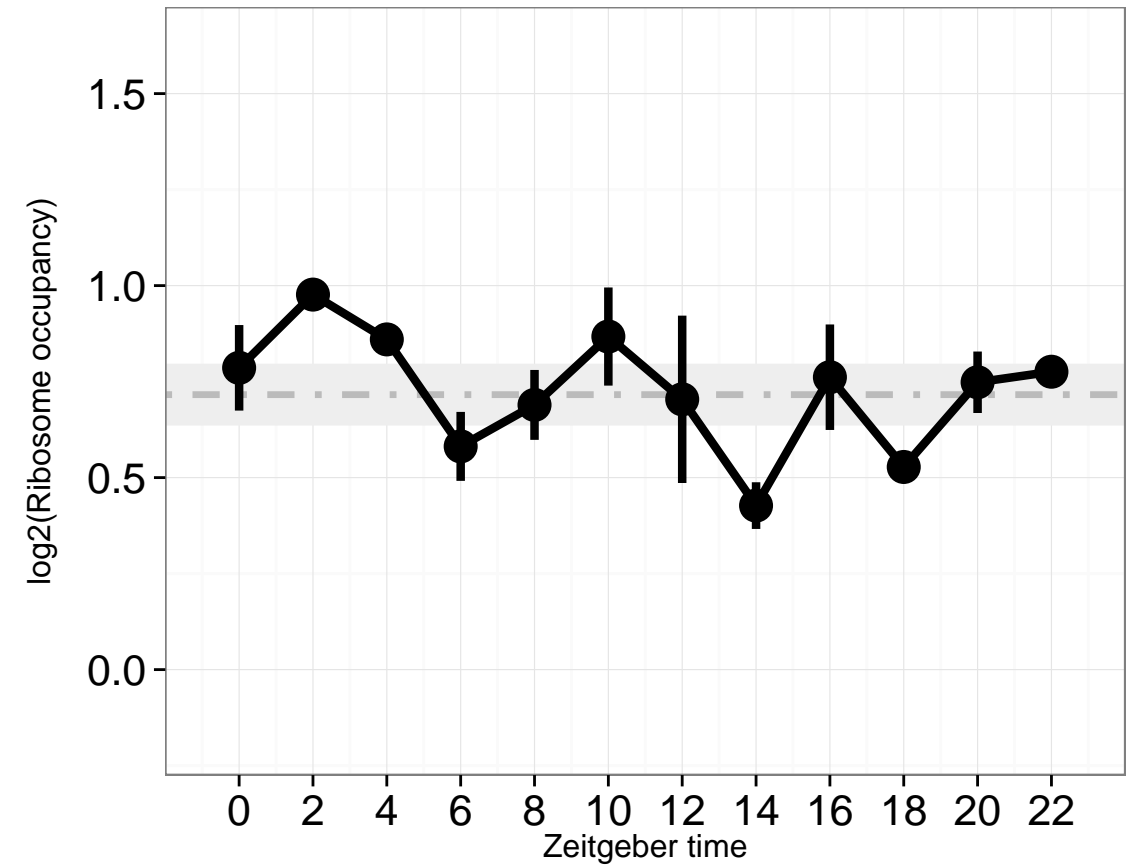

Supplement: Supplementary file 11553 [file 1]

# Fth1

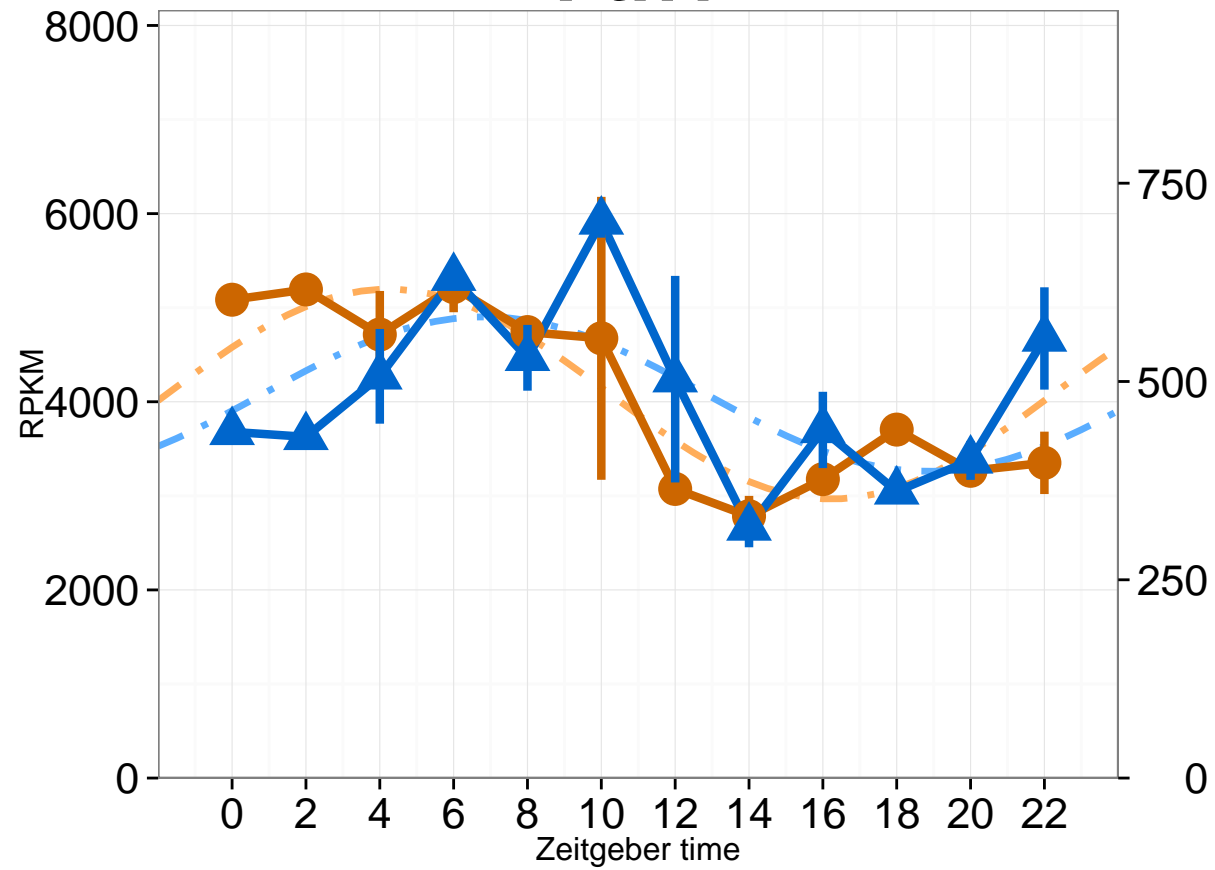

# Fth1

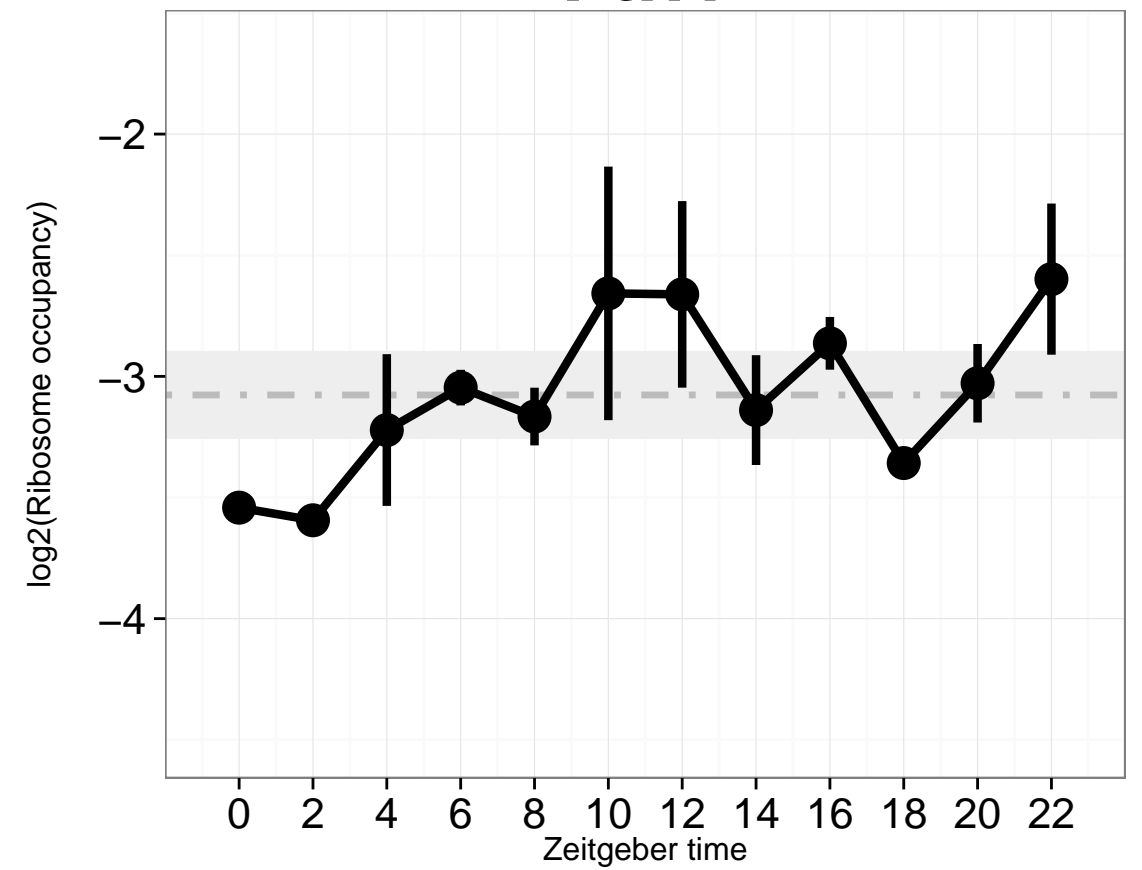

Supplement: Supplementary file 11554 [file 1]

## Phax

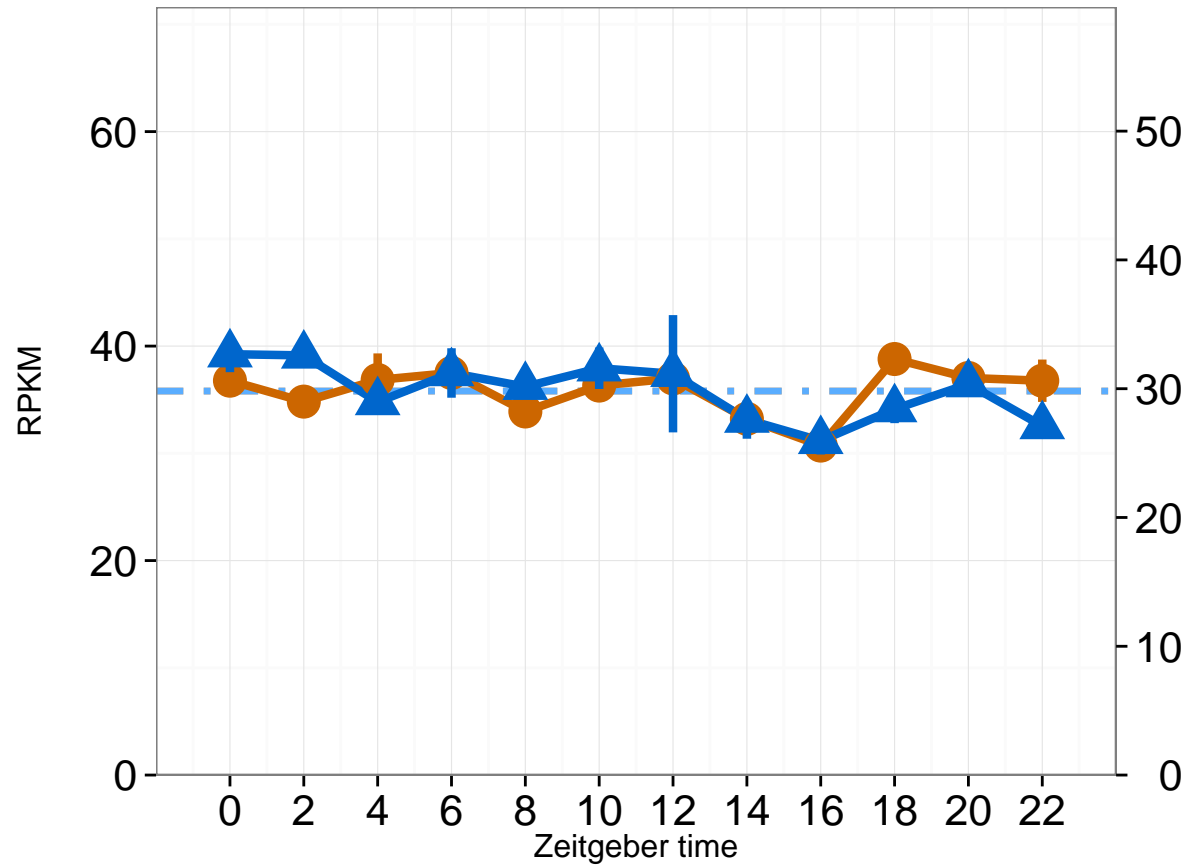

## Phax

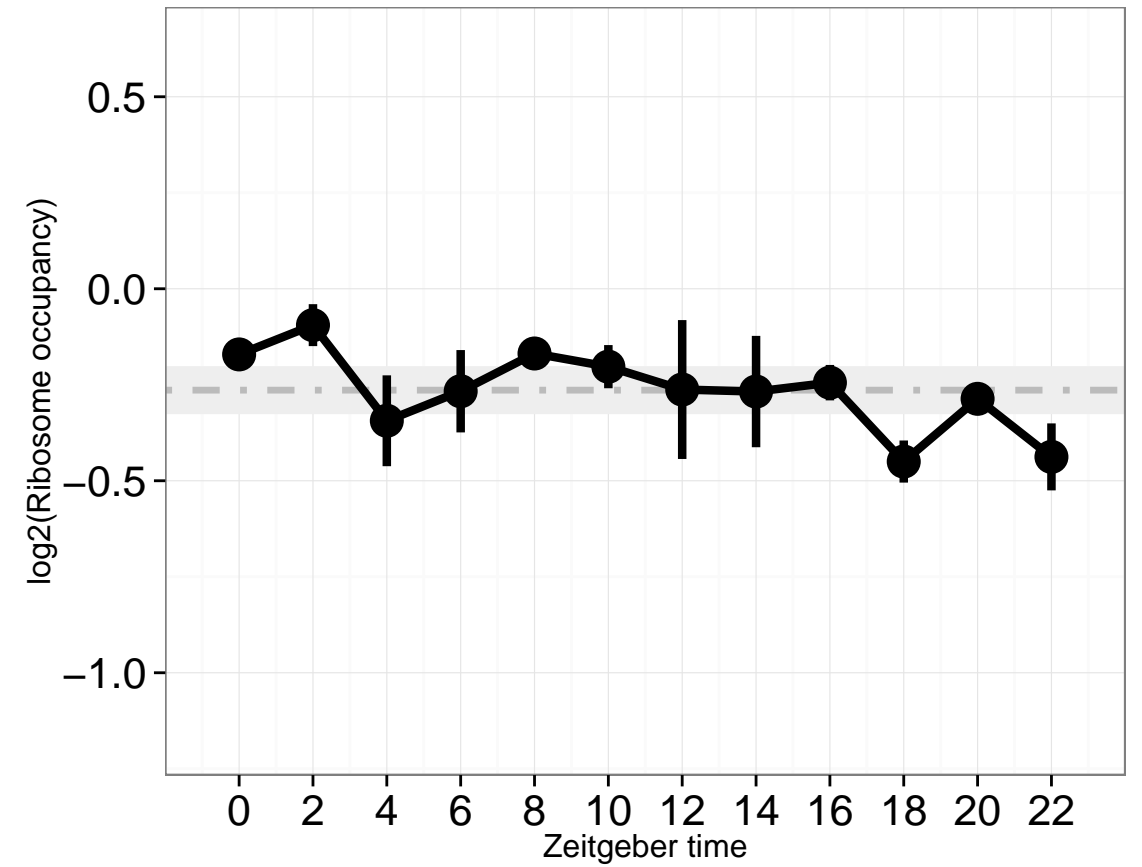

Supplement: Supplementary file 11555 [file 1]

## Slfn9

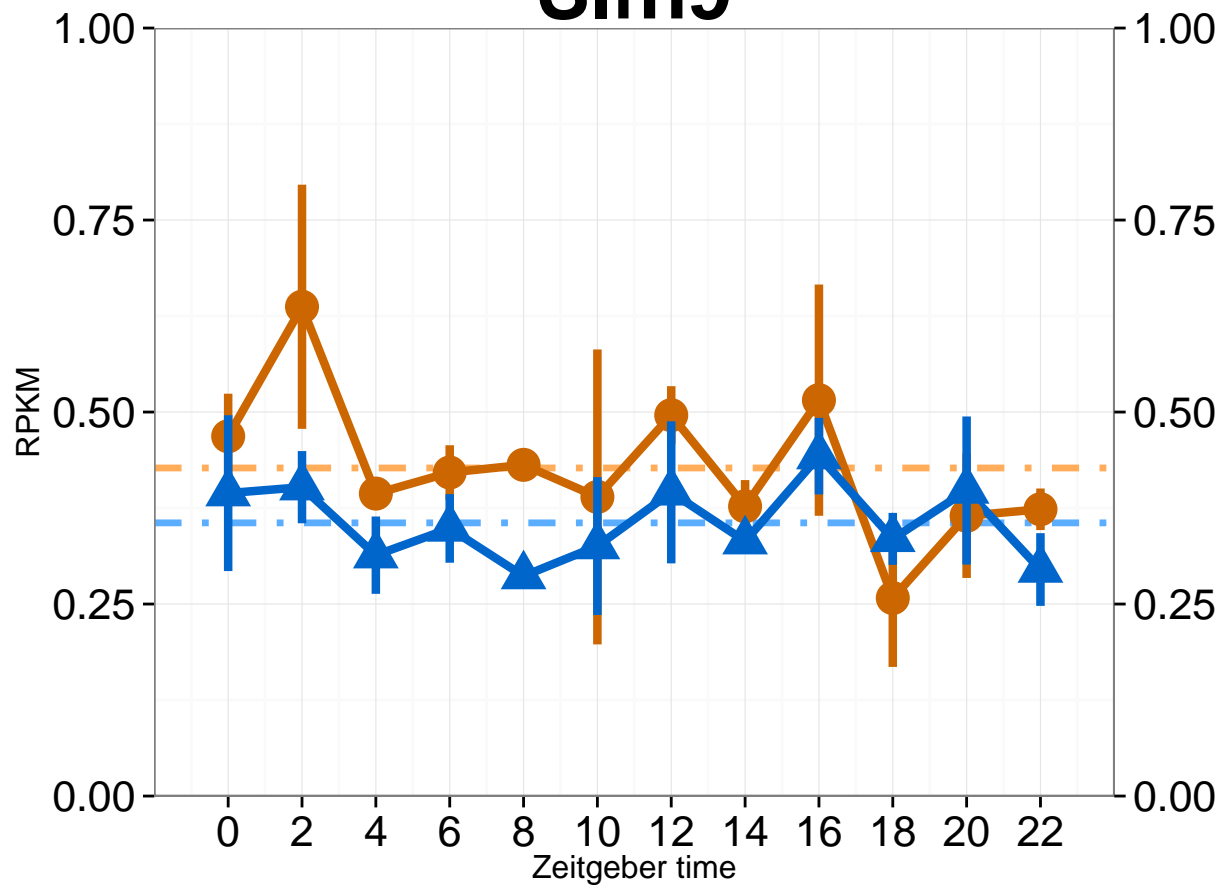

## Slfn9

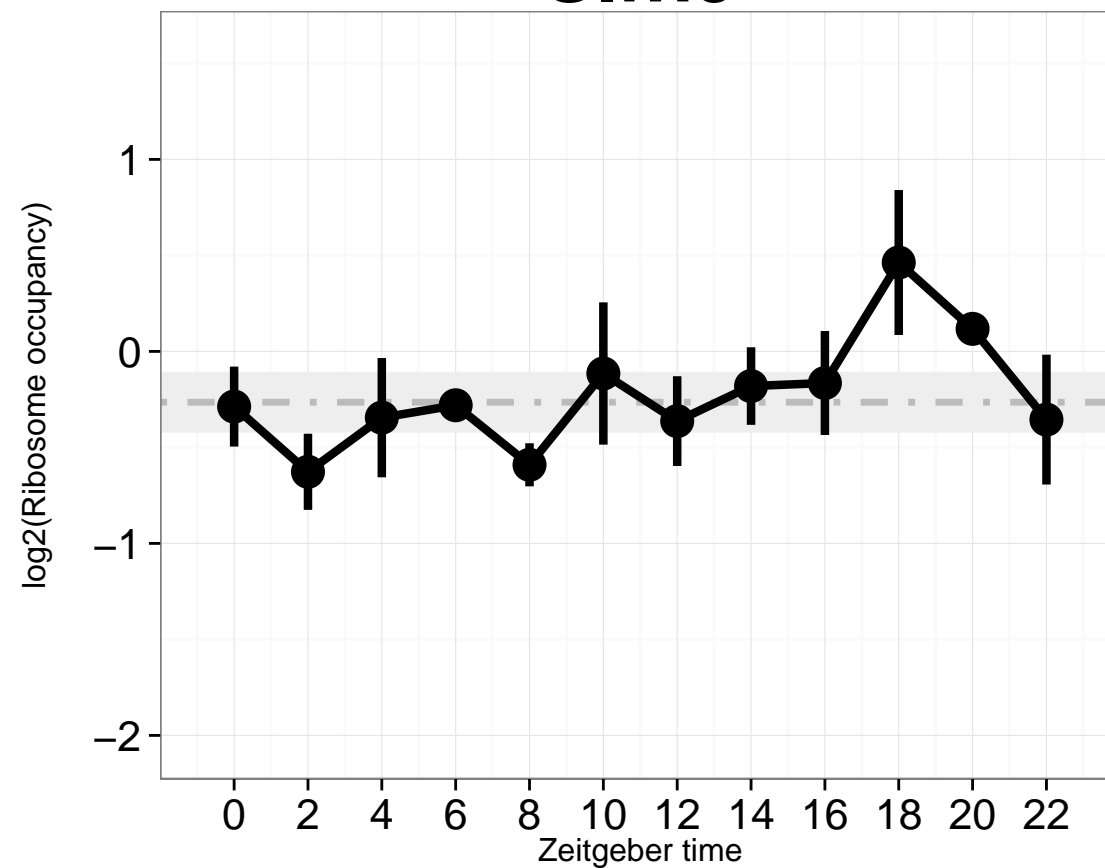

Supplement: Supplementary file 11556 [file 1]

# Fzd6

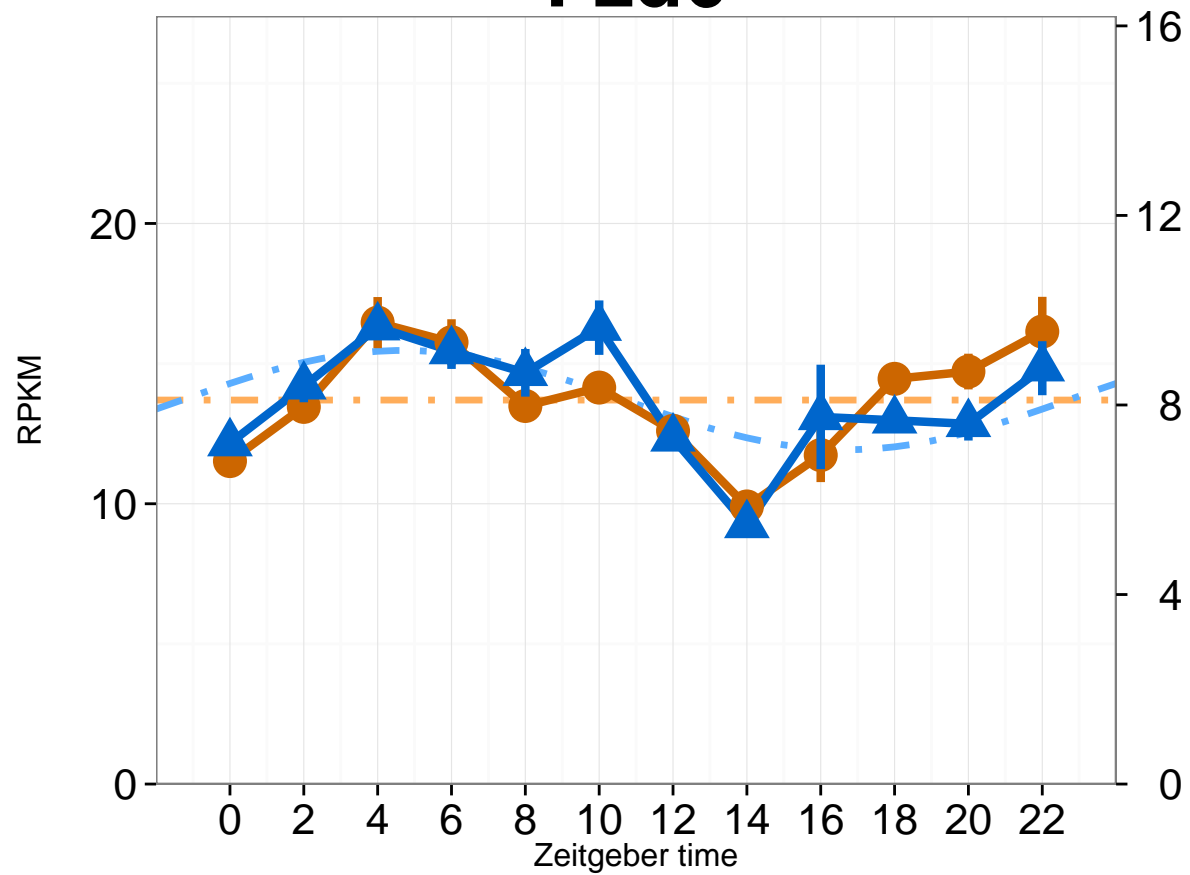

# Fzd6

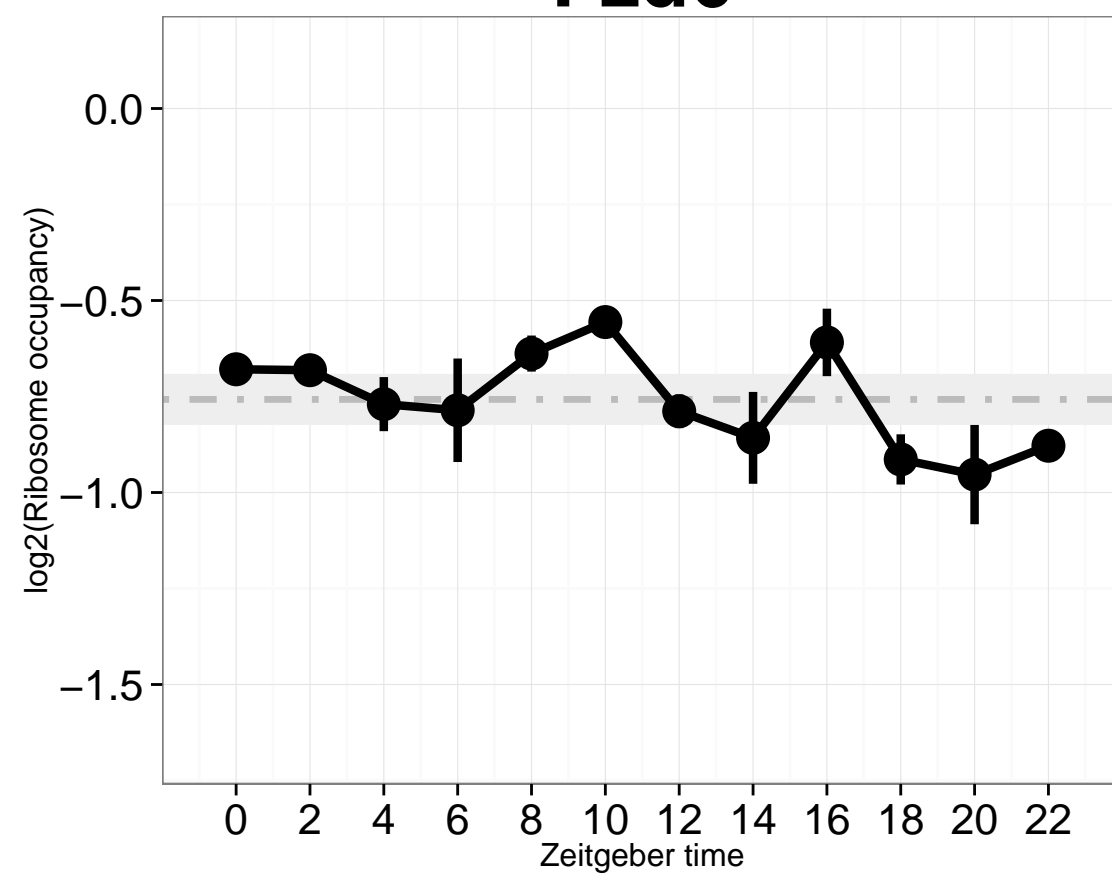

Supplement: Supplementary file 11557 [file 1]

# Rel

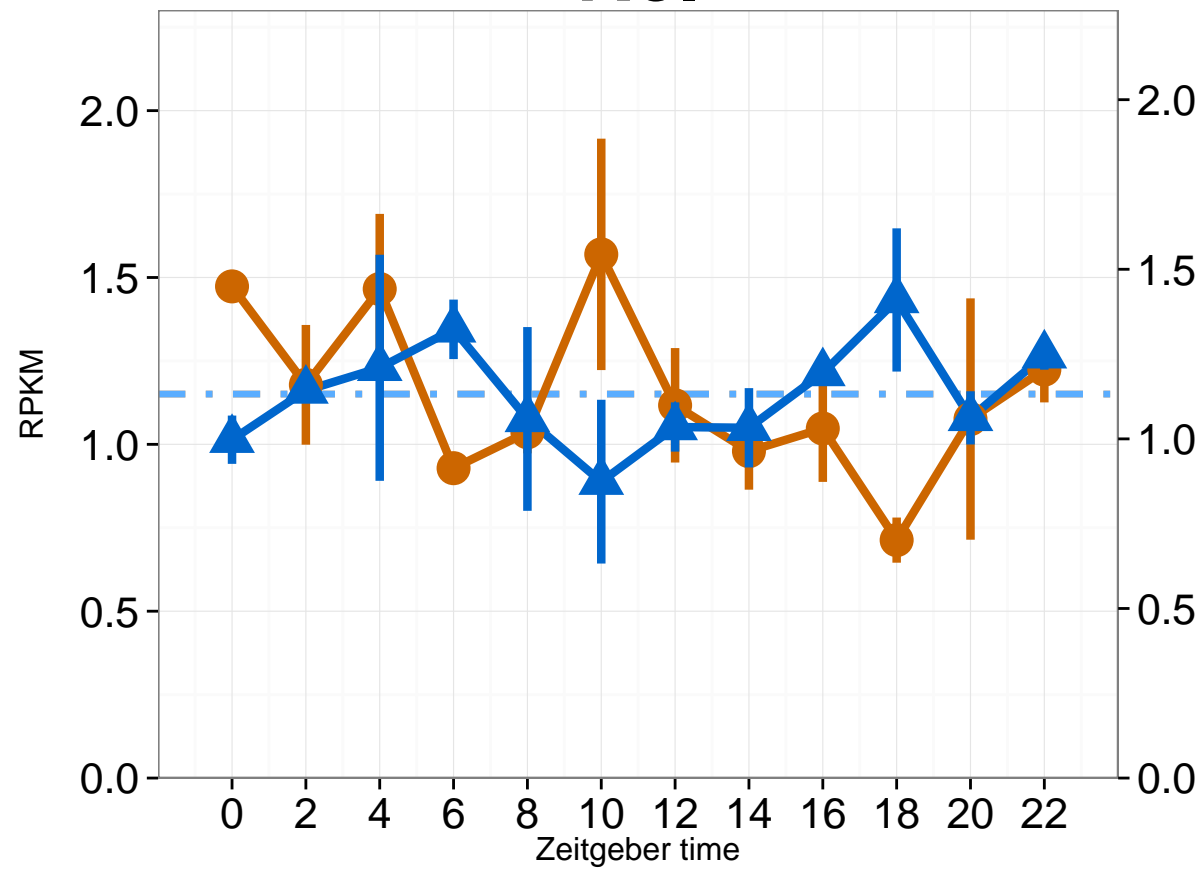

# Rel

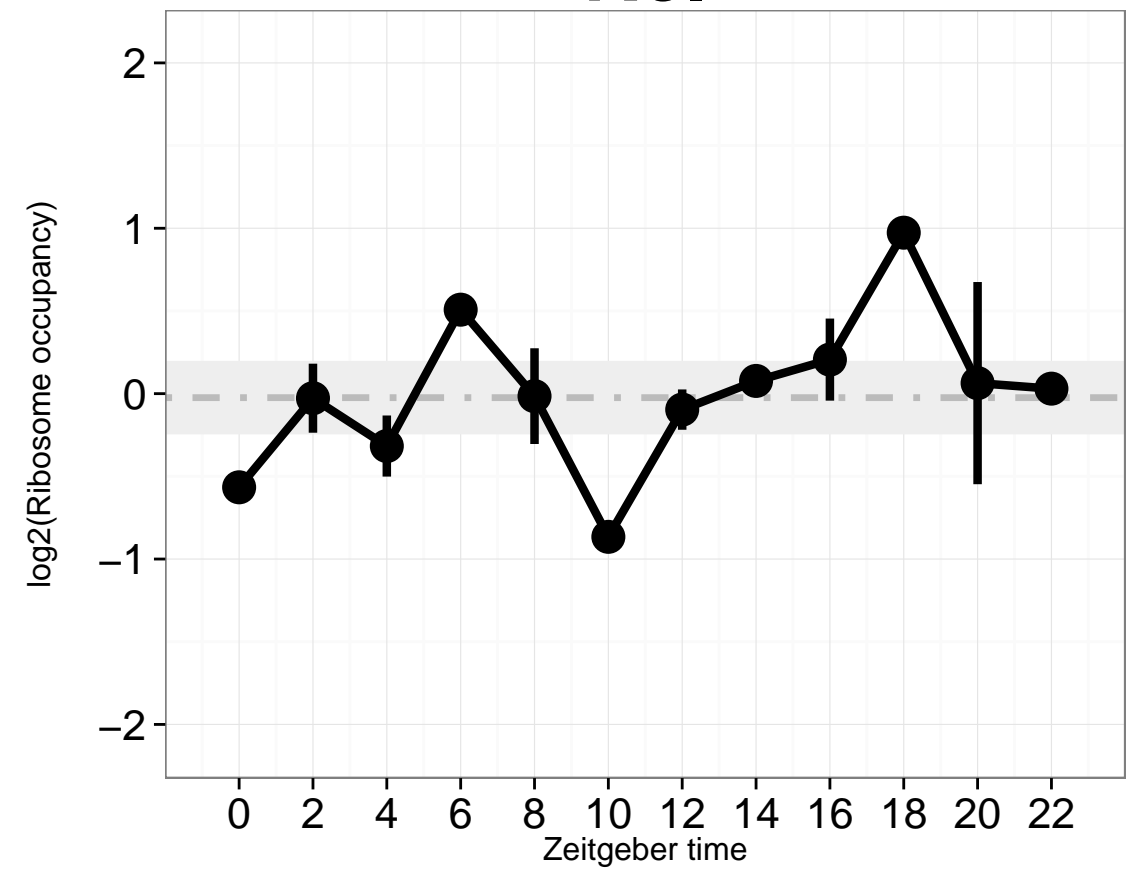

Supplement: Supplementary file 11558 [file 1]

## Wash

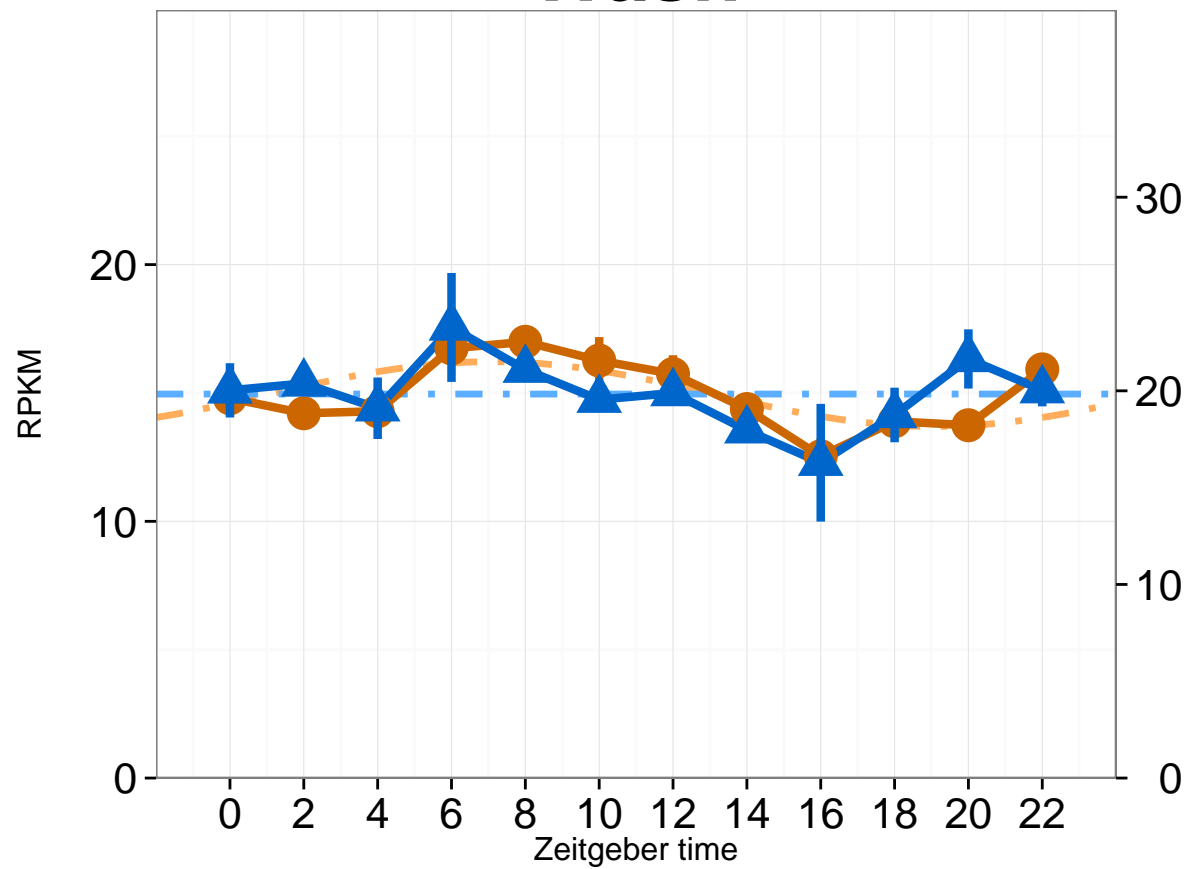

## Wash

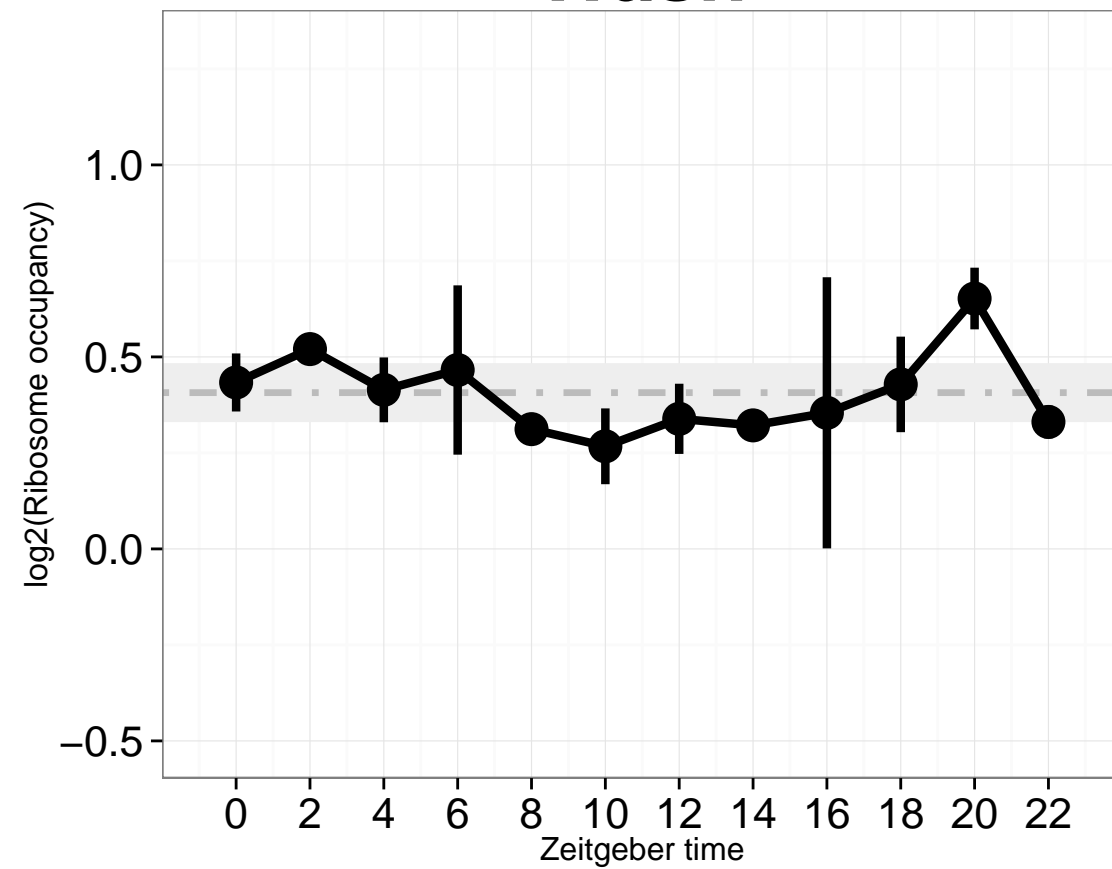

Supplement: Supplementary file 11559 [file 1]

# Mast4

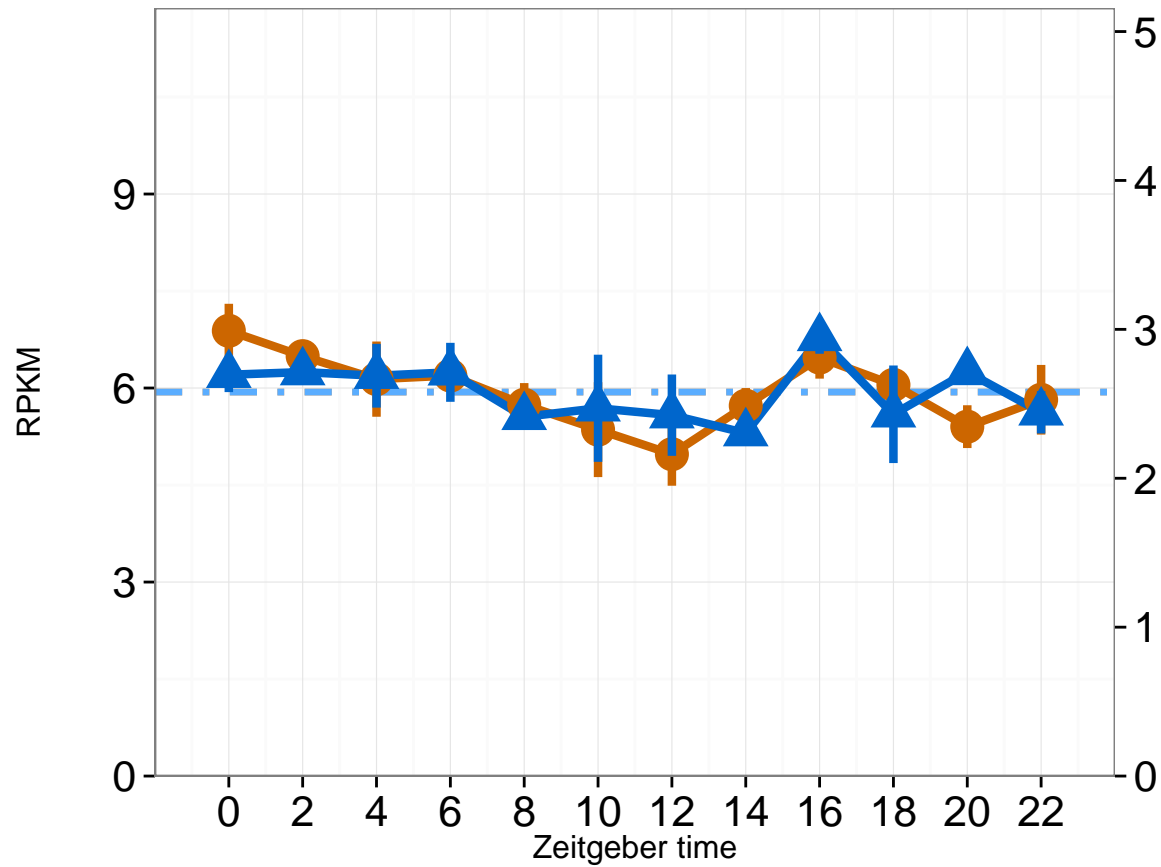

# Mast4

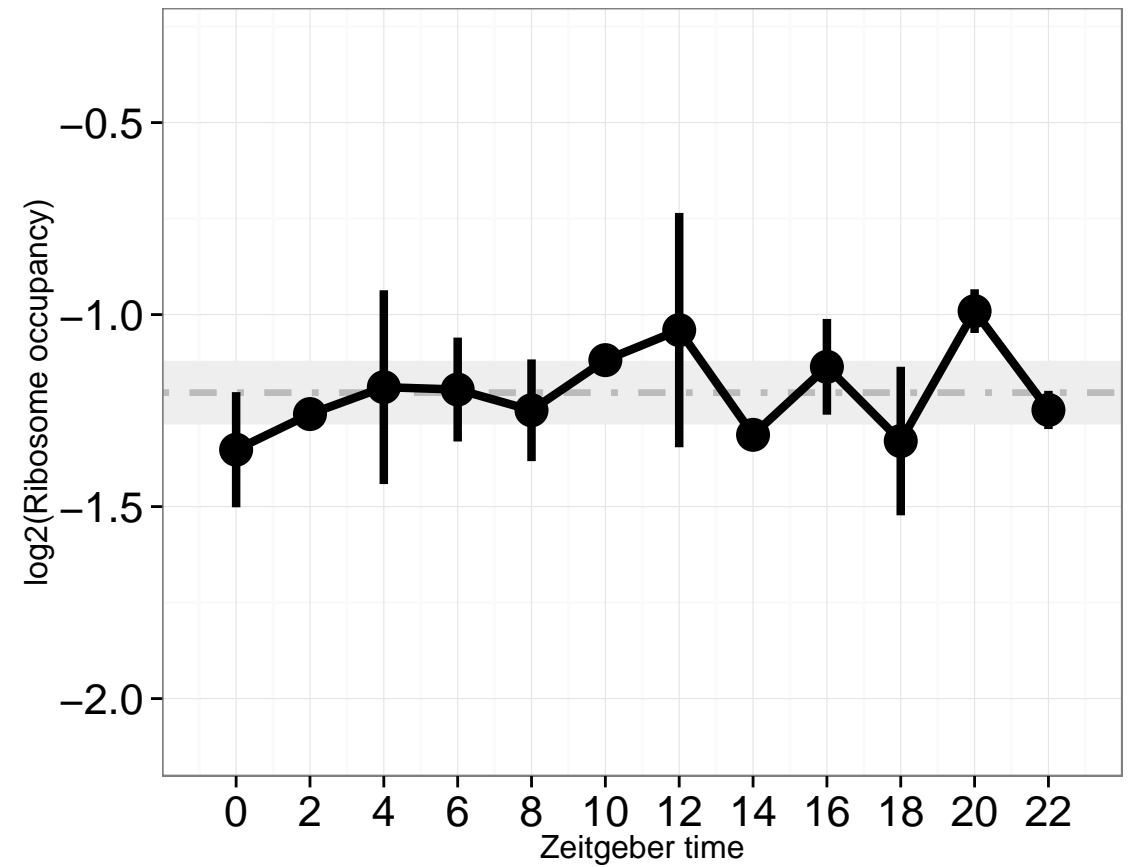

Supplement: Supplementary file 11560 [file 1]

# Slc6a6

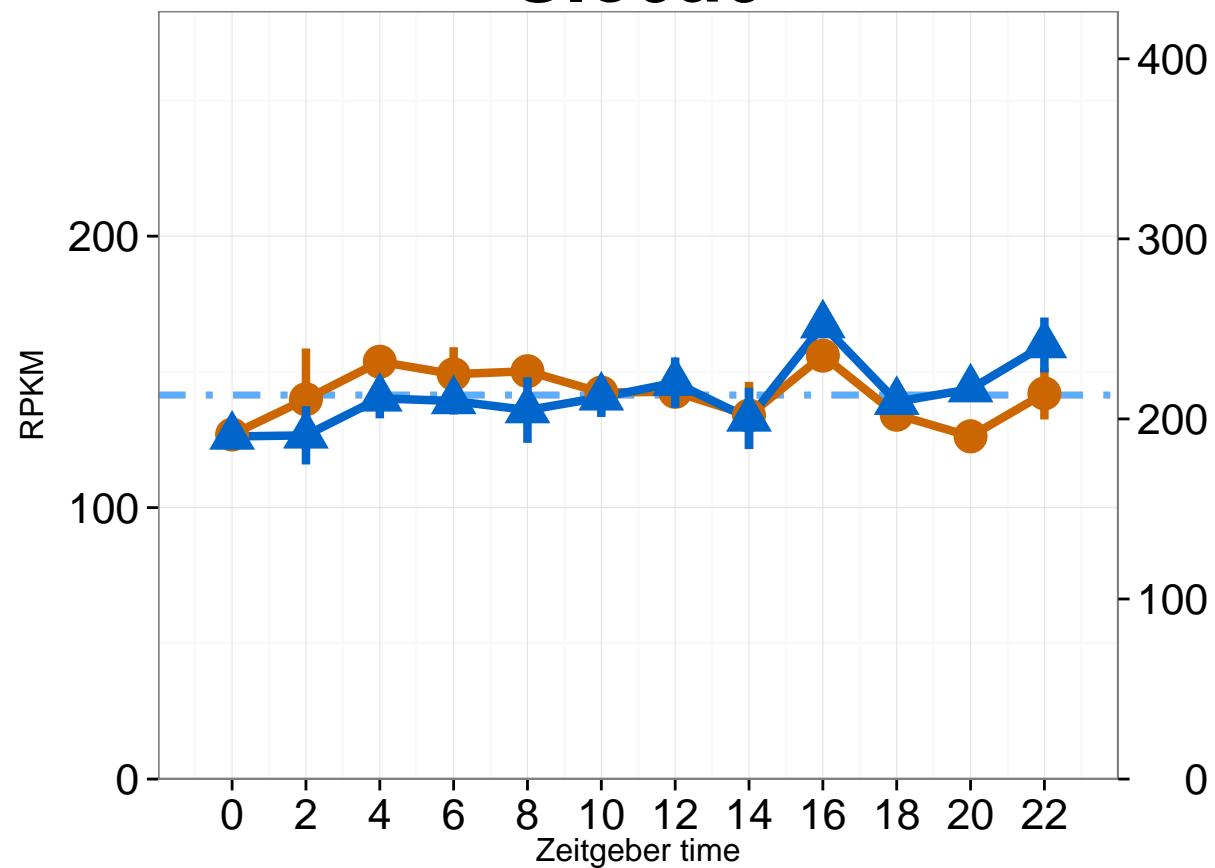

# Slc6a6

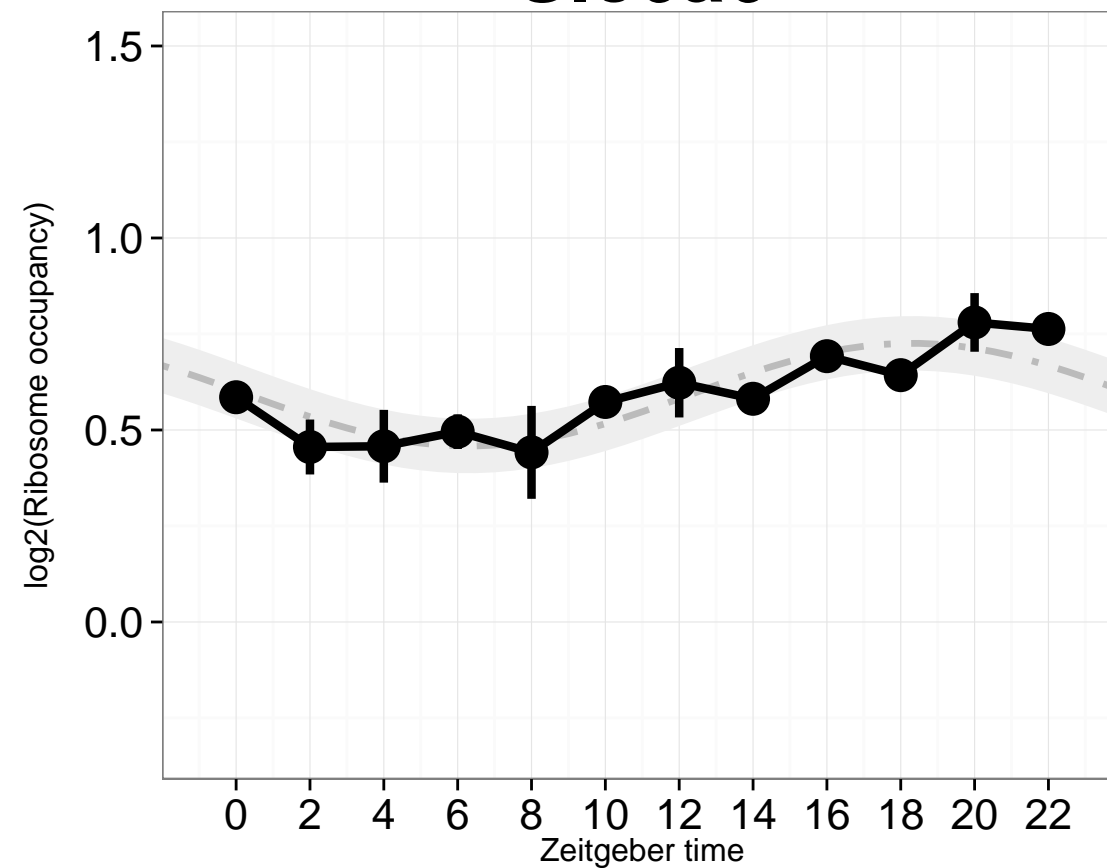

Supplement: Supplementary file 11561 [file 1]

# Derl3

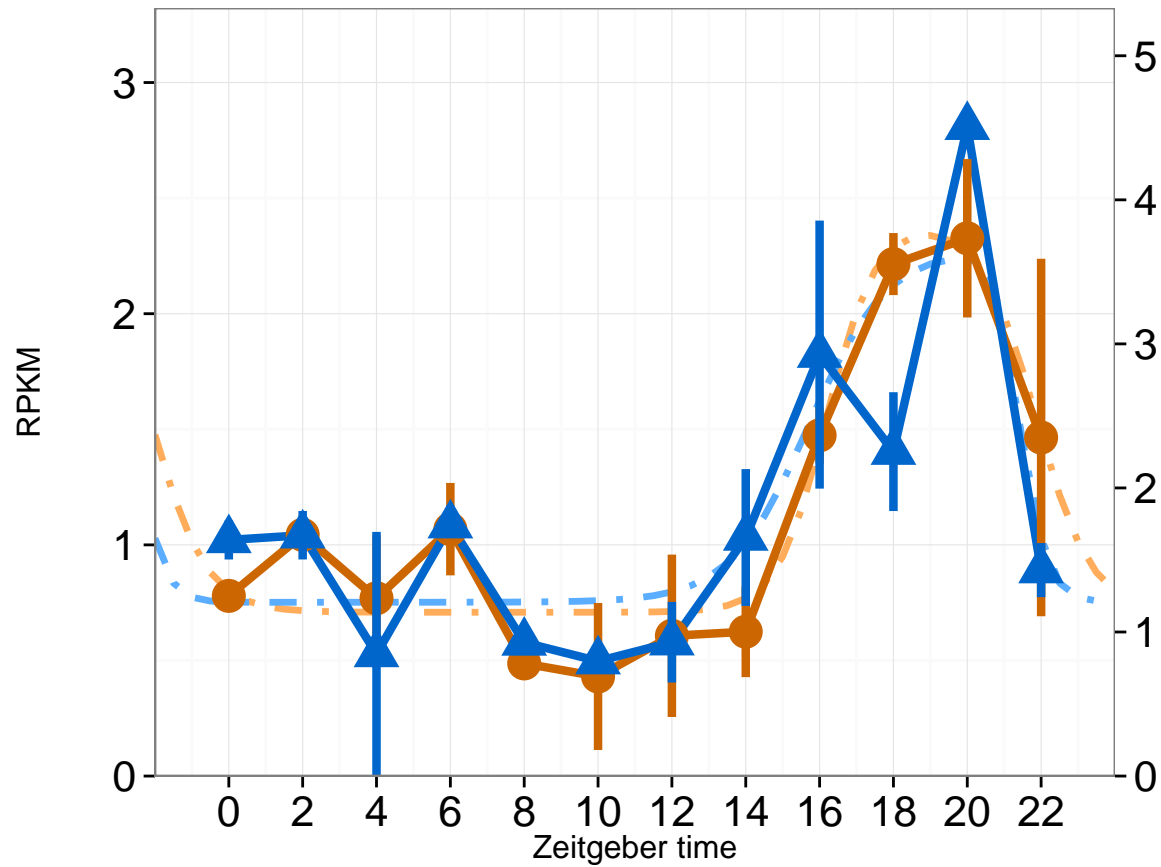

# Derl3

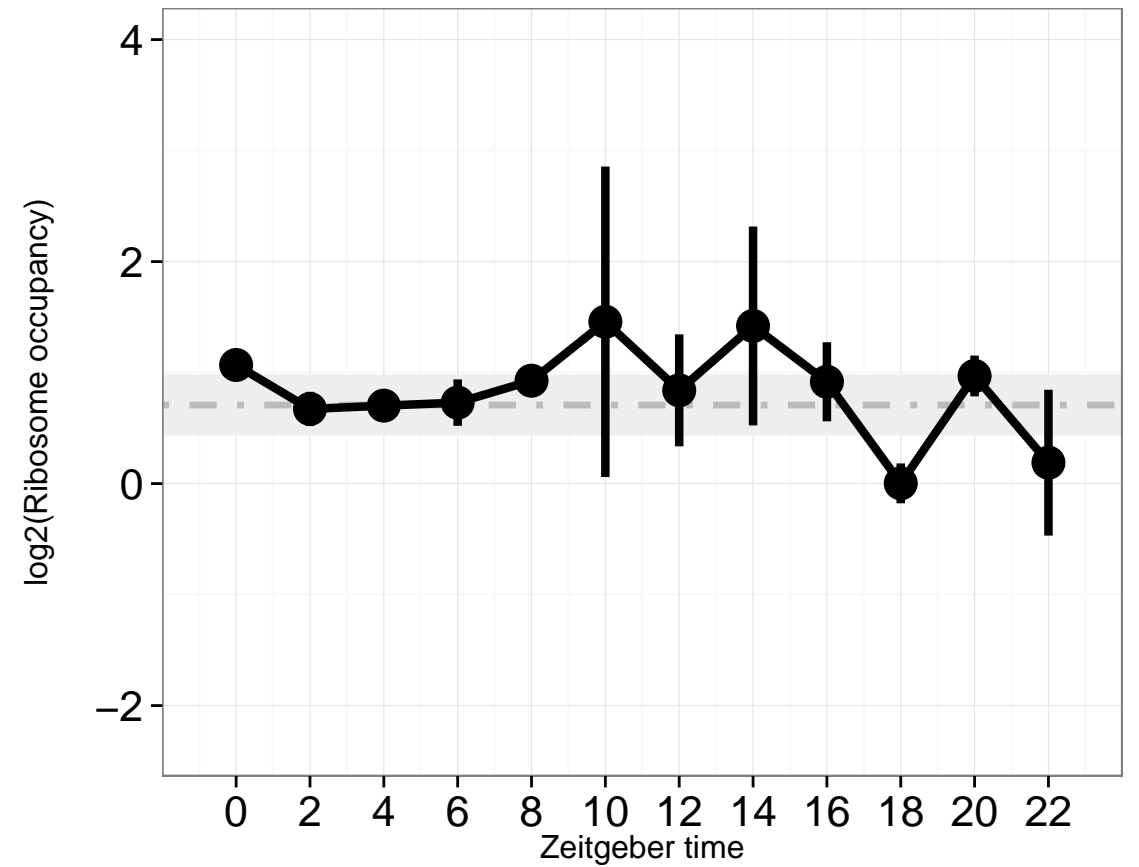

Supplement: Supplementary file 11562 [file 1]

## Exosc4

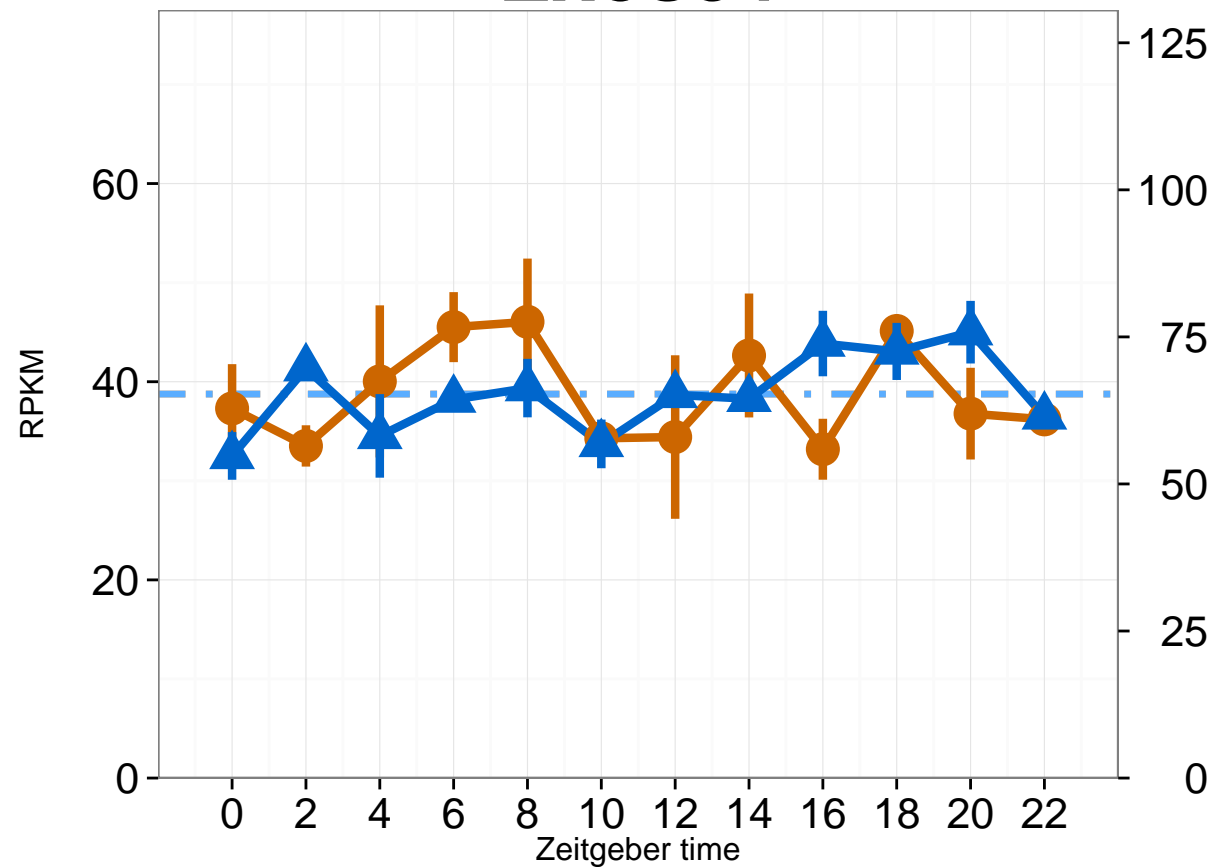

## Exosc4

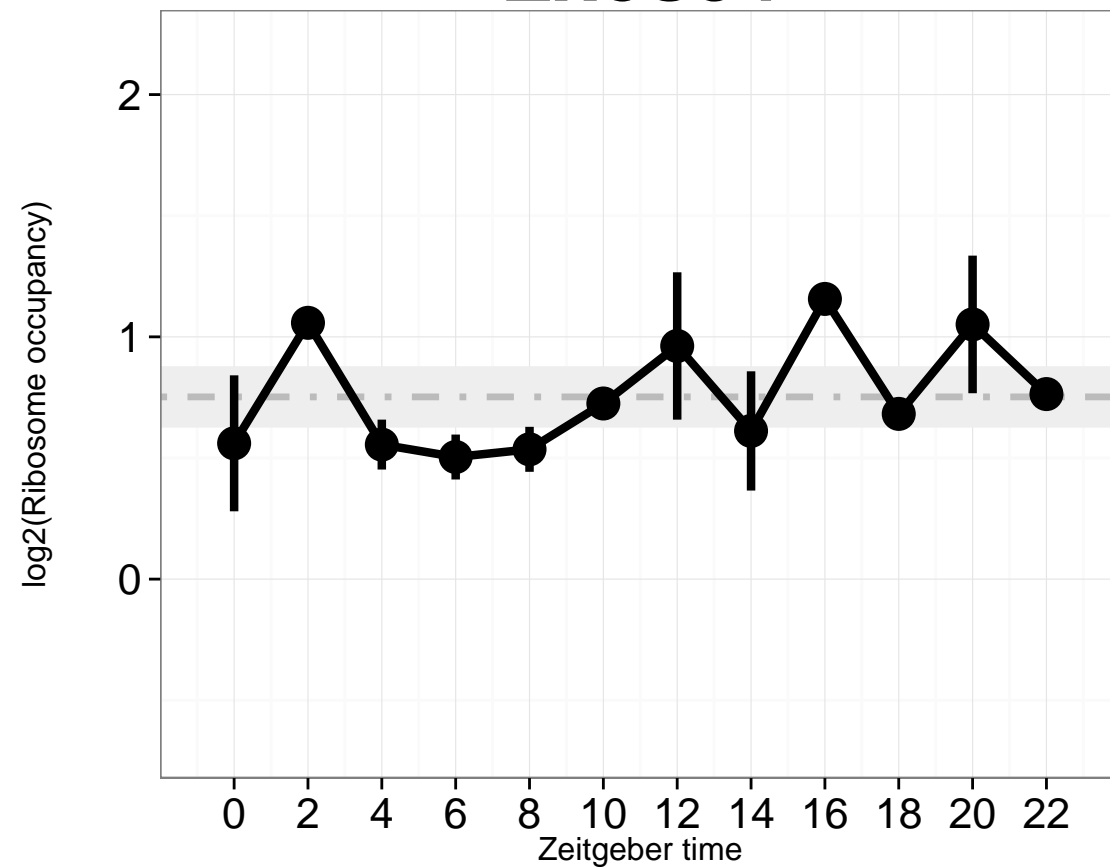

Supplement: Supplementary file 11563 [file 1]

## Slc52a3

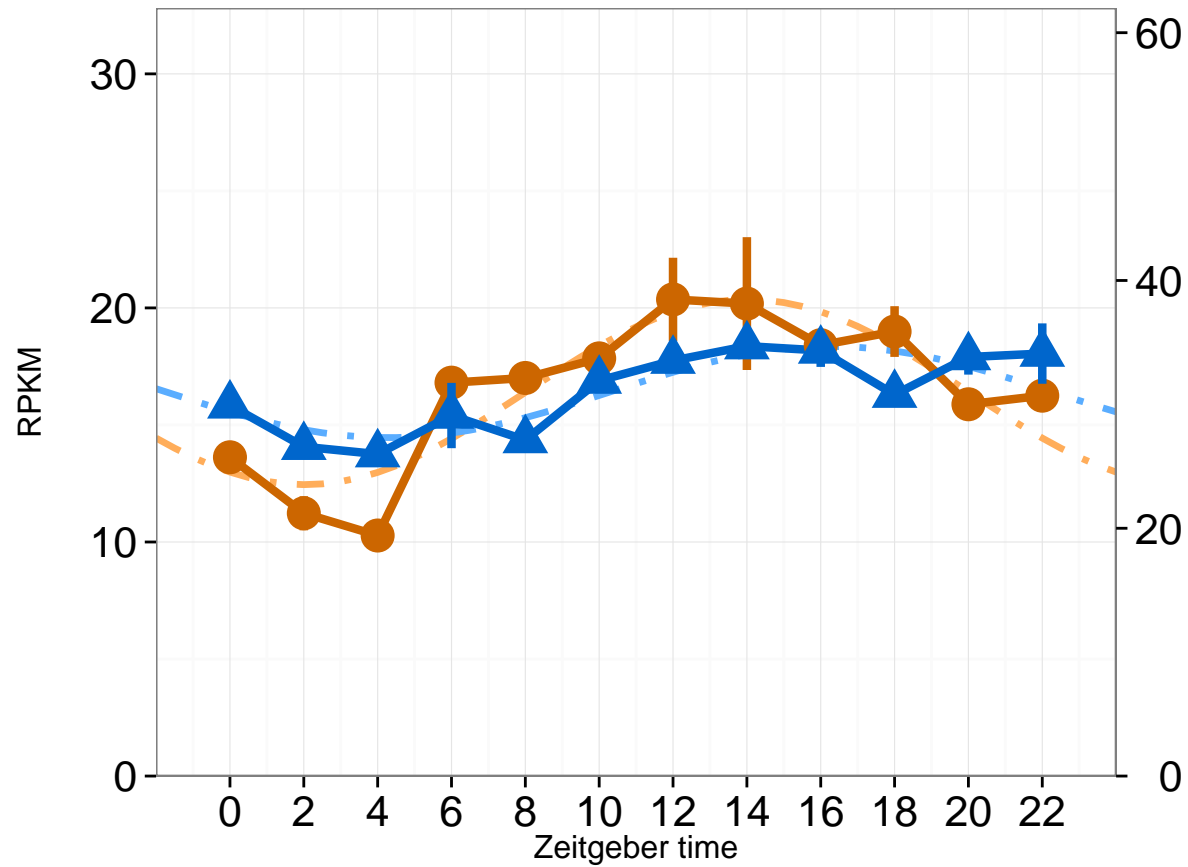

## Slc52a3

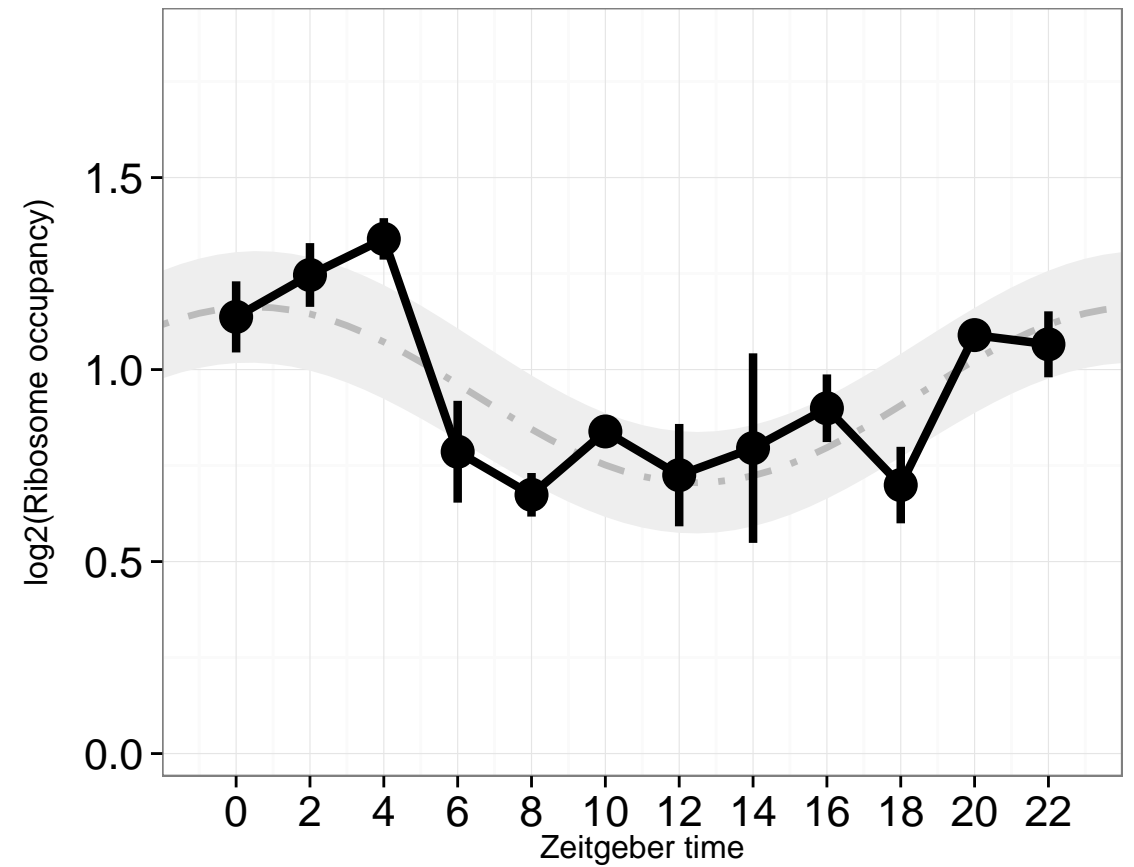

Supplement: Supplementary file 11564 [file 1]

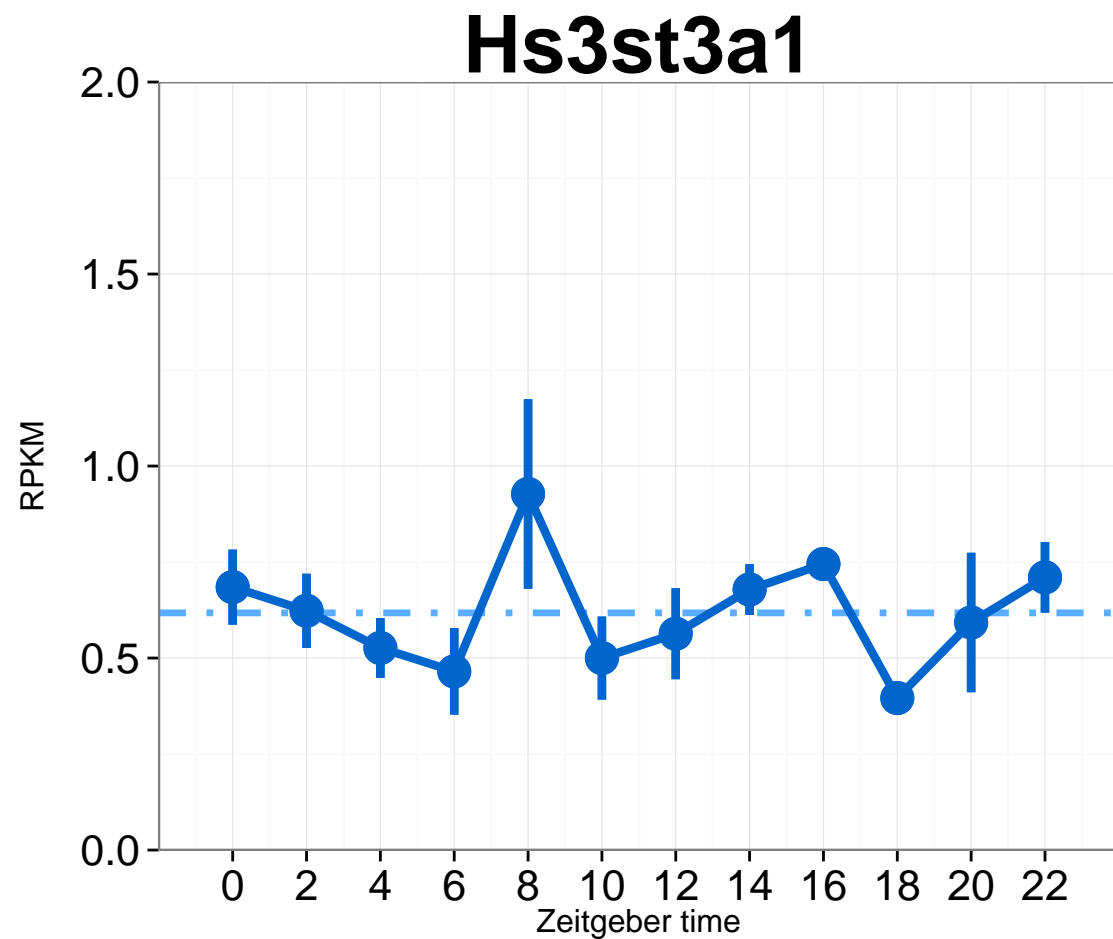

### Hs3st3a1 log<sub>2</sub>(Ribosome occupanc

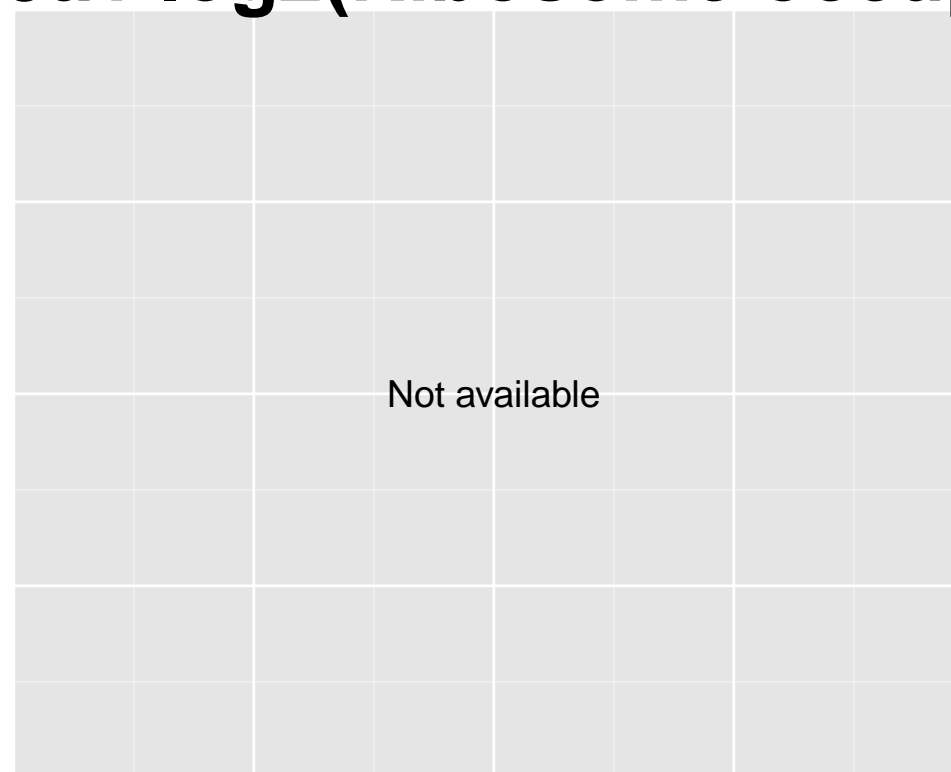

Supplement: Supplementary file 11565 [file 1]

## Hnrnpa1

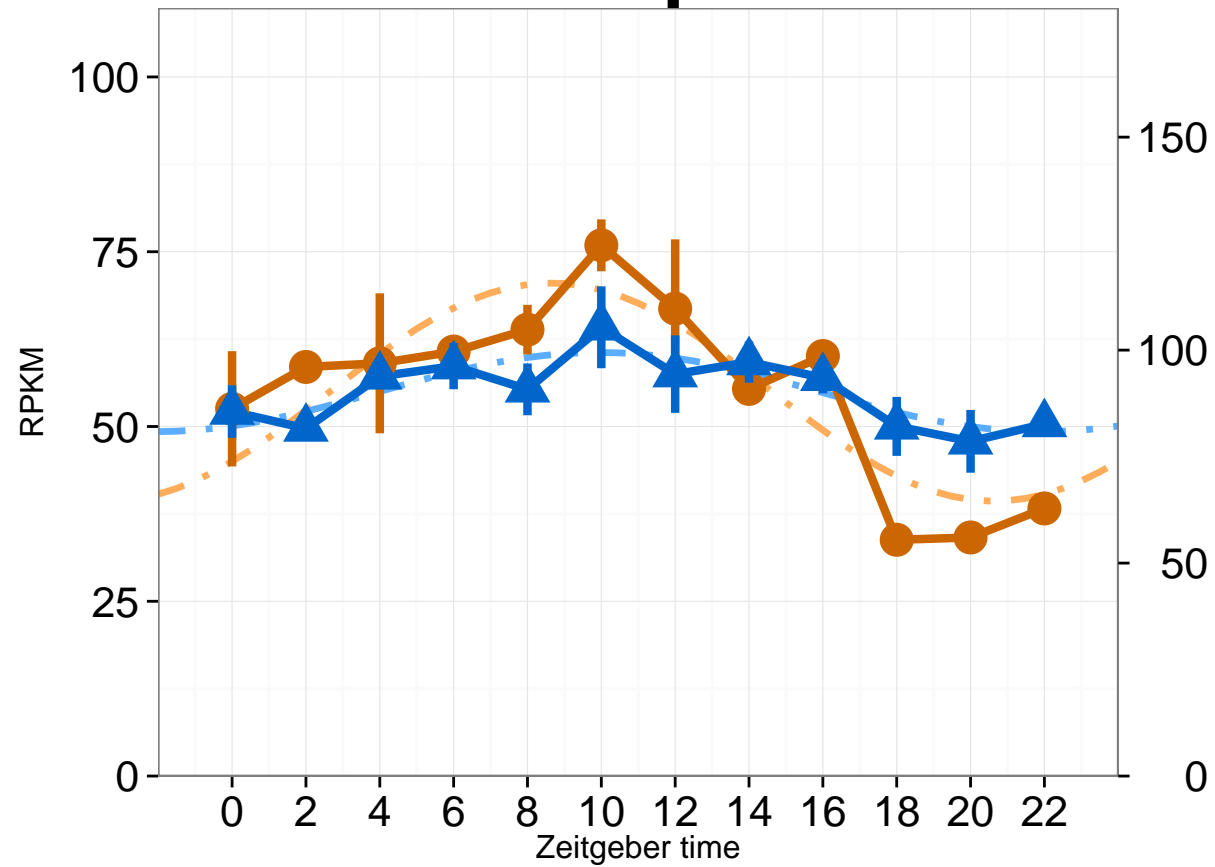

## Hnrnpa1

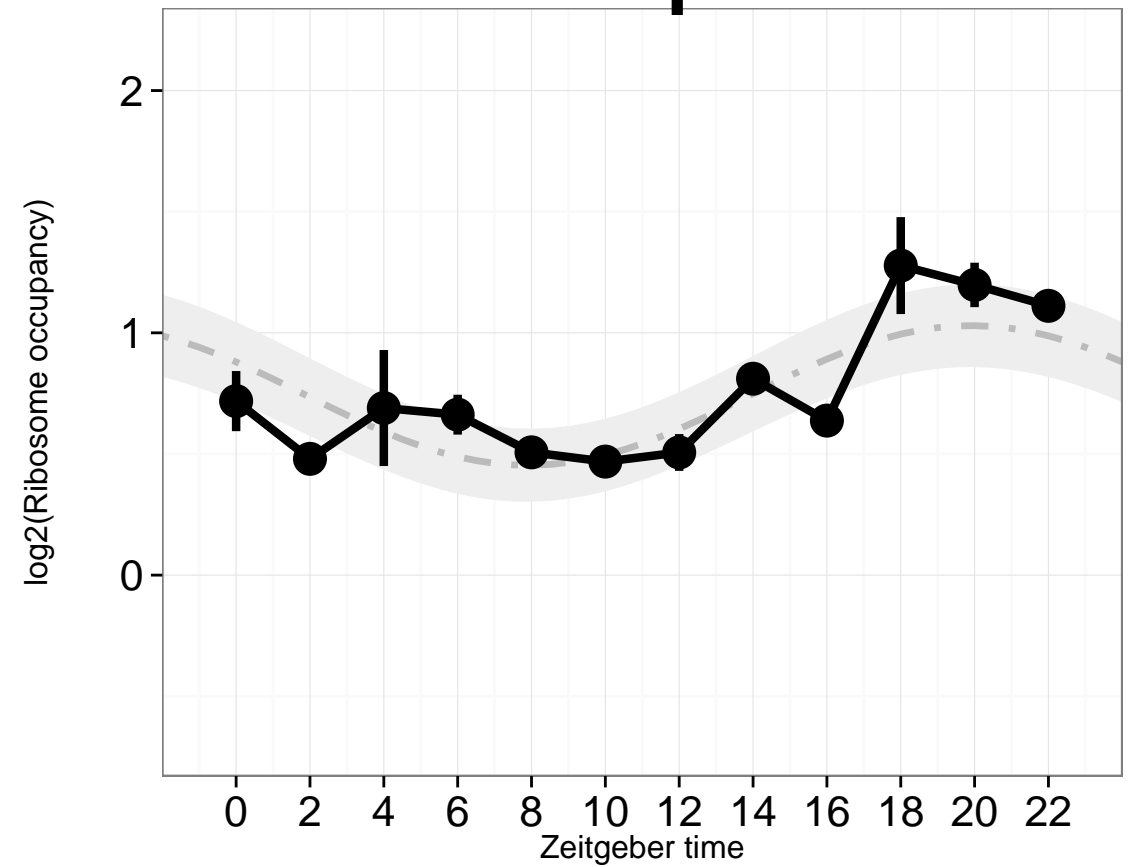

Supplement: Supplementary file 11566 [file 1]

# Ctu1

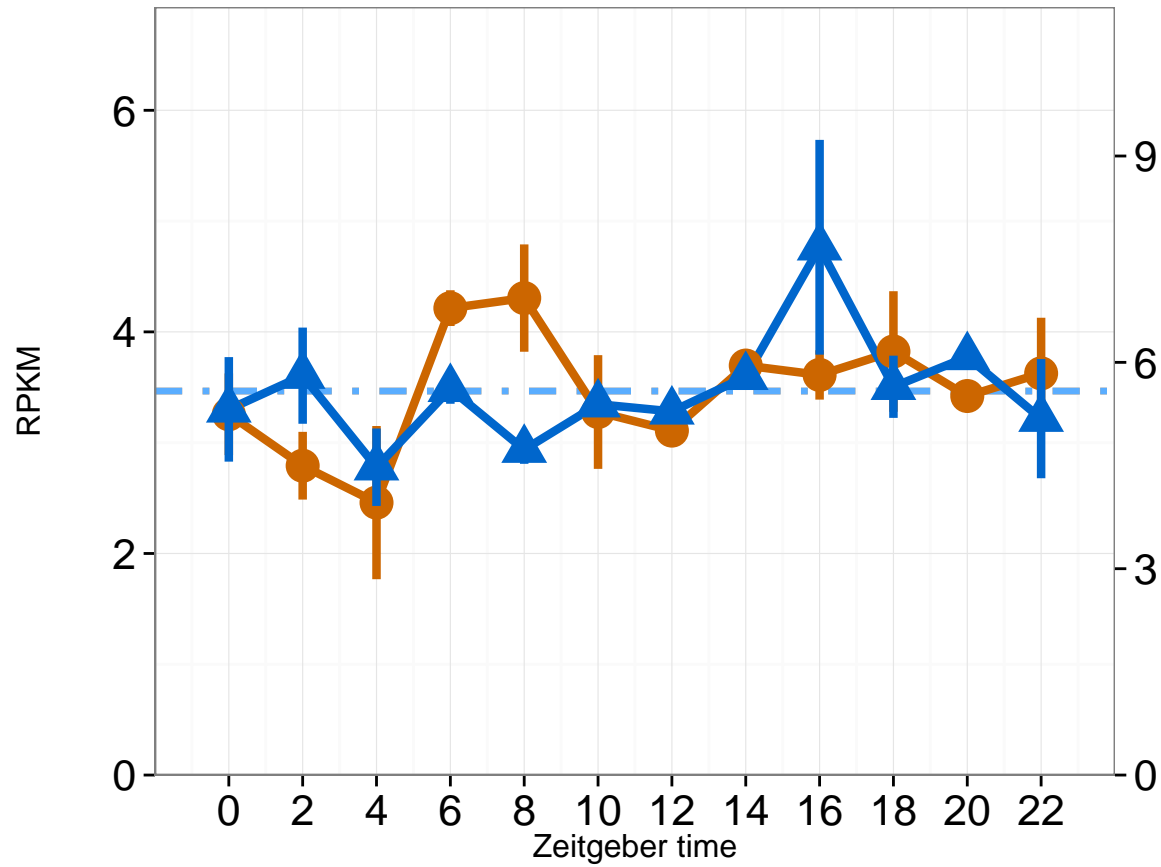

# Ctu1

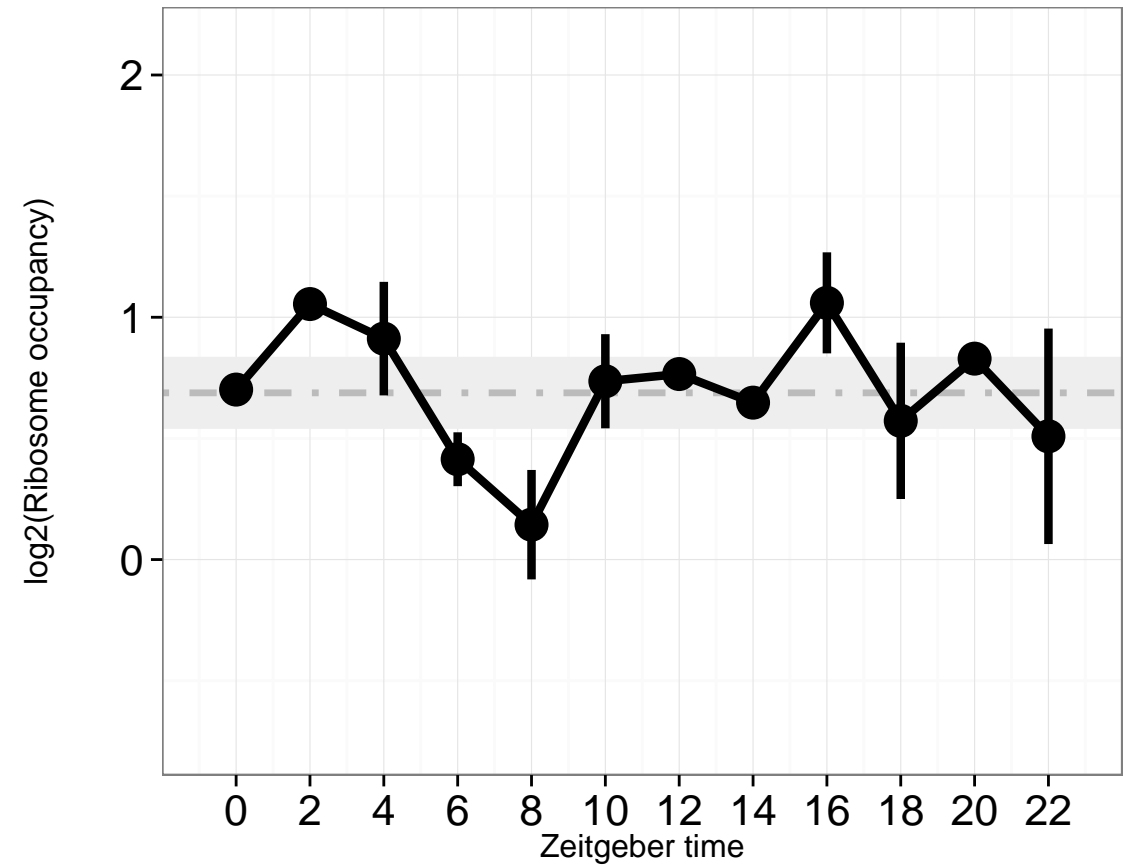

Supplement: Supplementary file 11567 [file 1]

# Cpne8

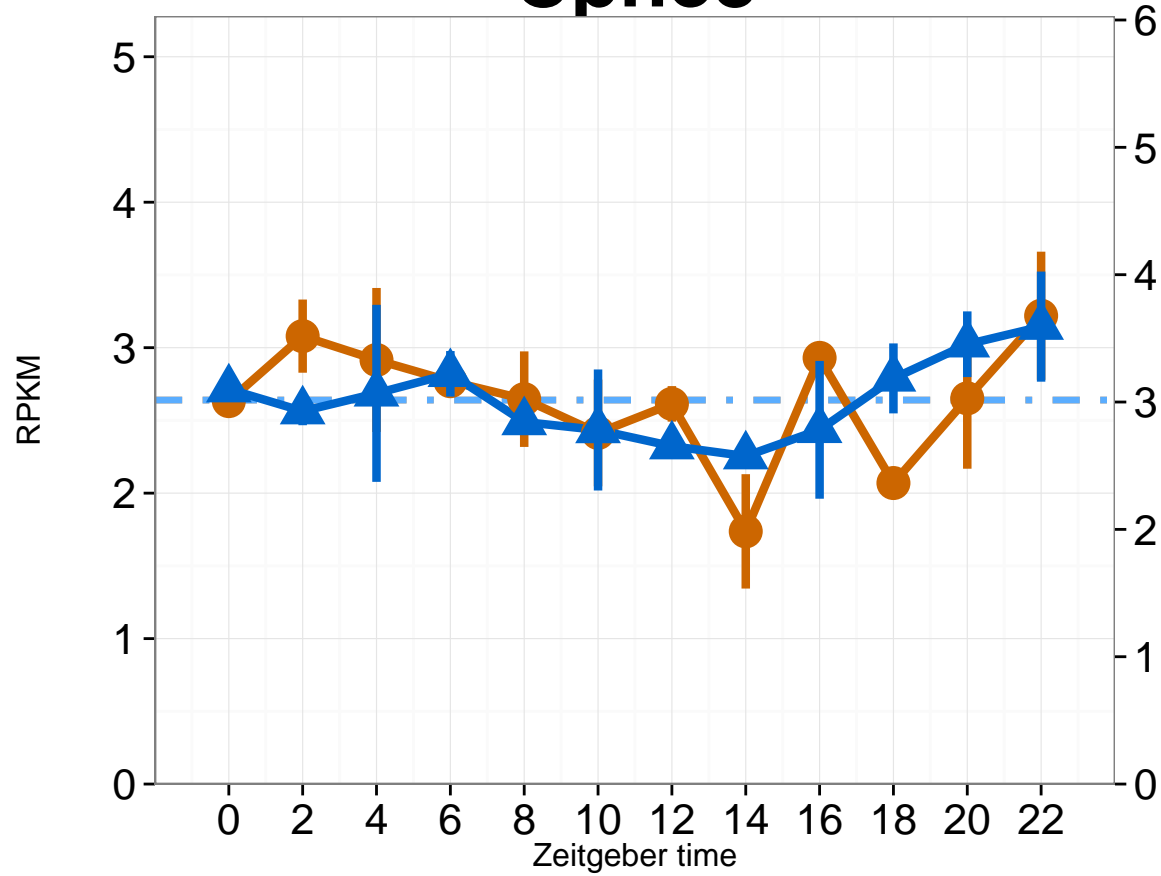

# Cpne8

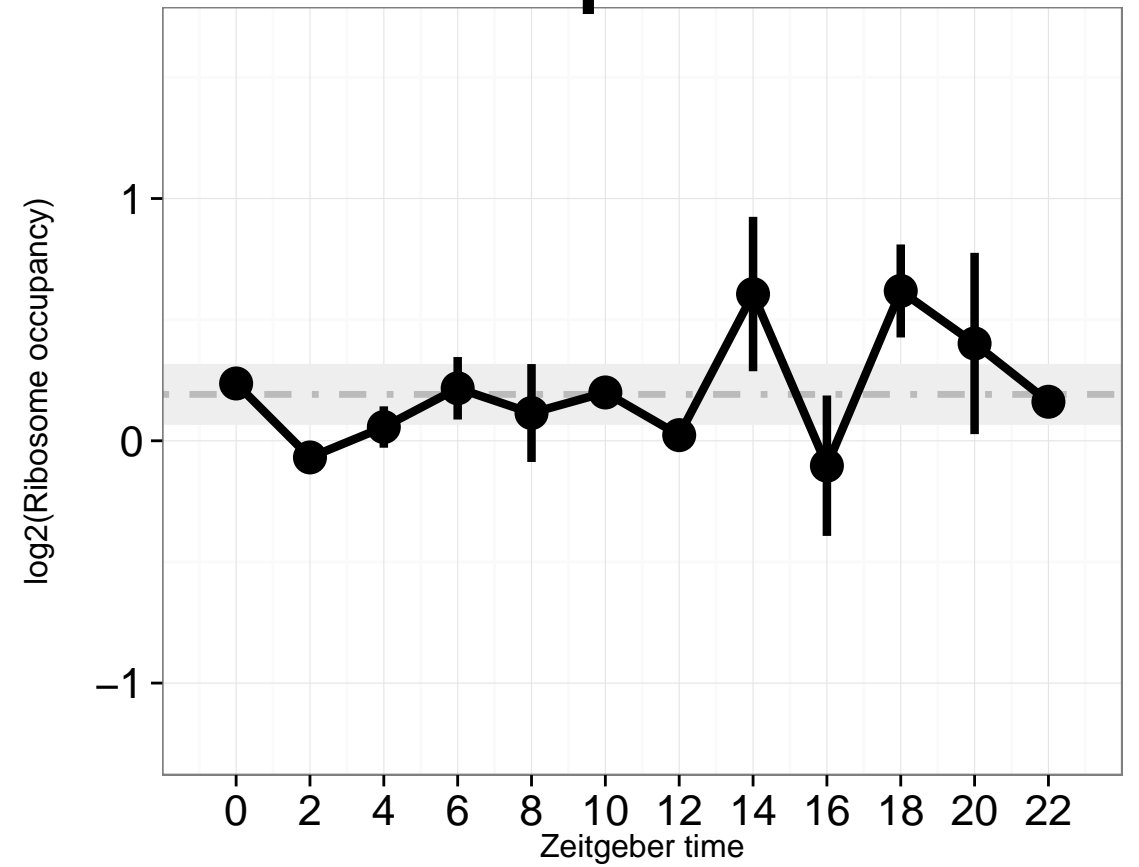

Supplement: Supplementary file 11568 [file 1]

## Gne

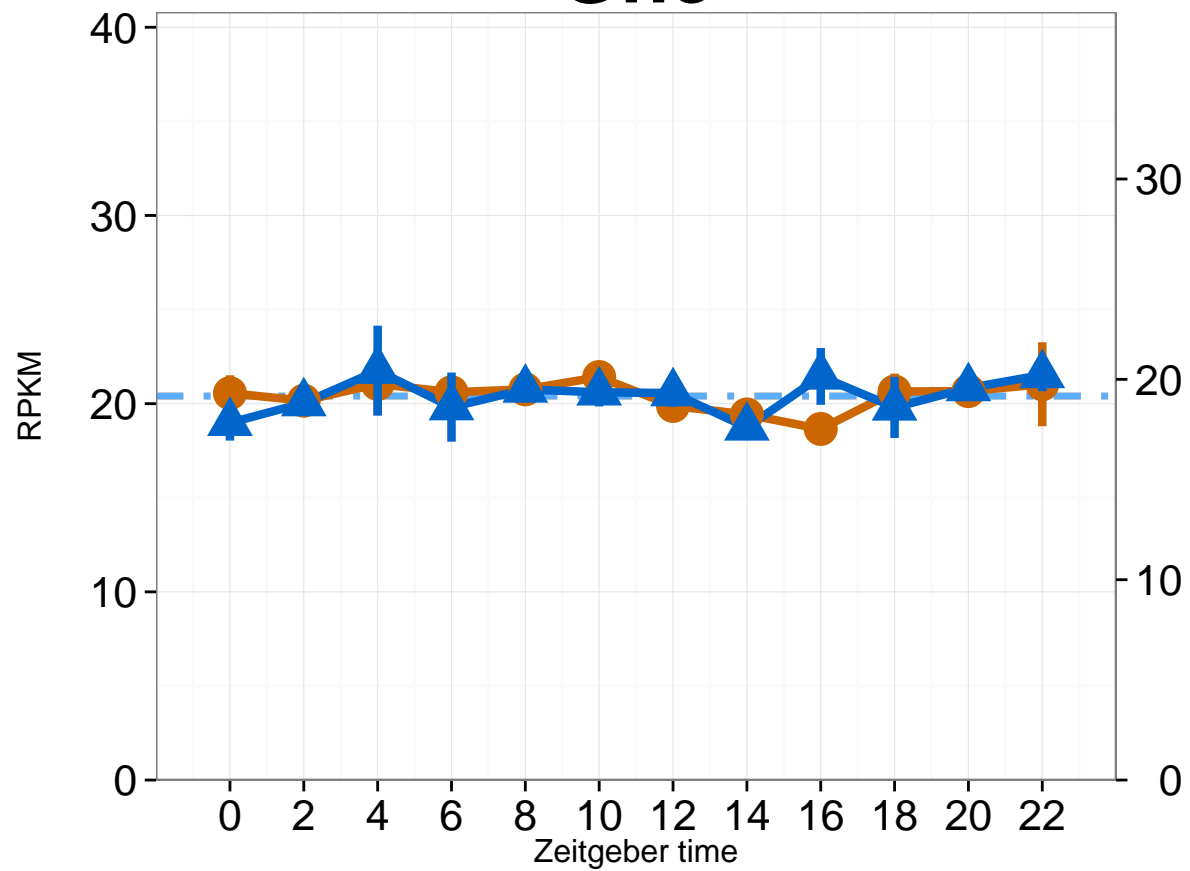

## Gne

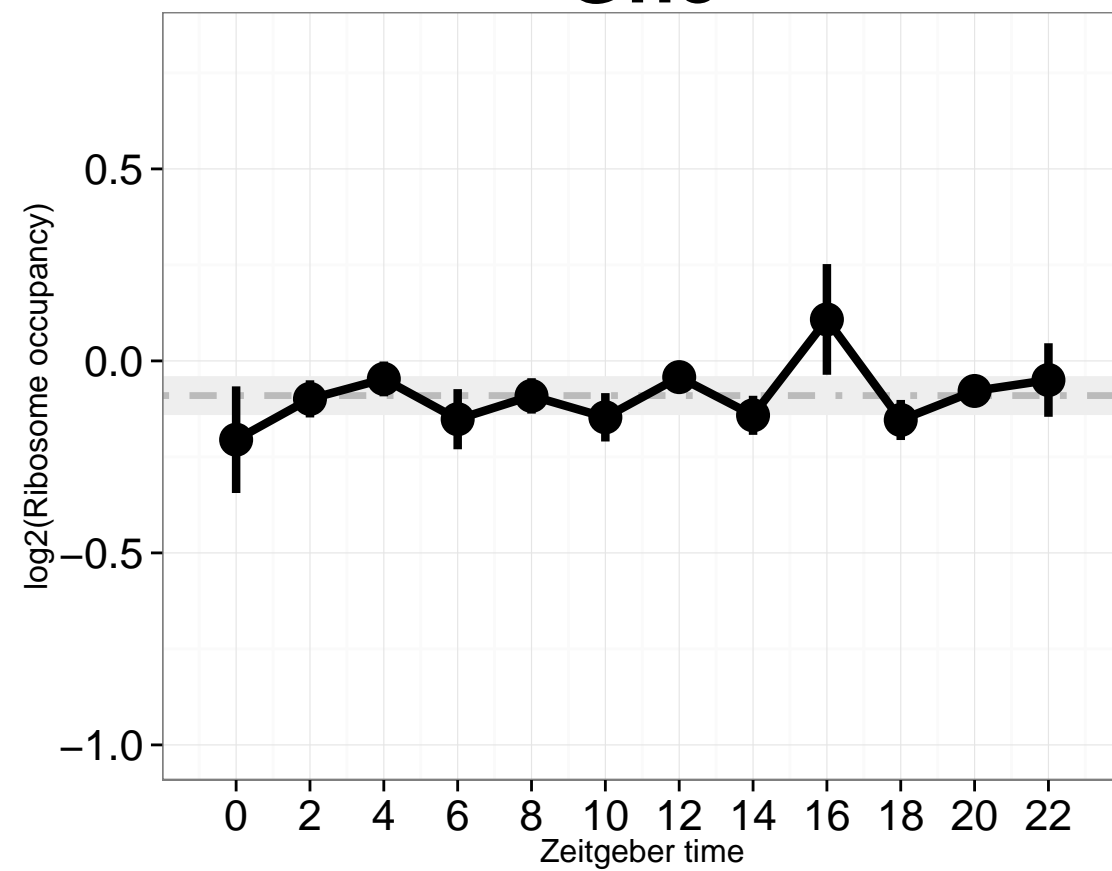

Supplement: Supplementary file 11569 [file 1]

## Birc6

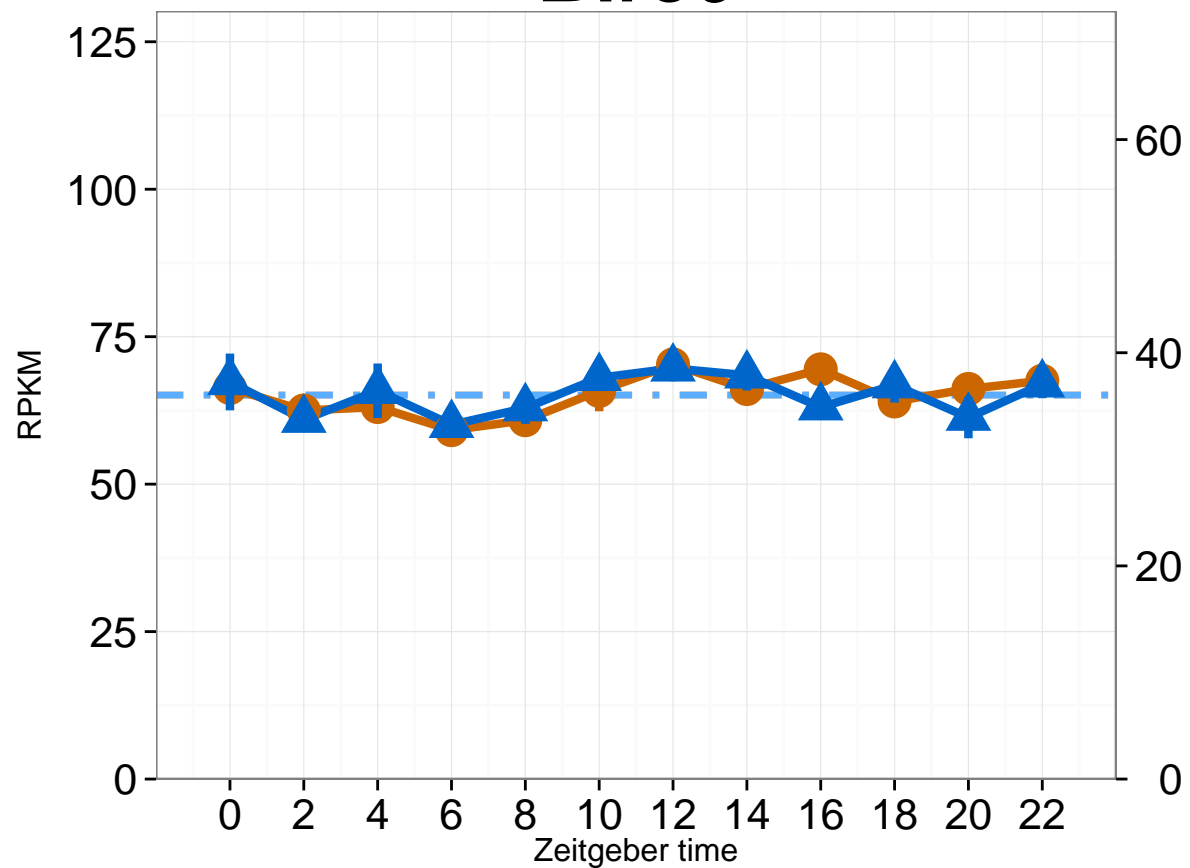

## Birc6

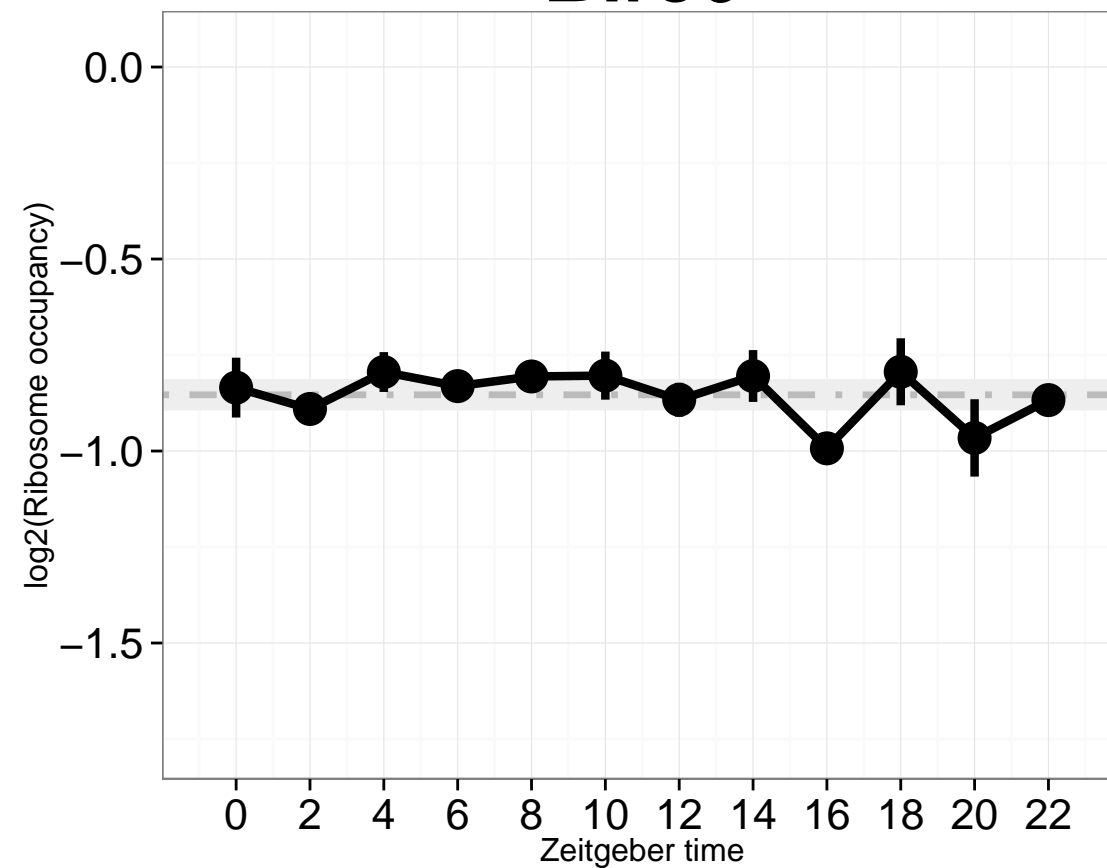

Supplement: Supplementary file 11570 [file 1]

## Tbcb

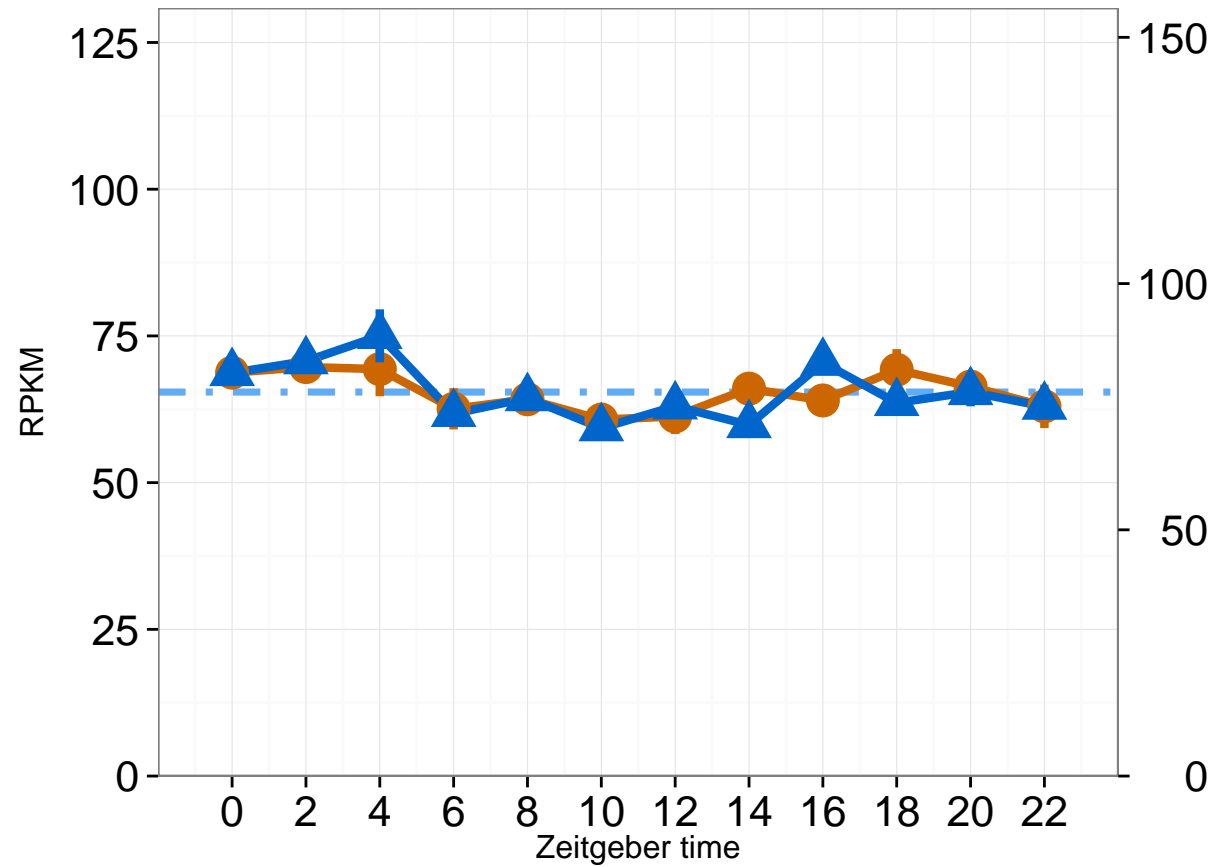

## Tbcb

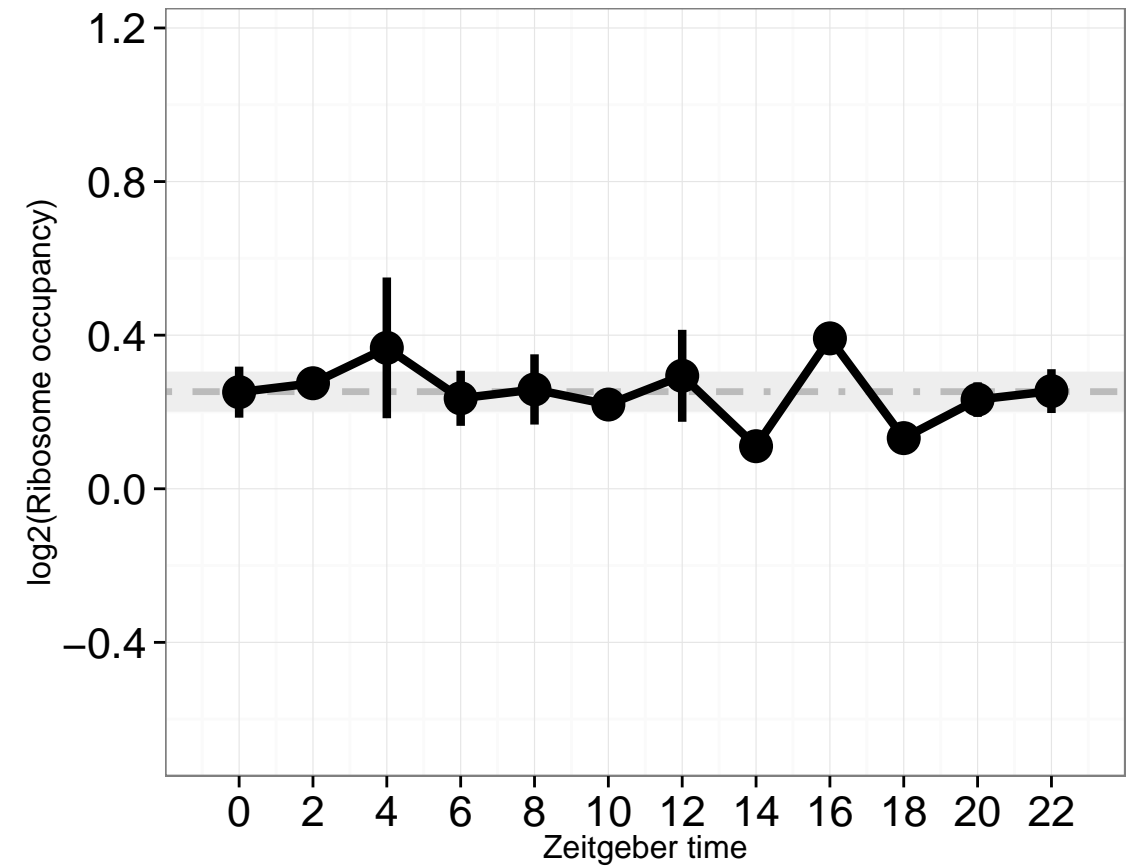

Supplement: Supplementary file 11571 [file 1]

# Runx1

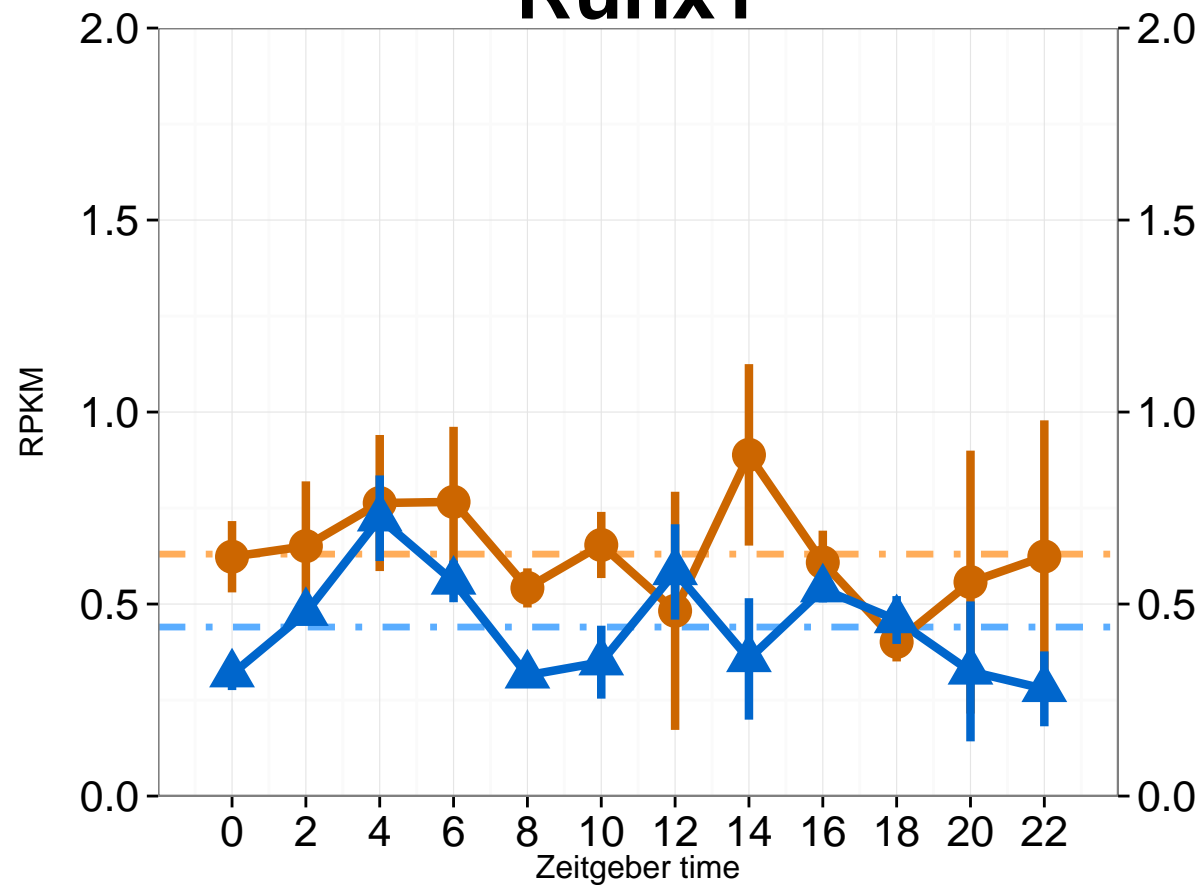

# Runx1

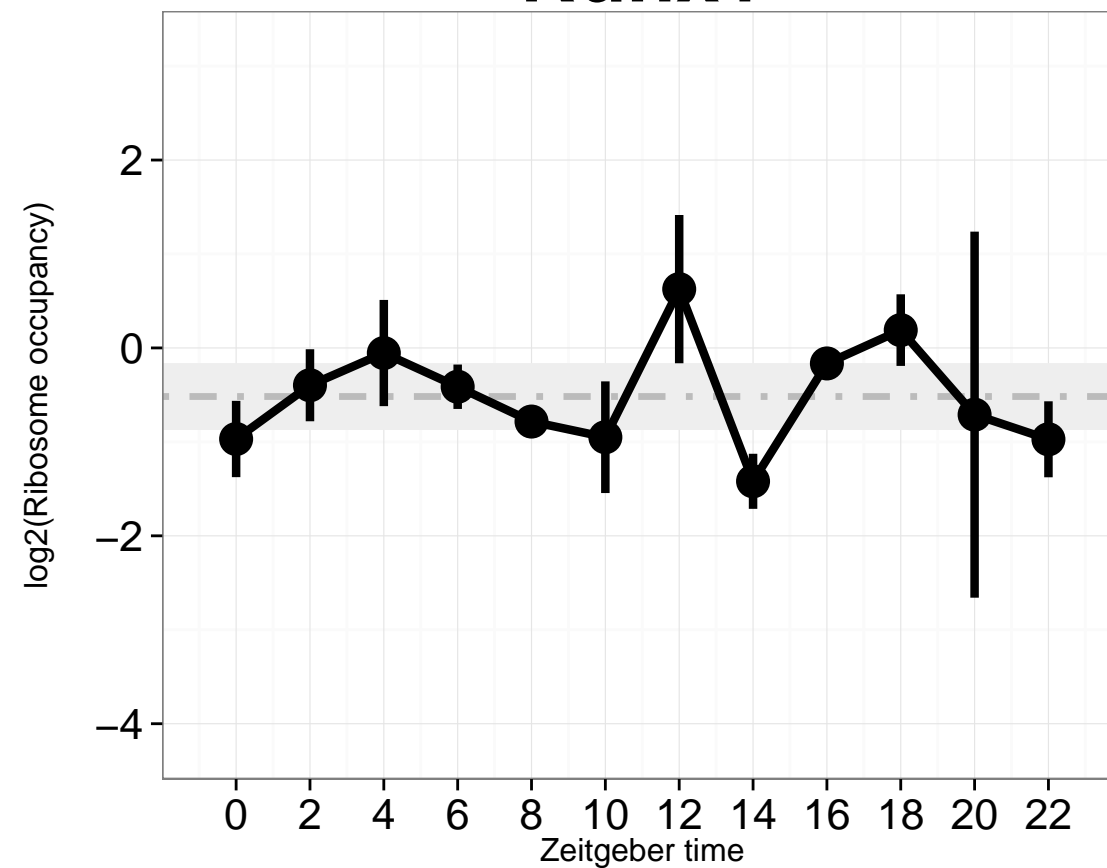

Supplement: Supplementary file 11572 [file 1]

# Ppfia1

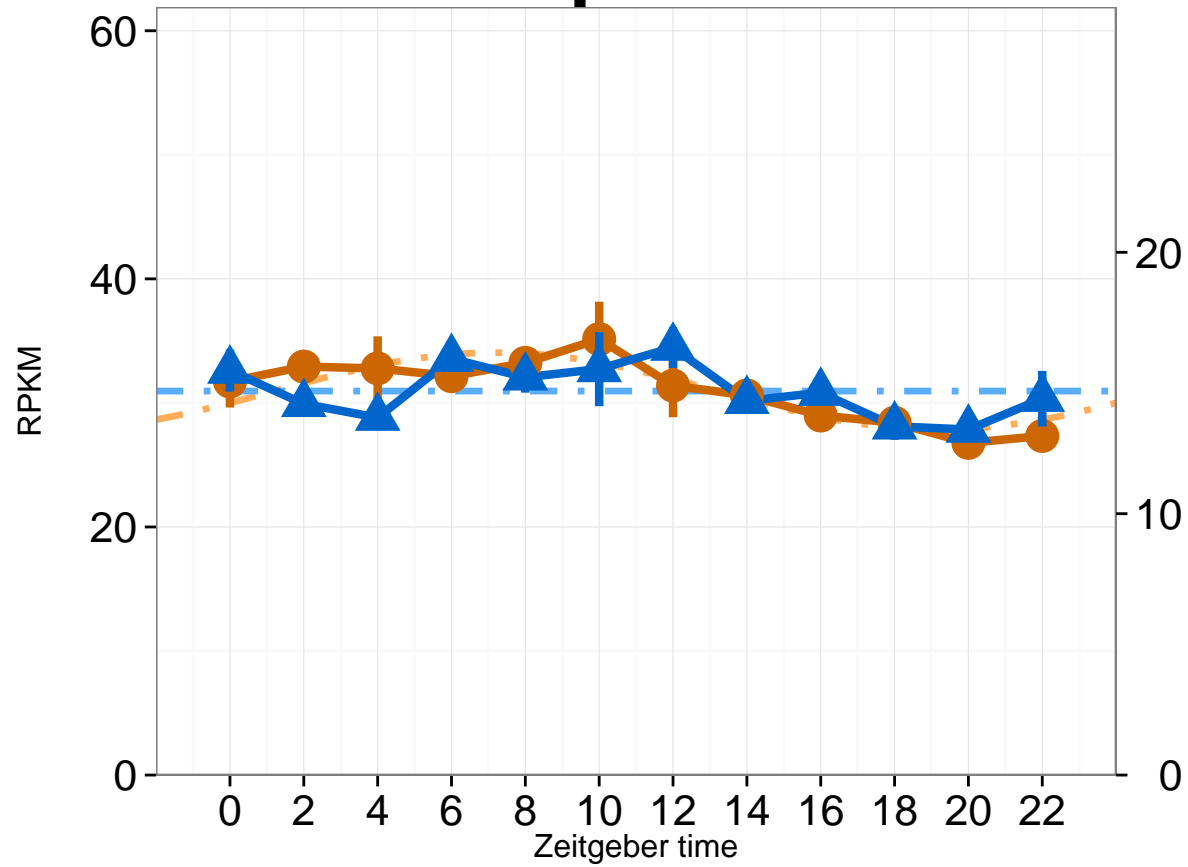

# Ppfia1

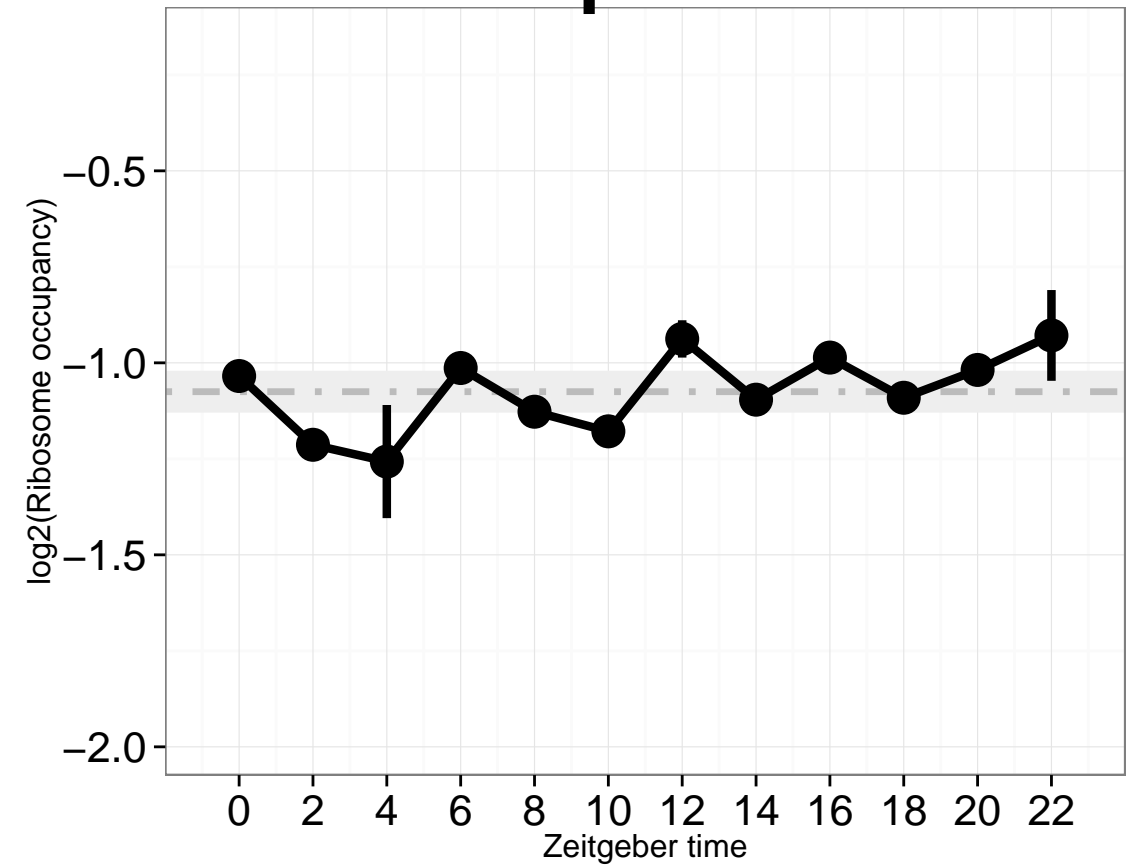

Supplement: Supplementary file 11573 [file 1]

# Trrap

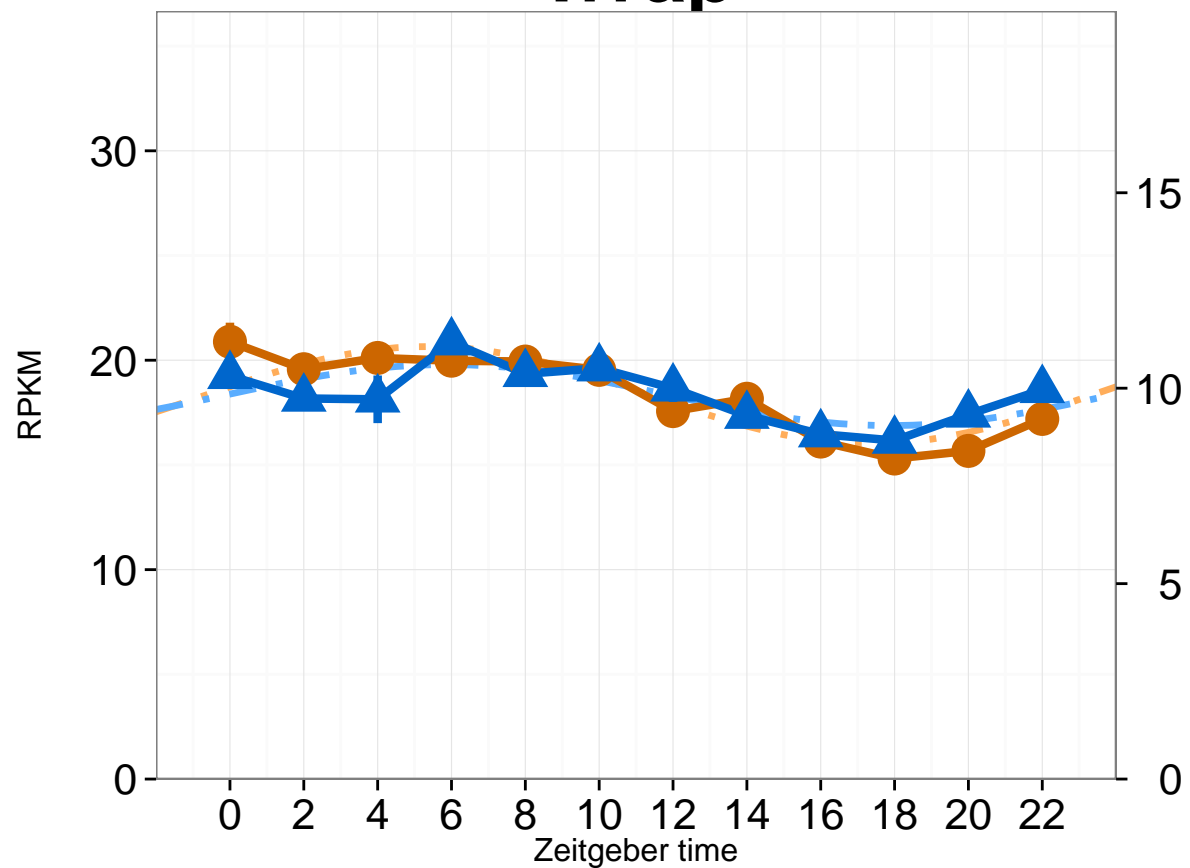

# Trrap

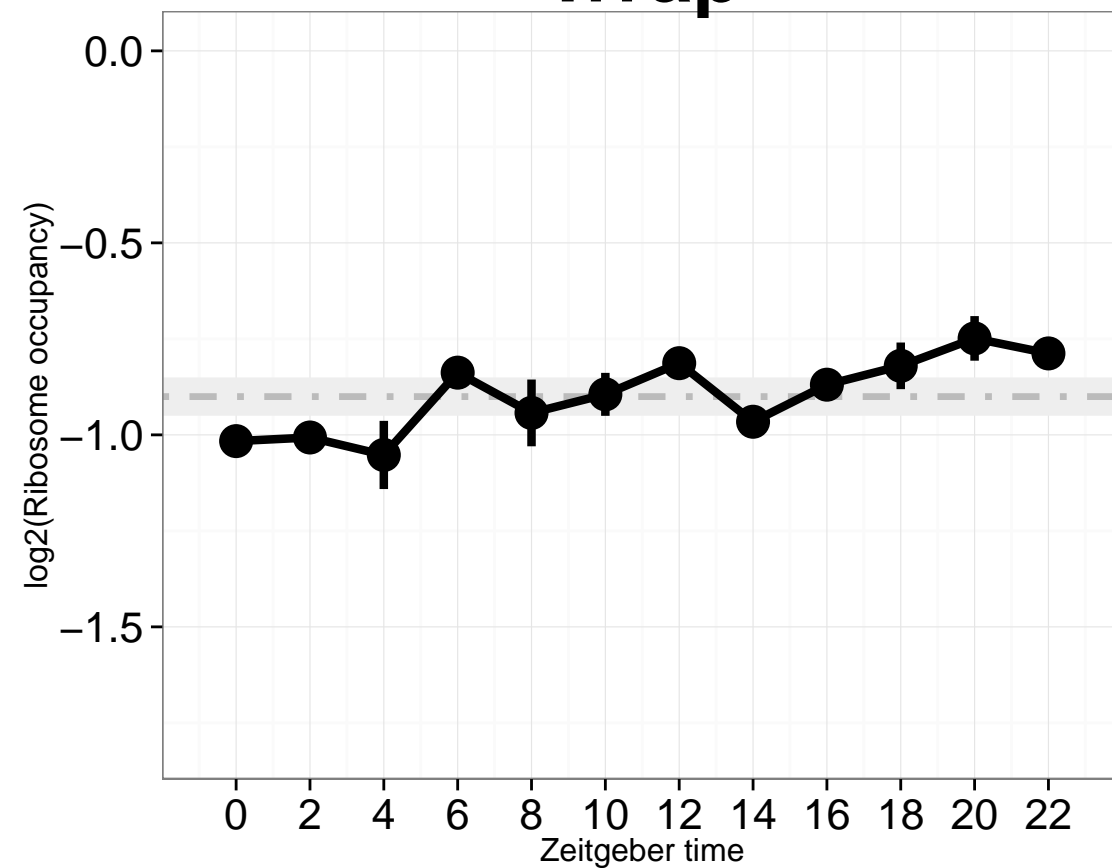

Supplement: Supplementary file 11574 [file 1]

# Itga8

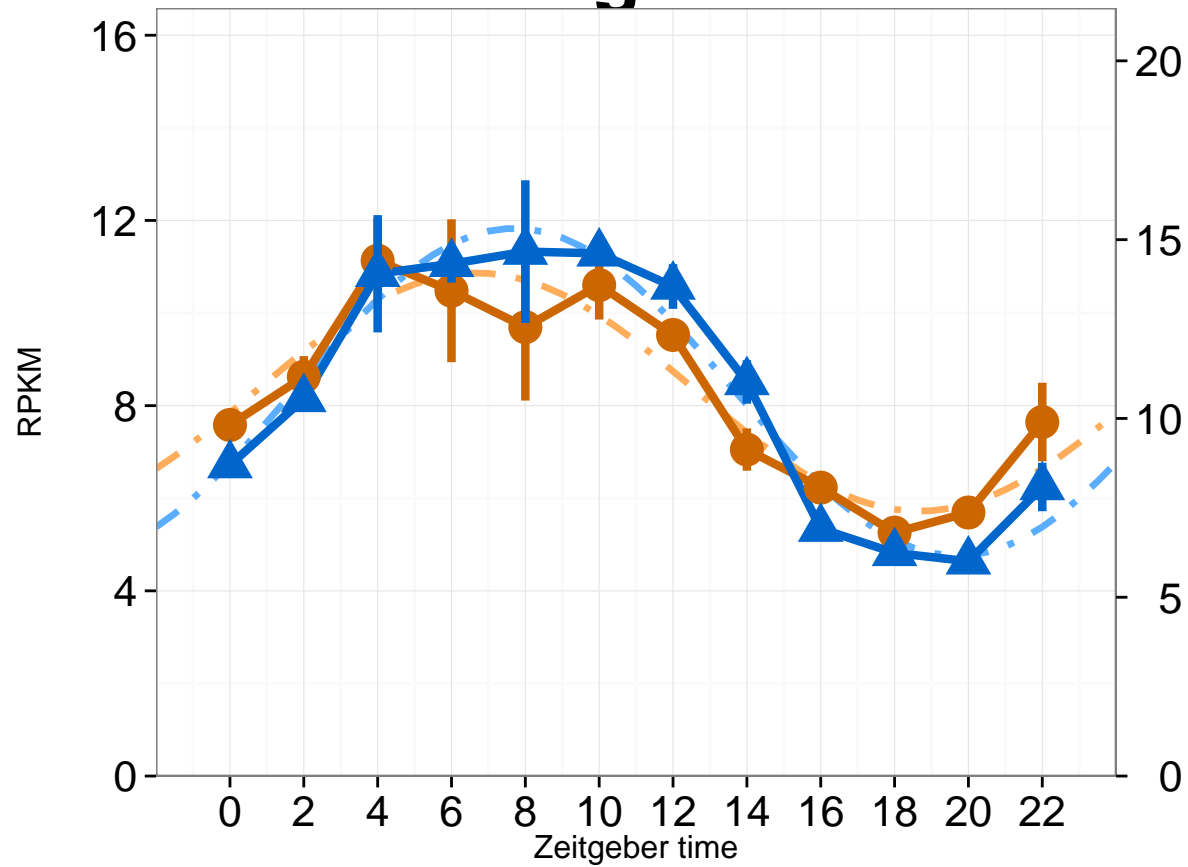

# Itga8

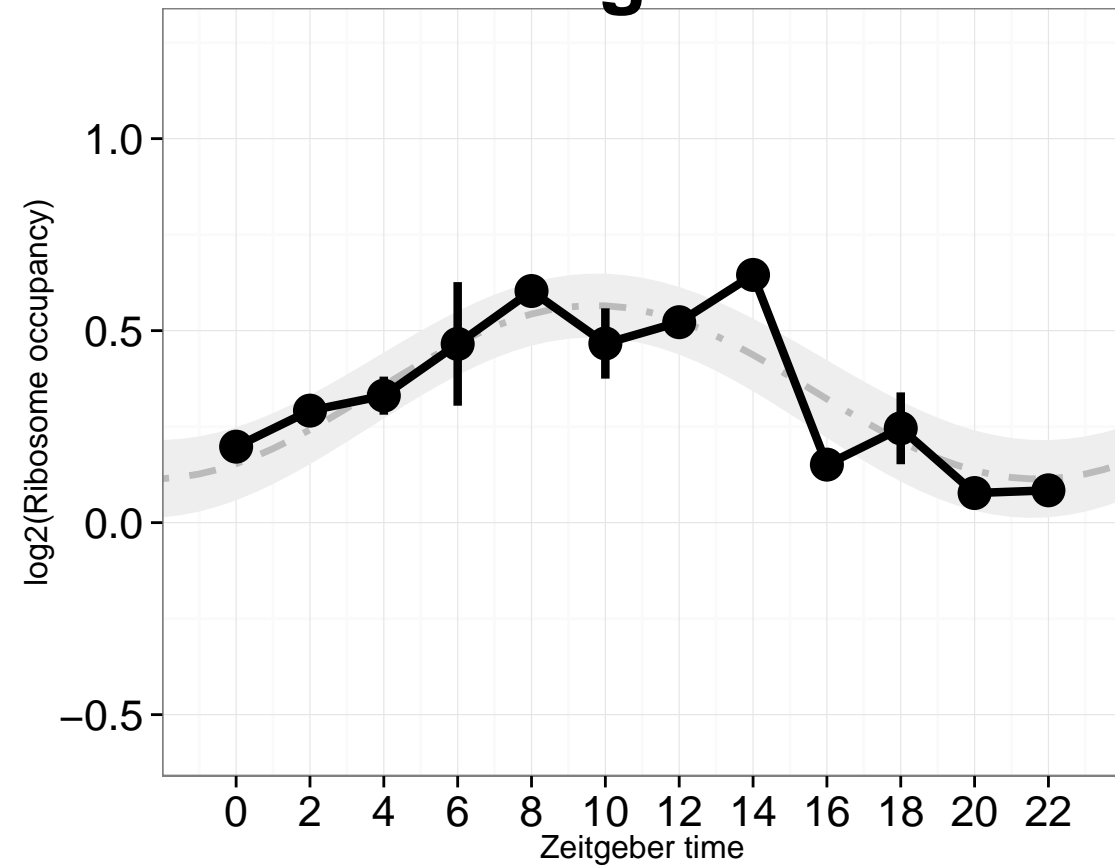

Supplement: Supplementary file 11575 [file 1]

## Ggnbp2

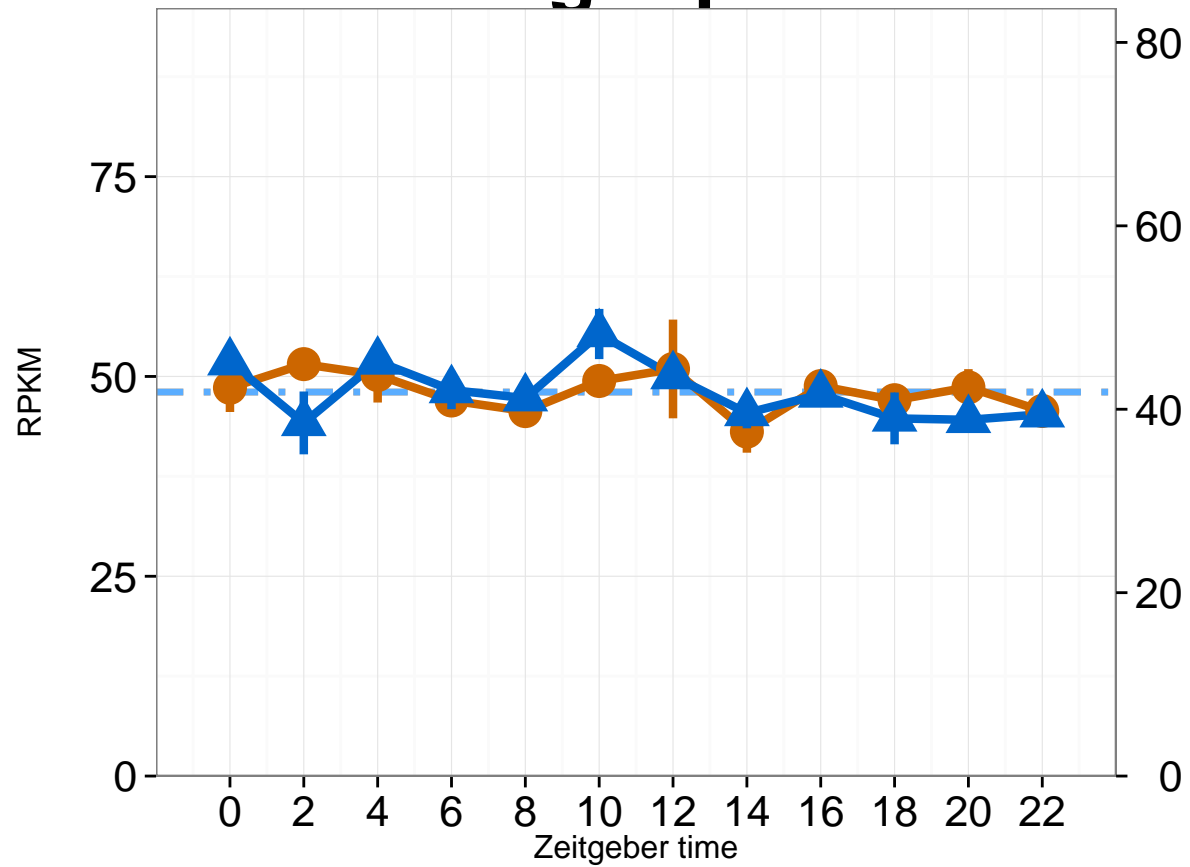

## Ggnbp2

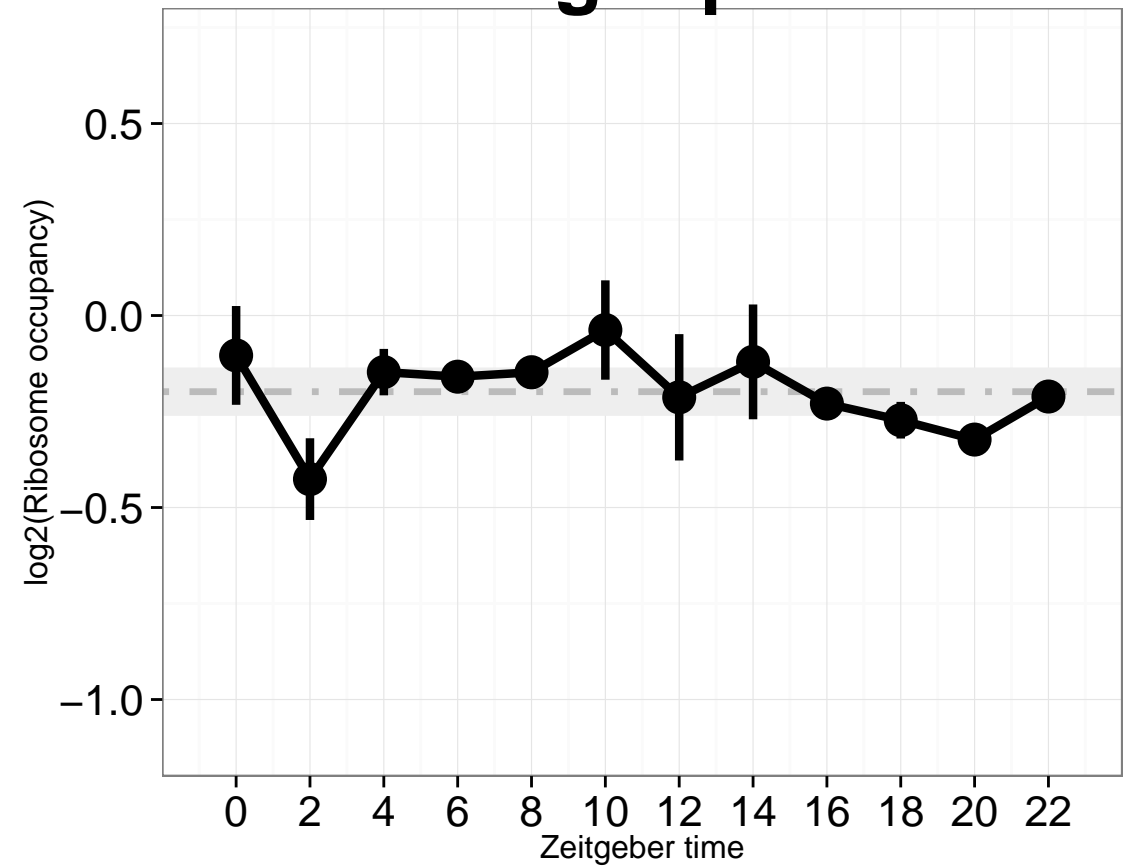

Supplement: Supplementary file 11576 [file 1]

# G630090E17Rik

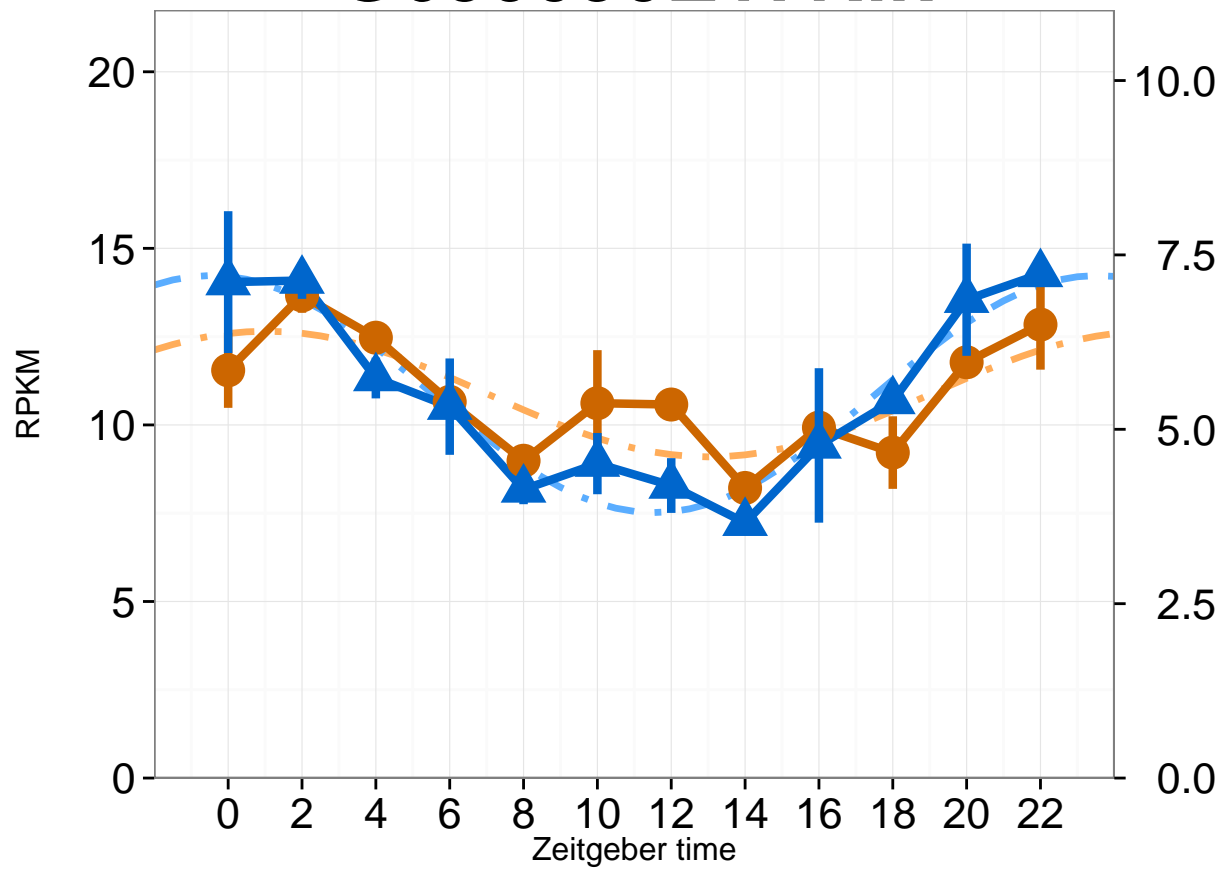

# G630090E17Rik

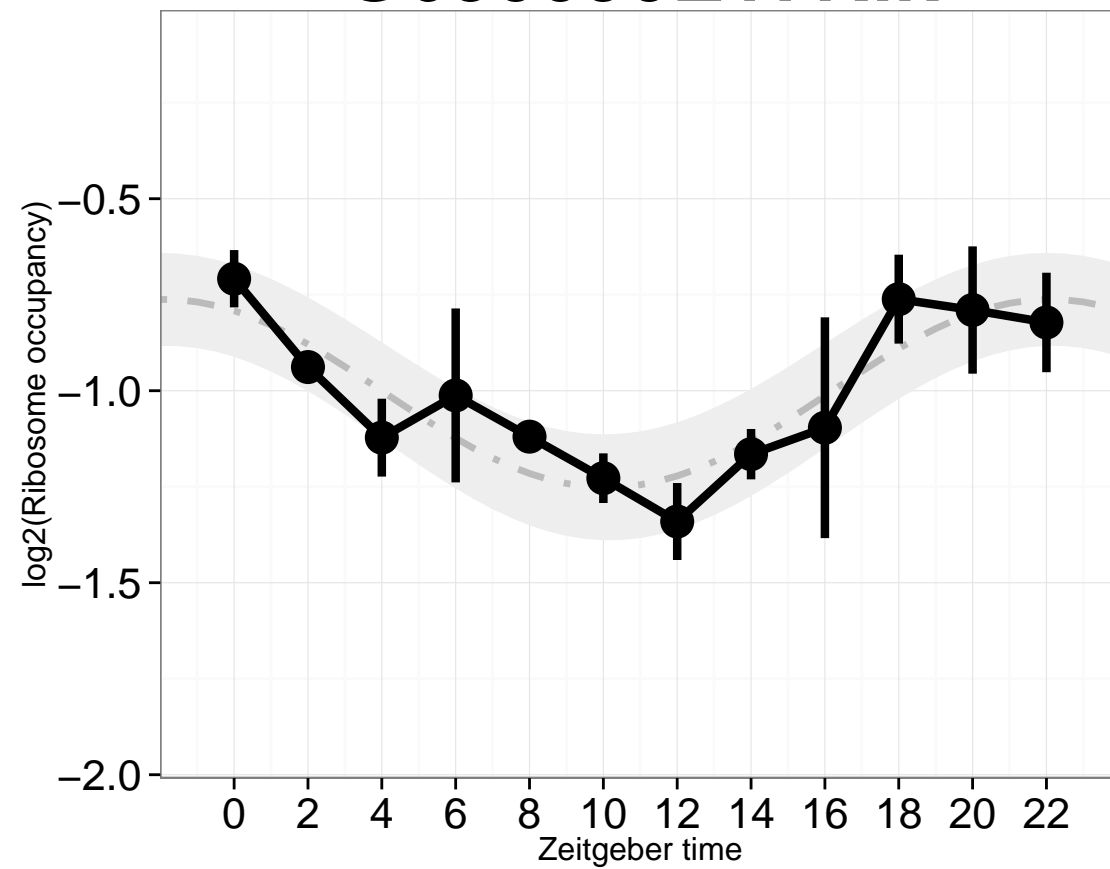

Supplement: Supplementary file 11577 [file 1]

## Ntrk1

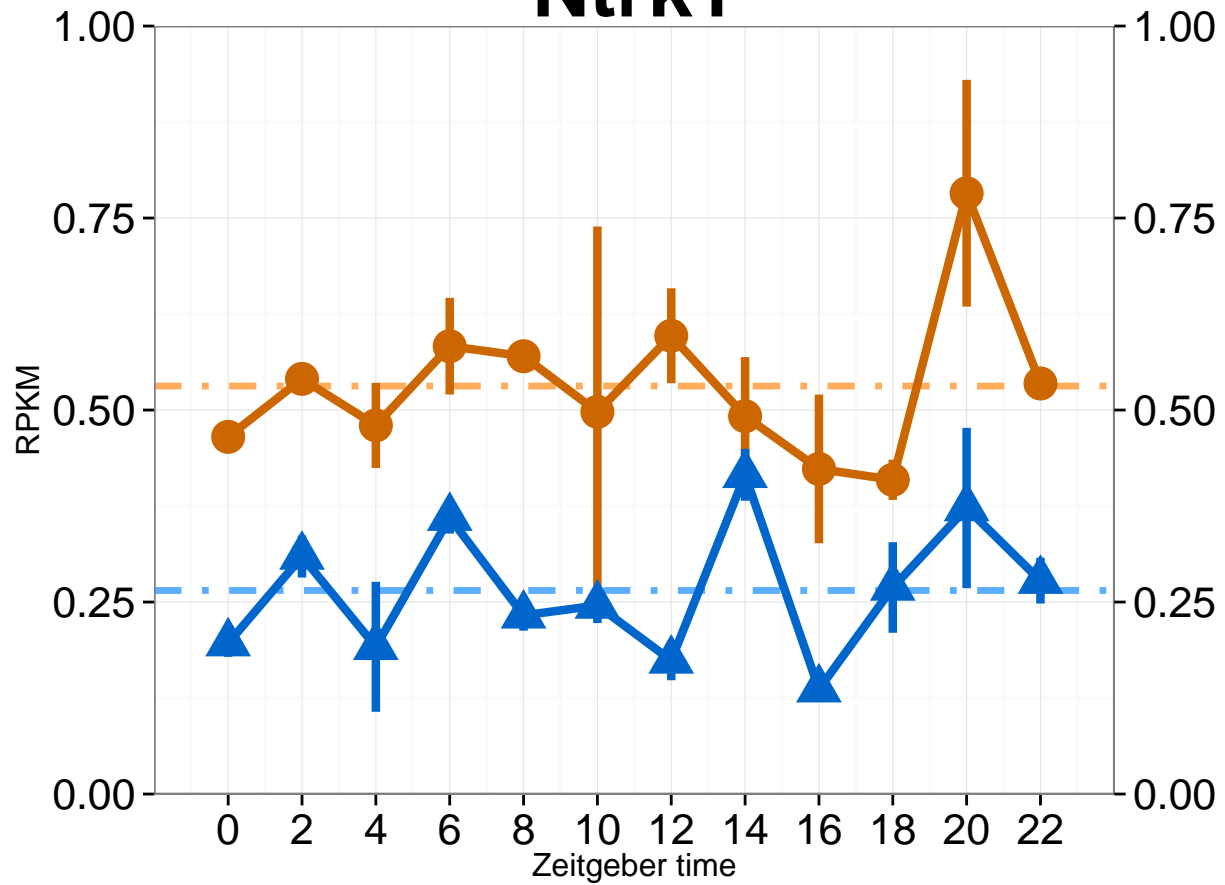

## Ntrk1

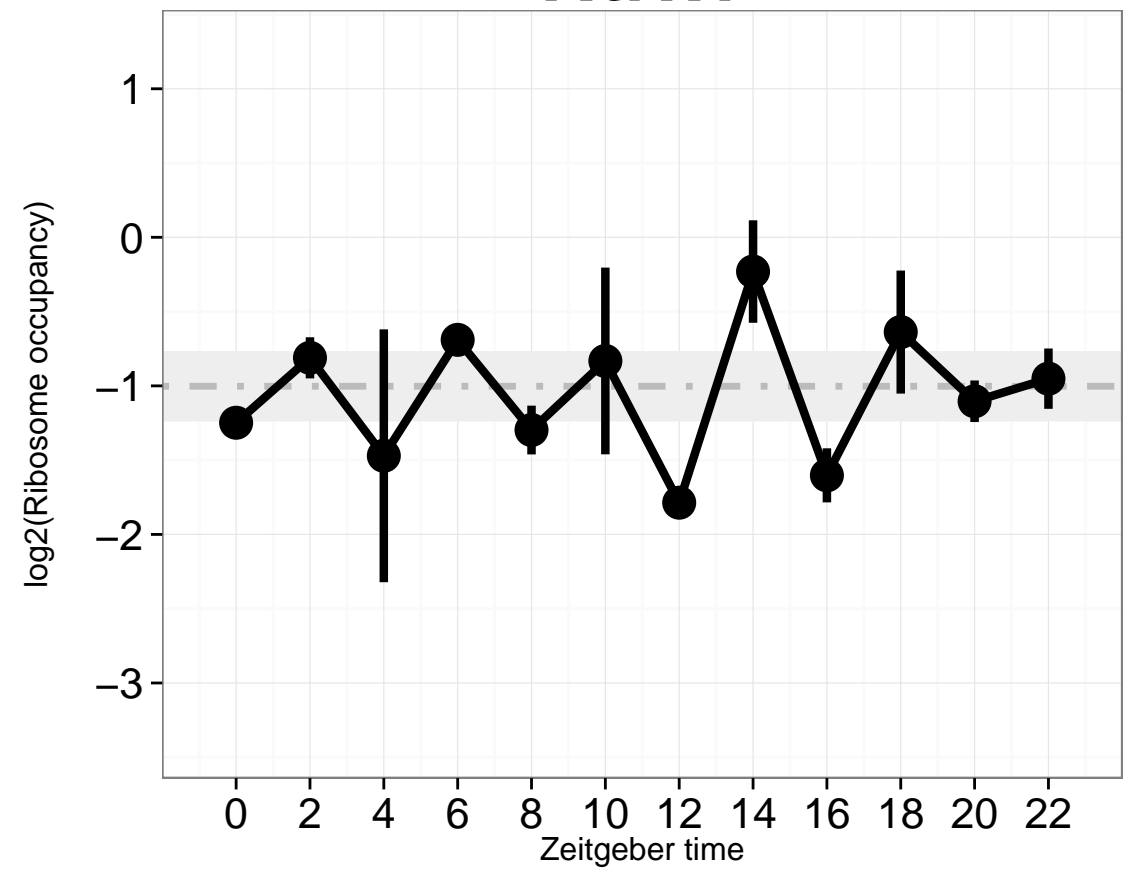

Supplement: Supplementary file 11578 [file 1]

## Kifc3

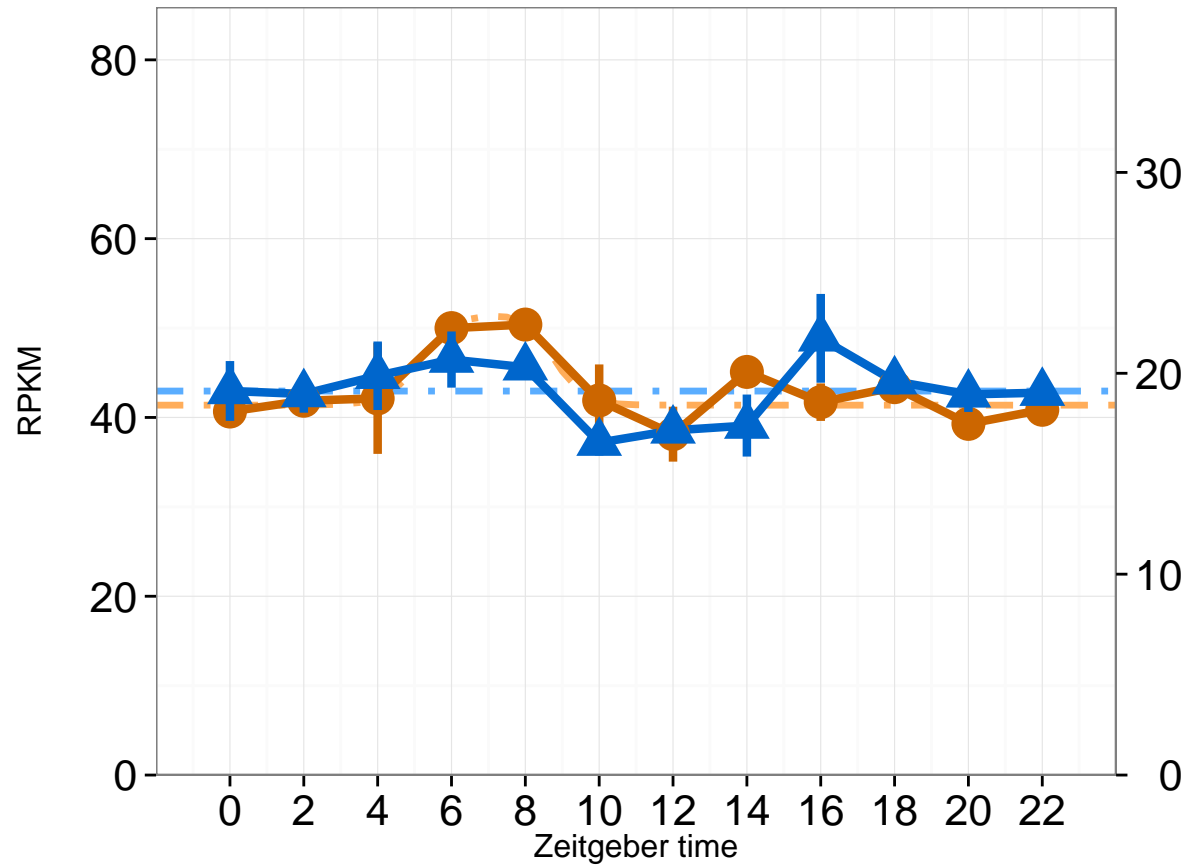

## Kifc3

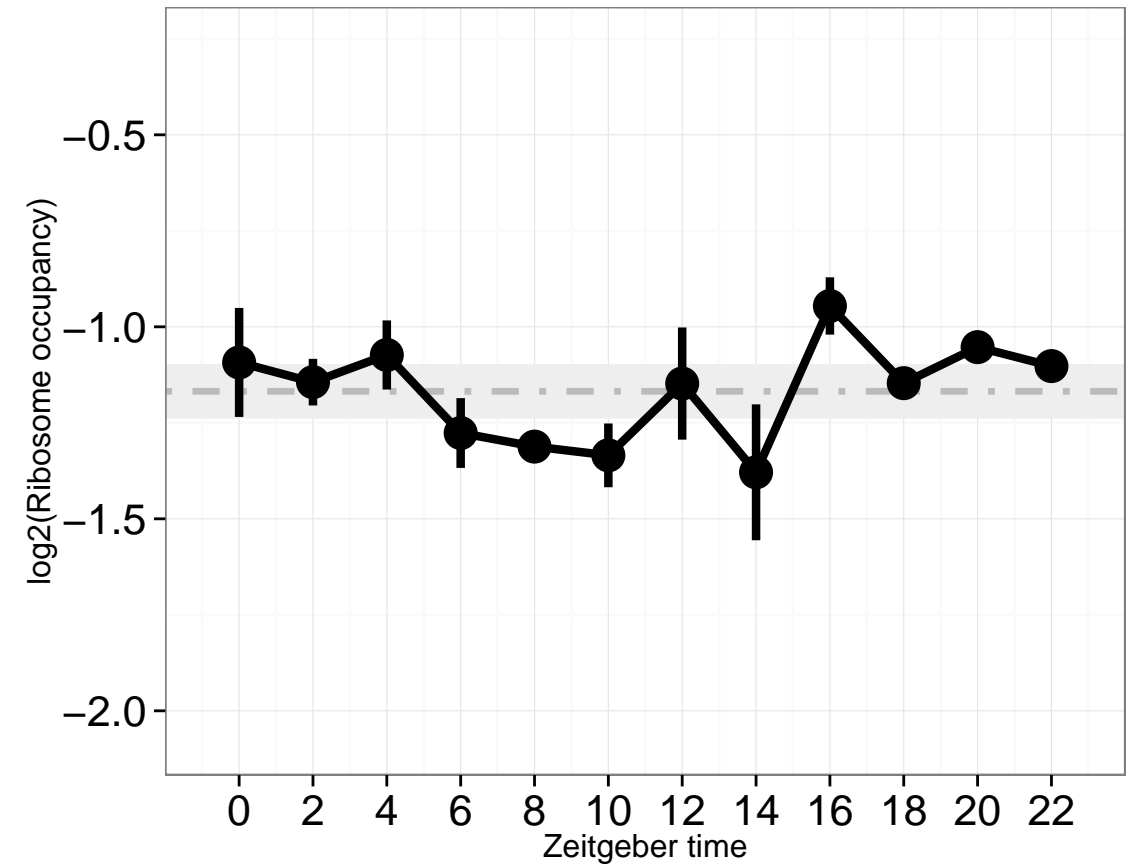

Supplement: Supplementary file 11579 [file 1]

## Bcl2l12

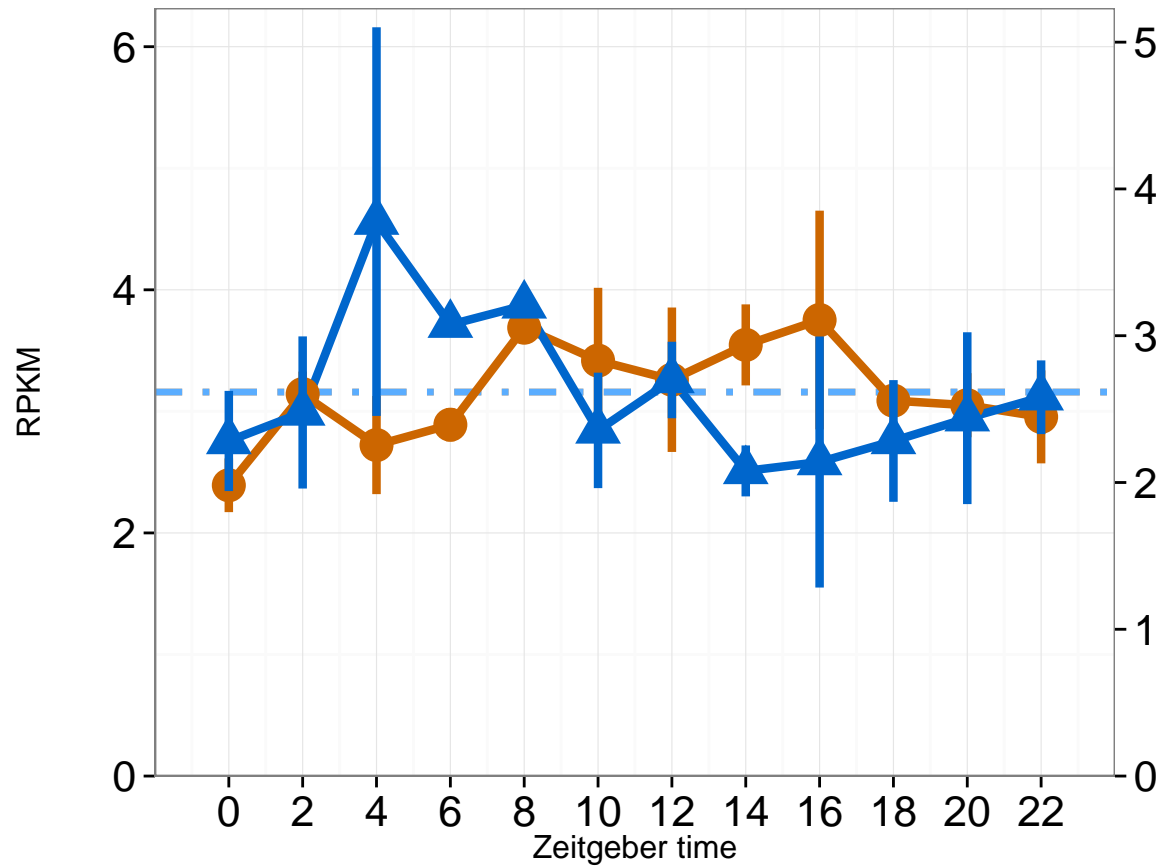

## Bcl2l12

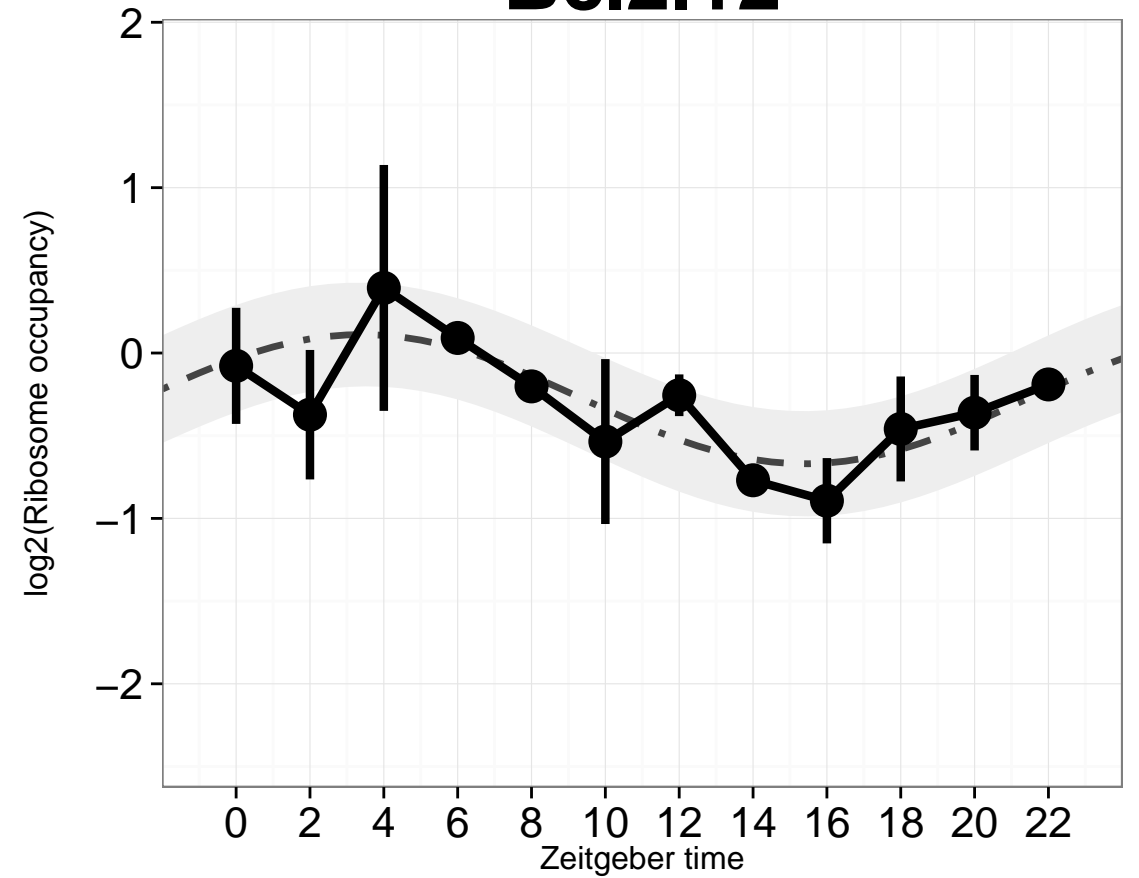

Supplement: Supplementary file 11580 [file 1]

## Sfxn3

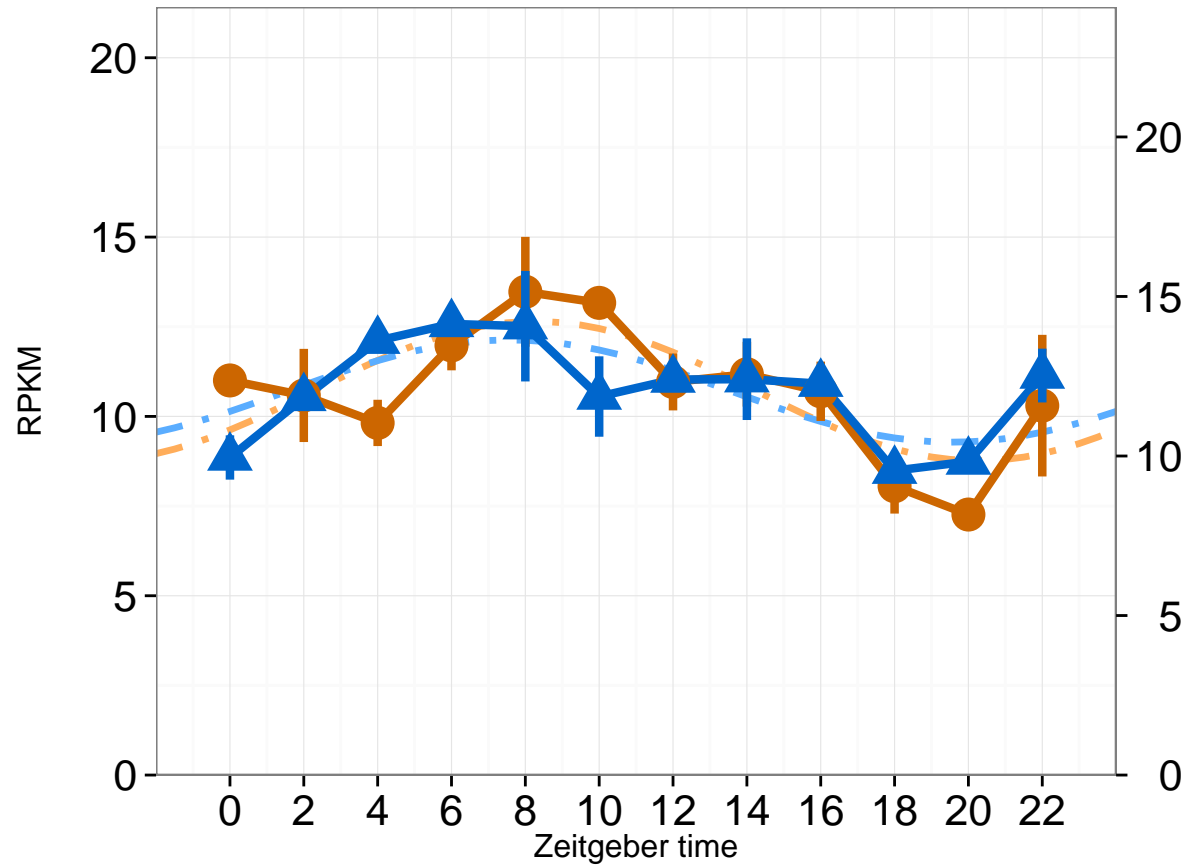

## Sfxn3

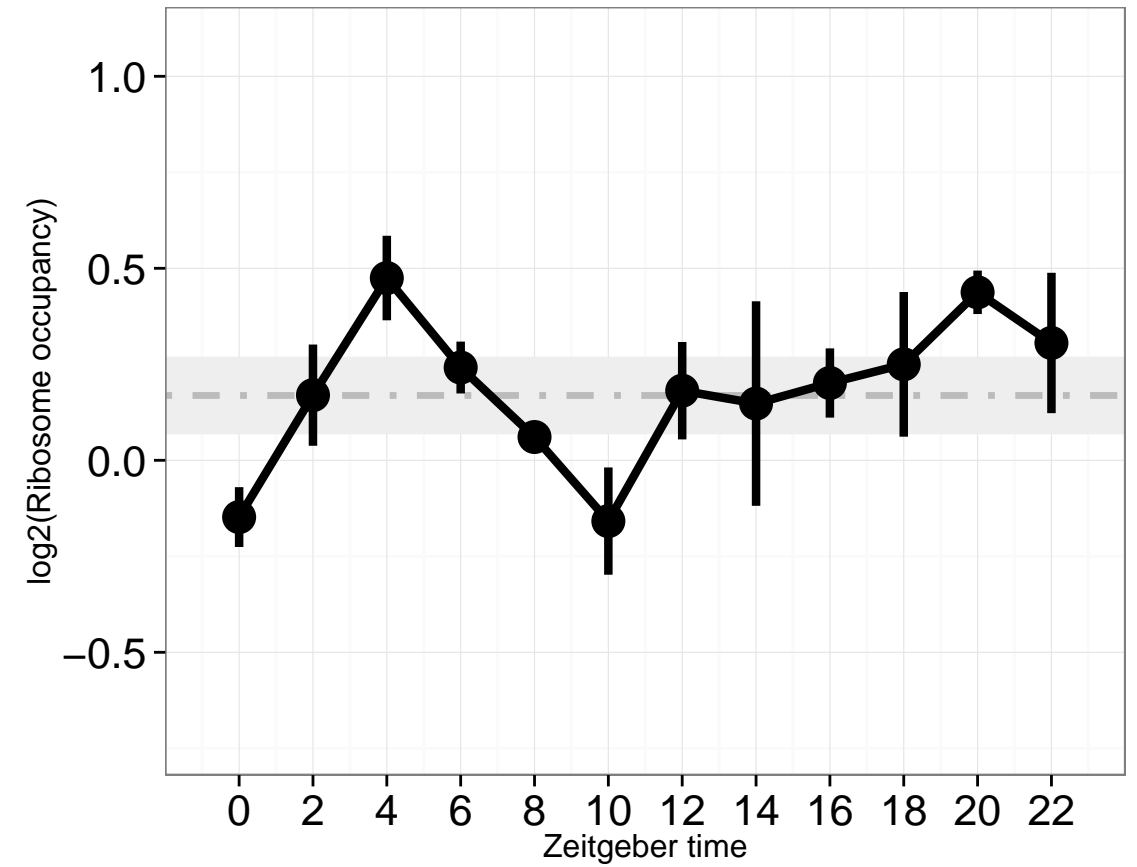

Supplement: Supplementary file 11581 [file 1]

# Lrp3

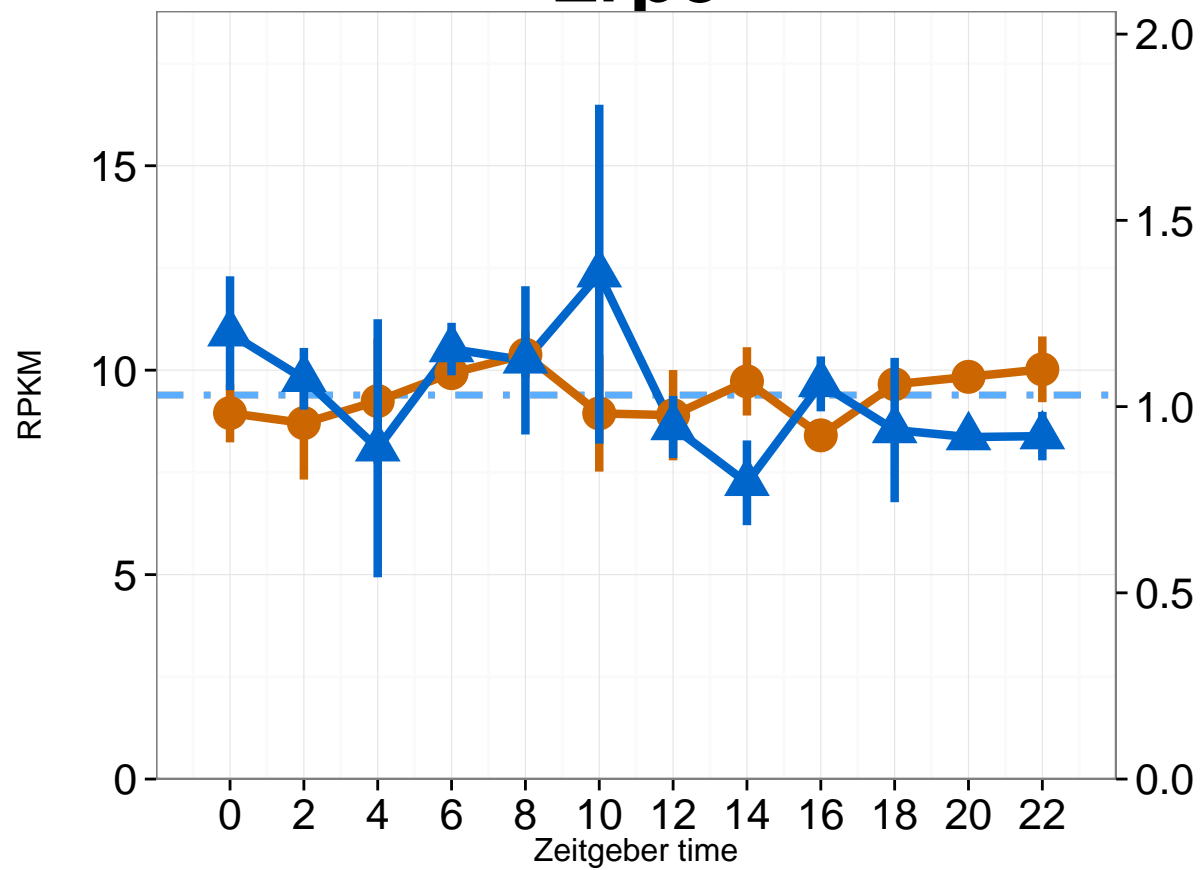

# Lrp3

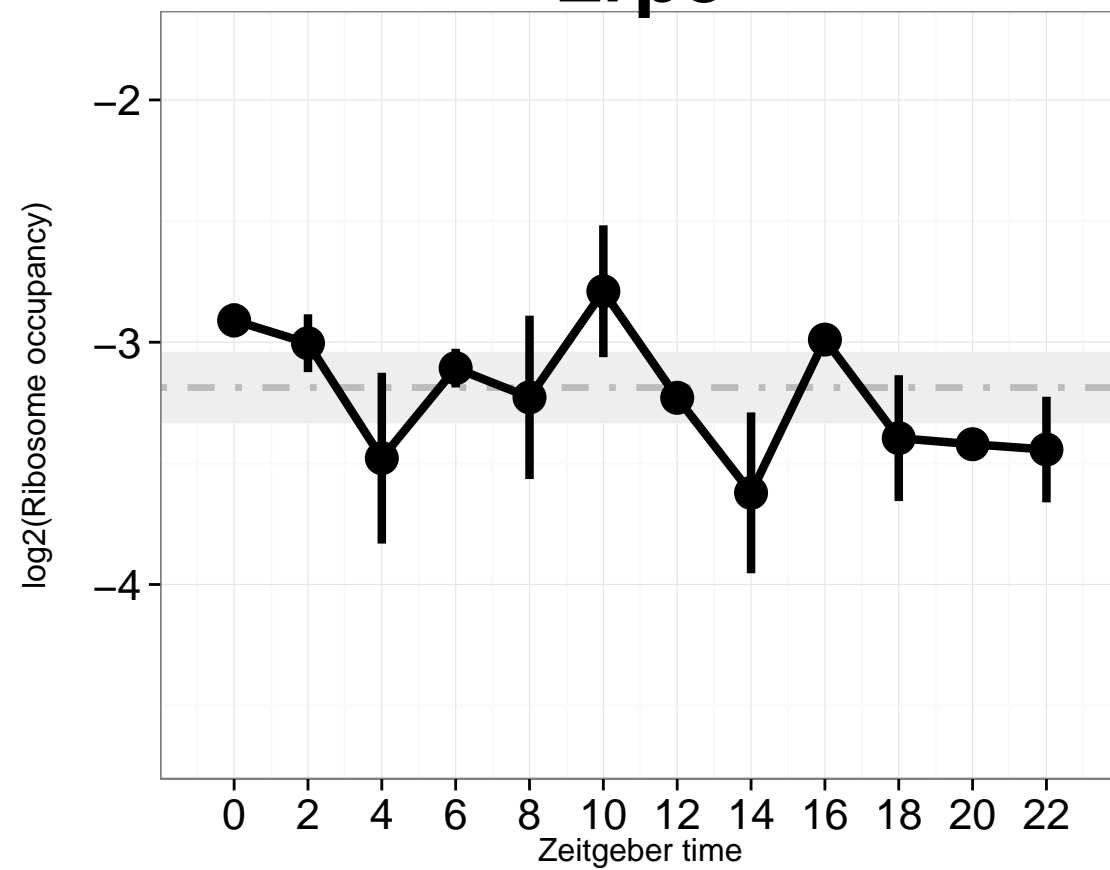

Supplement: Supplementary file 11582 [file 1]

# Tap1

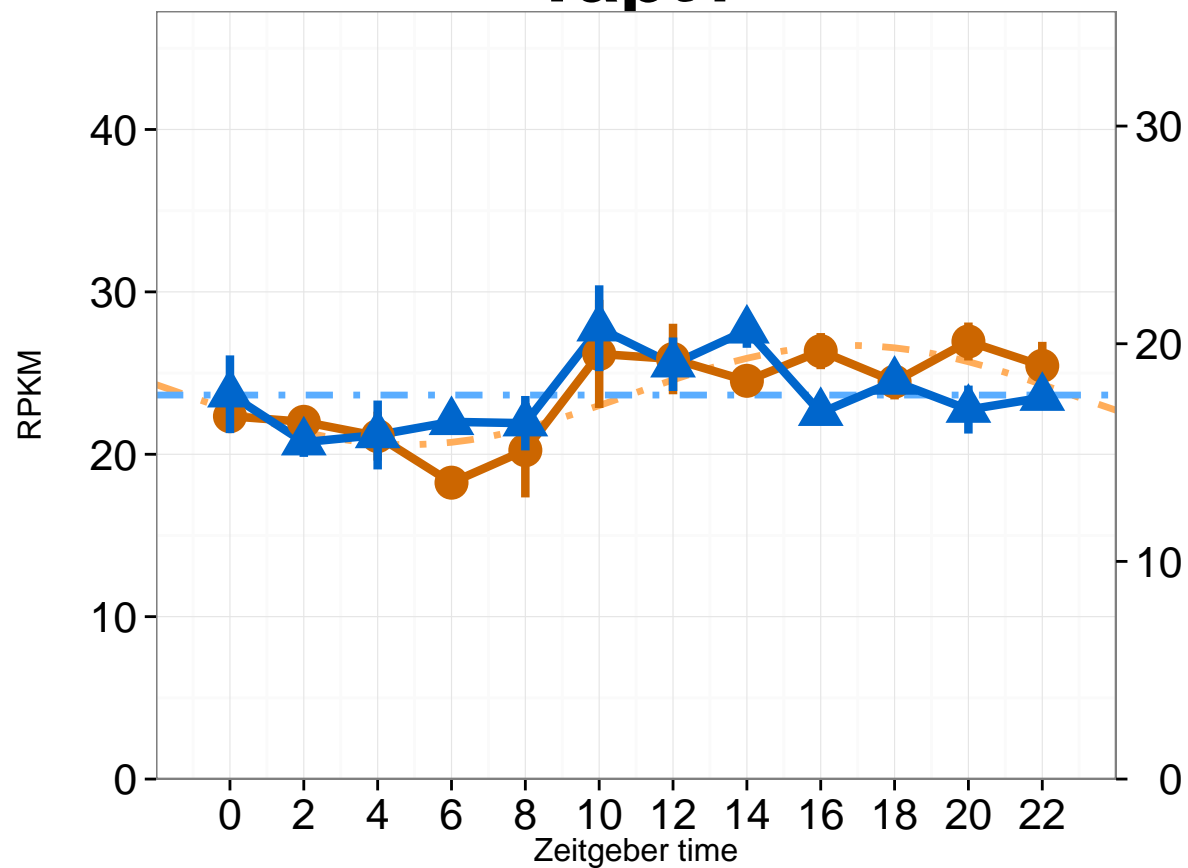

# Tap1

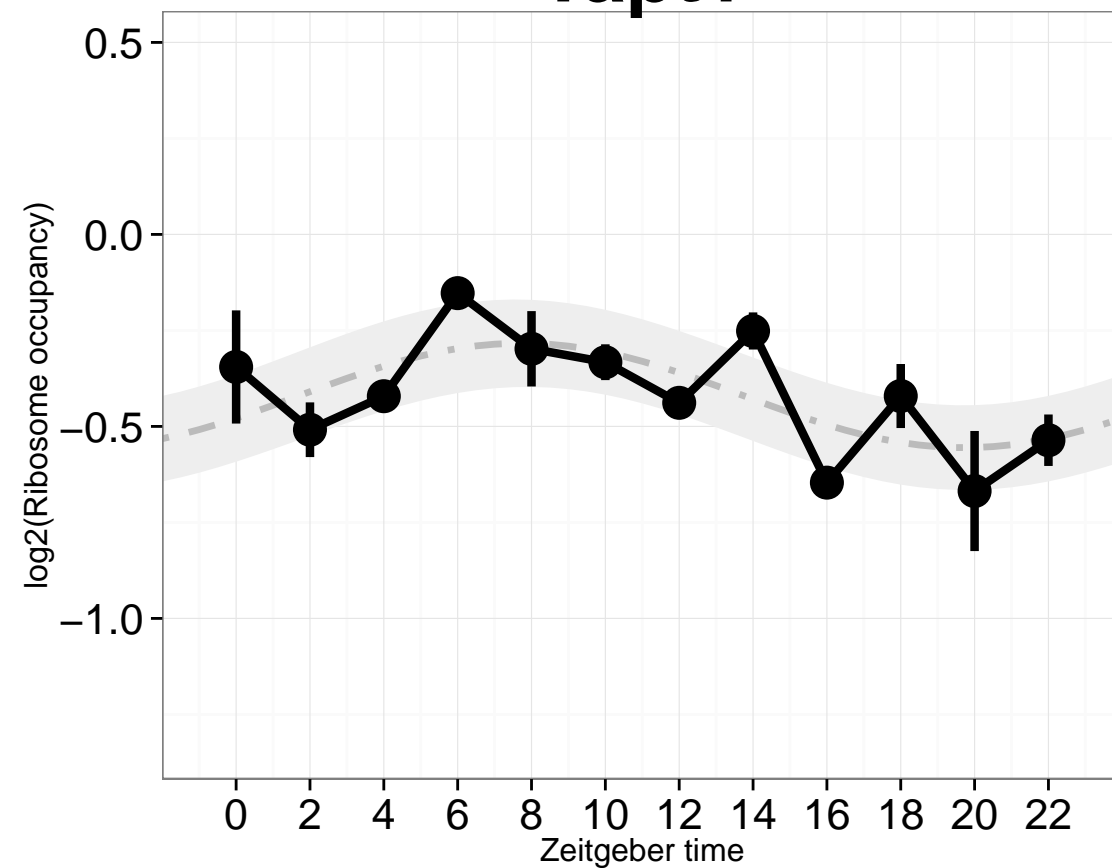

Supplement: Supplementary file 11583 [file 1]

# Amica1

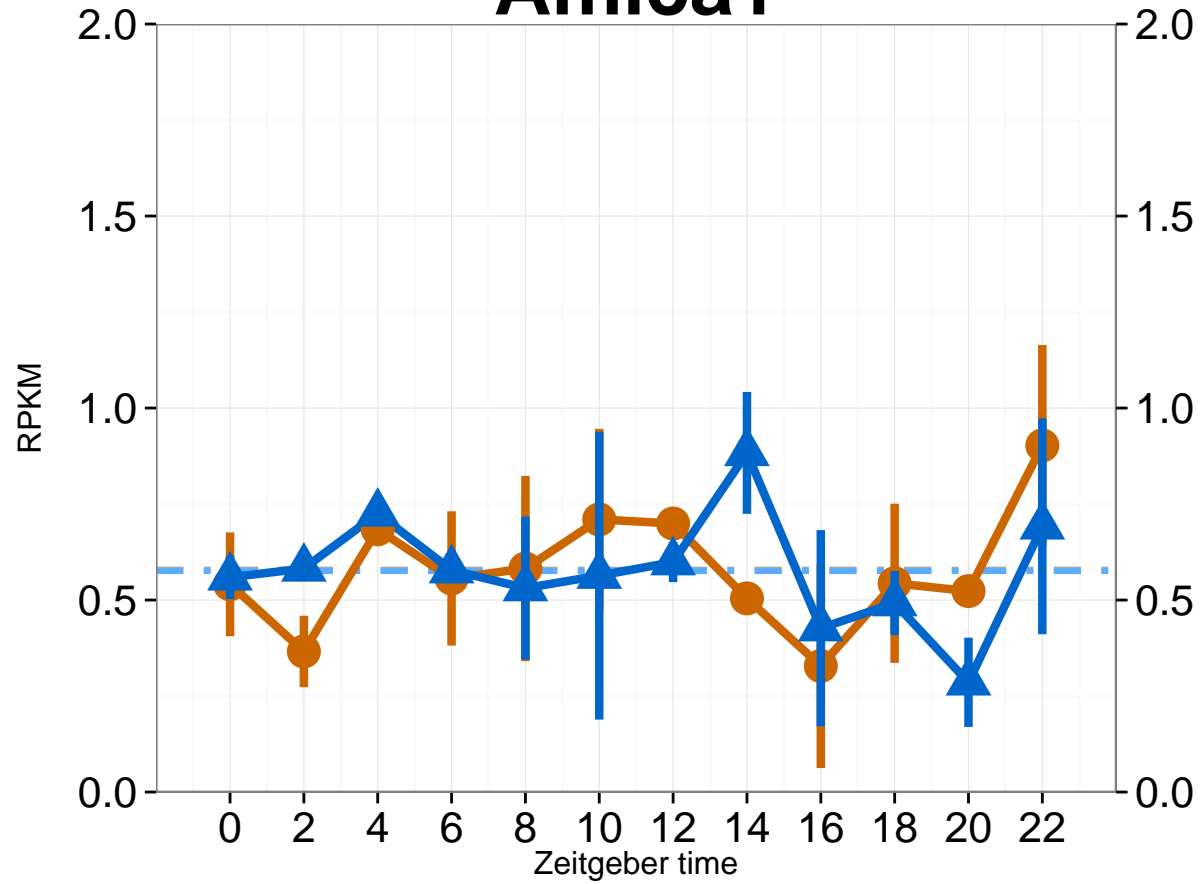

# Amica1

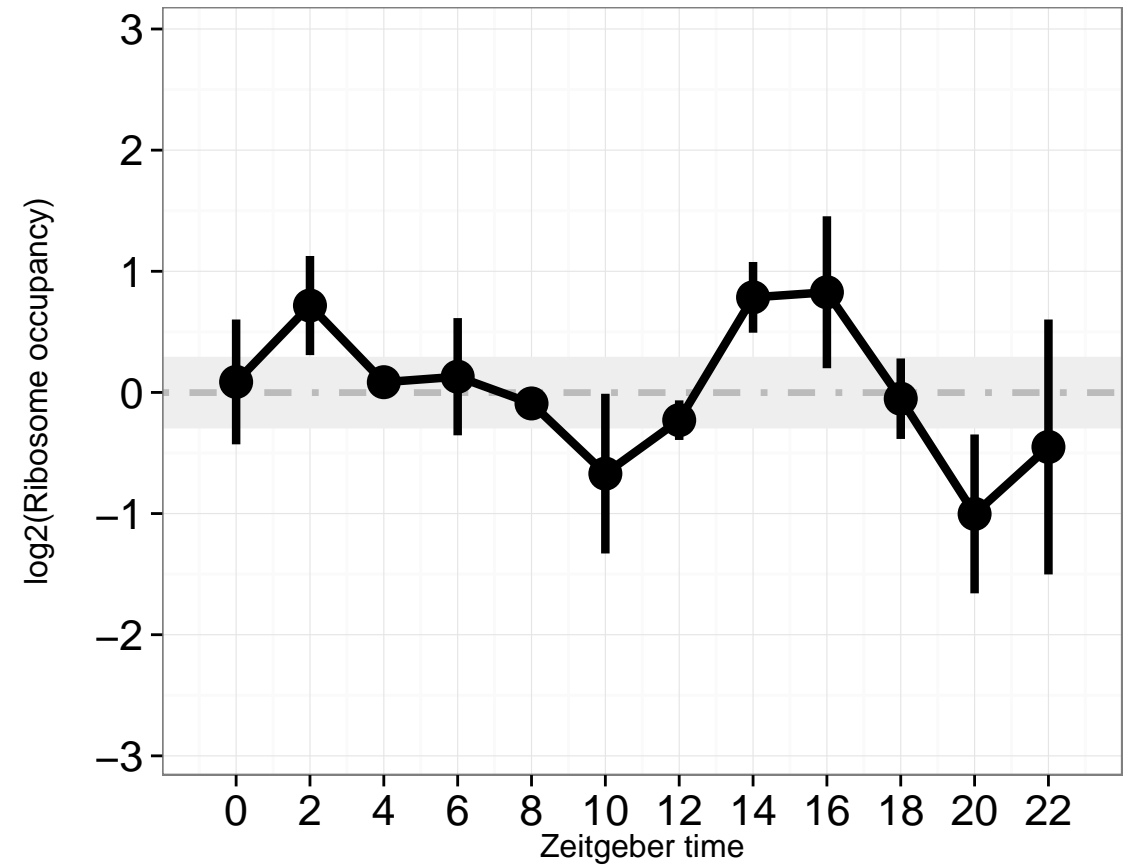

Supplement: Supplementary file 11584 [file 1]

## Ak5

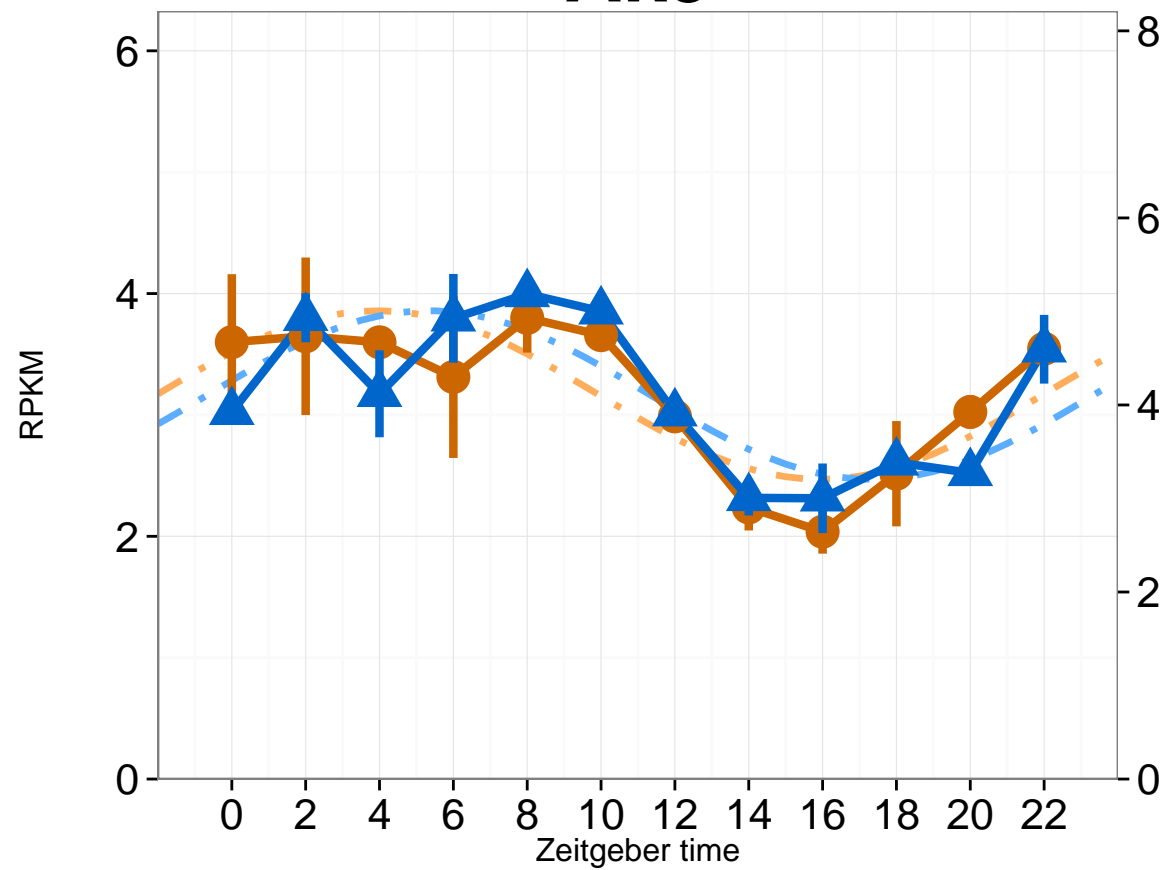

## Ak5

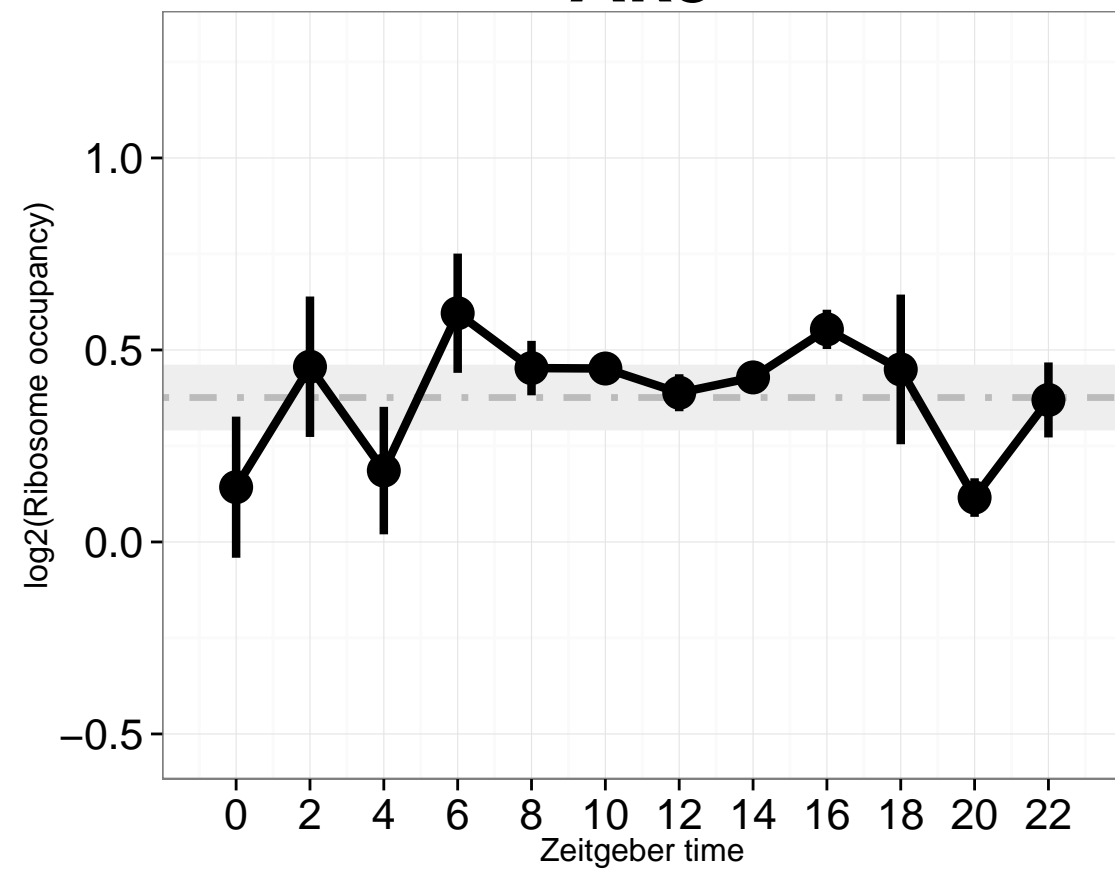

Supplement: Supplementary file 11585 [file 1]

# 1810055G02Rik

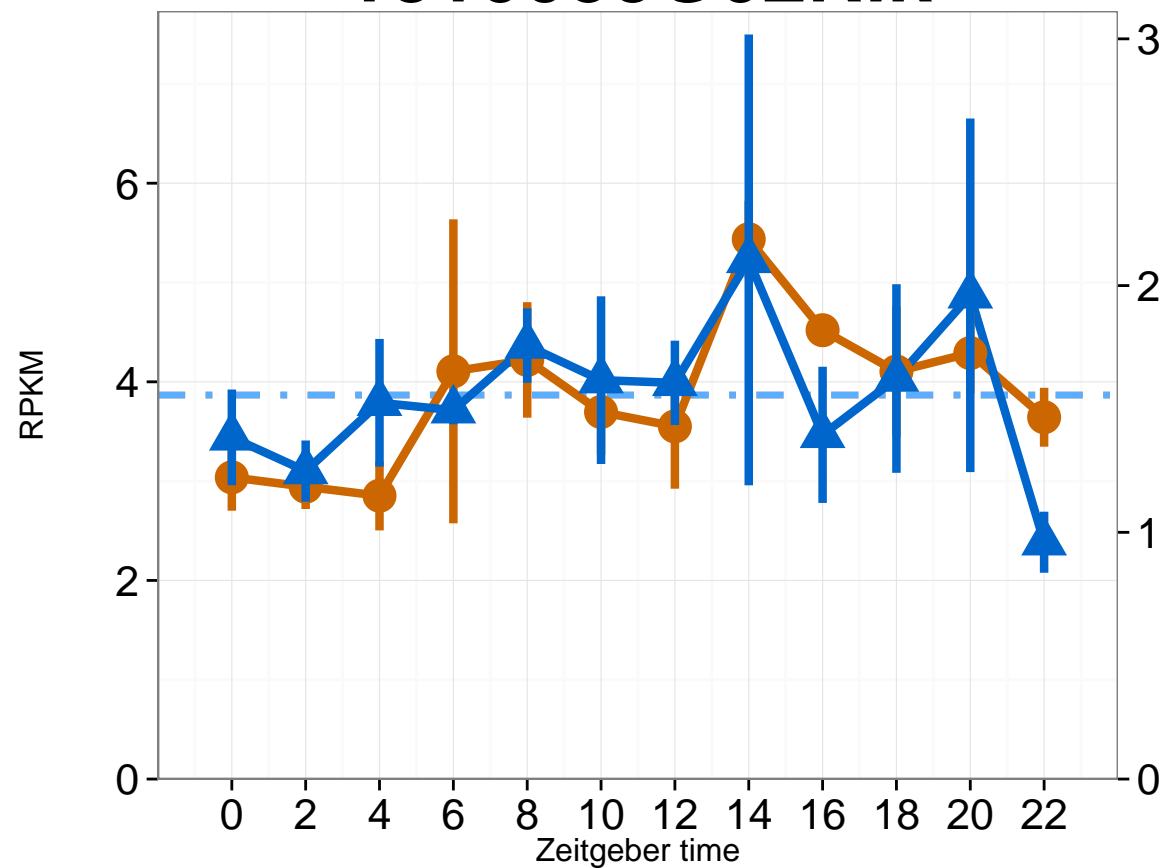

# 1810055G02Rik

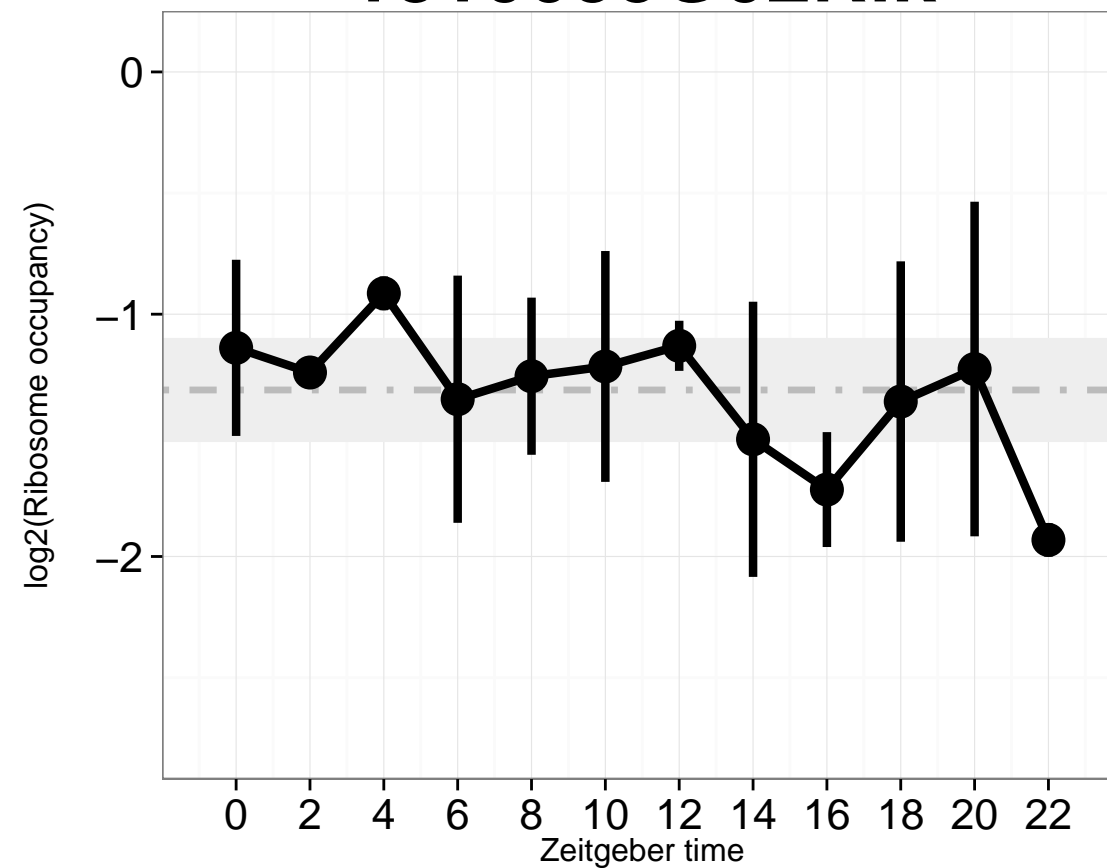

Supplement: Supplementary file 11586 [file 1]

## Smurf2

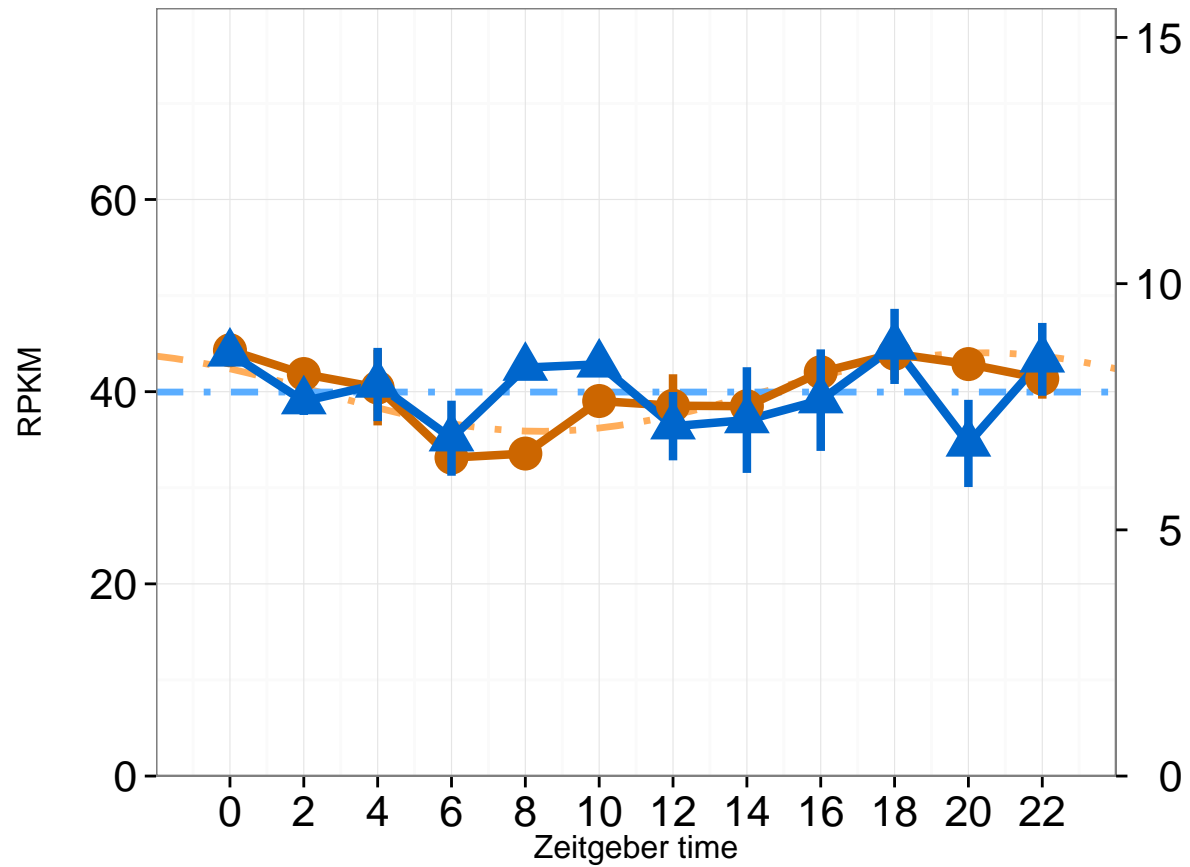

## Smurf2

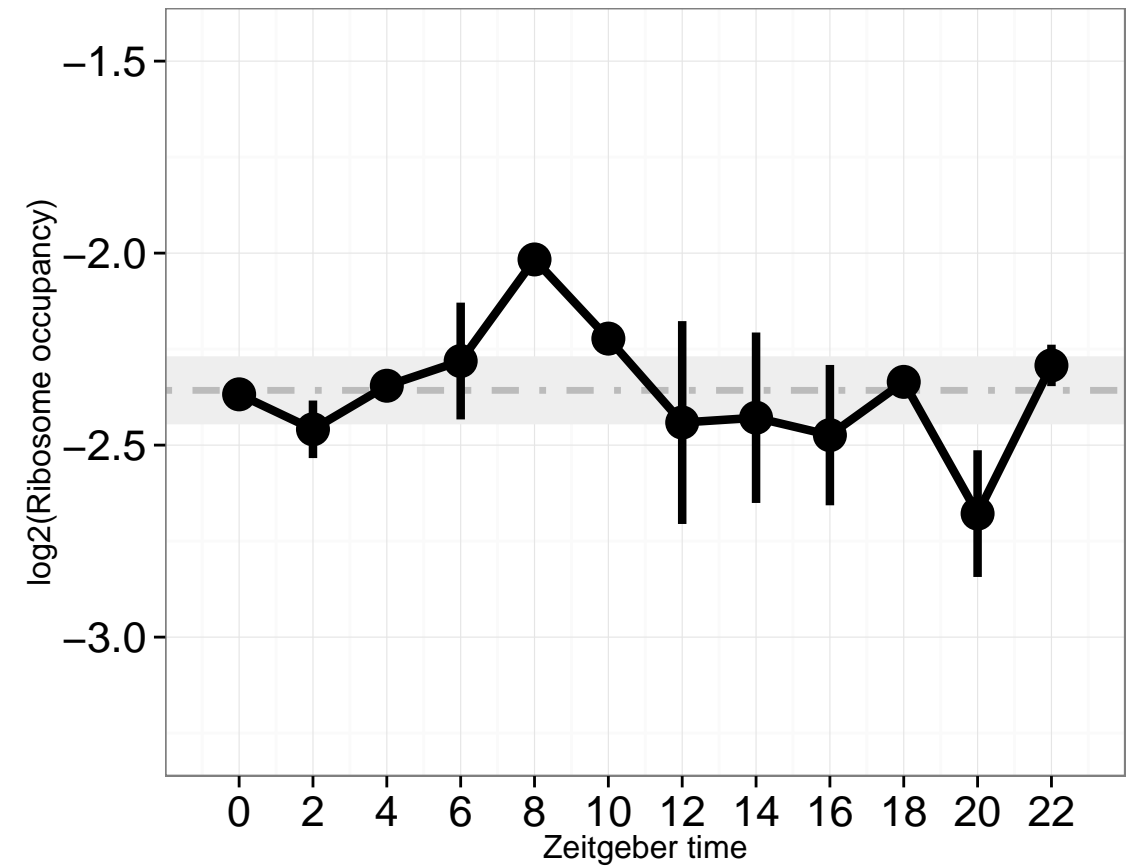

Supplement: Supplementary file 11587 [file 1]

## Med29

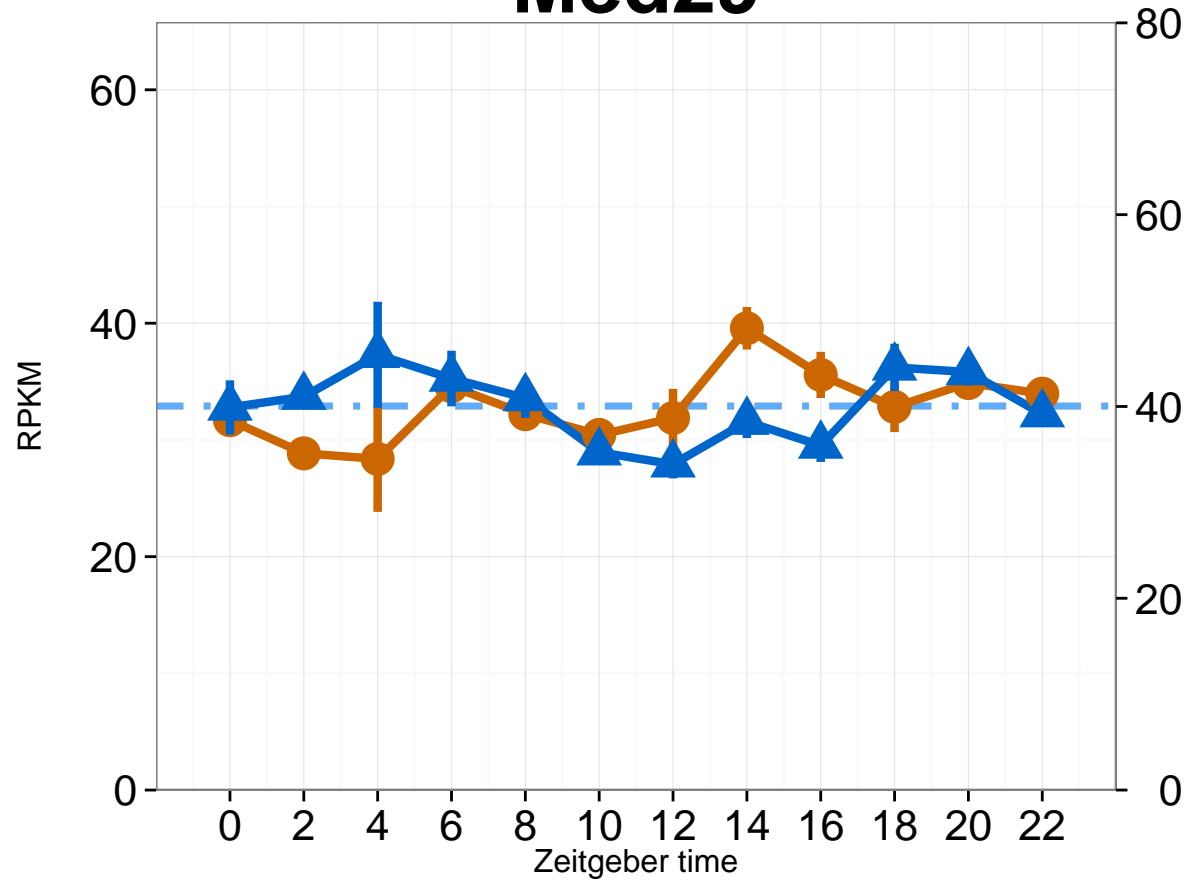

## Med29

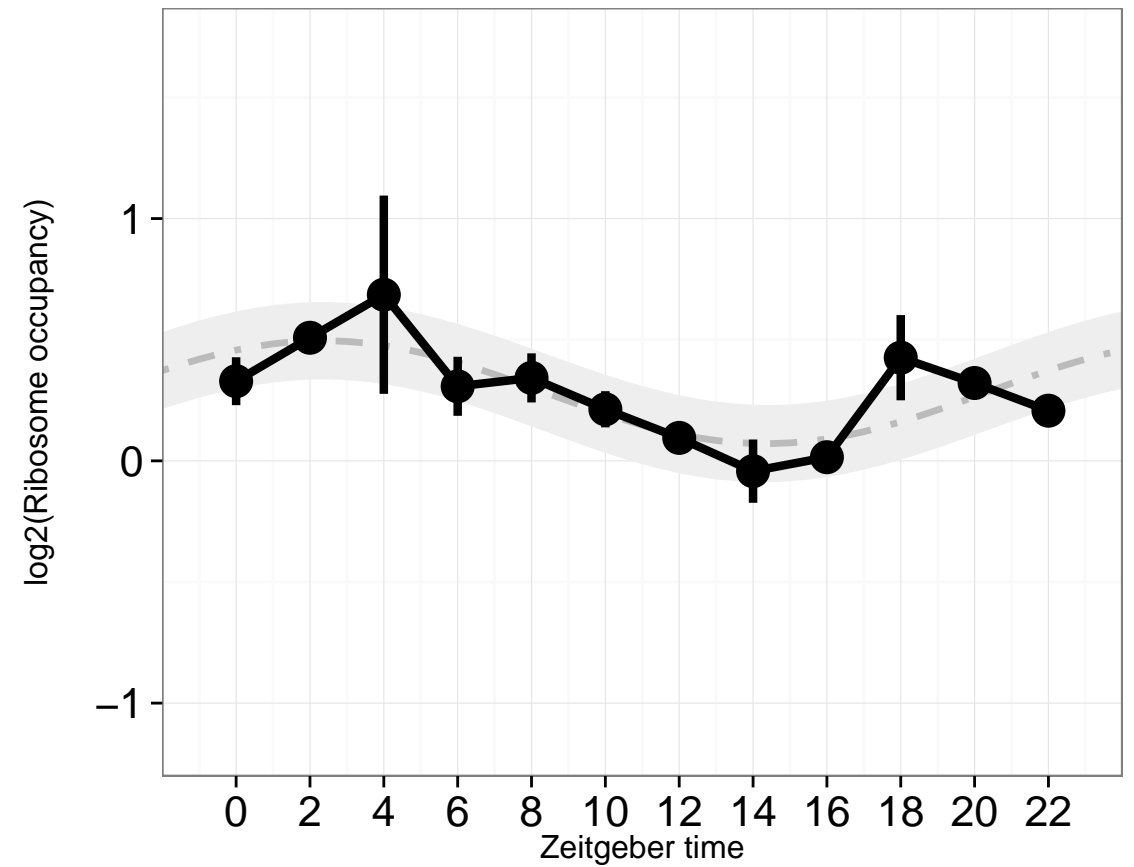

Supplement: Supplementary file 11588 [file 1]

## Folh1

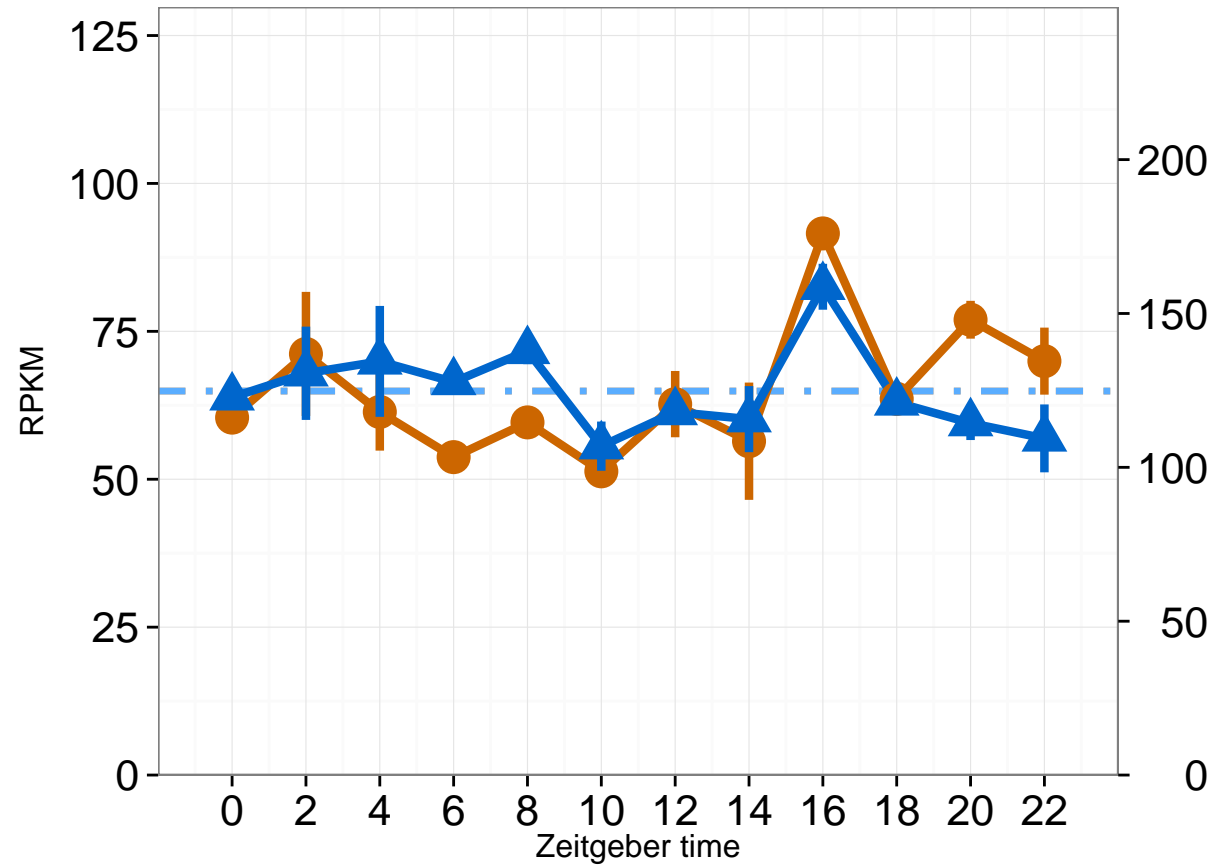

## Folh1

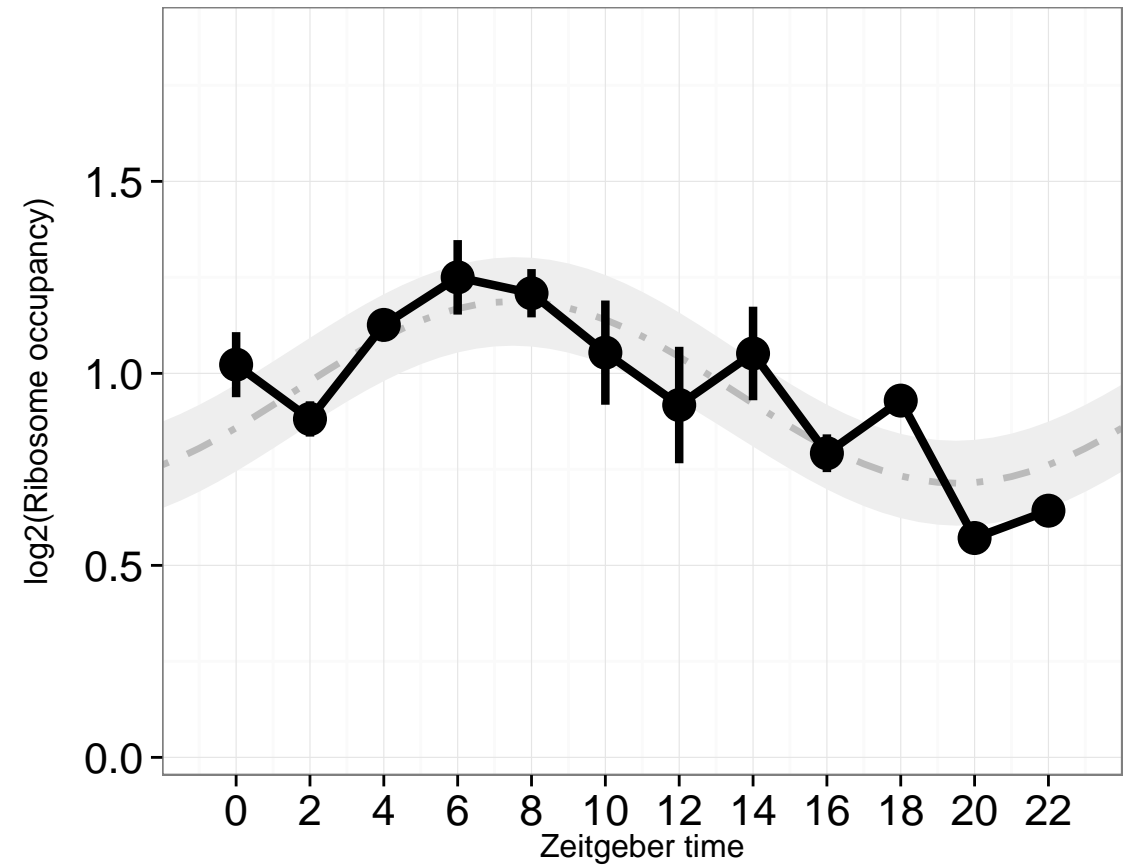

Supplement: Supplementary file 11589 [file 1]

# Gga1

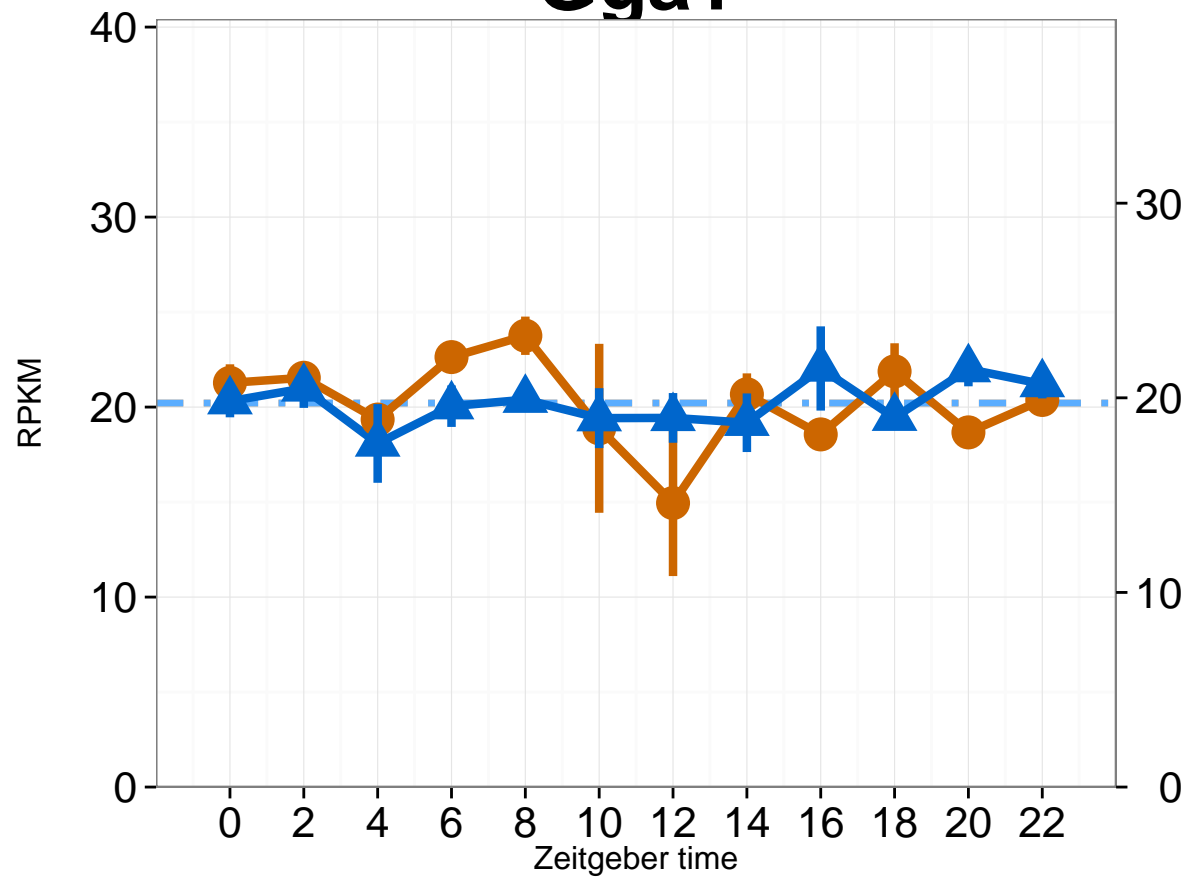

# Gga1

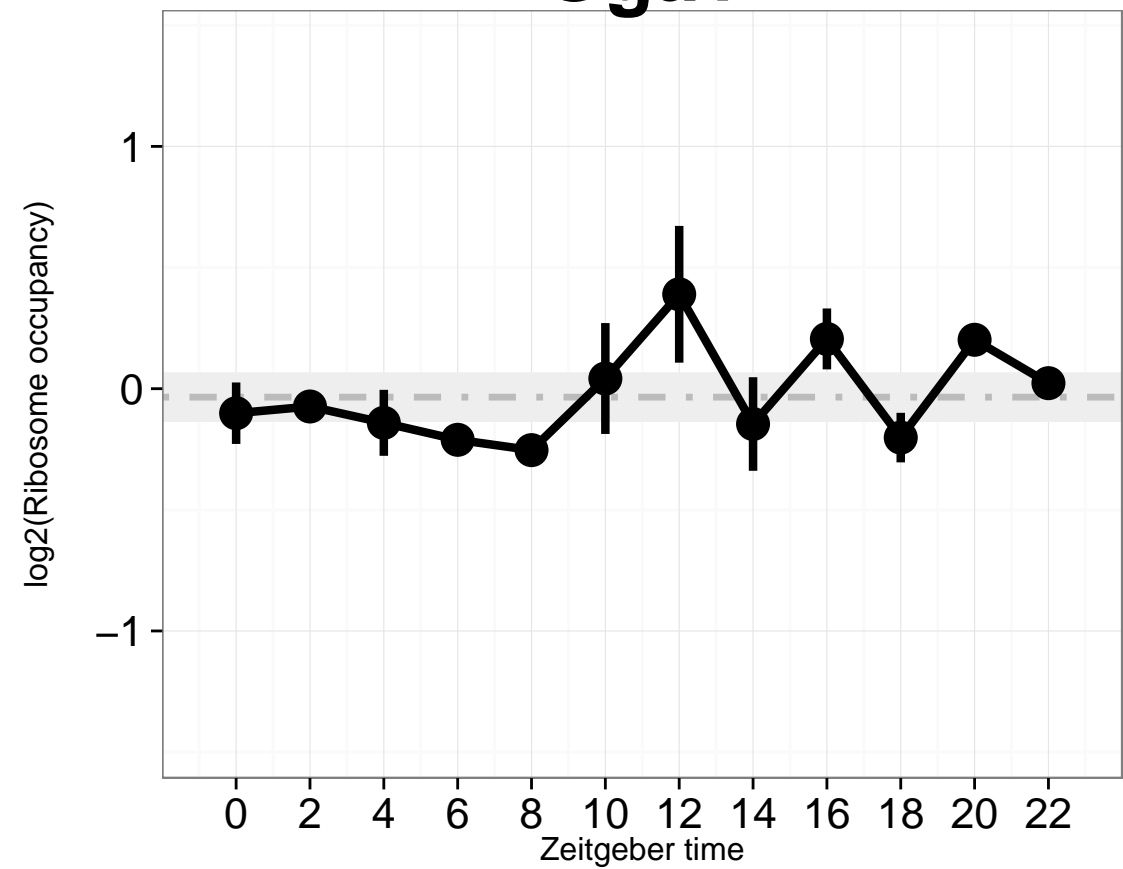

Supplement: Supplementary file 11590 [file 1]

# Rpl10

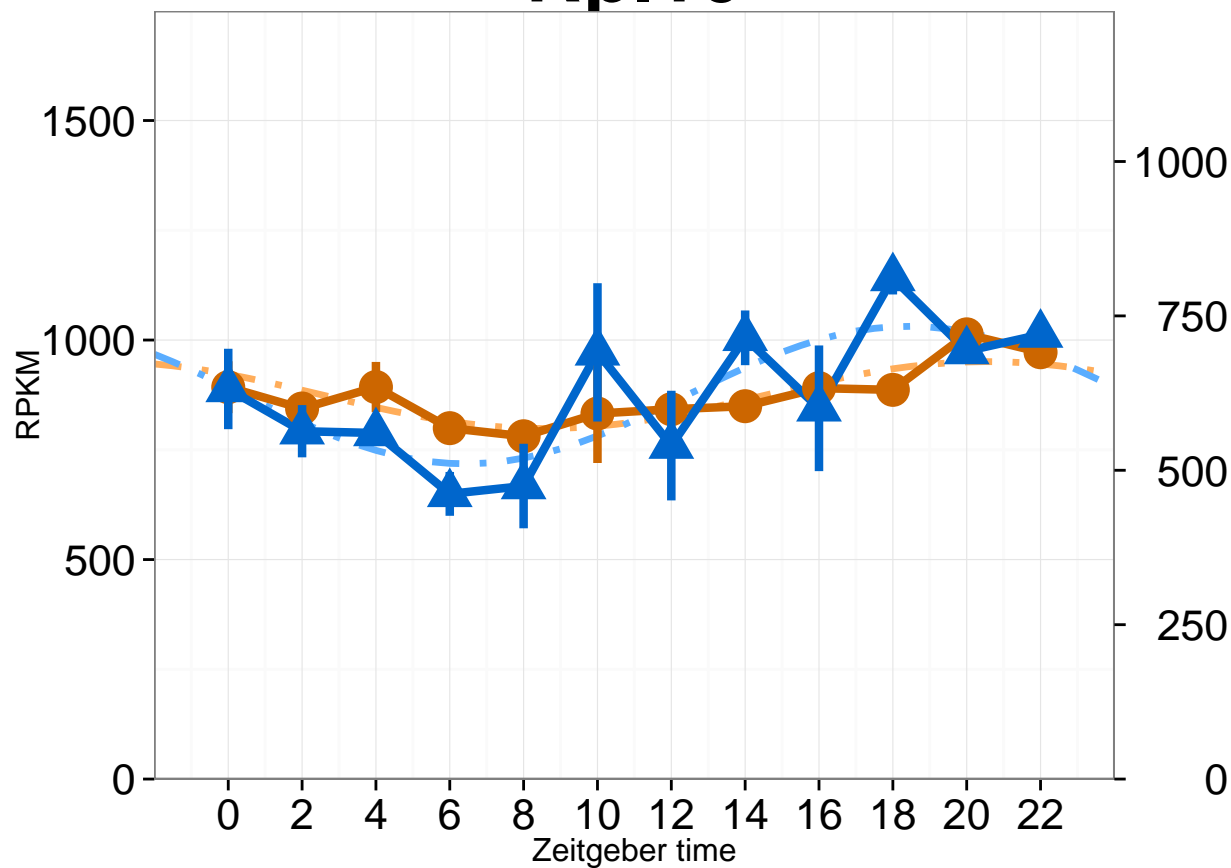

# Rpl10

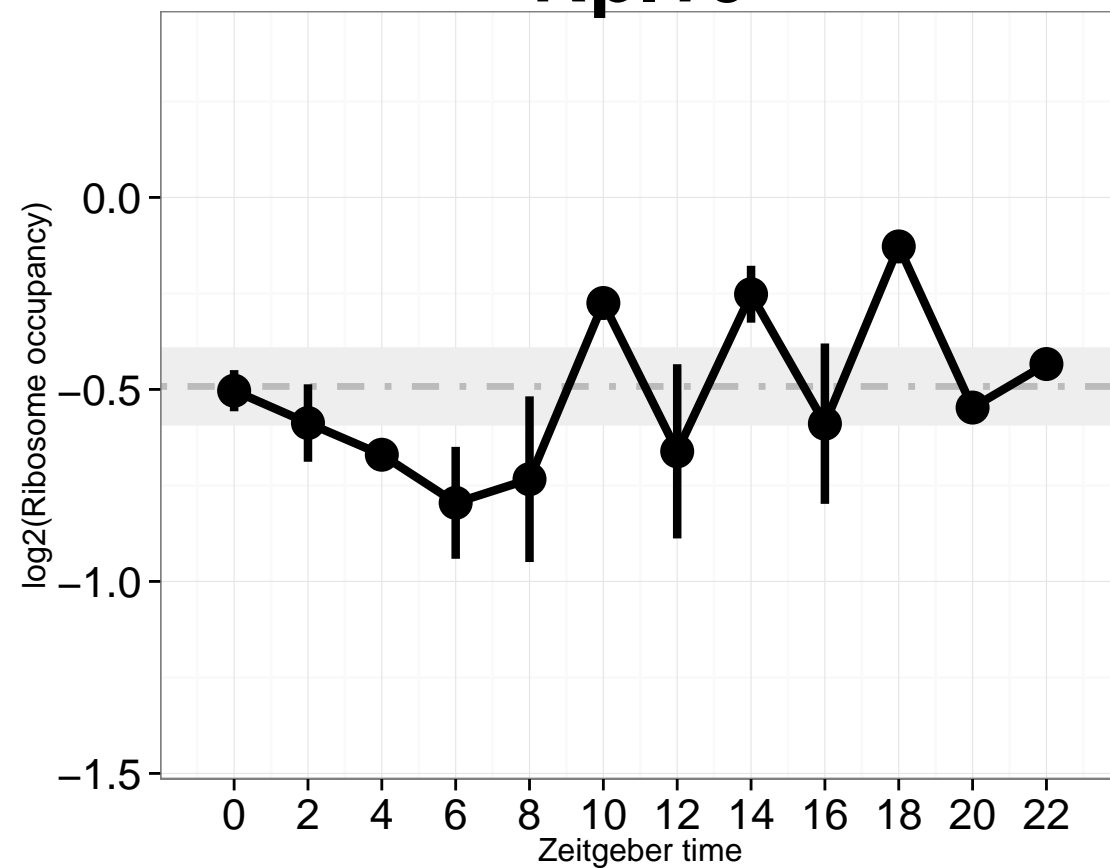

Supplement: Supplementary file 11591 [file 1]

## H1f0

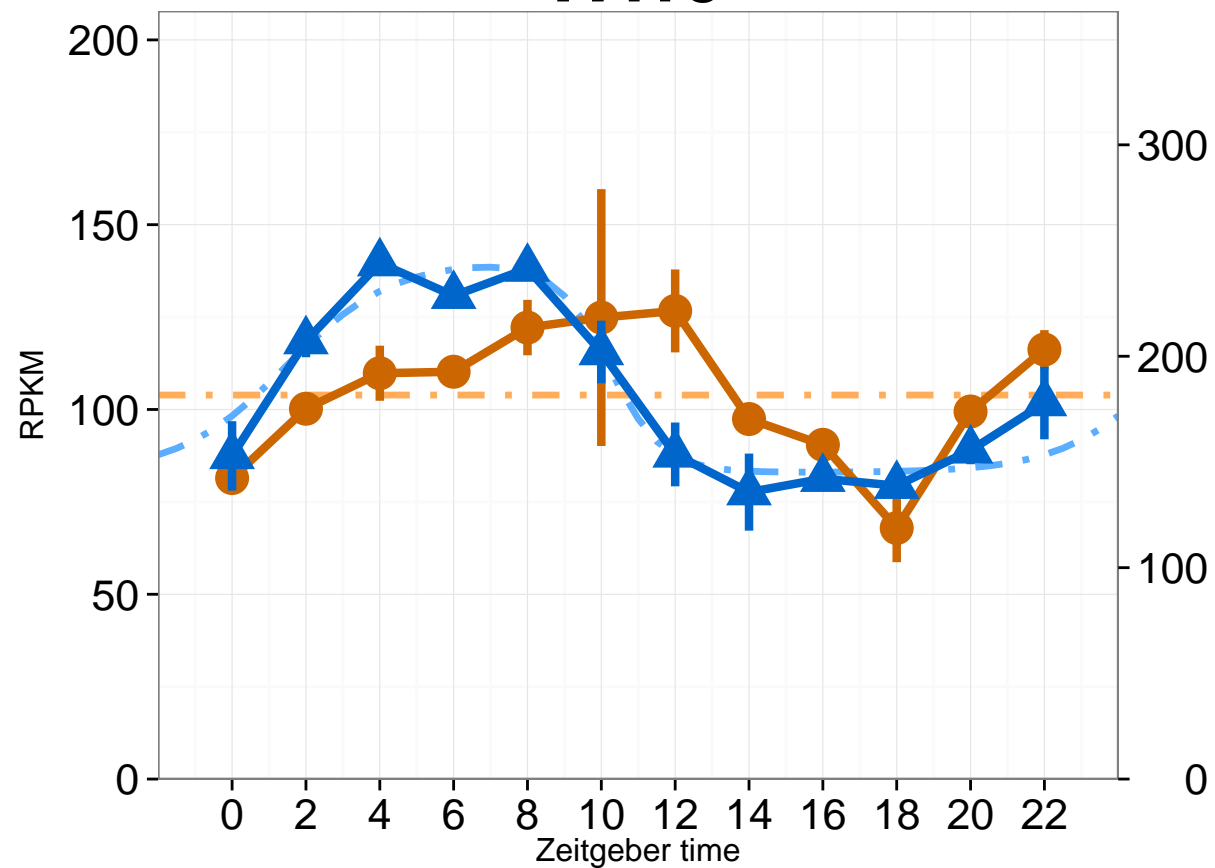

## H1f0

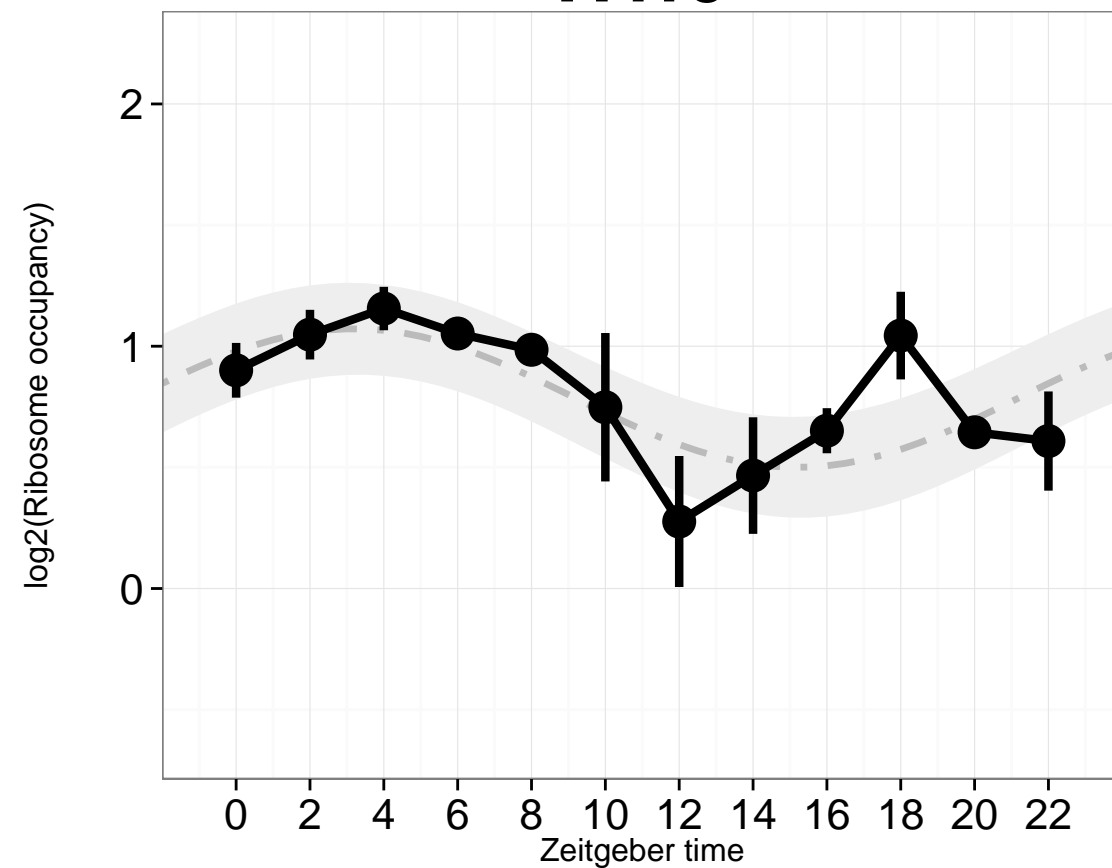

Supplement: Supplementary file 11592 [file 1]

## Wipi2

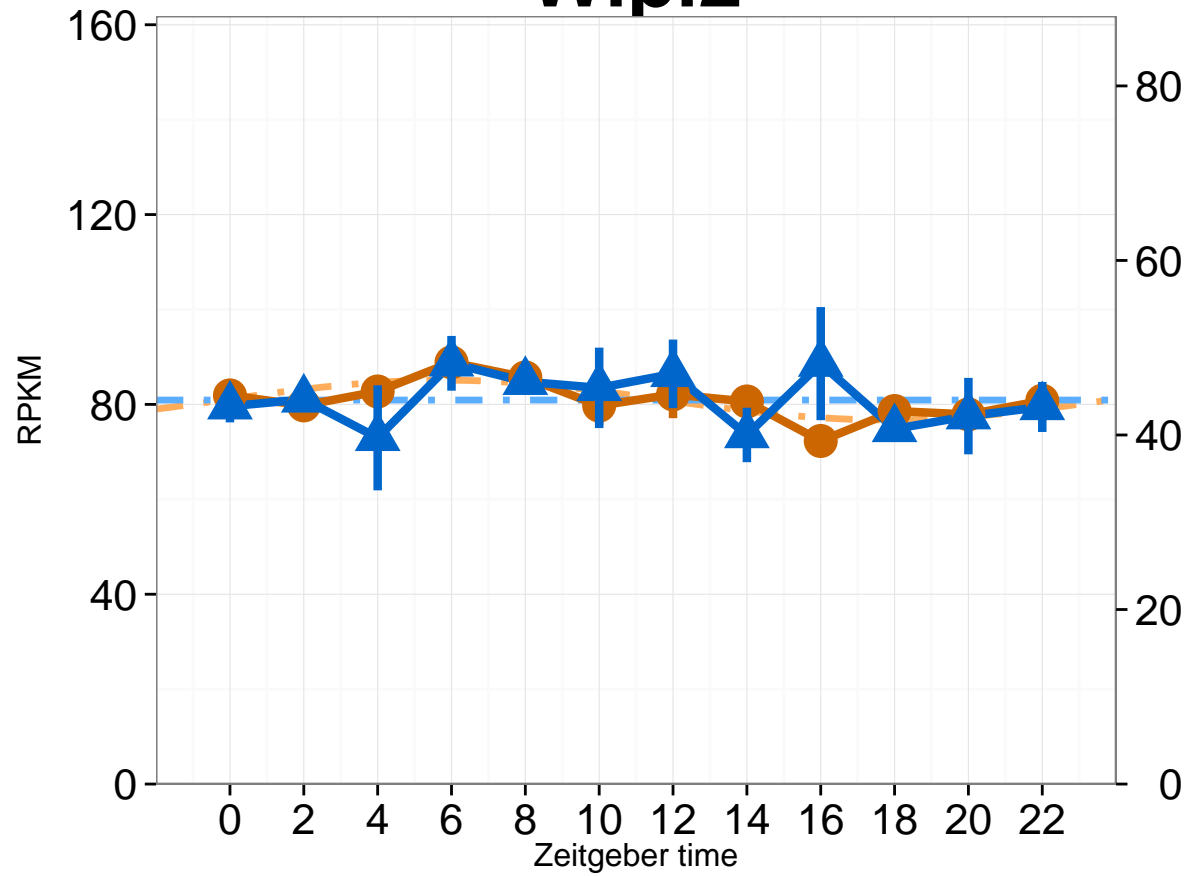

## Wipi2

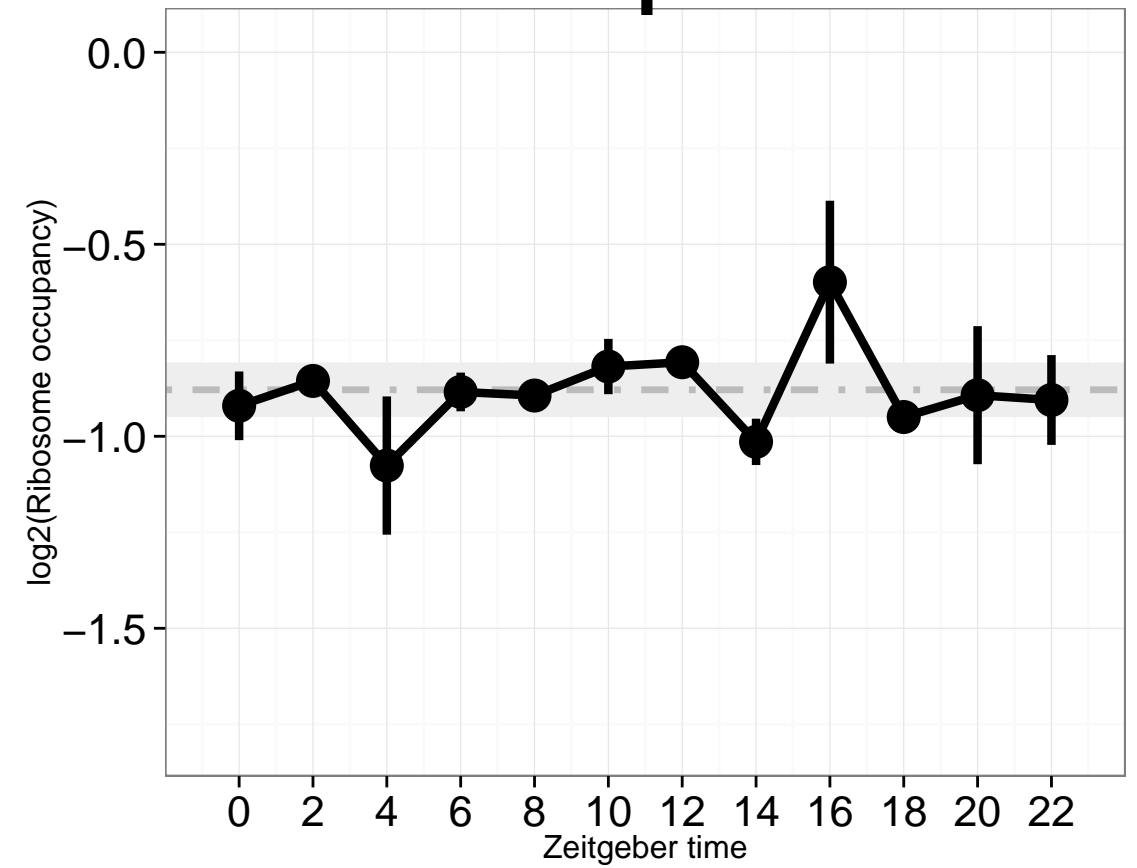

Supplement: Supplementary file 11593 [file 1]

## Sorl1

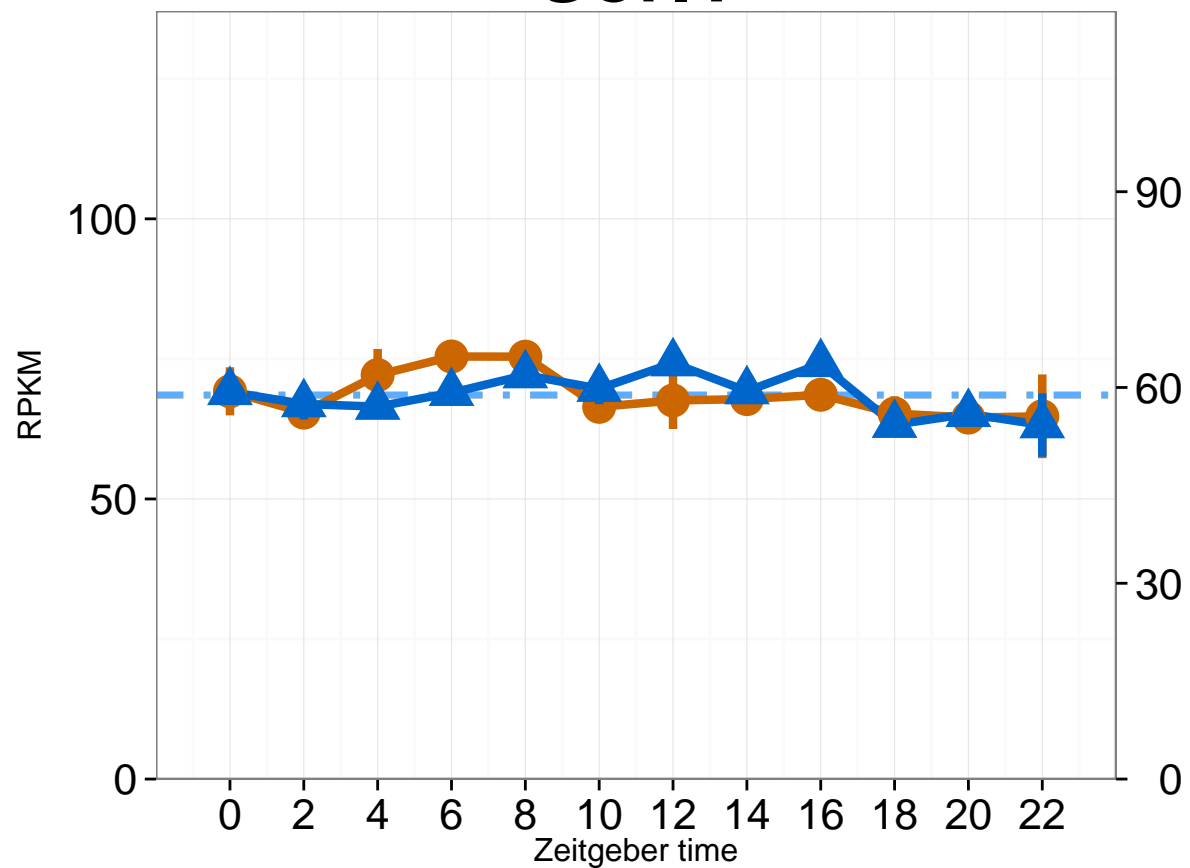

## Sorl1

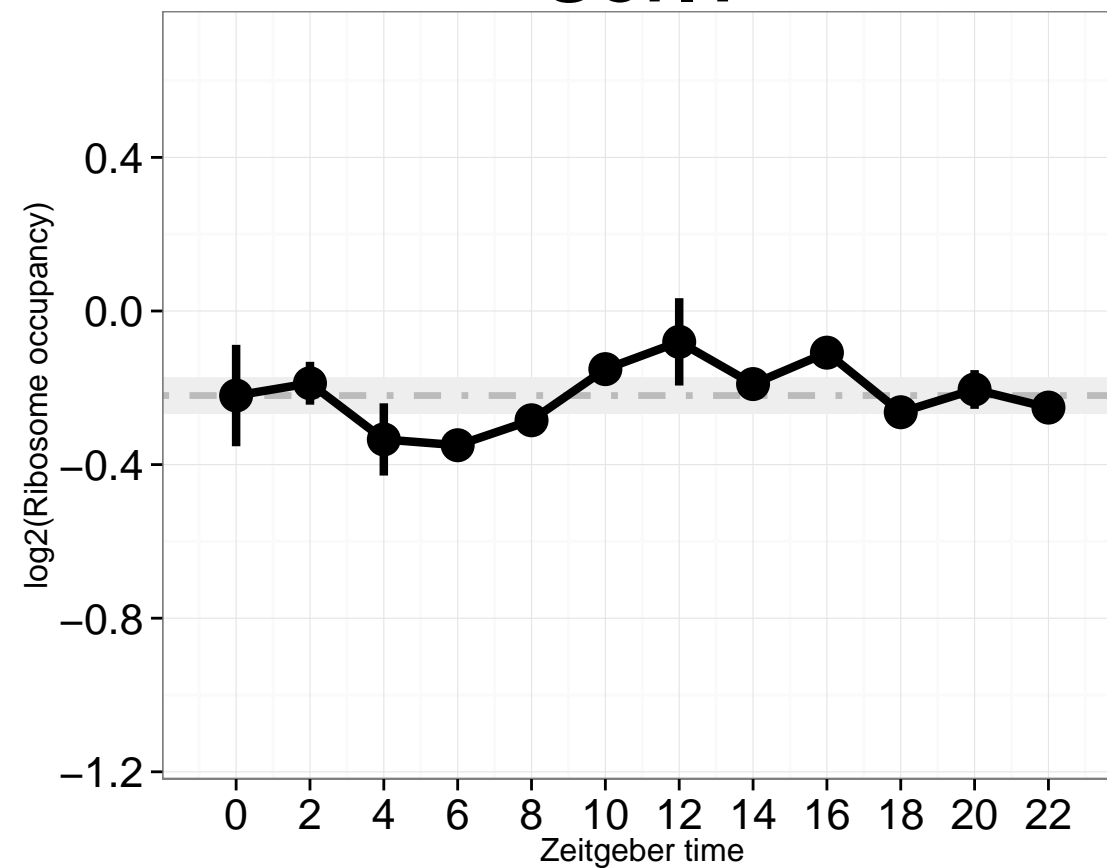

Supplement: Supplementary file 11594 [file 1]

# Fam114a1

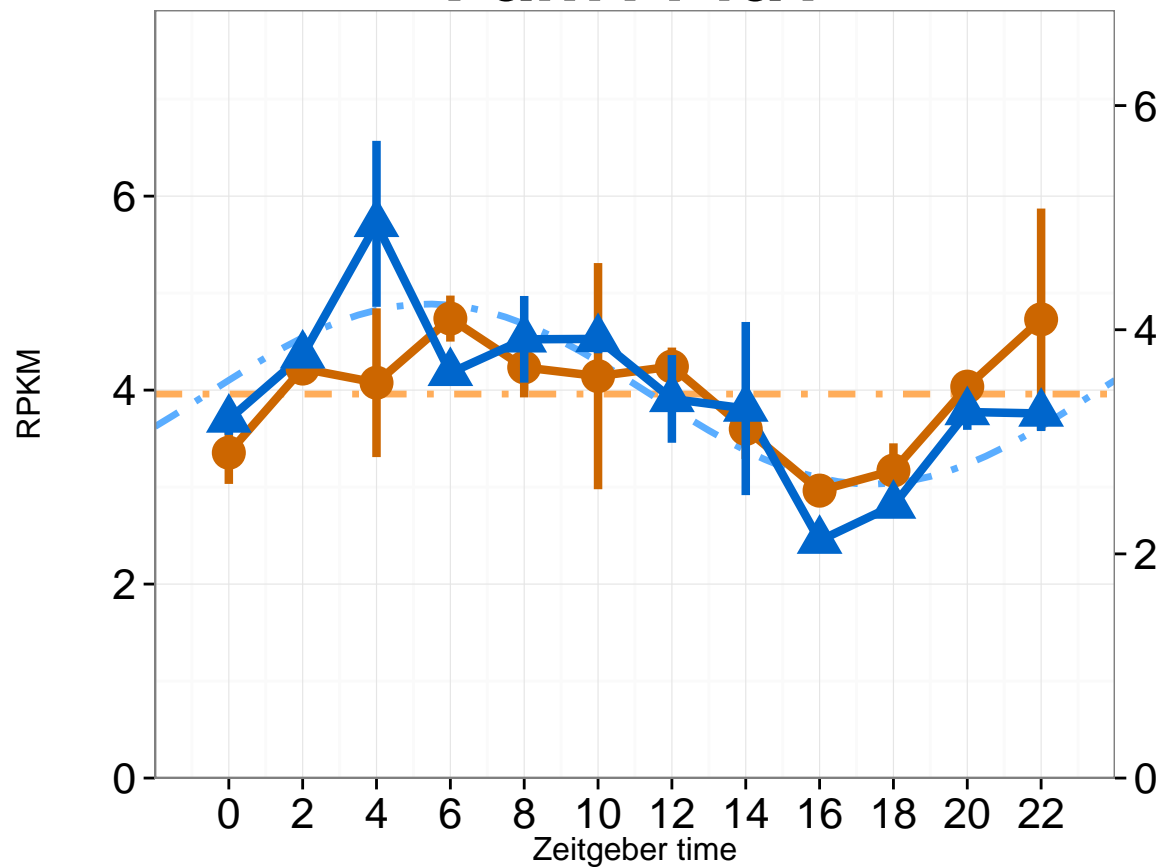

# Fam114a1

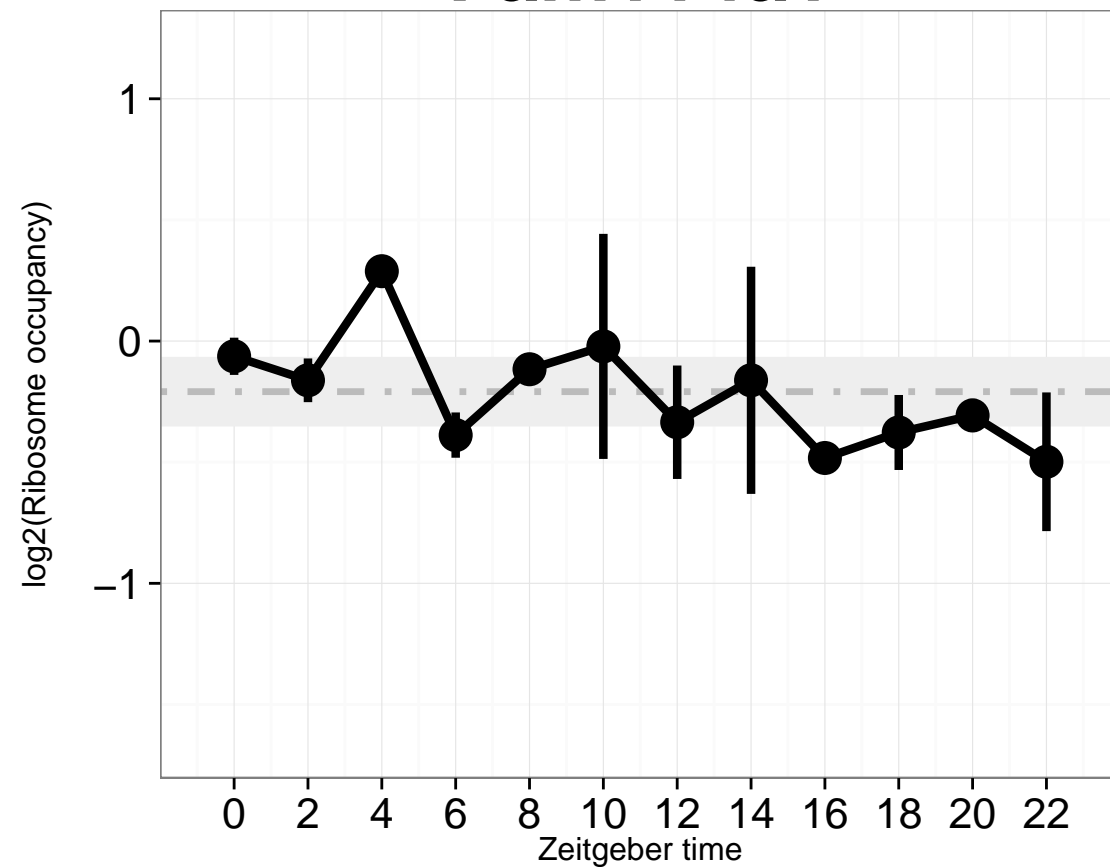

Supplement: Supplementary file 11595 [file 1]

## Rab14

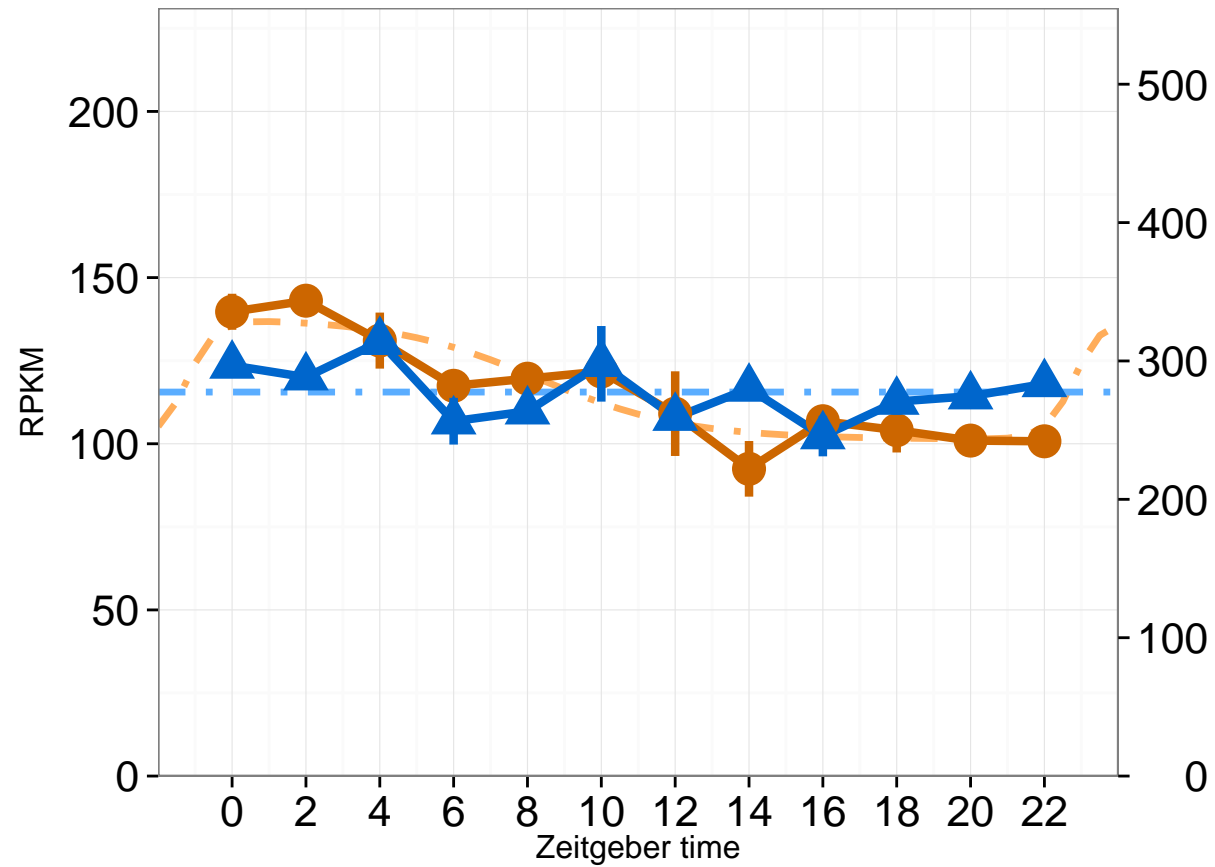

## Rab14

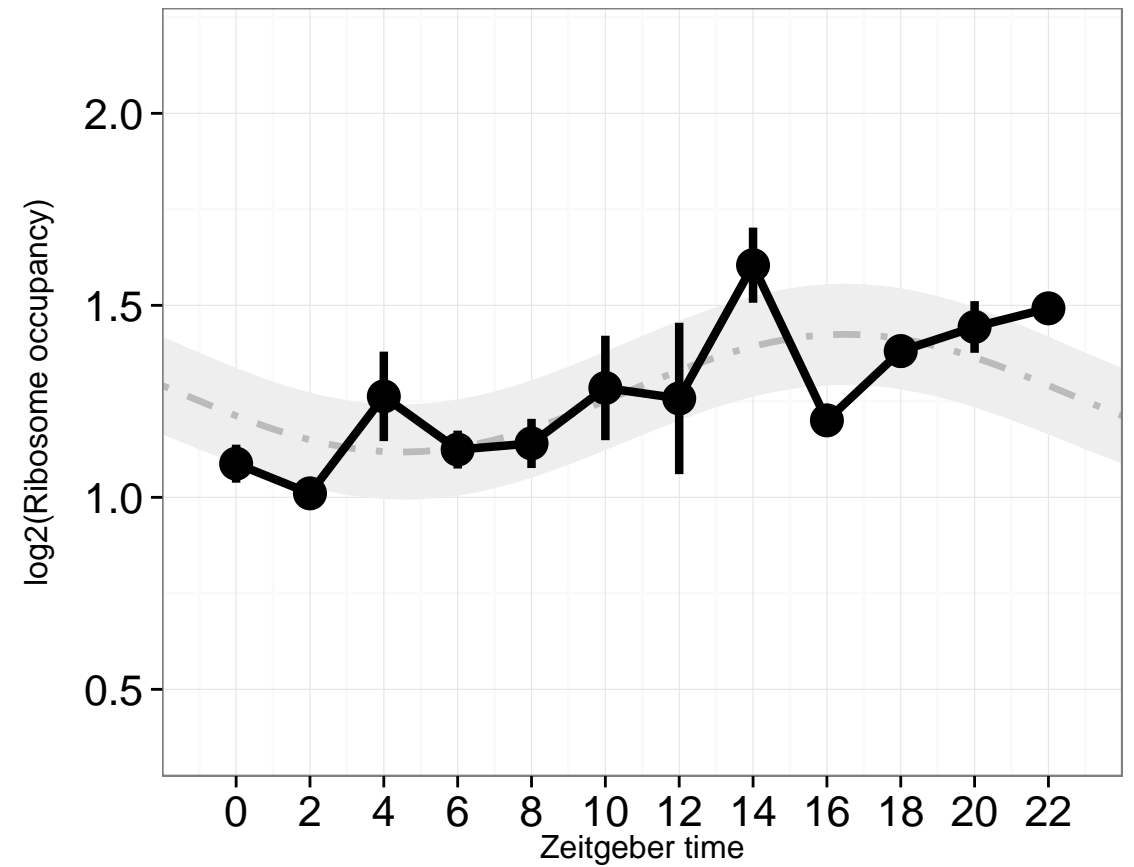

Supplement: Supplementary file 11596 [file 1]

## Jtb

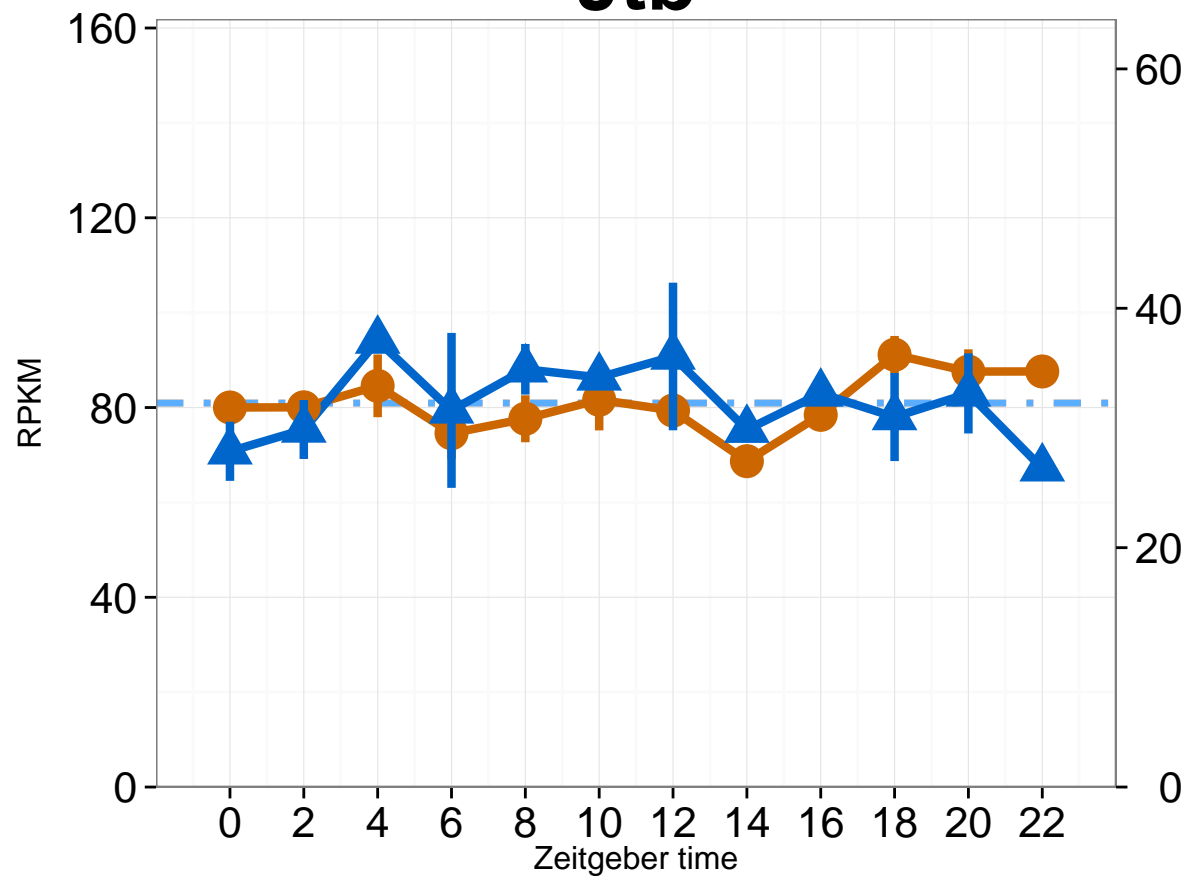

## Jtb

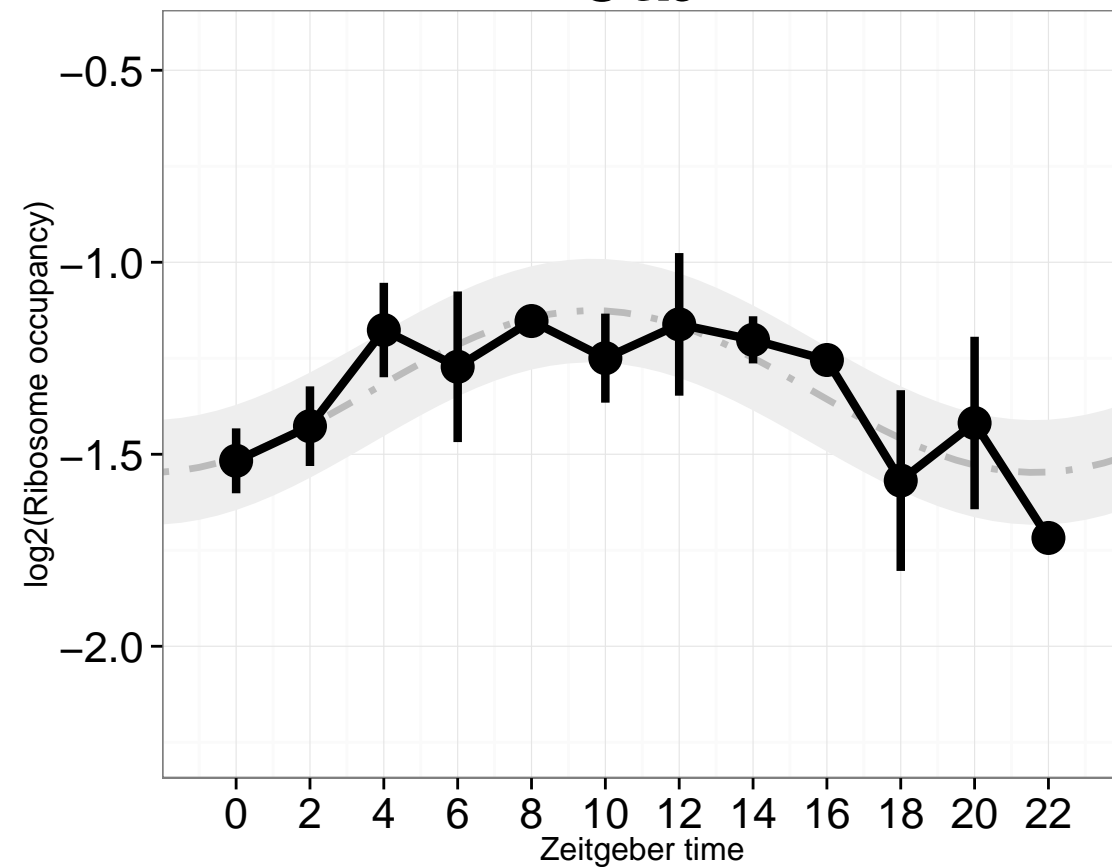

Supplement: Supplementary file 11597 [file 1]

## Abhd6

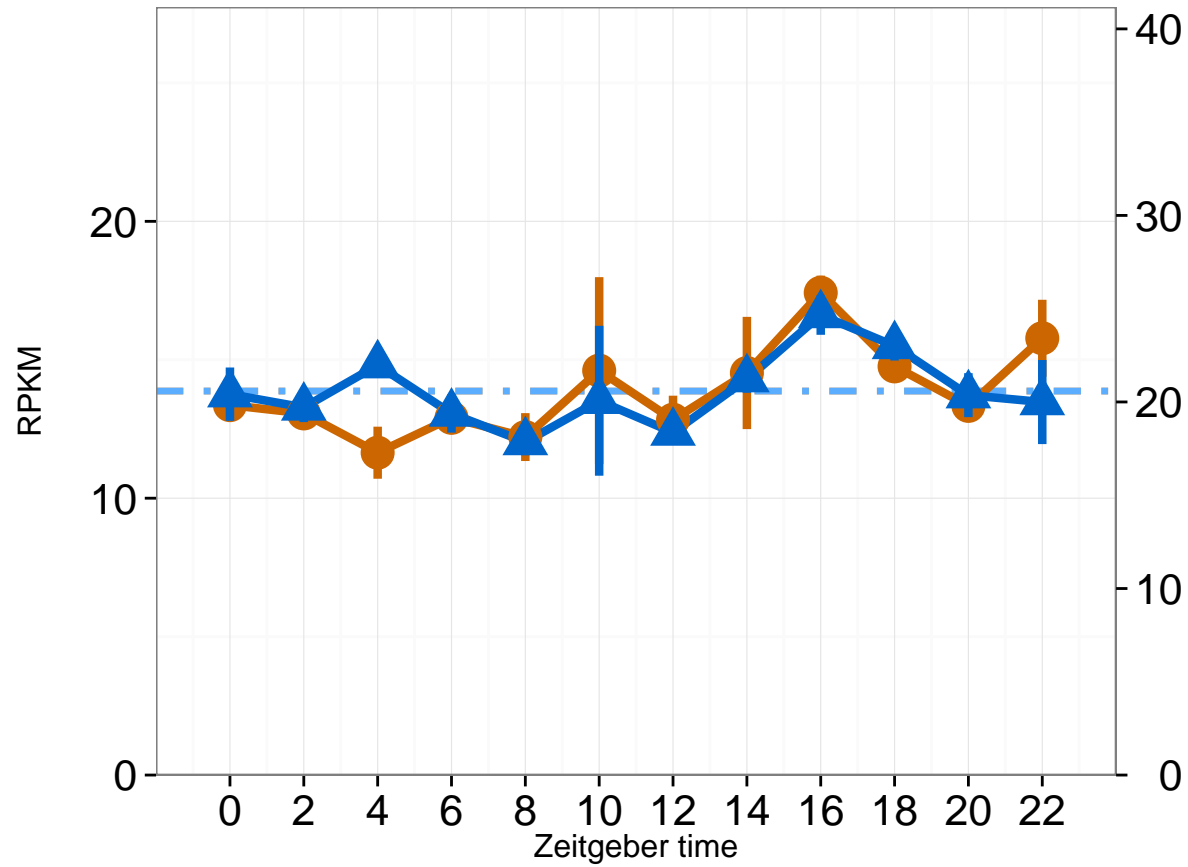

## Abhd6

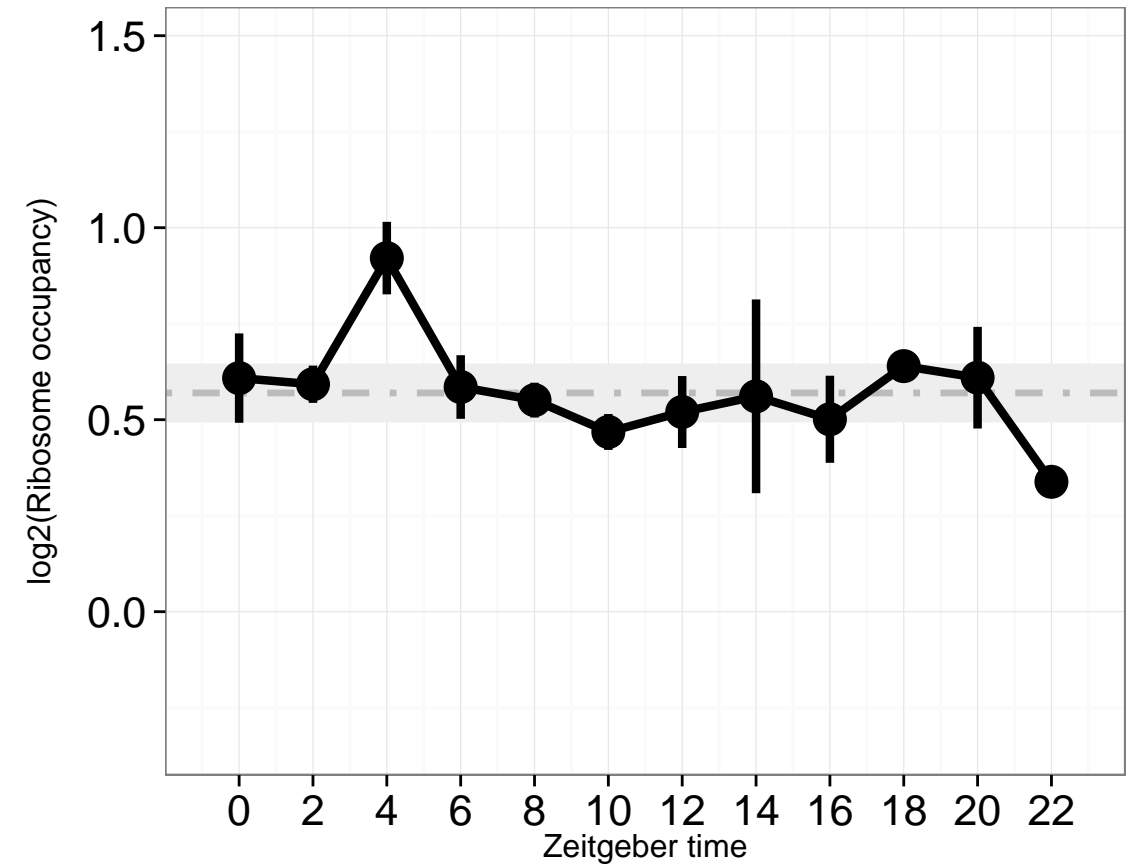

Supplement: Supplementary file 11598 [file 1]

## B3galtl

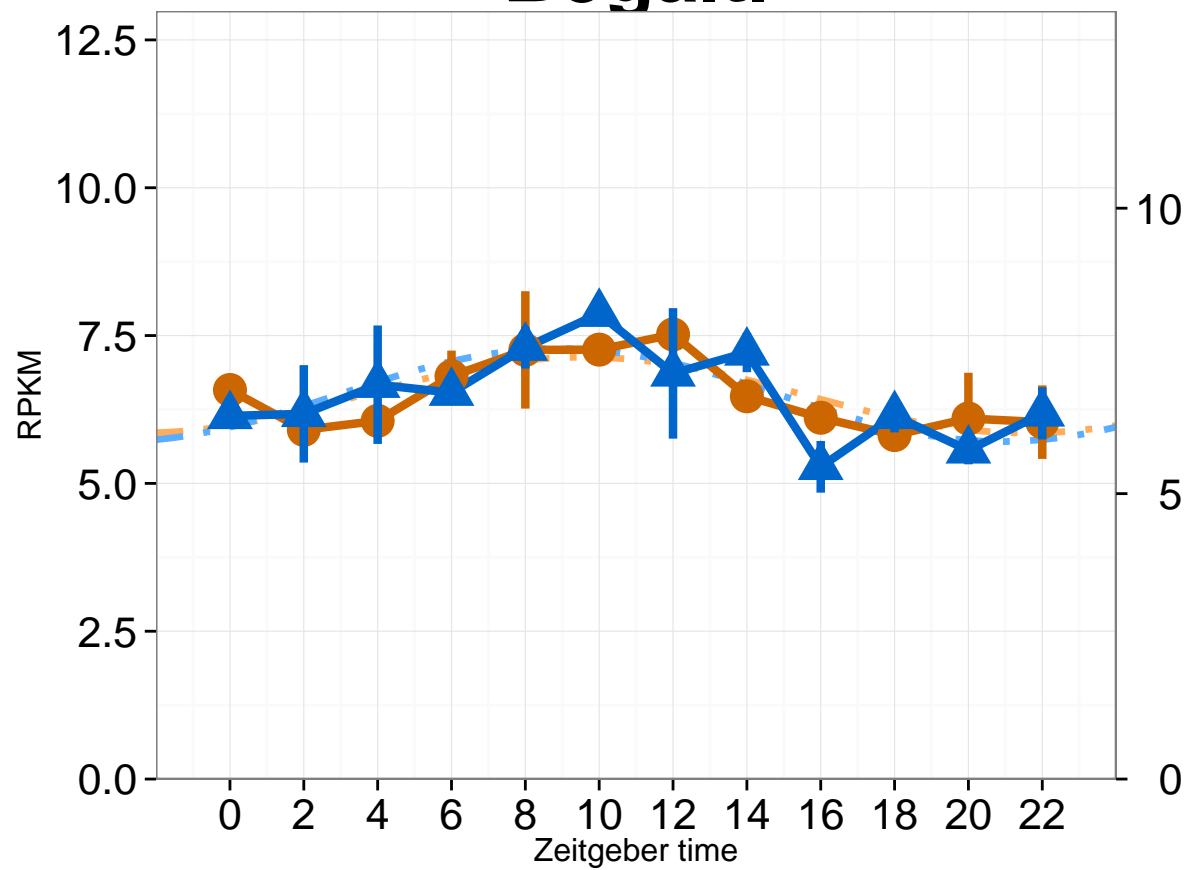

## B3galtl

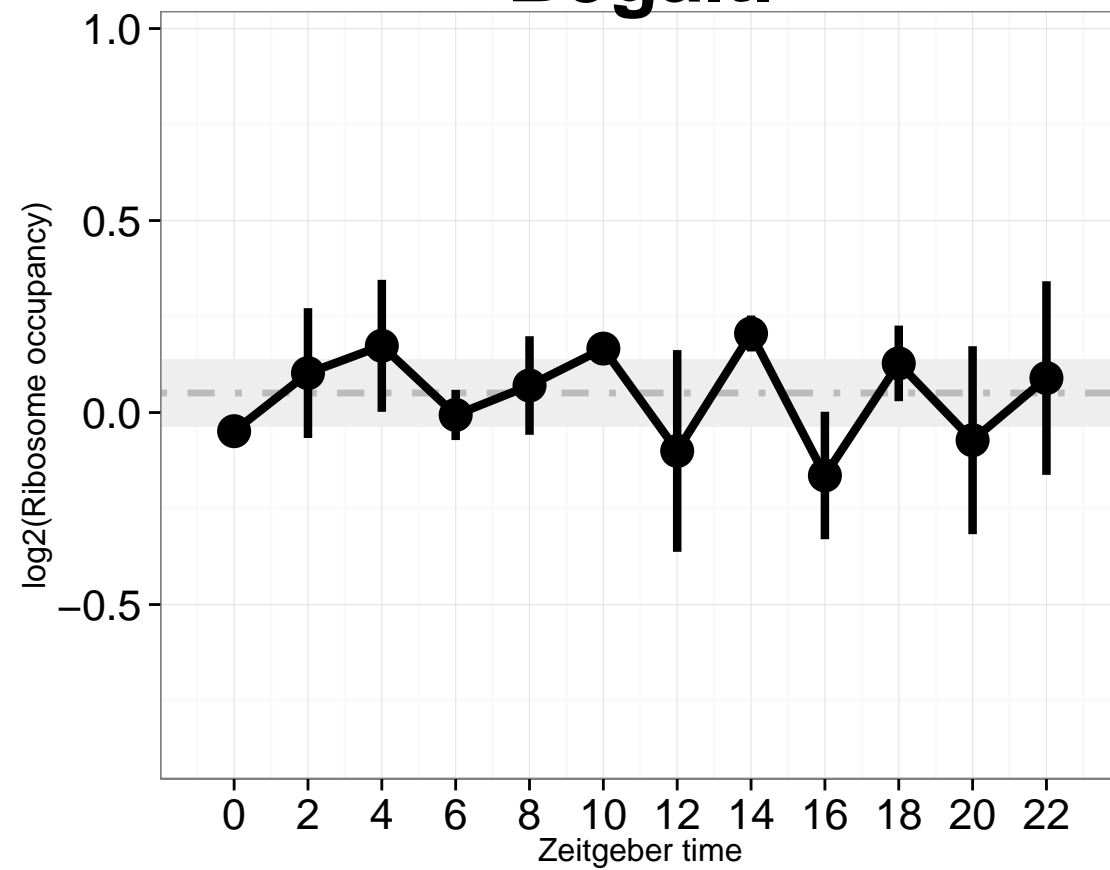

Supplement: Supplementary file 11599 [file 1]

## Ccdc9

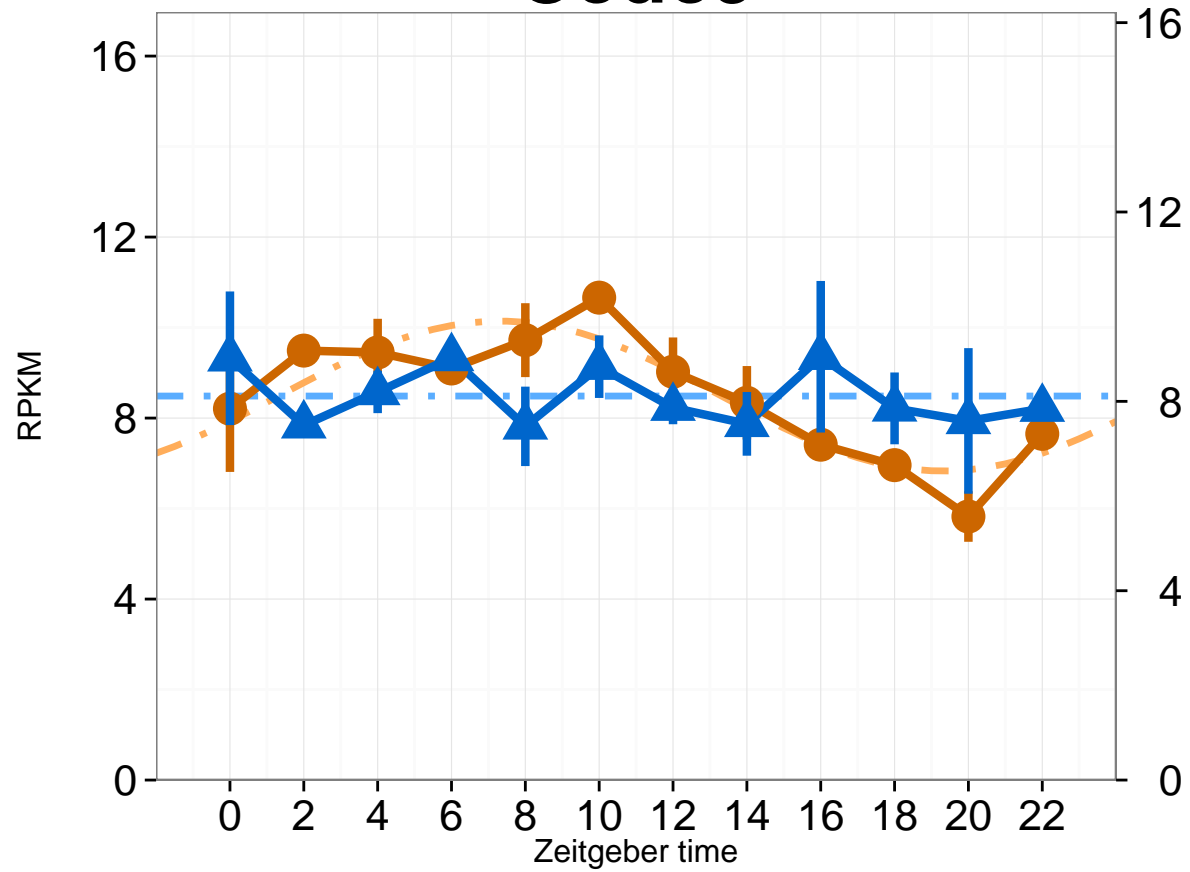

## Ccdc9

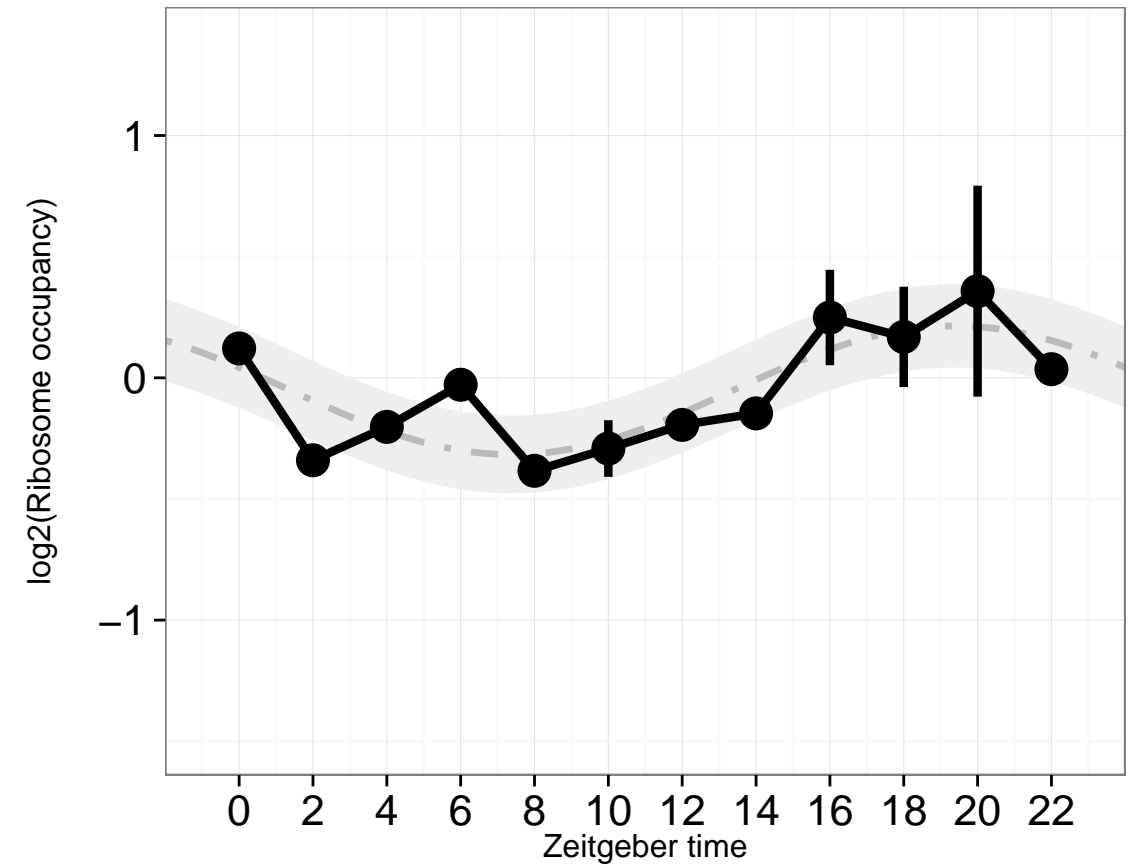

Supplement: Supplementary file 11600 [file 1]

# Wdyhv1

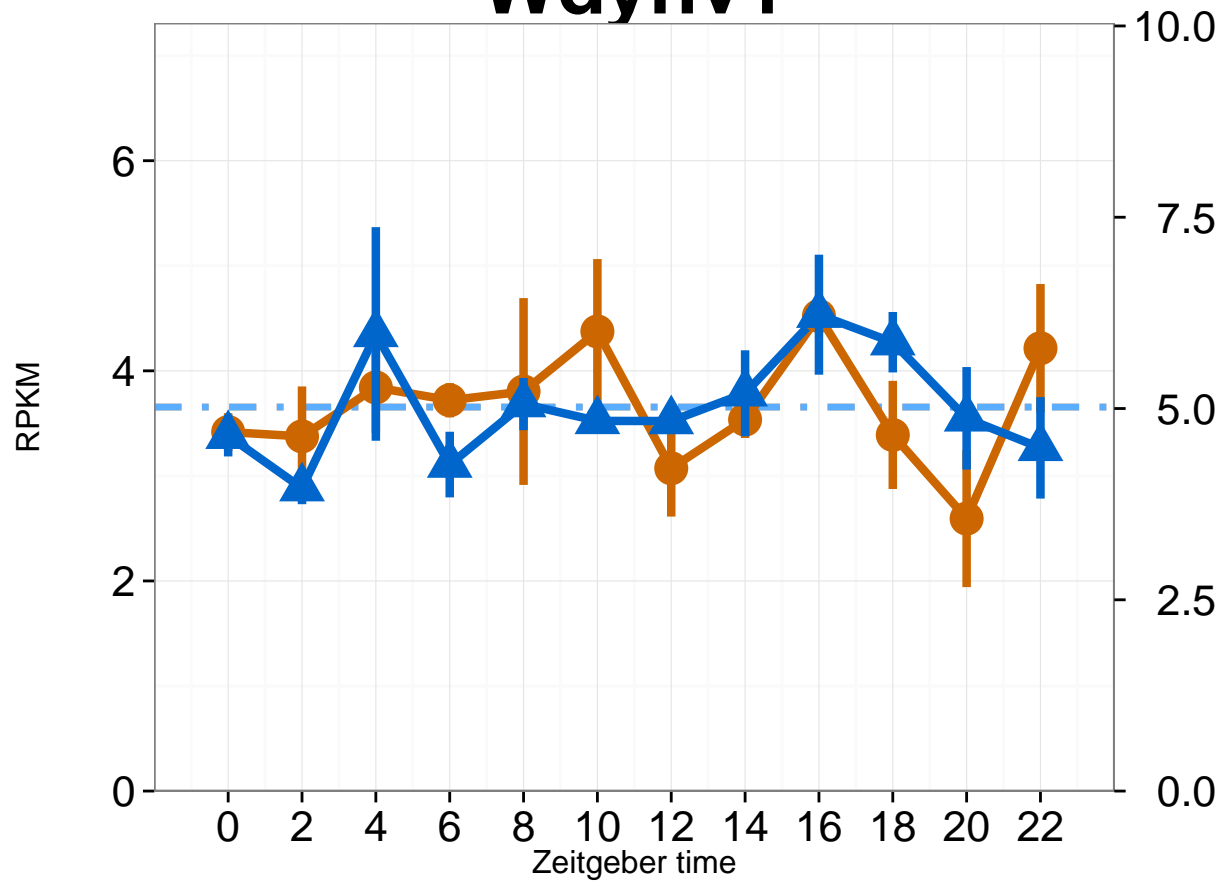

# Wdyhv1

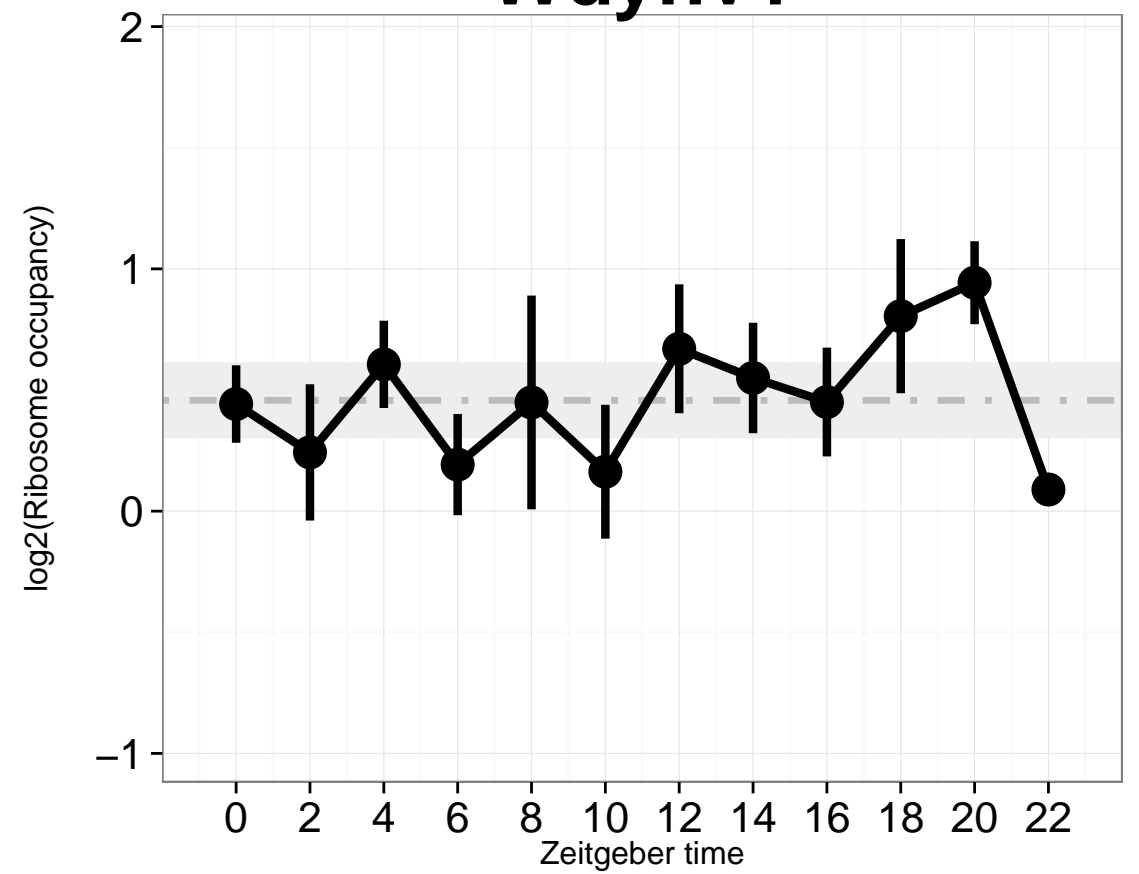

Supplement: Supplementary file 11601 [file 1]

# Frg1

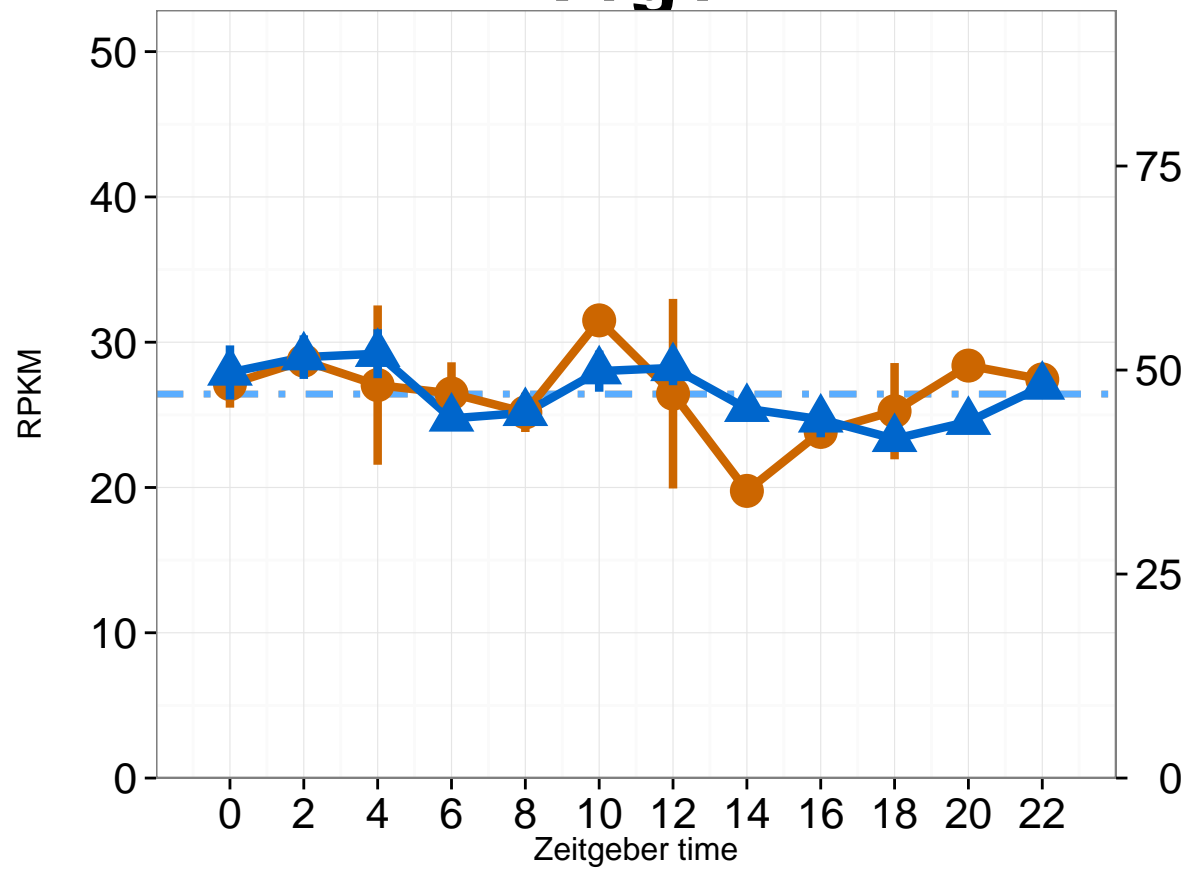

# Frg1

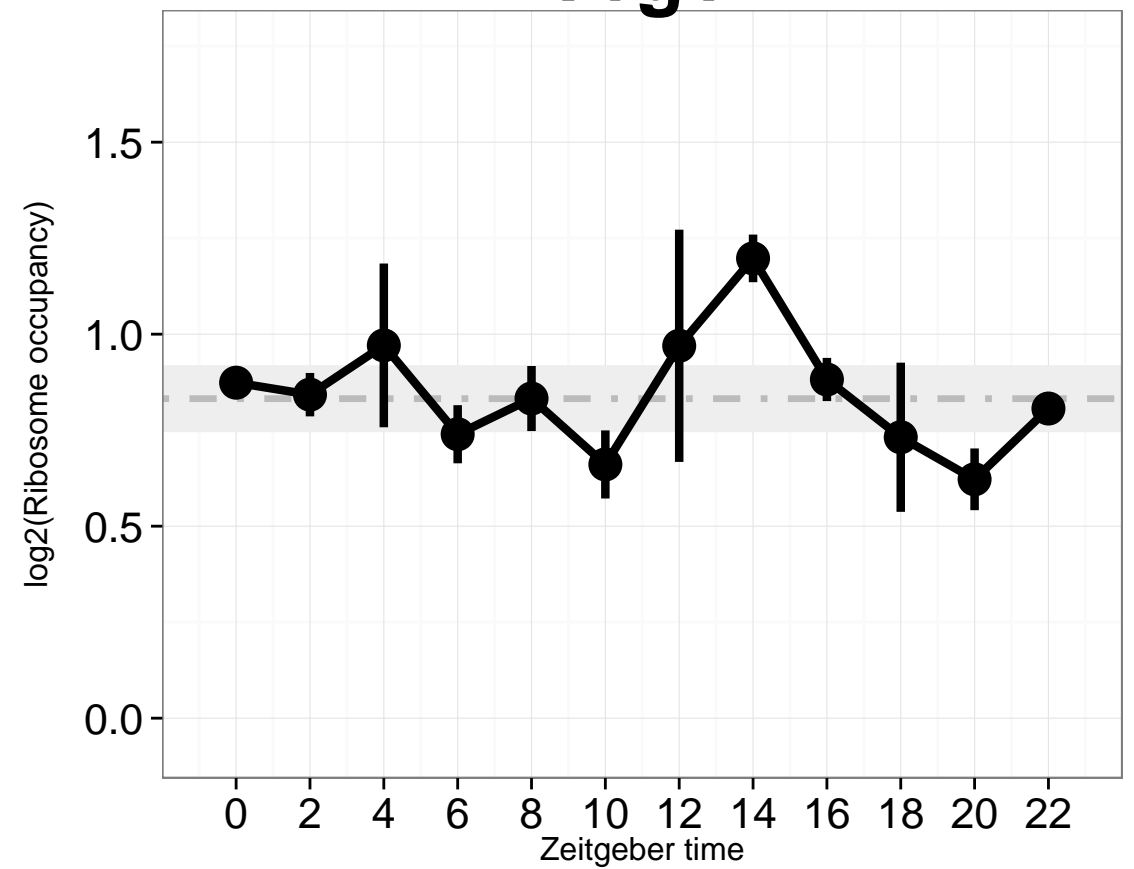

Supplement: Supplementary file 11602 [file 1]

# Car5b

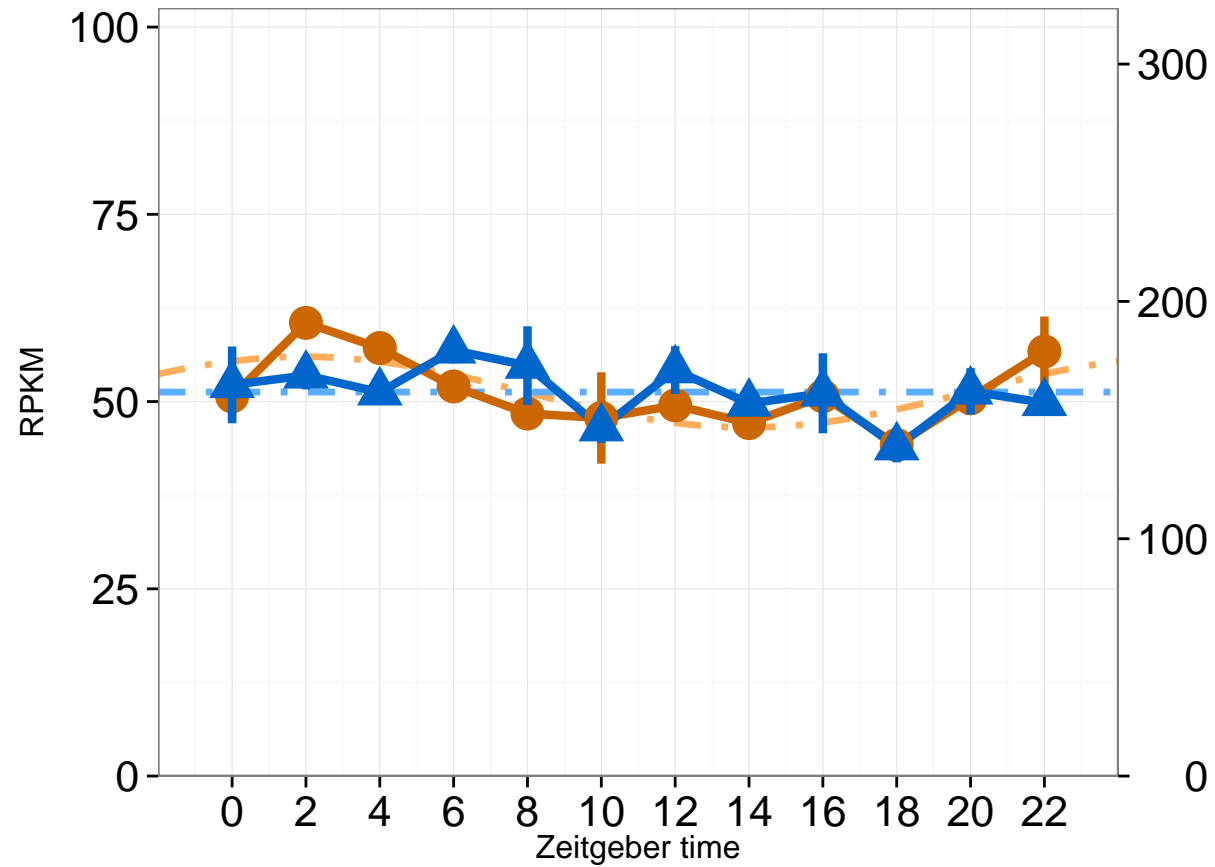

# Car5b

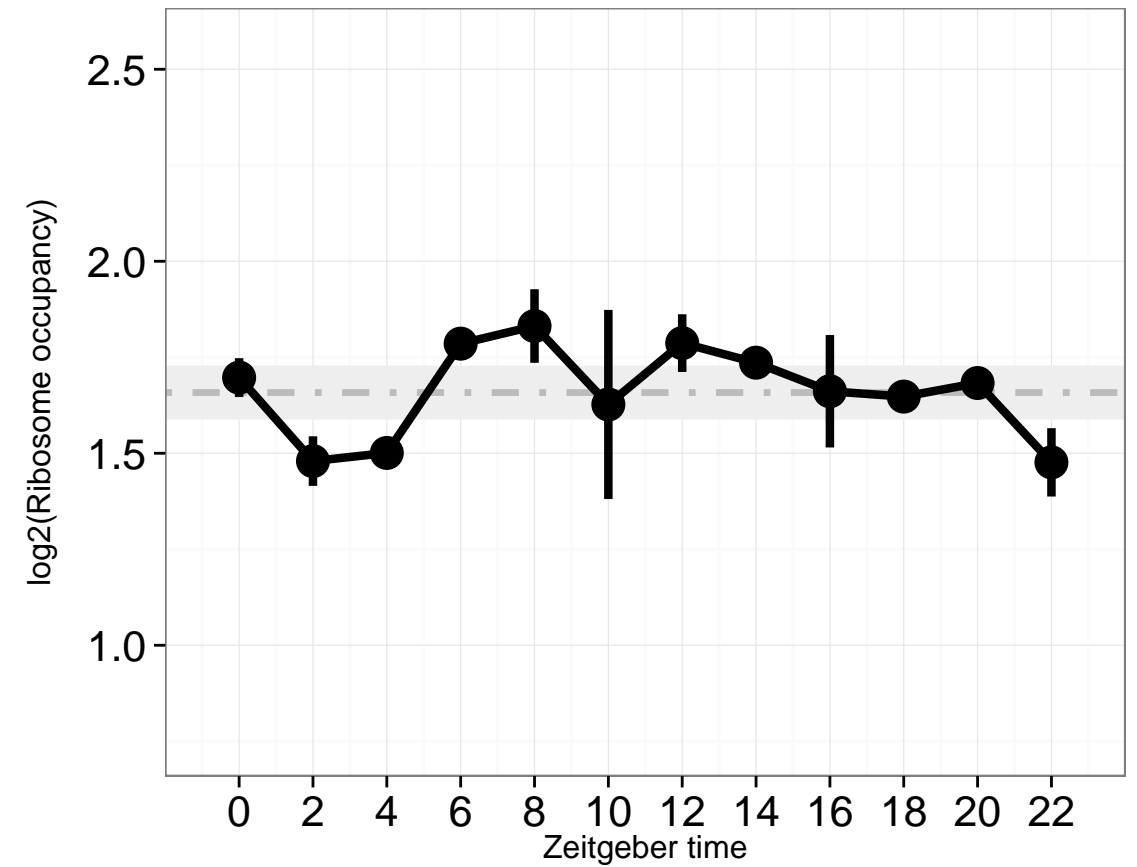

Supplement: Supplementary file 11603 [file 1]

# Pip4k2c

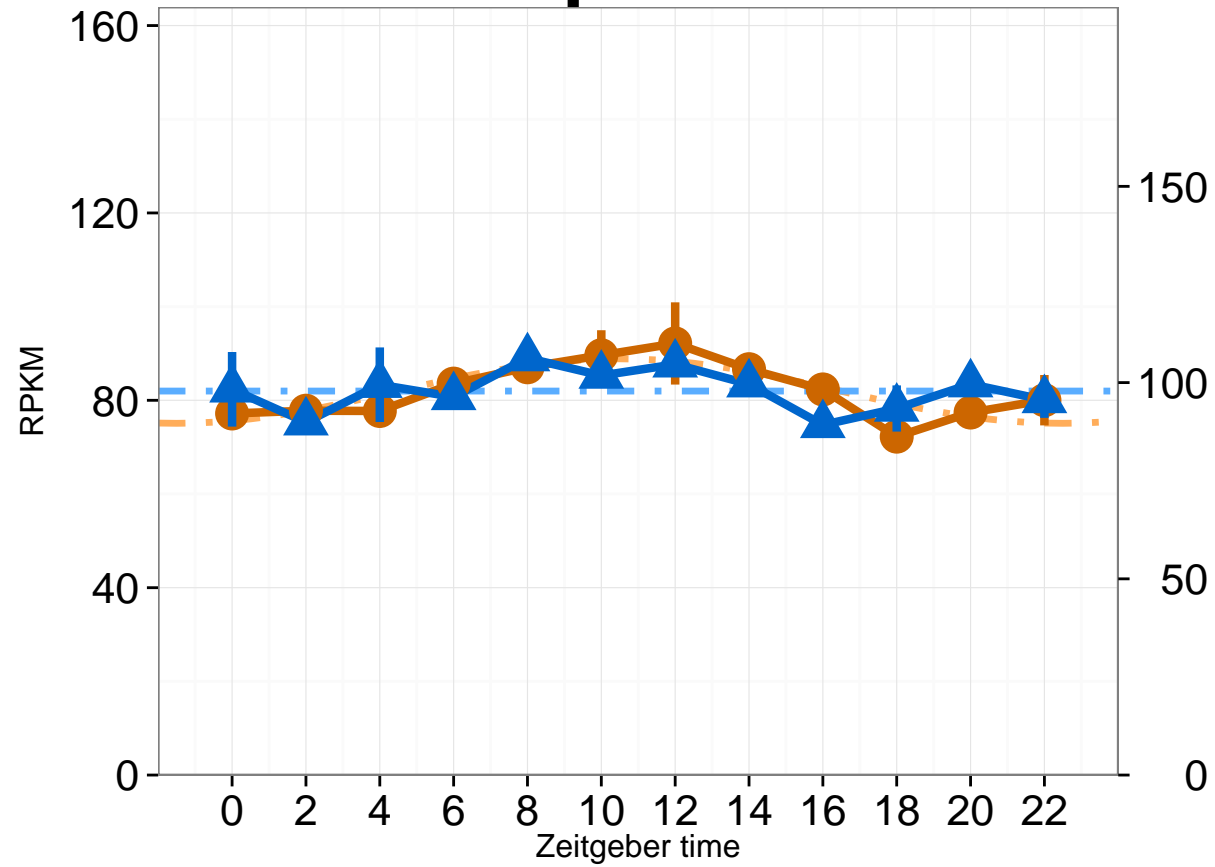

# Pip4k2c

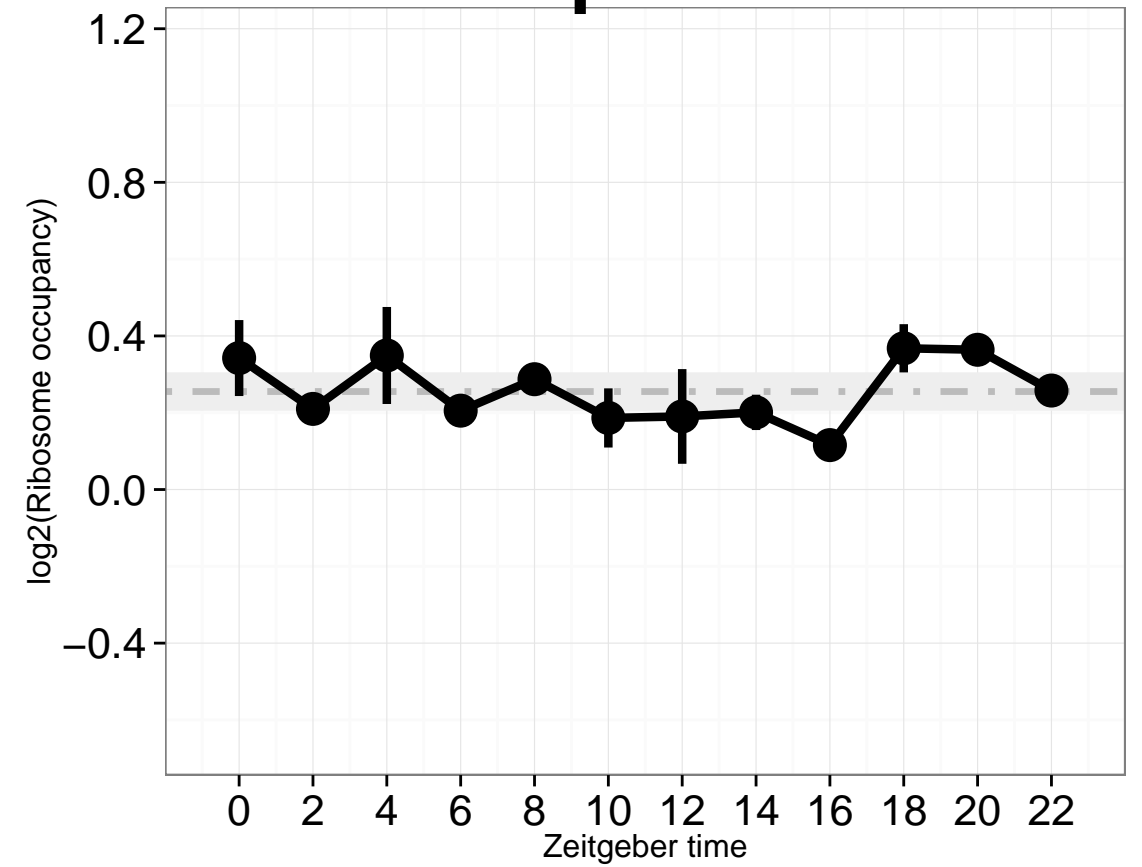

Supplement: Supplementary file 11604 [file 1]

## Ripply3

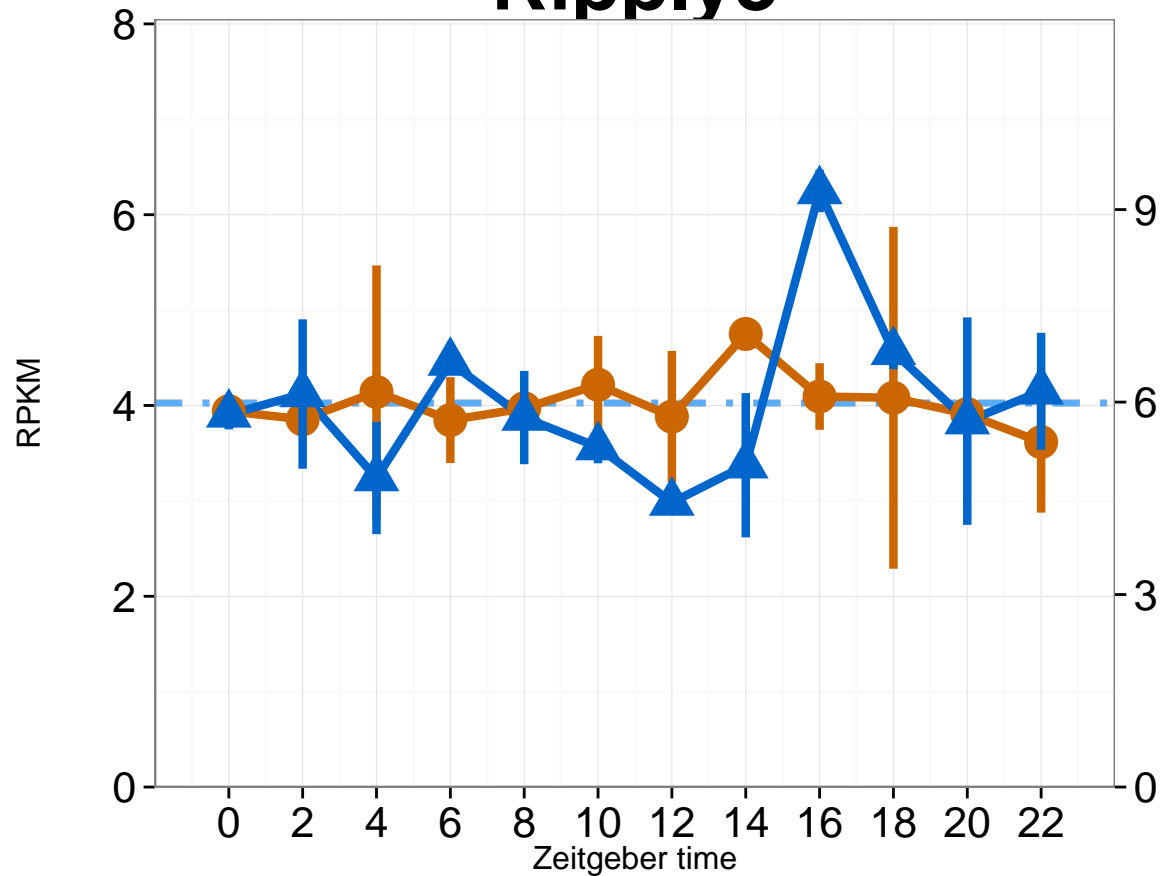

## Ripply3

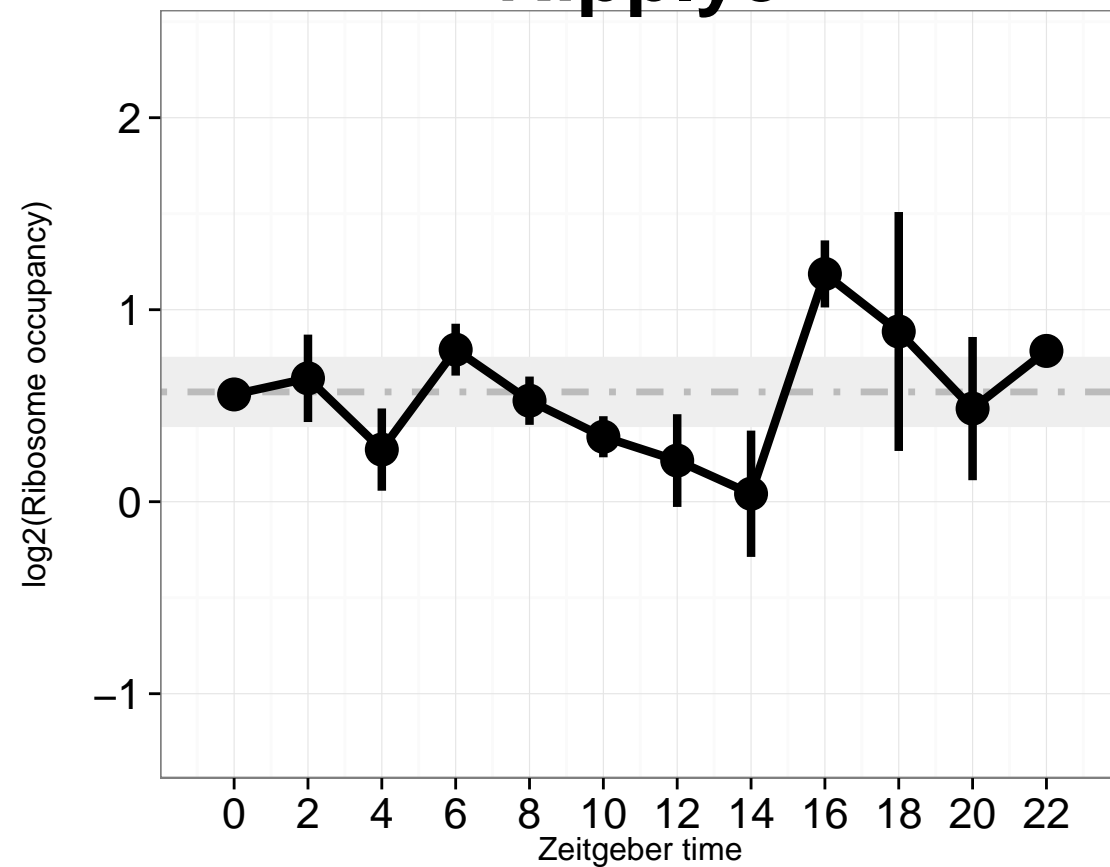

Supplement: Supplementary file 11605 [file 1]

# Rps14

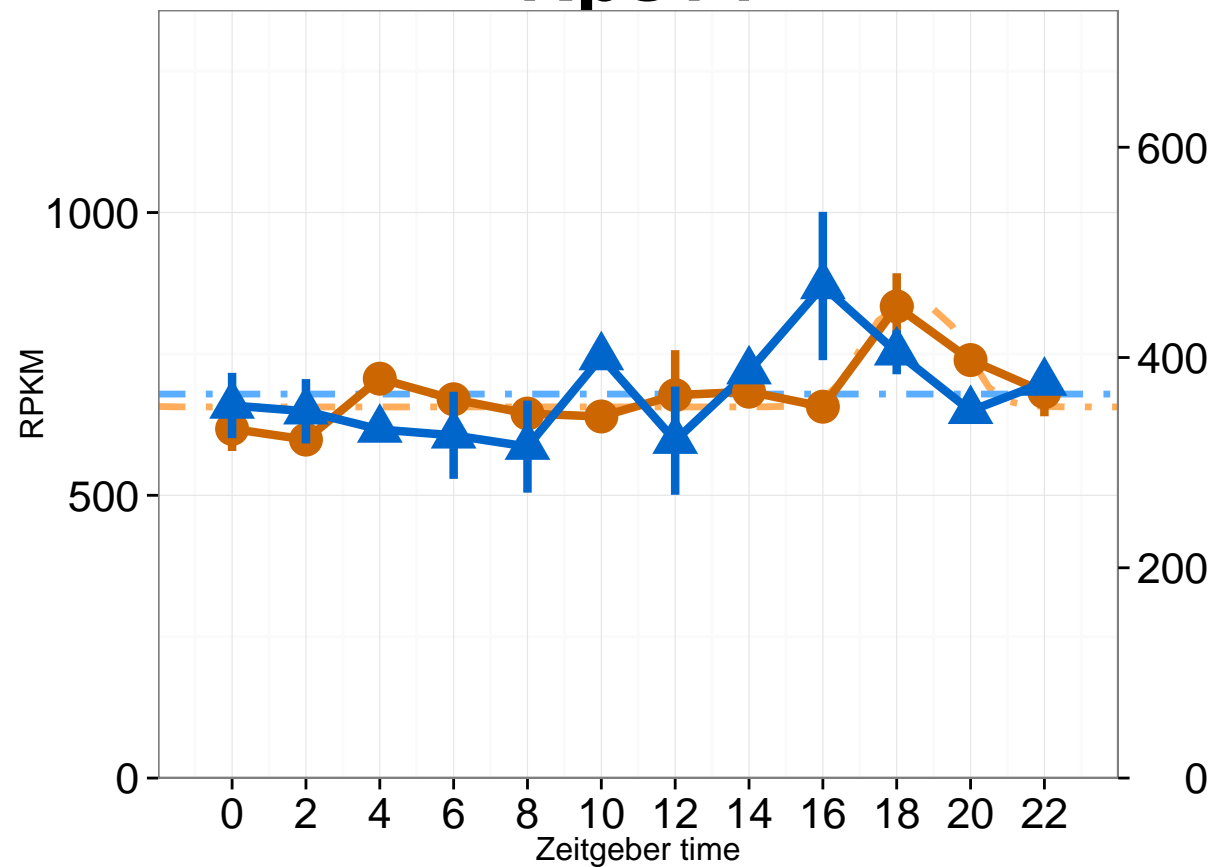

# Rps14

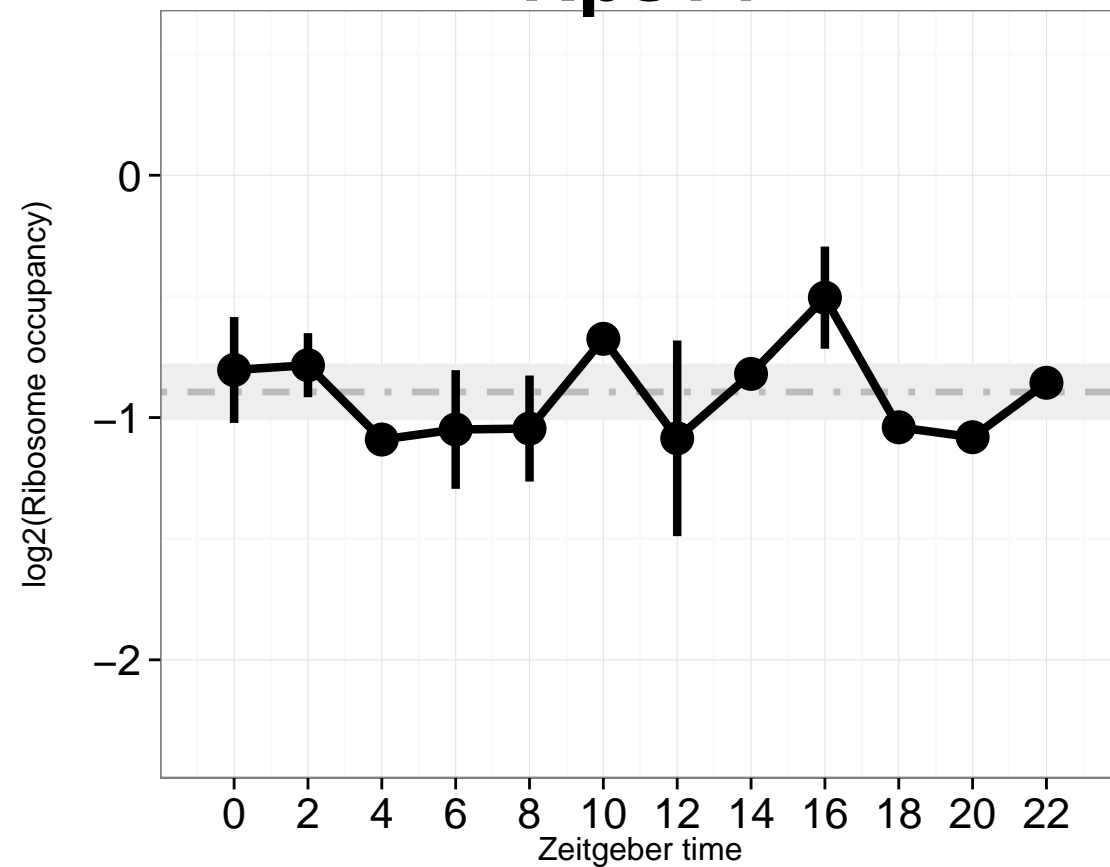

Supplement: Supplementary file 11606 [file 1]

## Nfia

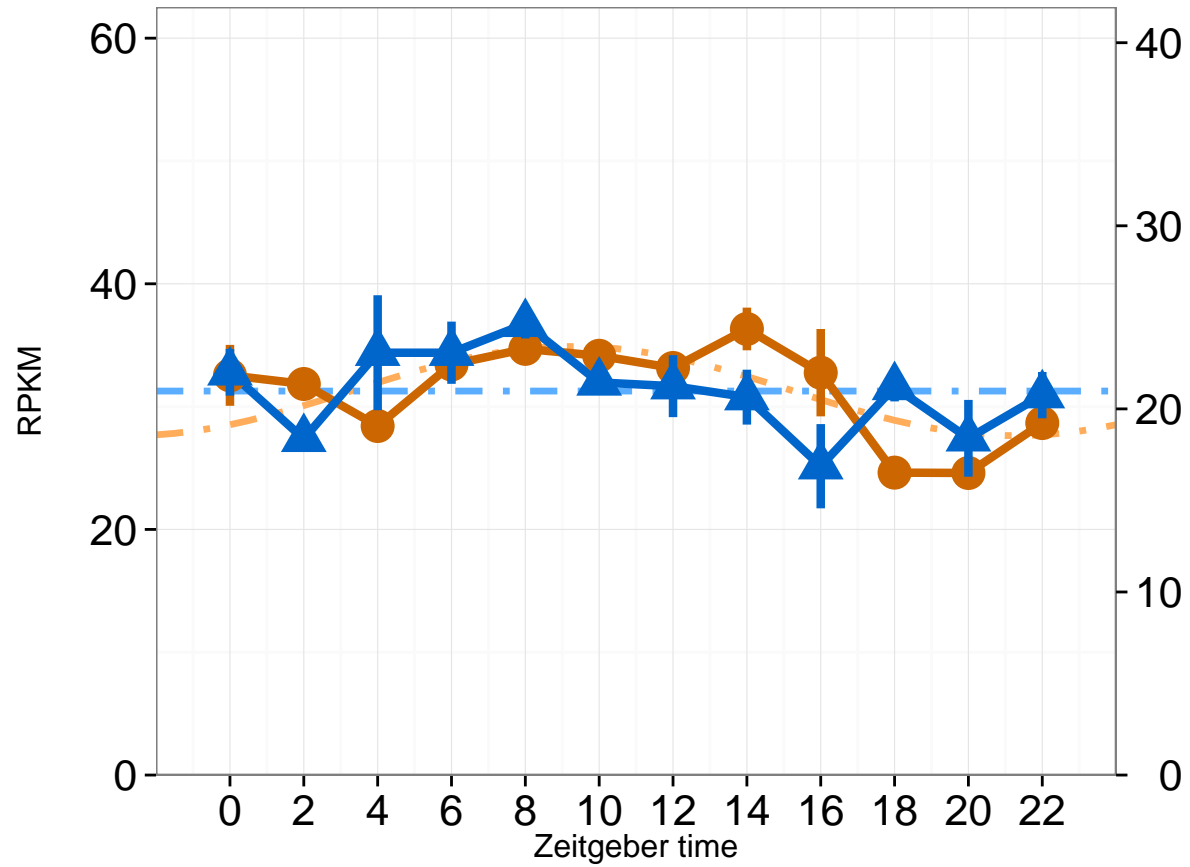

## Nfia

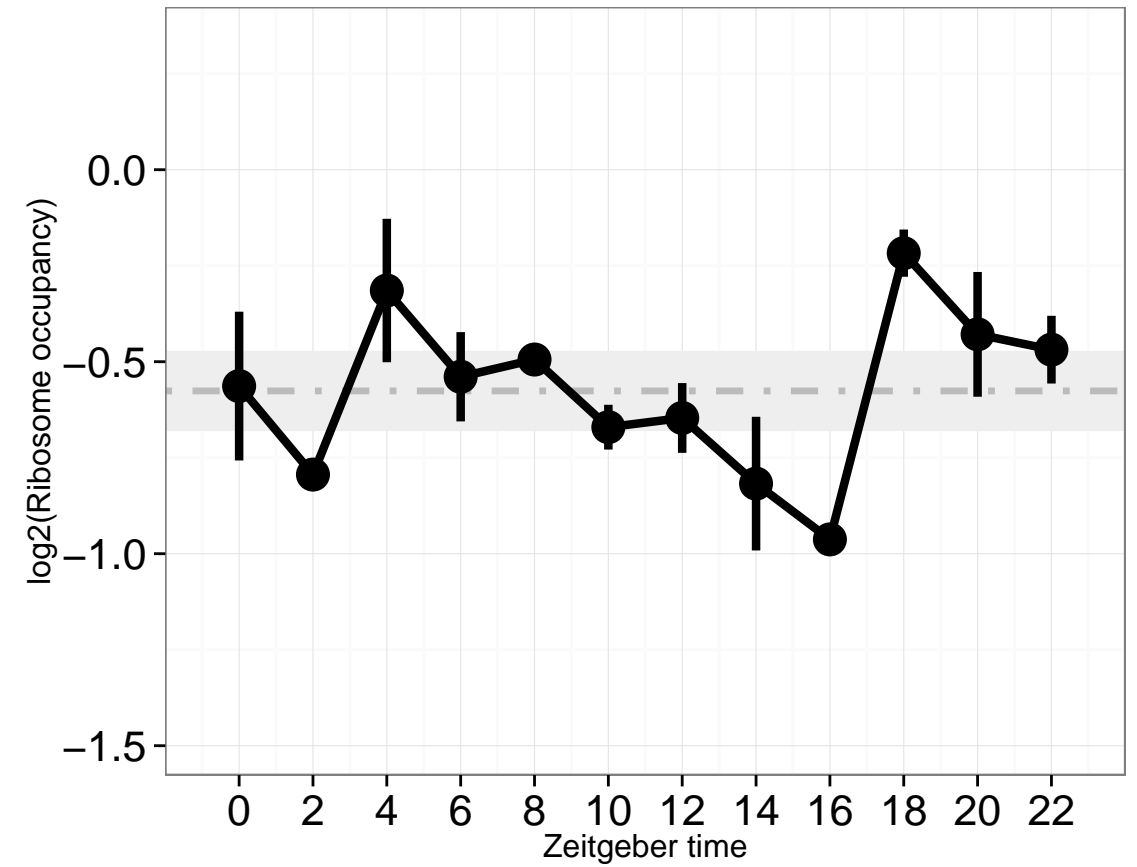

Supplement: Supplementary file 11607 [file 1]

# Vstm5

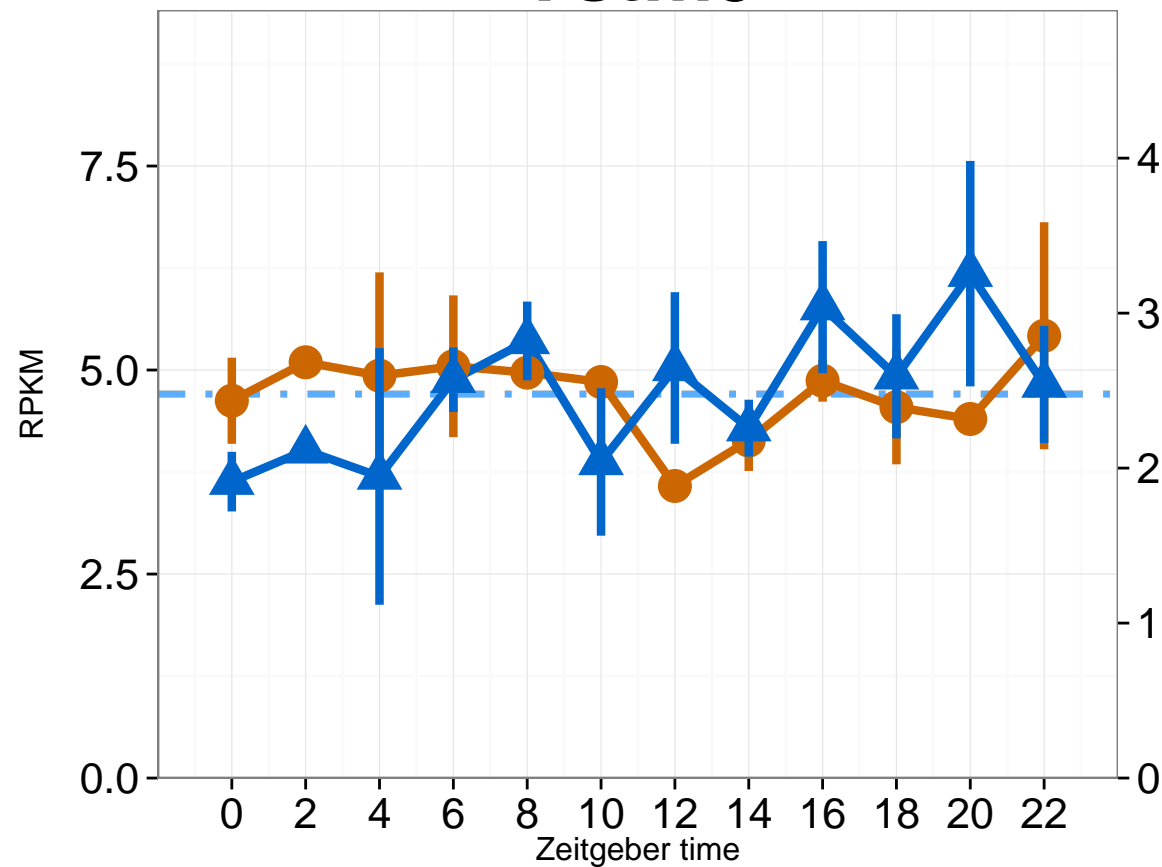

# Vstm5

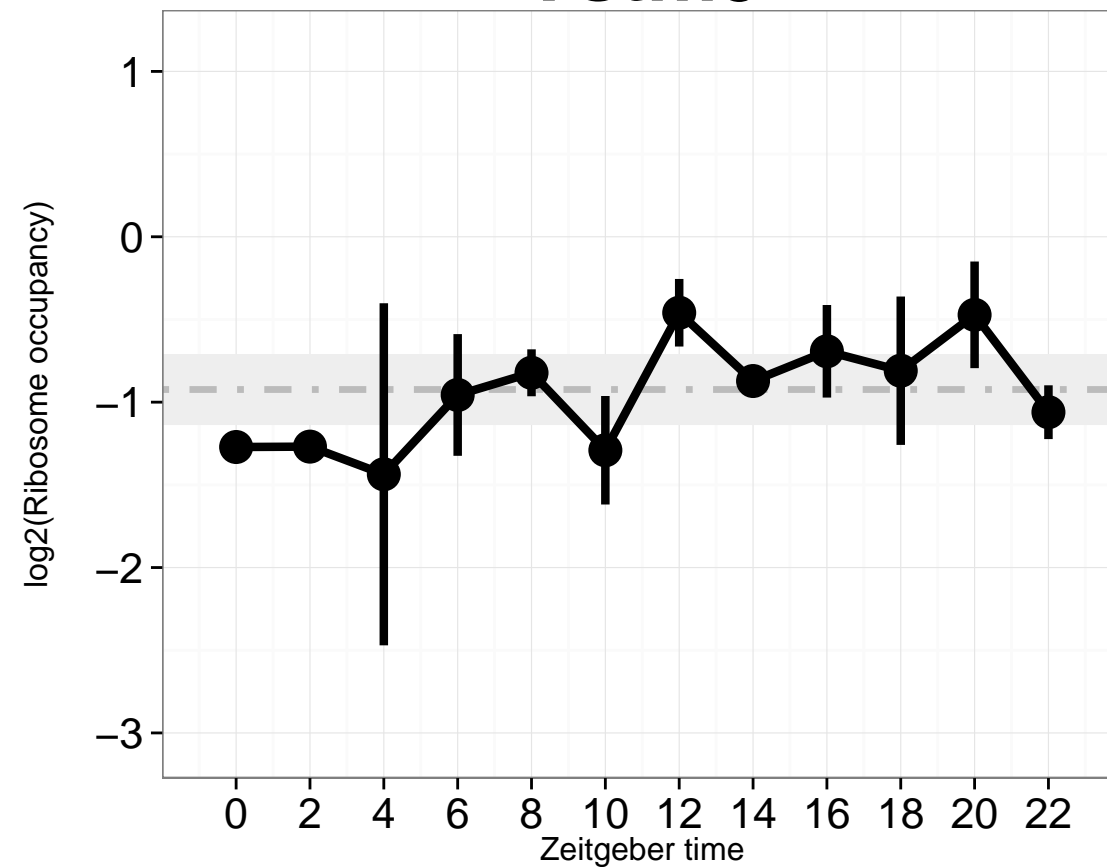

Supplement: Supplementary file 11608 [file 1]

## Fbxo42

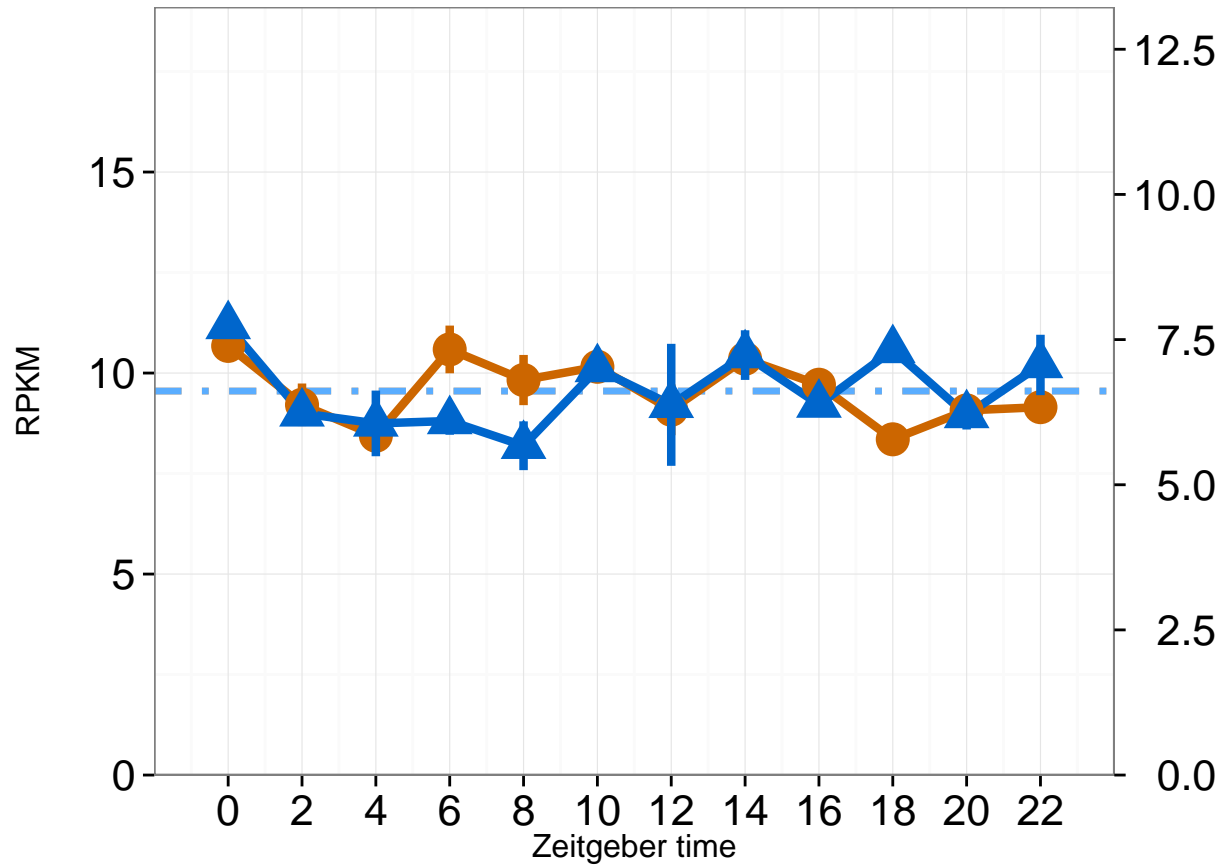

## Fbxo42

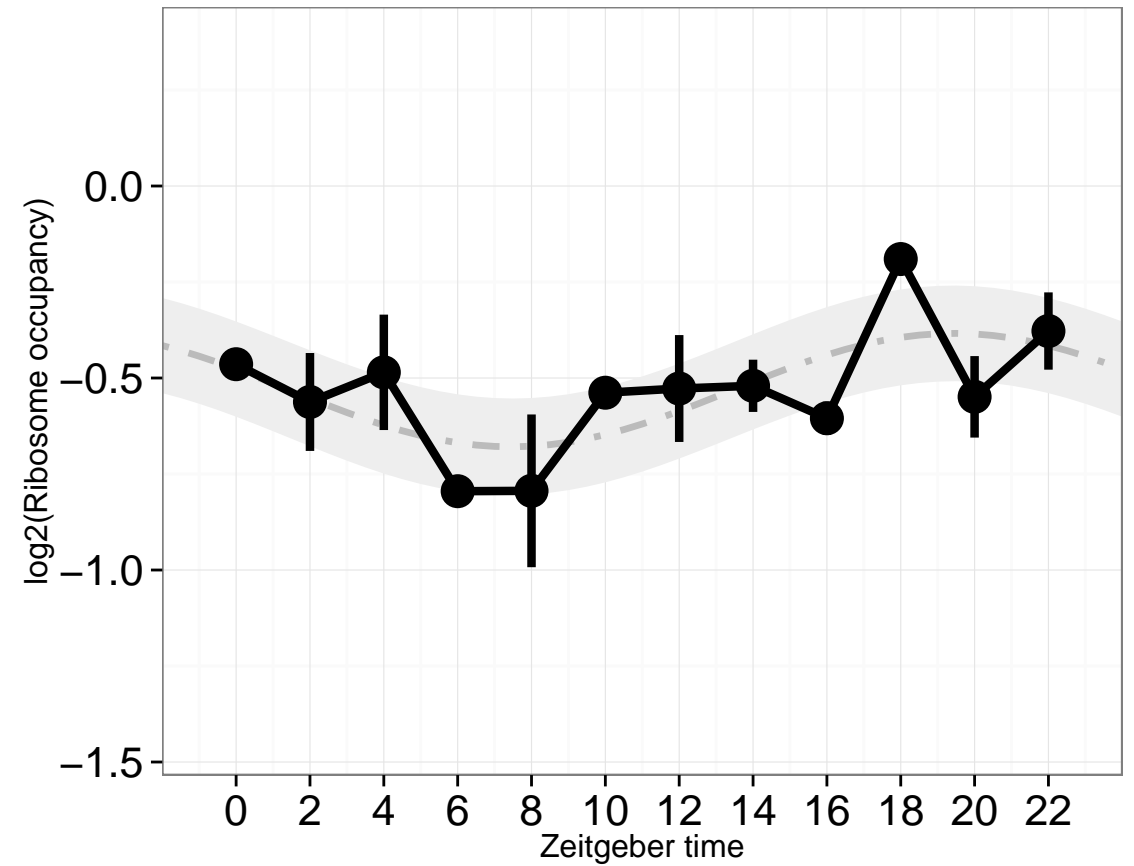

Supplement: Supplementary file 11609 [file 1]

# Fam101a

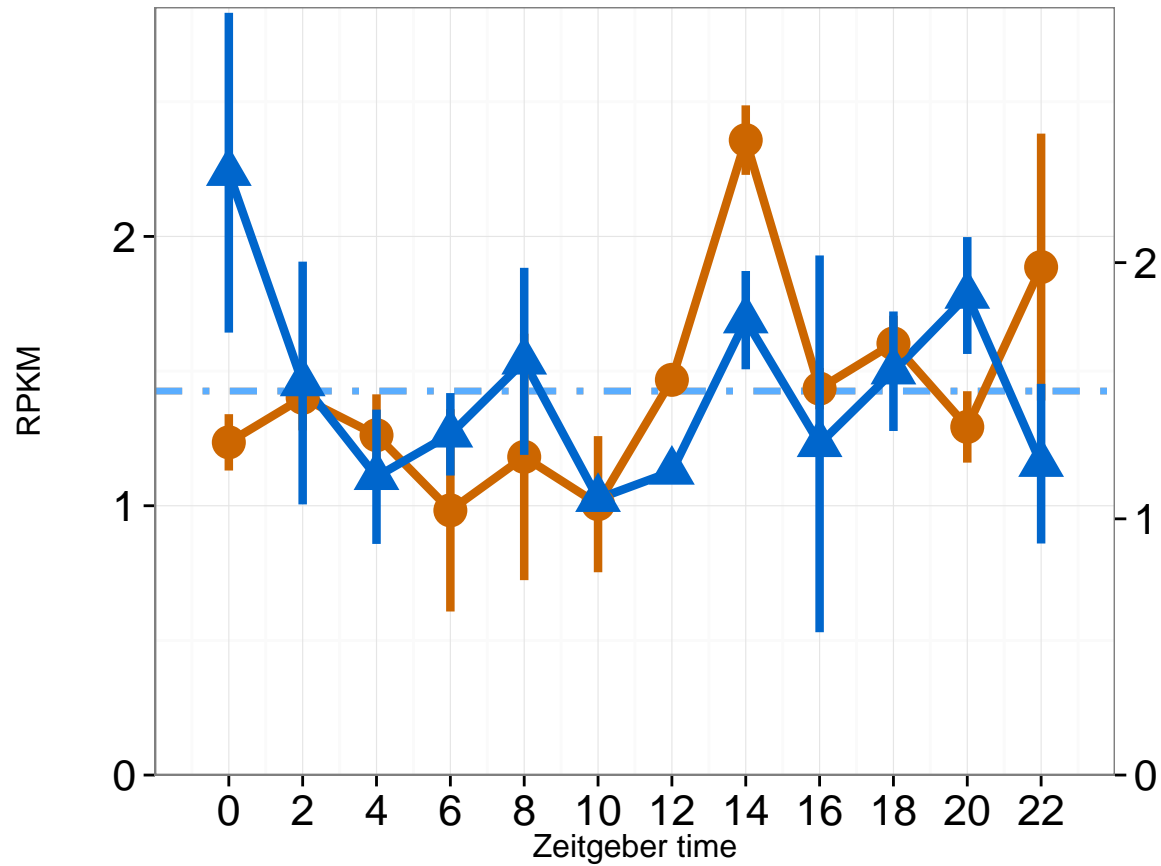

# Fam101a

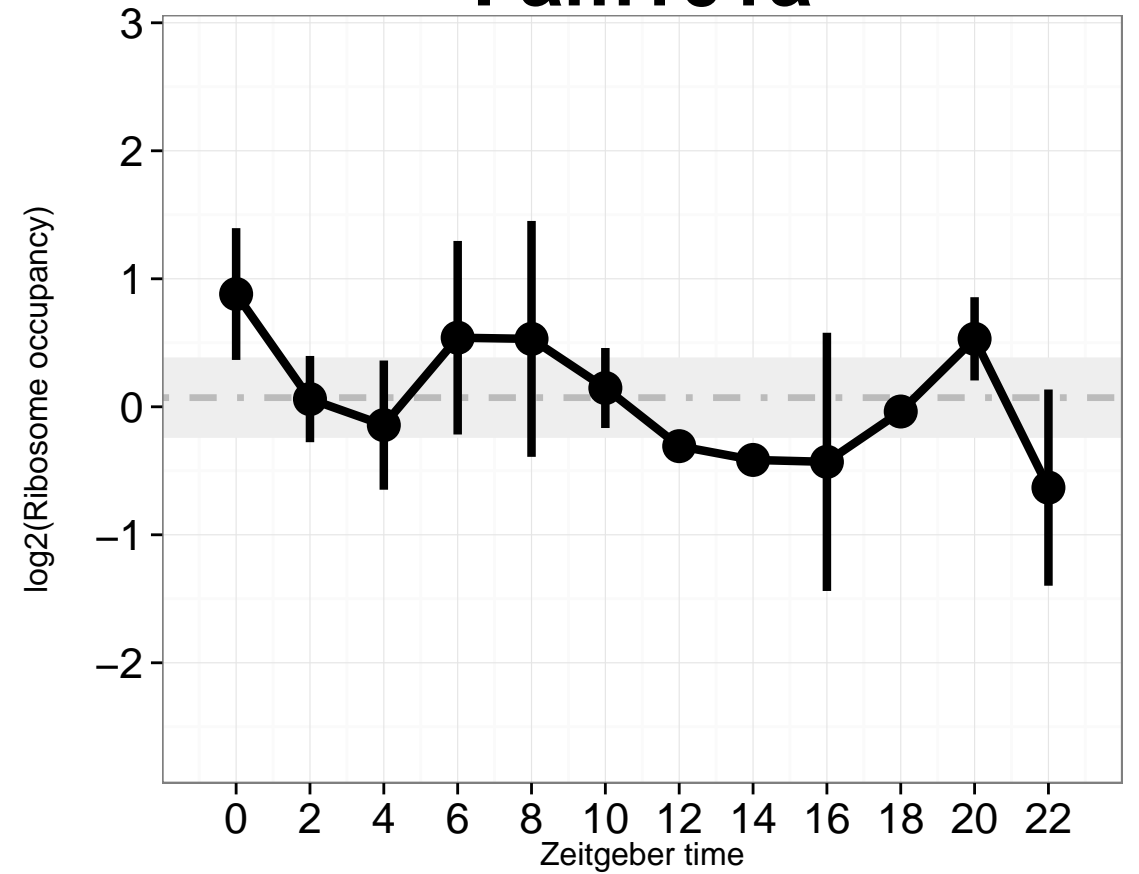

Supplement: Supplementary file 11610 [file 1]

## Naa40

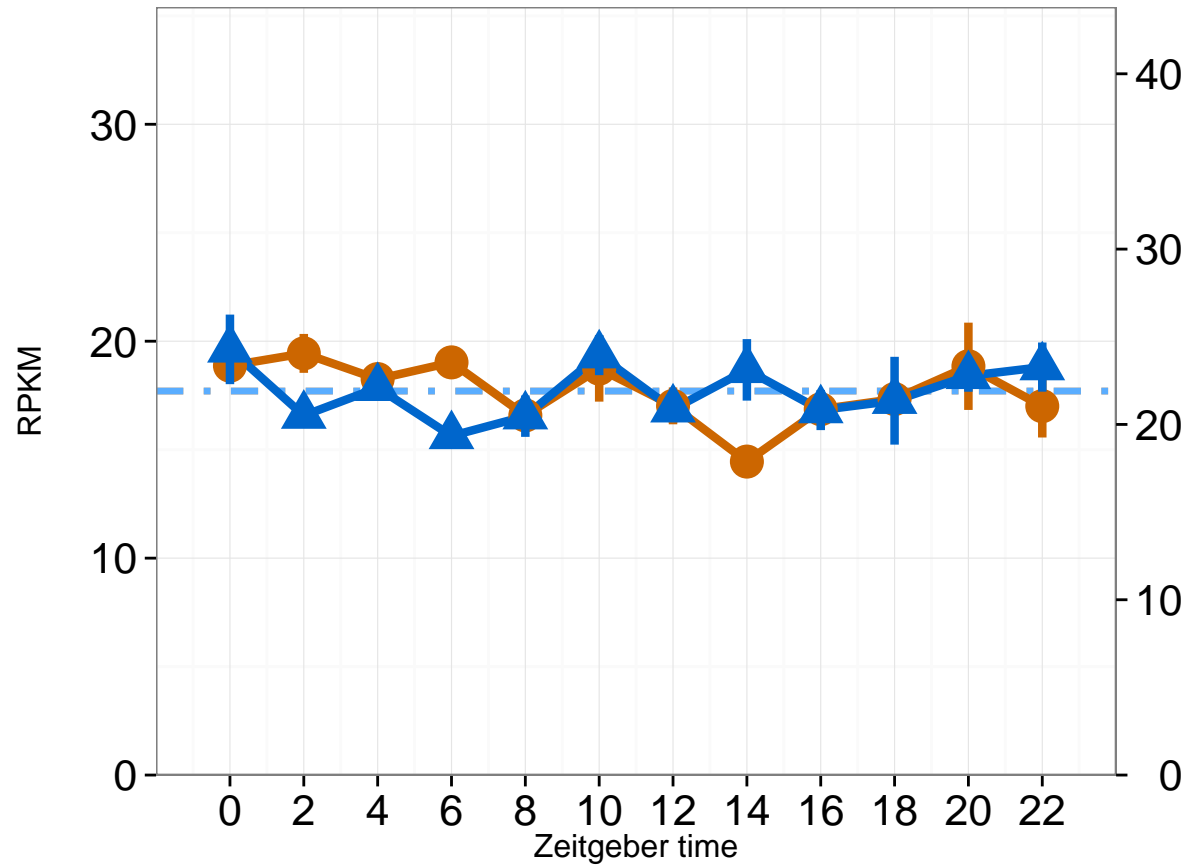

## Naa40

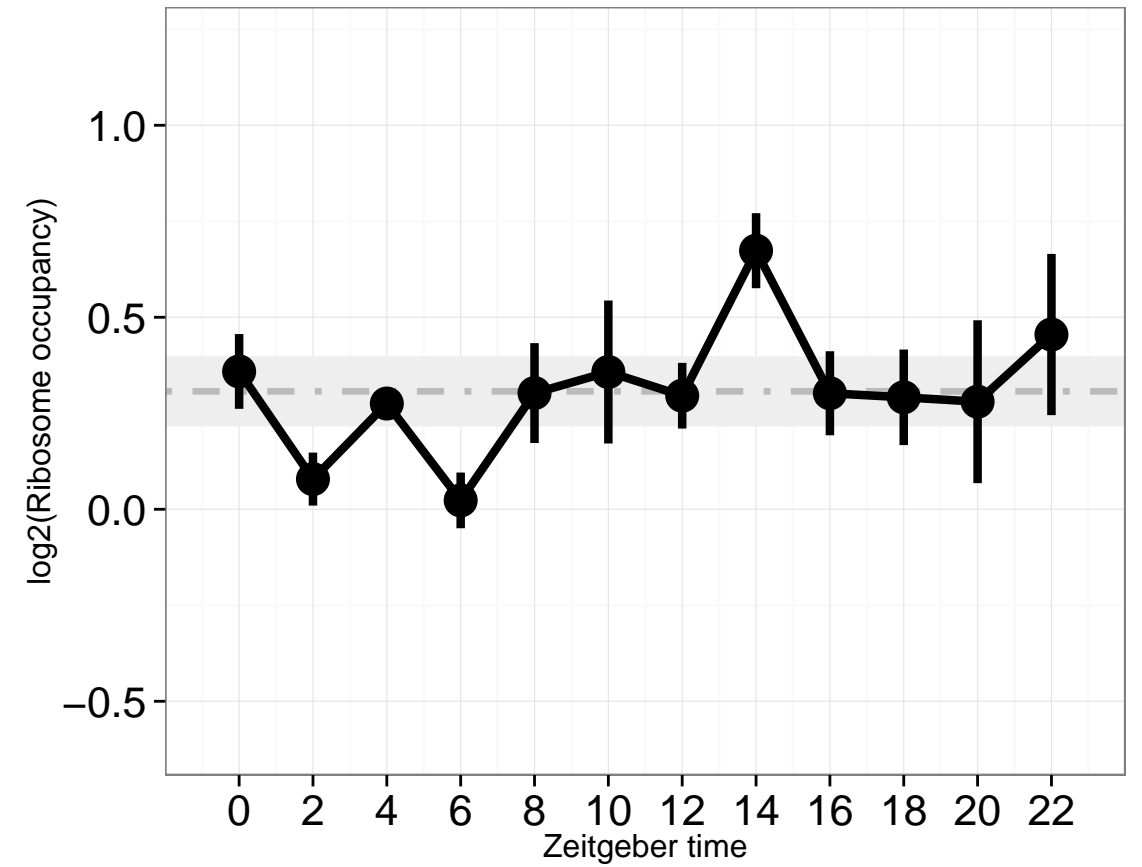

Supplement: Supplementary file 11611 [file 1]

# Gbp6

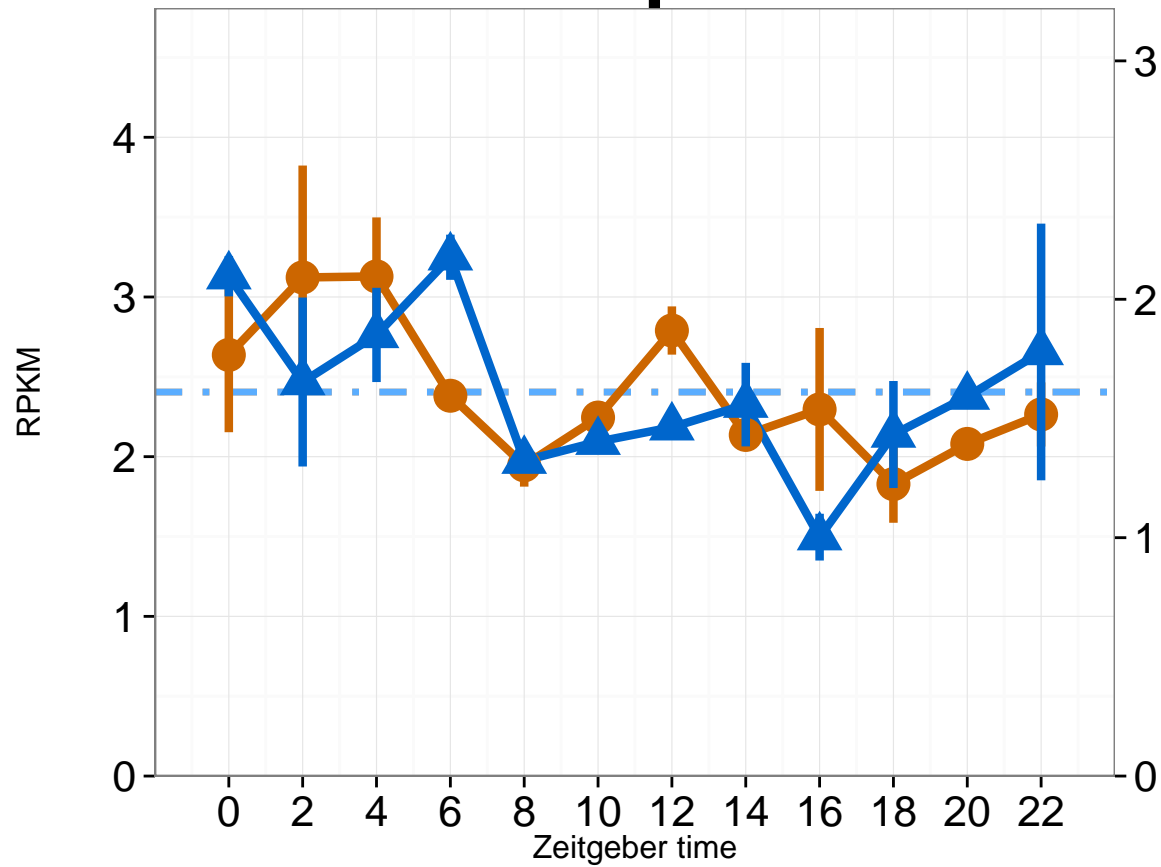

# Gbp6

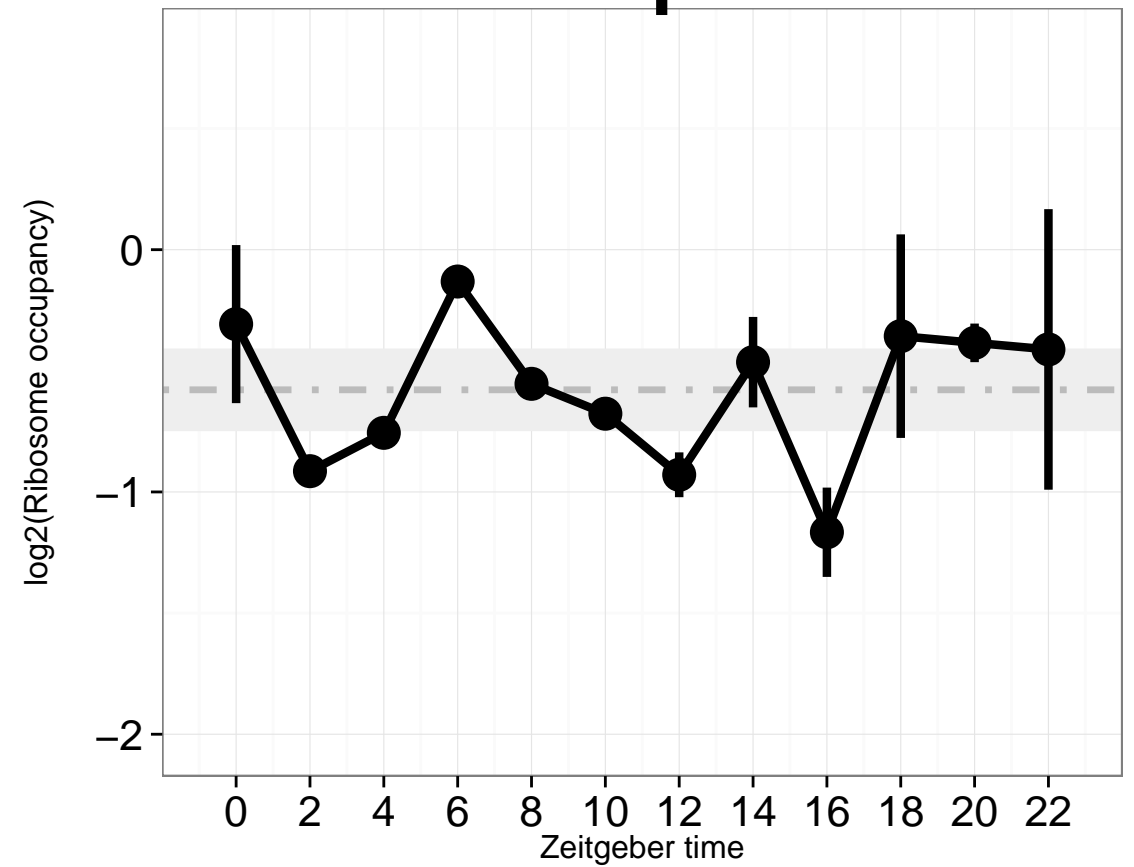

Supplement: Supplementary file 11612 [file 1]

## Ddx55

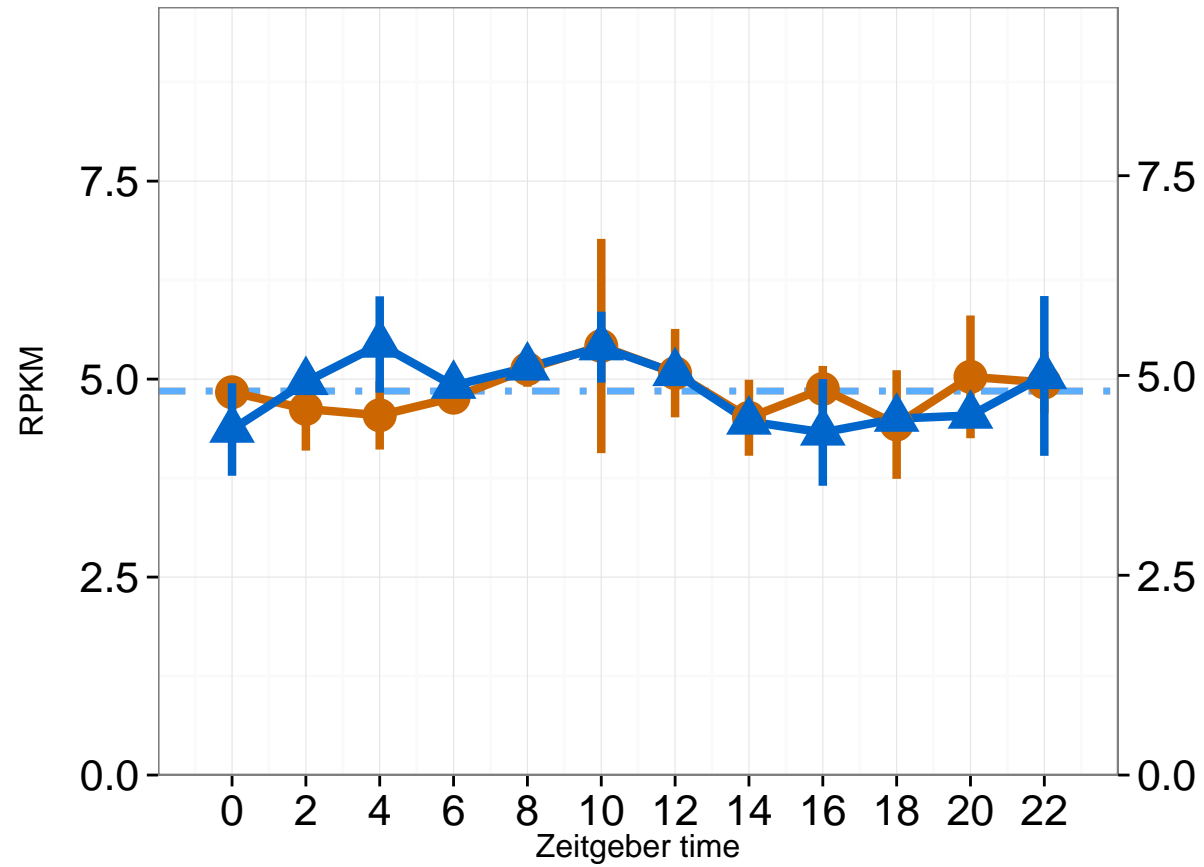

## Ddx55

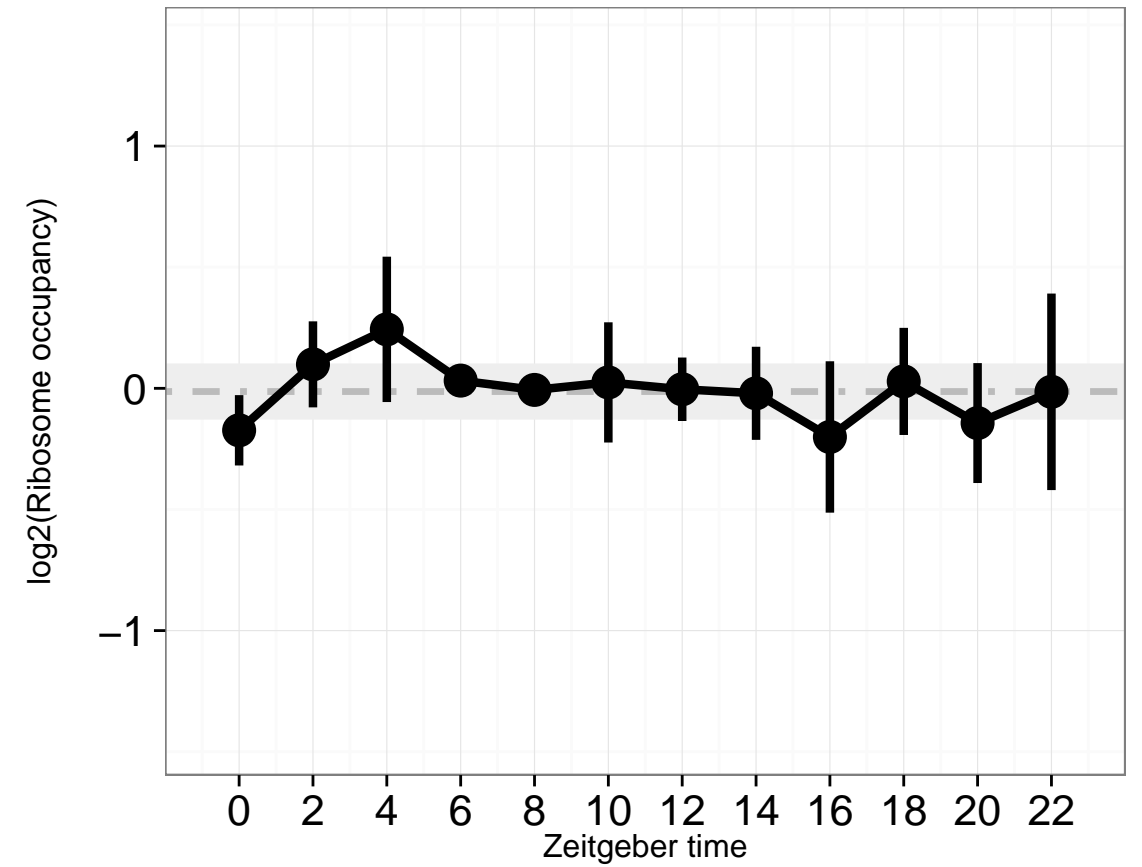

Supplement: Supplementary file 11613 [file 1]

# Pkn1

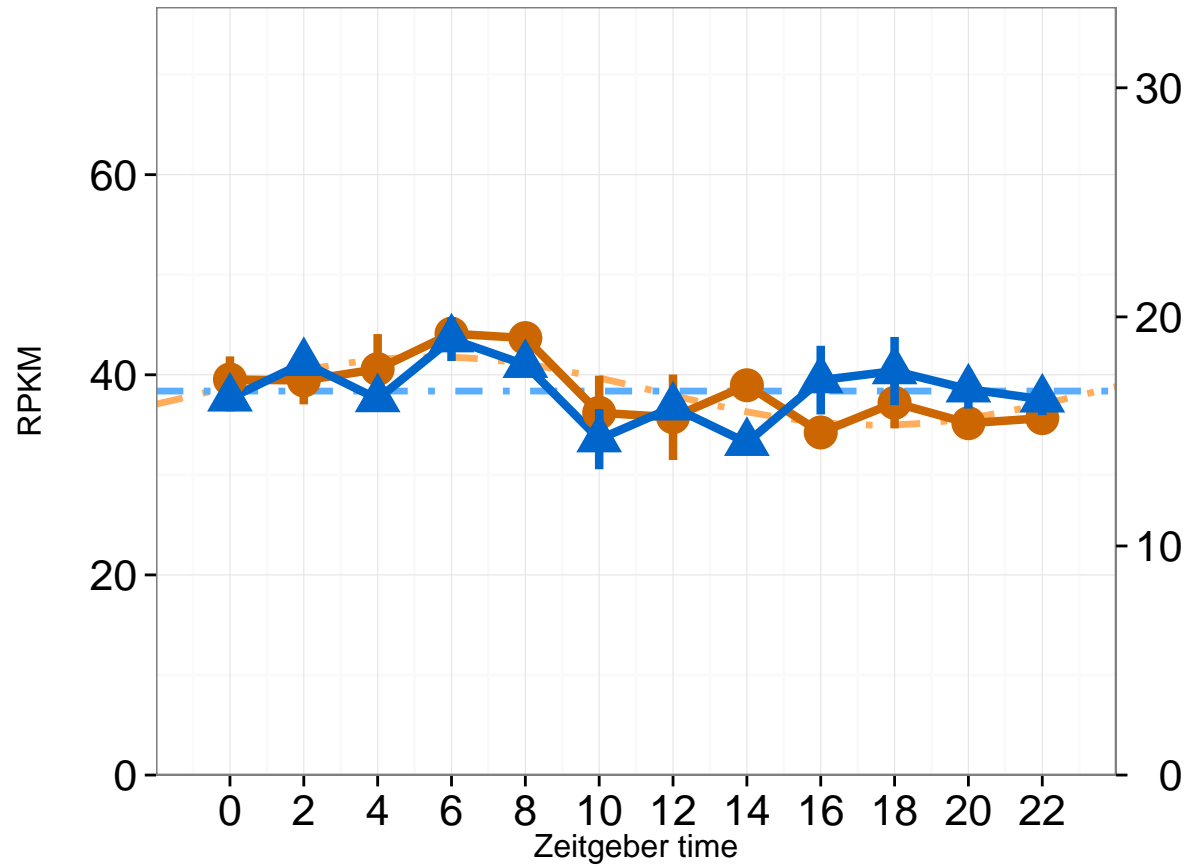

# Pkn1

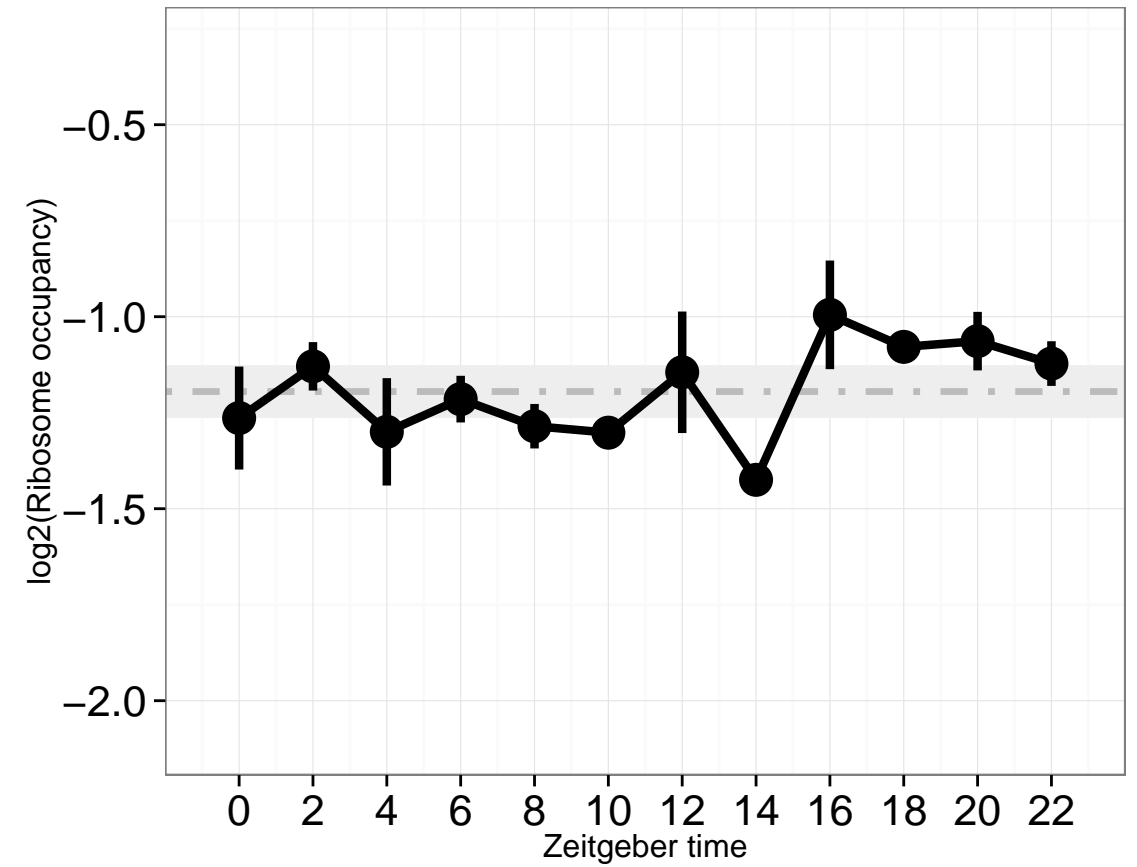

Supplement: Supplementary file 11614 [file 1]

## Tnfrsf12a

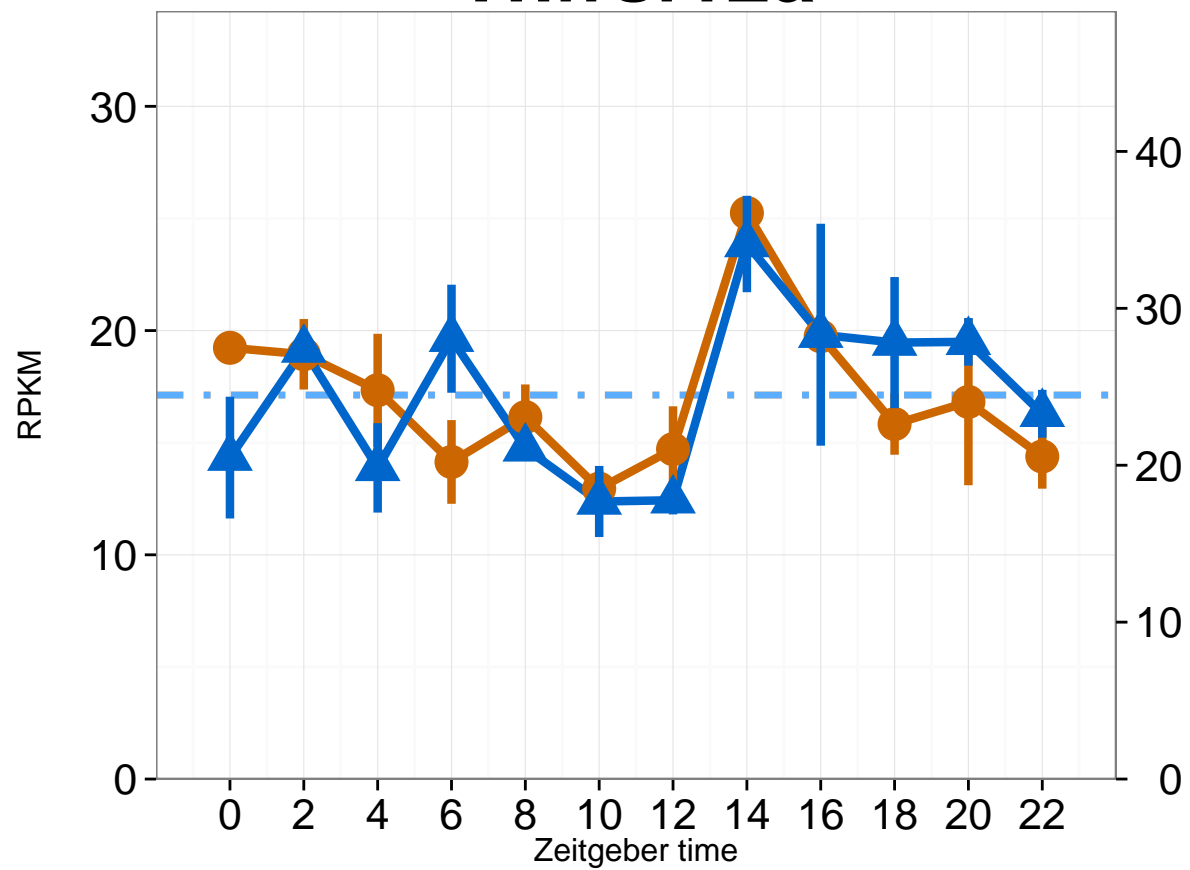

## Tnfrsf12a

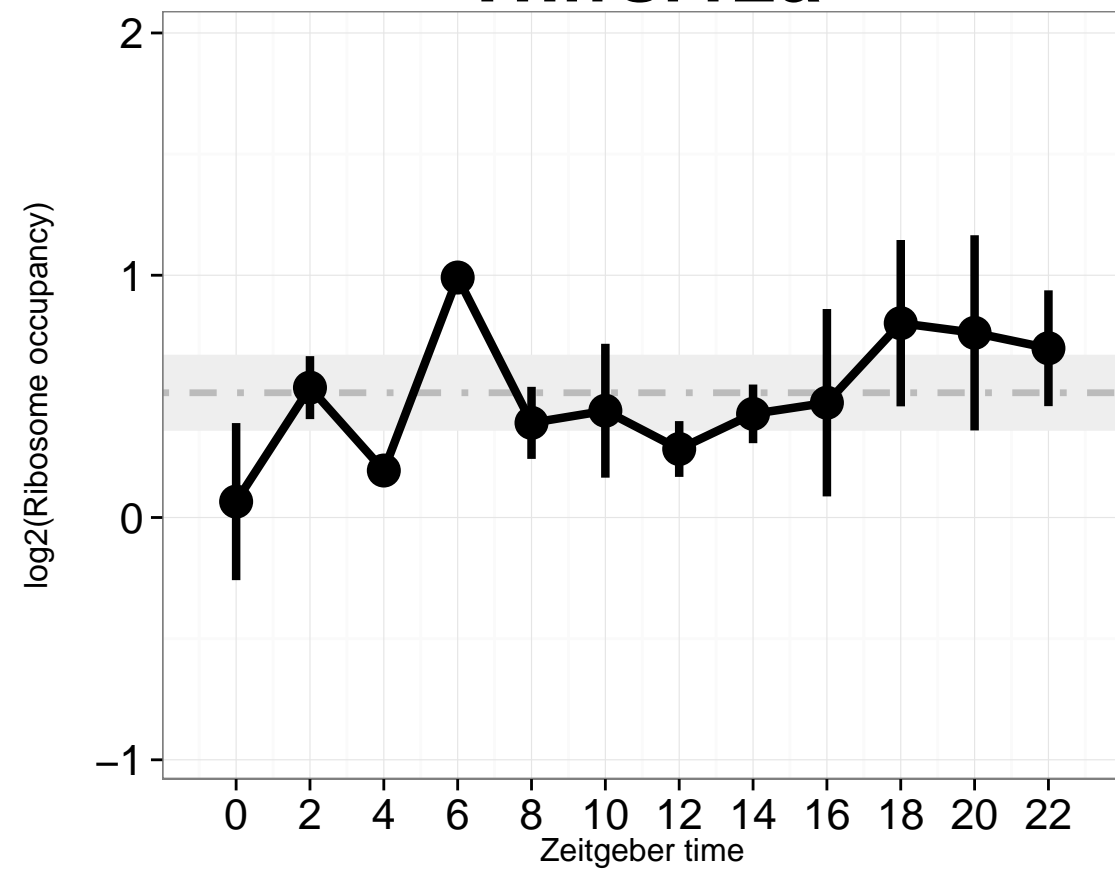

Supplement: Supplementary file 11615 [file 1]

# Cpm

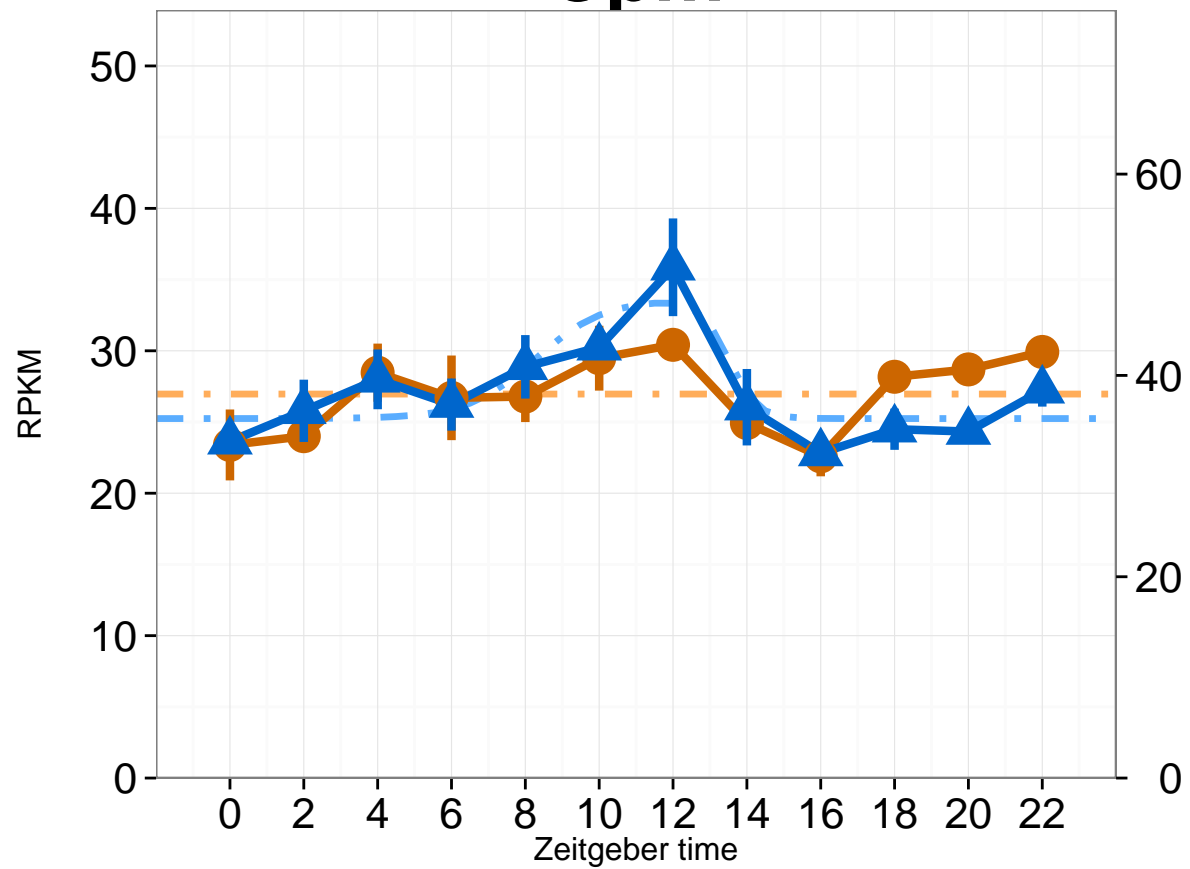

# Cpm

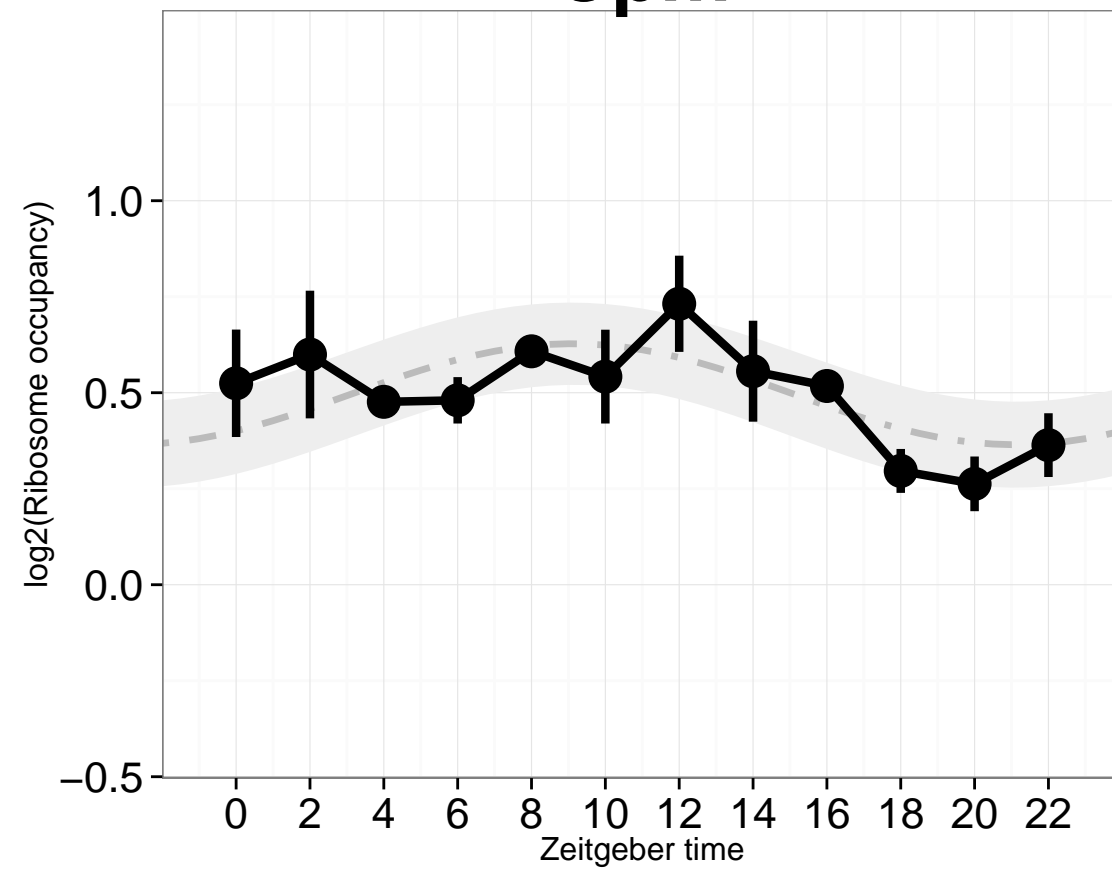

Supplement: Supplementary file 11616 [file 1]

# Rev1

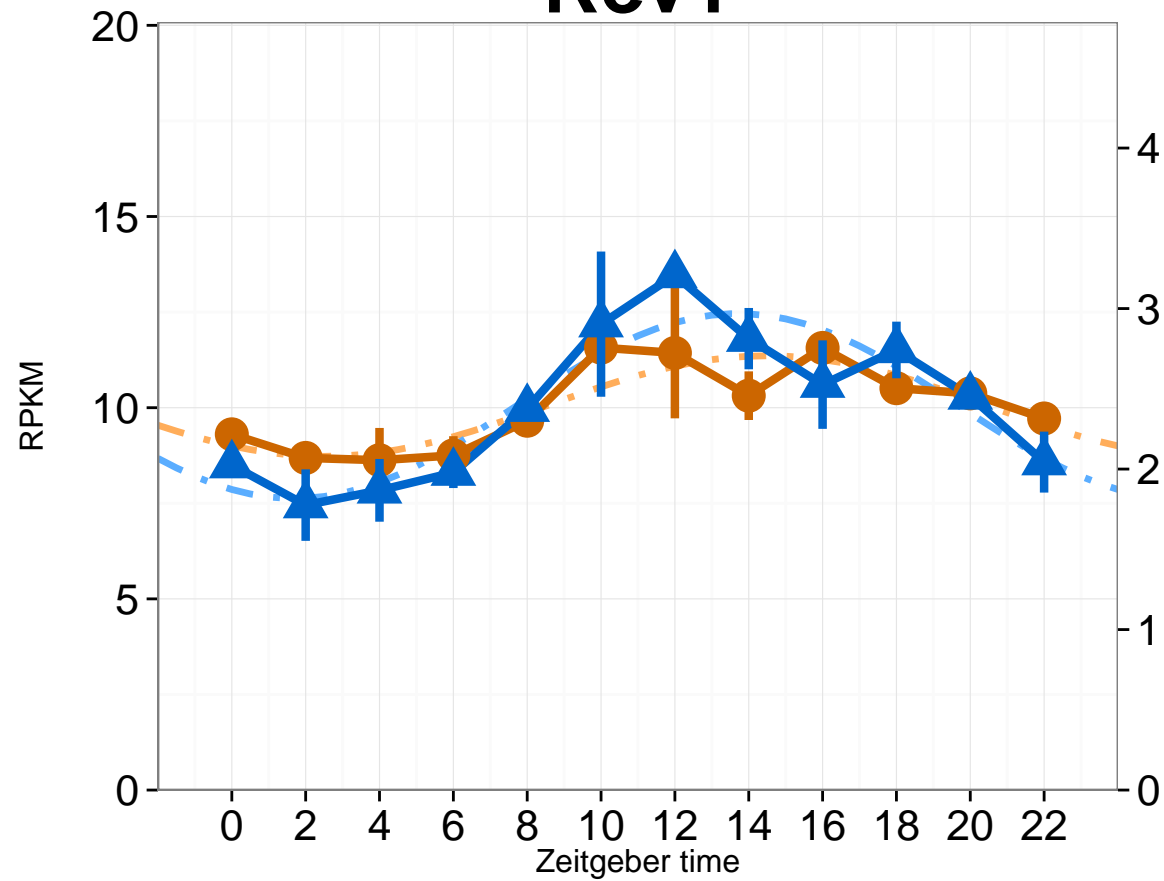

# Rev1

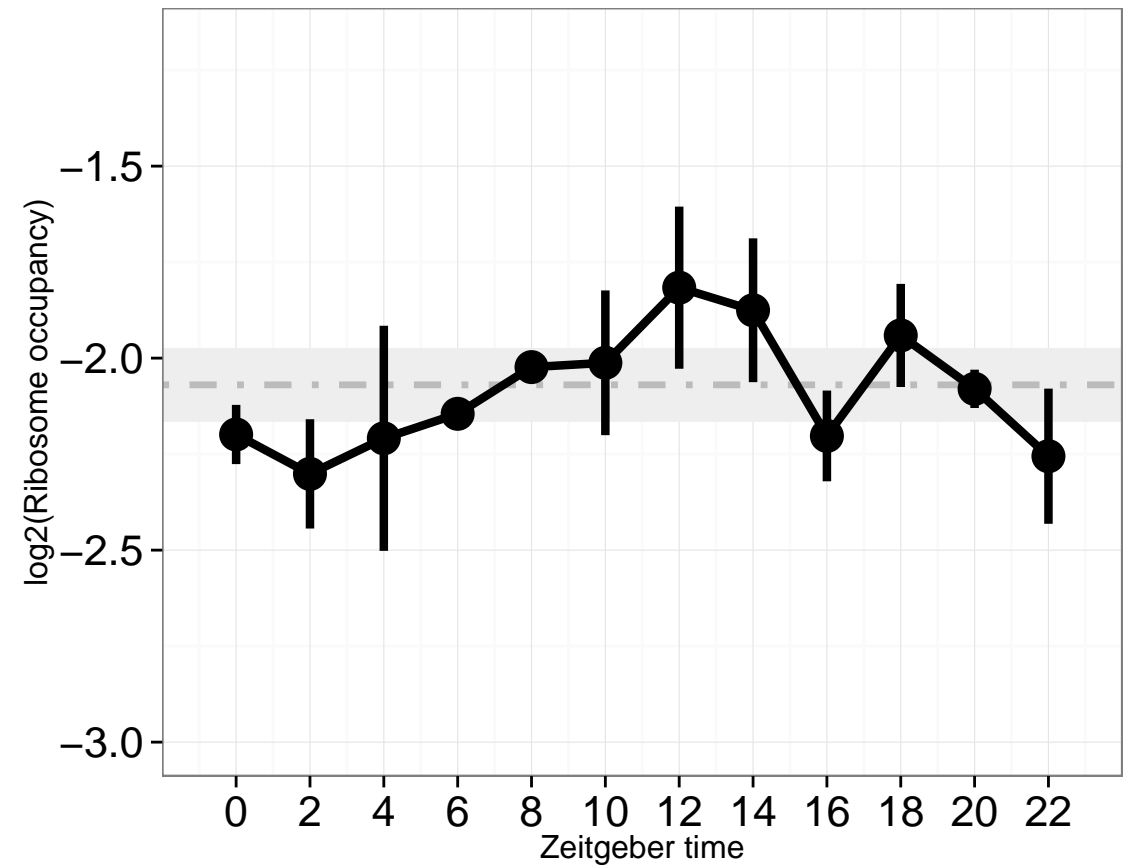

Supplement: Supplementary file 11617 [file 1]

# Ubtd1

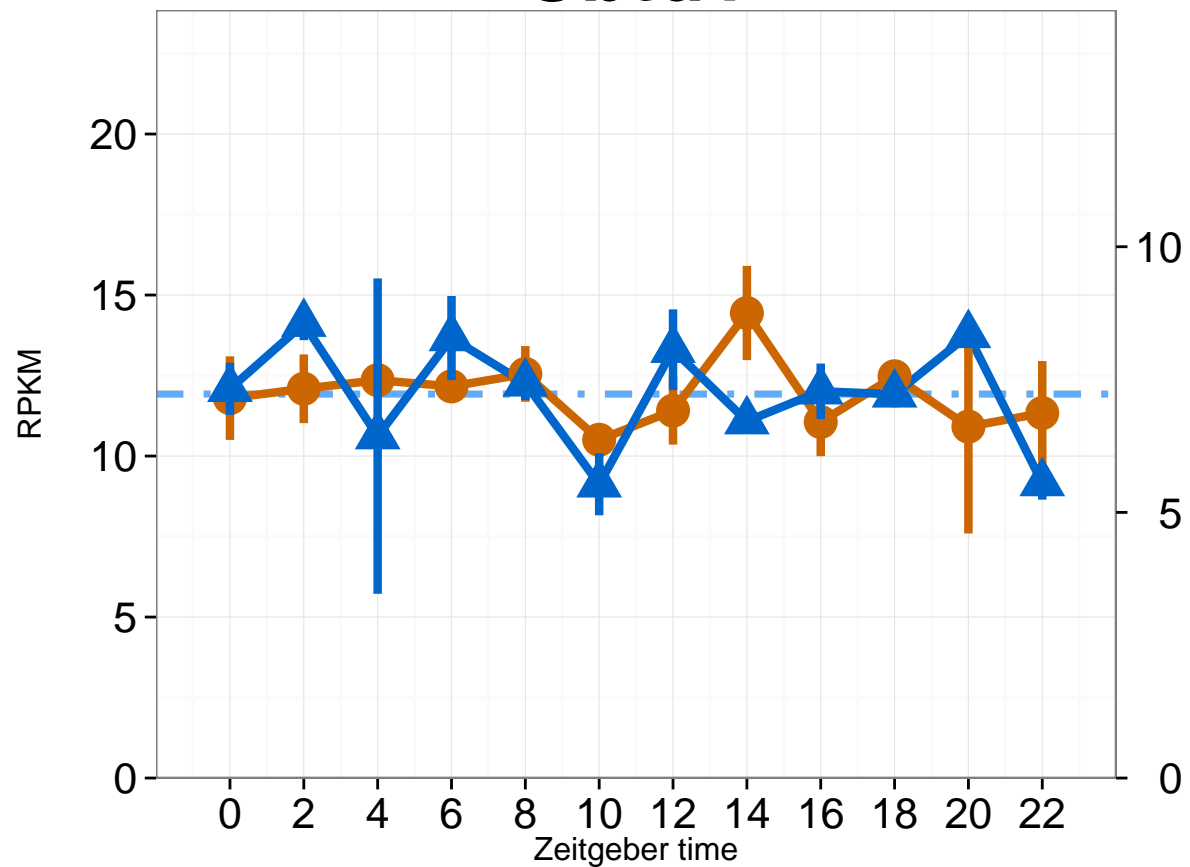

# Ubtd1

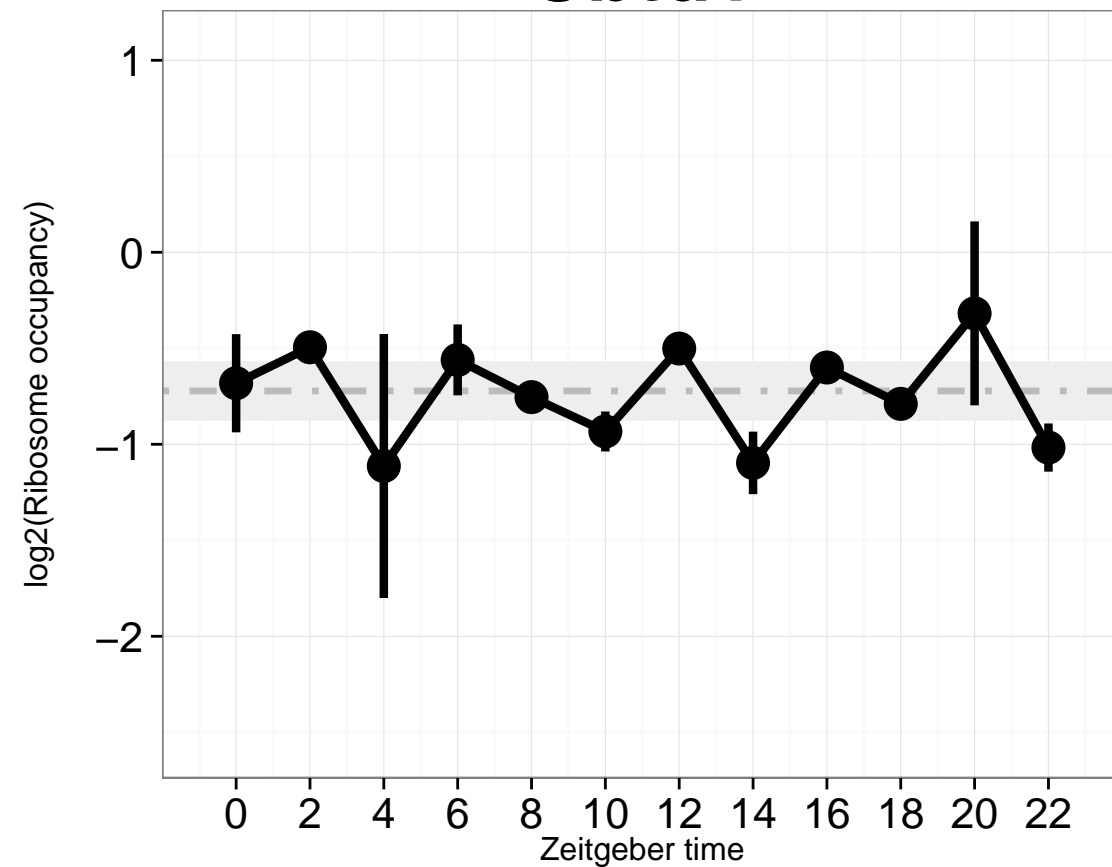

Supplement: Supplementary file 11618 [file 1]

# Capn10

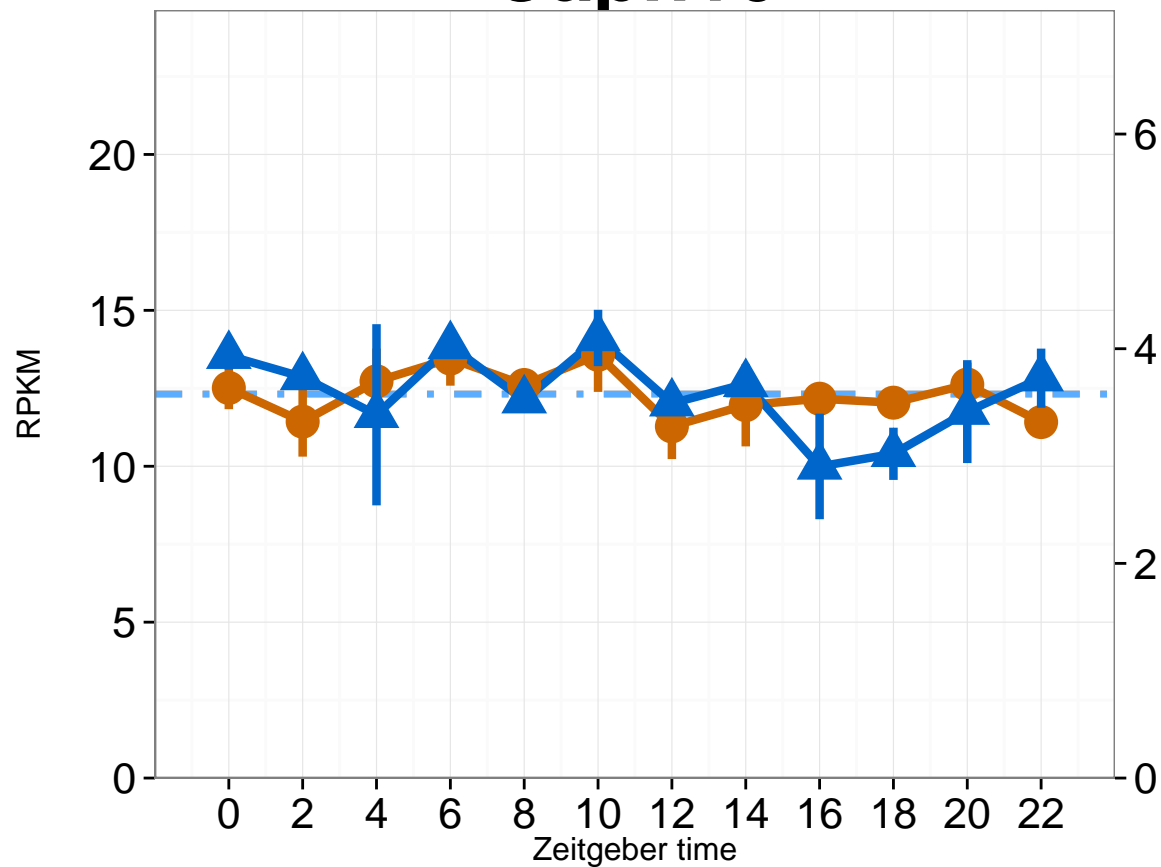

# Capn10

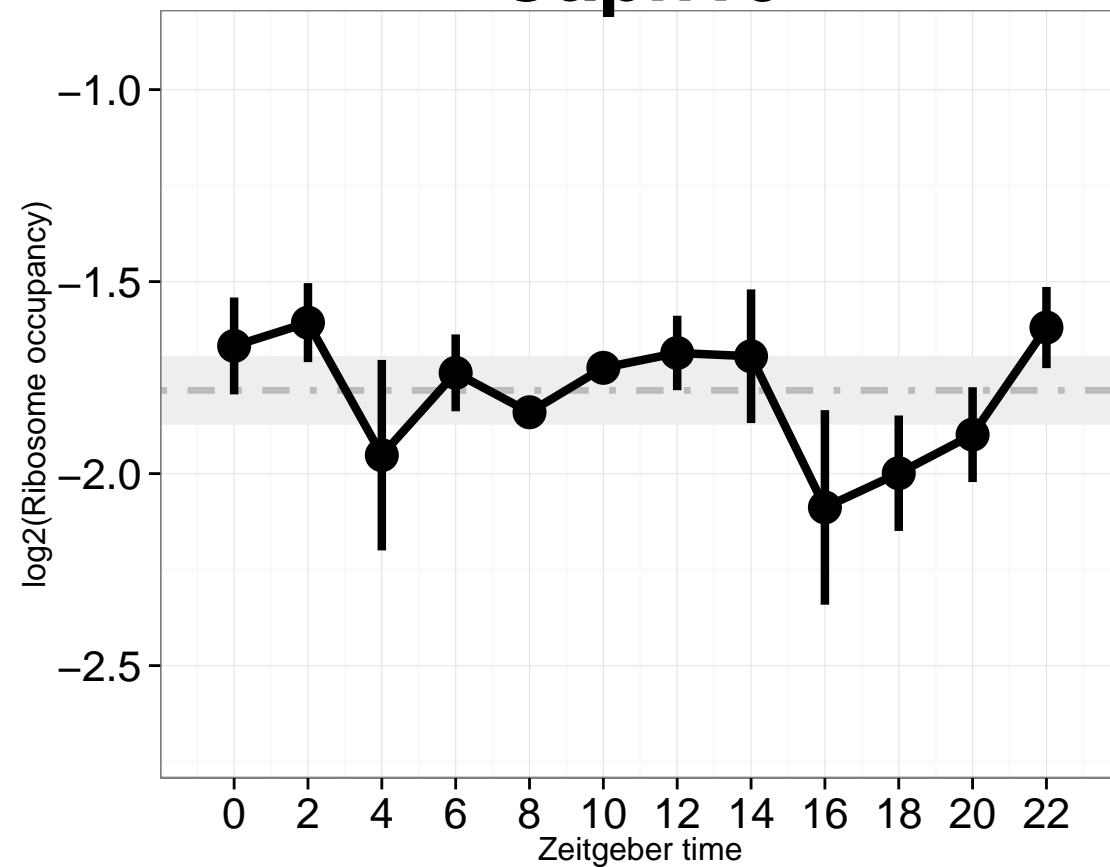

Supplement: Supplementary file 11619 [file 1]

## Ctsl

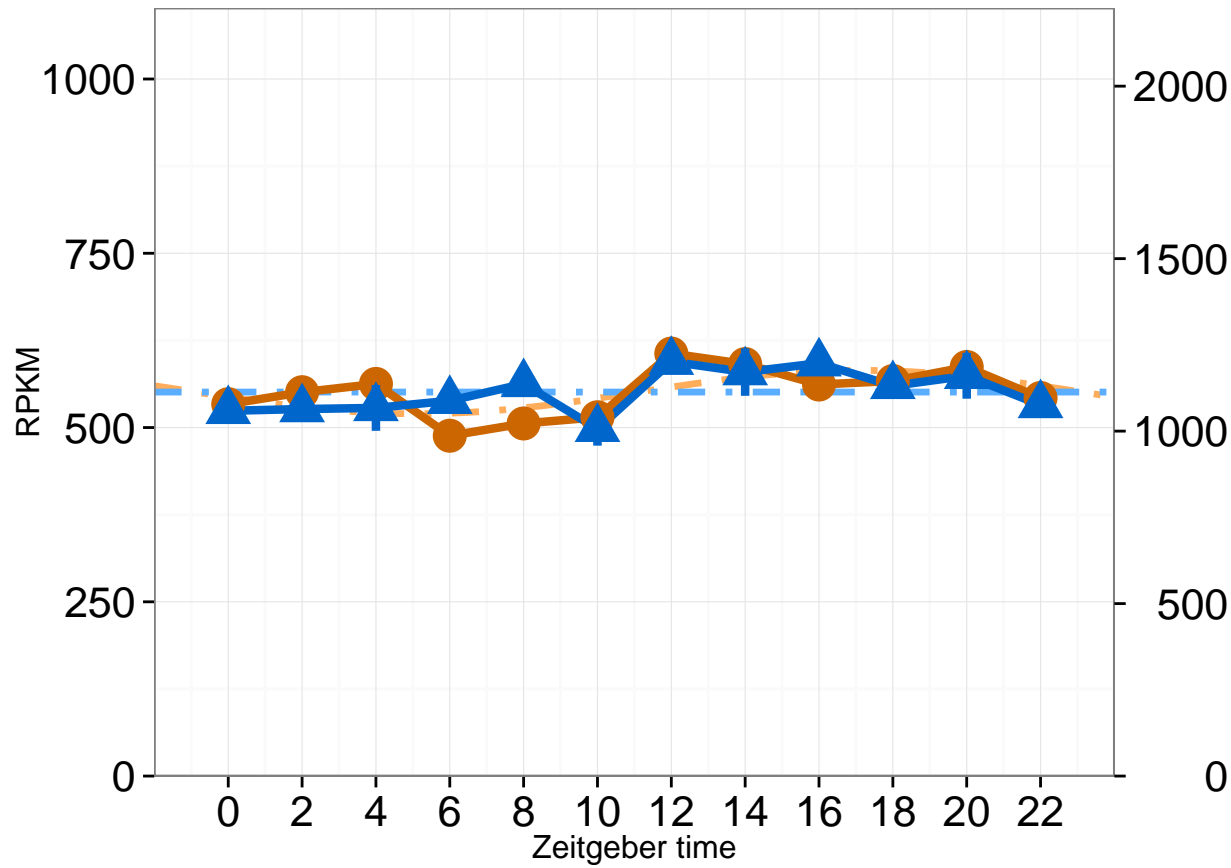

## Ctsl

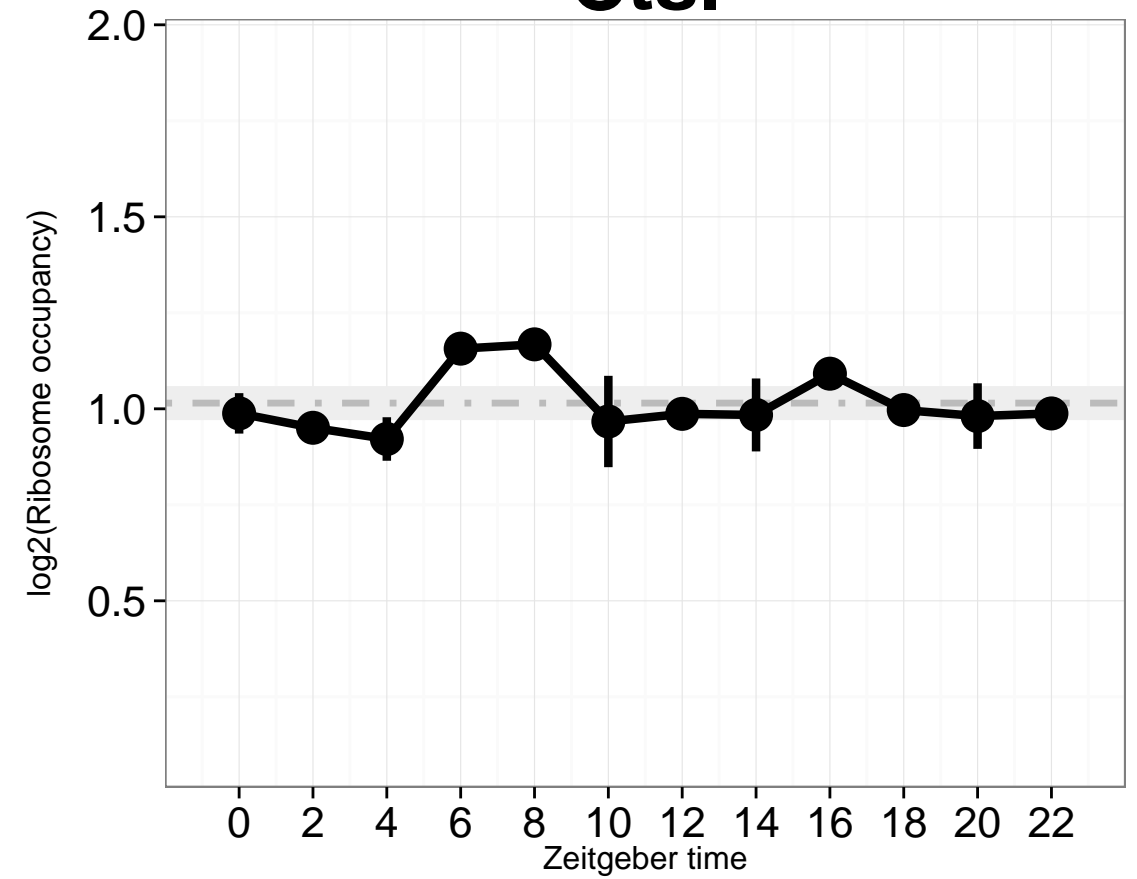

Supplement: Supplementary file 11620 [file 1]

# Kcnf1

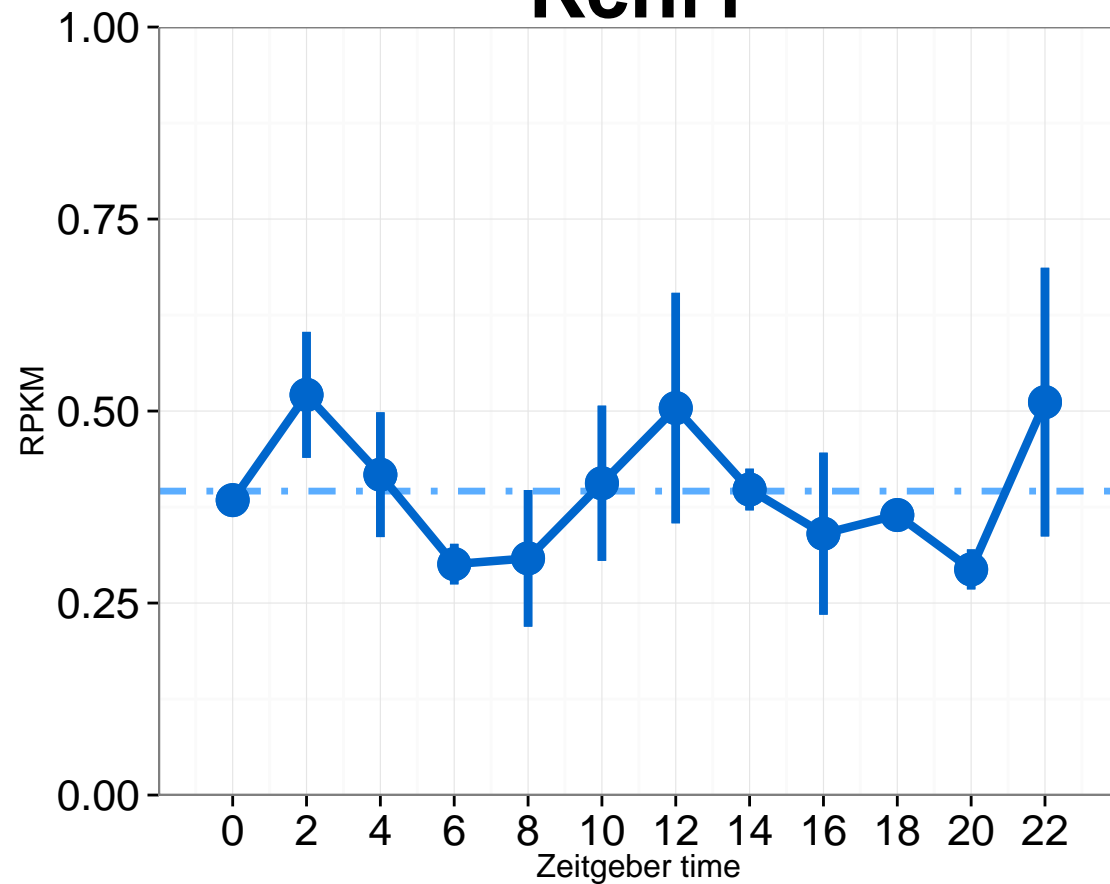

# Kcnf1 log2(Ribosome occupancy

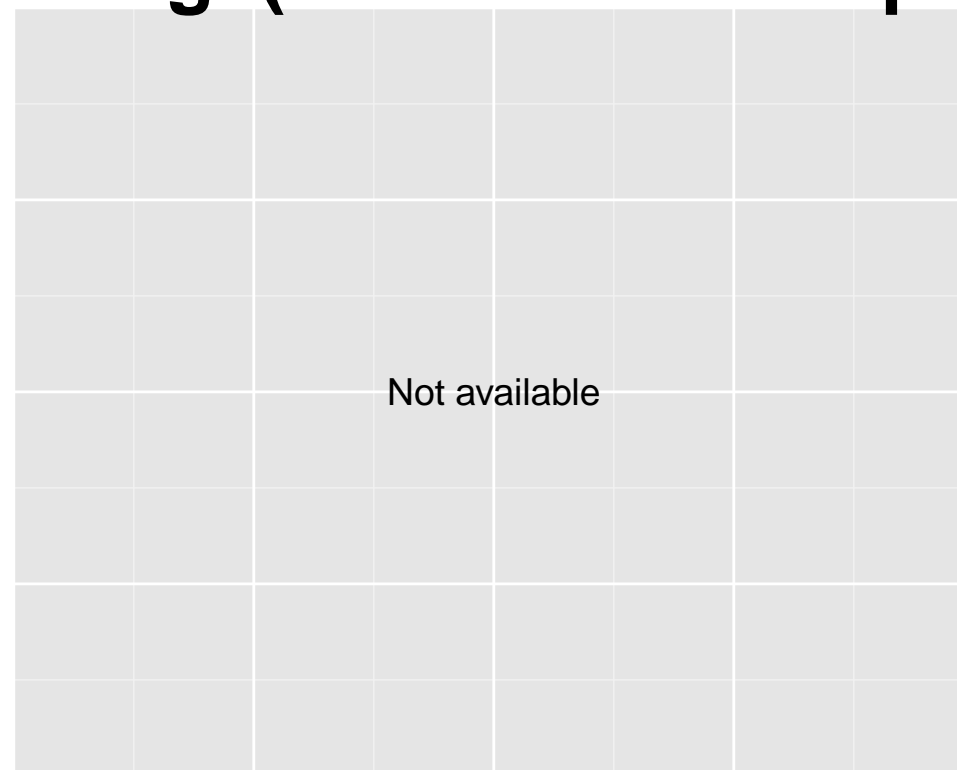

Supplement: Supplementary file 11621 [file 1]

## Fastk

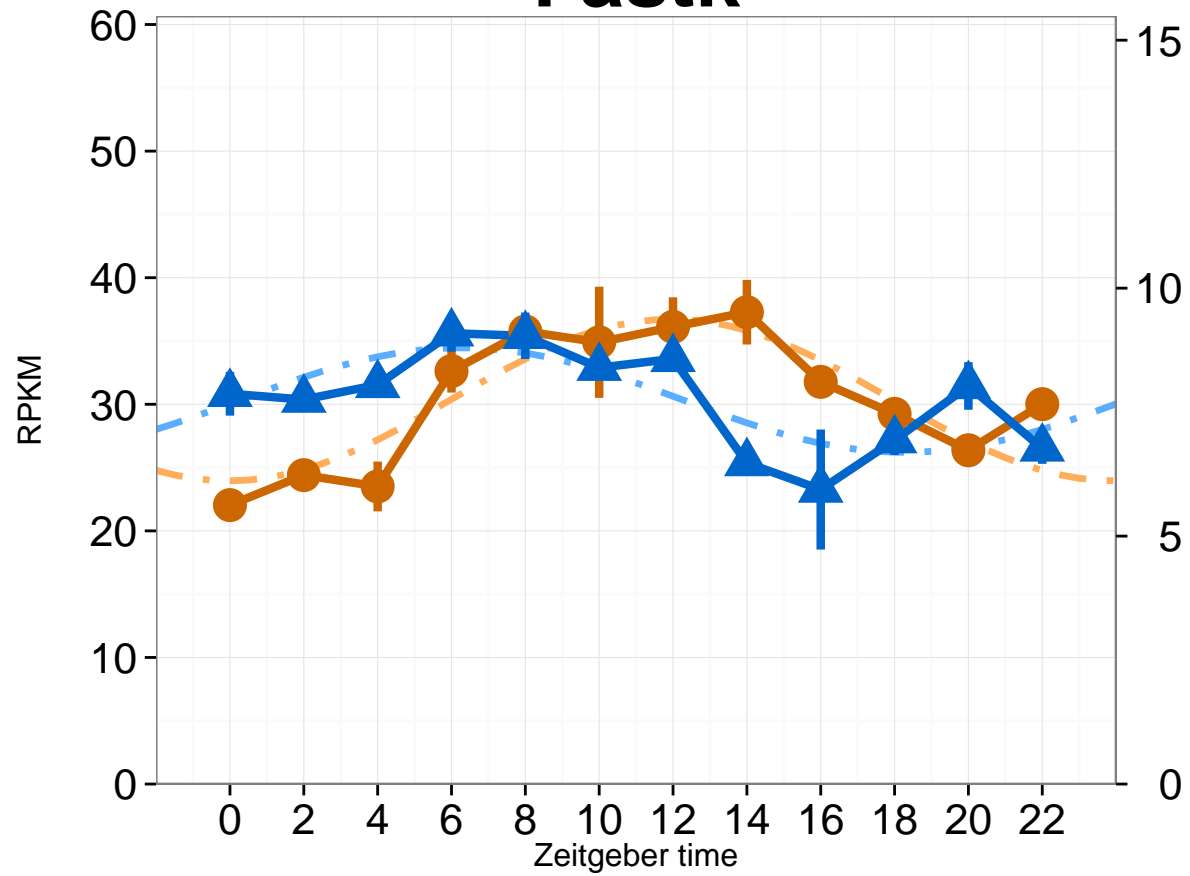

## Fastk

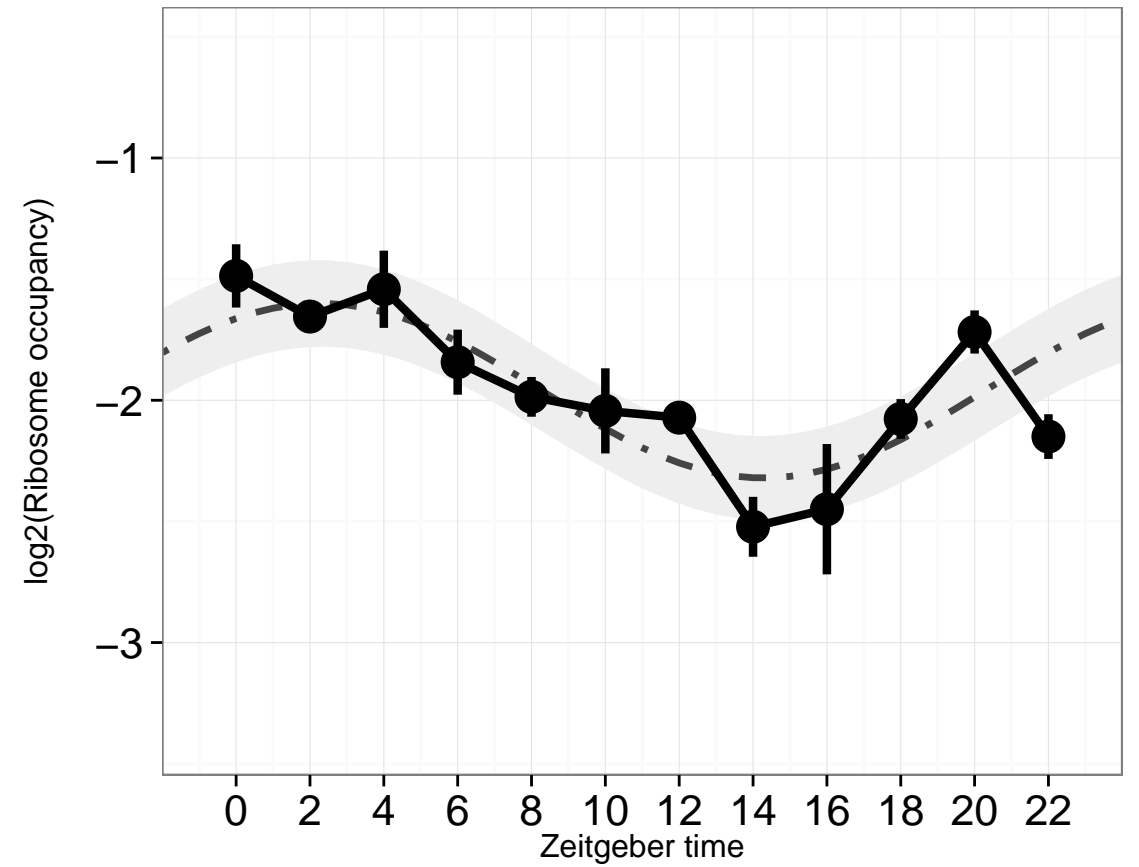

Supplement: Supplementary file 11622 [file 1]

## Epb4.1I5

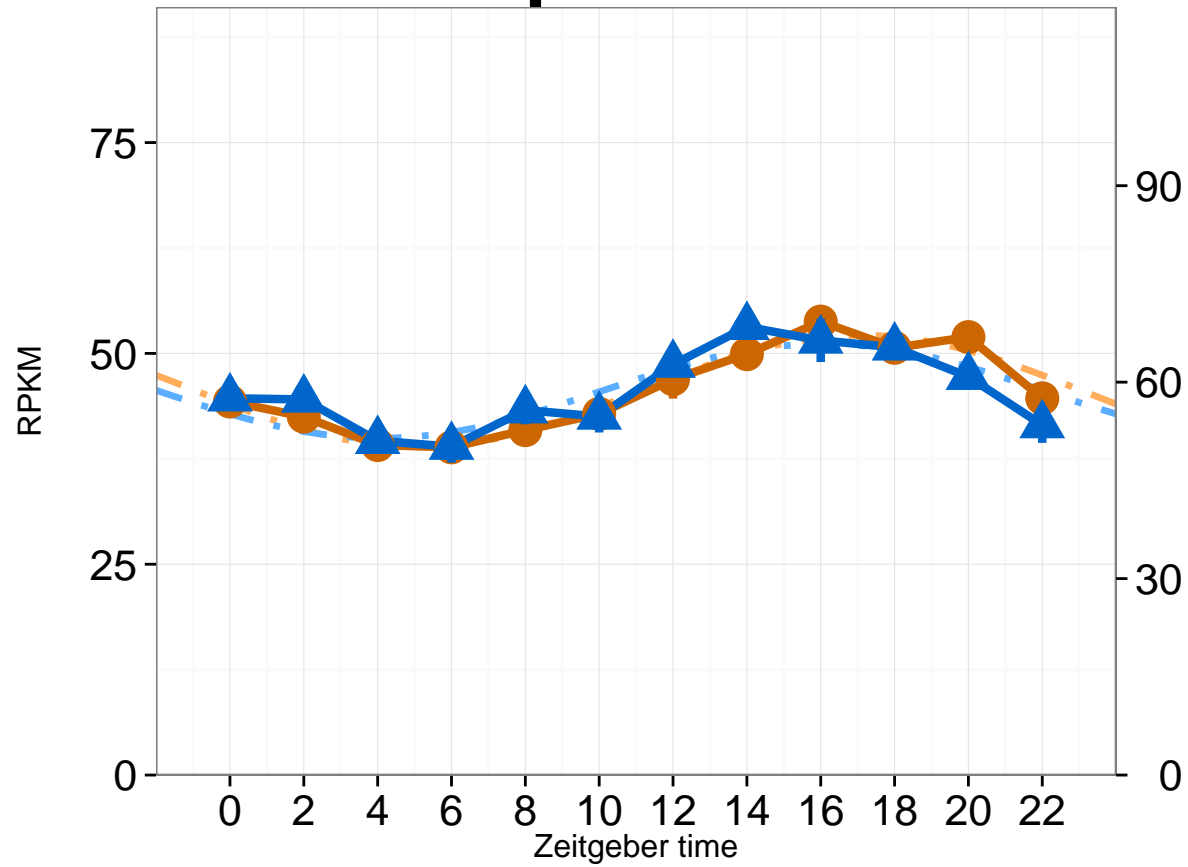

## Epb4.1I5

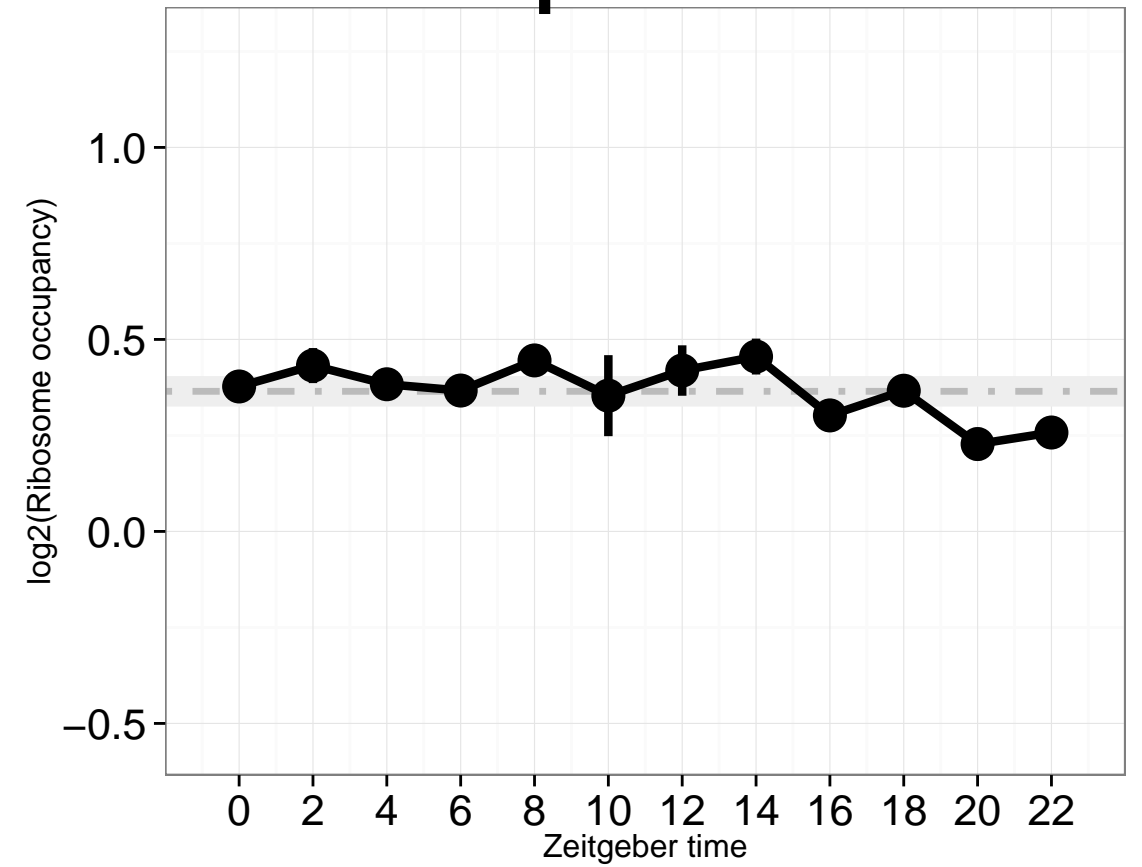

Supplement: Supplementary file 11623 [file 1]

## Chd4

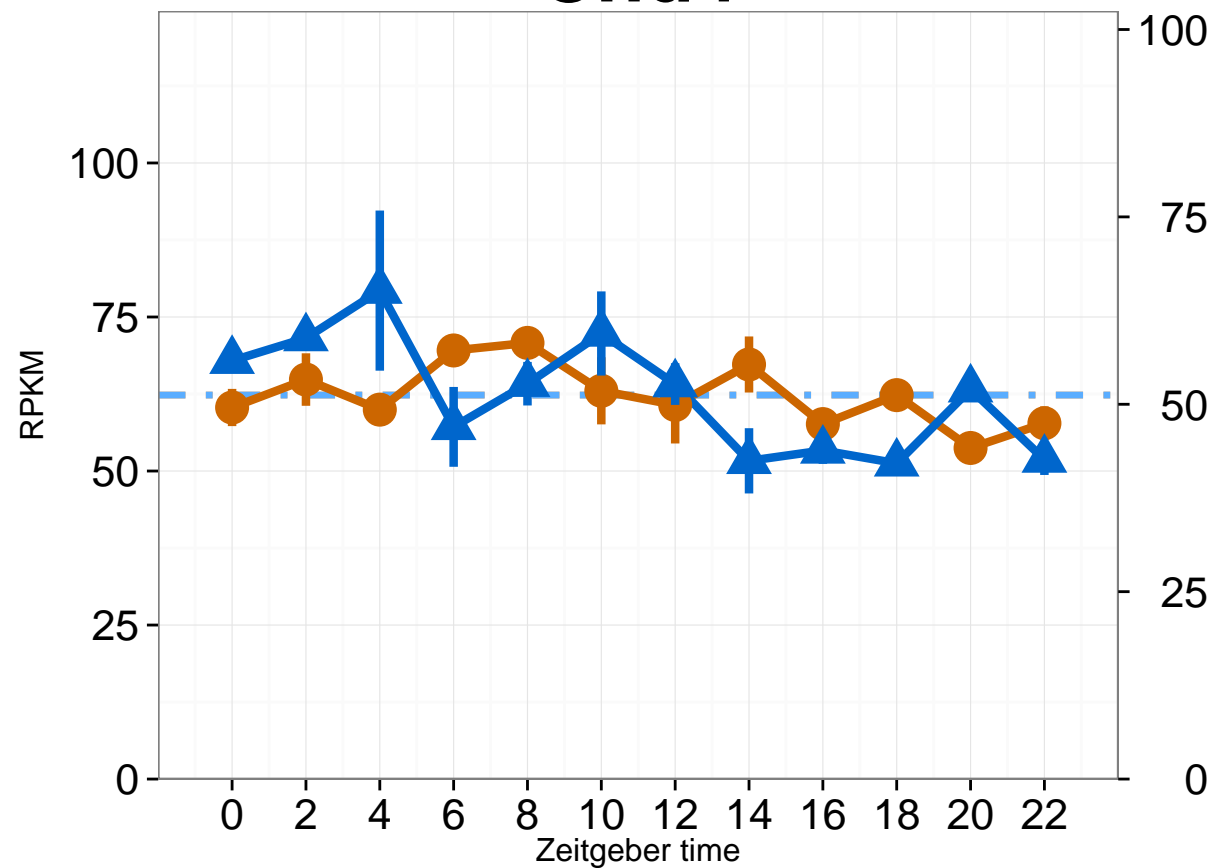

## Chd4

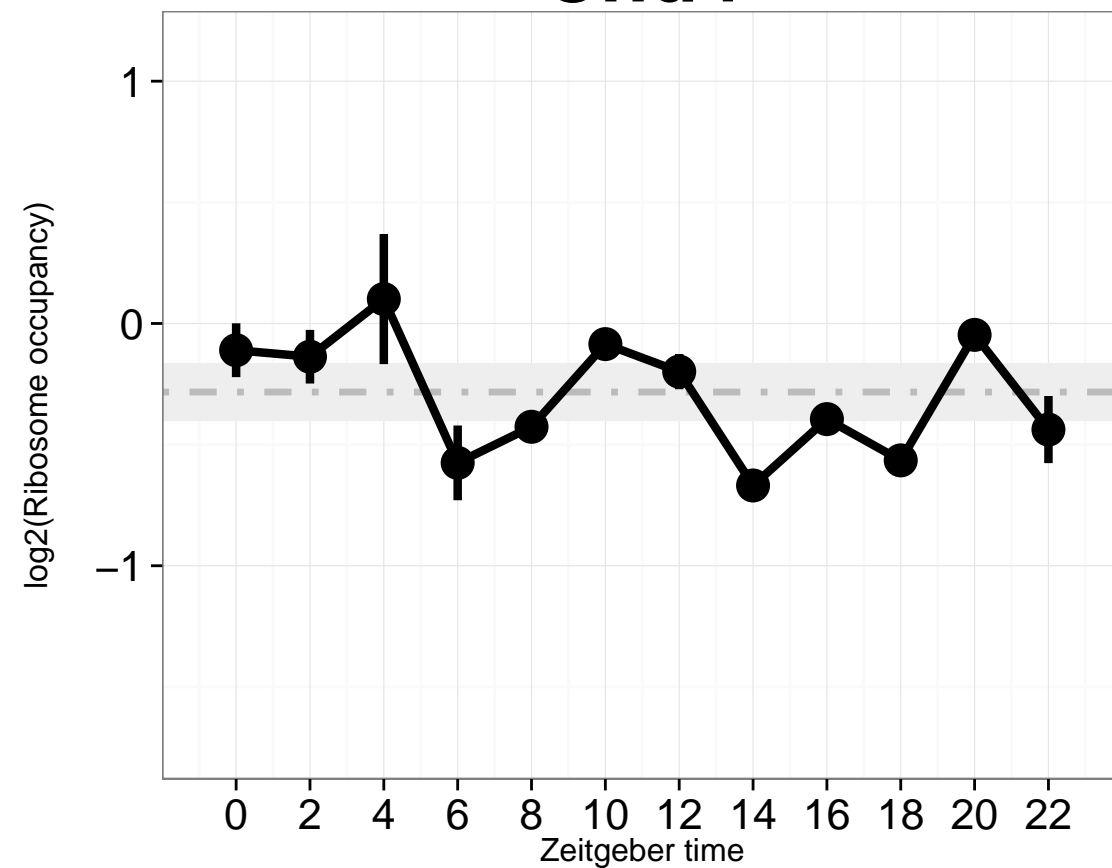

Supplement: Supplementary file 11624 [file 1]

## Gclc

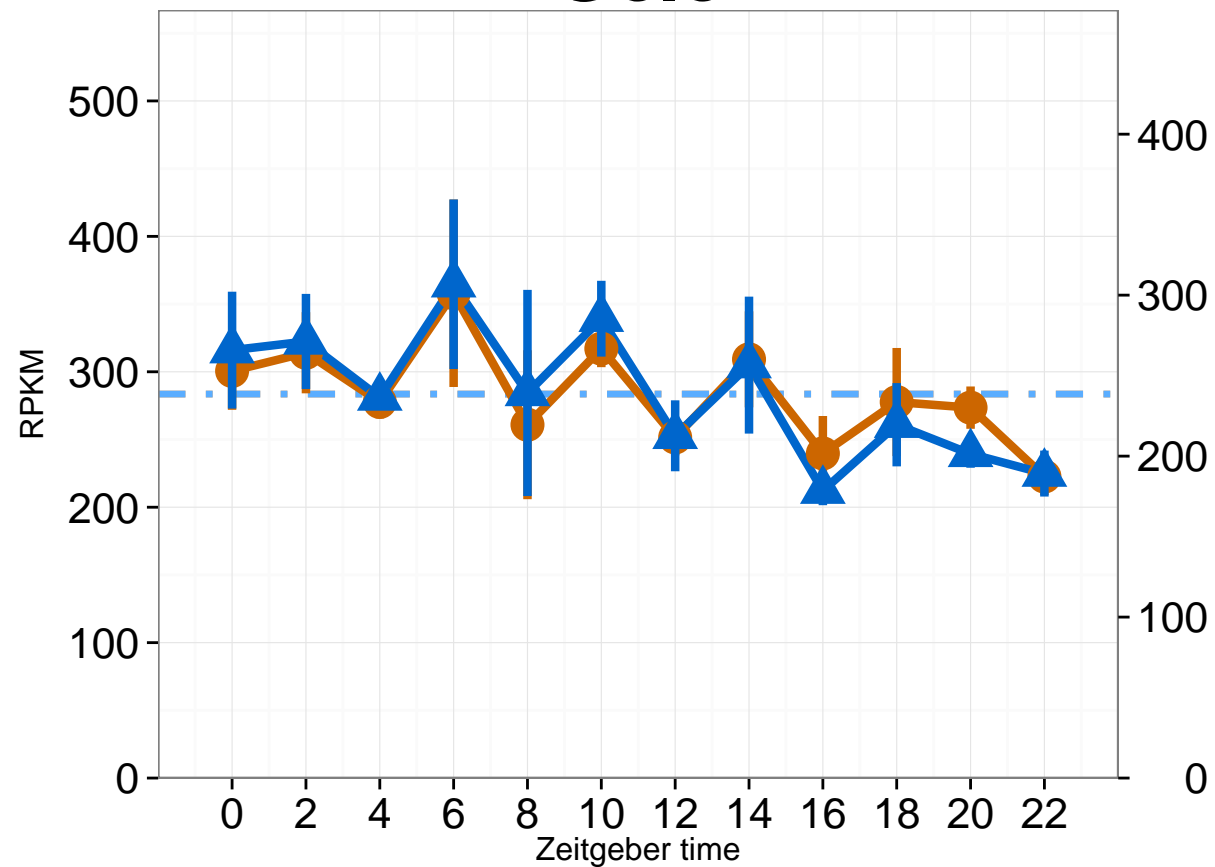

## Gclc

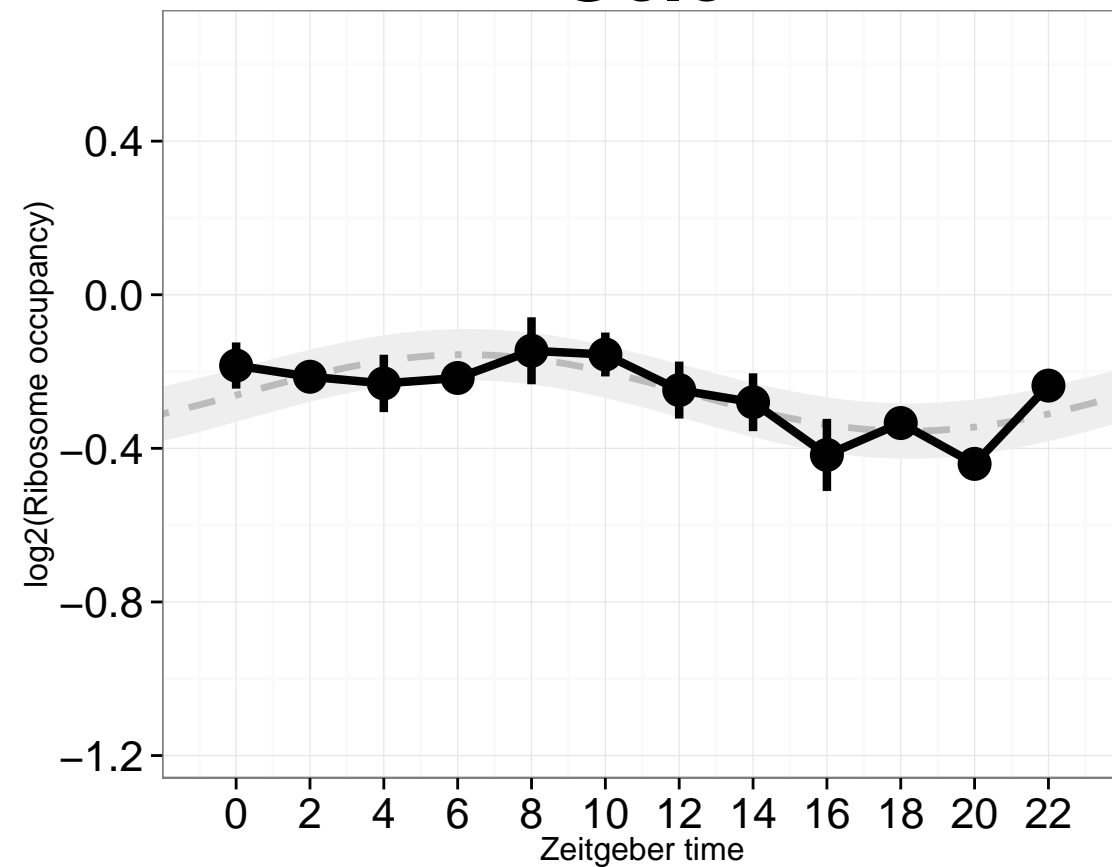

Supplement: Supplementary file 11625 [file 1]

## Ikbkap

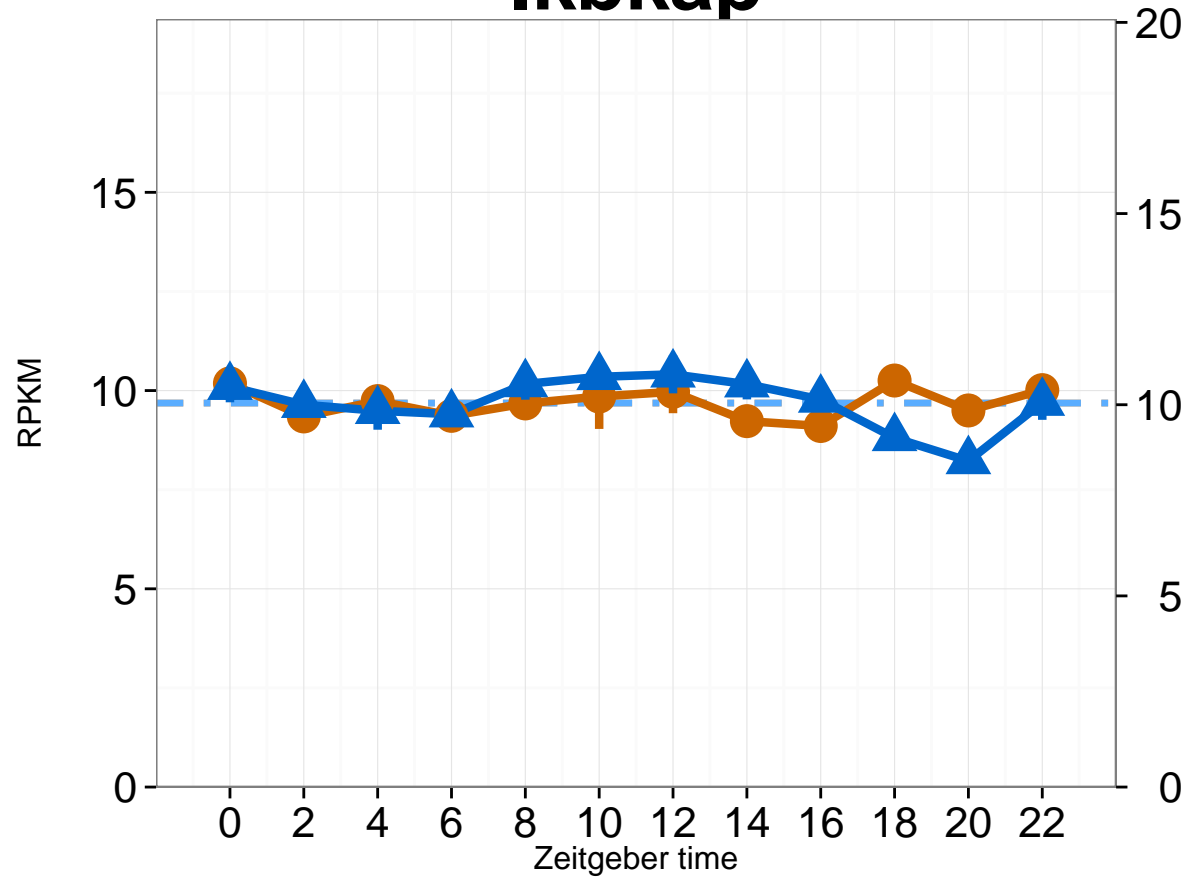

## Ikbkap

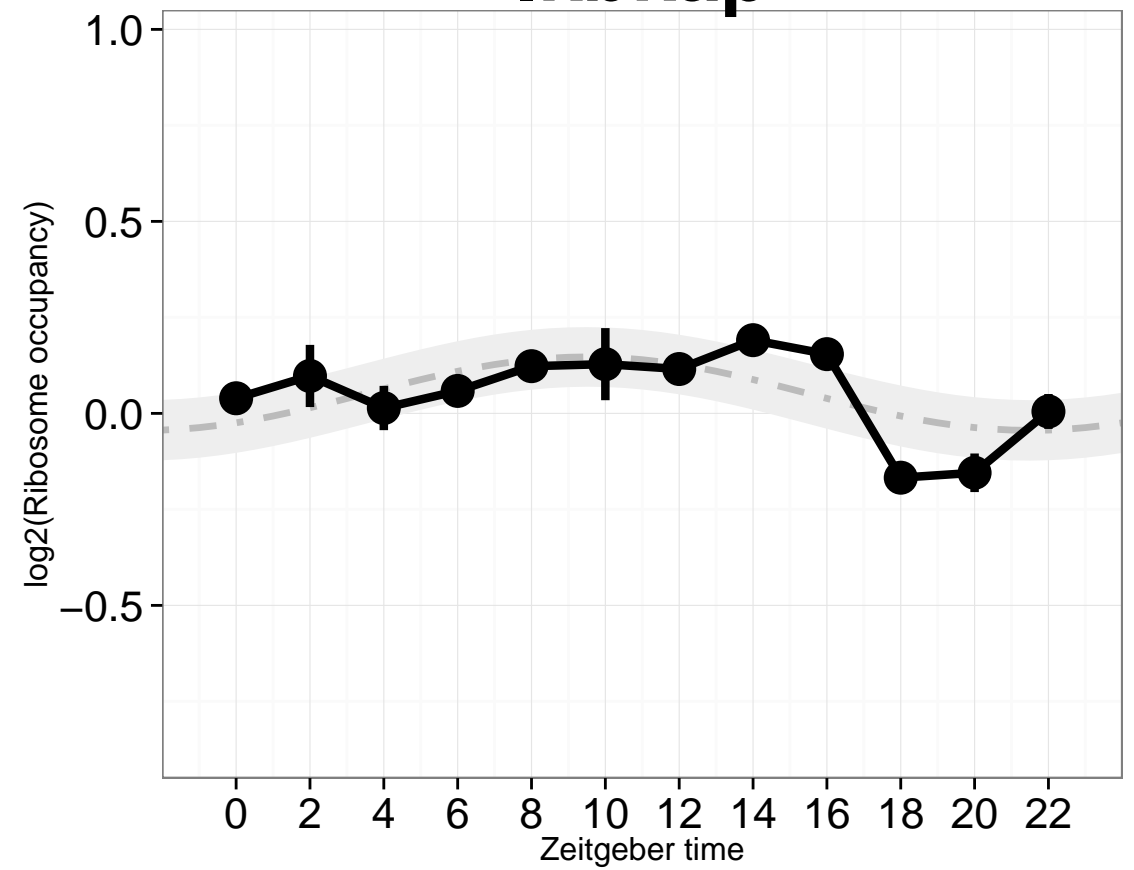

Supplement: Supplementary file 11626 [file 1]

## Lpp

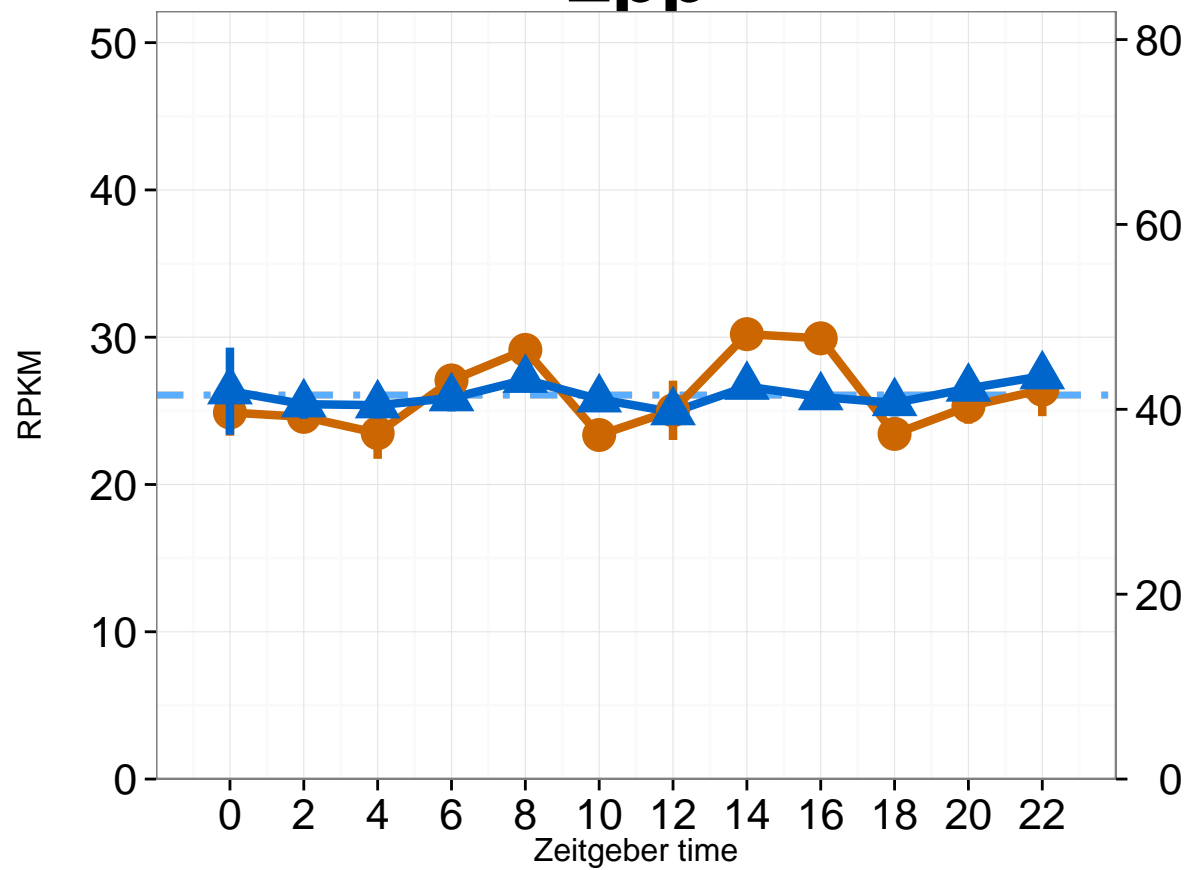

## Lpp

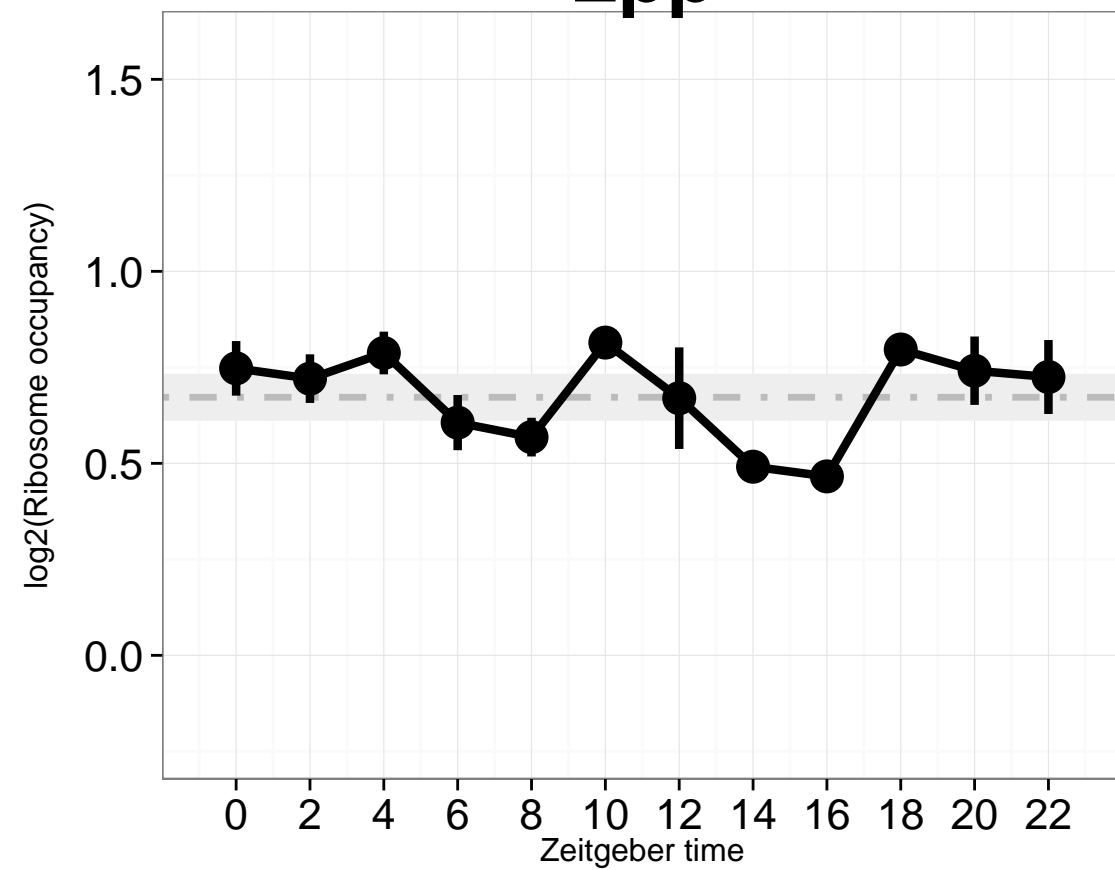

Supplement: Supplementary file 11627 [file 1]

## Dpysl3

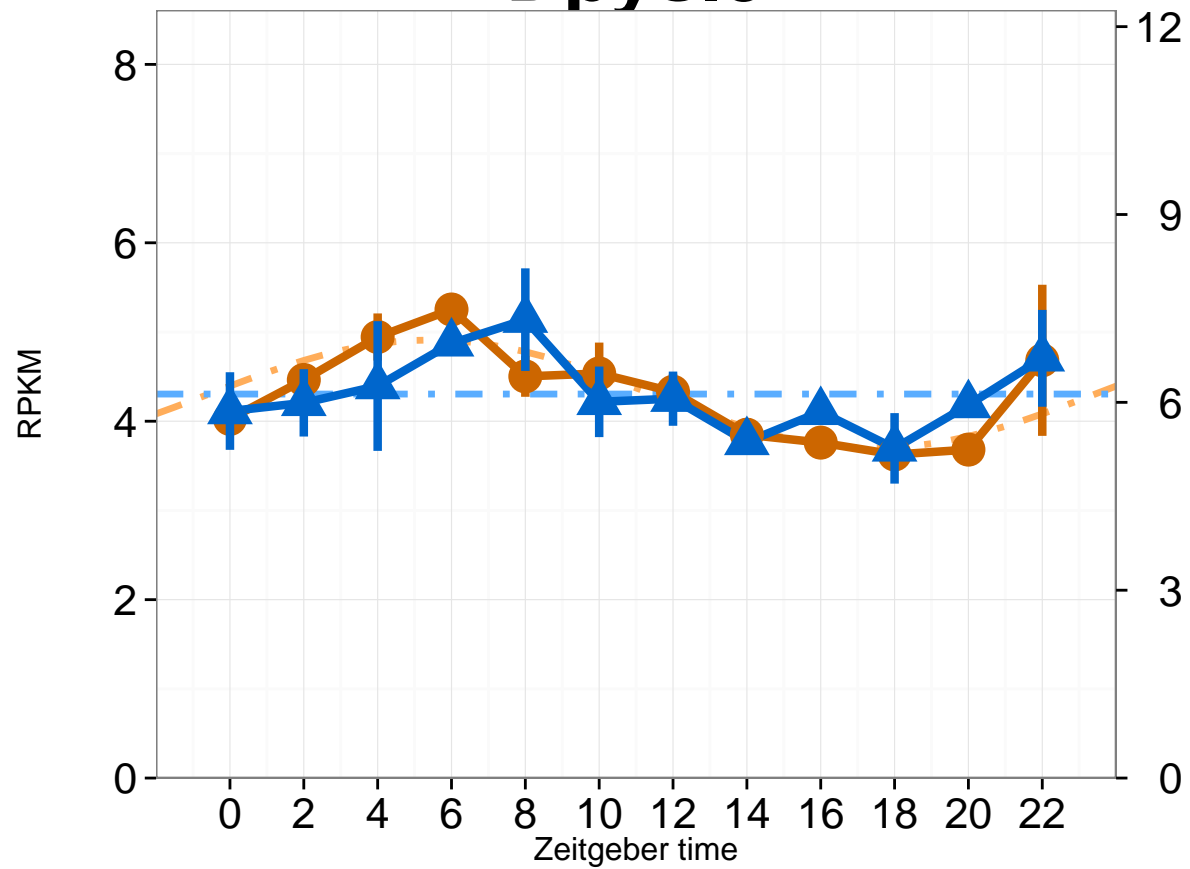

## Dpysl3

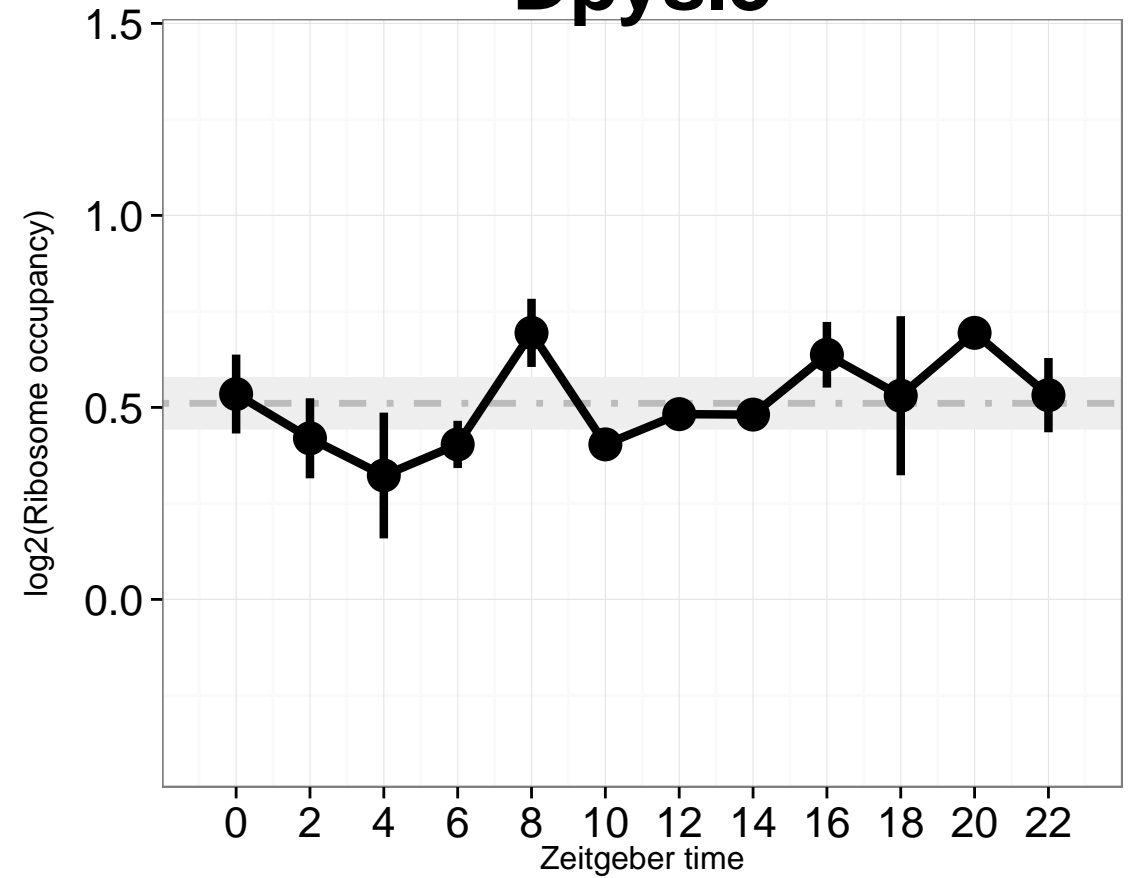

Supplement: Supplementary file 11628 [file 1]

# 1700123O20Rik

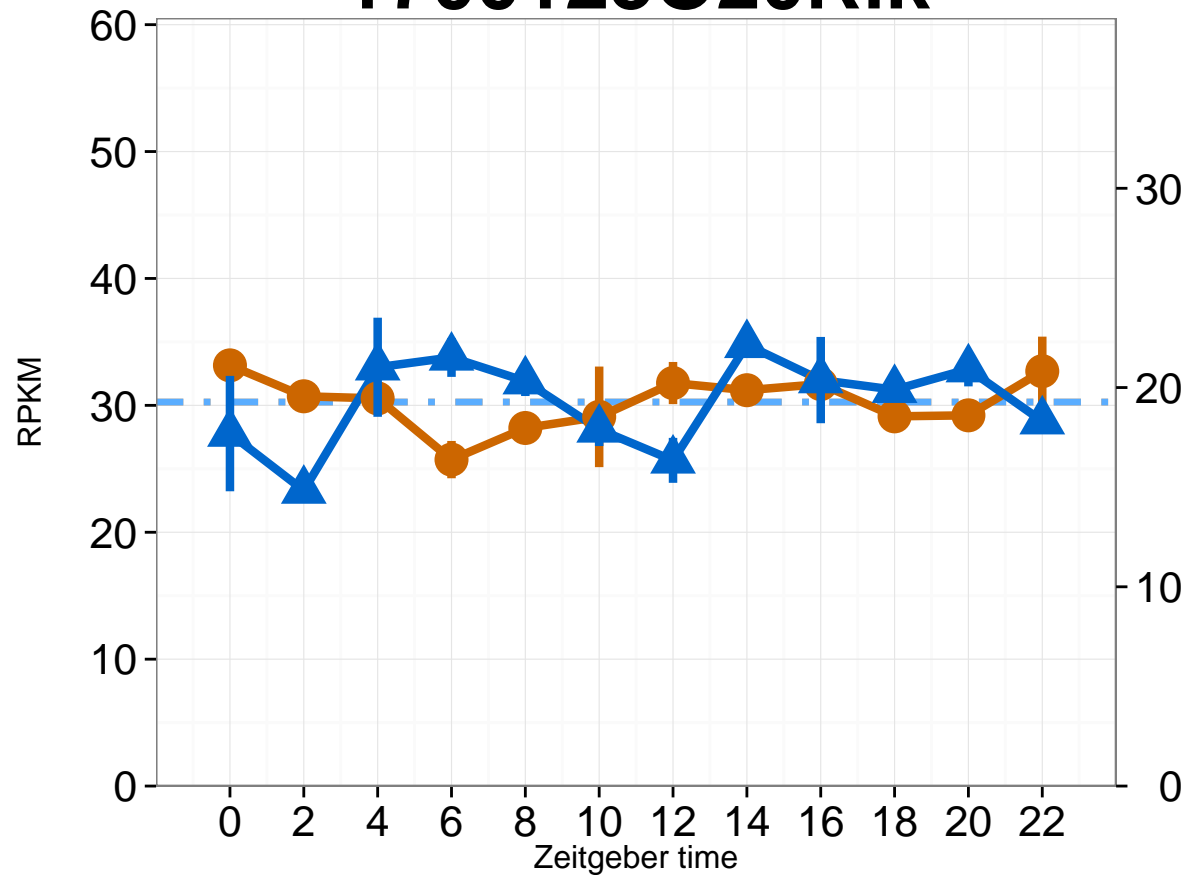

# 1700123O20Rik

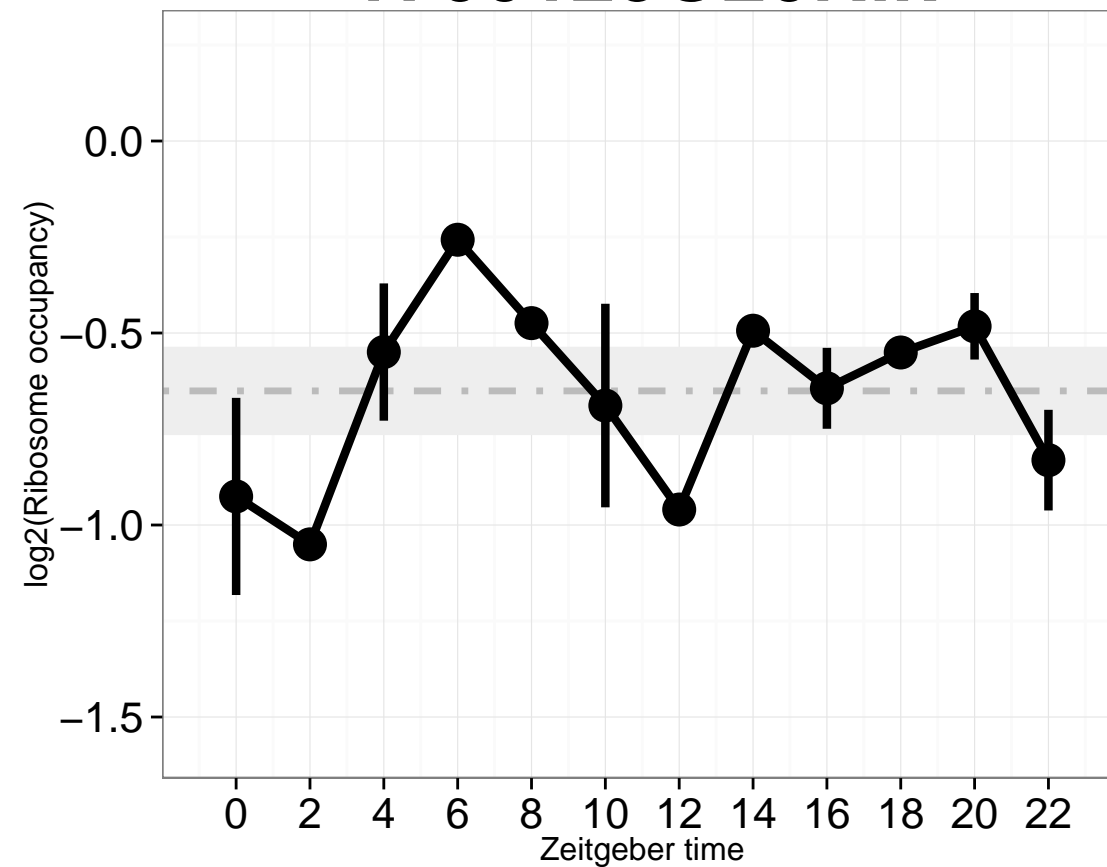

Supplement: Supplementary file 11629 [file 1]

# Fam96b

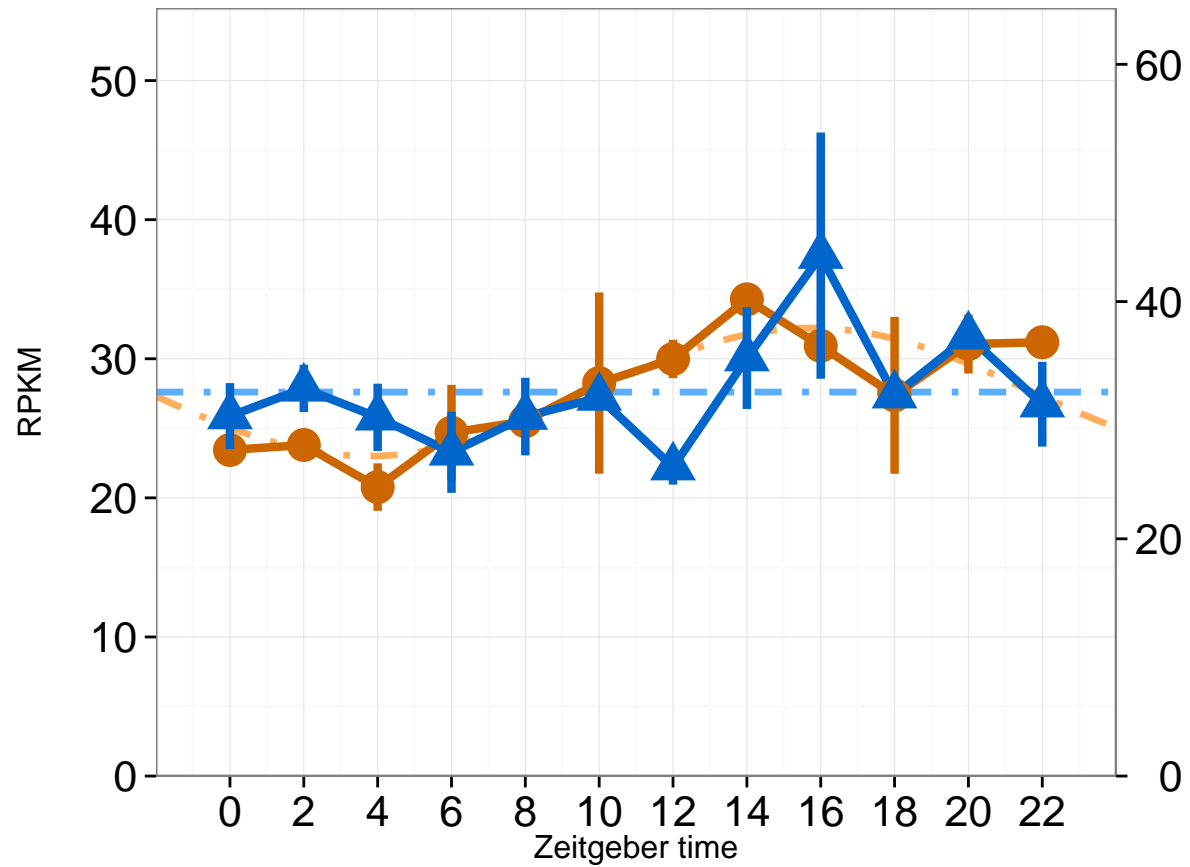

# Fam96b

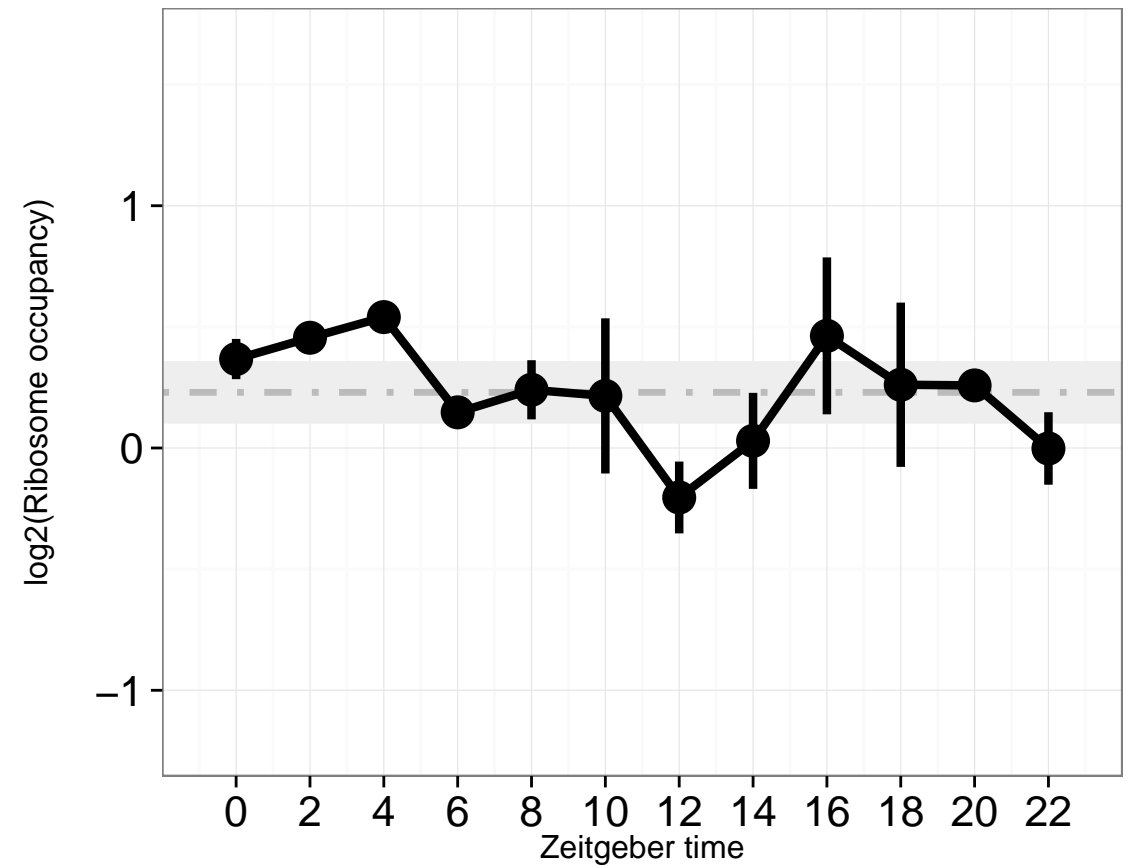

Supplement: Supplementary file 11630 [file 1]

# Atp6v0a1

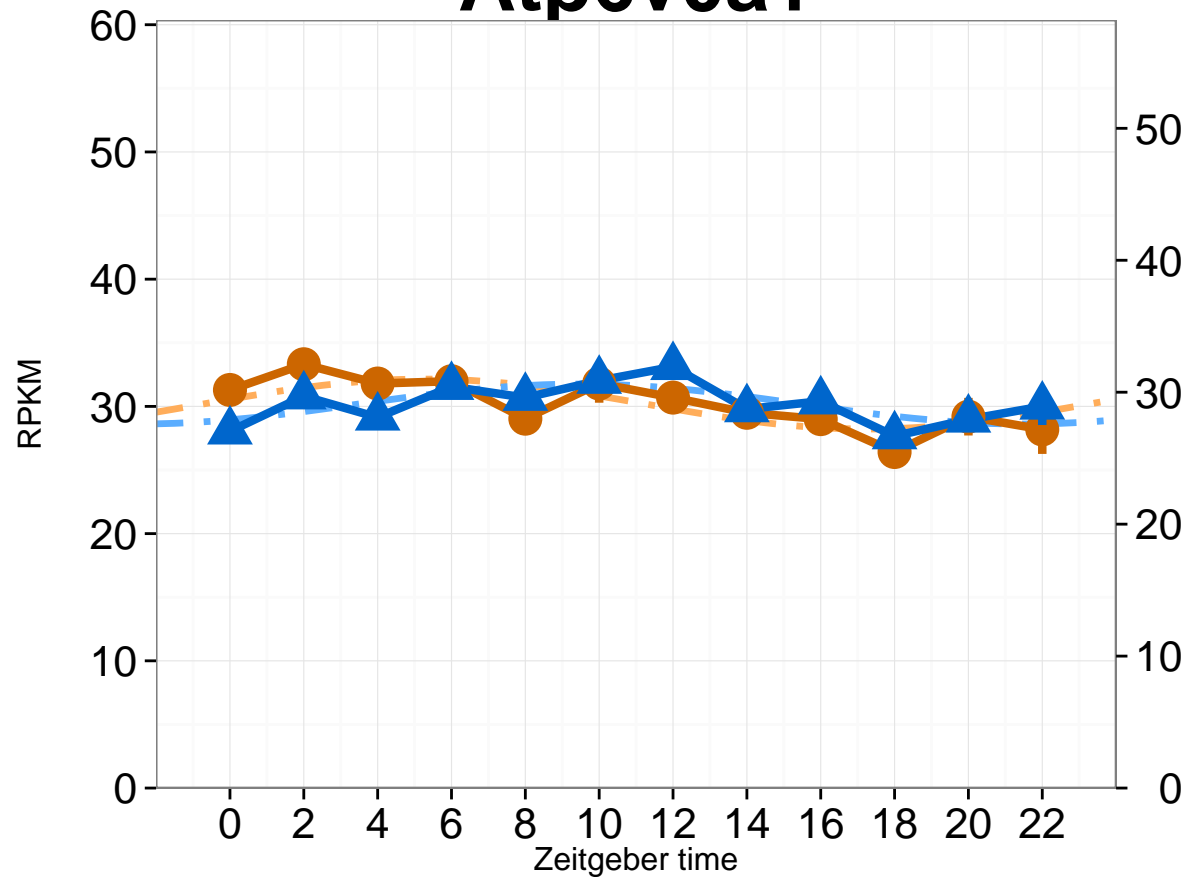

# Atp6v0a1

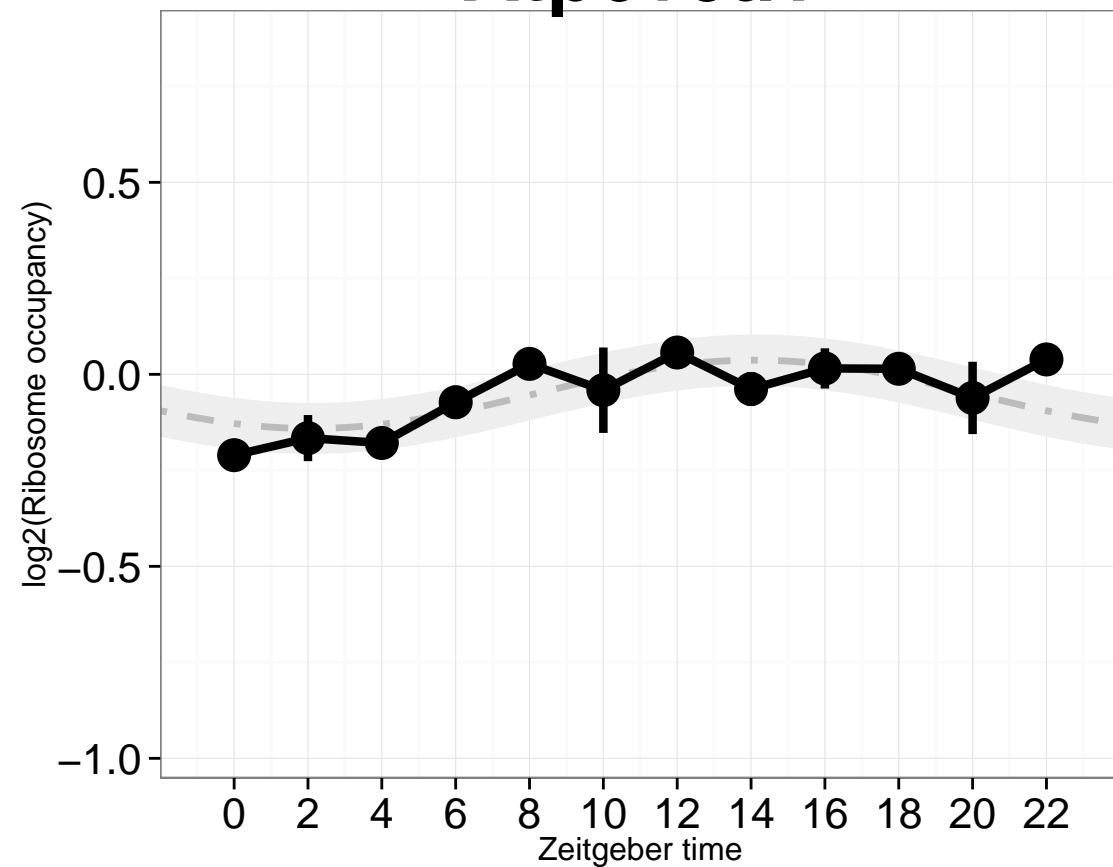

Supplement: Supplementary file 11631 [file 1]

# Exph5

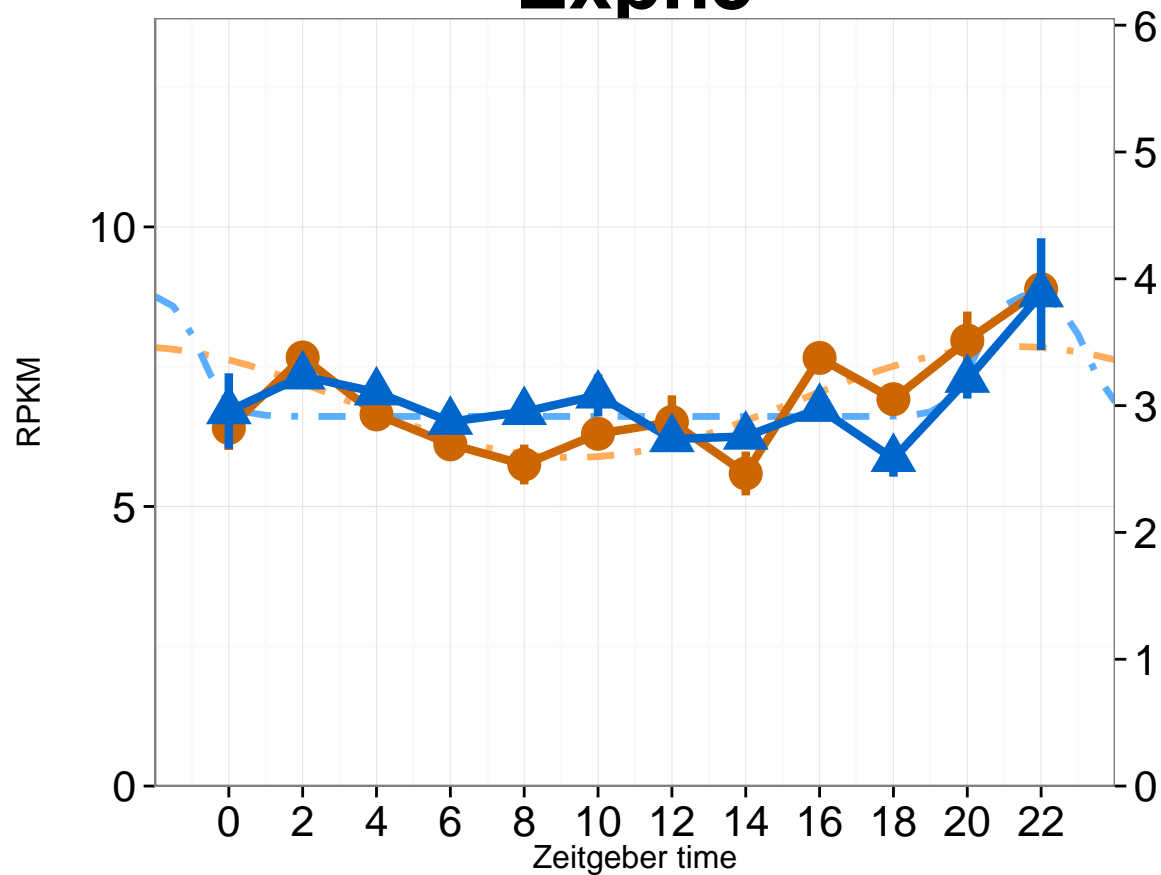

# Exph5

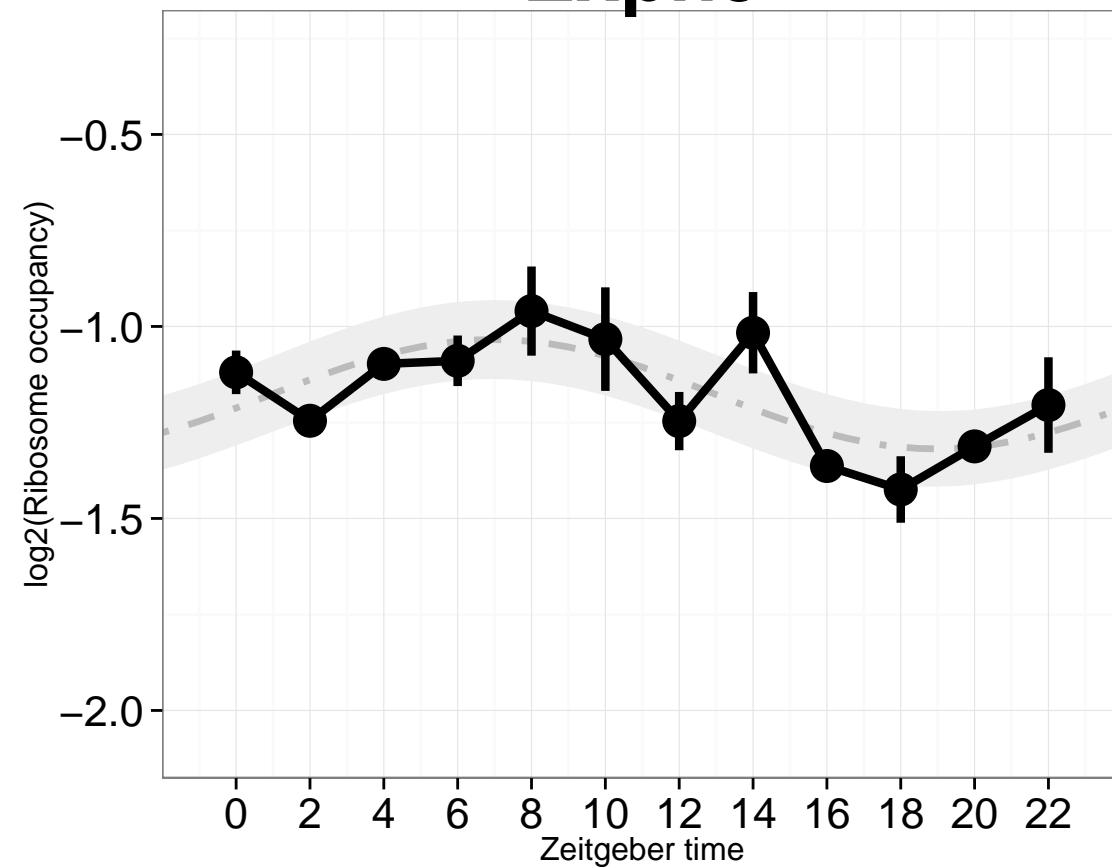

Supplement: Supplementary file 11632 [file 1]

## Tceb3

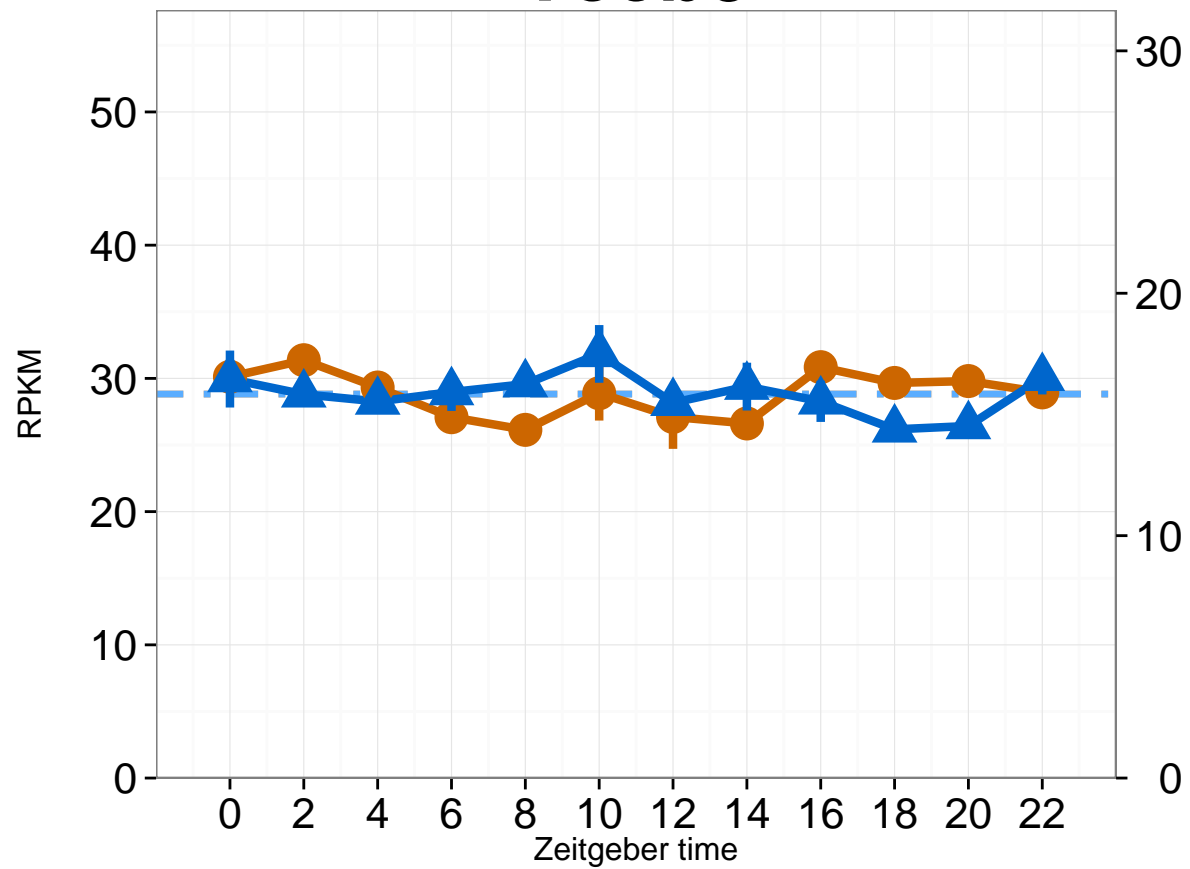

## Tceb3

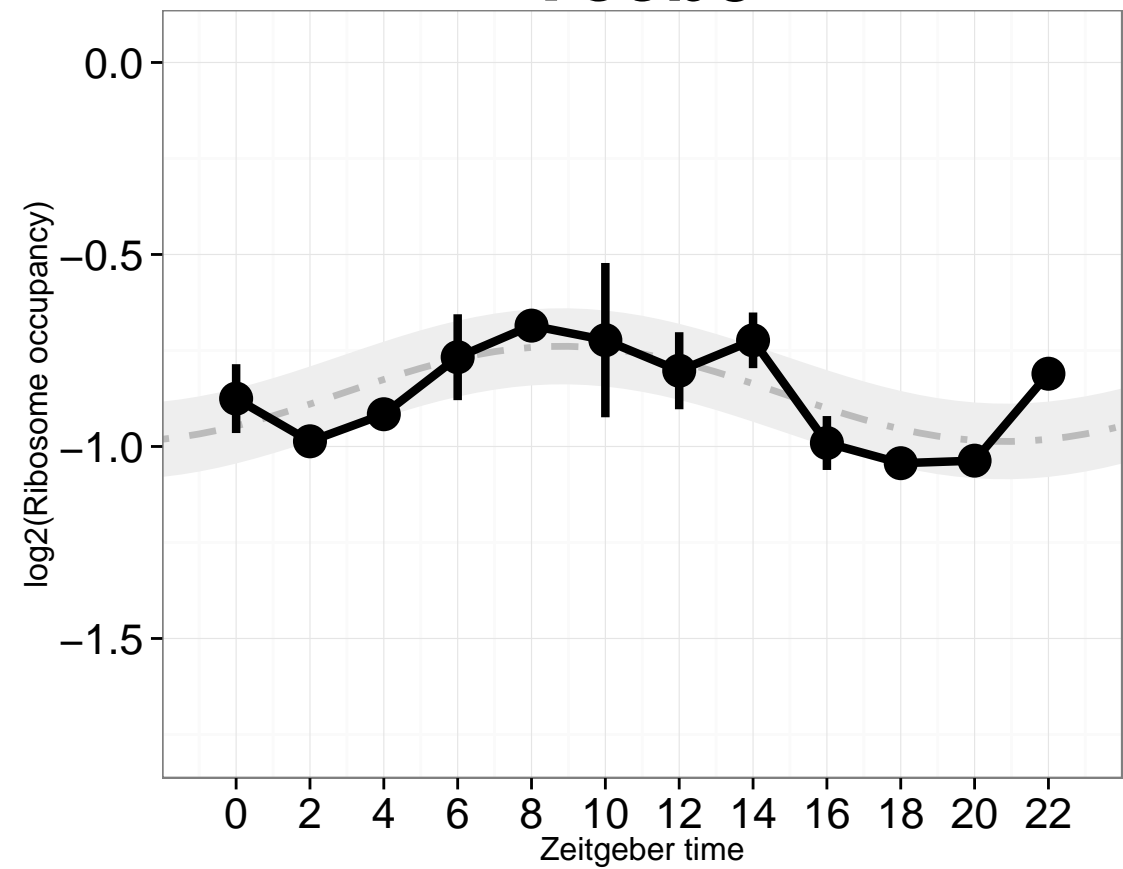

Supplement: Supplementary file 11633 [file 1]

## Pex3

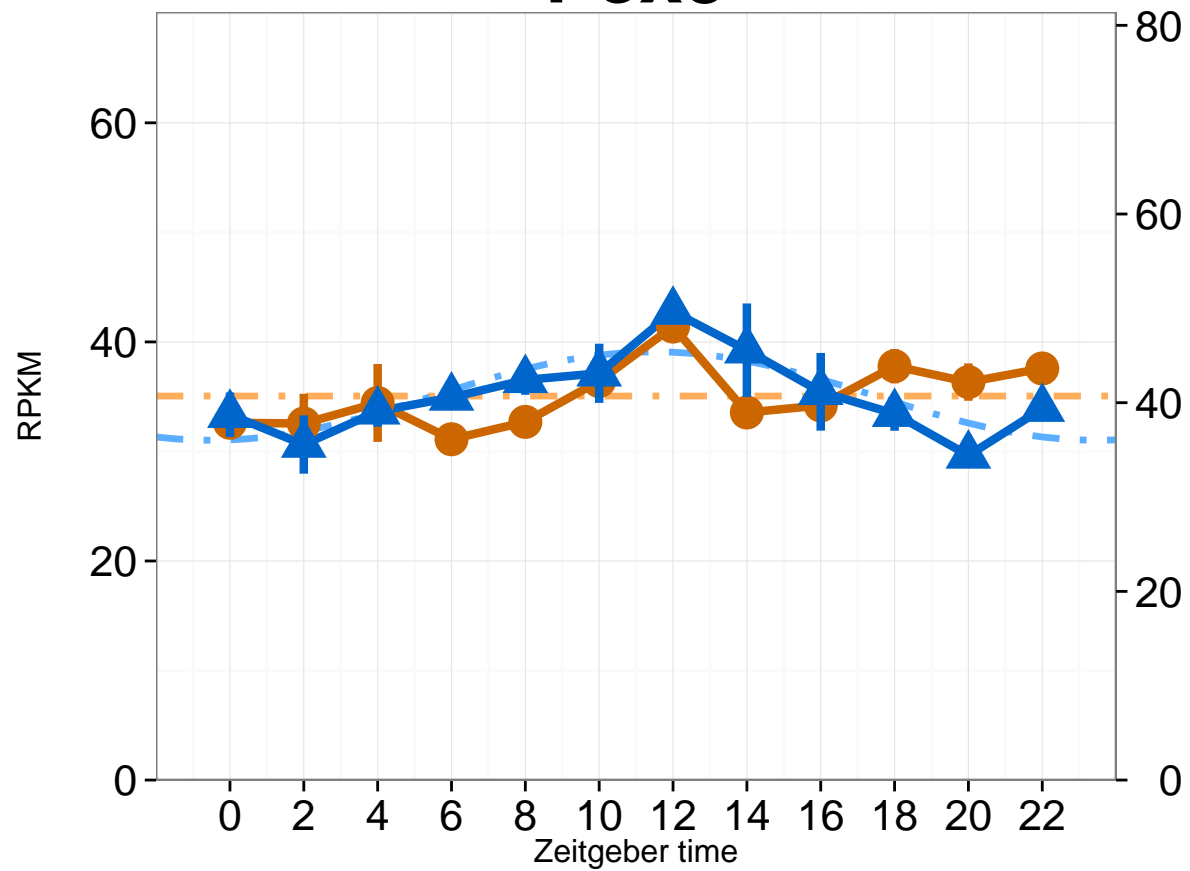

## Pex3

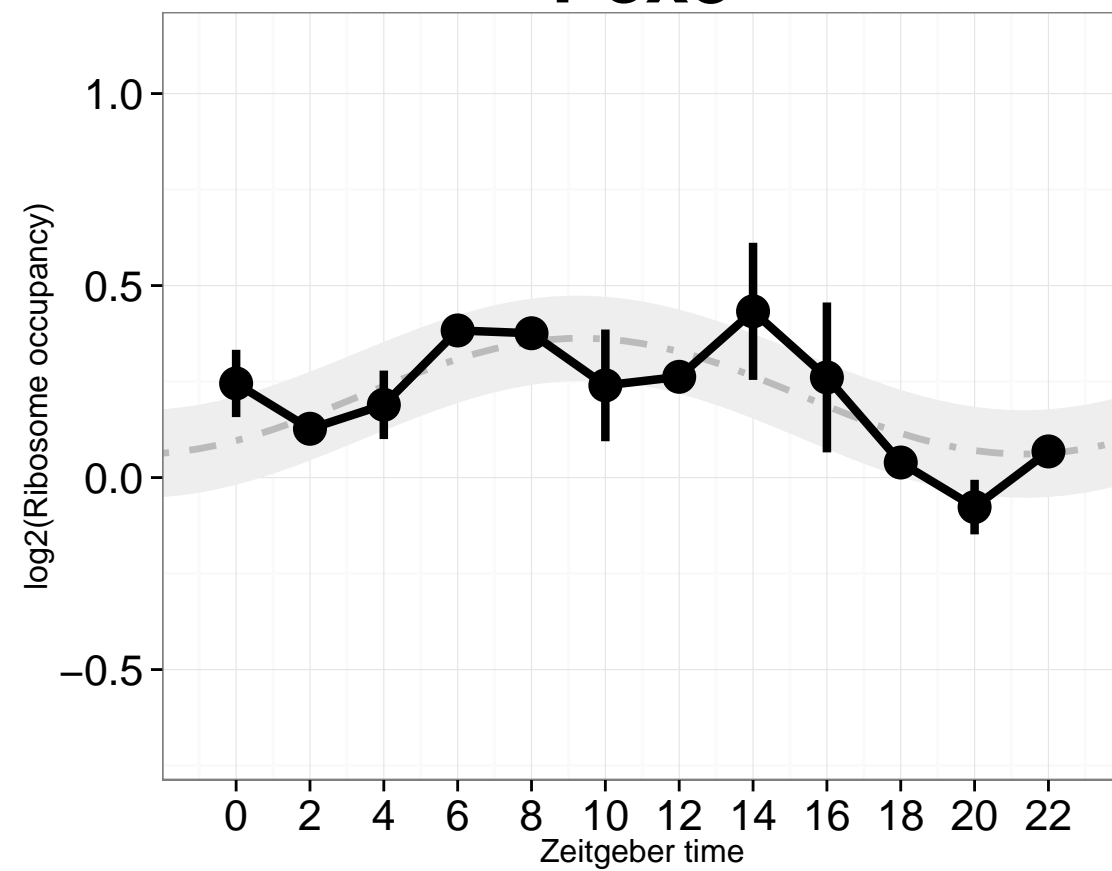

Supplement: Supplementary file 11634 [file 1]

## Stk10

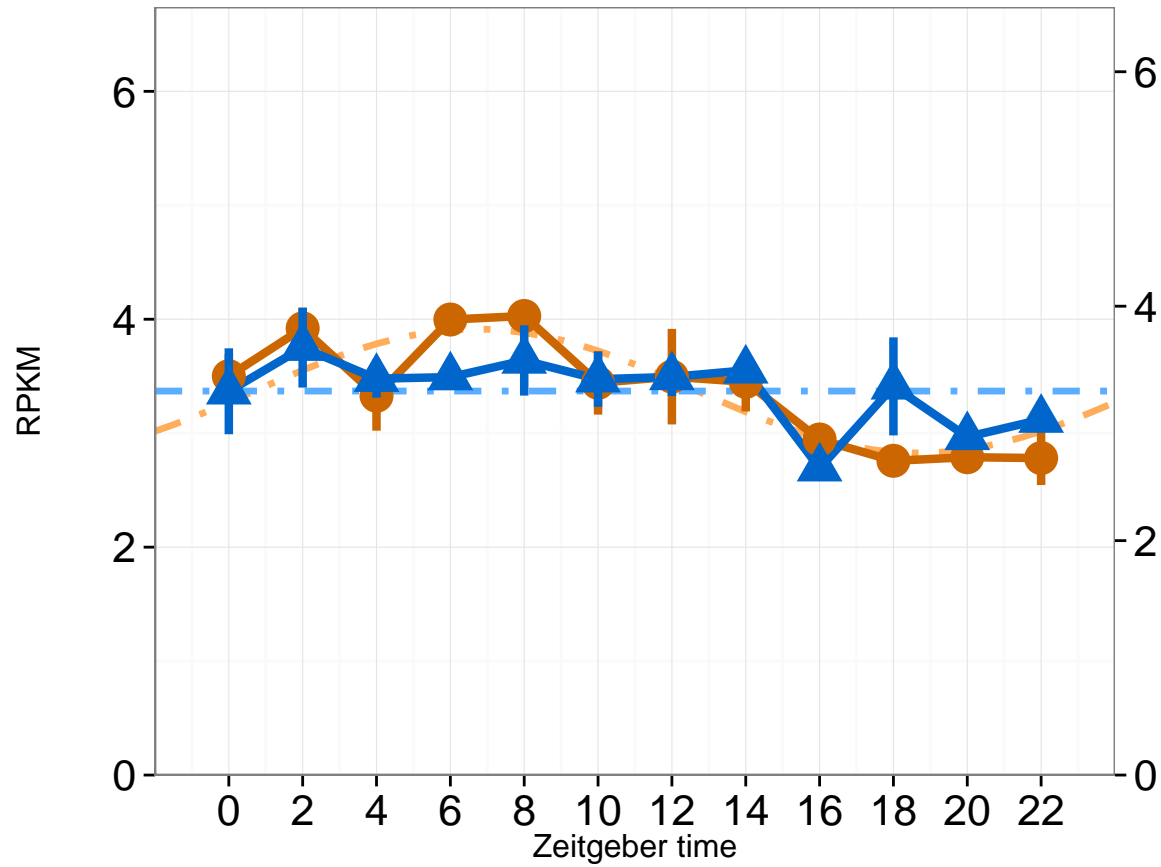

## Stk10

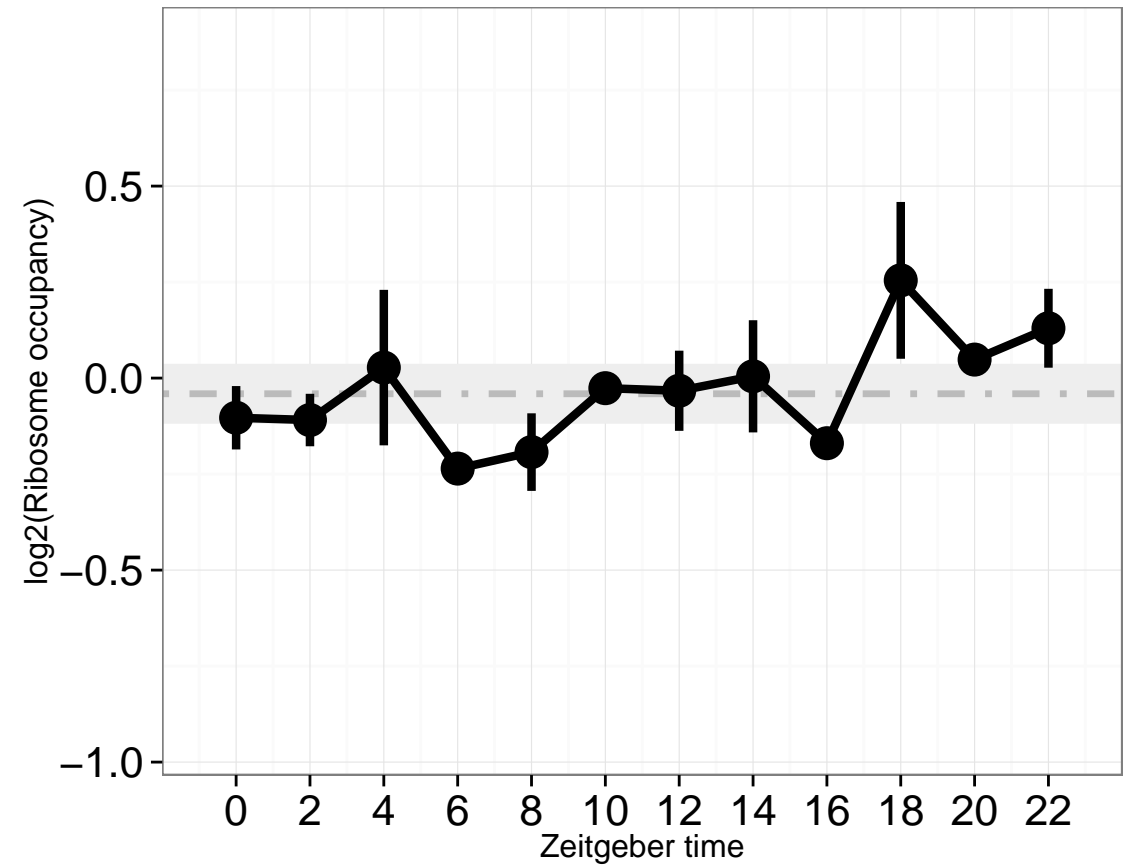

Supplement: Supplementary file 11635 [file 1]

## Slc5a9

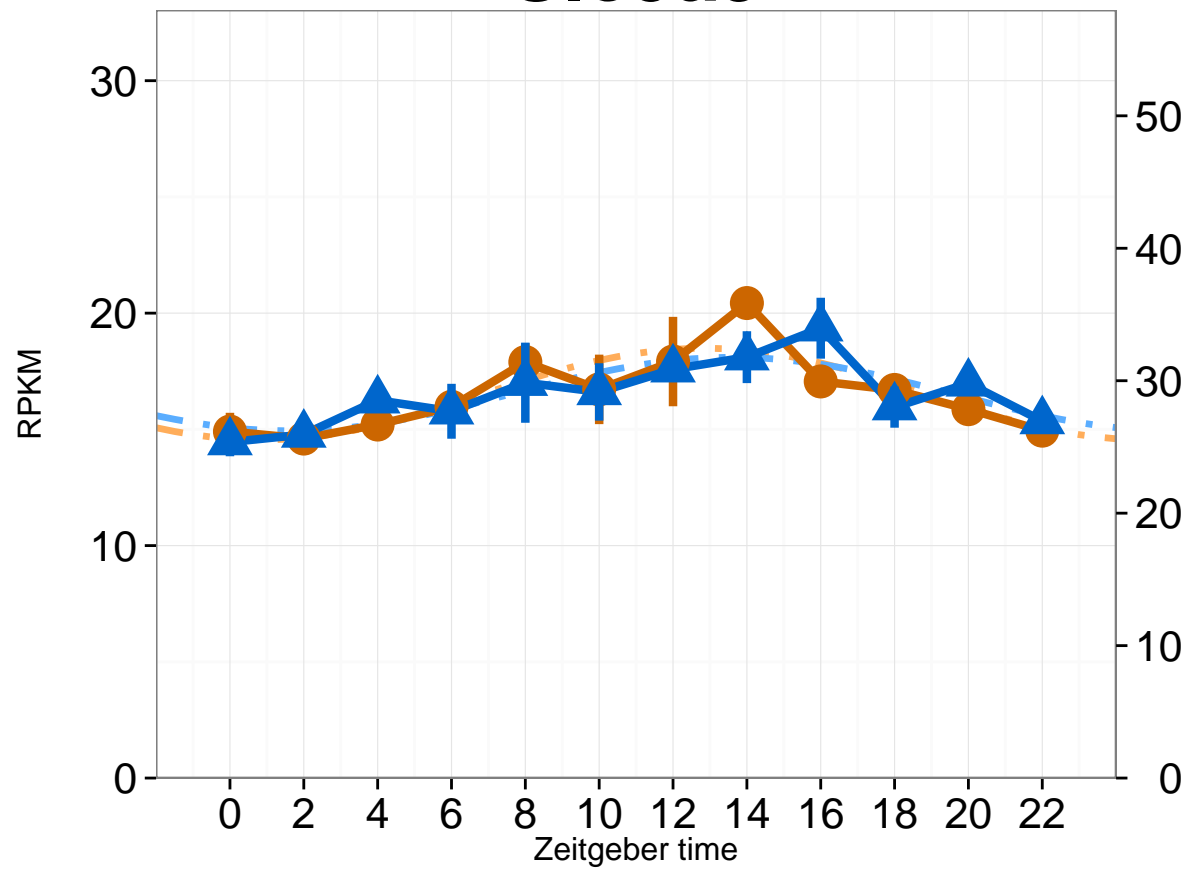

## Slc5a9

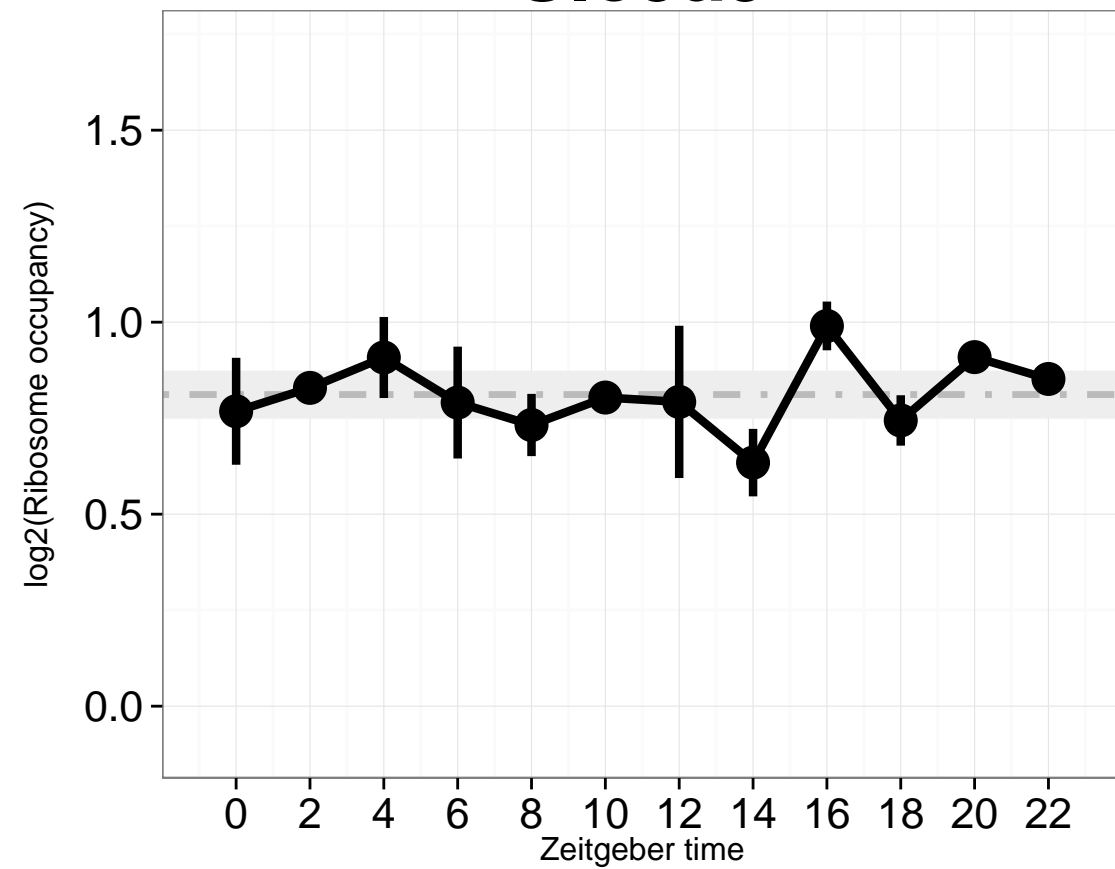

Supplement: Supplementary file 11636 [file 1]

# F8

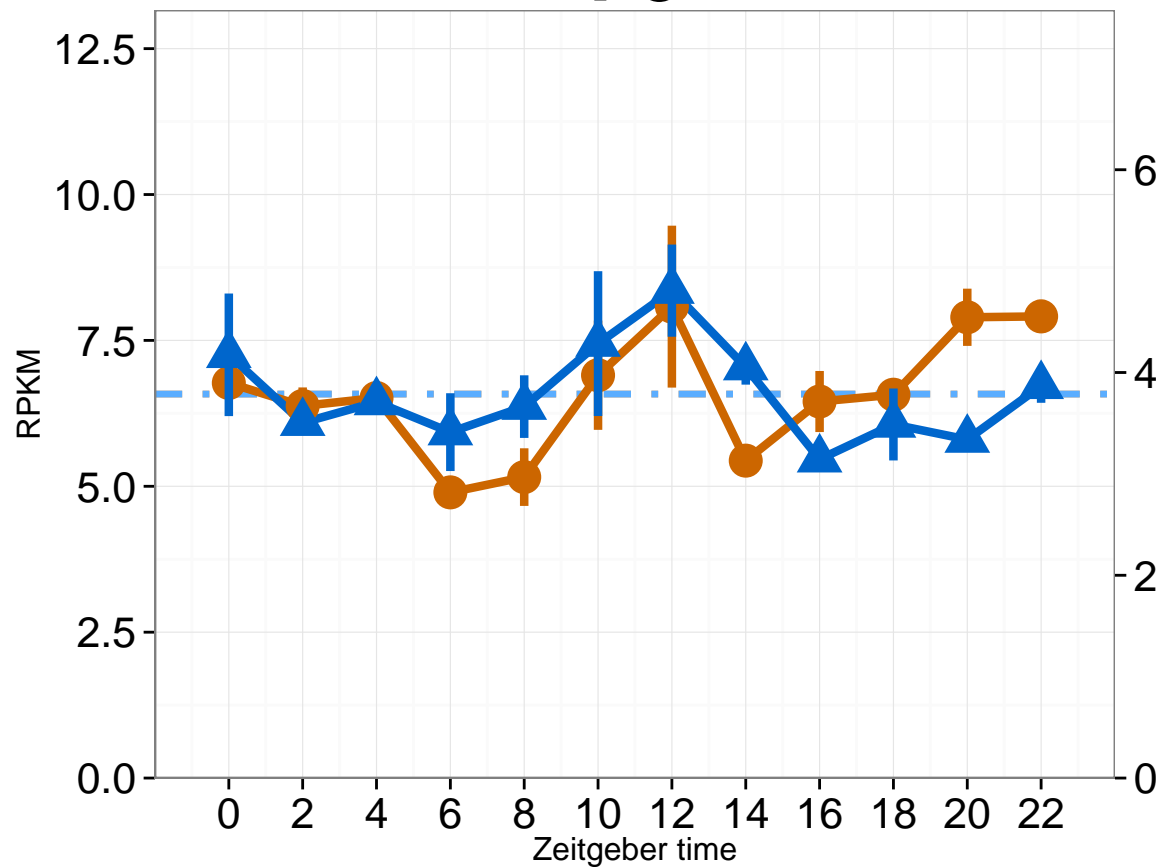

# F8

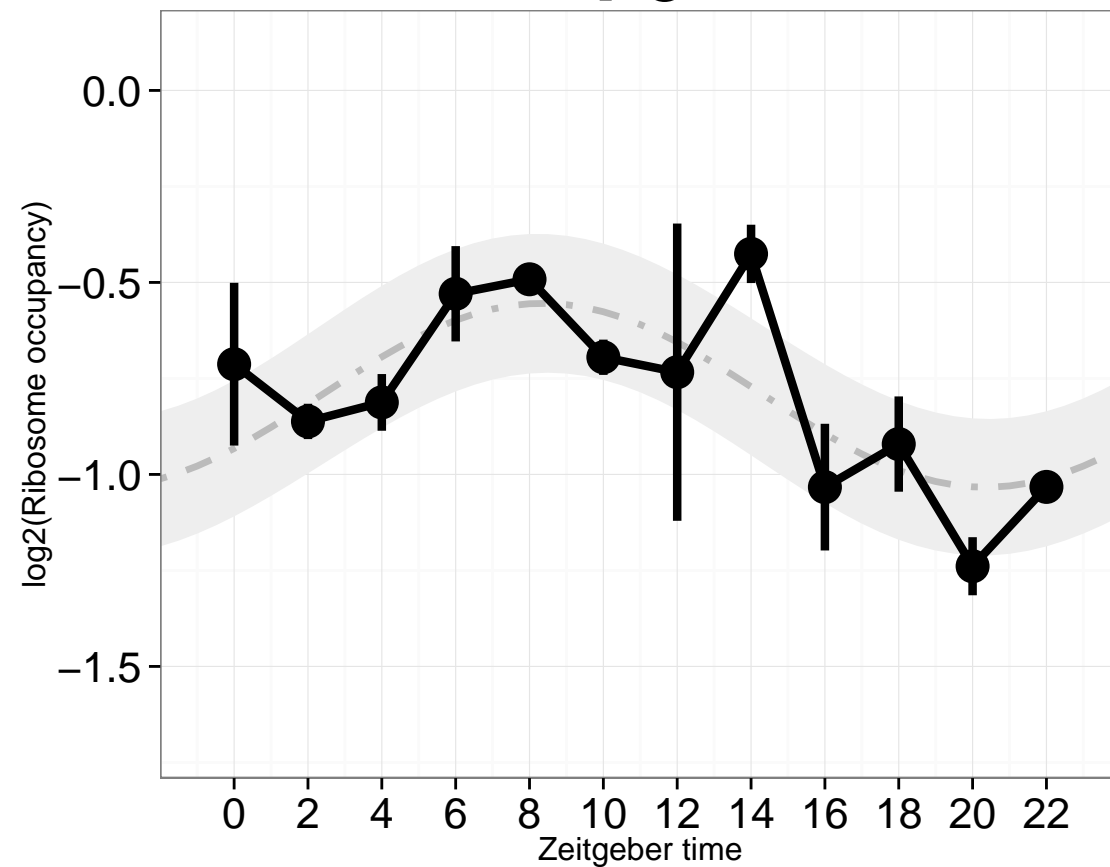

Supplement: Supplementary file 11637 [file 1]

## Clmp

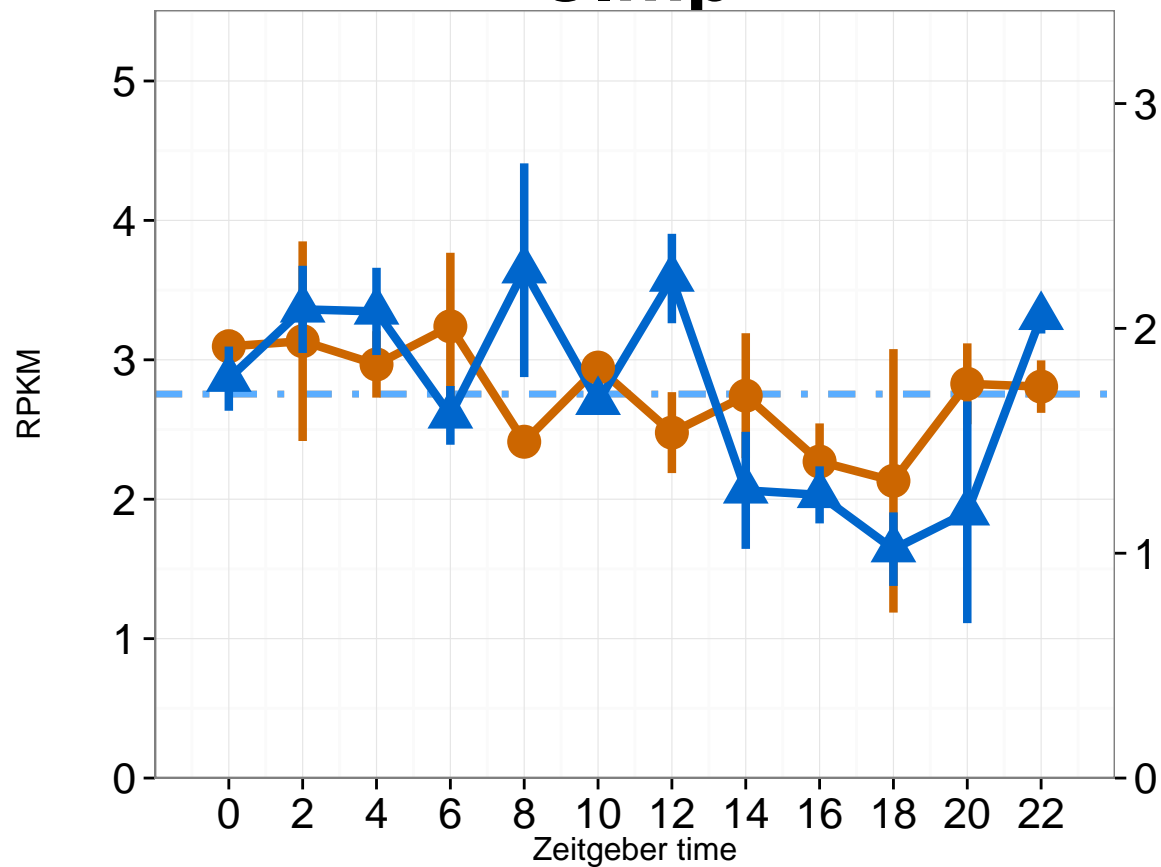

## Clmp

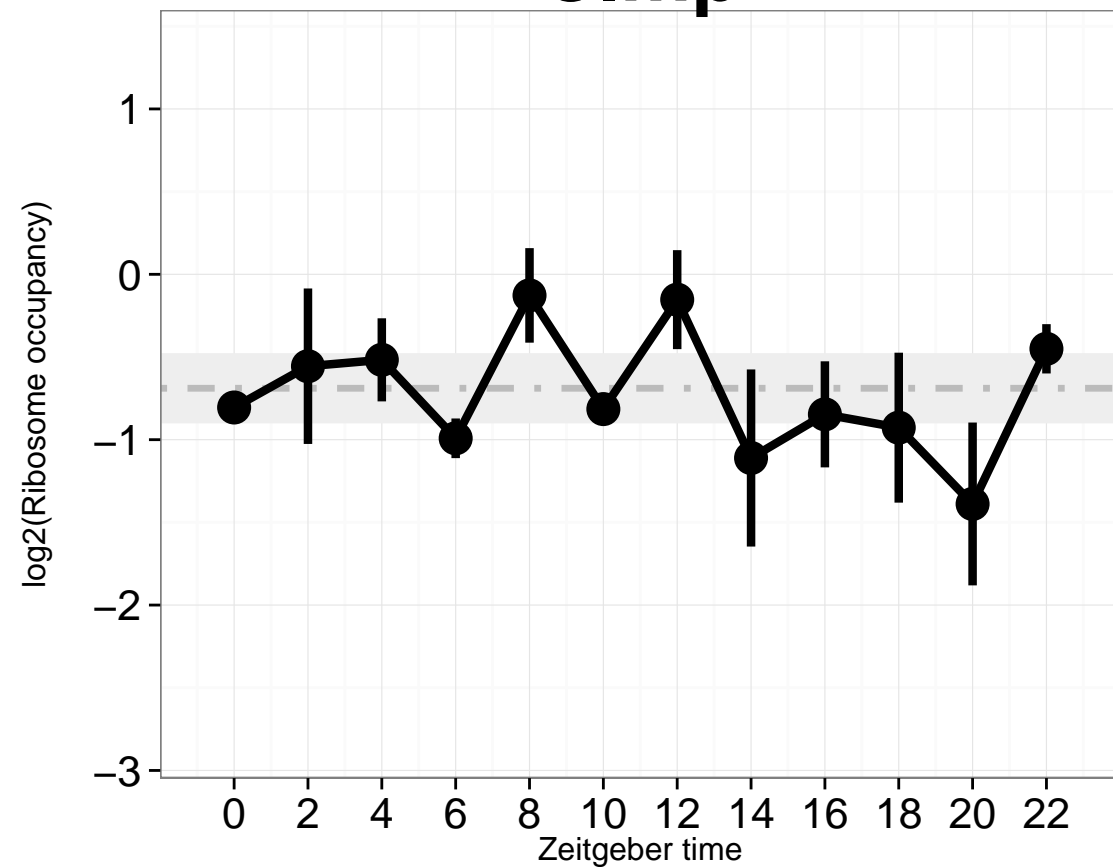

Supplement: Supplementary file 11638 [file 1]

## Smarce1

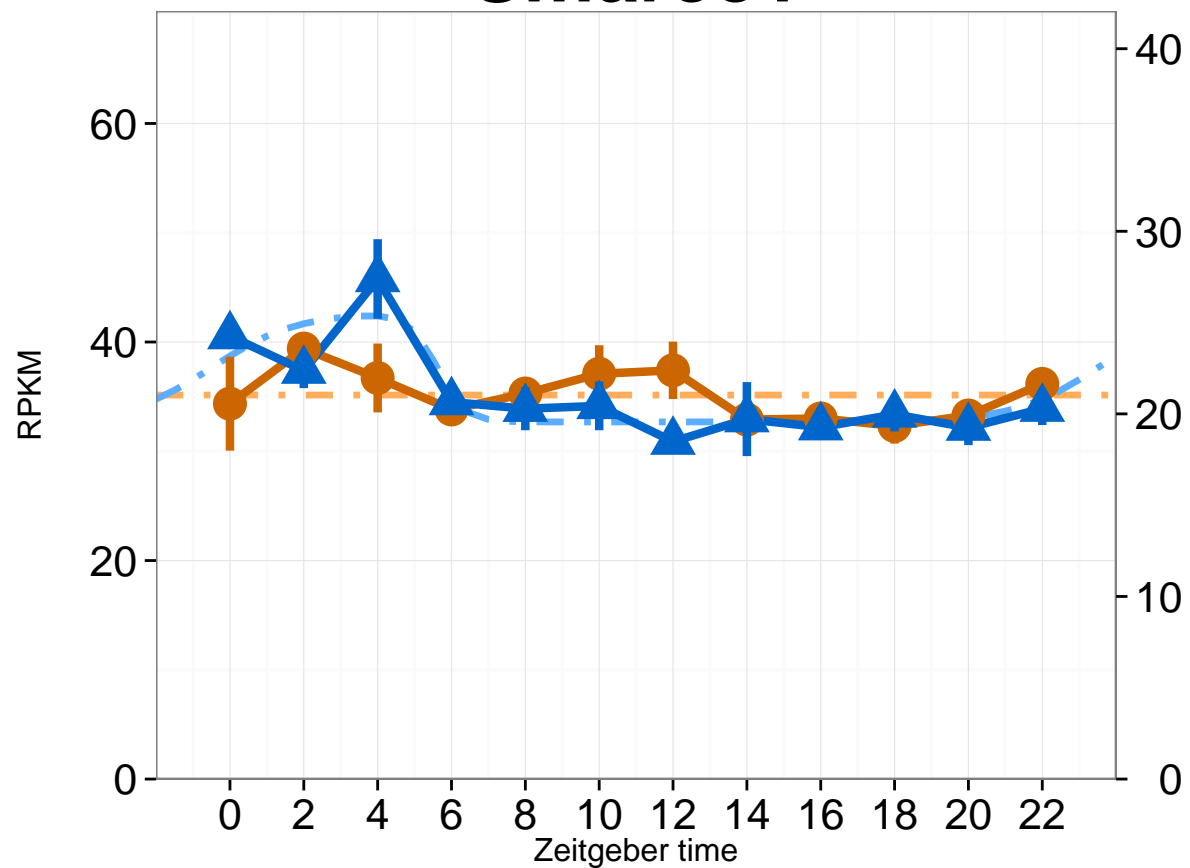

## Smarce1

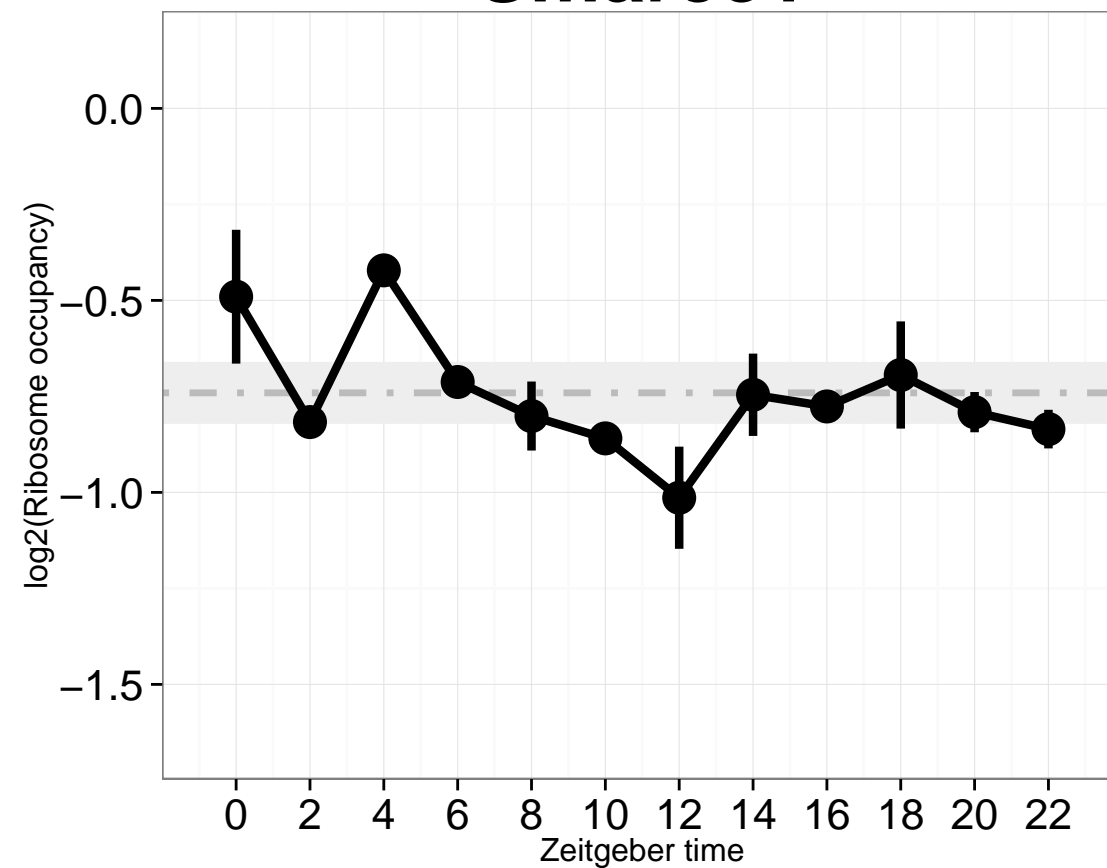

Supplement: Supplementary file 11639 [file 1]

# Memo1

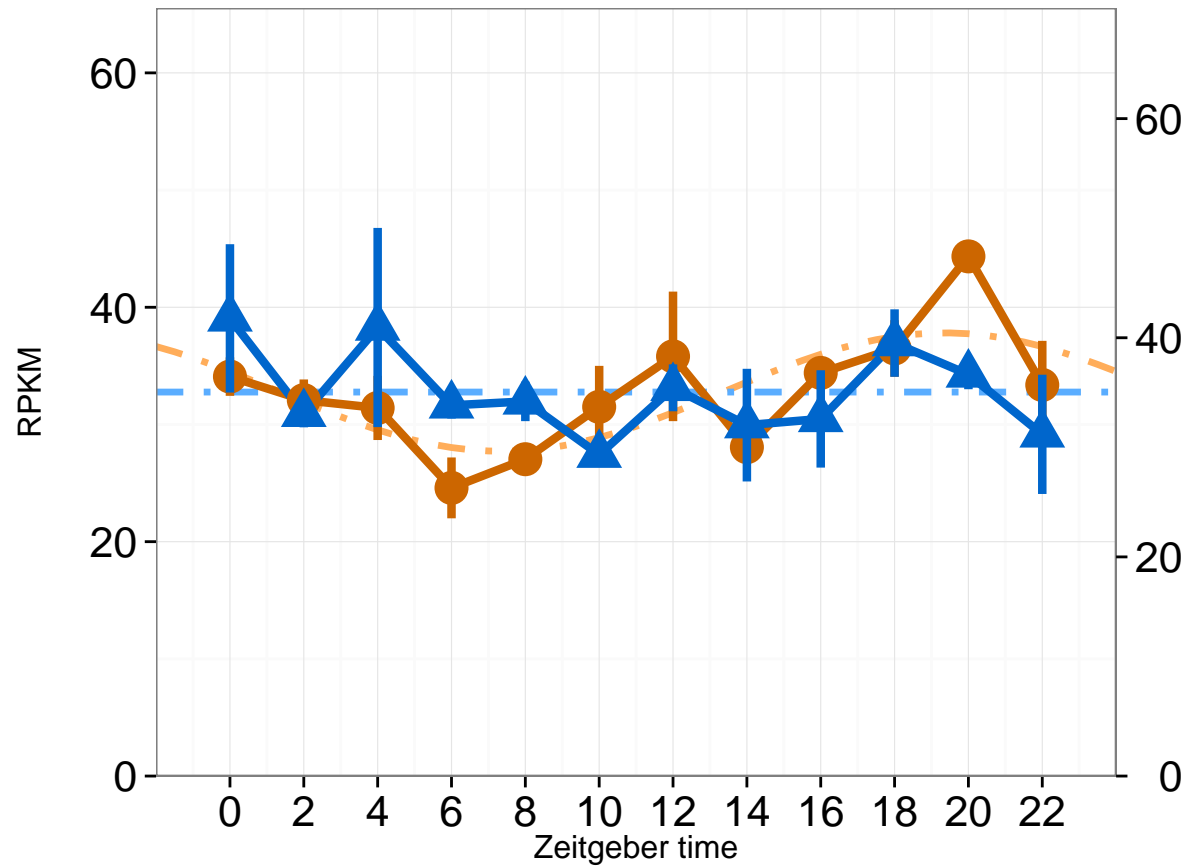

# Memo1

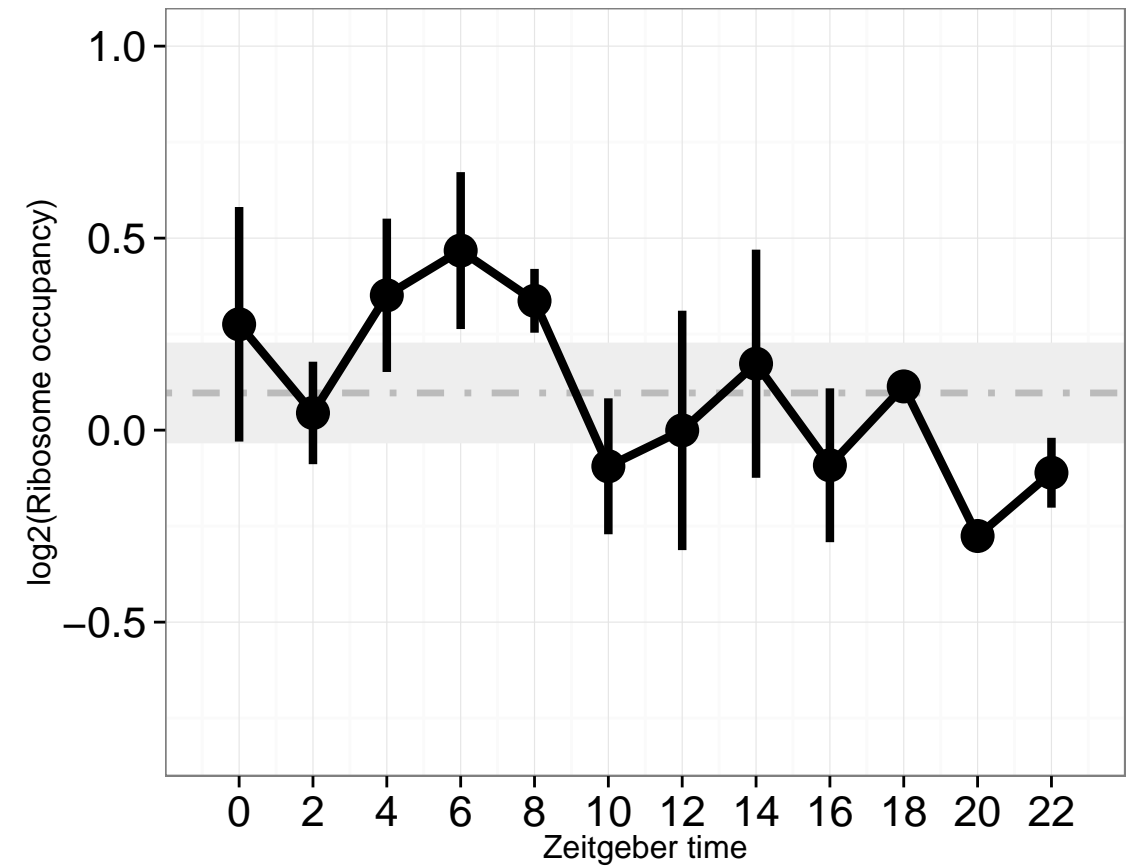

Supplement: Supplementary file 11640 [file 1]

# Trim12c

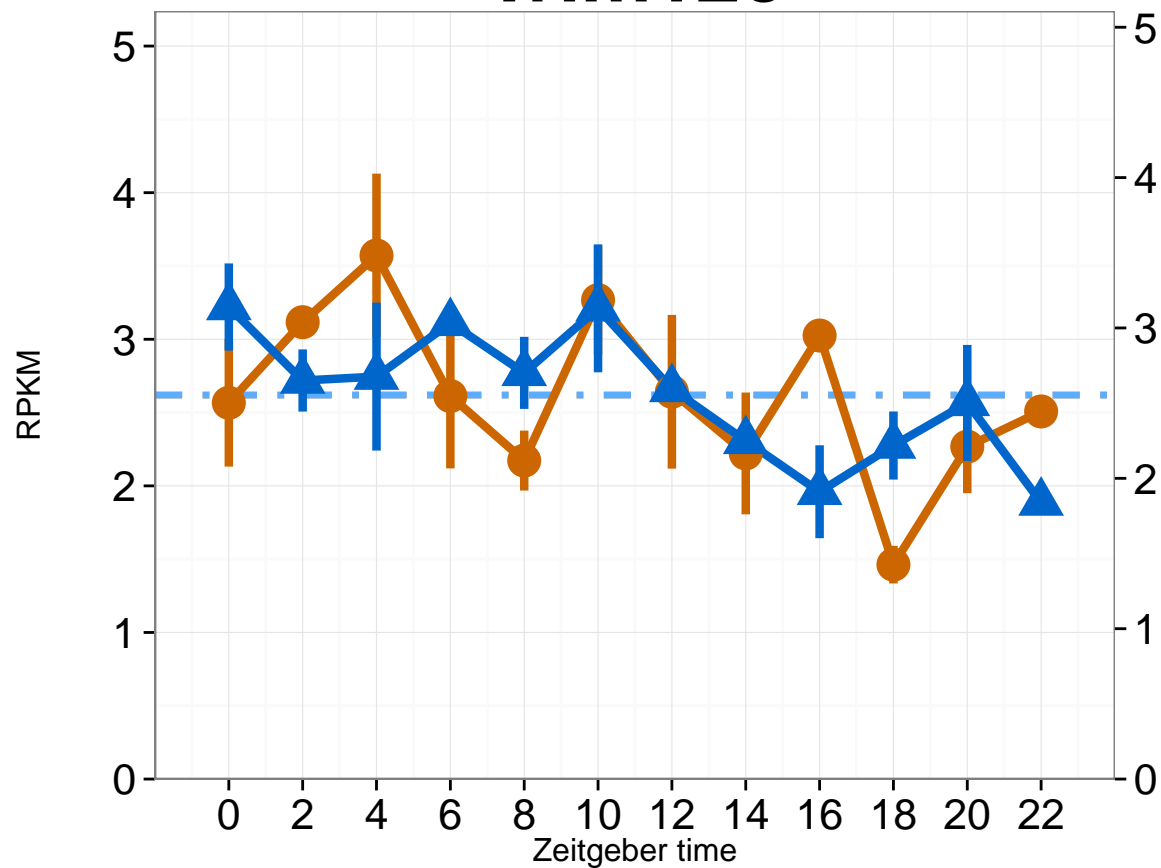

# Trim12c

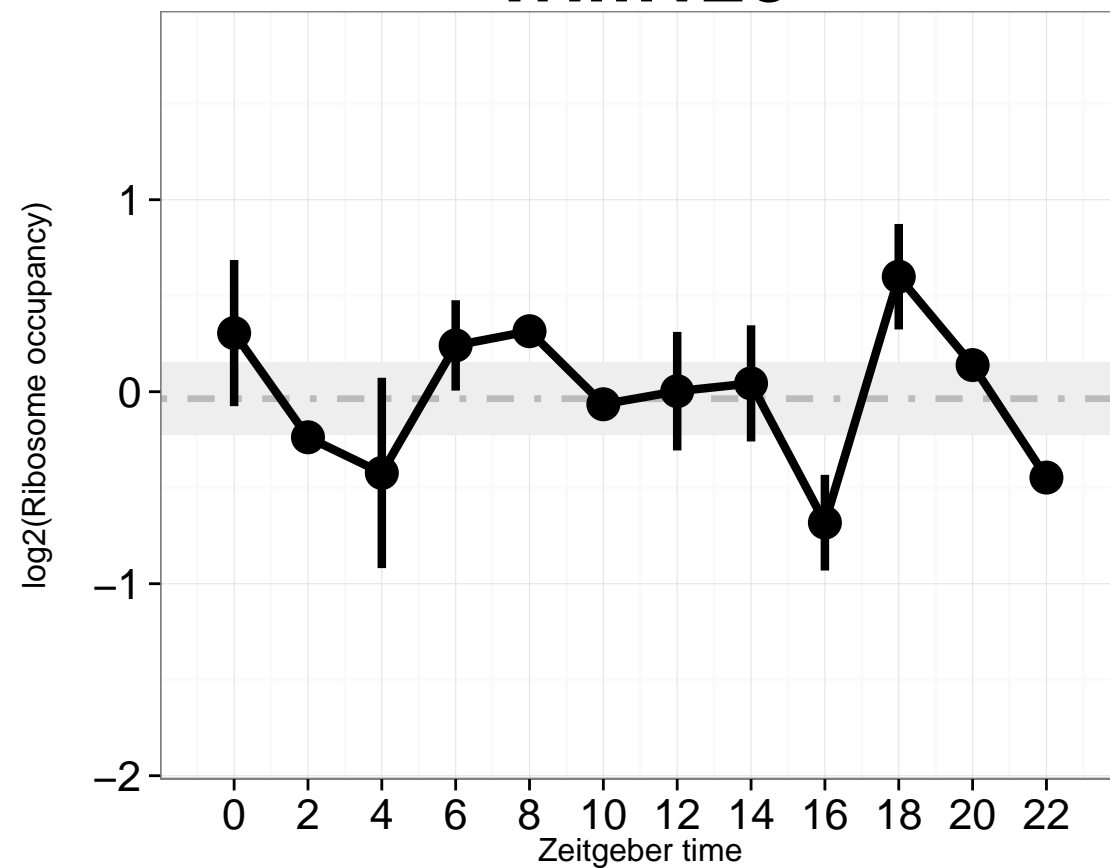

Supplement: Supplementary file 11641 [file 1]

## Sema3c

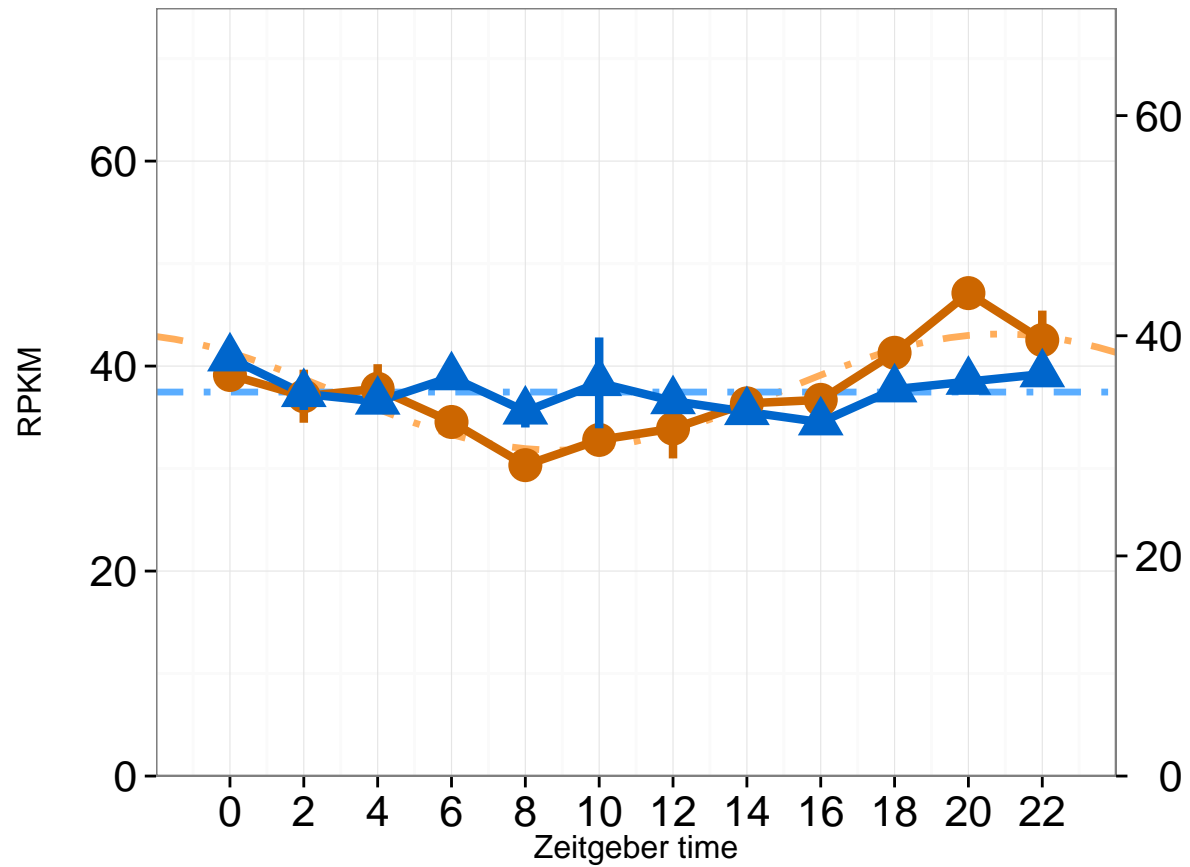

## Sema3c

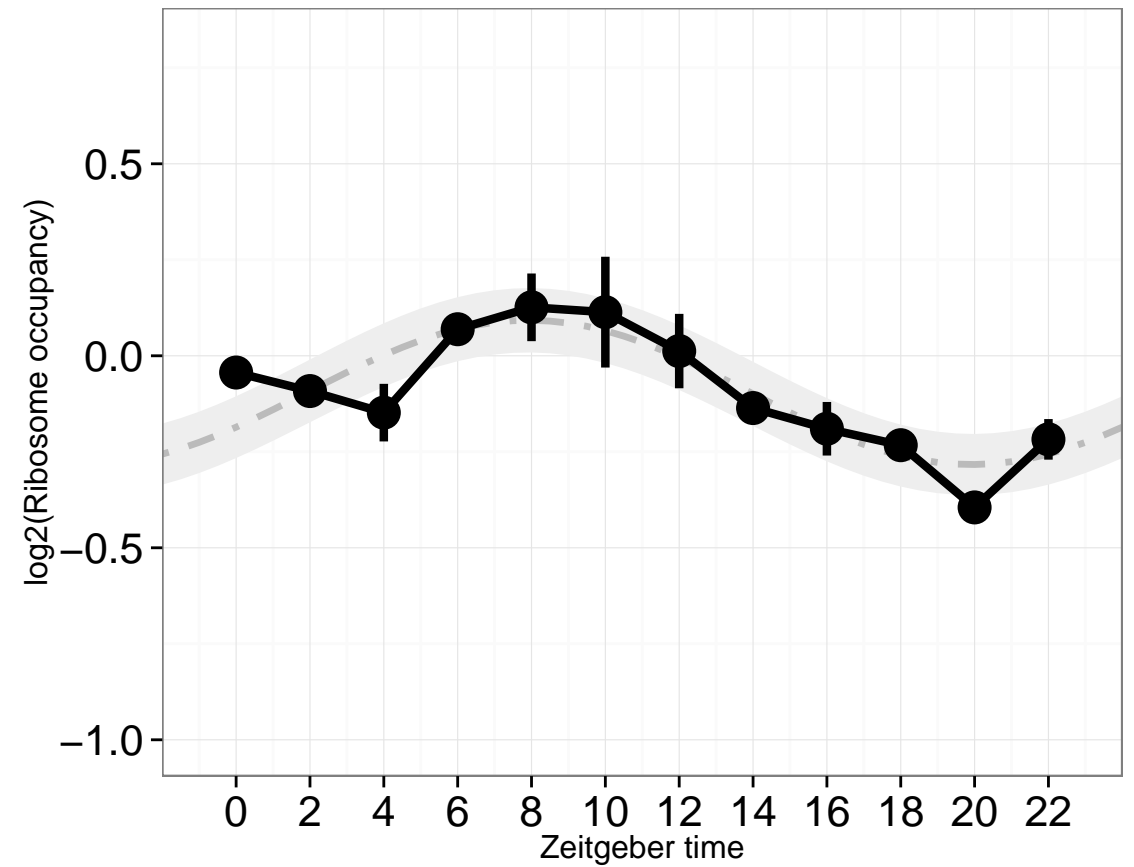

Supplement: Supplementary file 11642 [file 1]
