# Supplementary material (part 117 of 133)
Source: publisher figshare collection journal article supplement (https://springernature.figshare.com/articles/dataset/_/4903193)

## Klh15

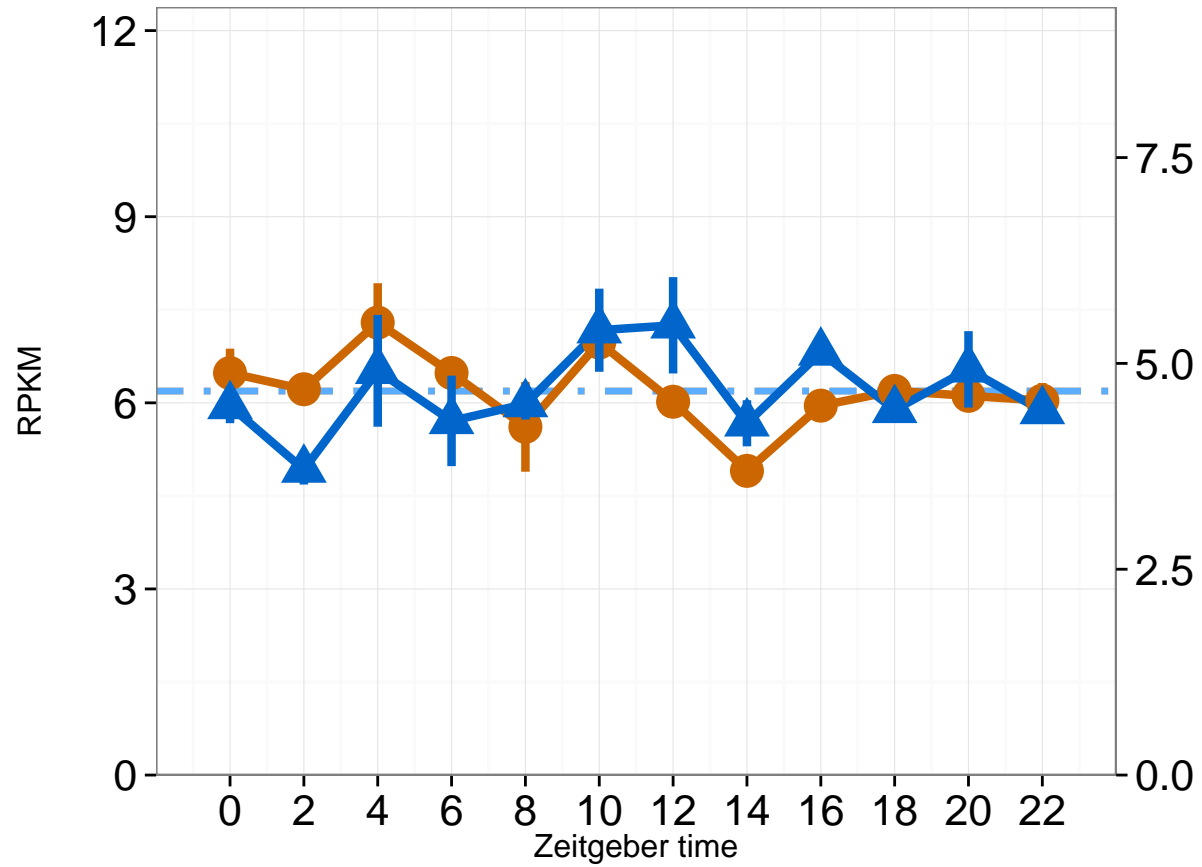

## Klh15

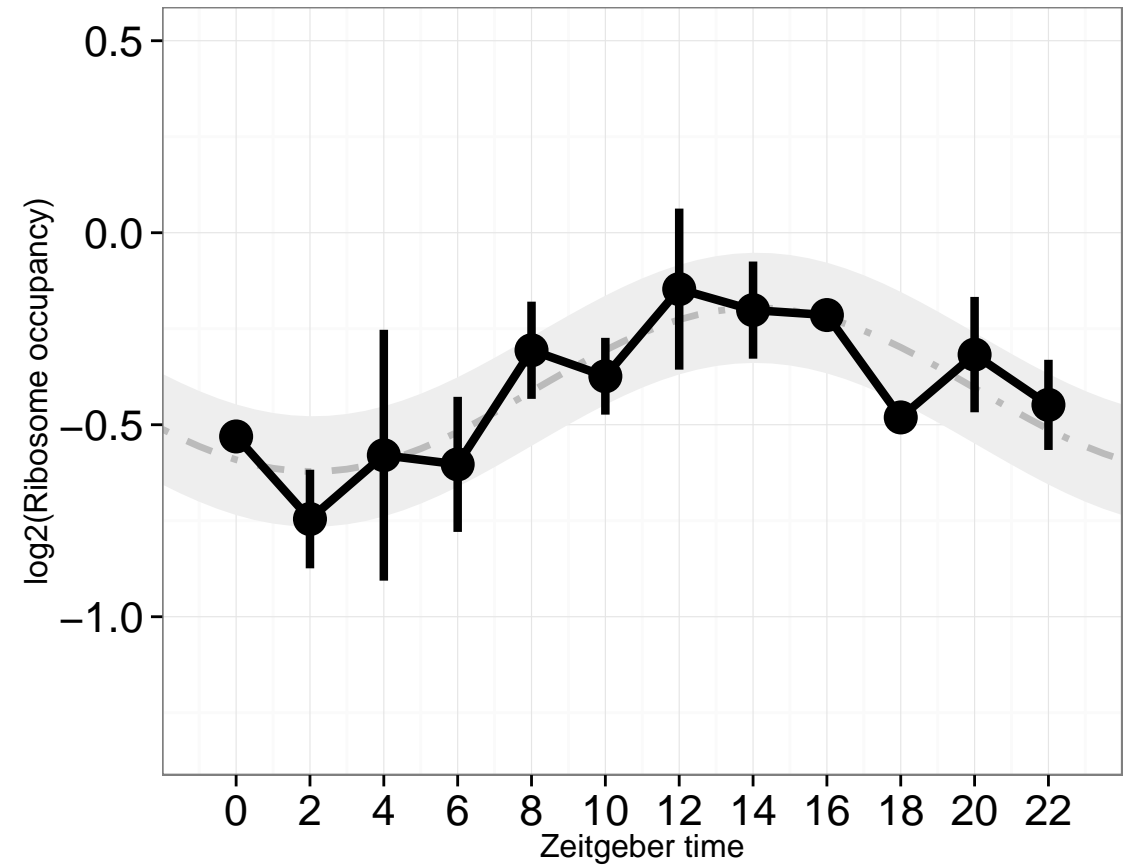

Supplement: Supplementary file 11643 [file 1]

## Amy1

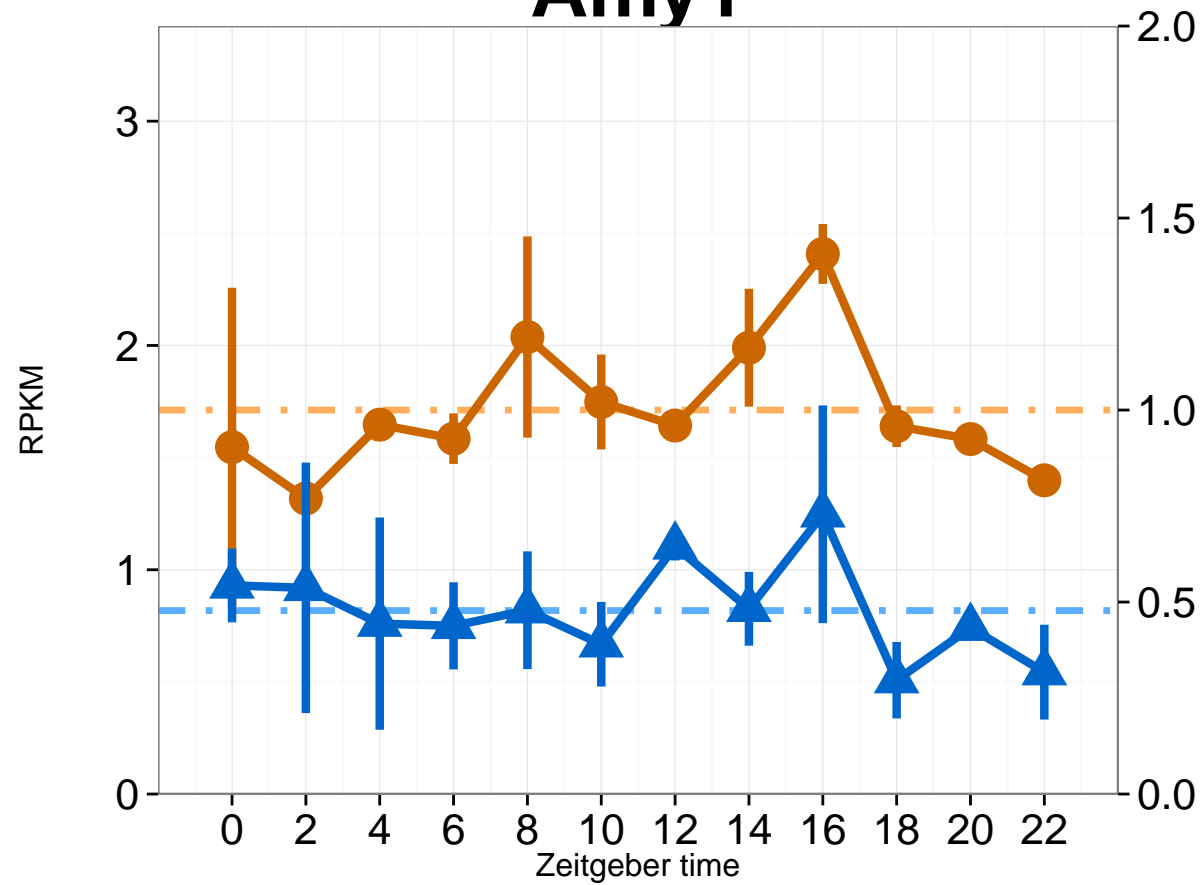

## Amy1

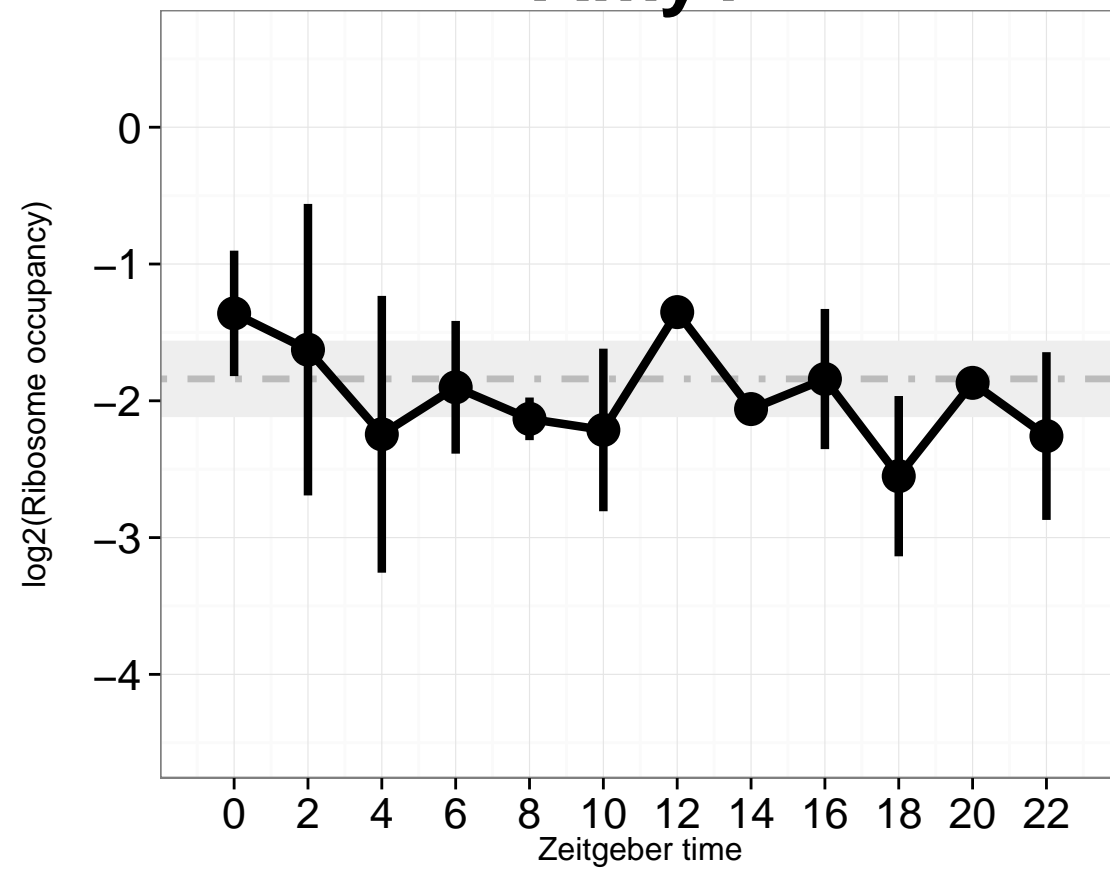

Supplement: Supplementary file 11644 [file 1]

## PIk5

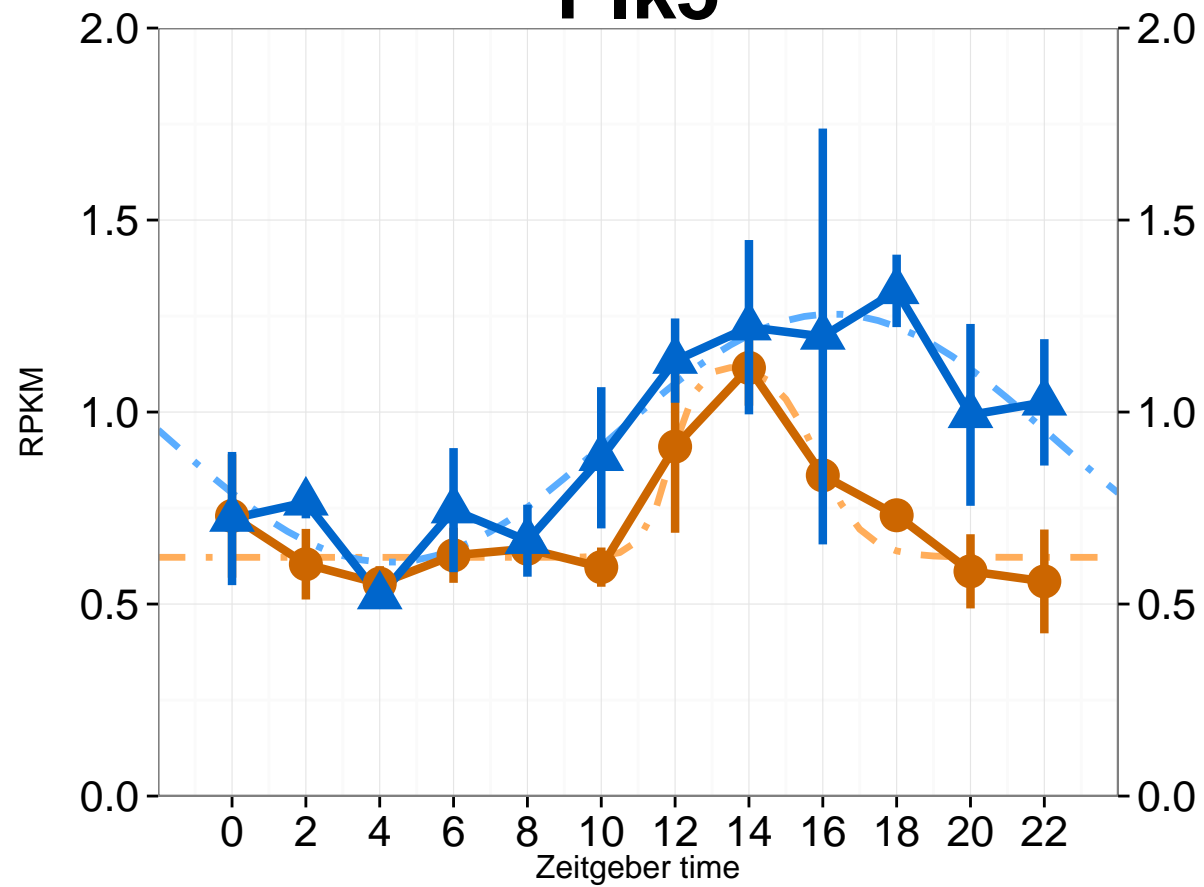

## PIk5

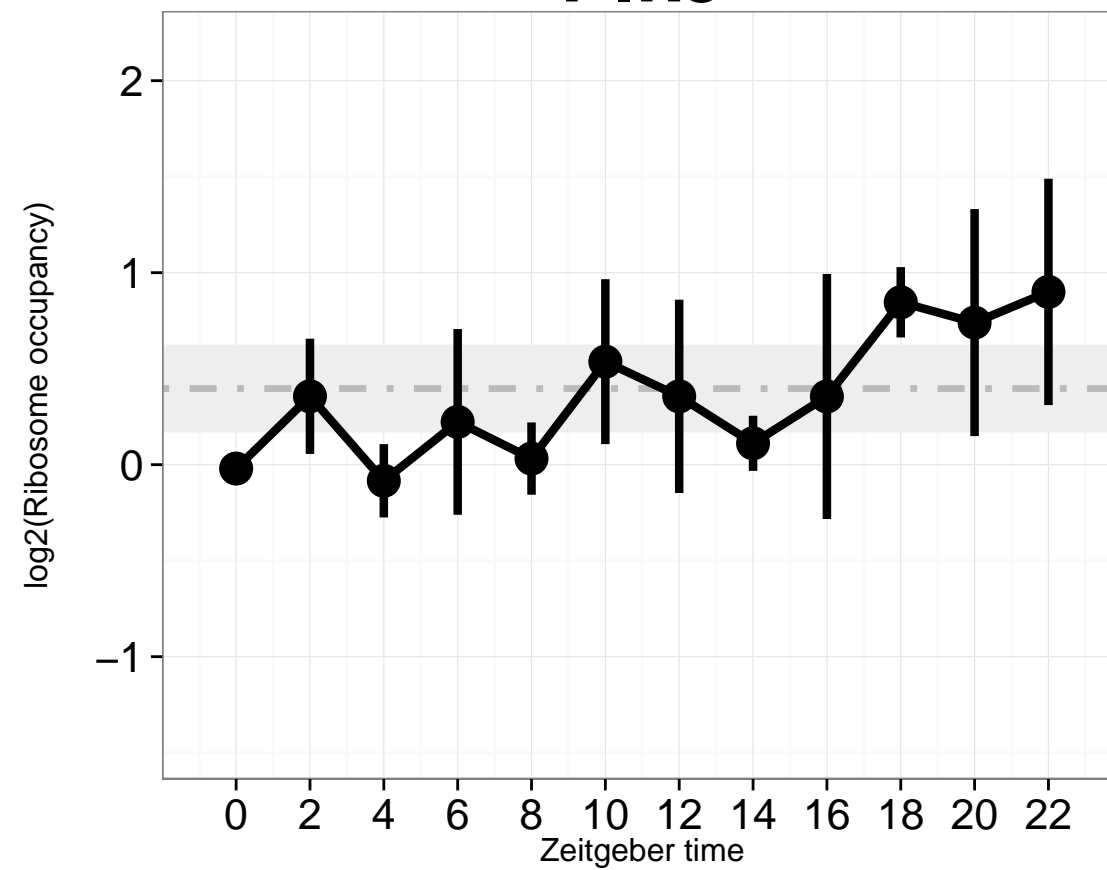

Supplement: Supplementary file 11645 [file 1]

## Fbxo3

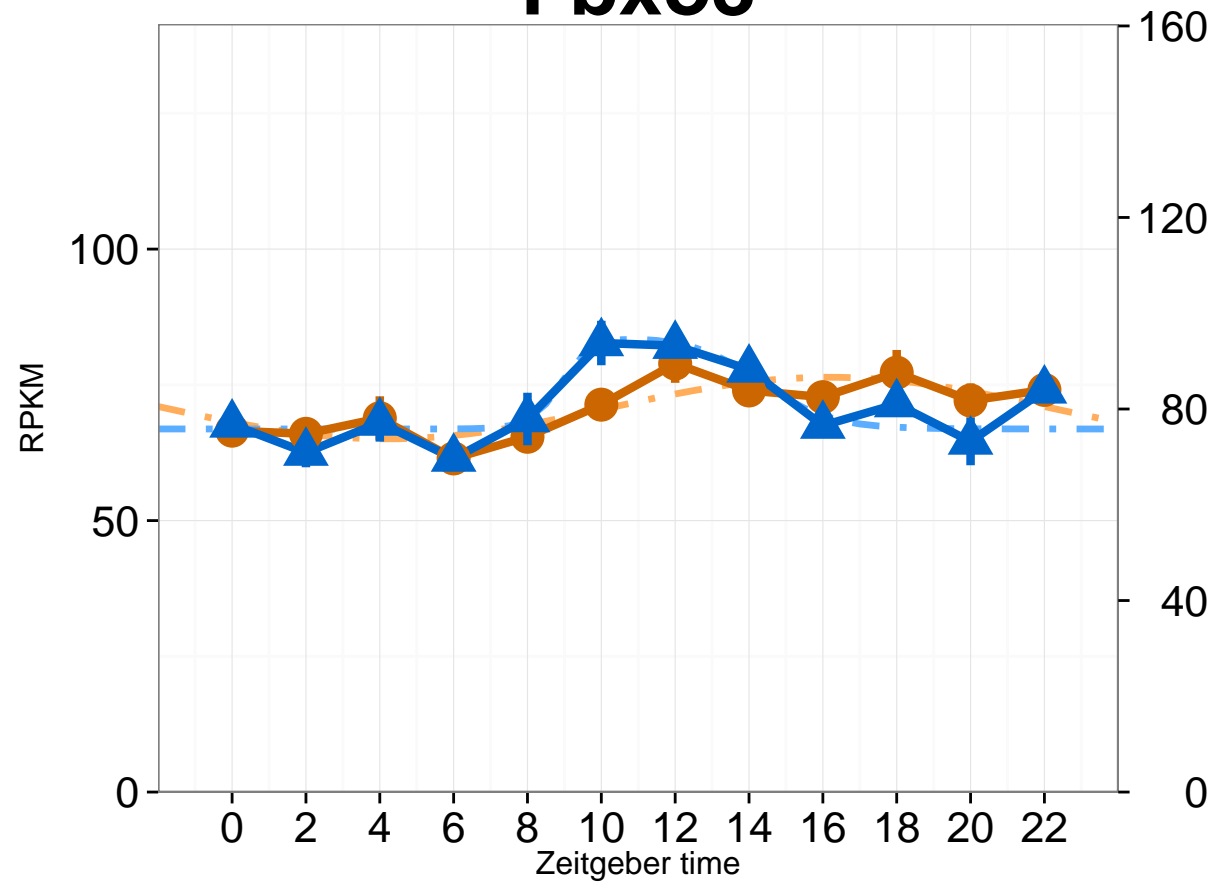

## Fbxo3

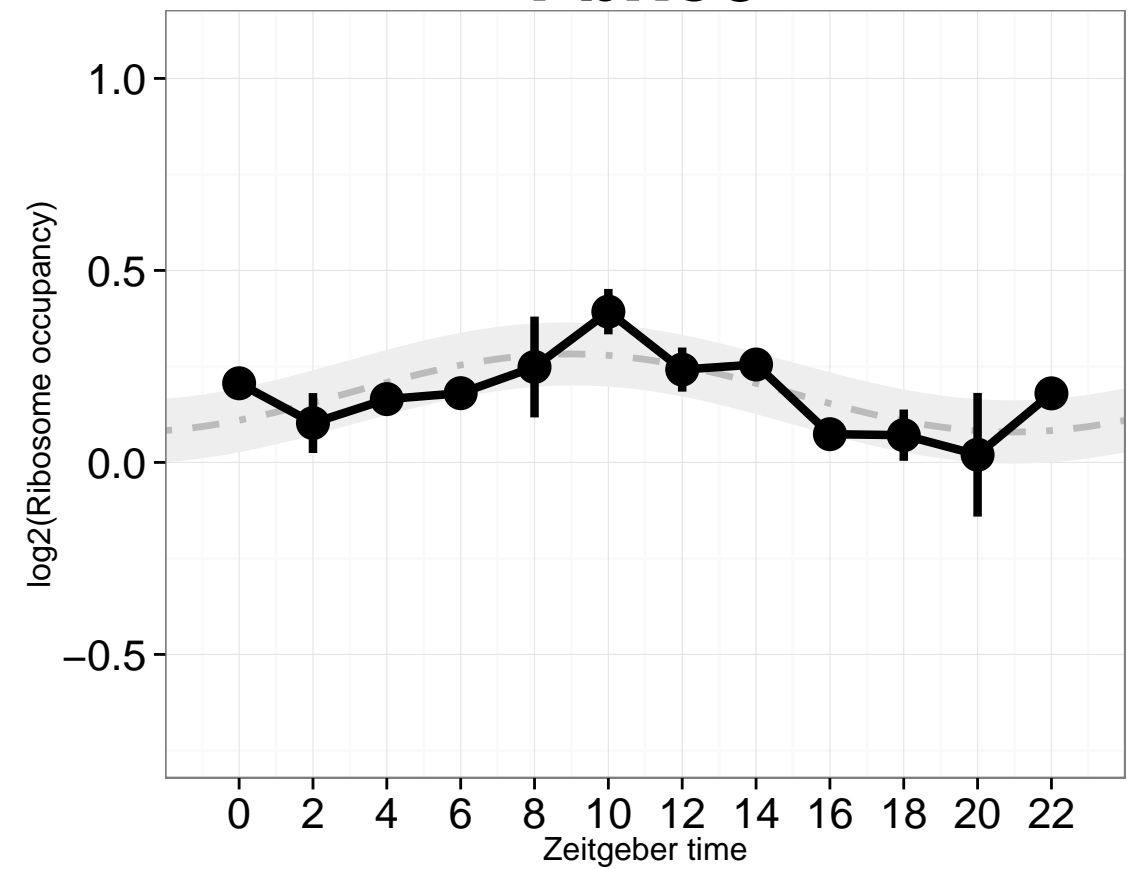

Supplement: Supplementary file 11646 [file 1]

# Col14a1

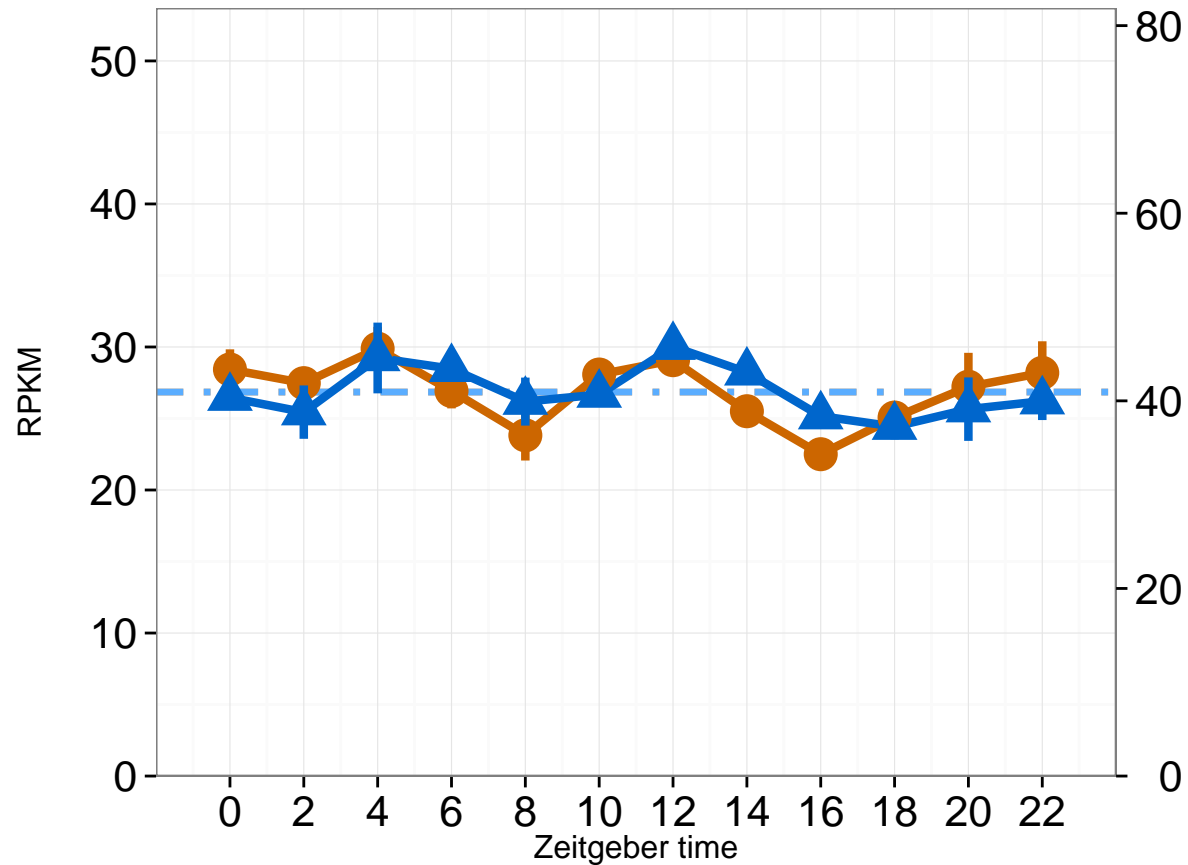

# Col14a1

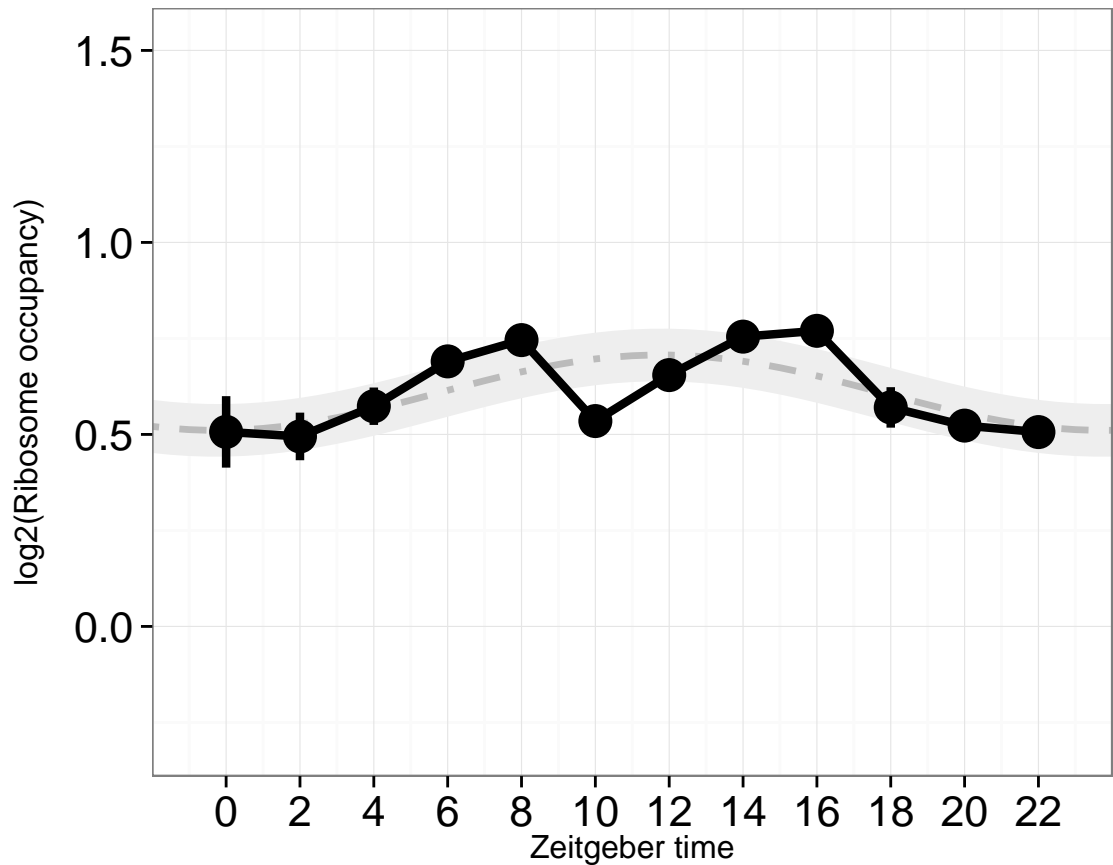

Supplement: Supplementary file 11647 [file 1]

# Pcdhb16

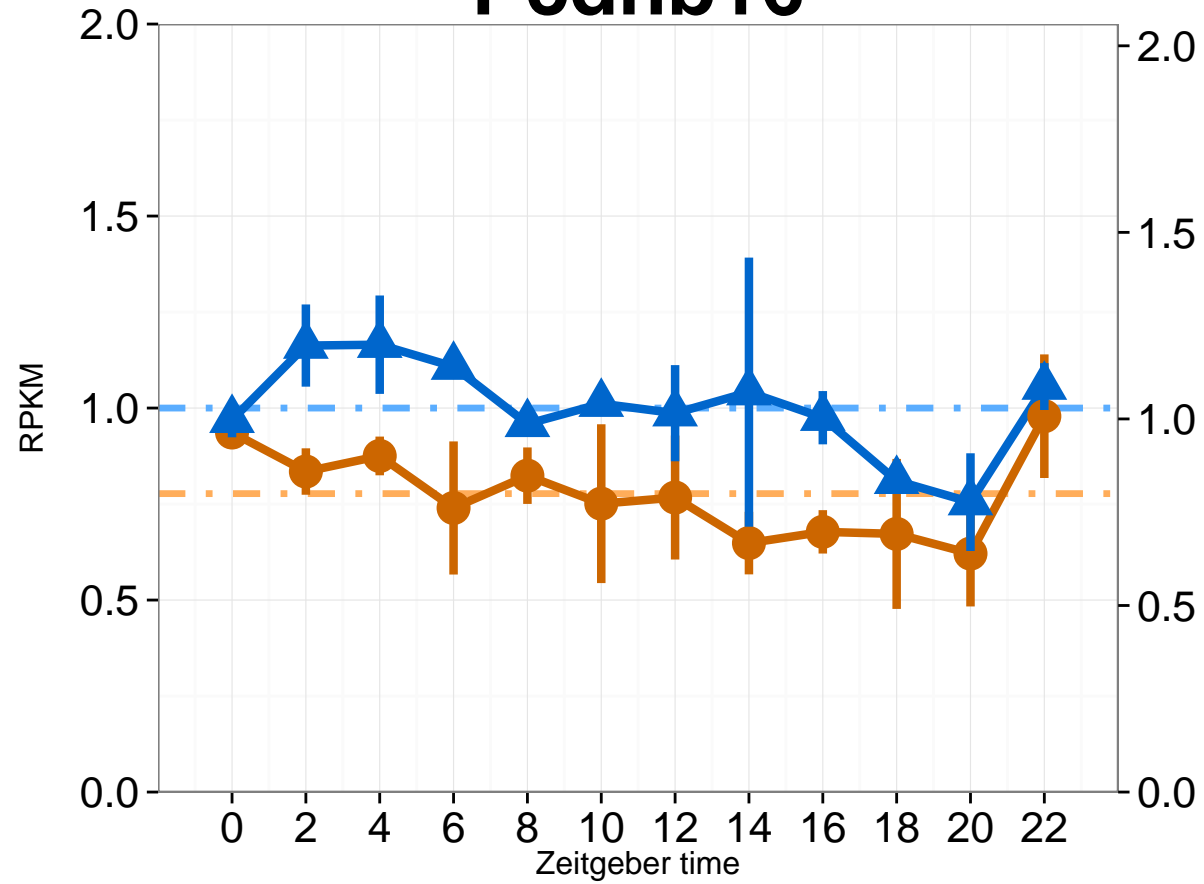

# Pcdhb16

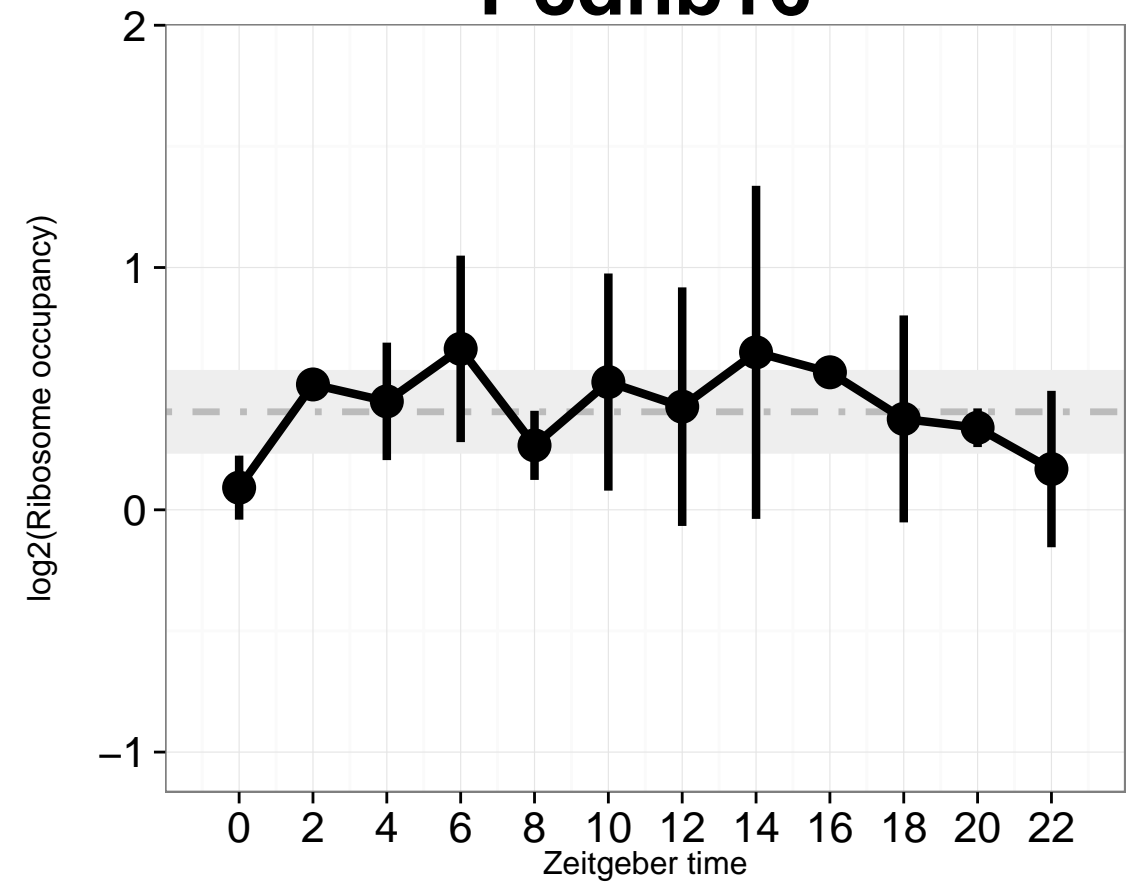

Supplement: Supplementary file 11648 [file 1]

## Vps72

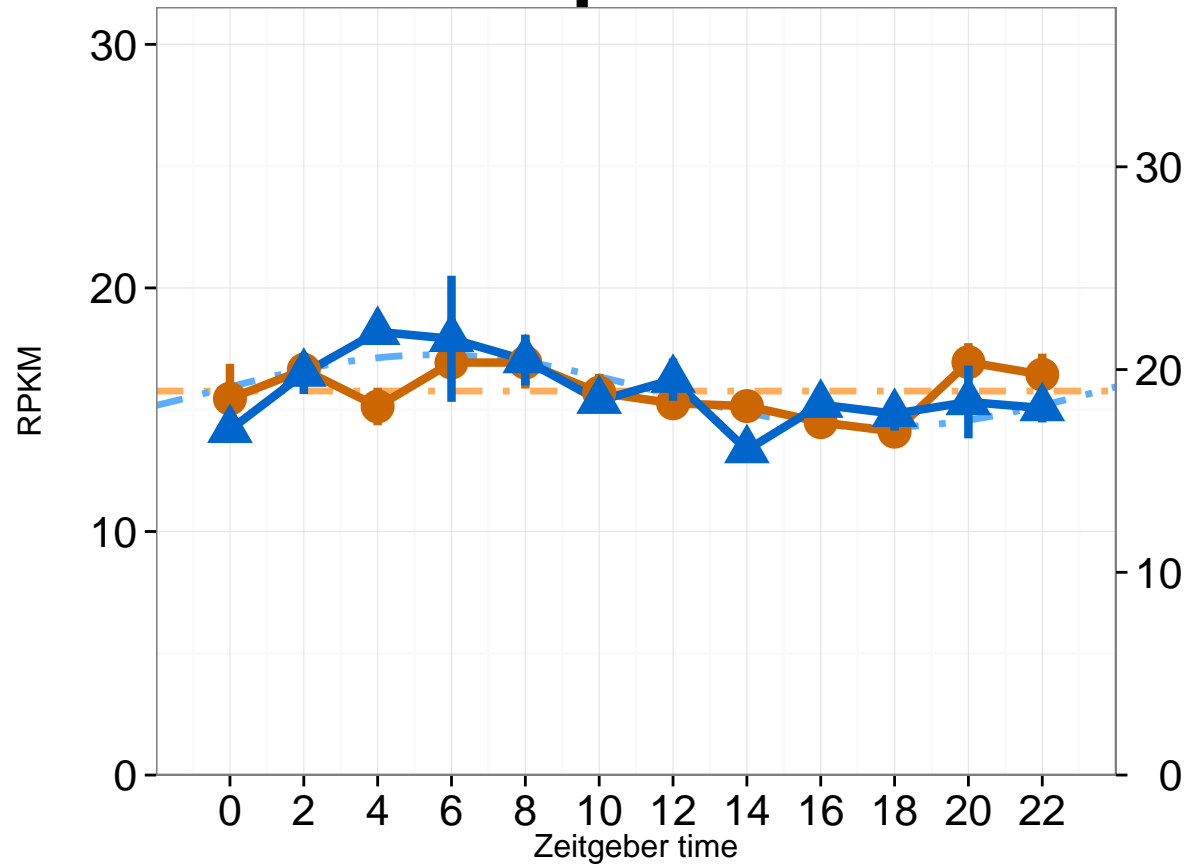

## Vps72

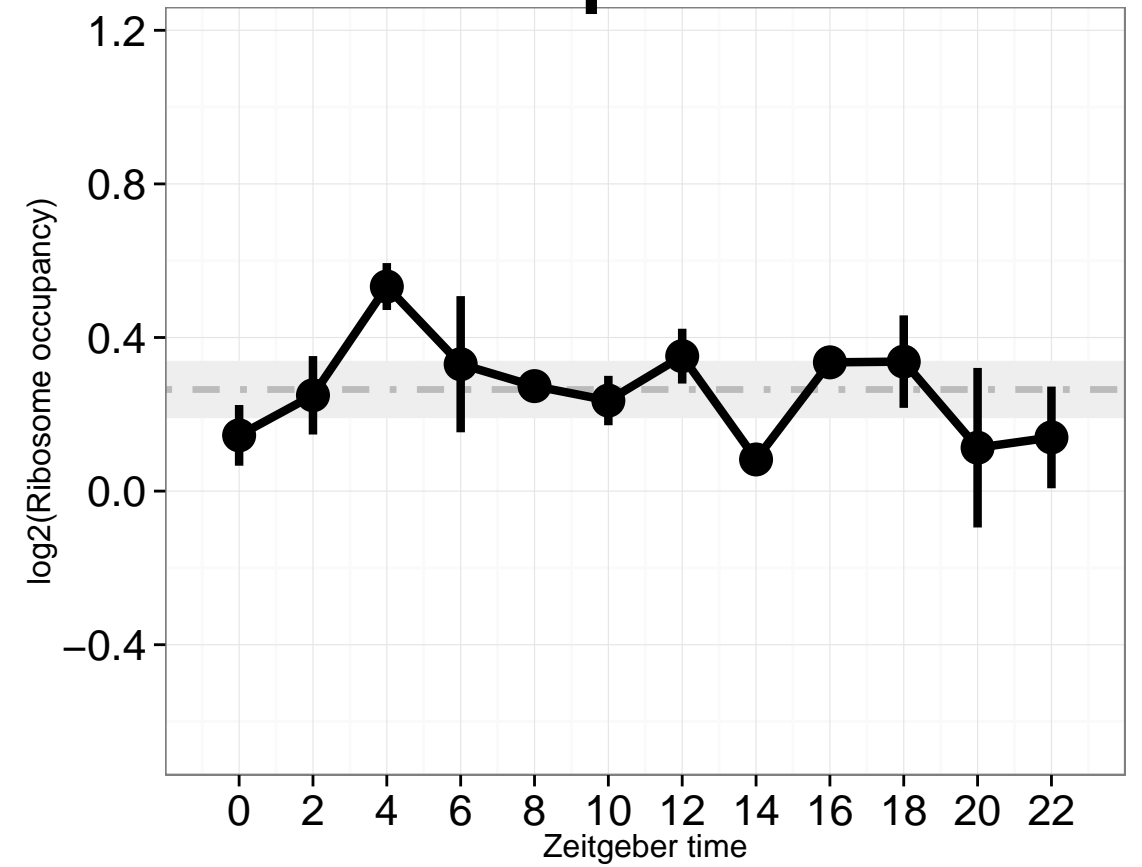

Supplement: Supplementary file 11649 [file 1]

# Pgm2

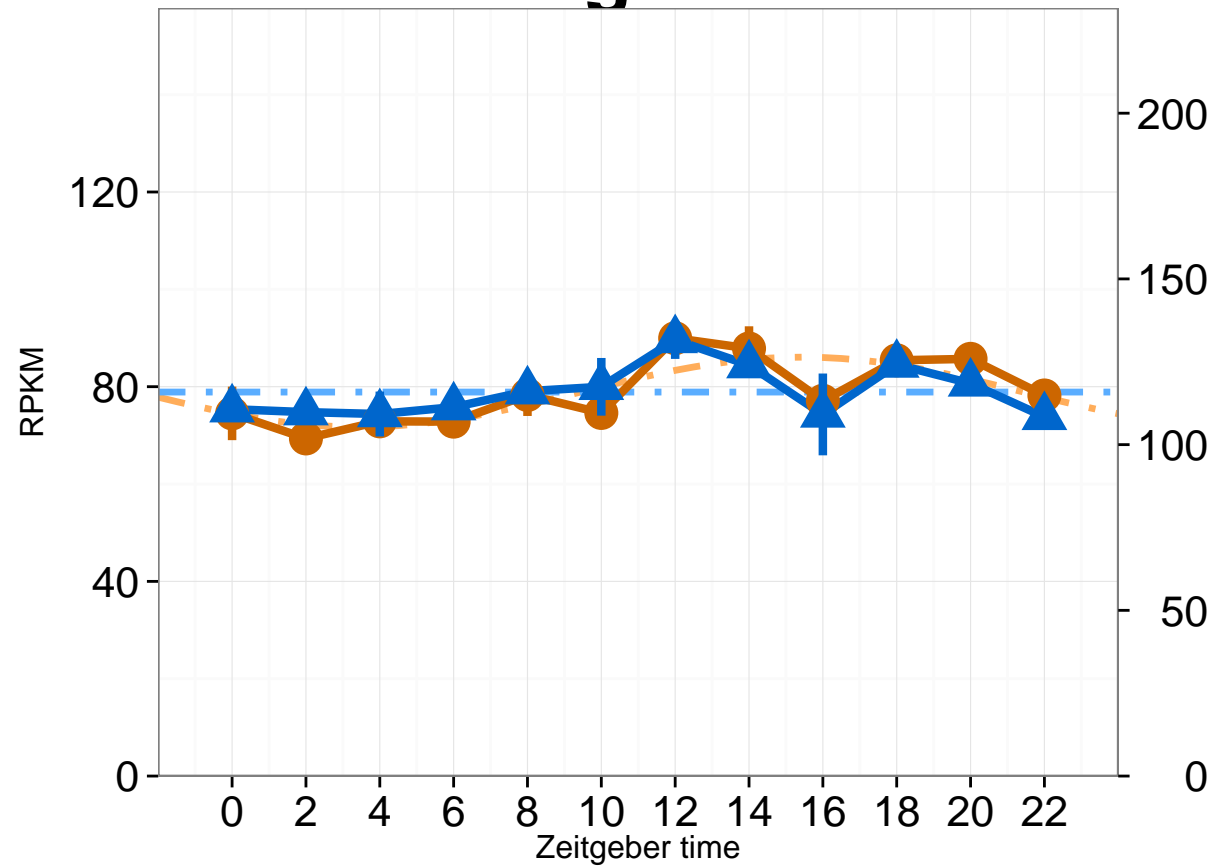

# Pgm2

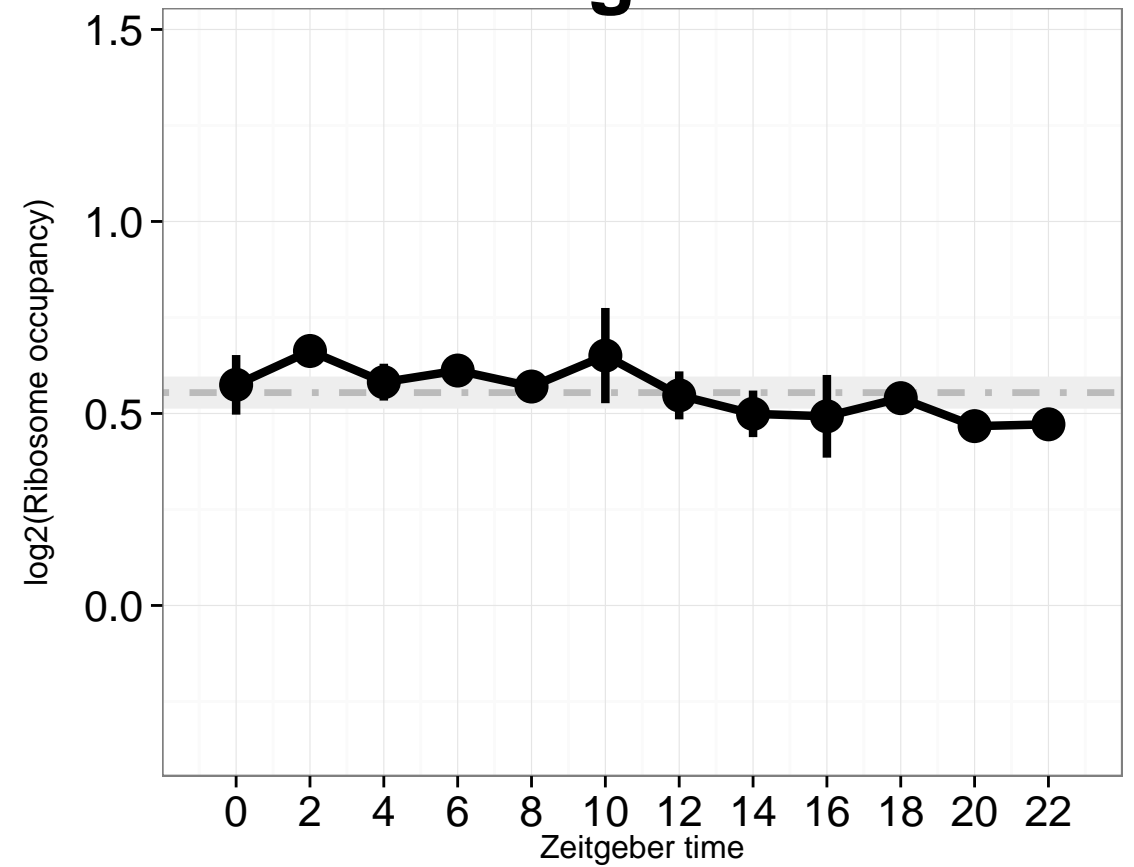

Supplement: Supplementary file 11650 [file 1]

## Ttpa

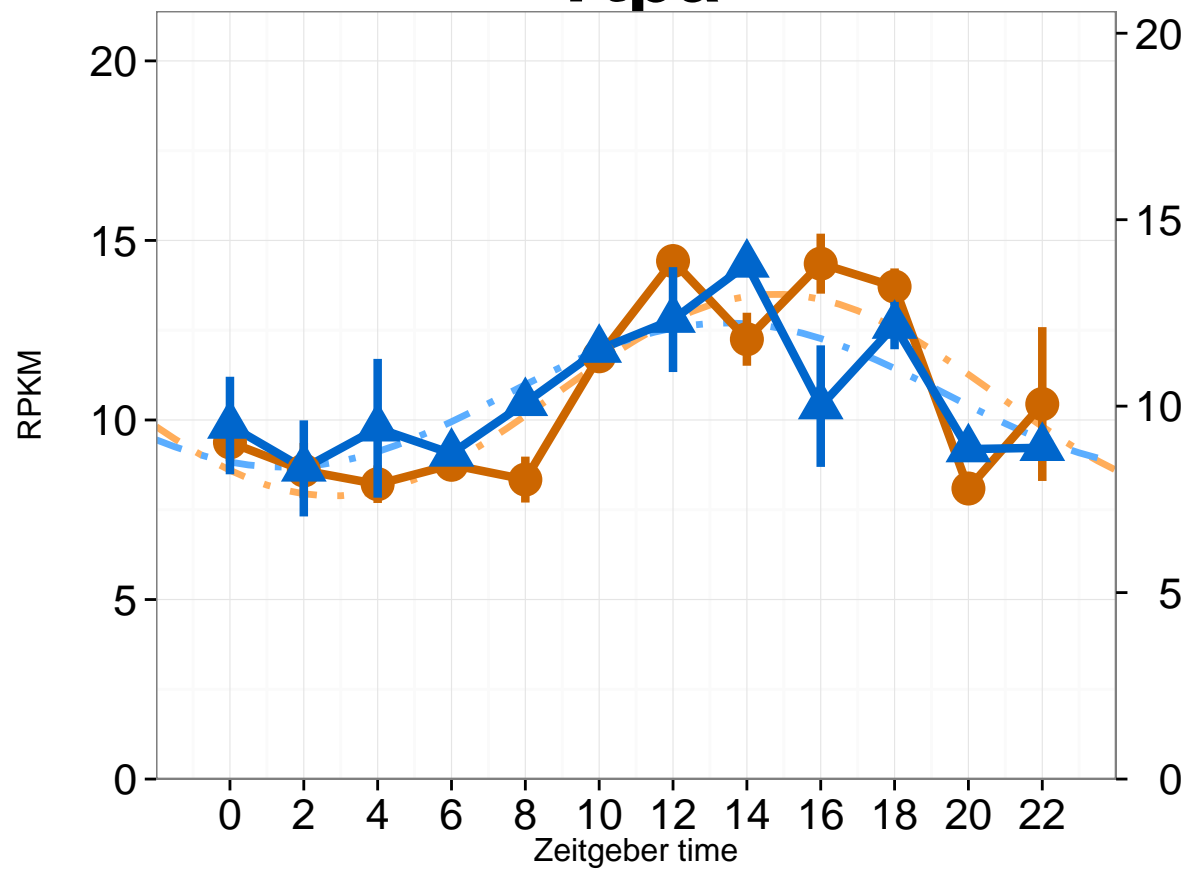

## Ttpa

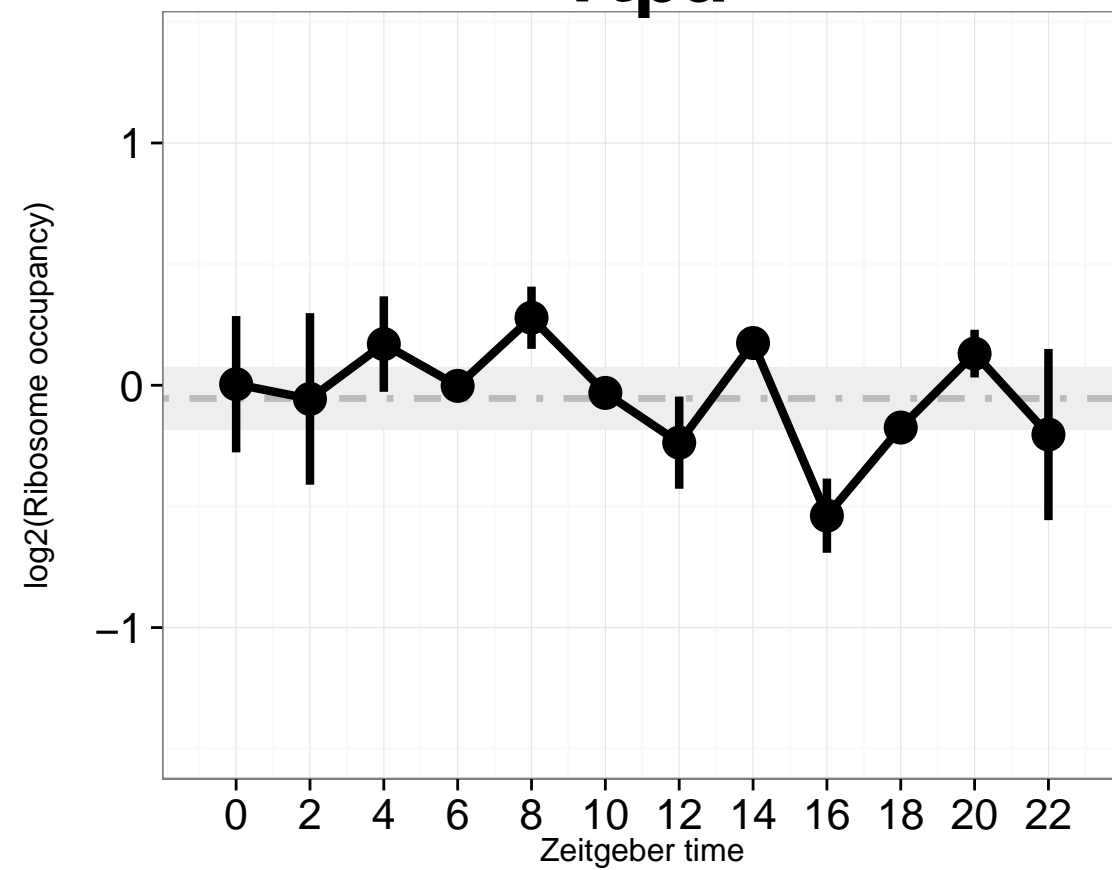

Supplement: Supplementary file 11651 [file 1]

## MyI6b

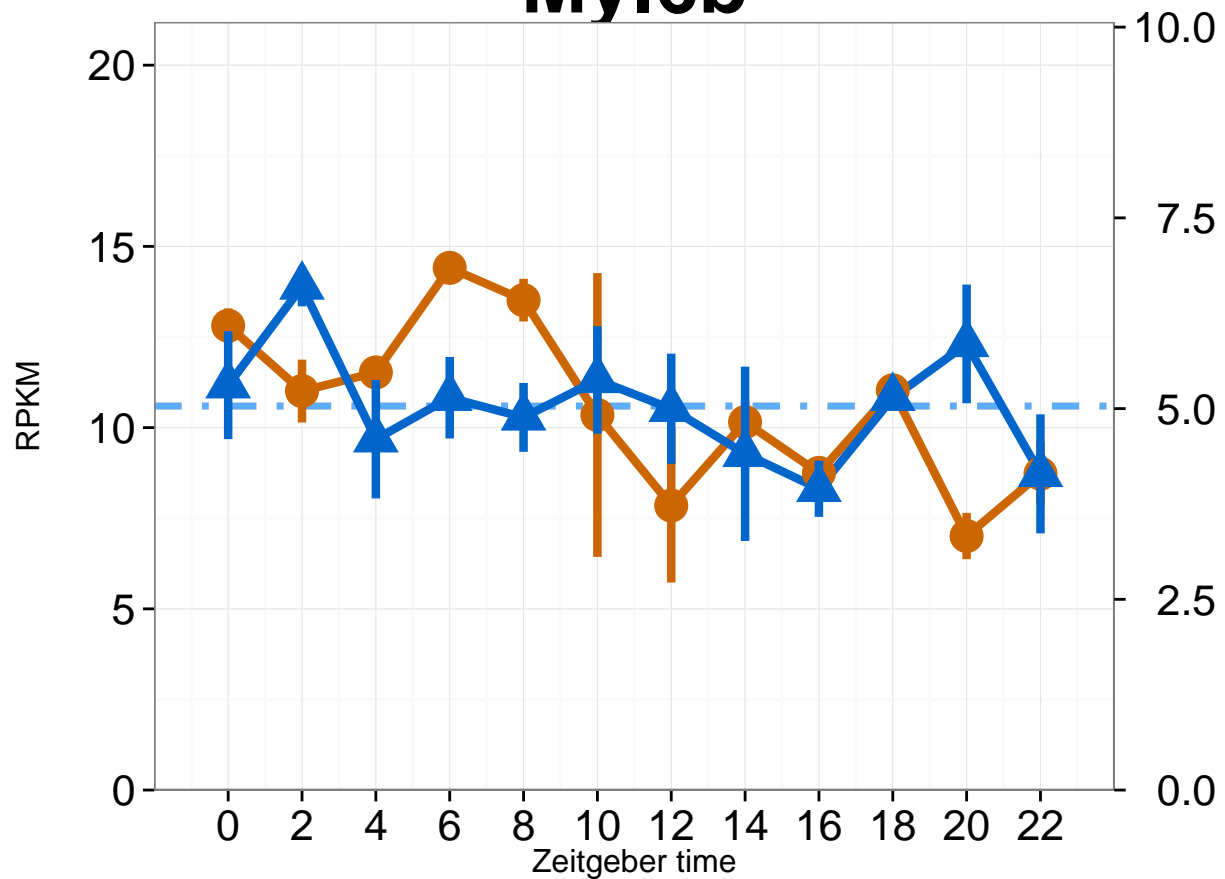

## MyI6b

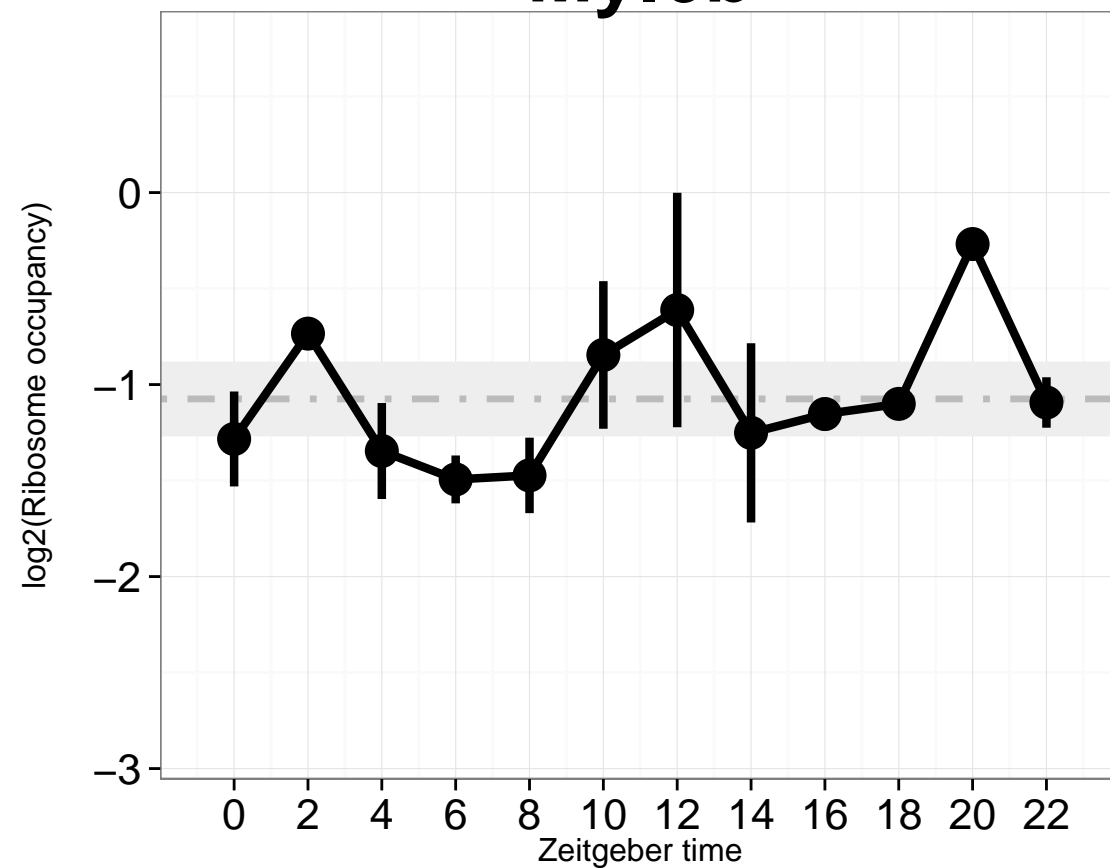

Supplement: Supplementary file 11652 [file 1]

# Cyp51

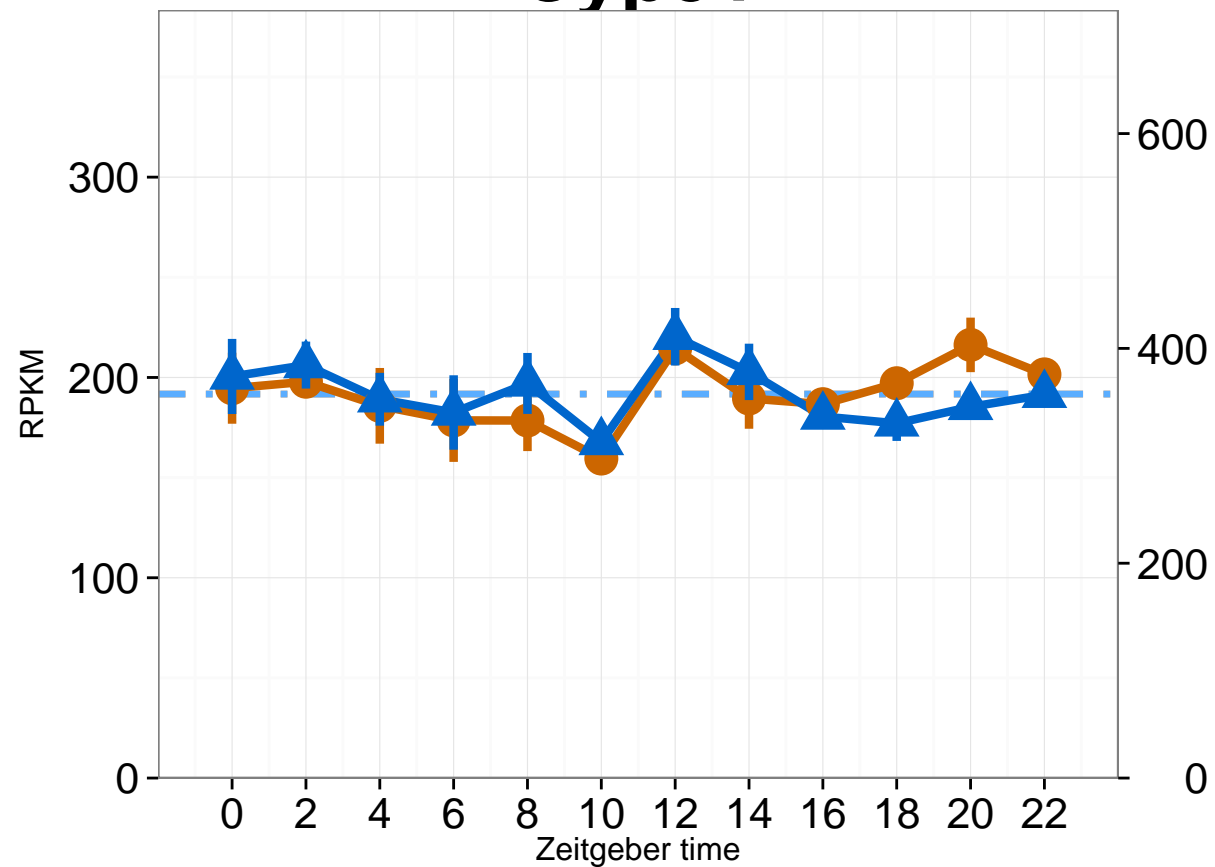

# Cyp51

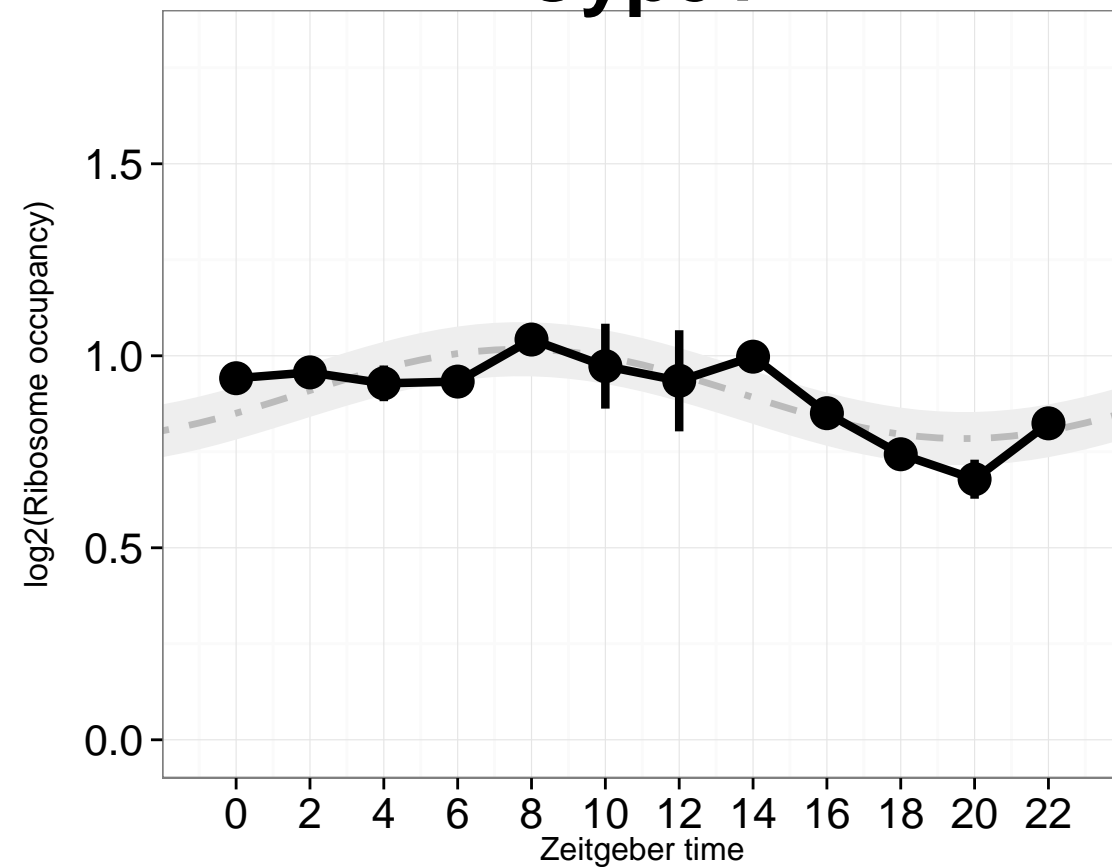

Supplement: Supplementary file 11653 [file 1]

## Polm

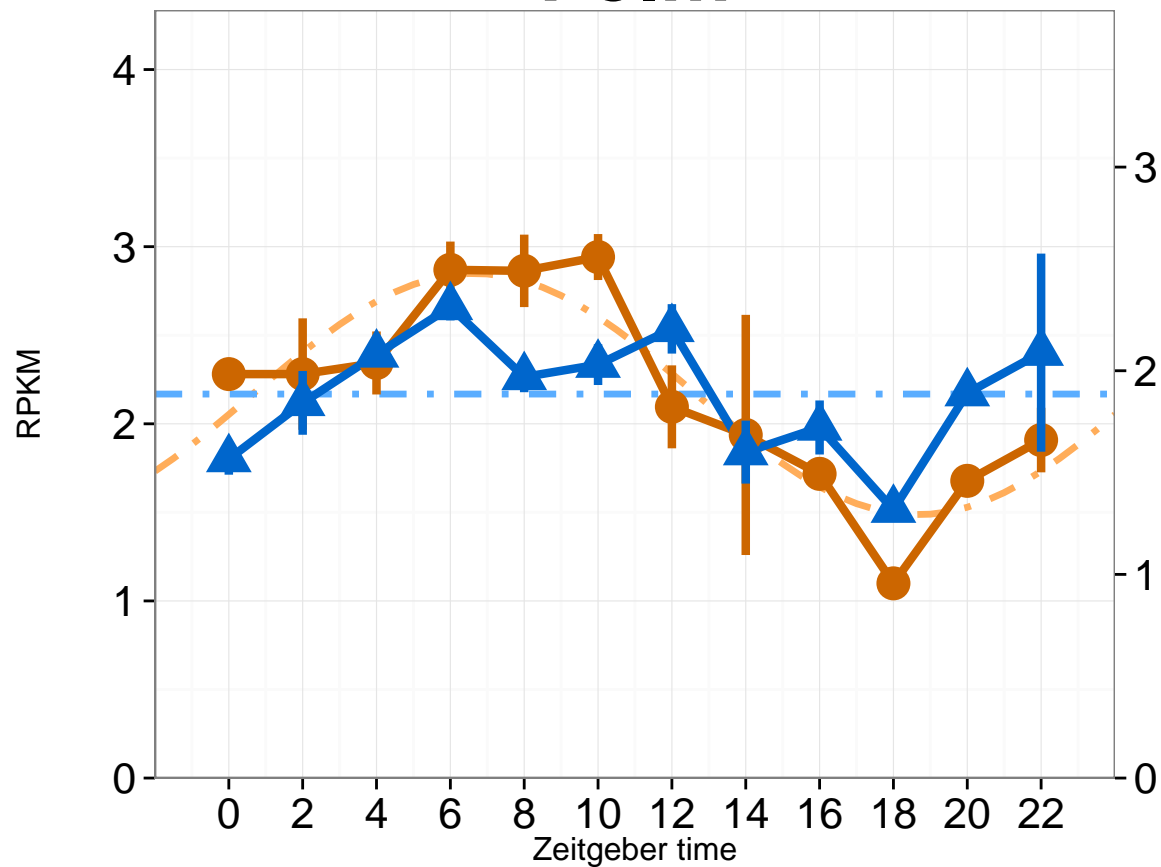

## Polm

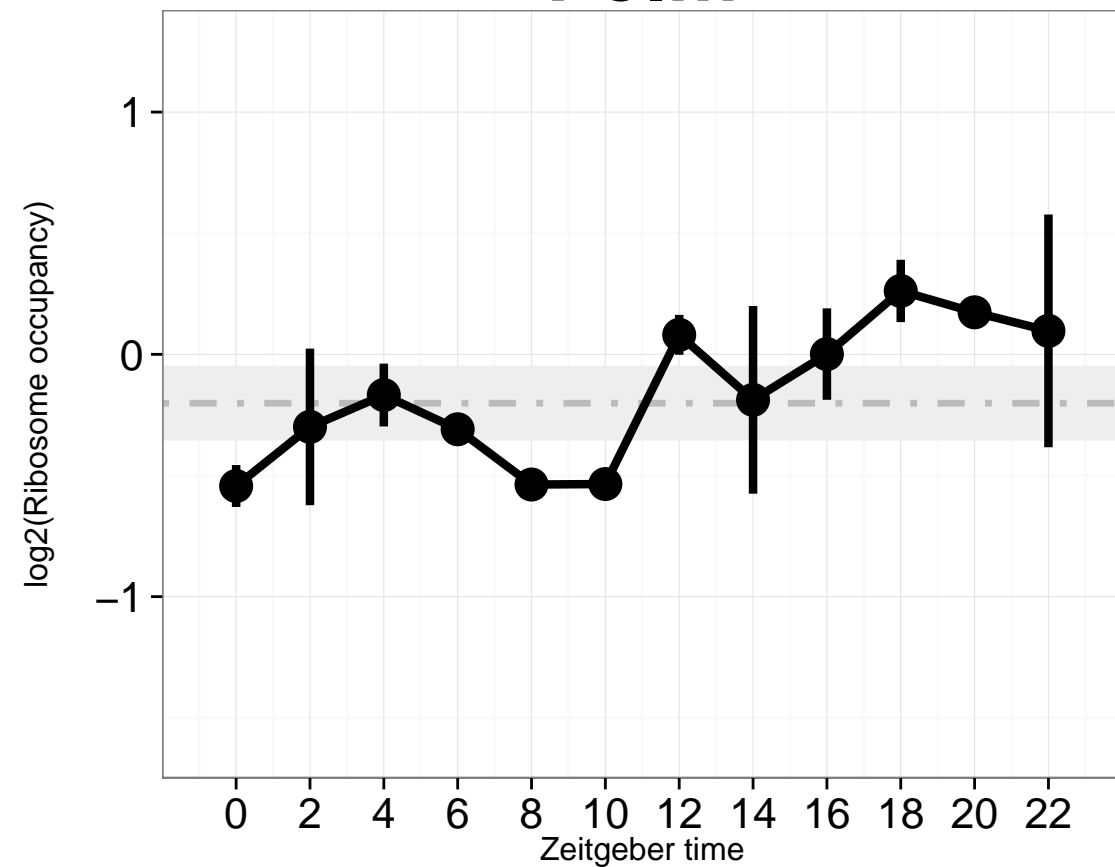

Supplement: Supplementary file 11654 [file 1]

# Lrig1

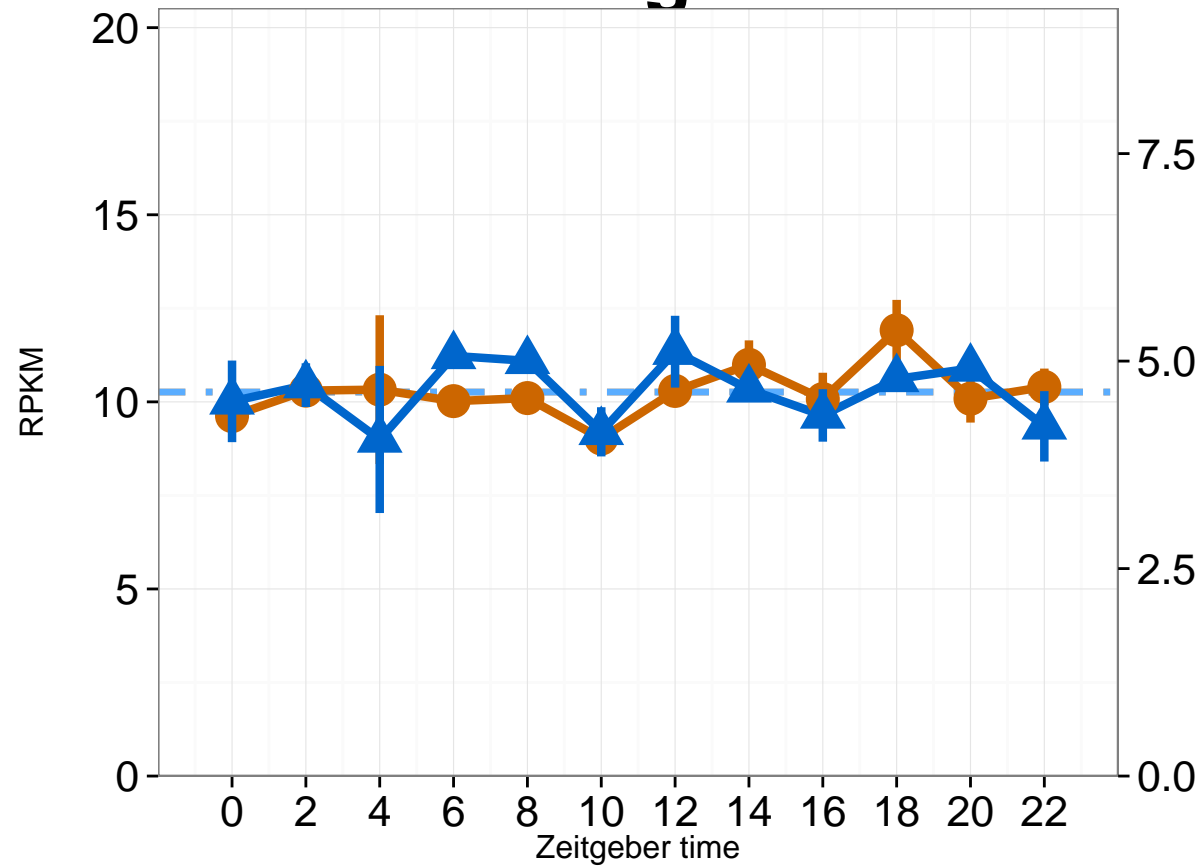

# Lrig1

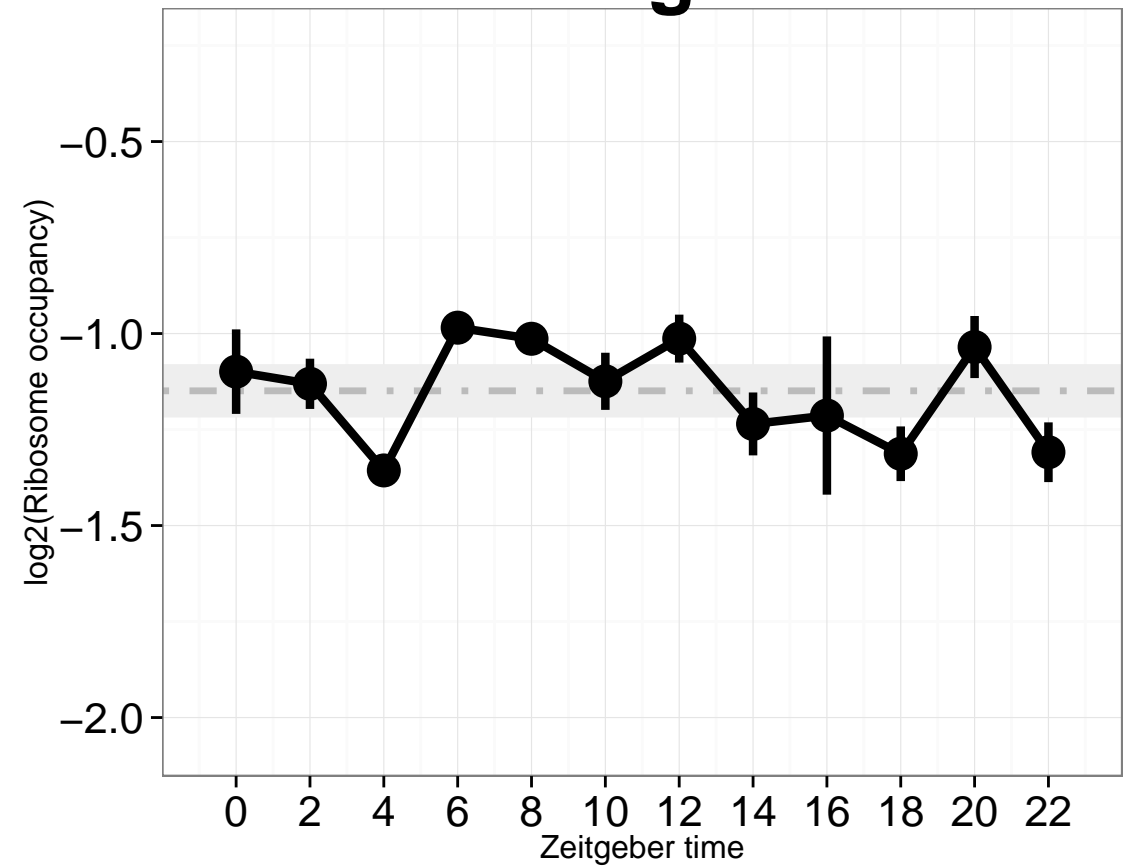

Supplement: Supplementary file 11655 [file 1]

## Mgat3

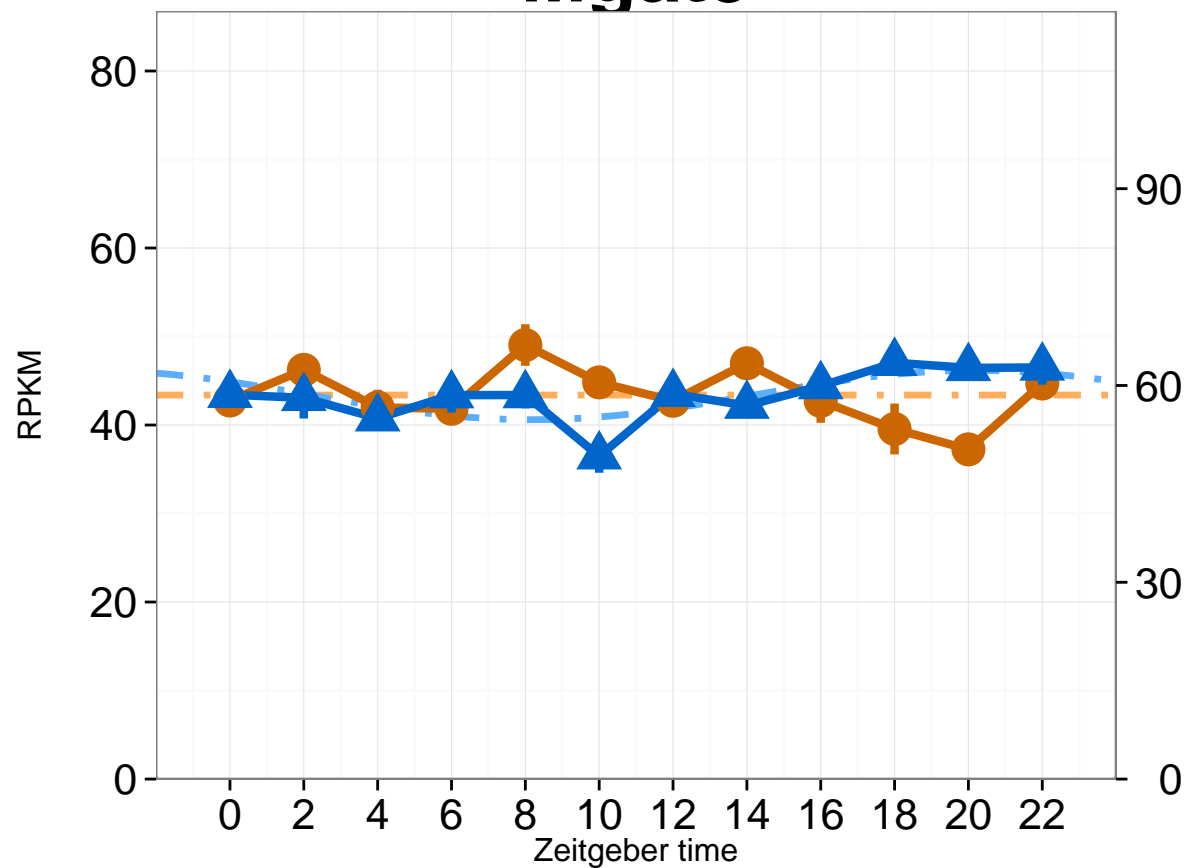

## Mgat3

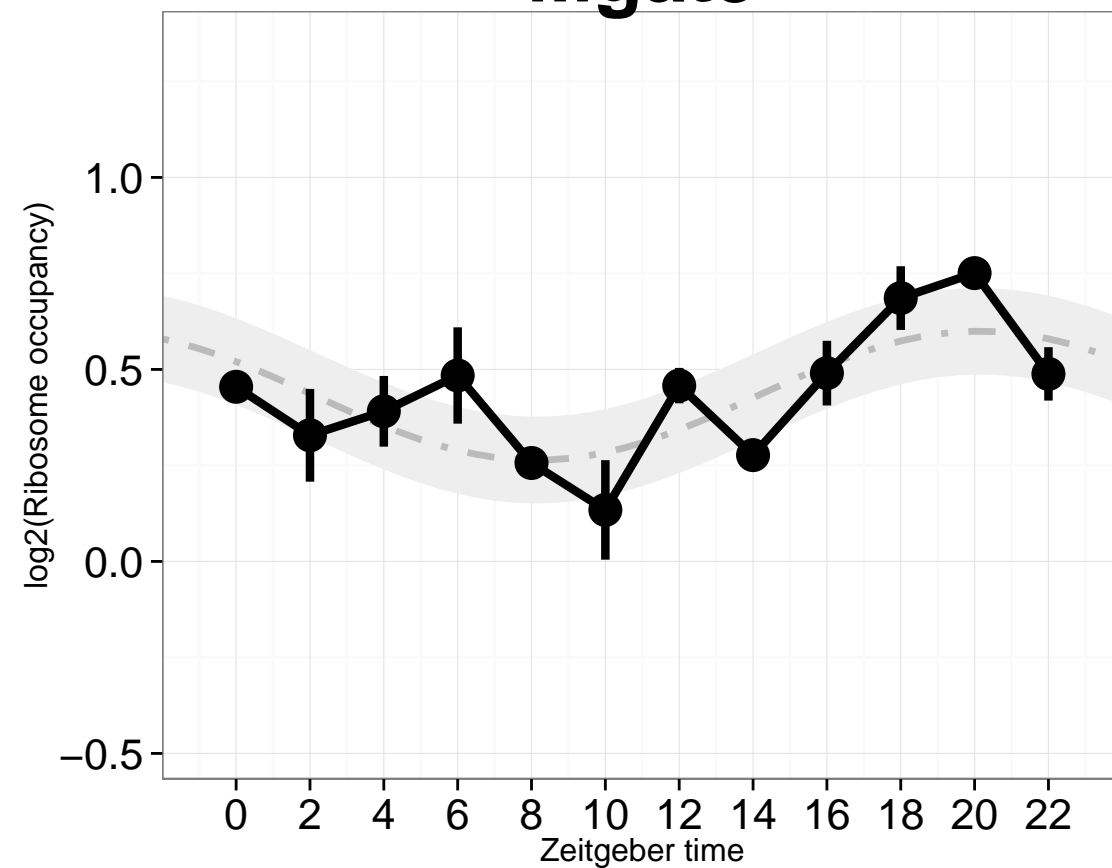

Supplement: Supplementary file 11656 [file 1]

# Sh3bp2

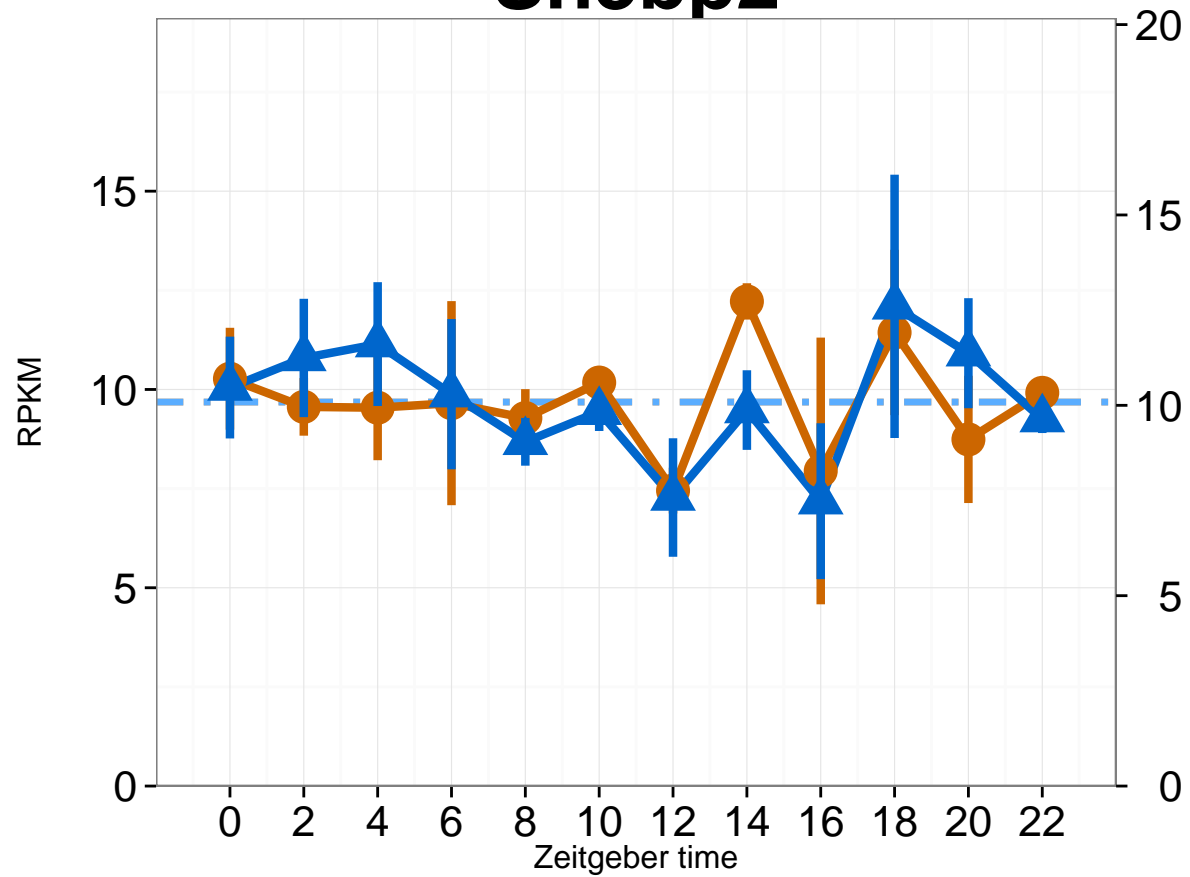

# Sh3bp2

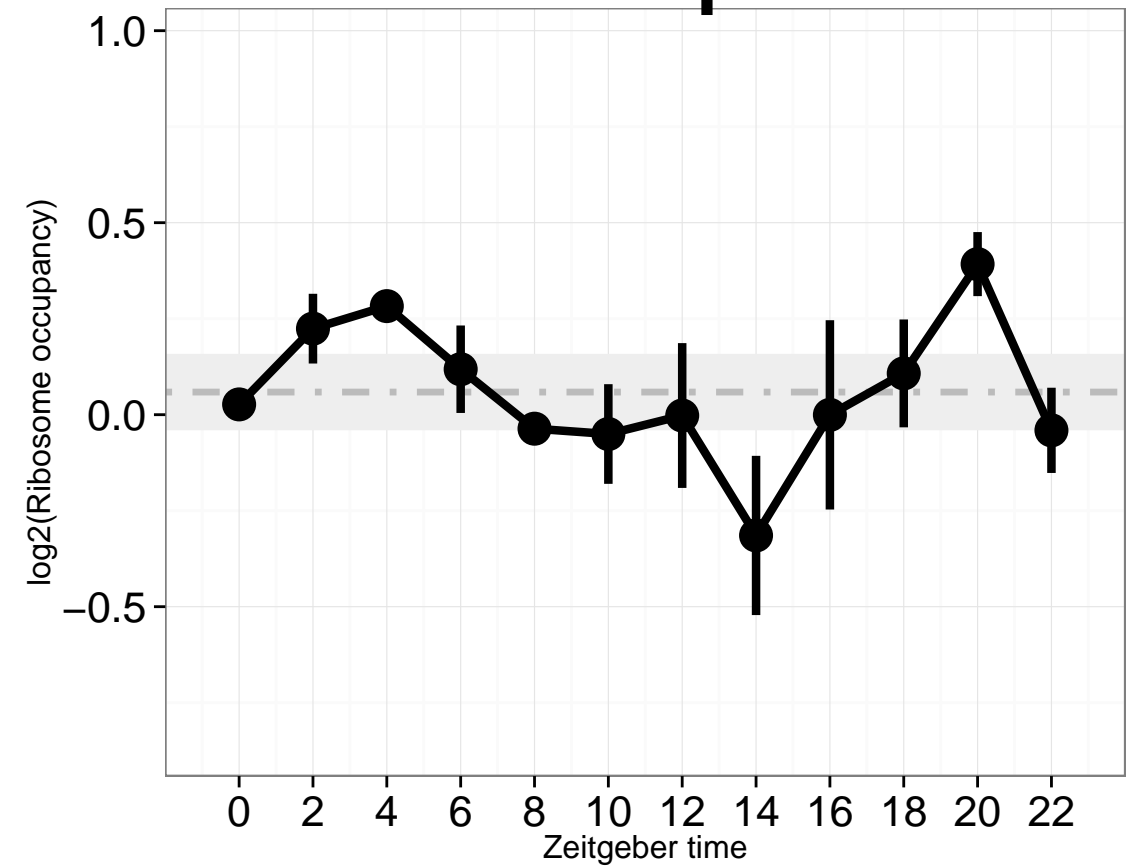

Supplement: Supplementary file 11657 [file 1]

## Zfp959

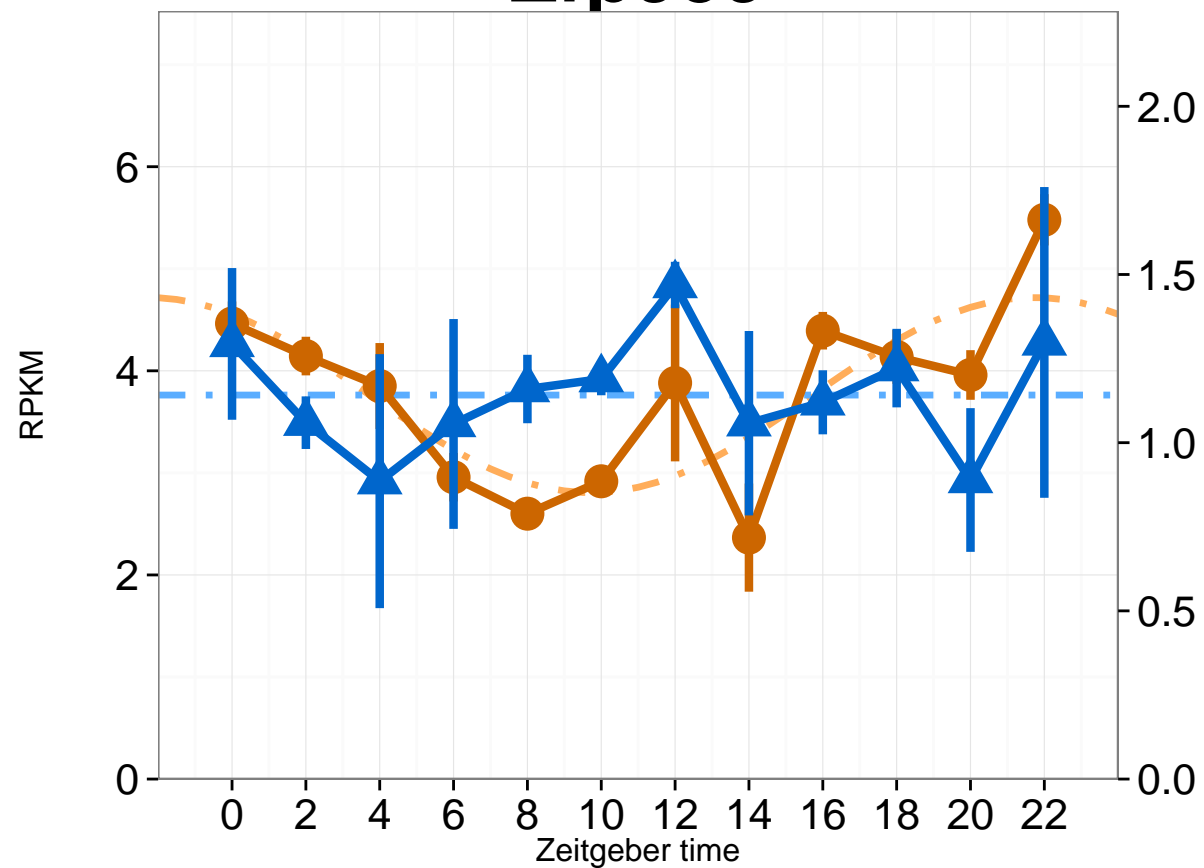

## Zfp959

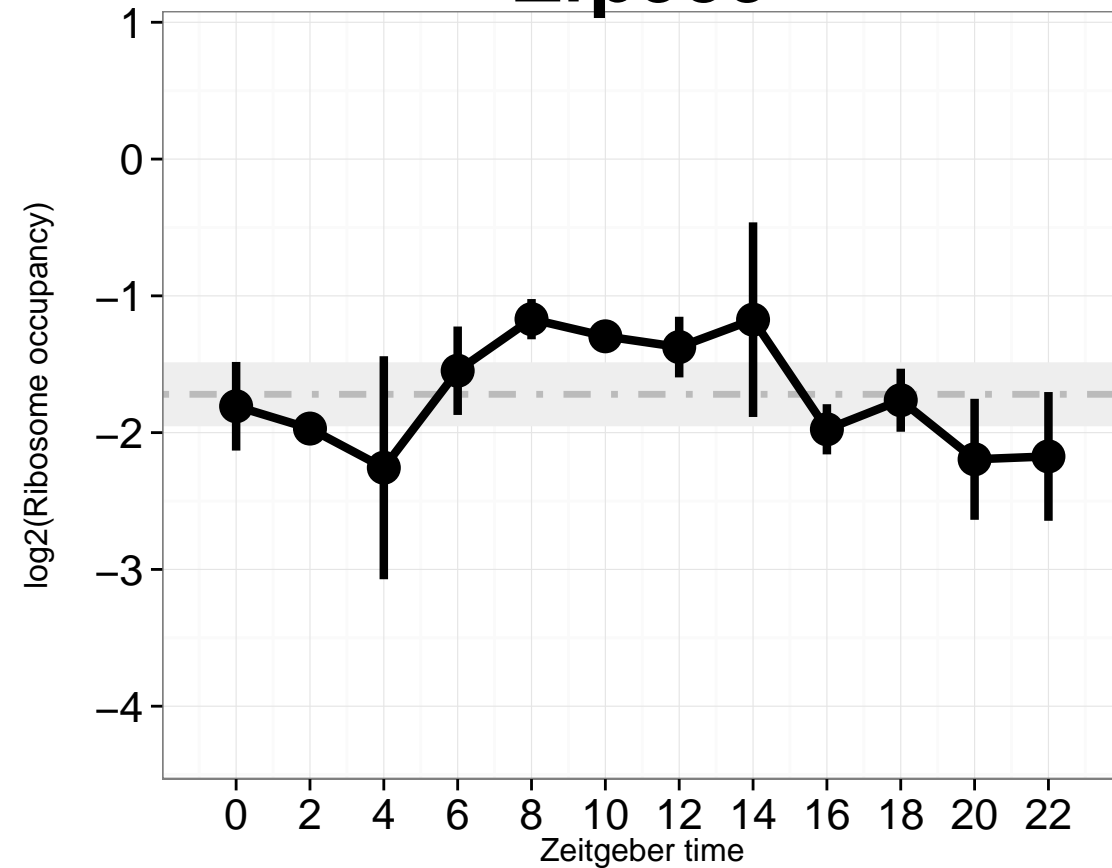

Supplement: Supplementary file 11658 [file 1]

## Ubr2

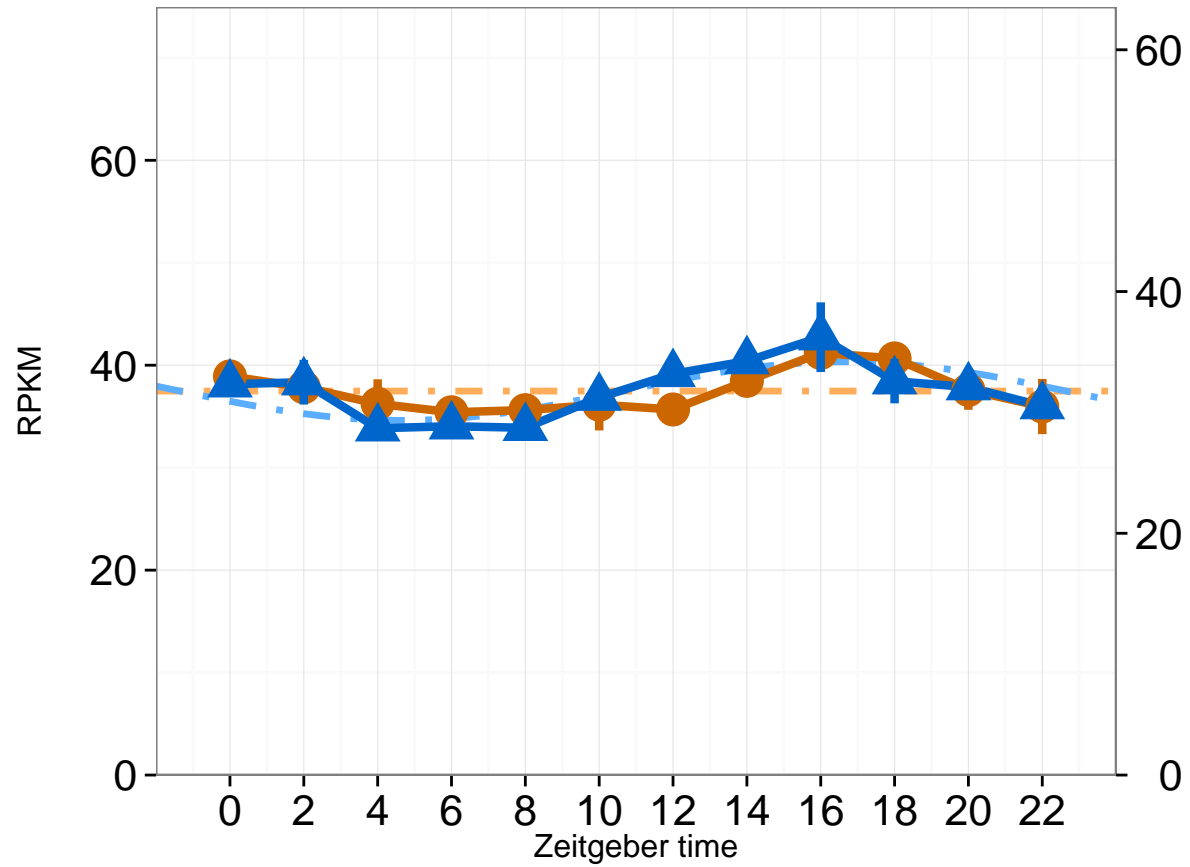

## Ubr2

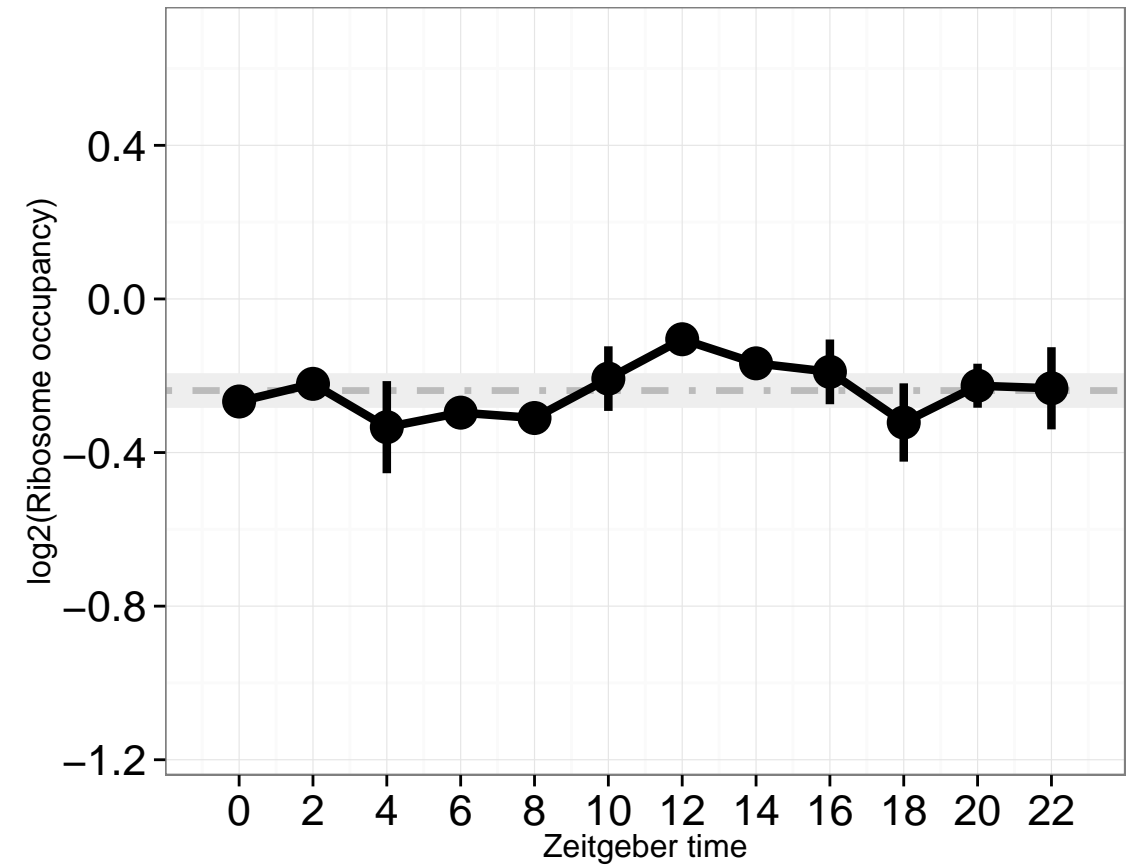

Supplement: Supplementary file 11659 [file 1]

## Anxa3

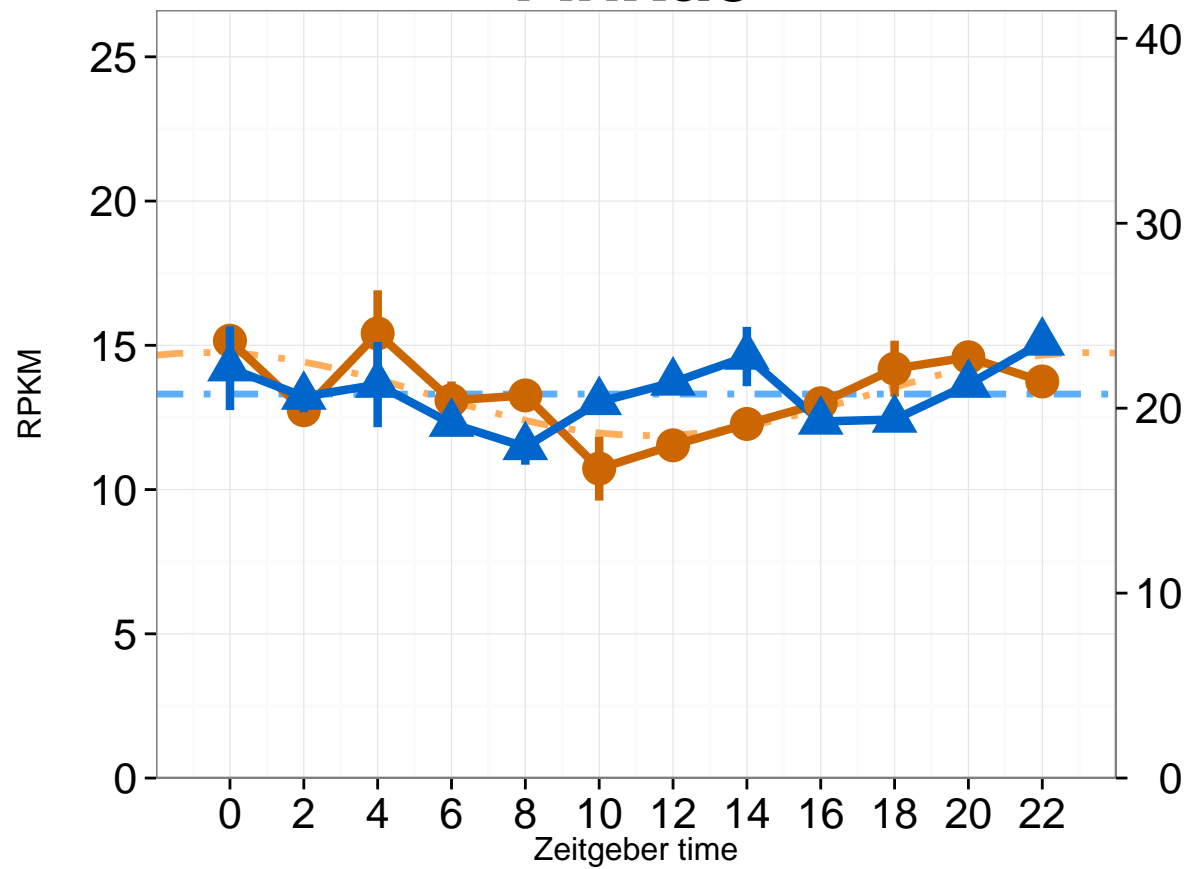

## Anxa3

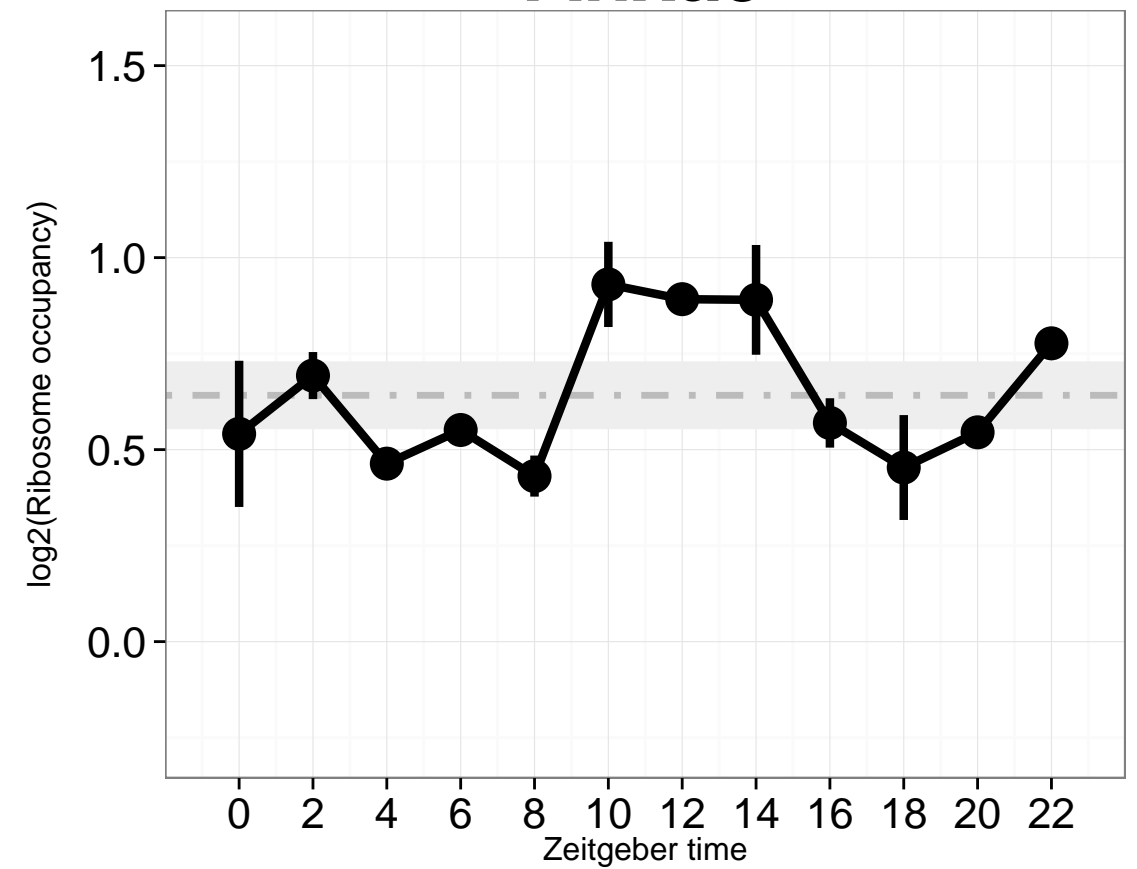

Supplement: Supplementary file 11660 [file 1]

## Syngn2

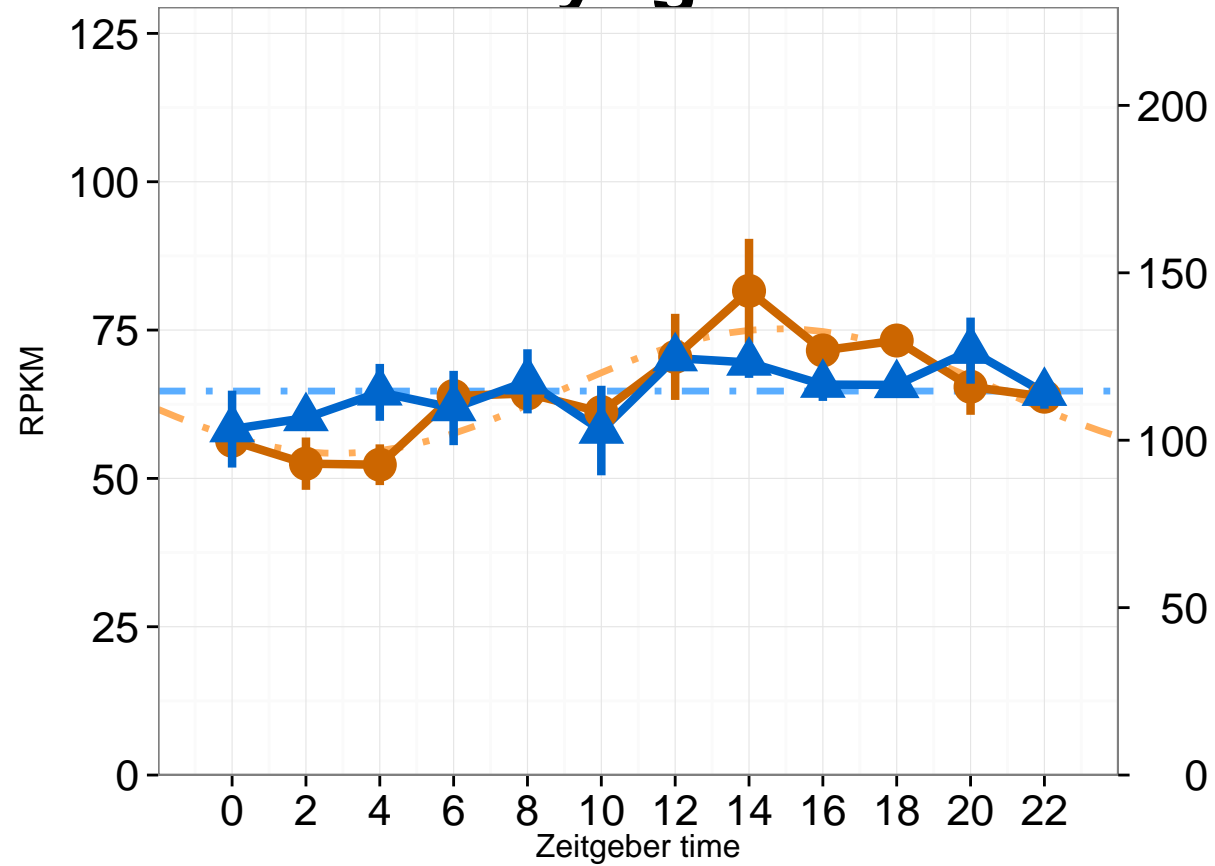

## Syngn2

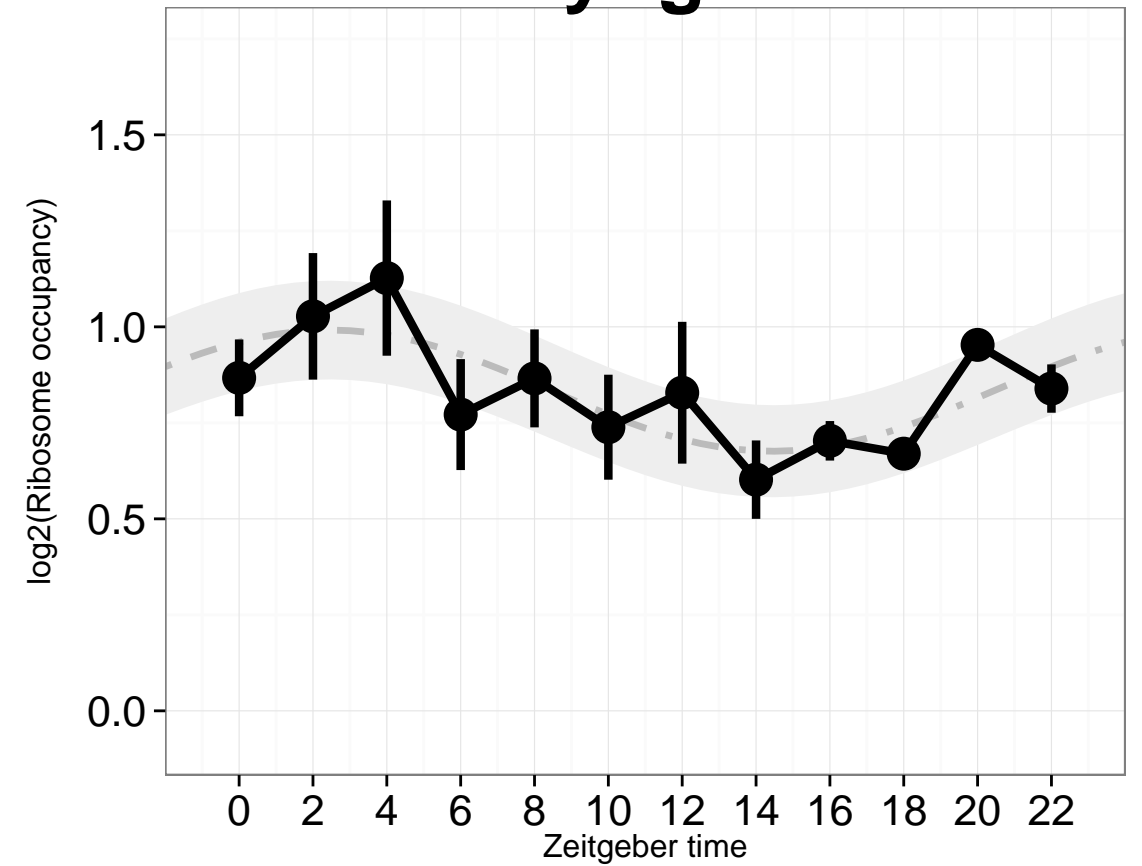

Supplement: Supplementary file 11661 [file 1]

# 4930422G04Rik

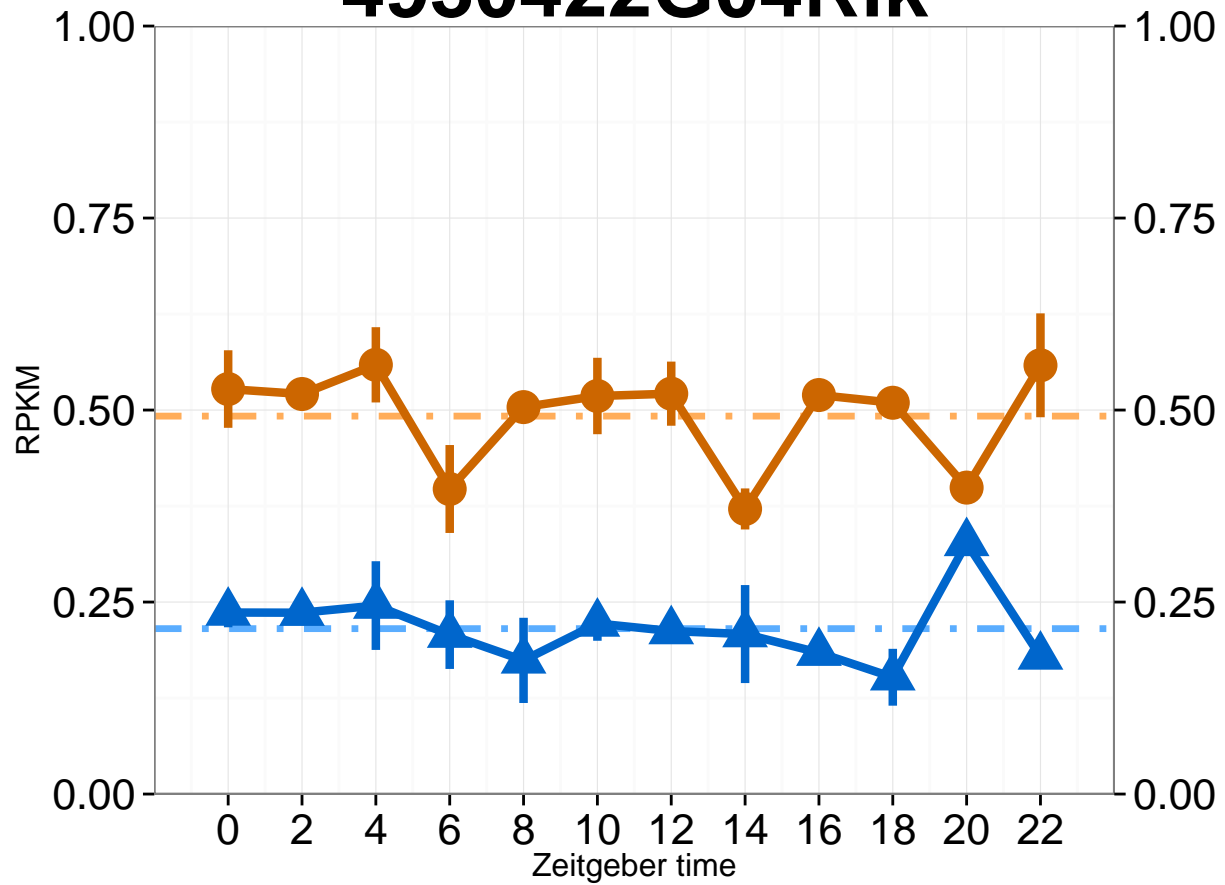

# 4930422G04Rik

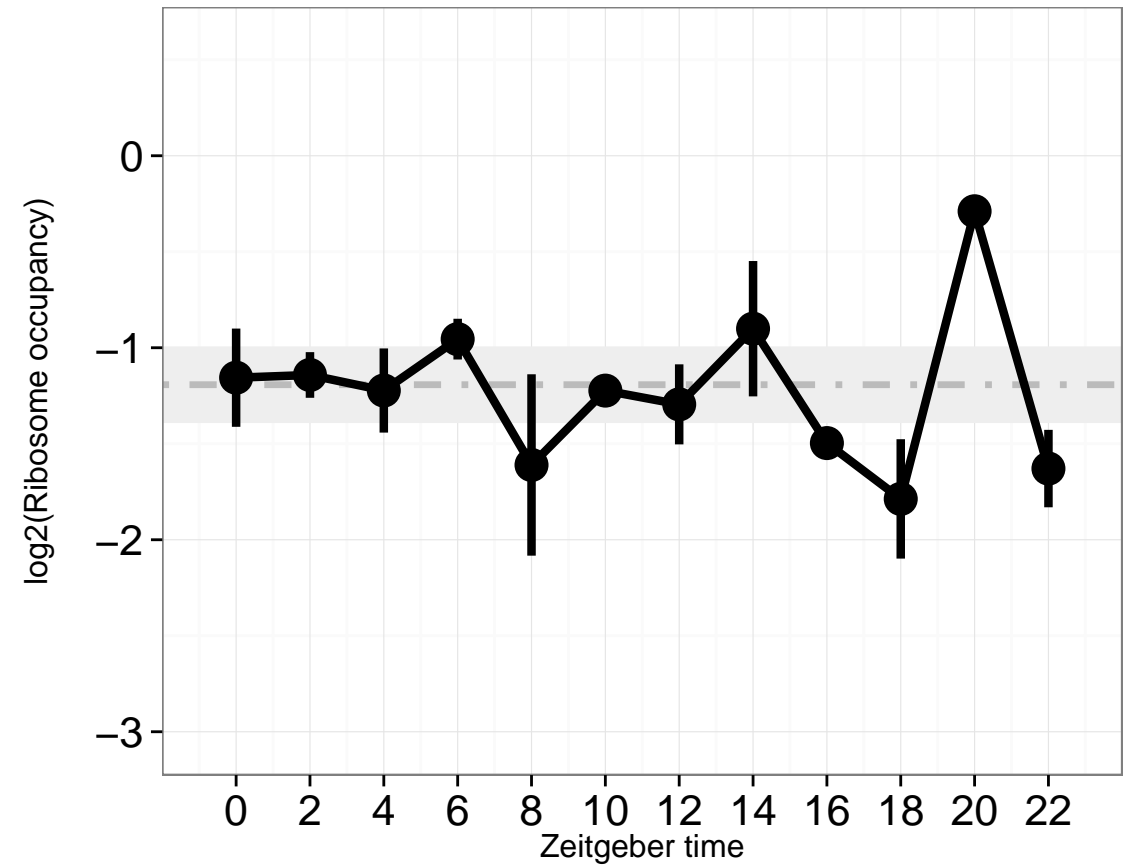

Supplement: Supplementary file 11662 [file 1]

**Sec14l4 TR**

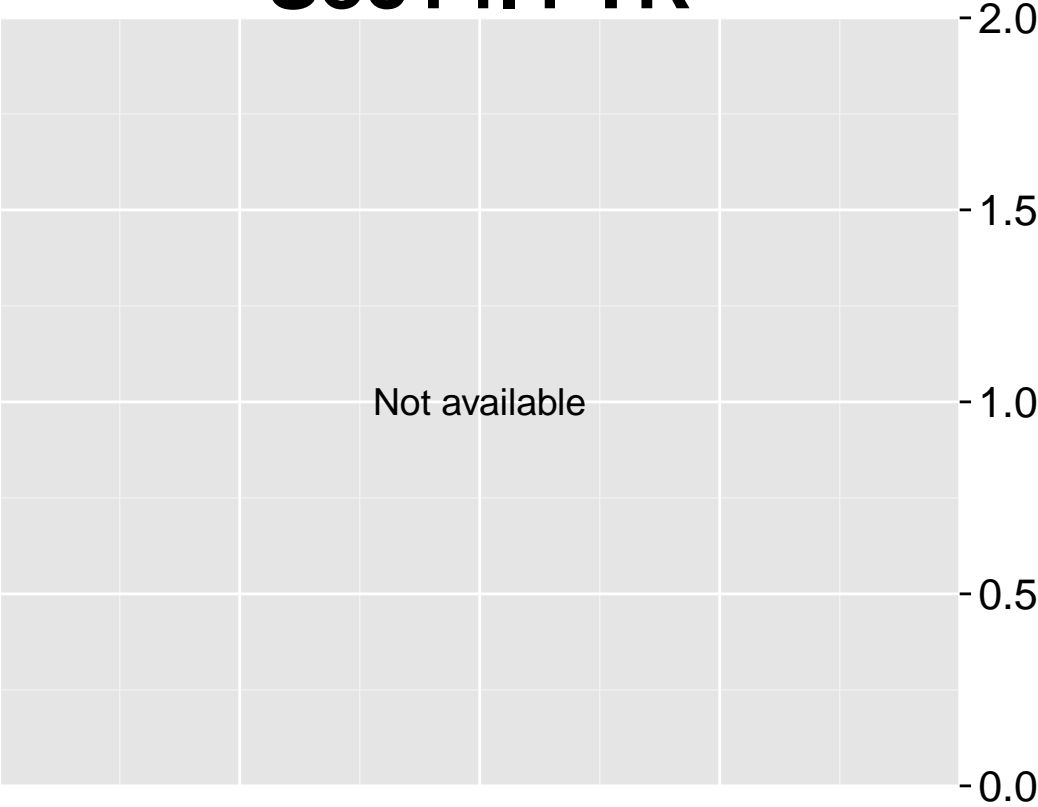

**Sec14l4 log2(Ribosome occupancy**

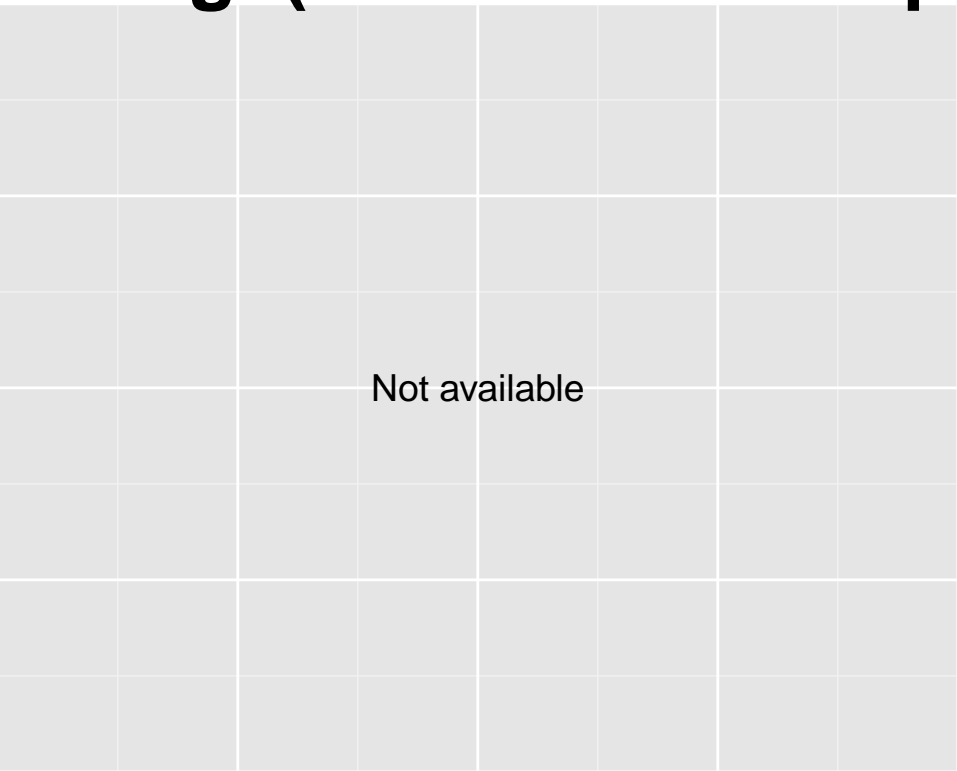

Supplement: Supplementary file 11663 [file 1]

# Sult1b1

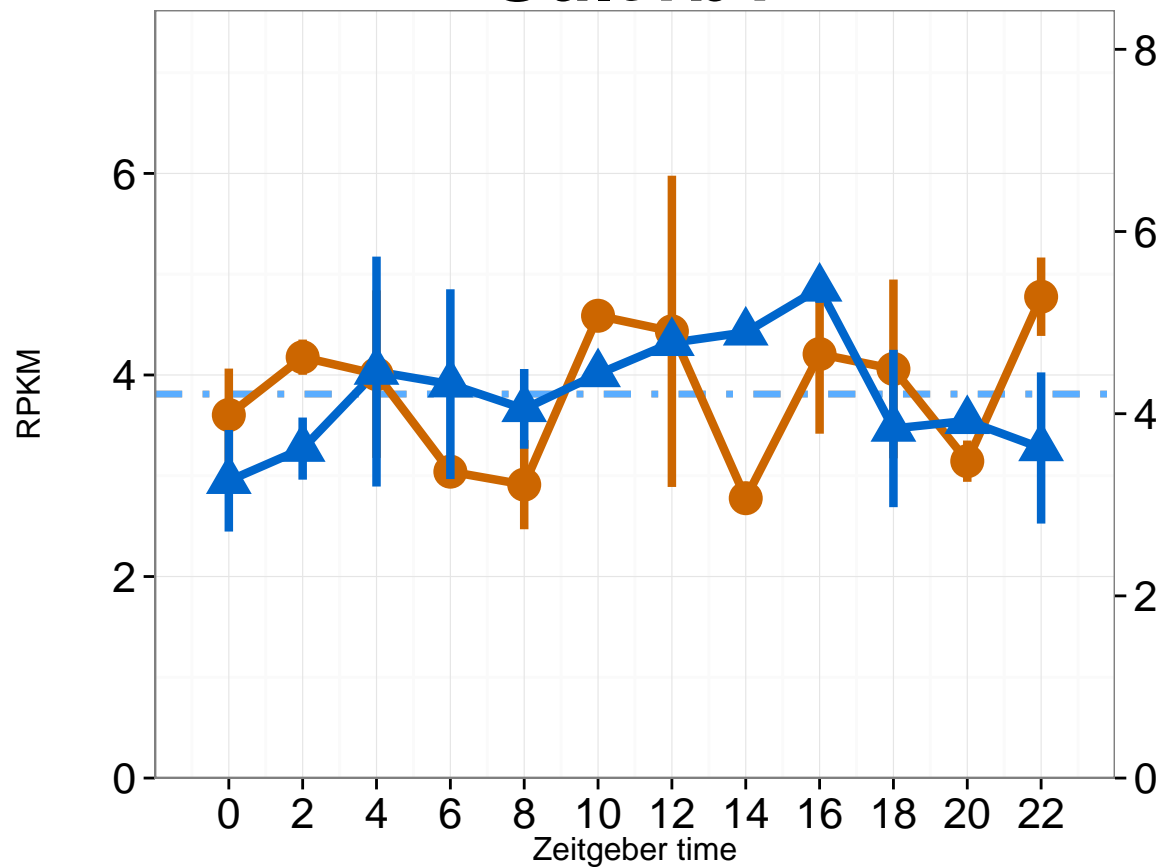

# Sult1b1

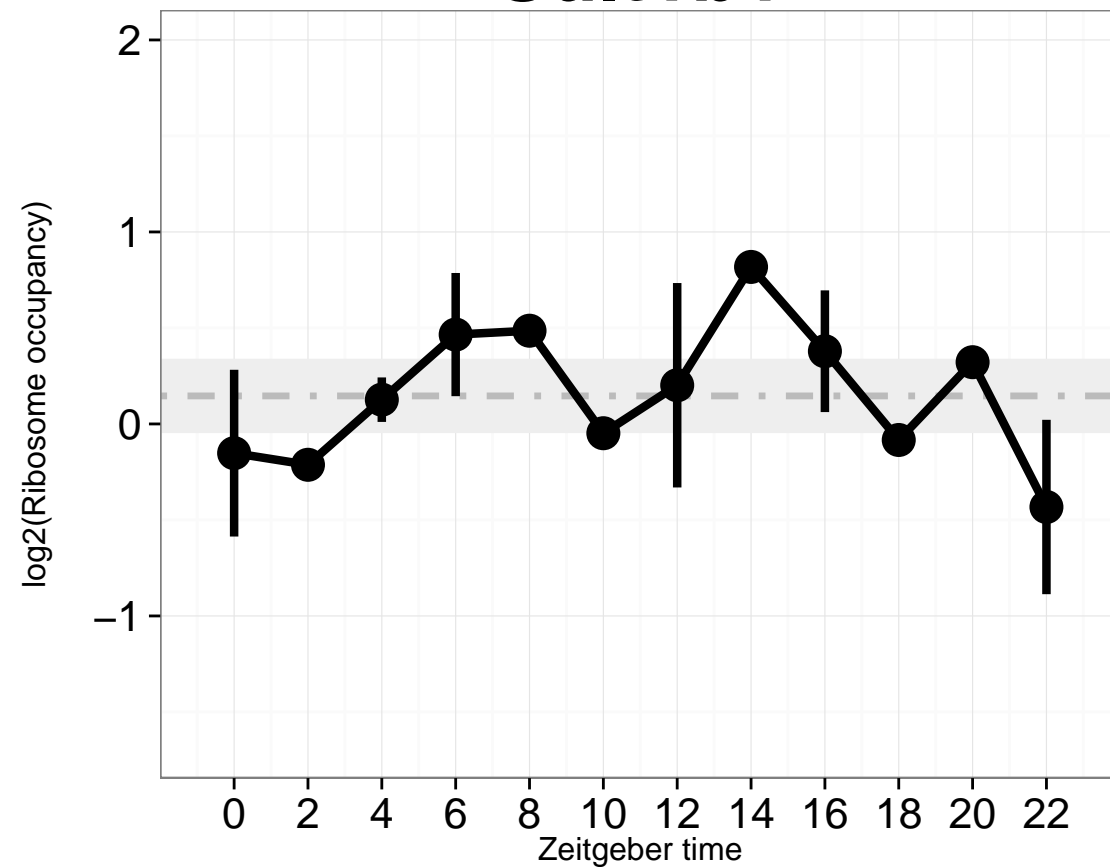

Supplement: Supplementary file 11664 [file 1]

# S100a13

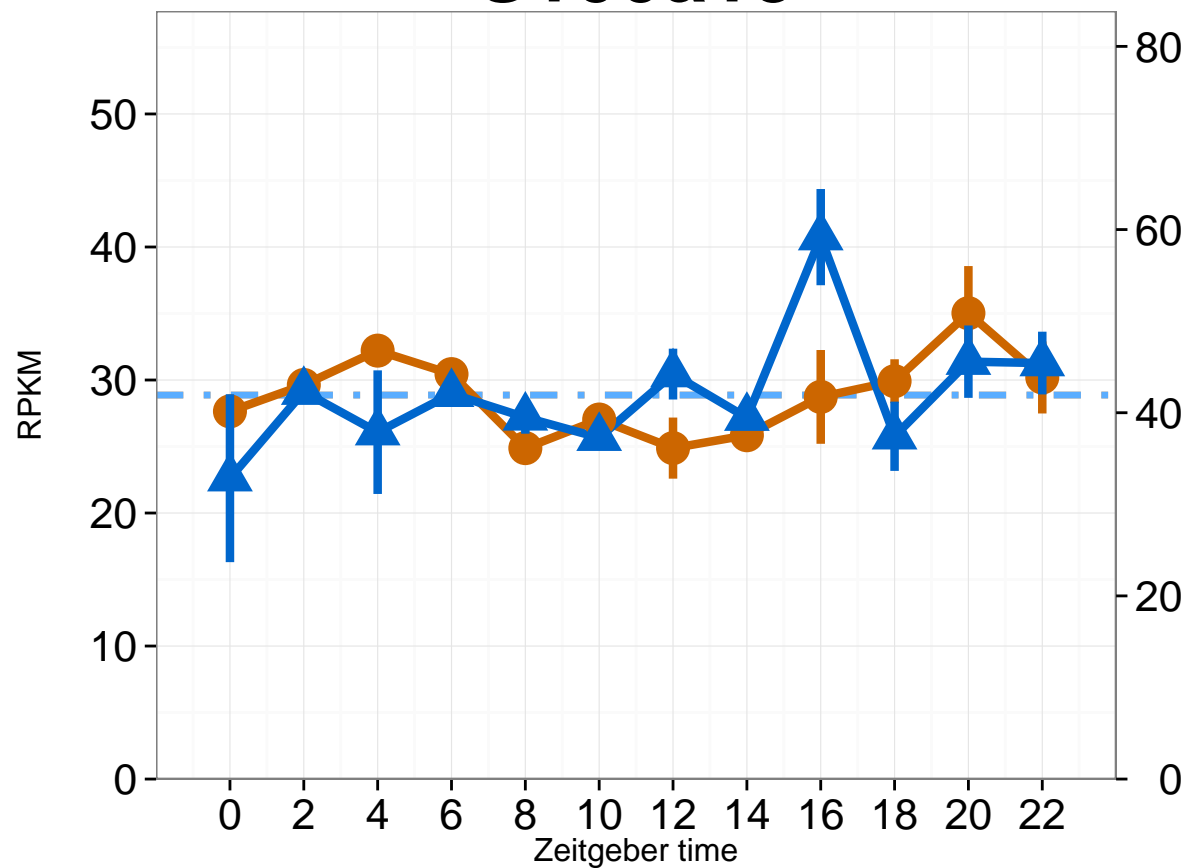

# S100a13

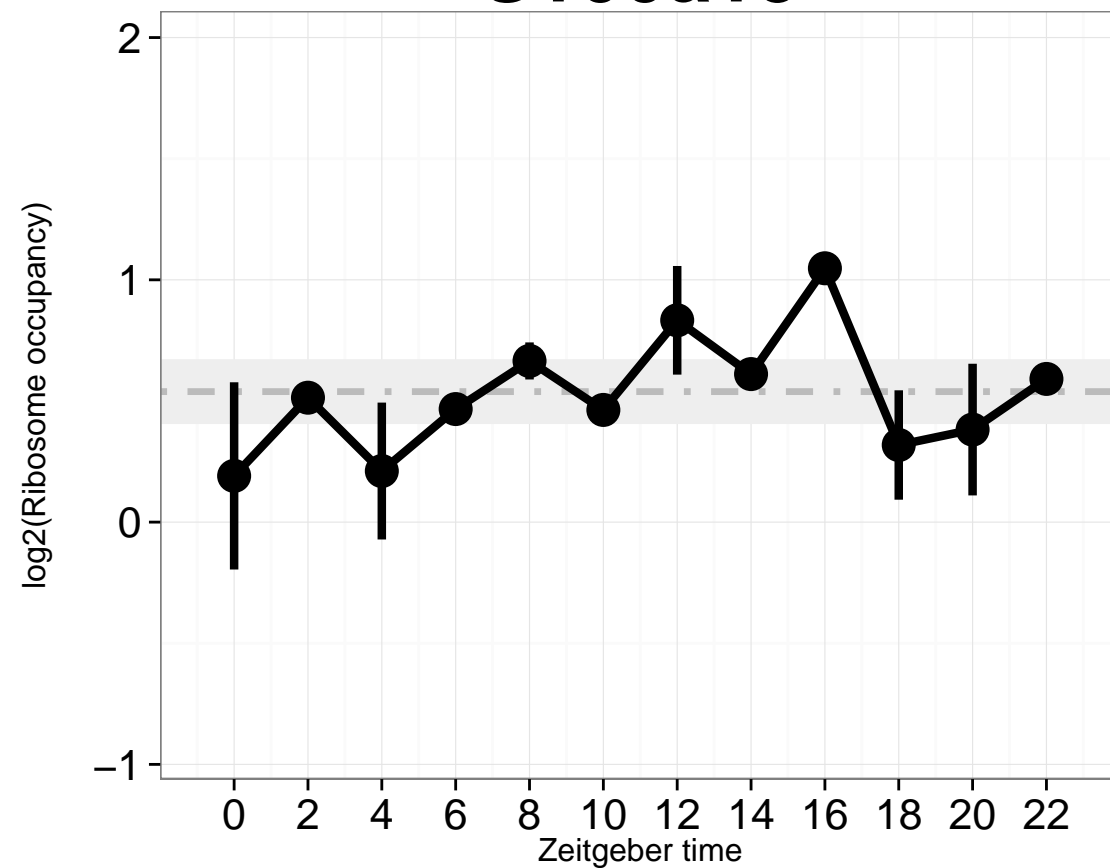

Supplement: Supplementary file 11665 [file 1]

## Ube2r2

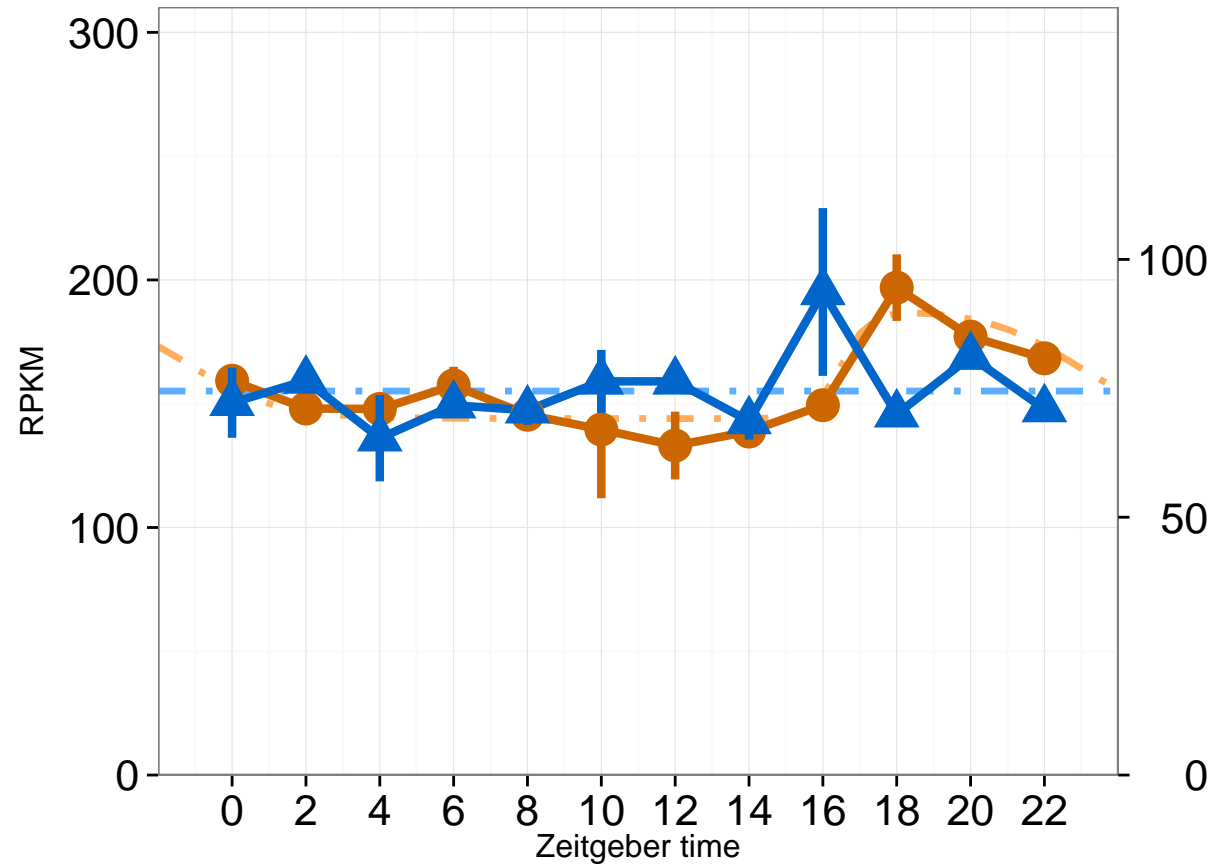

## Ube2r2

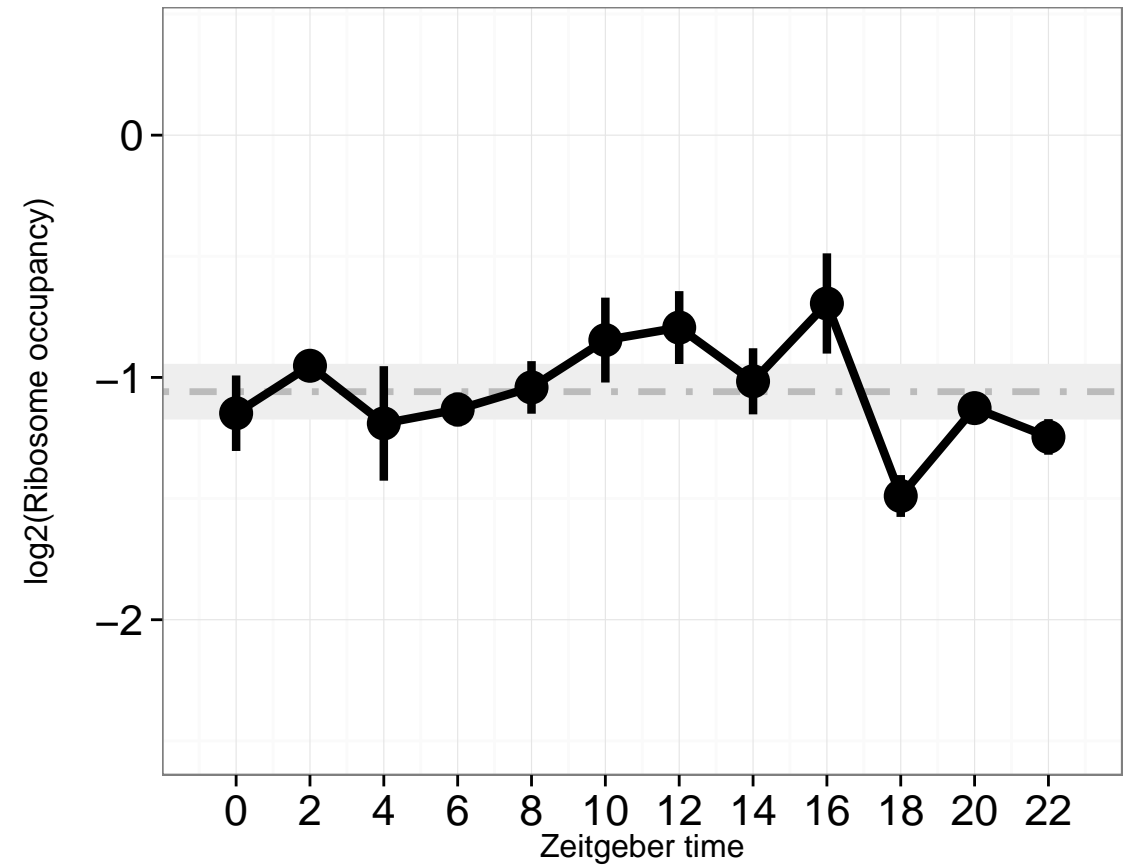

Supplement: Supplementary file 11666 [file 1]

## Mustn1

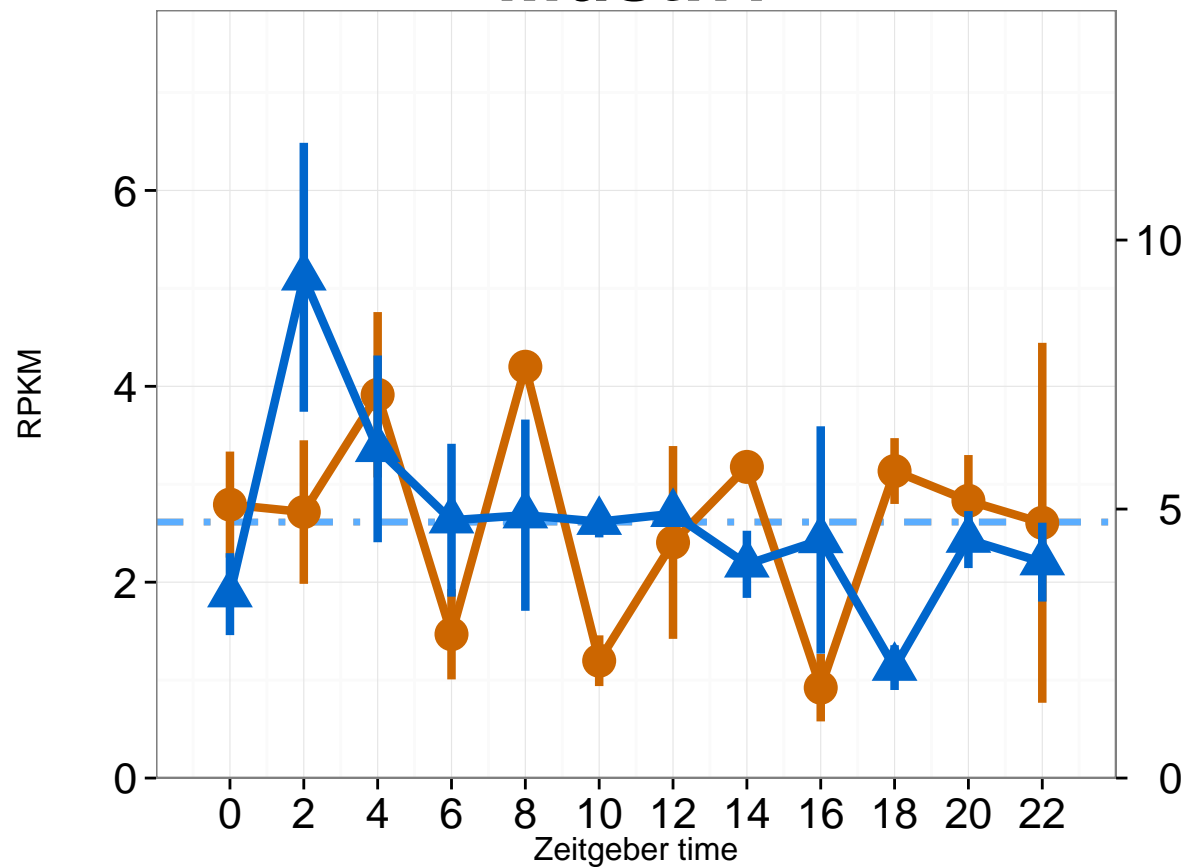

## Mustn1

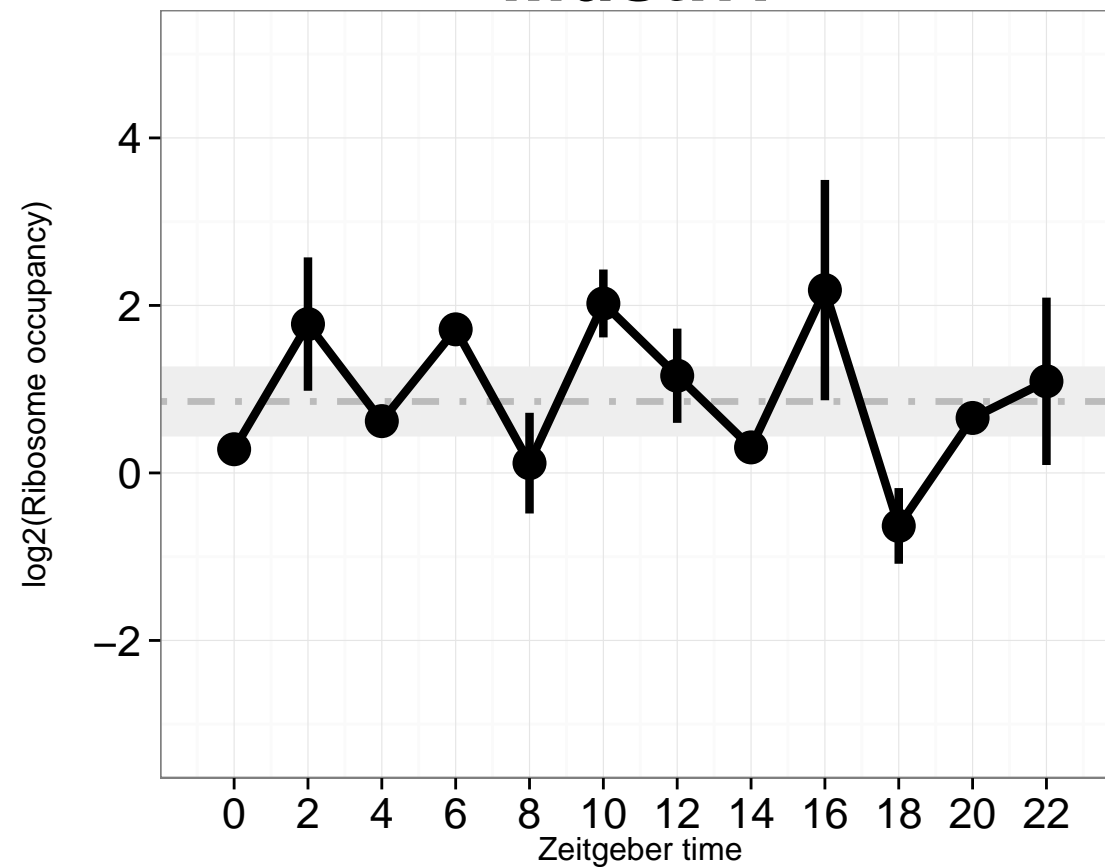

Supplement: Supplementary file 11667 [file 1]

## Gm266

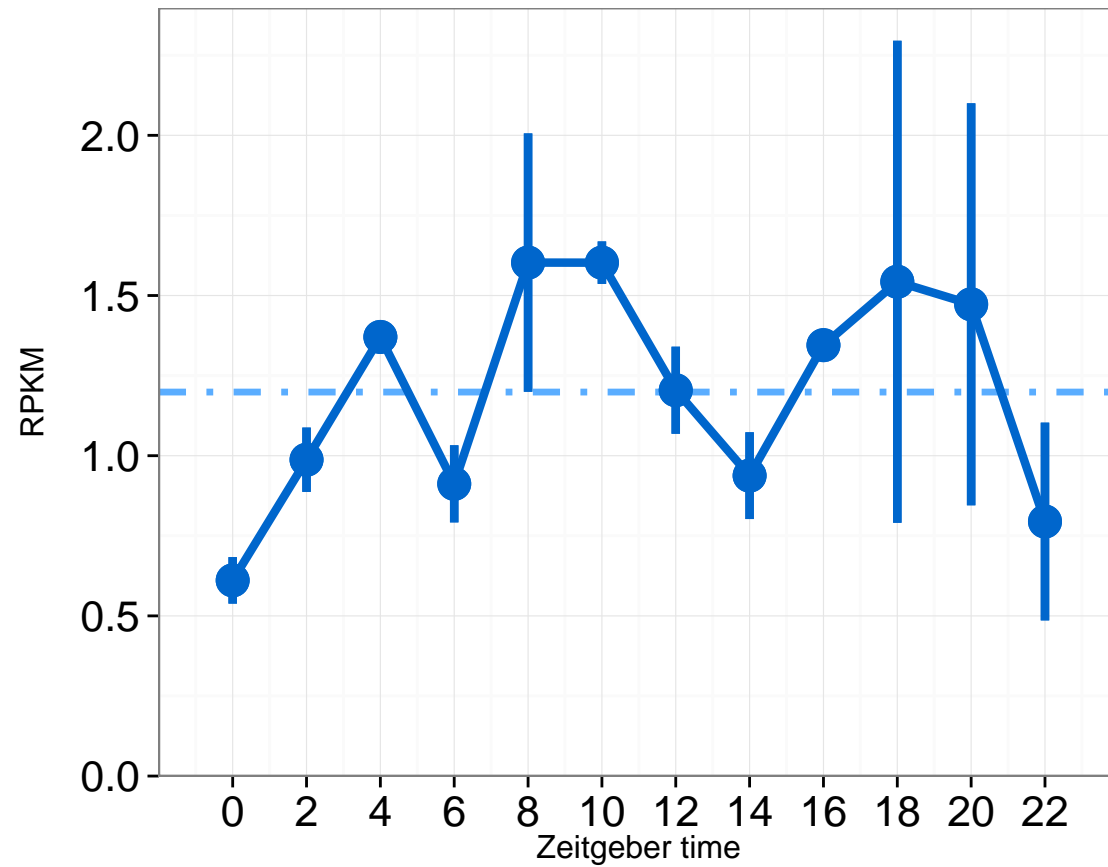

## Gm266 log2(Ribosome occupancy

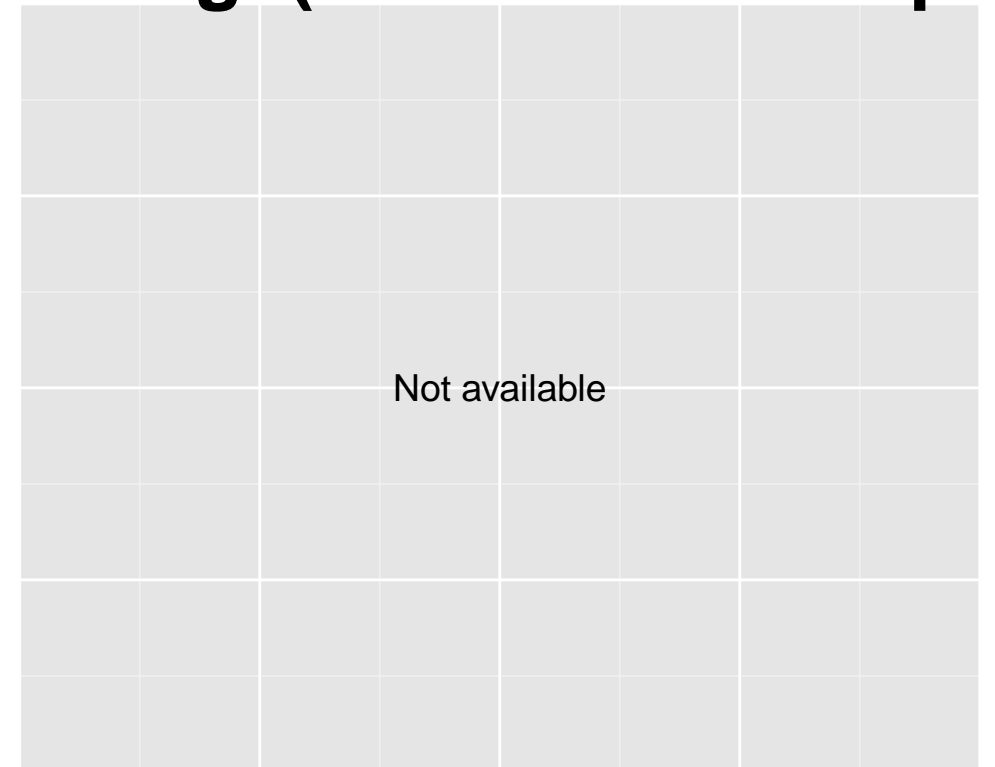

Supplement: Supplementary file 11668 [file 1]

# Chst1

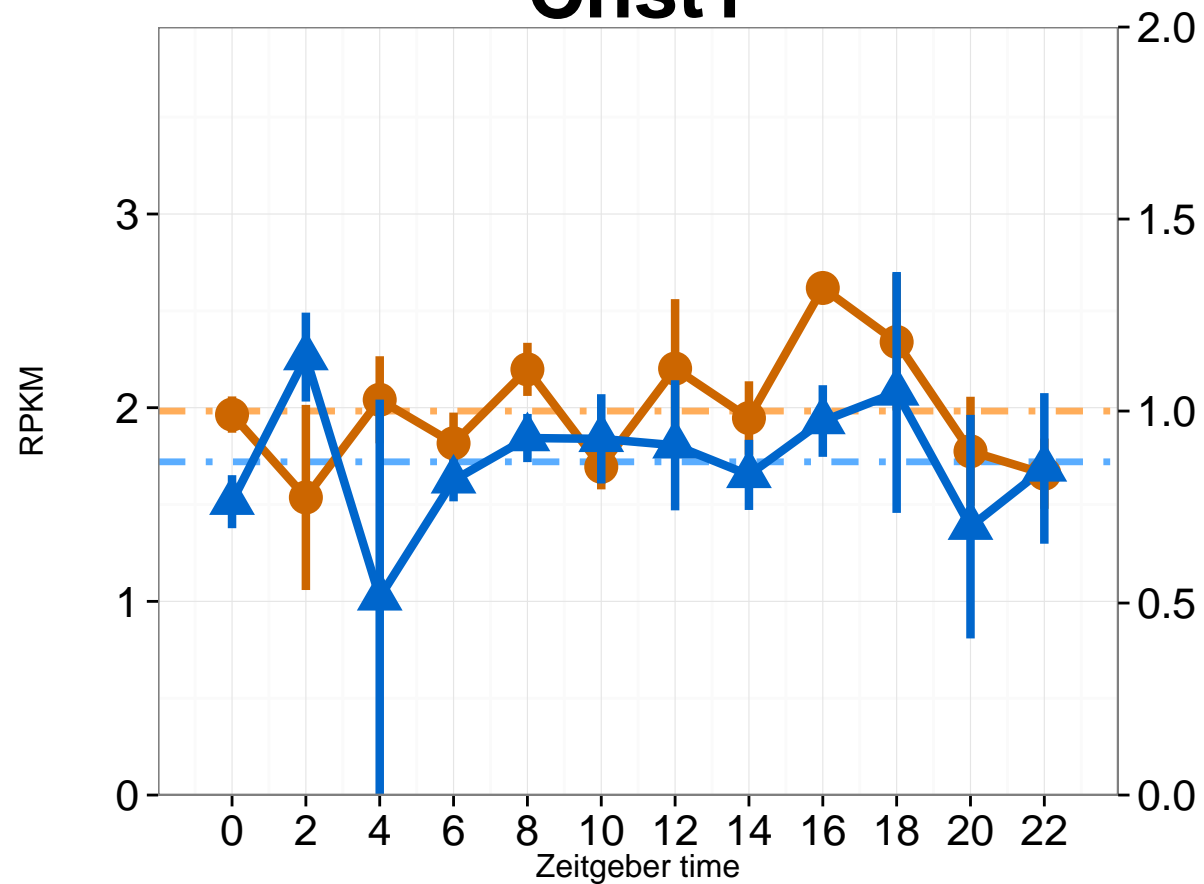

# Chst1

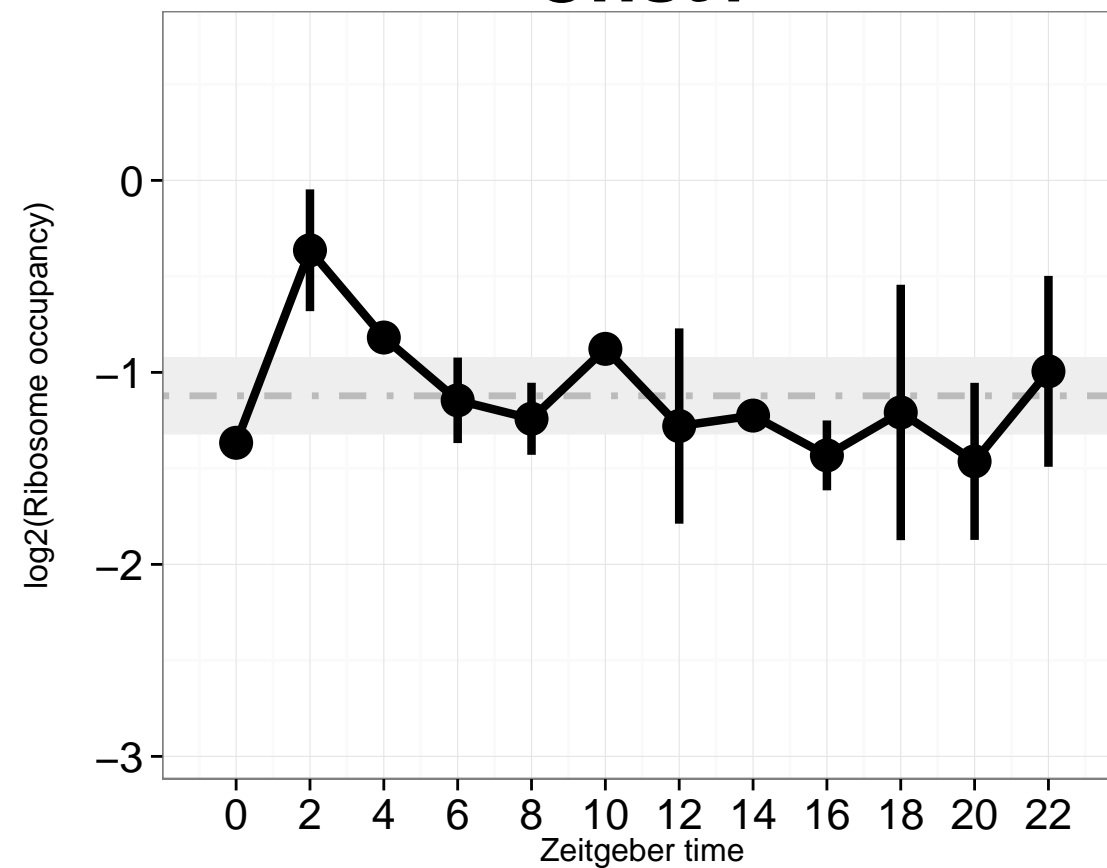

Supplement: Supplementary file 11669 [file 1]

## Sod3

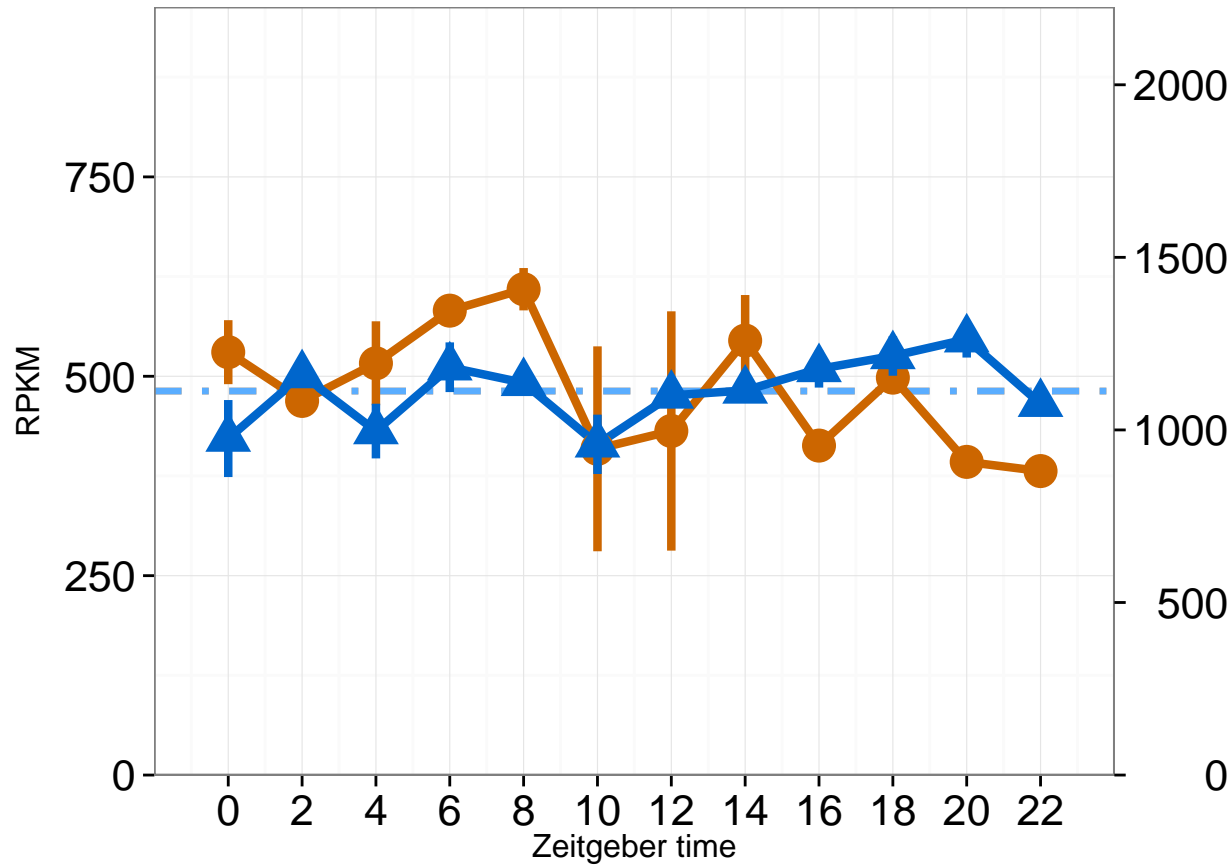

## Sod3

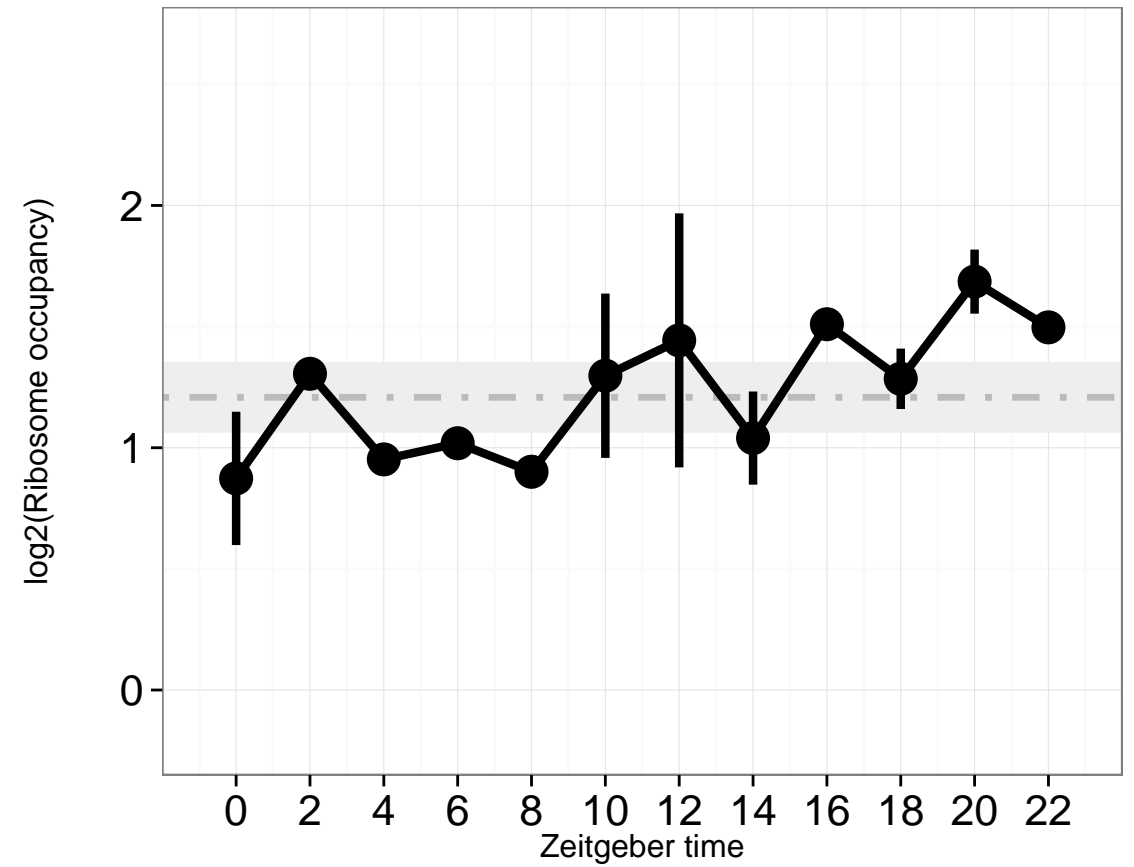

Supplement: Supplementary file 11670 [file 1]

## Sp3

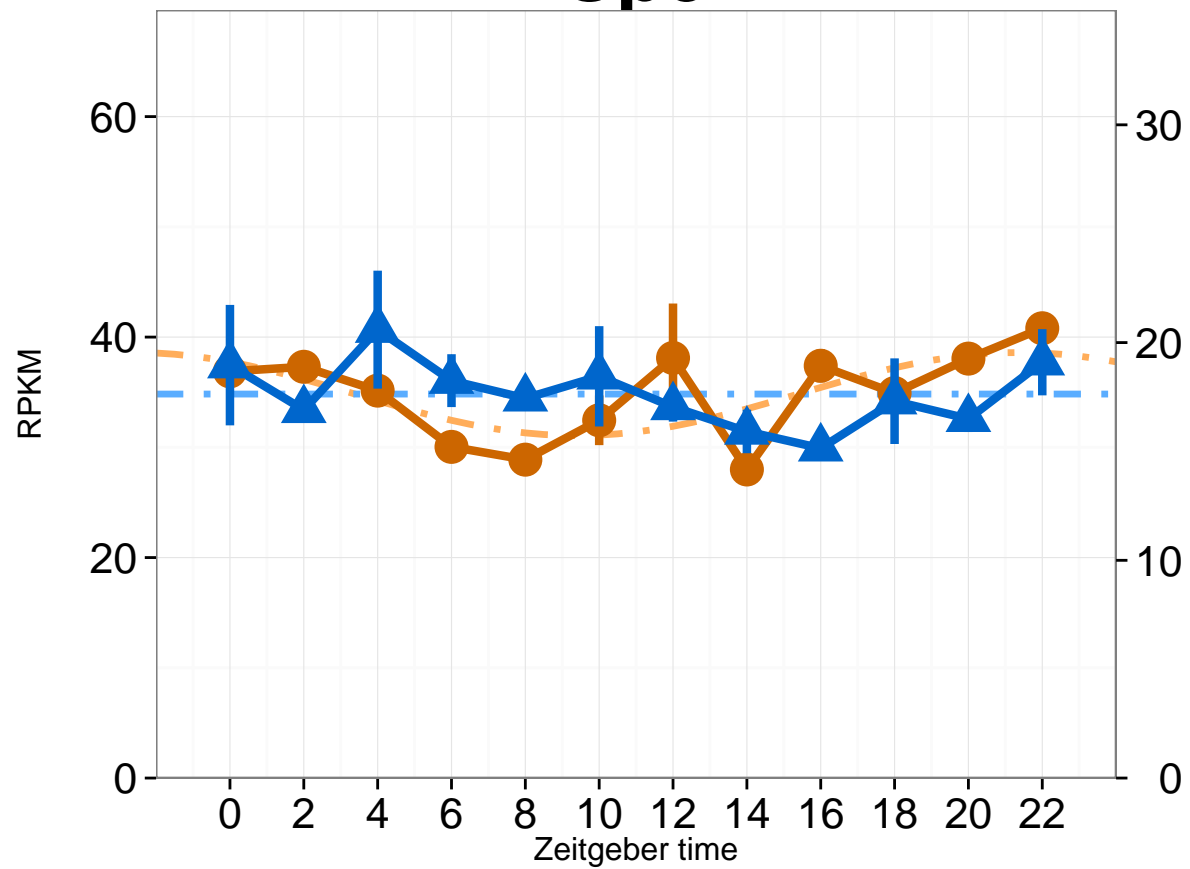

## Sp3

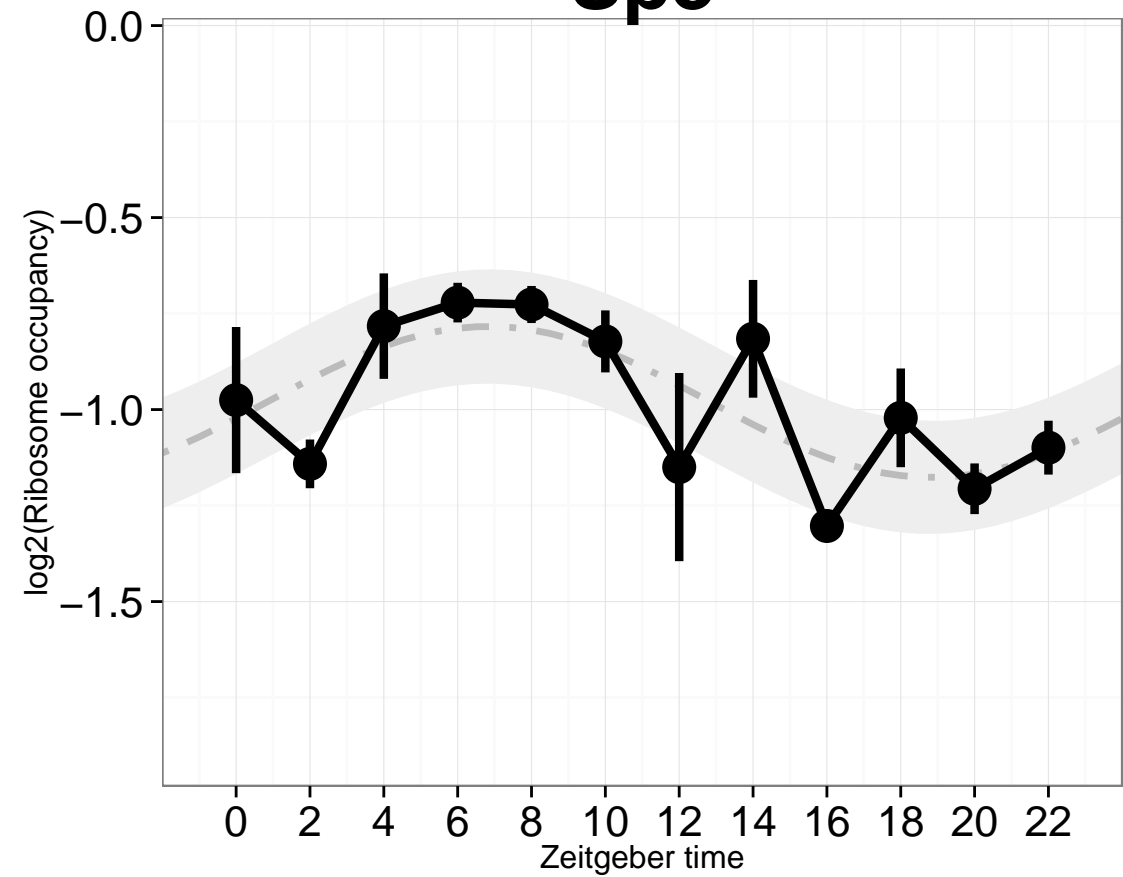

Supplement: Supplementary file 11671 [file 1]

# Lemd3

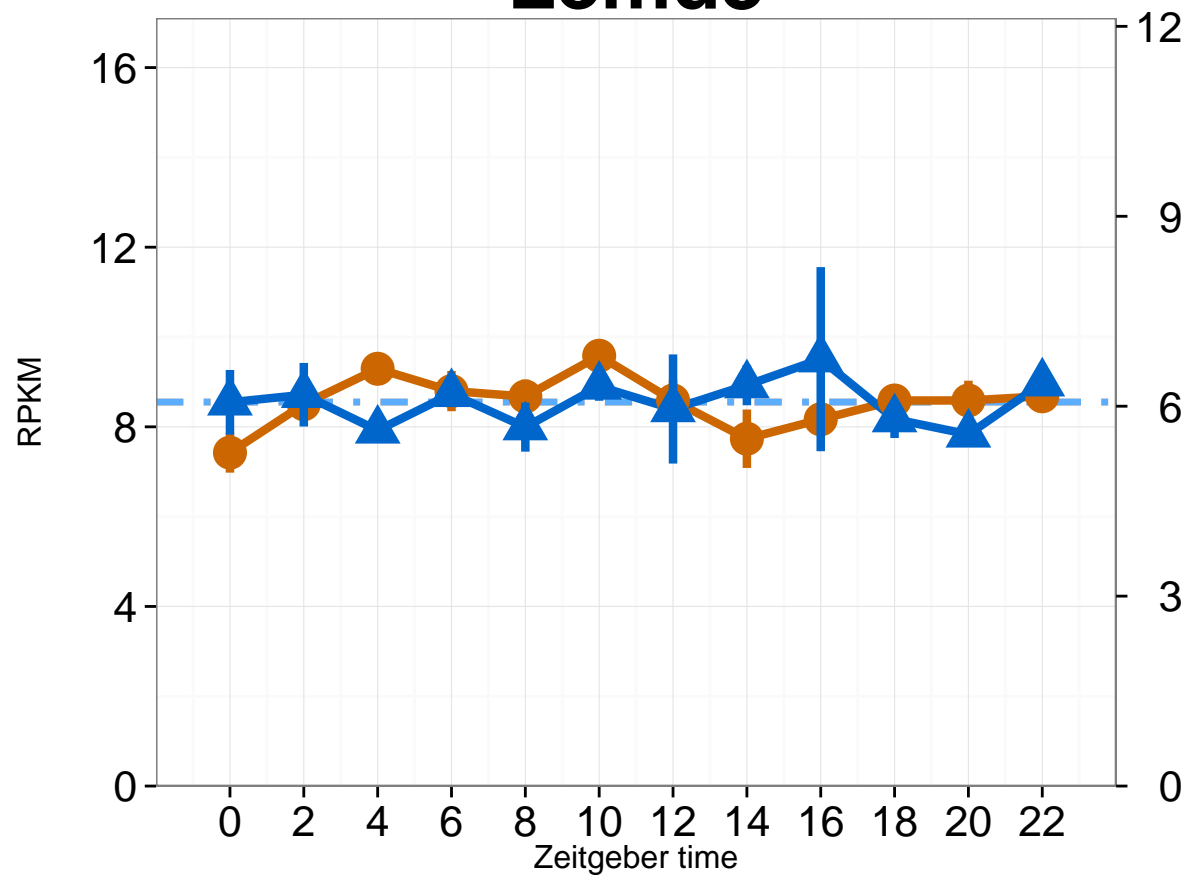

# Lemd3

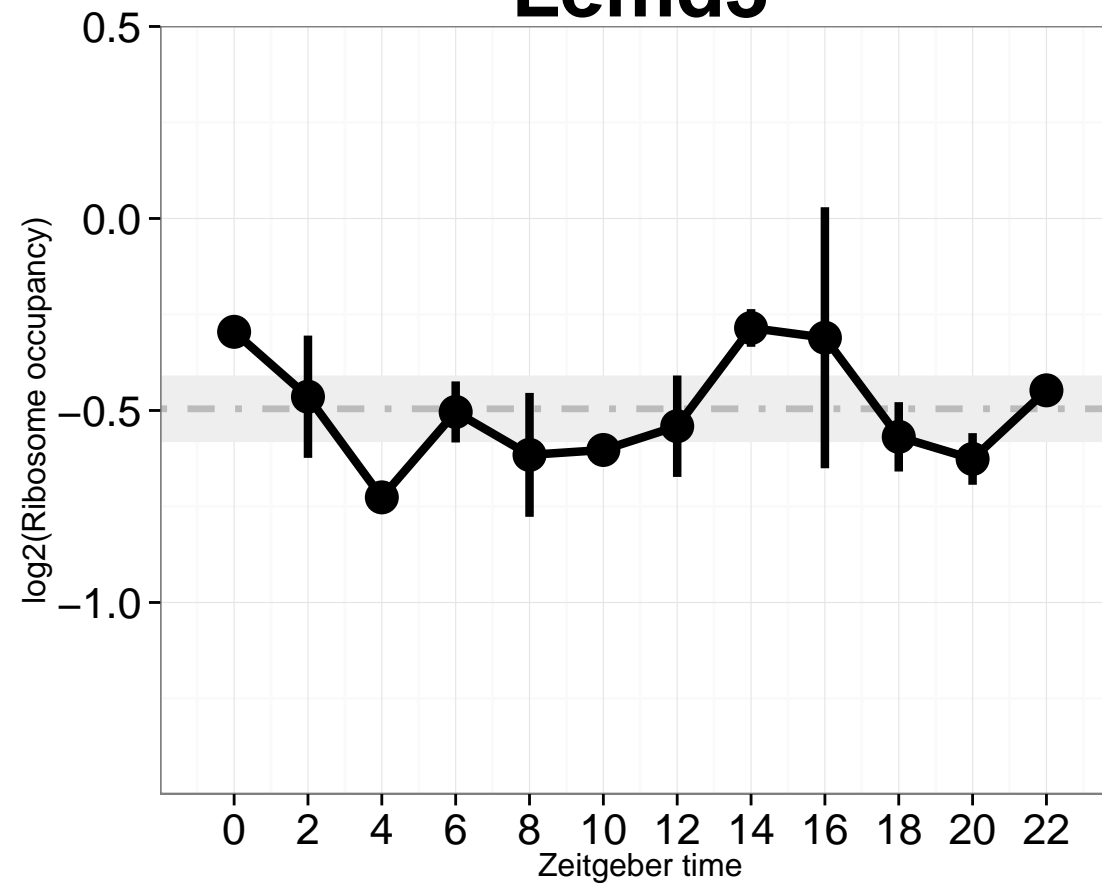

Supplement: Supplementary file 11672 [file 1]

## 4930506M07Rik

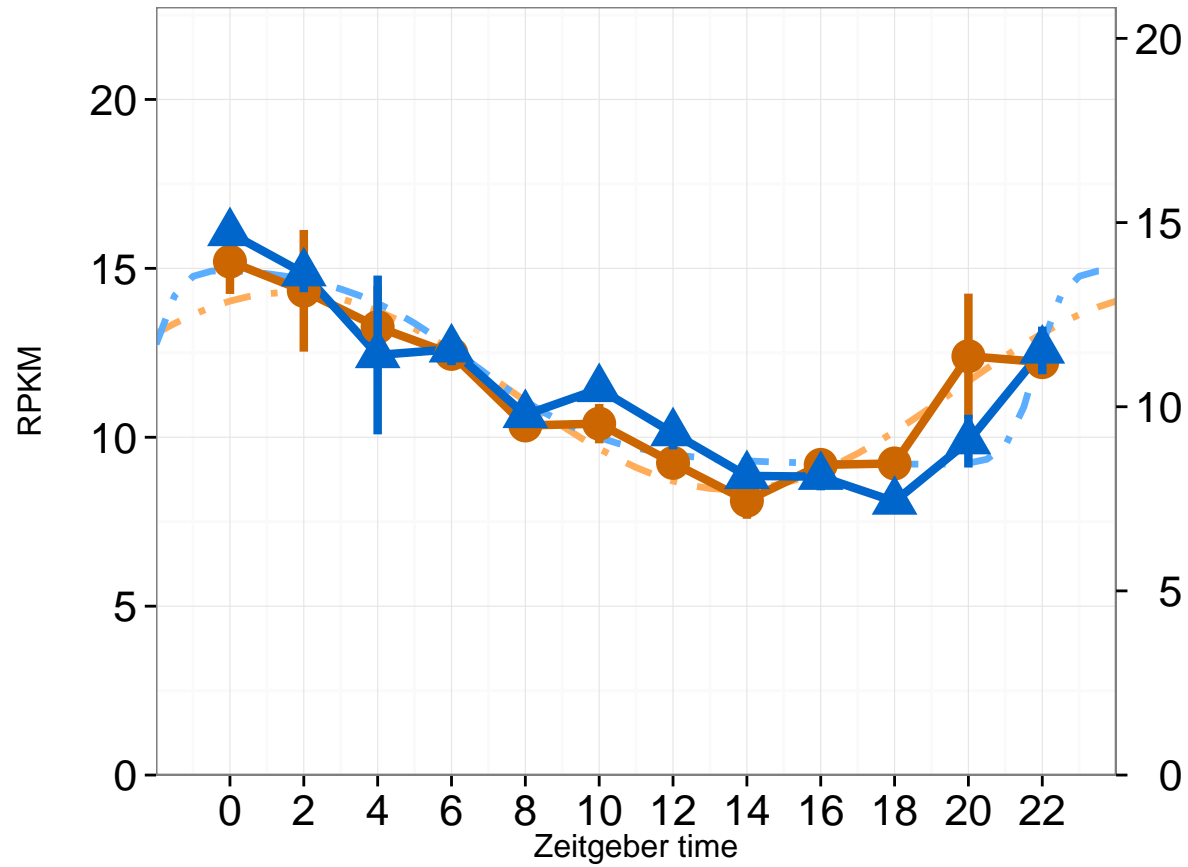

## 4930506M07Rik

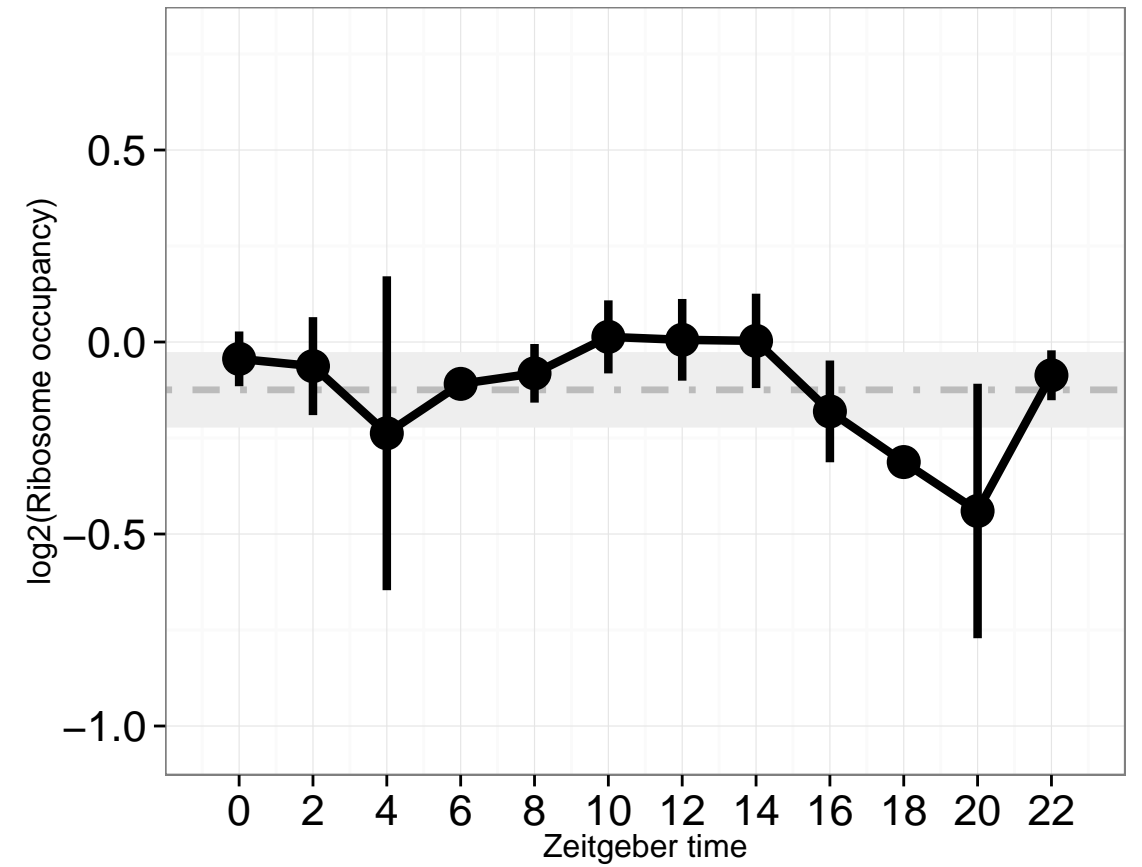

Supplement: Supplementary file 11673 [file 1]

## NoI9

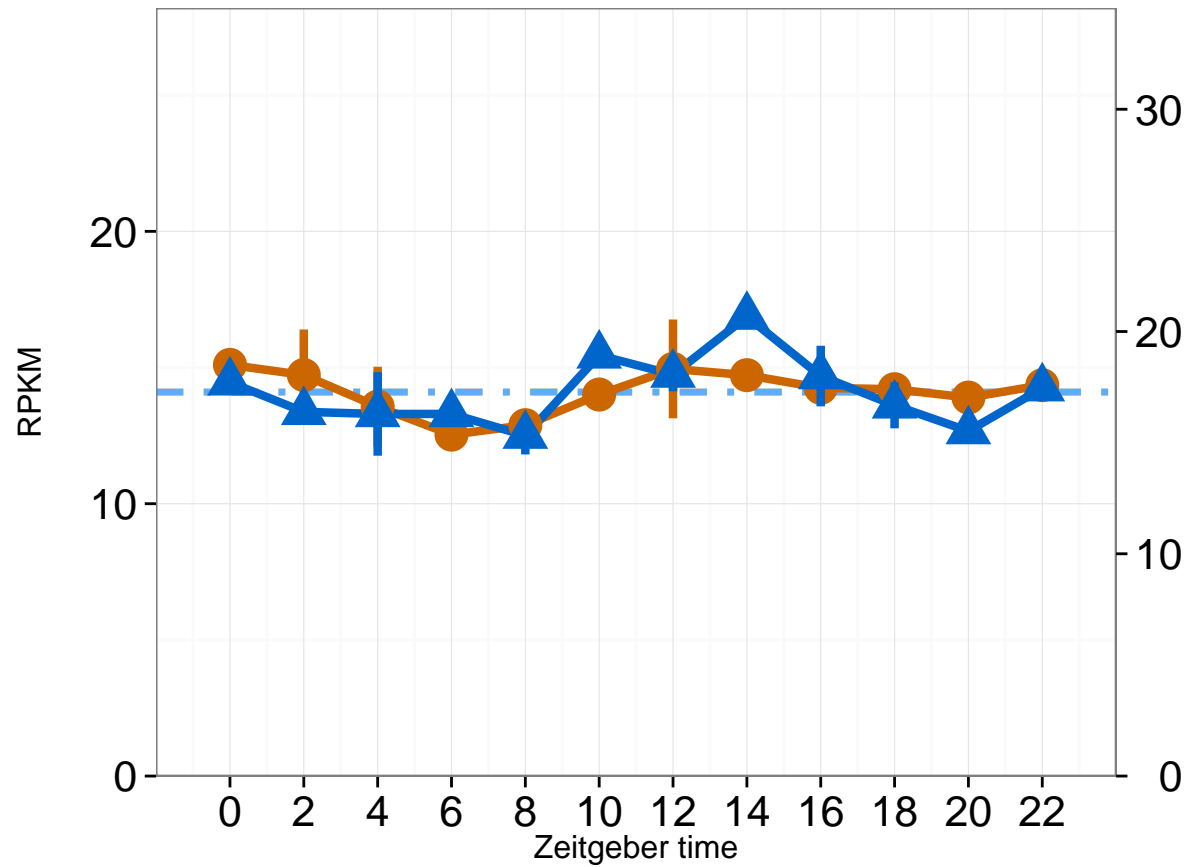

## NoI9

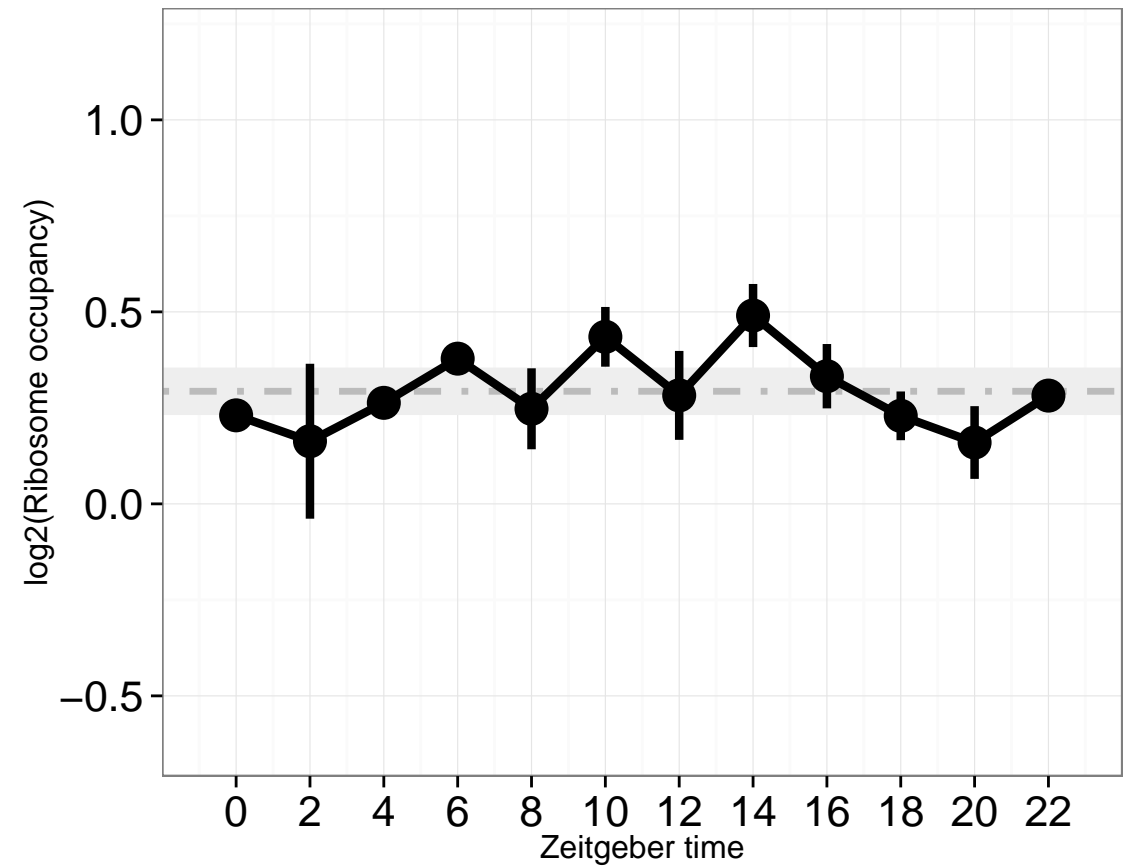

Supplement: Supplementary file 11674 [file 1]

# Jph1

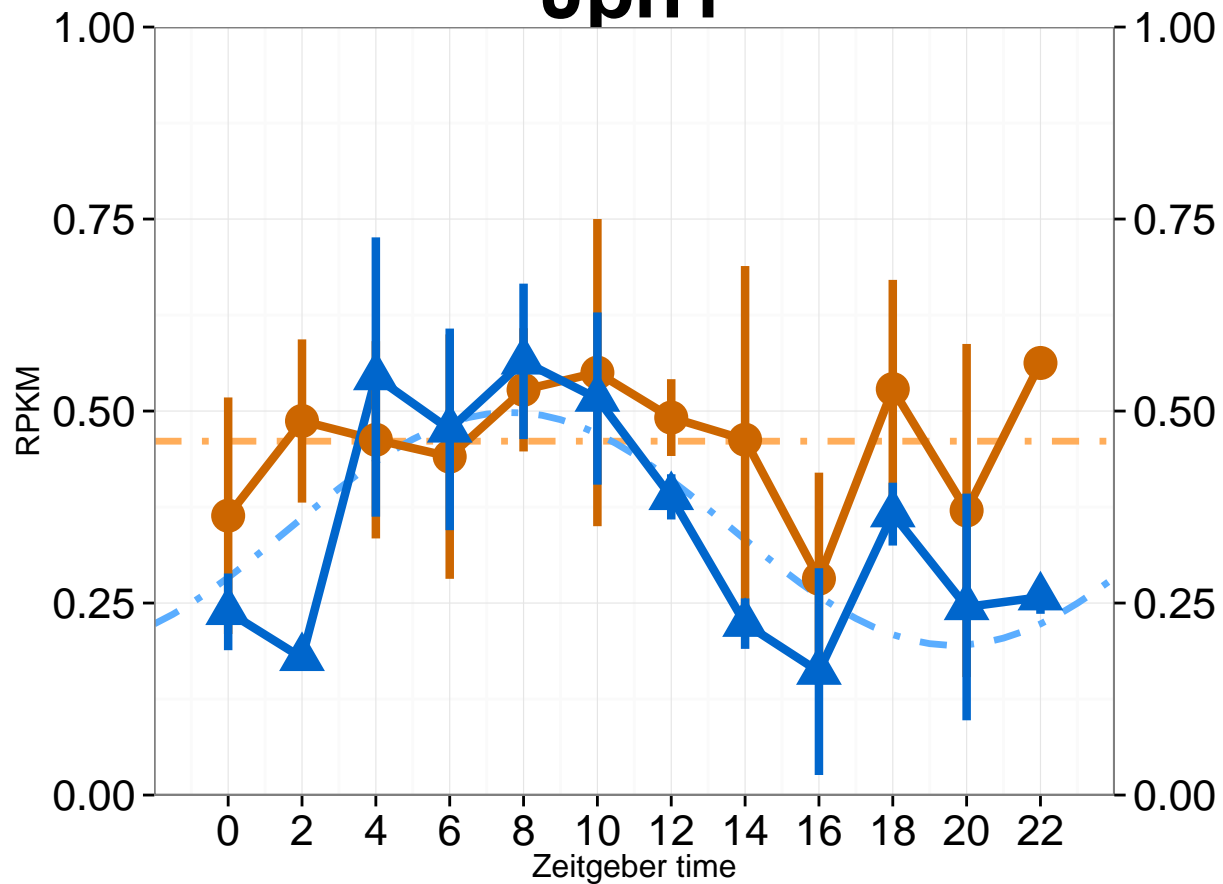

# Jph1

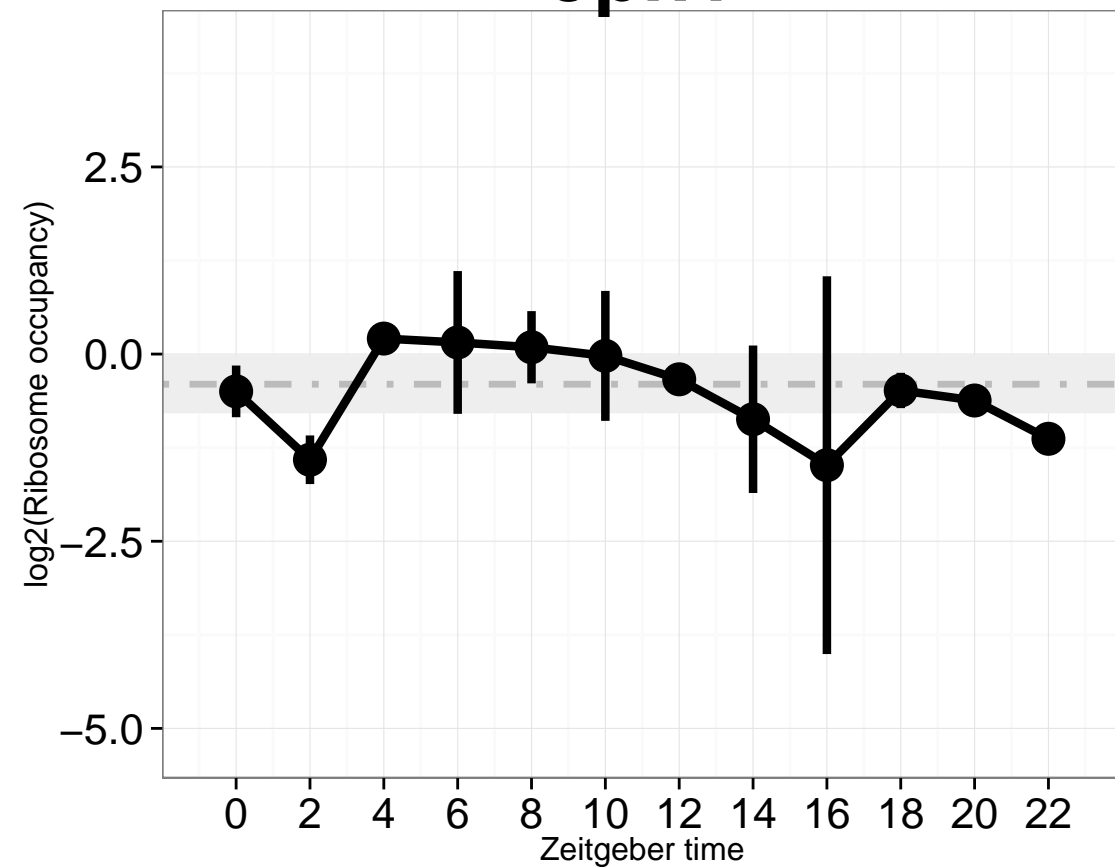

Supplement: Supplementary file 11675 [file 1]

## Shc3

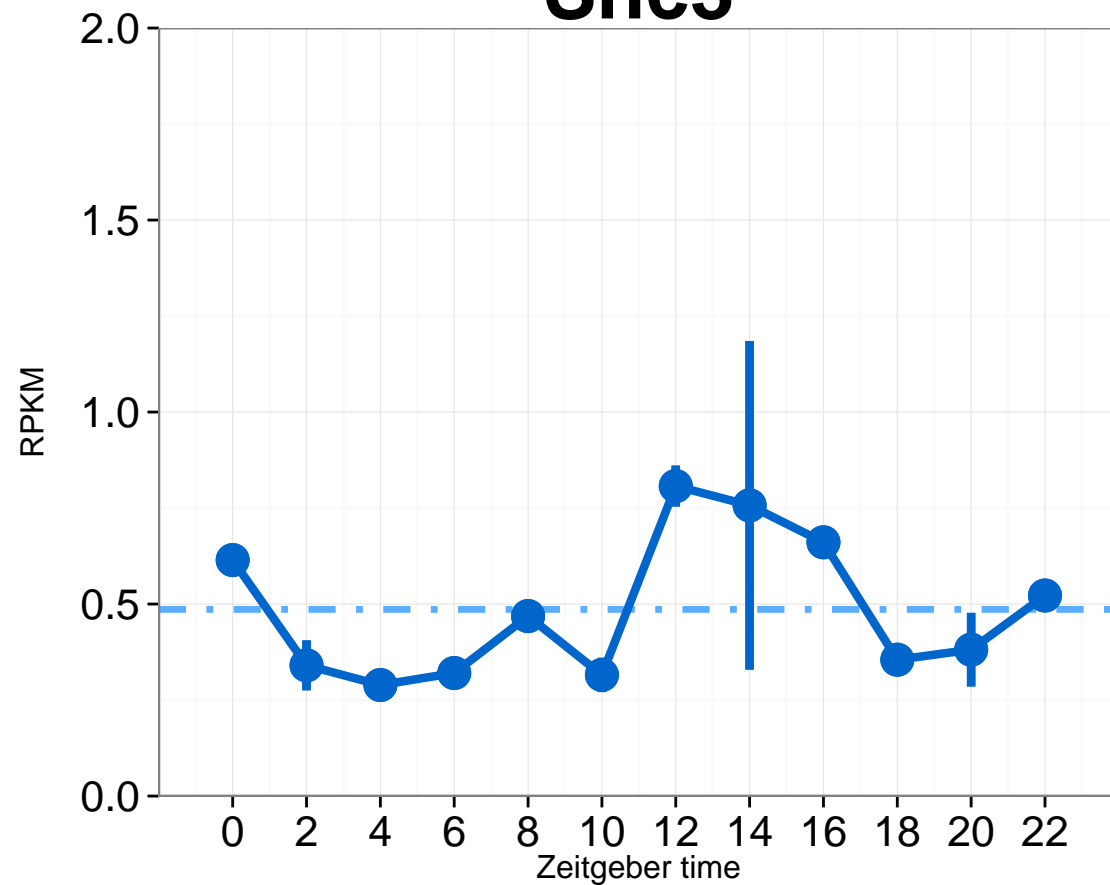

## Shc3 log2(Ribosome occupancy)

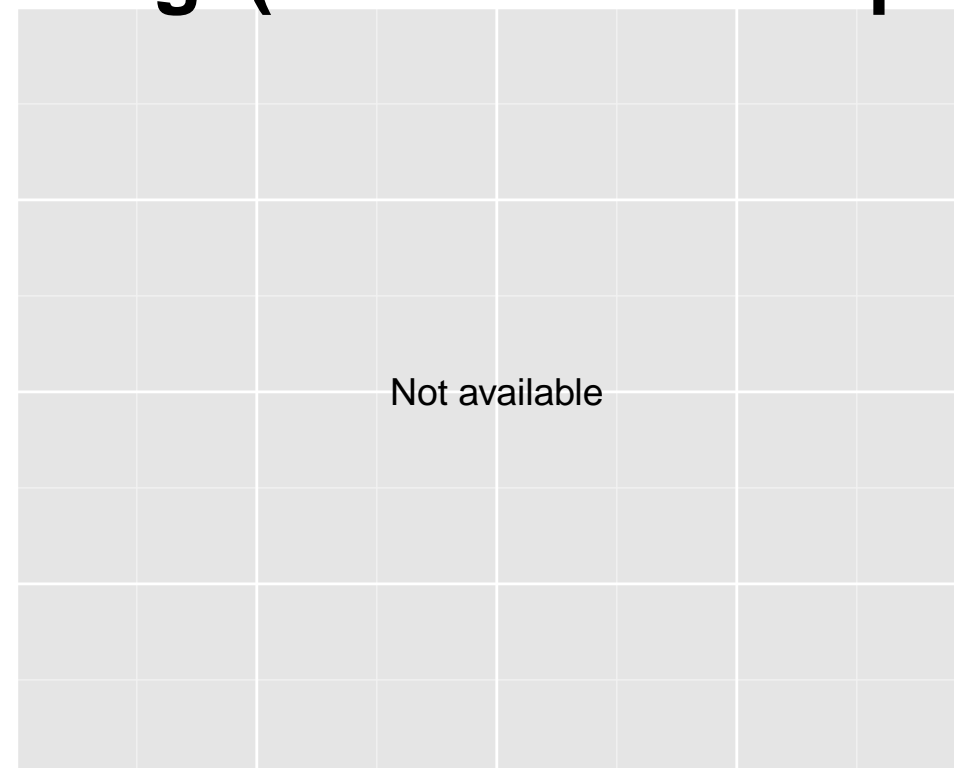

Supplement: Supplementary file 11676 [file 1]

## AI413582

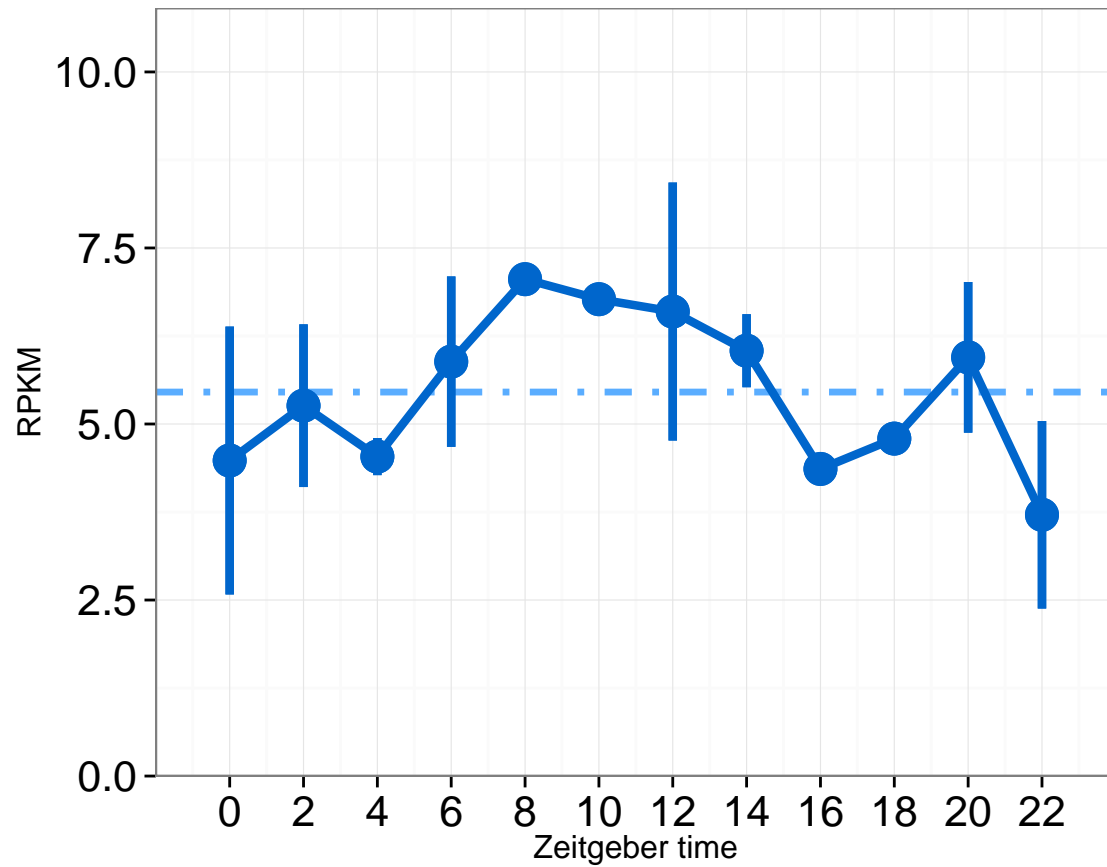

## AI413582 log2(Ribosome occupancy)

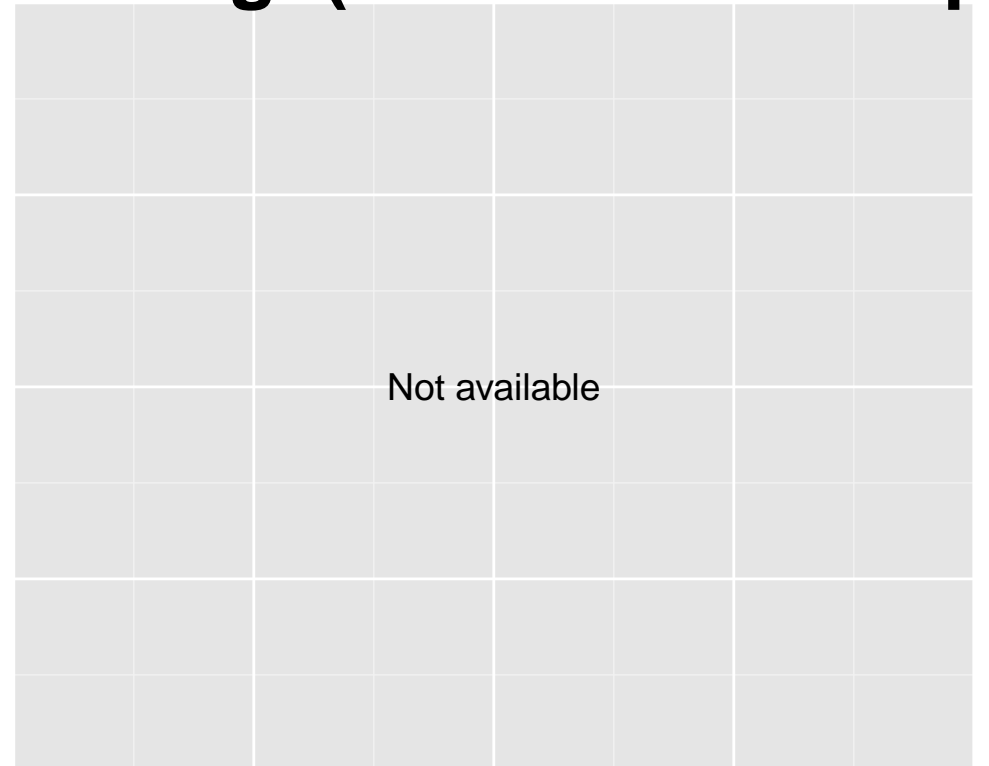

Supplement: Supplementary file 11677 [file 1]

# Phldb1

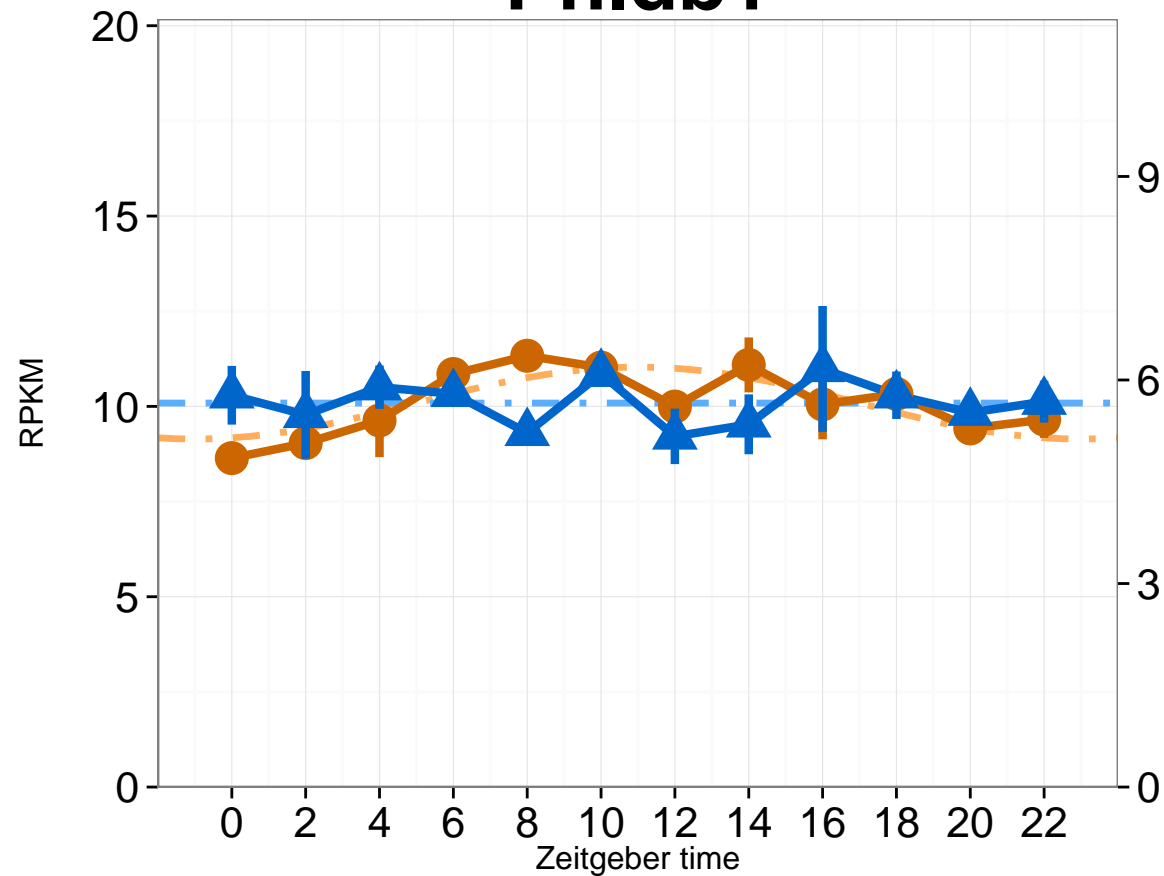

# Phldb1

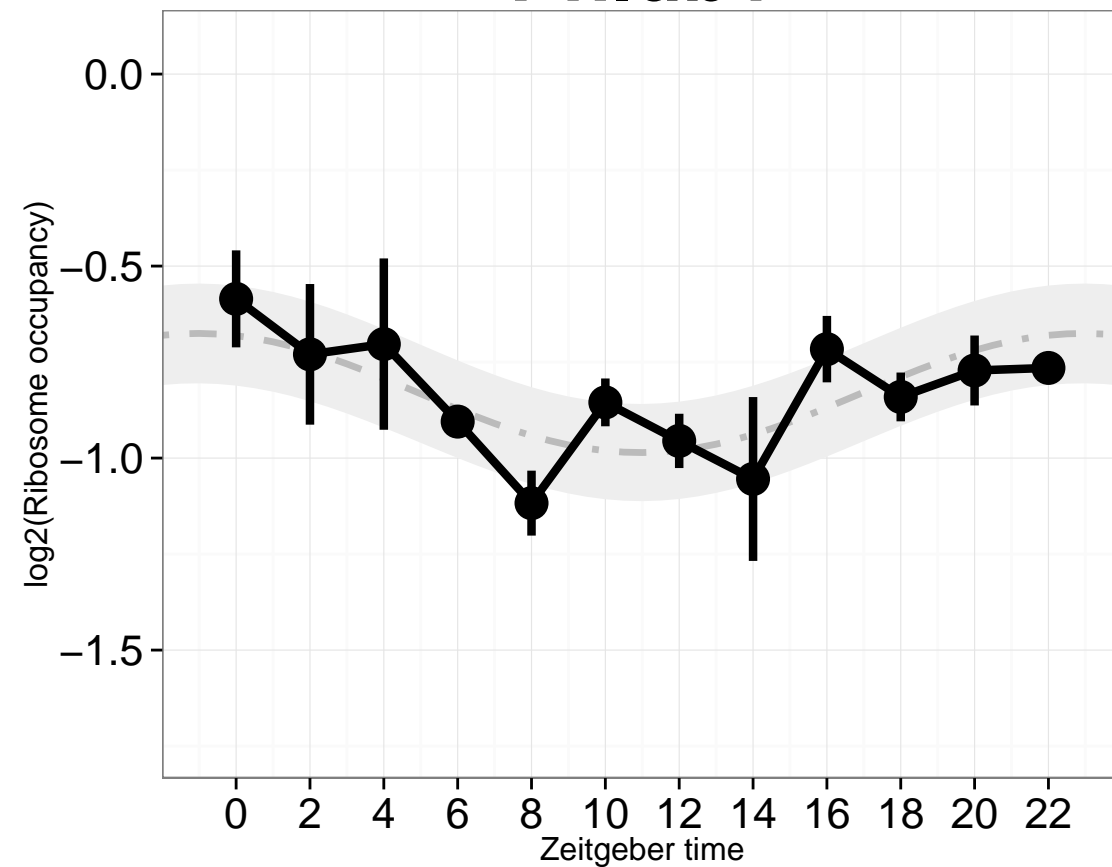

Supplement: Supplementary file 11678 [file 1]

# Fam73b

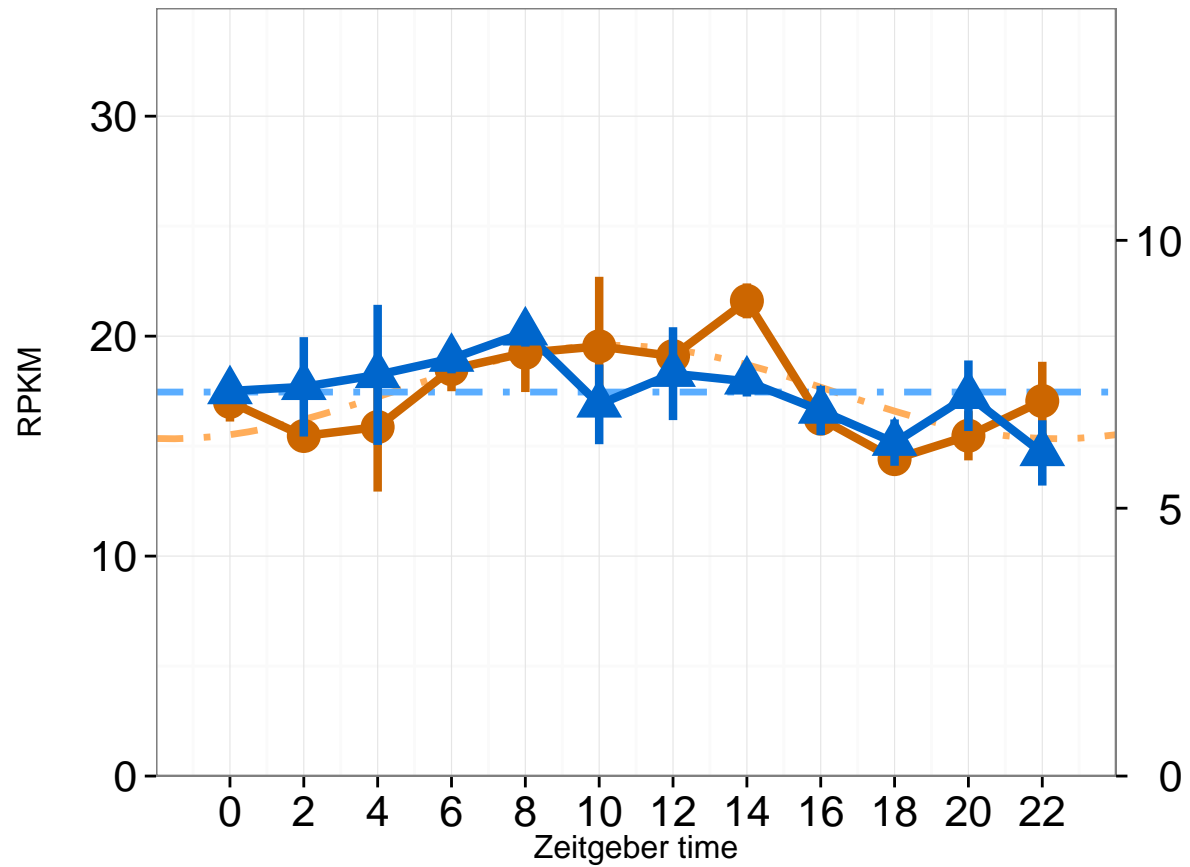

# Fam73b

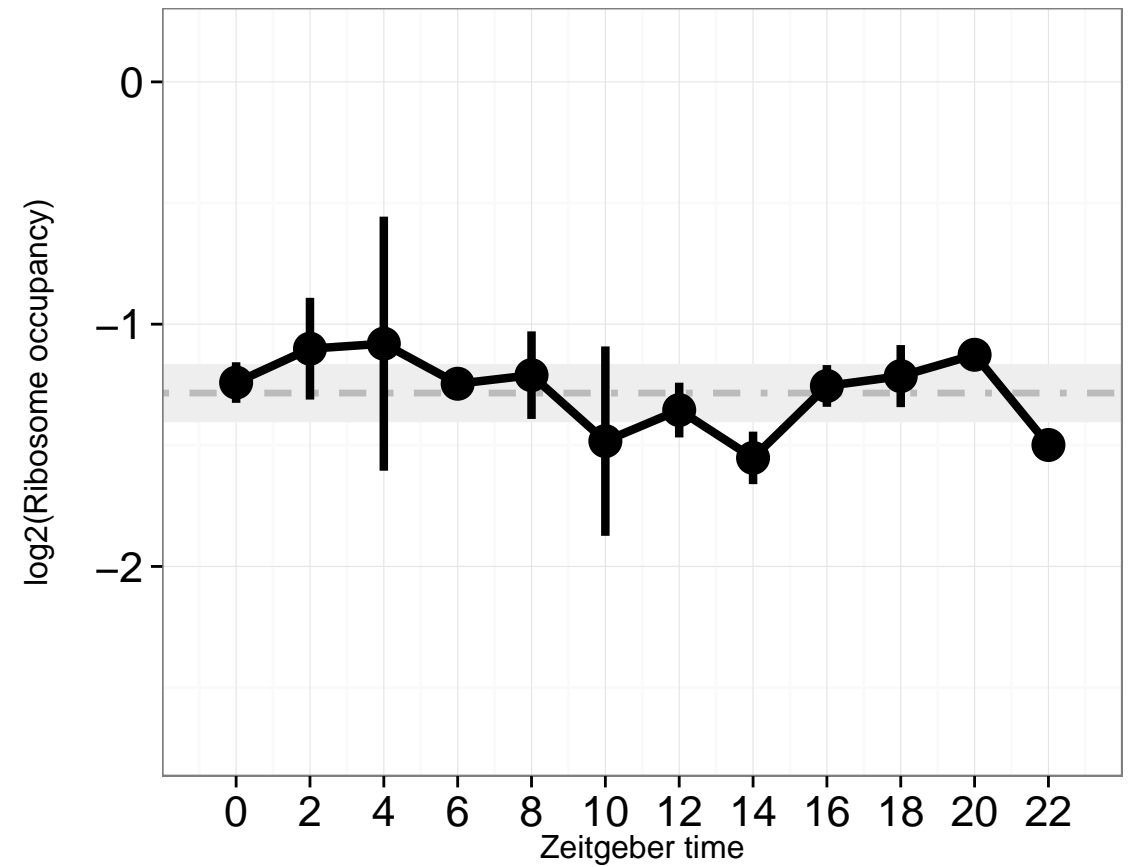

Supplement: Supplementary file 11679 [file 1]

## Txnrd1

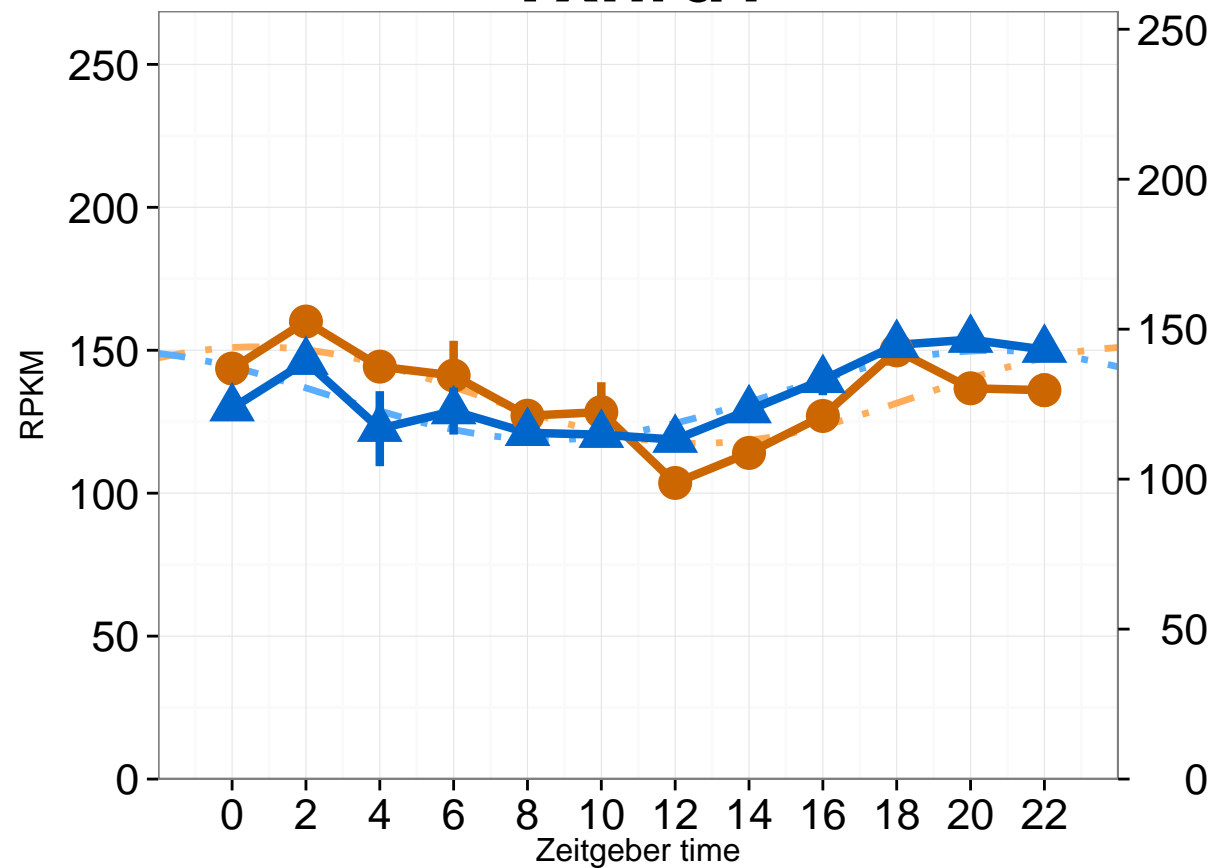

## Txnrd1

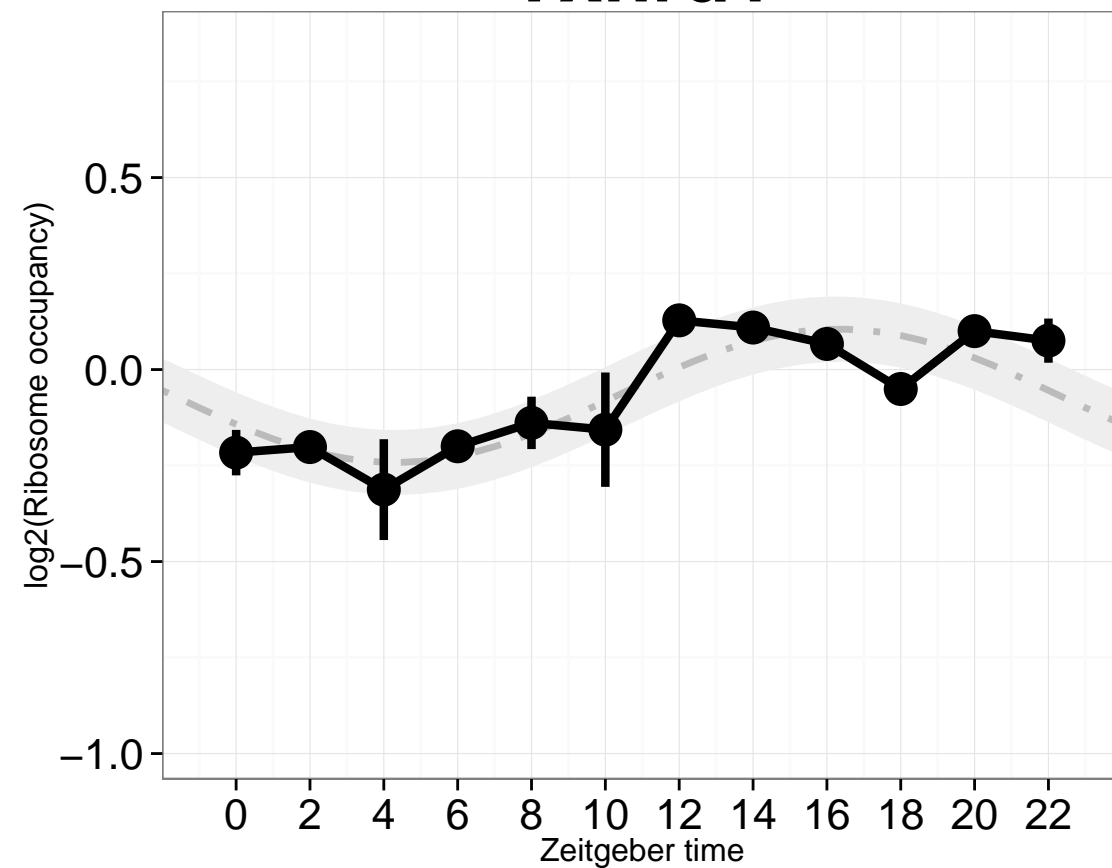

Supplement: Supplementary file 11680 [file 1]

## Ephb4

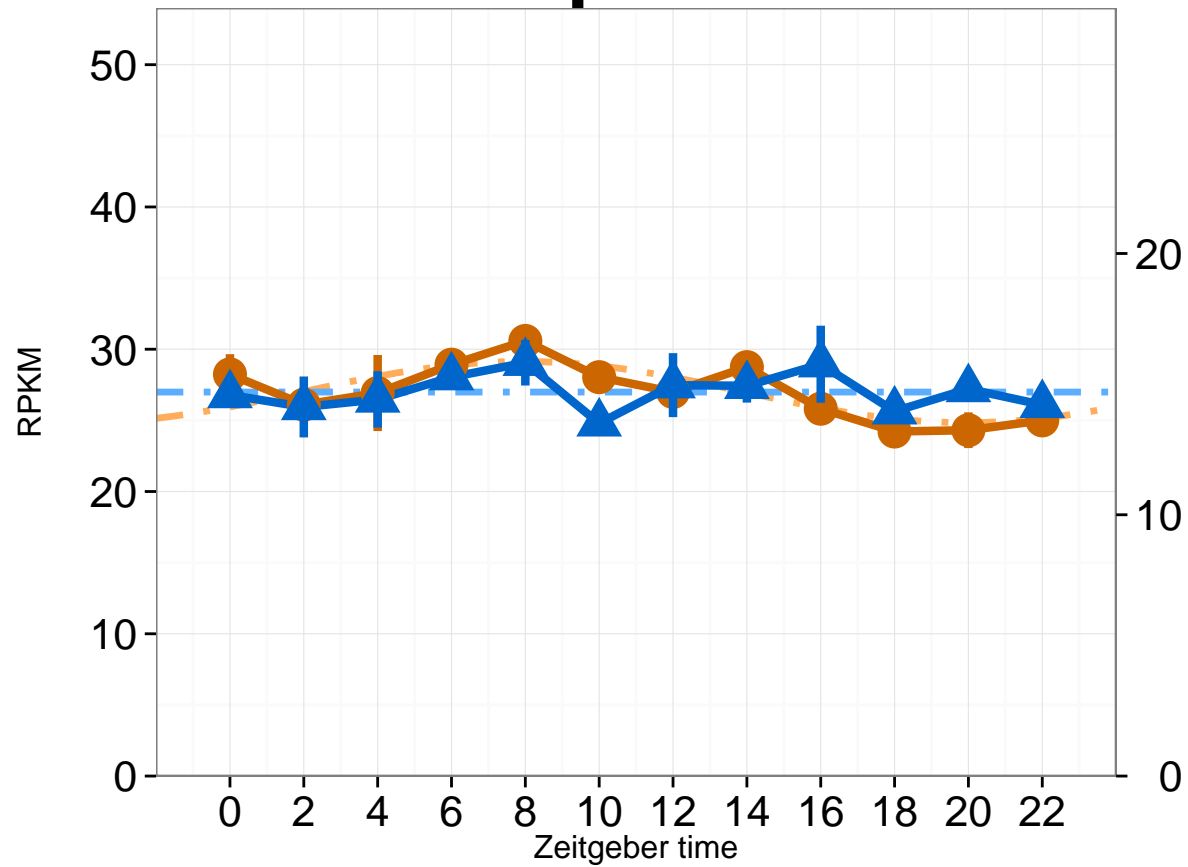

## Ephb4

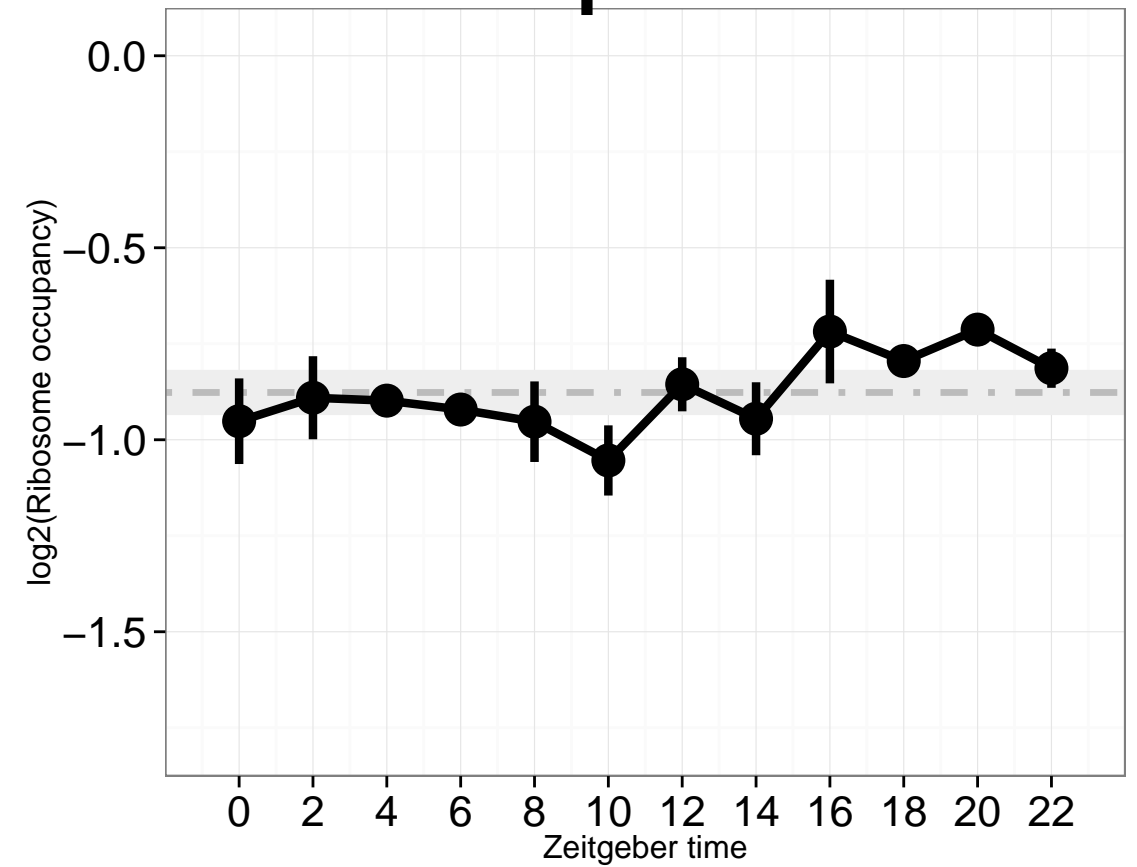

Supplement: Supplementary file 11681 [file 1]

# Slc22a6

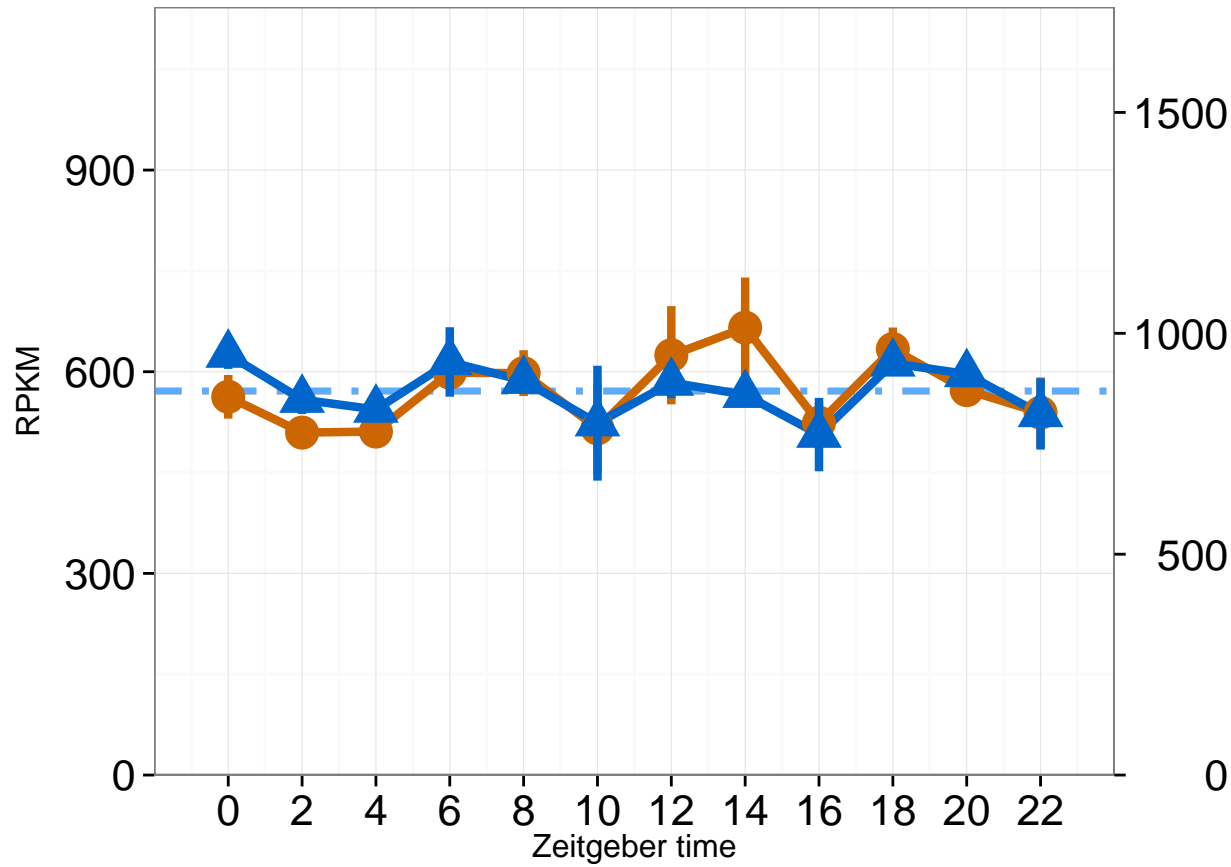

# Slc22a6

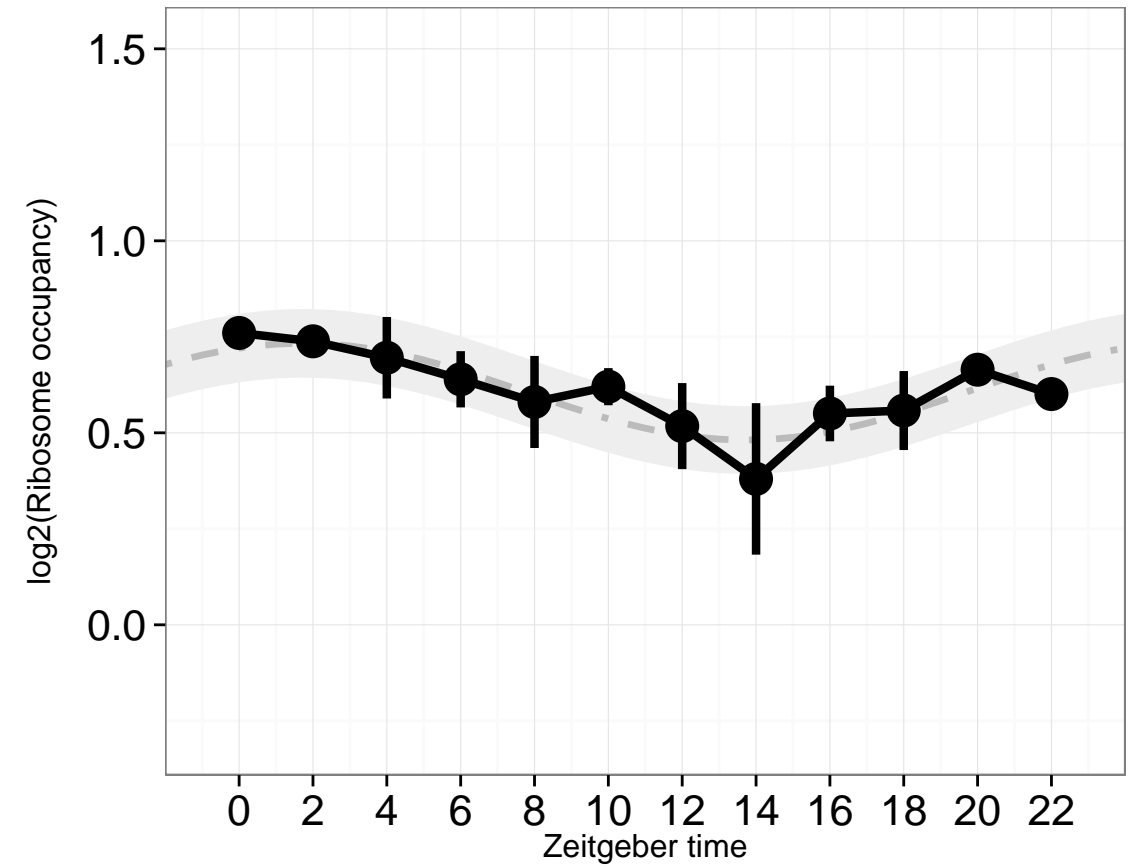

Supplement: Supplementary file 11682 [file 1]

## Pafah2

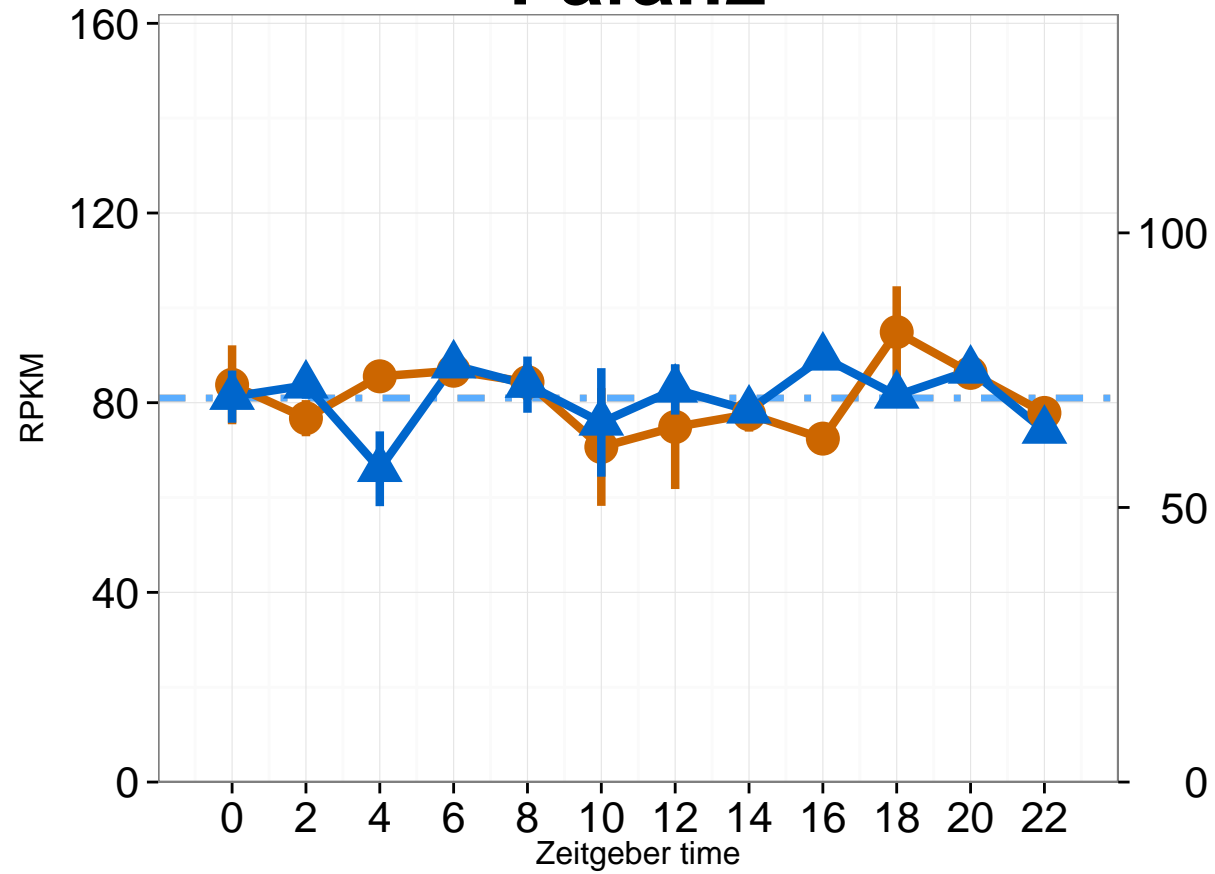

## Pafah2

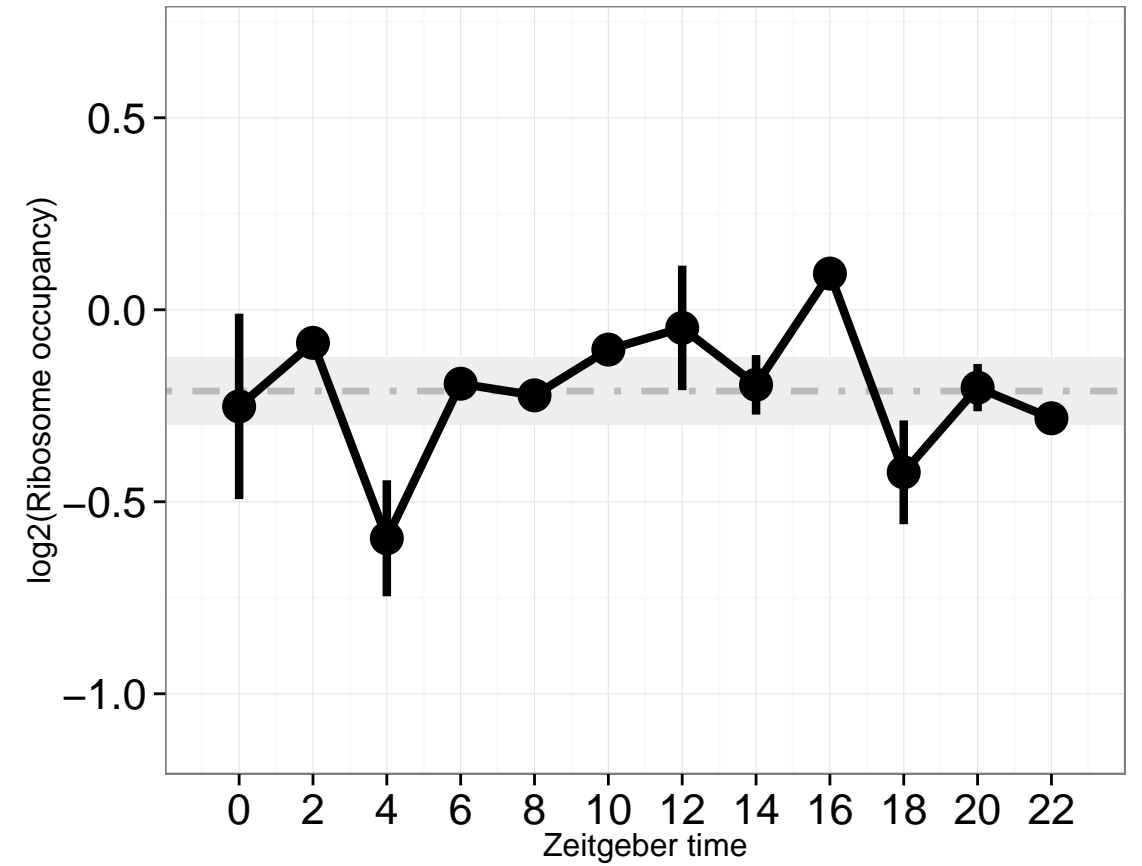

Supplement: Supplementary file 11683 [file 1]

# Tusc1

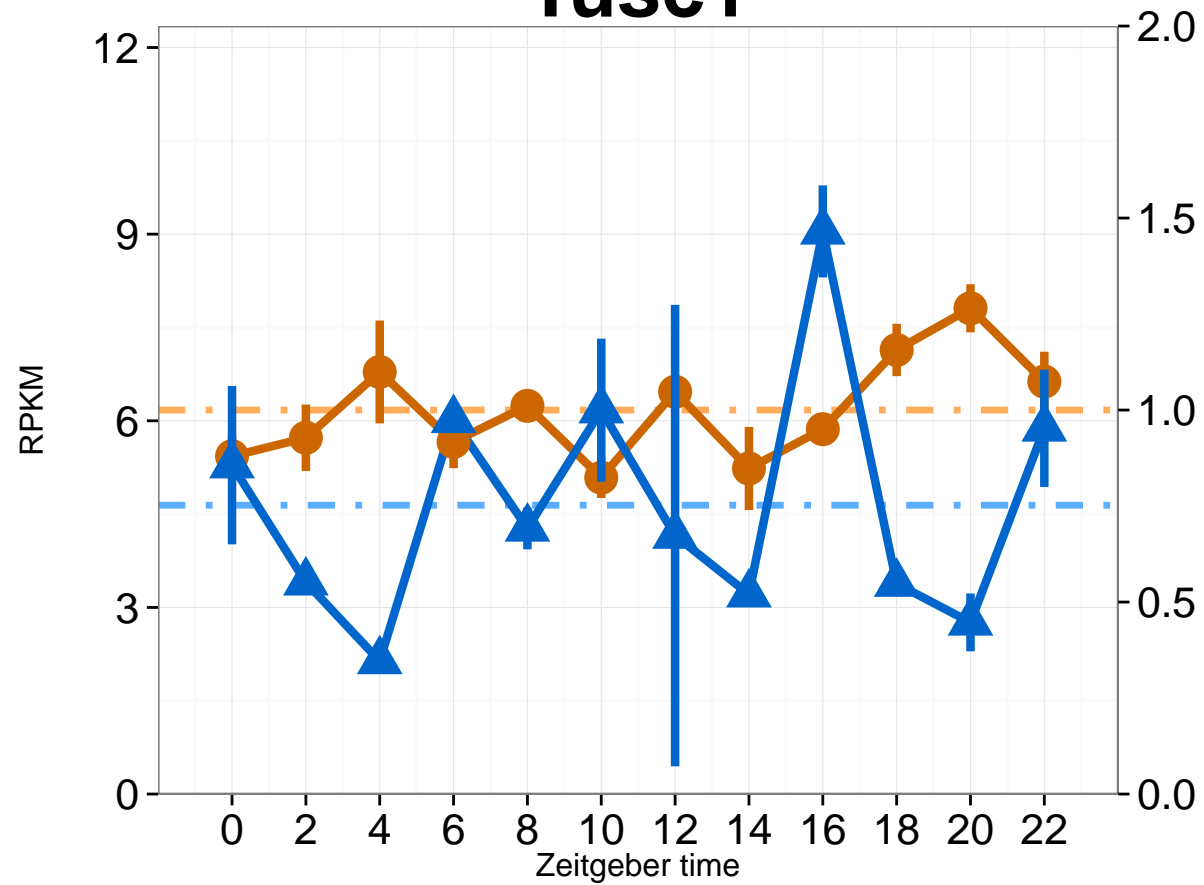

# Tusc1

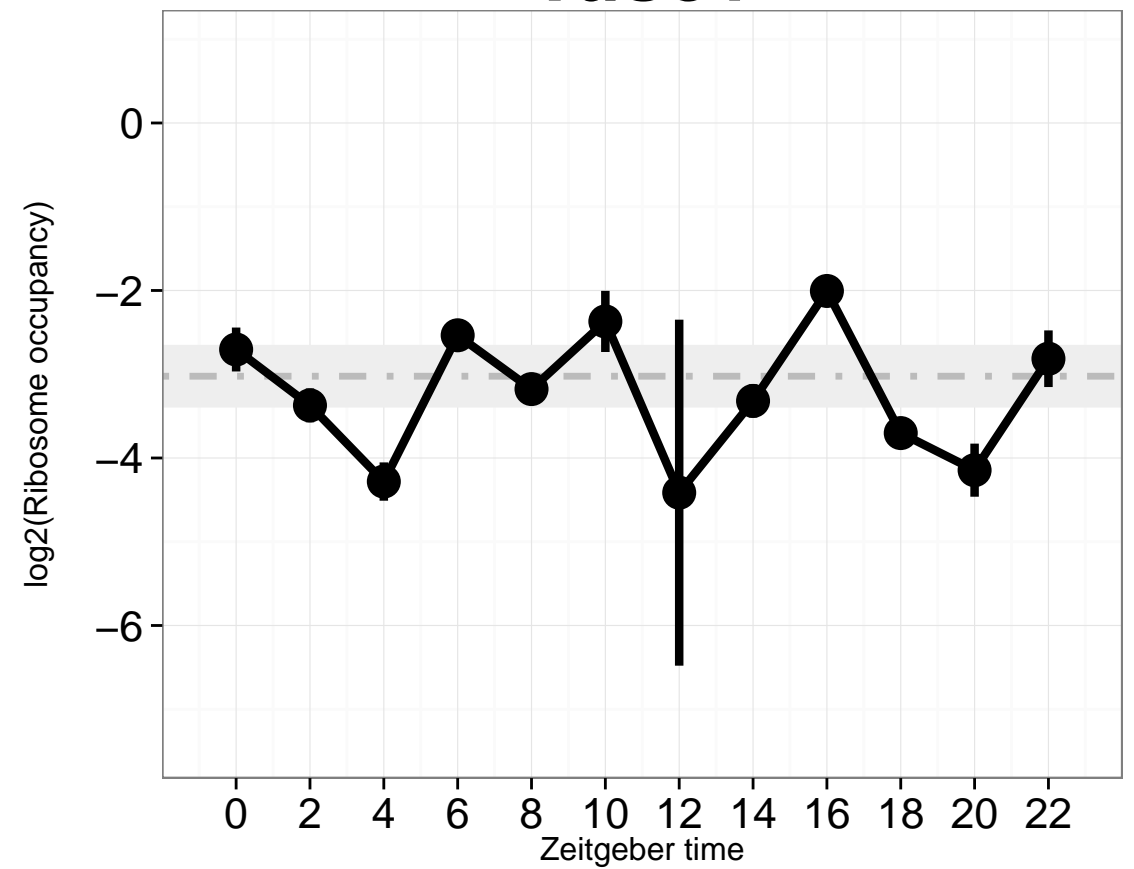

Supplement: Supplementary file 11684 [file 1]

# Slc25a46

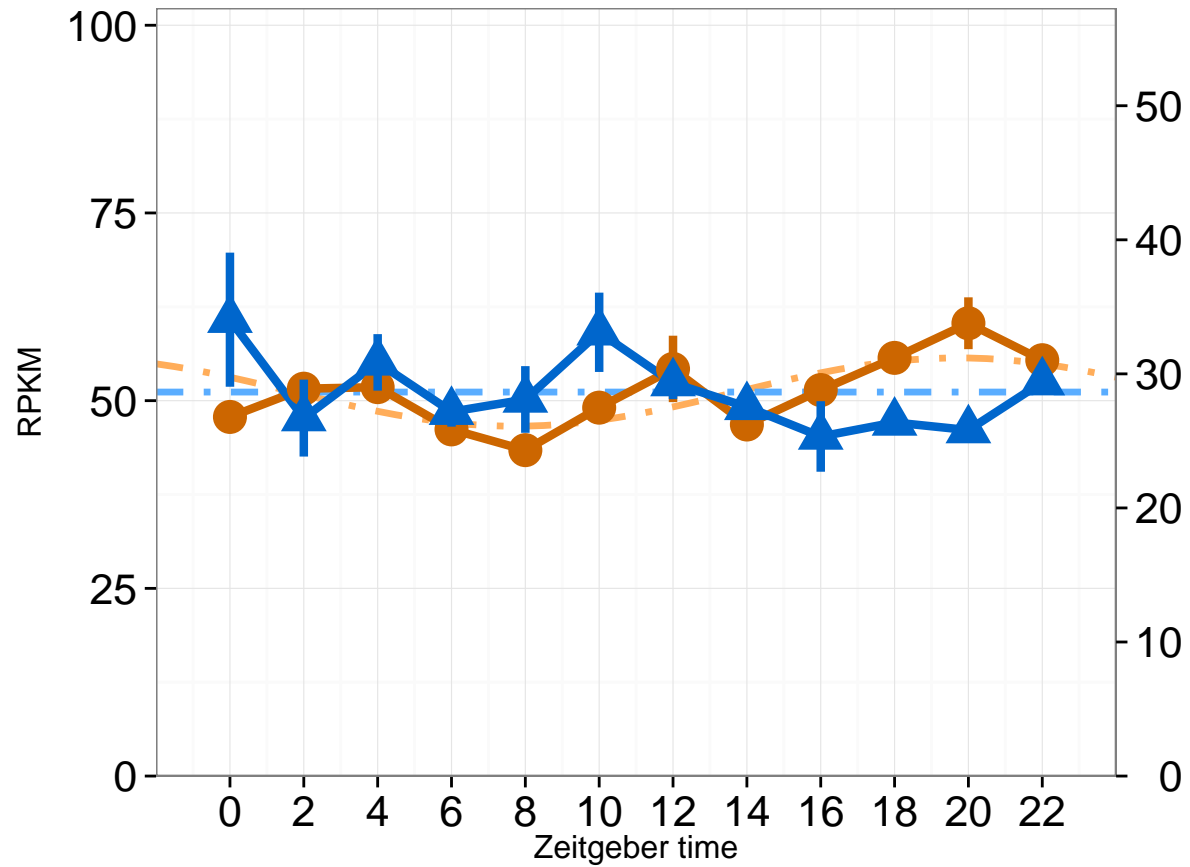

# Slc25a46

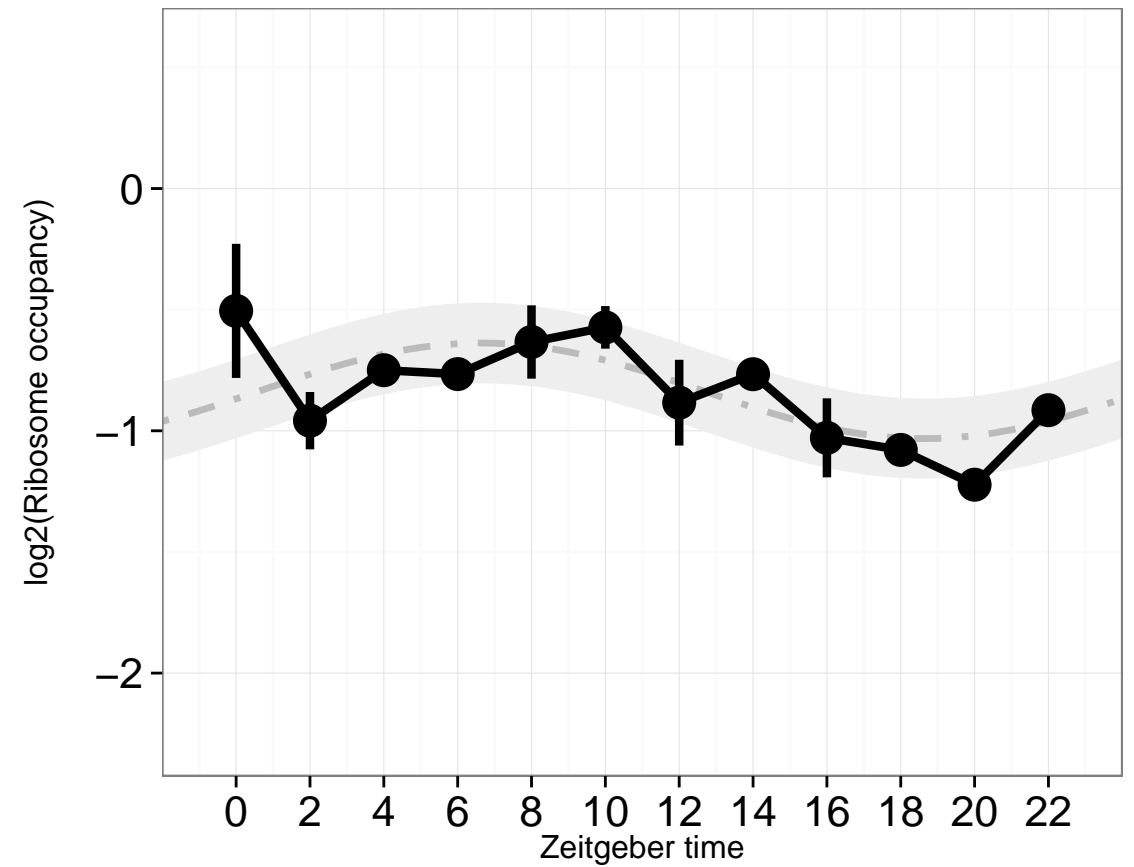

Supplement: Supplementary file 11685 [file 1]

## Arxes2

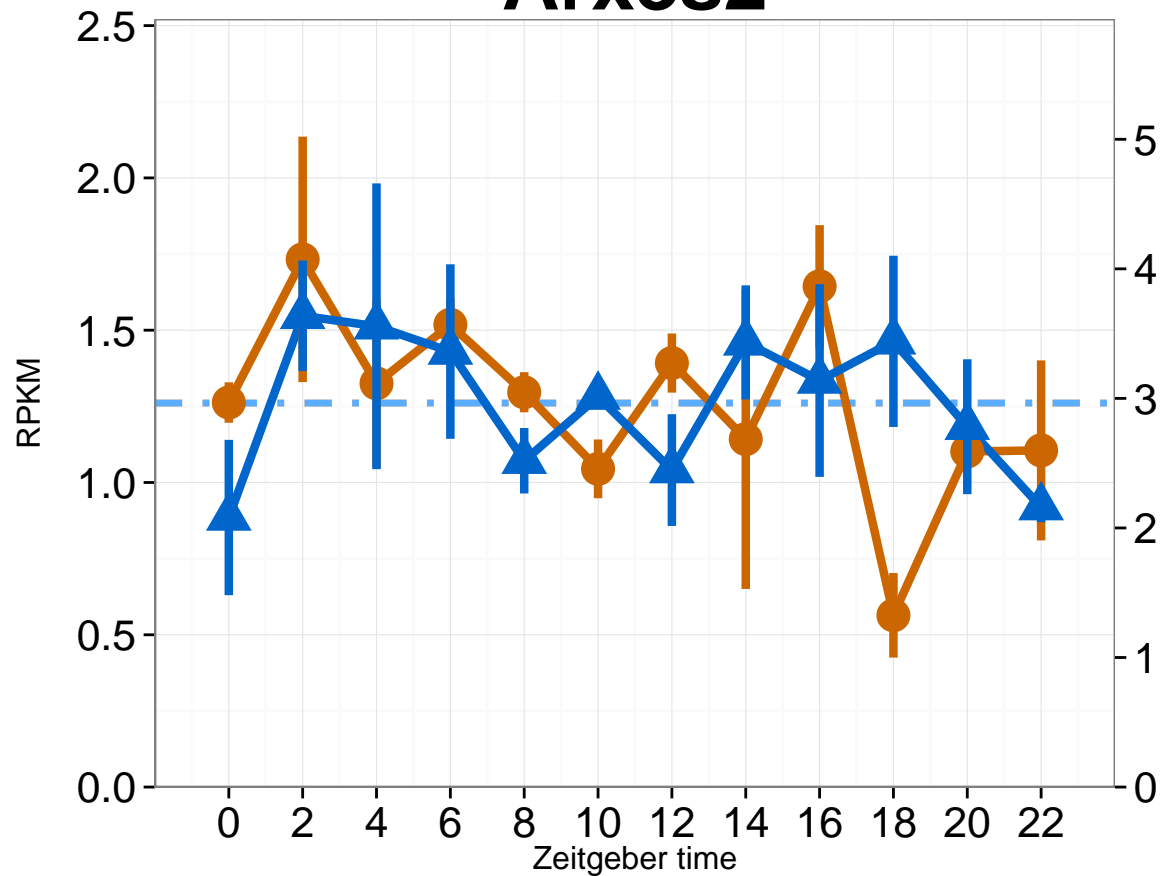

## Arxes2

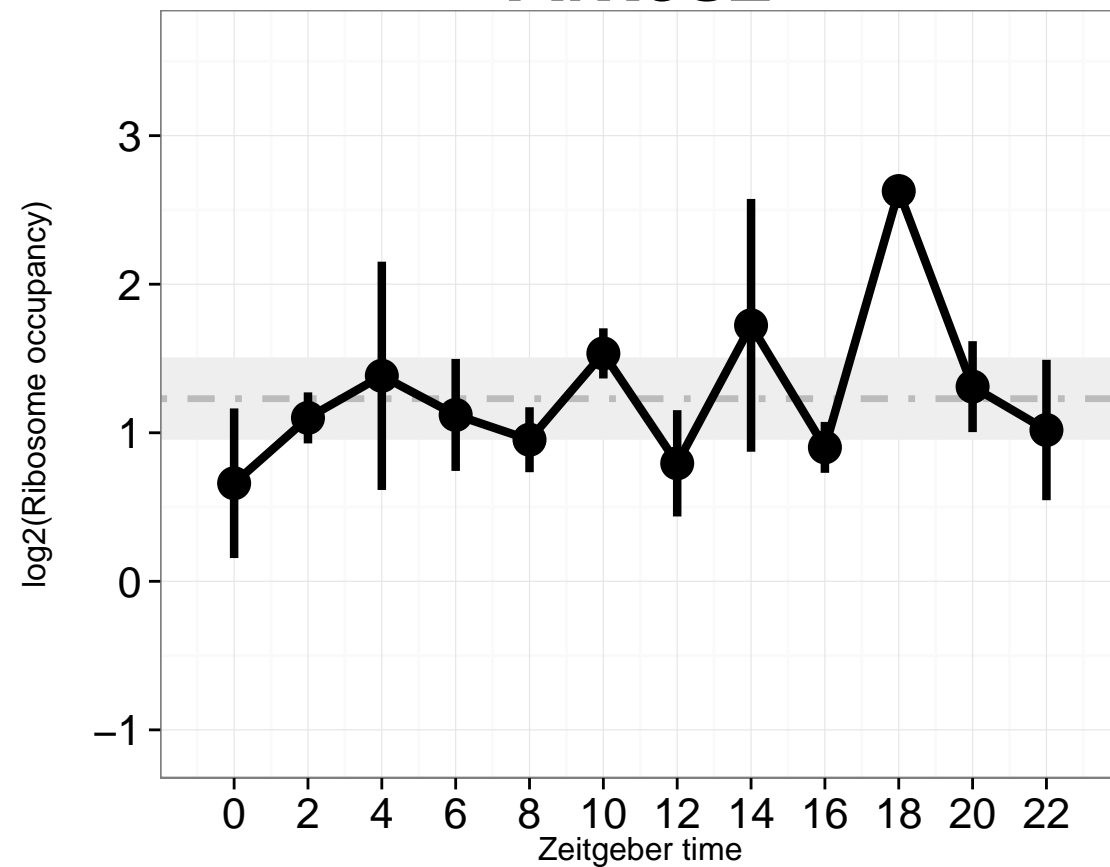

Supplement: Supplementary file 11686 [file 1]

## Sema6b

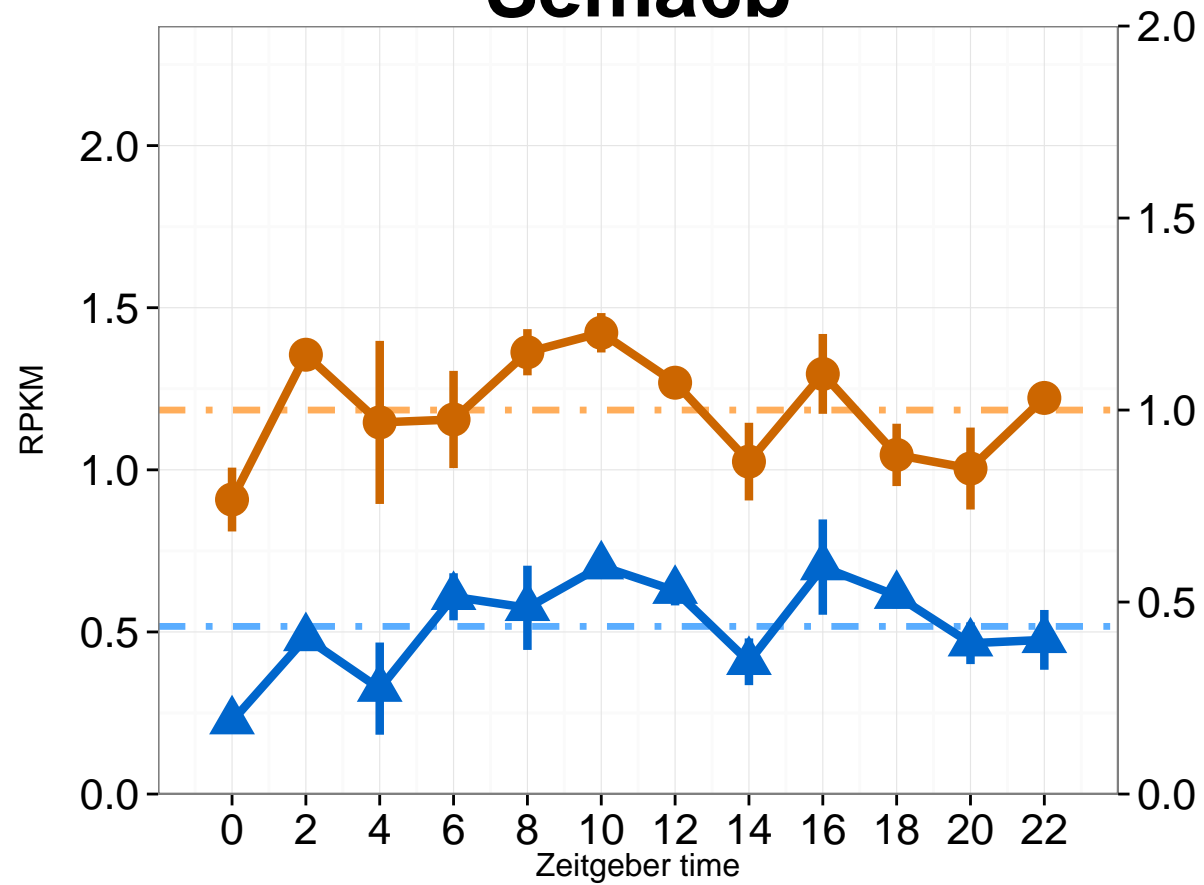

## Sema6b

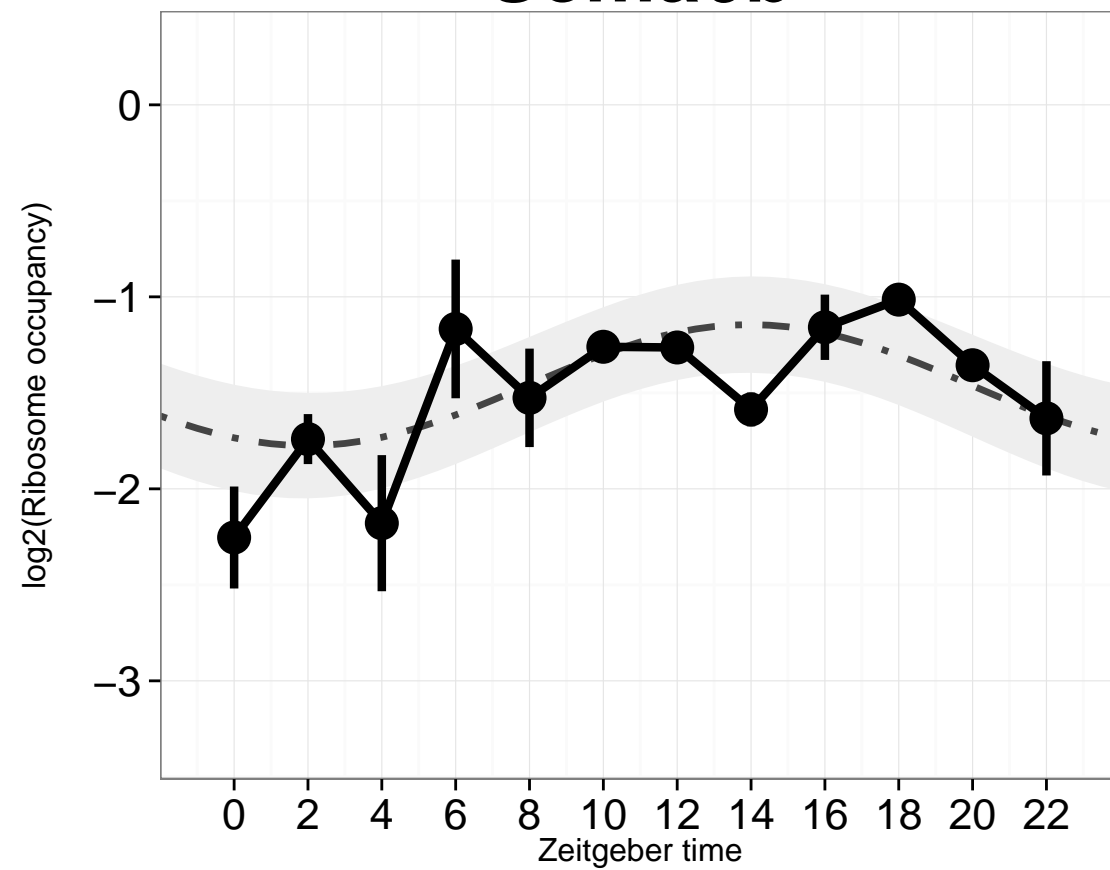

Supplement: Supplementary file 11687 [file 1]

## Mlf2

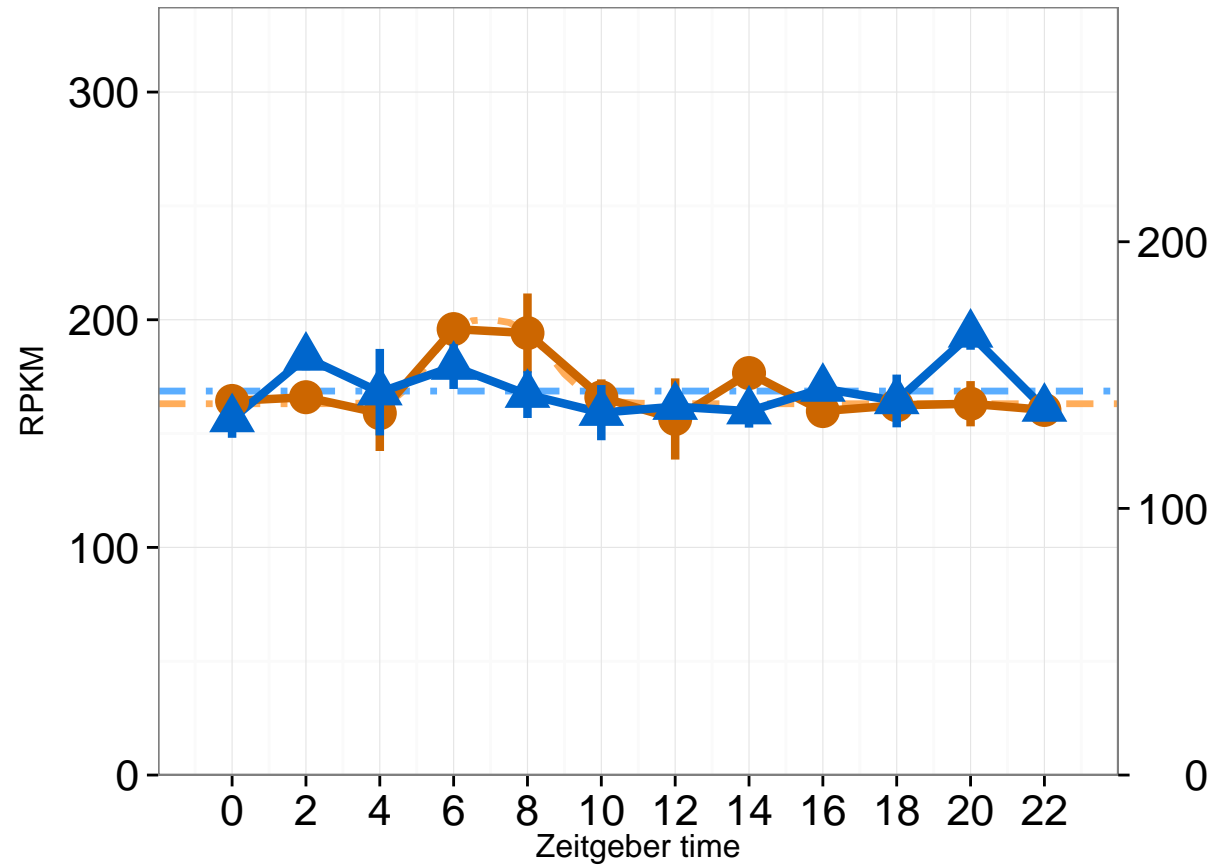

## Mlf2

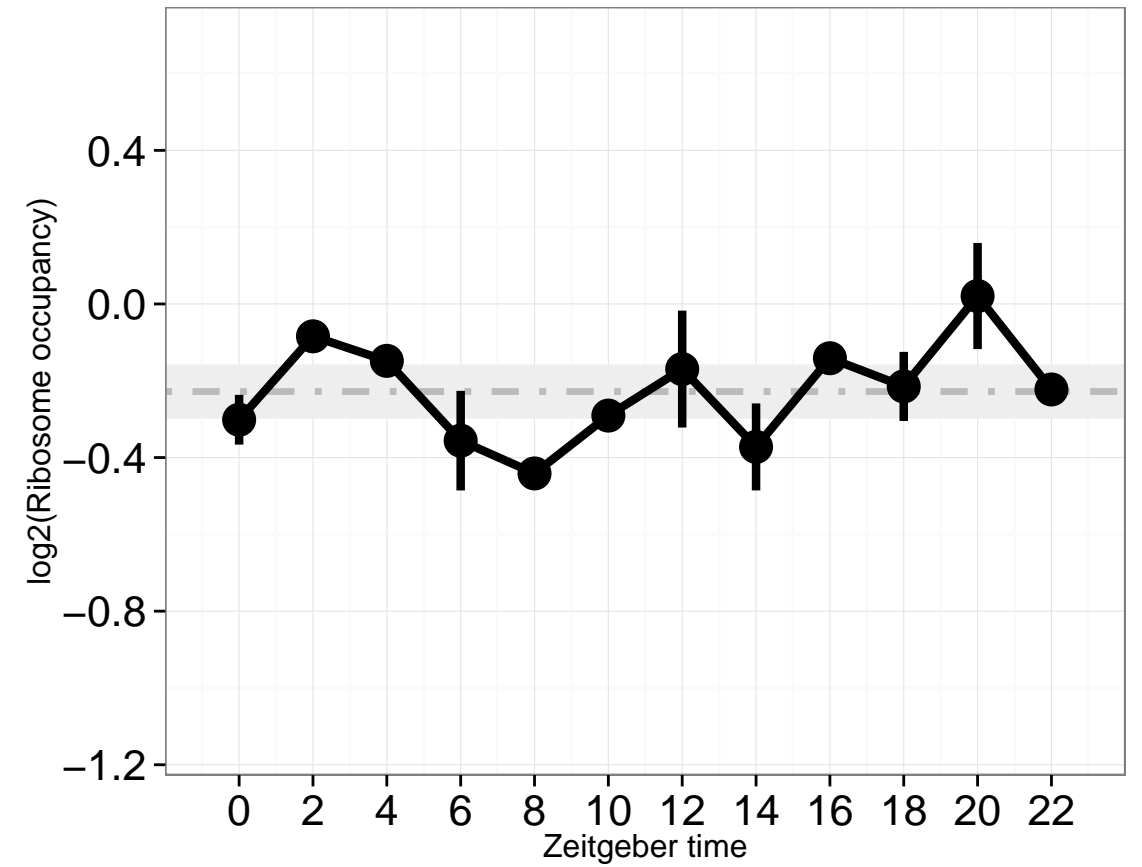

Supplement: Supplementary file 11688 [file 1]

# Gucy2g

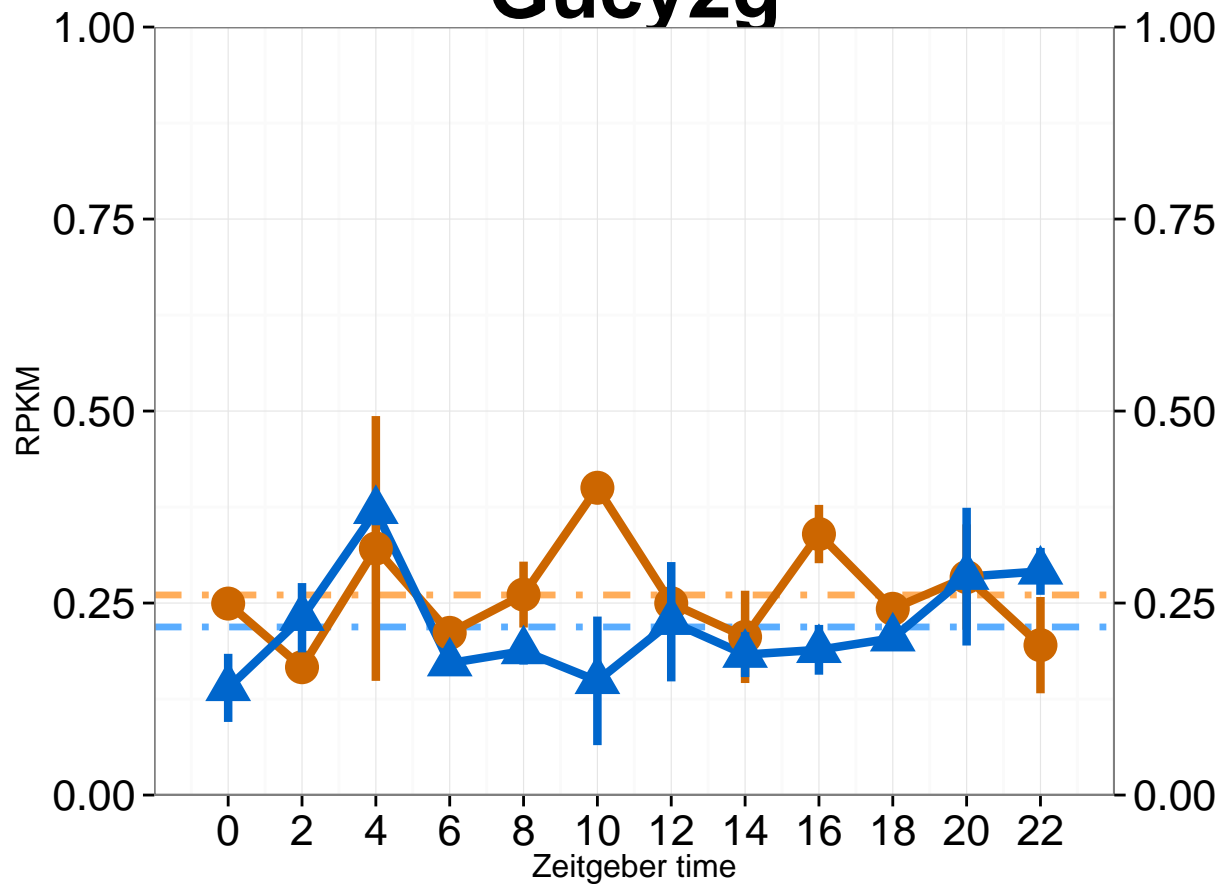

# Gucy2g

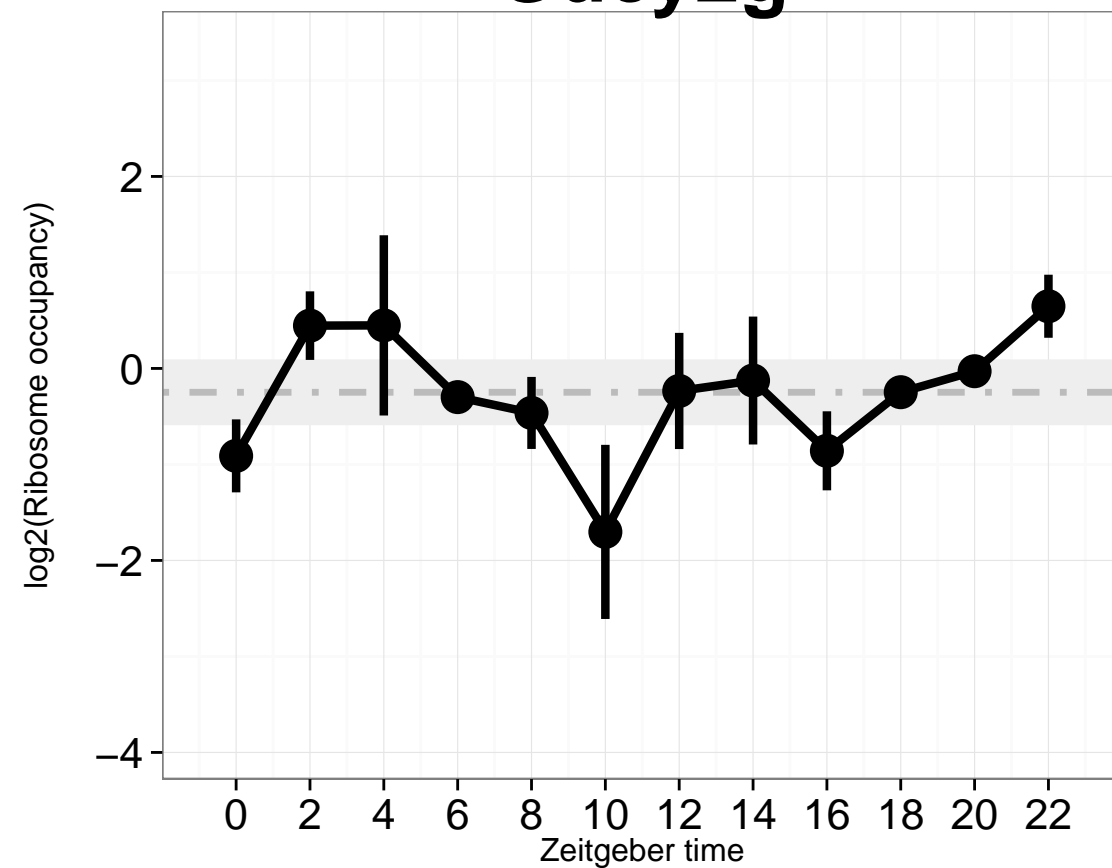

Supplement: Supplementary file 11689 [file 1]

# Sash1

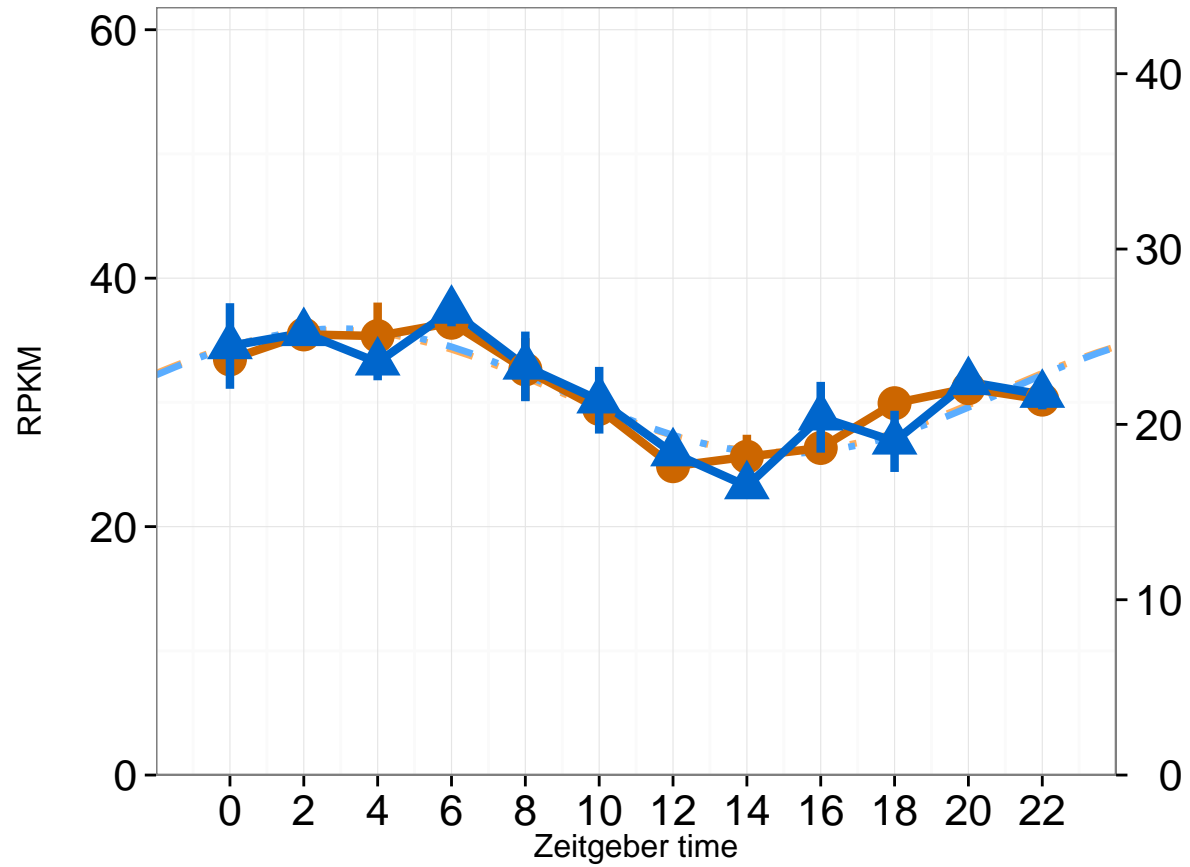

# Sash1

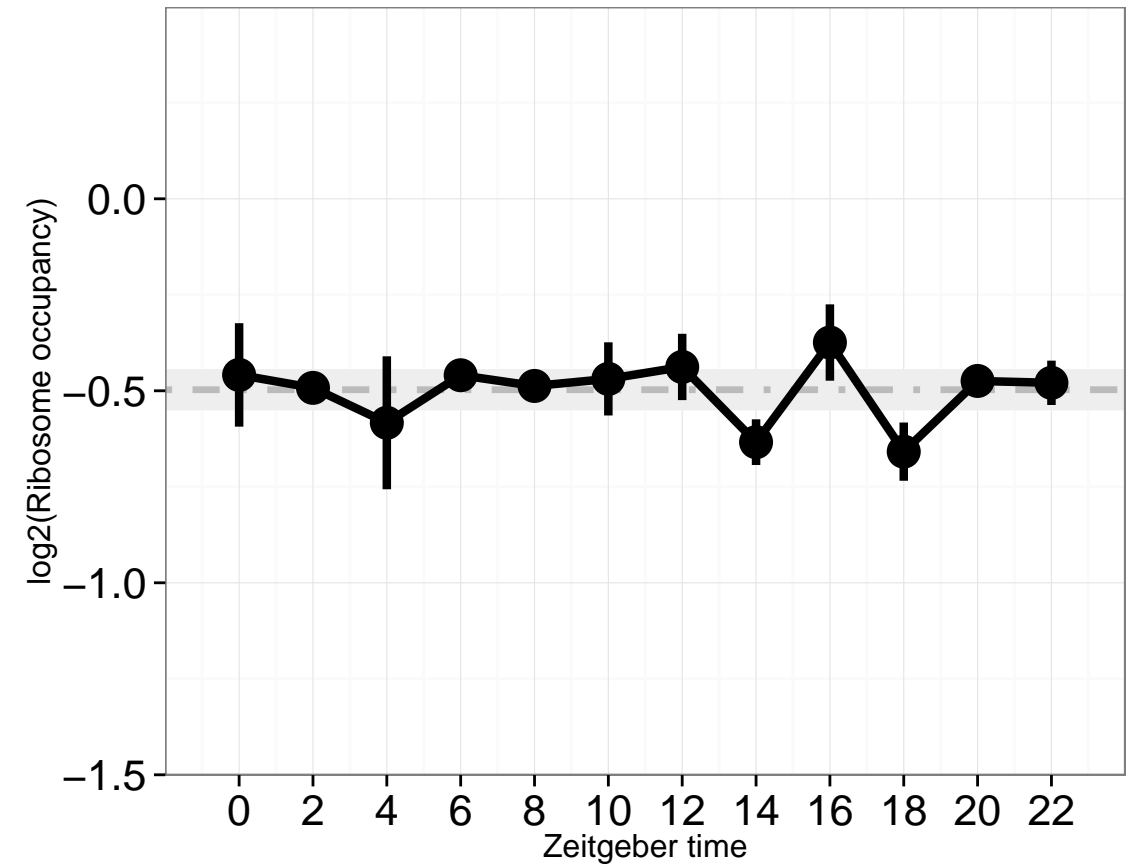

Supplement: Supplementary file 11690 [file 1]

# Atp6v1g3

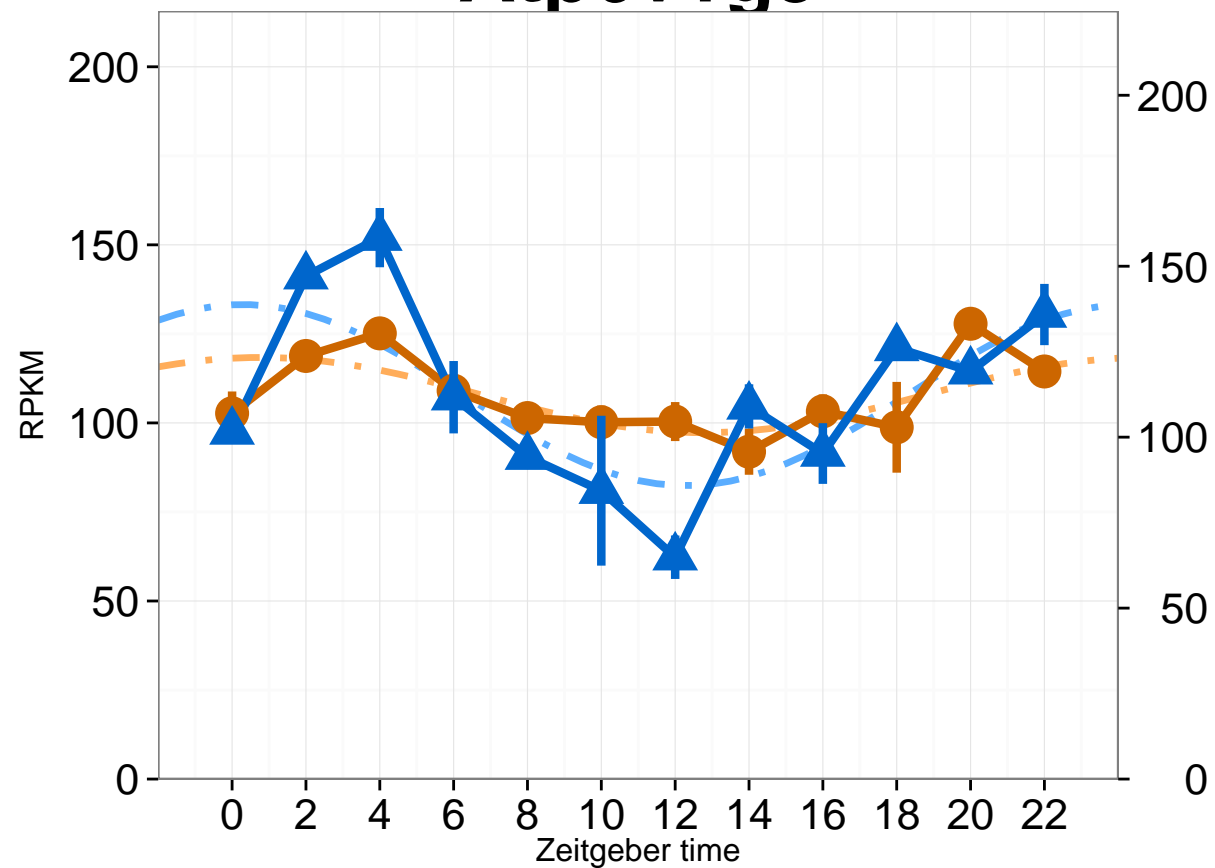

# Atp6v1g3

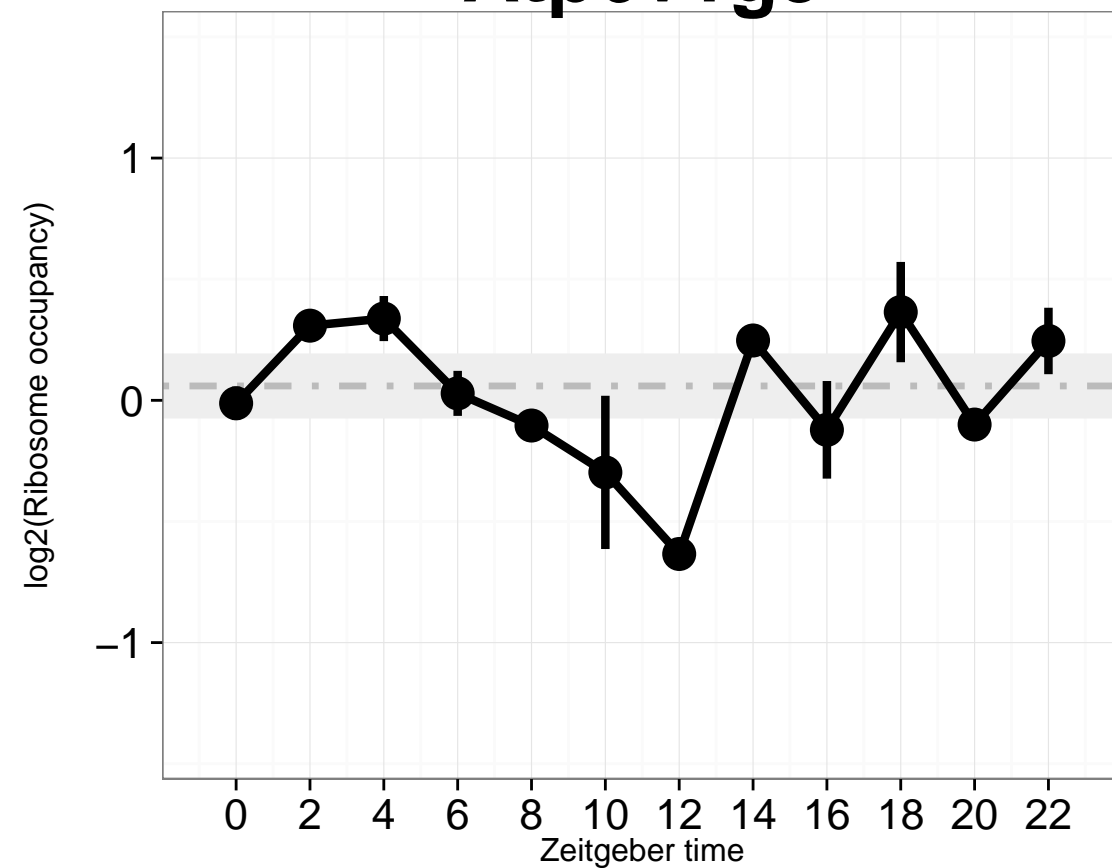

Supplement: Supplementary file 11691 [file 1]

## Rab3a

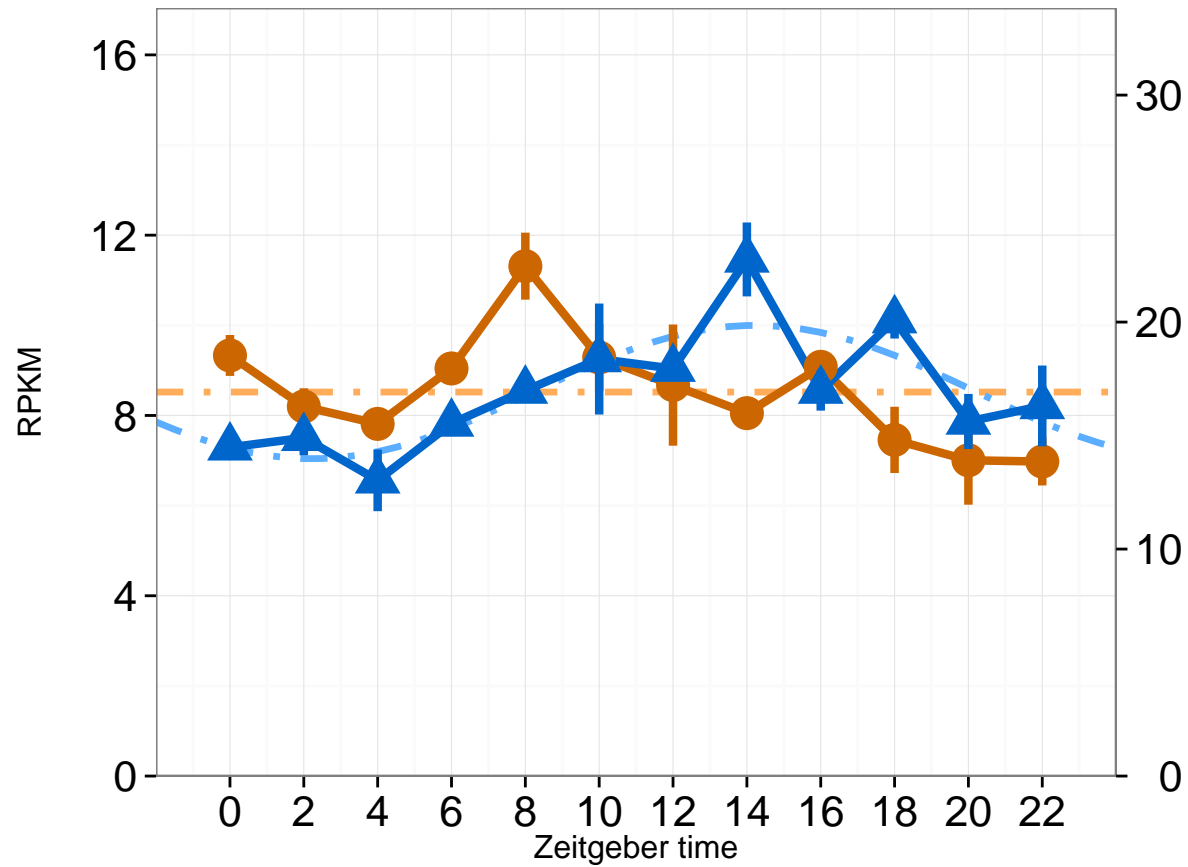

## Rab3a

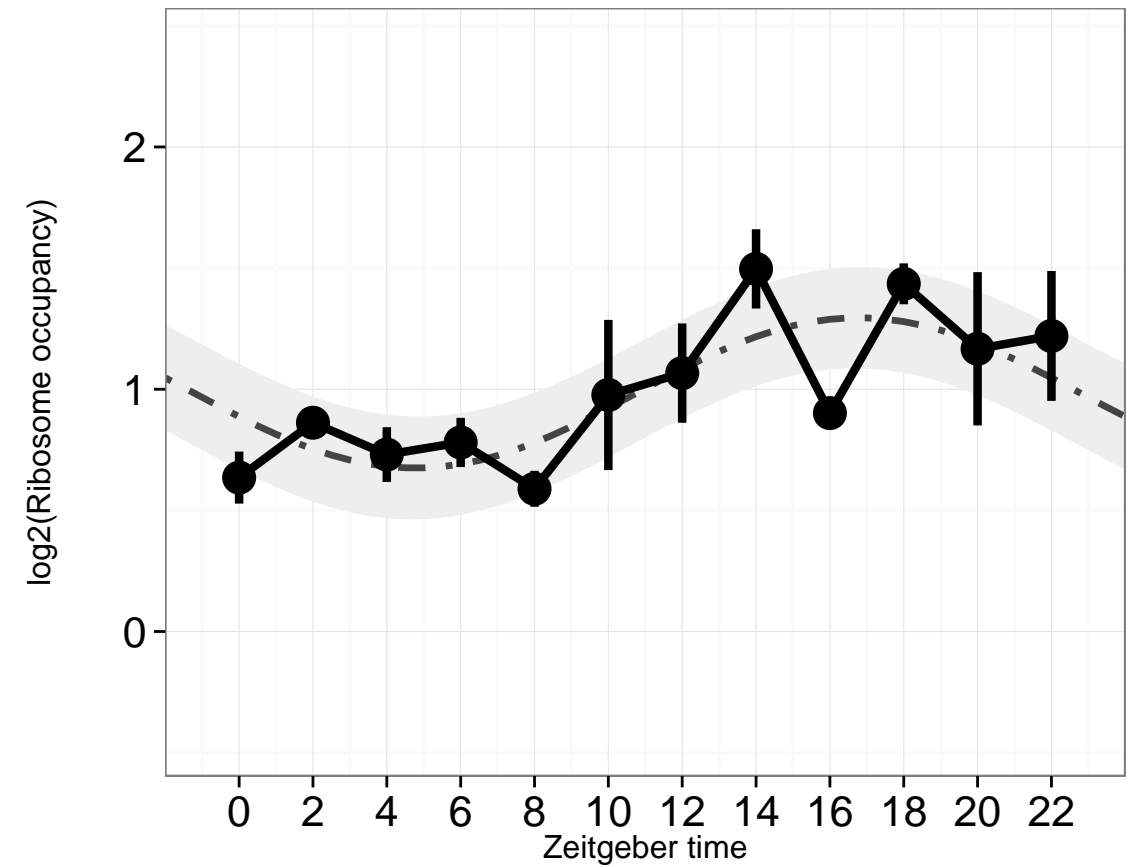

Supplement: Supplementary file 11692 [file 1]

## Plxnb2

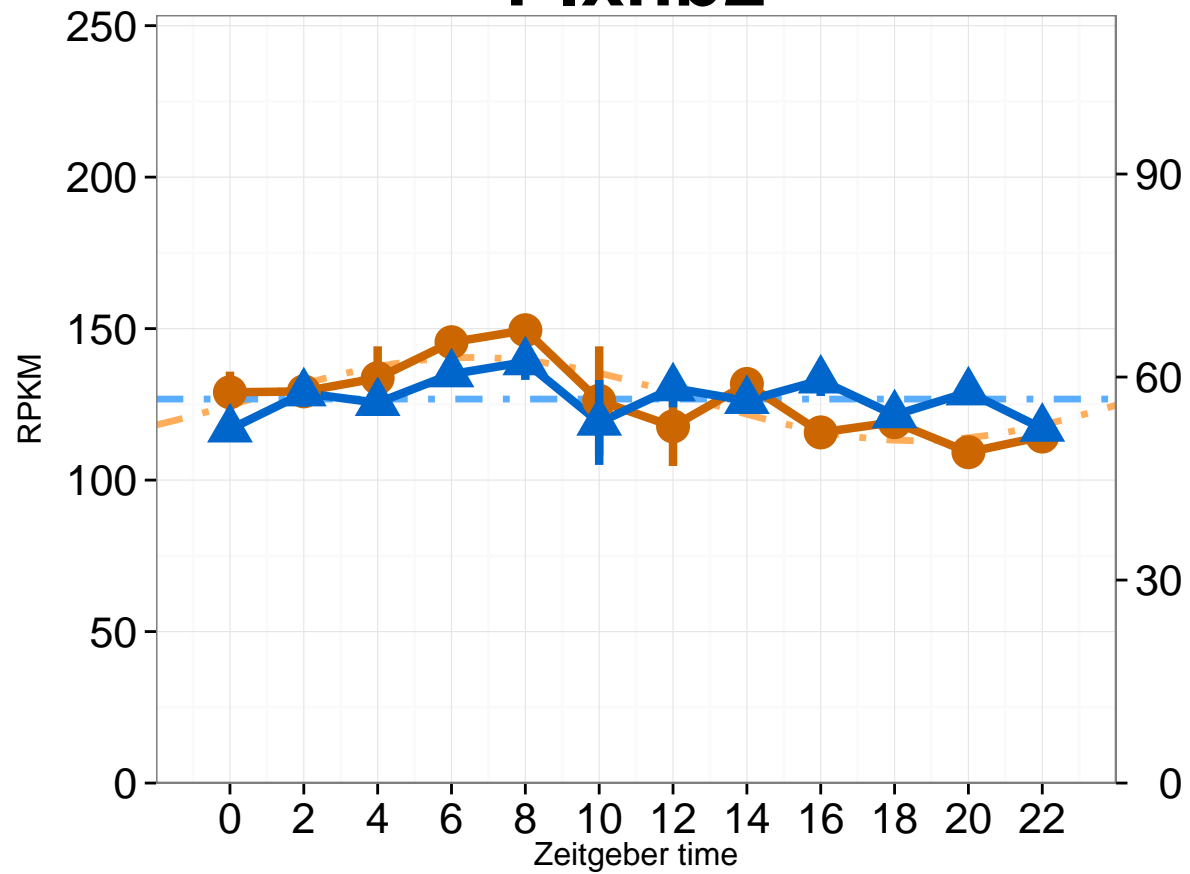

## Plxnb2

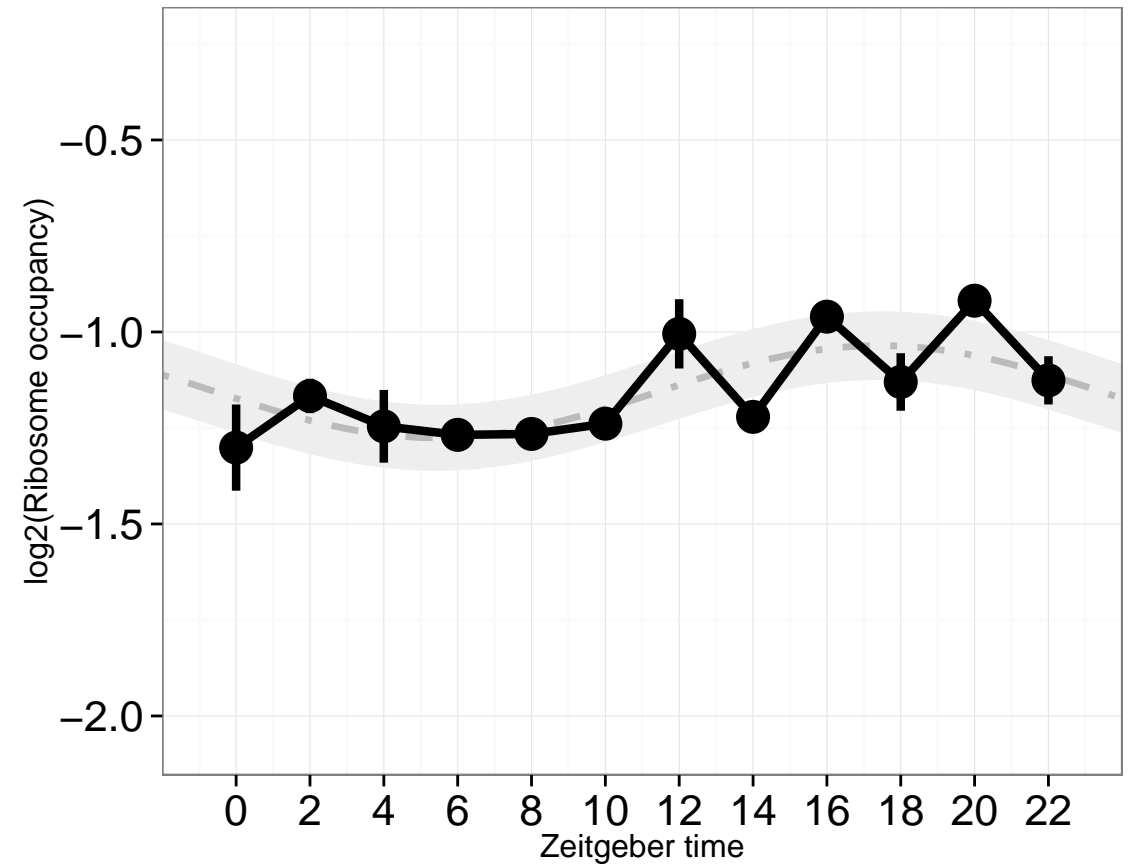

Supplement: Supplementary file 11693 [file 1]

# Apold1

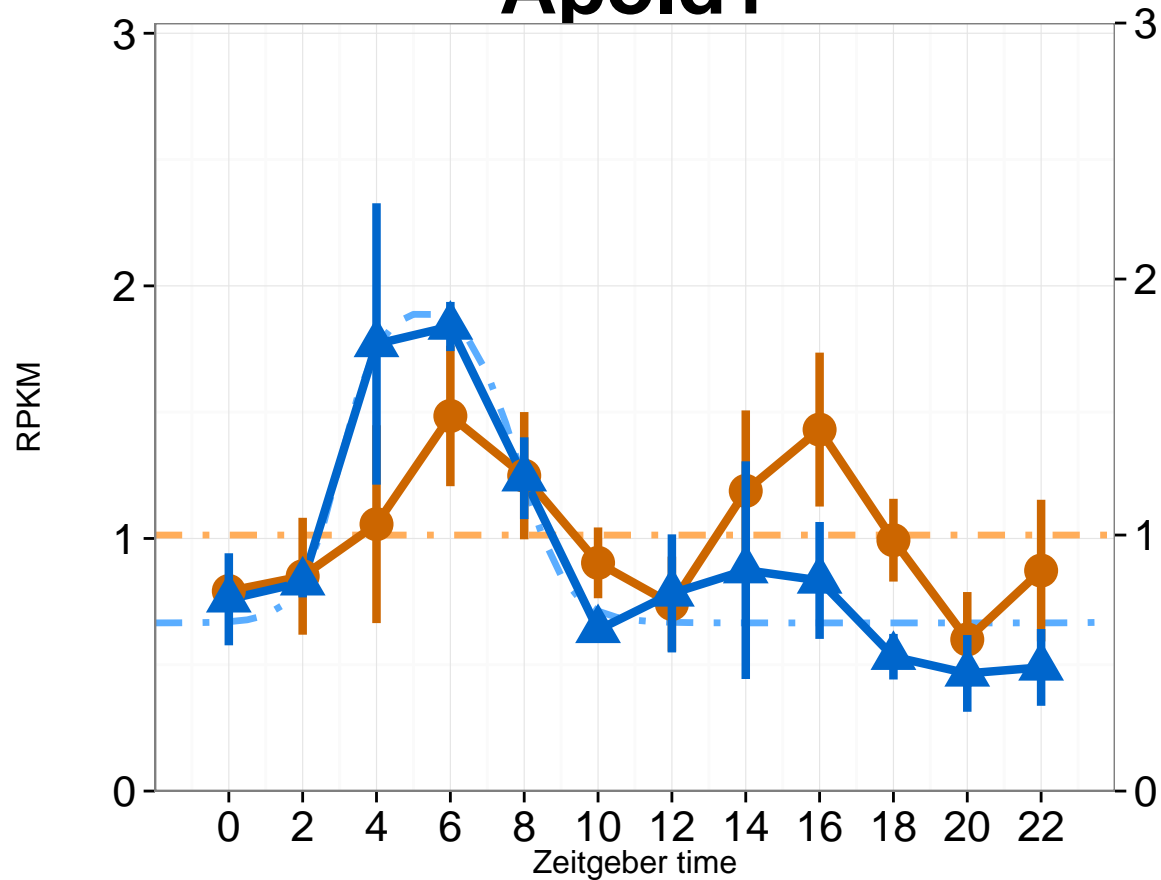

# Apold1

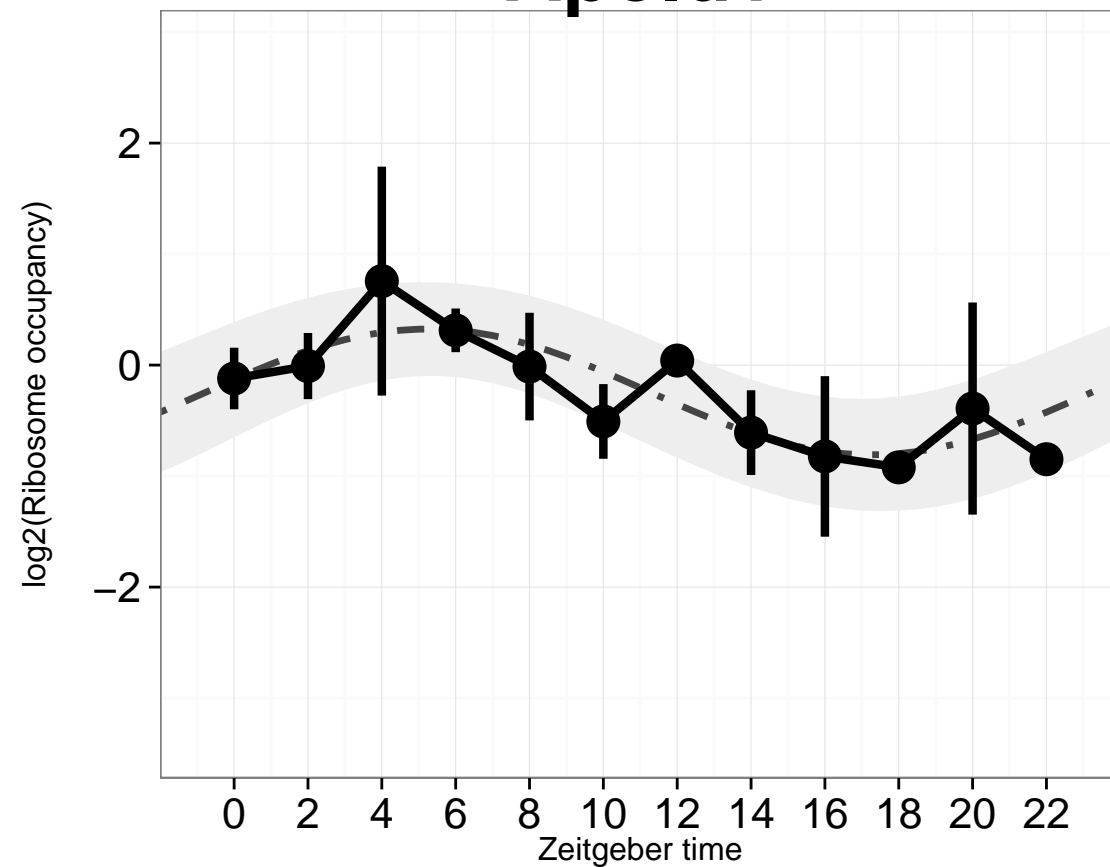

Supplement: Supplementary file 11694 [file 1]

# Pradc1

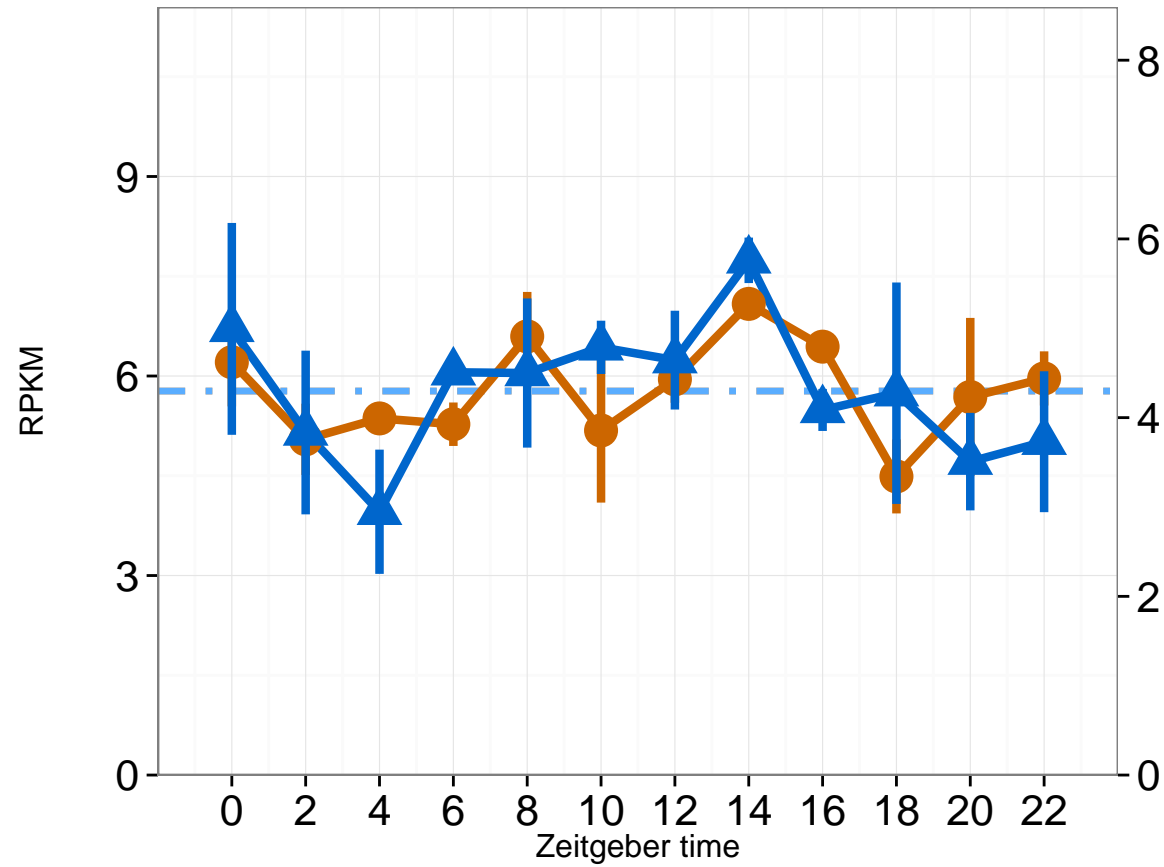

# Pradc1

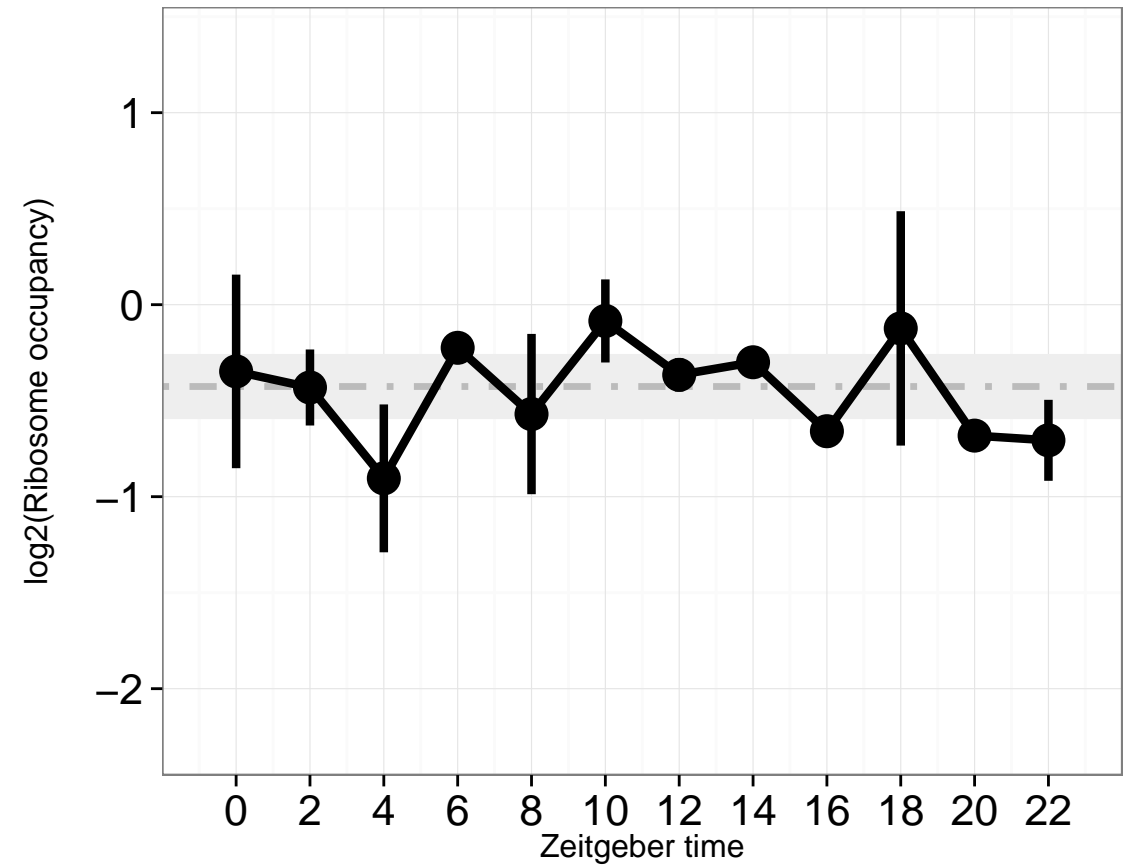

Supplement: Supplementary file 11695 [file 1]

# Pmf1

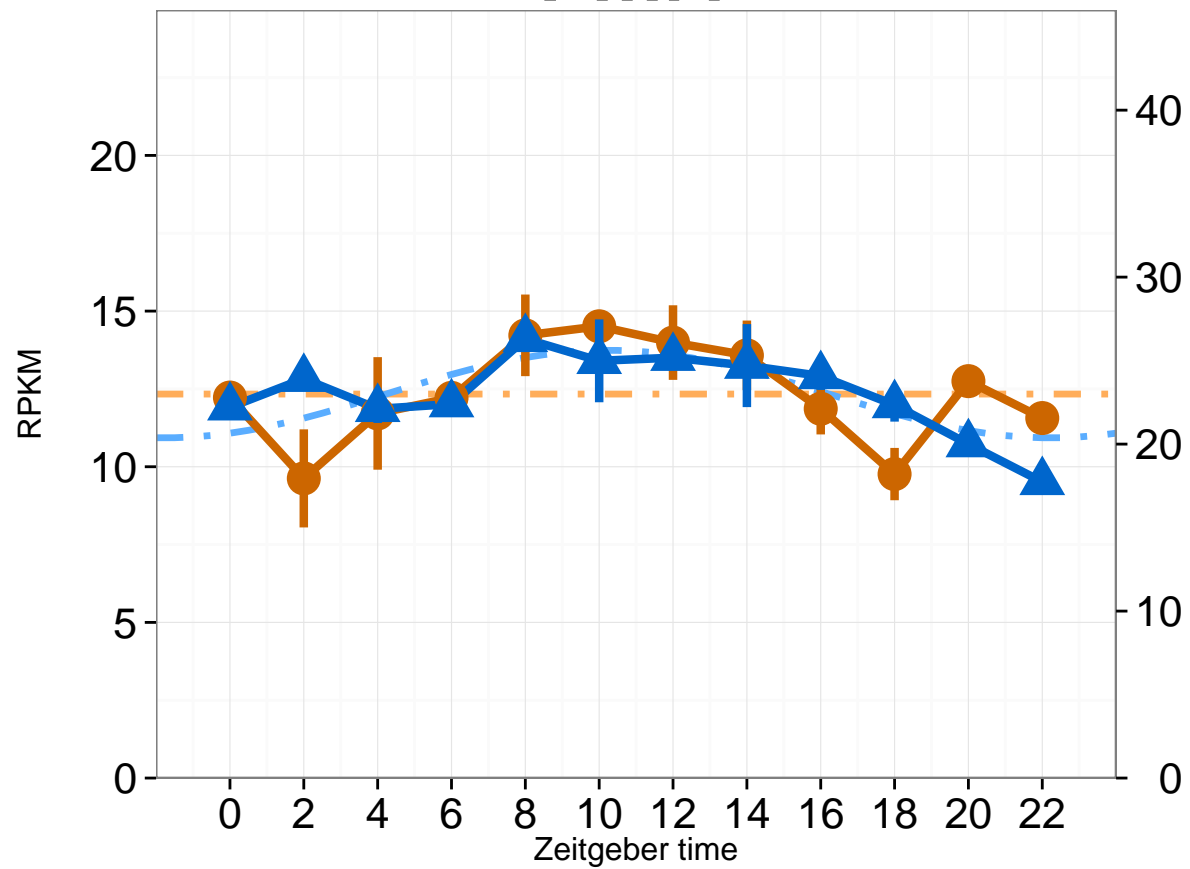

# Pmf1

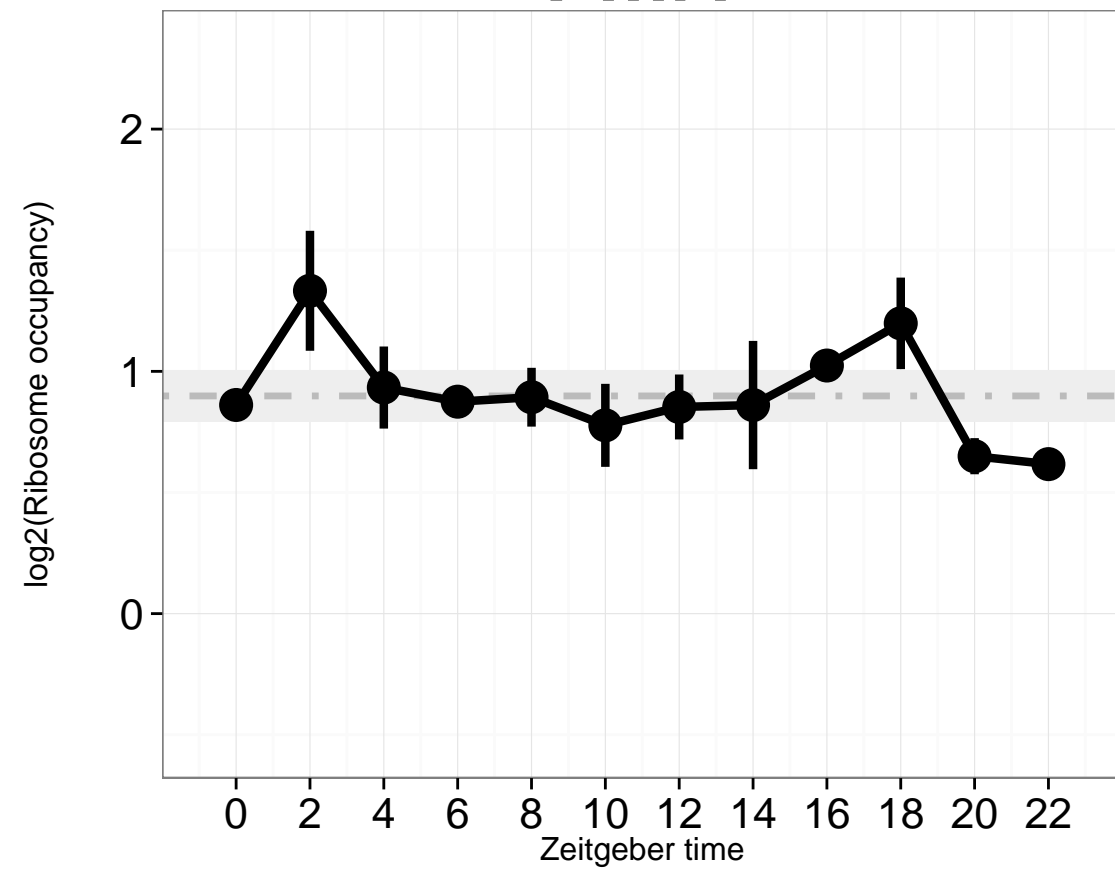

Supplement: Supplementary file 11696 [file 1]

## Rps2

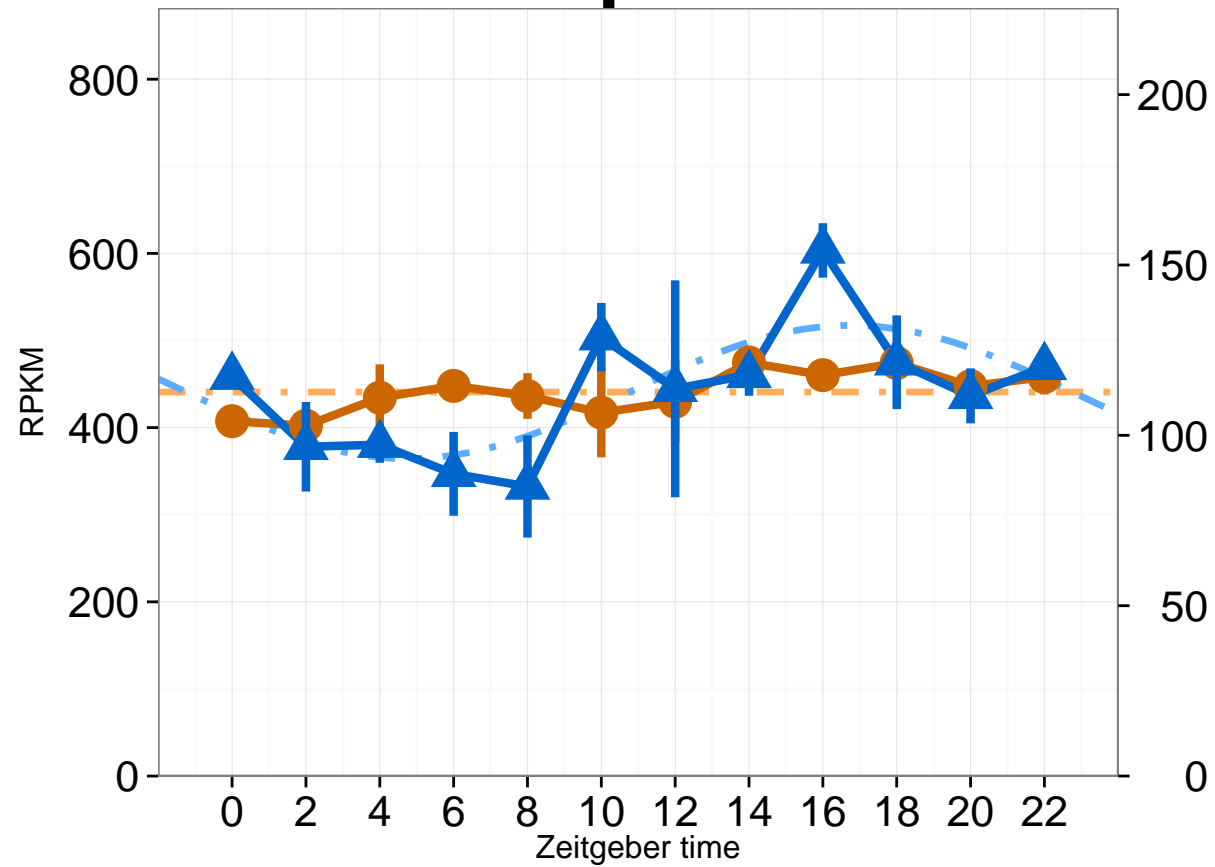

## Rps2

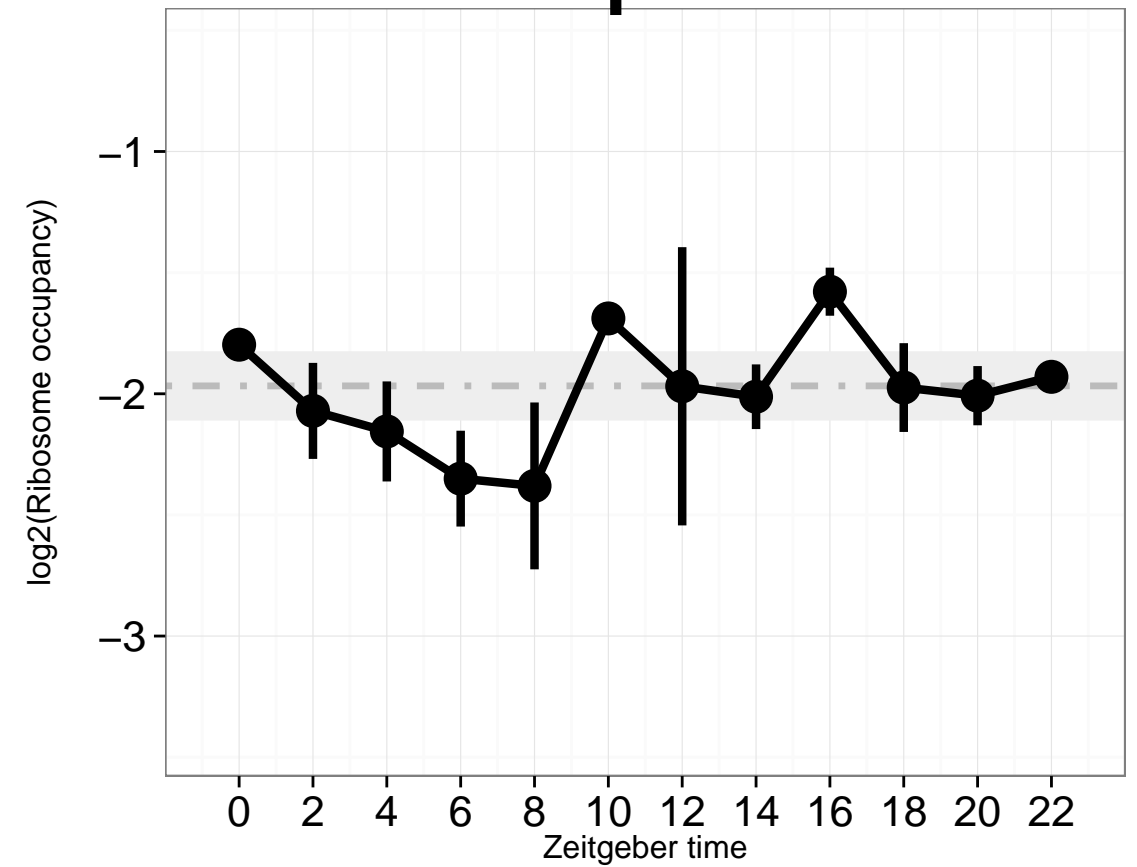

Supplement: Supplementary file 11697 [file 1]

# Ints7

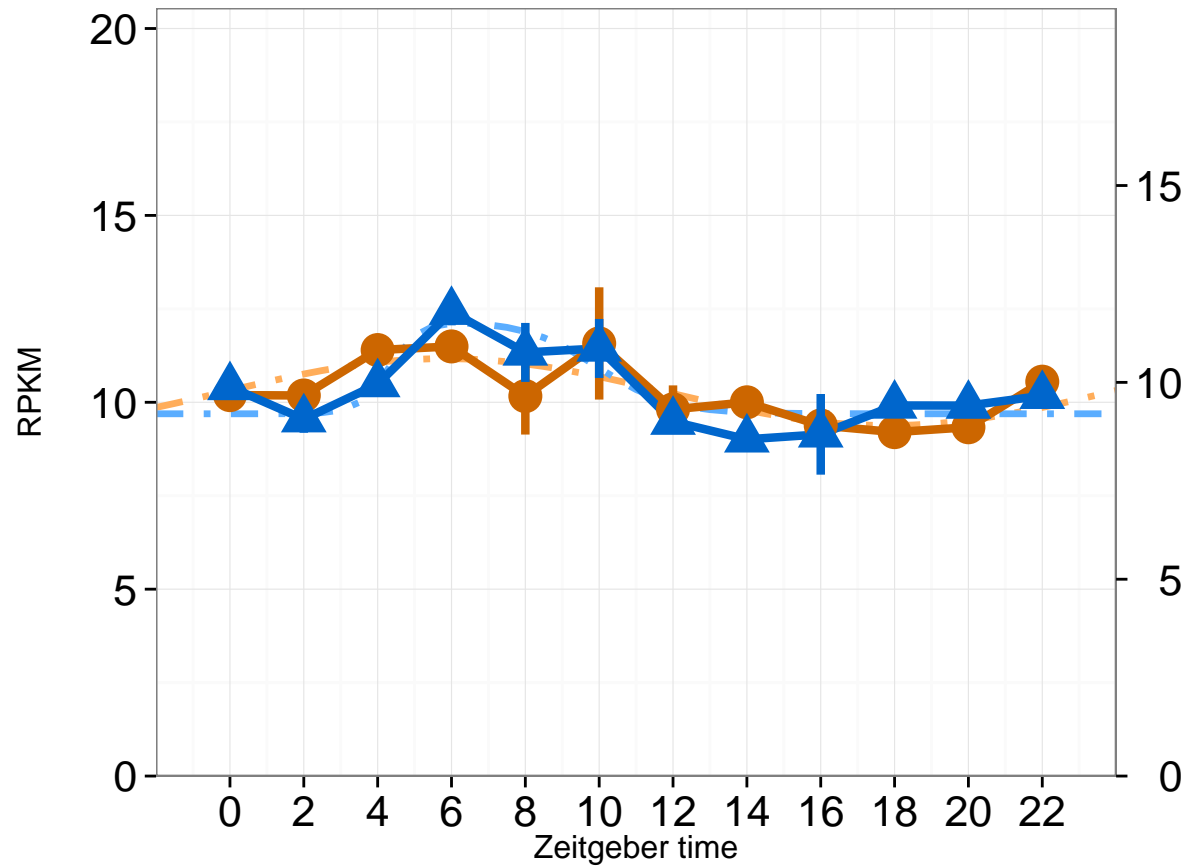

# Ints7

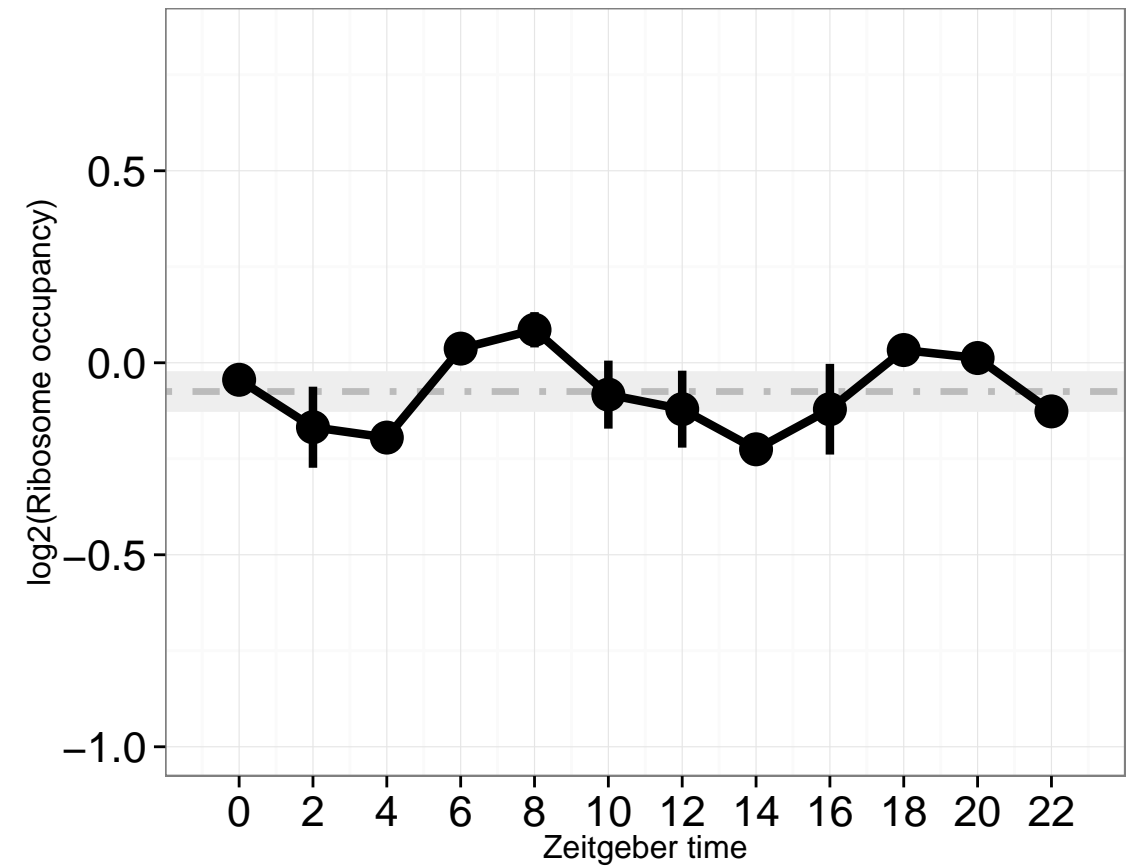

Supplement: Supplementary file 11698 [file 1]

## Eapp

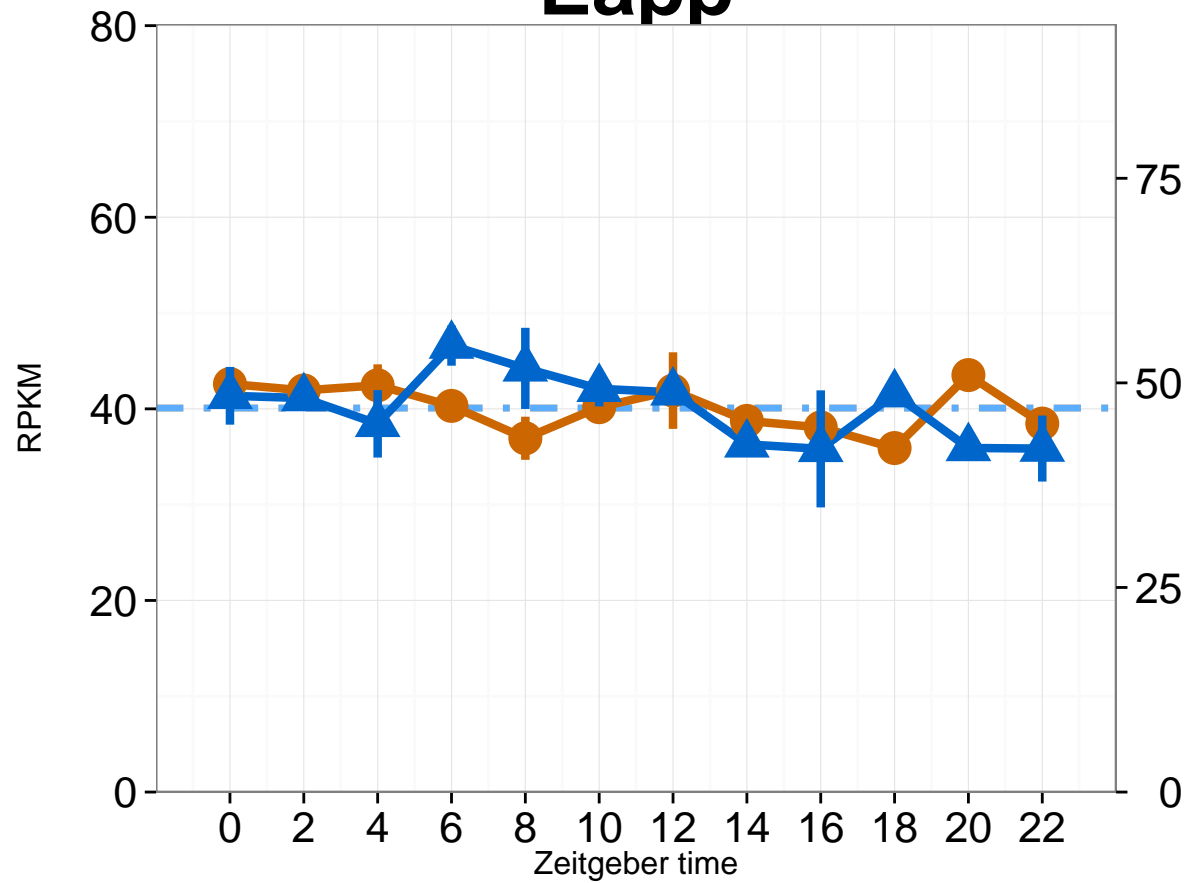

## Eapp

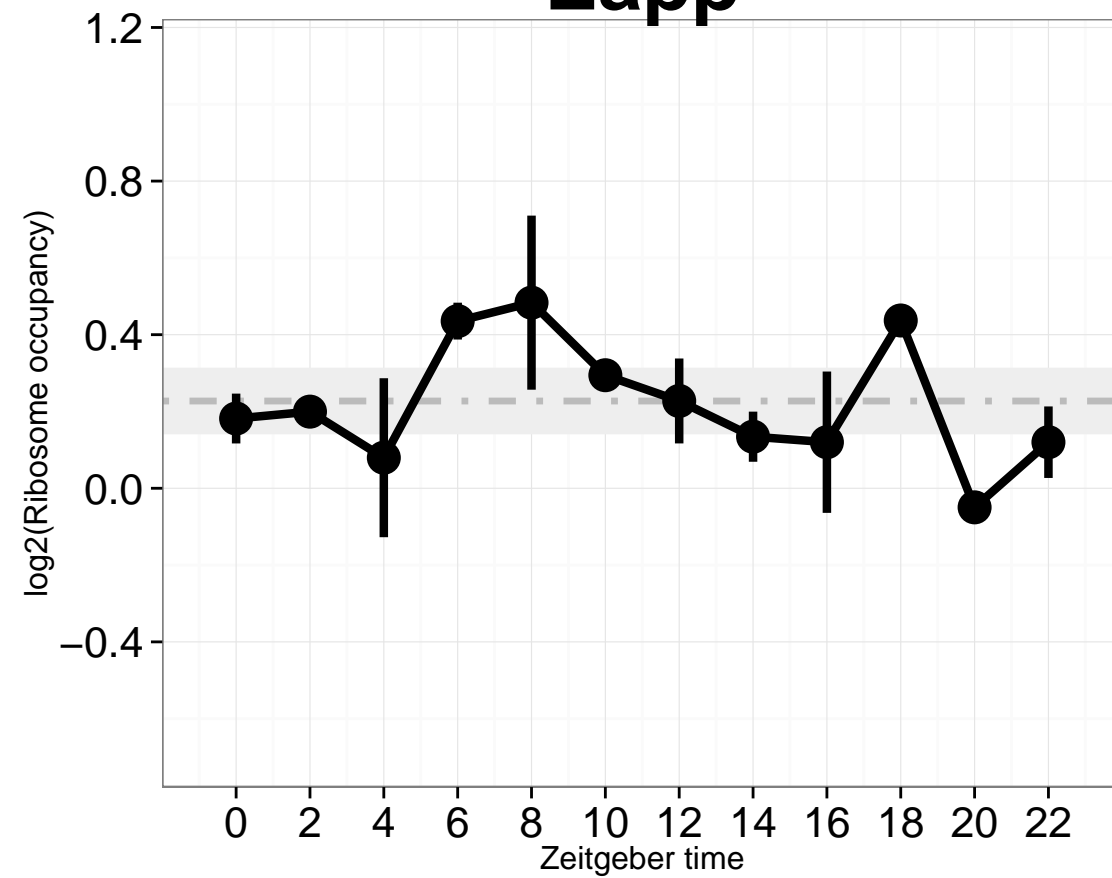

Supplement: Supplementary file 11699 [file 1]

# Qrich1

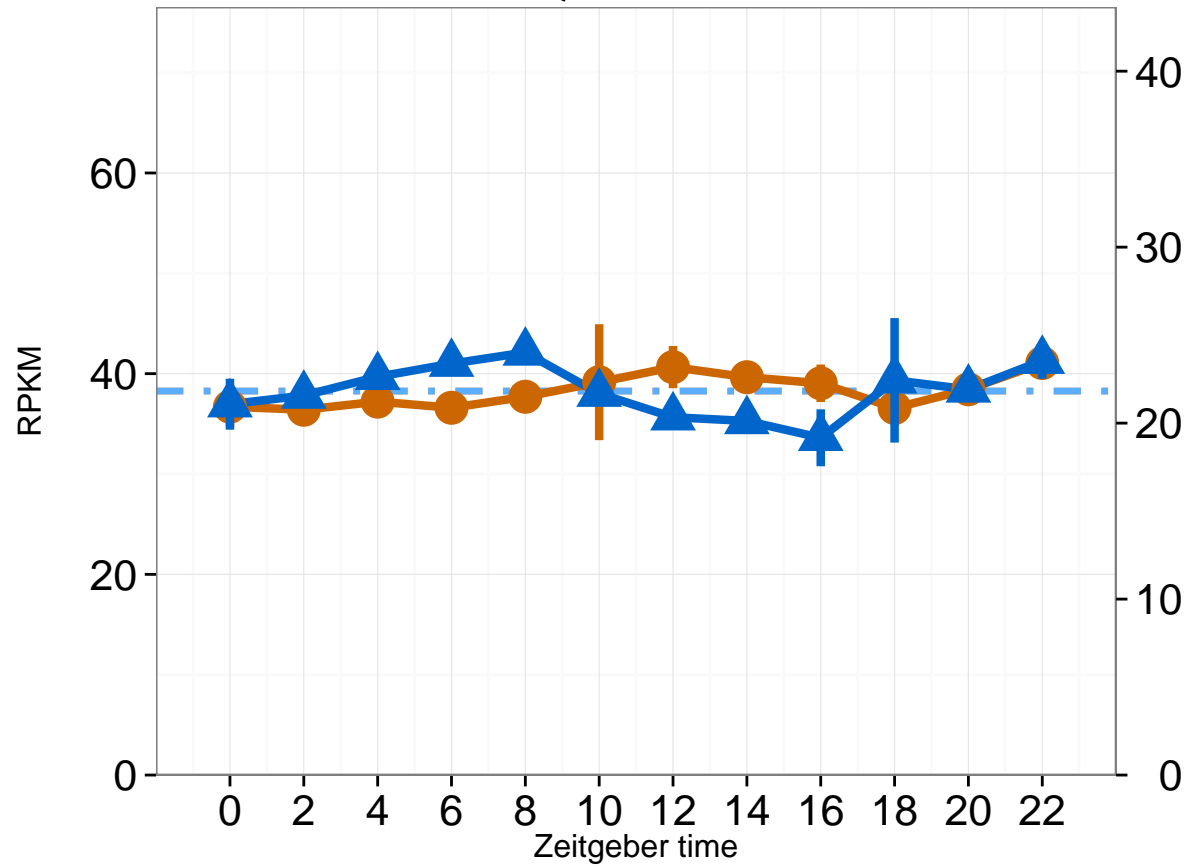

# Qrich1

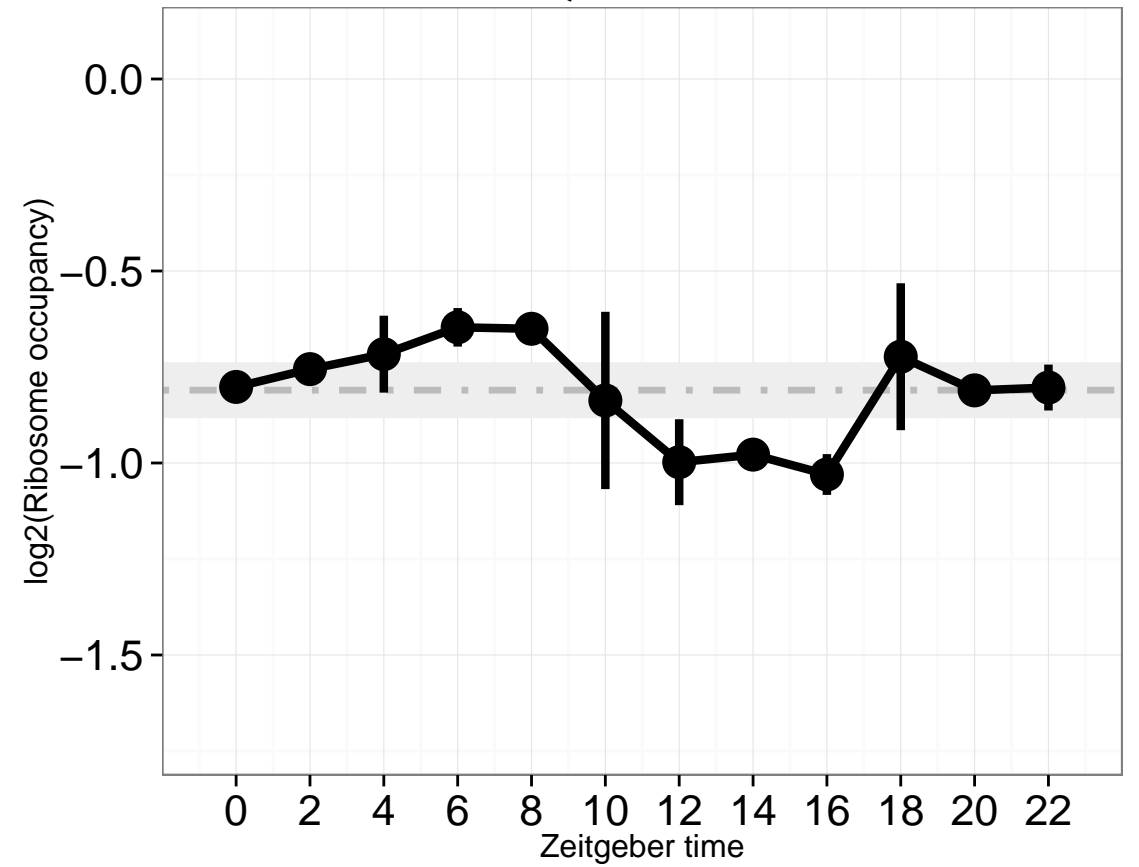

Supplement: Supplementary file 11700 [file 1]

# Tor1aip2

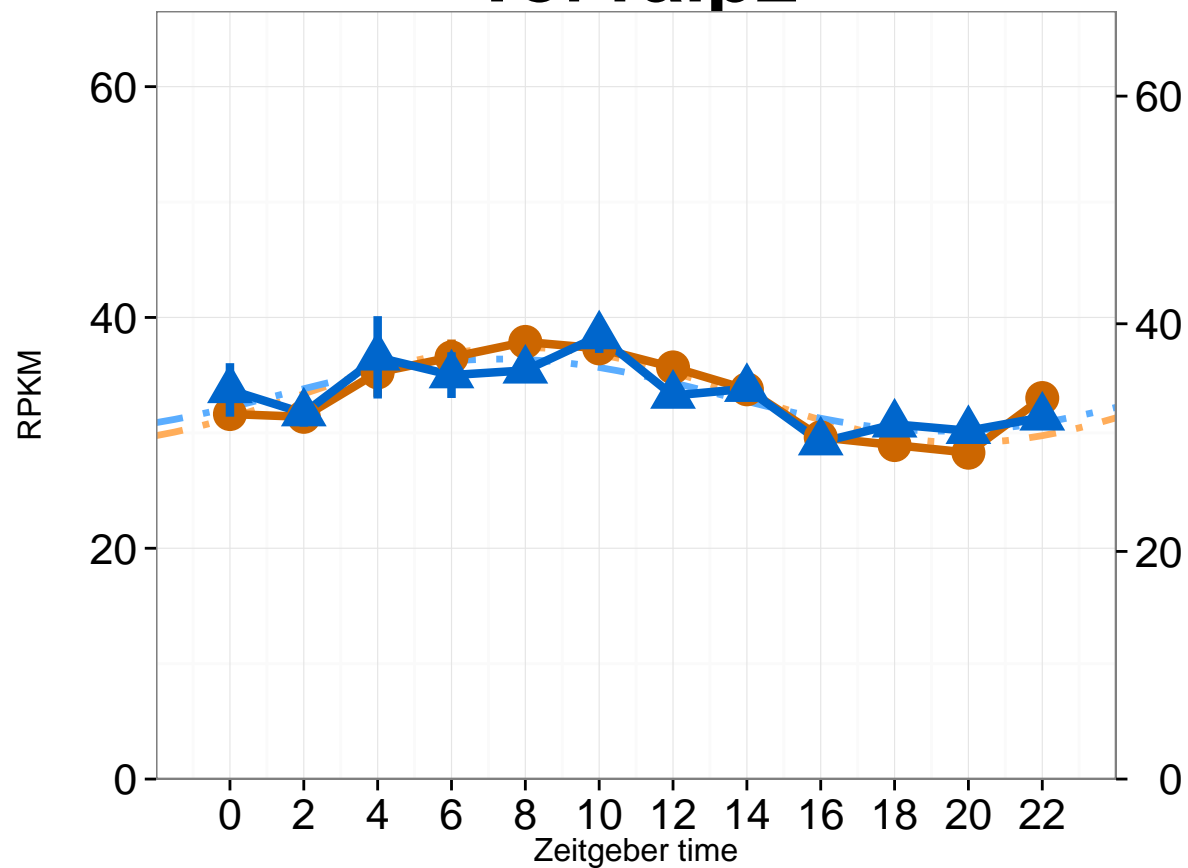

# Tor1aip2

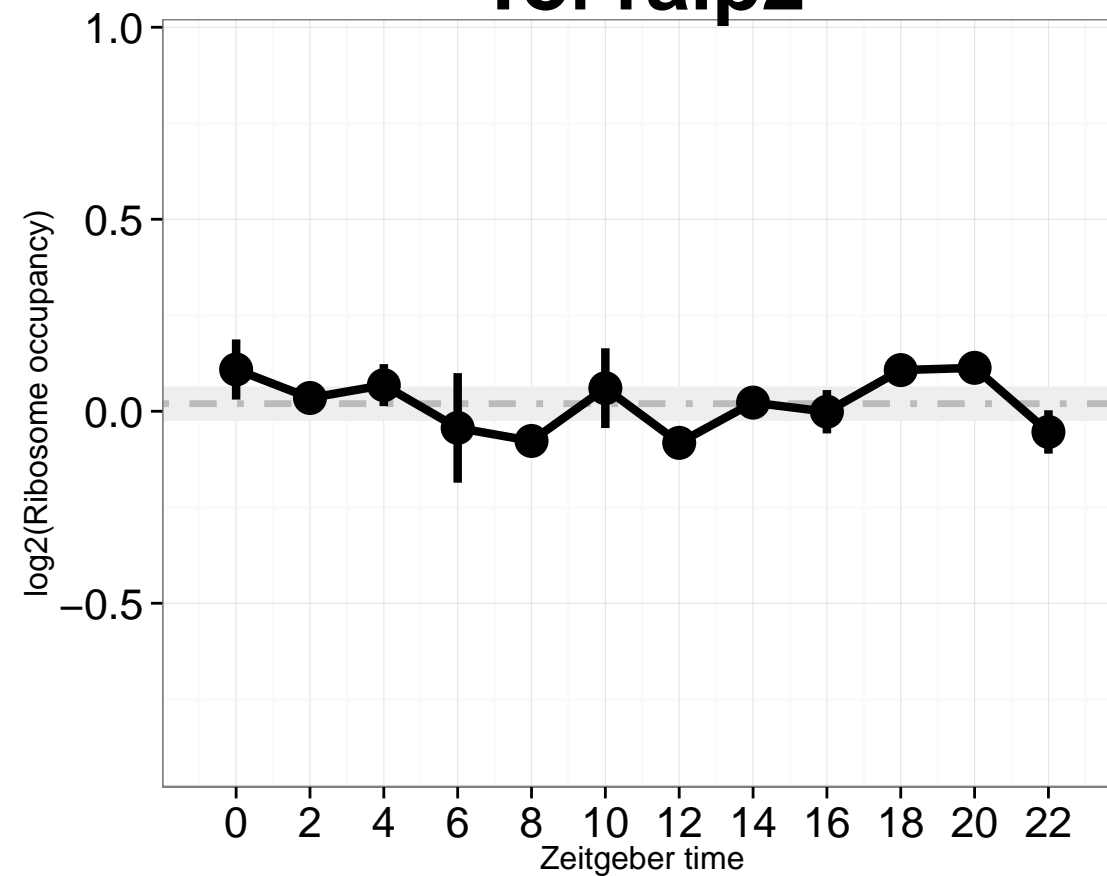

Supplement: Supplementary file 11701 [file 1]

# Aldh18a1

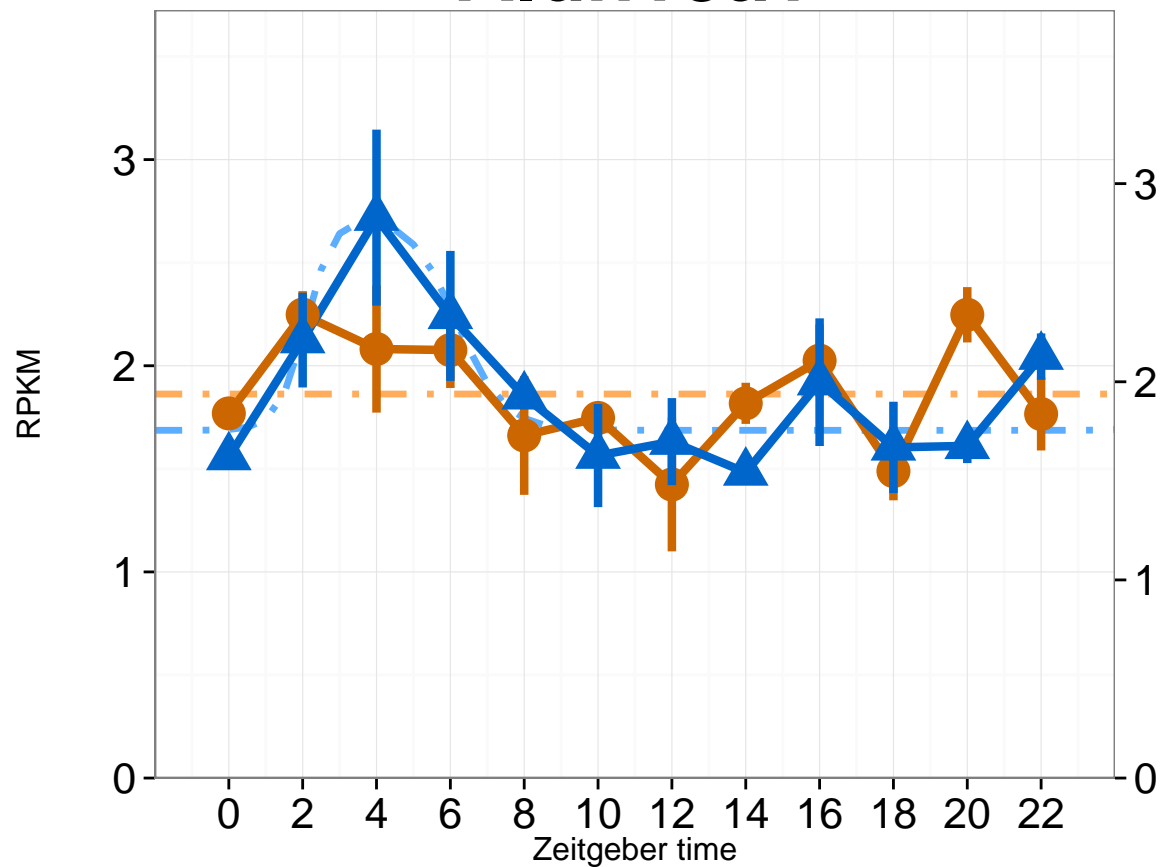

# Aldh18a1

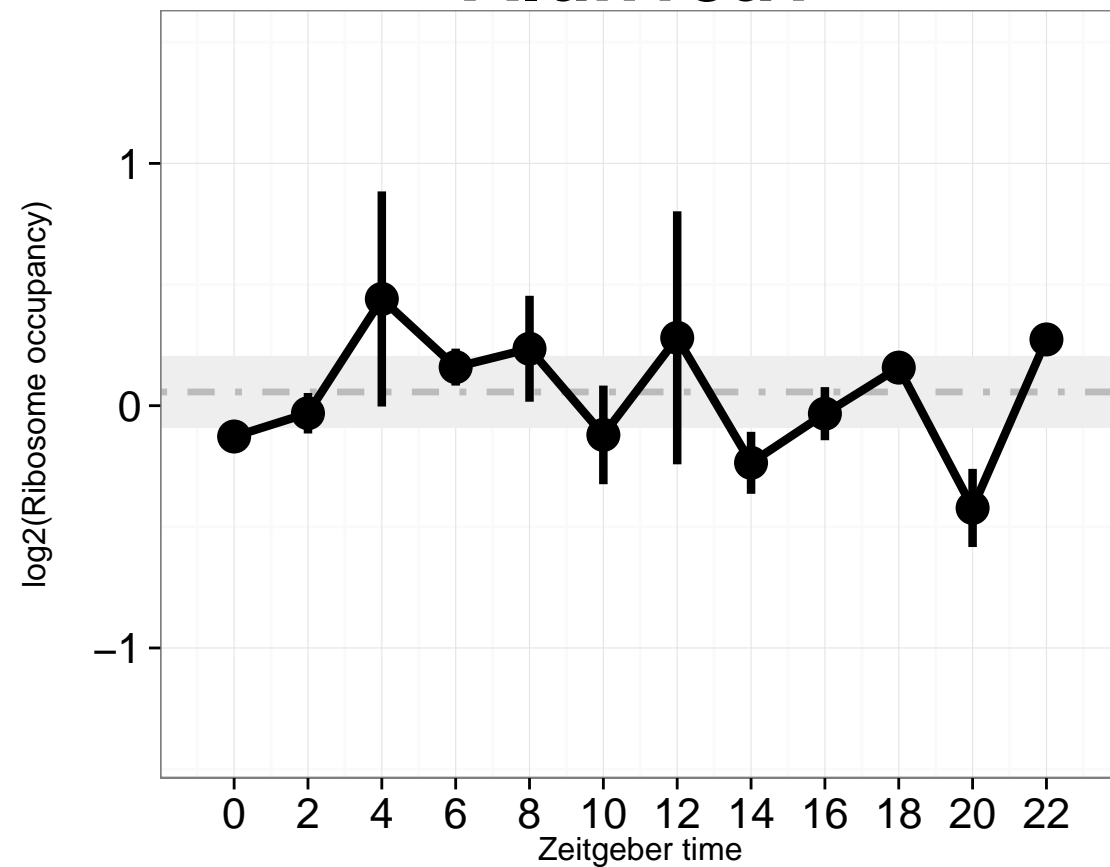

Supplement: Supplementary file 11702 [file 1]

## Aars

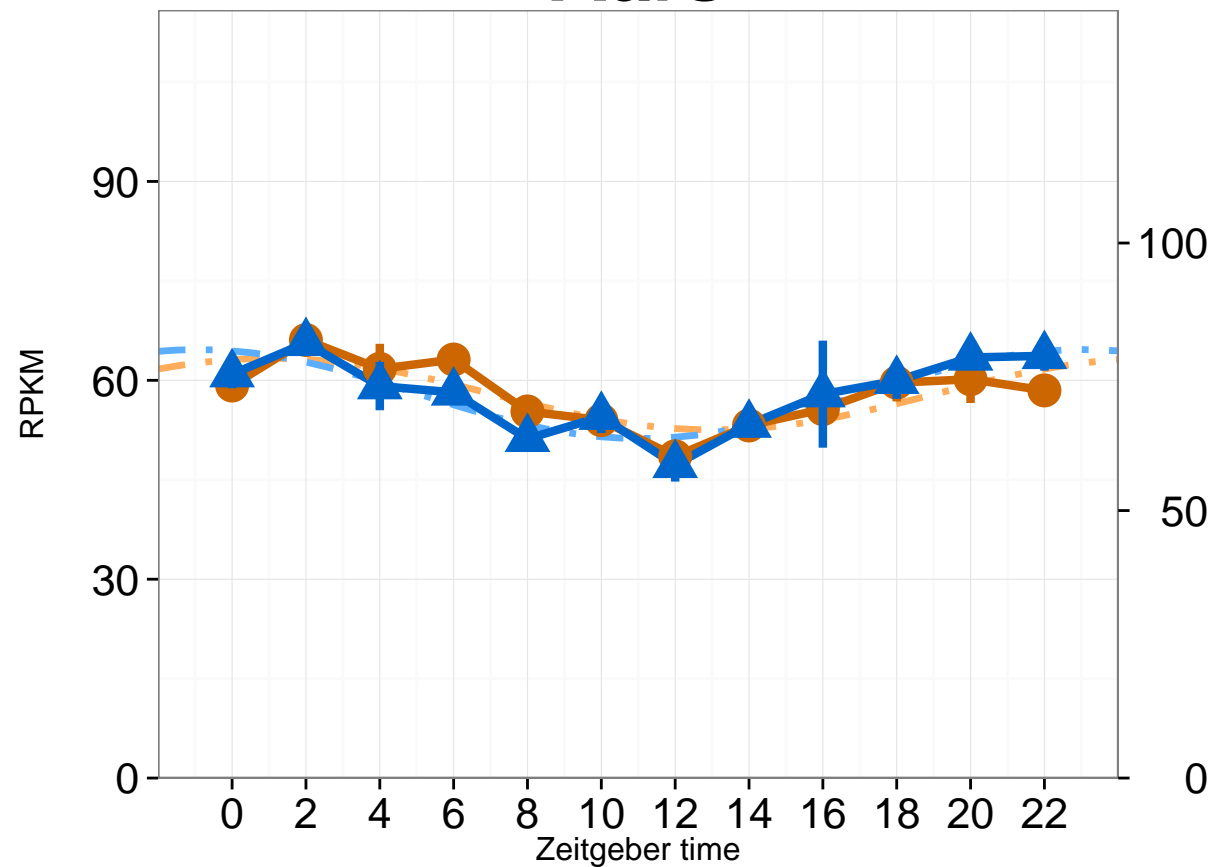

## Aars

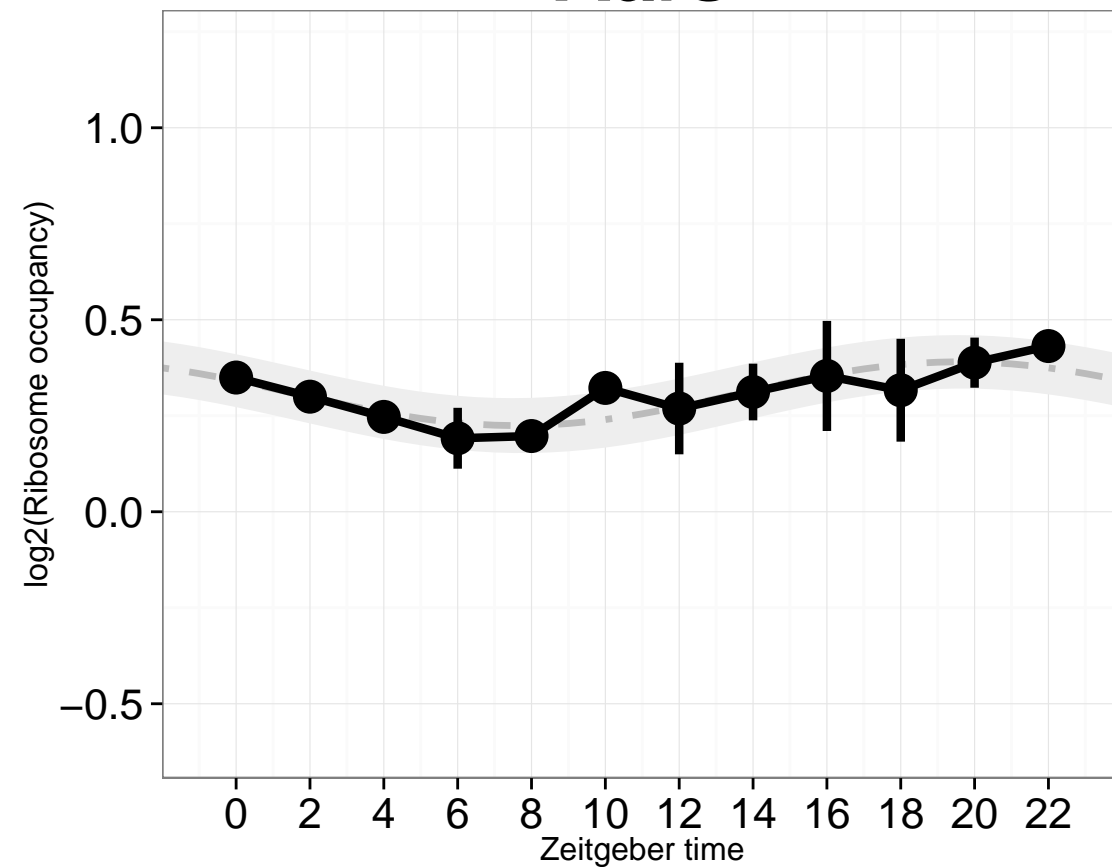

Supplement: Supplementary file 11703 [file 1]

## Mmgt2

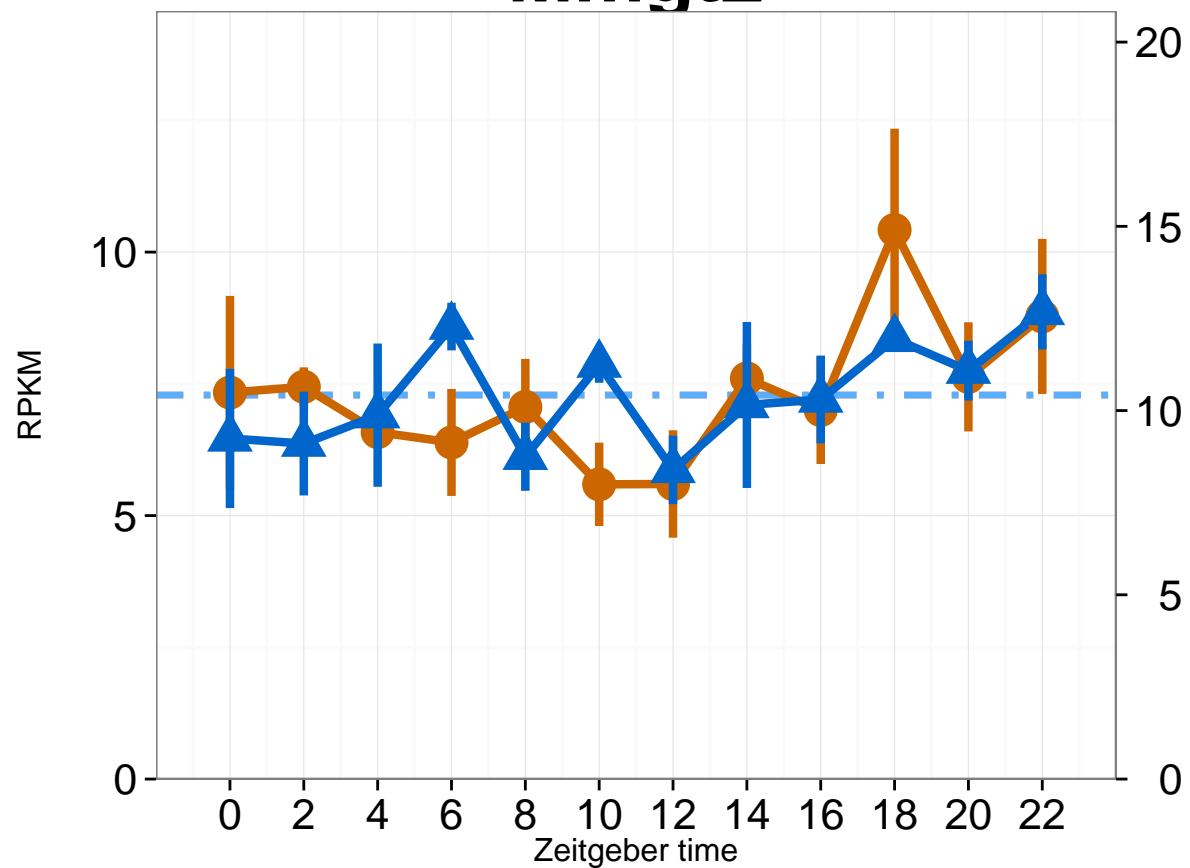

## Mmgt2

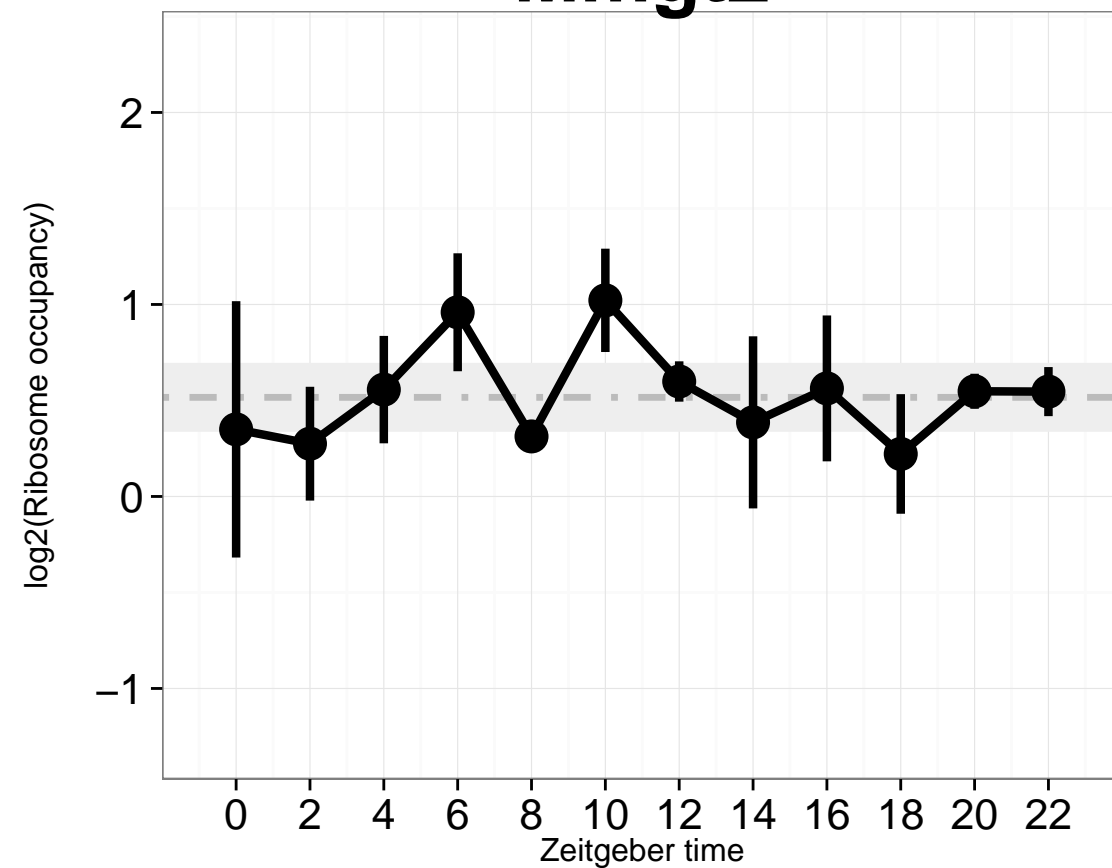

Supplement: Supplementary file 11704 [file 1]

## Nup43

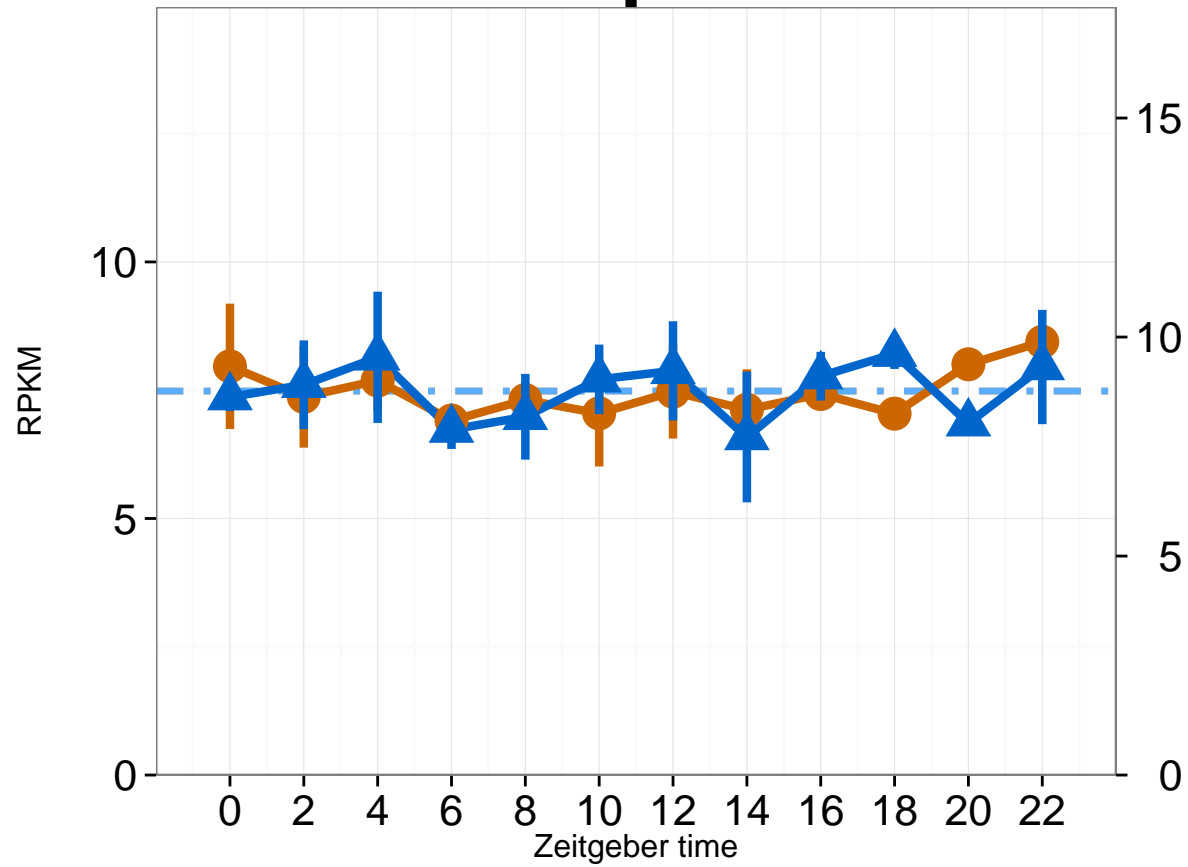

## Nup43

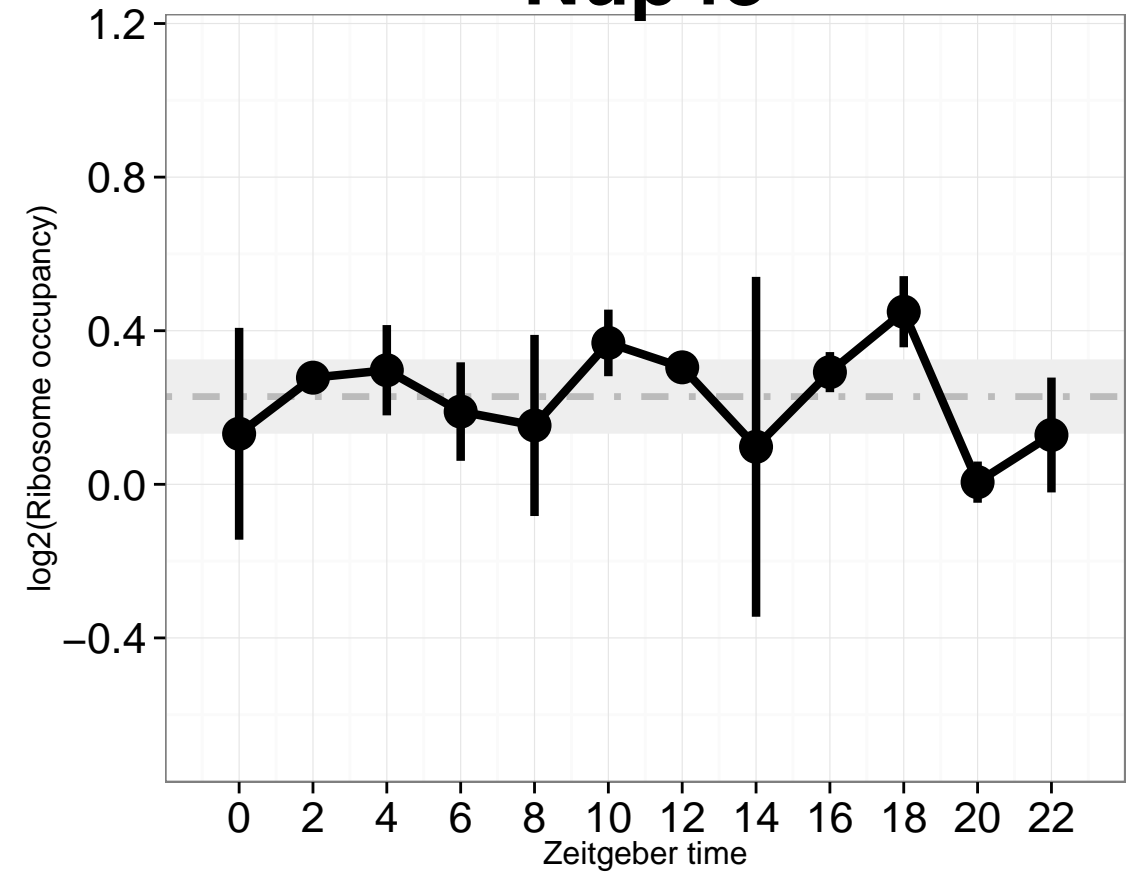

Supplement: Supplementary file 11705 [file 1]

# Wapal

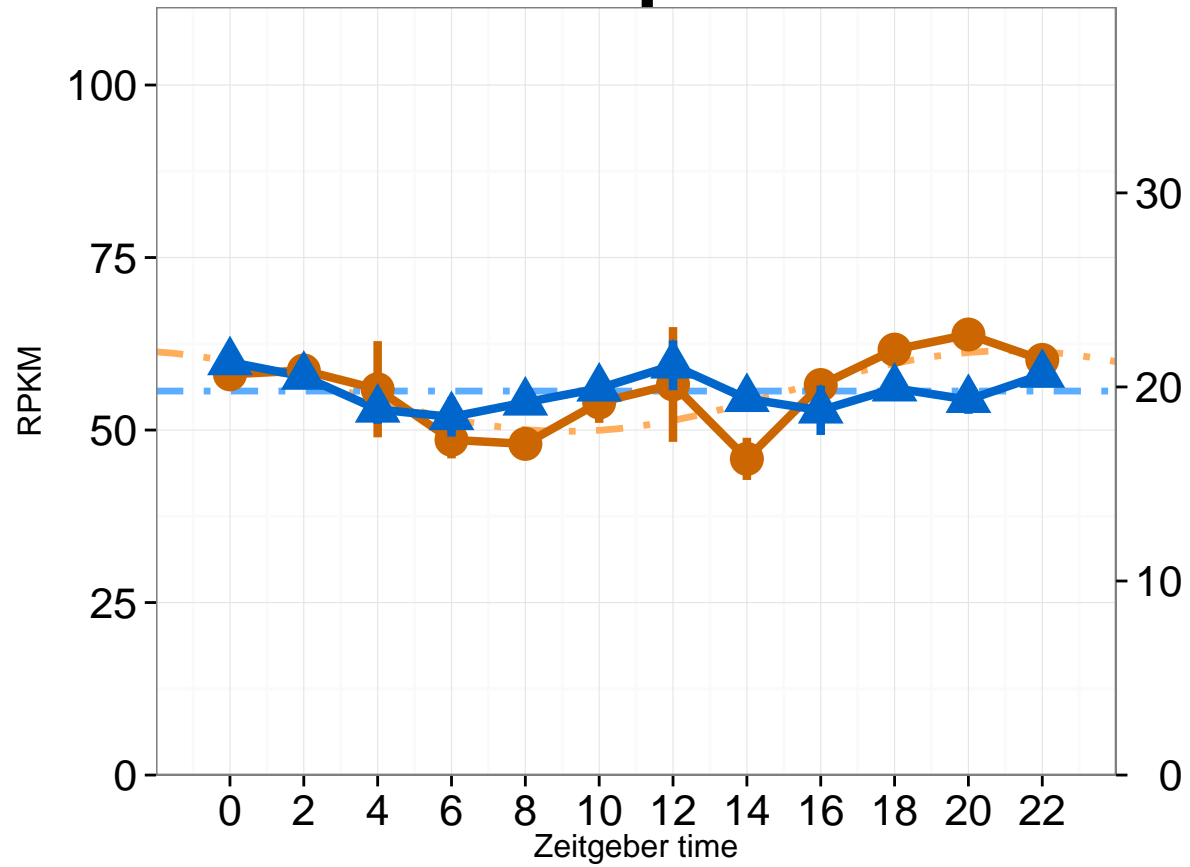

# Wapal

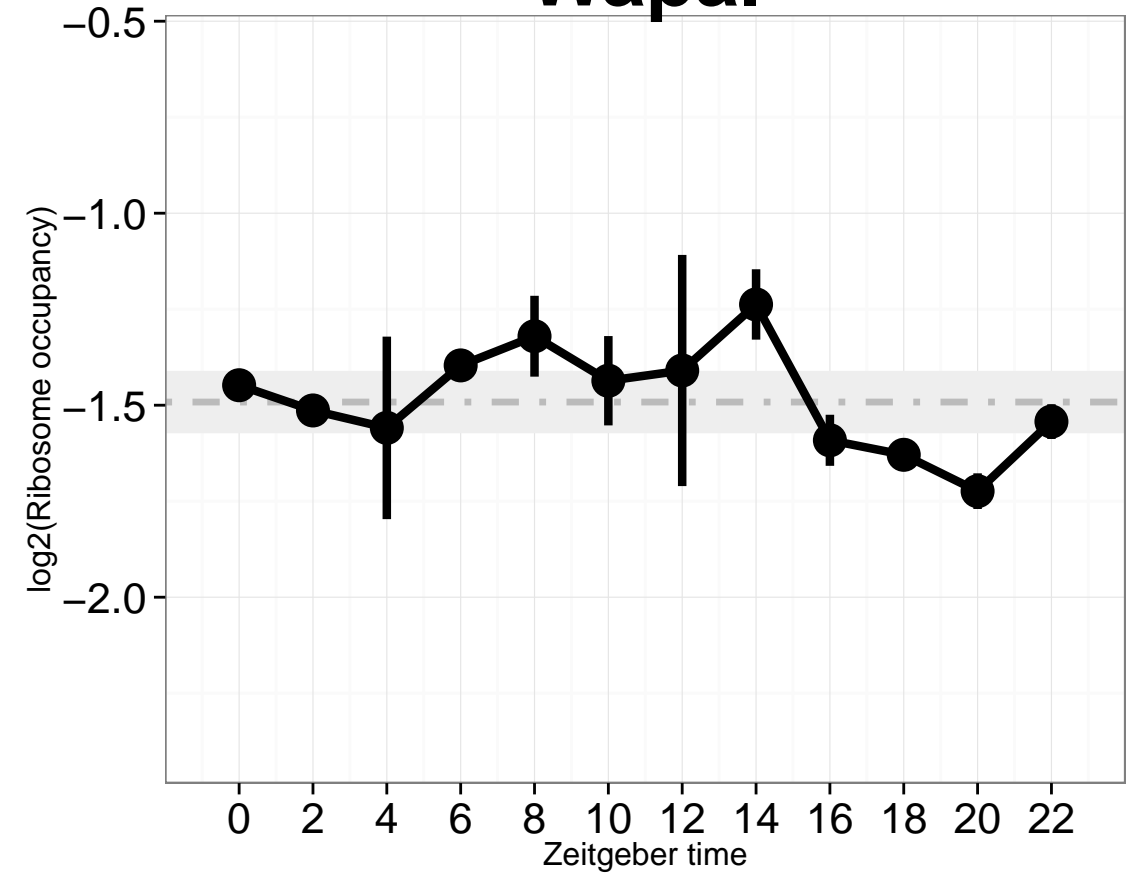

Supplement: Supplementary file 11706 [file 1]

## Ptdss2

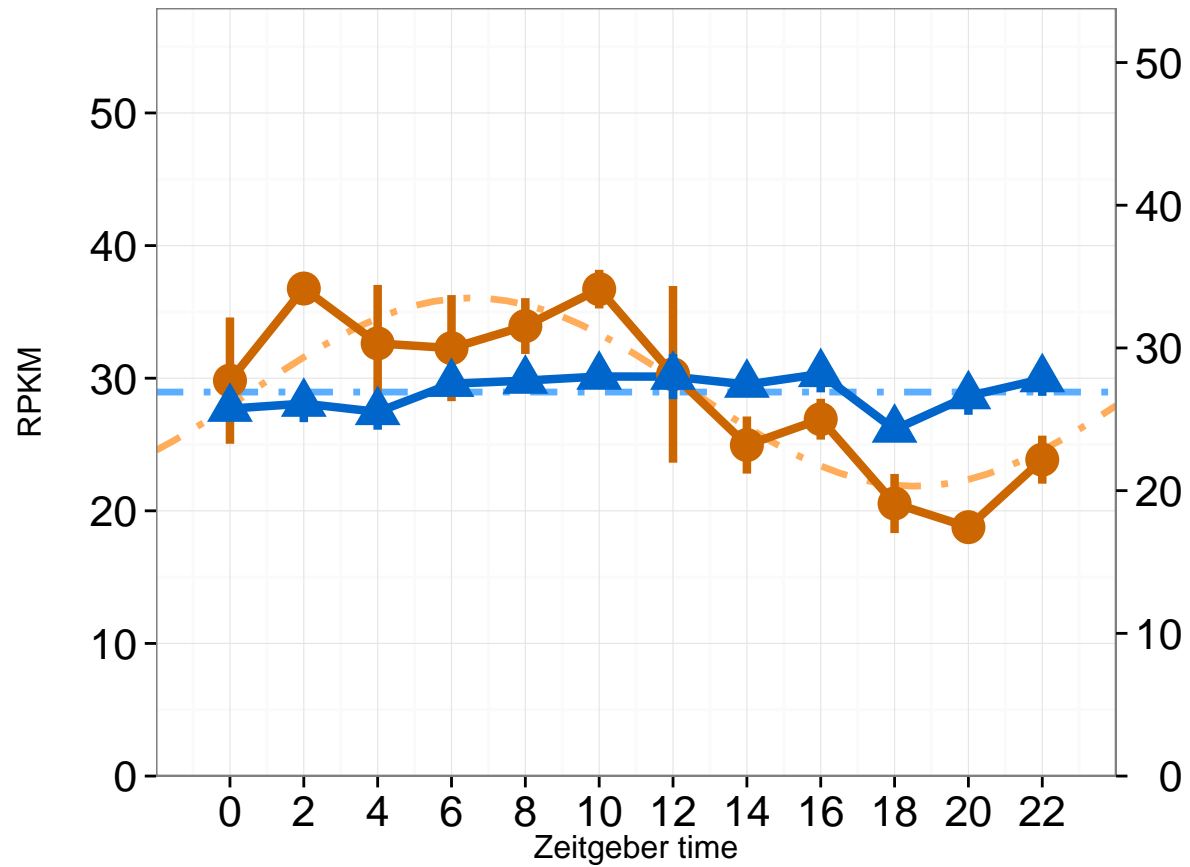

## Ptdss2

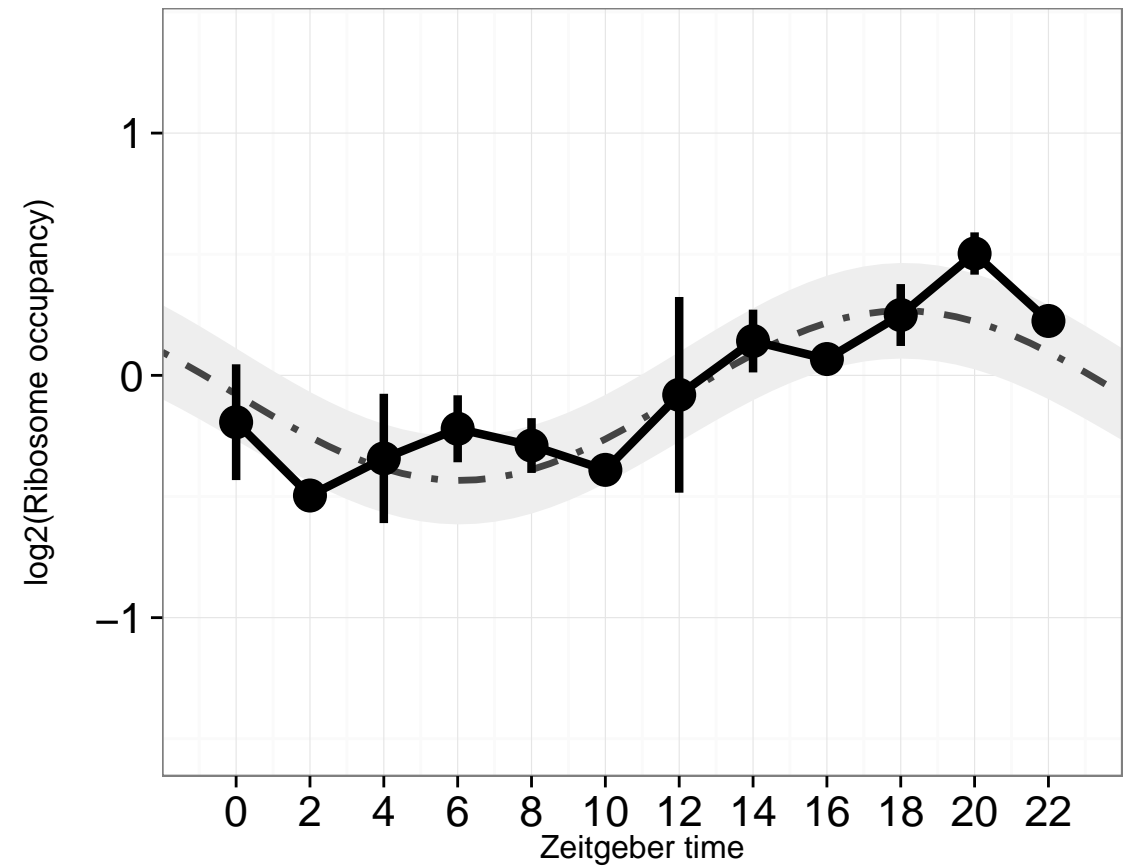

Supplement: Supplementary file 11707 [file 1]

## Ccdc117

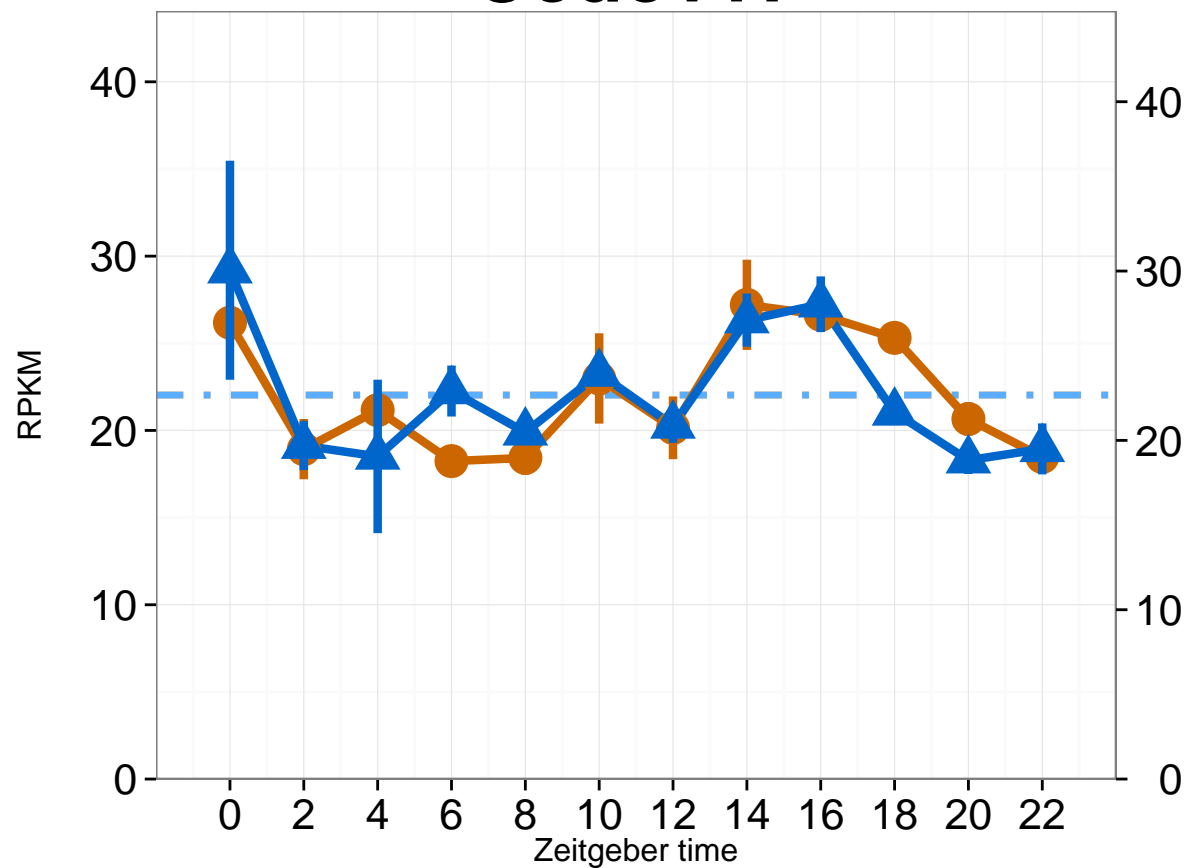

## Ccdc117

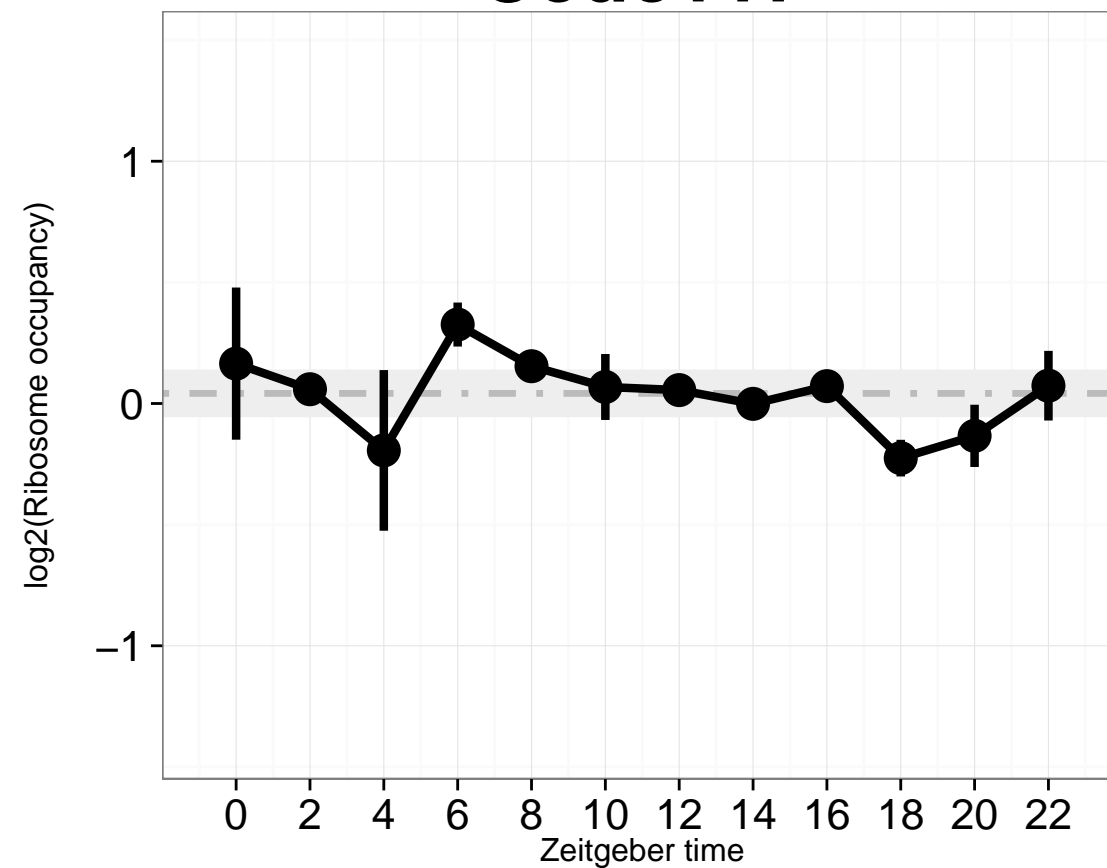

Supplement: Supplementary file 11708 [file 1]

## Fnip2

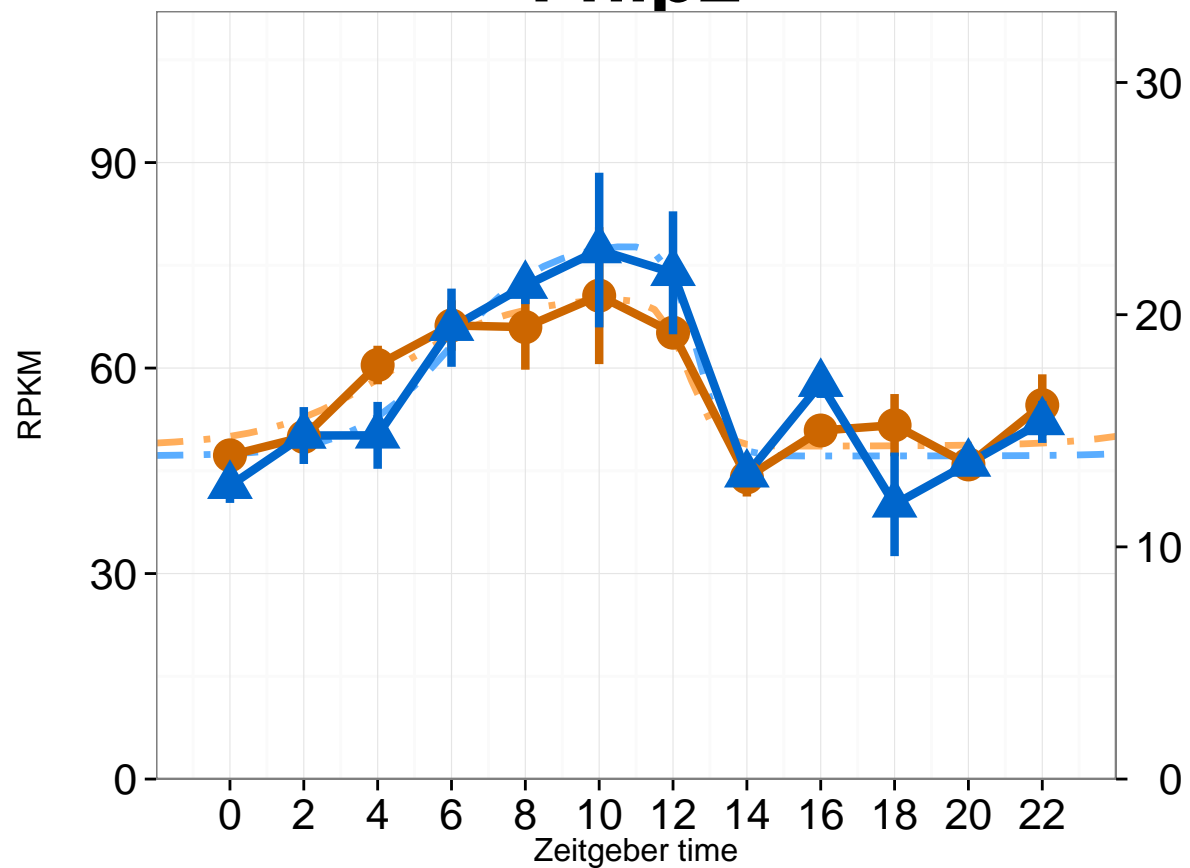

## Fnip2

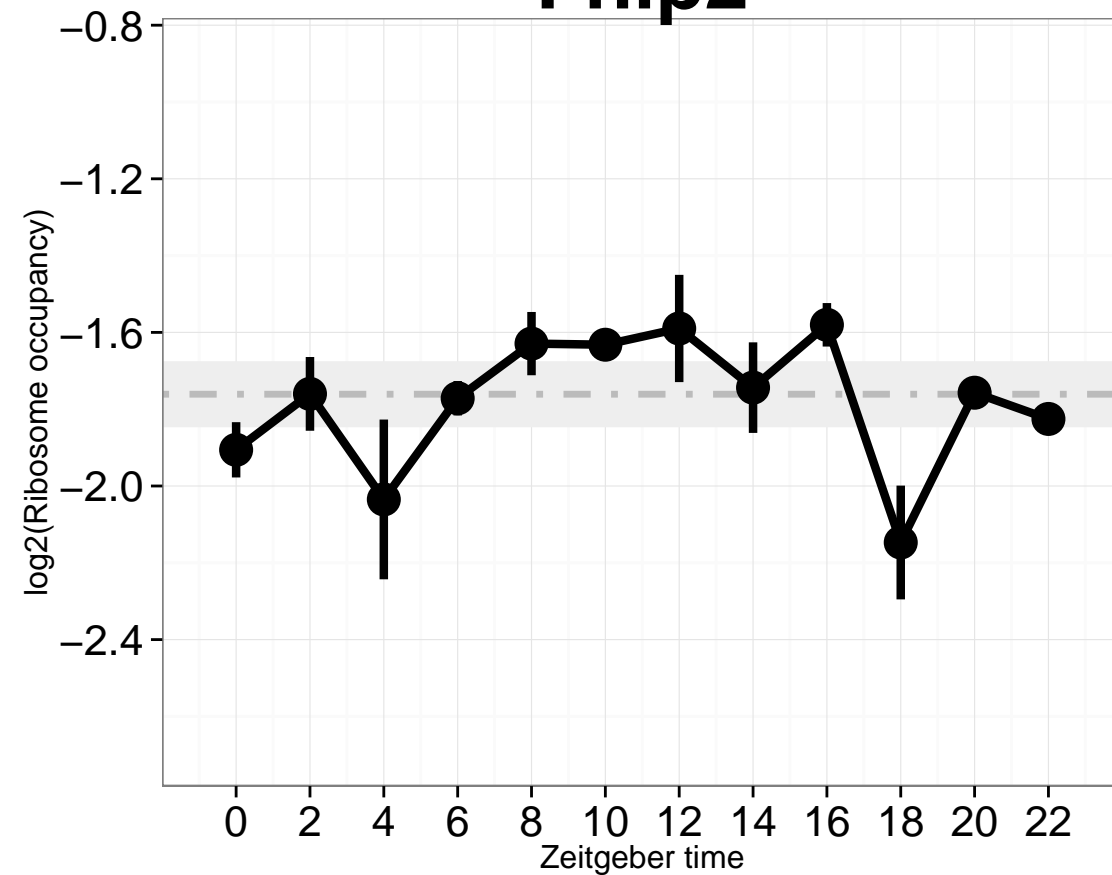

Supplement: Supplementary file 11709 [file 1]

## Rab5b

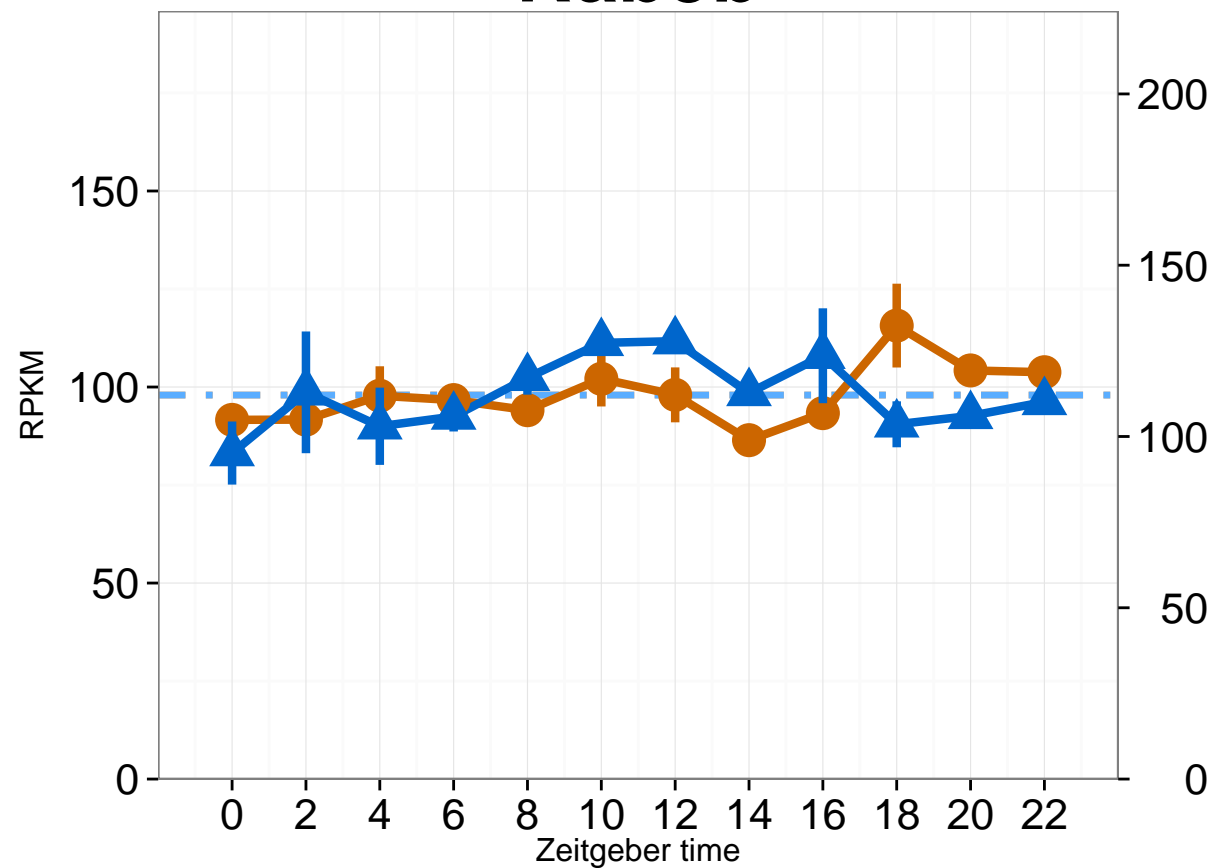

## Rab5b

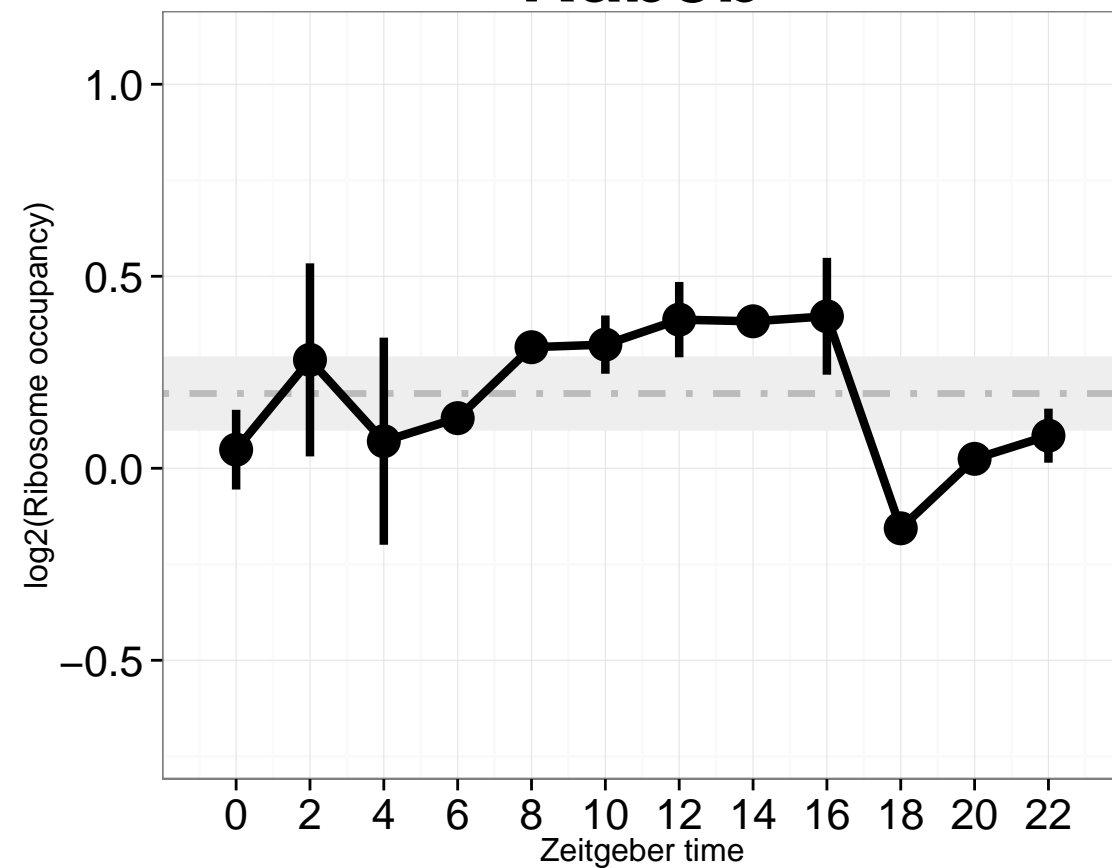

Supplement: Supplementary file 11710 [file 1]

## Cd3g

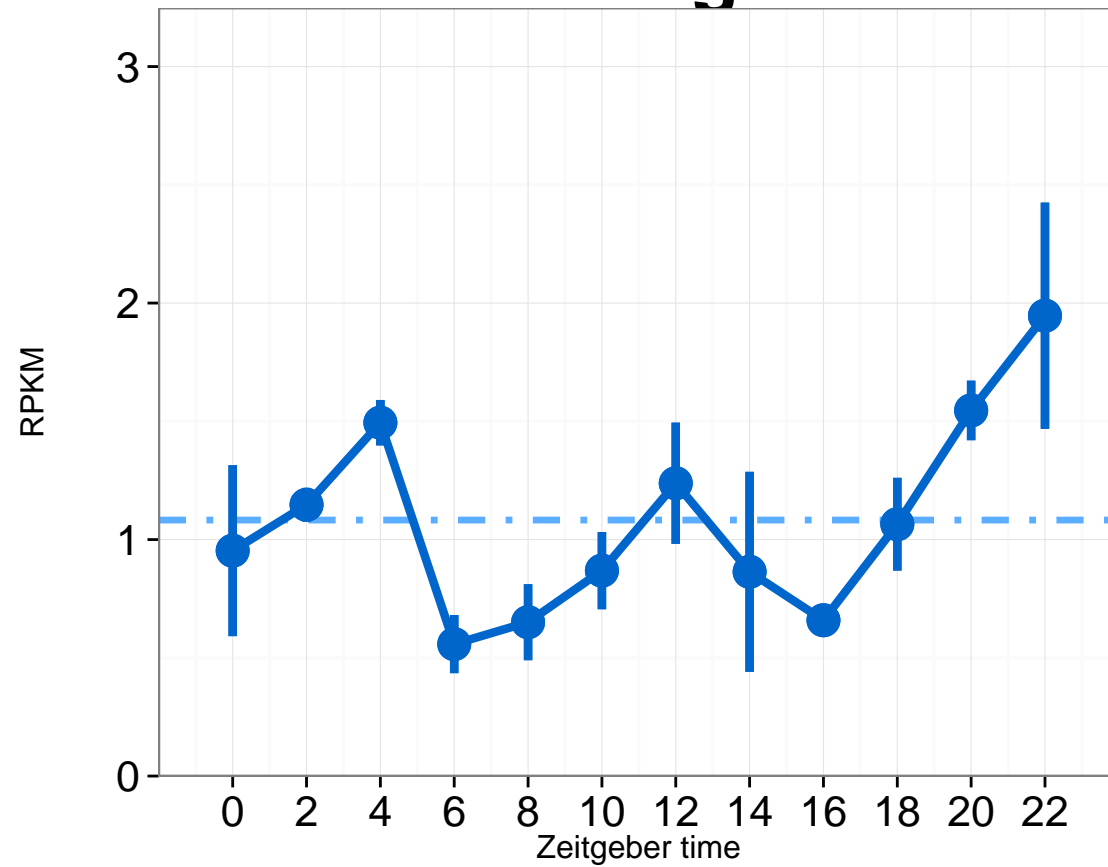

## Cd3g log2(Ribosome occupancy)

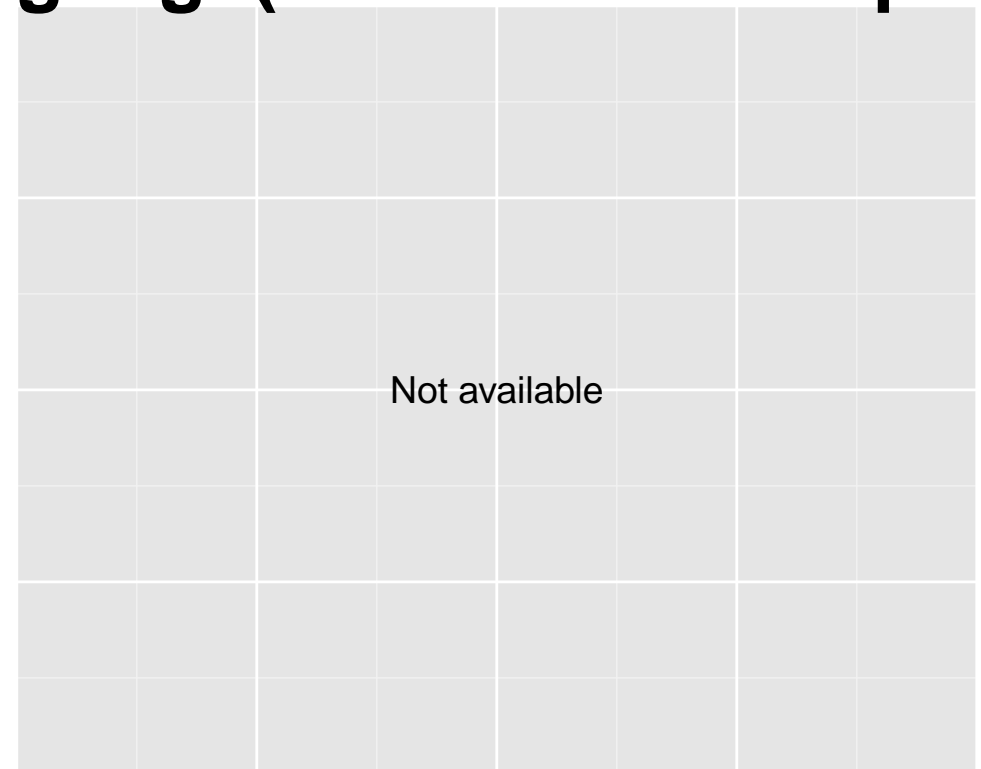

Supplement: Supplementary file 11711 [file 1]

## Numb1

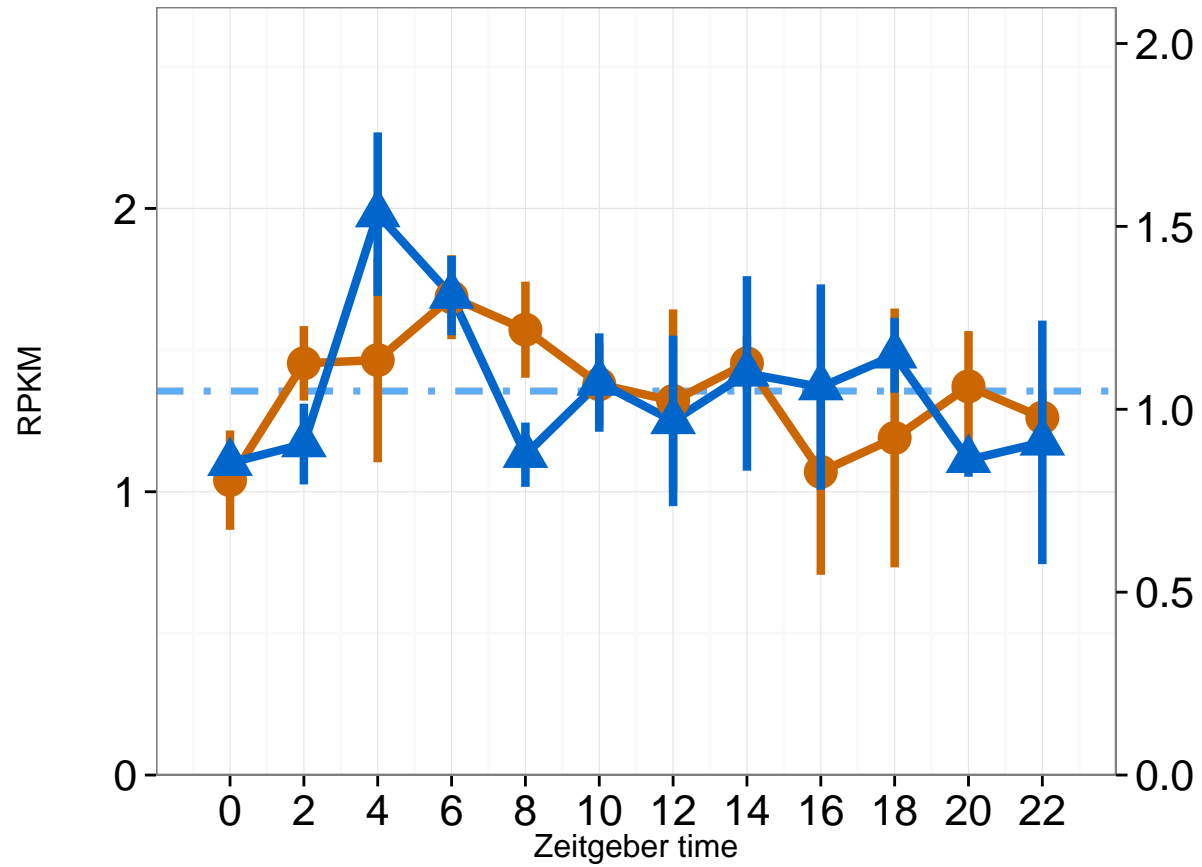

## Numb1

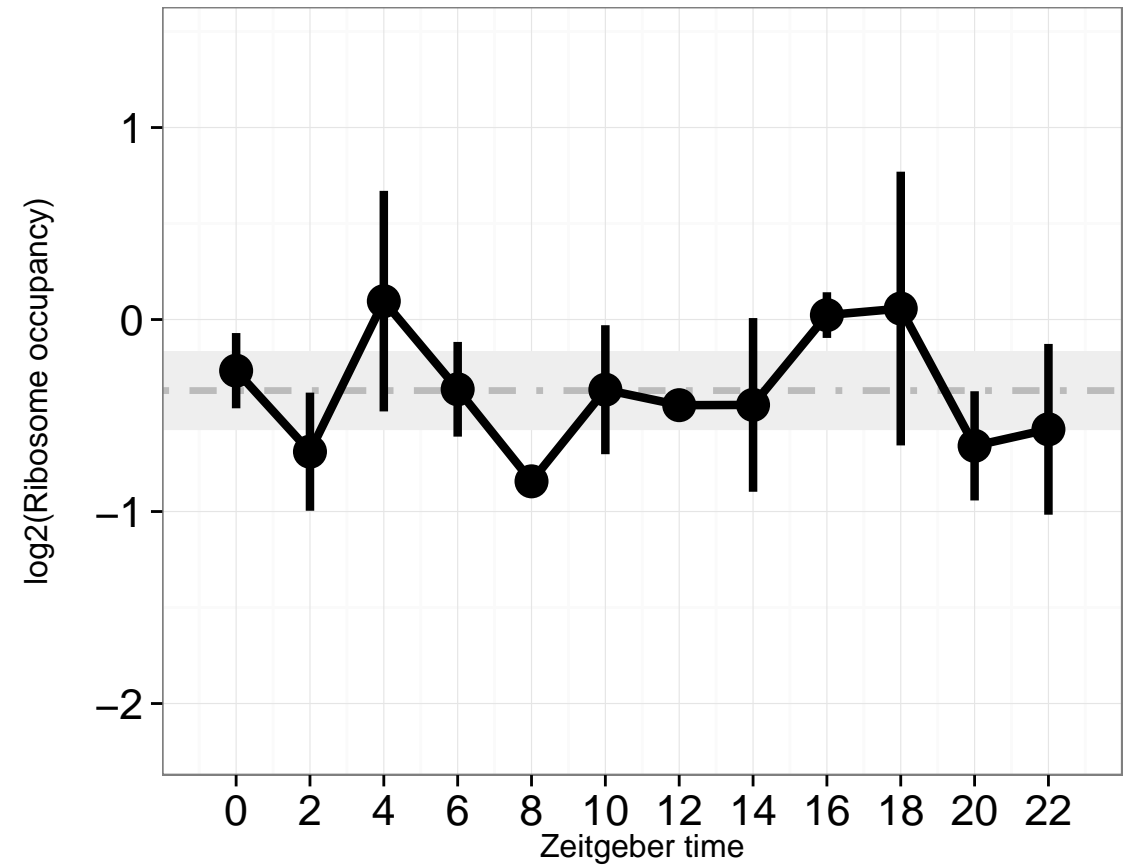

Supplement: Supplementary file 11712 [file 1]

# Trak1

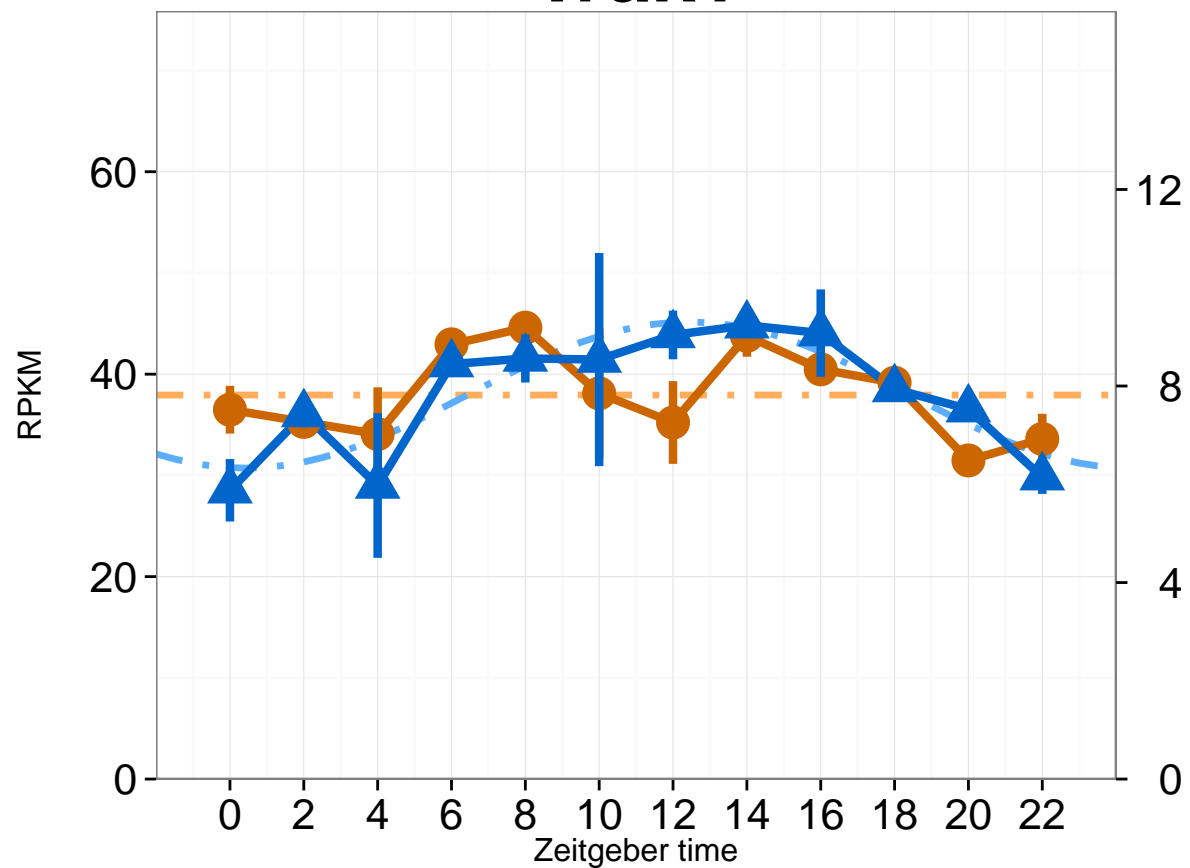

# Trak1

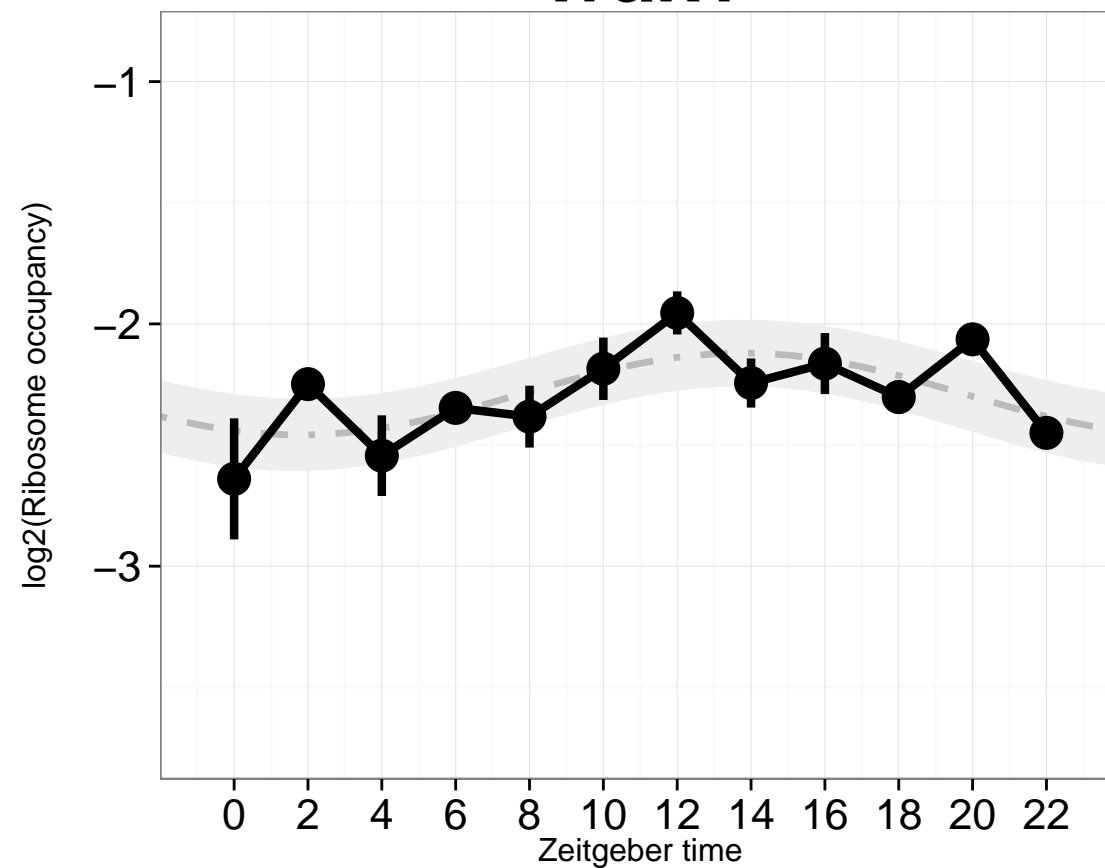

Supplement: Supplementary file 11713 [file 1]

## Col6a3

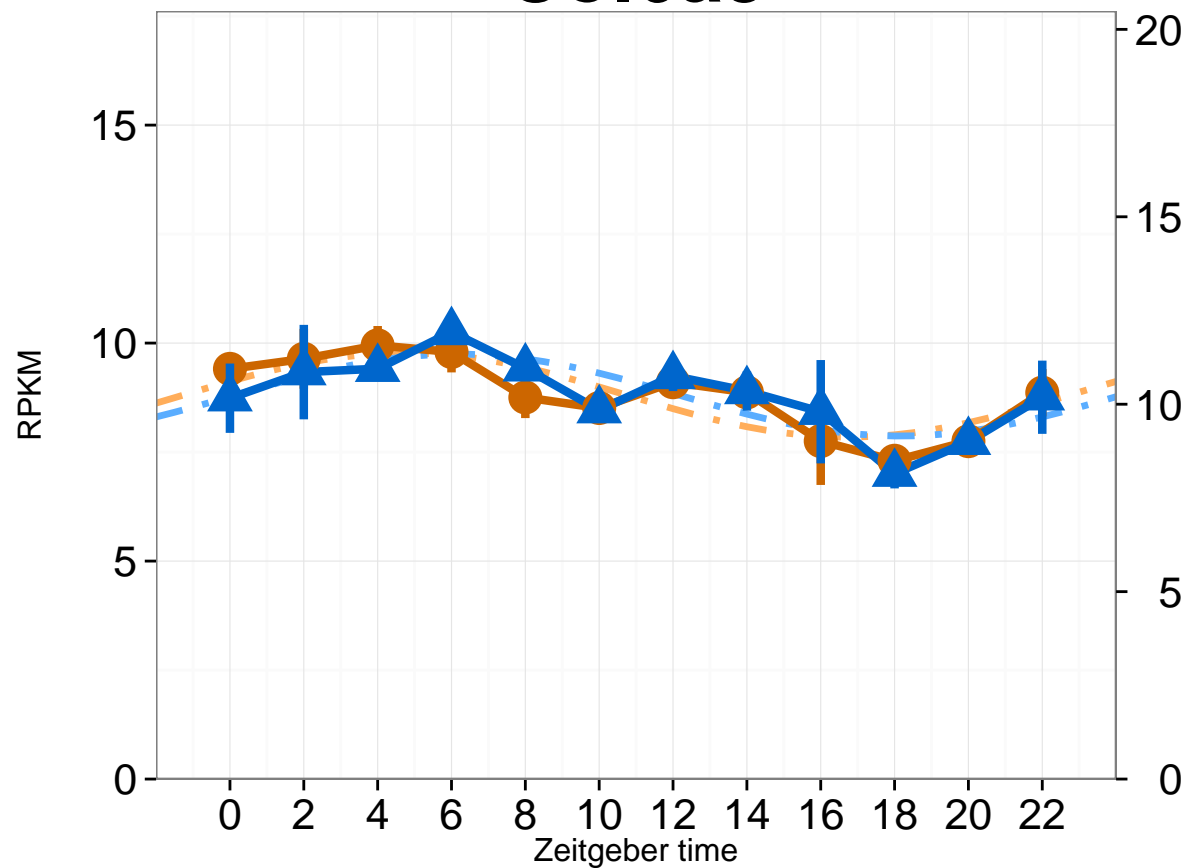

## Col6a3

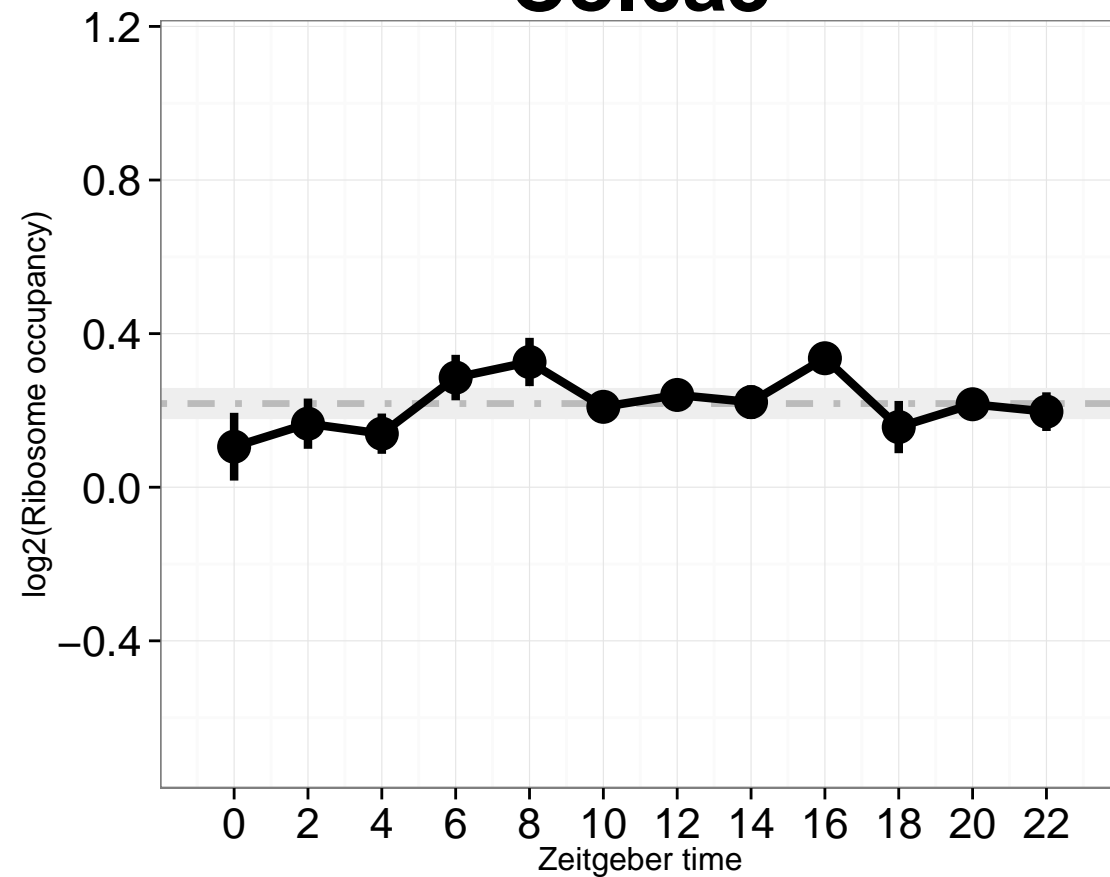

Supplement: Supplementary file 11714 [file 1]

# Cfdp1

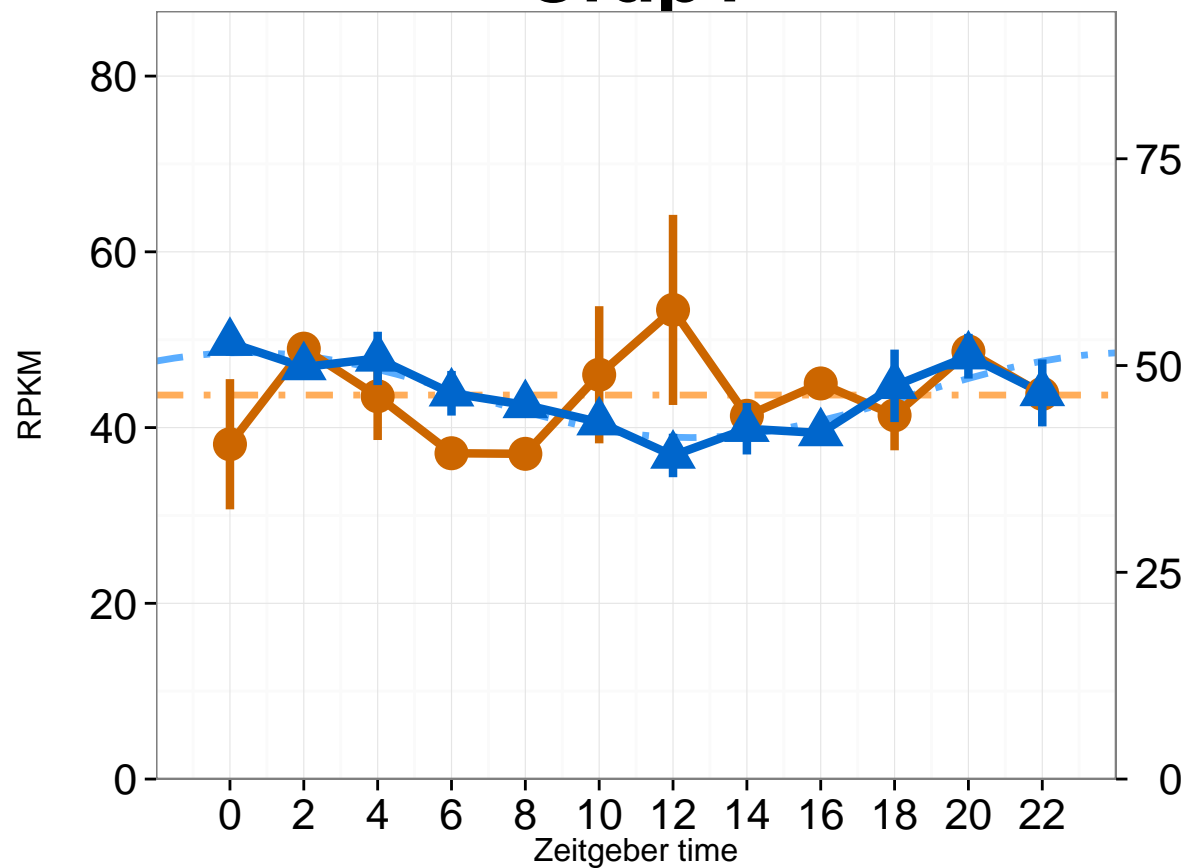

# Cfdp1

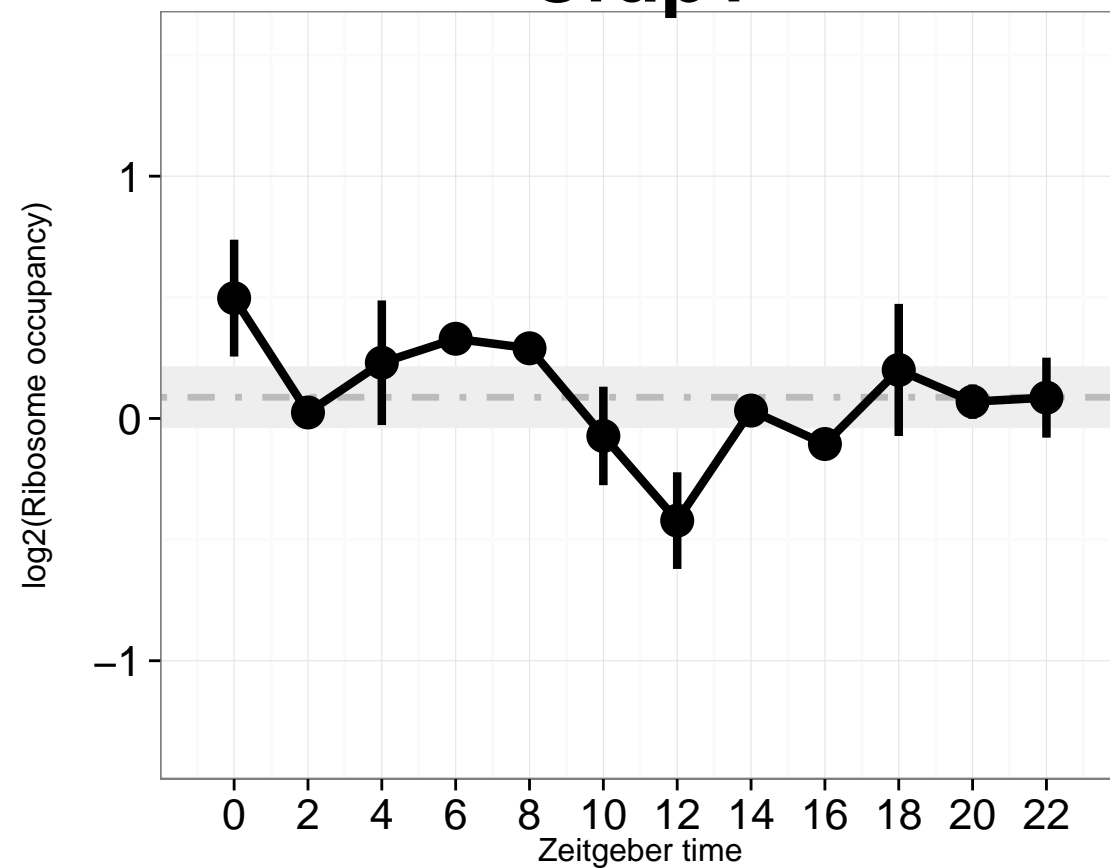

Supplement: Supplementary file 11715 [file 1]

## Ndr4

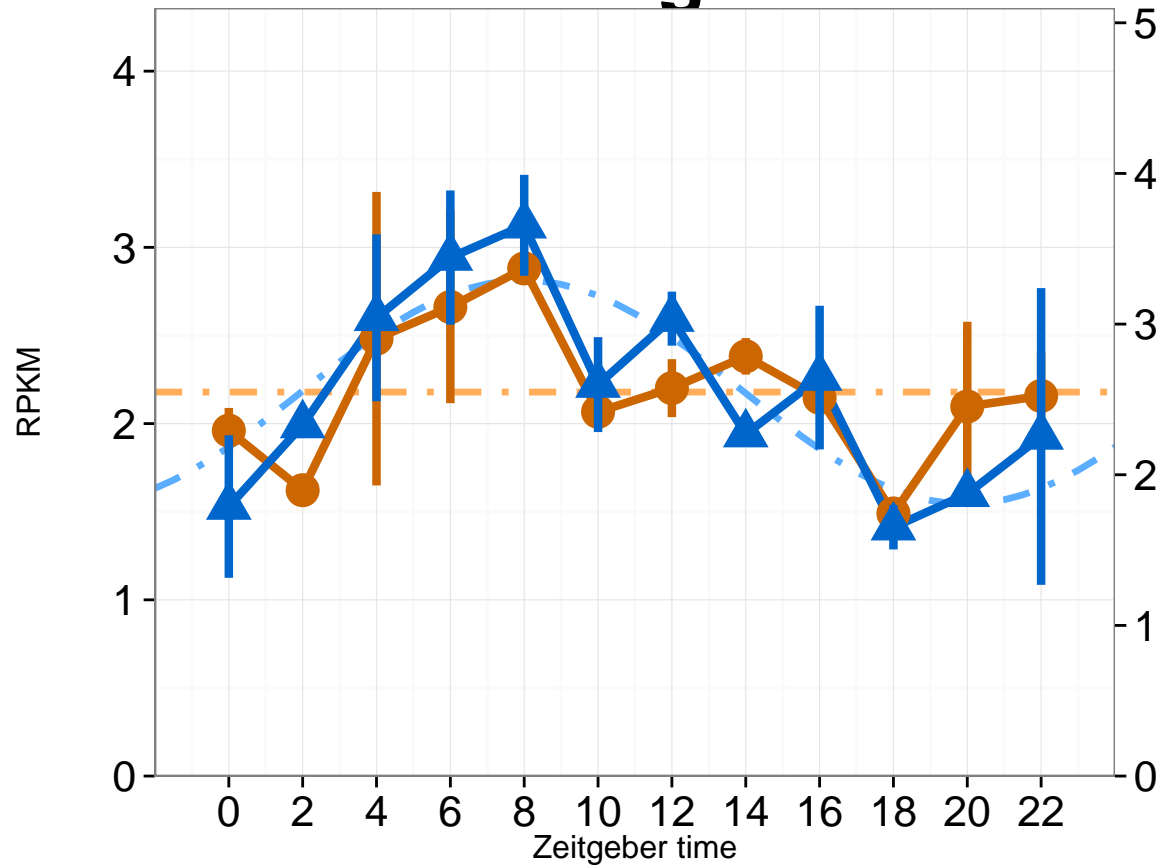

## Ndr4

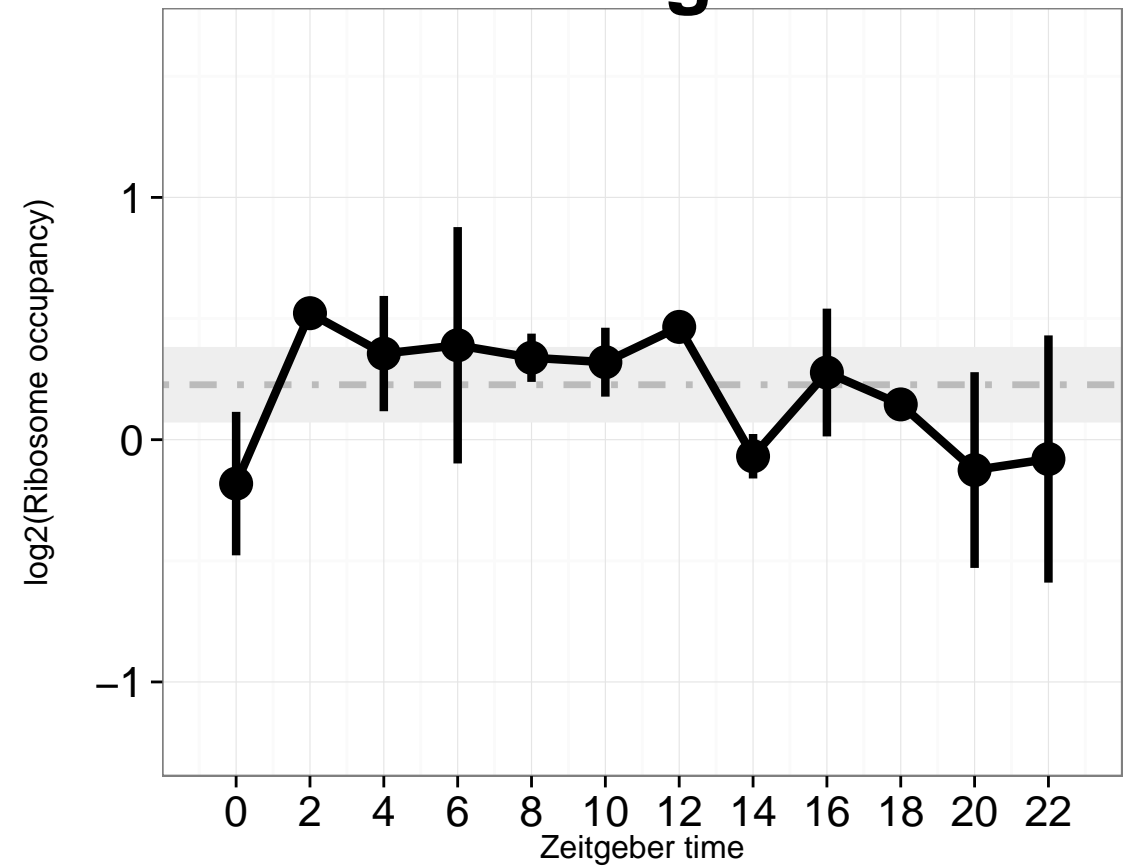

Supplement: Supplementary file 11716 [file 1]

# D3Ertd751e

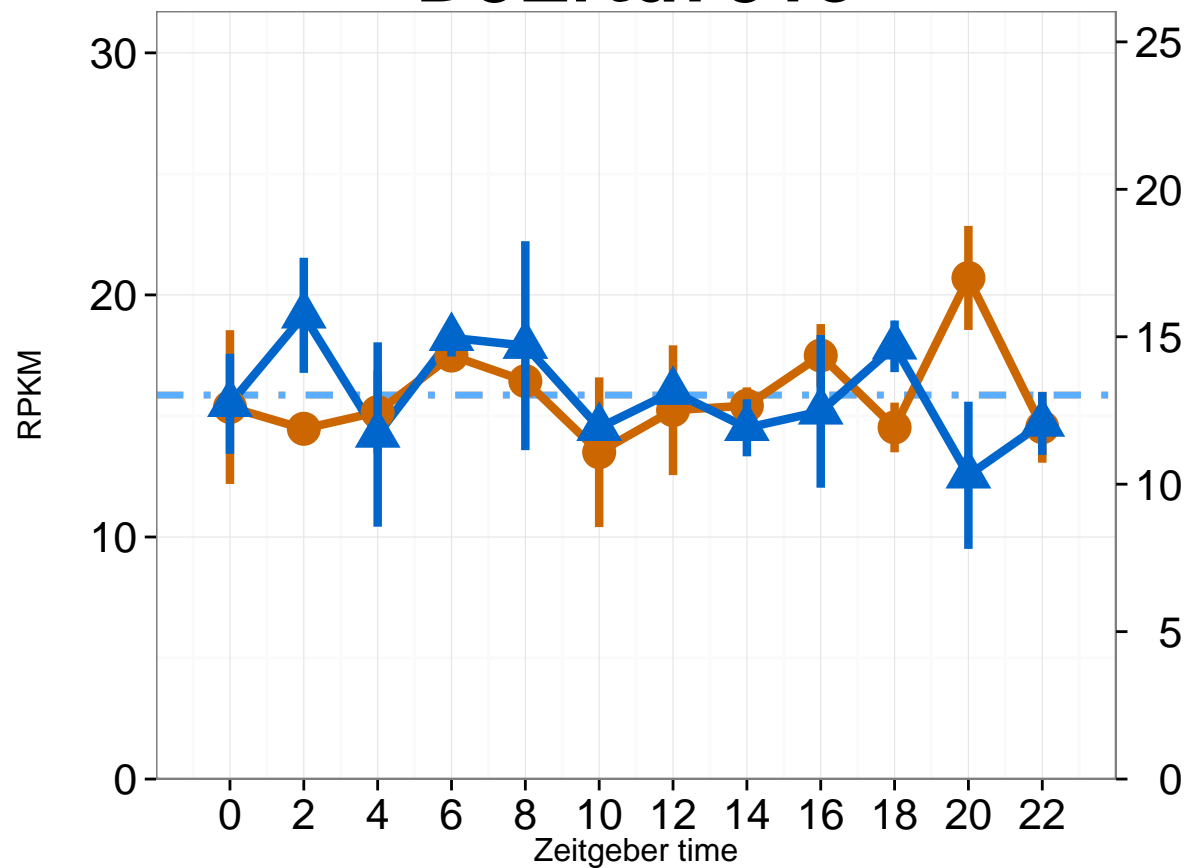

# D3Ertd751e

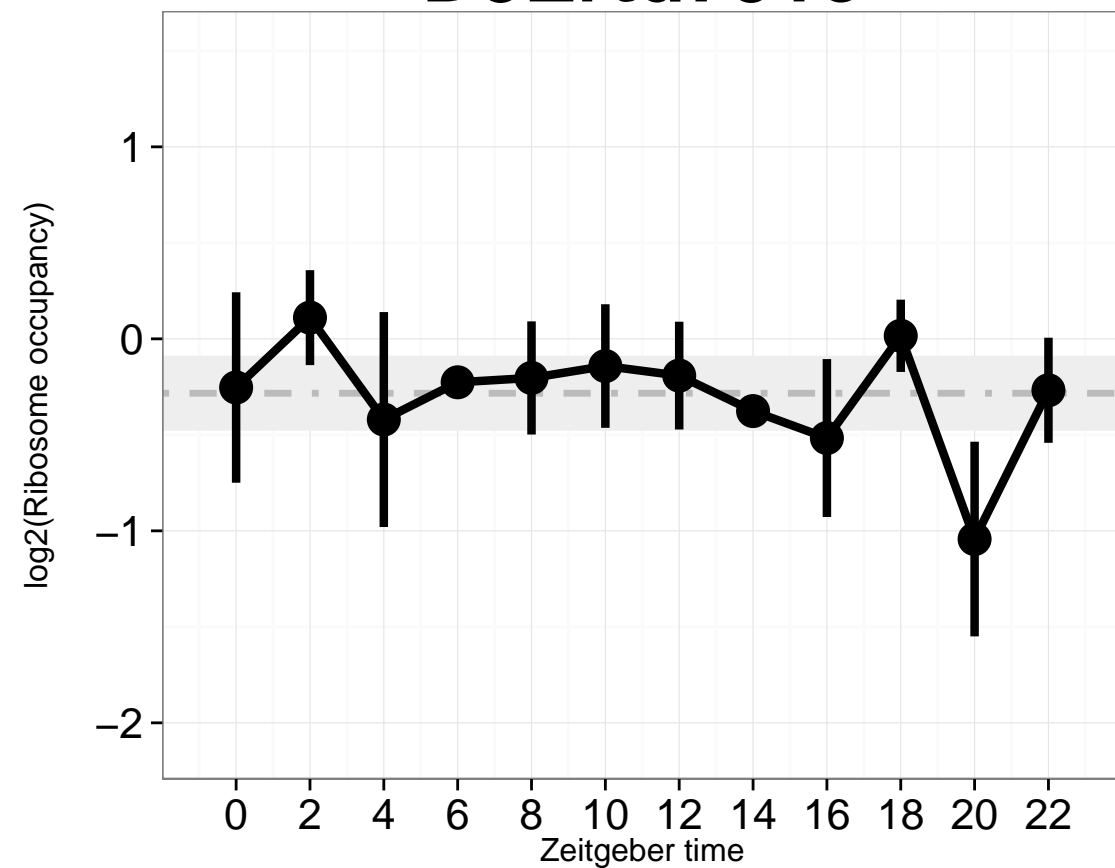

Supplement: Supplementary file 11717 [file 1]

# Bcat1

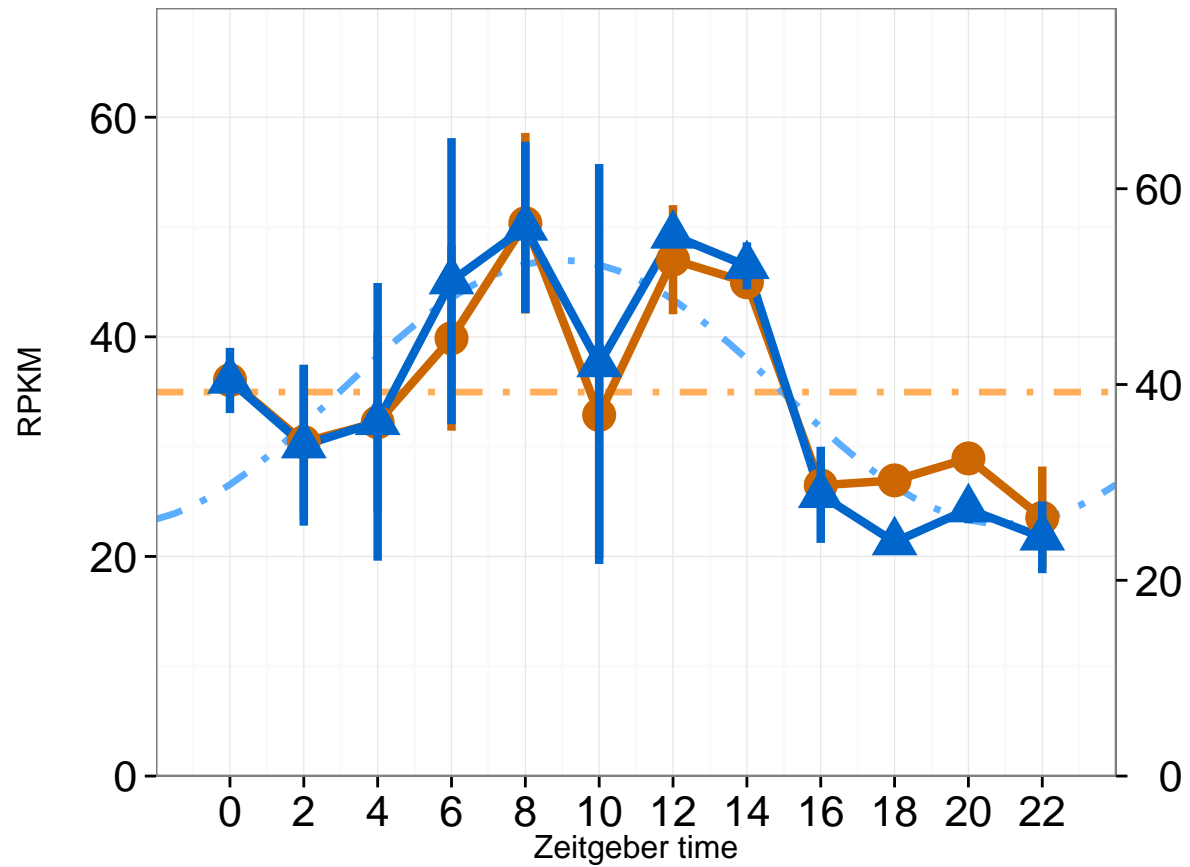

# Bcat1

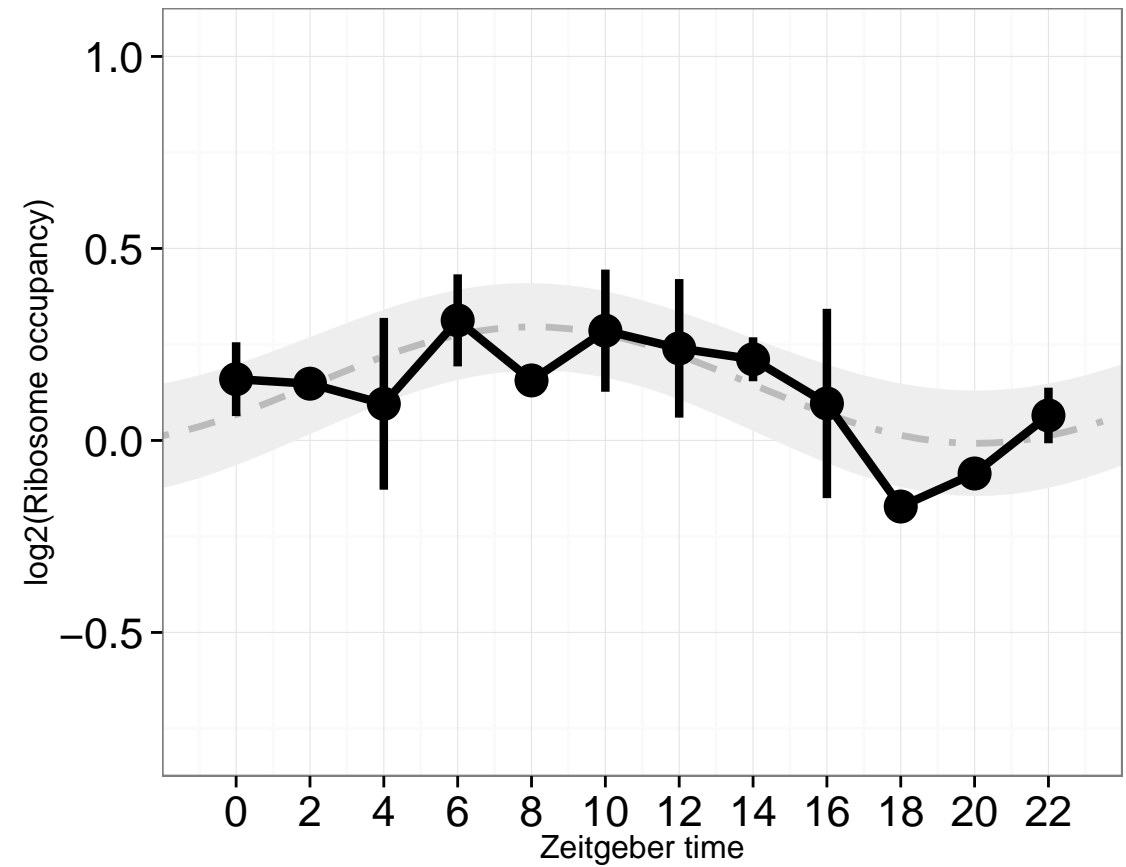

Supplement: Supplementary file 11718 [file 1]

## Mef2a

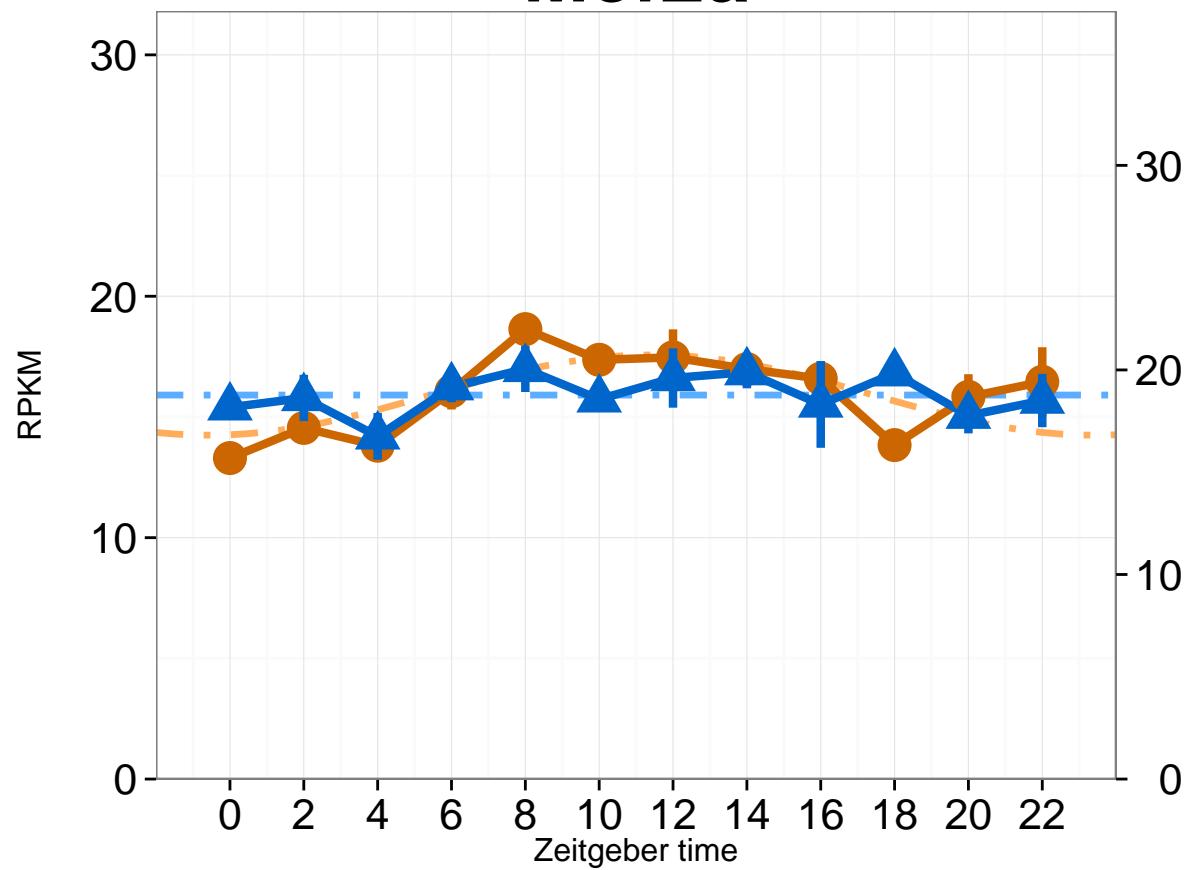

## Mef2a

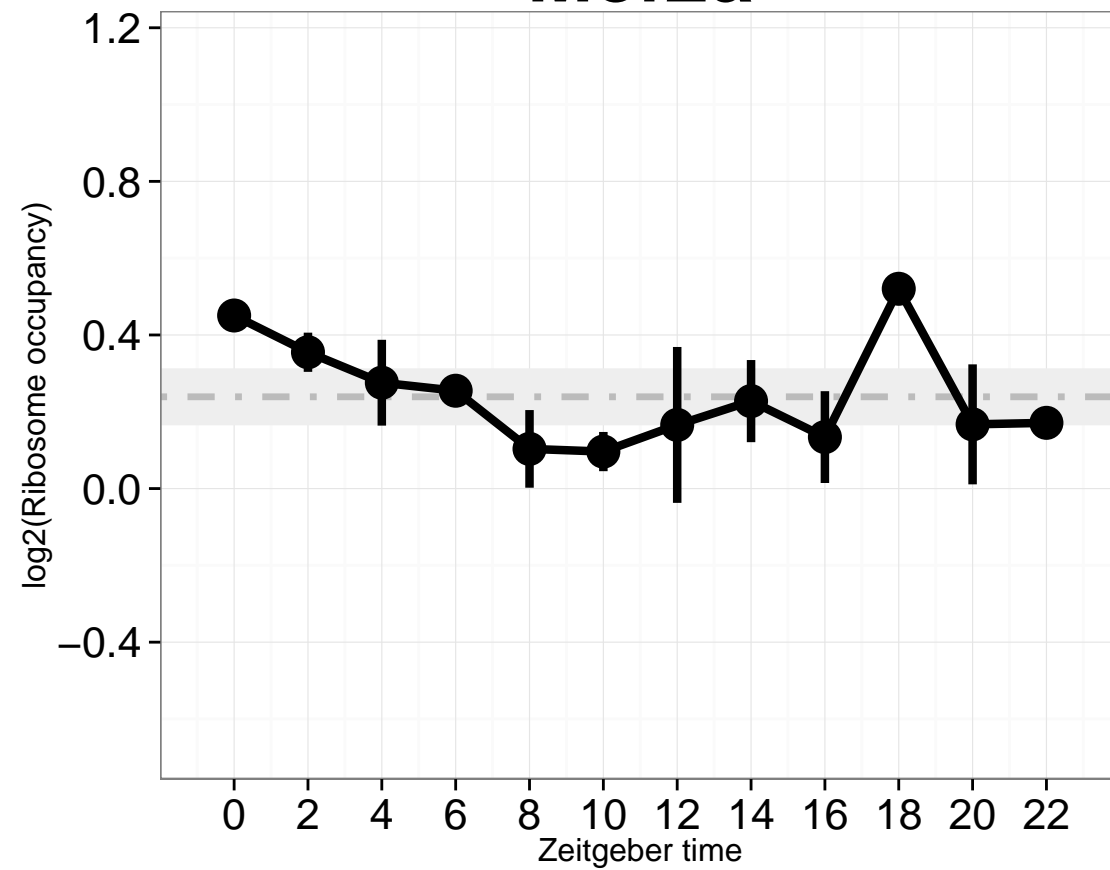

Supplement: Supplementary file 11719 [file 1]

# Arhgap1

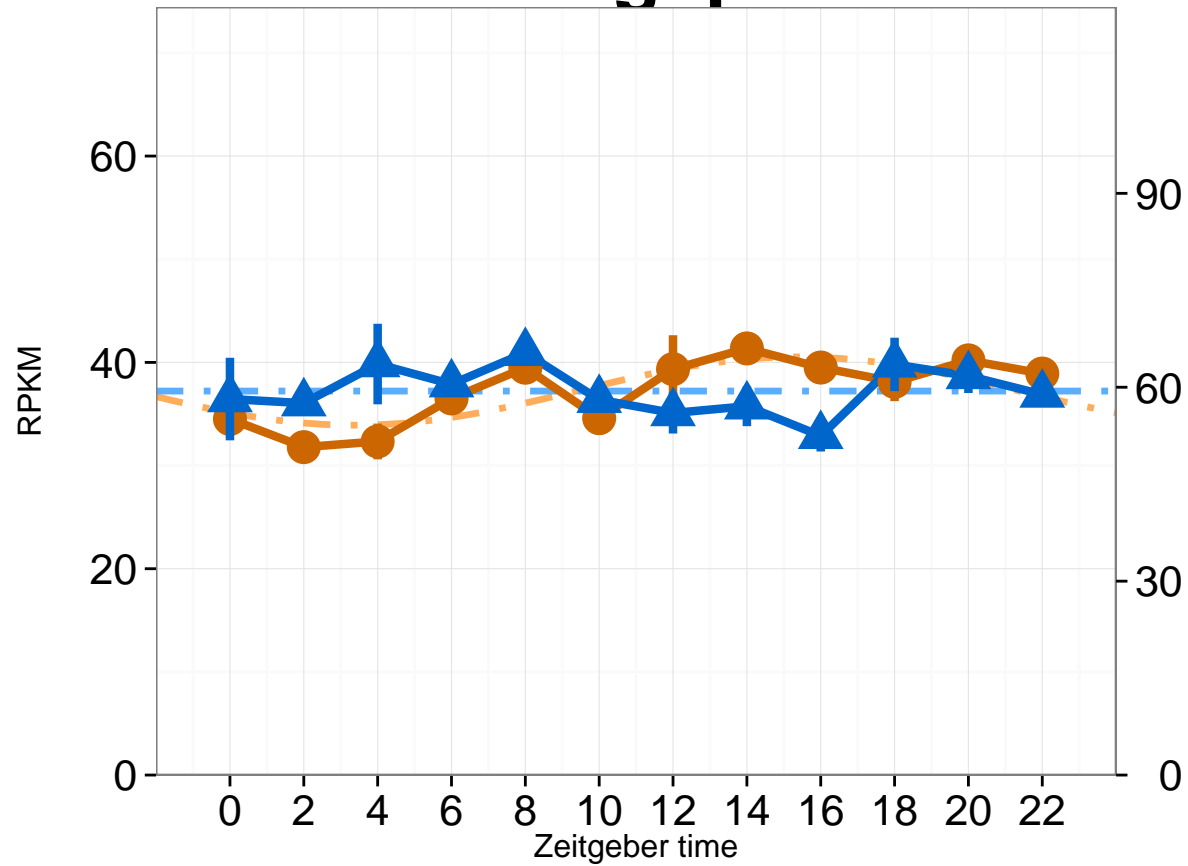

# Arhgap1

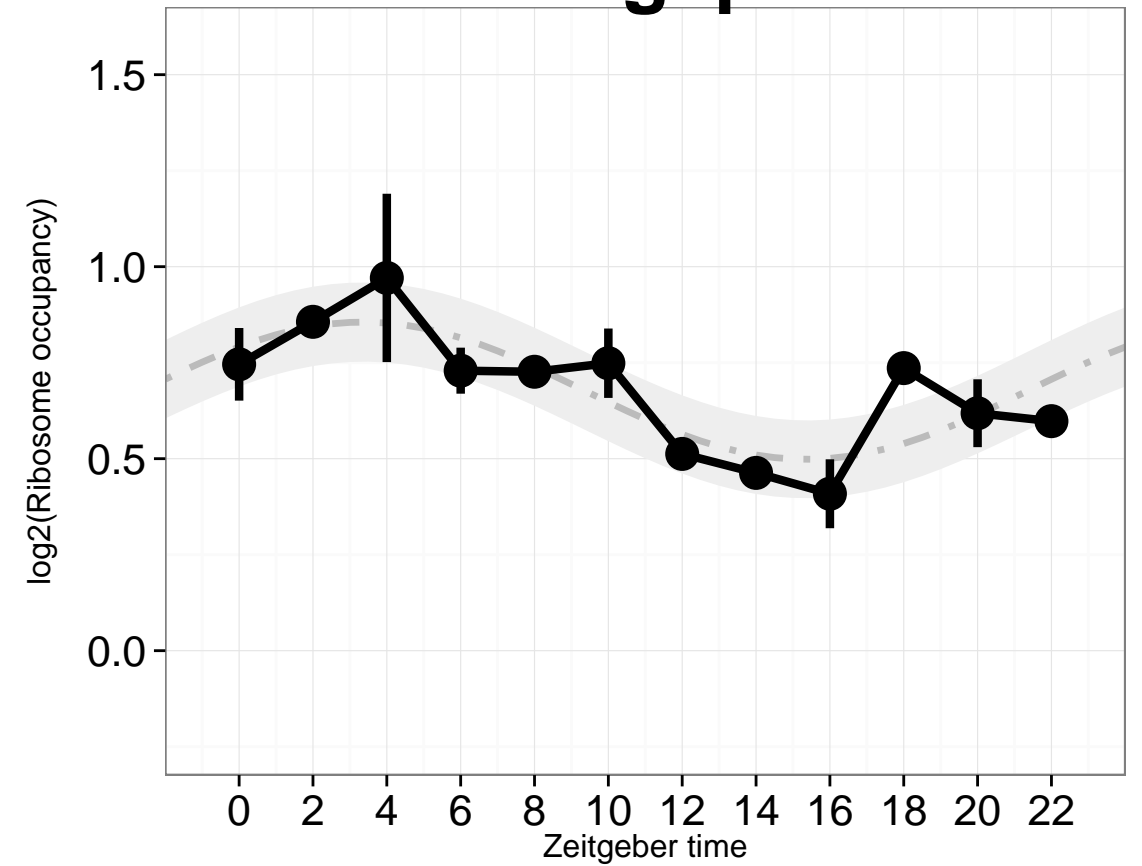

Supplement: Supplementary file 11720 [file 1]

## Lcp2

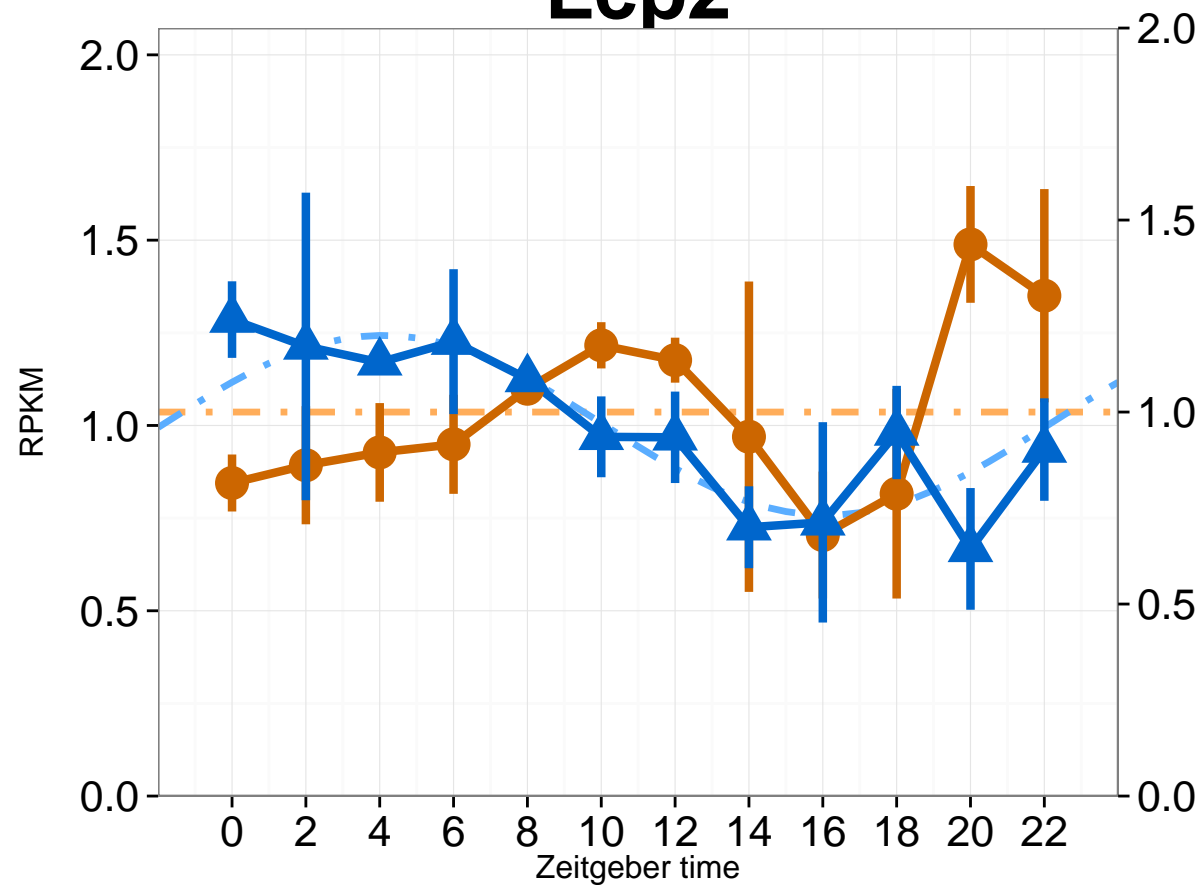

## Lcp2

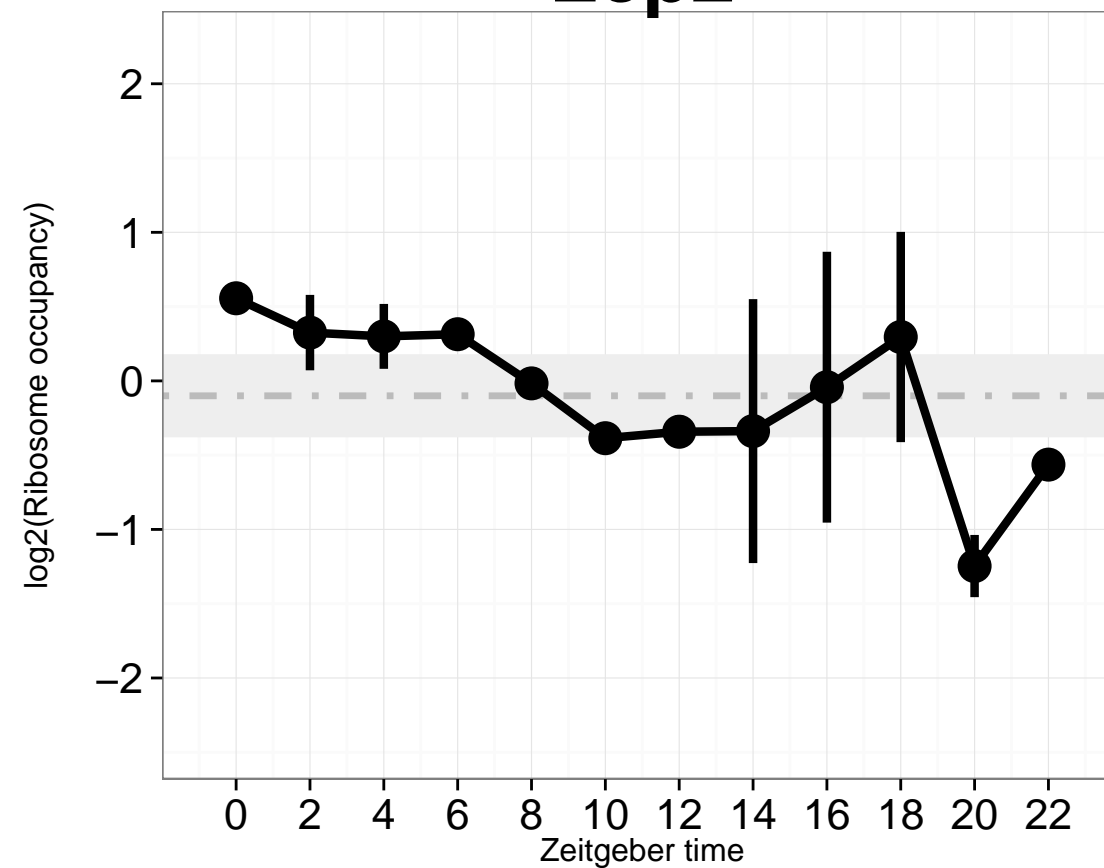

Supplement: Supplementary file 11721 [file 1]

## Qsox1

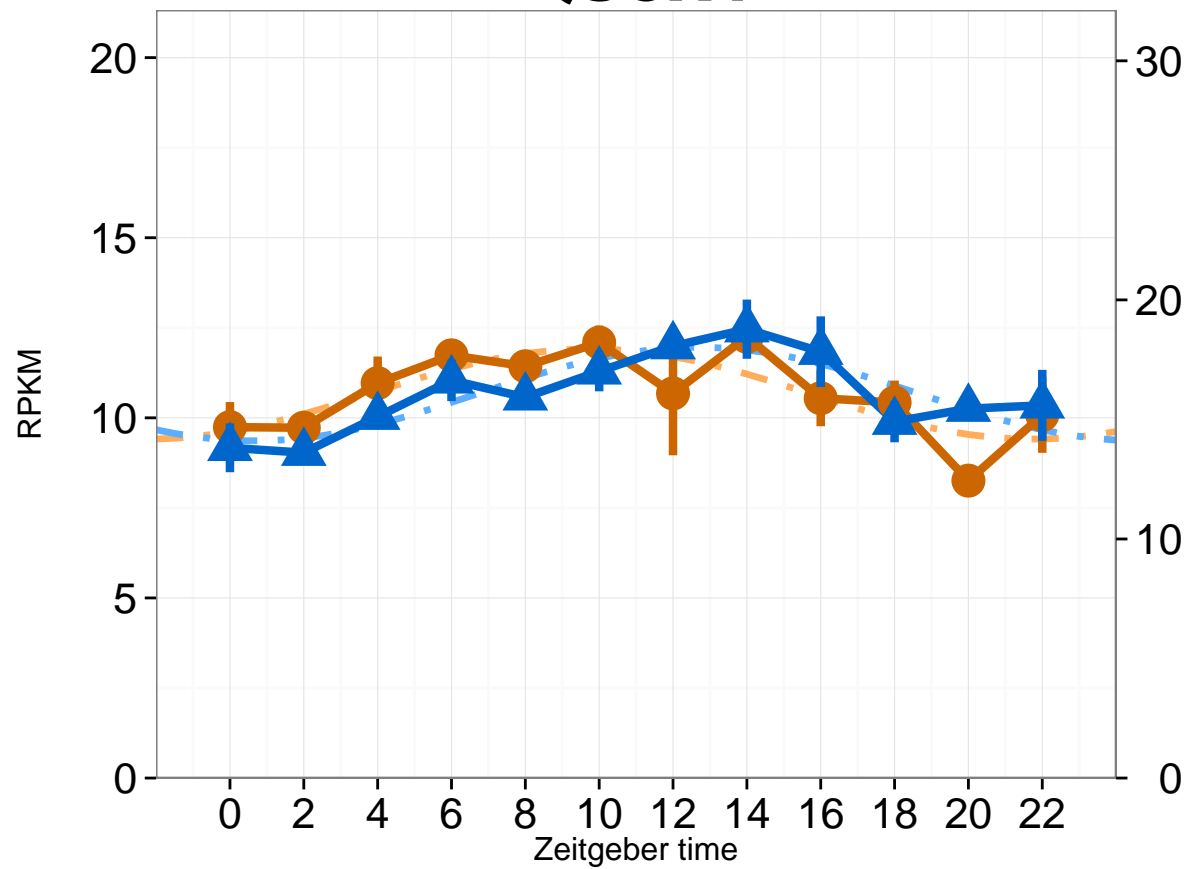

## Qsox1

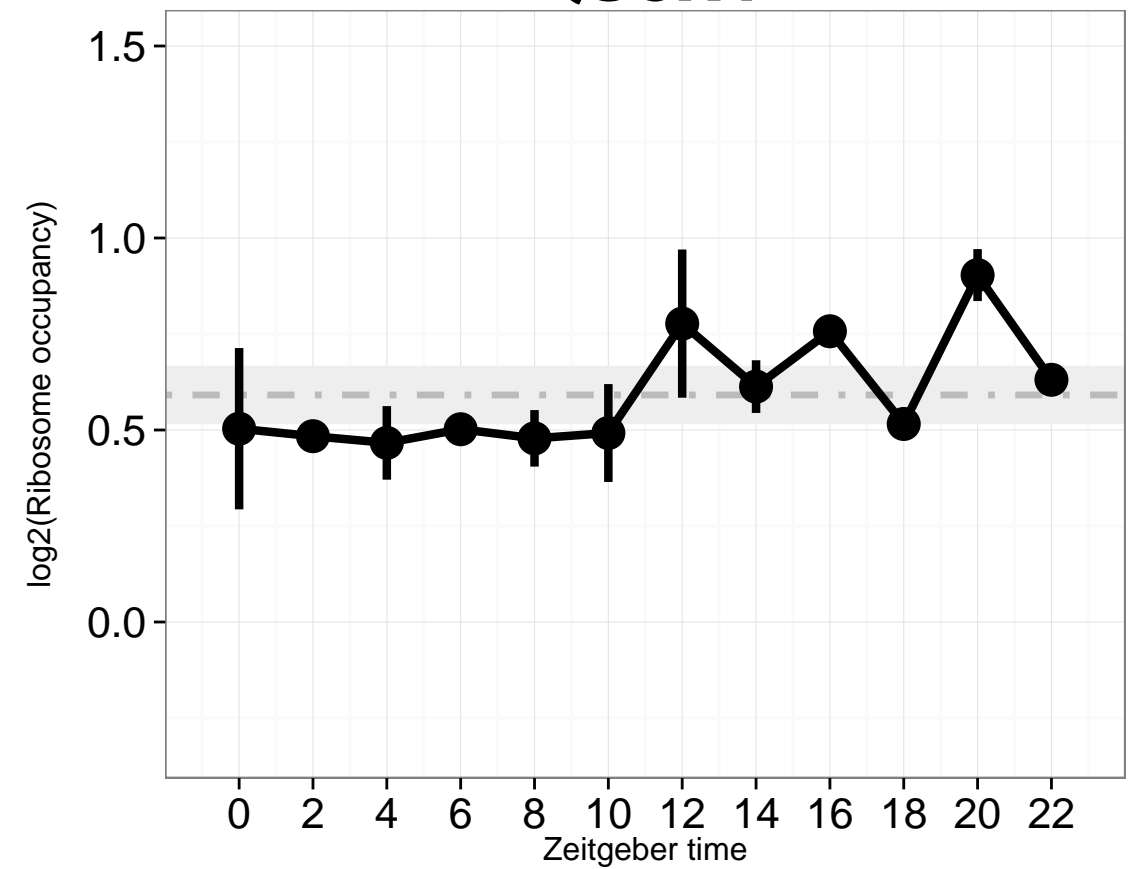

Supplement: Supplementary file 11722 [file 1]

# Mark1

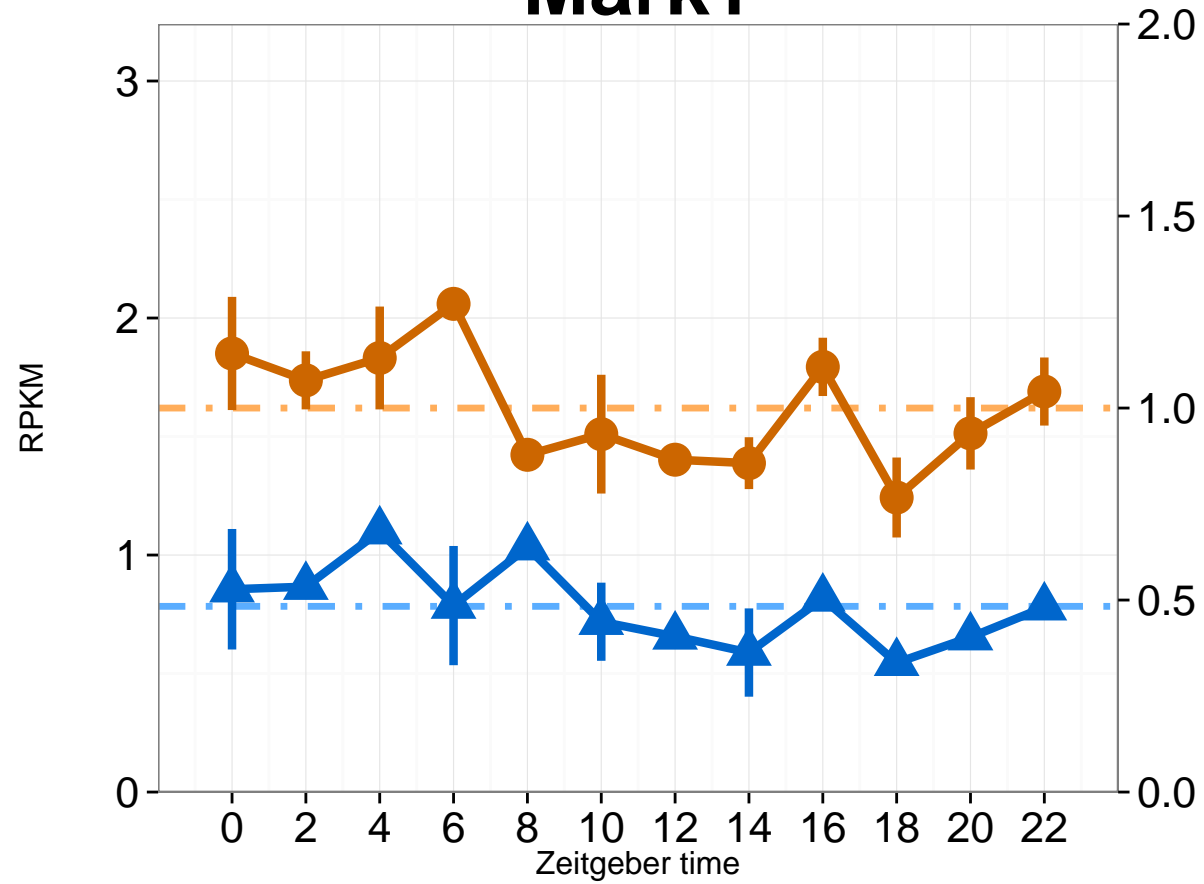

# Mark1

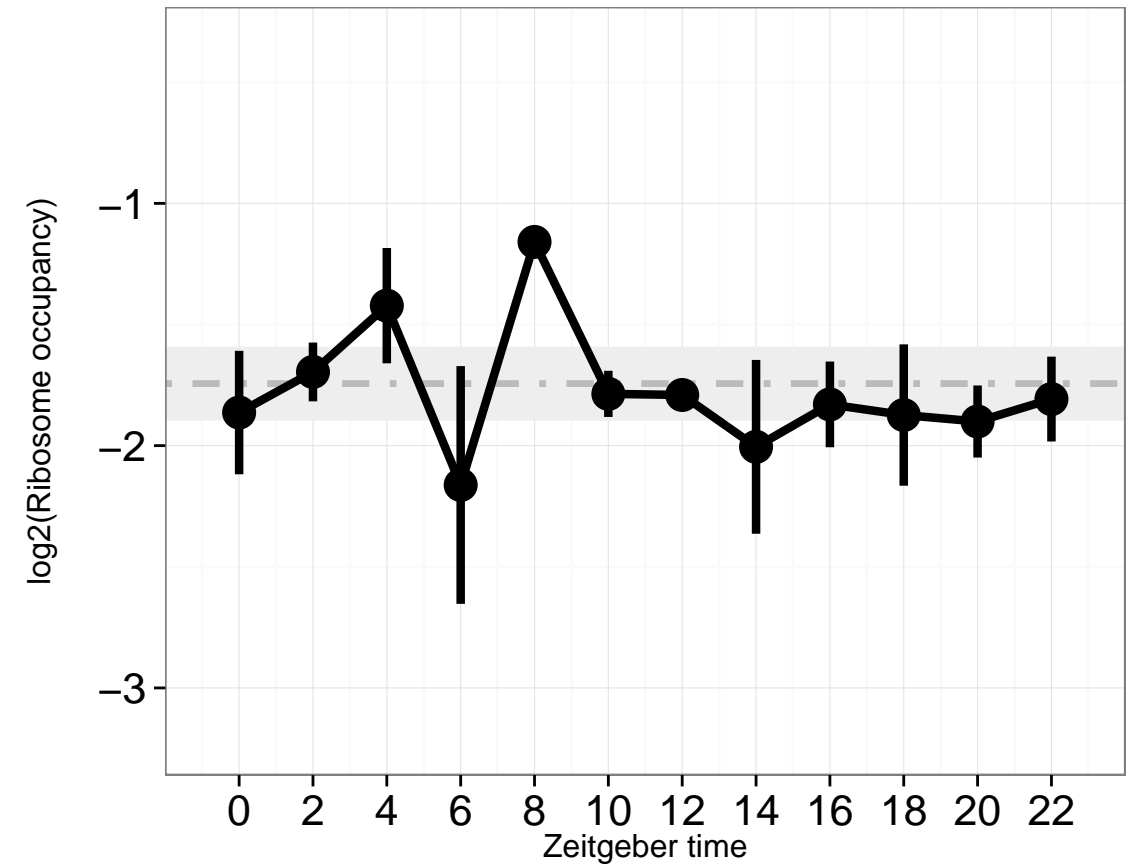

Supplement: Supplementary file 11723 [file 1]

## Glg1

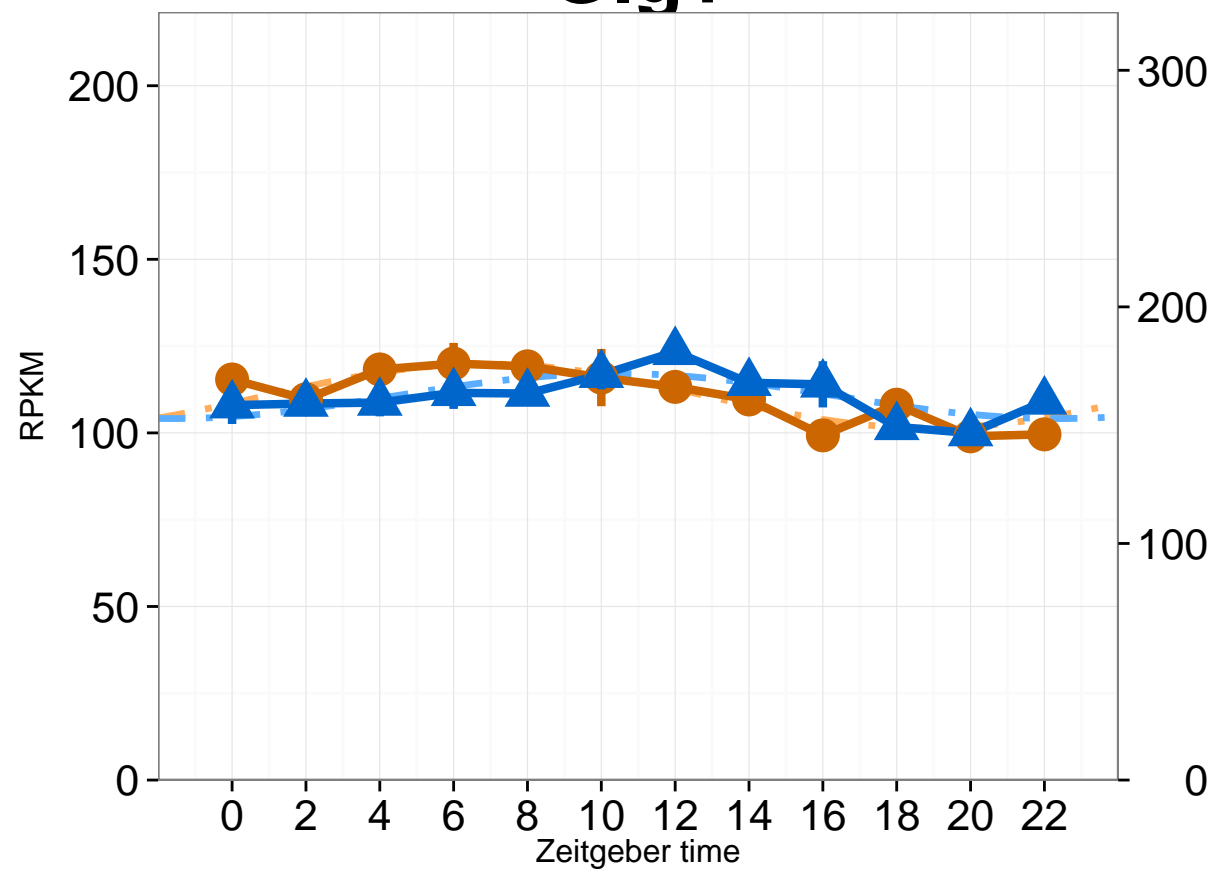

## Glg1

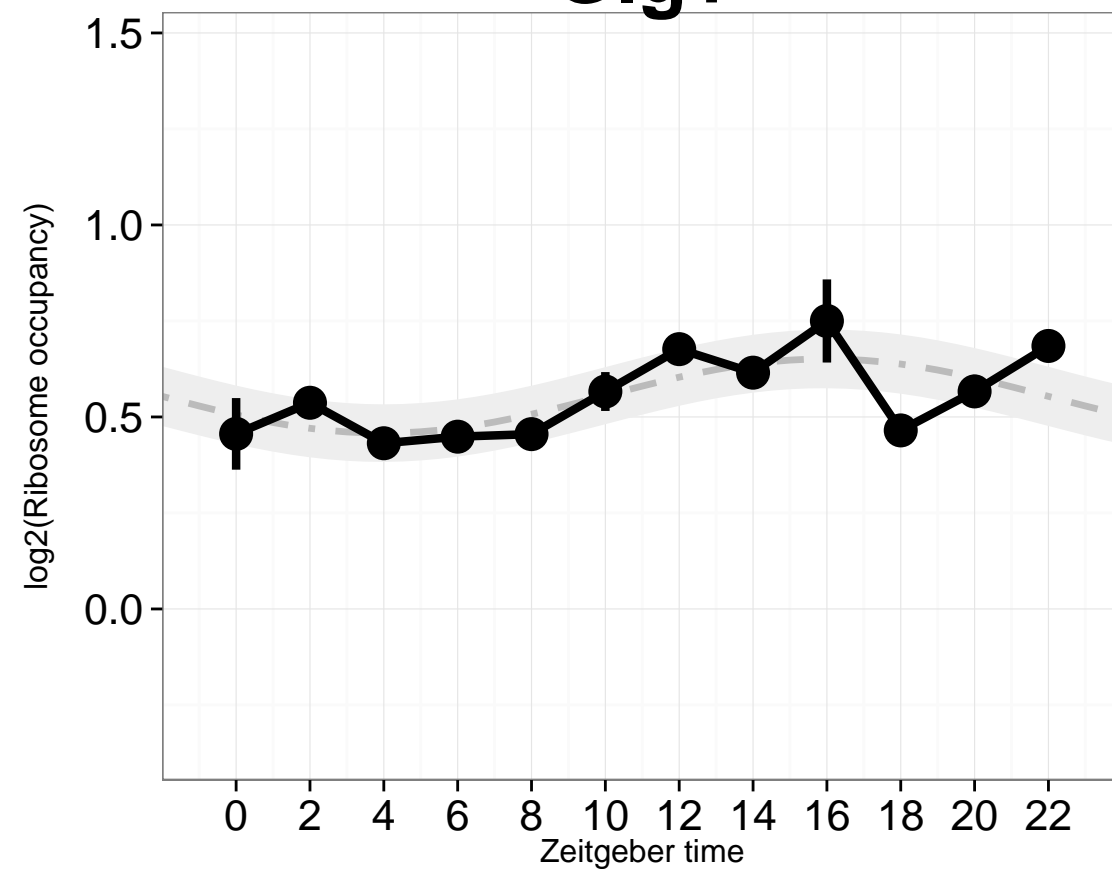

Supplement: Supplementary file 11724 [file 1]

# Samsn1

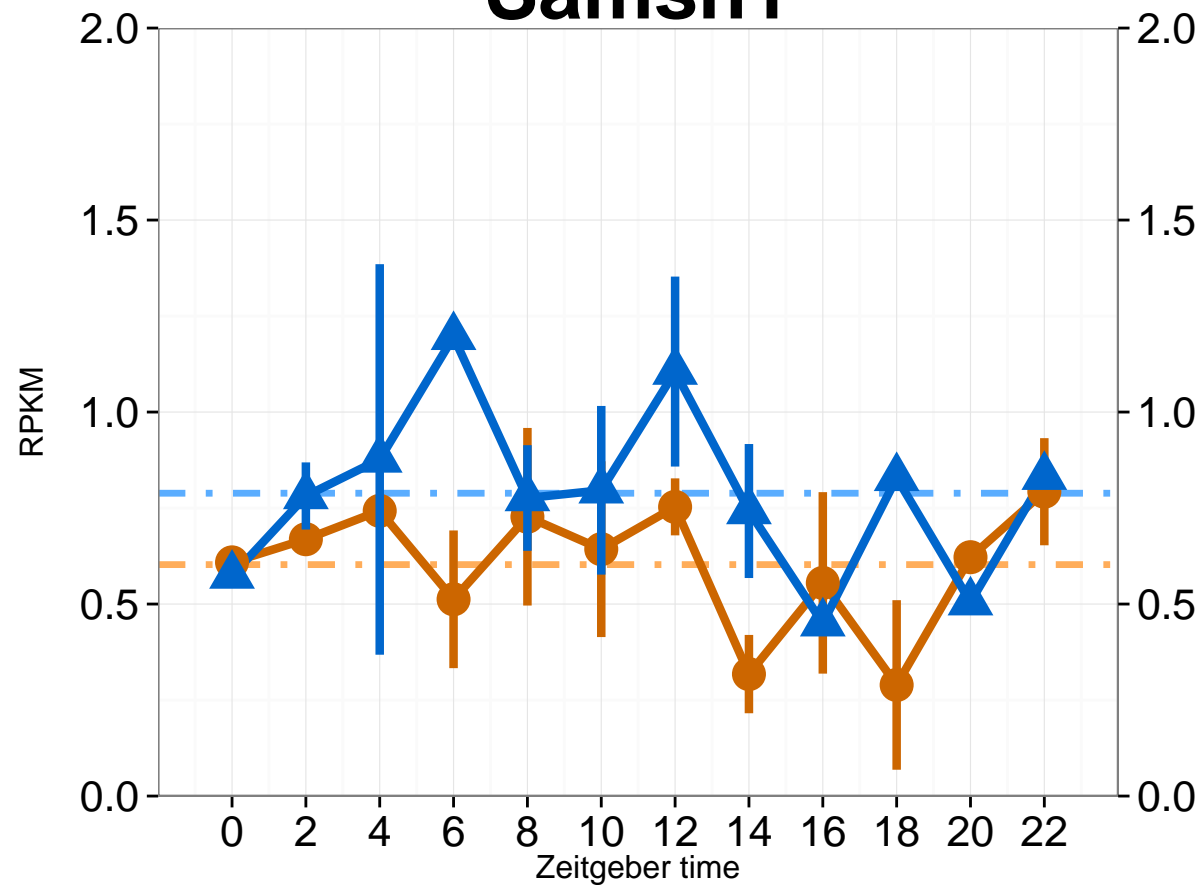

# Samsn1

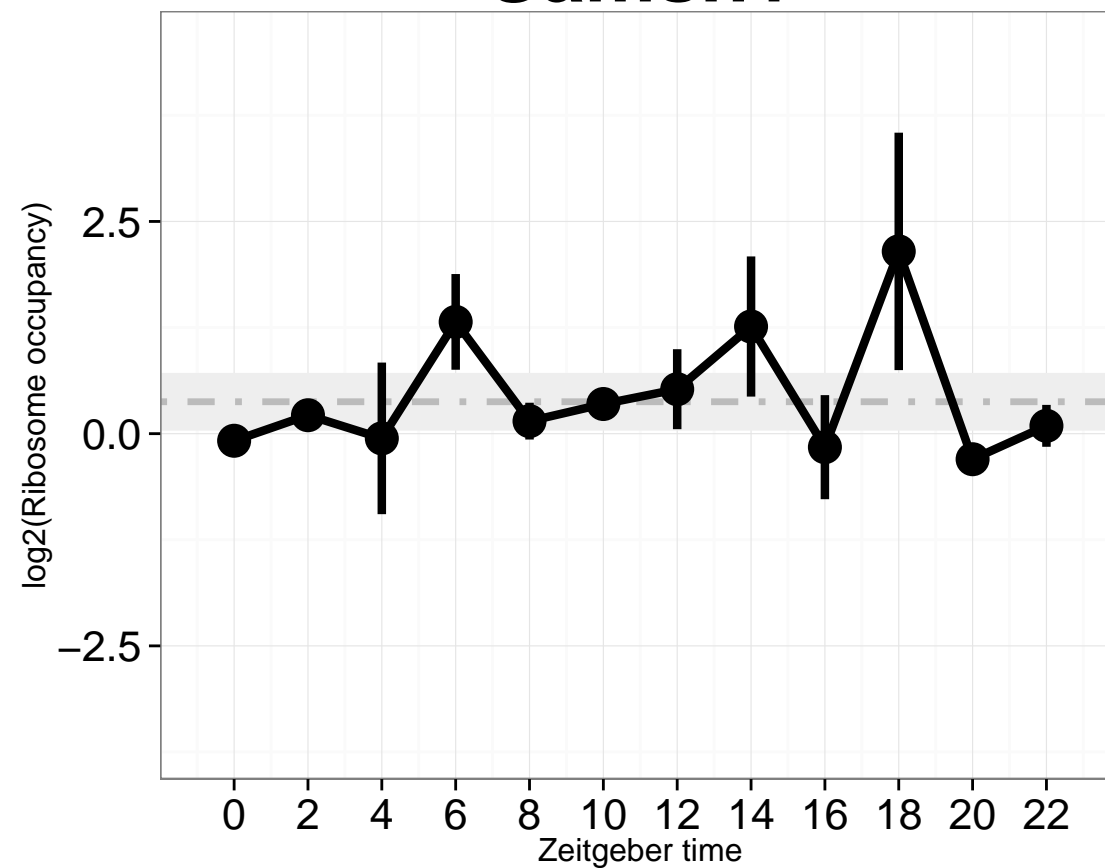

Supplement: Supplementary file 11725 [file 1]

## Chdh

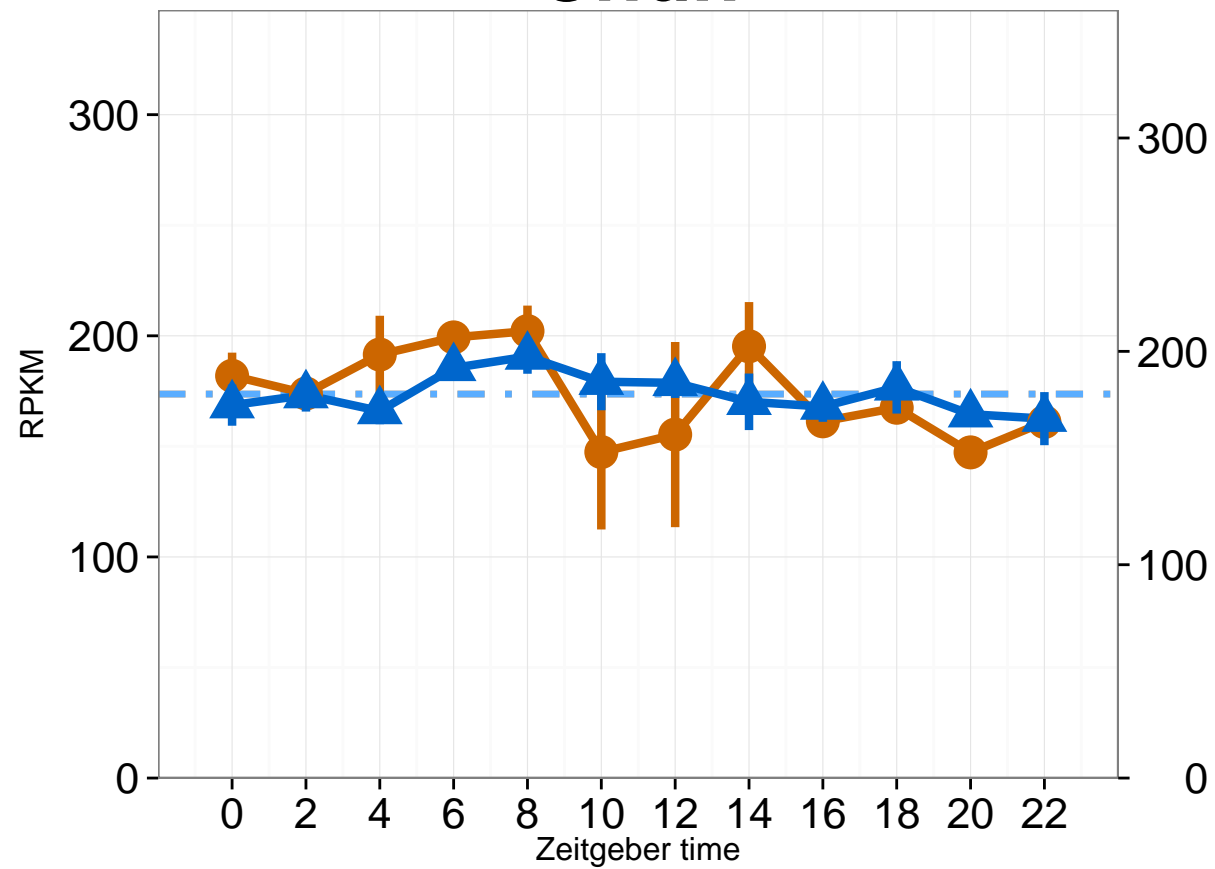

## Chdh

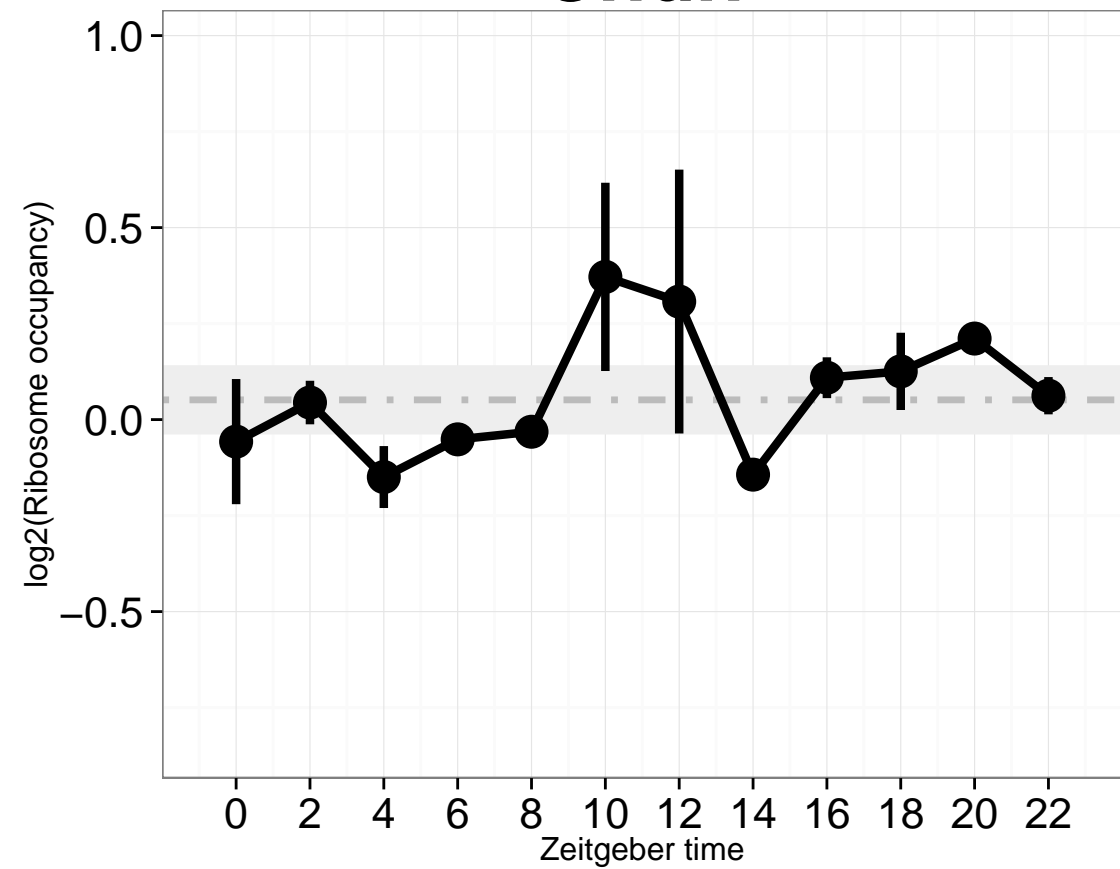

Supplement: Supplementary file 11726 [file 1]

## Scfd1

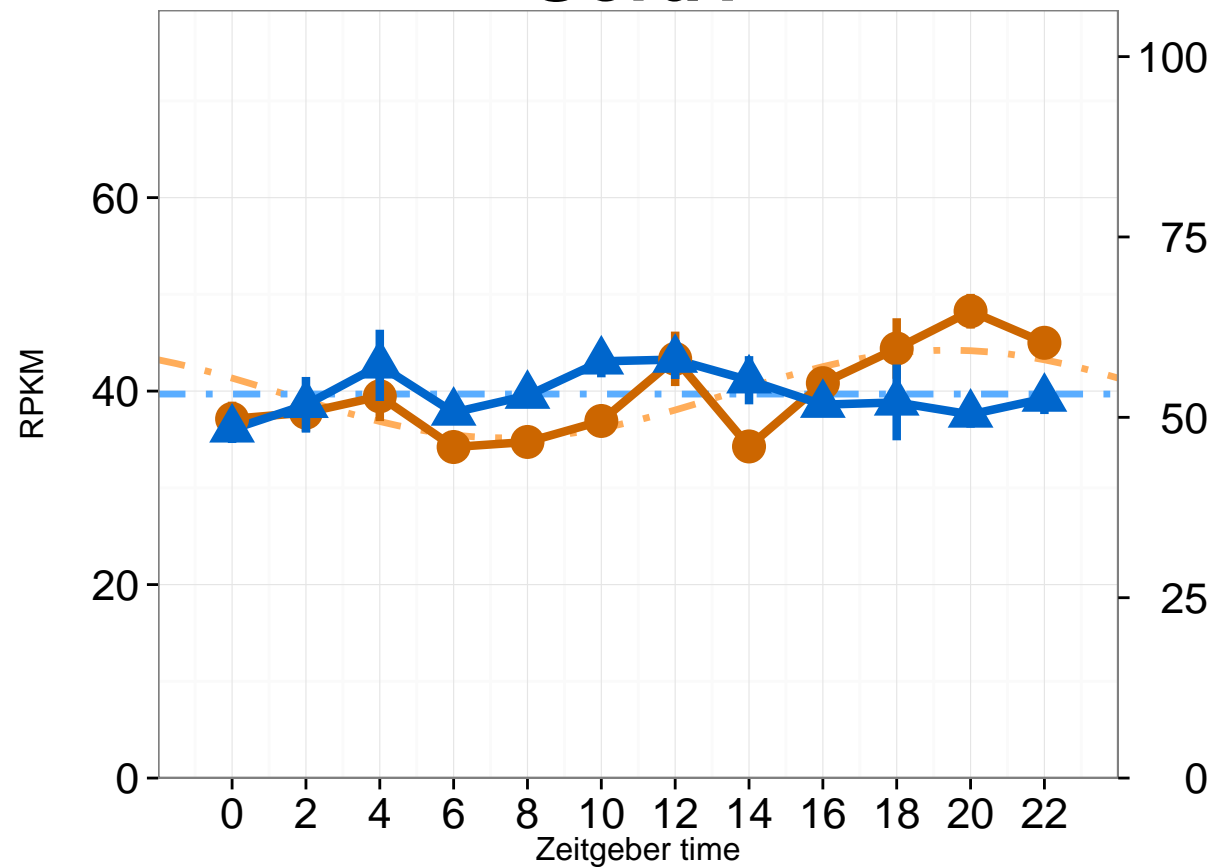

## Scfd1

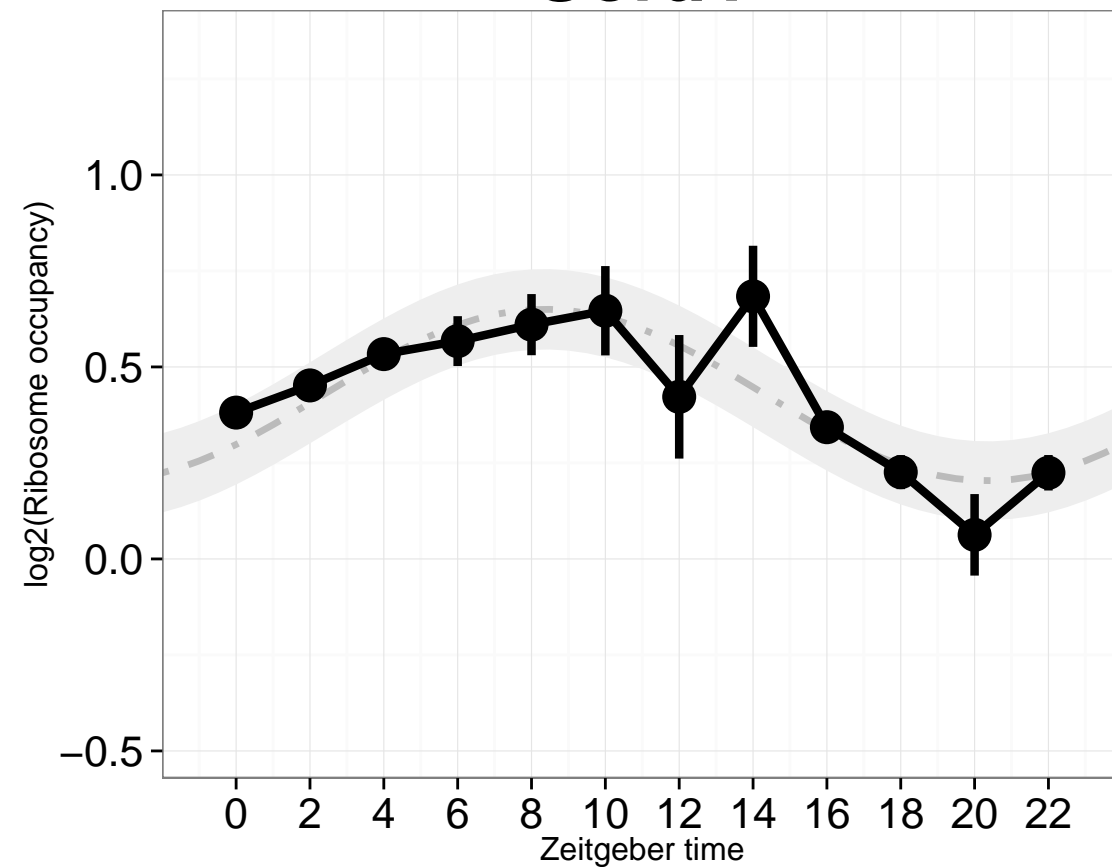

Supplement: Supplementary file 11727 [file 1]

# Hrasls

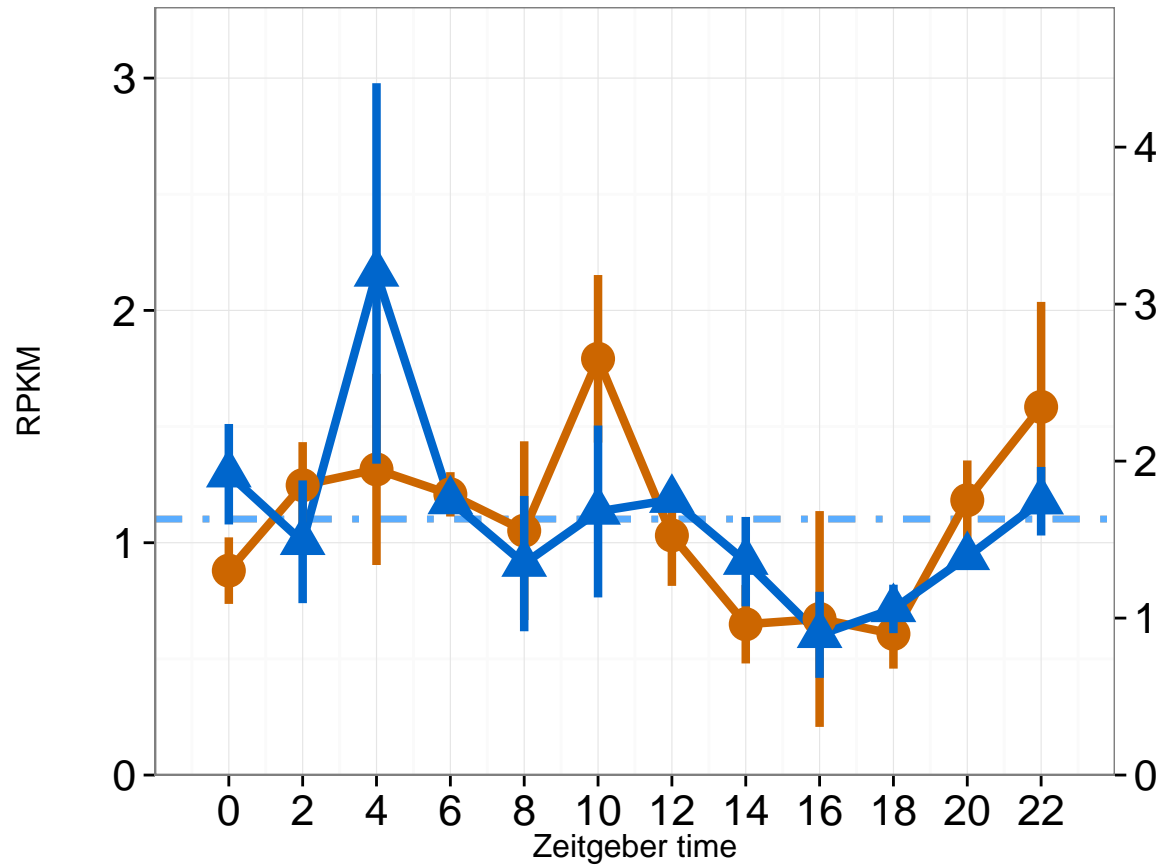

# Hrasls

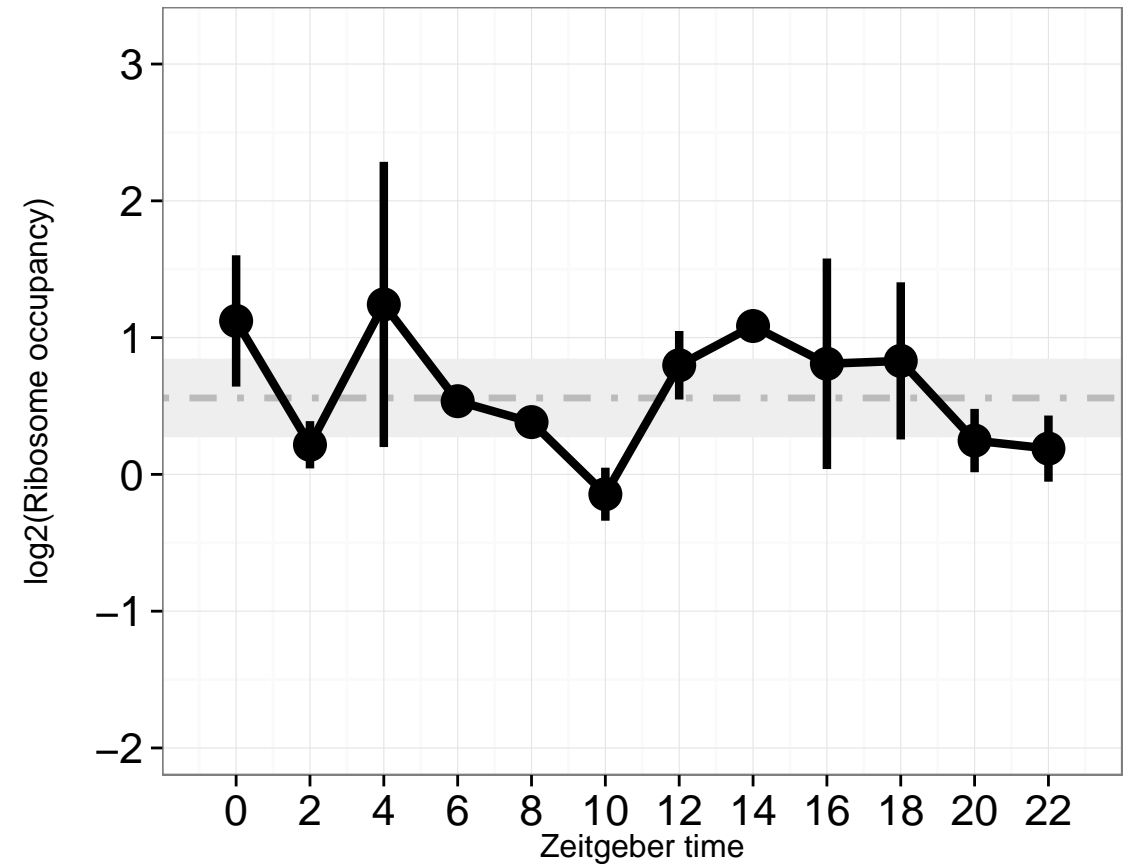

Supplement: Supplementary file 11728 [file 1]

## Nrf1

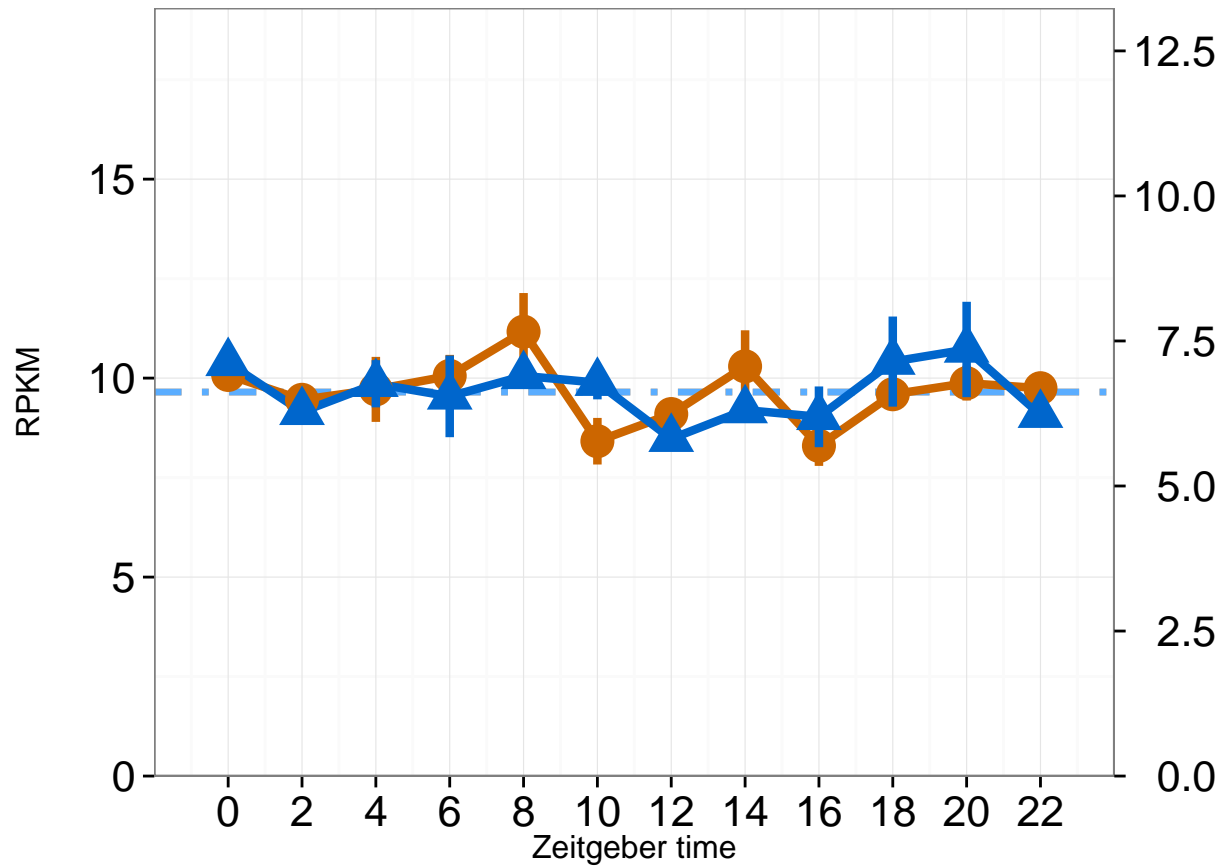

## Nrf1

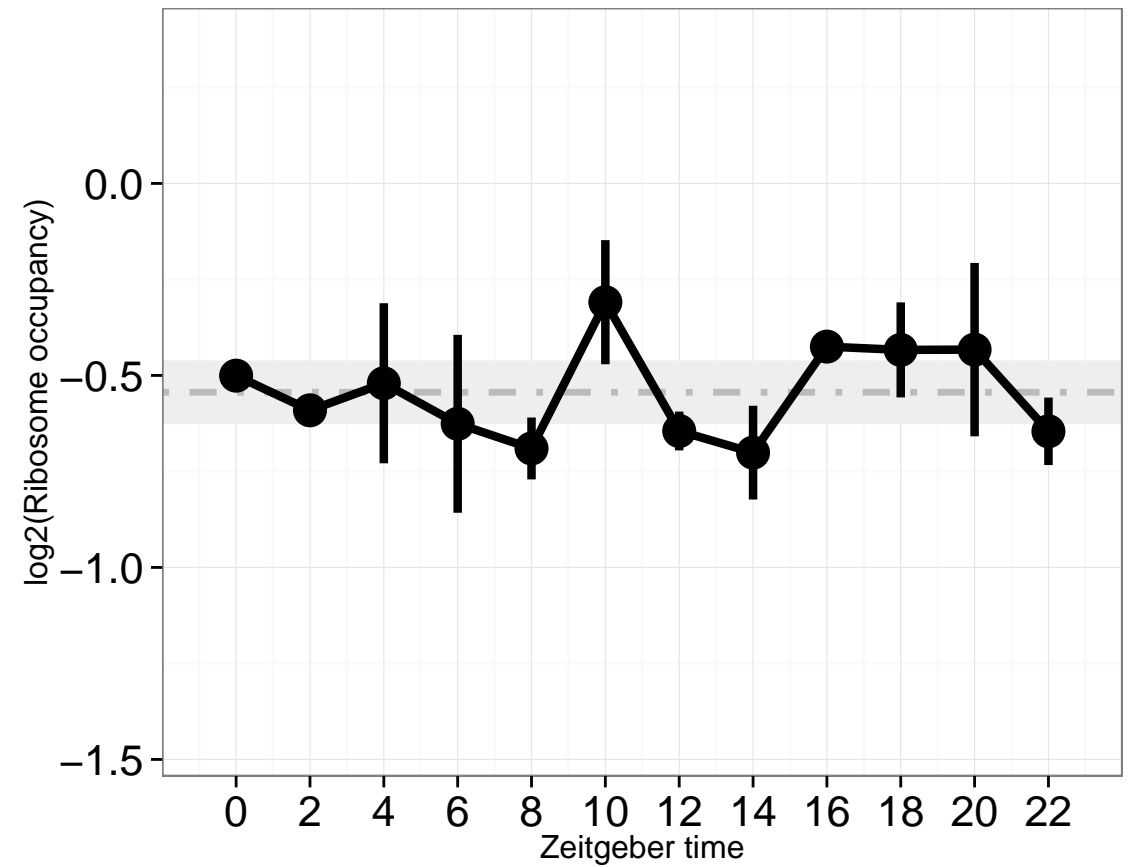

Supplement: Supplementary file 11729 [file 1]

# Paip1

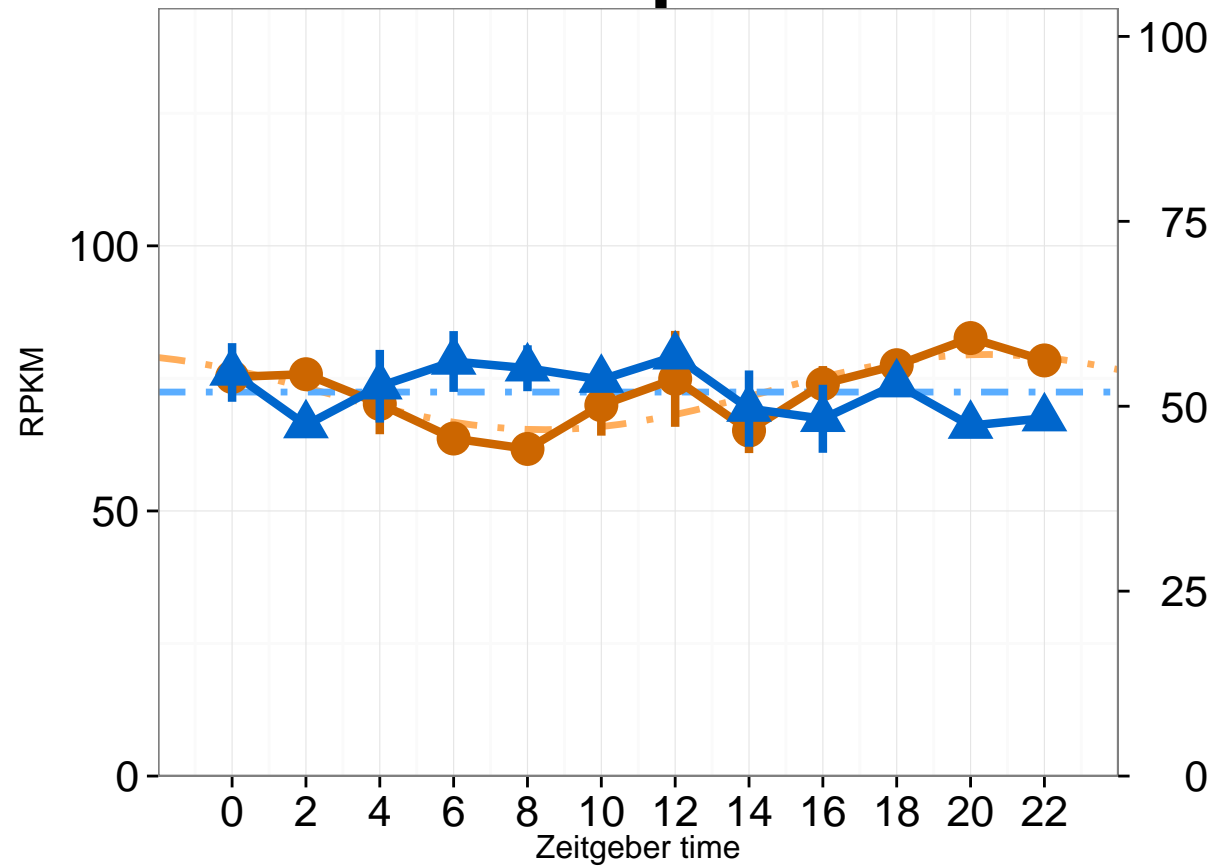

# Paip1

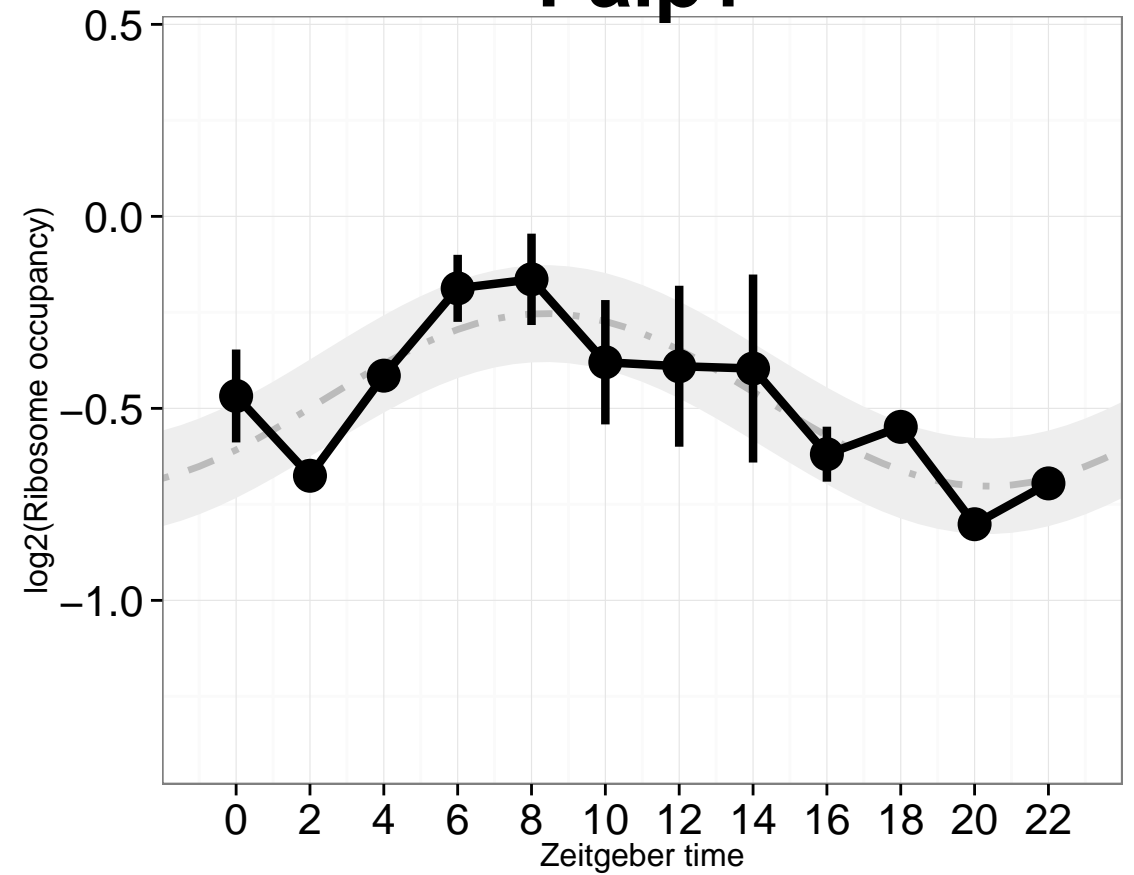

Supplement: Supplementary file 11730 [file 1]

## Cdc7

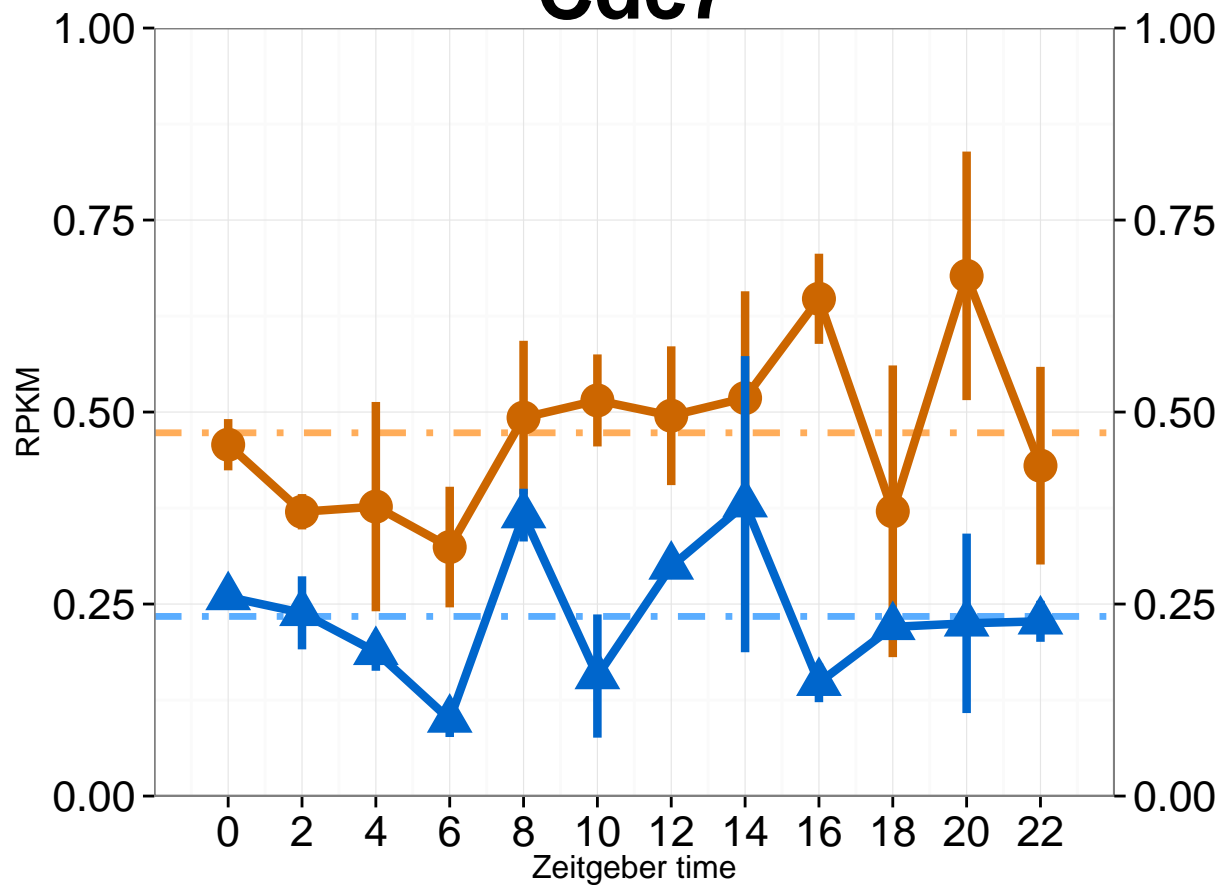

## Cdc7

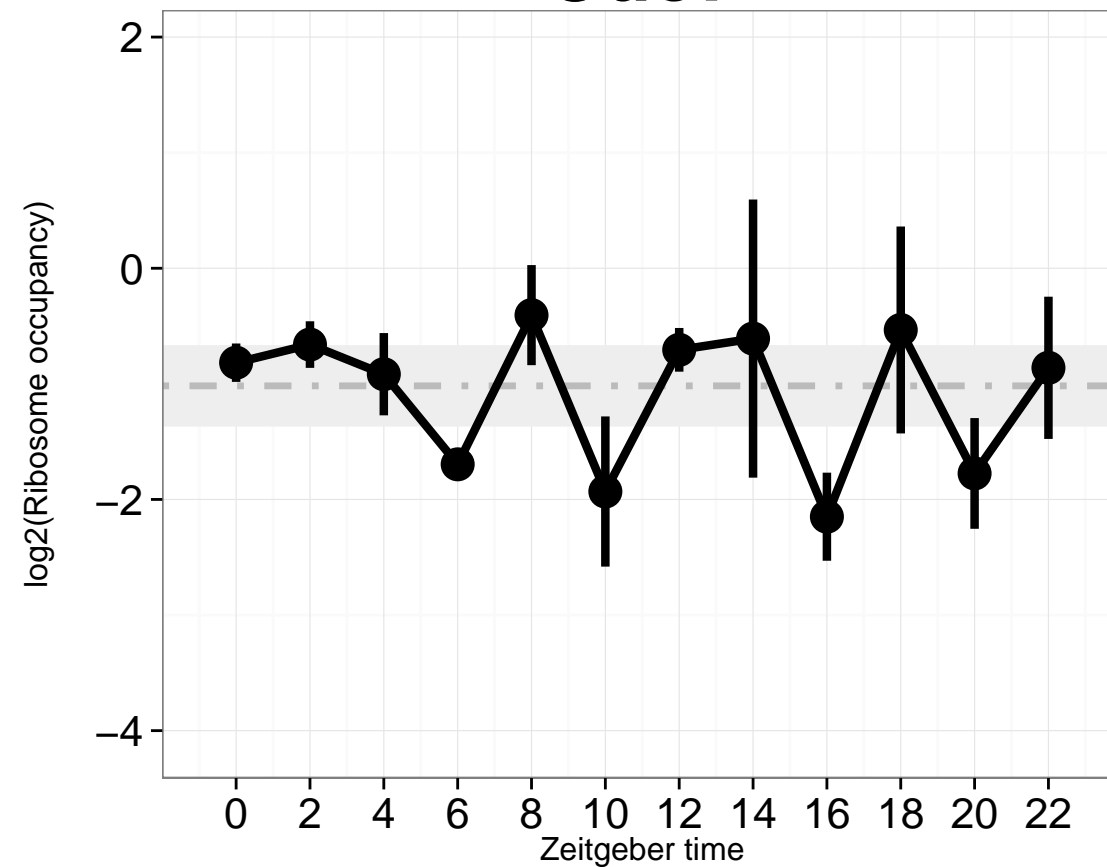

Supplement: Supplementary file 11731 [file 1]

## Sp4

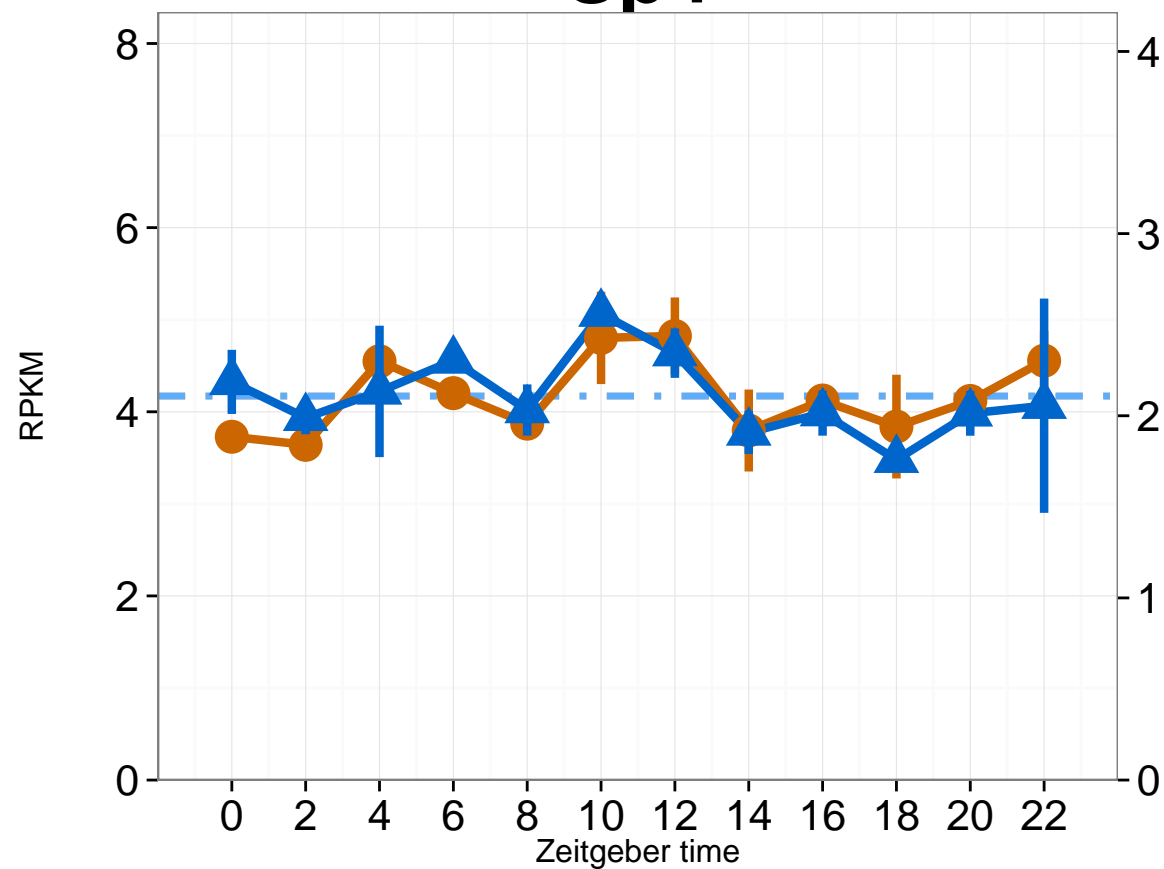

## Sp4

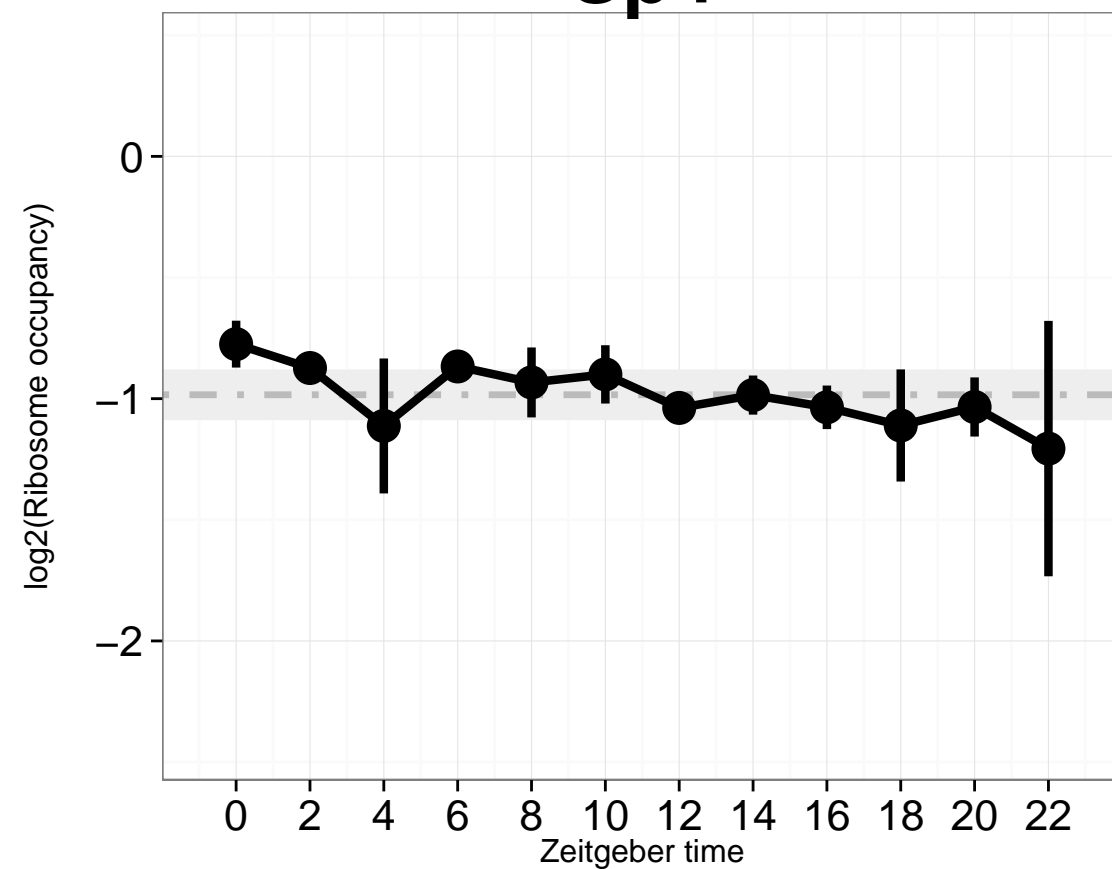

Supplement: Supplementary file 11732 [file 1]

# Sema4d

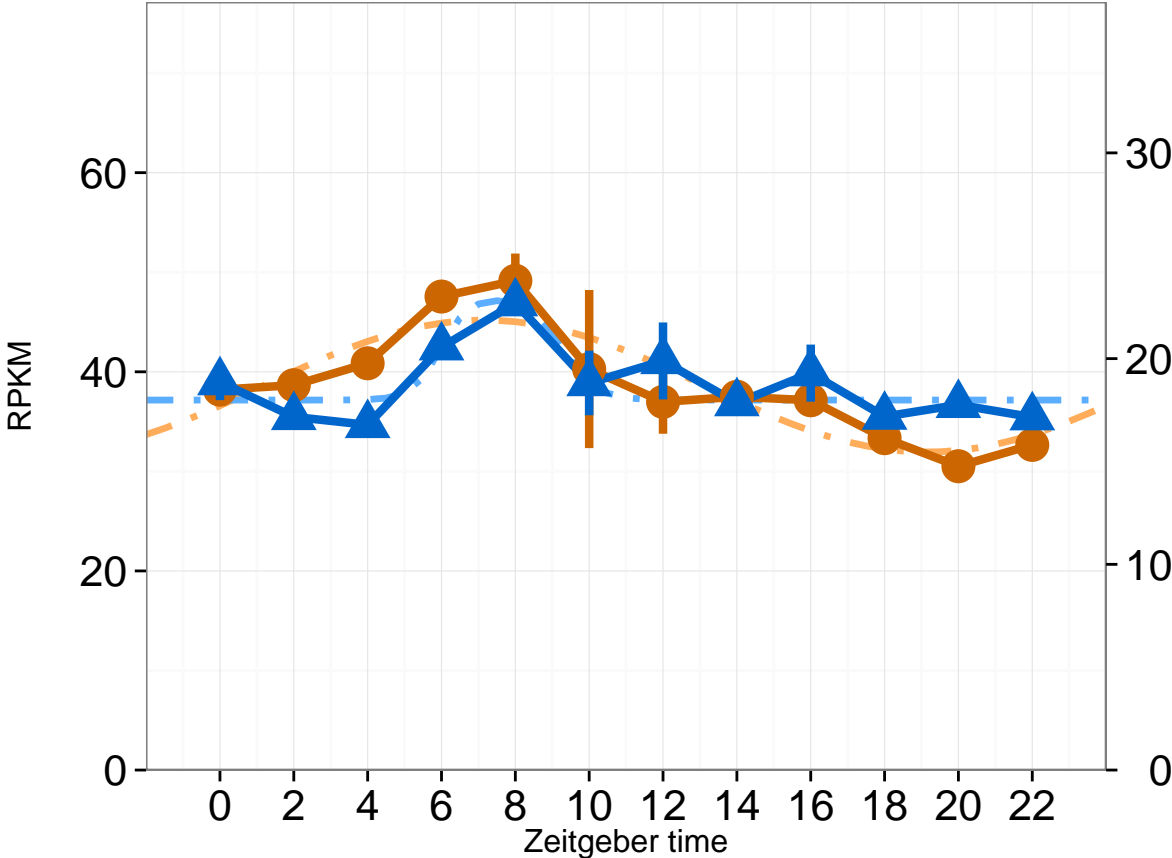

# Sema4d

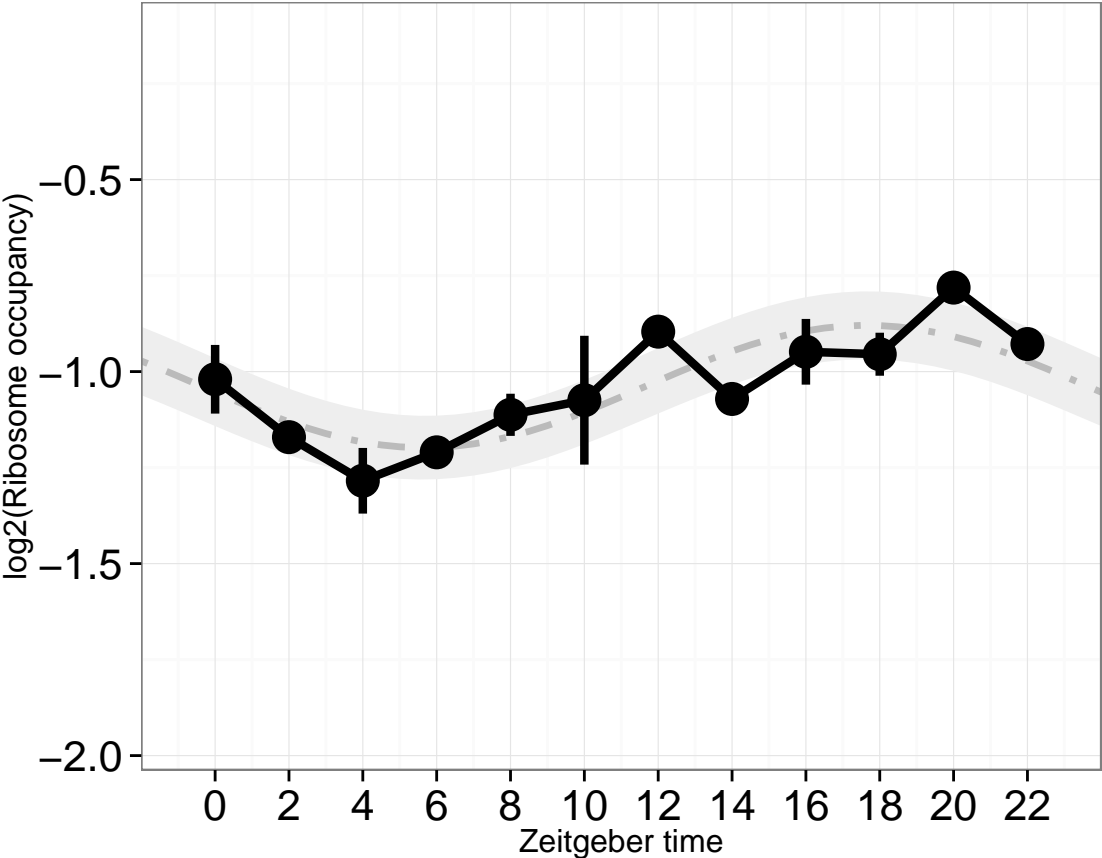

Supplement: Supplementary file 11733 [file 1]

# Ppip5k1

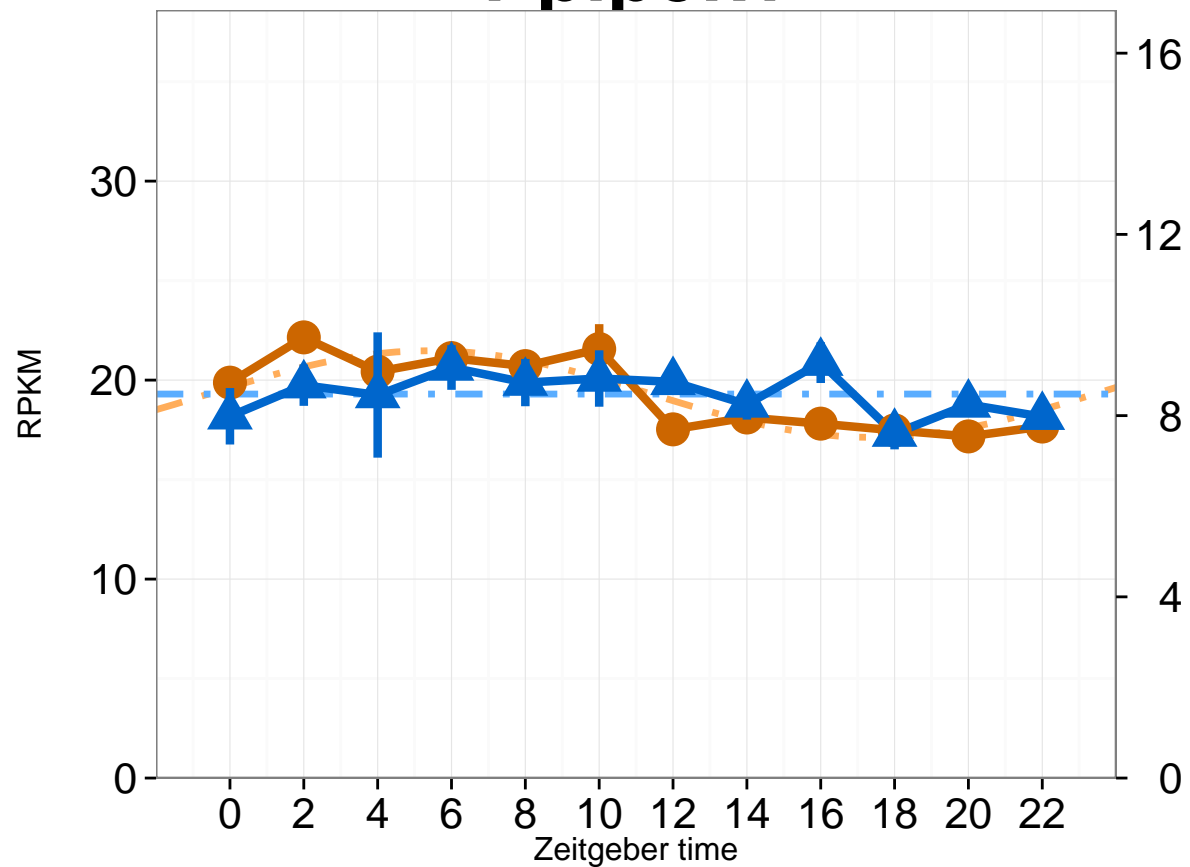

# Ppip5k1

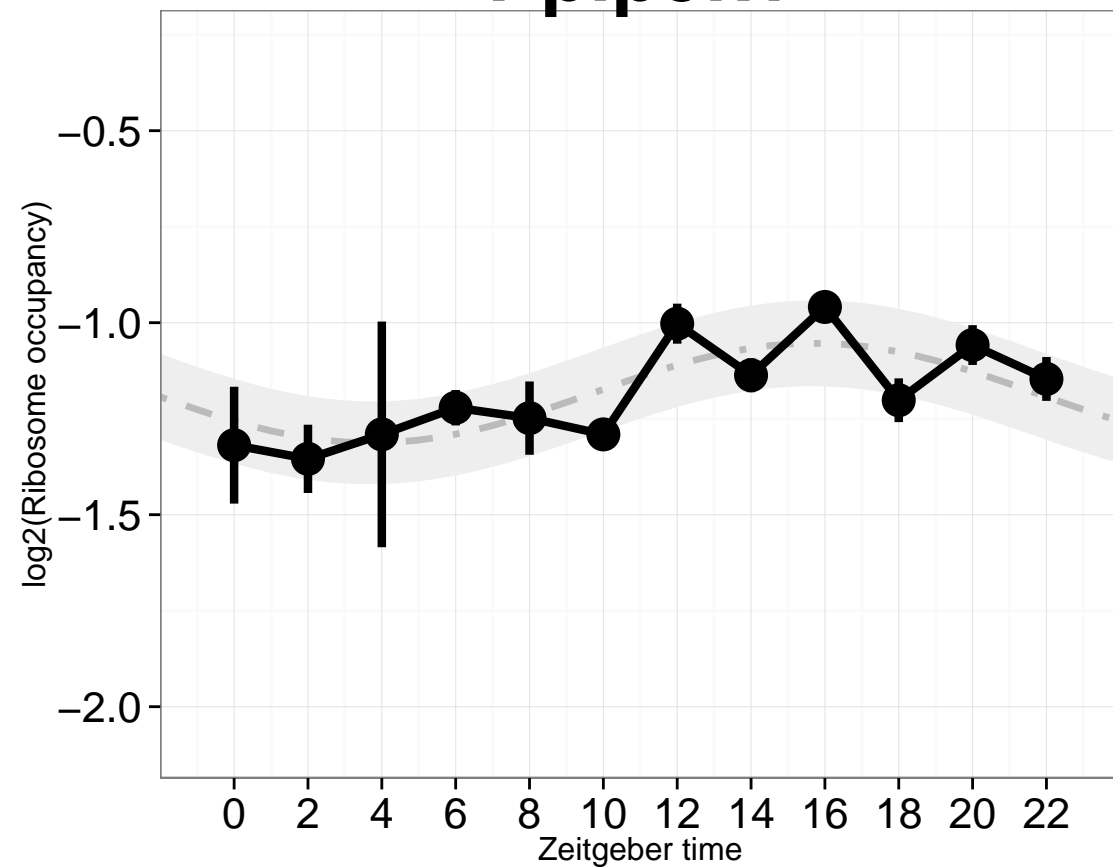

Supplement: Supplementary file 11734 [file 1]

## Hpx

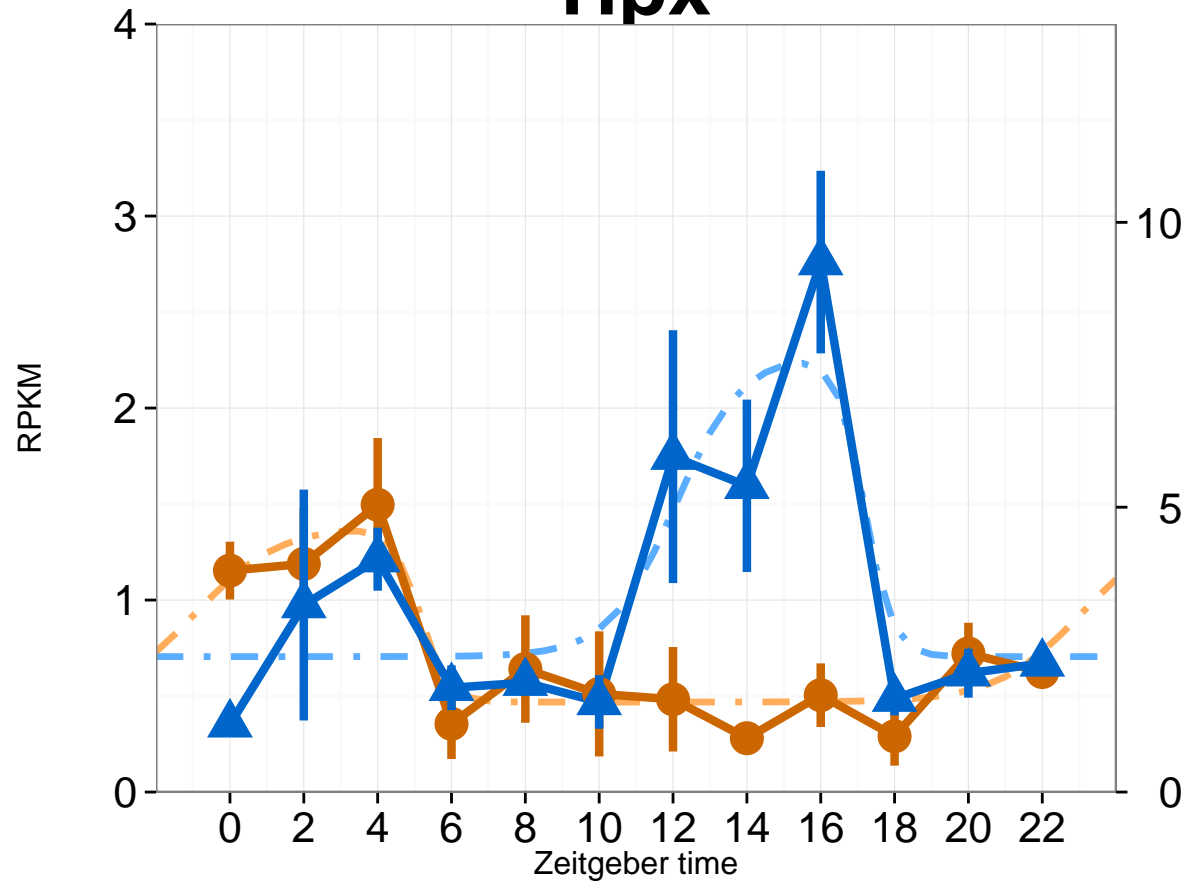

## Hpx

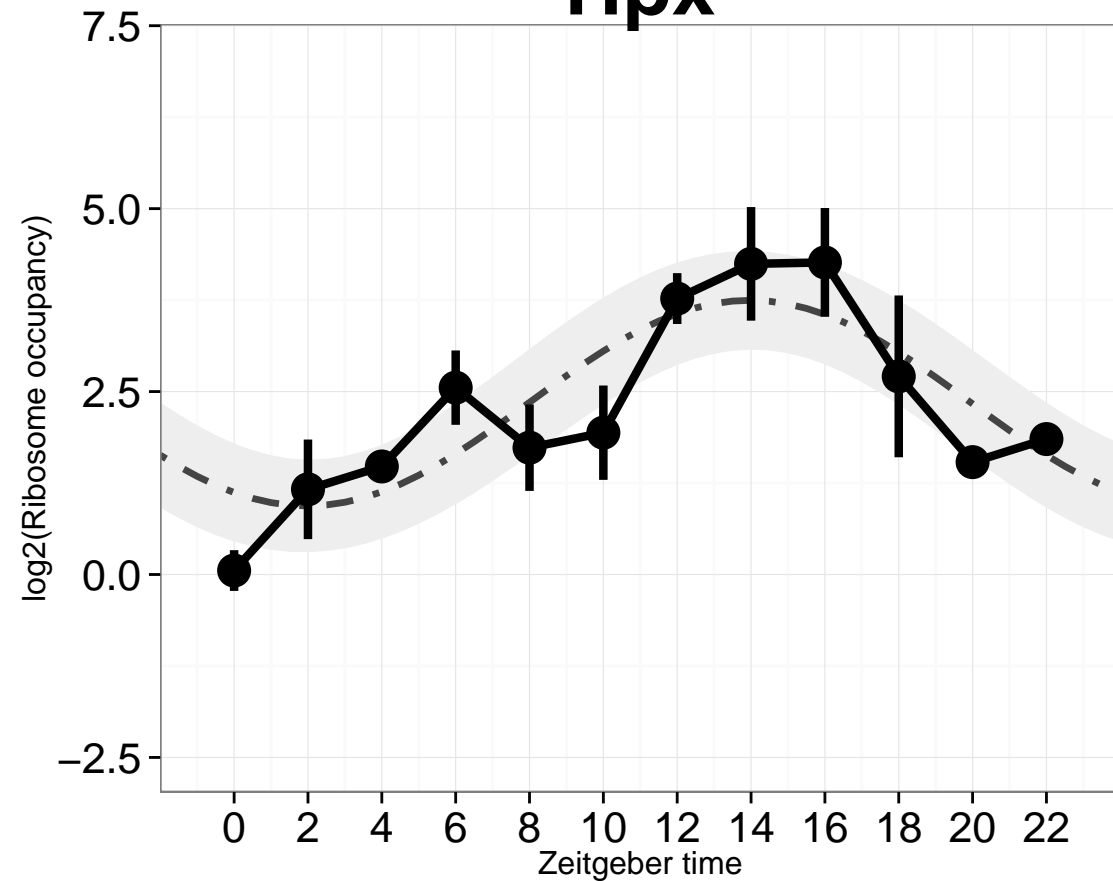

Supplement: Supplementary file 11735 [file 1]

## TtII1

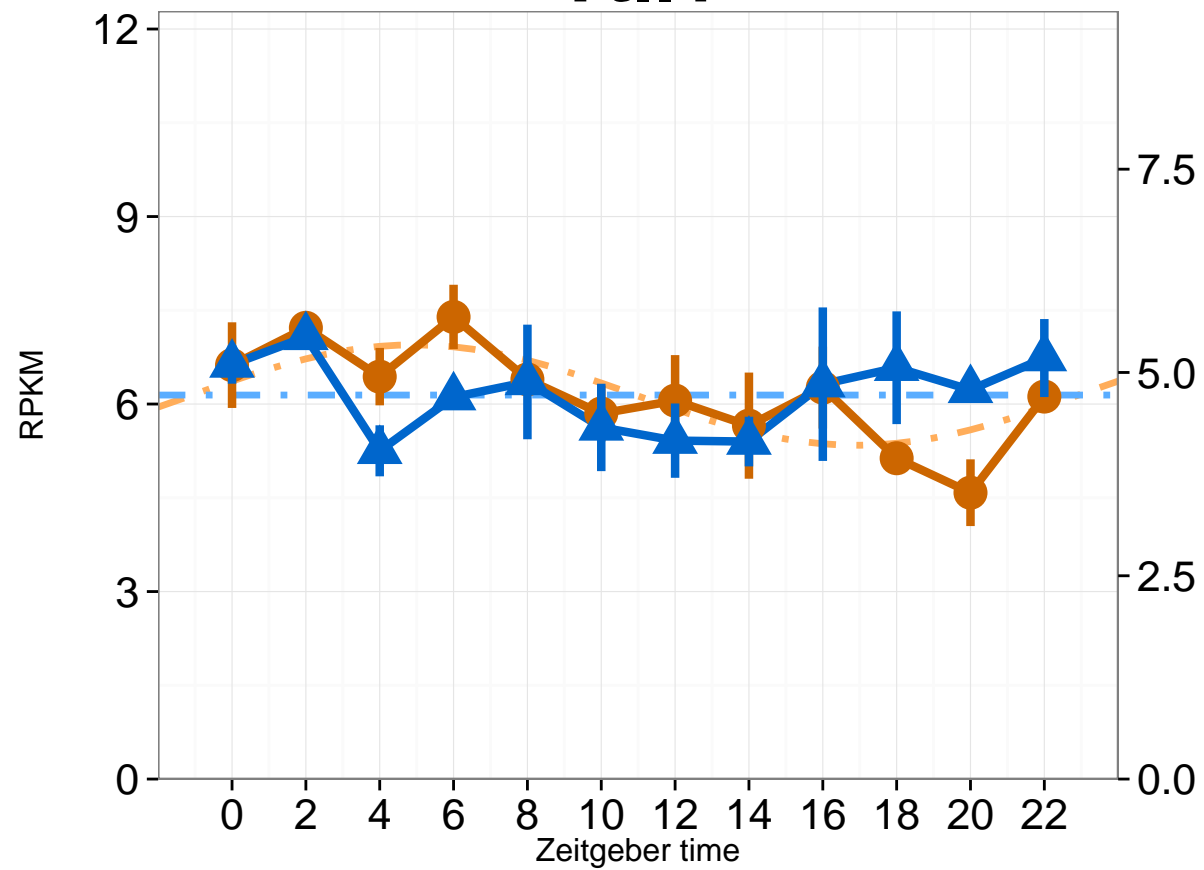

## TtII1

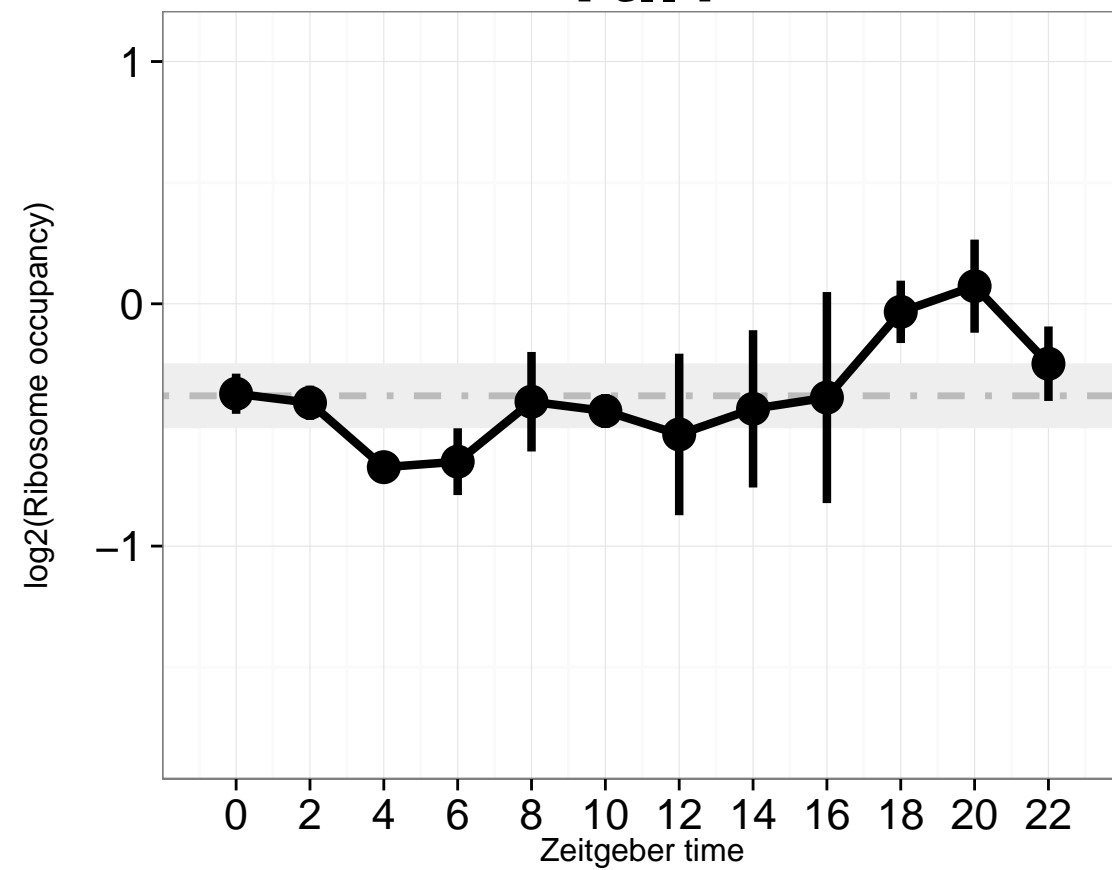

Supplement: Supplementary file 11736 [file 1]

# Cep110

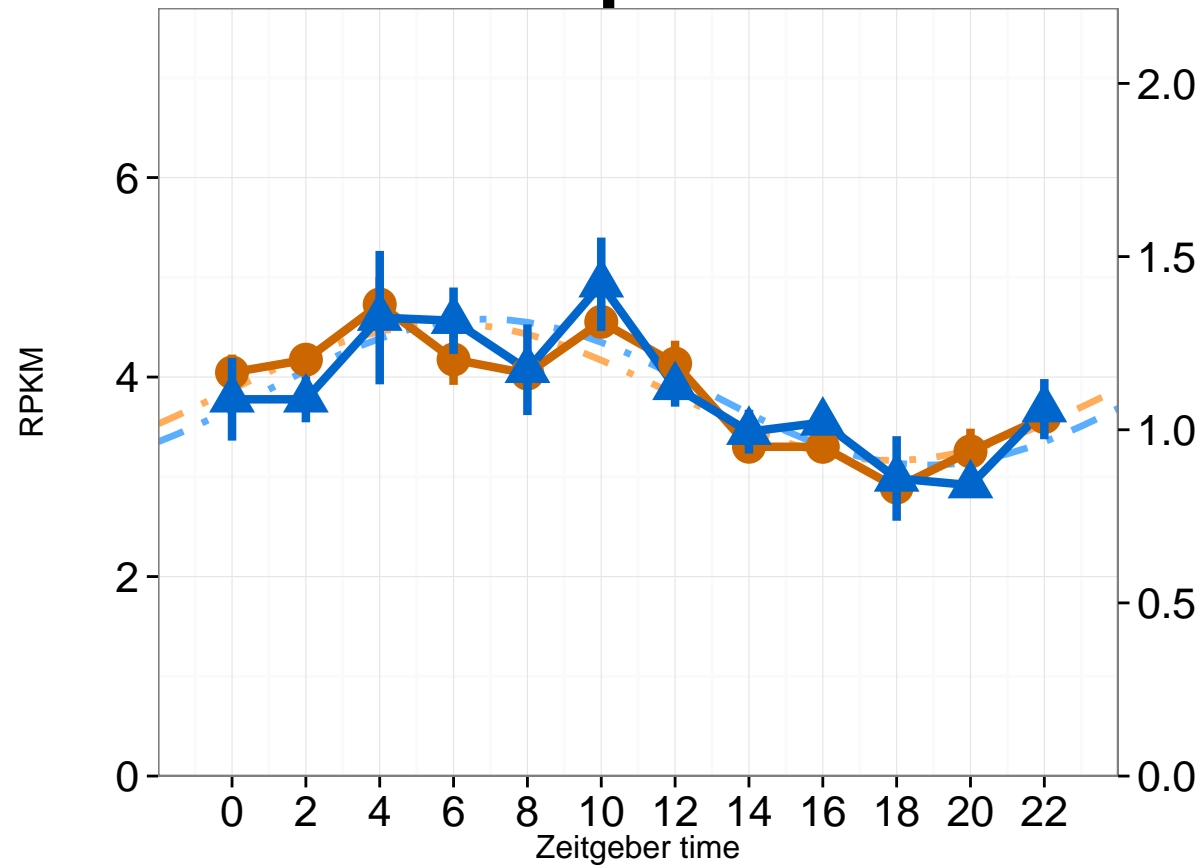

# Cep110

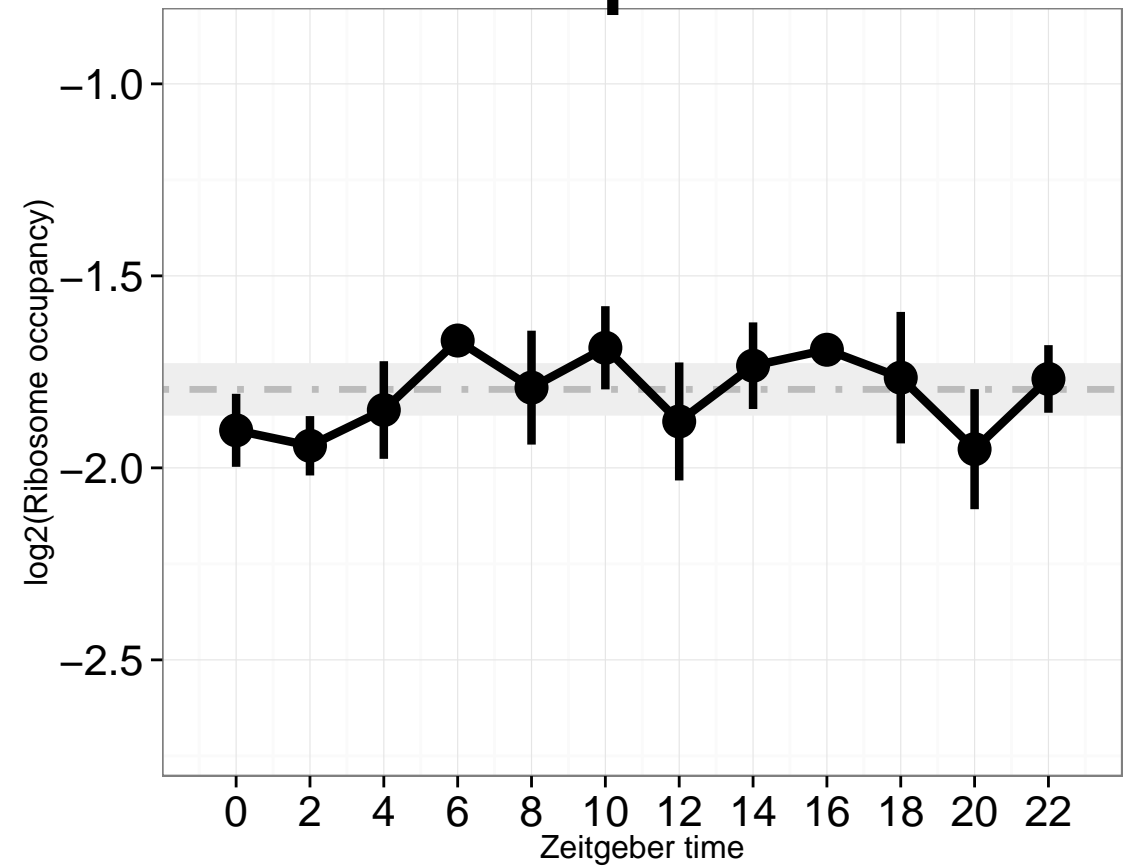

Supplement: Supplementary file 11737 [file 1]

# Aco1

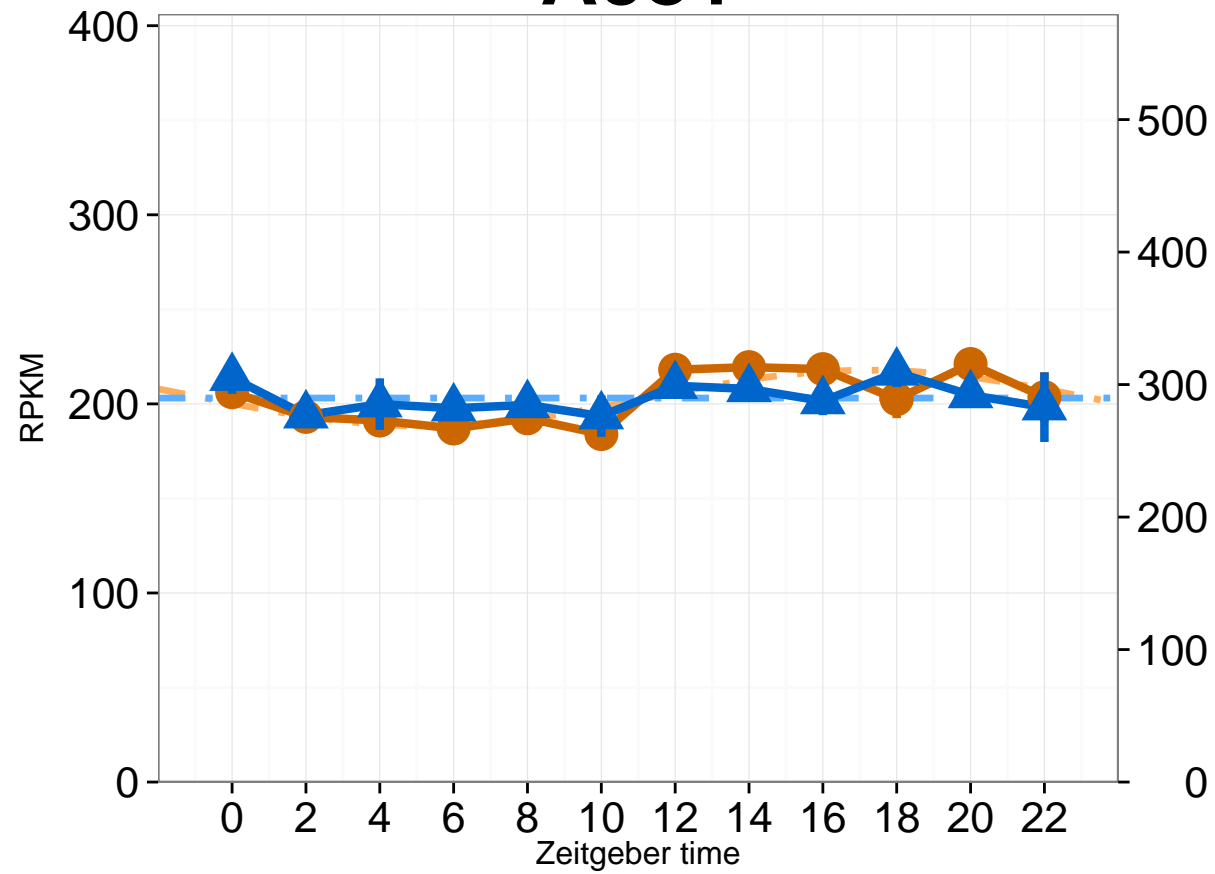

# Aco1

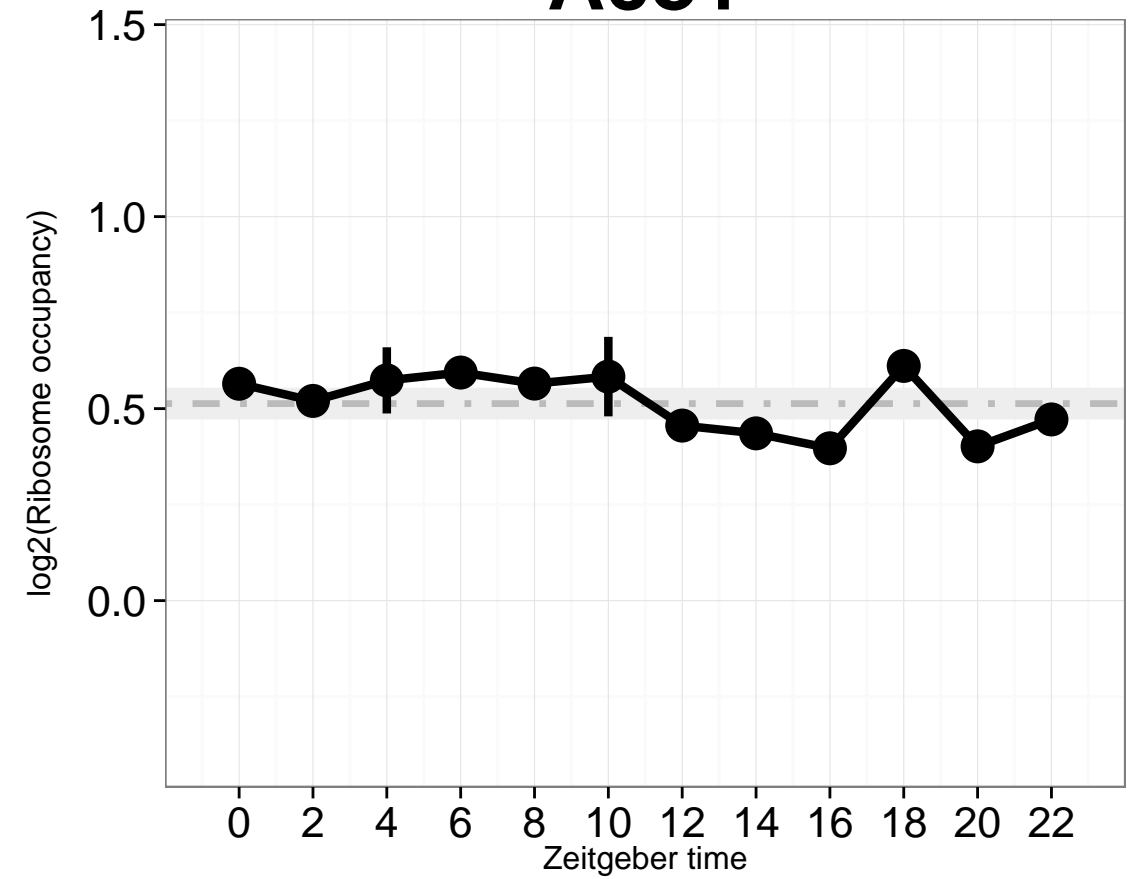

Supplement: Supplementary file 11738 [file 1]

## Hmgn2

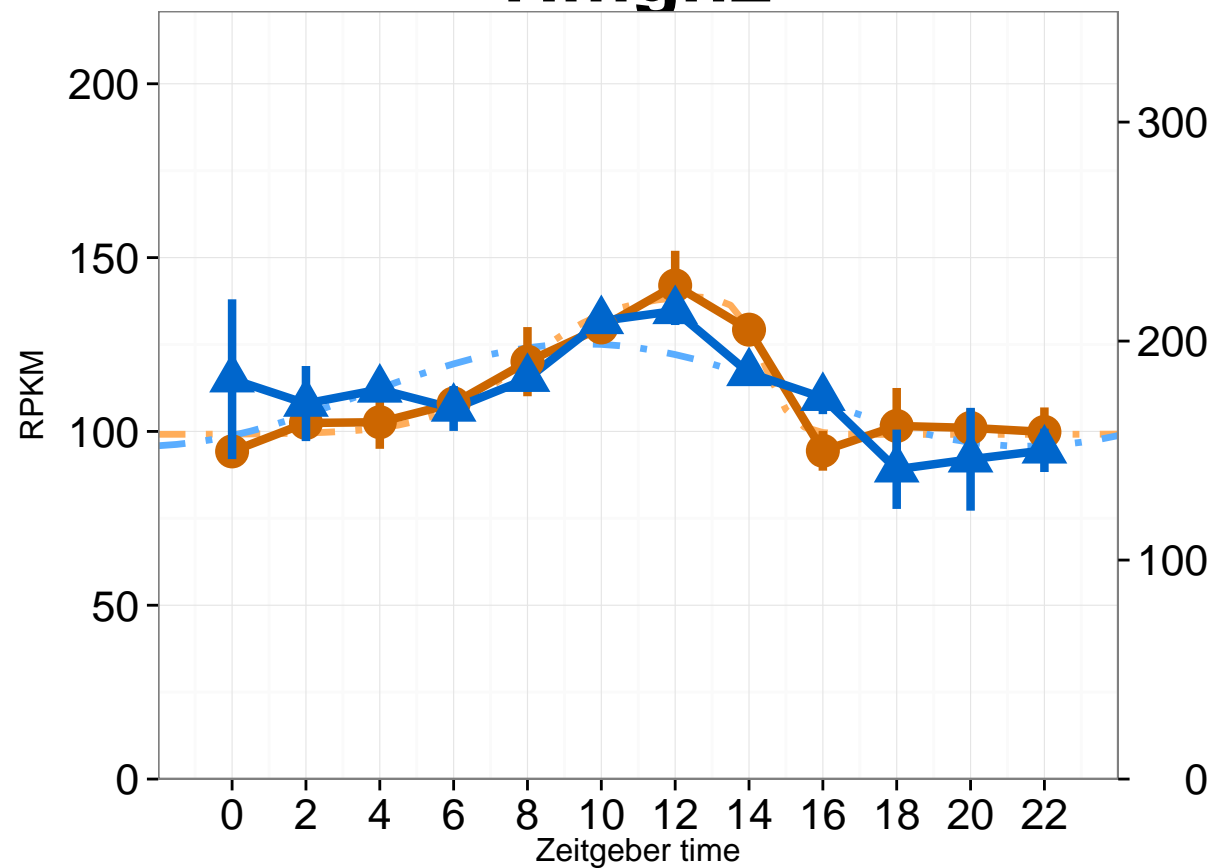

## Hmgn2

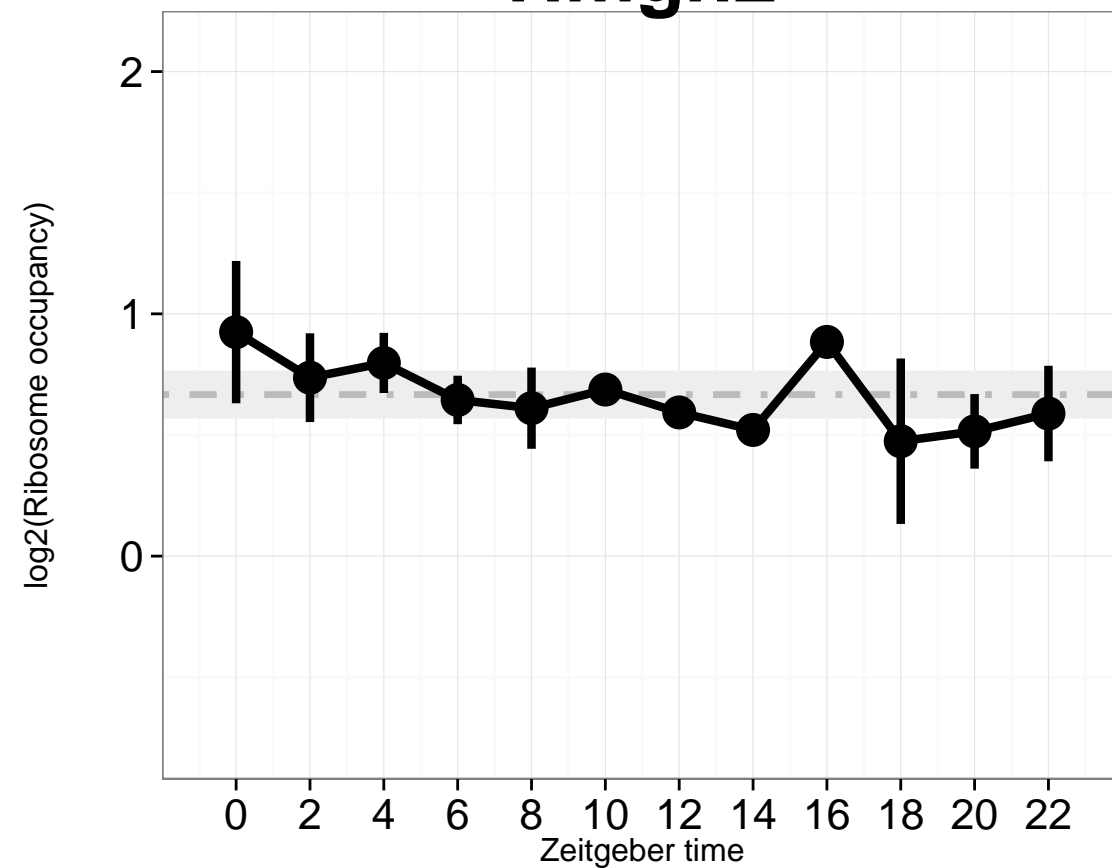

Supplement: Supplementary file 11739 [file 1]

## Trpc5

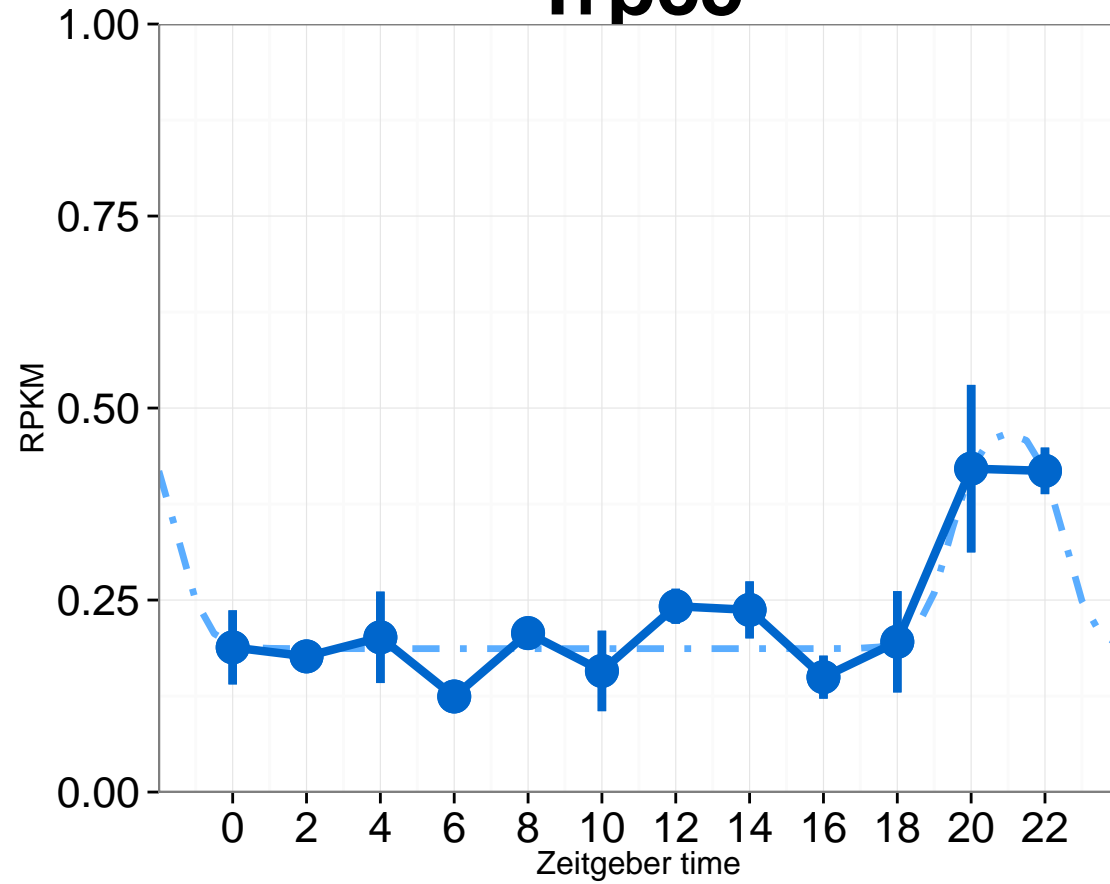

## Trpc5 log2(Ribosome occupancy)

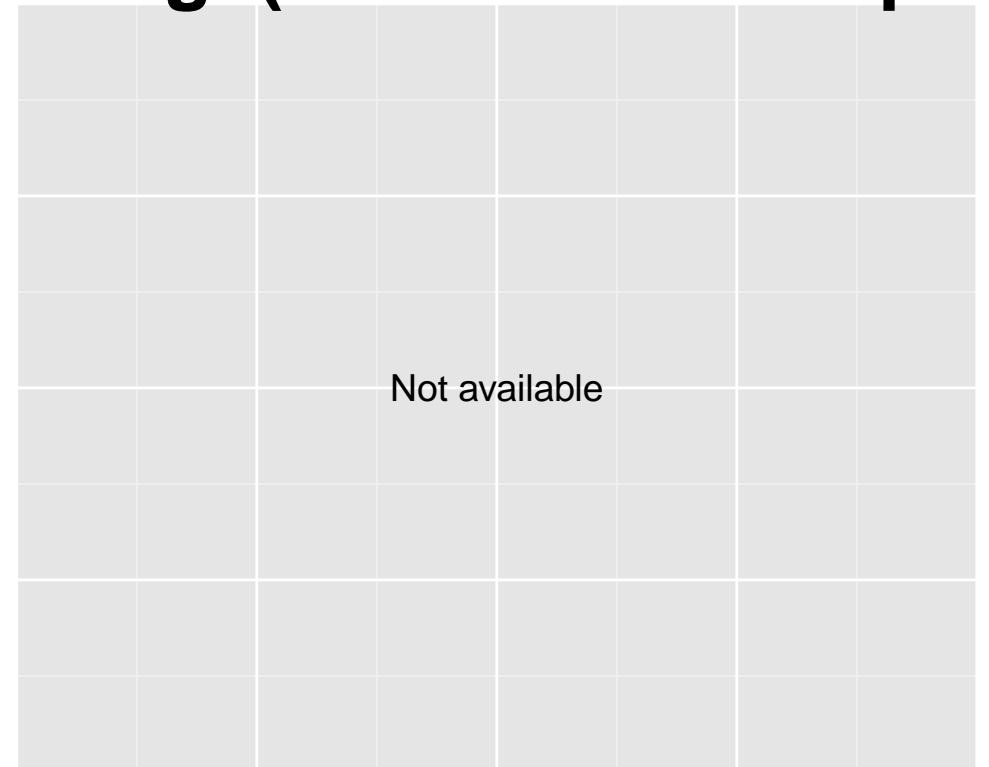

Supplement: Supplementary file 11740 [file 1]

## Pcyt2

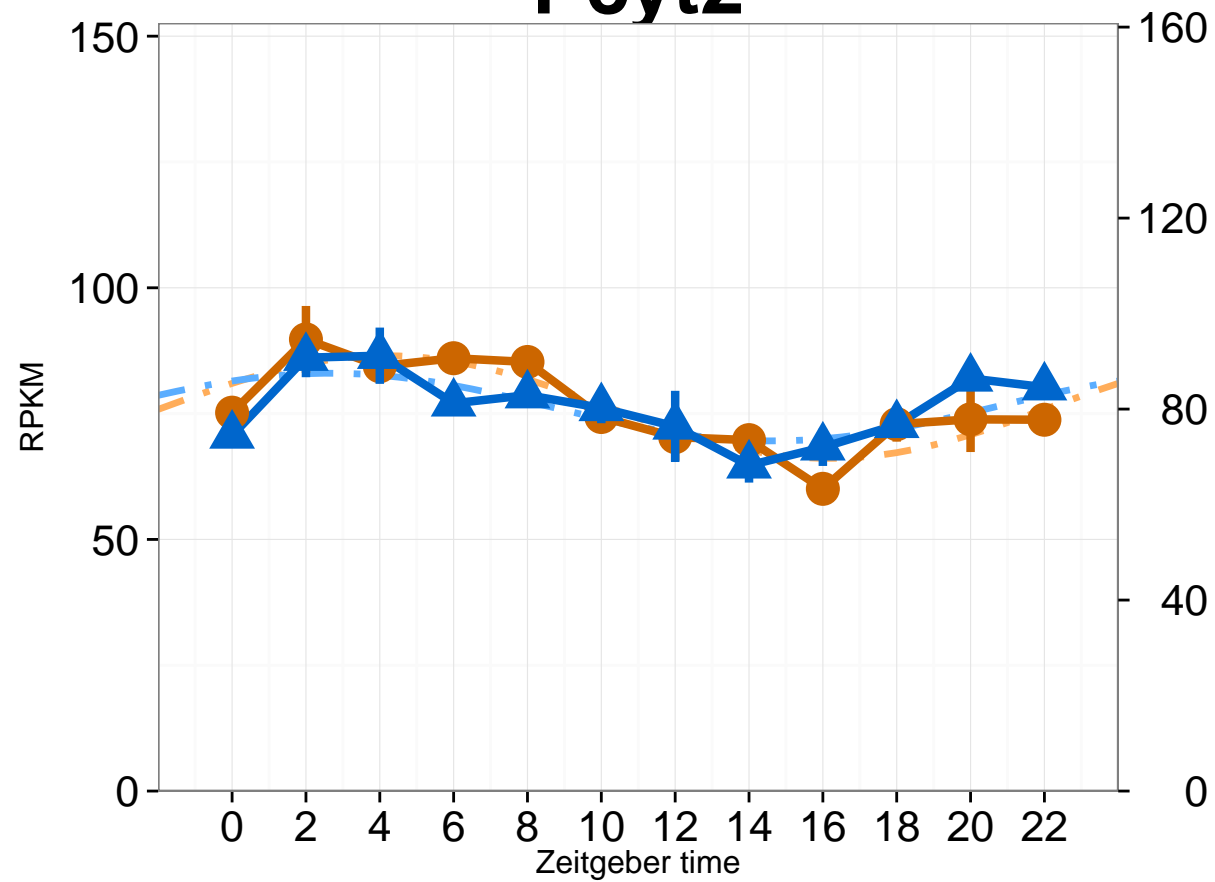

## Pcyt2

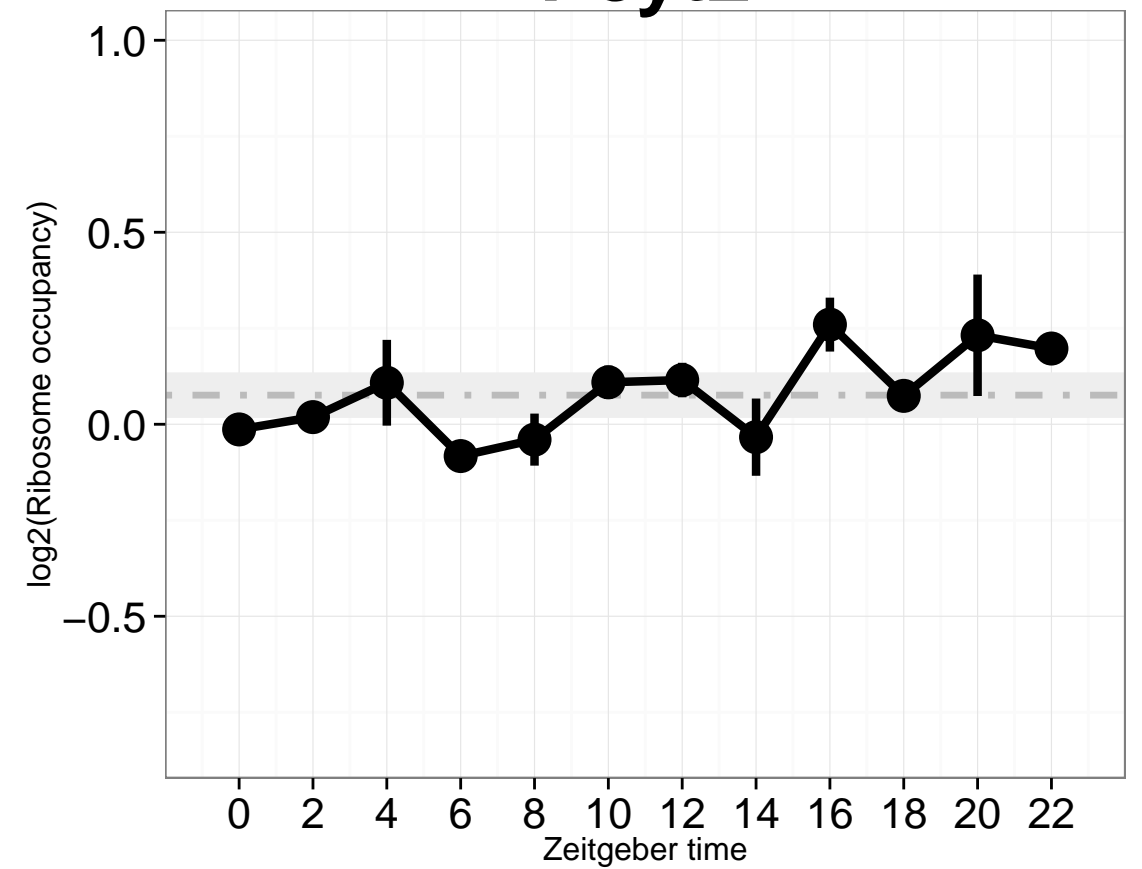

Supplement: Supplementary file 11741 [file 1]

# Lama1

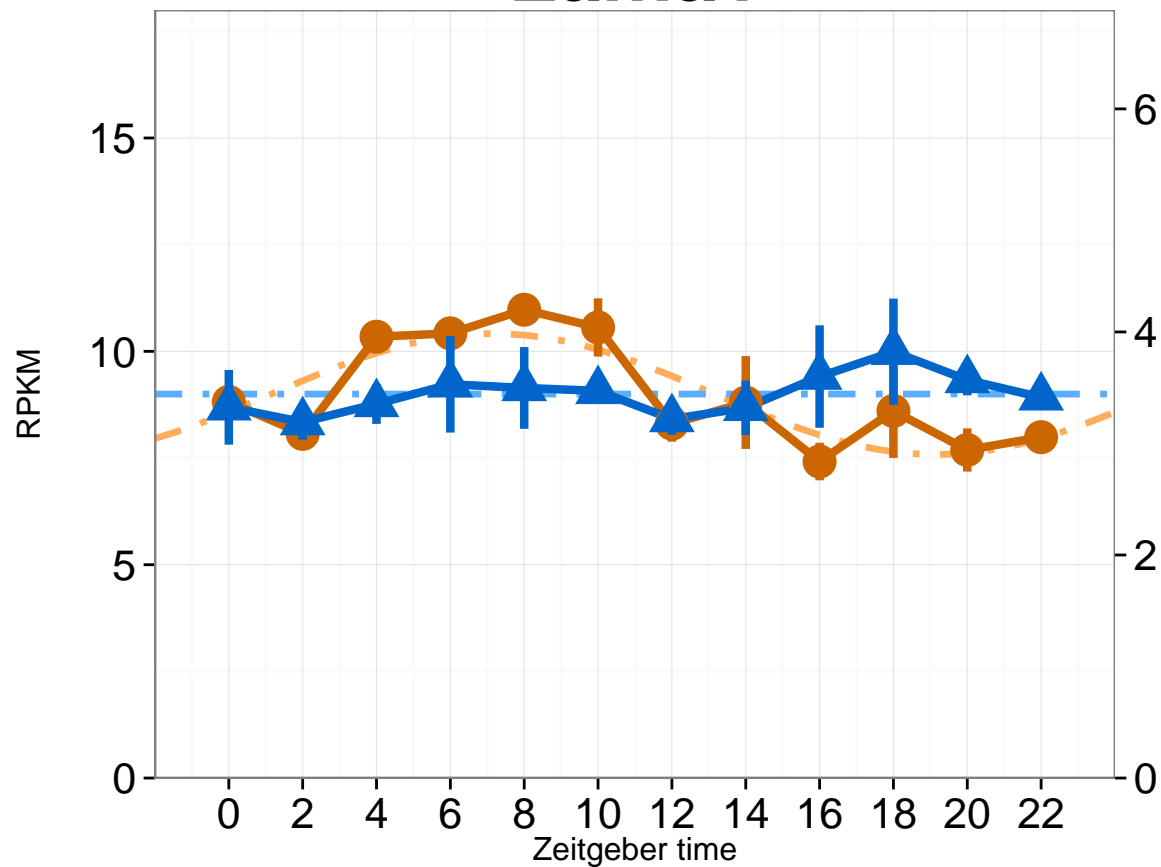

# Lama1

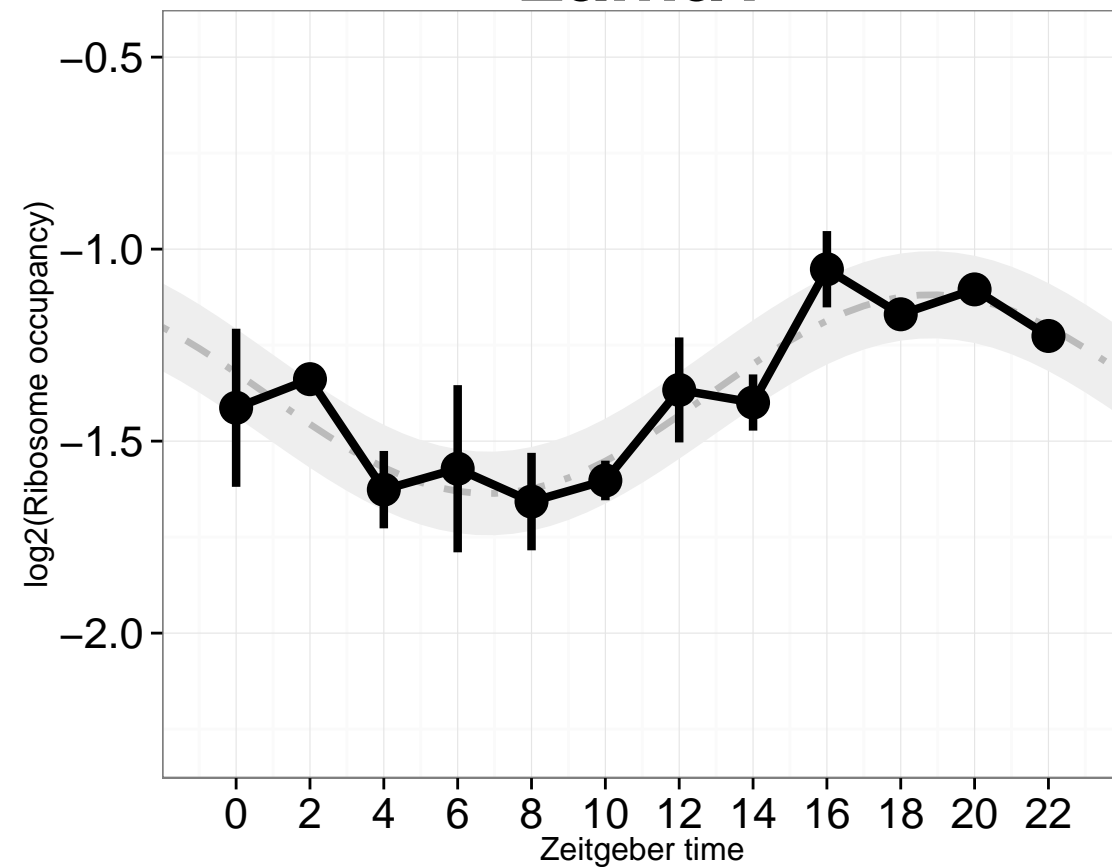

Supplement: Supplementary file 11742 [file 1]
