# Supplementary material (part 118 of 133)
Source: publisher figshare collection journal article supplement (https://springernature.figshare.com/articles/dataset/_/4903193)

# Caskin2

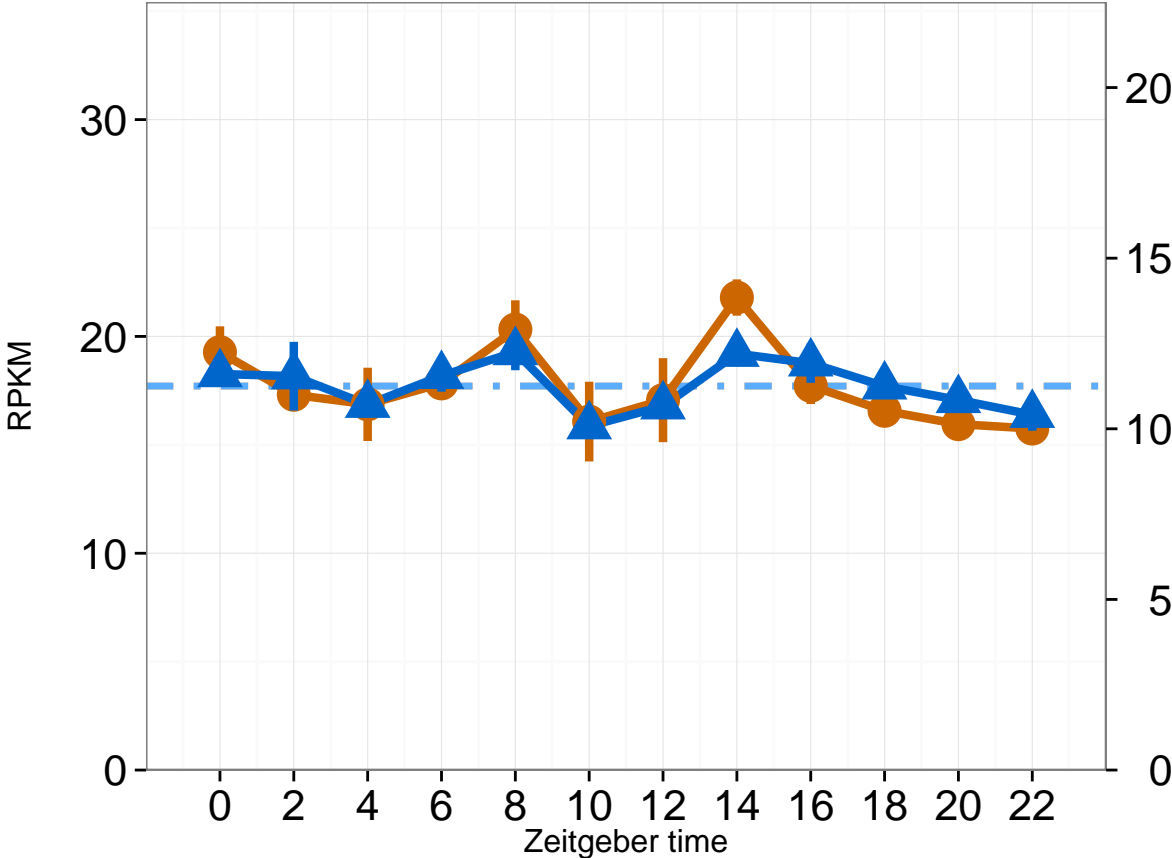

# Caskin2

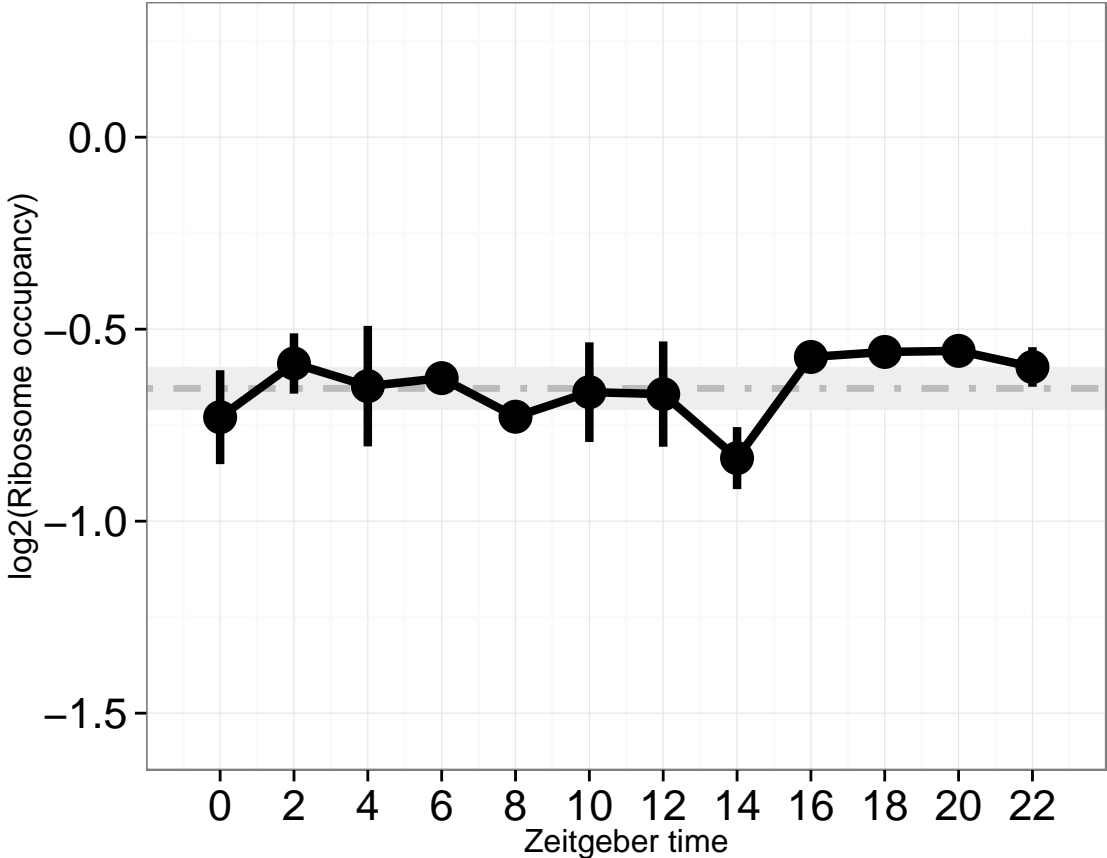

Supplement: Supplementary file 11743 [file 1]

# Slc7a1

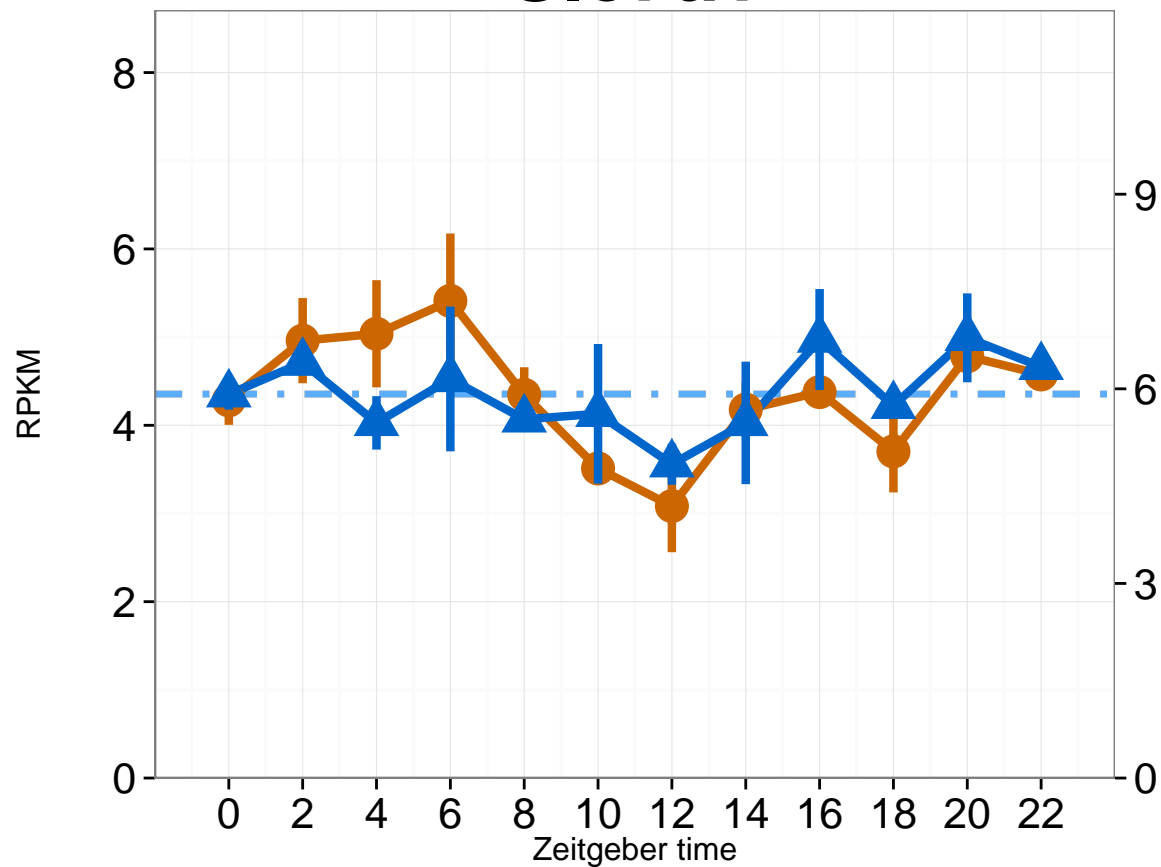

# Slc7a1

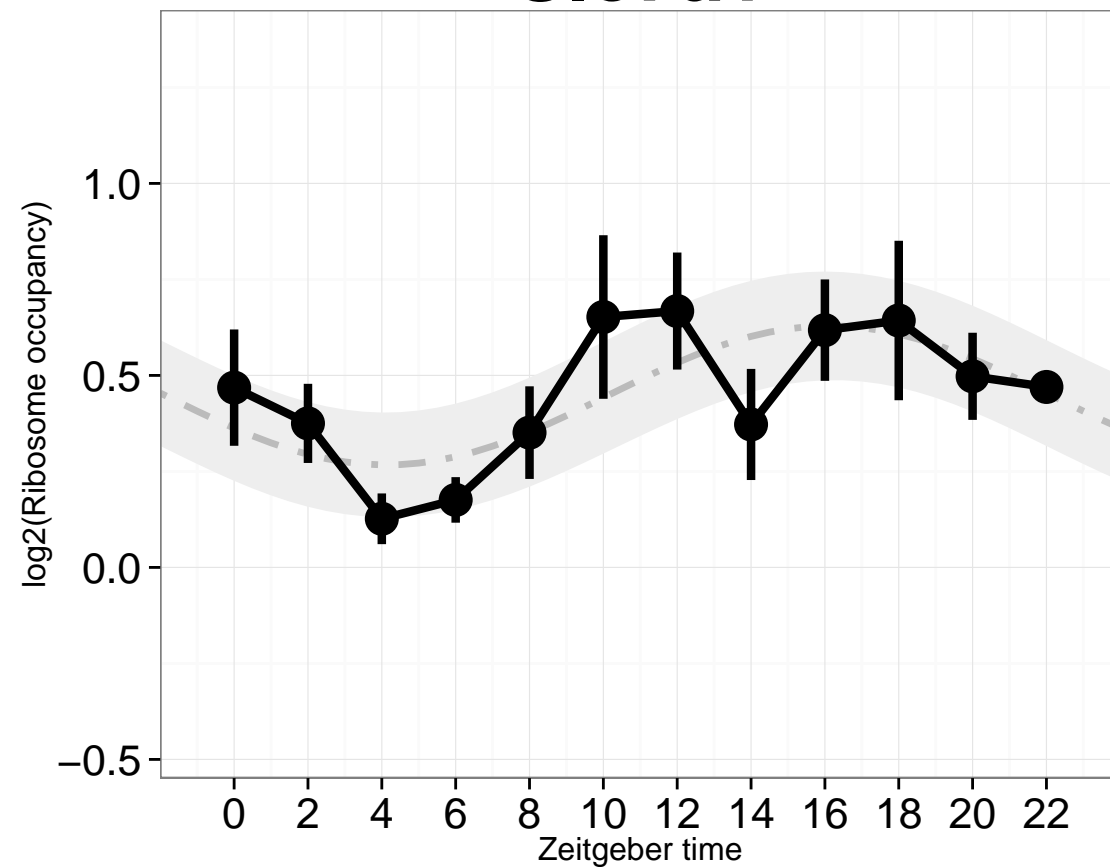

Supplement: Supplementary file 11744 [file 1]

# Osbp15

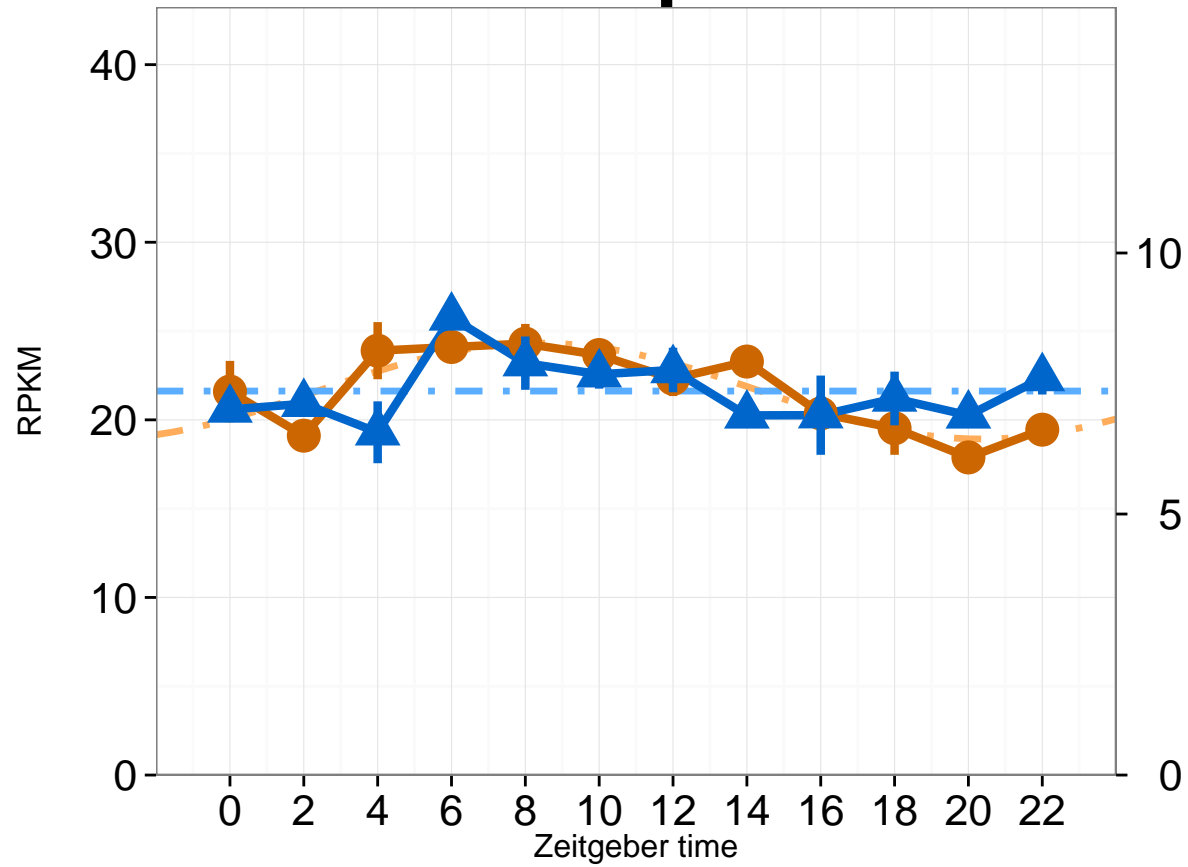

# Osbp15

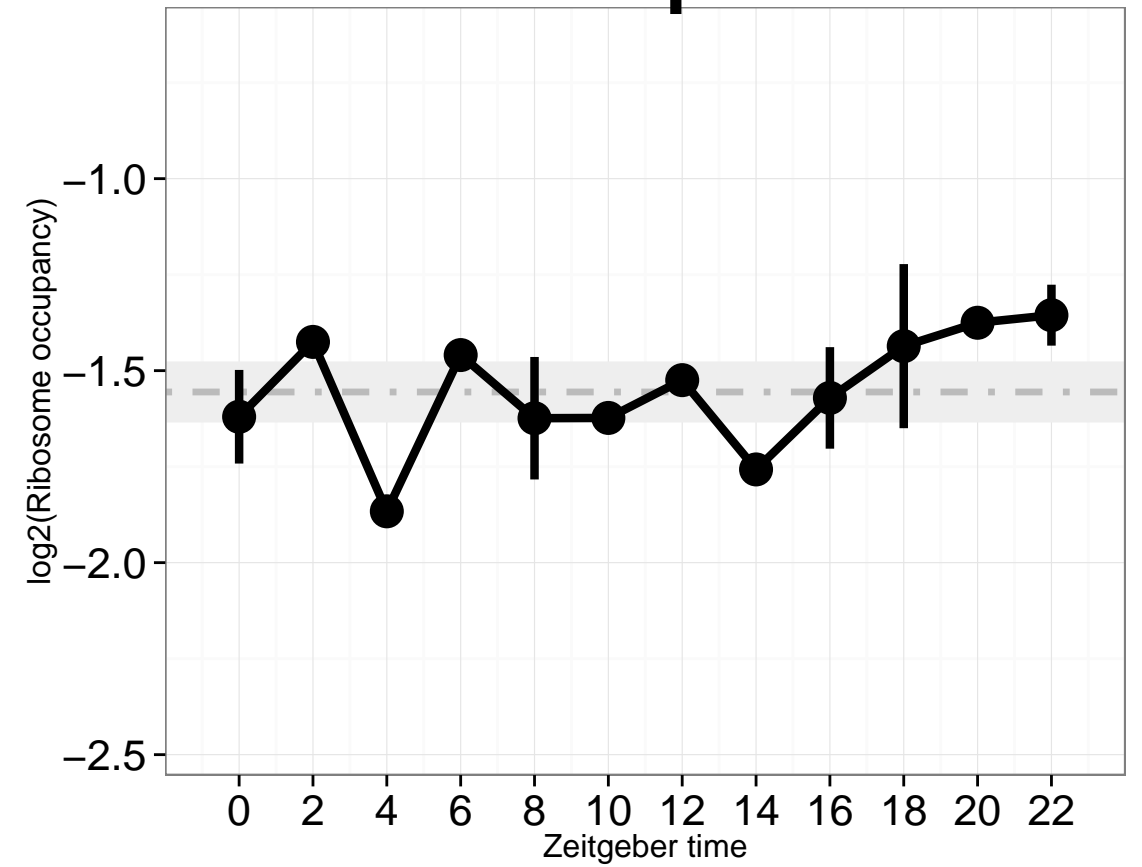

Supplement: Supplementary file 11745 [file 1]

# Pih1d1

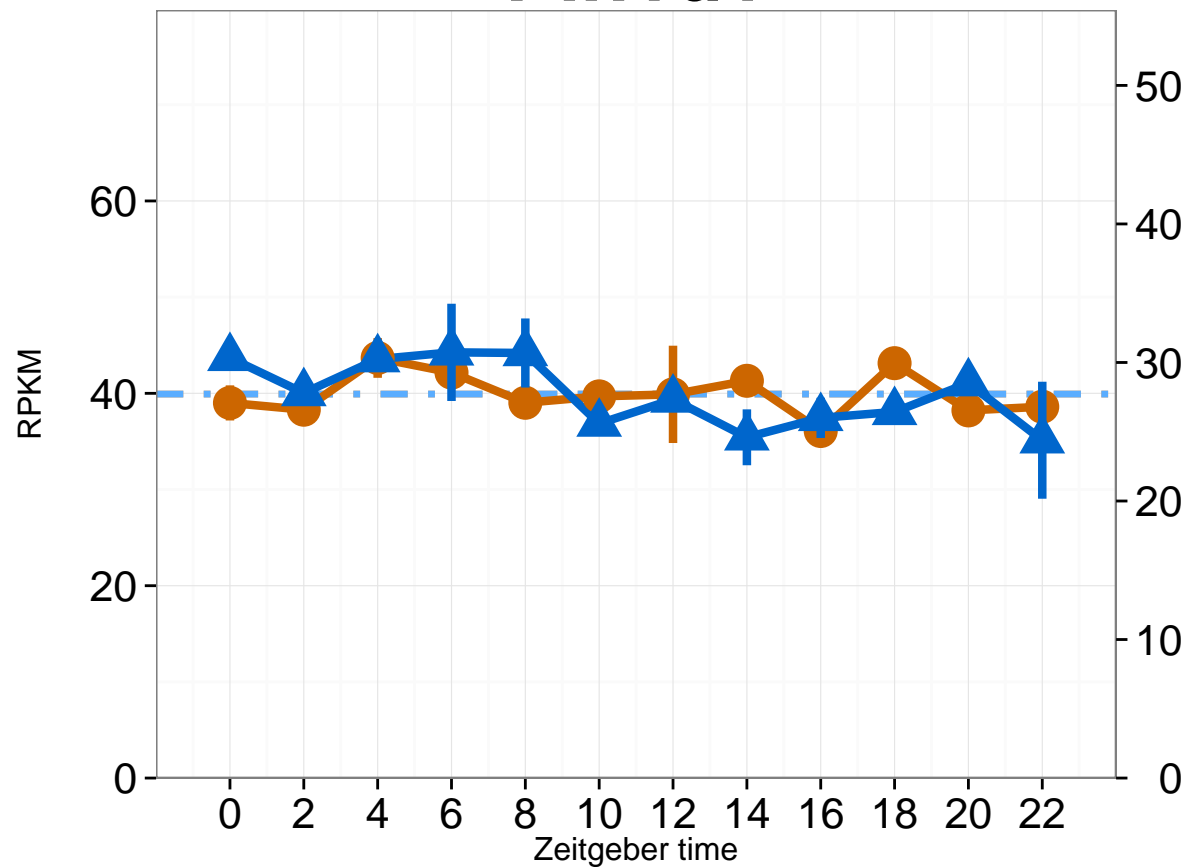

# Pih1d1

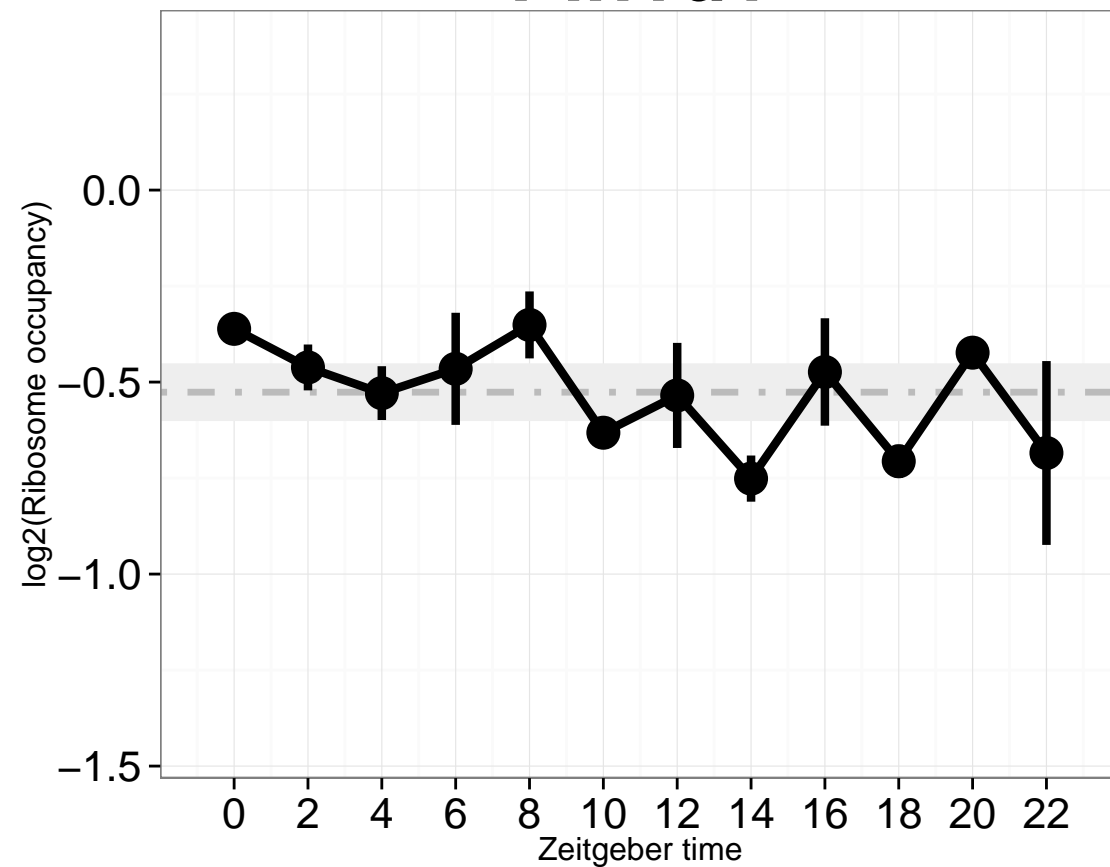

Supplement: Supplementary file 11746 [file 1]

# Grcc10

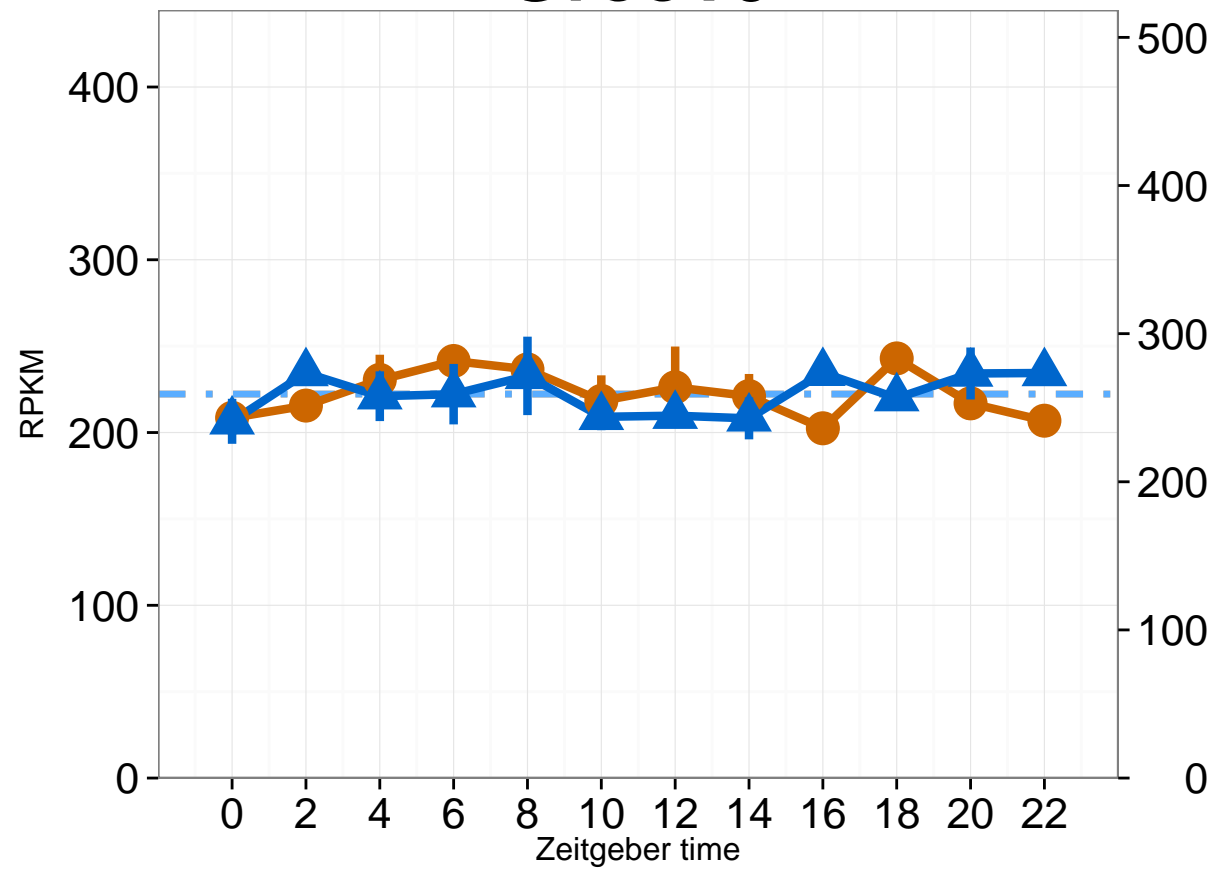

# Grcc10

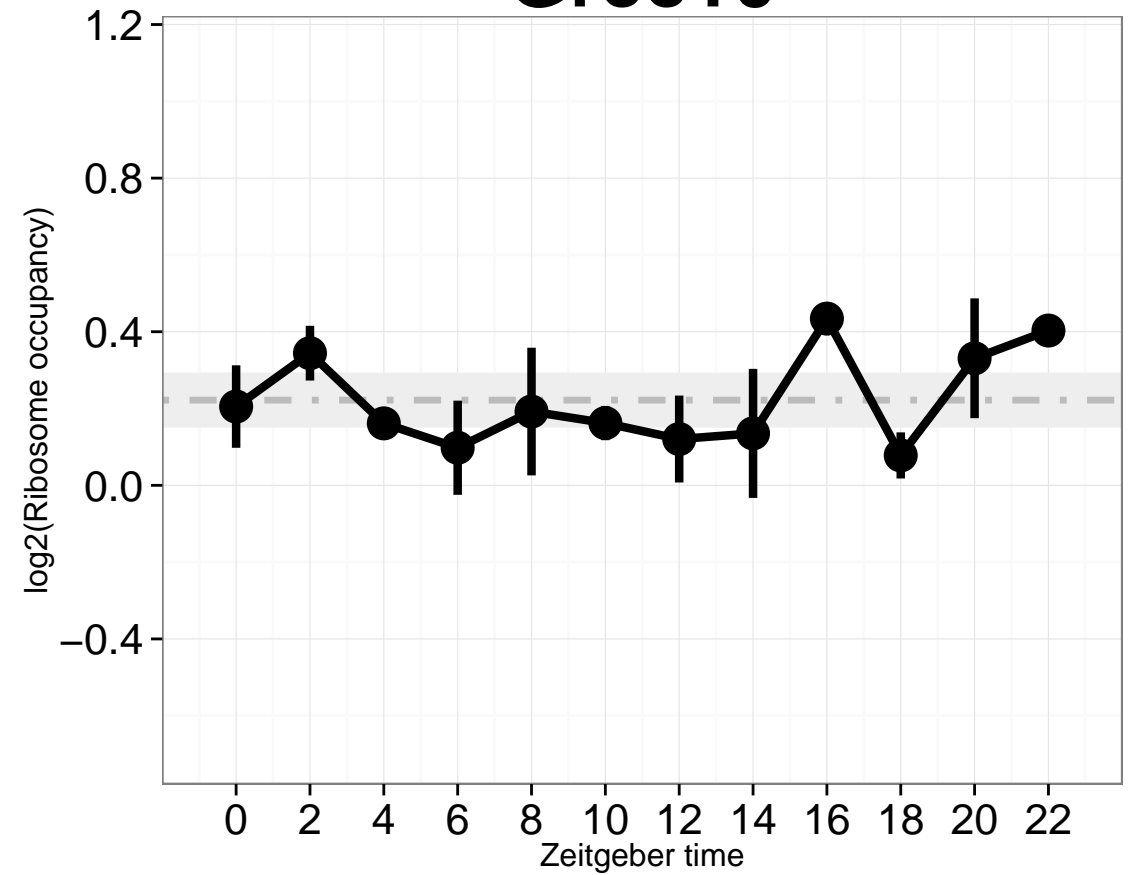

Supplement: Supplementary file 11747 [file 1]

## Maf

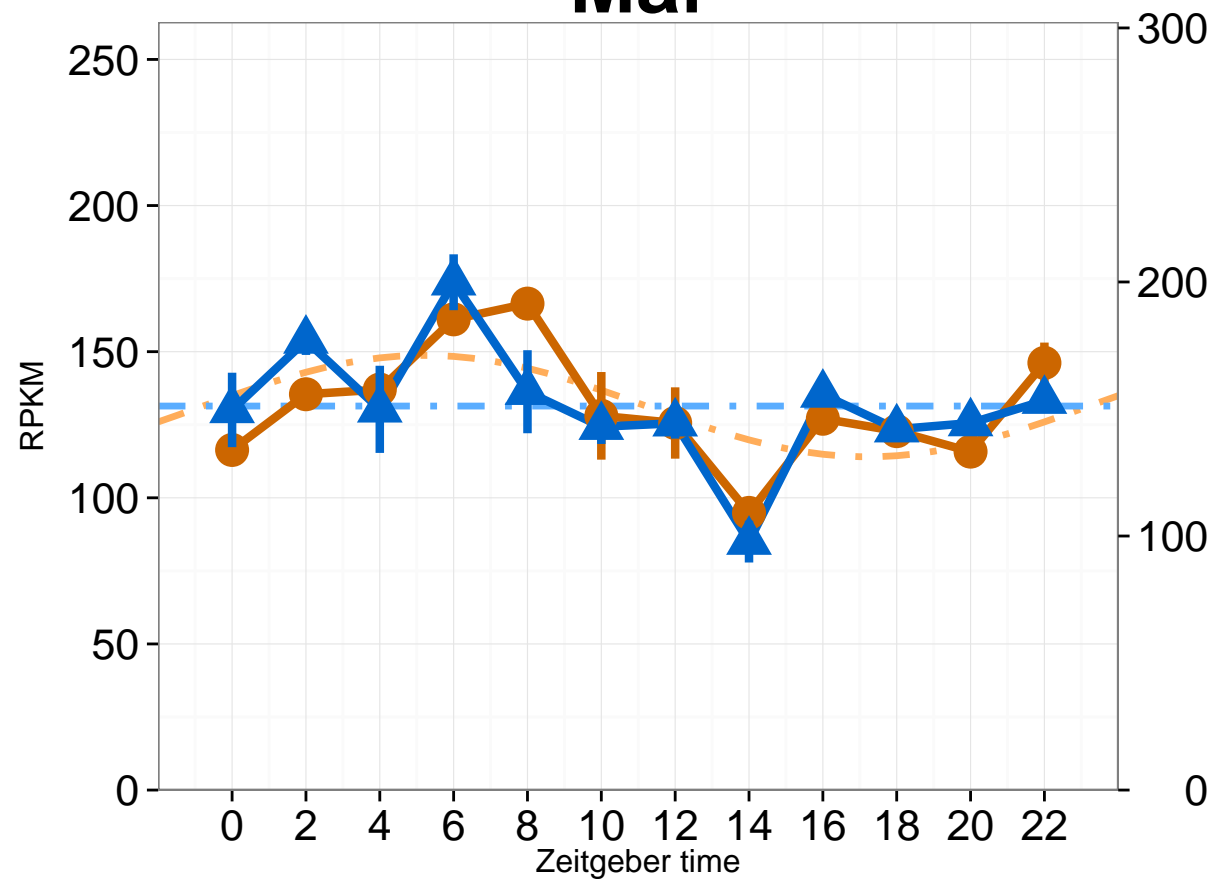

## Maf

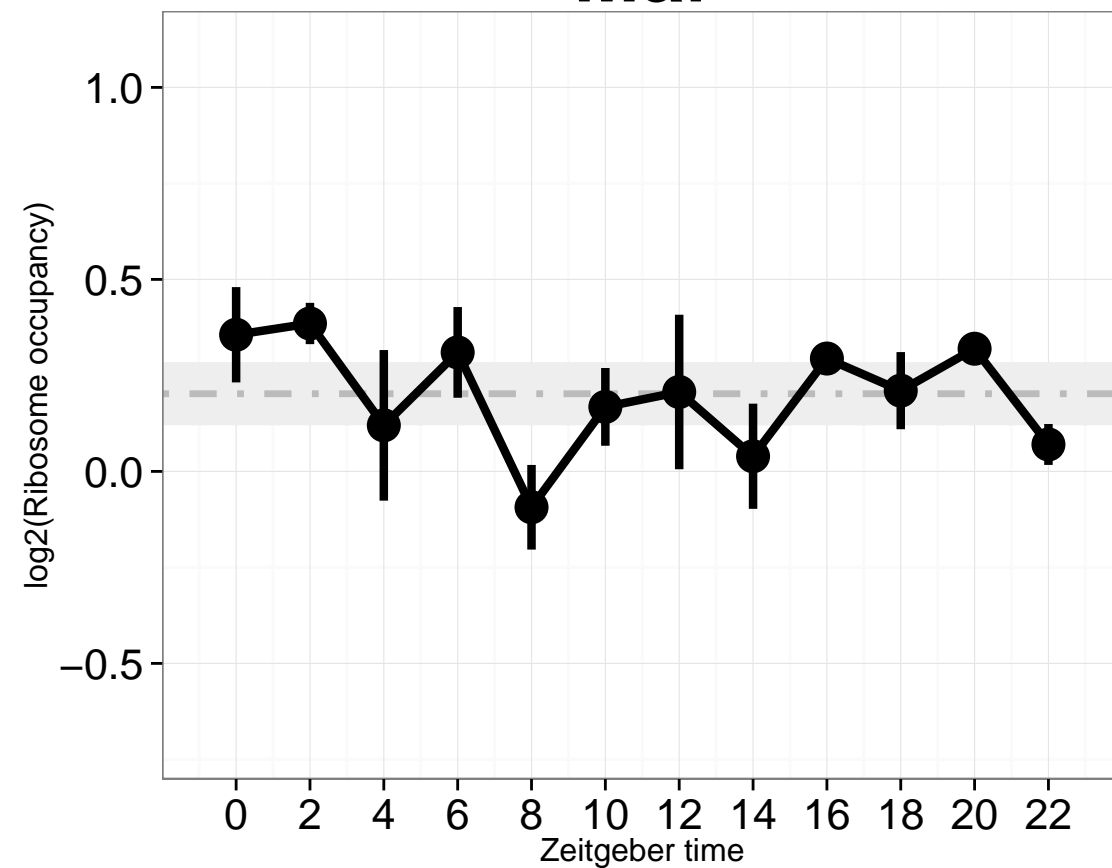

Supplement: Supplementary file 11748 [file 1]

## Gnmt

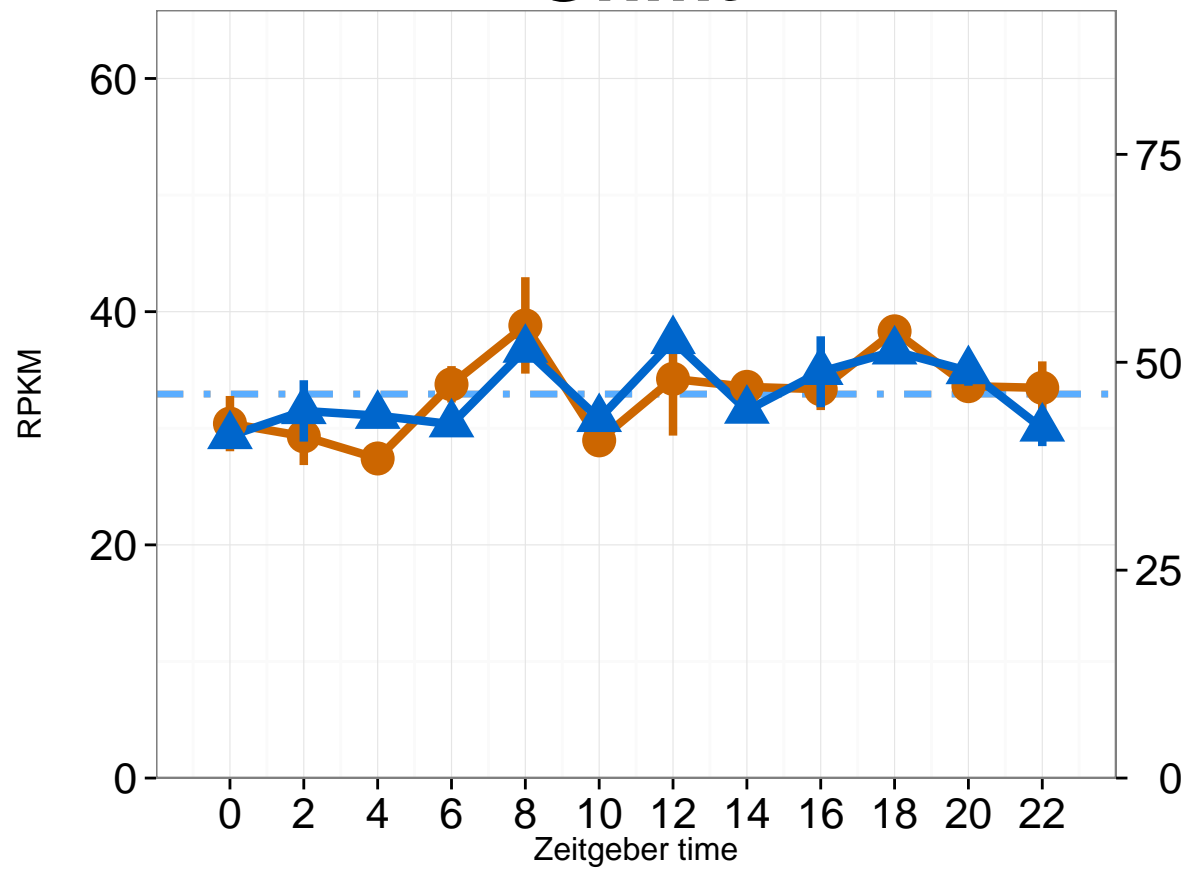

## Gnmt

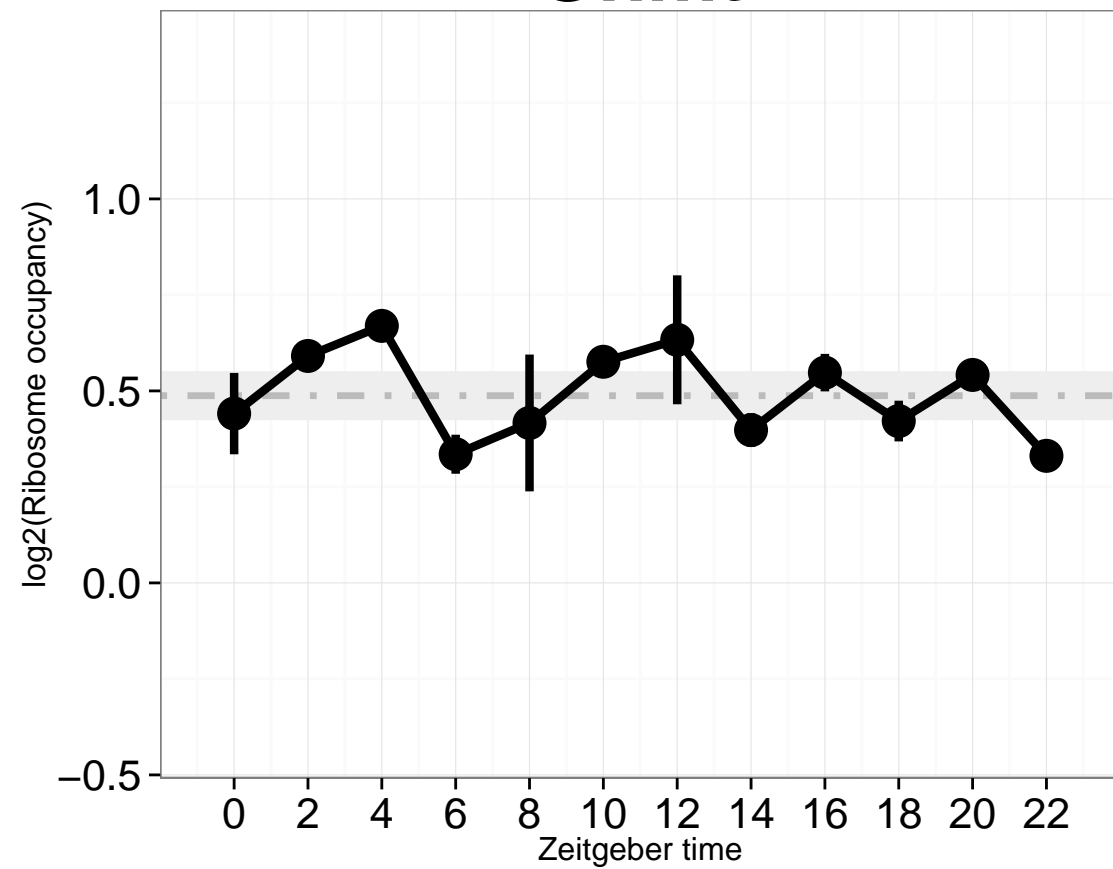

Supplement: Supplementary file 11749 [file 1]

## Picalm

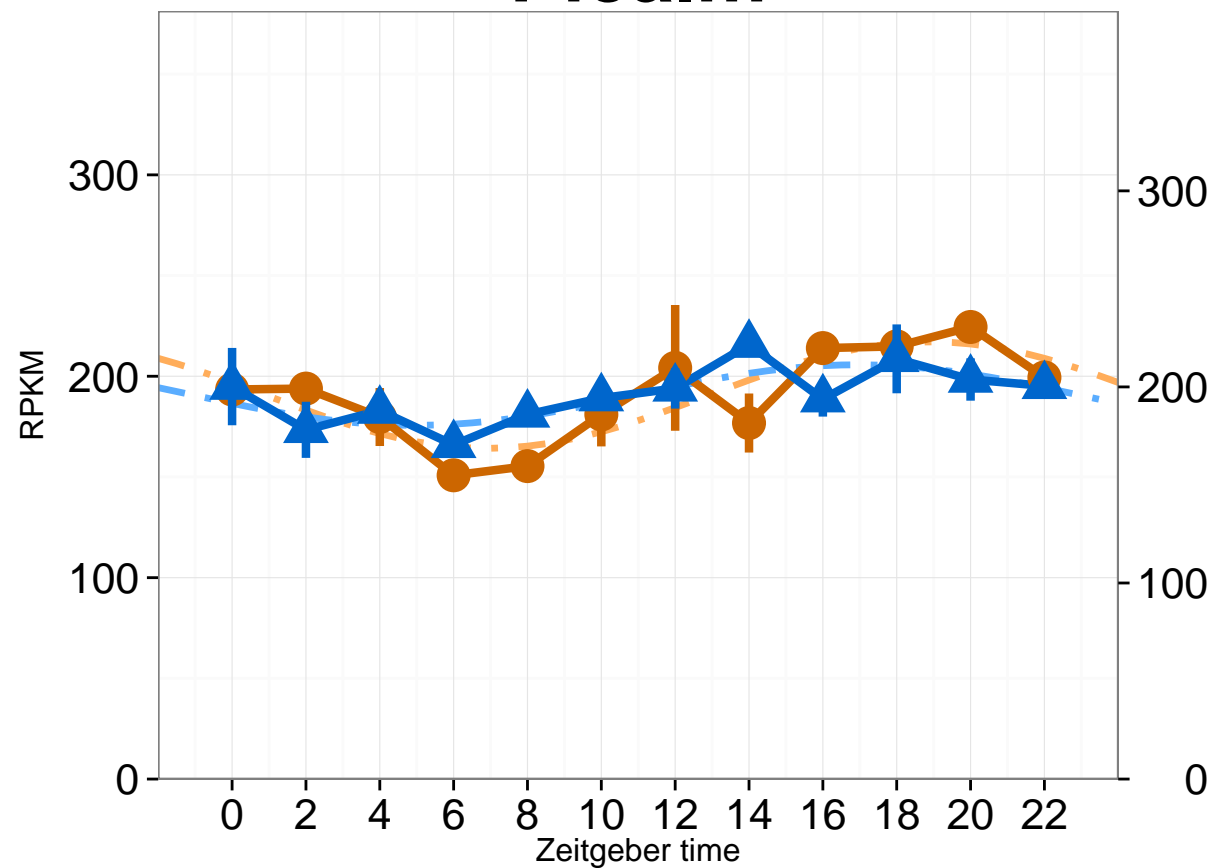

## Picalm

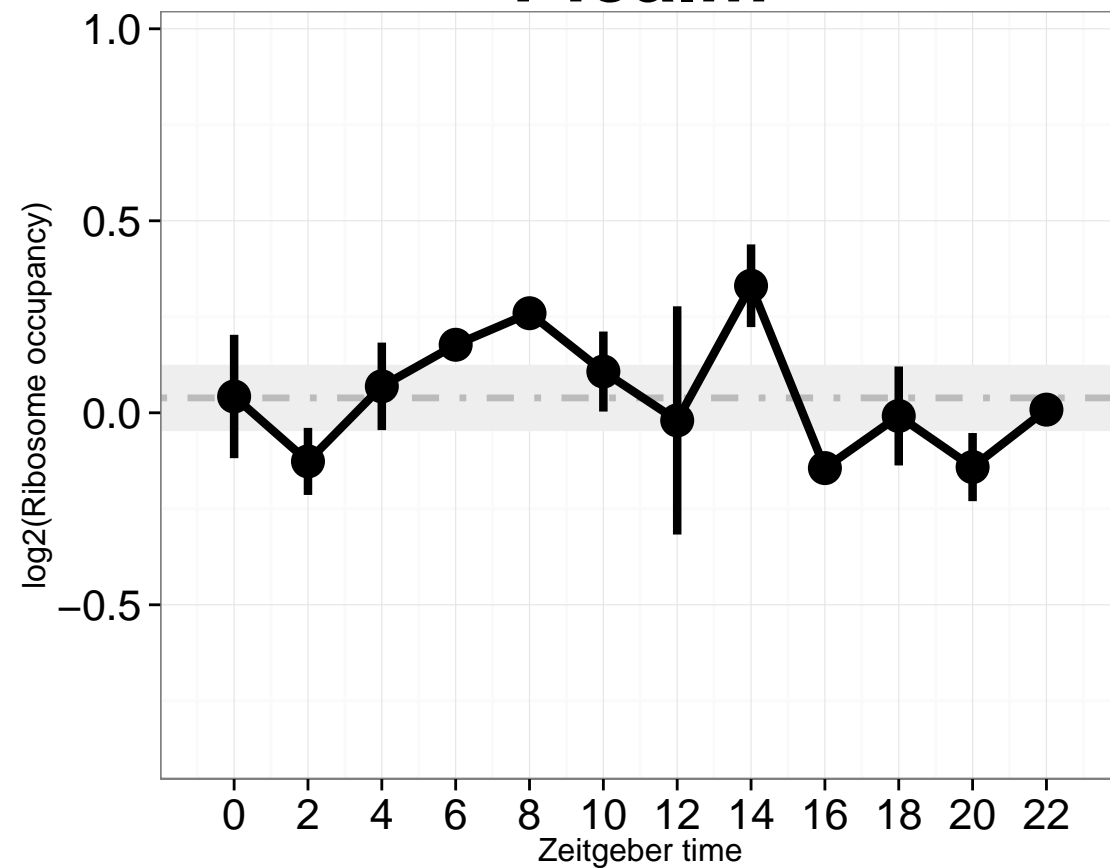

Supplement: Supplementary file 11750 [file 1]

# Mtx2

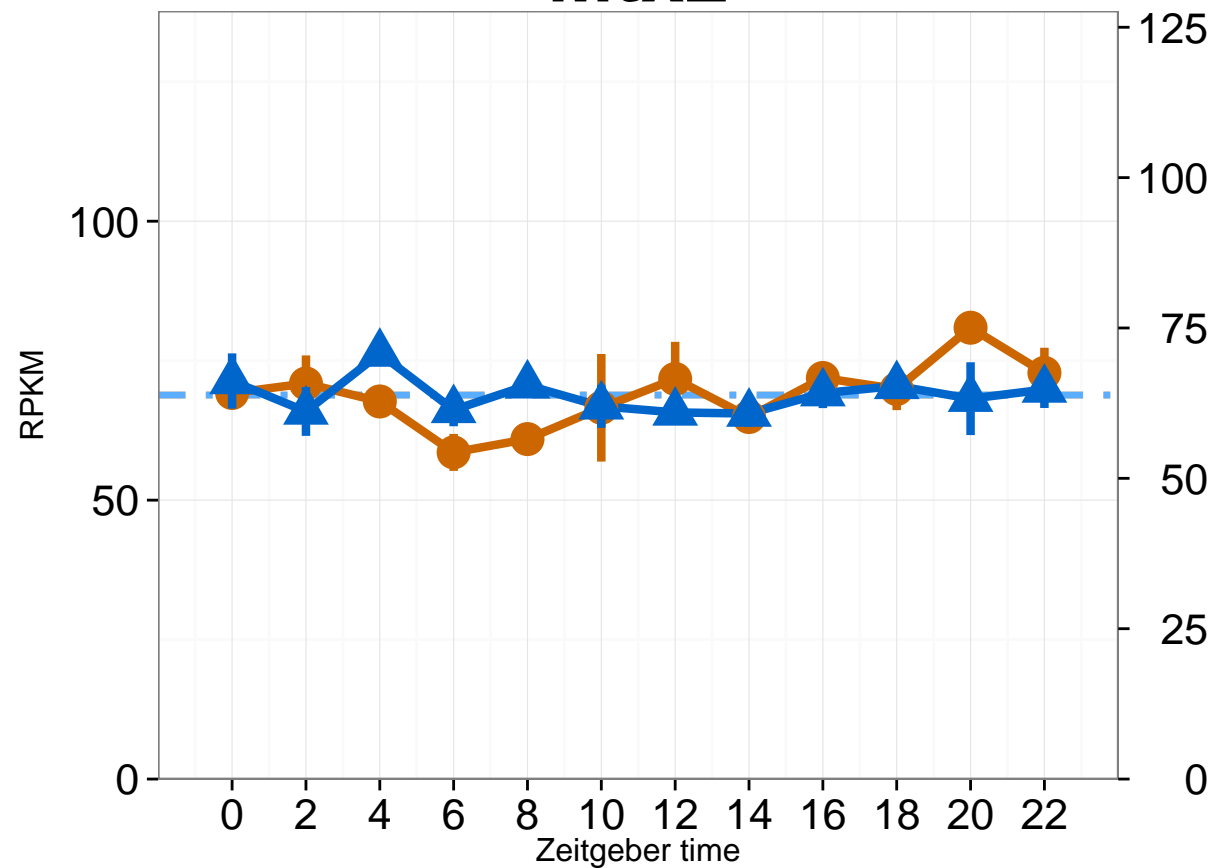

# Mtx2

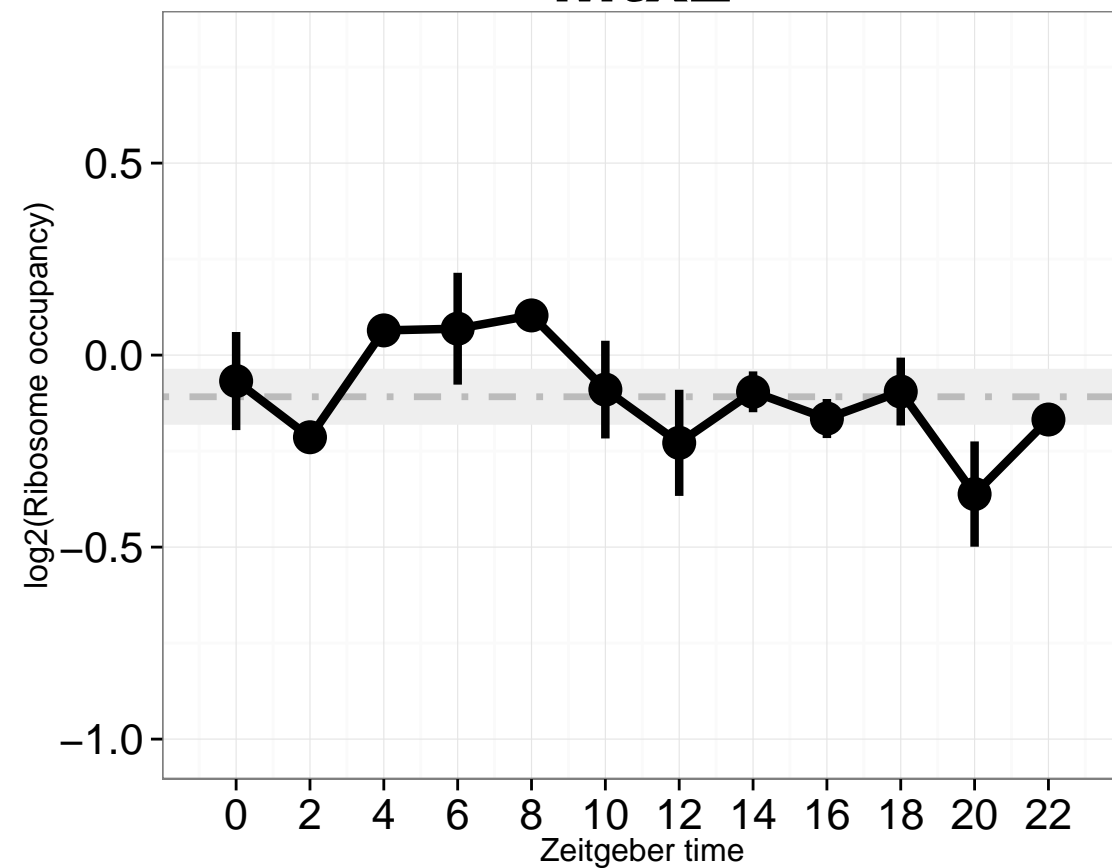

Supplement: Supplementary file 11751 [file 1]

## Sdf2

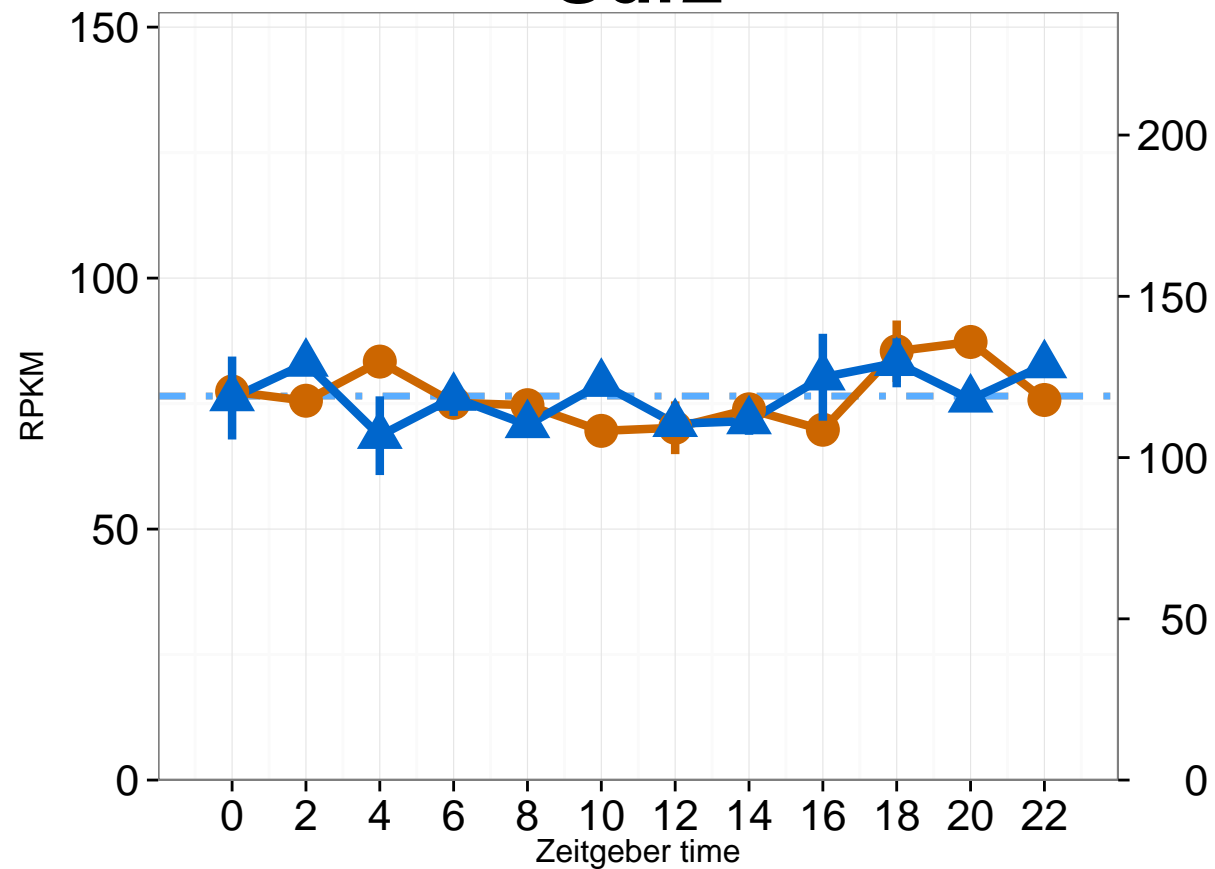

## Sdf2

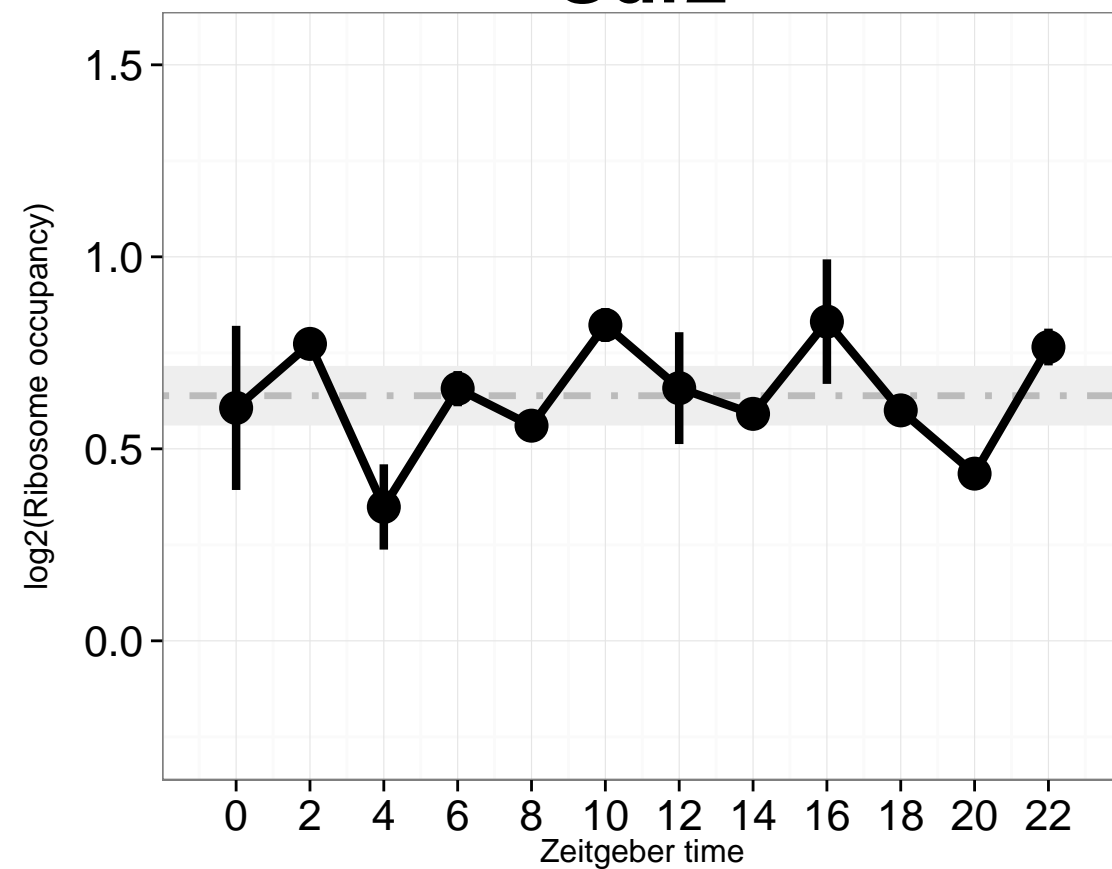

Supplement: Supplementary file 11752 [file 1]

# Dixdc1

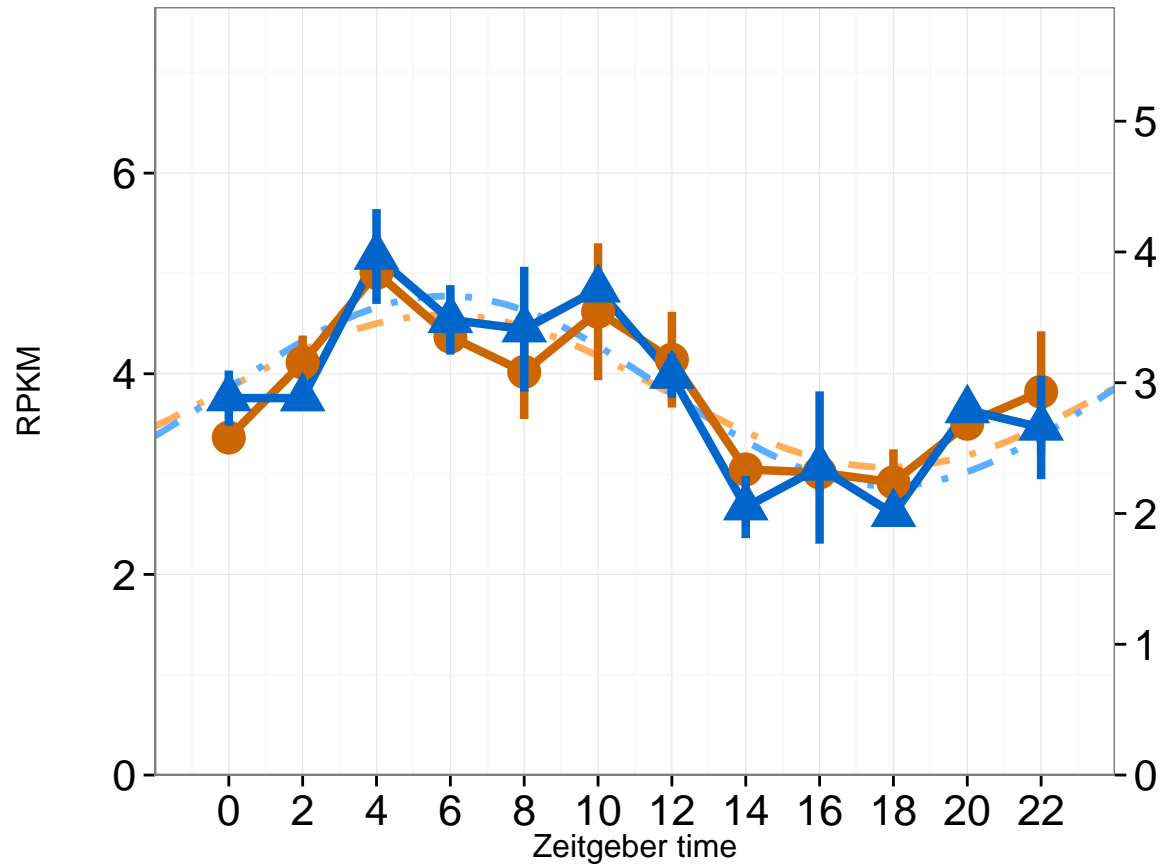

# Dixdc1

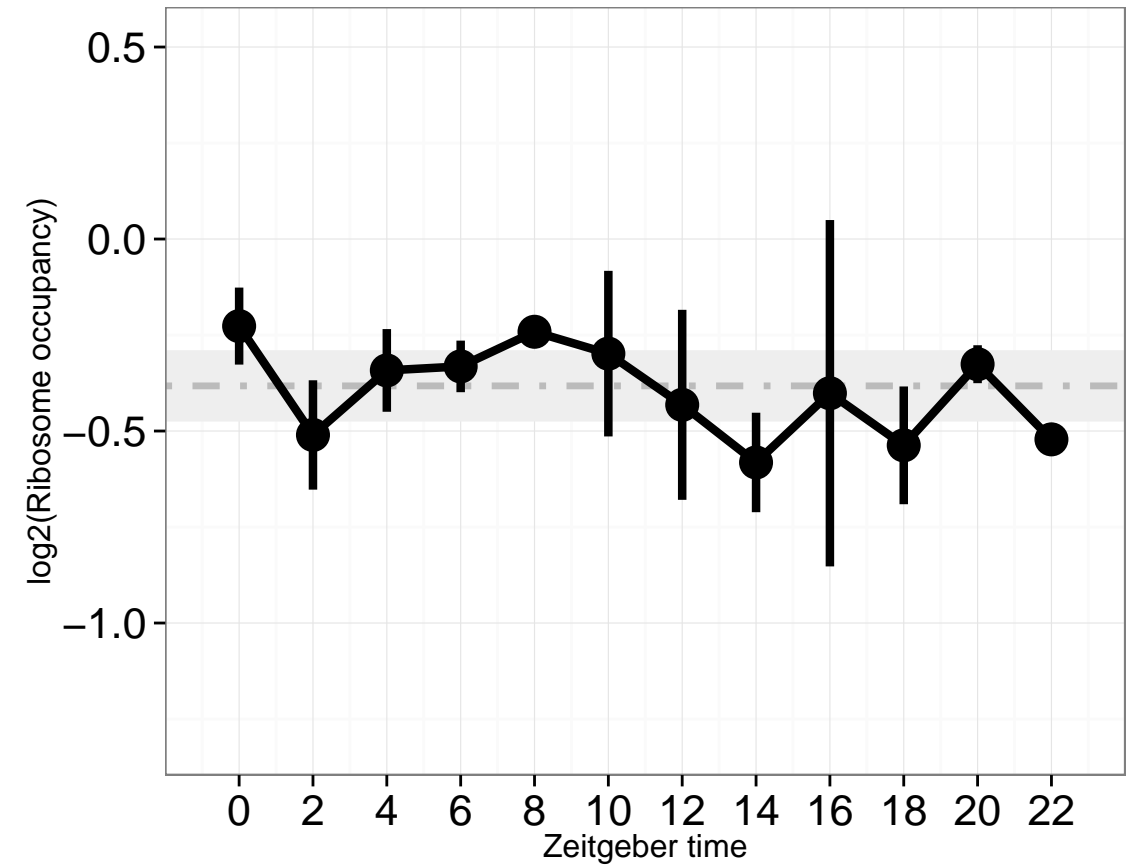

Supplement: Supplementary file 11753 [file 1]

# Scn7a

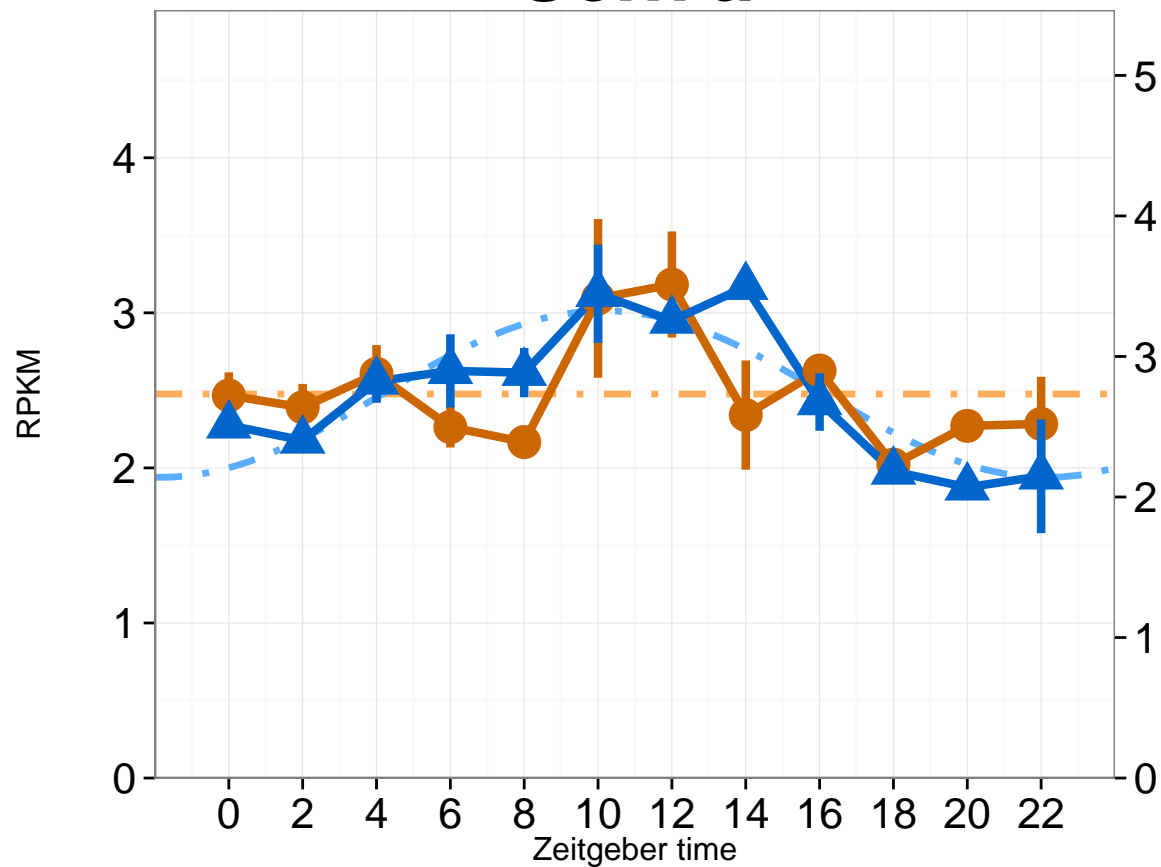

# Scn7a

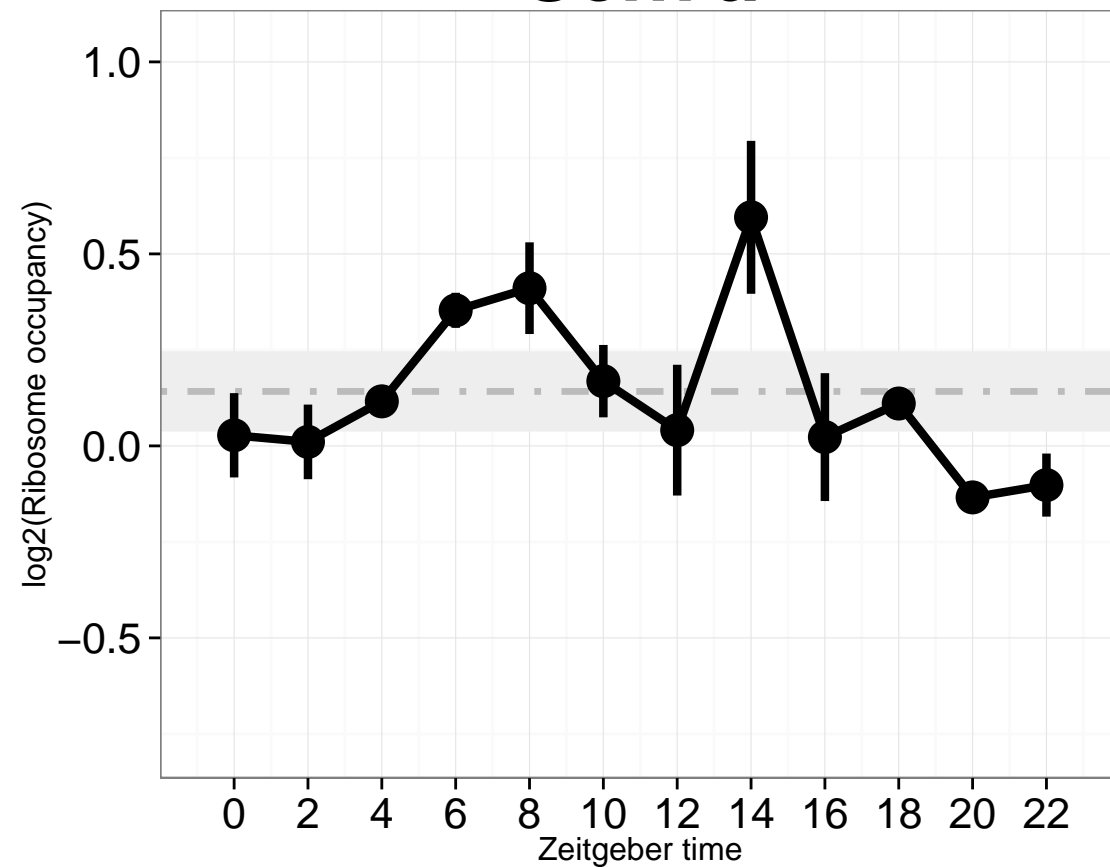

Supplement: Supplementary file 11754 [file 1]

# Rpl17

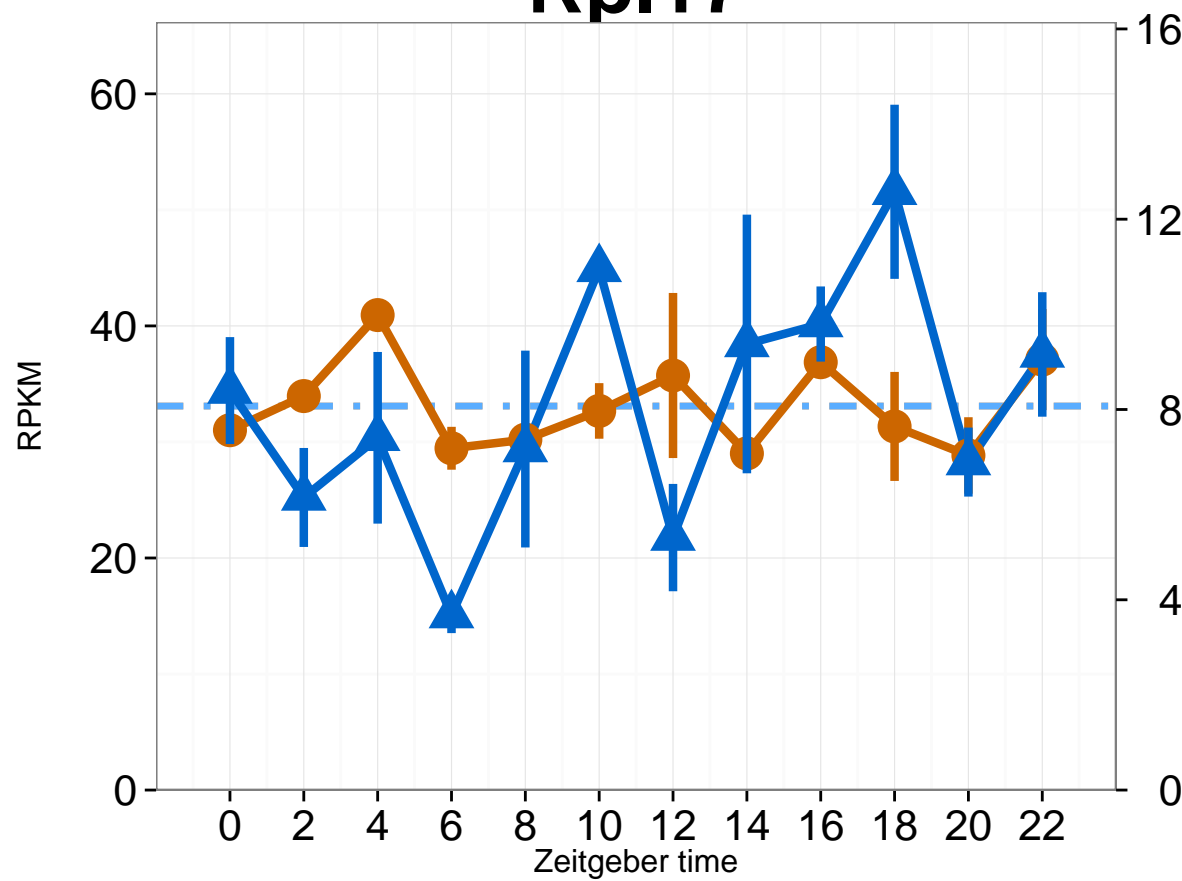

# Rpl17

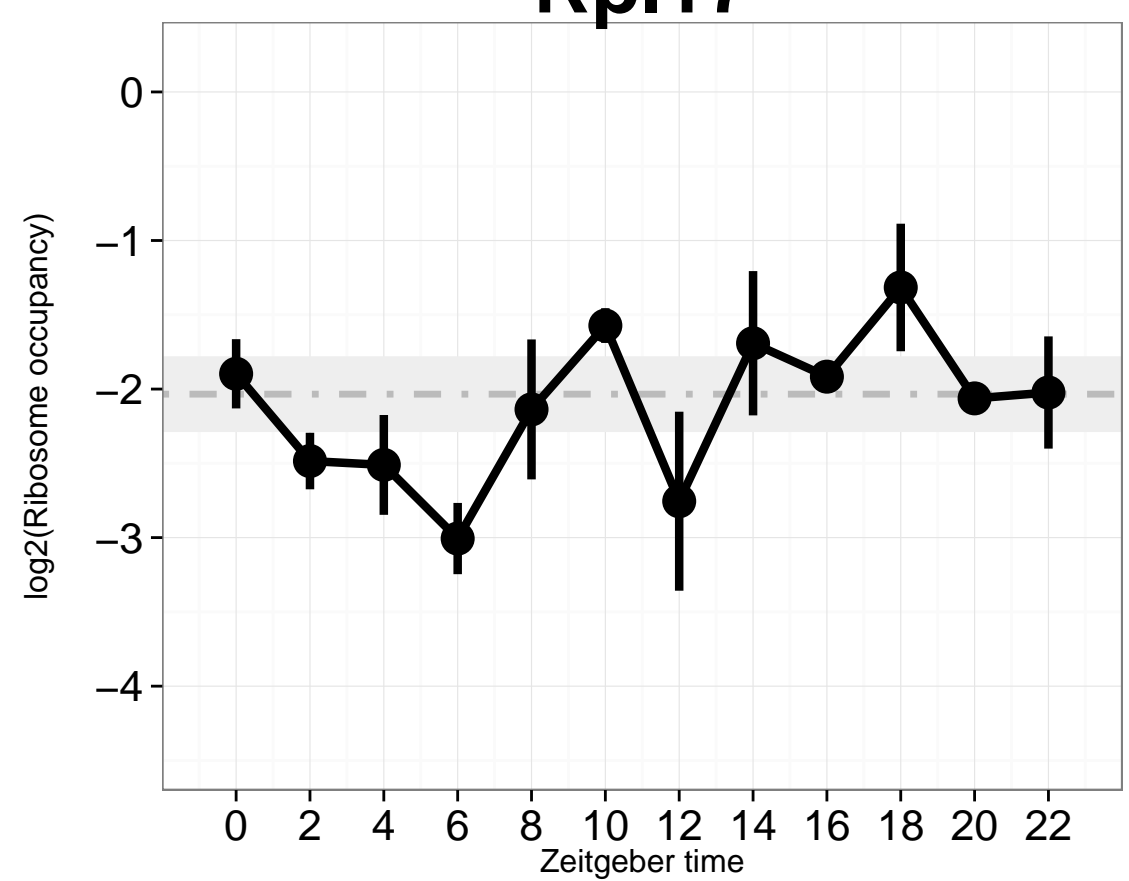

Supplement: Supplementary file 11755 [file 1]

## Npc1

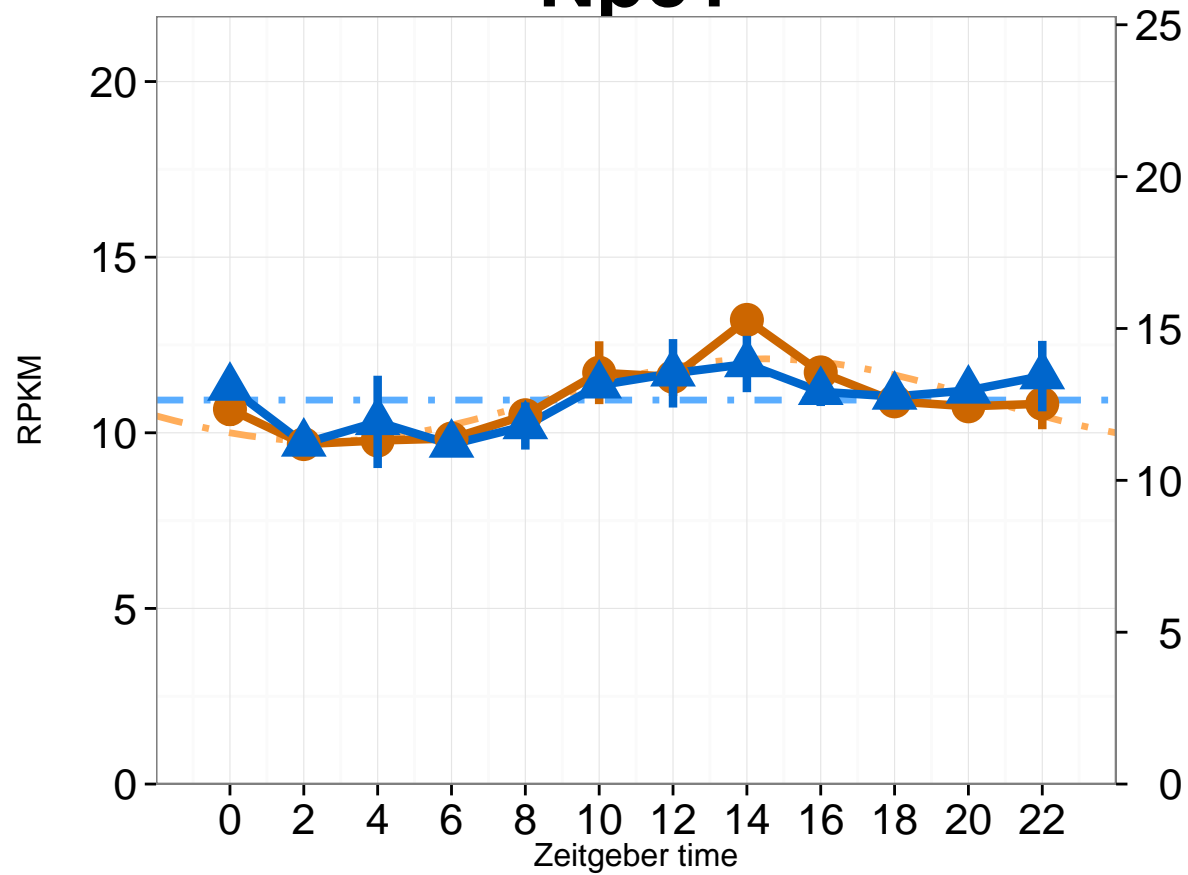

## Npc1

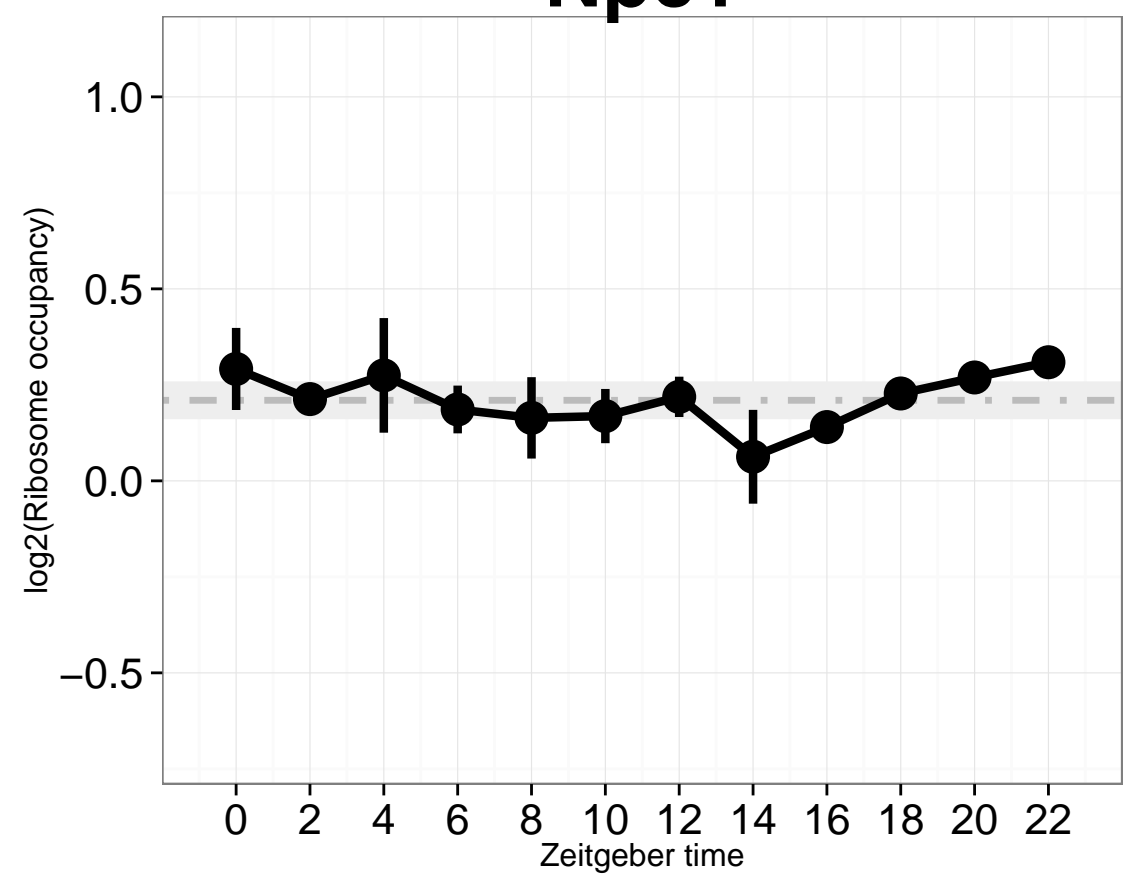

Supplement: Supplementary file 11756 [file 1]

# Stk32b

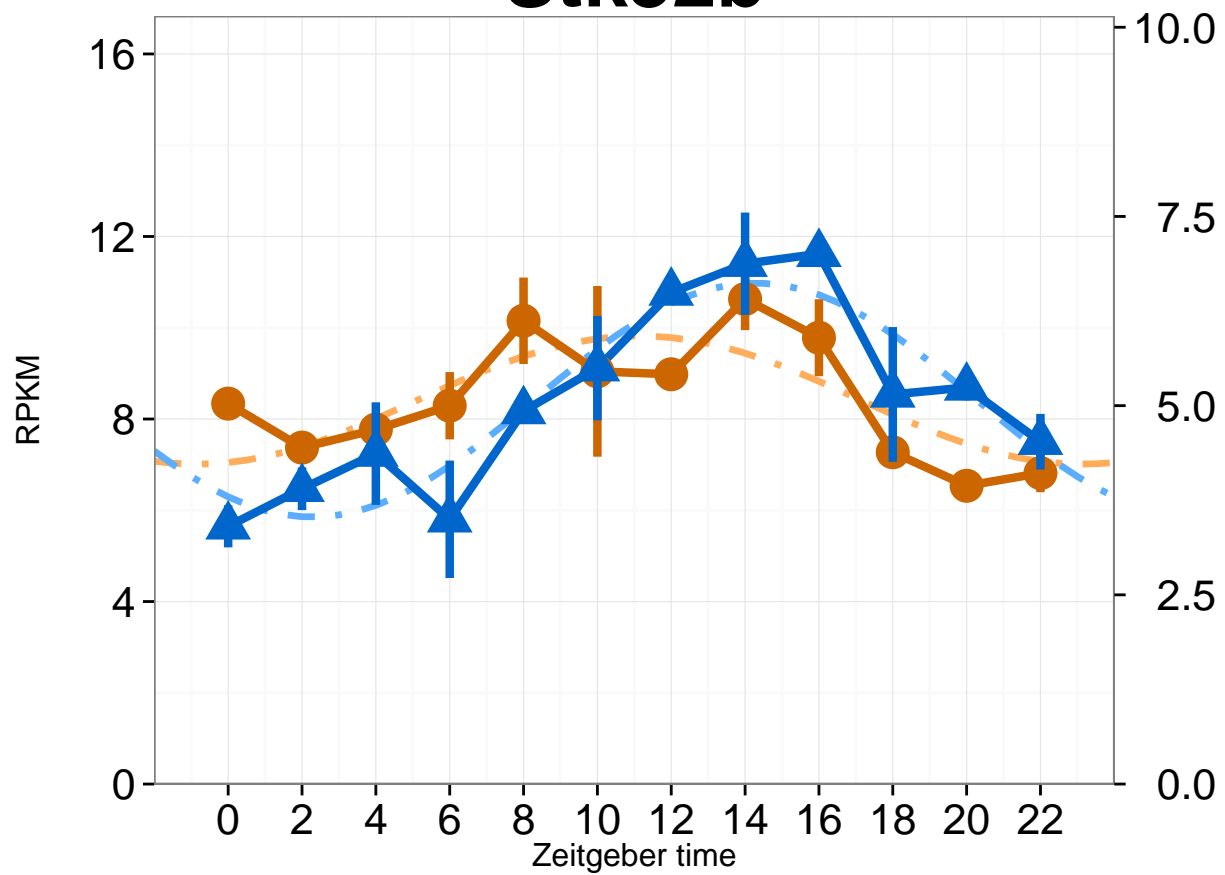

# Stk32b

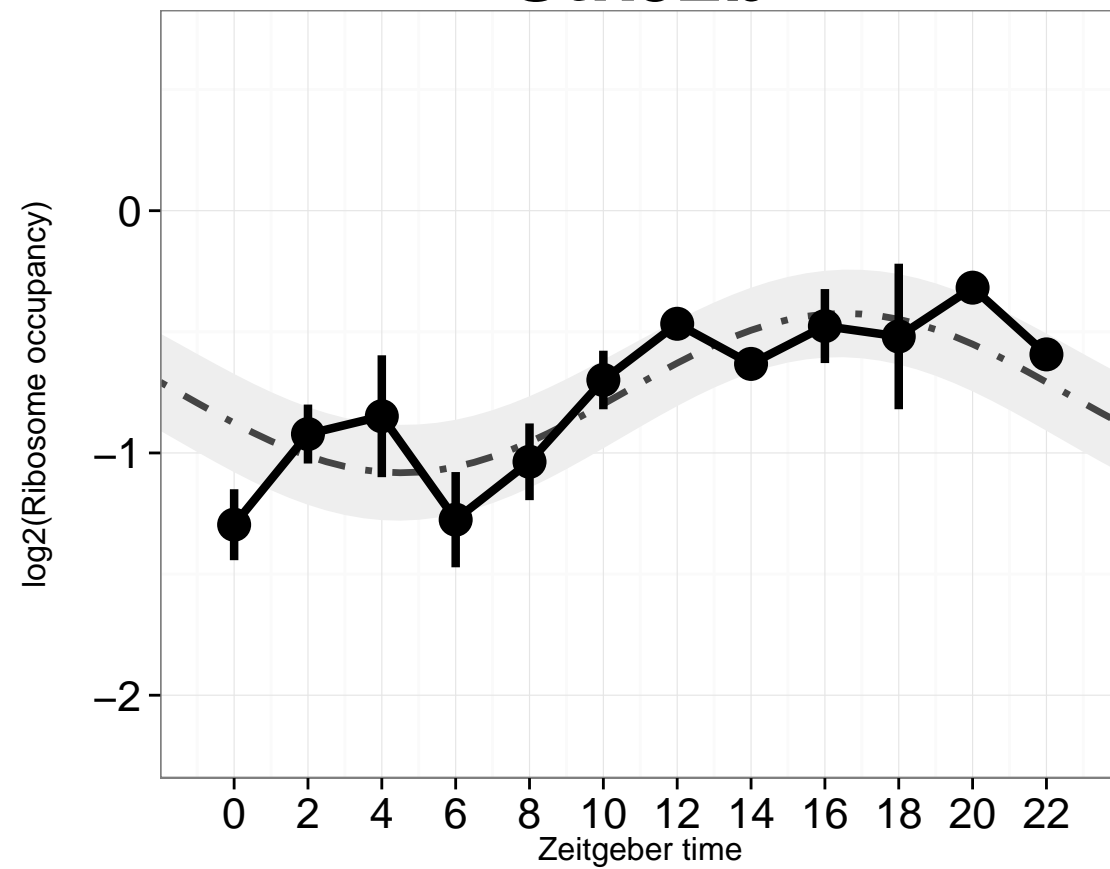

Supplement: Supplementary file 11757 [file 1]

# Ccdc58

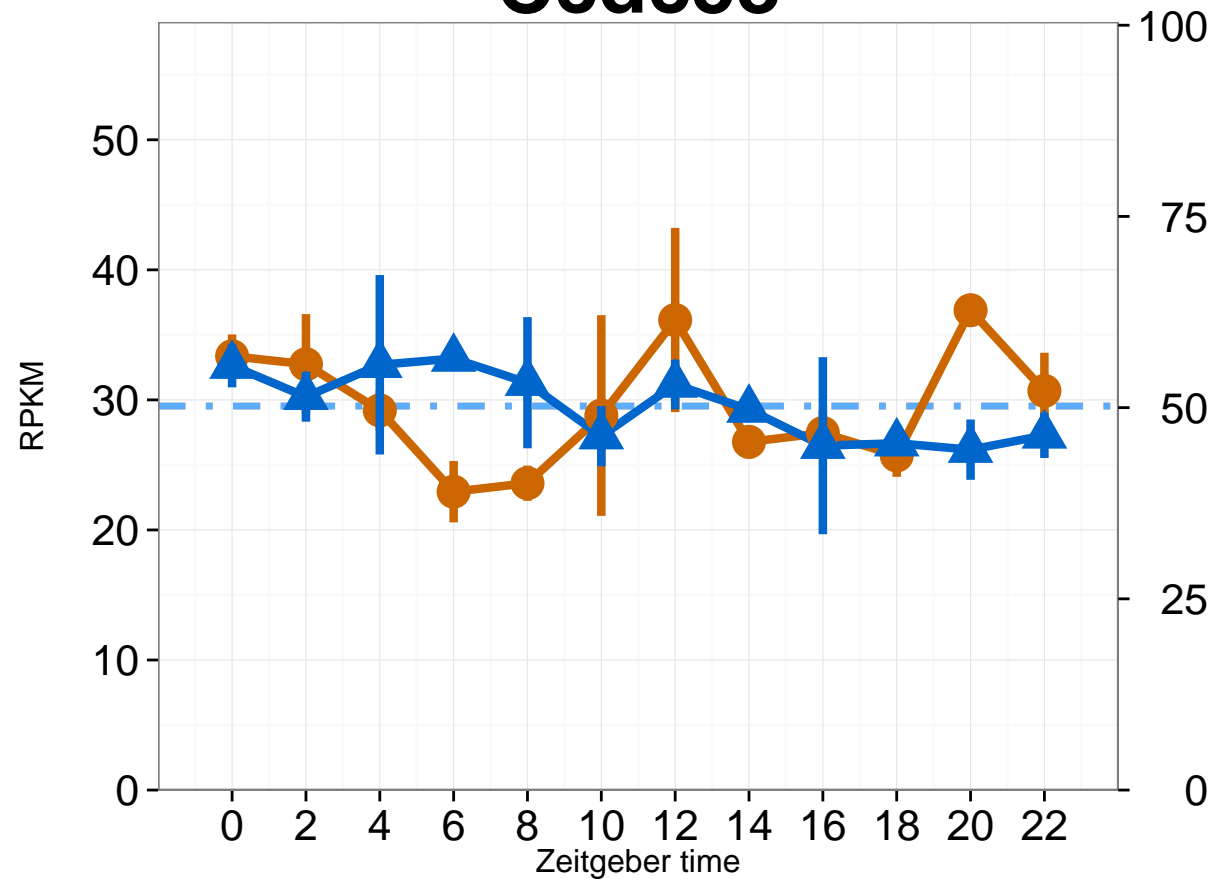

# Ccdc58

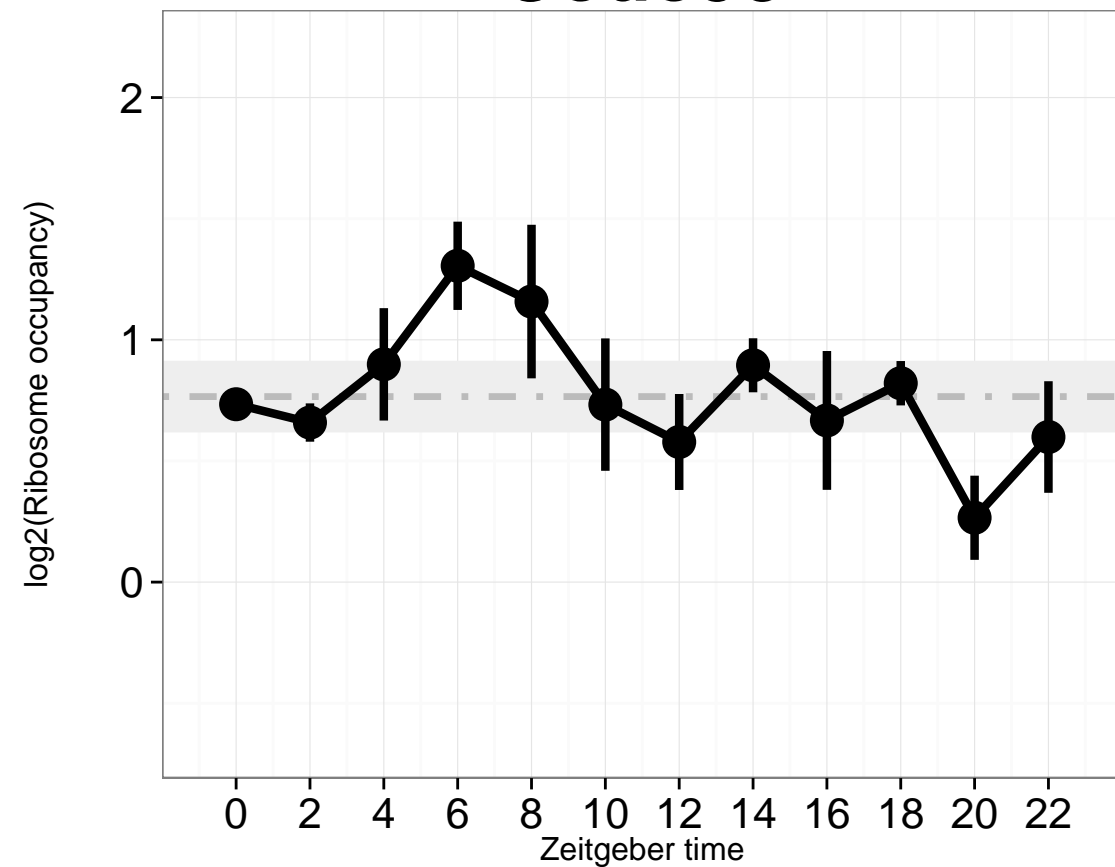

Supplement: Supplementary file 11758 [file 1]

## PvrI3

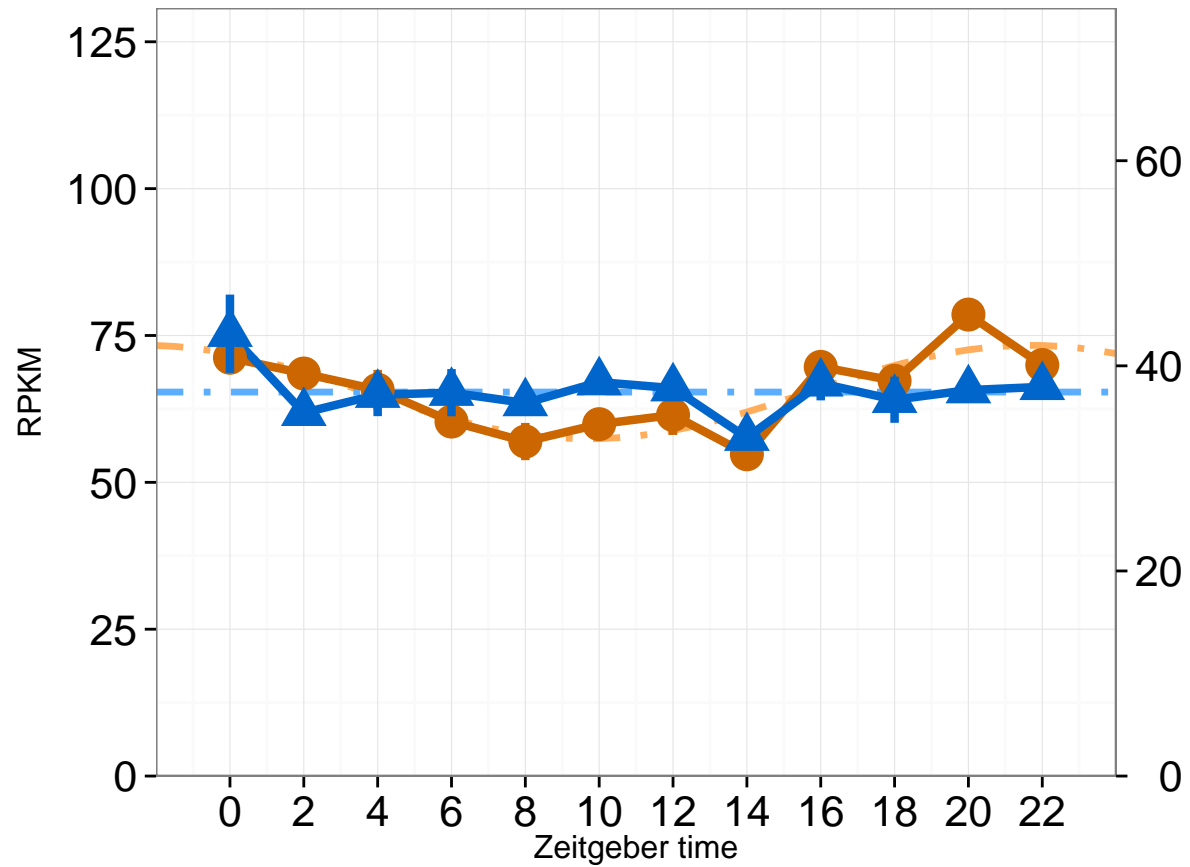

## PvrI3

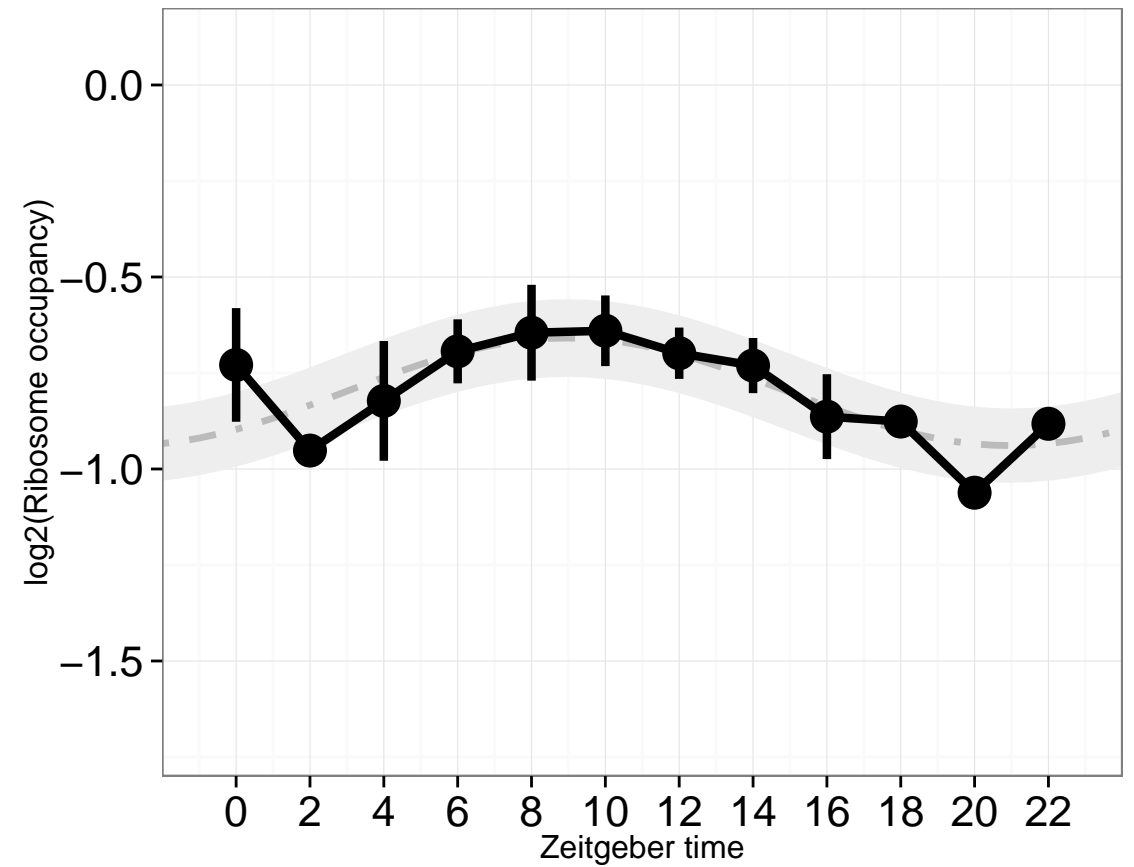

Supplement: Supplementary file 11759 [file 1]

# Haus8

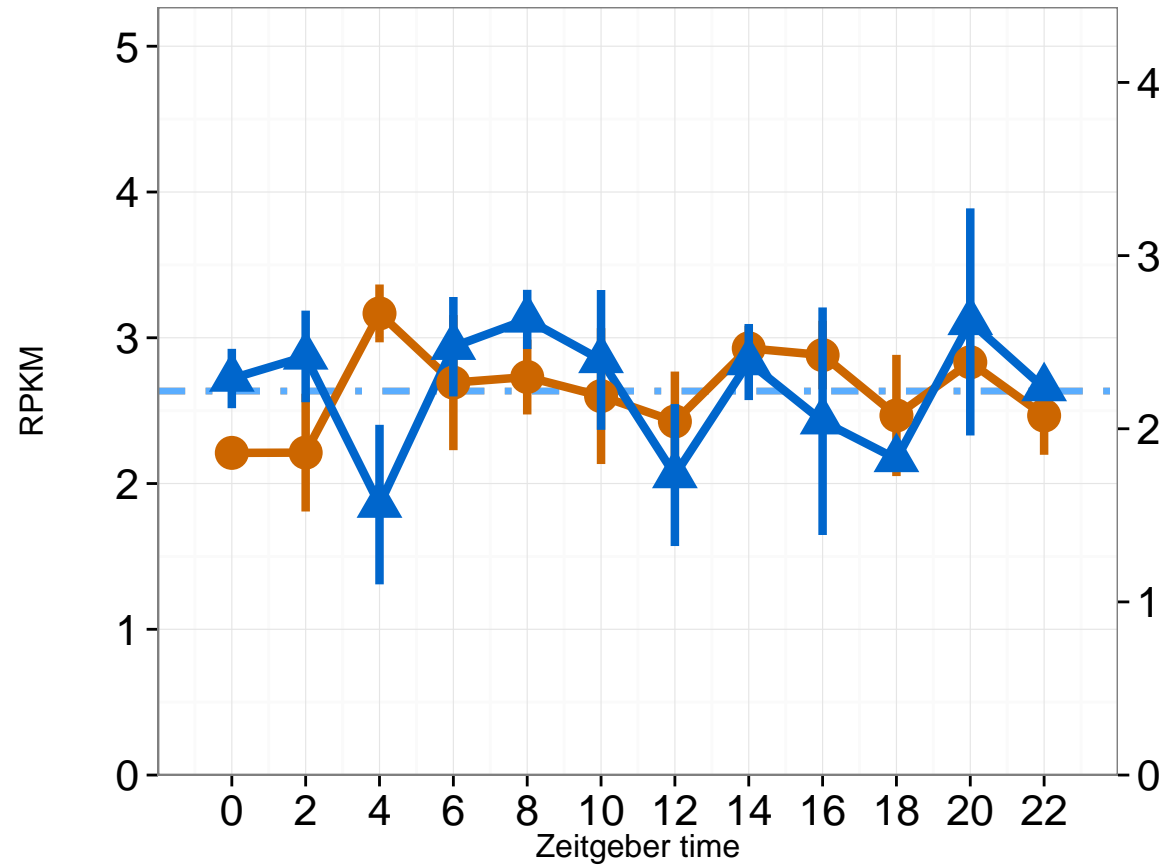

# Haus8

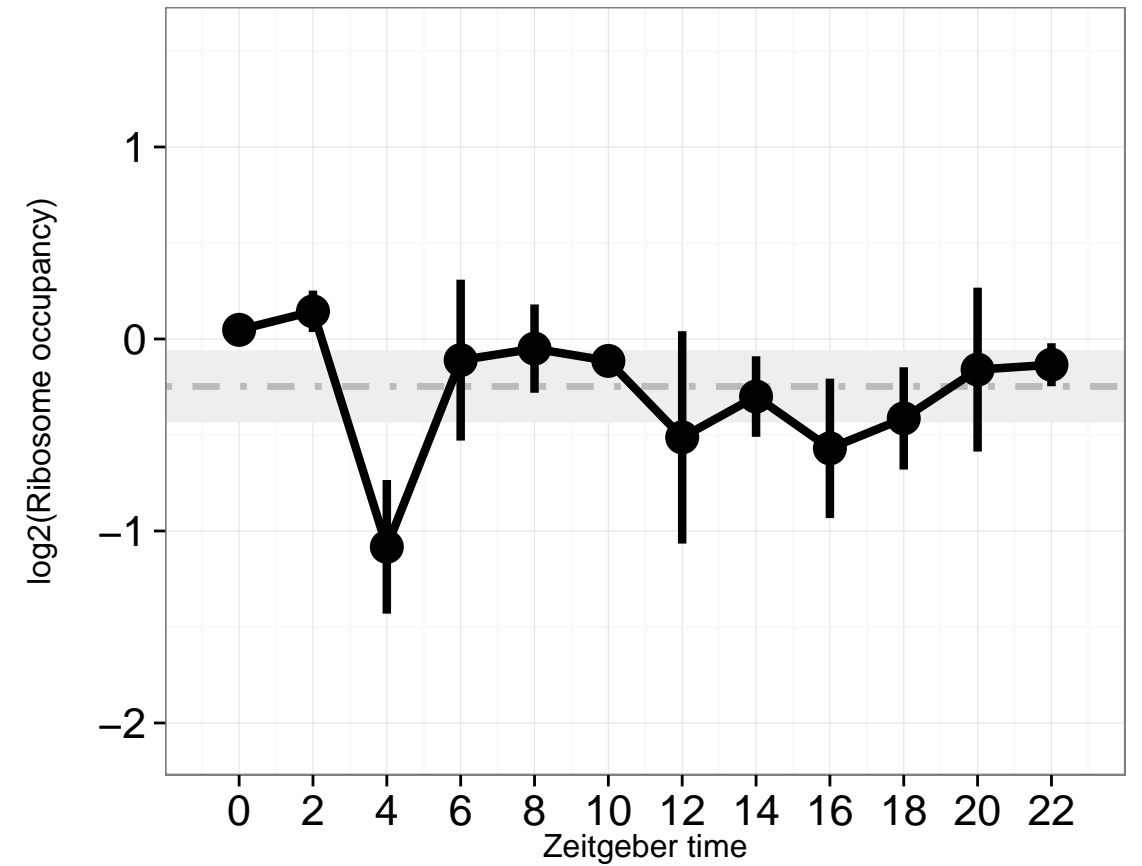

Supplement: Supplementary file 11760 [file 1]

# Traf1

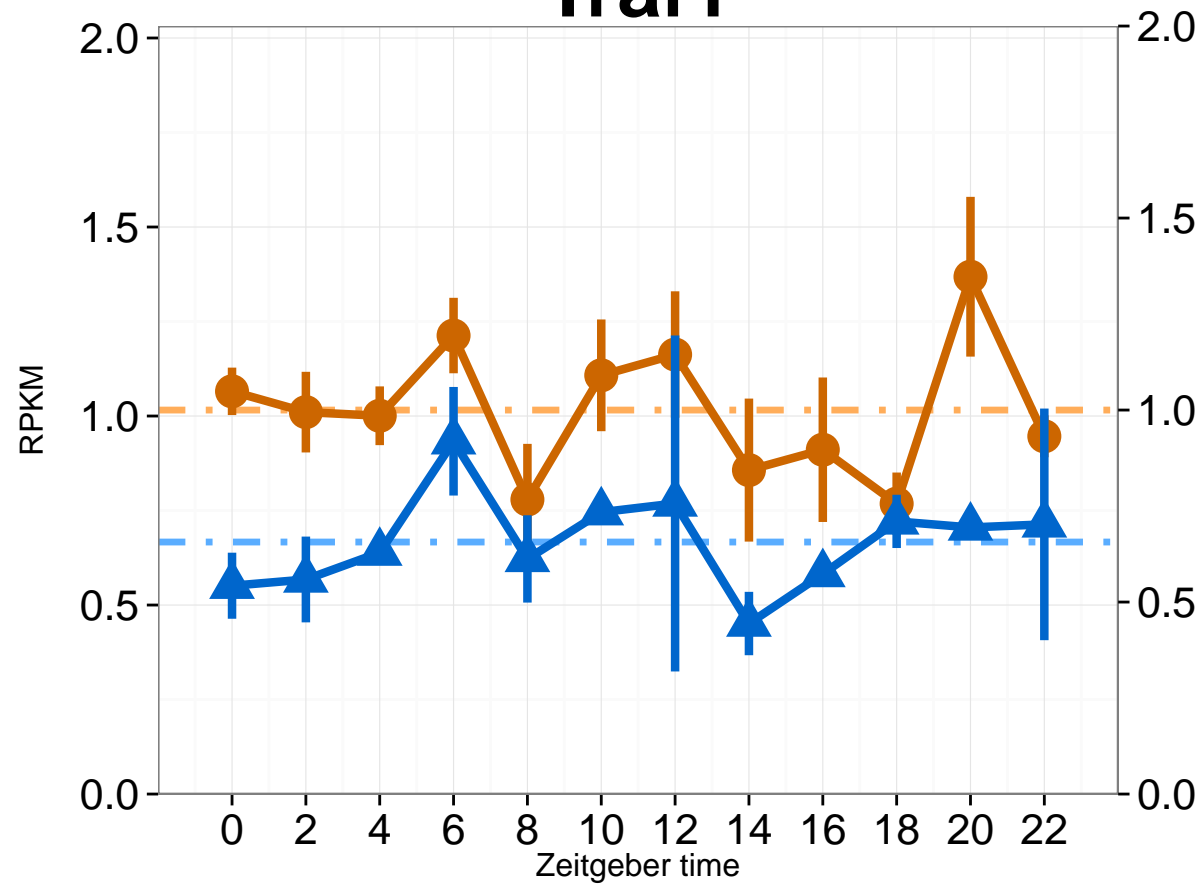

# Traf1

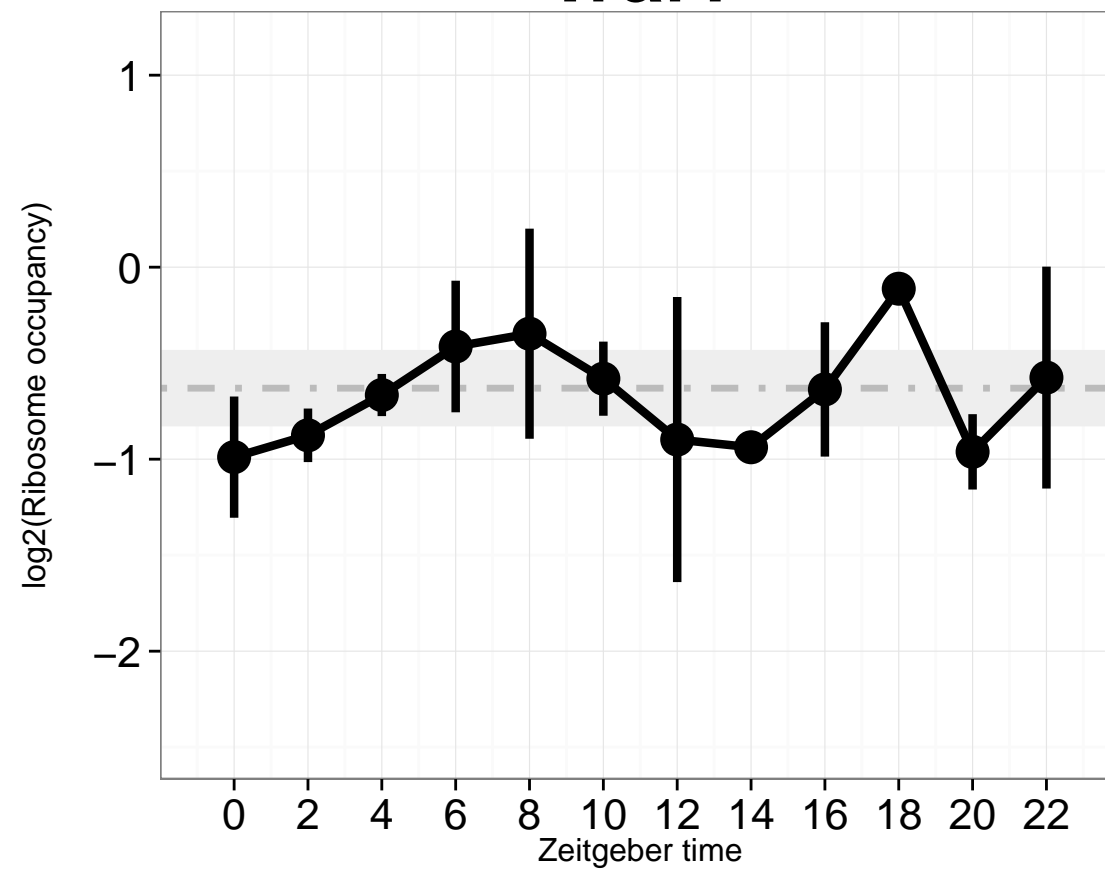

Supplement: Supplementary file 11761 [file 1]

# Ap1s2

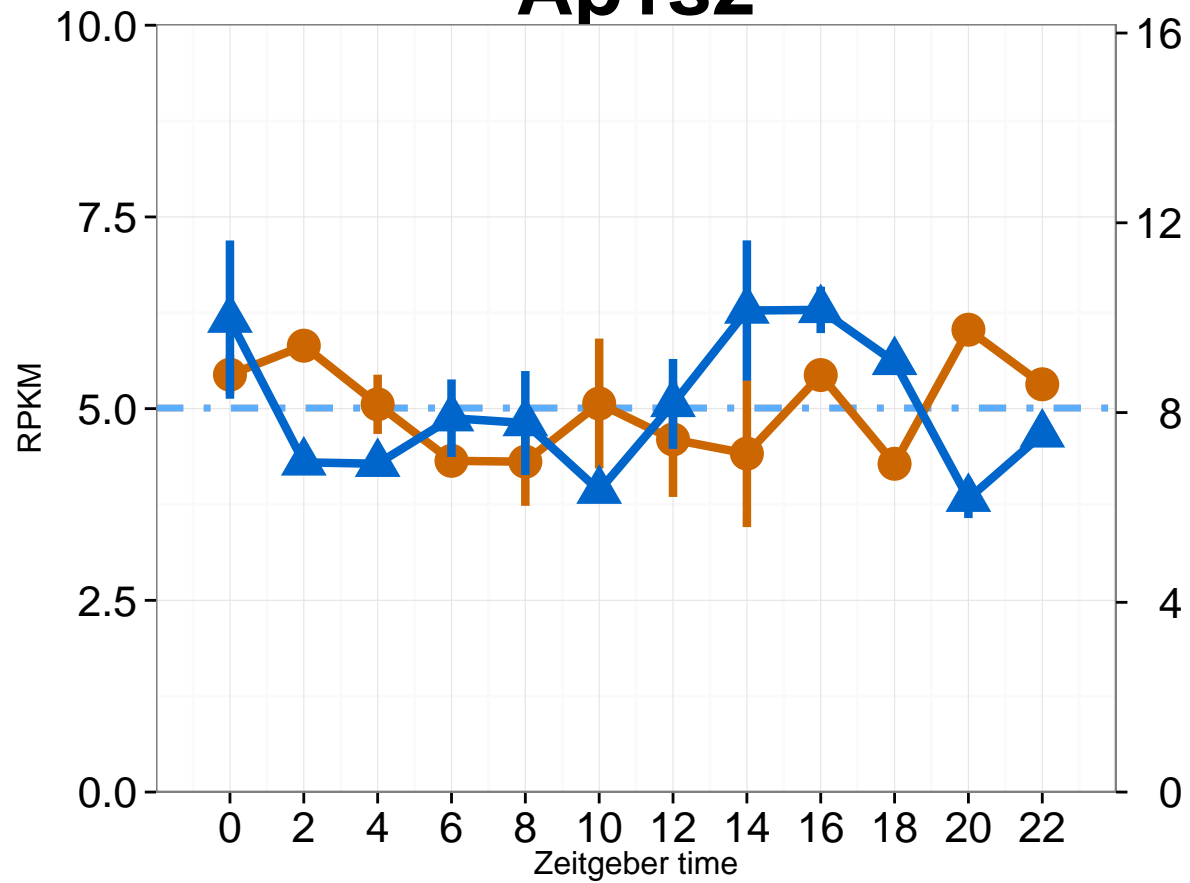

# Ap1s2

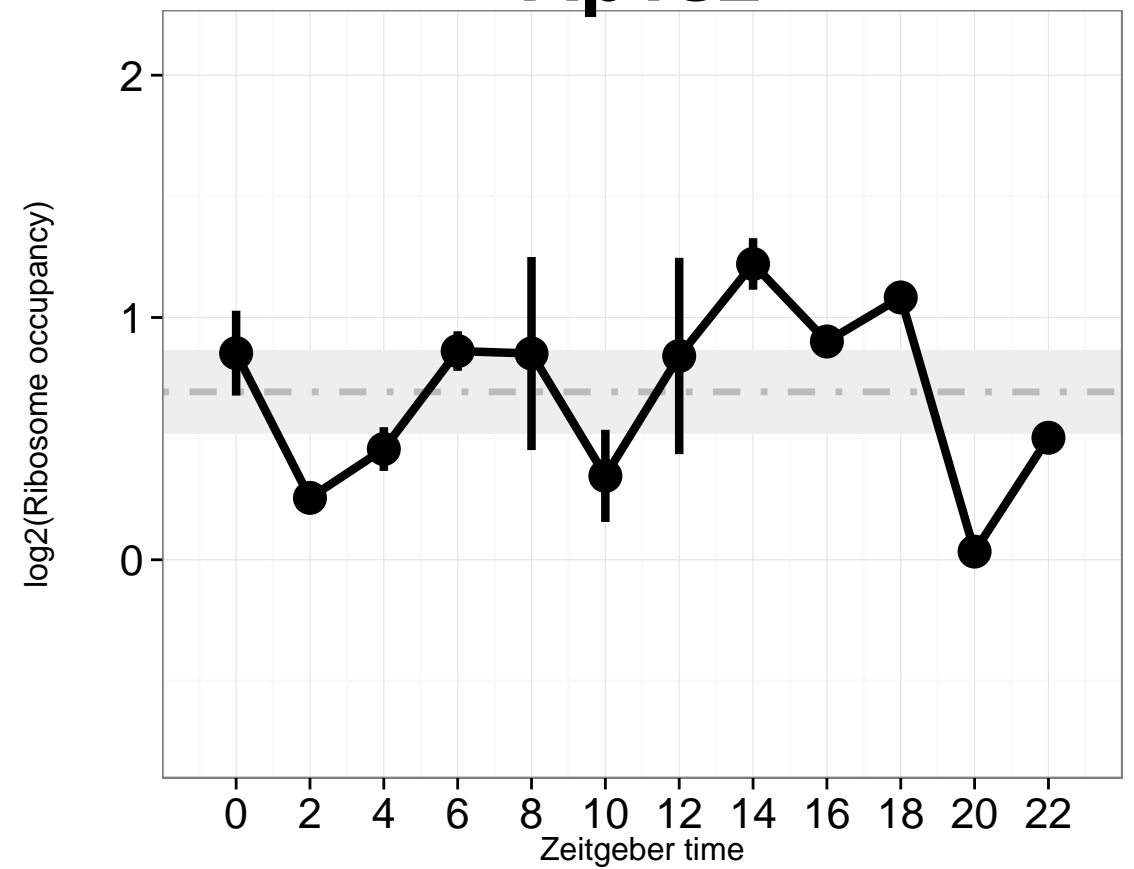

Supplement: Supplementary file 11762 [file 1]

## Hmox2

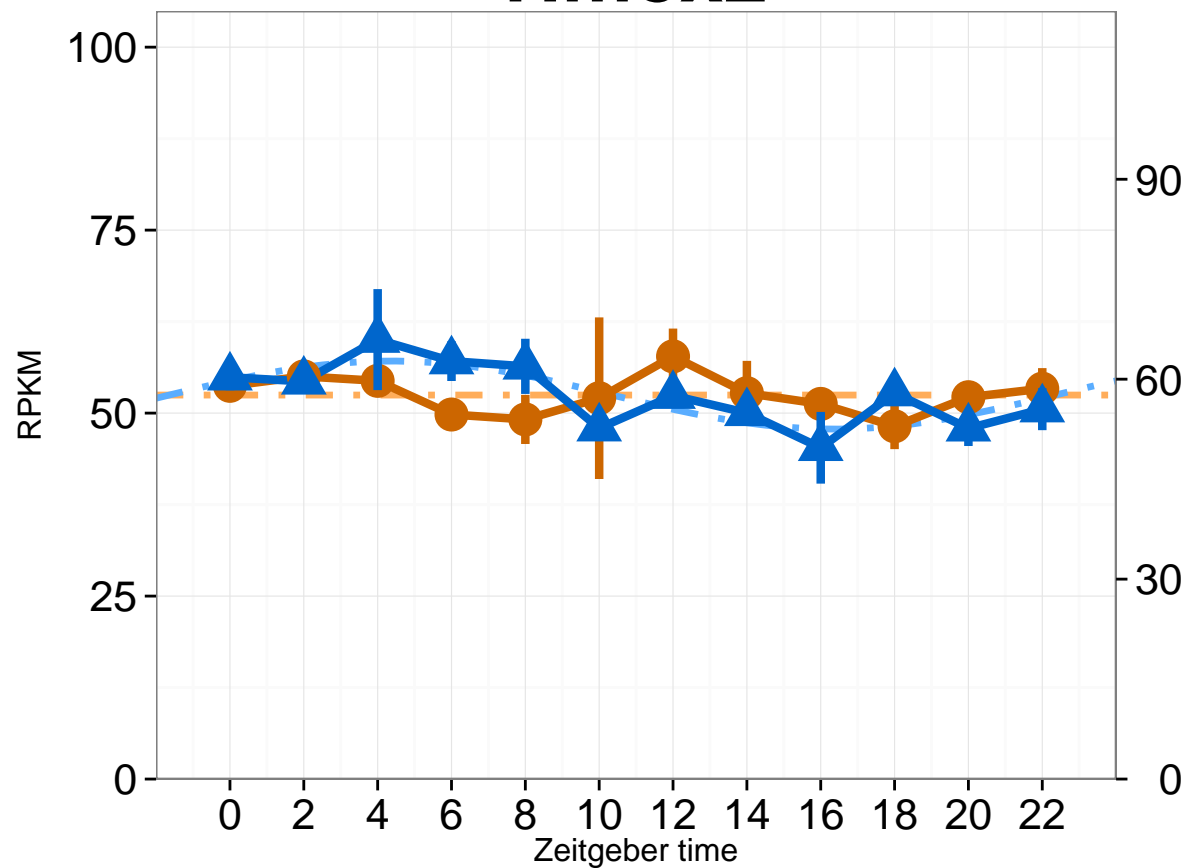

## Hmox2

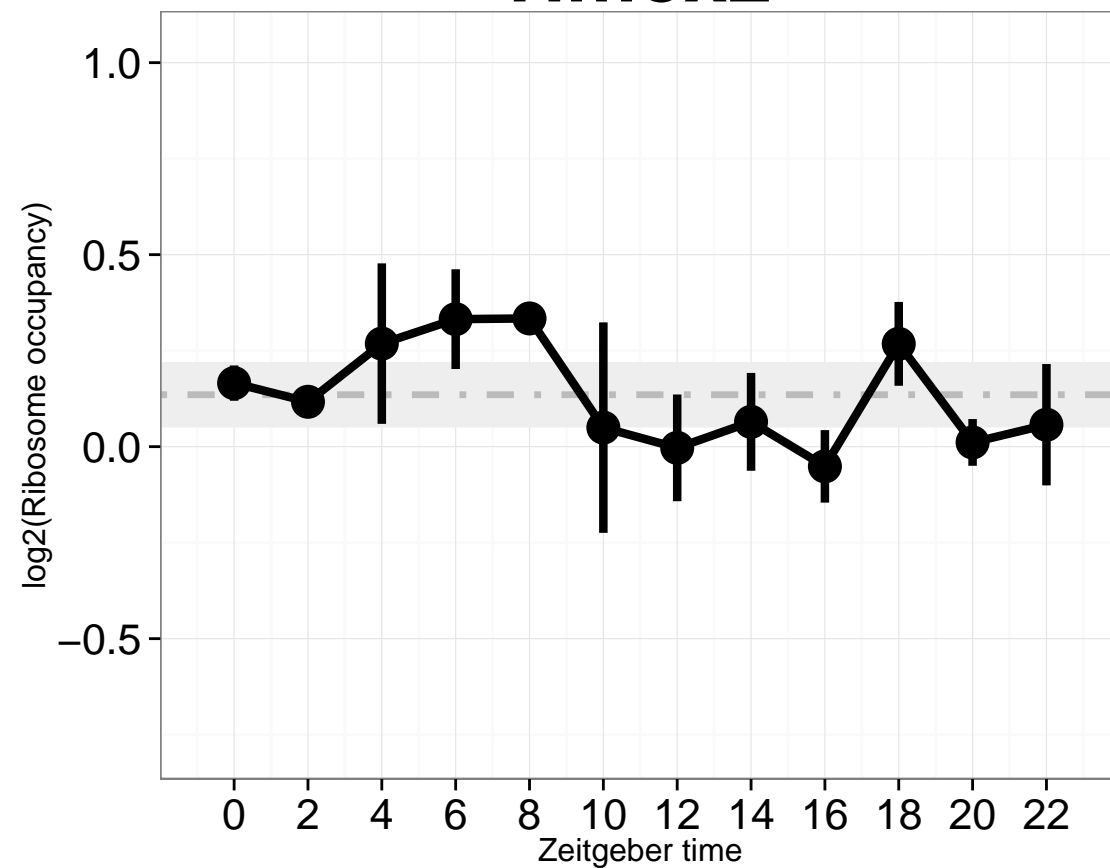

Supplement: Supplementary file 11763 [file 1]

# Gpr64

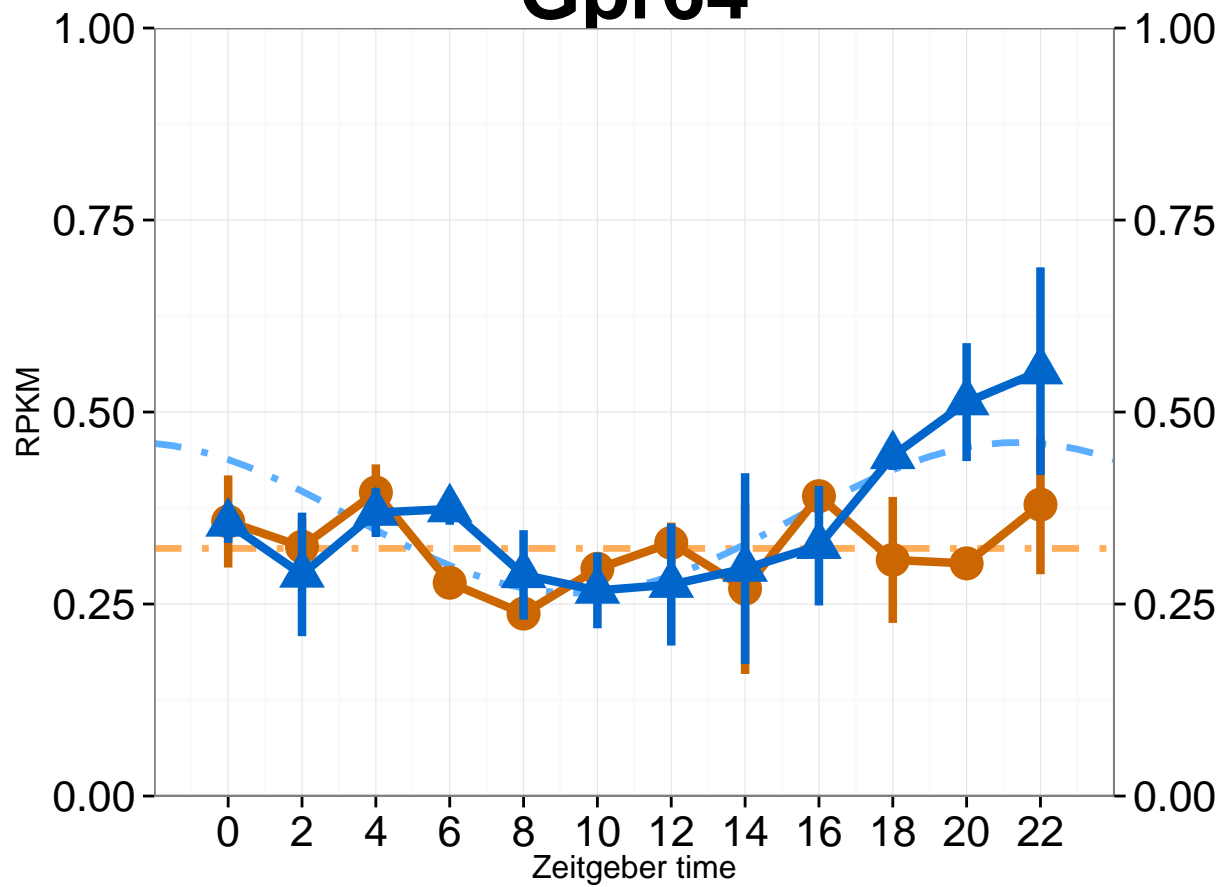

# Gpr64

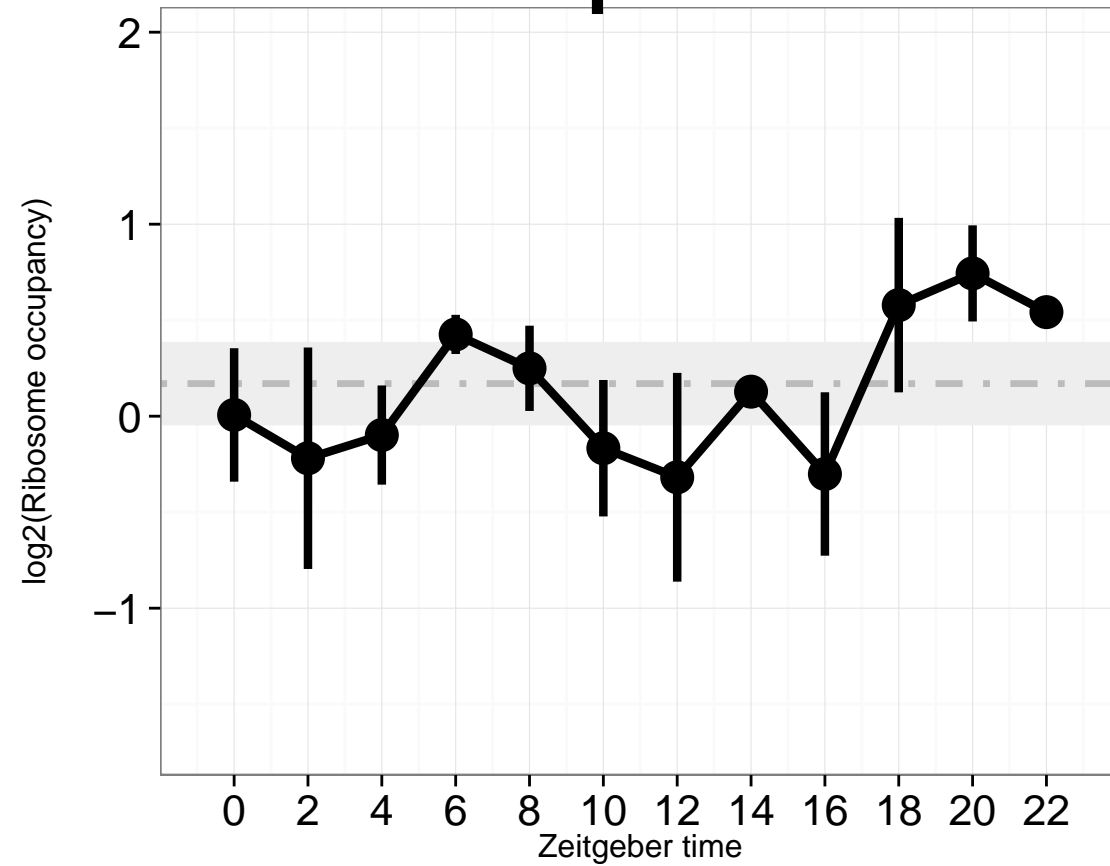

Supplement: Supplementary file 11764 [file 1]

## Il10rb

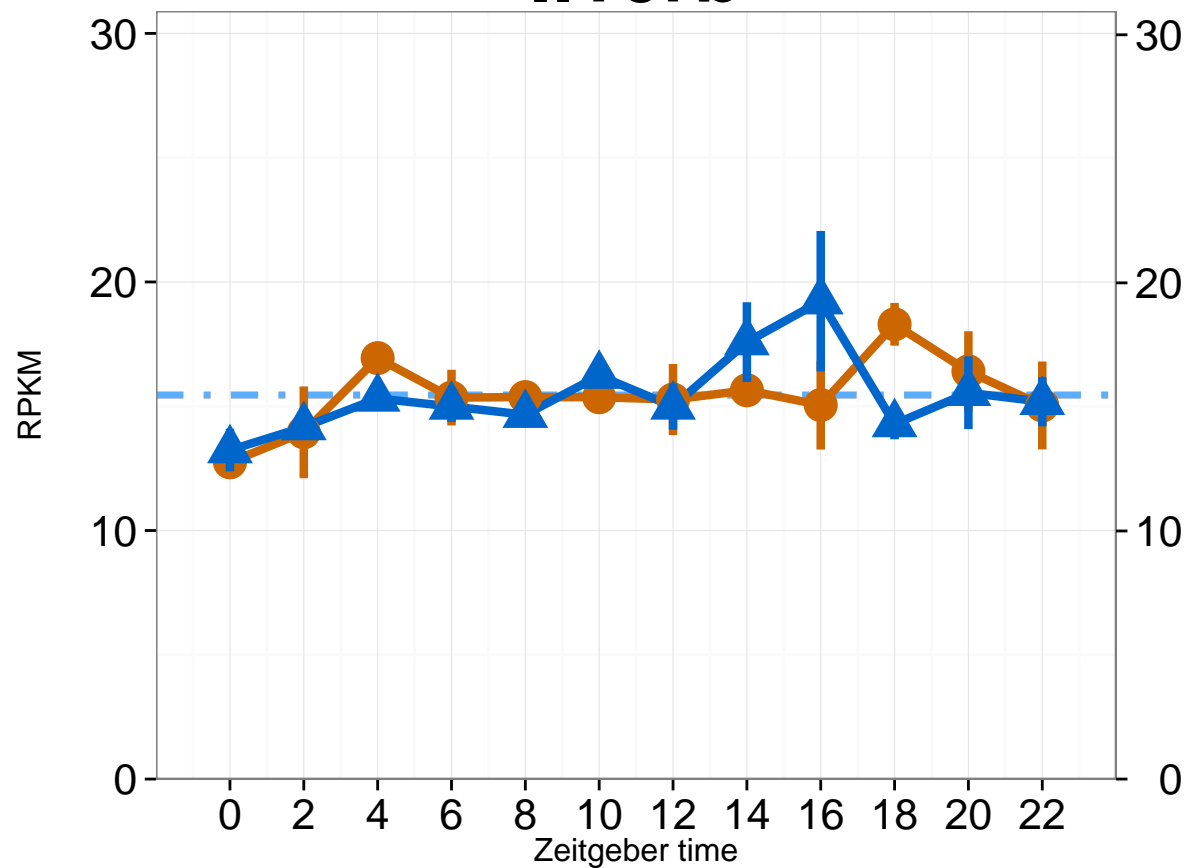

## Il10rb

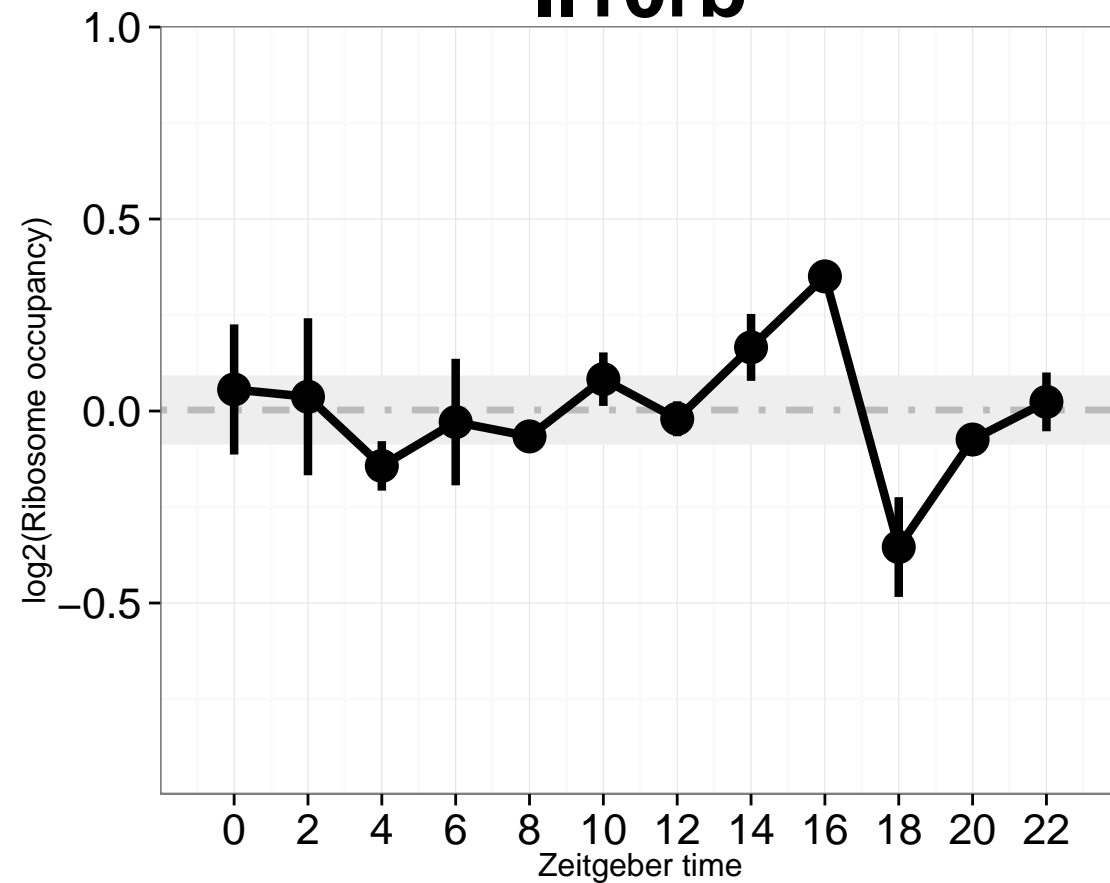

Supplement: Supplementary file 11765 [file 1]

# Slc34a2

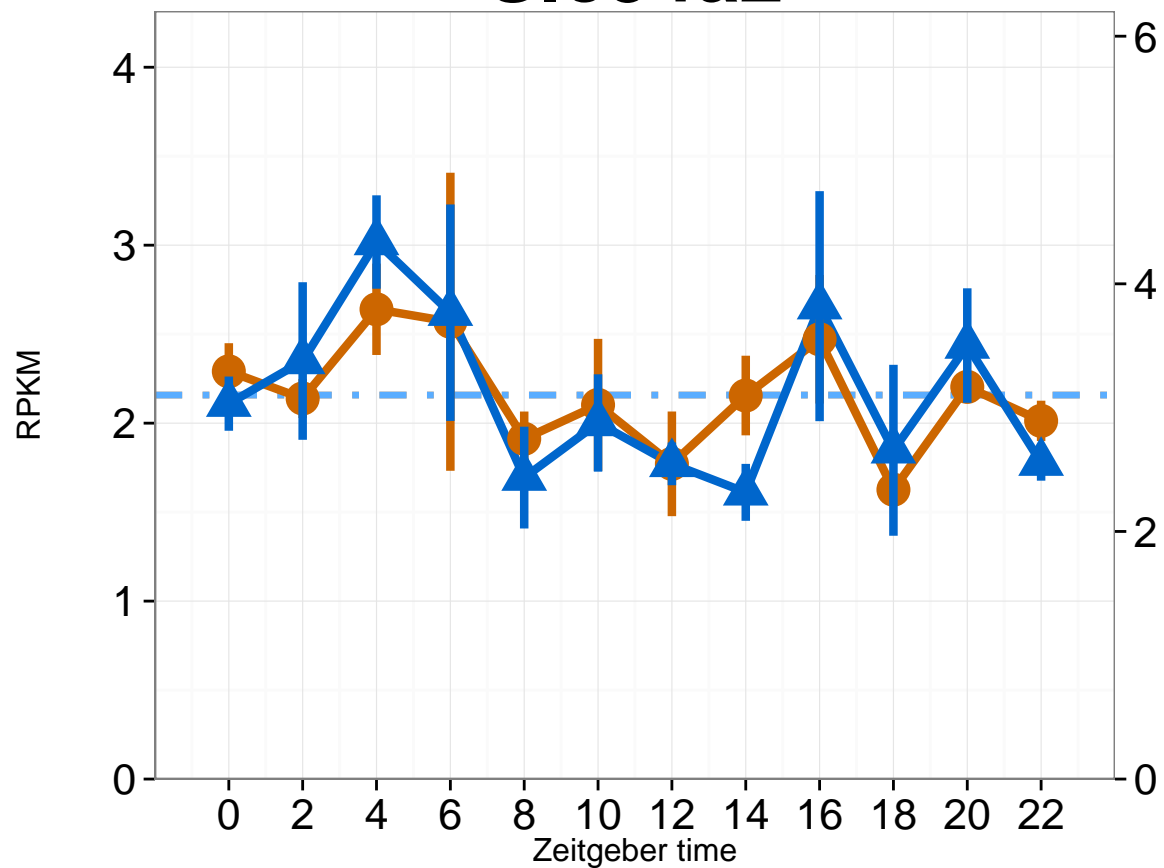

# Slc34a2

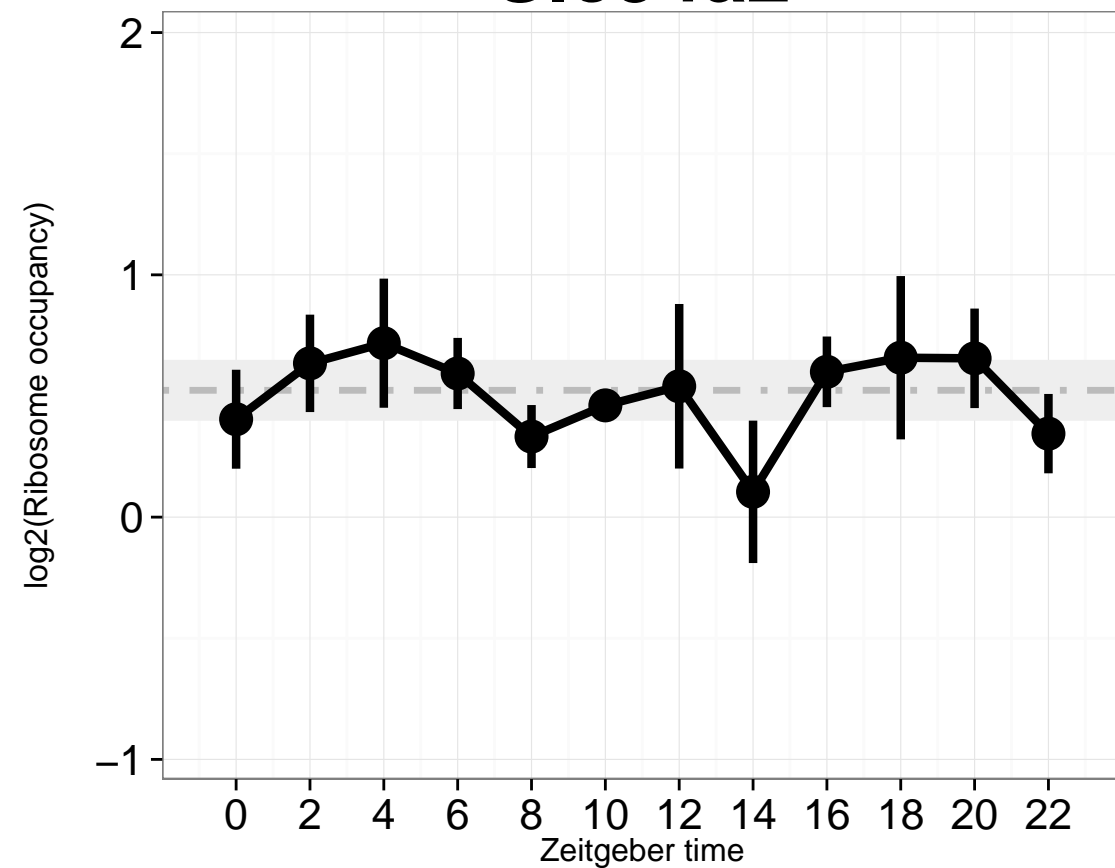

Supplement: Supplementary file 11766 [file 1]

# Xpnpep1

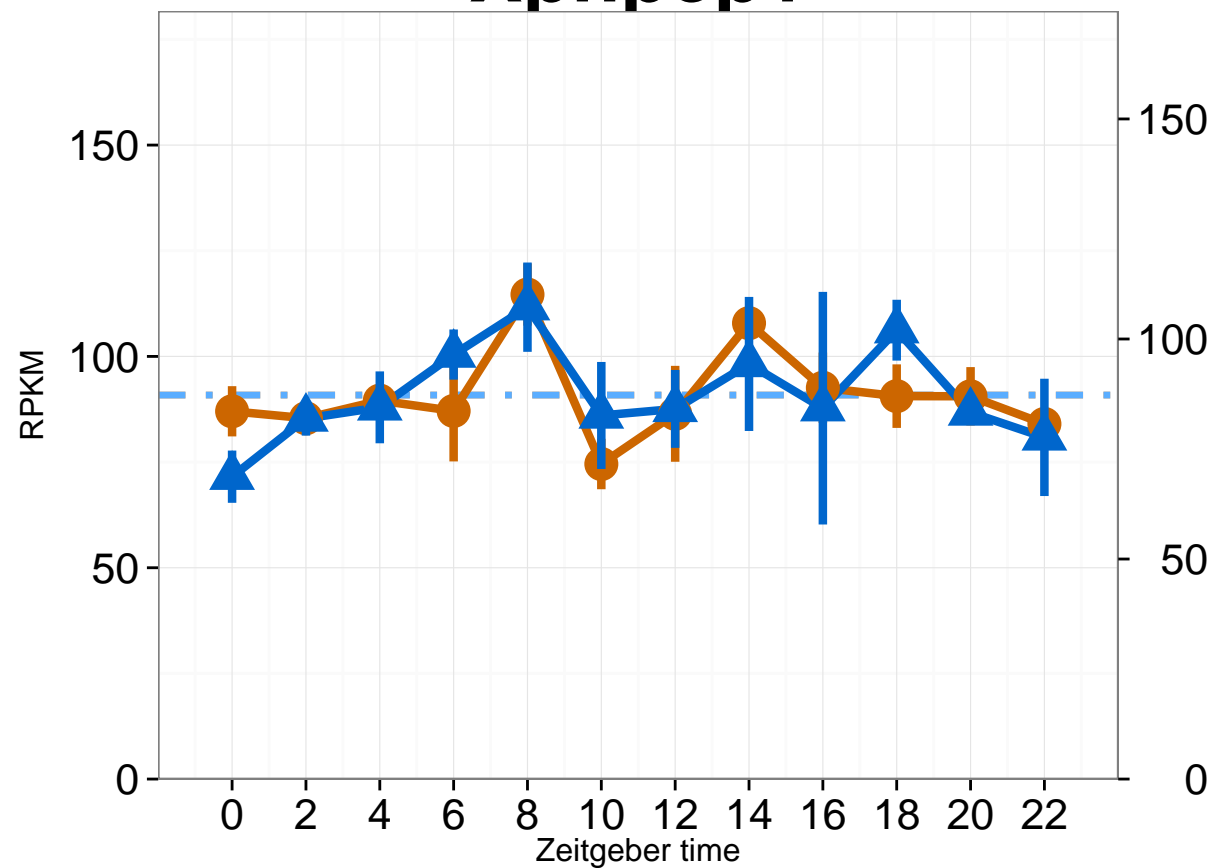

# Xpnpep1

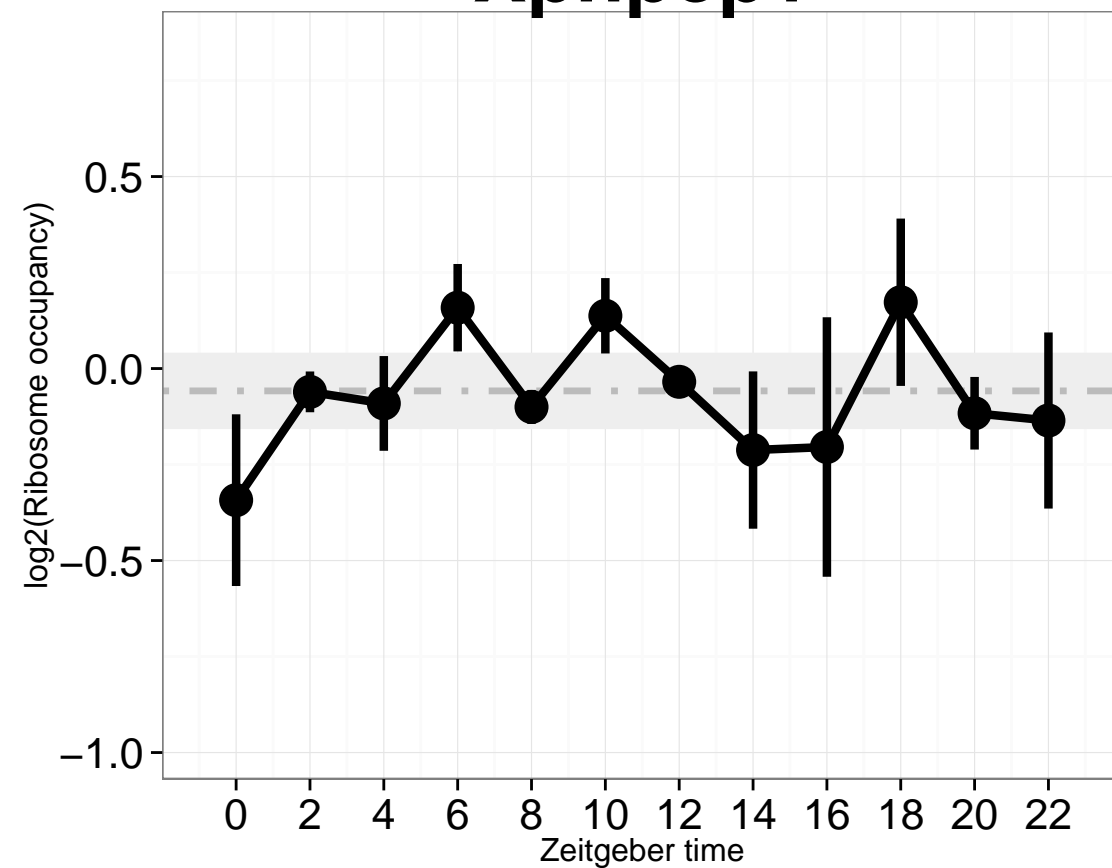

Supplement: Supplementary file 11767 [file 1]

# Herpud1

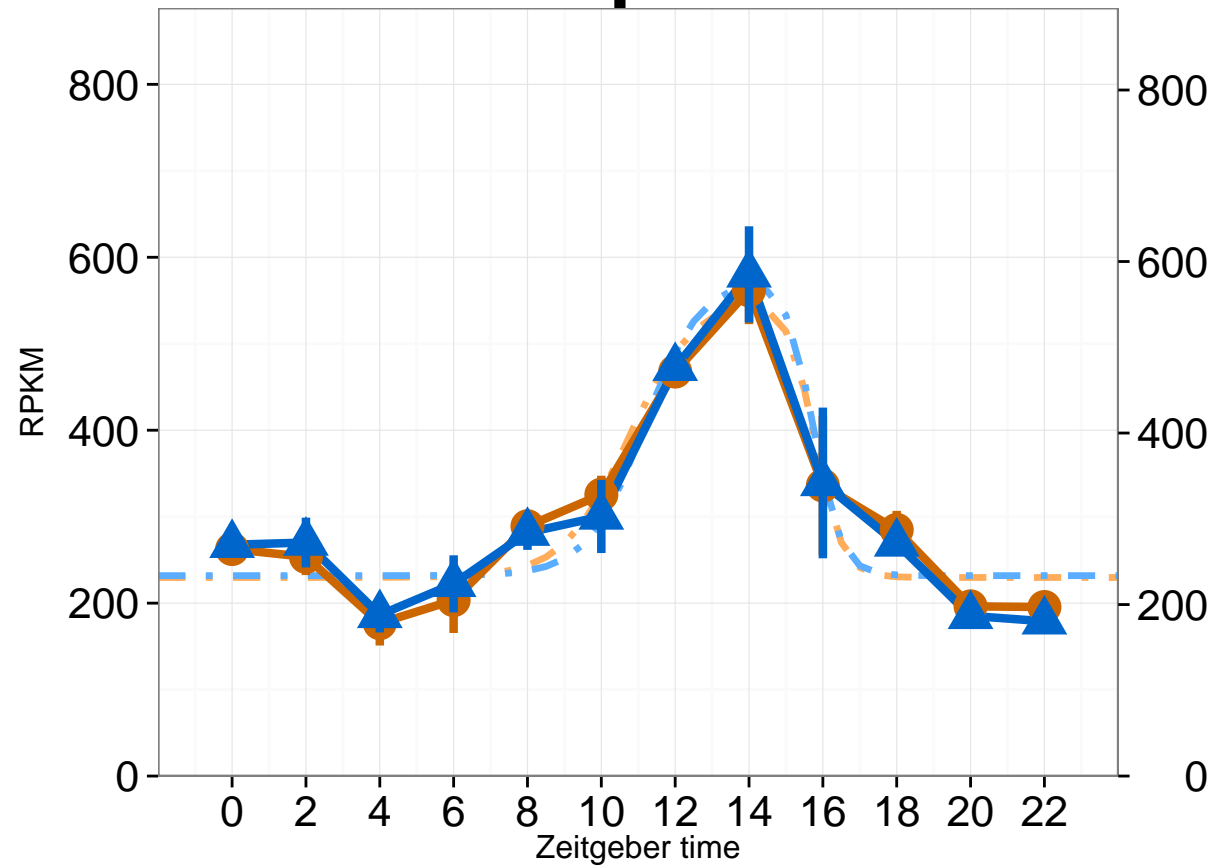

# Herpud1

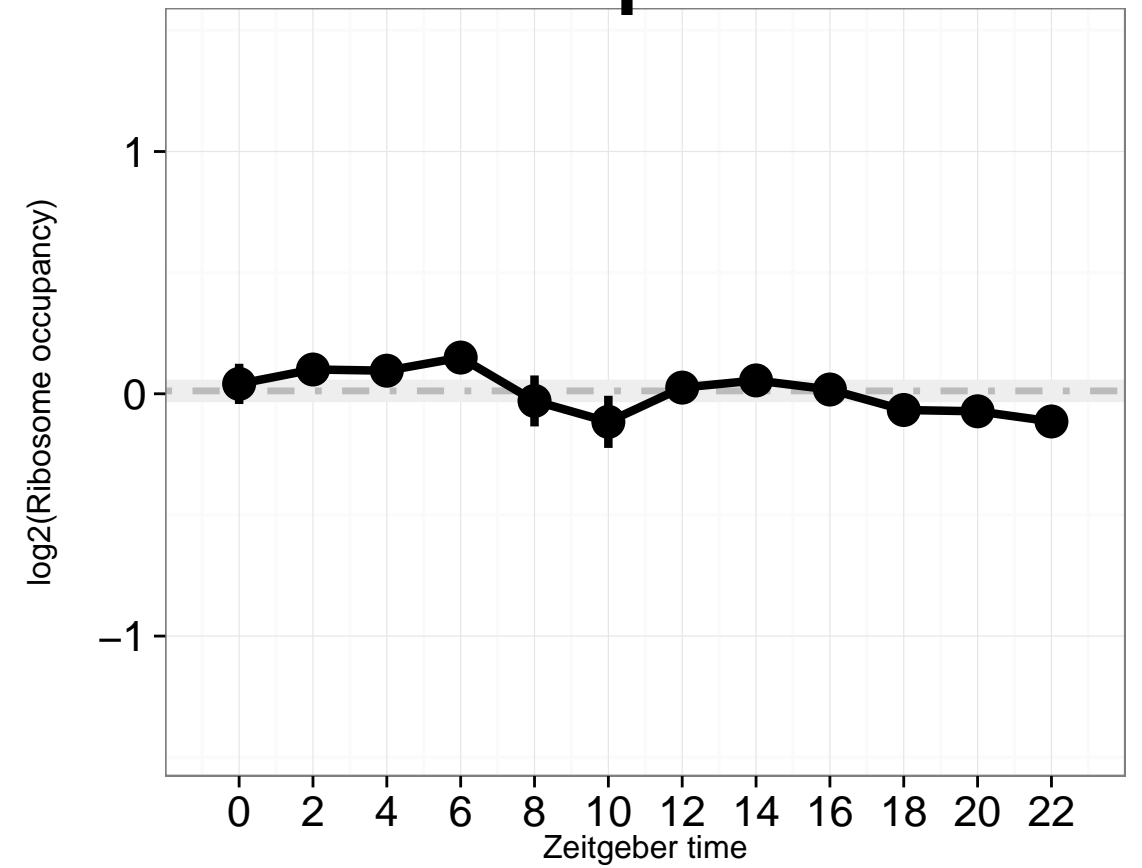

Supplement: Supplementary file 11768 [file 1]

# Tex10

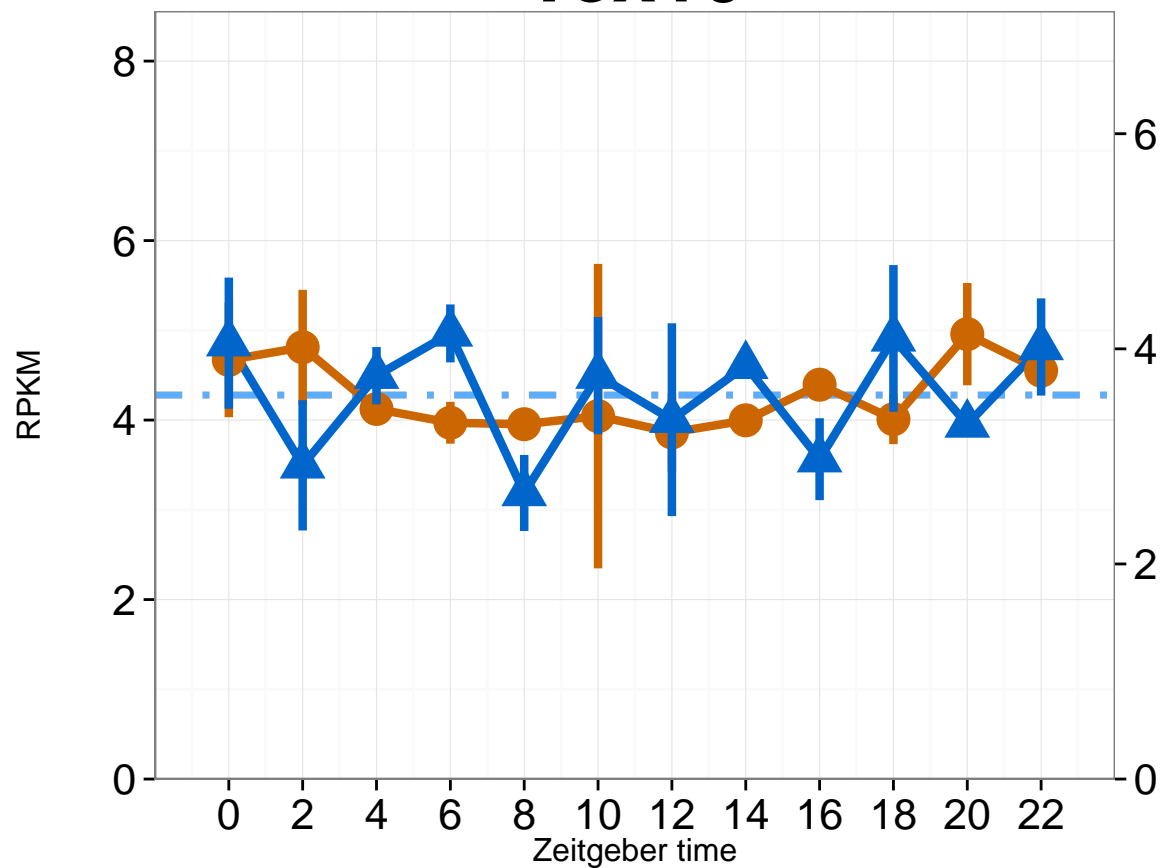

# Tex10

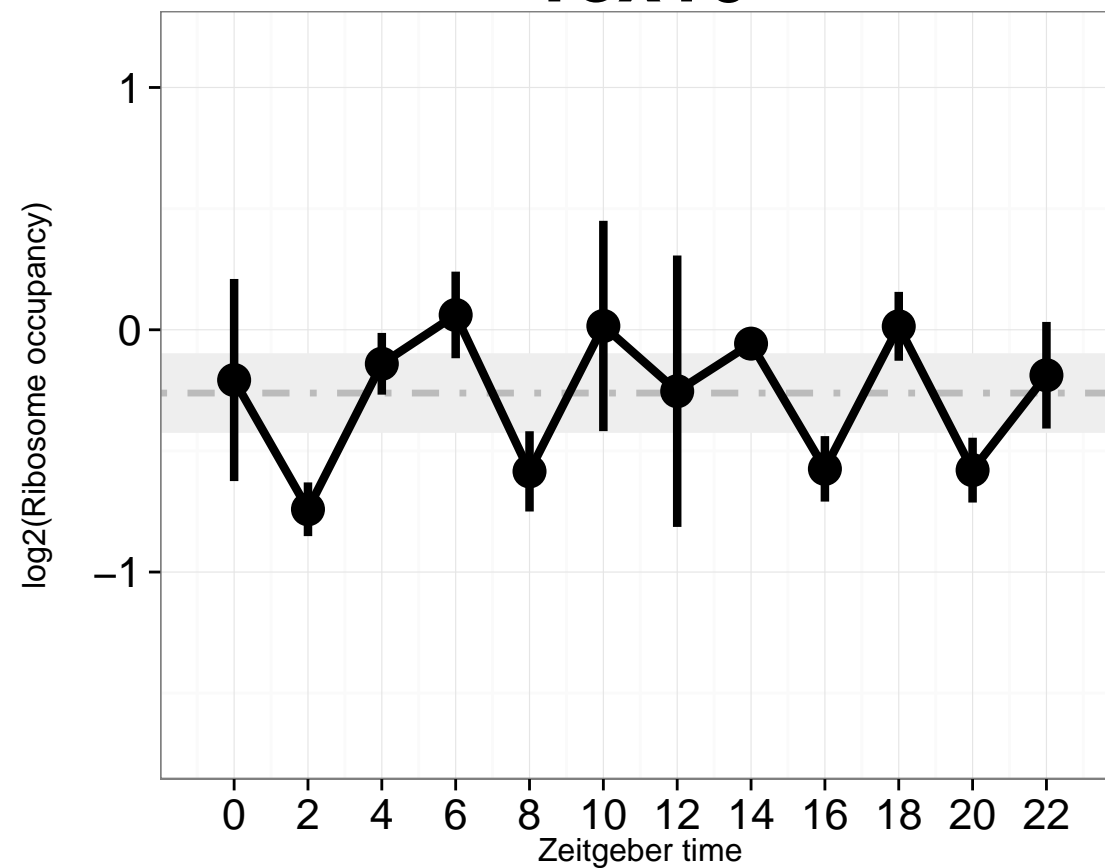

Supplement: Supplementary file 11769 [file 1]

# Caap1

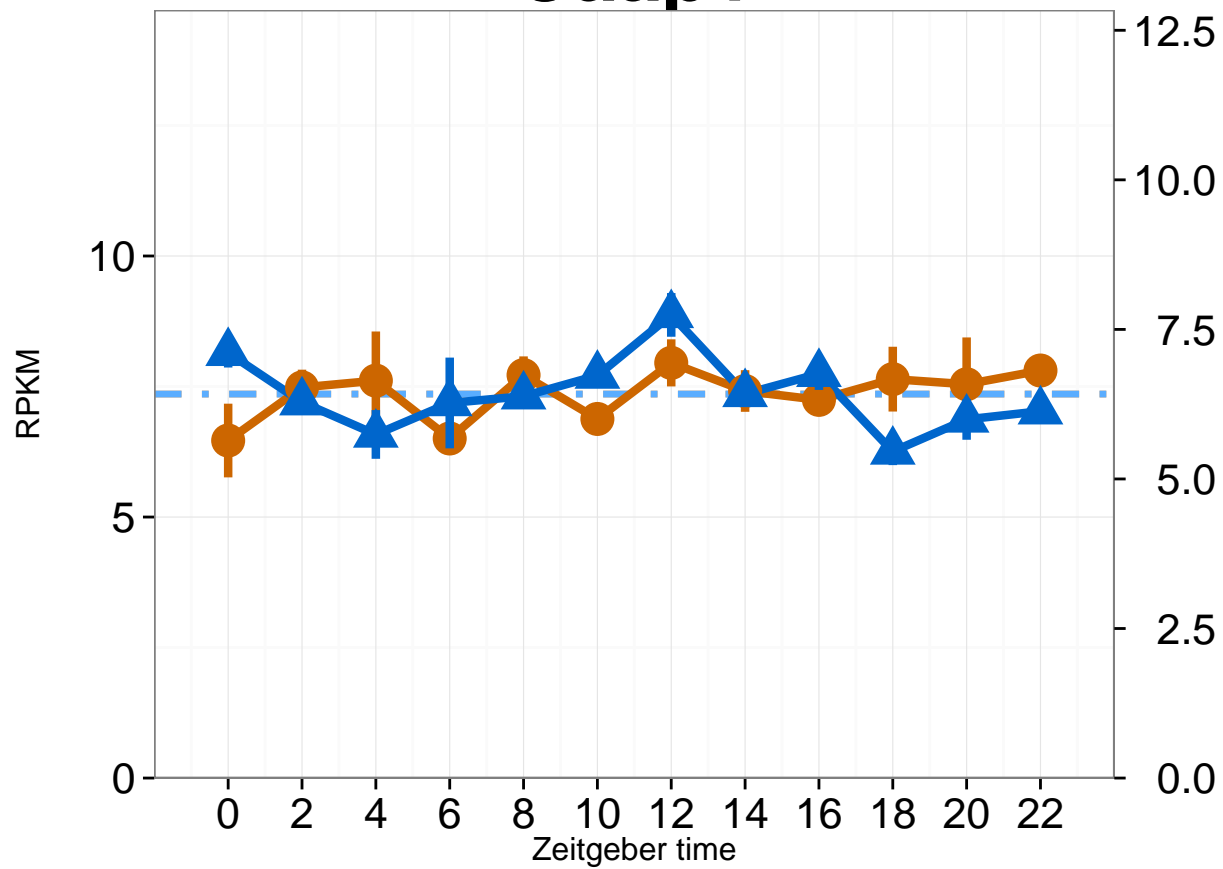

# Caap1

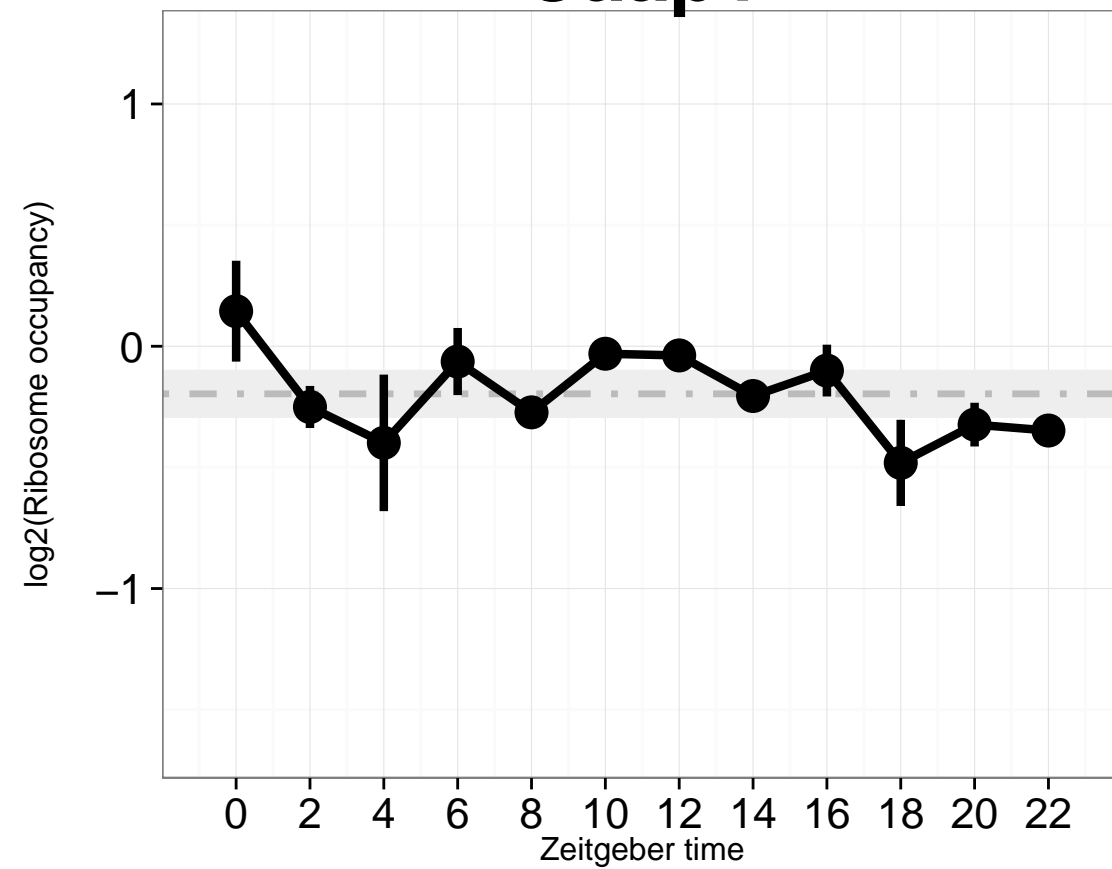

Supplement: Supplementary file 11770 [file 1]

# Cyp2a5

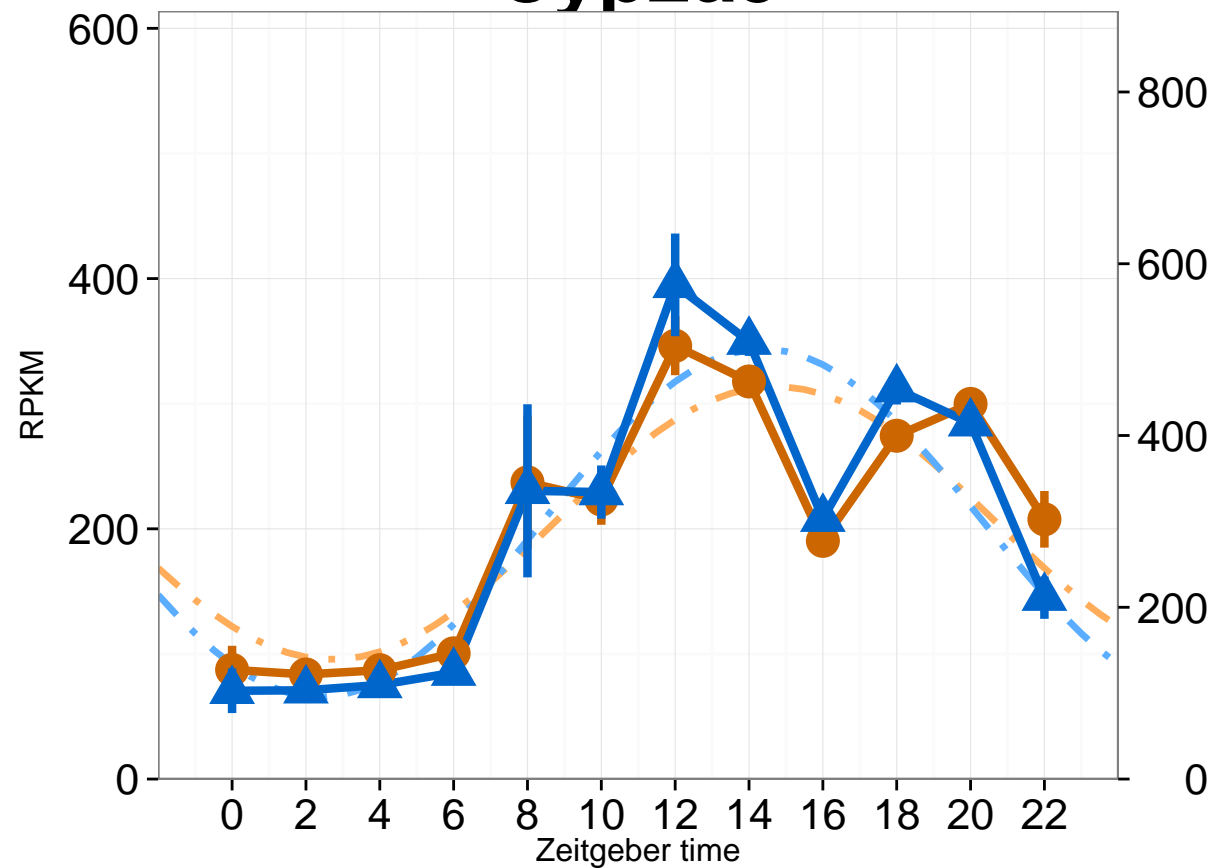

# Cyp2a5

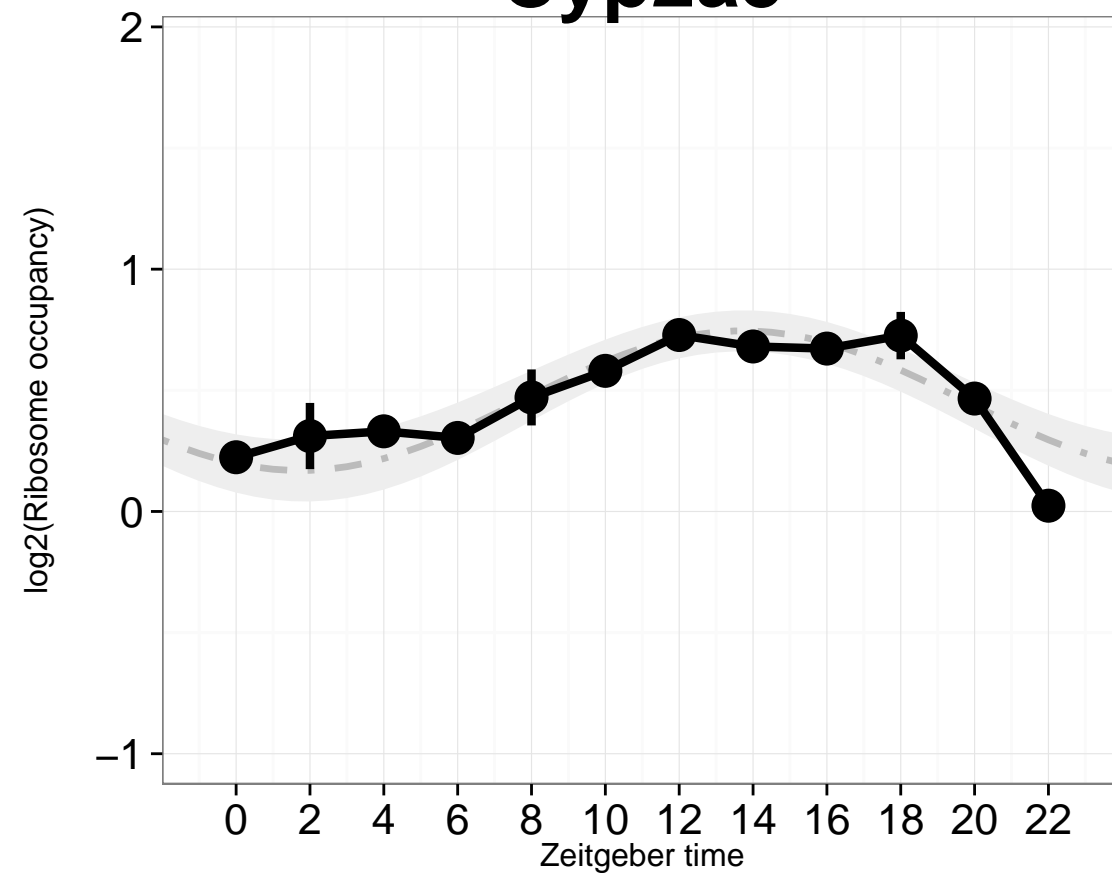

Supplement: Supplementary file 11771 [file 1]

# Rccd1

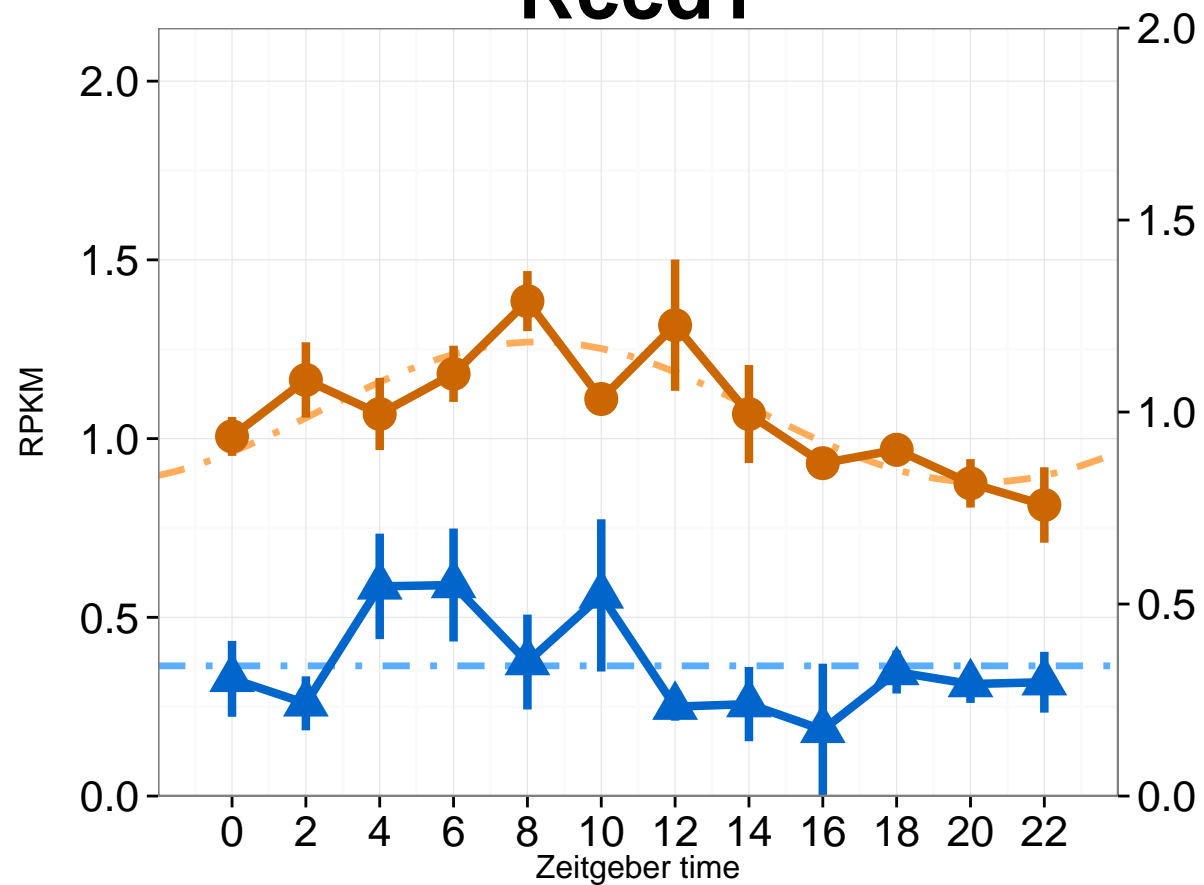

# Rccd1

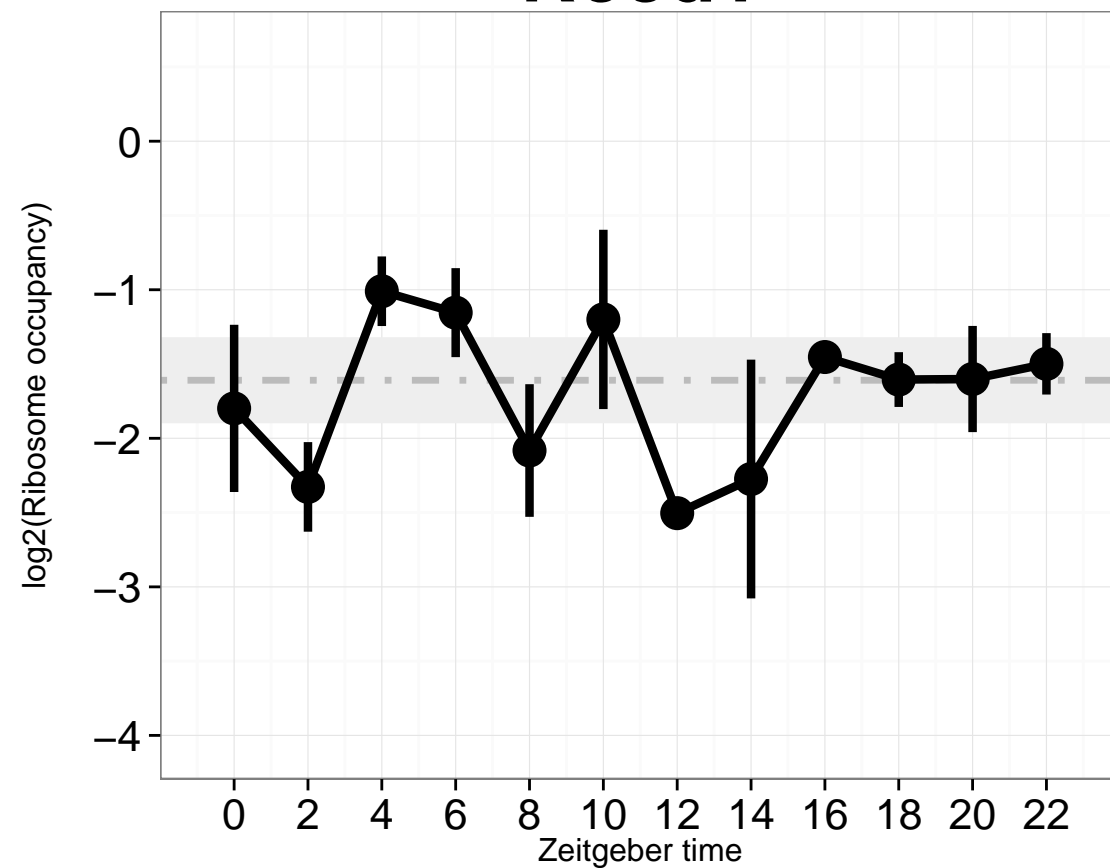

Supplement: Supplementary file 11772 [file 1]

## Astn2

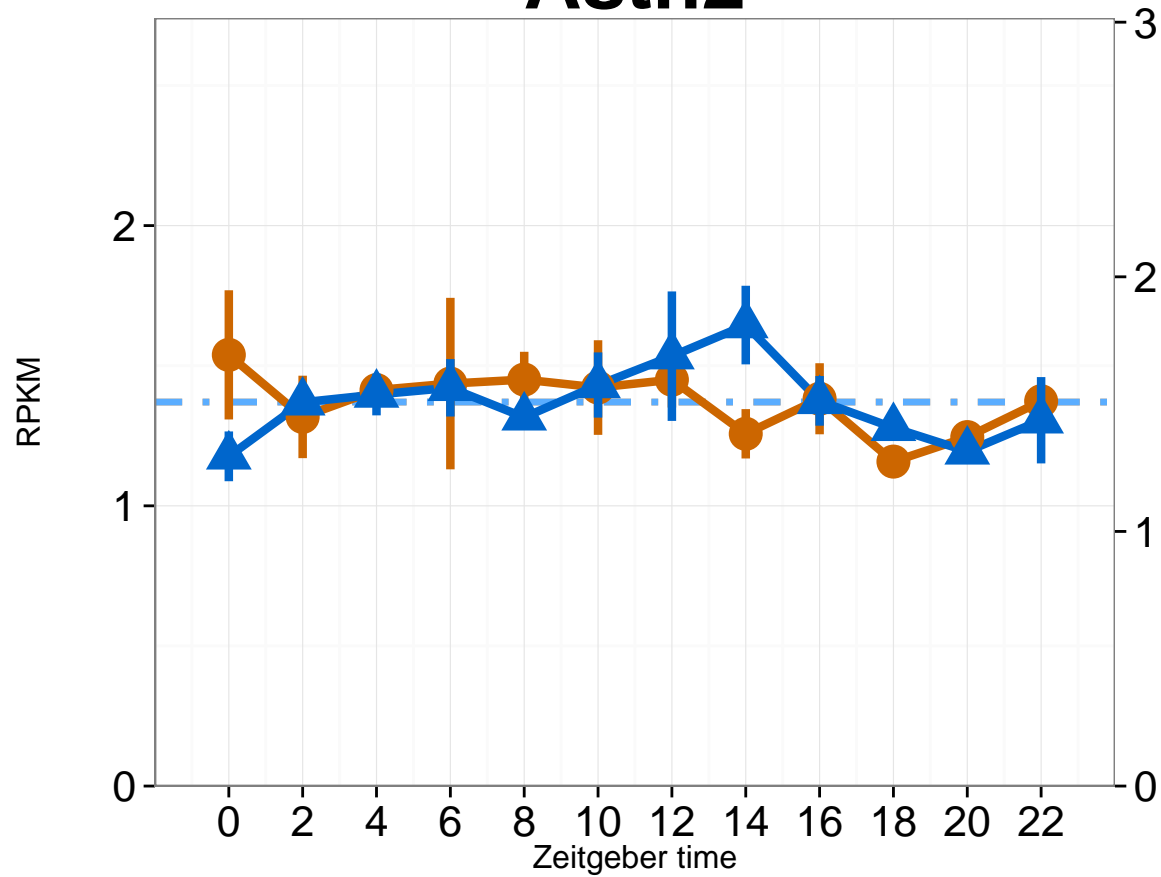

## Astn2

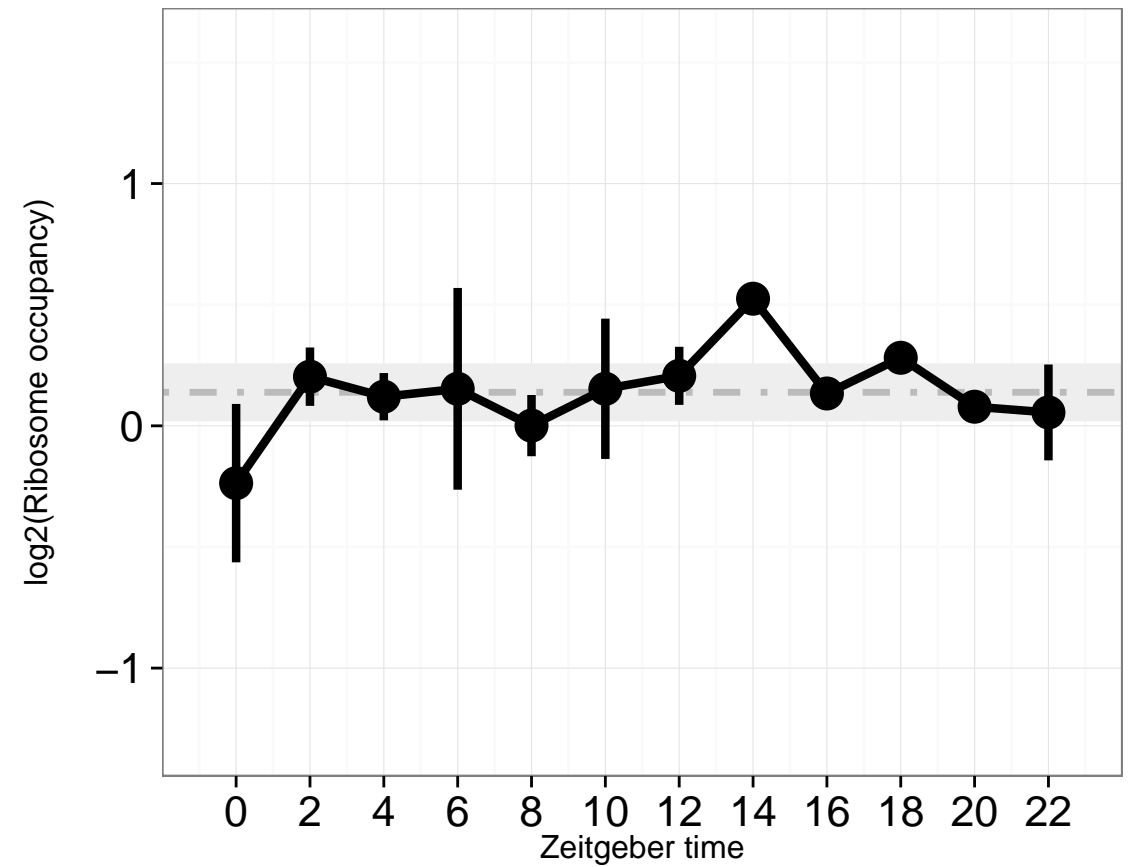

Supplement: Supplementary file 11773 [file 1]

# Abhd14a

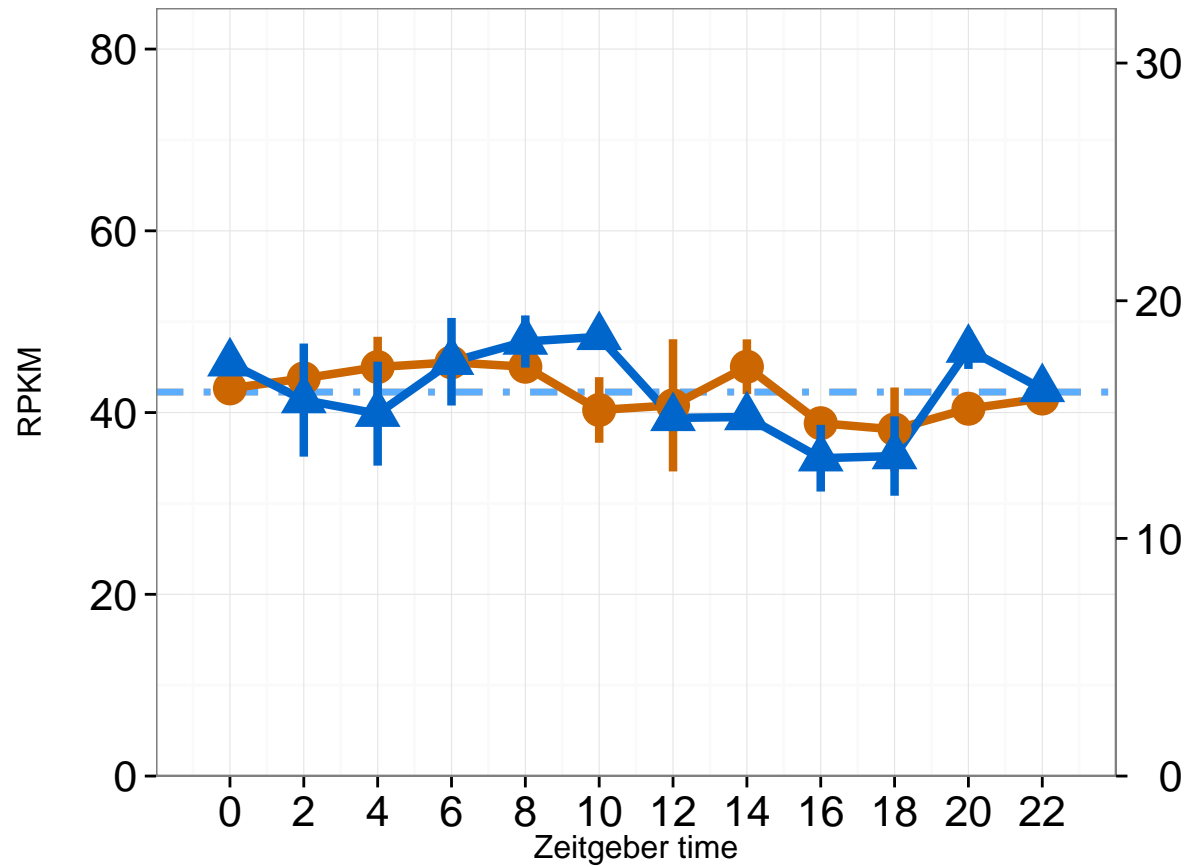

# Abhd14a

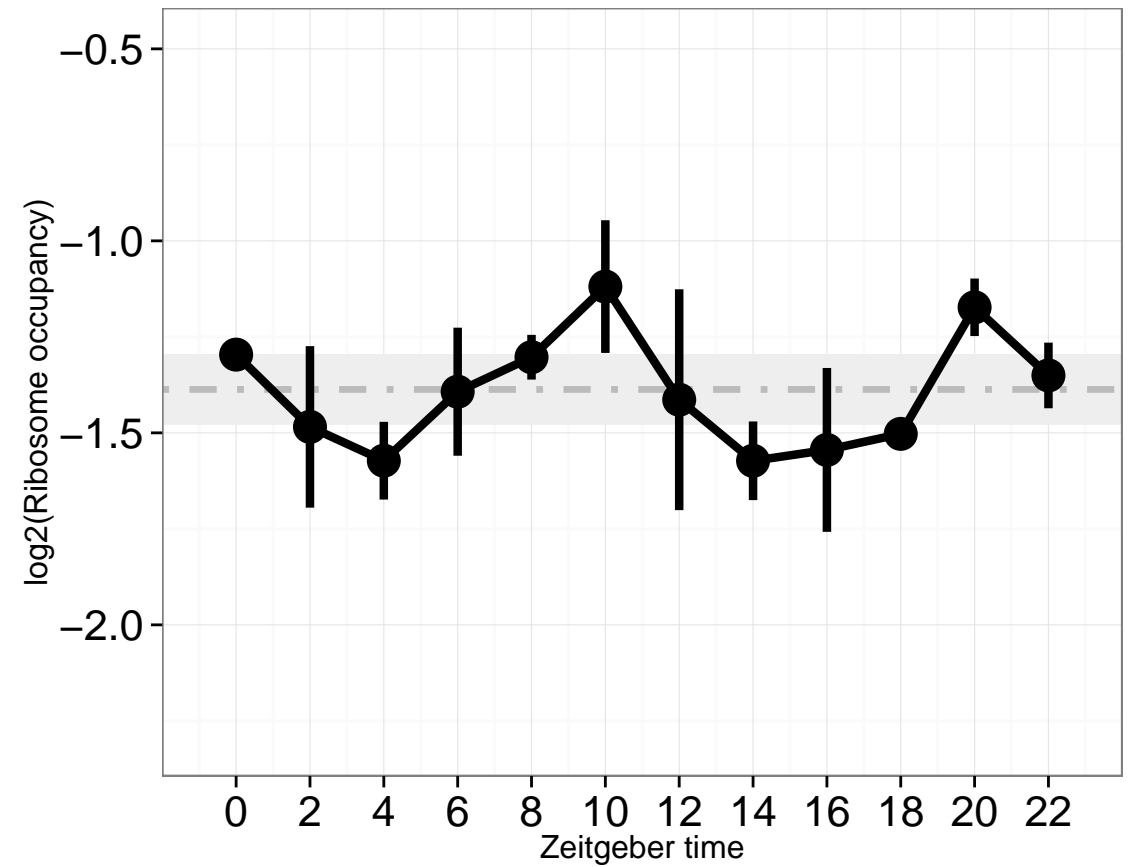

Supplement: Supplementary file 11774 [file 1]

# Srp14

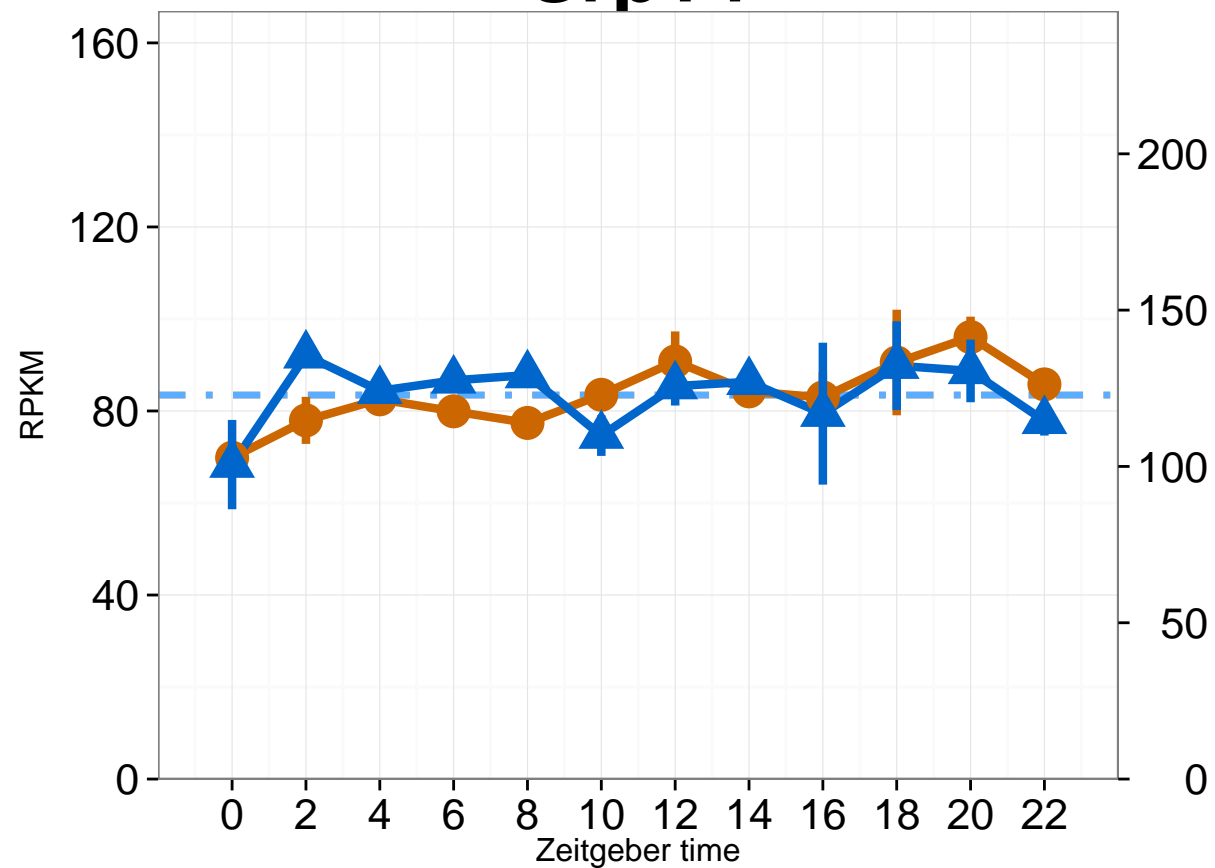

# Srp14

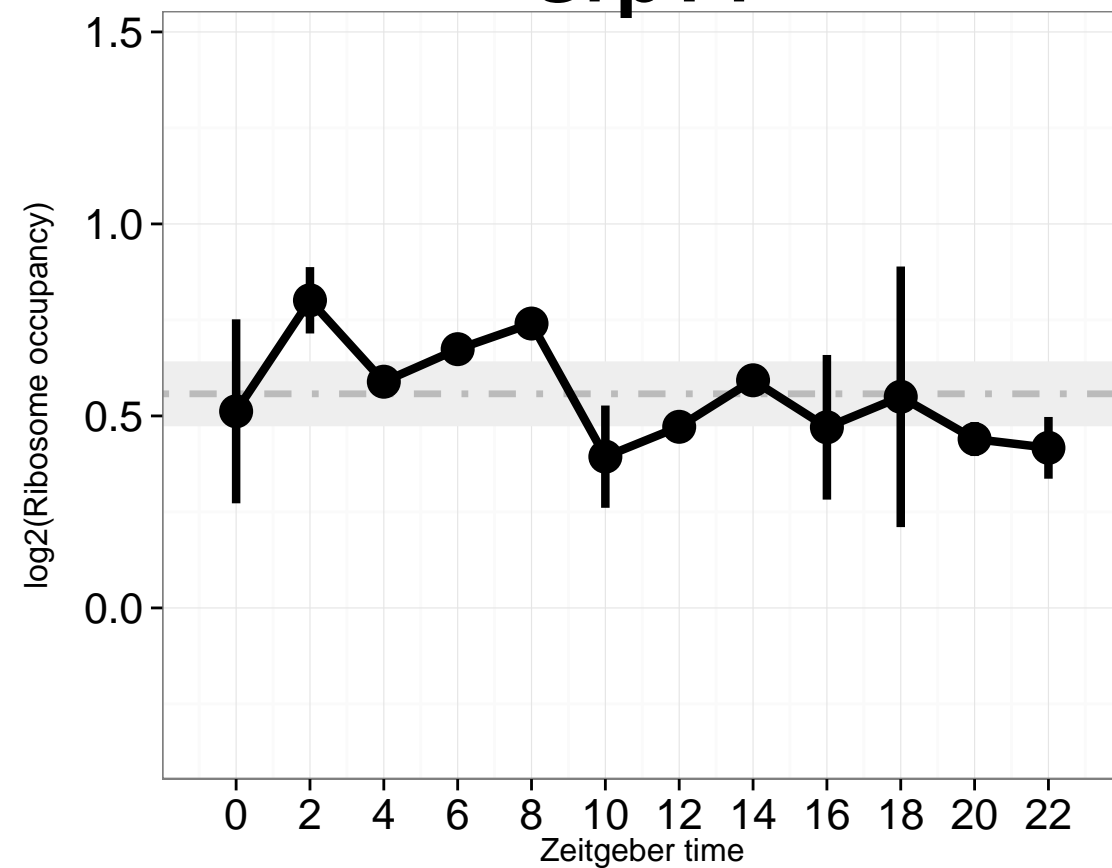

Supplement: Supplementary file 11775 [file 1]

# Ntng2

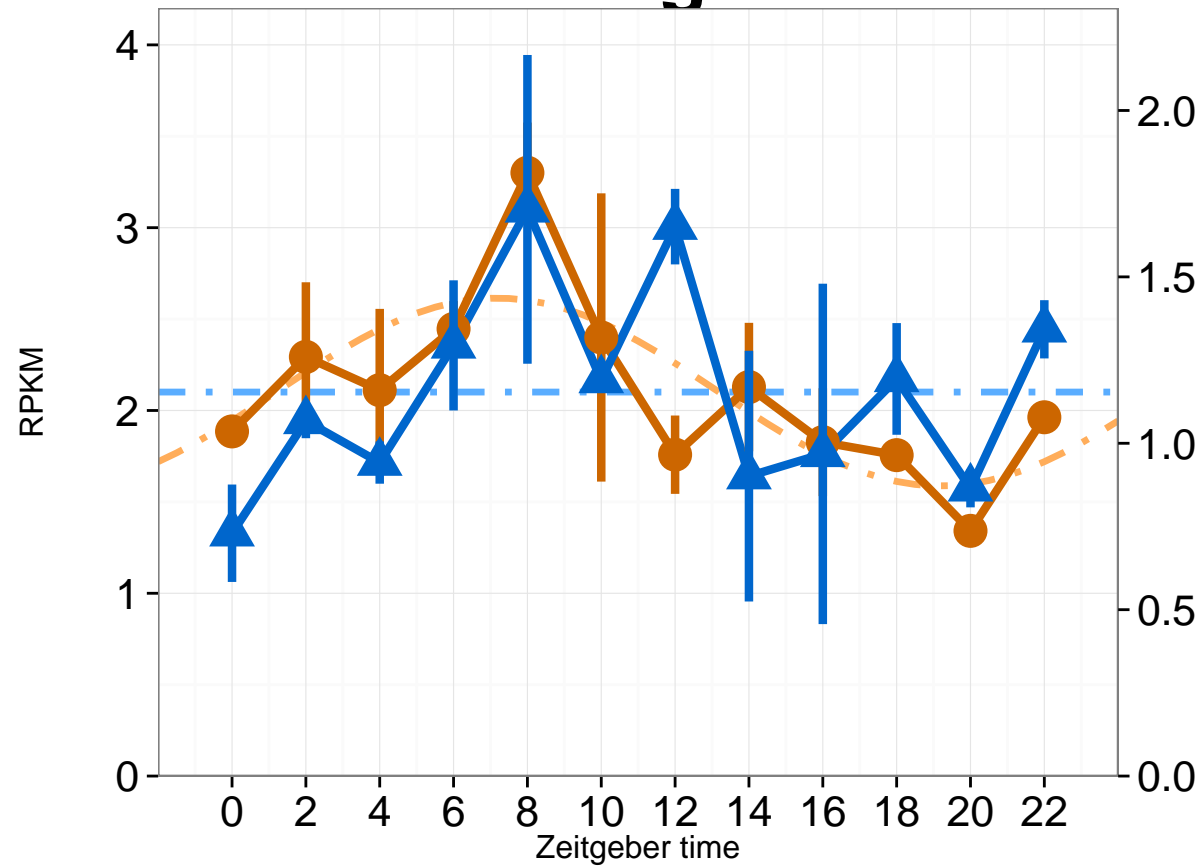

# Ntng2

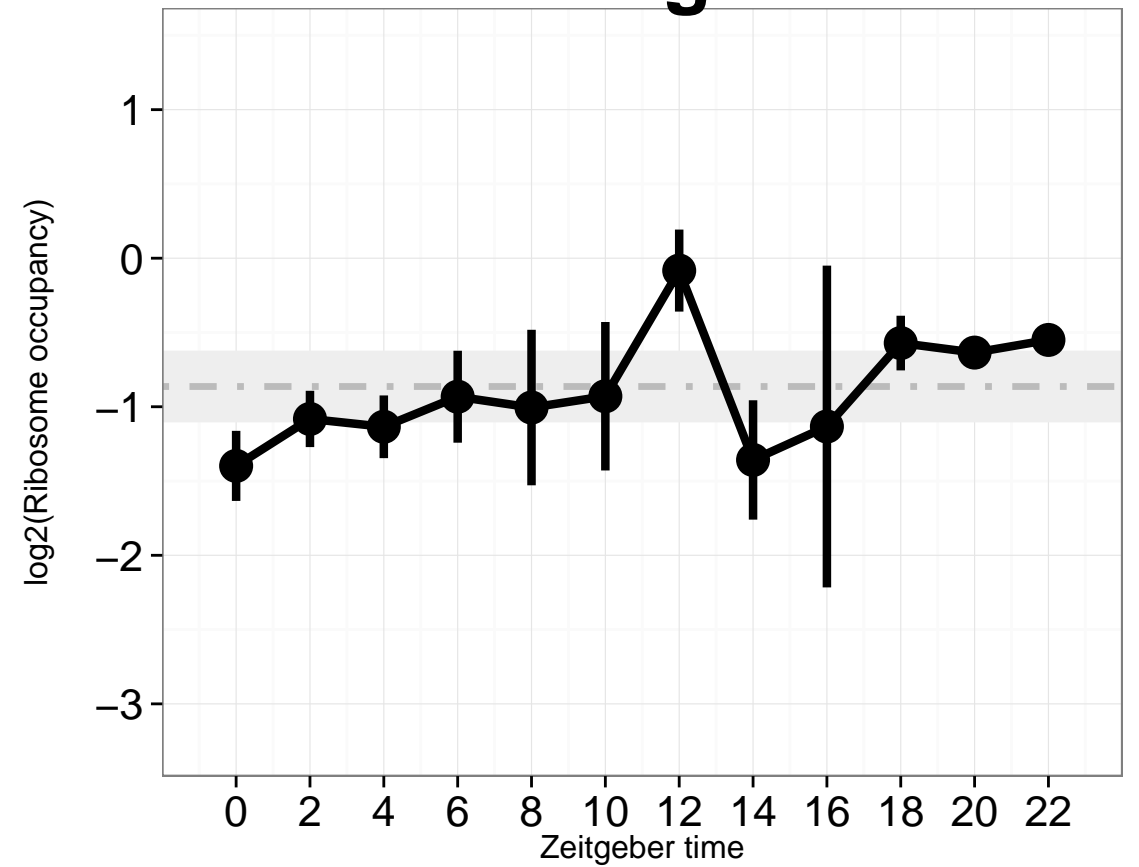

Supplement: Supplementary file 11776 [file 1]

# Ctsa

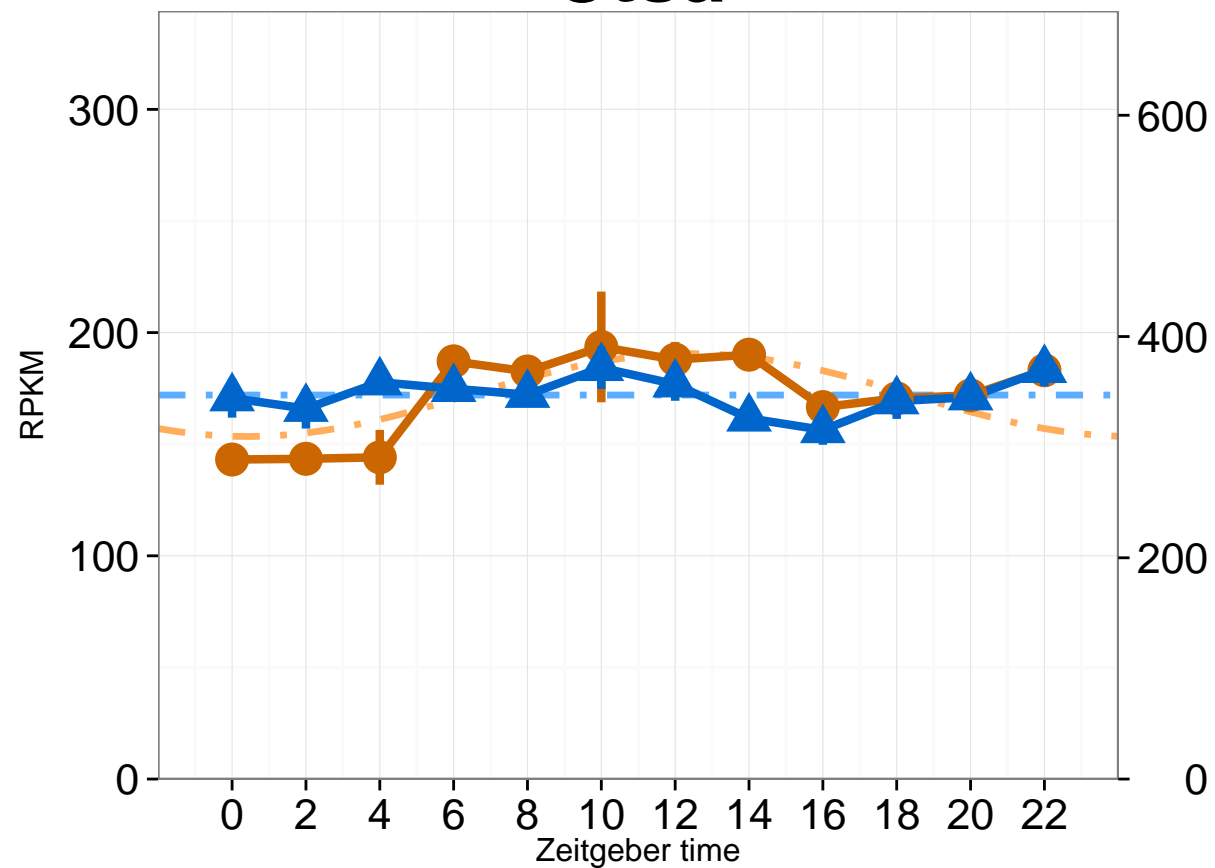

# Ctsa

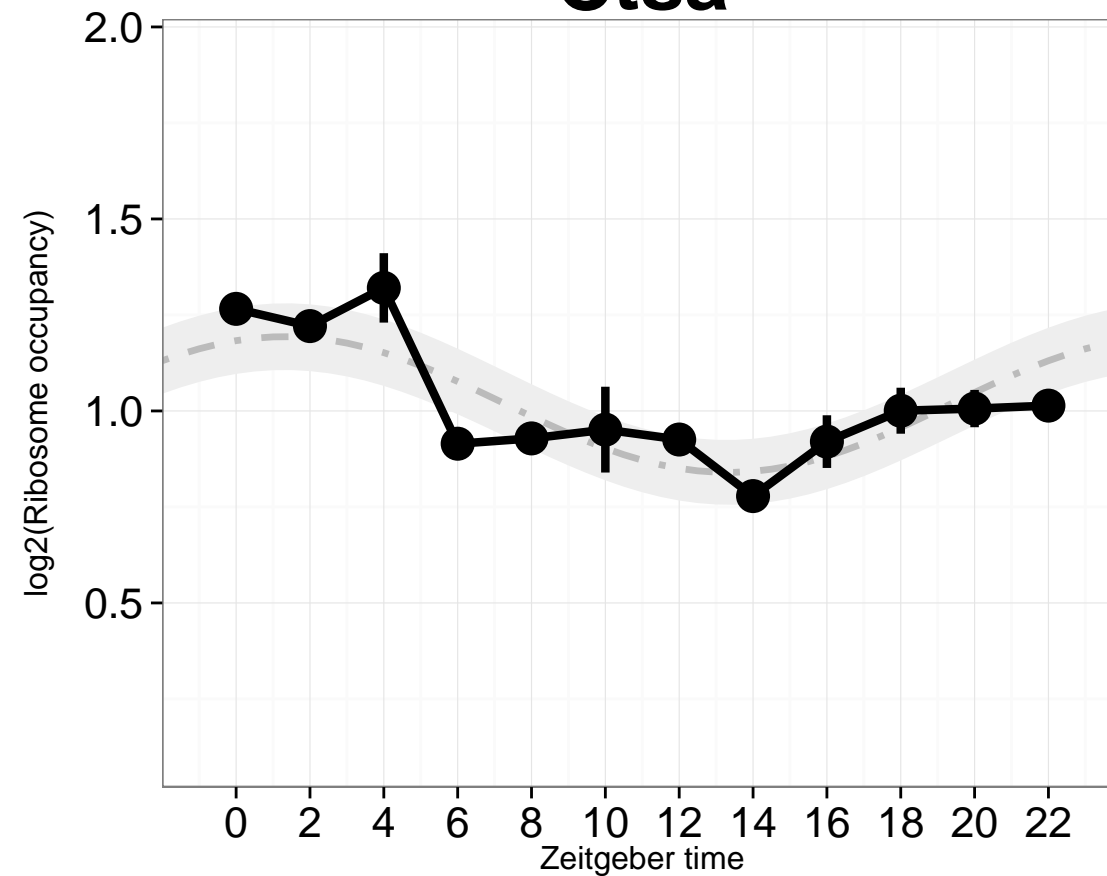

Supplement: Supplementary file 11777 [file 1]

## Tst

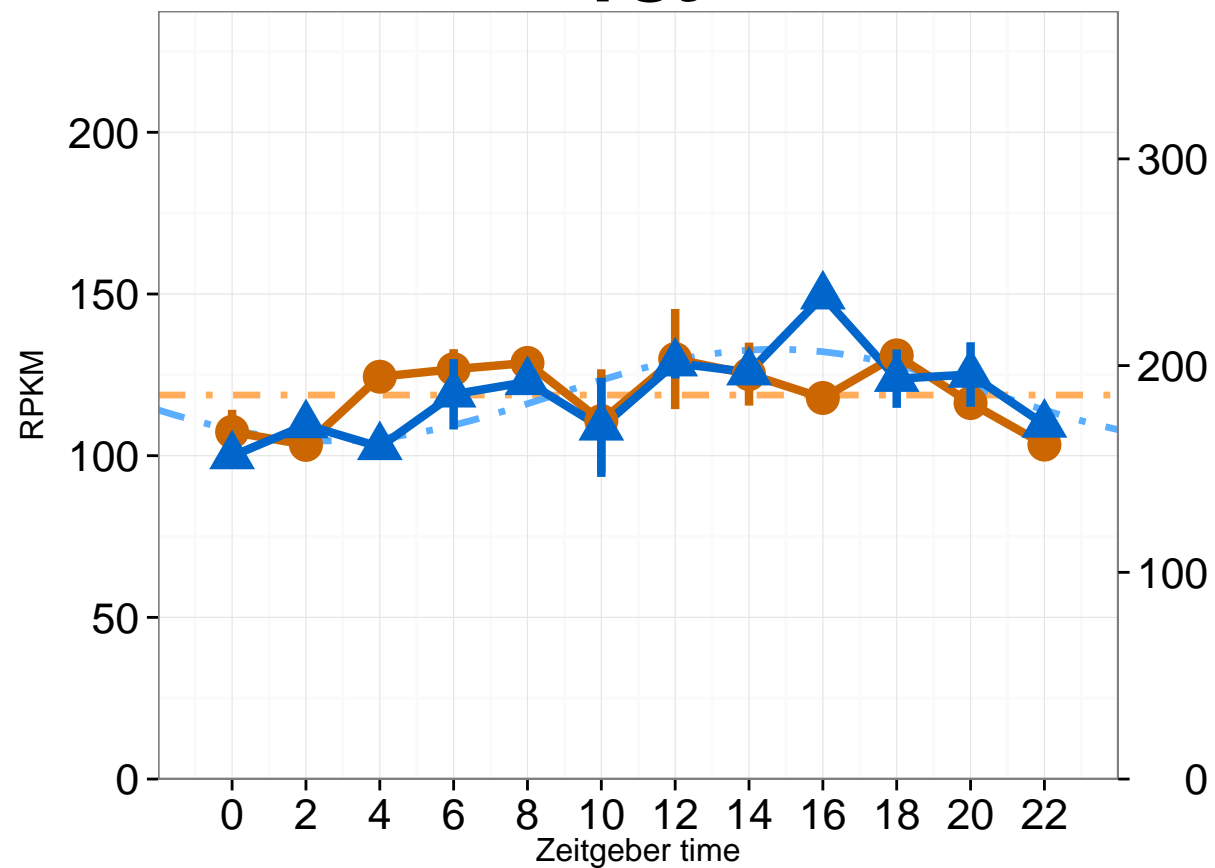

## Tst

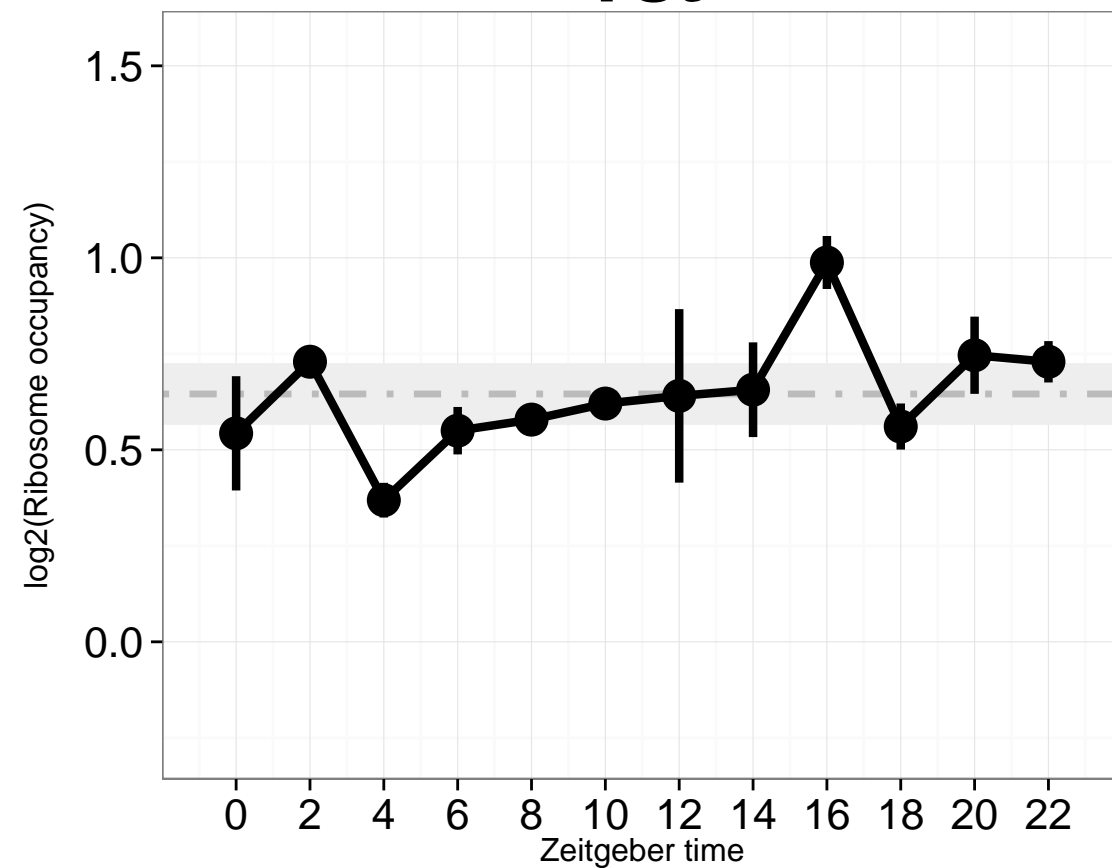

Supplement: Supplementary file 11778 [file 1]

## Creb3l2

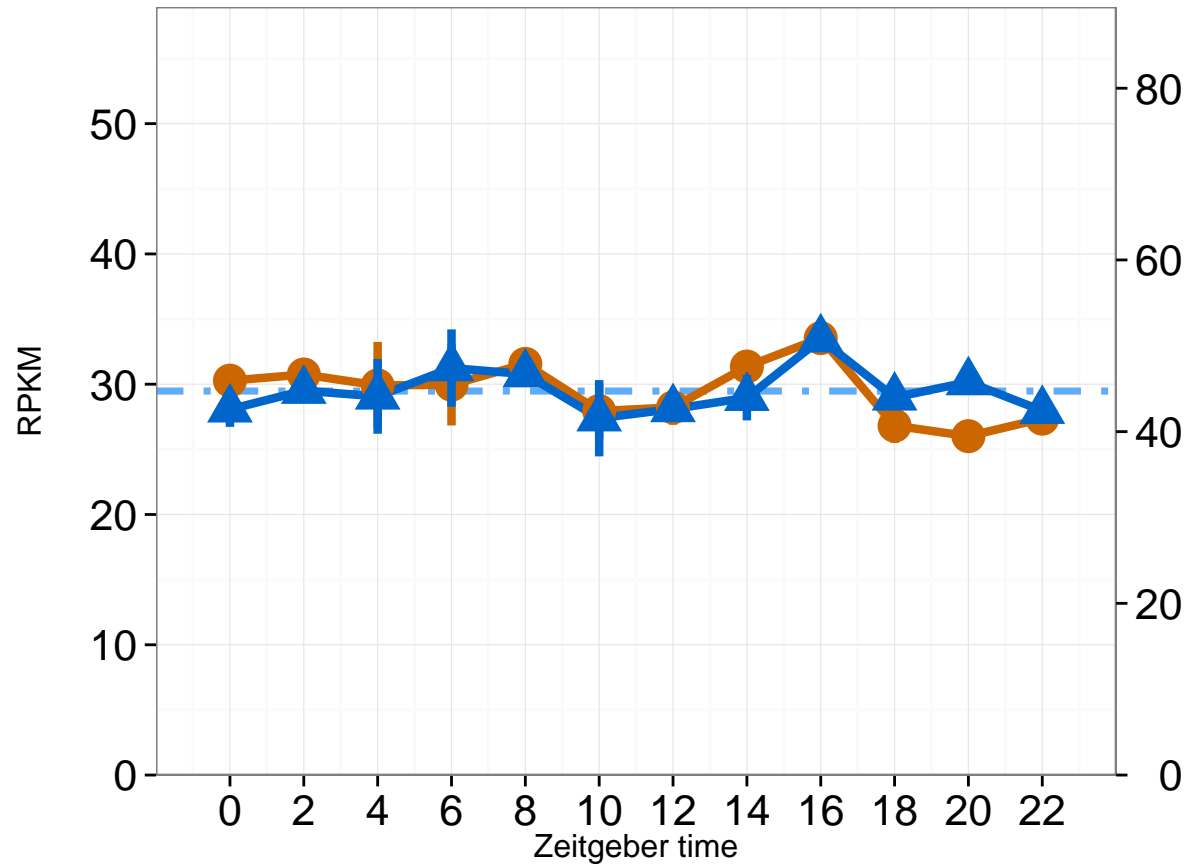

## Creb3l2

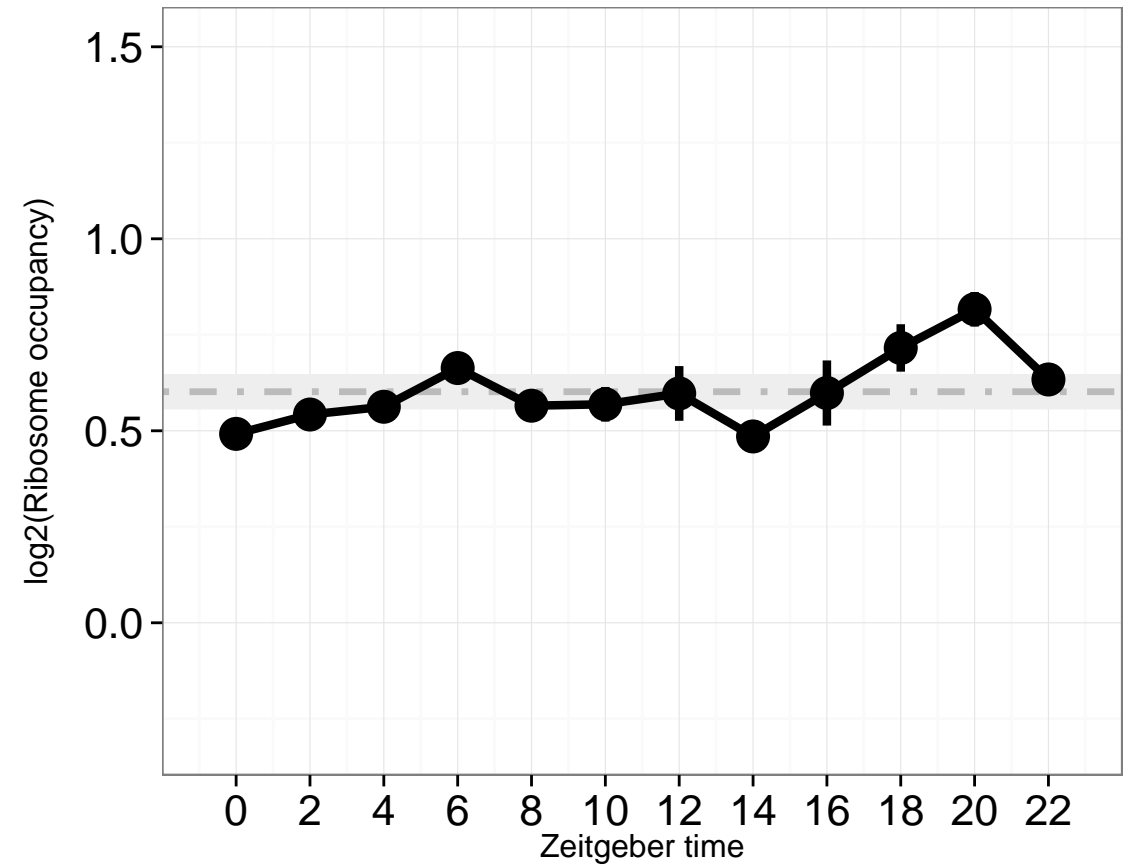

Supplement: Supplementary file 11779 [file 1]

# Tmem51

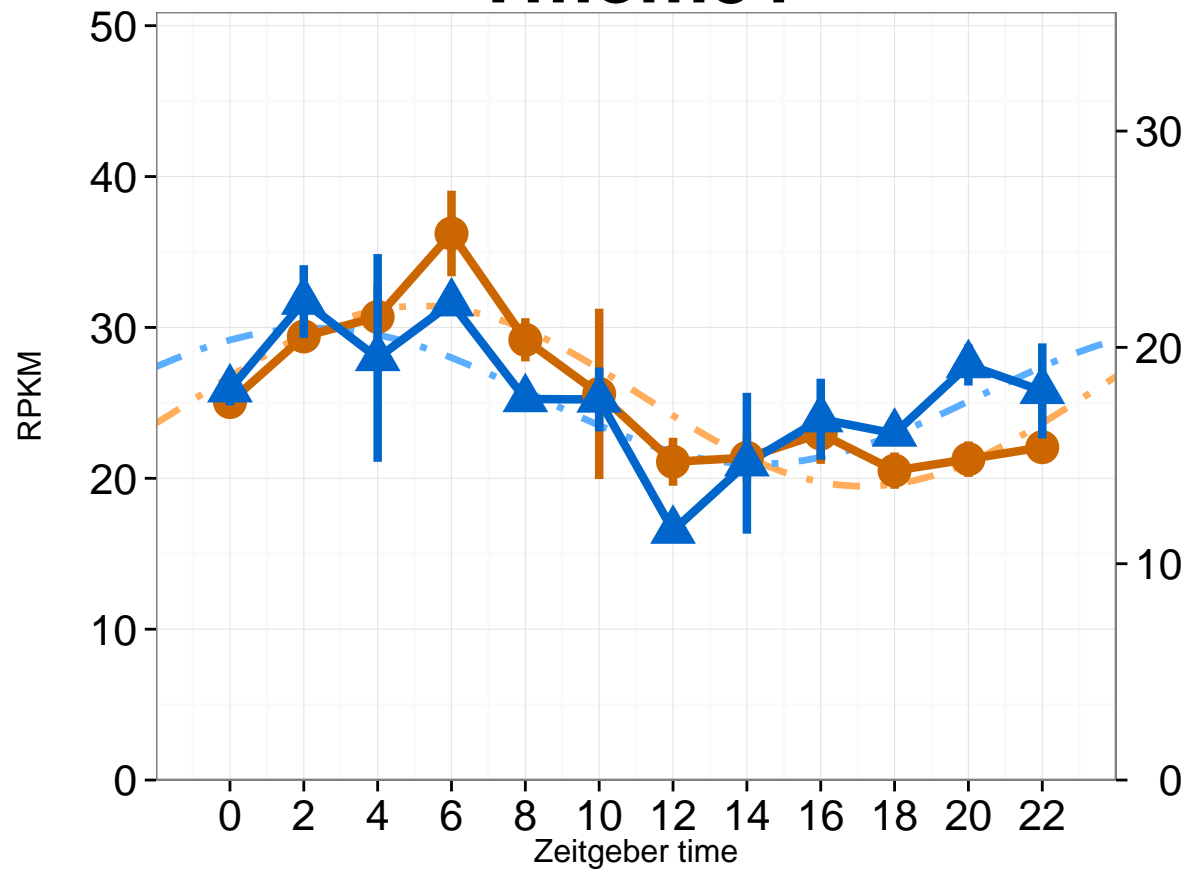

# Tmem51

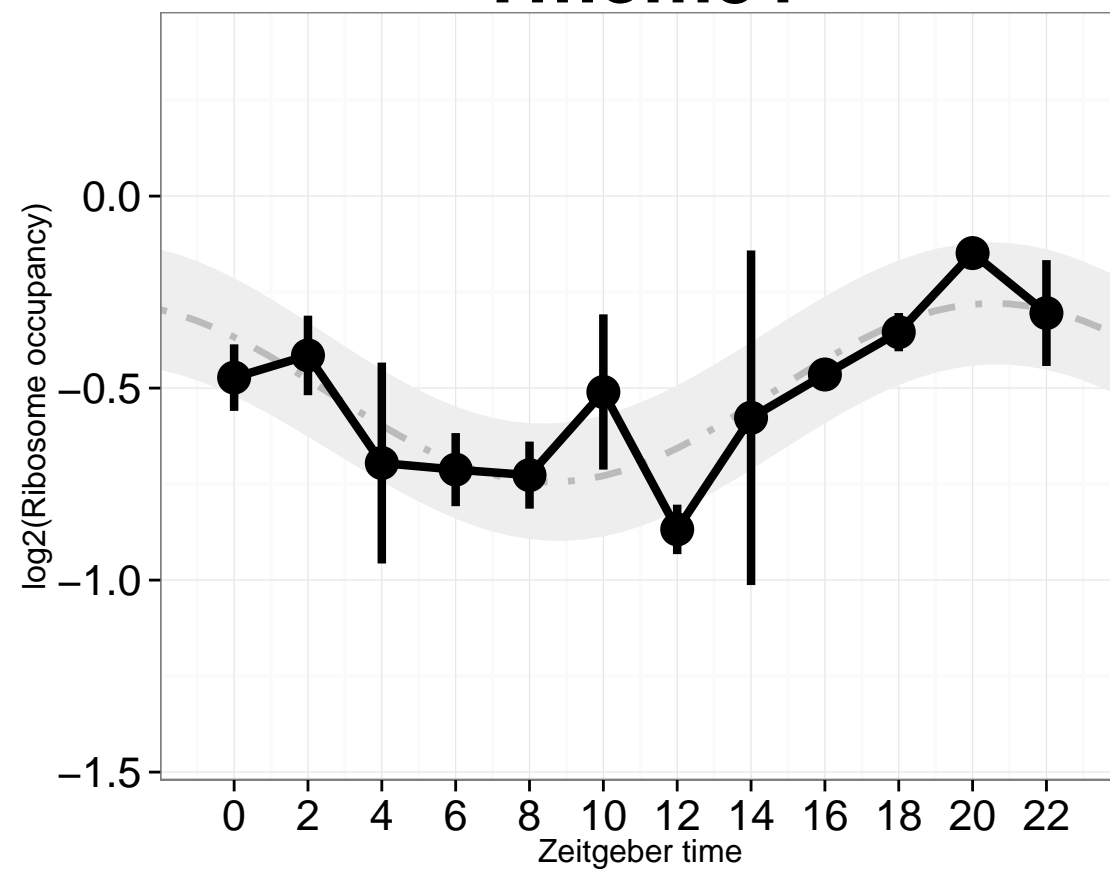

Supplement: Supplementary file 11780 [file 1]

# Cldn16

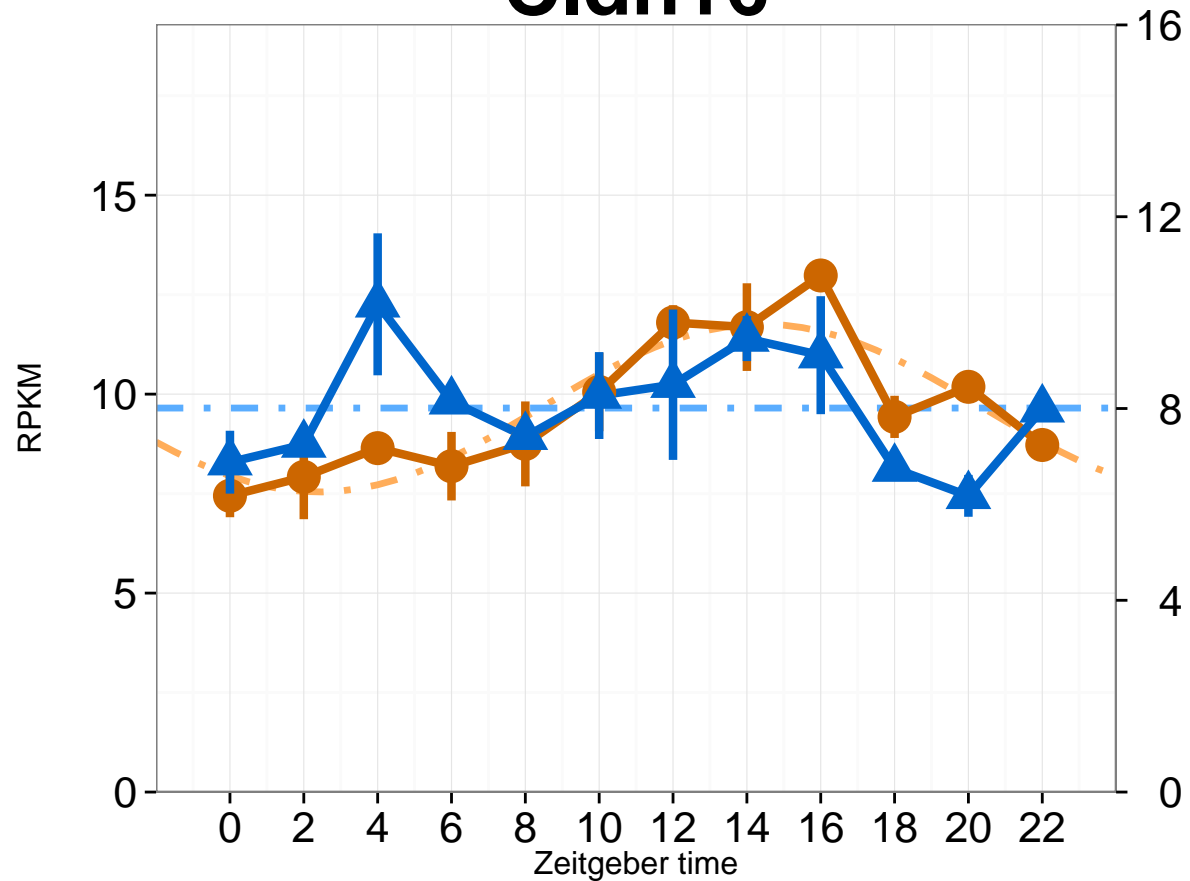

# Cldn16

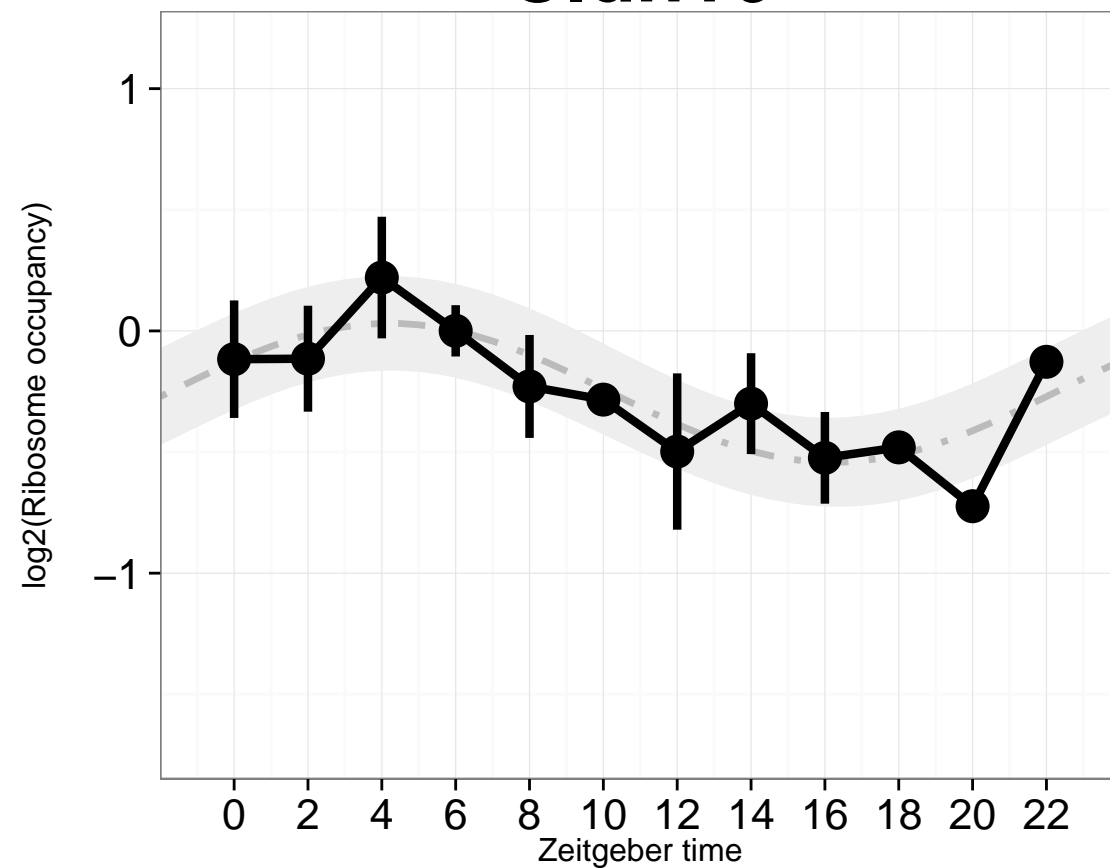

Supplement: Supplementary file 11781 [file 1]

# Zfp455

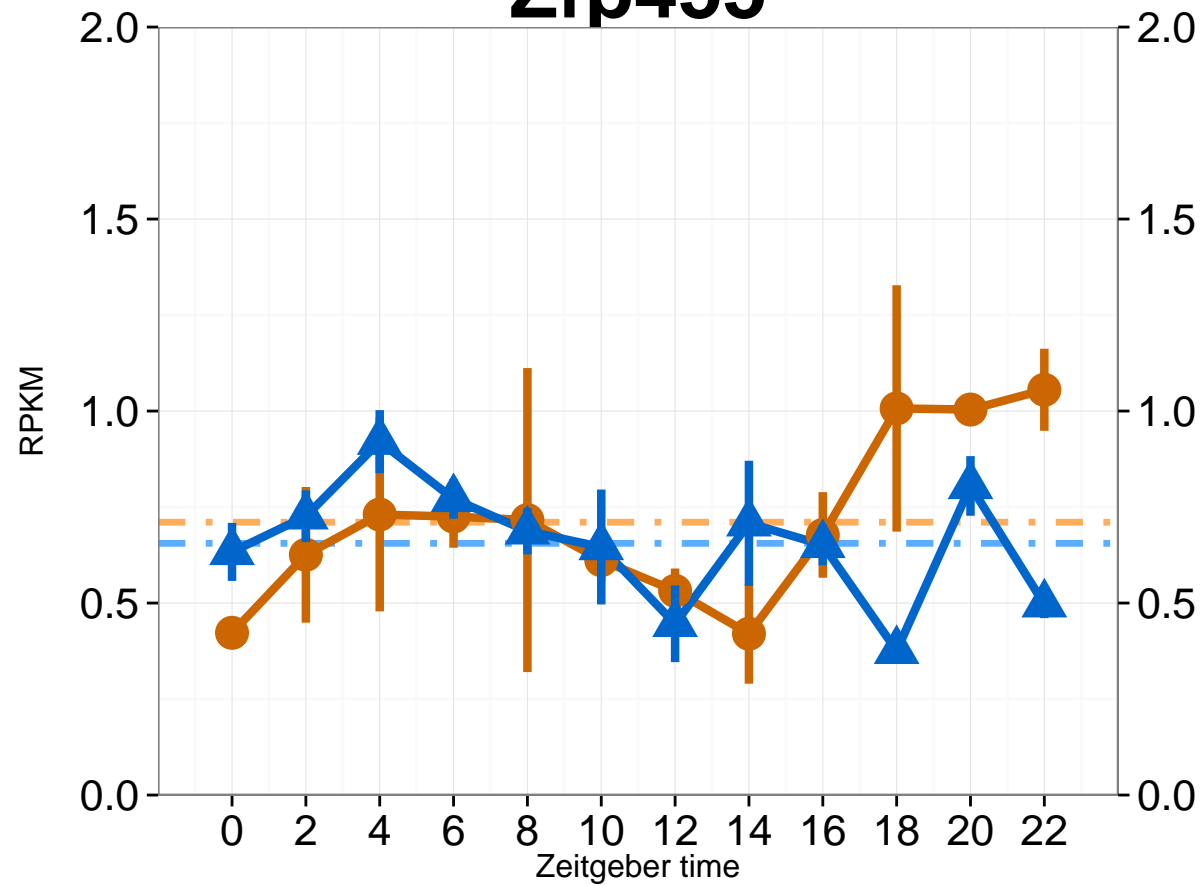

# Zfp455

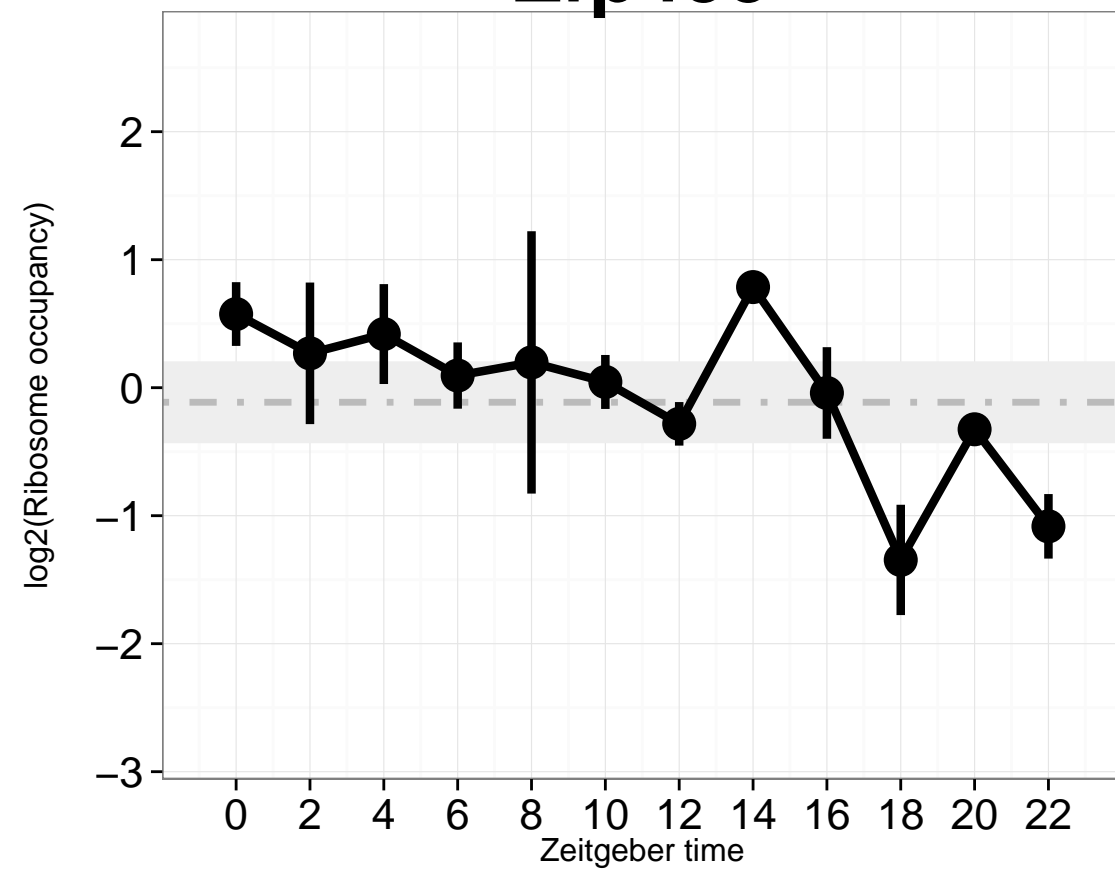

Supplement: Supplementary file 11782 [file 1]

# Sipa1l2

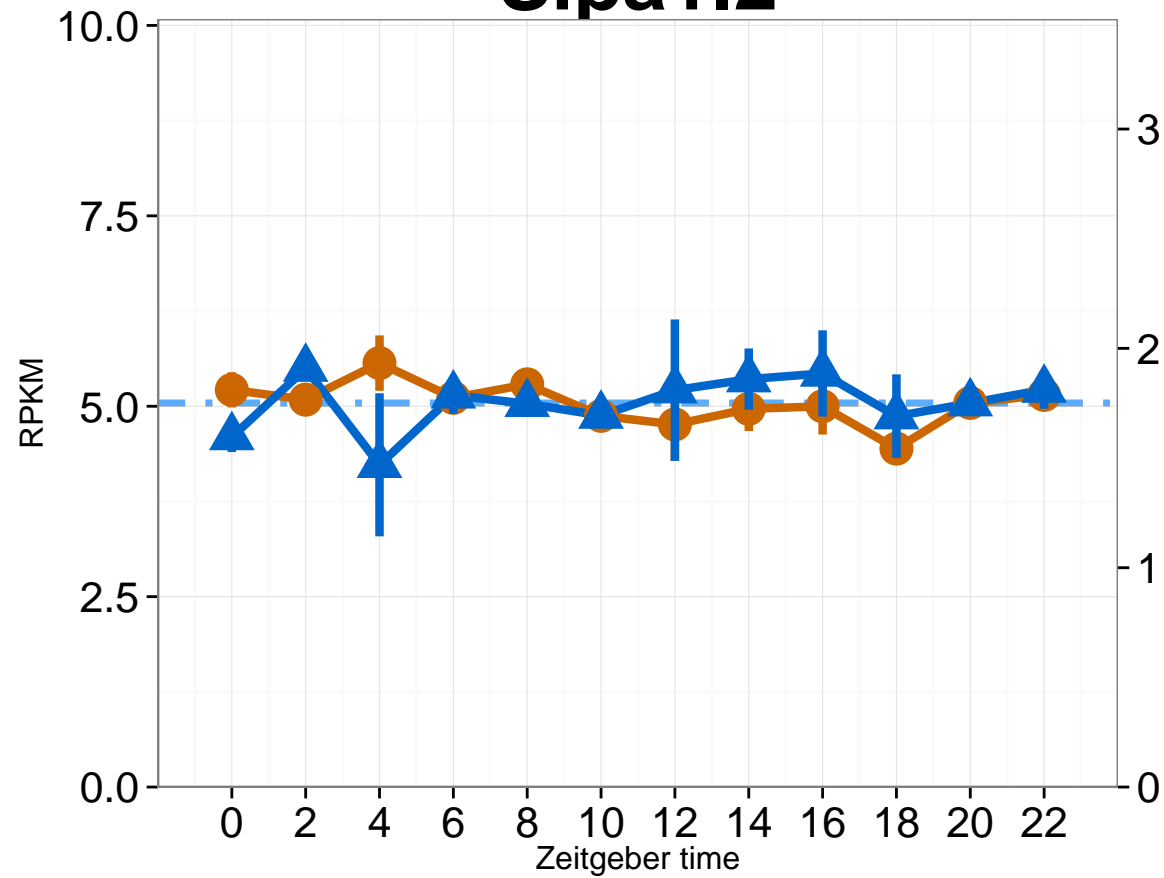

# Sipa1l2

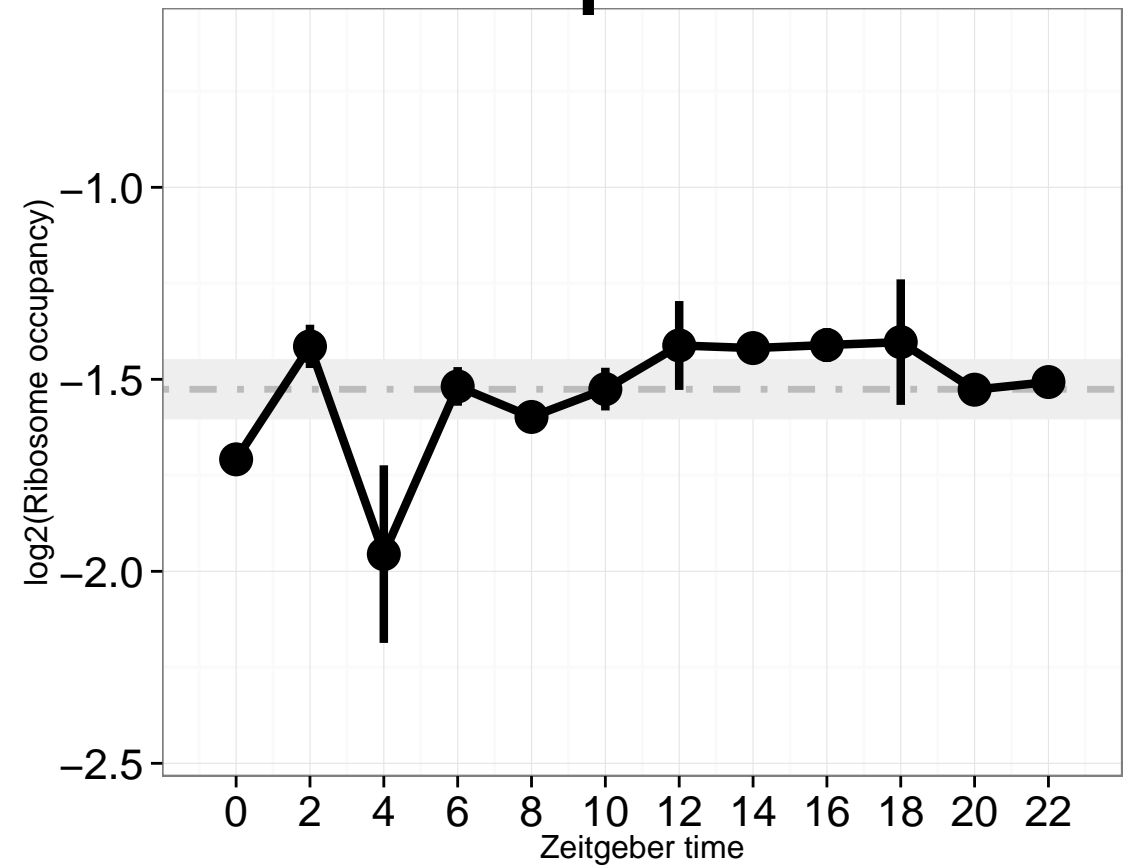

Supplement: Supplementary file 11783 [file 1]

## Tnip2

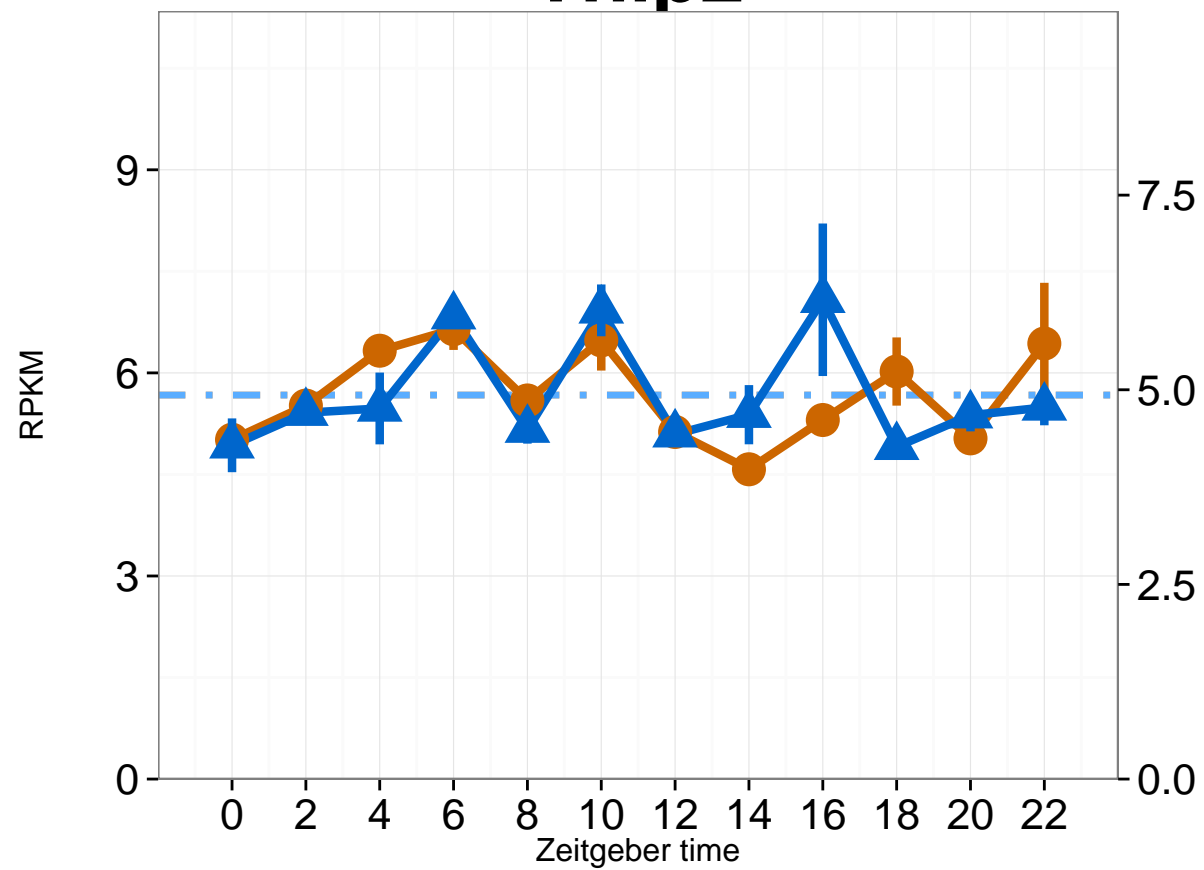

## Tnip2

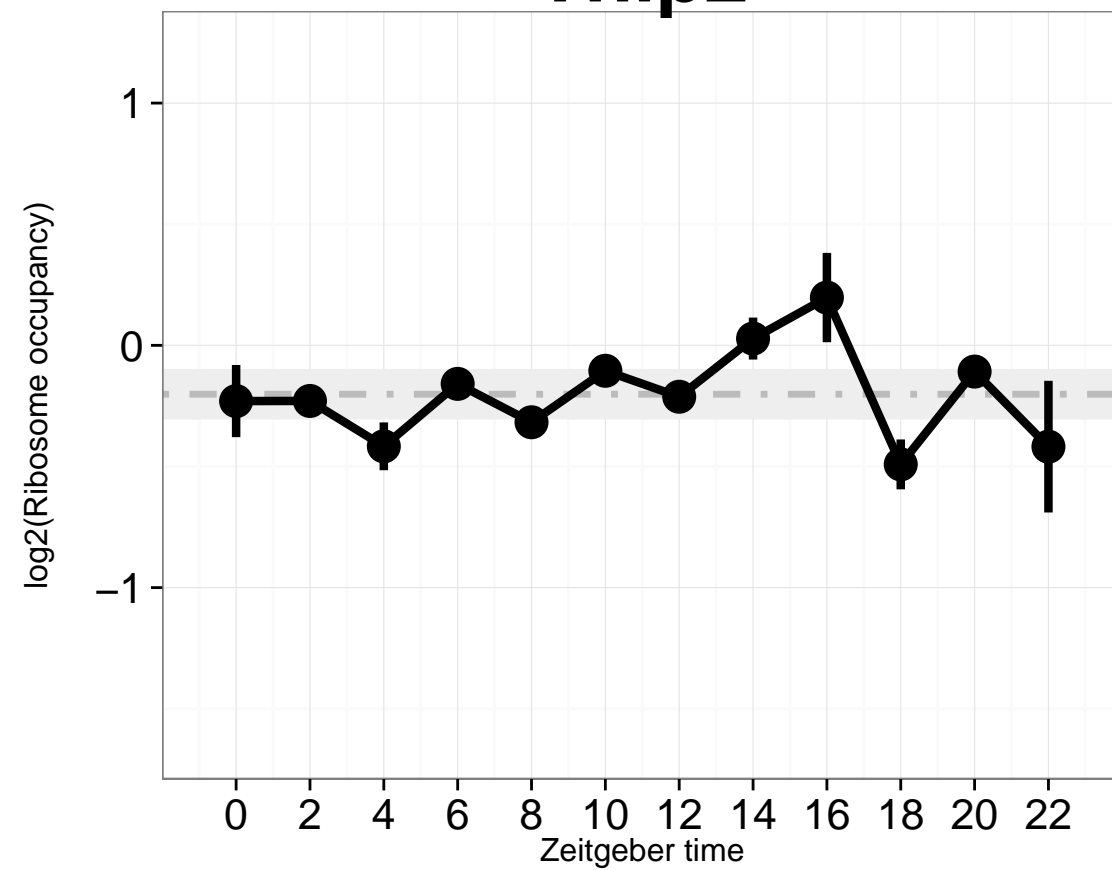

Supplement: Supplementary file 11784 [file 1]

0610010K14Rik TR

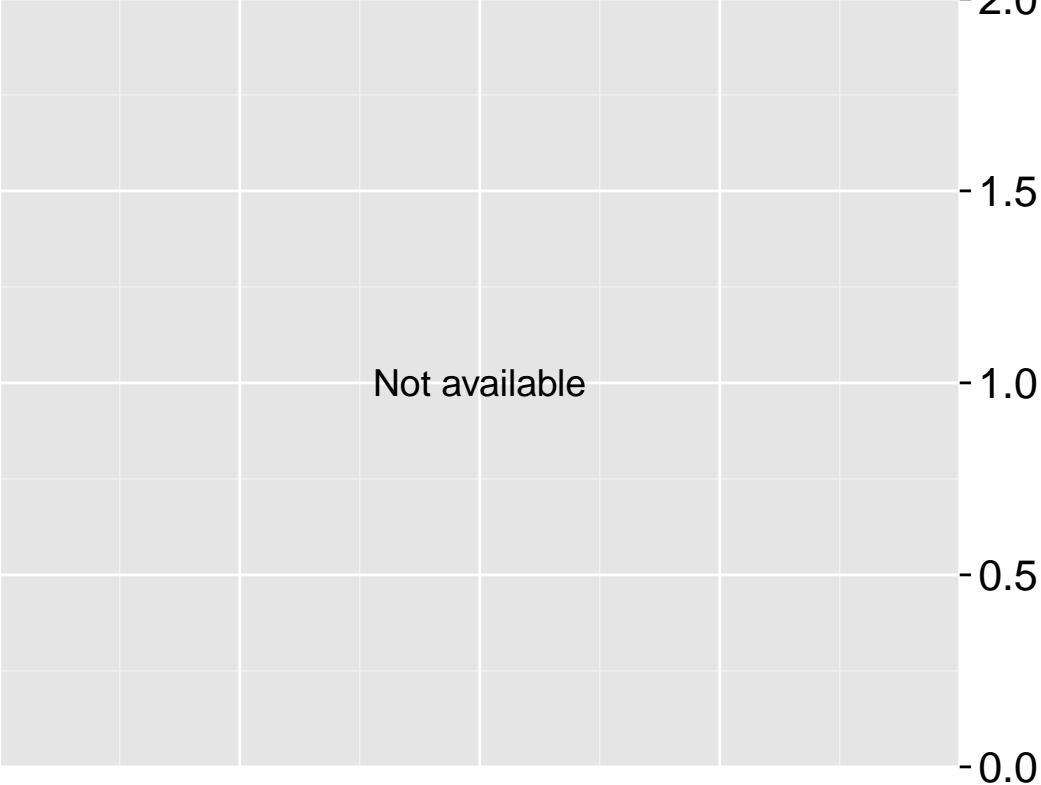

0610010K14Rik log2(Ribosome occup

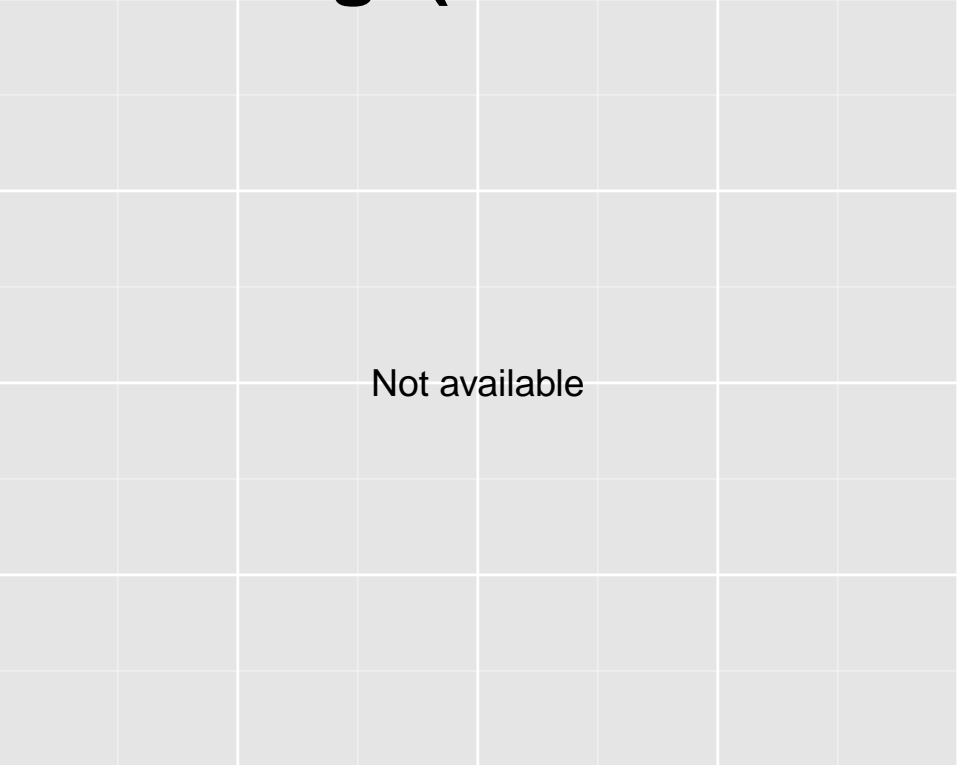

Supplement: Supplementary file 11785 [file 1]

## Aimp2

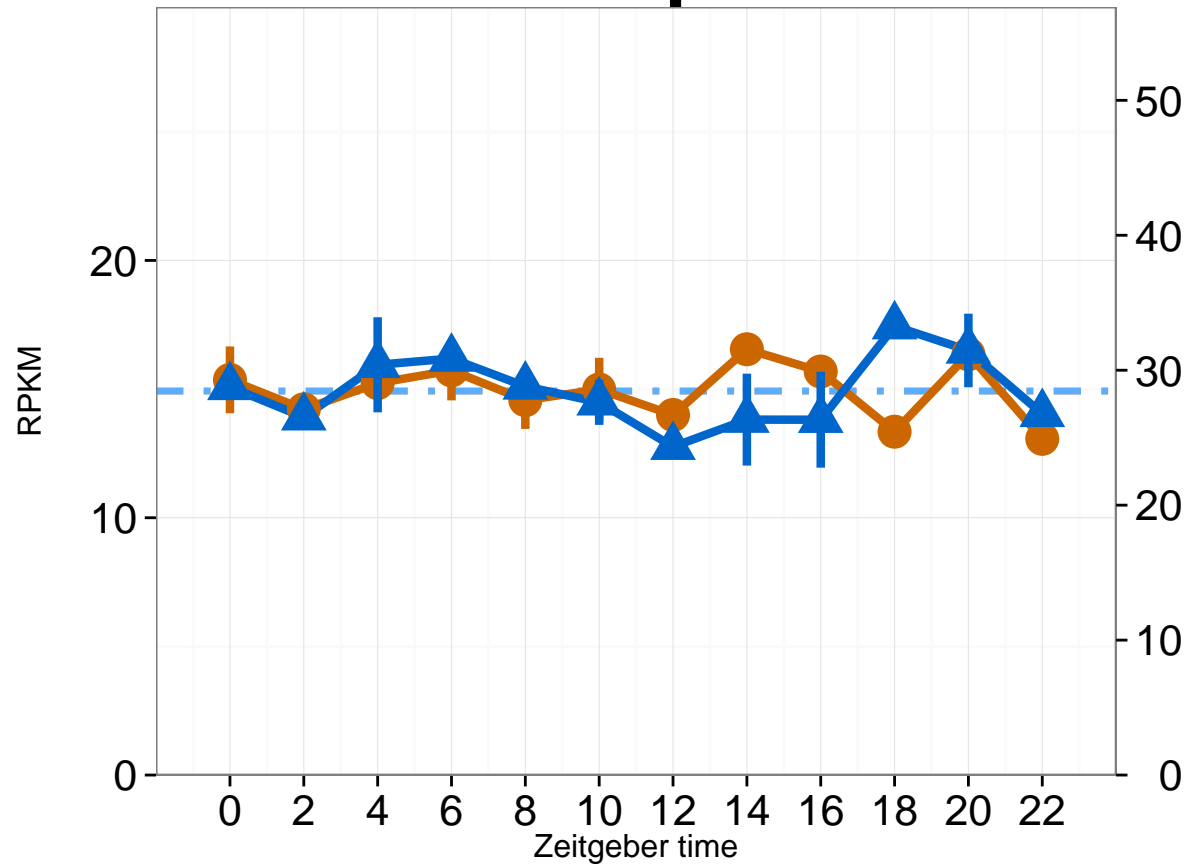

## Aimp2

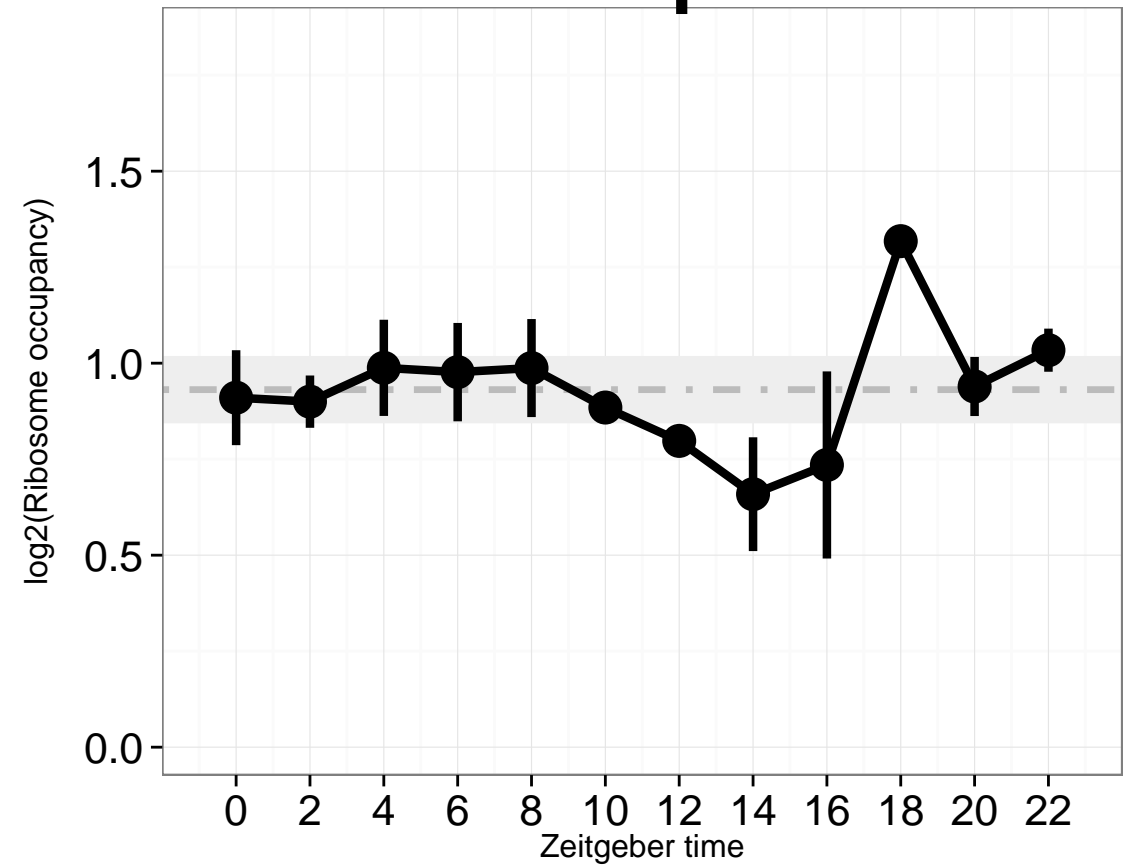

Supplement: Supplementary file 11786 [file 1]

# Greb1l

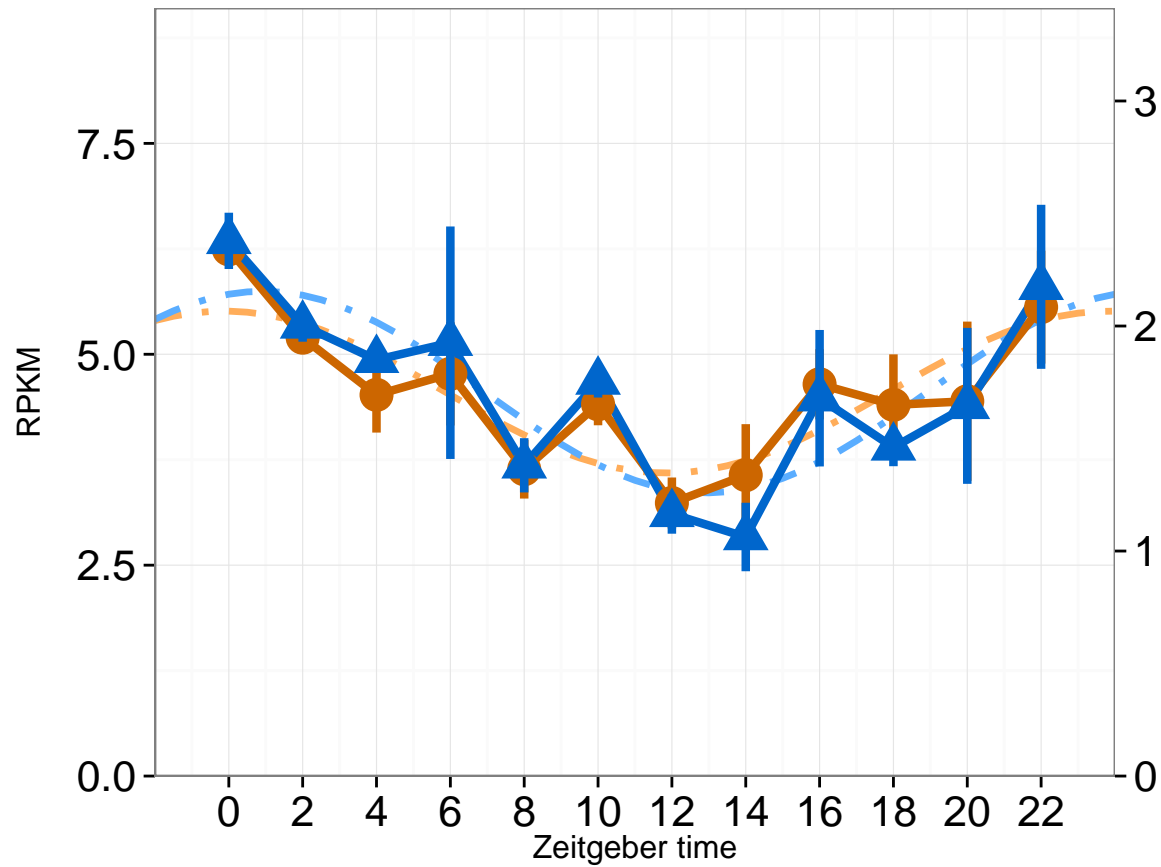

# Greb1l

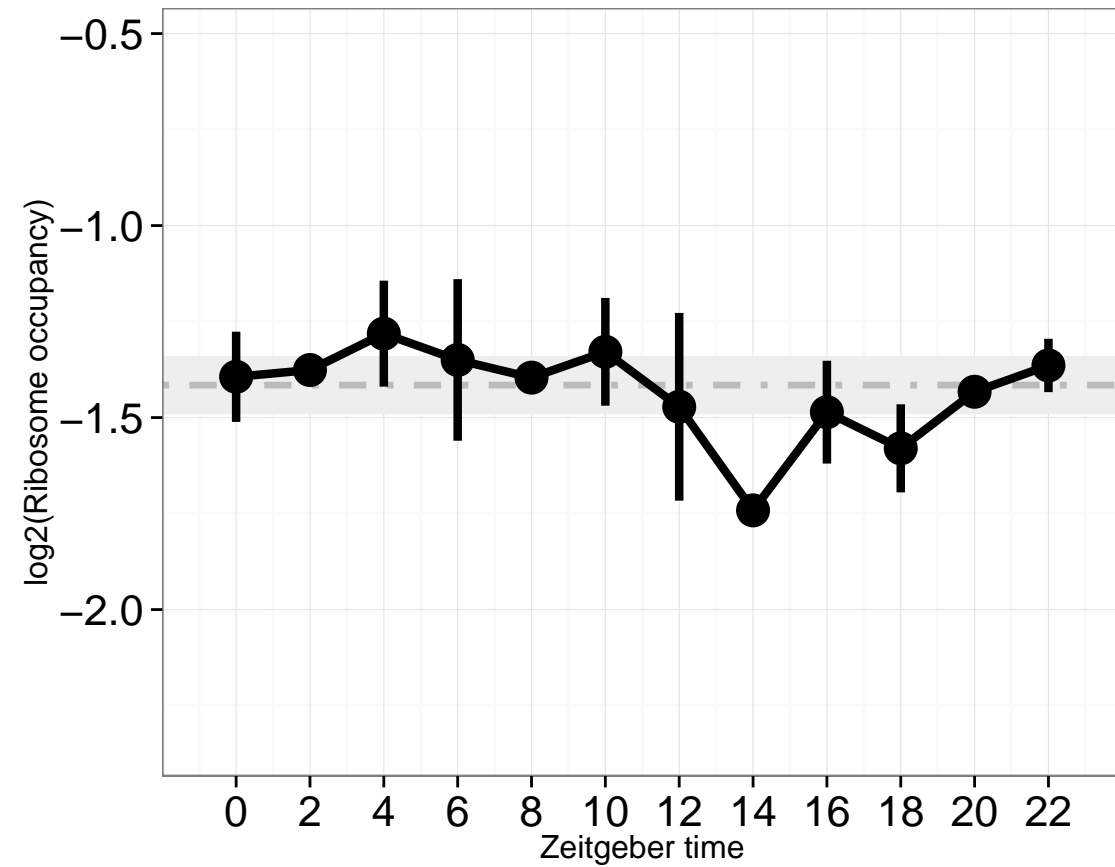

Supplement: Supplementary file 11787 [file 1]

## Cldn15

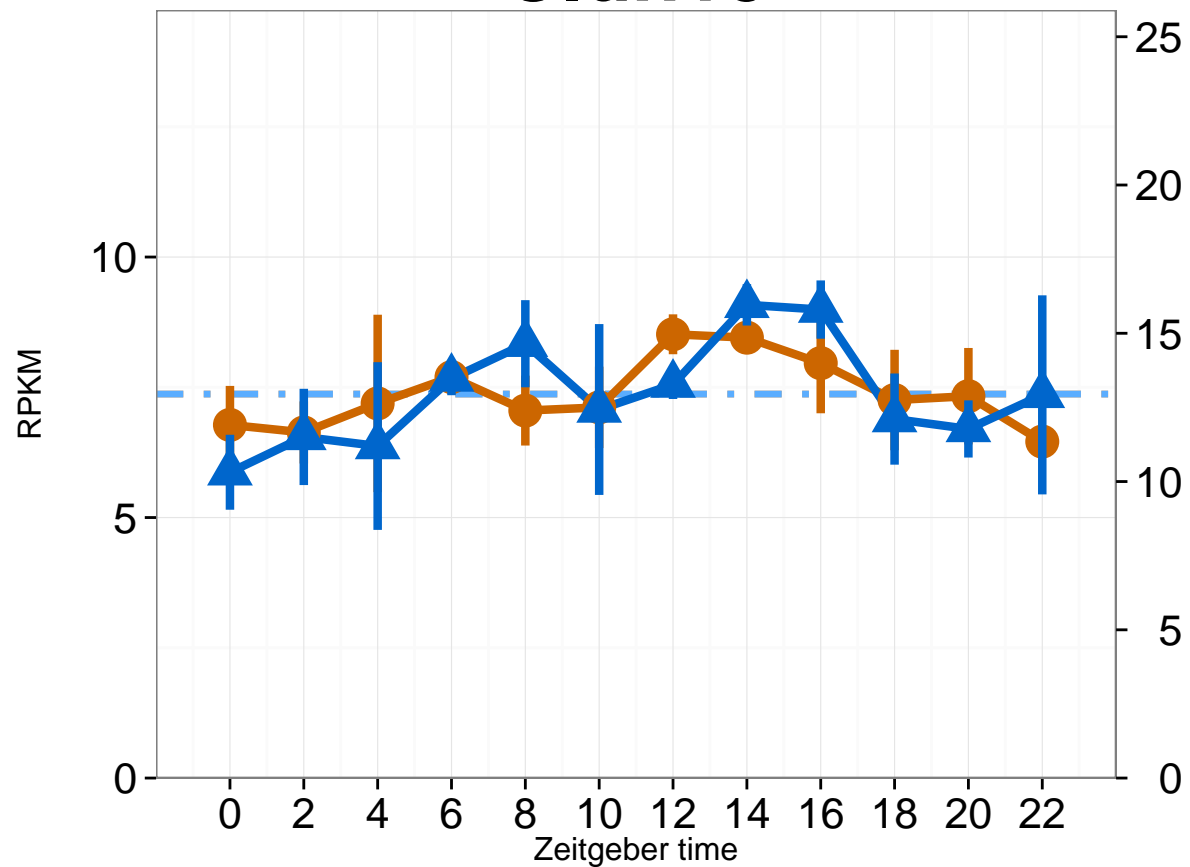

## Cldn15

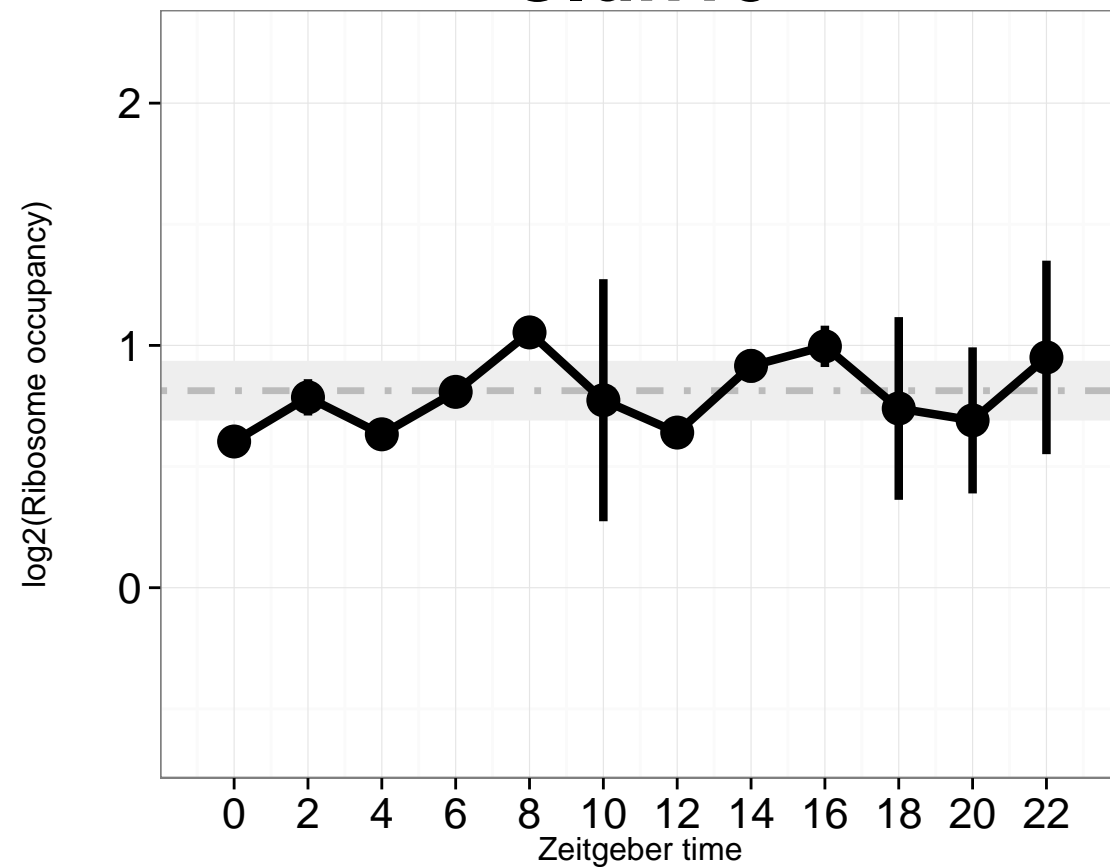

Supplement: Supplementary file 11788 [file 1]

## Ddx23

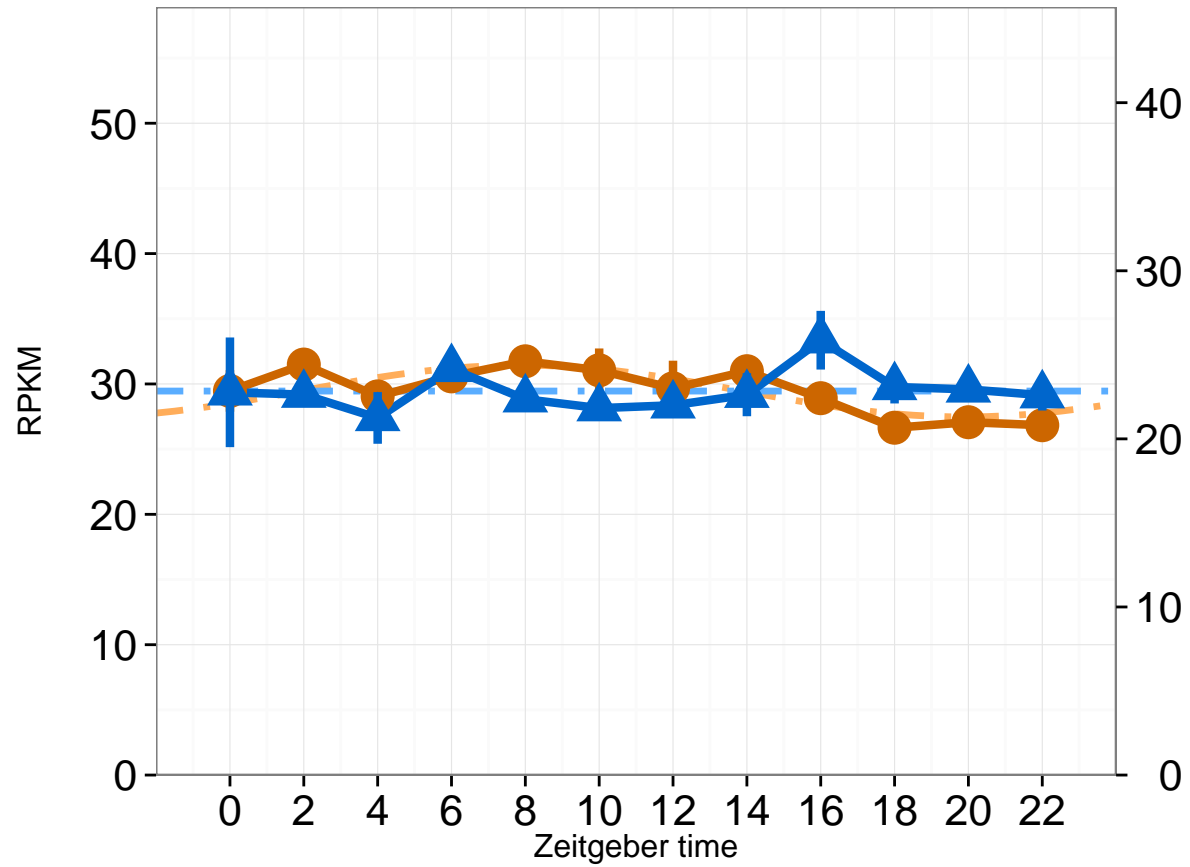

## Ddx23

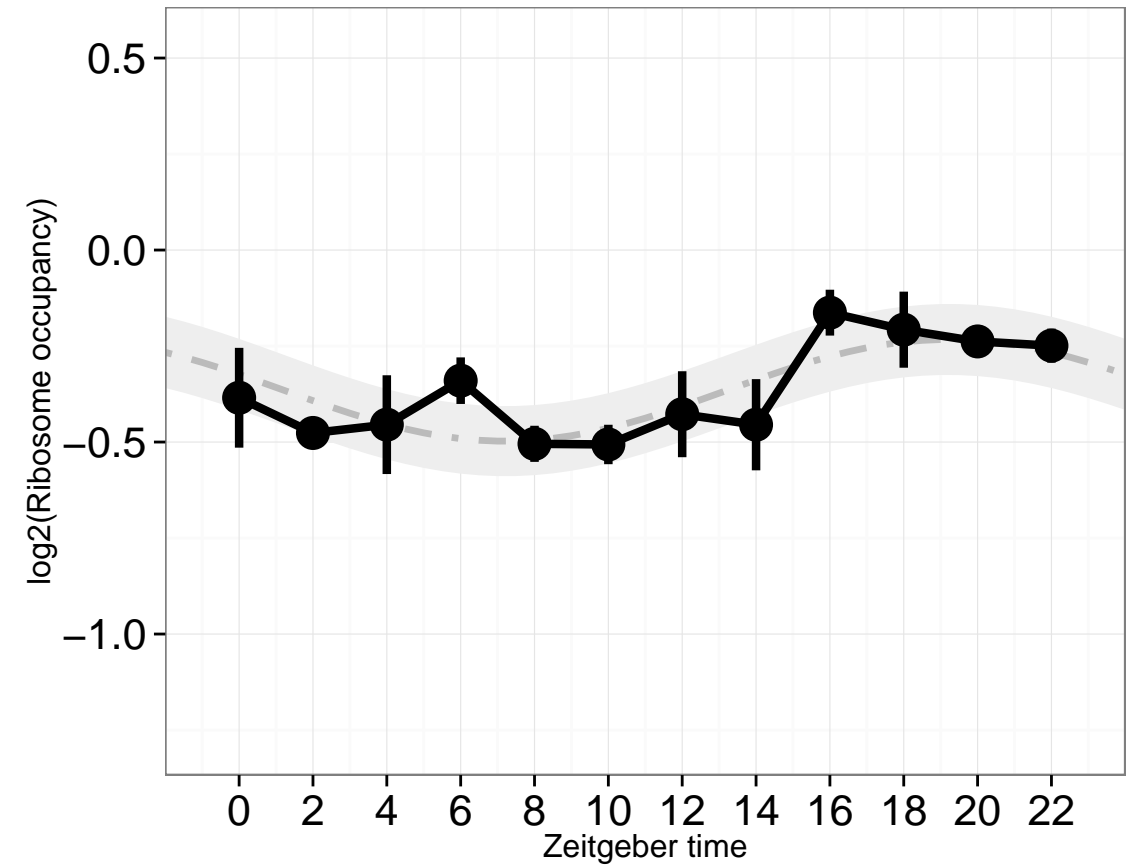

Supplement: Supplementary file 11789 [file 1]

## Api5

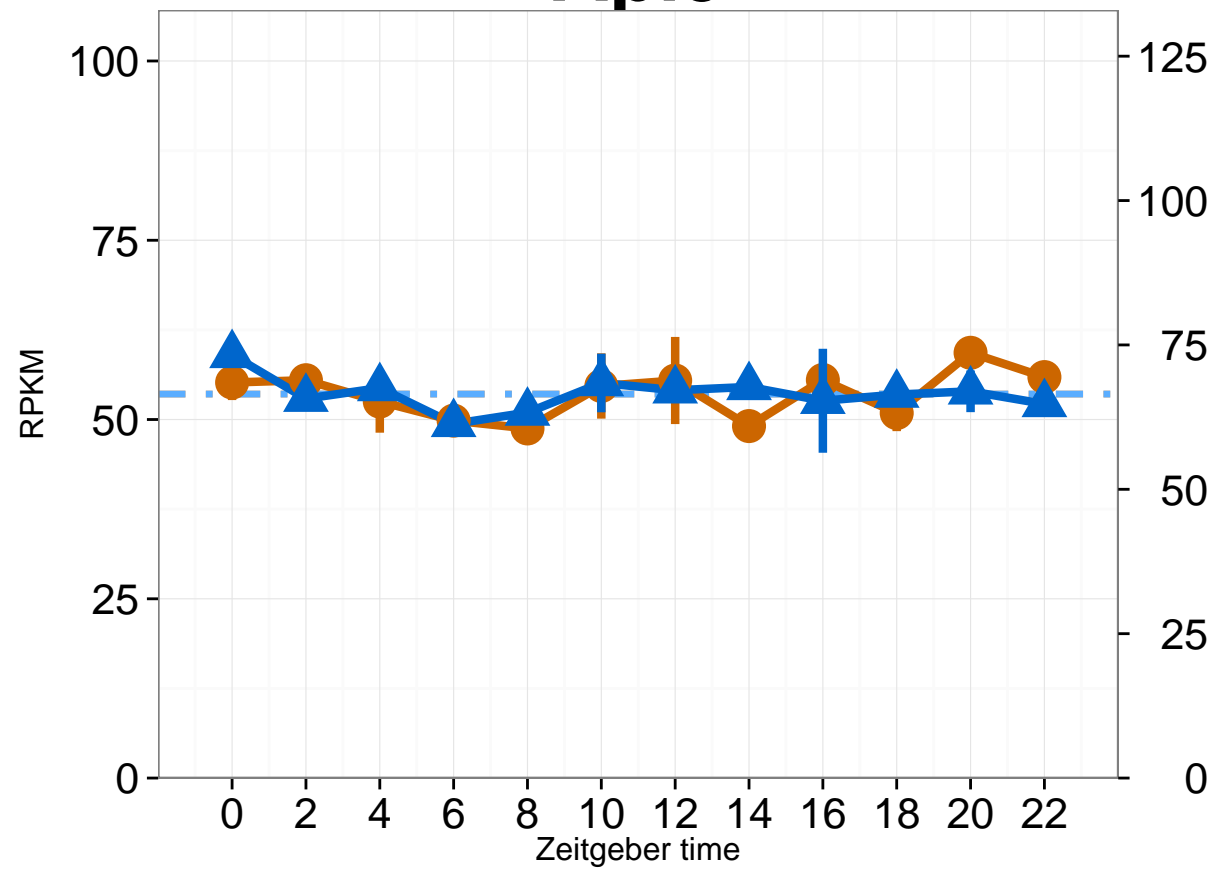

## Api5

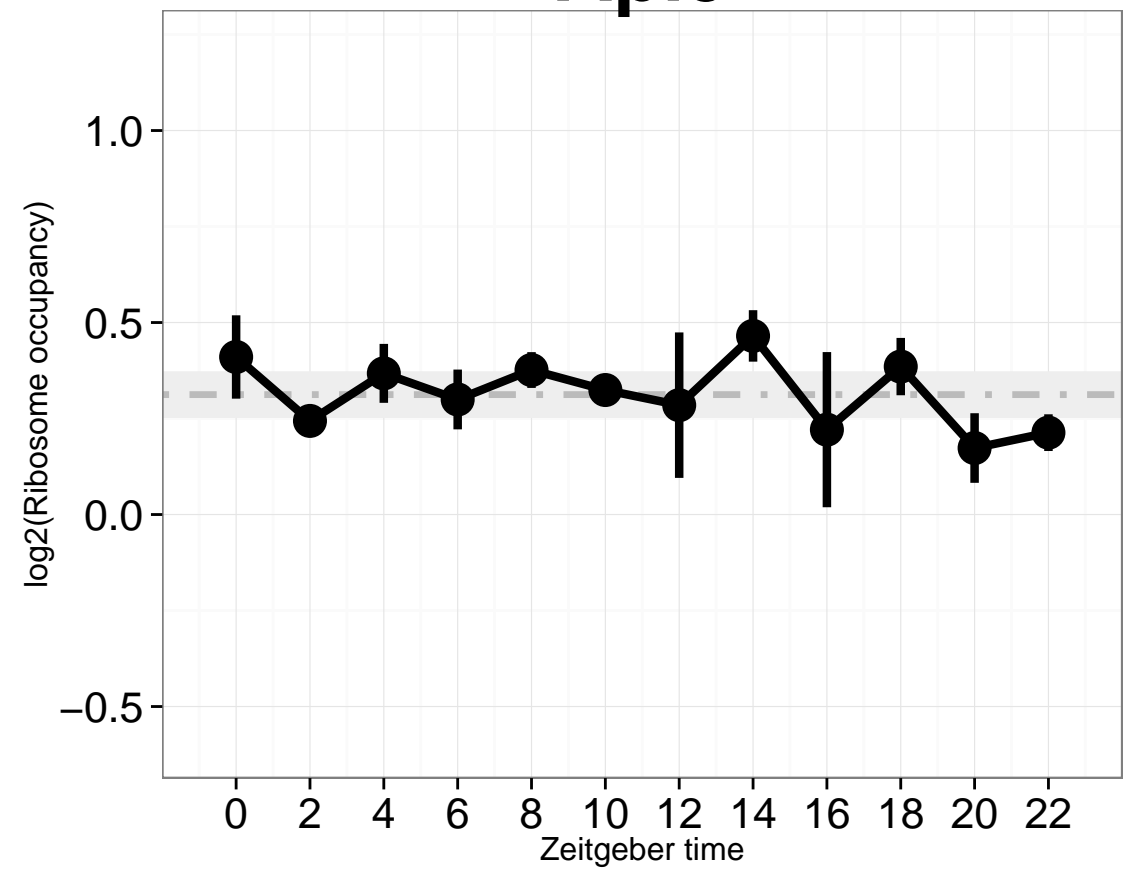

Supplement: Supplementary file 11790 [file 1]

# Mki67

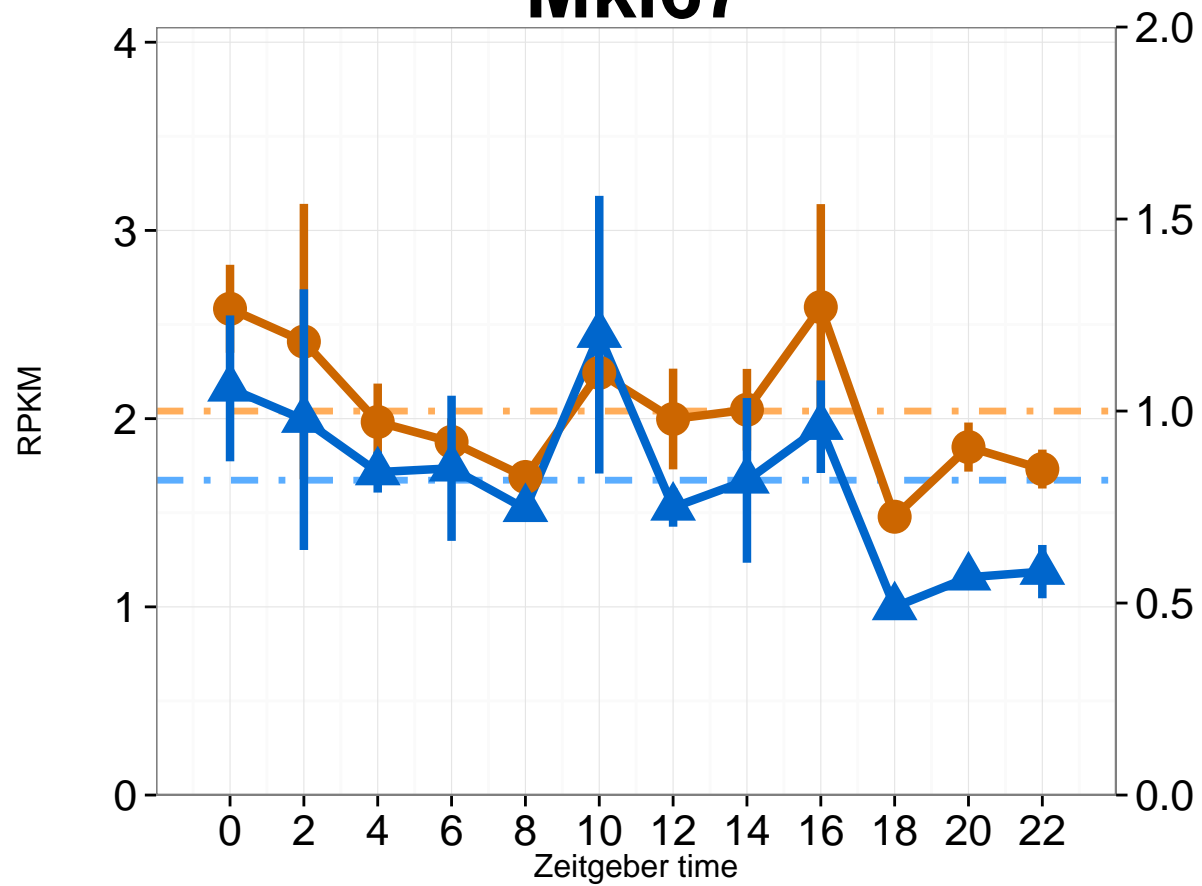

# Mki67

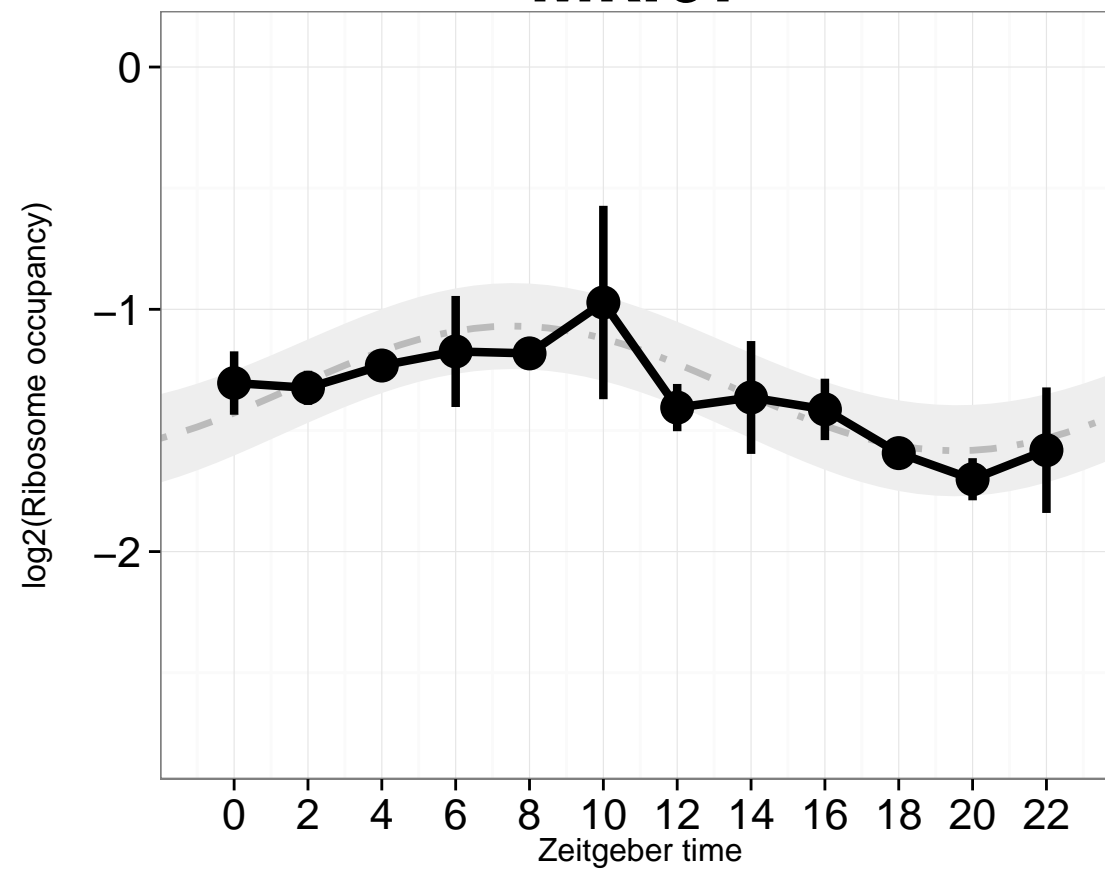

Supplement: Supplementary file 11791 [file 1]

## Upf1

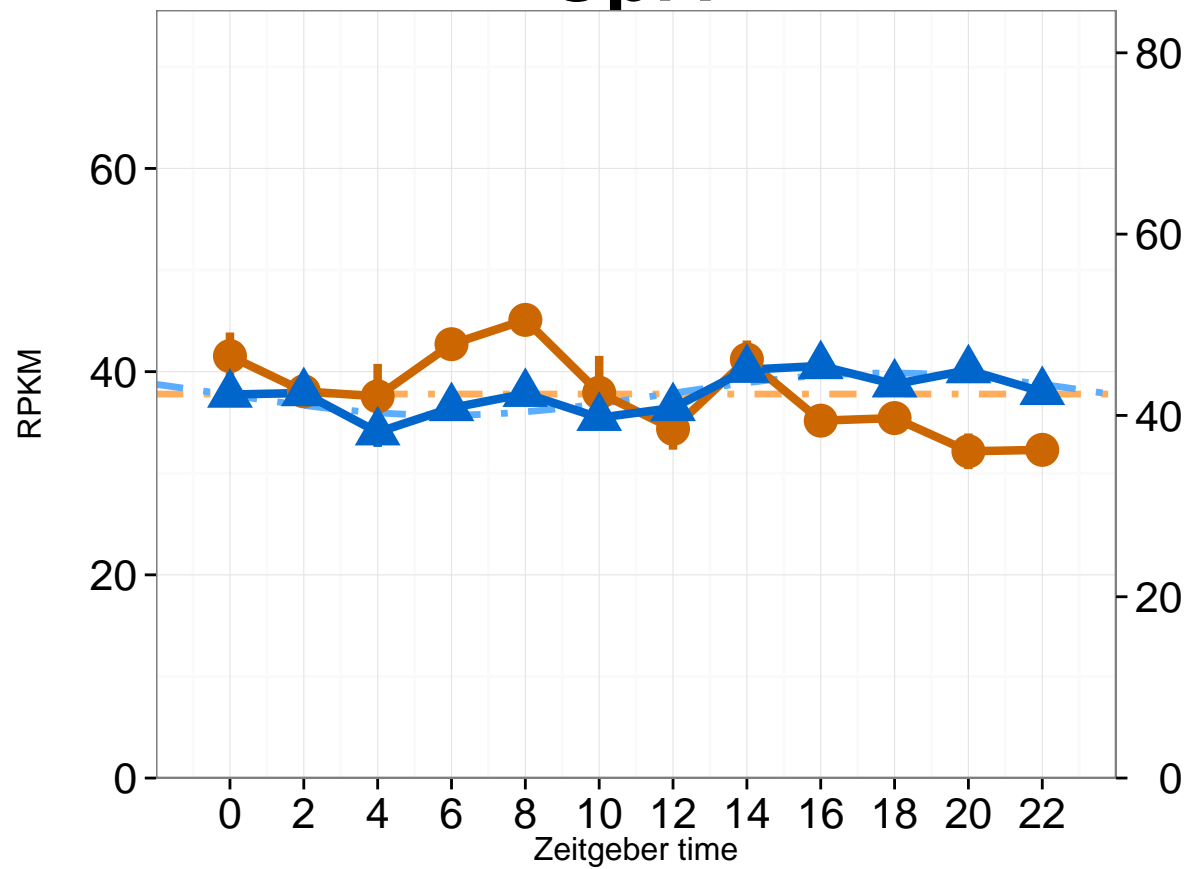

## Upf1

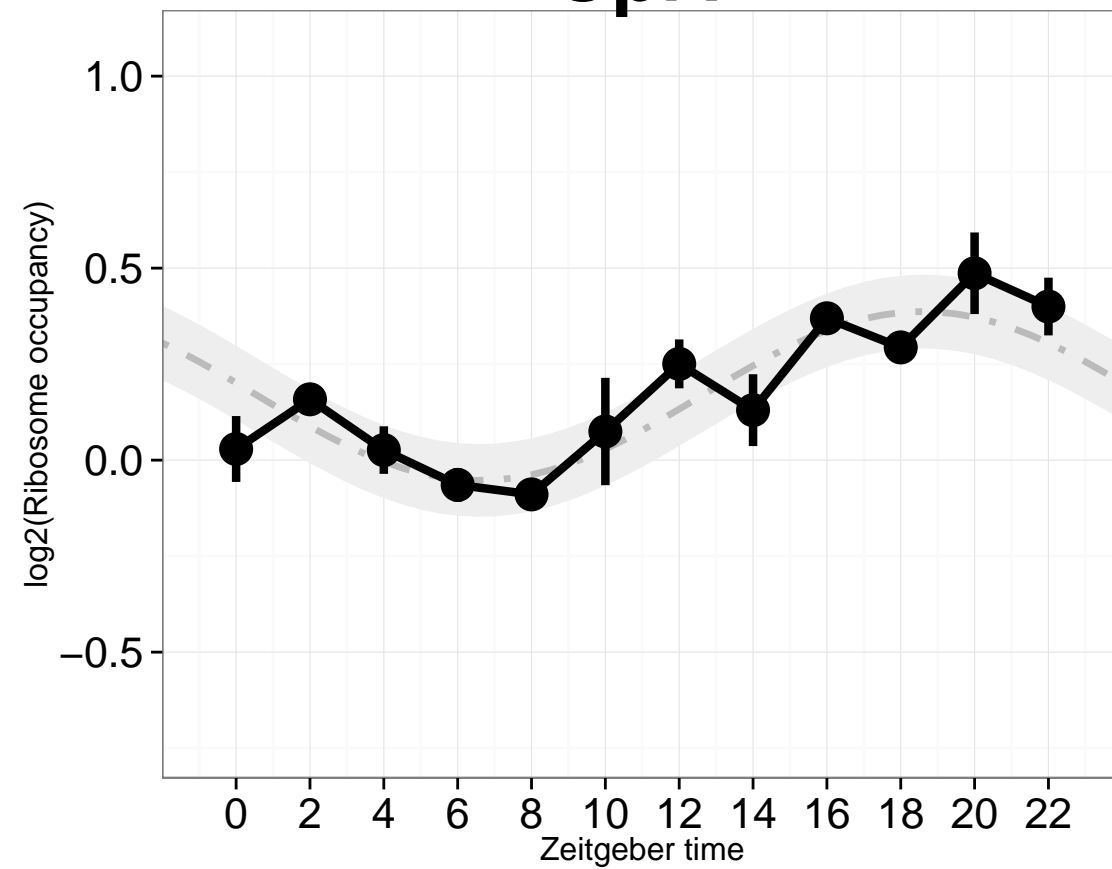

Supplement: Supplementary file 11792 [file 1]

## Nebi

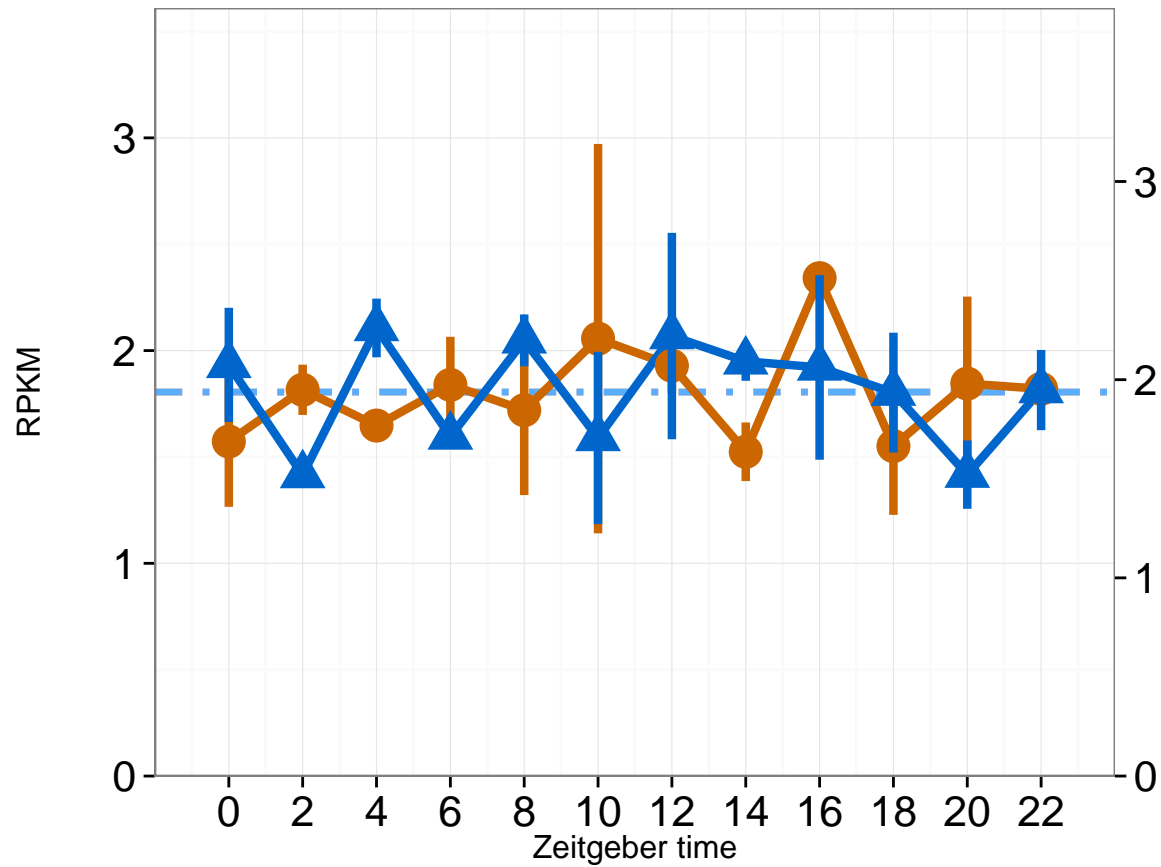

## Nebi

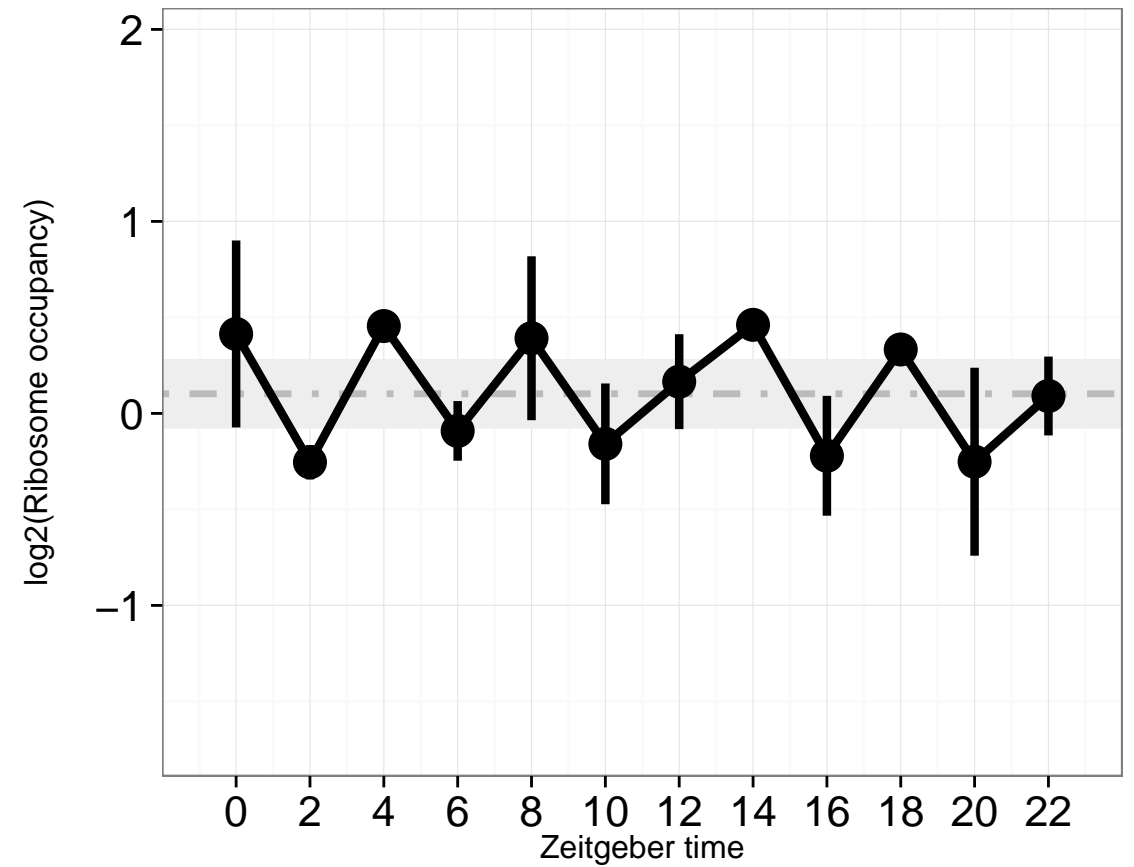

Supplement: Supplementary file 11793 [file 1]

## Pmm2

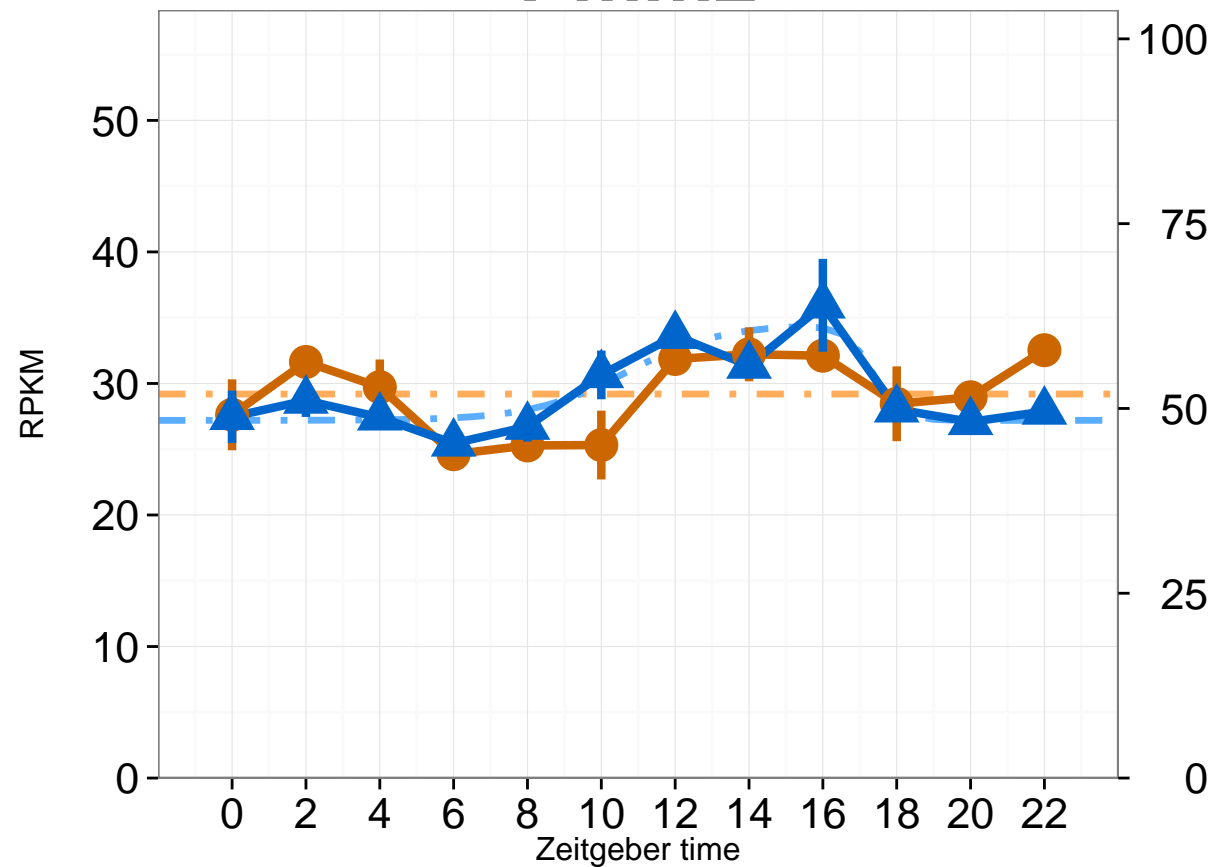

## Pmm2

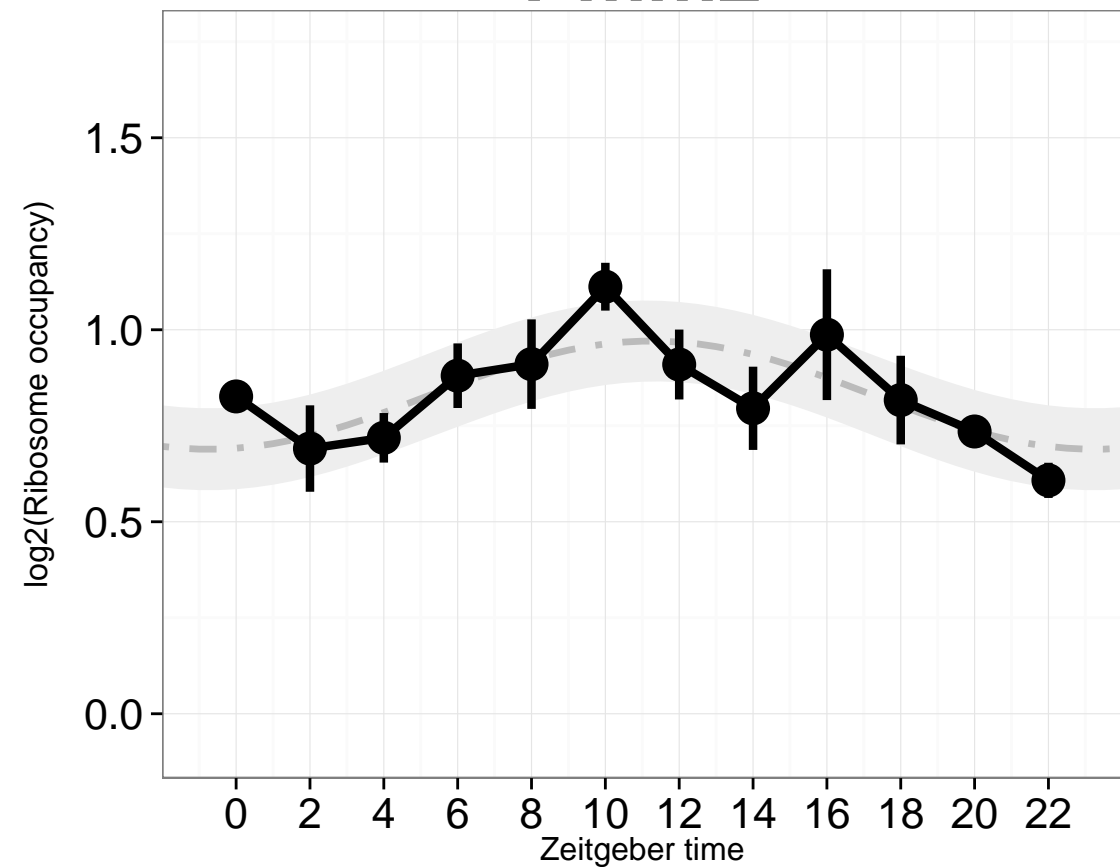

Supplement: Supplementary file 11794 [file 1]

## Dhdh

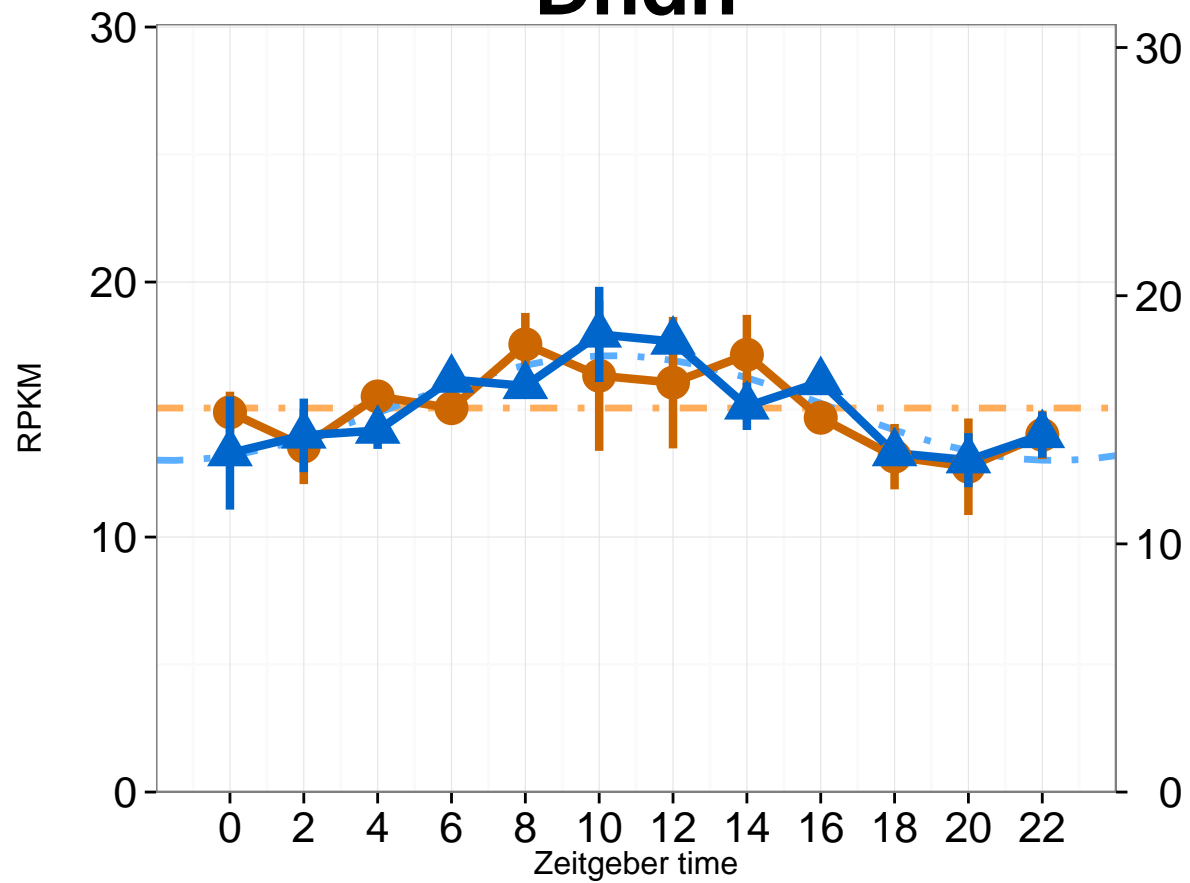

## Dhdh

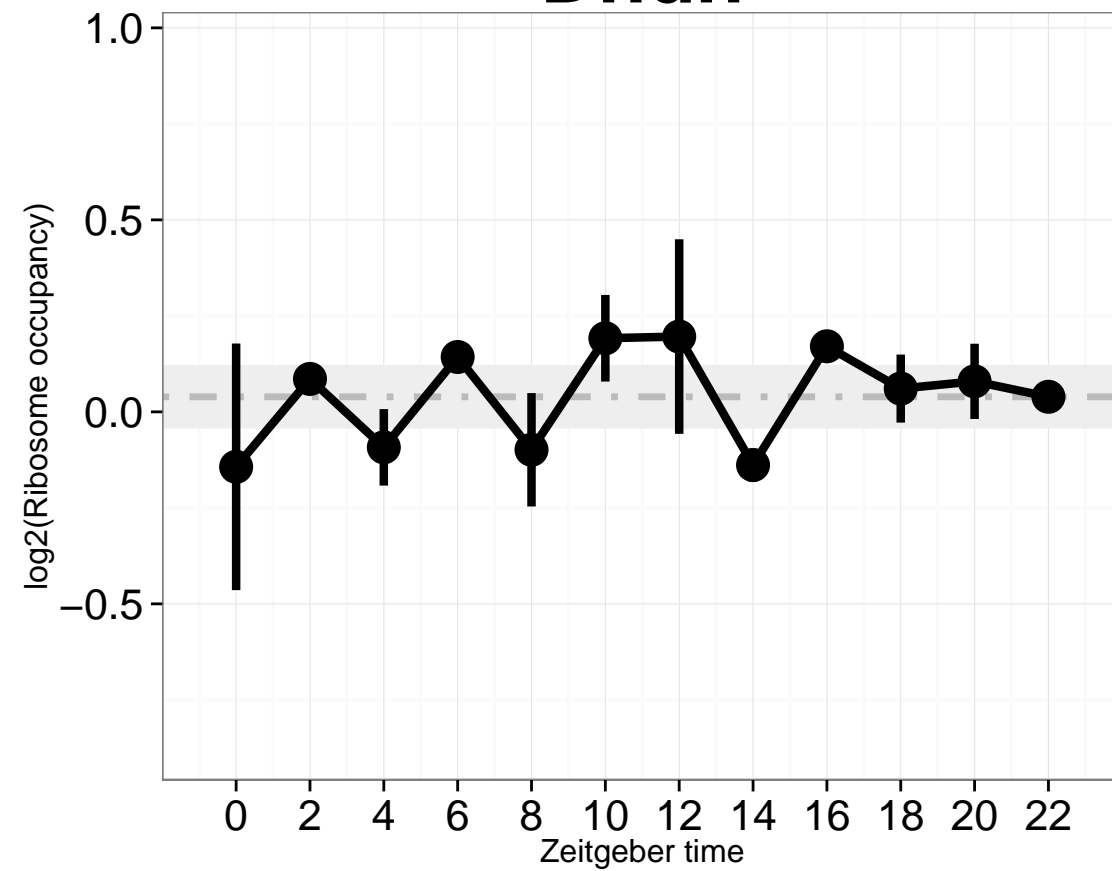

Supplement: Supplementary file 11795 [file 1]

## Lsm4

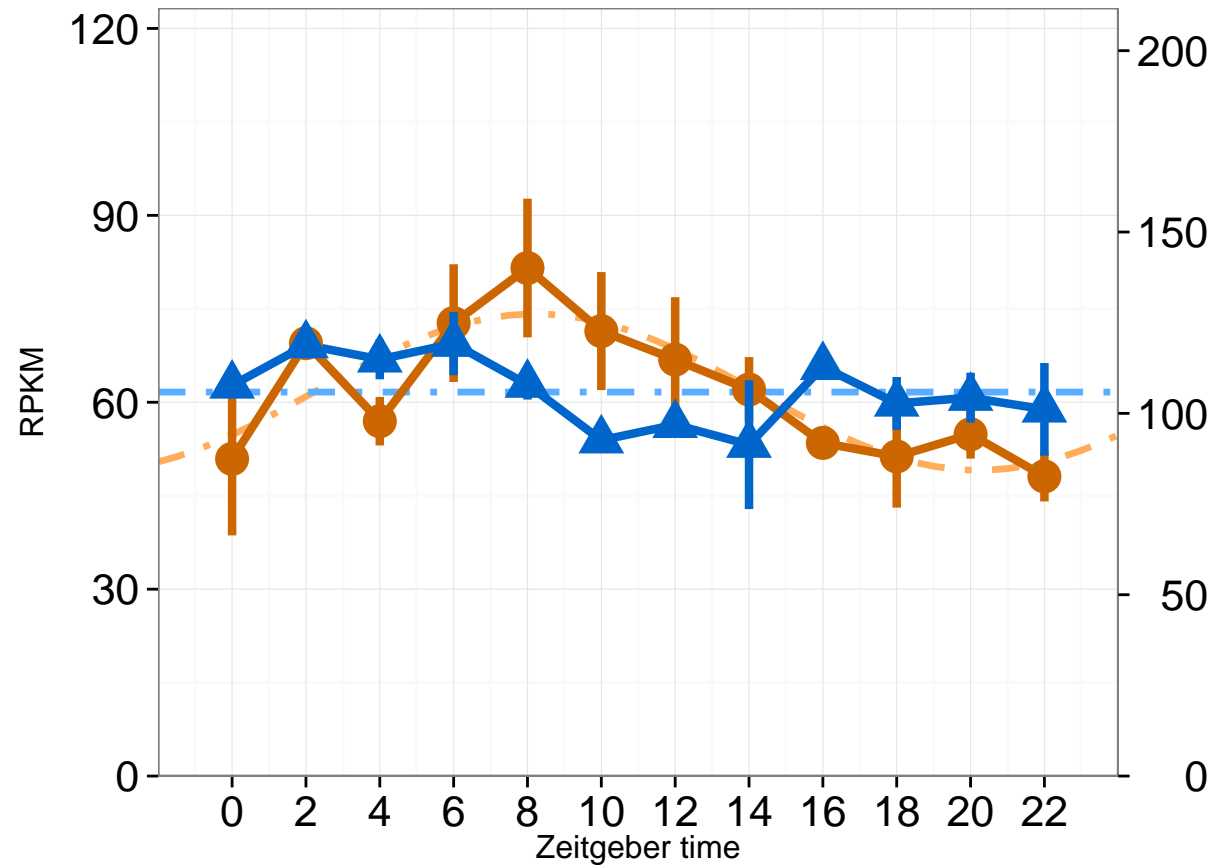

## Lsm4

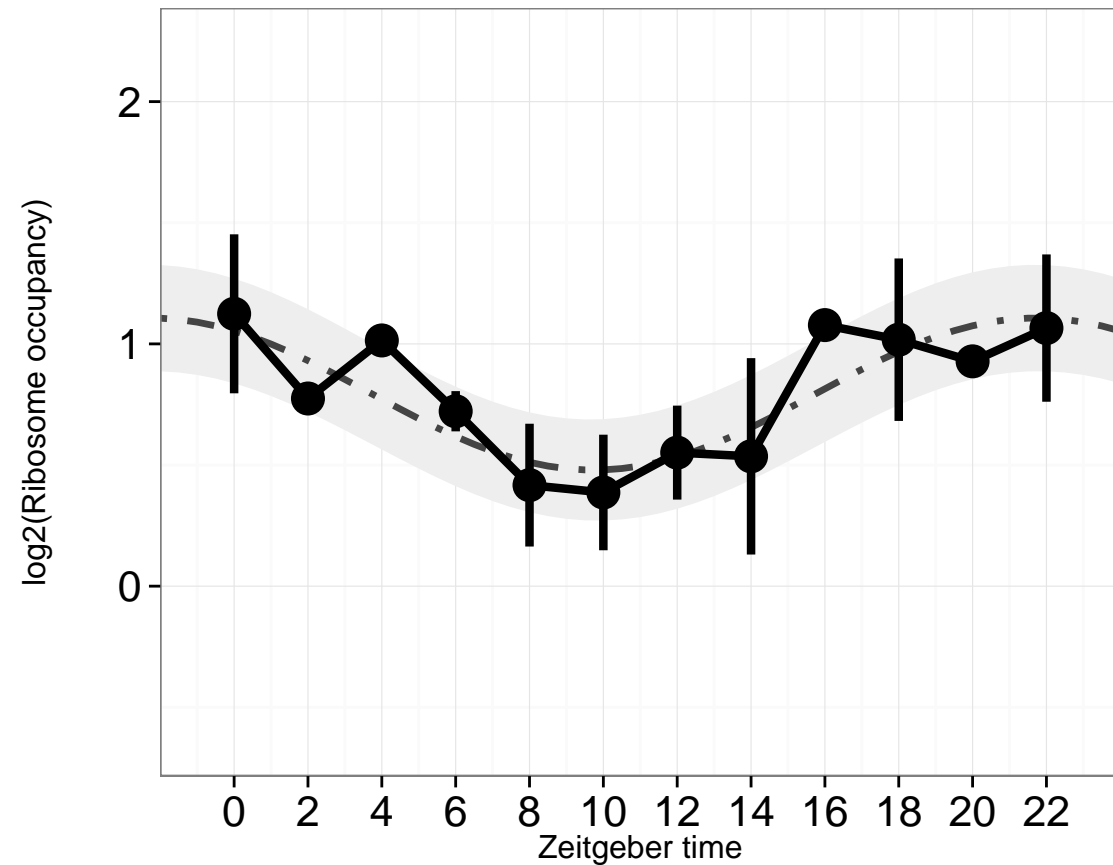

Supplement: Supplementary file 11797 [file 1]

## Sssca1

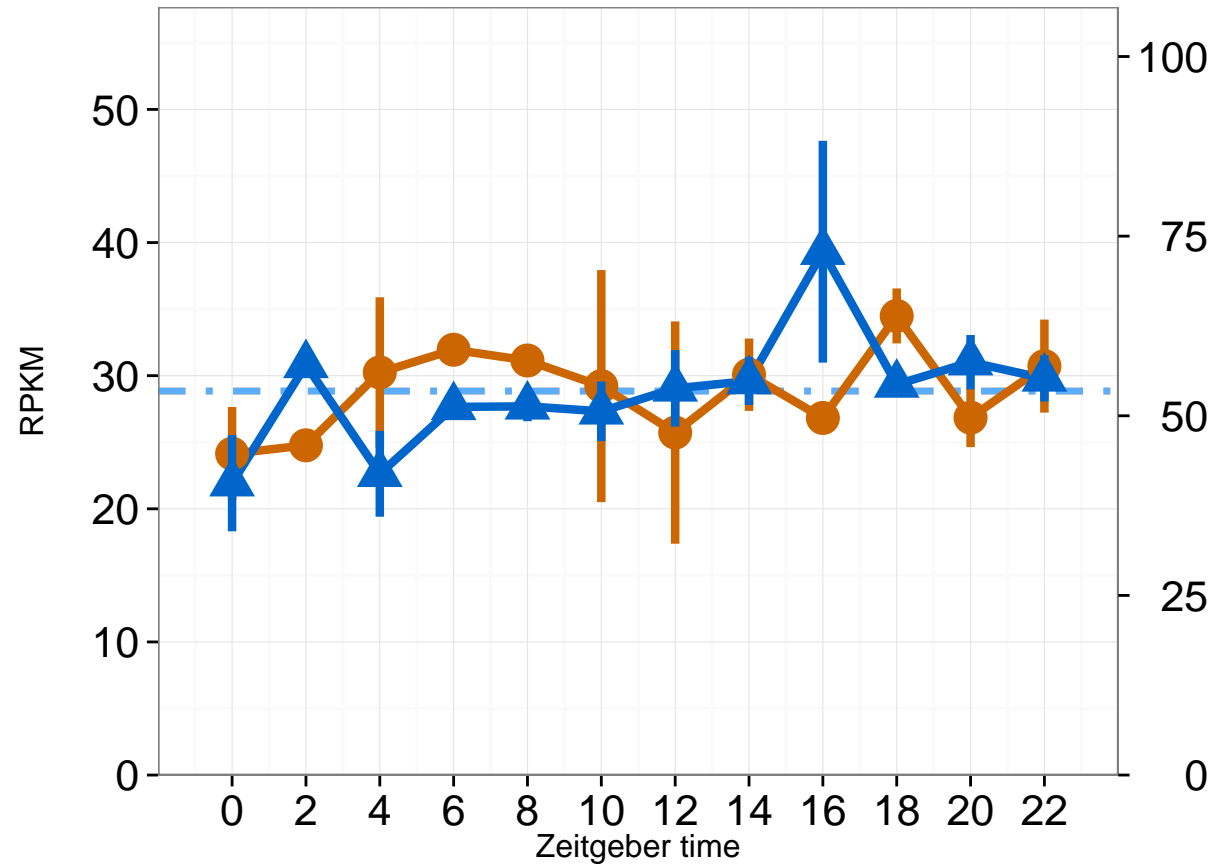

## Sssca1

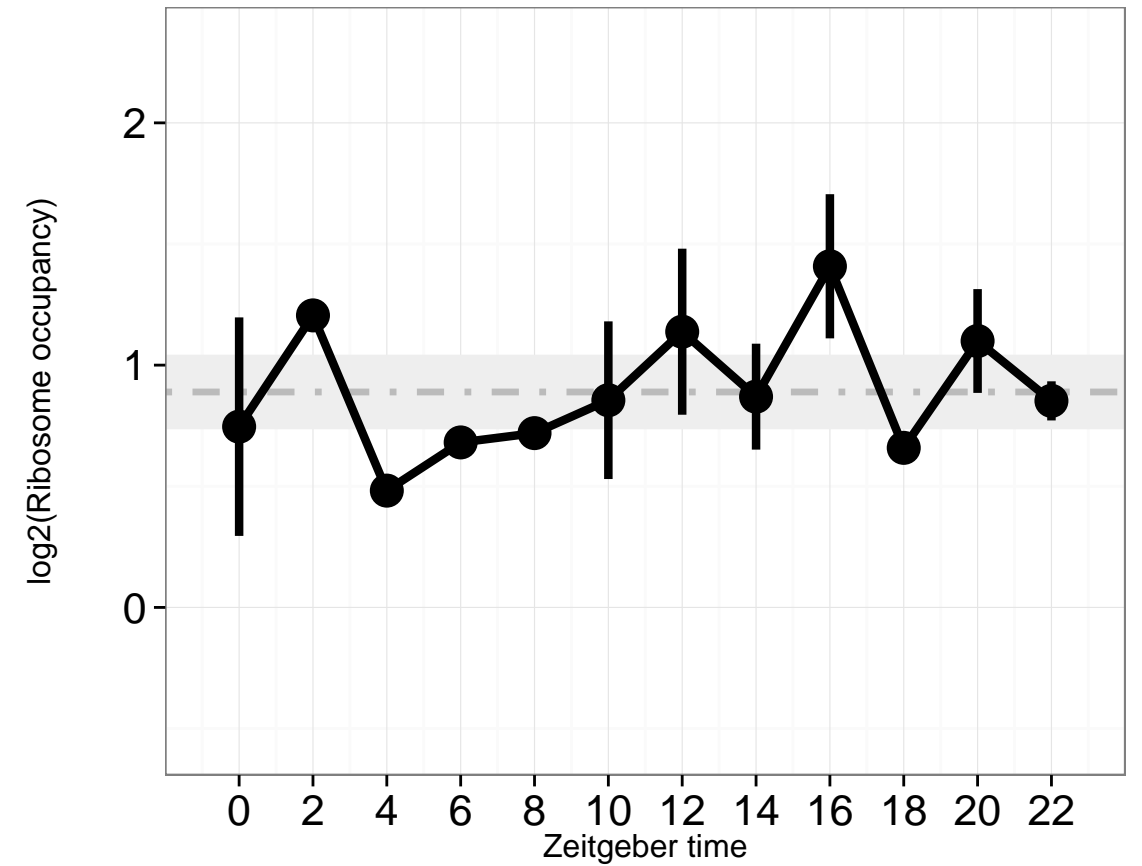

Supplement: Supplementary file 11798 [file 1]

# Ntpcr

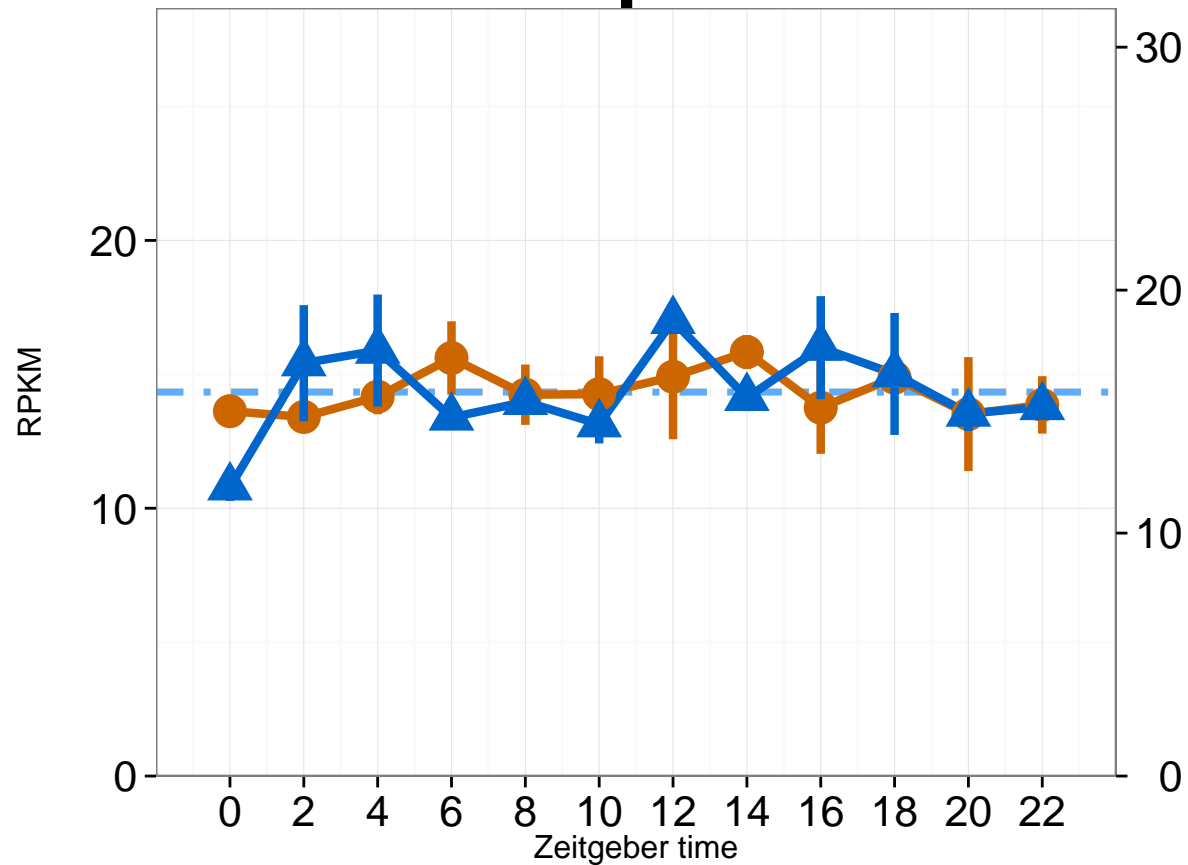

# Ntpcr

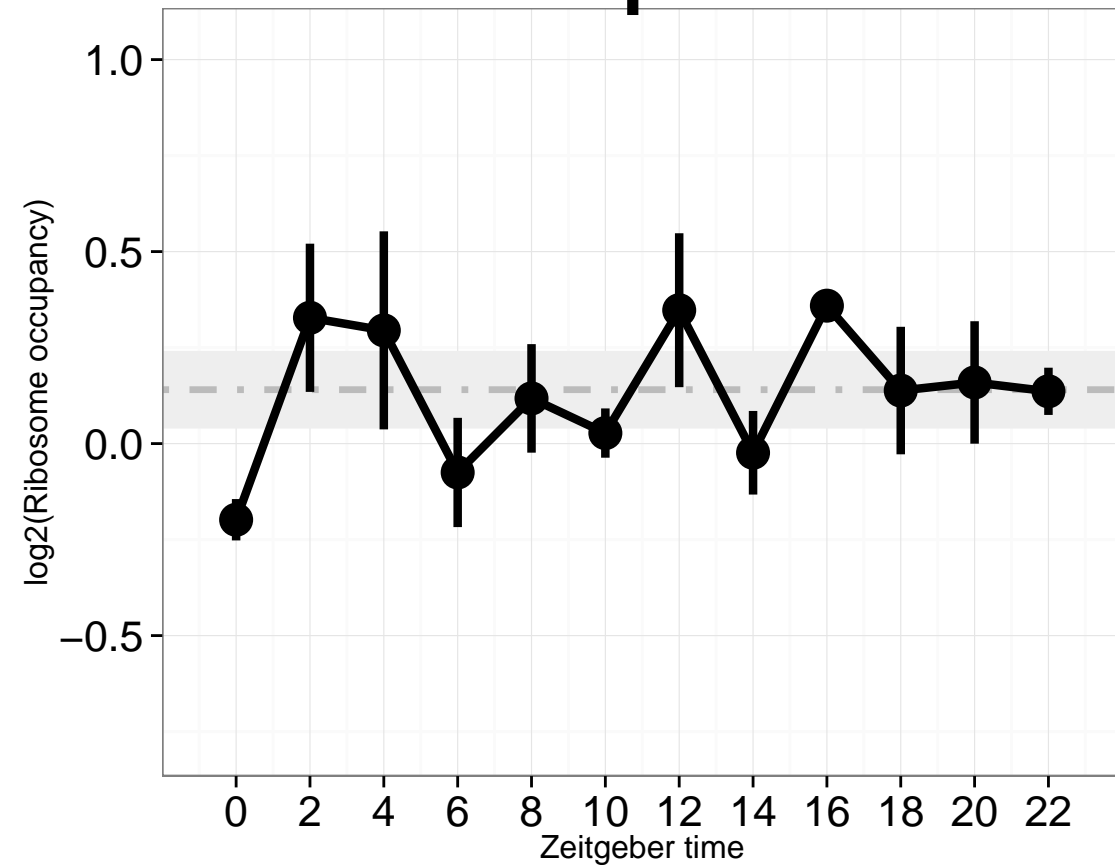

Supplement: Supplementary file 11799 [file 1]

## Hnrnpdl

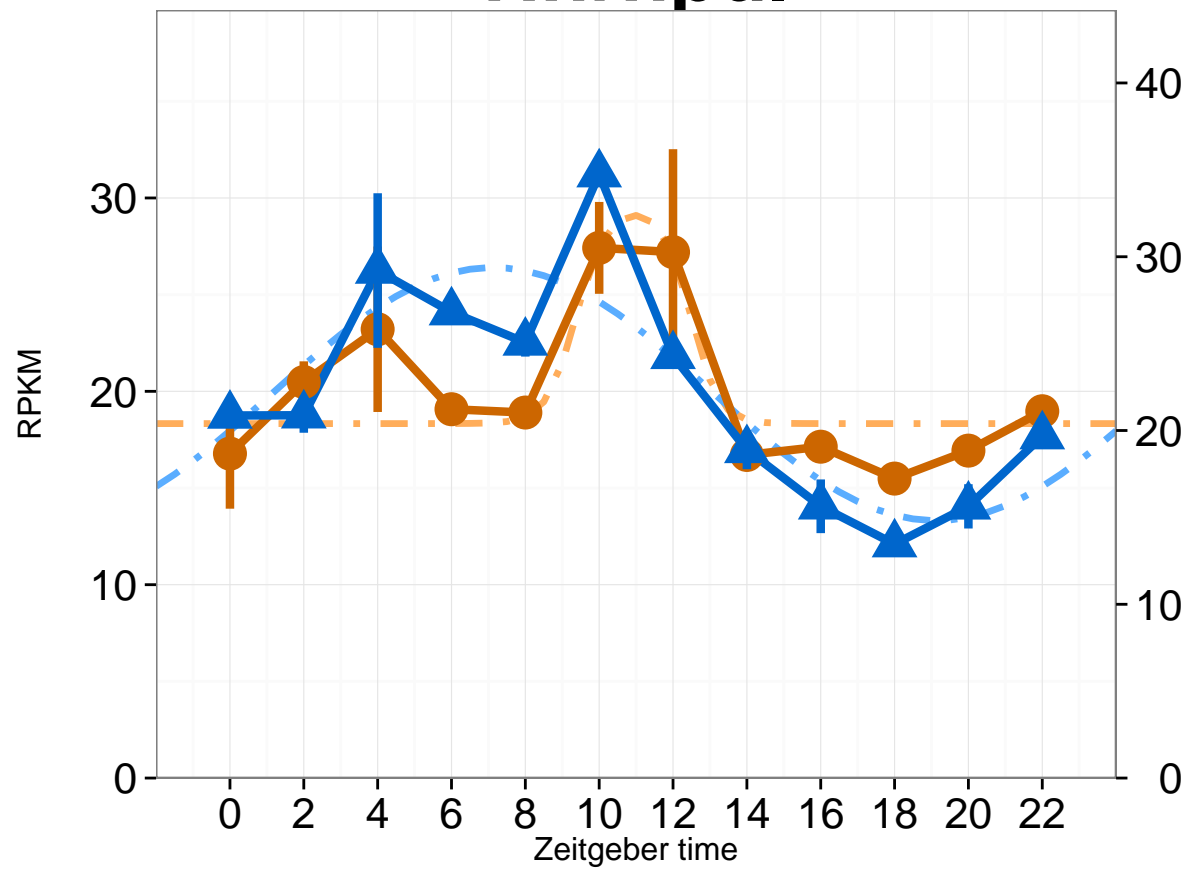

## Hnrnpdl

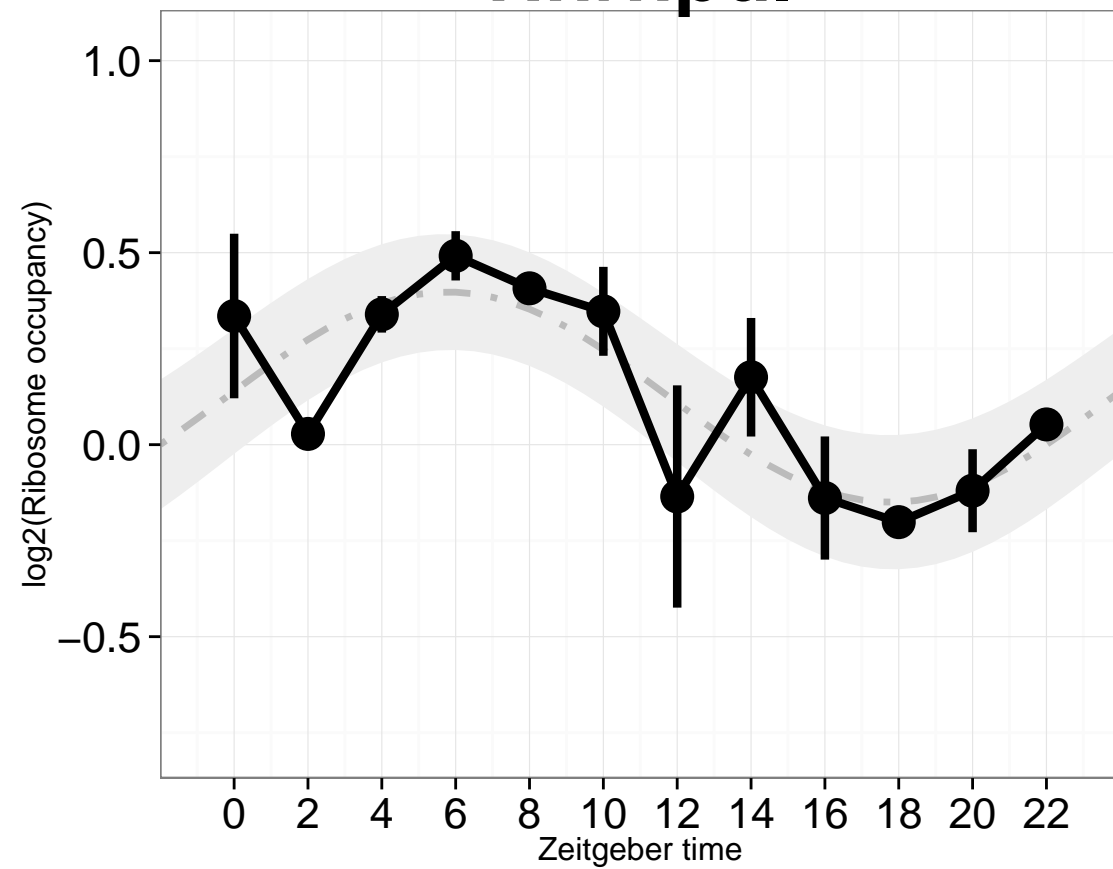

Supplement: Supplementary file 11800 [file 1]

# Ppp1cc

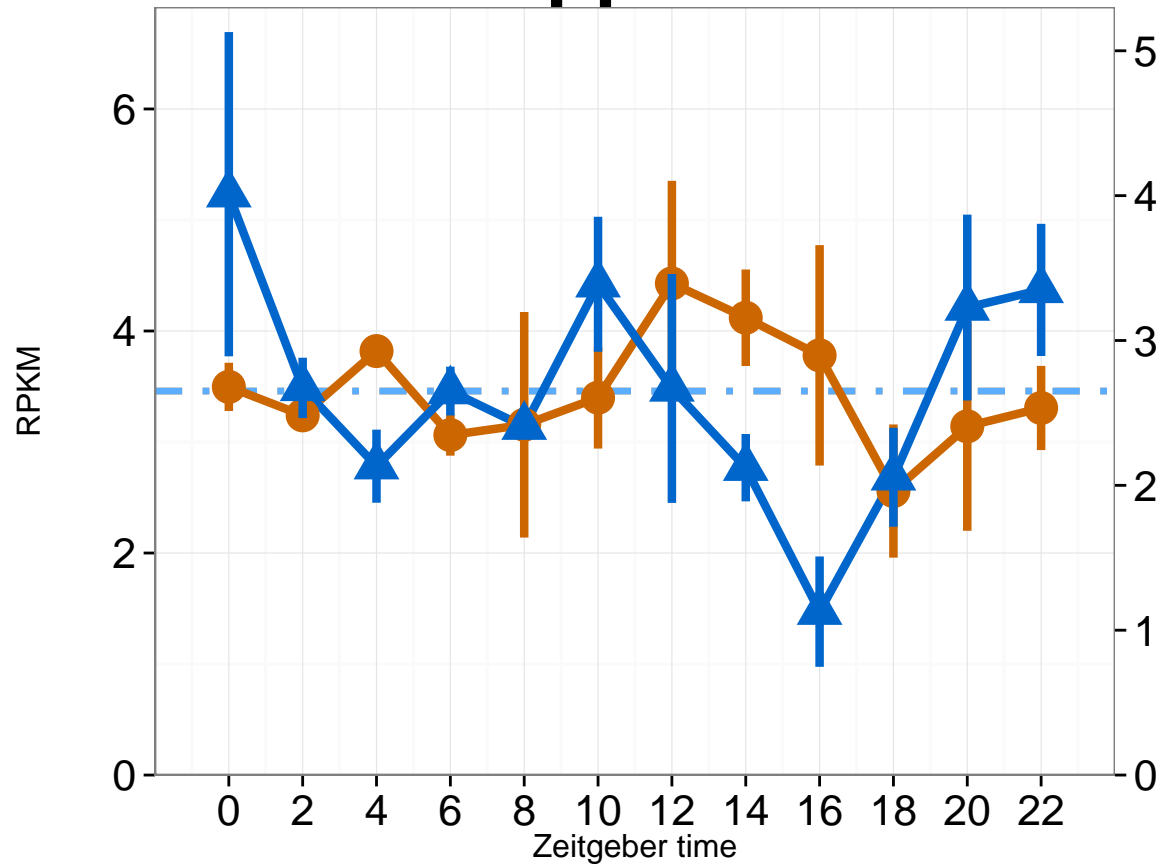

# Ppp1cc

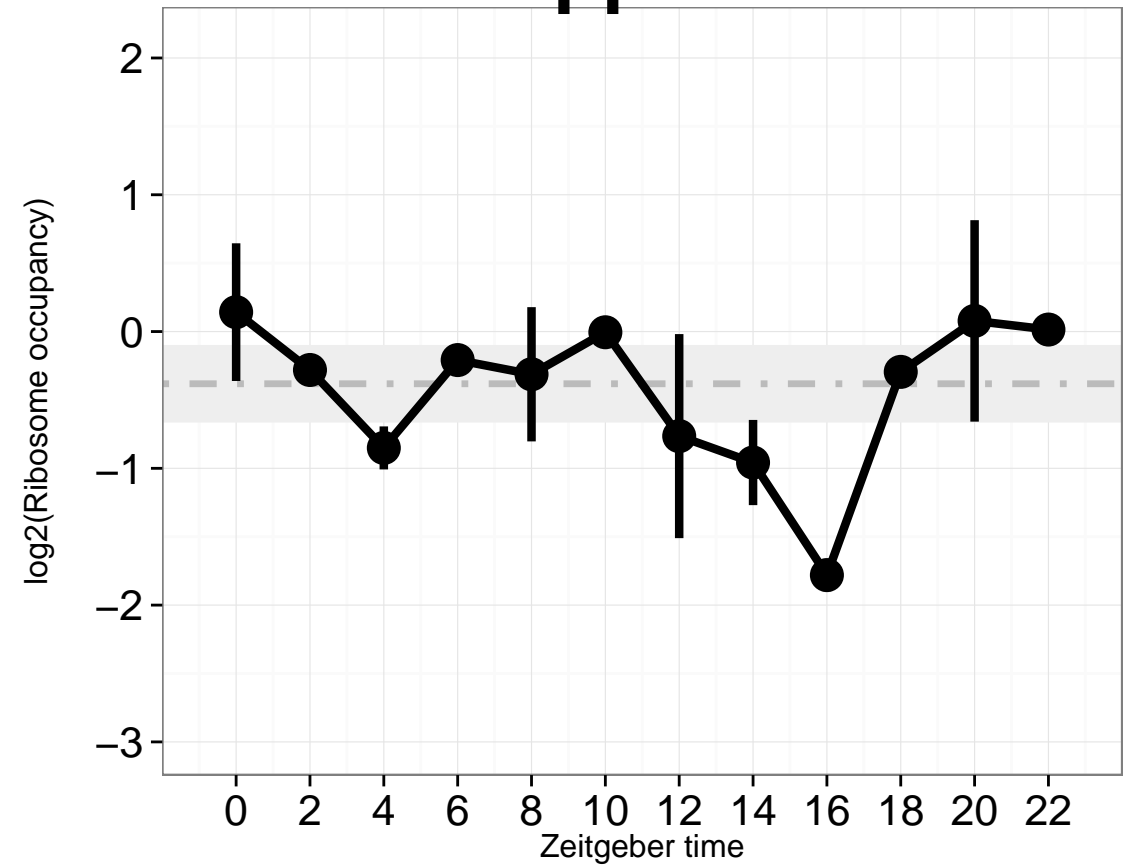

Supplement: Supplementary file 11801 [file 1]

## A630033H20Rik

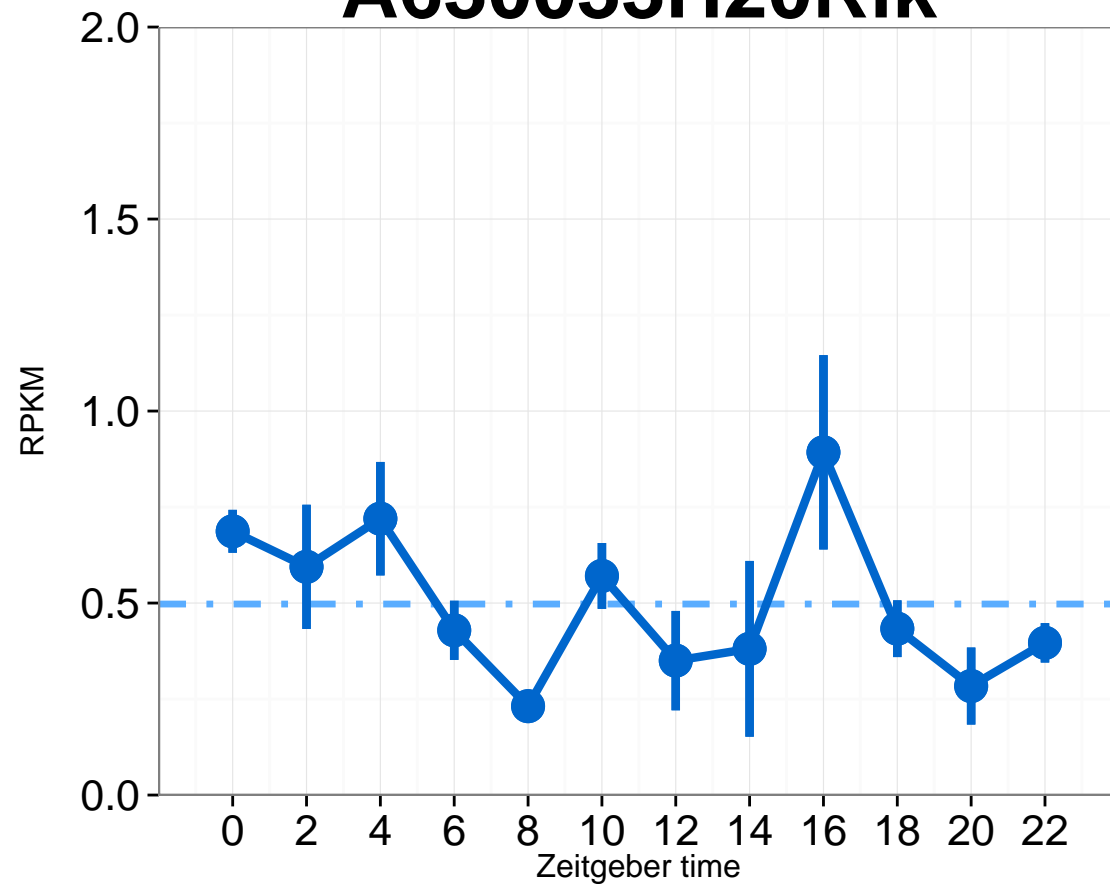

## A630033H20Rik log<sub>2</sub>(Ribosome occup

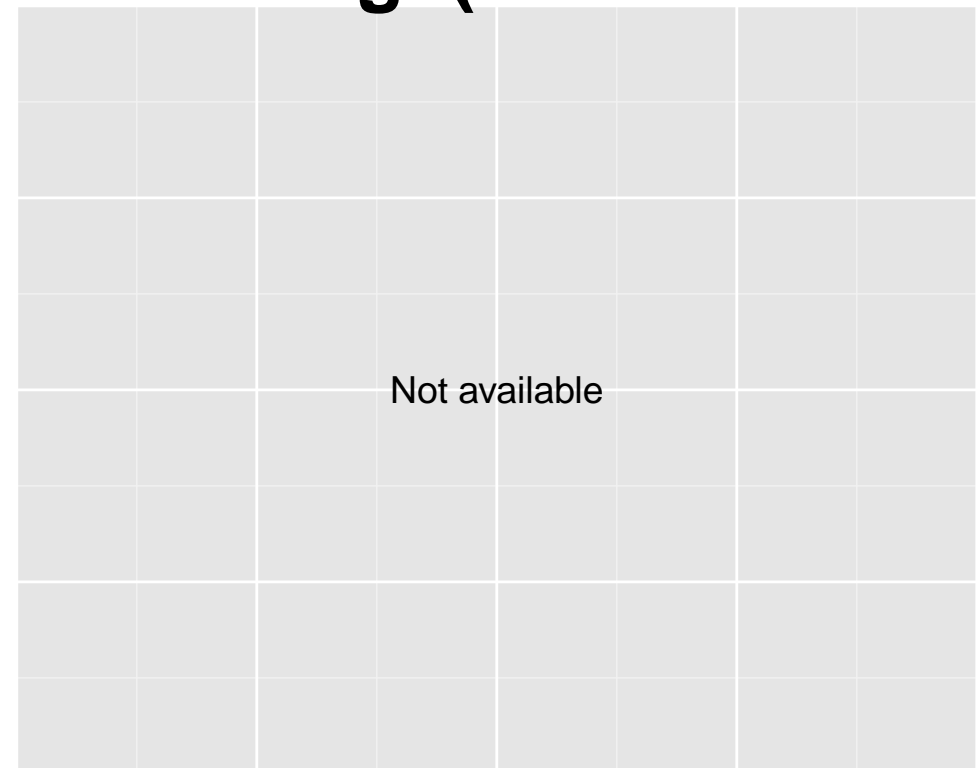

Supplement: Supplementary file 11802 [file 1]

# Atp13a2

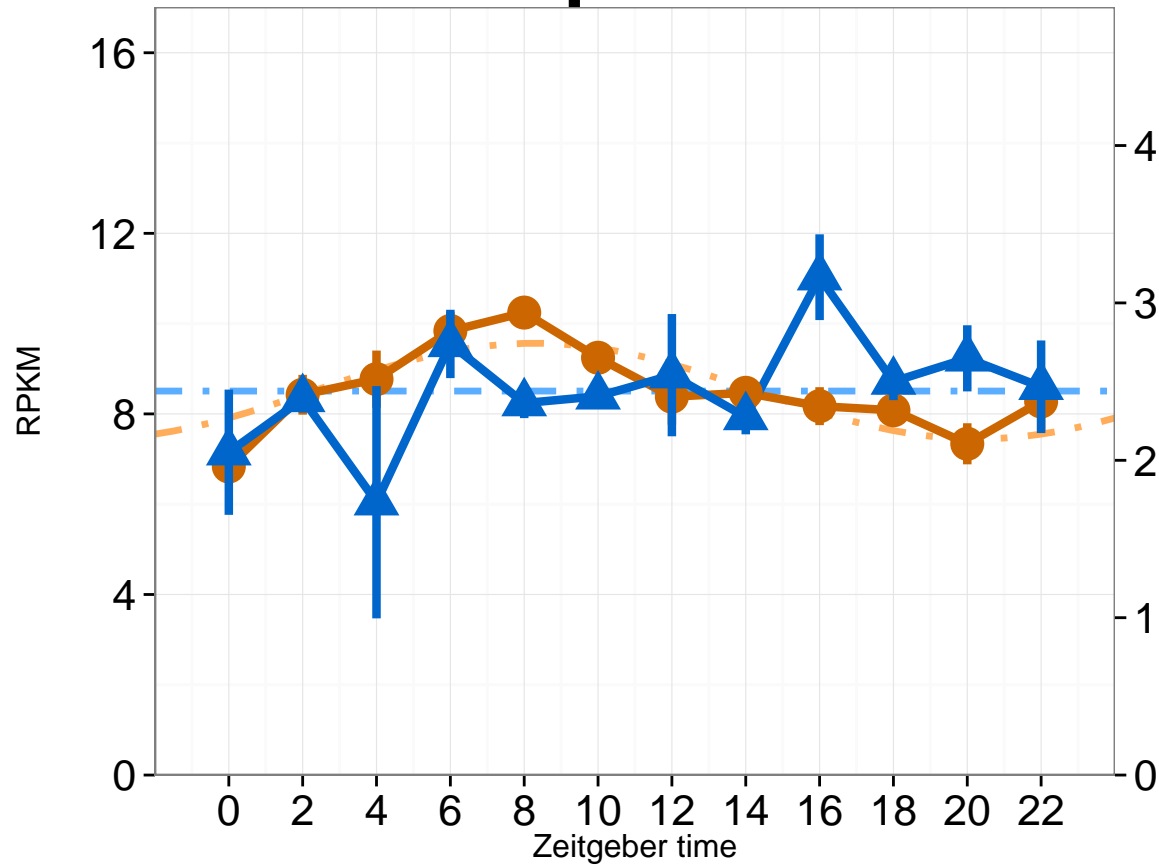

# Atp13a2

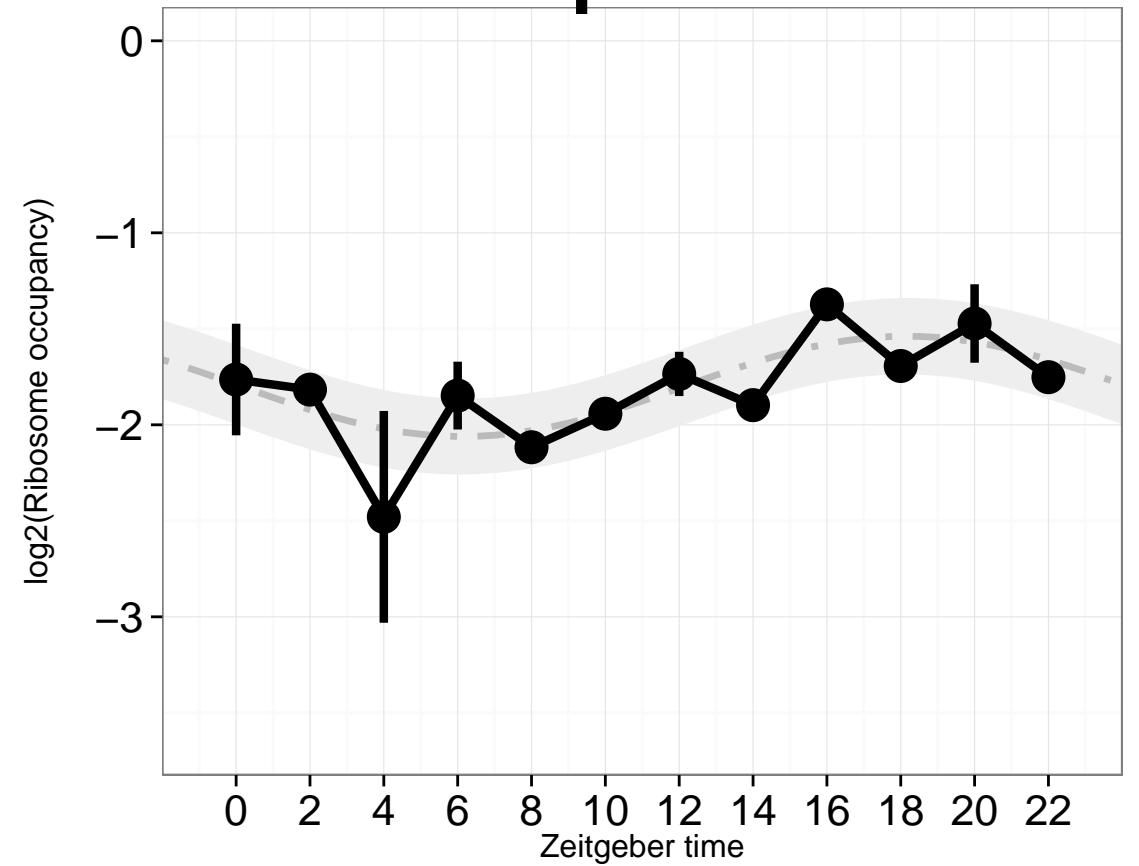

Supplement: Supplementary file 11803 [file 1]

# Zmynd19

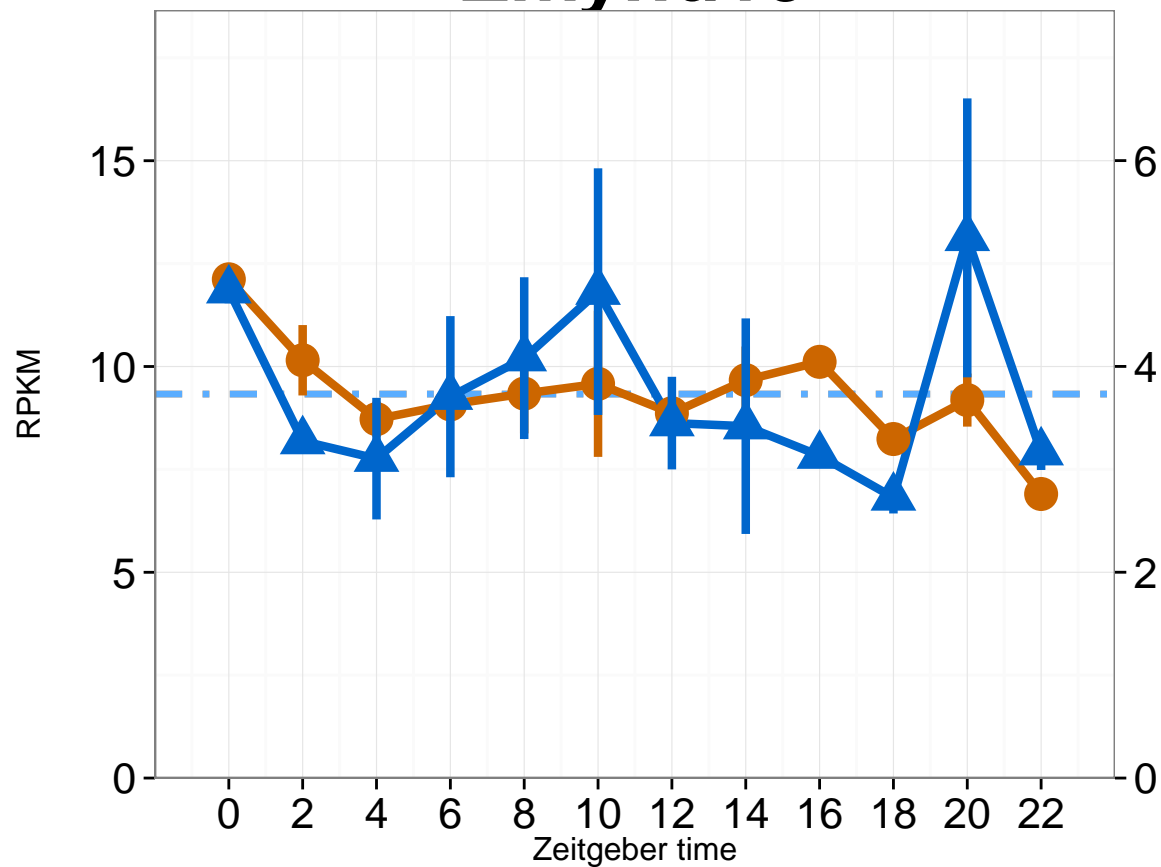

# Zmynd19

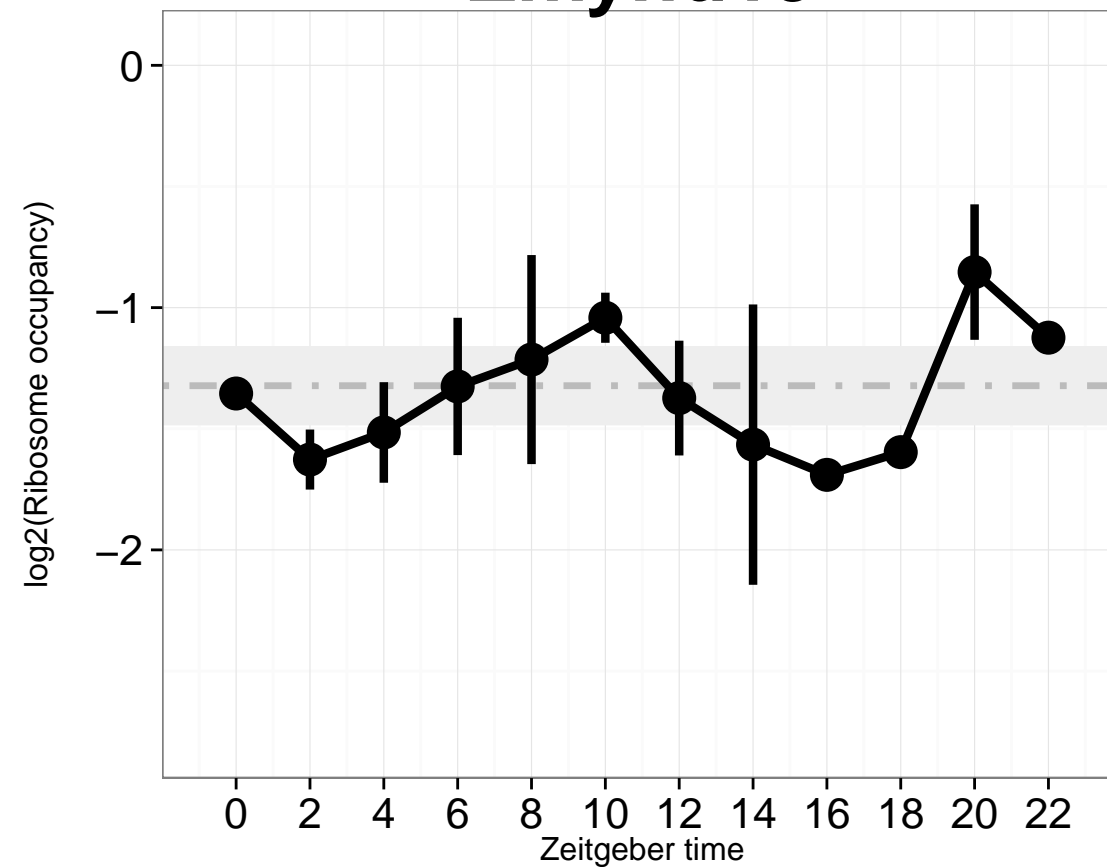

Supplement: Supplementary file 11804 [file 1]

# Rmnd5a

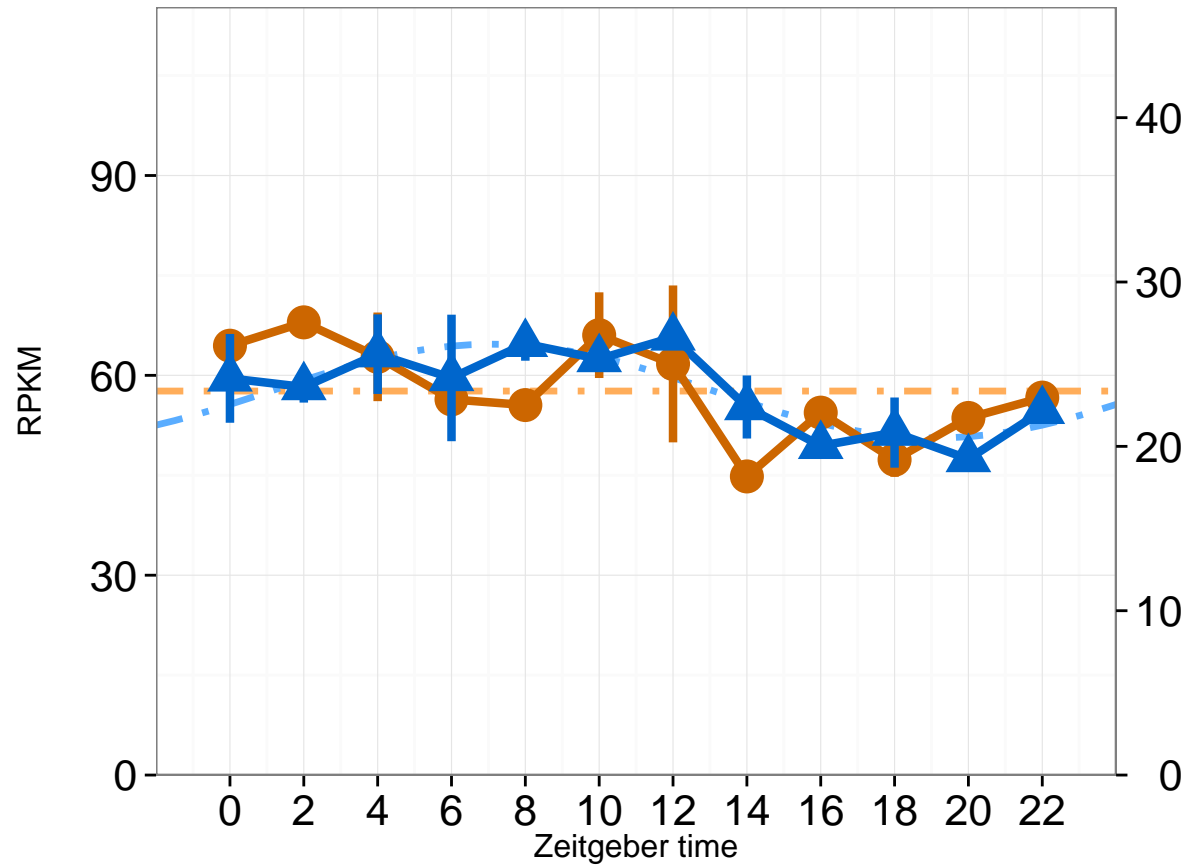

# Rmnd5a

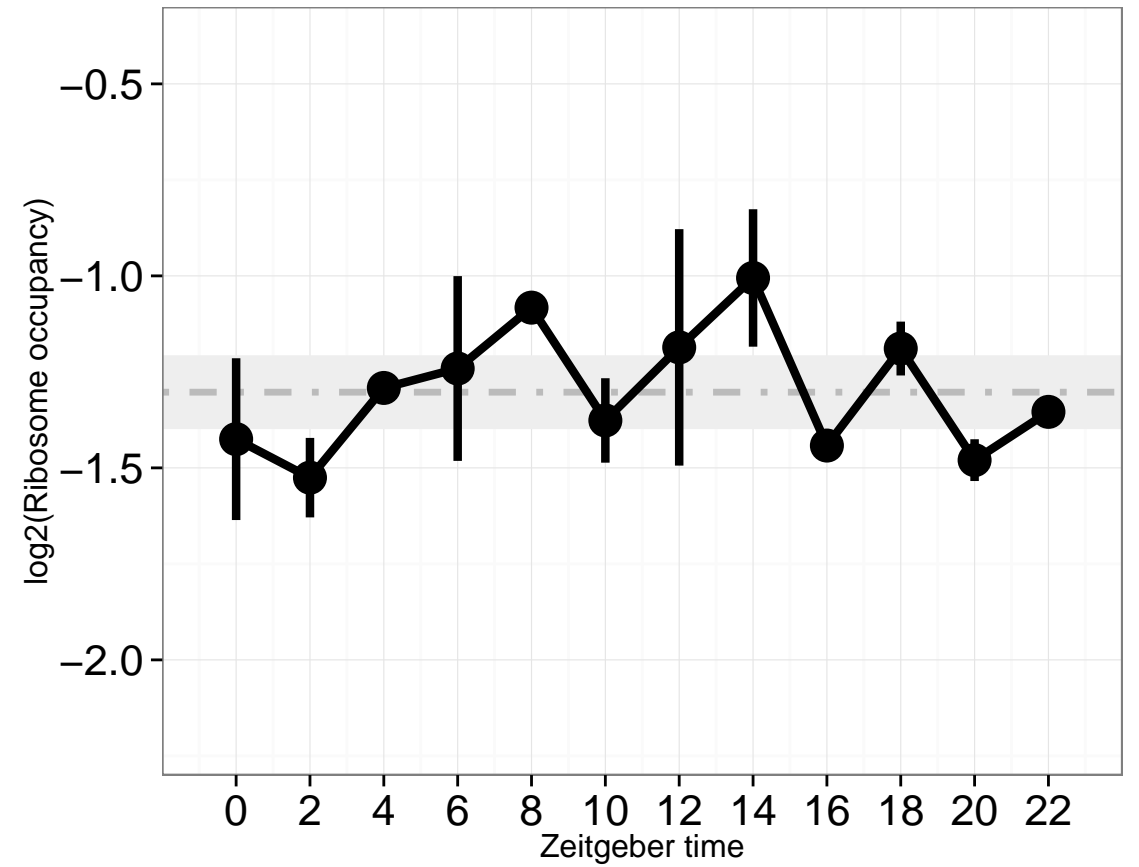

Supplement: Supplementary file 11805 [file 1]

## Wnt7b

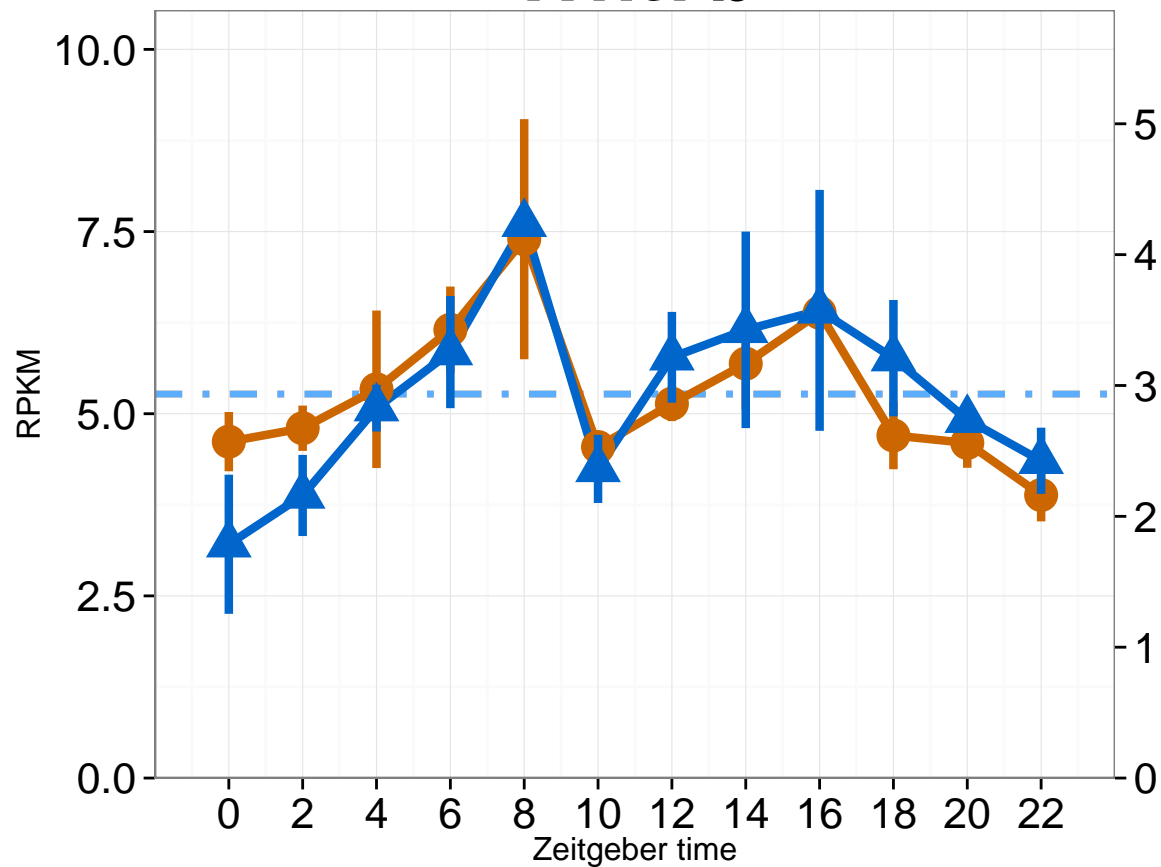

## Wnt7b

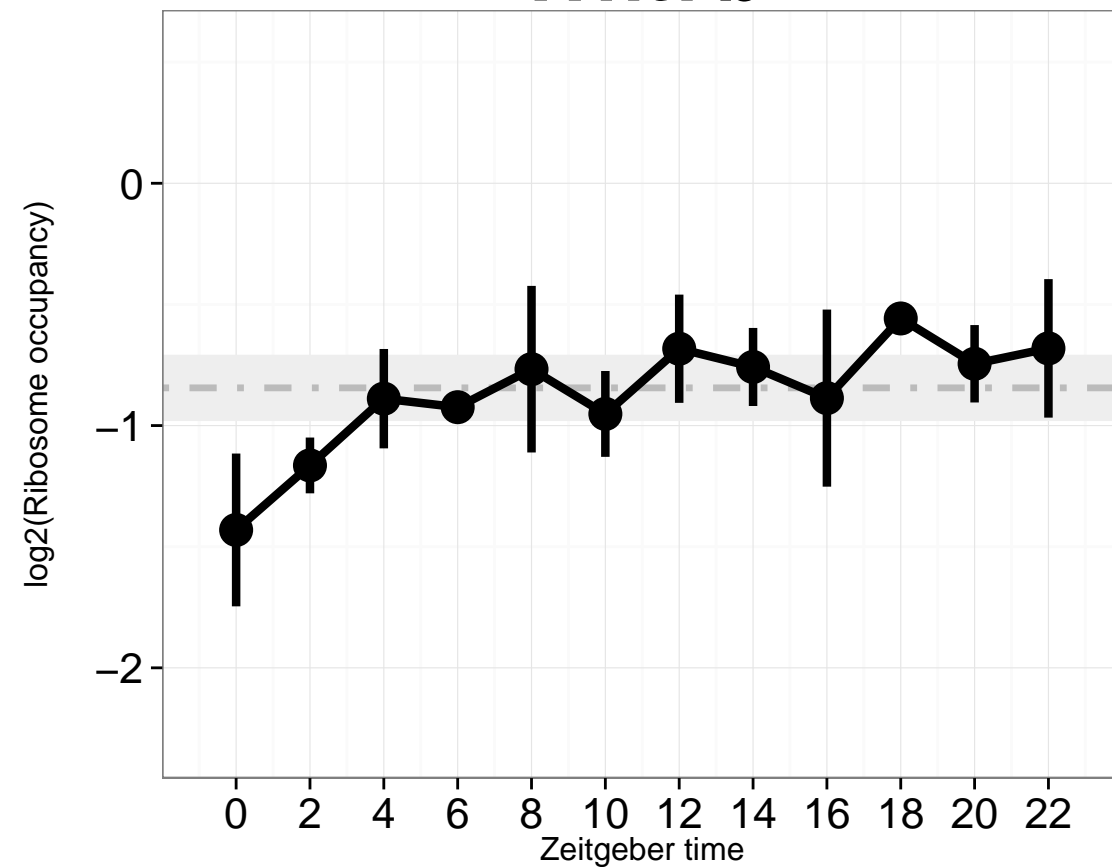

Supplement: Supplementary file 11806 [file 1]

# Fign

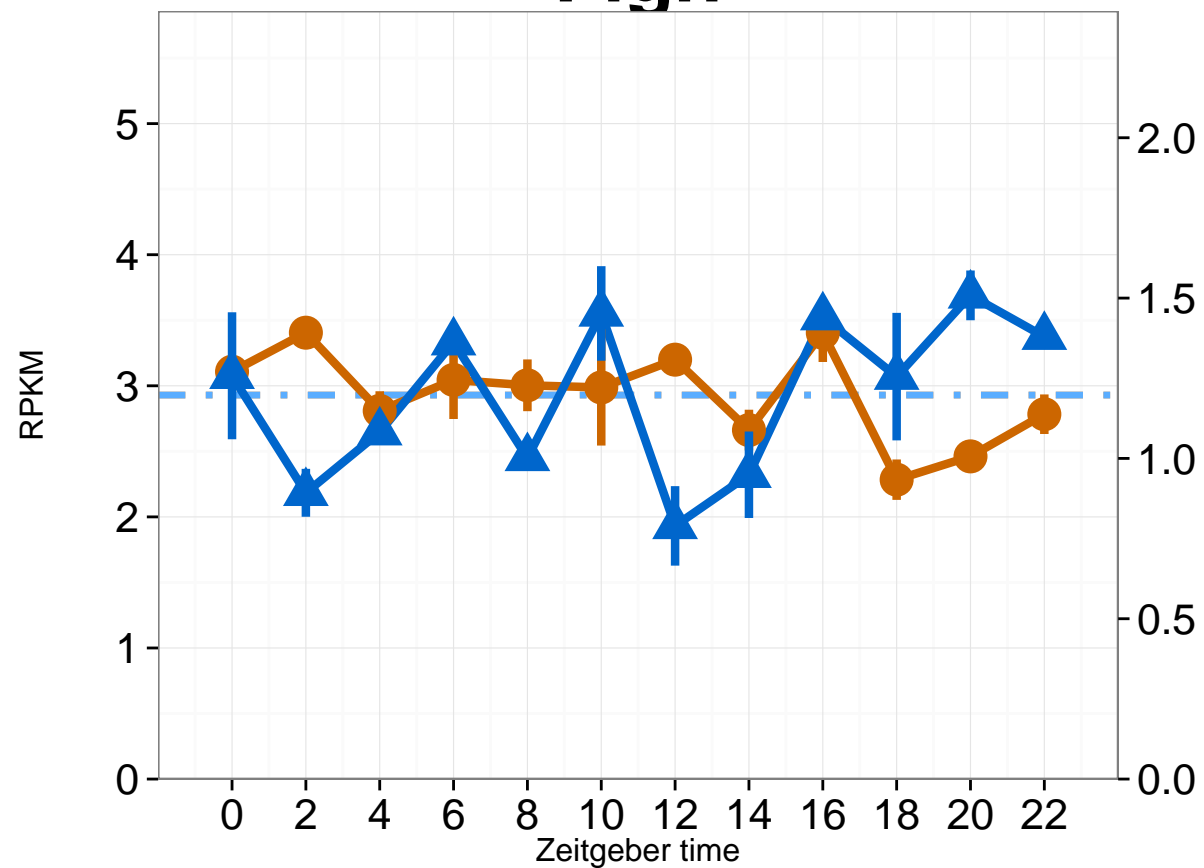

# Fign

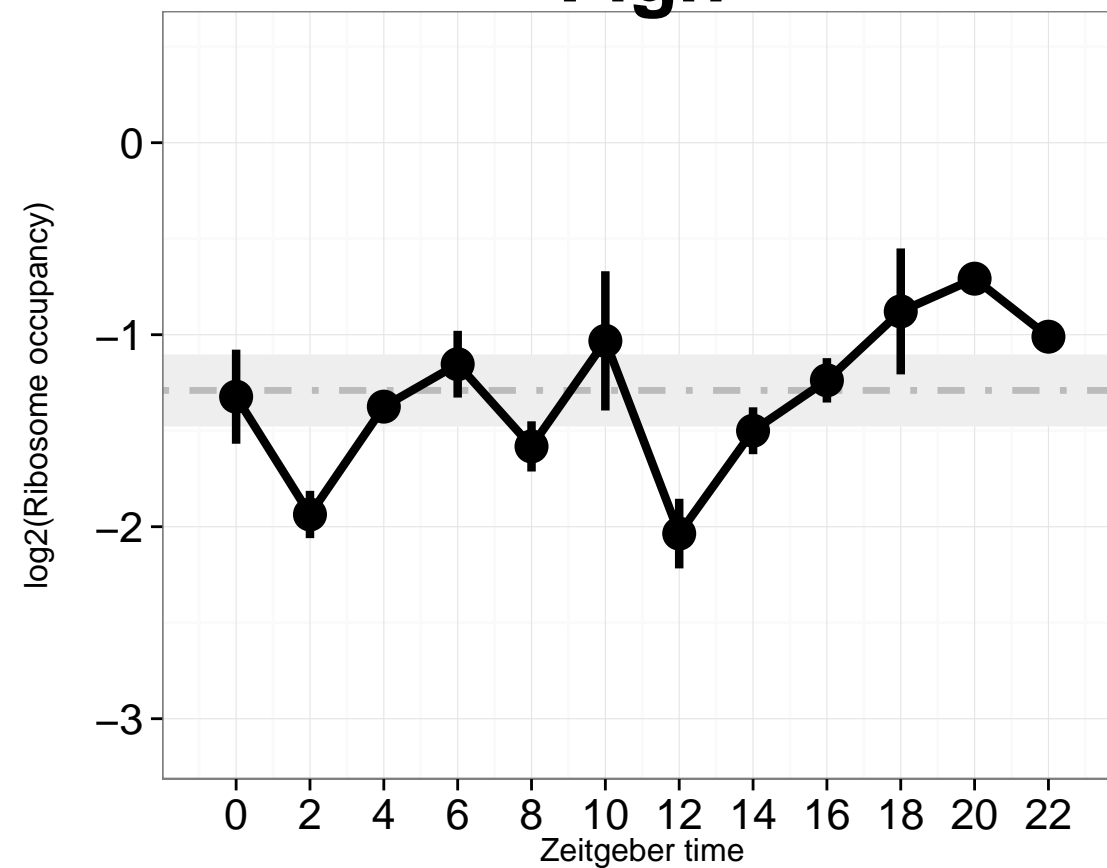

Supplement: Supplementary file 11807 [file 1]

## Nup210

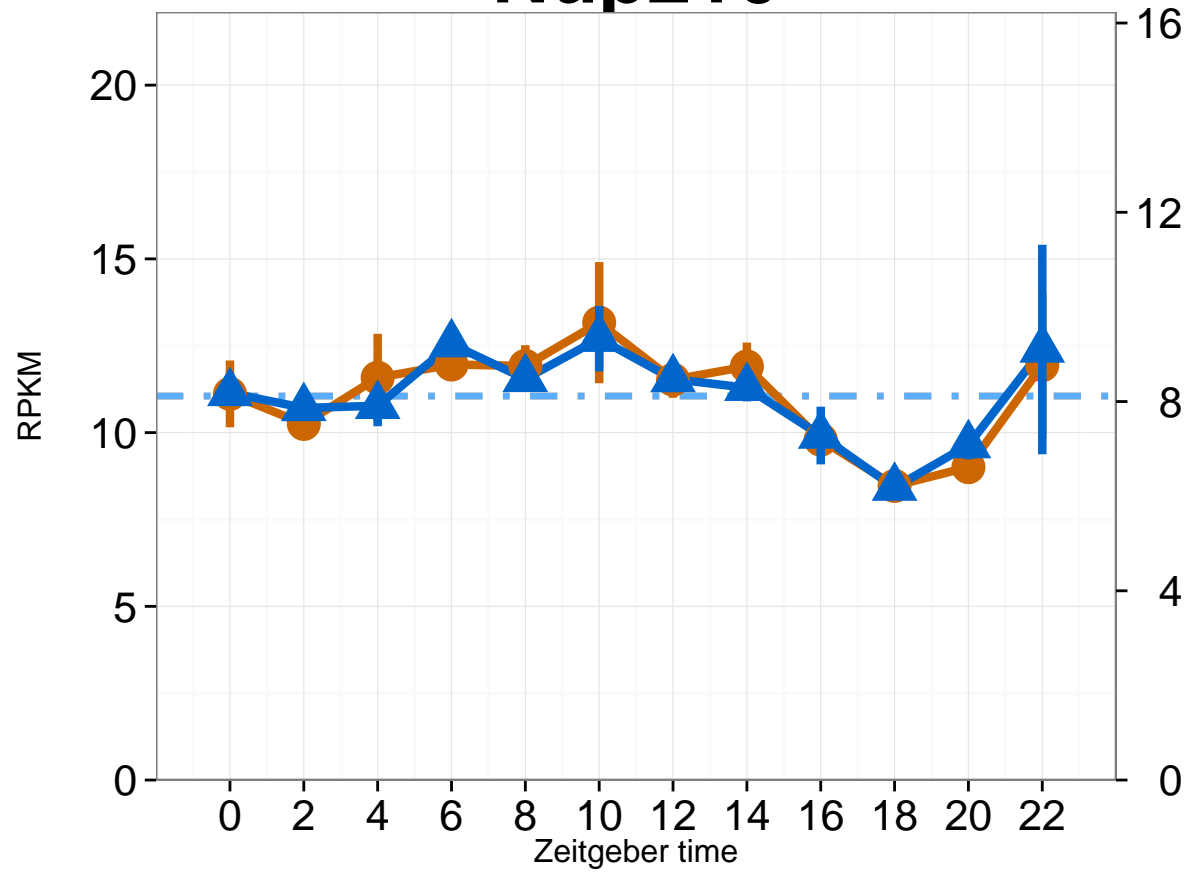

## Nup210

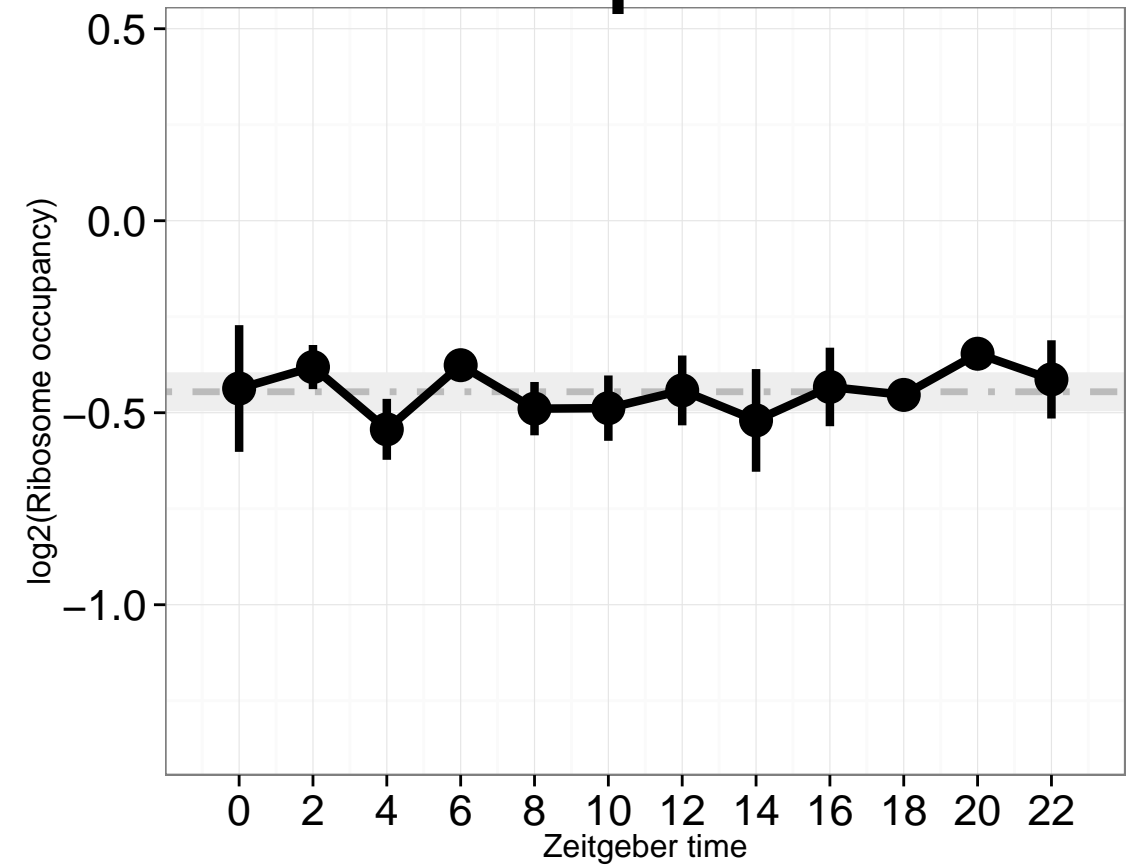

Supplement: Supplementary file 11808 [file 1]

## Kif27

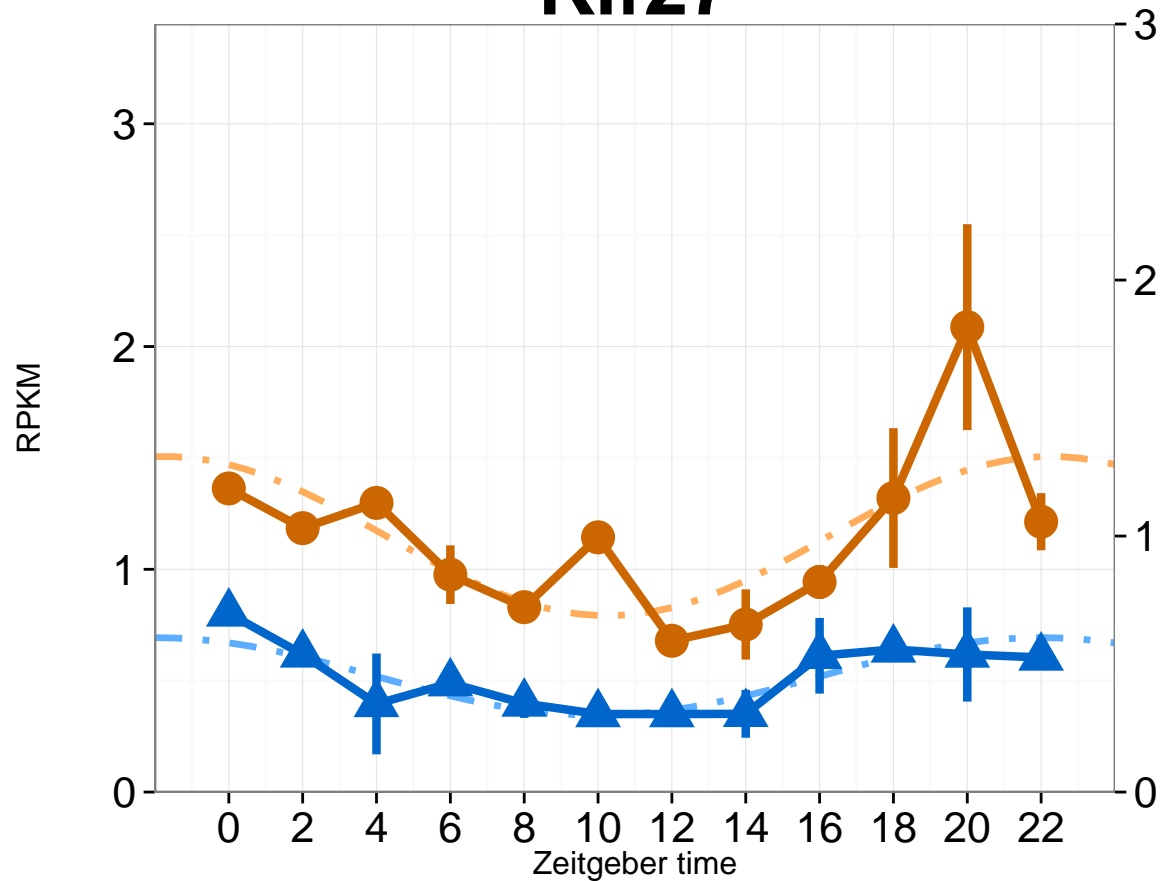

## Kif27

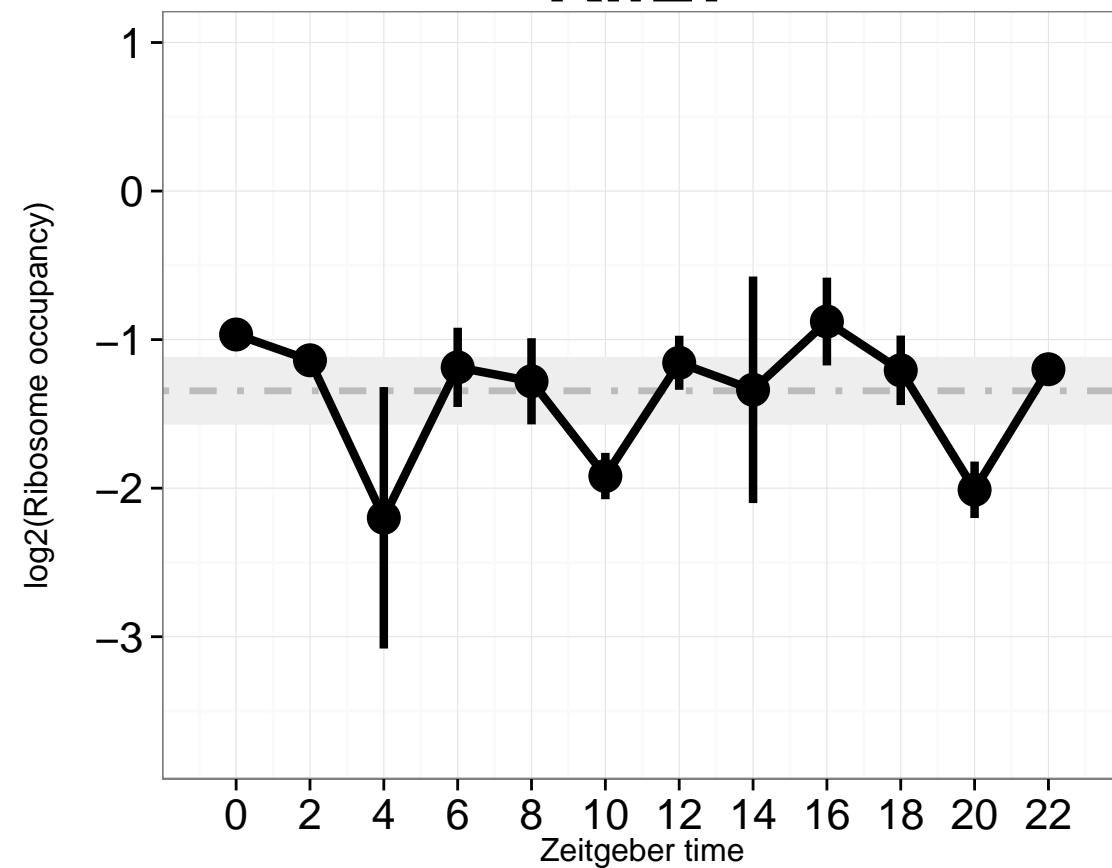

Supplement: Supplementary file 11809 [file 1]

# Fxyd5

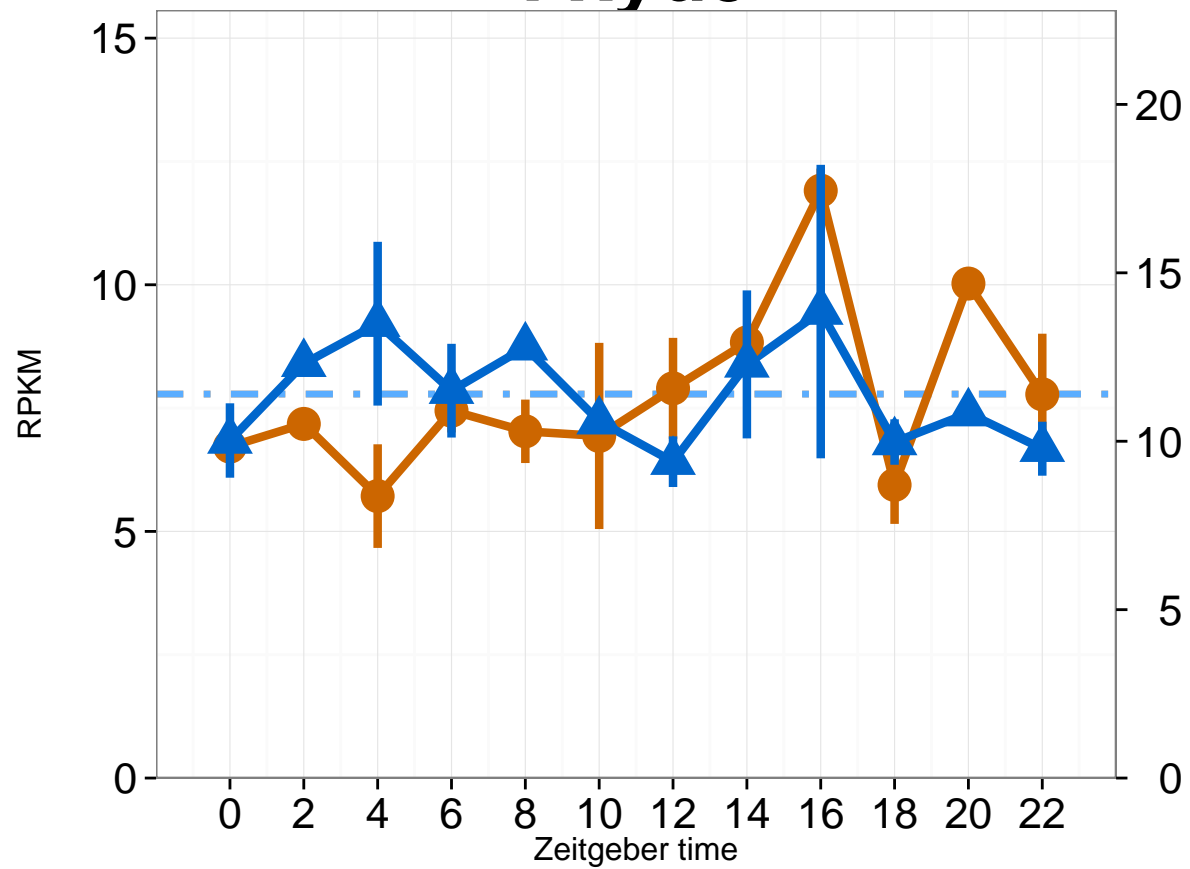

# Fxyd5

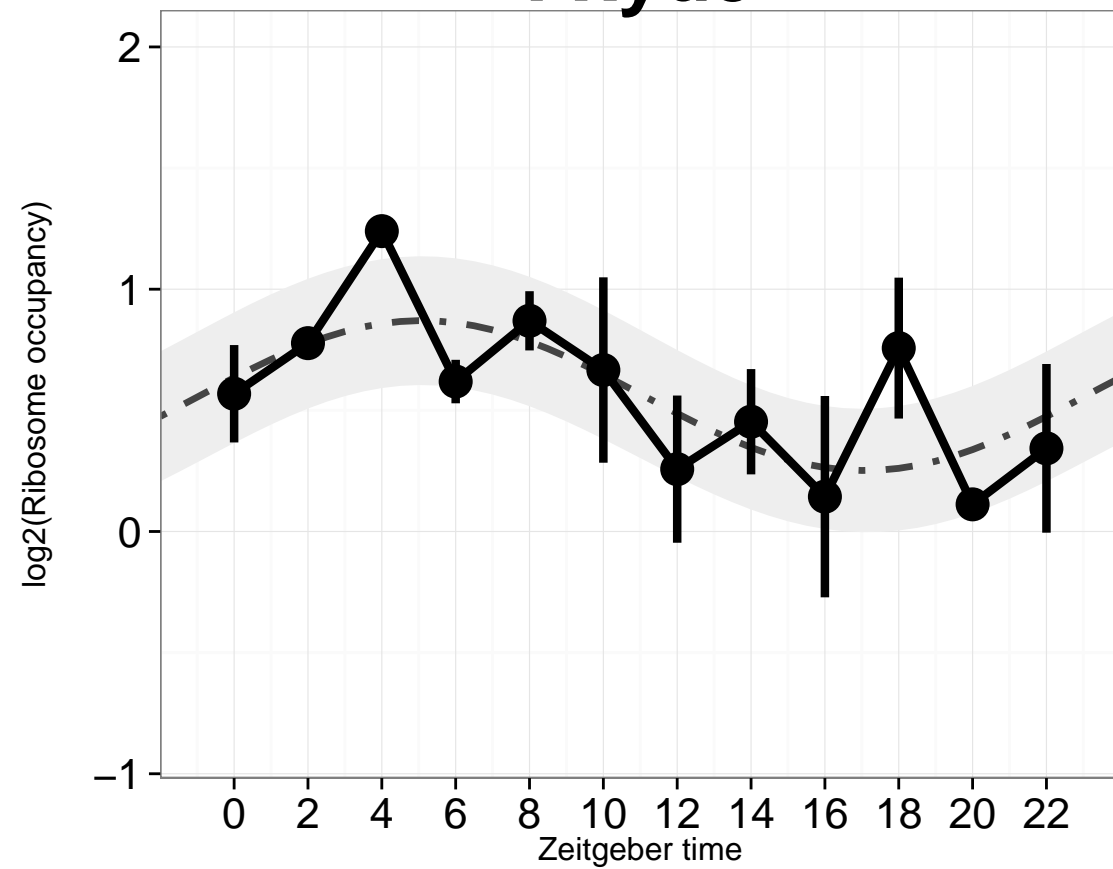

Supplement: Supplementary file 11810 [file 1]

# Cdkn1a

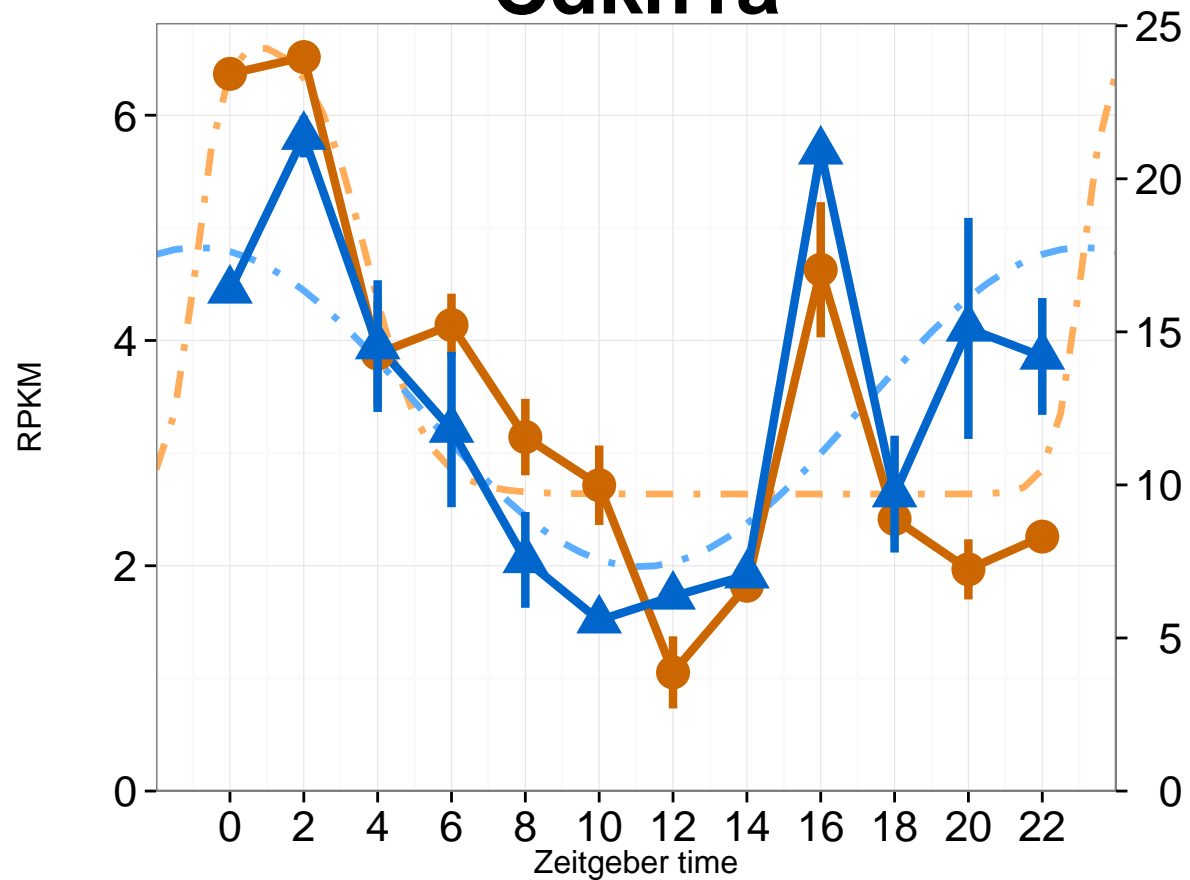

# Cdkn1a

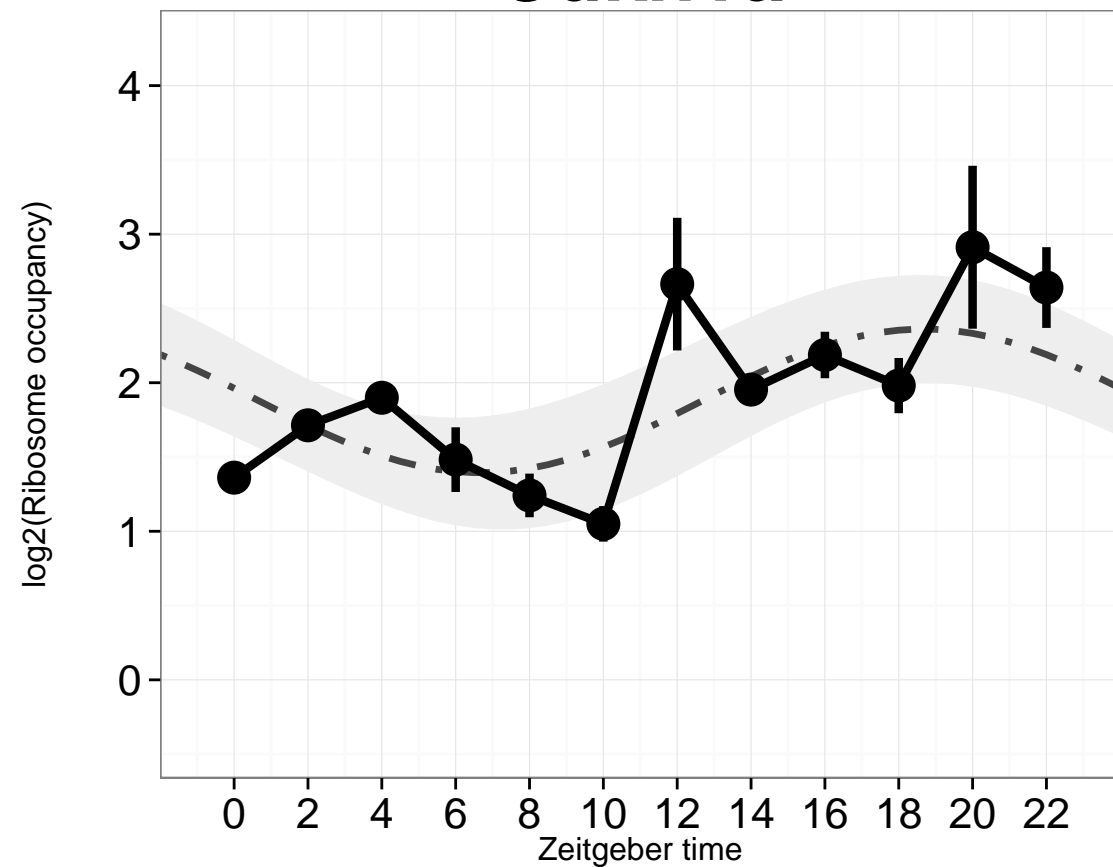

Supplement: Supplementary file 11811 [file 1]

# Ppp1r8

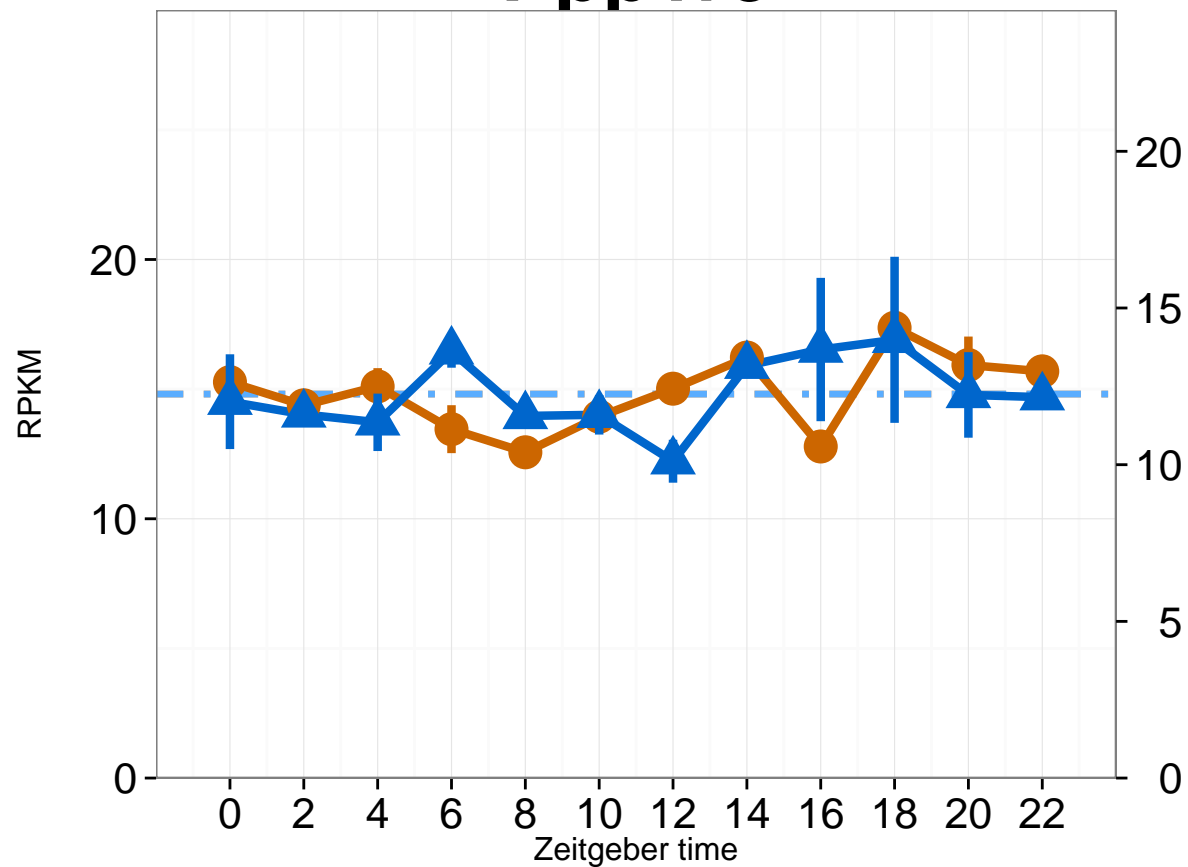

# Ppp1r8

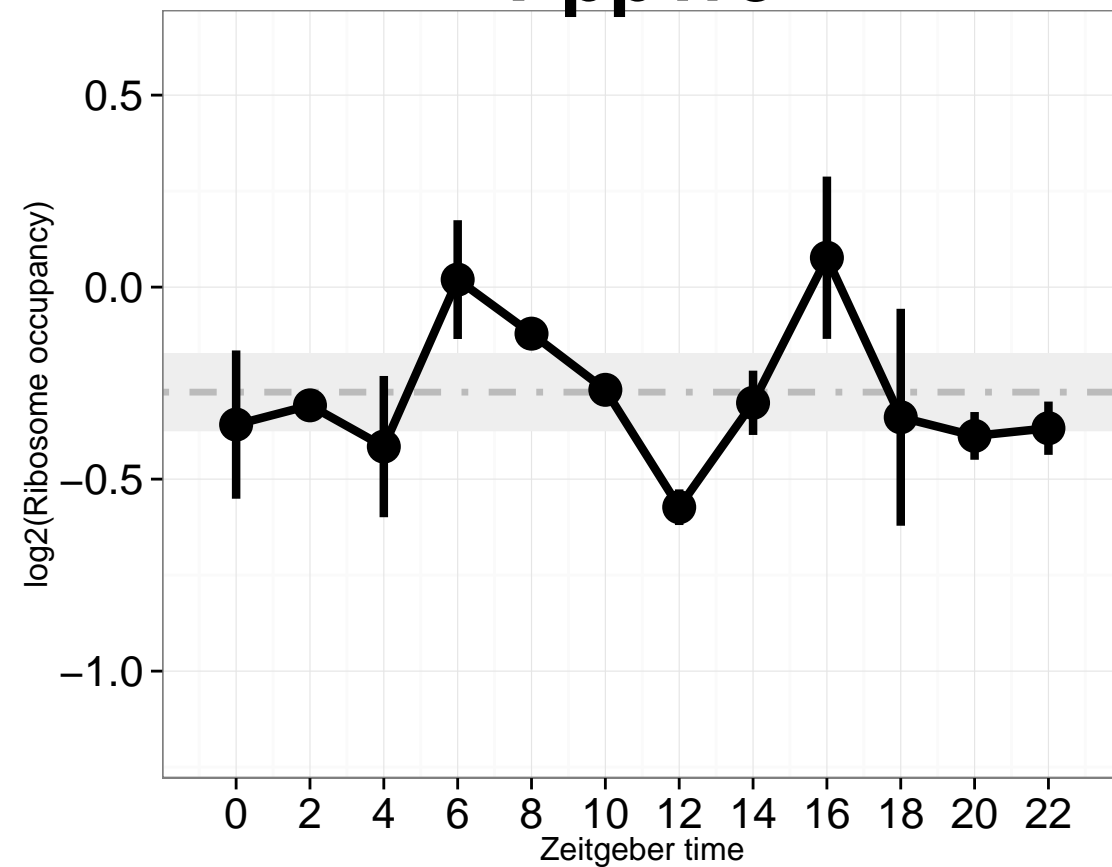

Supplement: Supplementary file 11812 [file 1]

## Slx4

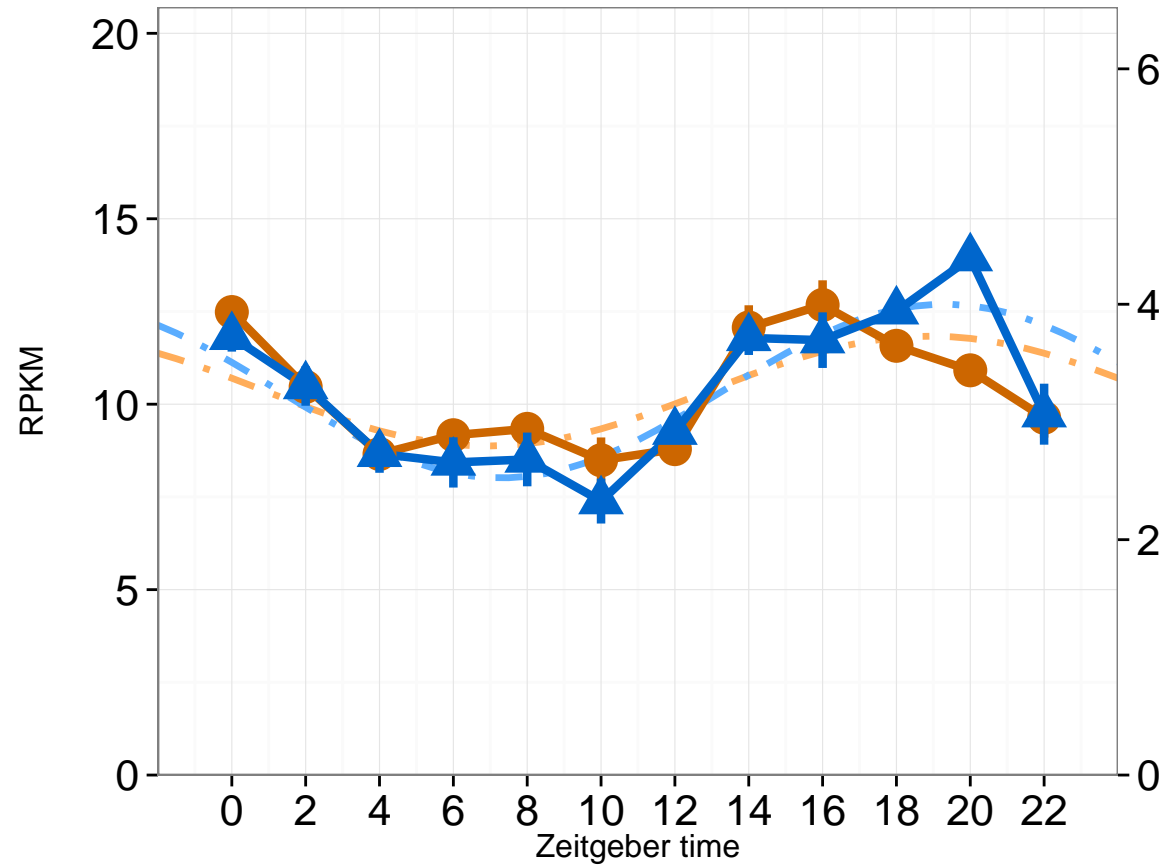

## Slx4

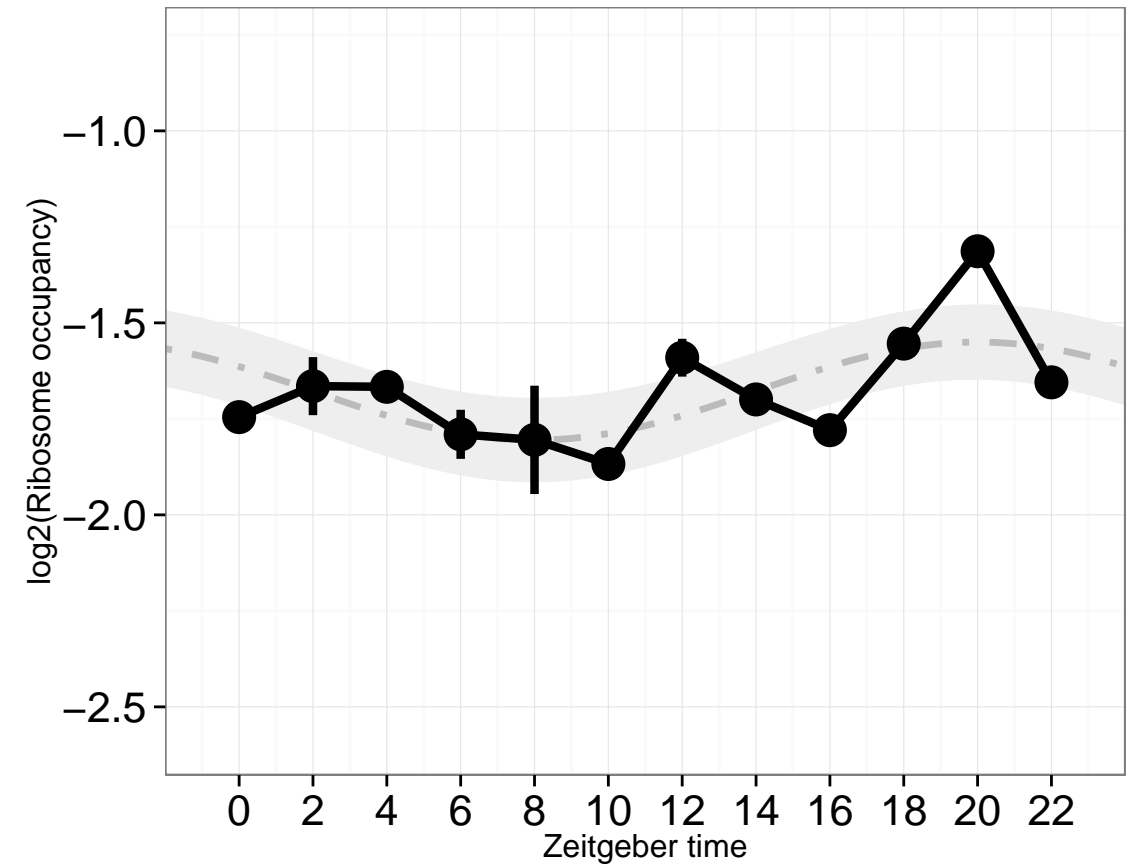

Supplement: Supplementary file 11813 [file 1]

## Hic2

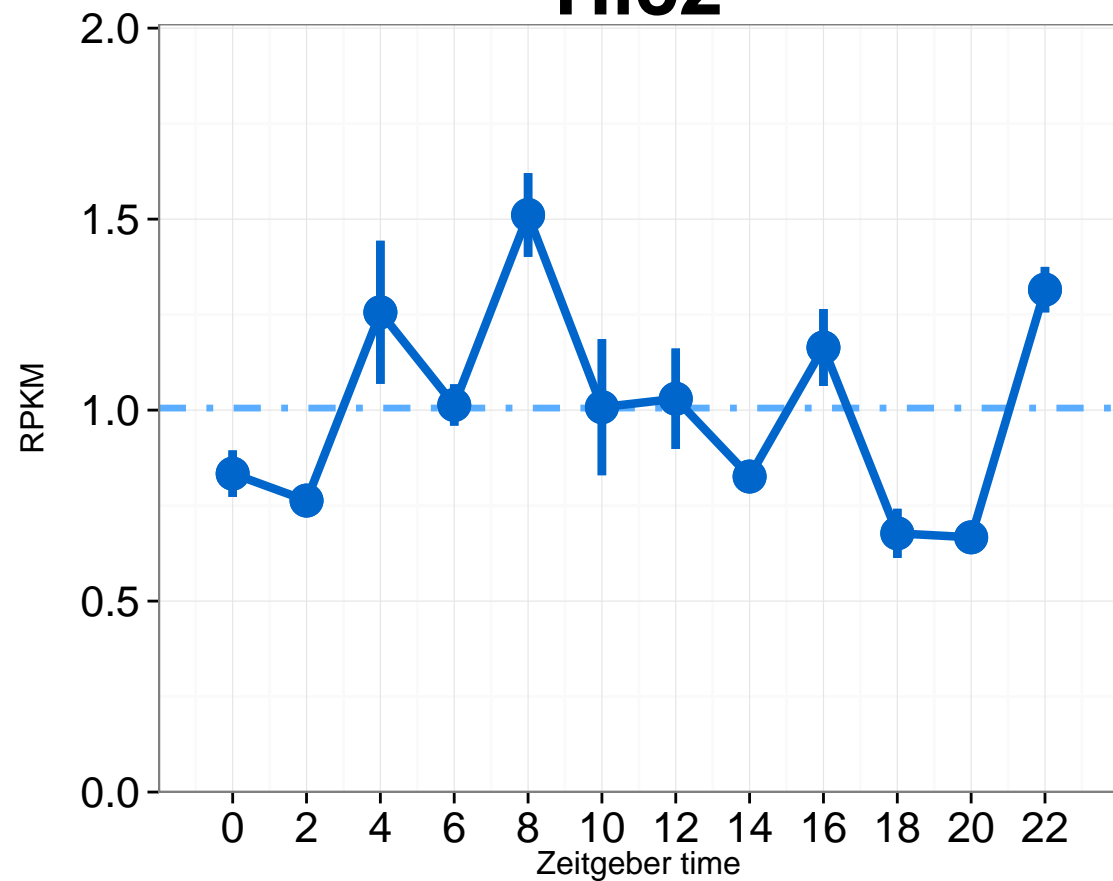

## Hic2 log2(Ribosome occupancy)

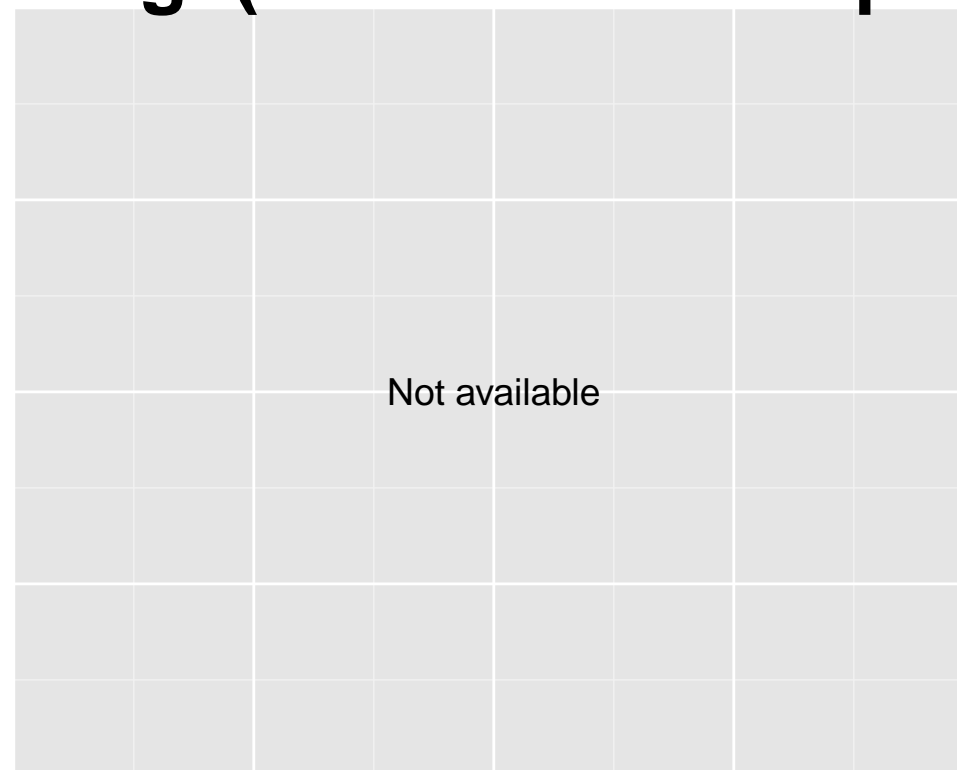

Supplement: Supplementary file 11814 [file 1]

## Lars

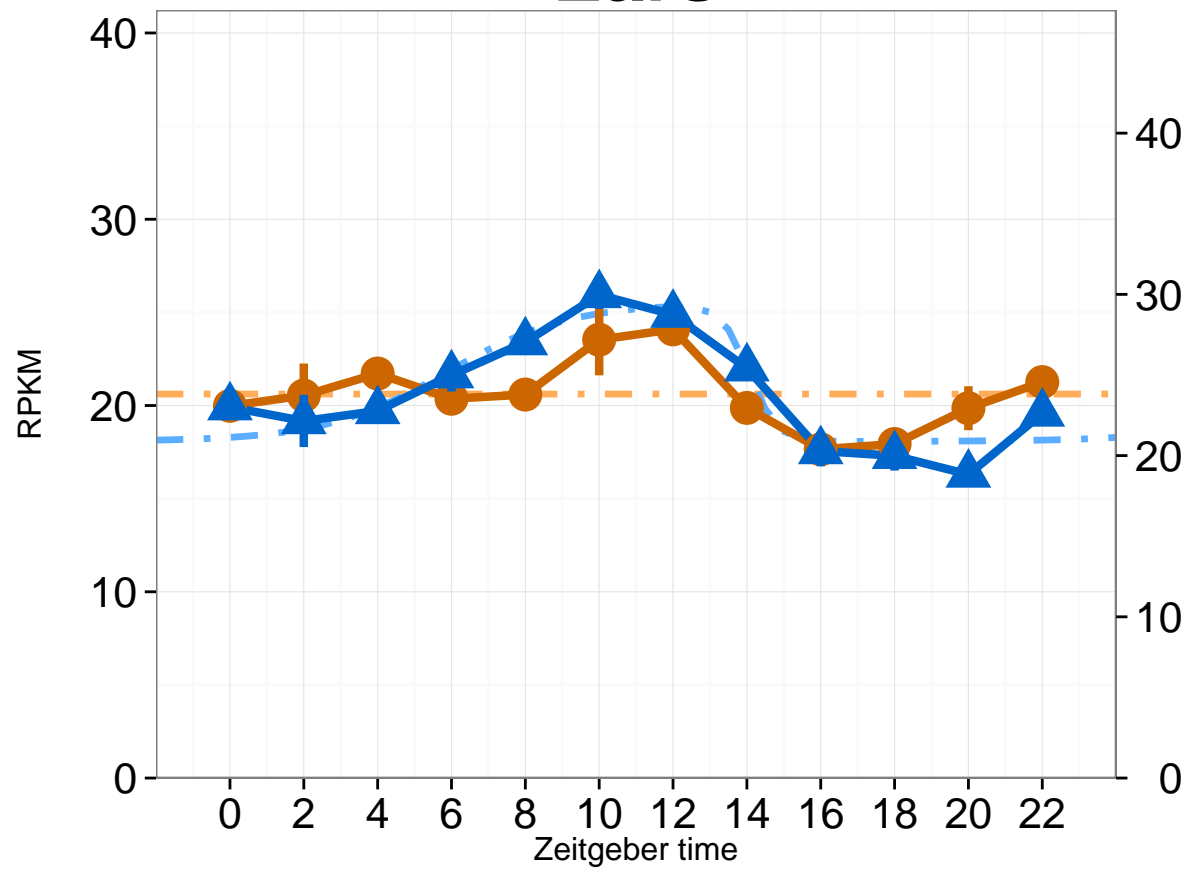

## Lars

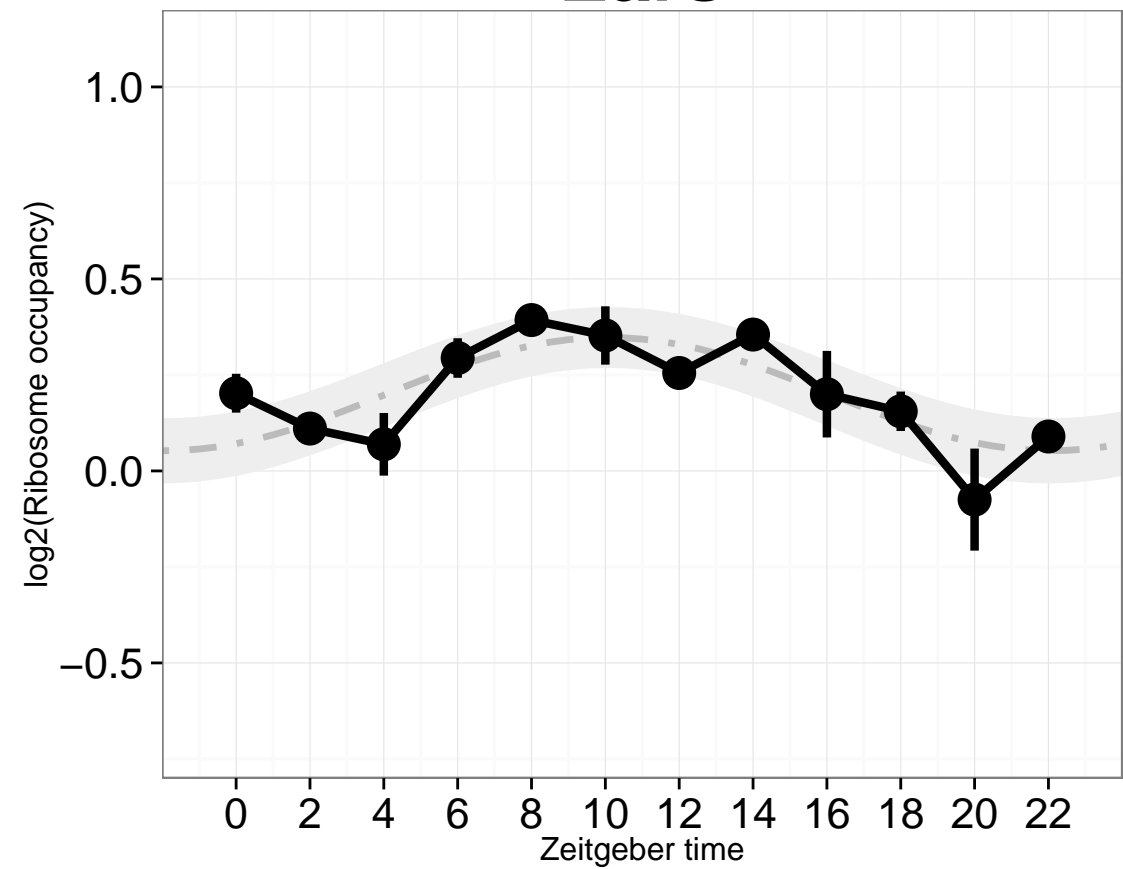

Supplement: Supplementary file 11815 [file 1]

# Hsbp1l1

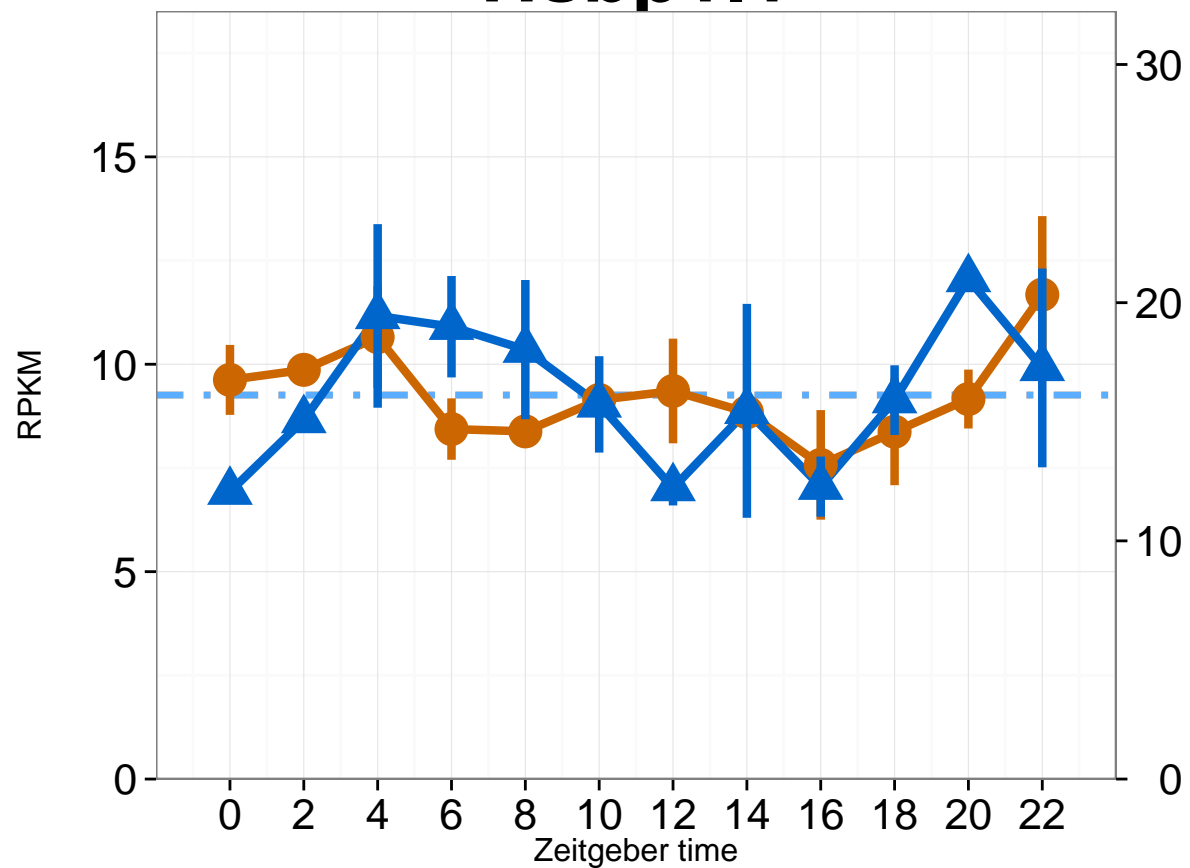

# Hsbp1l1

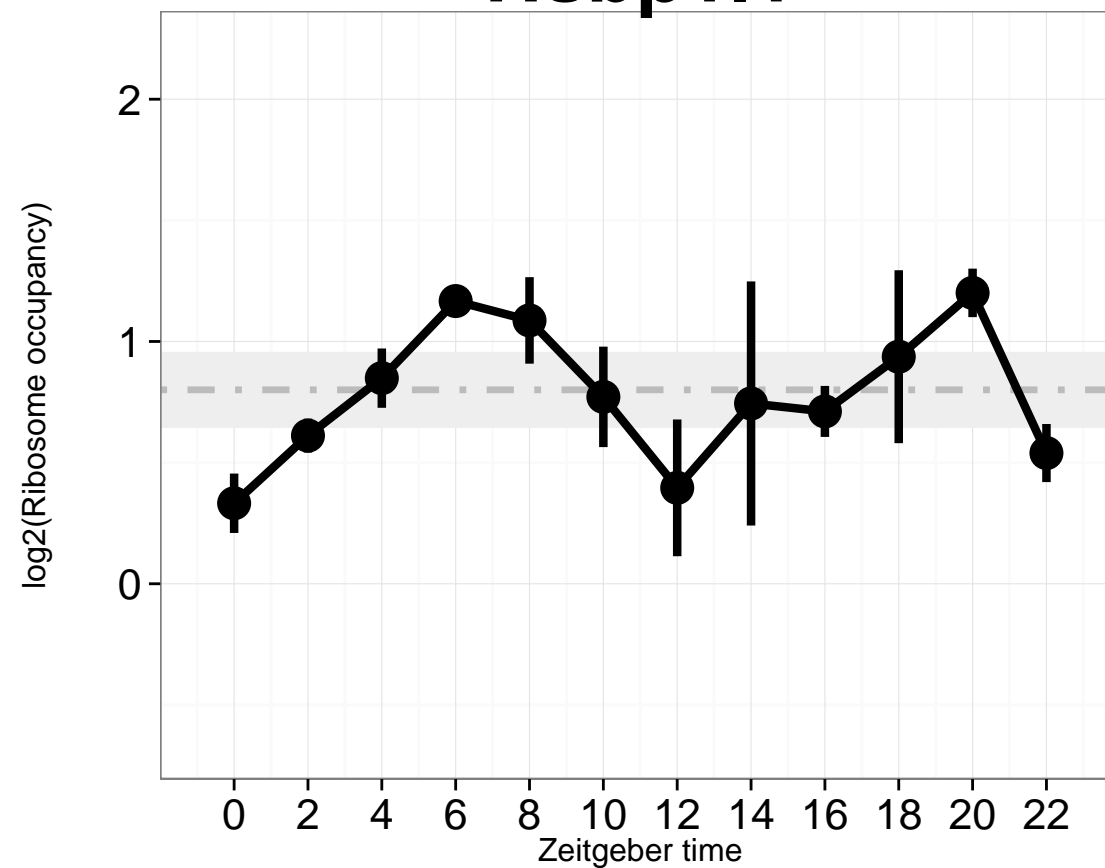

Supplement: Supplementary file 11816 [file 1]

## Xpc

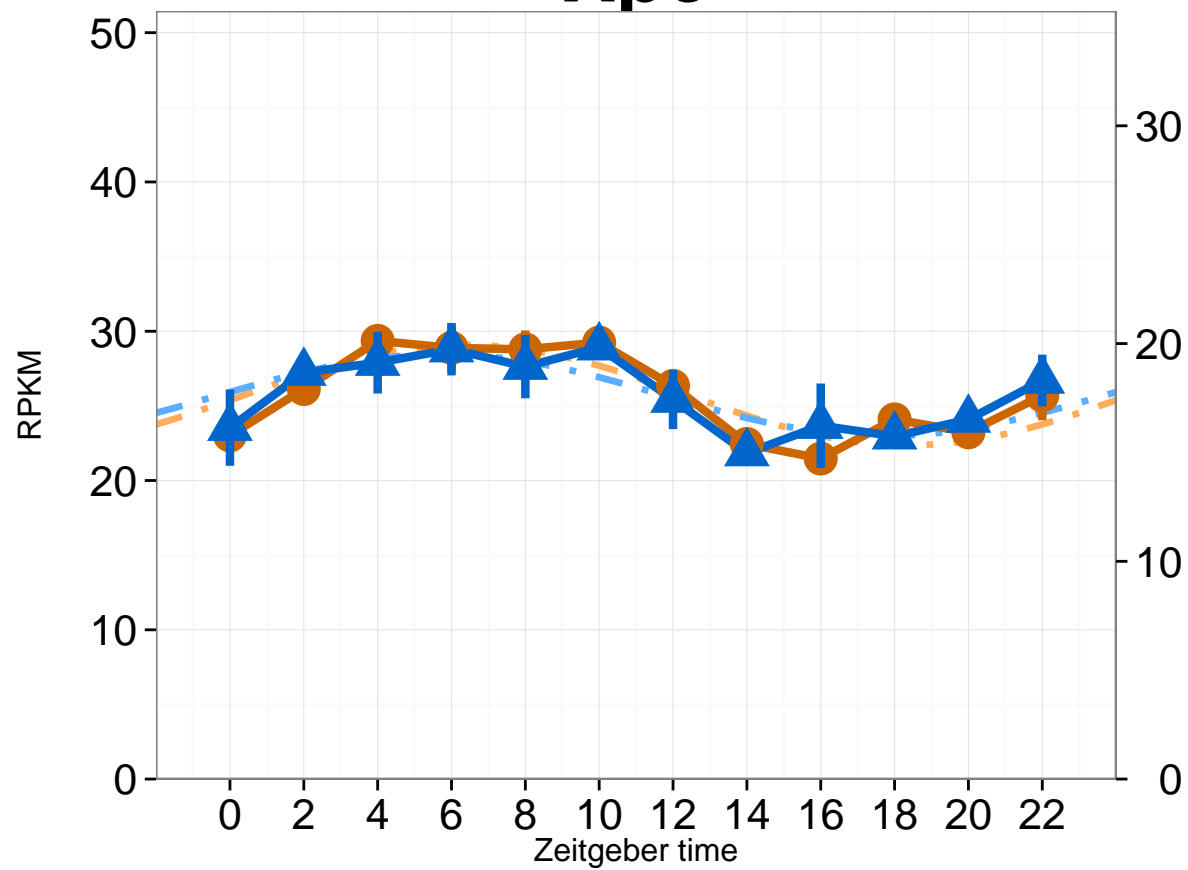

## Xpc

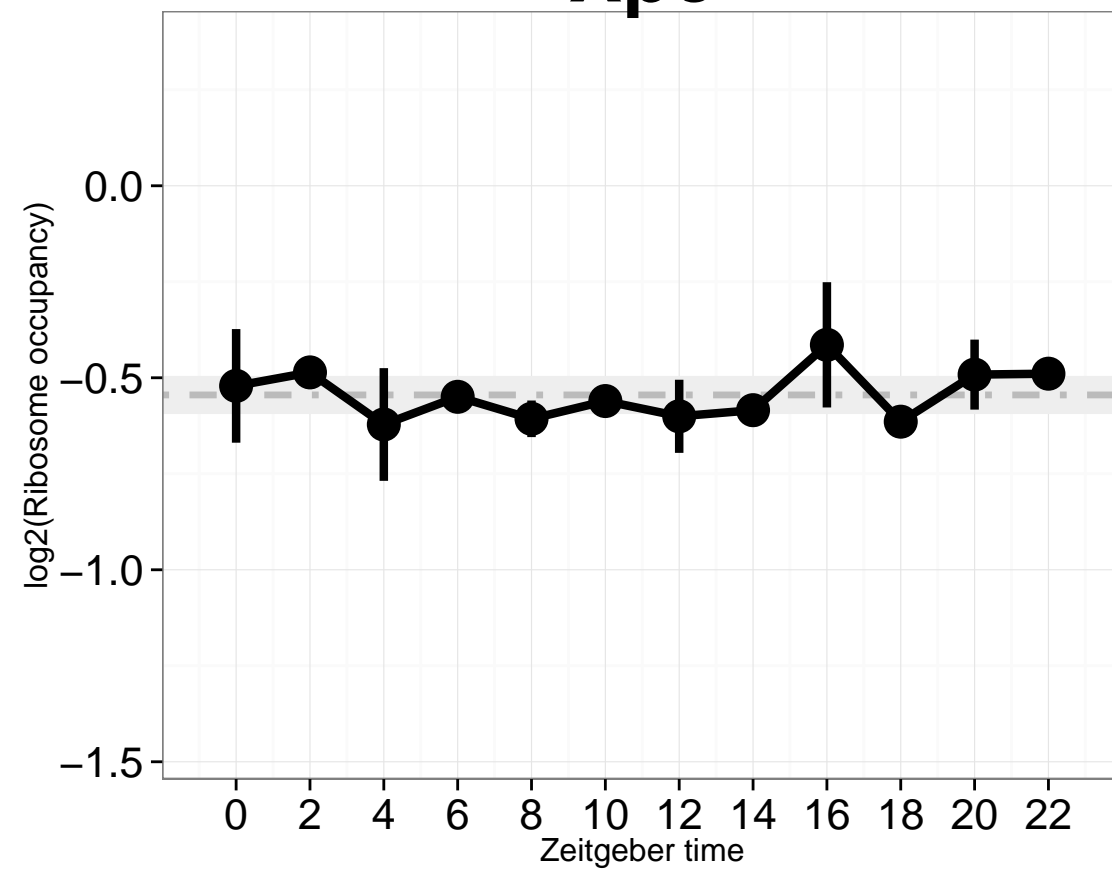

Supplement: Supplementary file 11817 [file 1]

## Snf8

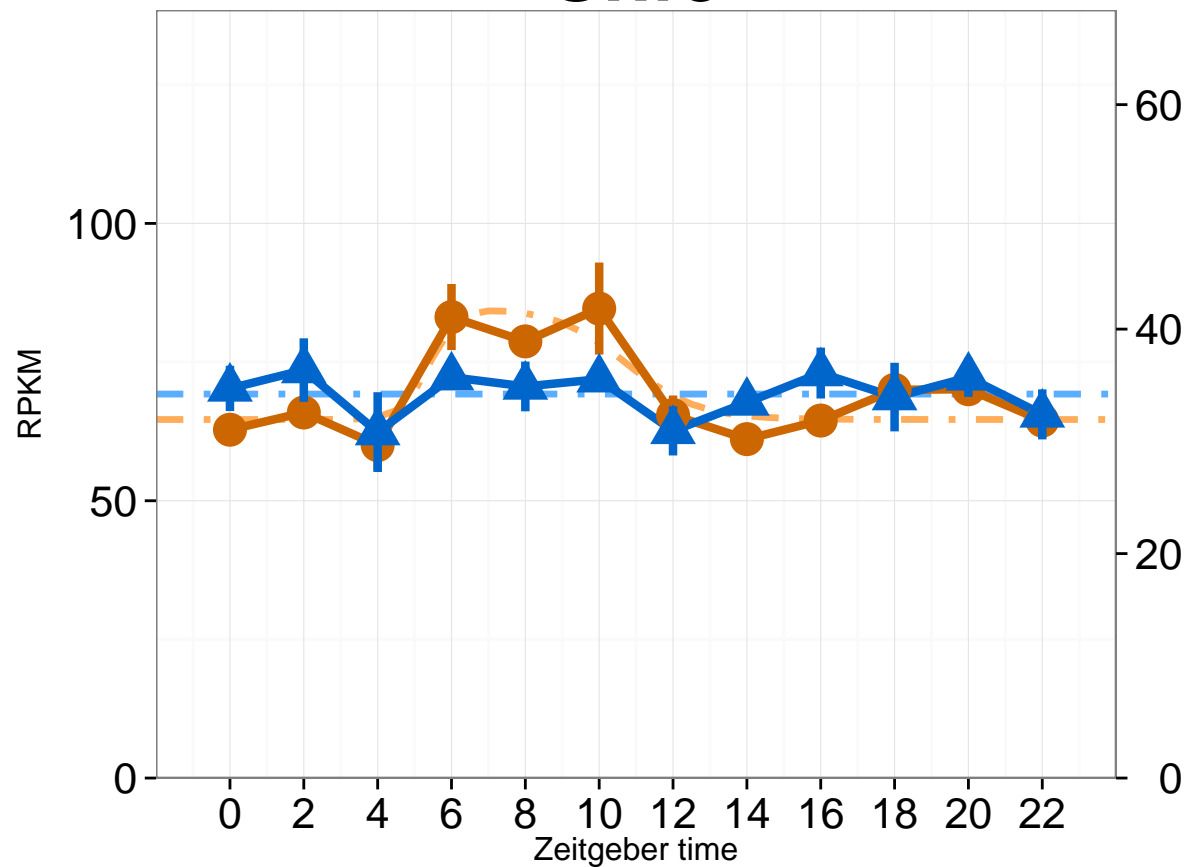

## Snf8

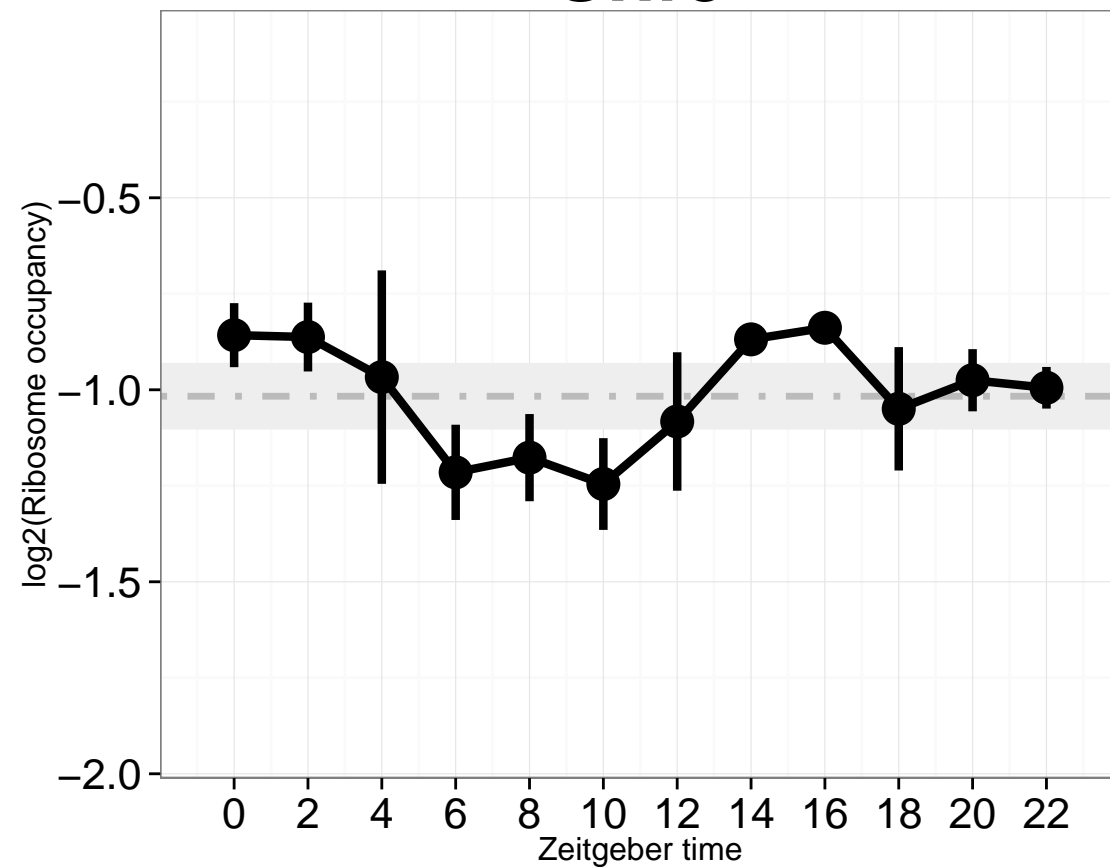

Supplement: Supplementary file 11818 [file 1]

## Ccl9

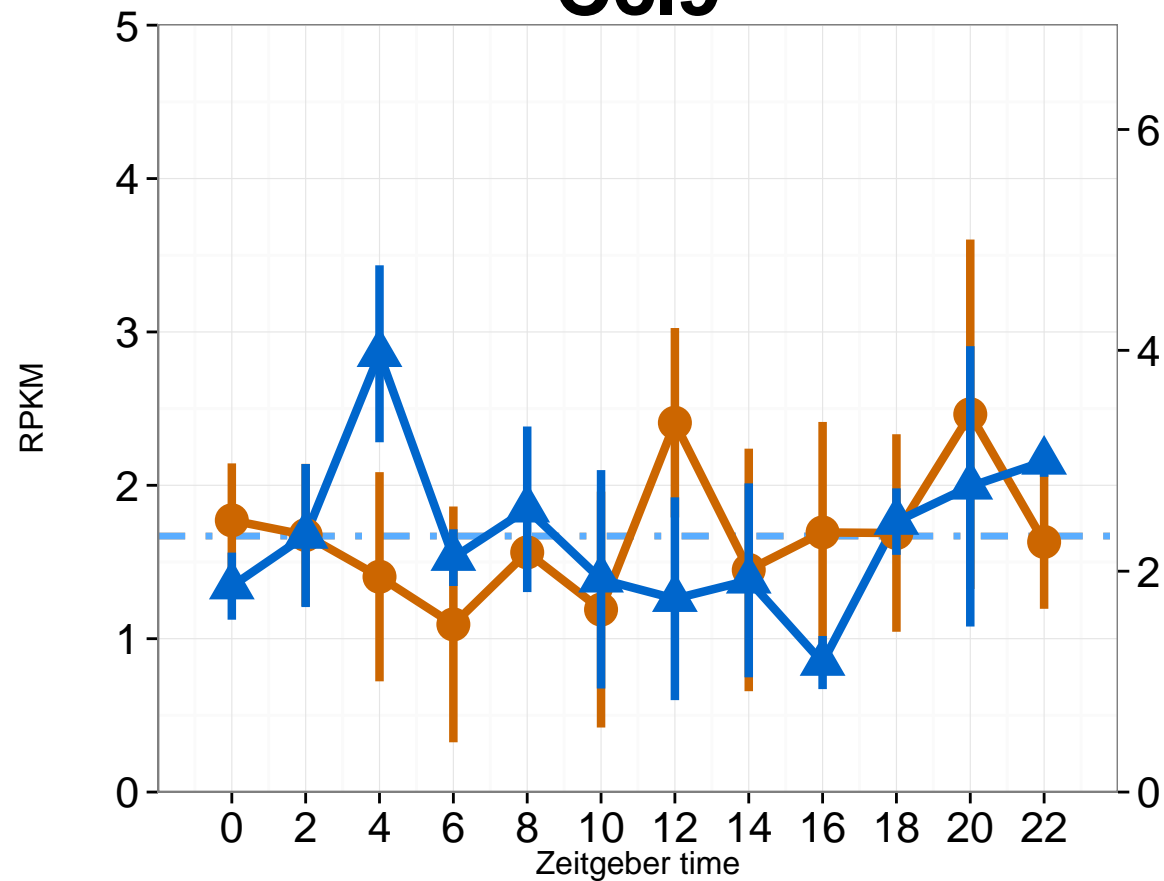

## Ccl9

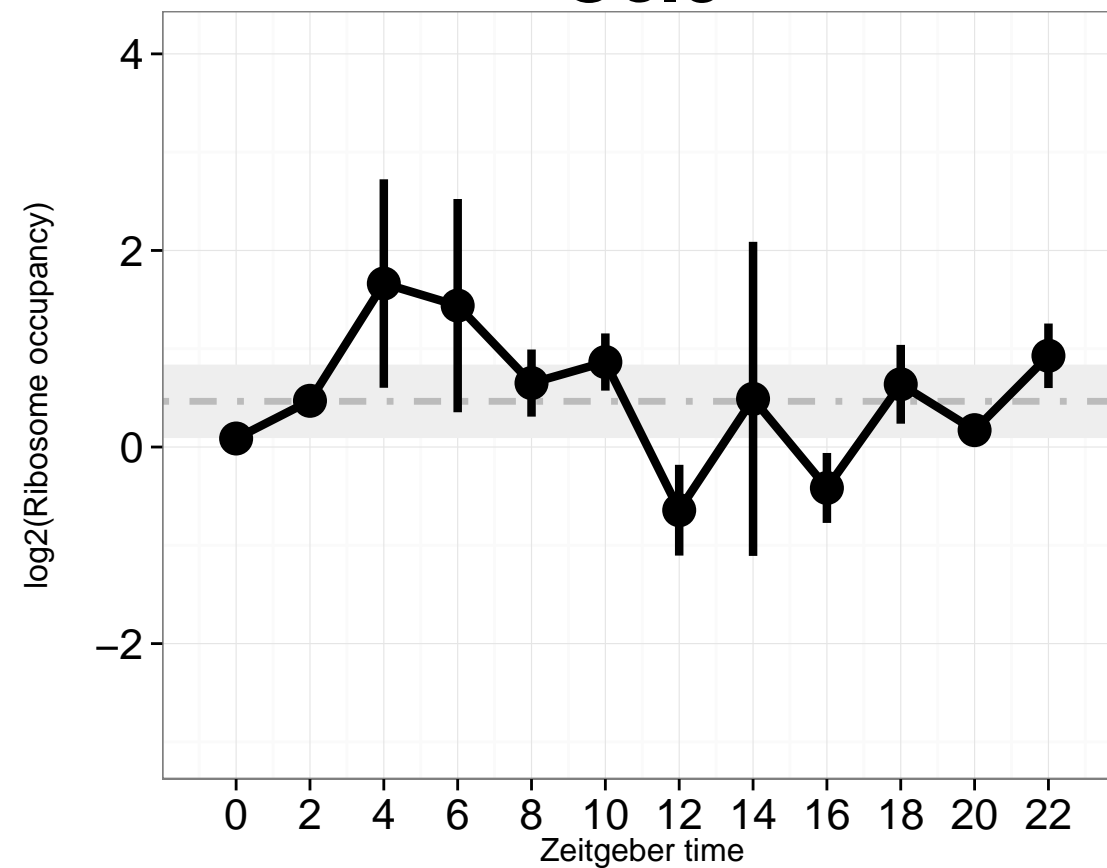

Supplement: Supplementary file 11819 [file 1]

## Bbs1

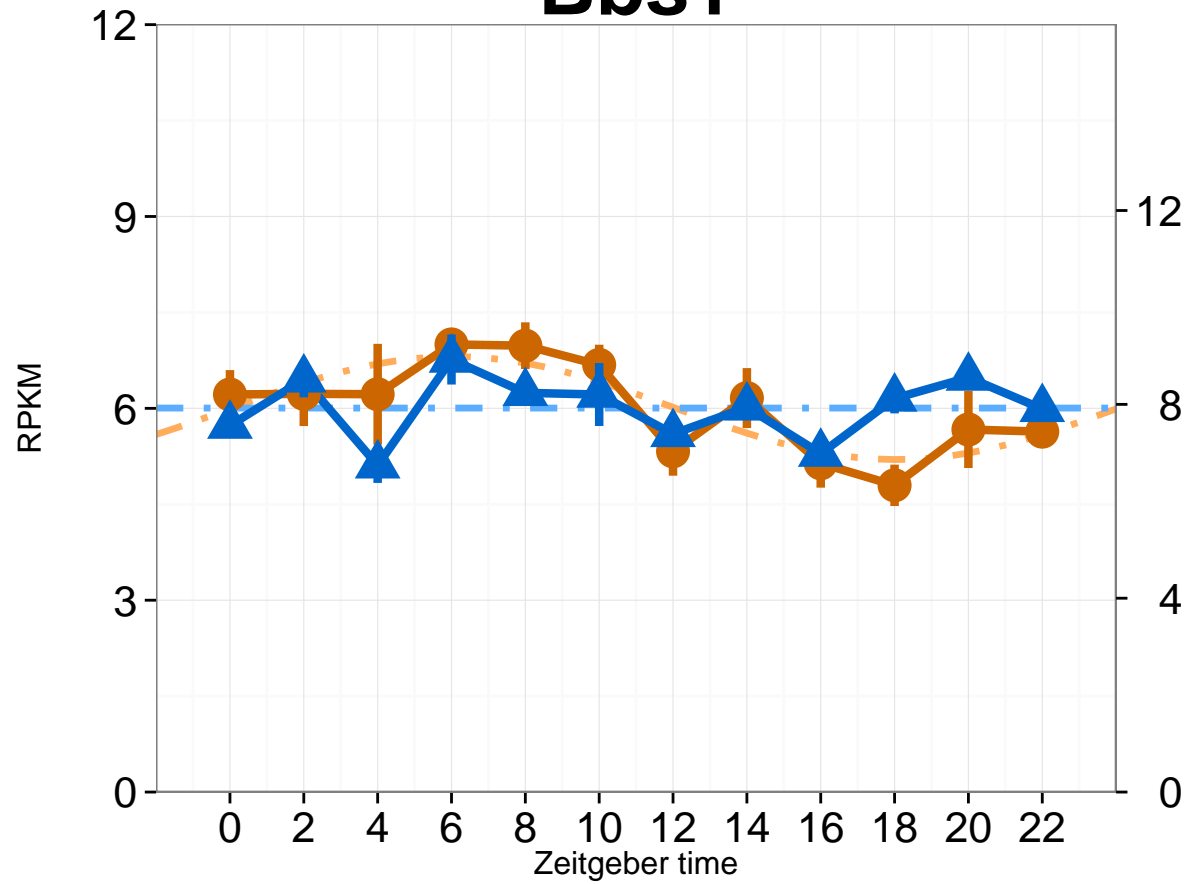

## Bbs1

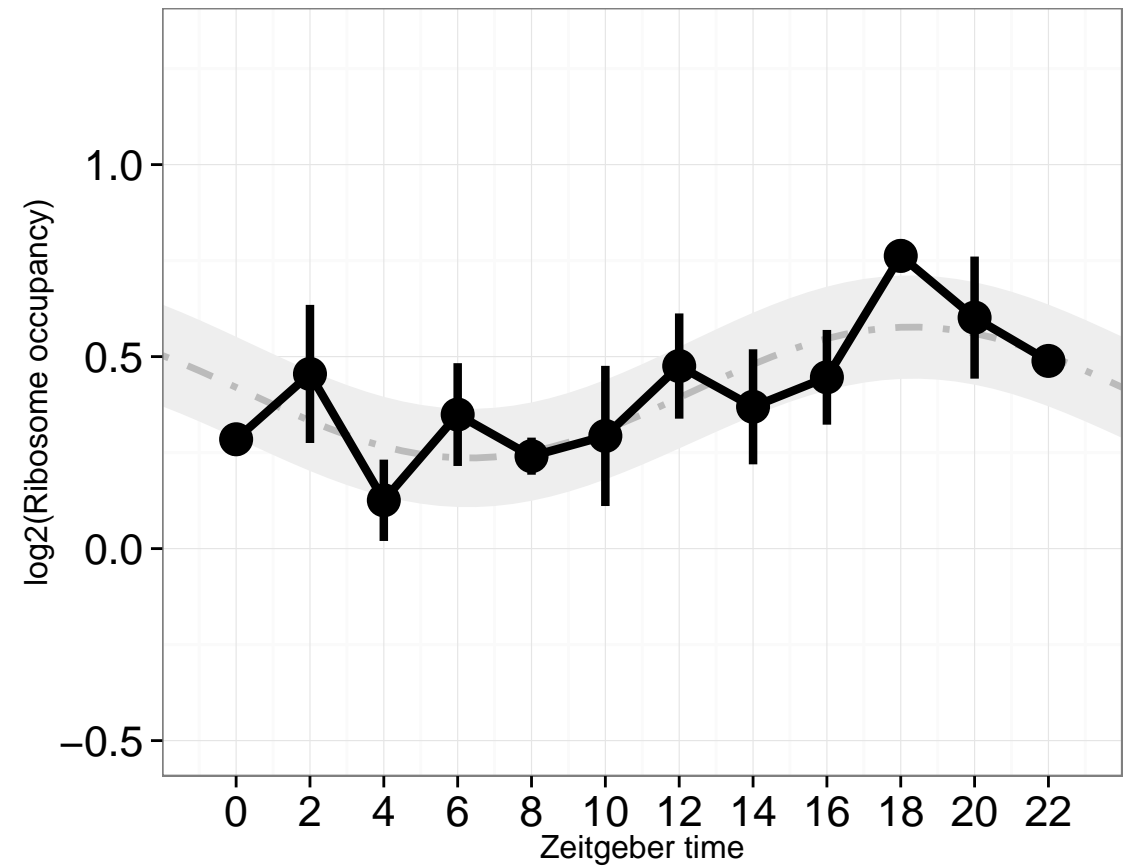

Supplement: Supplementary file 11820 [file 1]

# Slc40a1

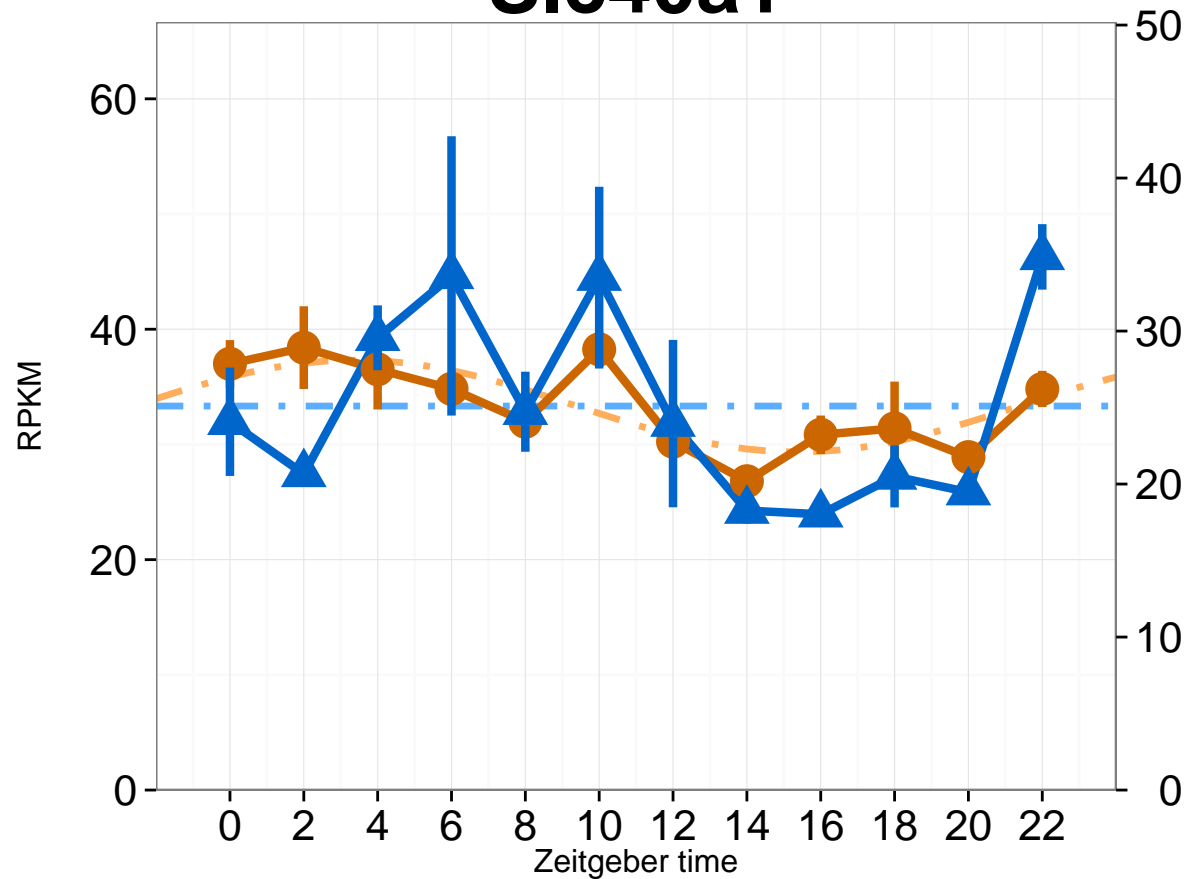

# Slc40a1

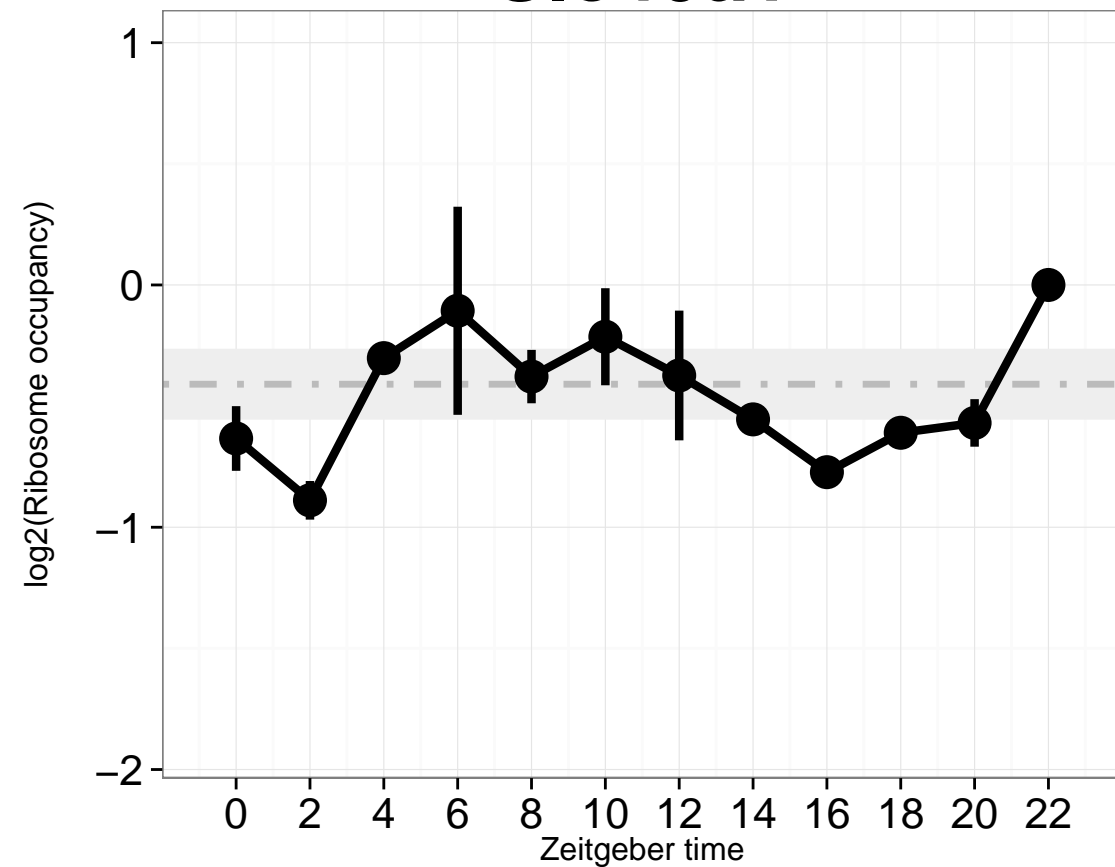

Supplement: Supplementary file 11821 [file 1]

# Hpcal1

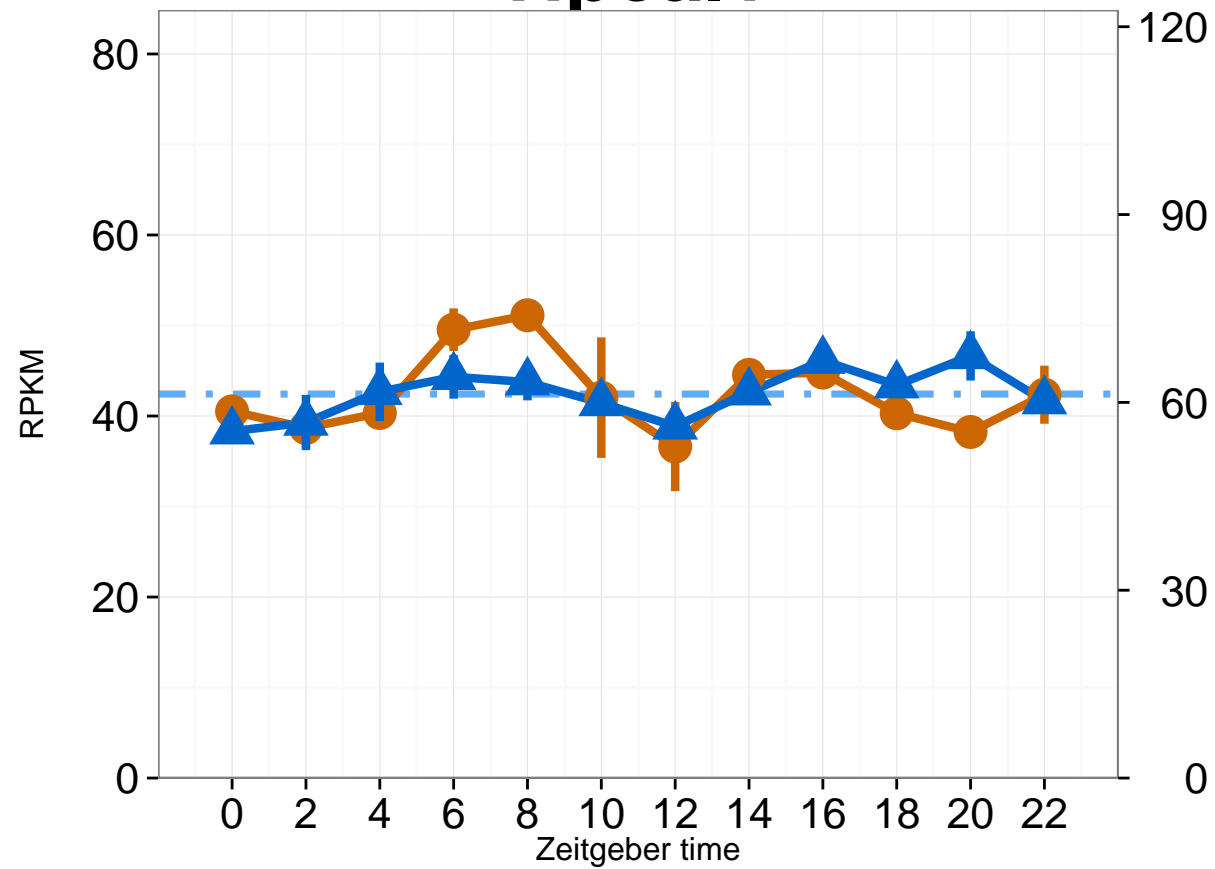

# Hpcal1

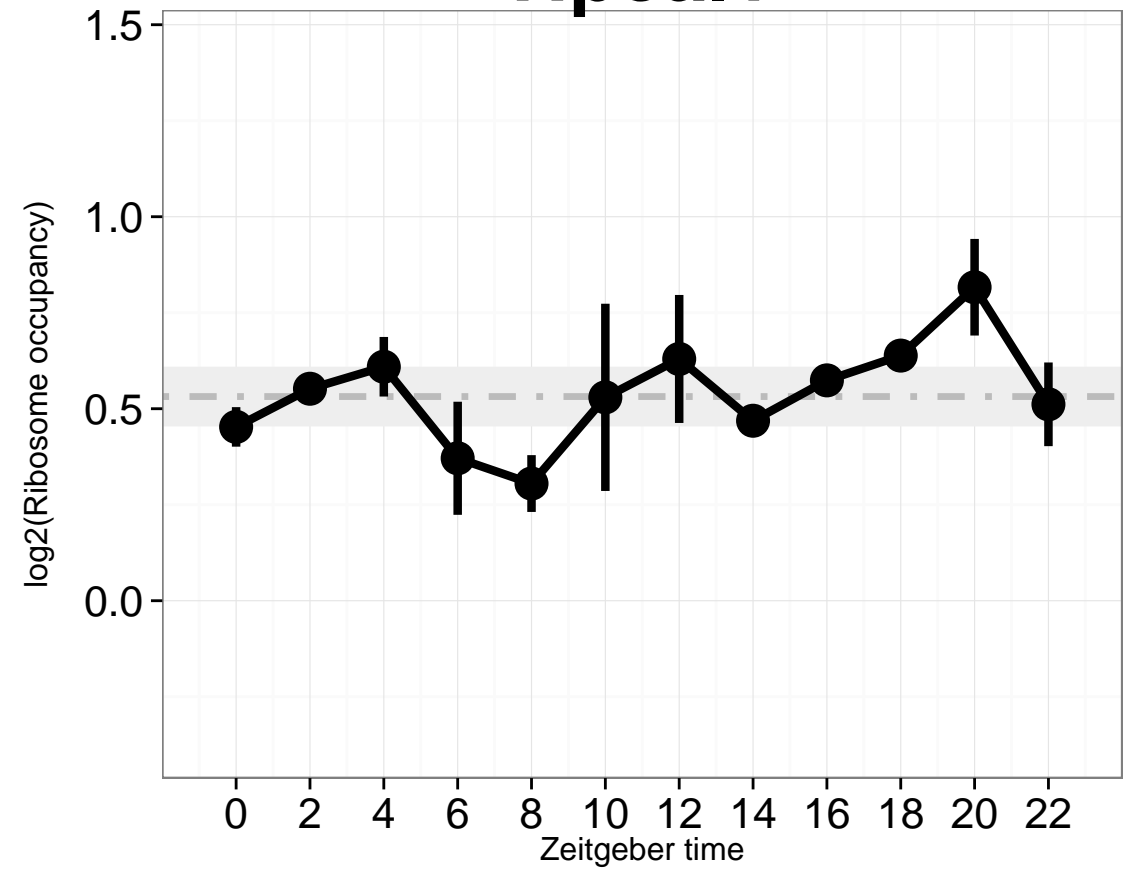

Supplement: Supplementary file 11822 [file 1]

# Sh3bp5l

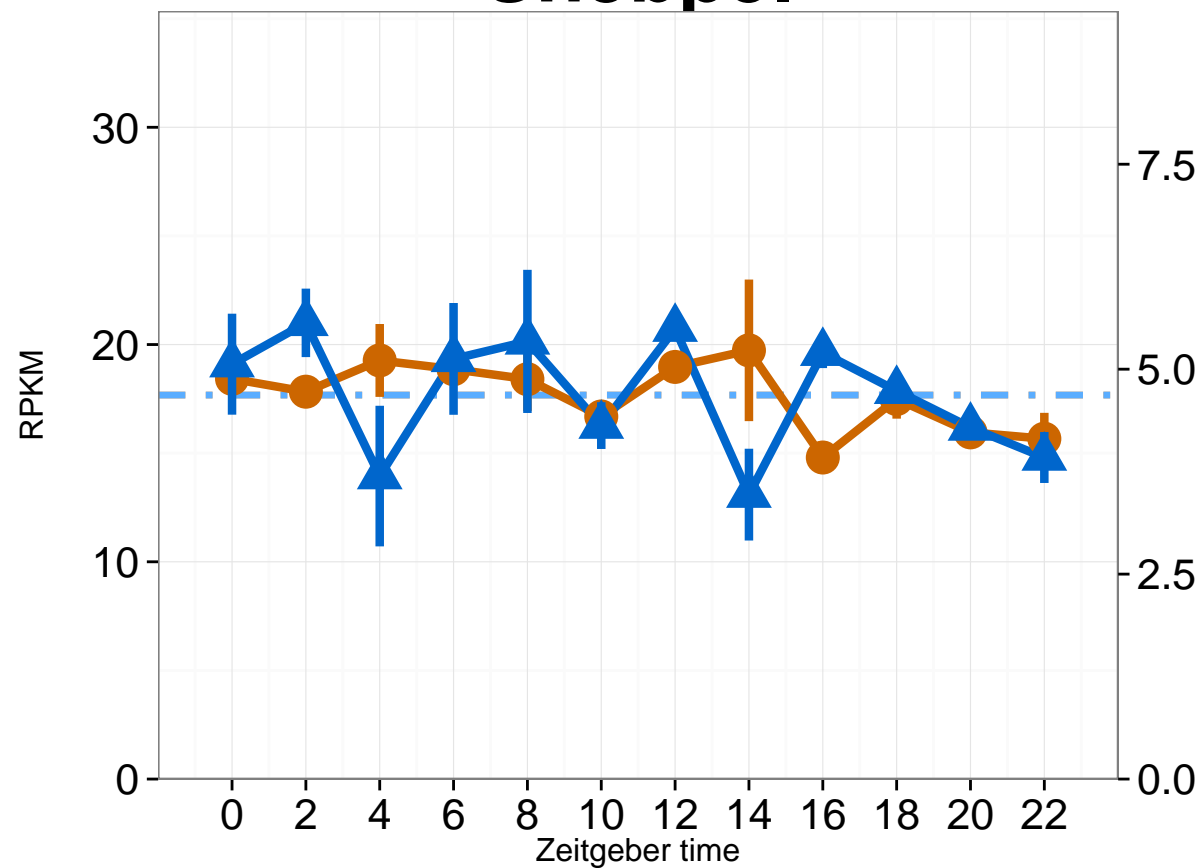

# Sh3bp5l

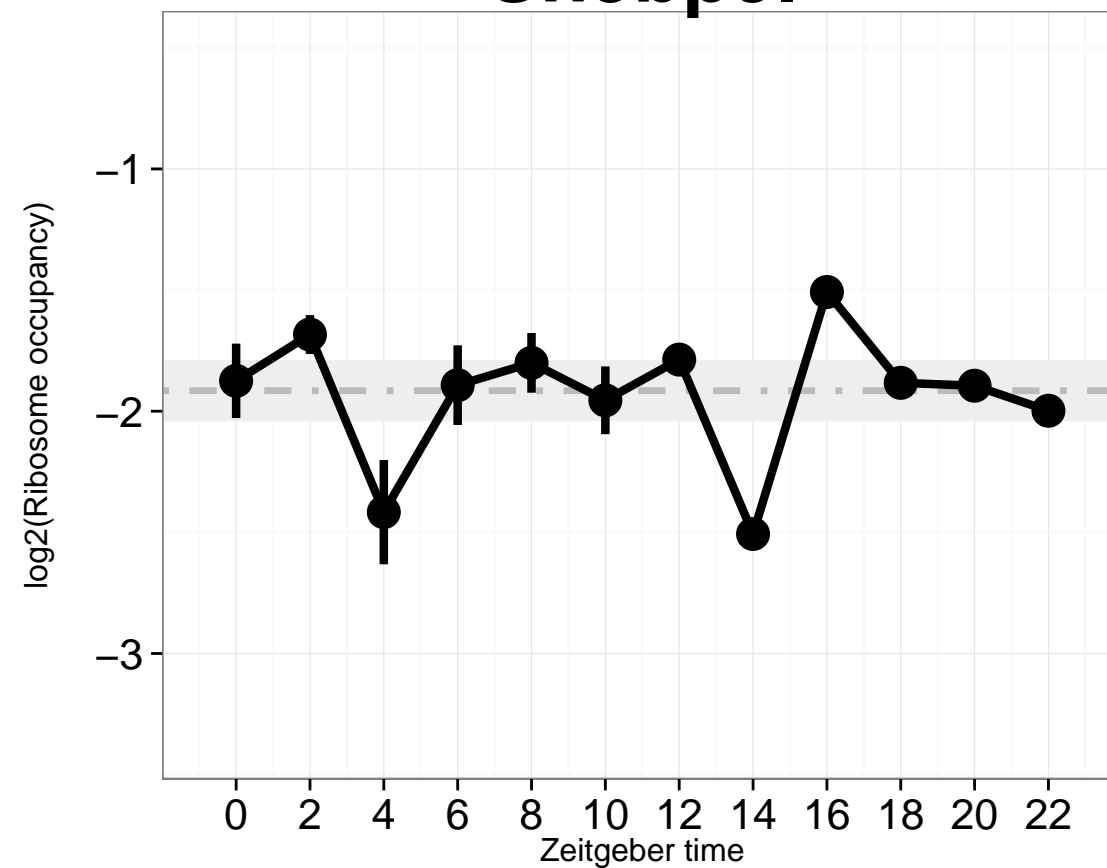

Supplement: Supplementary file 11823 [file 1]

## Eif3k

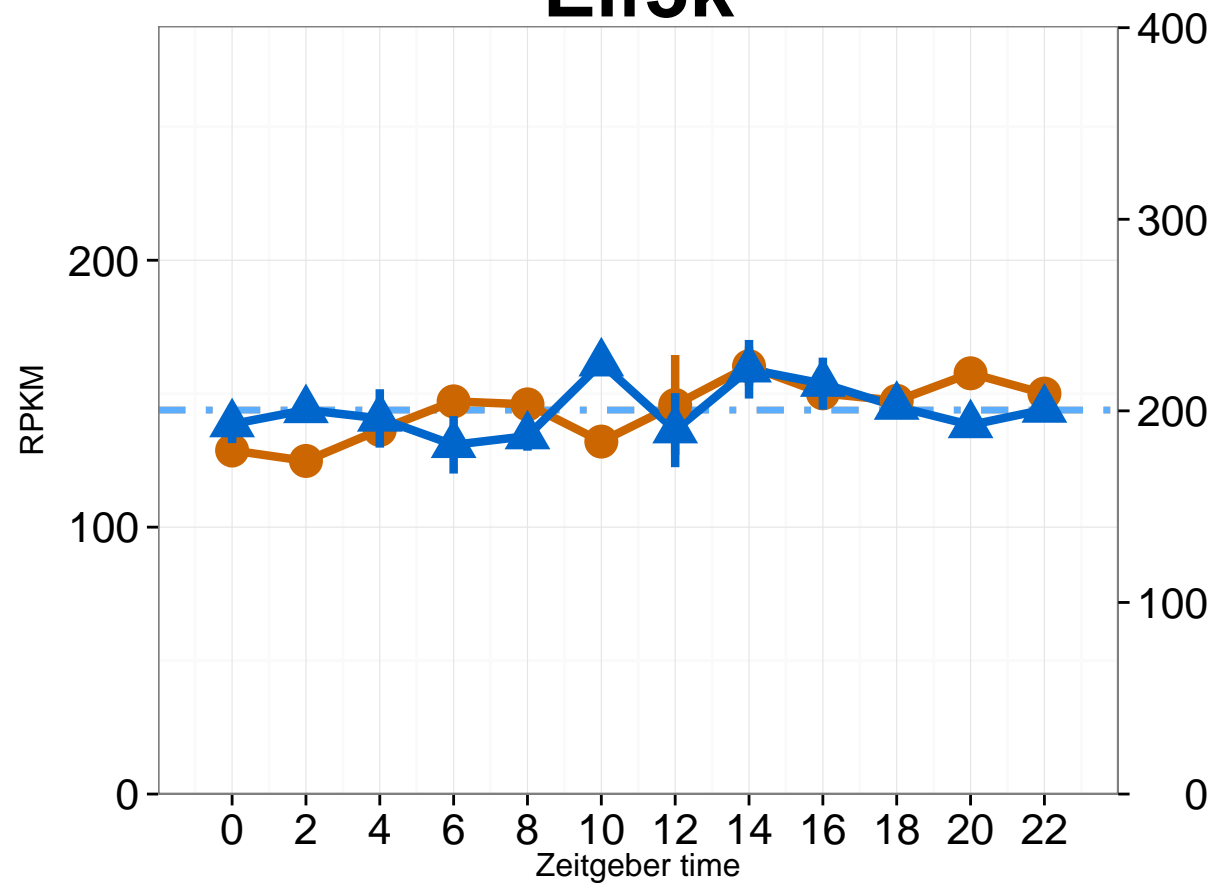

## Eif3k

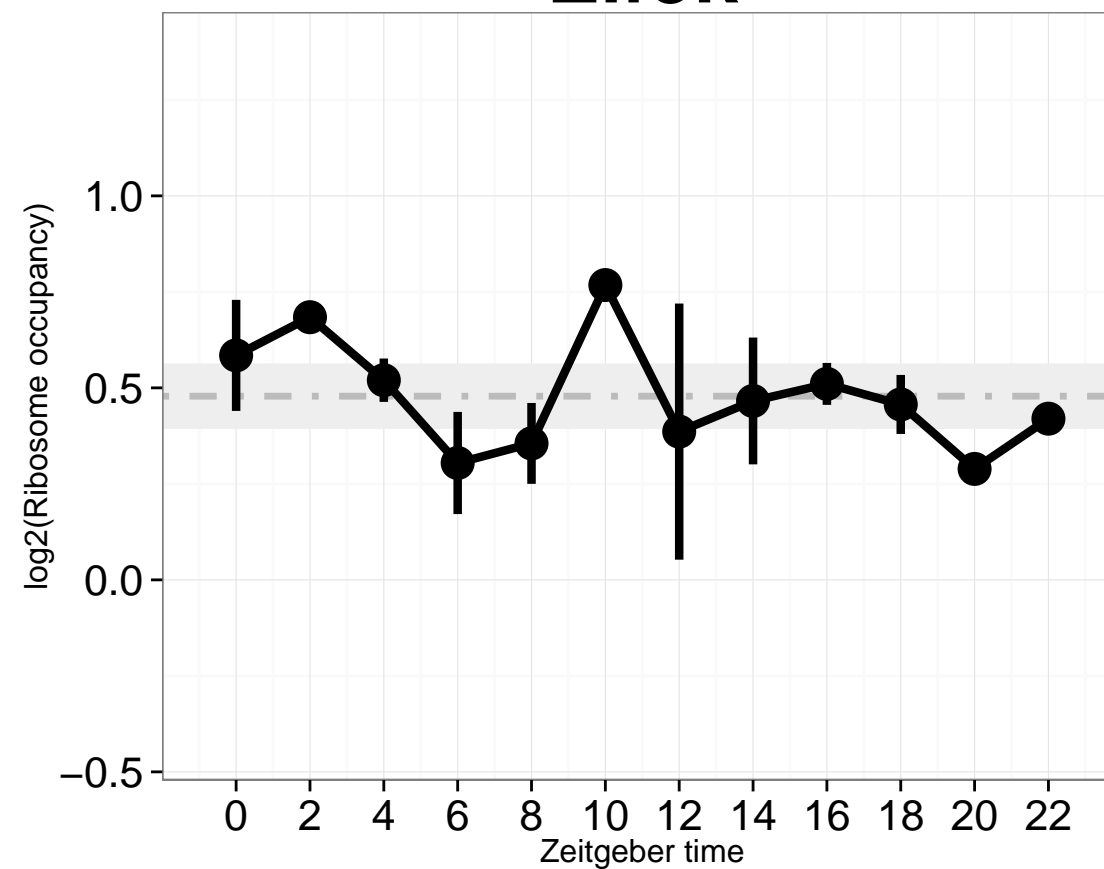

Supplement: Supplementary file 11824 [file 1]

# Gtf3c1

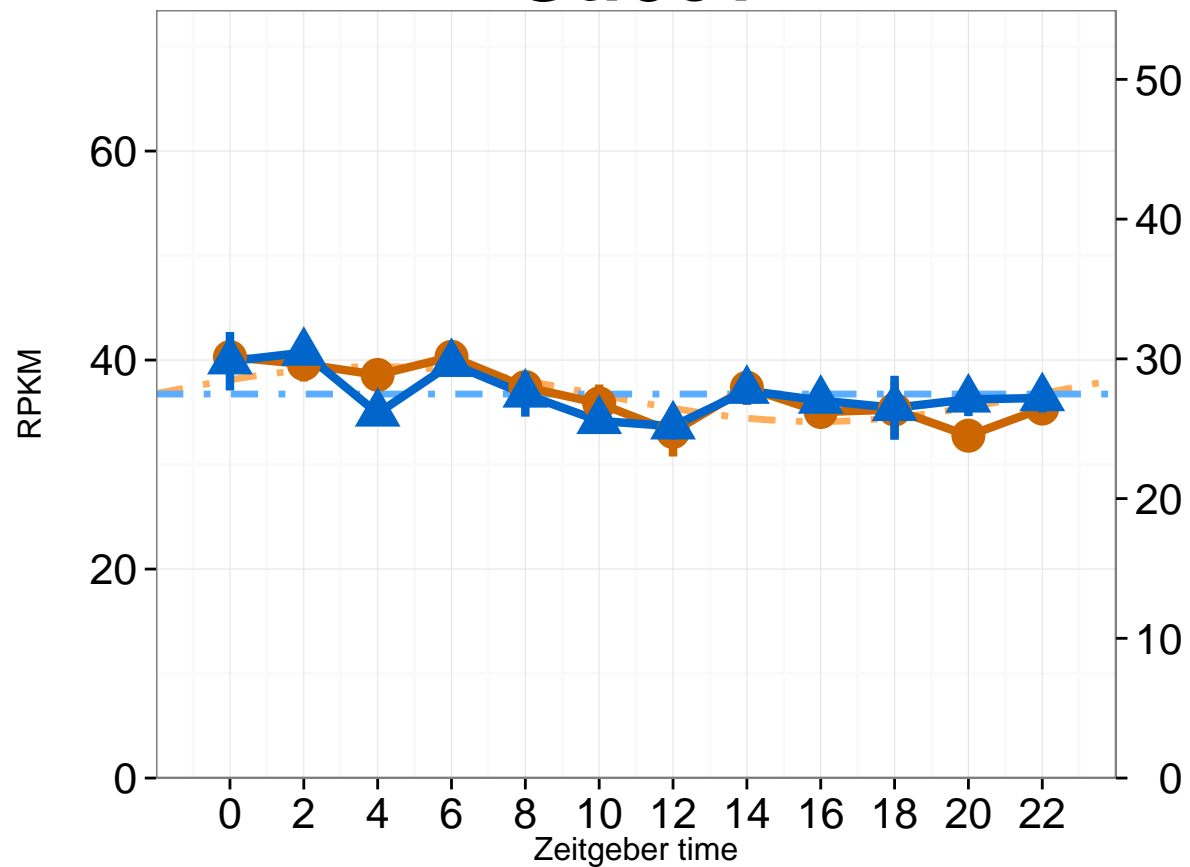

# Gtf3c1

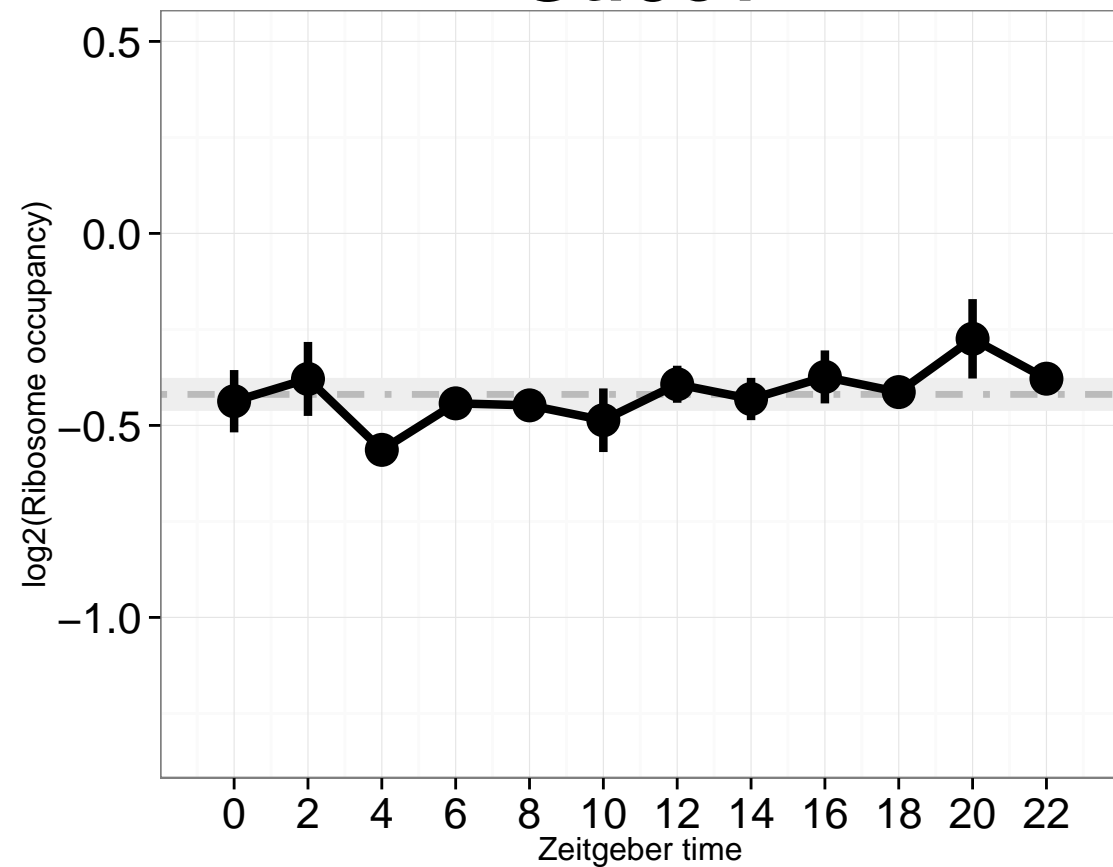

Supplement: Supplementary file 11825 [file 1]

## H2-Aa

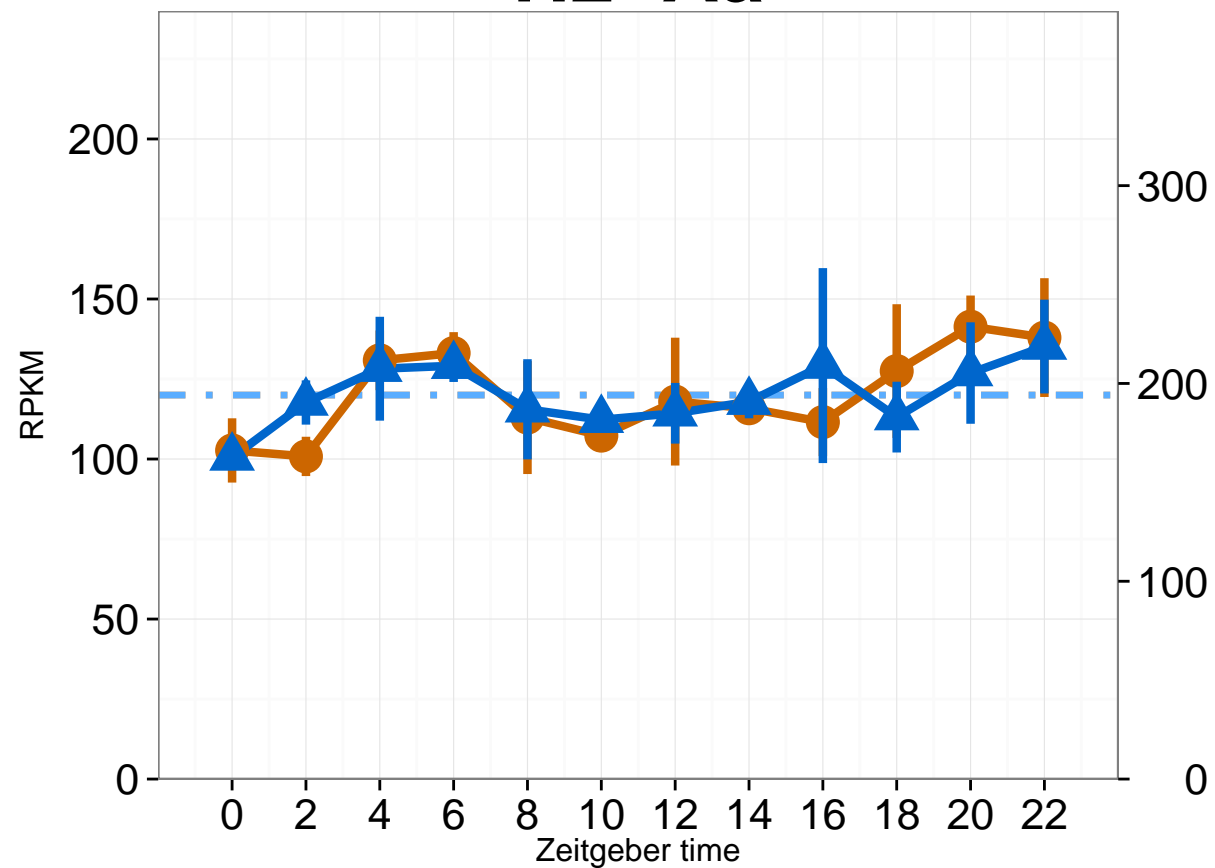

## H2-Aa

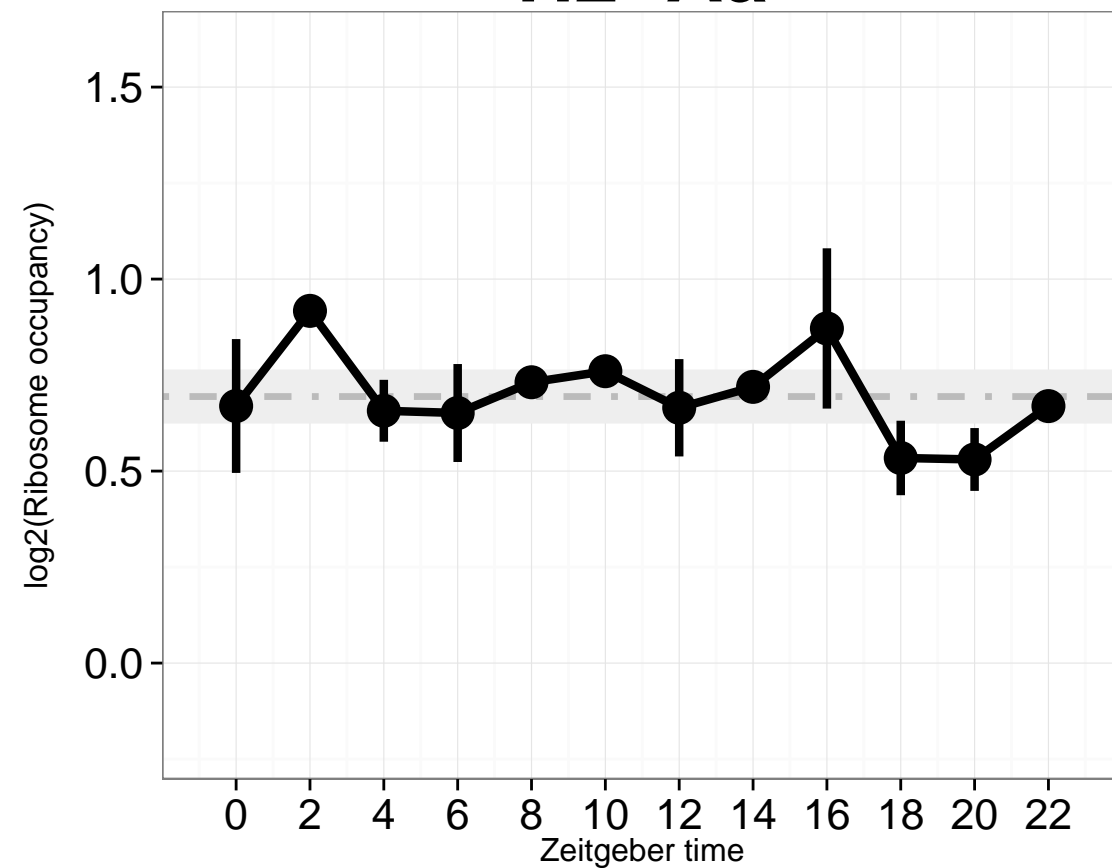

Supplement: Supplementary file 11826 [file 1]

## Hps5

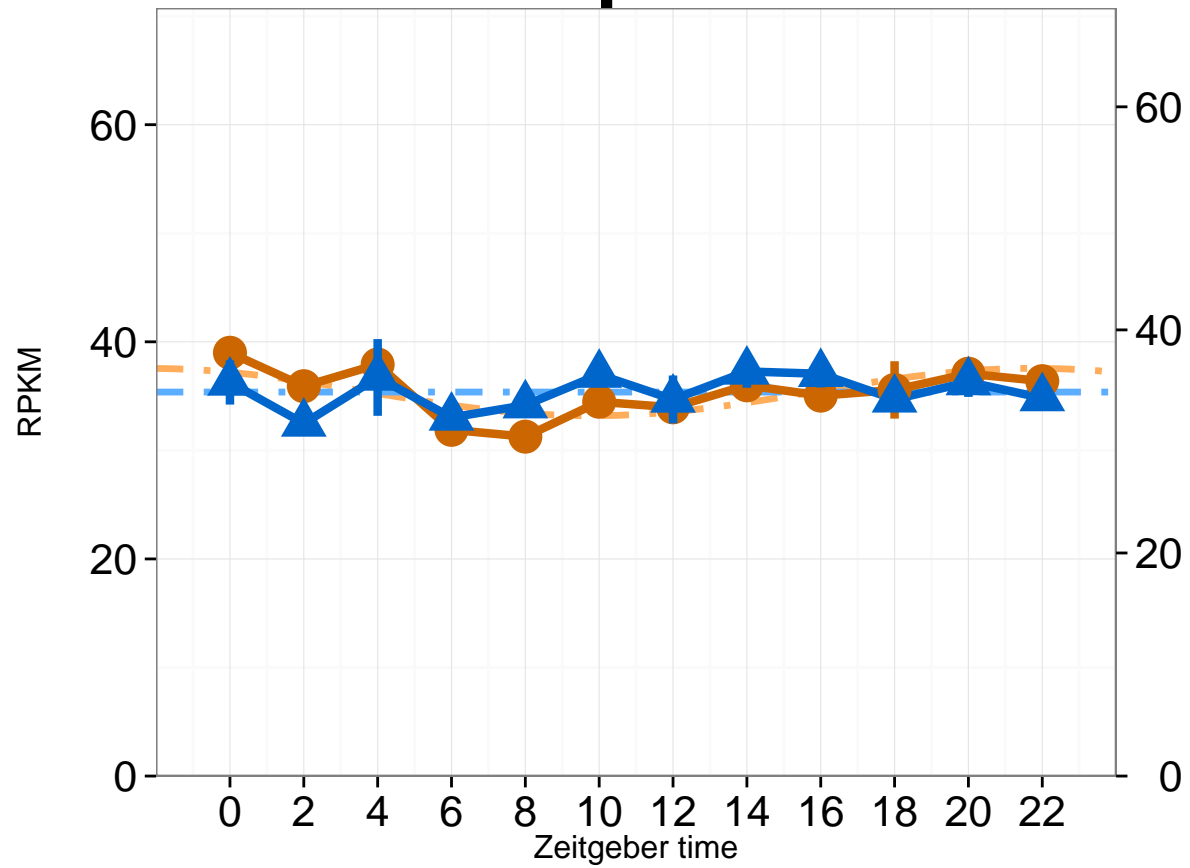

## Hps5

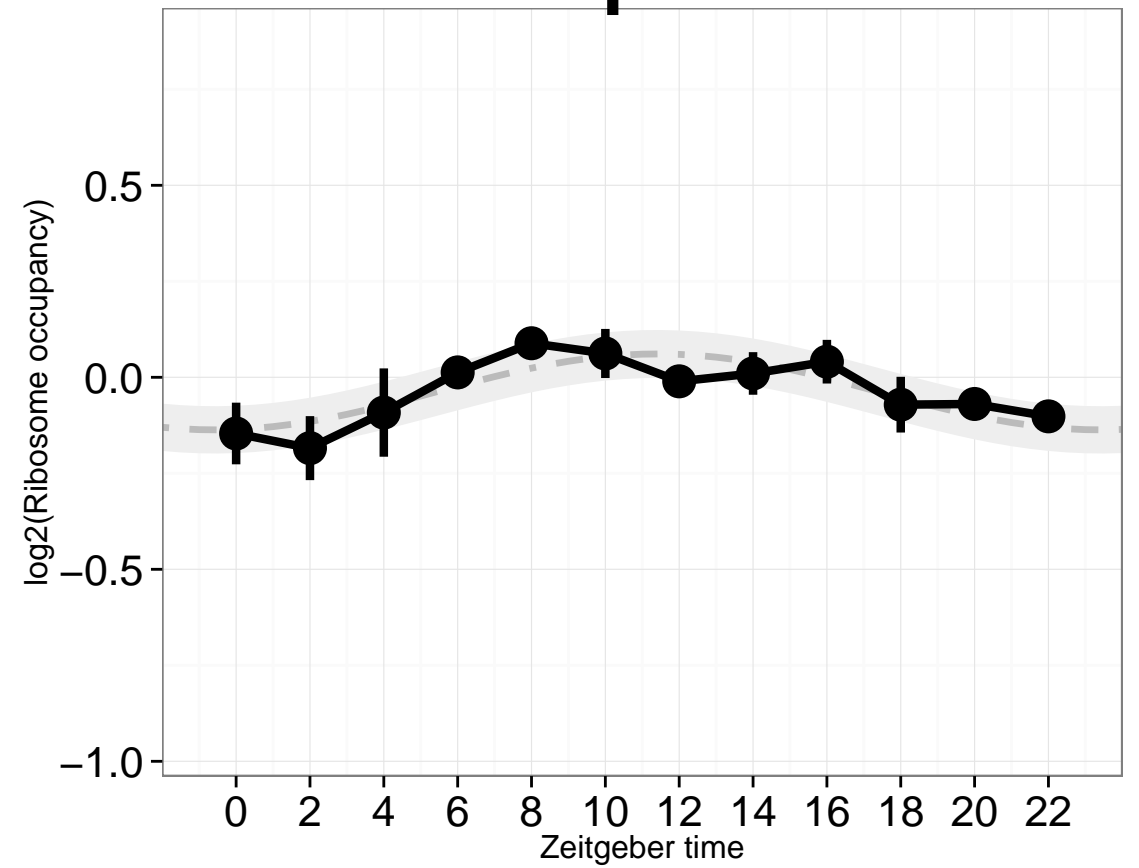

Supplement: Supplementary file 11827 [file 1]

## Smc5

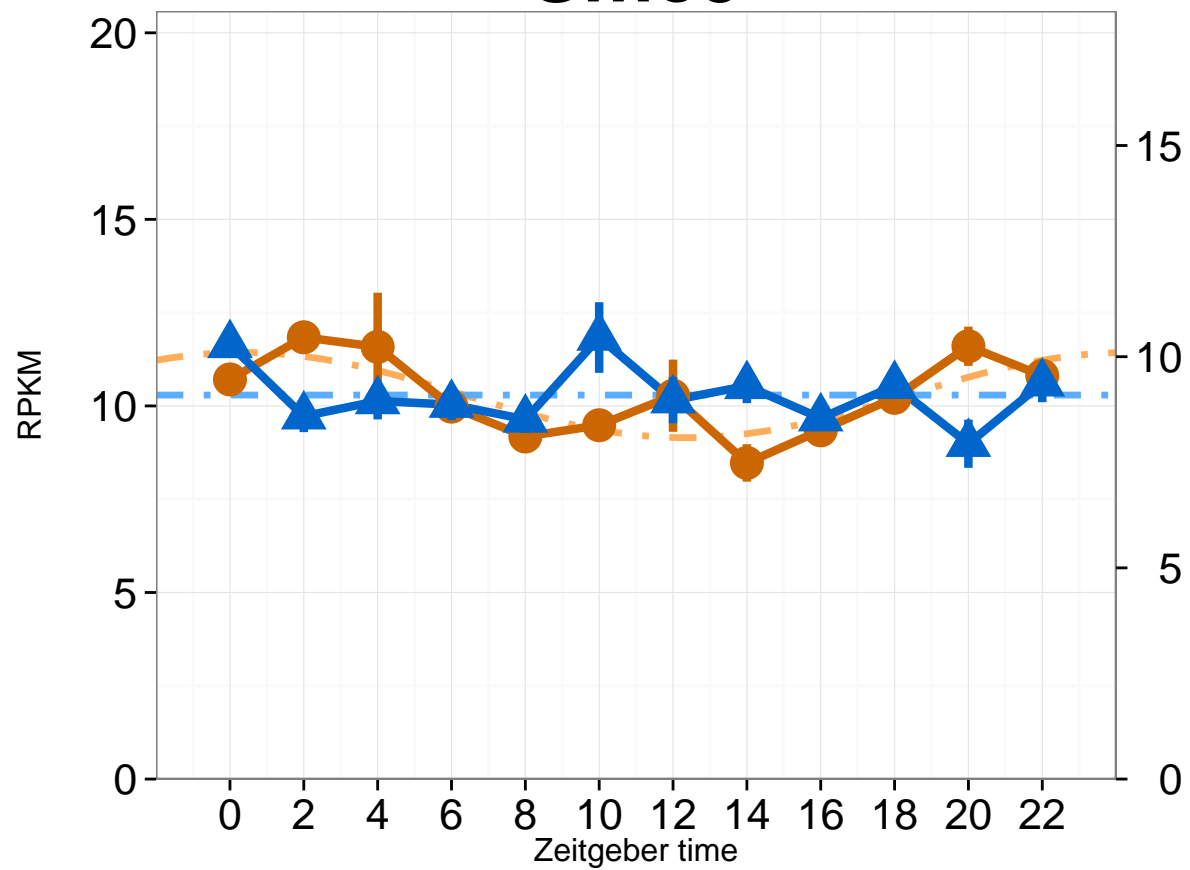

## Smc5

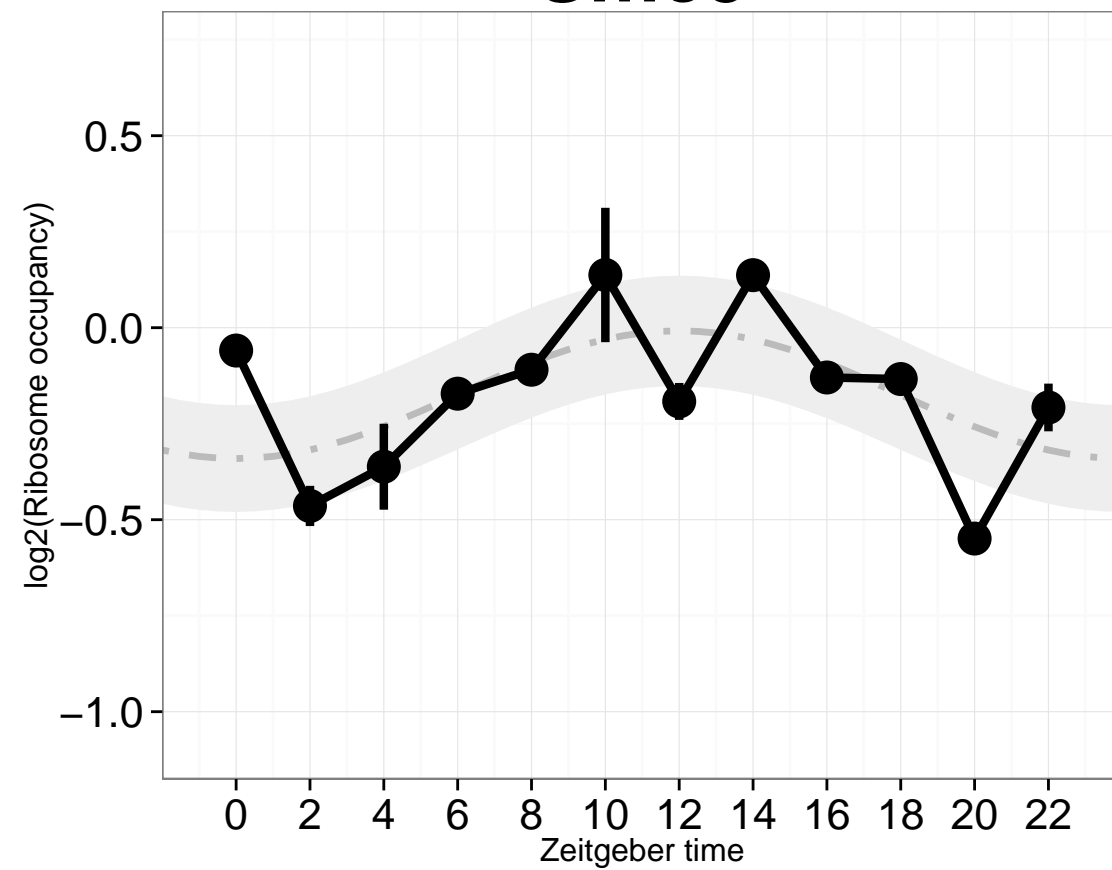

Supplement: Supplementary file 11828 [file 1]

# Snx32

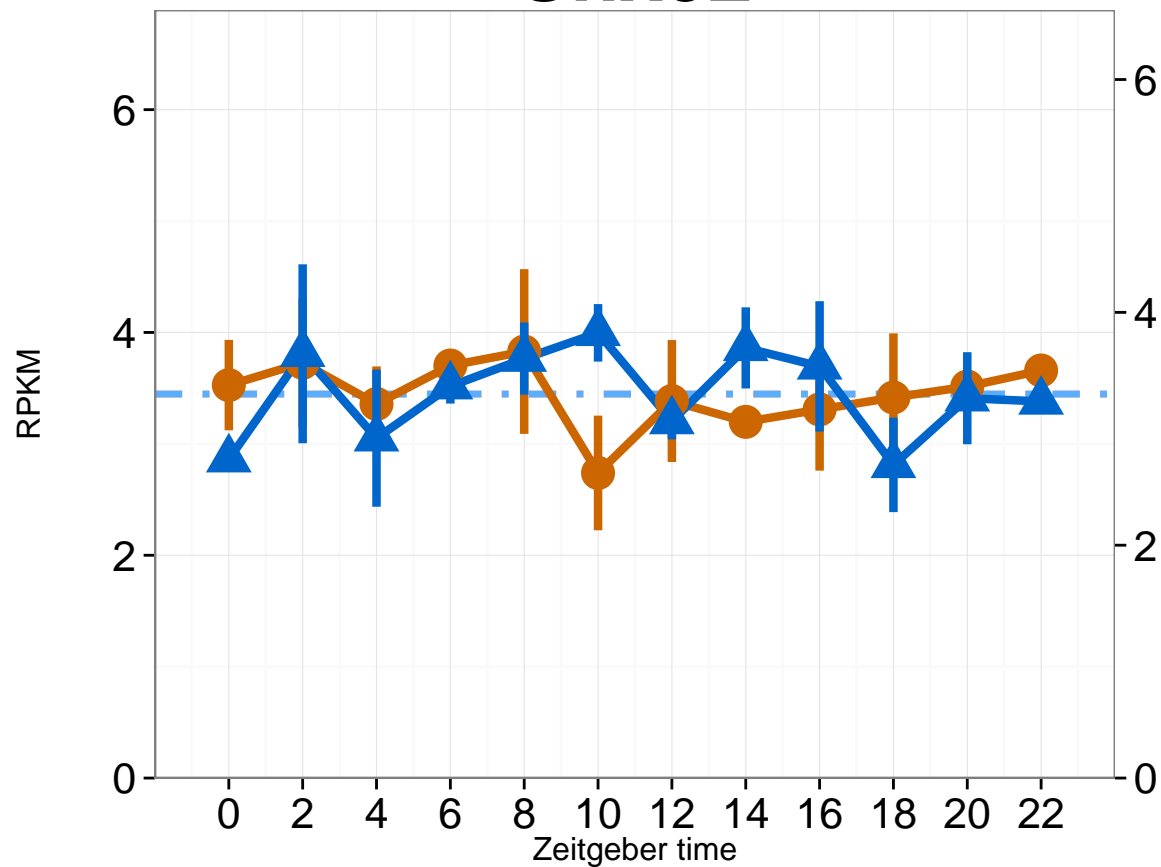

# Snx32

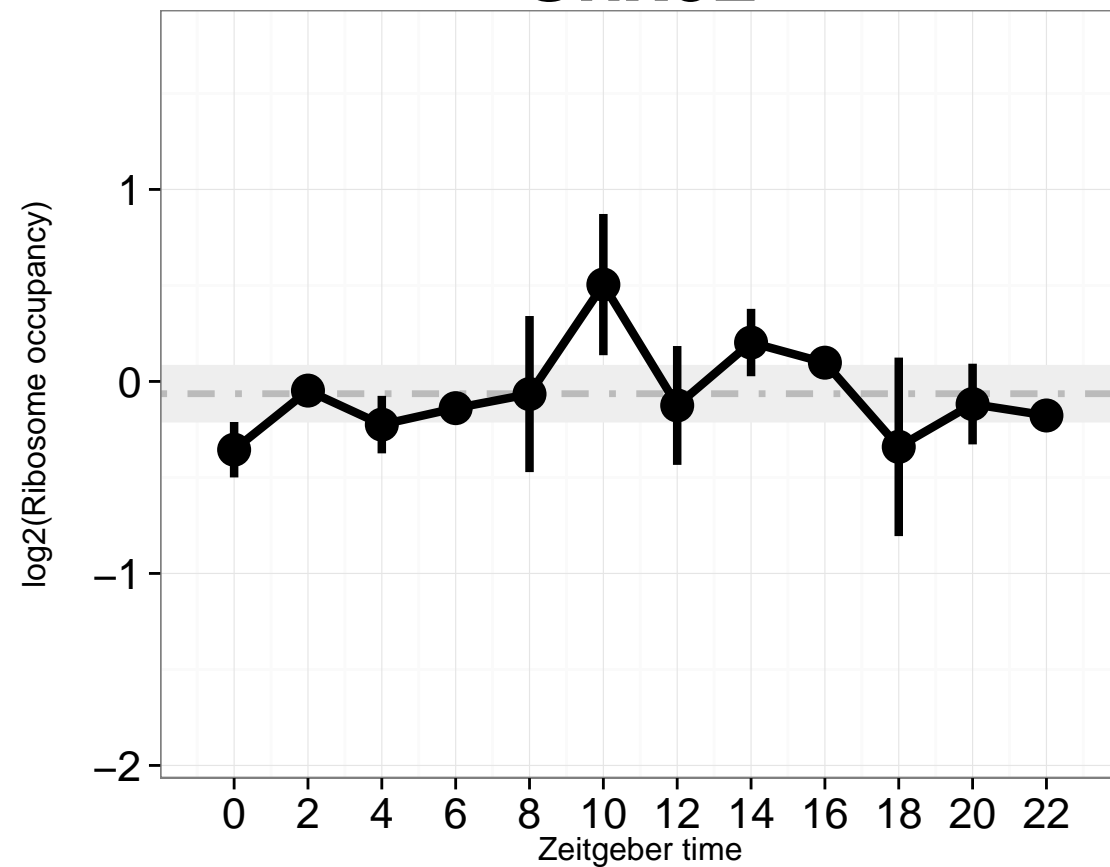

Supplement: Supplementary file 11829 [file 1]

## Tox3

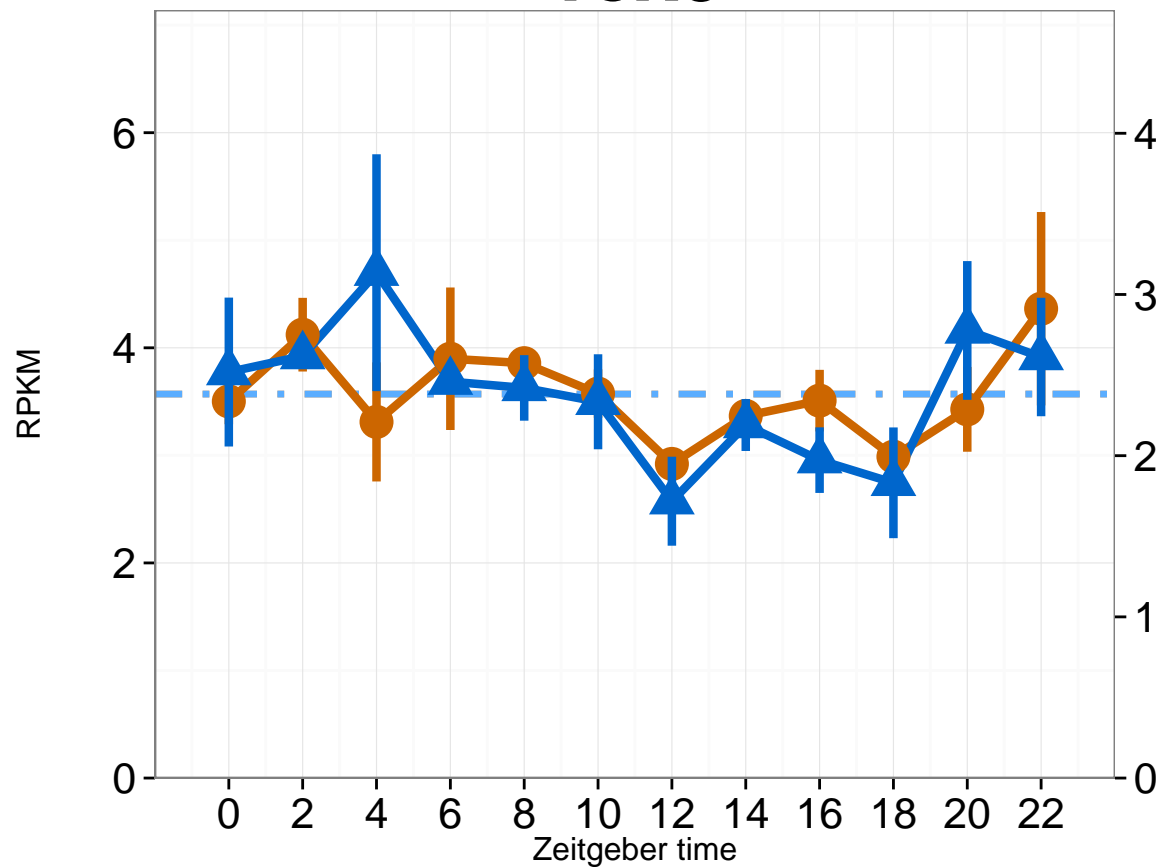

## Tox3

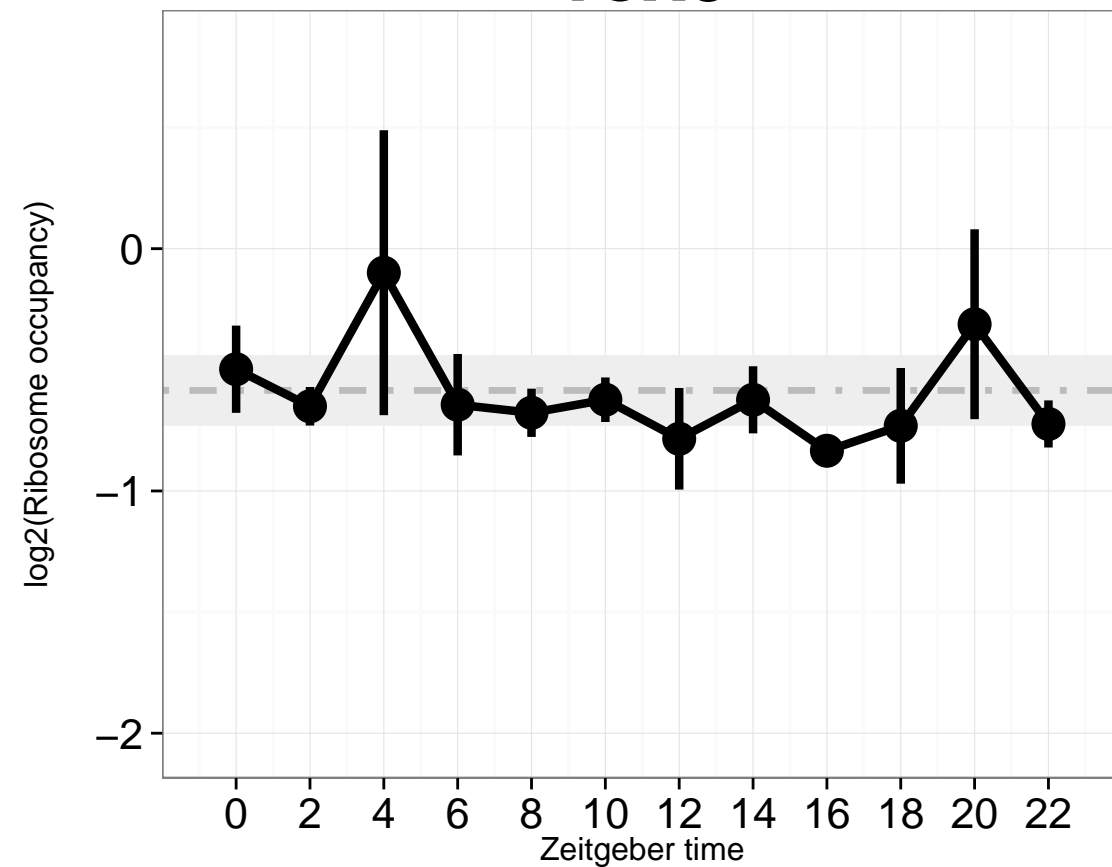

Supplement: Supplementary file 11830 [file 1]

## Rnf149

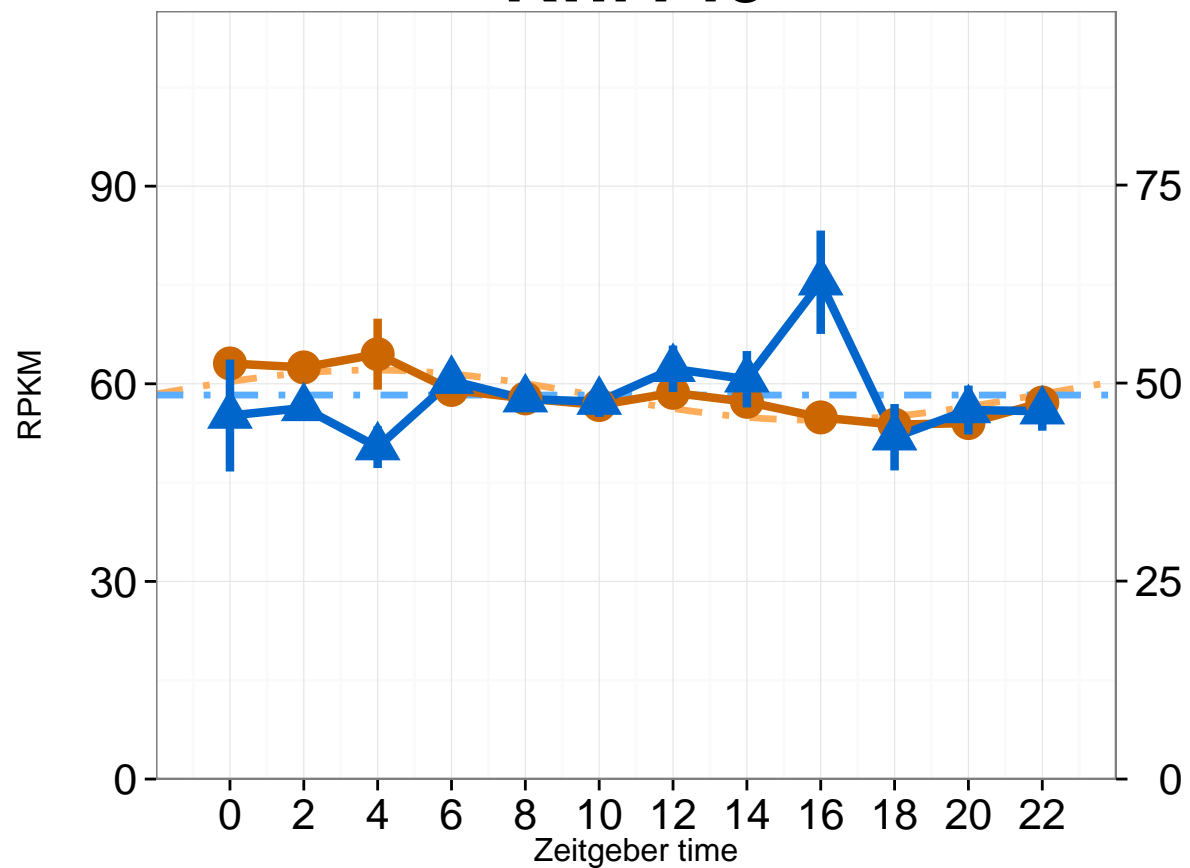

## Rnf149

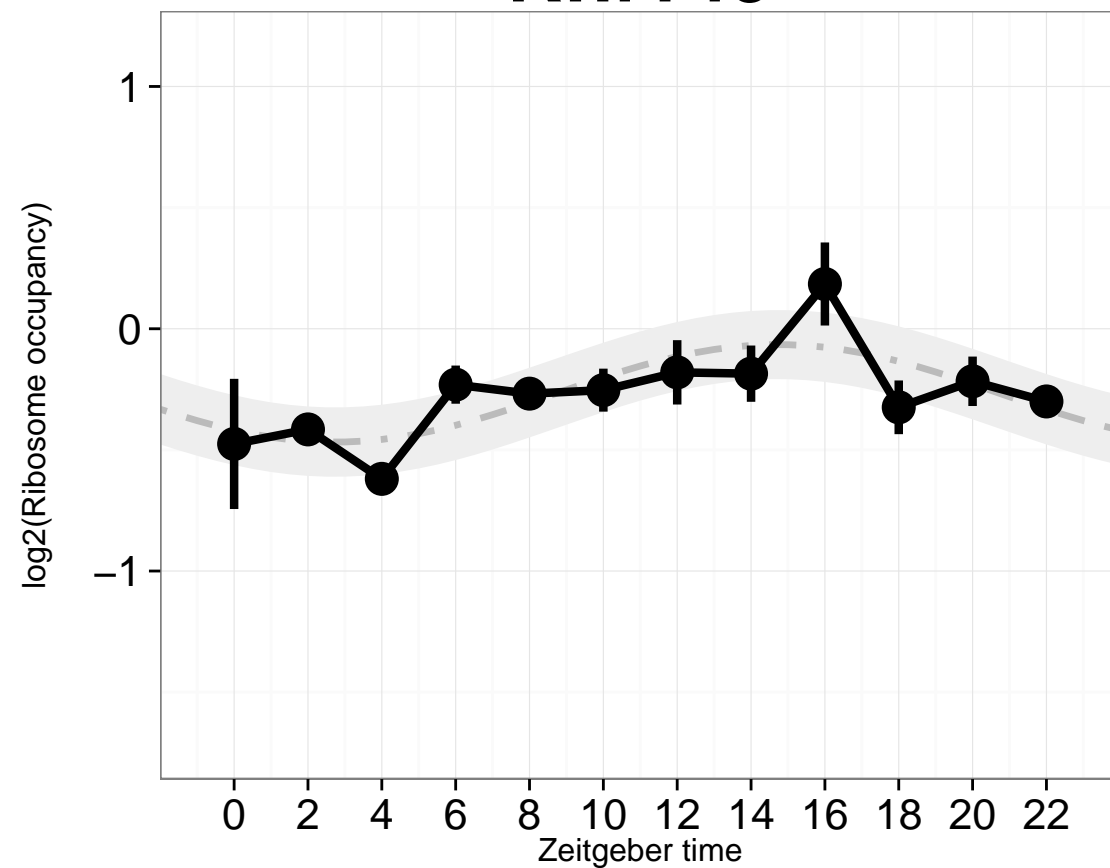

Supplement: Supplementary file 11831 [file 1]

# Ccdc109b

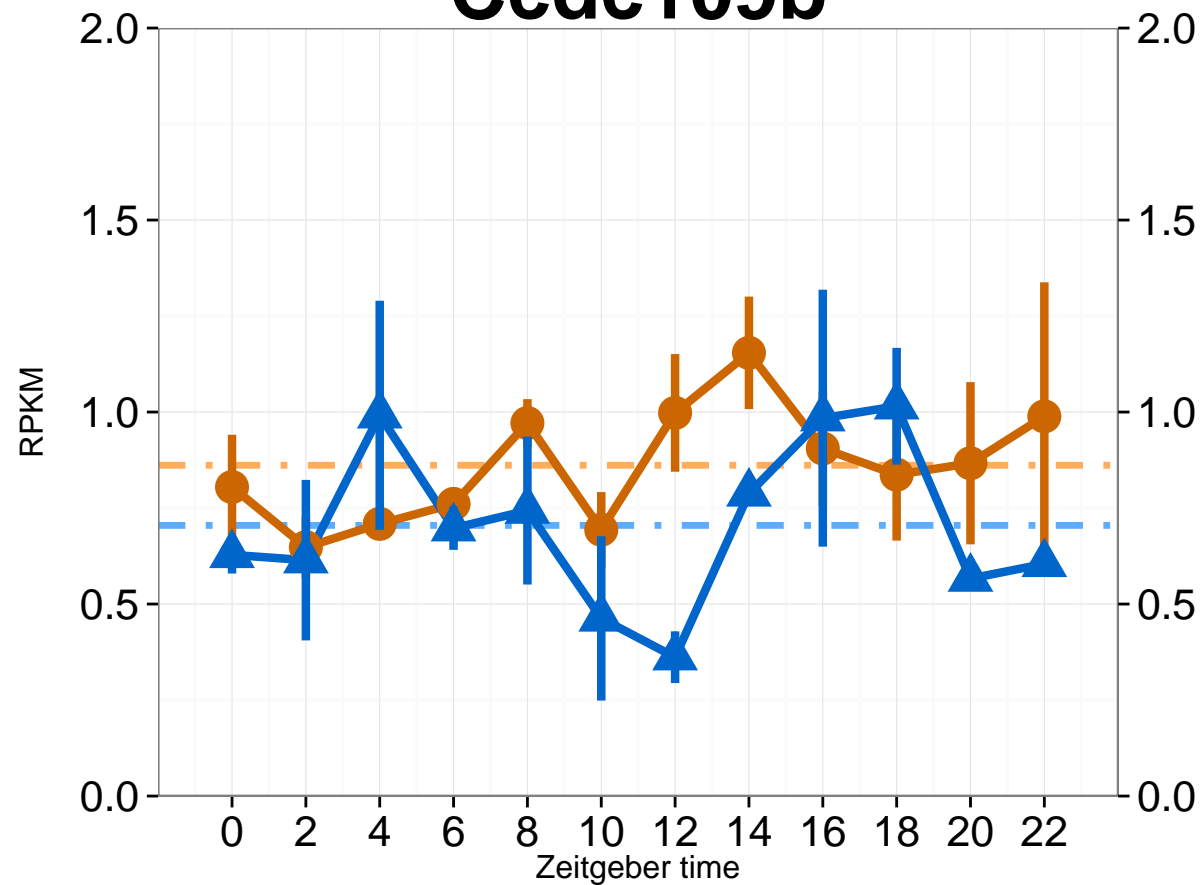

# Ccdc109b

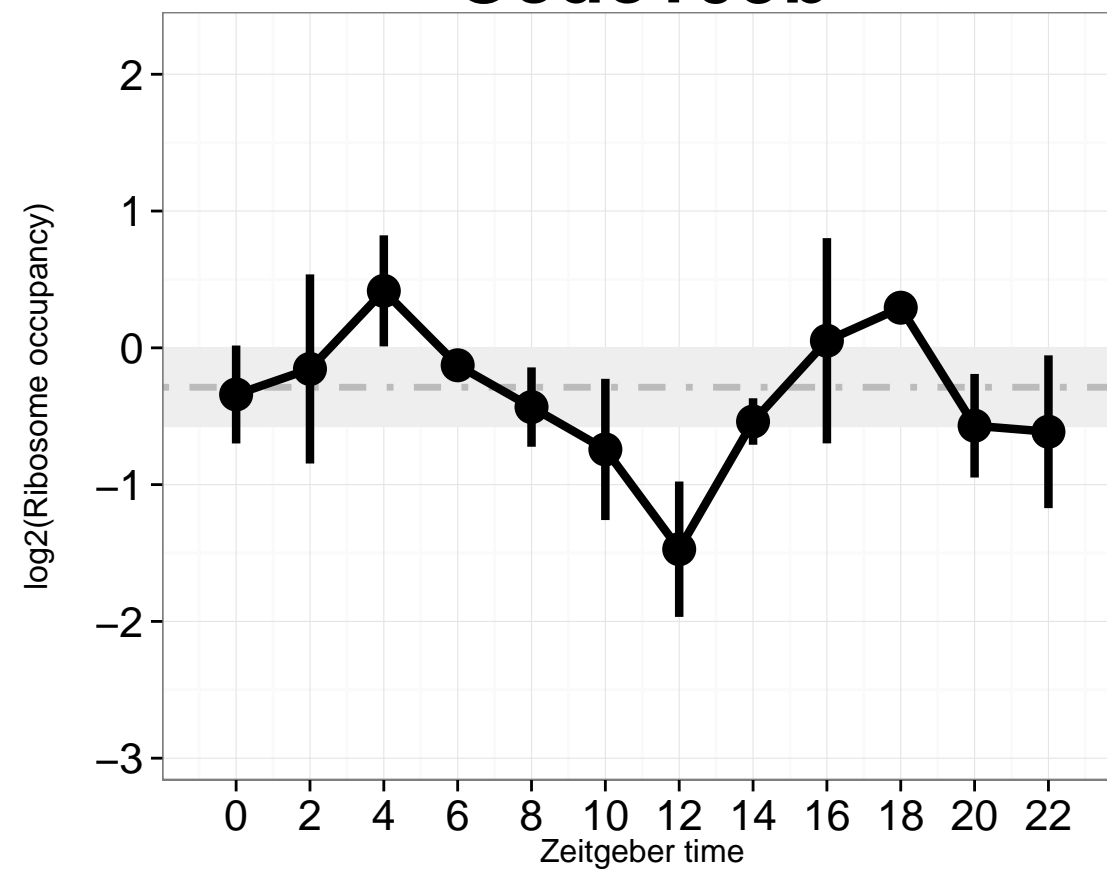

Supplement: Supplementary file 11832 [file 1]

## Cacul1

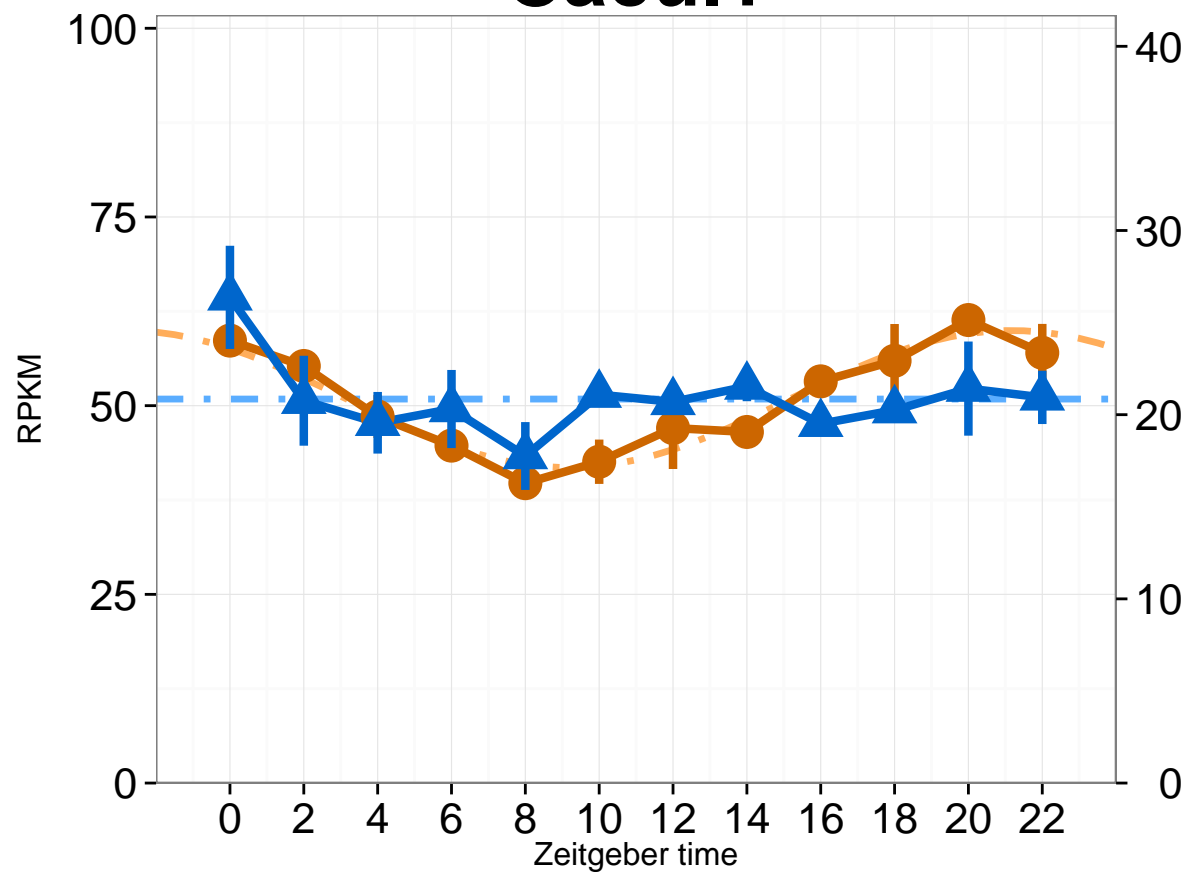

## Cacul1

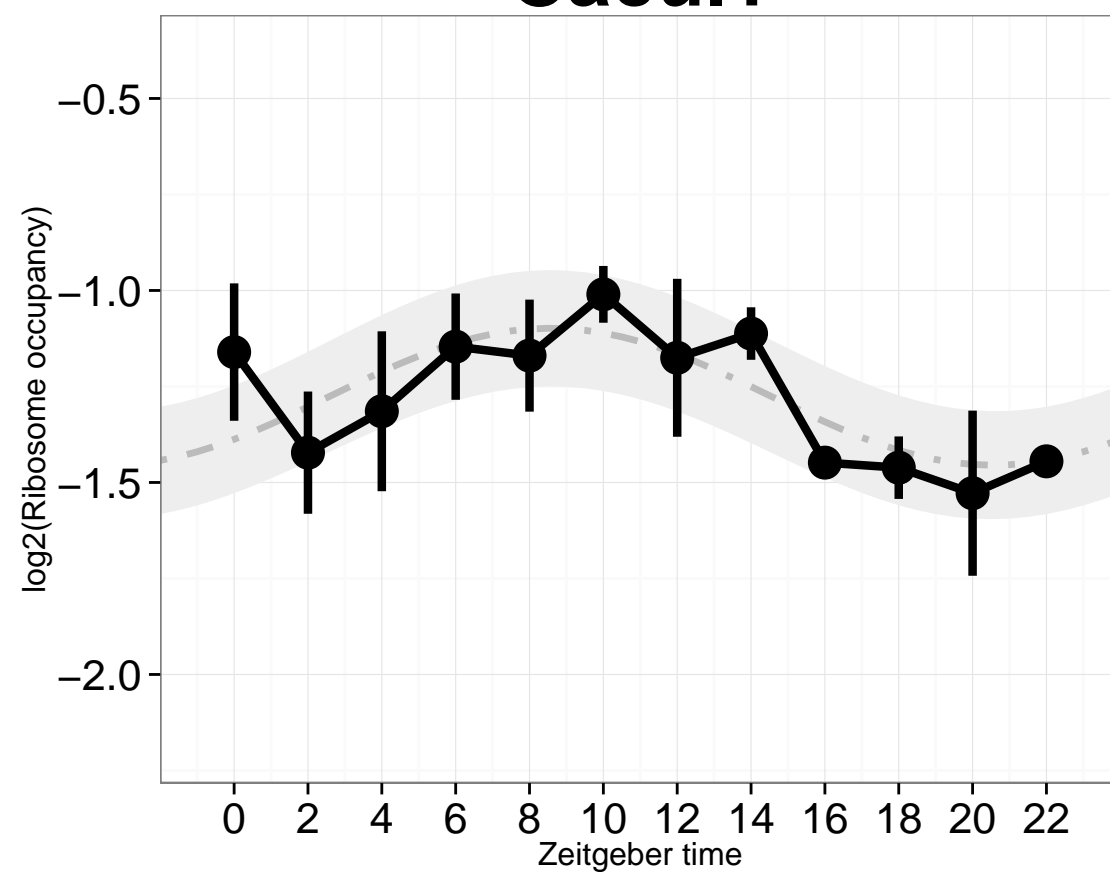

Supplement: Supplementary file 11833 [file 1]

# P2rx1

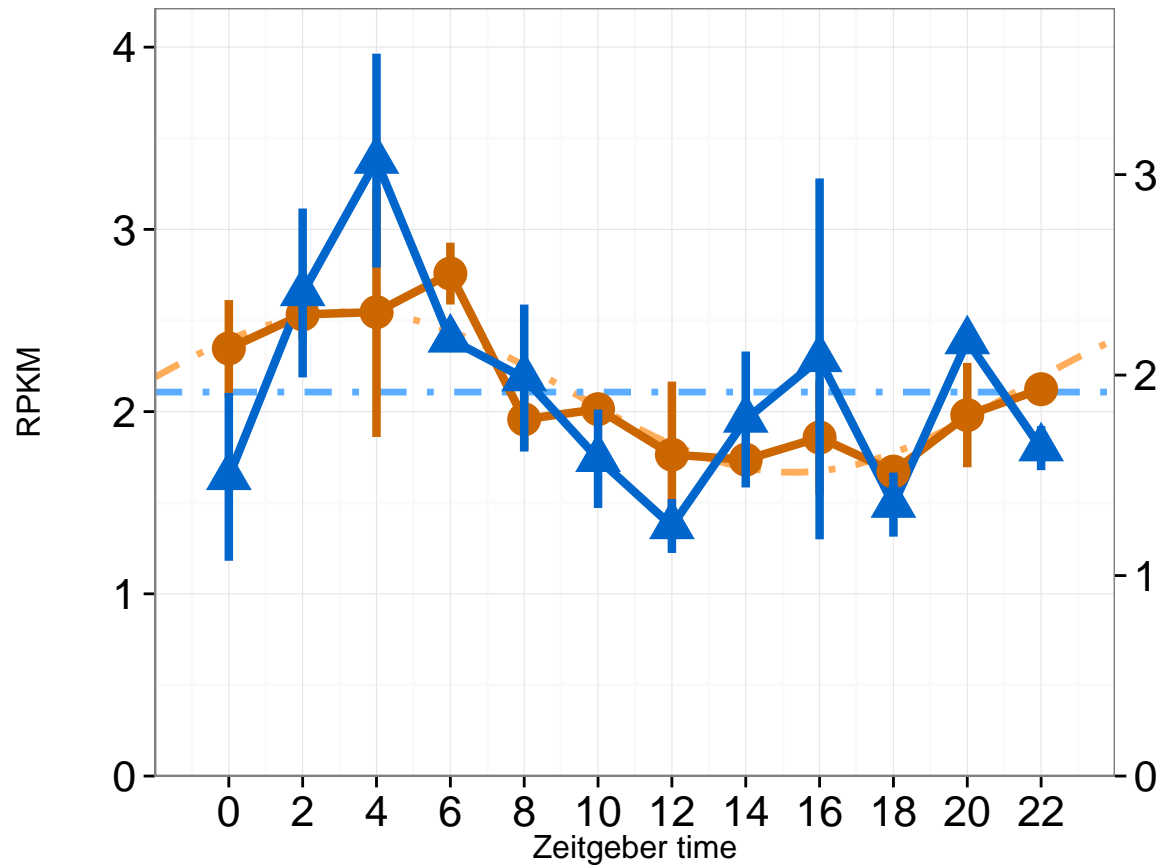

# P2rx1

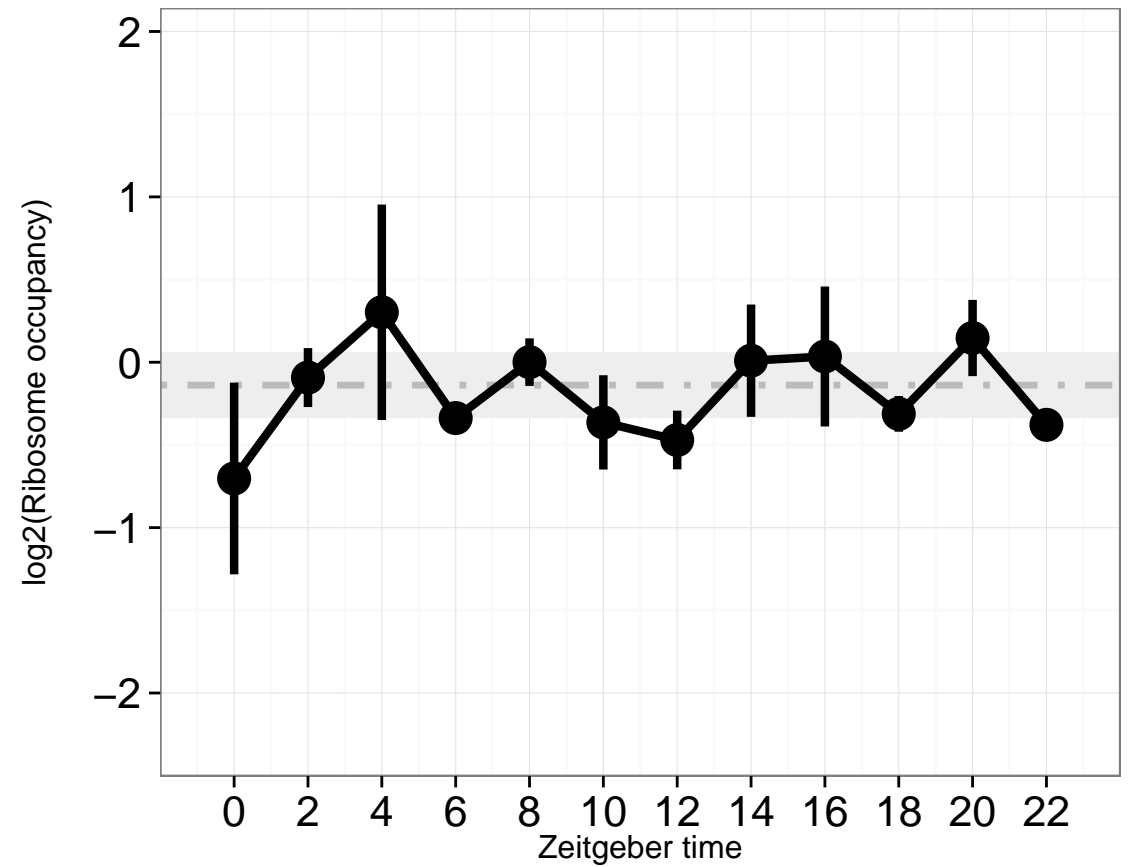

Supplement: Supplementary file 11834 [file 1]

# Zfp418

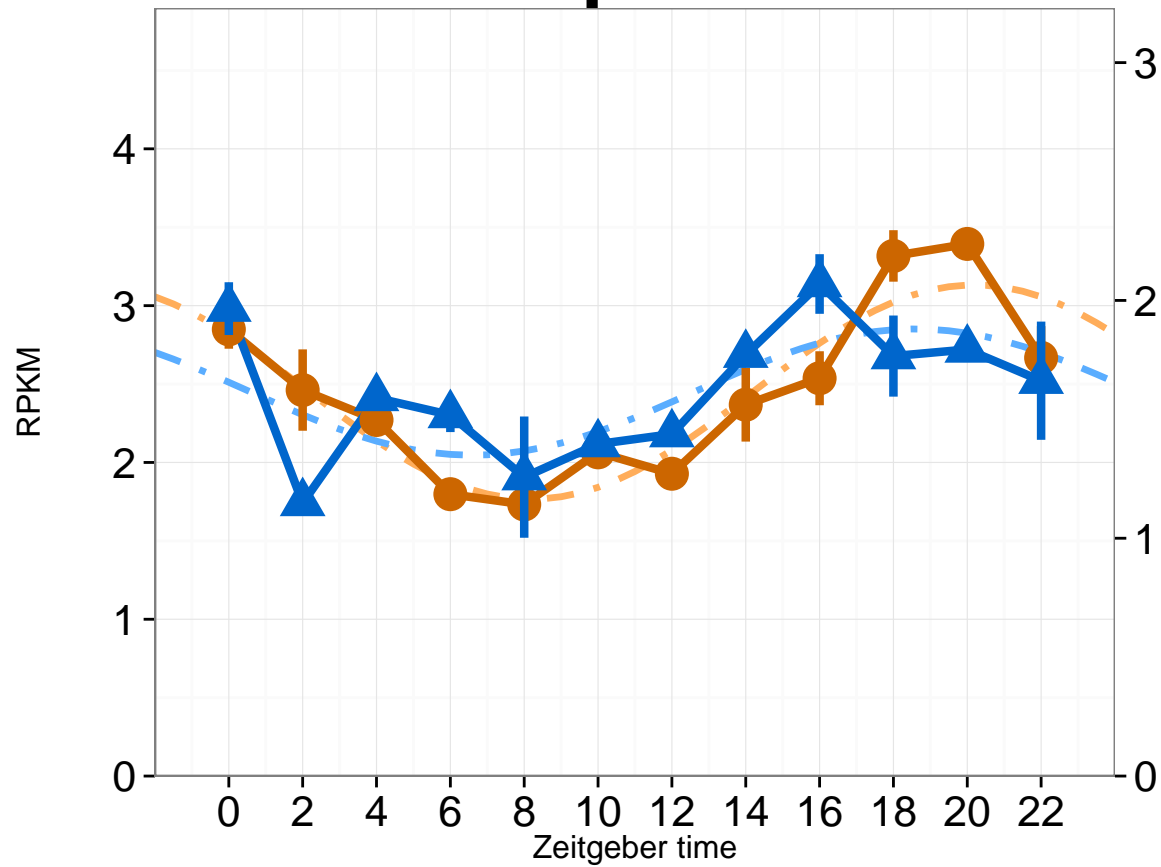

# Zfp418

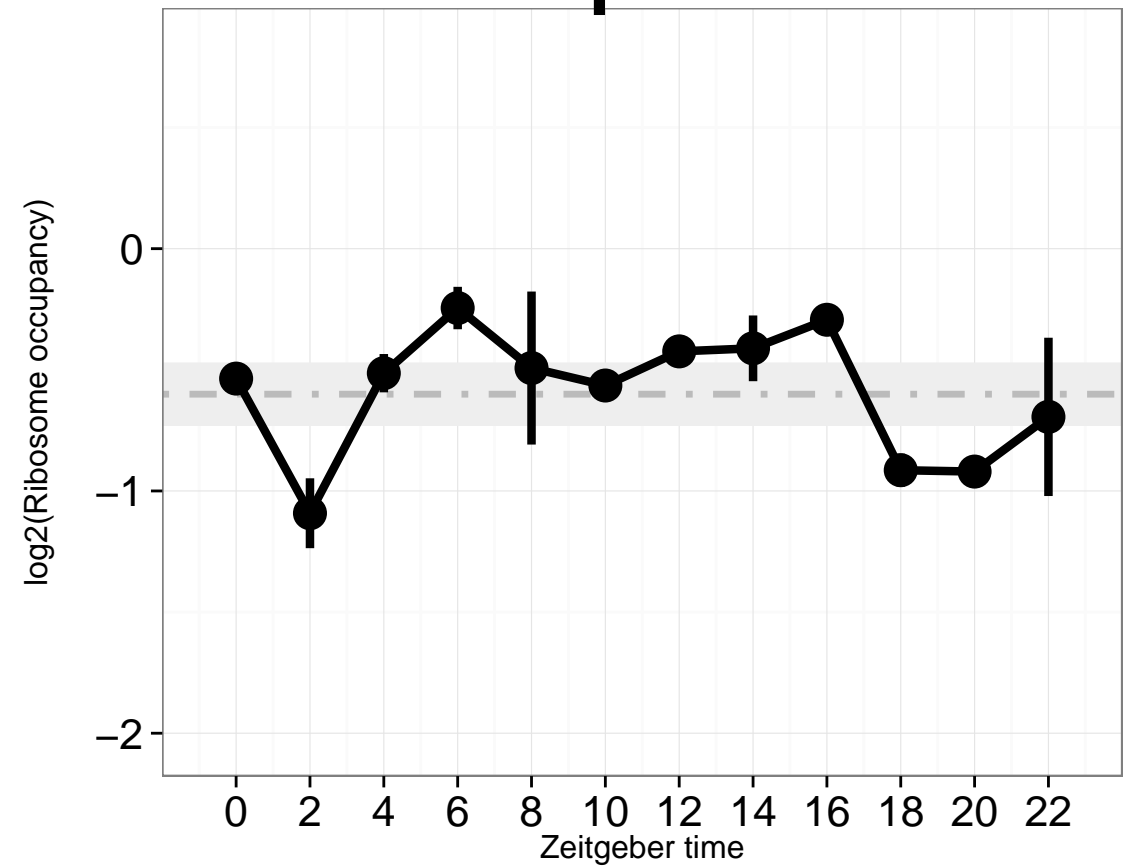

Supplement: Supplementary file 11835 [file 1]

## Ing5

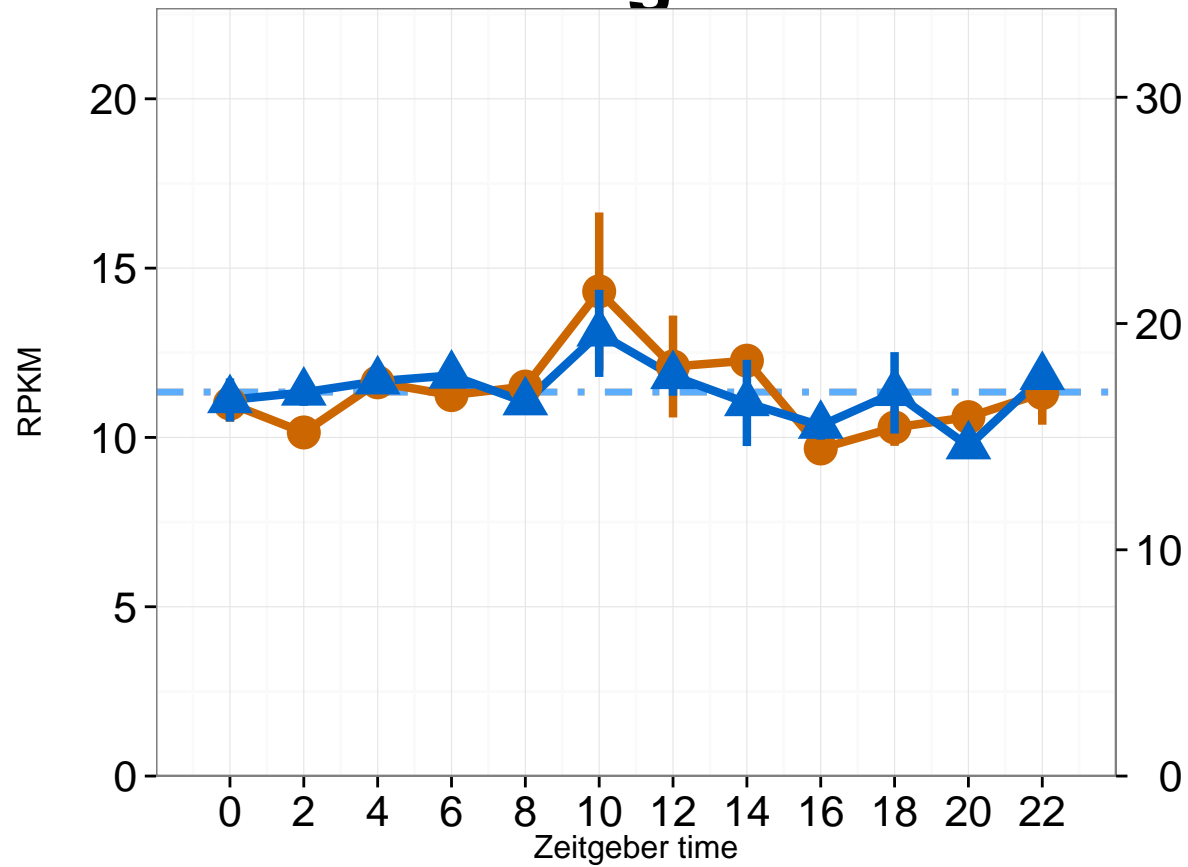

## Ing5

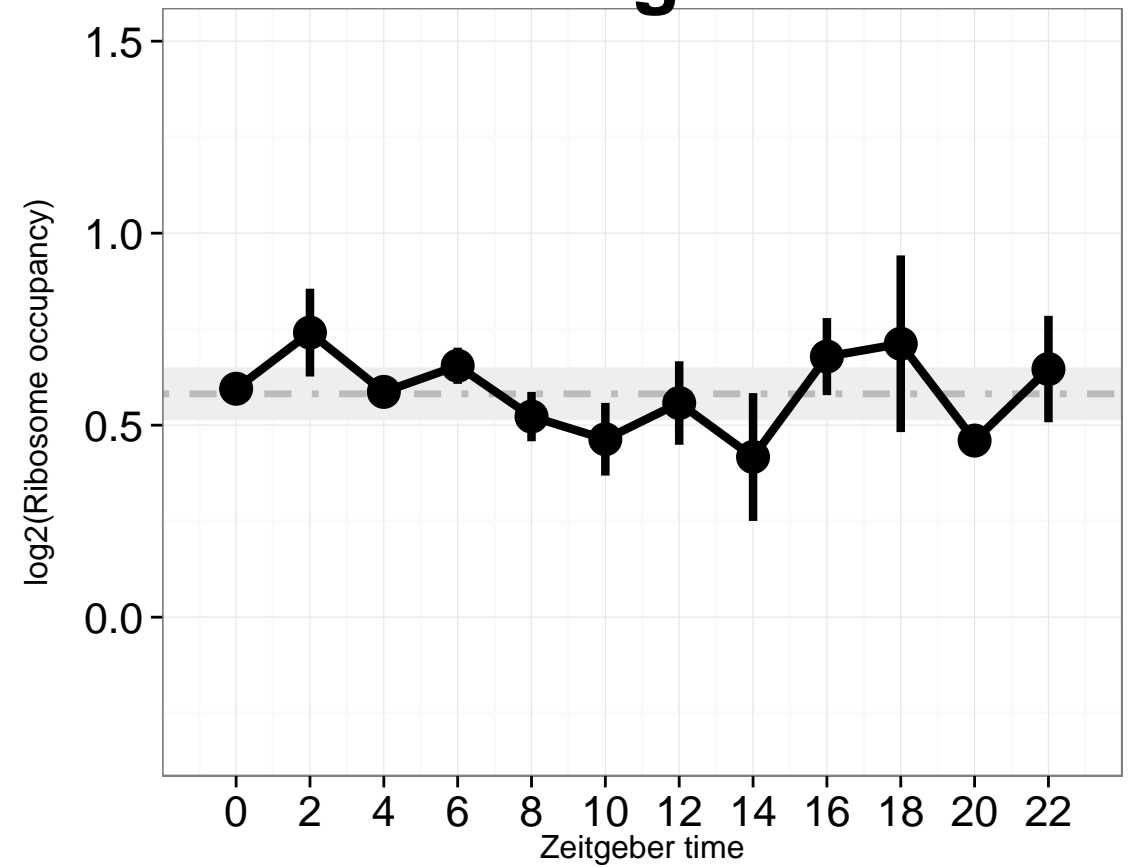

Supplement: Supplementary file 11836 [file 1]

Rwdd2b

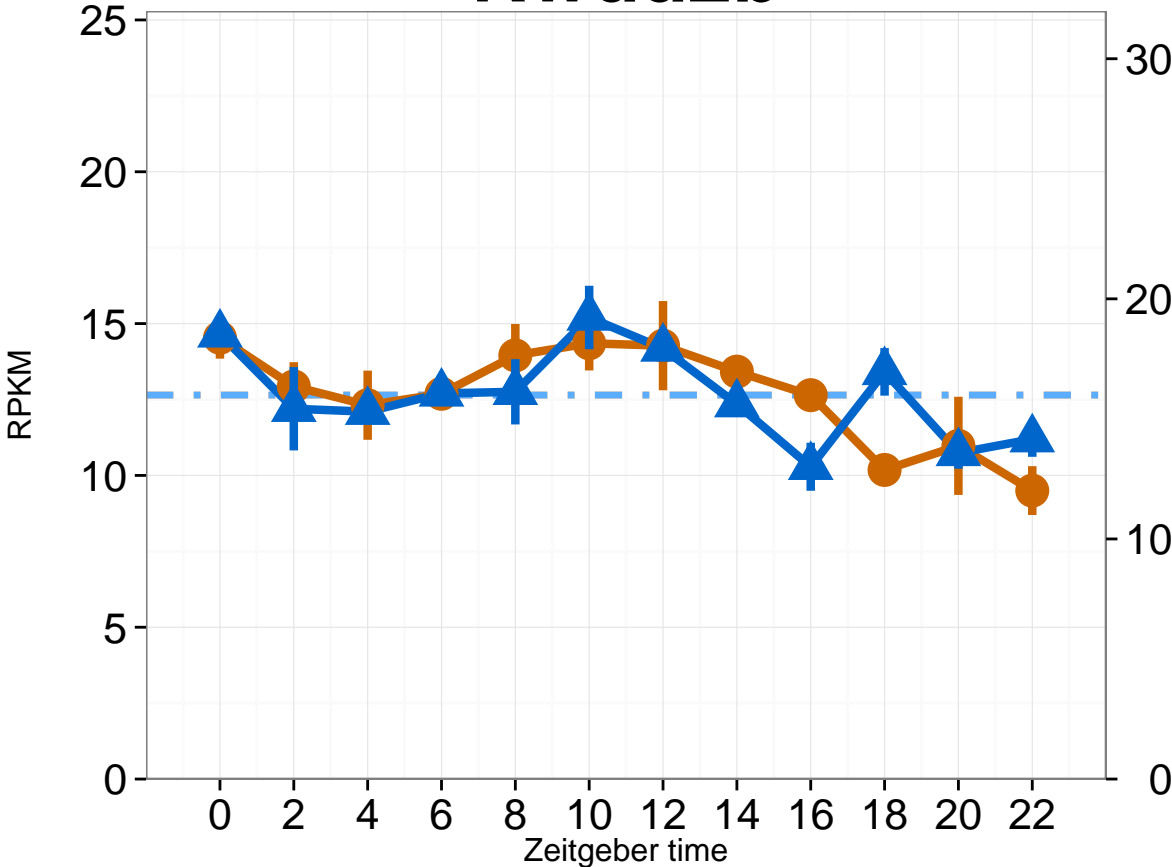

Rwdd2b

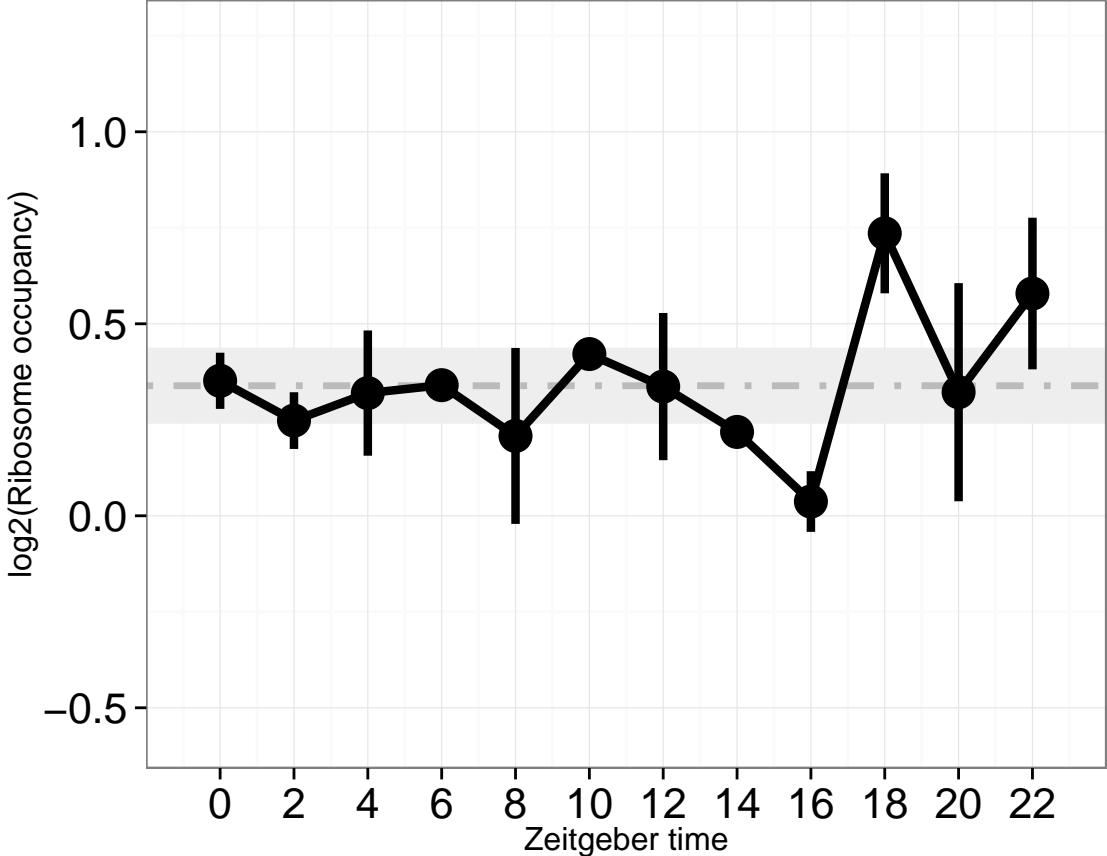

Supplement: Supplementary file 11837 [file 1]

## Fam86

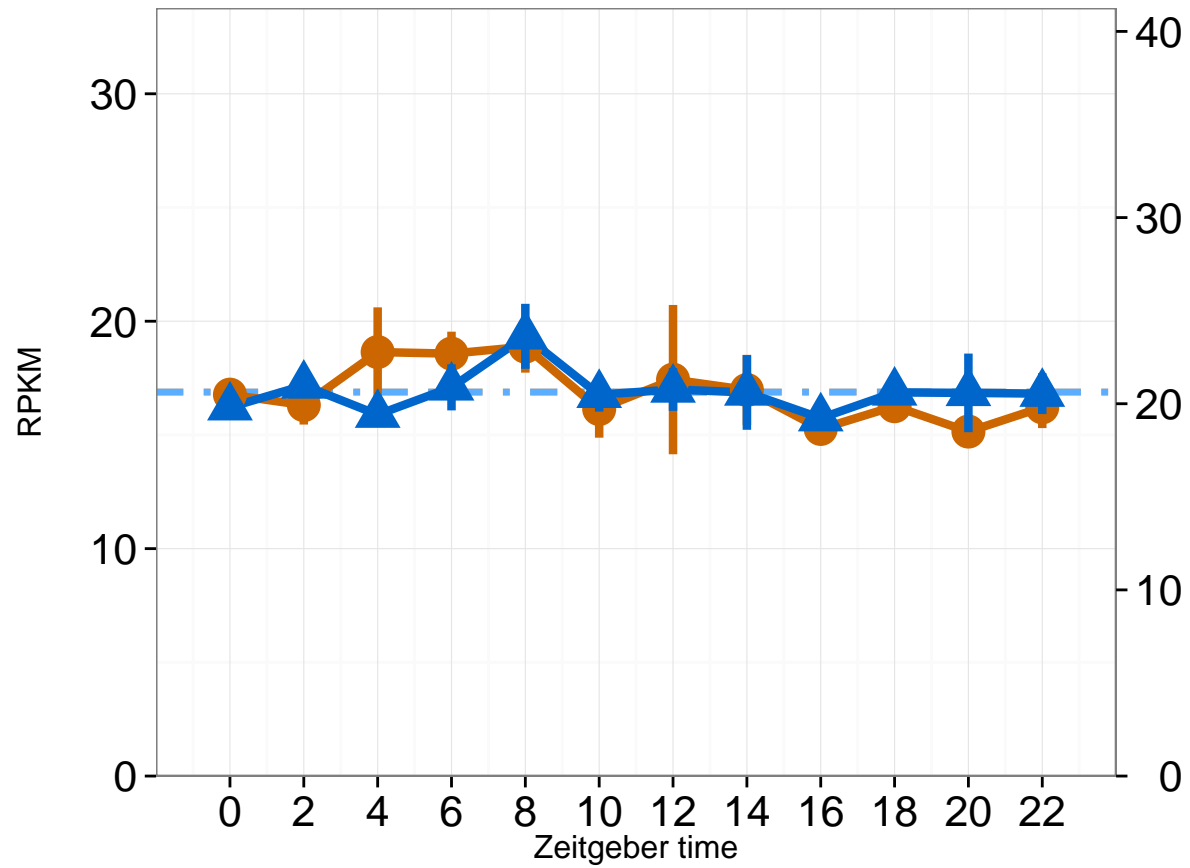

## Fam86

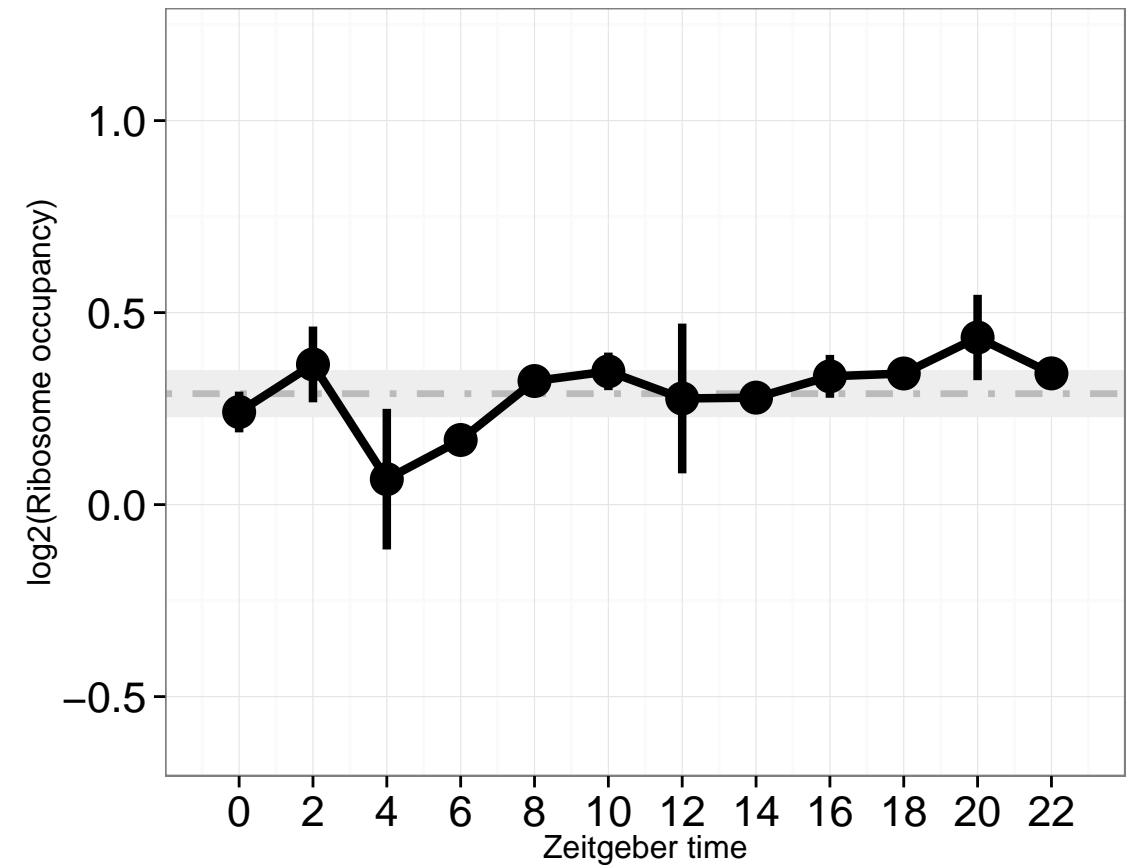

Supplement: Supplementary file 11838 [file 1]

## BC026585

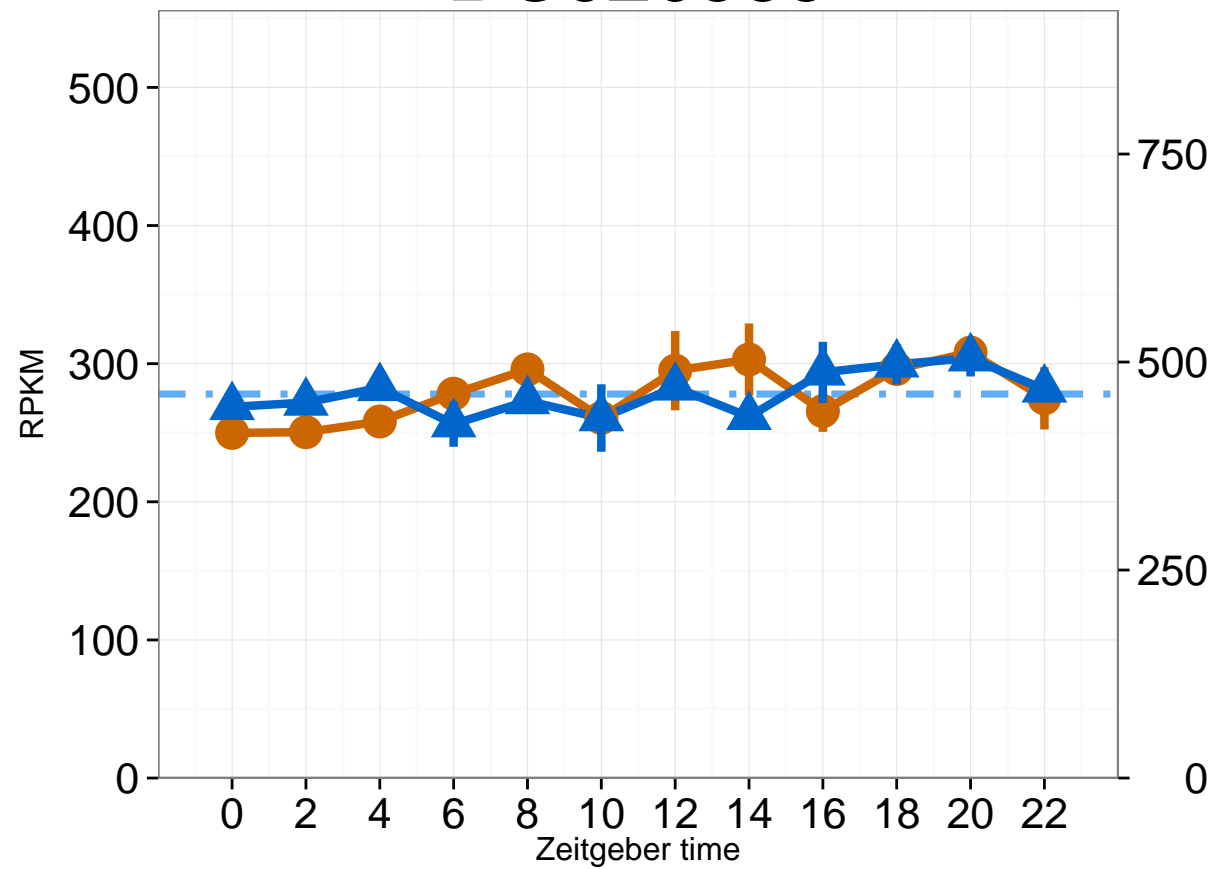

## BC026585

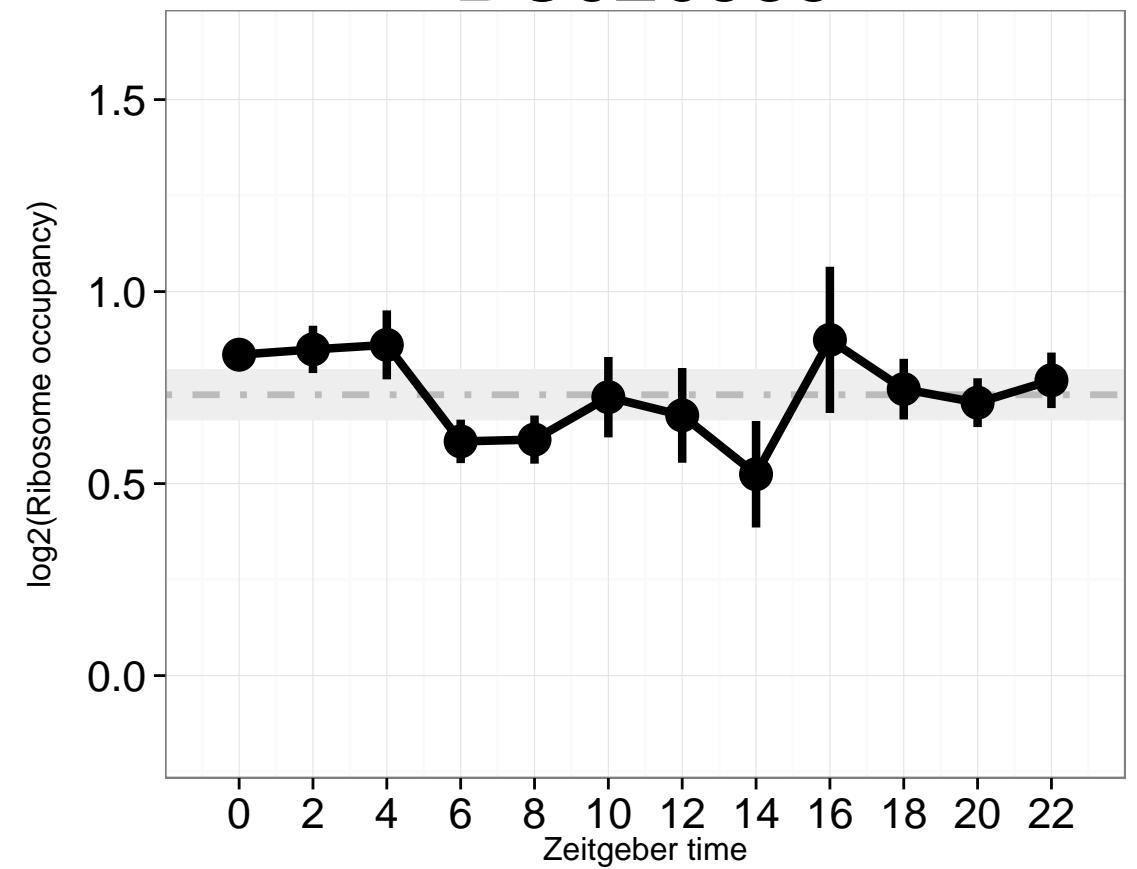

Supplement: Supplementary file 11839 [file 1]

## Gtl3

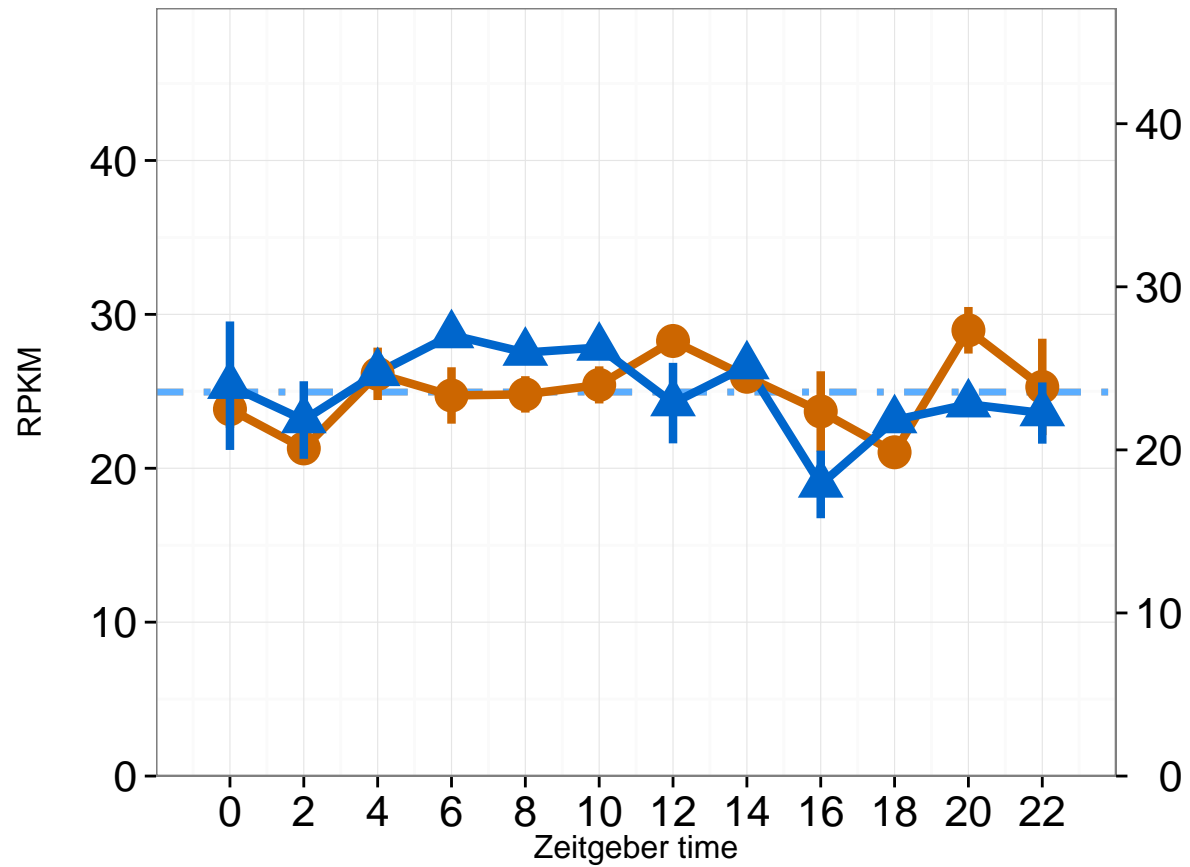

## Gtl3

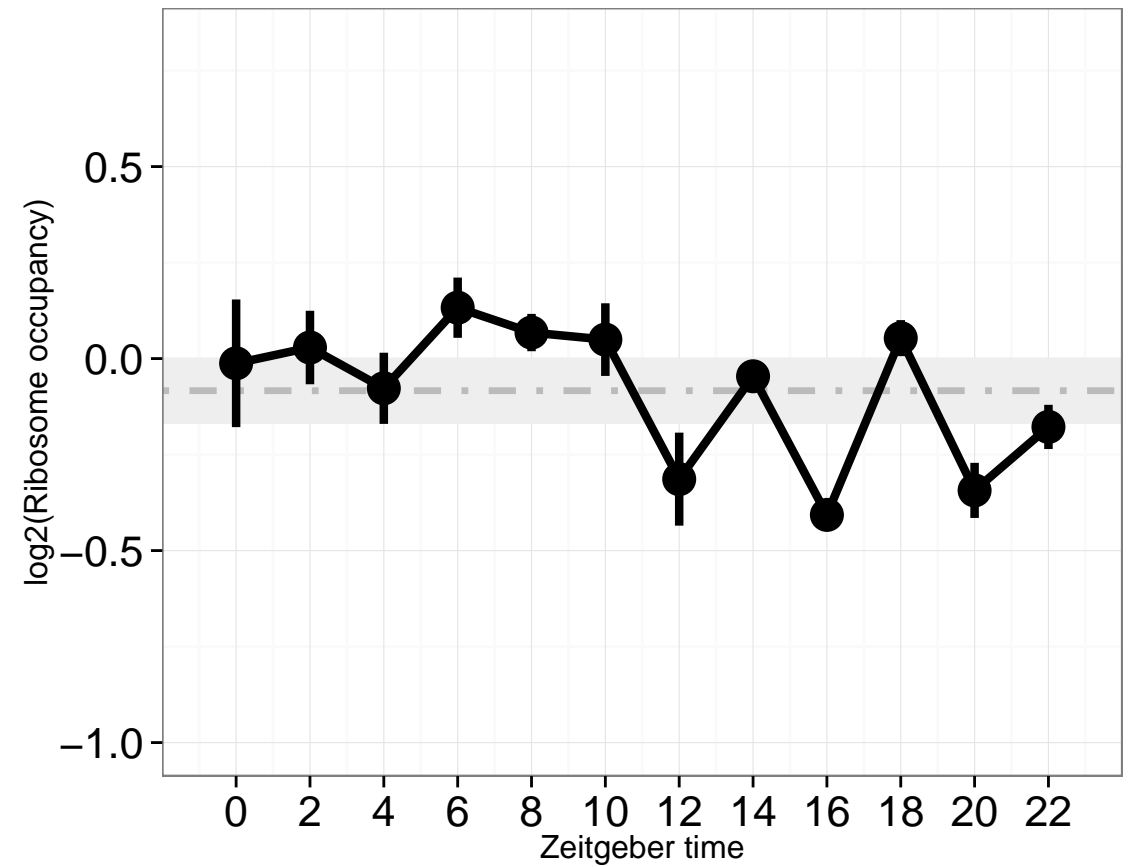

Supplement: Supplementary file 11840 [file 1]

## Glul

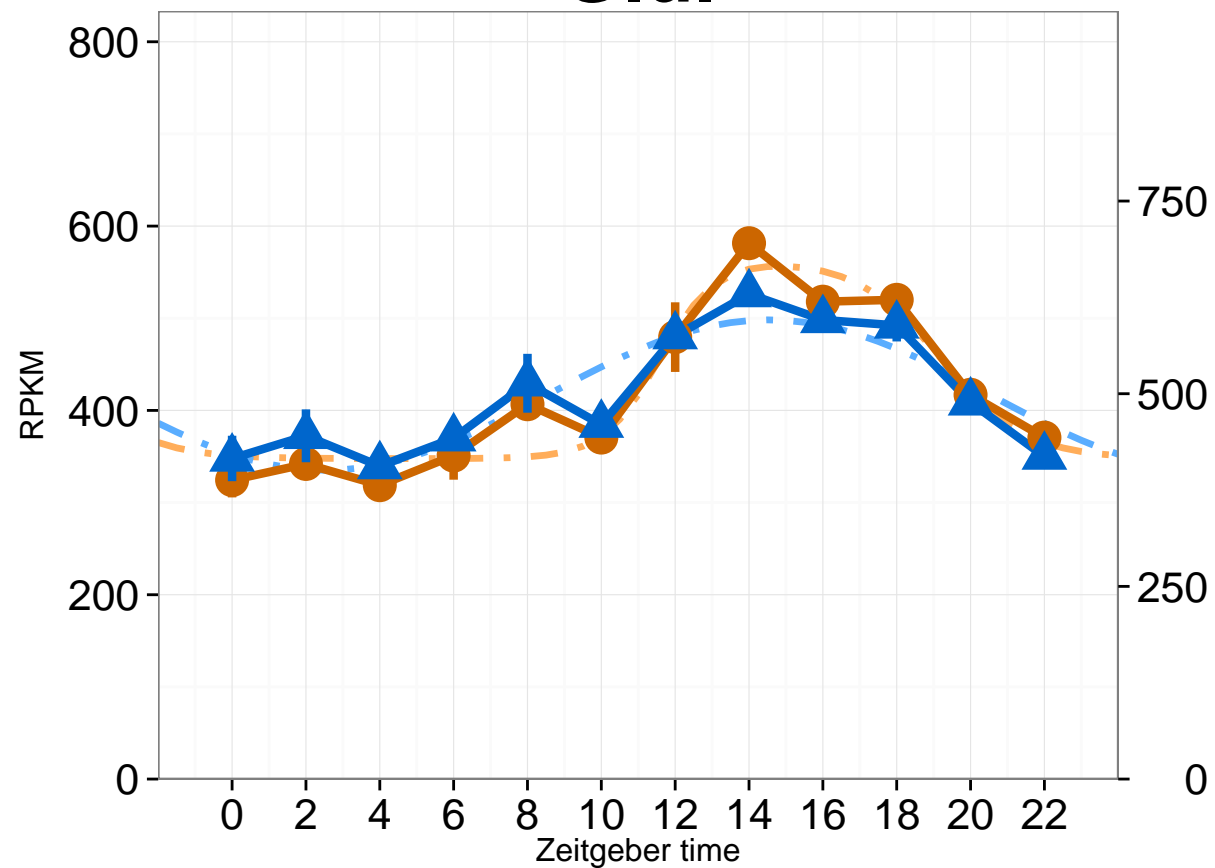

## Glul

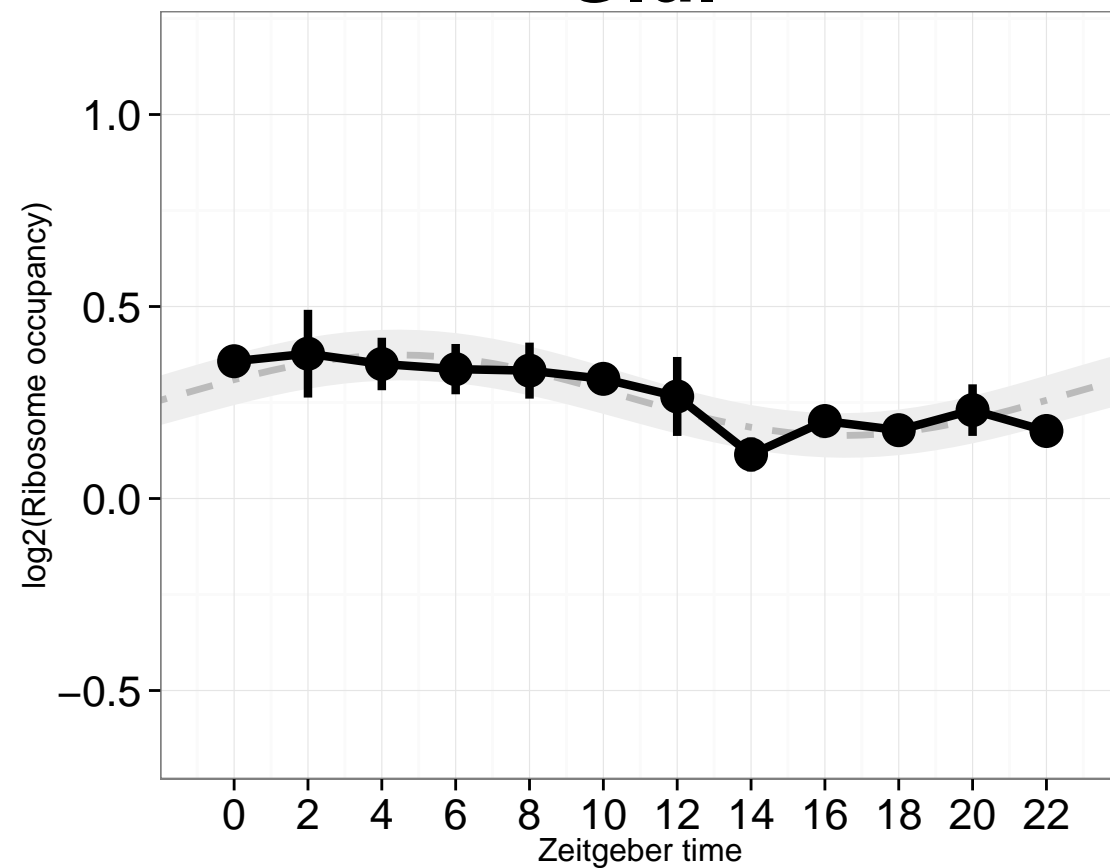

Supplement: Supplementary file 11841 [file 1]

# Dynlt1b

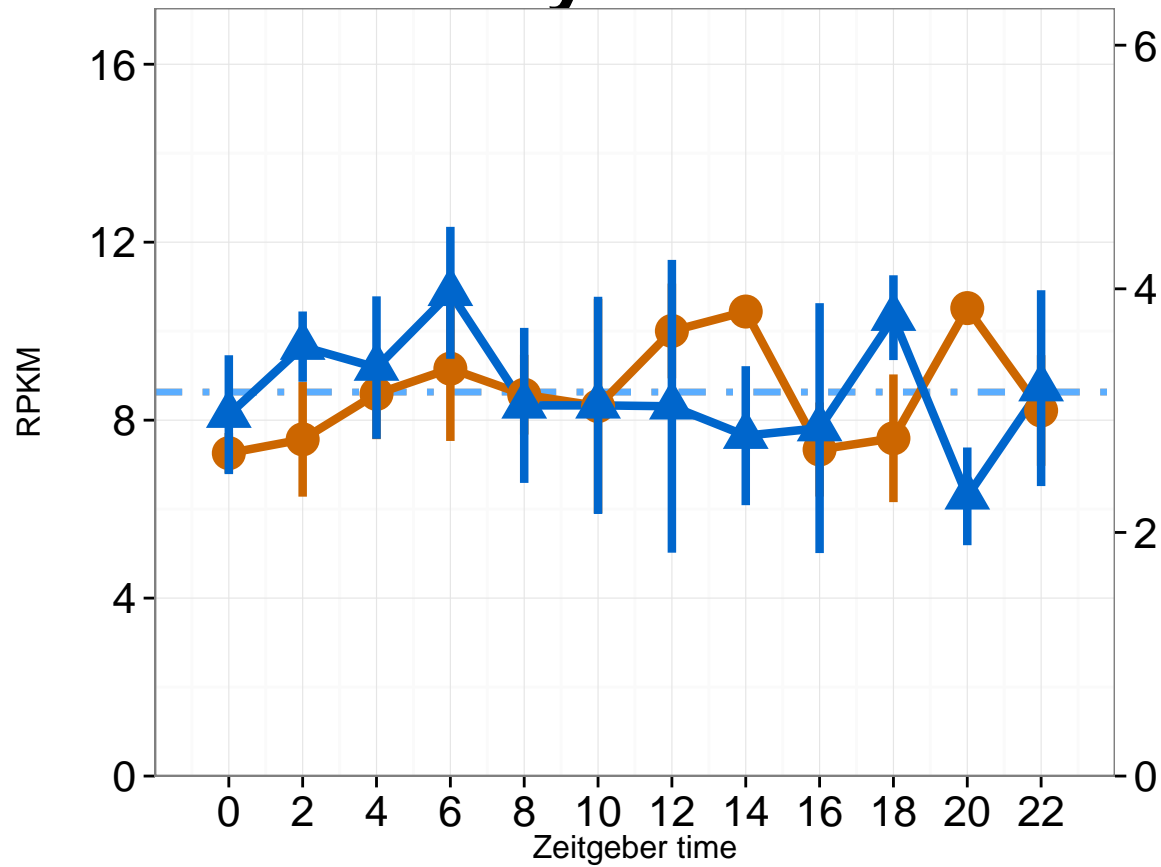

# Dynlt1b

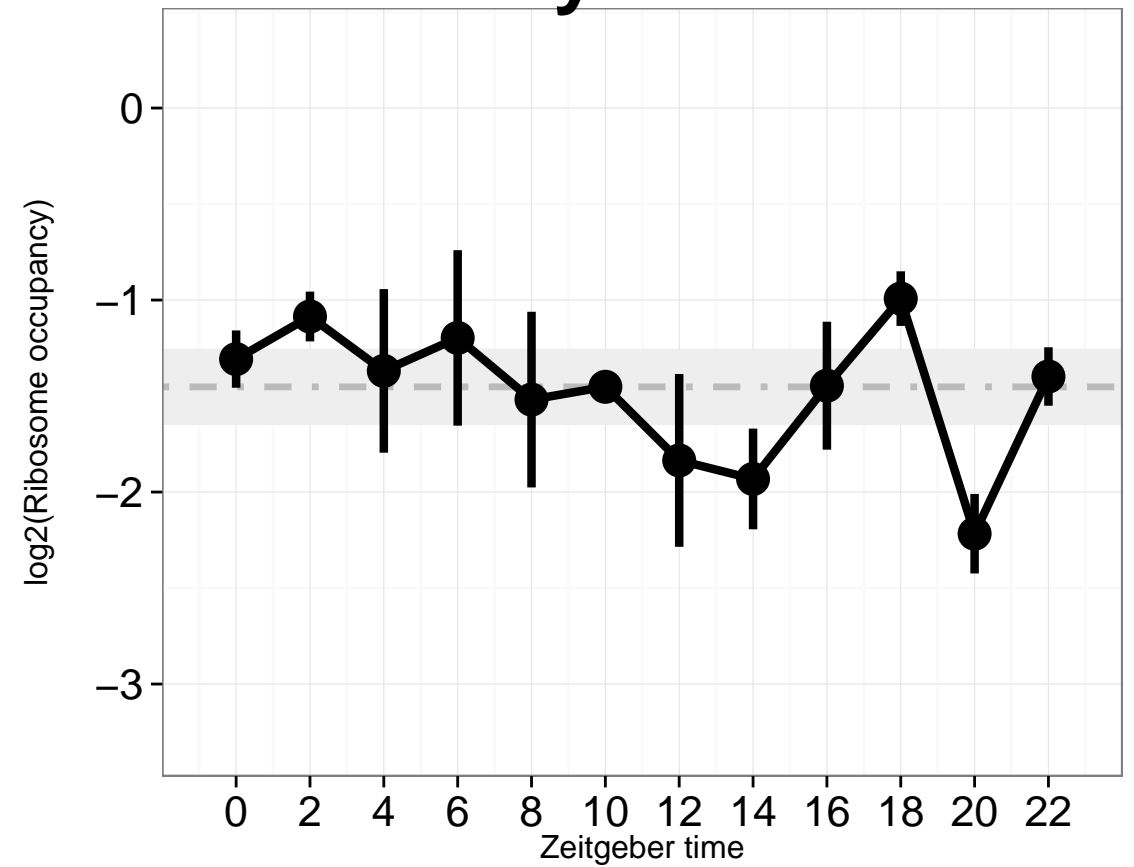

Supplement: Supplementary file 11842 [file 1]

# Apba3

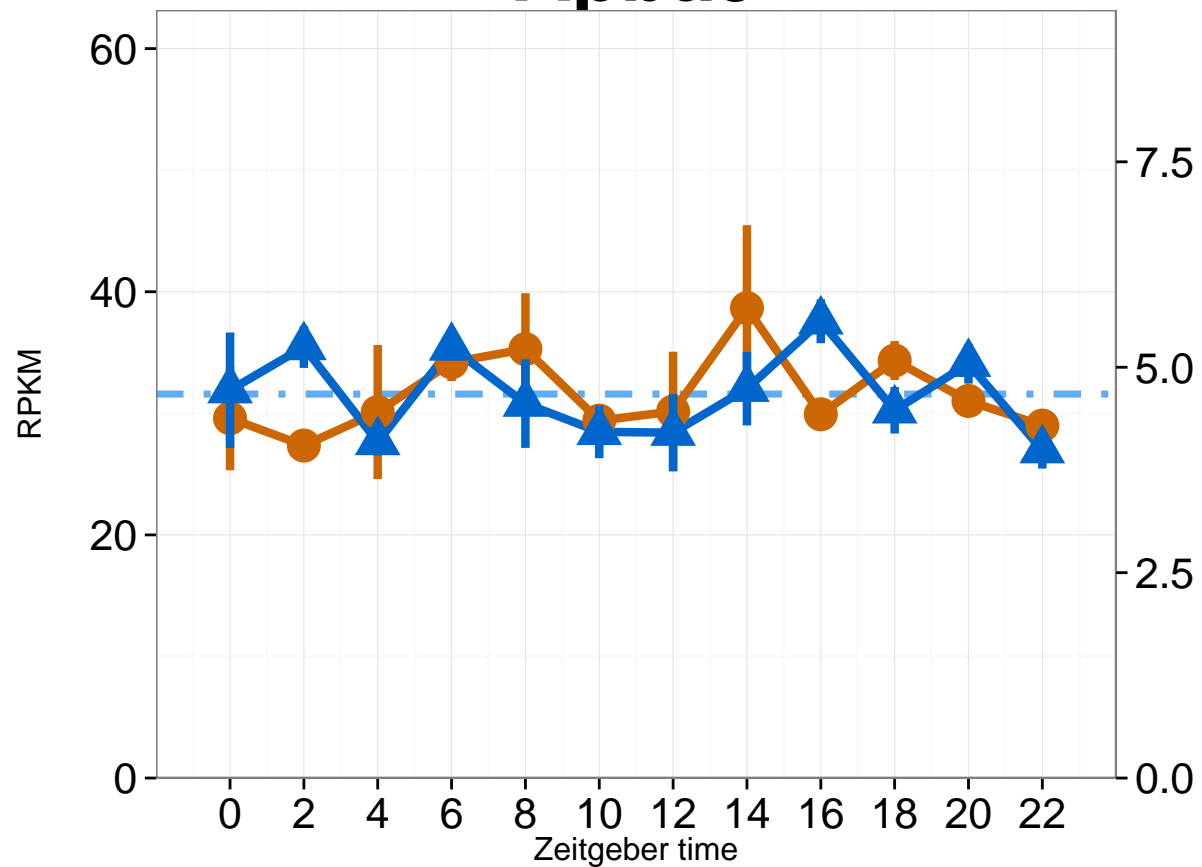

# Apba3

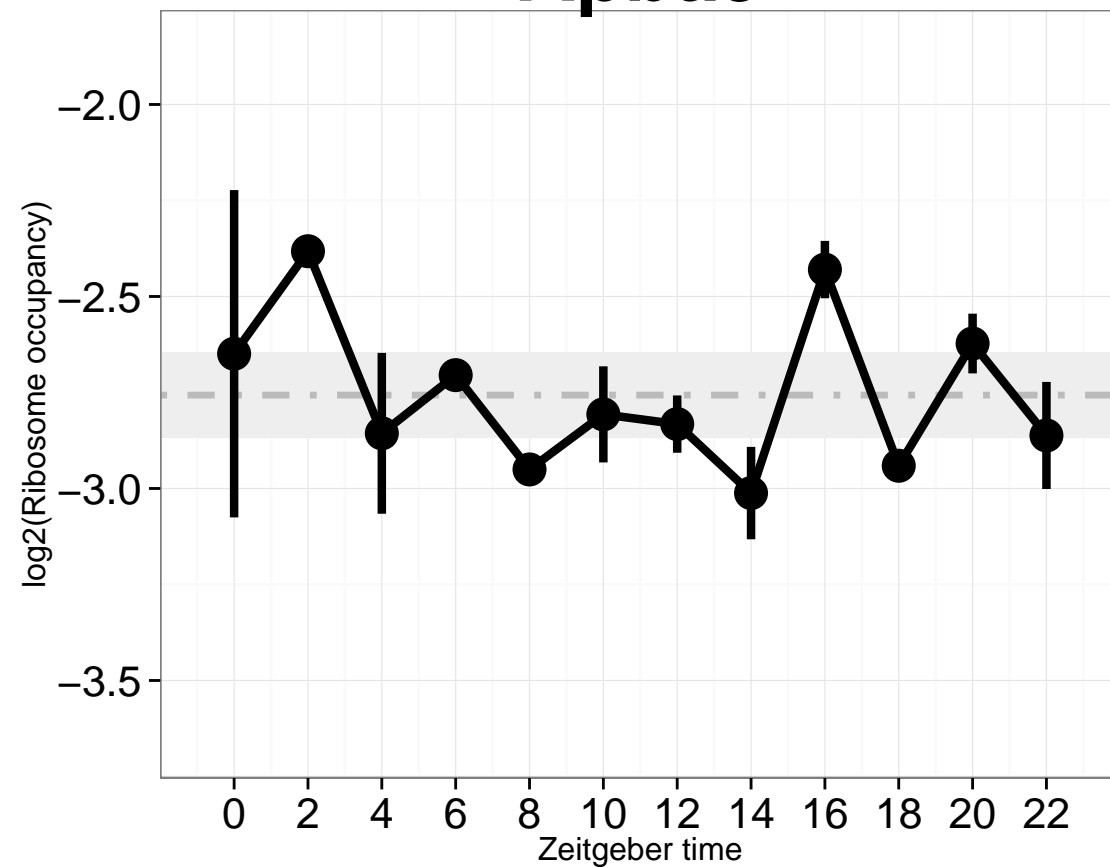

Supplement: Supplementary file 11843 [file 1]
