# Supplementary material (part 119 of 133)
Source: publisher figshare collection journal article supplement (https://springernature.figshare.com/articles/dataset/_/4903193)

## Bco2

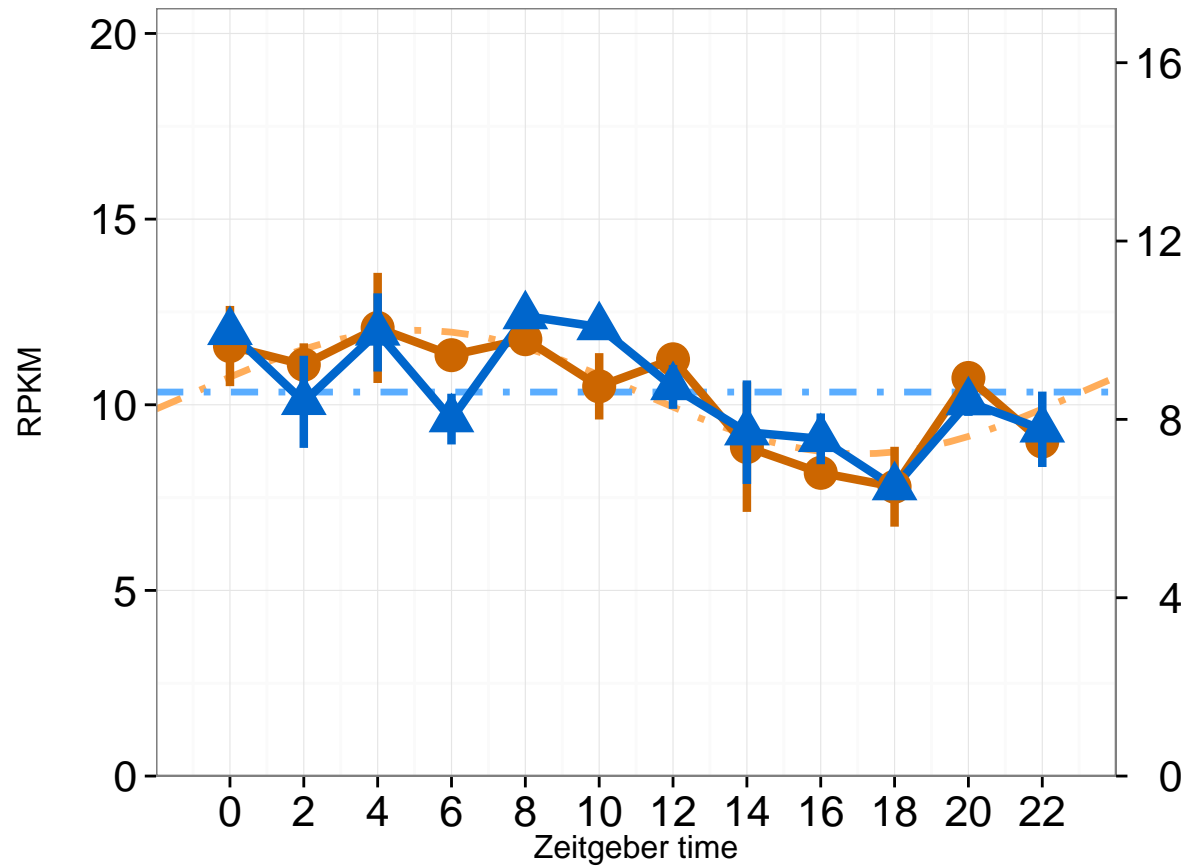

## Bco2

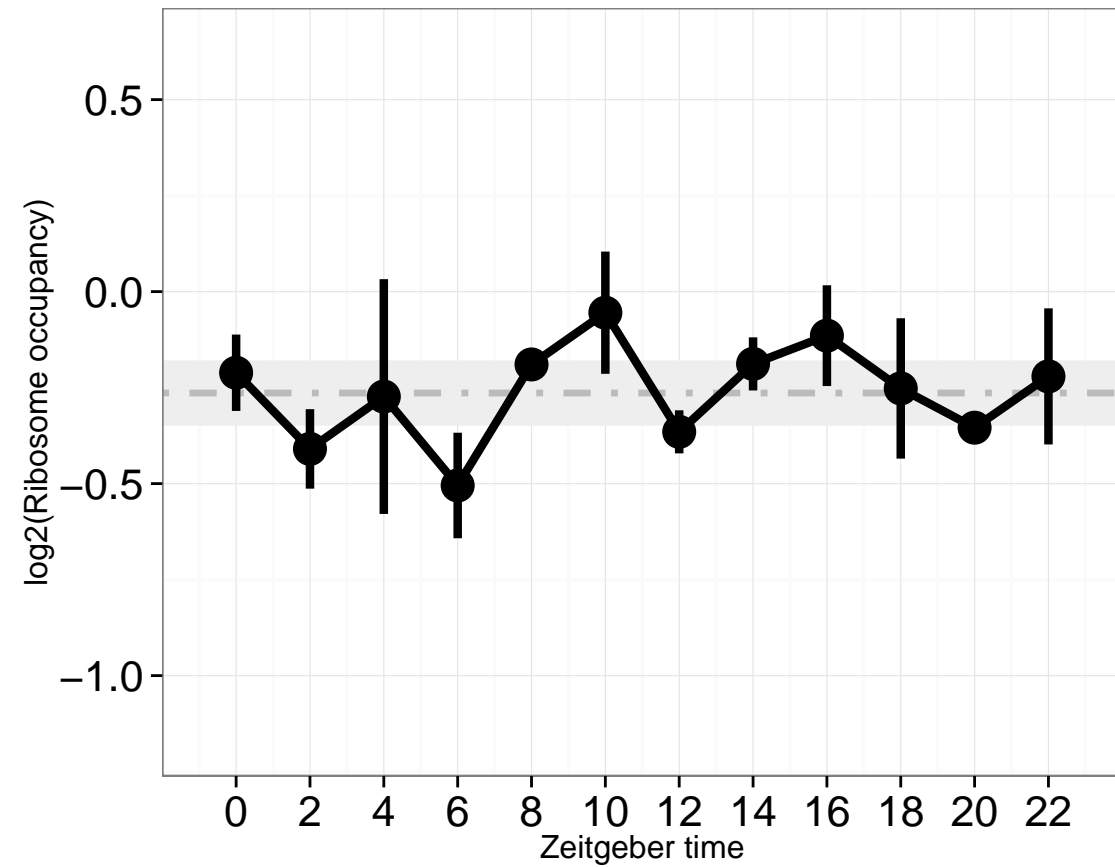

Supplement: Supplementary file 11844 [file 1]

# Myo3b

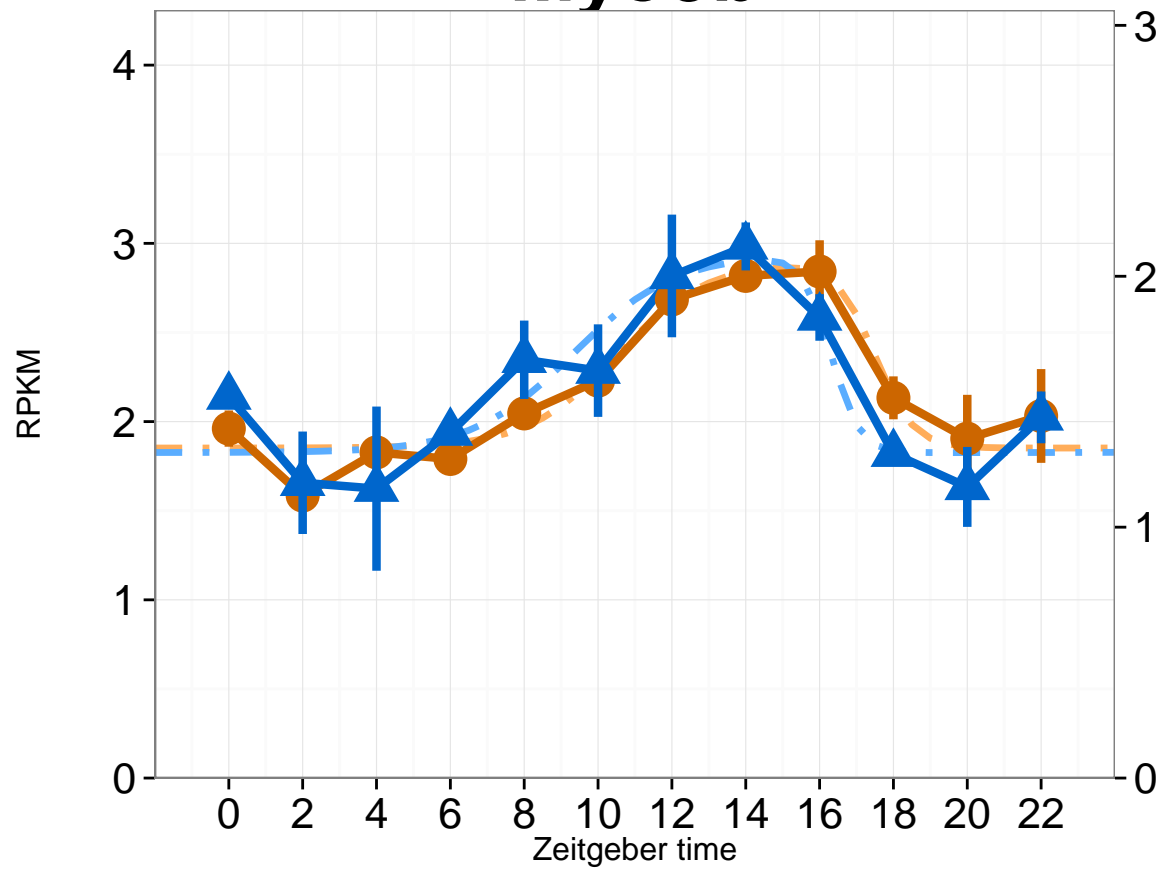

# Myo3b

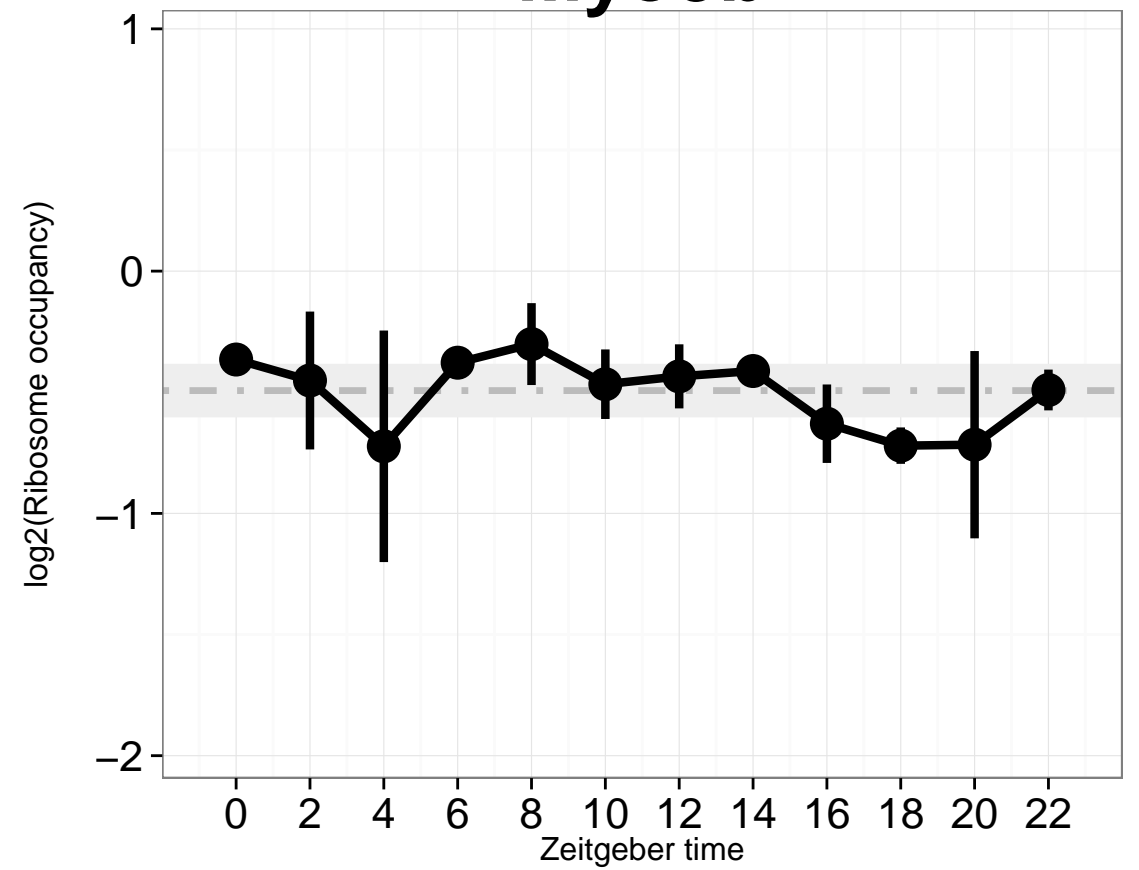

Supplement: Supplementary file 11845 [file 1]

# Tbc1d12

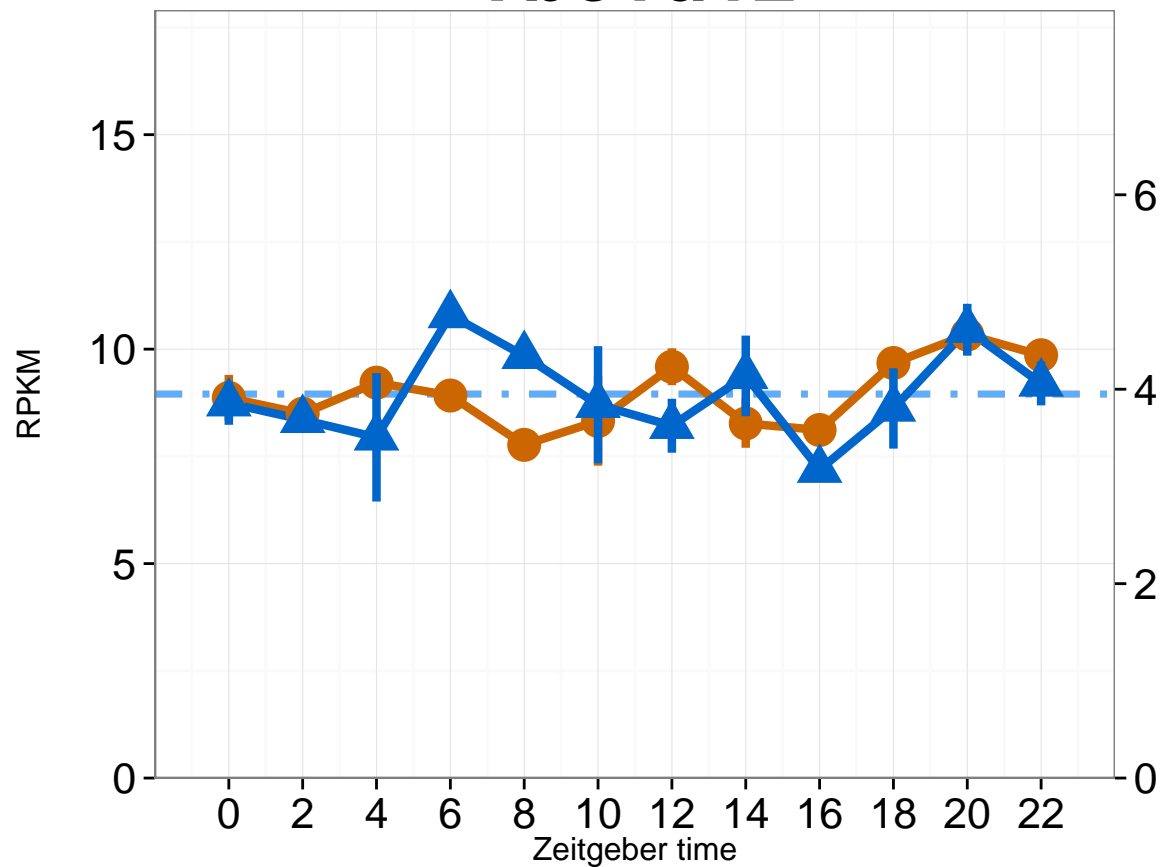

# Tbc1d12

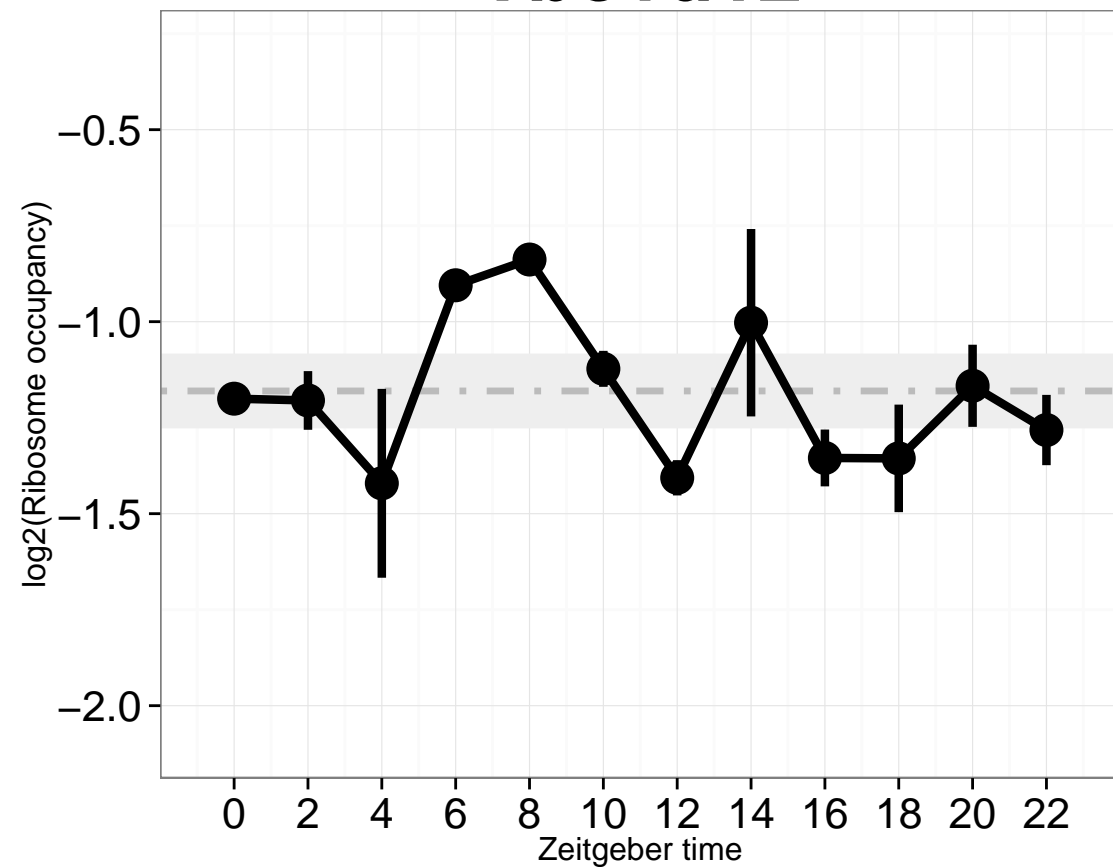

Supplement: Supplementary file 11846 [file 1]

## Slc25a38

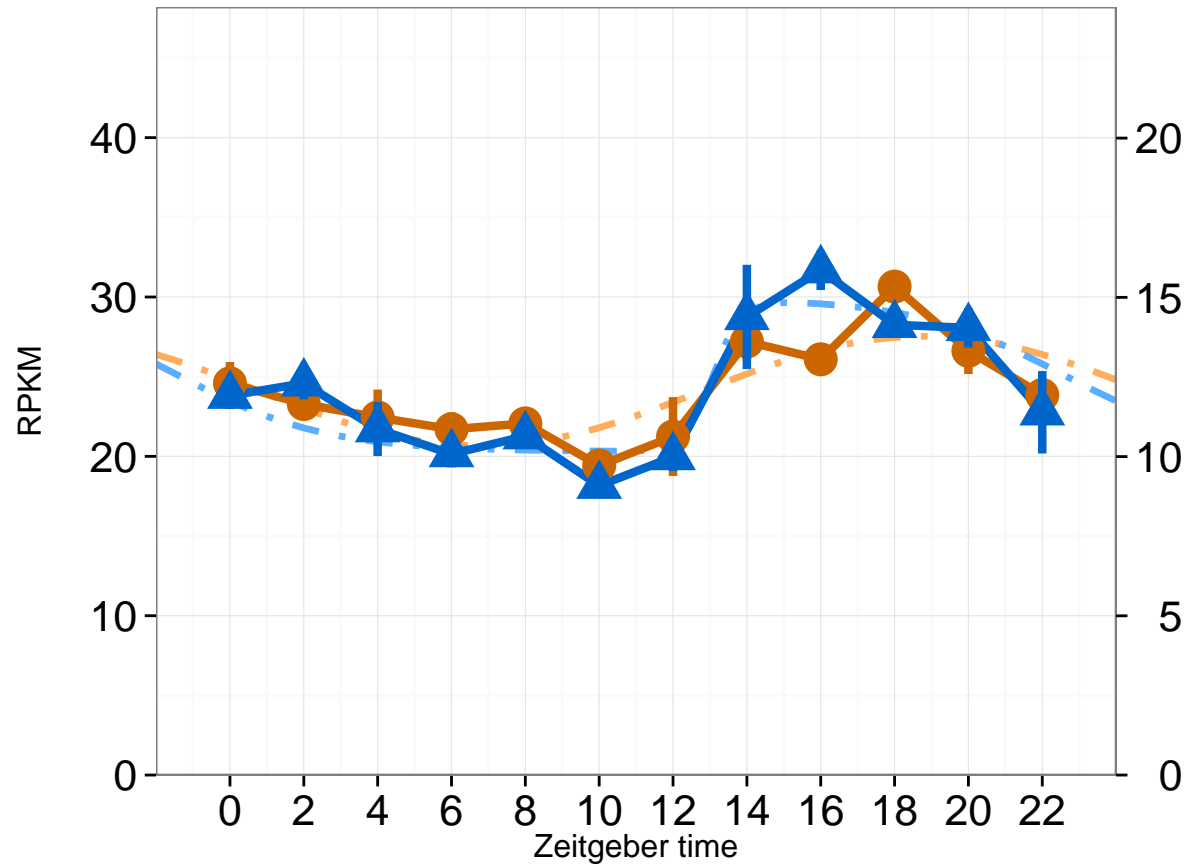

## Slc25a38

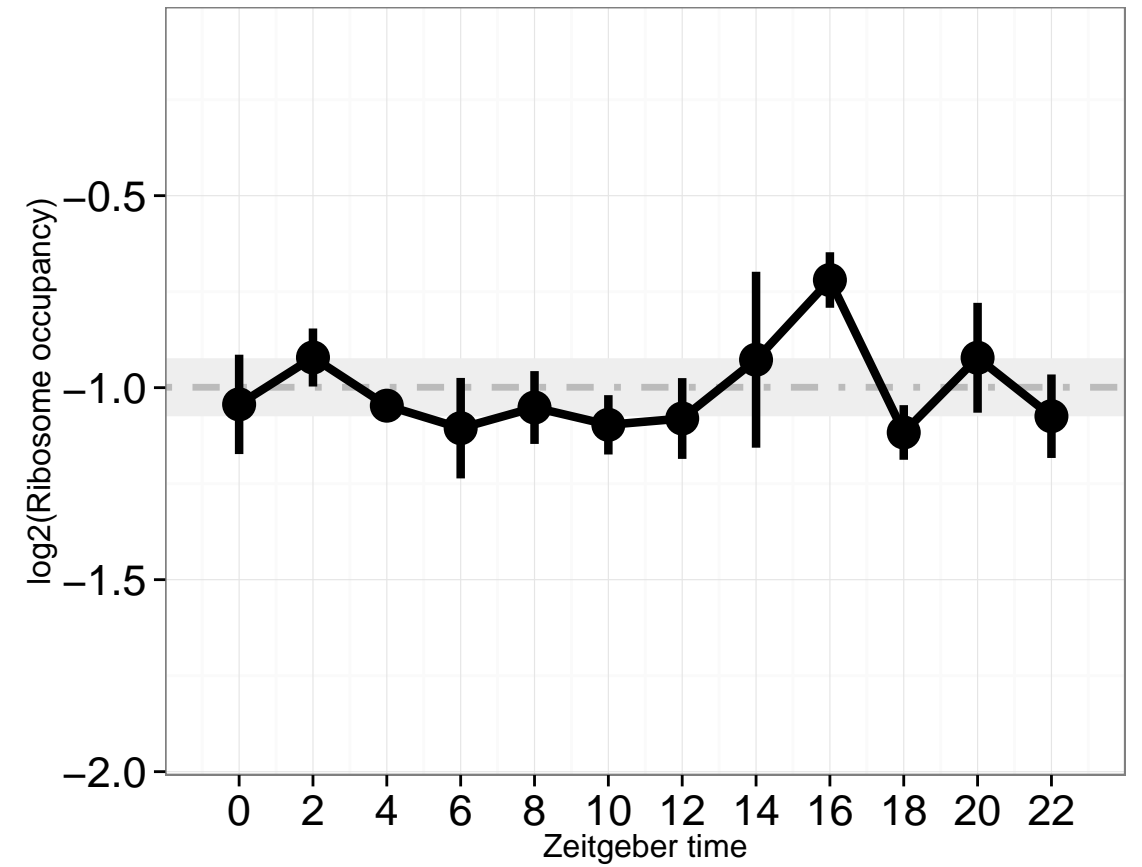

Supplement: Supplementary file 11847 [file 1]

## Synj2bp

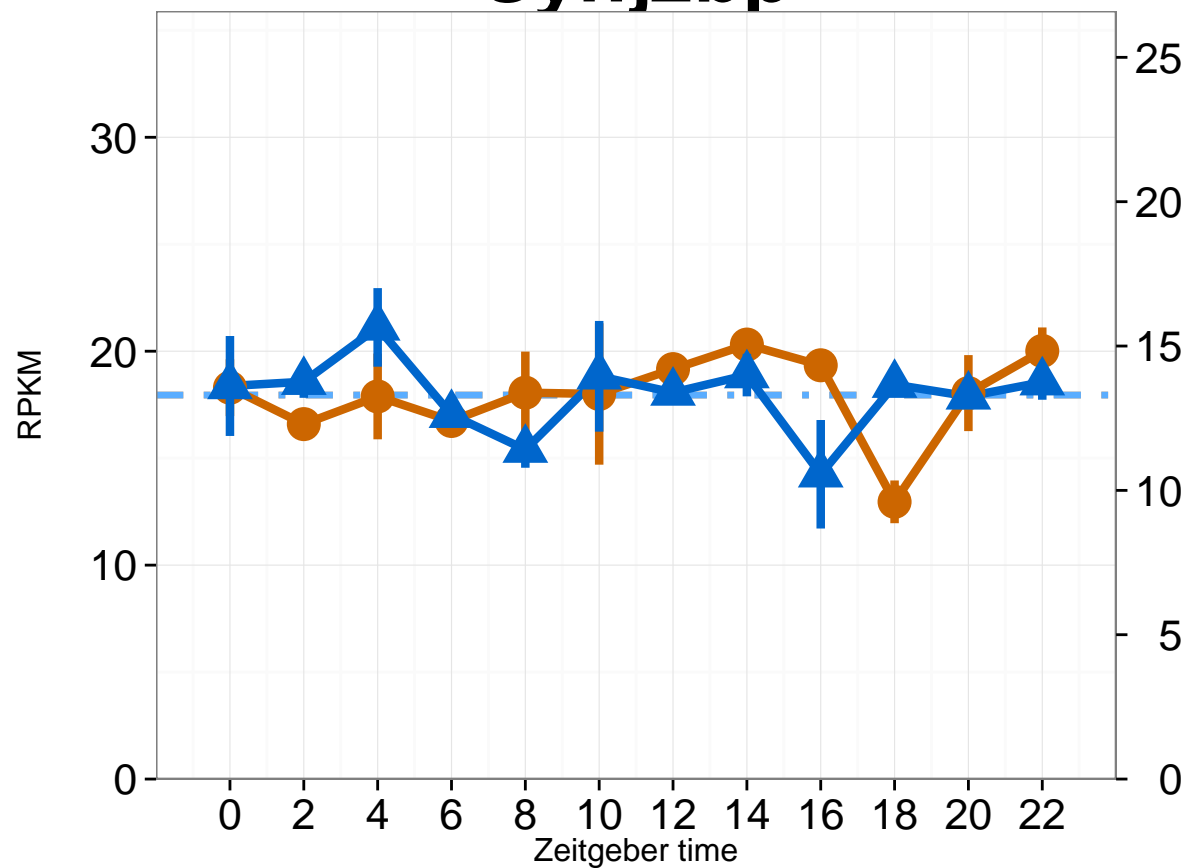

## Synj2bp

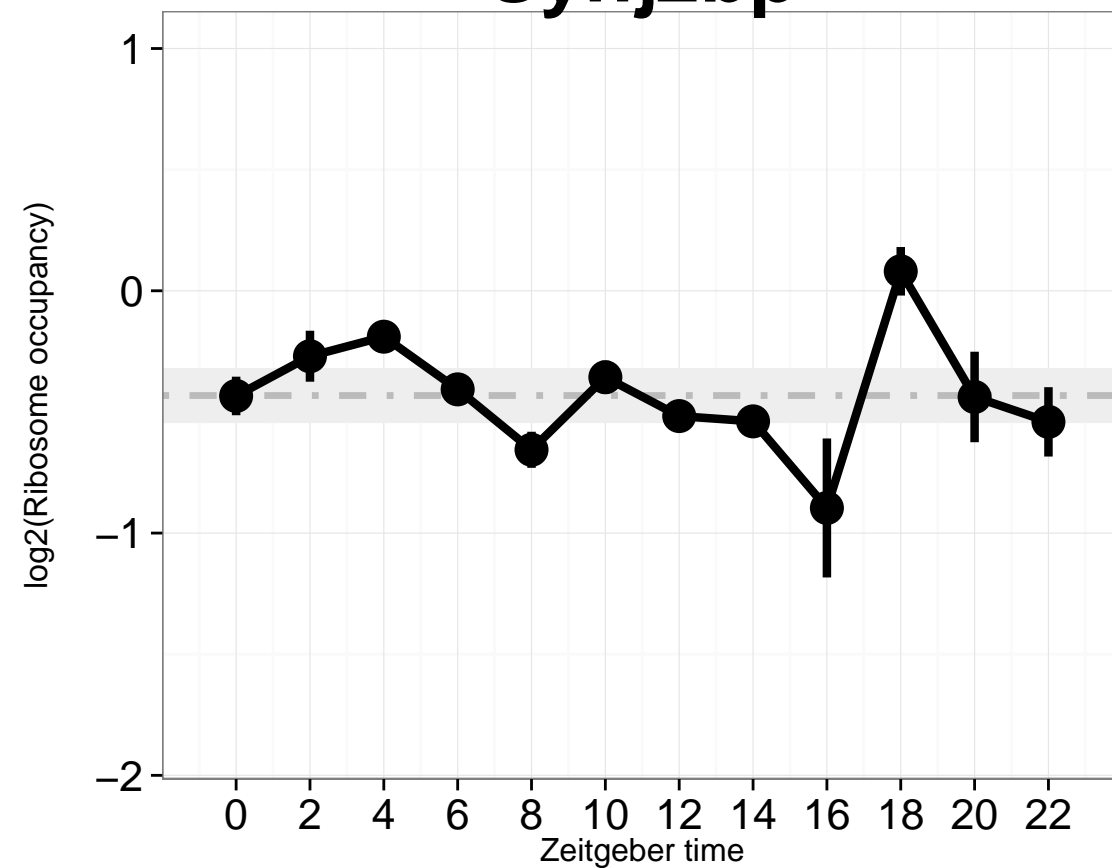

Supplement: Supplementary file 11848 [file 1]

# Gm4951

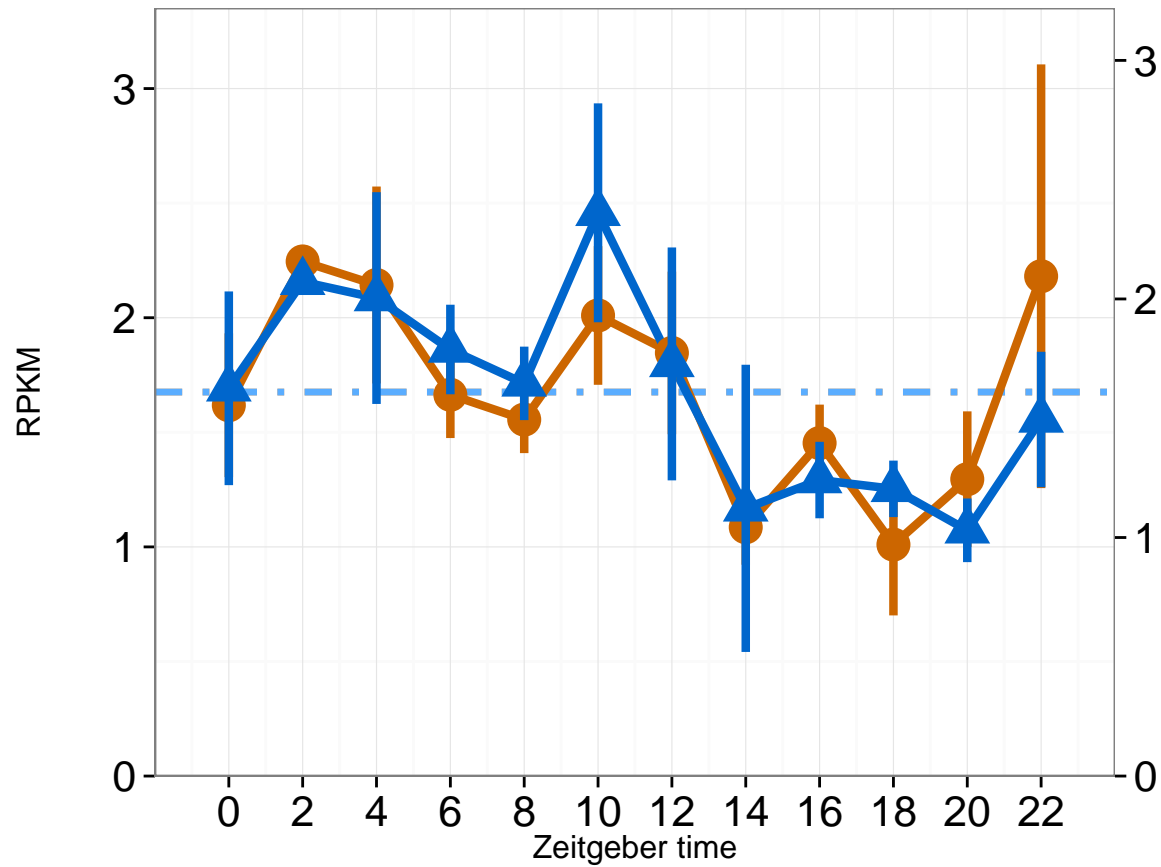

# Gm4951

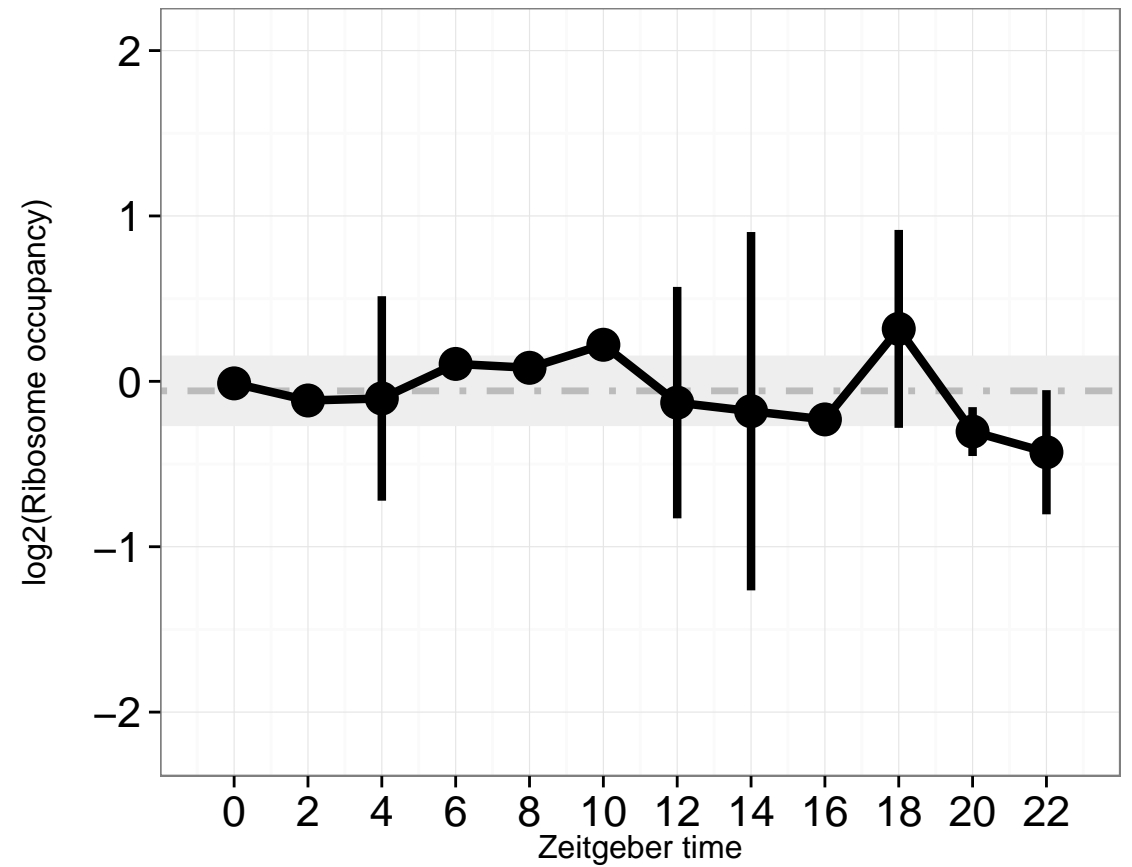

Supplement: Supplementary file 11849 [file 1]

# Ogg1

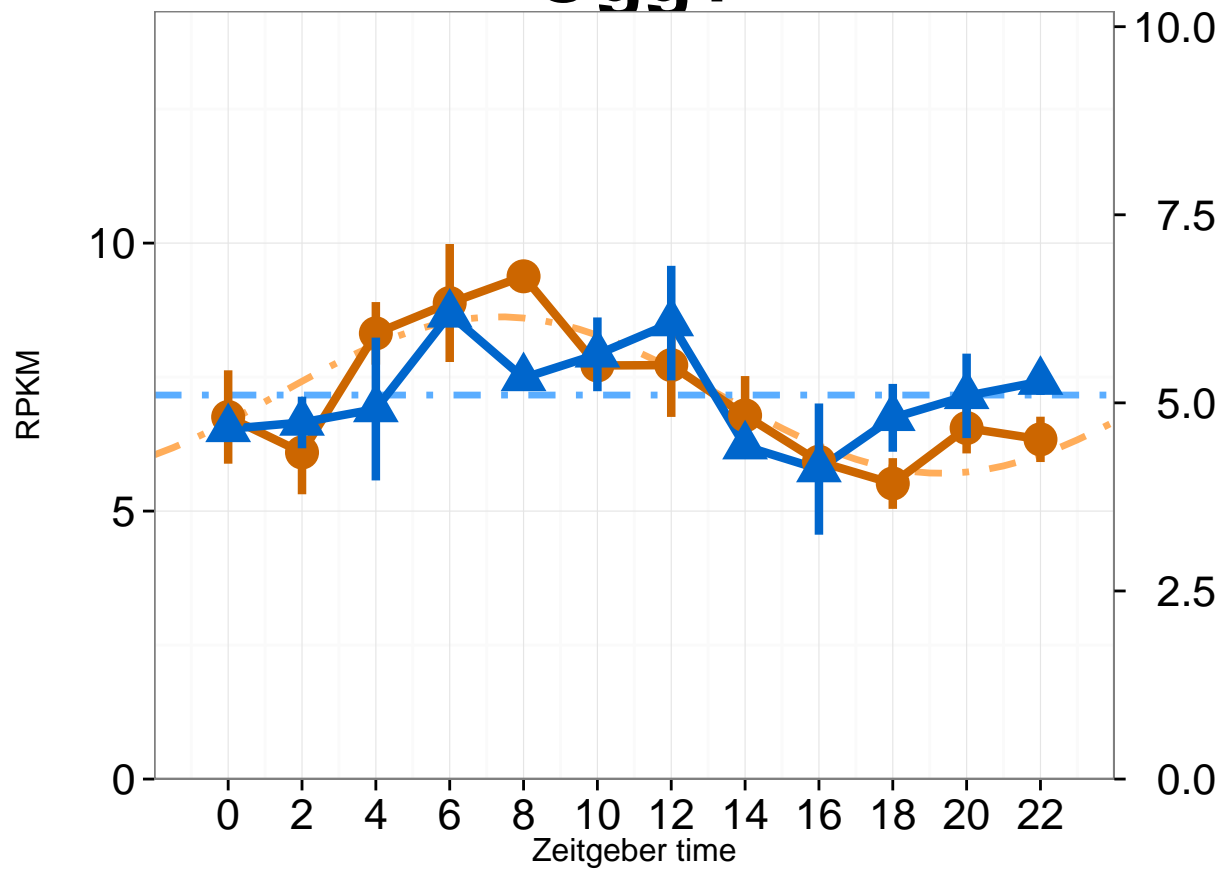

# Ogg1

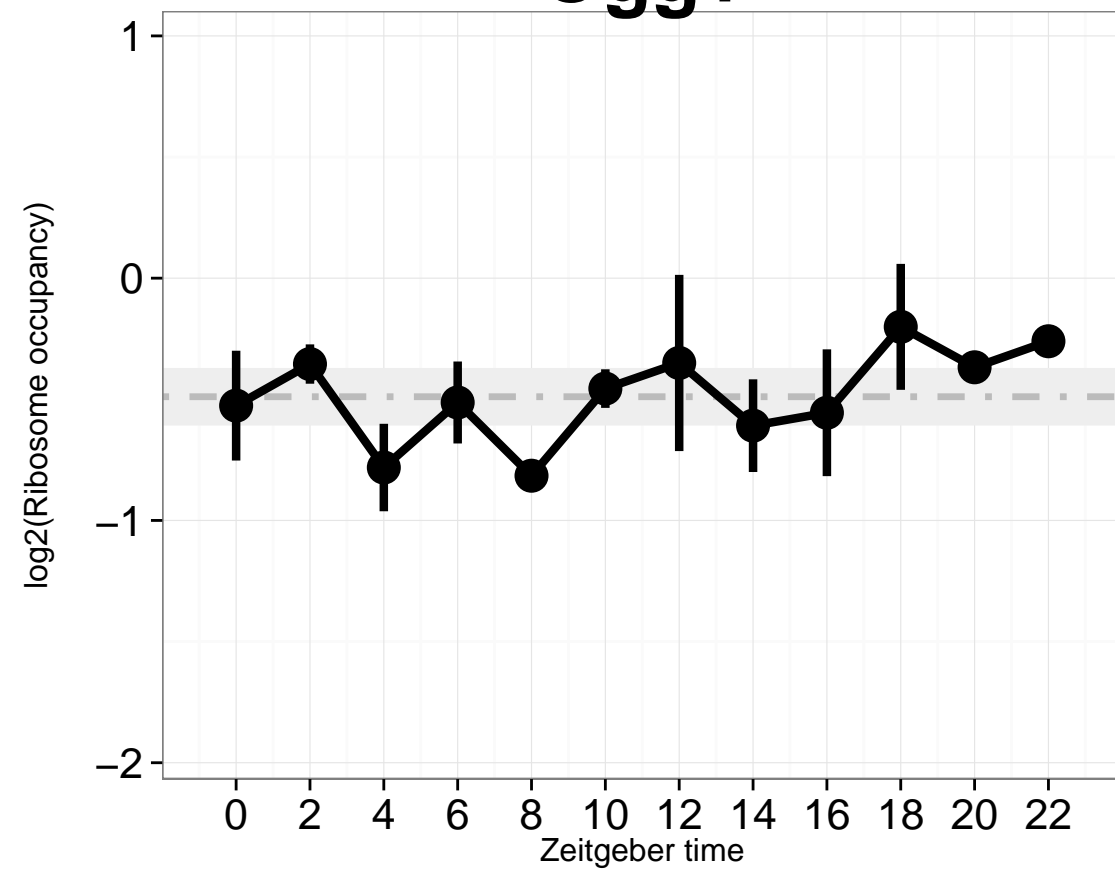

Supplement: Supplementary file 11850 [file 1]

## Nbas

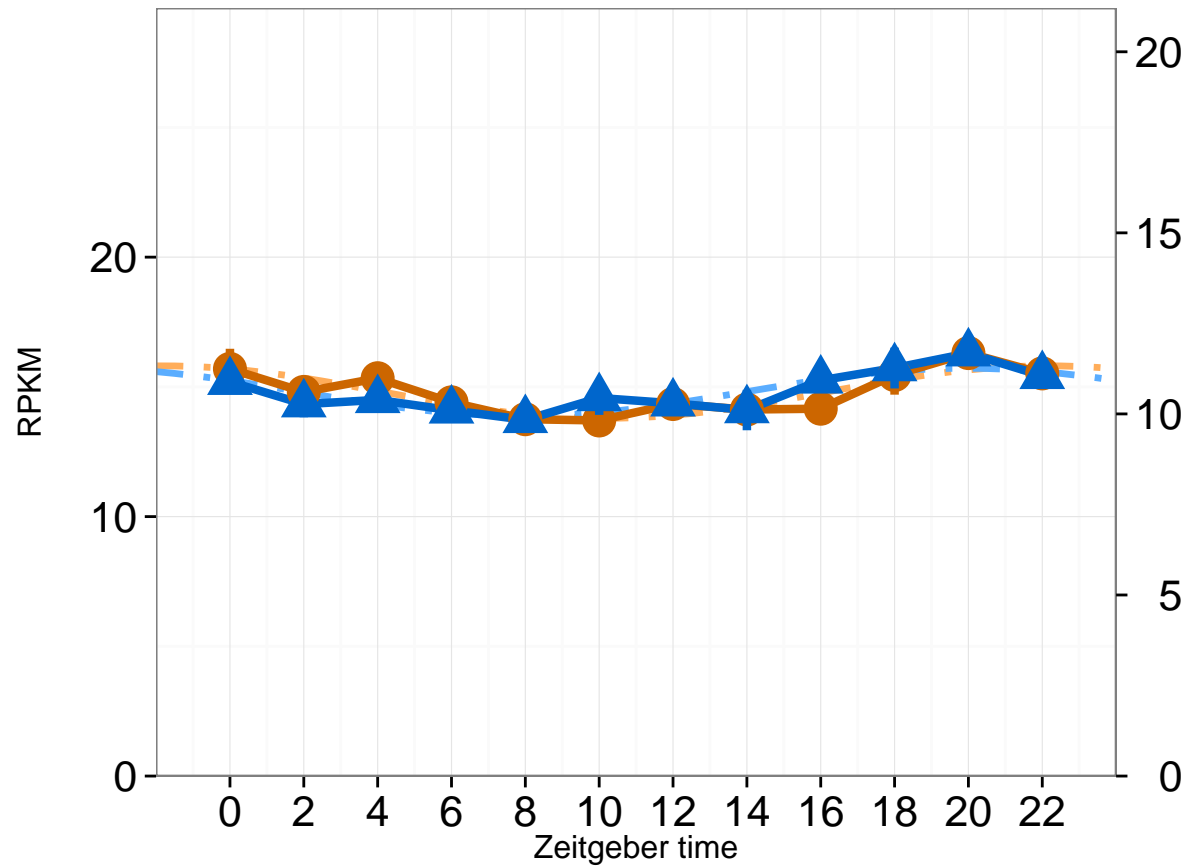

## Nbas

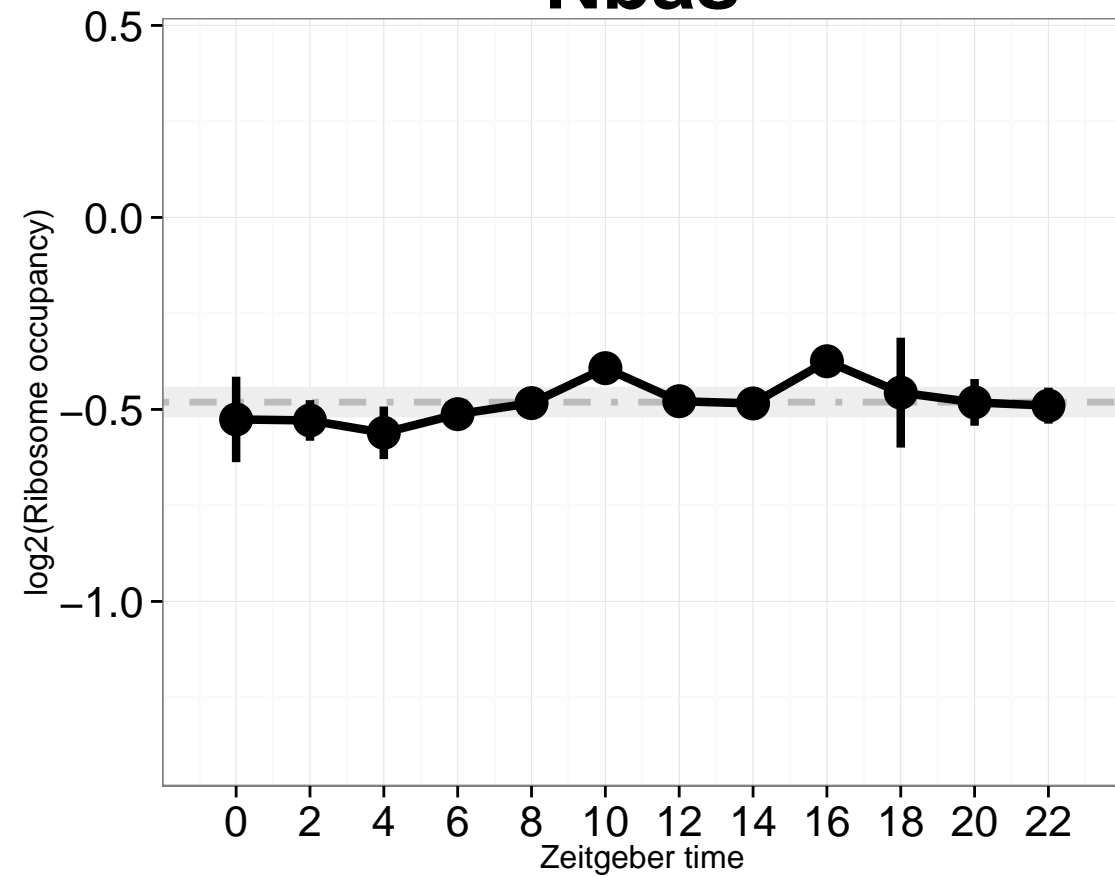

Supplement: Supplementary file 11851 [file 1]

# Pla2r1

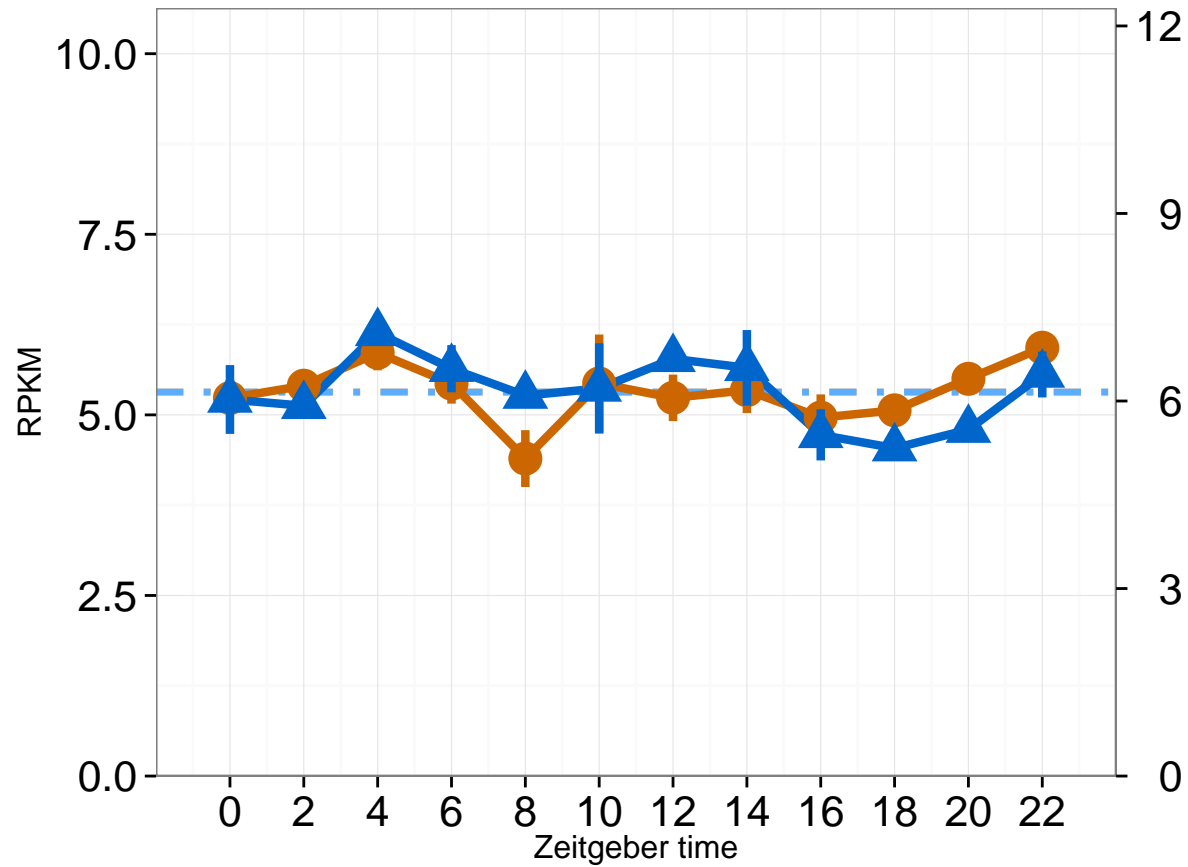

# Pla2r1

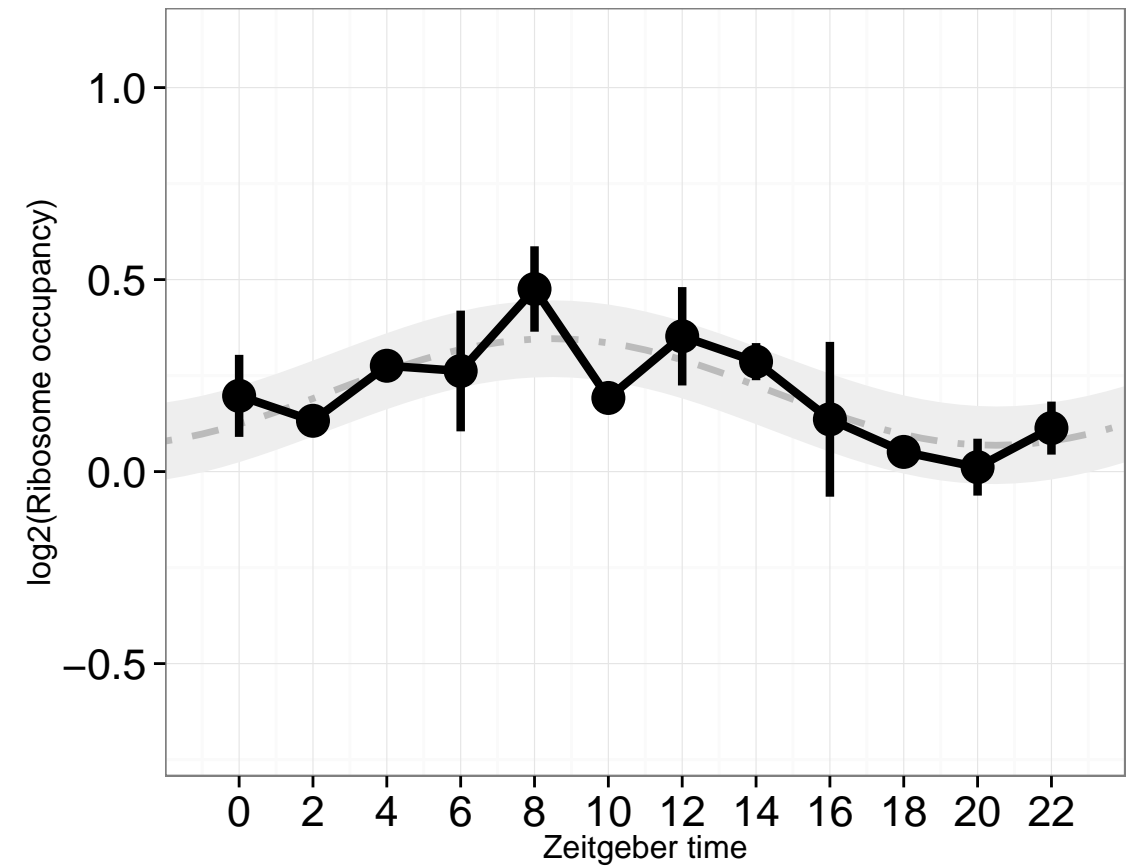

Supplement: Supplementary file 11852 [file 1]

## Faf2

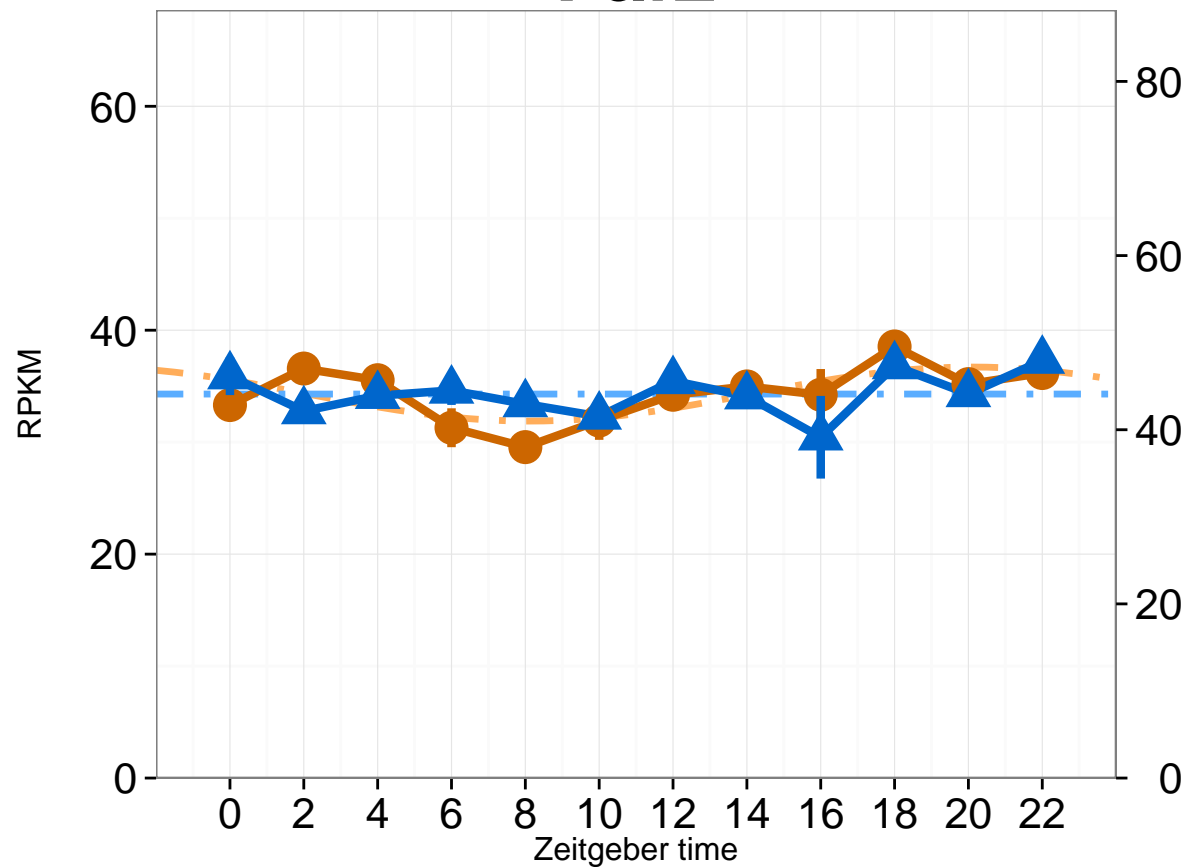

## Faf2

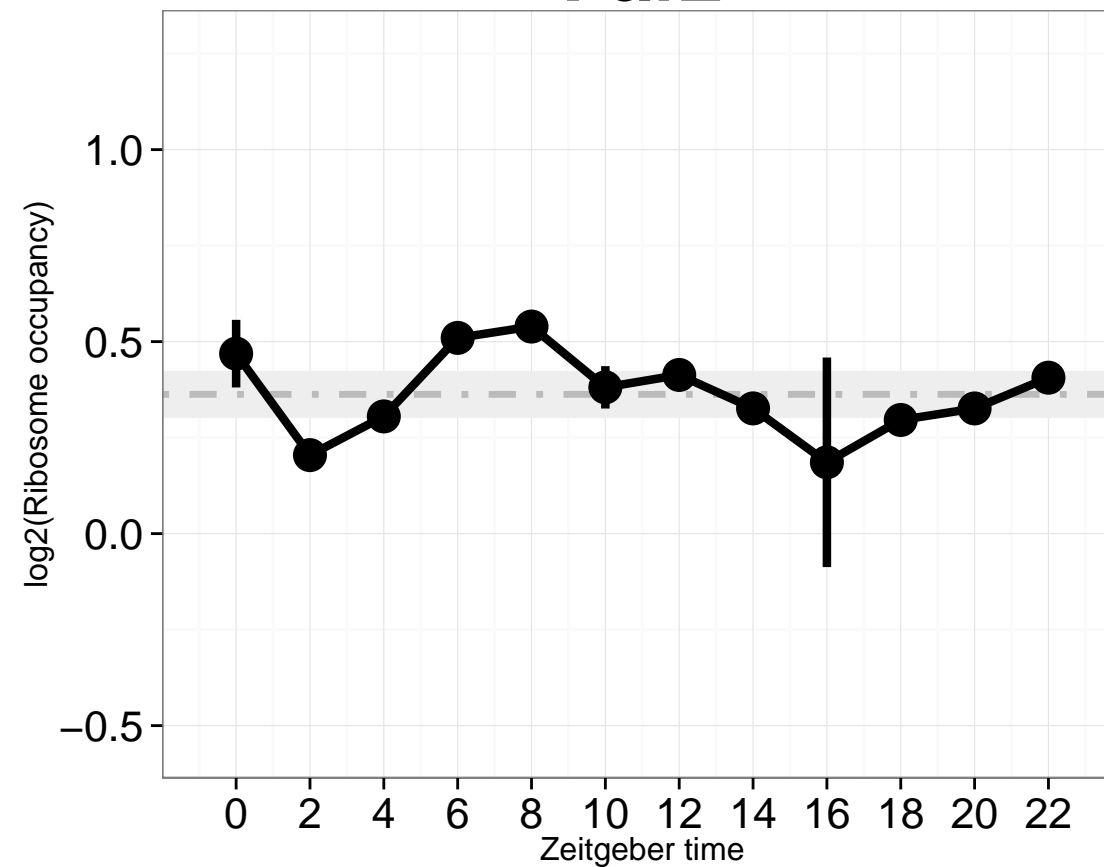

Supplement: Supplementary file 11853 [file 1]

## Otud4

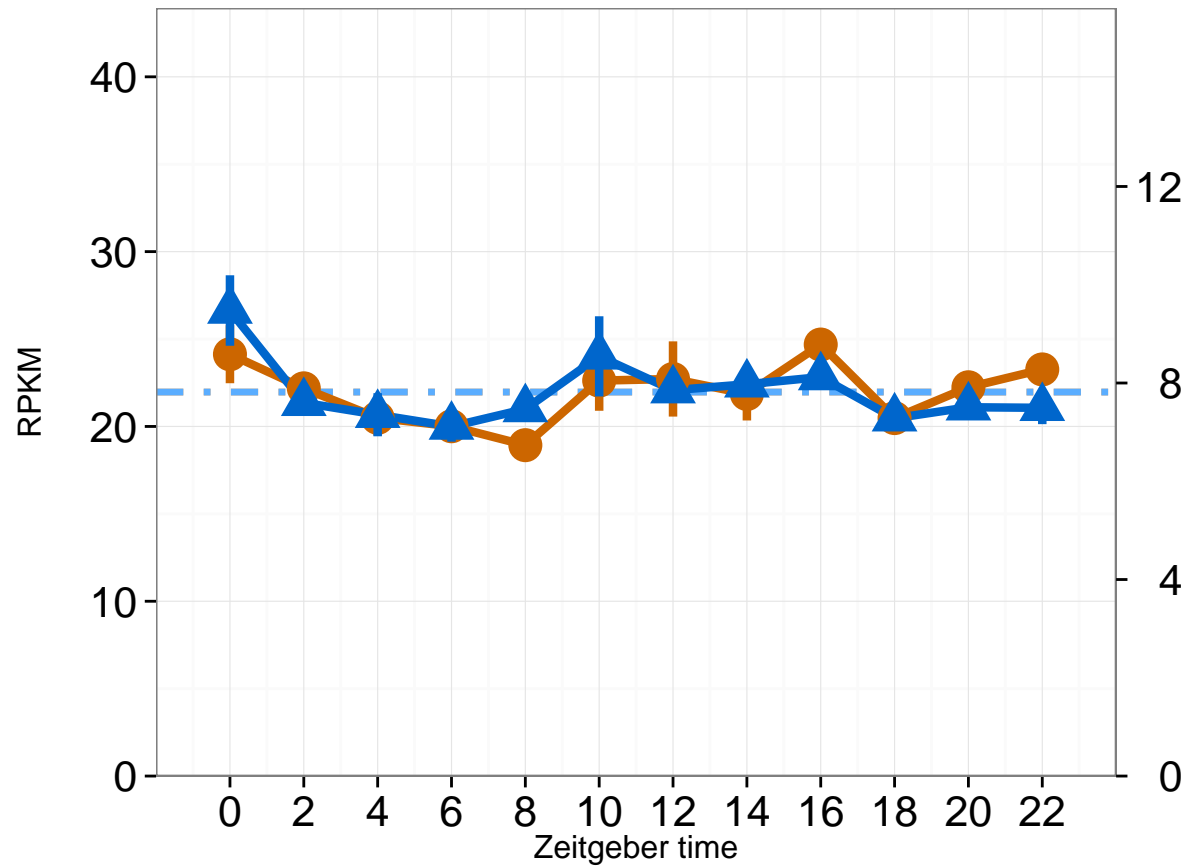

## Otud4

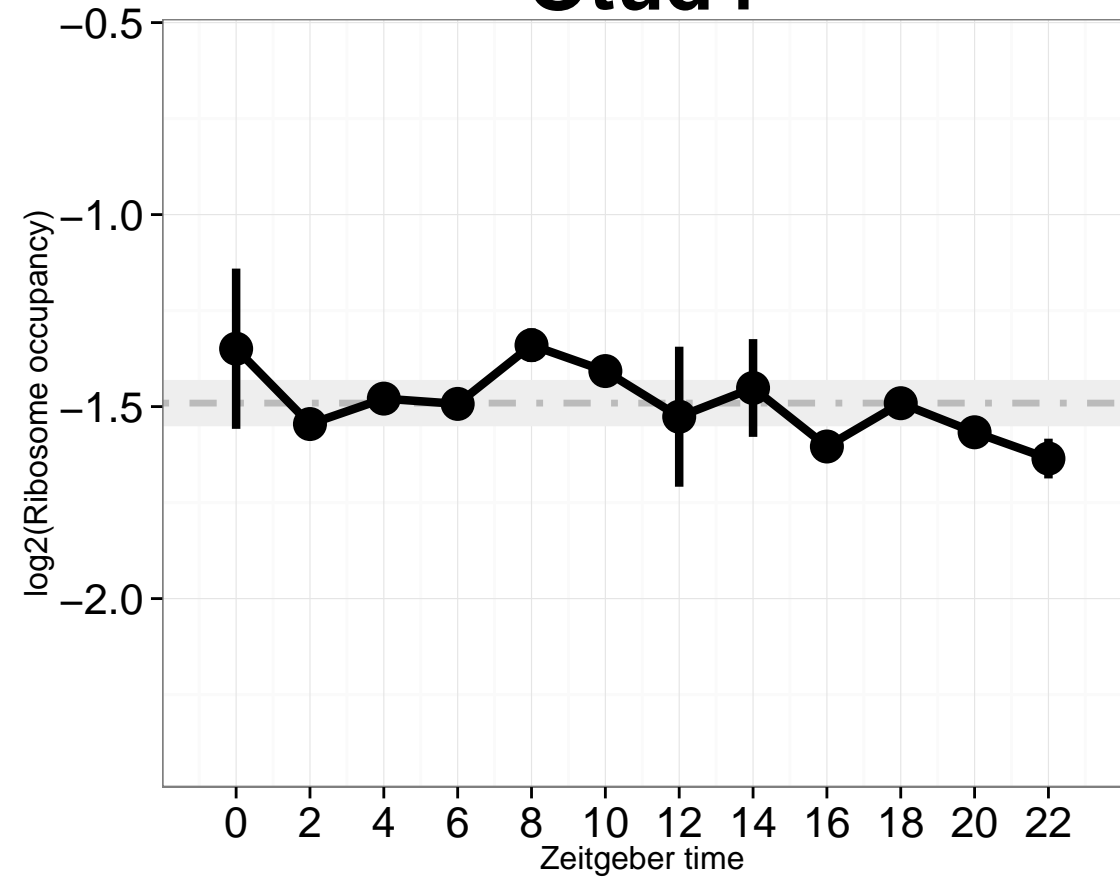

Supplement: Supplementary file 11854 [file 1]

## Eif2s1

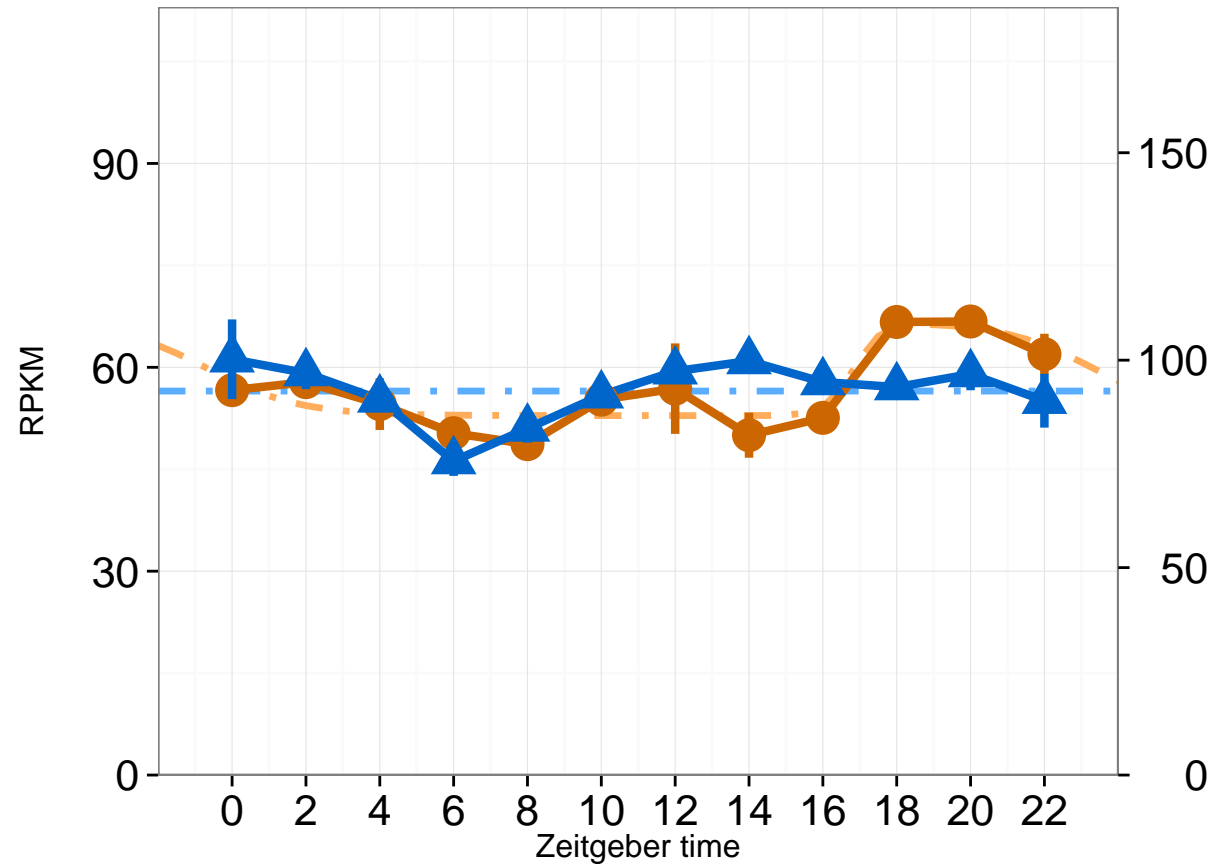

## Eif2s1

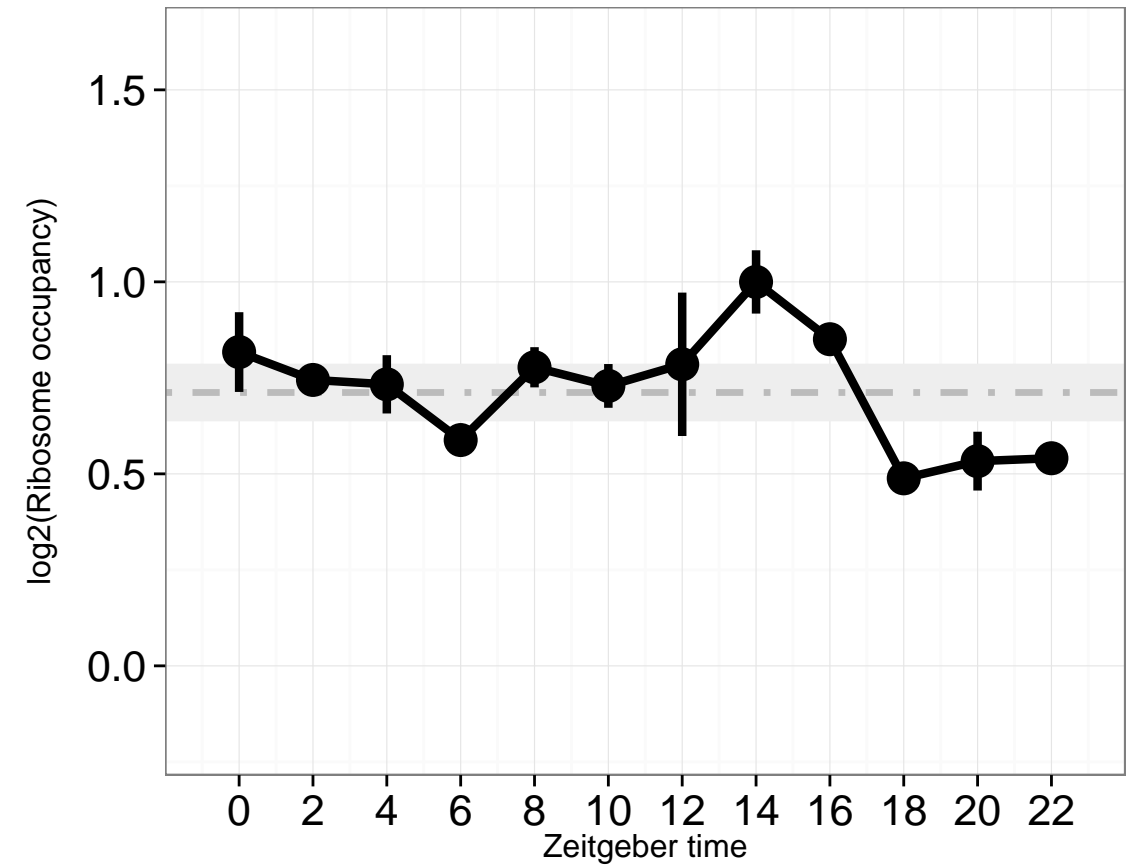

Supplement: Supplementary file 11856 [file 1]

## Sat1

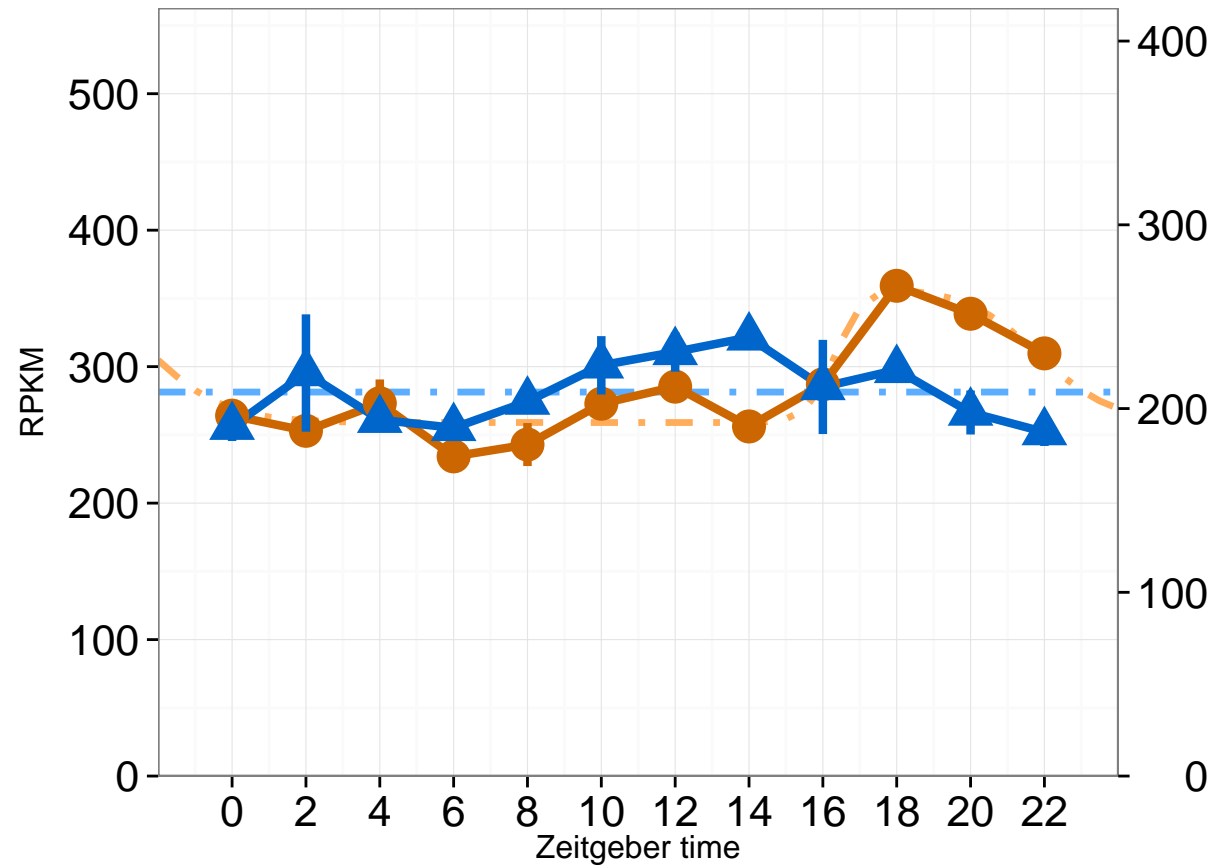

## Sat1

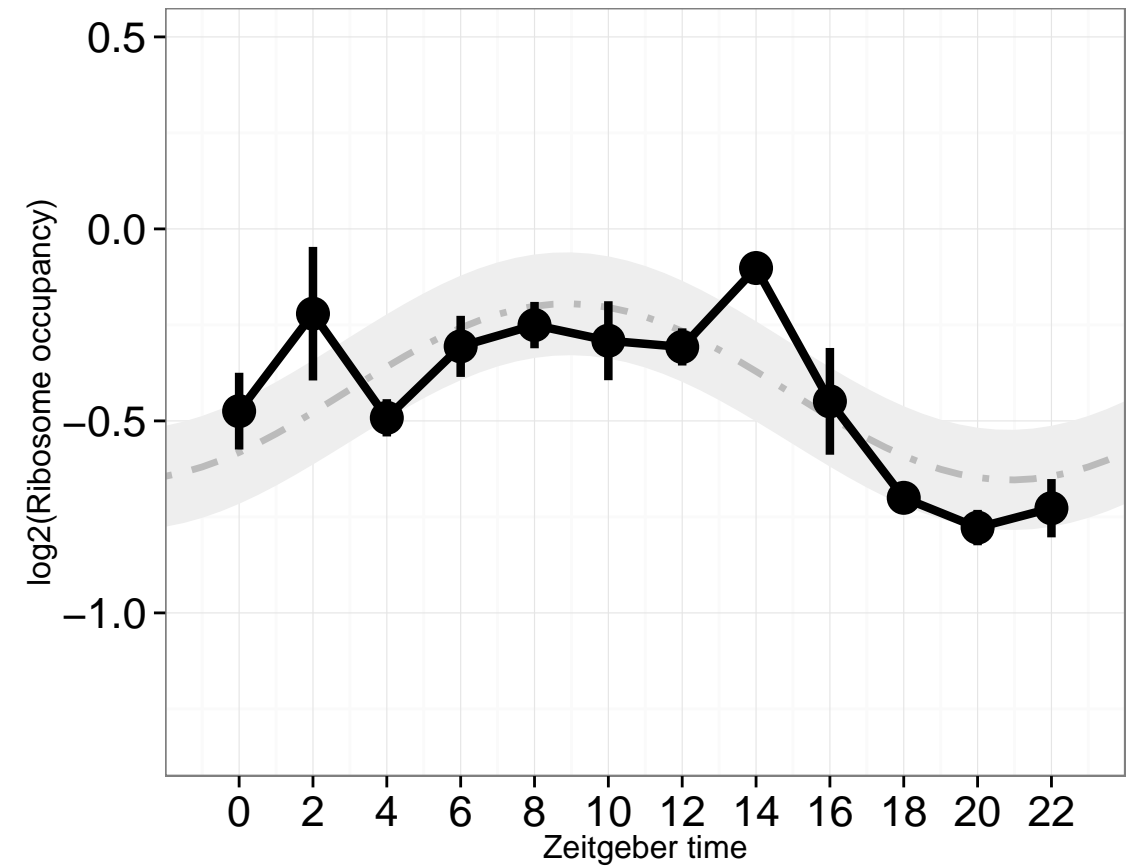

Supplement: Supplementary file 11857 [file 1]

## She

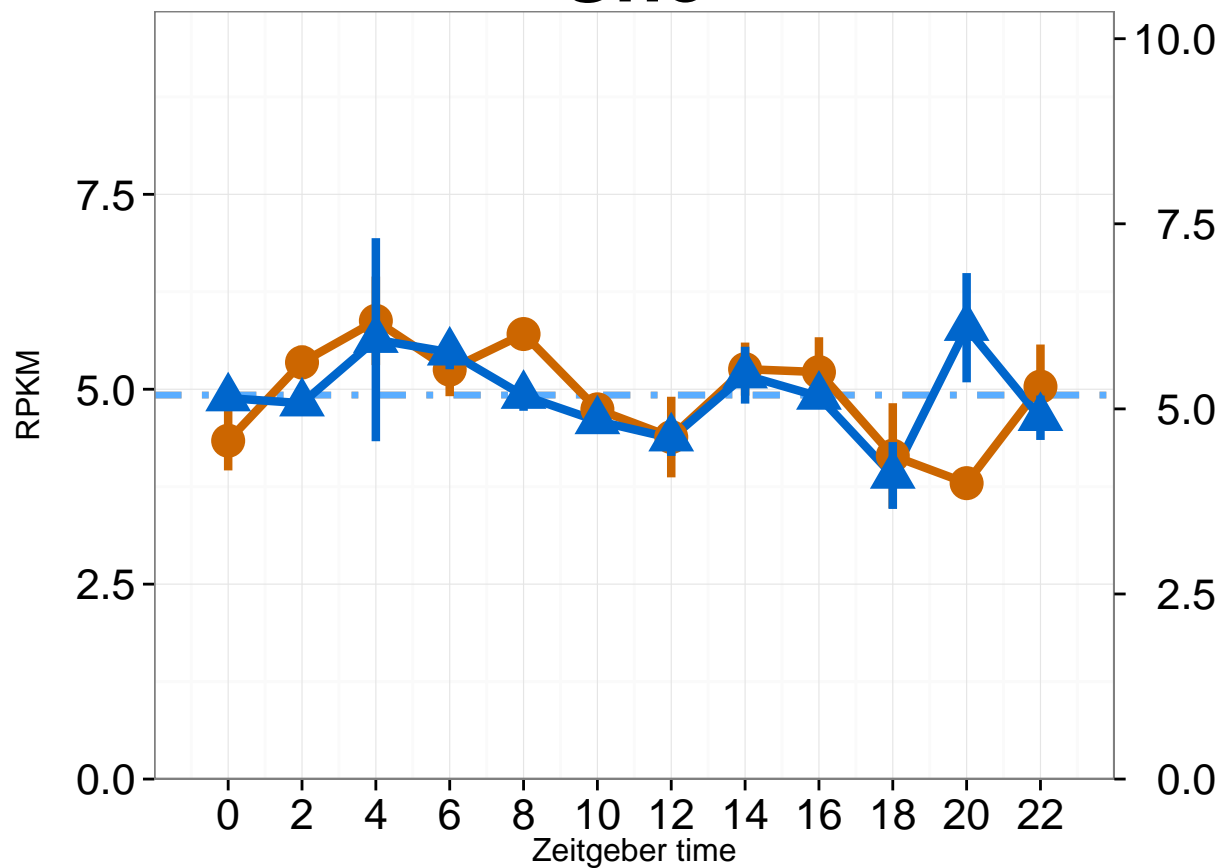

## She

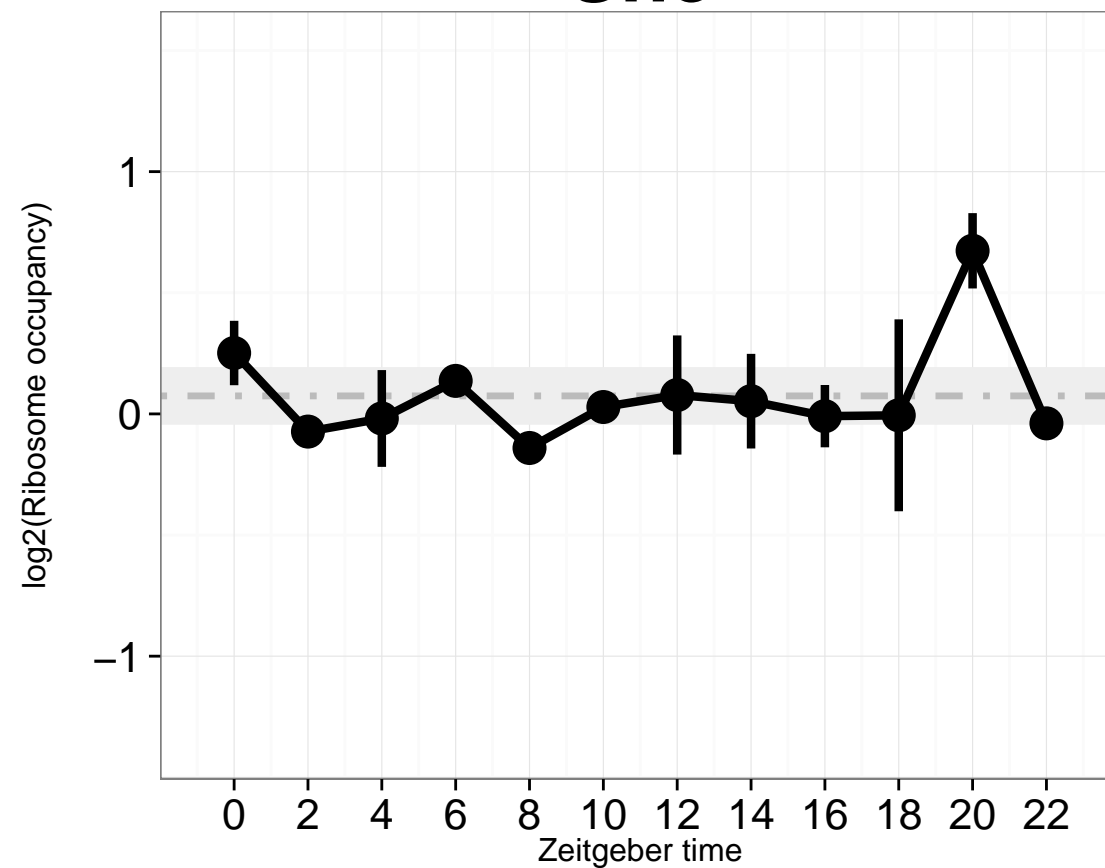

Supplement: Supplementary file 11858 [file 1]

# Tgfb3

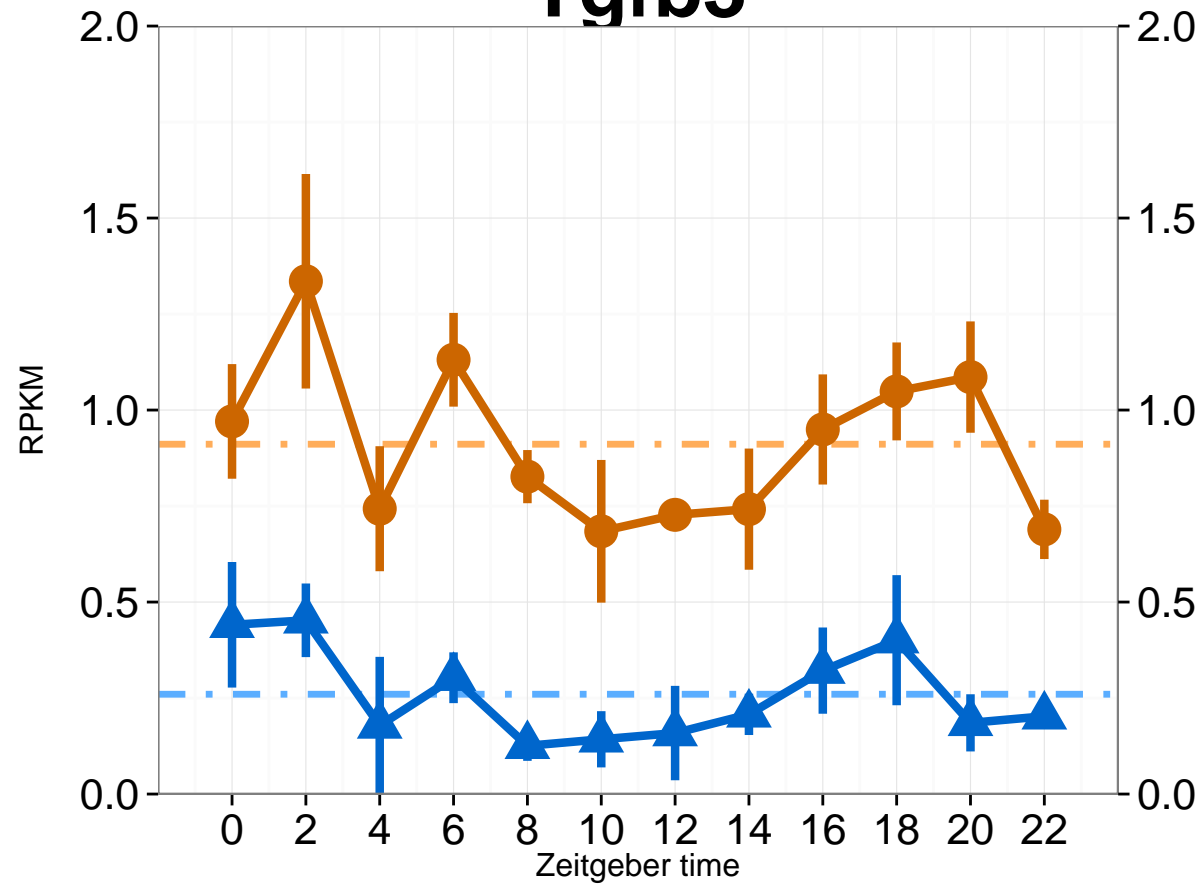

# Tgfb3

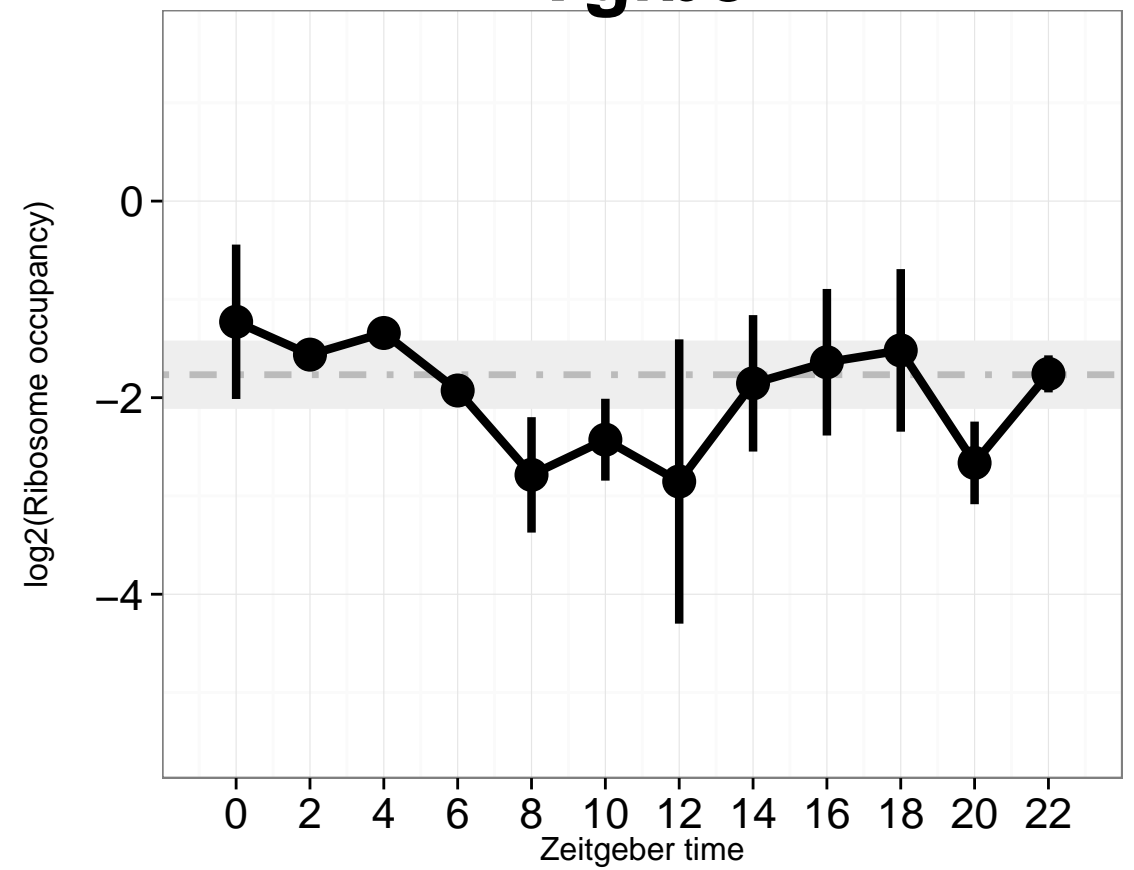

Supplement: Supplementary file 11859 [file 1]

## Narf

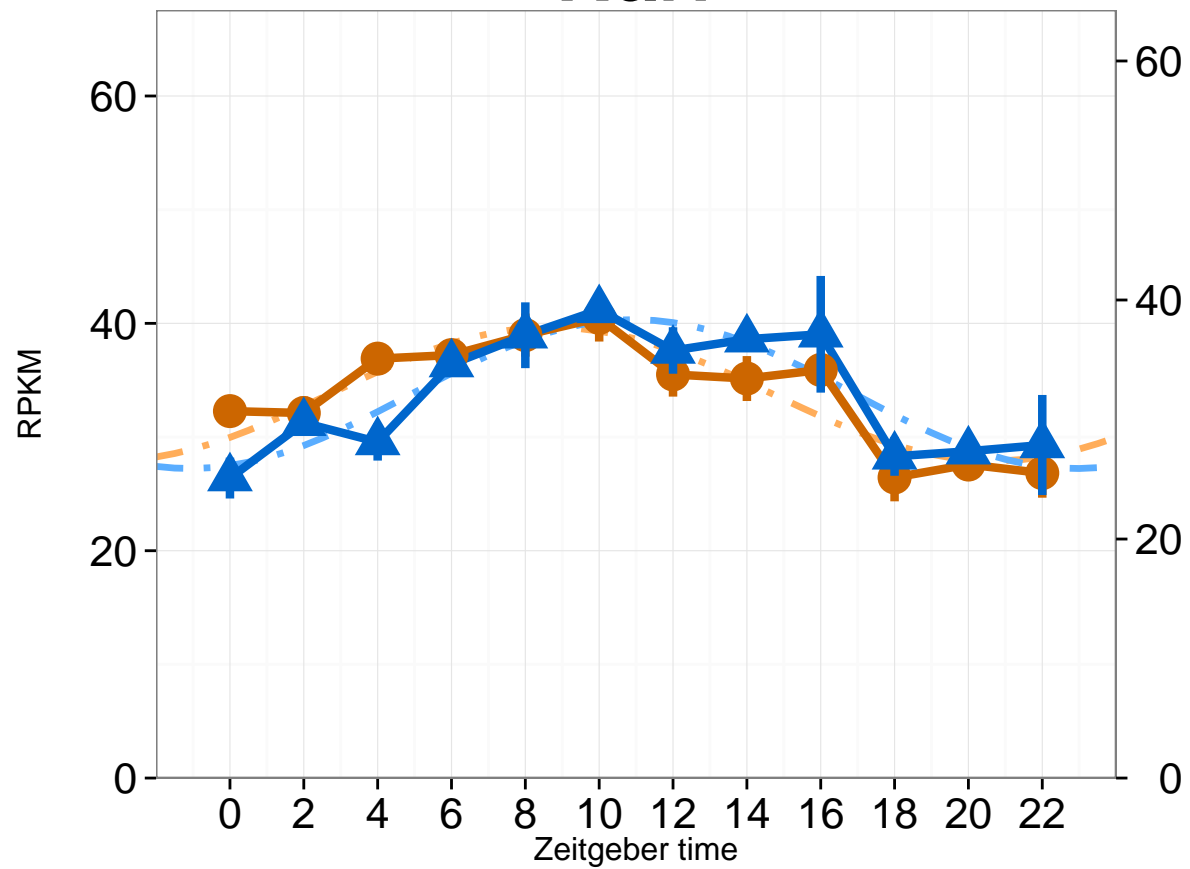

## Narf

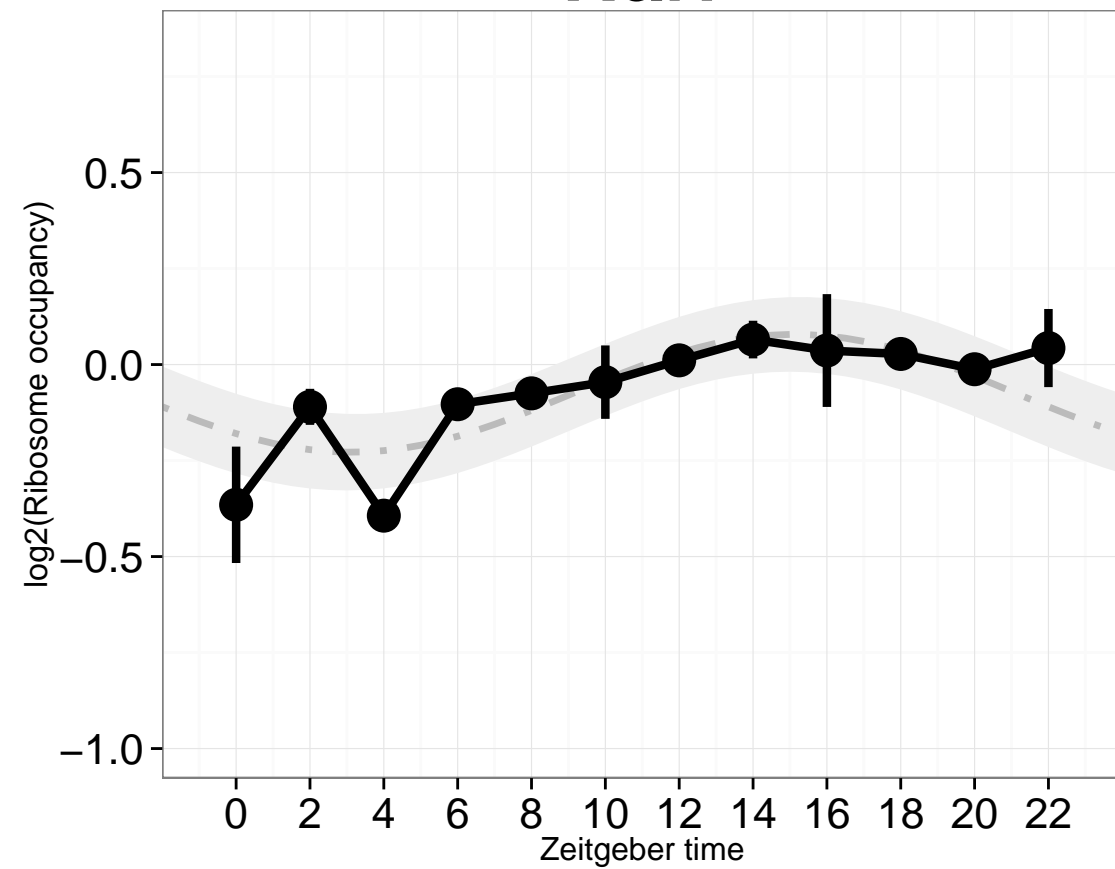

Supplement: Supplementary file 11860 [file 1]

## Scrib

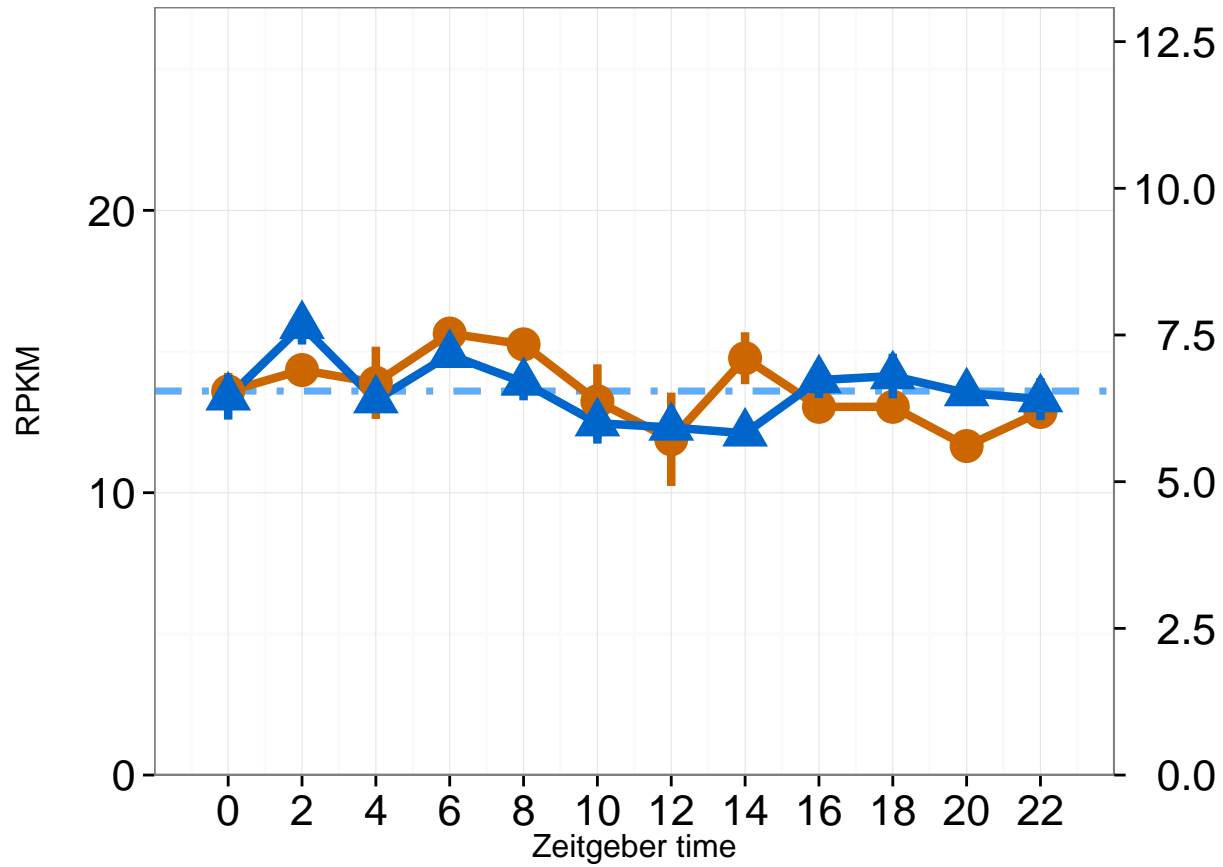

## Scrib

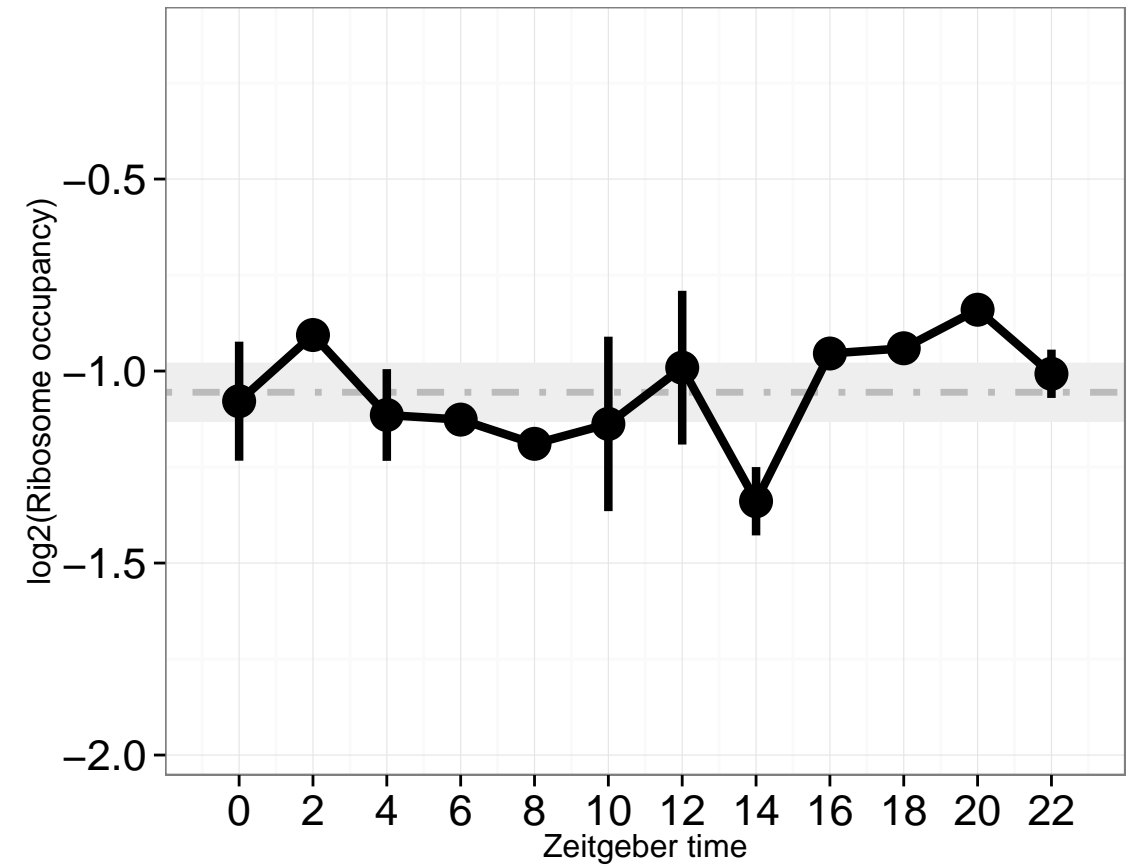

Supplement: Supplementary file 11861 [file 1]

## Tmem45b

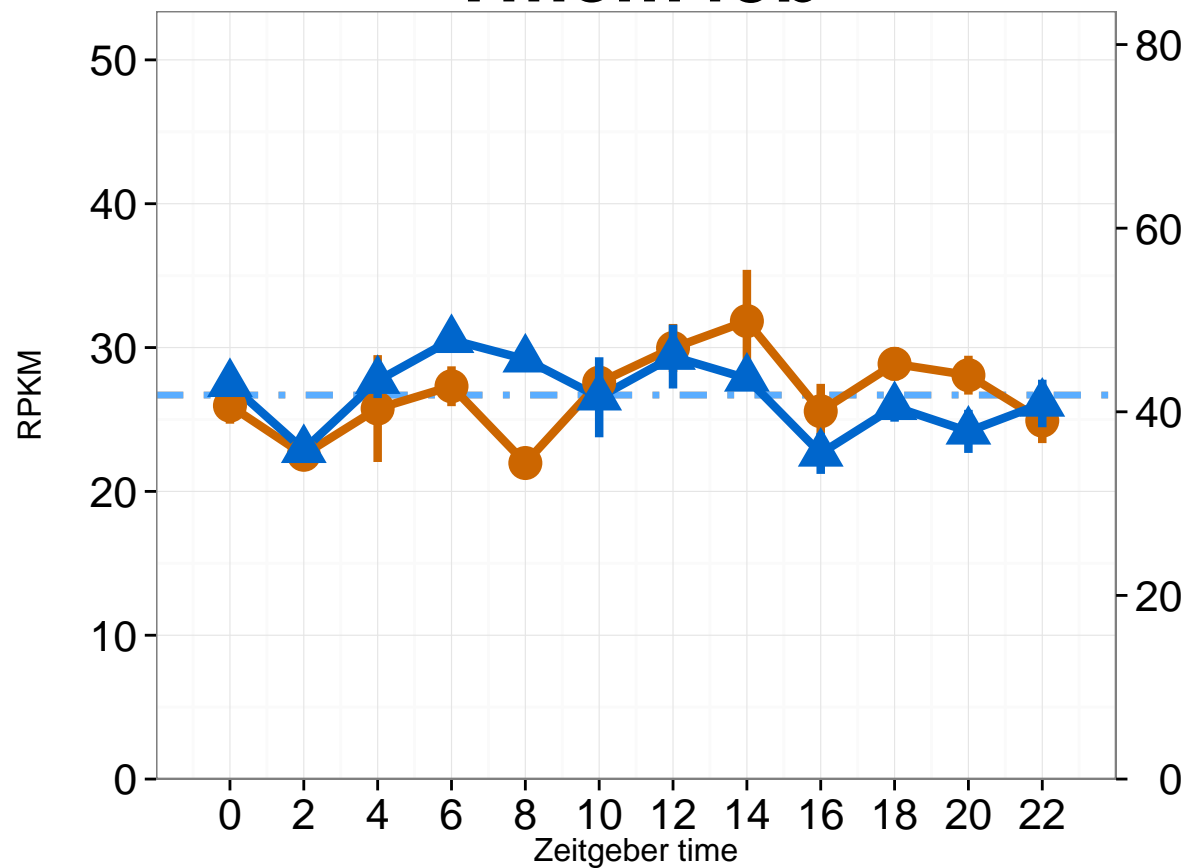

## Tmem45b

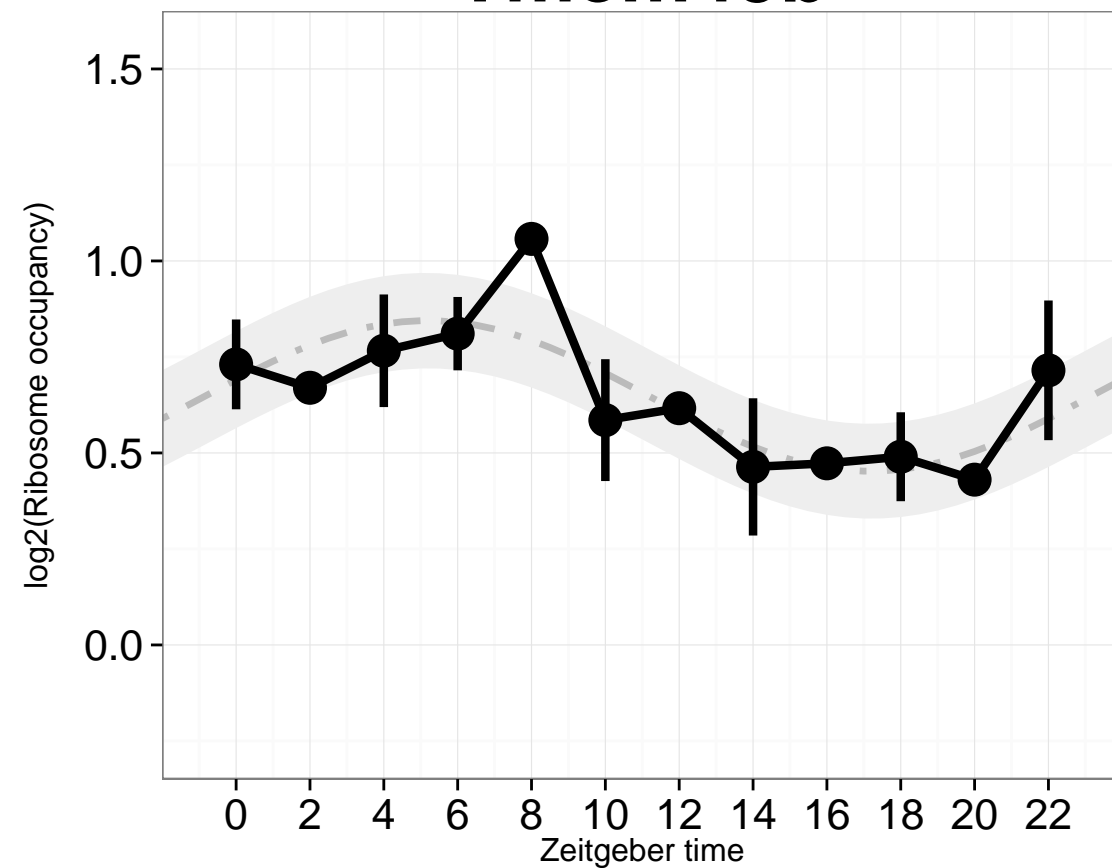

Supplement: Supplementary file 11862 [file 1]

# Dnajb9

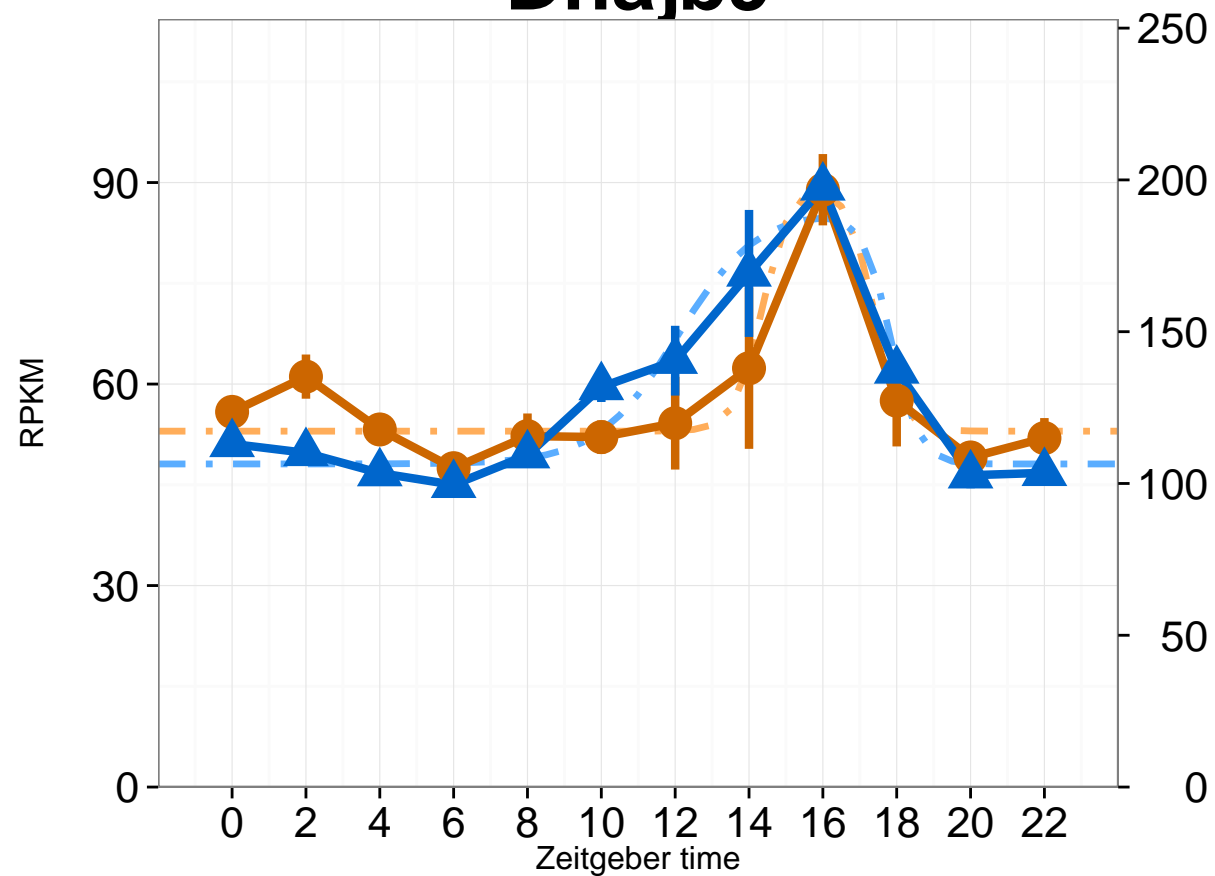

# Dnajb9

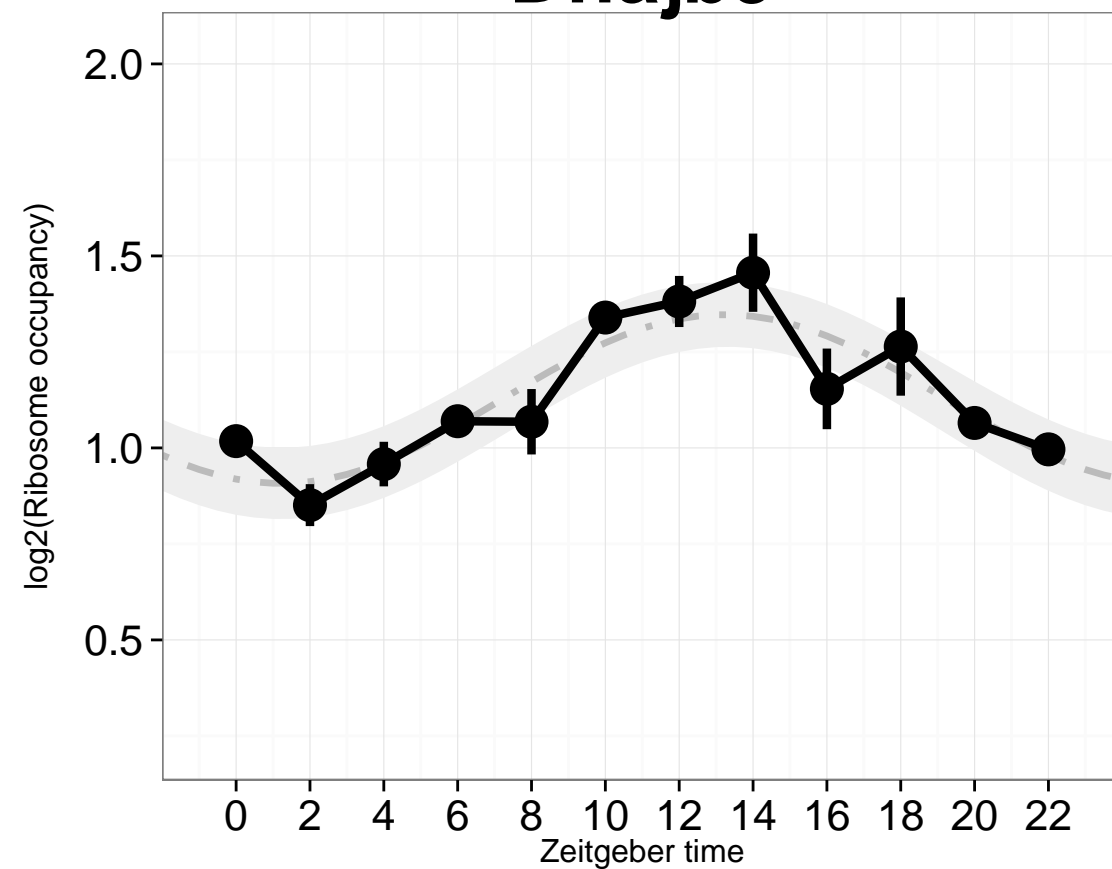

Supplement: Supplementary file 11863 [file 1]

## Ywhaz

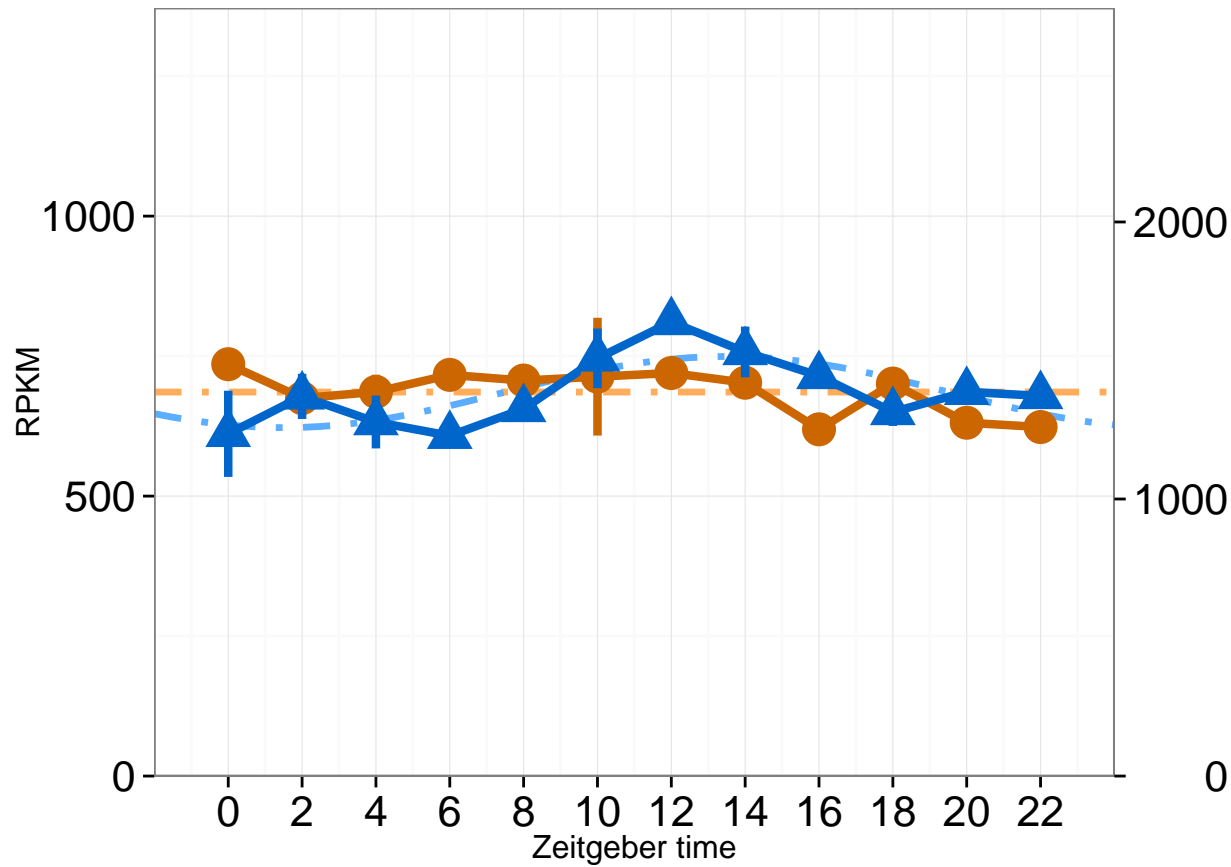

## Ywhaz

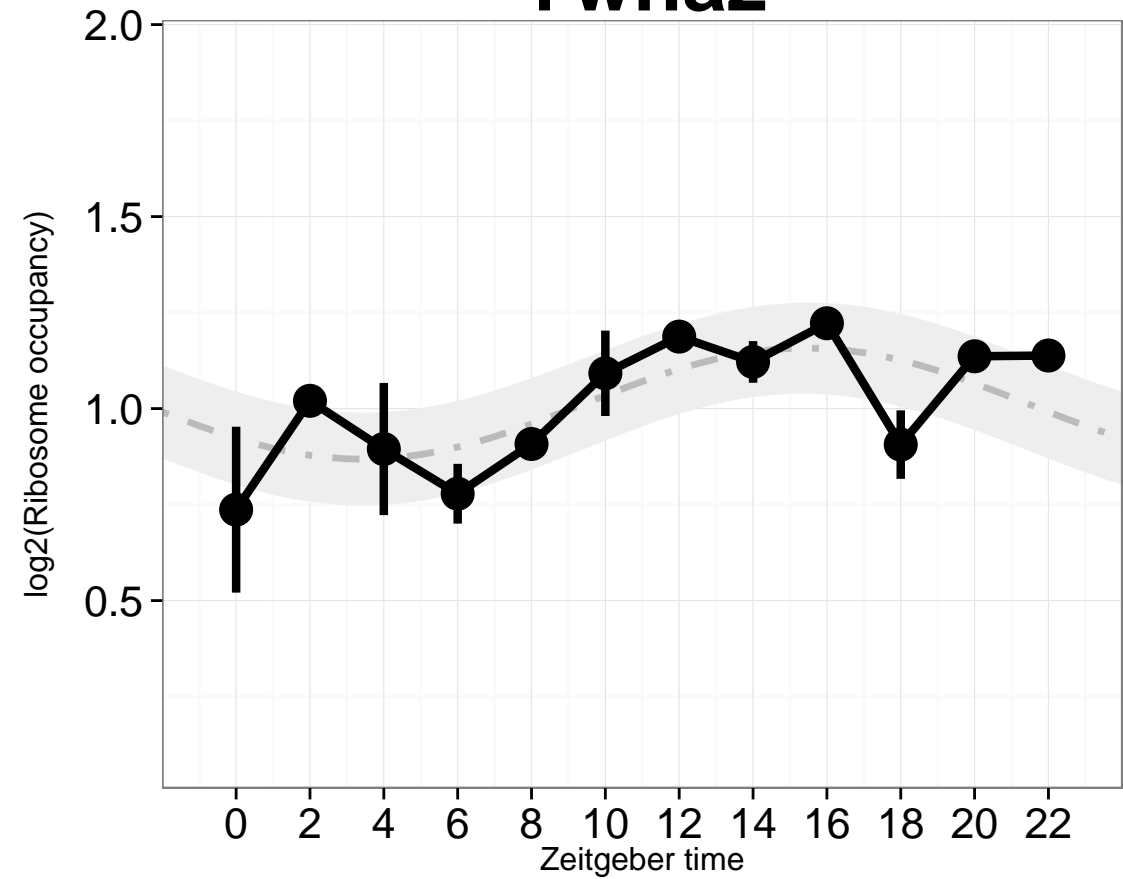

Supplement: Supplementary file 11864 [file 1]

# Gch1

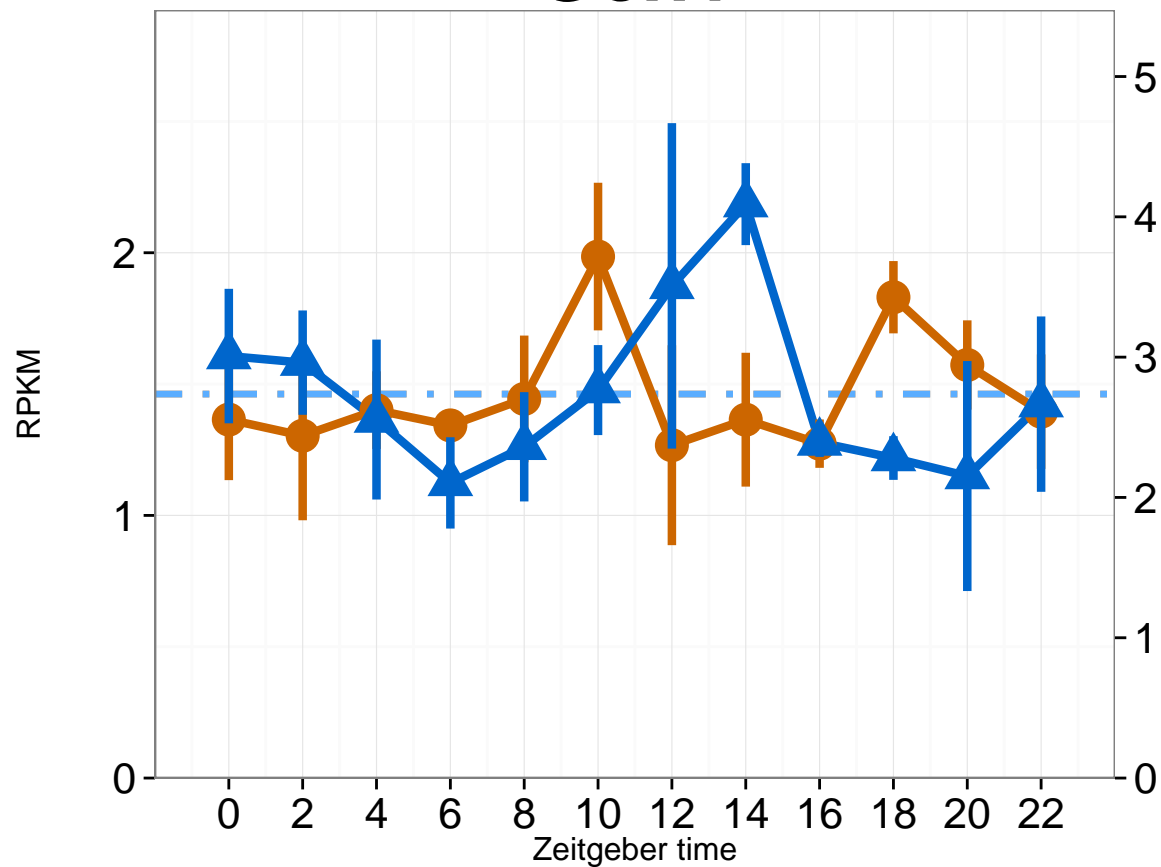

# Gch1

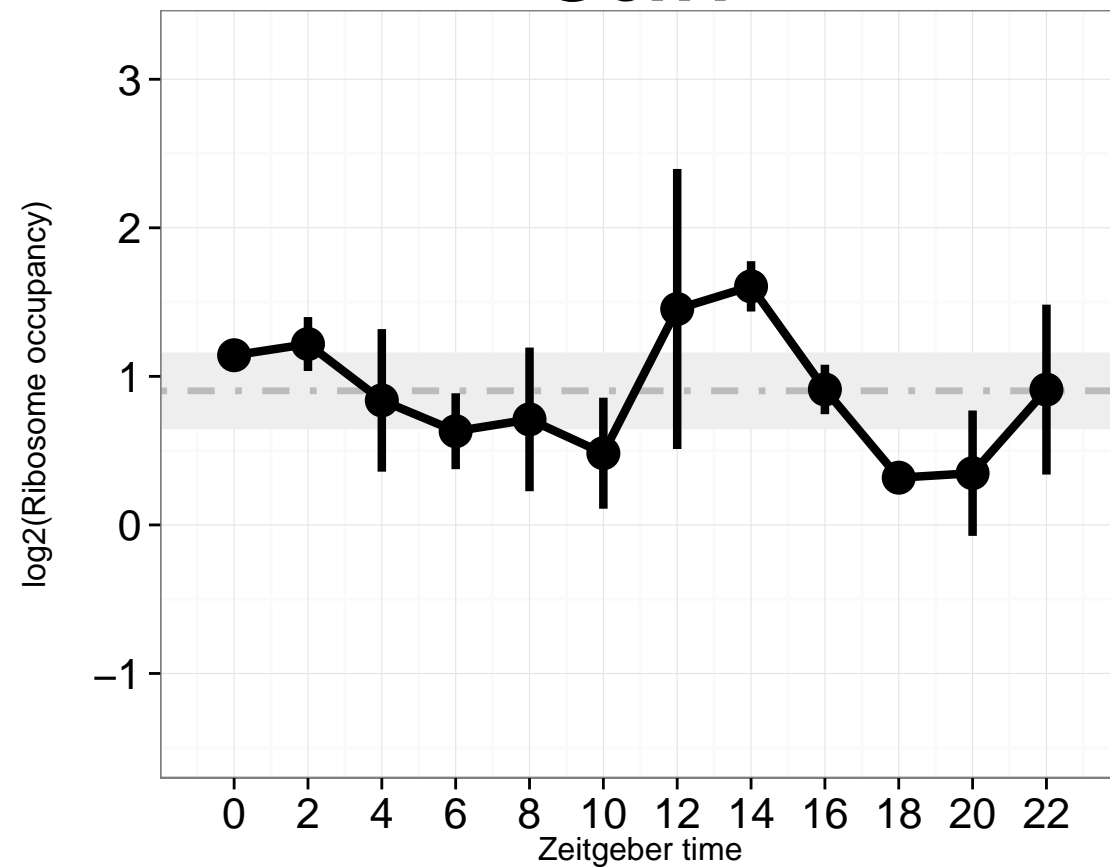

Supplement: Supplementary file 11865 [file 1]

# Zfp346

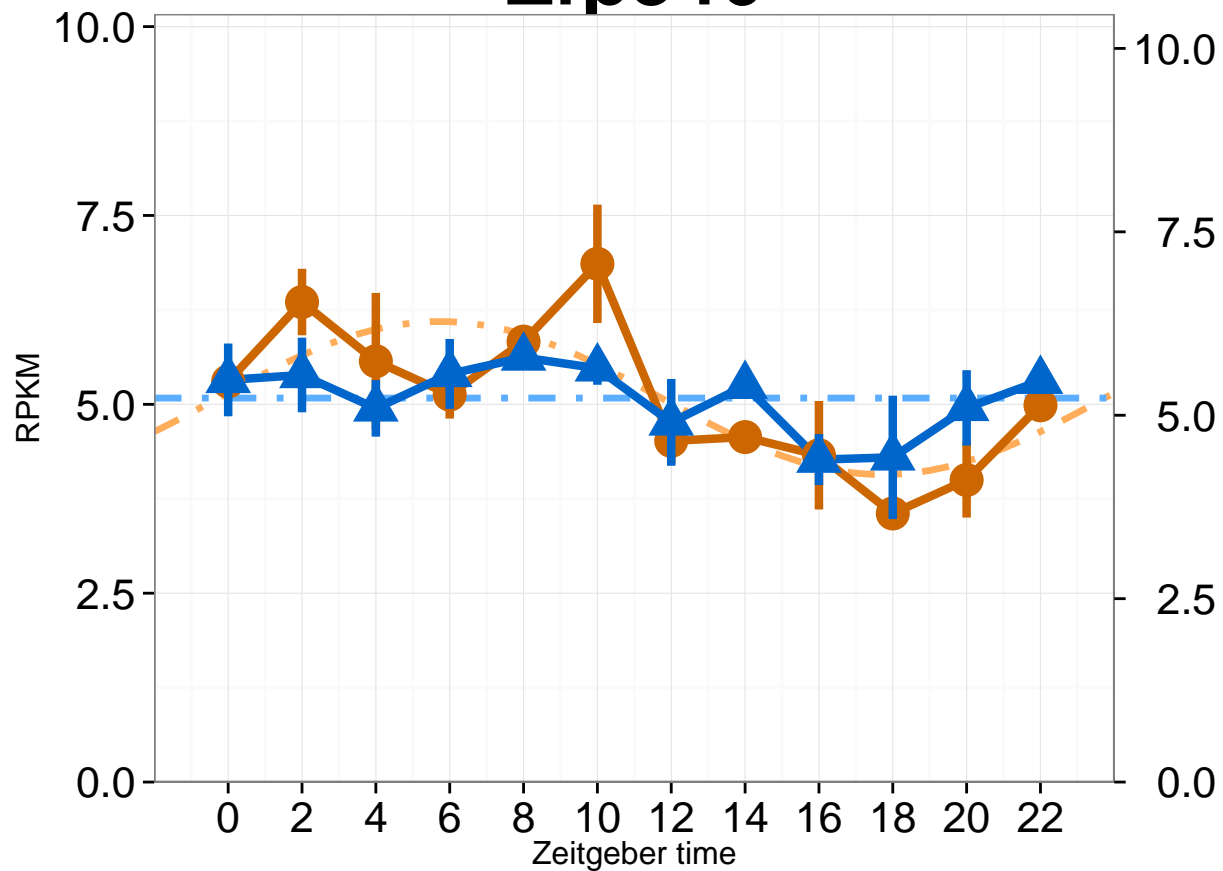

# Zfp346

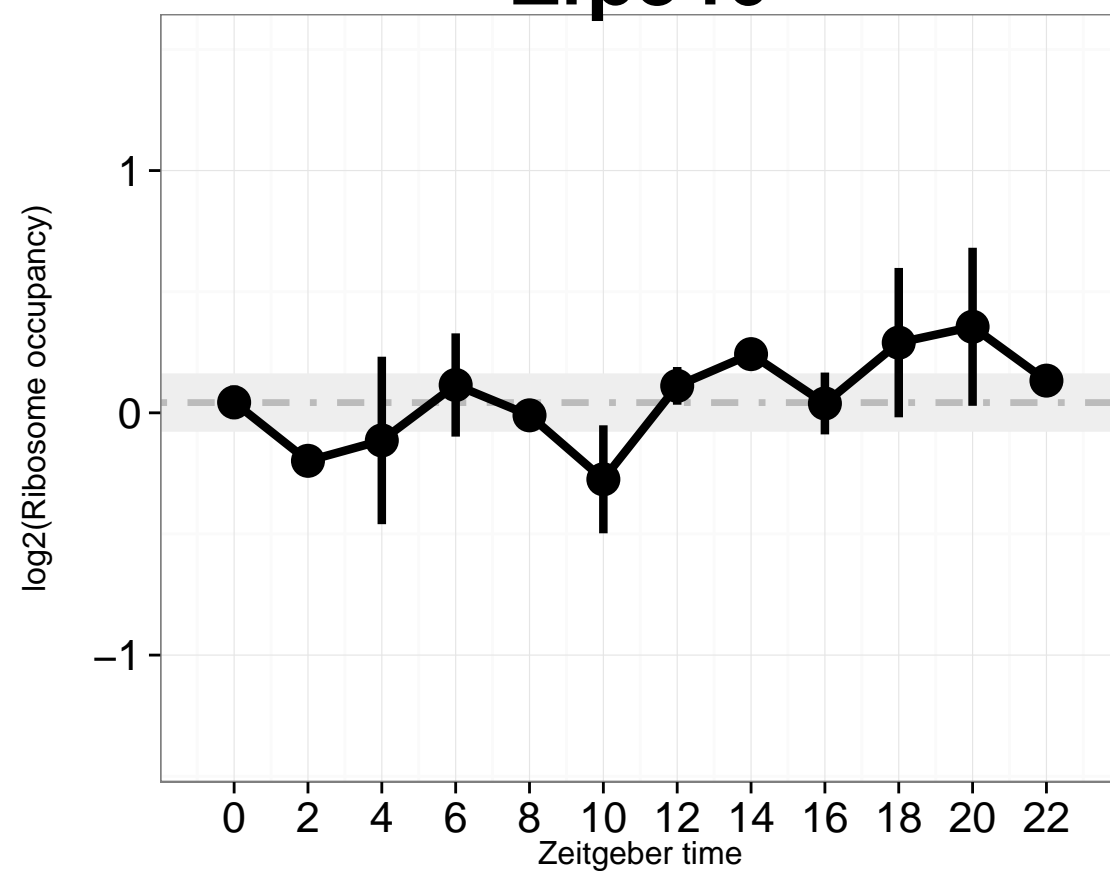

Supplement: Supplementary file 11866 [file 1]

## Amer1

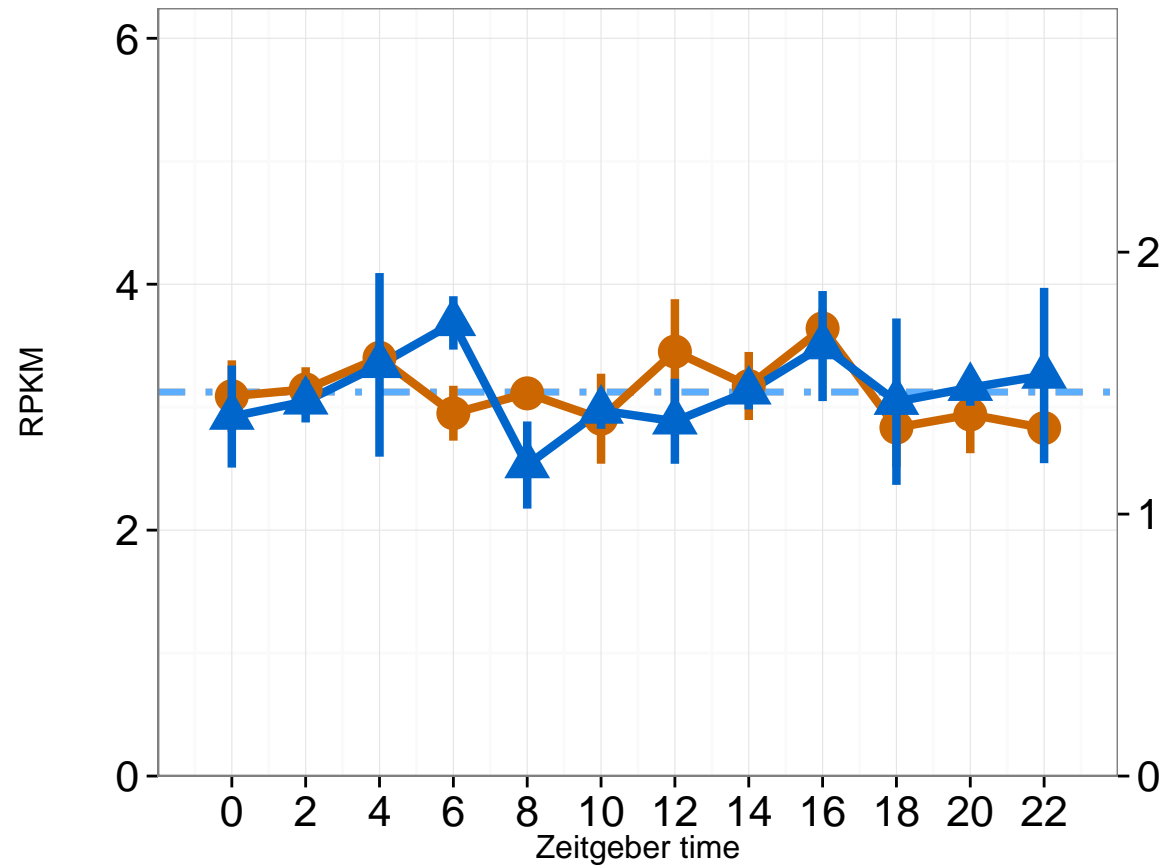

## Amer1

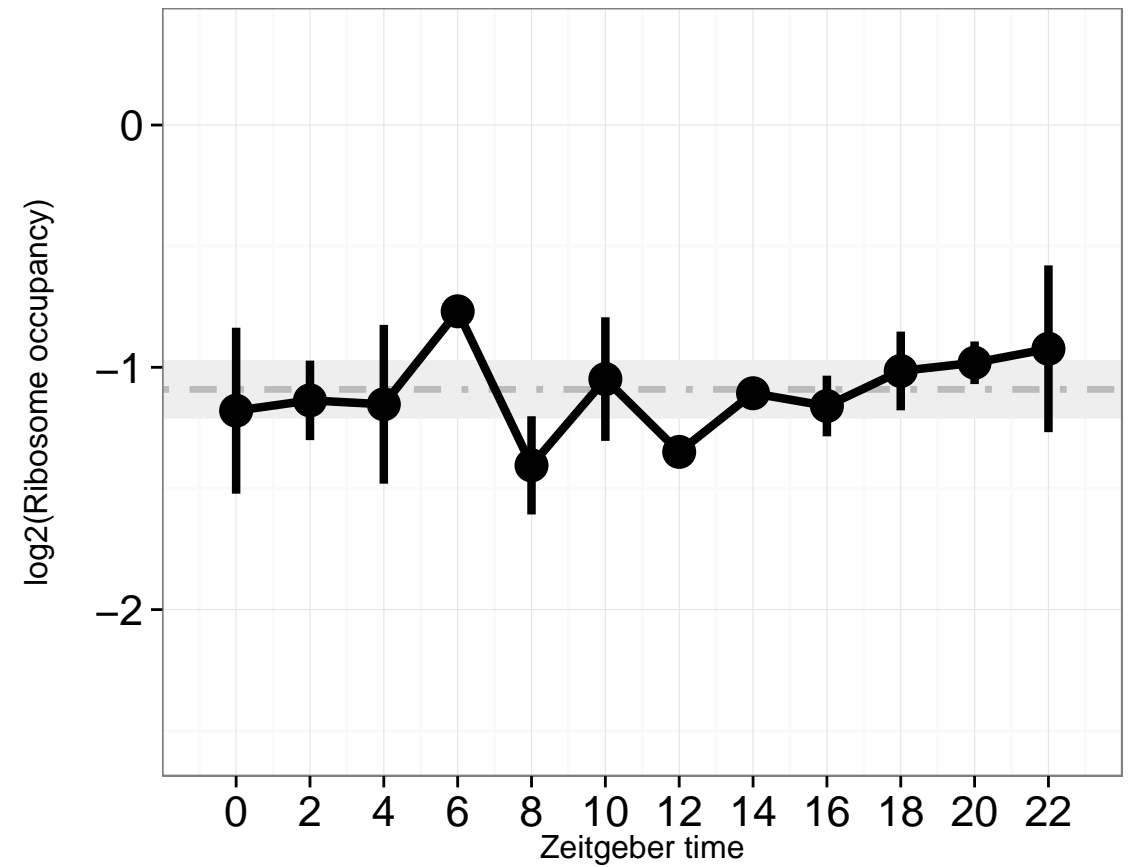

Supplement: Supplementary file 11867 [file 1]

# Cyp4v3

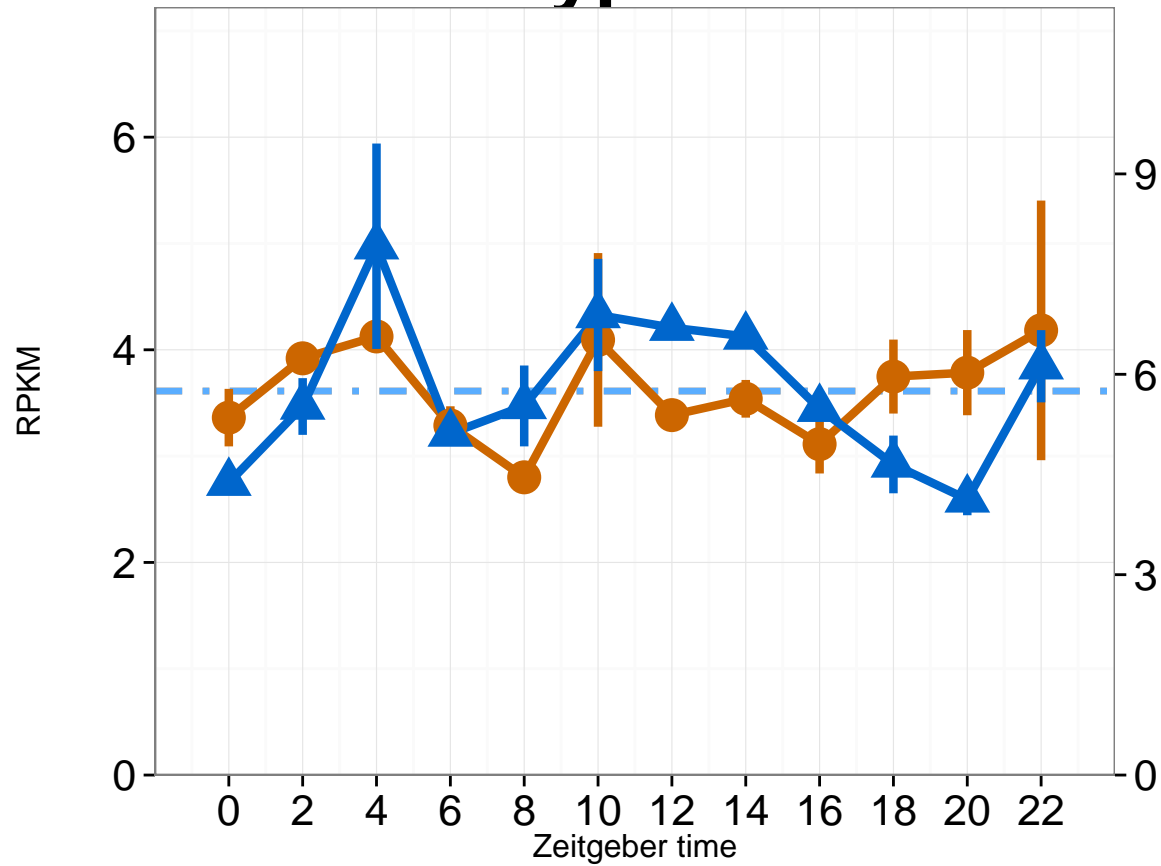

# Cyp4v3

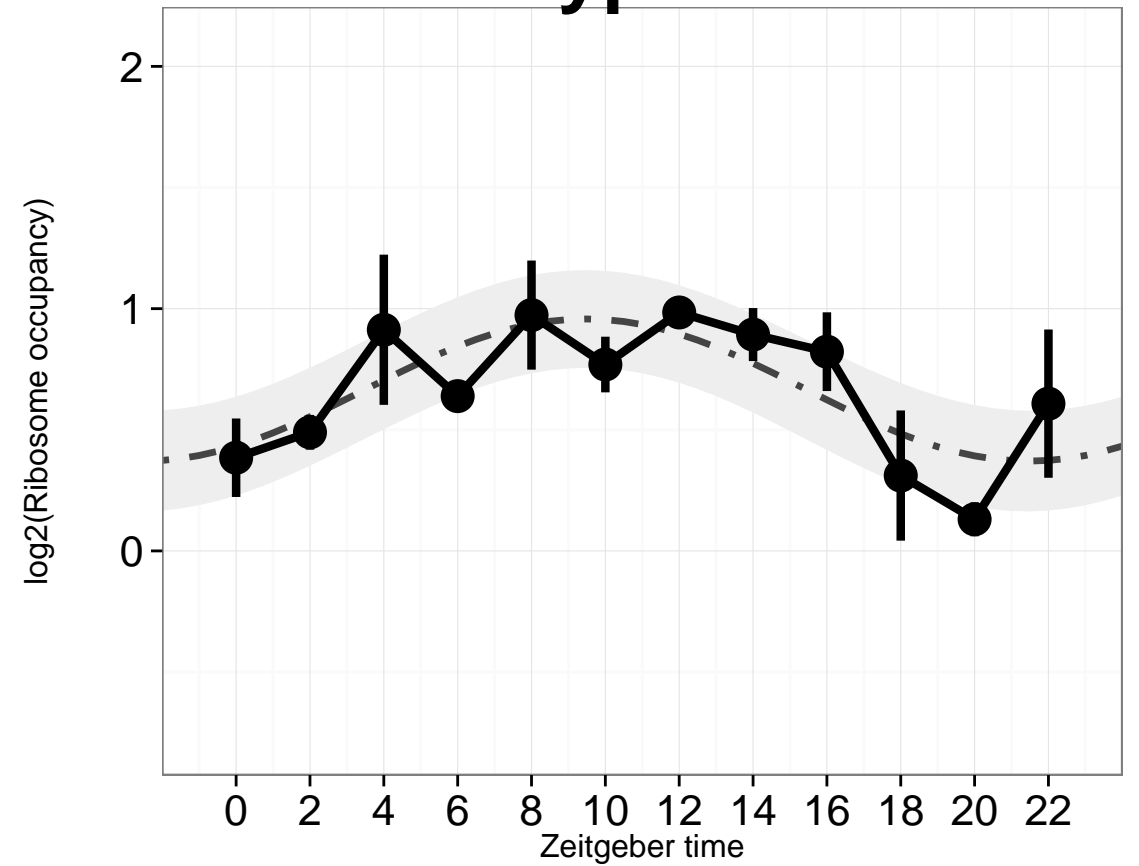

Supplement: Supplementary file 11868 [file 1]

## Slc35g1

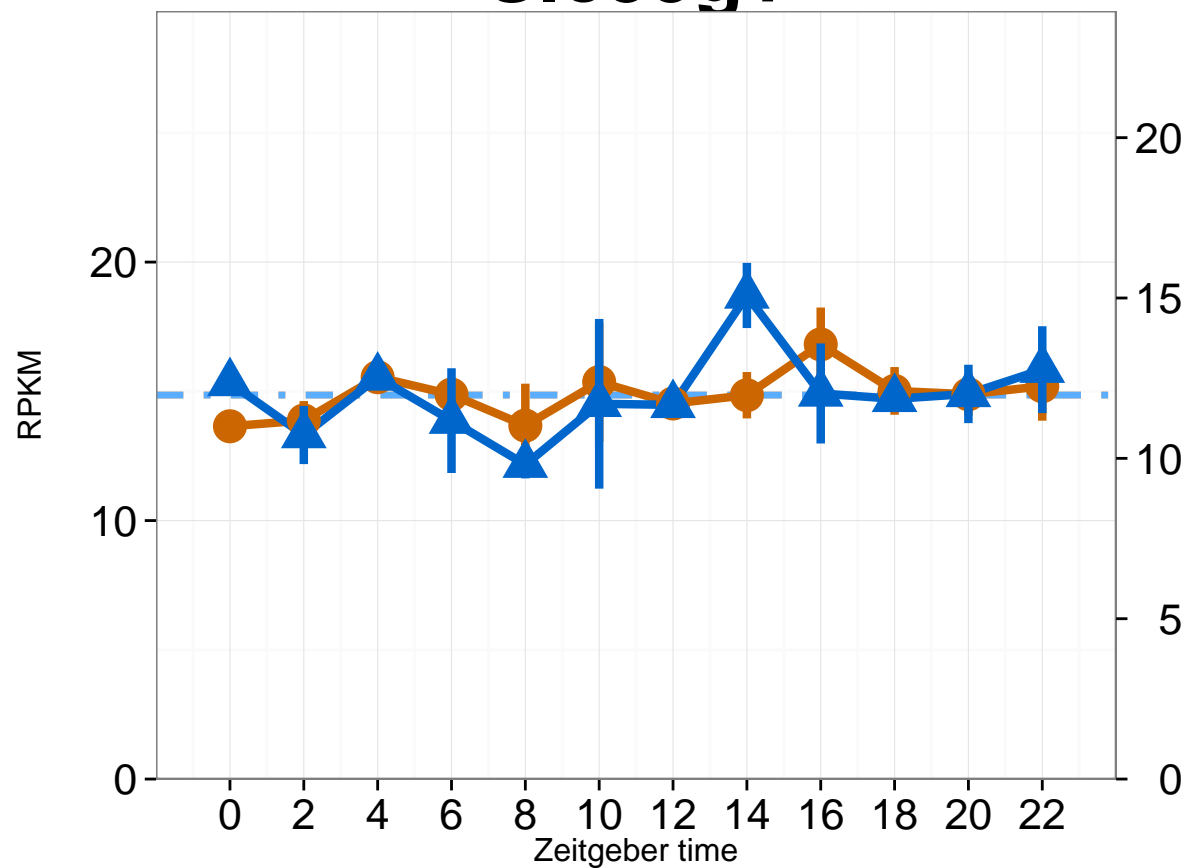

## Slc35g1

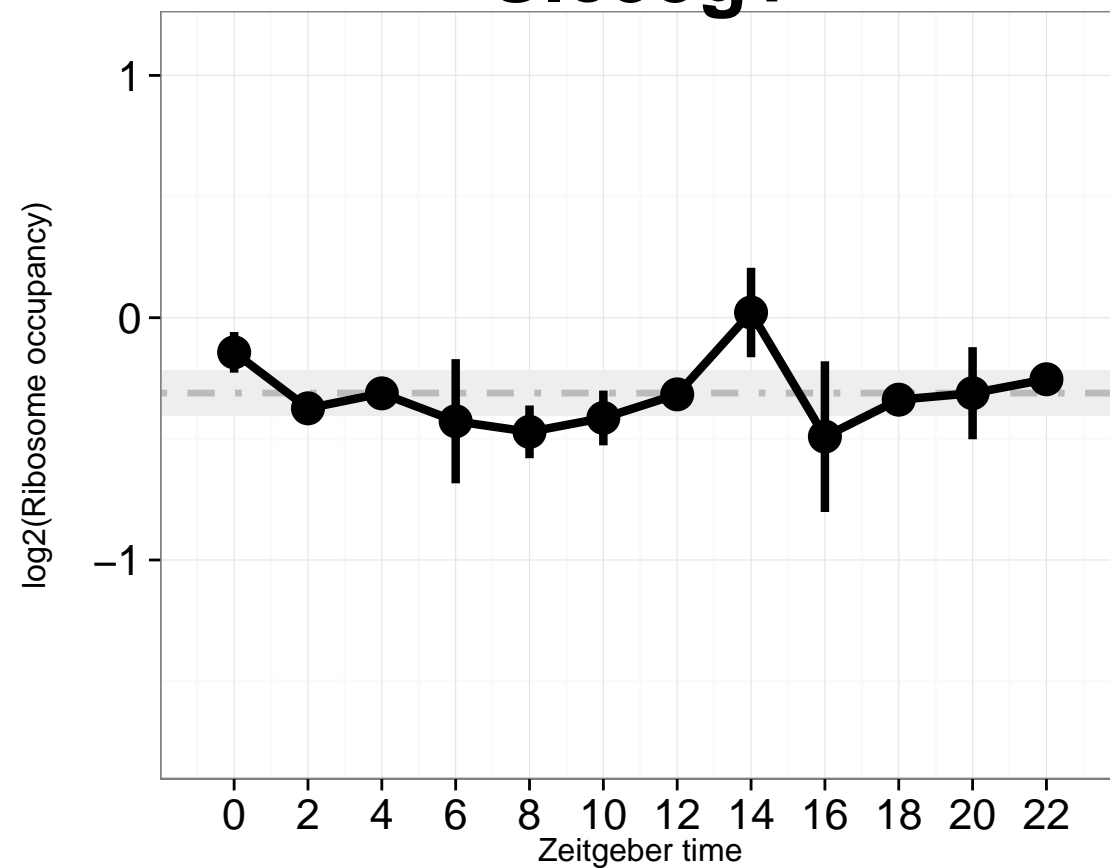

Supplement: Supplementary file 11869 [file 1]

## Stard7

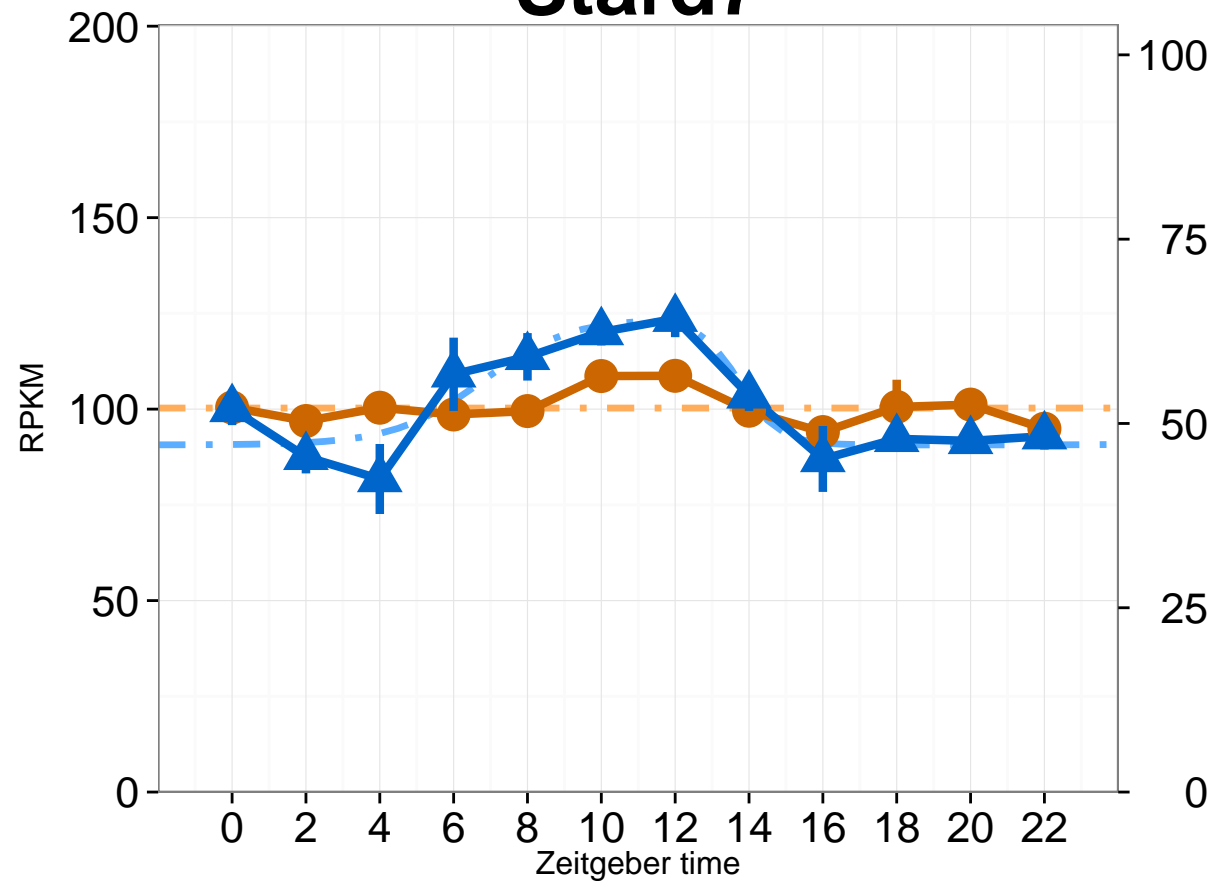

## Stard7

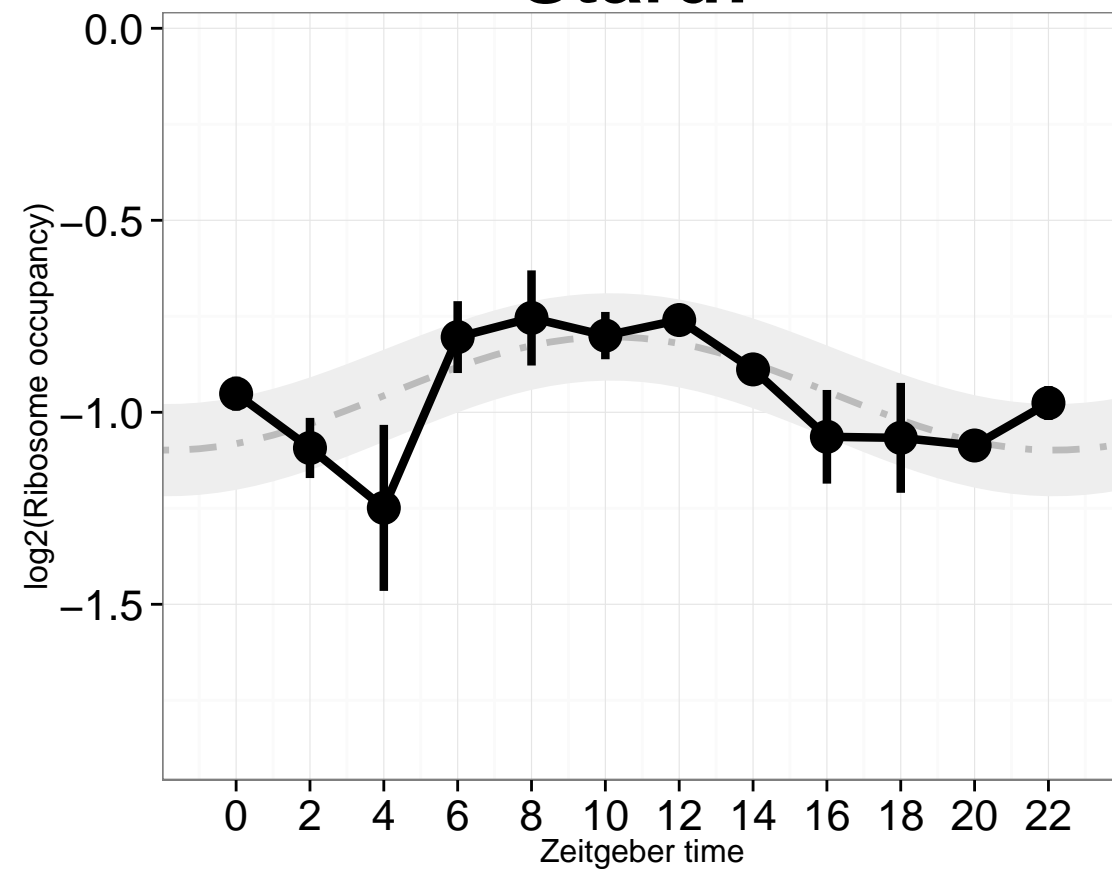

Supplement: Supplementary file 11870 [file 1]

**Slc10a1 TR**

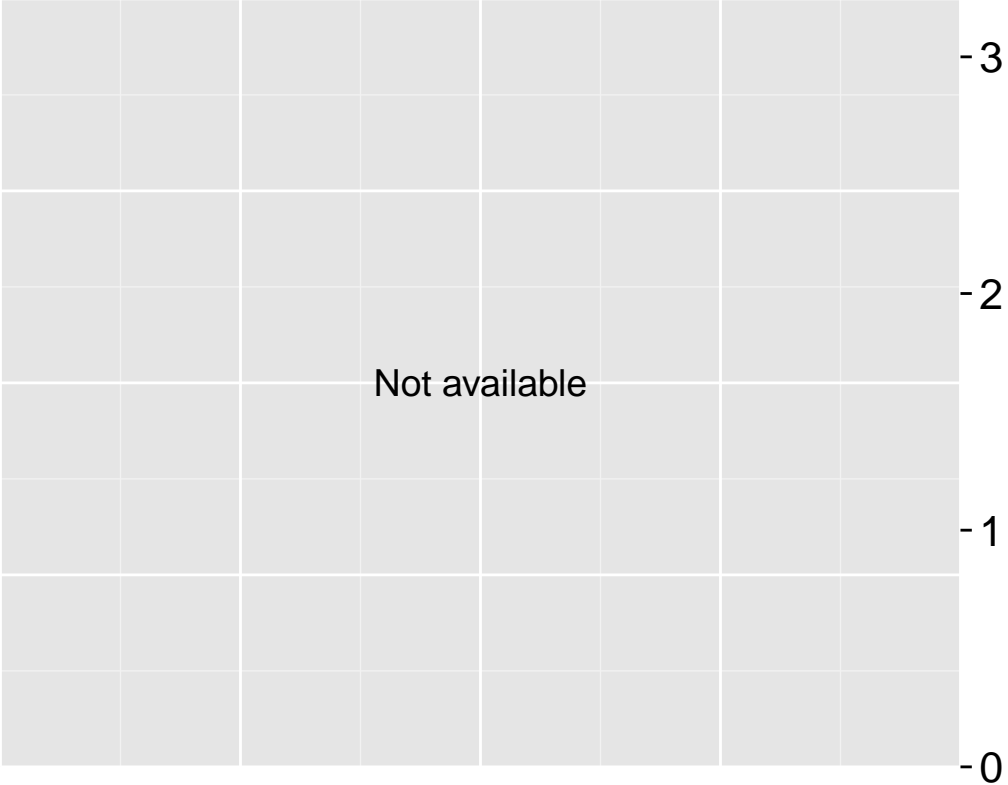

**Slc10a1 log2(Ribosome occupancy**

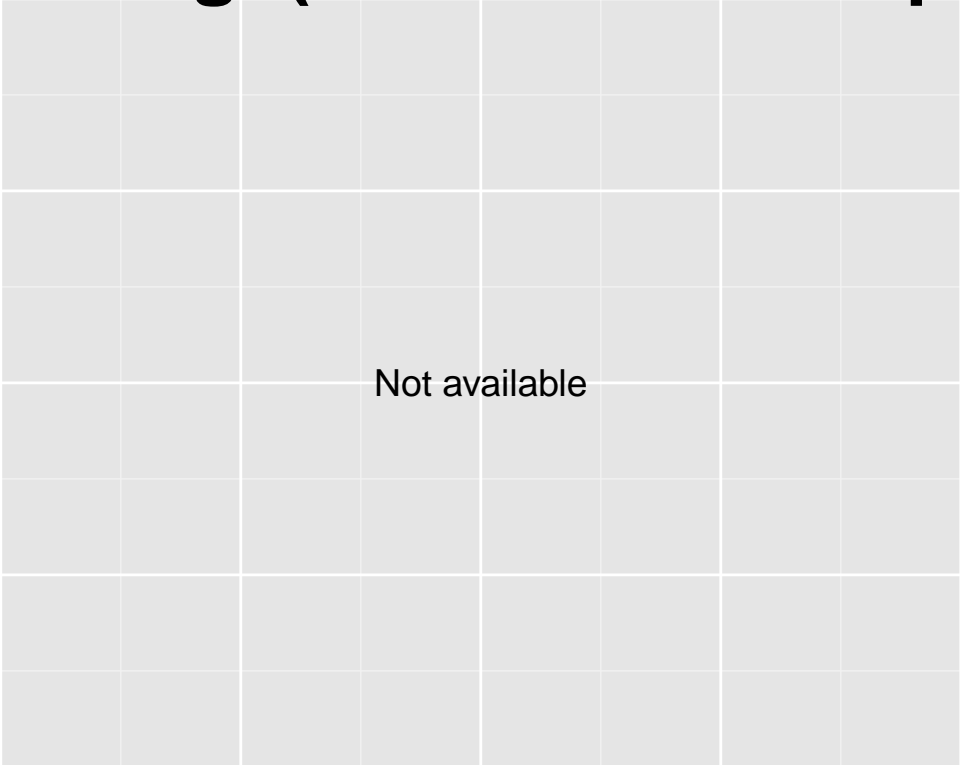

Supplement: Supplementary file 11871 [file 1]

## Mphosph9

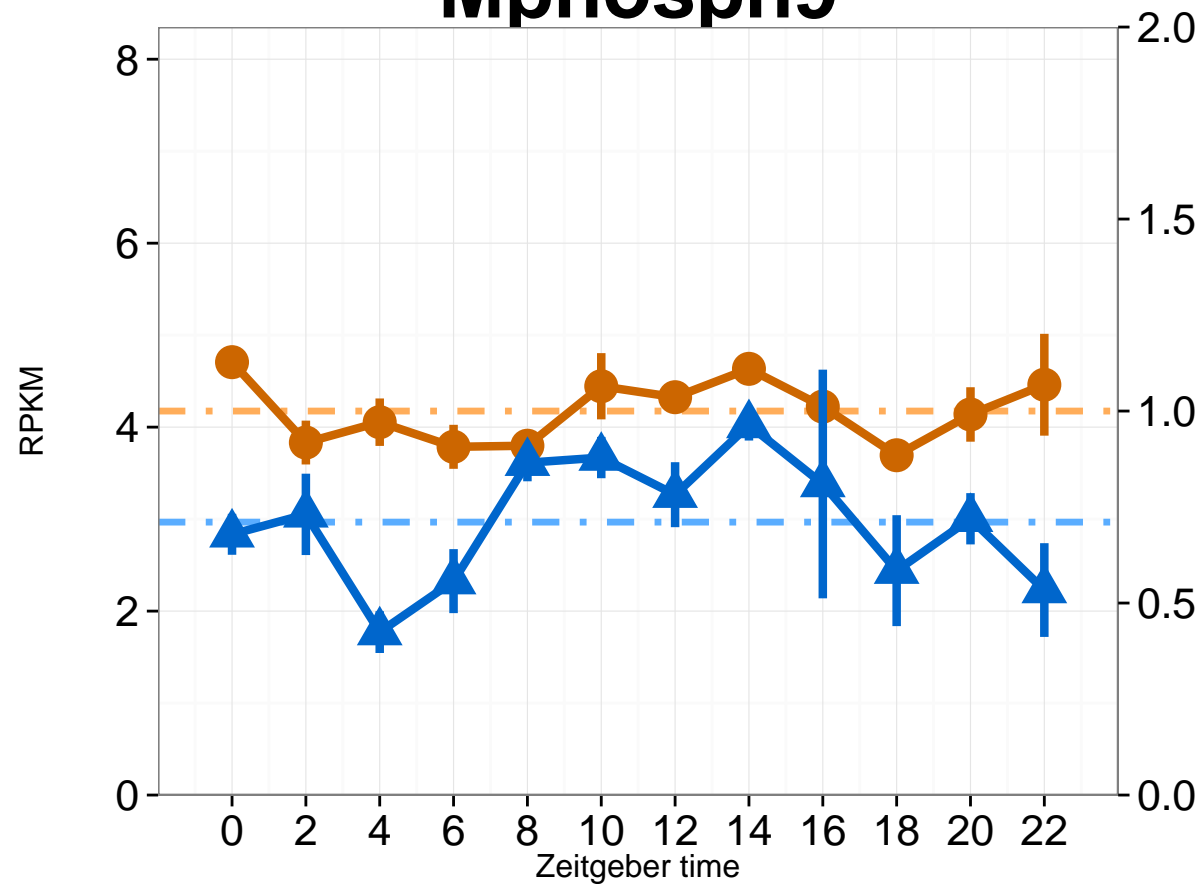

## Mphosph9

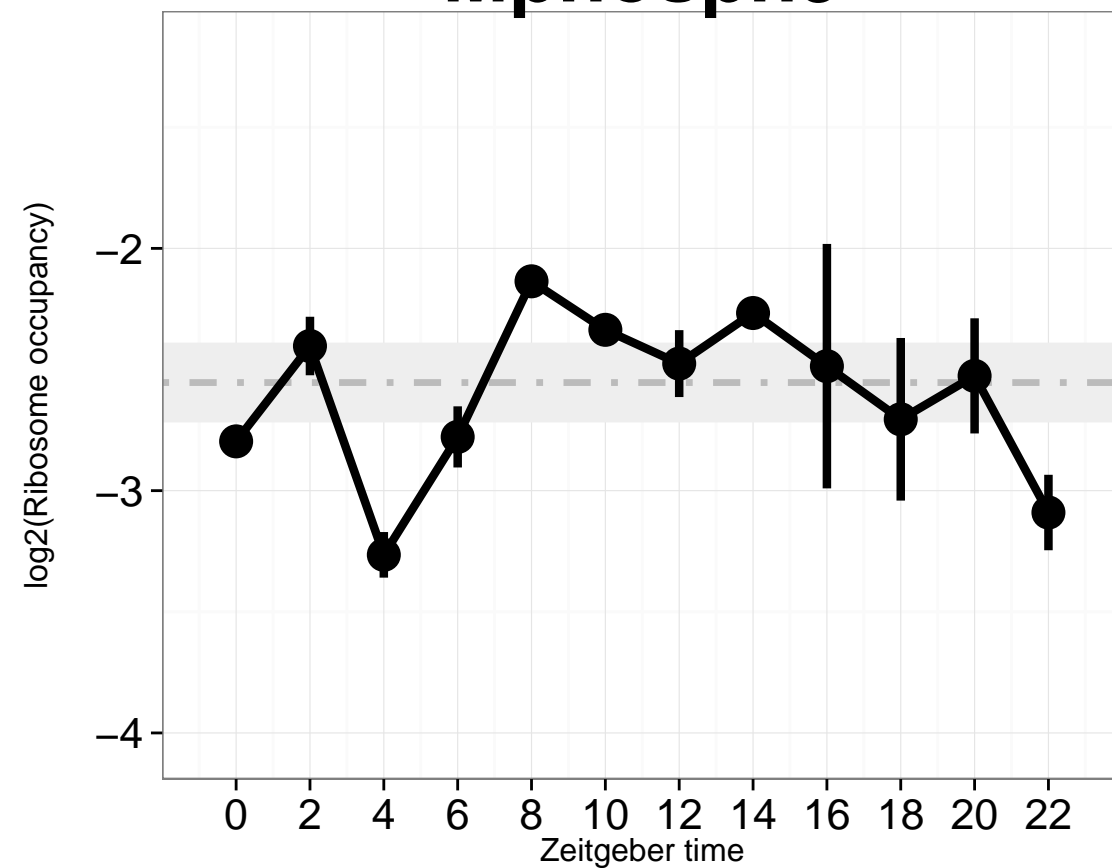

Supplement: Supplementary file 11872 [file 1]

# Lrtm2

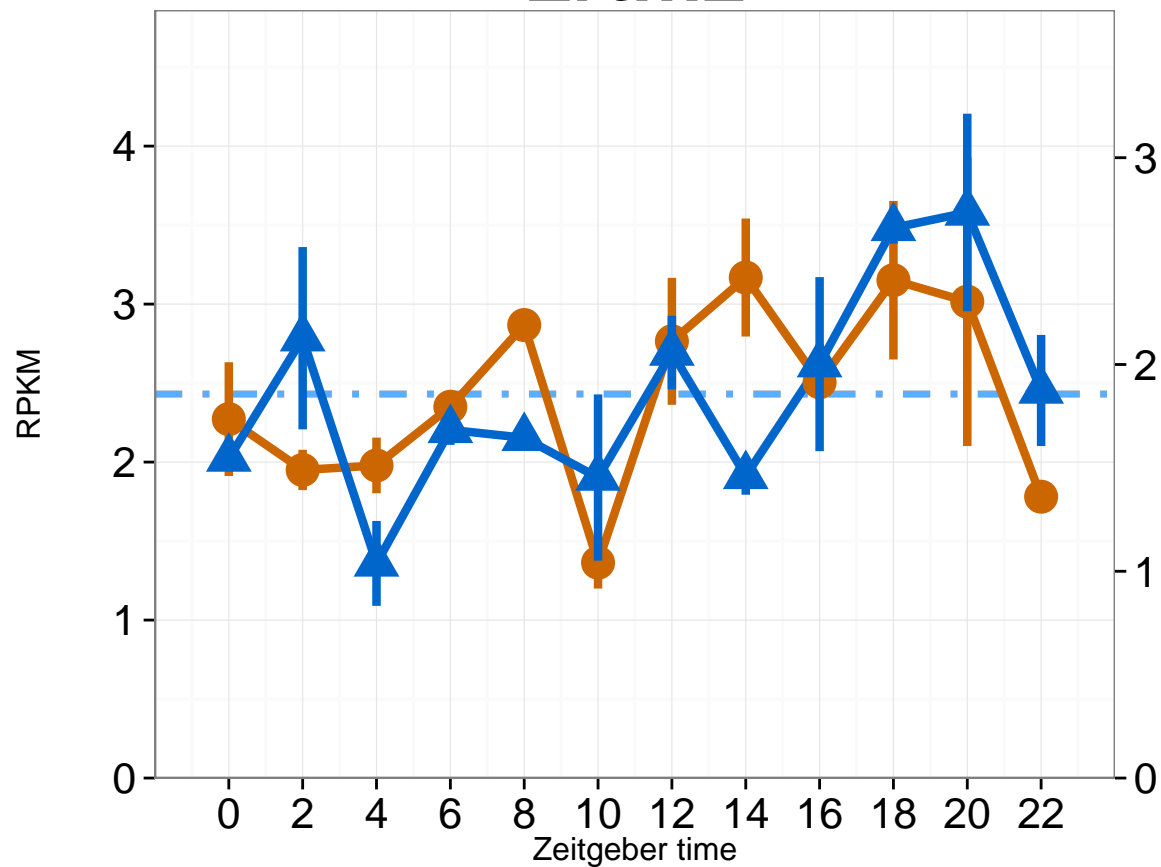

# Lrtm2

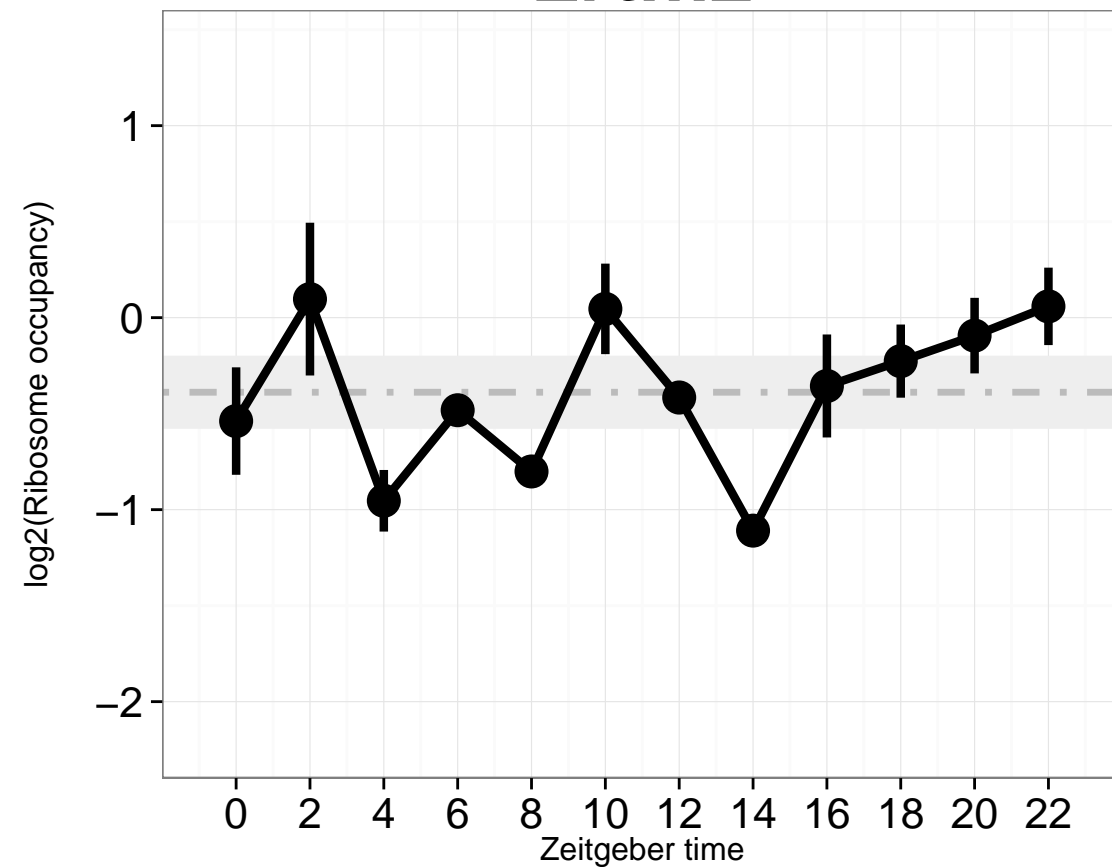

Supplement: Supplementary file 11873 [file 1]

## Cnpy4

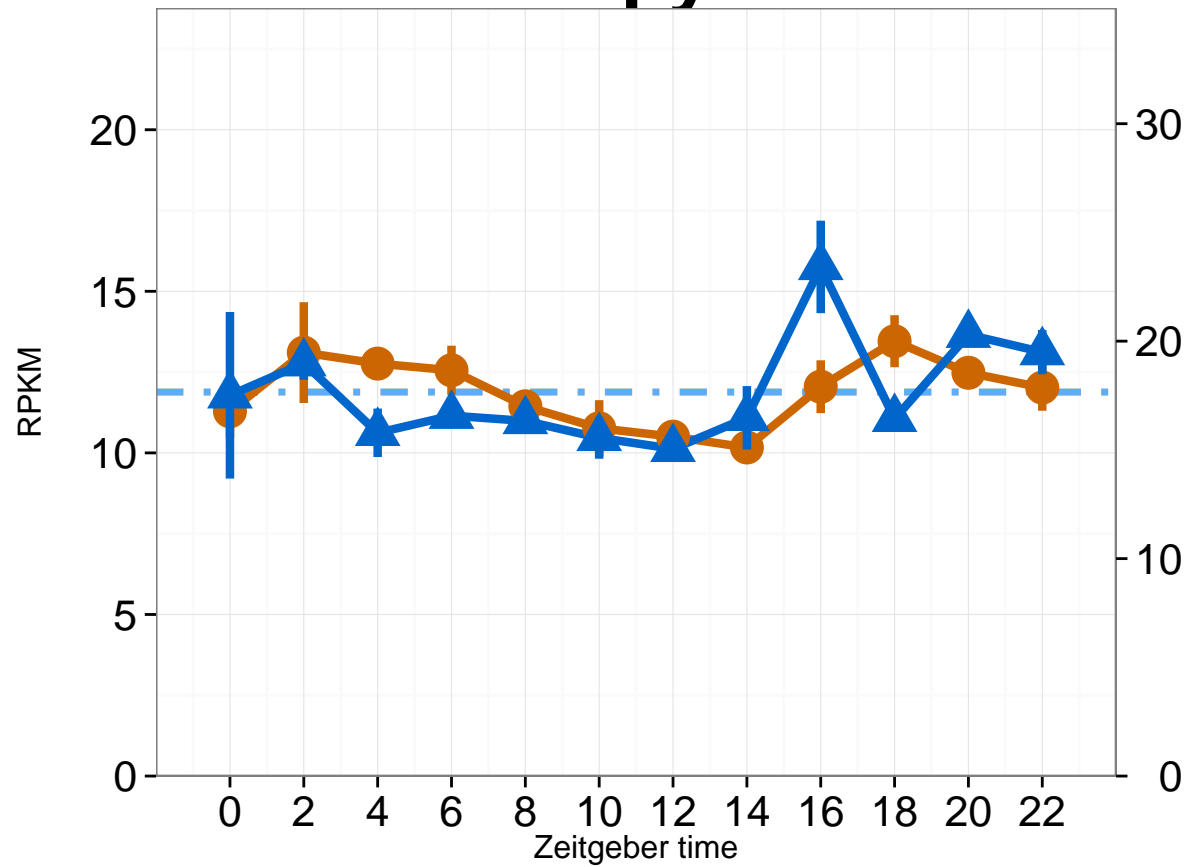

## Cnpy4

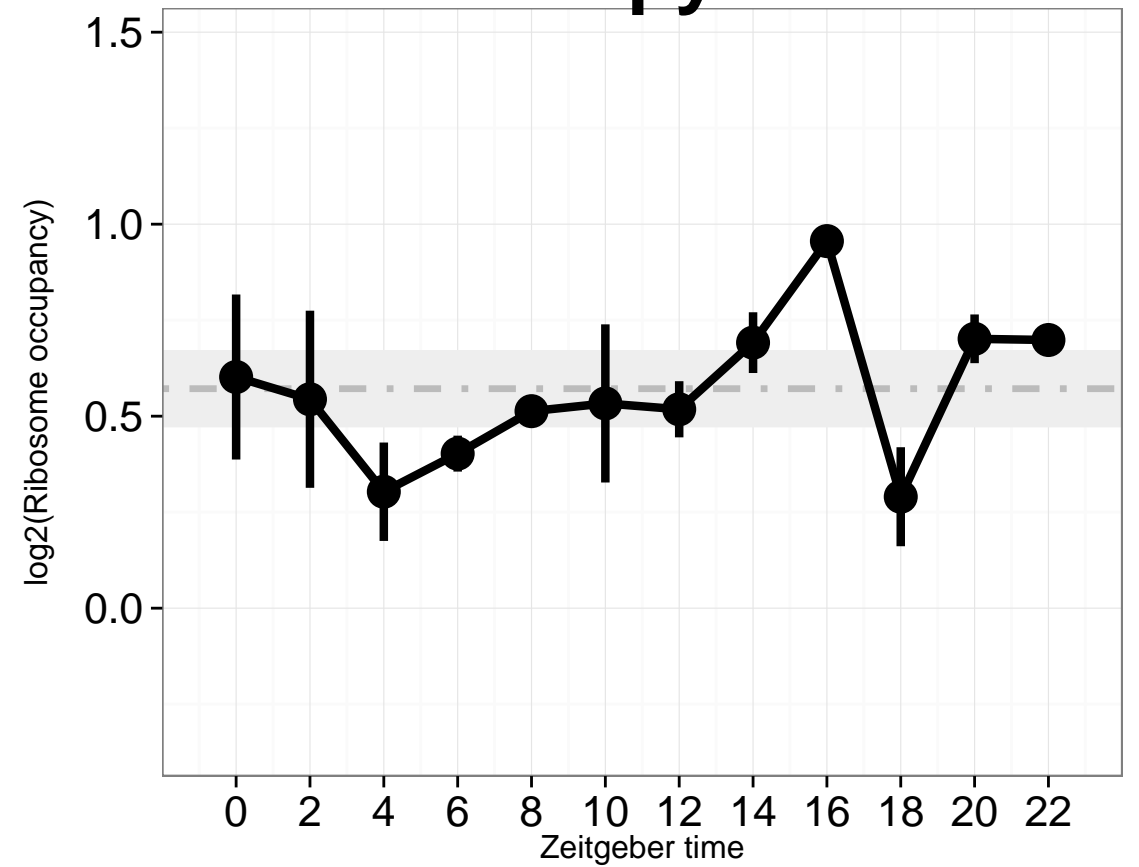

Supplement: Supplementary file 11874 [file 1]

# Ppp2r4

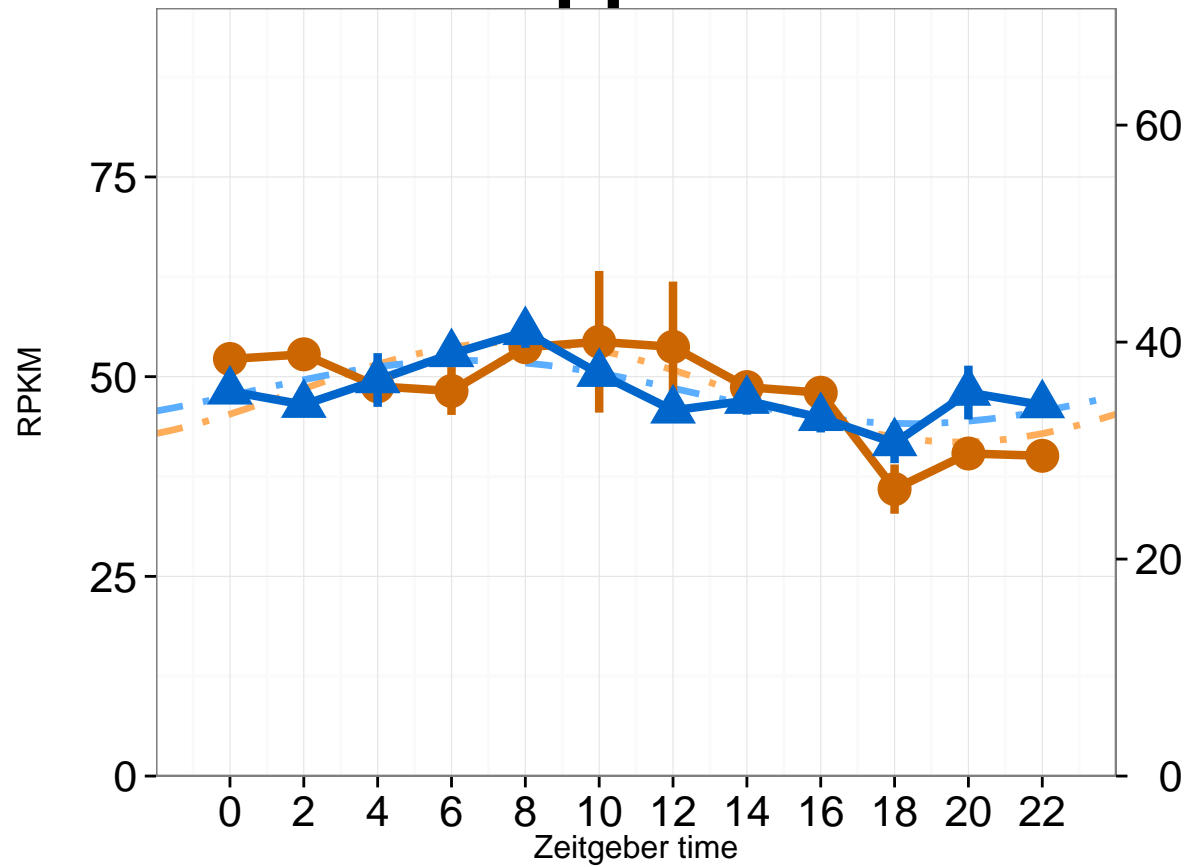

# Ppp2r4

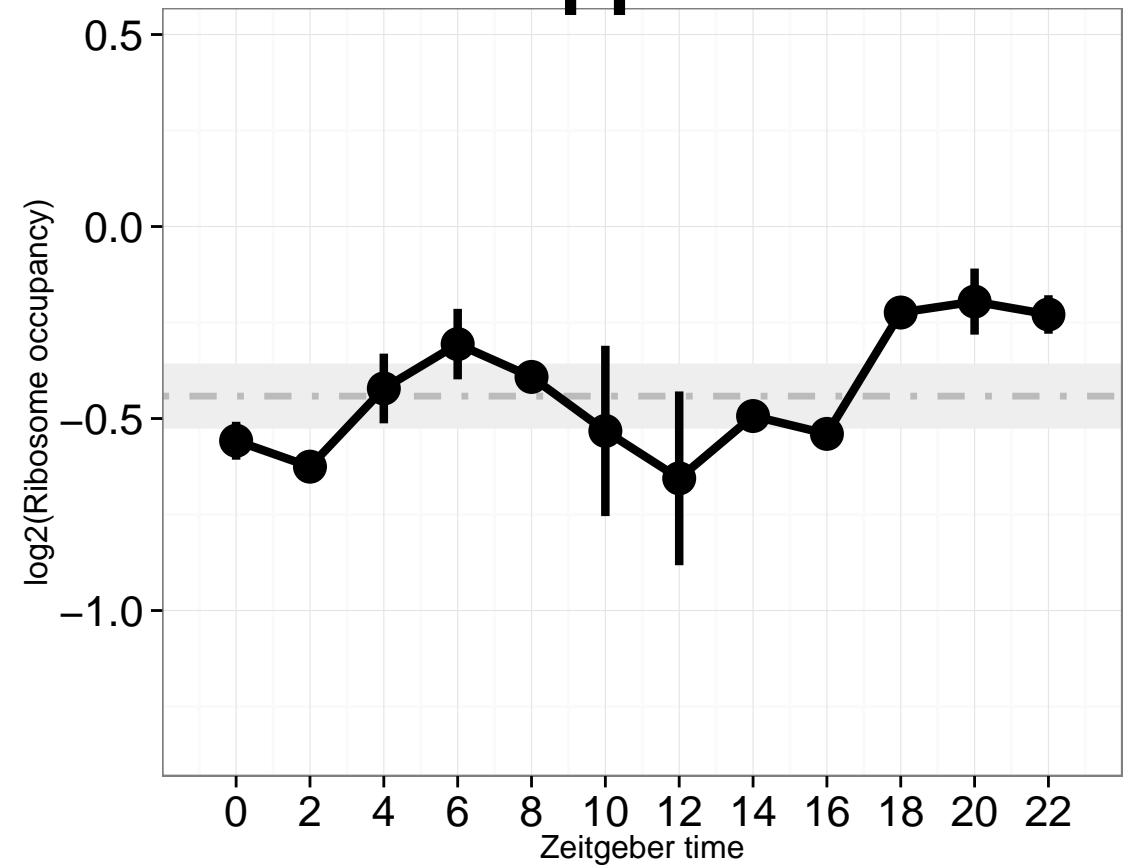

Supplement: Supplementary file 11875 [file 1]

## Ada

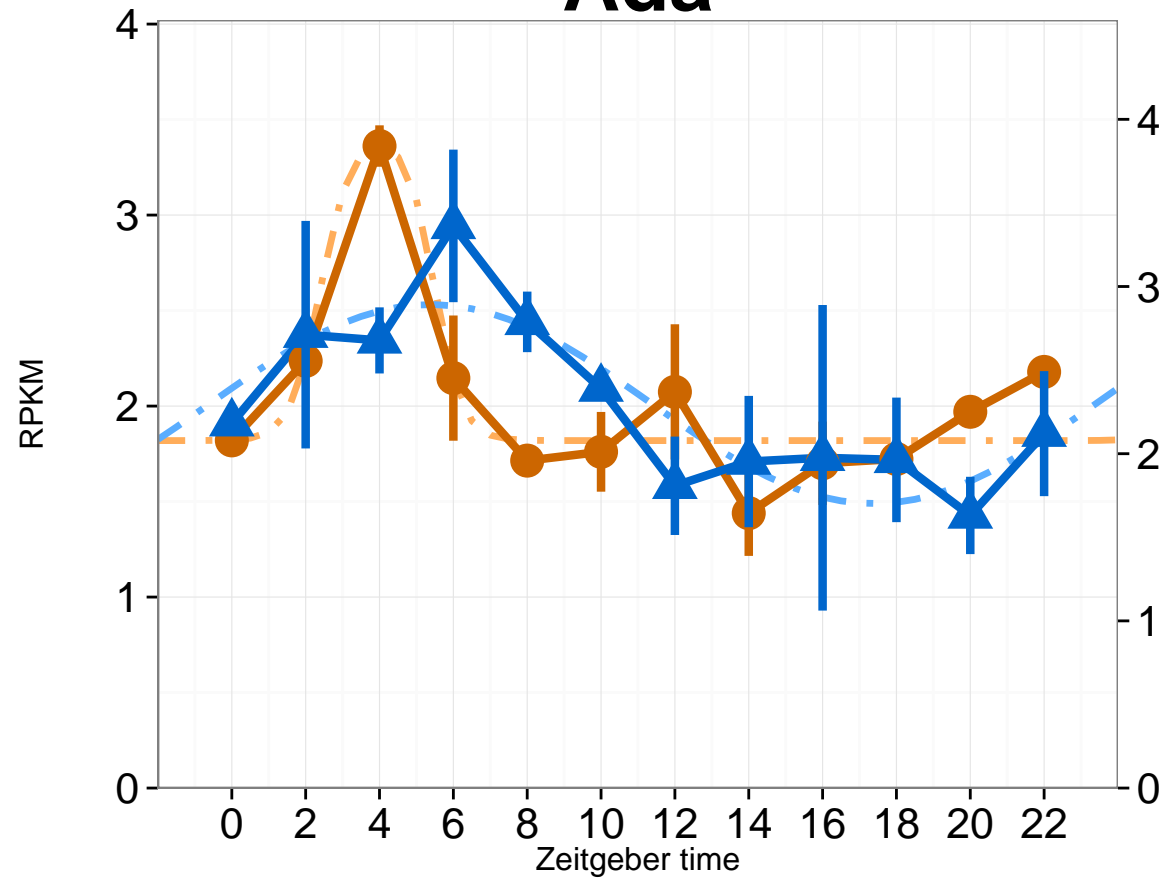

## Ada

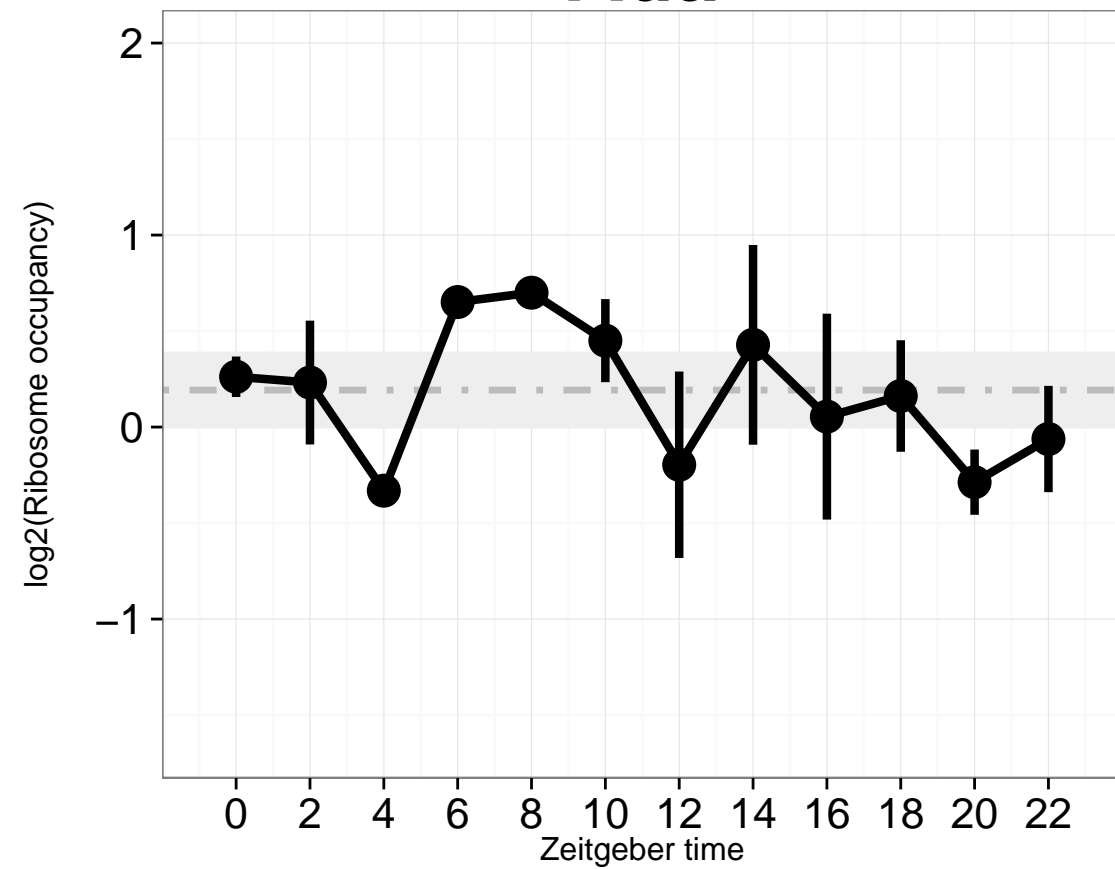

Supplement: Supplementary file 11876 [file 1]

## Vwce

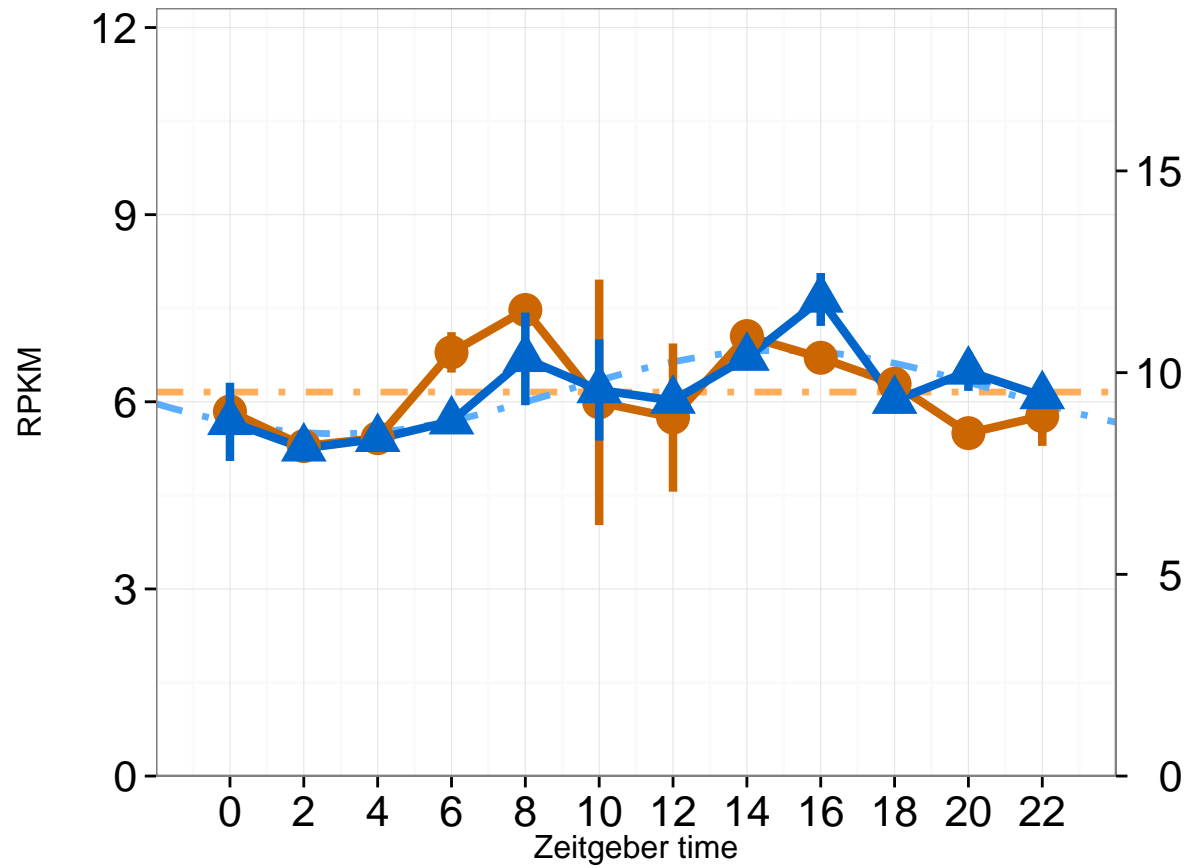

## Vwce

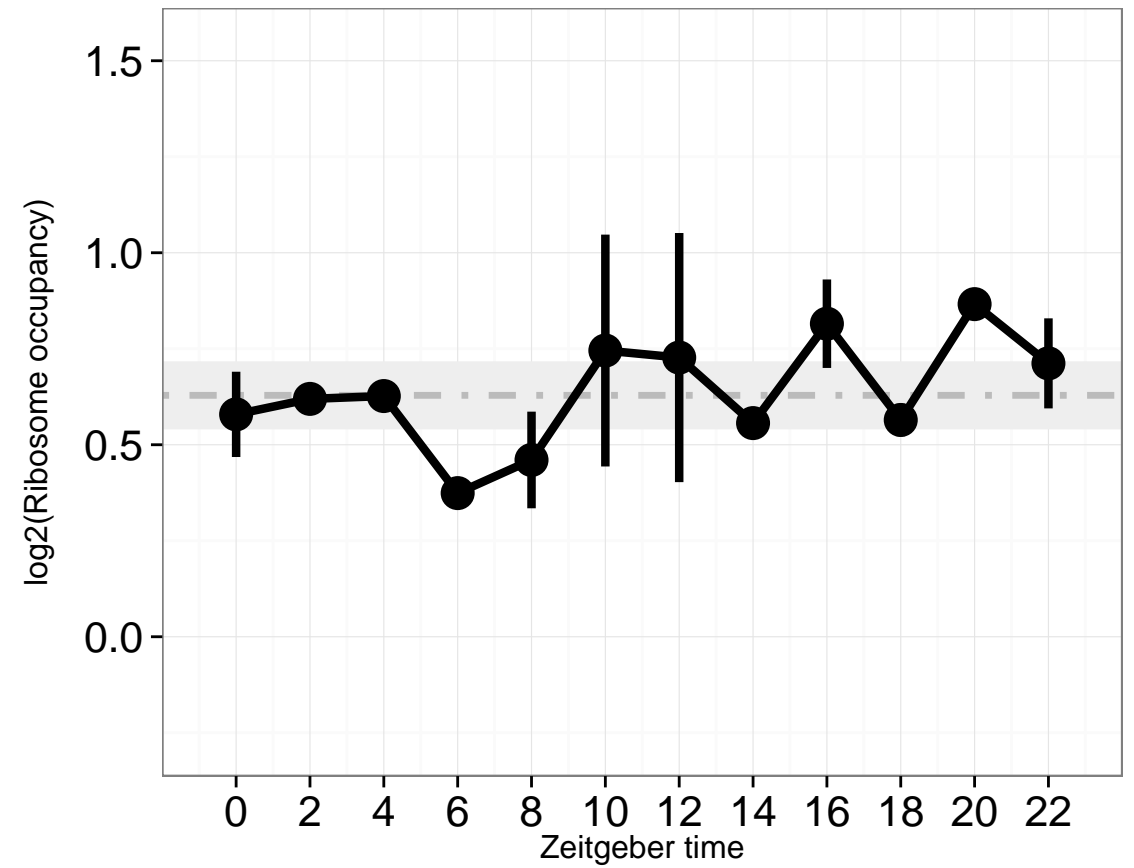

Supplement: Supplementary file 11877 [file 1]

# Eva1b

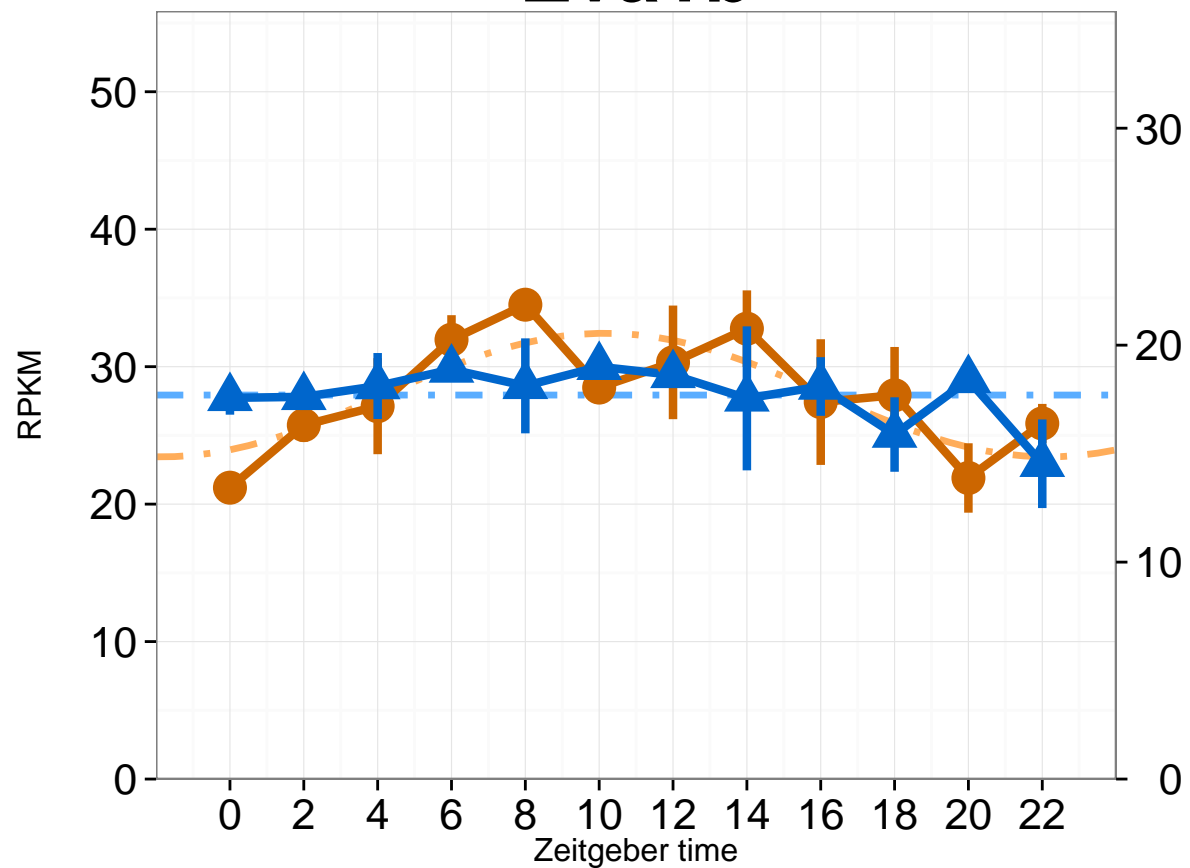

# Eva1b

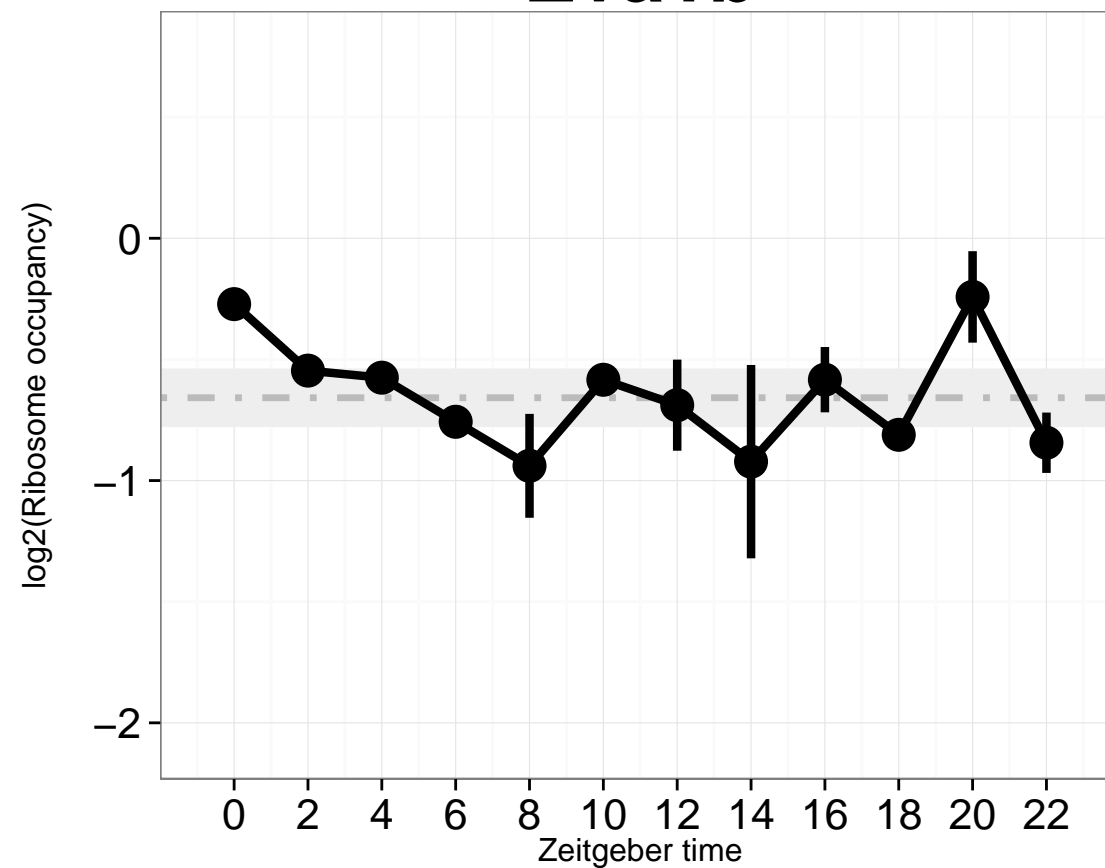

Supplement: Supplementary file 11878 [file 1]

# Fcgr4

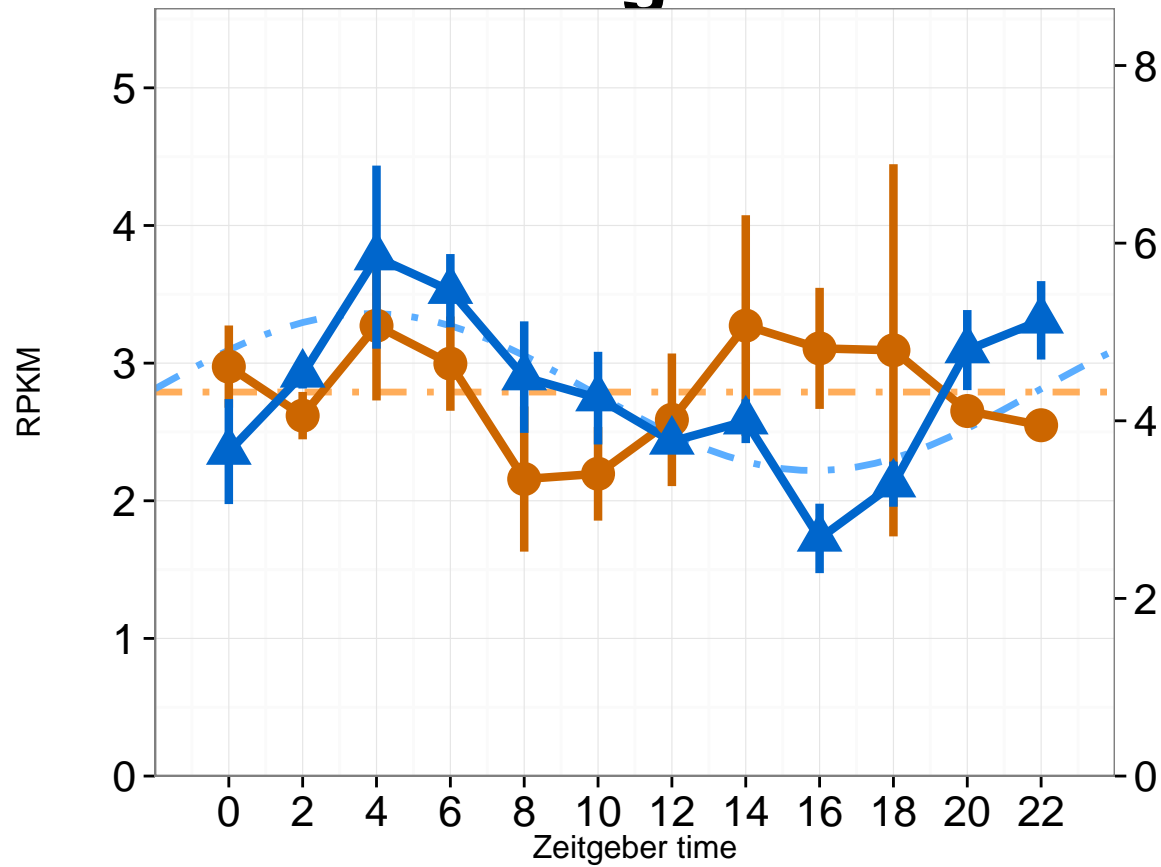

# Fcgr4

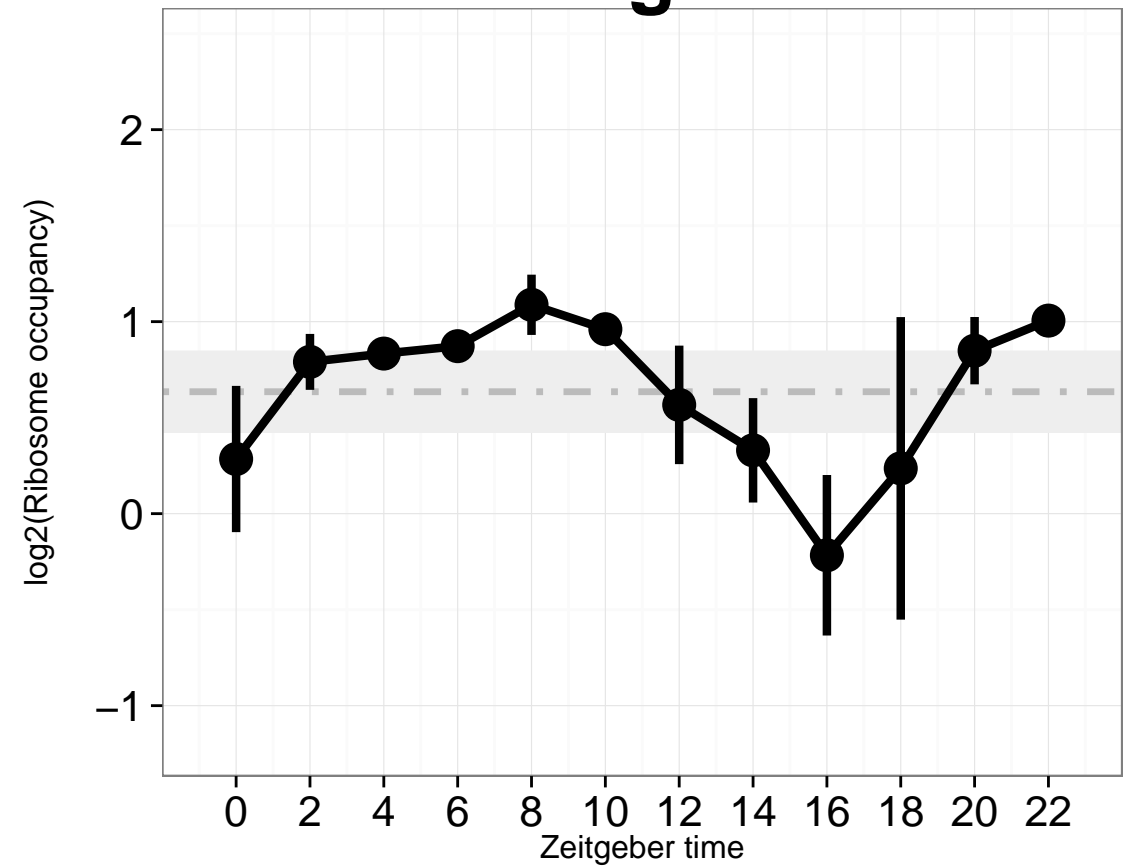

Supplement: Supplementary file 11879 [file 1]

## Tpi1

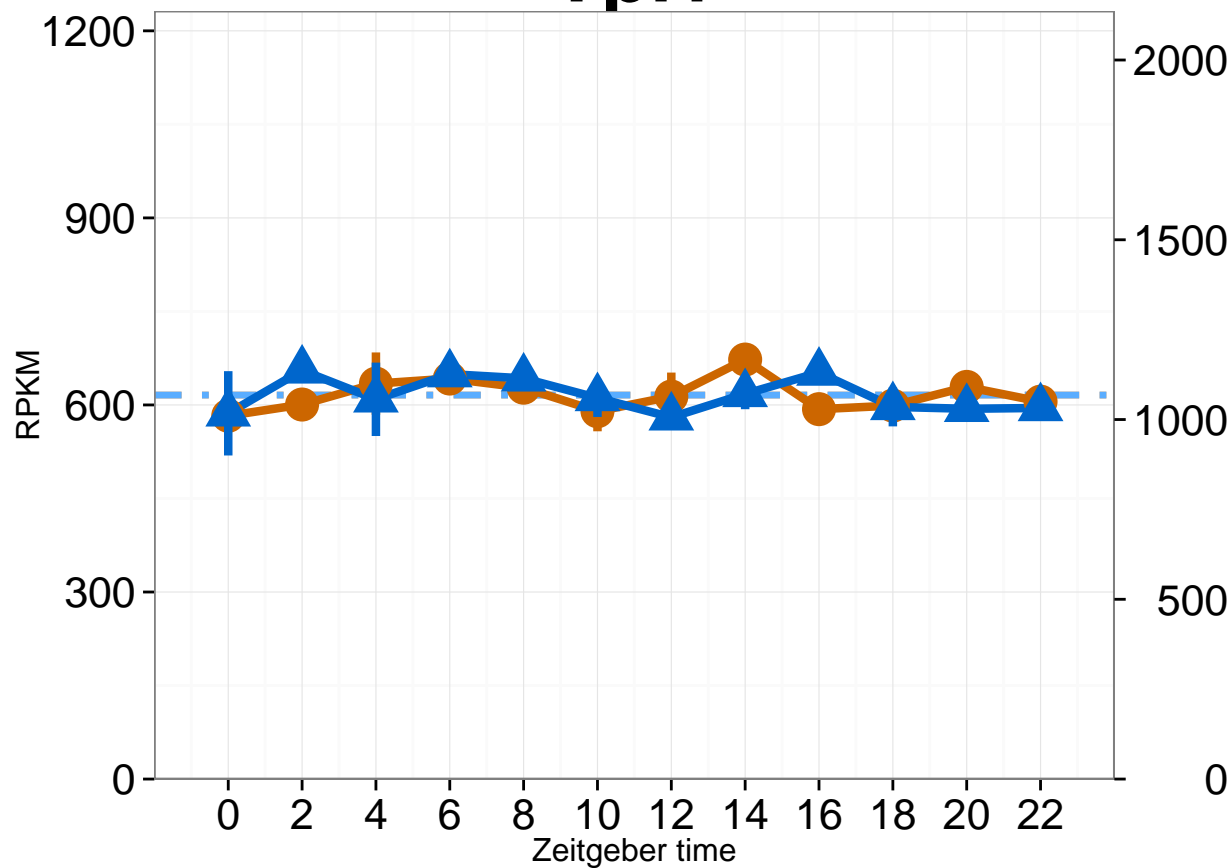

## Tpi1

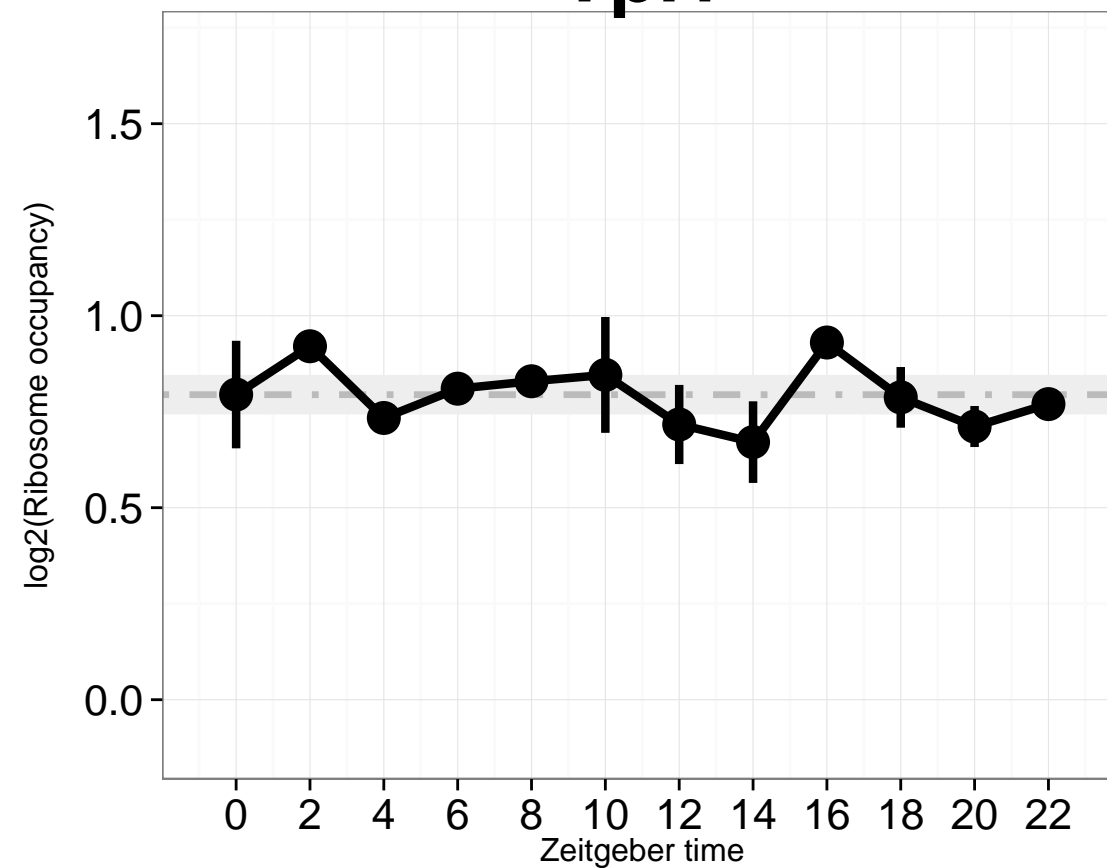

Supplement: Supplementary file 11880 [file 1]

## Tex264

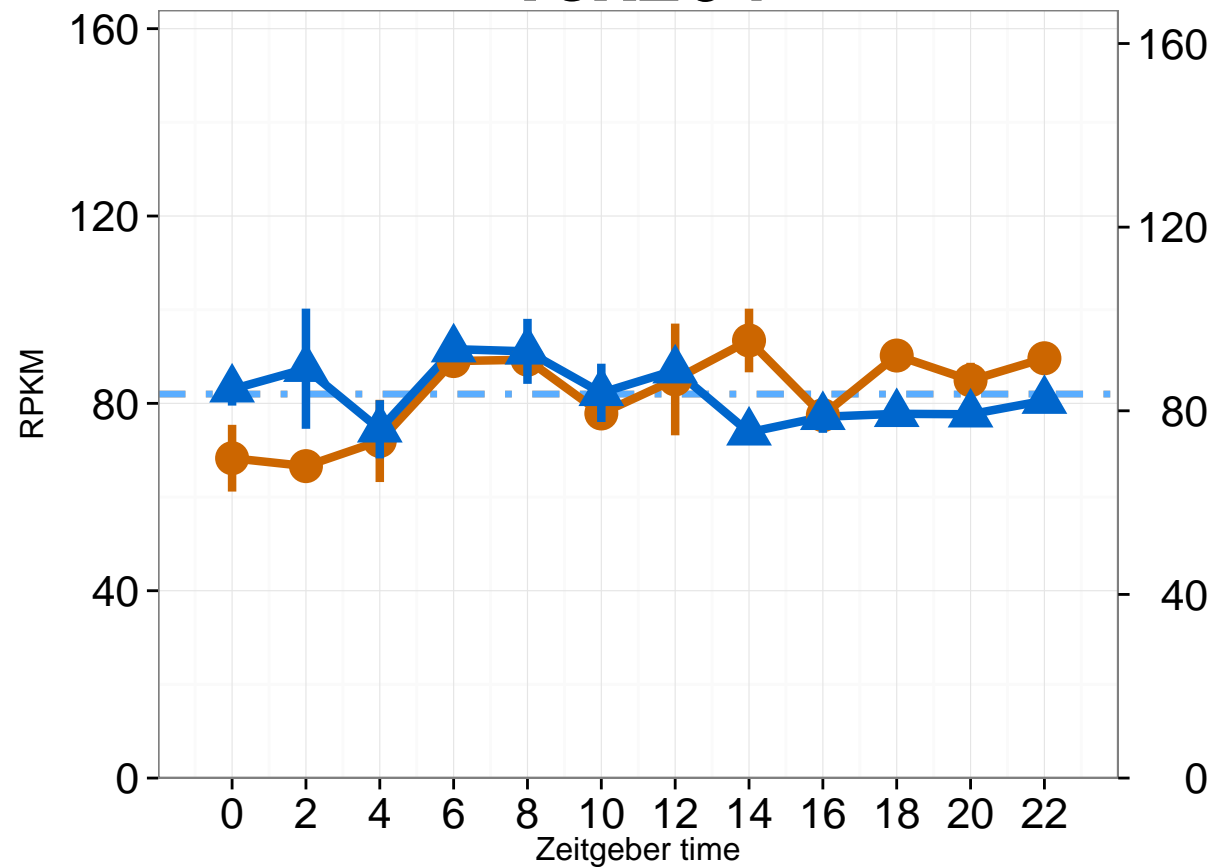

## Tex264

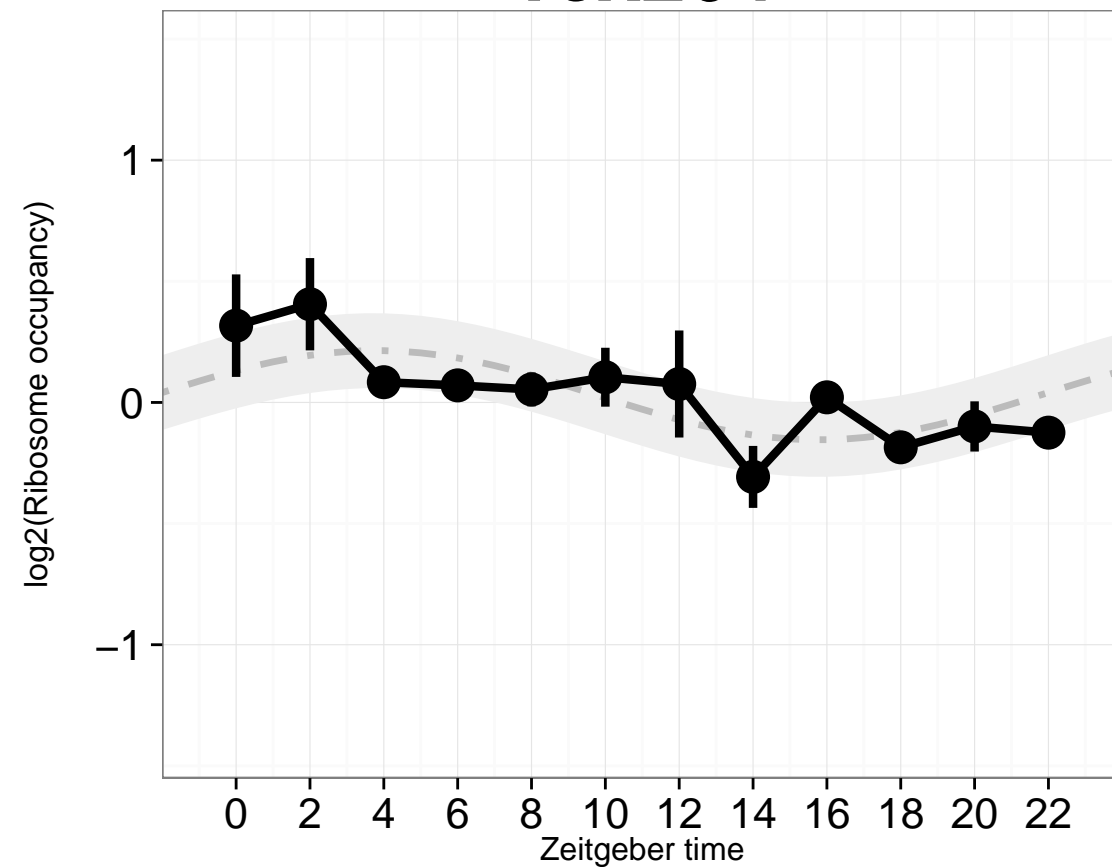

Supplement: Supplementary file 11881 [file 1]

## Ate1

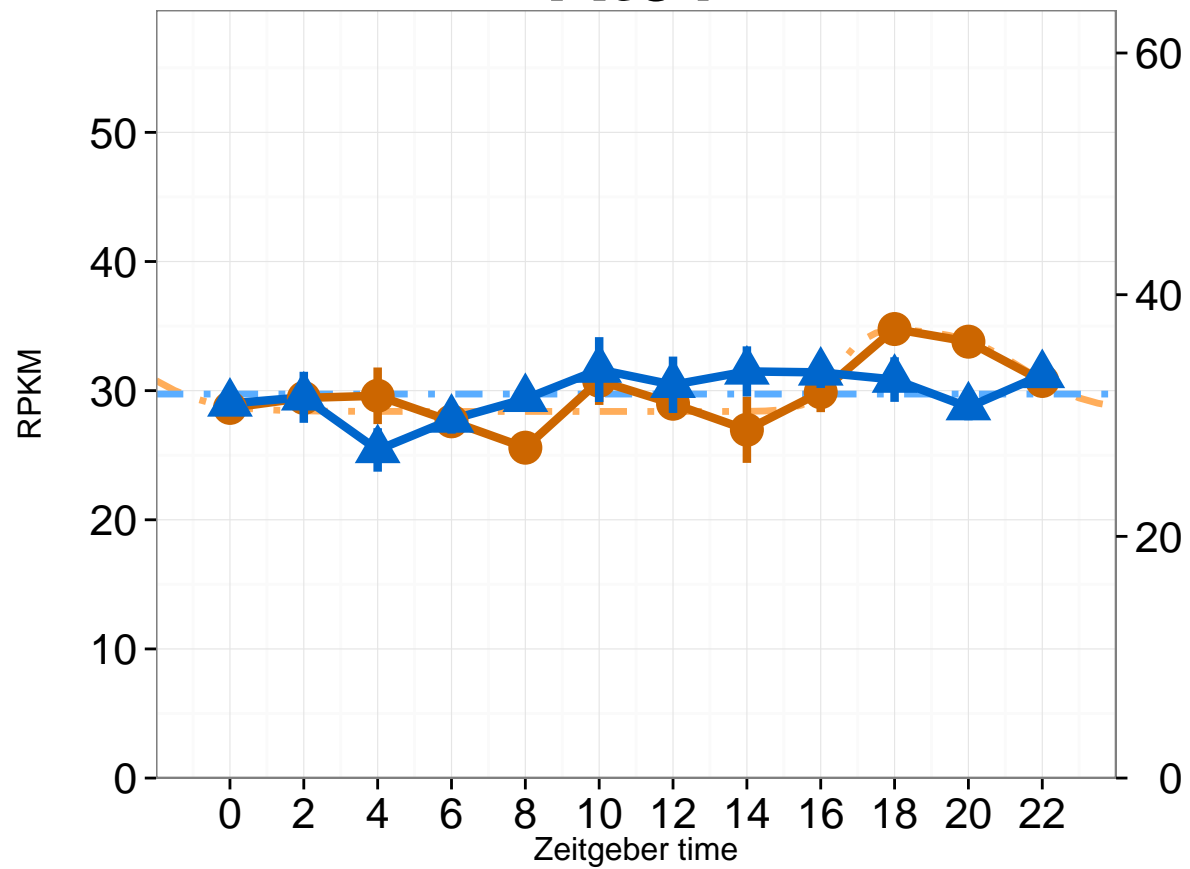

## Ate1

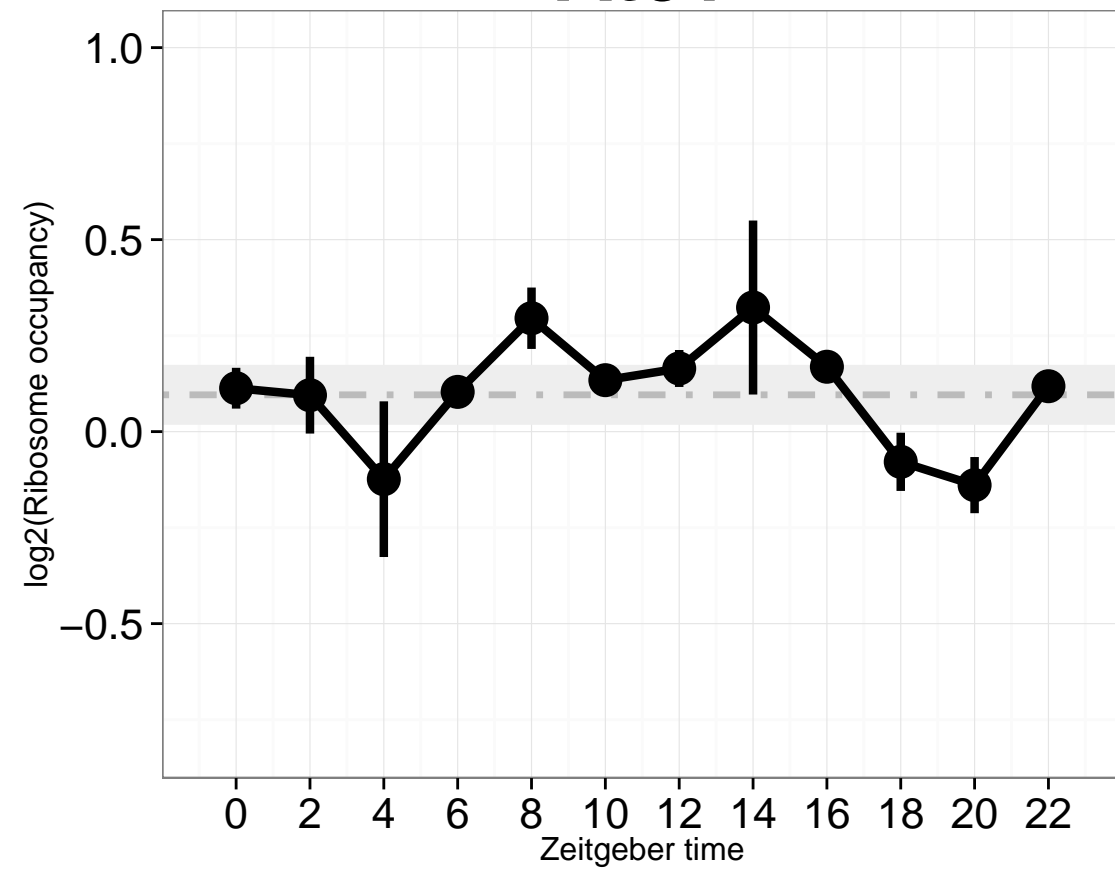

Supplement: Supplementary file 11882 [file 1]

## Lgals4

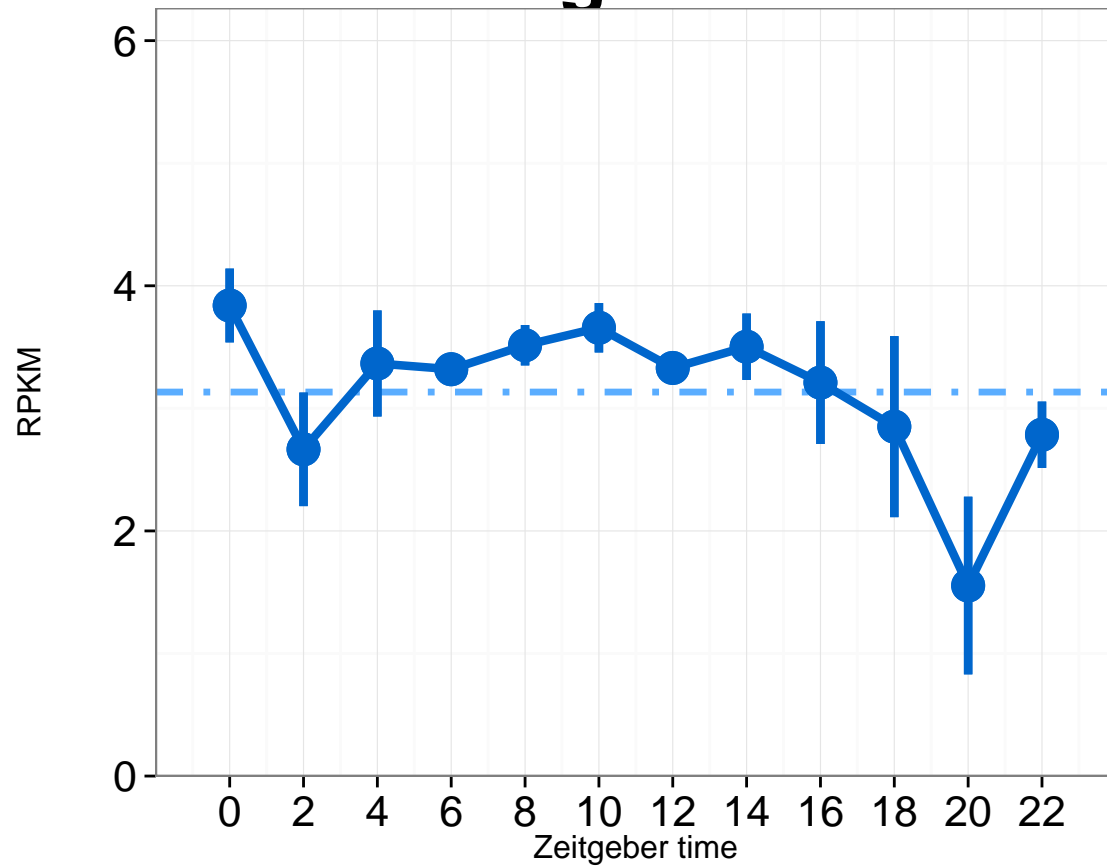

## Lgals4 log2(Ribosome occupancy

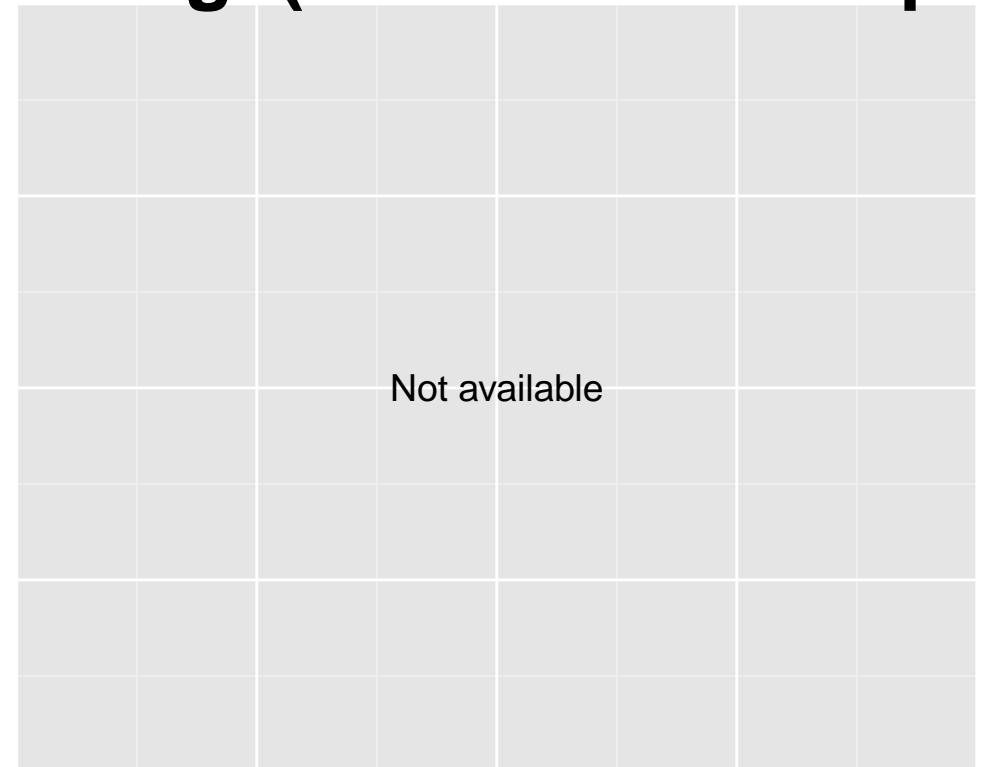

Supplement: Supplementary file 11883 [file 1]

## Mtbp

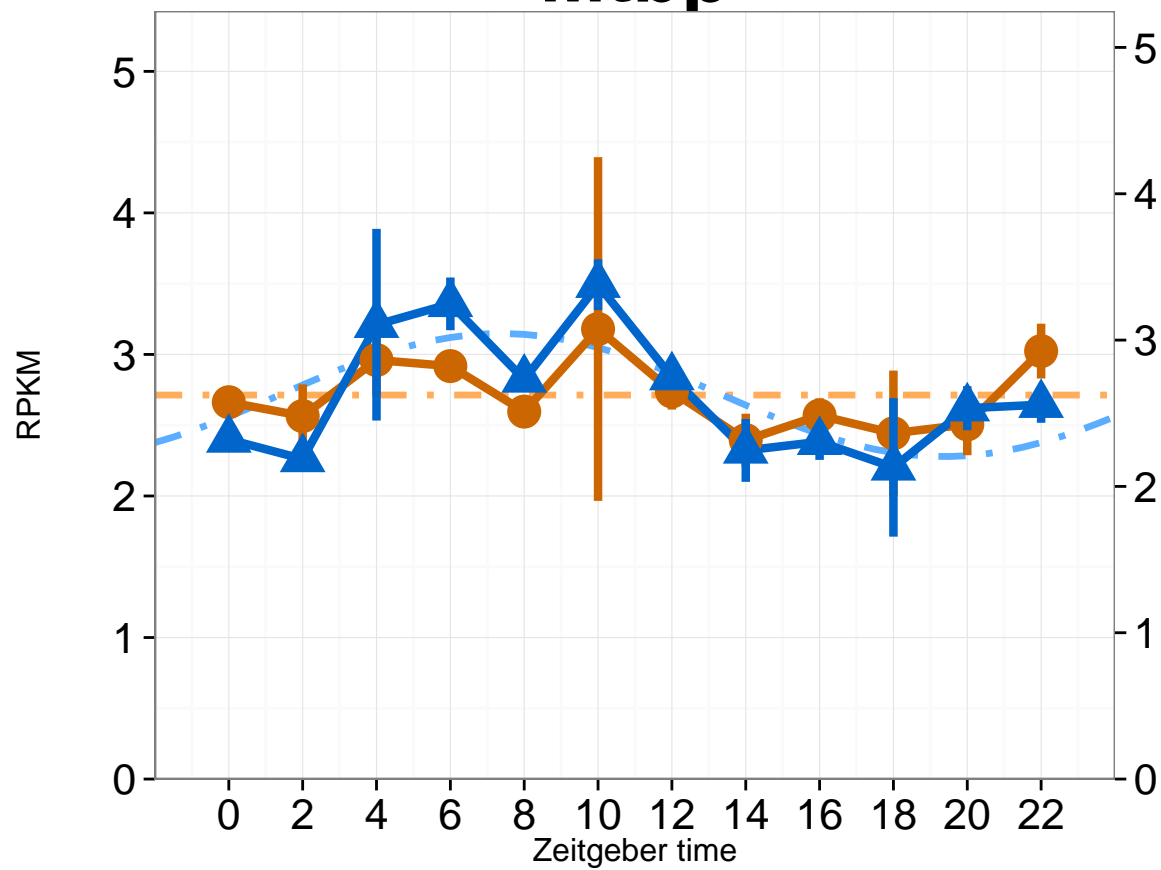

## Mtbp

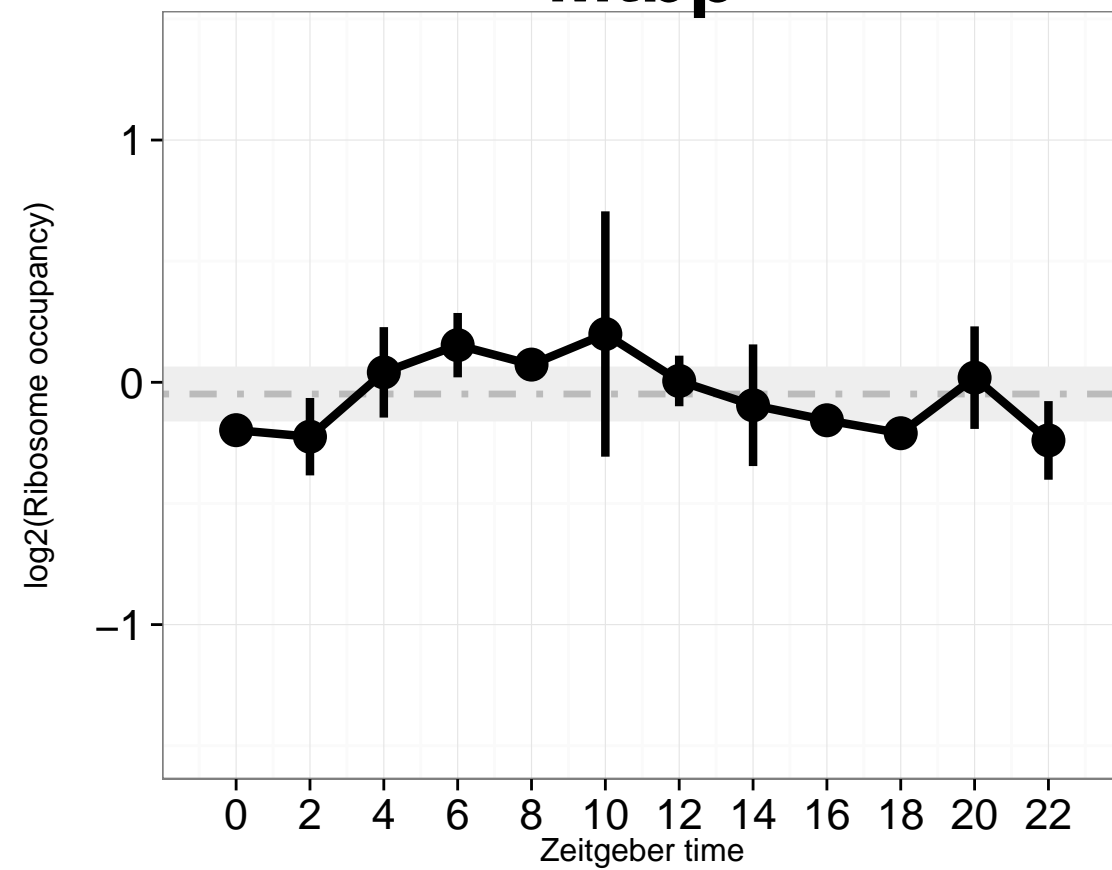

Supplement: Supplementary file 11884 [file 1]

# 9130401M01Rik

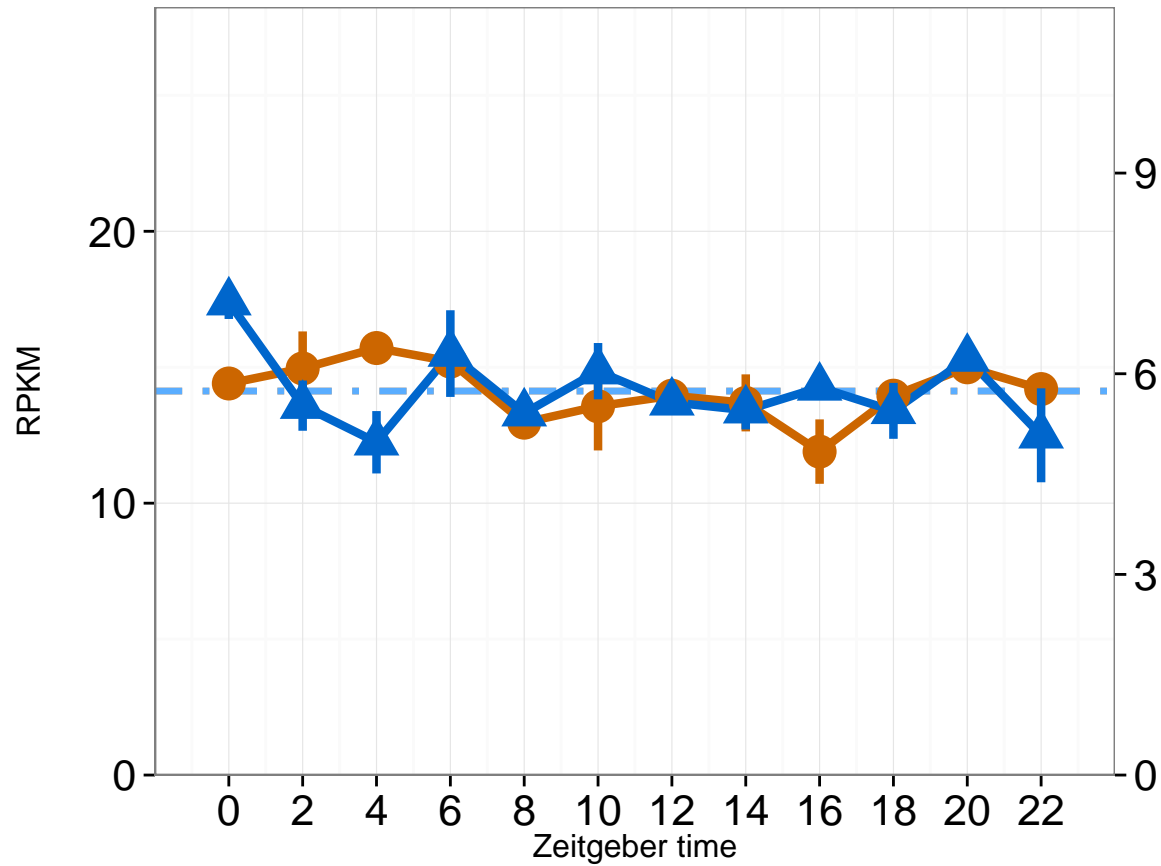

# 9130401M01Rik

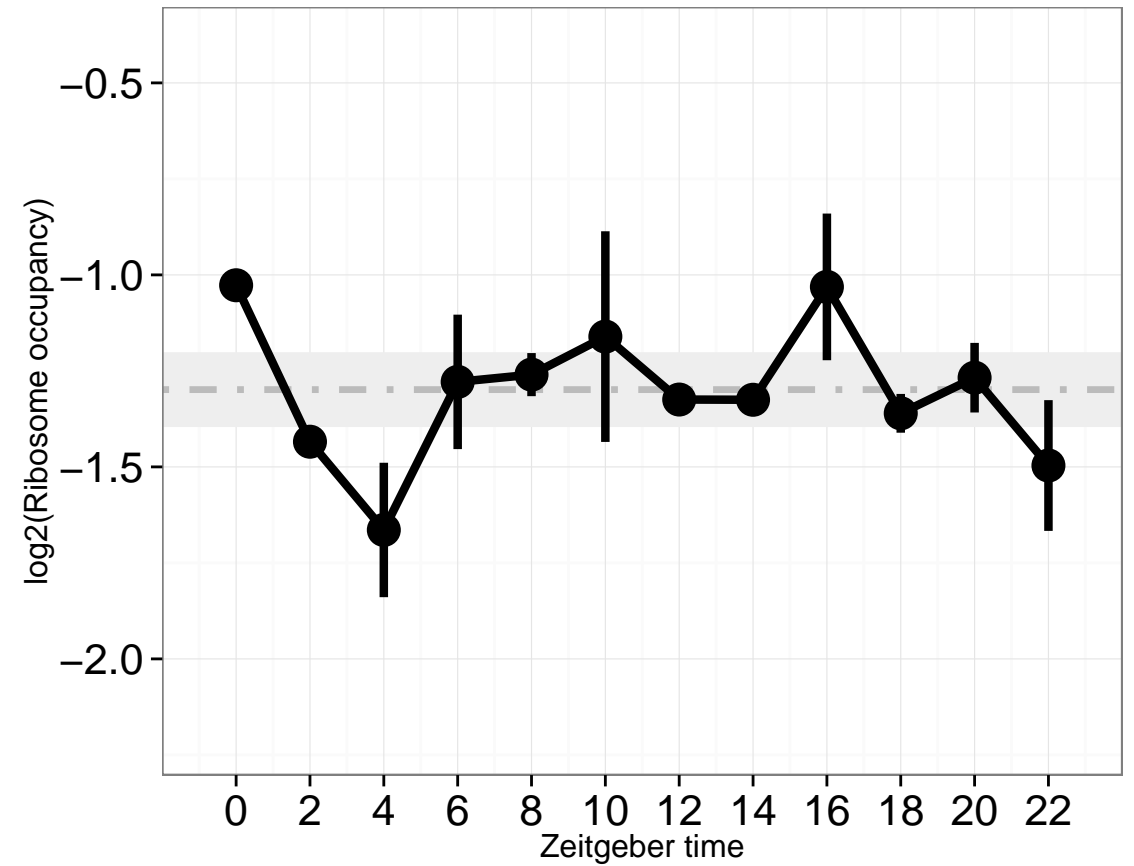

Supplement: Supplementary file 11885 [file 1]

# Cdk19

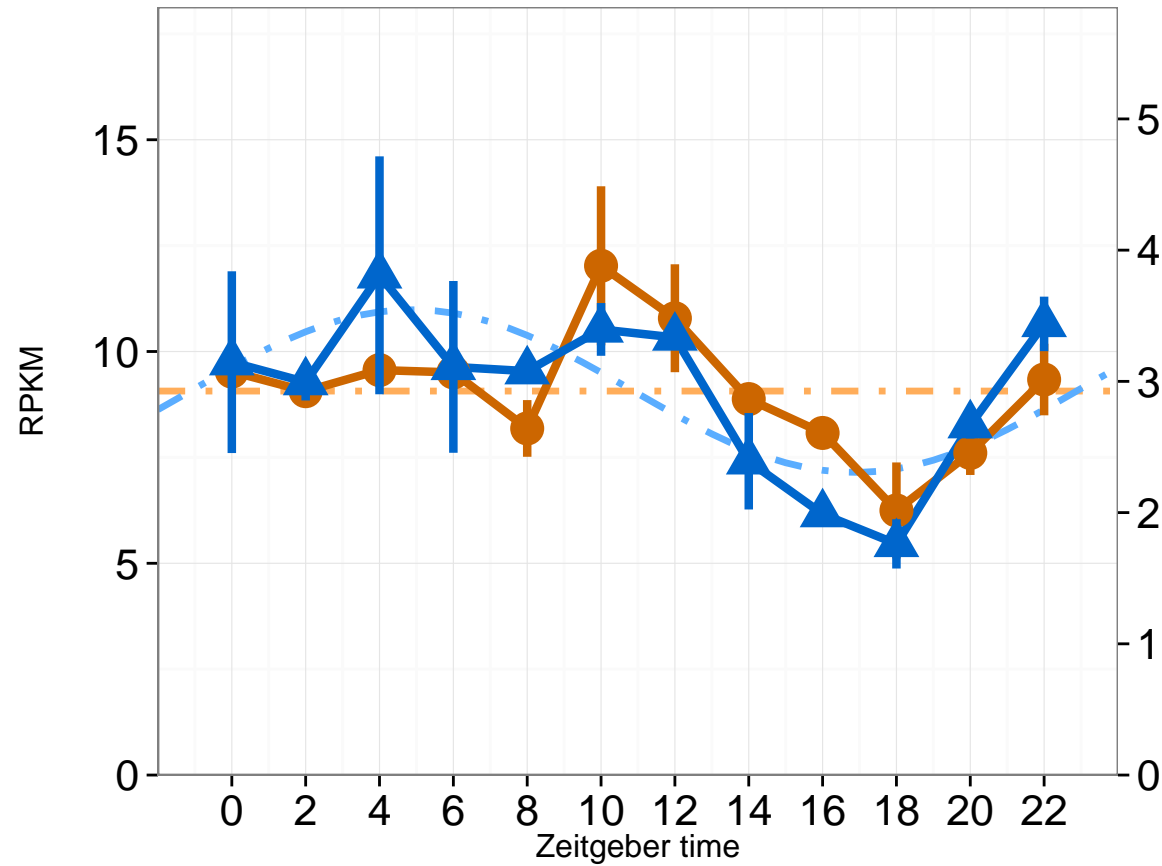

# Cdk19

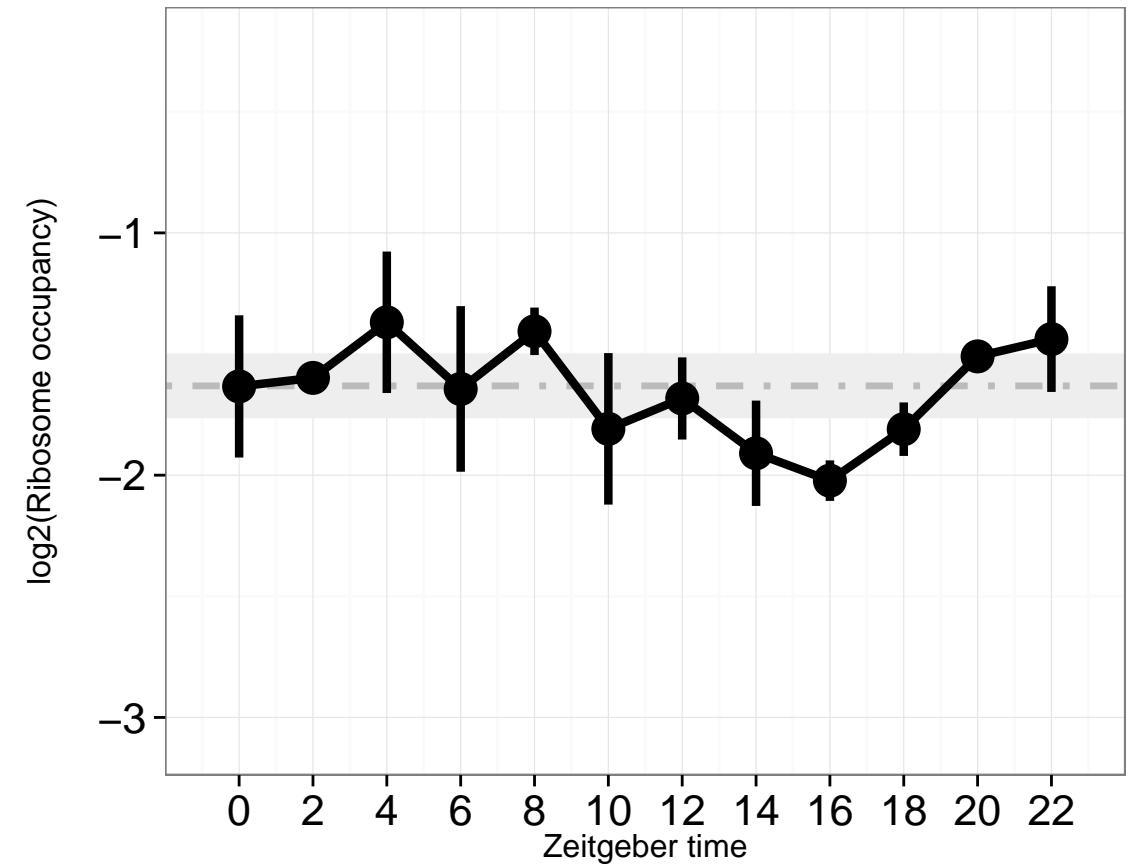

Supplement: Supplementary file 11886 [file 1]

## Leprel2

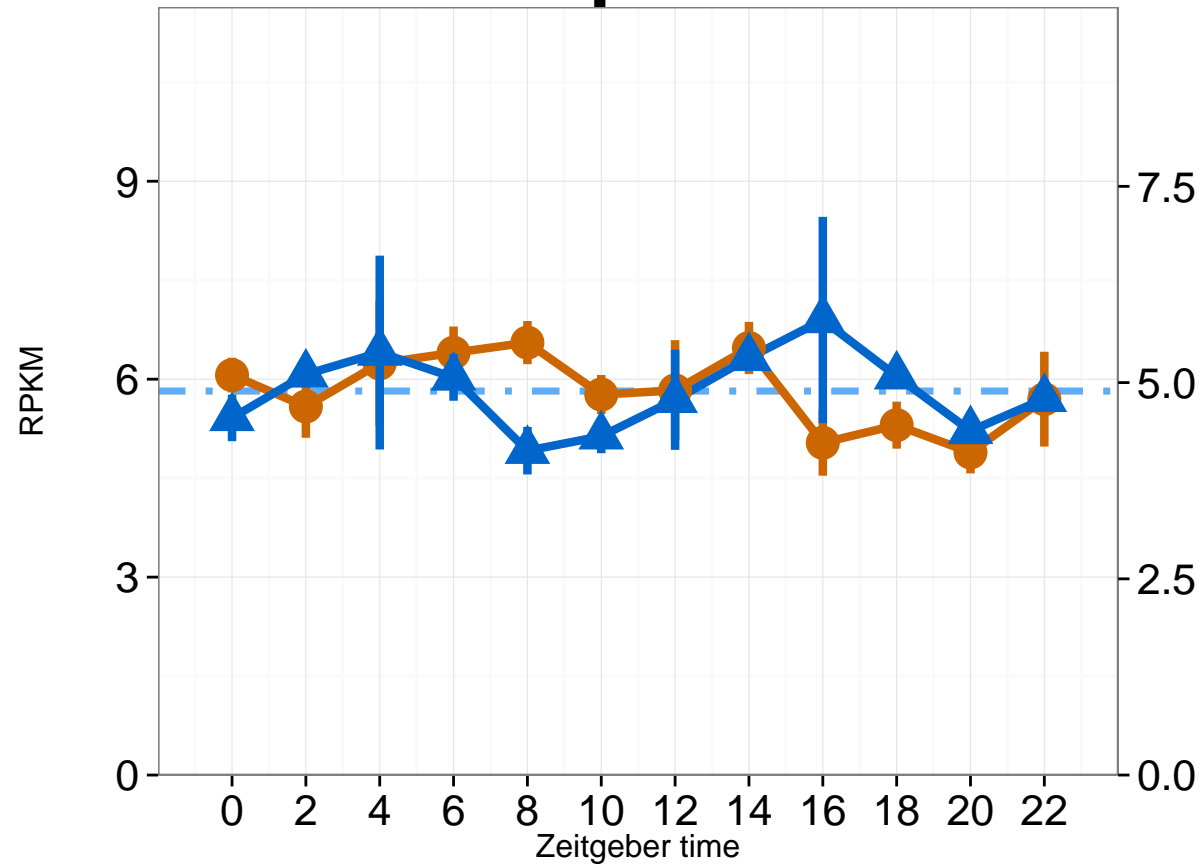

## Leprel2

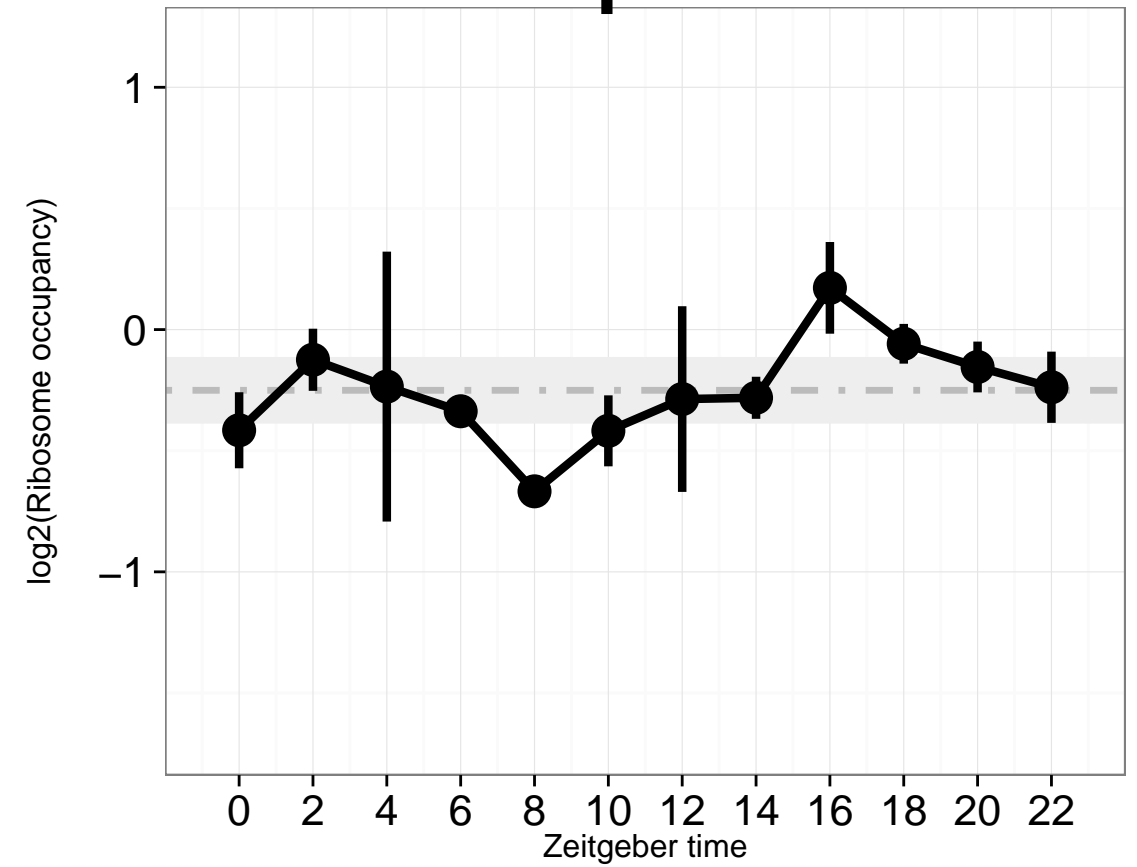

Supplement: Supplementary file 11887 [file 1]

## Tdp2

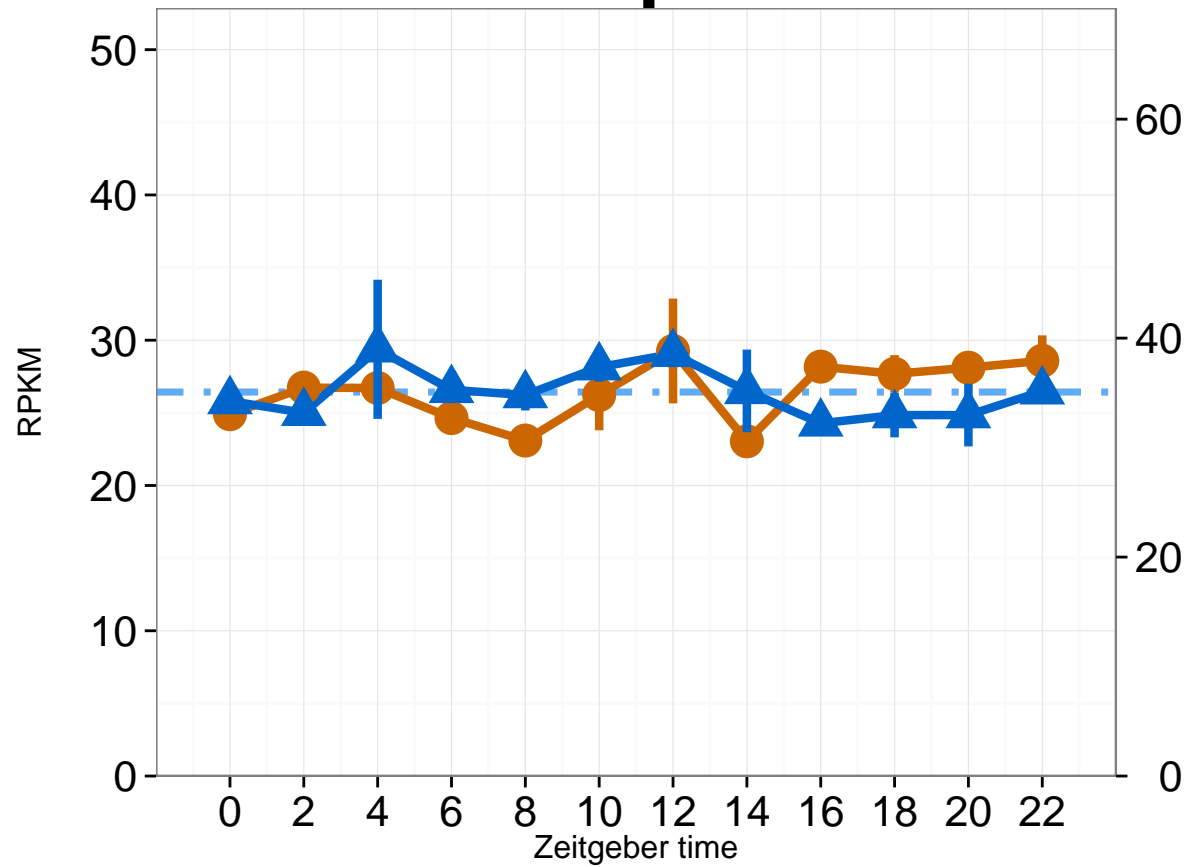

## Tdp2

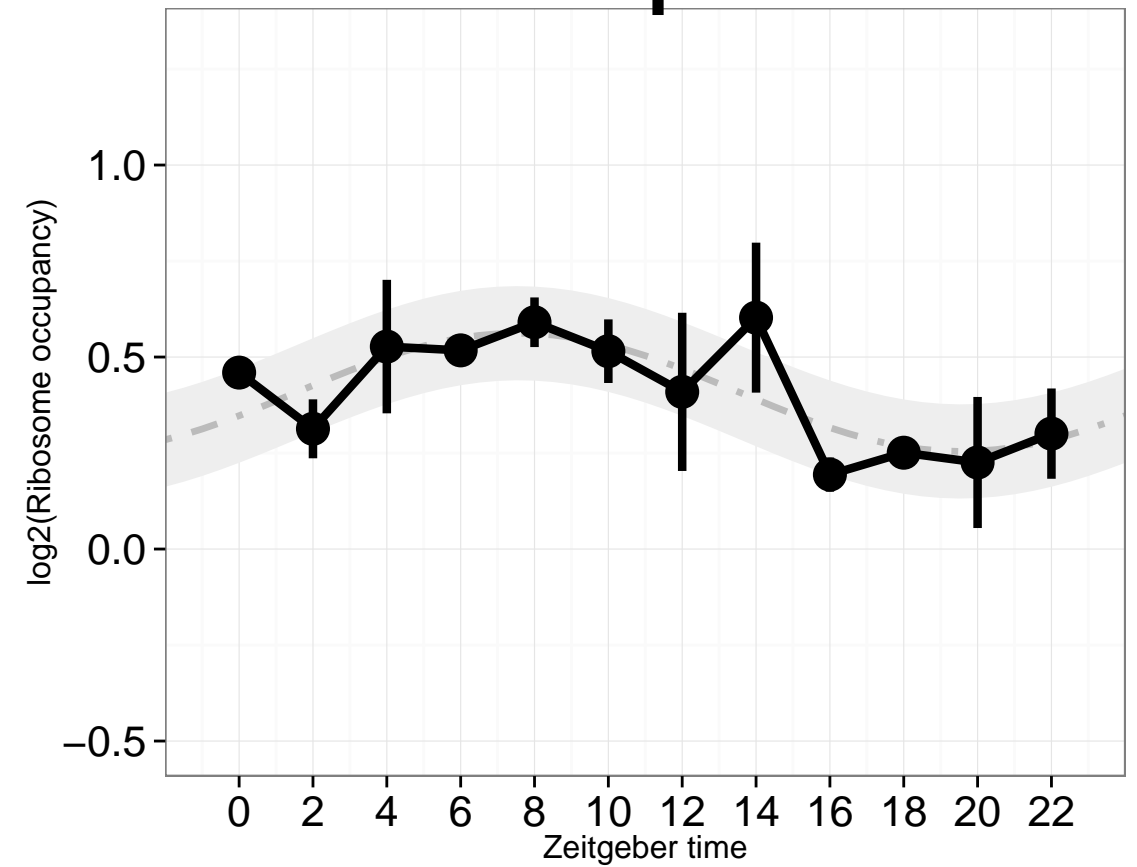

Supplement: Supplementary file 11888 [file 1]

# Sept10

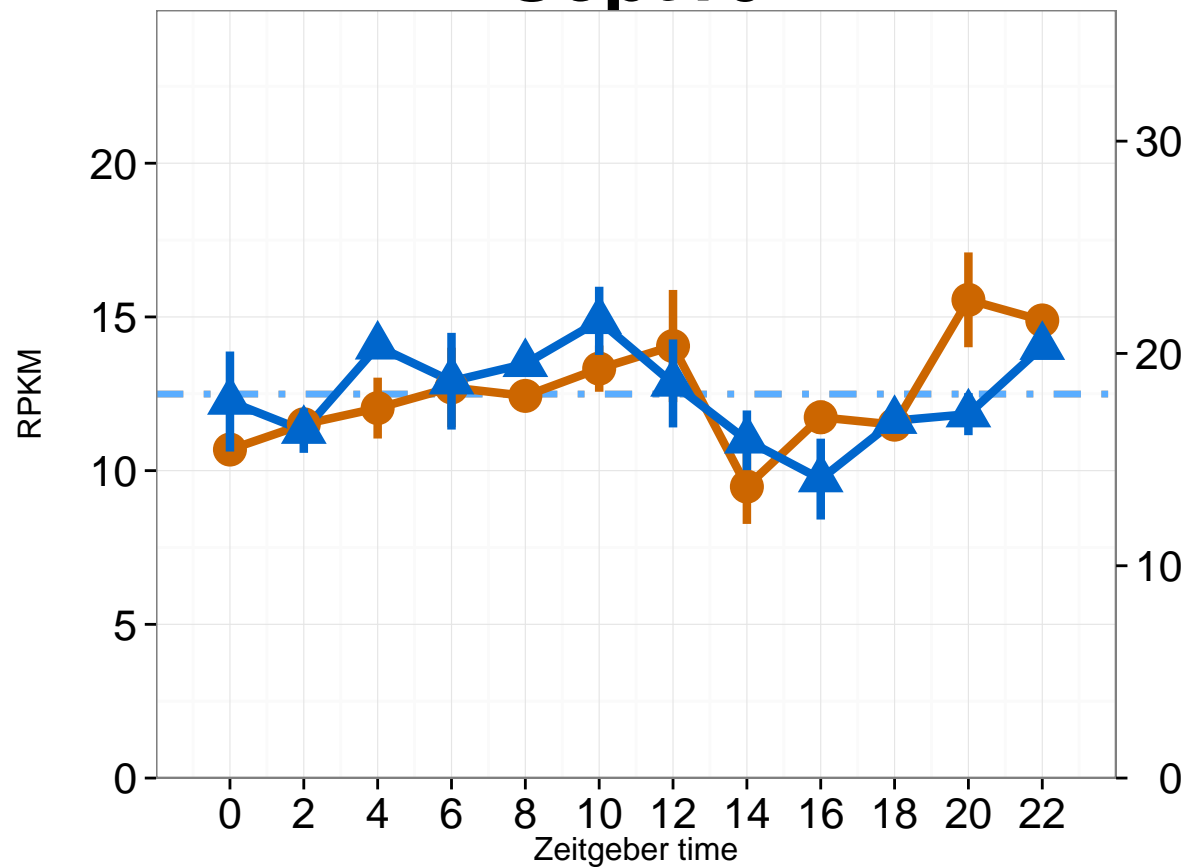

# Sept10

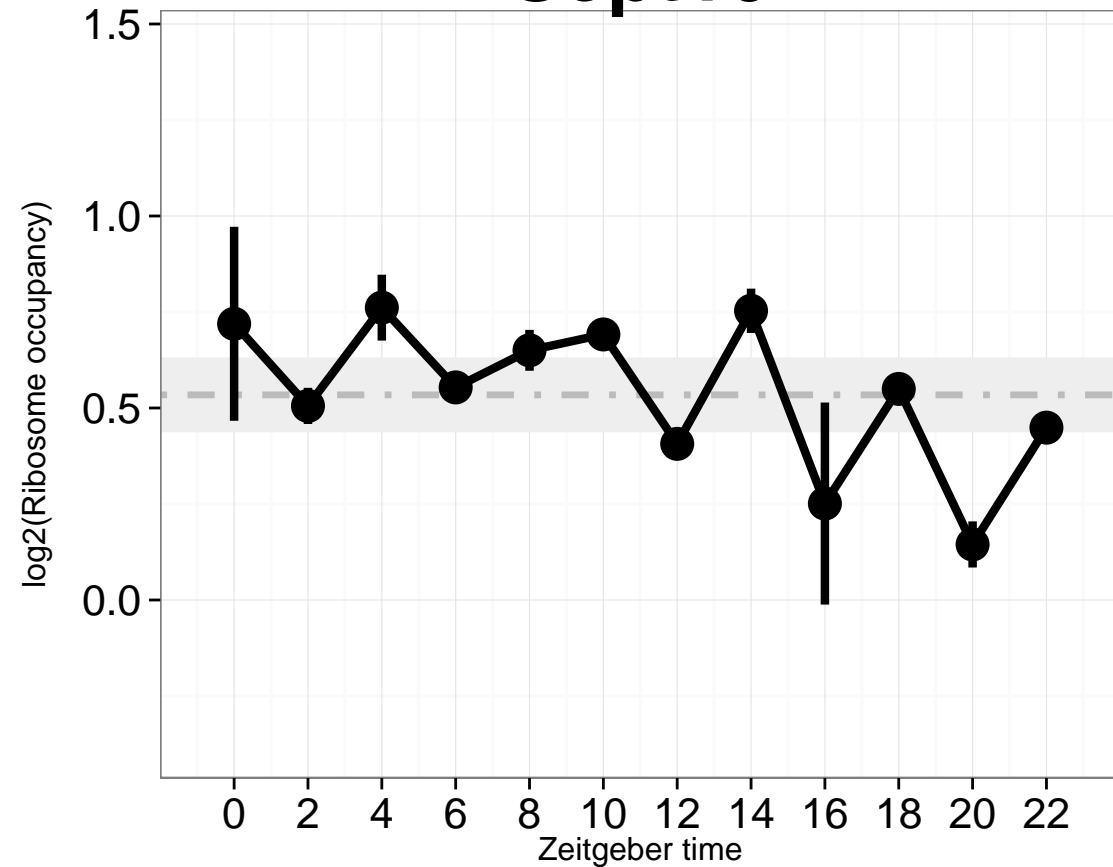

Supplement: Supplementary file 11889 [file 1]

# Stxbp6

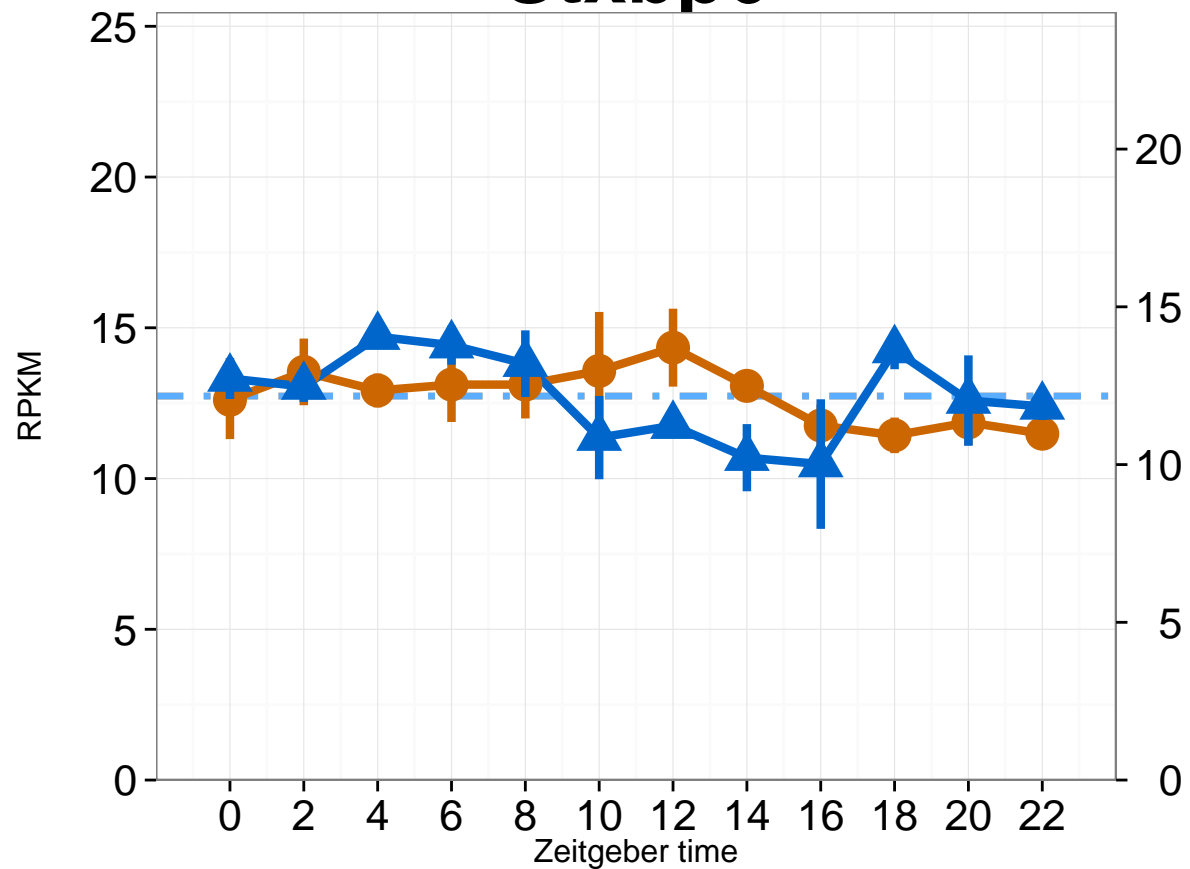

# Stxbp6

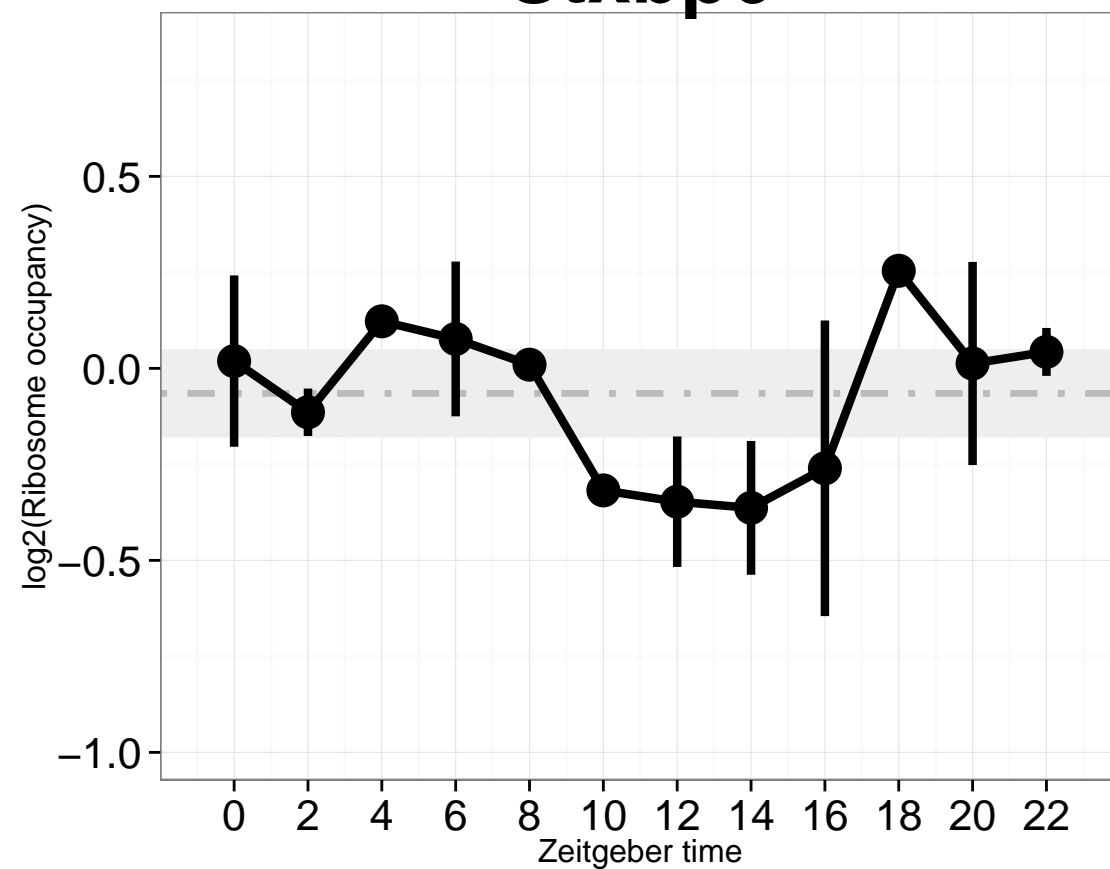

Supplement: Supplementary file 11890 [file 1]

## Acmsd

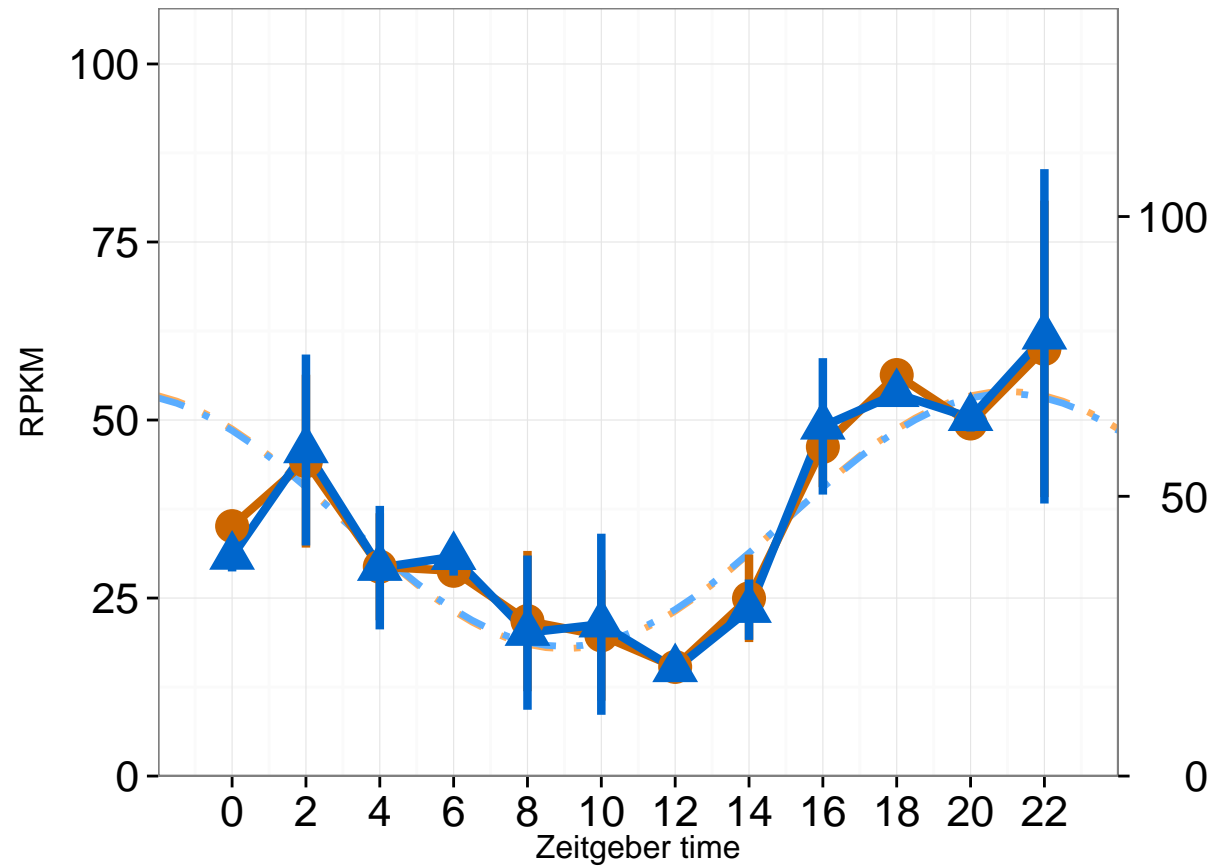

## Acmsd

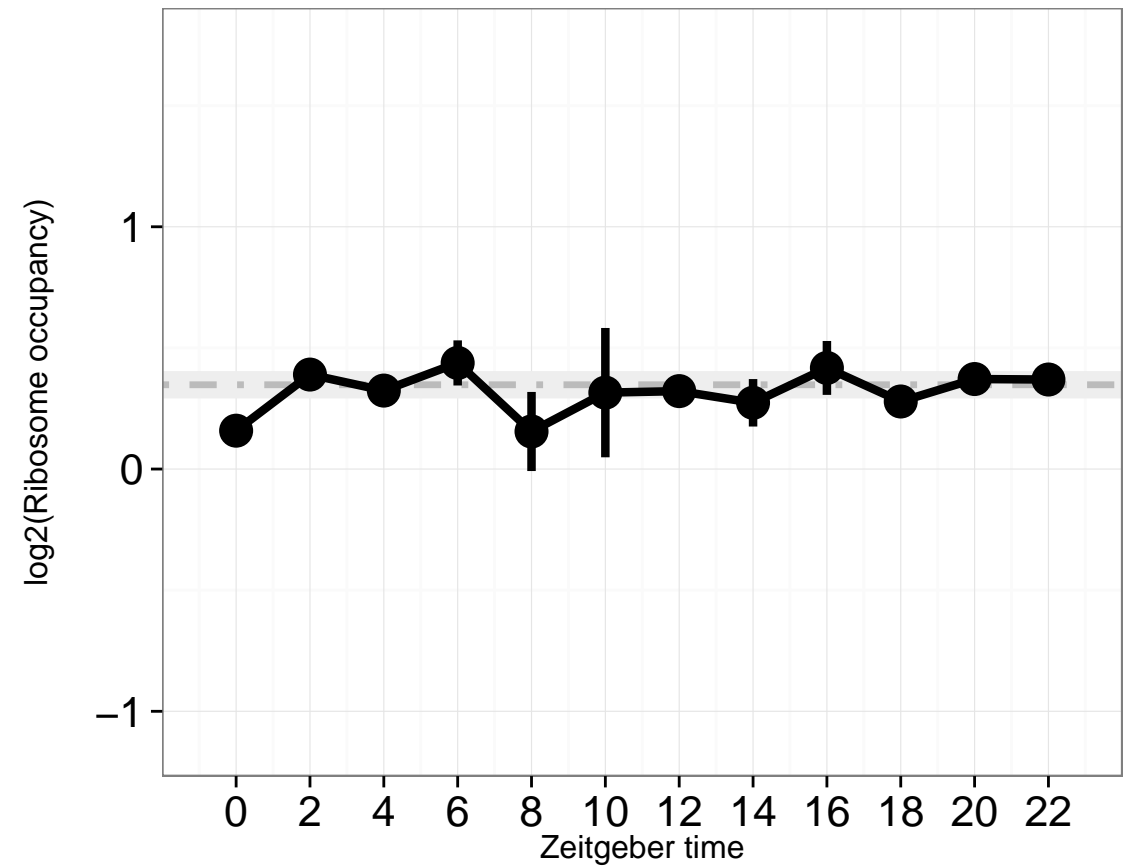

Supplement: Supplementary file 11891 [file 1]

## Glipr1

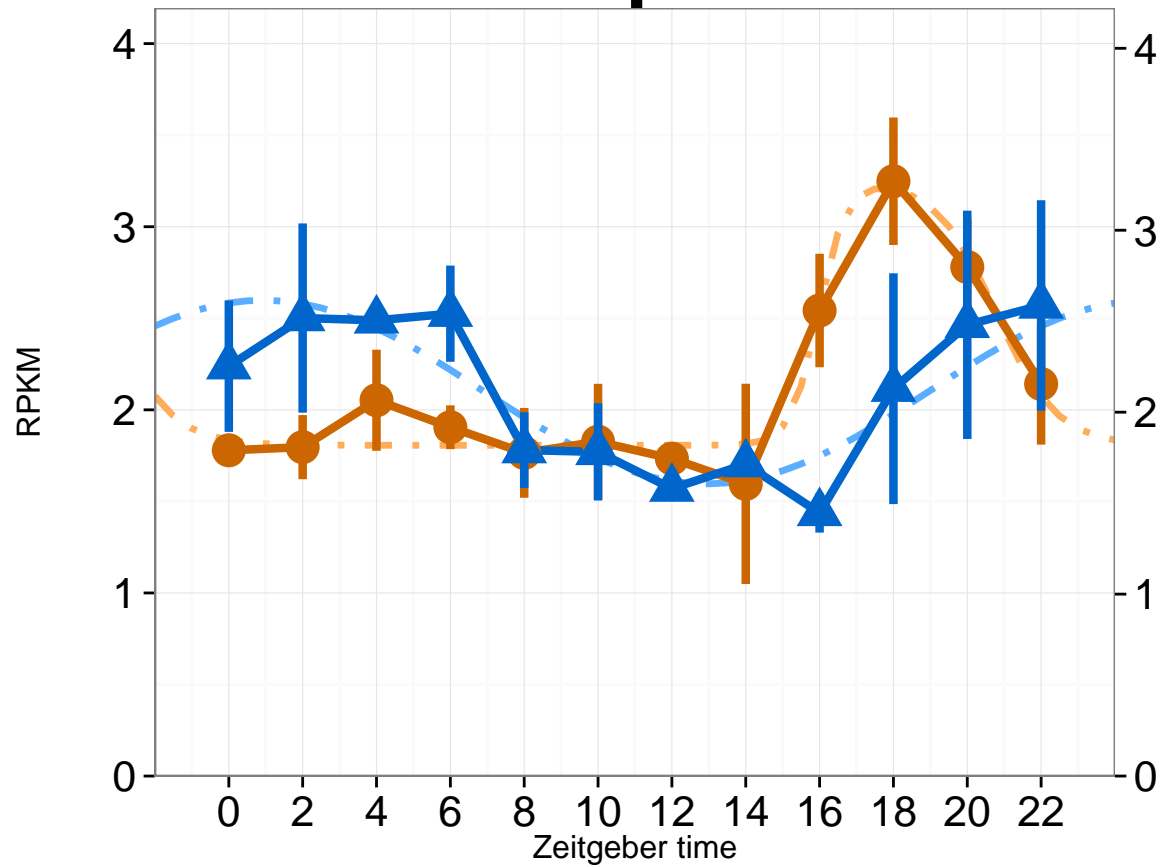

## Glipr1

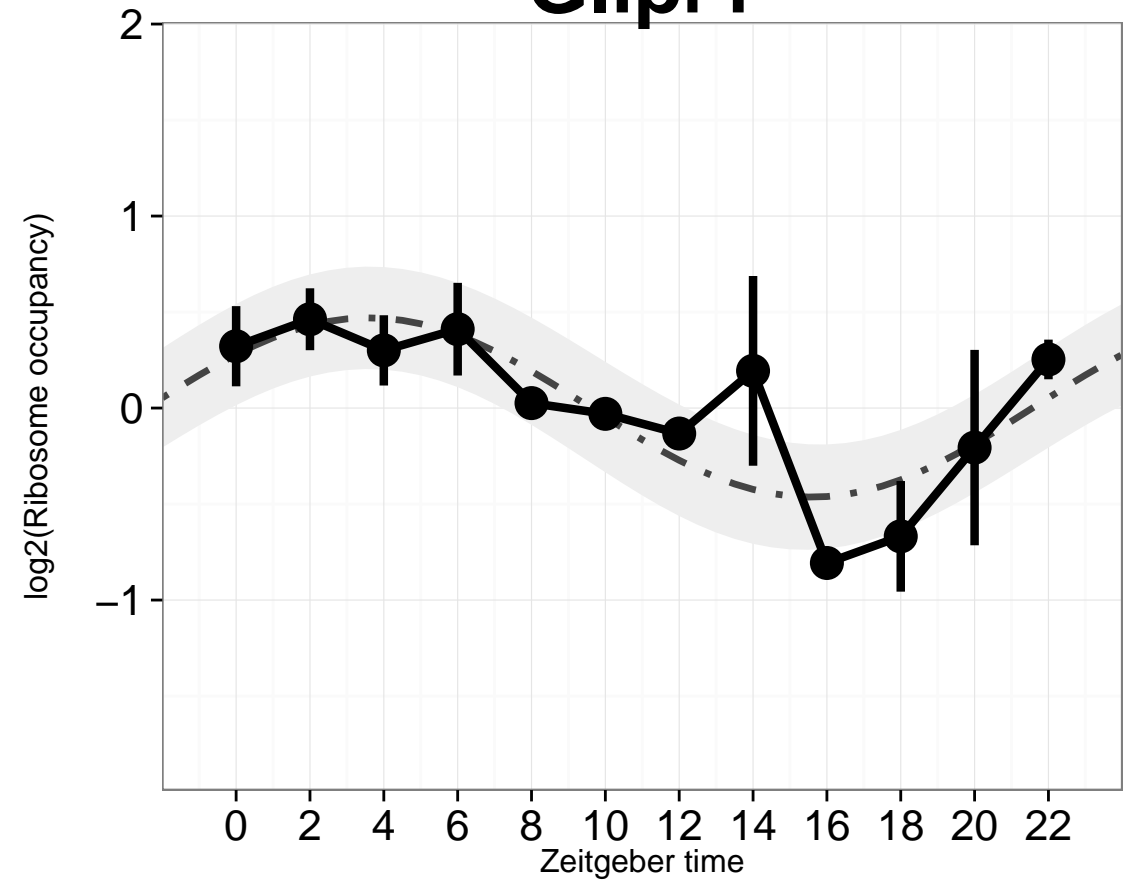

Supplement: Supplementary file 11892 [file 1]

## Ppid

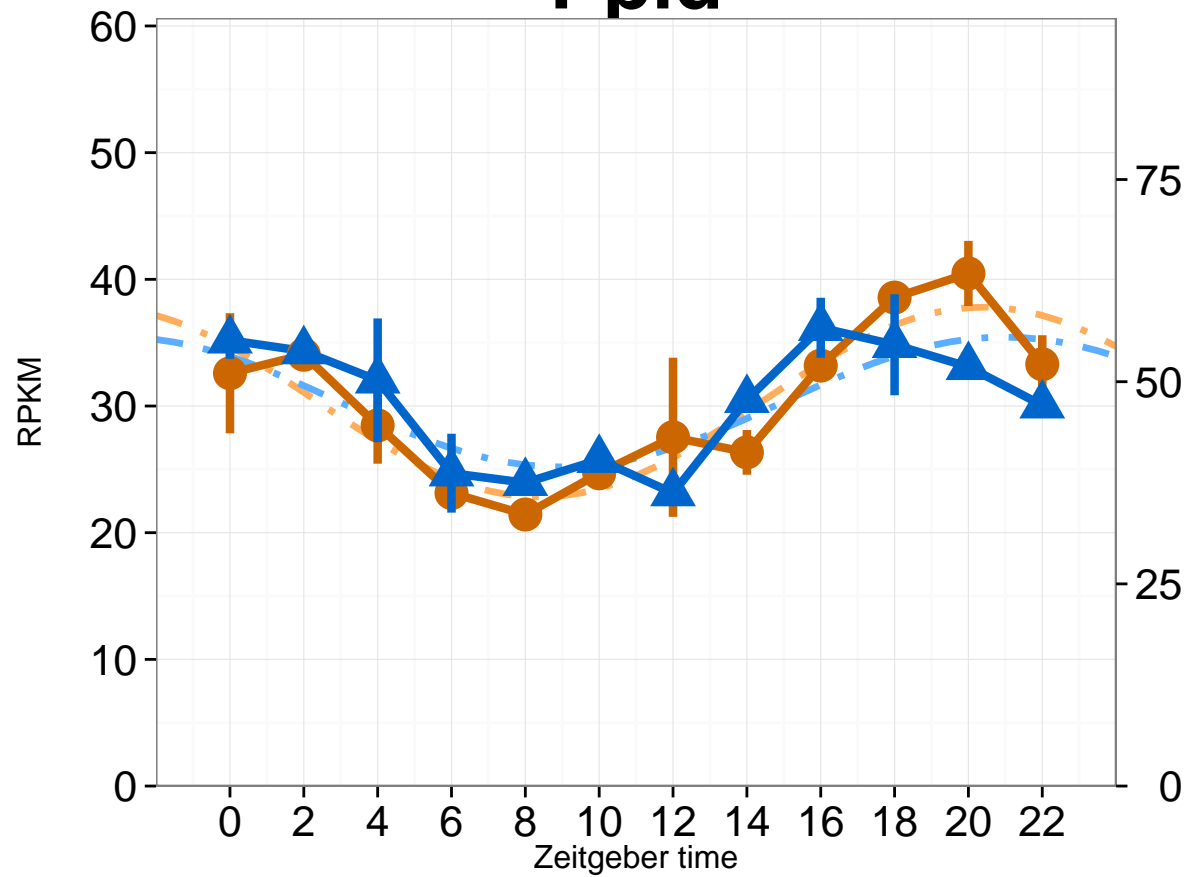

## Ppid

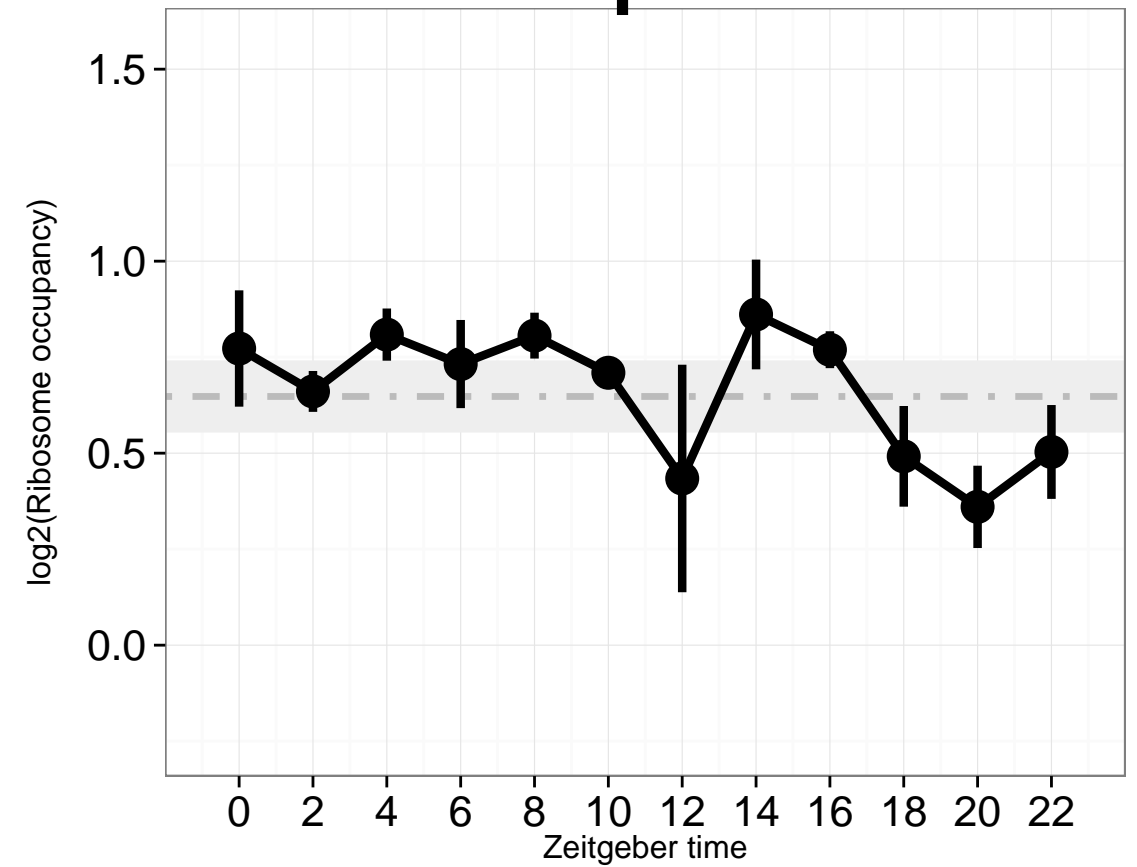

Supplement: Supplementary file 11893 [file 1]

## Rnf10

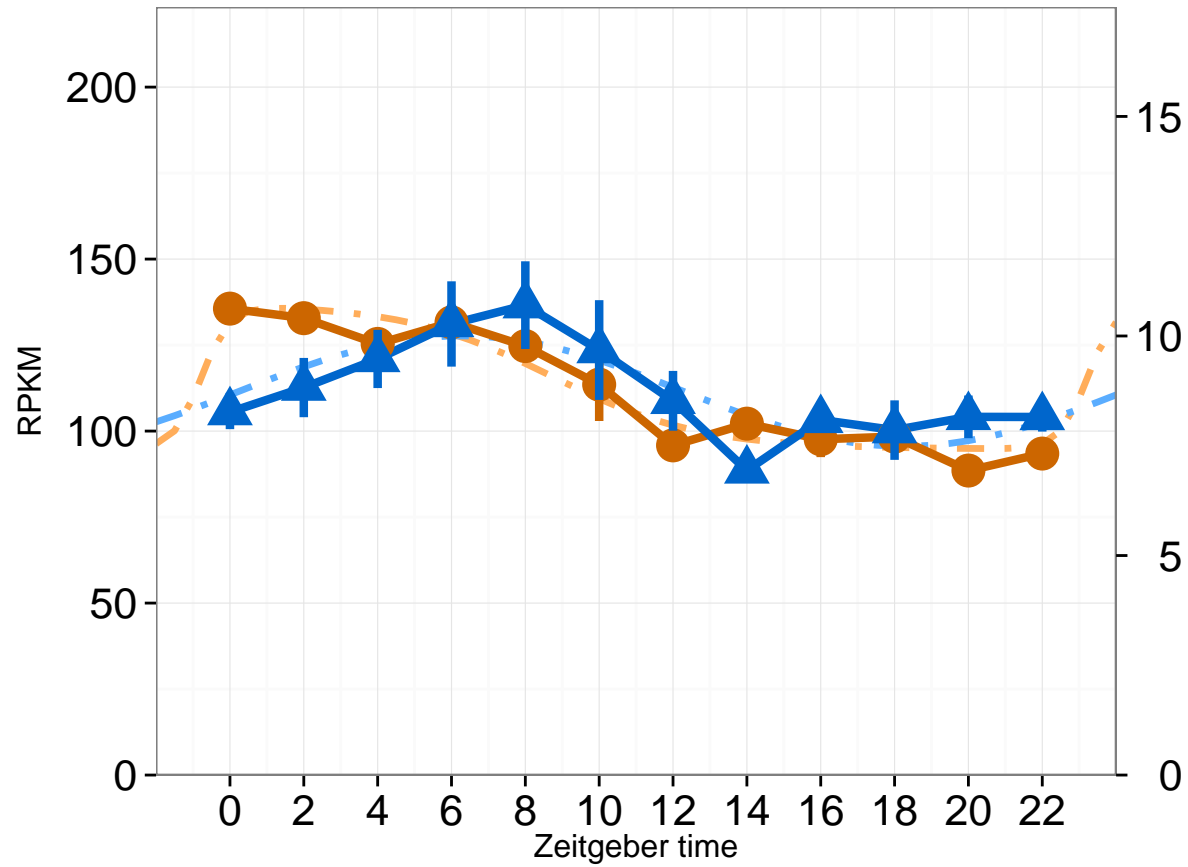

## Rnf10

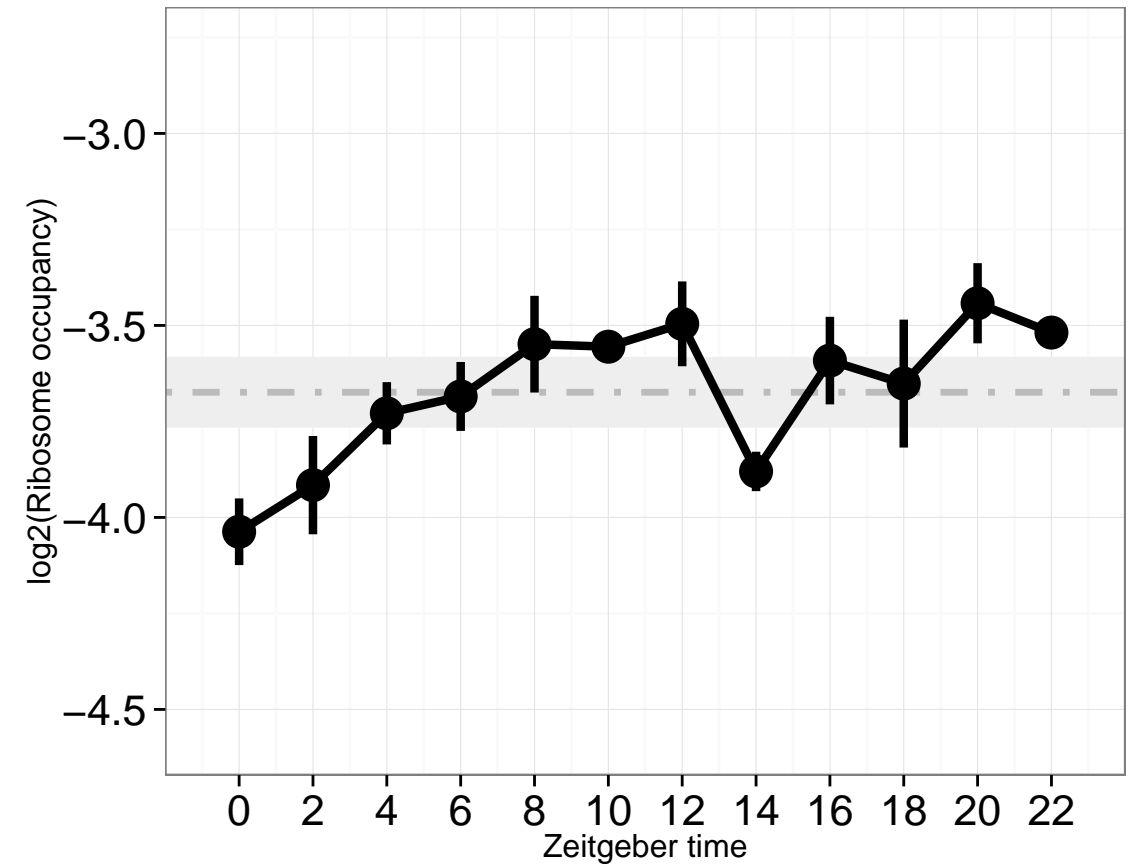

Supplement: Supplementary file 11894 [file 1]

## Cd320

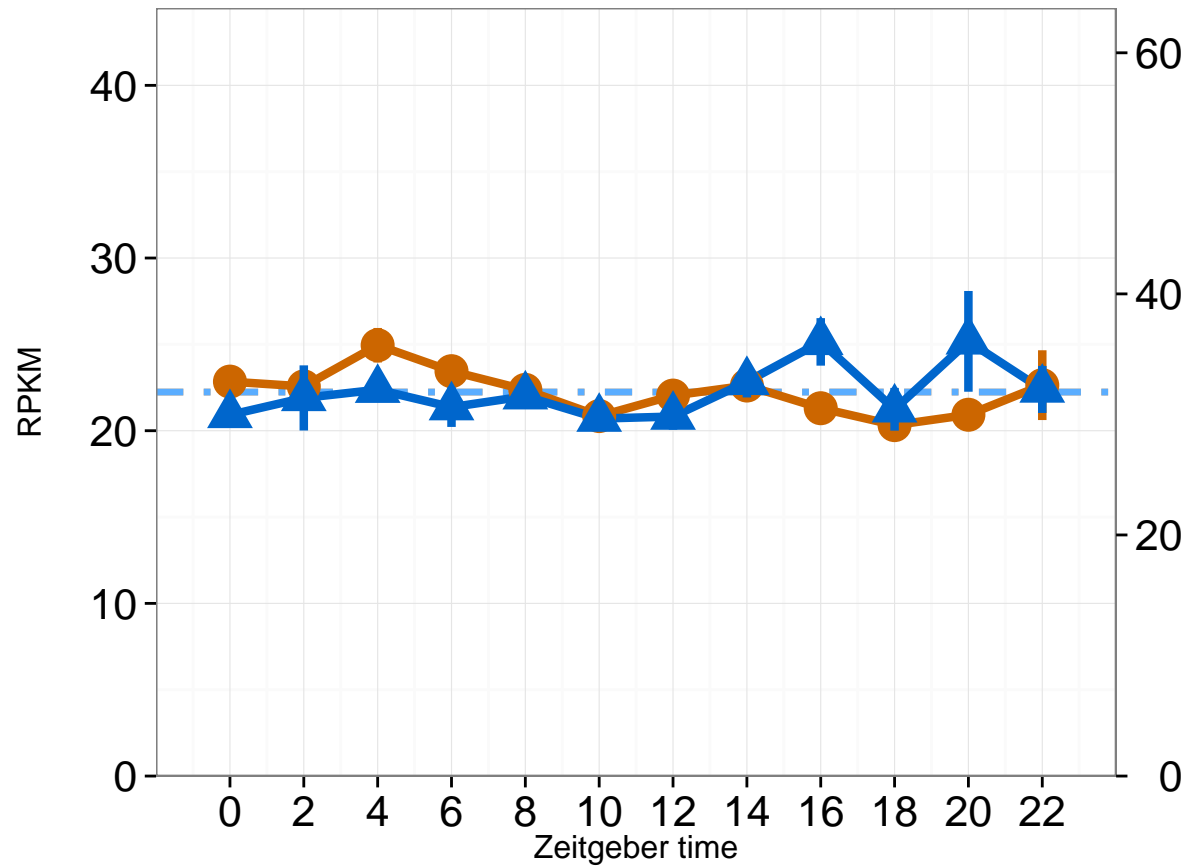

## Cd320

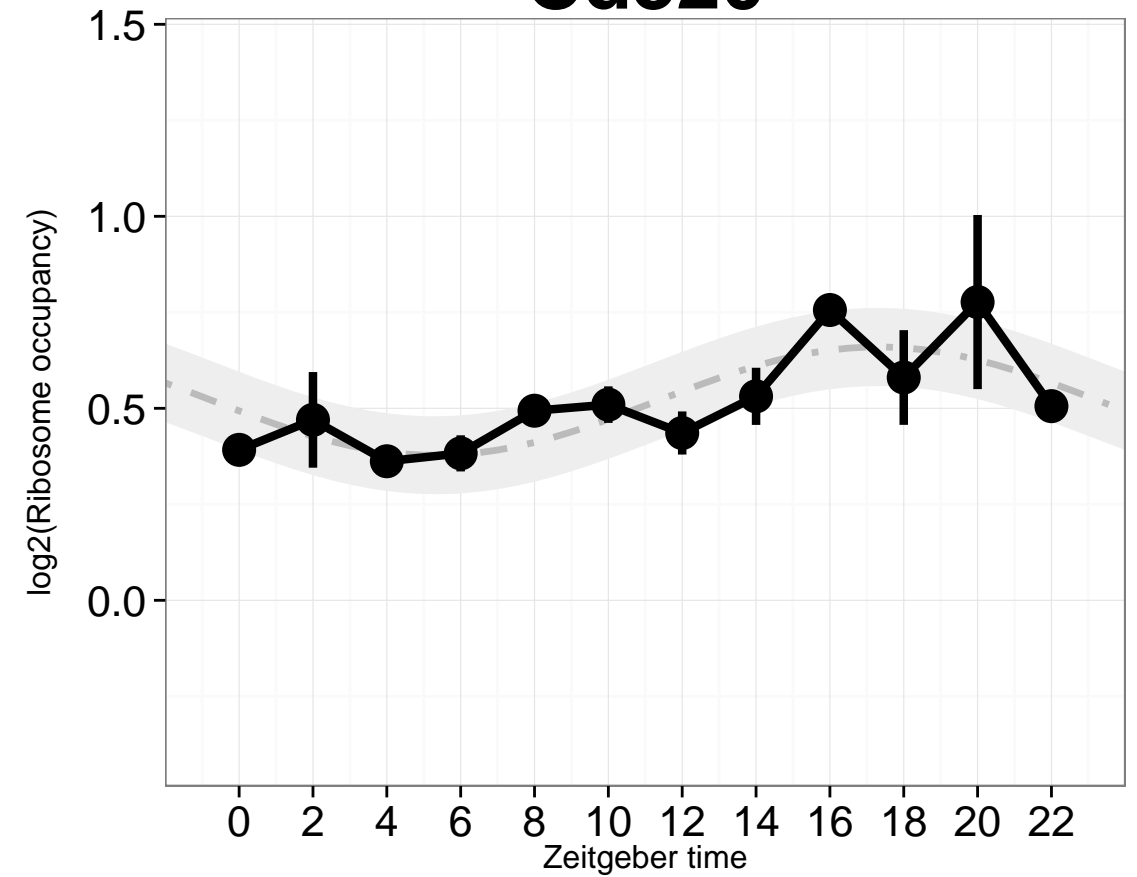

Supplement: Supplementary file 11895 [file 1]

## Gab1

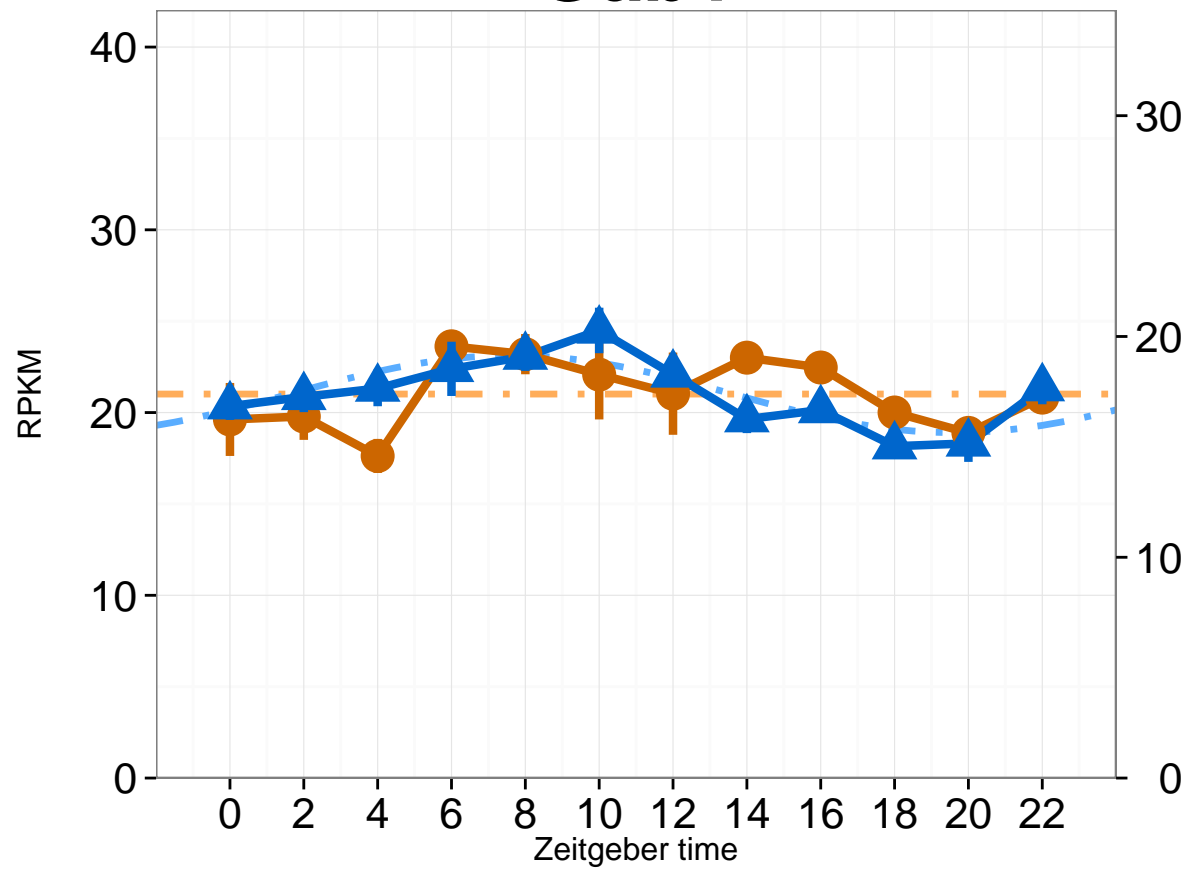

## Gab1

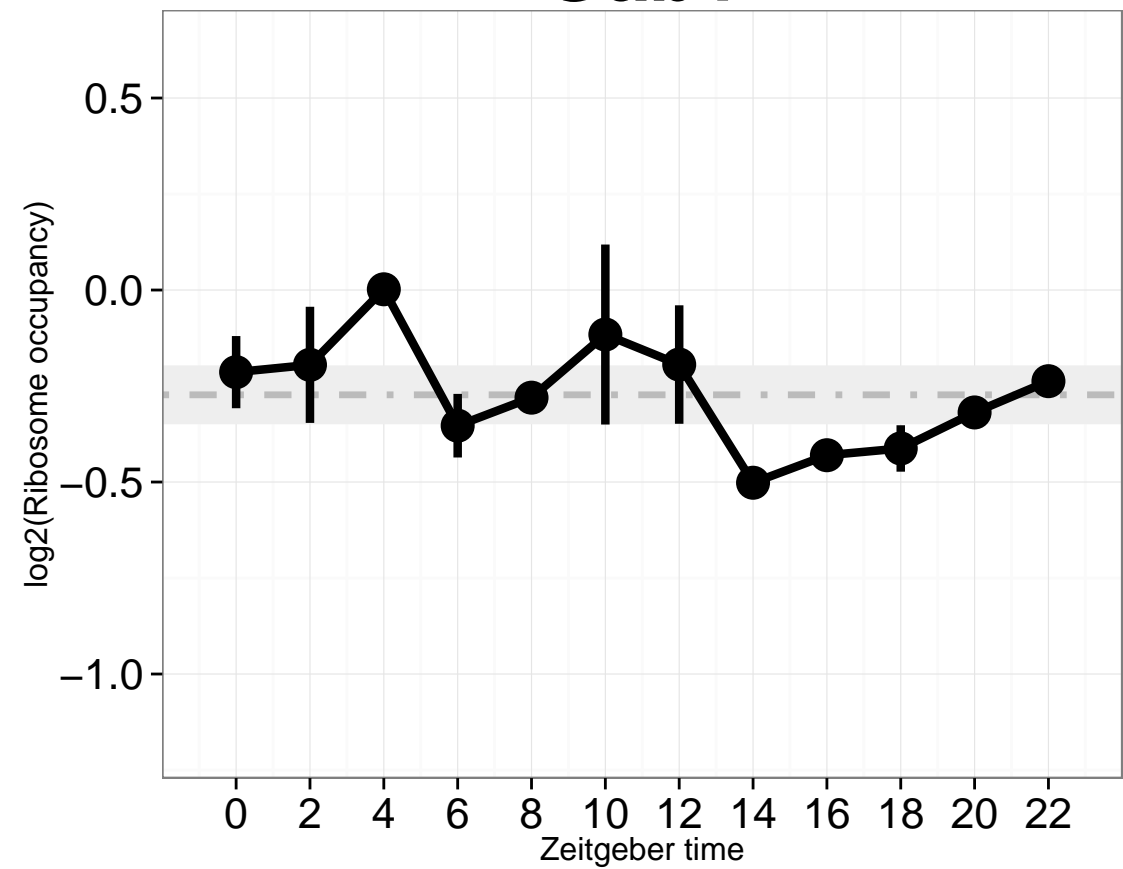

Supplement: Supplementary file 11896 [file 1]

## Fuom

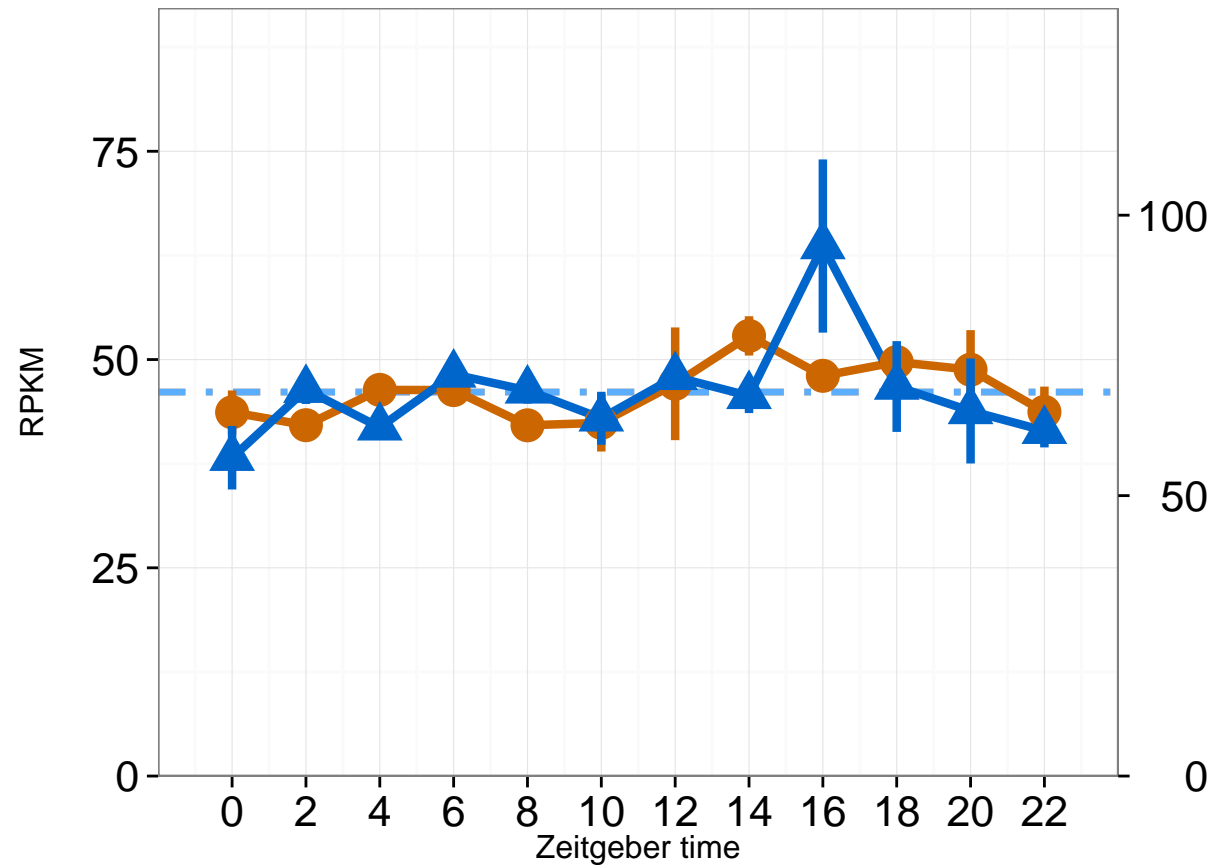

## Fuom

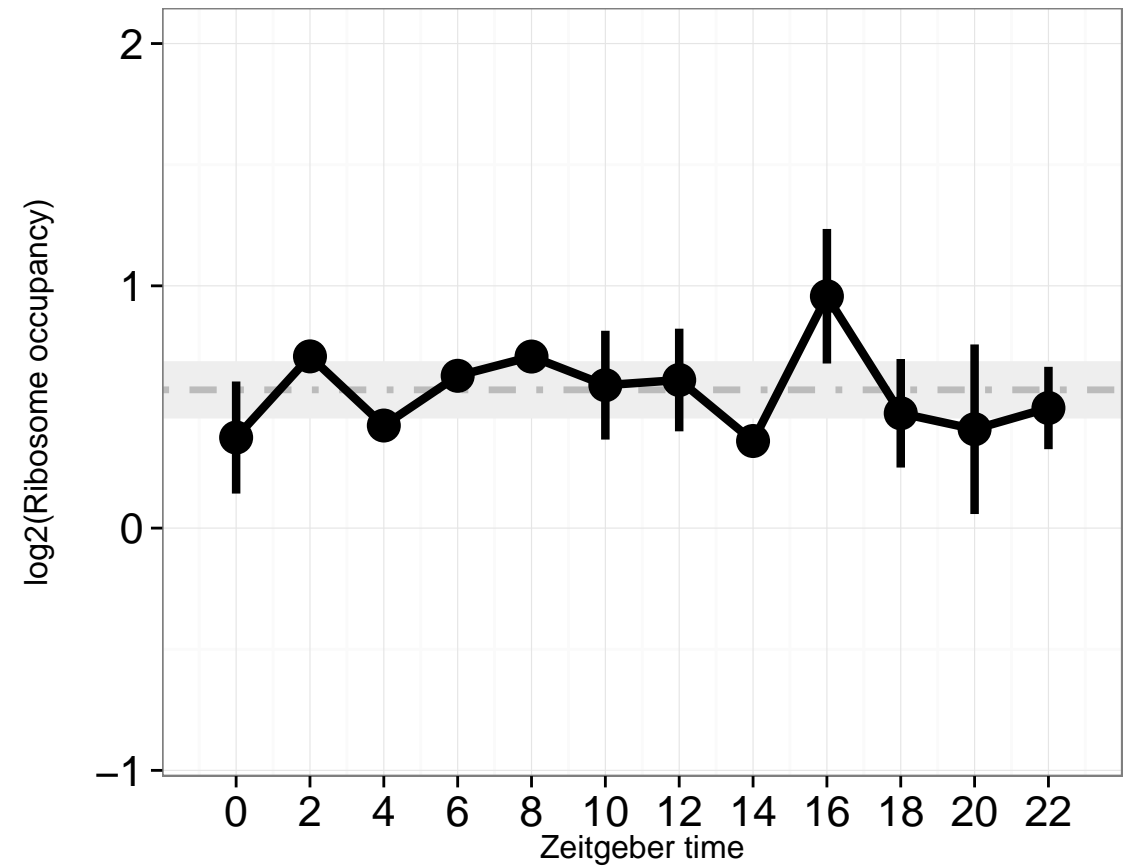

Supplement: Supplementary file 11897 [file 1]

# Rc3h1

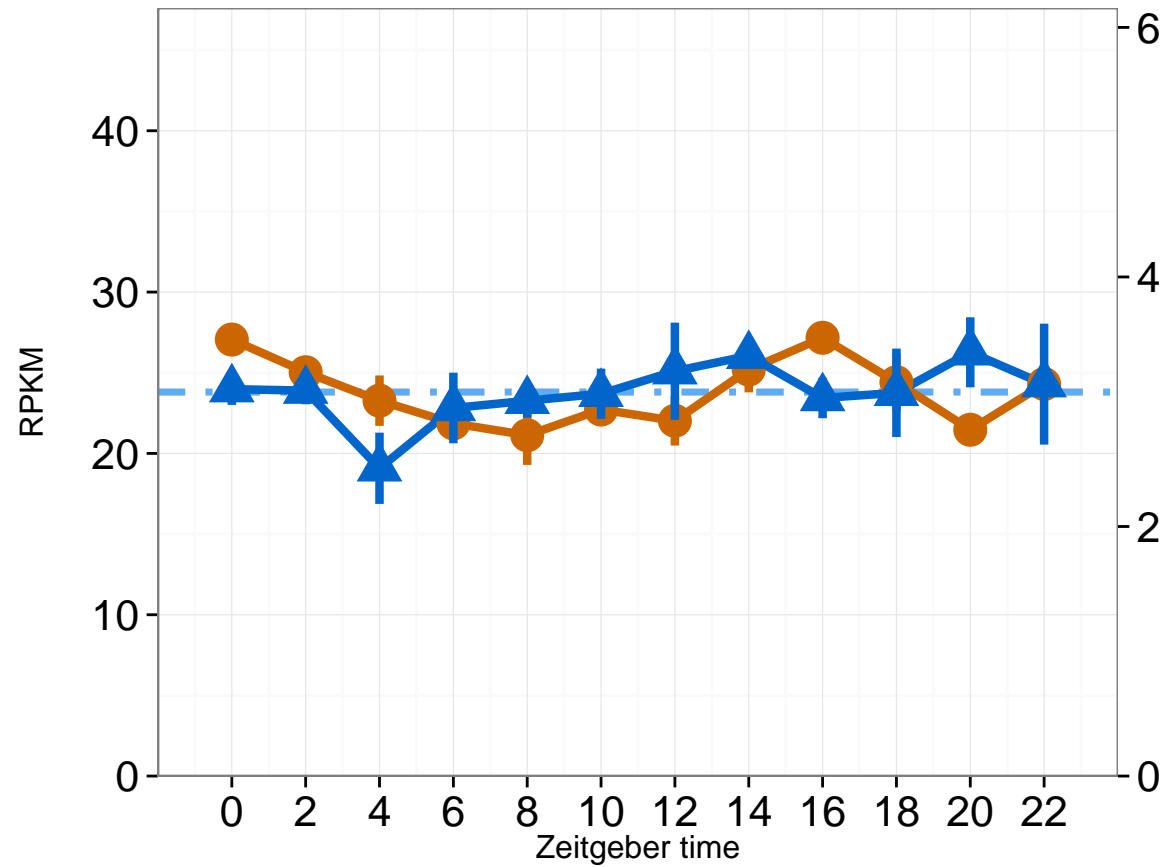

# Rc3h1

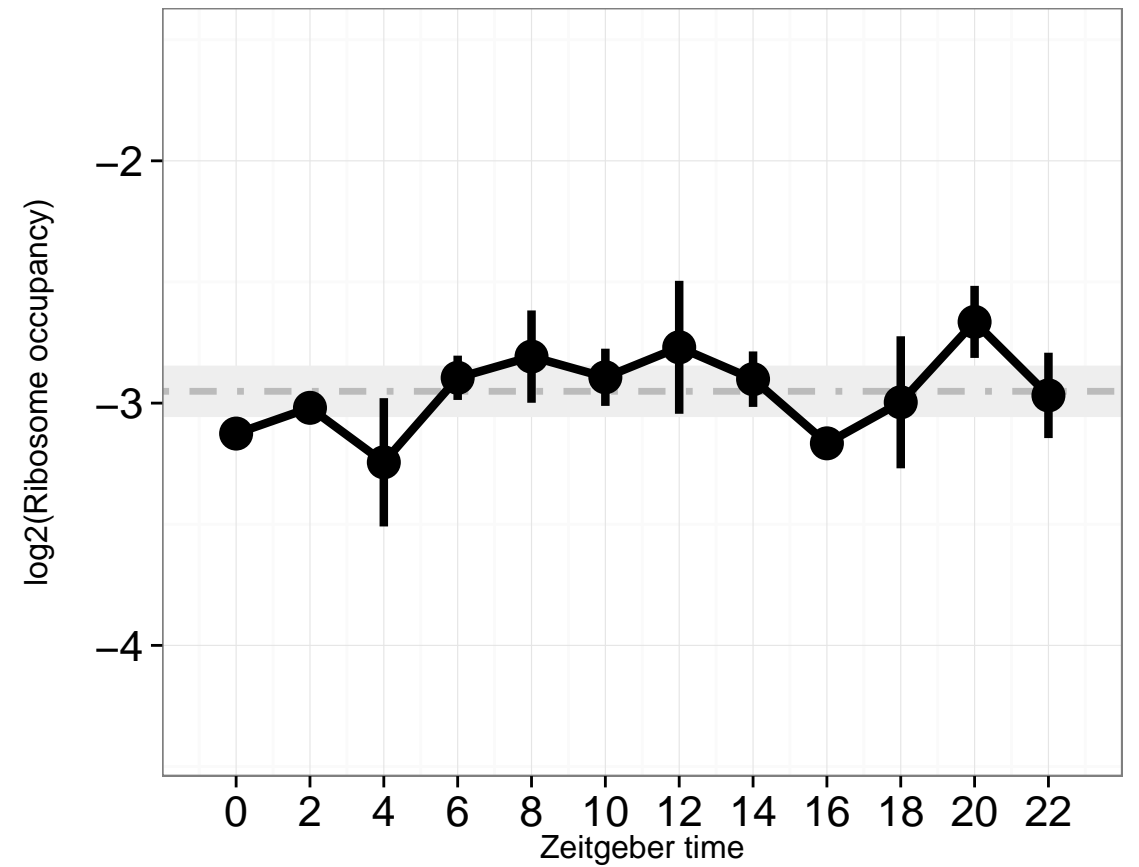

Supplement: Supplementary file 11898 [file 1]

## Kcnab2

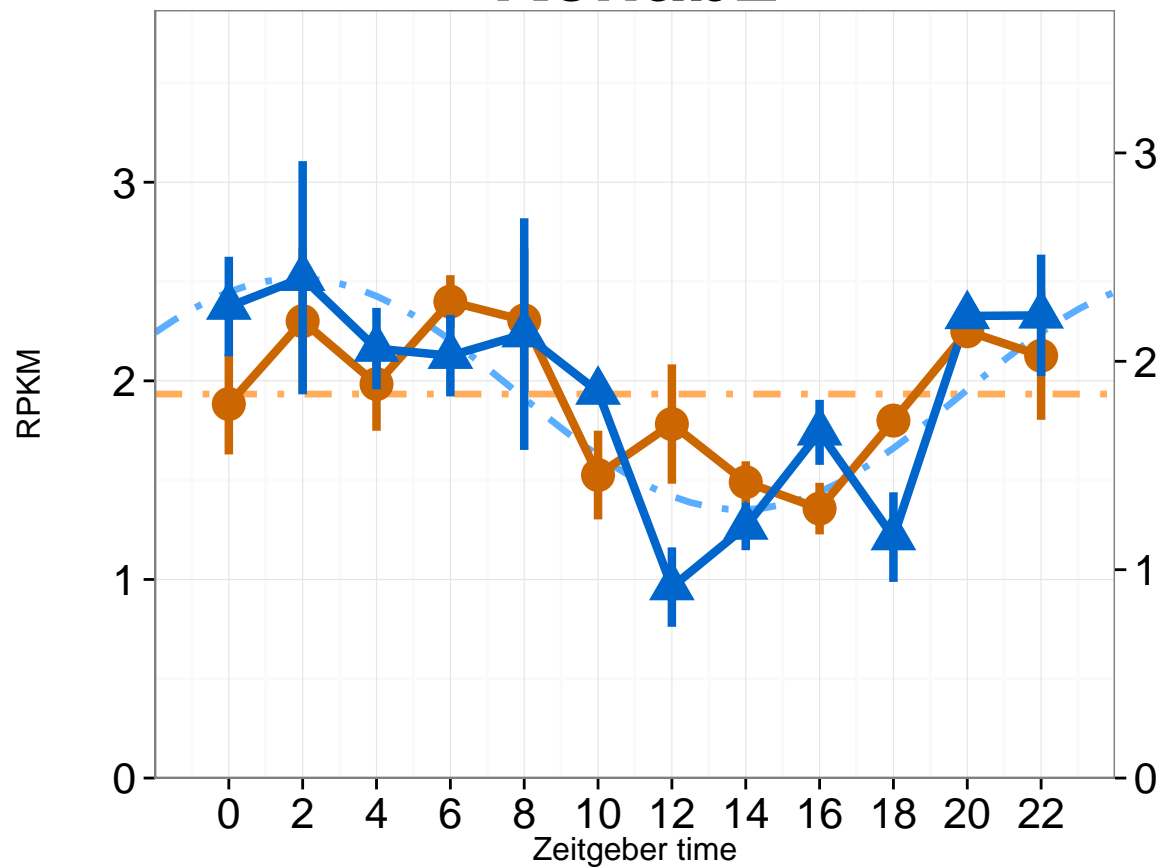

## Kcnab2

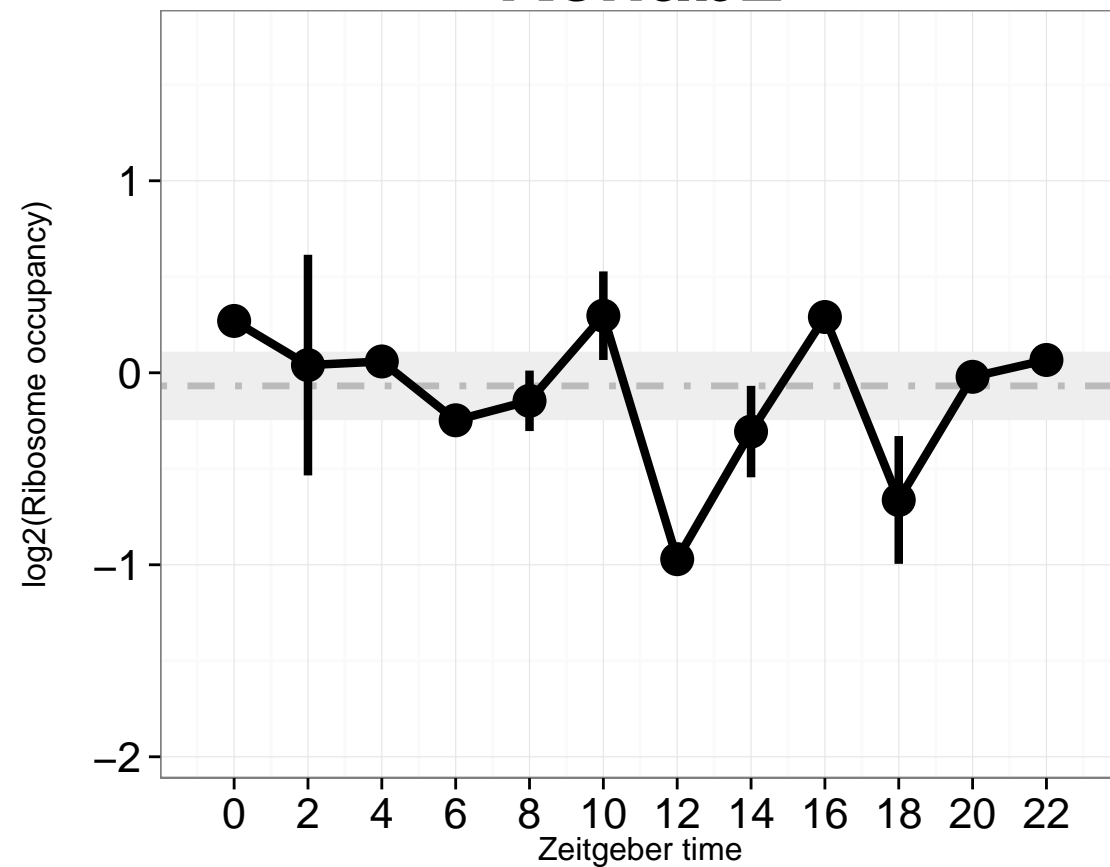

Supplement: Supplementary file 11899 [file 1]

## Ppapdc2

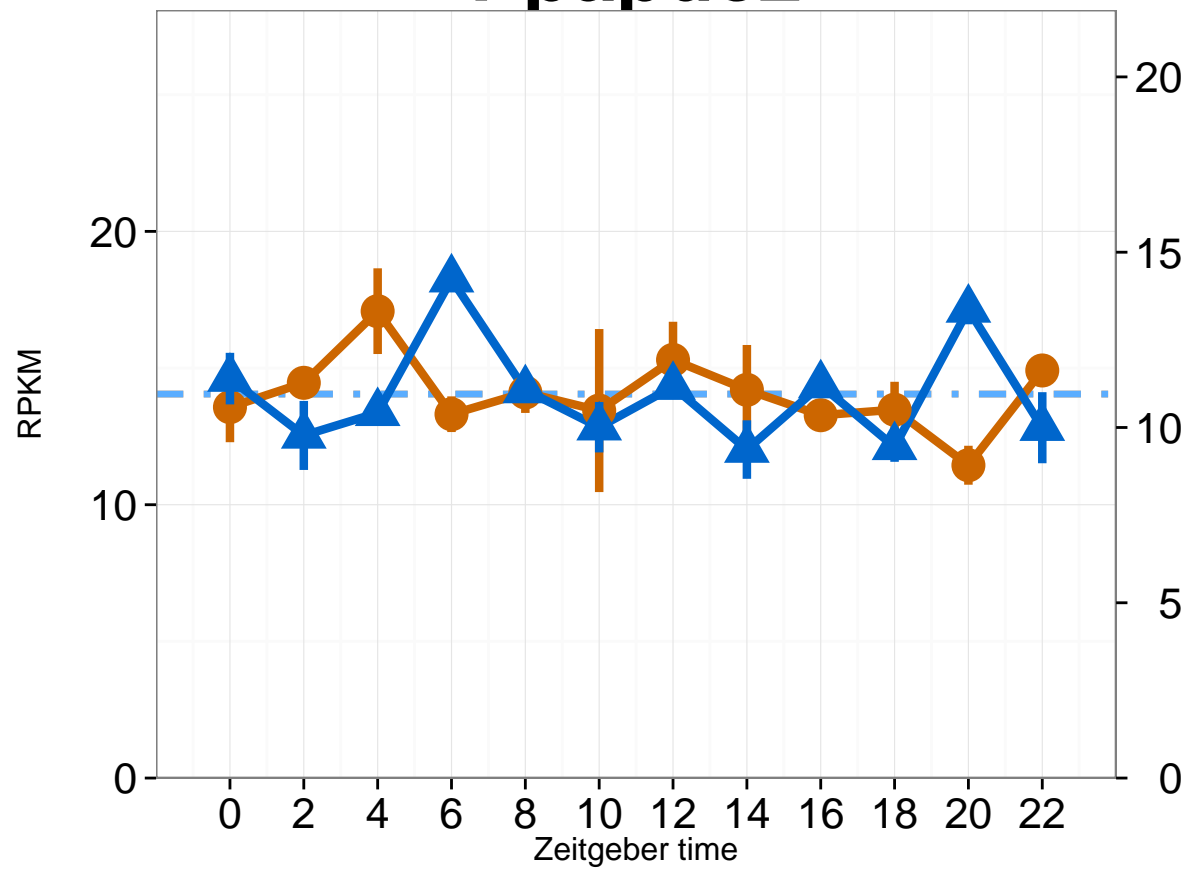

## Ppapdc2

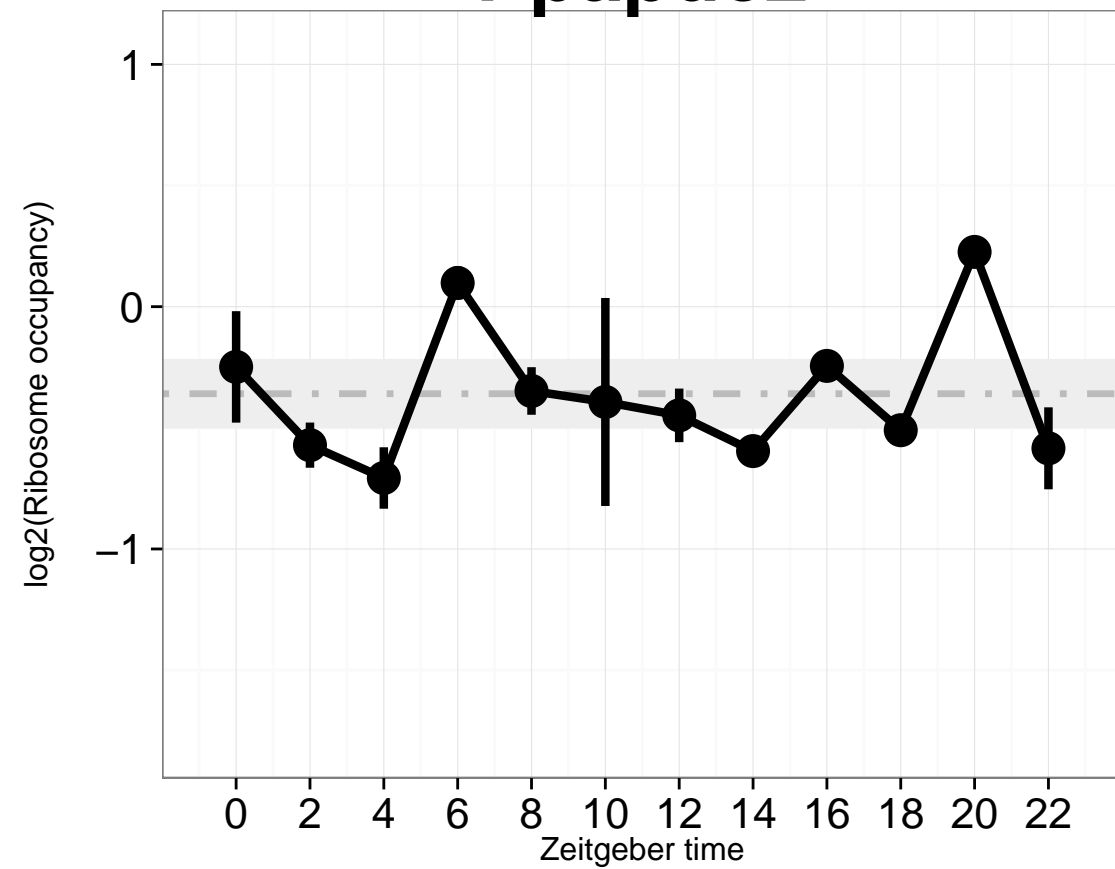

Supplement: Supplementary file 11900 [file 1]

# Ppm1g

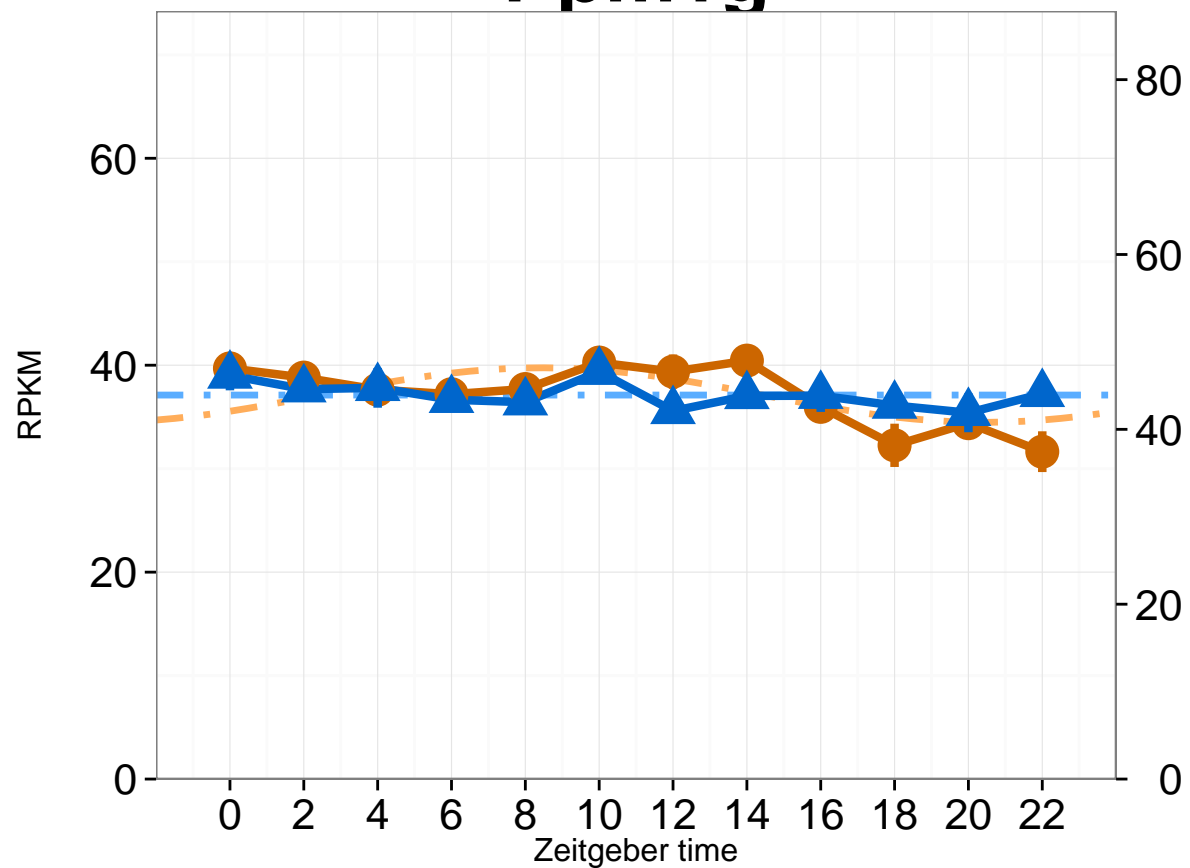

# Ppm1g

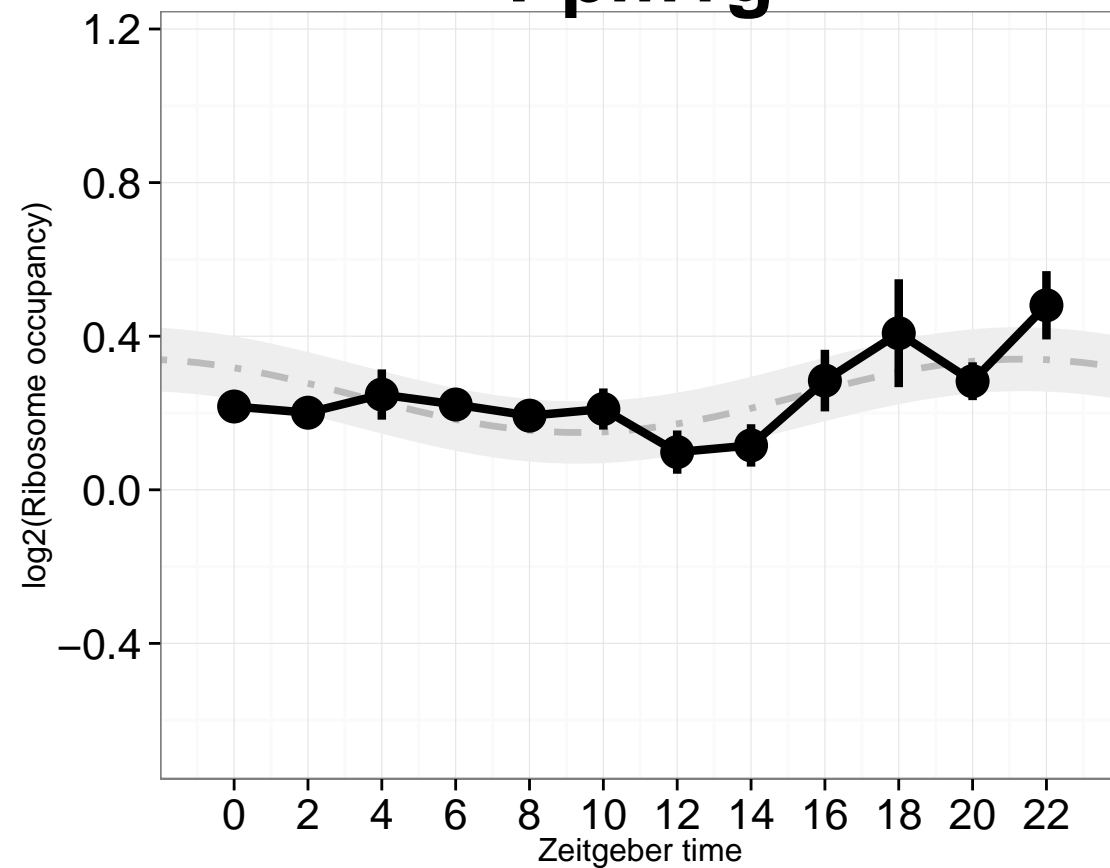

Supplement: Supplementary file 11901 [file 1]

## Akr1b10

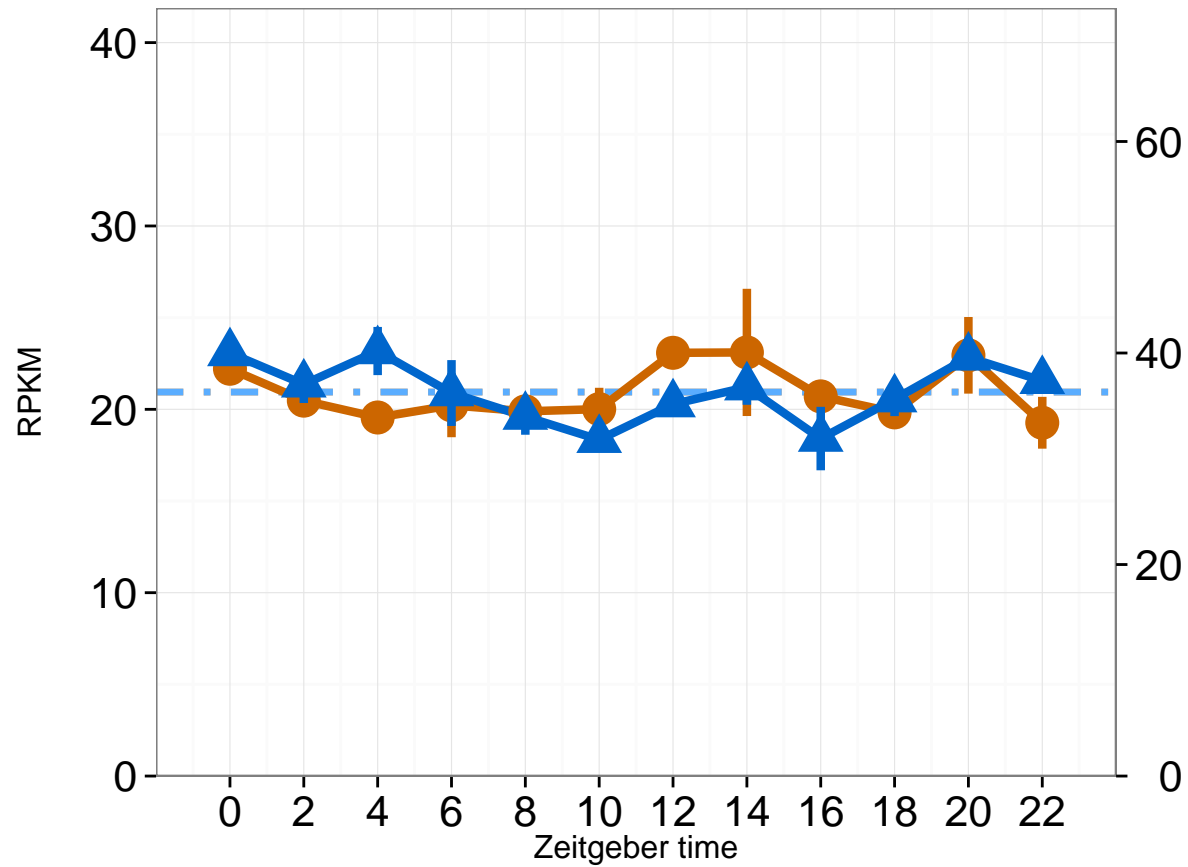

## Akr1b10

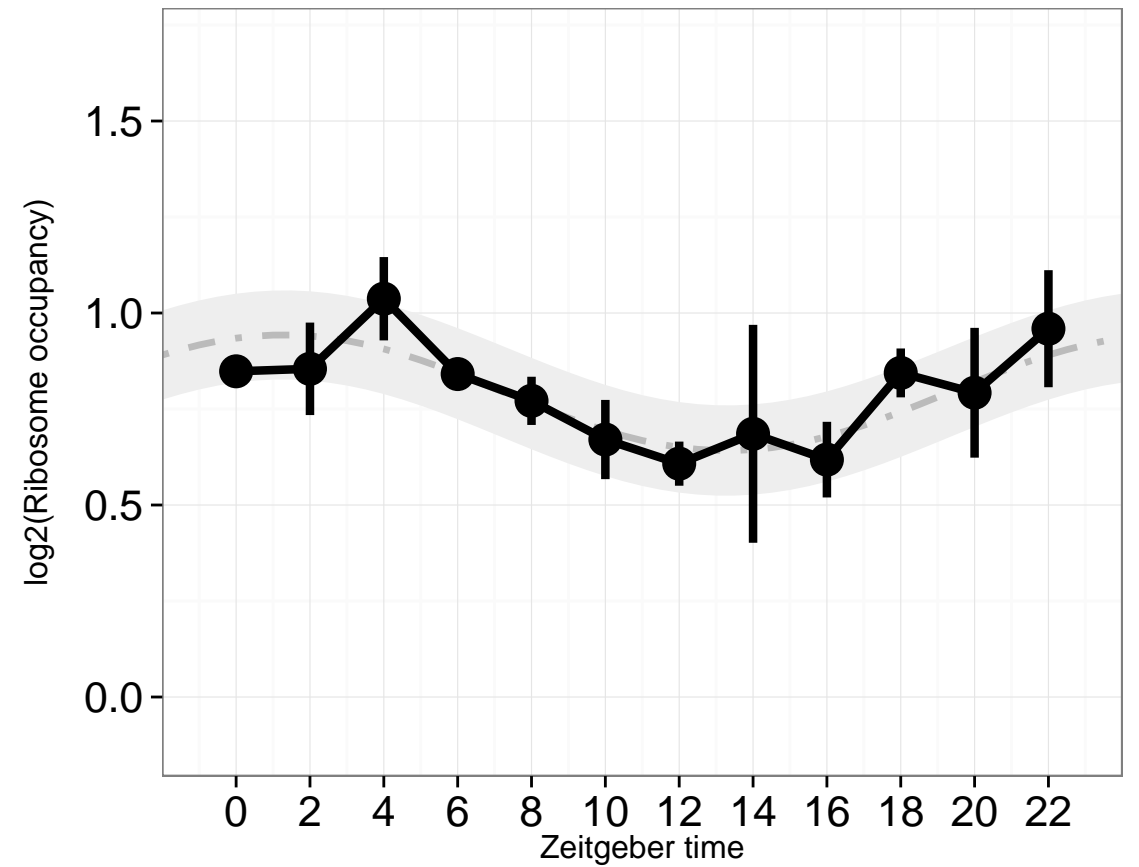

Supplement: Supplementary file 11902 [file 1]

# Tmem86a

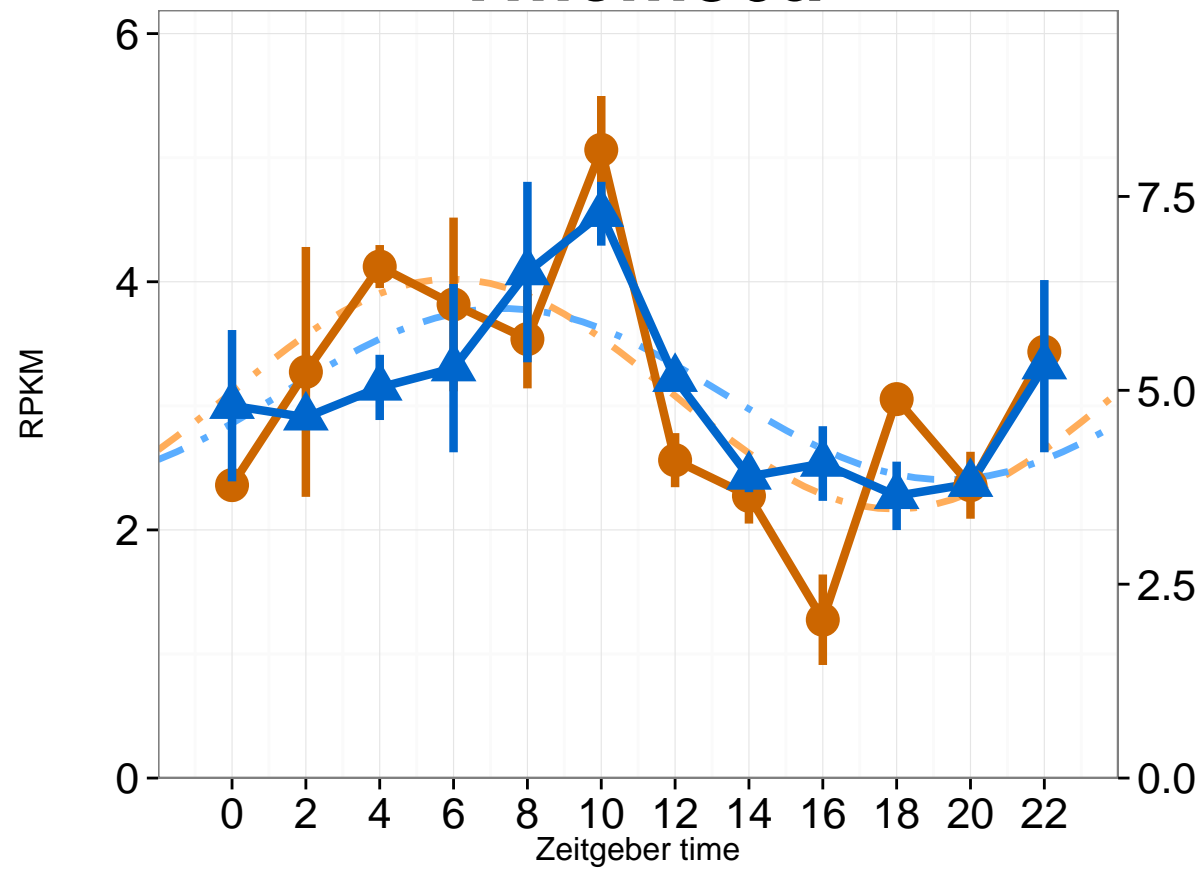

# Tmem86a

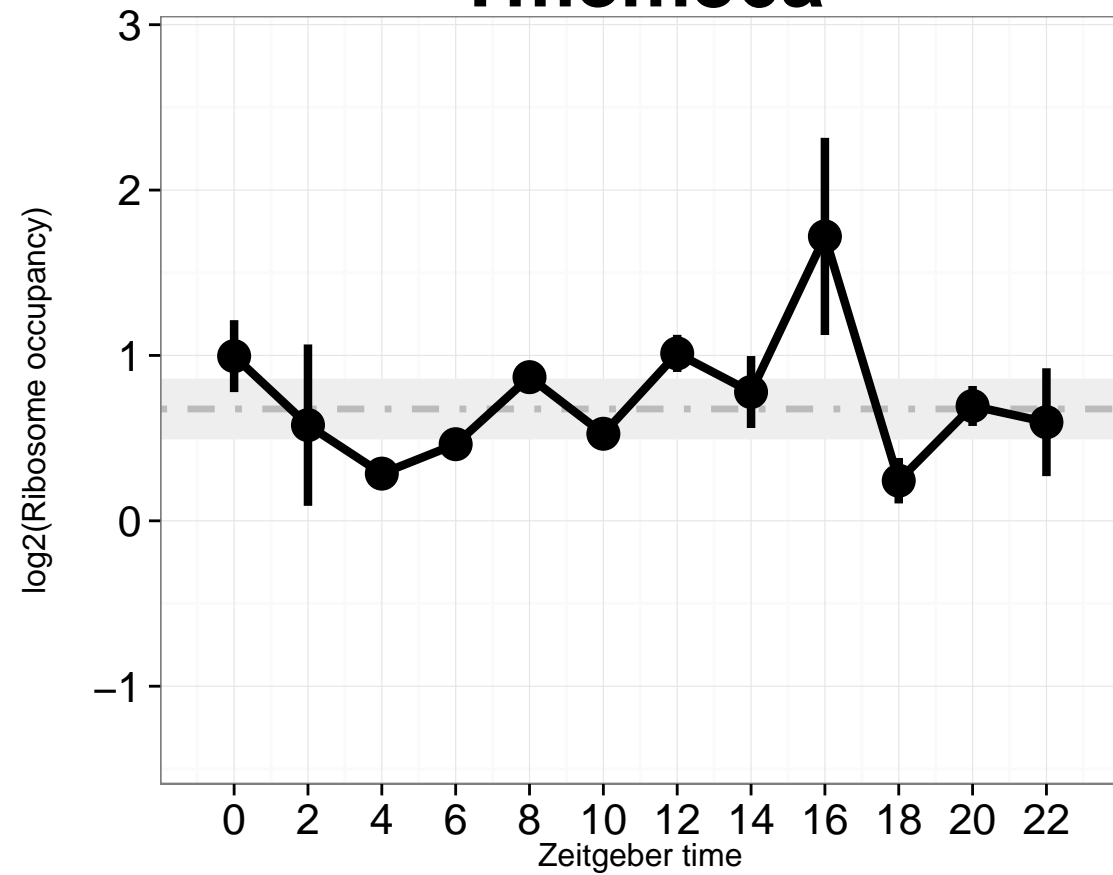

Supplement: Supplementary file 11903 [file 1]

# C1s

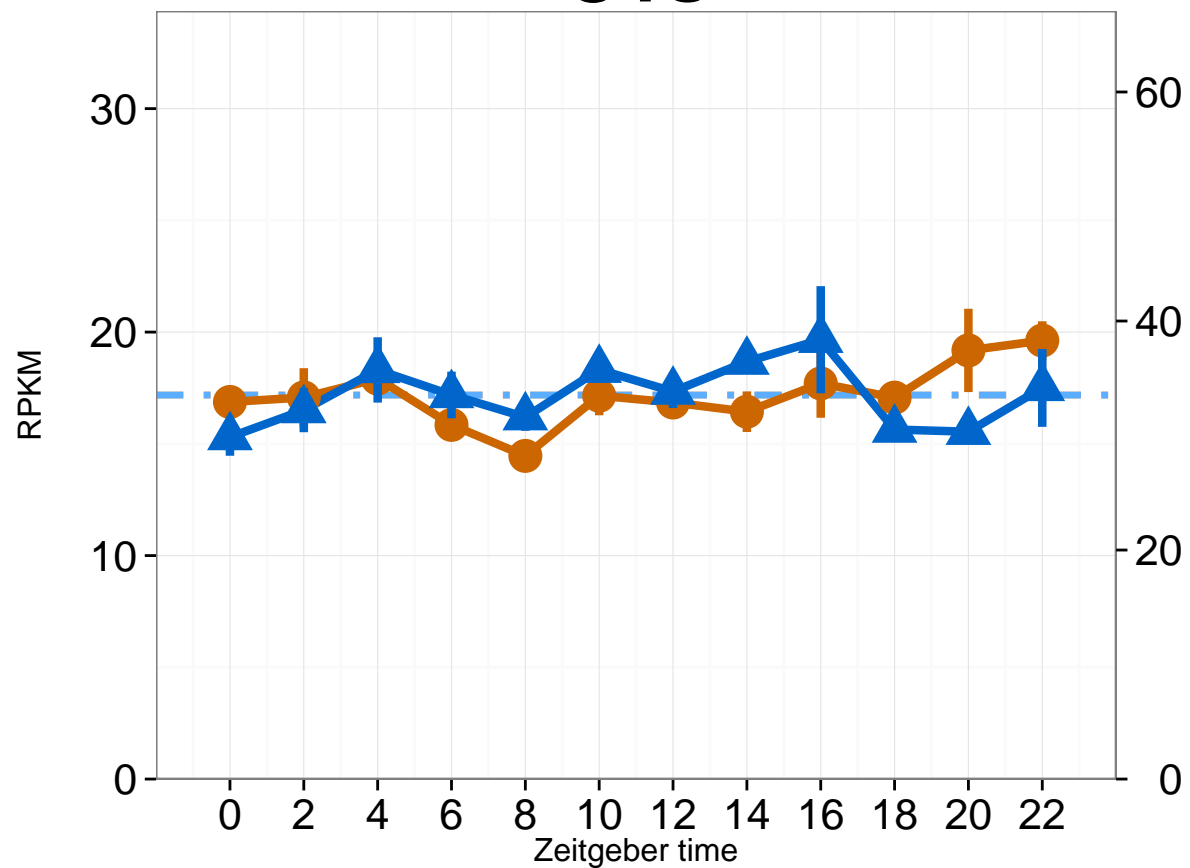

# C1s

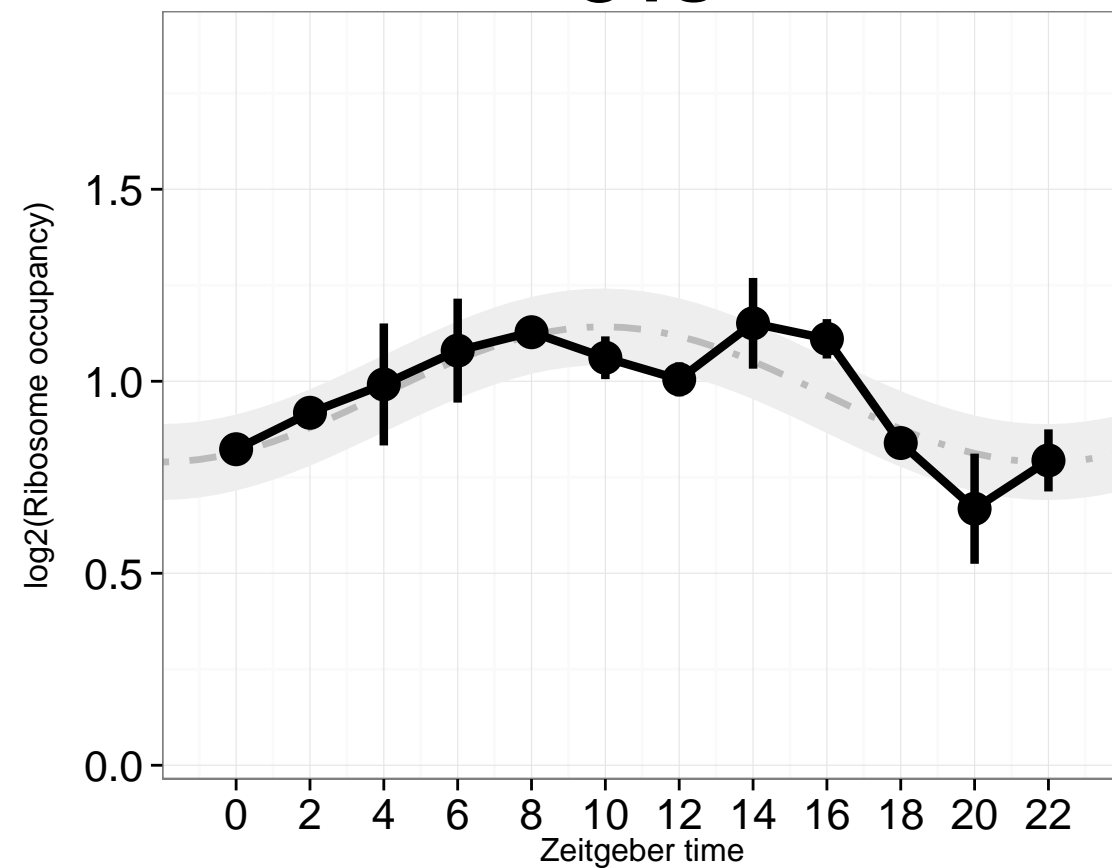

Supplement: Supplementary file 11904 [file 1]

**Tmem71 TR**

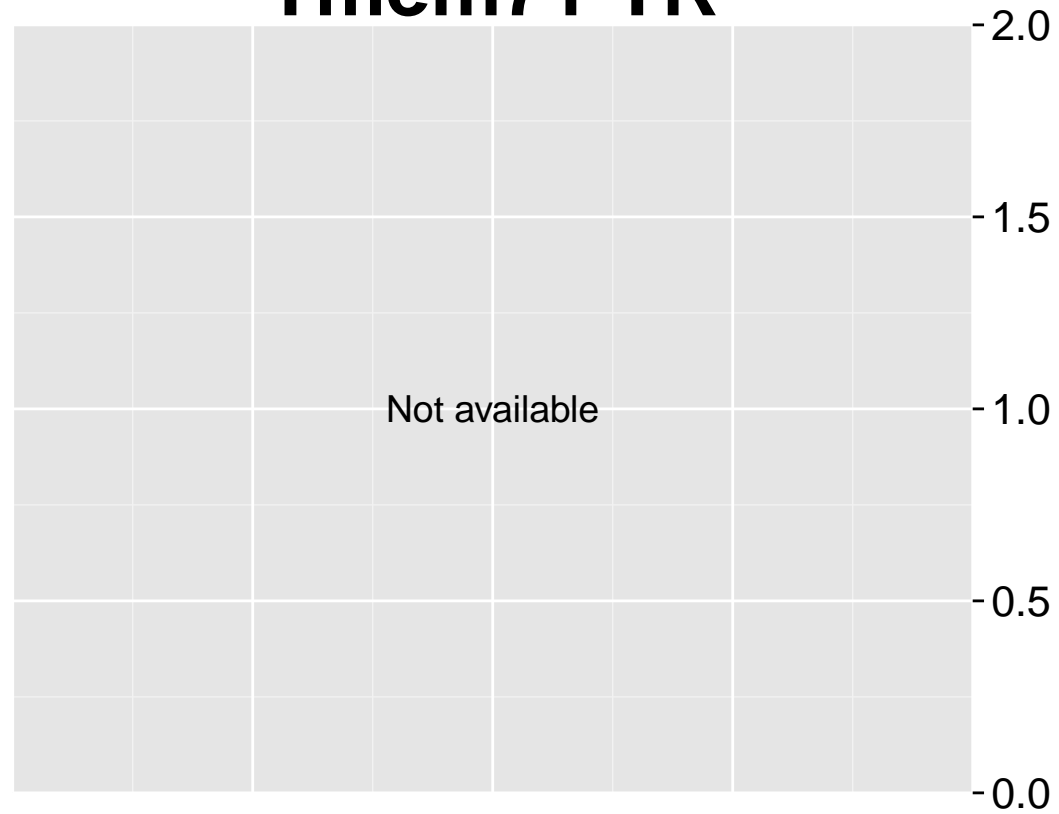

**Tmem71 log2(Ribosome occupanc**

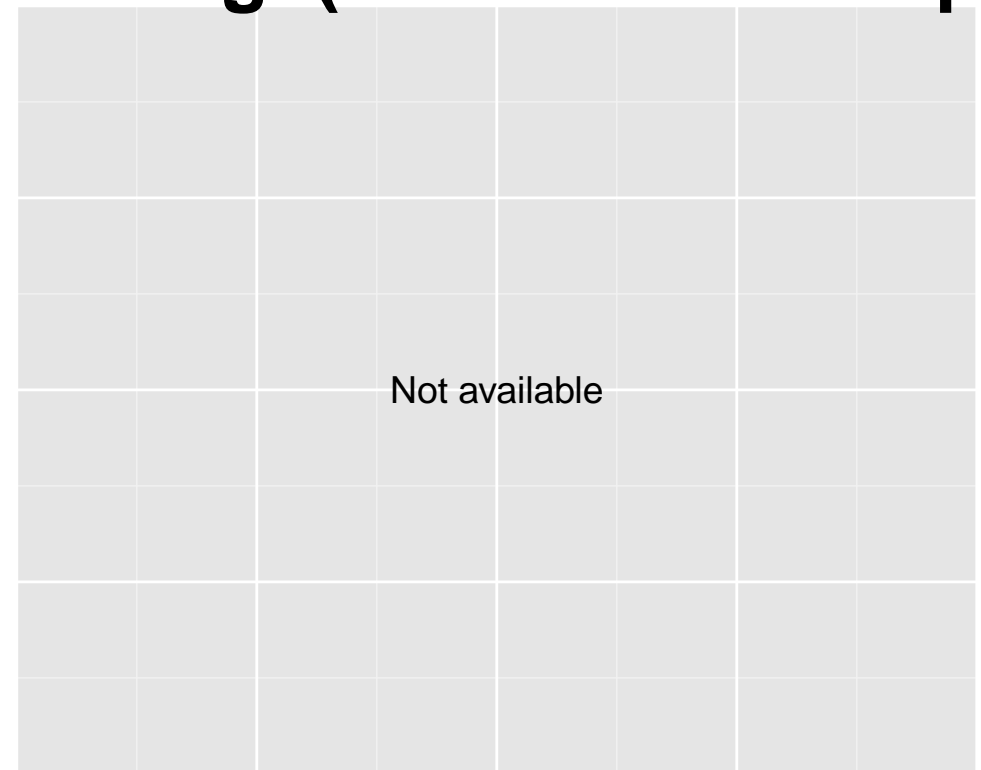

Supplement: Supplementary file 11905 [file 1]

## Ddr2

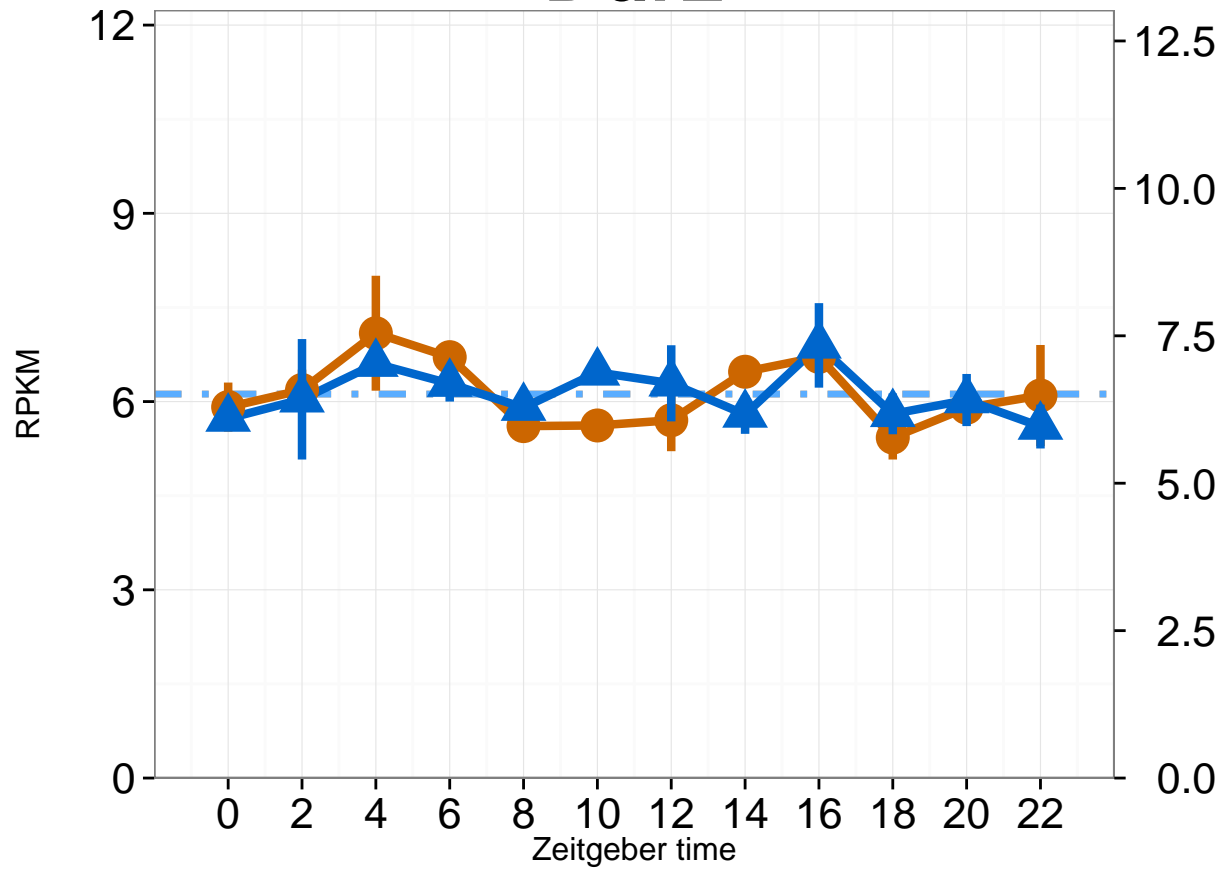

## Ddr2

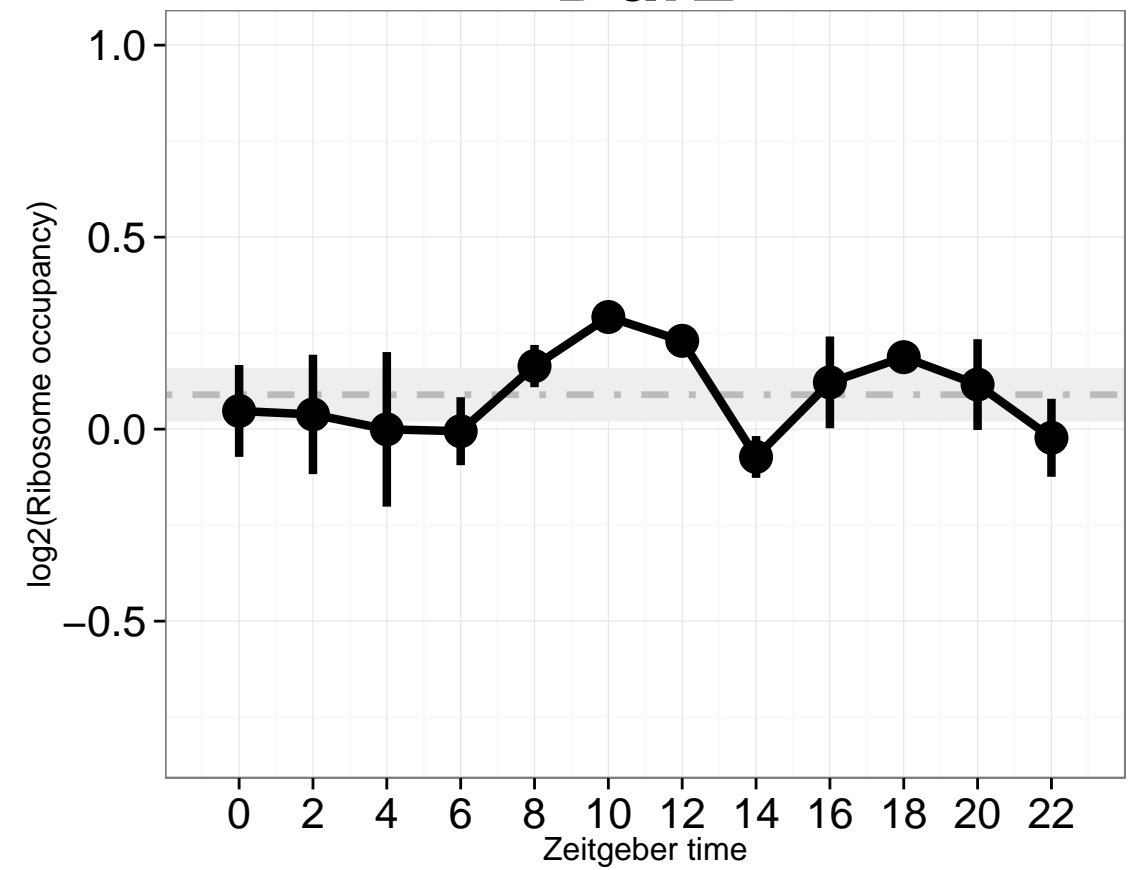

Supplement: Supplementary file 11906 [file 1]

## Eprs

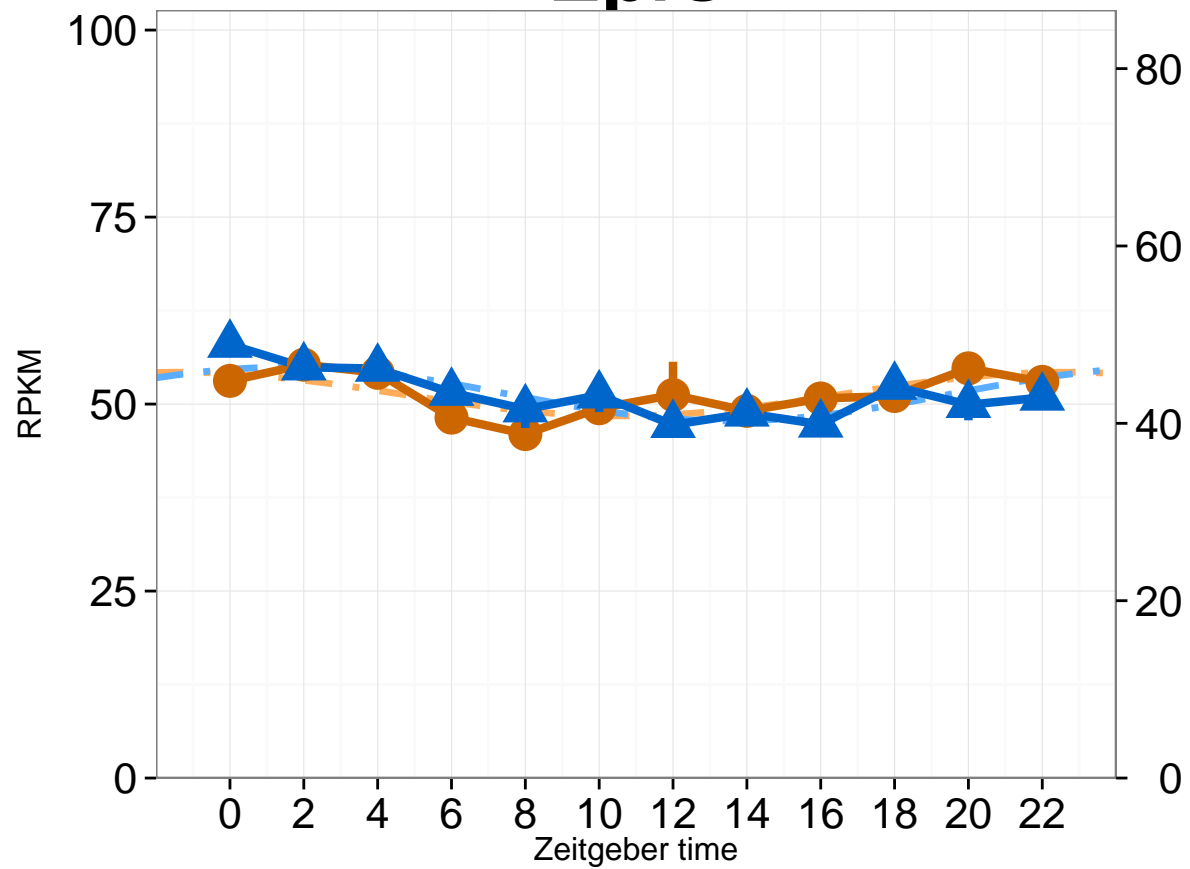

## Eprs

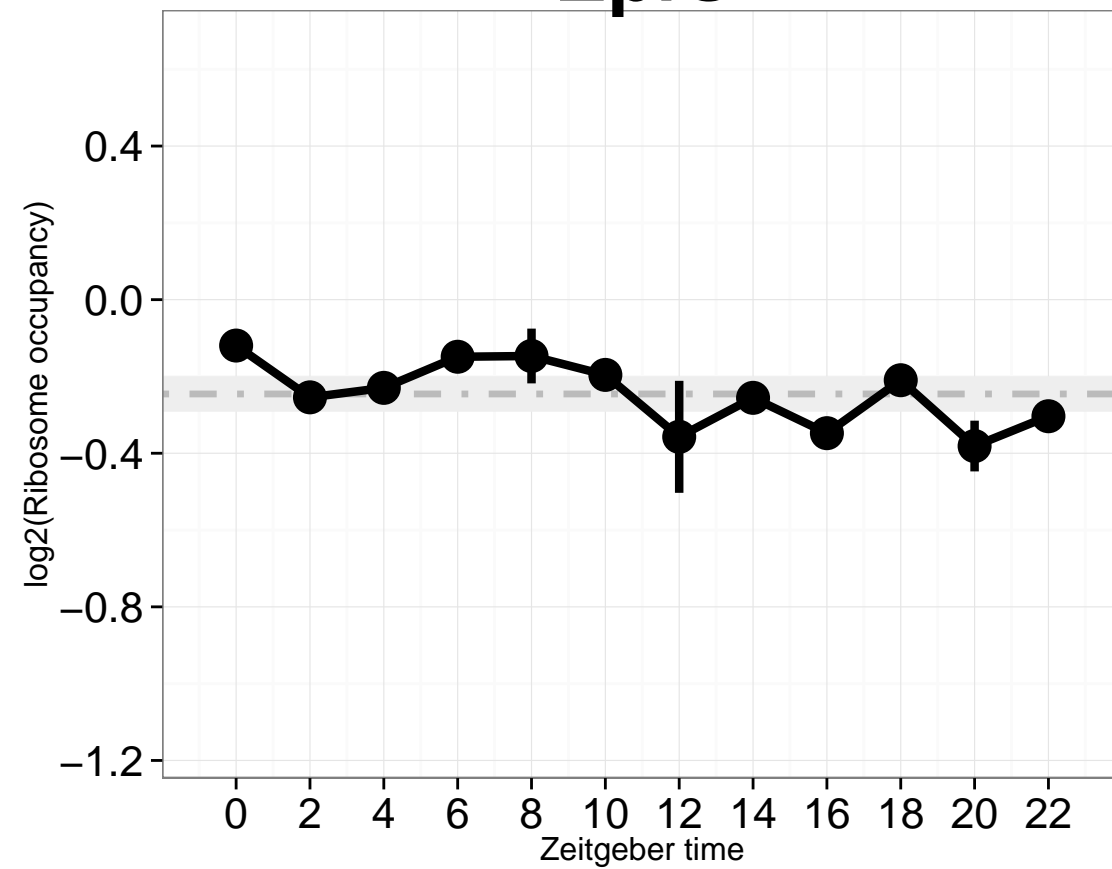

Supplement: Supplementary file 11907 [file 1]

# Anapc7

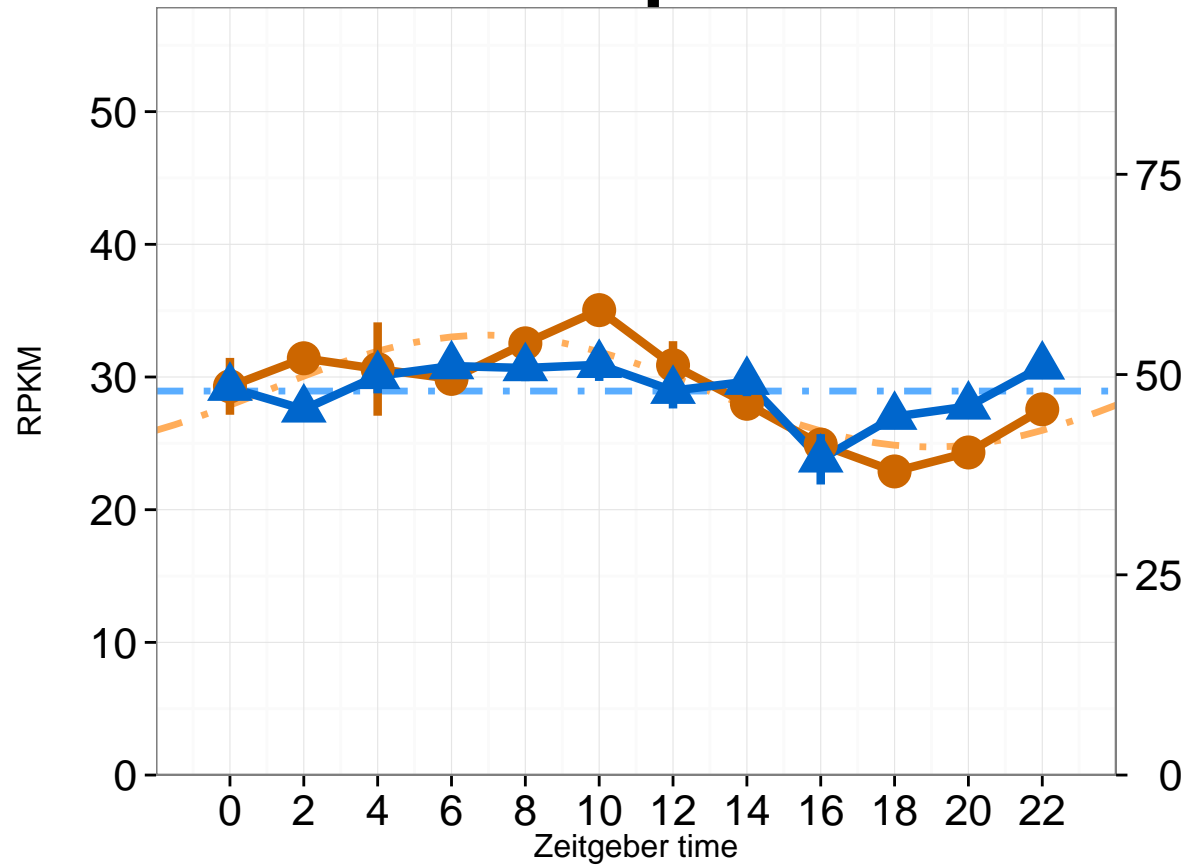

# Anapc7

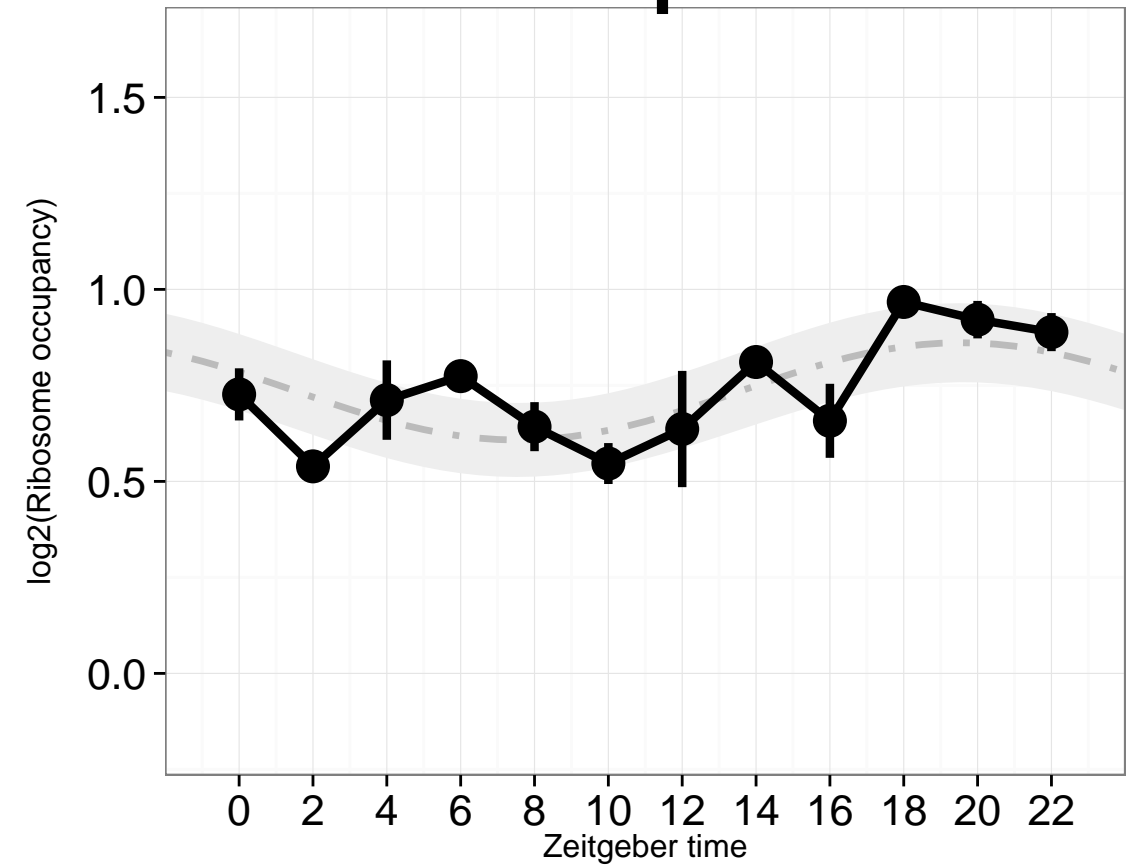

Supplement: Supplementary file 11908 [file 1]

## Rmdn1

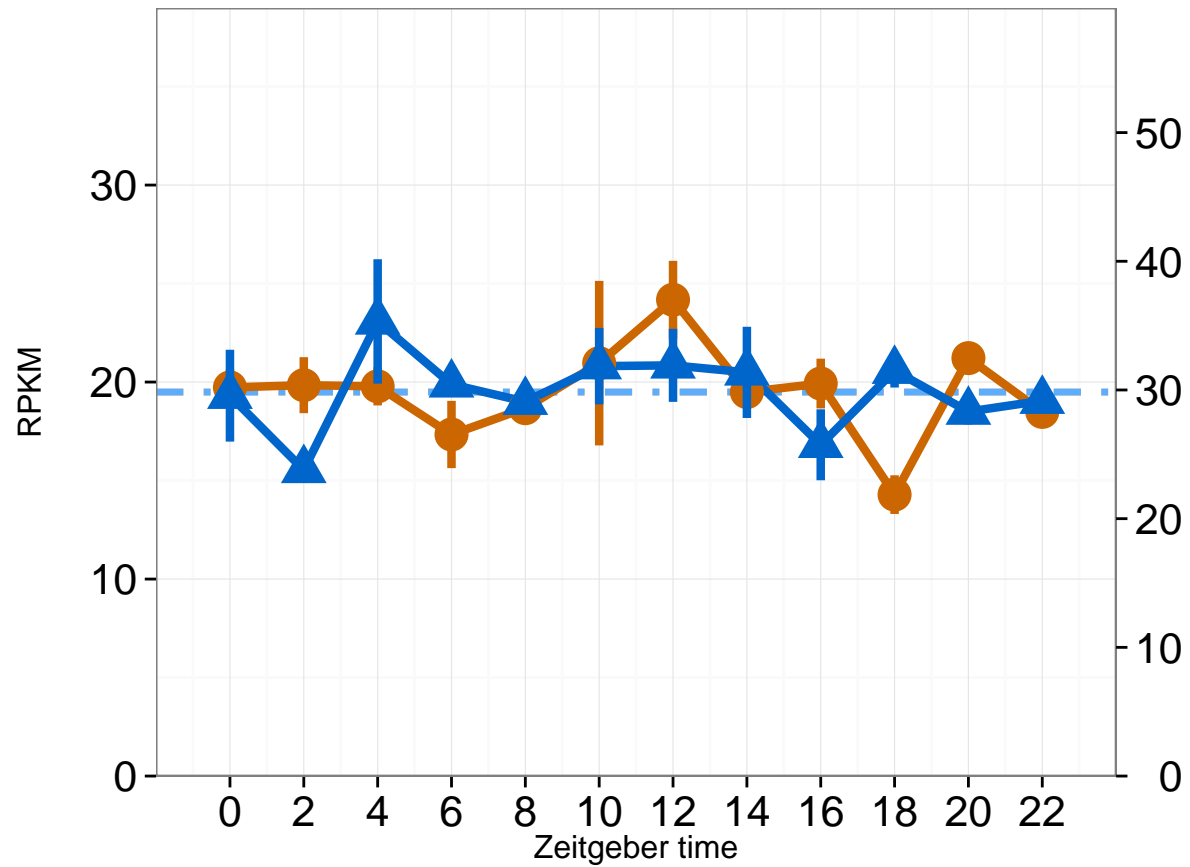

## Rmdn1

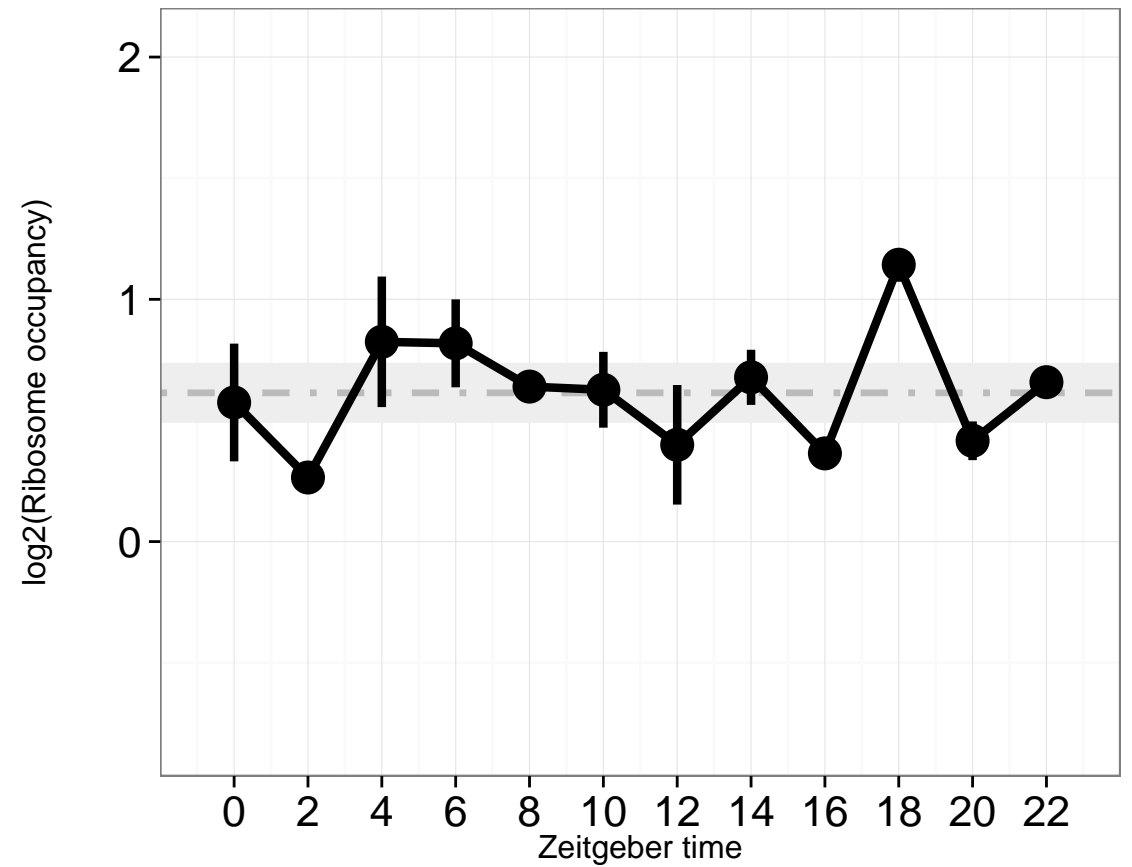

Supplement: Supplementary file 11909 [file 1]

## Setx

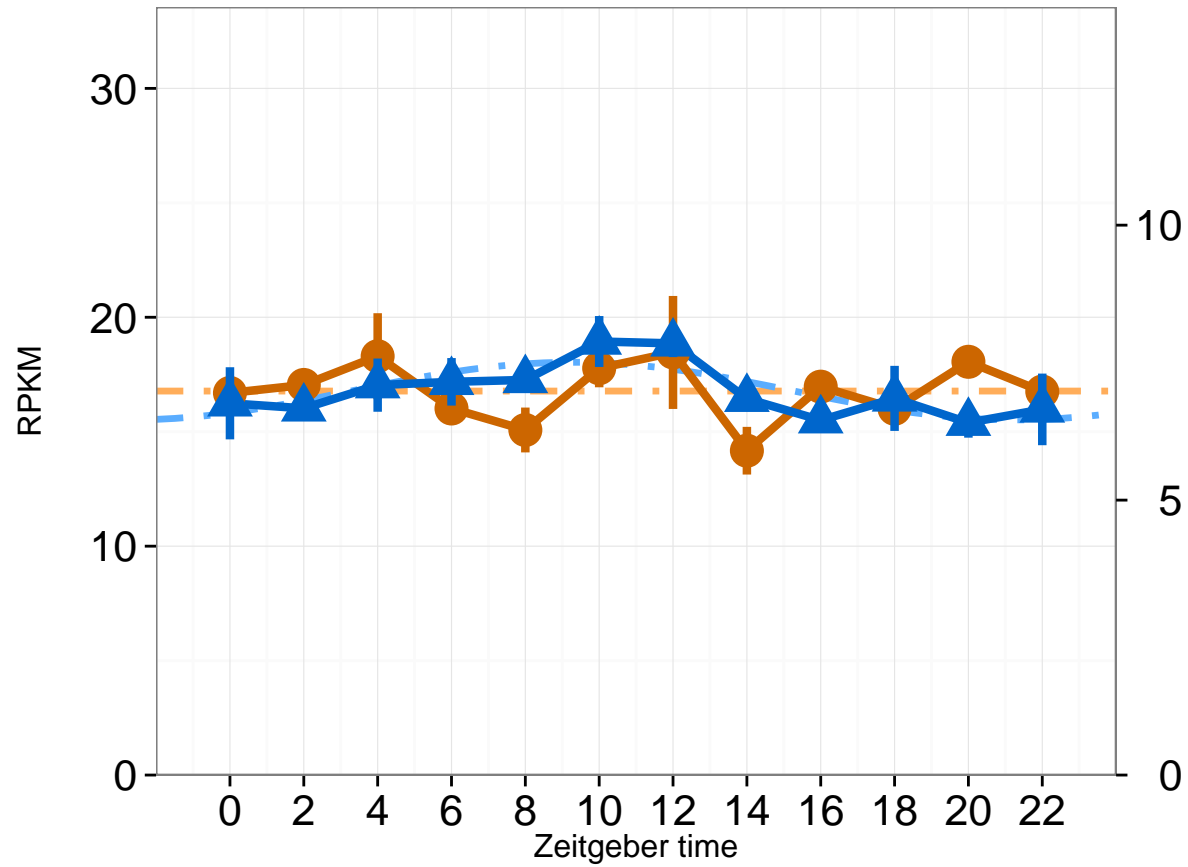

## Setx

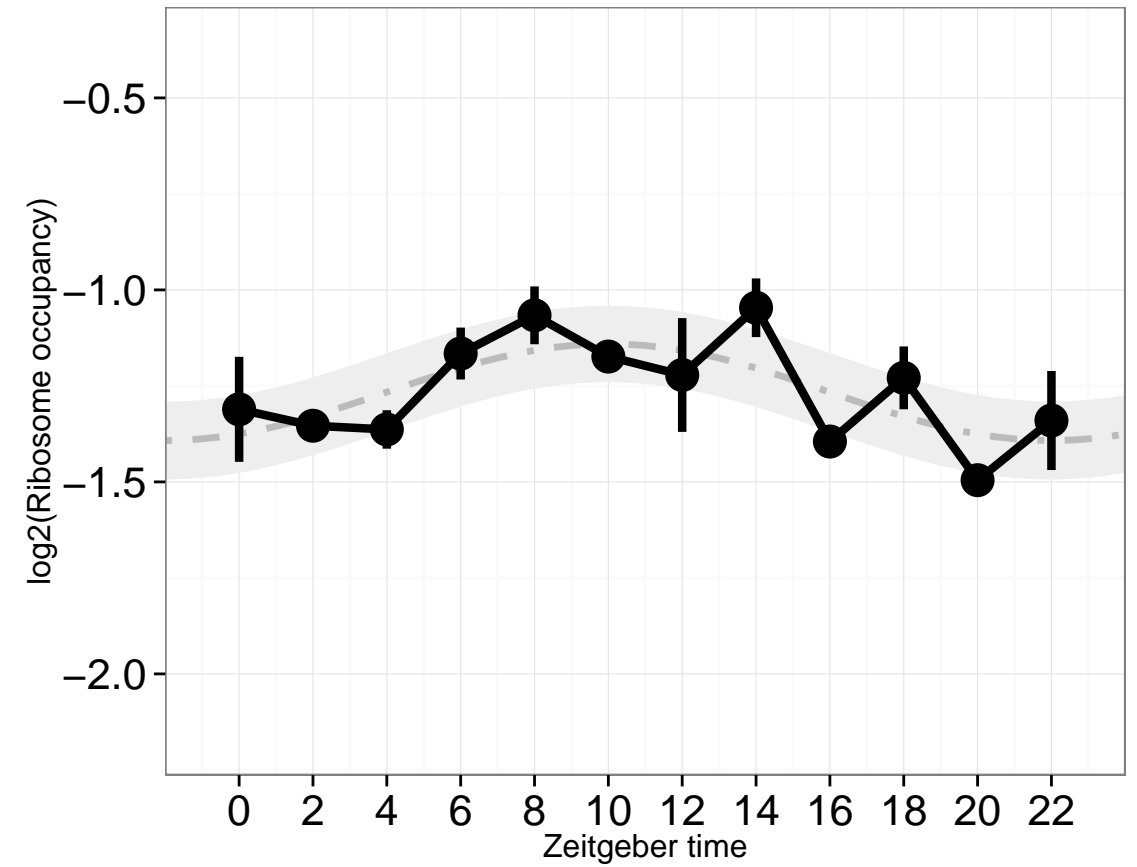

Supplement: Supplementary file 11910 [file 1]

## Slc23a2

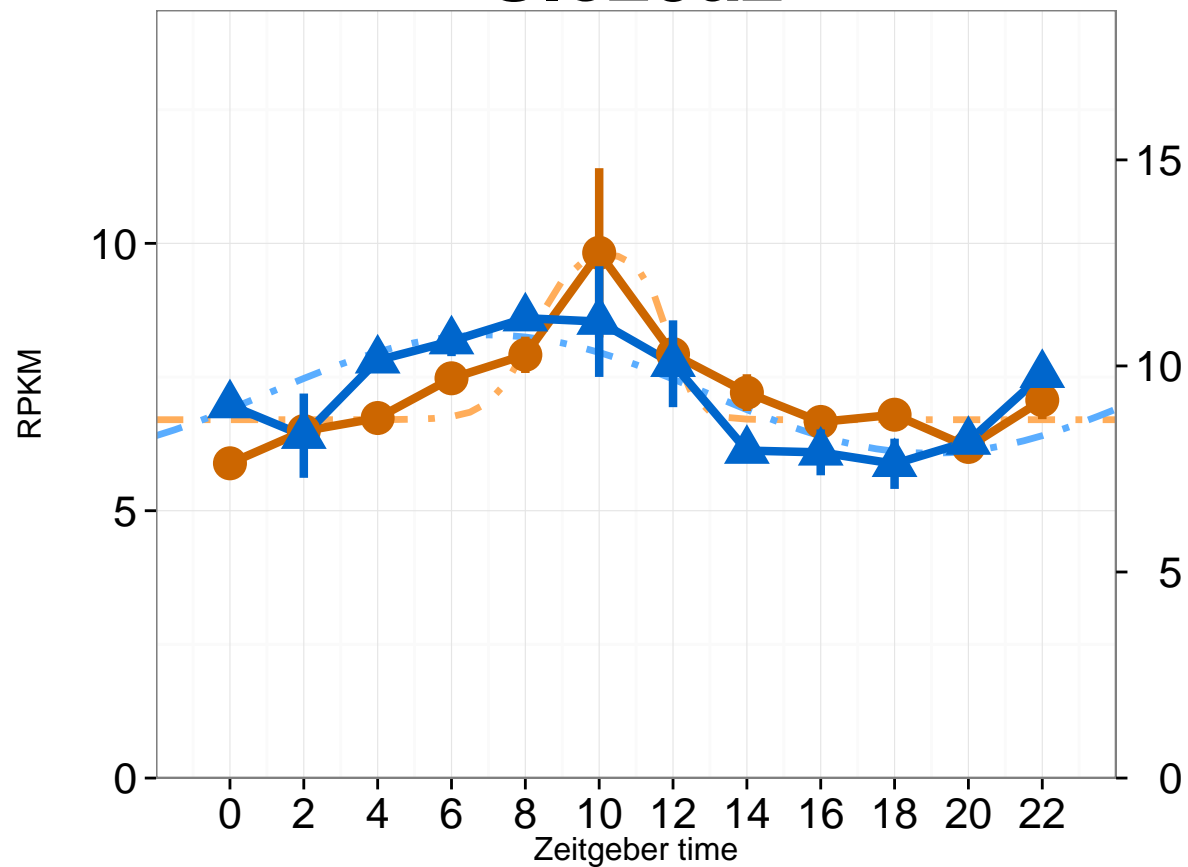

## Slc23a2

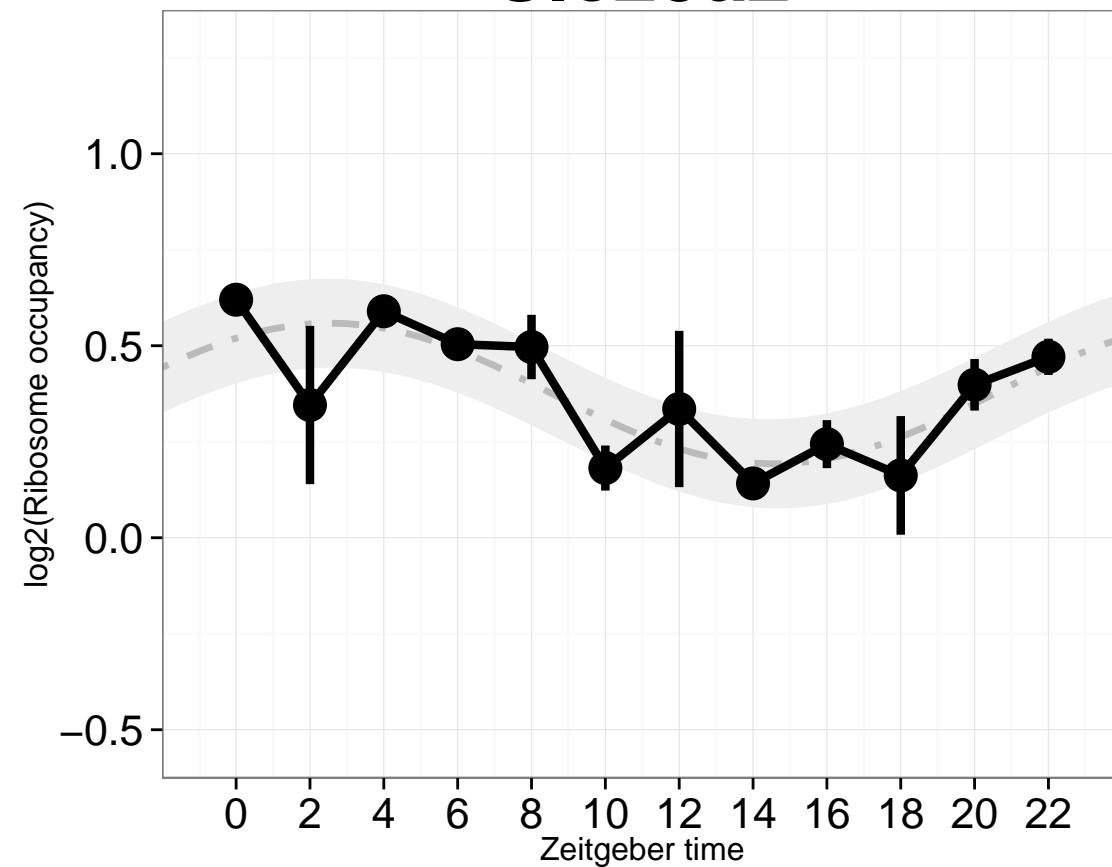

Supplement: Supplementary file 11911 [file 1]

## Tcea2

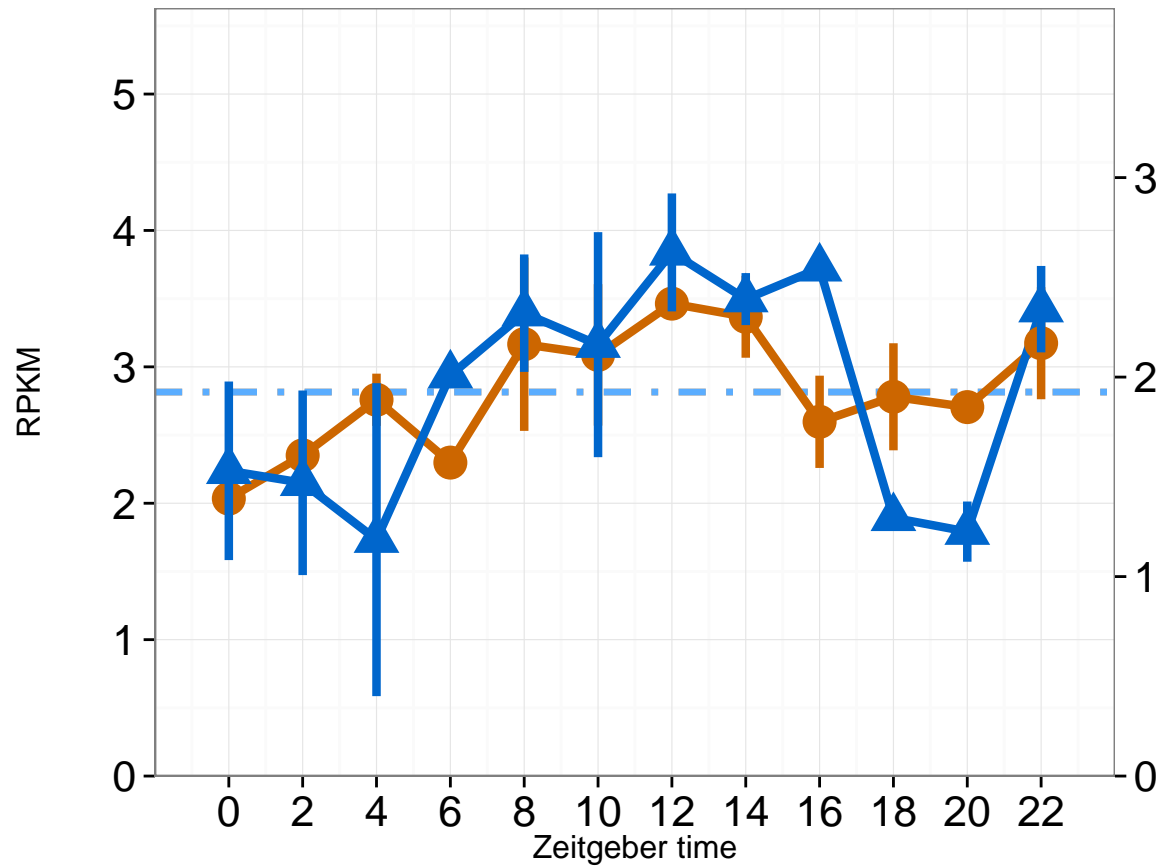

## Tcea2

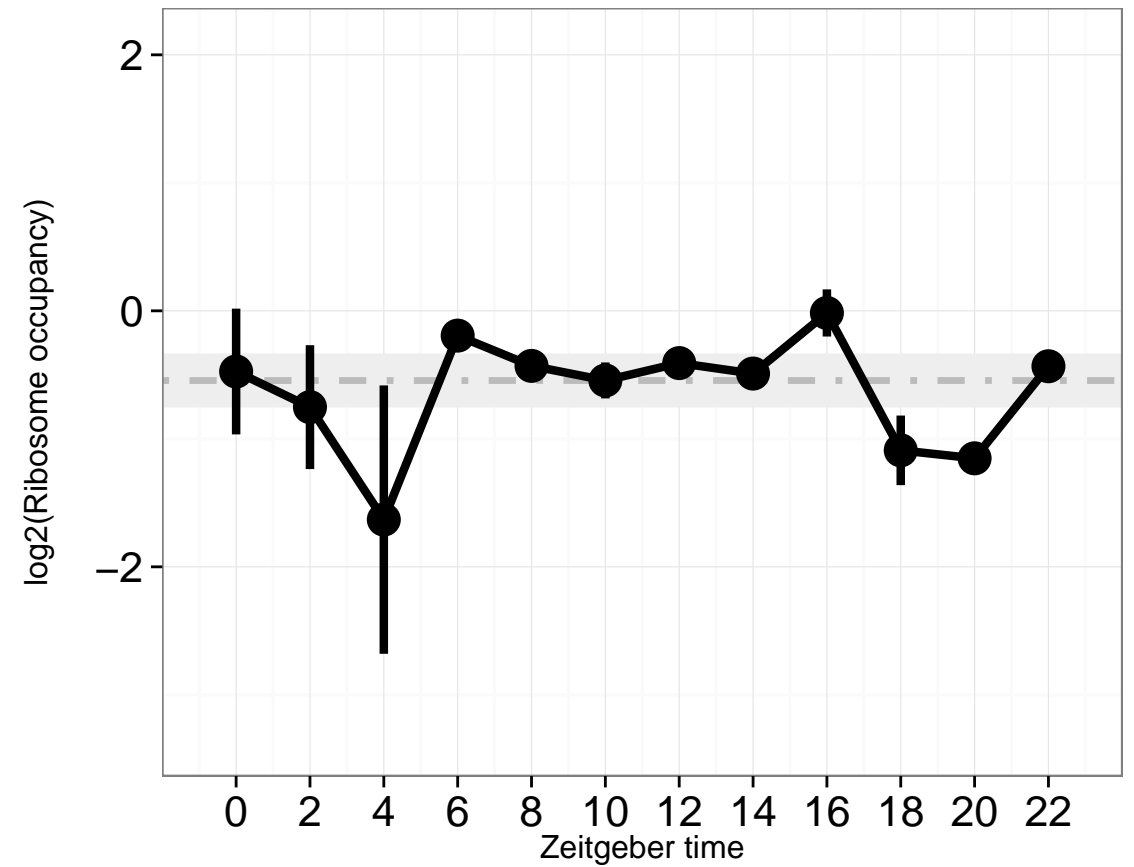

Supplement: Supplementary file 11912 [file 1]

# Rp9

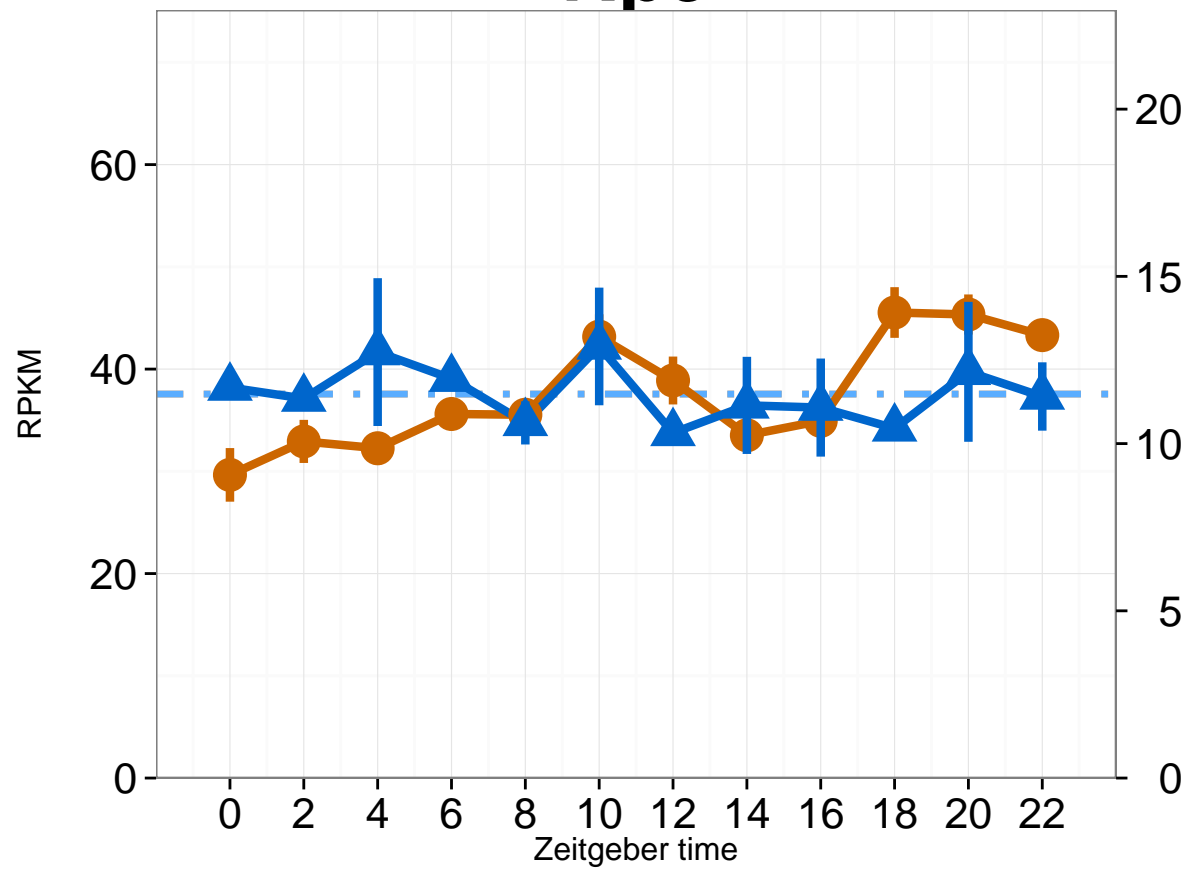

# Rp9

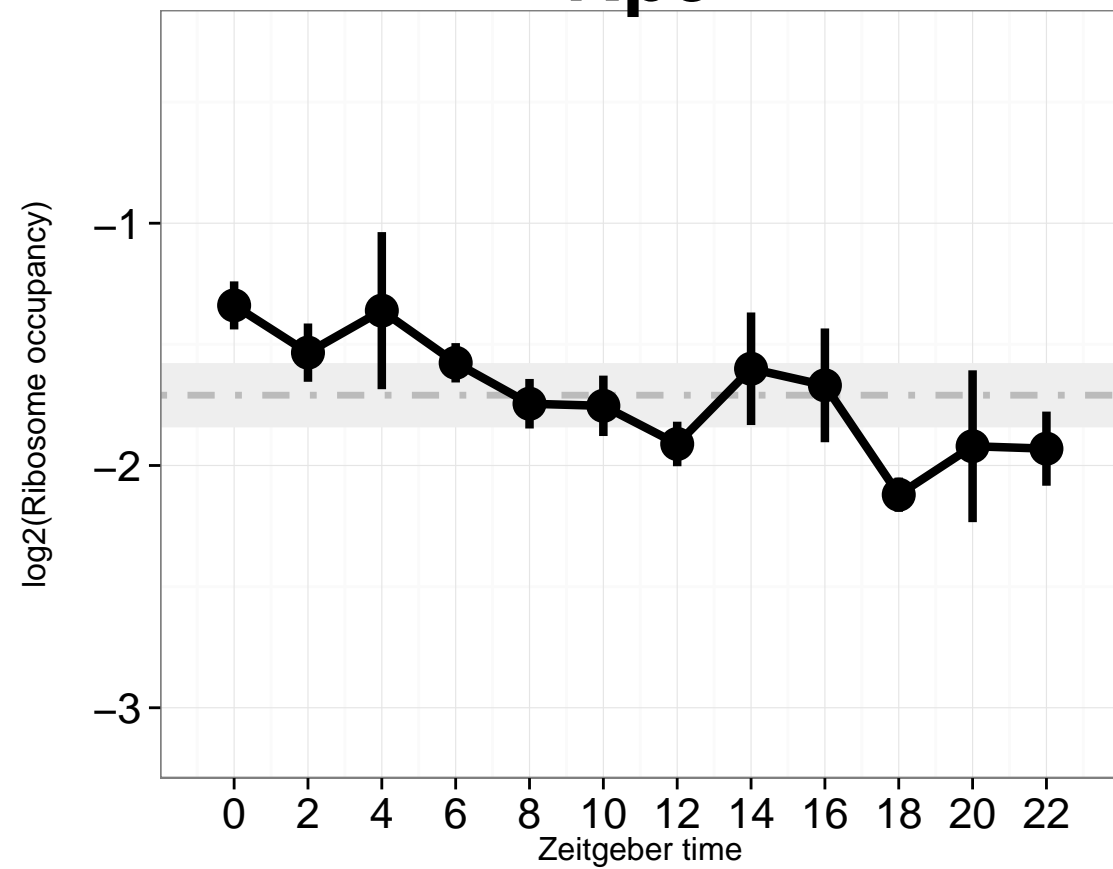

Supplement: Supplementary file 11913 [file 1]

# Cacna1c

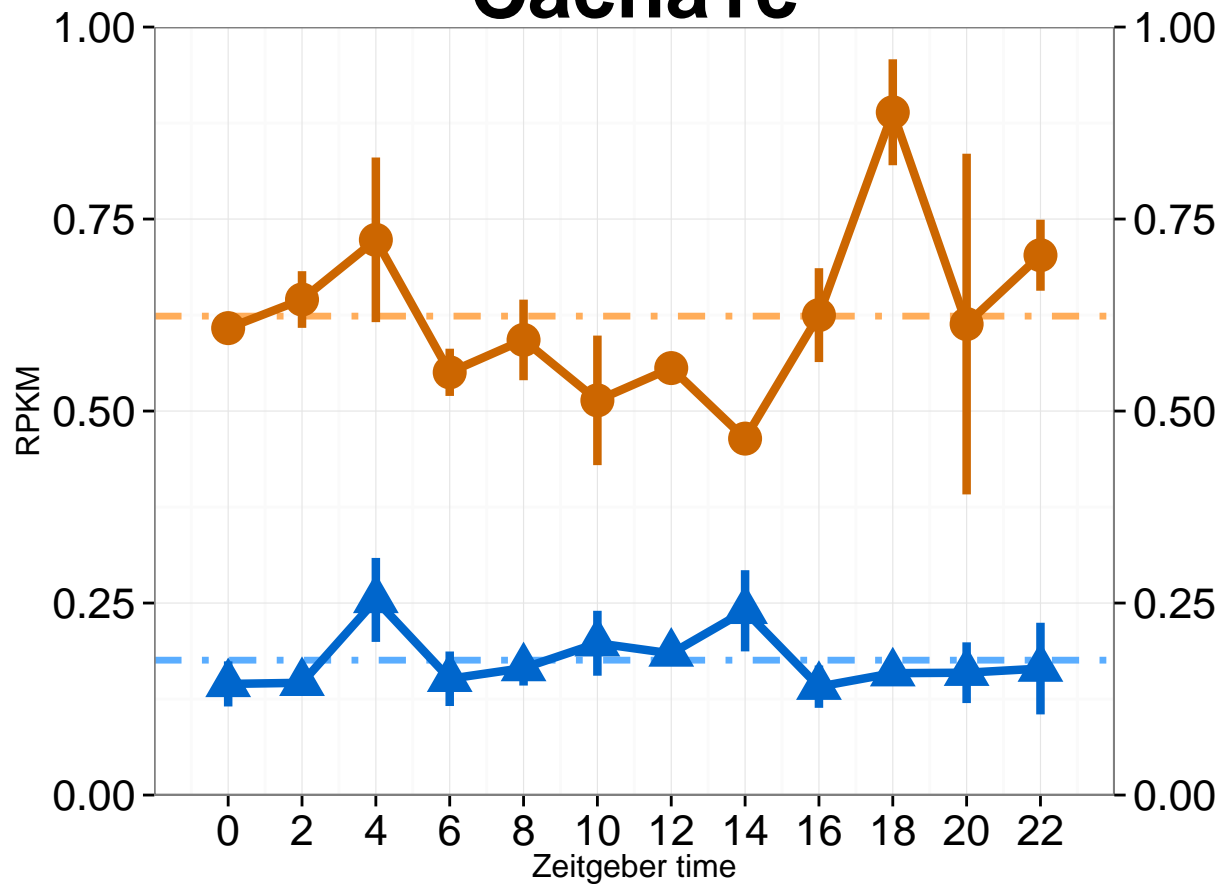

# Cacna1c

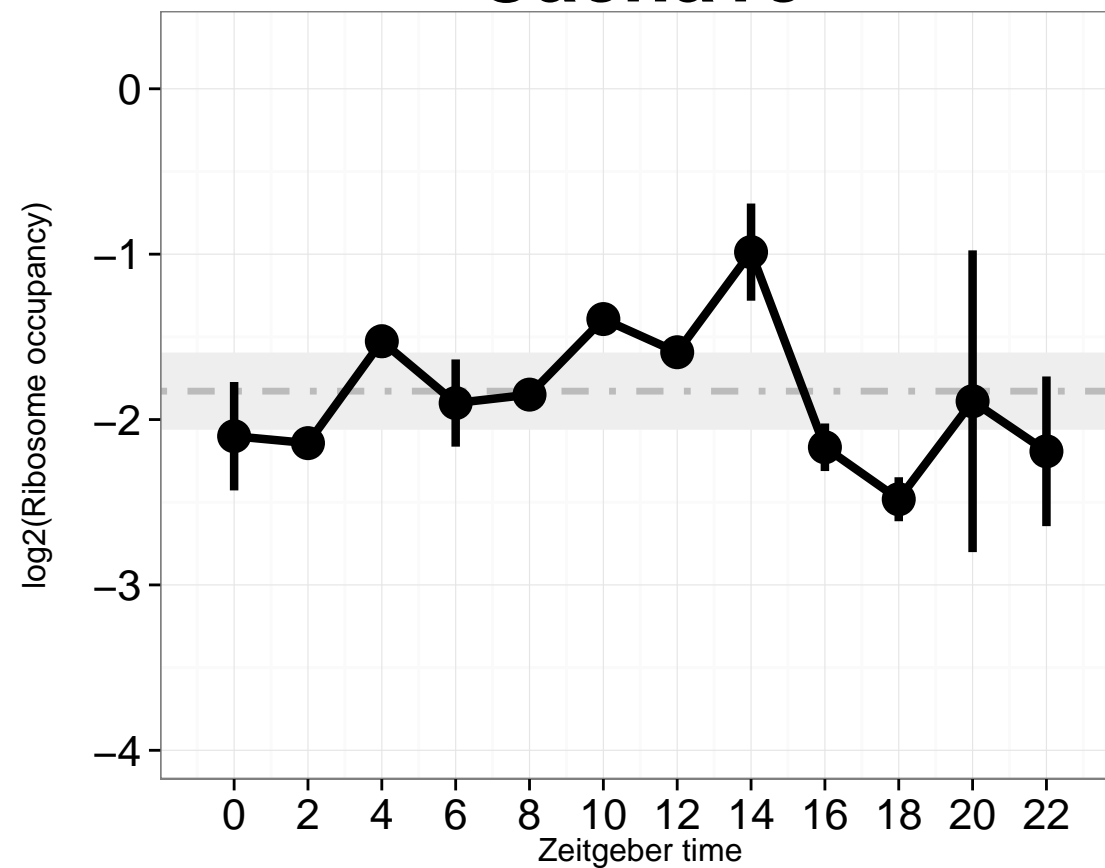

Supplement: Supplementary file 11914 [file 1]

## Birc5

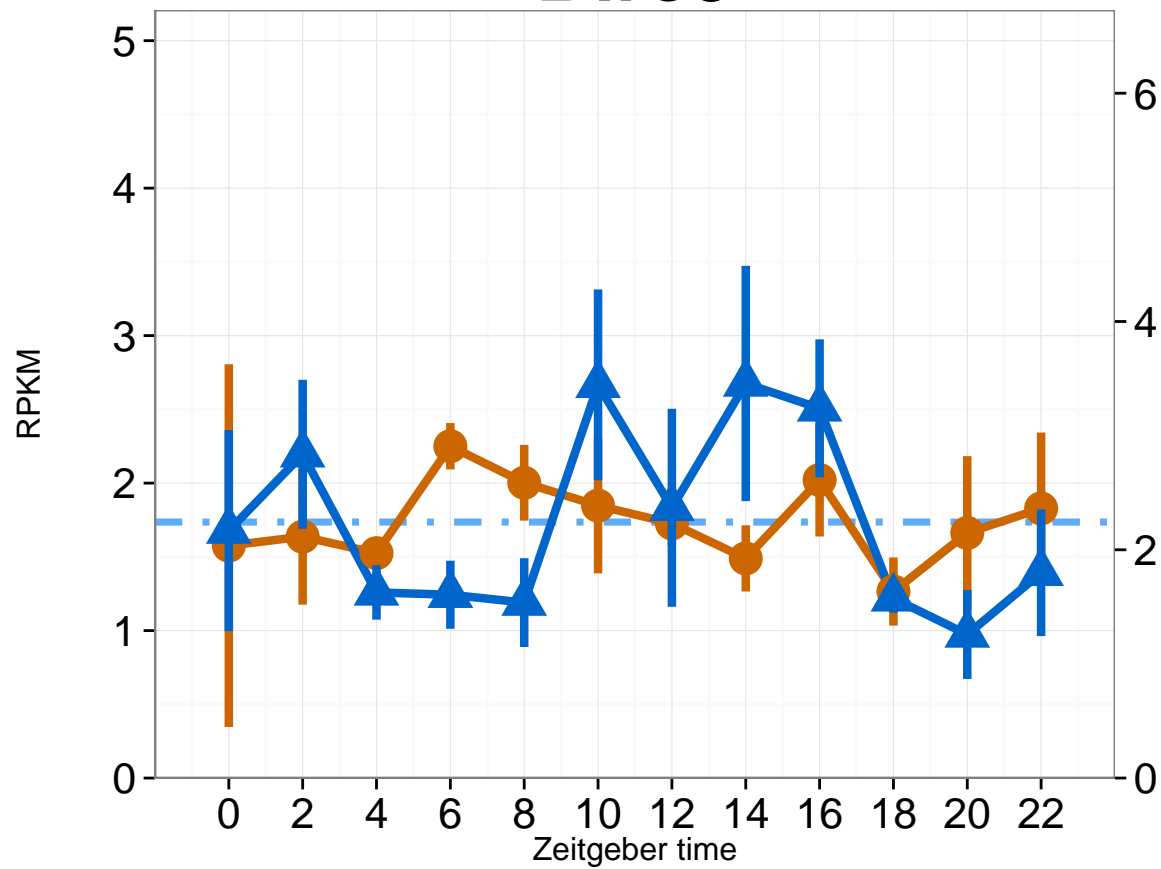

## Birc5

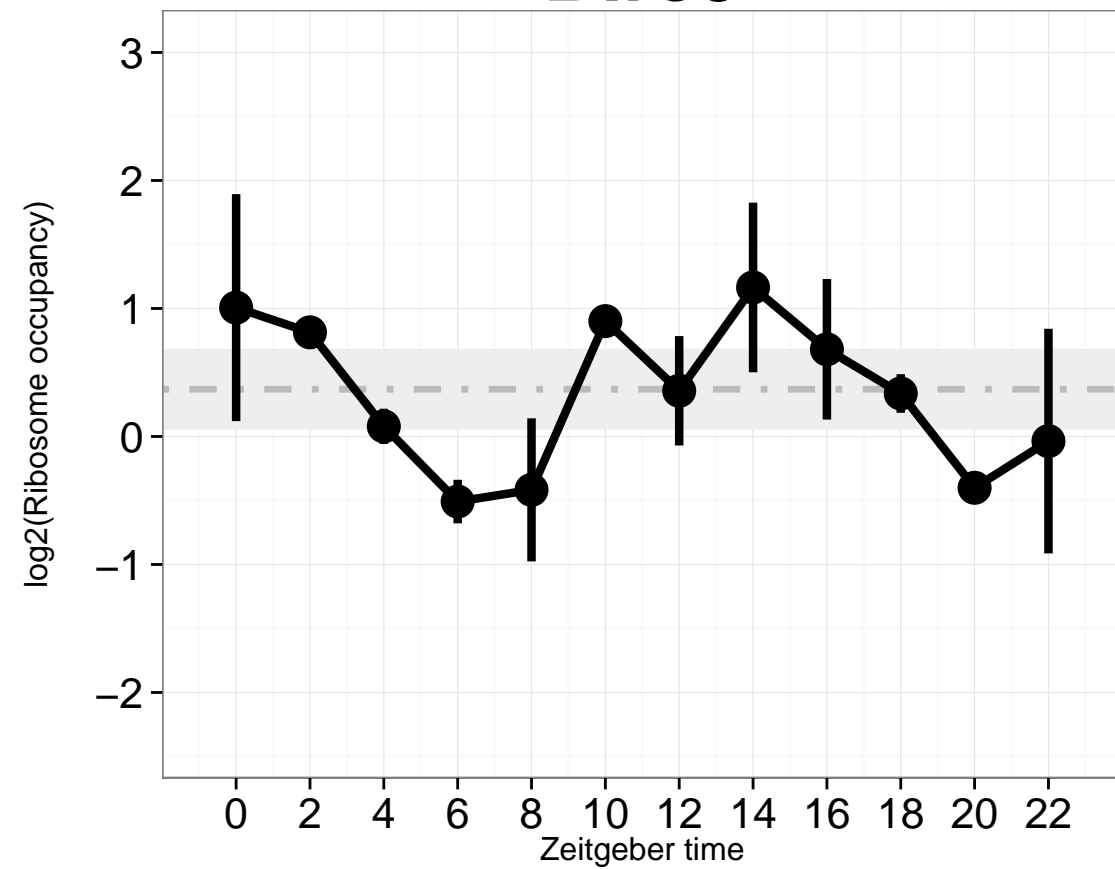

Supplement: Supplementary file 11915 [file 1]

# Asb6

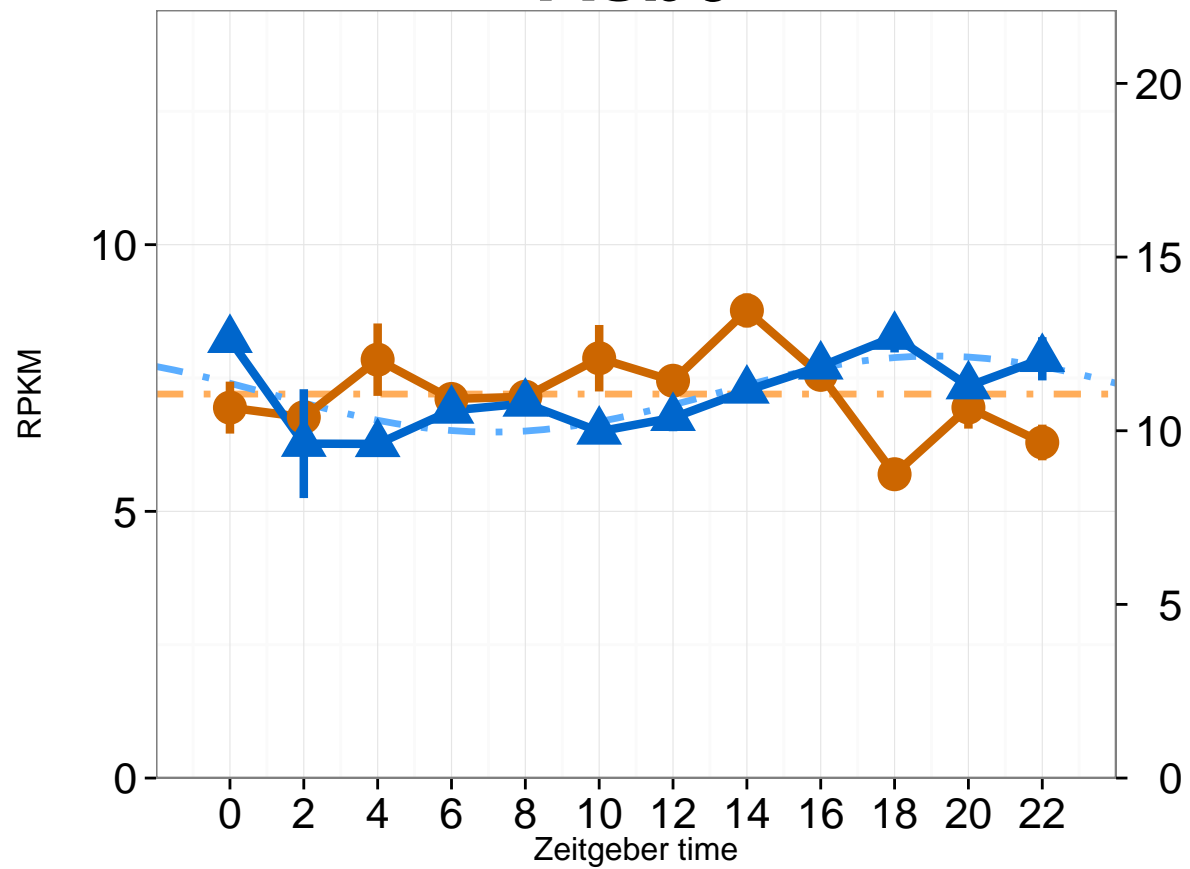

# Asb6

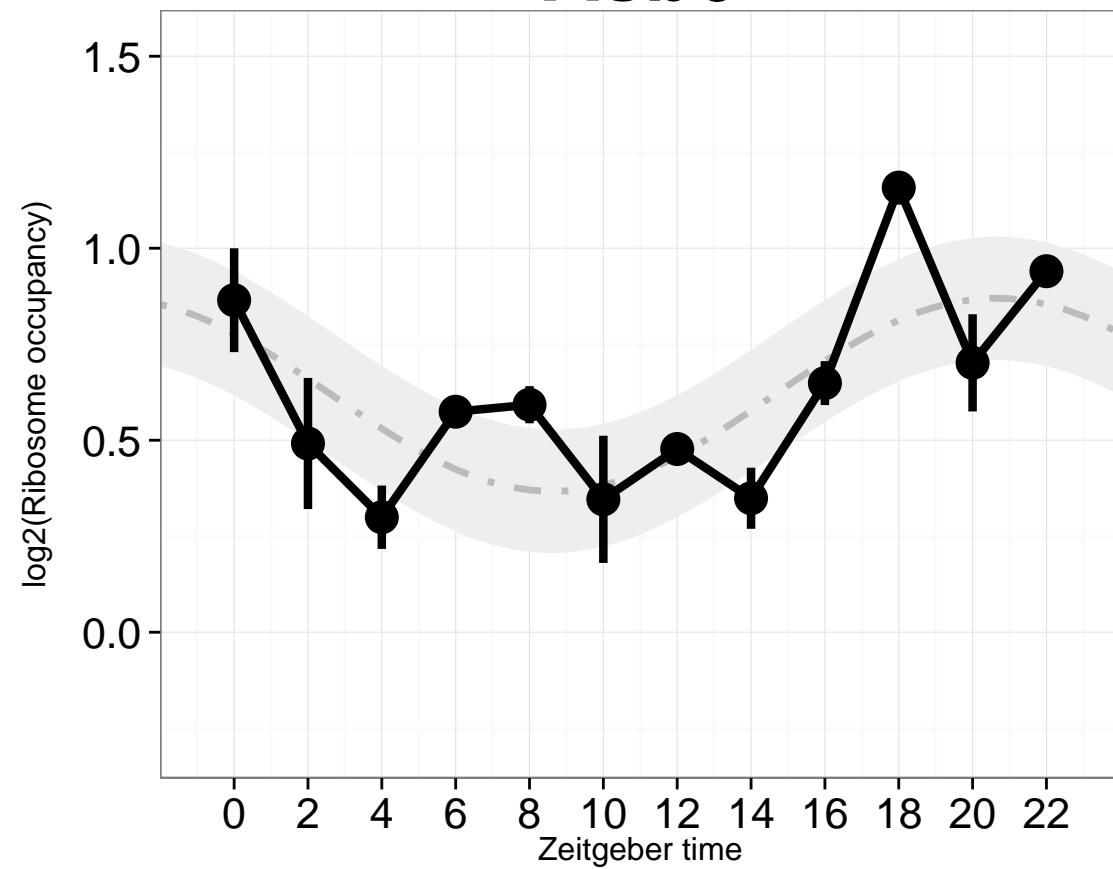

Supplement: Supplementary file 11916 [file 1]

# Rnf7

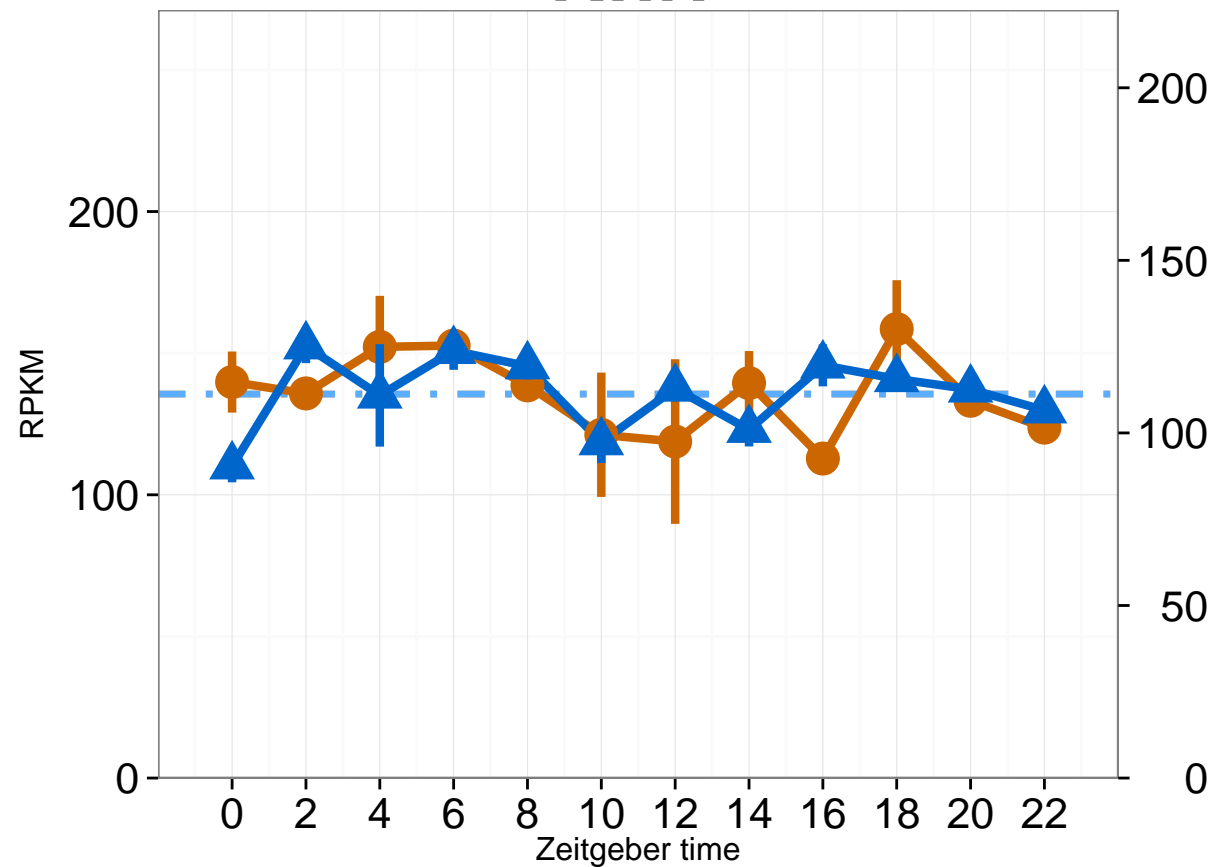

# Rnf7

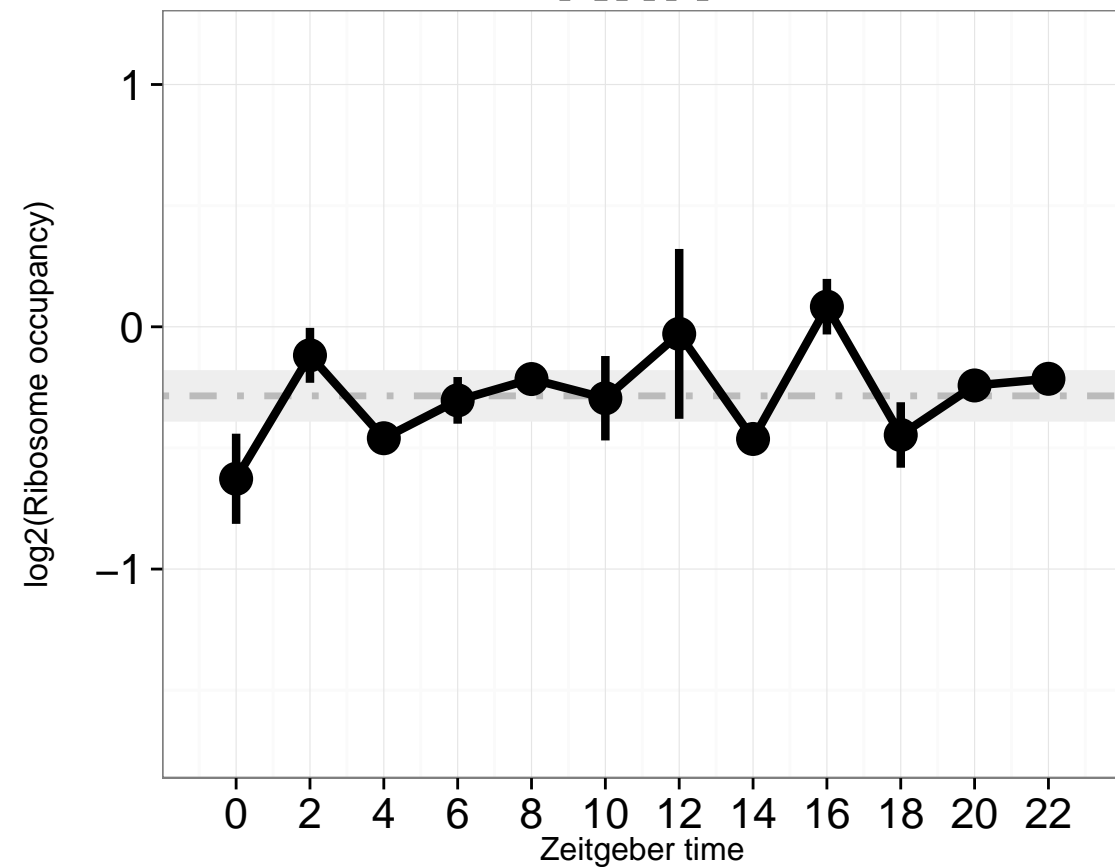

Supplement: Supplementary file 11917 [file 1]

## Atrn1

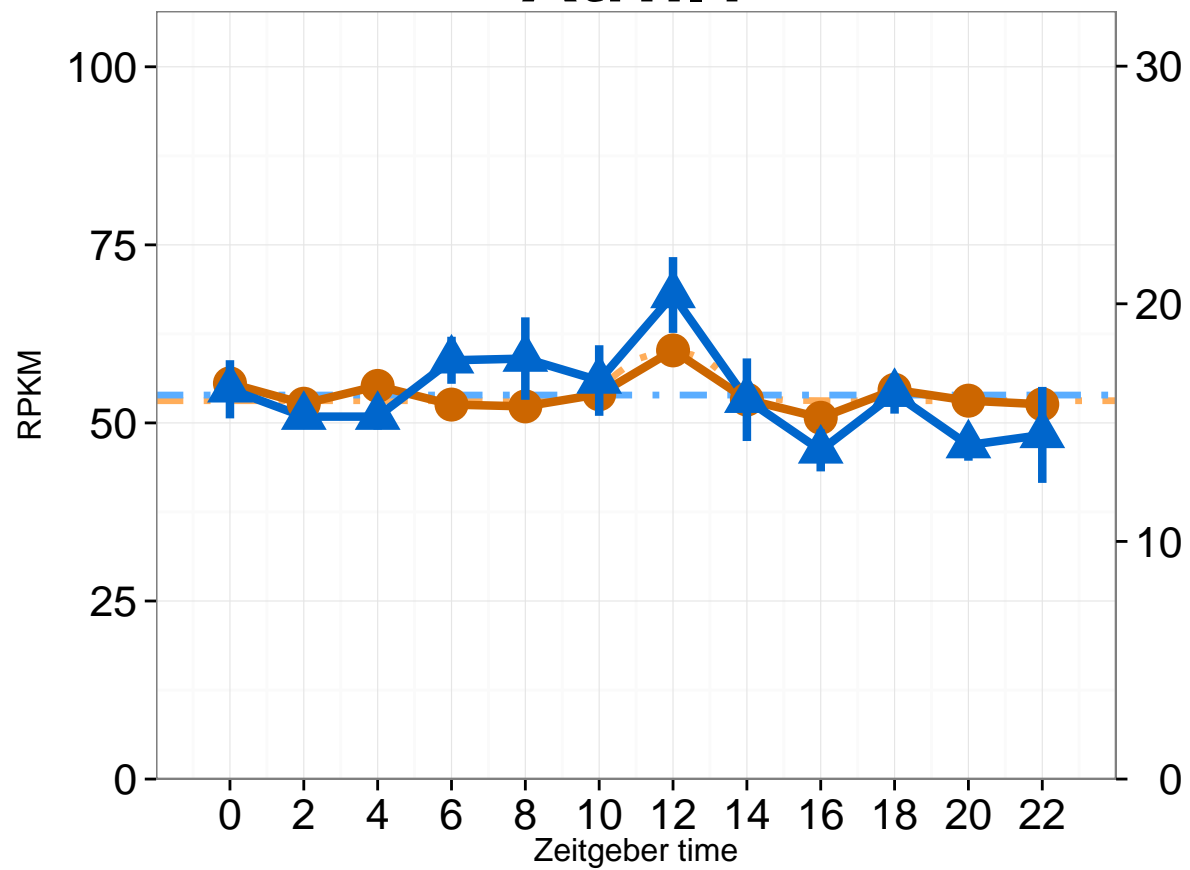

## Atrn1

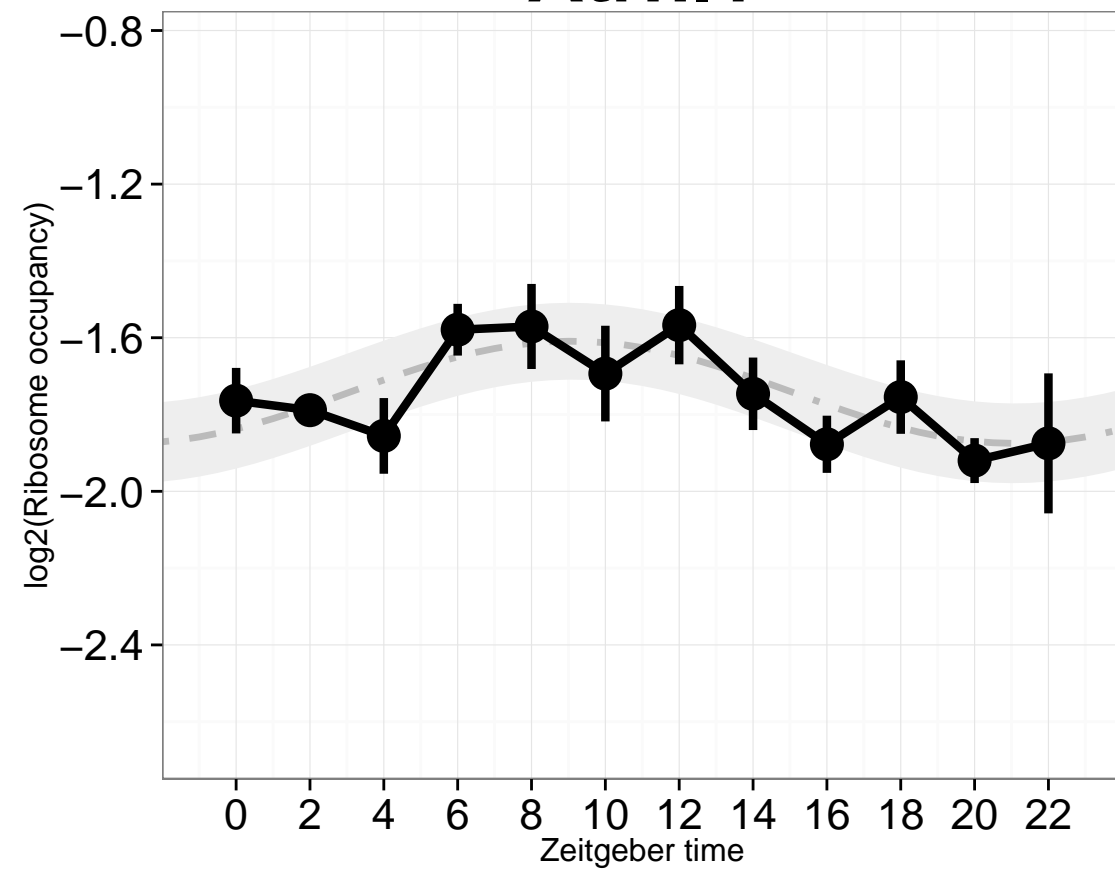

Supplement: Supplementary file 11918 [file 1]

# Mrps35

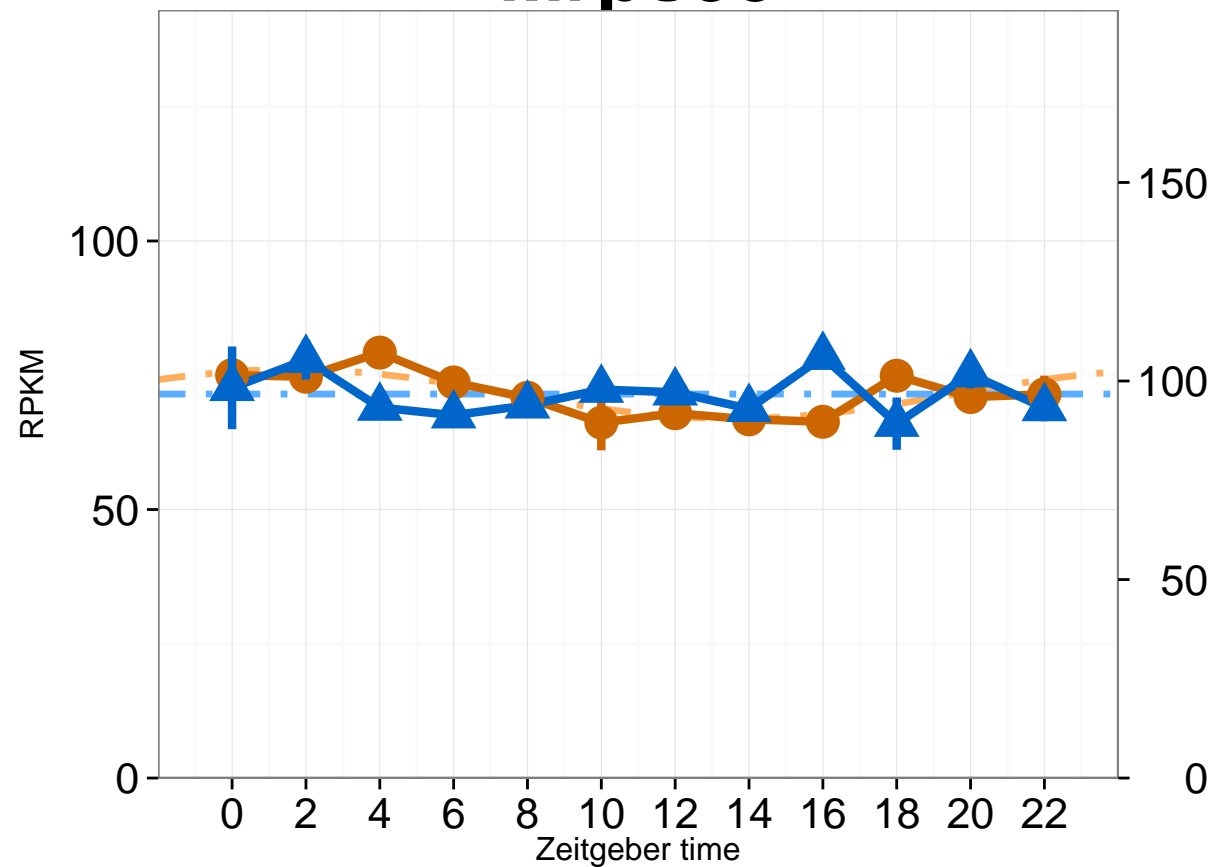

# Mrps35

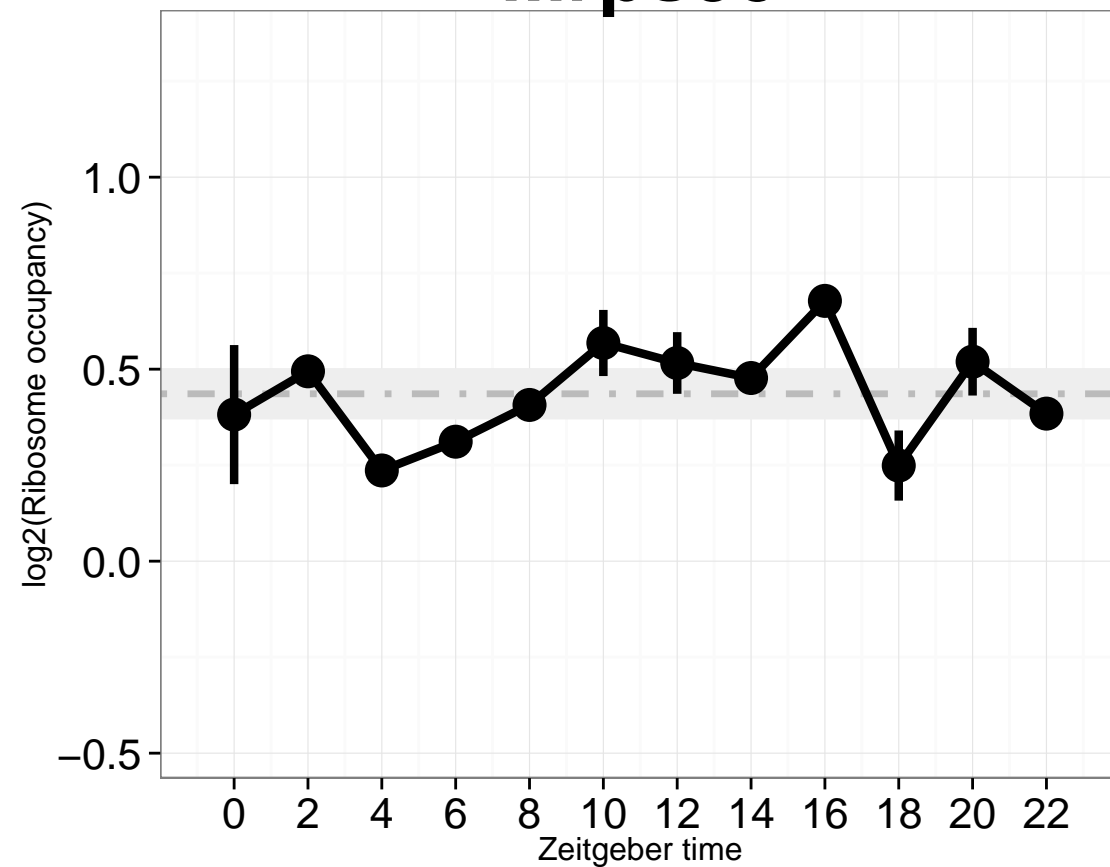

Supplement: Supplementary file 11919 [file 1]

## Muc1

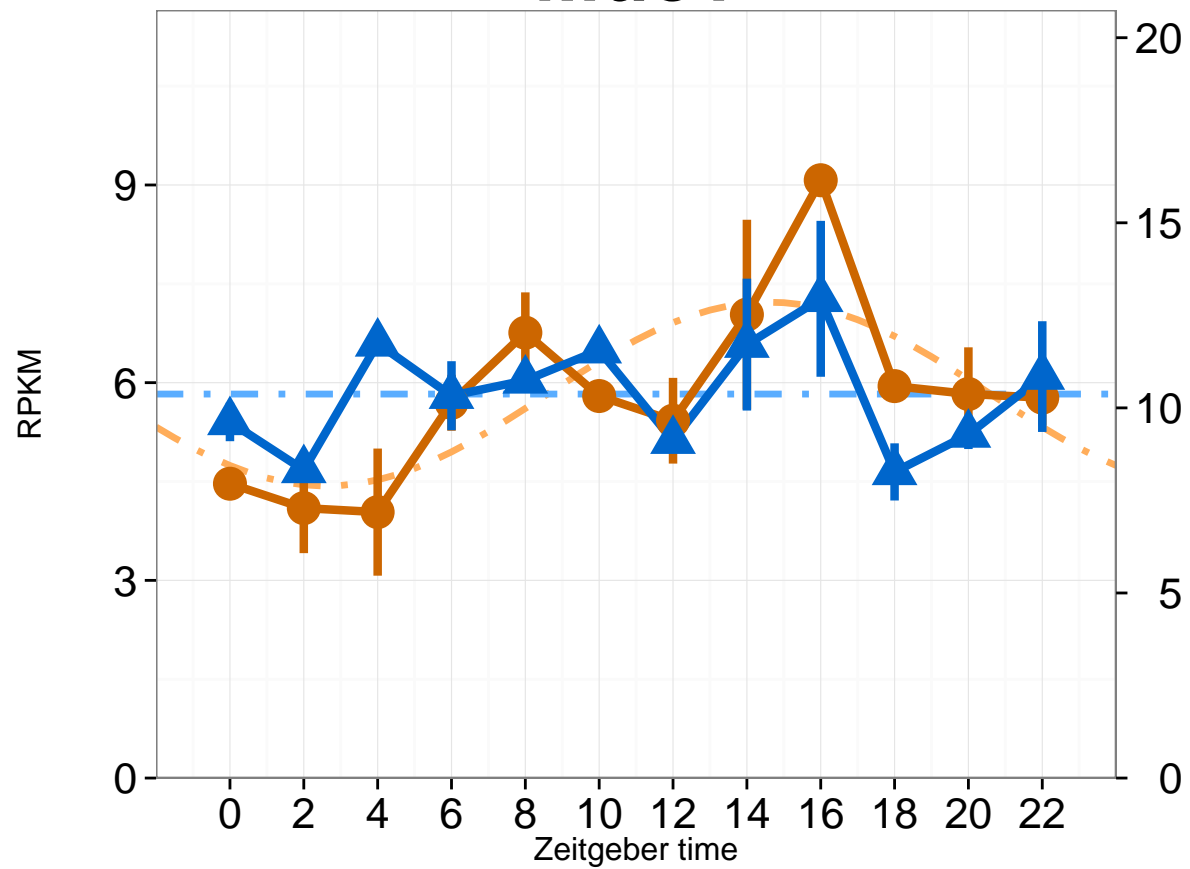

## Muc1

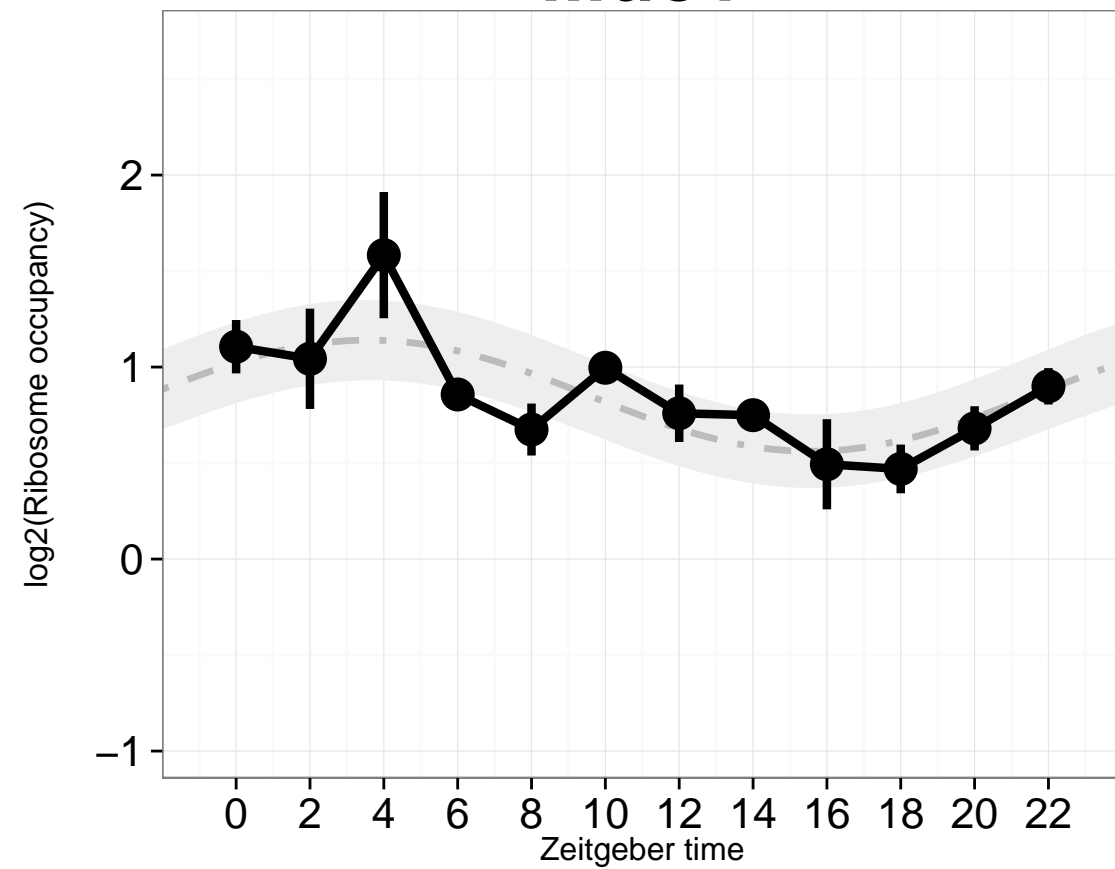

Supplement: Supplementary file 11920 [file 1]

## Cckar

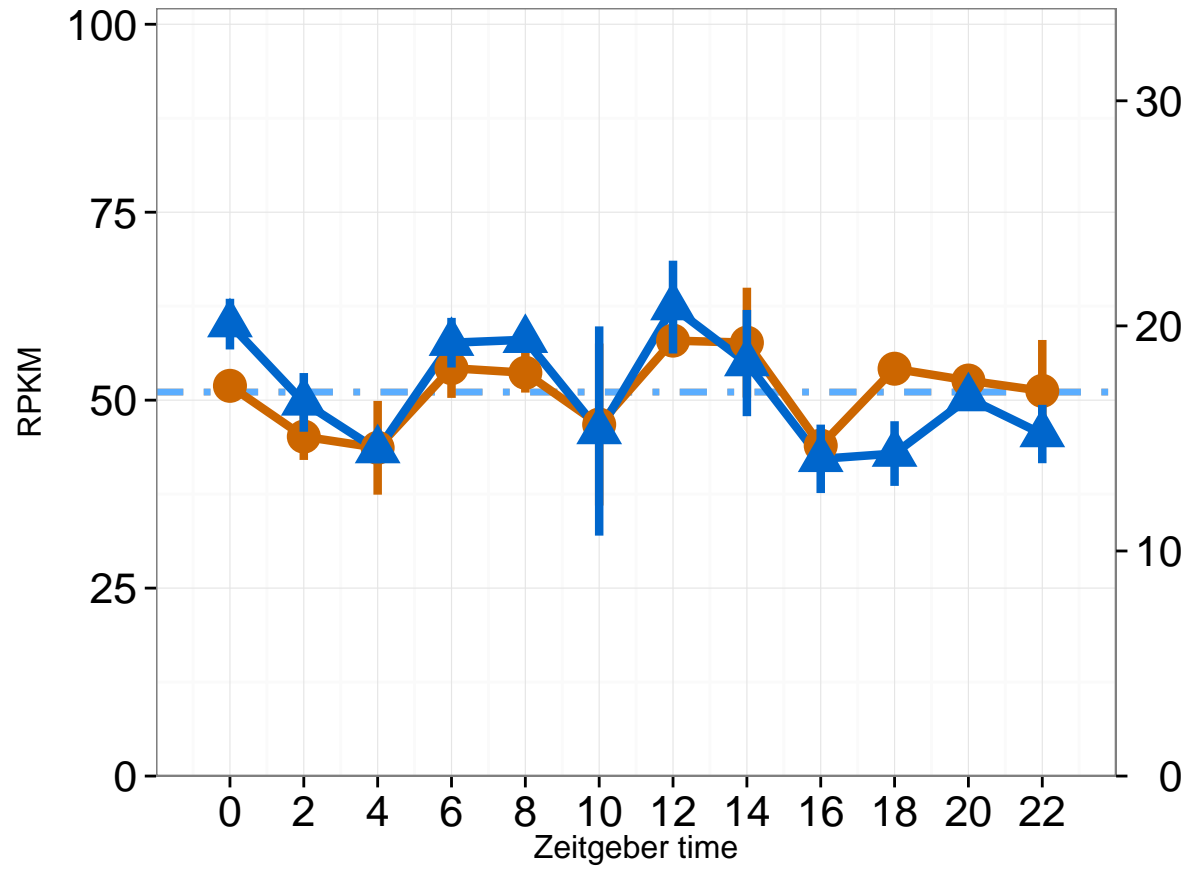

## Cckar

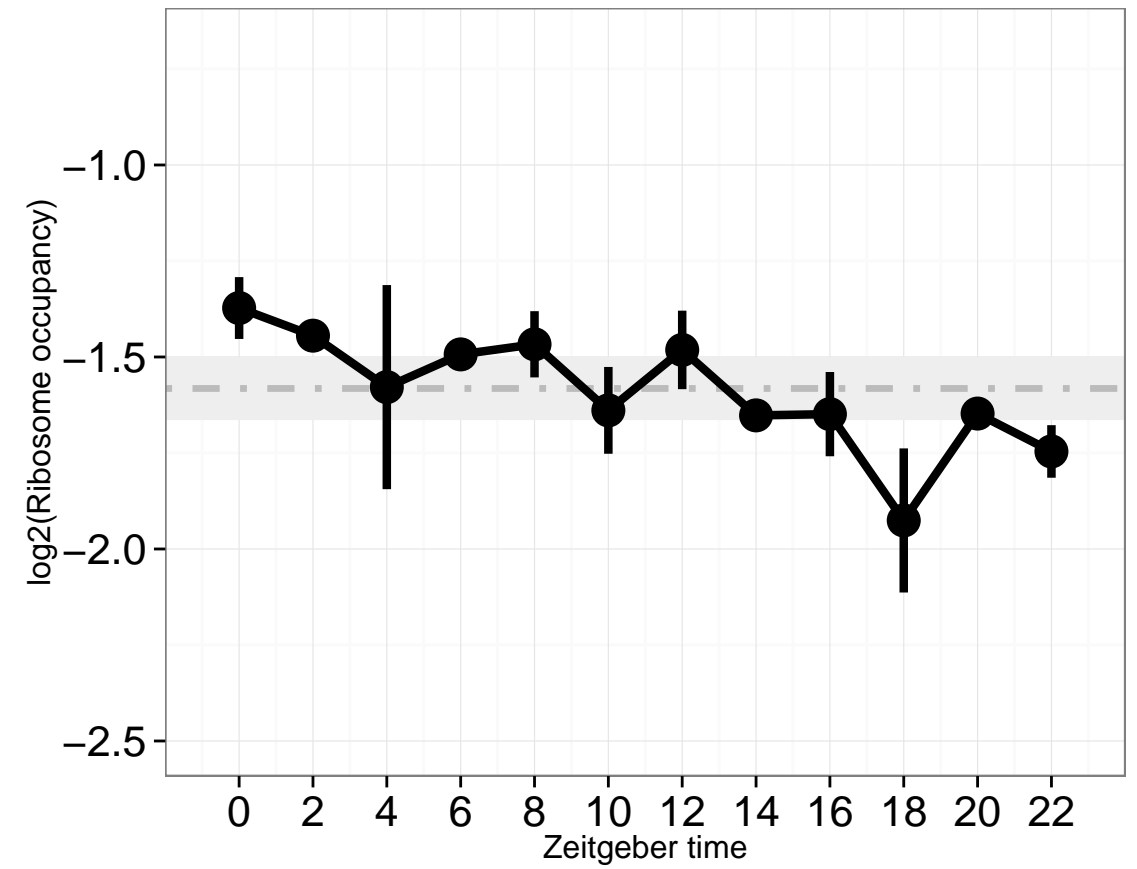

Supplement: Supplementary file 11921 [file 1]

## Tacstd2

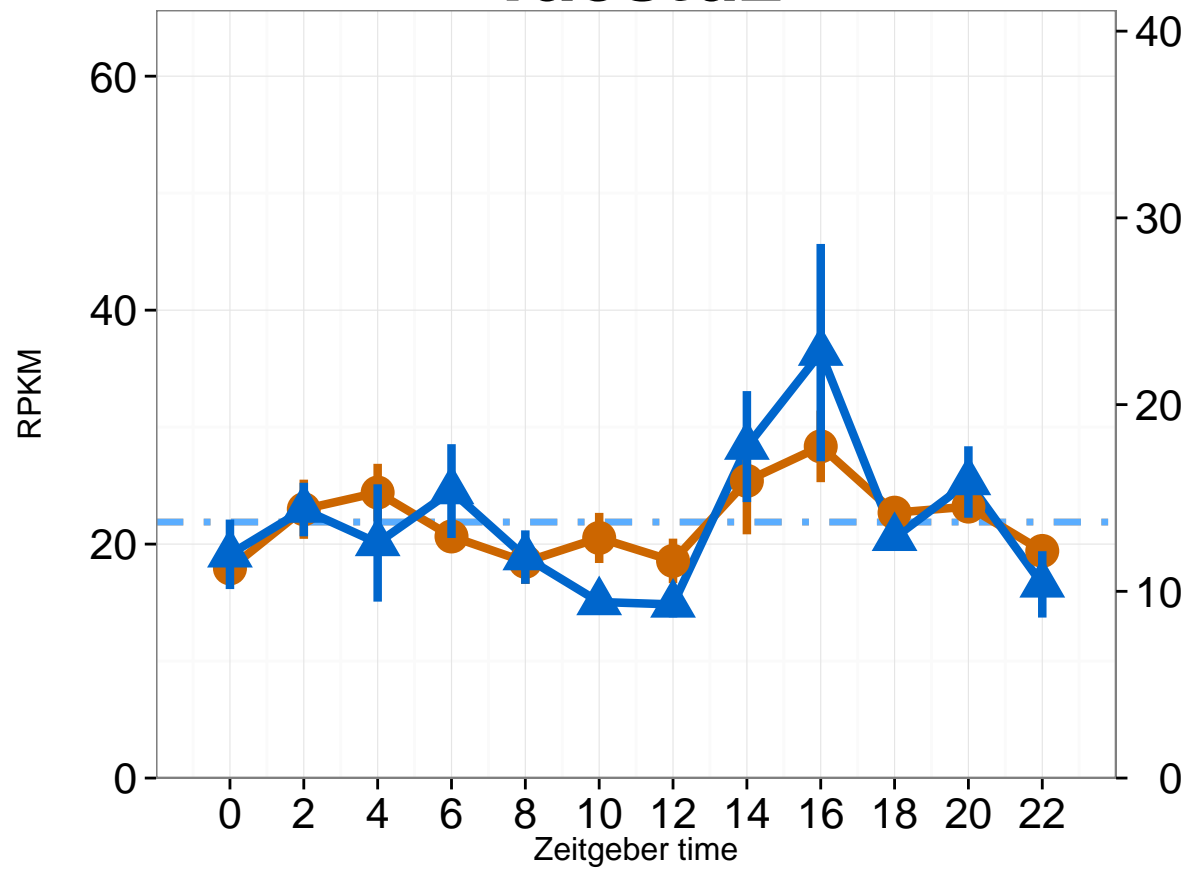

## Tacstd2

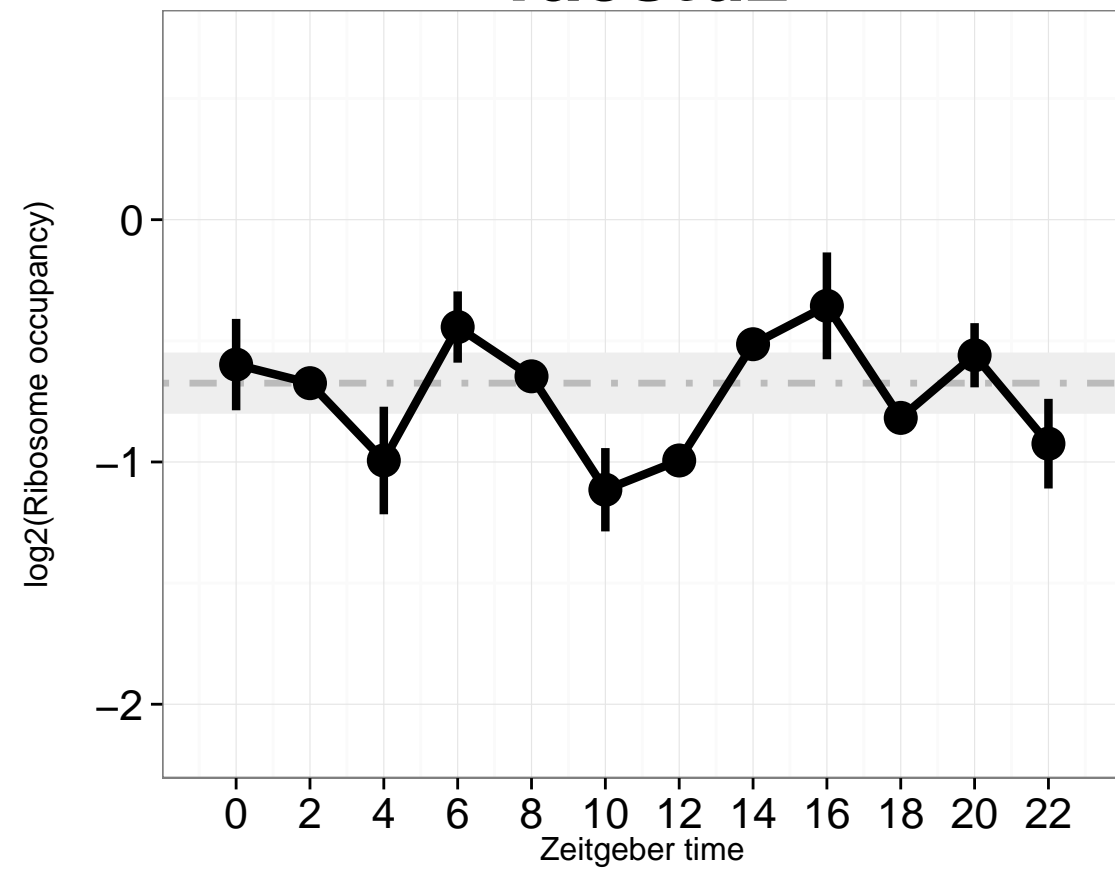

Supplement: Supplementary file 11922 [file 1]

# Fpgt

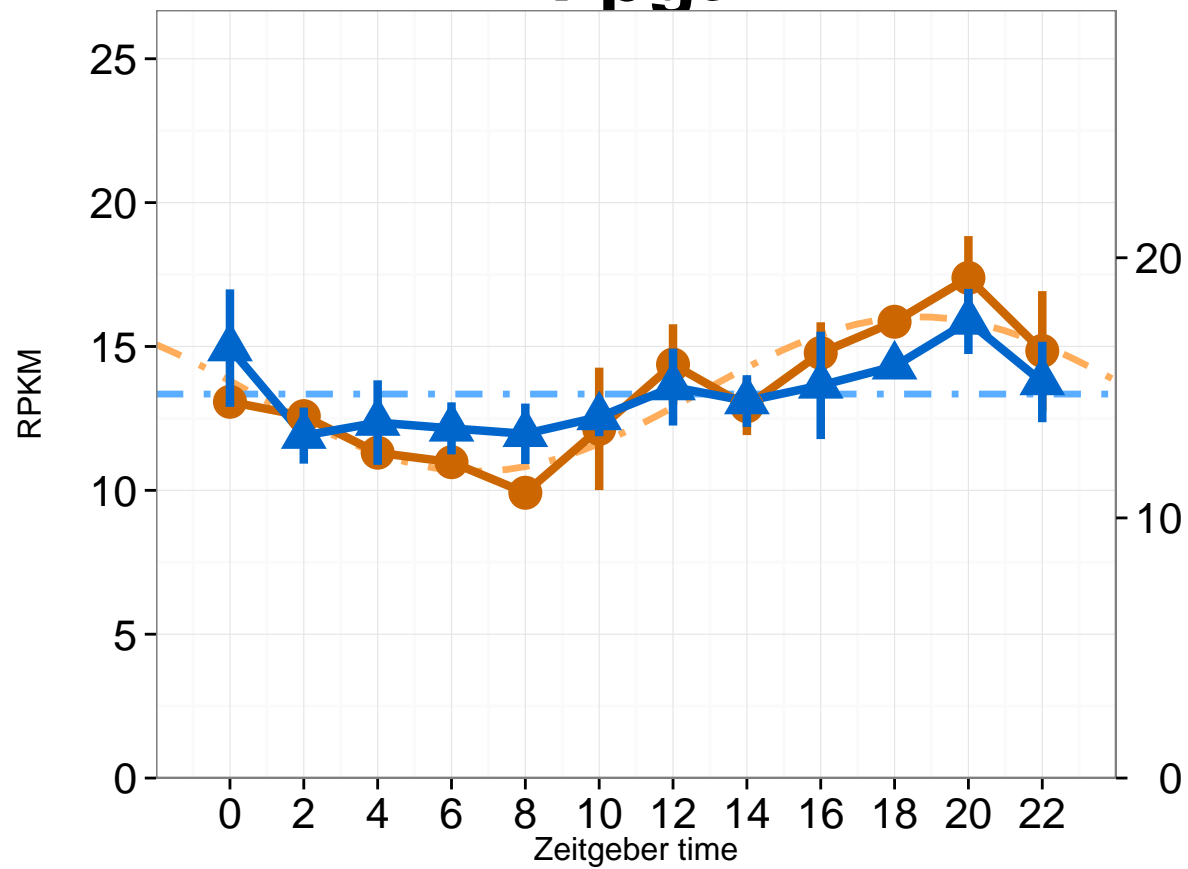

# Fpgt

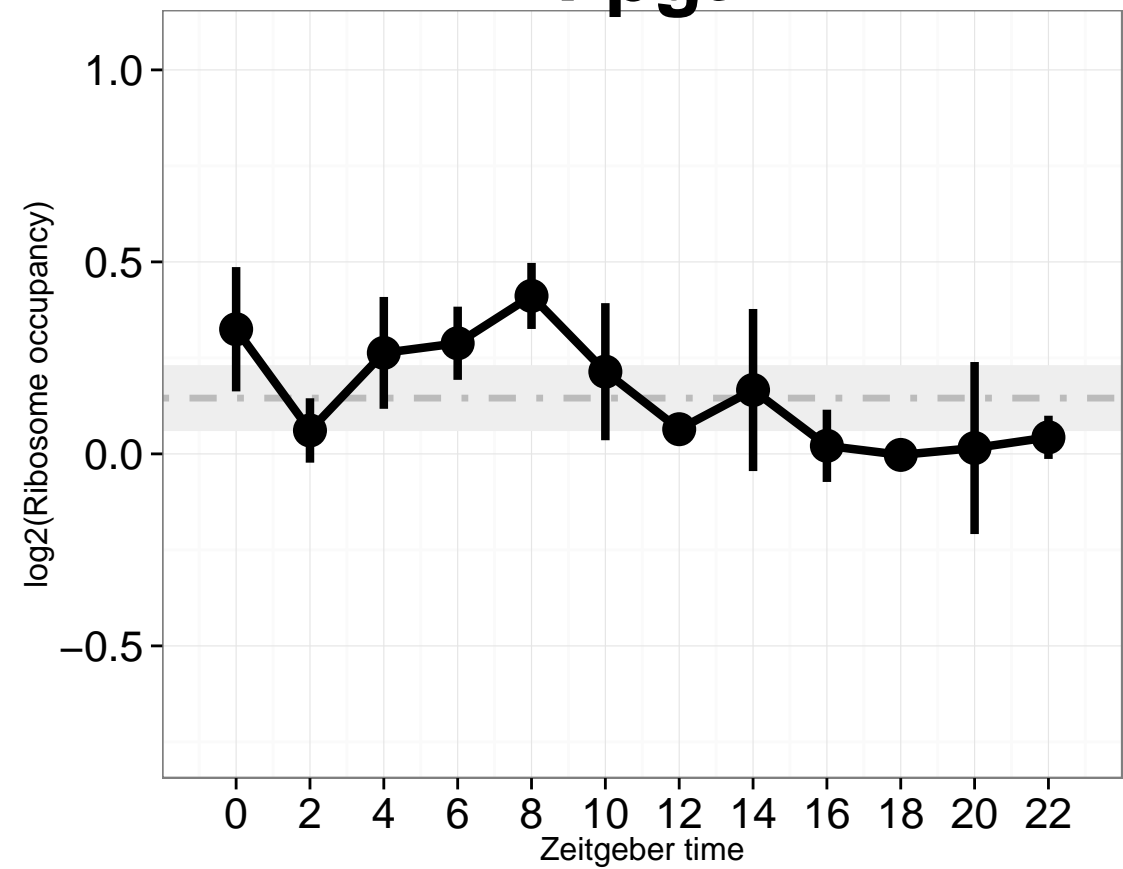

Supplement: Supplementary file 11923 [file 1]

## Pdgfrb

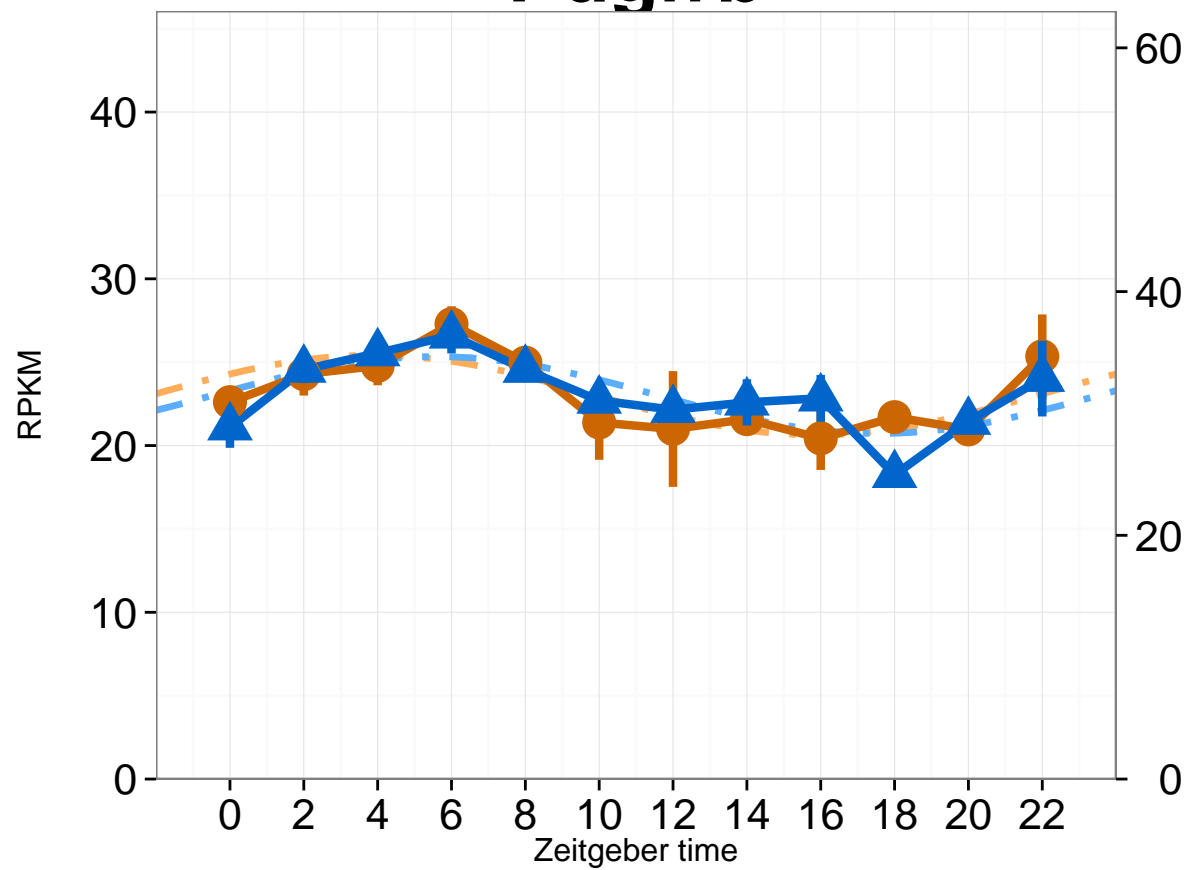

## Pdgfrb

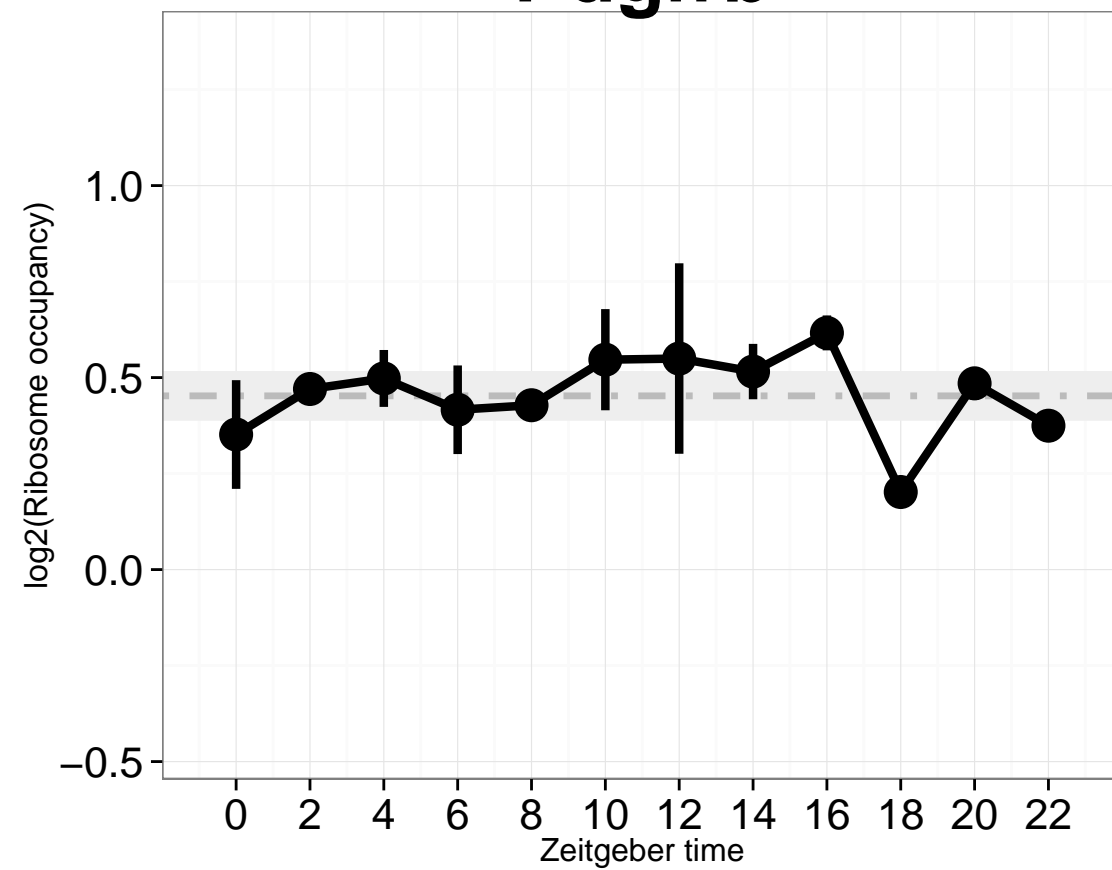

Supplement: Supplementary file 11924 [file 1]

## Dlat

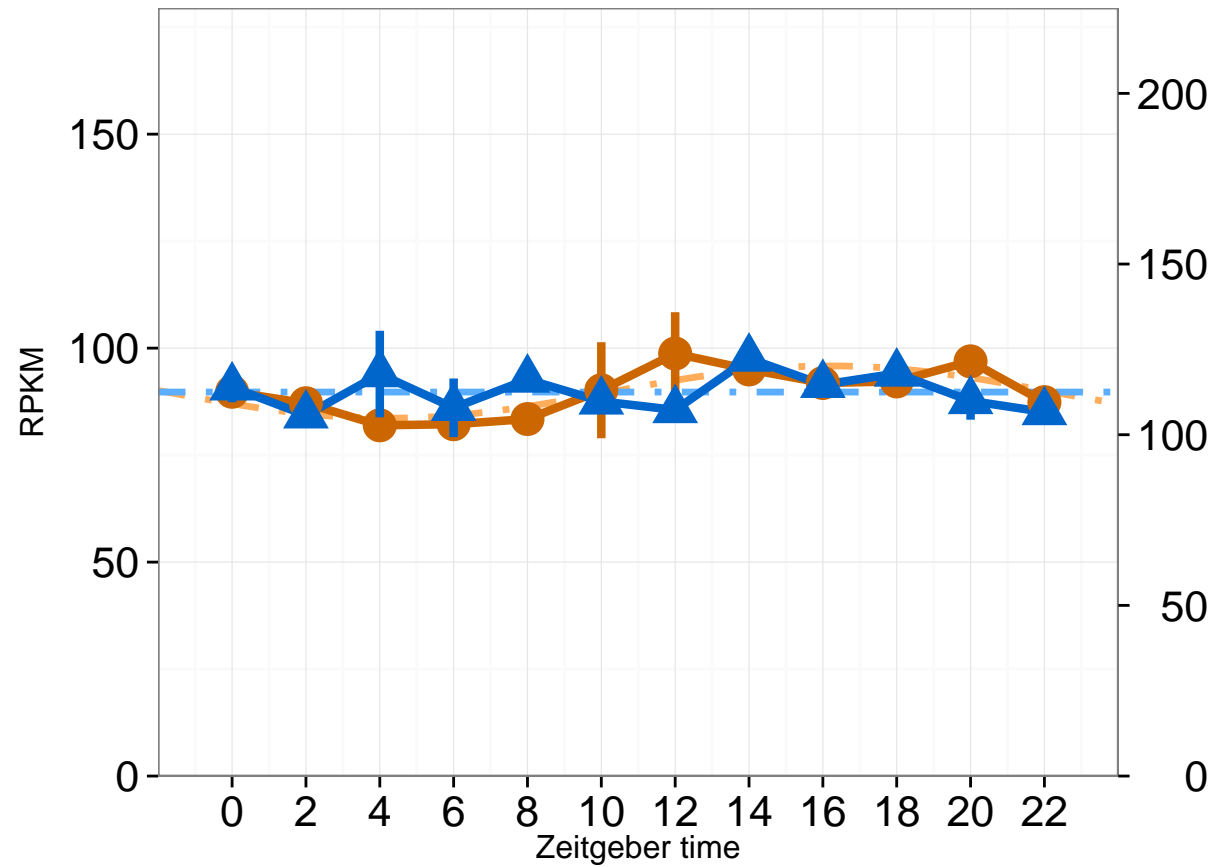

## Dlat

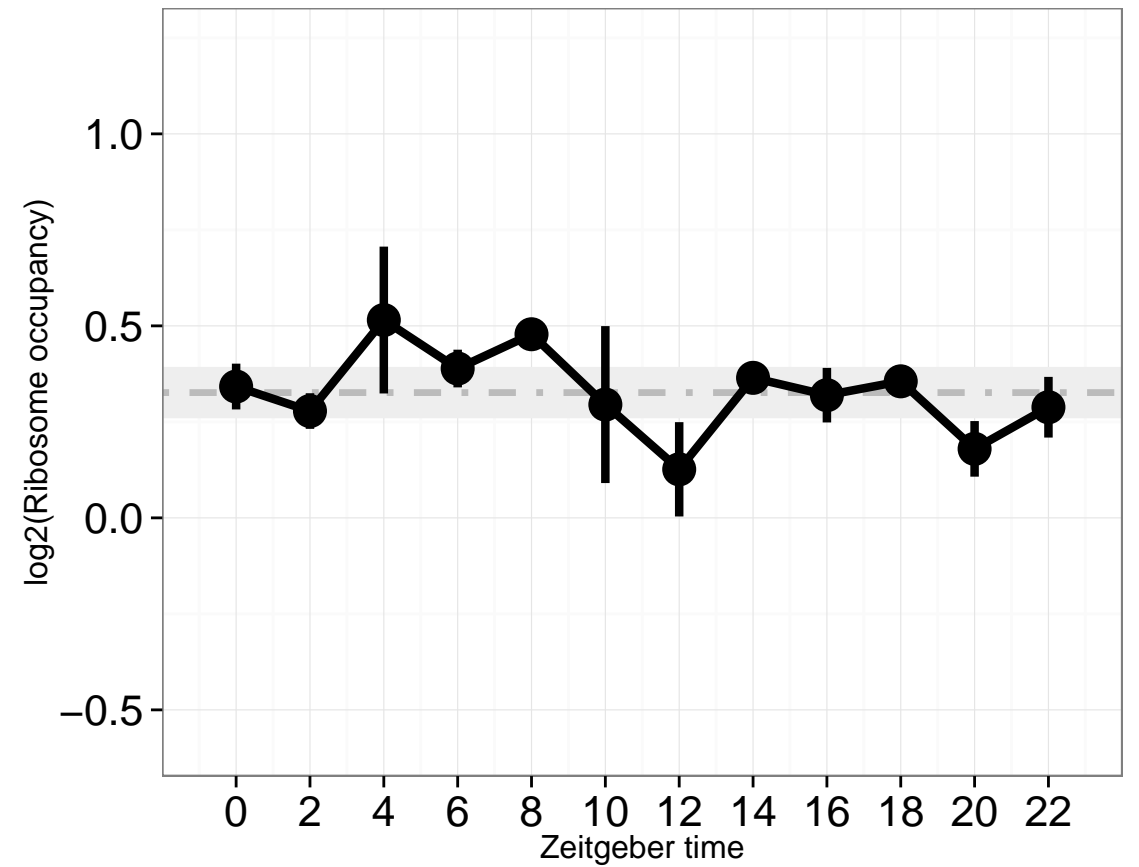

Supplement: Supplementary file 11925 [file 1]

# Atp8b2

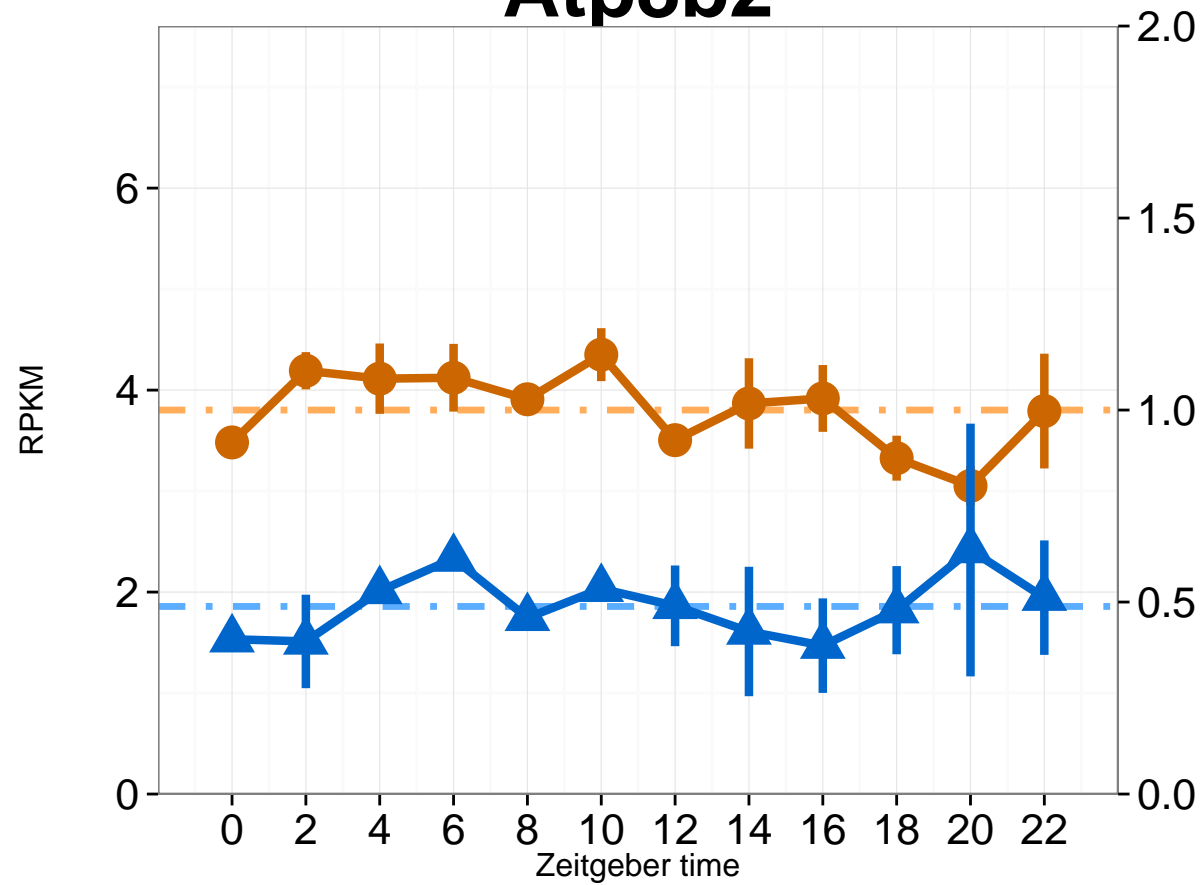

# Atp8b2

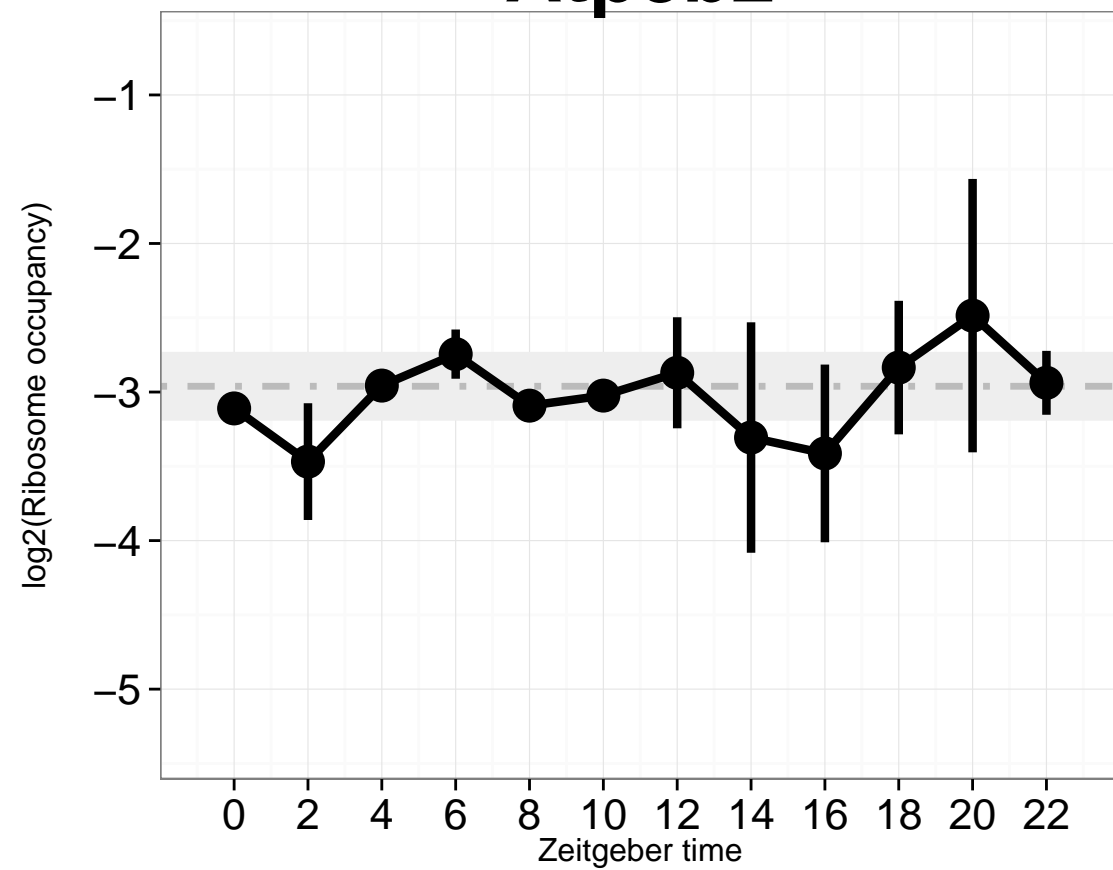

Supplement: Supplementary file 11926 [file 1]

## Apln

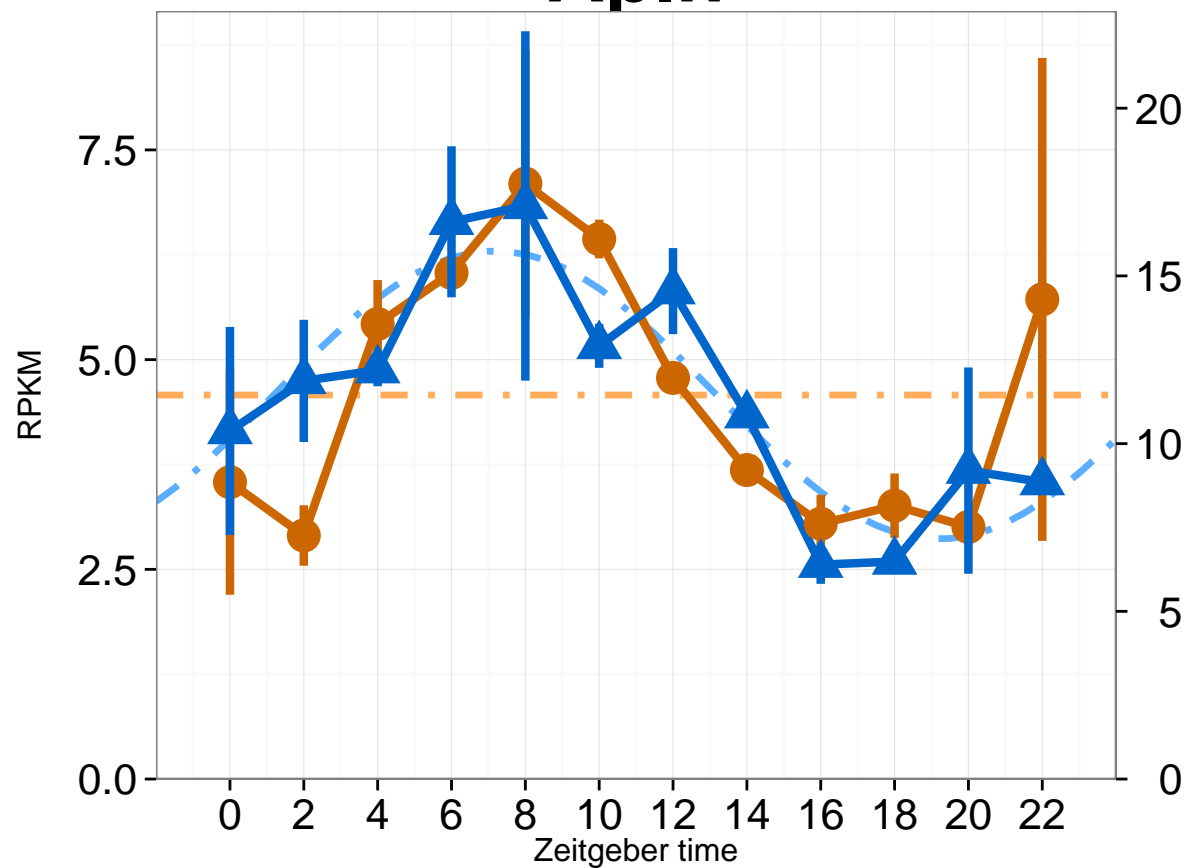

## Apln

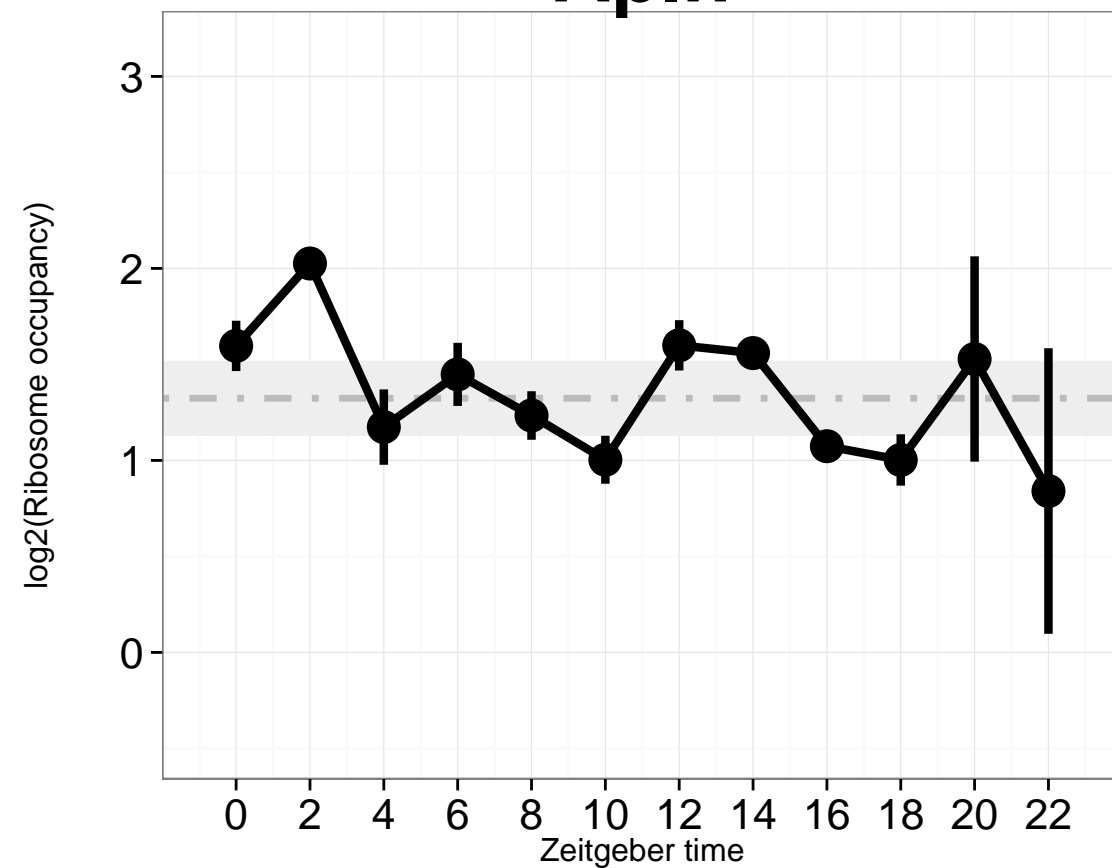

Supplement: Supplementary file 11927 [file 1]

## Abhd15

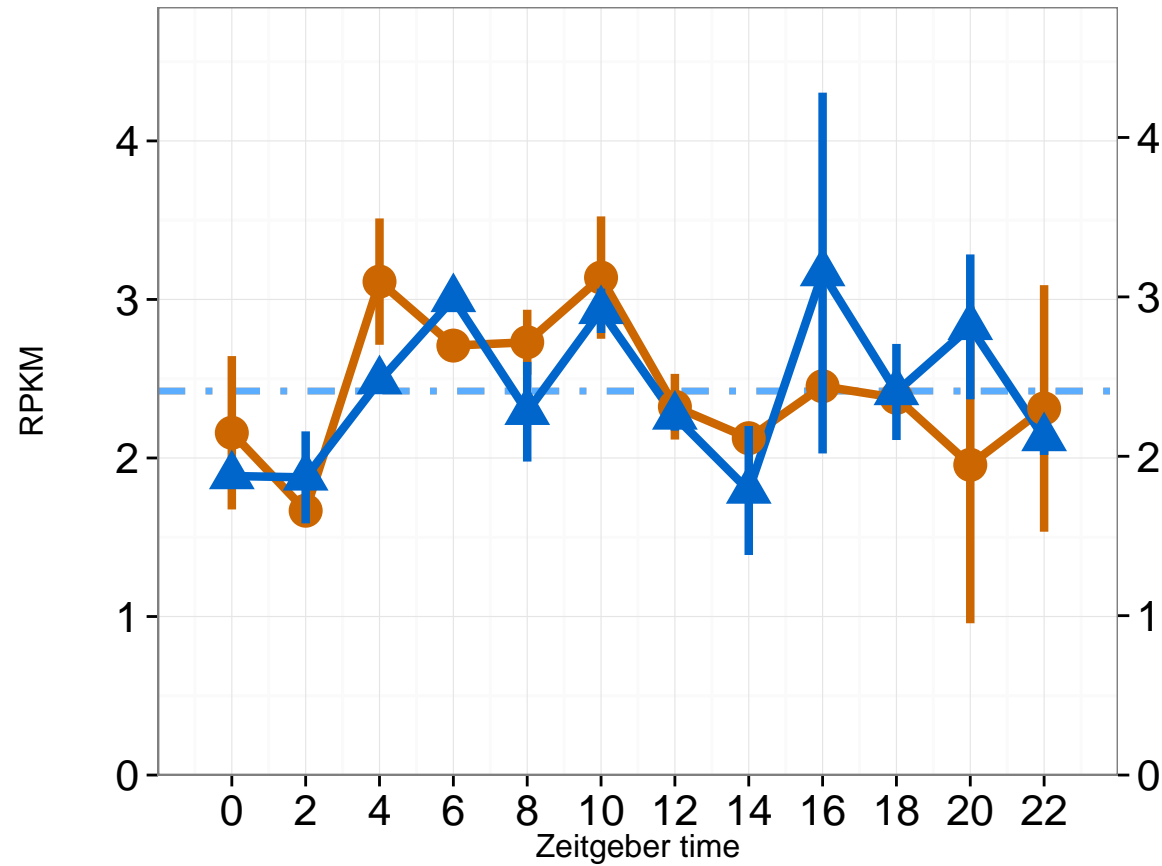

## Abhd15

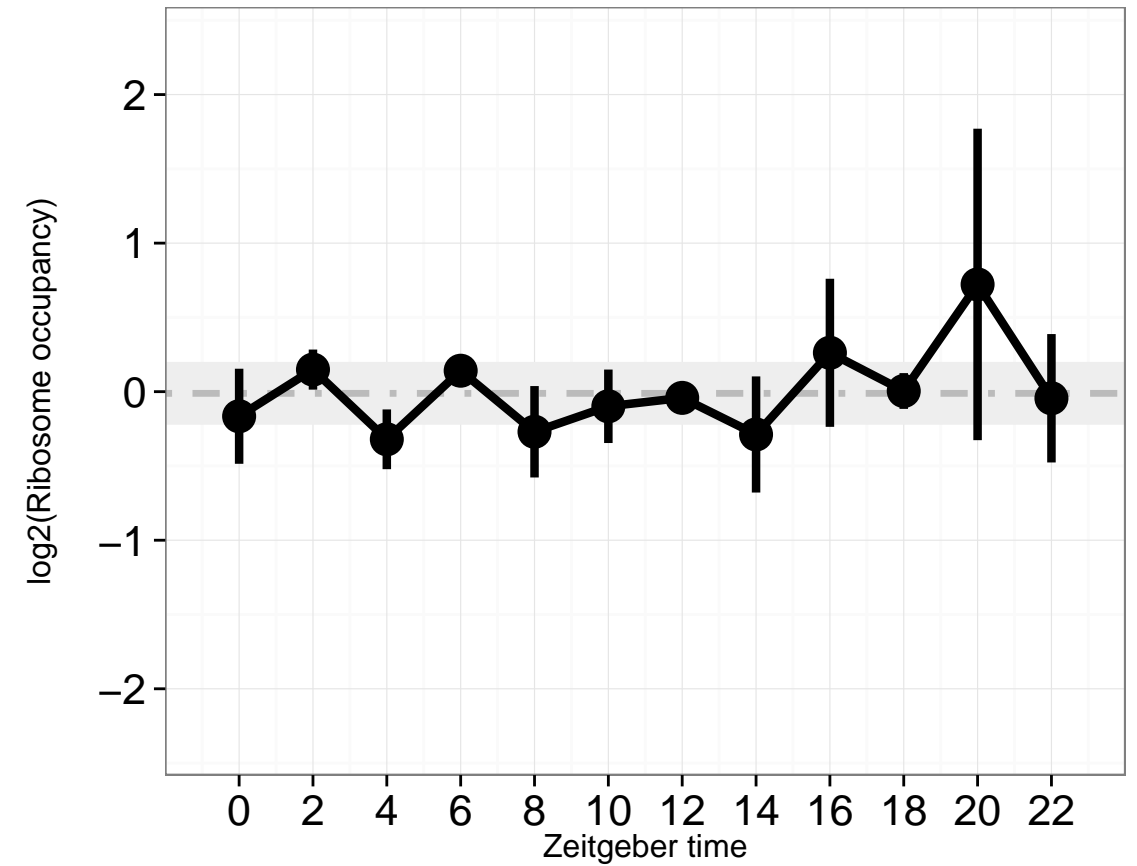

Supplement: Supplementary file 11928 [file 1]

## Eef2

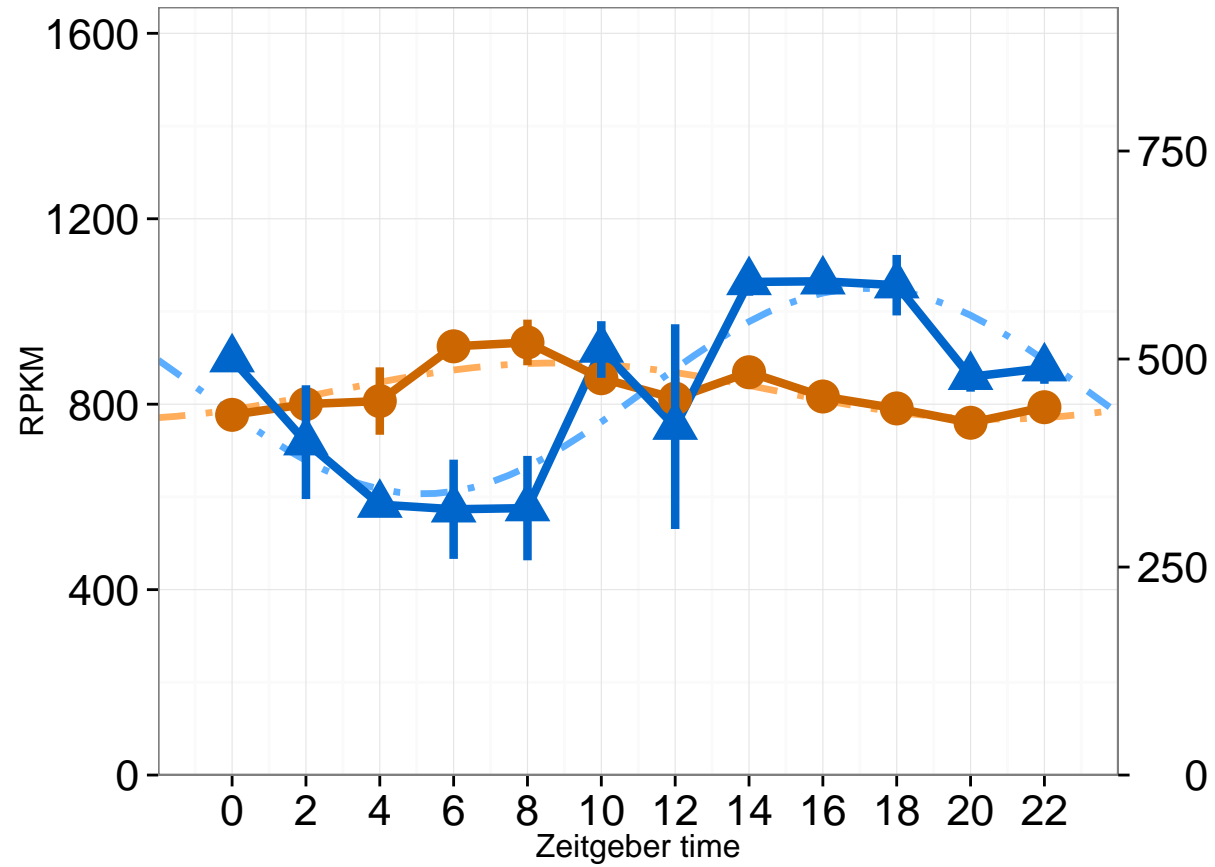

## Eef2

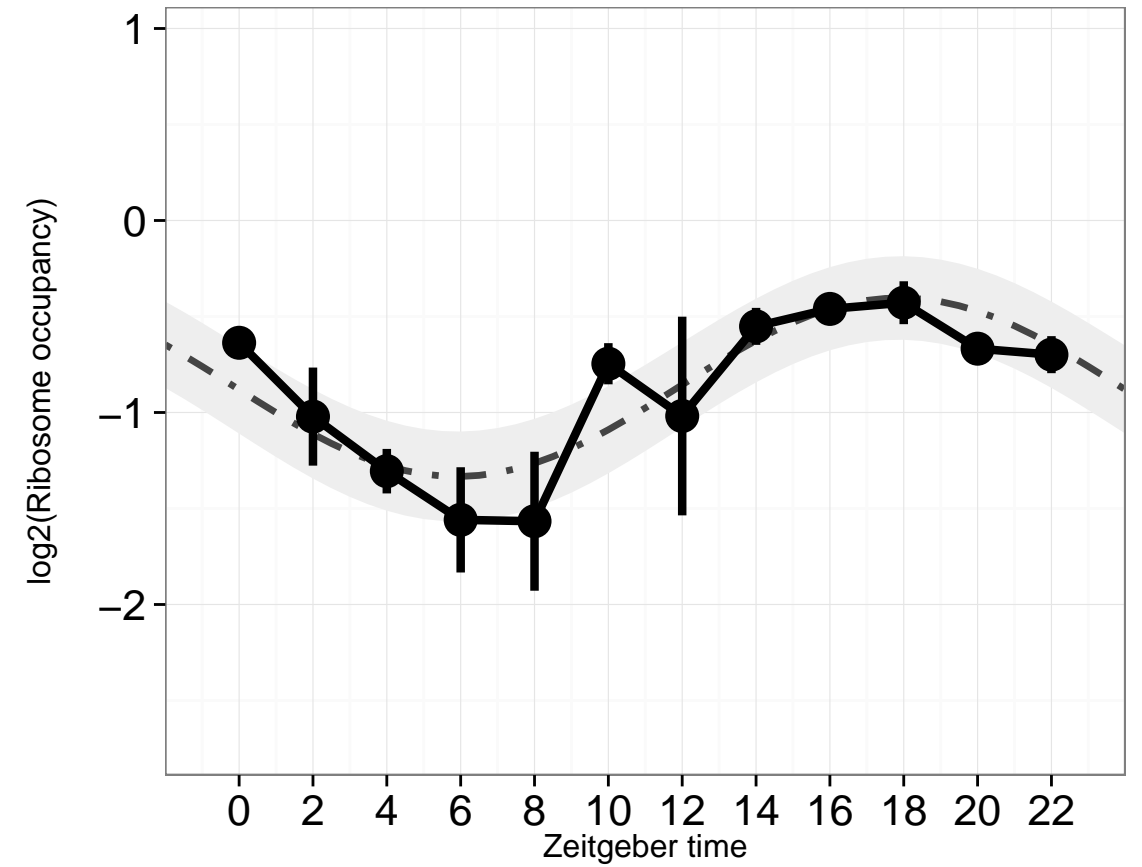

Supplement: Supplementary file 11929 [file 1]

# Kif26b

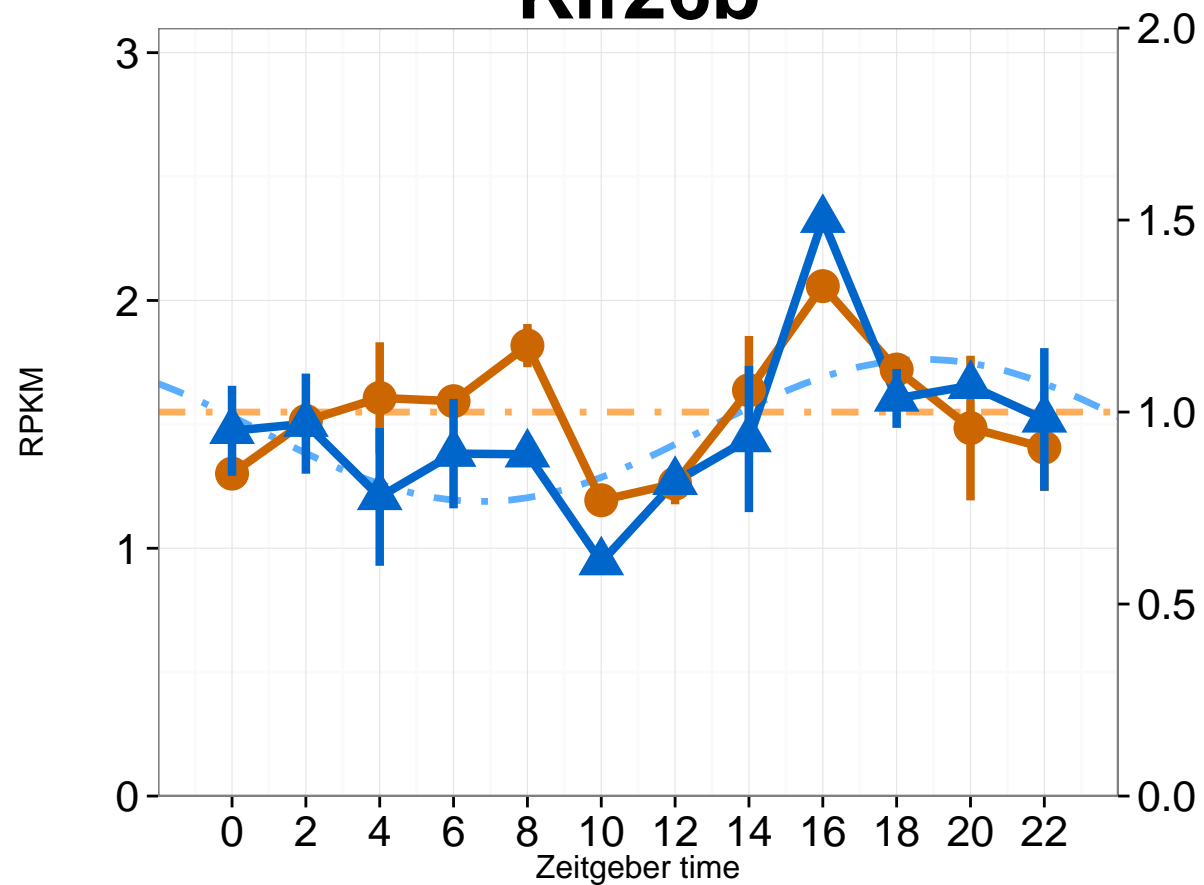

# Kif26b

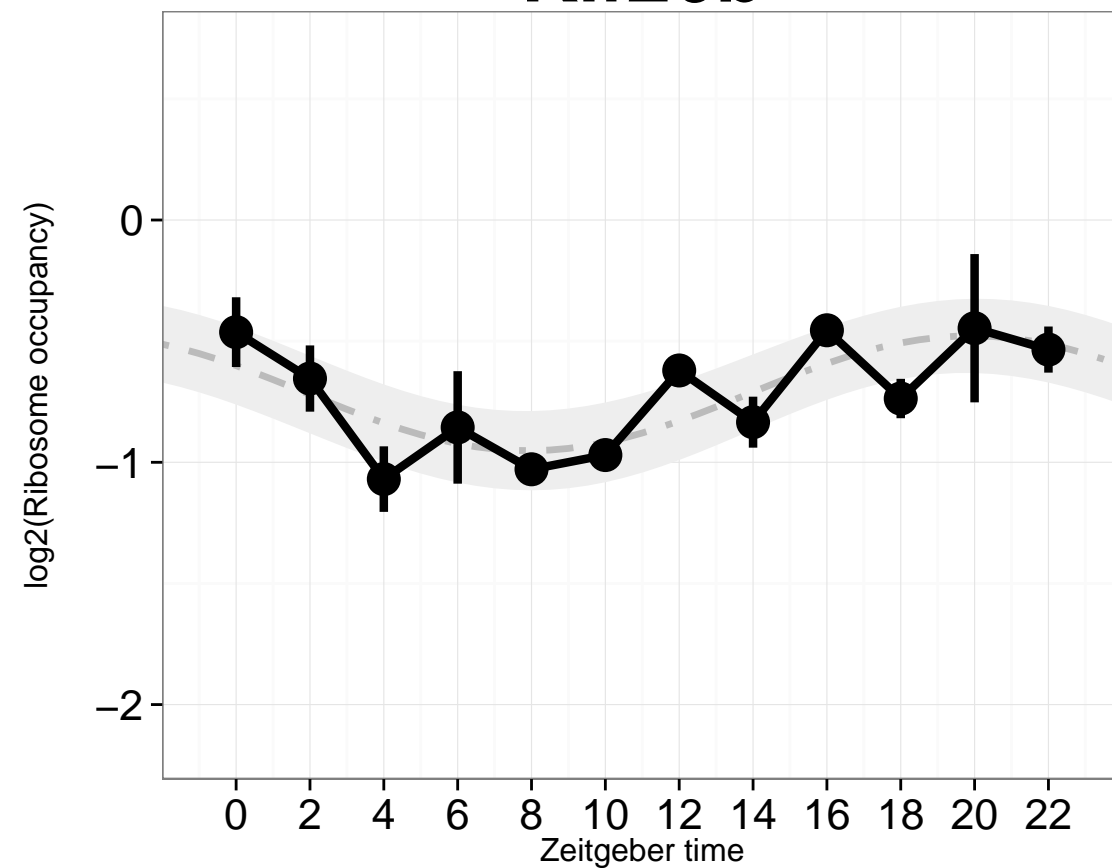

Supplement: Supplementary file 11930 [file 1]

## Mapt

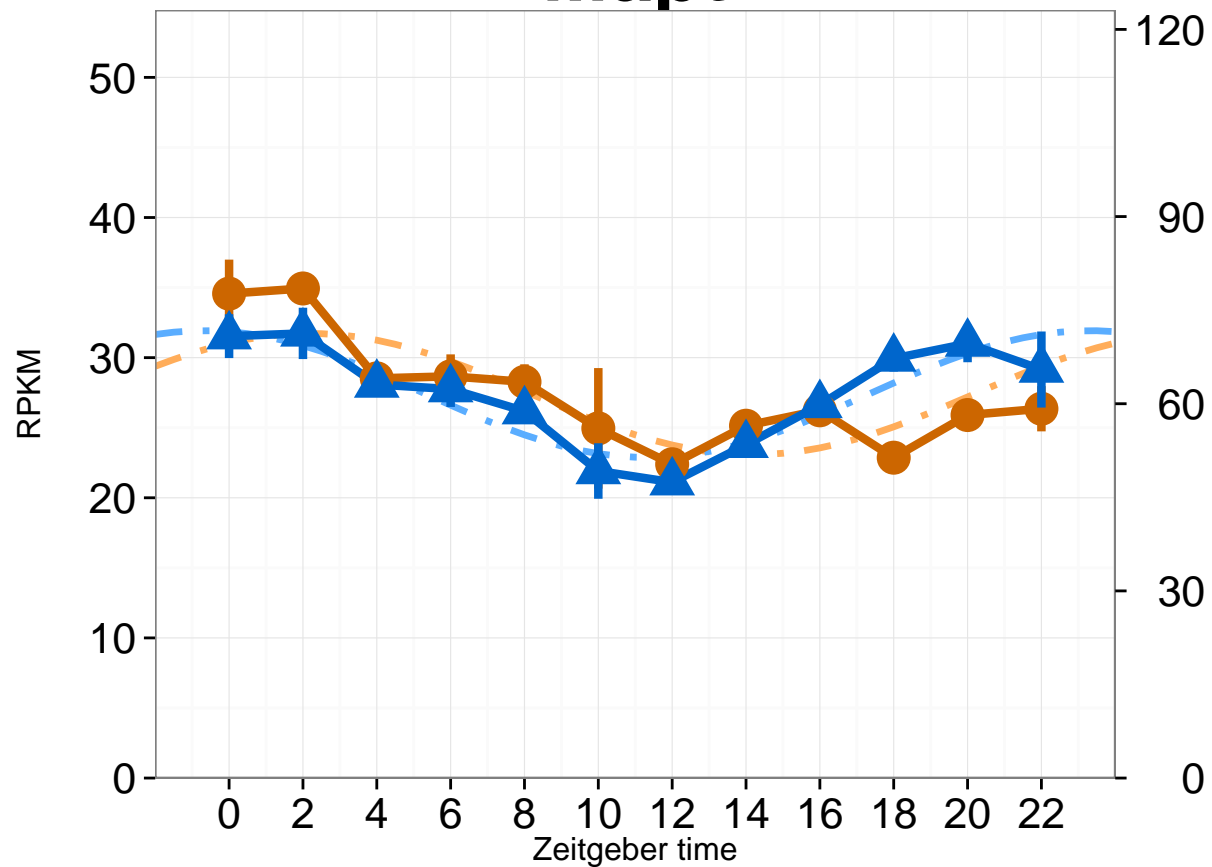

## Mapt

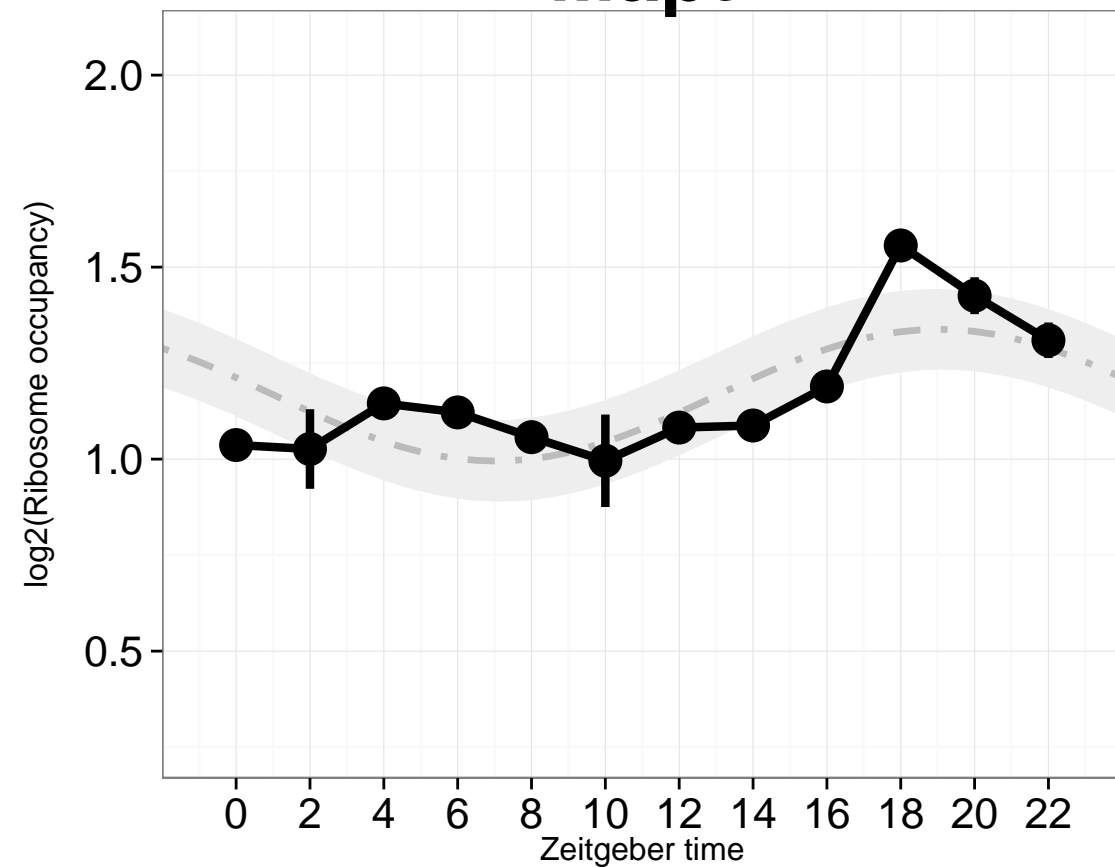

Supplement: Supplementary file 11931 [file 1]

# St6gal1

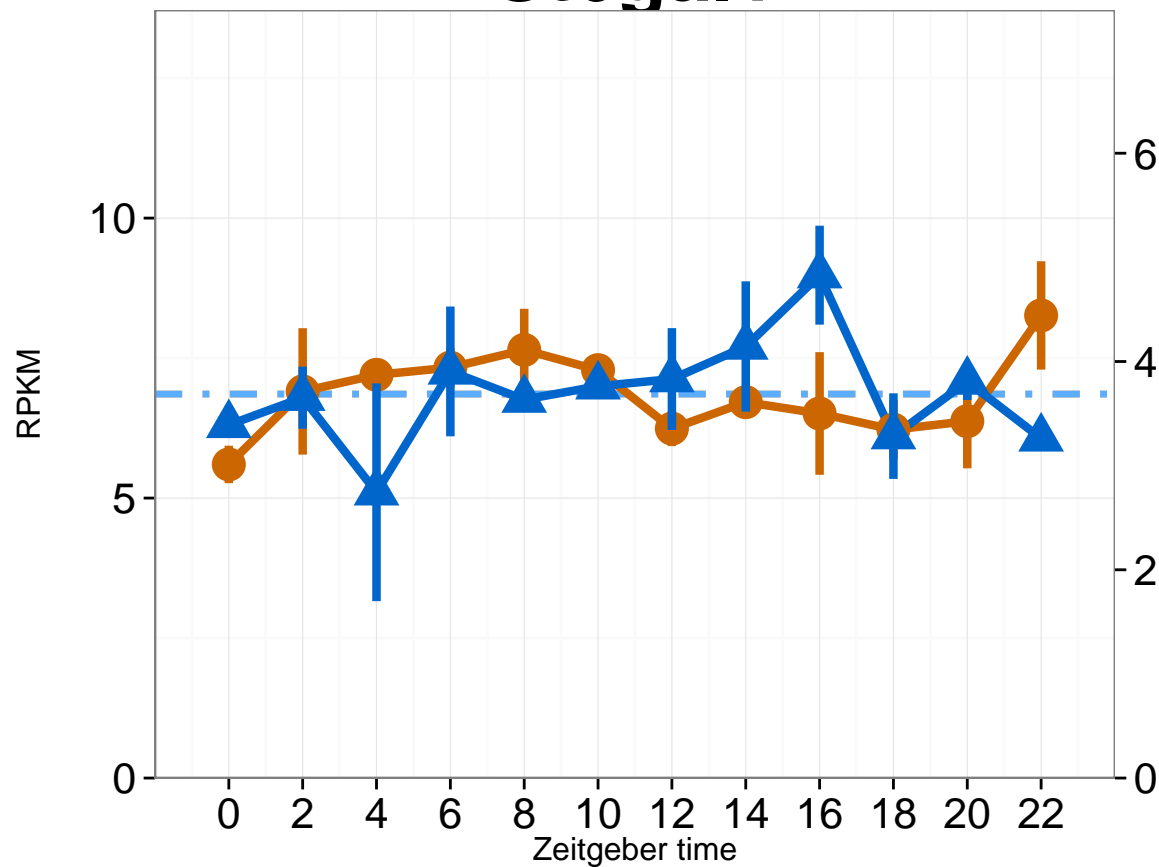

# St6gal1

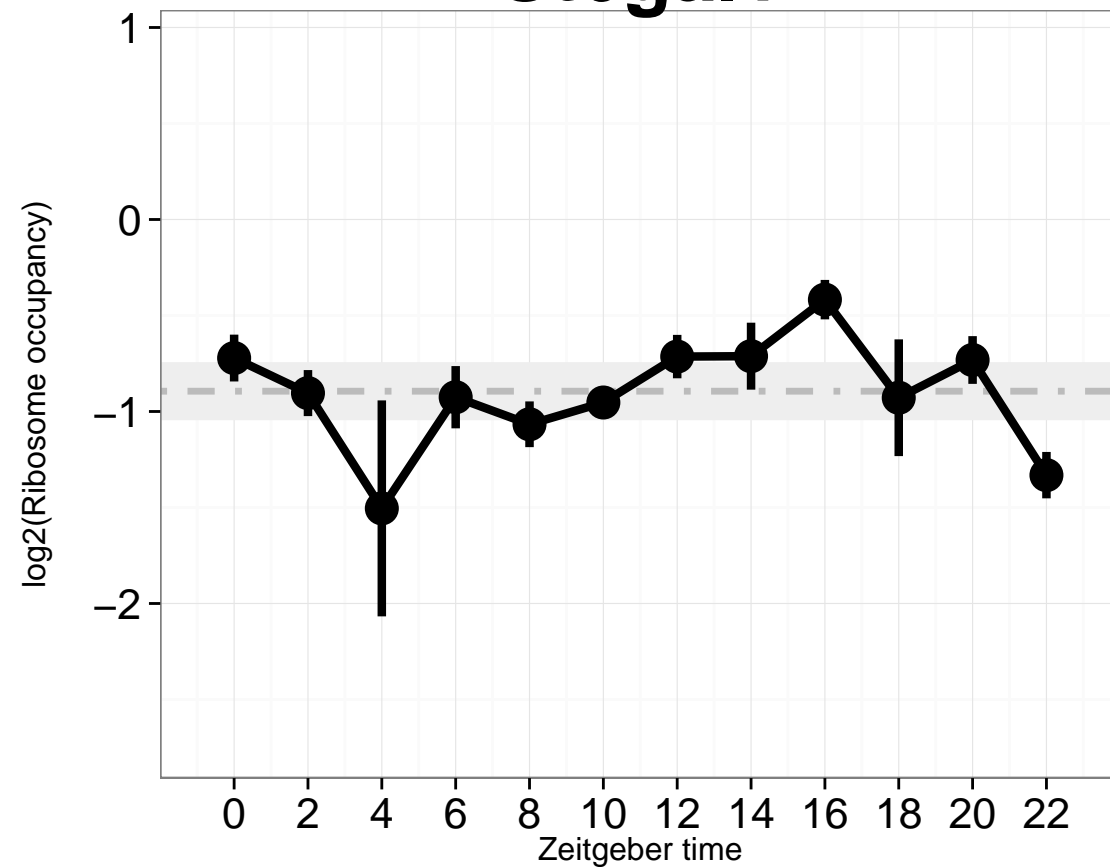

Supplement: Supplementary file 11932 [file 1]

# Zfp169

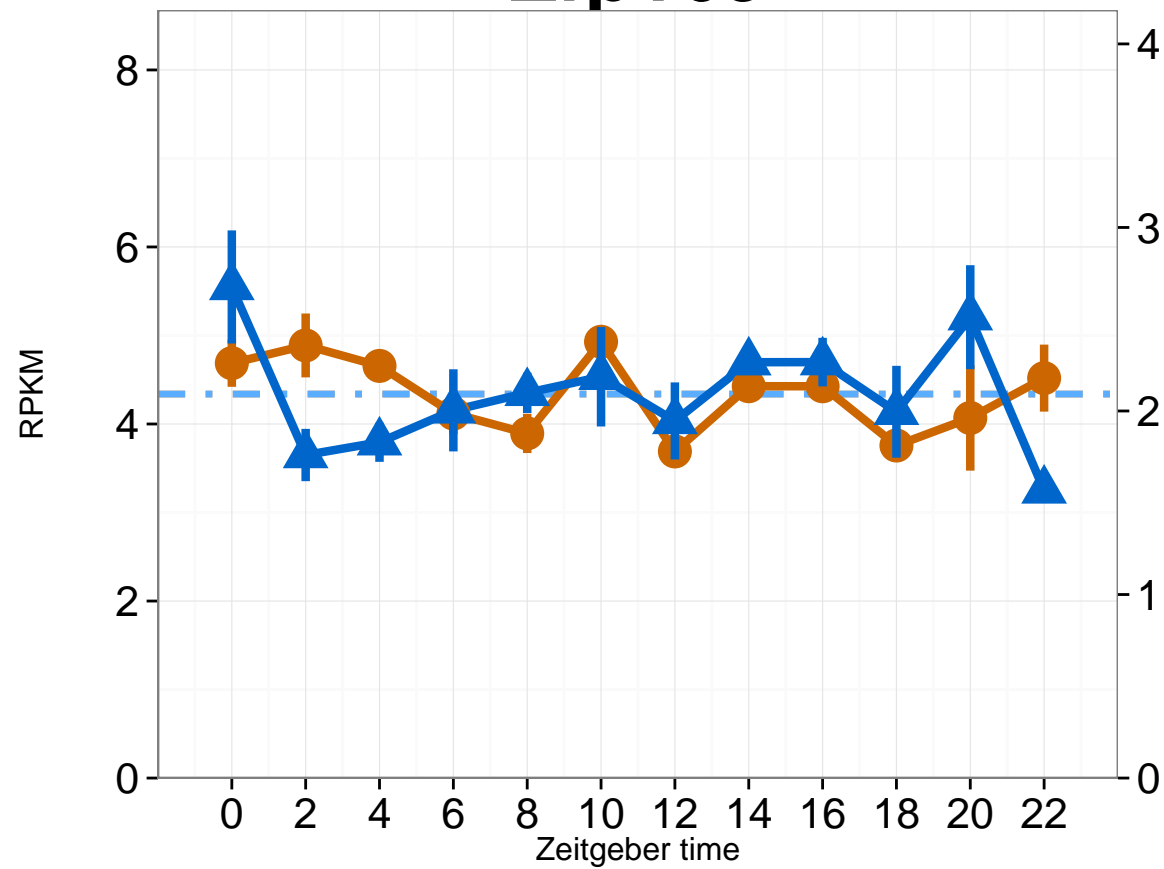

# Zfp169

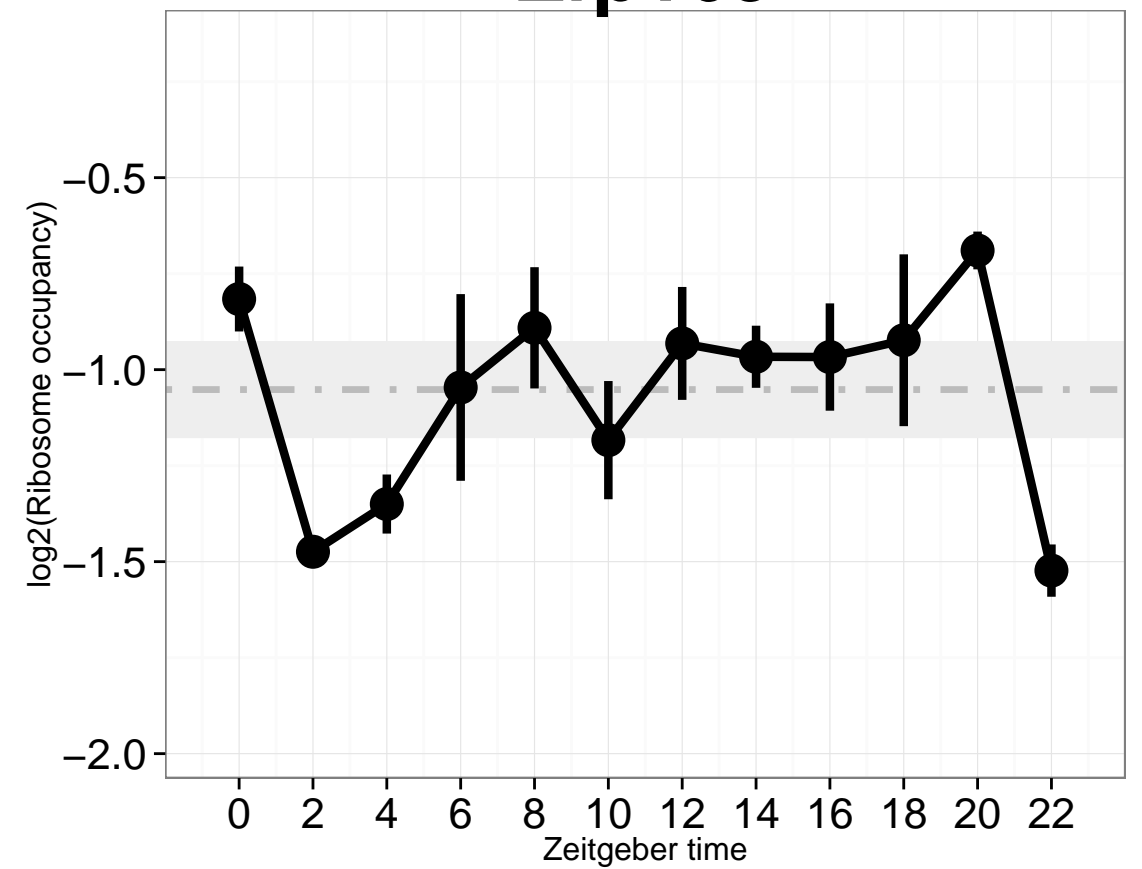

Supplement: Supplementary file 11933 [file 1]

# Zfp131

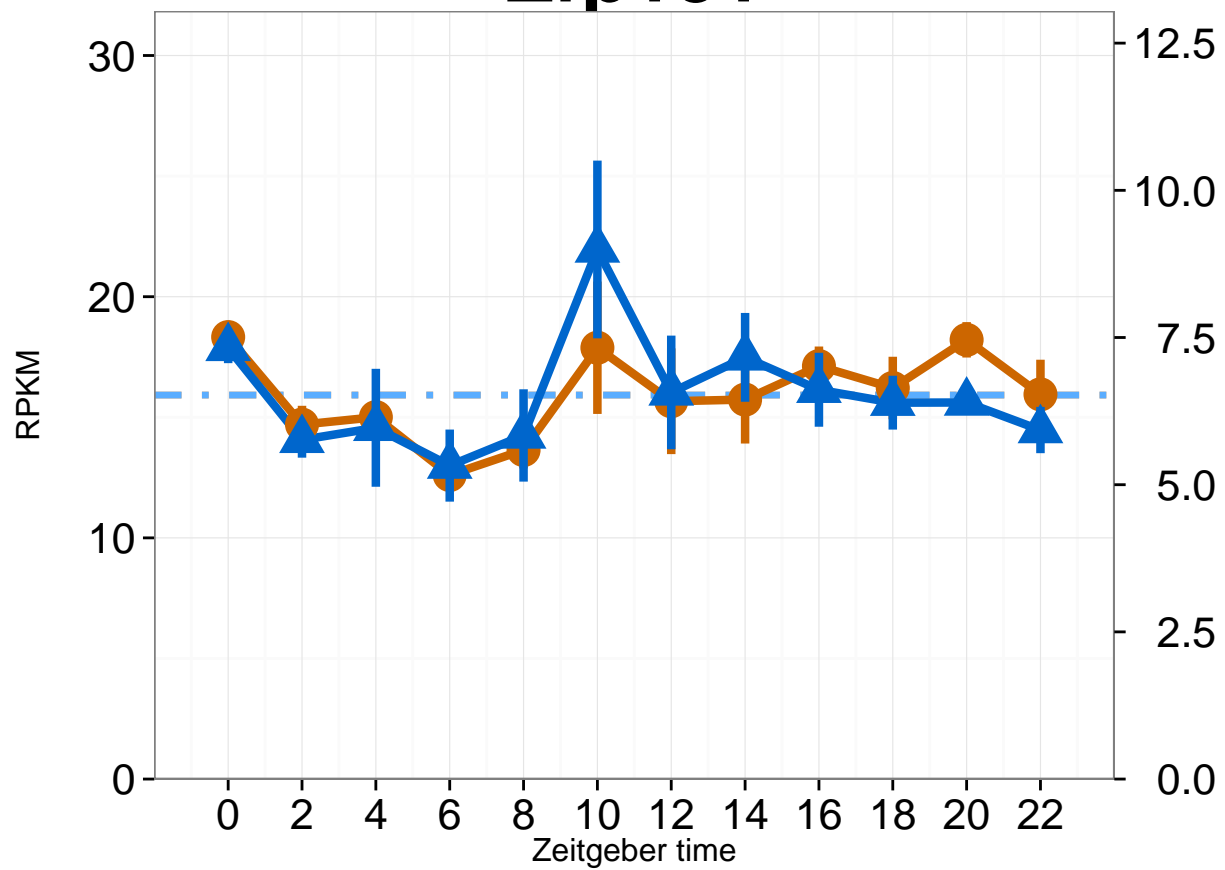

# Zfp131

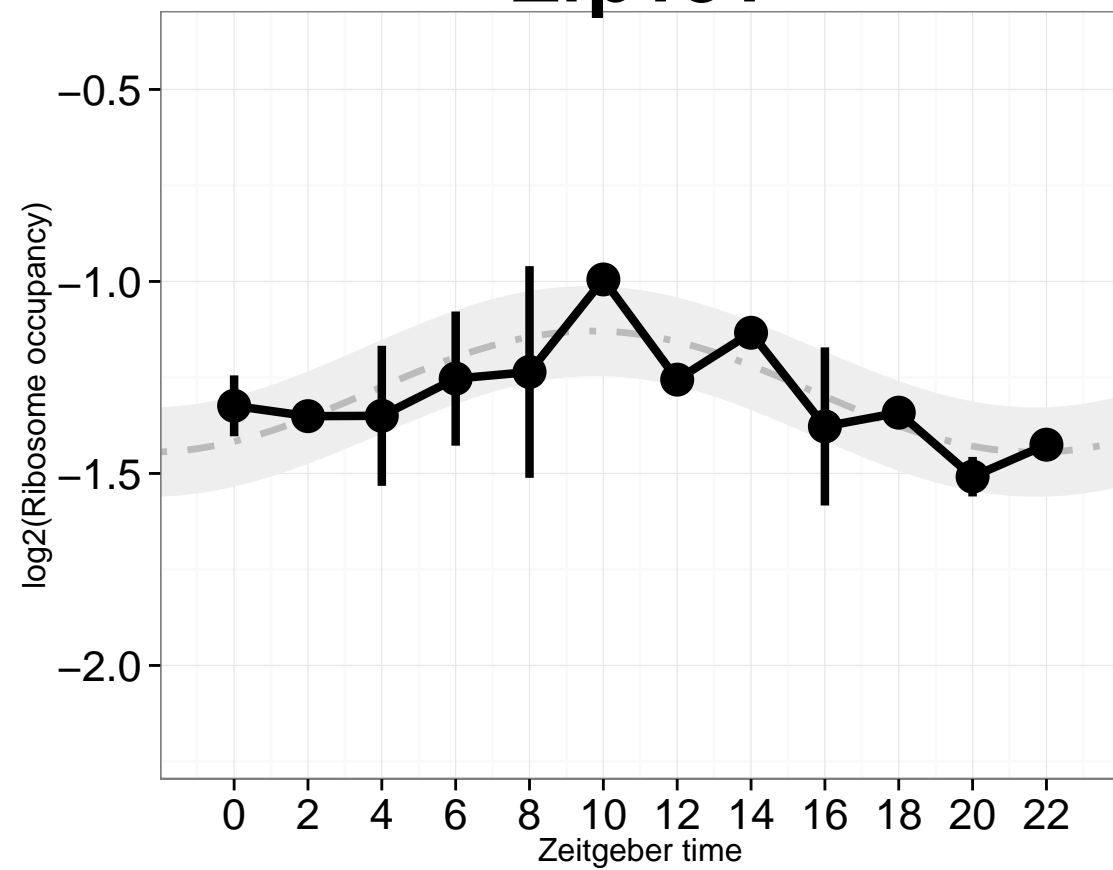

Supplement: Supplementary file 11934 [file 1]

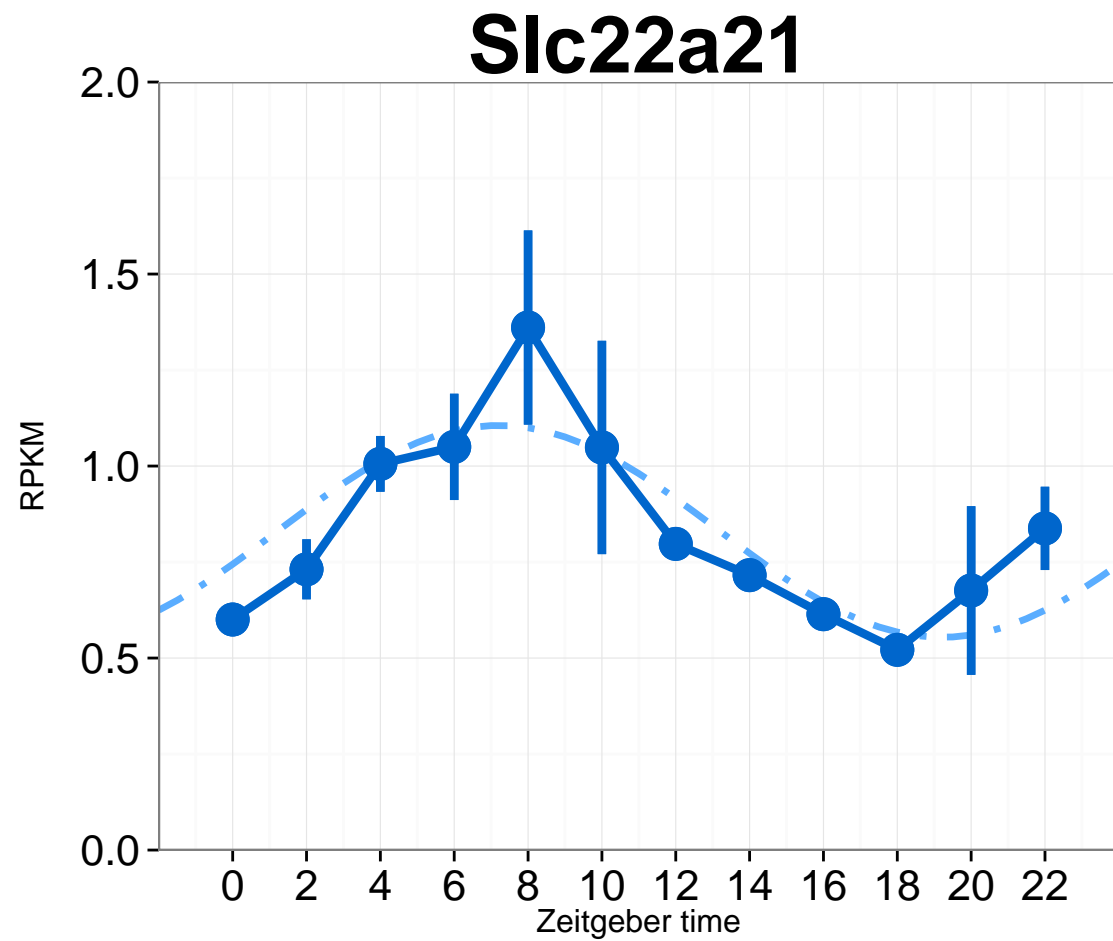

### Slc22a21 log2(Ribosome occupanc

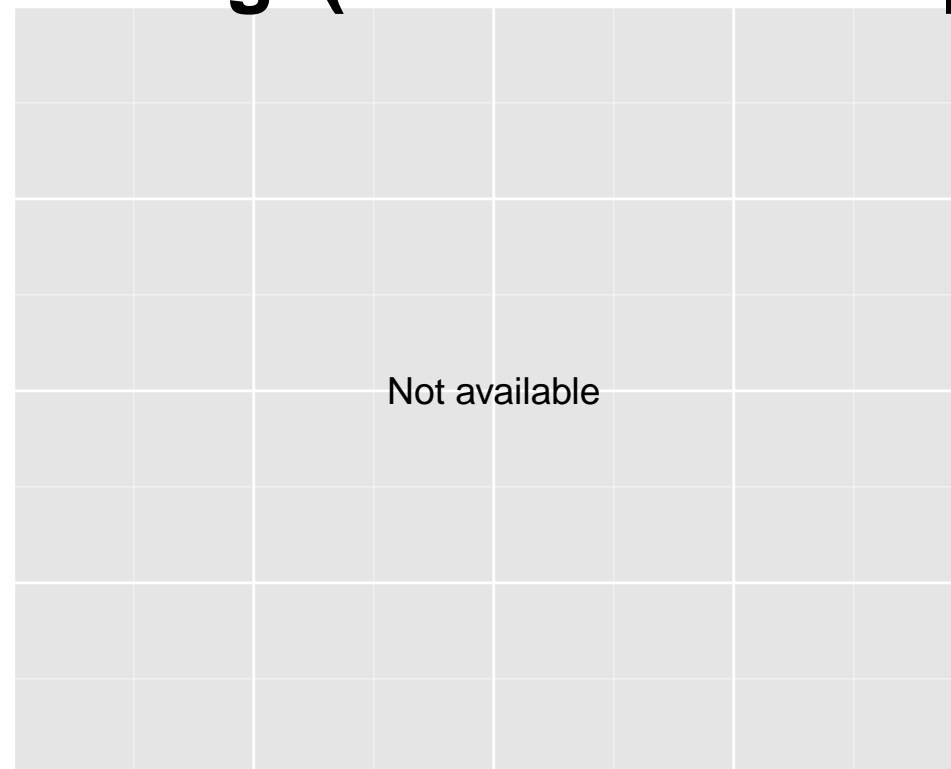

Supplement: Supplementary file 11935 [file 1]

**Sycn TR**

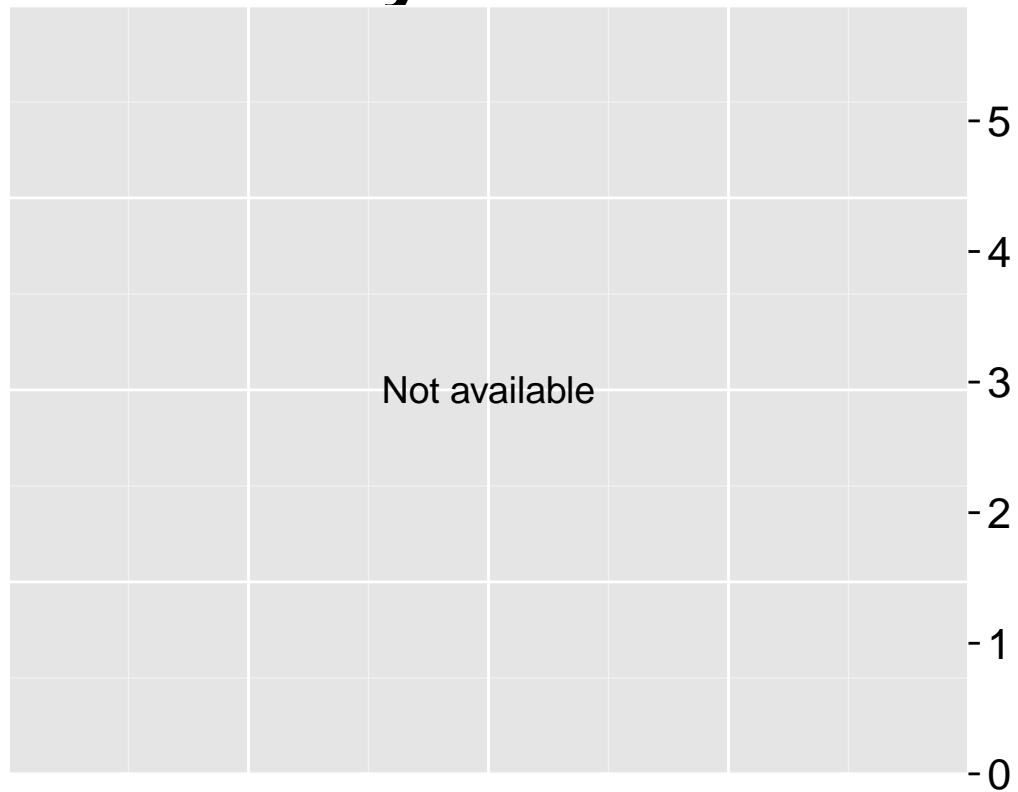

**Sycn log2(Ribosome occupancy)**

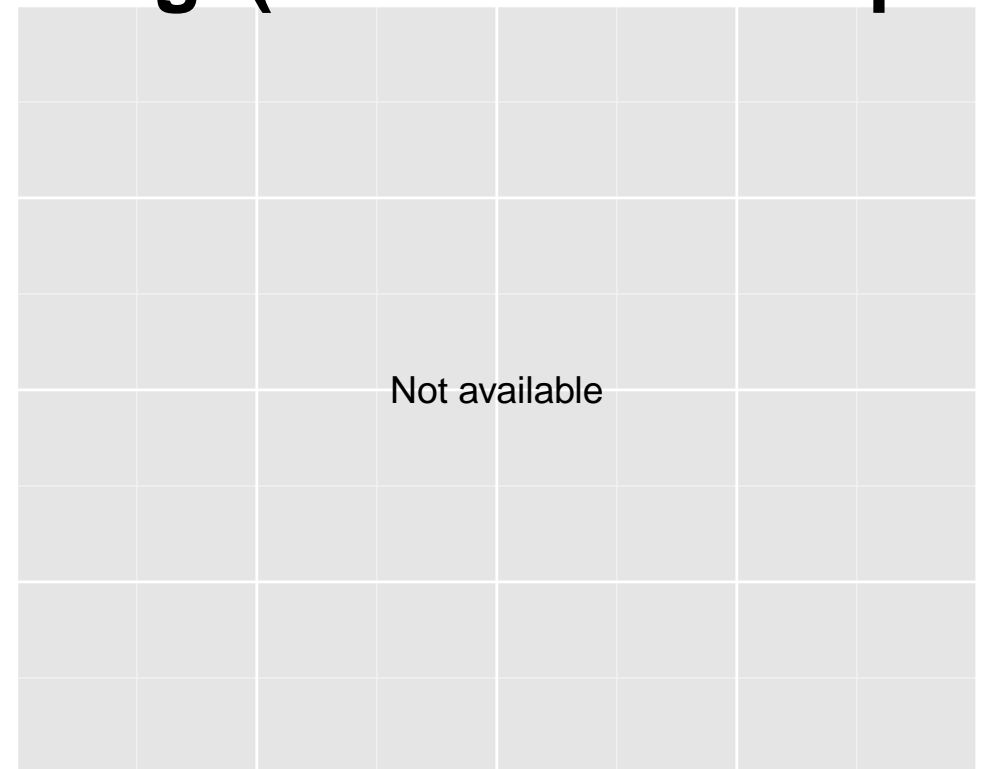

Supplement: Supplementary file 11936 [file 1]

## Ube2b

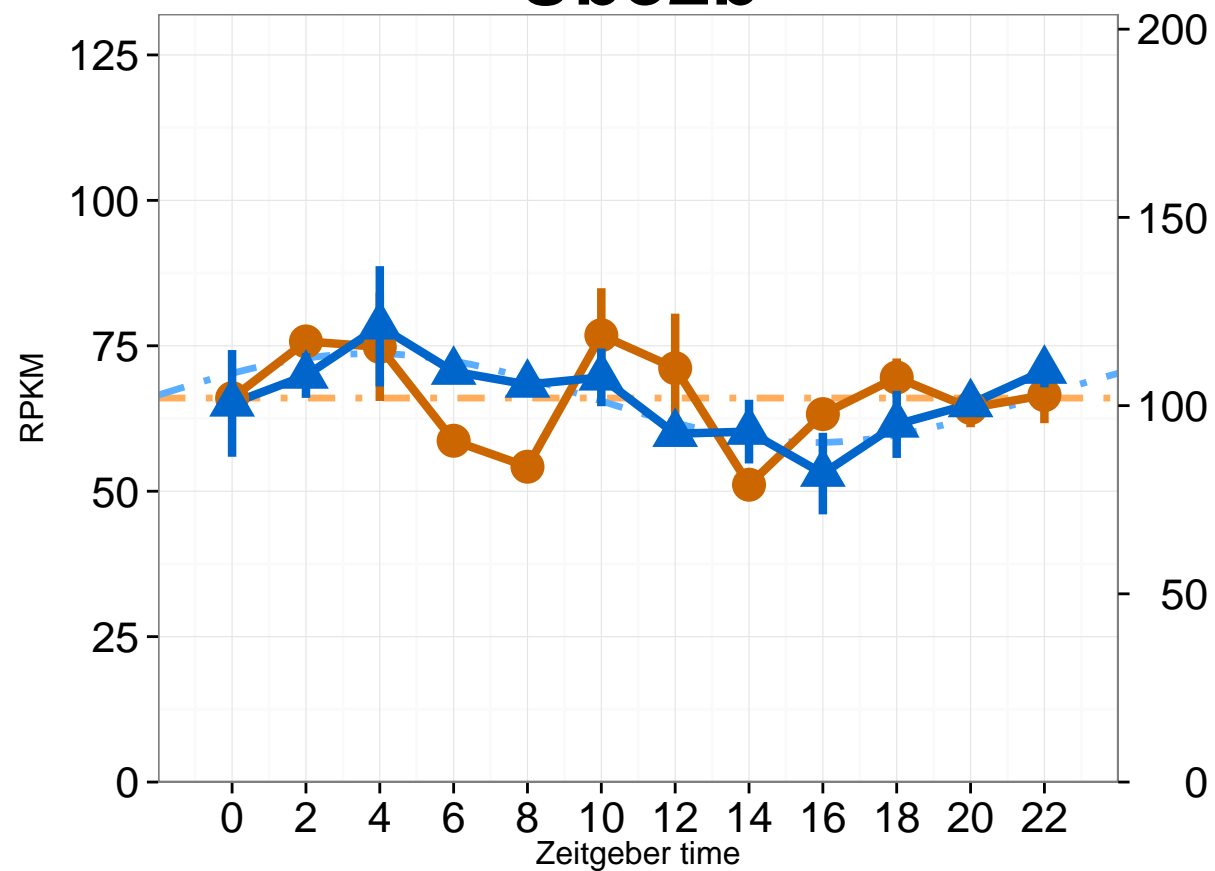

## Ube2b

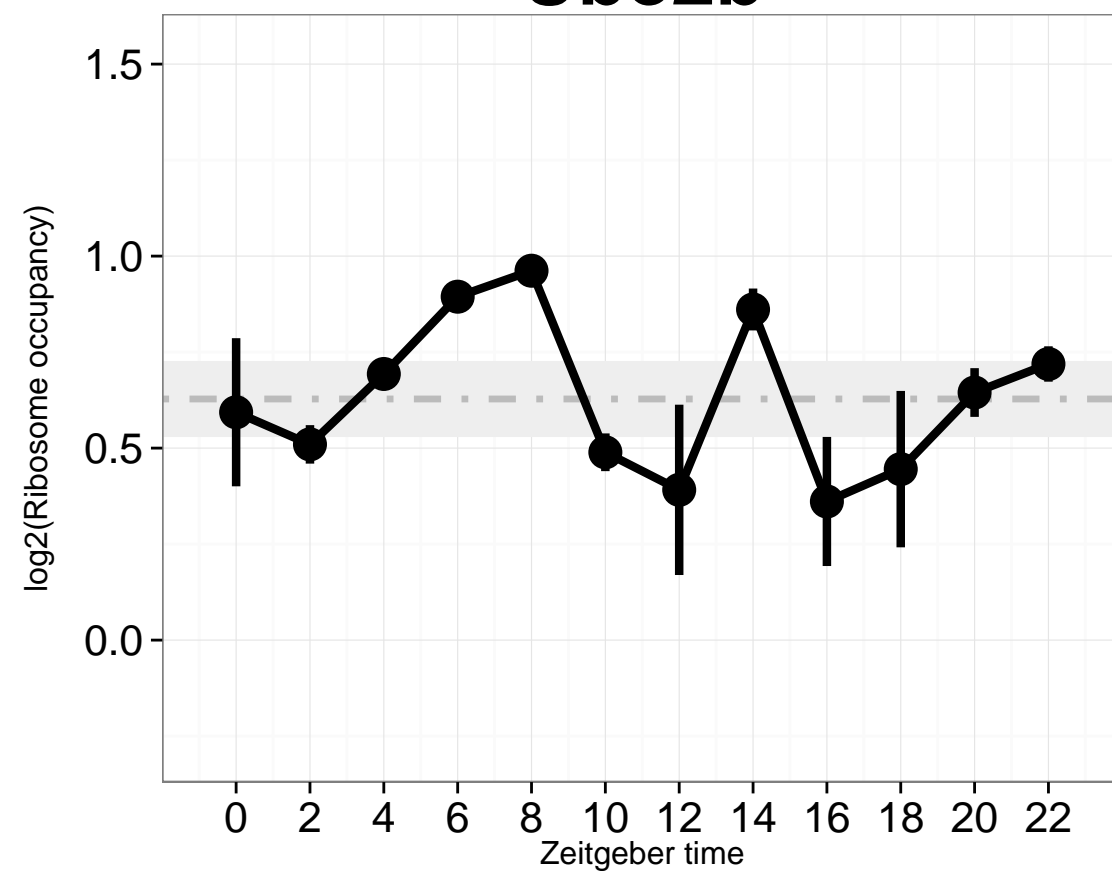

Supplement: Supplementary file 11937 [file 1]

## U2af1

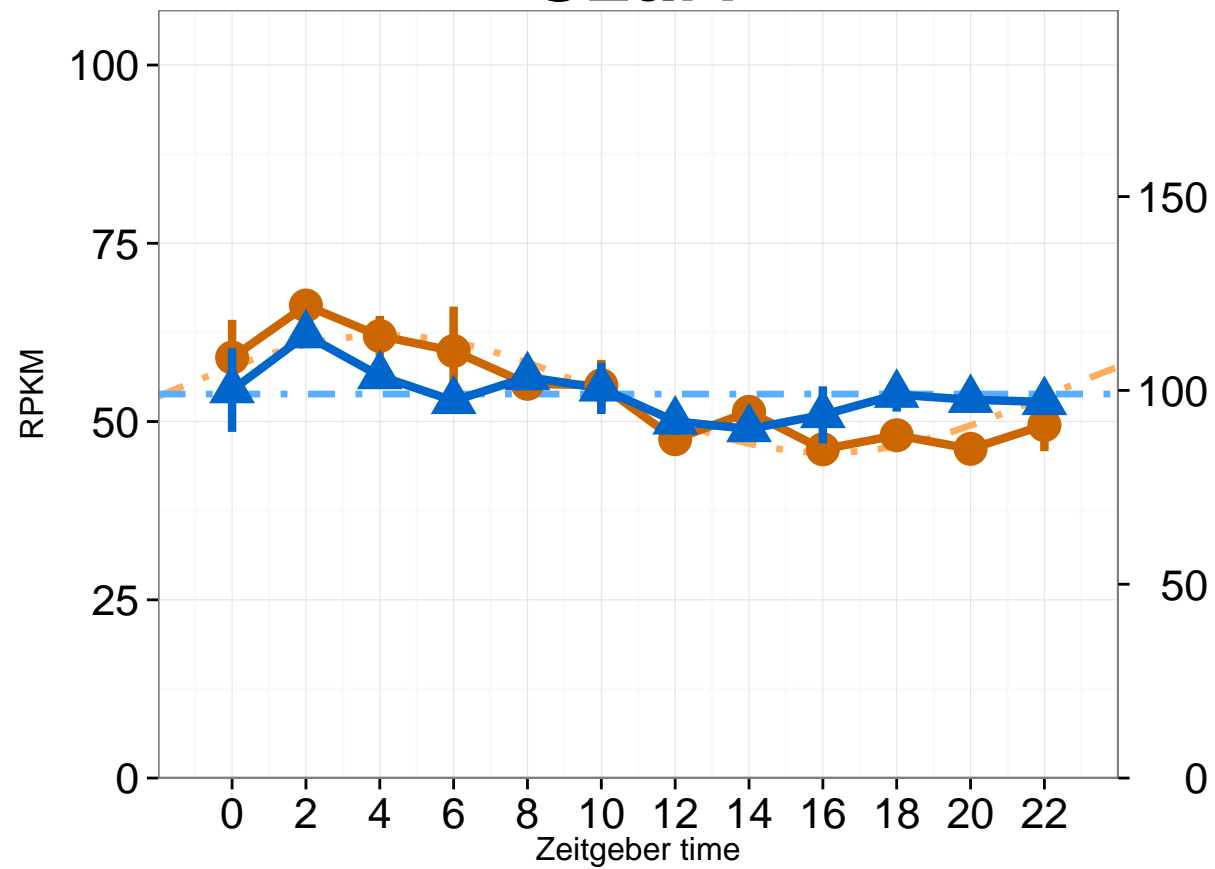

## U2af1

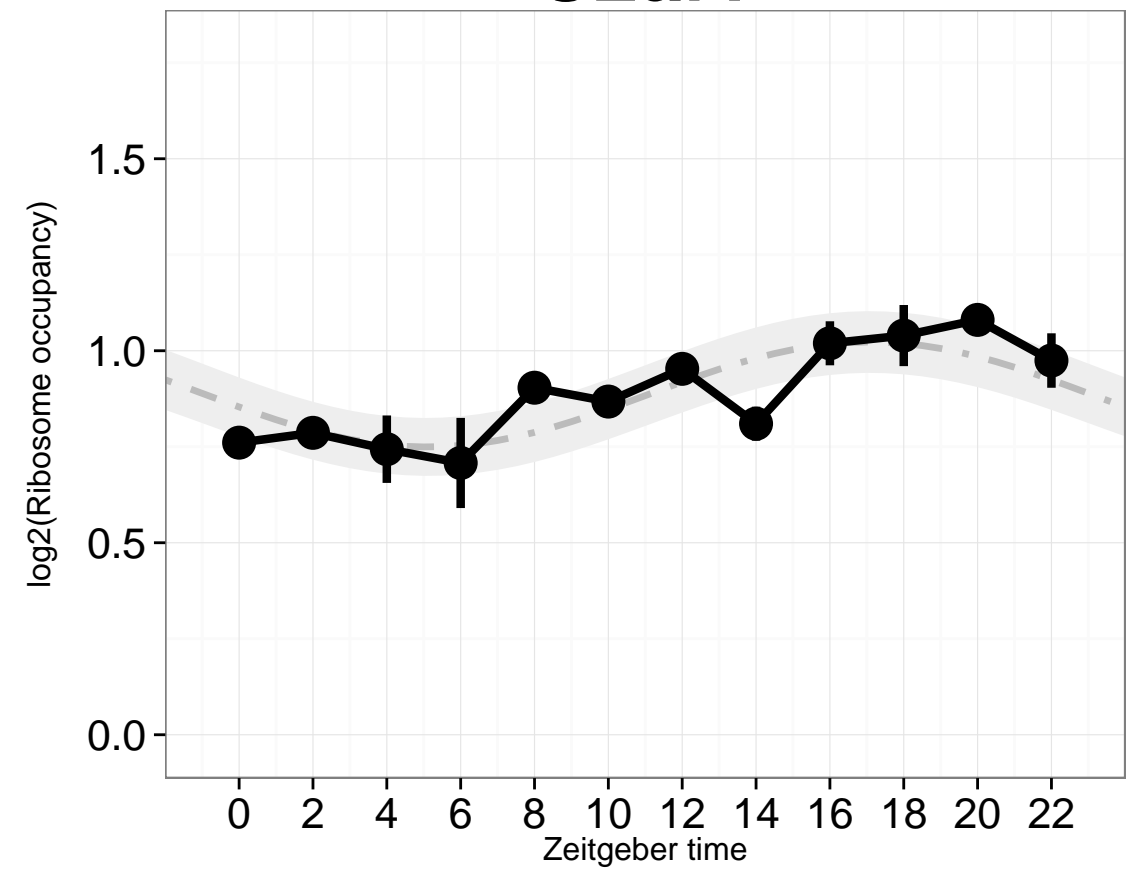

Supplement: Supplementary file 11938 [file 1]

## Mmp14

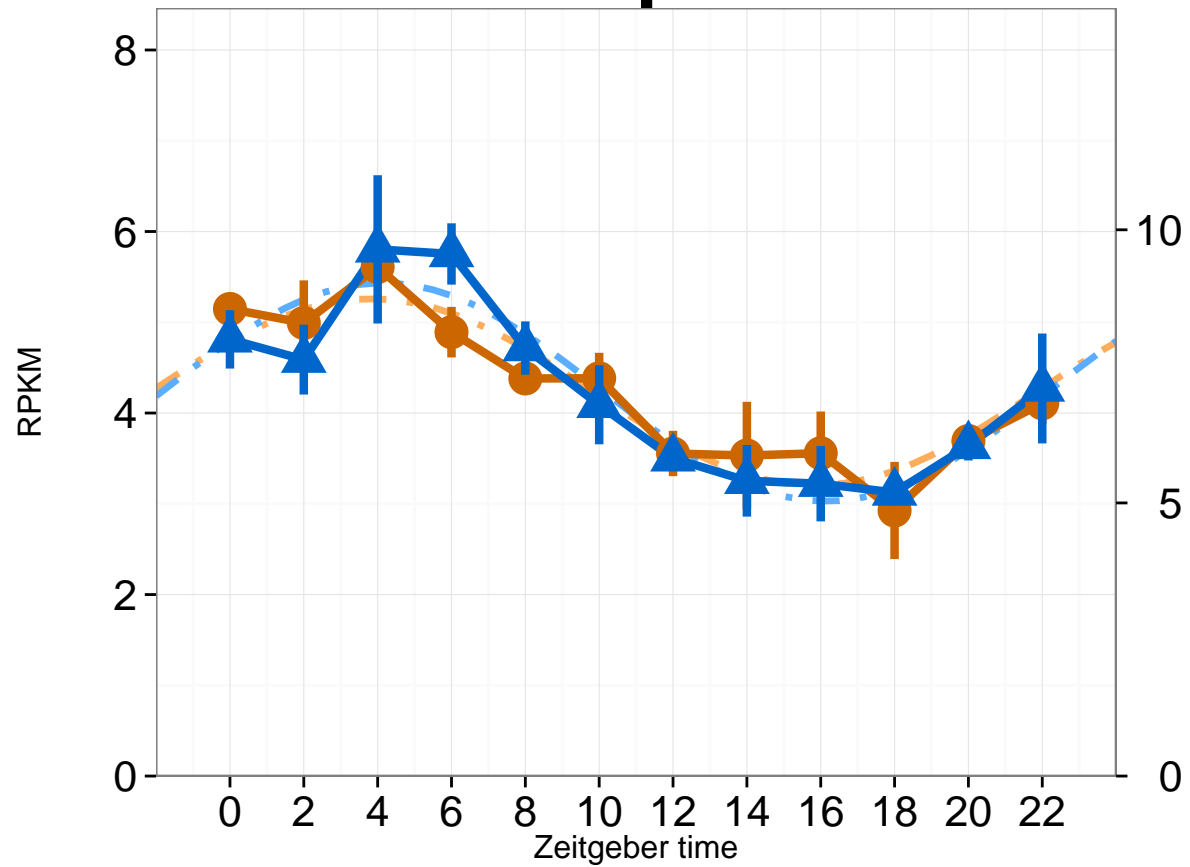

## Mmp14

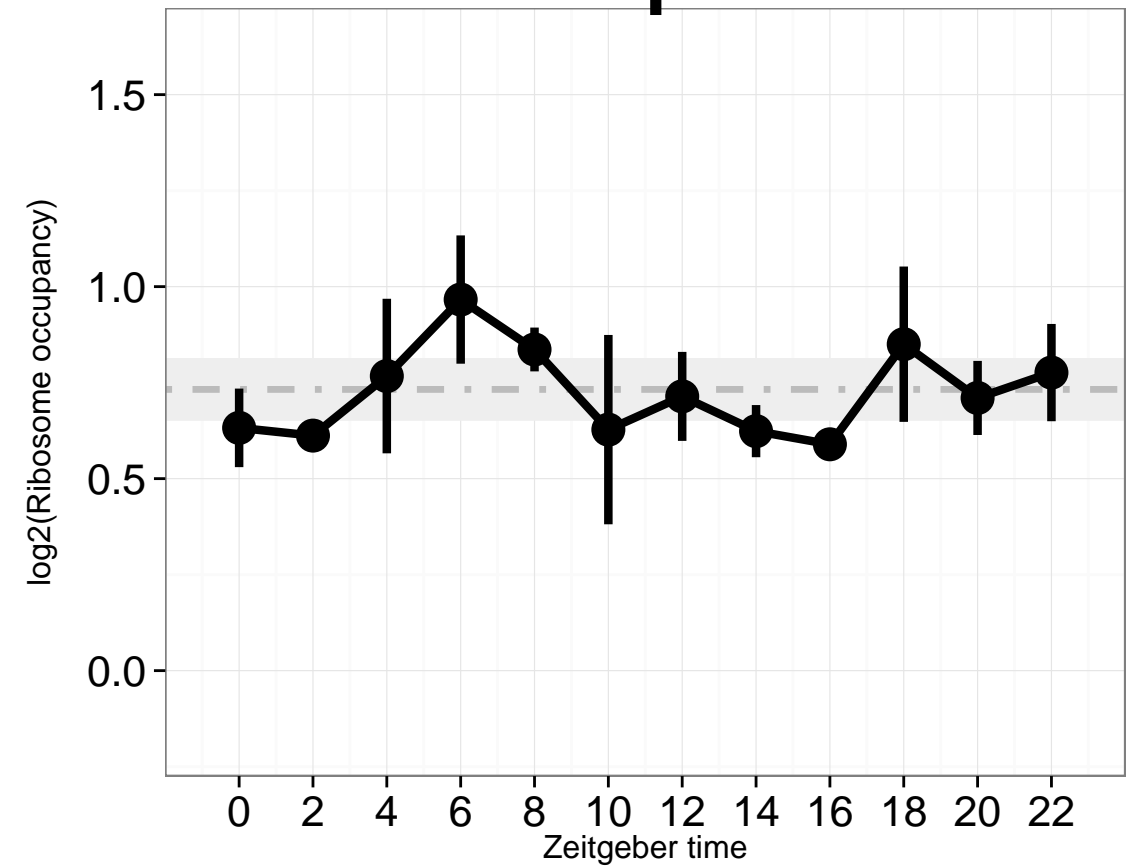

Supplement: Supplementary file 11939 [file 1]

## Tbc1d15

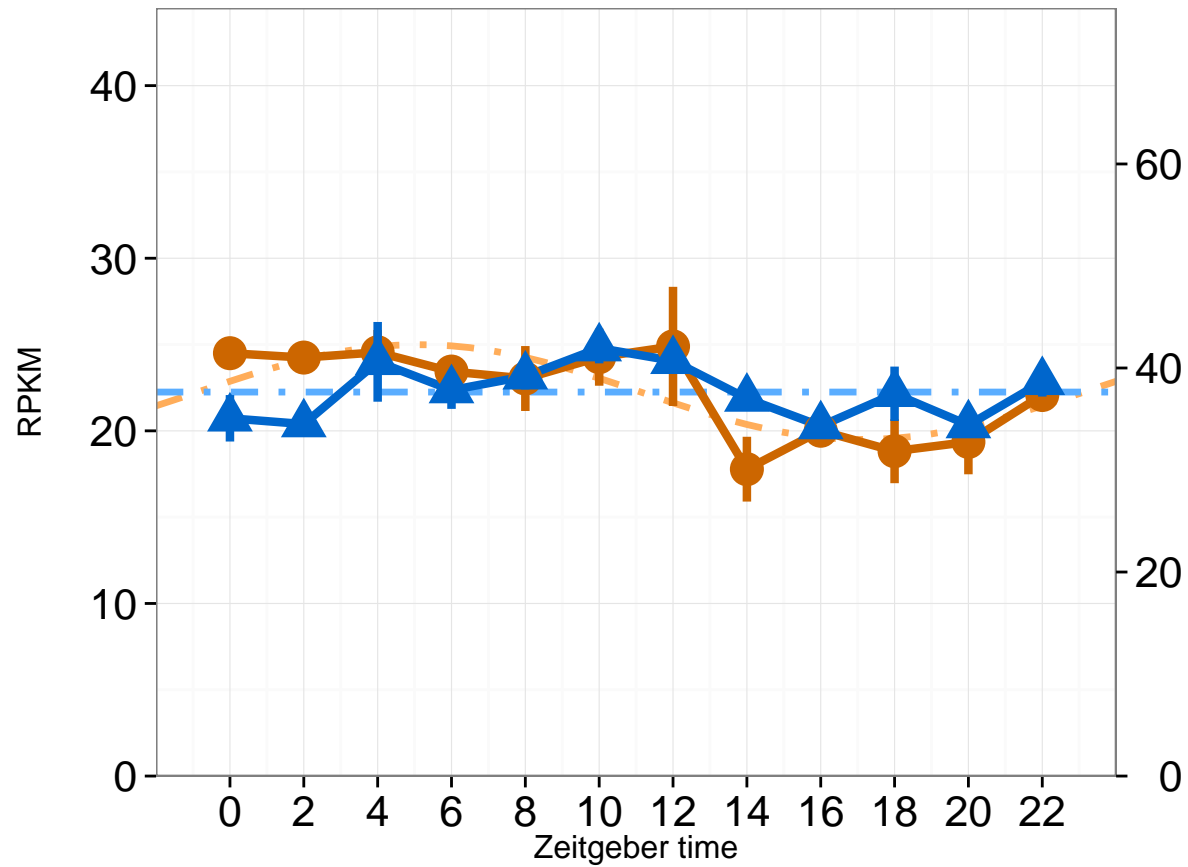

## Tbc1d15

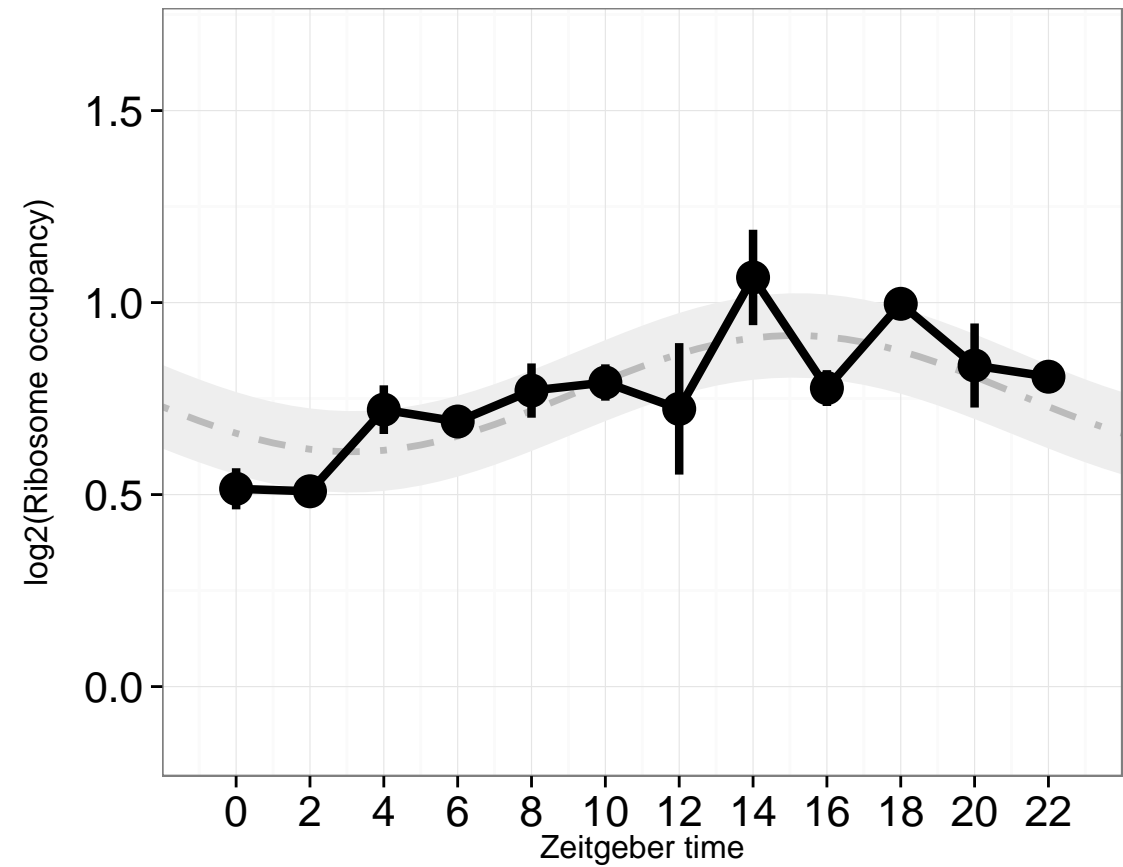

Supplement: Supplementary file 11940 [file 1]

## Ptgis

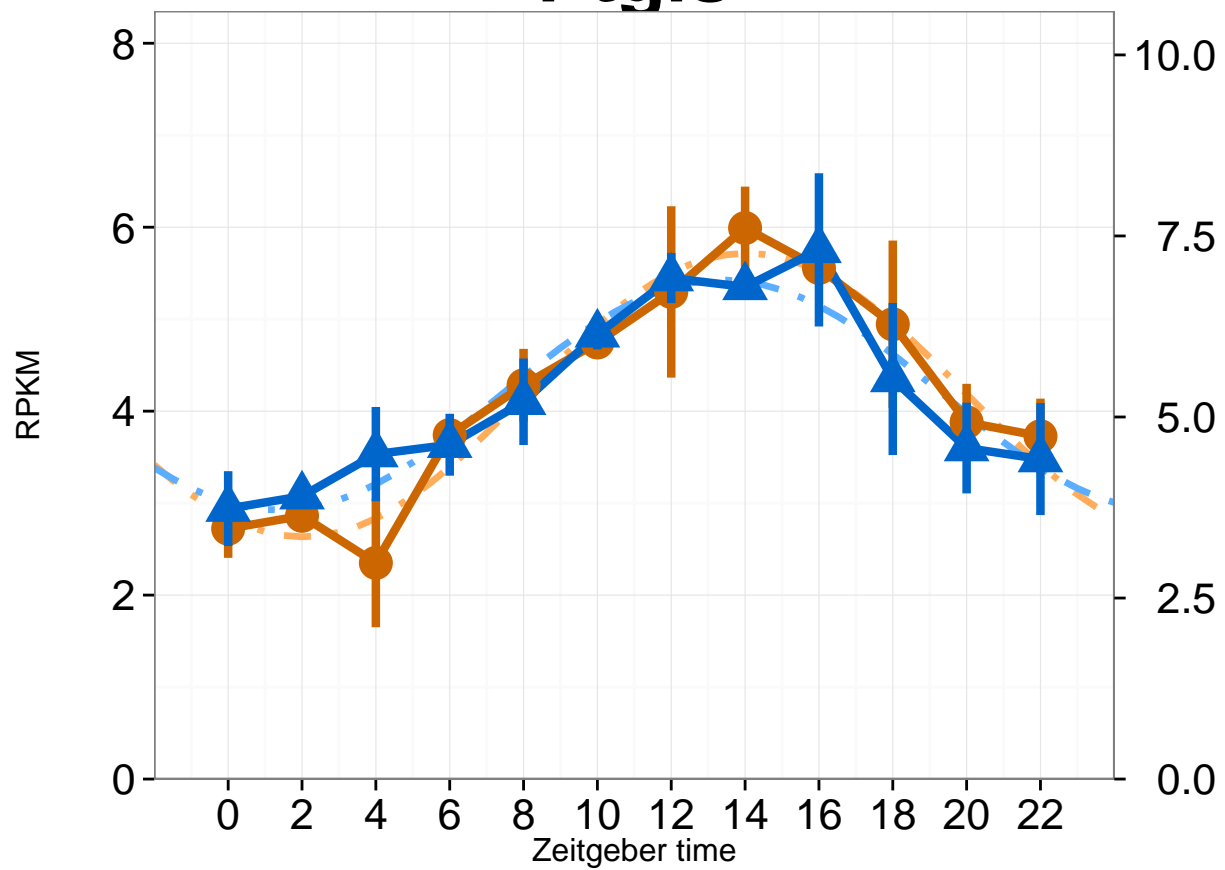

## Ptgis

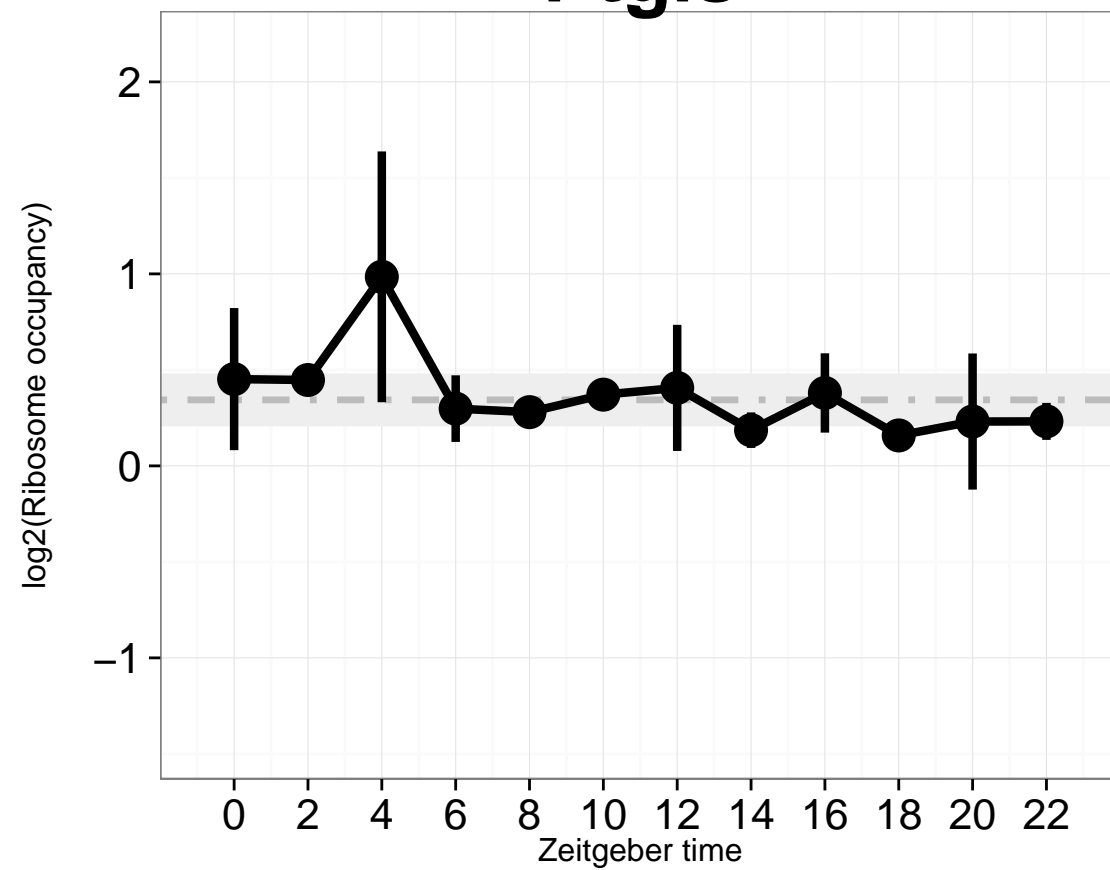

Supplement: Supplementary file 11941 [file 1]

## Dnm1

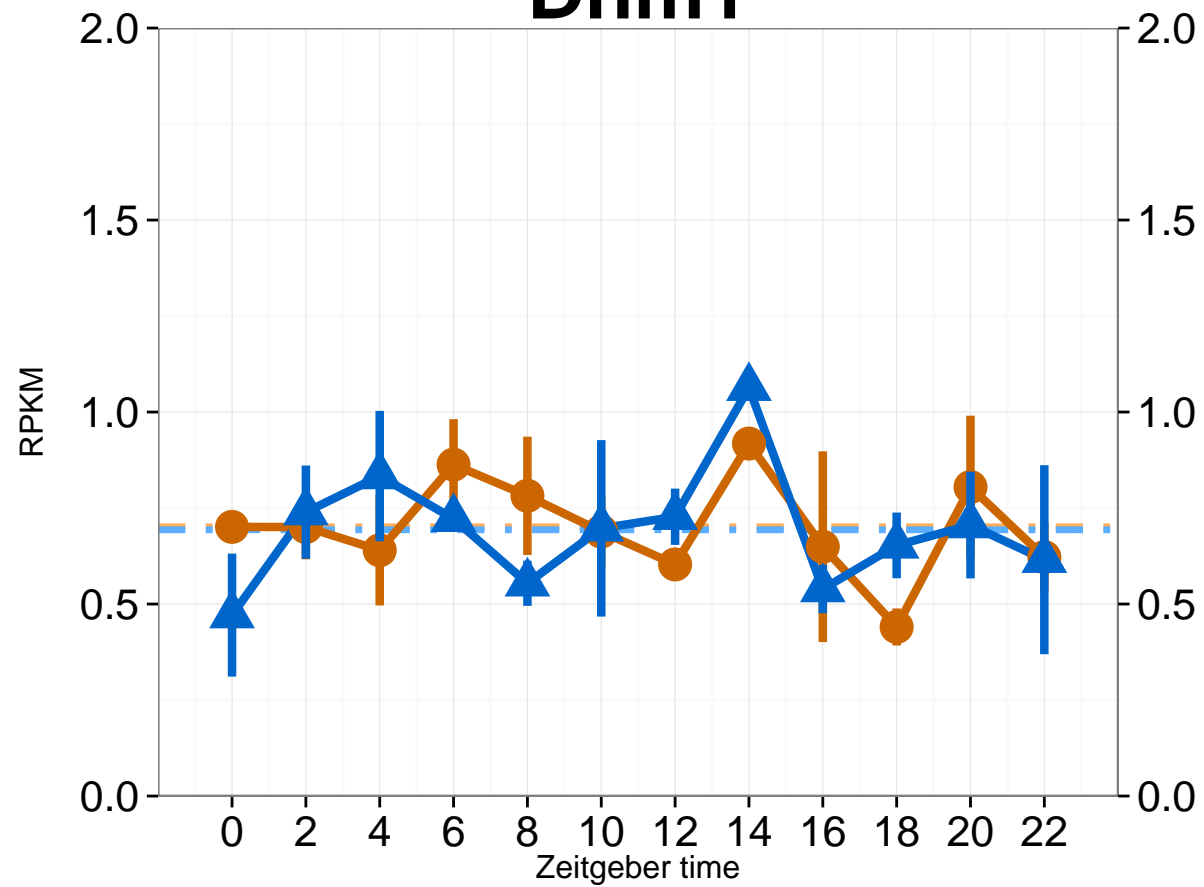

## Dnm1

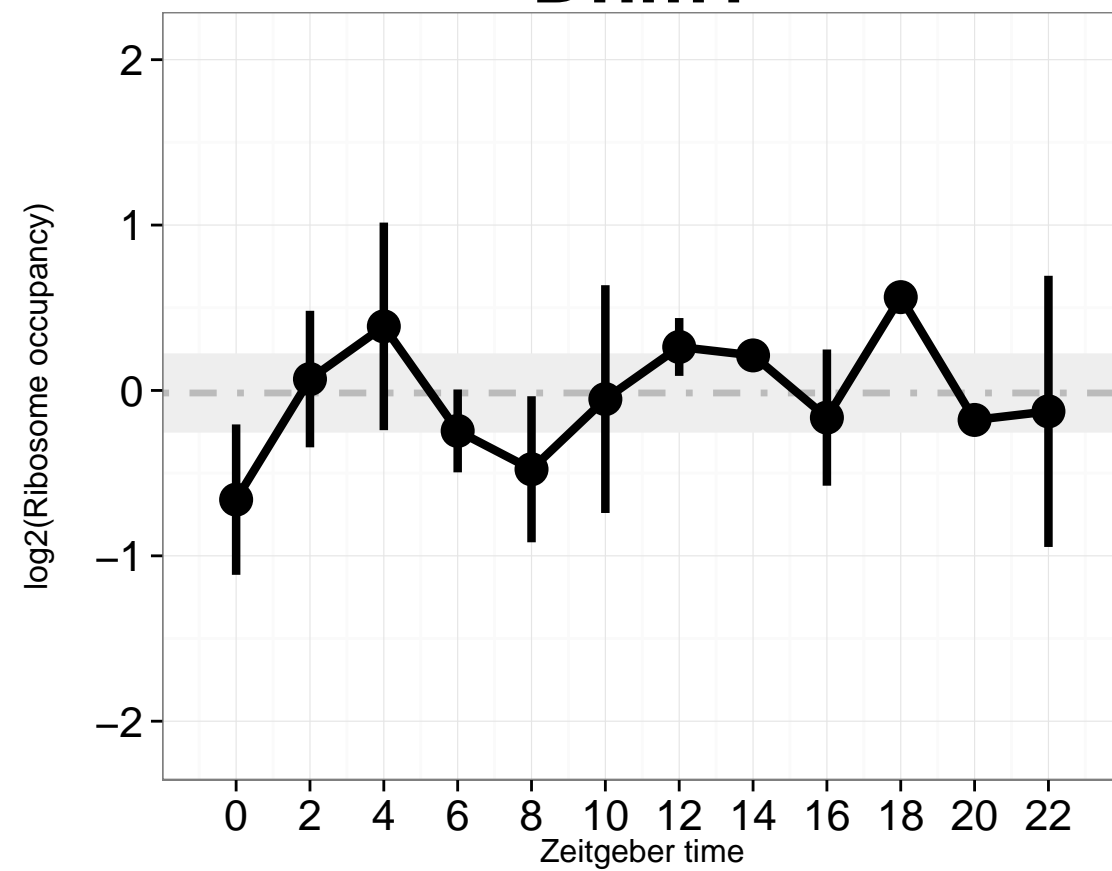

Supplement: Supplementary file 11942 [file 1]

## Ptcd3

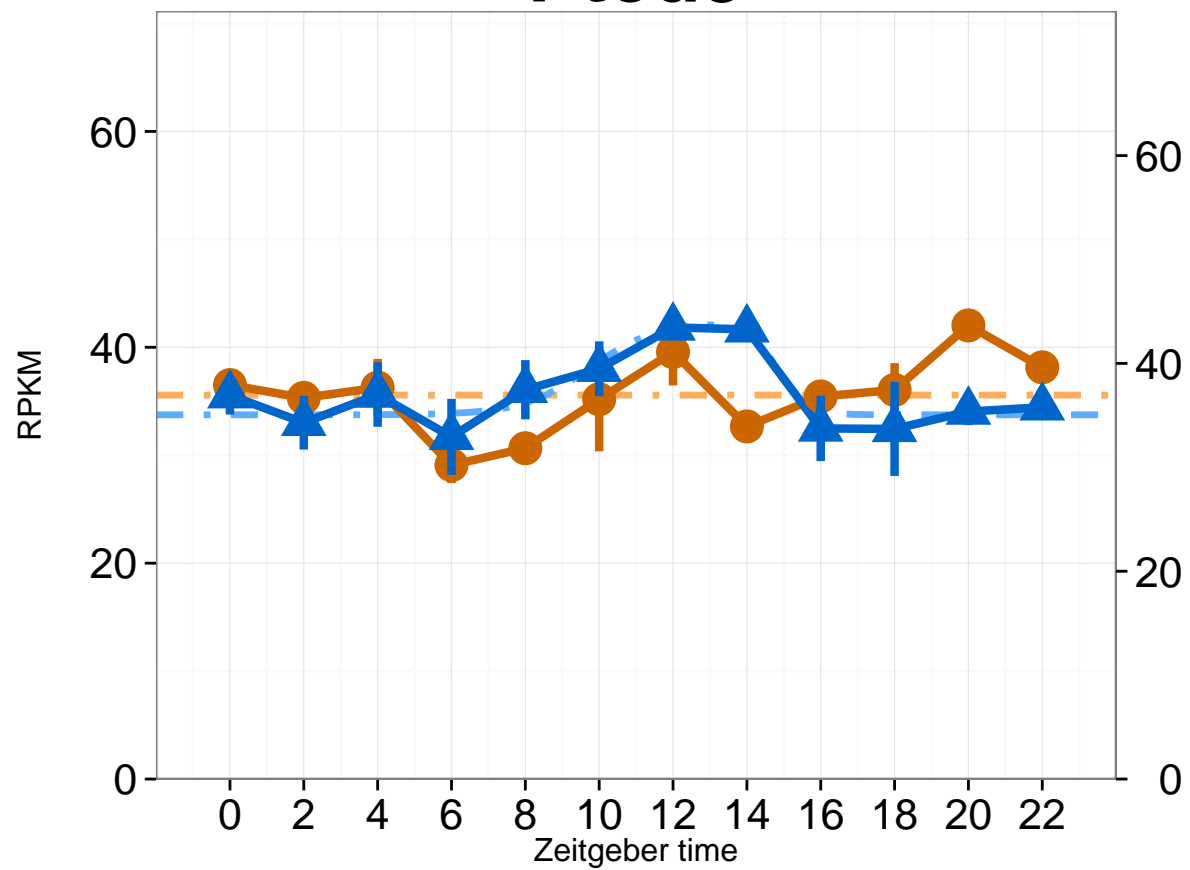

## Ptcd3

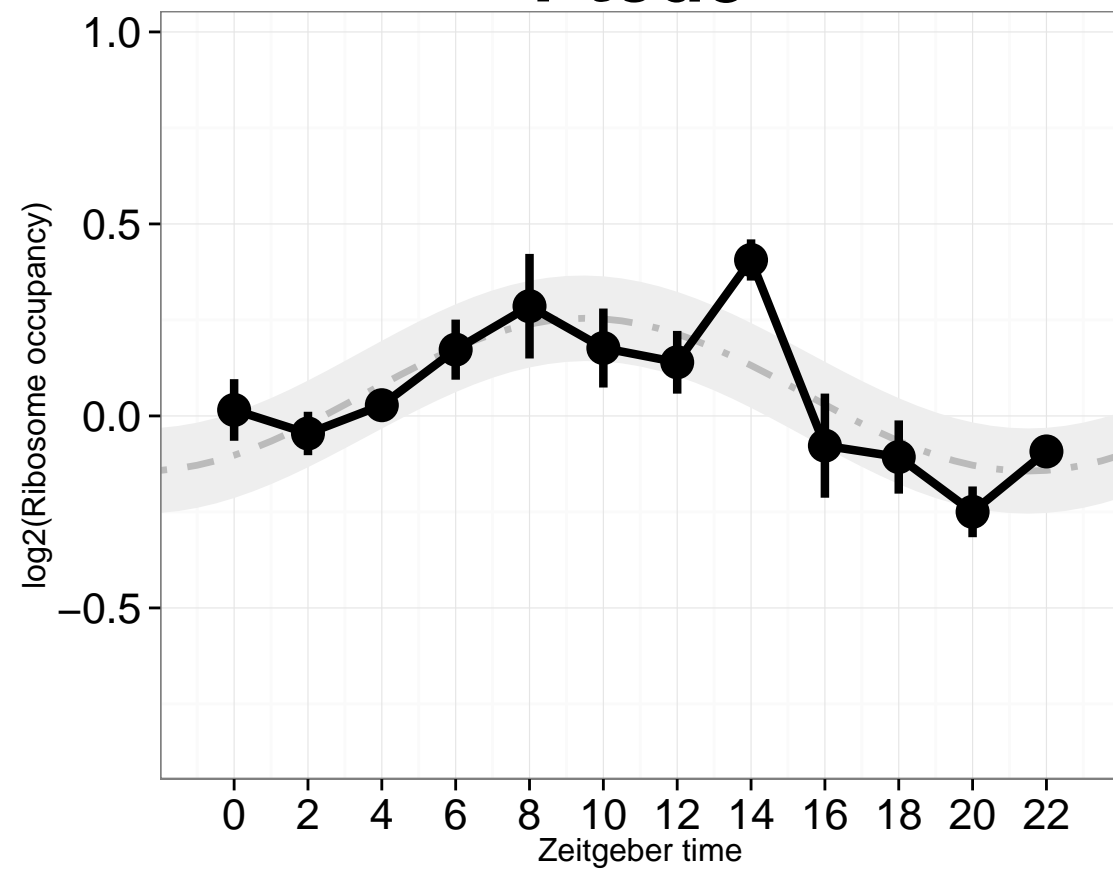

Supplement: Supplementary file 11943 [file 1]

## Mocs2

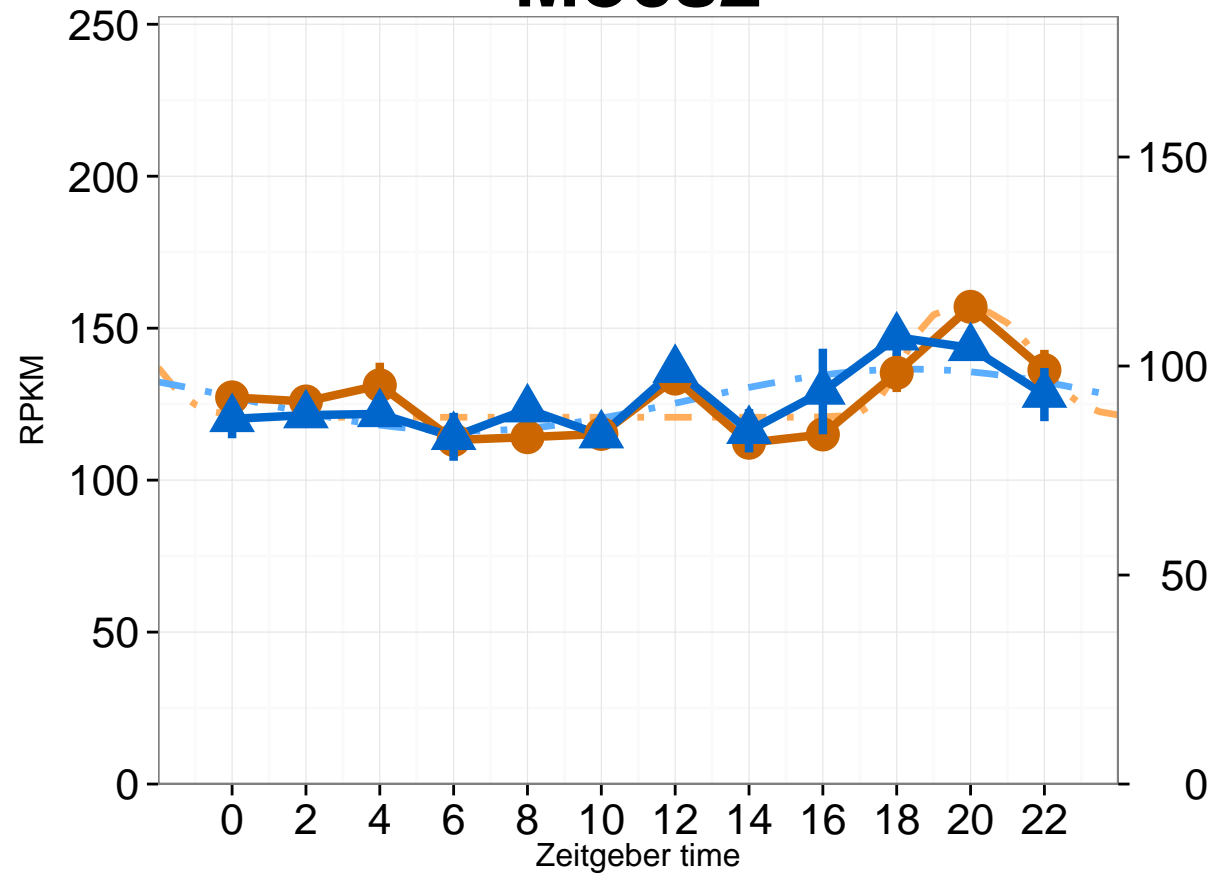

## Mocs2

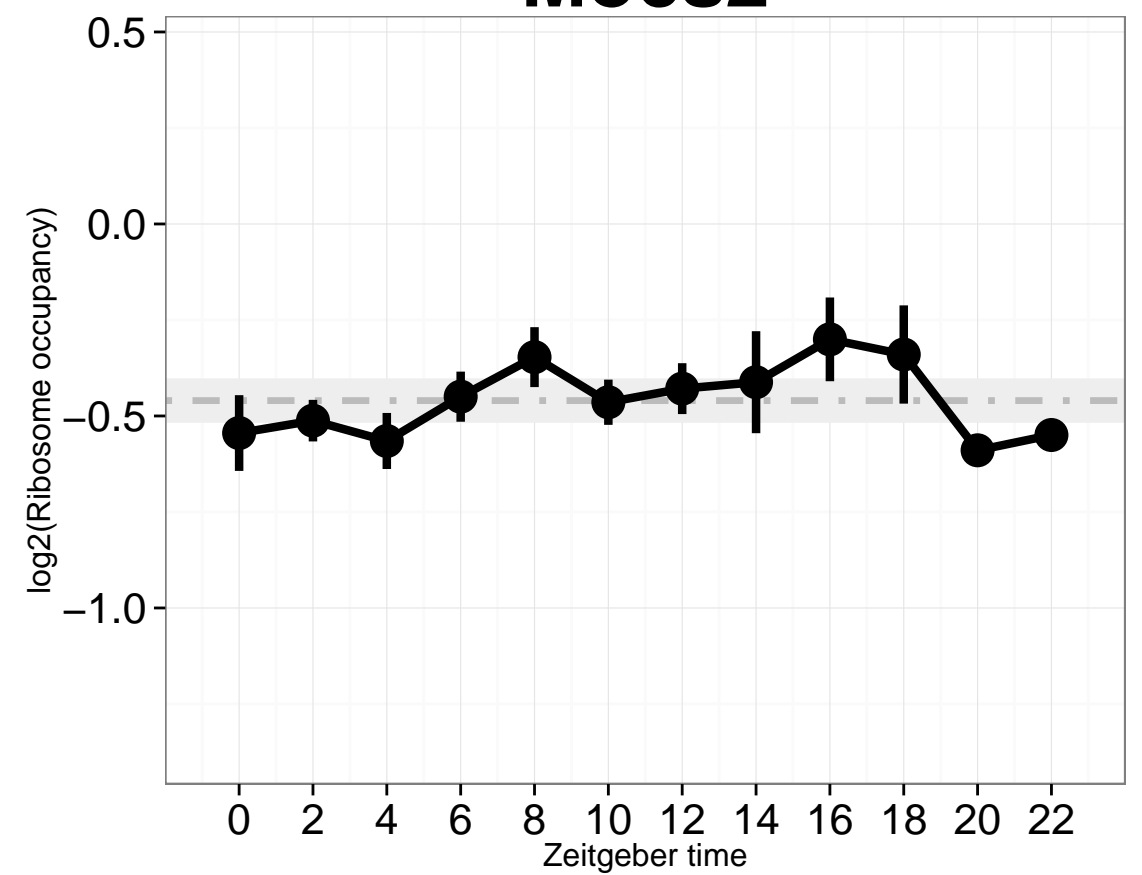

Supplement: Supplementary file 11944 [file 1]
