# Supplementary material (part 120 of 133)
Source: publisher figshare collection journal article supplement (https://springernature.figshare.com/articles/dataset/_/4903193)

## Aurkaip1

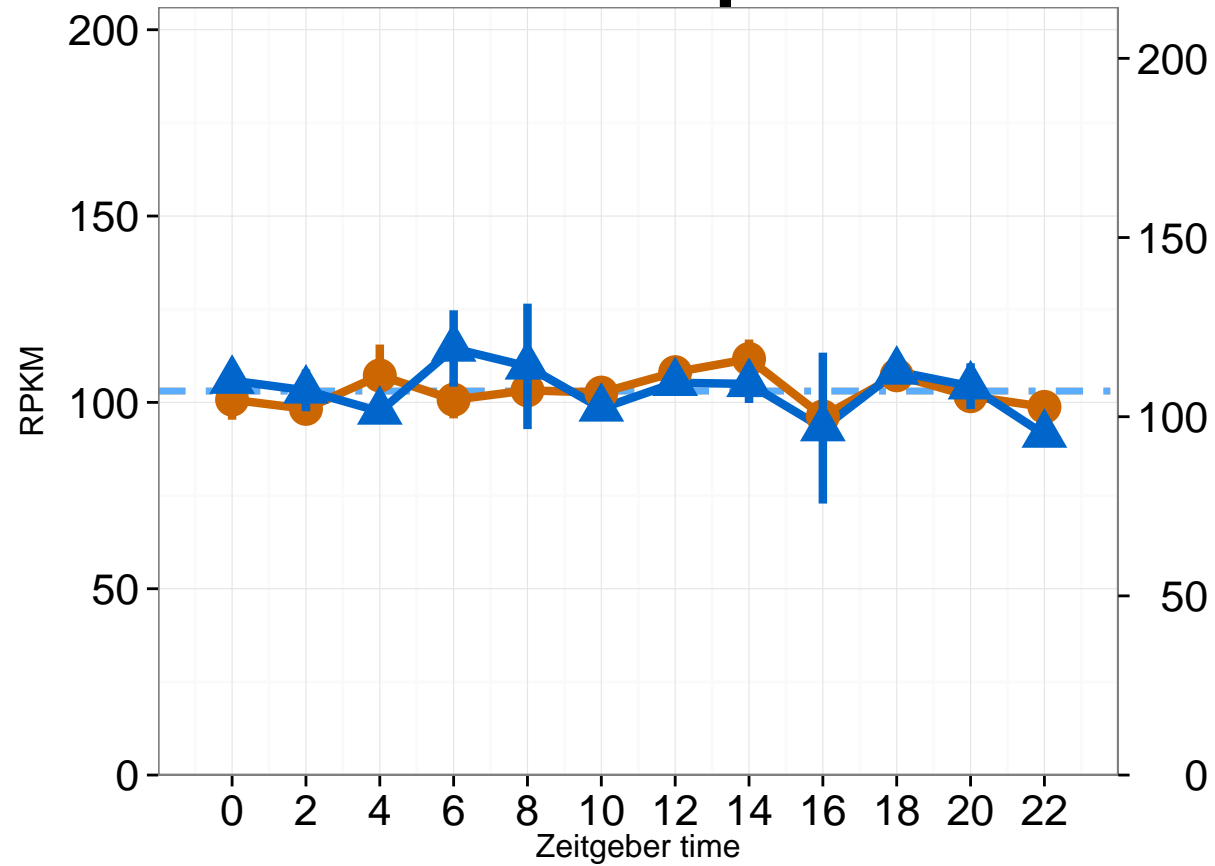

## Aurkaip1

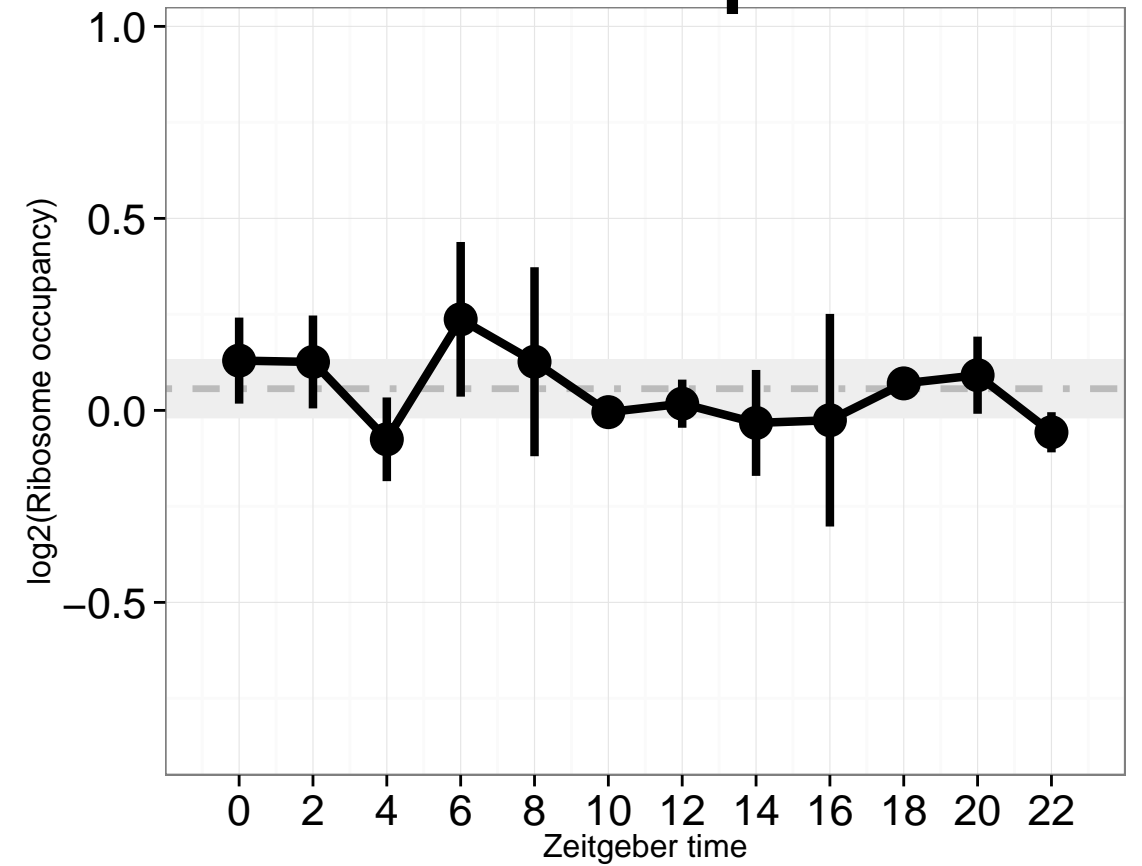

Supplement: Supplementary file 11945 [file 1]

## Krt80

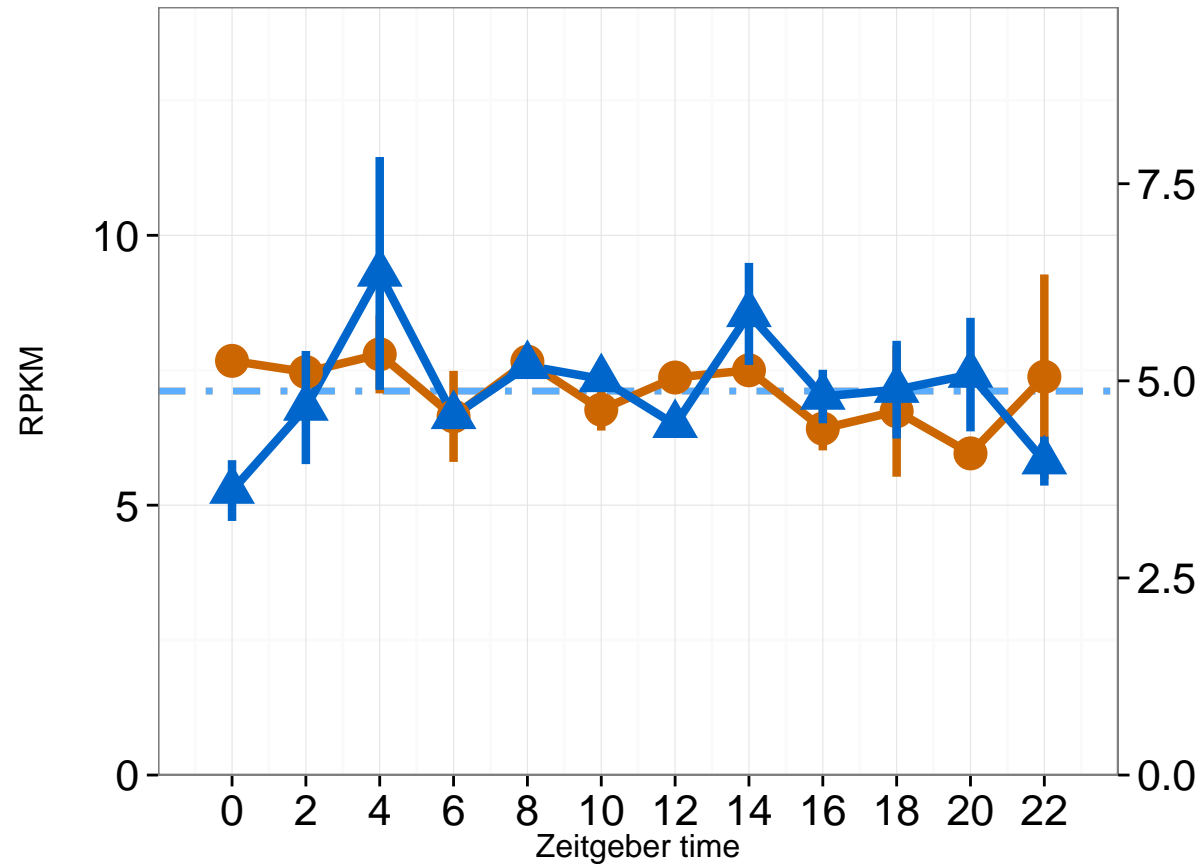

## Krt80

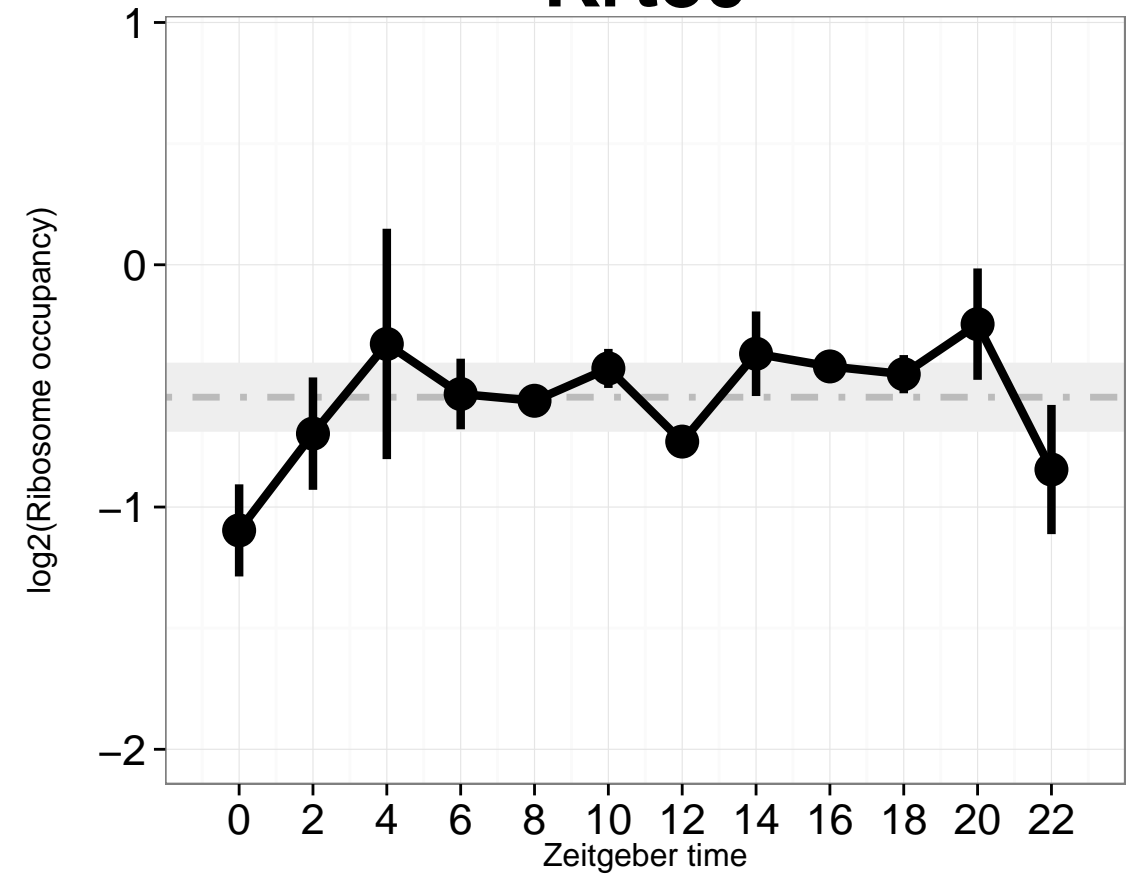

Supplement: Supplementary file 11946 [file 1]

## Smad5

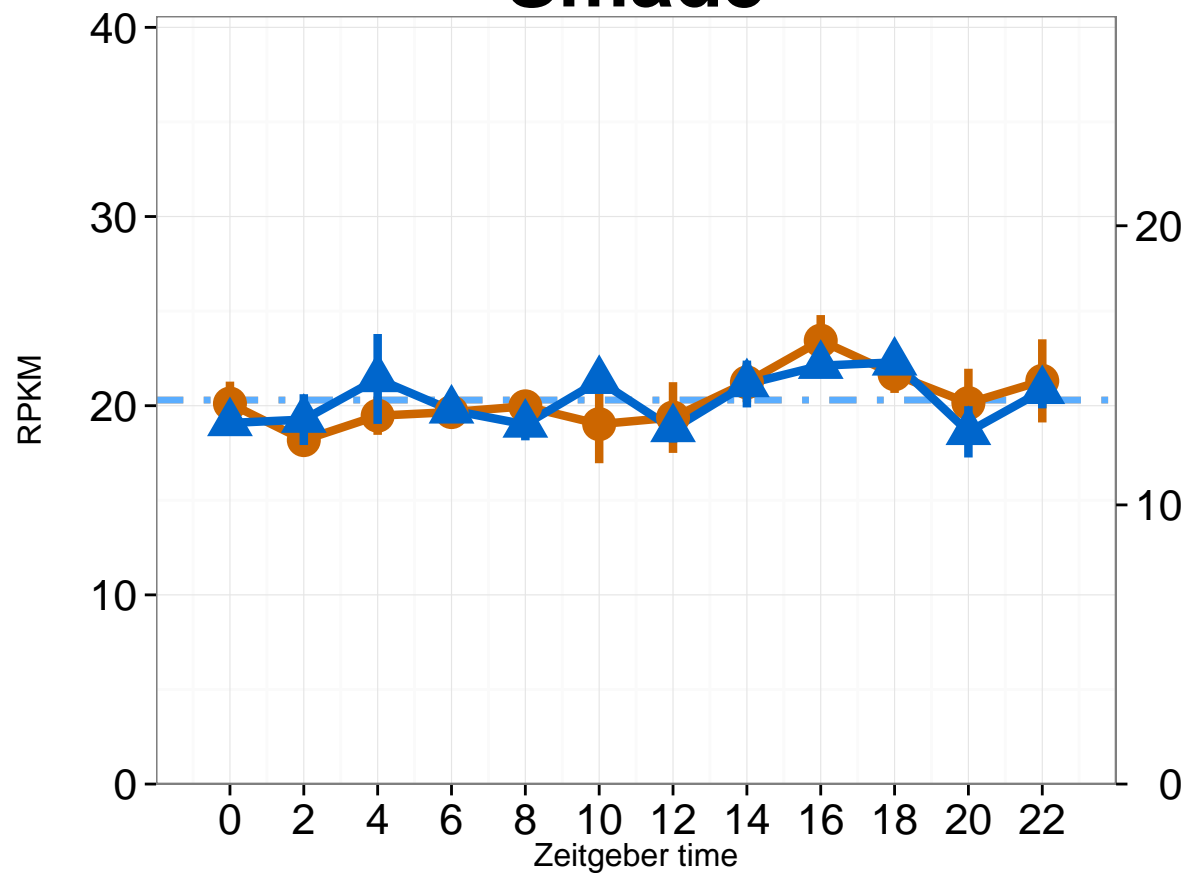

## Smad5

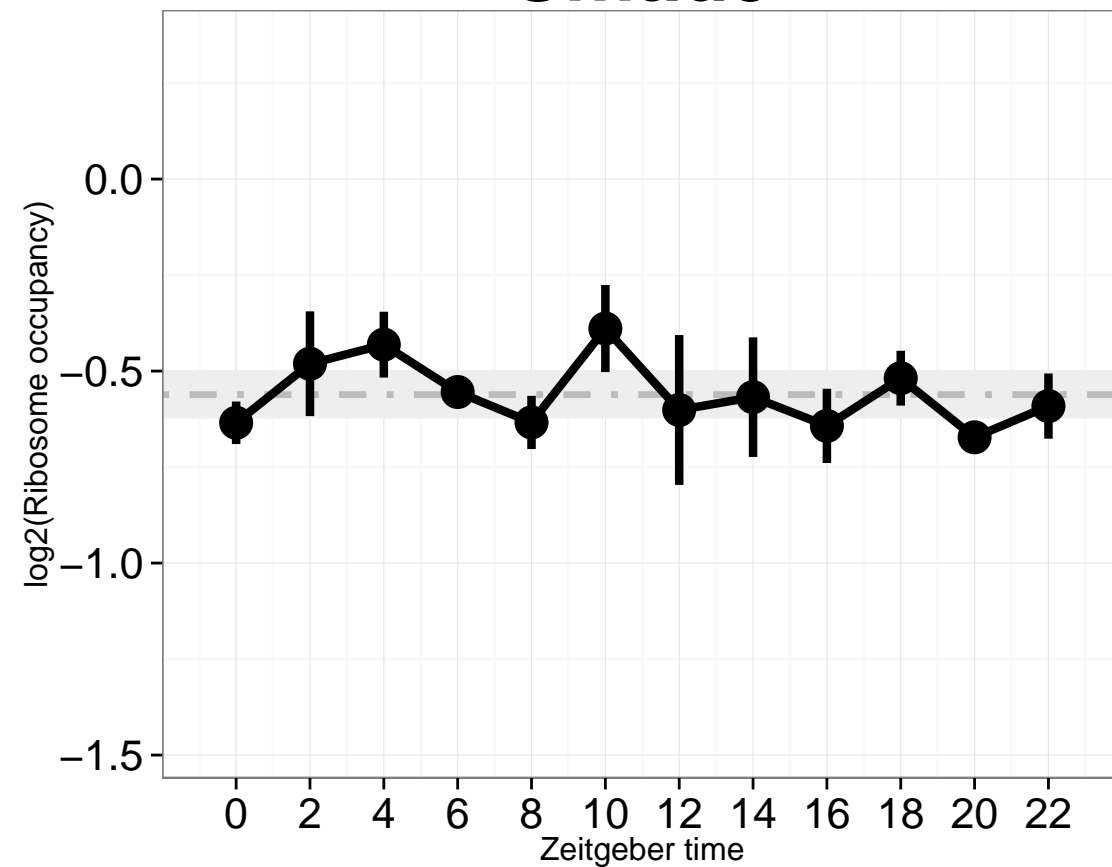

Supplement: Supplementary file 11947 [file 1]

## Cd74

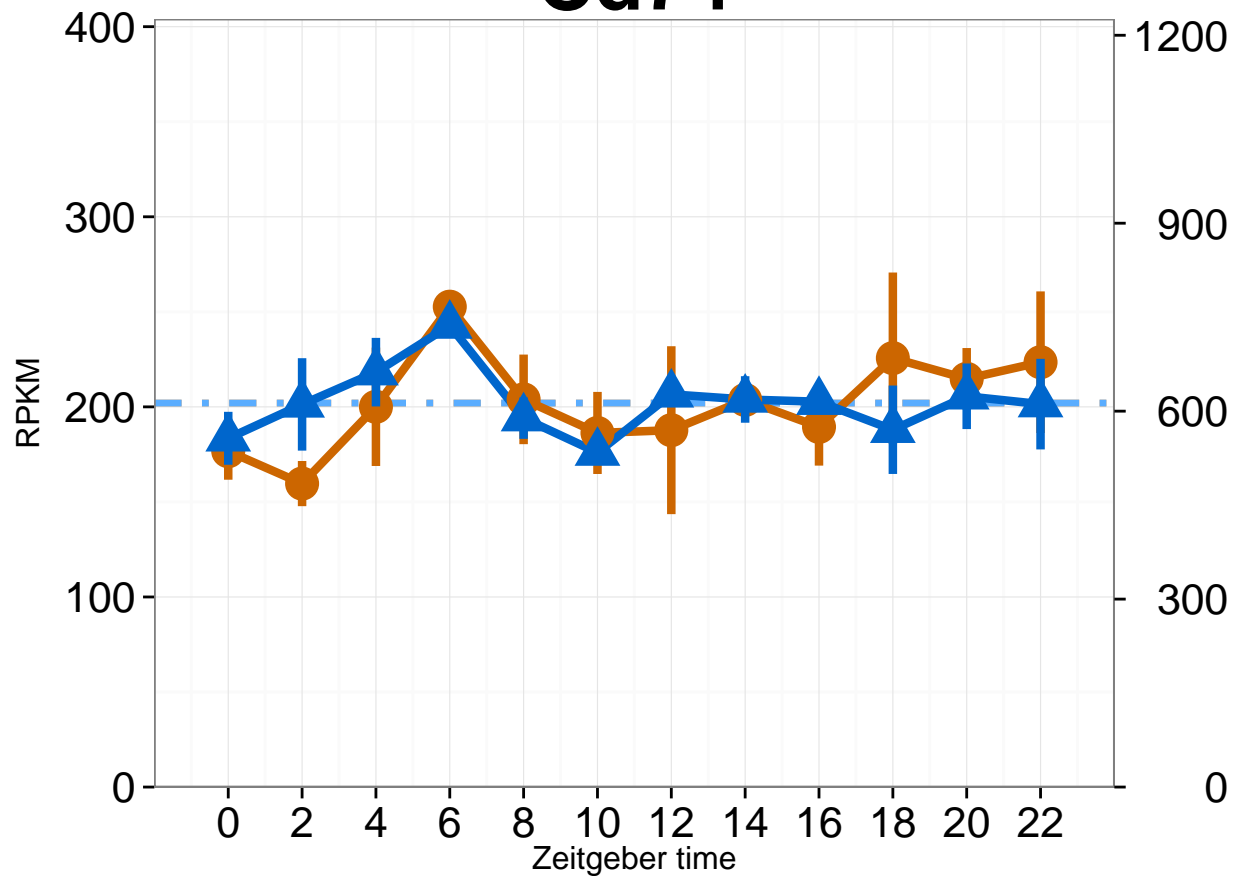

## Cd74

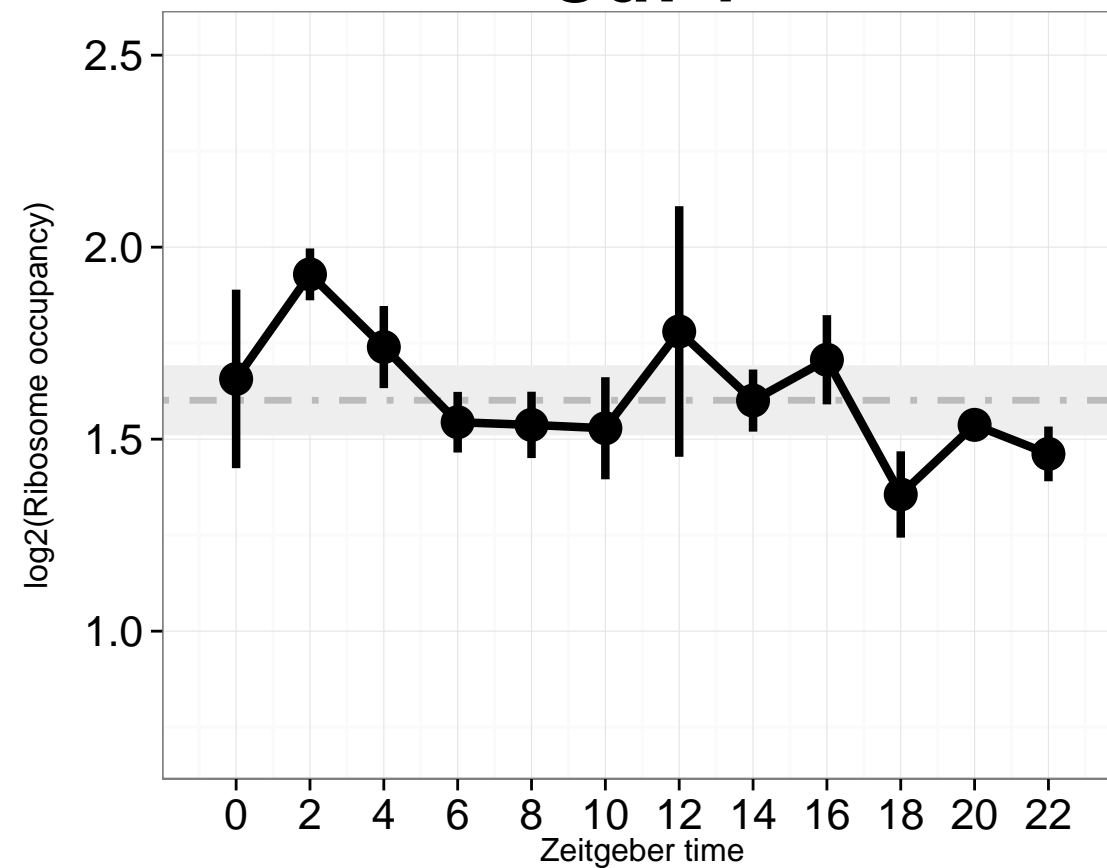

Supplement: Supplementary file 11948 [file 1]

# Hist1h1c

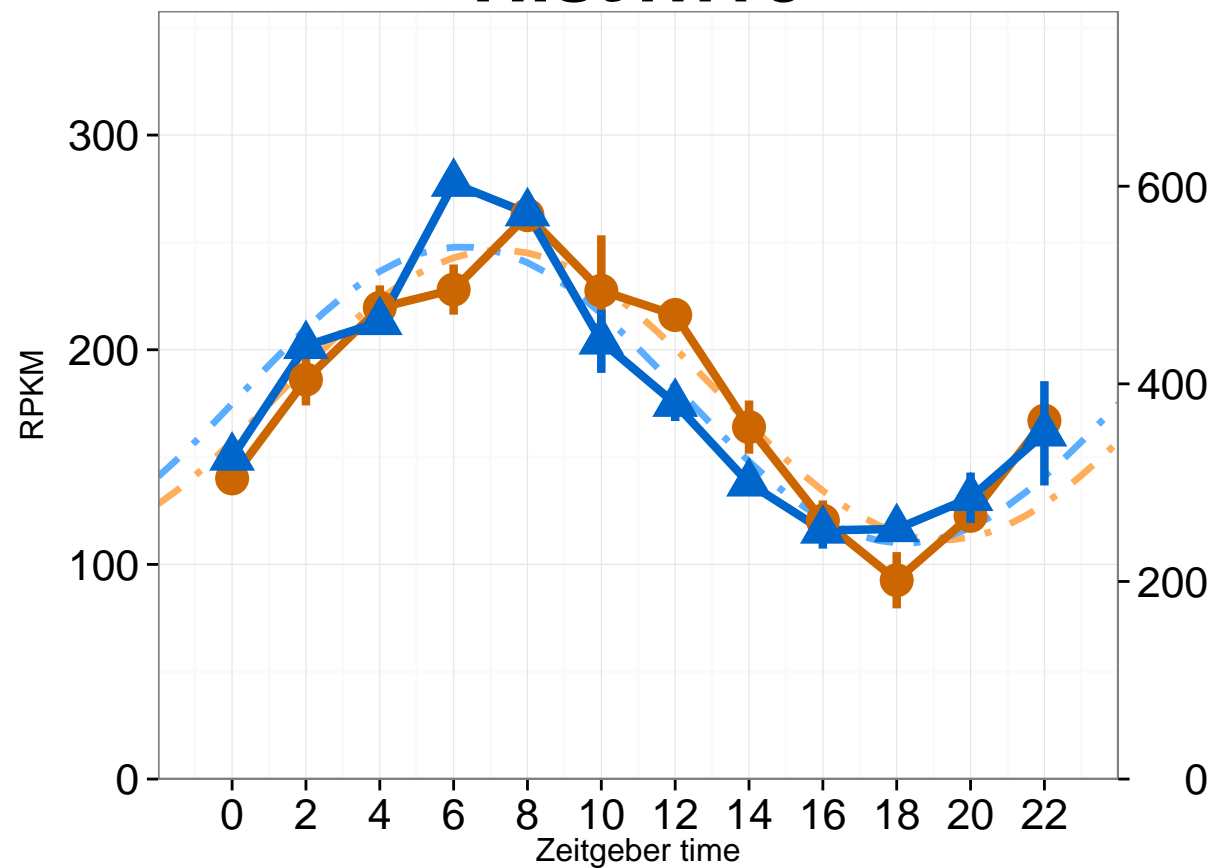

# Hist1h1c

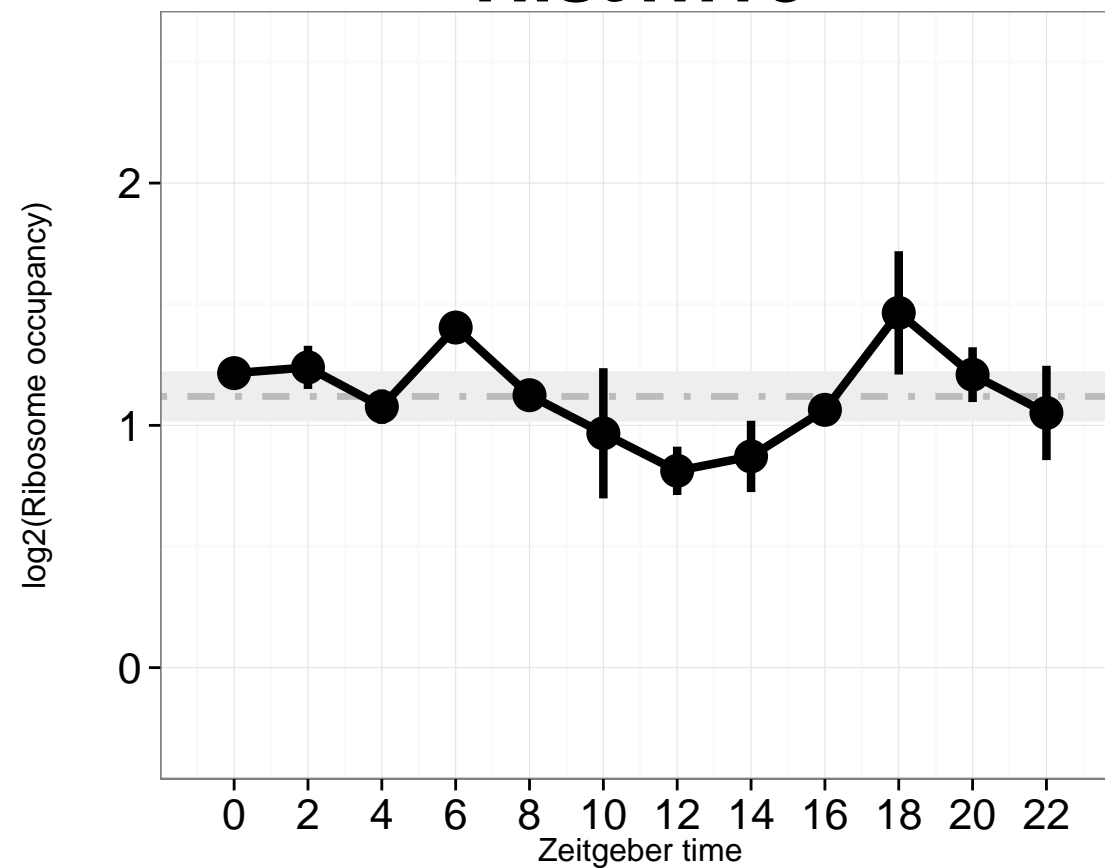

Supplement: Supplementary file 11949 [file 1]

## Spg11

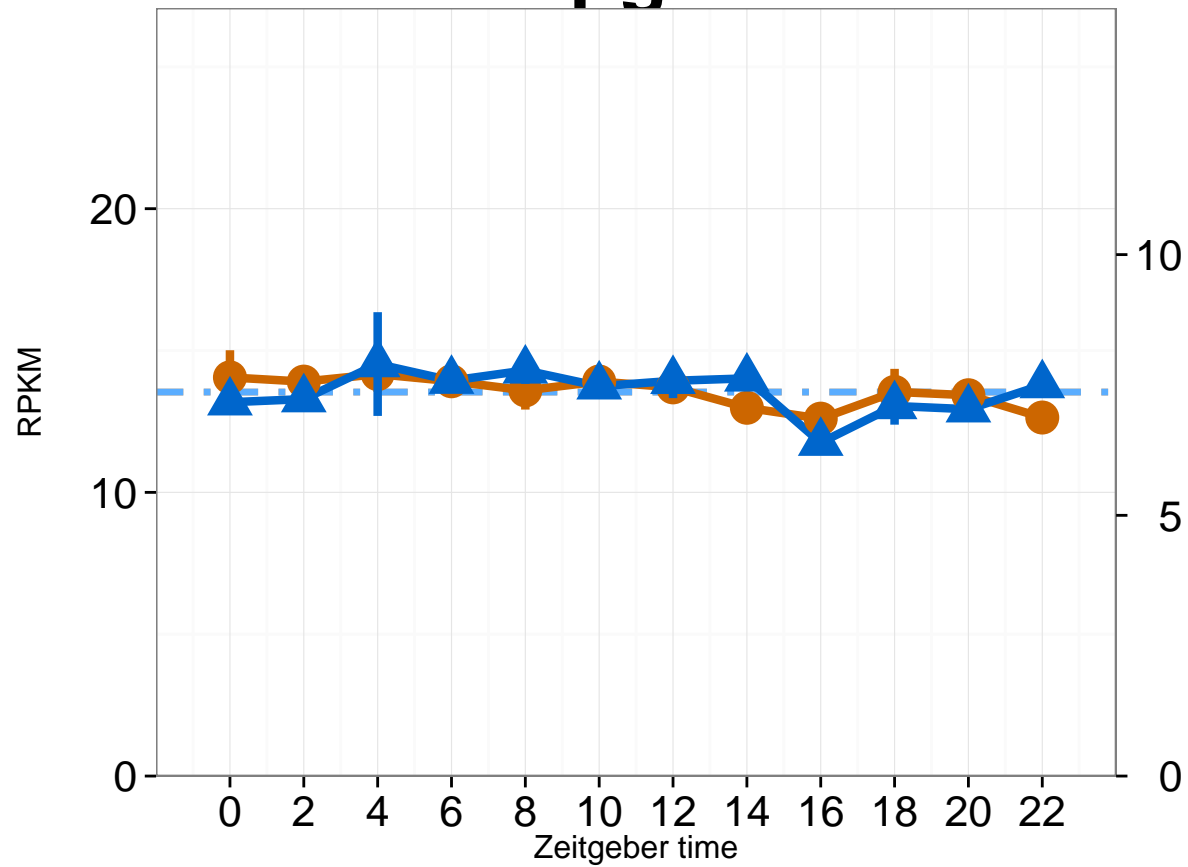

## Spg11

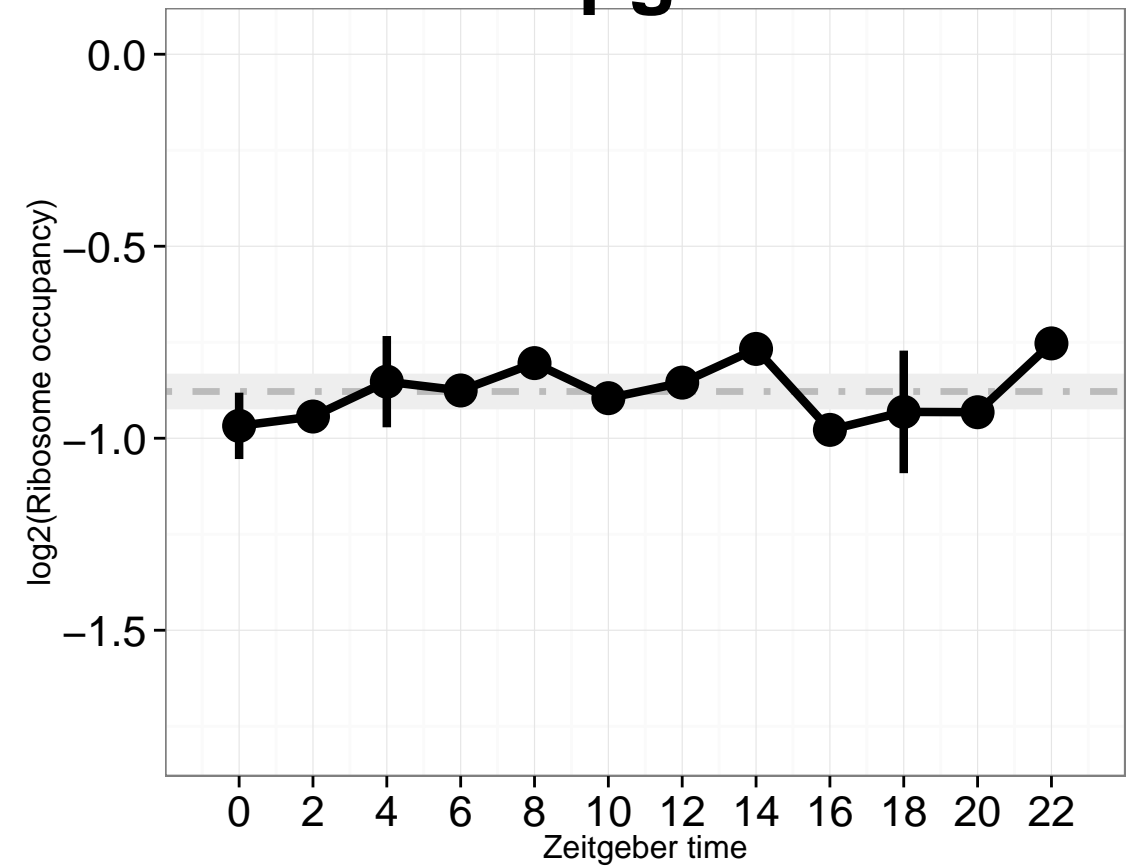

Supplement: Supplementary file 11950 [file 1]

## Inppl1

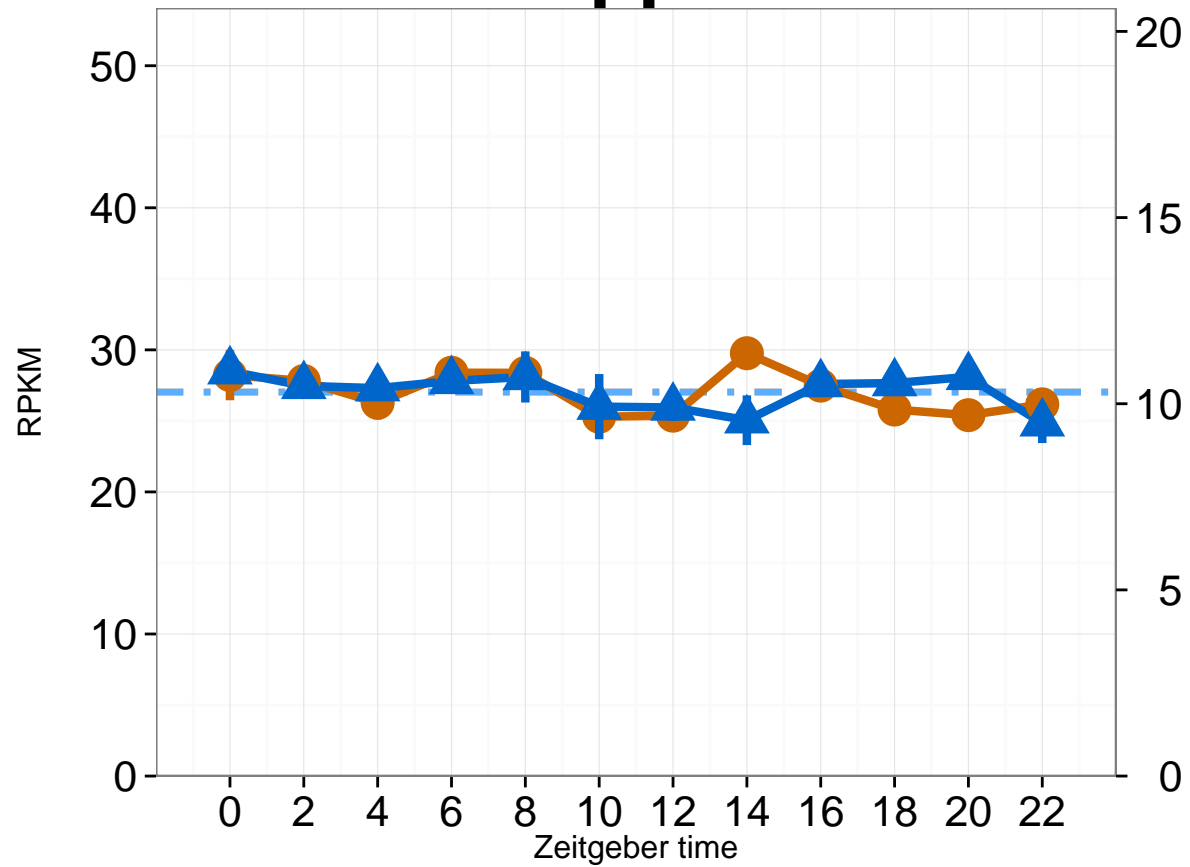

## Inppl1

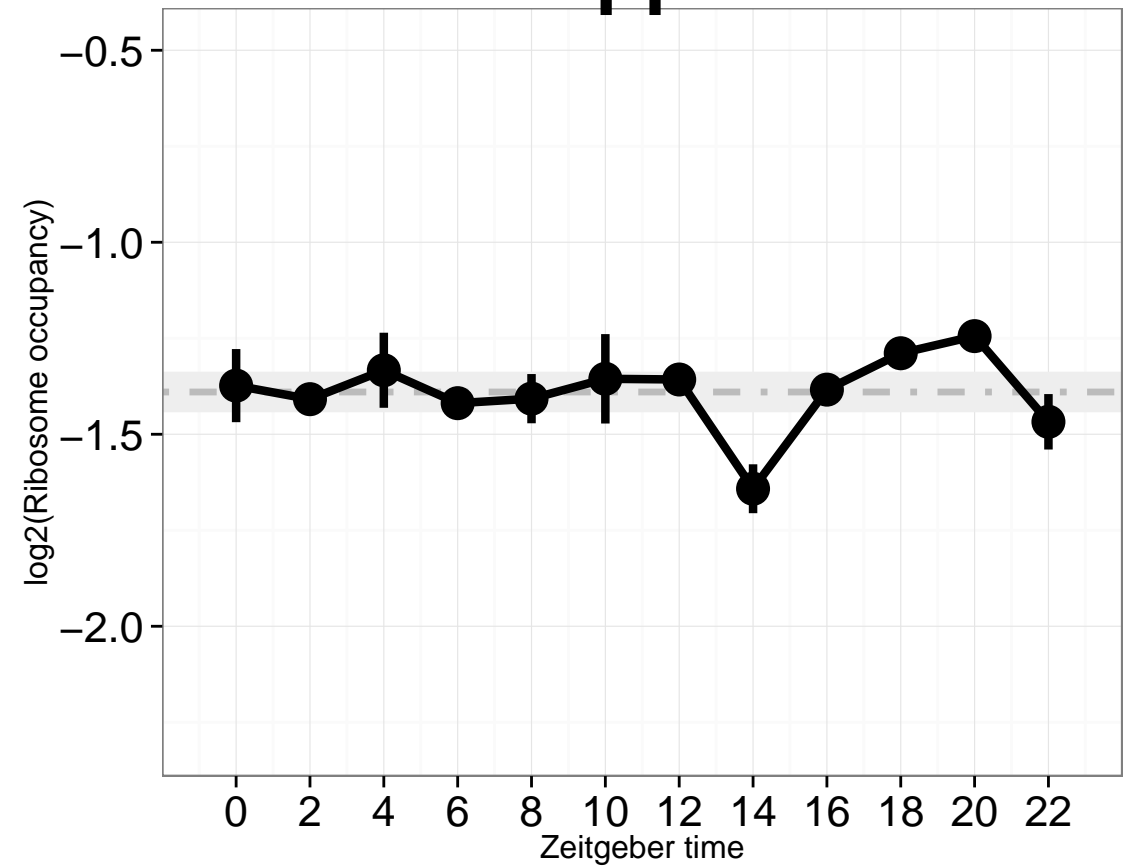

Supplement: Supplementary file 11951 [file 1]

# Luzp1

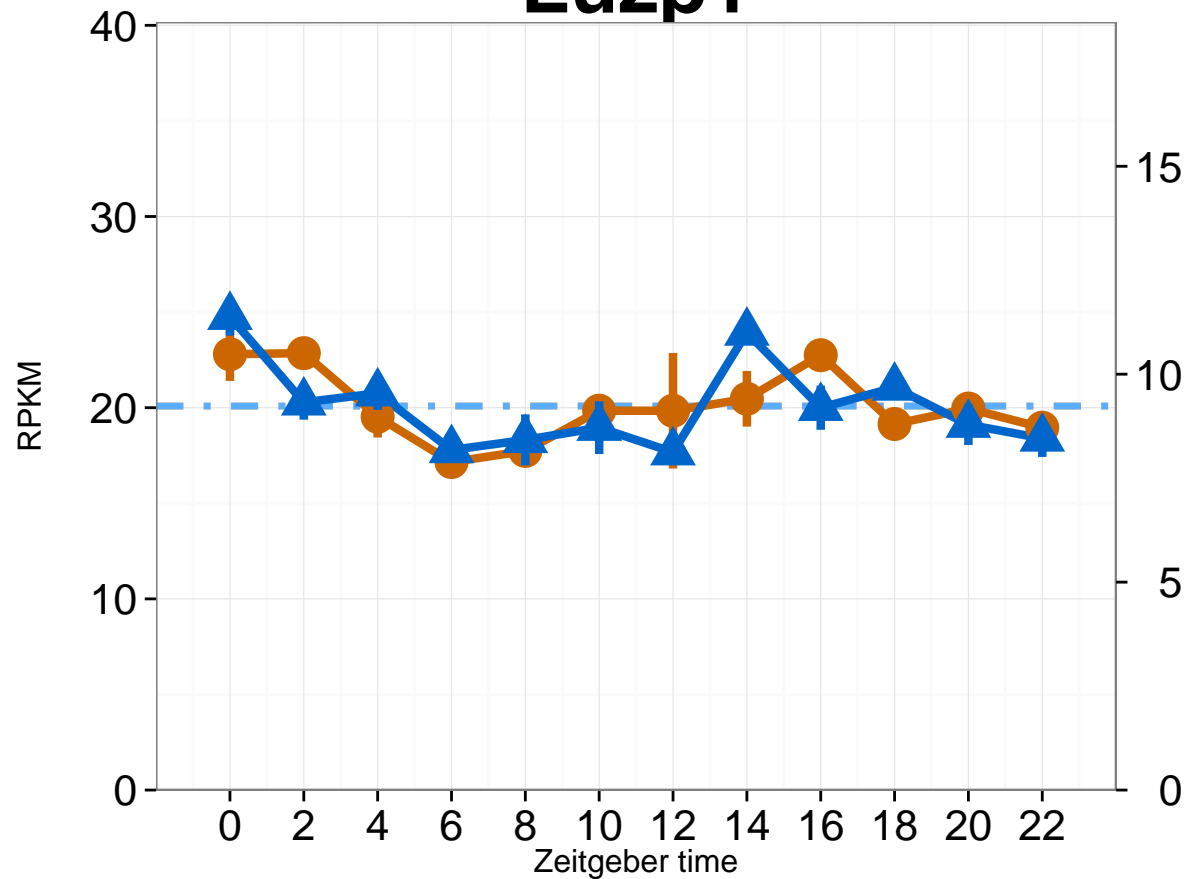

# Luzp1

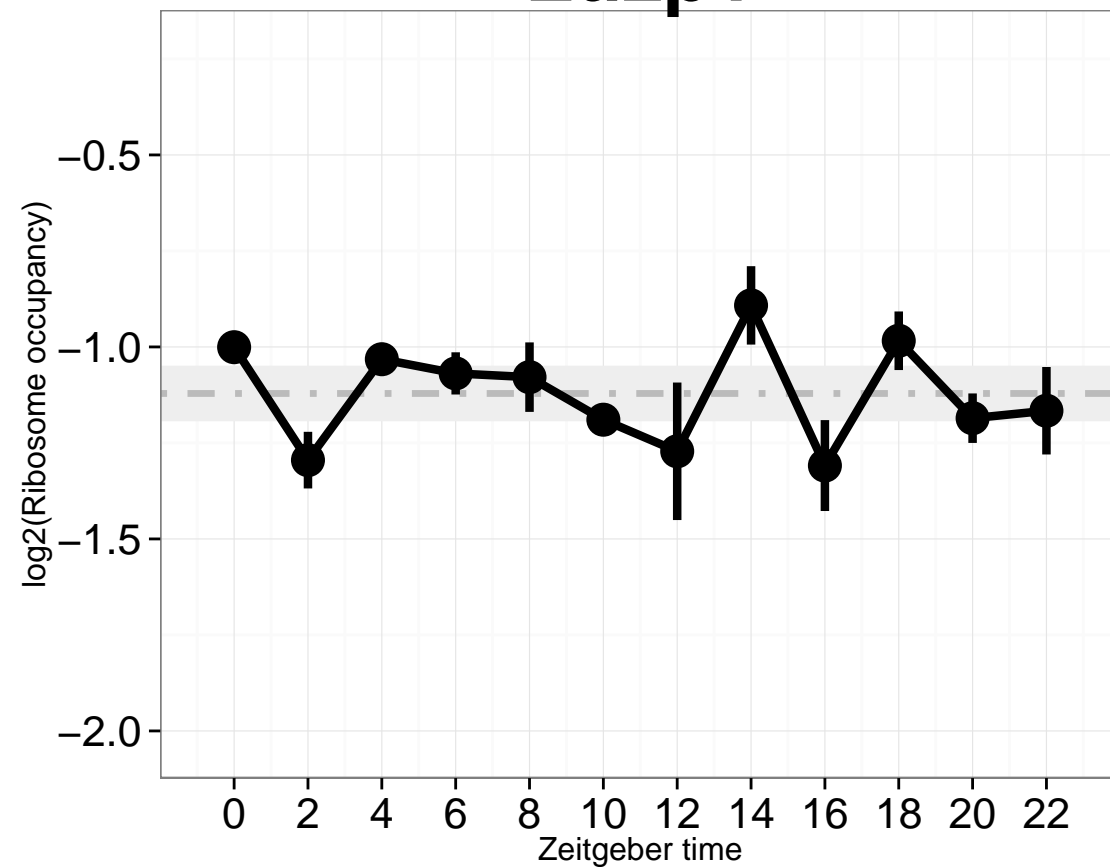

Supplement: Supplementary file 11952 [file 1]

## Csf3r

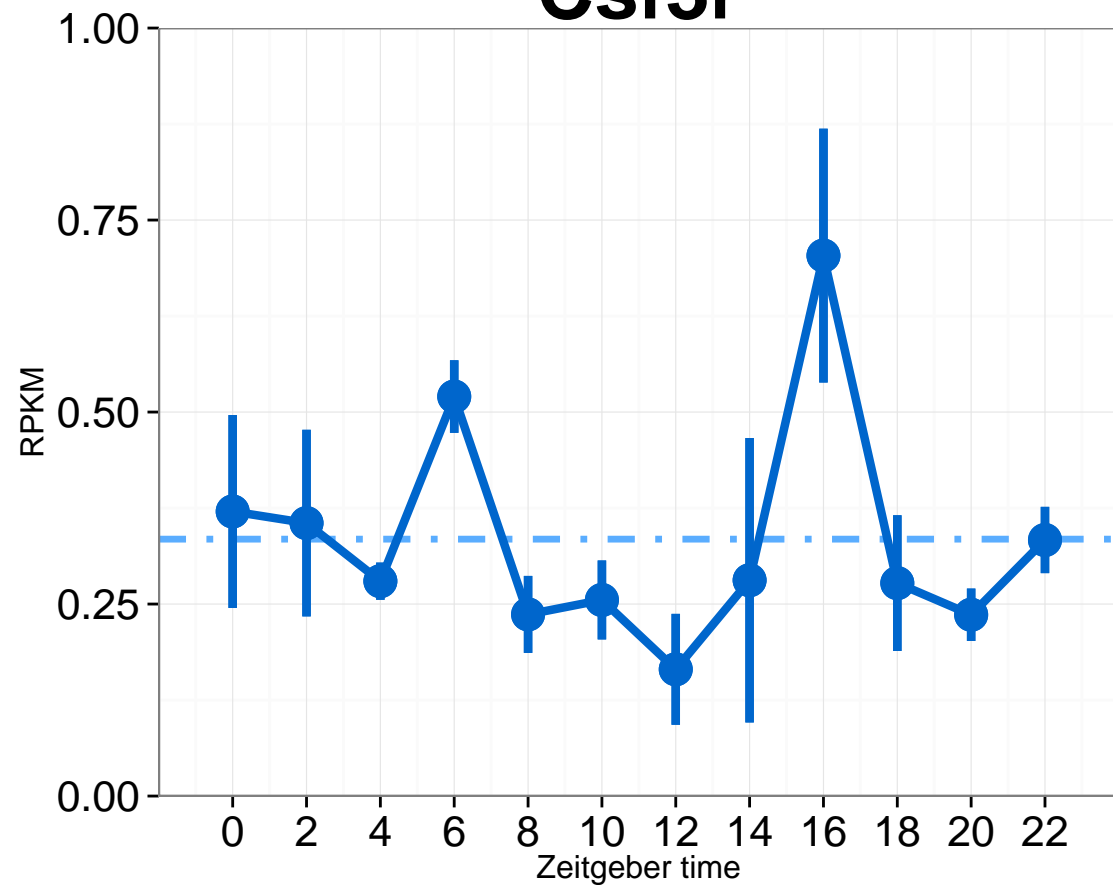

## Csf3r log2(Ribosome occupancy)

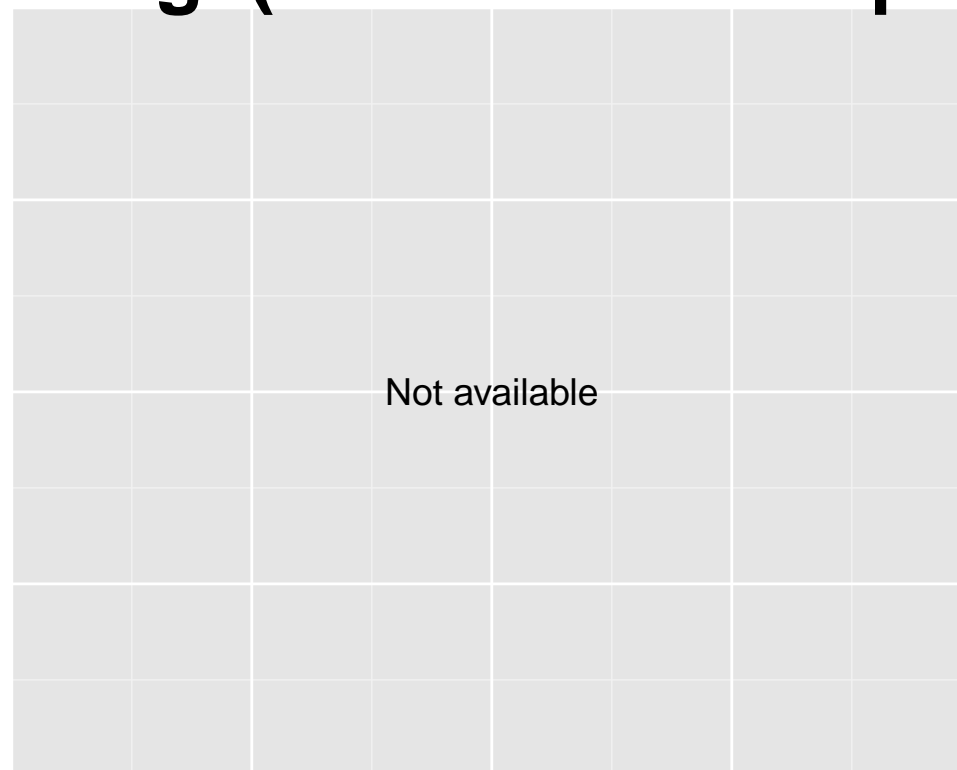

Supplement: Supplementary file 11953 [file 1]

## Dbnl

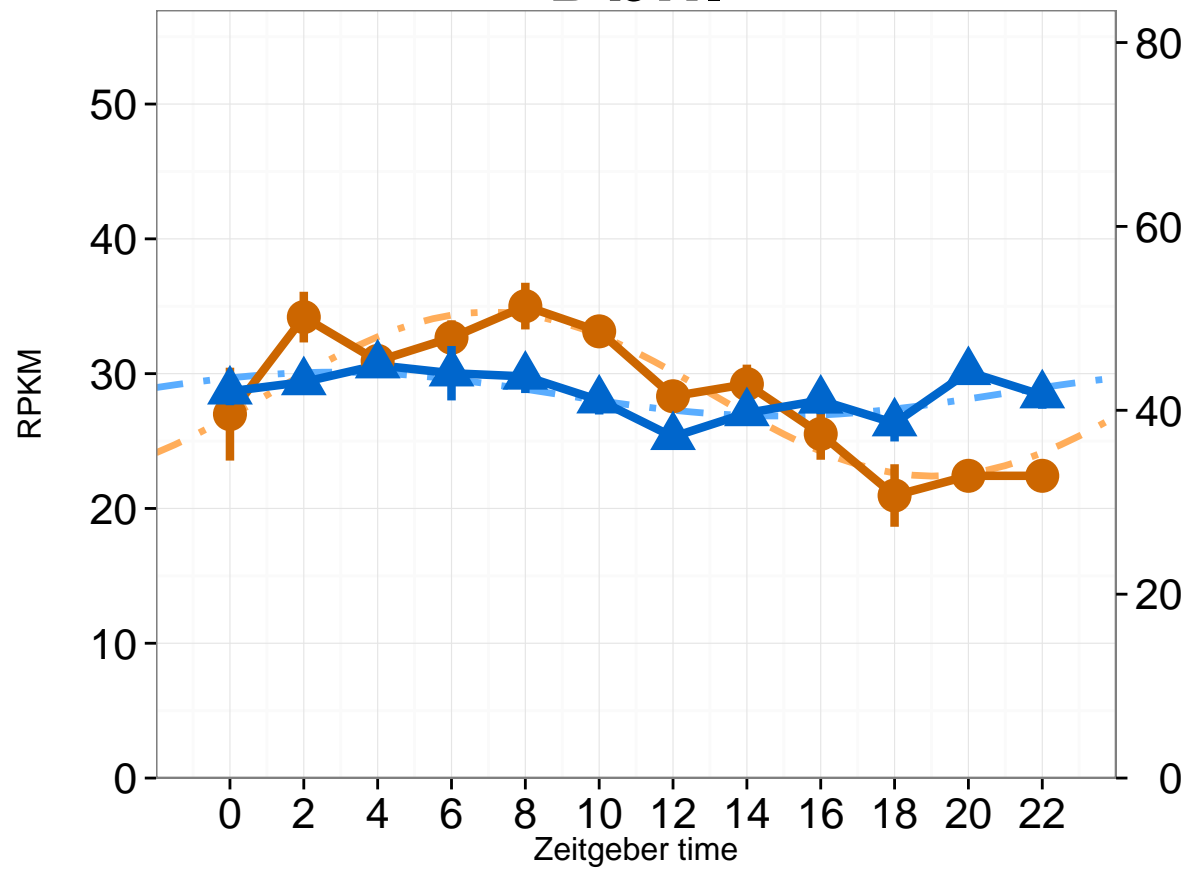

## Dbnl

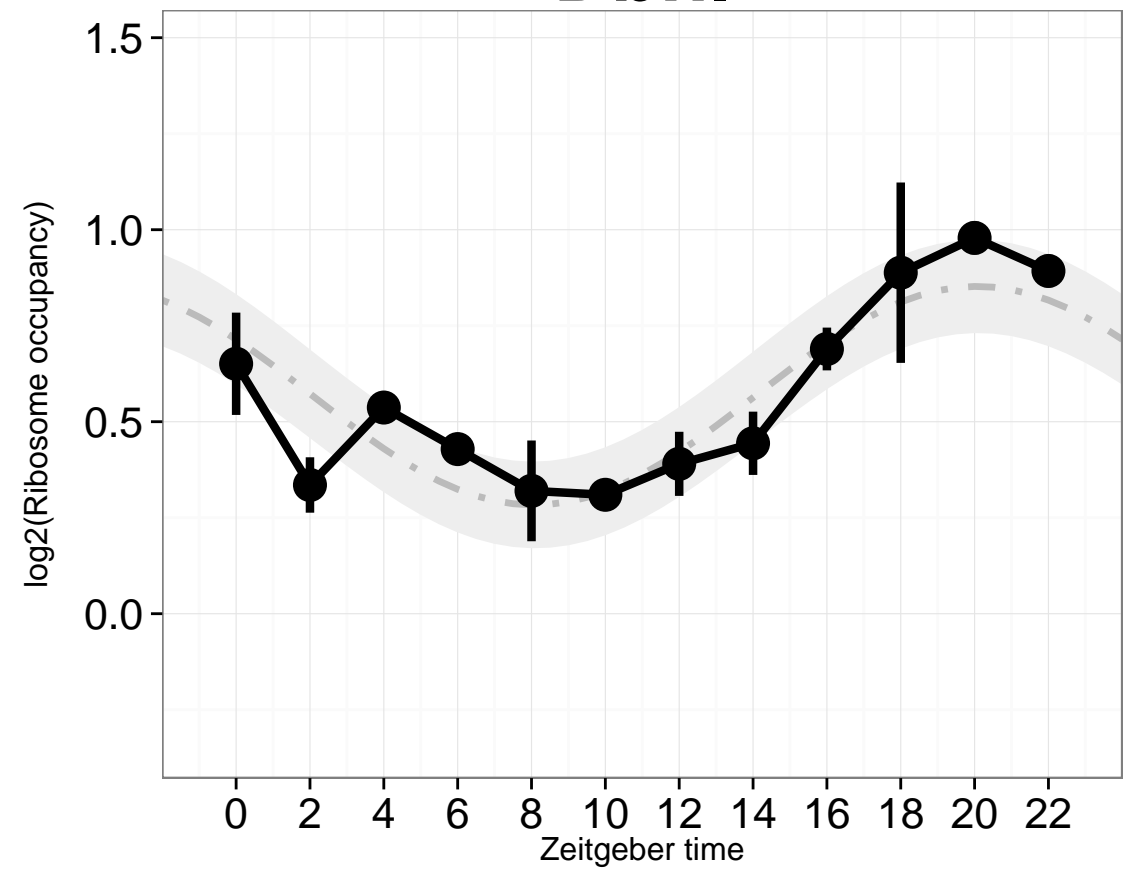

Supplement: Supplementary file 11954 [file 1]

## Slc6a20b

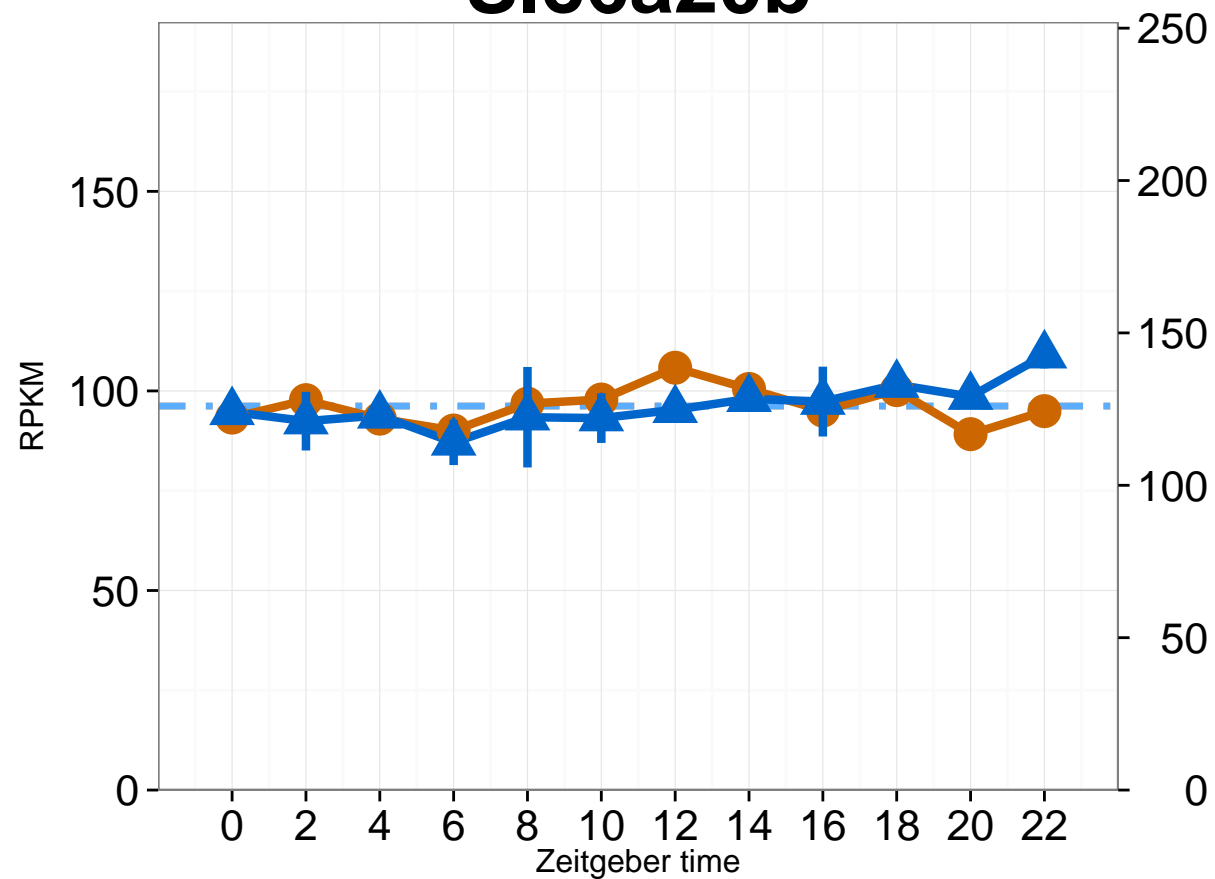

## Slc6a20b

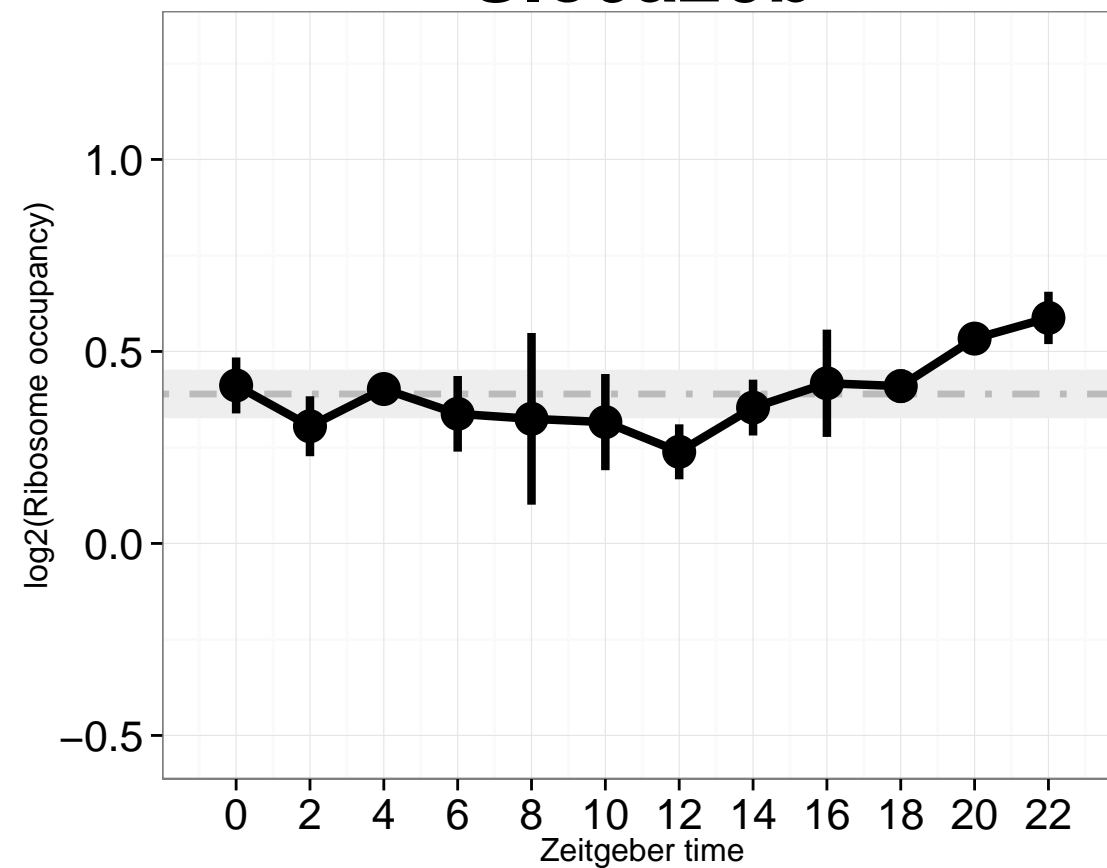

Supplement: Supplementary file 11955 [file 1]

## Pdik1l

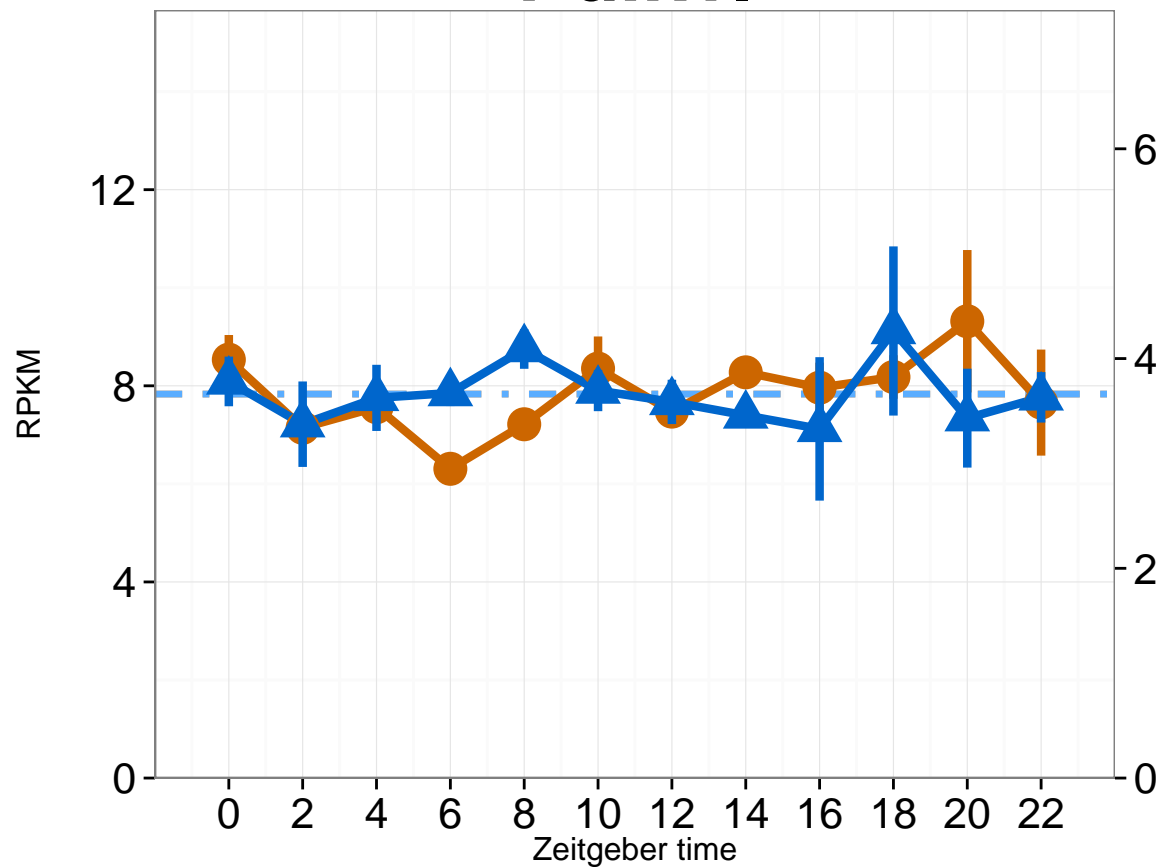

## Pdik1l

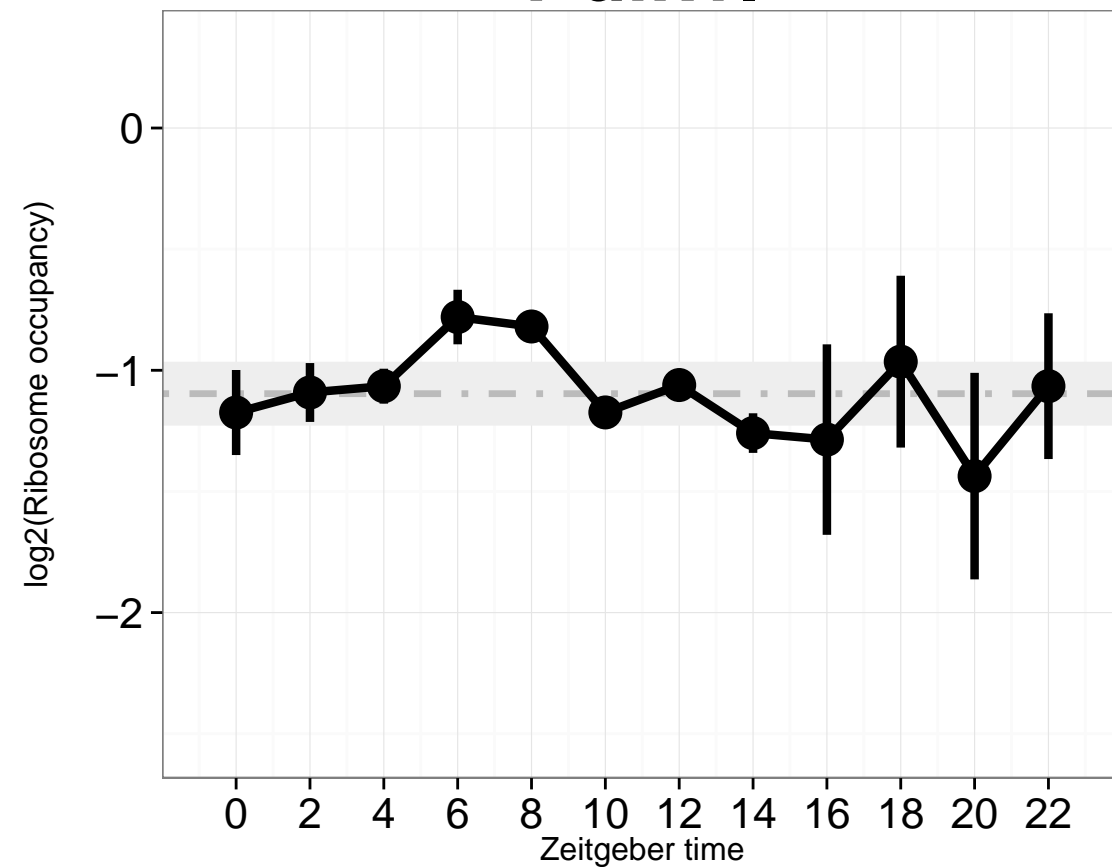

Supplement: Supplementary file 11956 [file 1]

# Nphp4

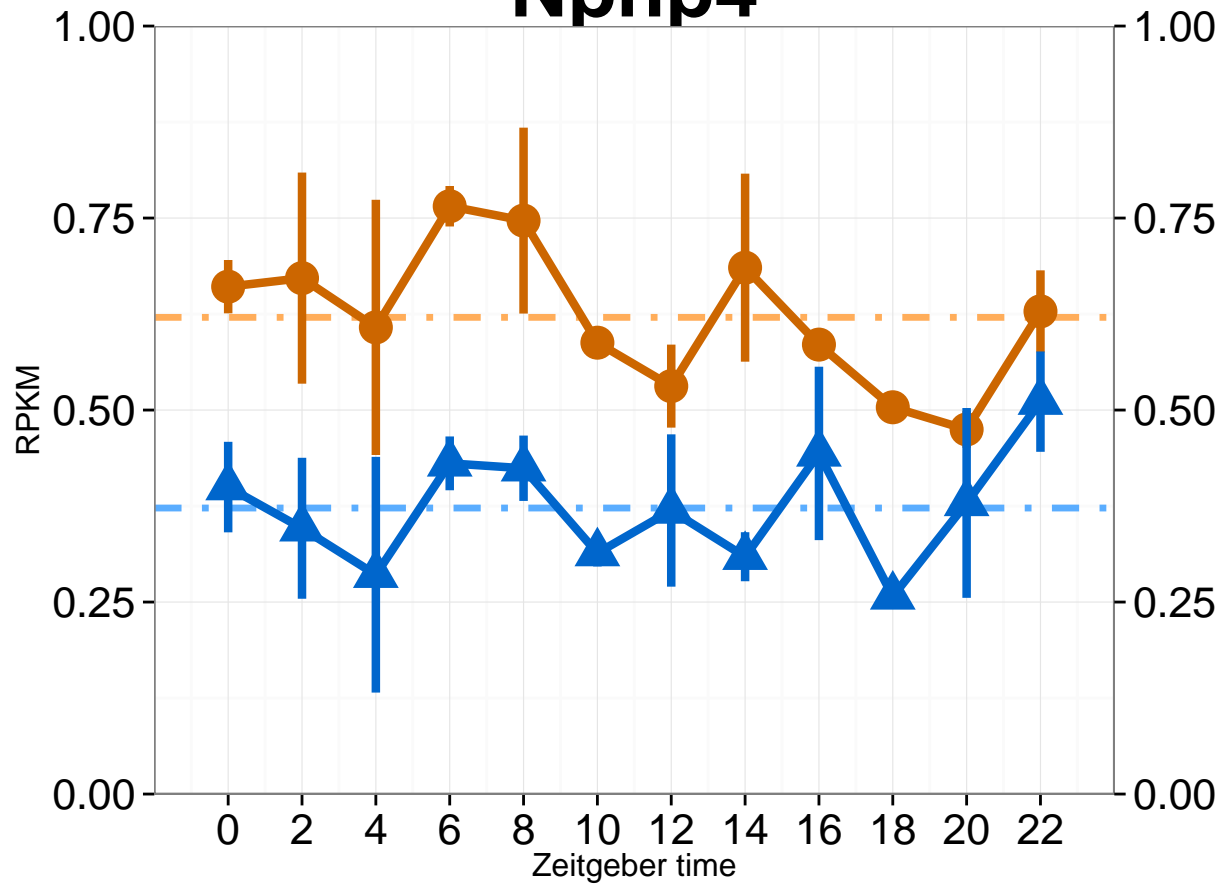

# Nphp4

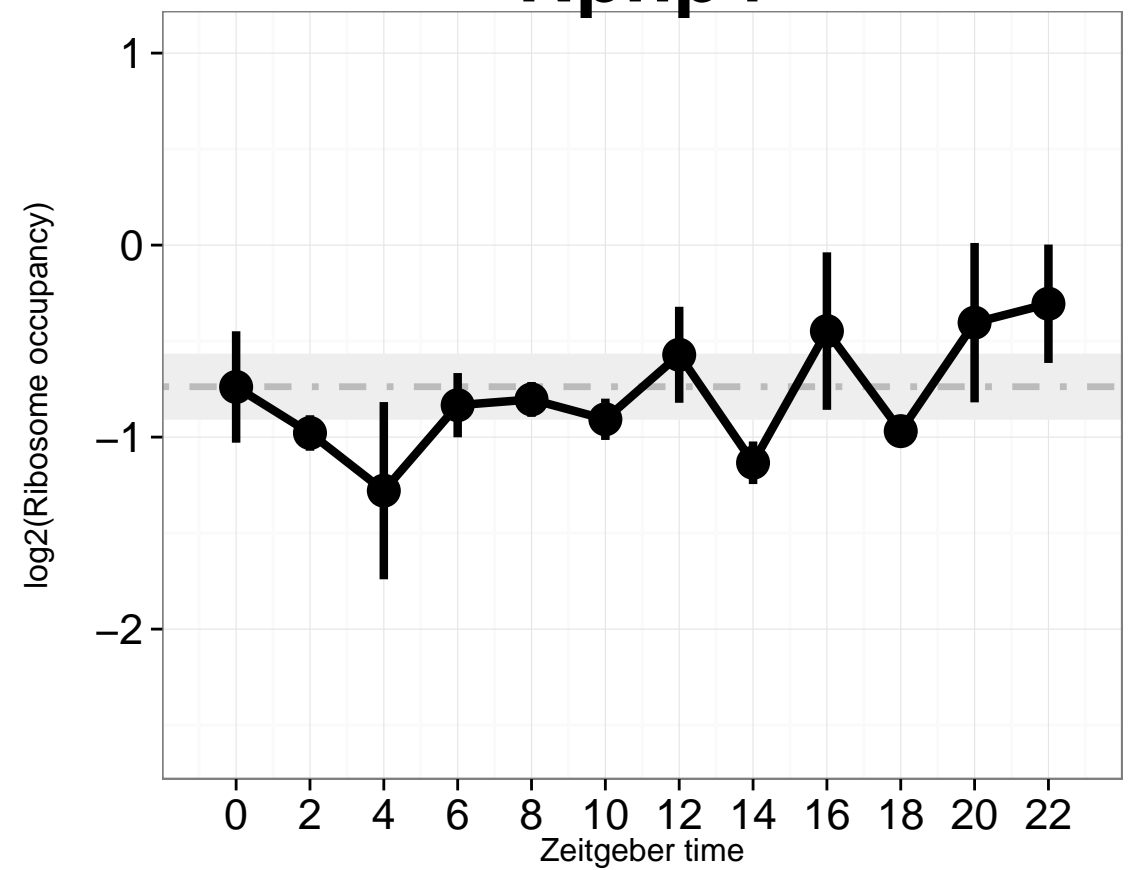

Supplement: Supplementary file 11957 [file 1]

## 0610010F05Rik

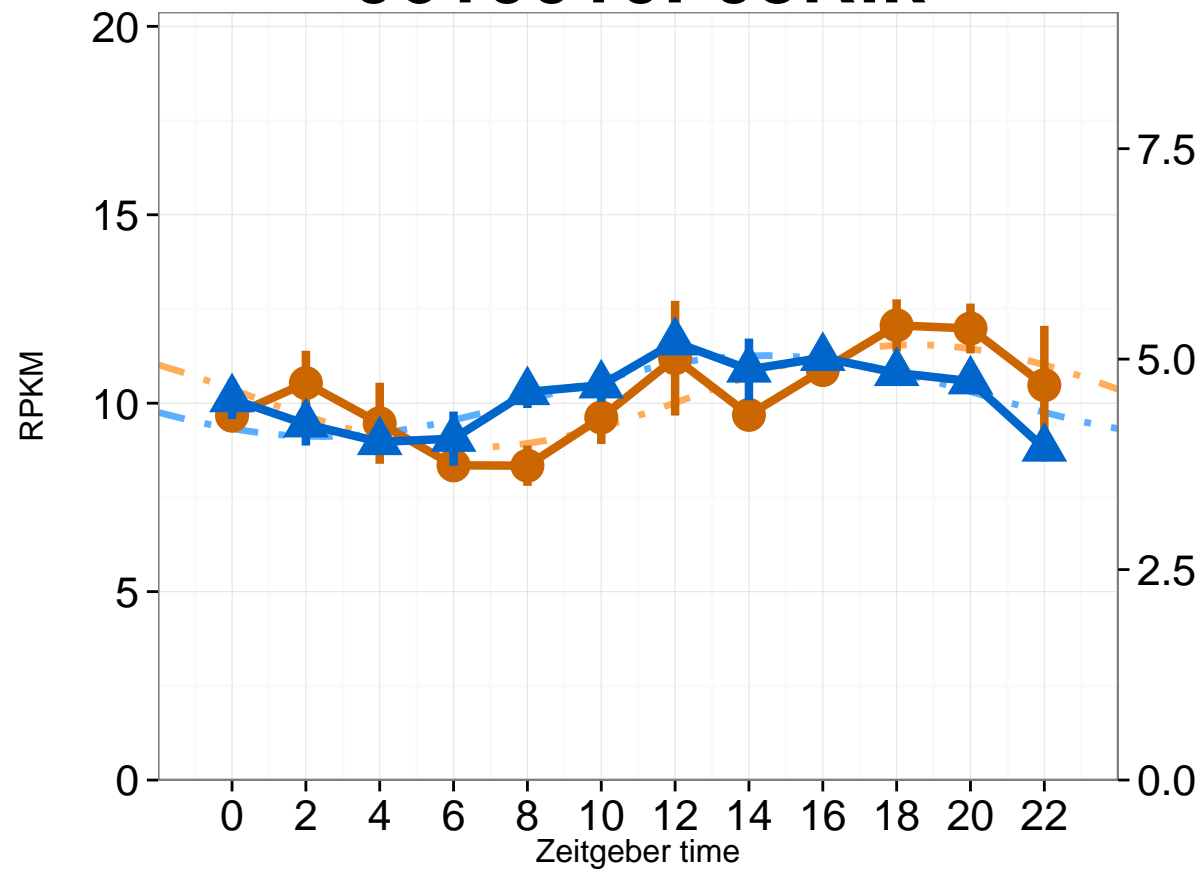

## 0610010F05Rik

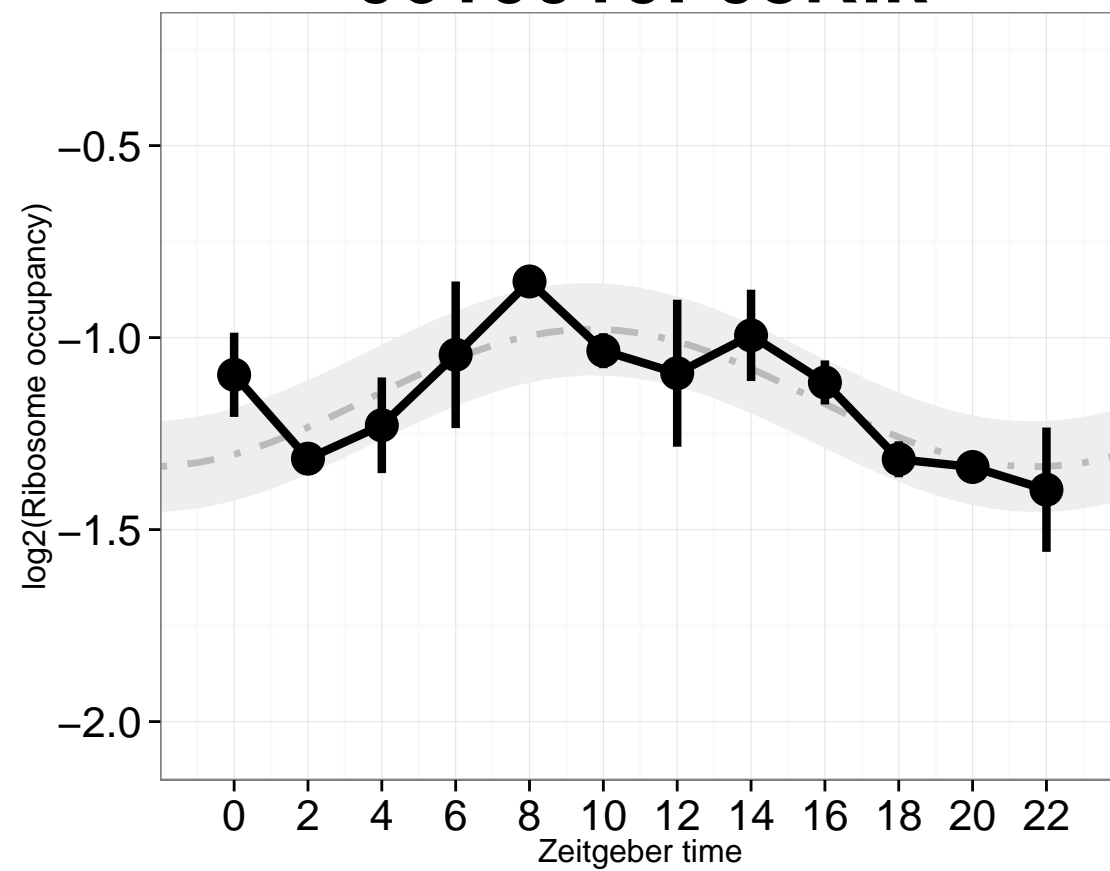

Supplement: Supplementary file 11958 [file 1]

## Cetn3

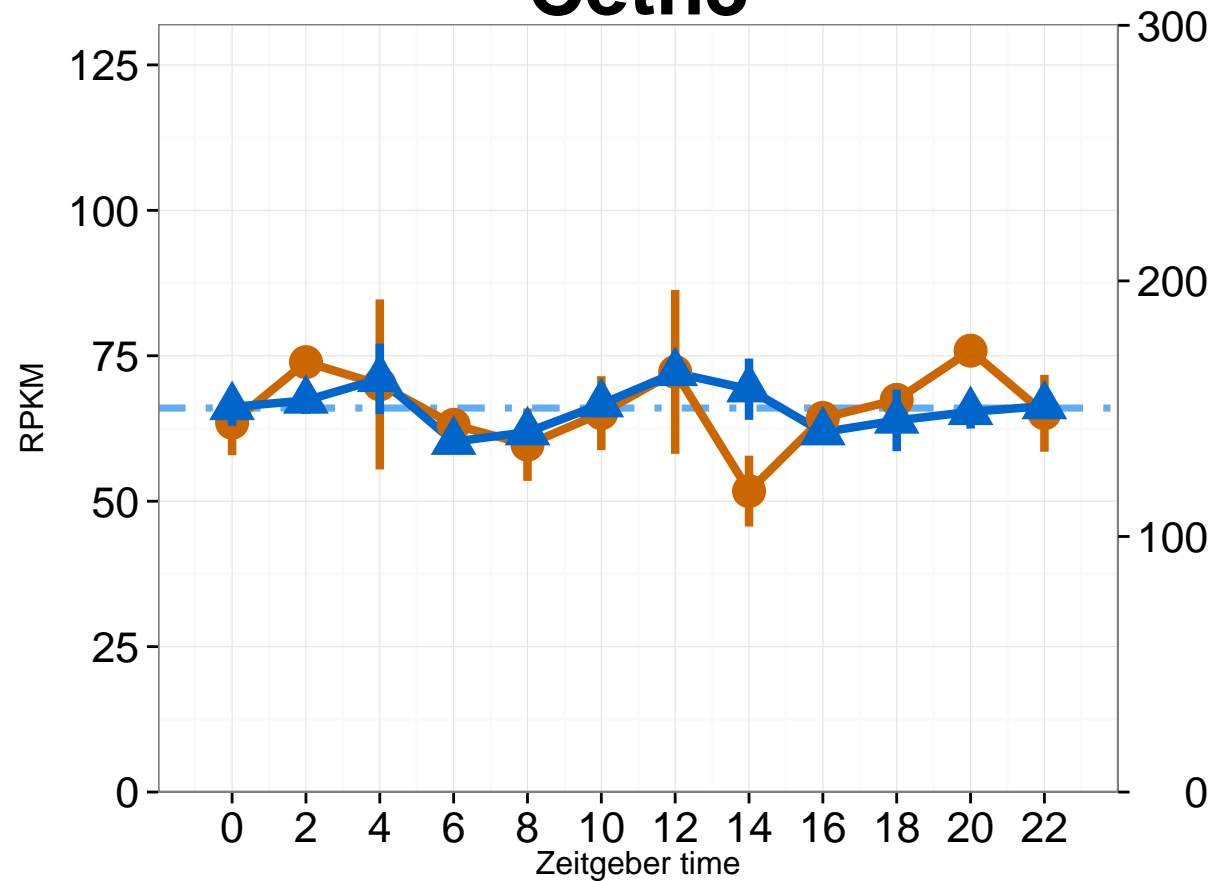

## Cetn3

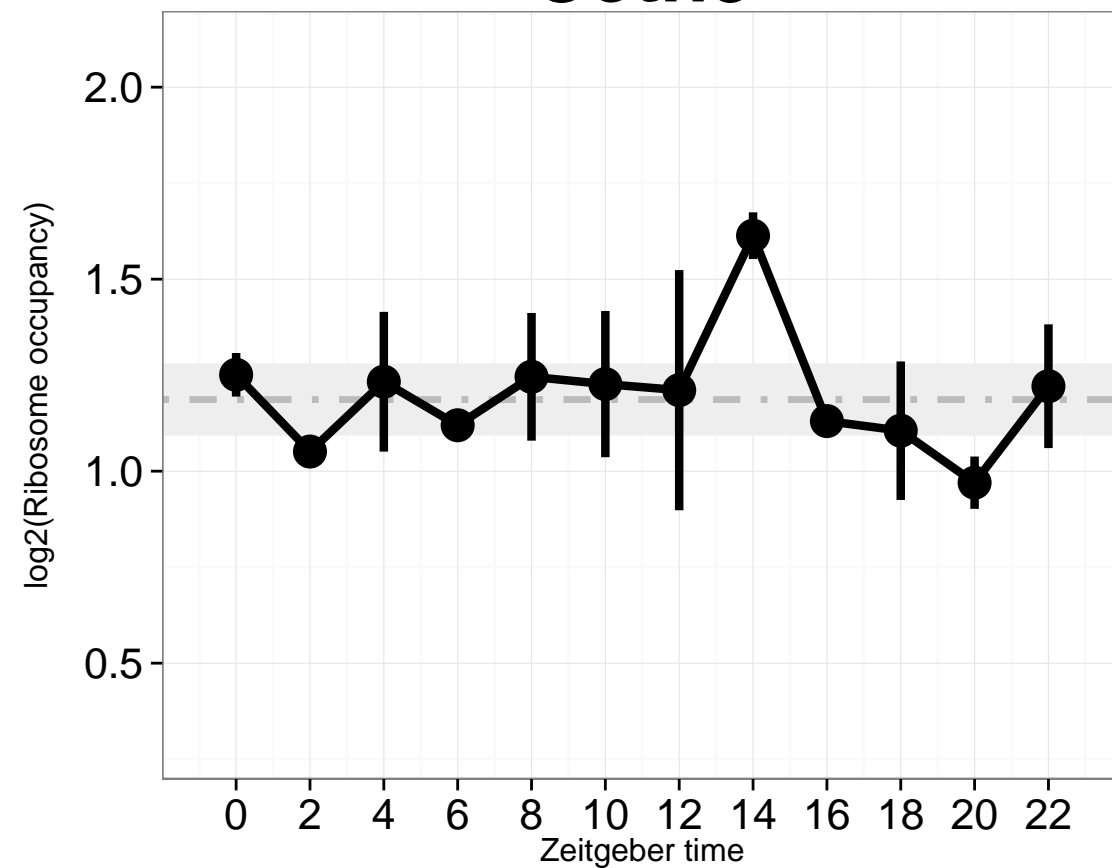

Supplement: Supplementary file 11959 [file 1]

# Donson

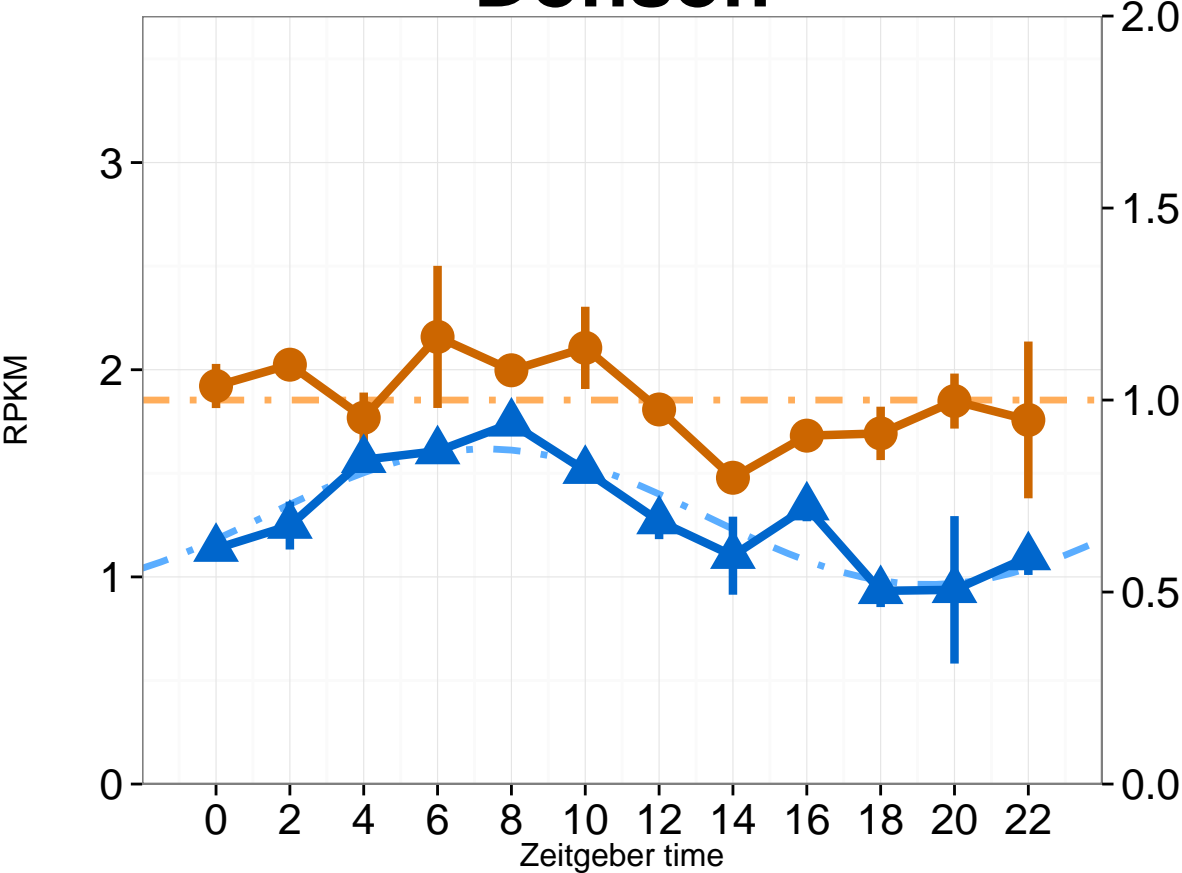

# Donson

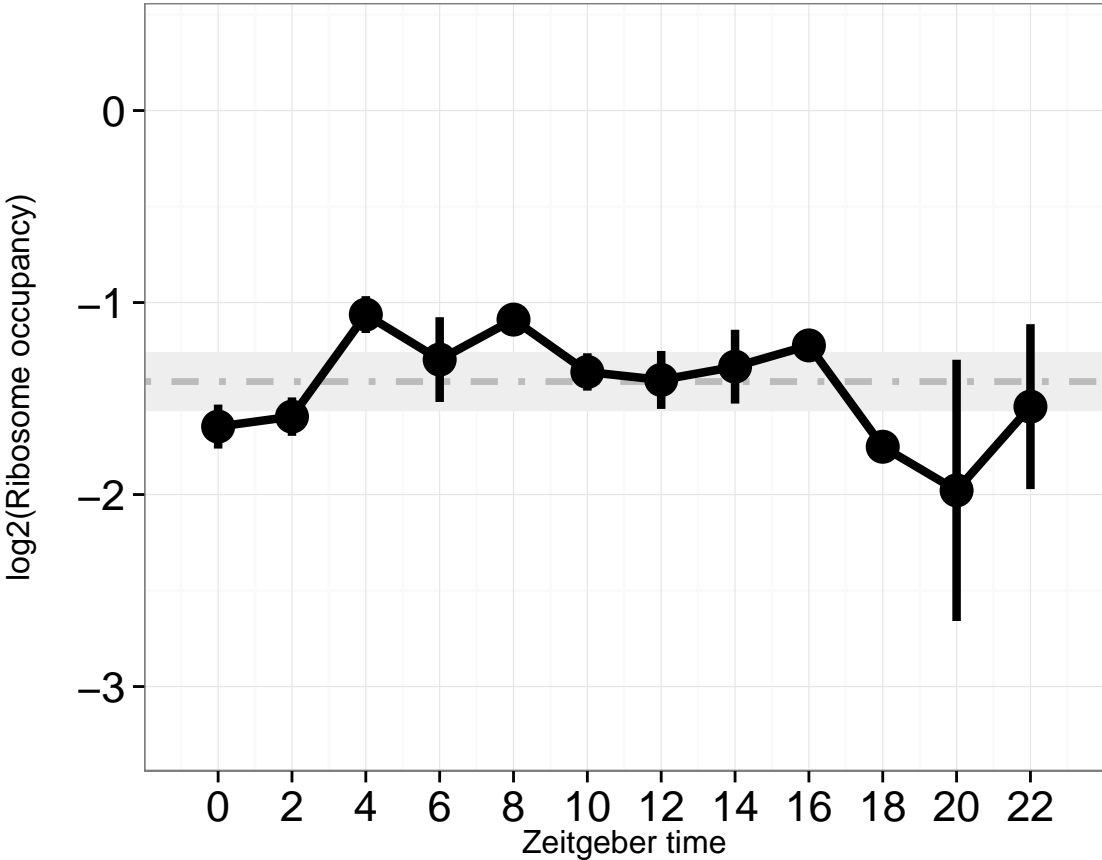

Supplement: Supplementary file 11960 [file 1]

# Capn11

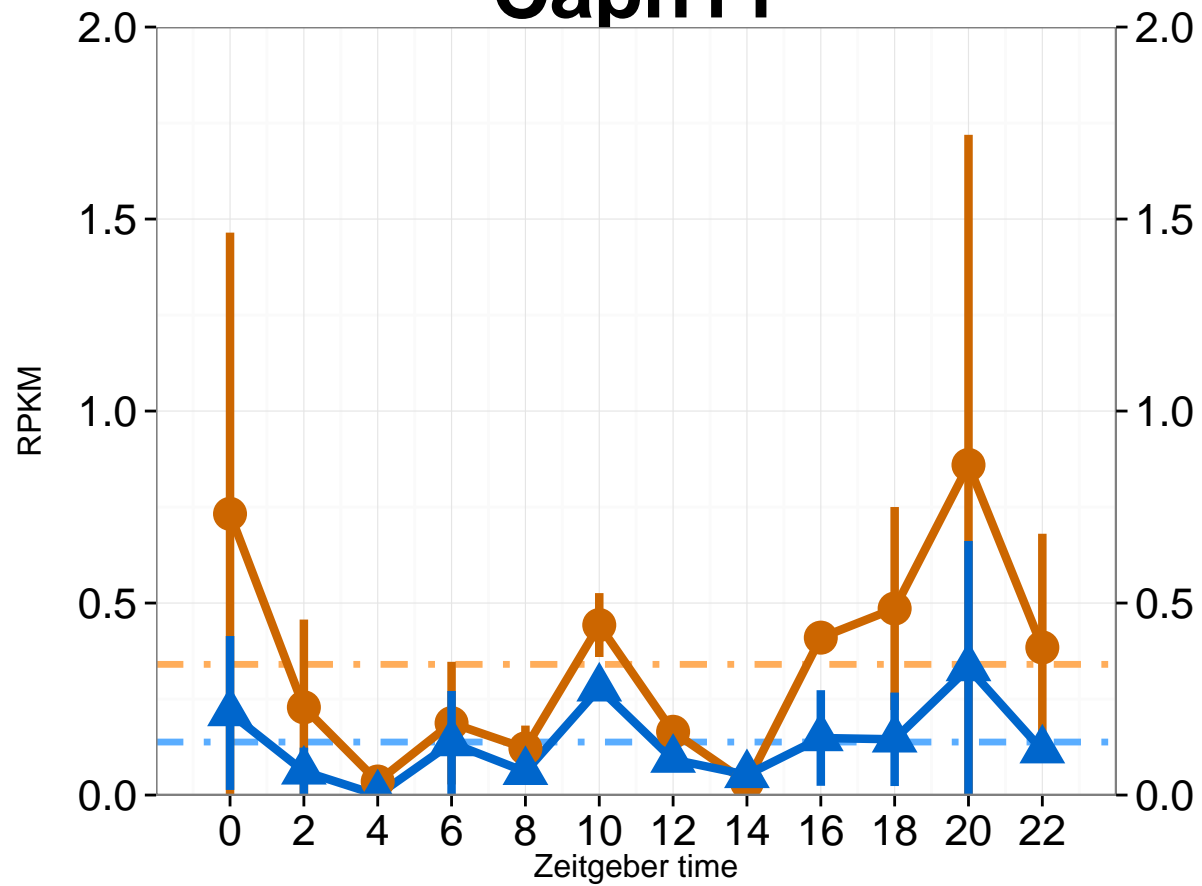

# Capn11

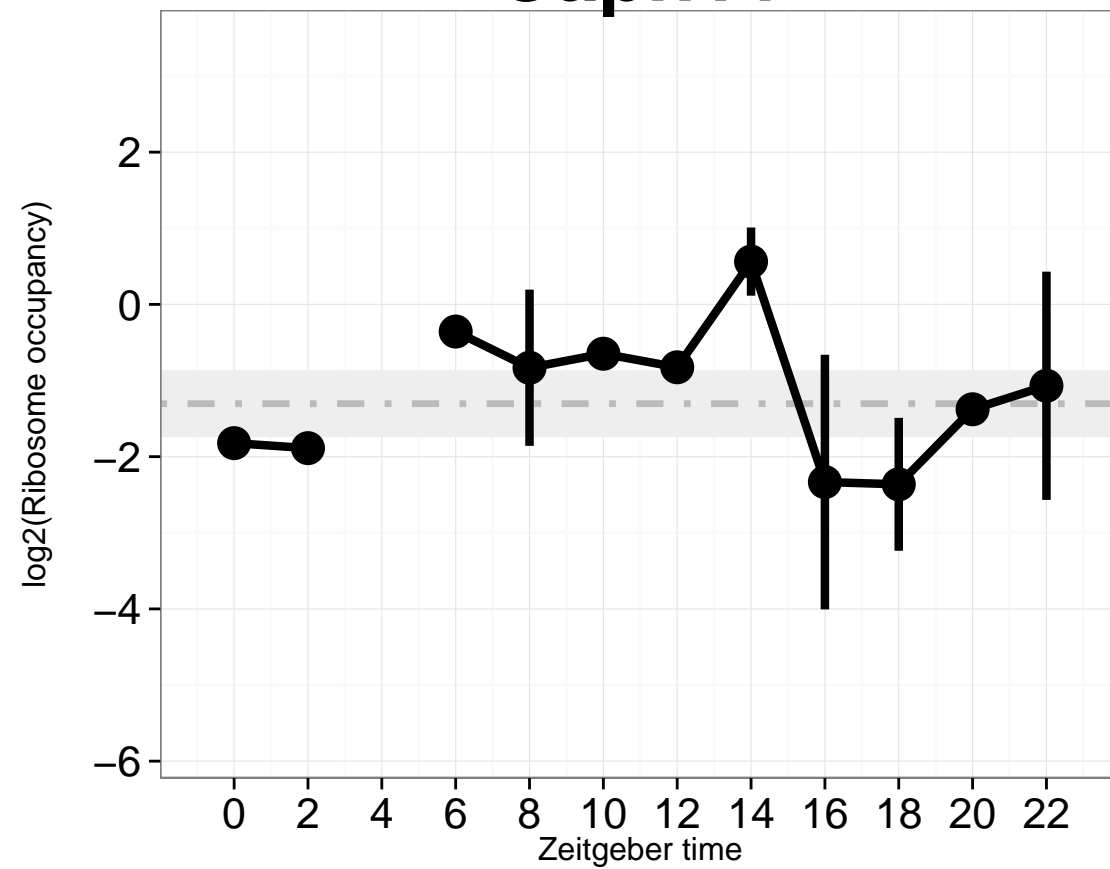

Supplement: Supplementary file 11961 [file 1]

# ScIt1

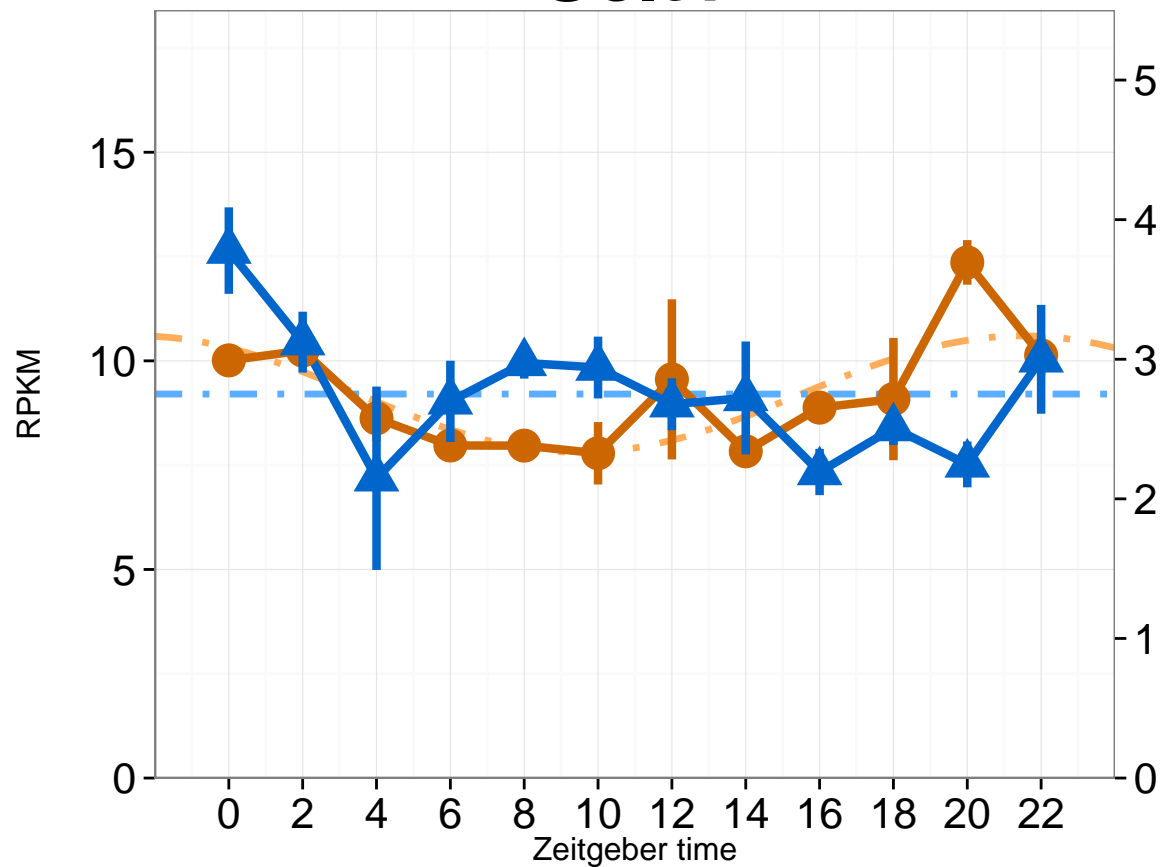

# ScIt1

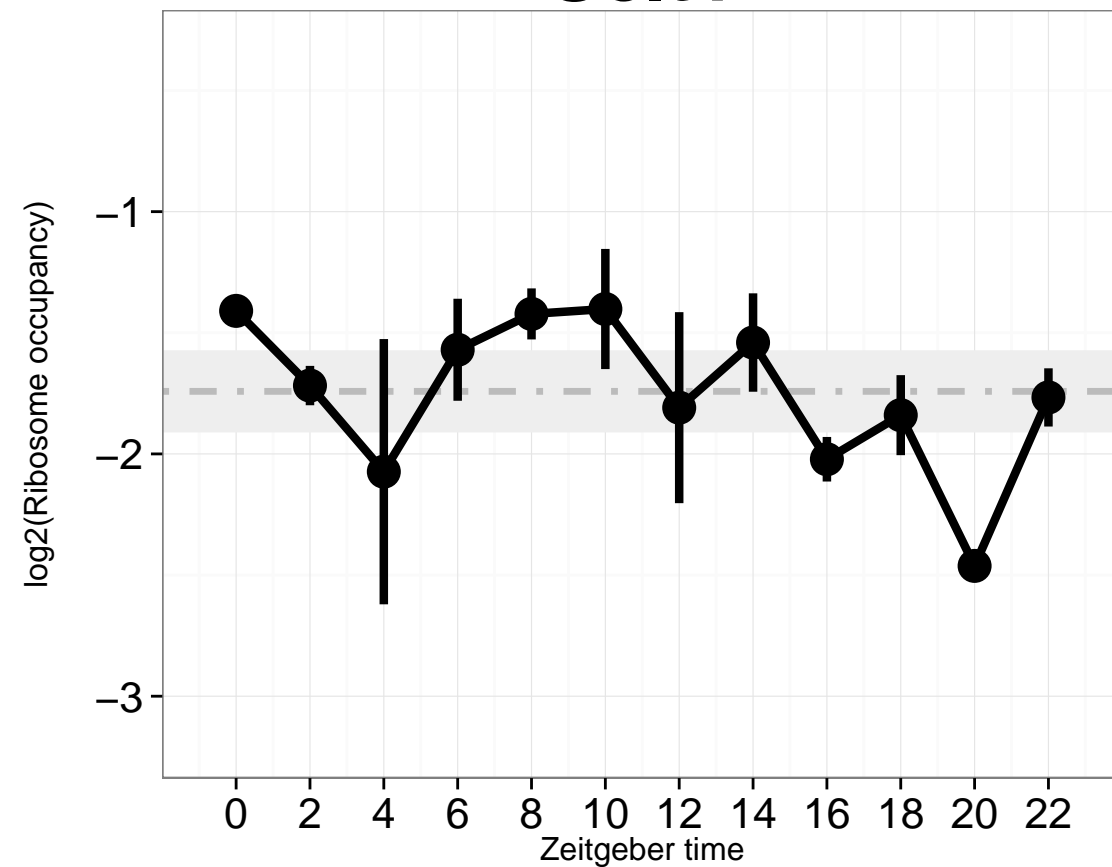

Supplement: Supplementary file 11962 [file 1]

# Ppp1r14b

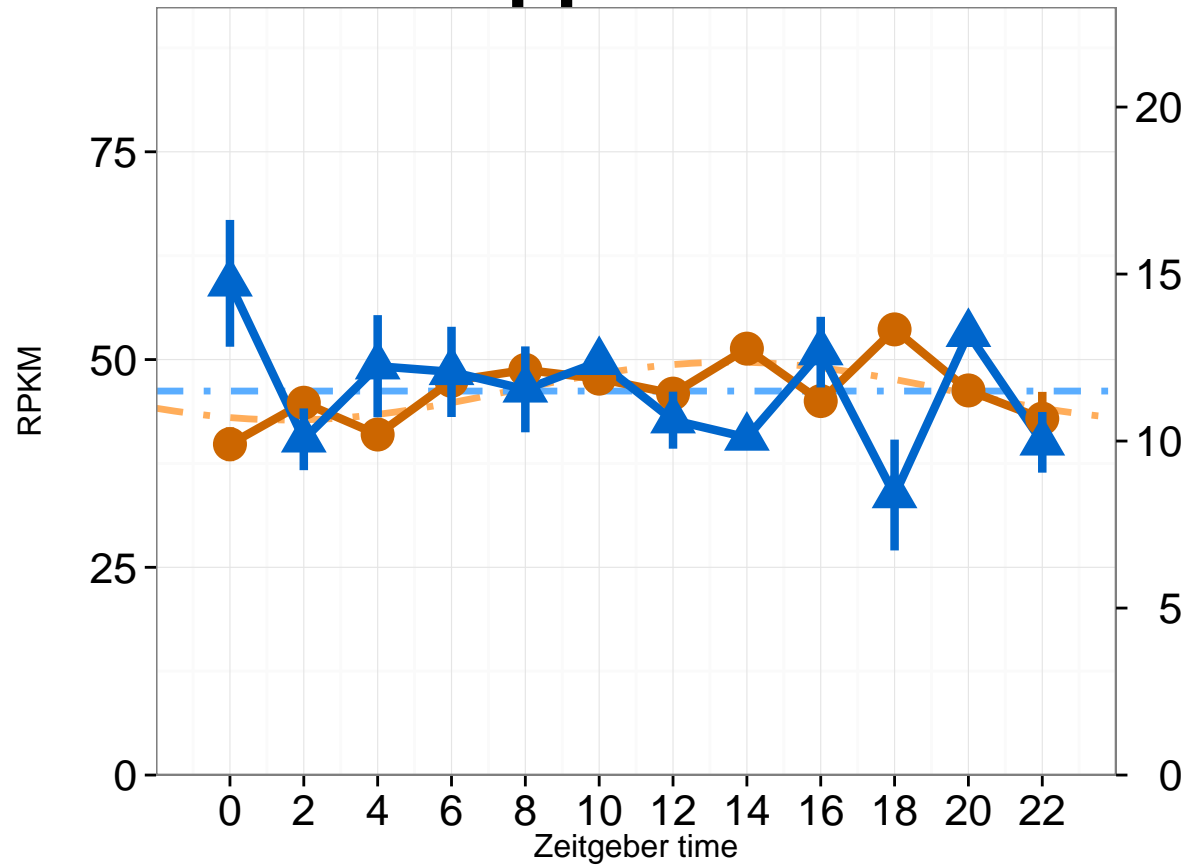

# Ppp1r14b

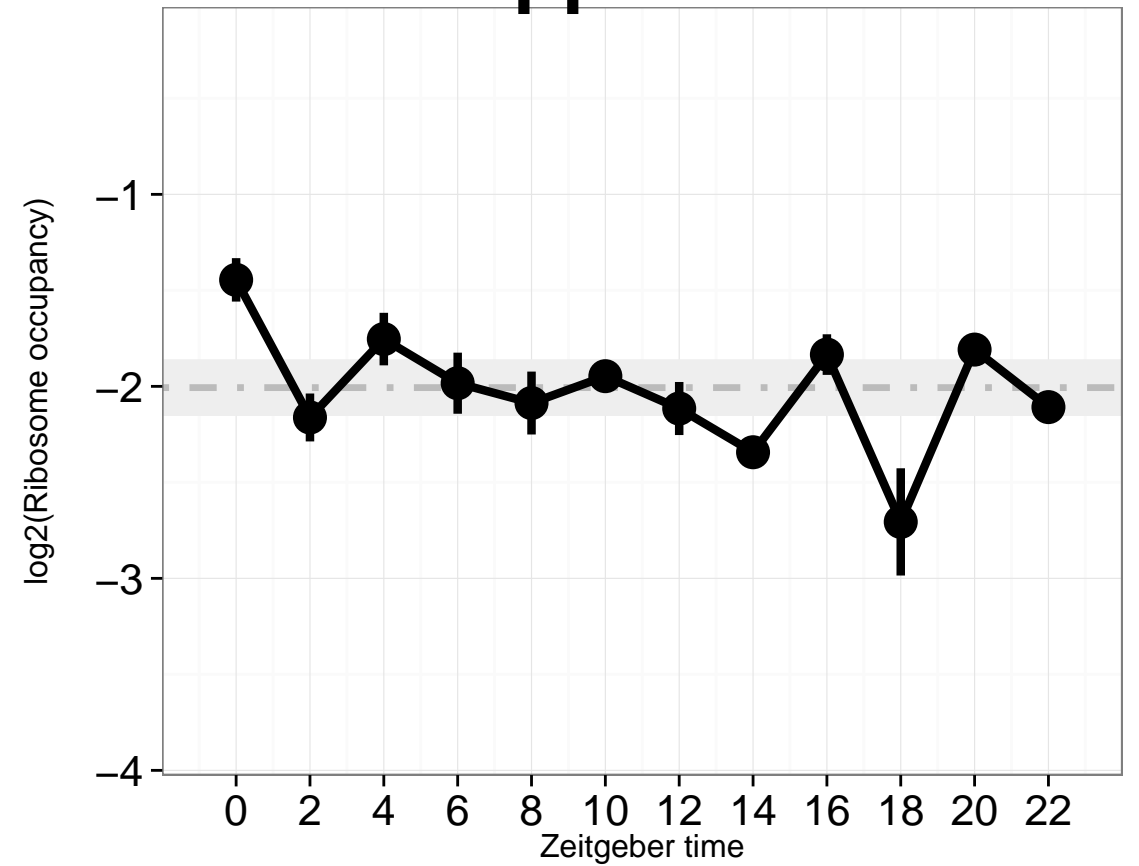

Supplement: Supplementary file 11963 [file 1]

## Xrcc5

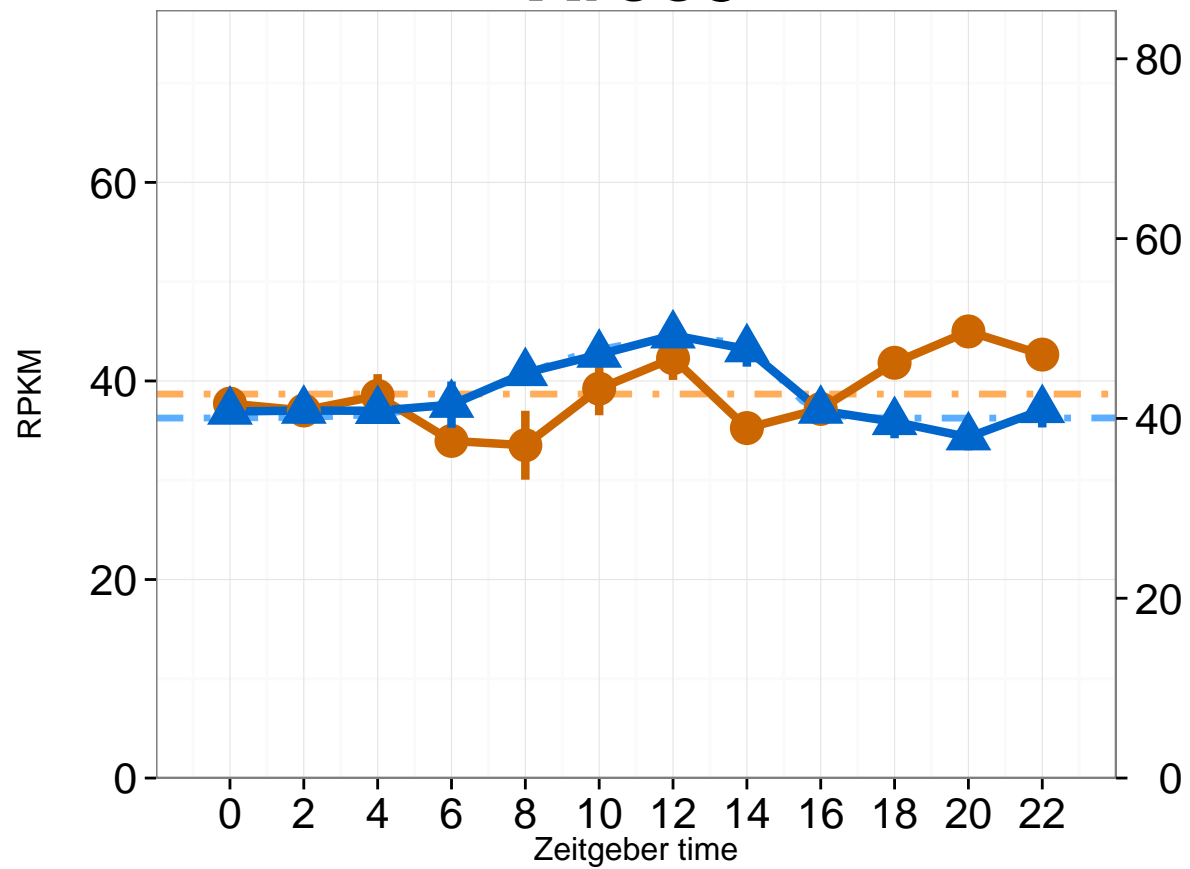

## Xrcc5

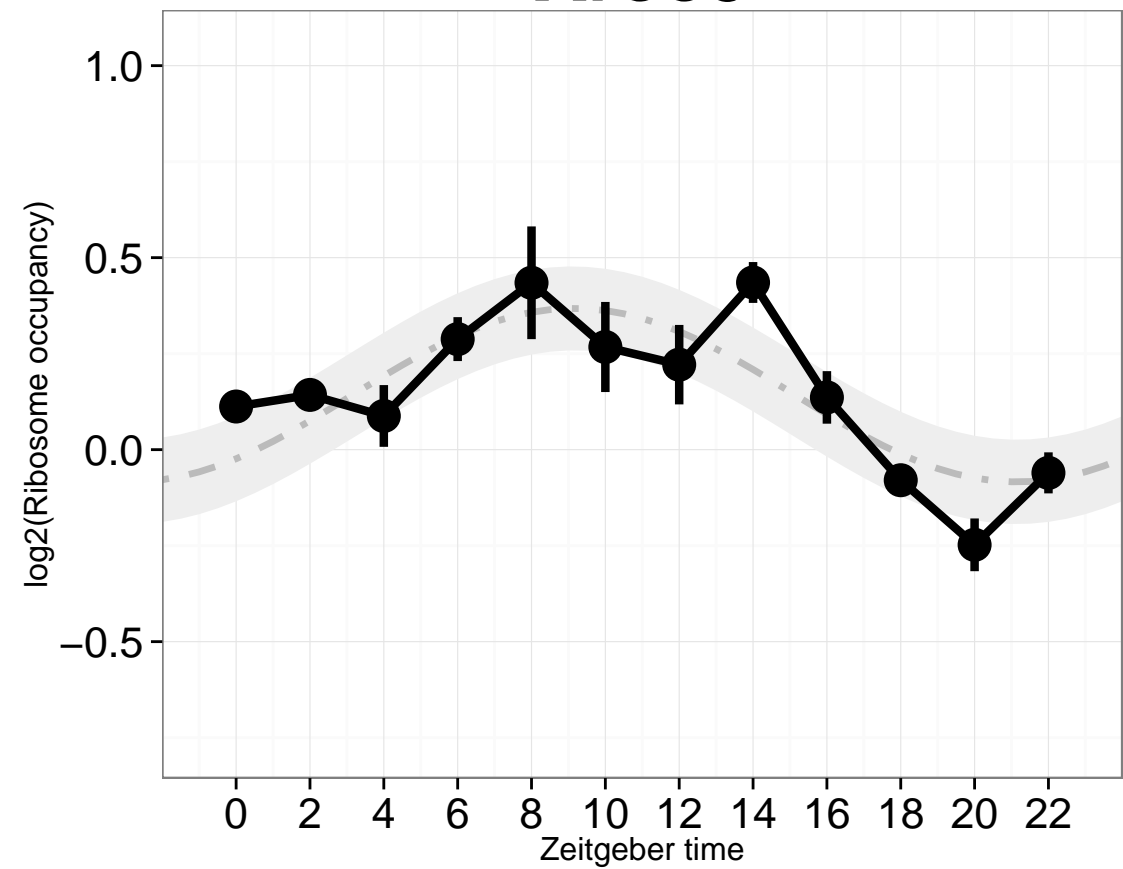

Supplement: Supplementary file 11964 [file 1]

## U2af1l4

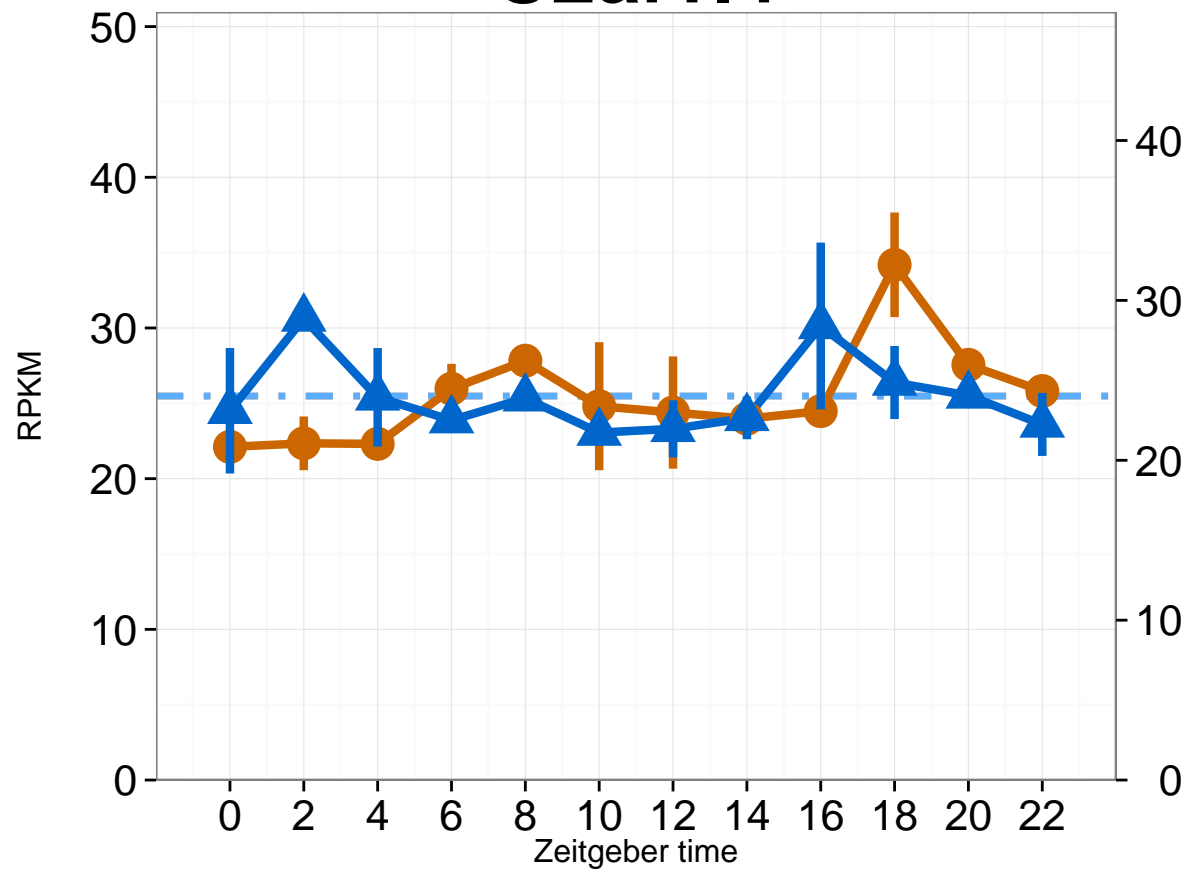

## U2af1l4

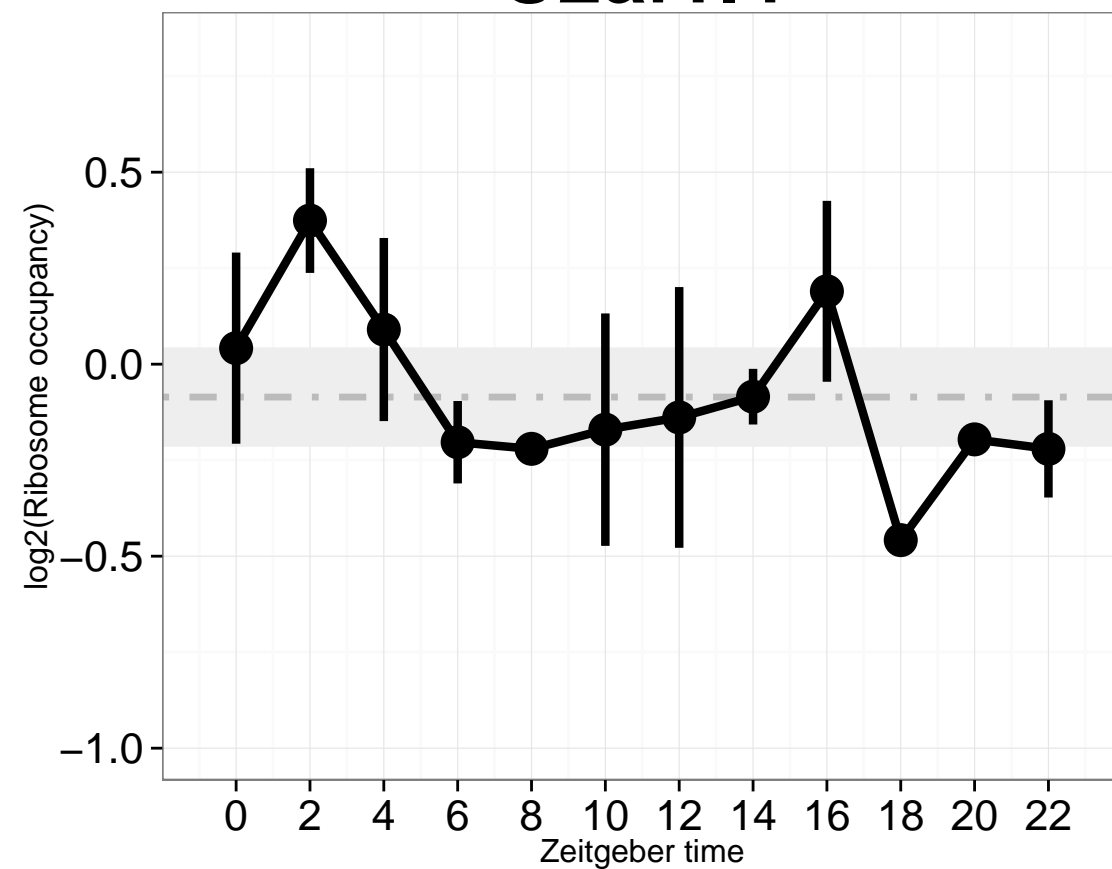

Supplement: Supplementary file 11965 [file 1]

## Fbxo4

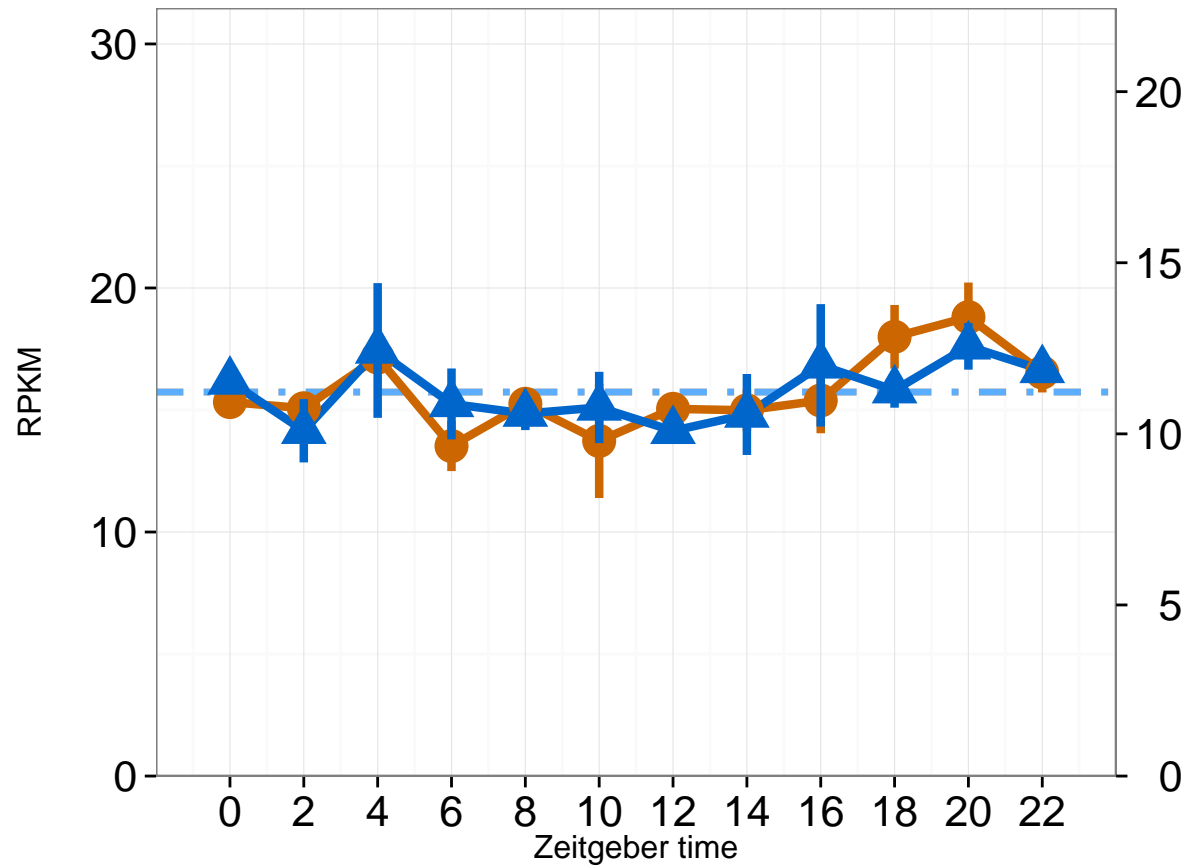

## Fbxo4

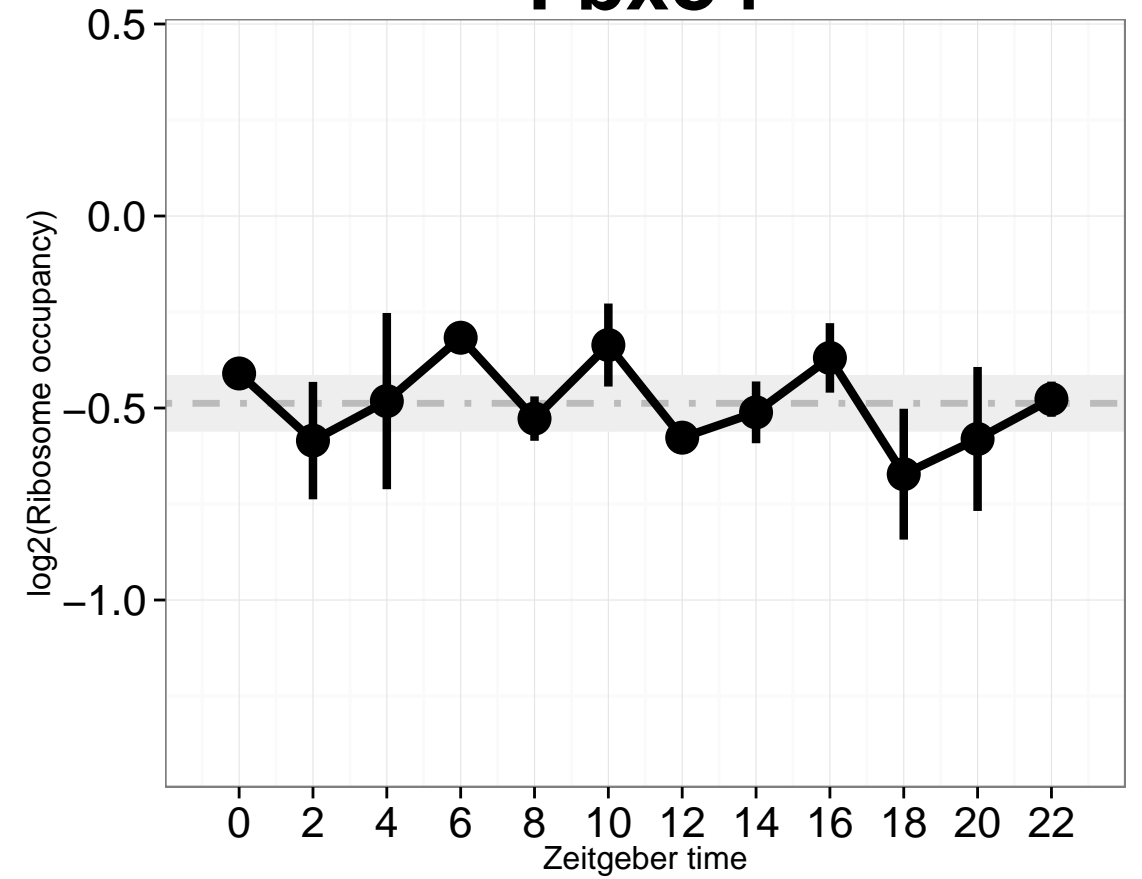

Supplement: Supplementary file 11966 [file 1]

## Ptch2

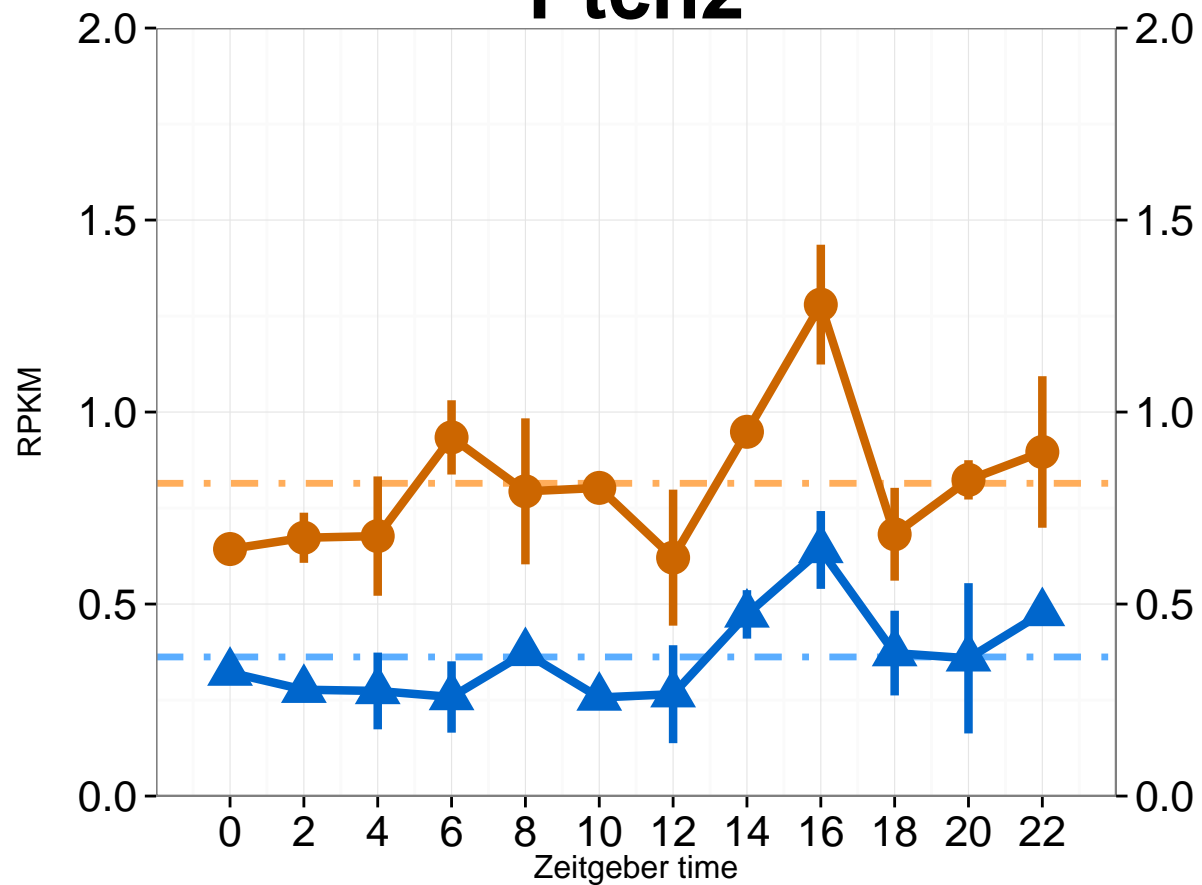

## Ptch2

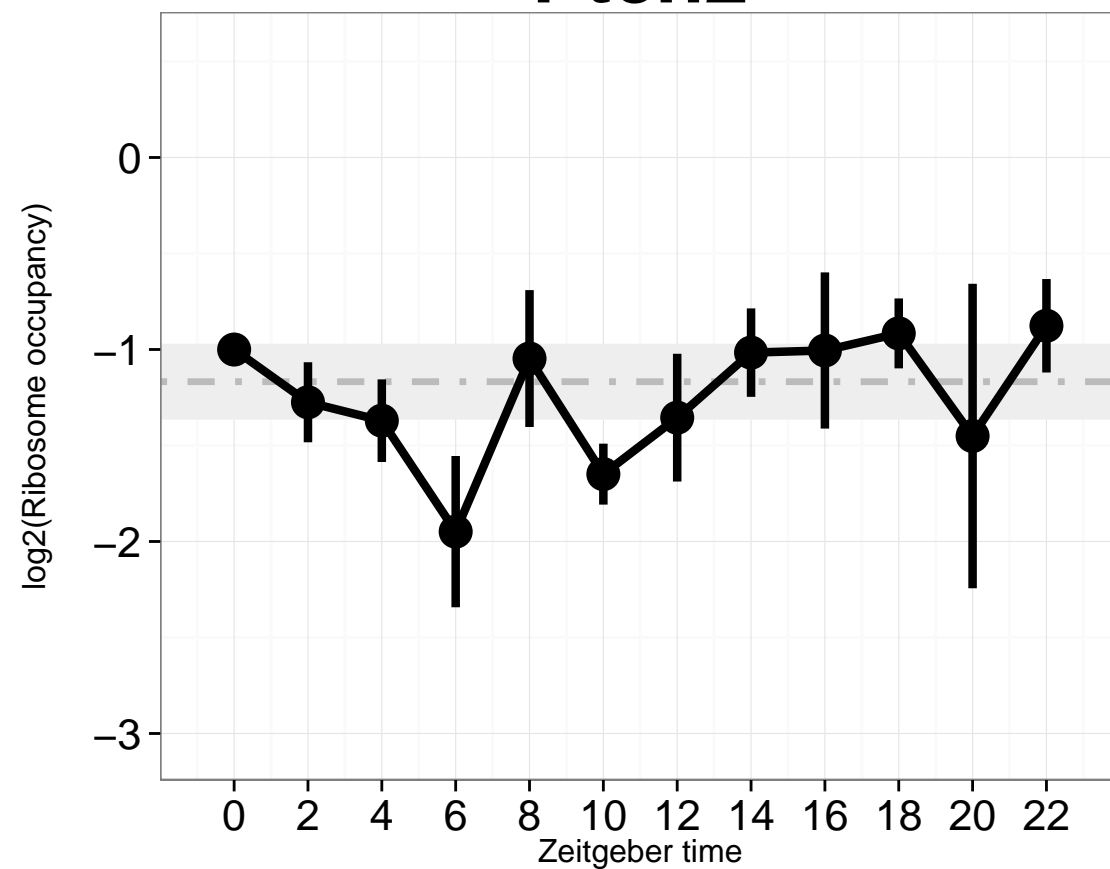

Supplement: Supplementary file 11967 [file 1]

## Tti2

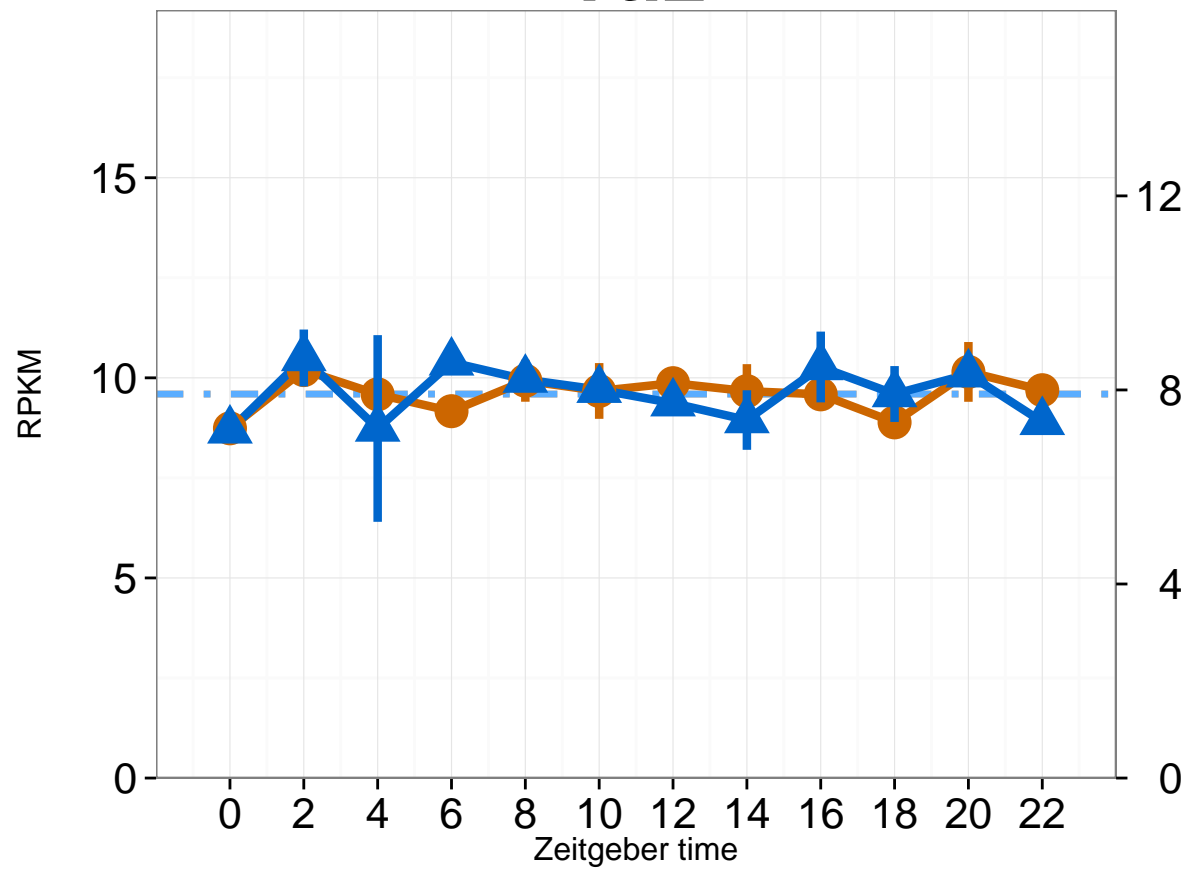

## Tti2

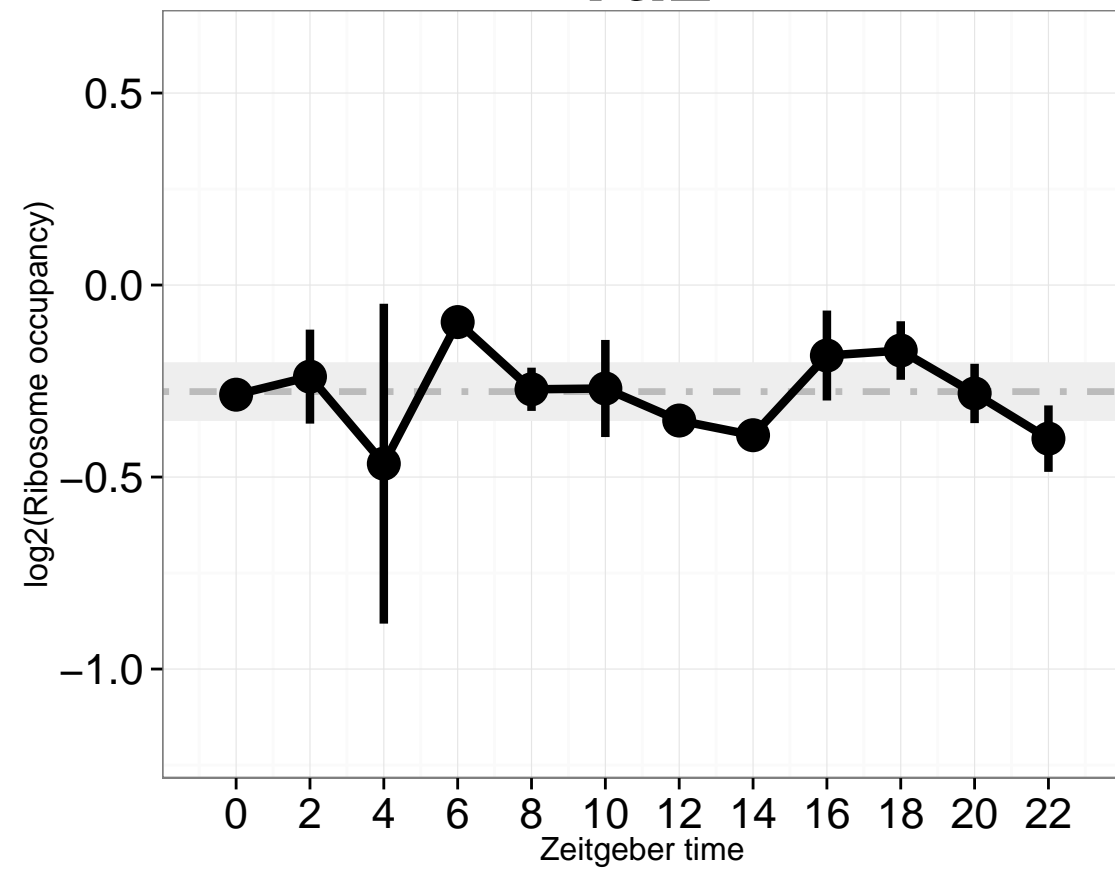

Supplement: Supplementary file 11968 [file 1]

## Pan3

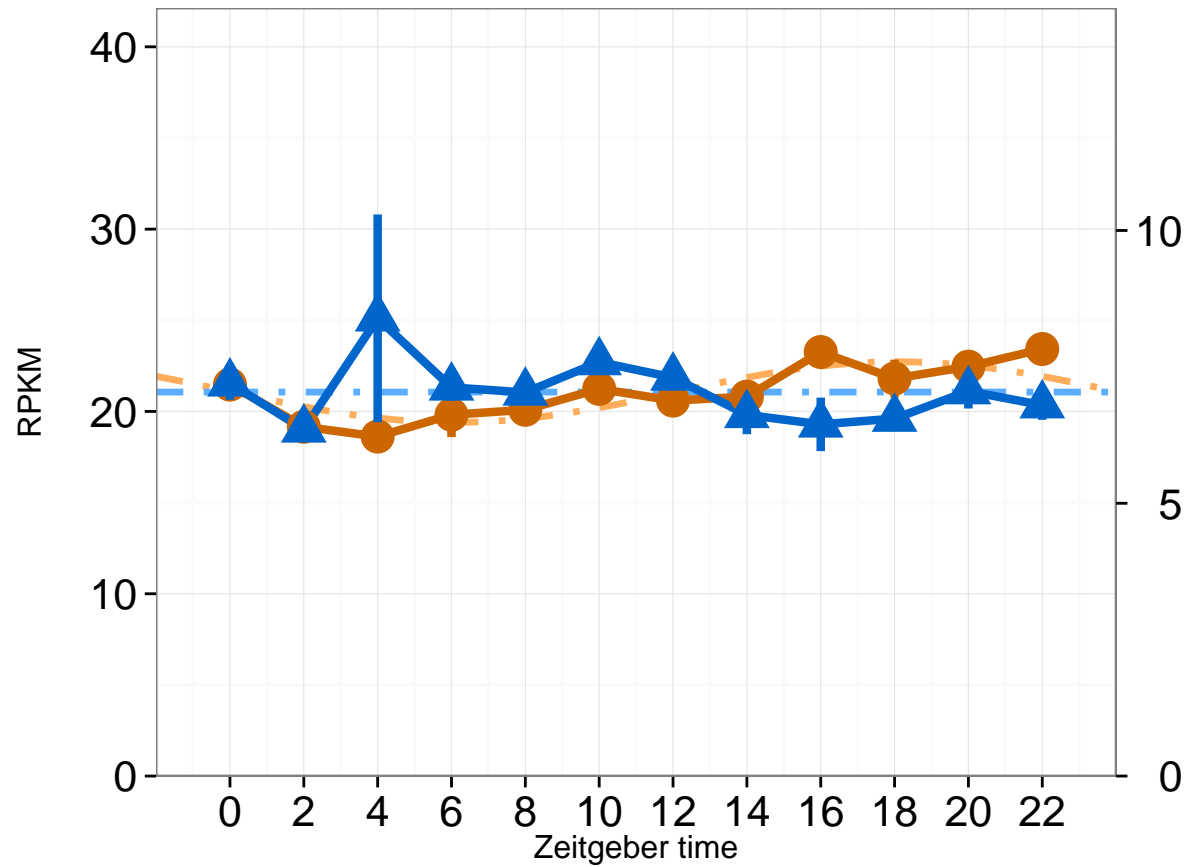

## Pan3

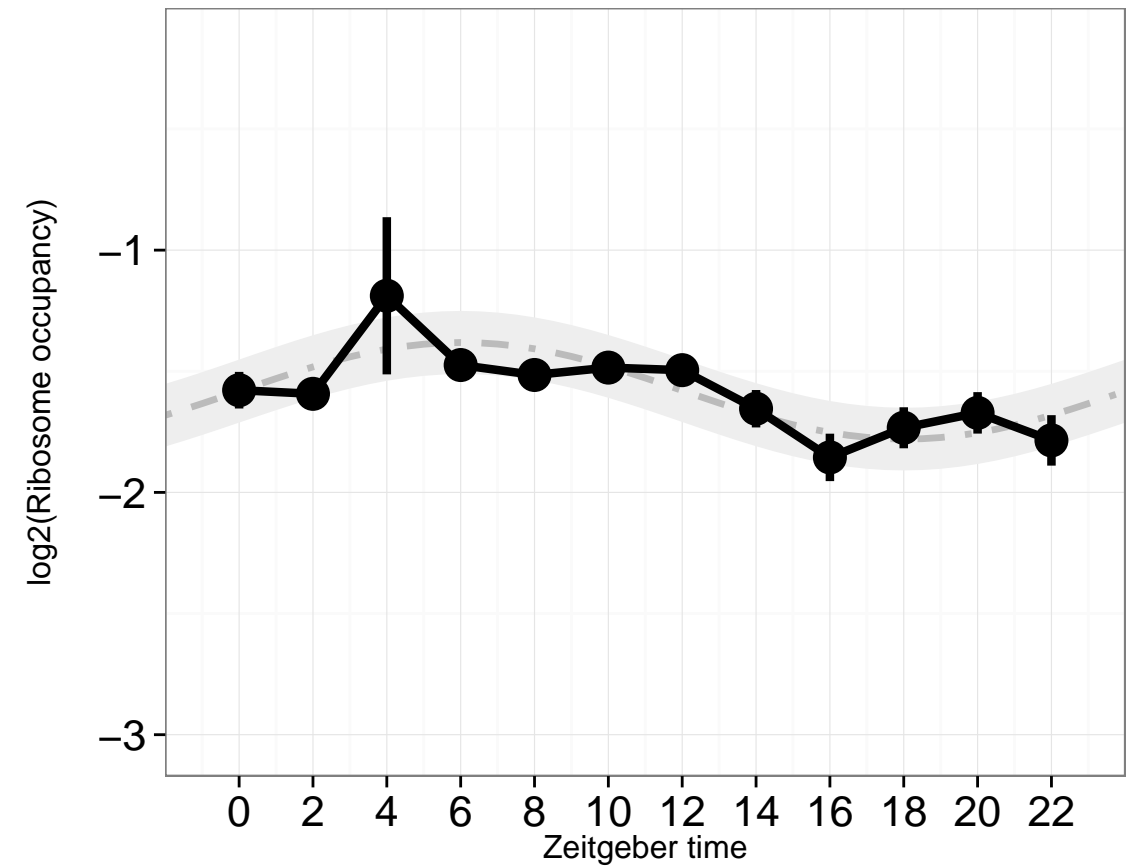

Supplement: Supplementary file 11969 [file 1]

# Pcgf3

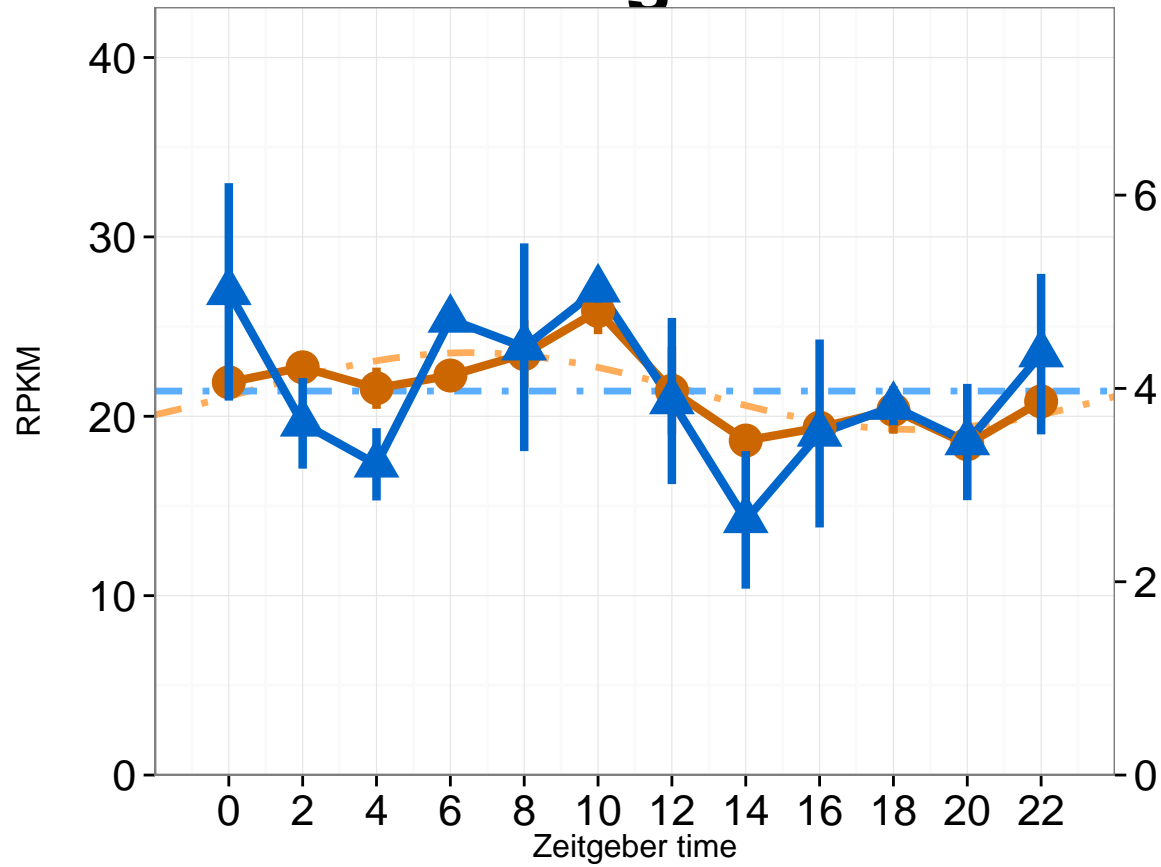

# Pcgf3

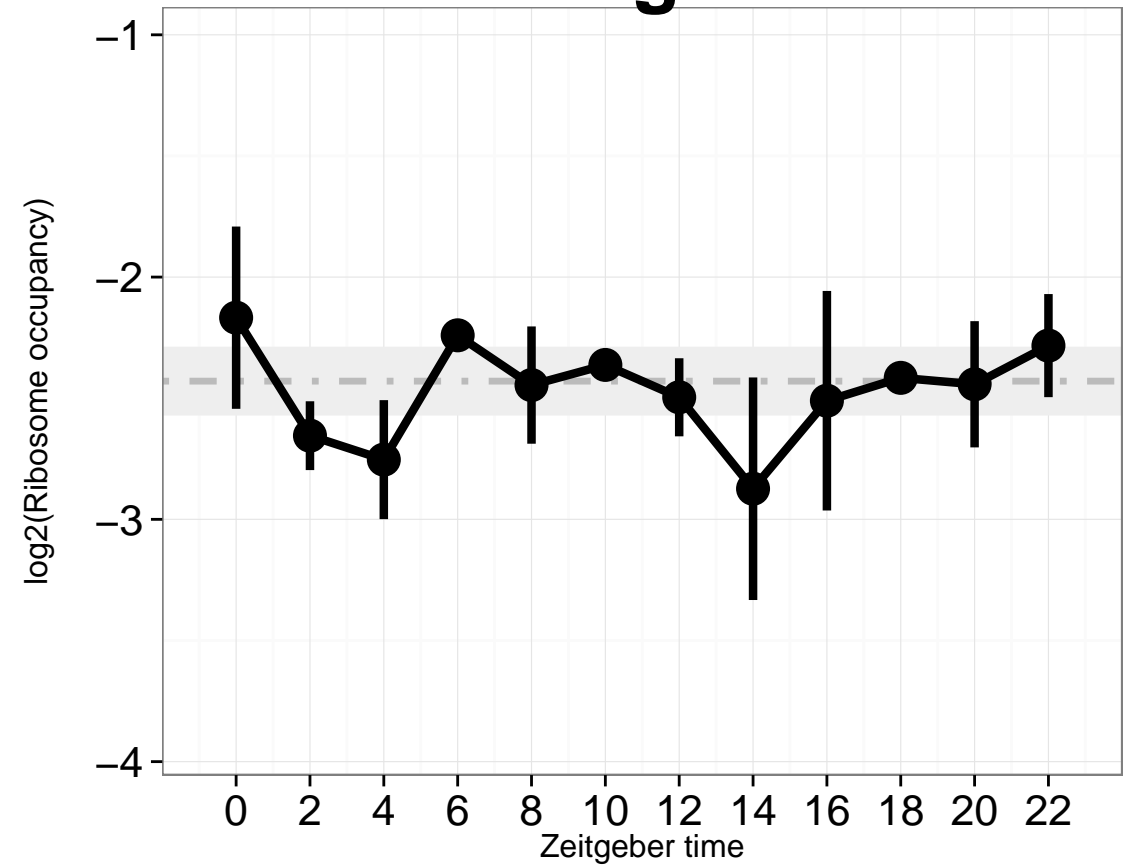

Supplement: Supplementary file 11970 [file 1]

# Gm21807

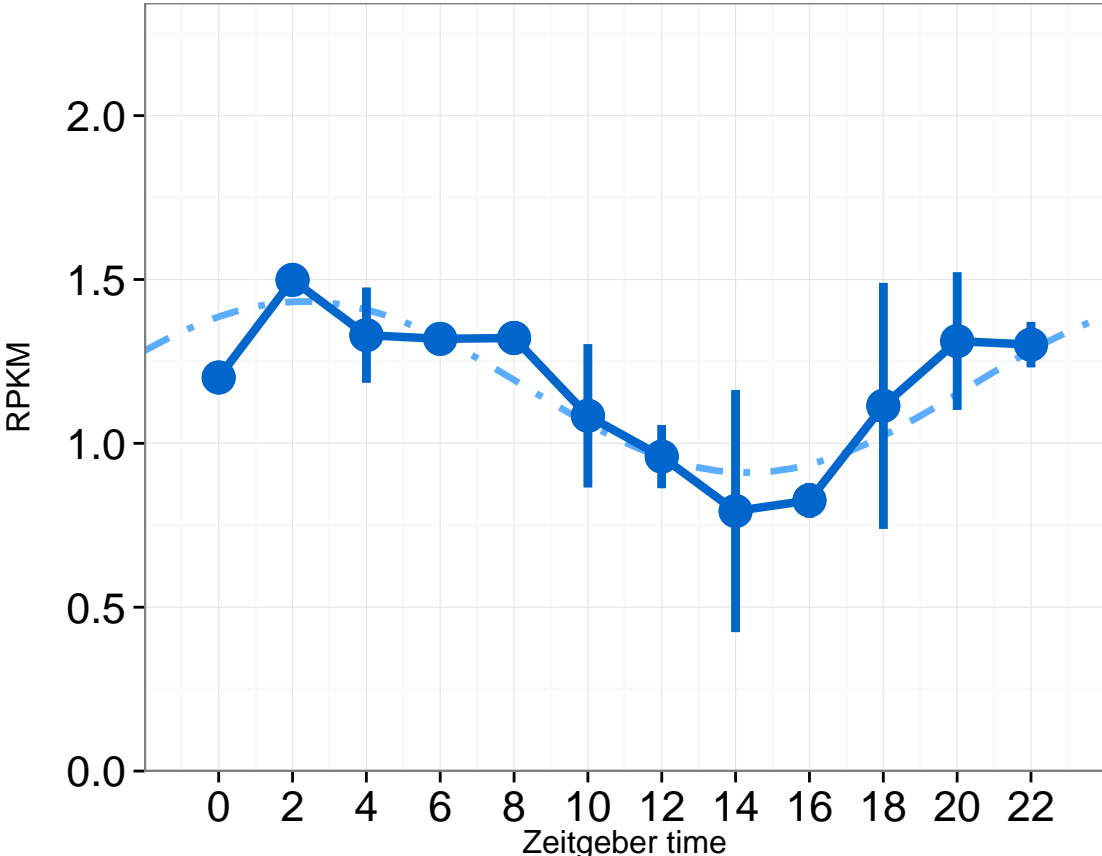

# Gm21807 log2(Ribosome occupanc

Supplement: Supplementary file 11971 [file 1]

## Abcf2

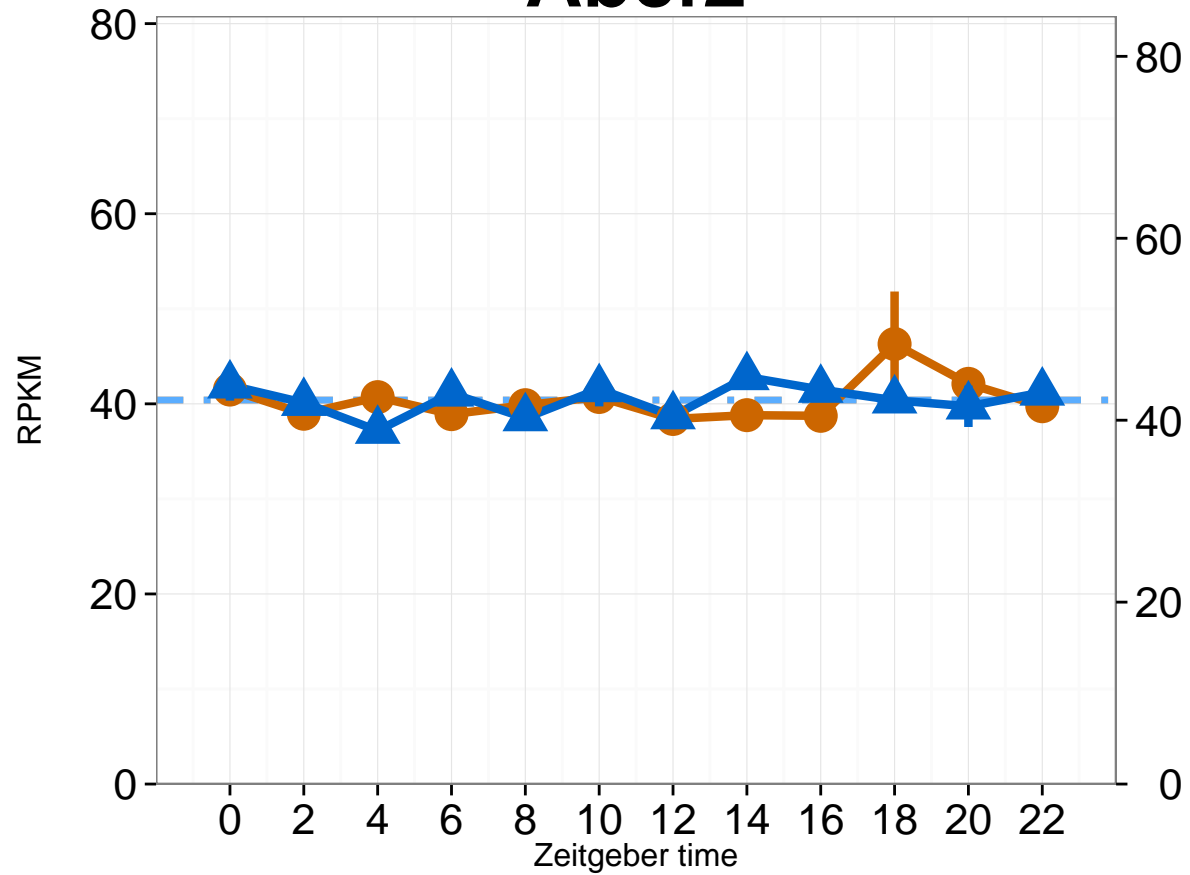

## Abcf2

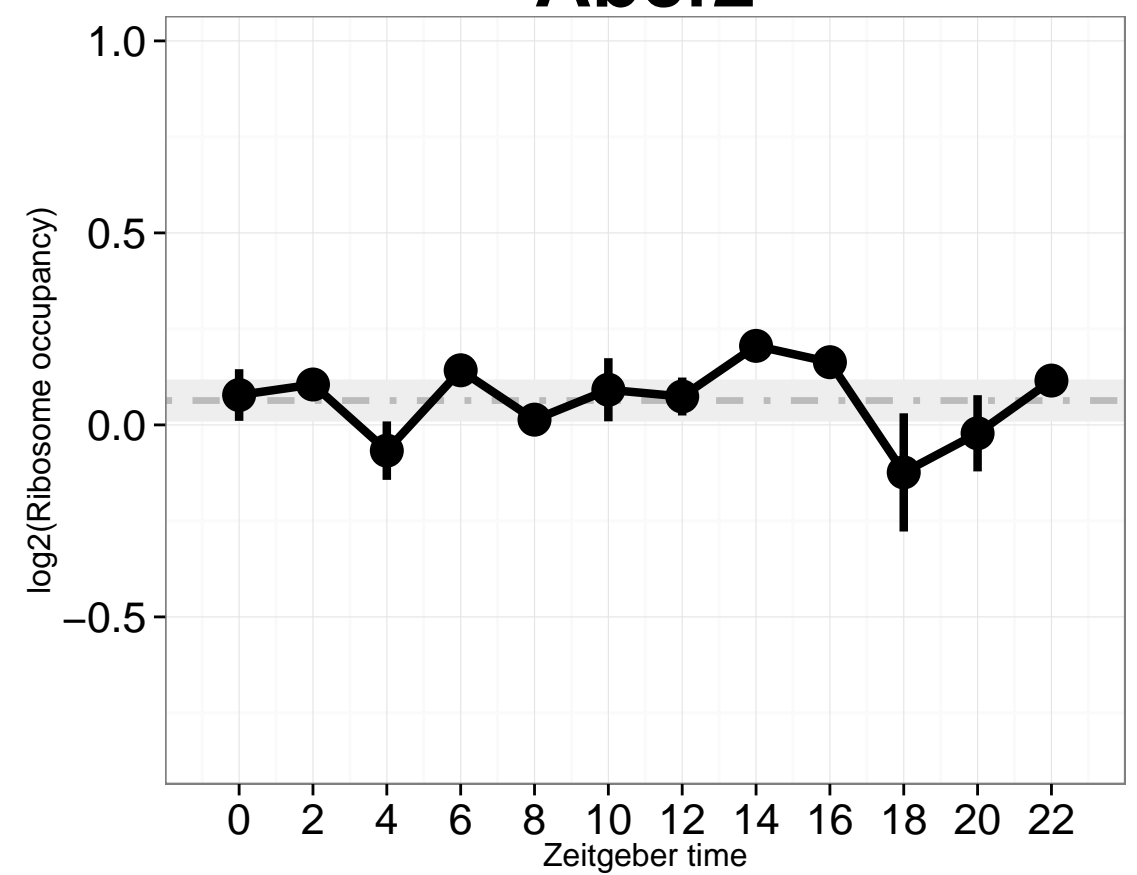

Supplement: Supplementary file 11972 [file 1]

# H2-T23

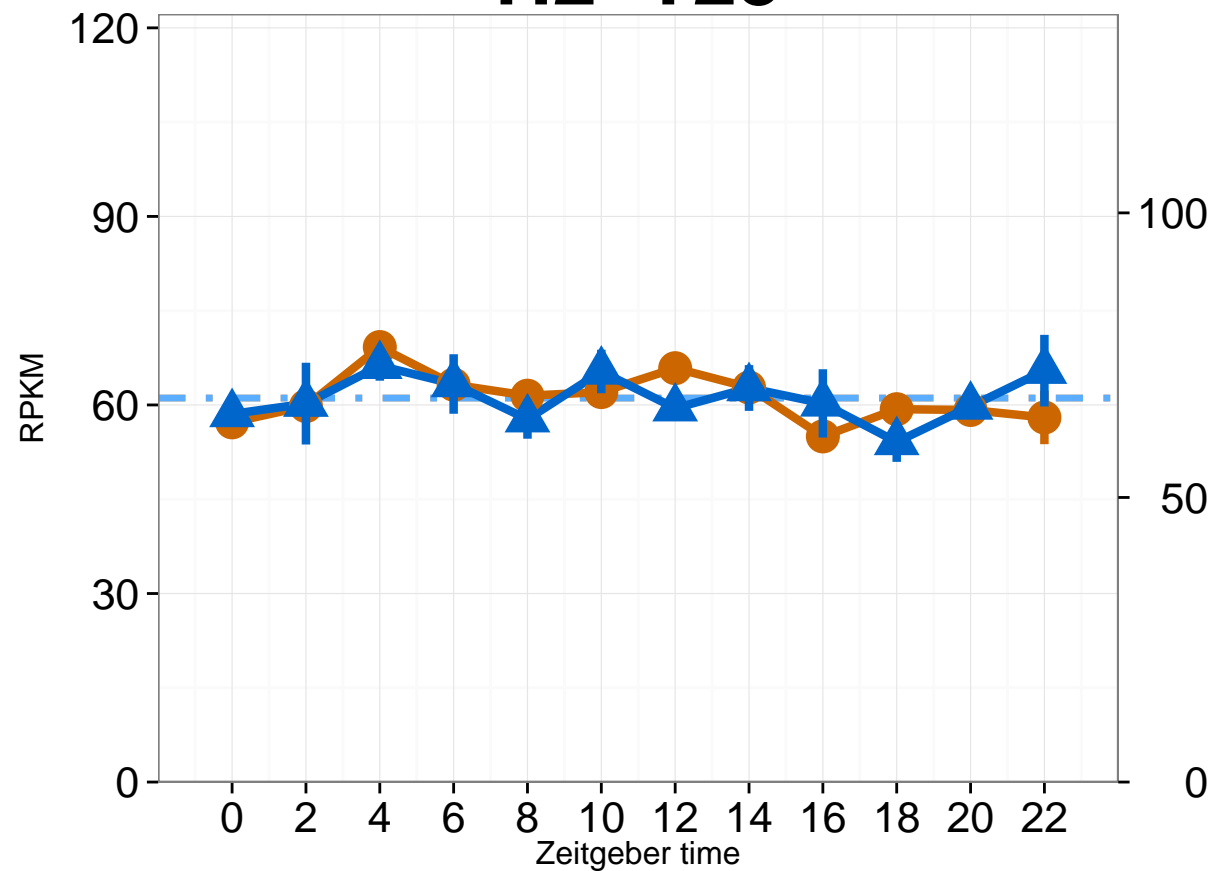

# H2-T23

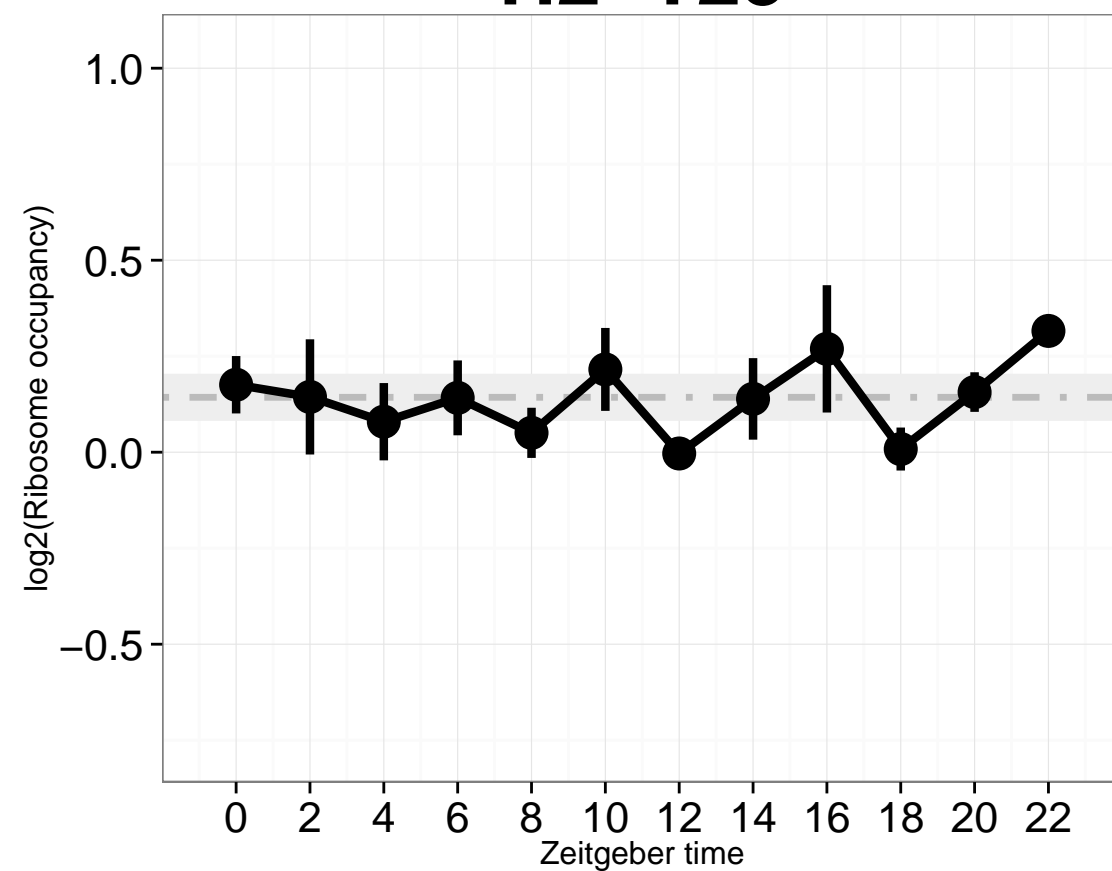

Supplement: Supplementary file 11973 [file 1]

## Wtap

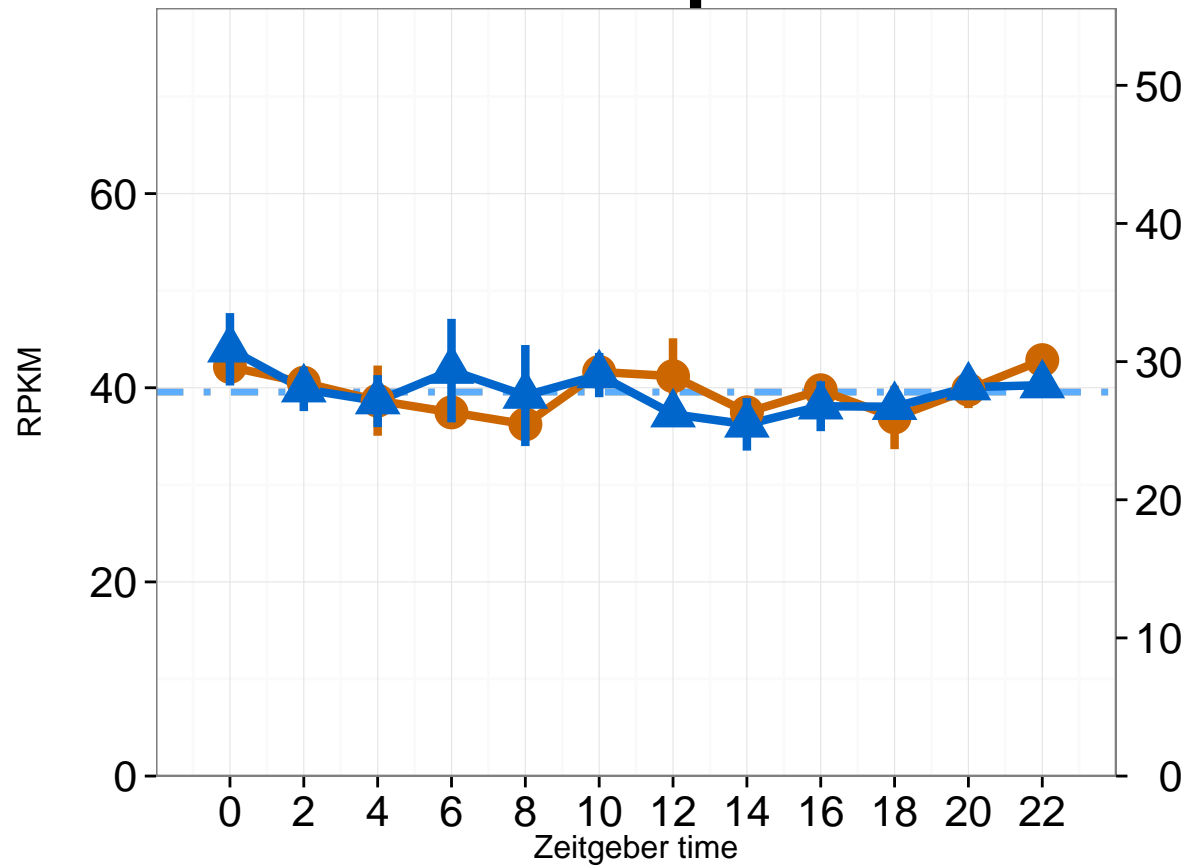

## Wtap

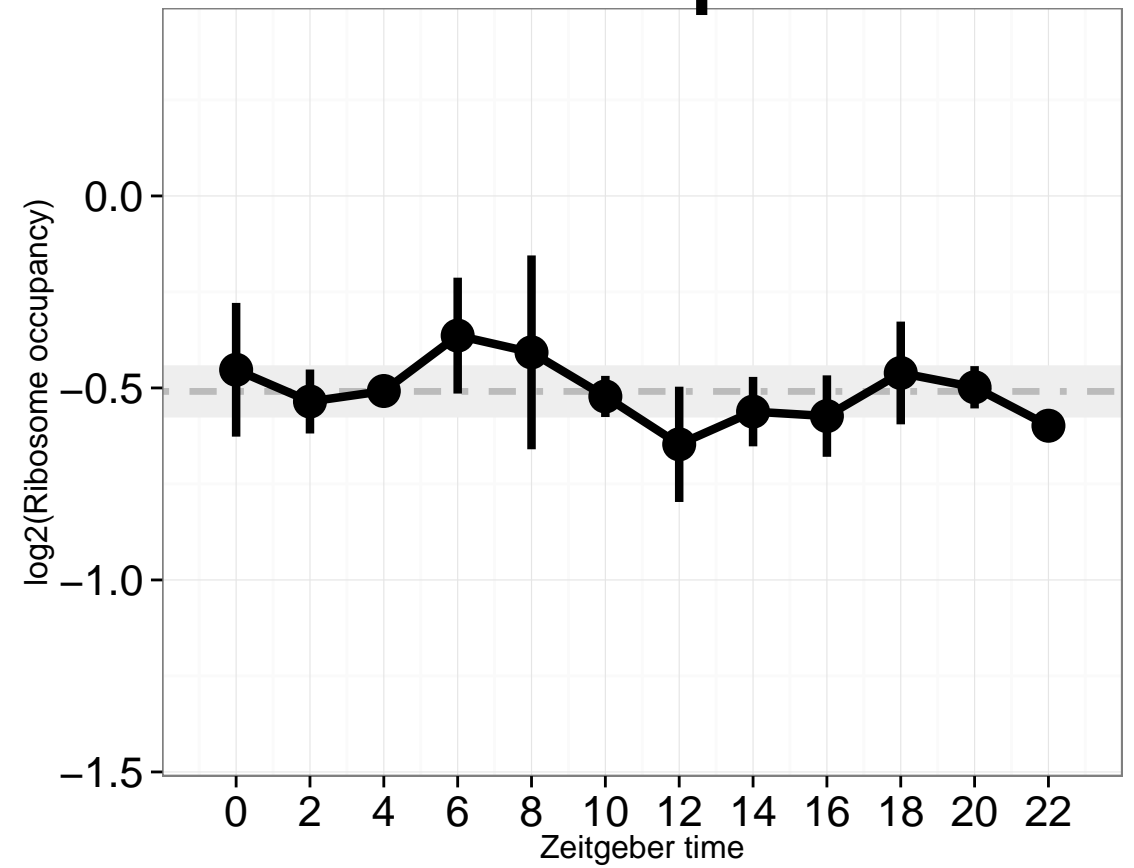

Supplement: Supplementary file 11974 [file 1]

## Dhfr

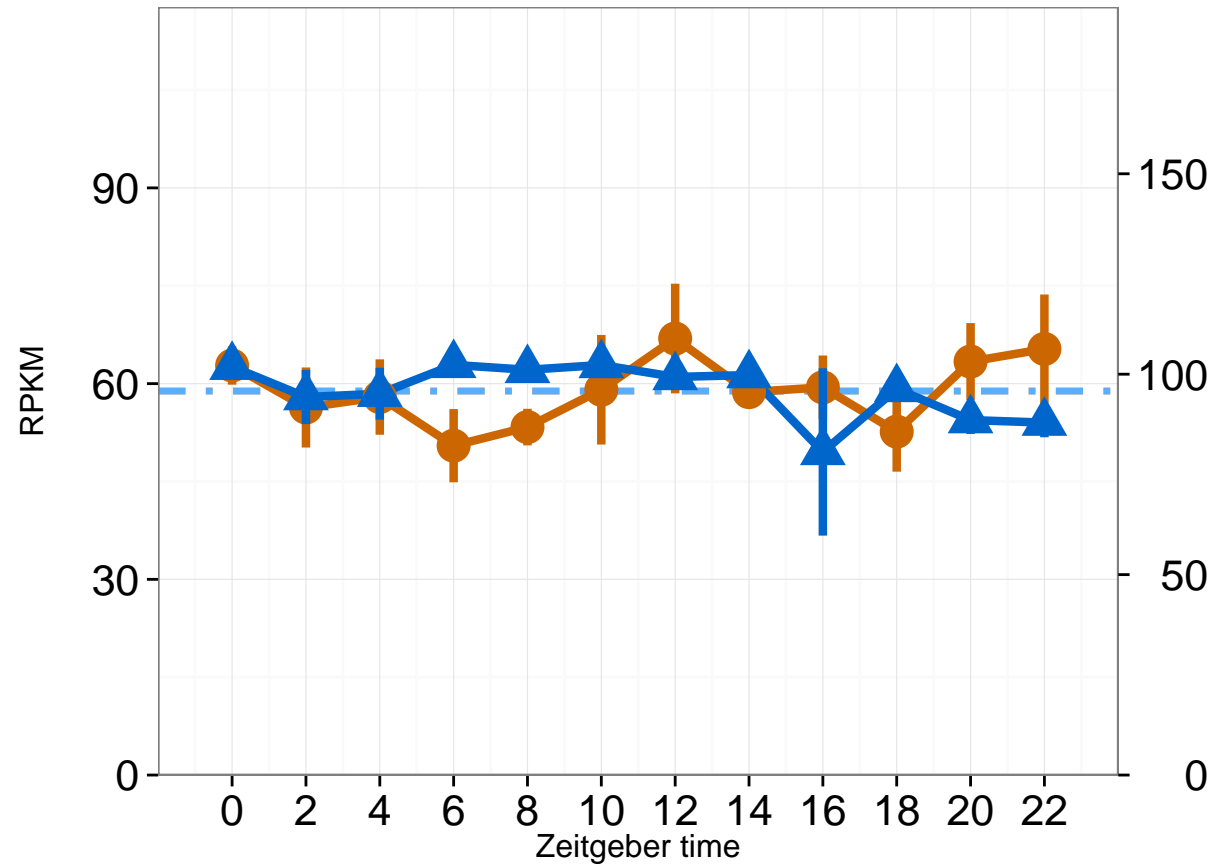

## Dhfr

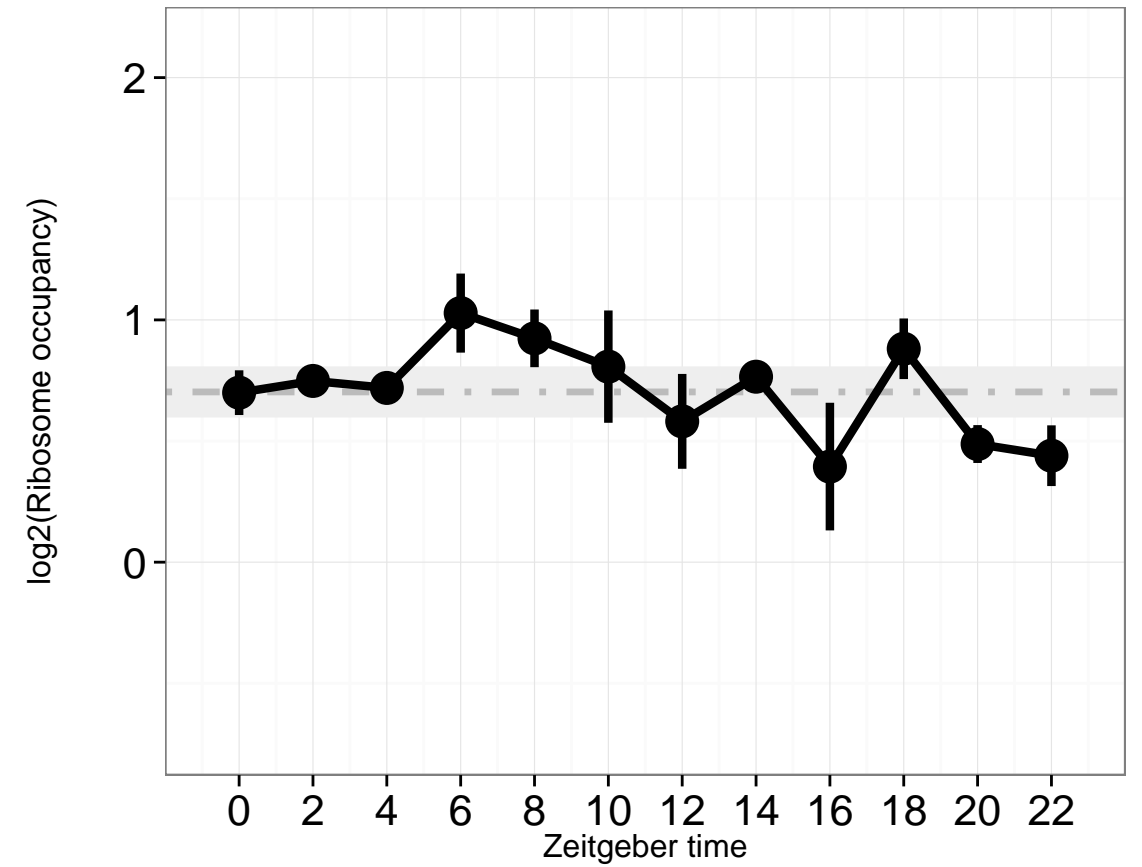

Supplement: Supplementary file 11975 [file 1]

## Swap70

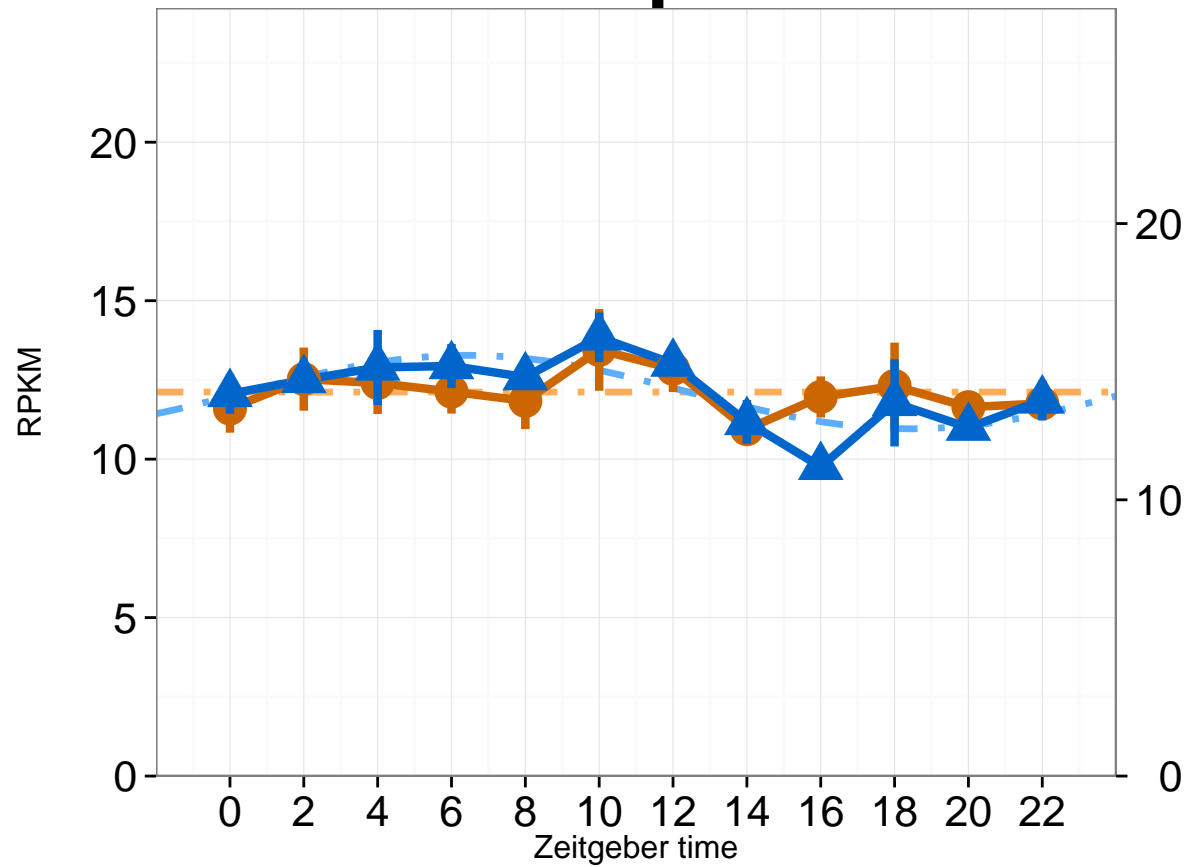

## Swap70

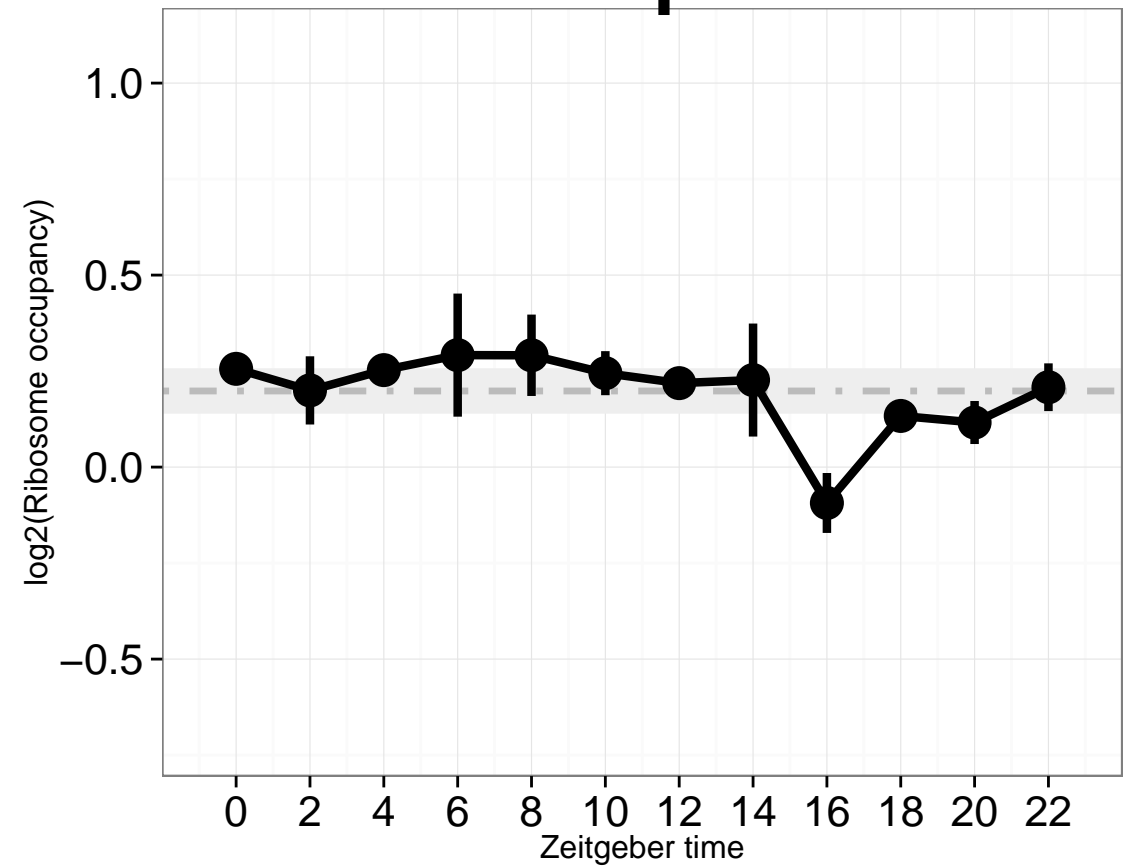

Supplement: Supplementary file 11976 [file 1]

## Mad2l2

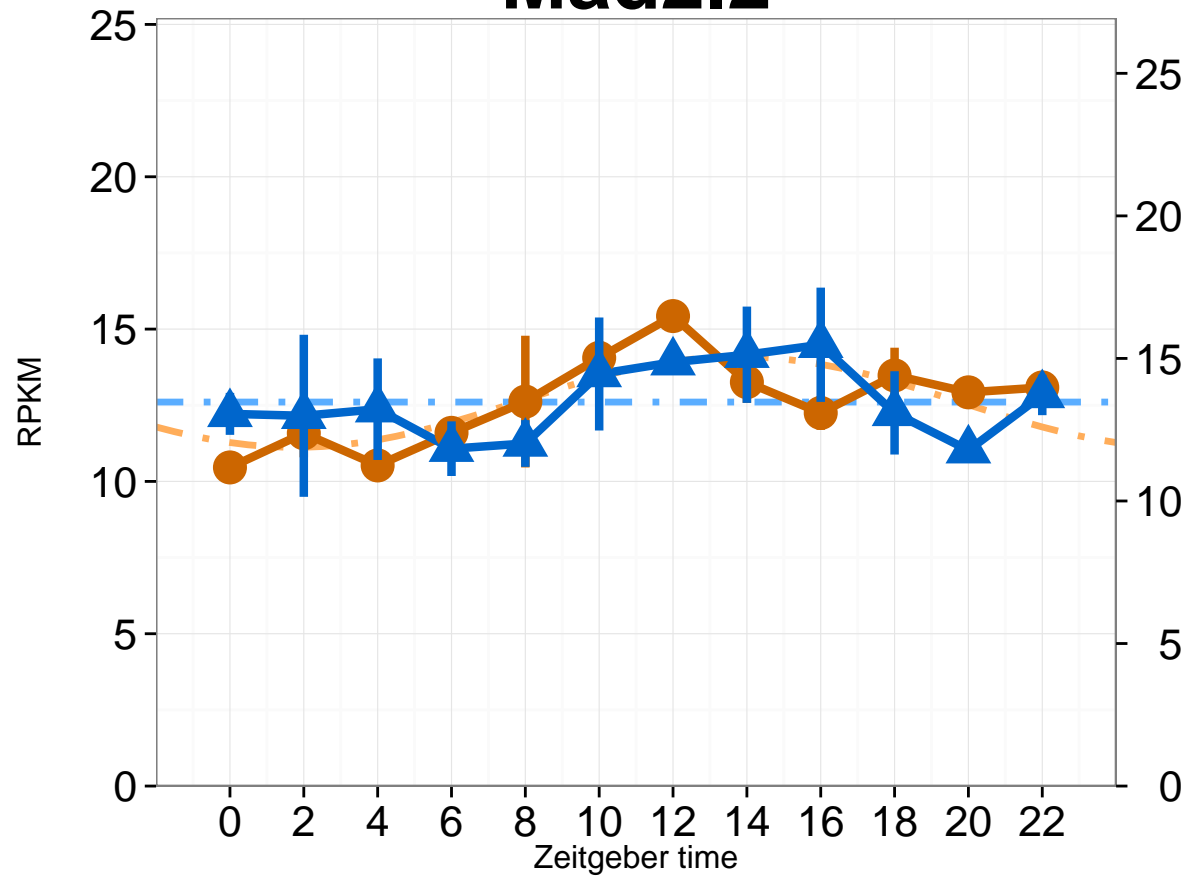

## Mad2l2

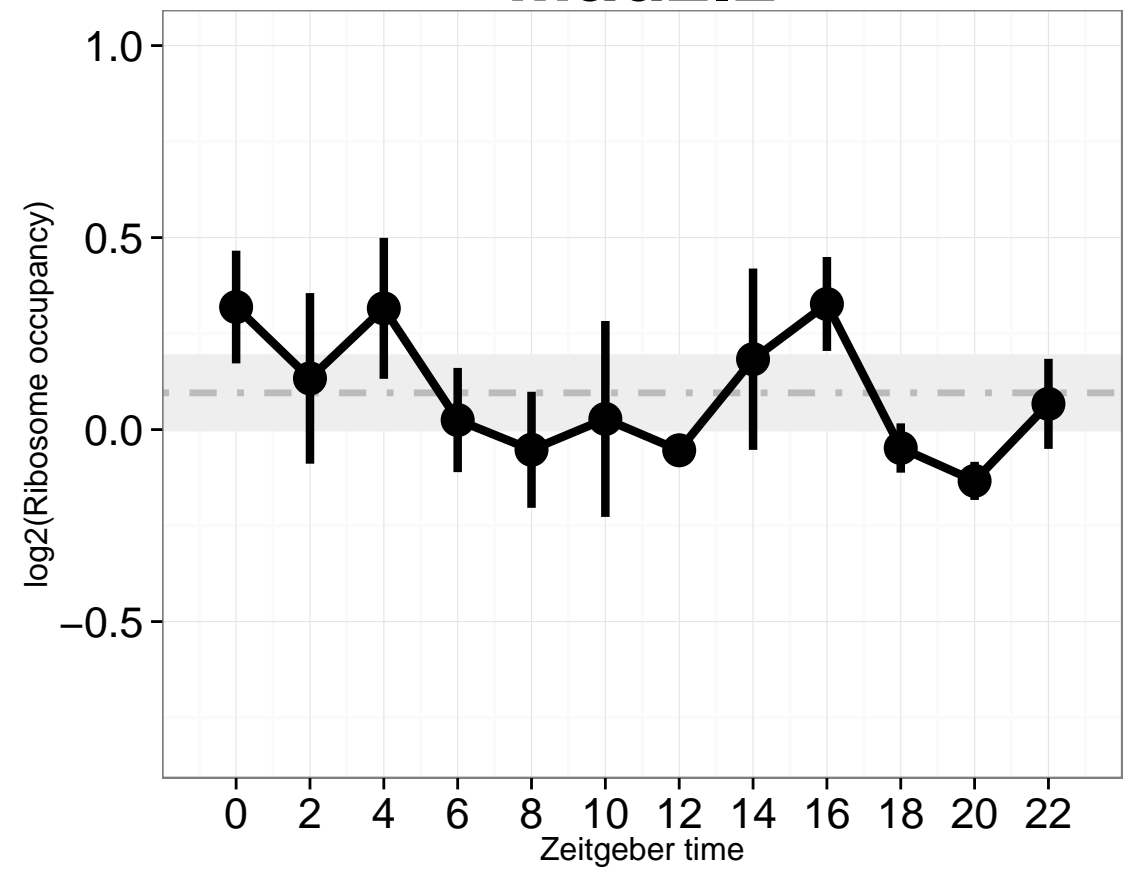

Supplement: Supplementary file 11977 [file 1]

# Phlpp1

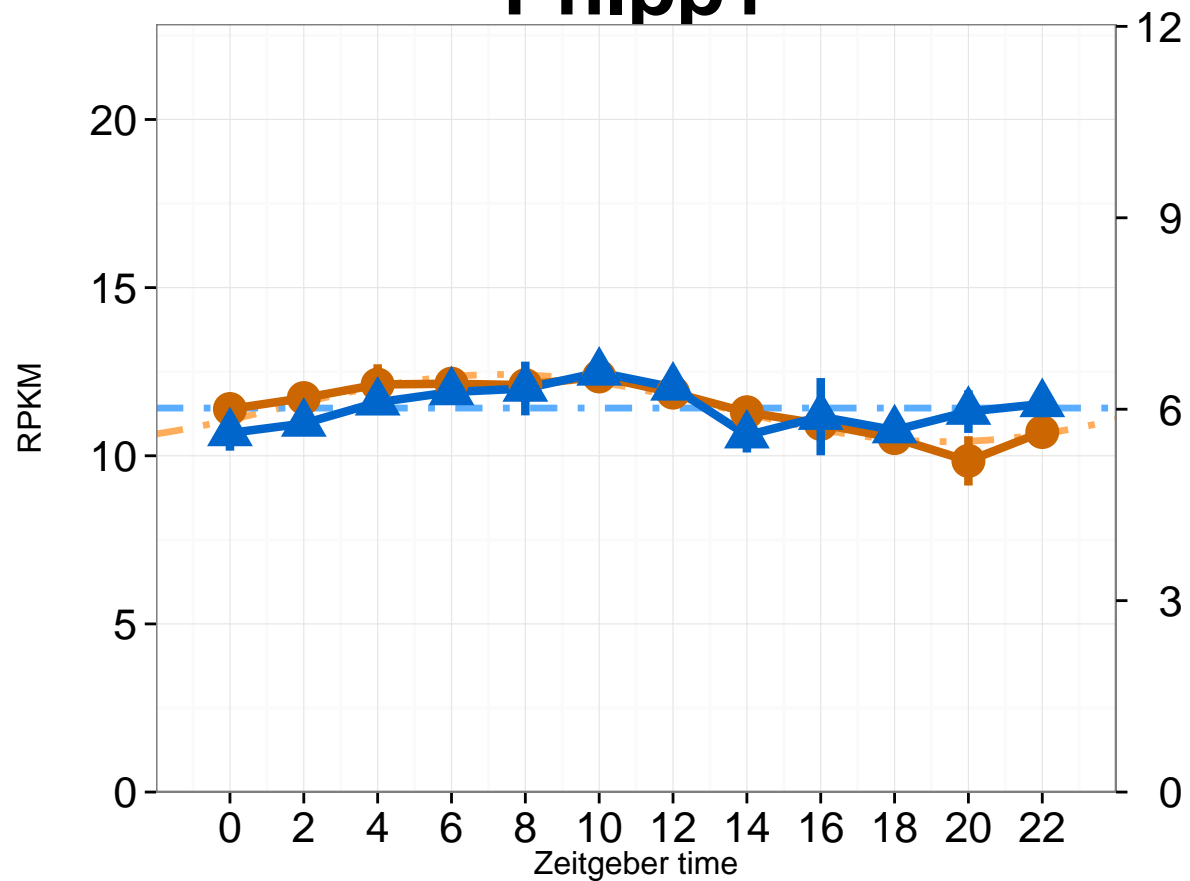

# Phlpp1

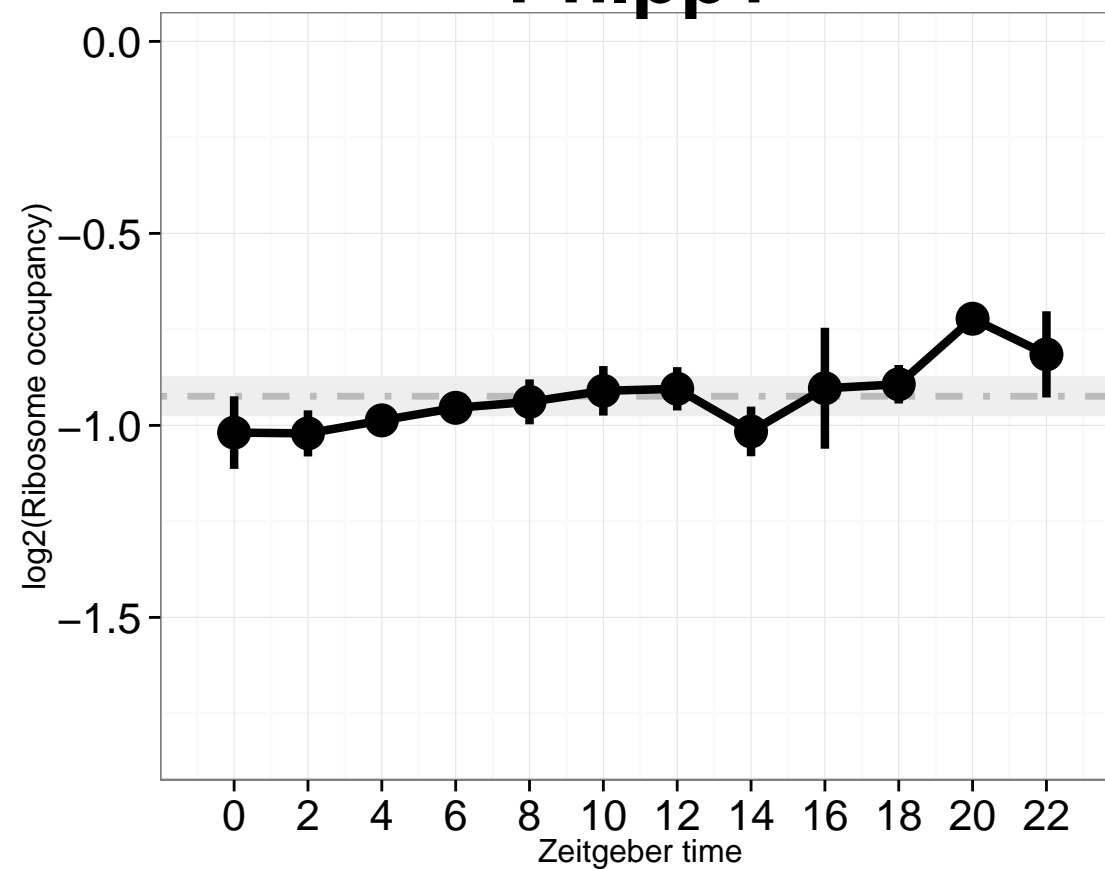

Supplement: Supplementary file 11978 [file 1]

## Pfas

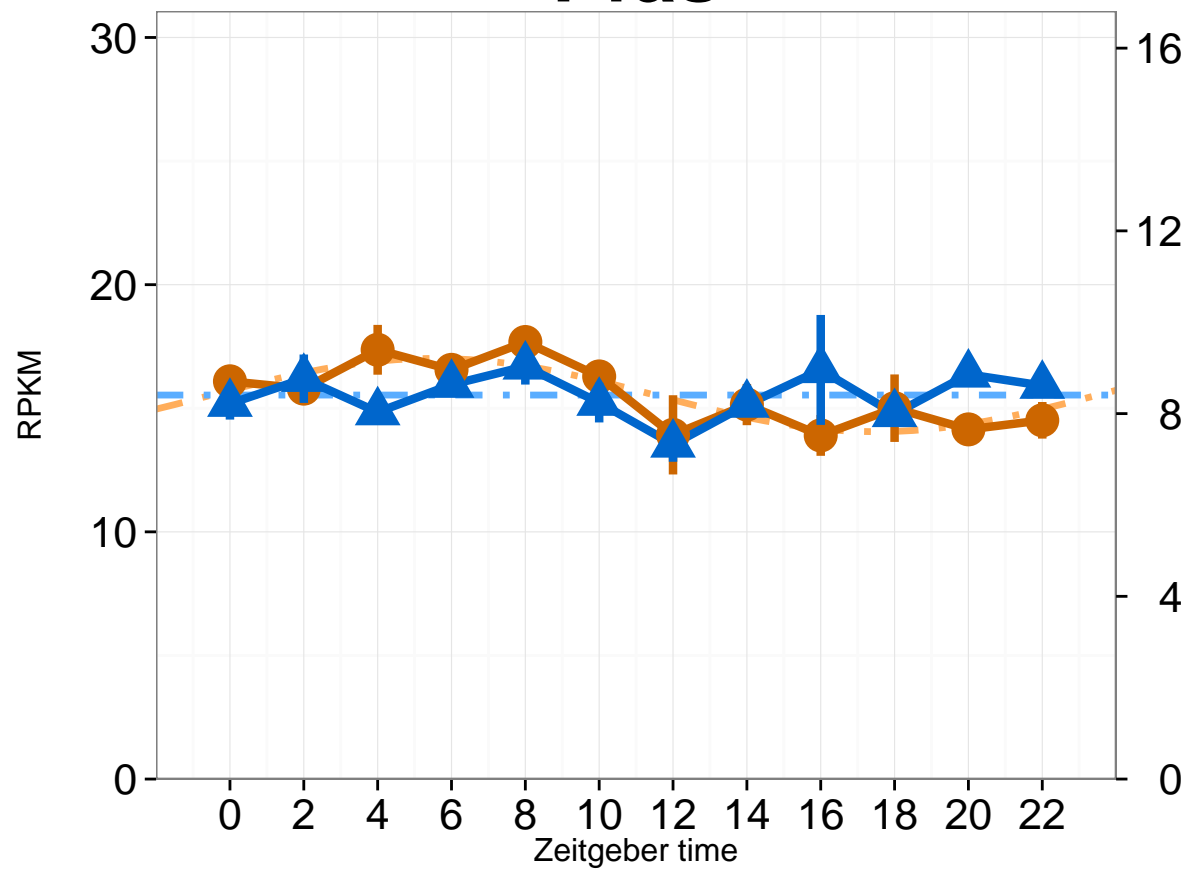

## Pfas

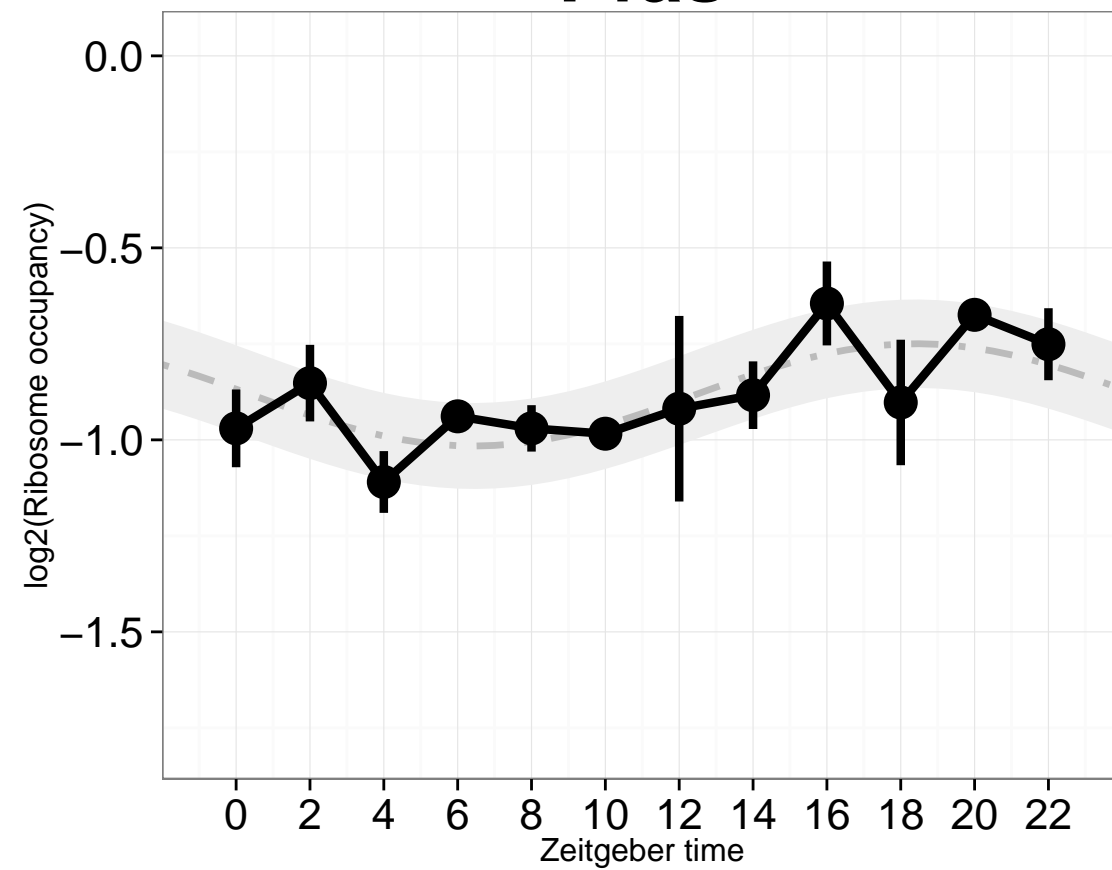

Supplement: Supplementary file 11979 [file 1]

# Gtf2h4

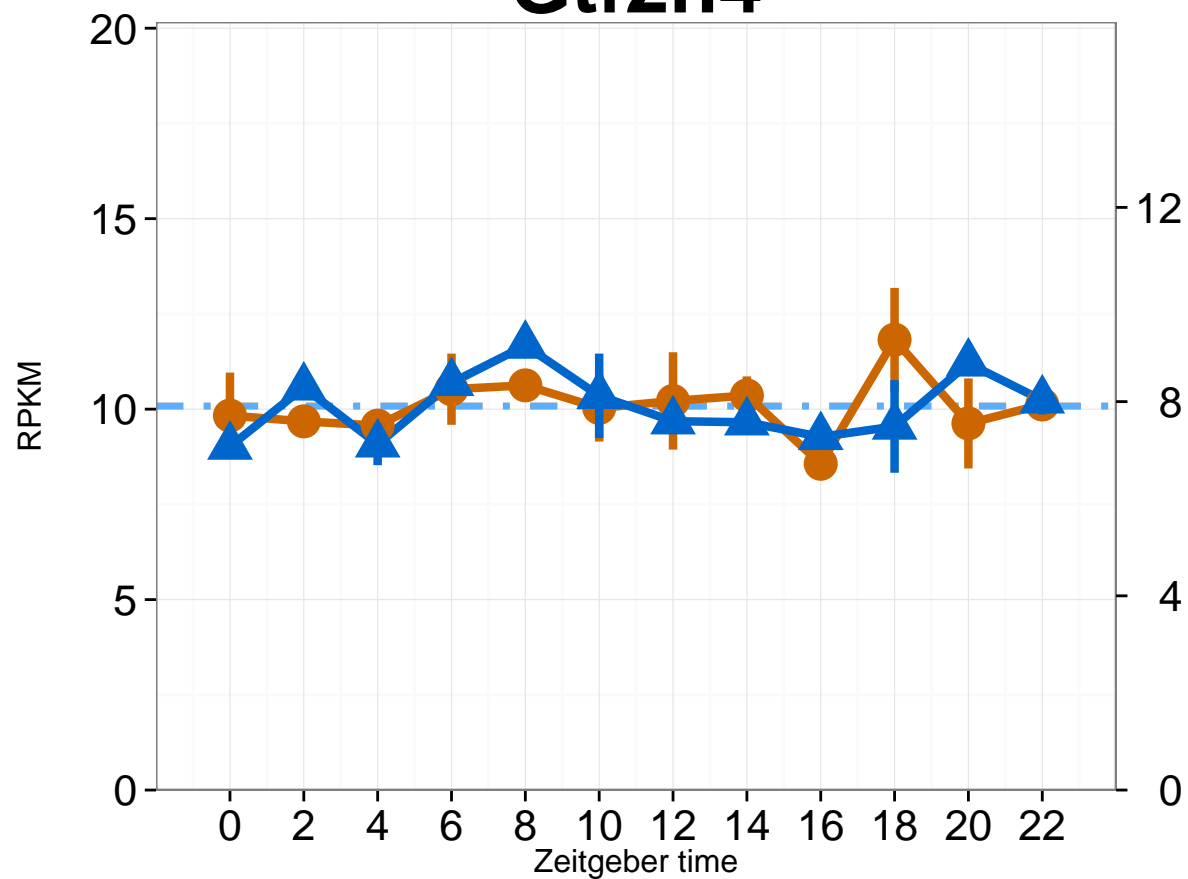

# Gtf2h4

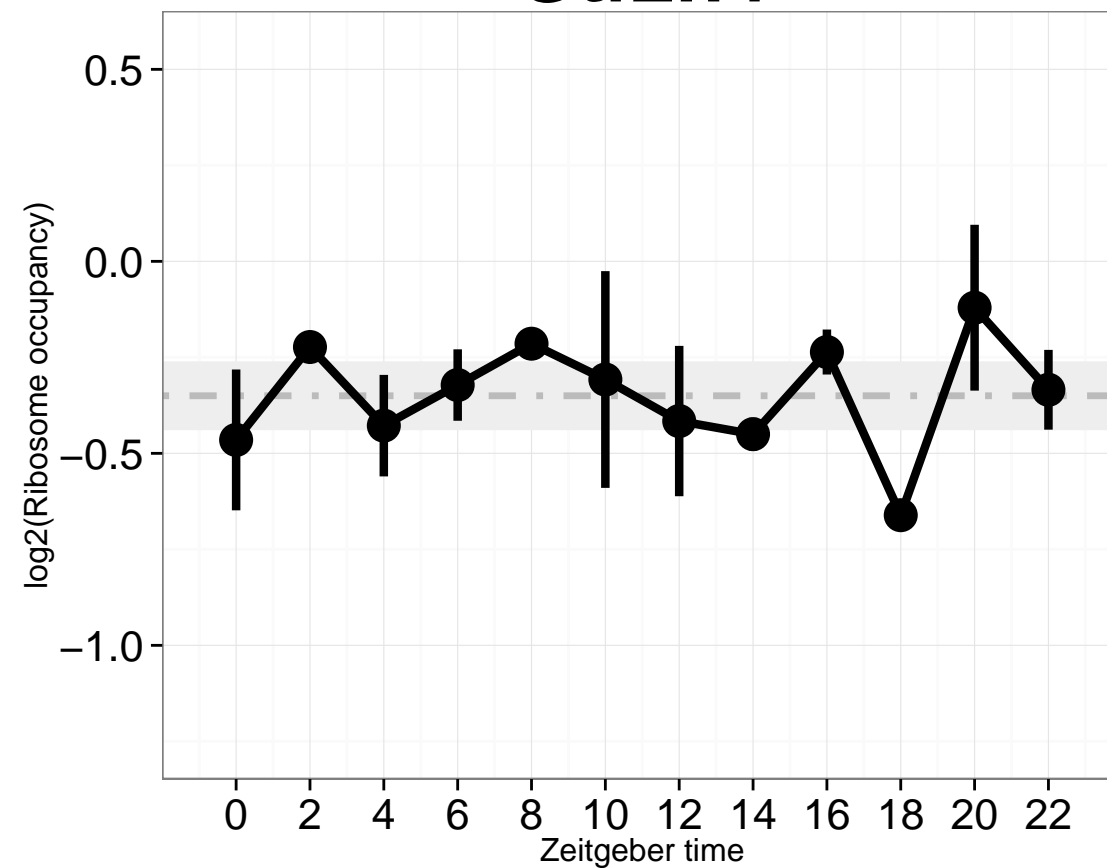

Supplement: Supplementary file 11980 [file 1]

## Tfip11

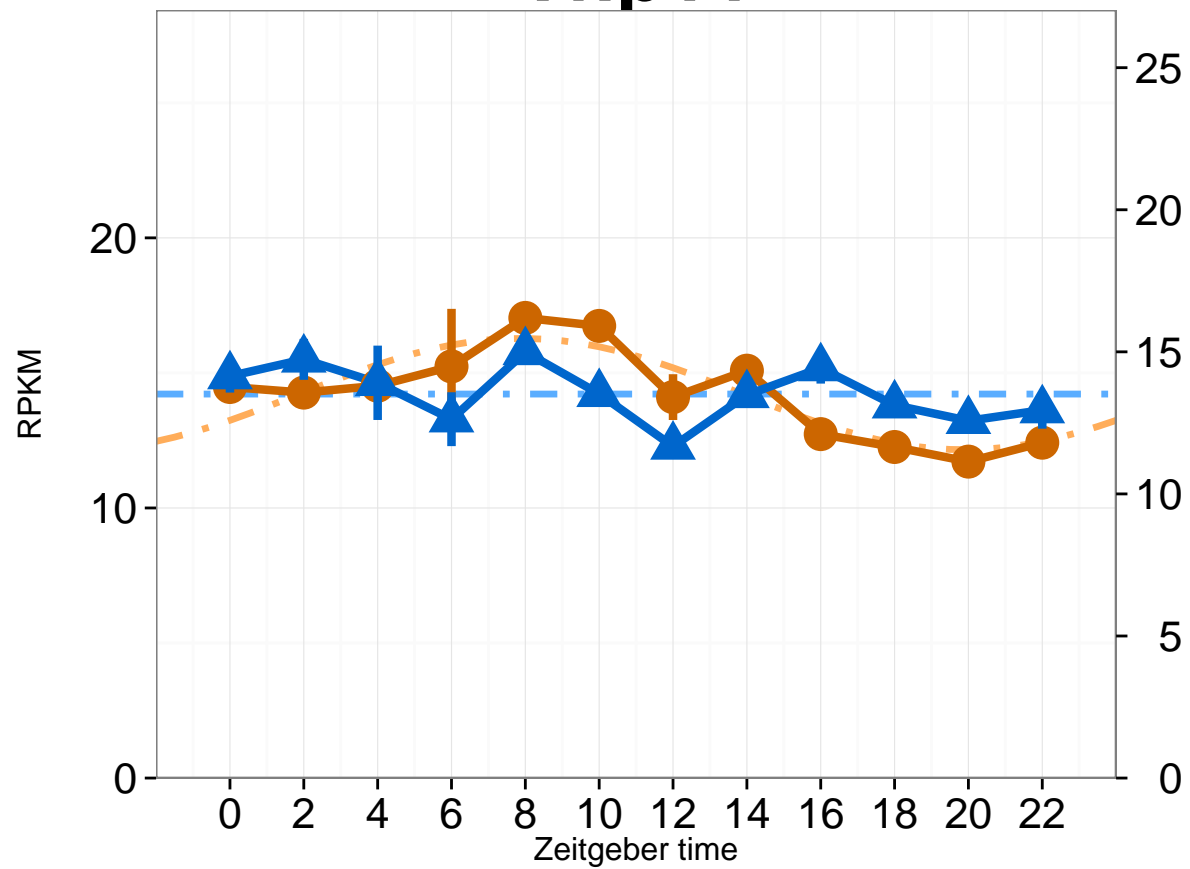

## Tfip11

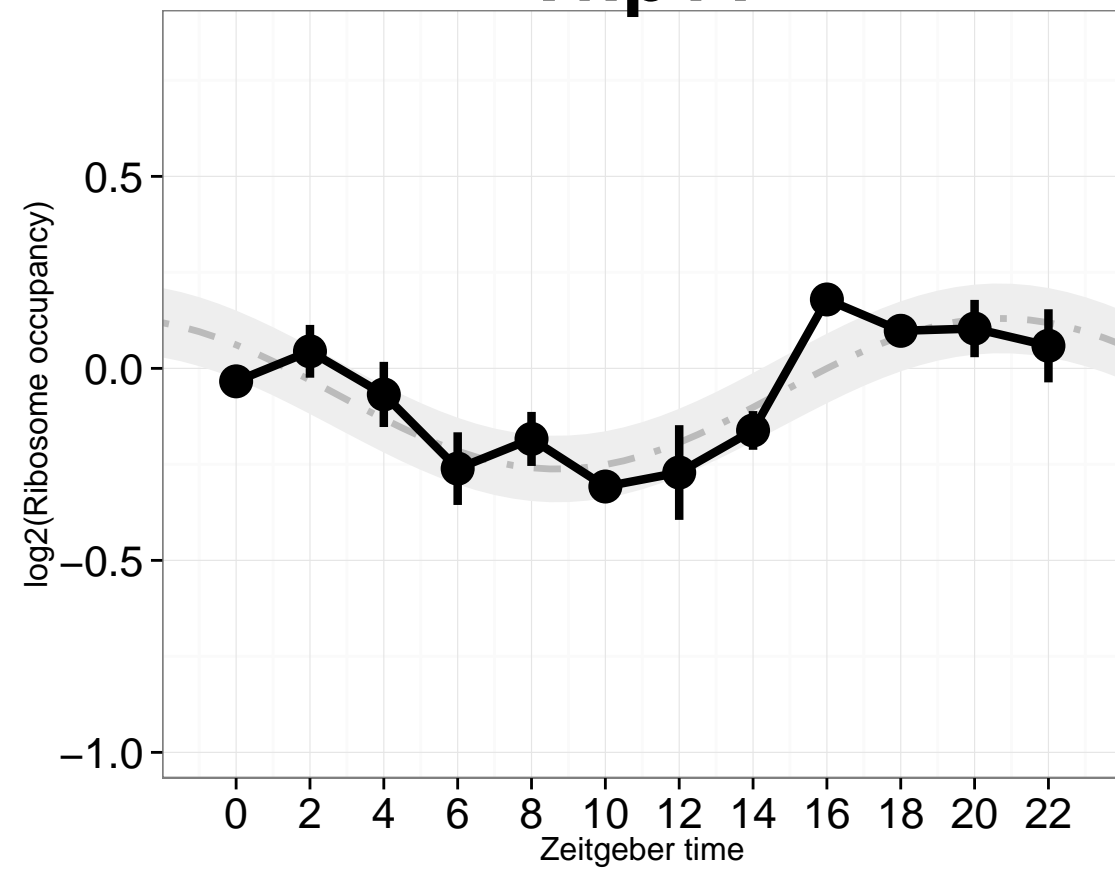

Supplement: Supplementary file 11981 [file 1]

## Tbkbp1

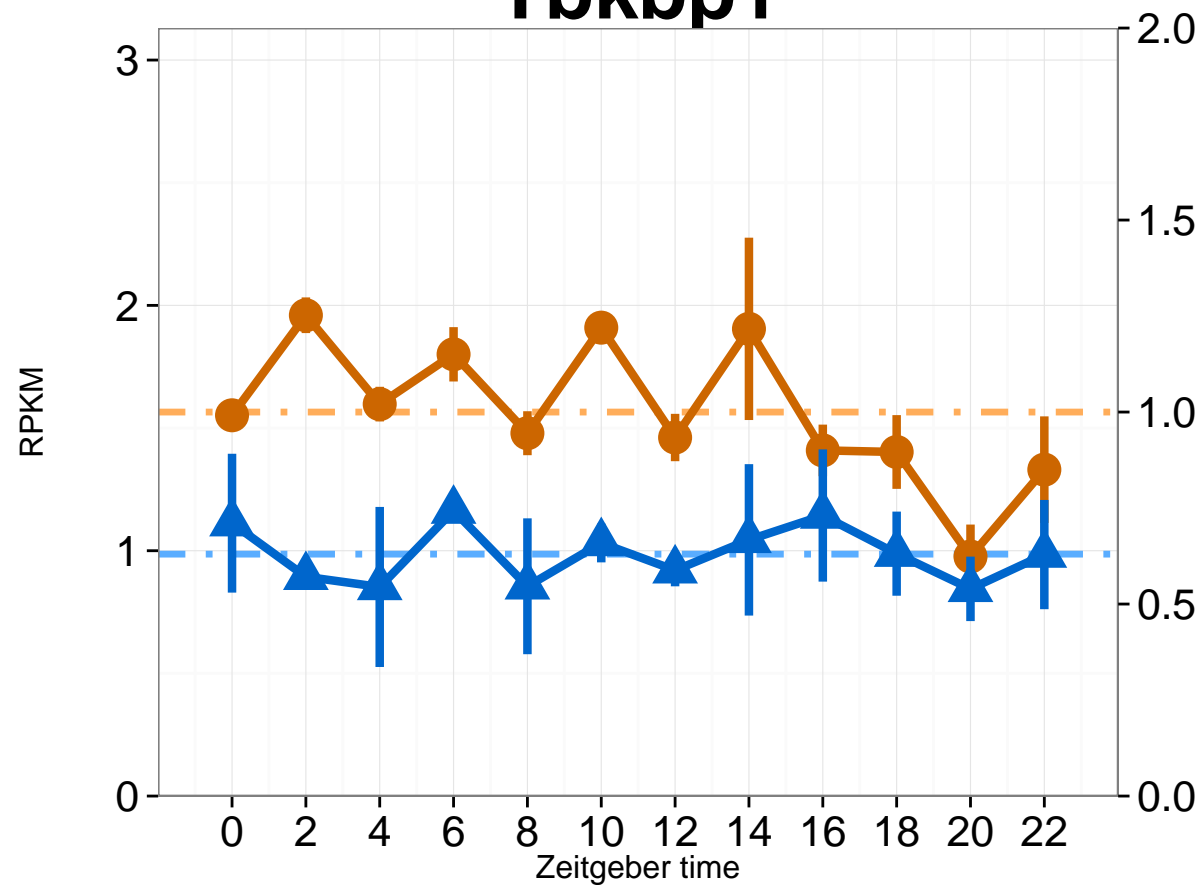

## Tbkbp1

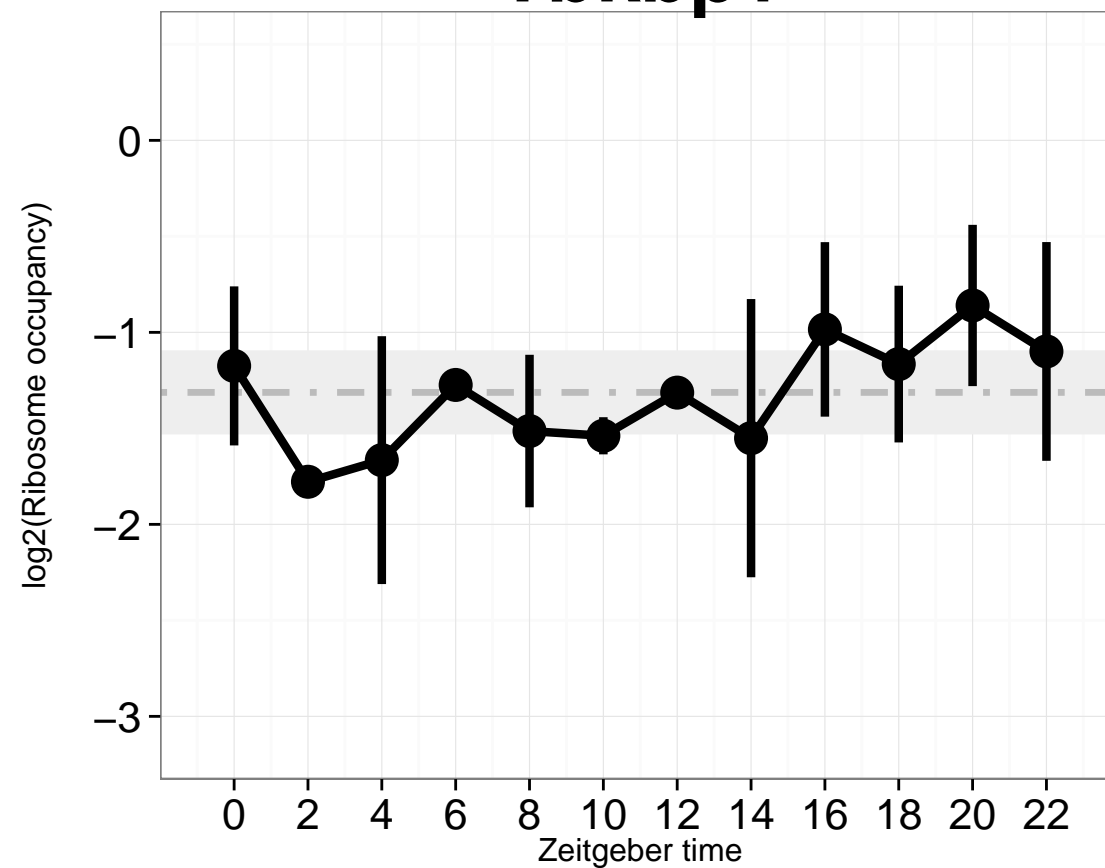

Supplement: Supplementary file 11982 [file 1]

# Tmem175

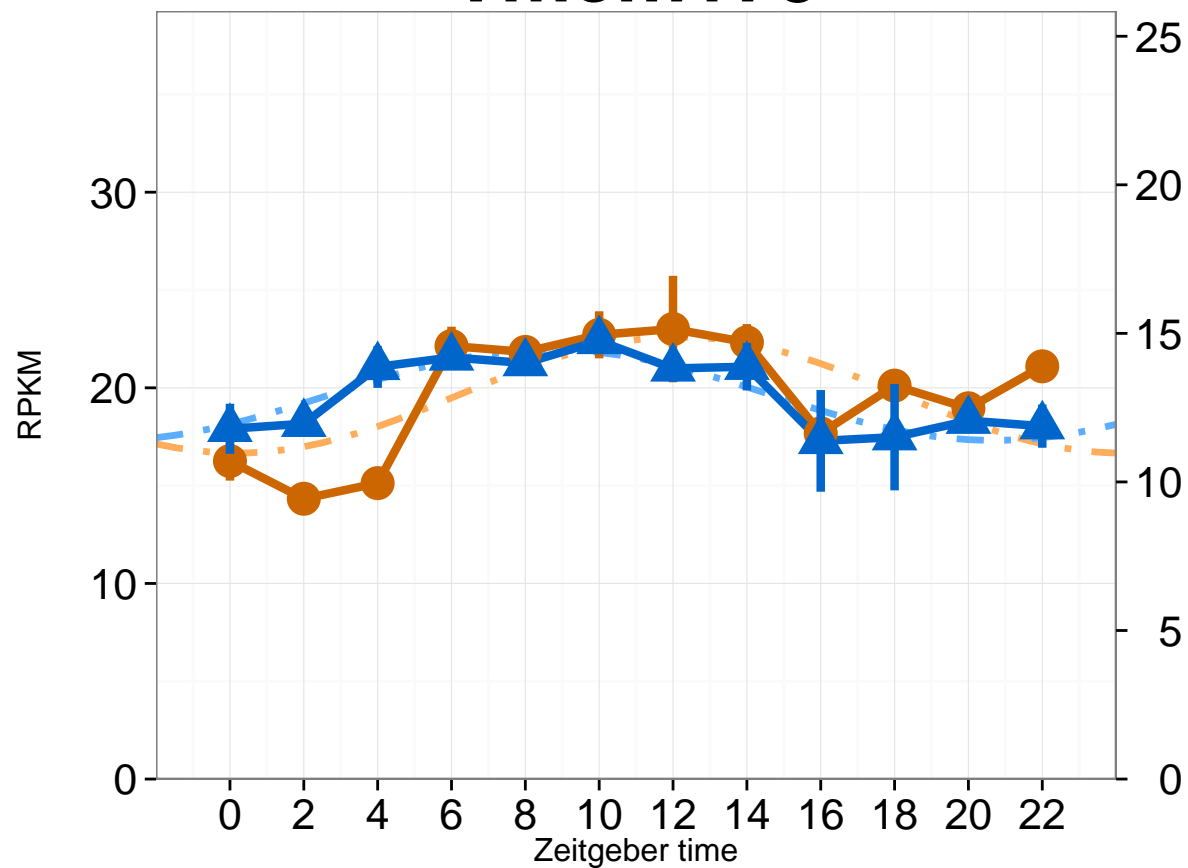

# Tmem175

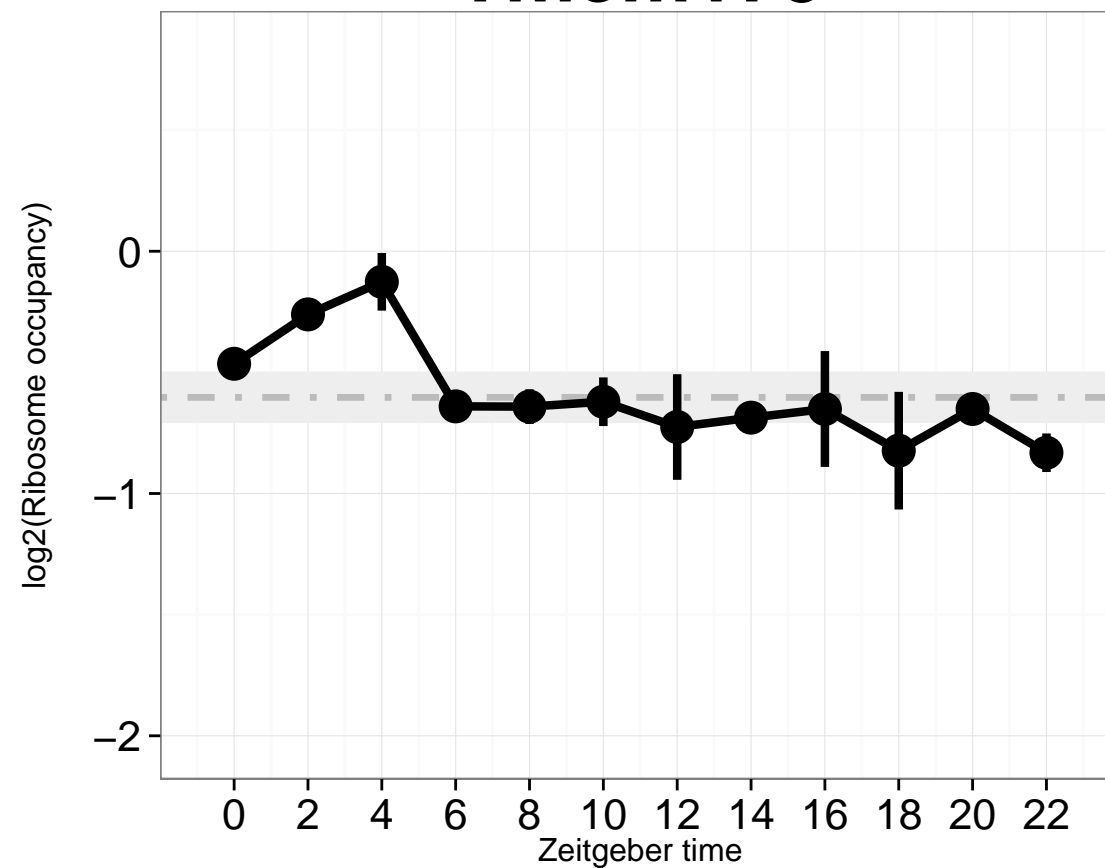

Supplement: Supplementary file 11983 [file 1]

# 1190002N15Rik

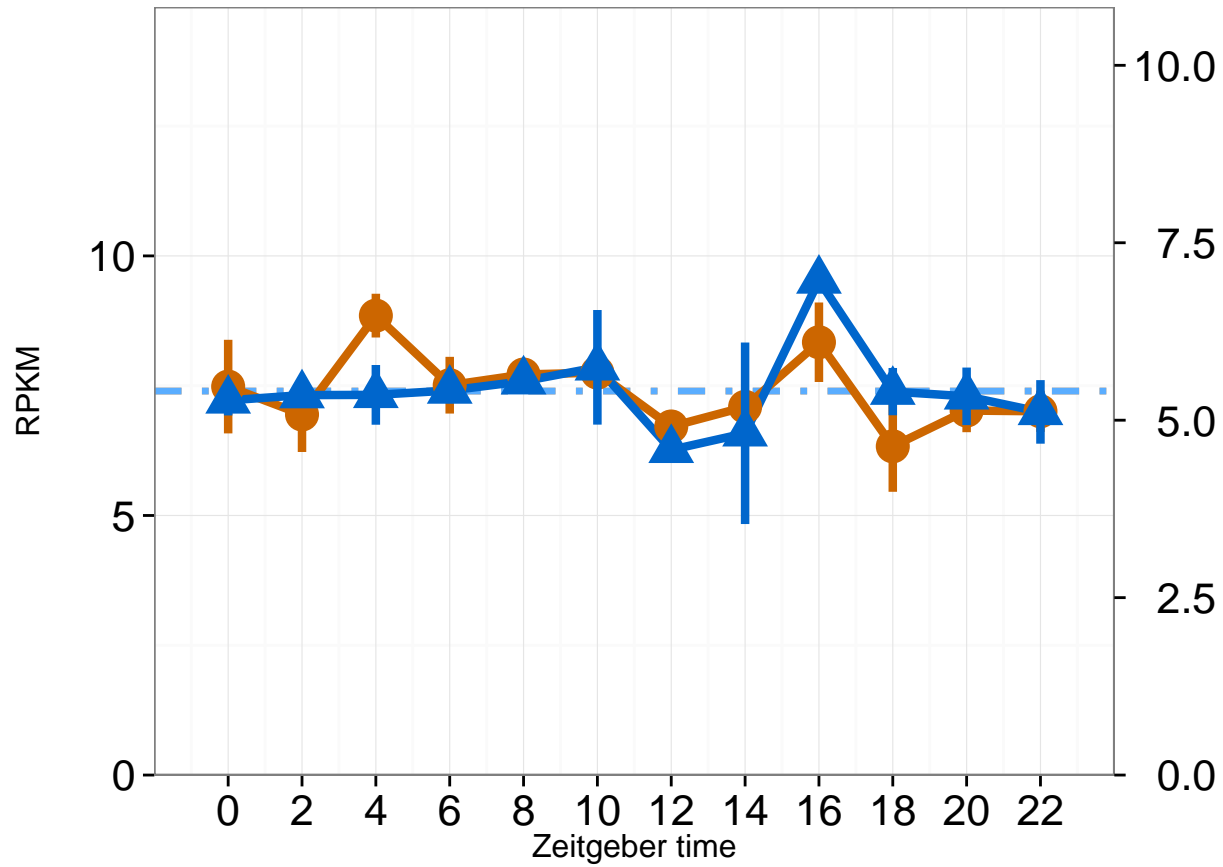

# 1190002N15Rik

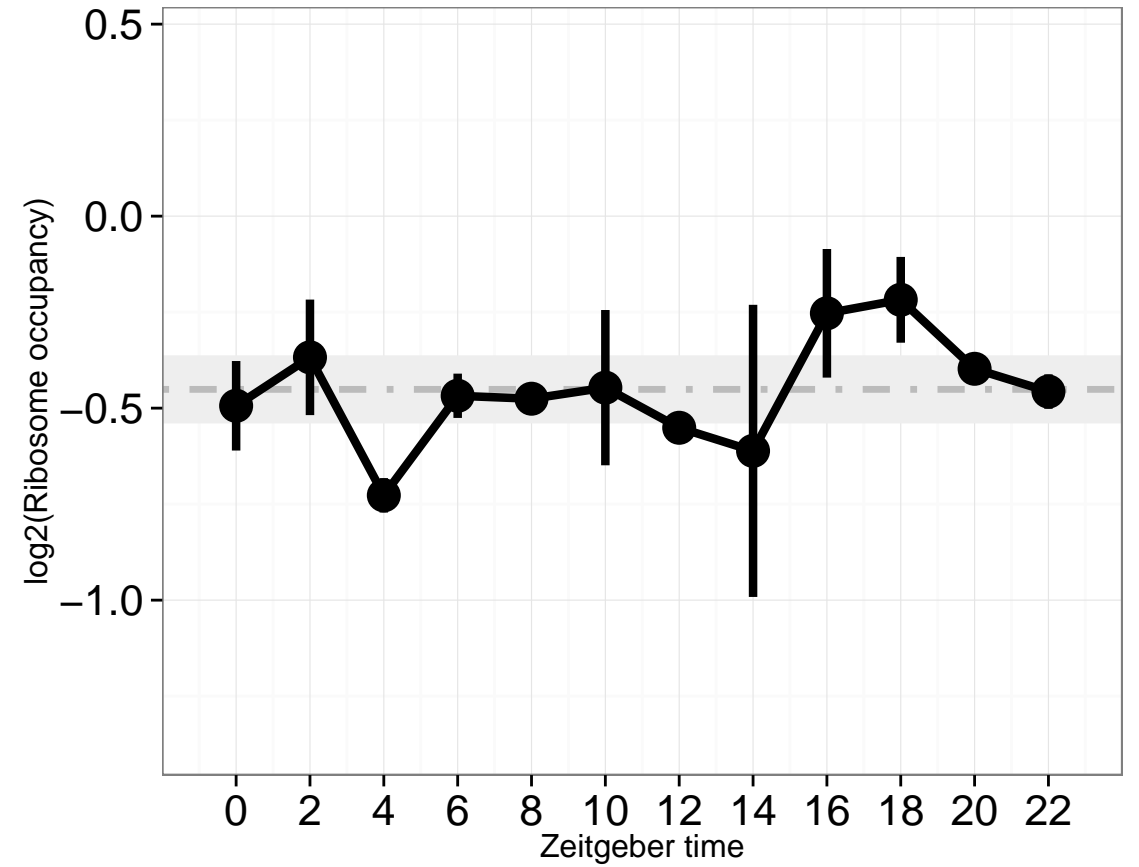

Supplement: Supplementary file 11984 [file 1]

## 9130011E15Rik

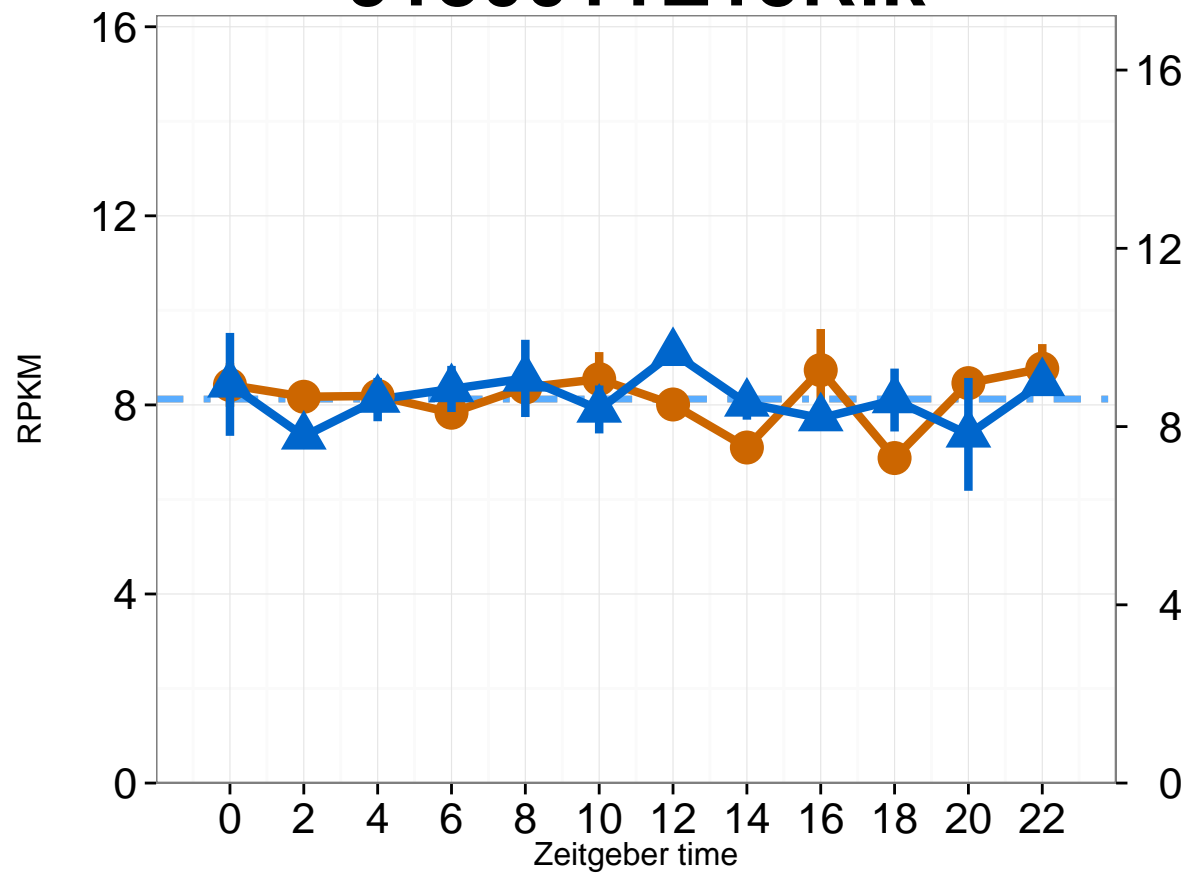

## 9130011E15Rik

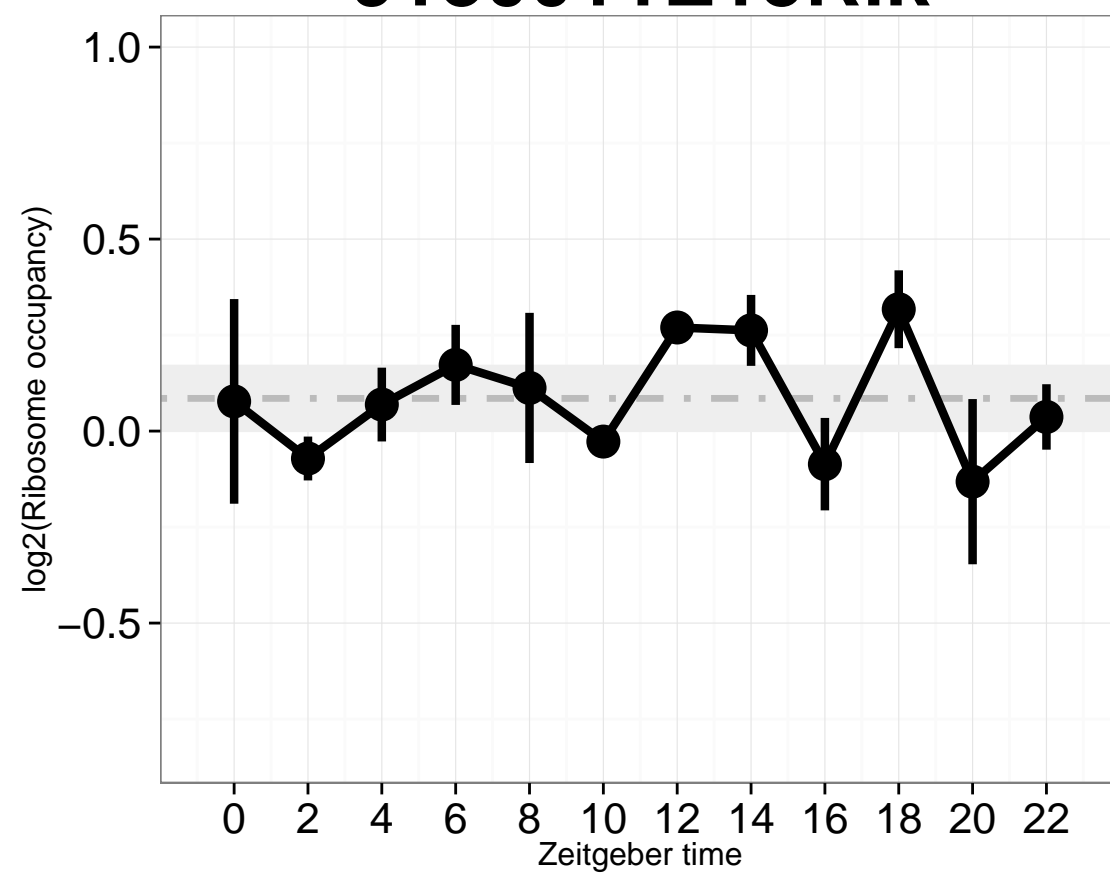

Supplement: Supplementary file 11985 [file 1]

# Atxn10

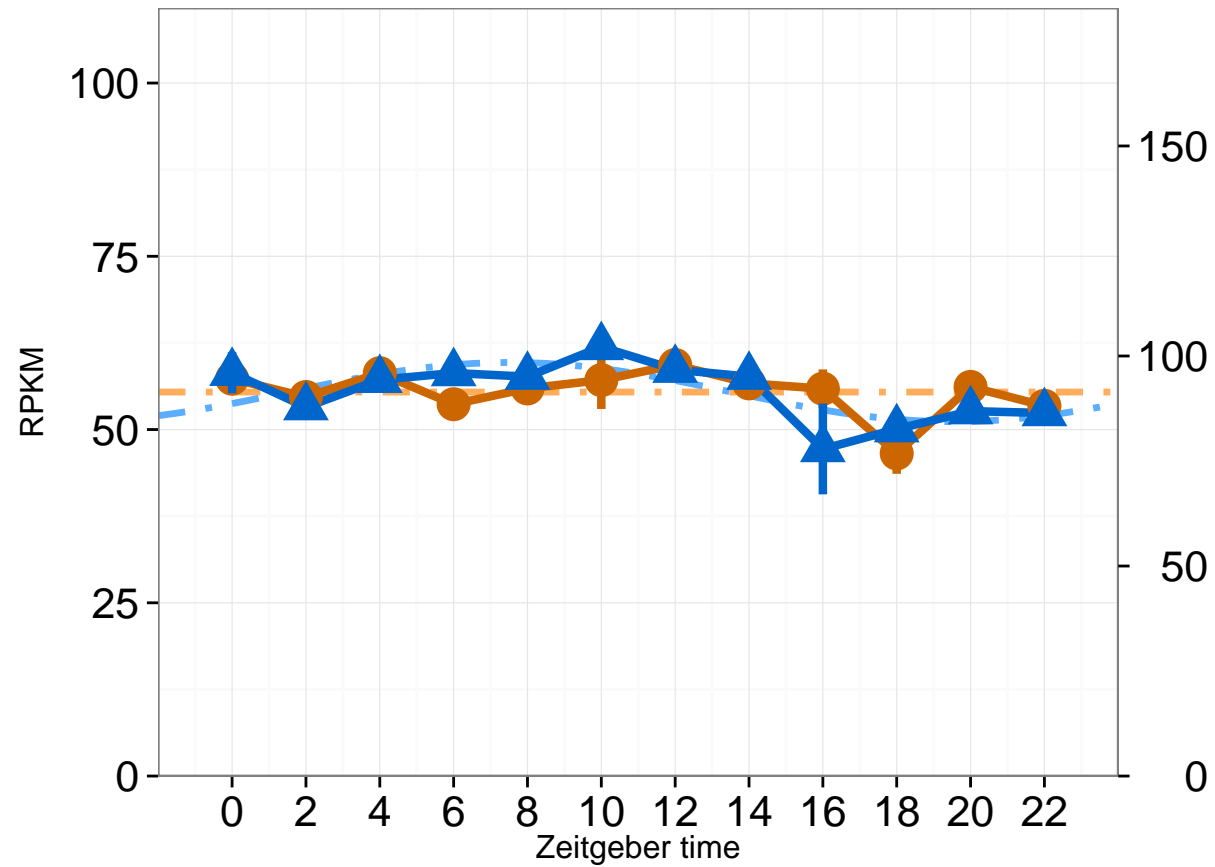

# Atxn10

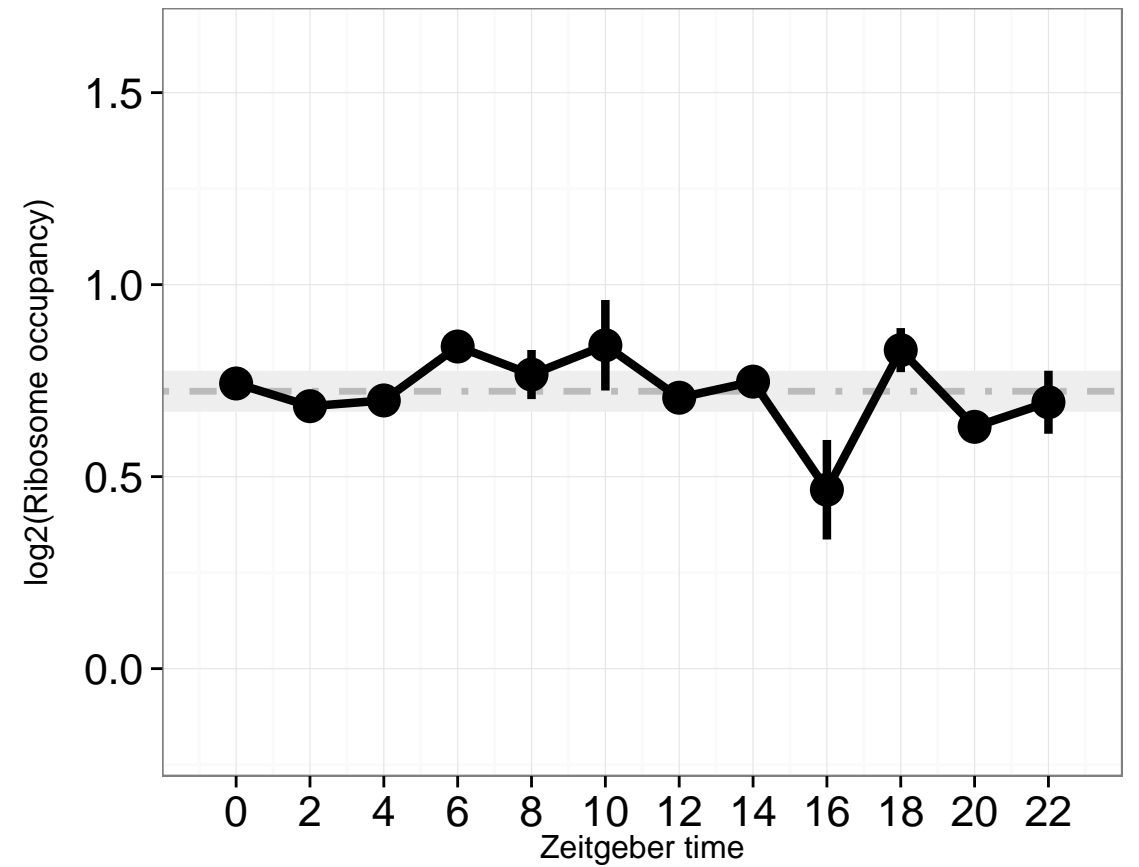

Supplement: Supplementary file 11986 [file 1]

## Tex261

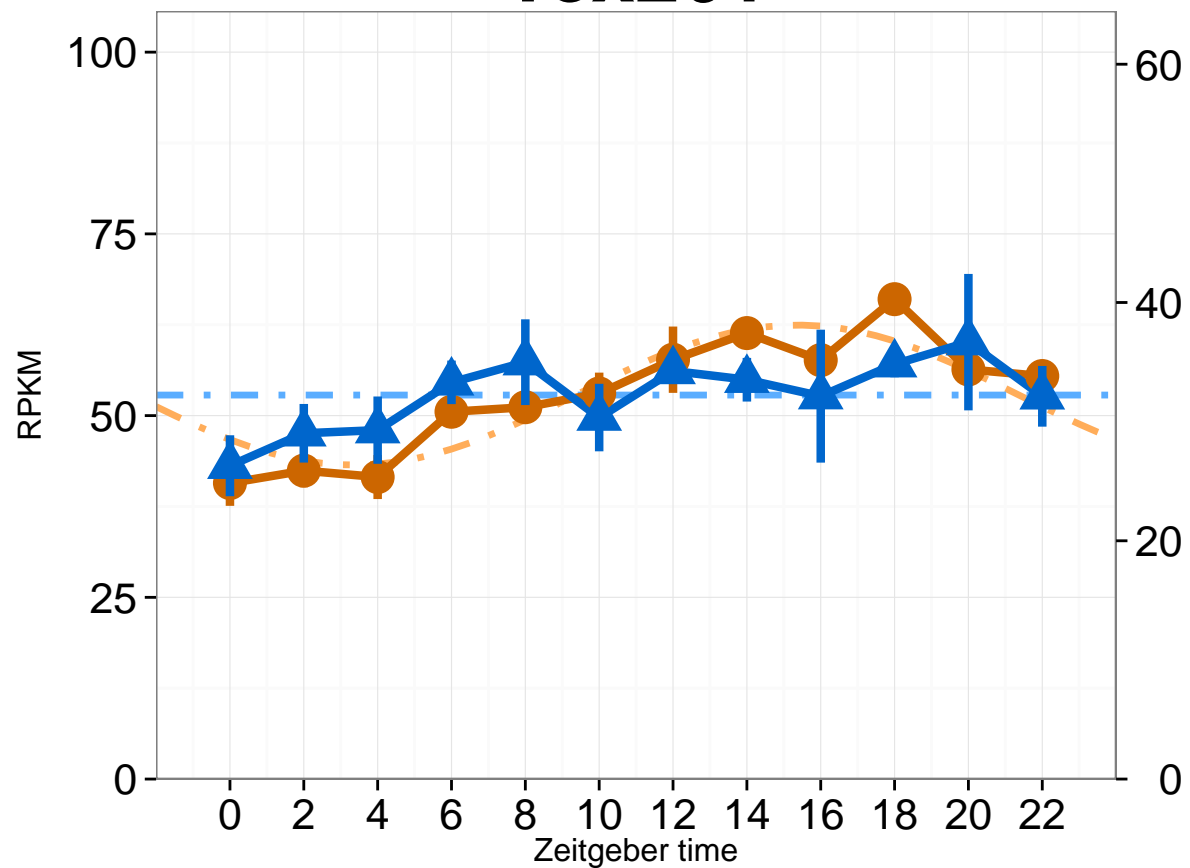

## Tex261

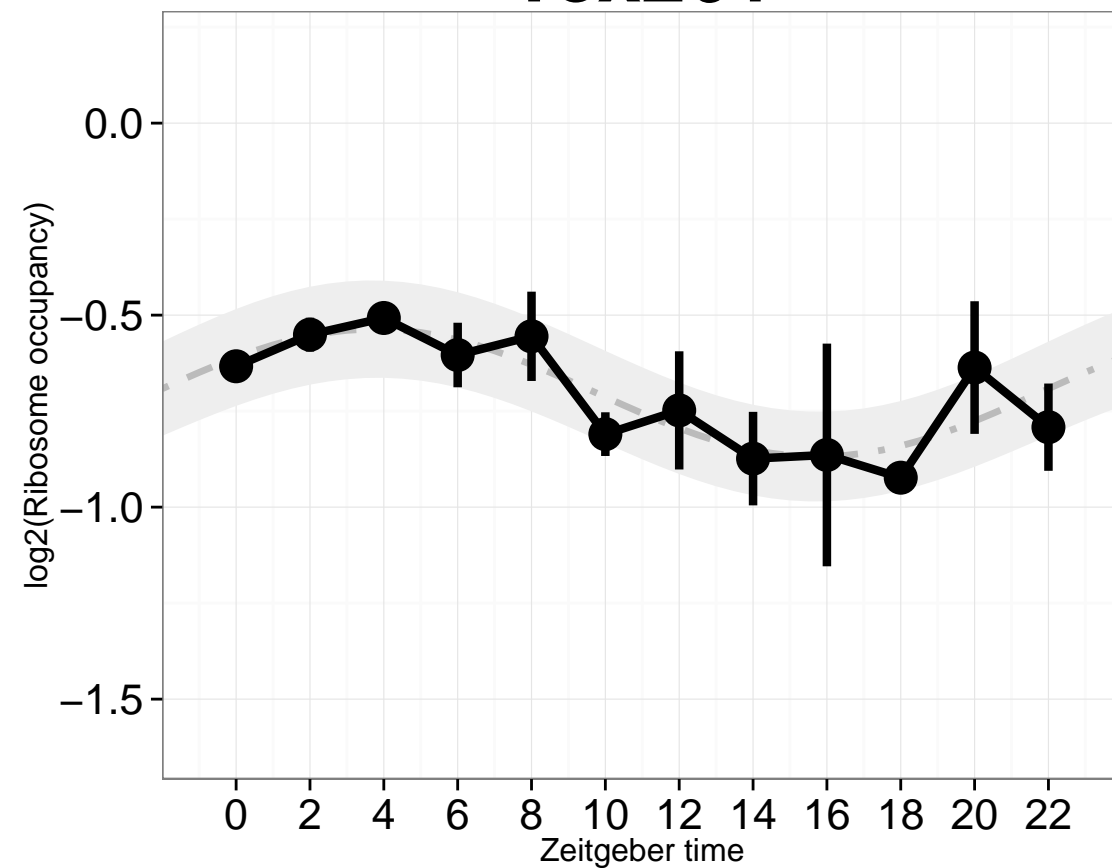

Supplement: Supplementary file 11987 [file 1]

# Rpl29

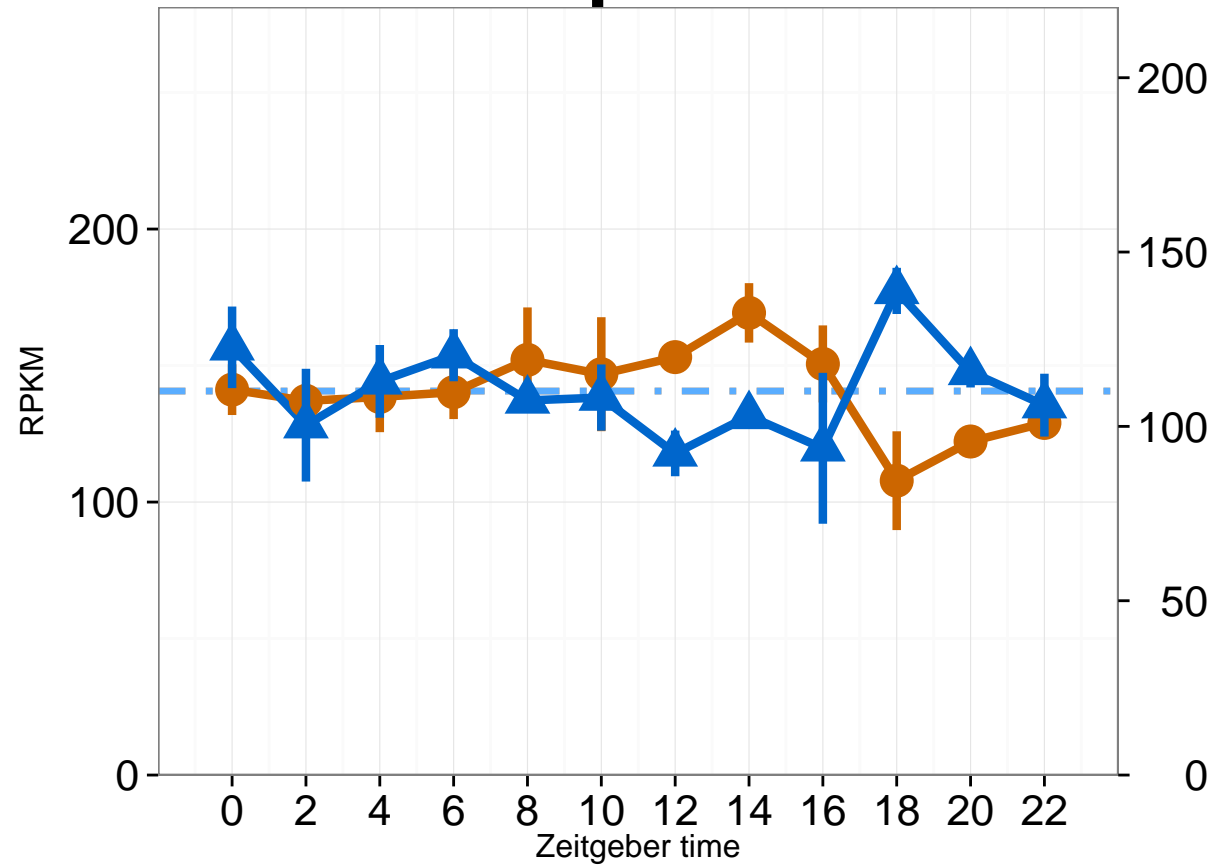

# Rpl29

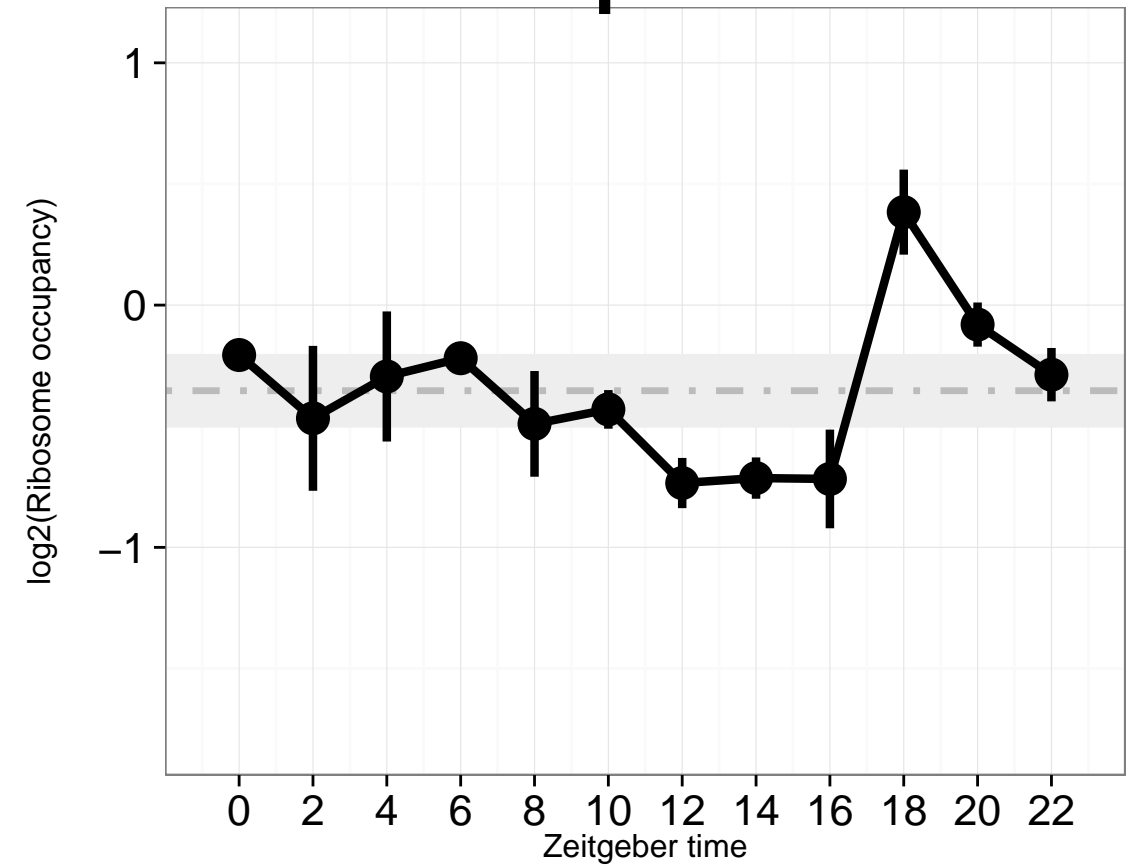

Supplement: Supplementary file 11988 [file 1]

# lqgap3

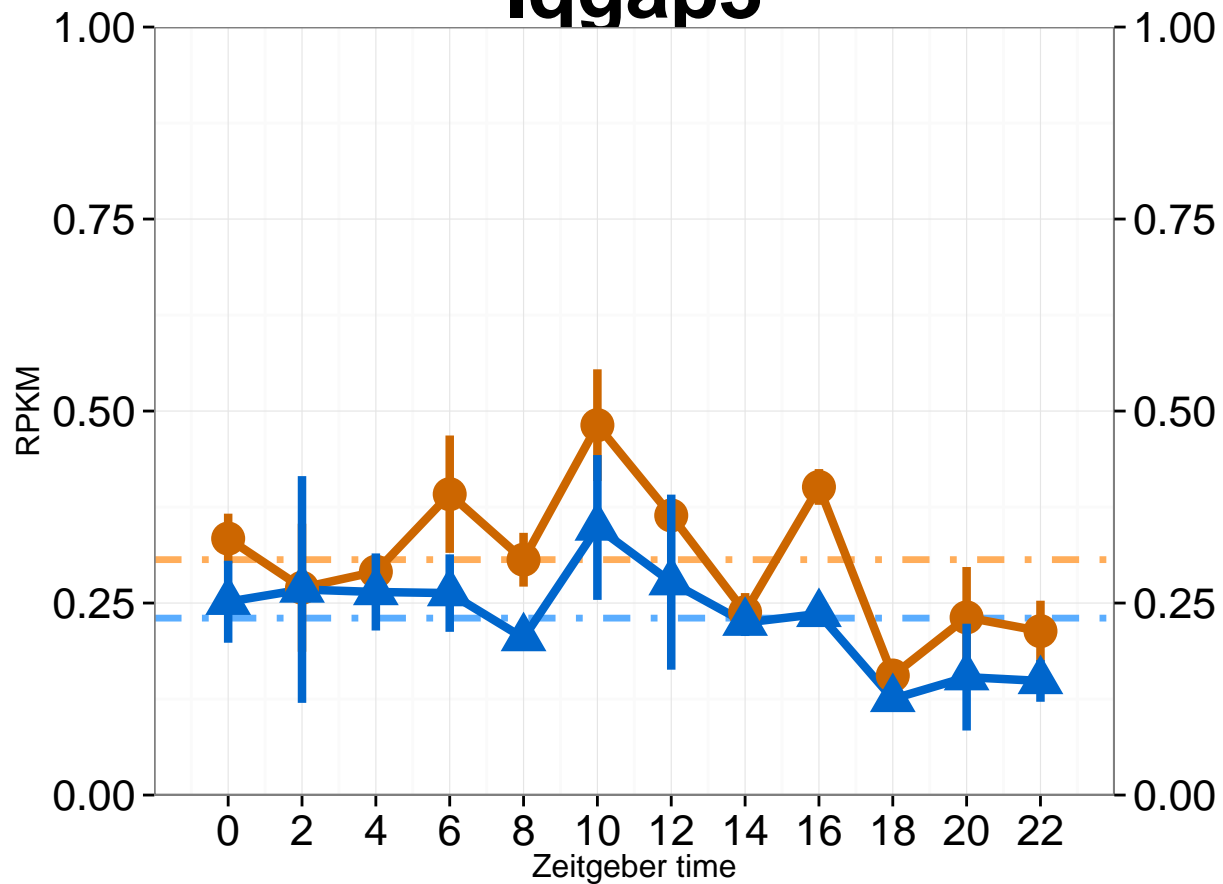

# lqgap3

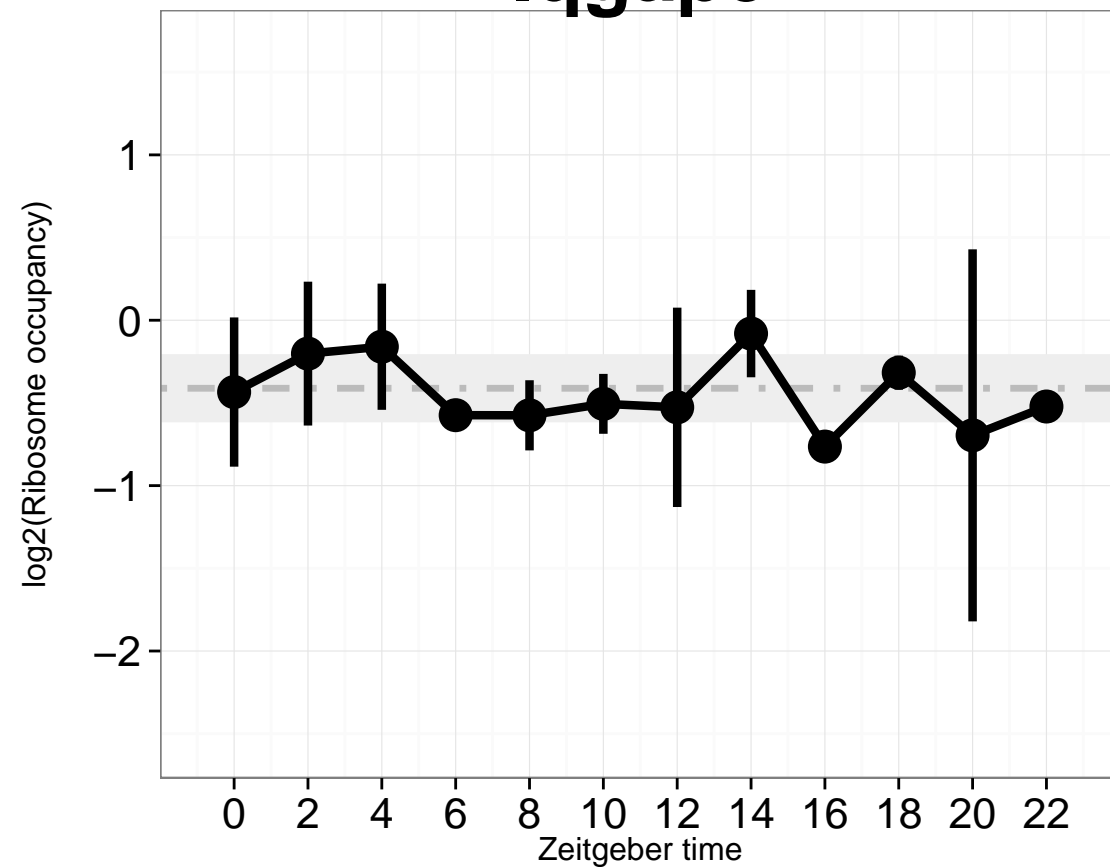

Supplement: Supplementary file 11989 [file 1]

# Apbb1ip

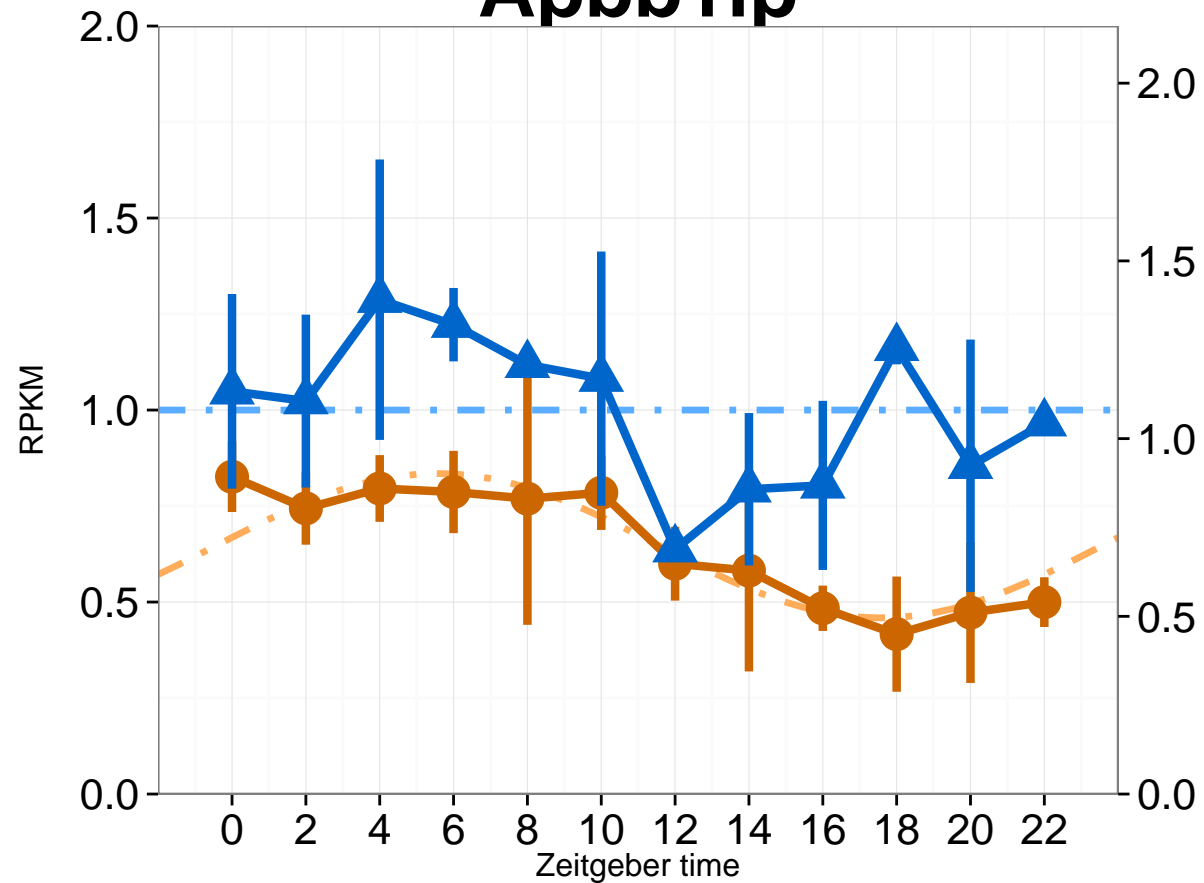

# Apbb1ip

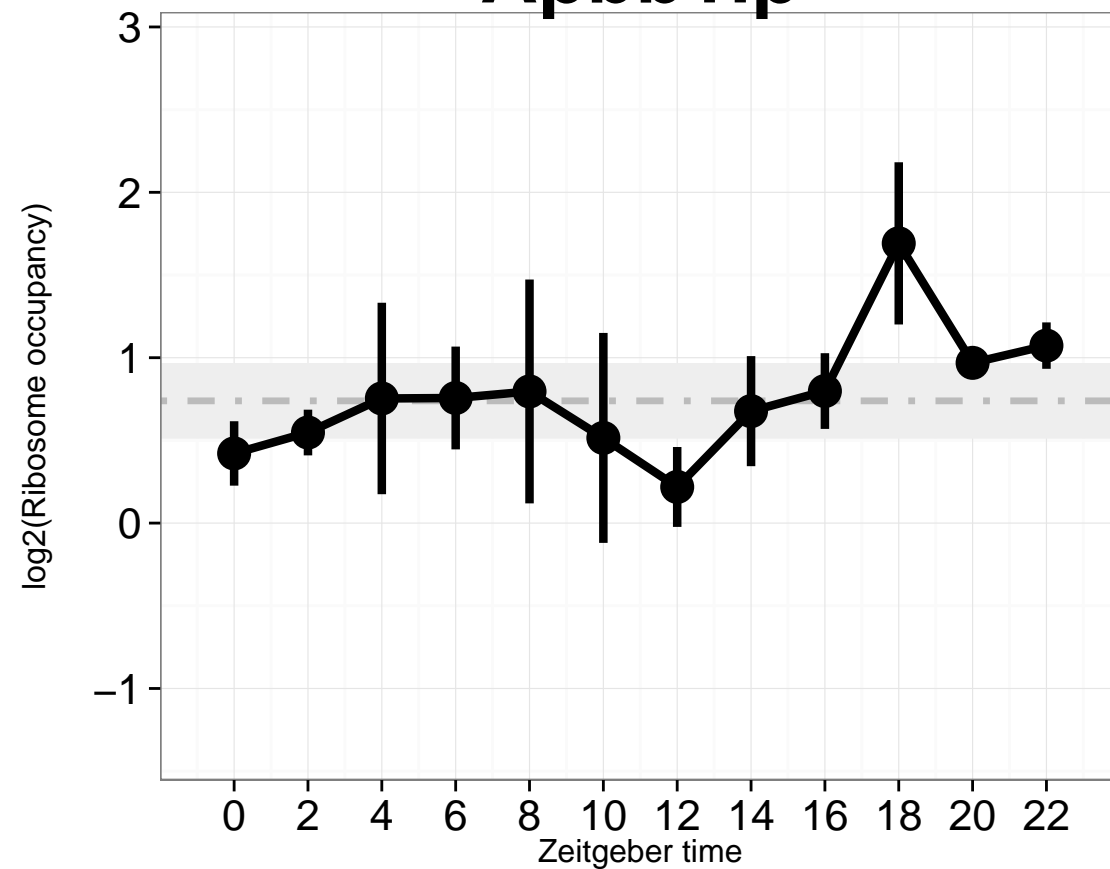

Supplement: Supplementary file 11990 [file 1]

## Nsg2

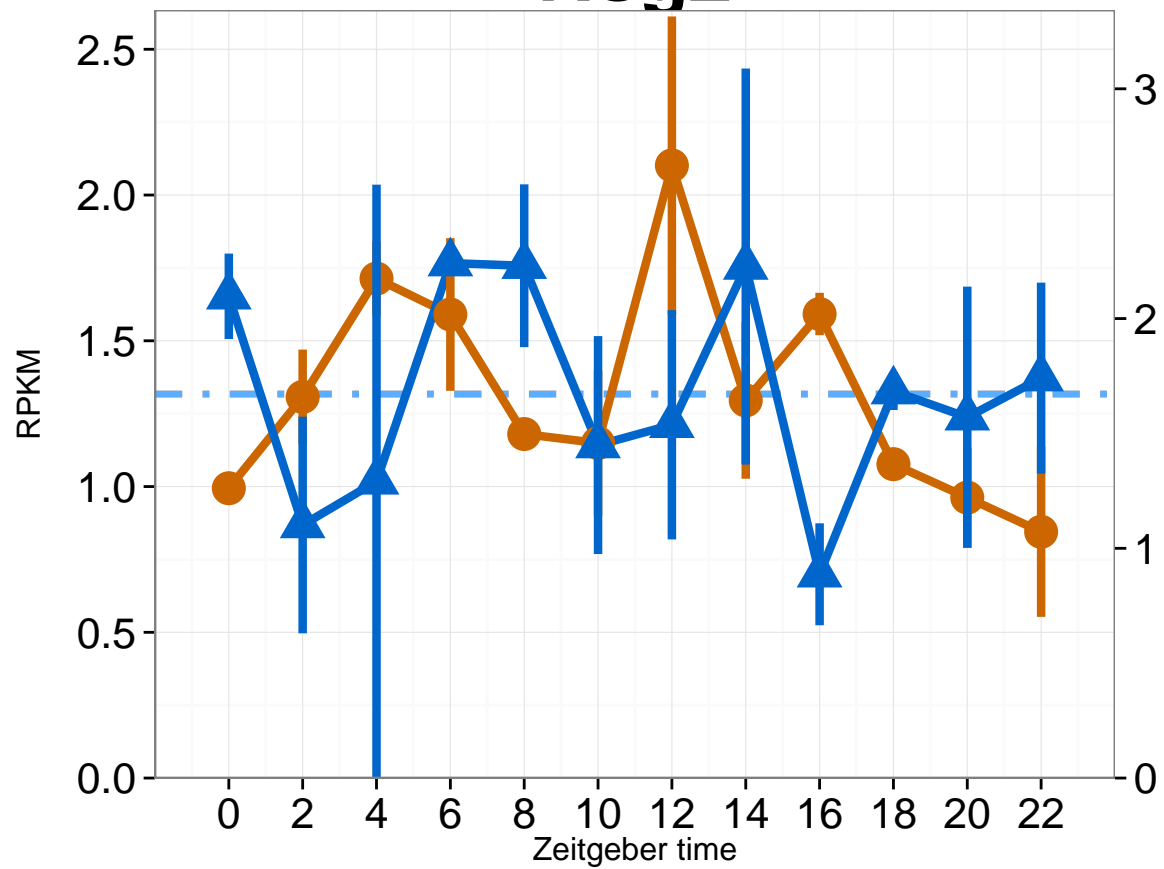

## Nsg2

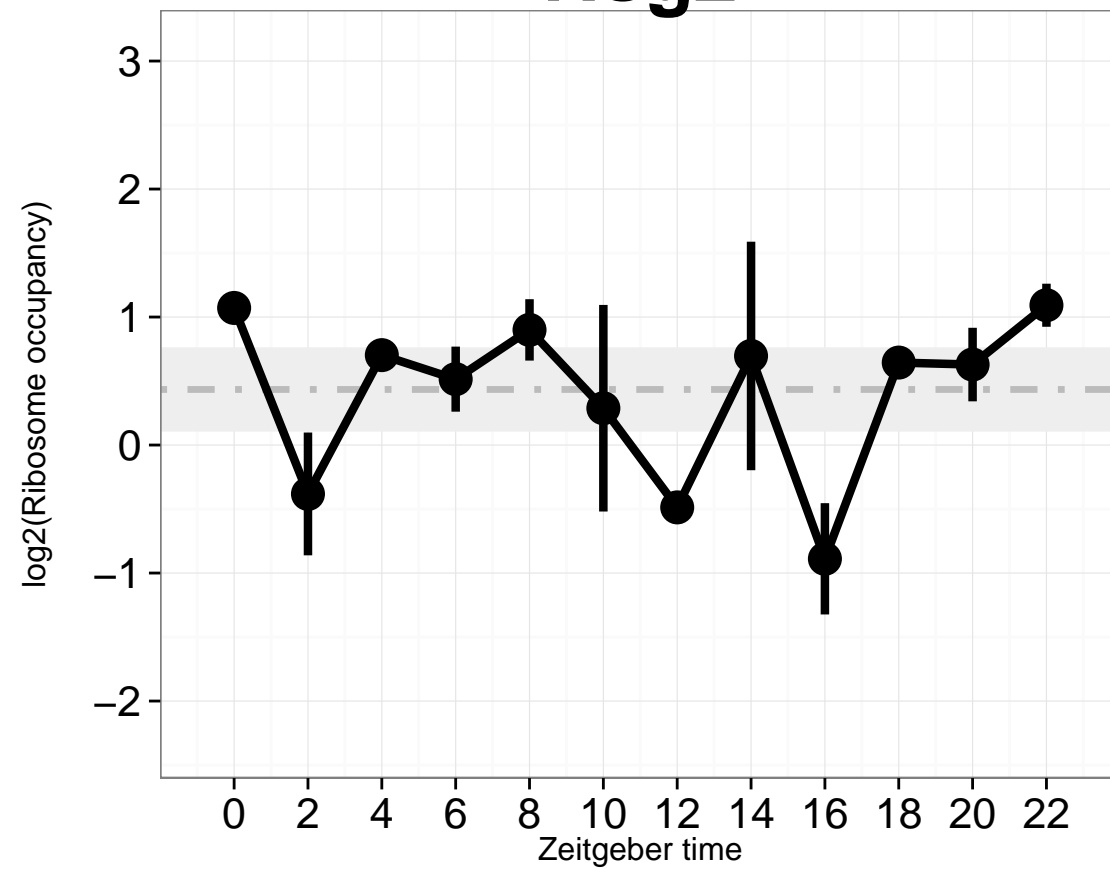

Supplement: Supplementary file 11991 [file 1]

# CasZ1

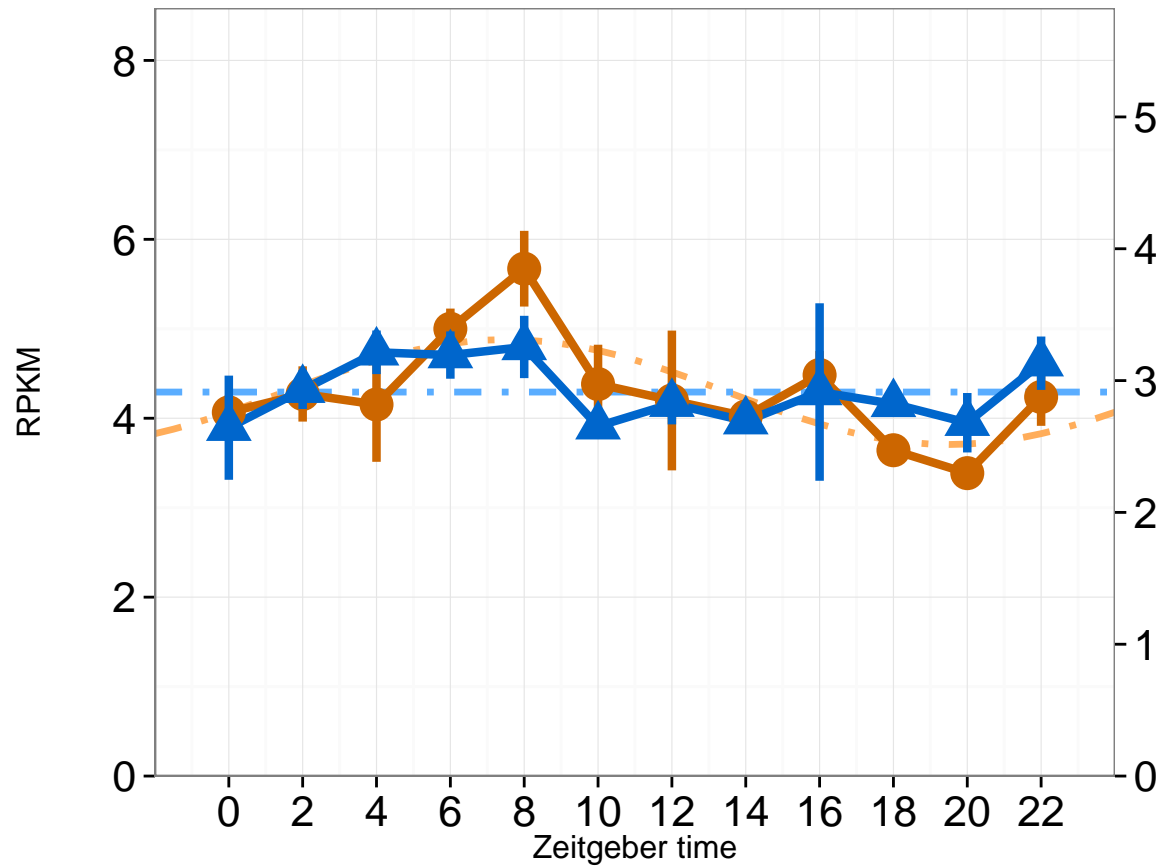

# CasZ1

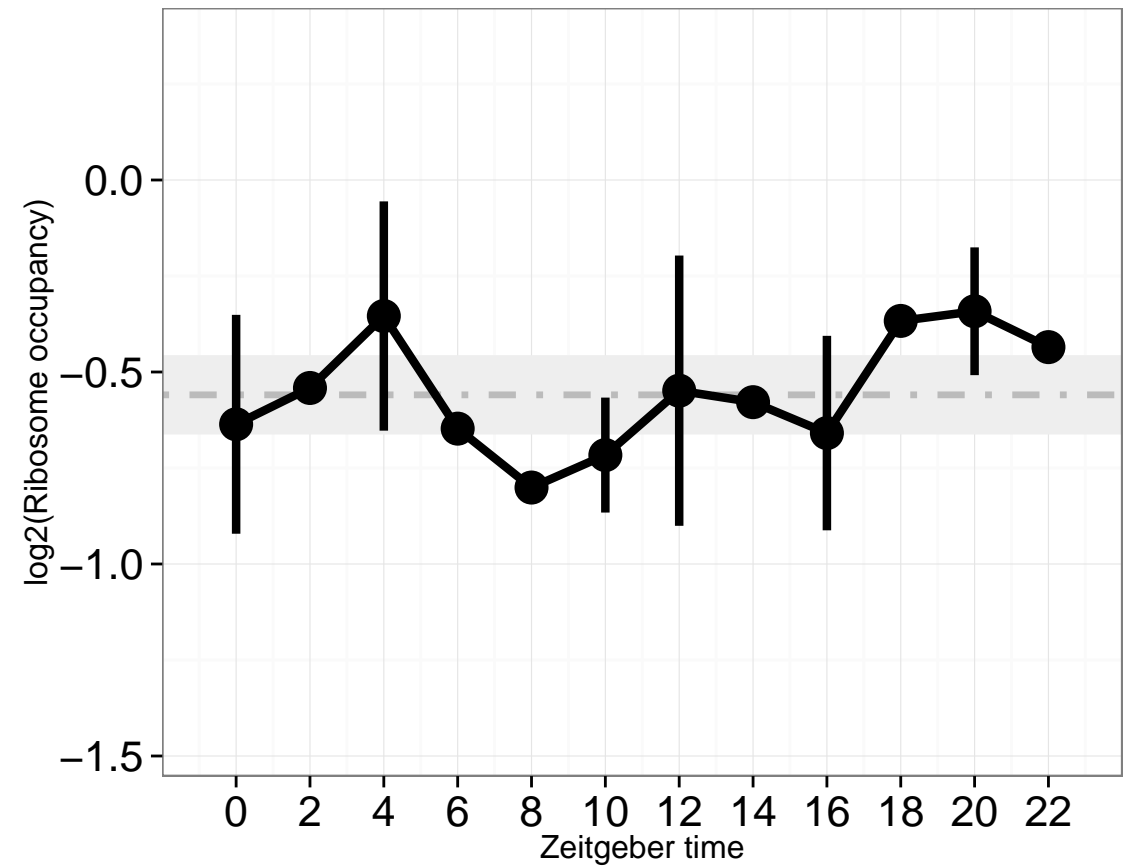

Supplement: Supplementary file 11992 [file 1]

## Igfals

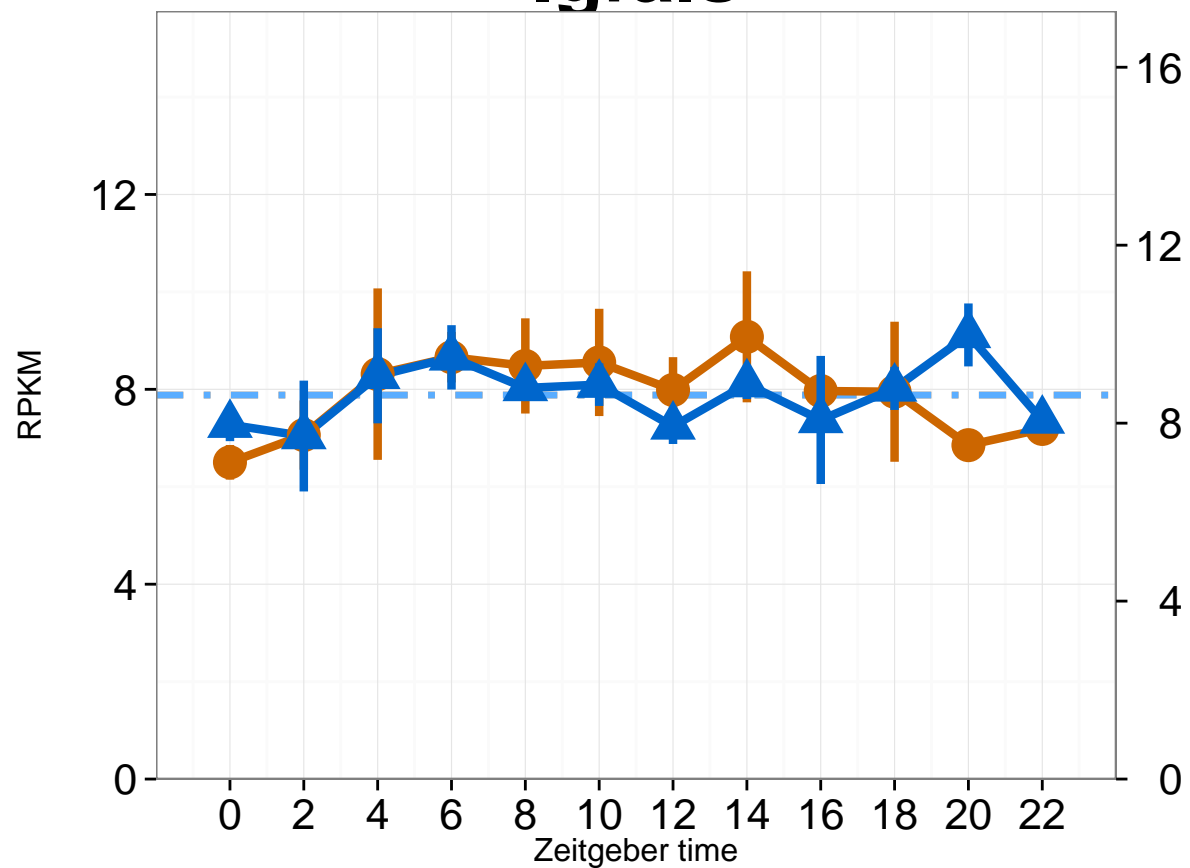

## Igfals

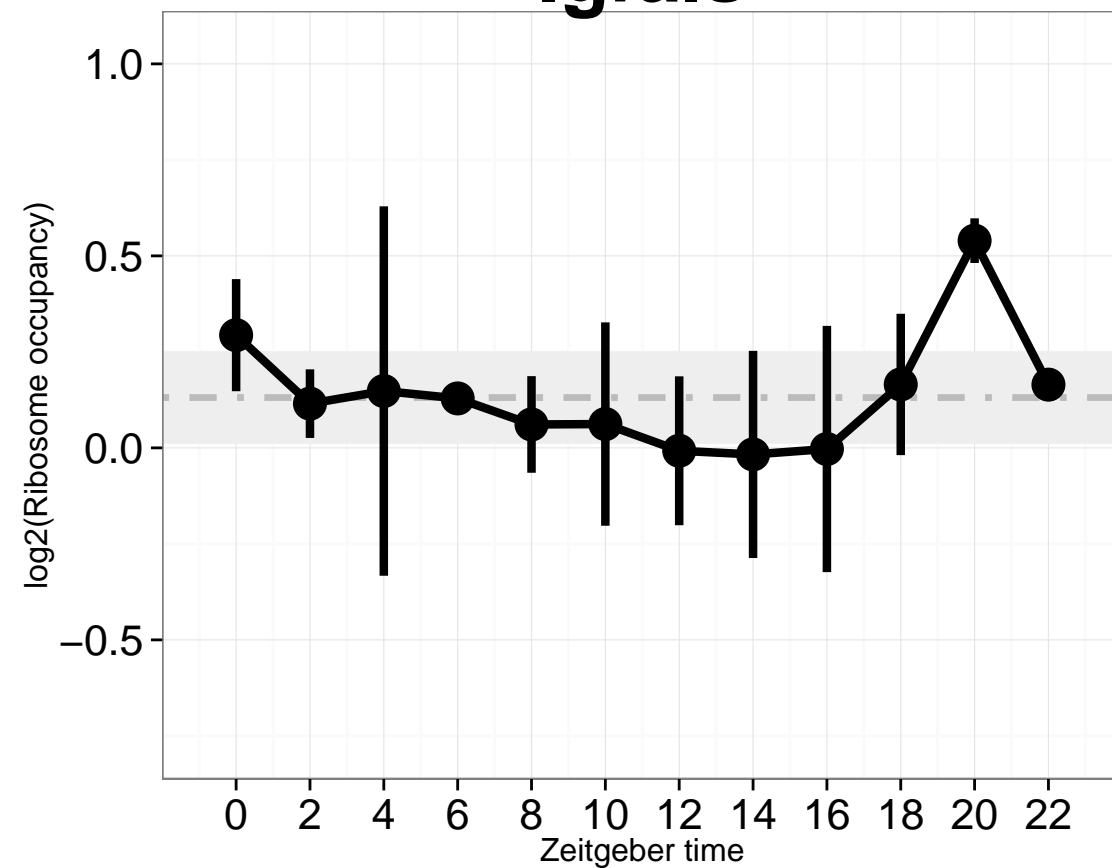

Supplement: Supplementary file 11993 [file 1]

# Ccdc85a

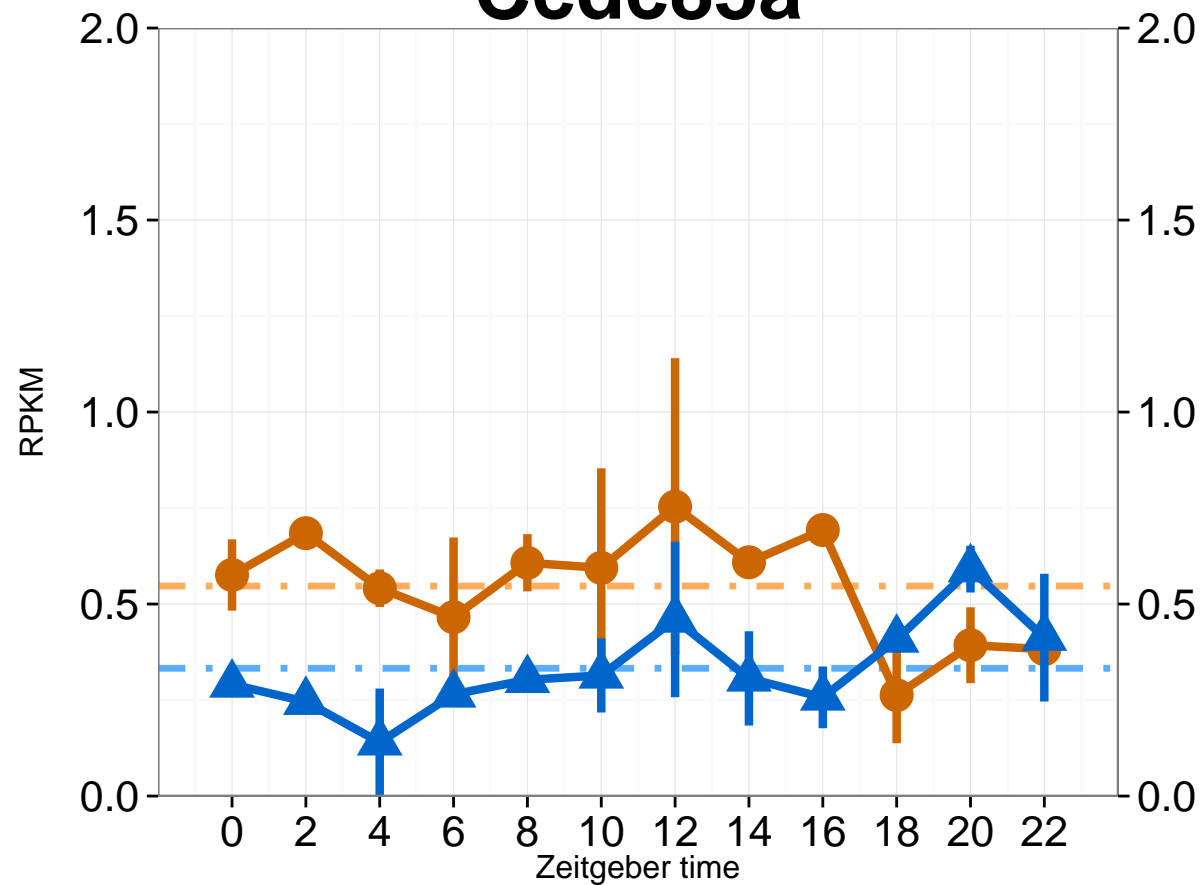

# Ccdc85a

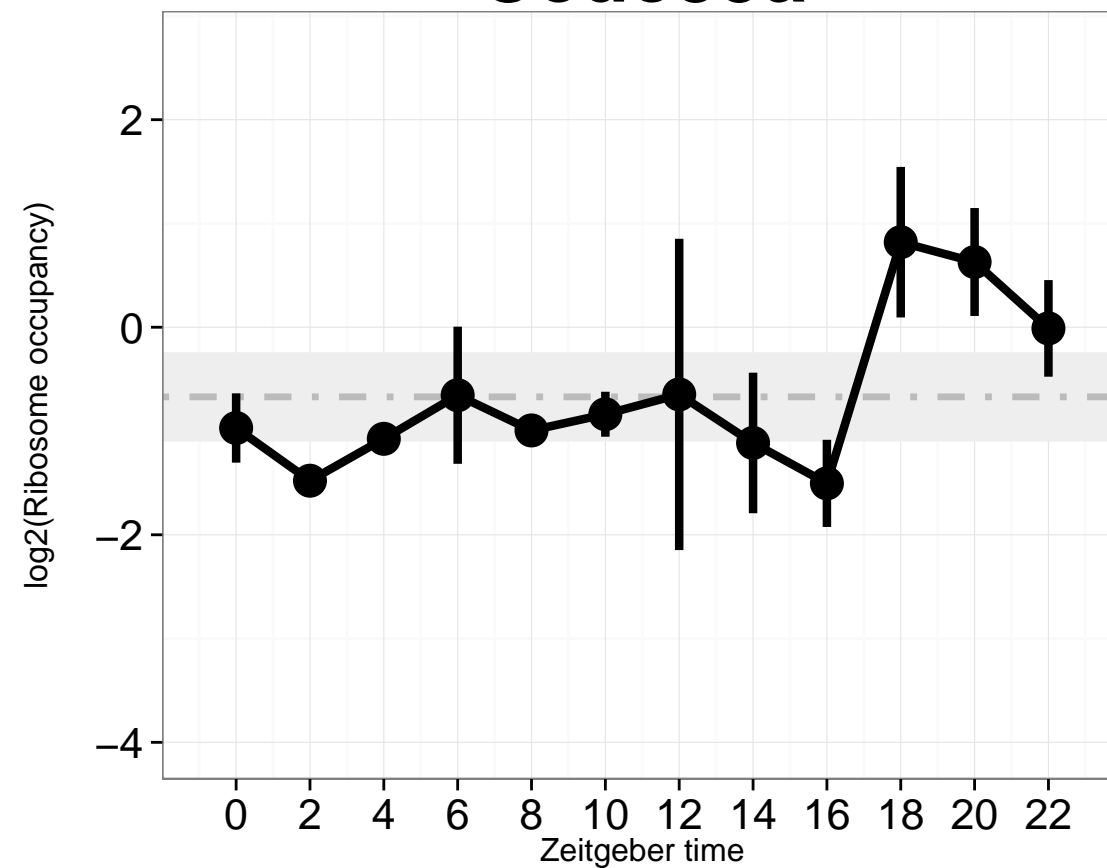

Supplement: Supplementary file 11994 [file 1]

# H2afj

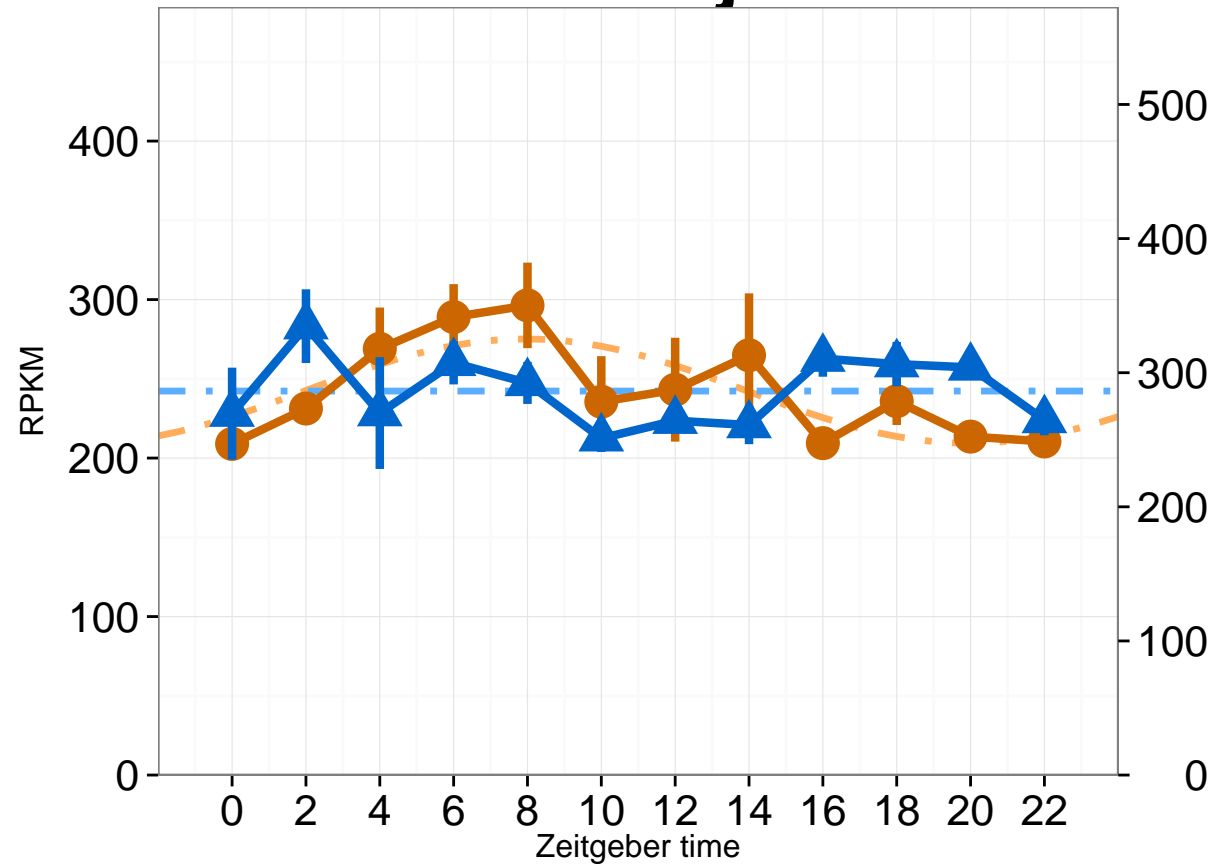

# H2afj

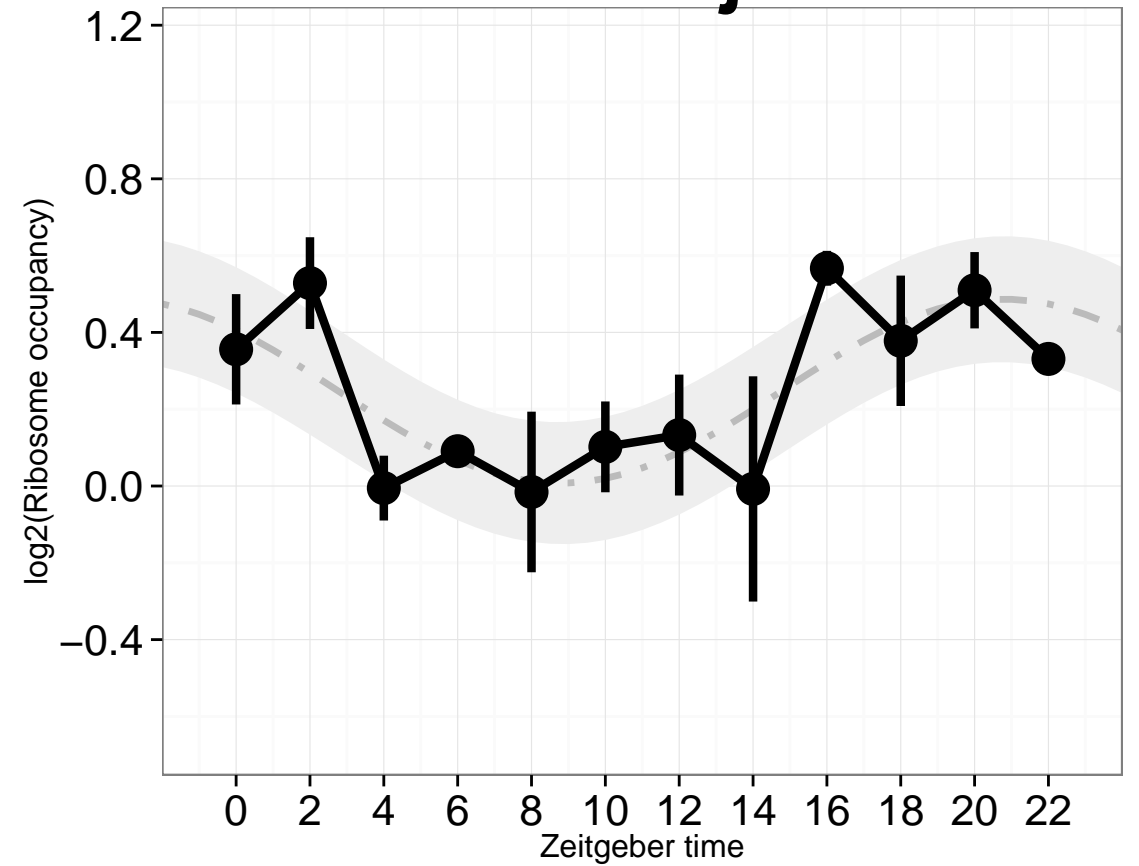

Supplement: Supplementary file 11995 [file 1]

# Klh14

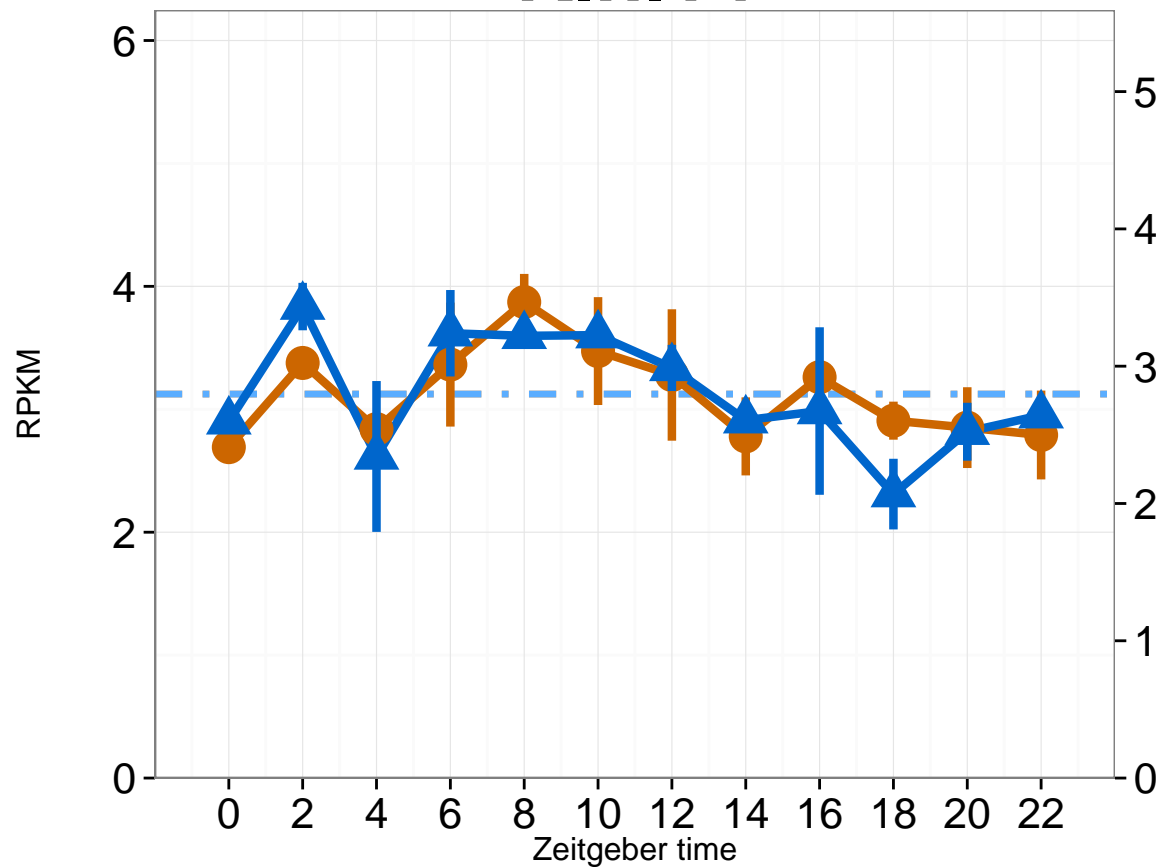

# Klh14

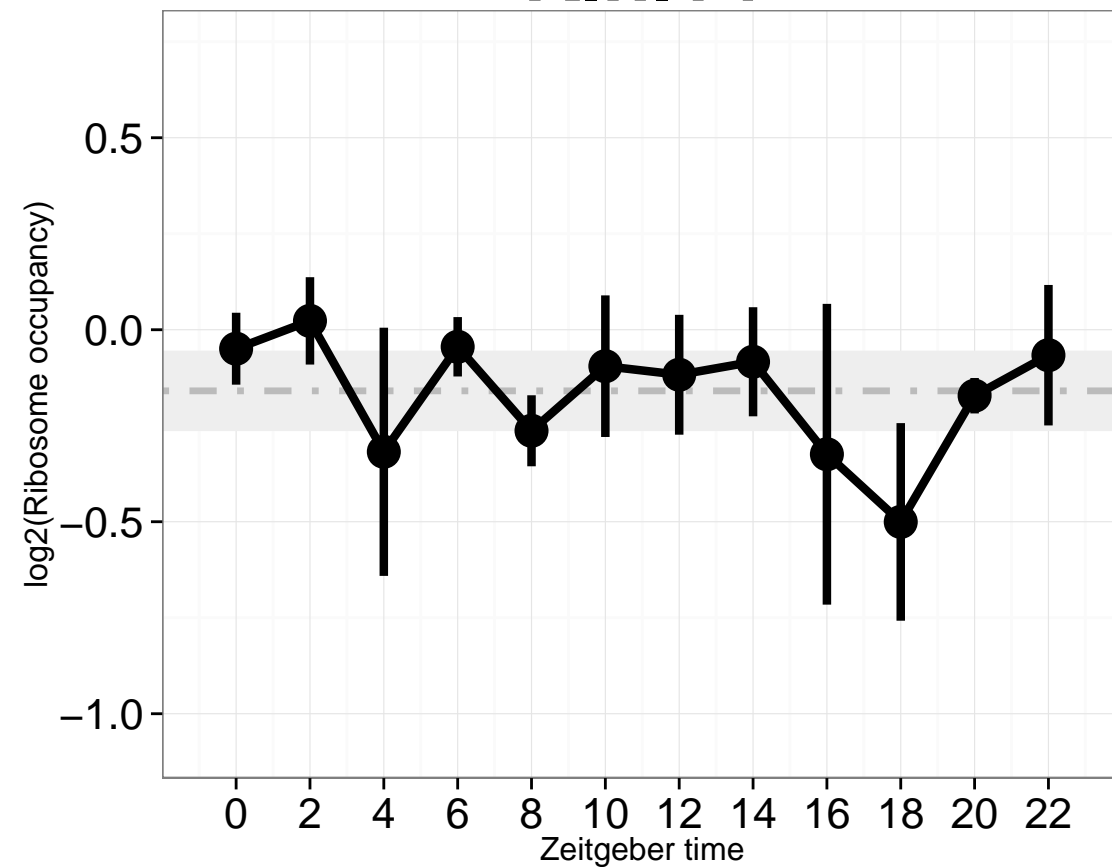

Supplement: Supplementary file 11996 [file 1]

## Crip2

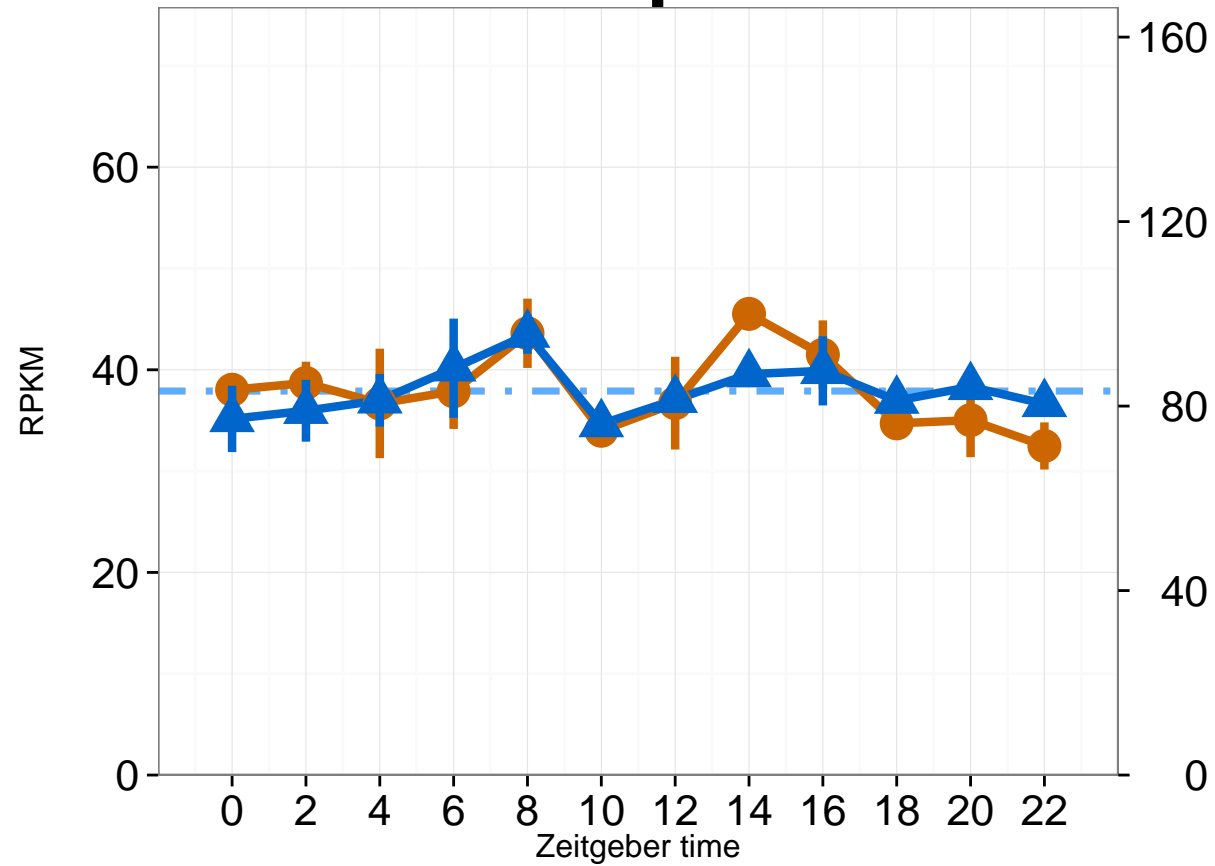

## Crip2

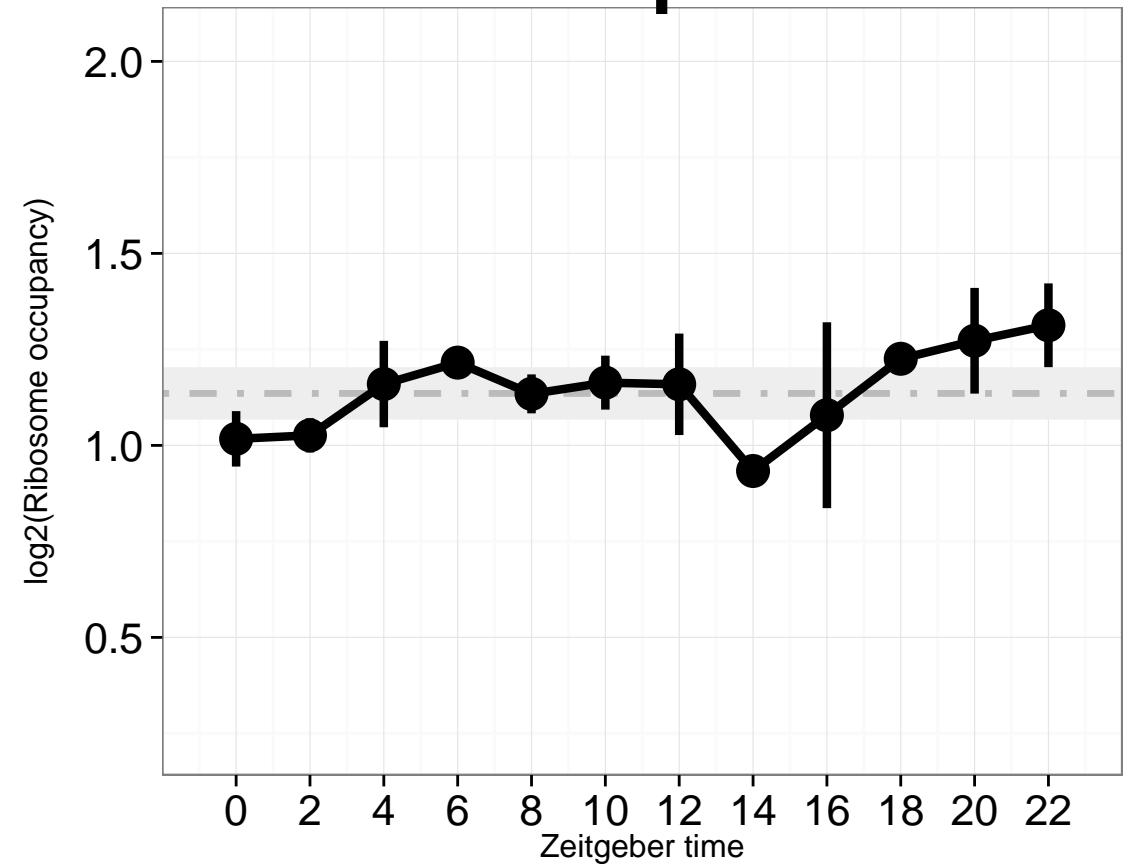

Supplement: Supplementary file 11997 [file 1]

## Gorasp2

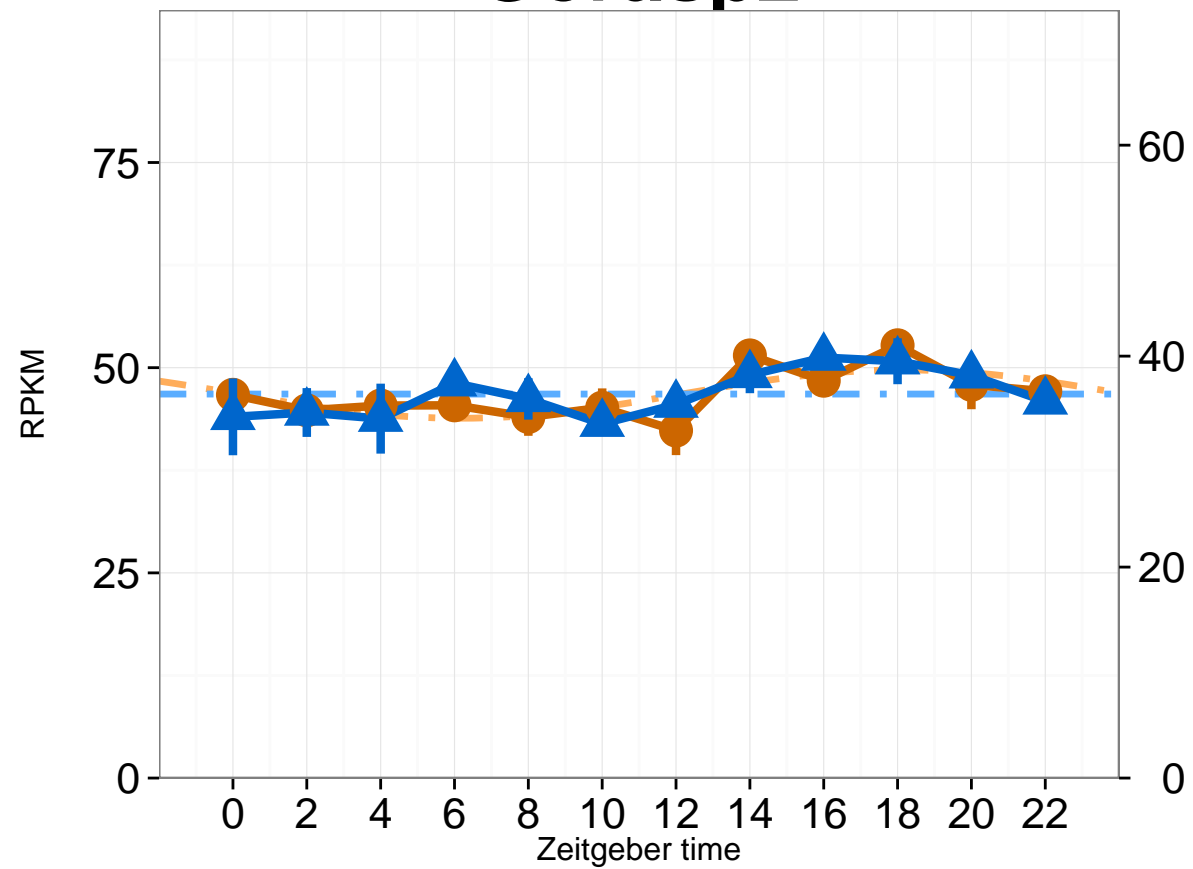

## Gorasp2

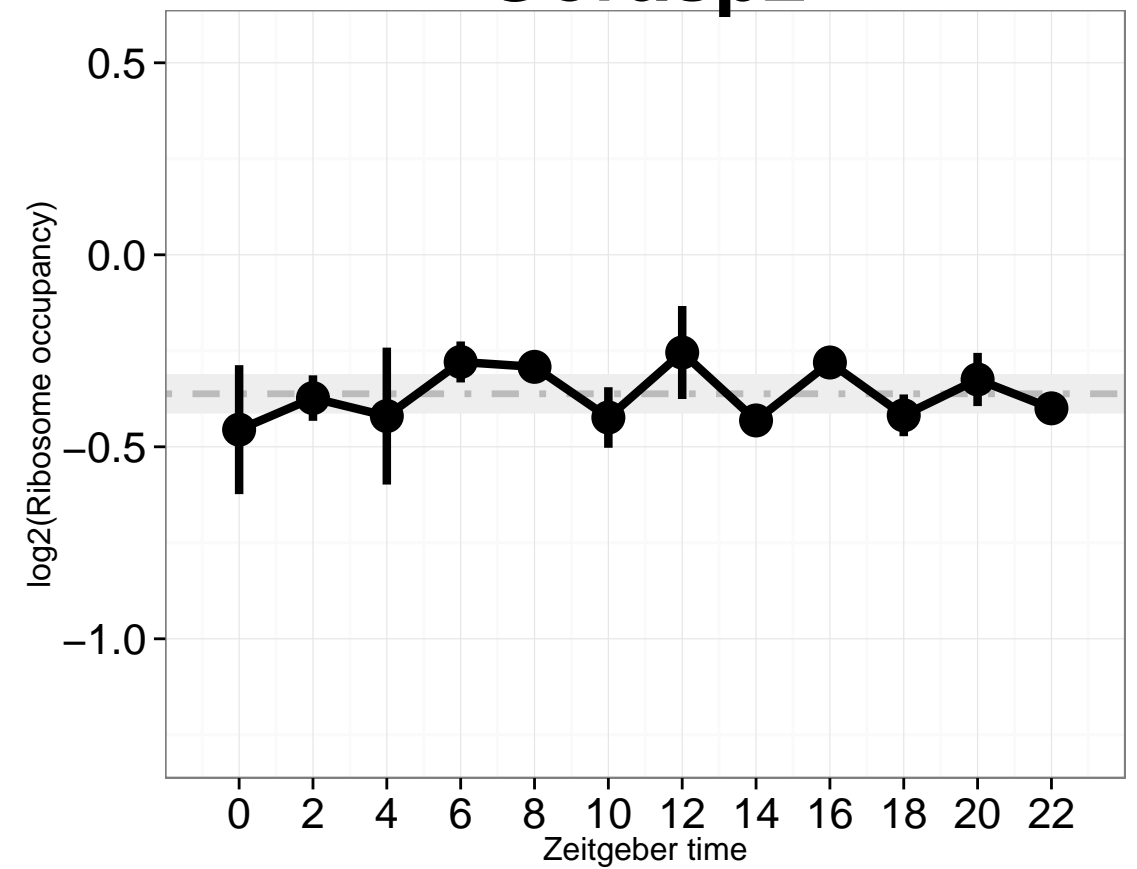

Supplement: Supplementary file 11998 [file 1]

# Ppm1e

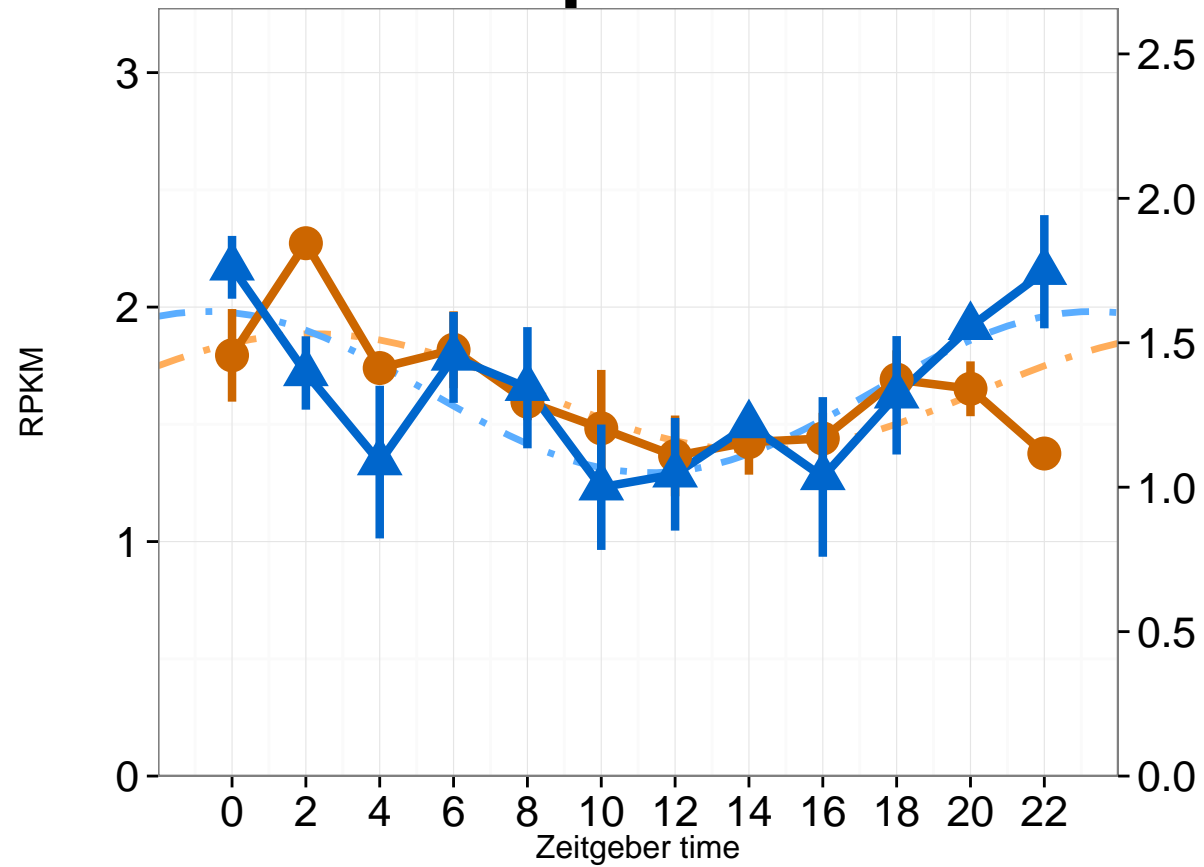

# Ppm1e

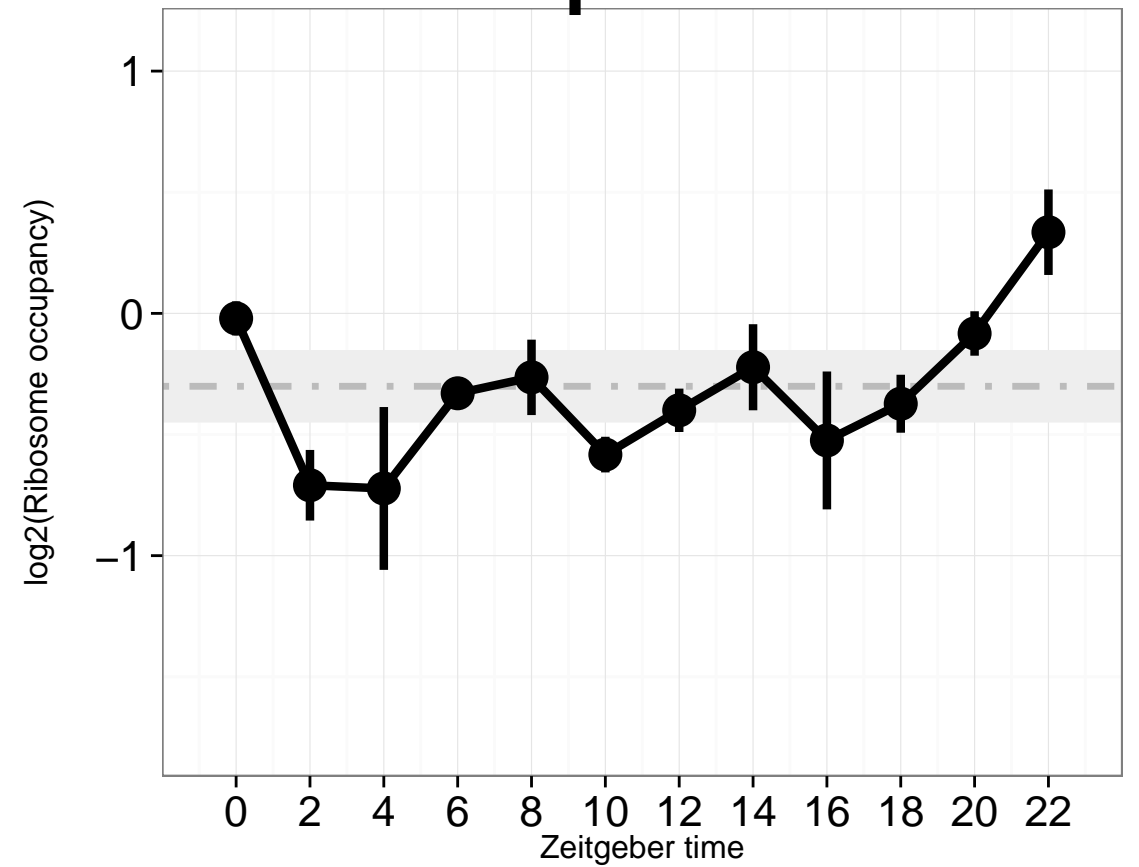

Supplement: Supplementary file 11999 [file 1]

## Sox5

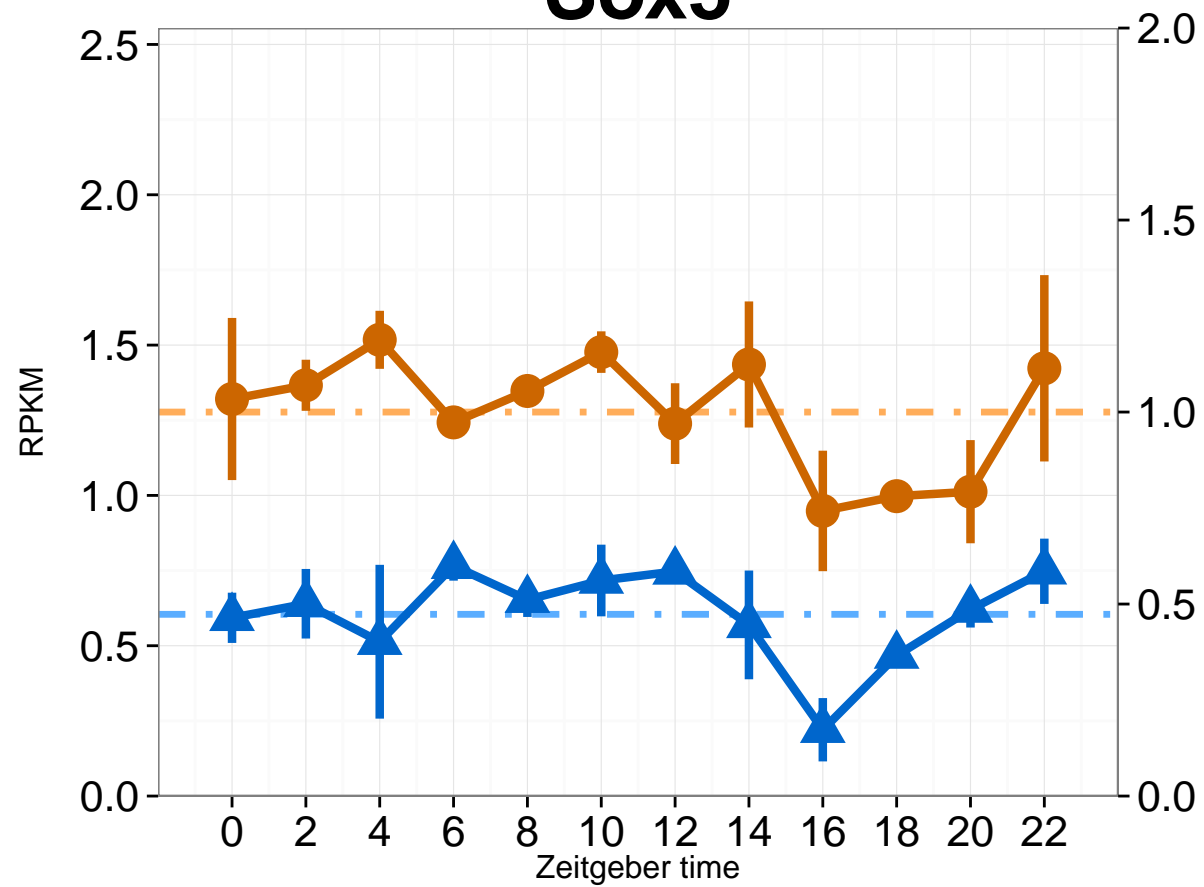

## Sox5

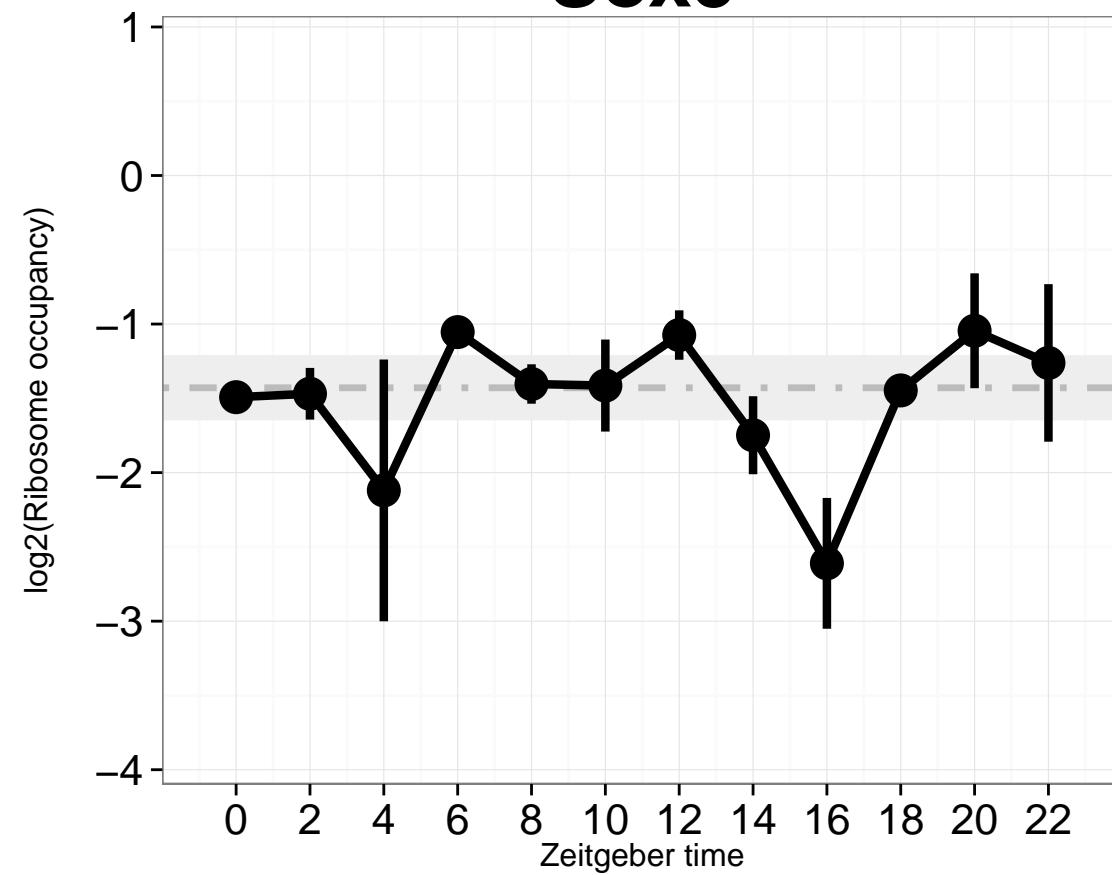

Supplement: Supplementary file 12000 [file 1]

**Prرت1 TR**

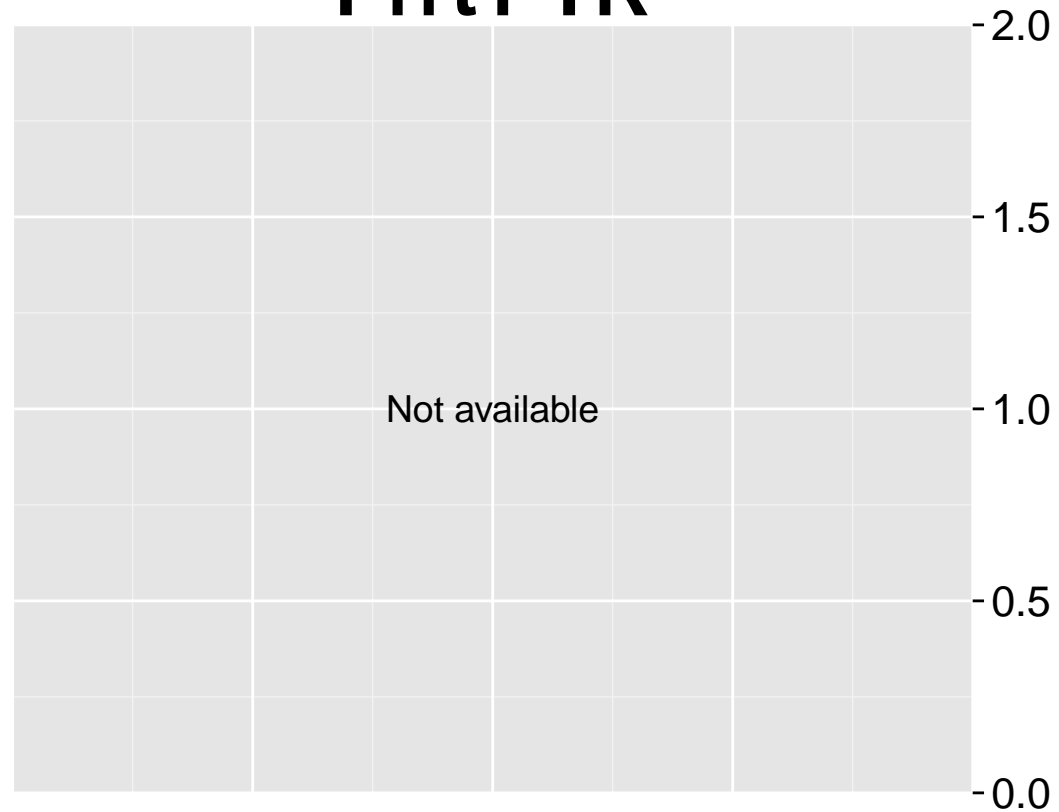

**Prرت1 log2(Ribosome occupancy)**

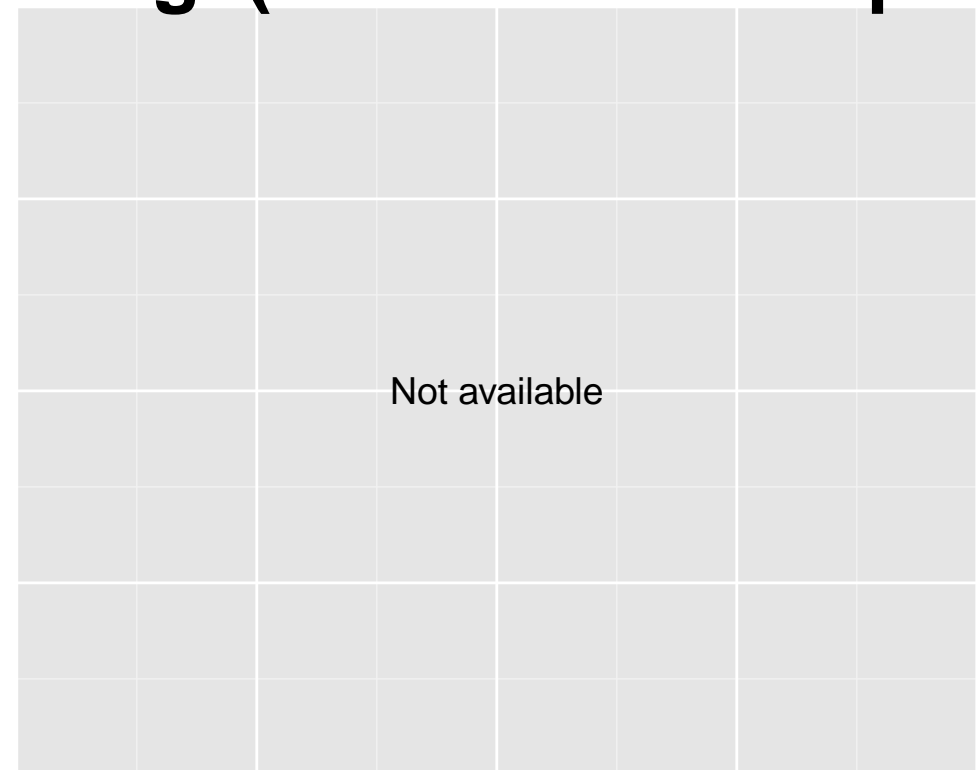

Supplement: Supplementary file 12001 [file 1]

**Ctnna3 TR**

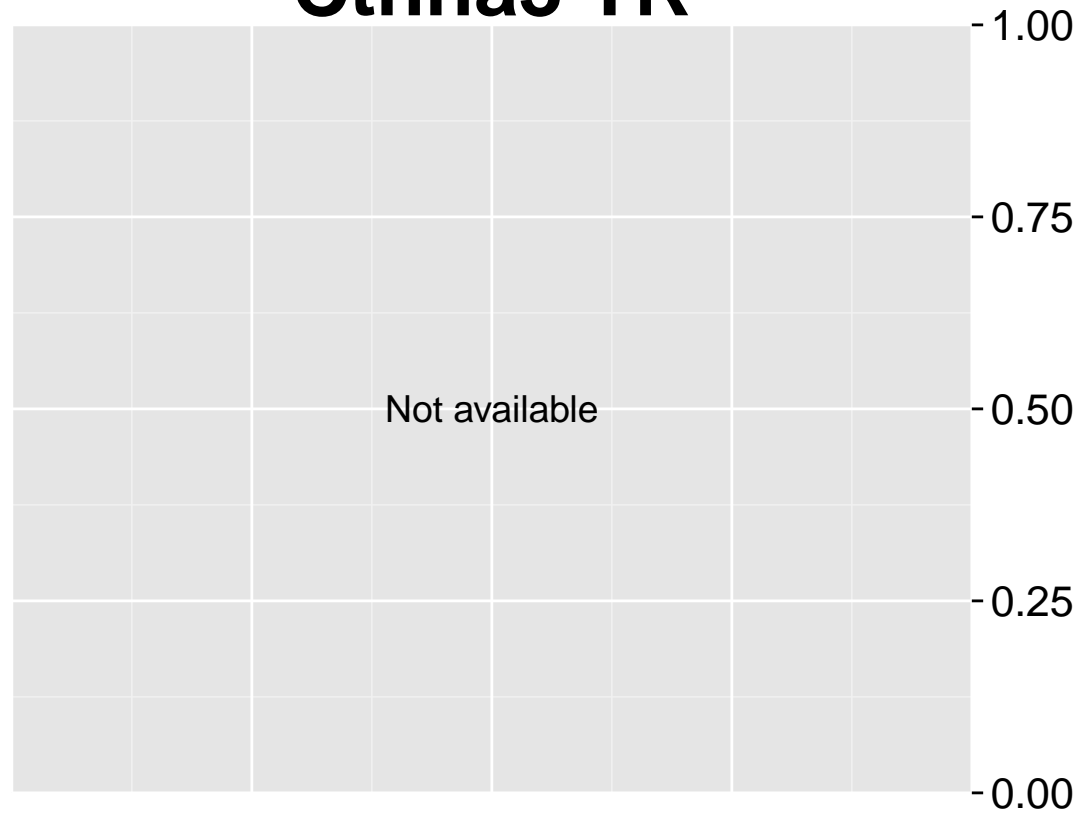

**Ctnna3 log2(Ribosome occupancy**

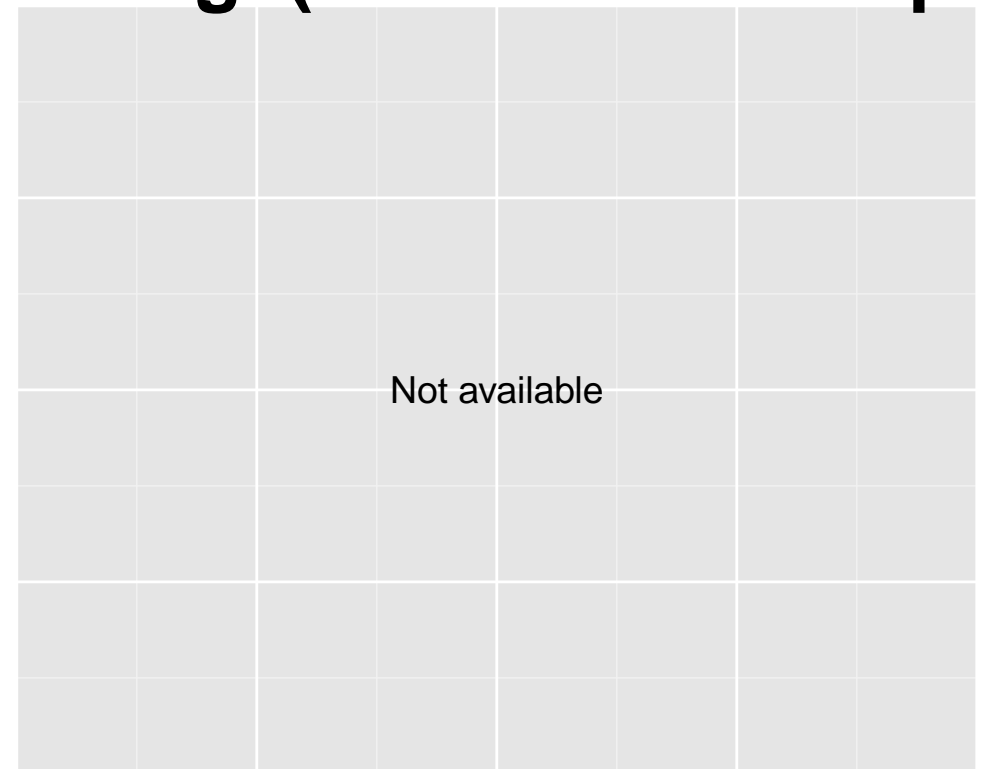

Supplement: Supplementary file 12002 [file 1]

# Slc41a3

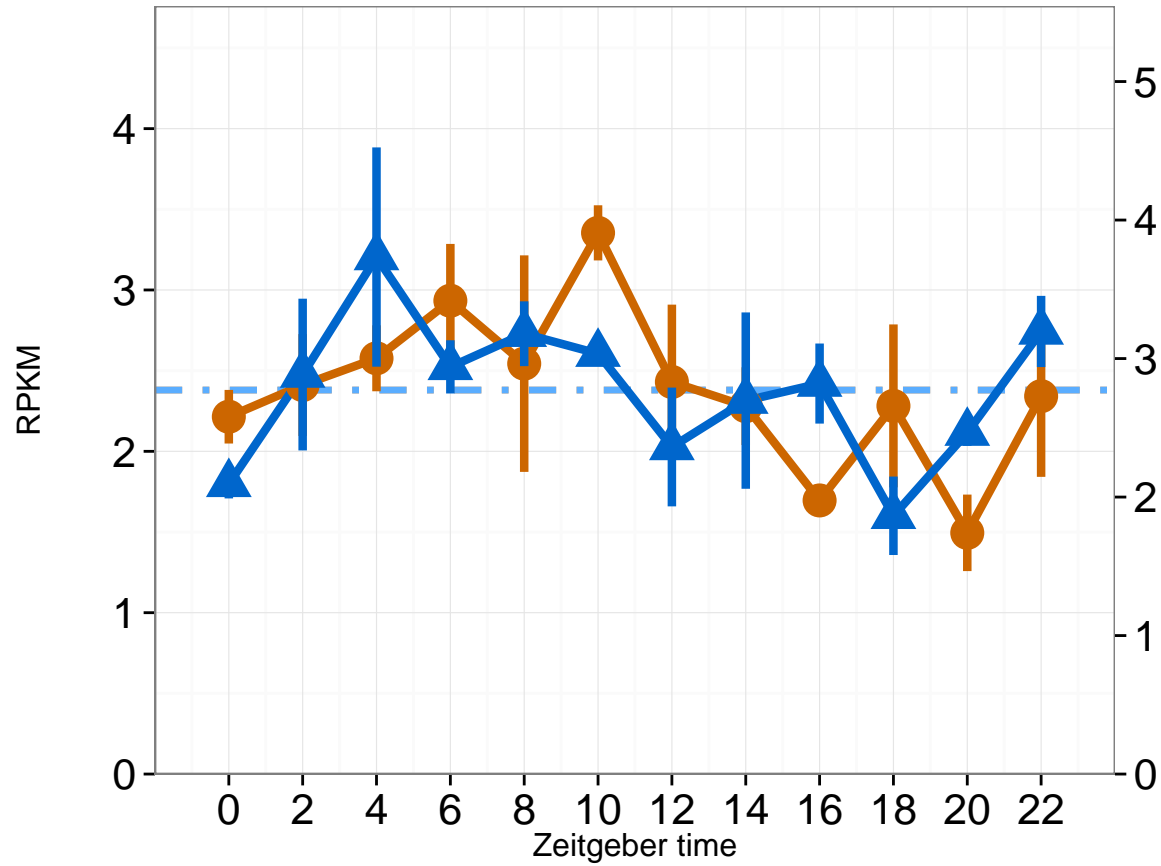

# Slc41a3

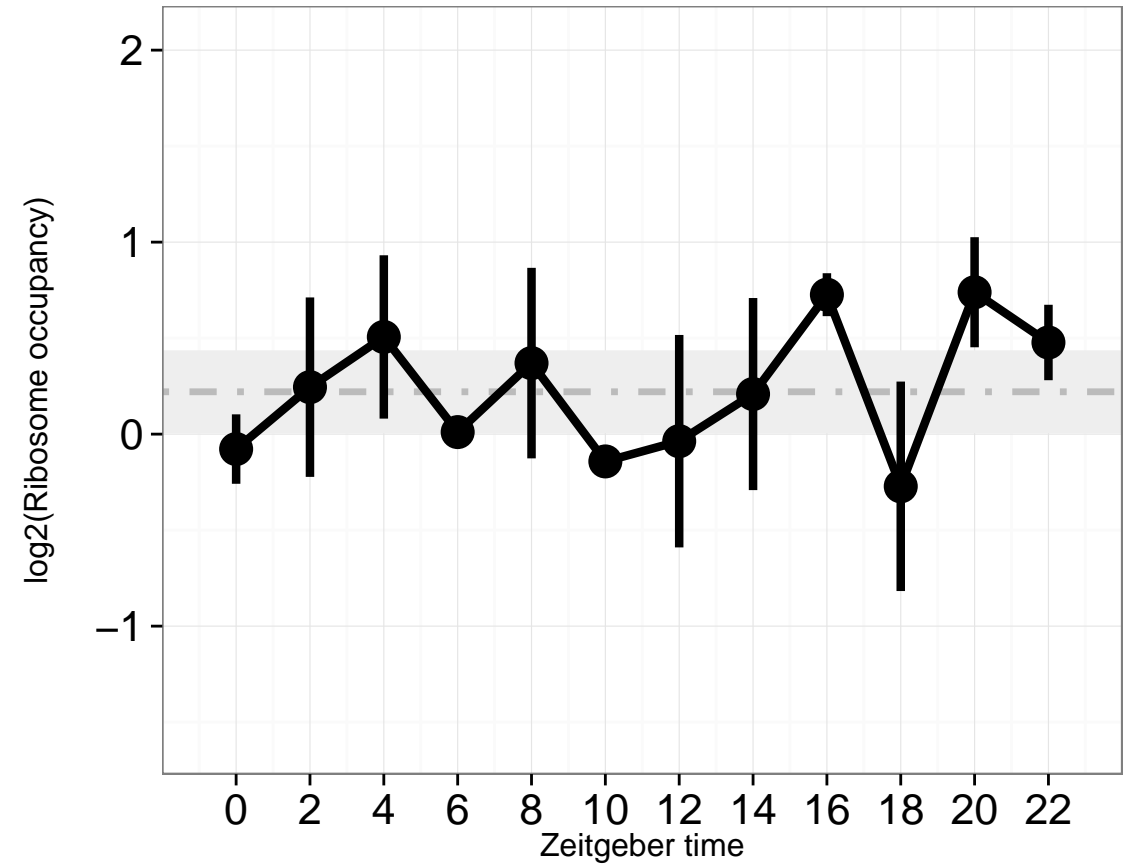

Supplement: Supplementary file 12003 [file 1]

## Myo18a

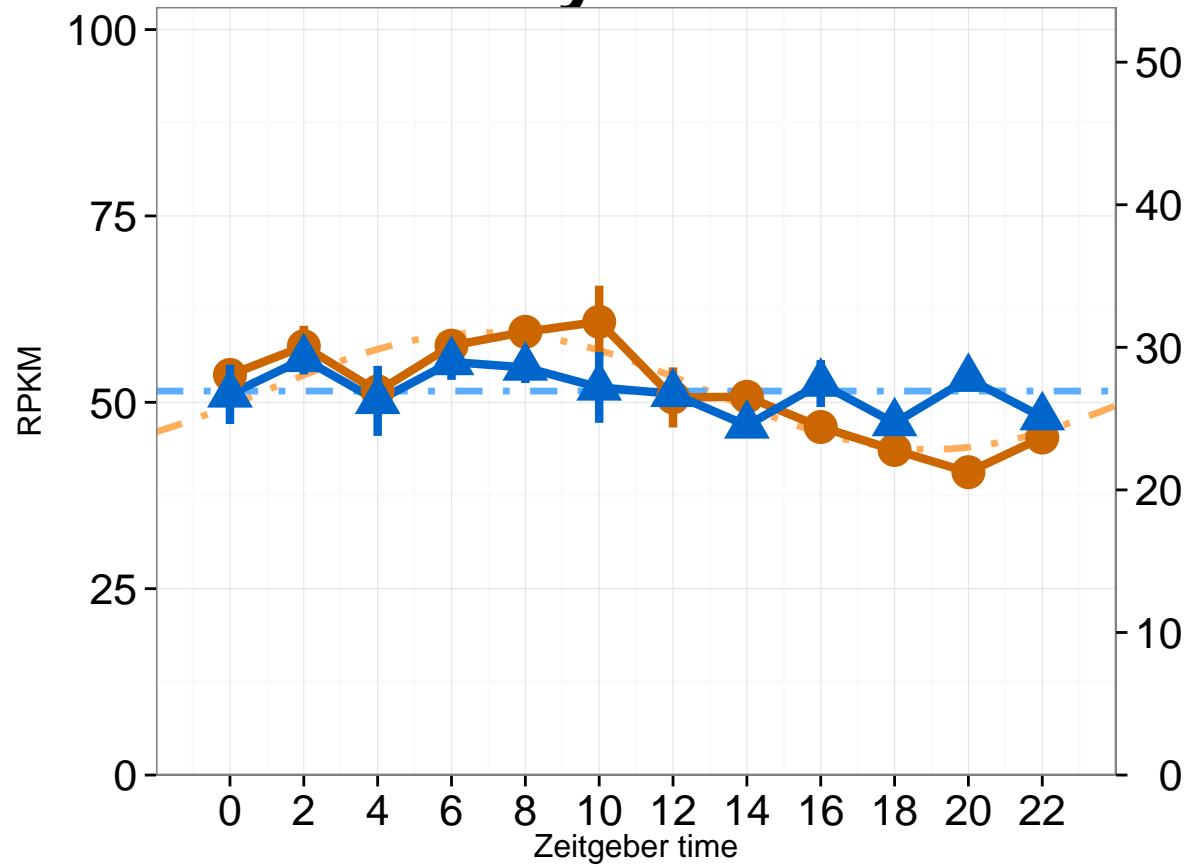

## Myo18a

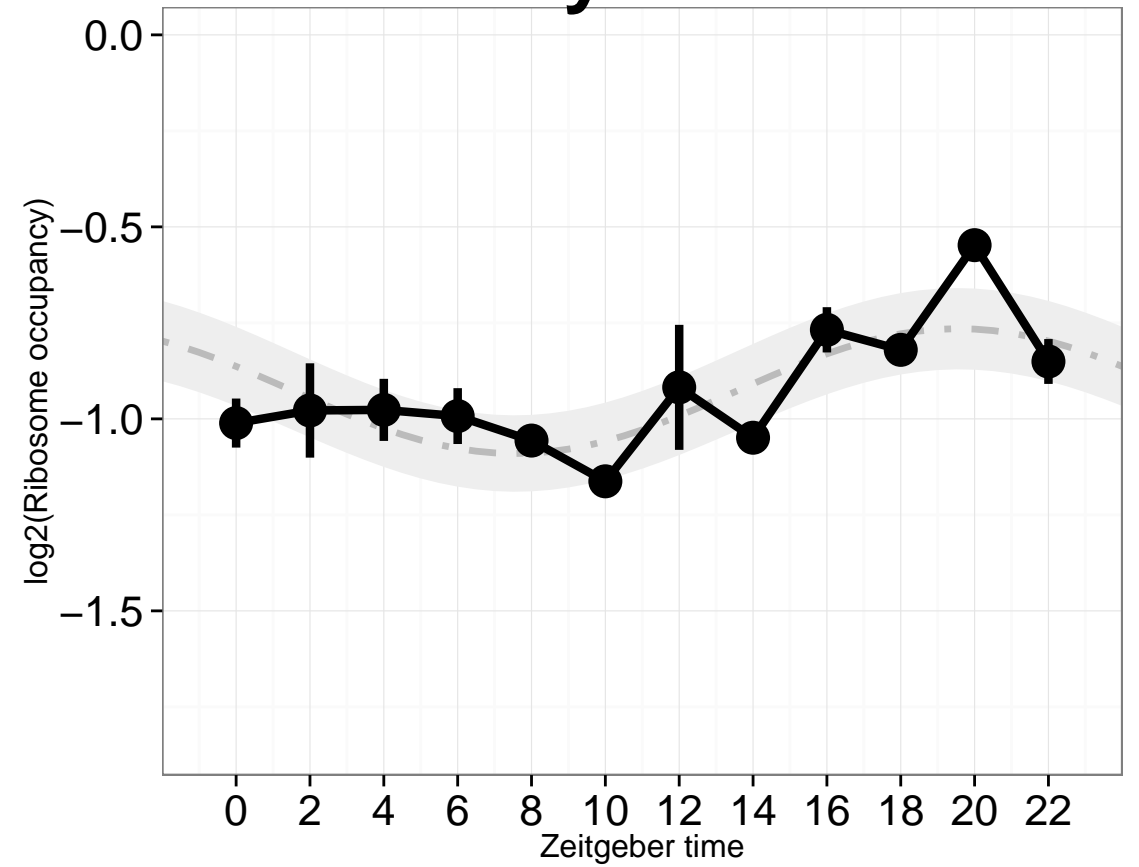

Supplement: Supplementary file 12004 [file 1]

# Hist1h1d

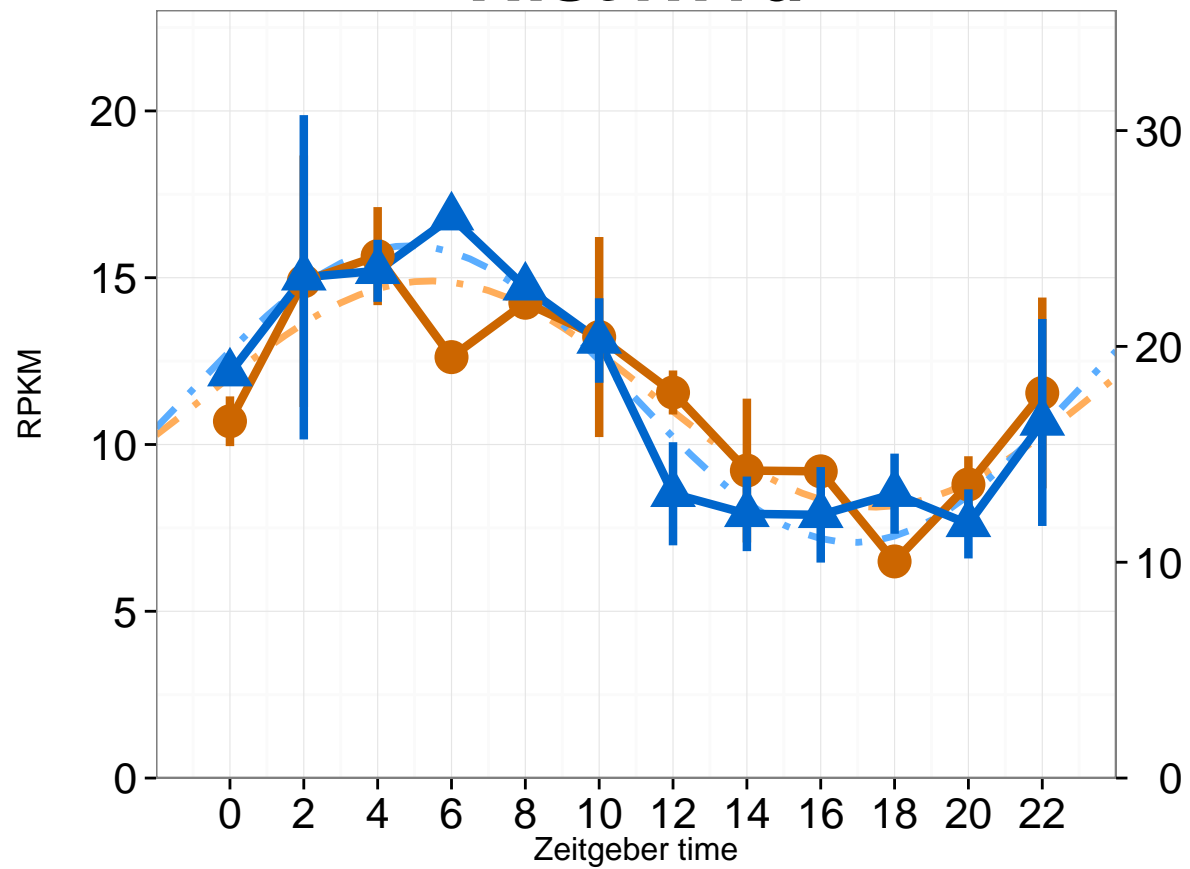

# Hist1h1d

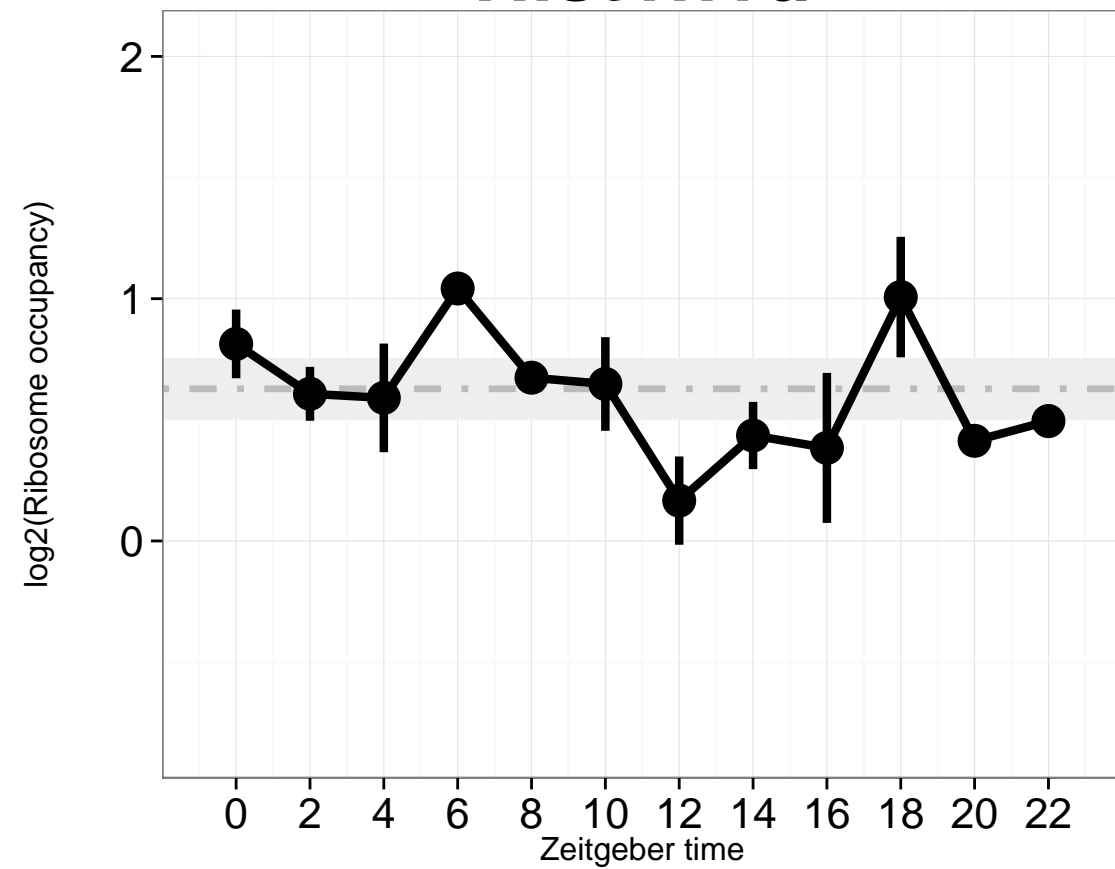

Supplement: Supplementary file 12005 [file 1]

# Grtp1

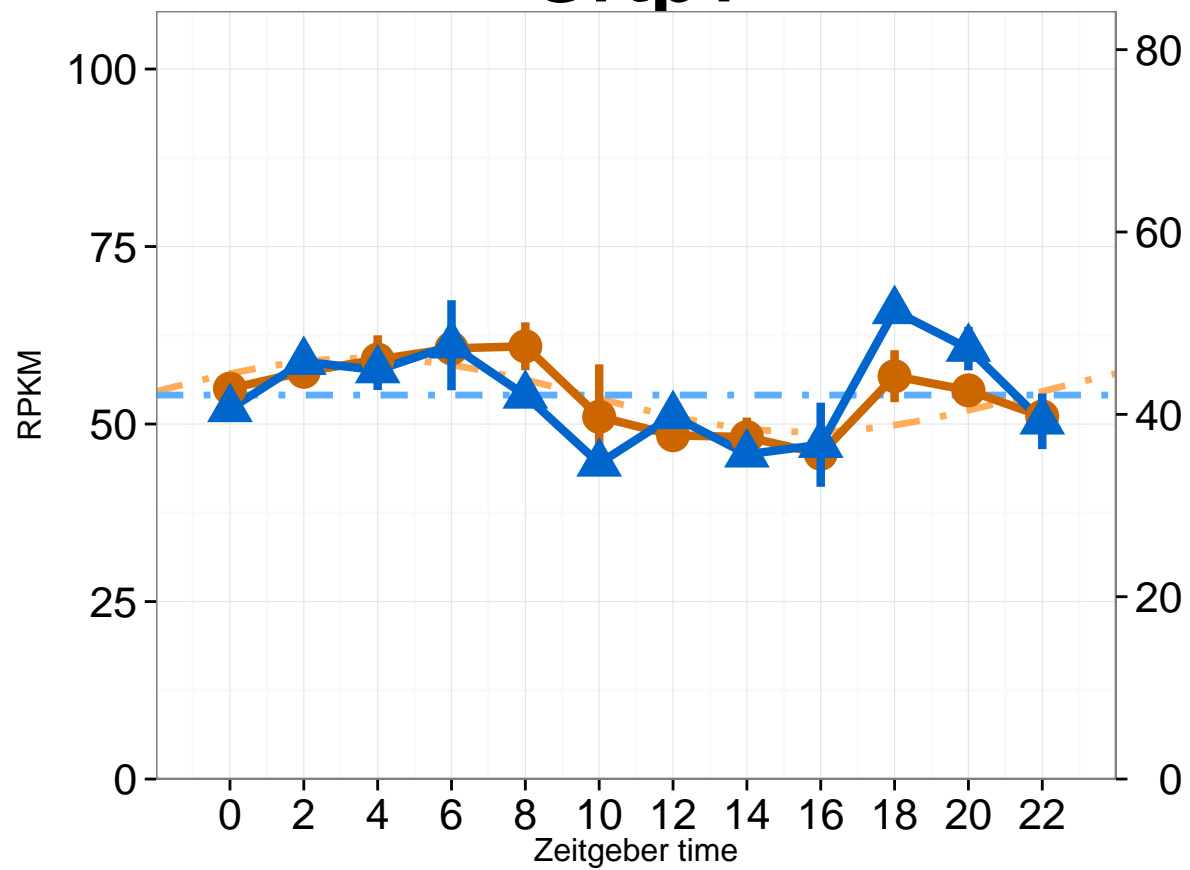

# Grtp1

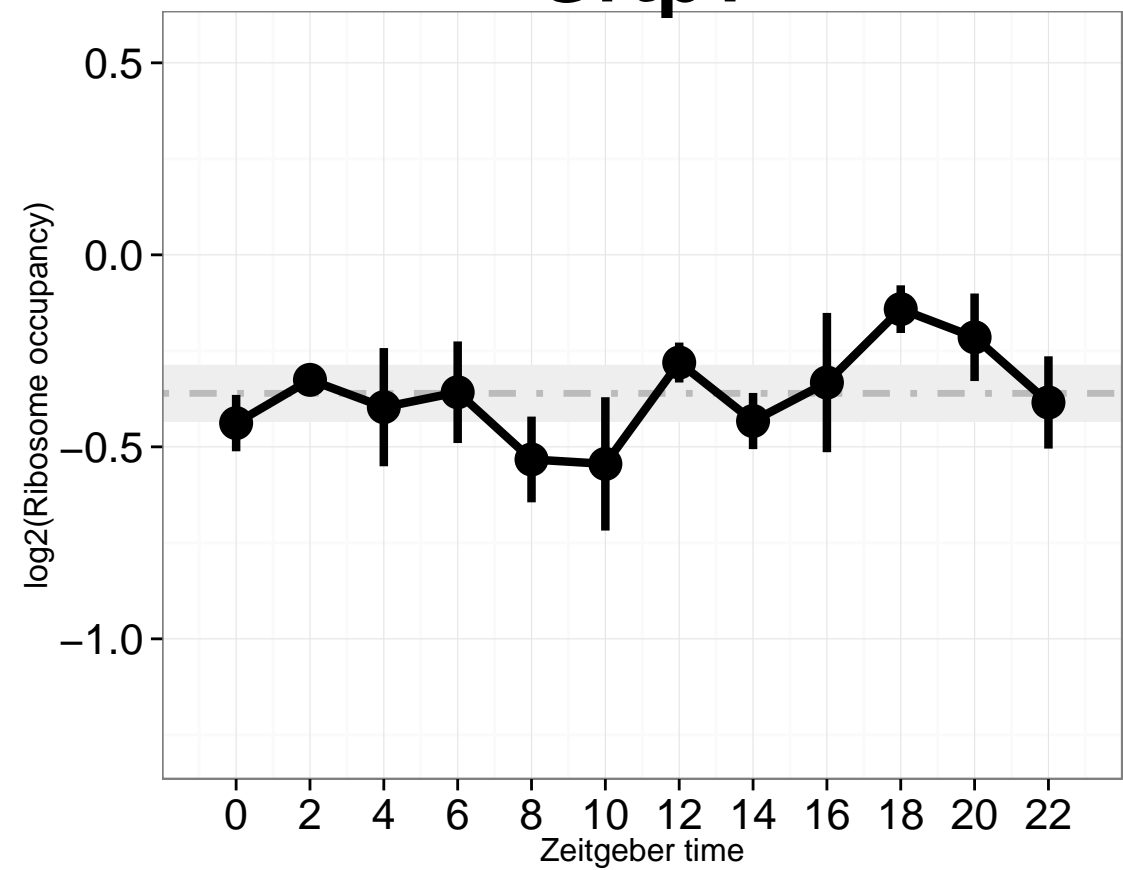

Supplement: Supplementary file 12006 [file 1]

## Jak2

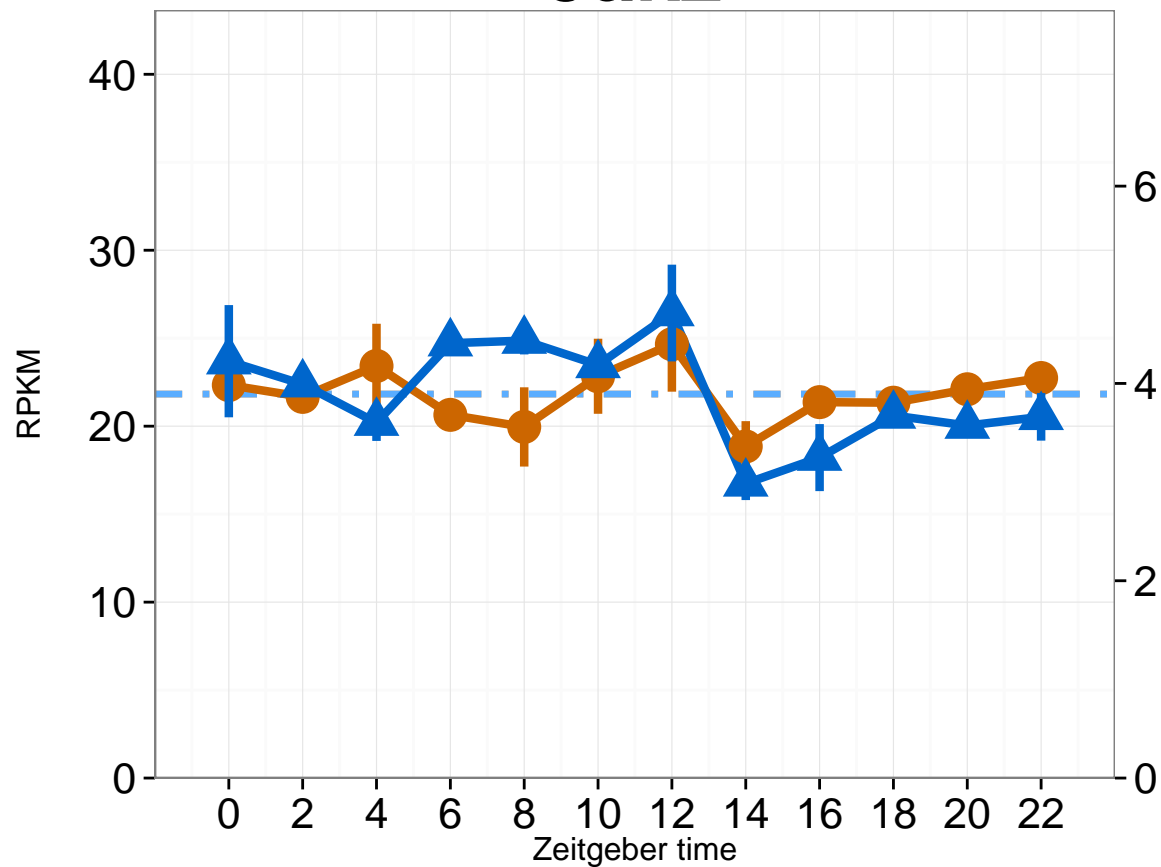

## Jak2

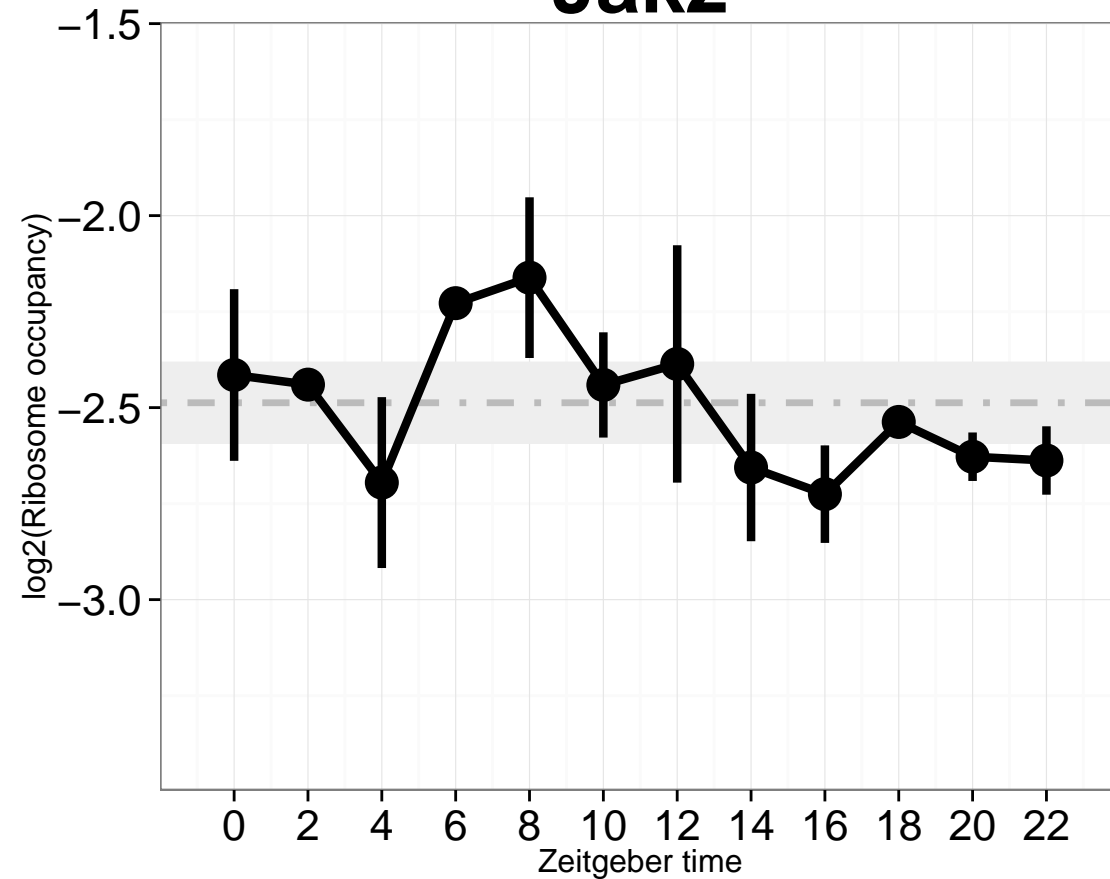

Supplement: Supplementary file 12007 [file 1]

## Dhx34

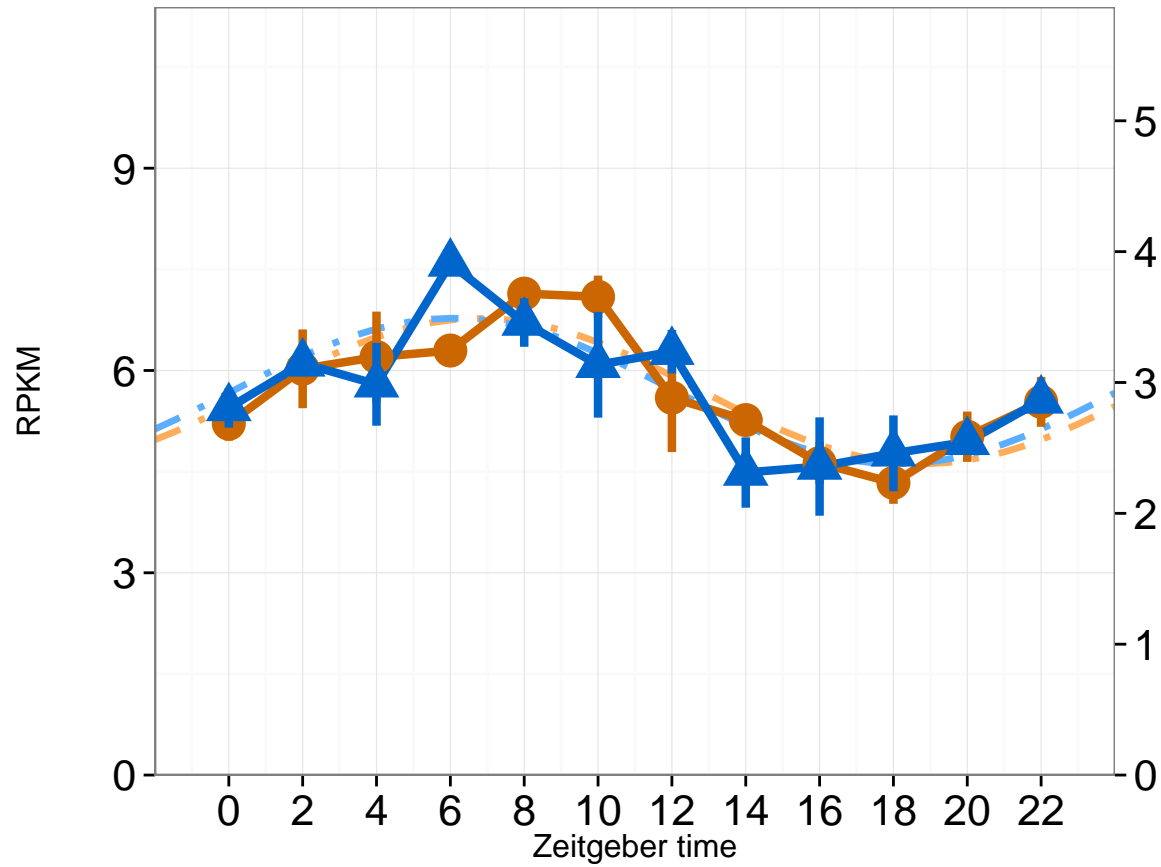

## Dhx34

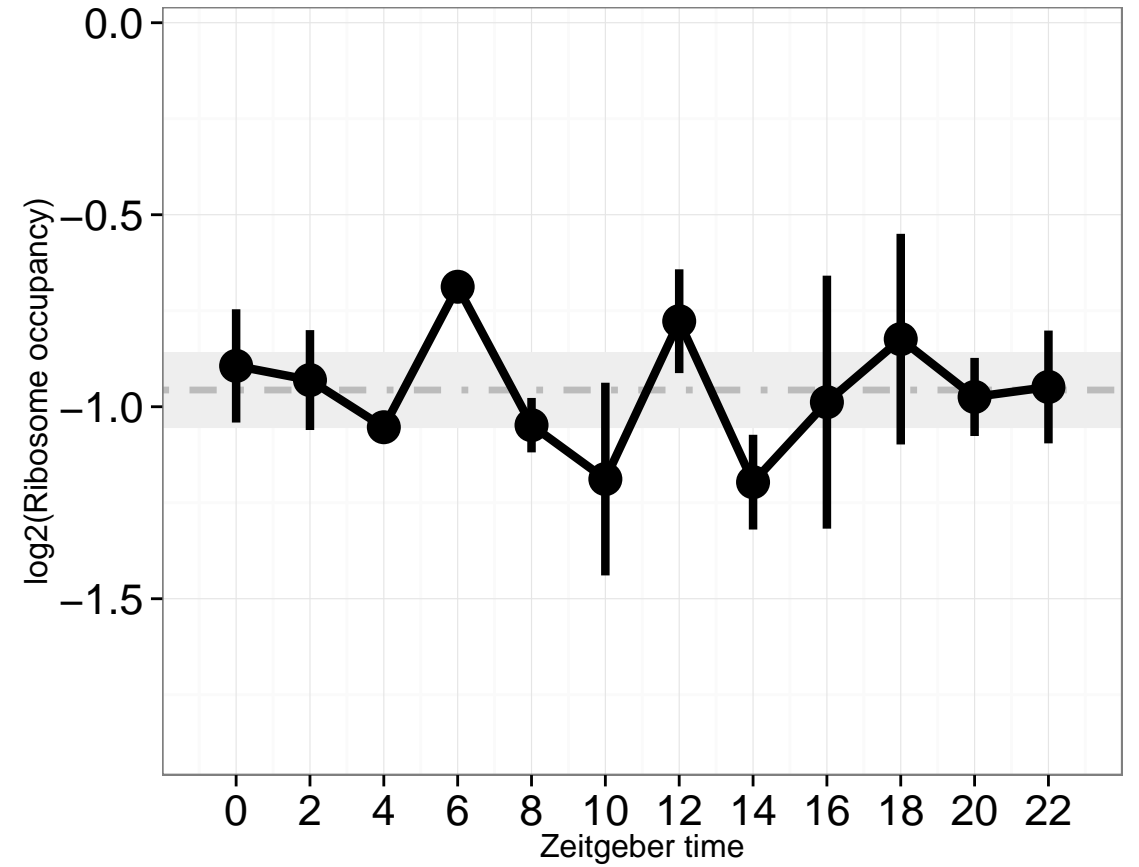

Supplement: Supplementary file 12008 [file 1]

# Zfp628

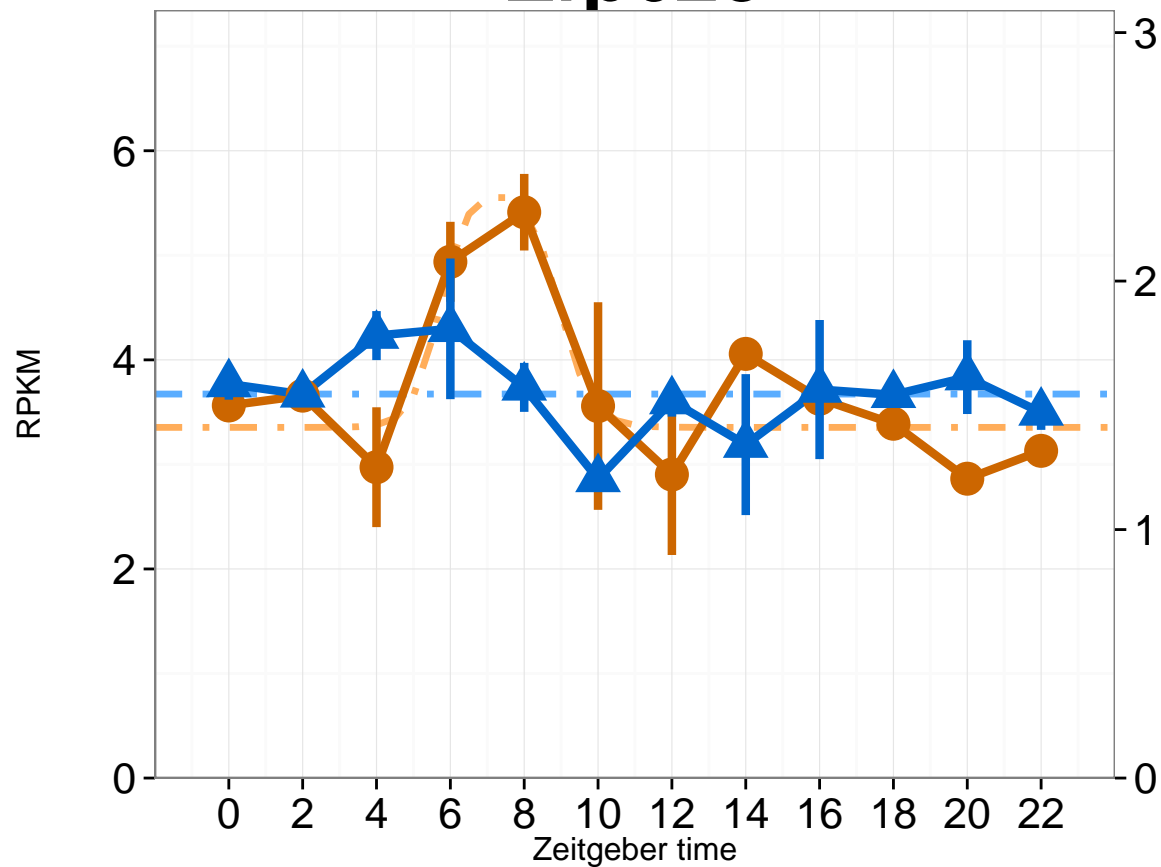

# Zfp628

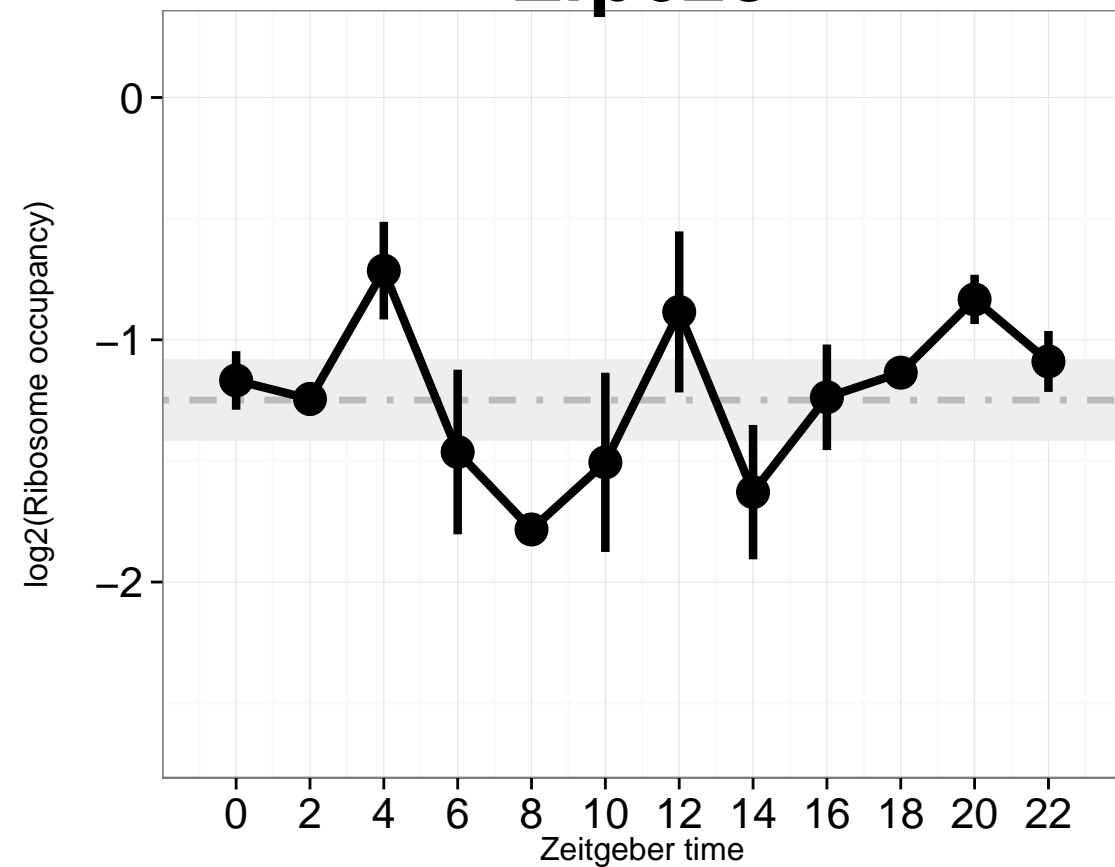

Supplement: Supplementary file 12009 [file 1]

# Tbc1d5

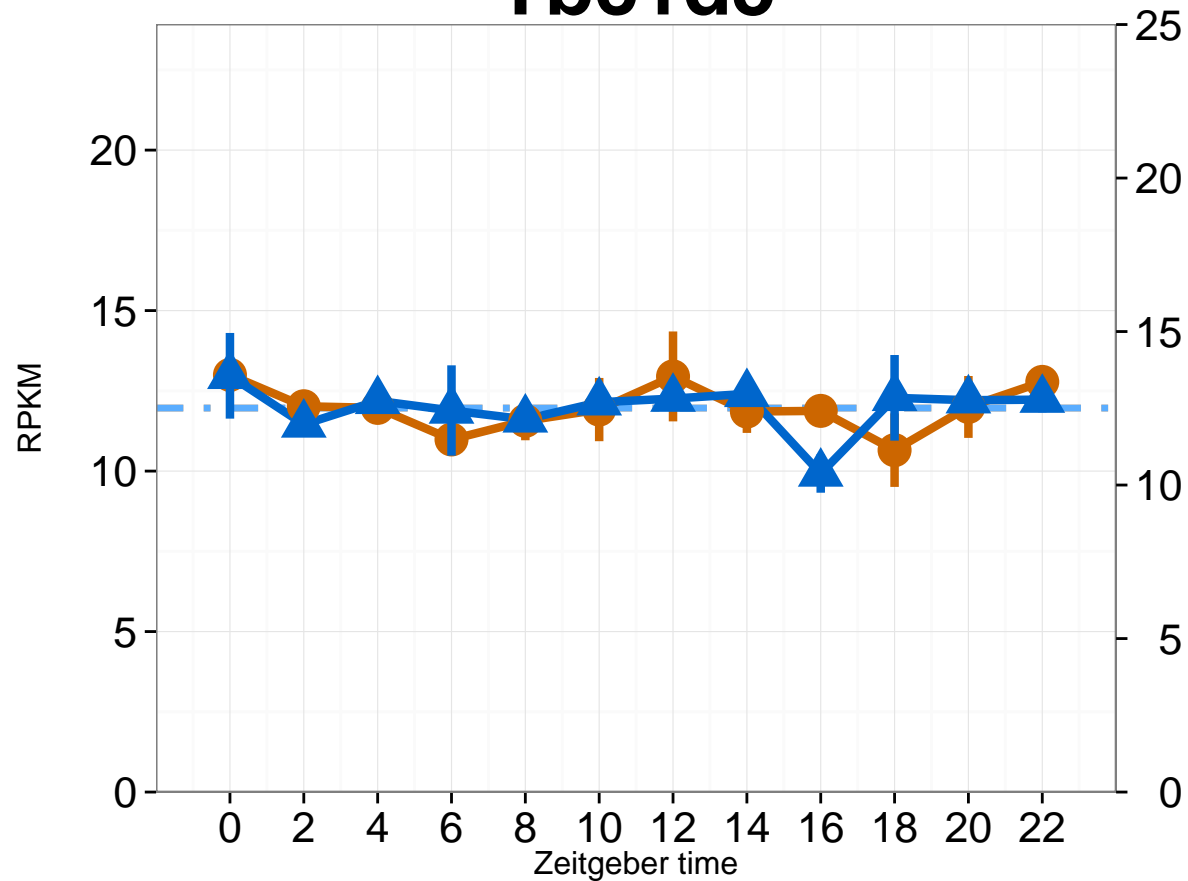

# Tbc1d5

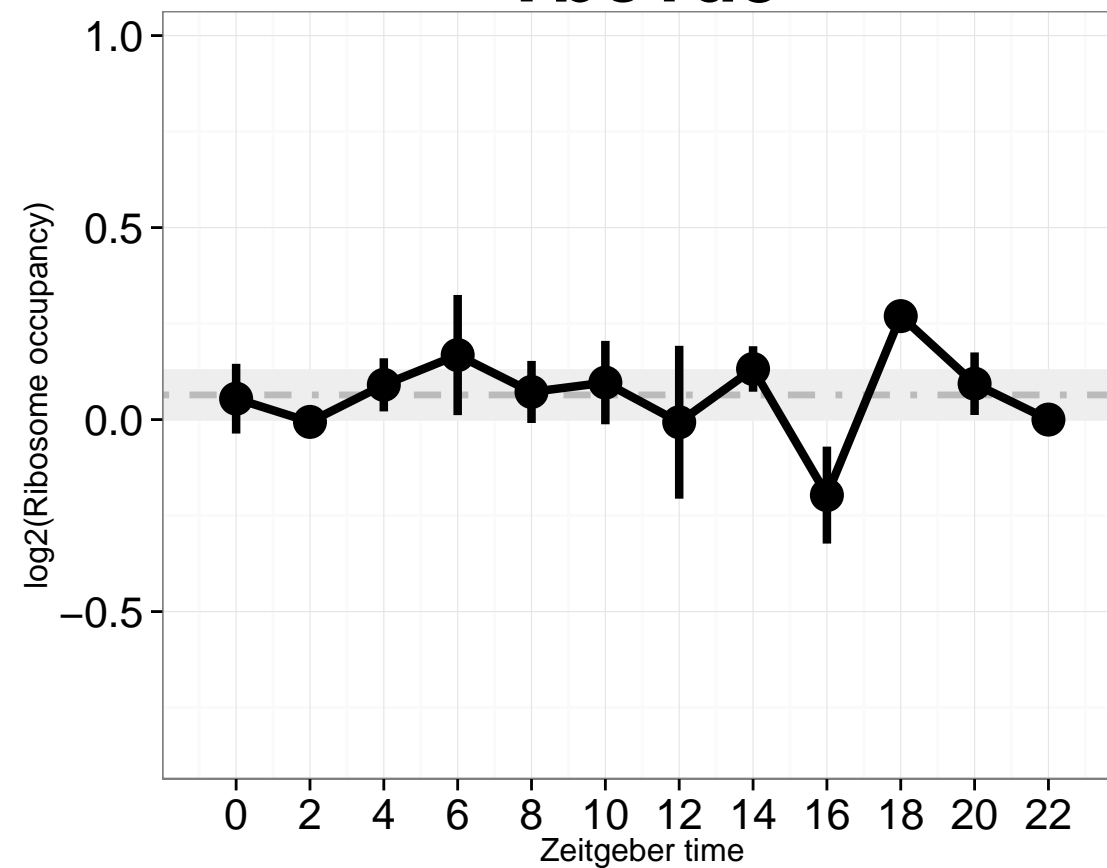

Supplement: Supplementary file 12010 [file 1]

## Ppp4r2

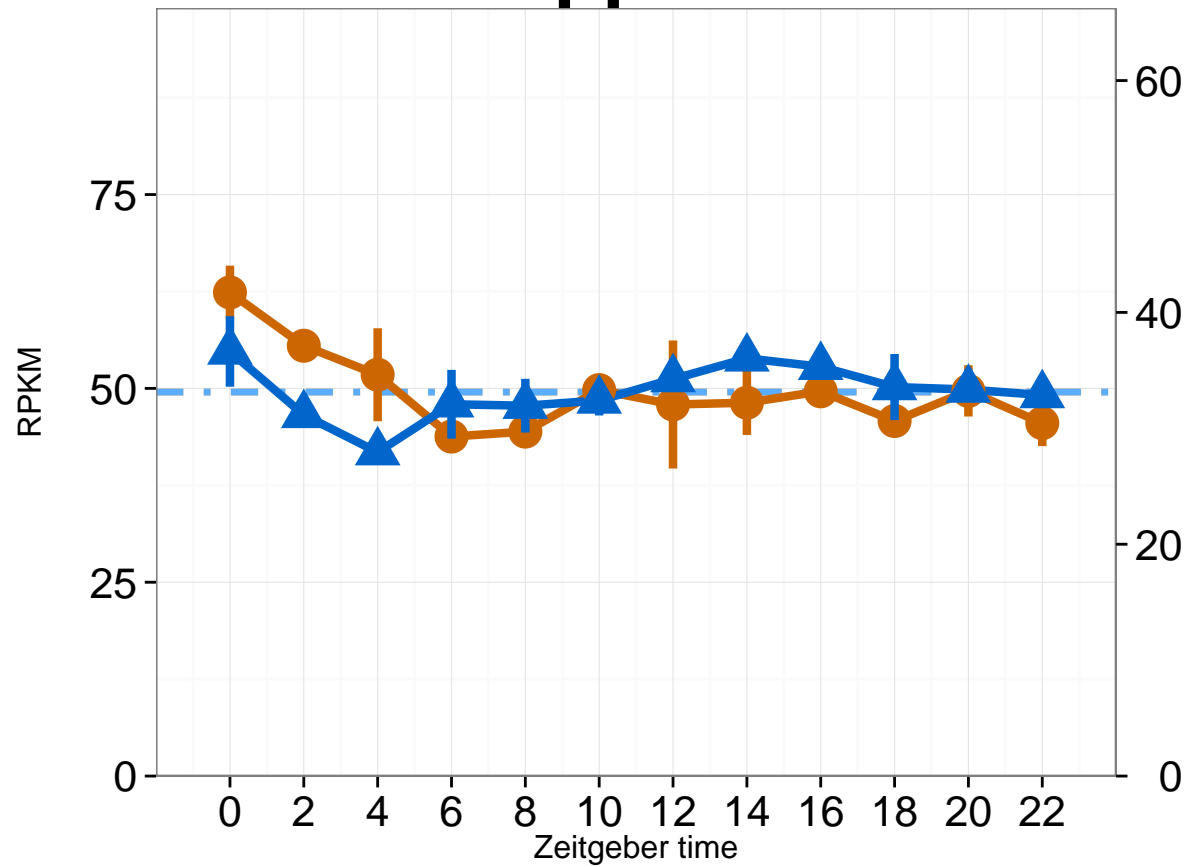

## Ppp4r2

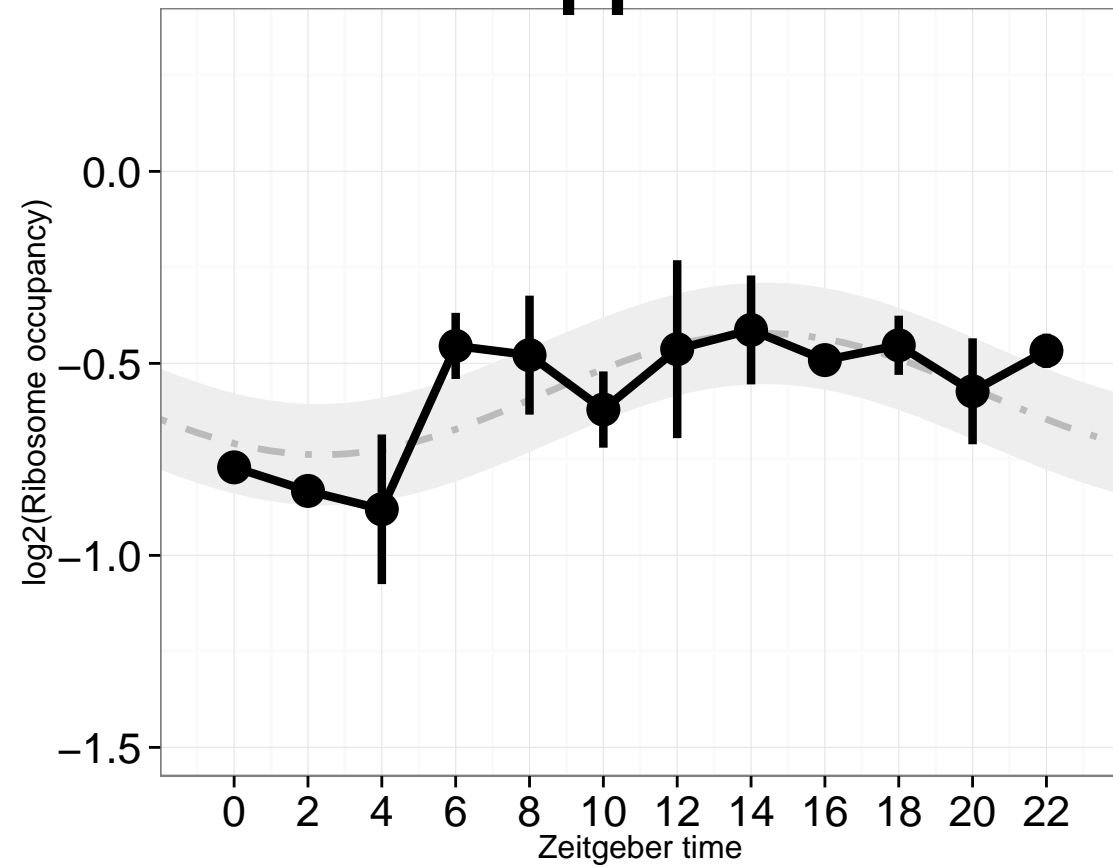

Supplement: Supplementary file 12011 [file 1]

# Coa3

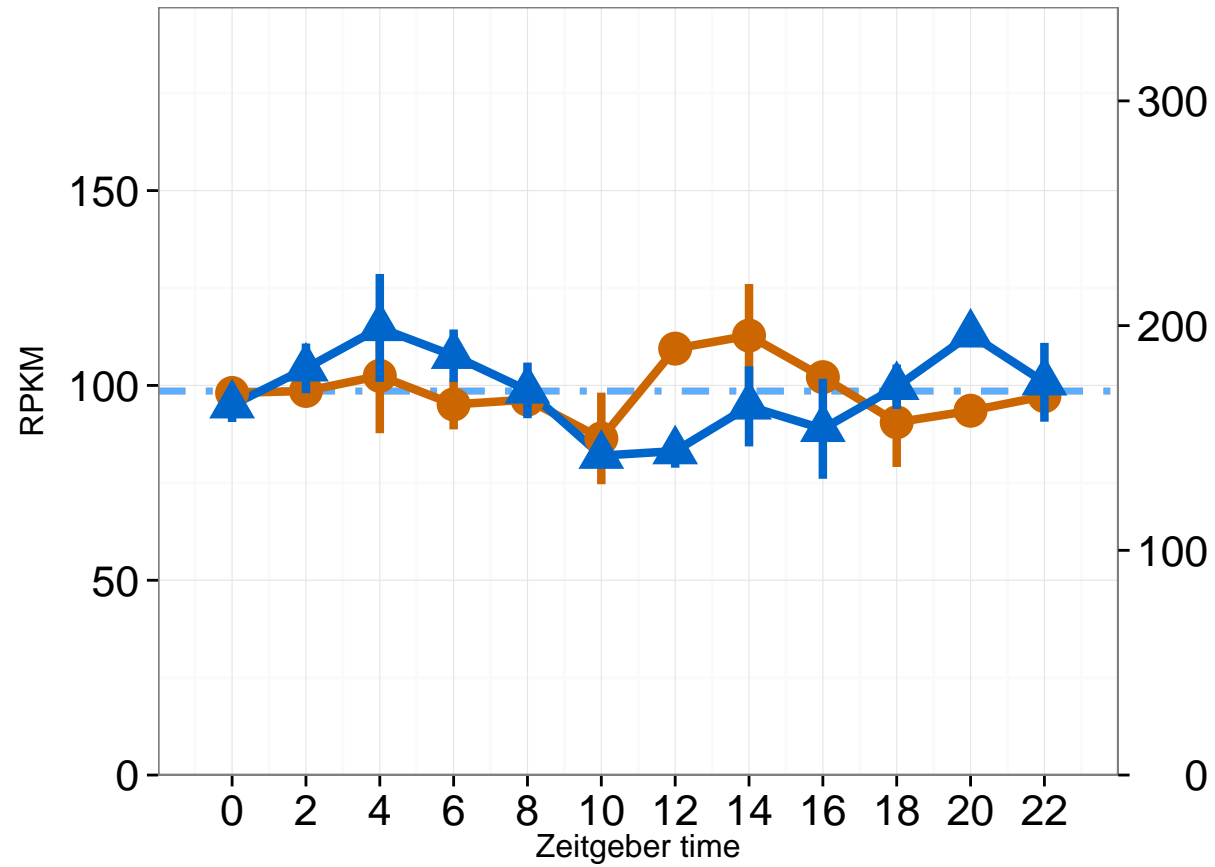

# Coa3

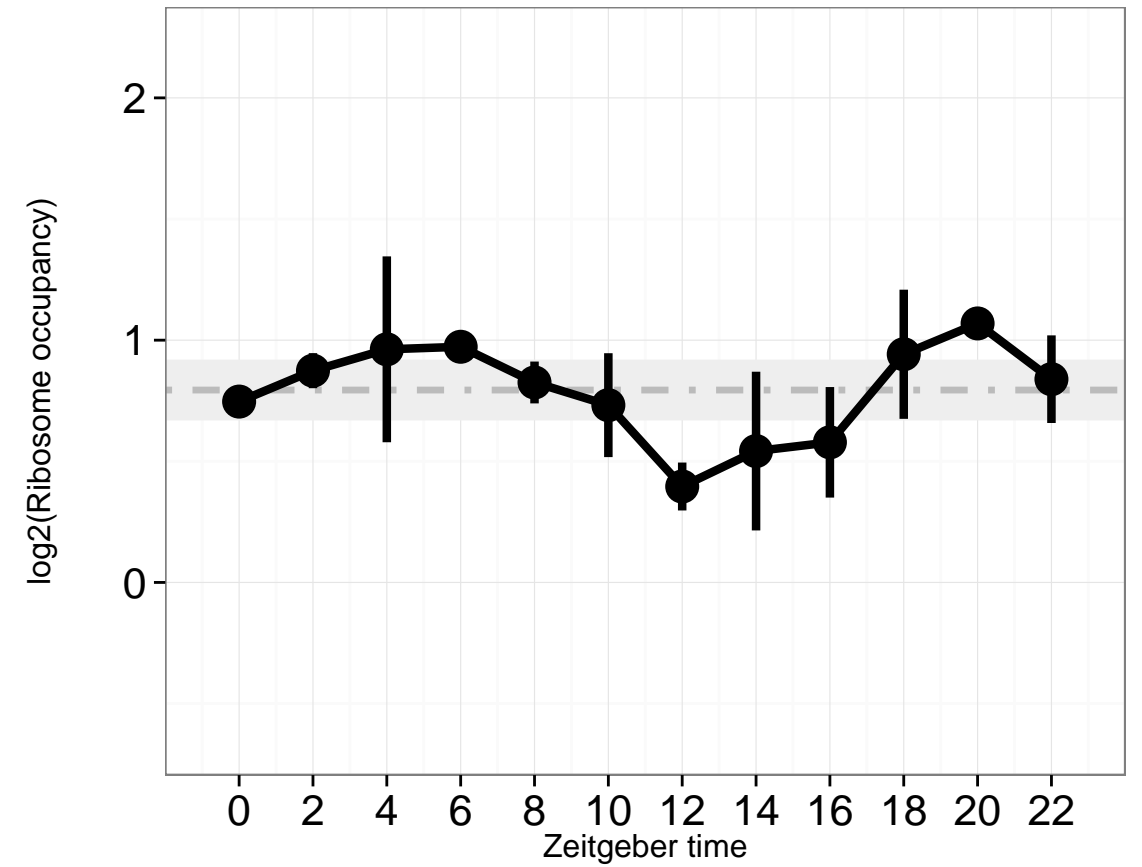

Supplement: Supplementary file 12012 [file 1]

# U2surp

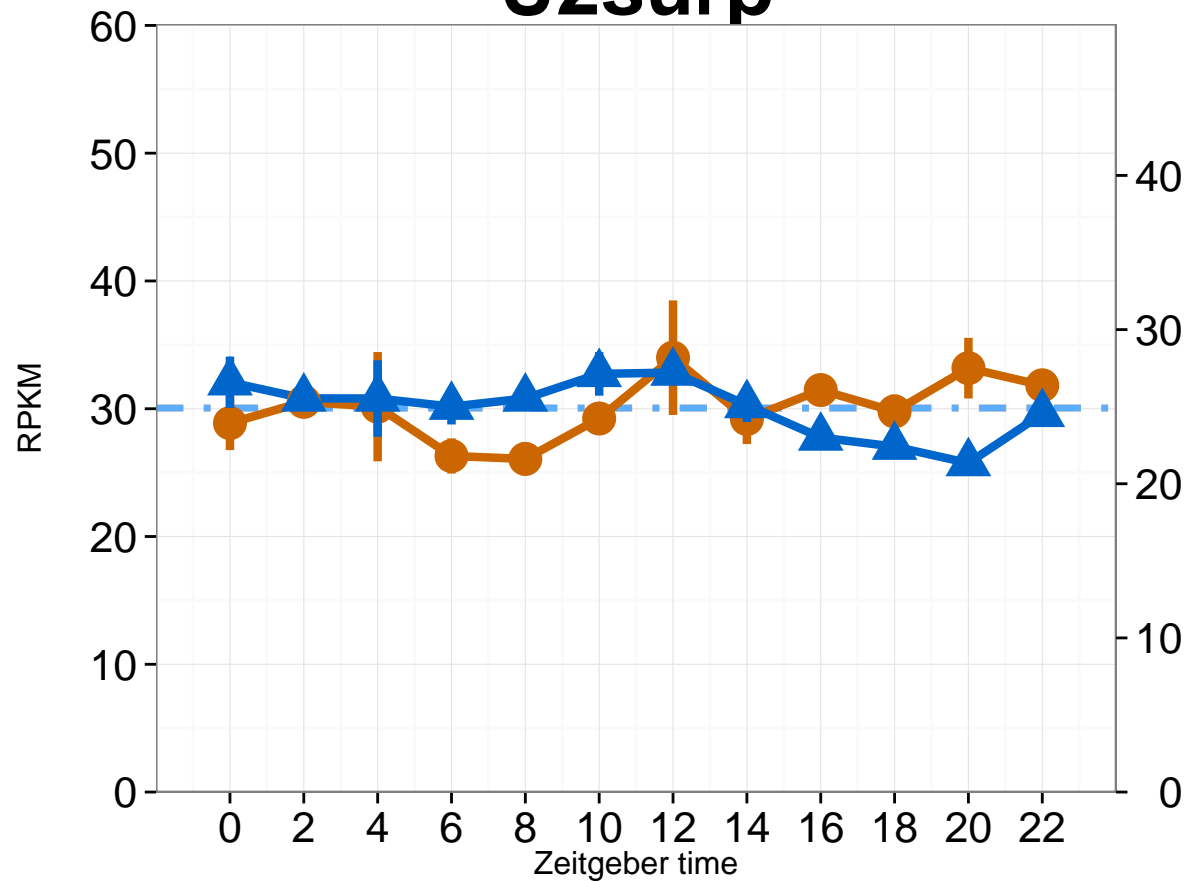

# U2surp

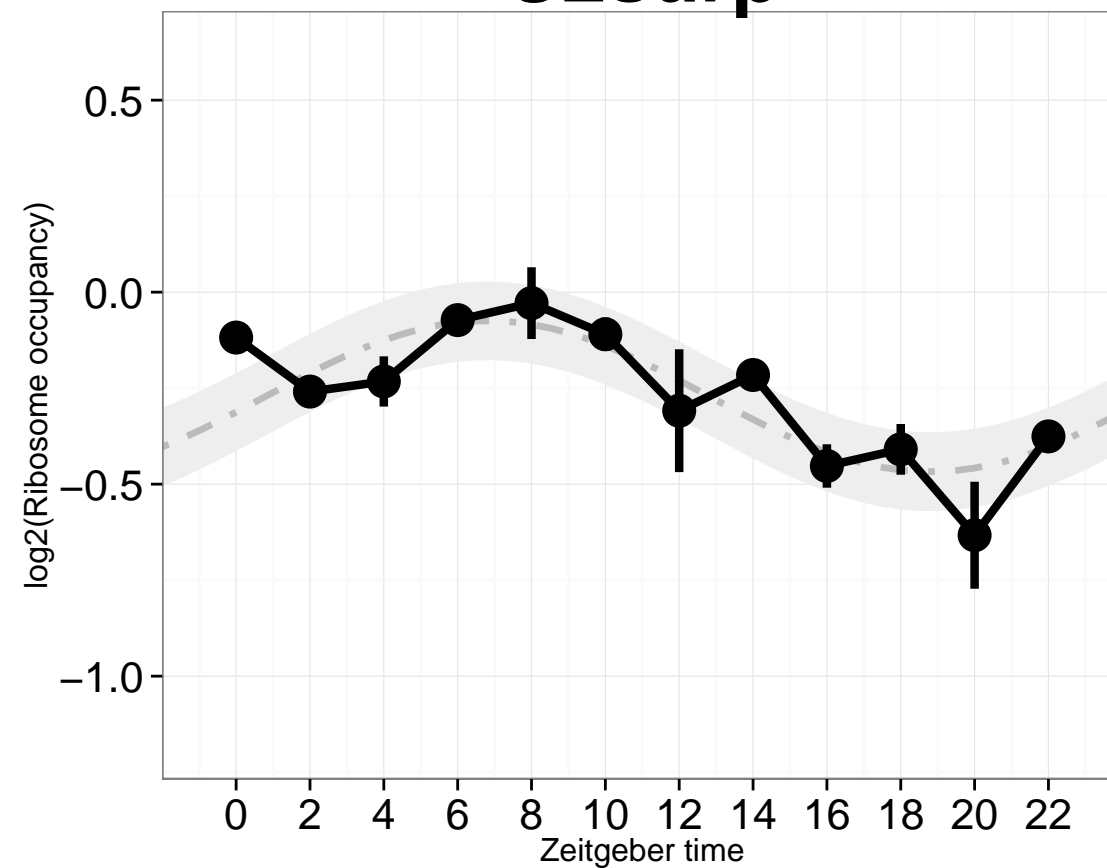

Supplement: Supplementary file 12013 [file 1]

# Matn4

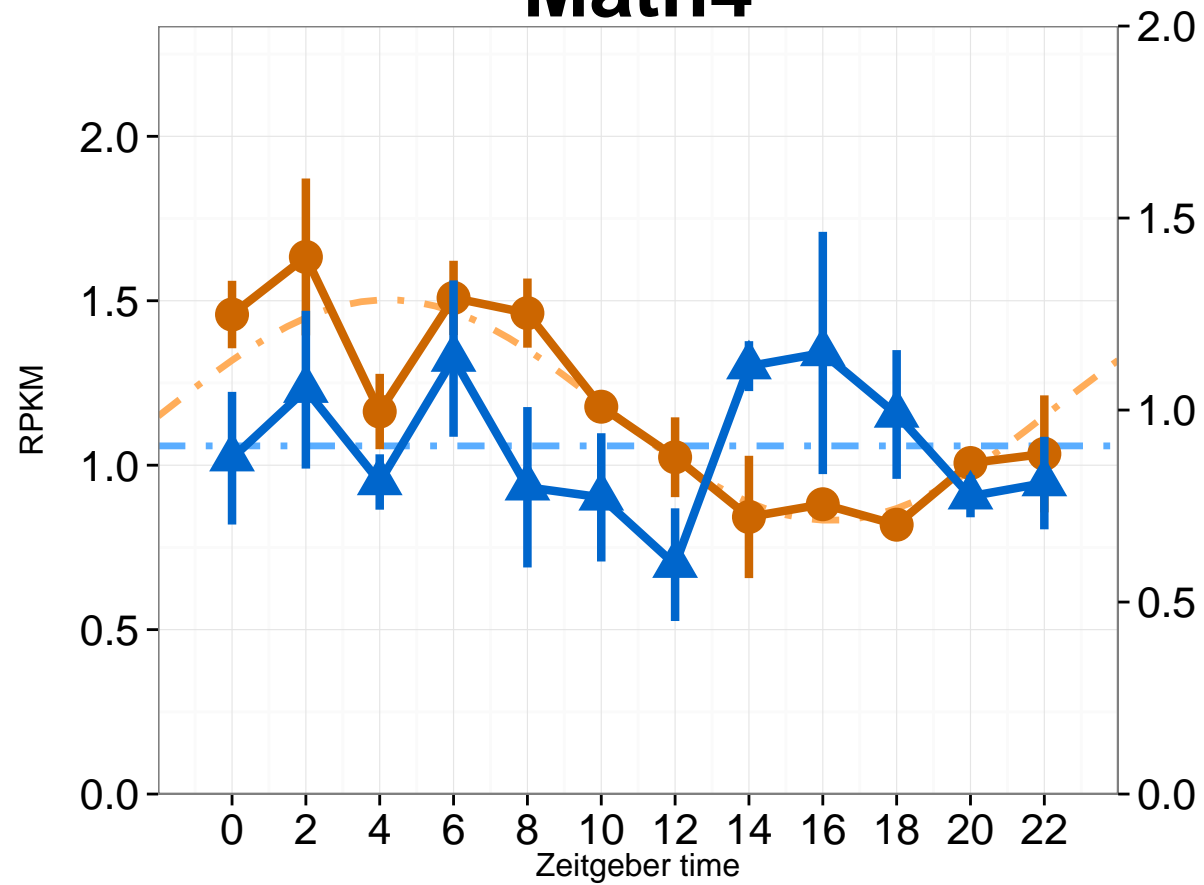

# Matn4

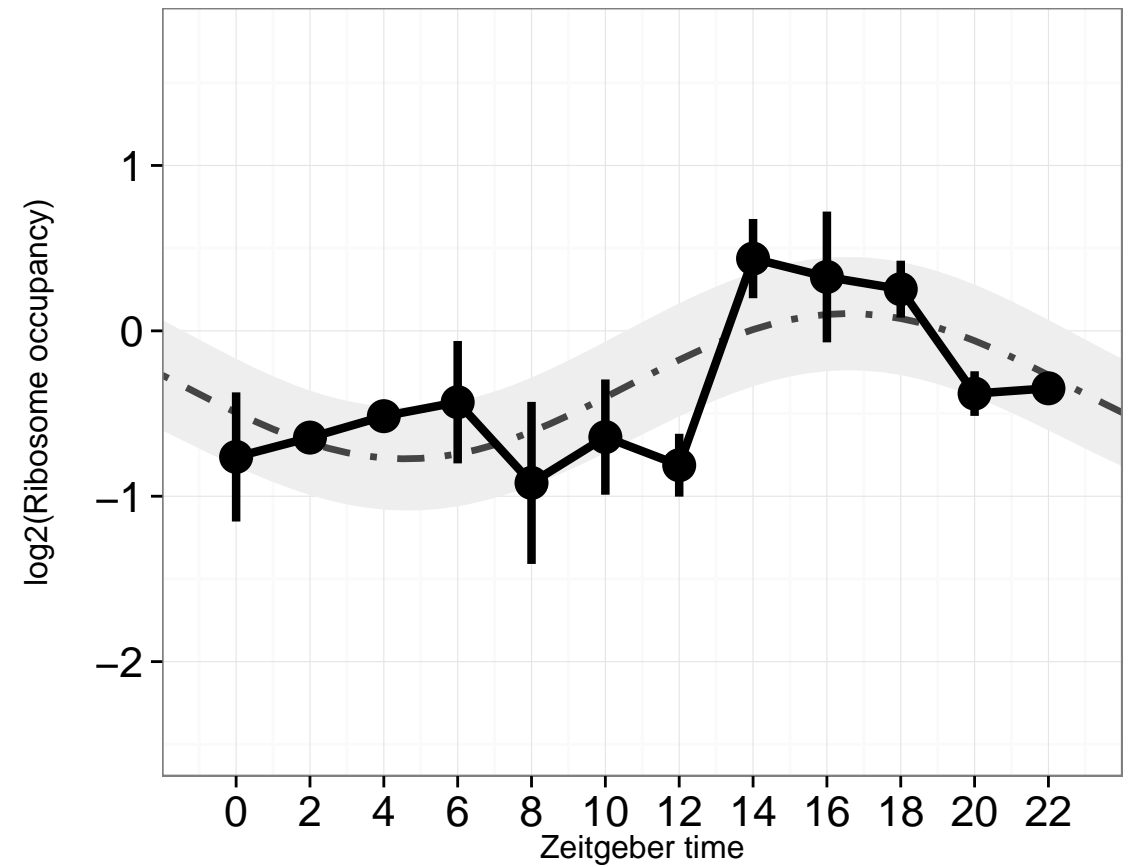

Supplement: Supplementary file 12014 [file 1]

## Vwf

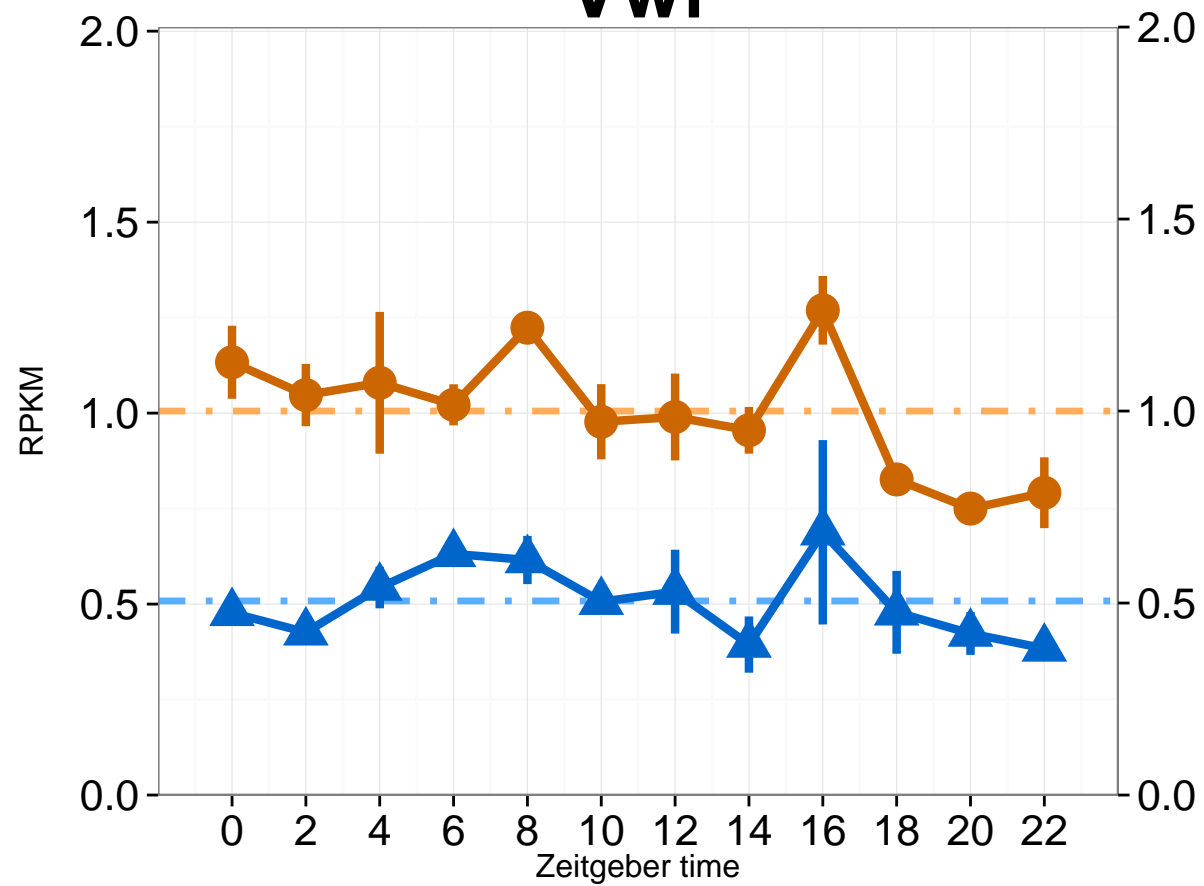

## Vwf

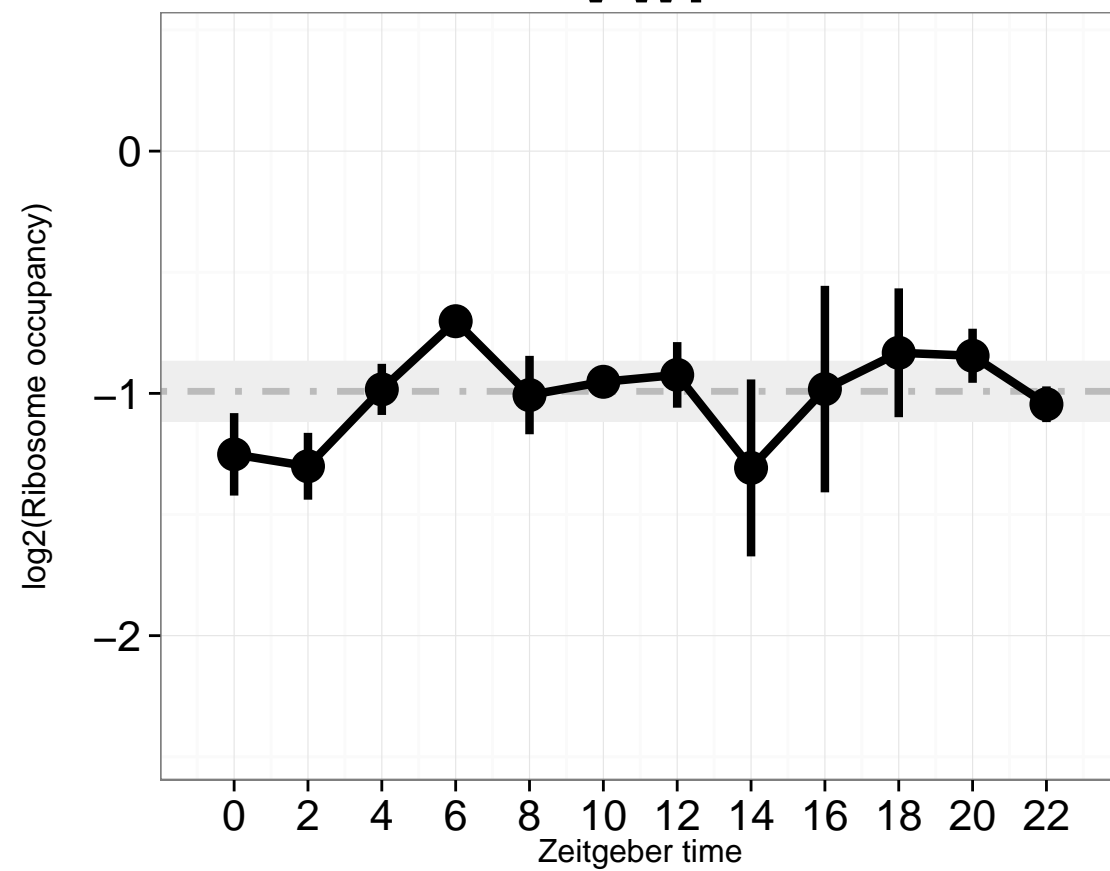

Supplement: Supplementary file 12015 [file 1]

## Dap3

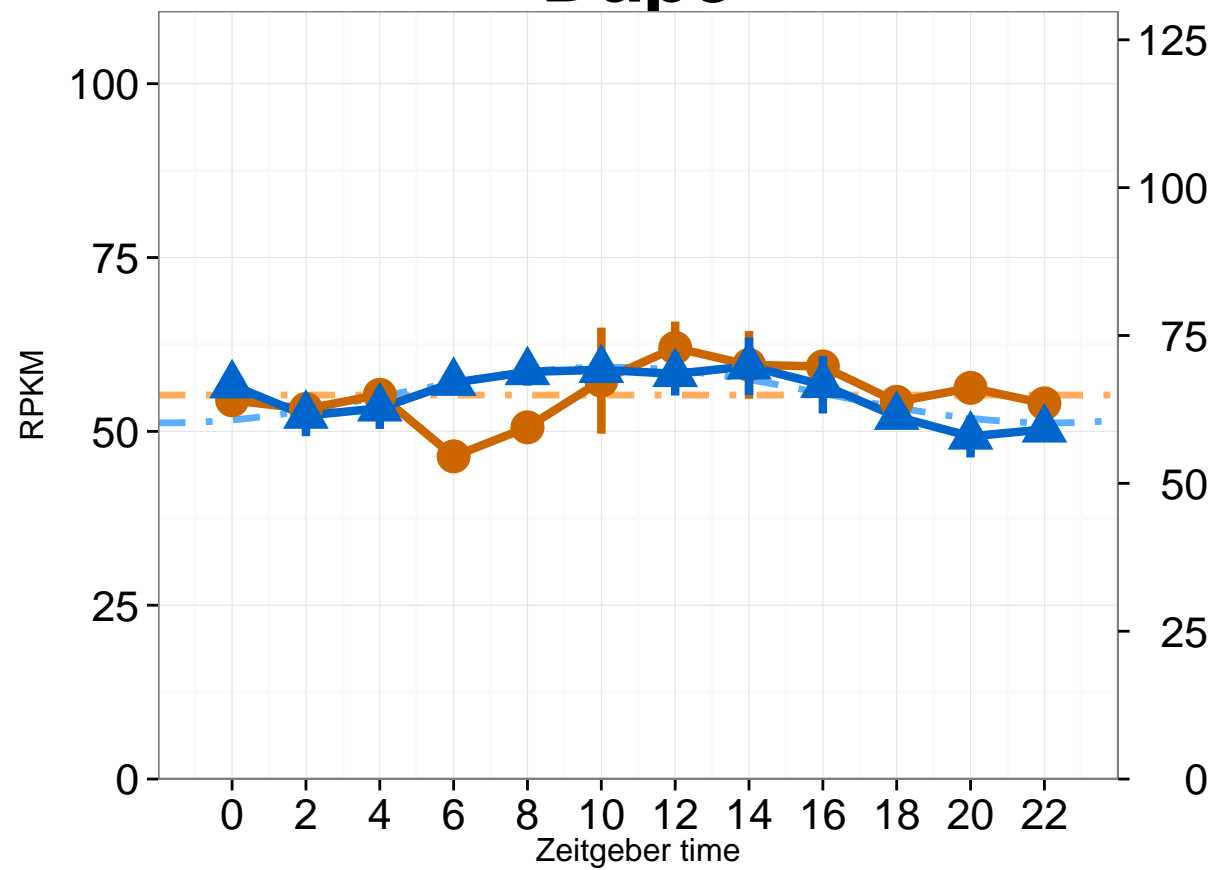

## Dap3

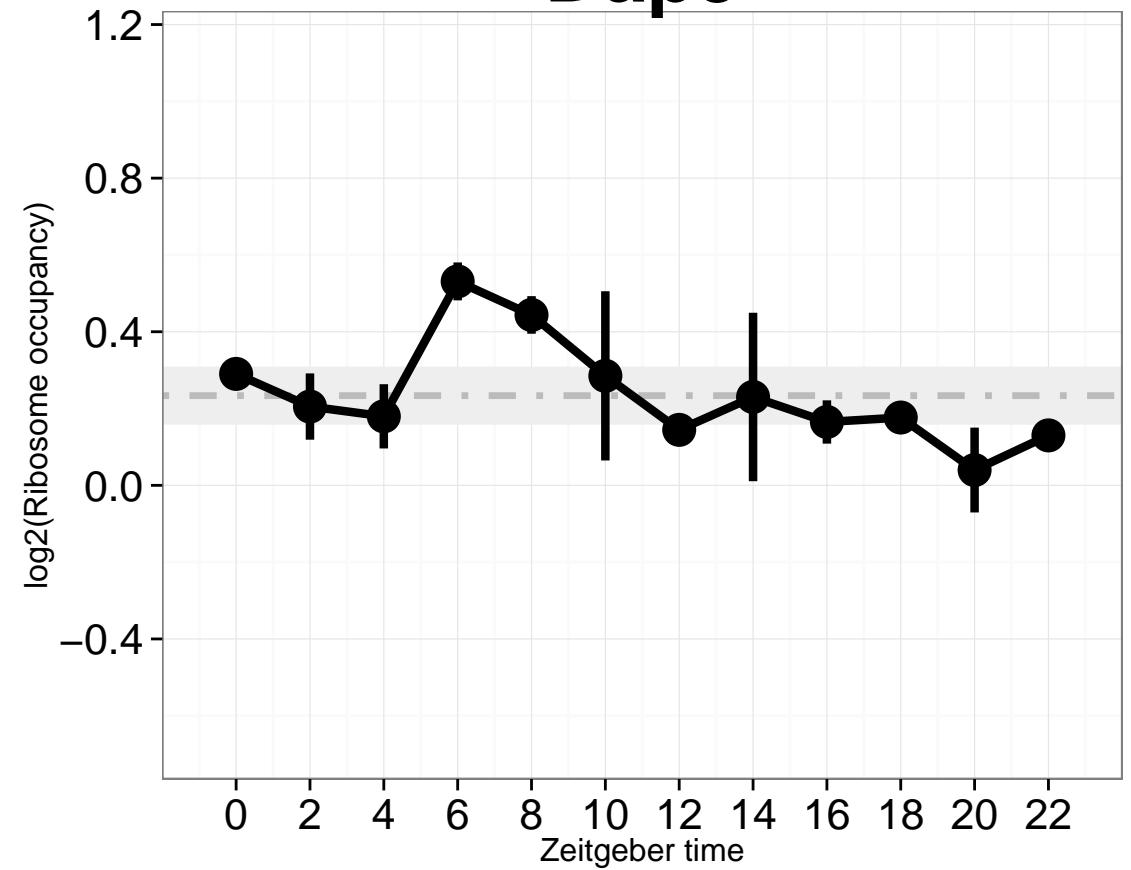

Supplement: Supplementary file 12016 [file 1]

# Gm21994

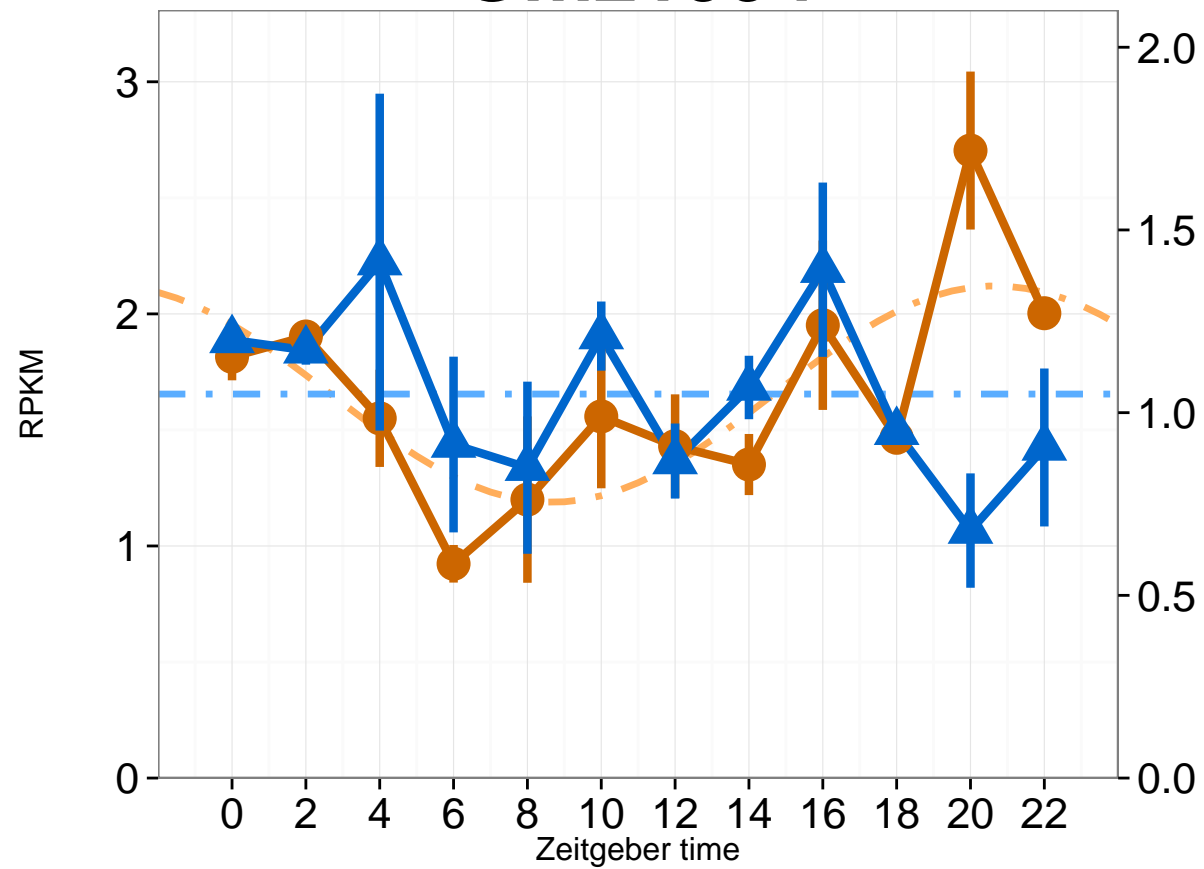

# Gm21994

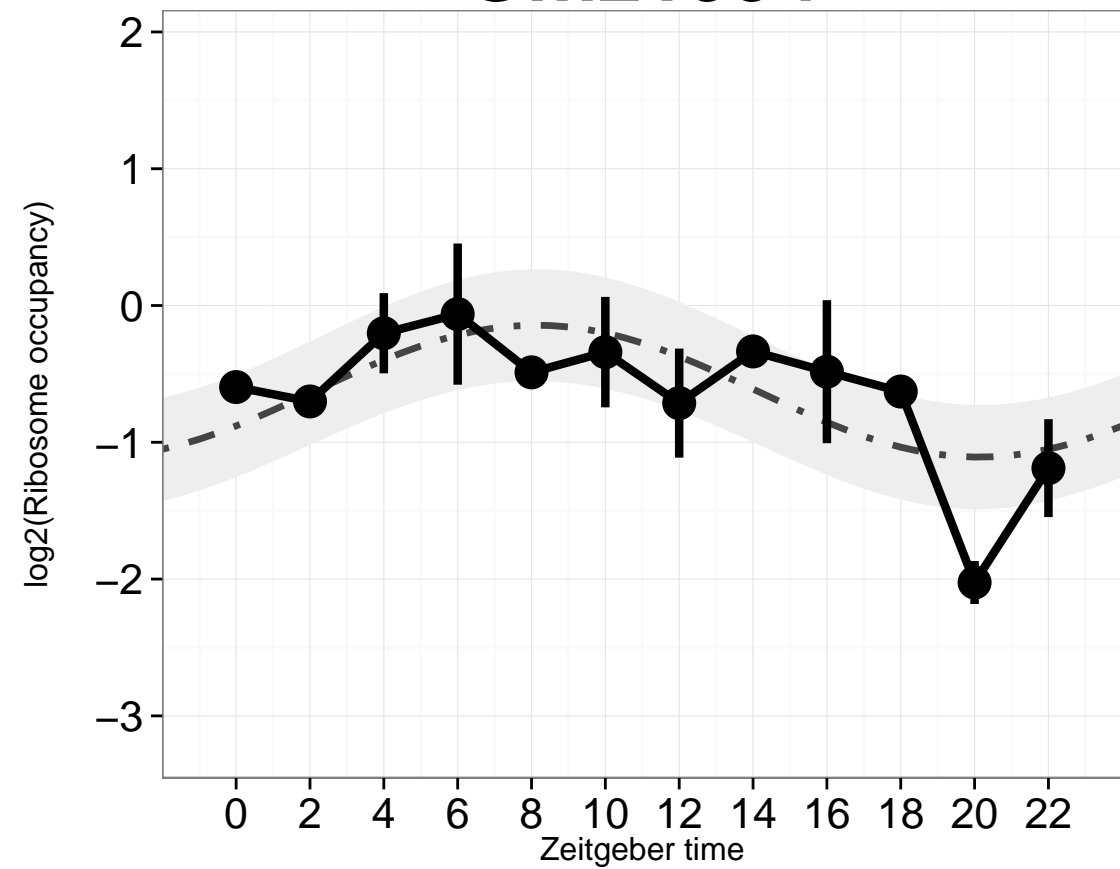

Supplement: Supplementary file 12017 [file 1]

# Pck1

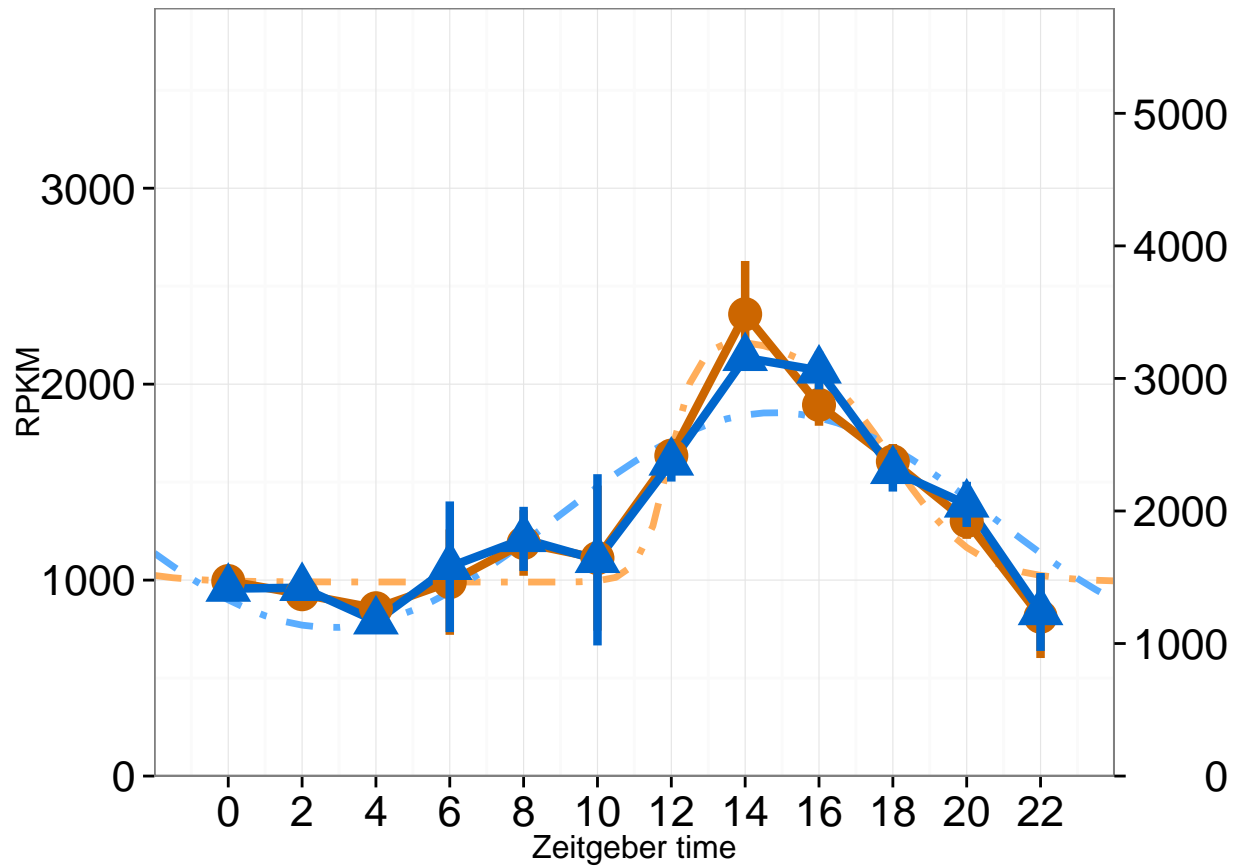

# Pck1

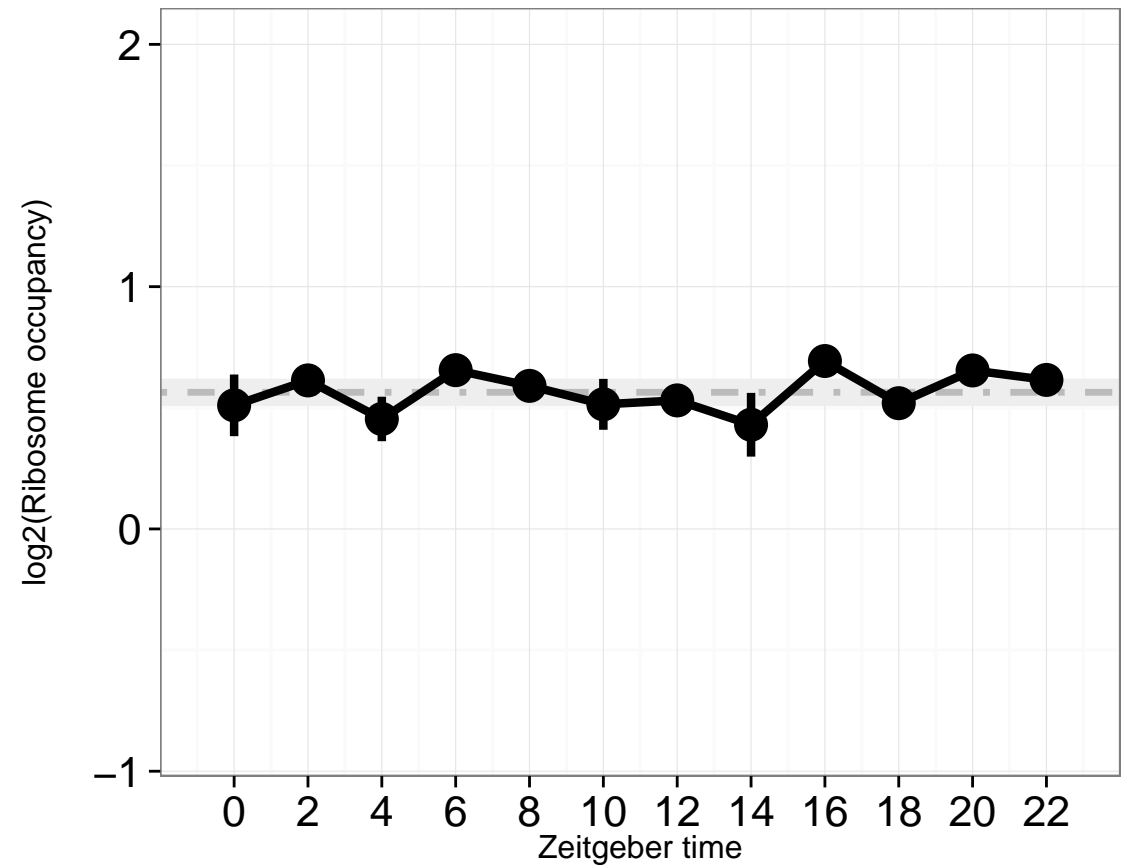

Supplement: Supplementary file 12018 [file 1]

## Fnta

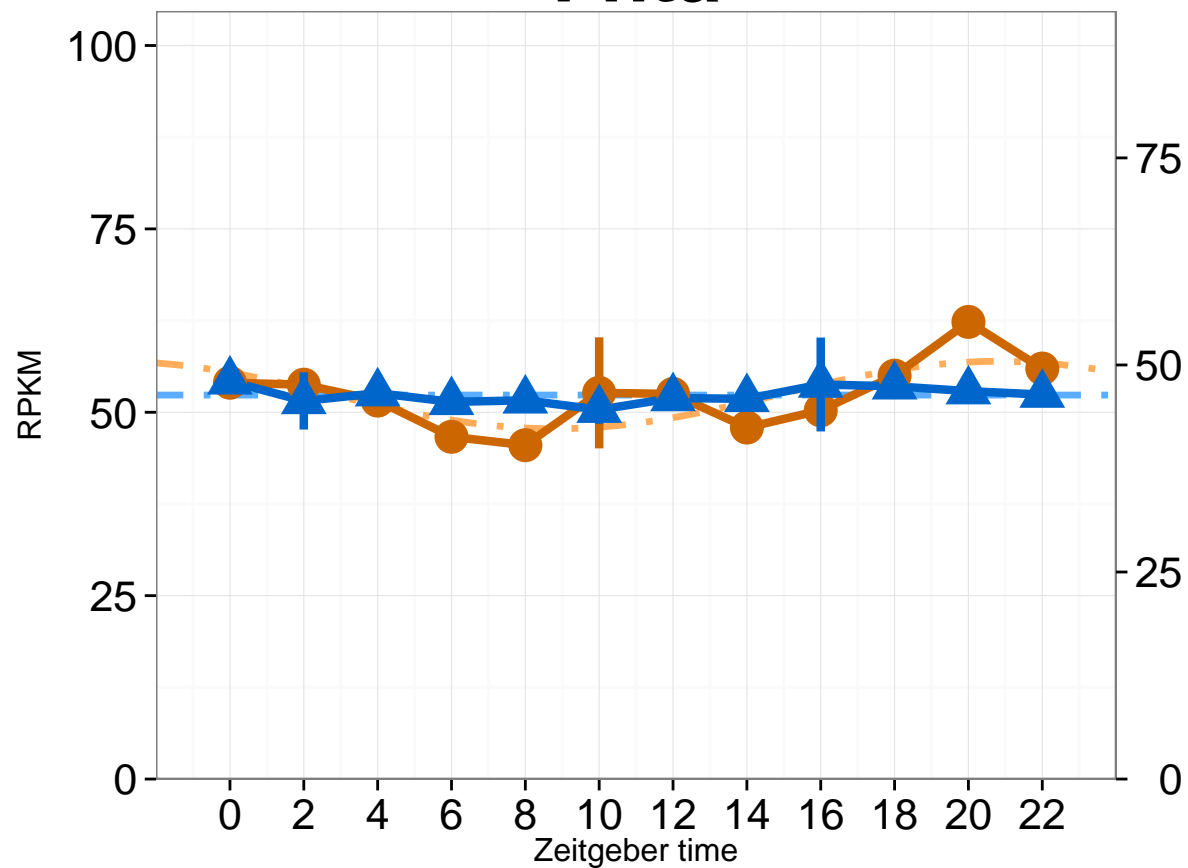

## Fnta

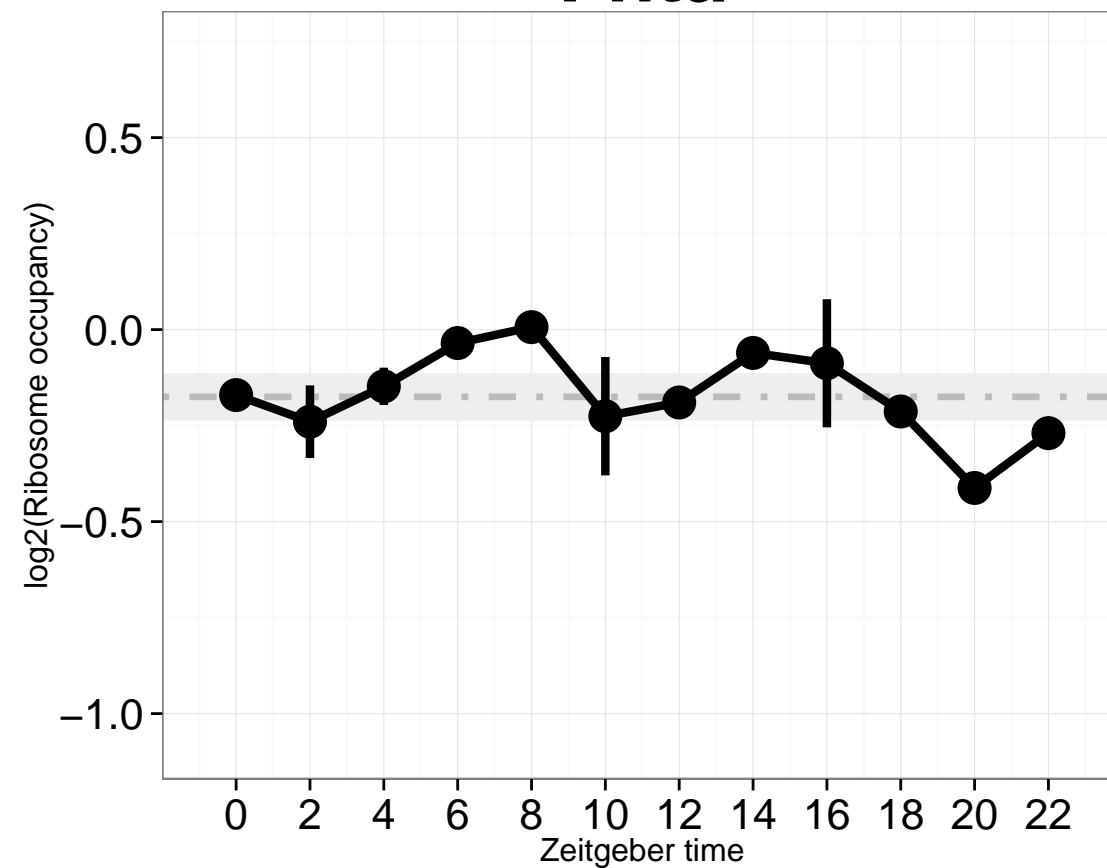

Supplement: Supplementary file 12019 [file 1]

# Prpf39

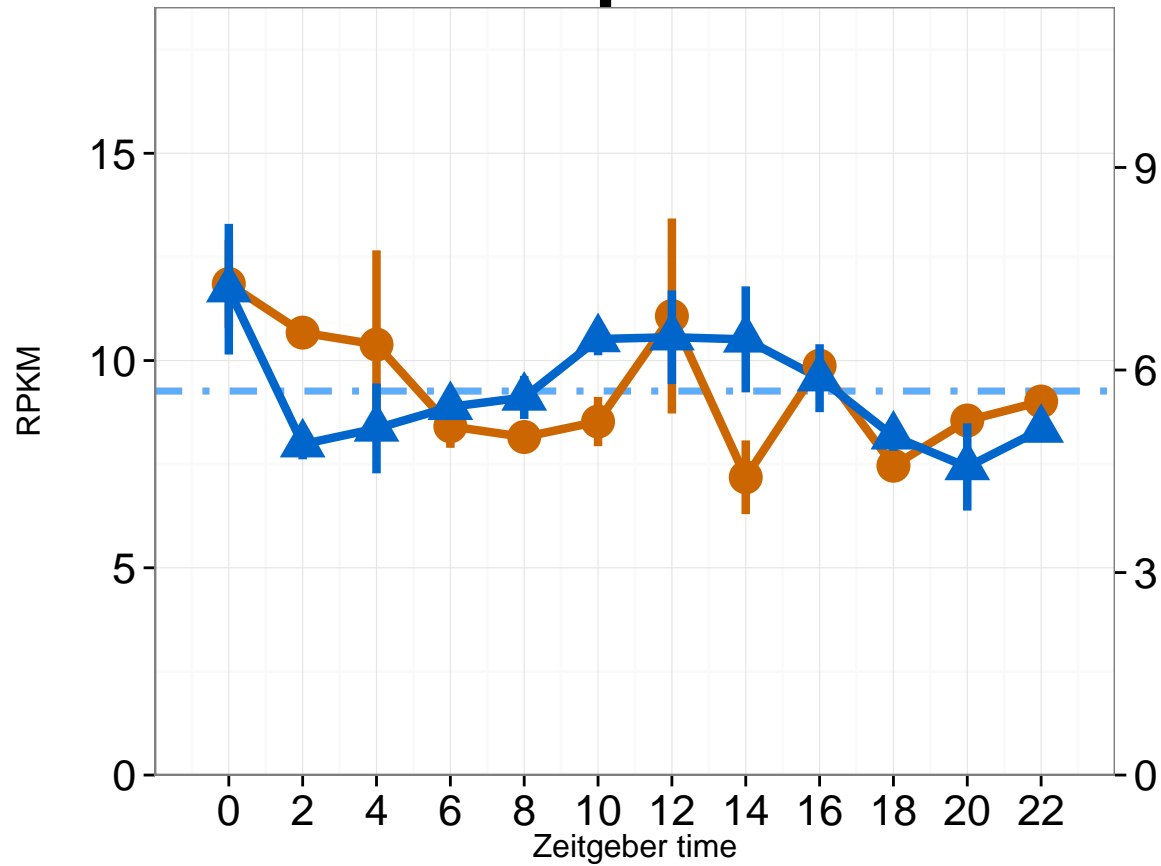

# Prpf39

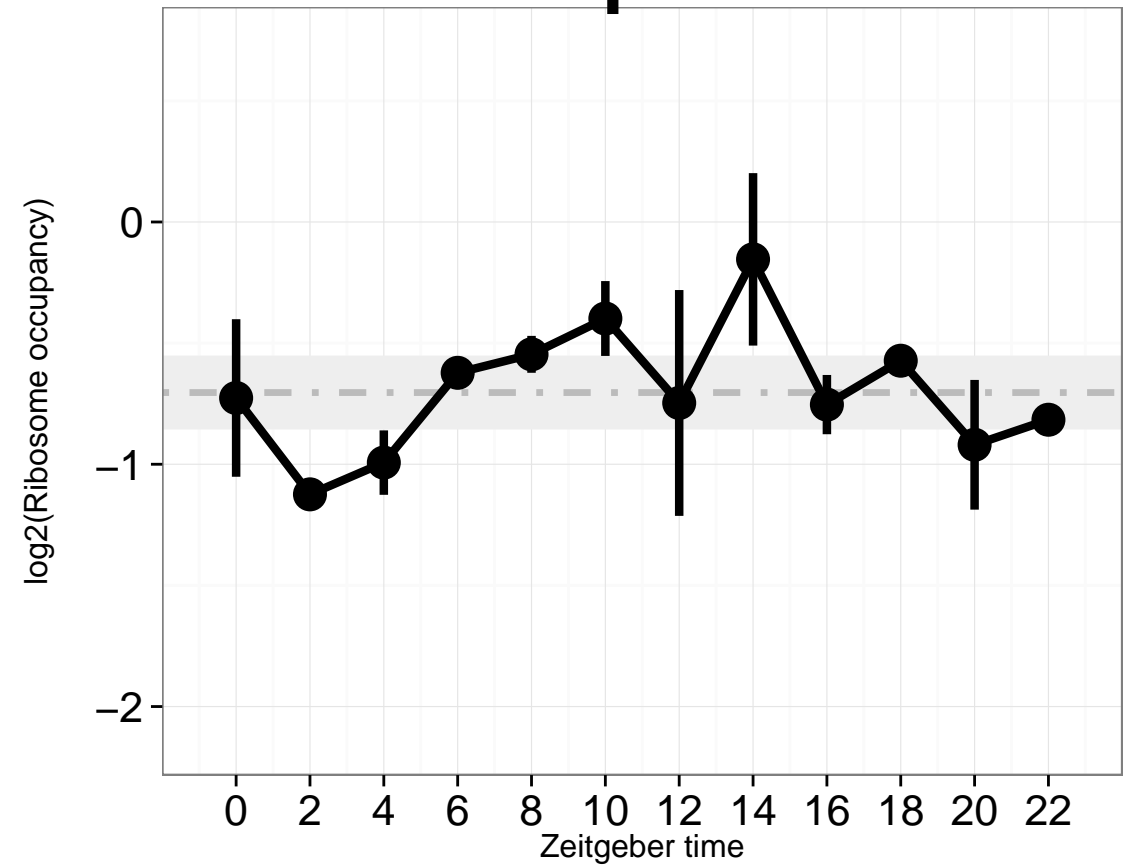

Supplement: Supplementary file 12020 [file 1]

# Utp3

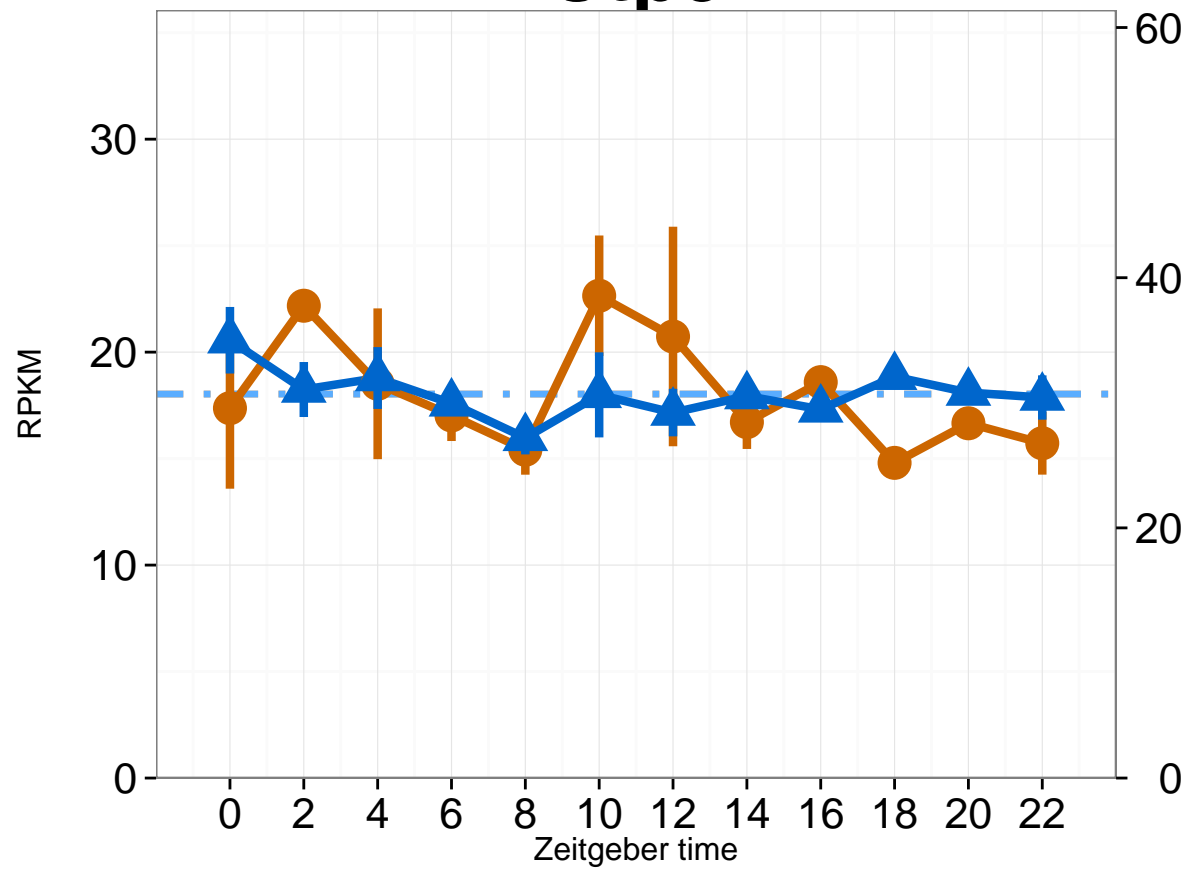

# Utp3

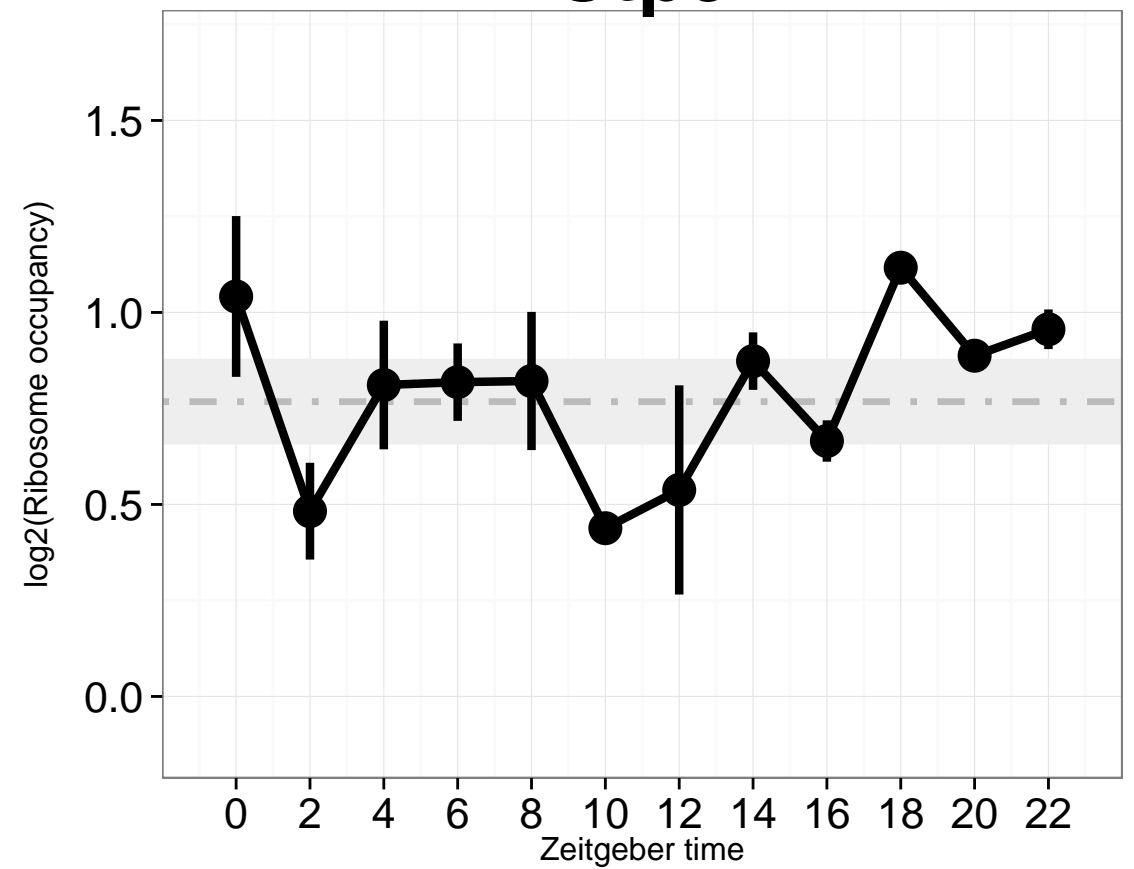

Supplement: Supplementary file 12021 [file 1]

# Taf12

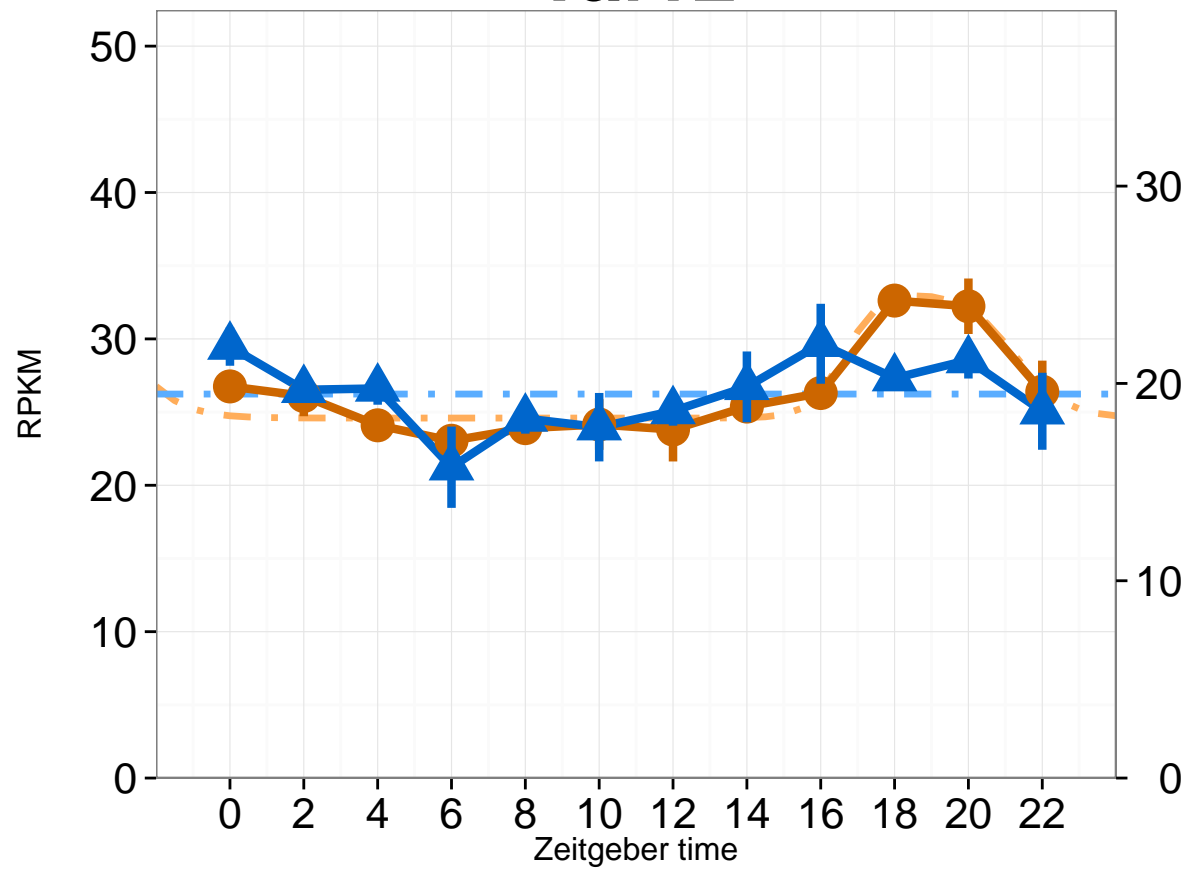

# Taf12

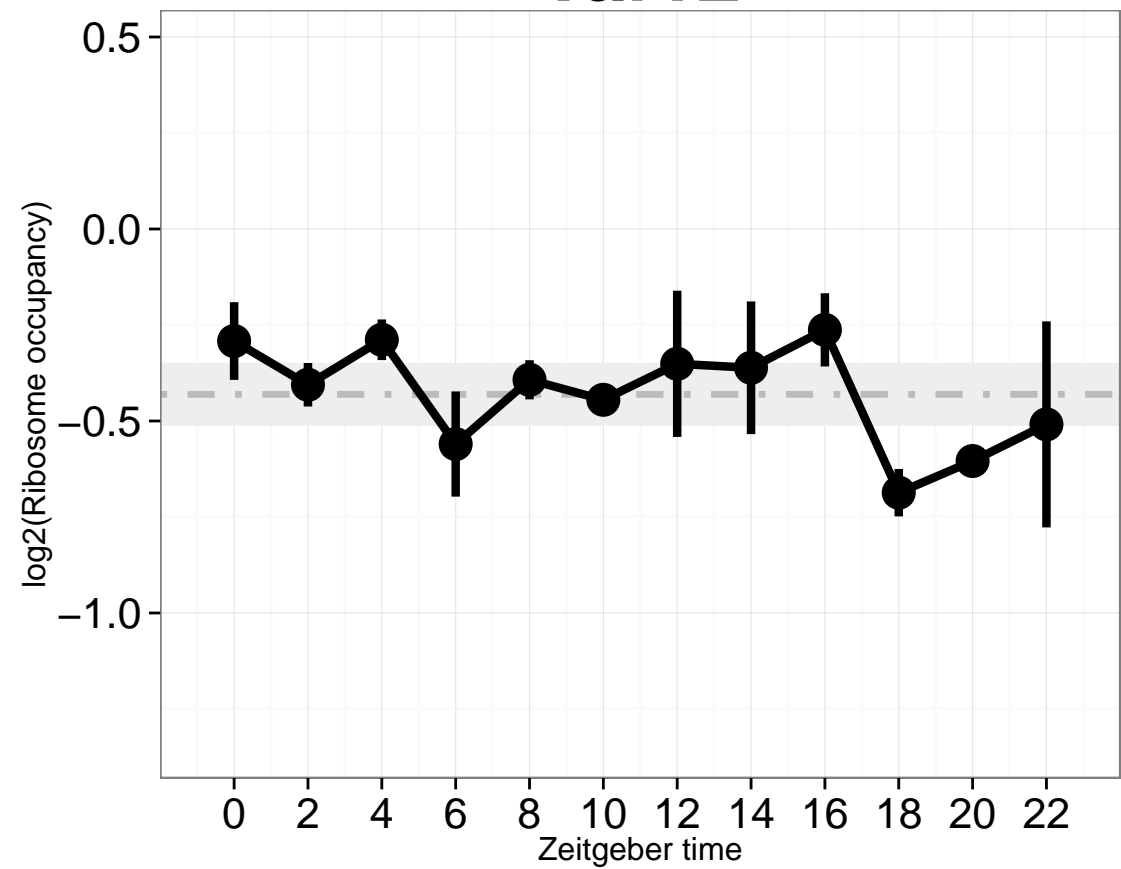

Supplement: Supplementary file 12022 [file 1]

# Schip1

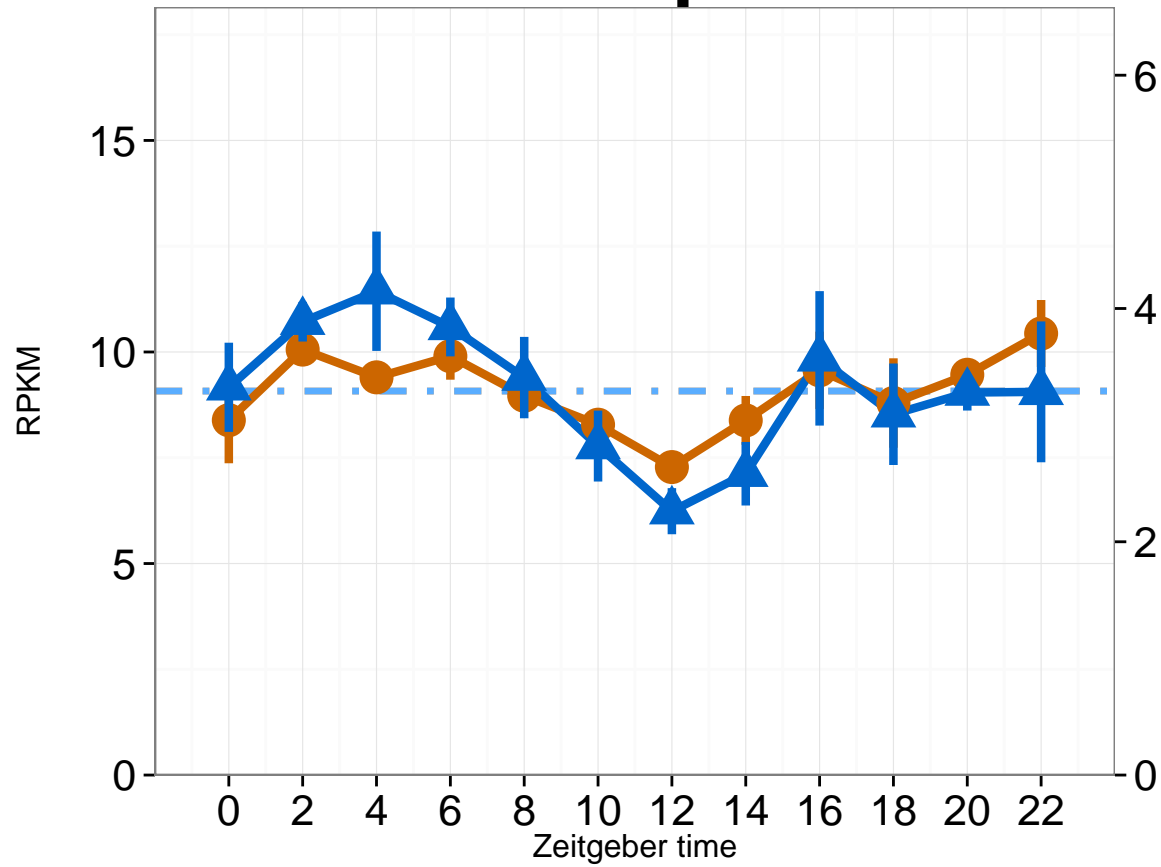

# Schip1

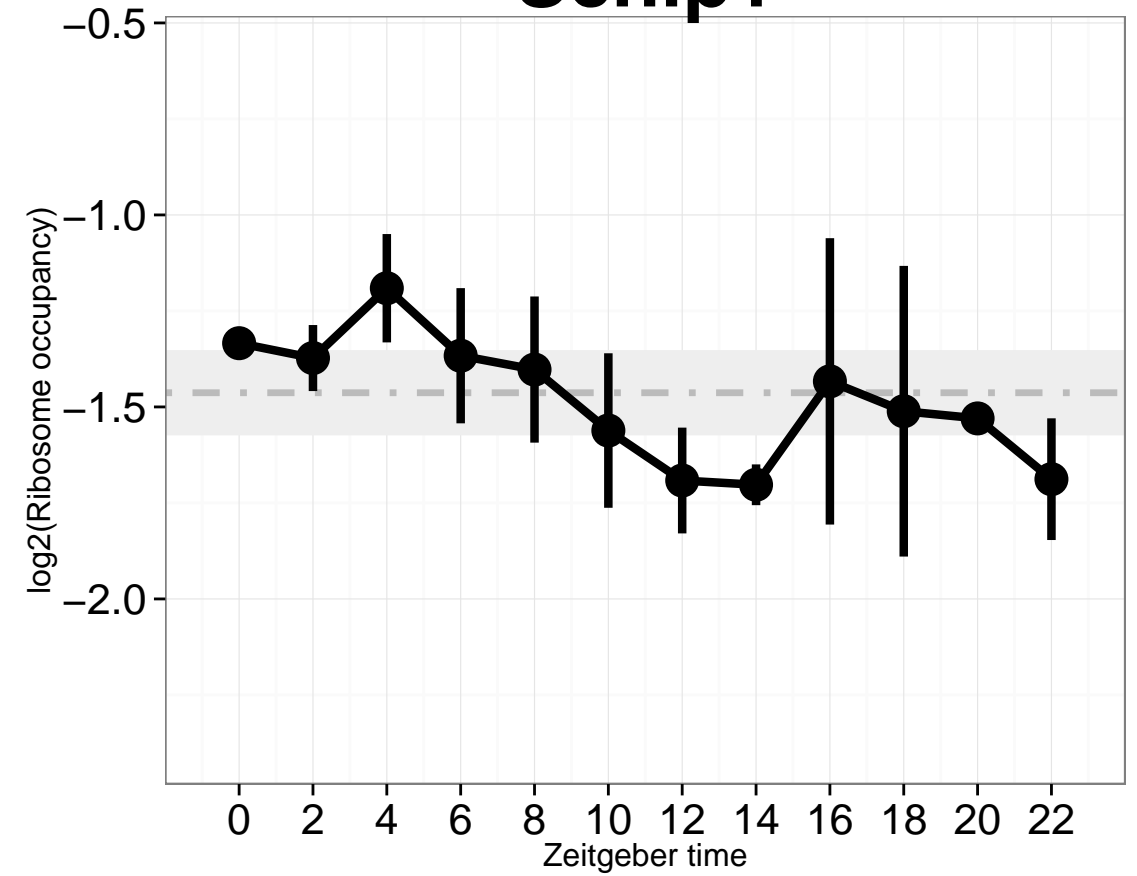

Supplement: Supplementary file 12023 [file 1]

## Tmed4

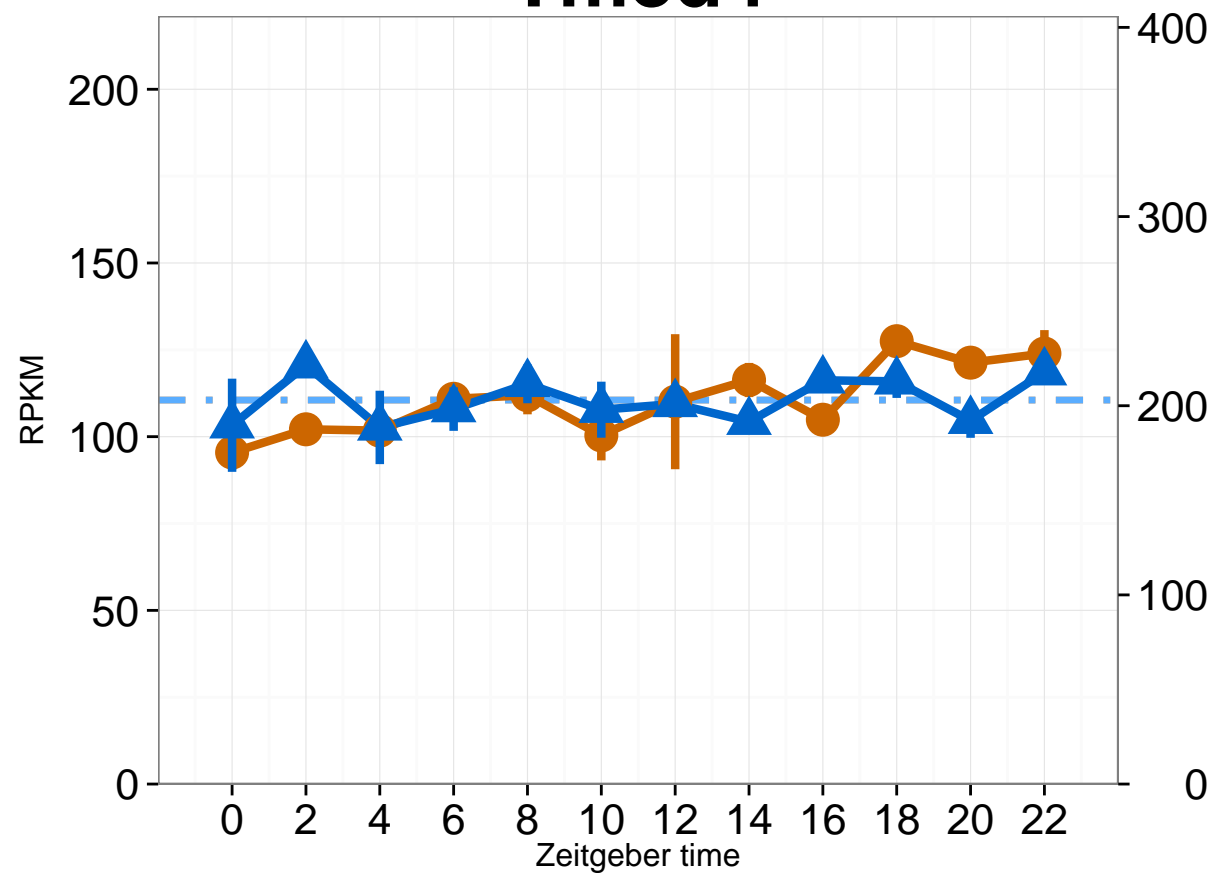

## Tmed4

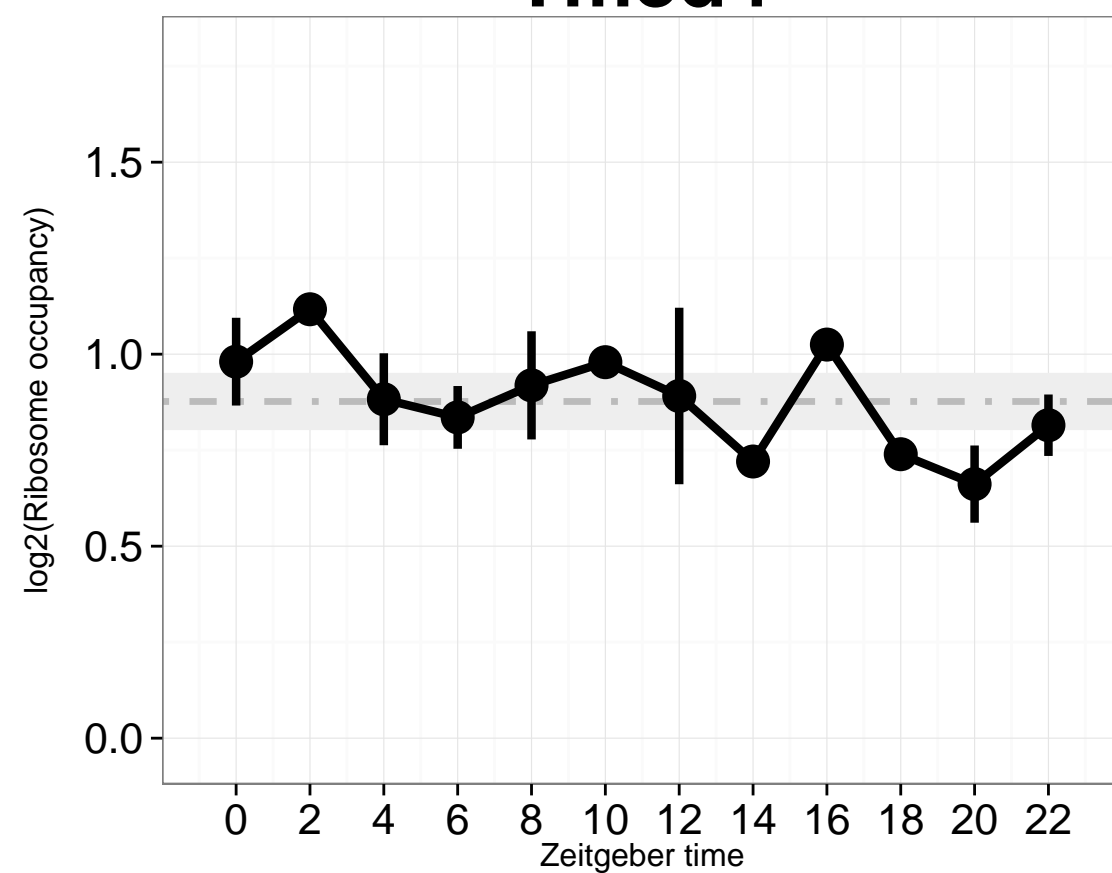

Supplement: Supplementary file 12024 [file 1]

## Uhrf2

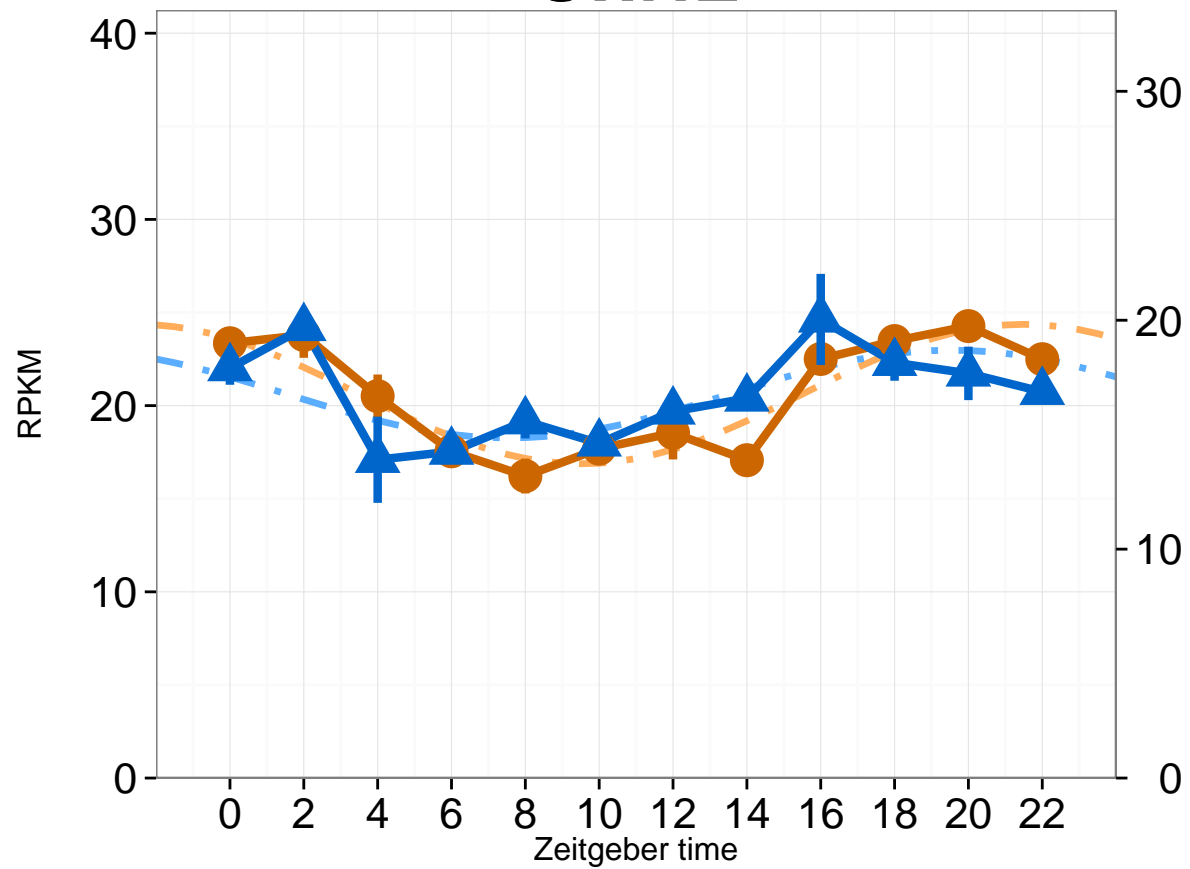

## Uhrf2

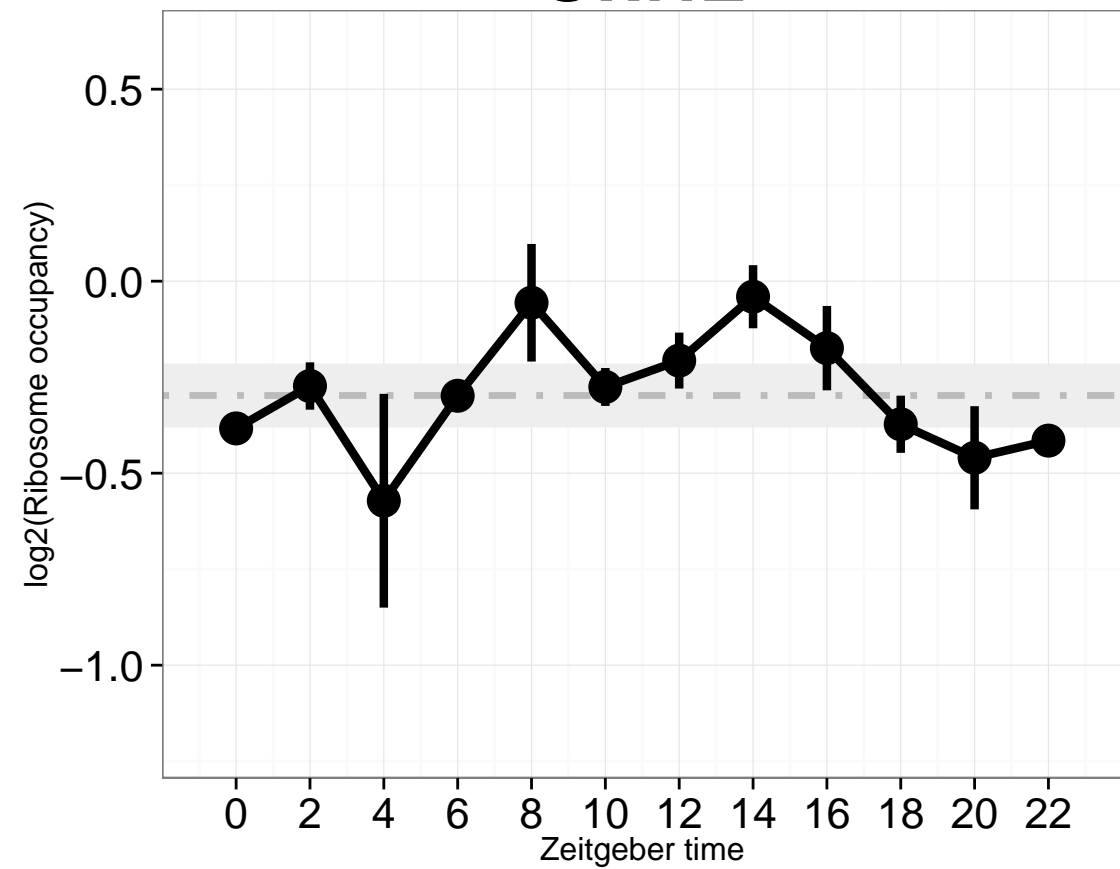

Supplement: Supplementary file 12025 [file 1]

# Man2a2

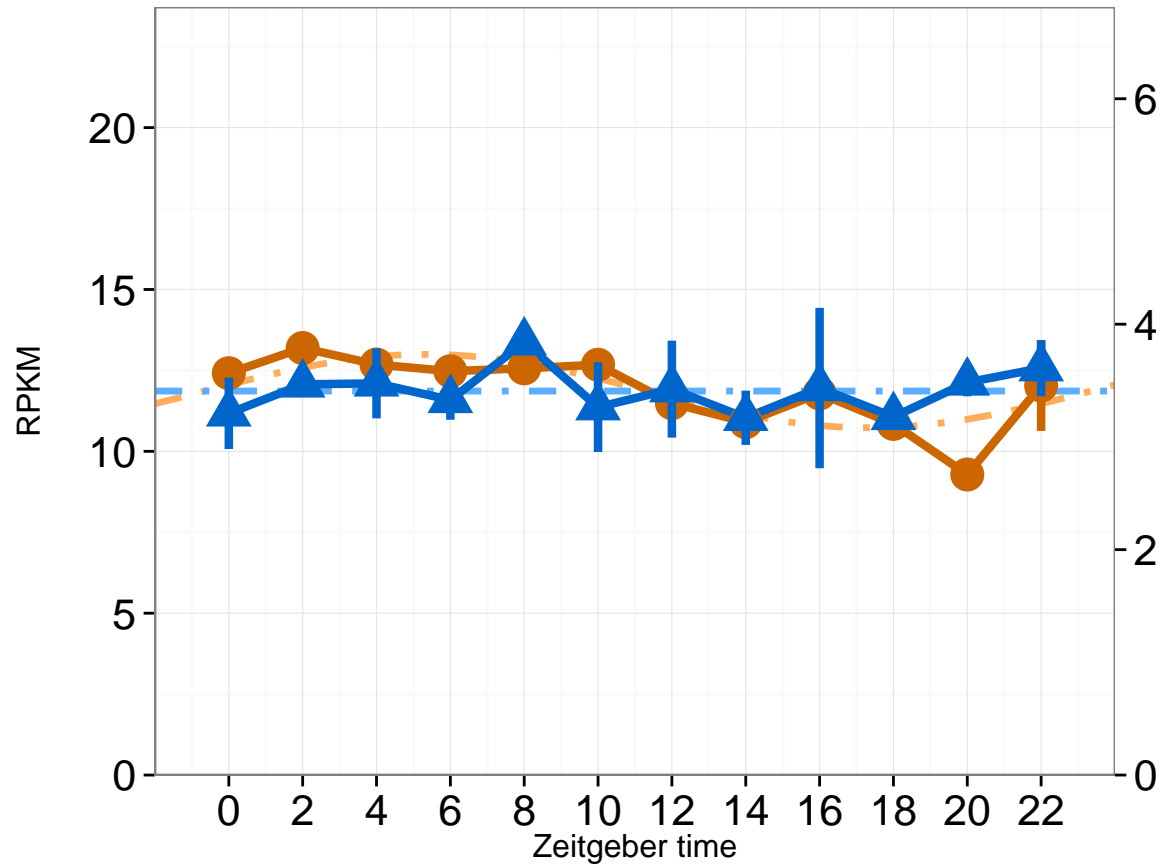

# Man2a2

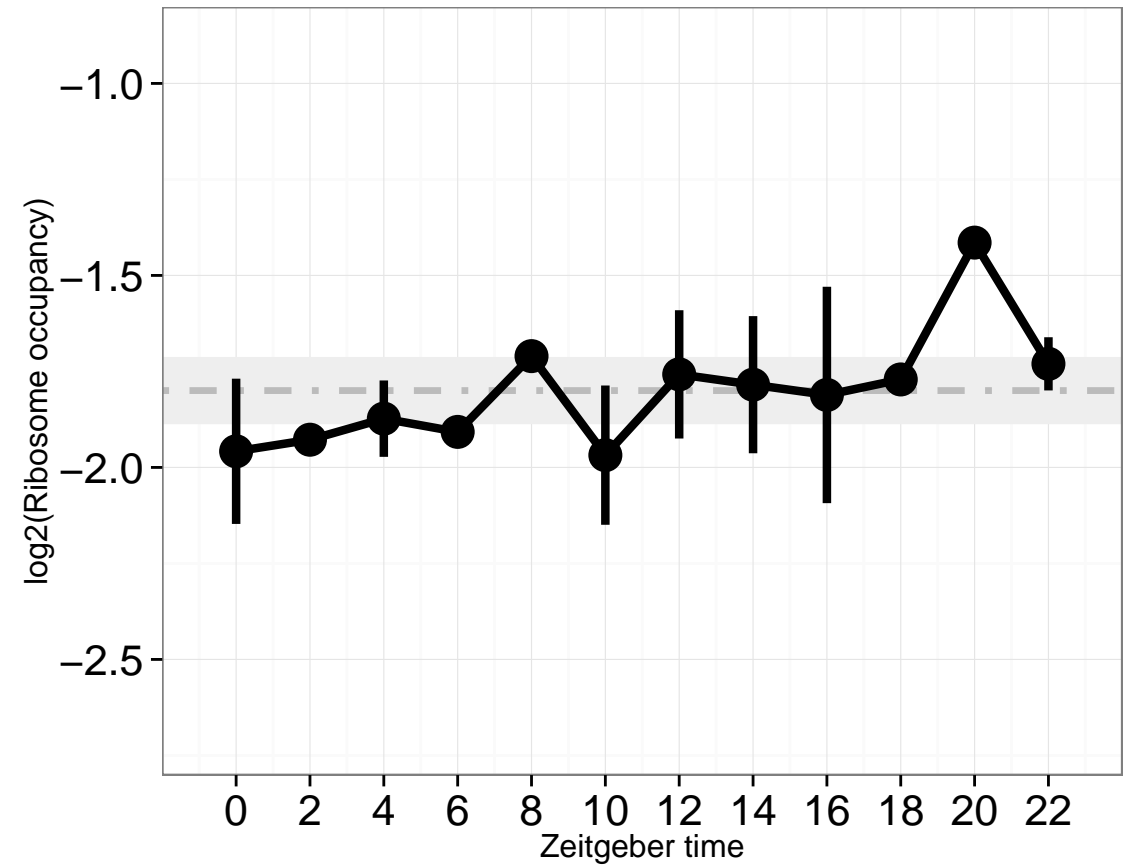

Supplement: Supplementary file 12026 [file 1]

## Polr1b

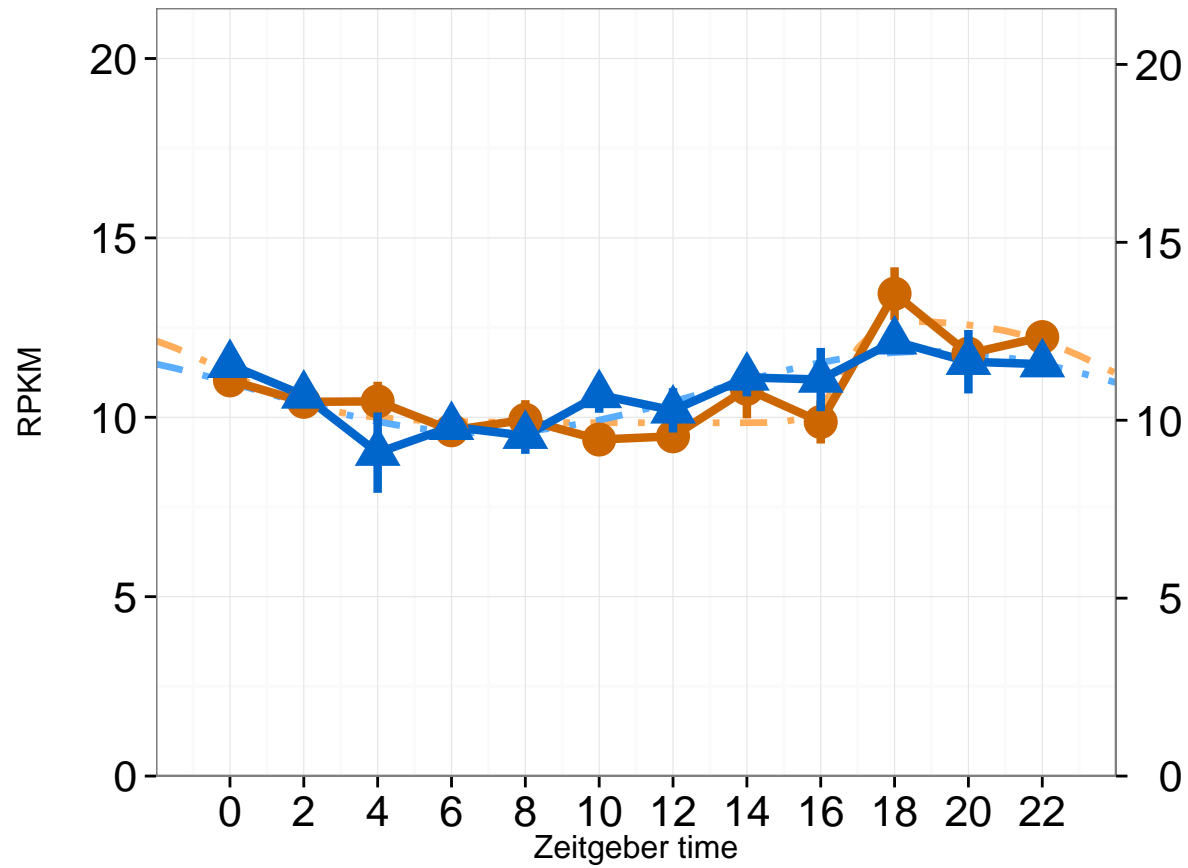

## Polr1b

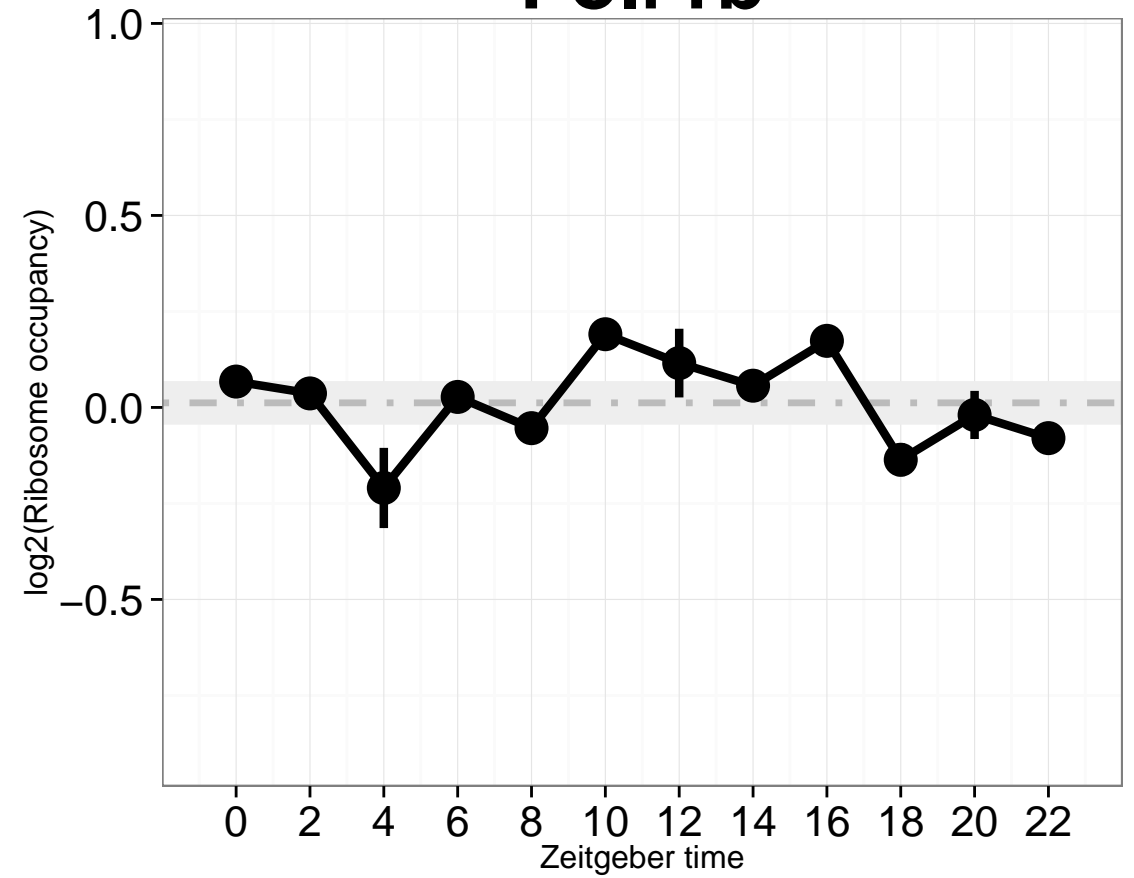

Supplement: Supplementary file 12027 [file 1]

## Intu

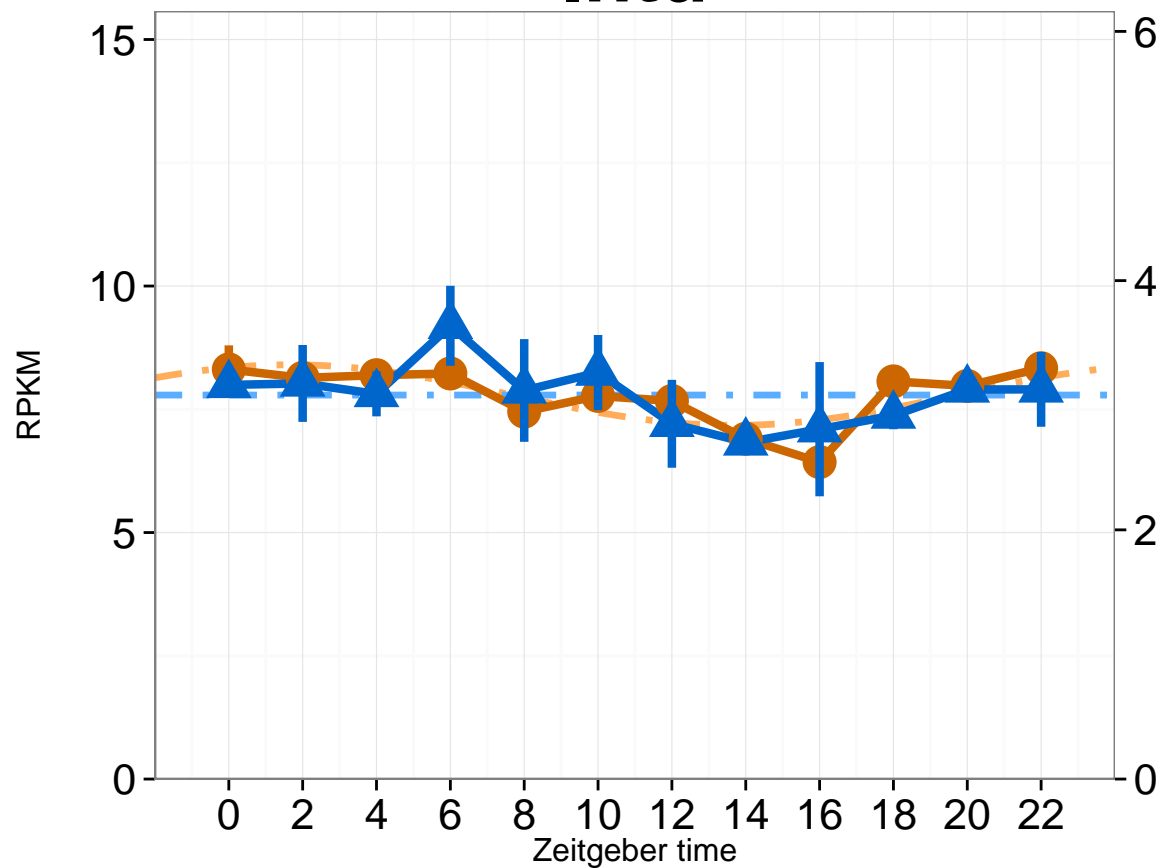

## Intu

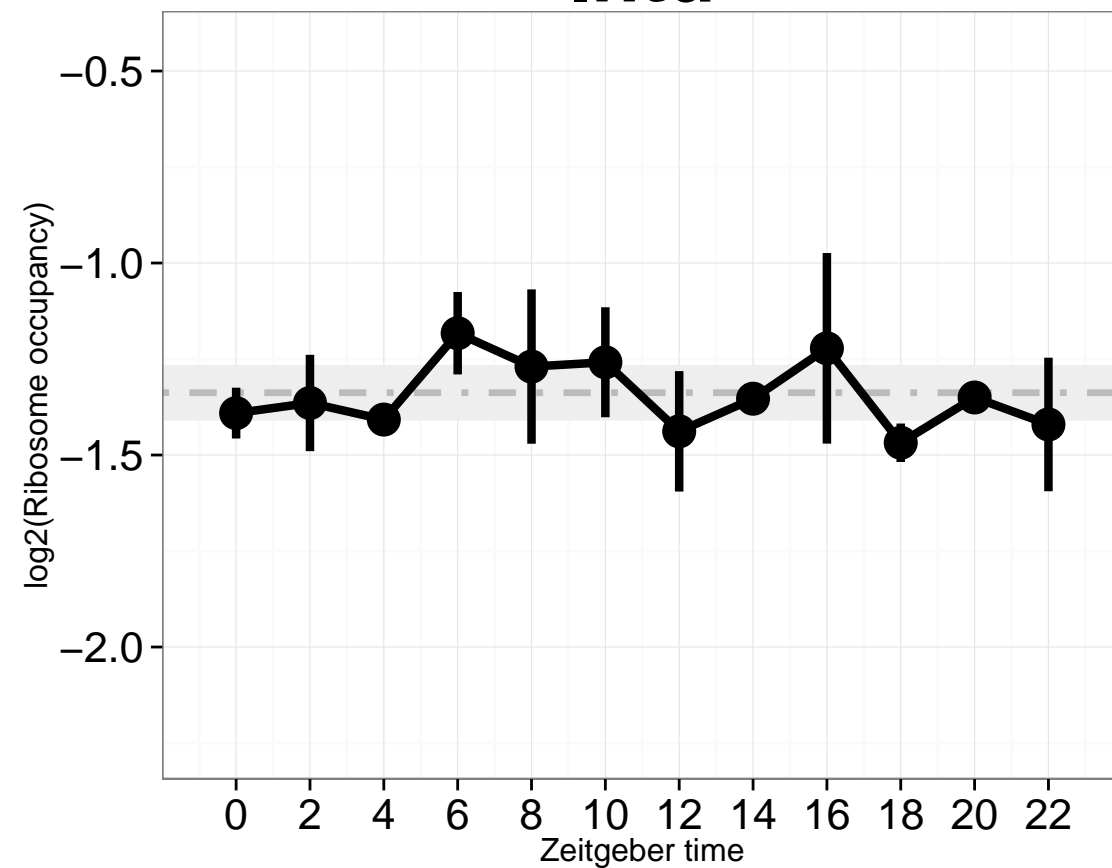

Supplement: Supplementary file 12028 [file 1]

# Trappc1

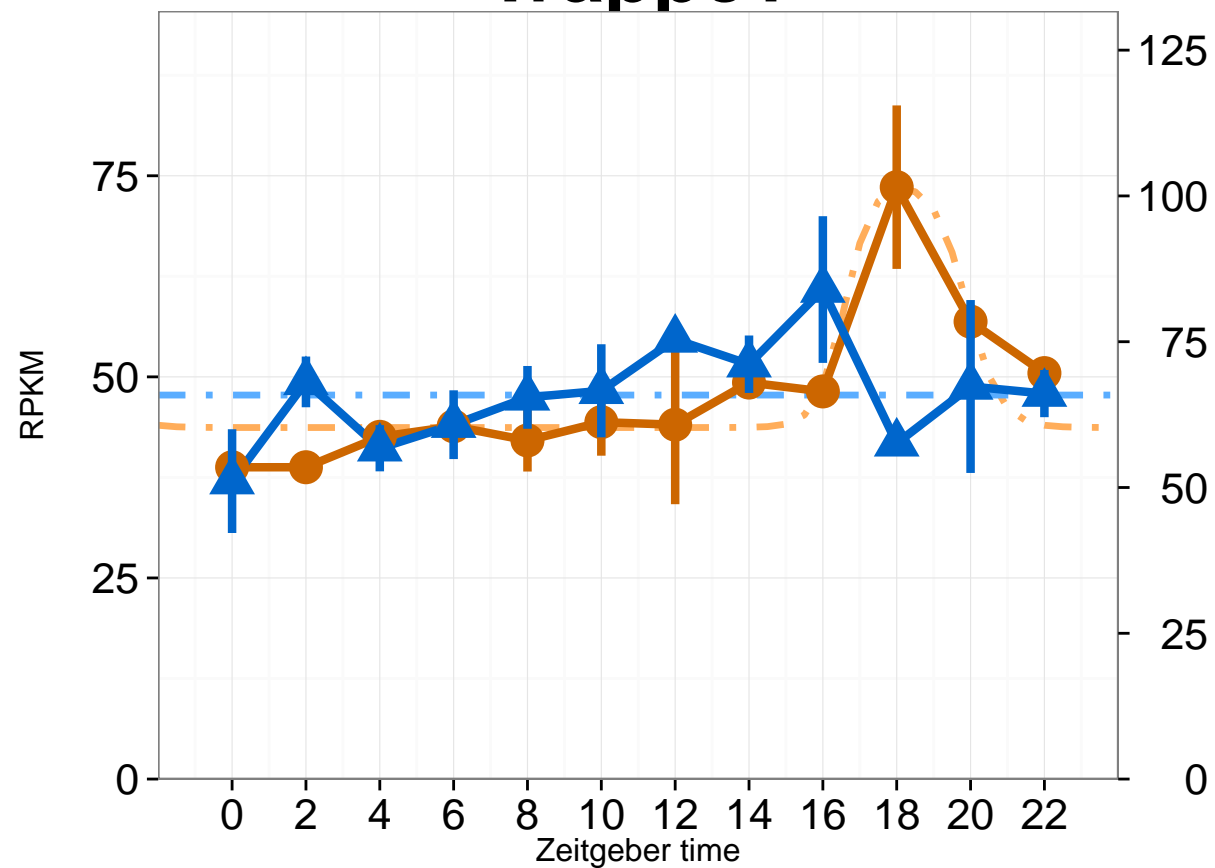

# Trappc1

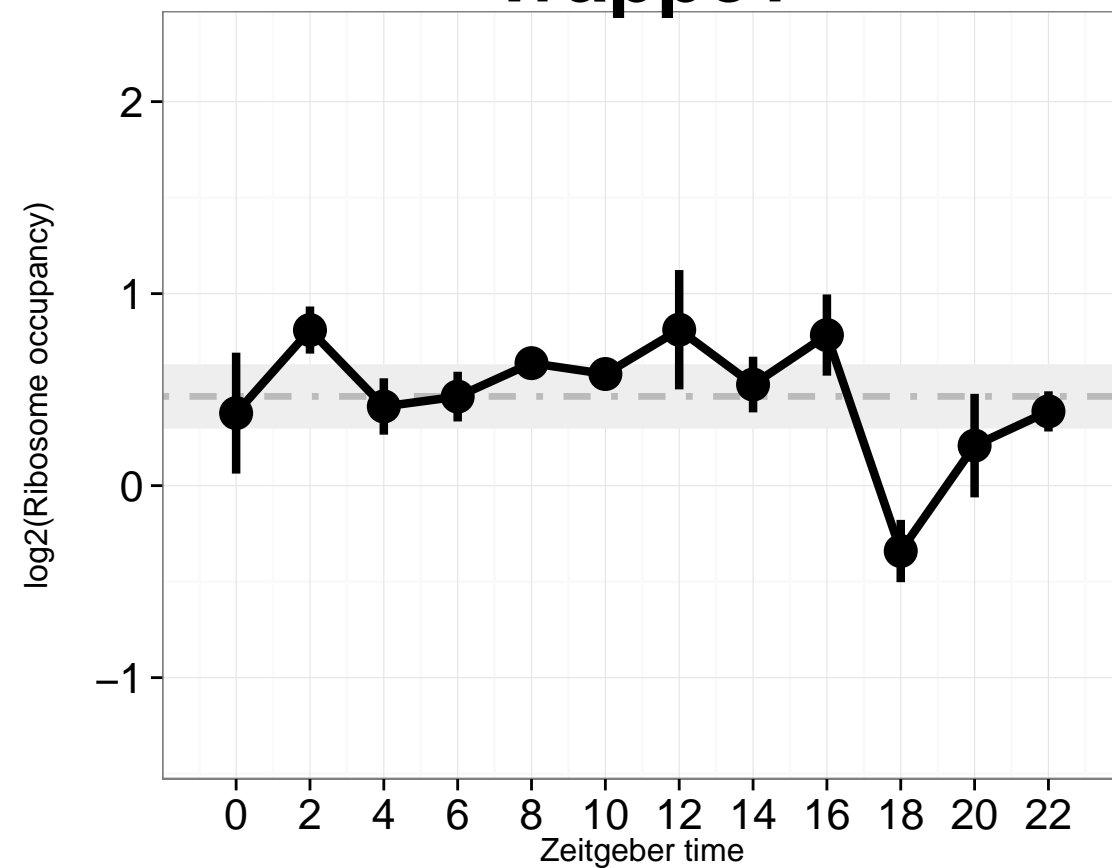

Supplement: Supplementary file 12029 [file 1]

# Fam110a

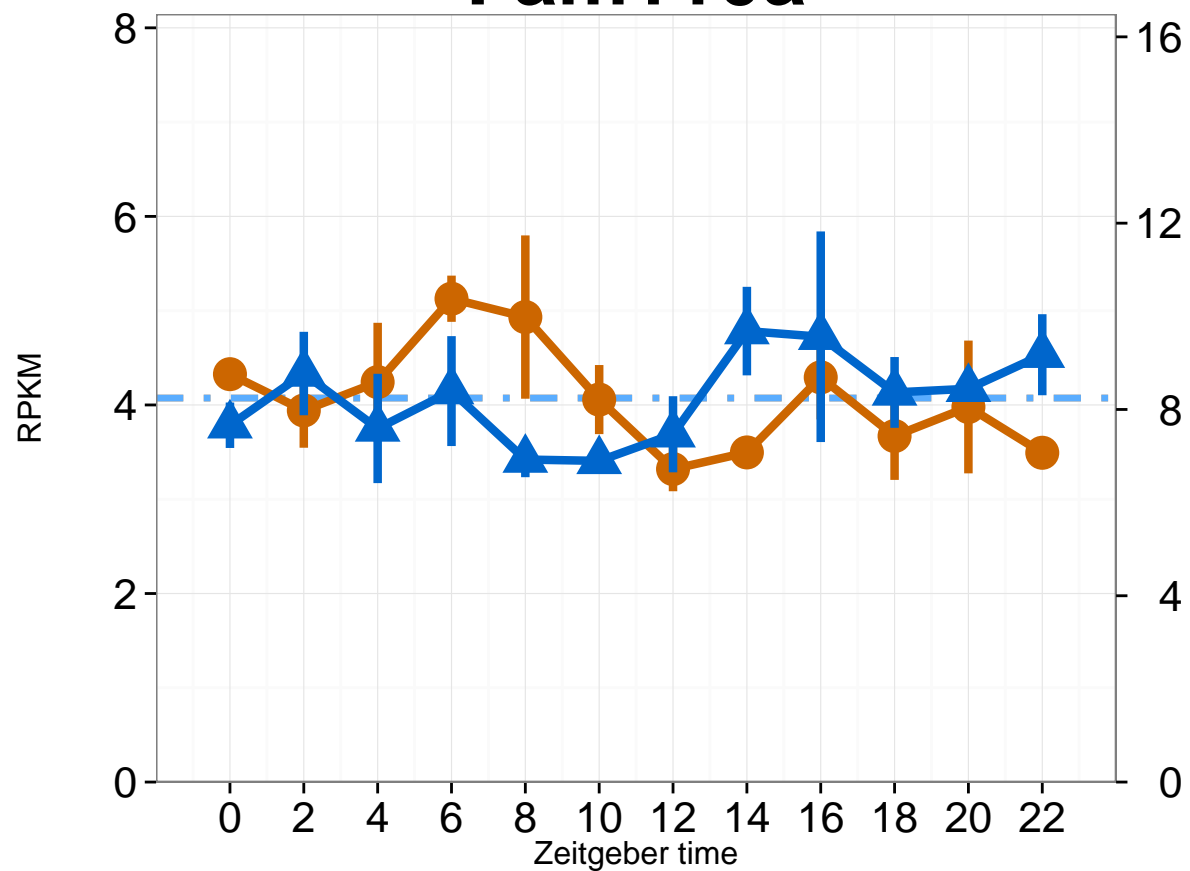

# Fam110a

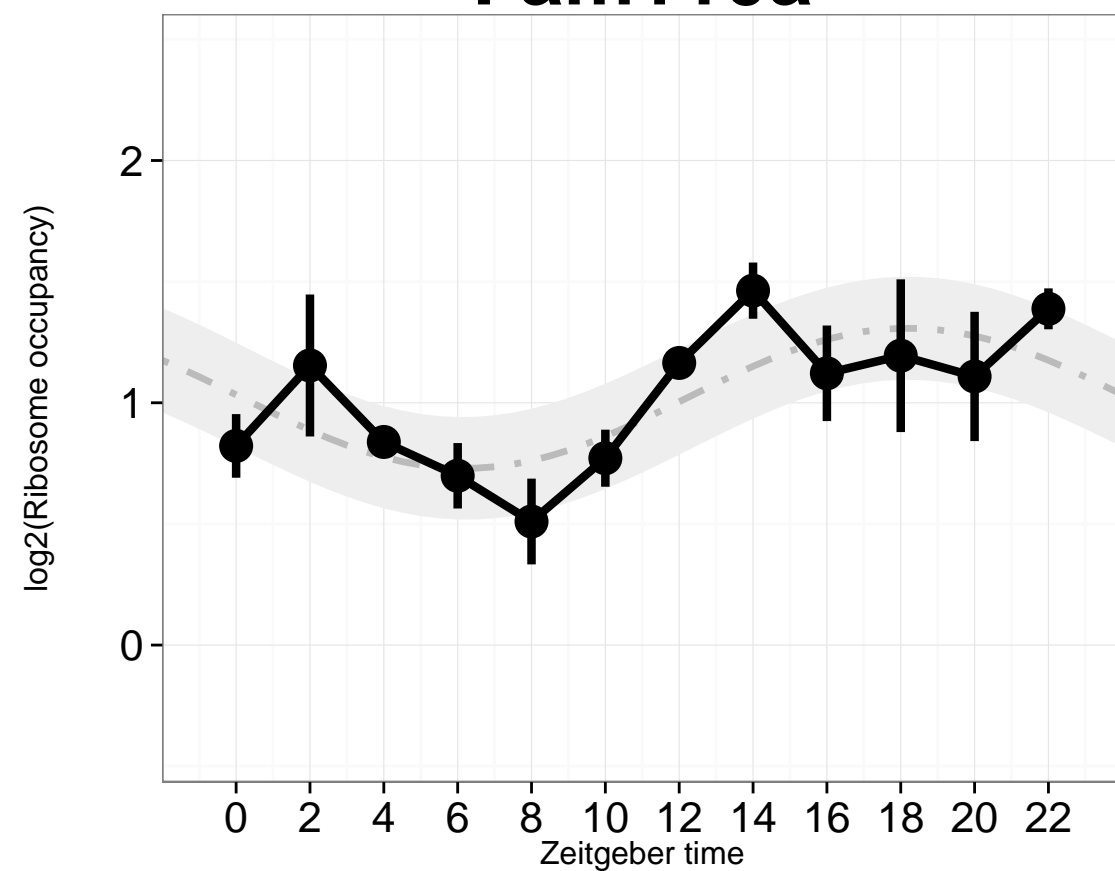

Supplement: Supplementary file 12030 [file 1]

# Gcm1

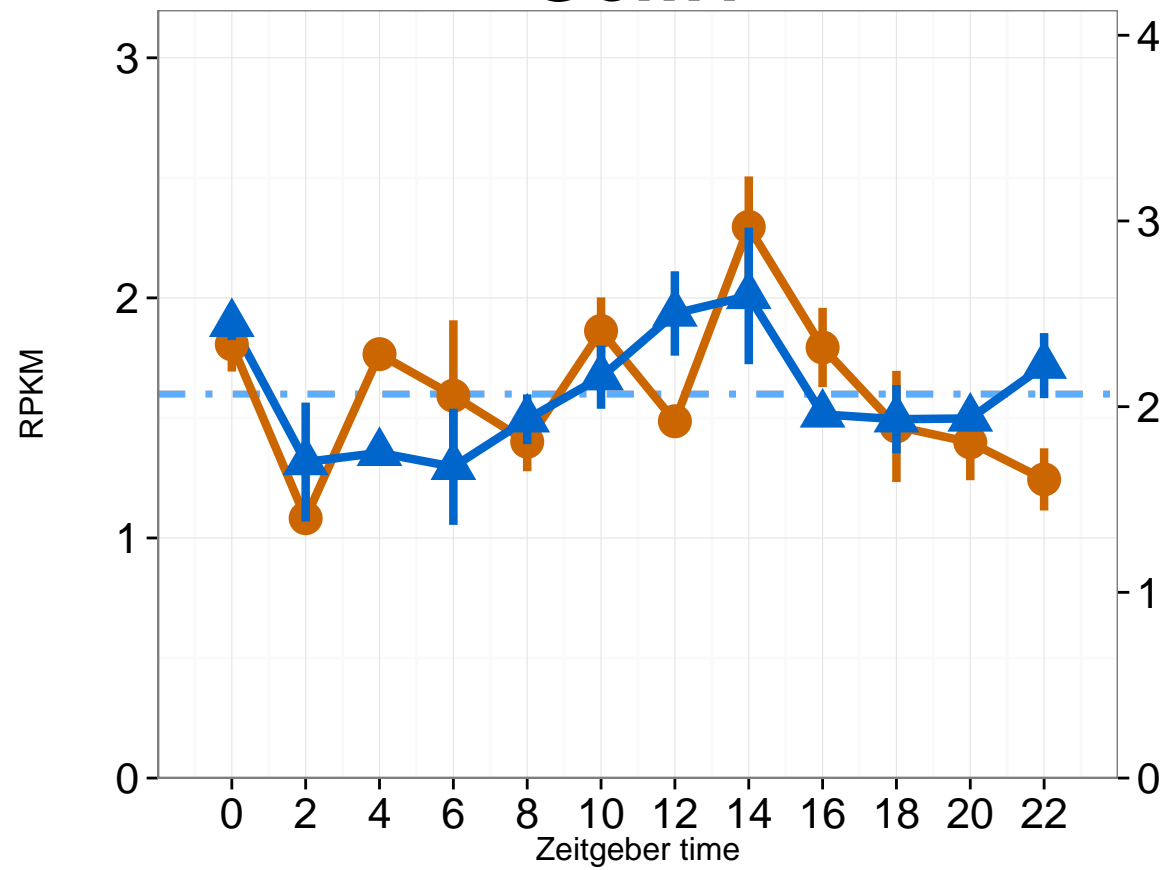

# Gcm1

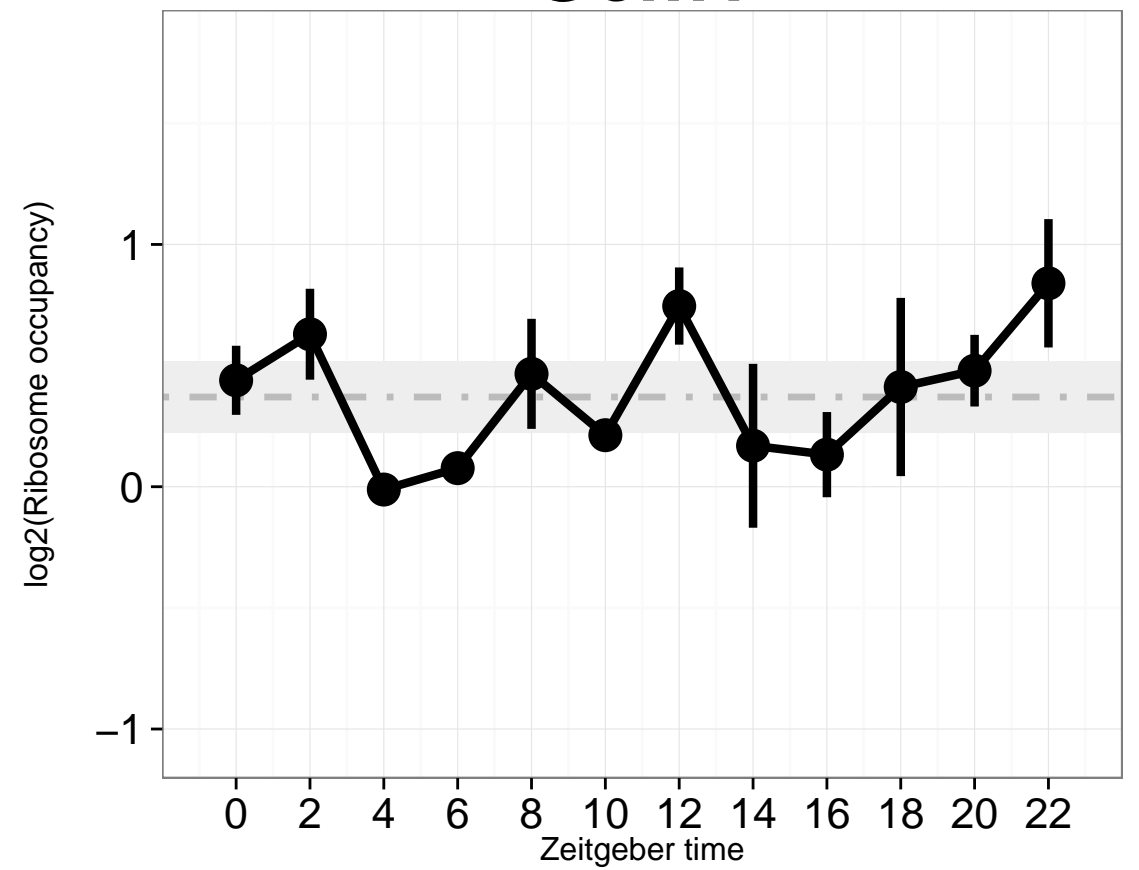

Supplement: Supplementary file 12031 [file 1]

## Cat

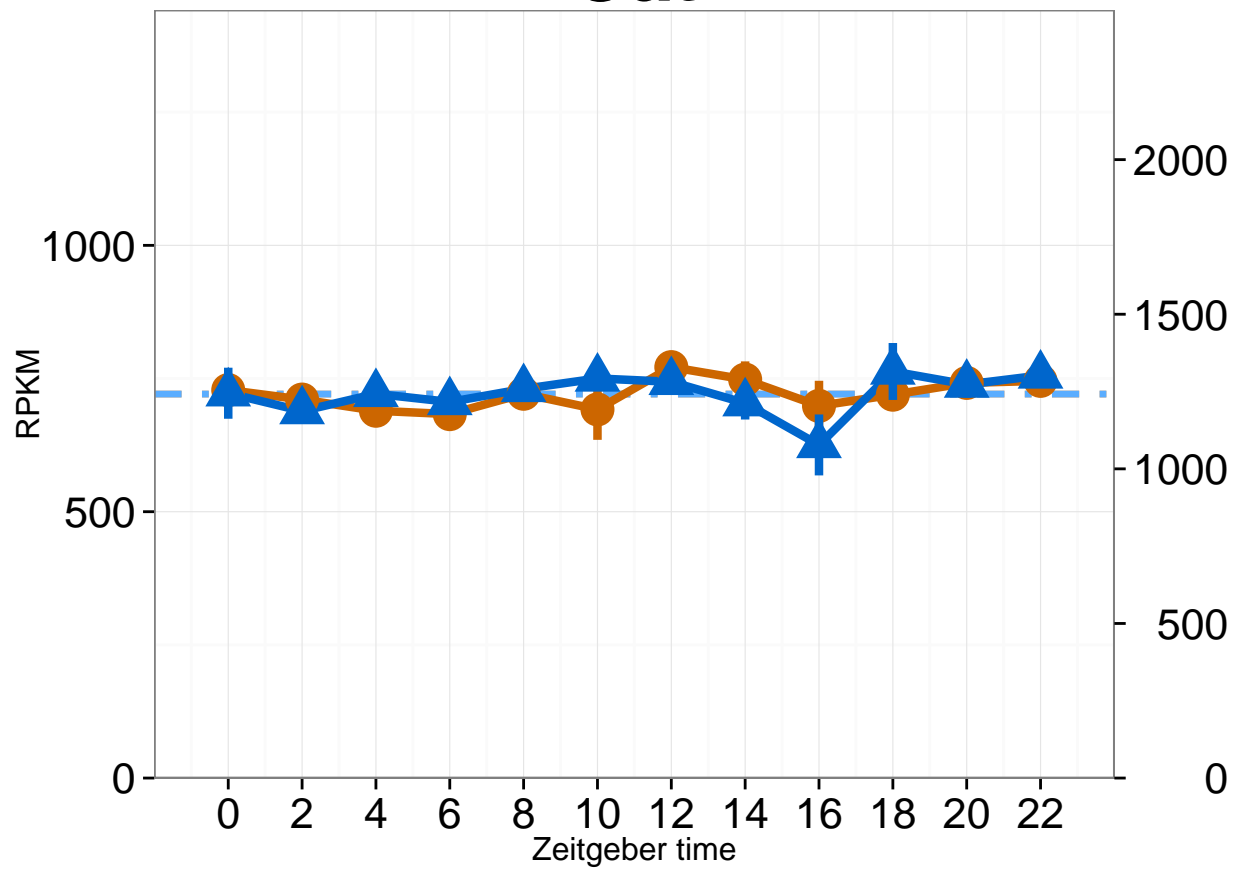

## Cat

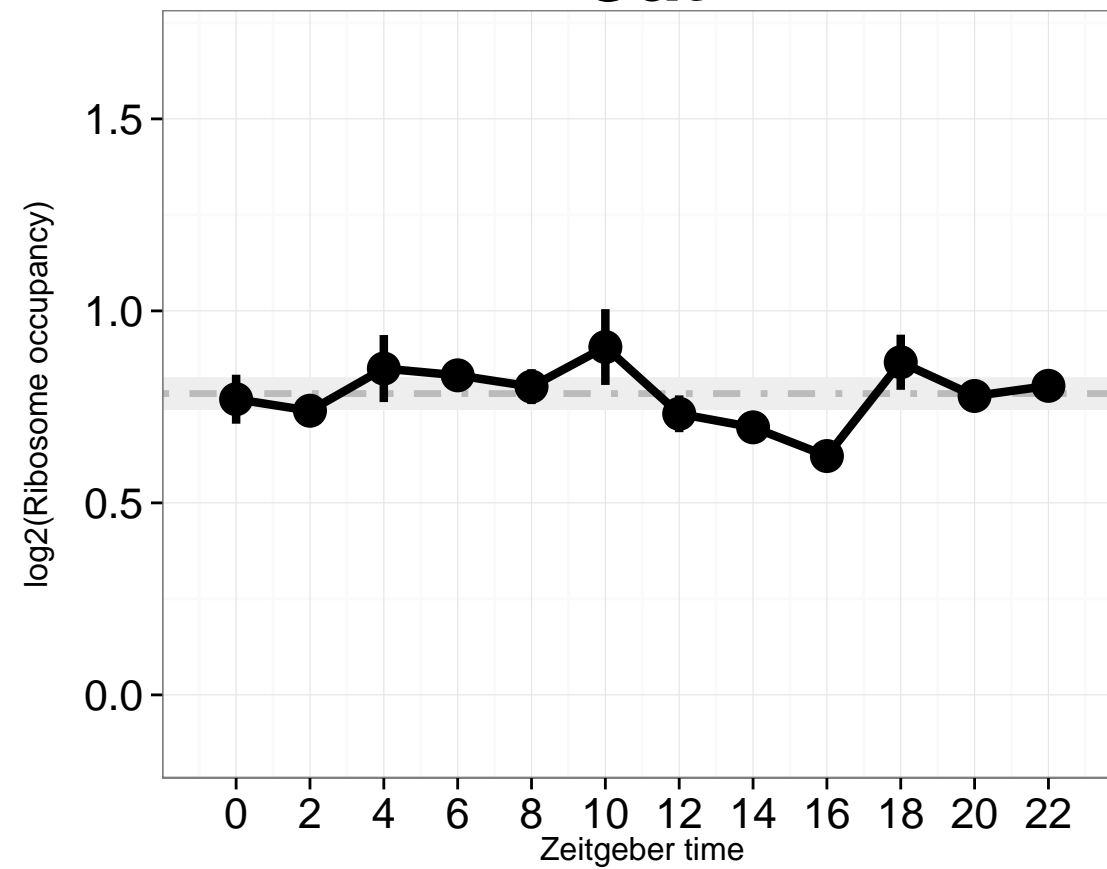

Supplement: Supplementary file 12032 [file 1]

## Pgp

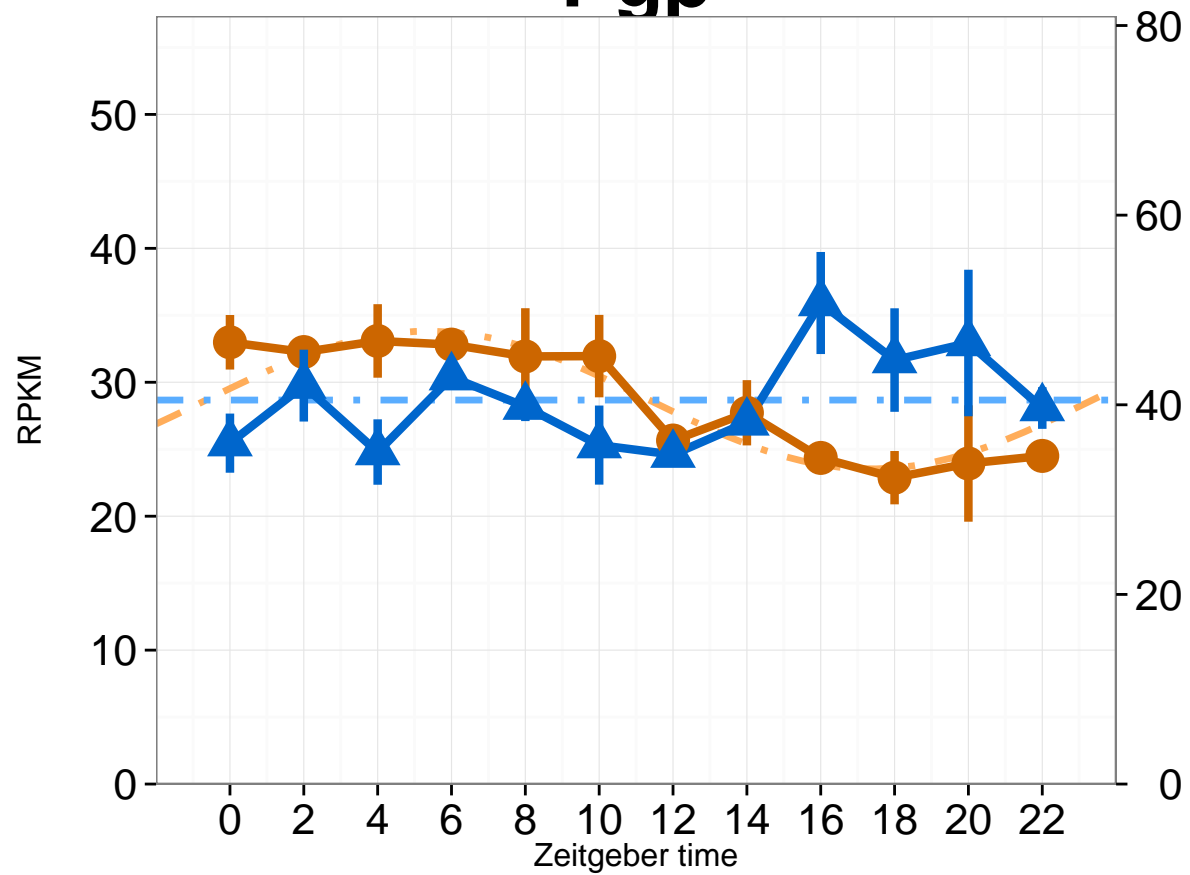

## Pgp

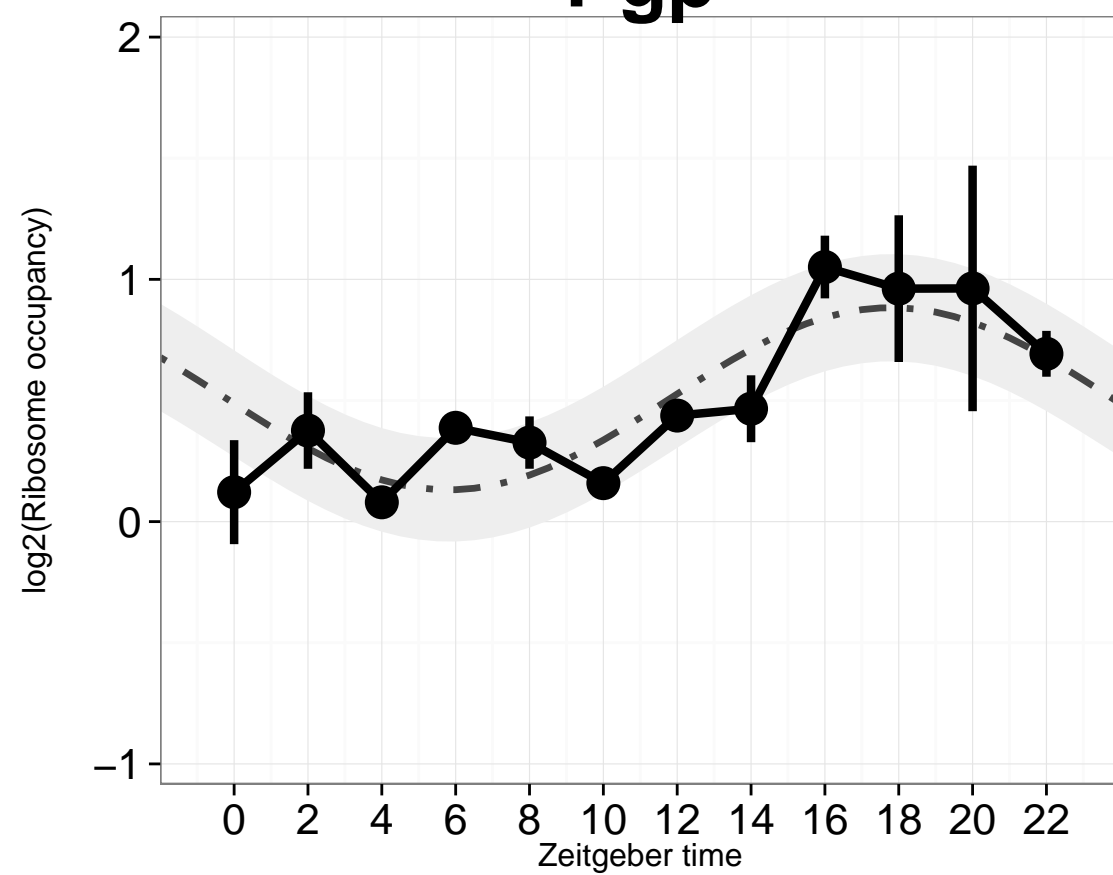

Supplement: Supplementary file 12033 [file 1]

## Eci3

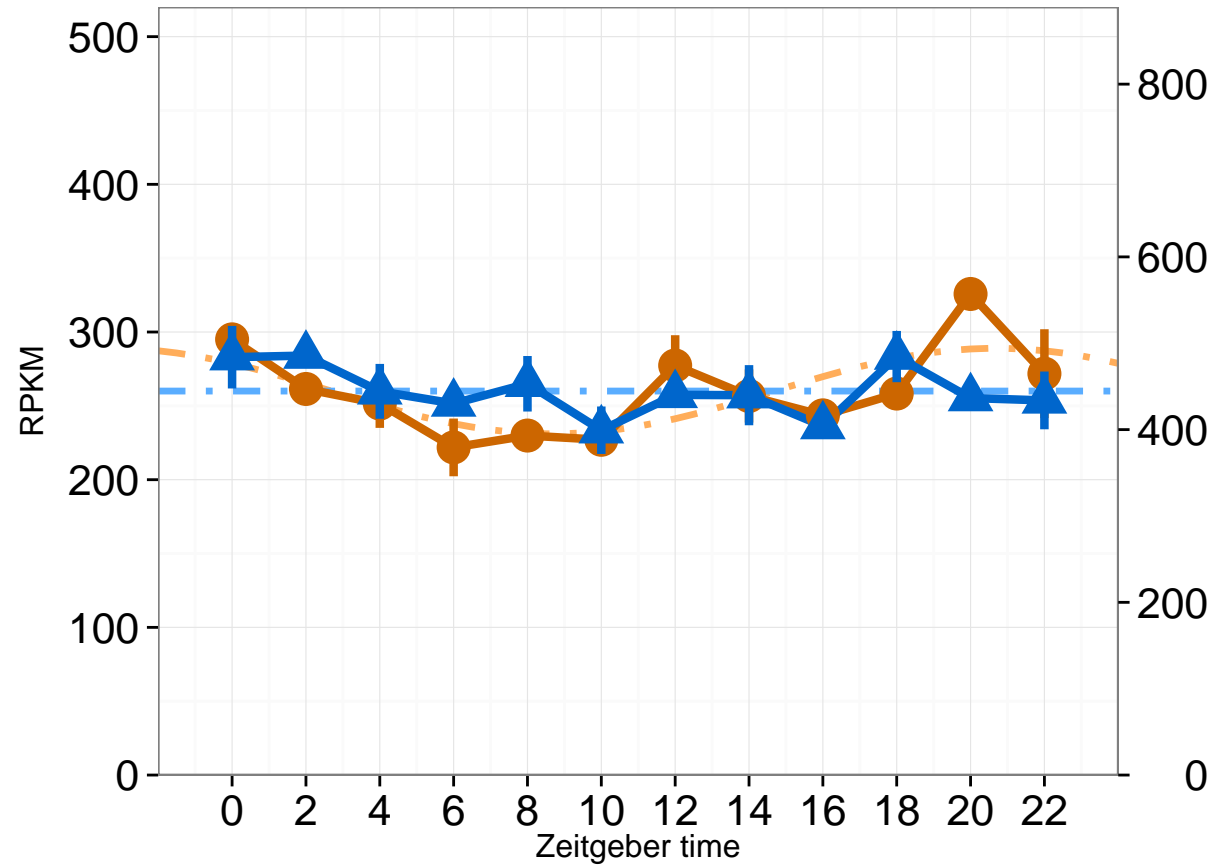

## Eci3

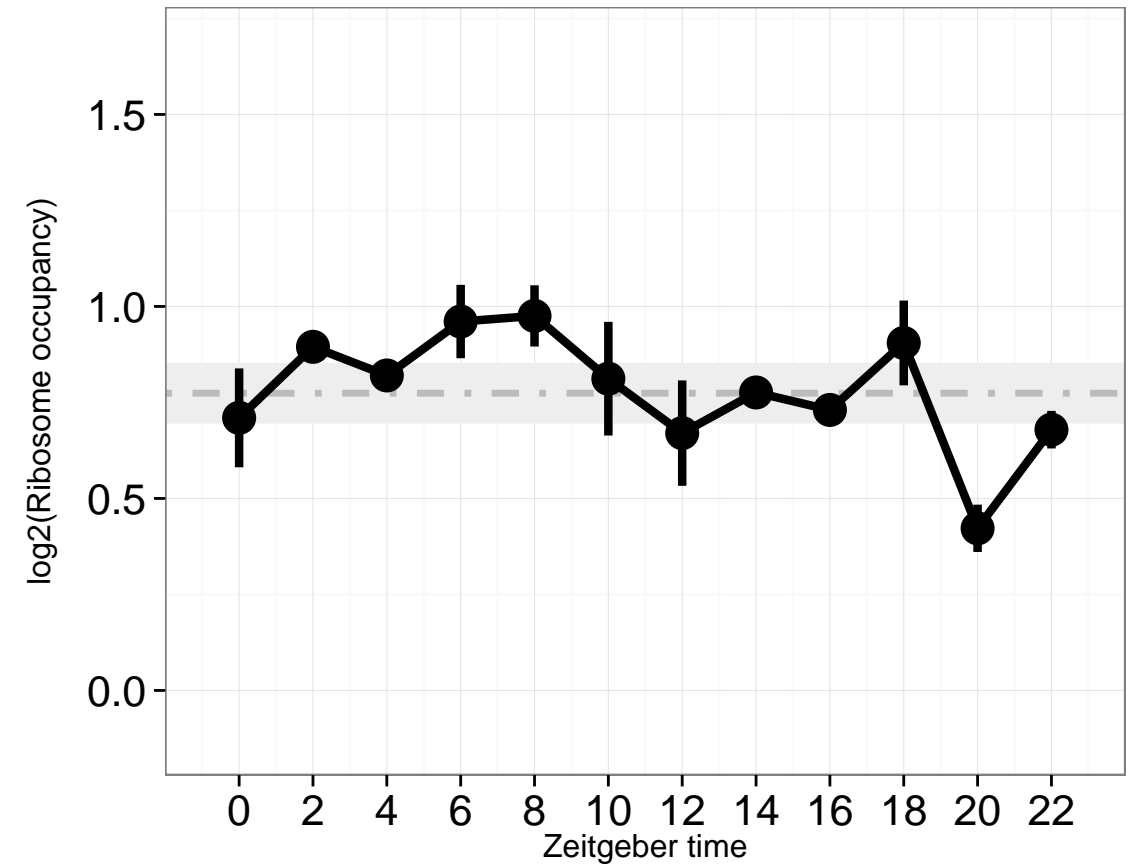

Supplement: Supplementary file 12034 [file 1]

# 4933427D14Rik

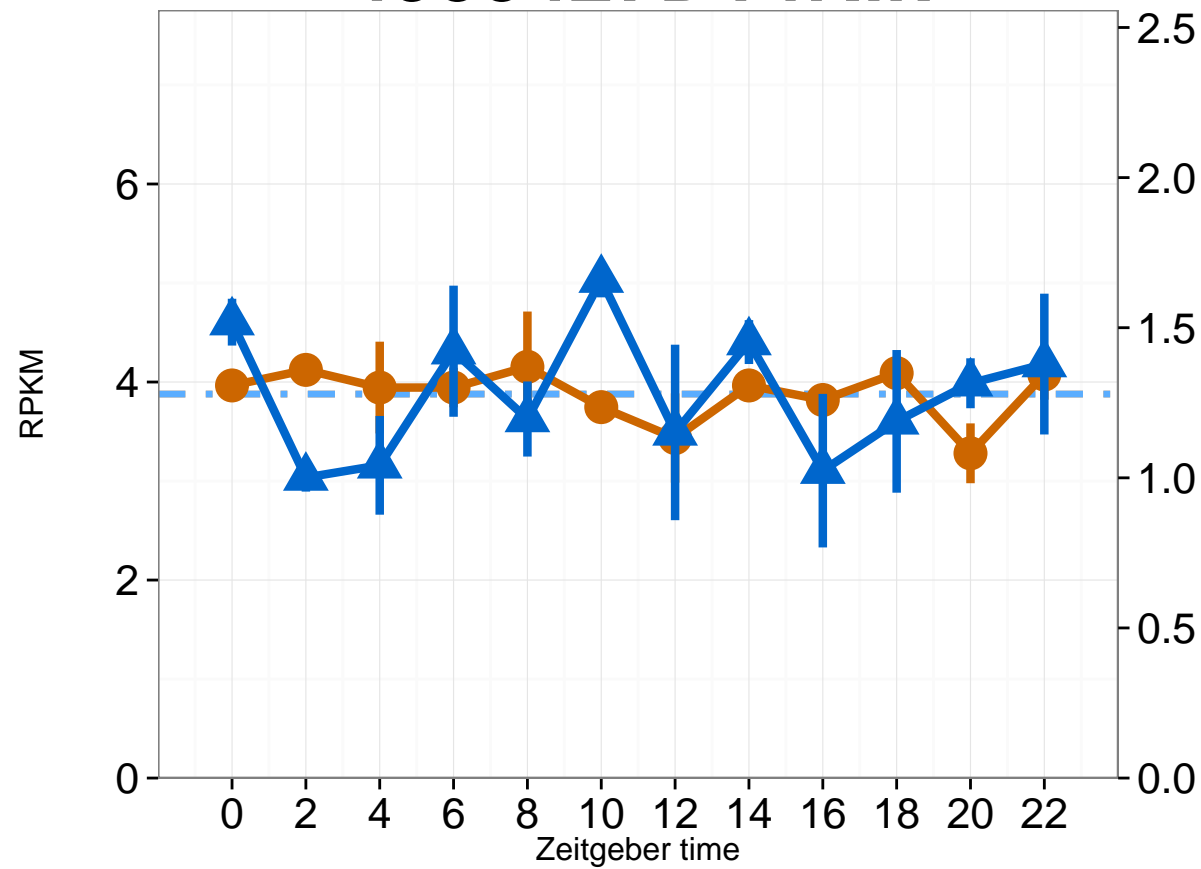

# 4933427D14Rik

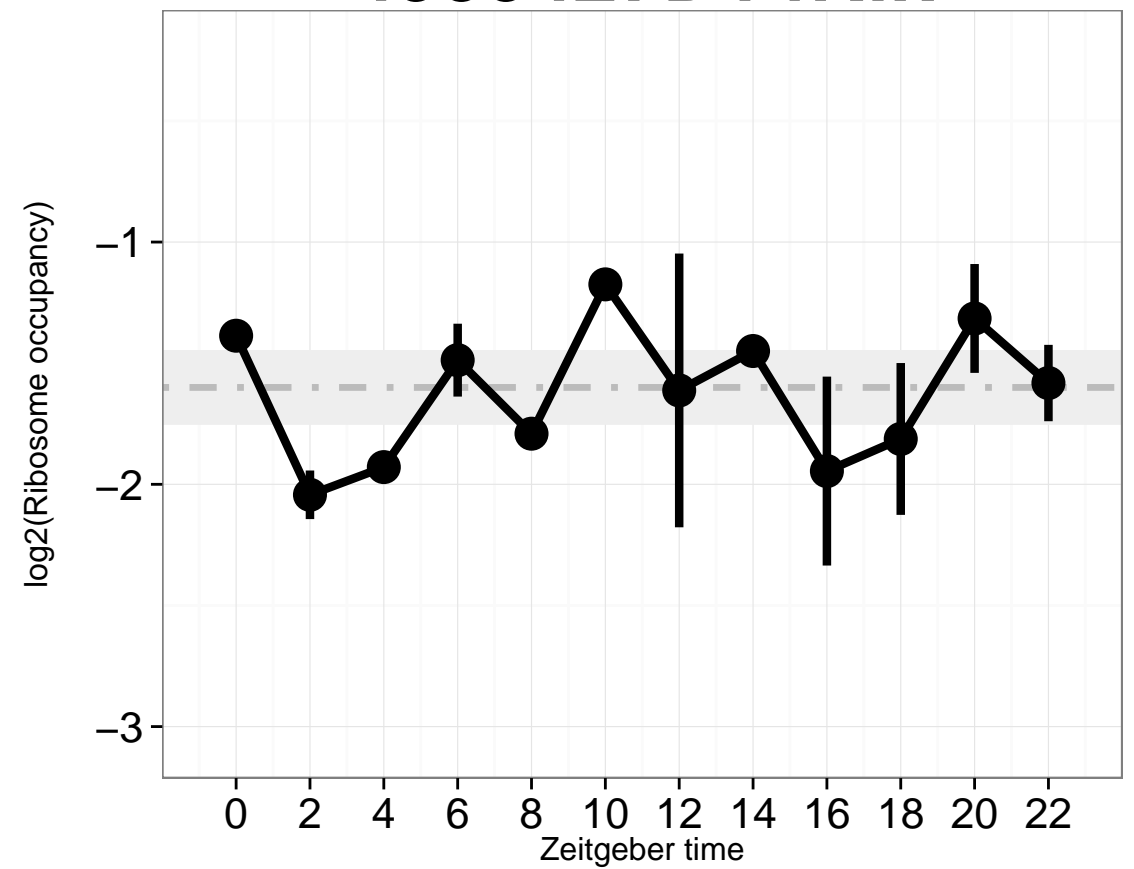

Supplement: Supplementary file 12035 [file 1]

# Zfp397

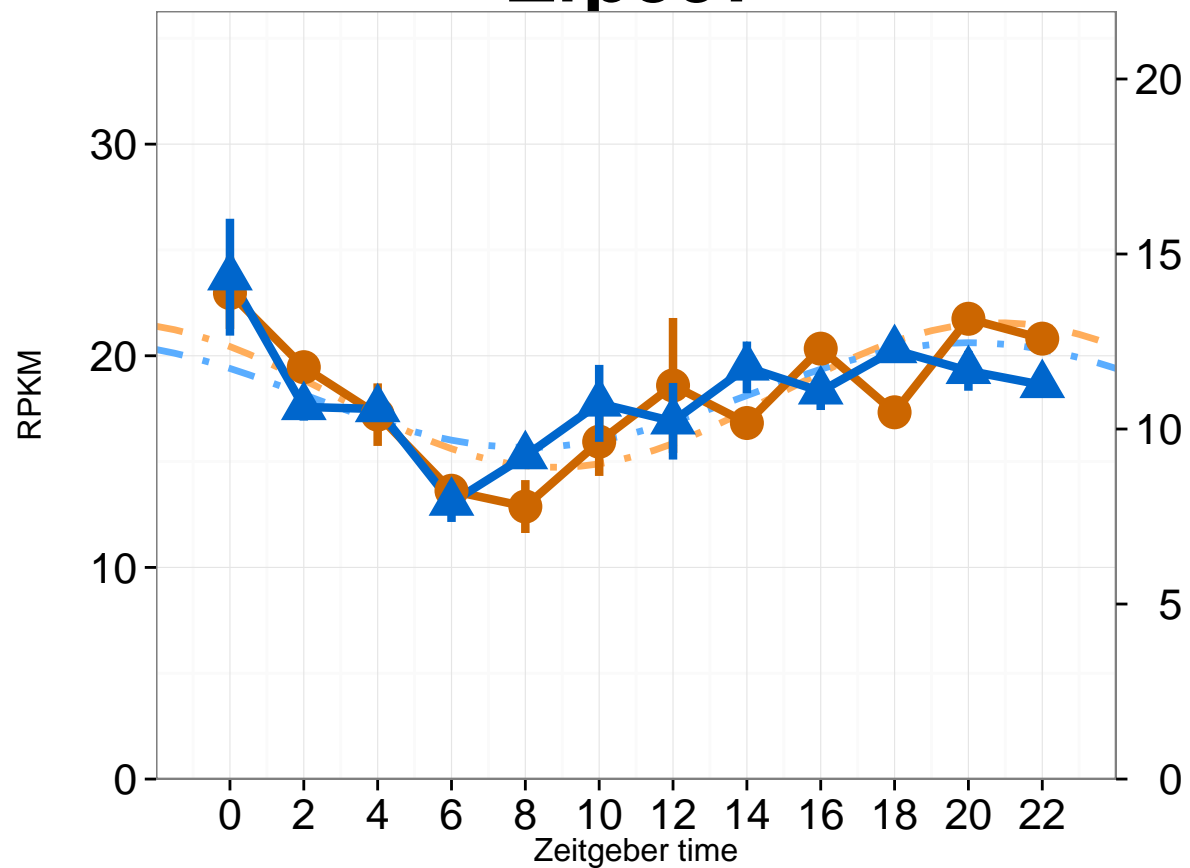

# Zfp397

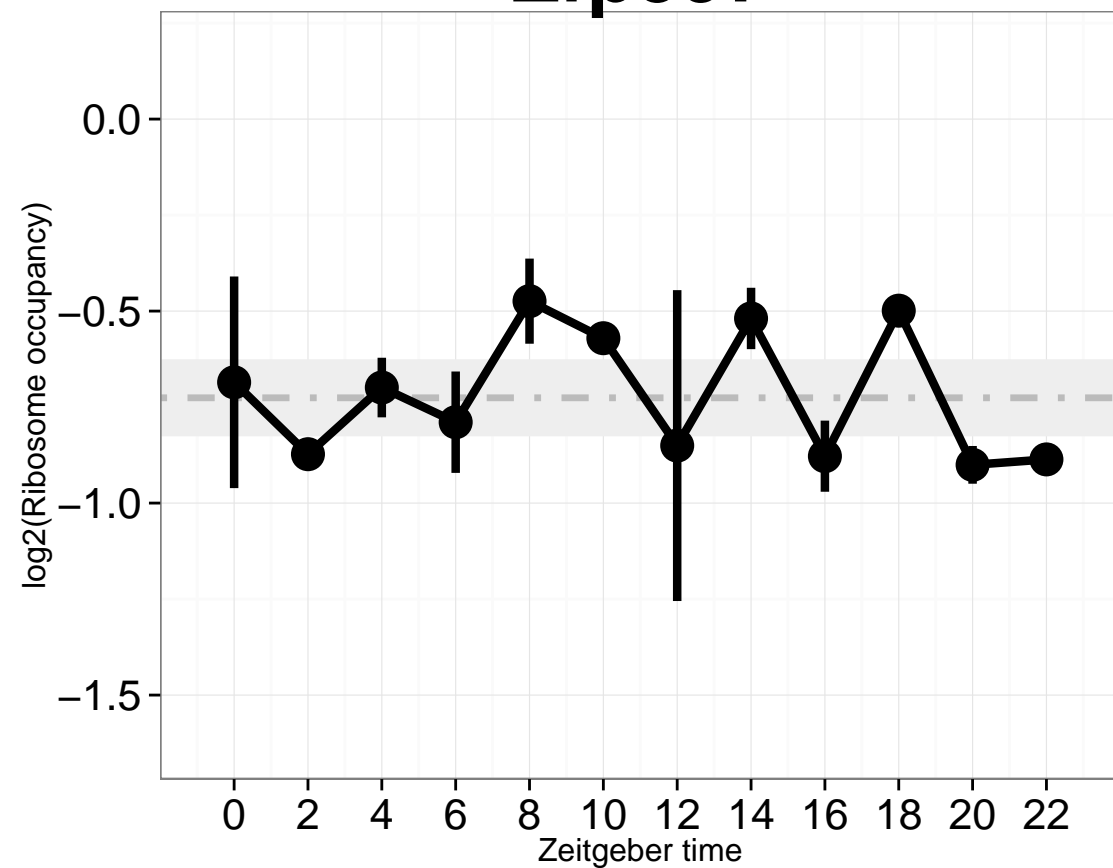

Supplement: Supplementary file 12036 [file 1]

# Prpf3

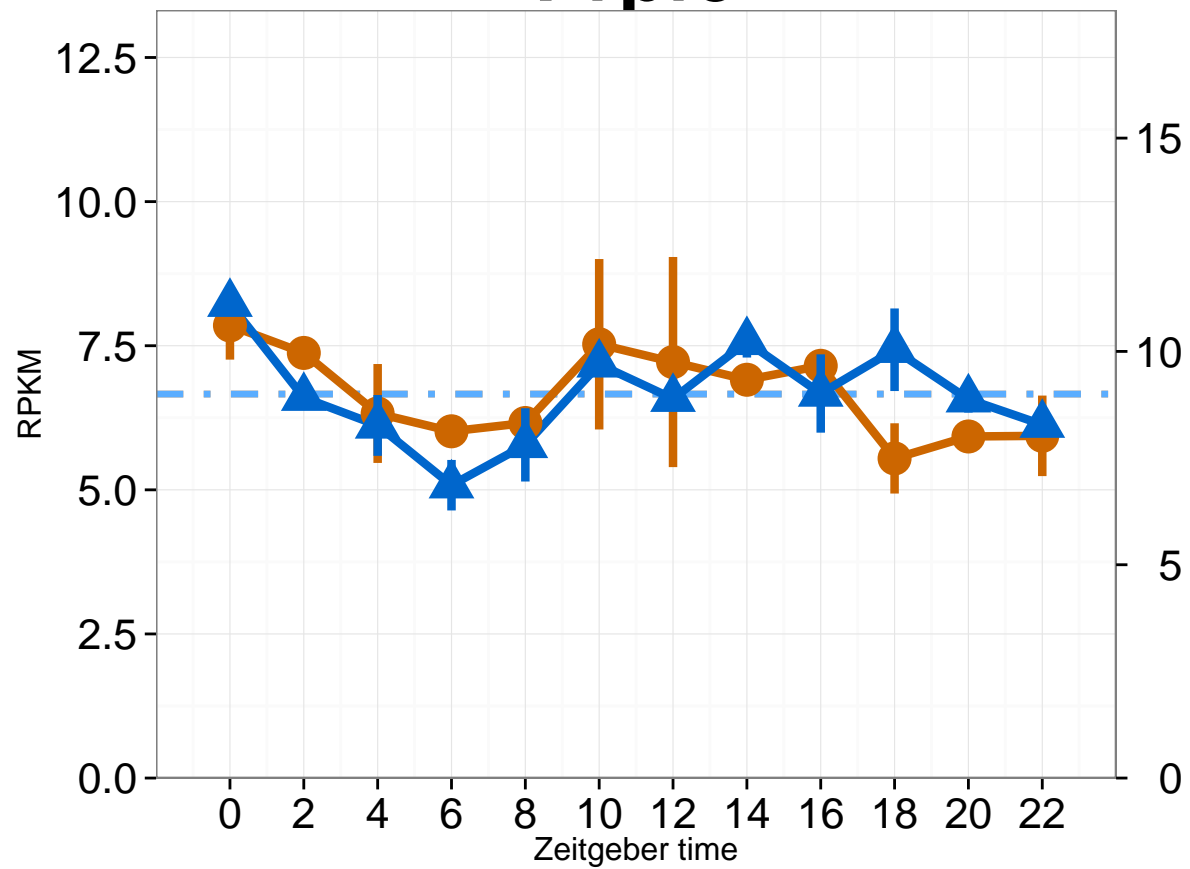

# Prpf3

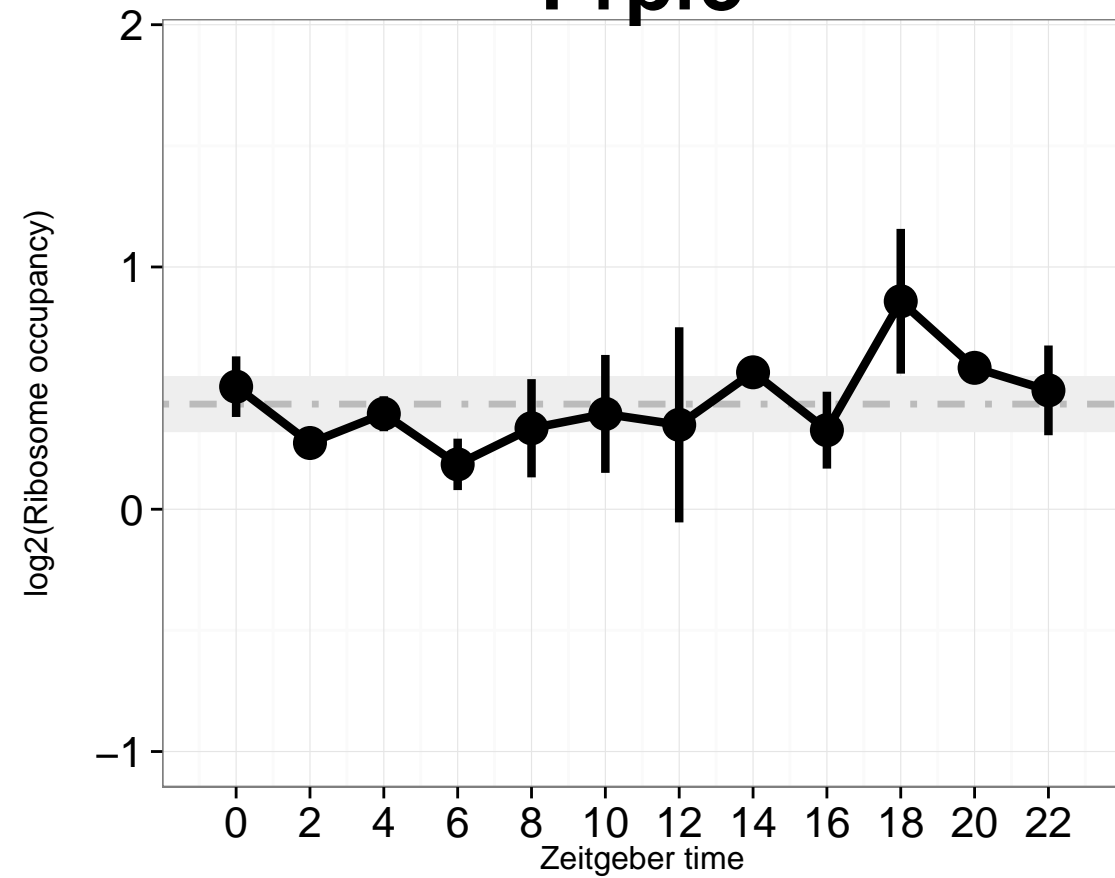

Supplement: Supplementary file 12037 [file 1]

# Cdo1

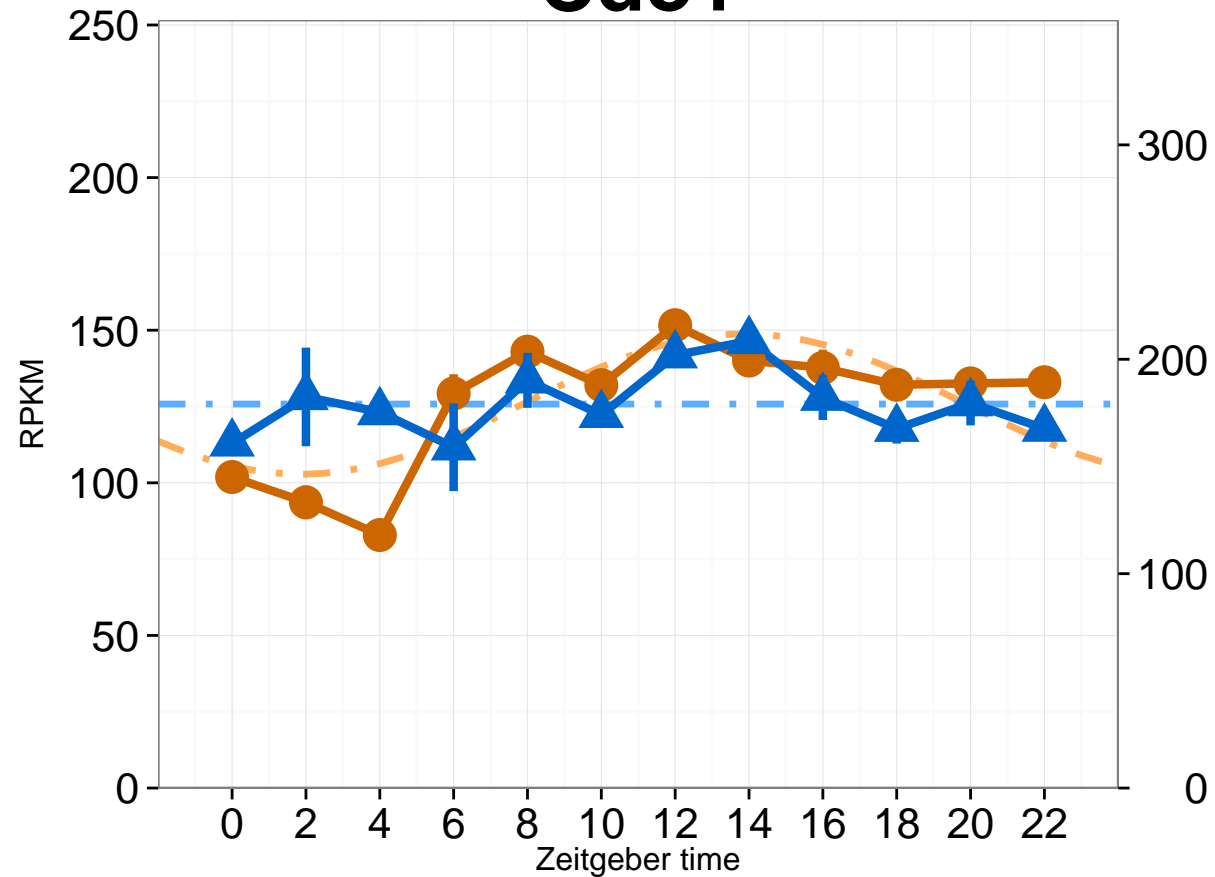

# Cdo1

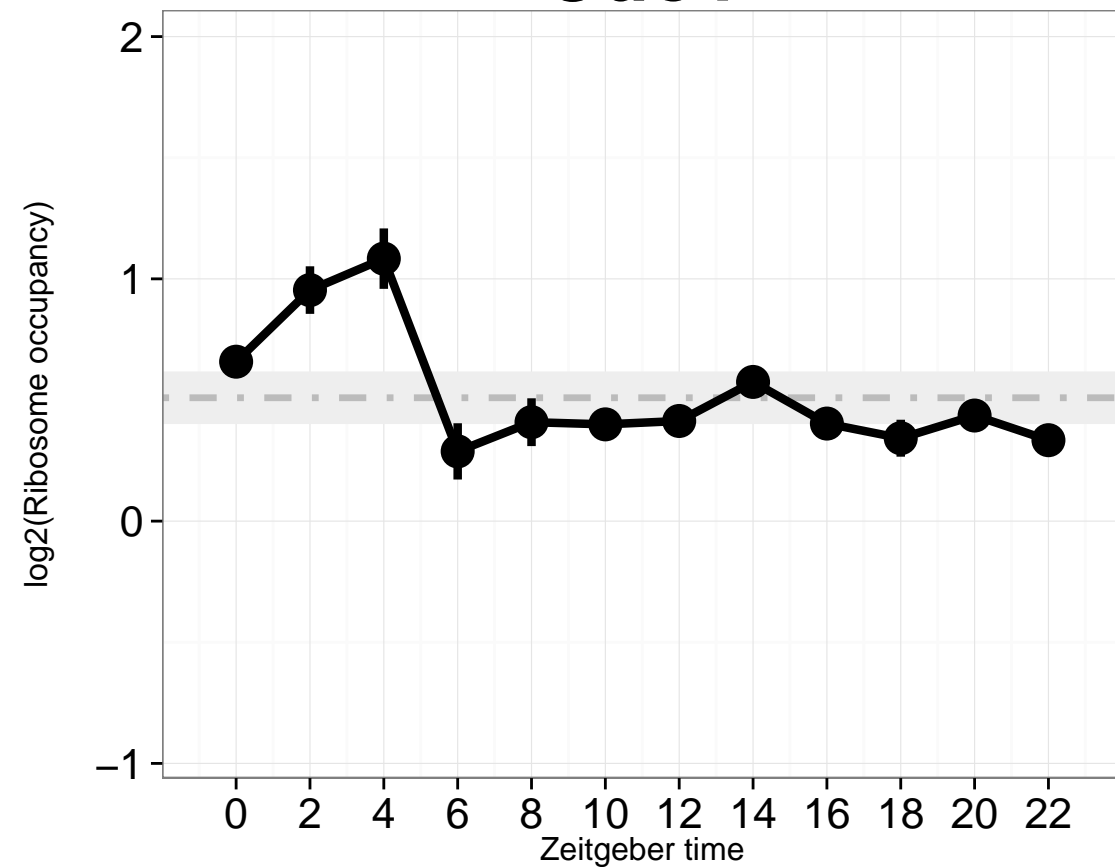

Supplement: Supplementary file 12038 [file 1]

## Cd274

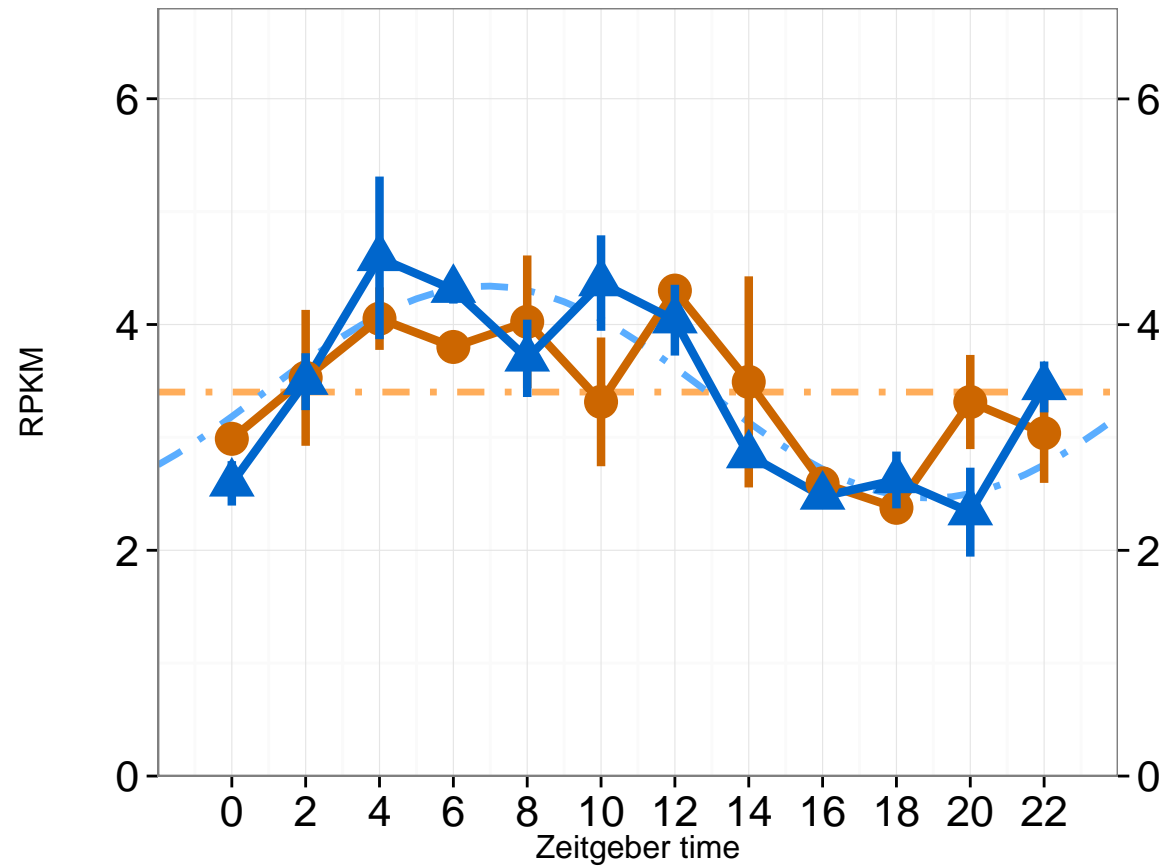

## Cd274

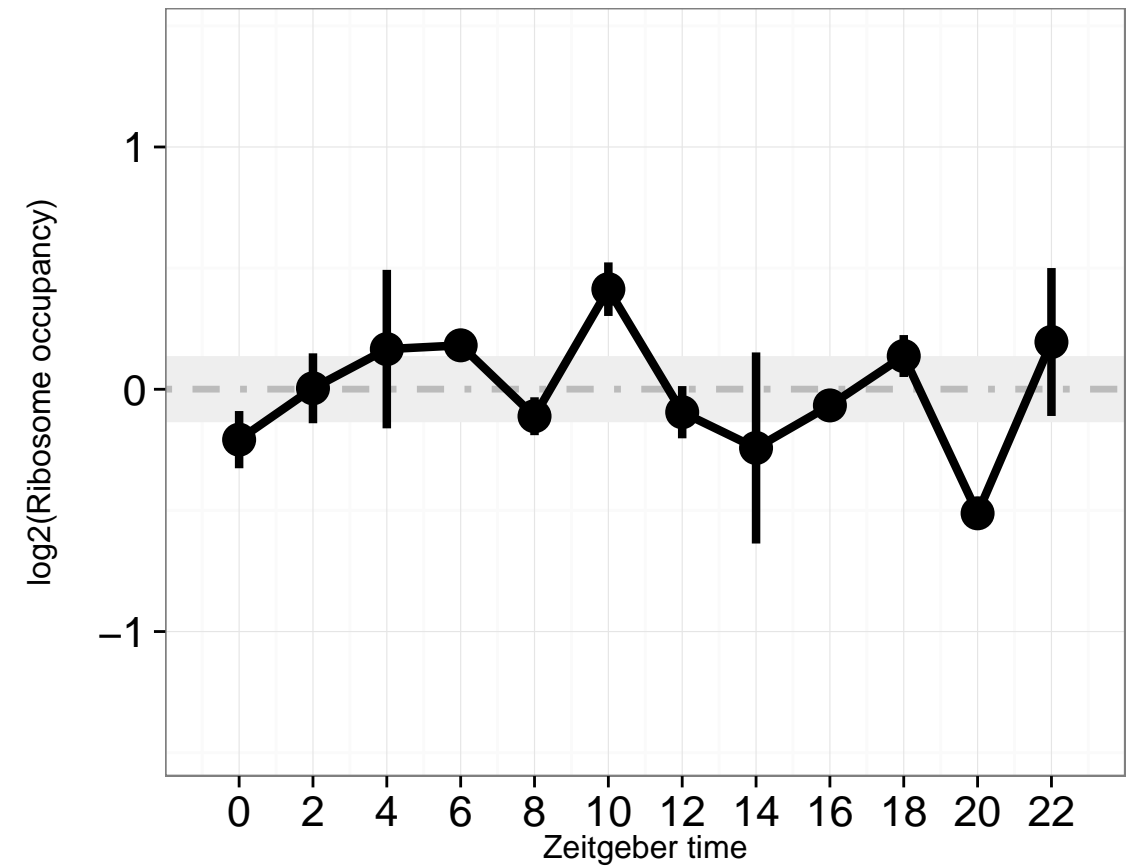

Supplement: Supplementary file 12039 [file 1]

## Zmynd10

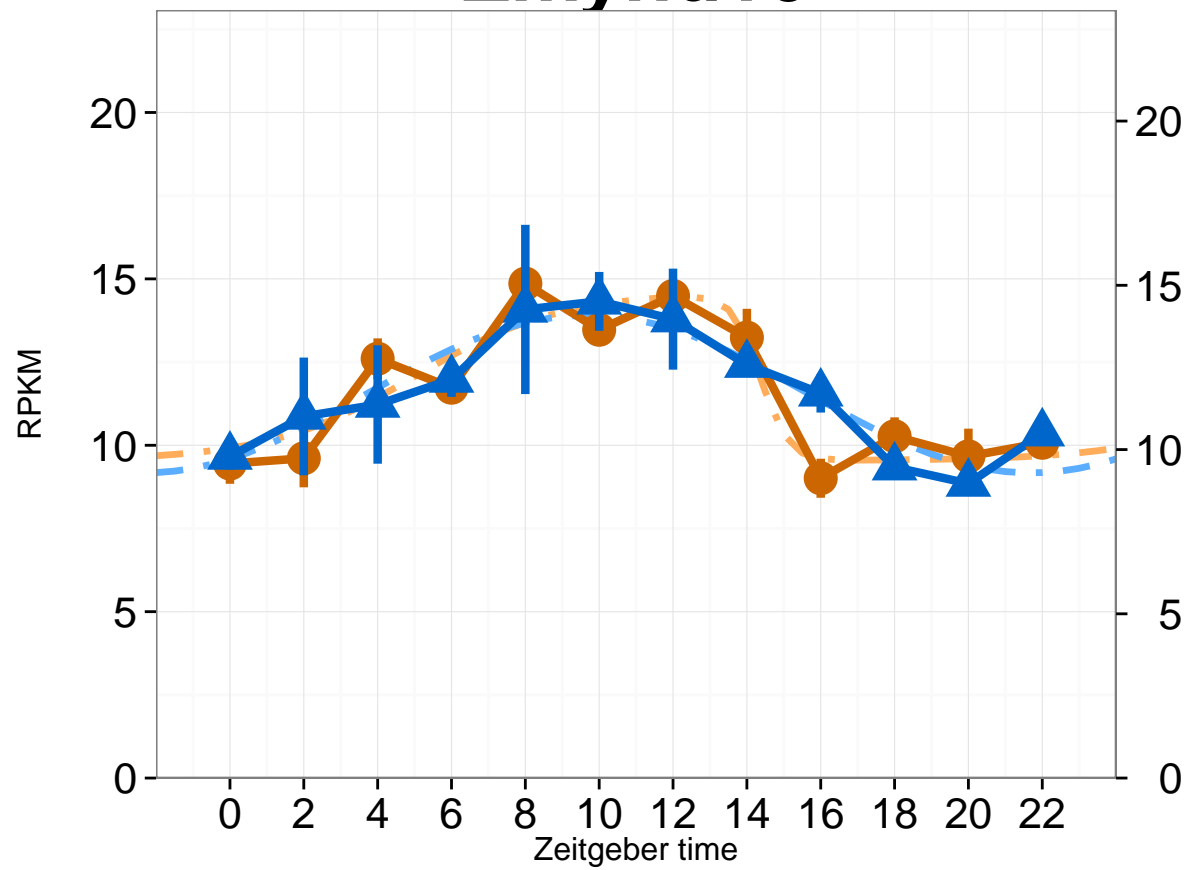

## Zmynd10

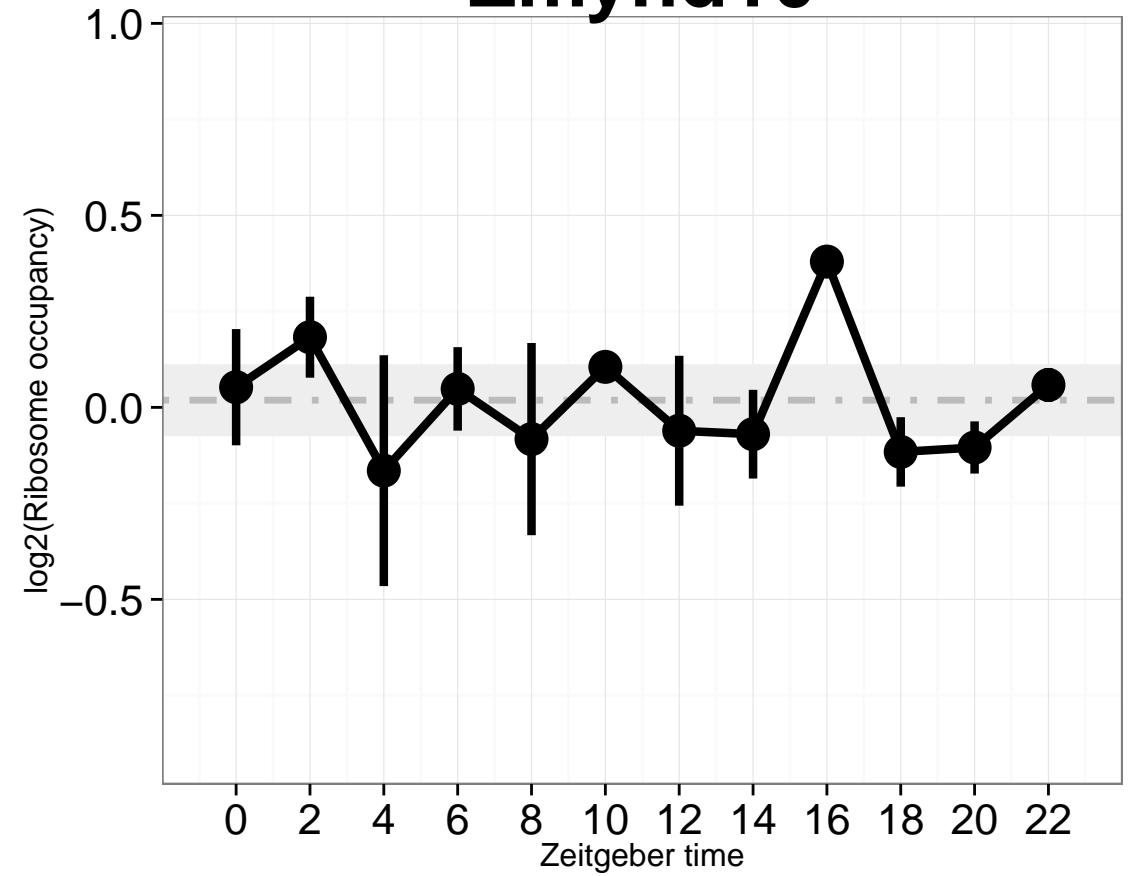

Supplement: Supplementary file 12040 [file 1]

## Adi1

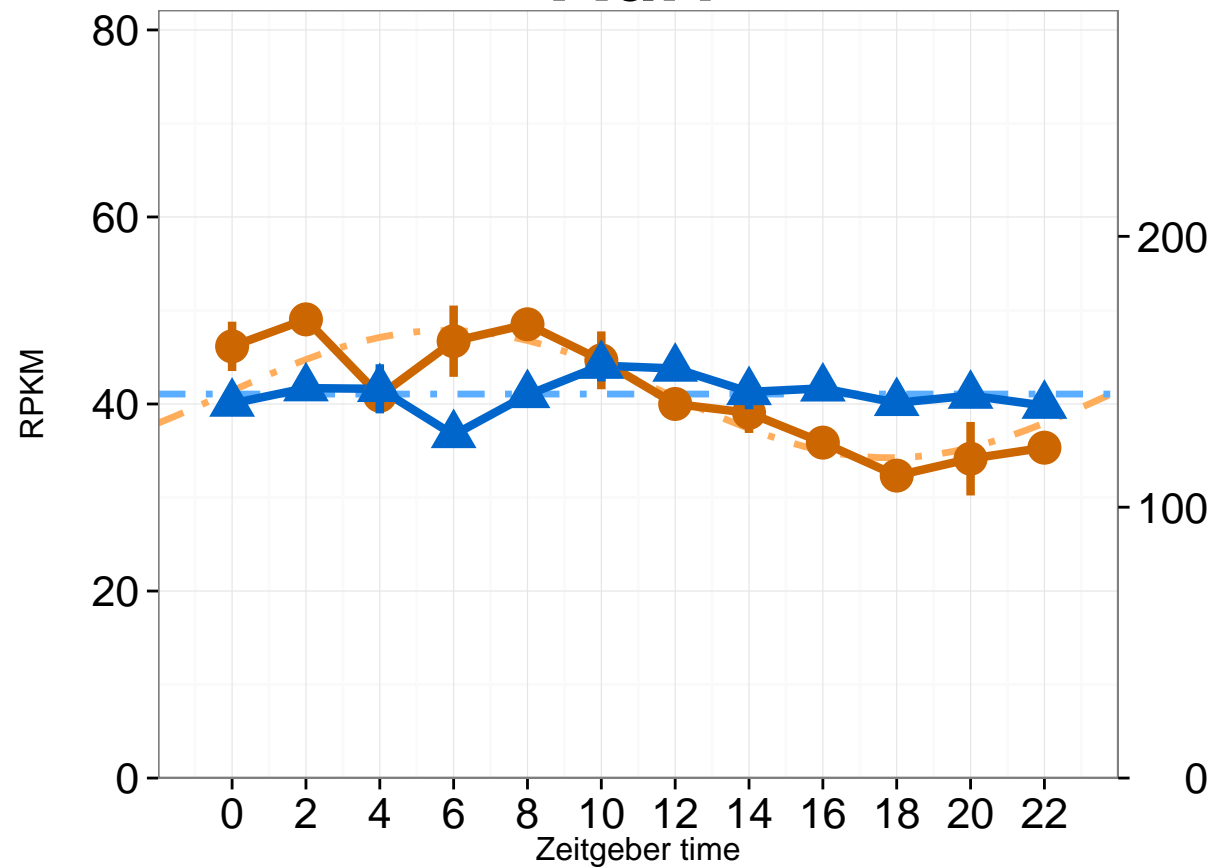

## Adi1

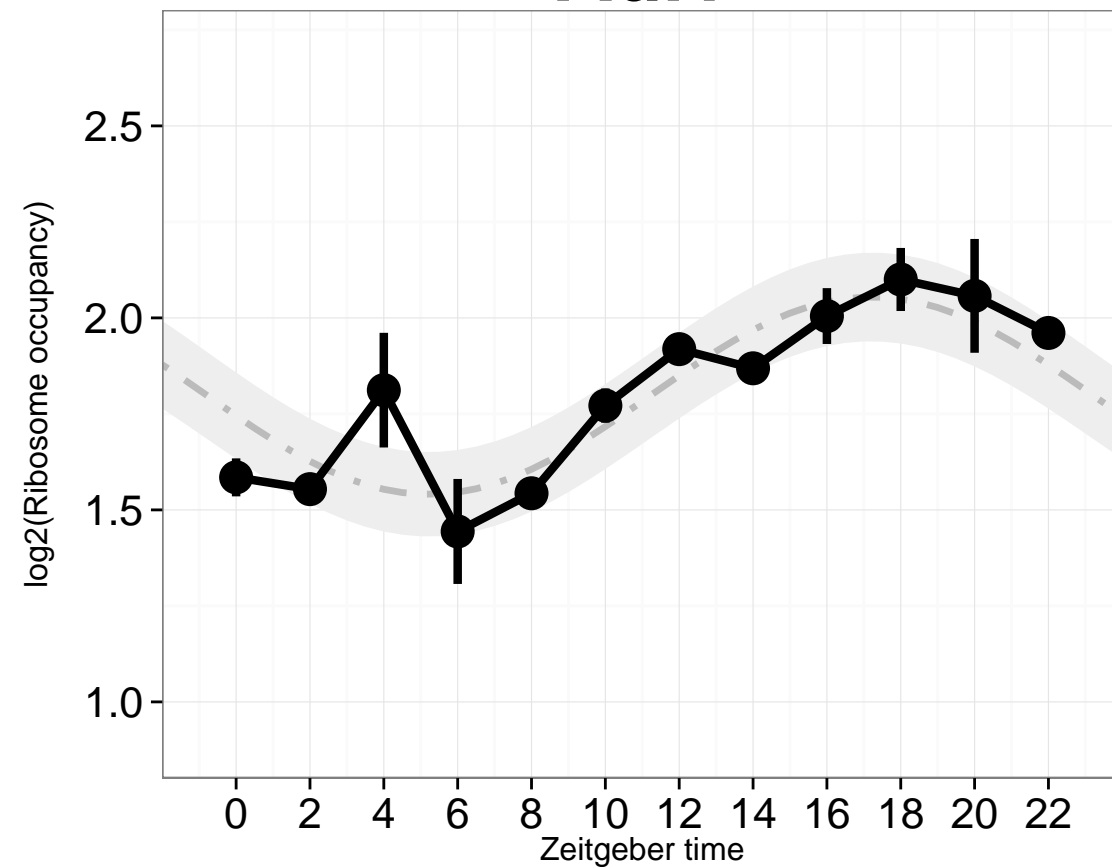

Supplement: Supplementary file 12041 [file 1]

## Abhd12

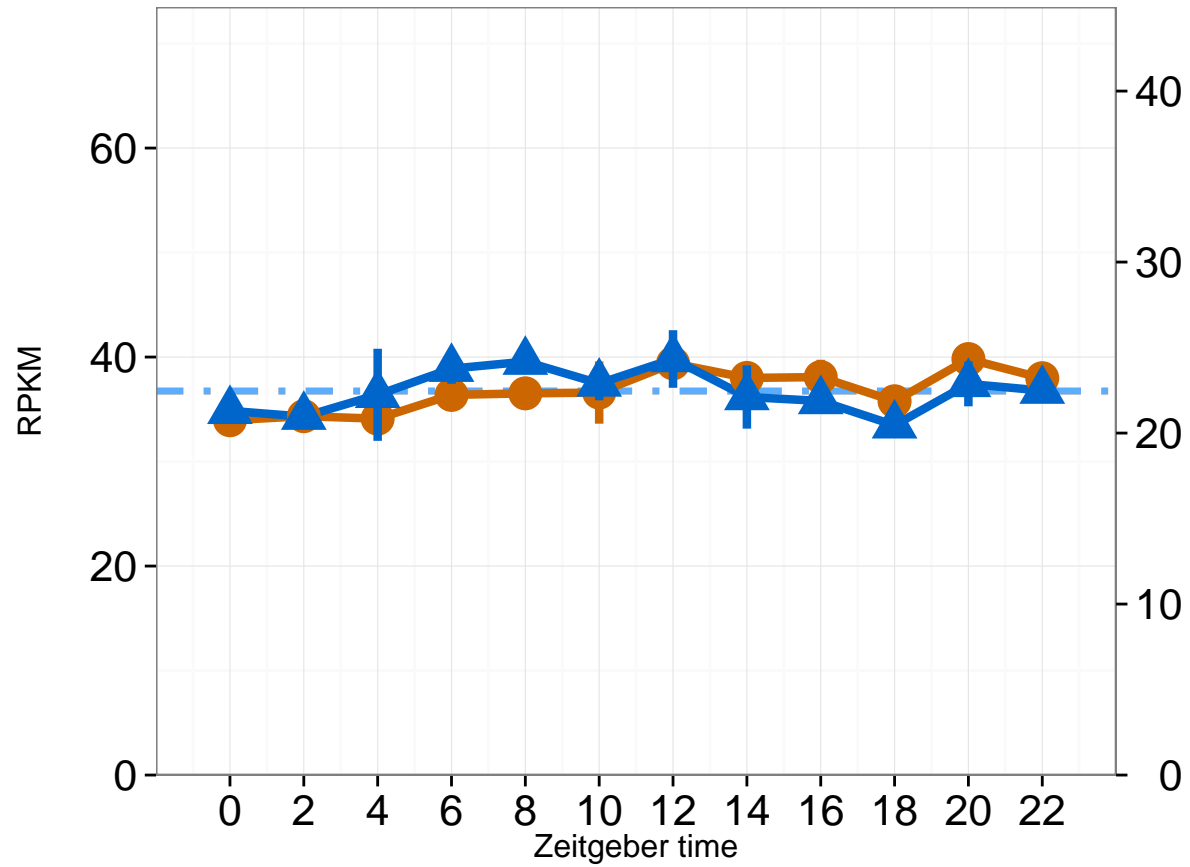

## Abhd12

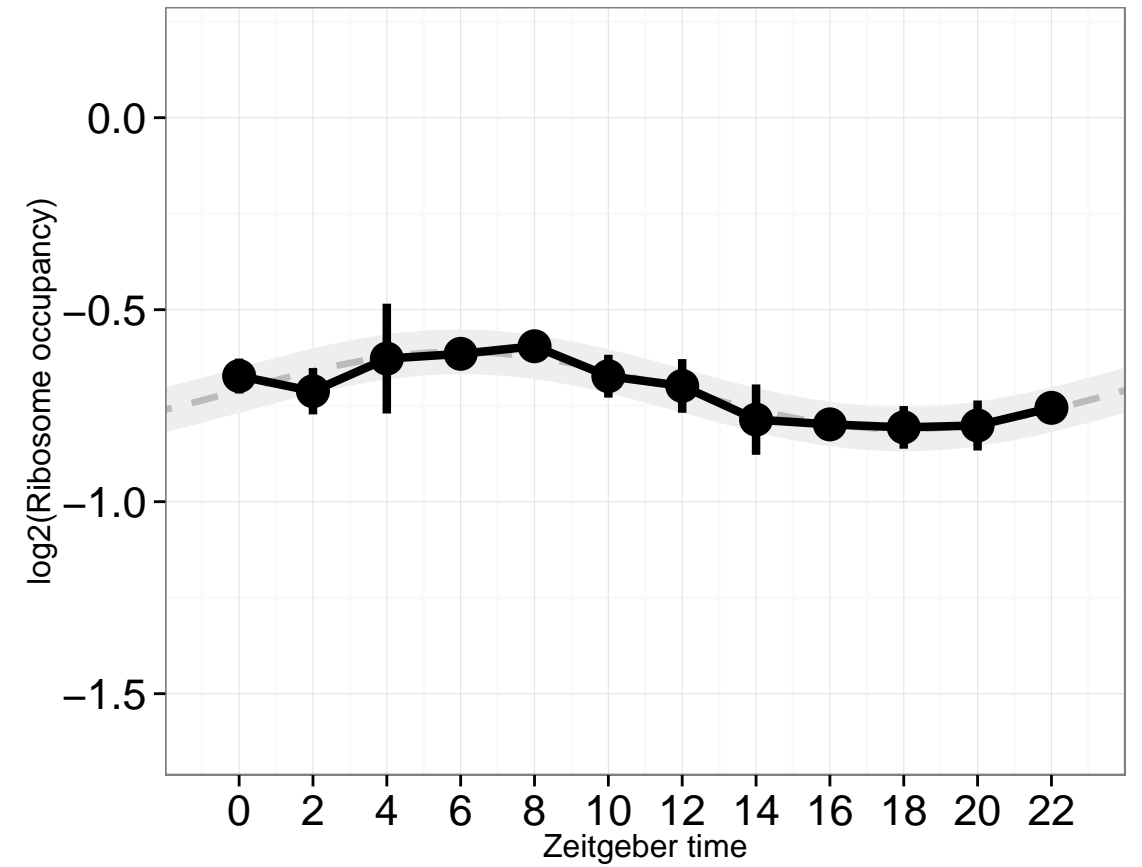

Supplement: Supplementary file 12042 [file 1]

# Fam188b

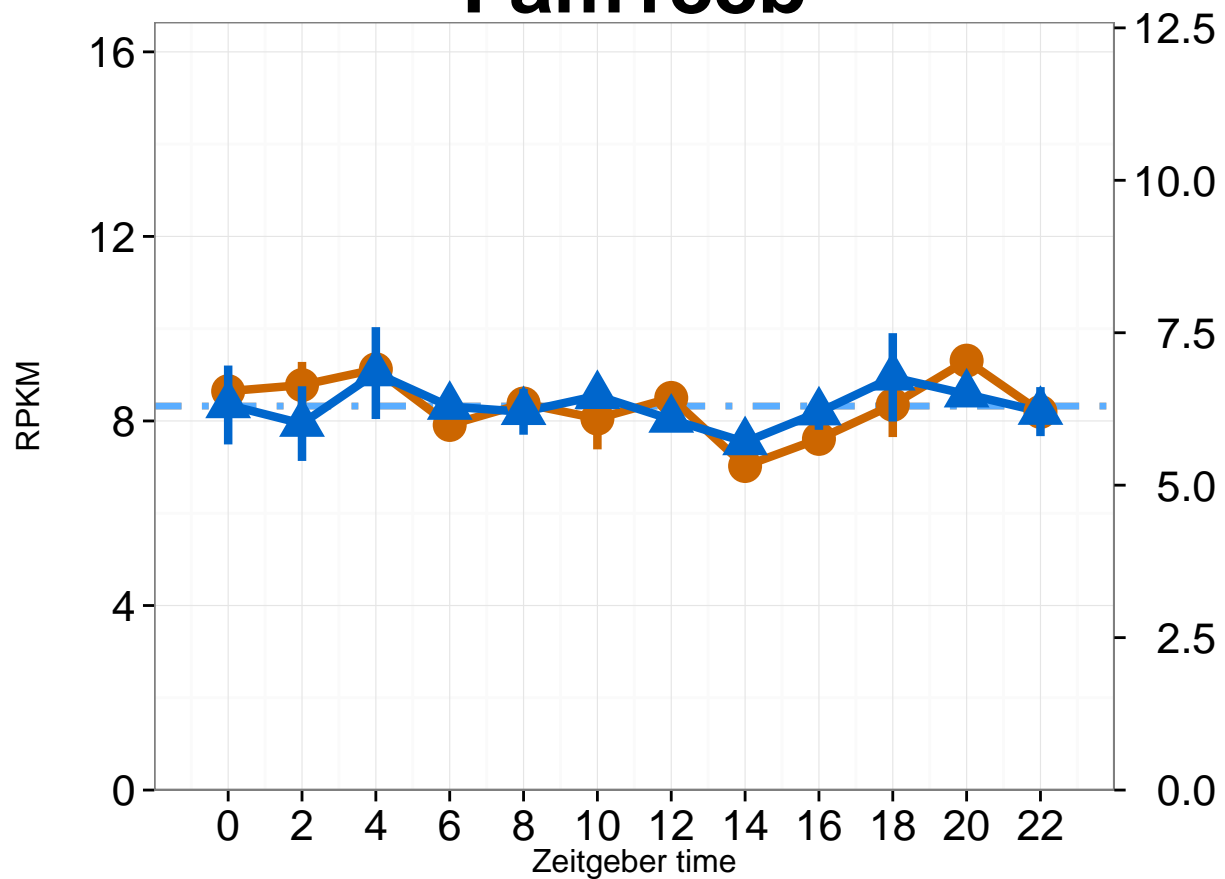

# Fam188b

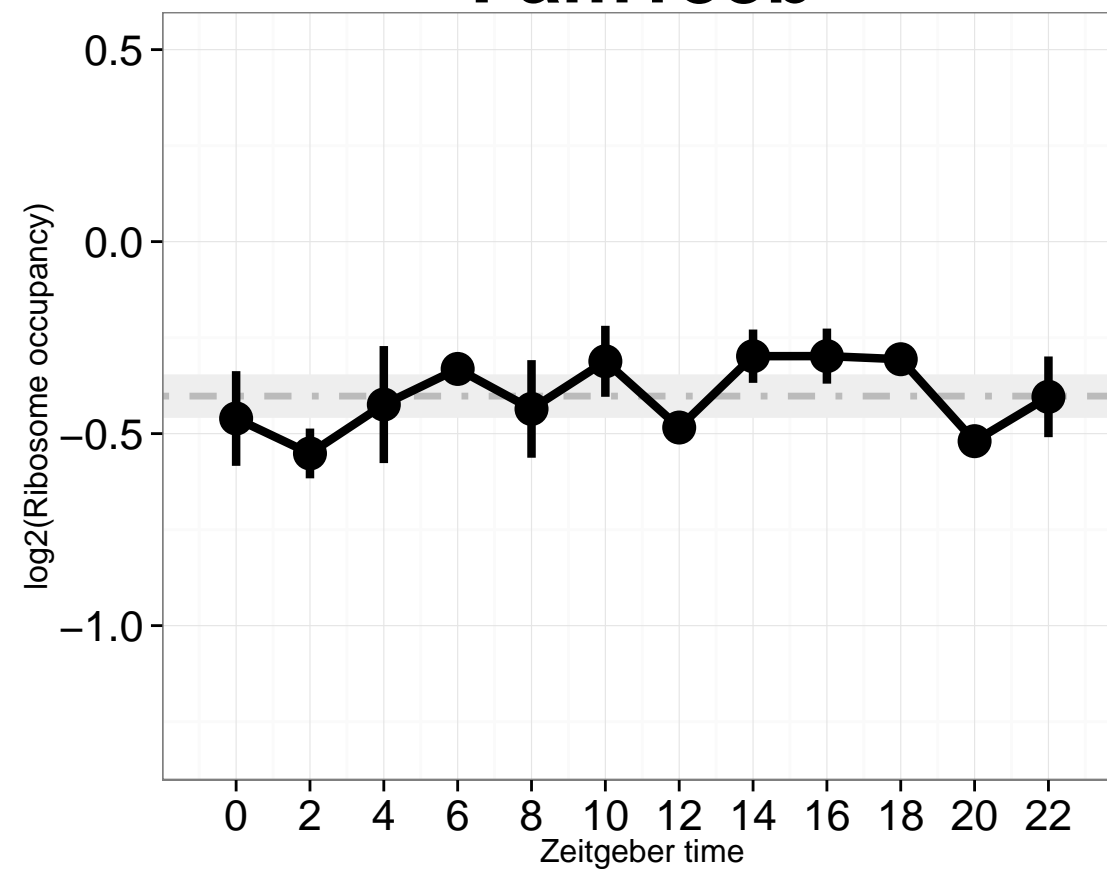

Supplement: Supplementary file 12043 [file 1]

# Kif20a

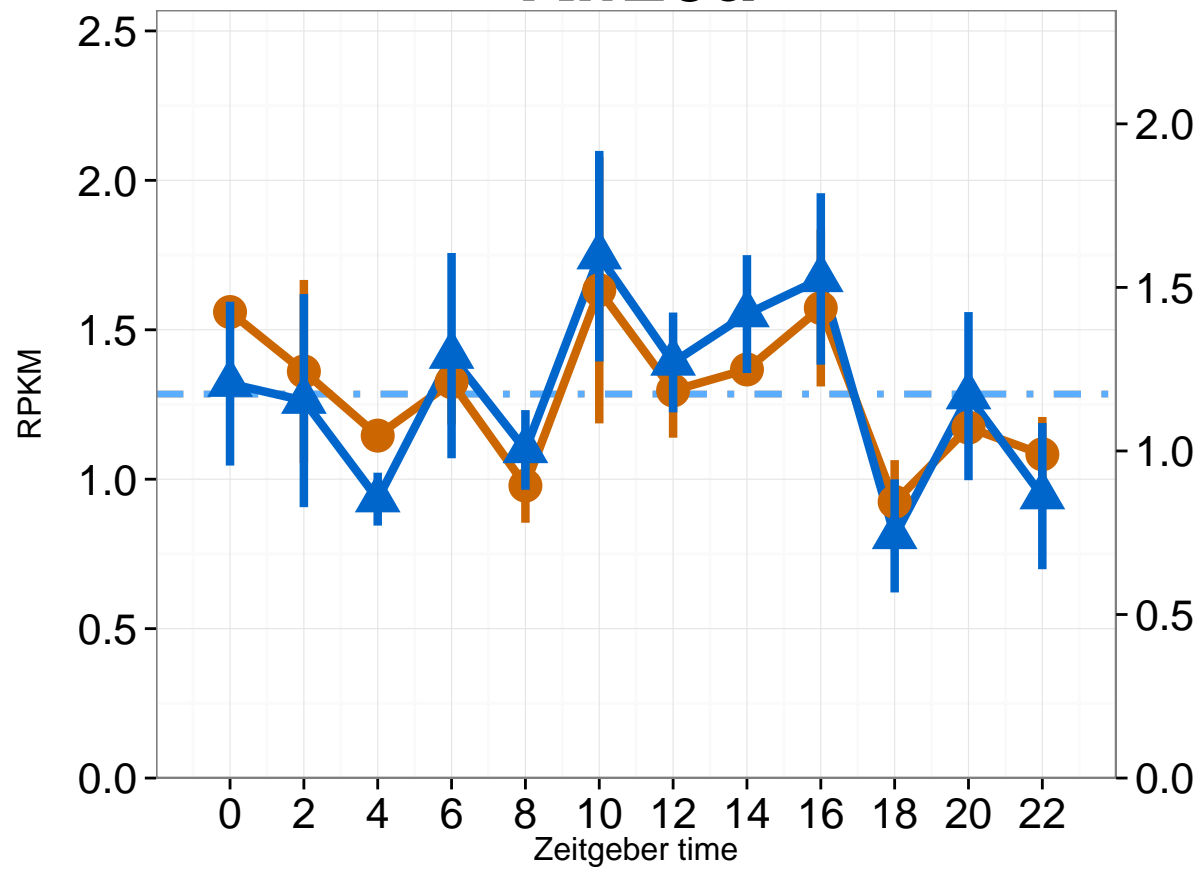

# Kif20a

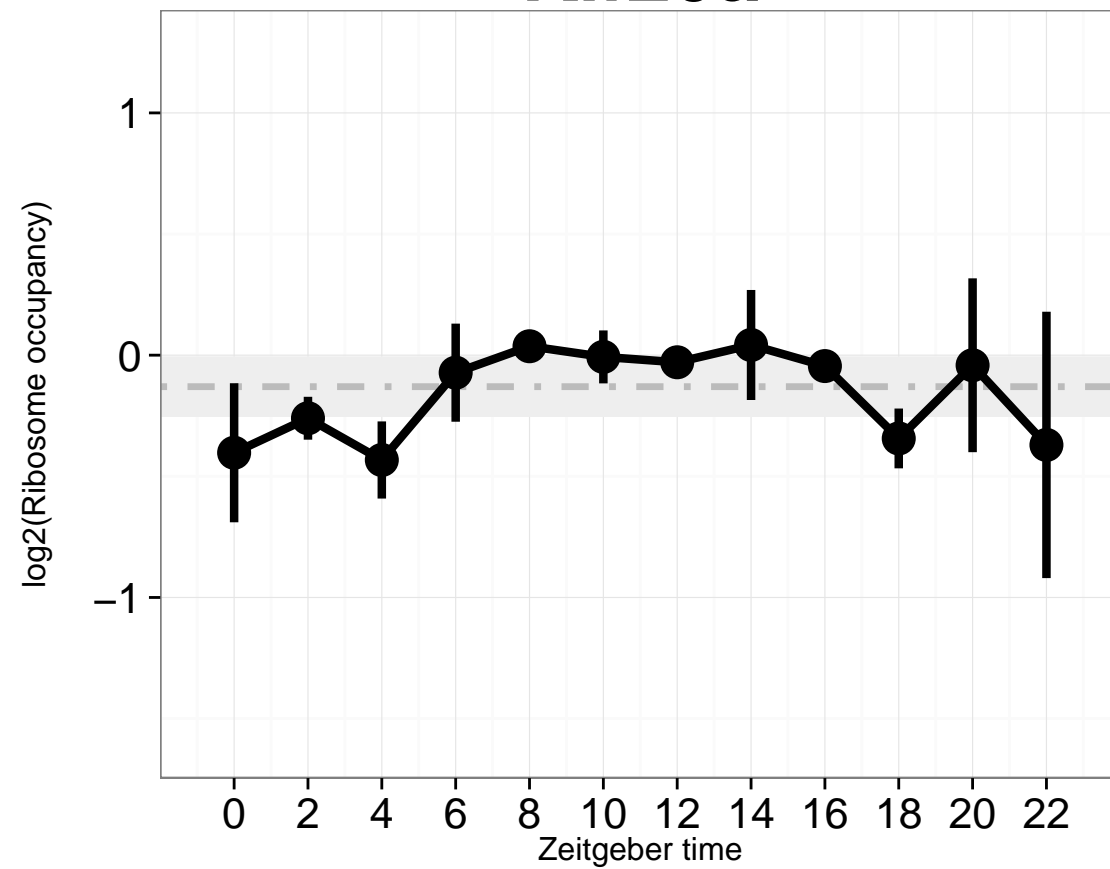

Supplement: Supplementary file 12044 [file 1]
