# Supplementary material (part 121 of 133)
Source: publisher figshare collection journal article supplement (https://springernature.figshare.com/articles/dataset/_/4903193)

## Hoxb8

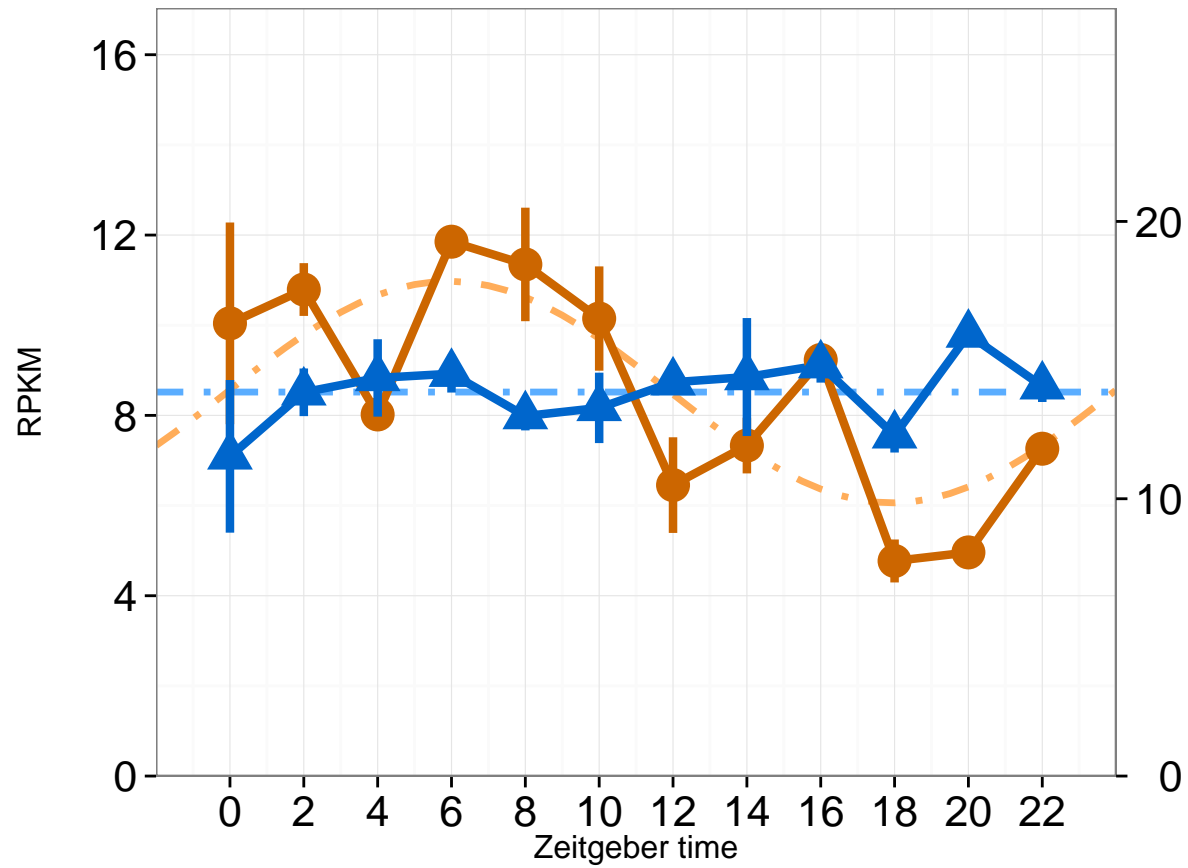

## Hoxb8

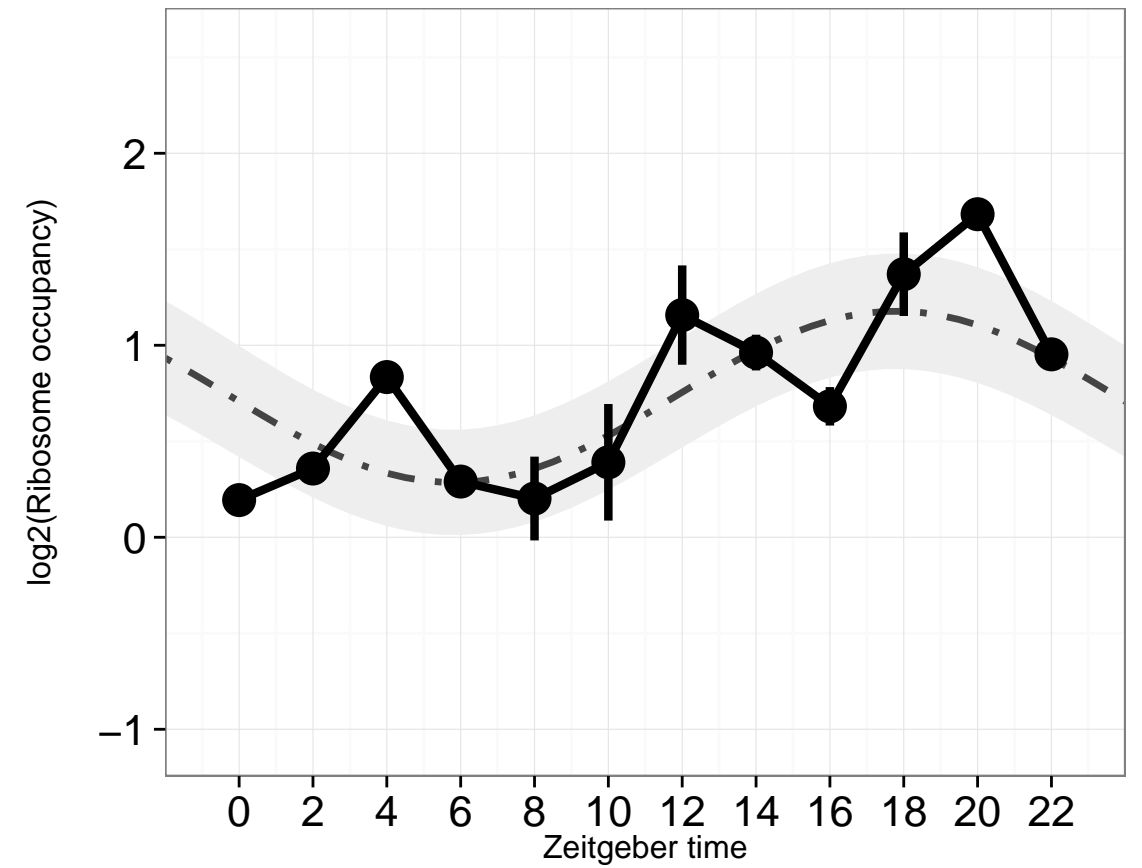

Supplement: Supplementary file 12045 [file 1]

## Ttc21b

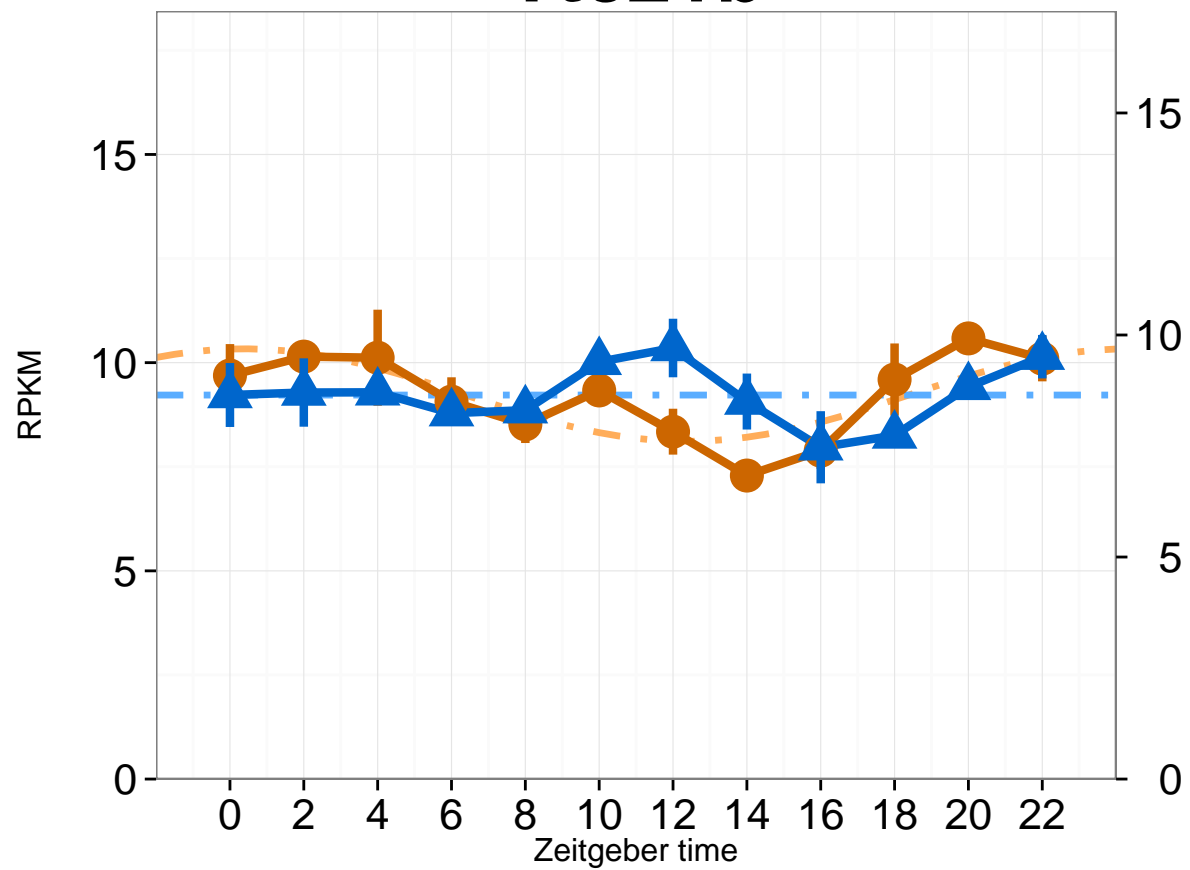

## Ttc21b

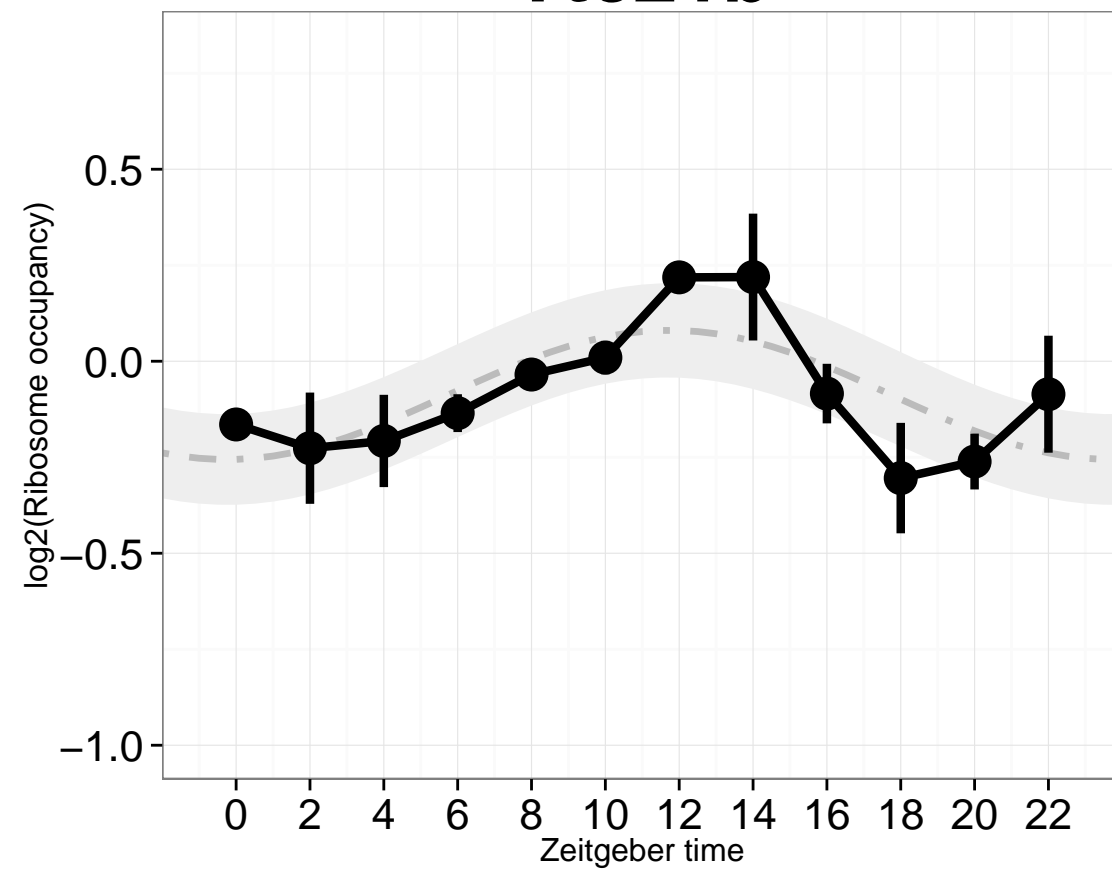

Supplement: Supplementary file 12046 [file 1]

# Wdr48

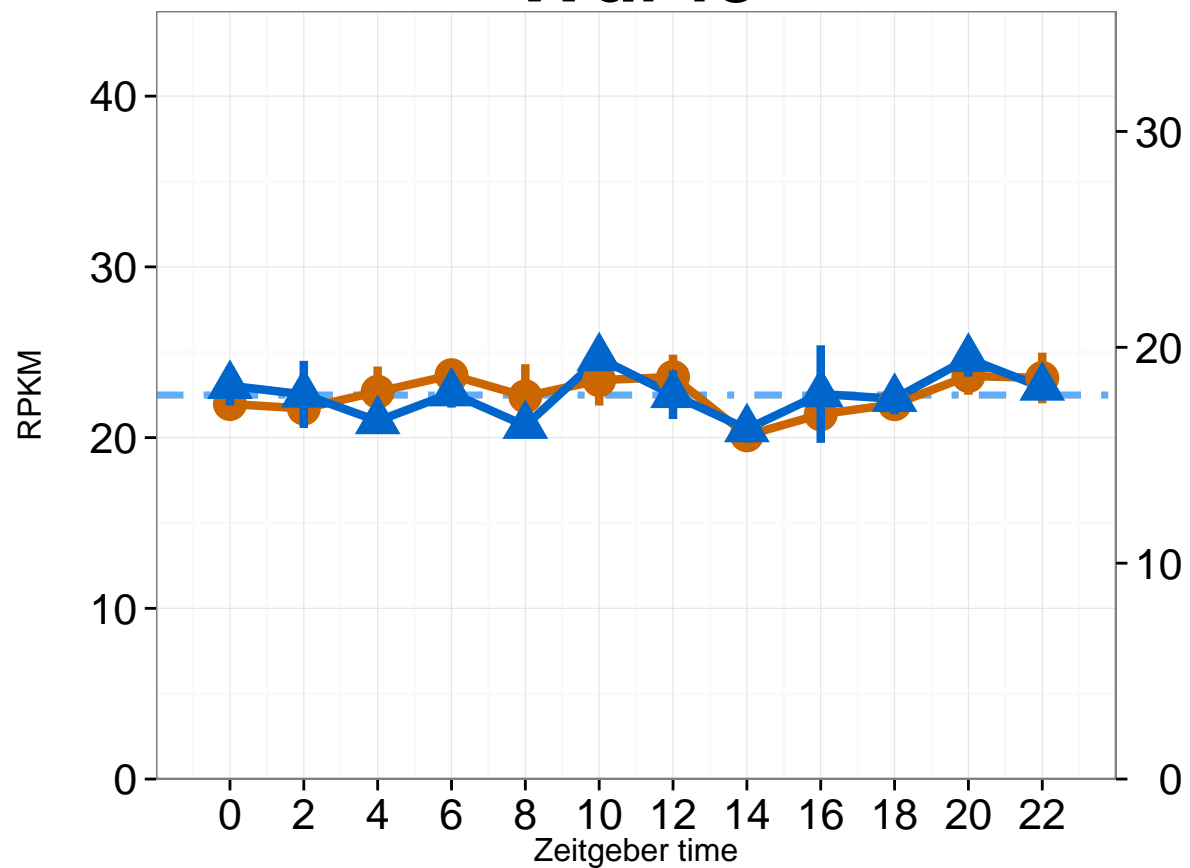

# Wdr48

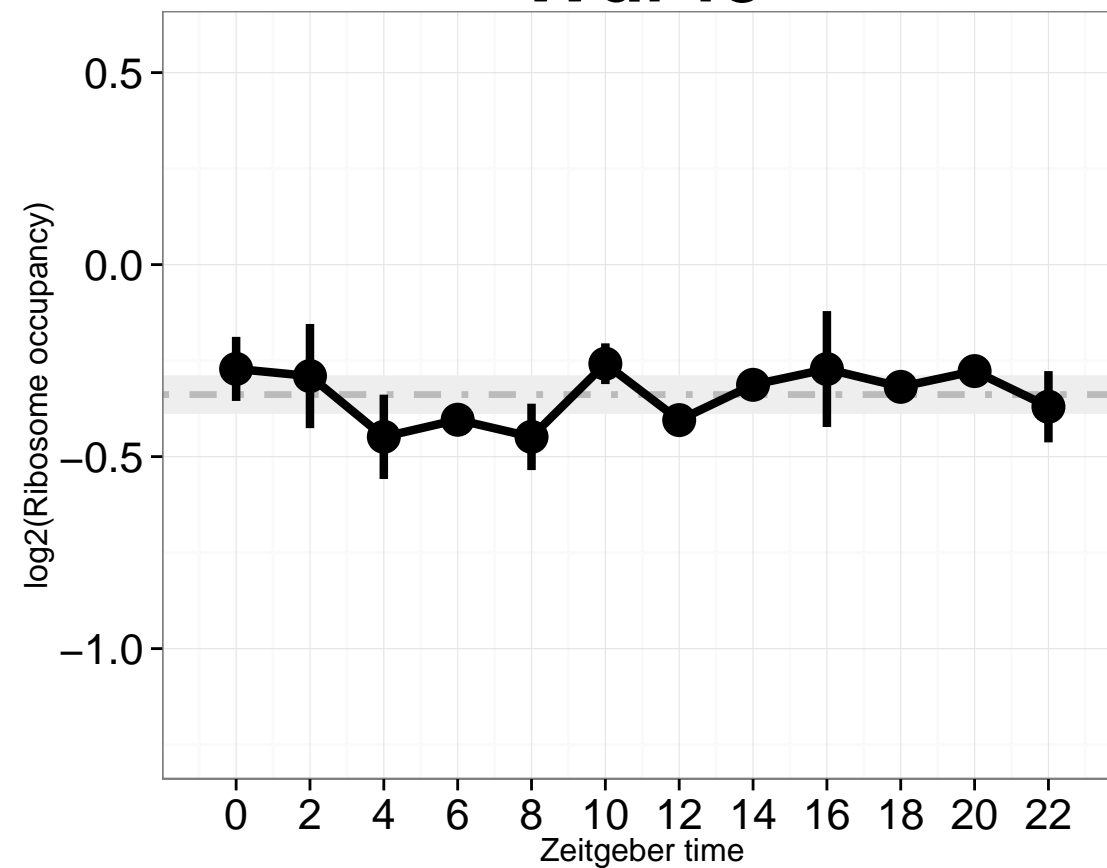

Supplement: Supplementary file 12047 [file 1]

## Zdhhc2

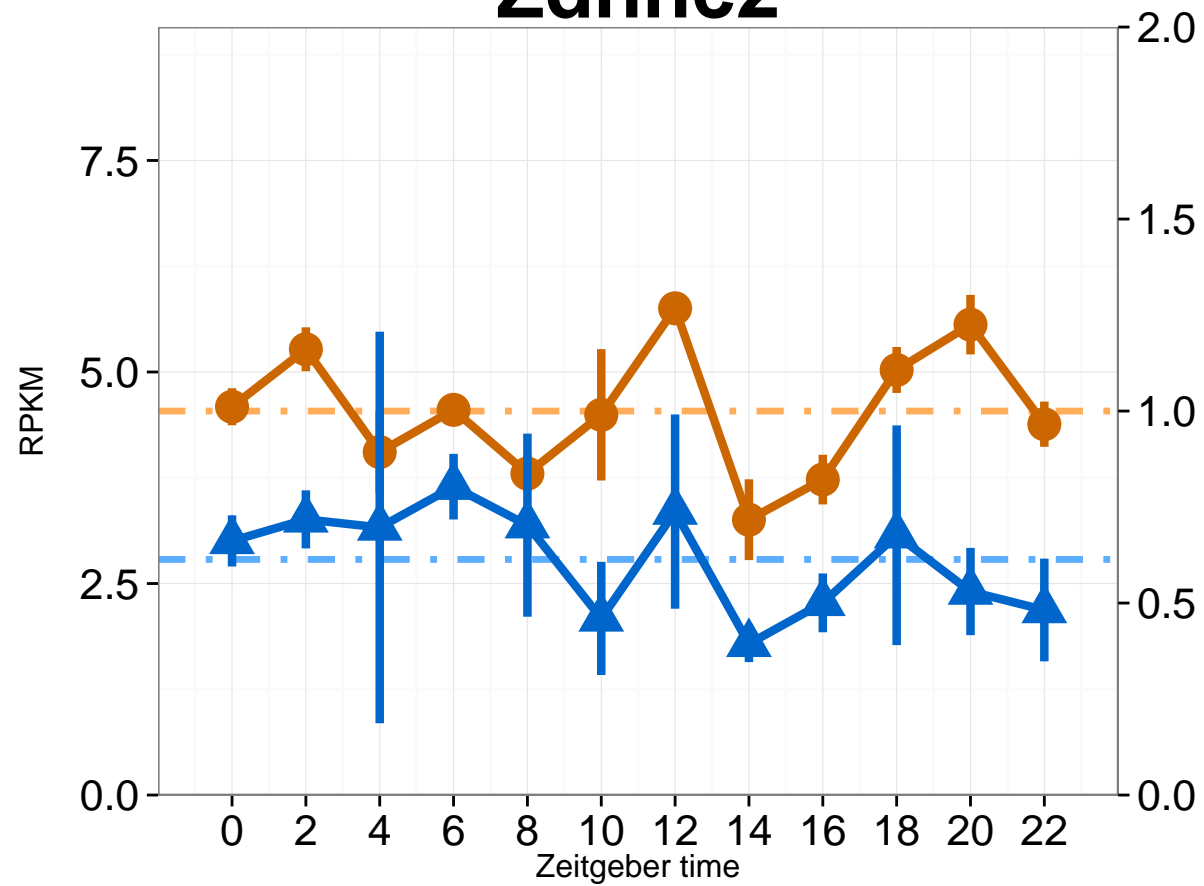

## Zdhhc2

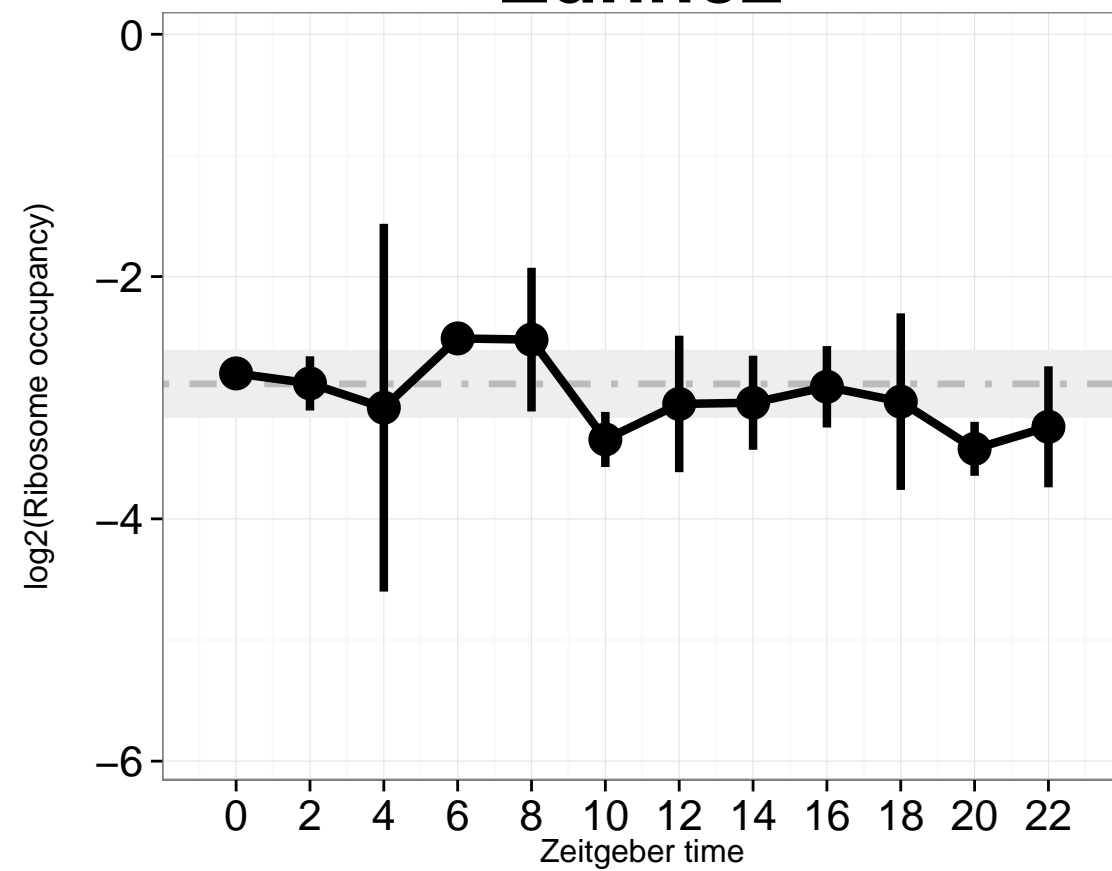

Supplement: Supplementary file 12048 [file 1]

## Nt5e

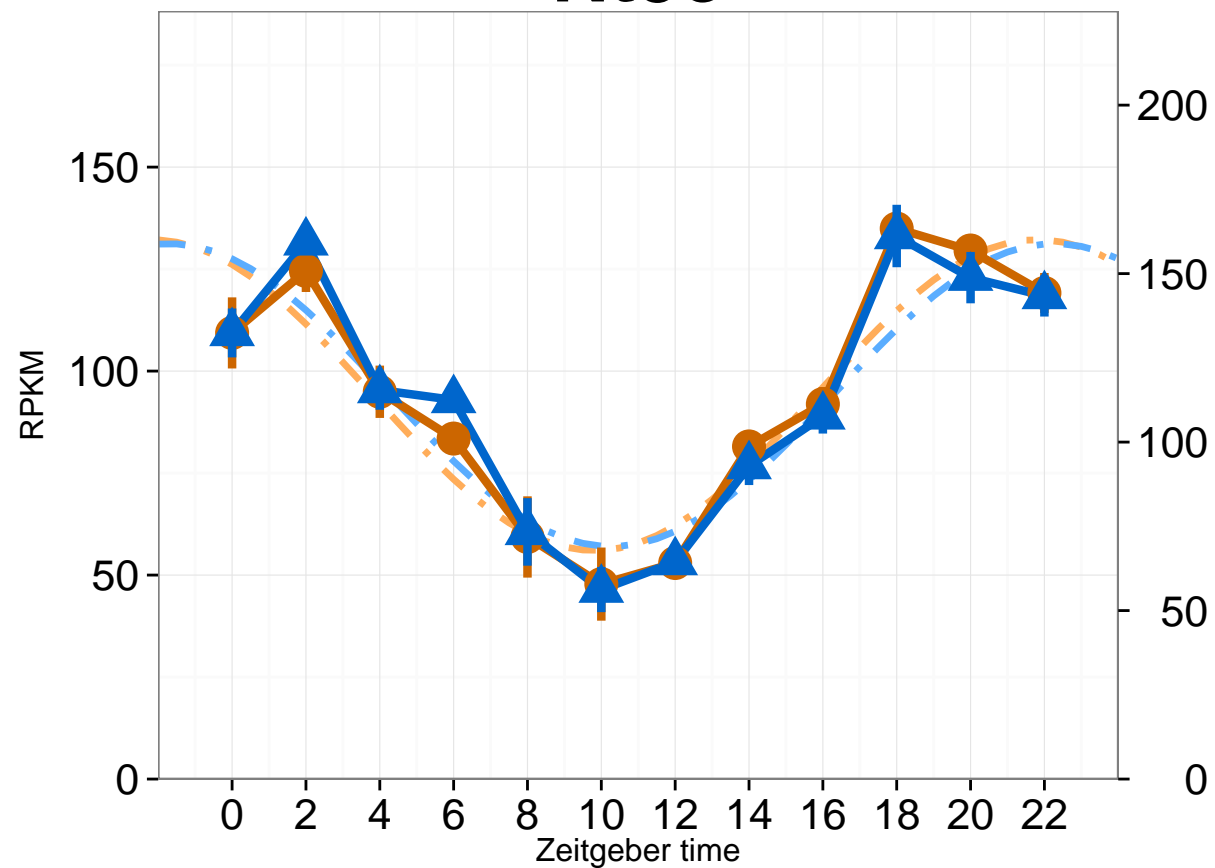

## Nt5e

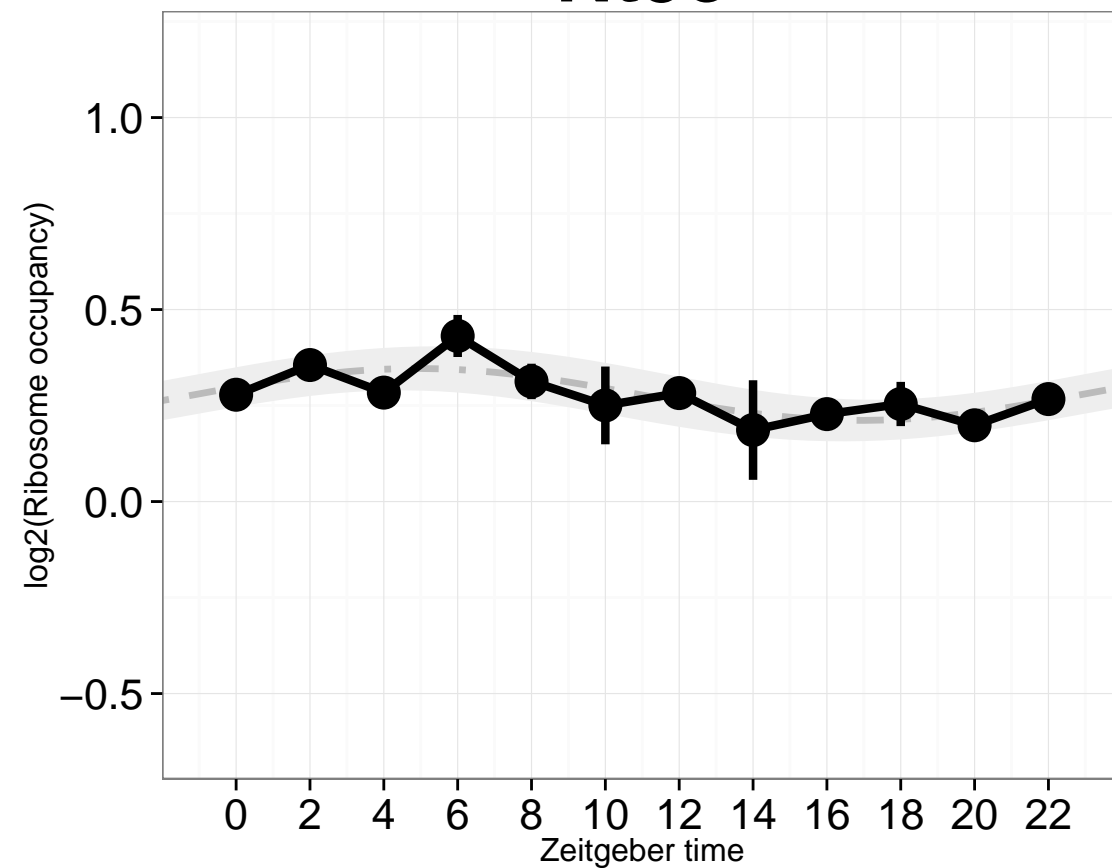

Supplement: Supplementary file 12049 [file 1]

# Eif2b3

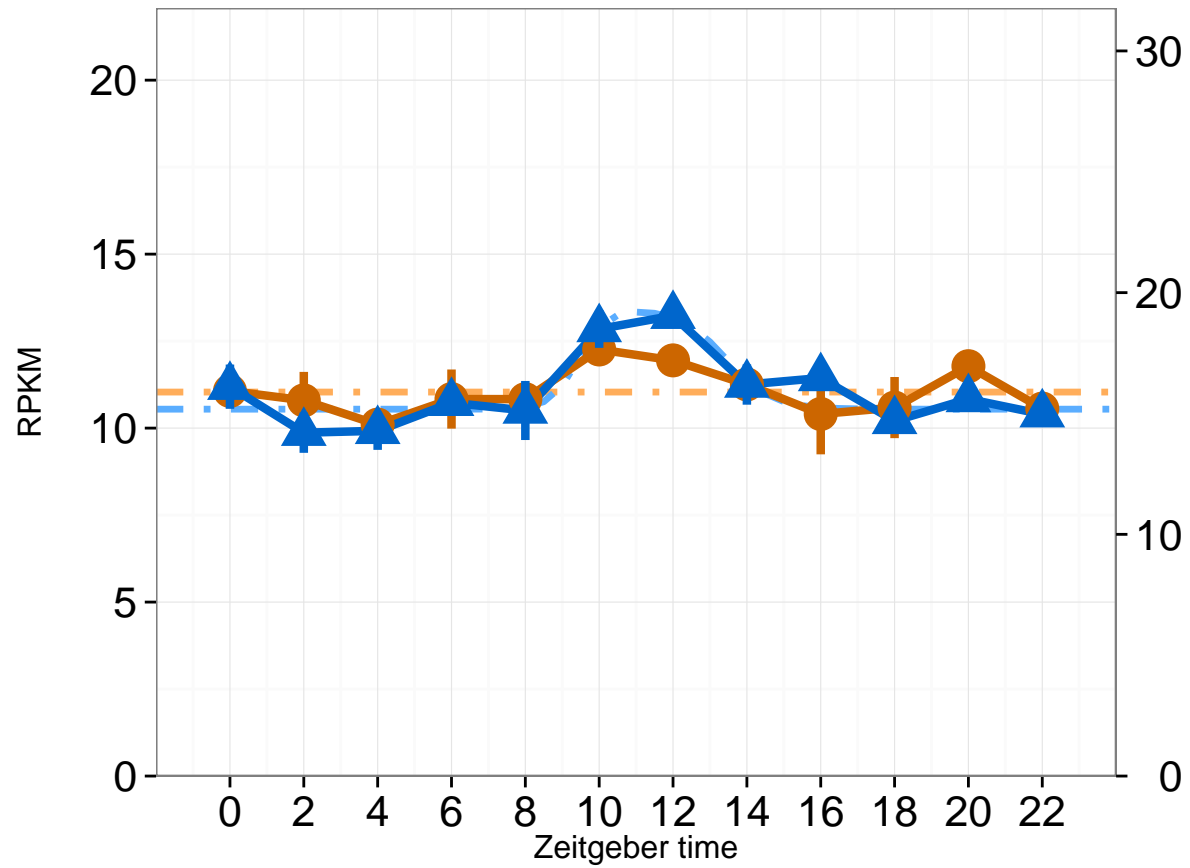

# Eif2b3

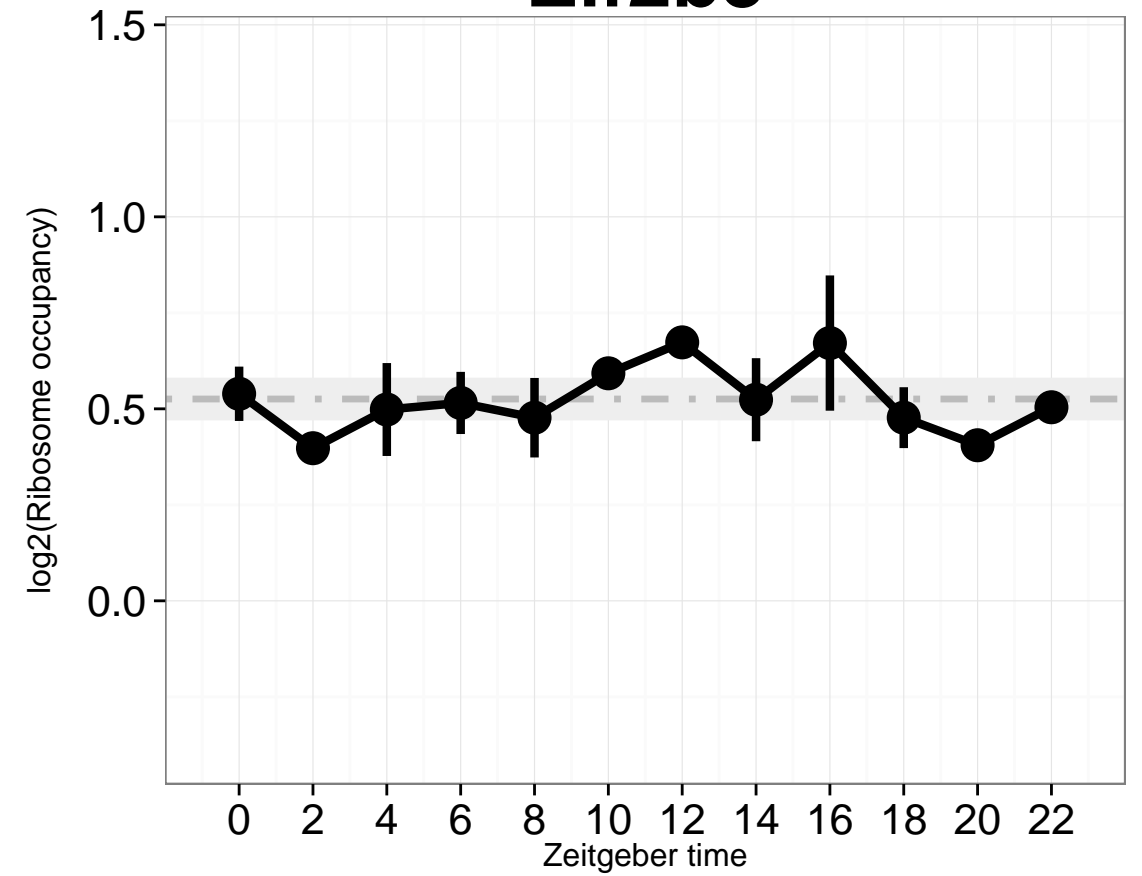

Supplement: Supplementary file 12050 [file 1]

# MyI7

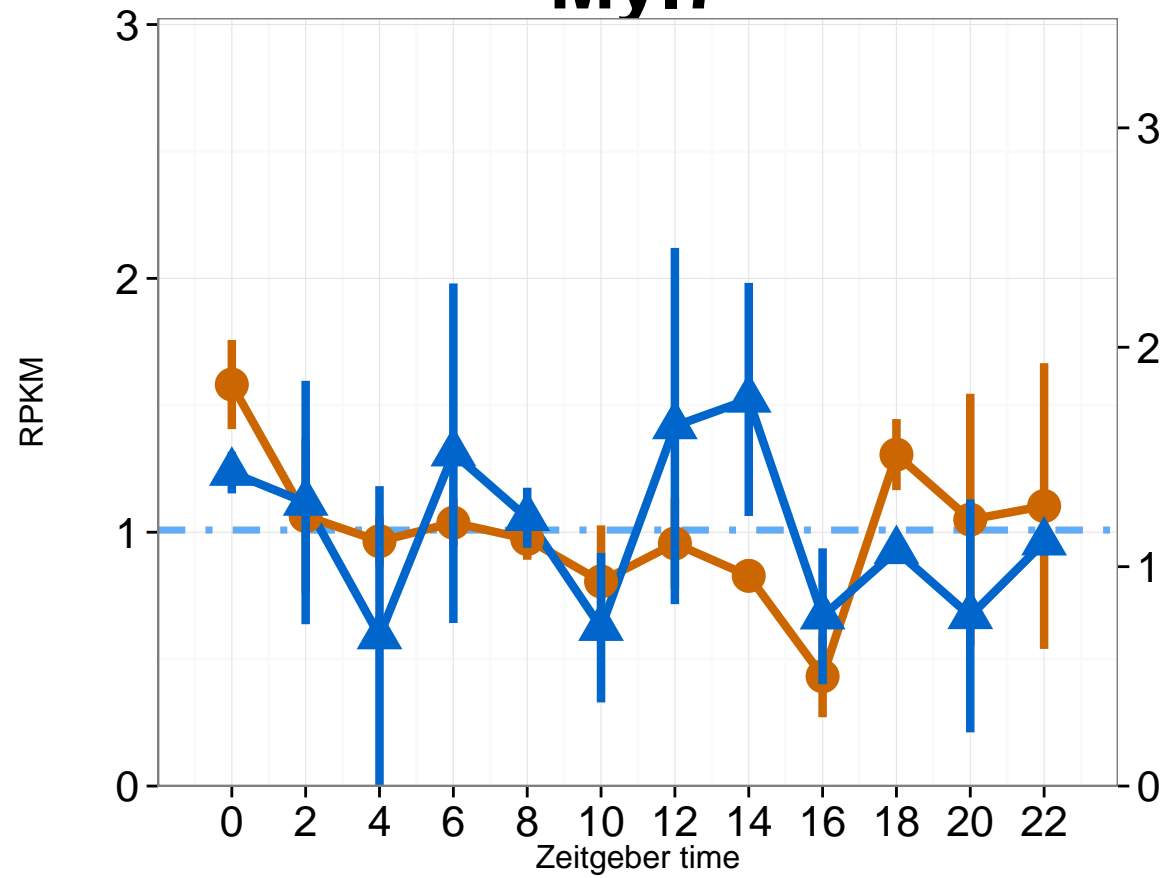

# MyI7

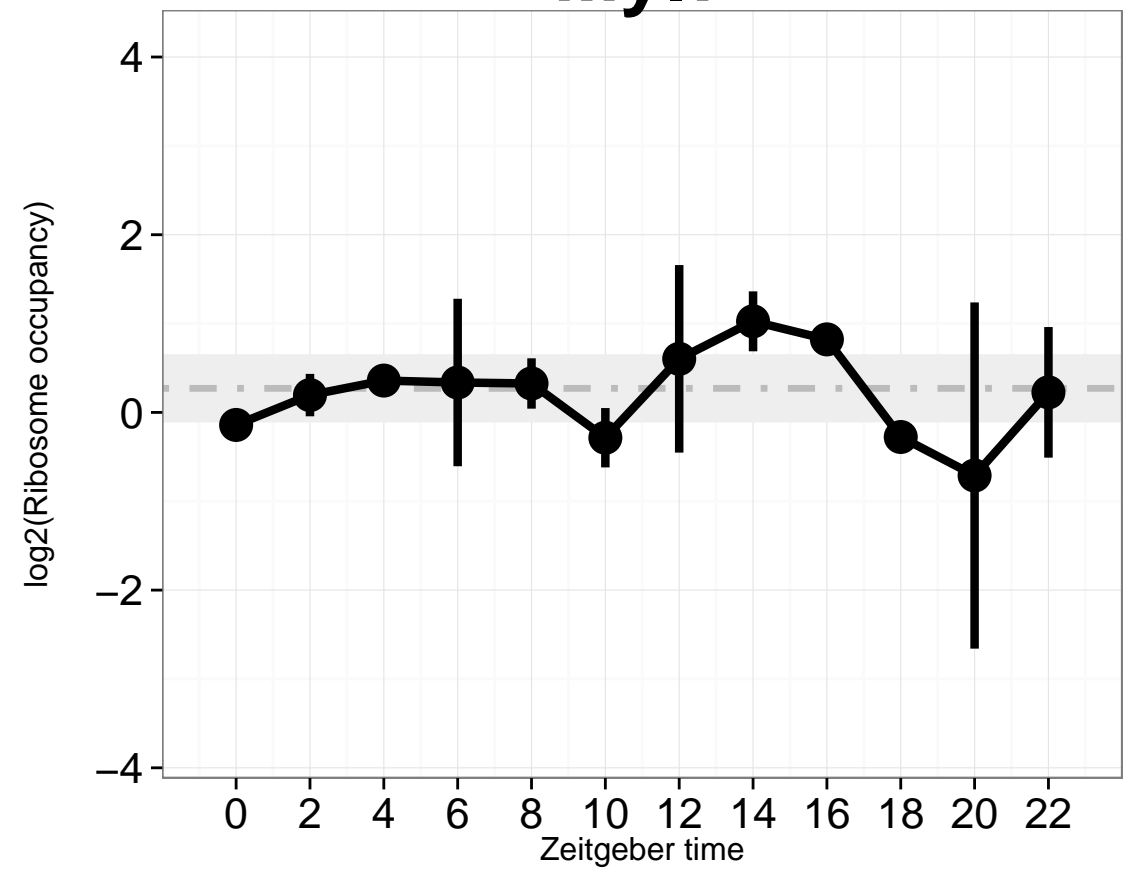

Supplement: Supplementary file 12051 [file 1]

# Gucy1b3

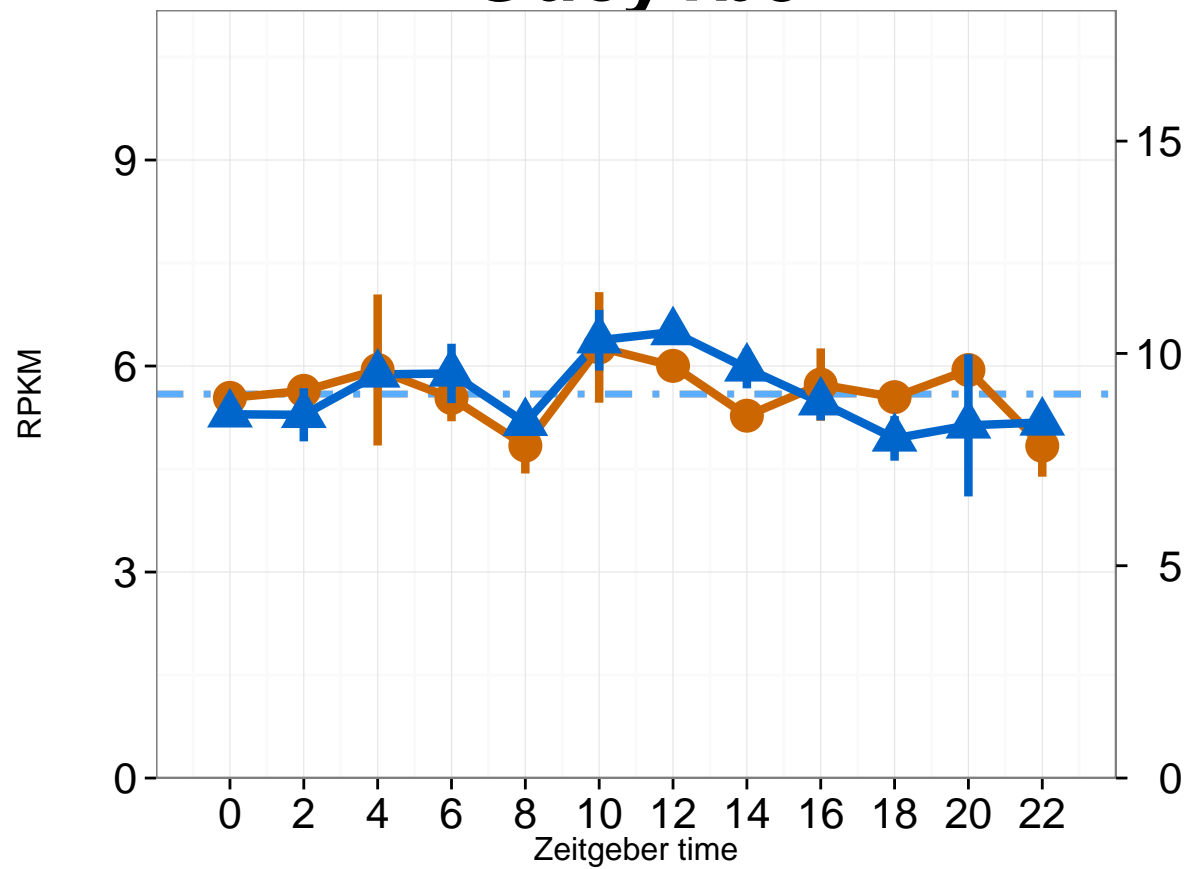

# Gucy1b3

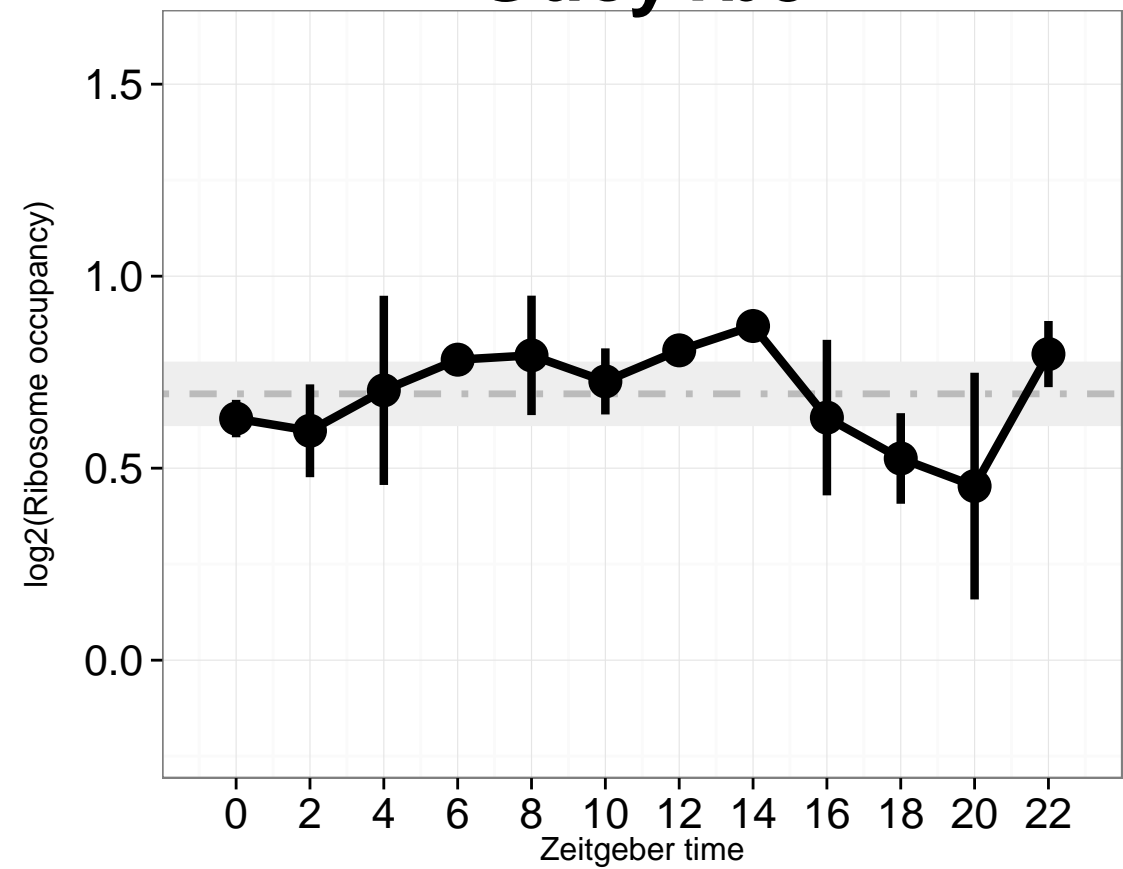

Supplement: Supplementary file 12052 [file 1]

## Ctsb

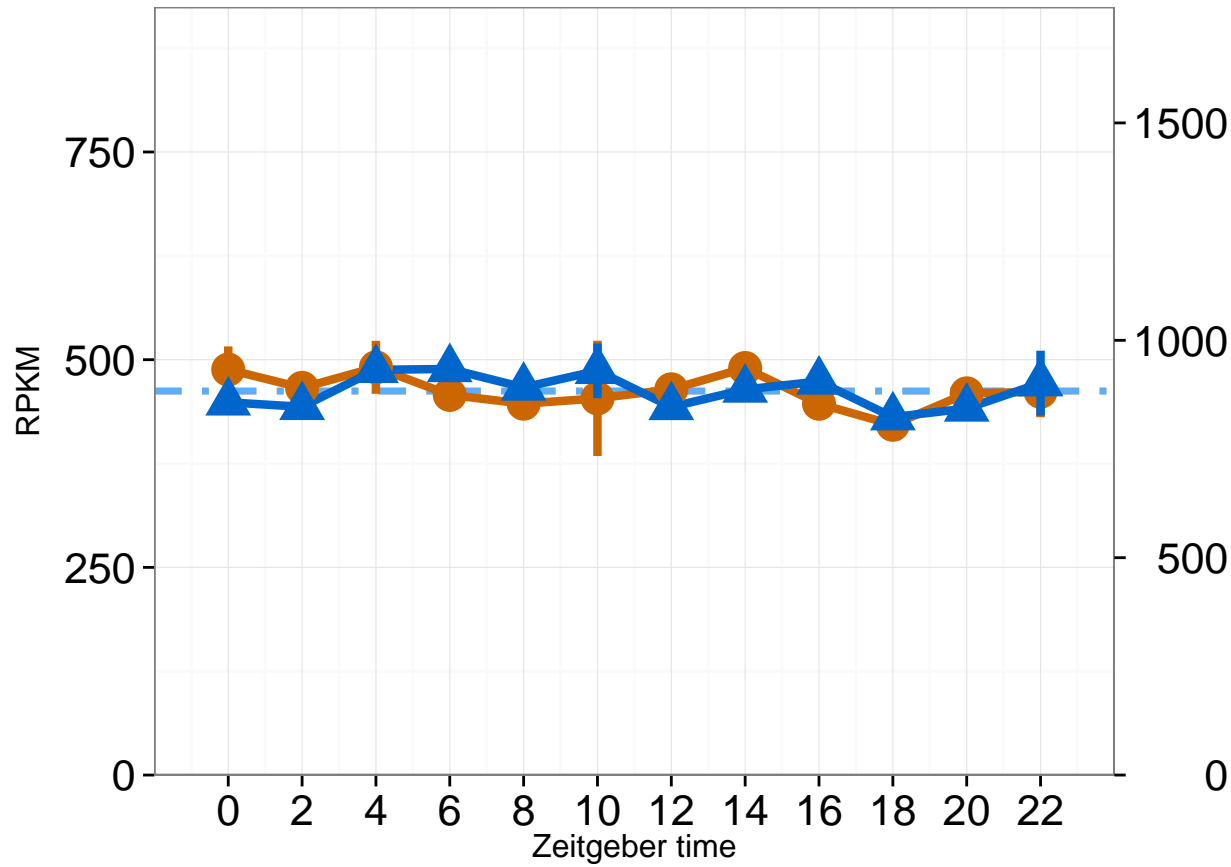

## Ctsb

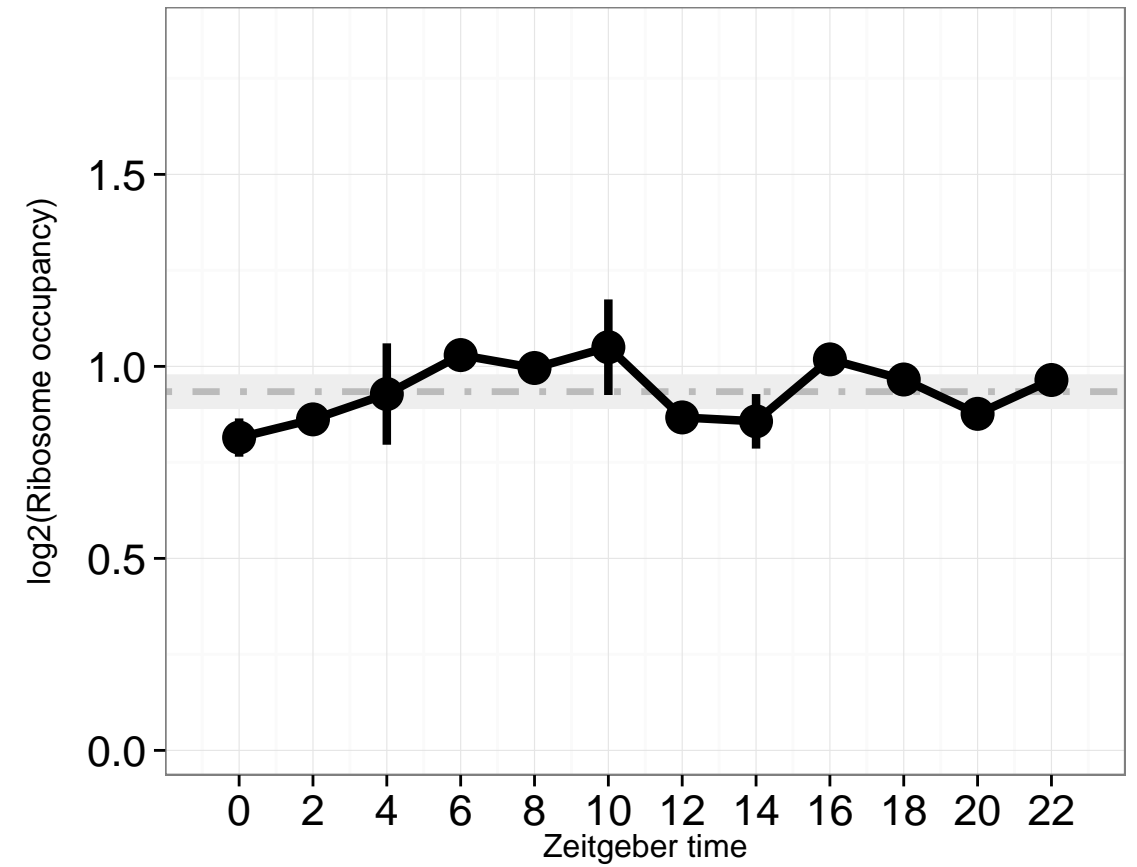

Supplement: Supplementary file 12053 [file 1]

# Ppm1b

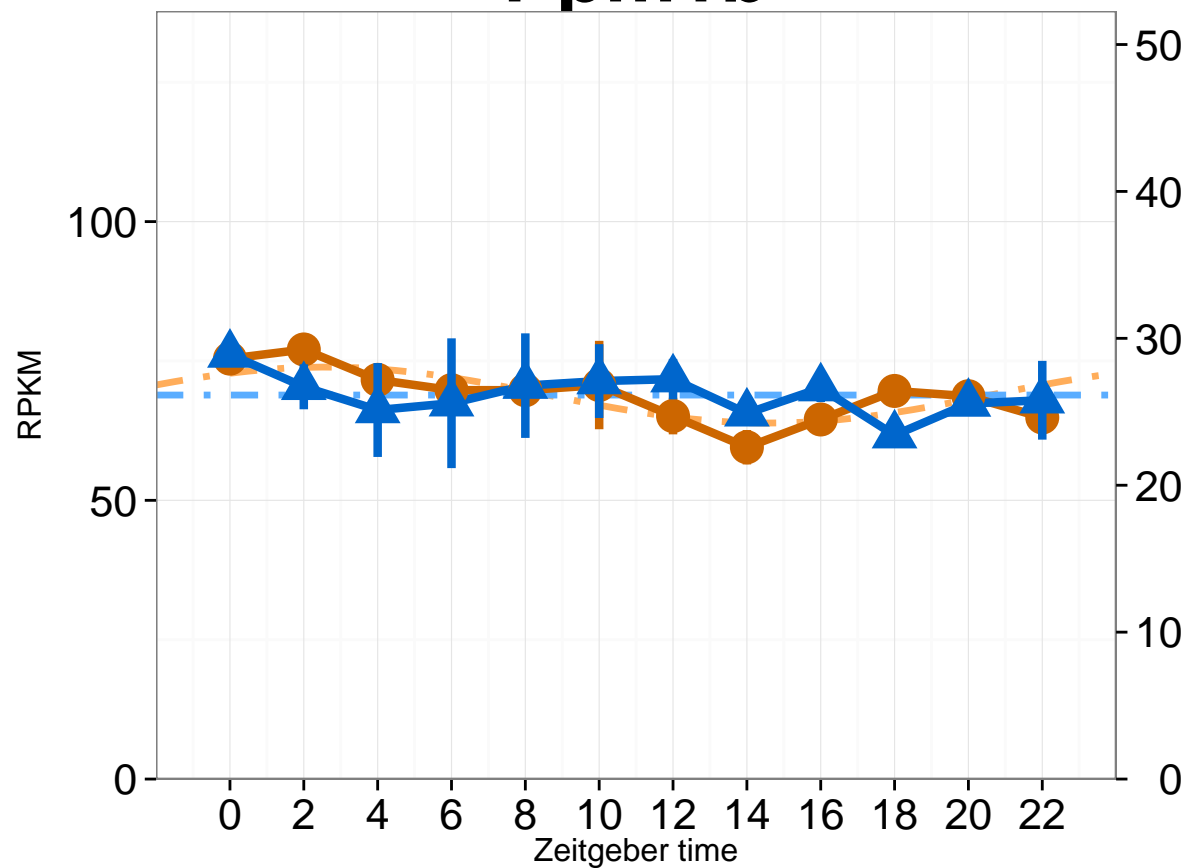

# Ppm1b

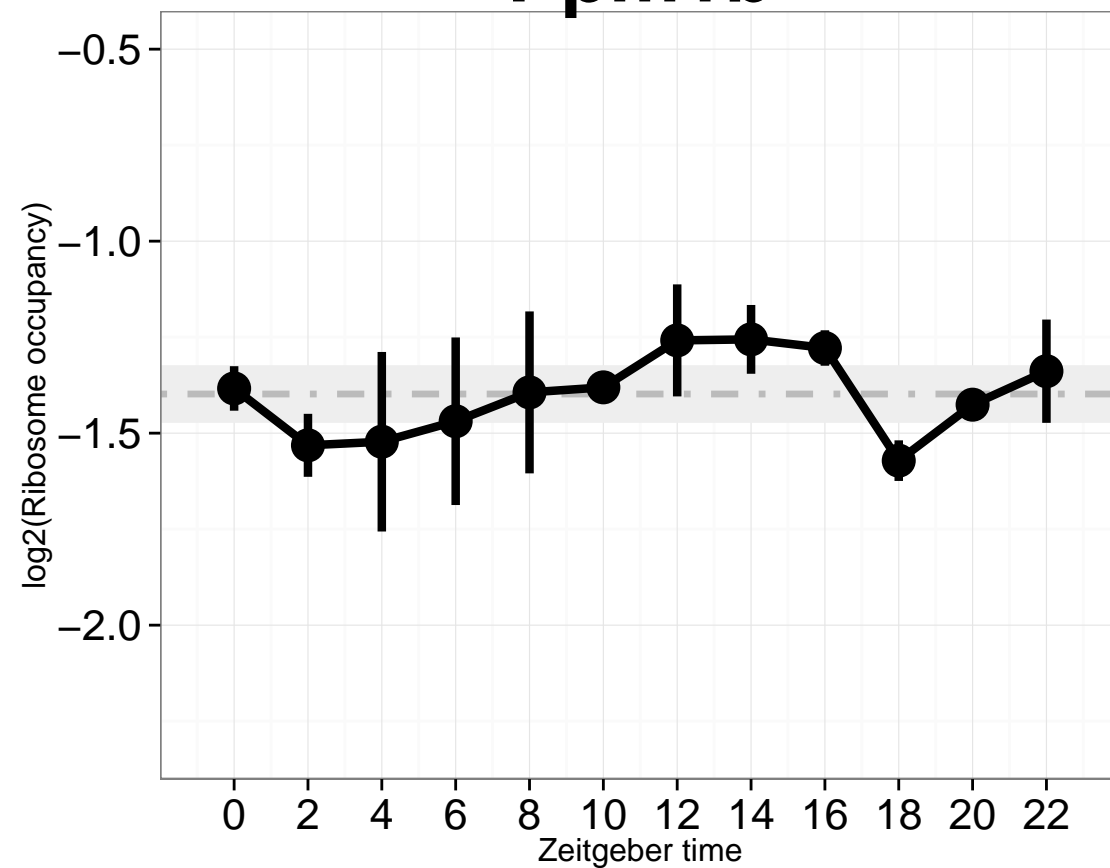

Supplement: Supplementary file 12054 [file 1]

## Hars2

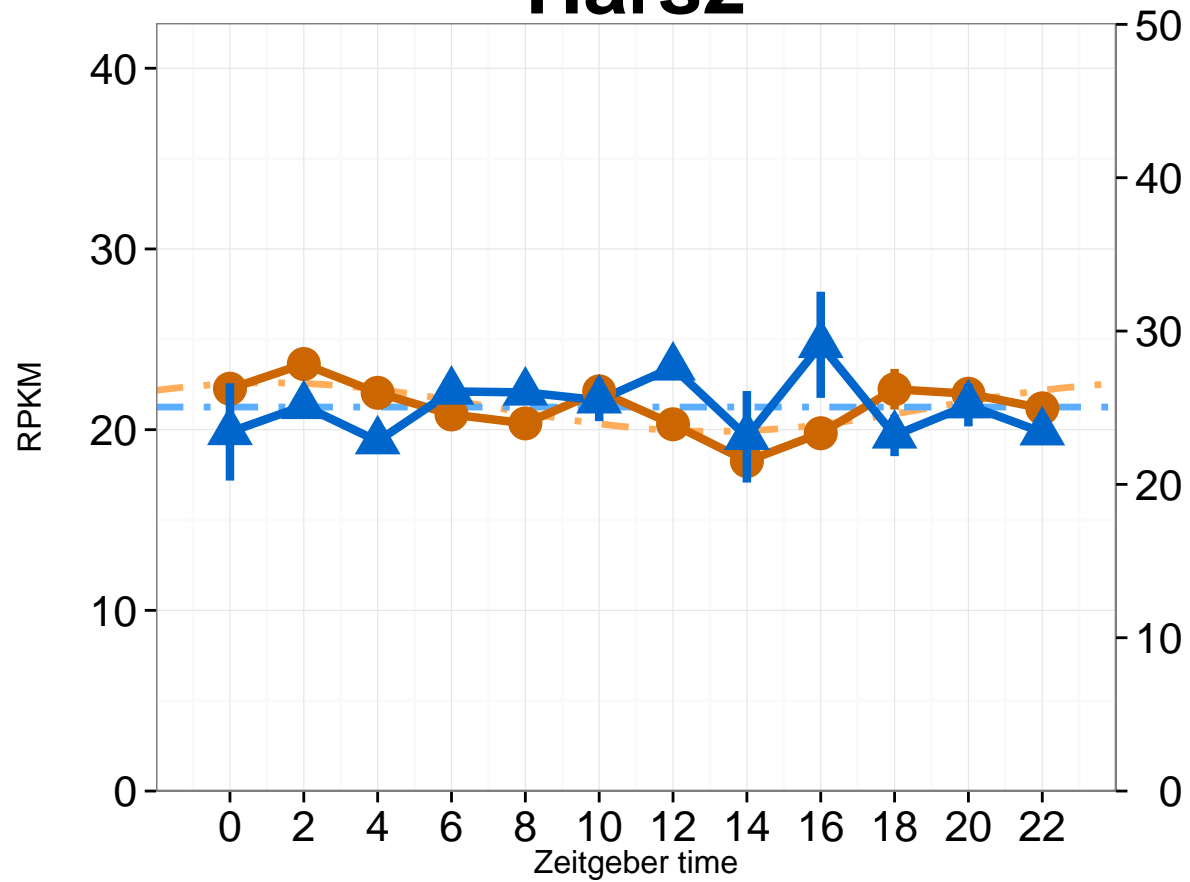

## Hars2

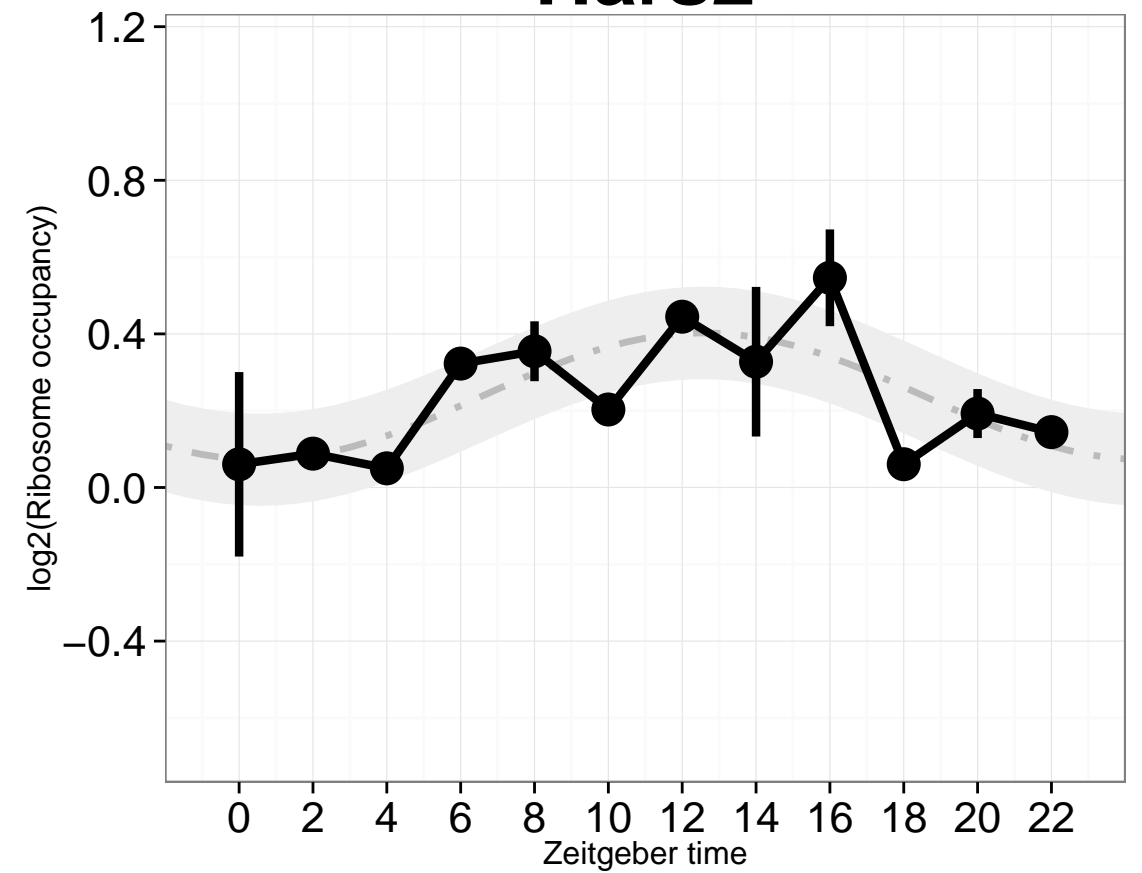

Supplement: Supplementary file 12055 [file 1]

# BC005561

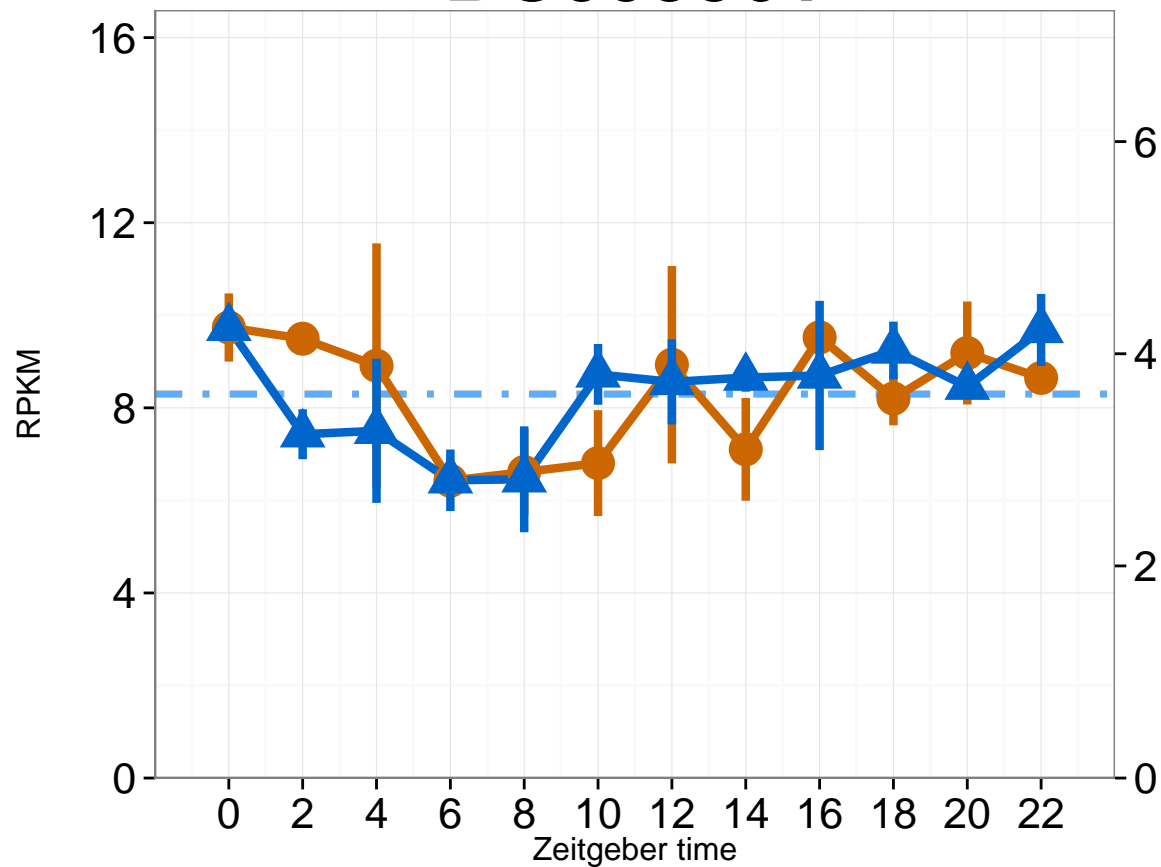

# BC005561

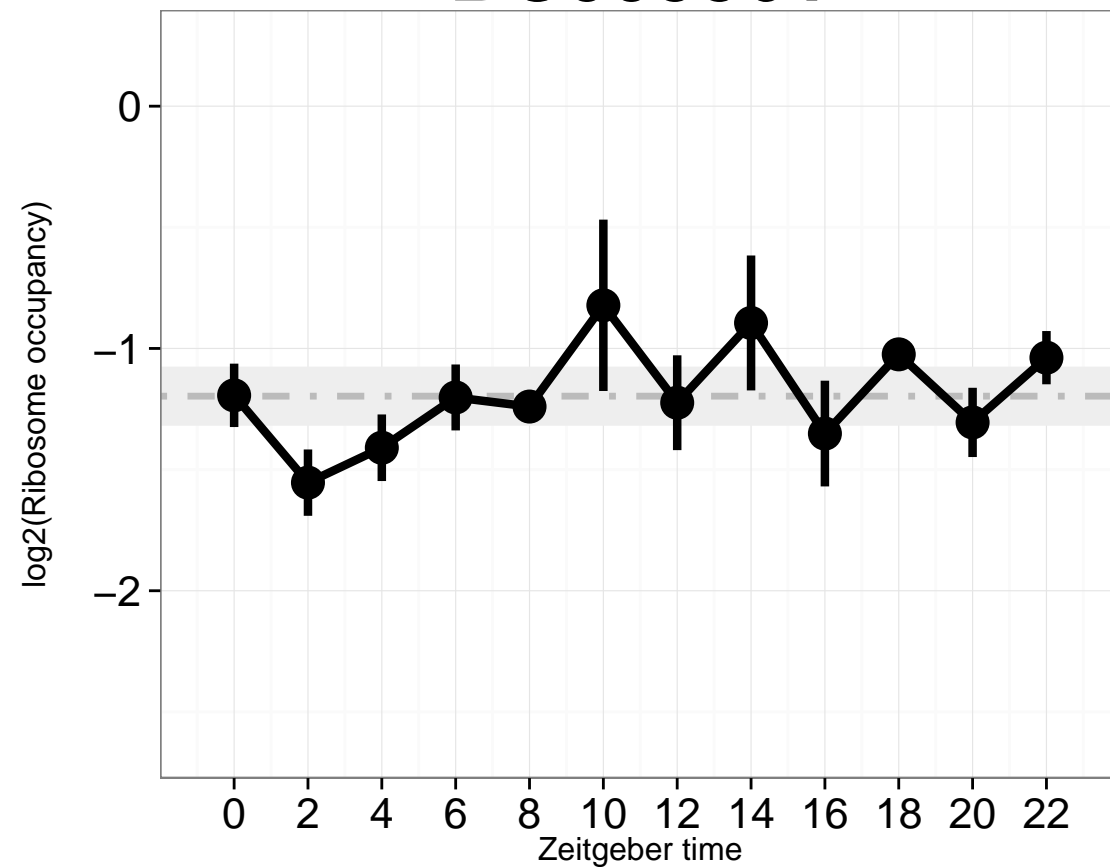

Supplement: Supplementary file 12056 [file 1]

# Hnf1b

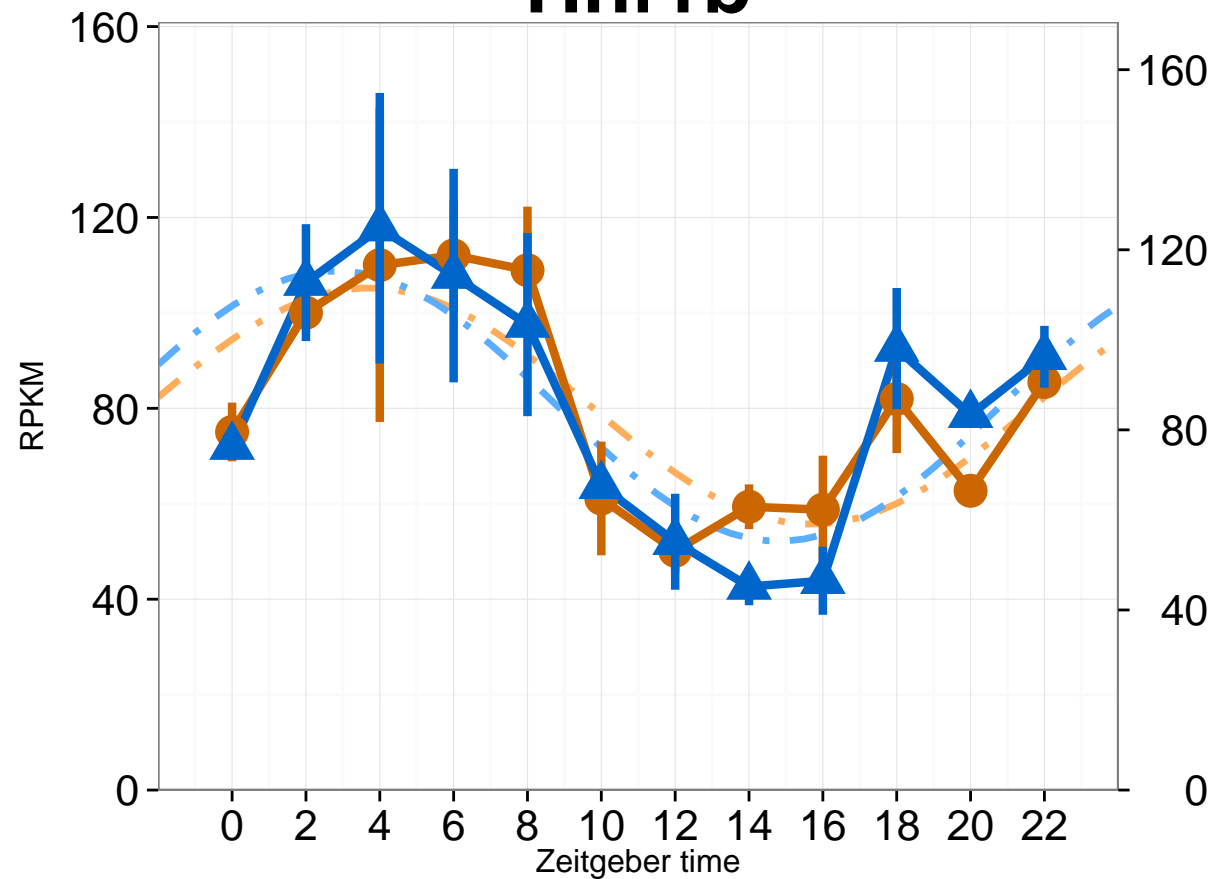

# Hnf1b

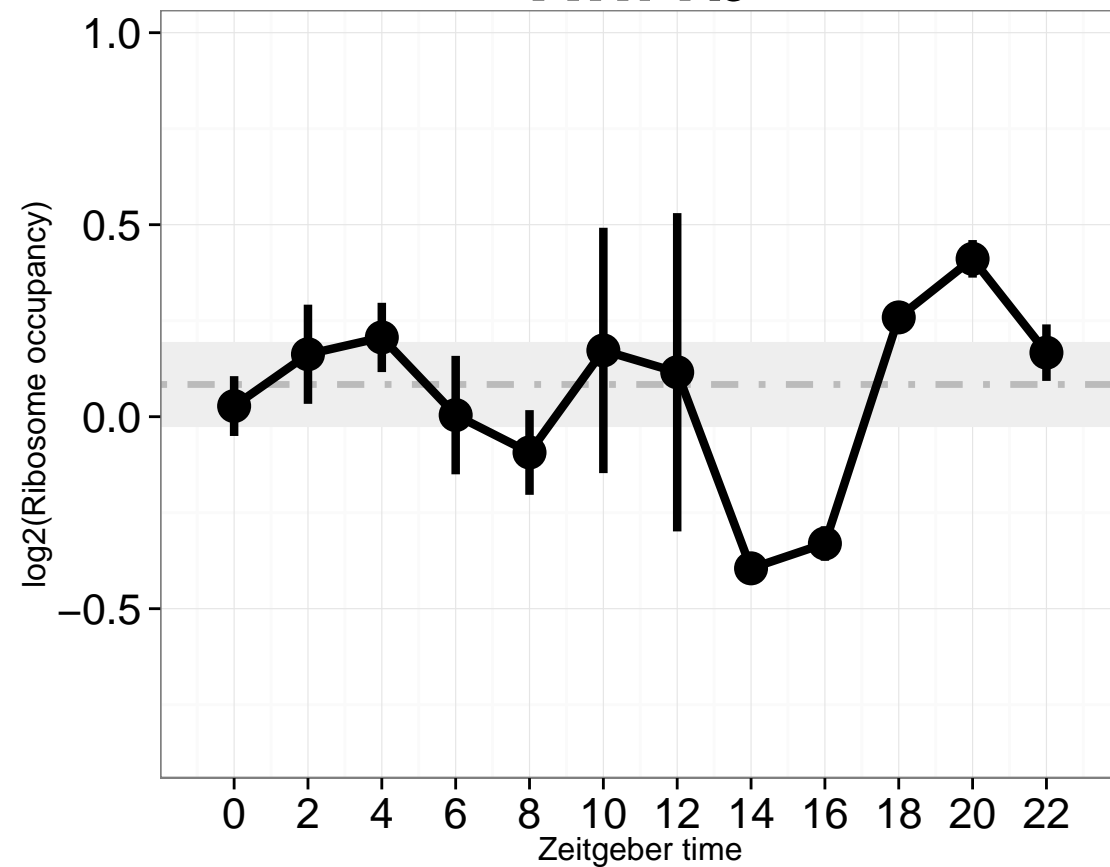

Supplement: Supplementary file 12057 [file 1]

## Pld4

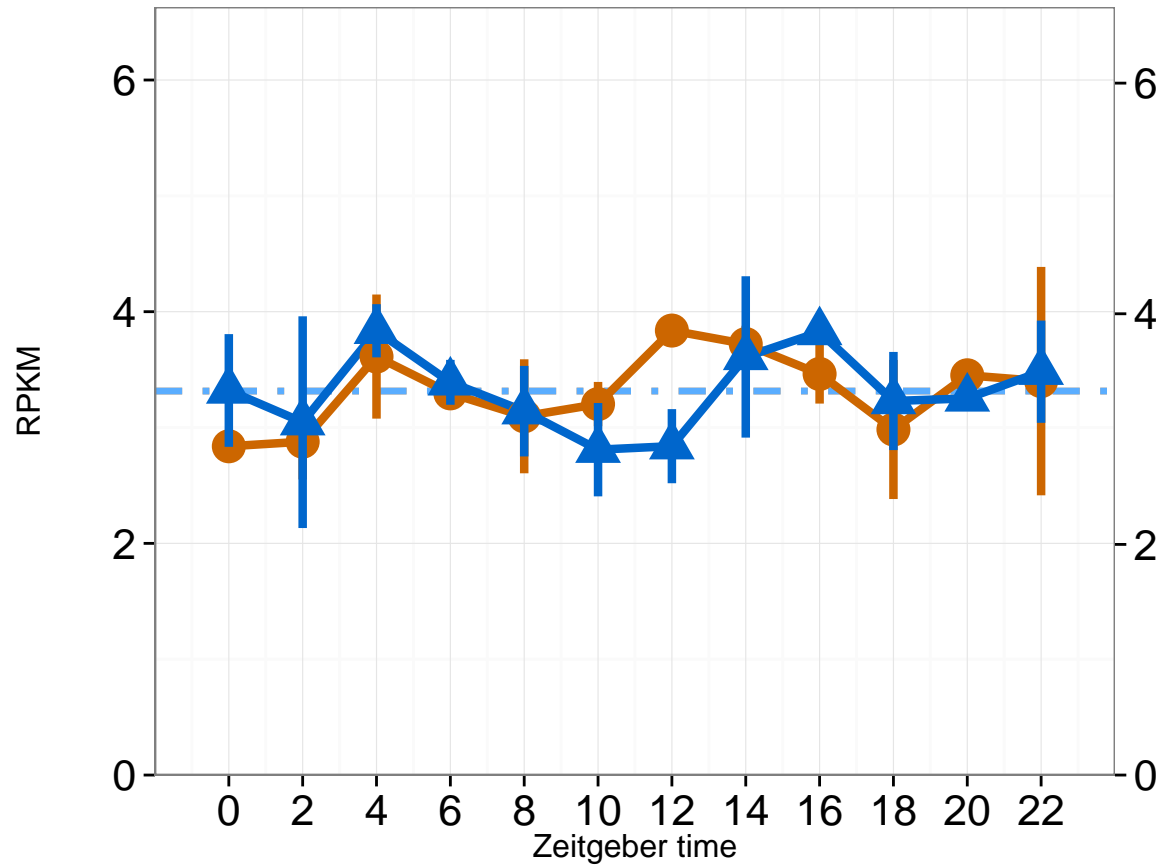

## Pld4

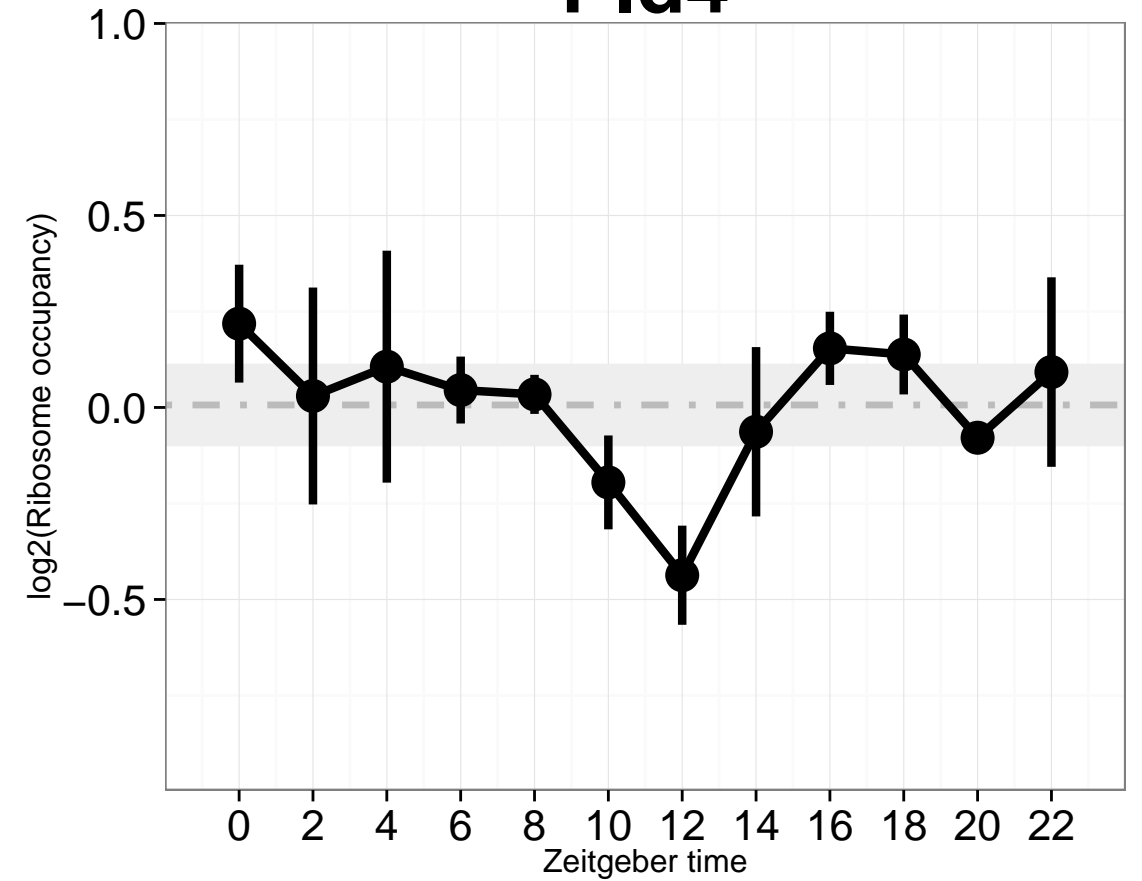

Supplement: Supplementary file 12058 [file 1]

## Plcxd3

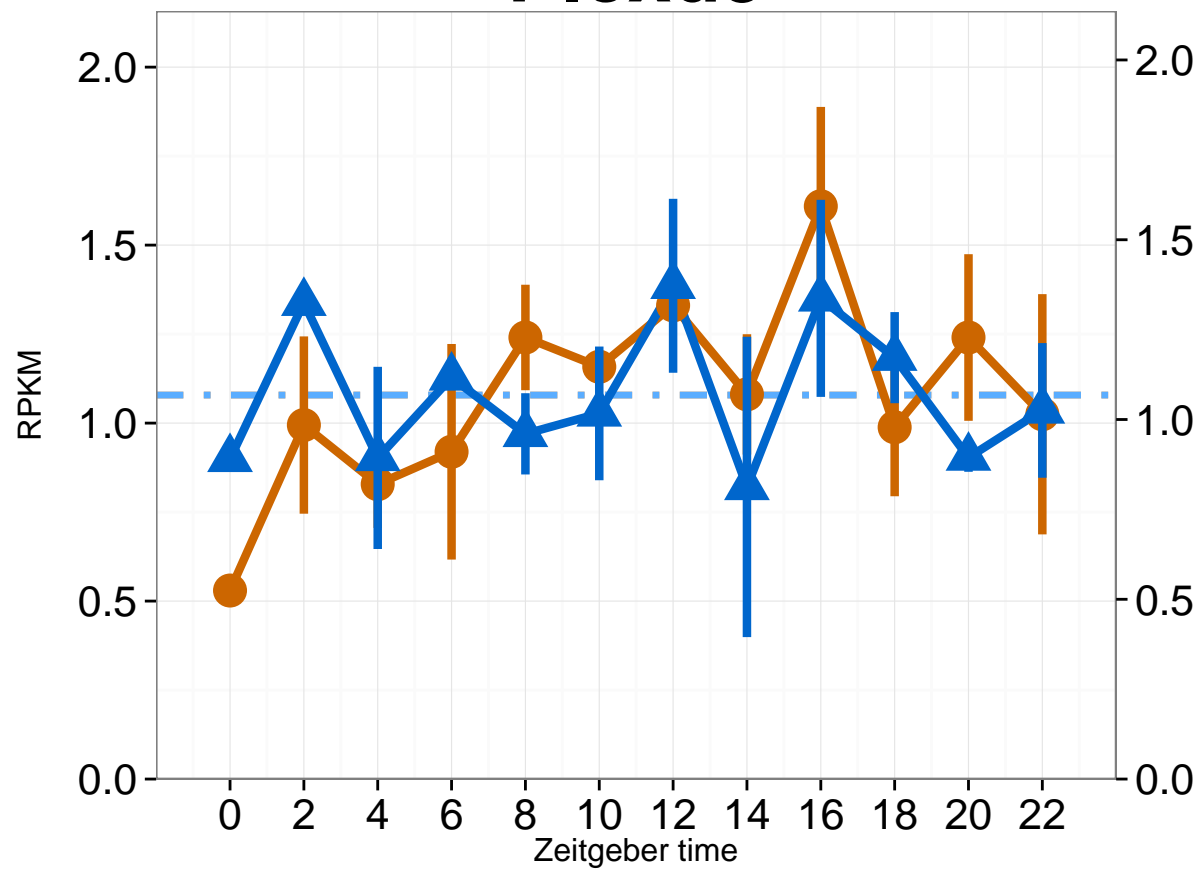

## Plcxd3

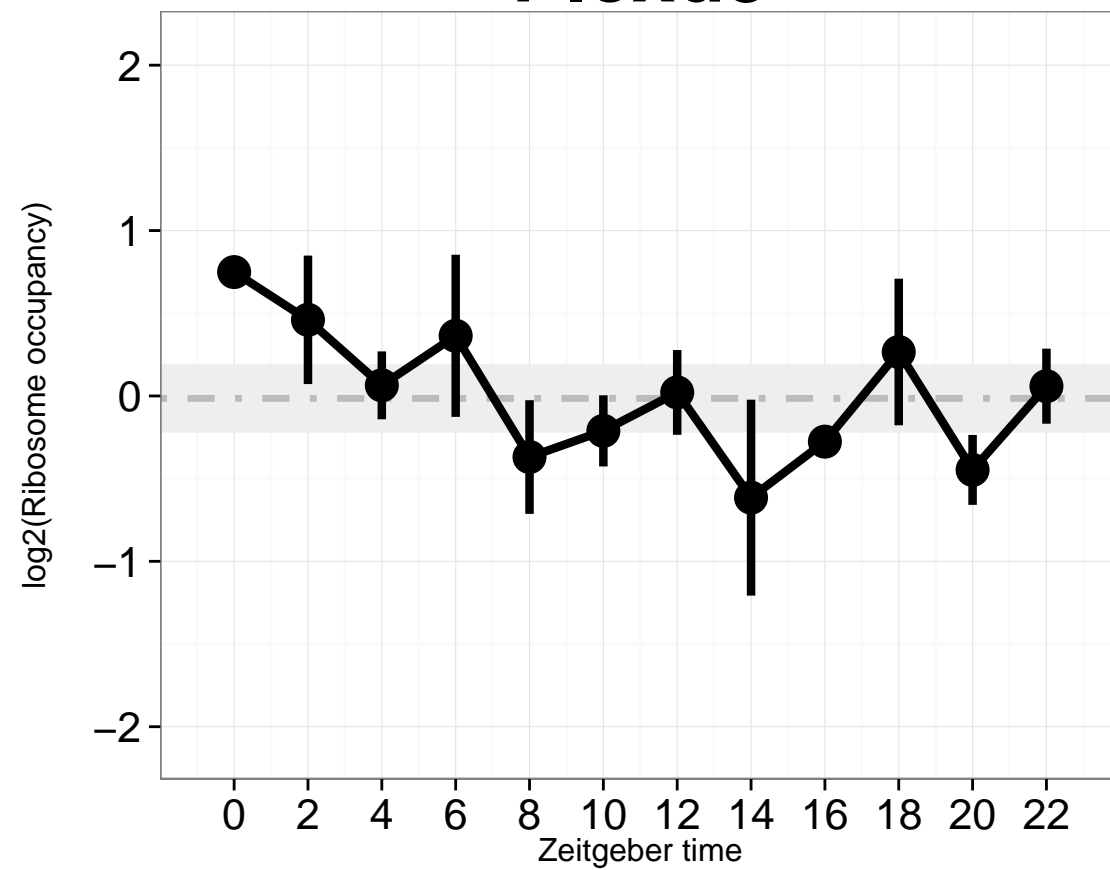

Supplement: Supplementary file 12059 [file 1]

# Crlf1

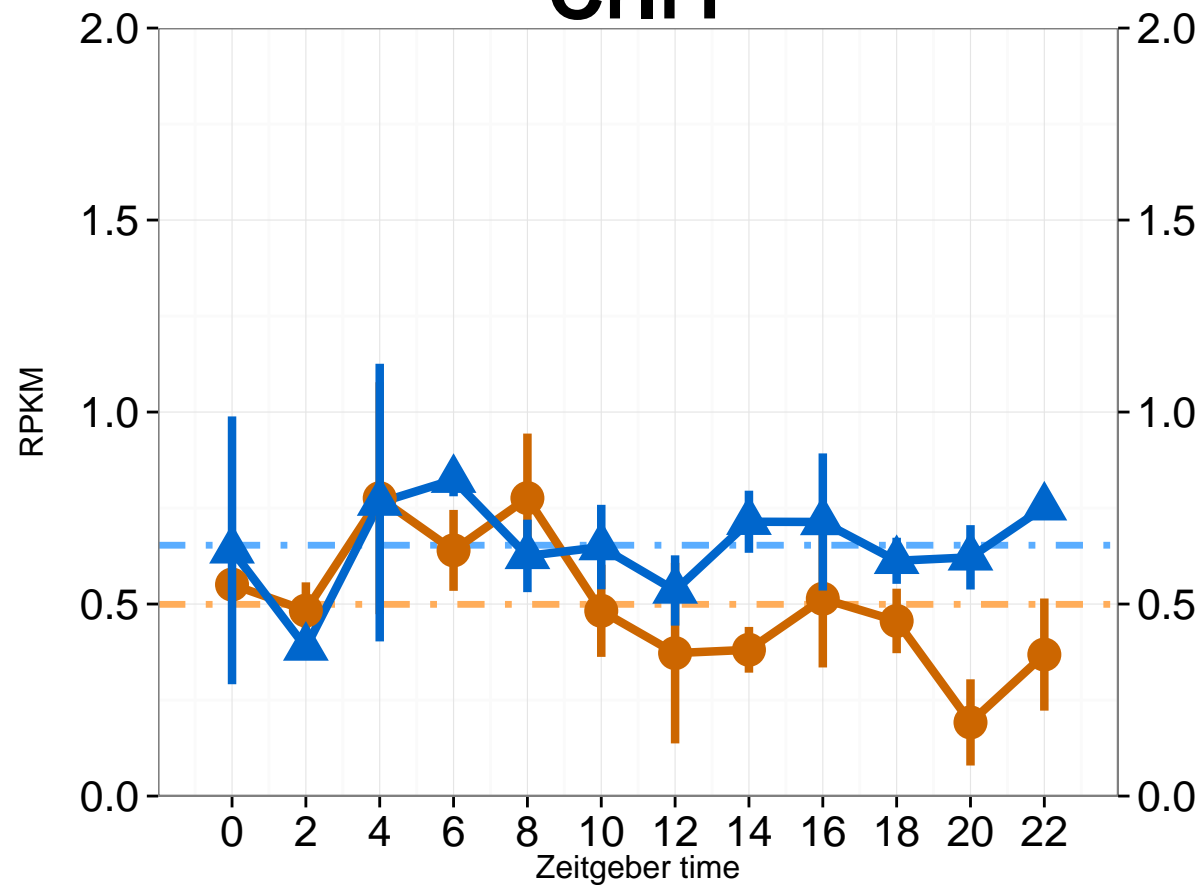

# Crlf1

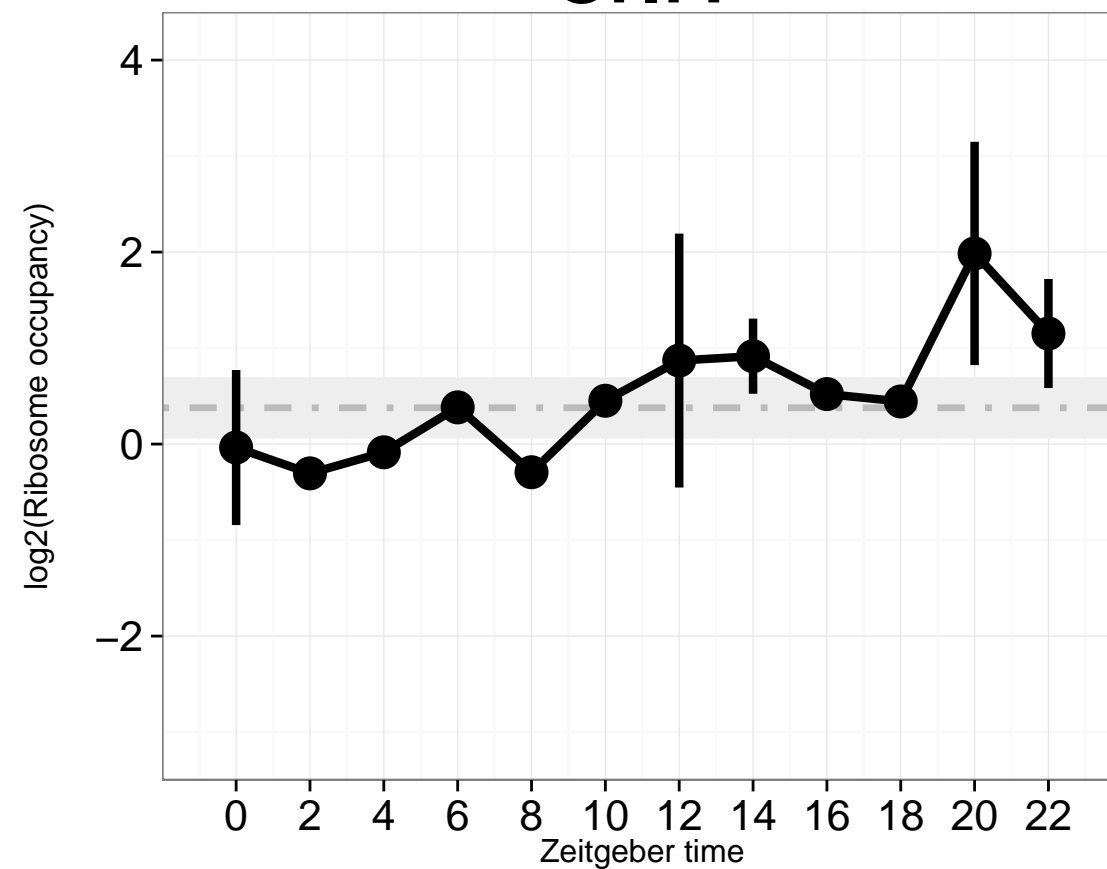

Supplement: Supplementary file 12060 [file 1]

## Smek2

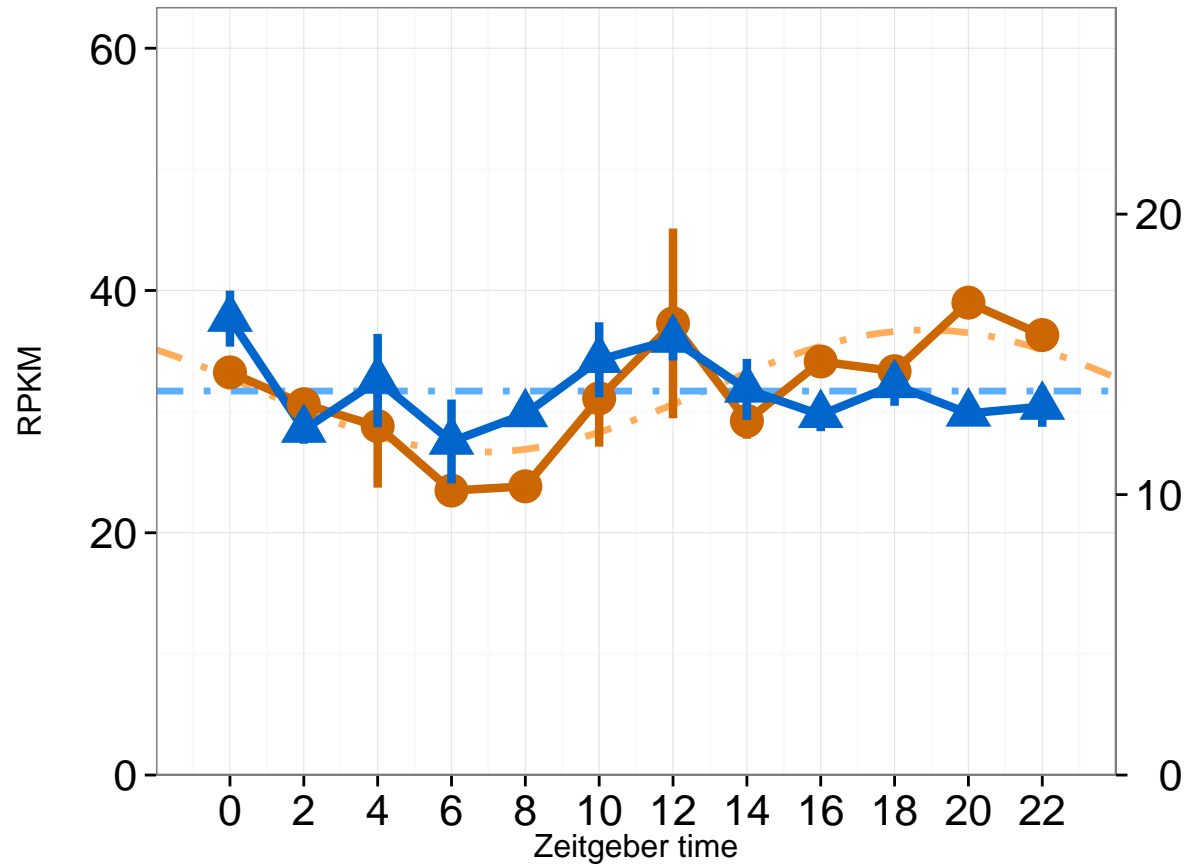

## Smek2

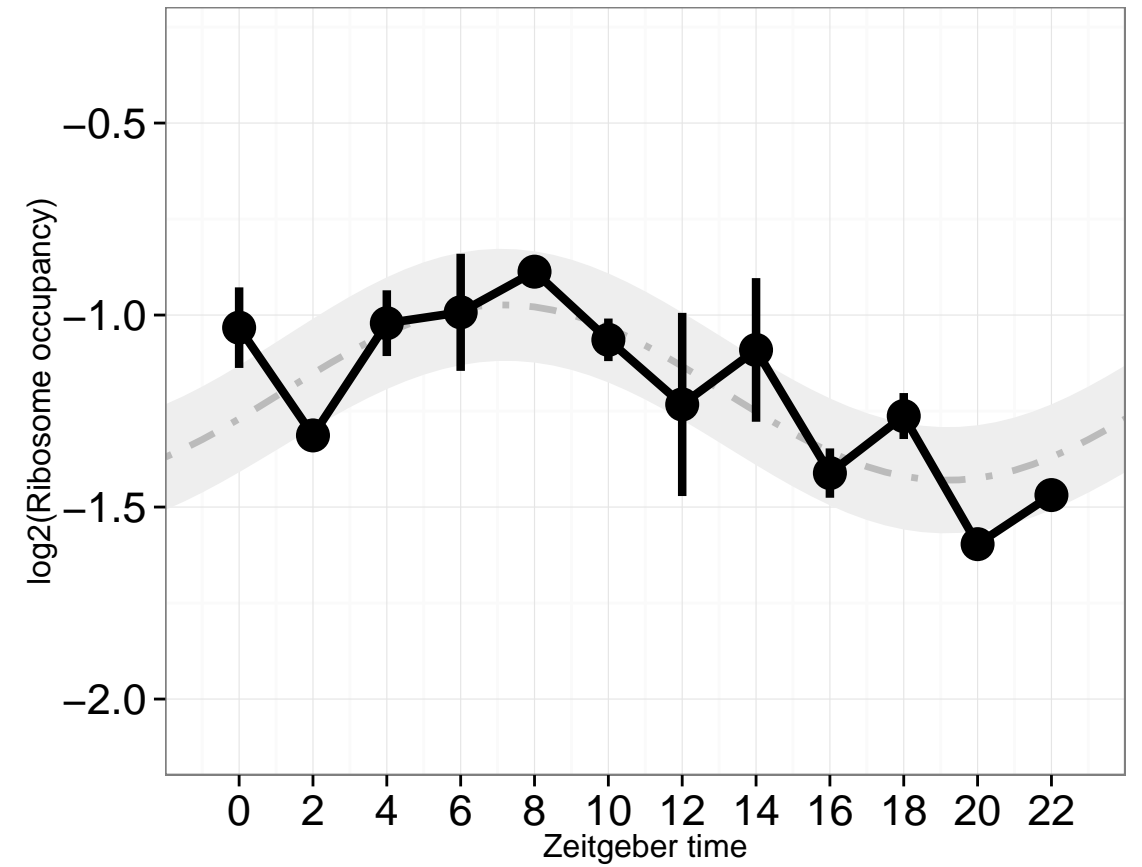

Supplement: Supplementary file 12061 [file 1]

# Tmem143

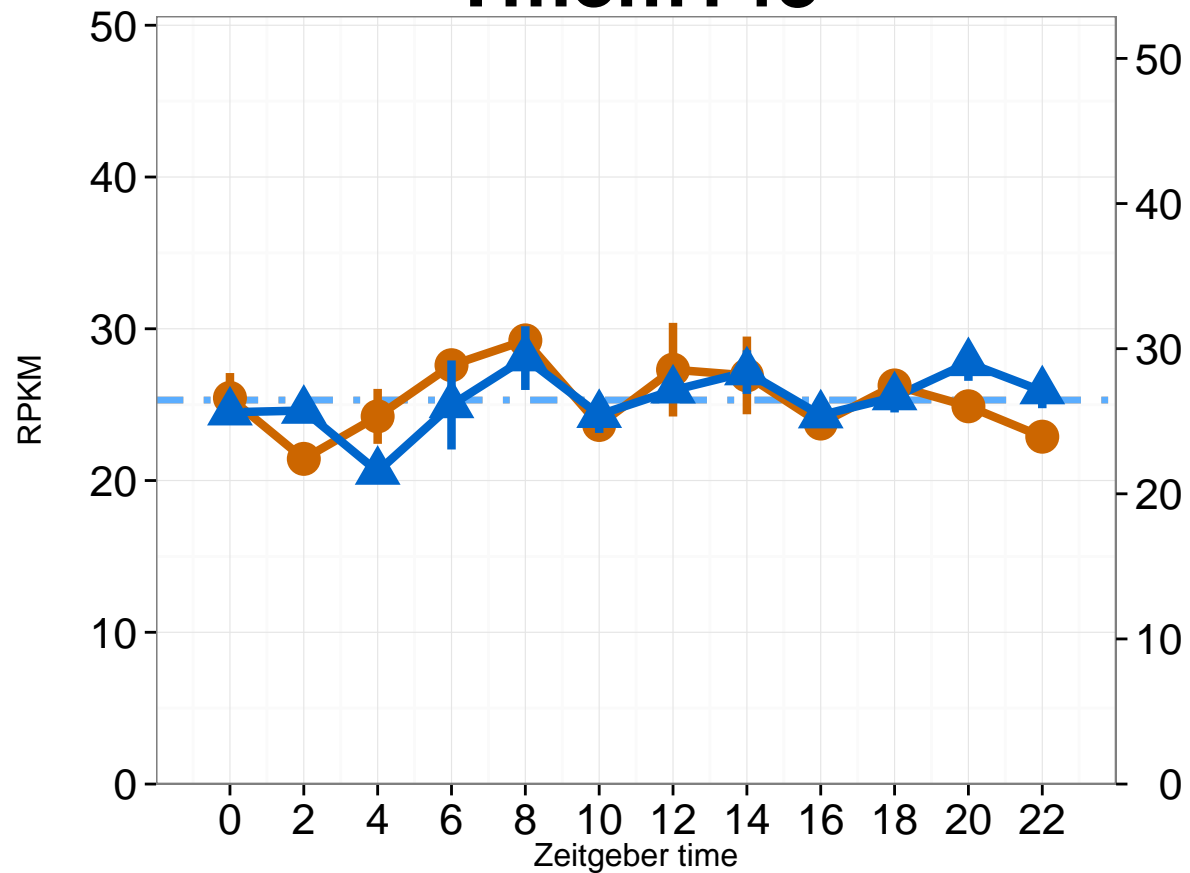

# Tmem143

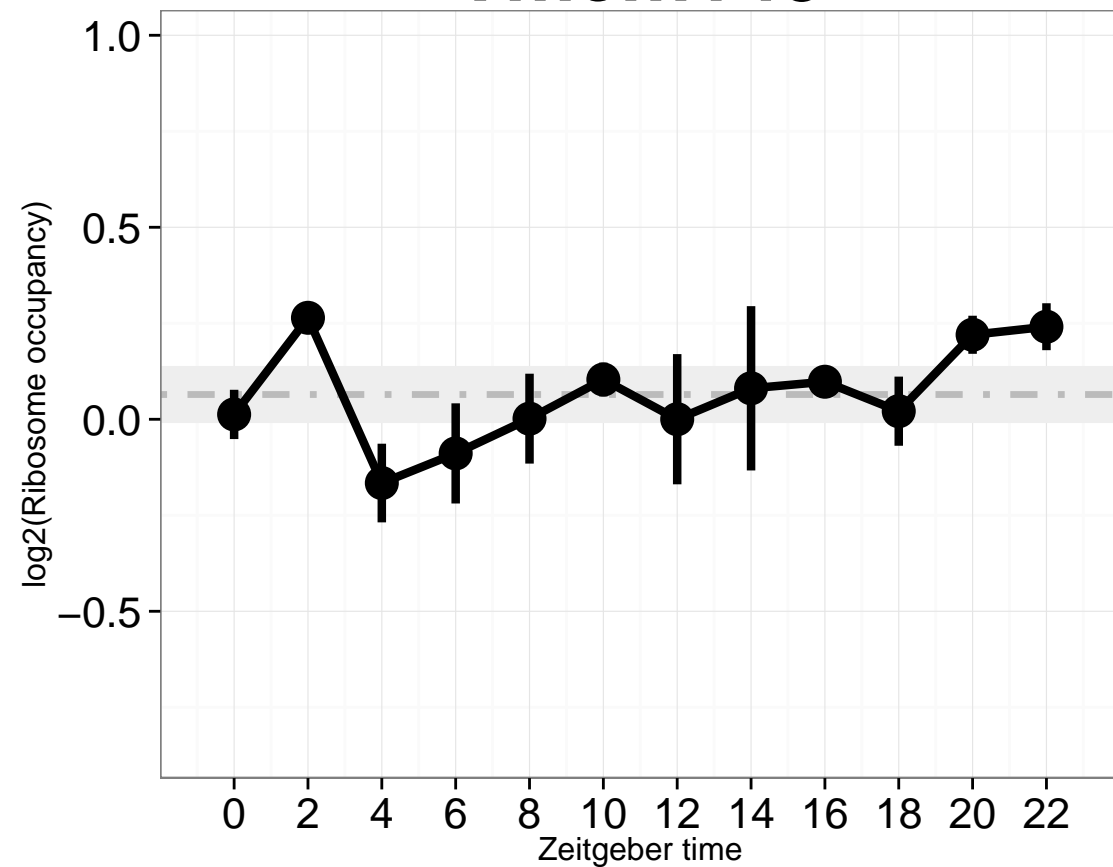

Supplement: Supplementary file 12062 [file 1]

# Bola1

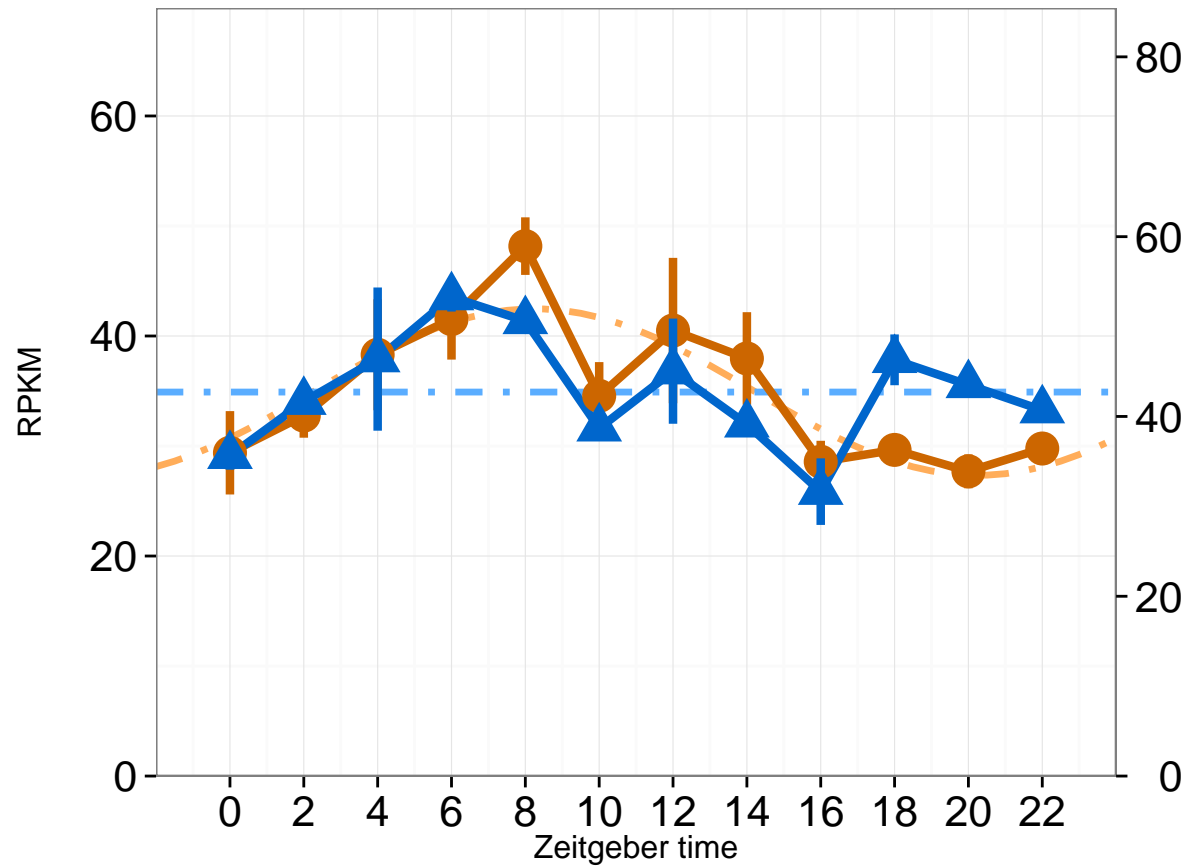

# Bola1

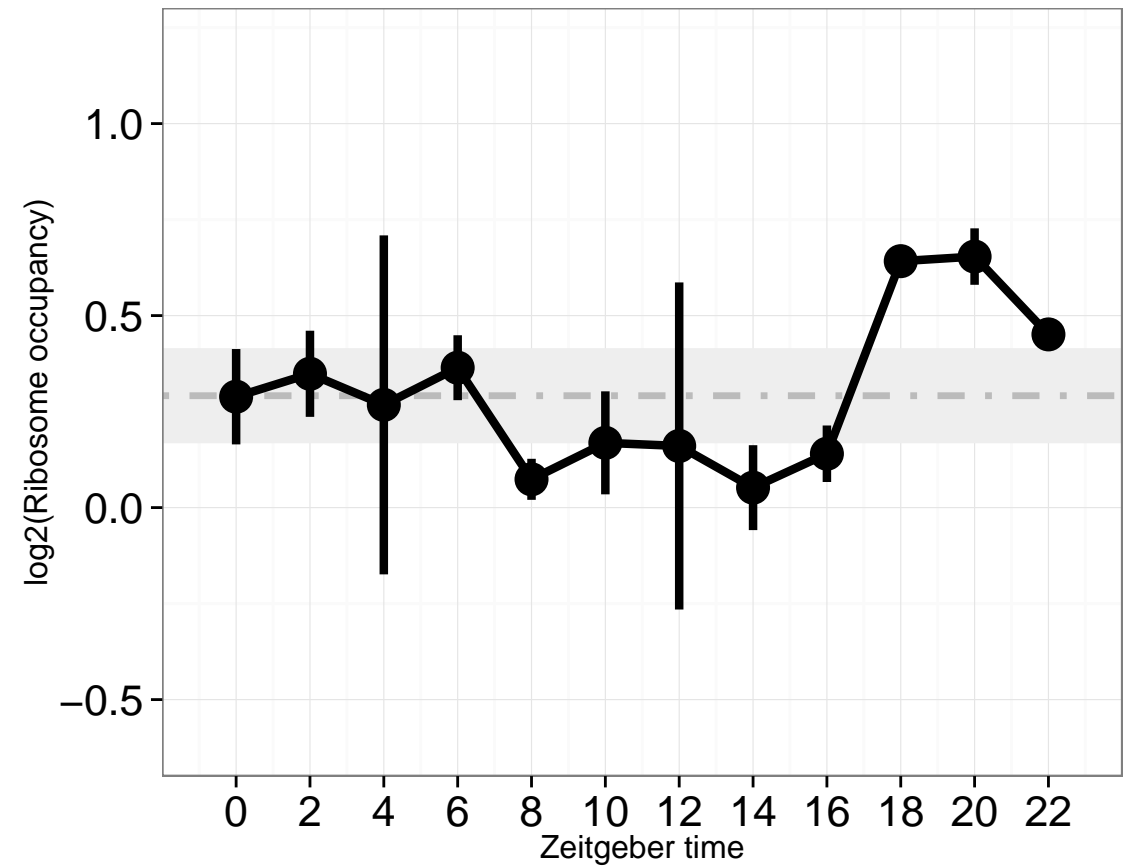

Supplement: Supplementary file 12063 [file 1]

# Mrpl1

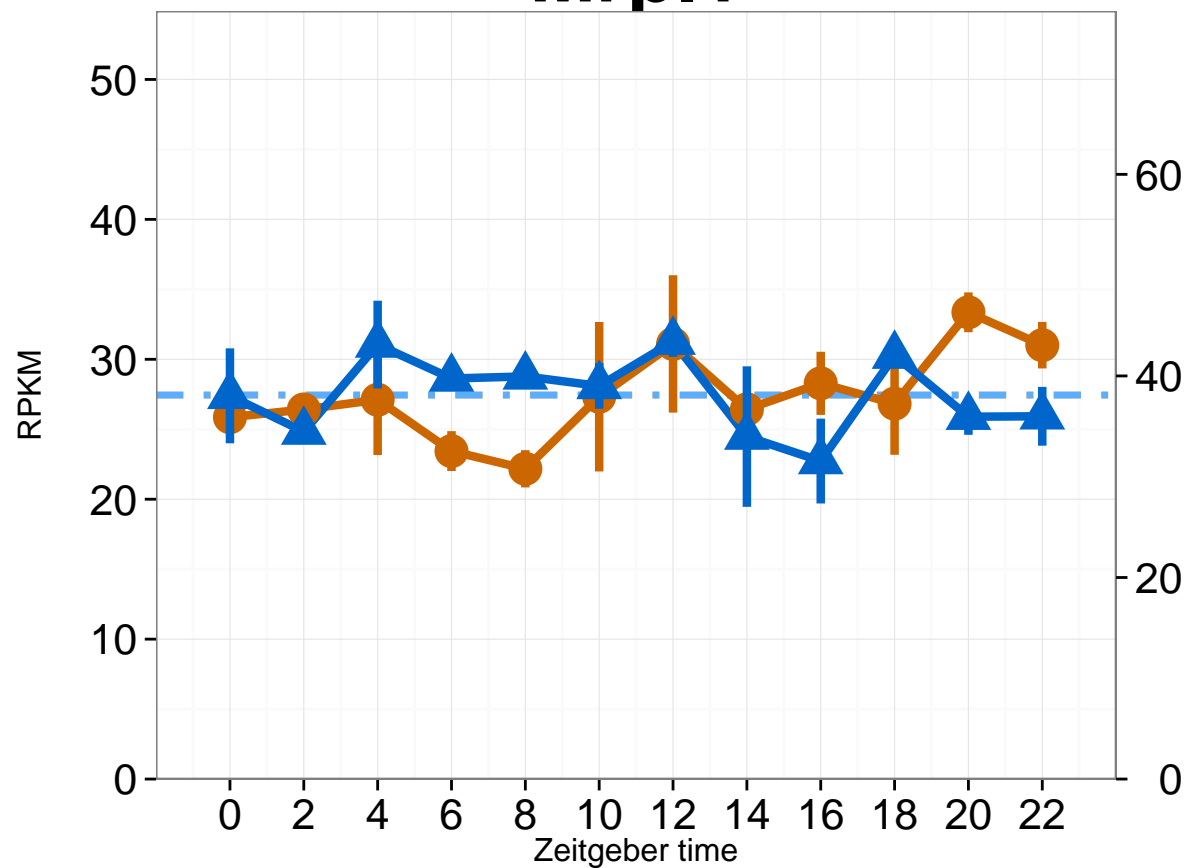

# Mrpl1

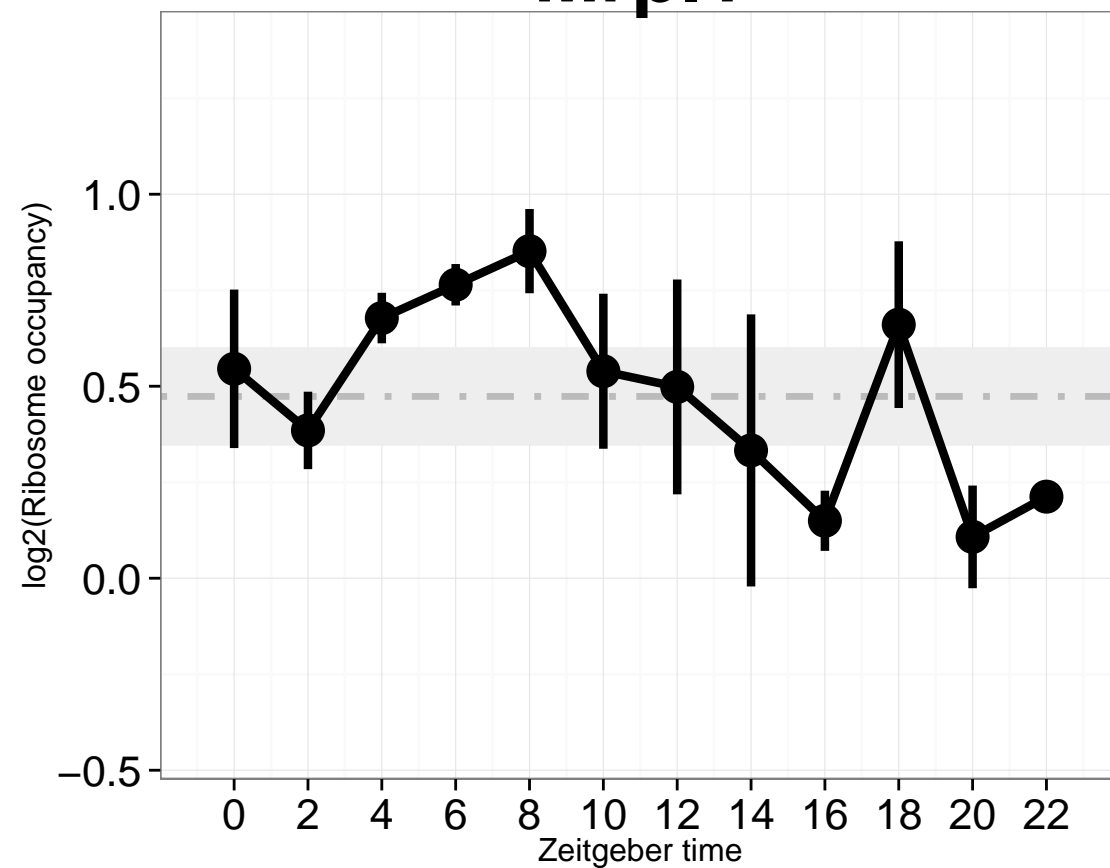

Supplement: Supplementary file 12064 [file 1]

## Gcnt4

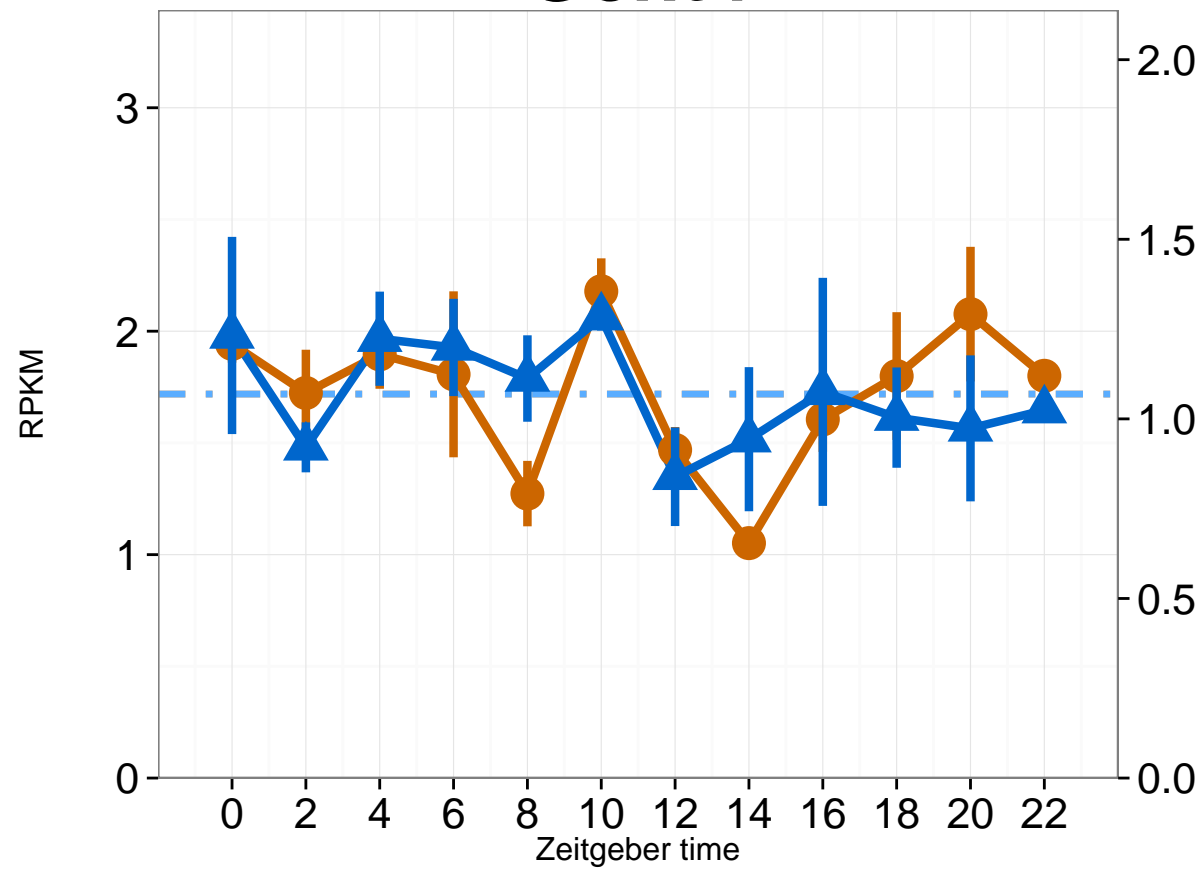

## Gcnt4

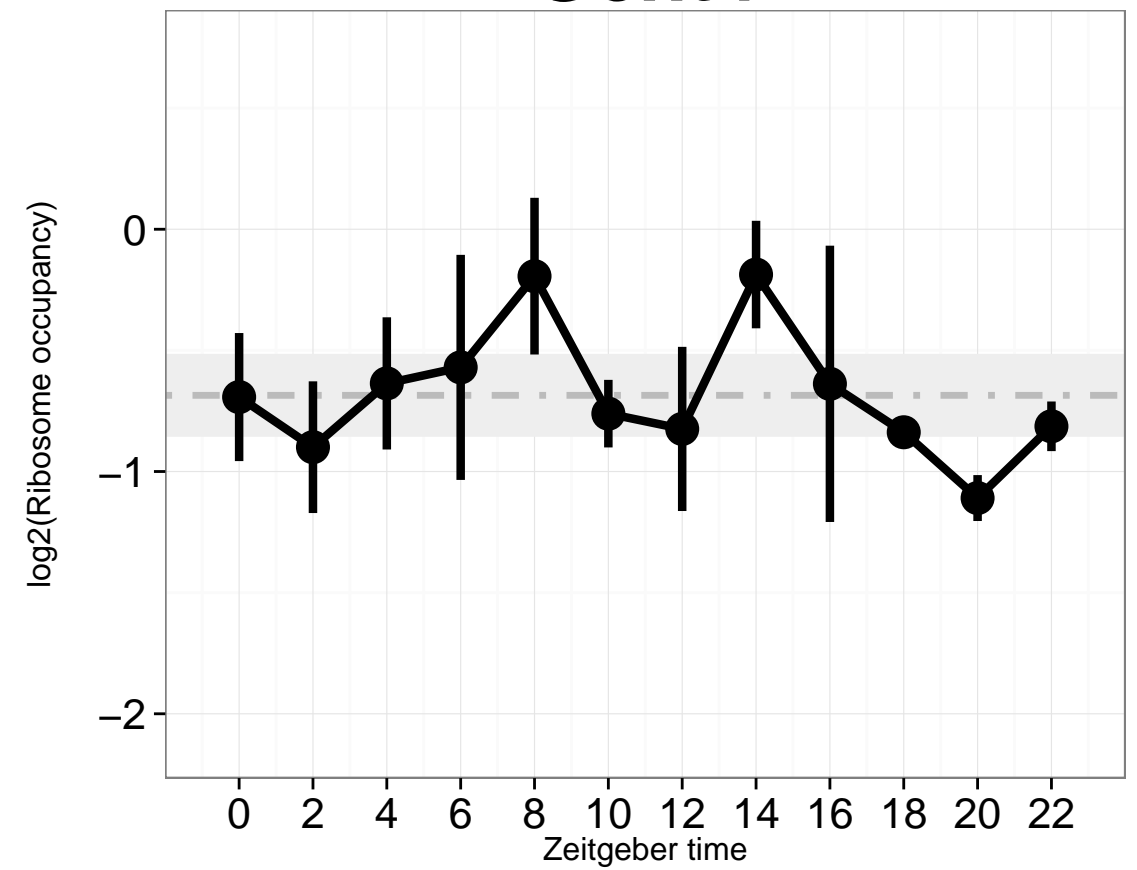

Supplement: Supplementary file 12065 [file 1]

## Chst15

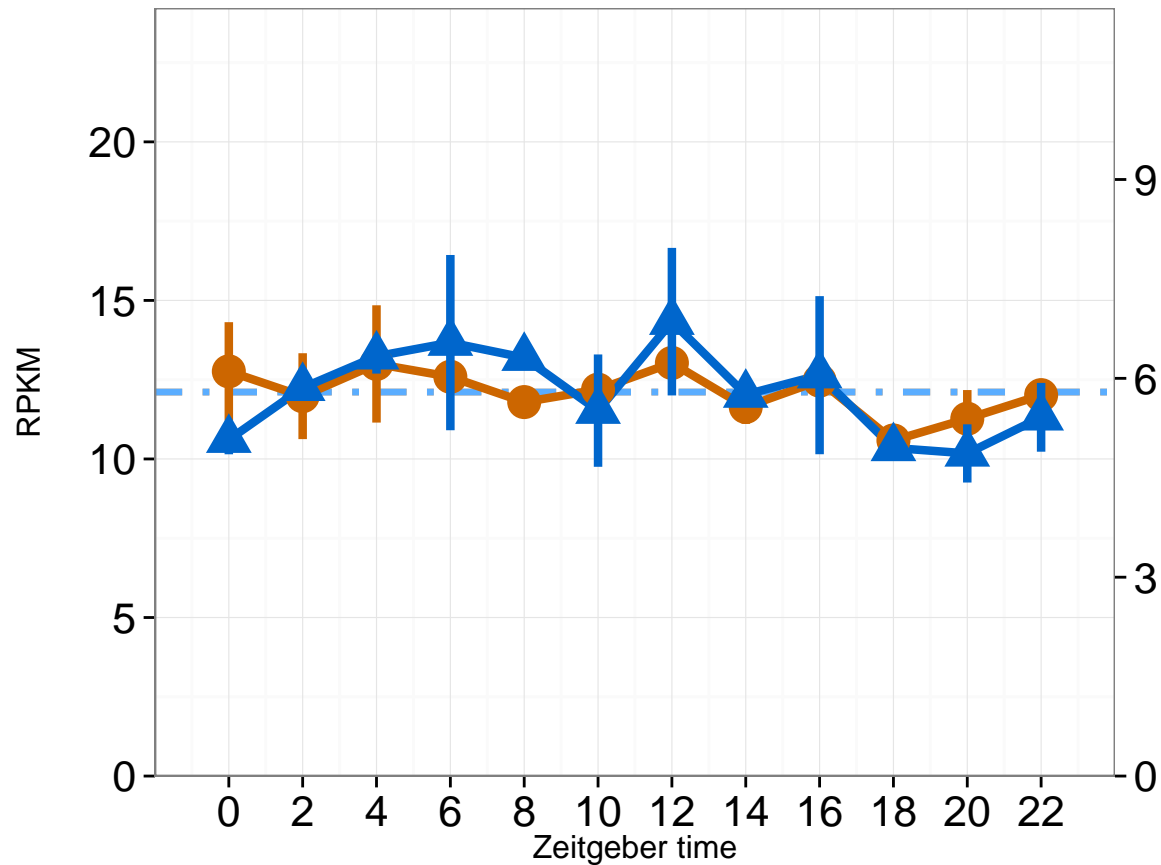

## Chst15

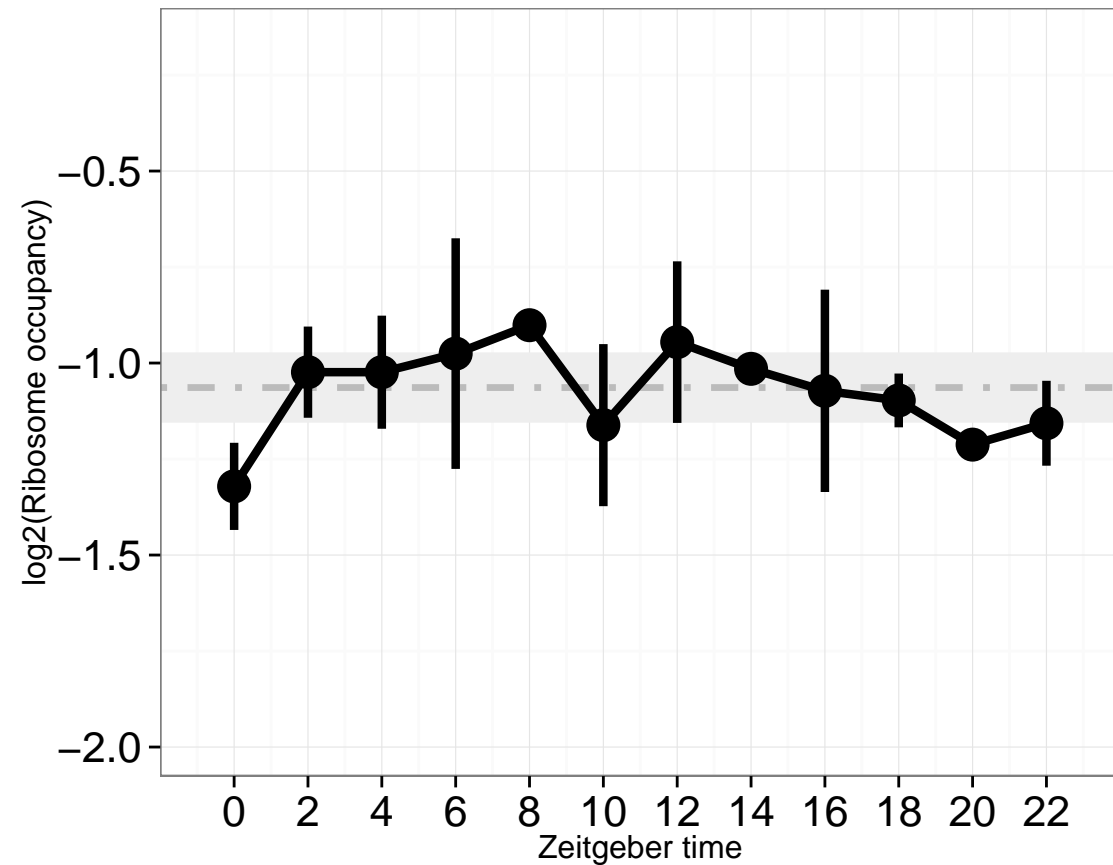

Supplement: Supplementary file 12066 [file 1]

## Mettl3

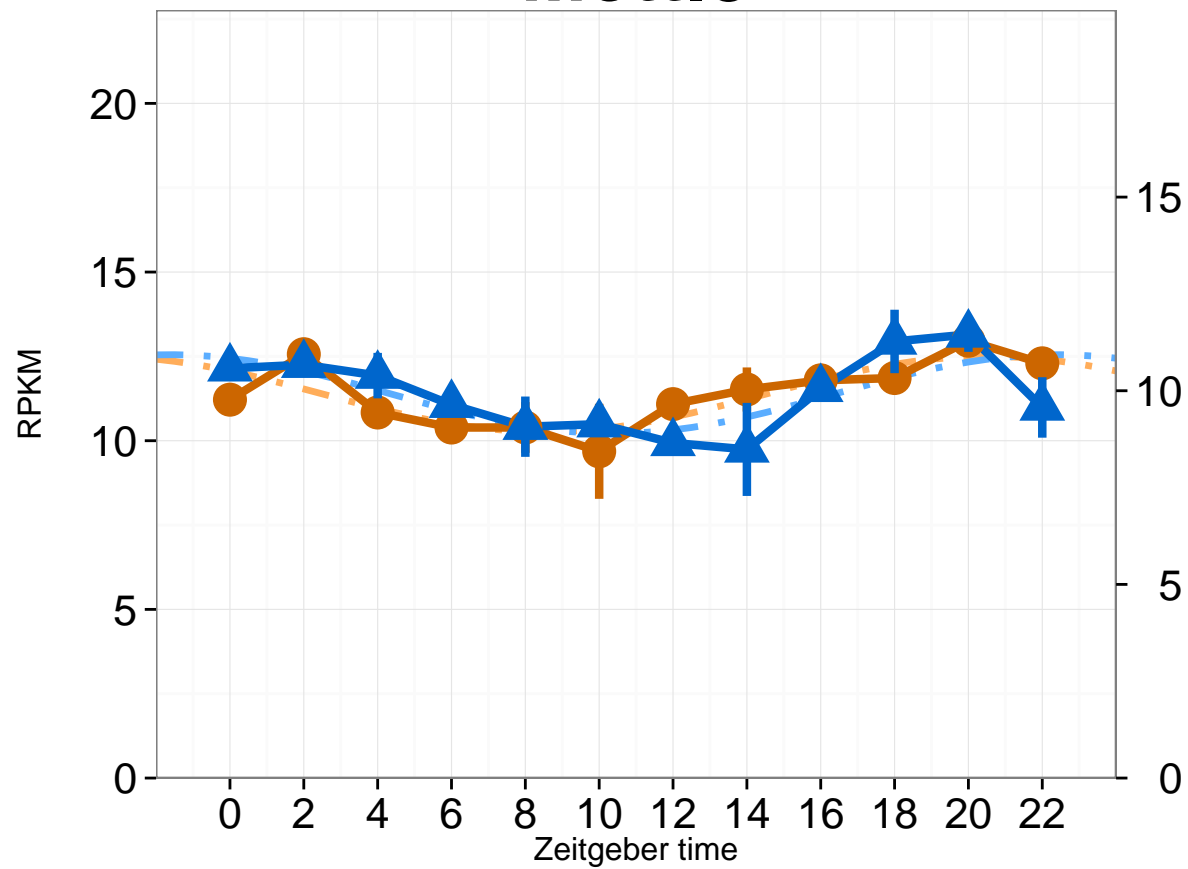

## Mettl3

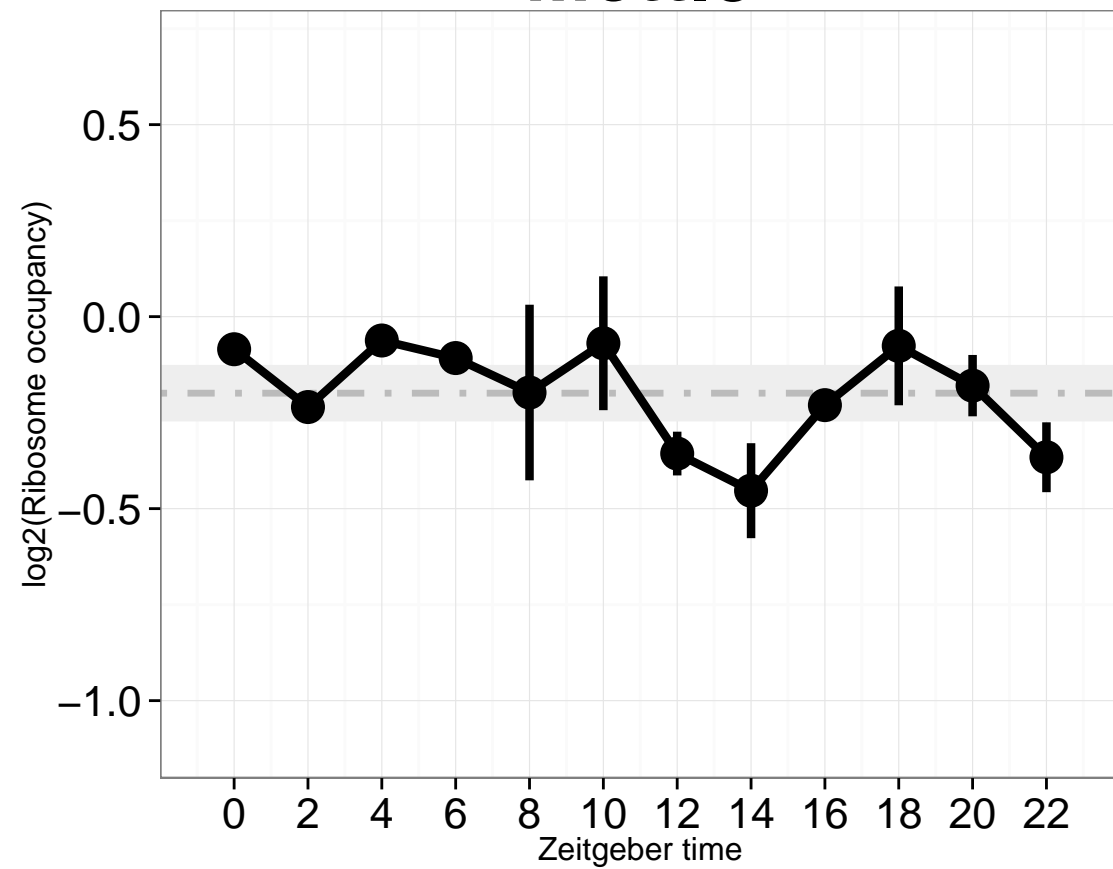

Supplement: Supplementary file 12067 [file 1]

# 1110059G10Rik

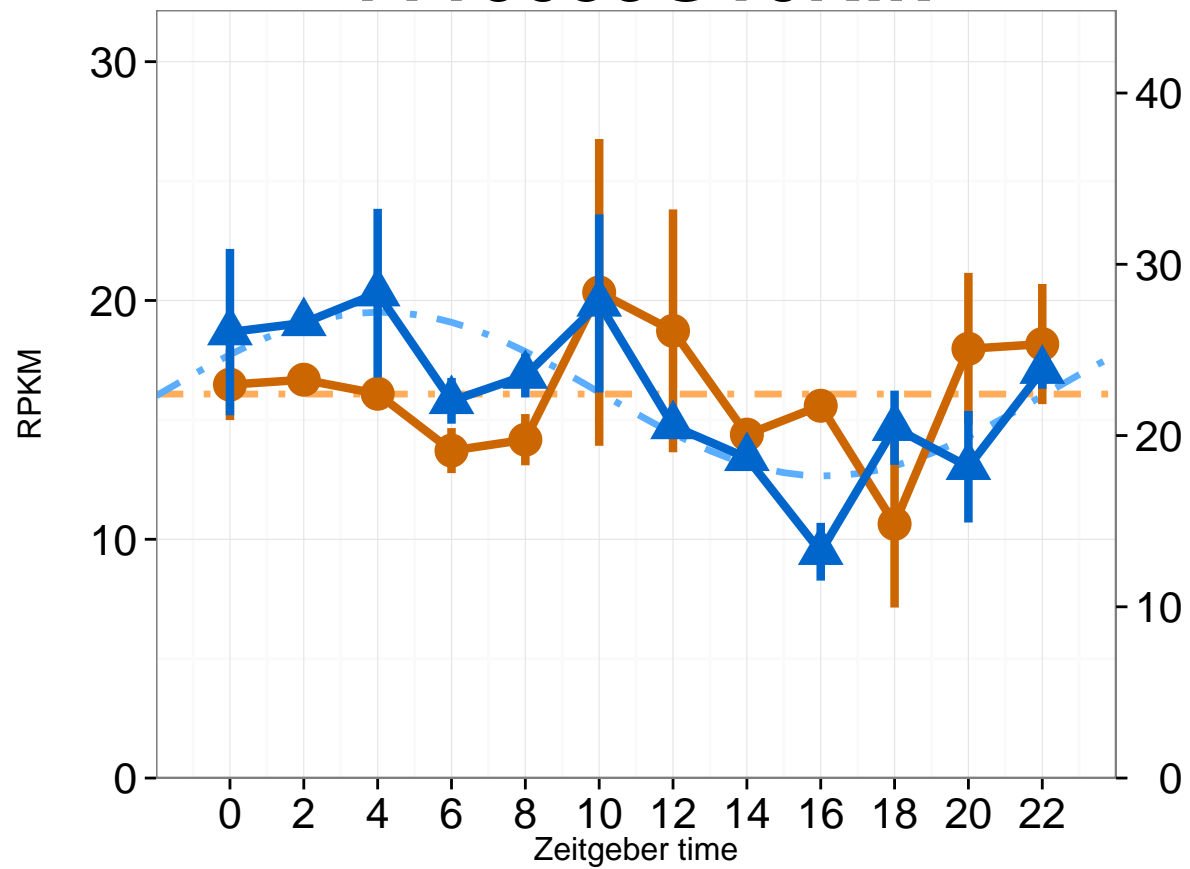

# 1110059G10Rik

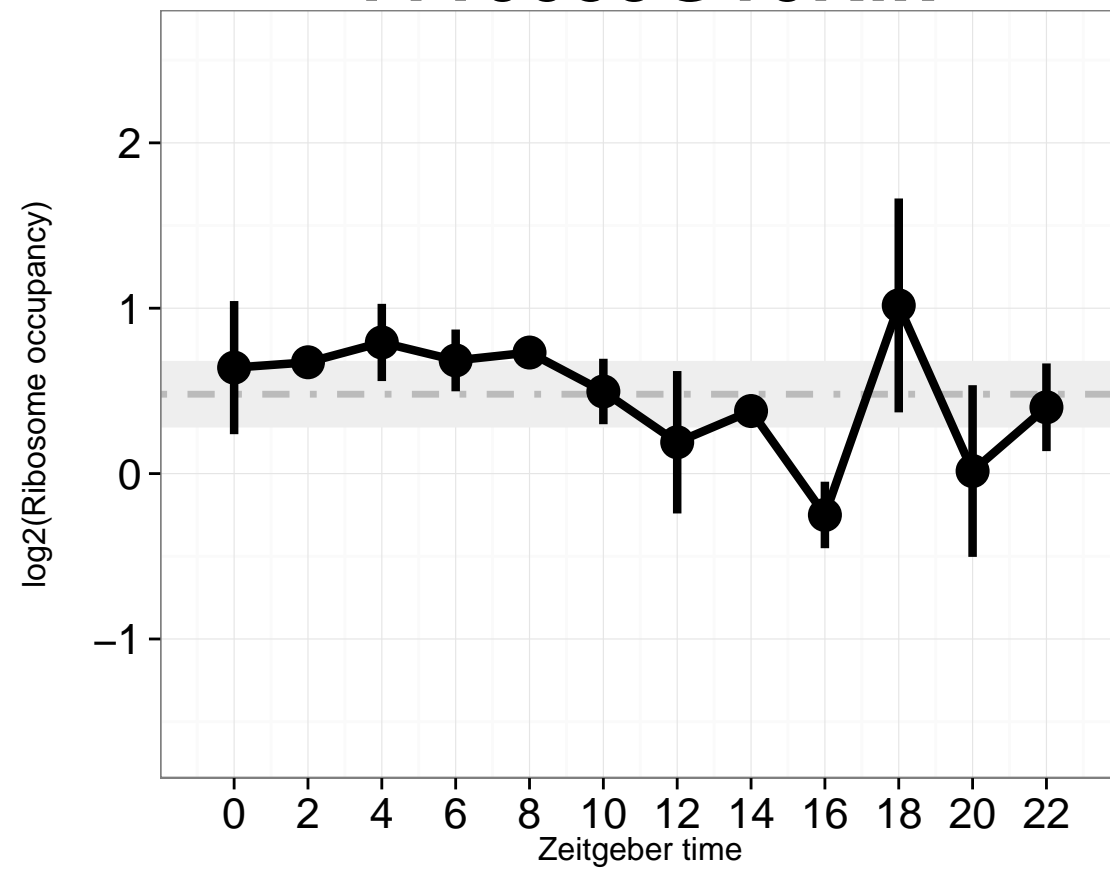

Supplement: Supplementary file 12068 [file 1]

# Atad2b

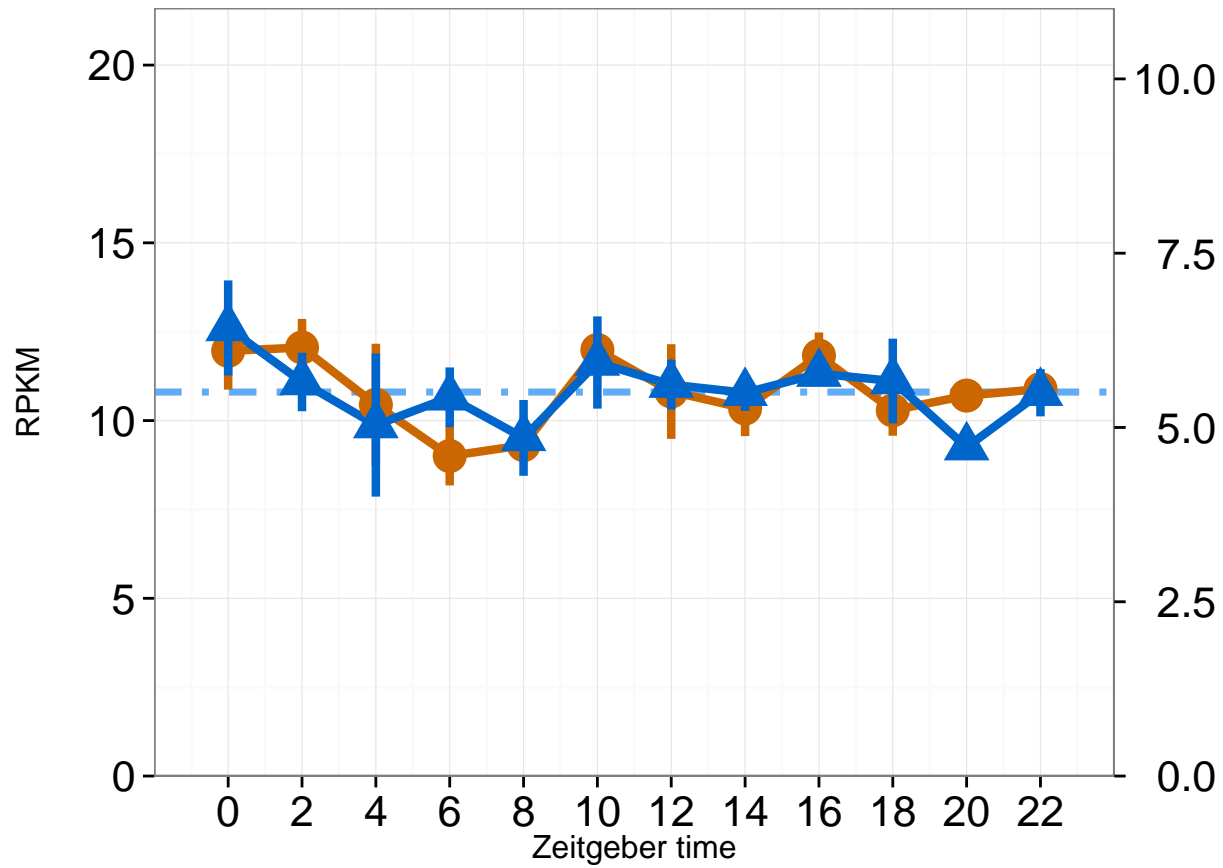

# Atad2b

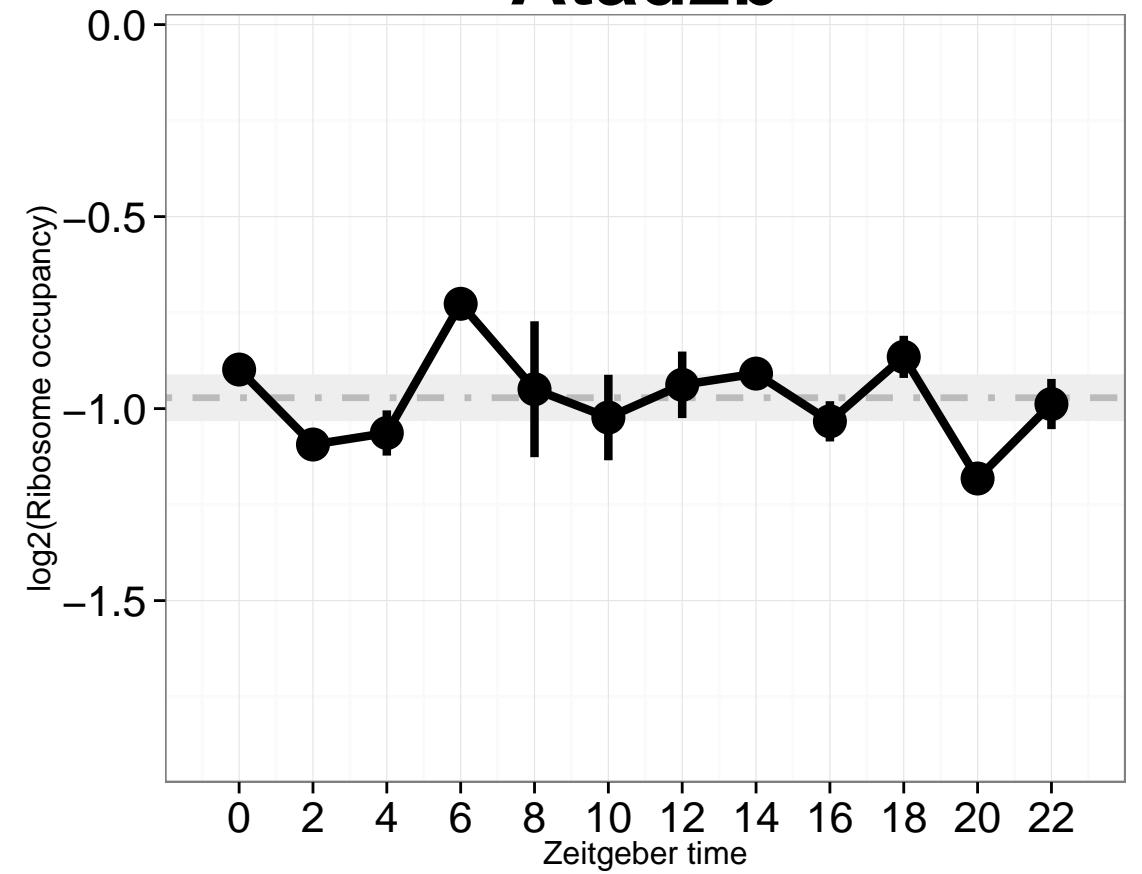

Supplement: Supplementary file 12069 [file 1]

# Fam101b

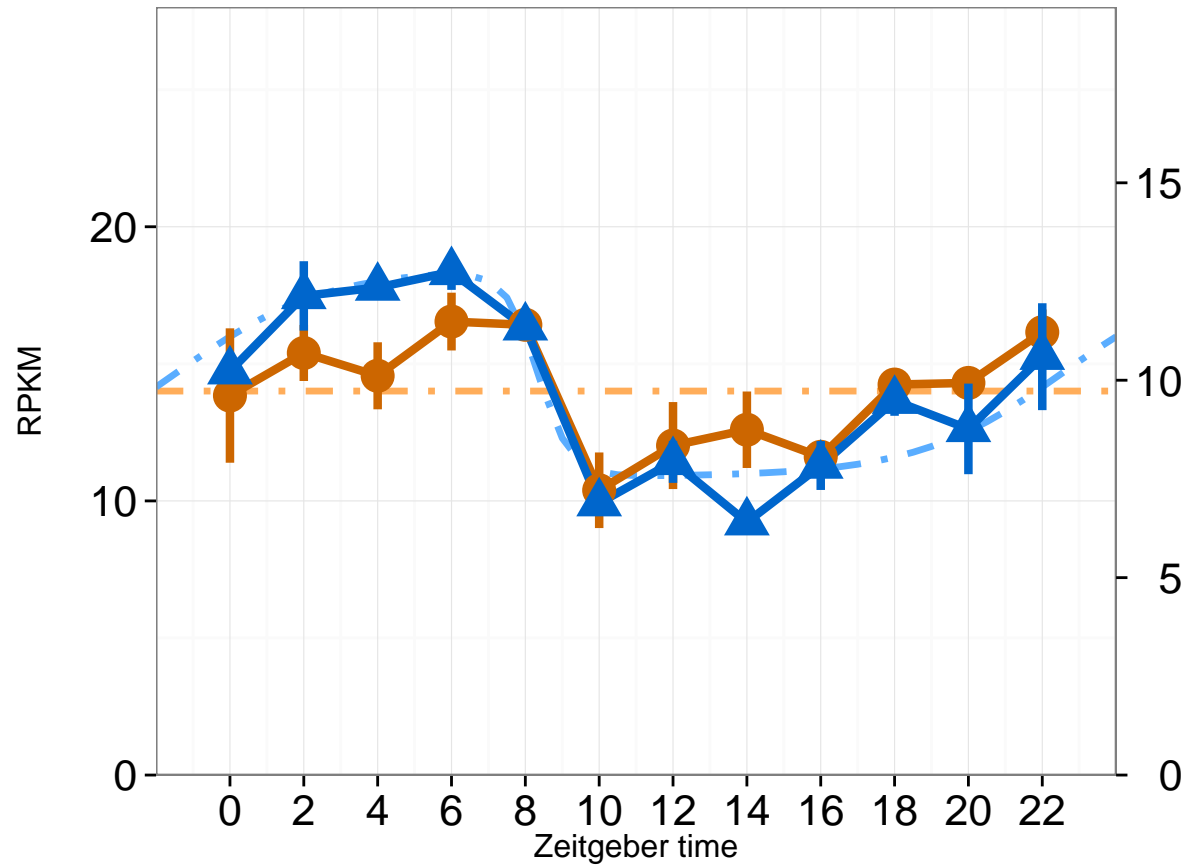

# Fam101b

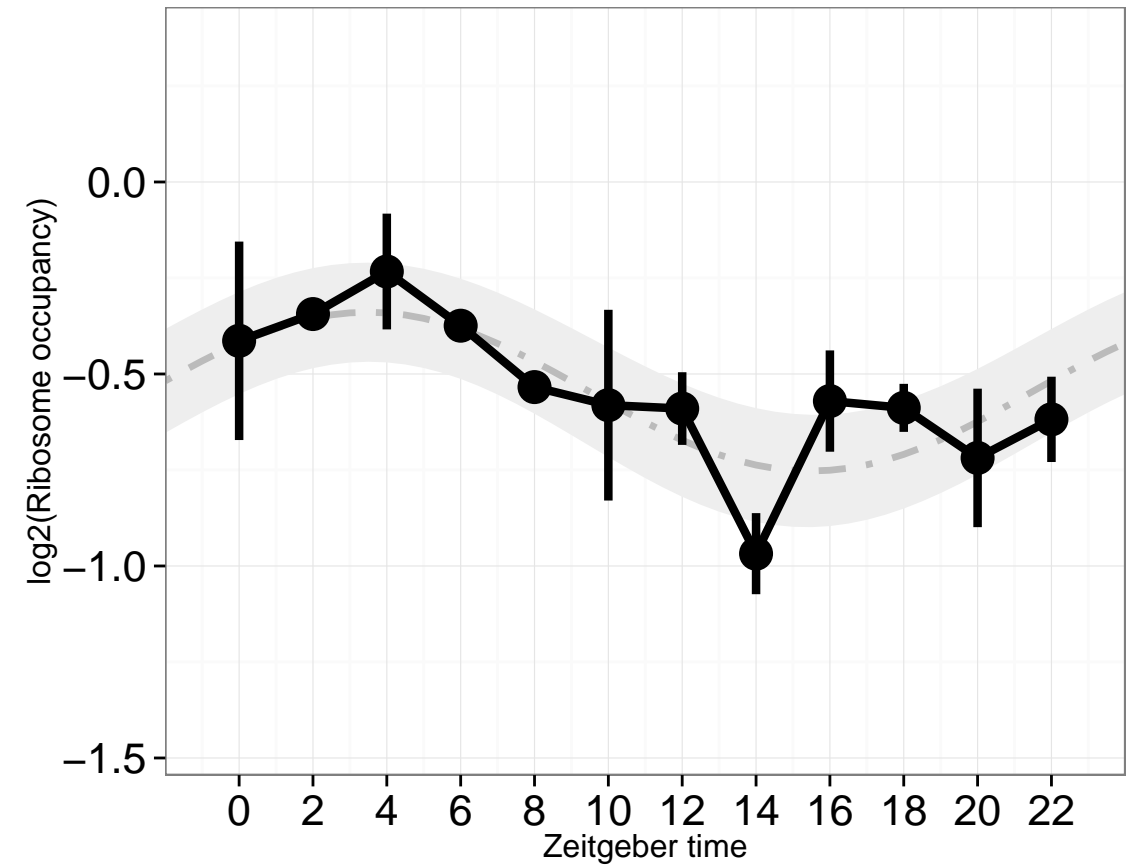

Supplement: Supplementary file 12070 [file 1]

## Klc1

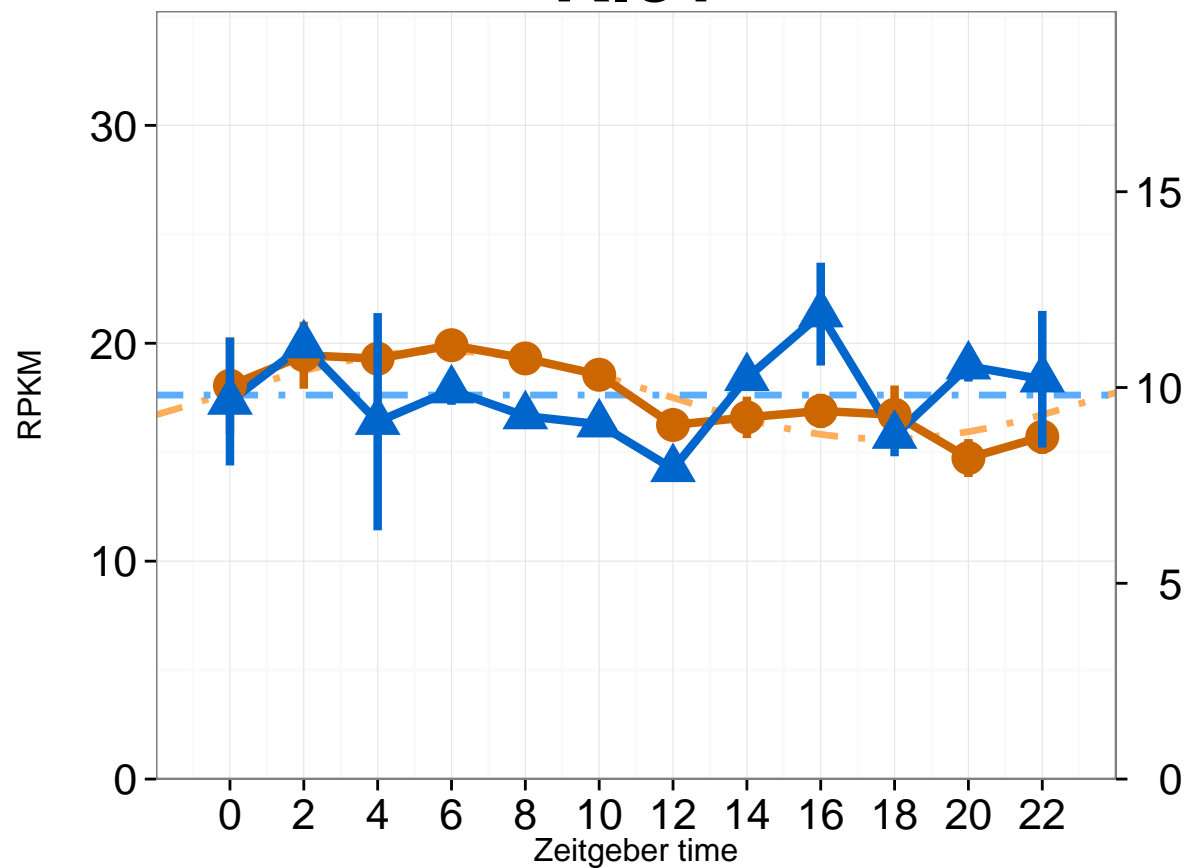

## Klc1

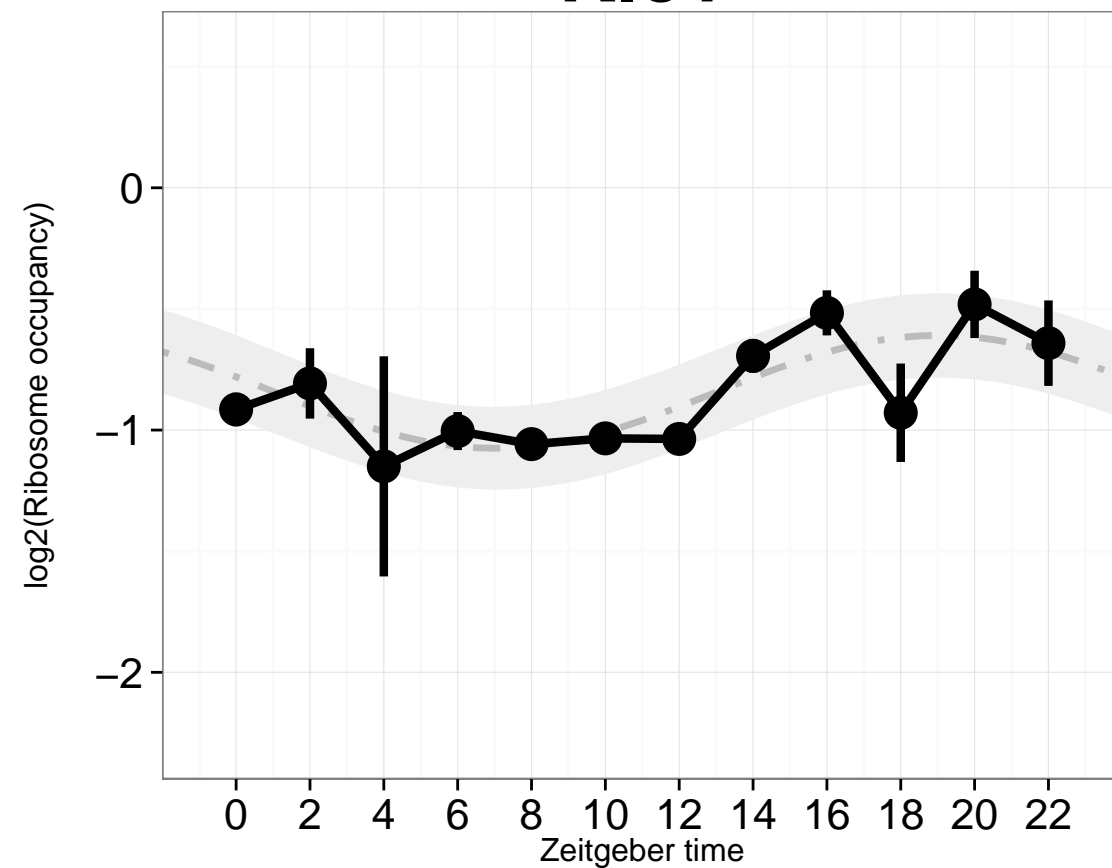

Supplement: Supplementary file 12071 [file 1]

# Stub1

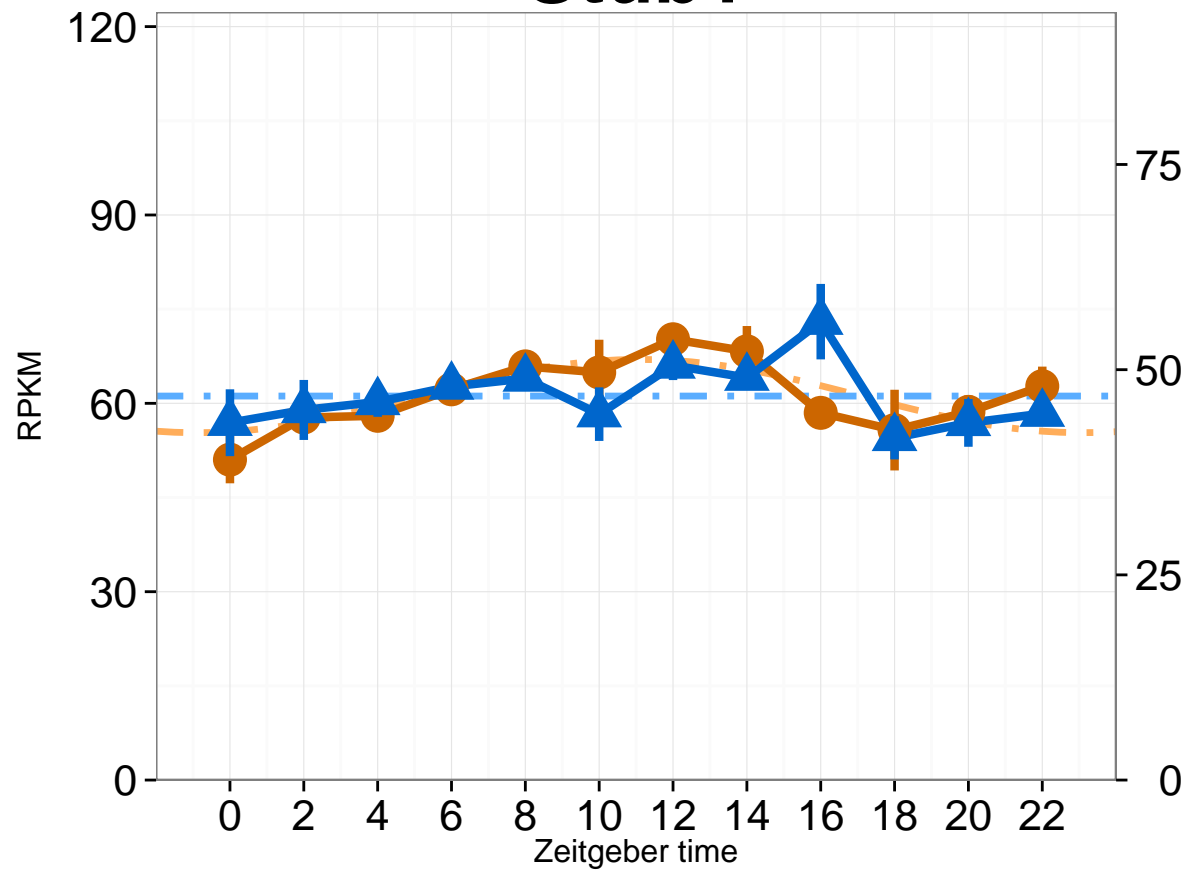

# Stub1

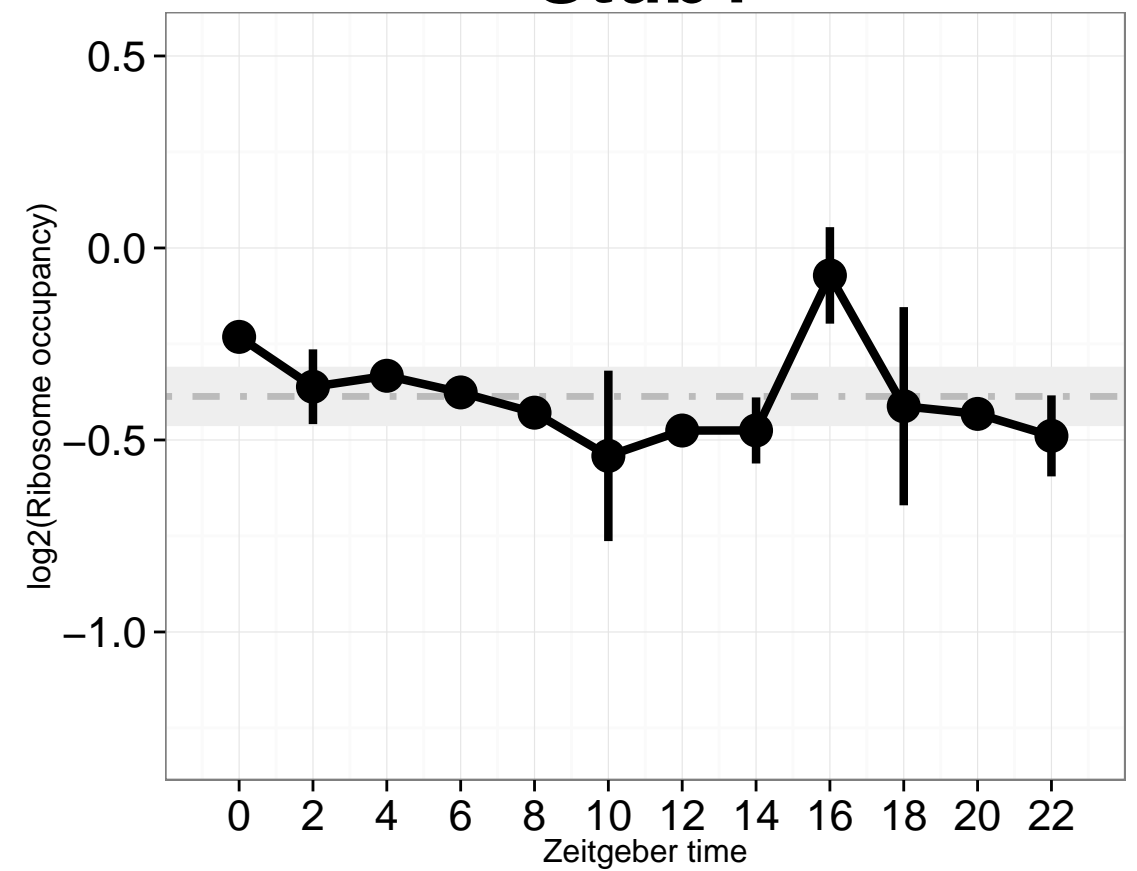

Supplement: Supplementary file 12072 [file 1]

## Cntfr

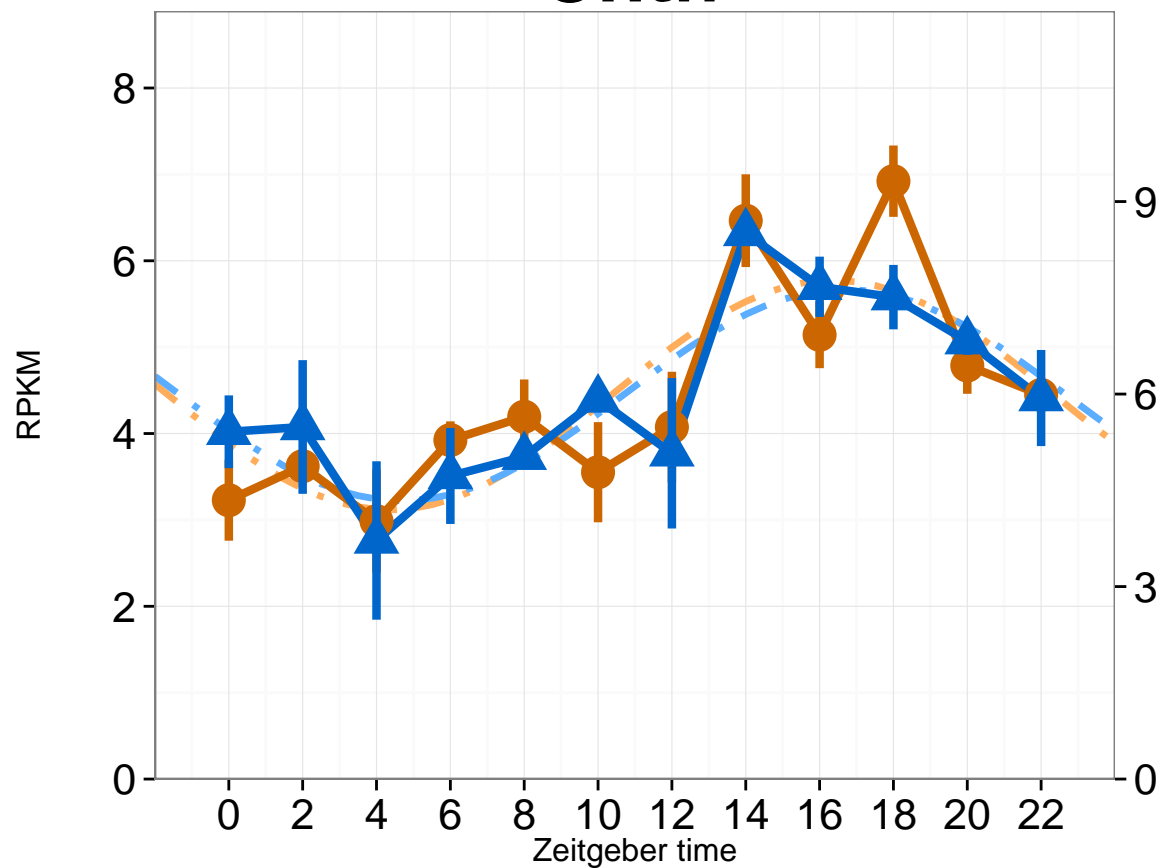

## Cntfr

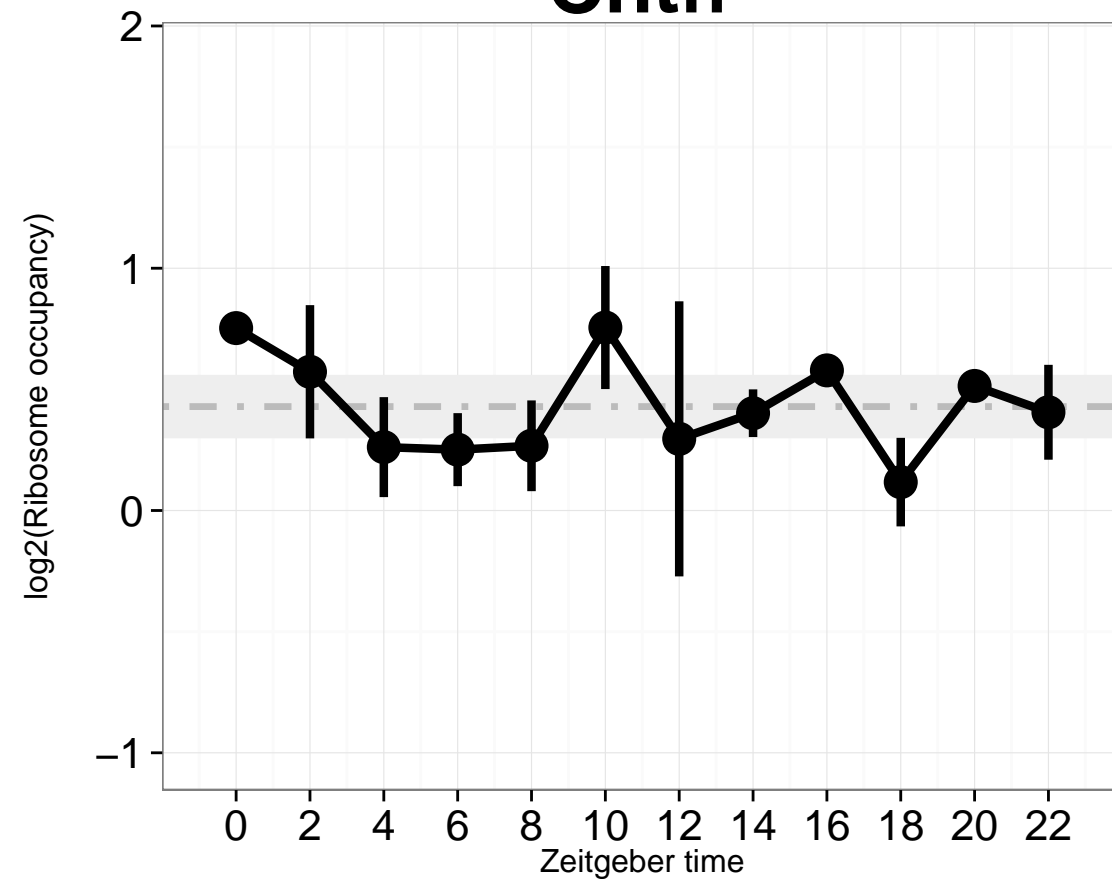

Supplement: Supplementary file 12073 [file 1]

## Hmga1

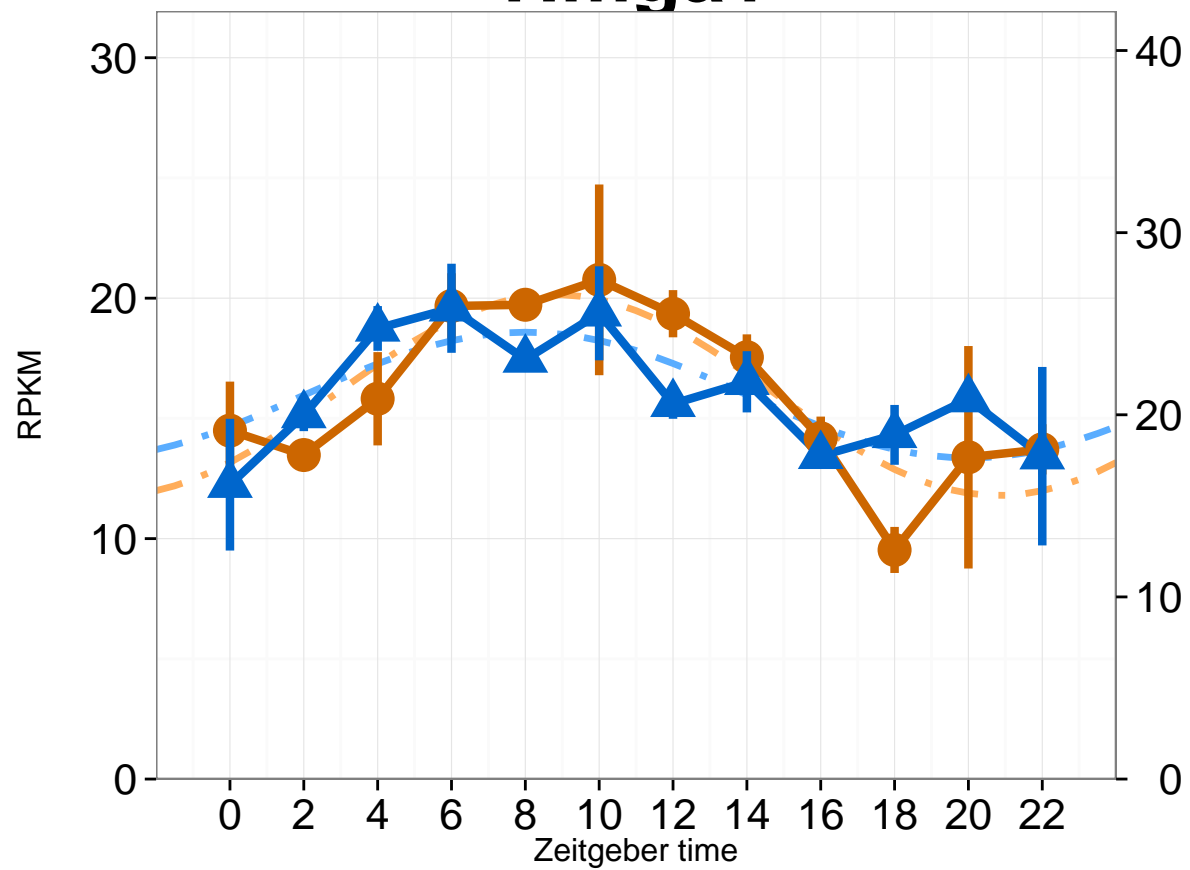

## Hmga1

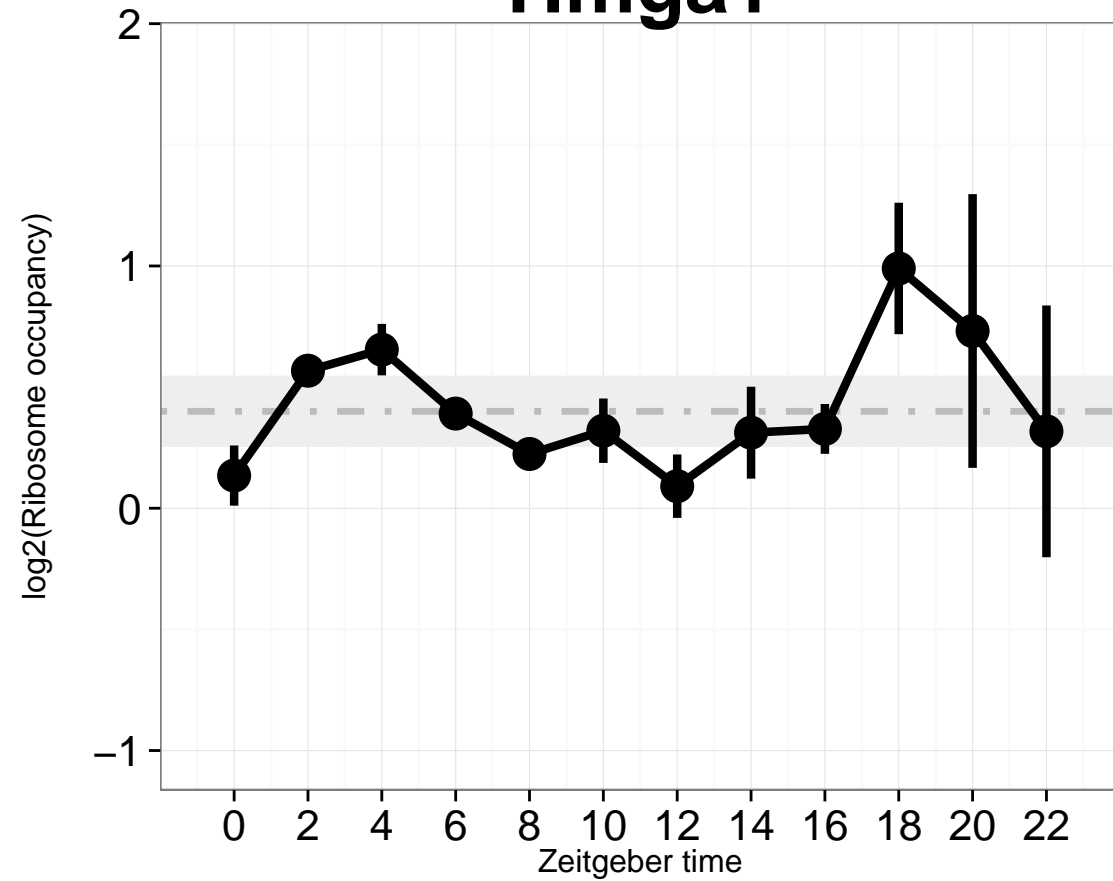

Supplement: Supplementary file 12074 [file 1]

## Hnrnpab

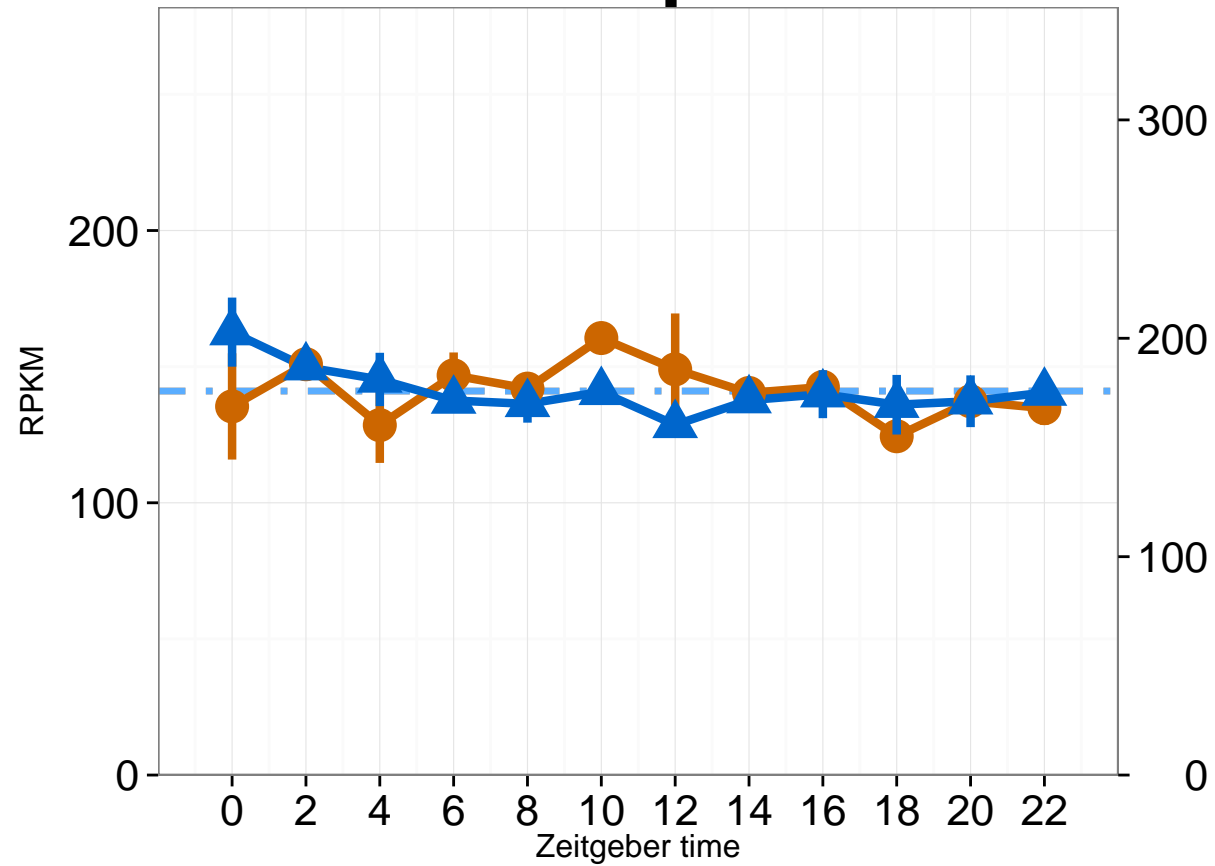

## Hnrnpab

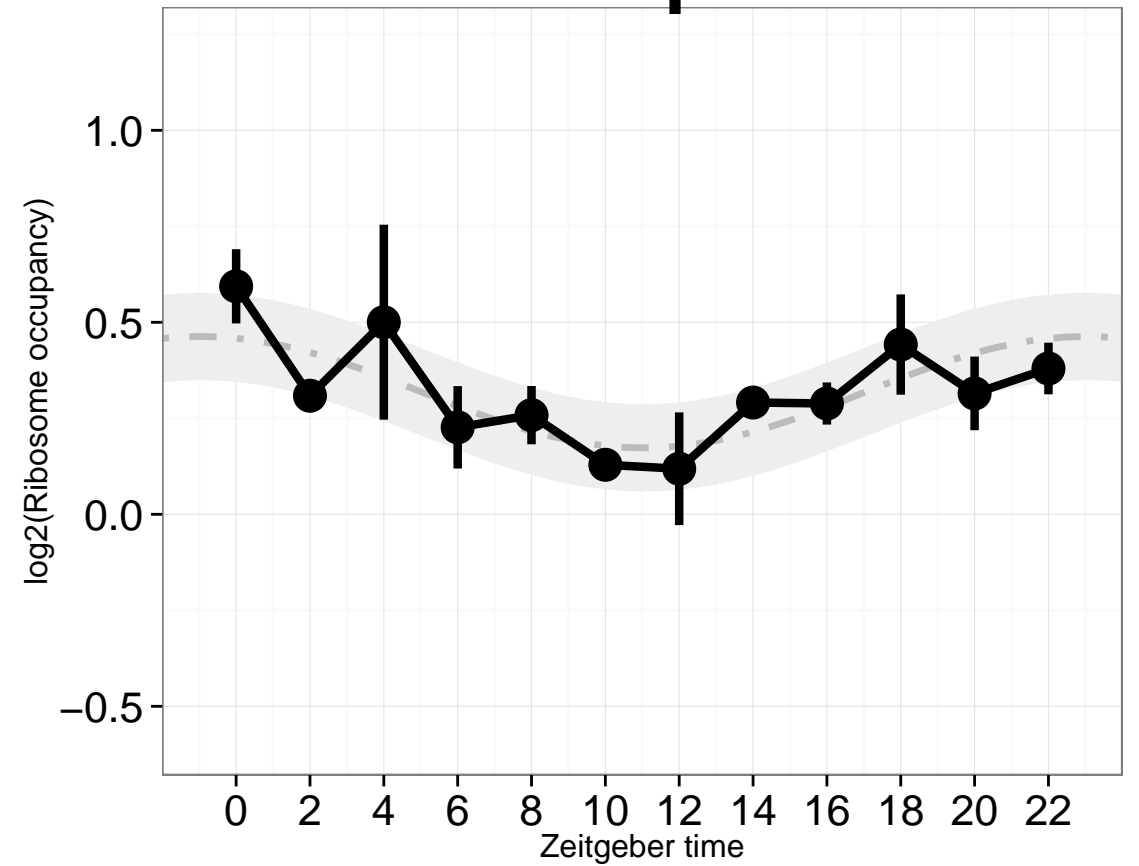

Supplement: Supplementary file 12075 [file 1]

# Neurl2

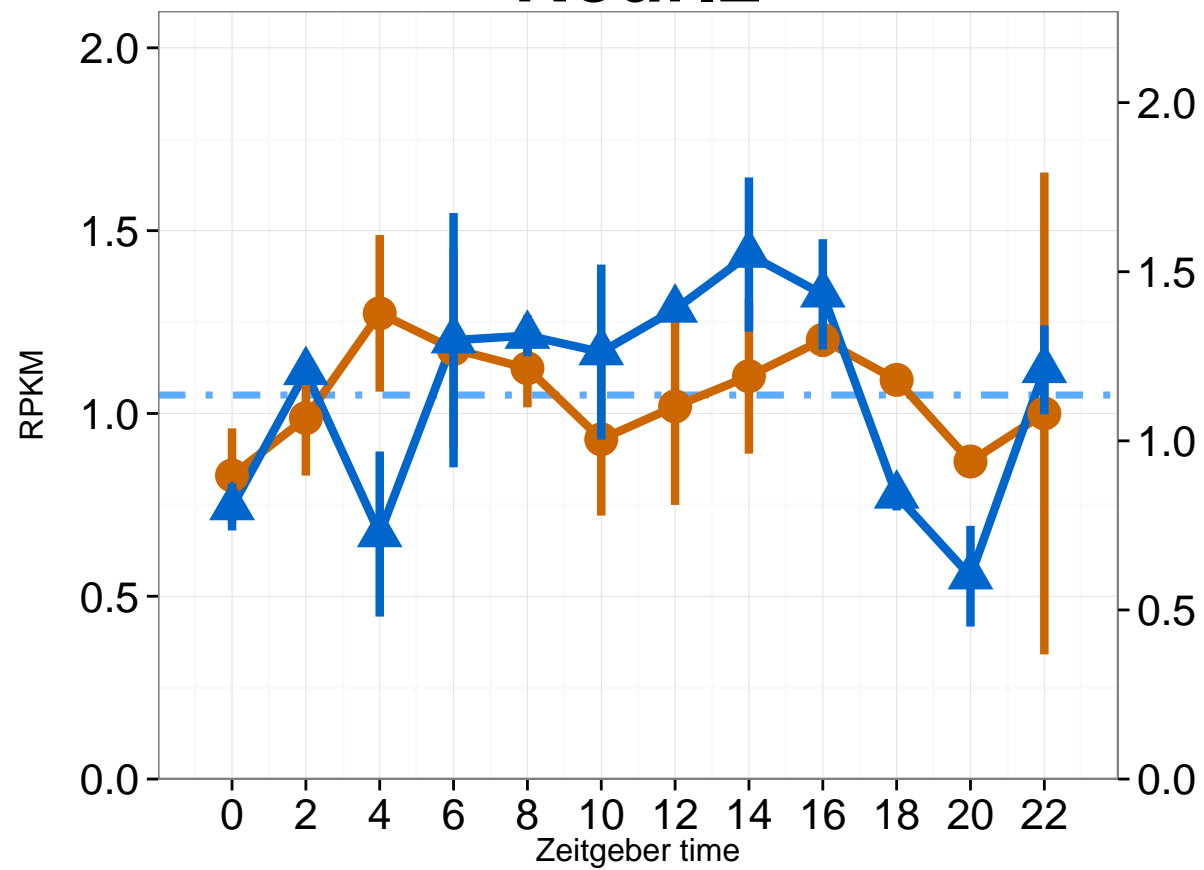

# Neurl2

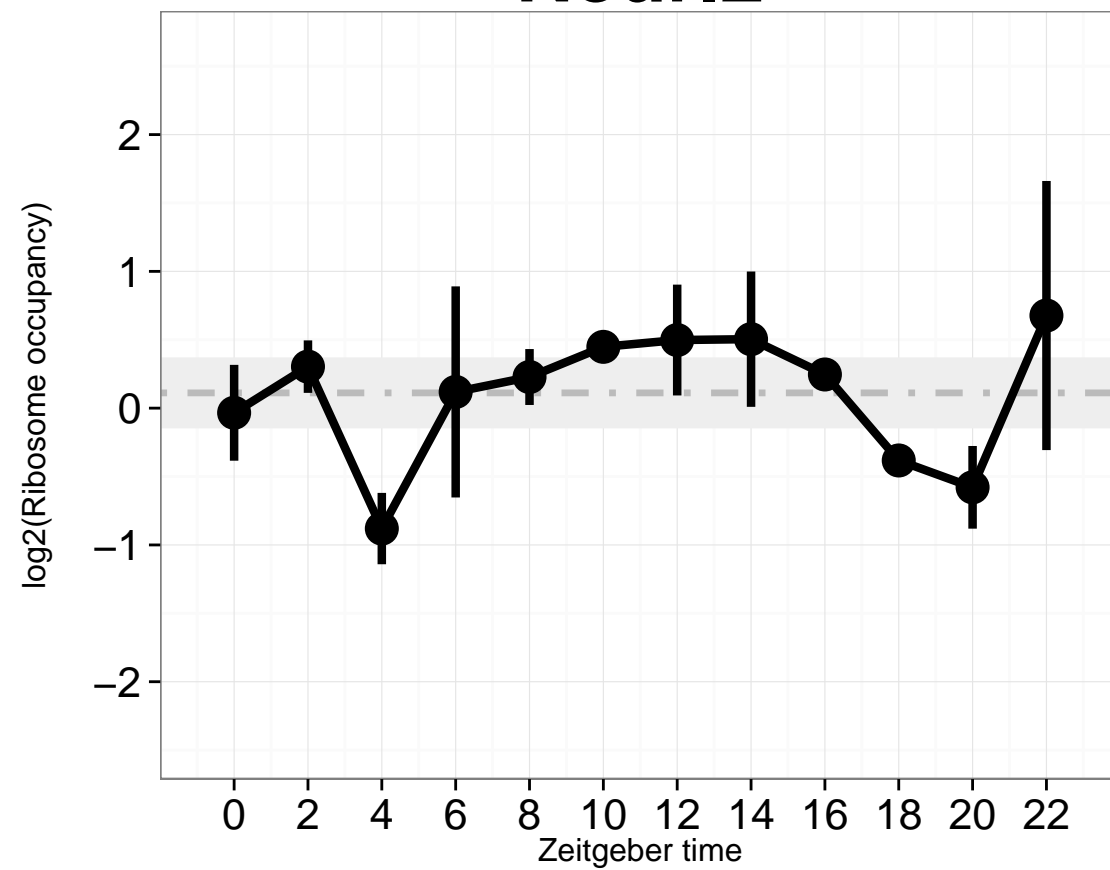

Supplement: Supplementary file 12076 [file 1]

# Frmd4a

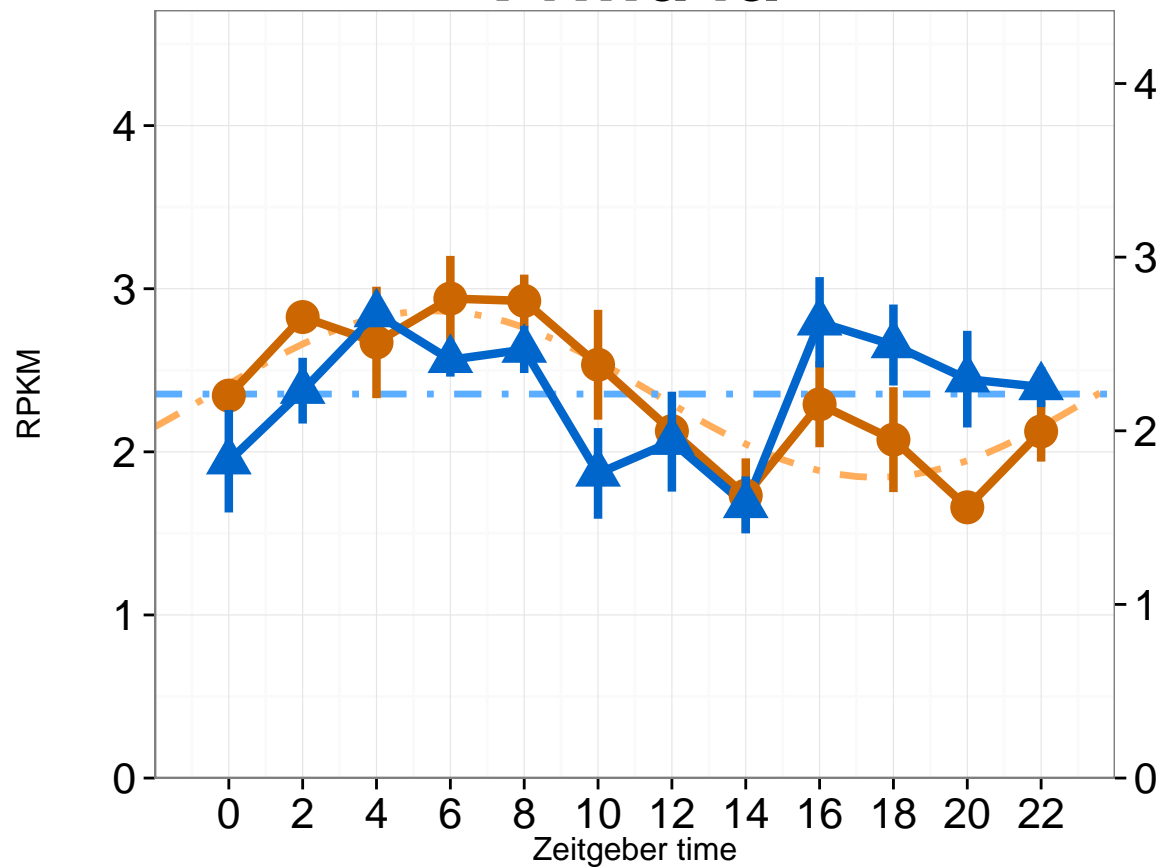

# Frmd4a

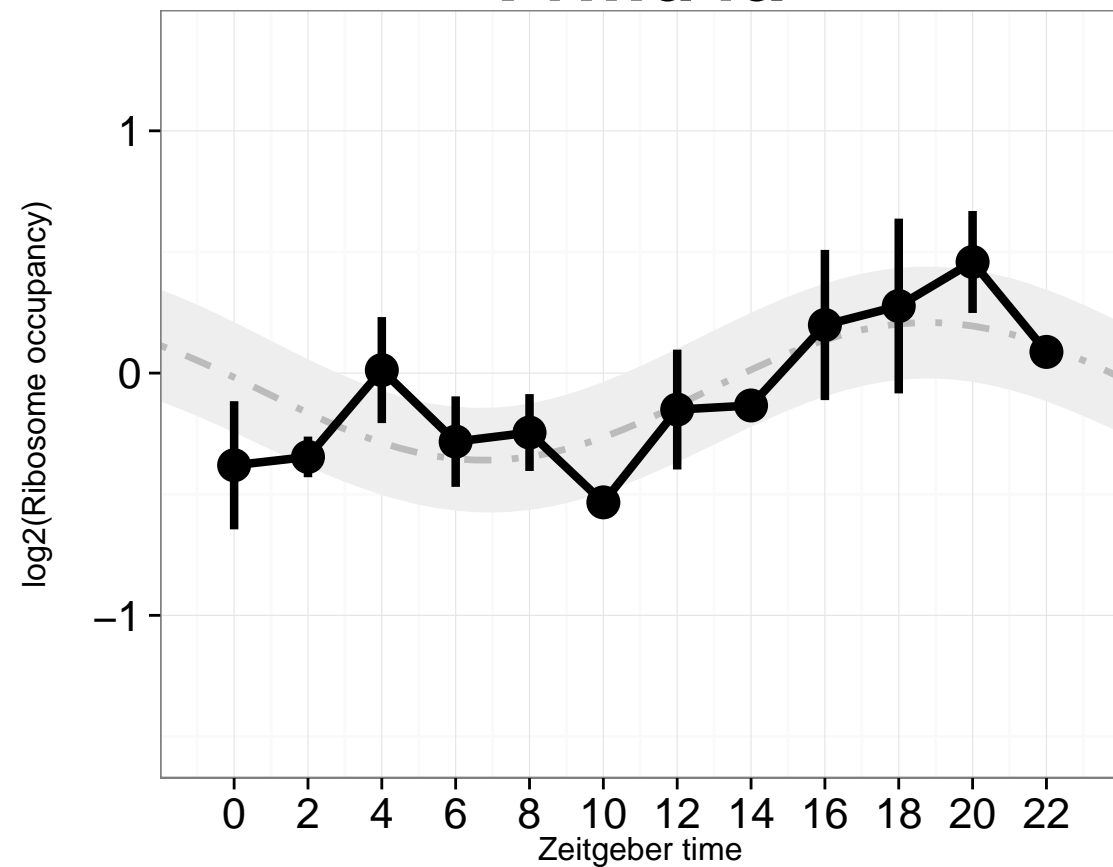

Supplement: Supplementary file 12077 [file 1]

# Drg2

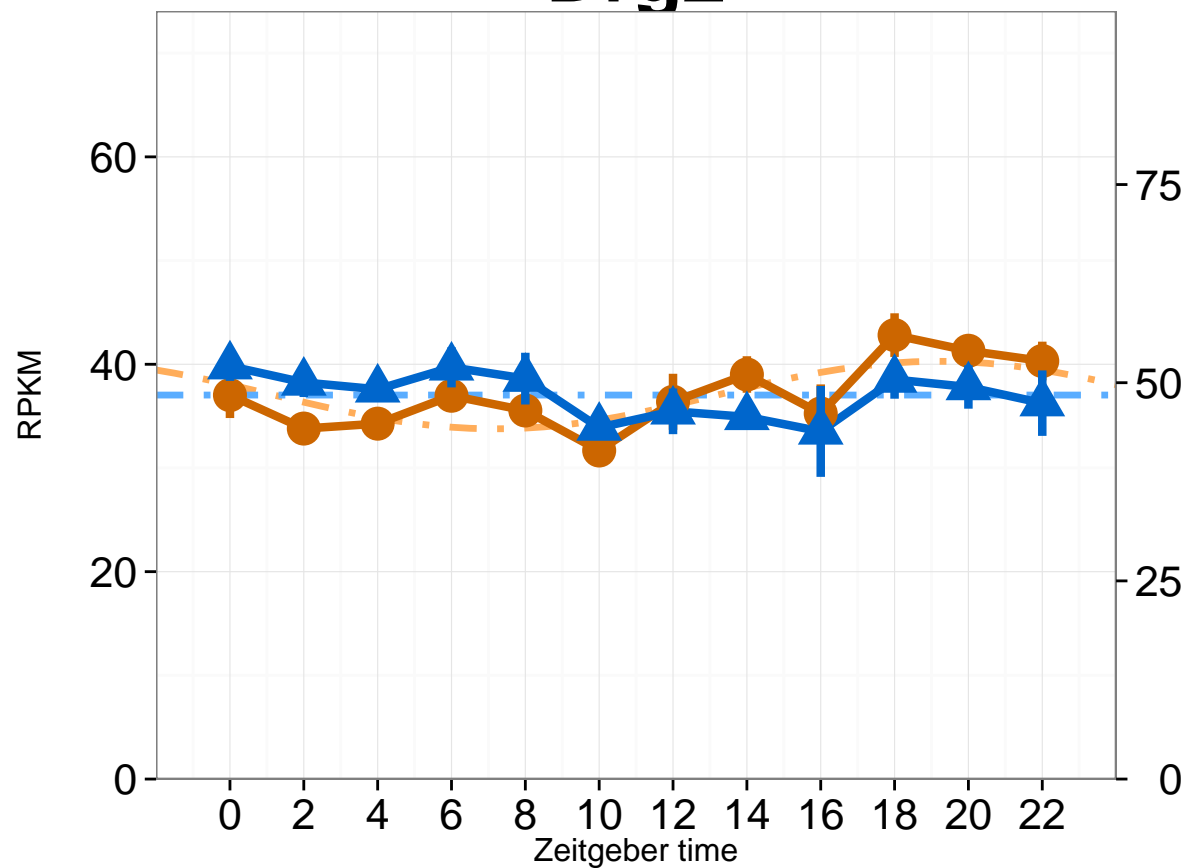

# Drg2

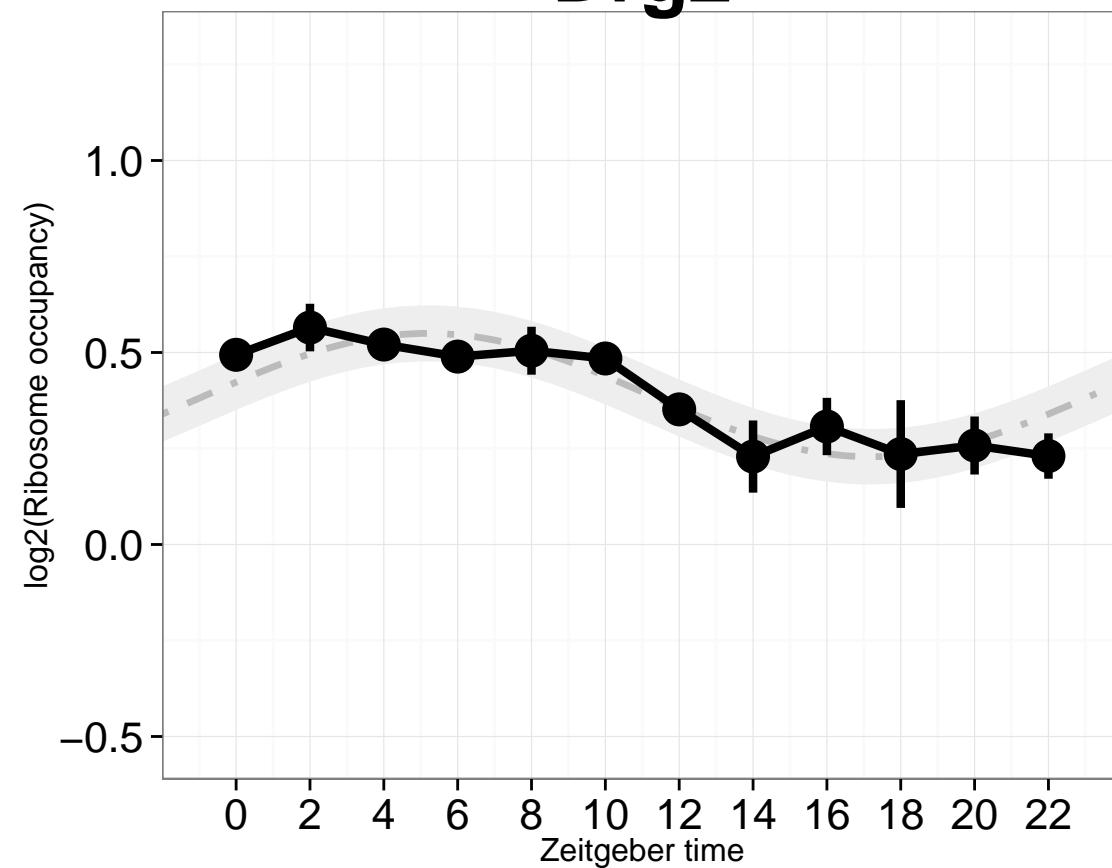

Supplement: Supplementary file 12078 [file 1]

# Upf3a

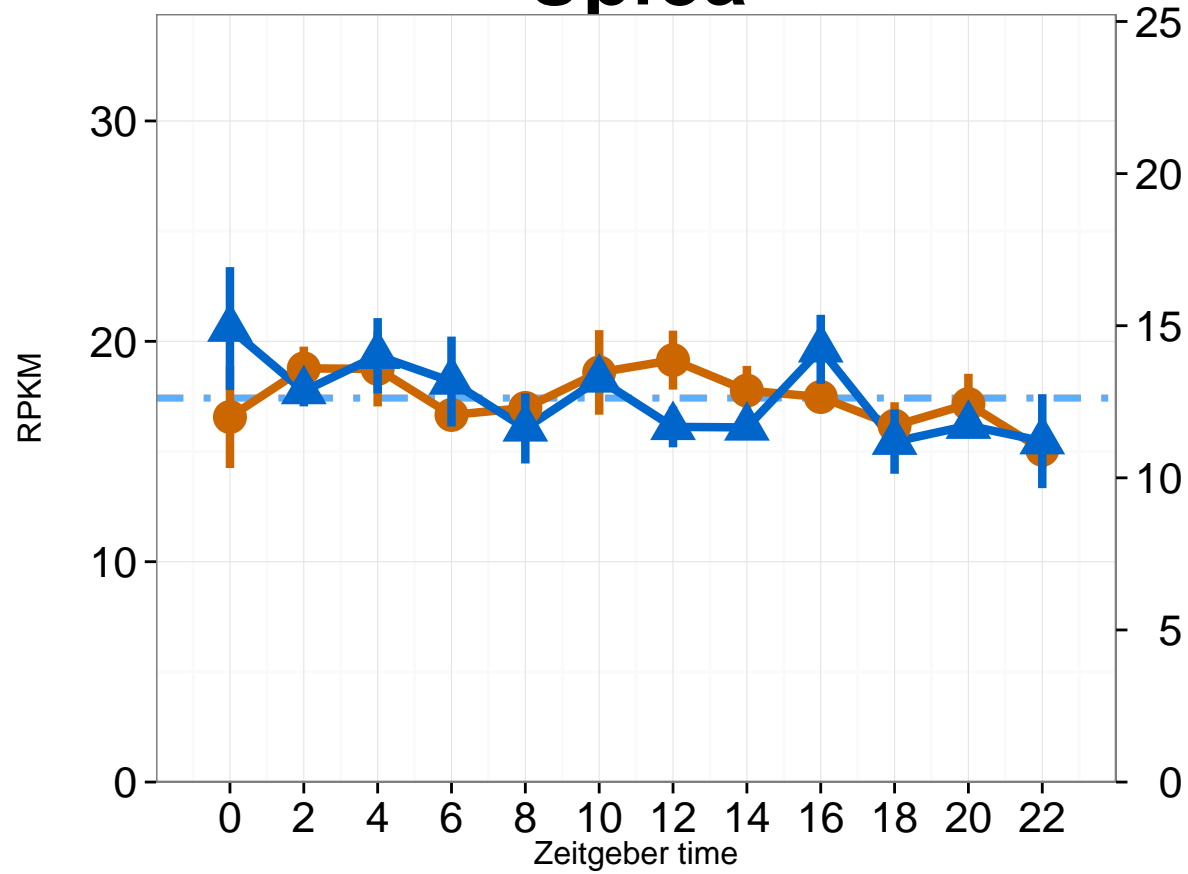

# Upf3a

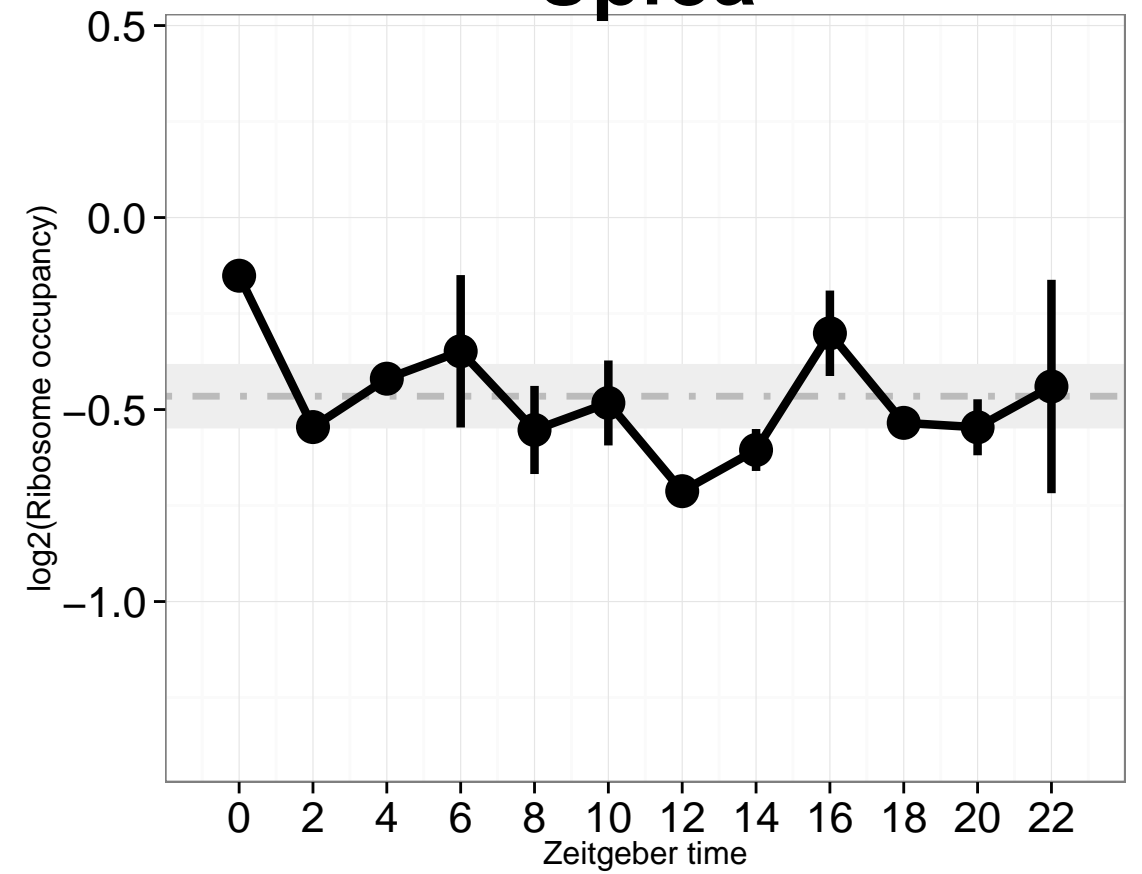

Supplement: Supplementary file 12079 [file 1]

**Slc10a6**

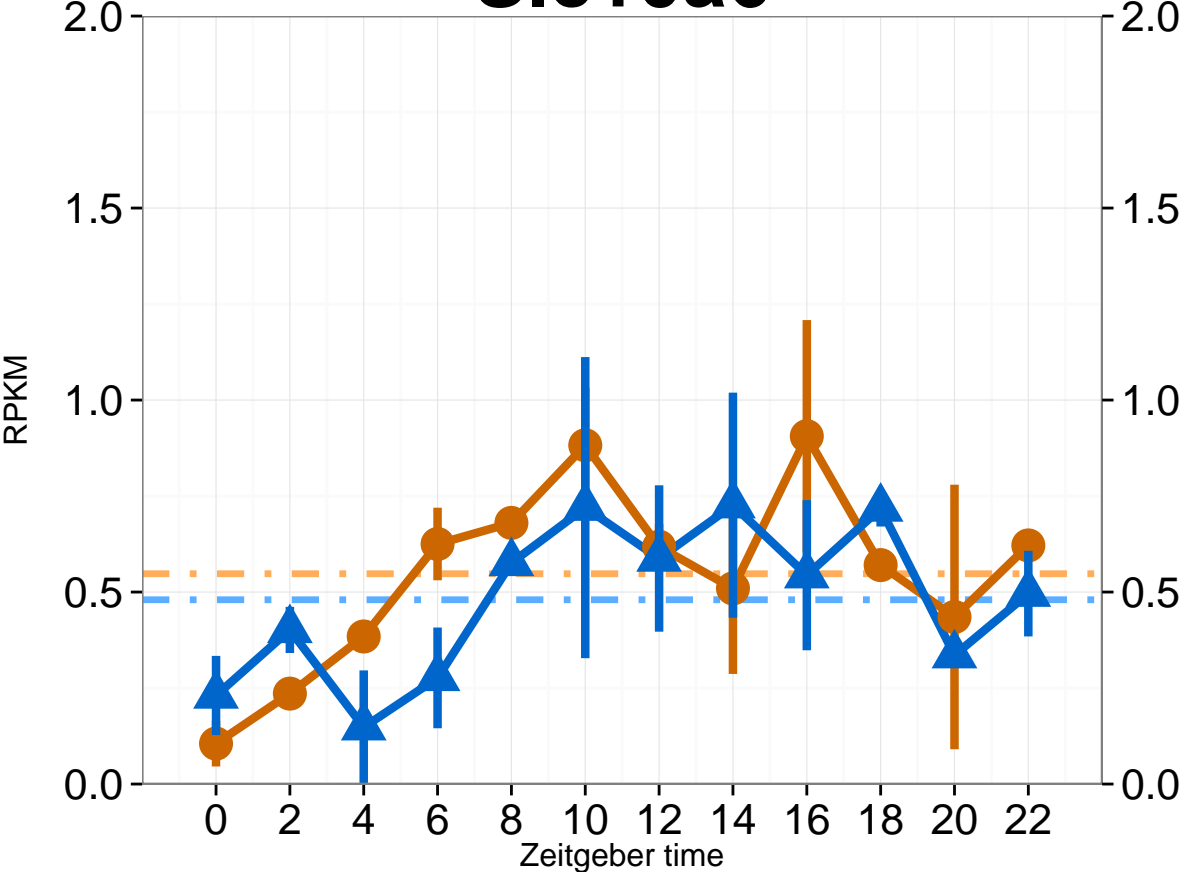

**Slc10a6**

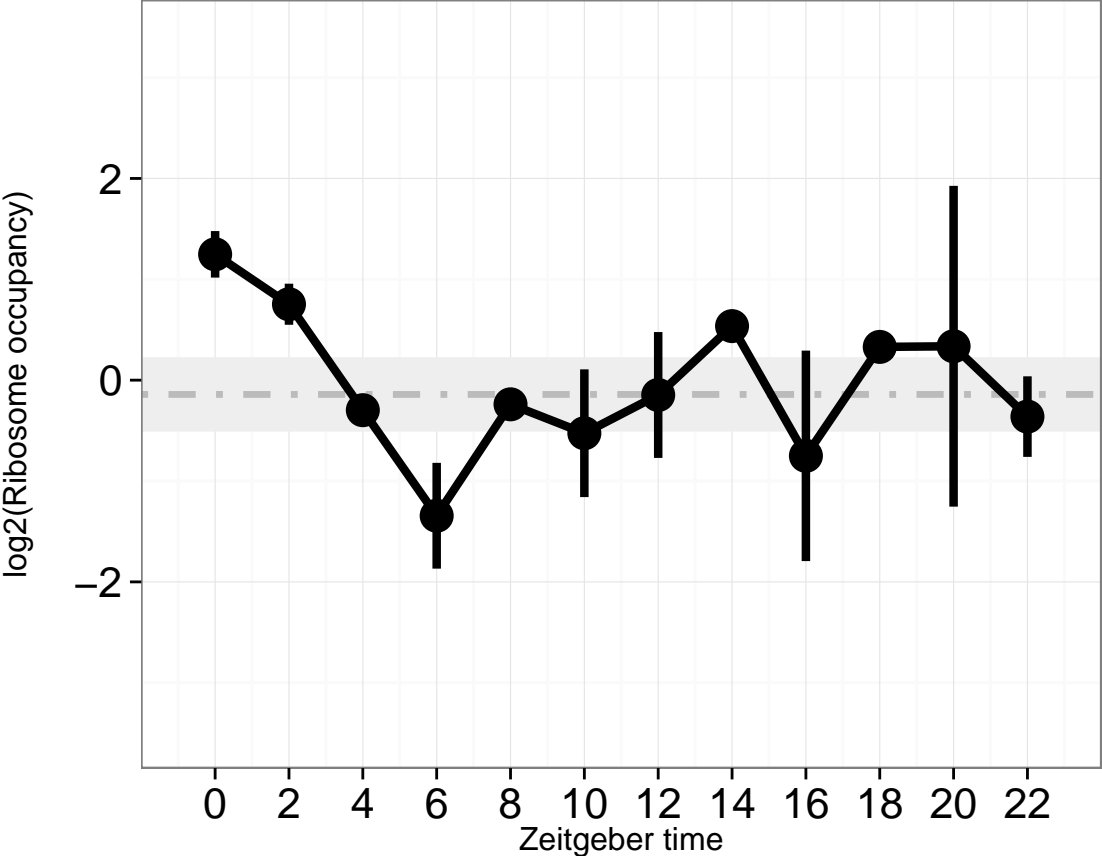

Supplement: Supplementary file 12080 [file 1]

# Dtwd1

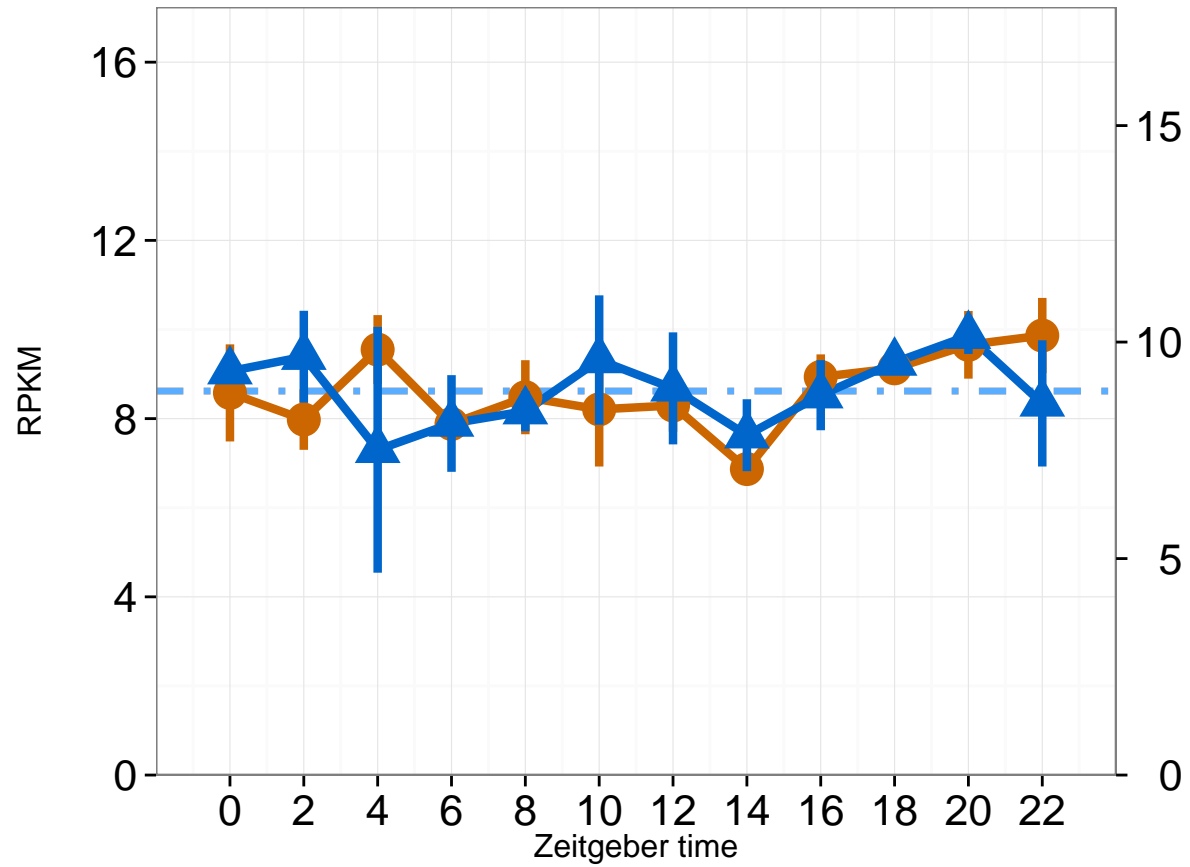

# Dtwd1

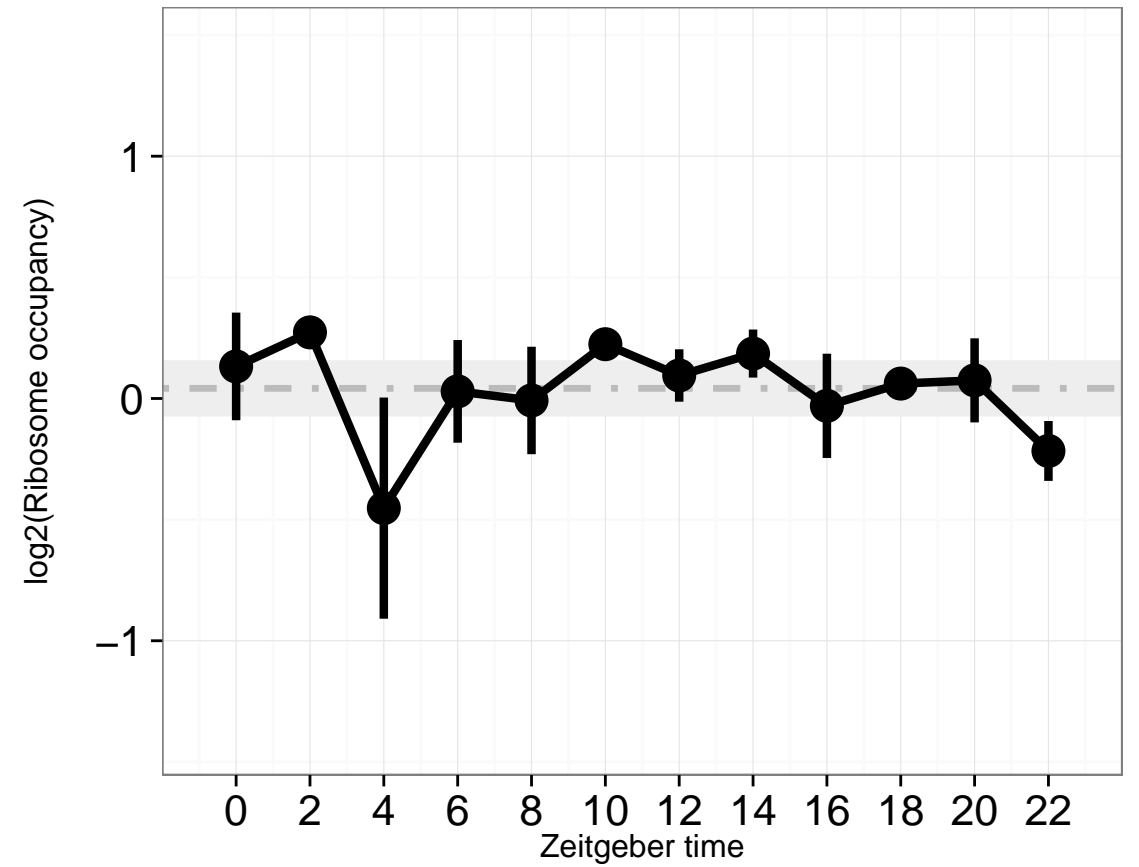

Supplement: Supplementary file 12081 [file 1]

## Ptrh1

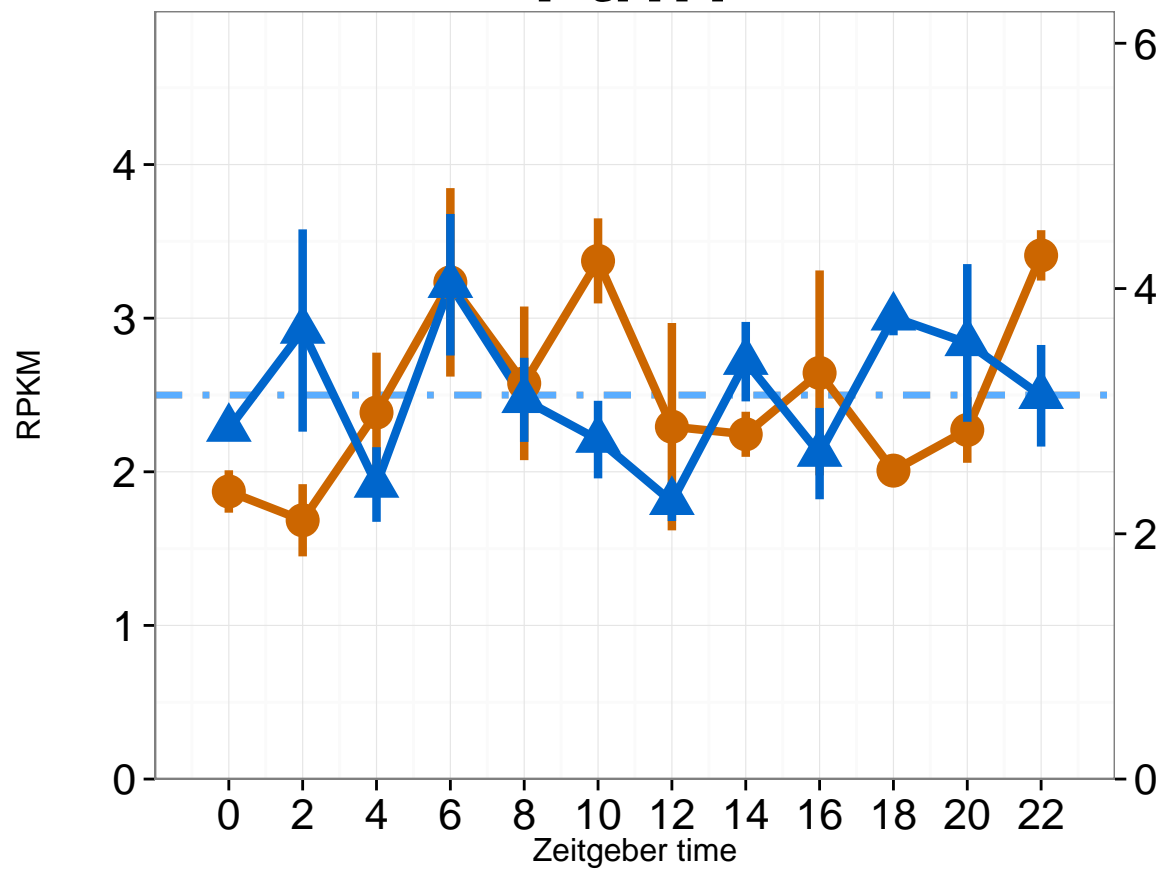

## Ptrh1

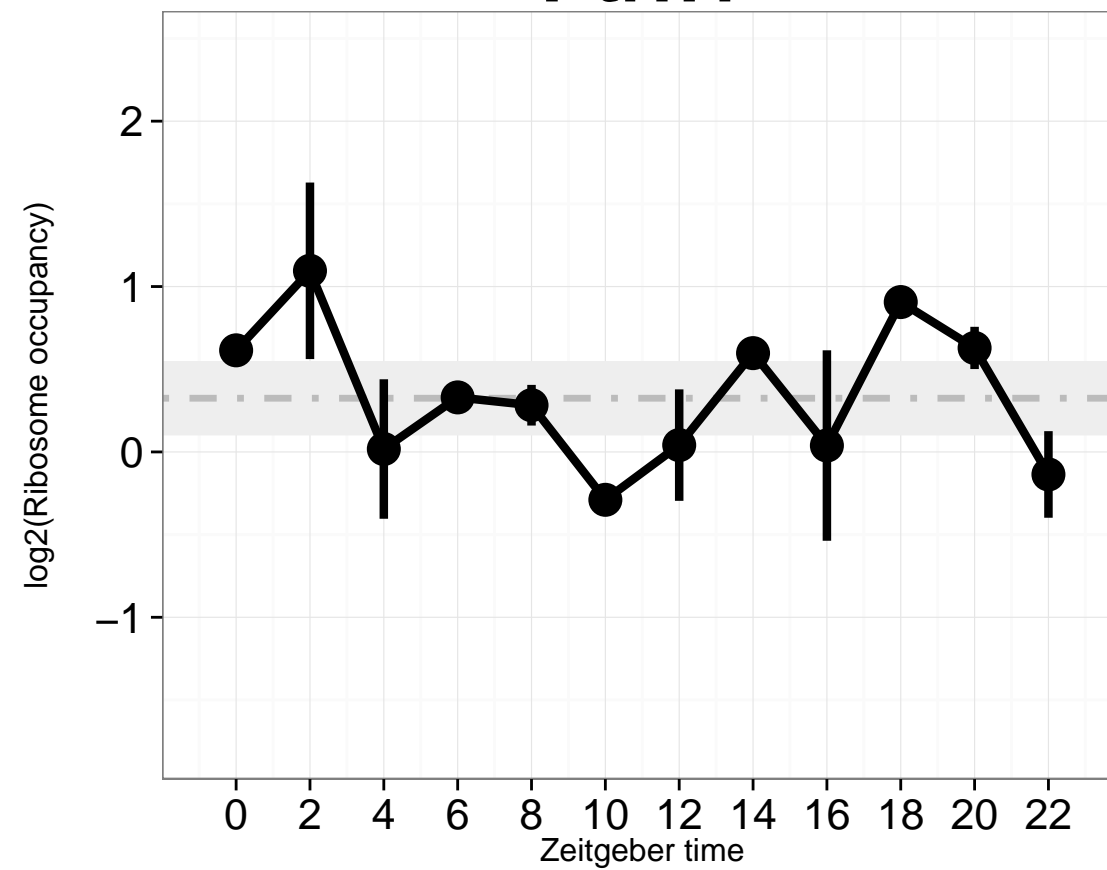

Supplement: Supplementary file 12082 [file 1]

## Parp1

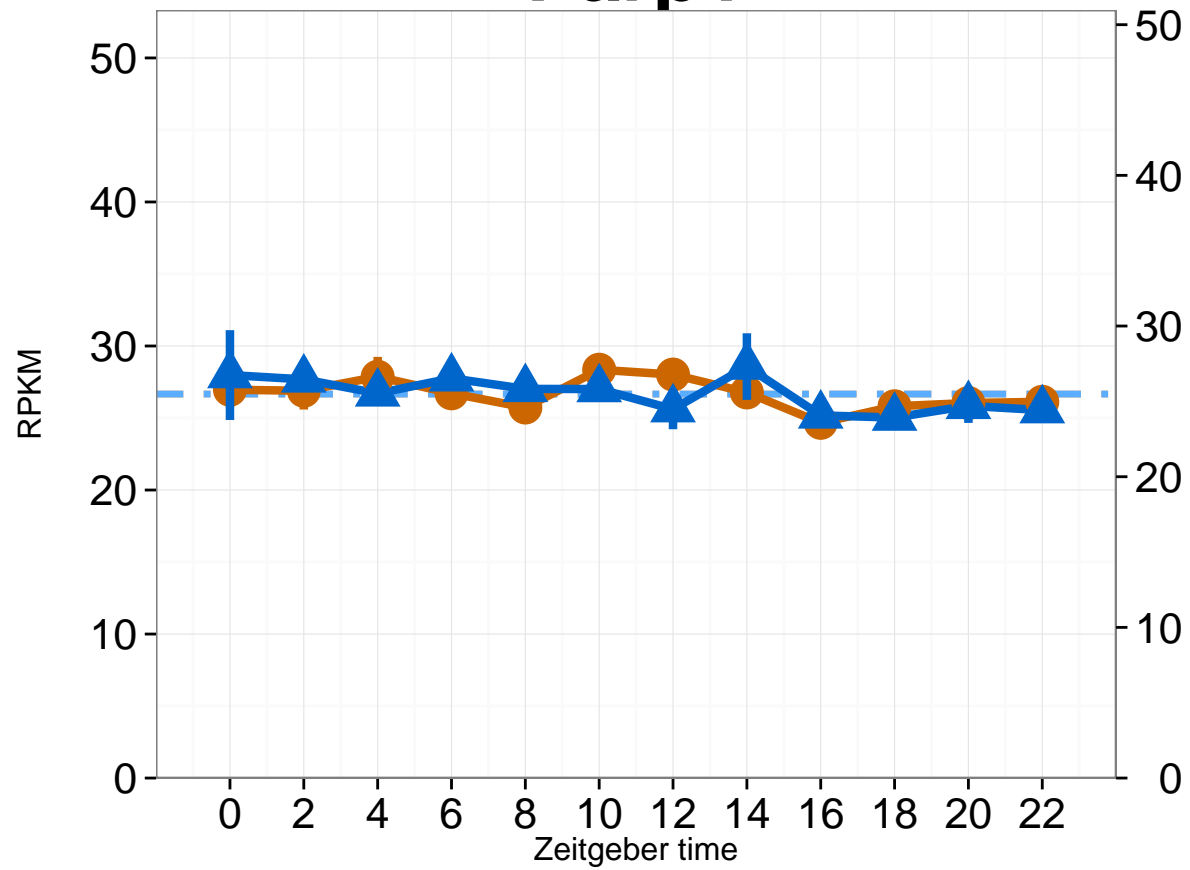

## Parp1

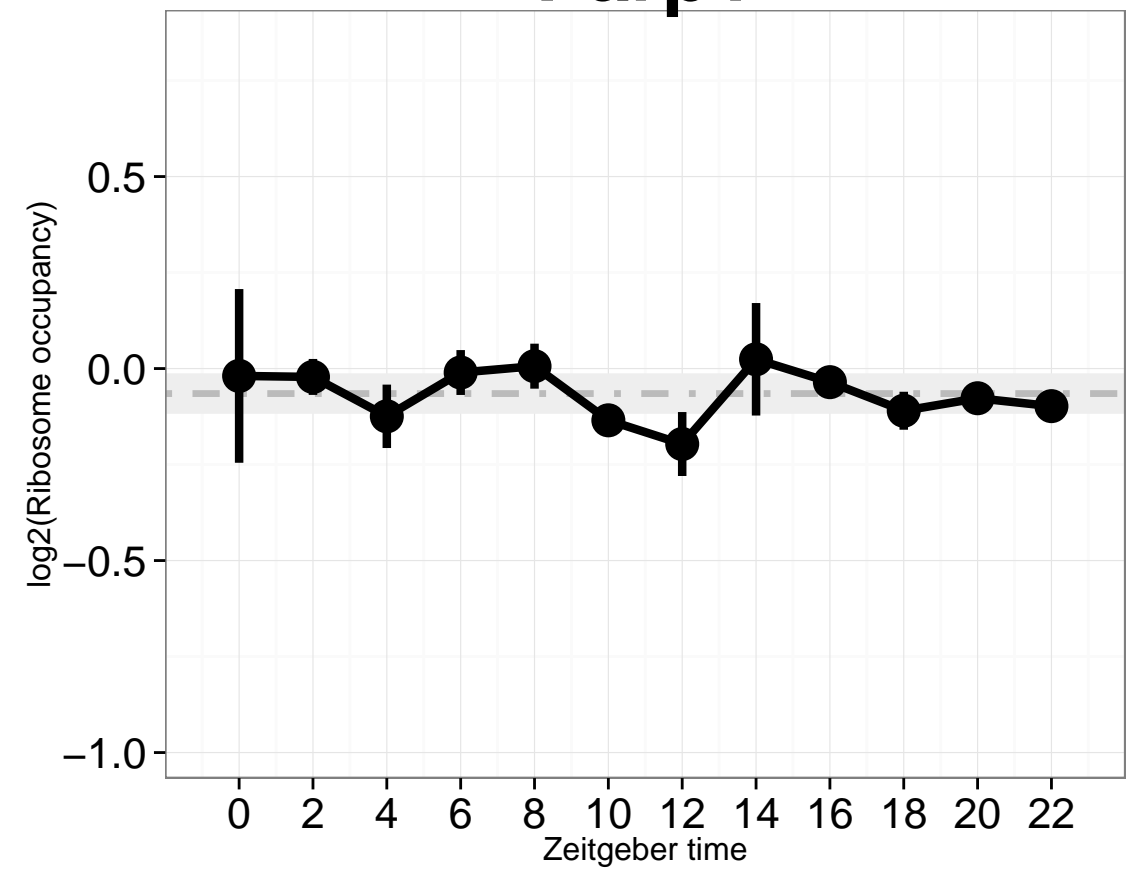

Supplement: Supplementary file 12083 [file 1]

# Fbxo18

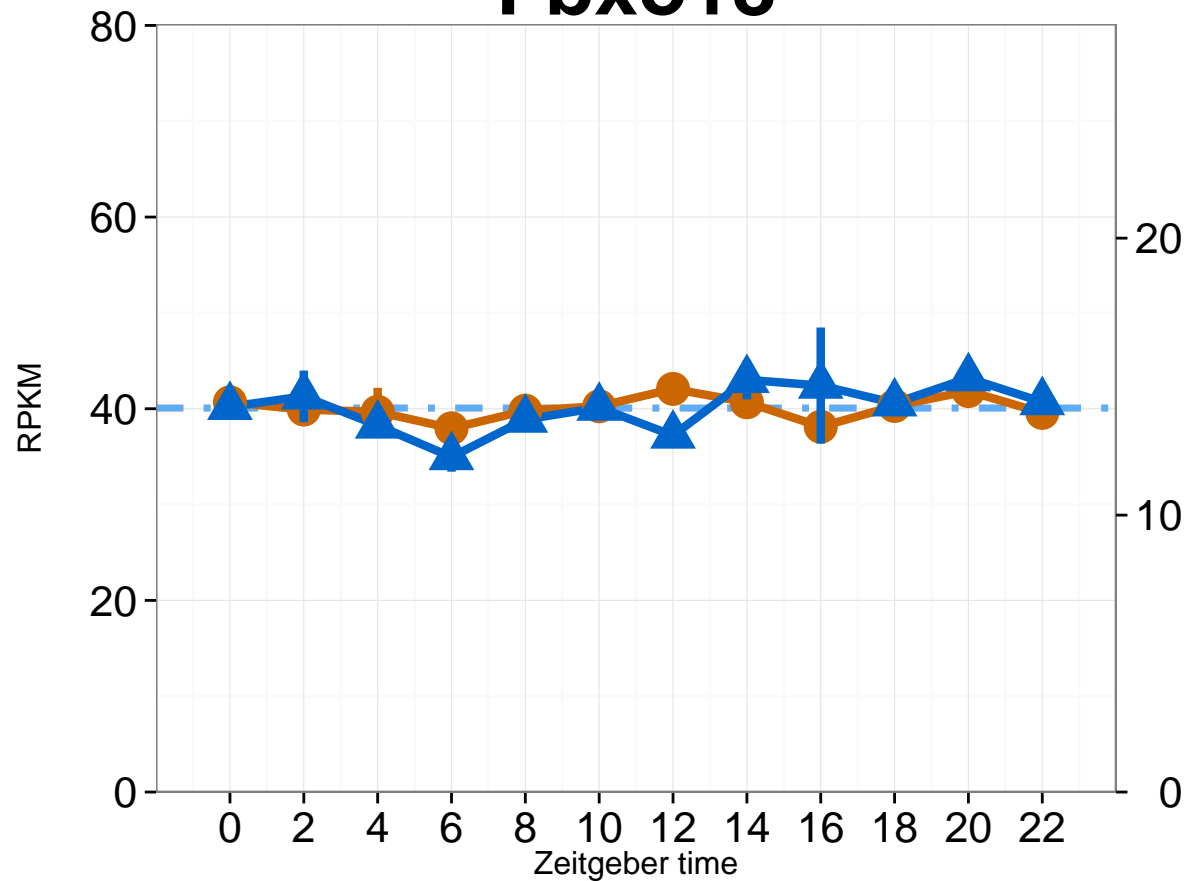

# Fbxo18

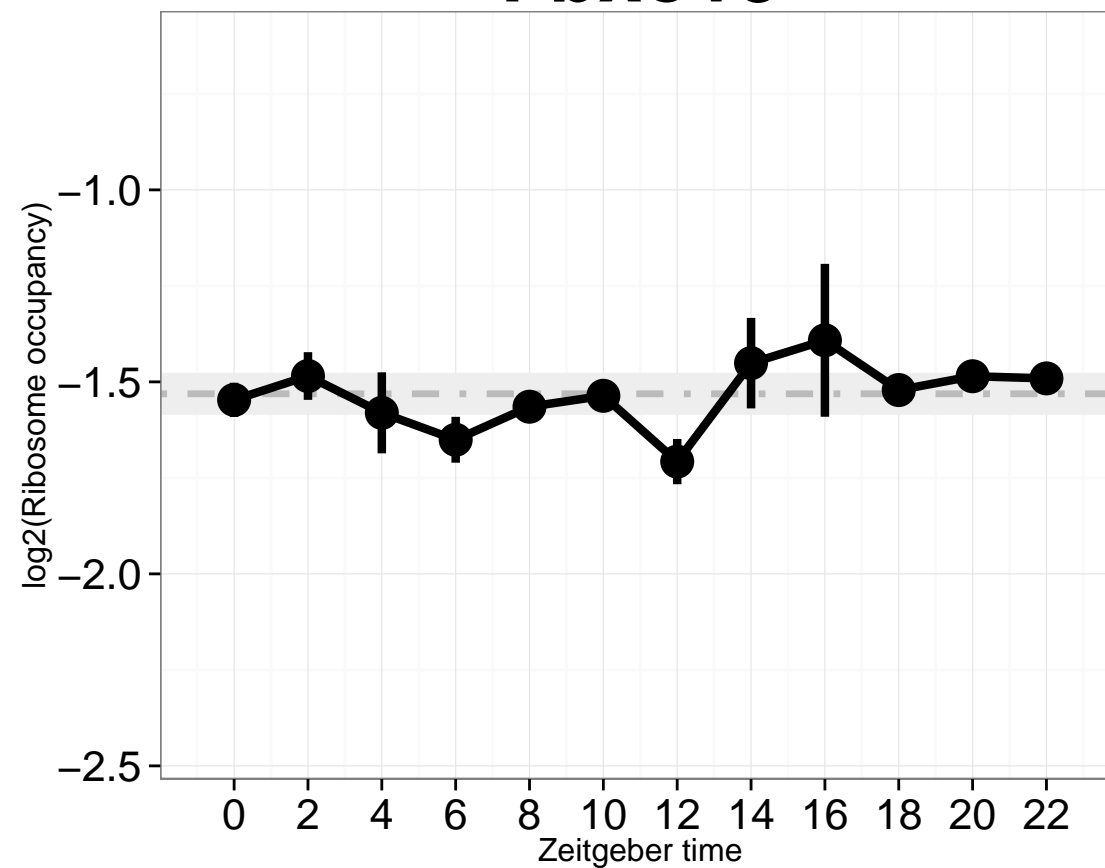

Supplement: Supplementary file 12084 [file 1]

## Ginm1

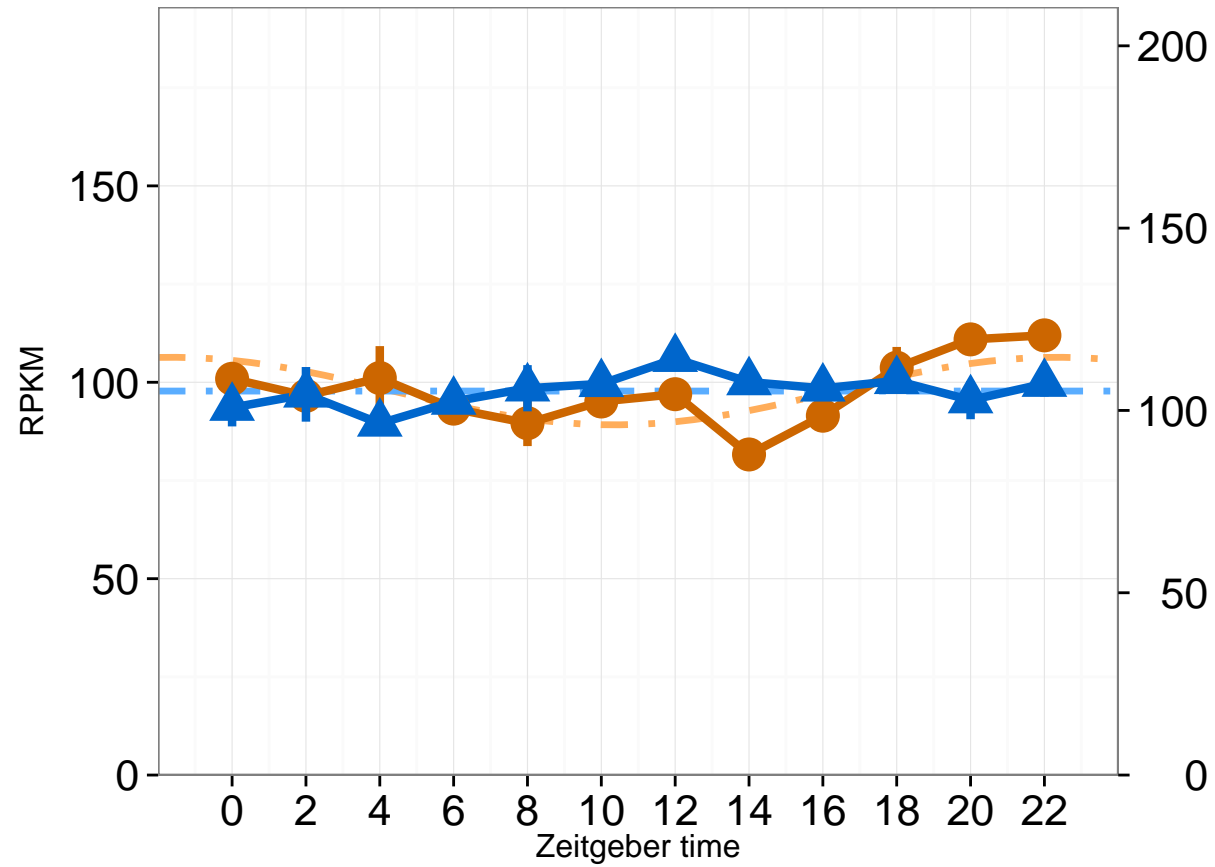

## Ginm1

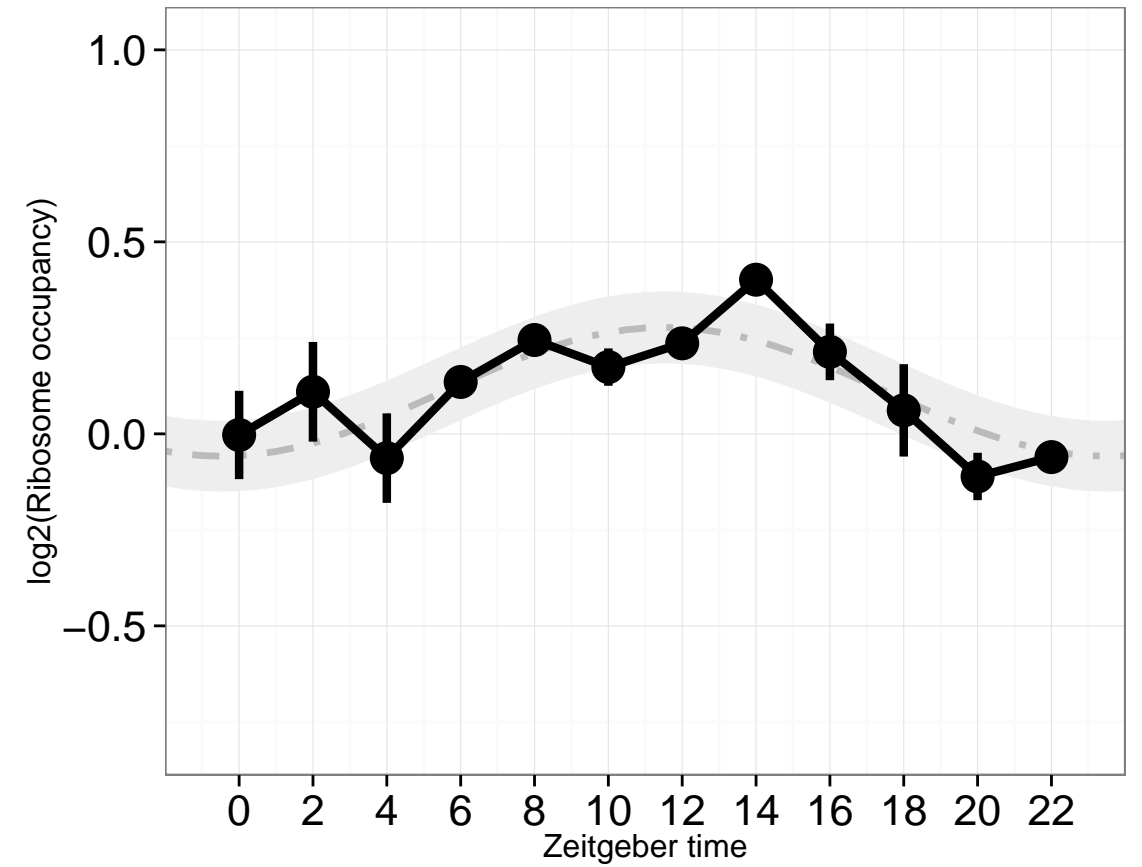

Supplement: Supplementary file 12085 [file 1]

# Atp6v1d

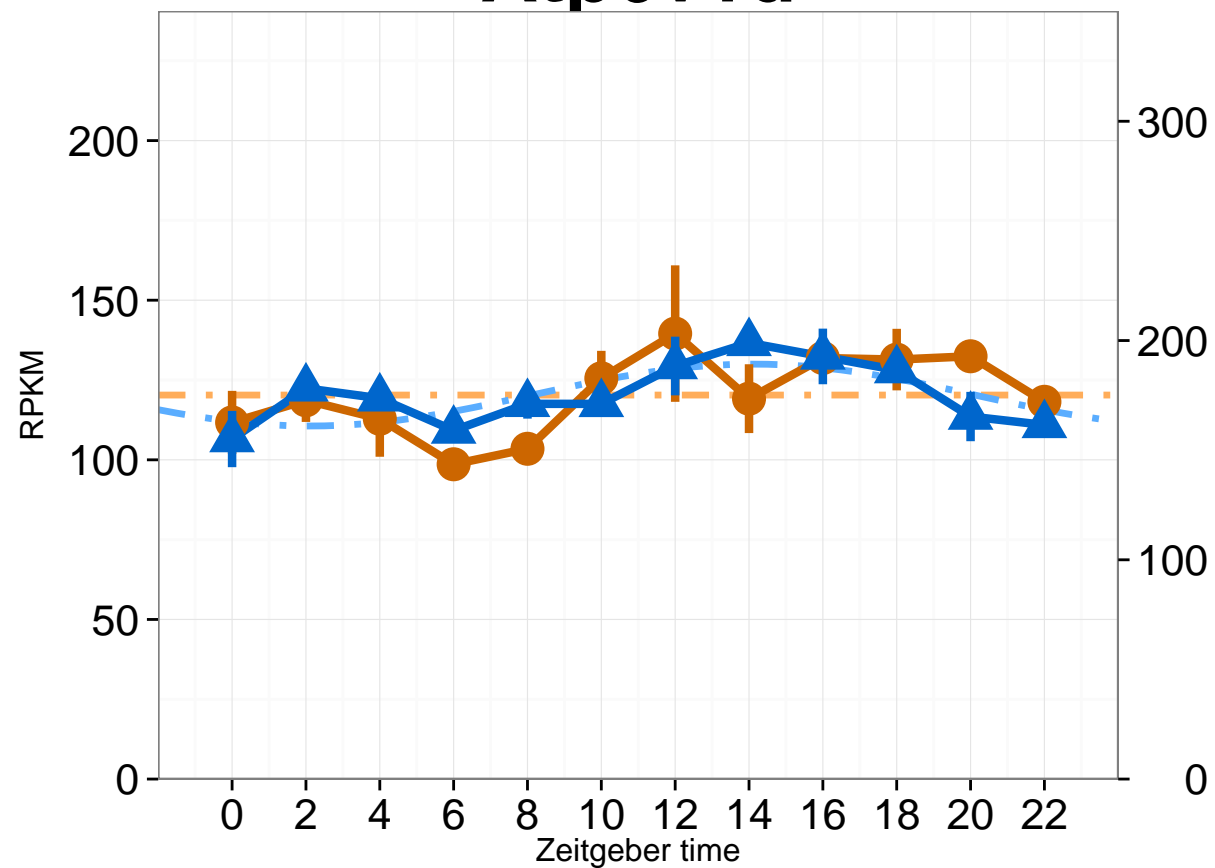

# Atp6v1d

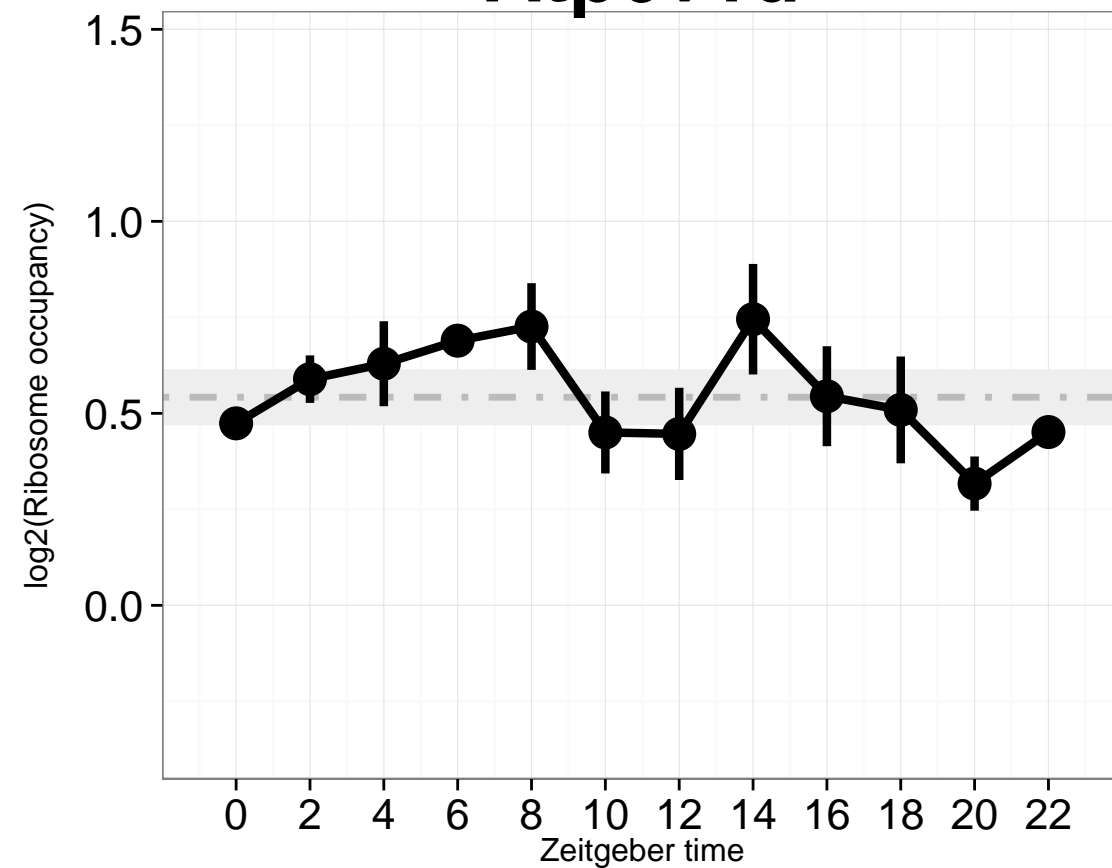

Supplement: Supplementary file 12086 [file 1]

## Pigs

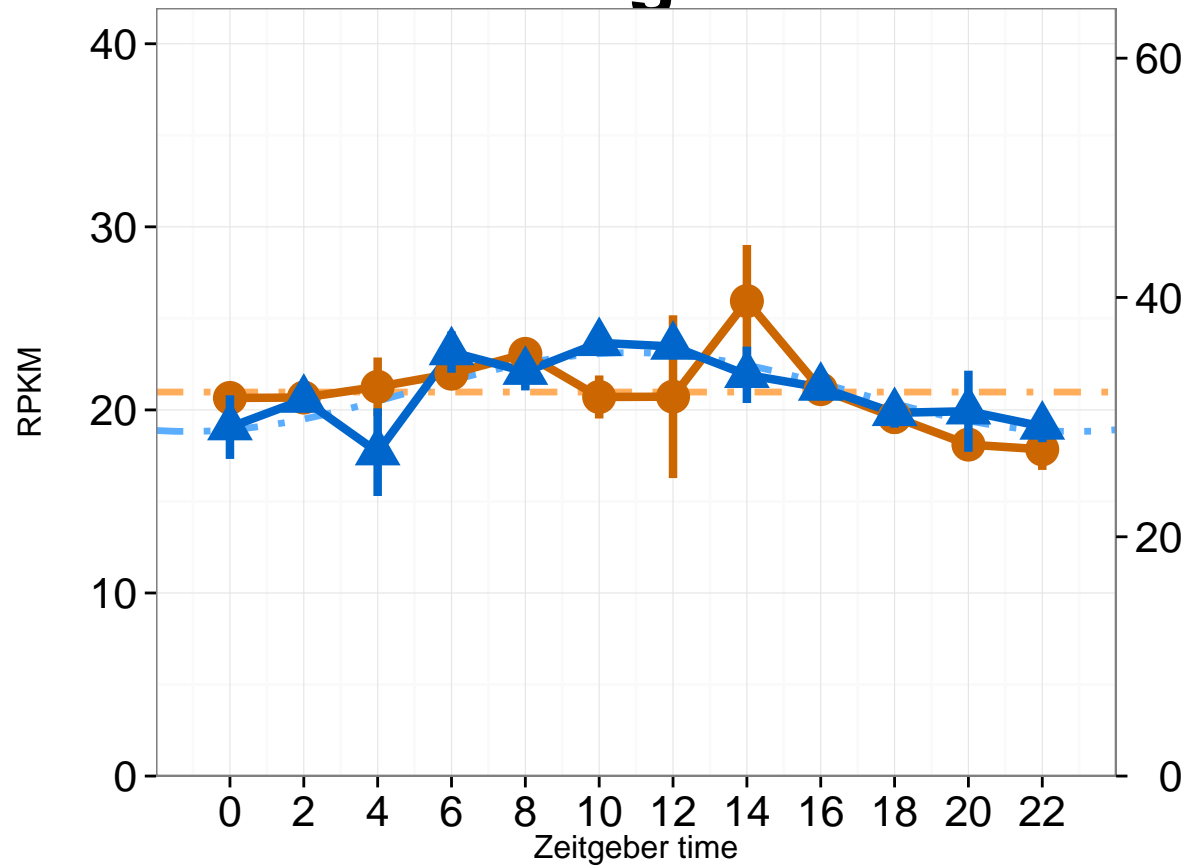

## Pigs

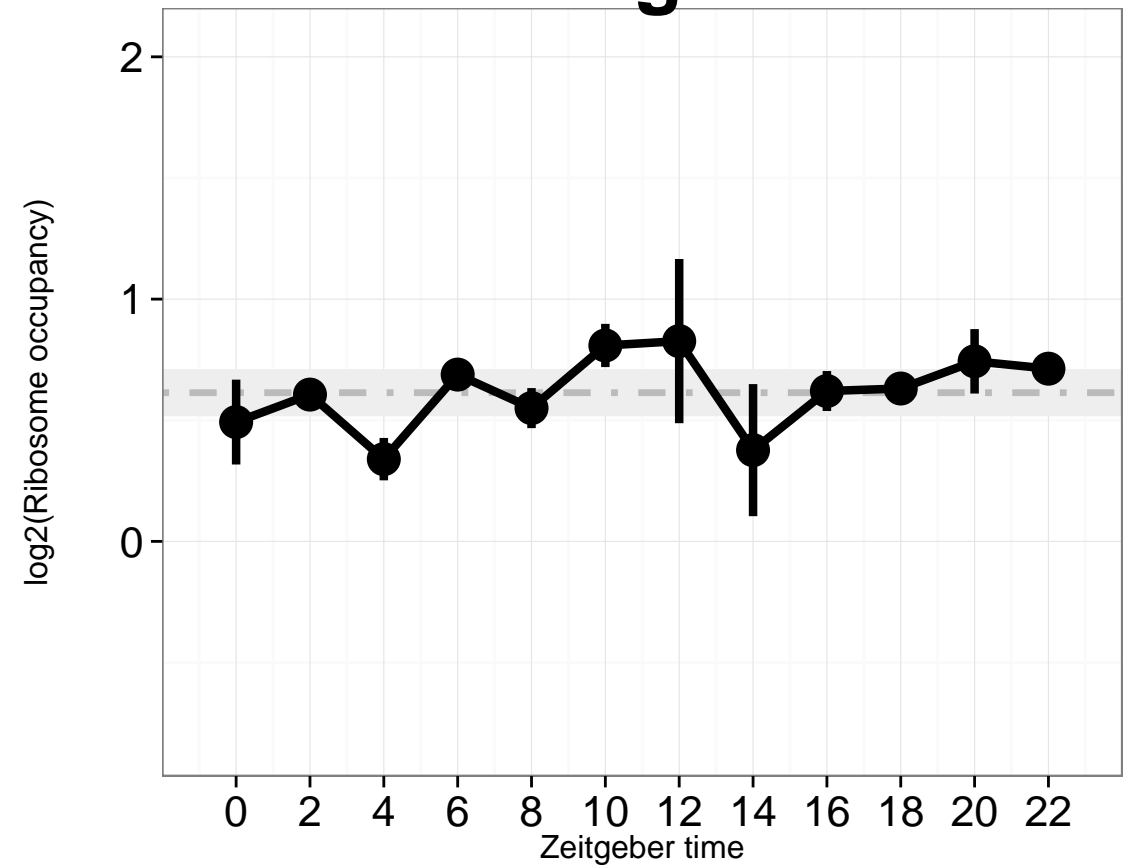

Supplement: Supplementary file 12087 [file 1]

# Cnot4

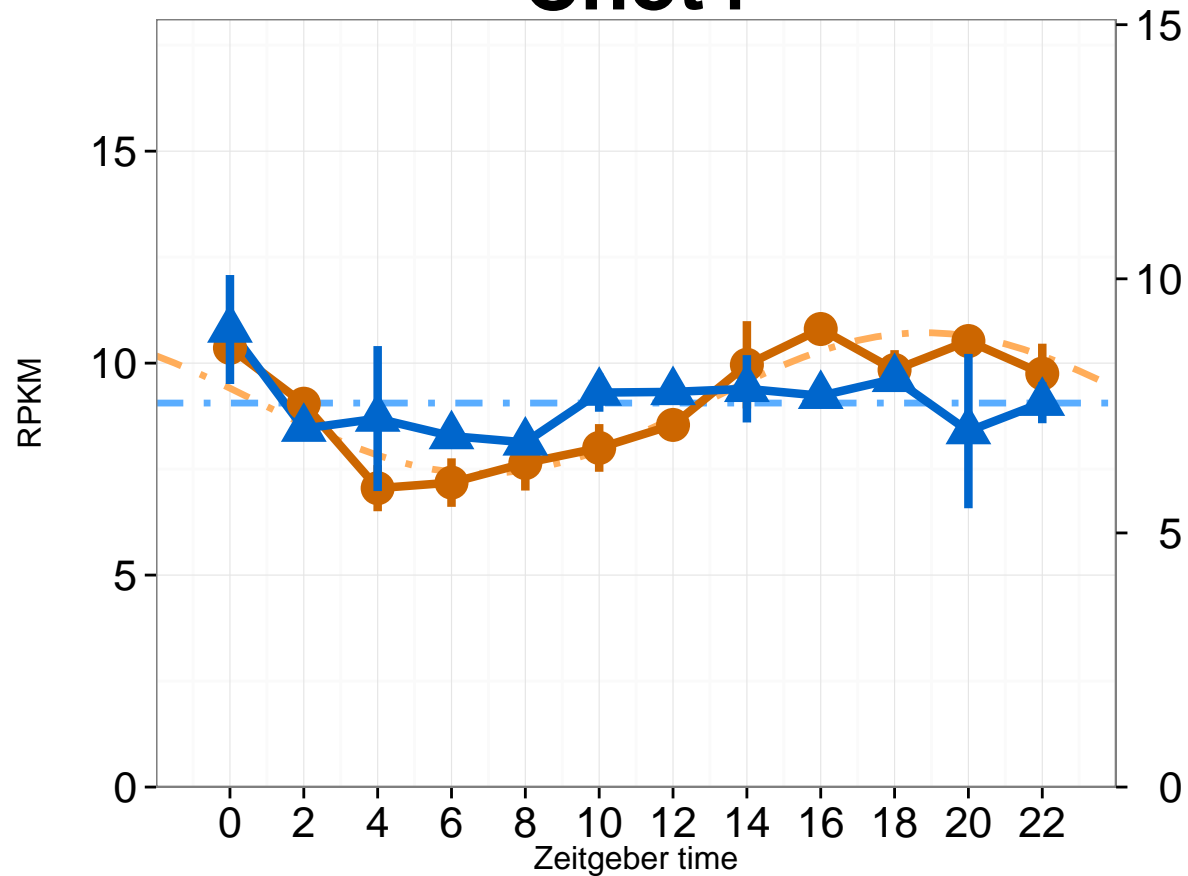

# Cnot4

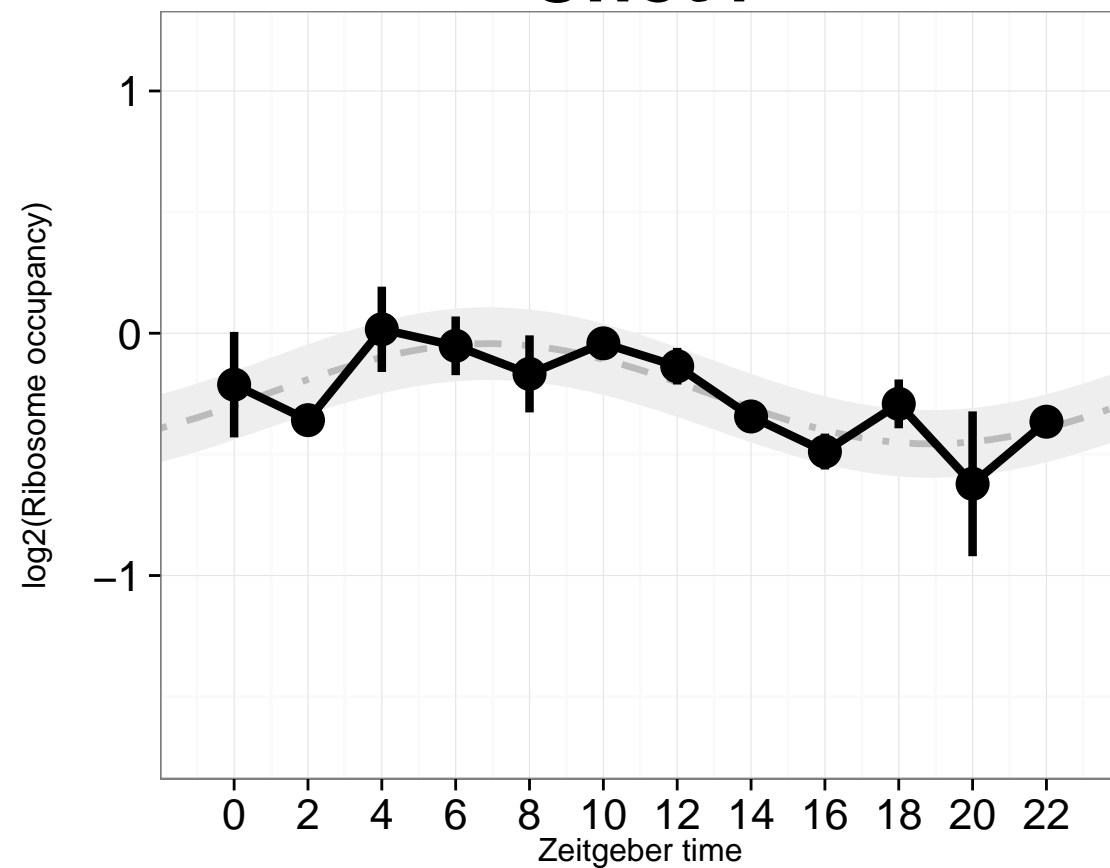

Supplement: Supplementary file 12088 [file 1]

## Prep

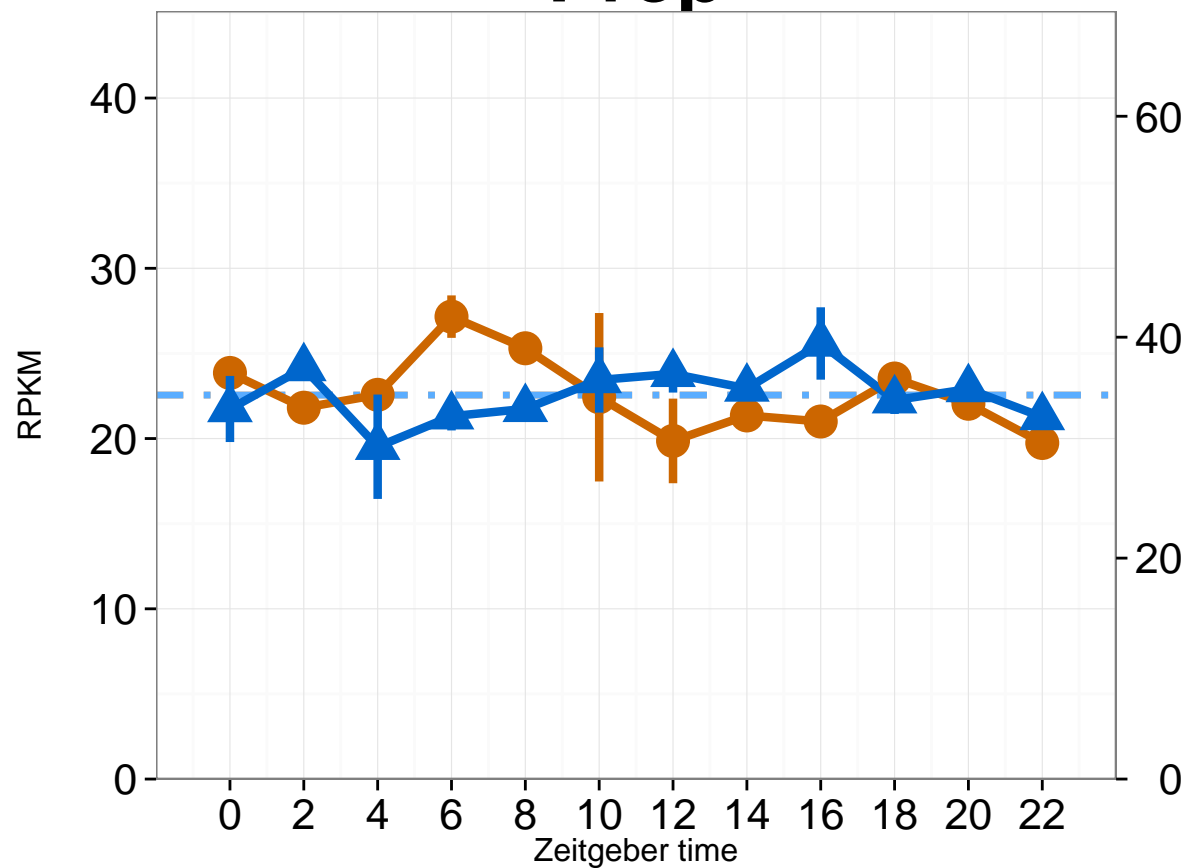

## Prep

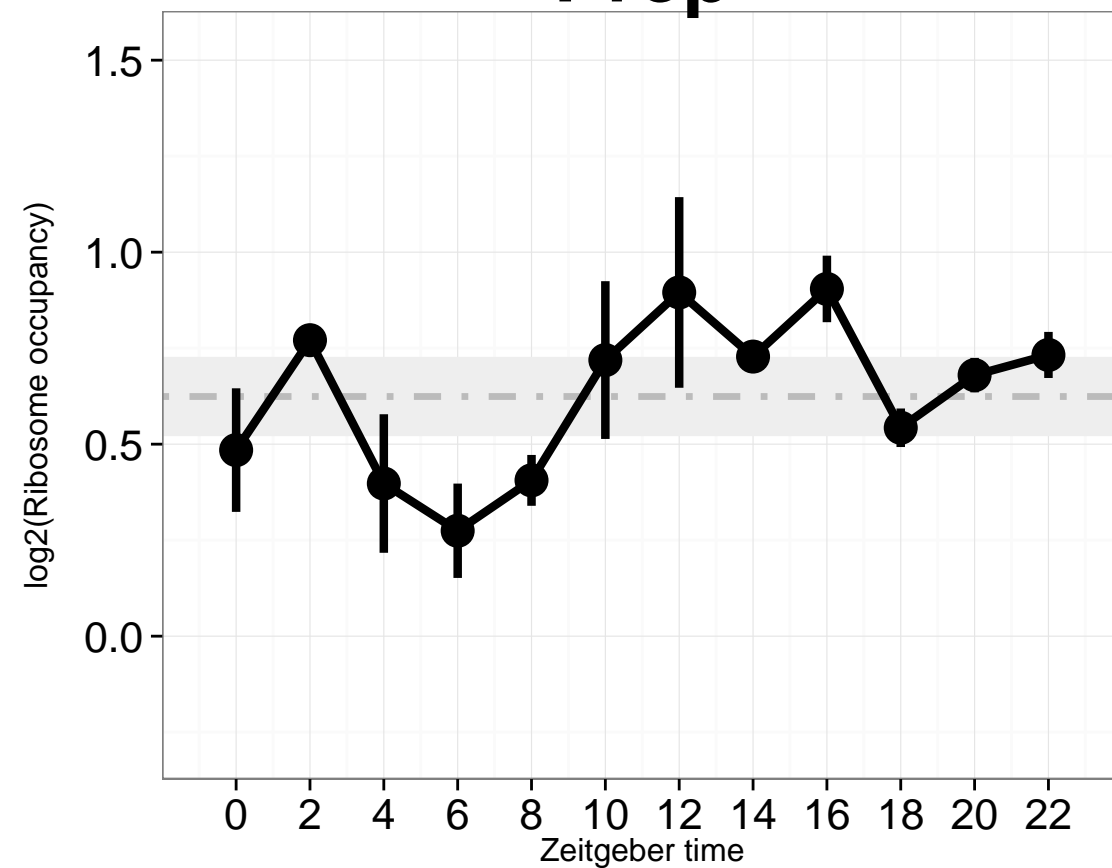

Supplement: Supplementary file 12089 [file 1]

## Acd

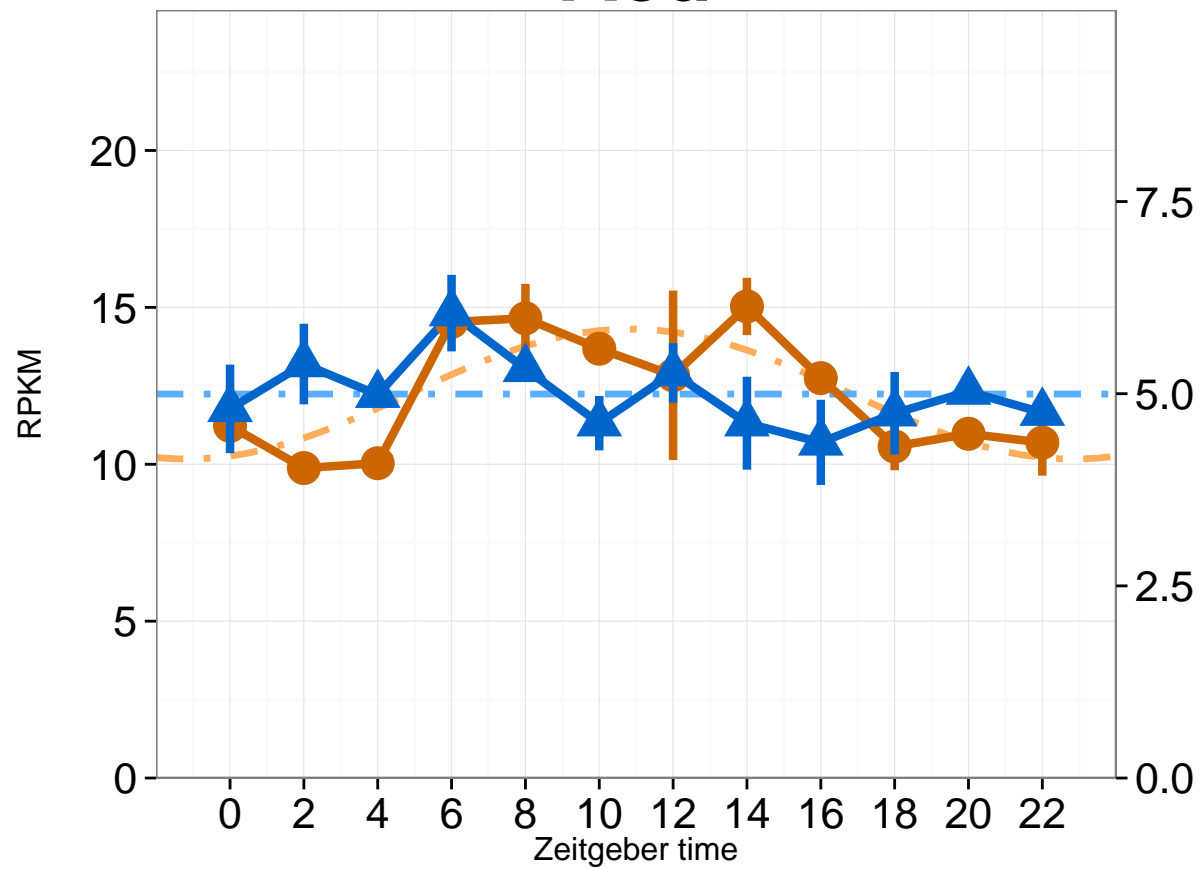

## Acd

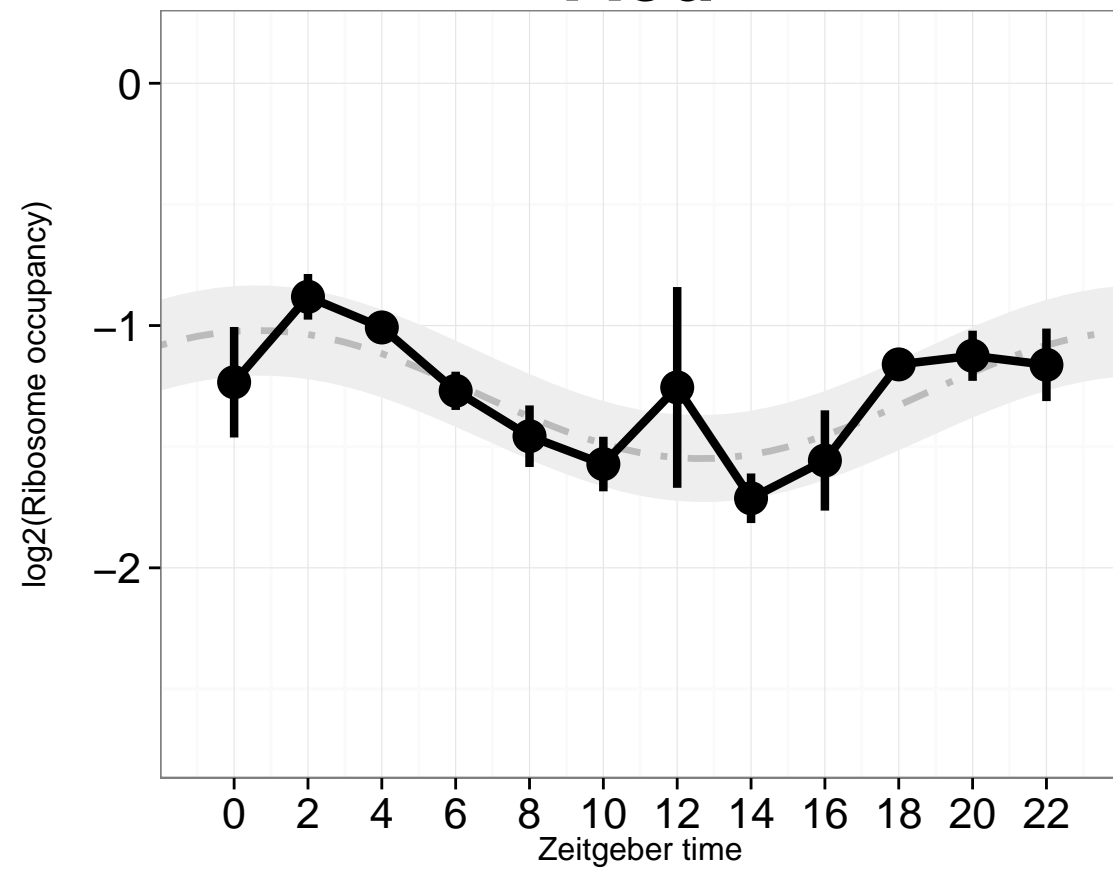

Supplement: Supplementary file 12090 [file 1]

## Nup188

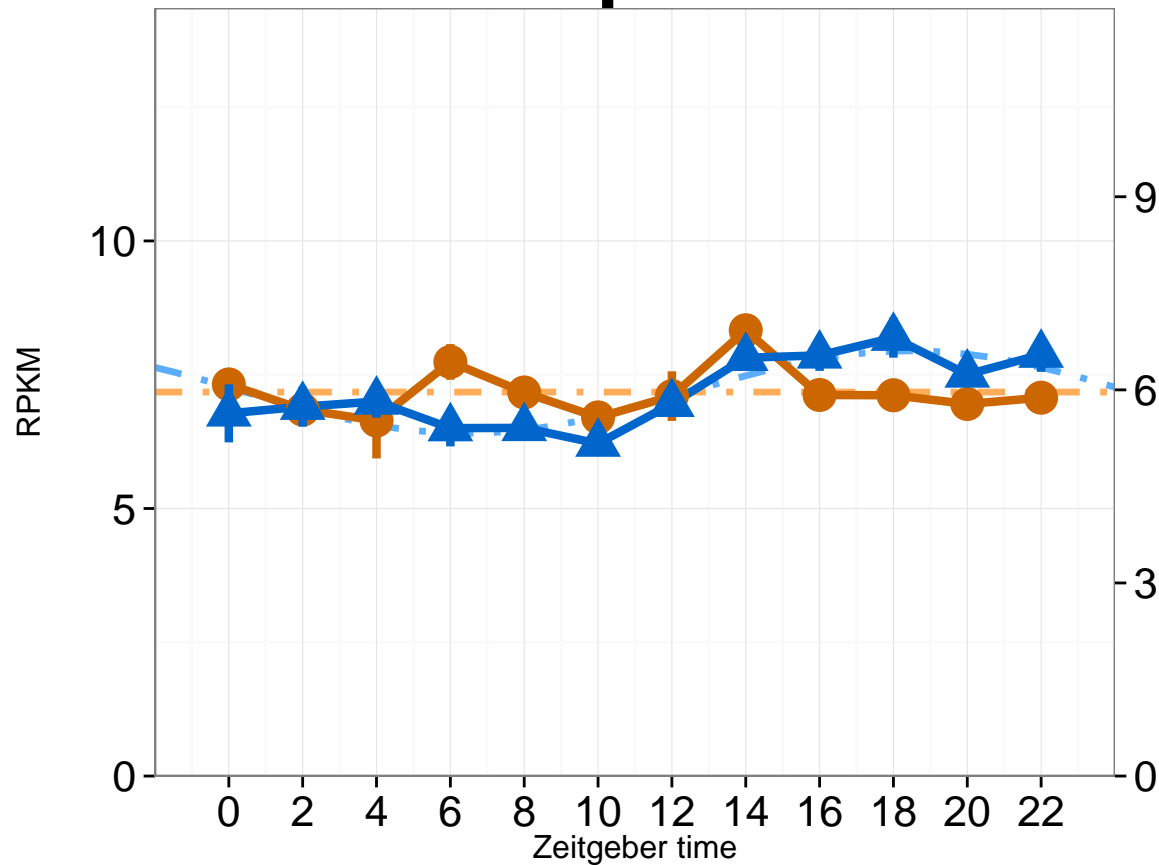

## Nup188

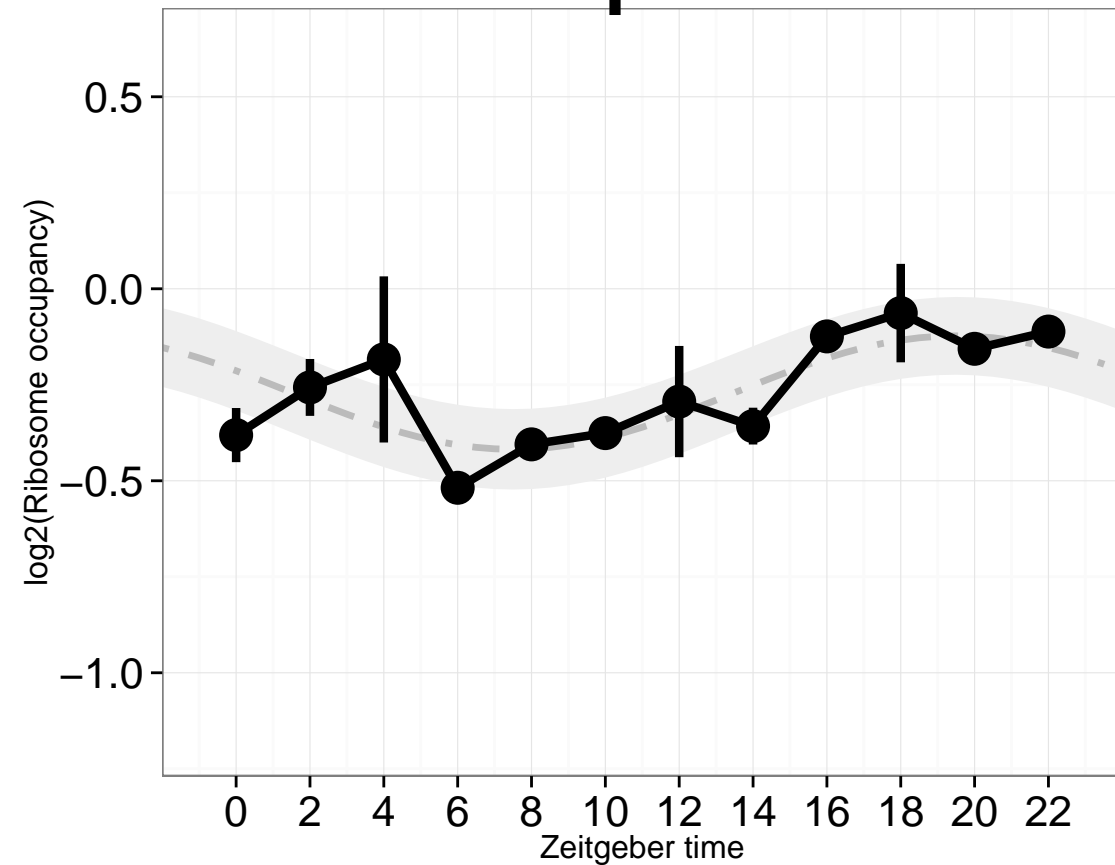

Supplement: Supplementary file 12091 [file 1]

## Ankmy2

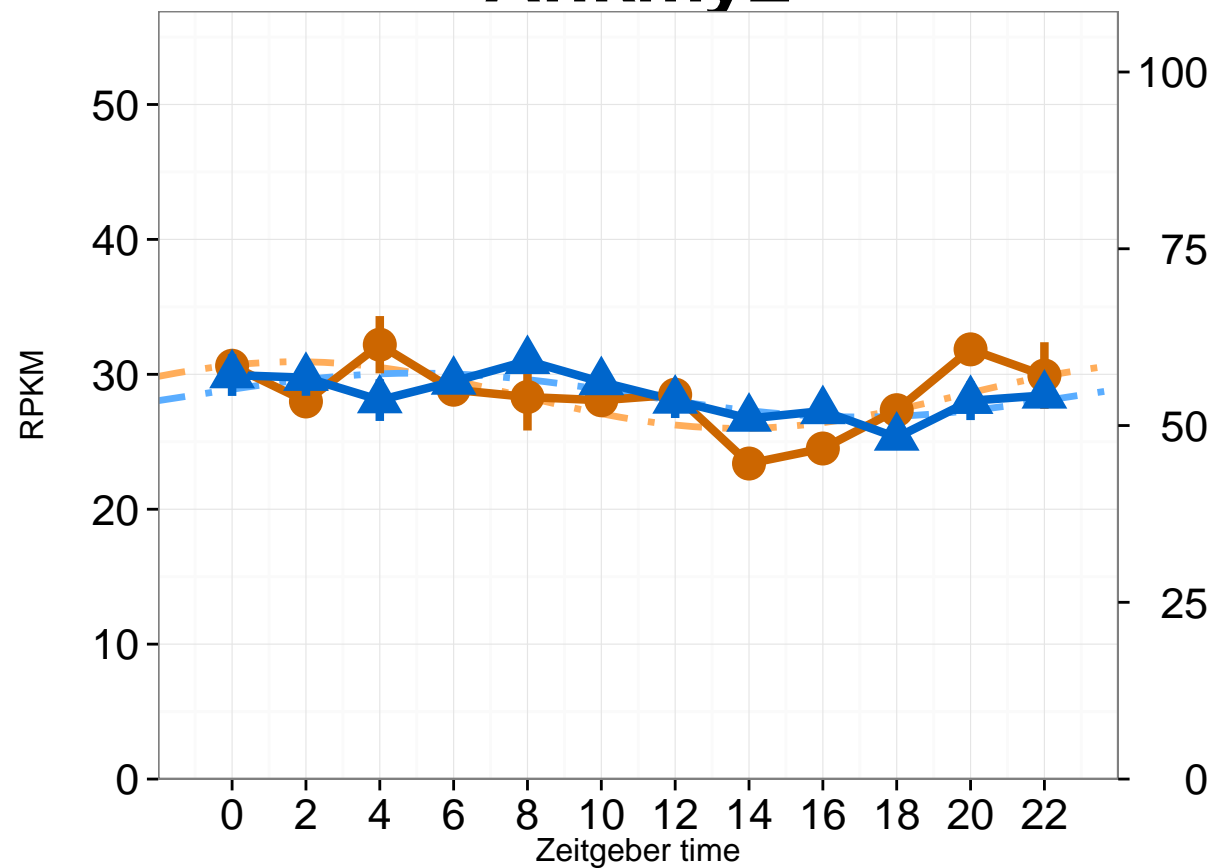

## Ankmy2

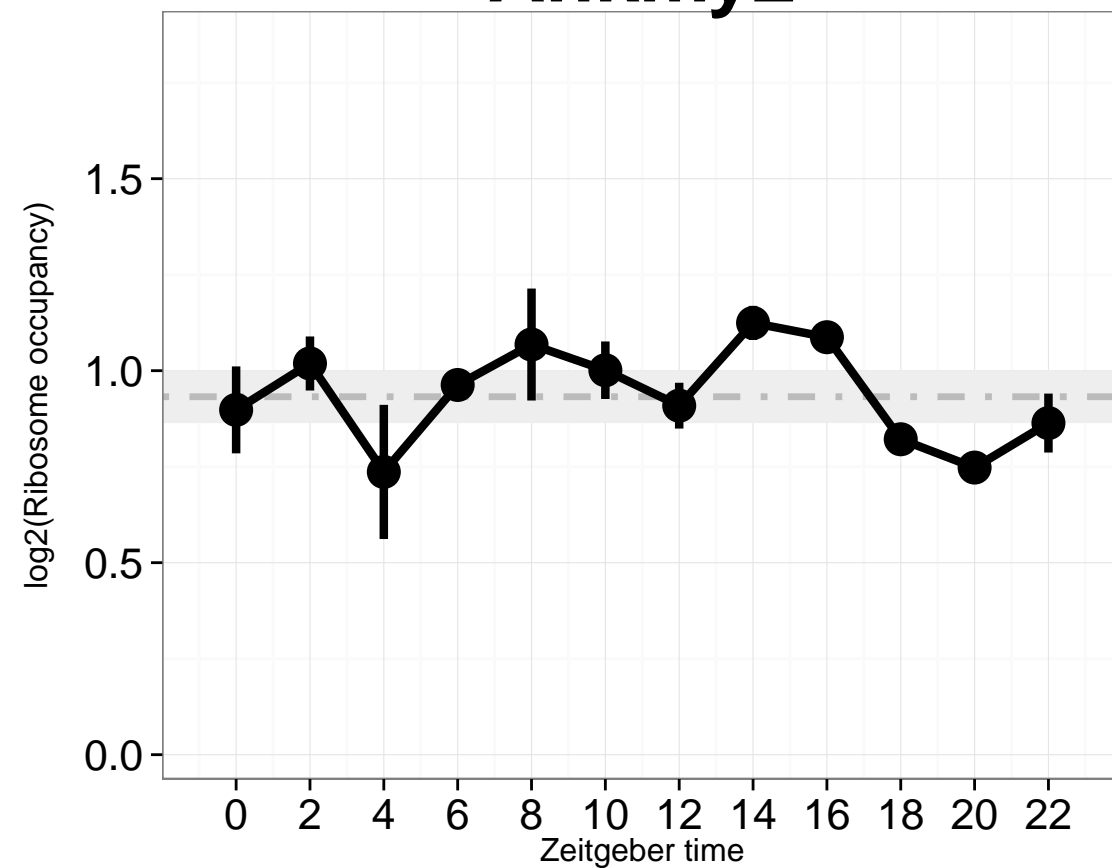

Supplement: Supplementary file 12092 [file 1]

## Zfp239

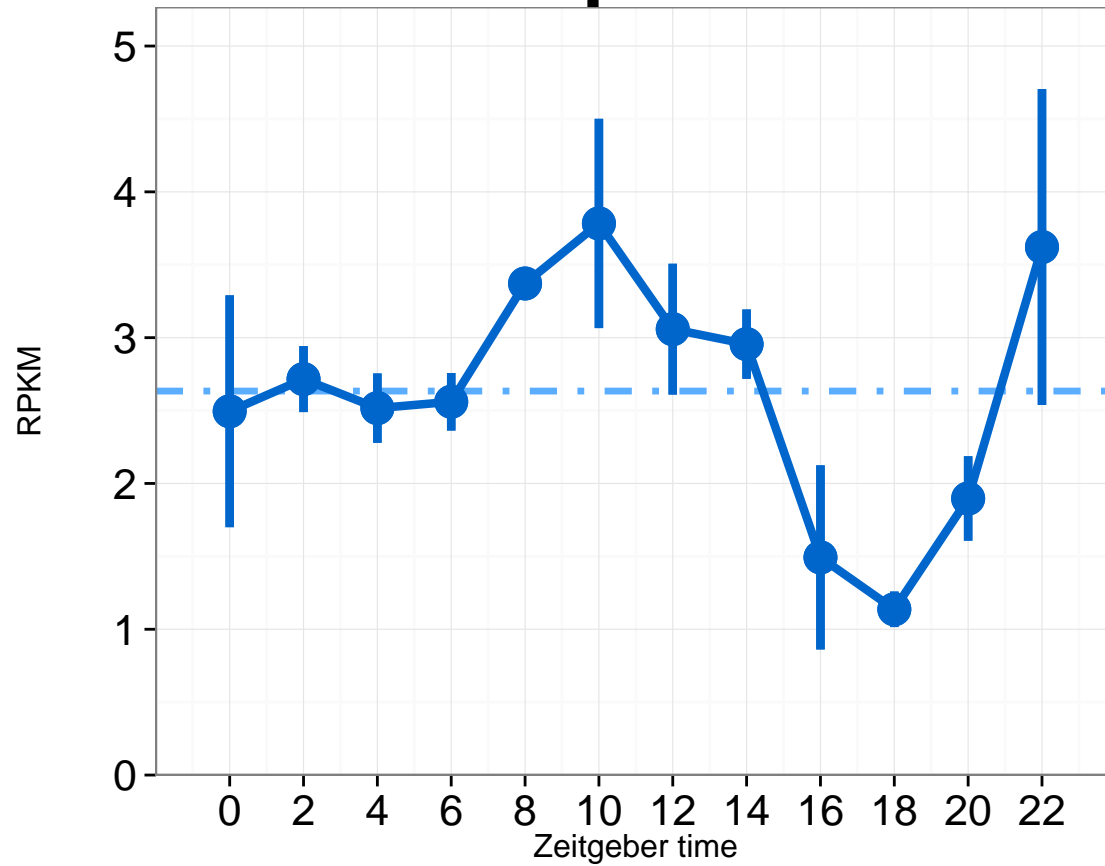

## Zfp239 log2(Ribosome occupancy

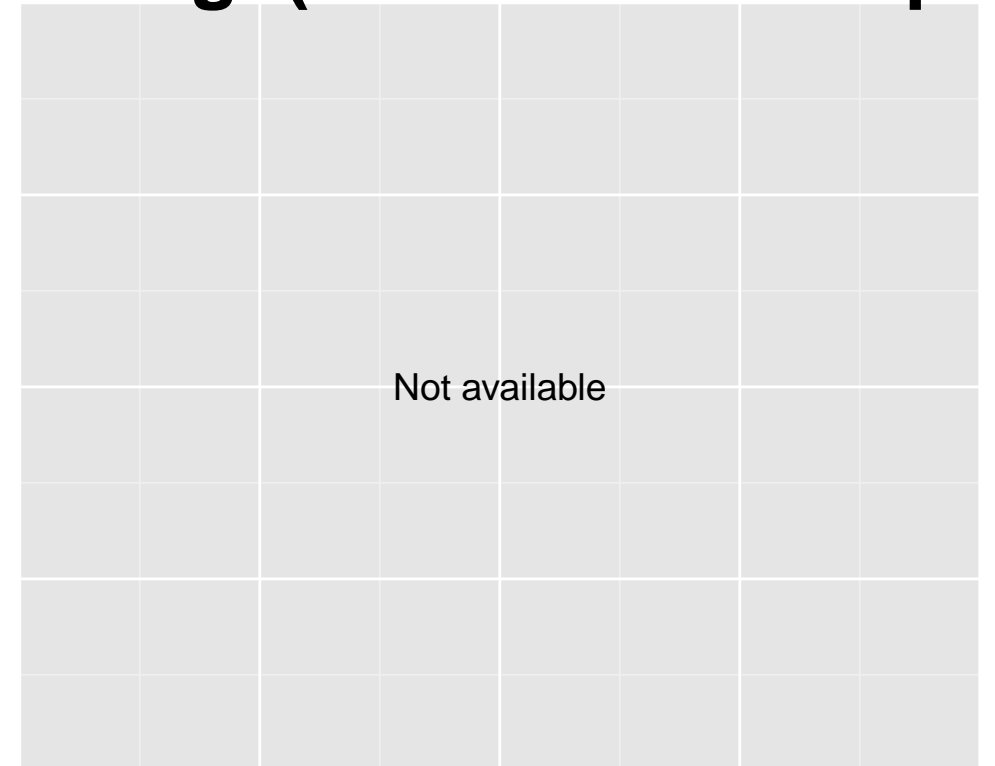

Supplement: Supplementary file 12093 [file 1]

## Mxd3

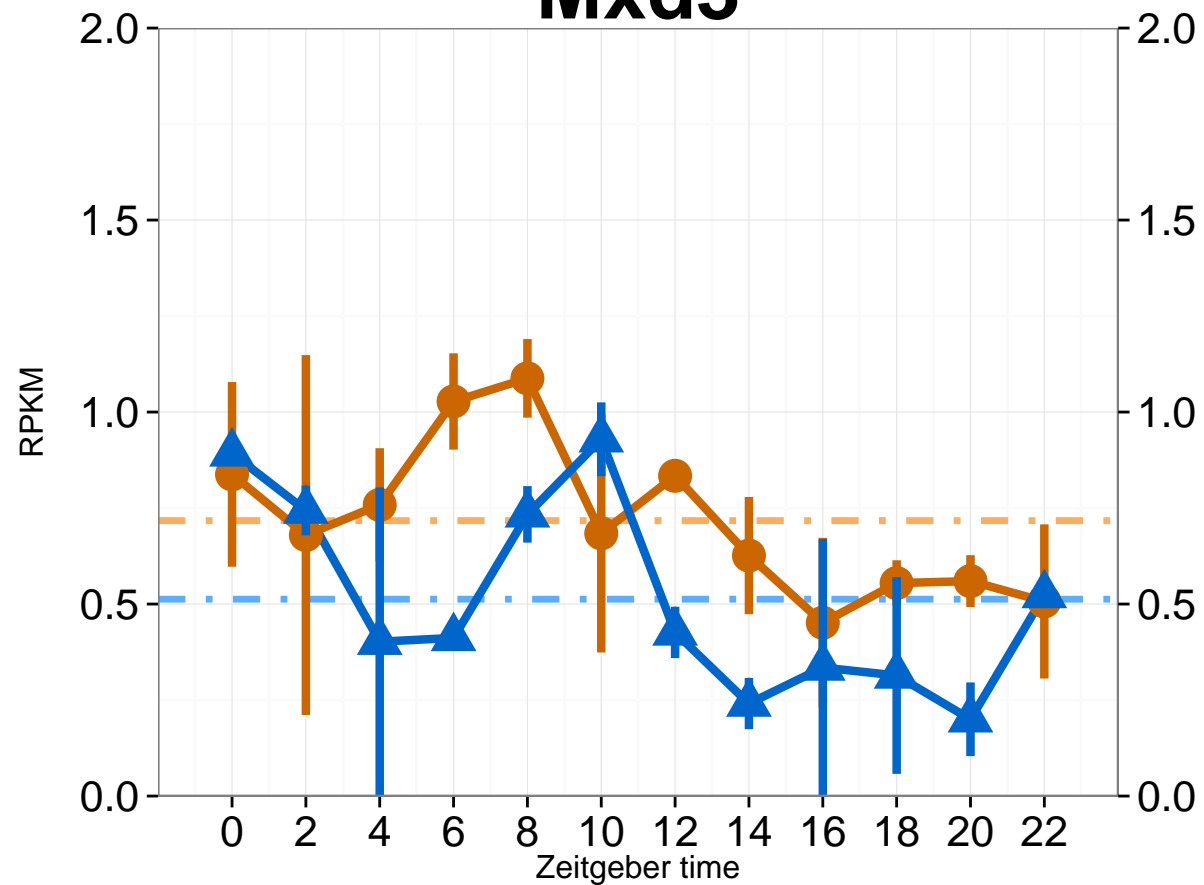

## Mxd3

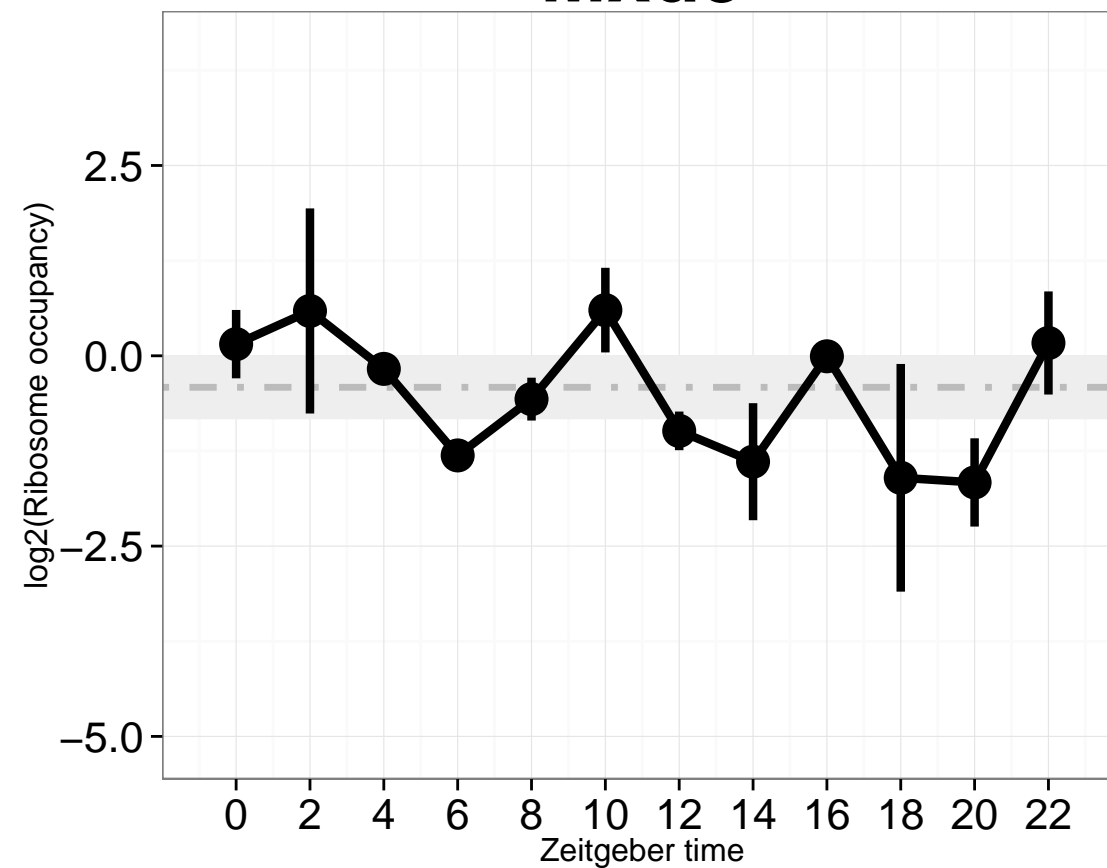

Supplement: Supplementary file 12094 [file 1]

## Cherp

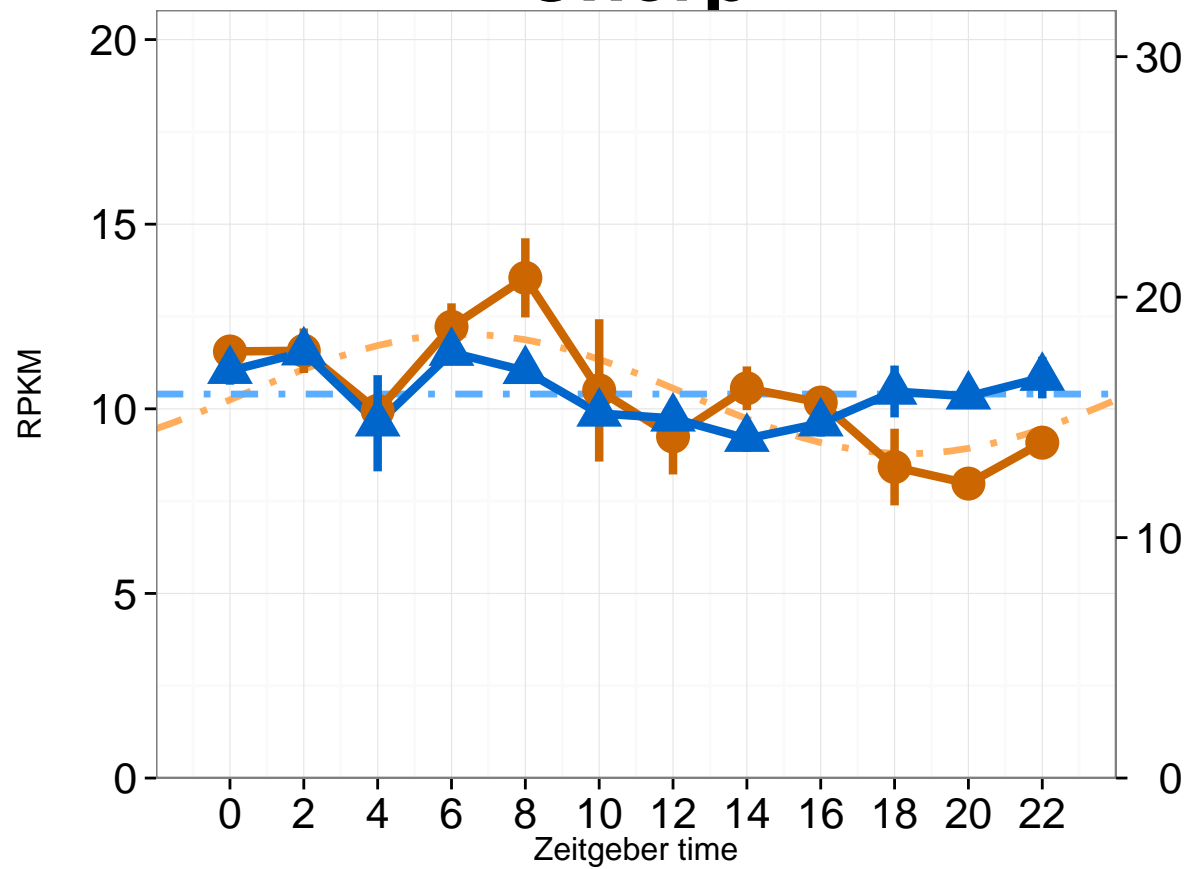

## Cherp

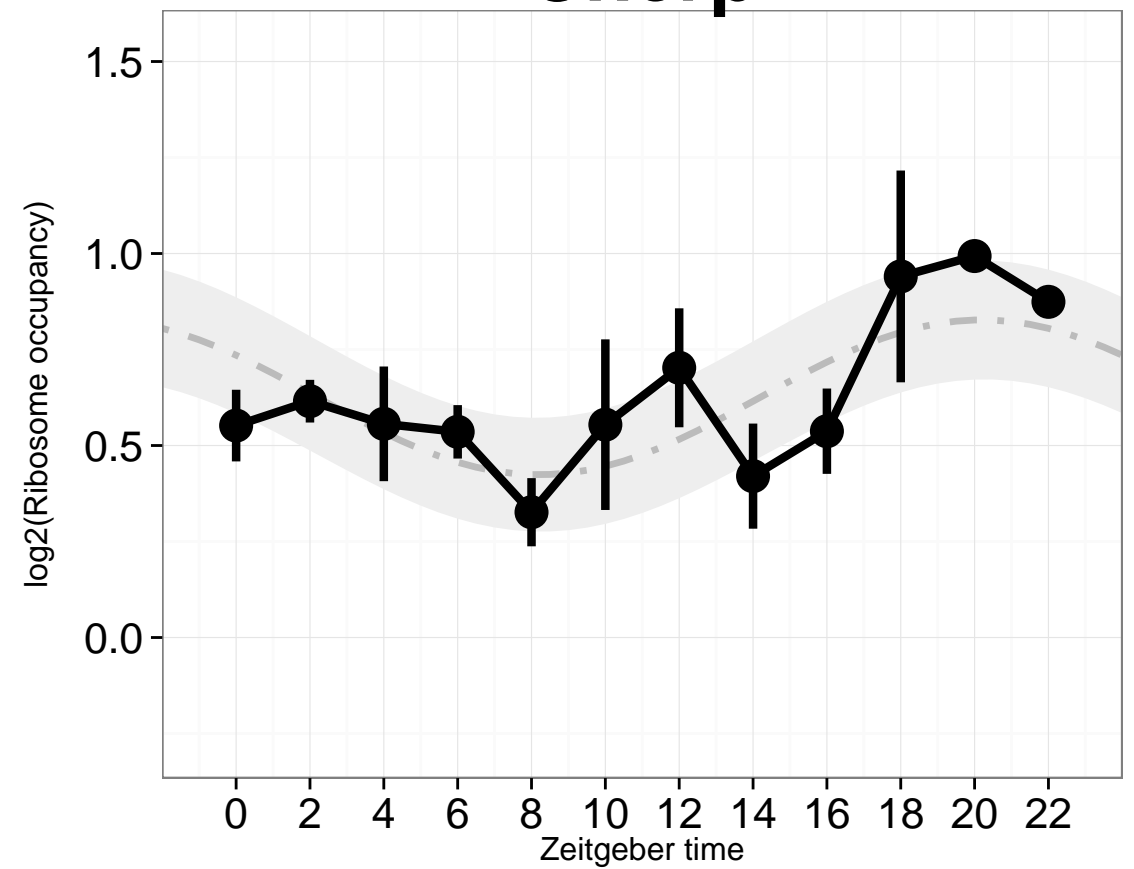

Supplement: Supplementary file 12095 [file 1]

## Hdgfl1

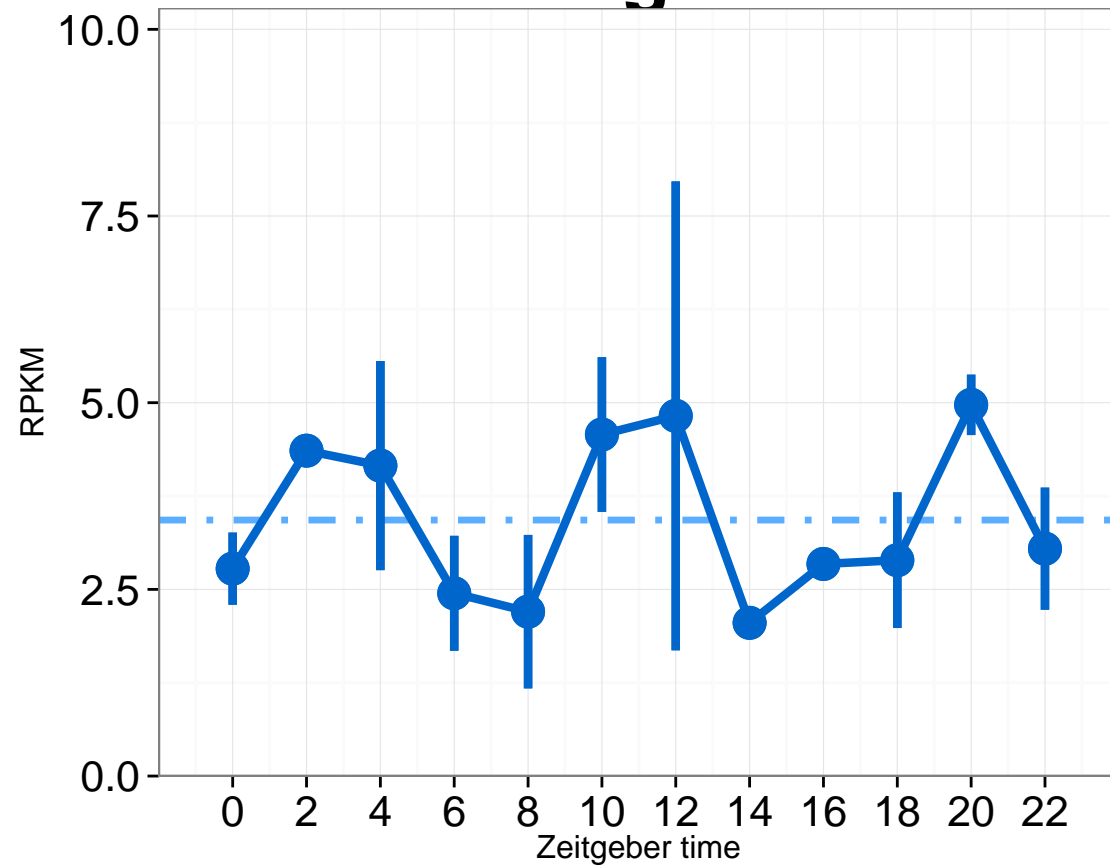

## Hdgfl1 log2(Ribosome occupancy

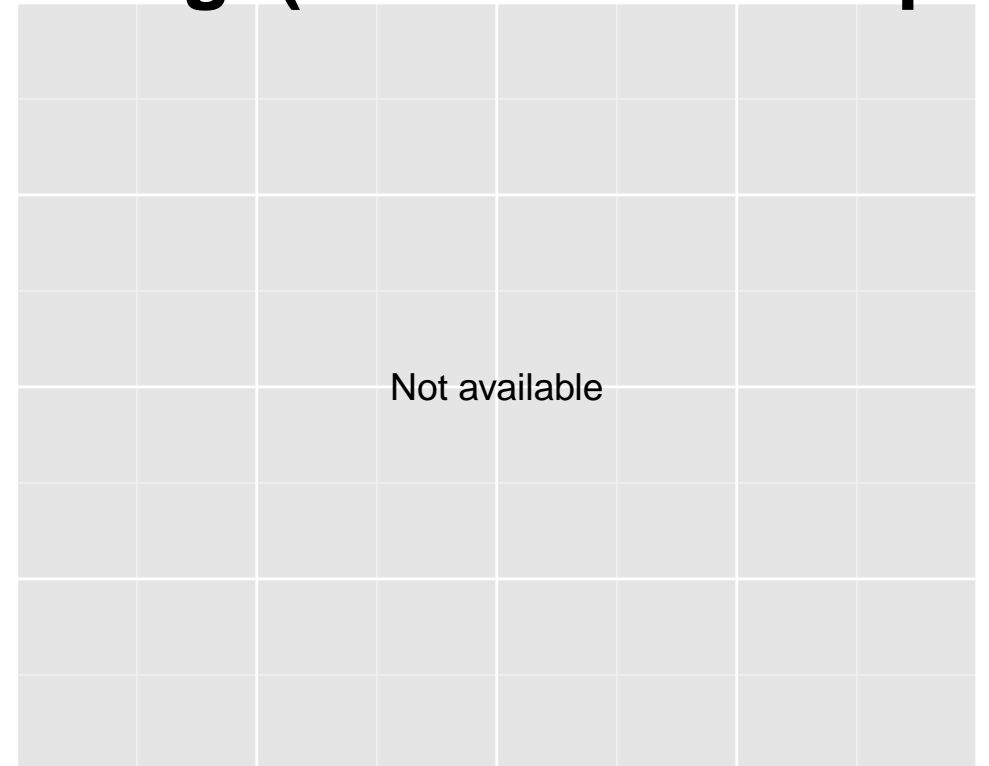

Supplement: Supplementary file 12096 [file 1]

# Mpp3

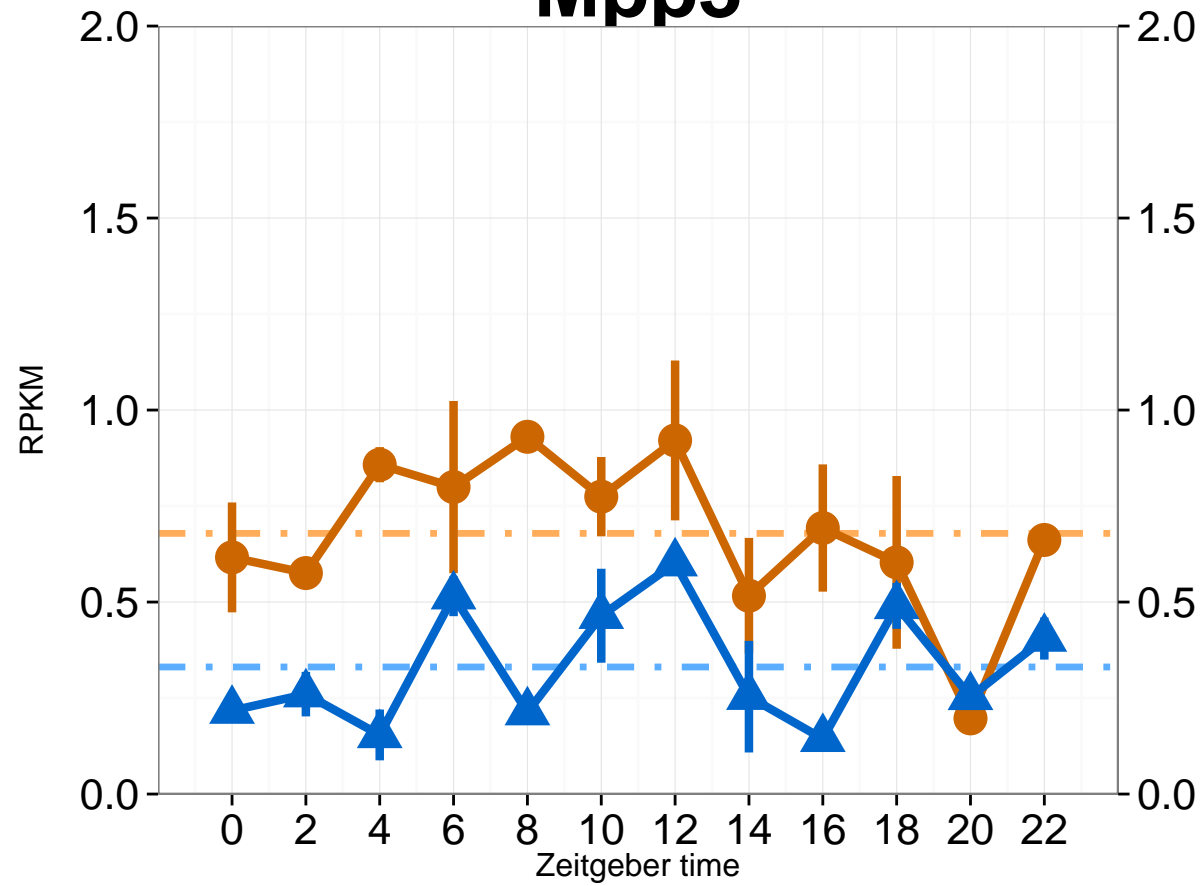

# Mpp3

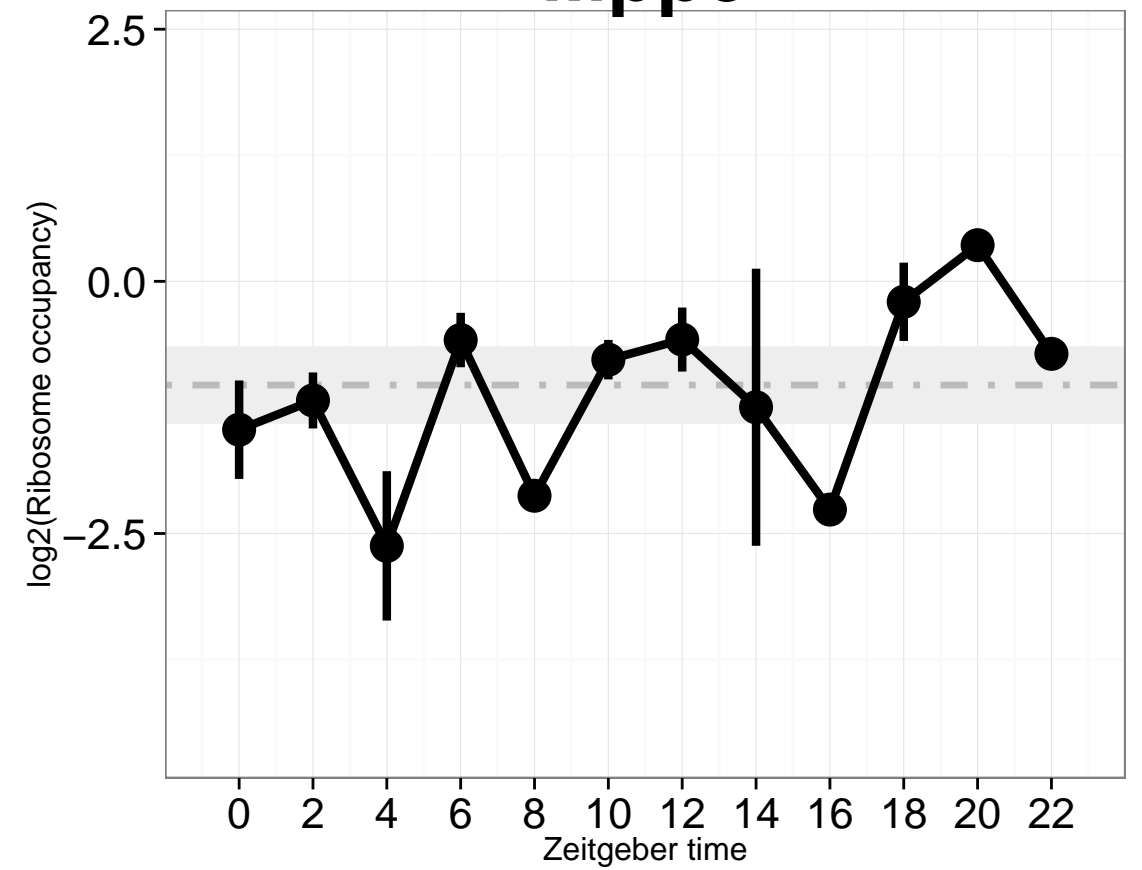

Supplement: Supplementary file 12097 [file 1]

# Dyrk1a

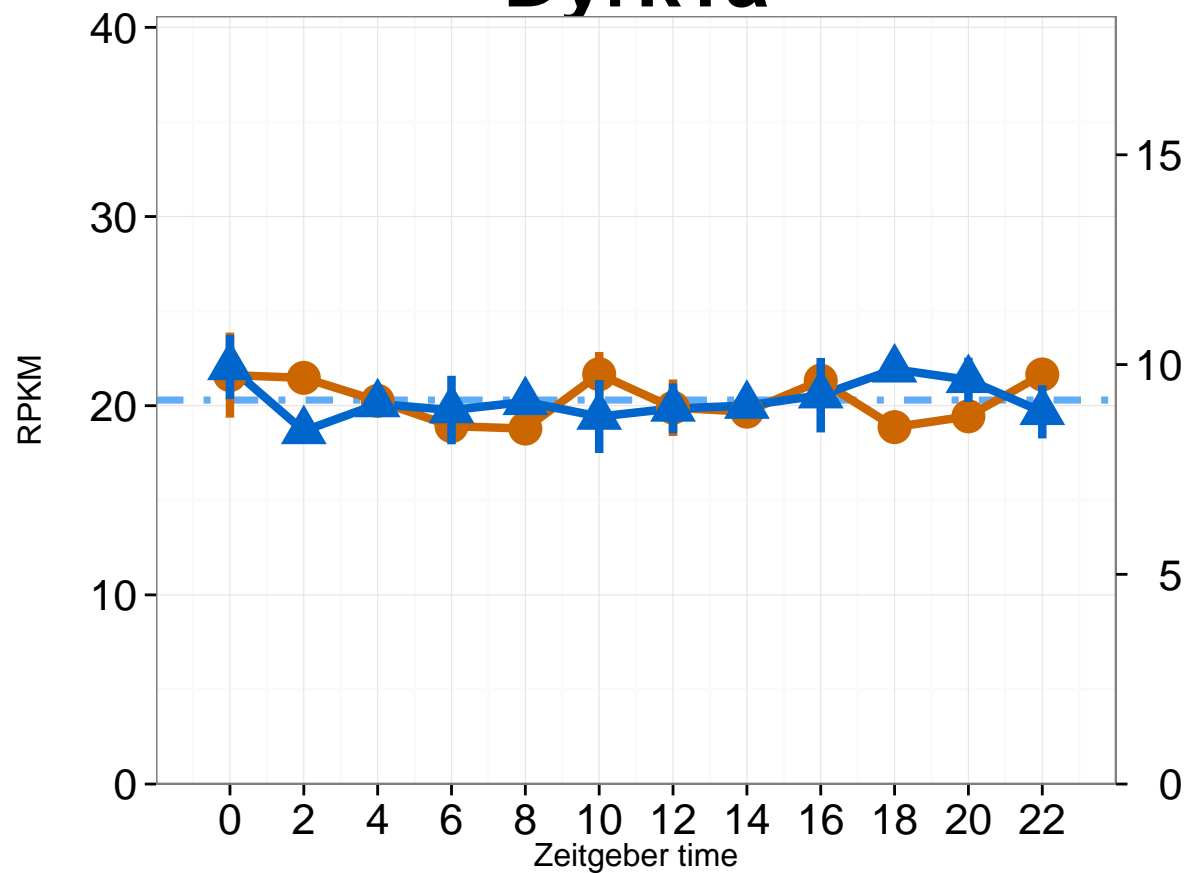

# Dyrk1a

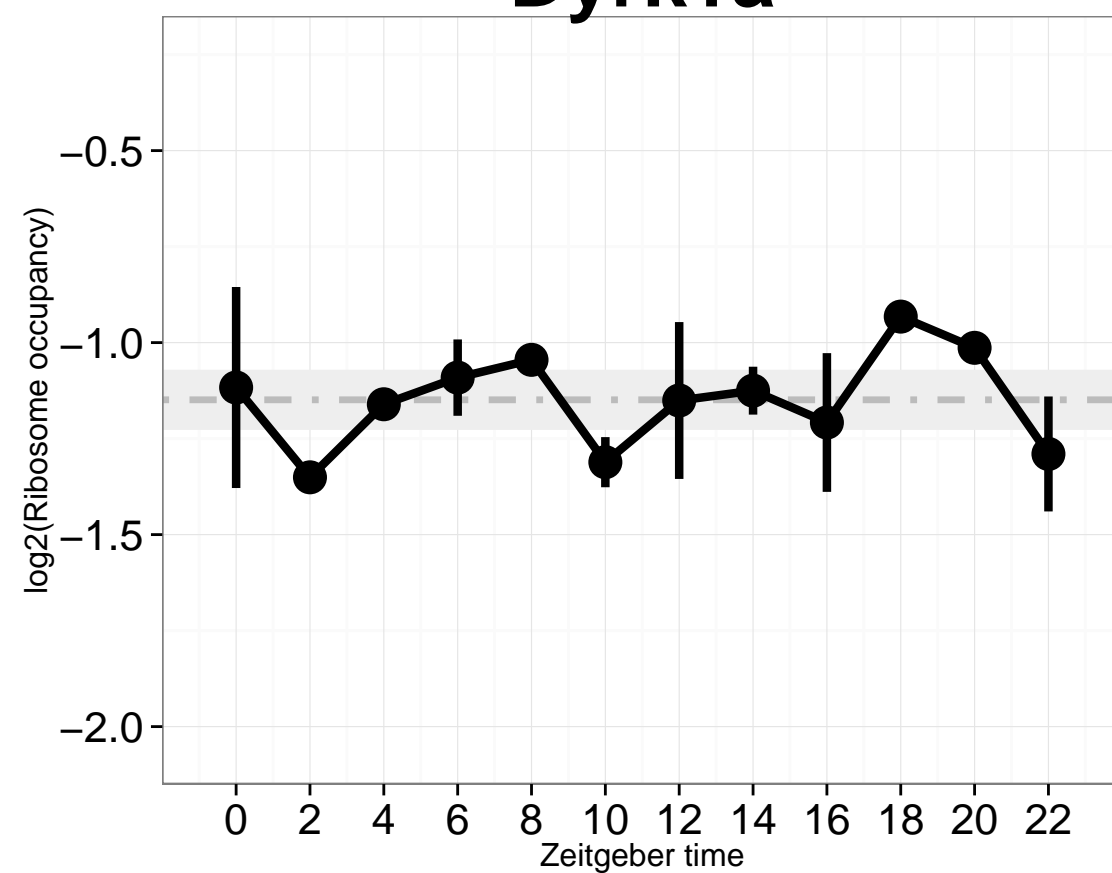

Supplement: Supplementary file 12098 [file 1]

## Scd2

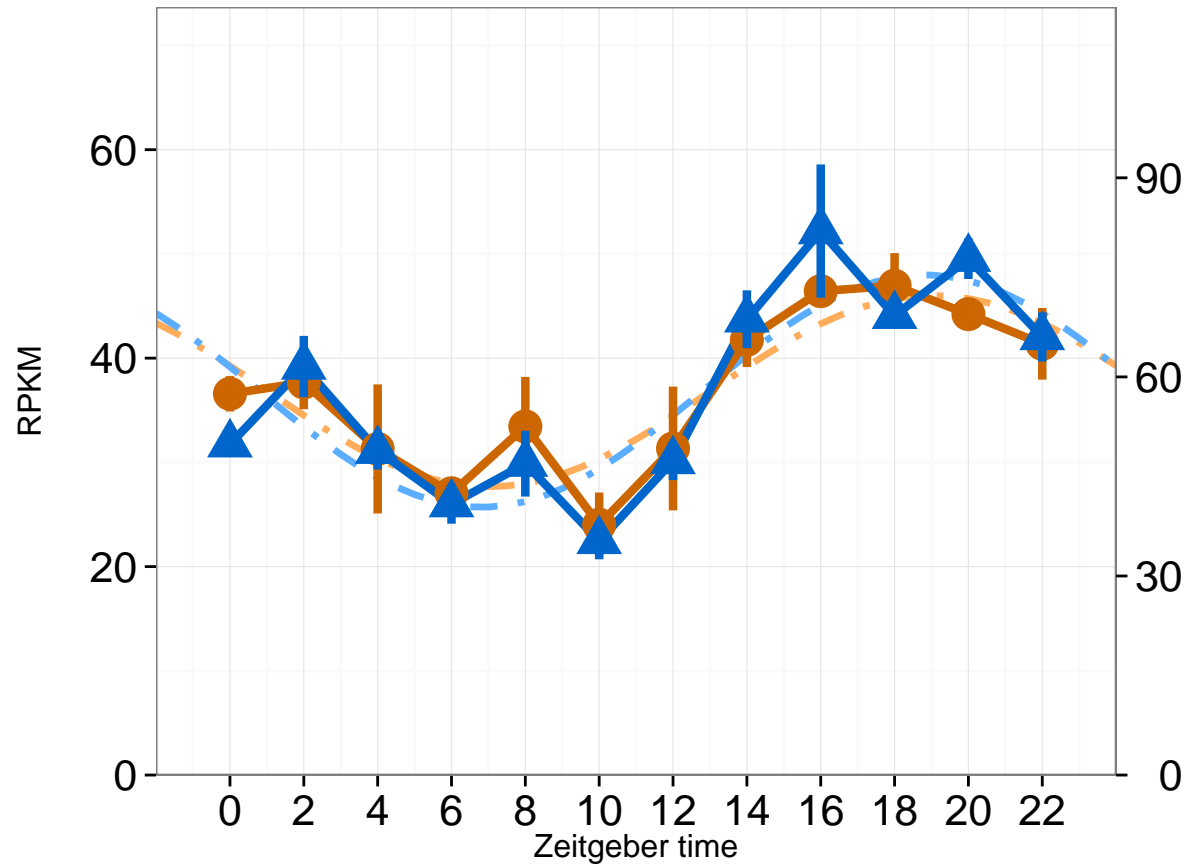

## Scd2

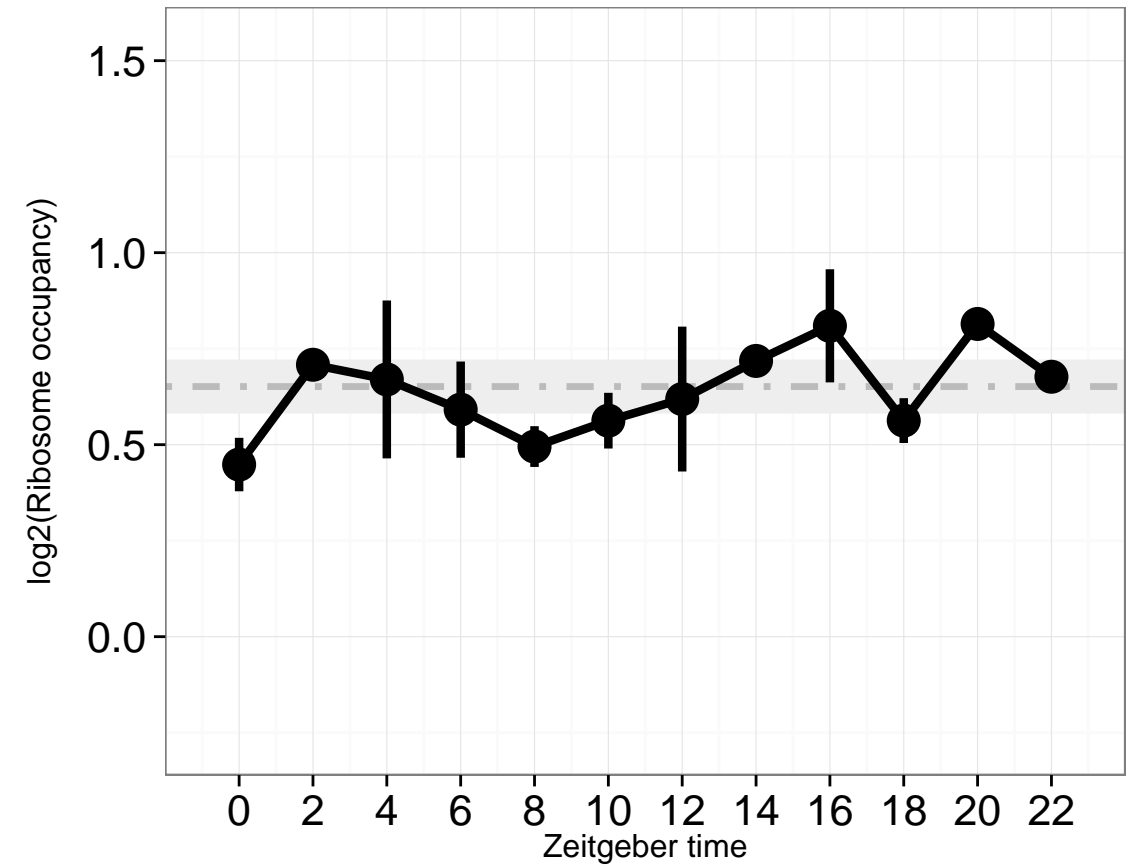

Supplement: Supplementary file 12099 [file 1]

## Isca2

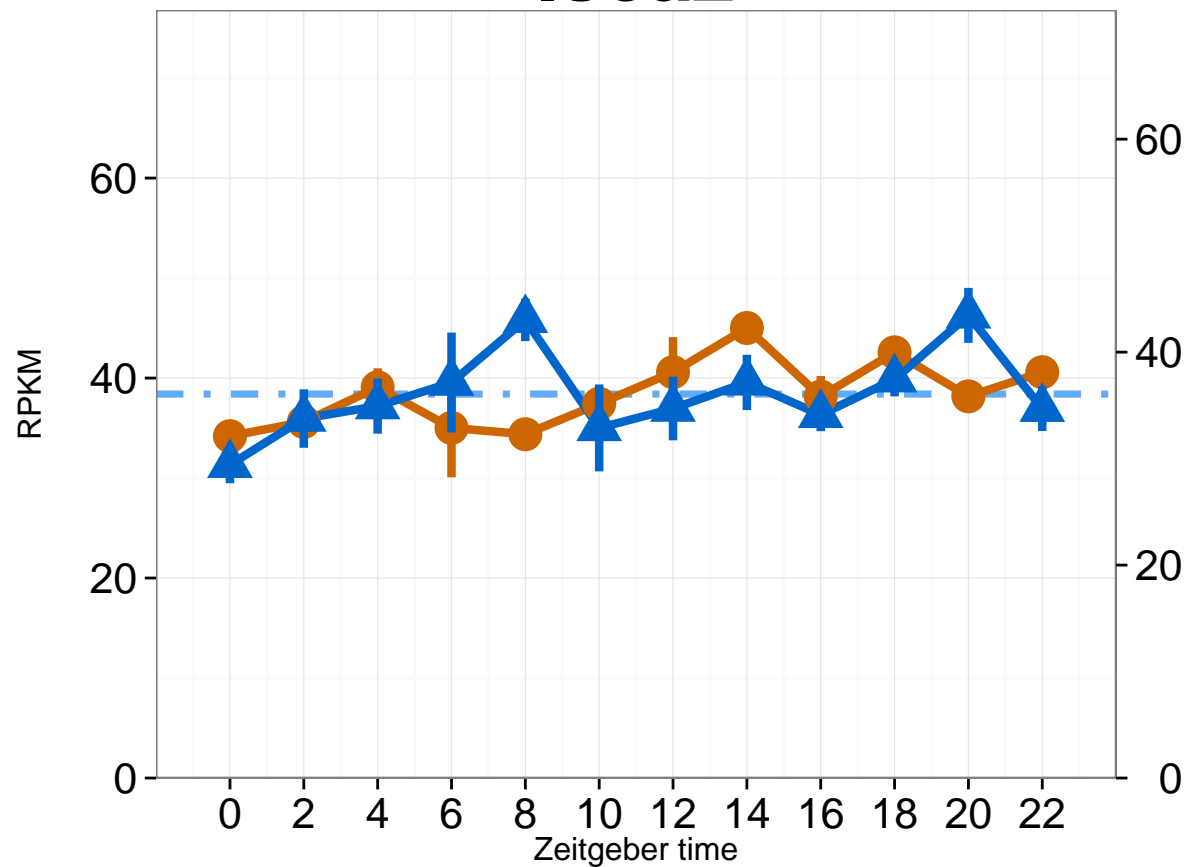

## Isca2

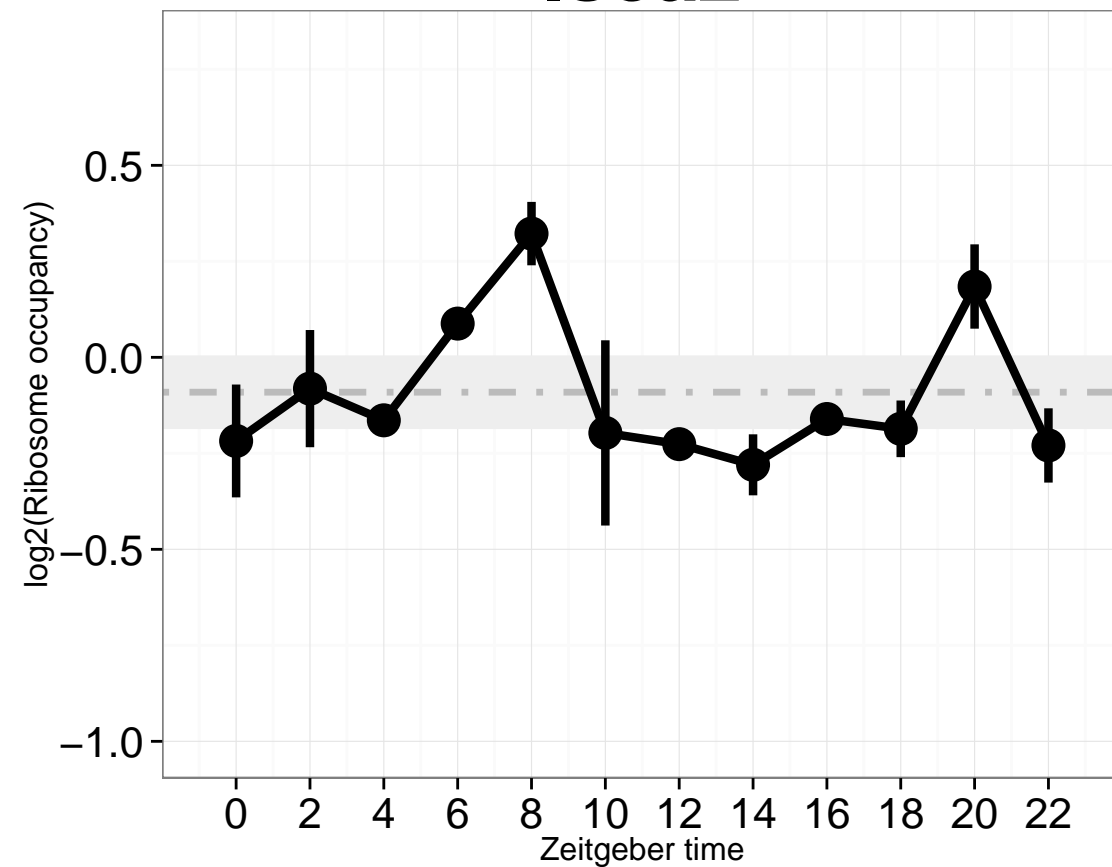

Supplement: Supplementary file 12100 [file 1]

# Evi5

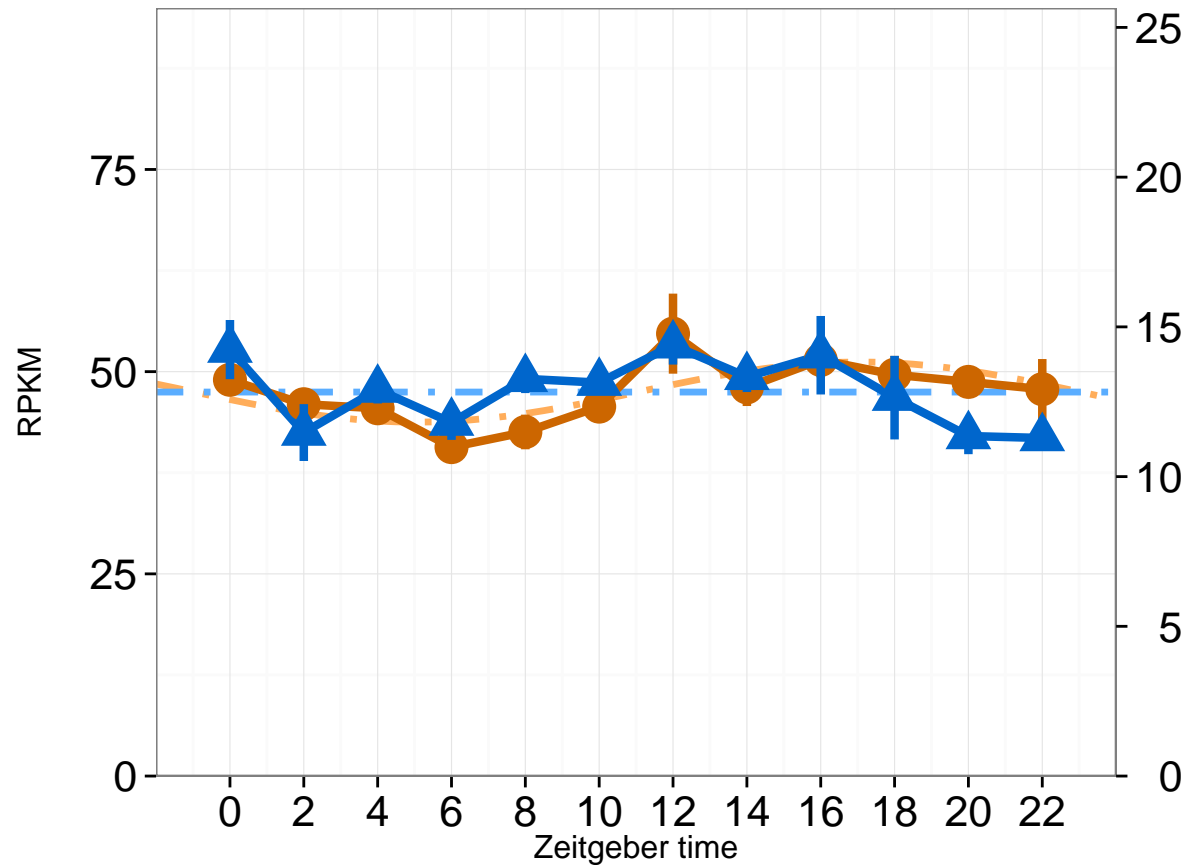

# Evi5

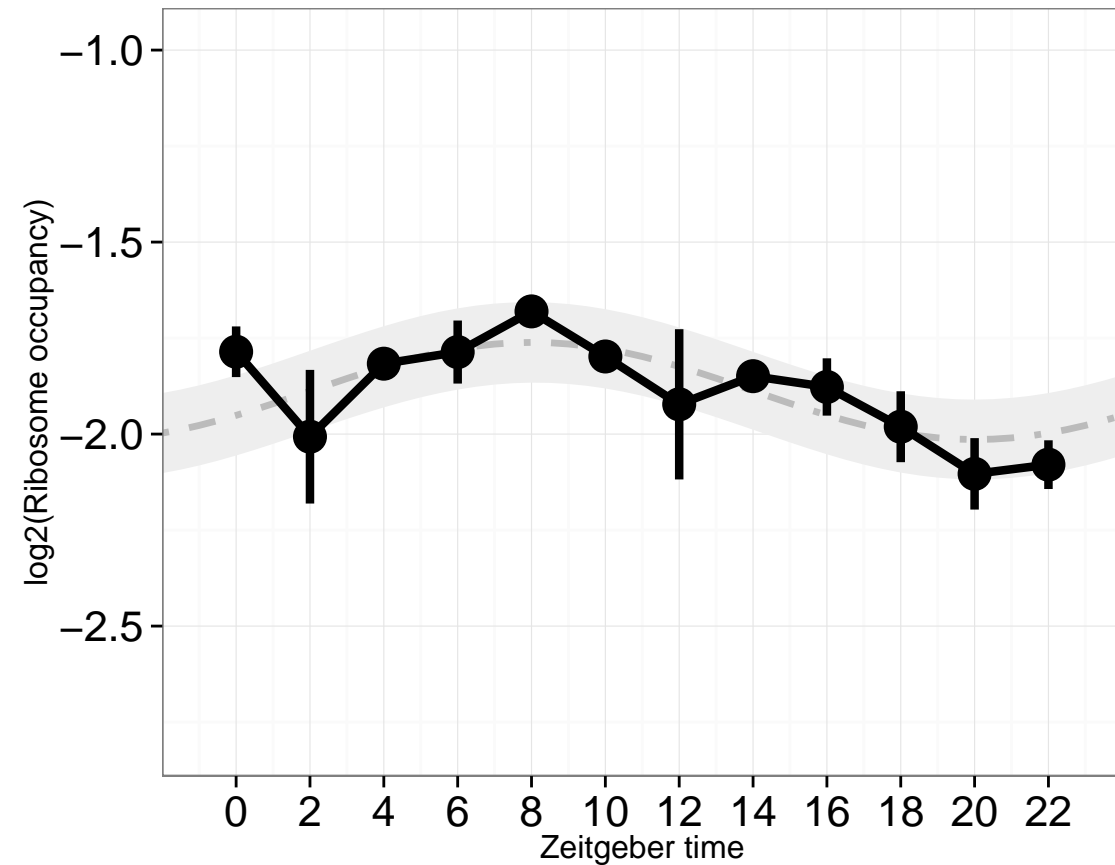

Supplement: Supplementary file 12101 [file 1]

## Ntn4

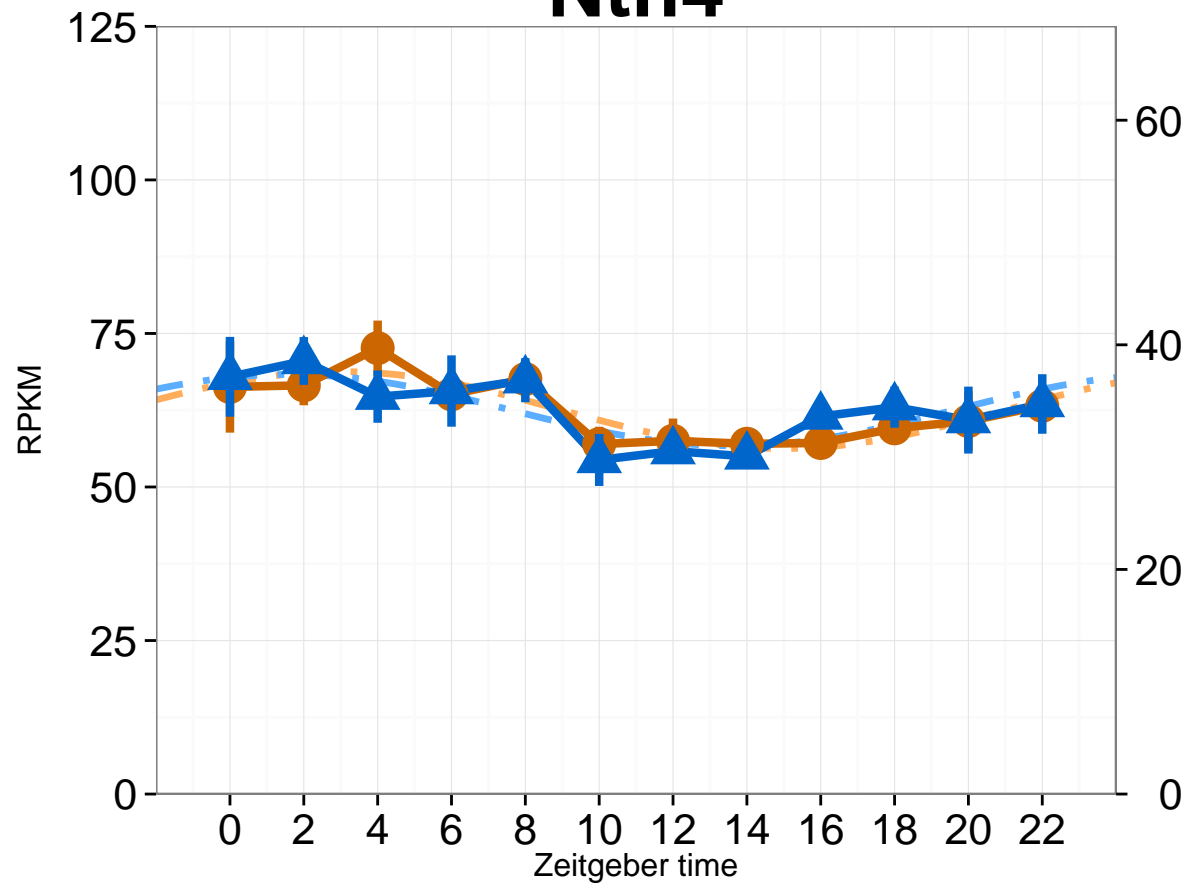

## Ntn4

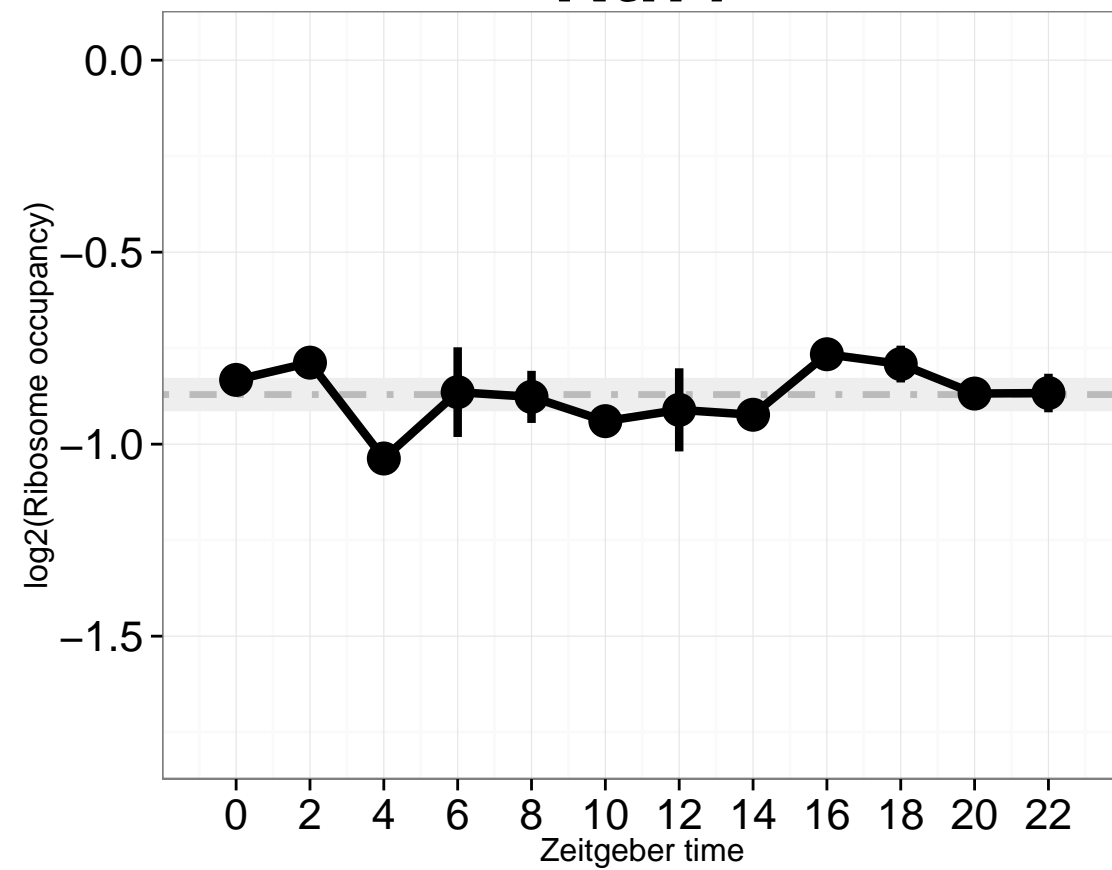

Supplement: Supplementary file 12102 [file 1]

## Nipal2

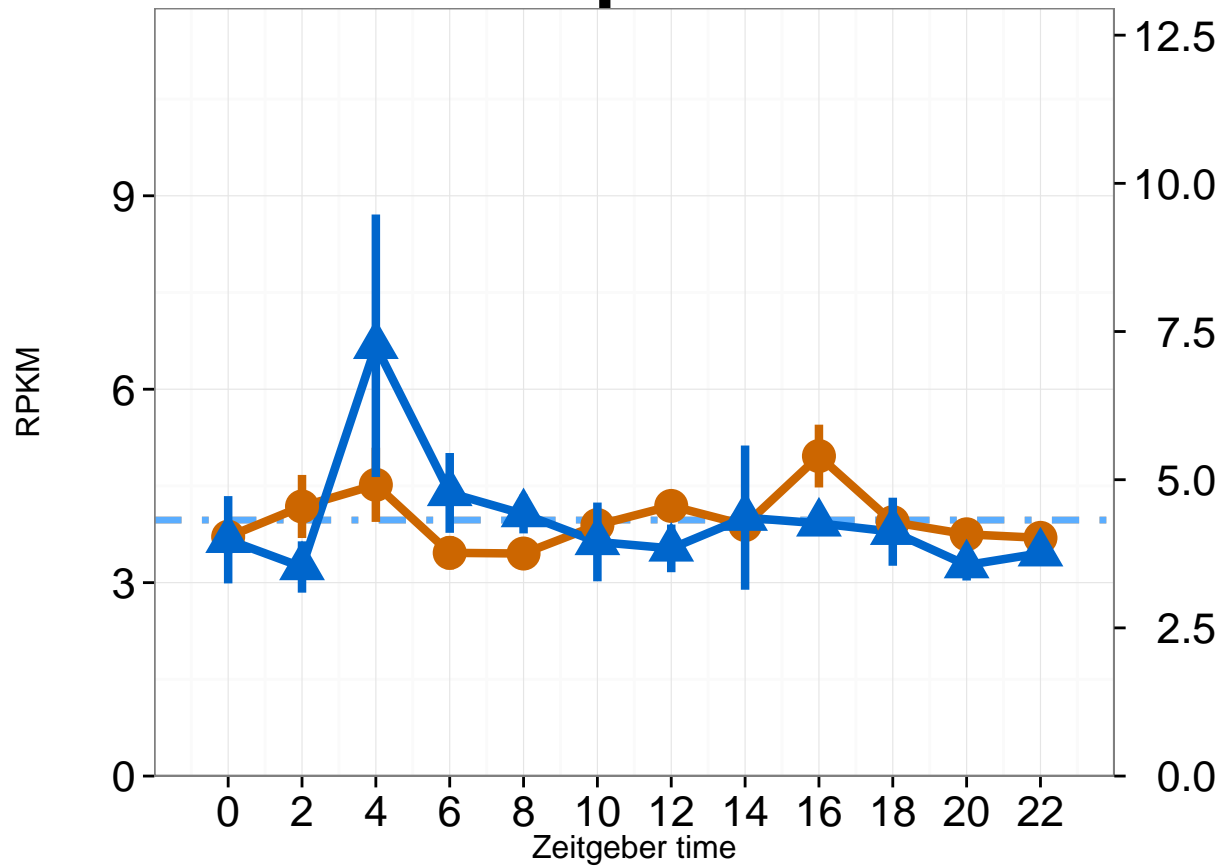

## Nipal2

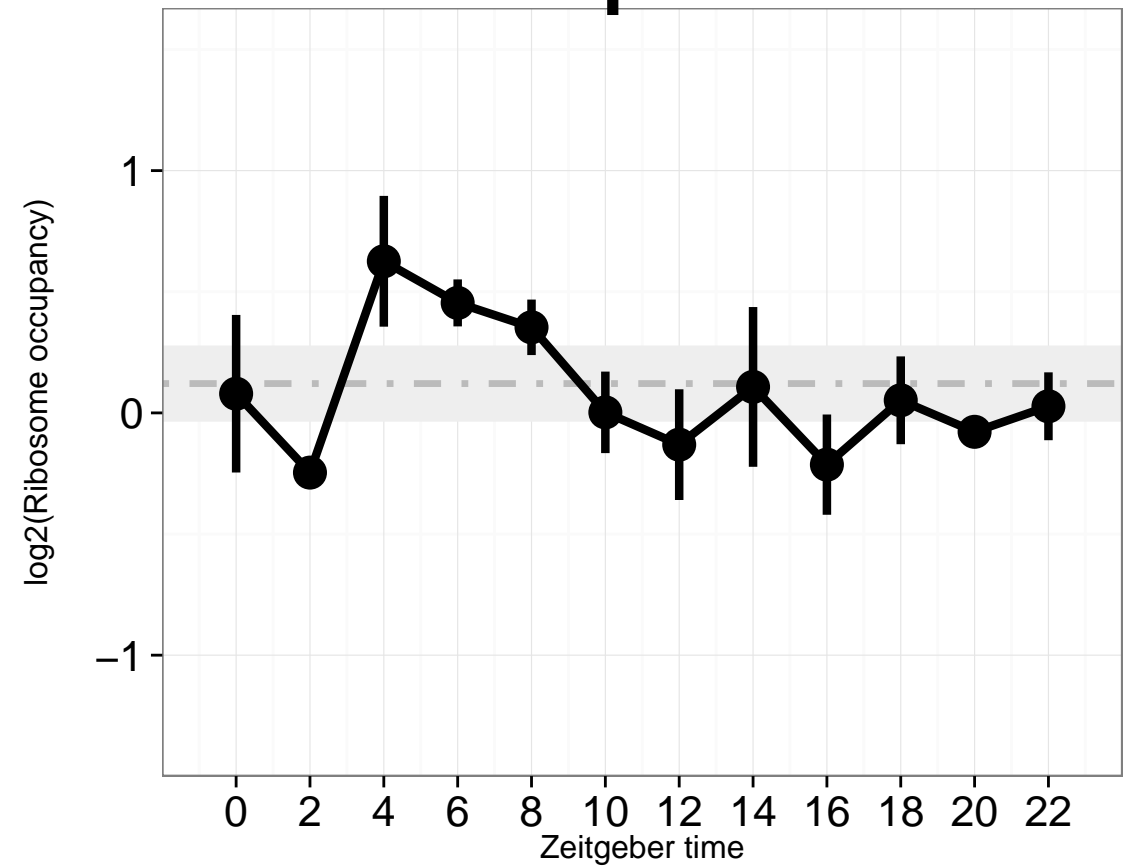

Supplement: Supplementary file 12103 [file 1]

# Hist1h3b

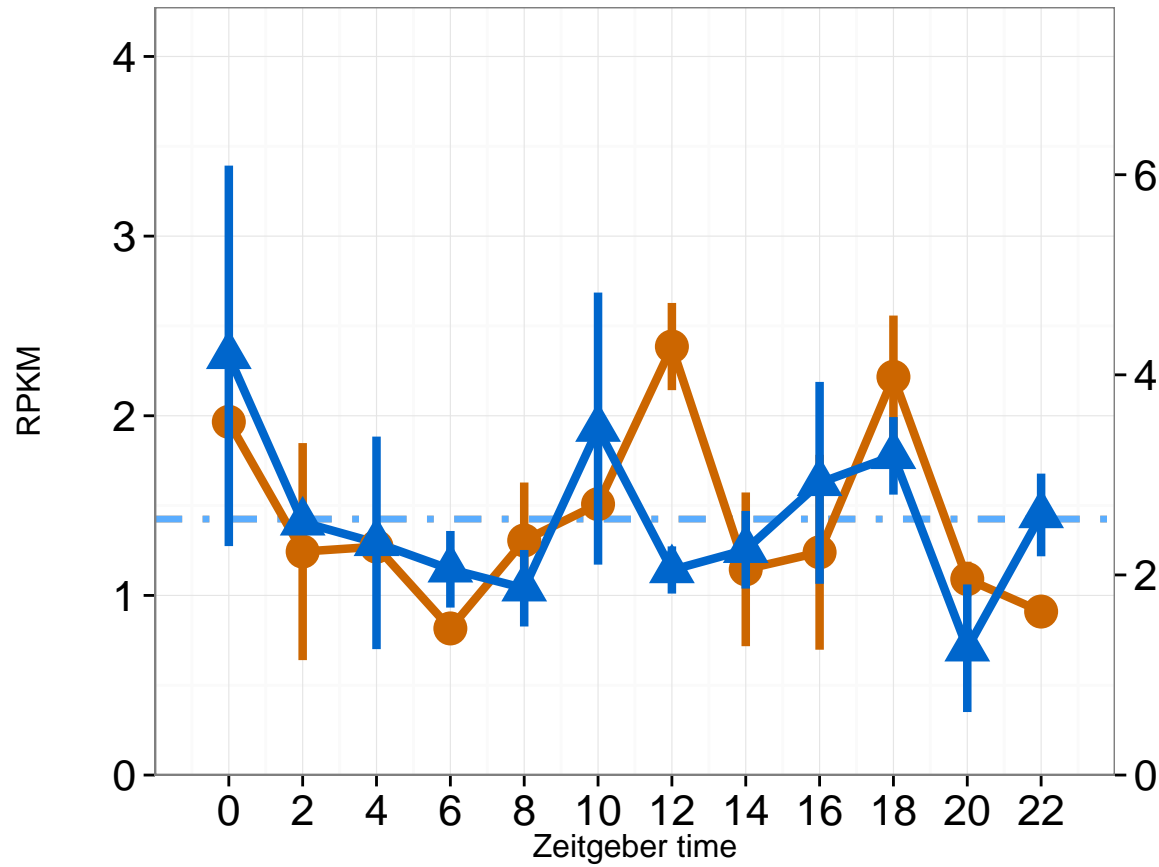

# Hist1h3b

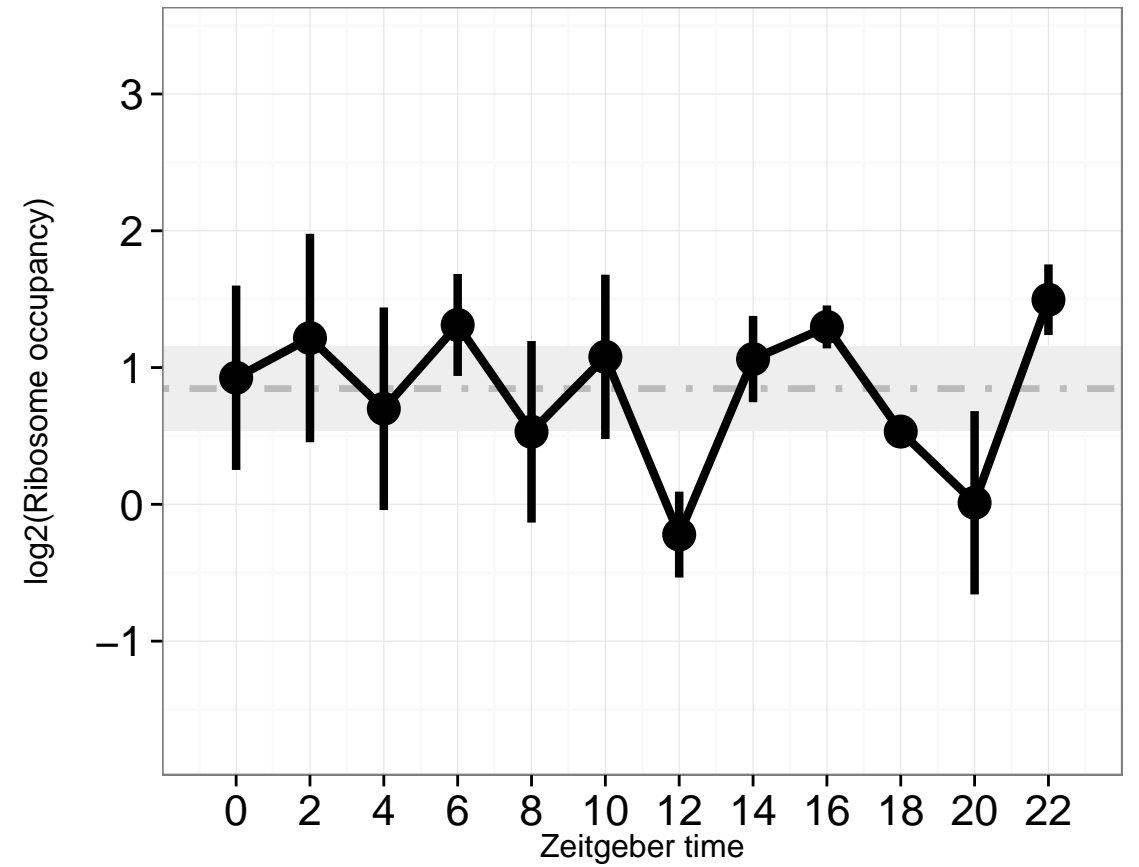

Supplement: Supplementary file 12104 [file 1]

## Tyw5

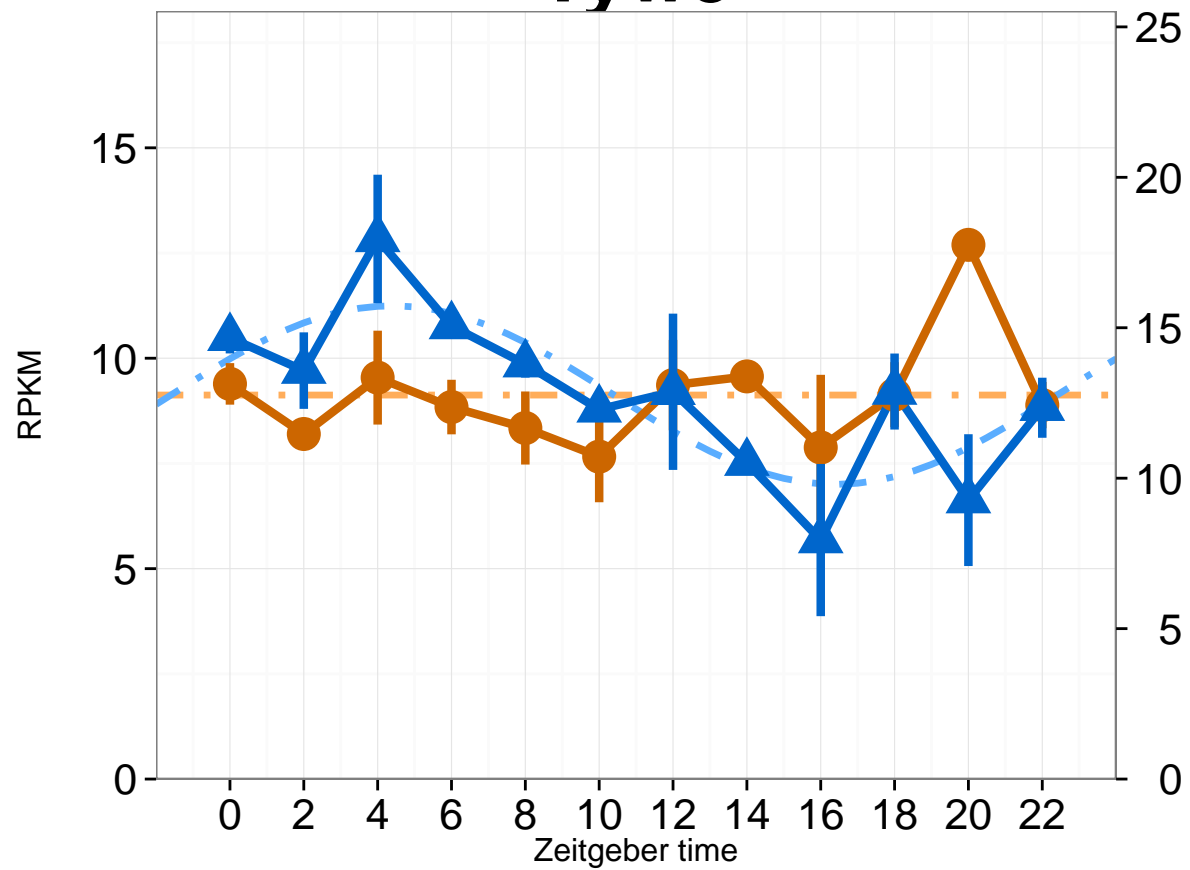

## Tyw5

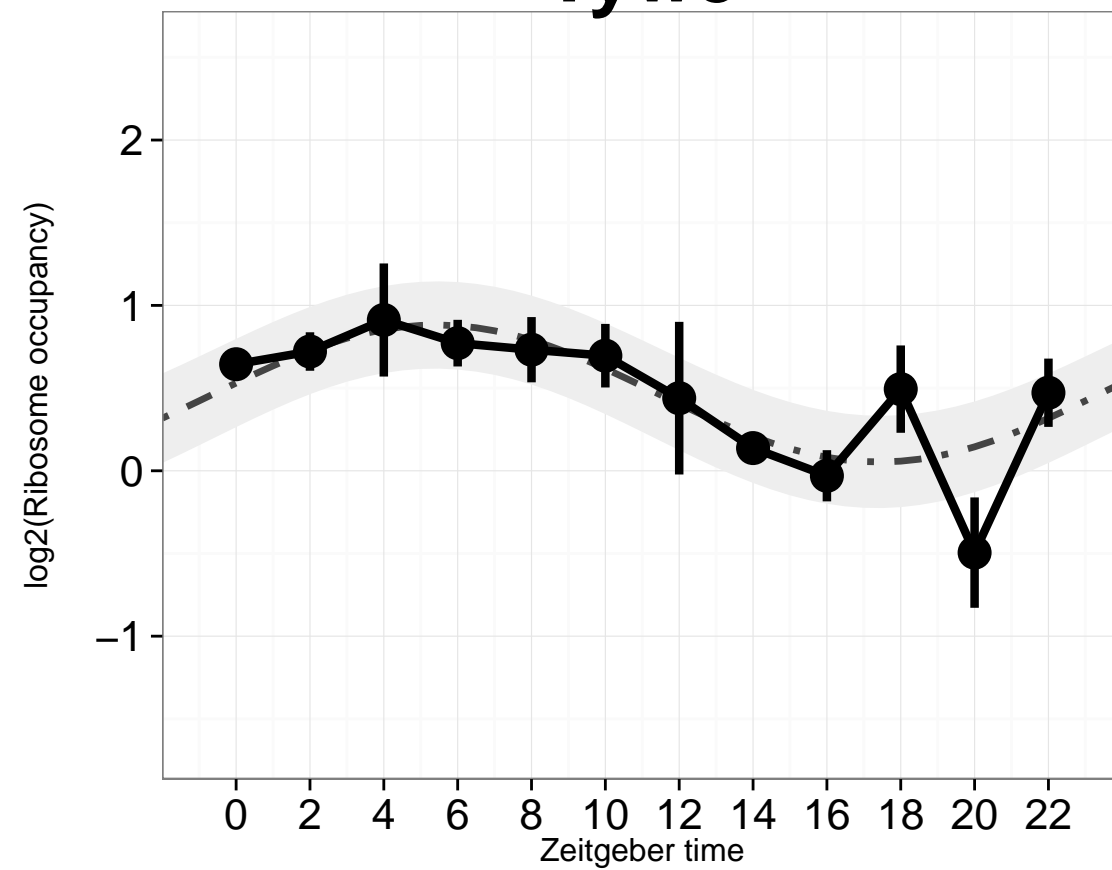

Supplement: Supplementary file 12105 [file 1]

# Rpl22l1

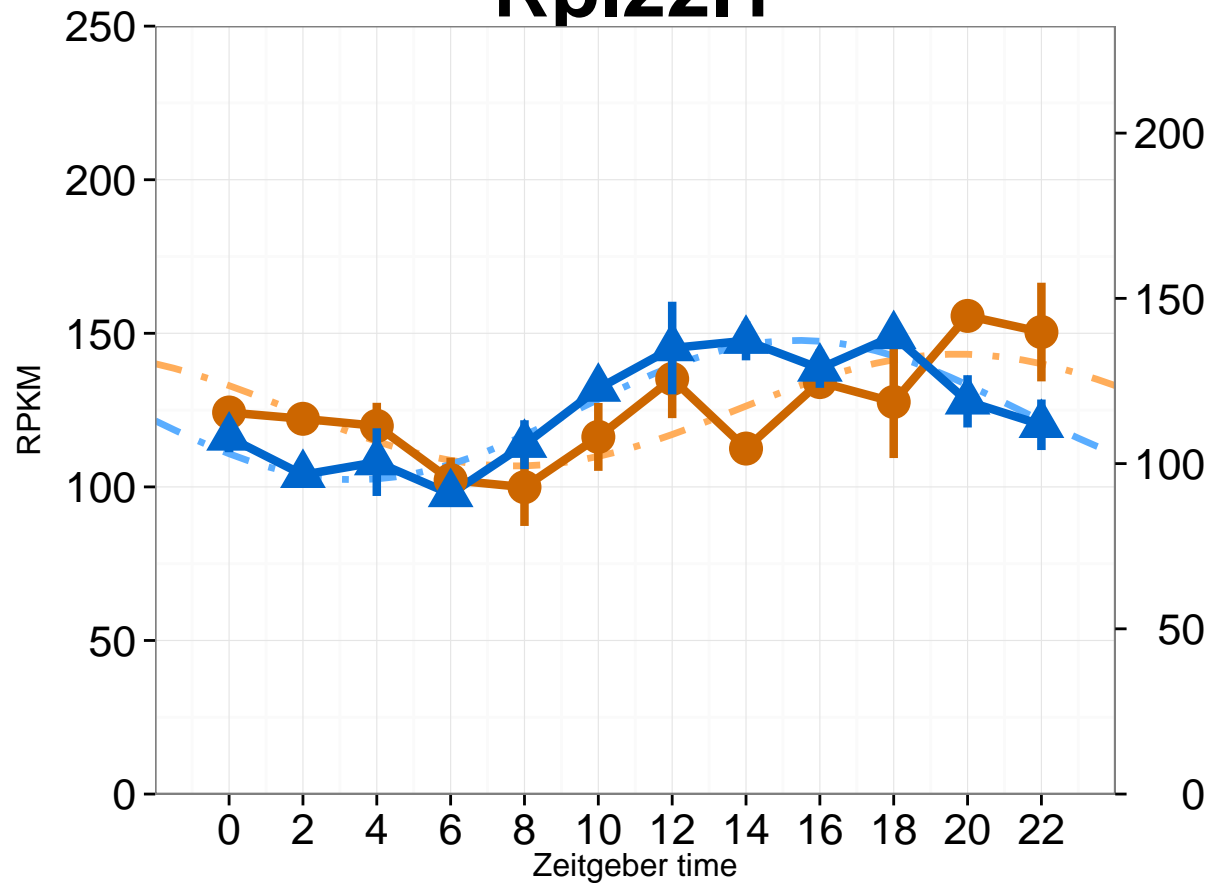

# Rpl22l1

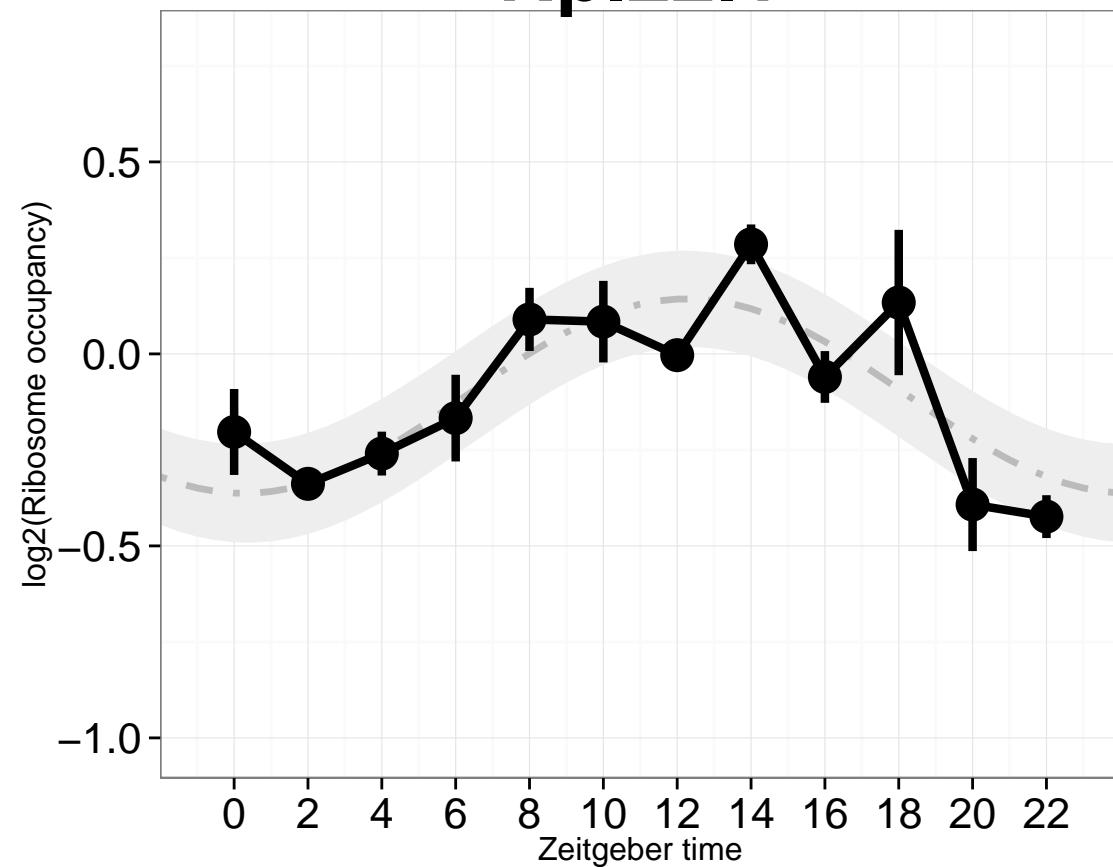

Supplement: Supplementary file 12106 [file 1]

## Nrcam

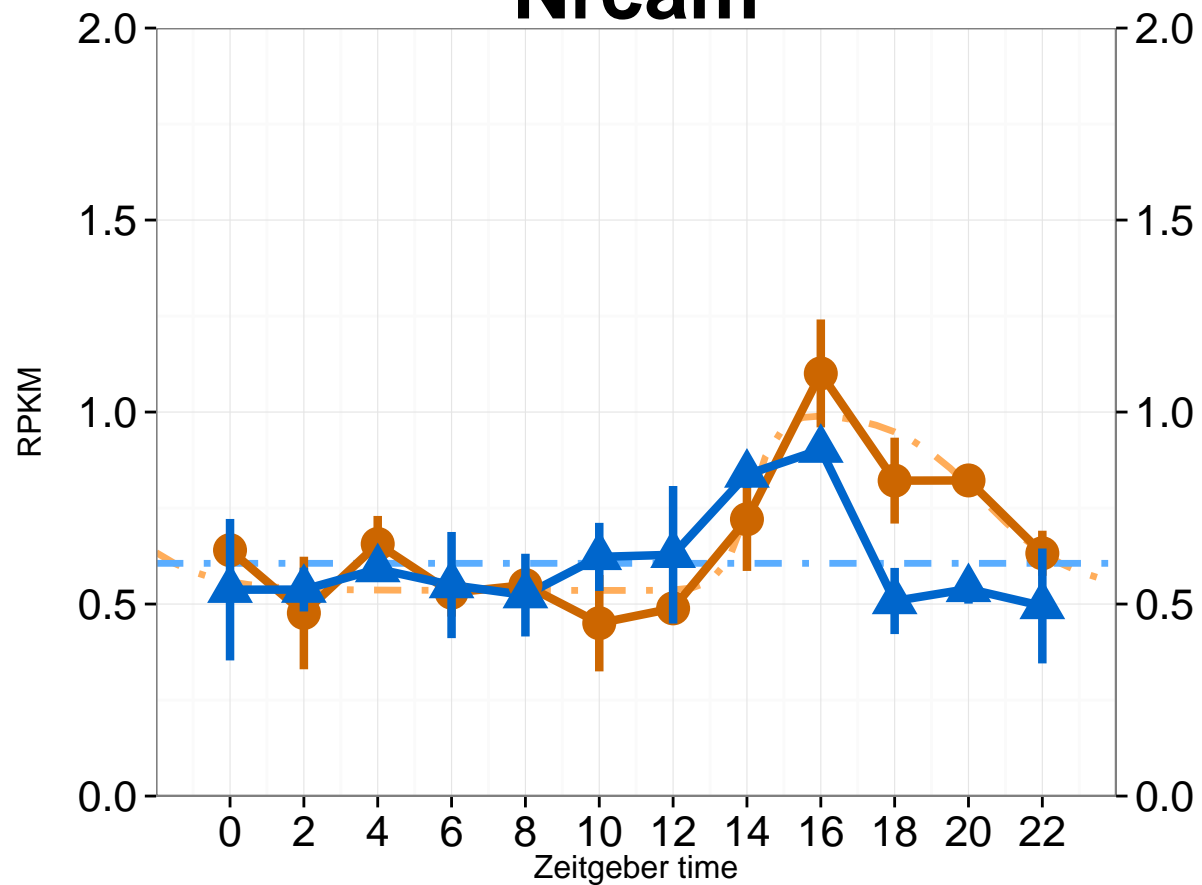

## Nrcam

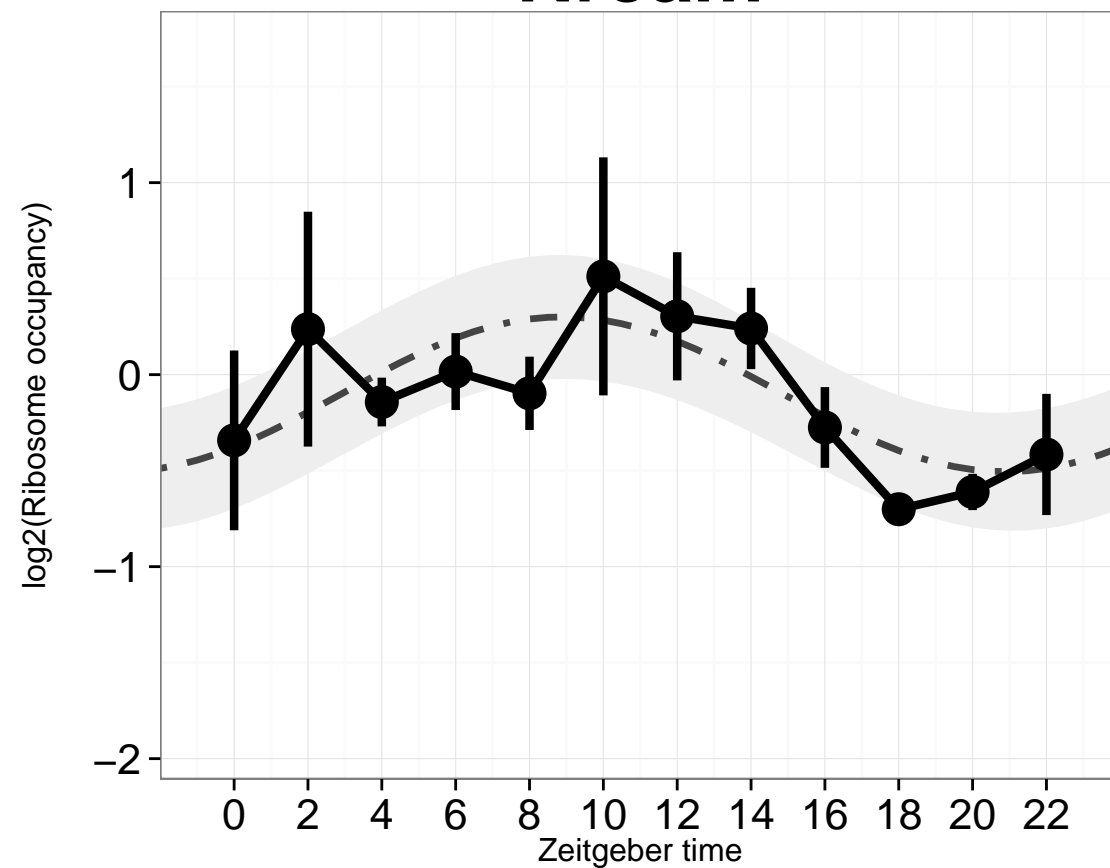

Supplement: Supplementary file 12107 [file 1]

## Hnrnpu

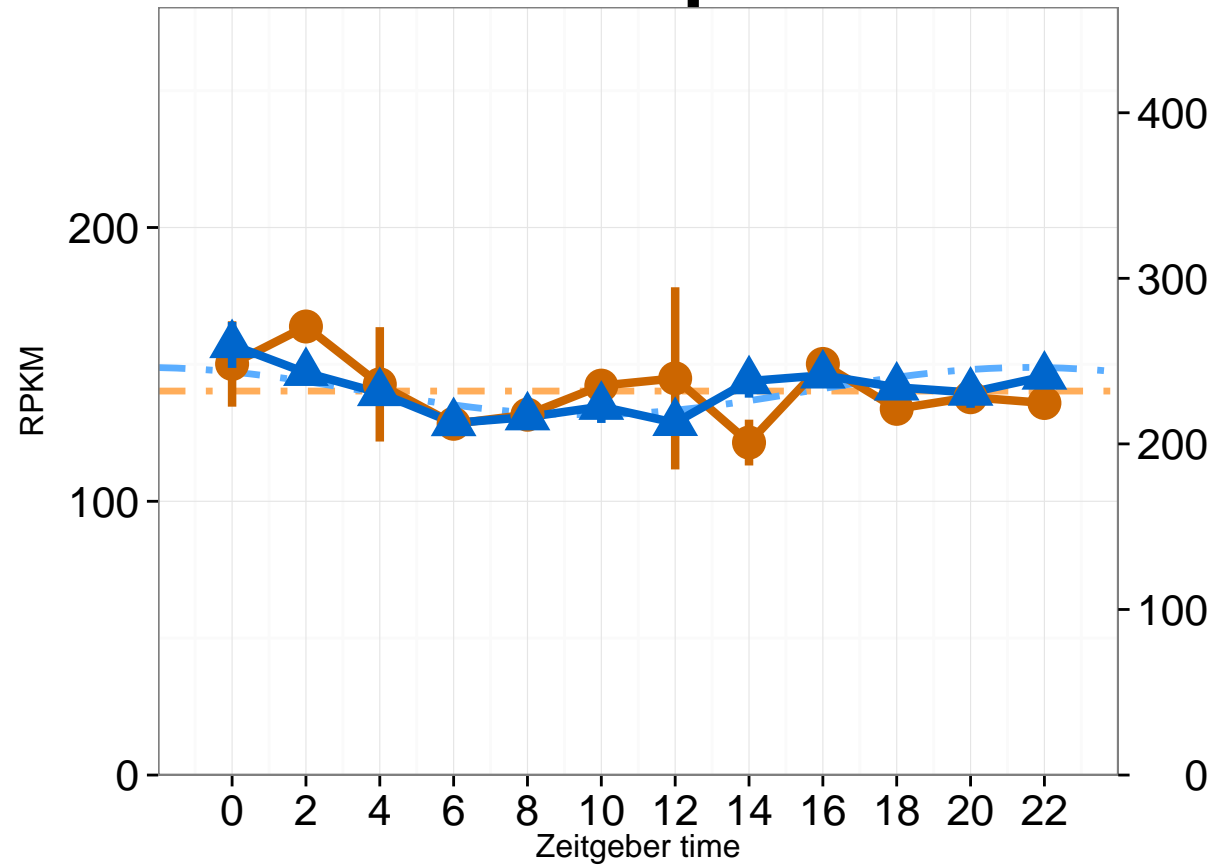

## Hnrnpu

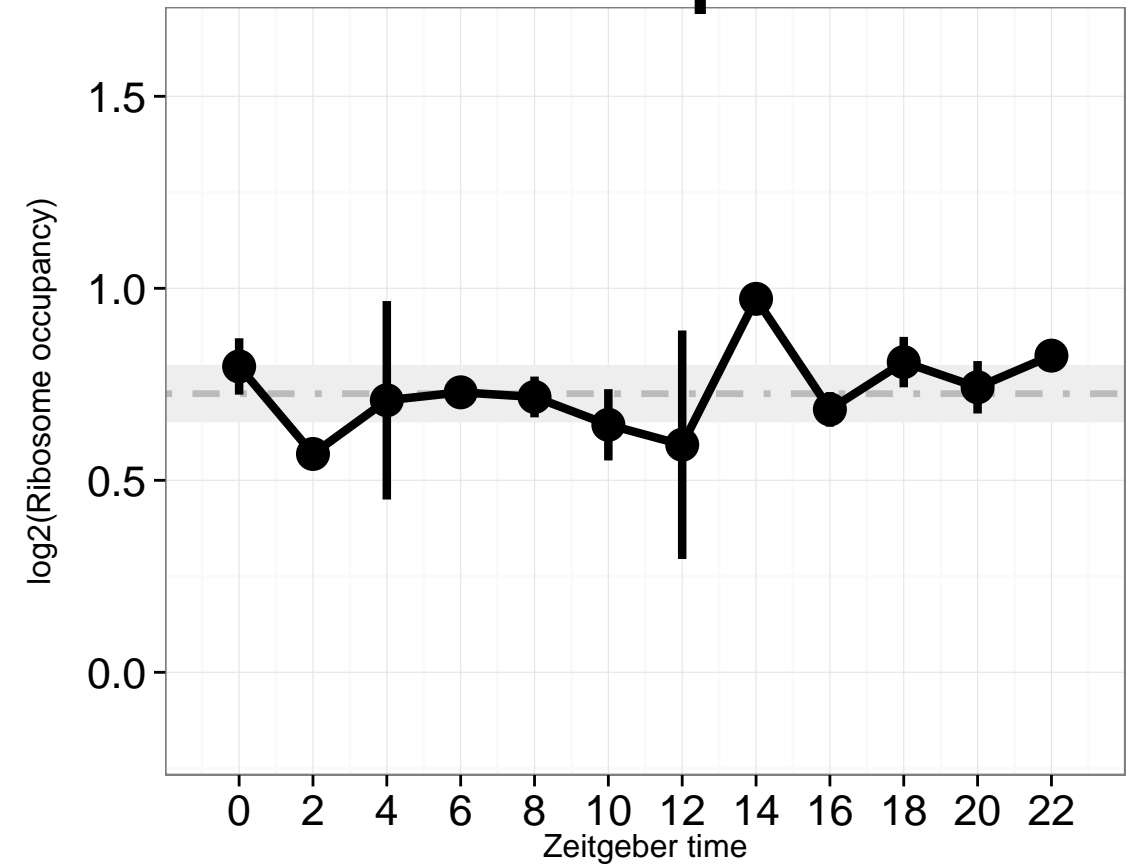

Supplement: Supplementary file 12108 [file 1]

## Maff

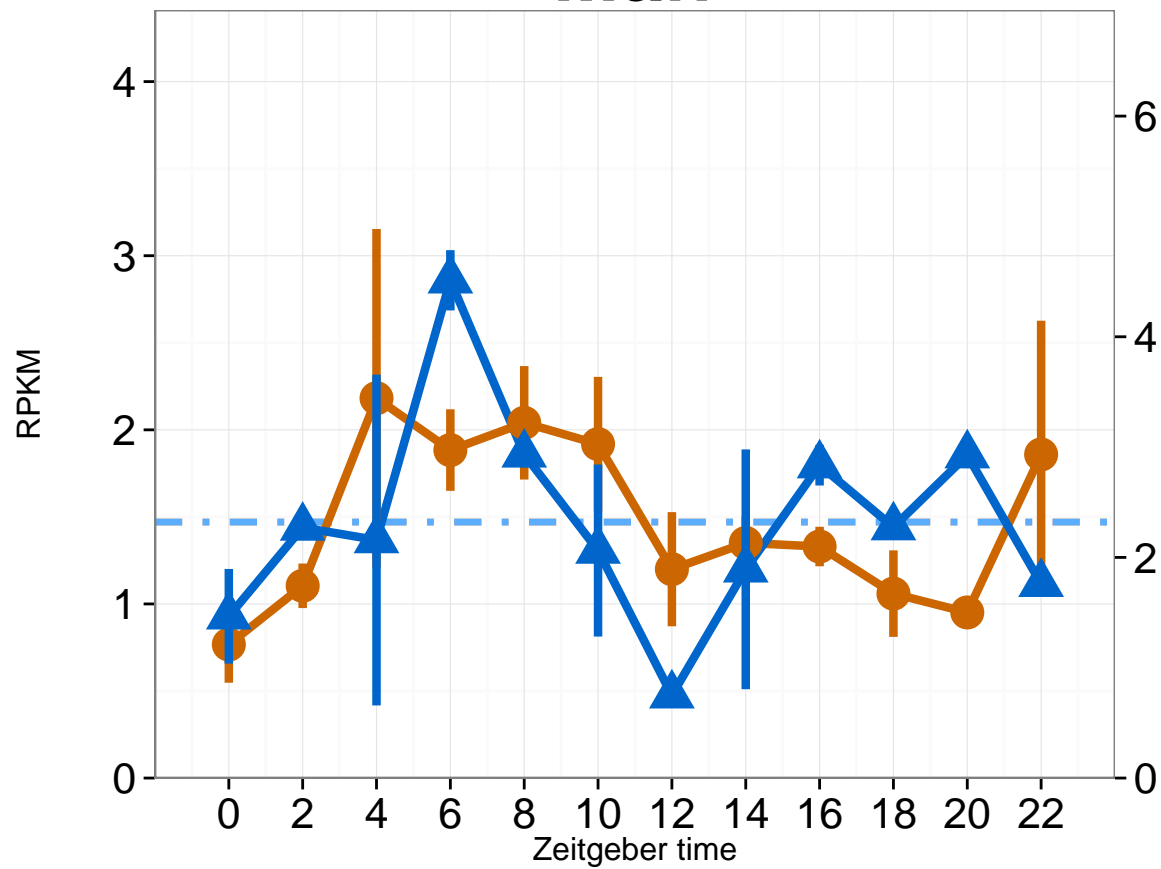

## Maff

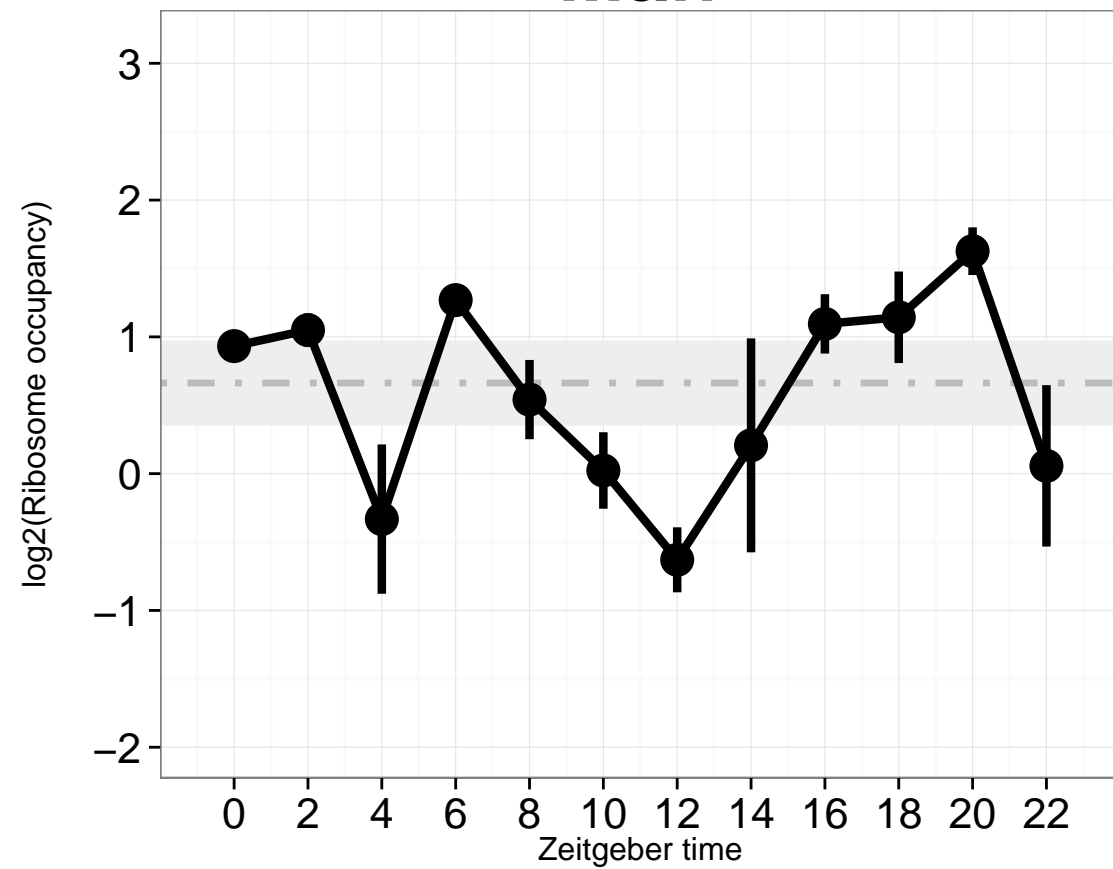

Supplement: Supplementary file 12109 [file 1]

# Trabd2b

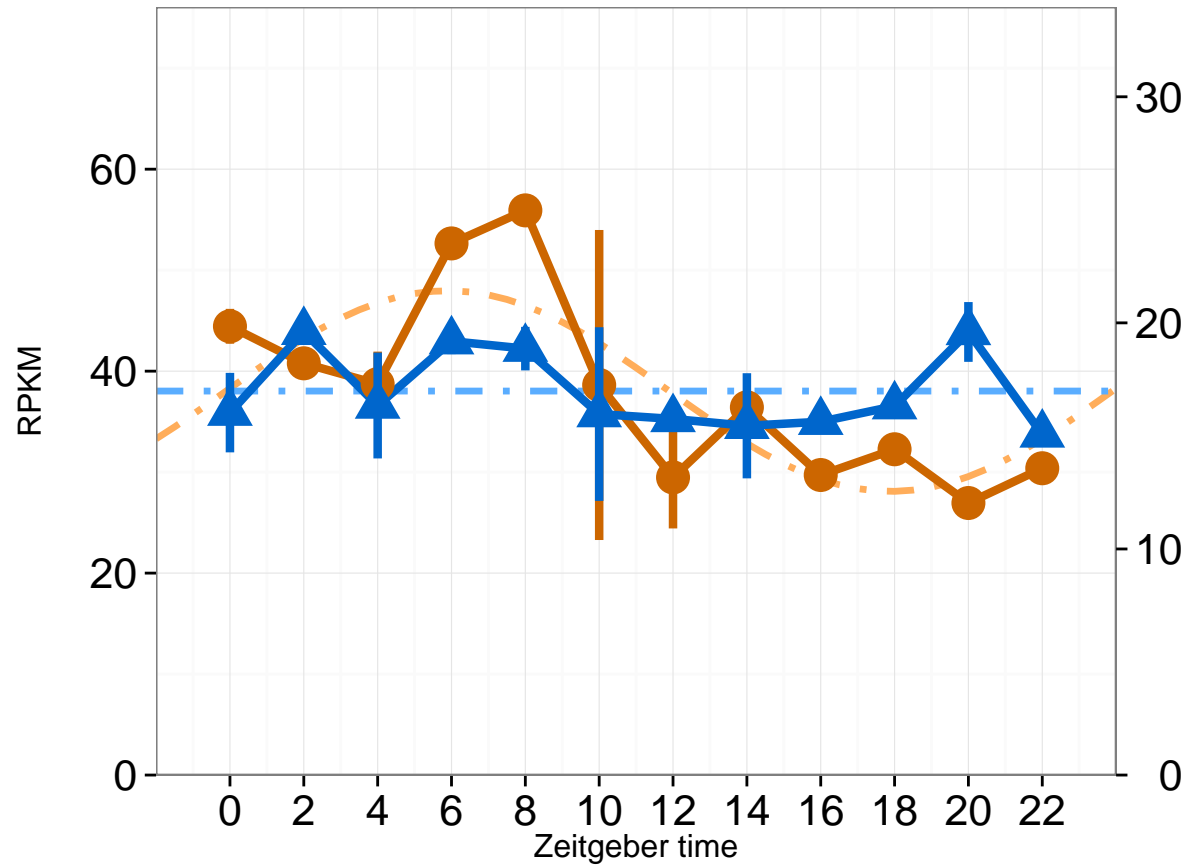

# Trabd2b

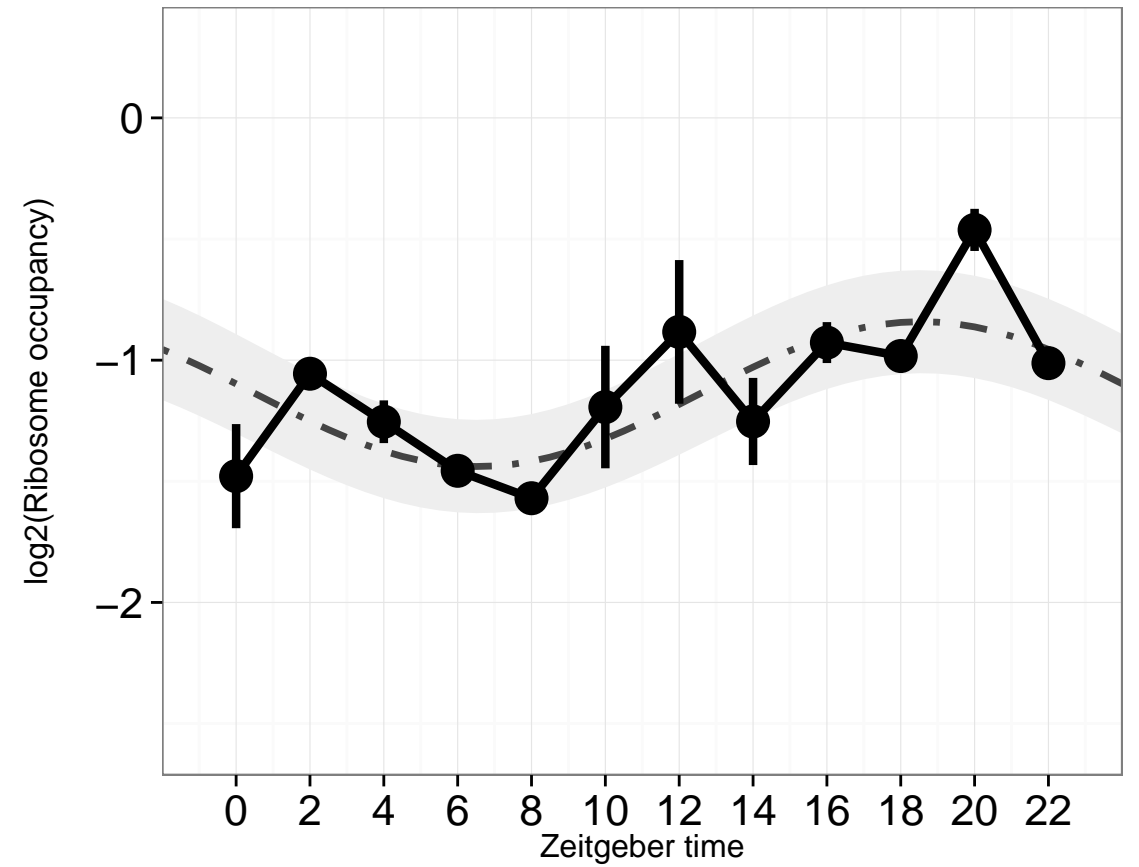

Supplement: Supplementary file 12110 [file 1]

## Gusb

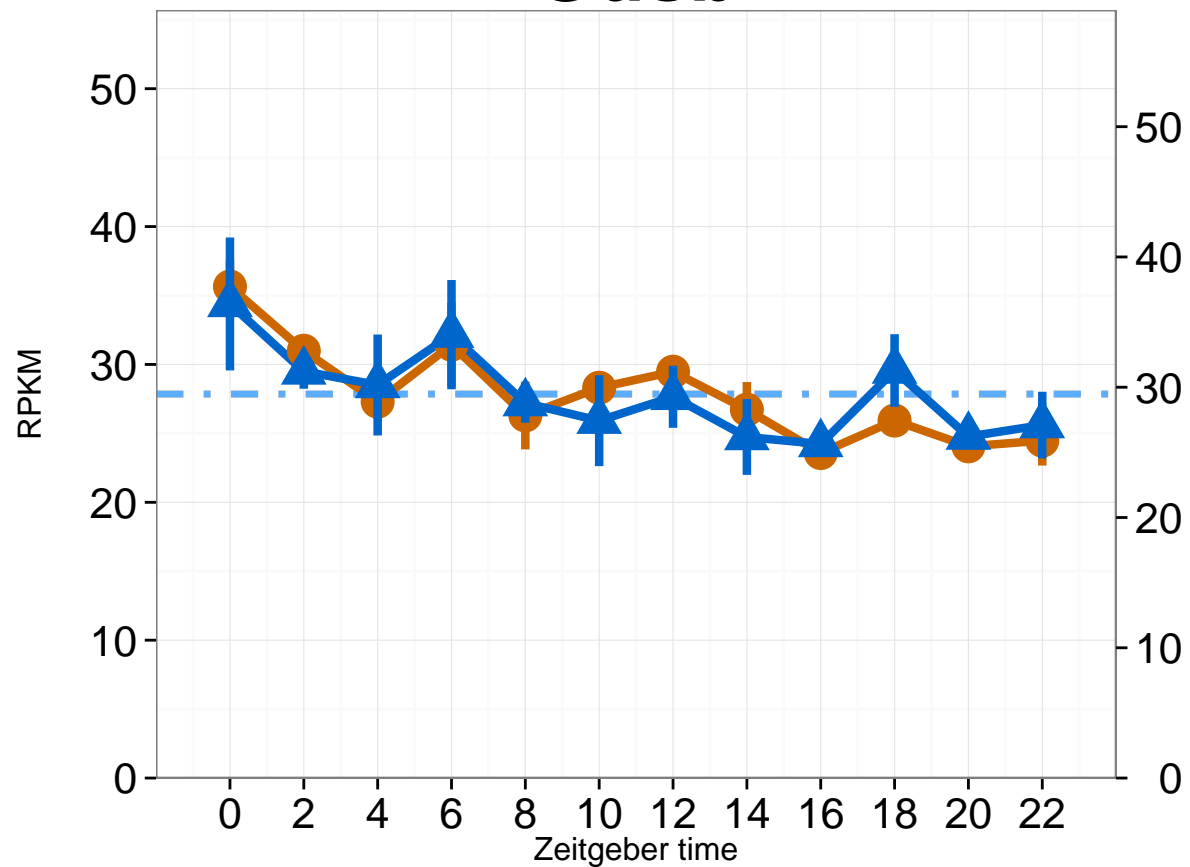

## Gusb

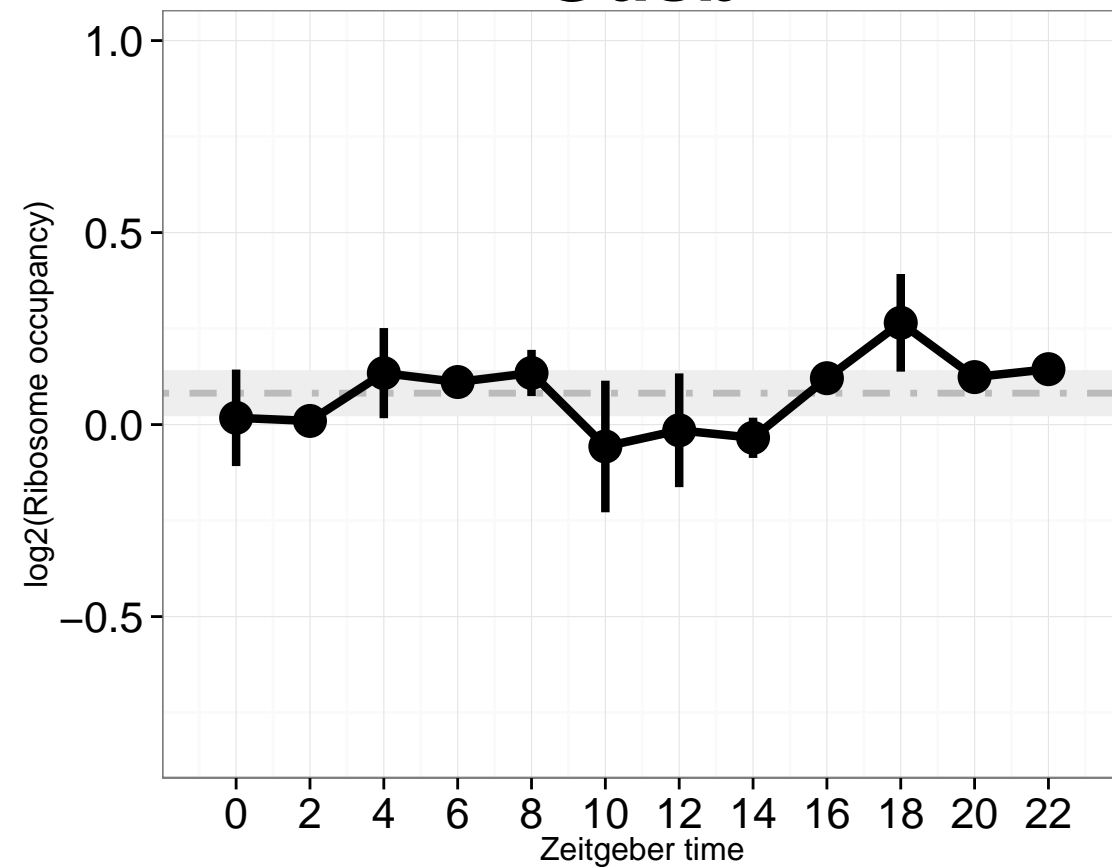

Supplement: Supplementary file 12111 [file 1]

## Slc30a7

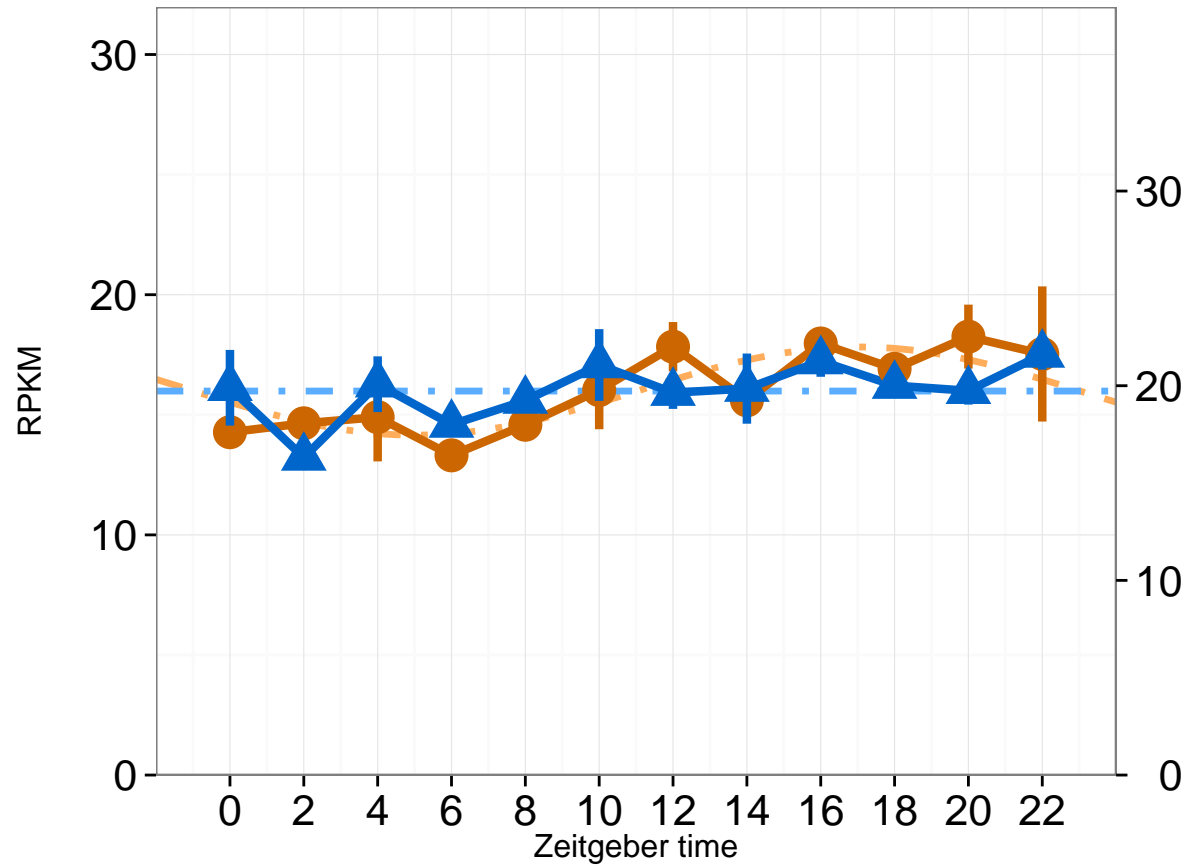

## Slc30a7

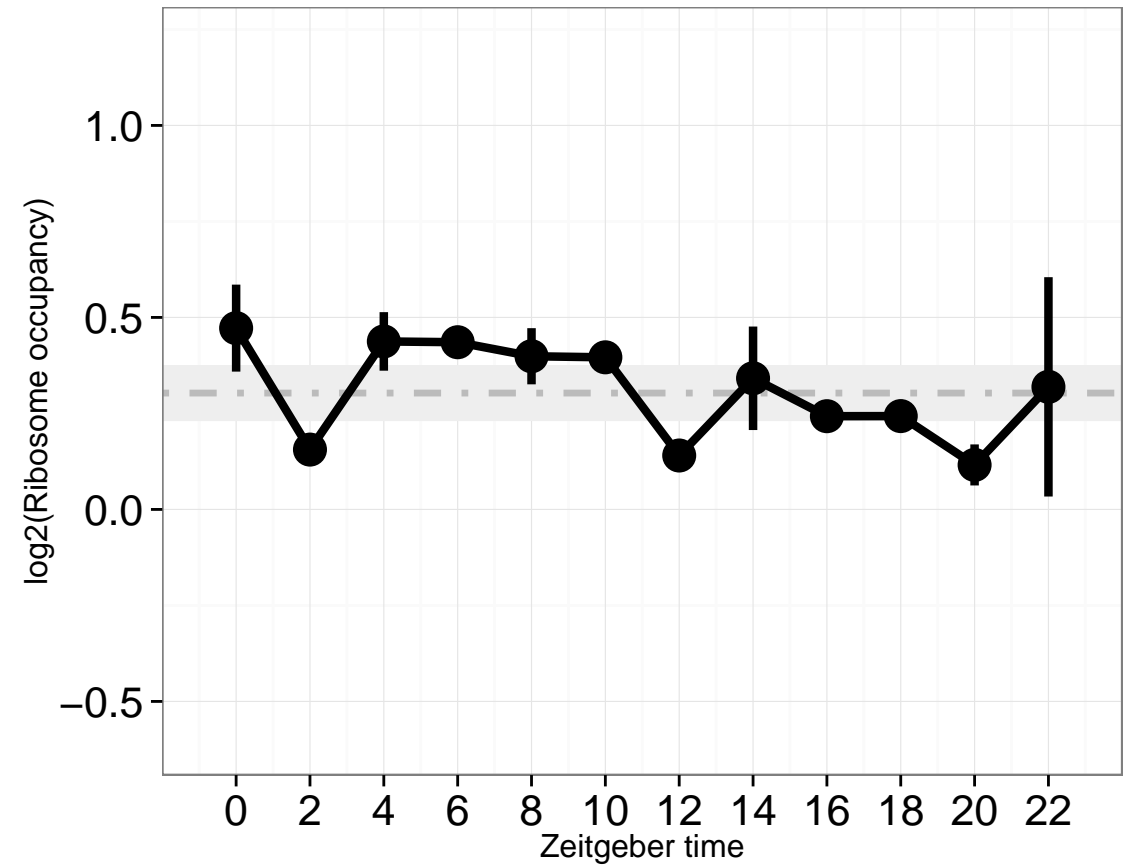

Supplement: Supplementary file 12112 [file 1]

## Chadl

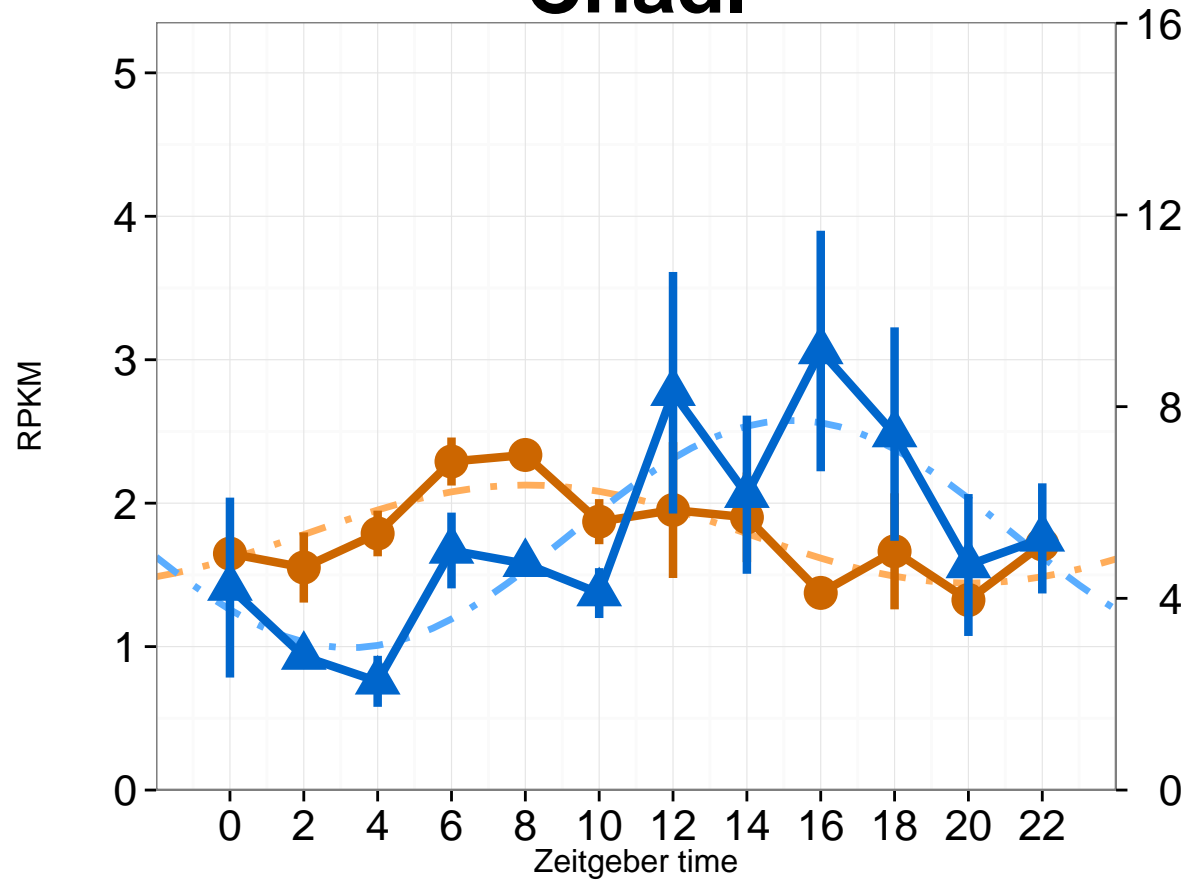

## Chadl

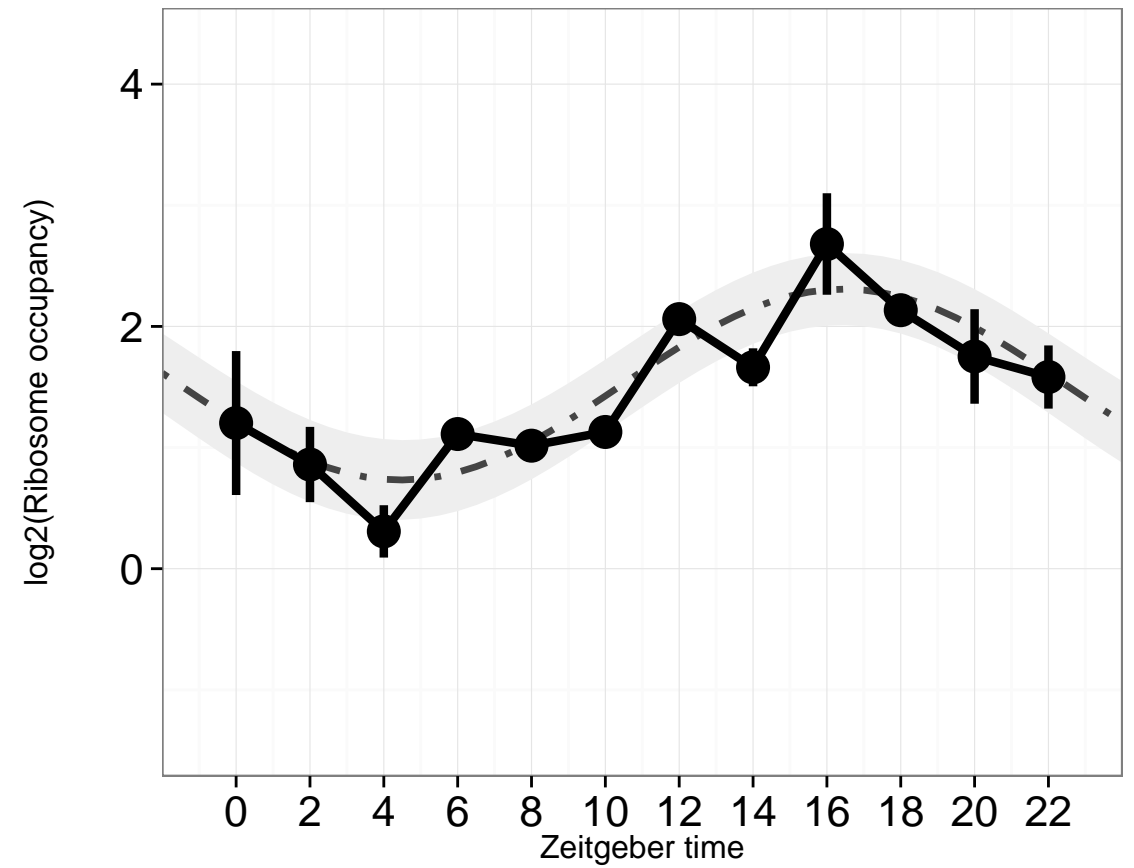

Supplement: Supplementary file 12113 [file 1]

# Ncaph2

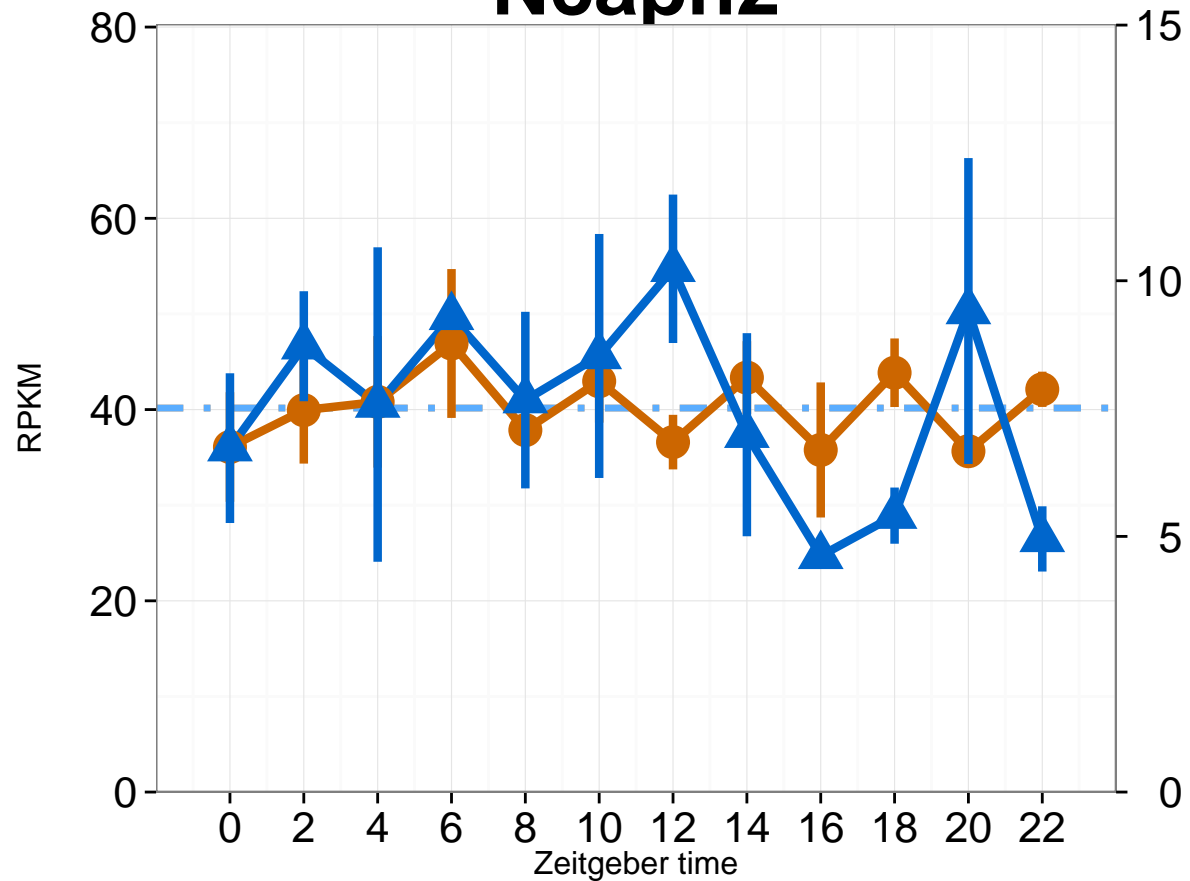

# Ncaph2

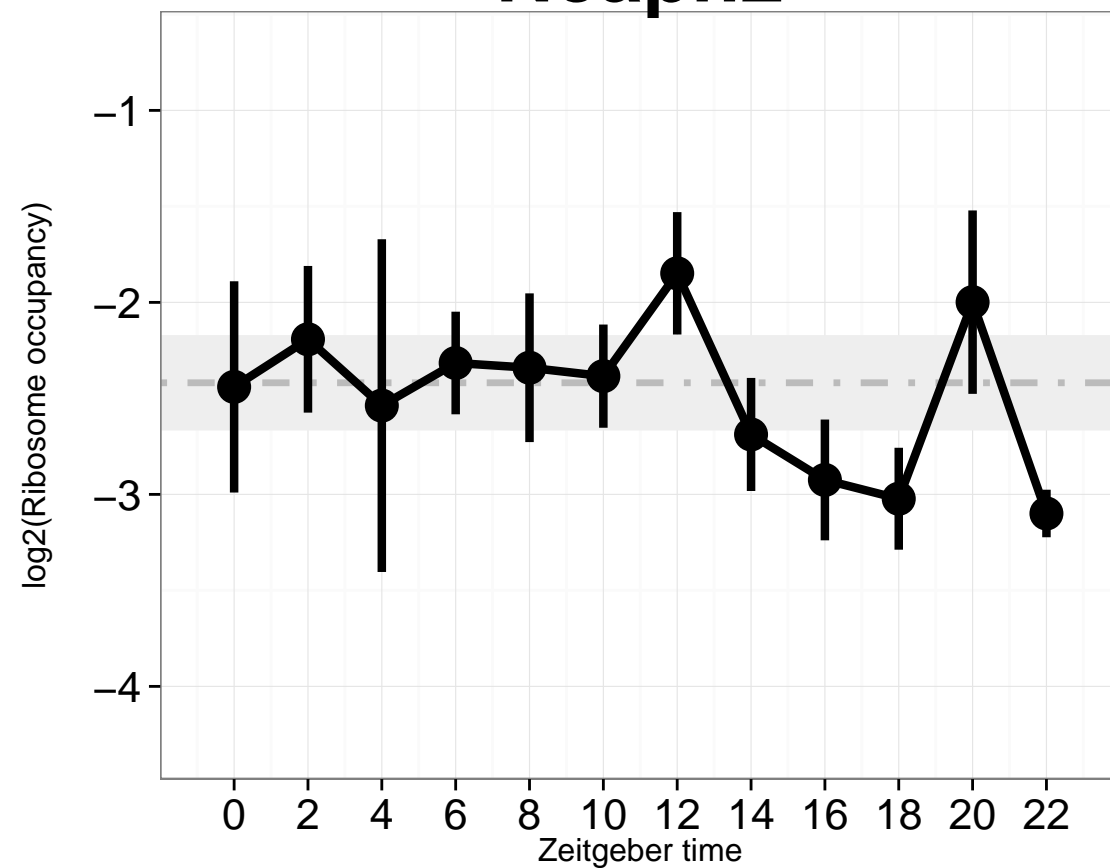

Supplement: Supplementary file 12114 [file 1]

# Tnrc6c

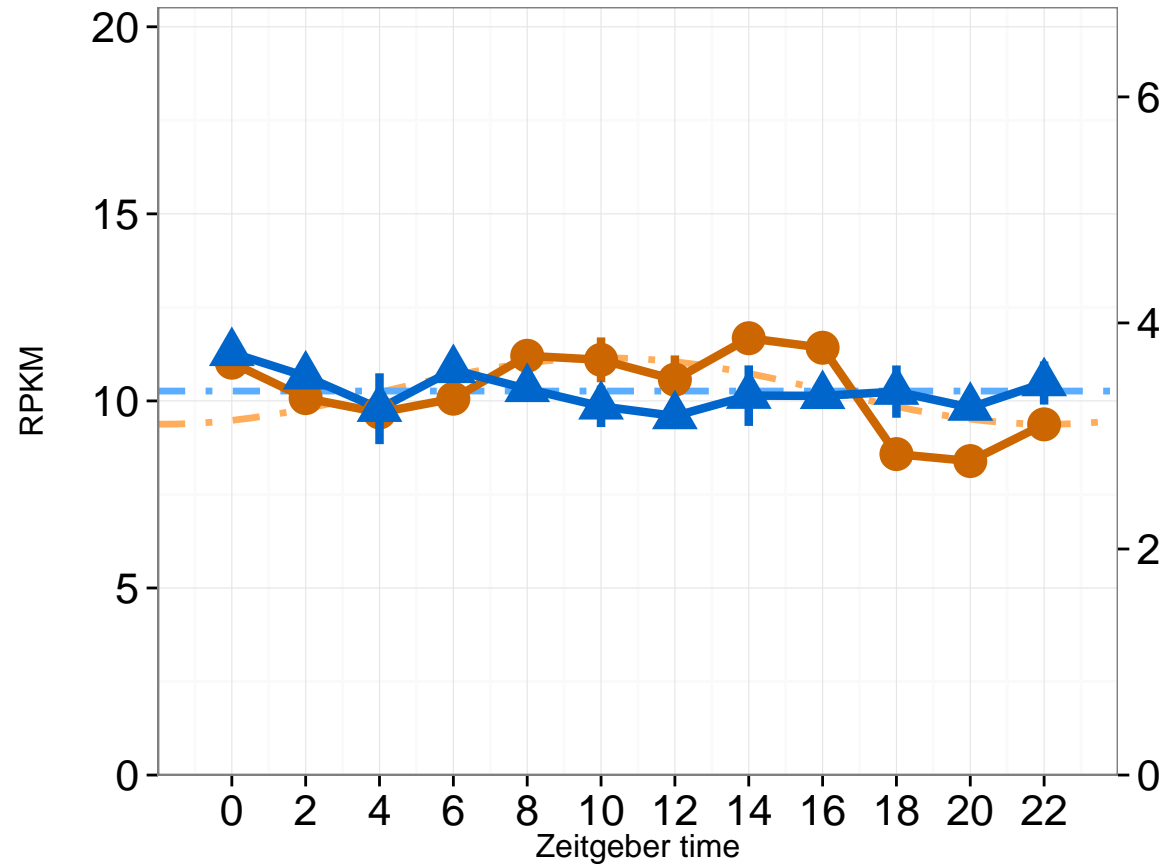

# Tnrc6c

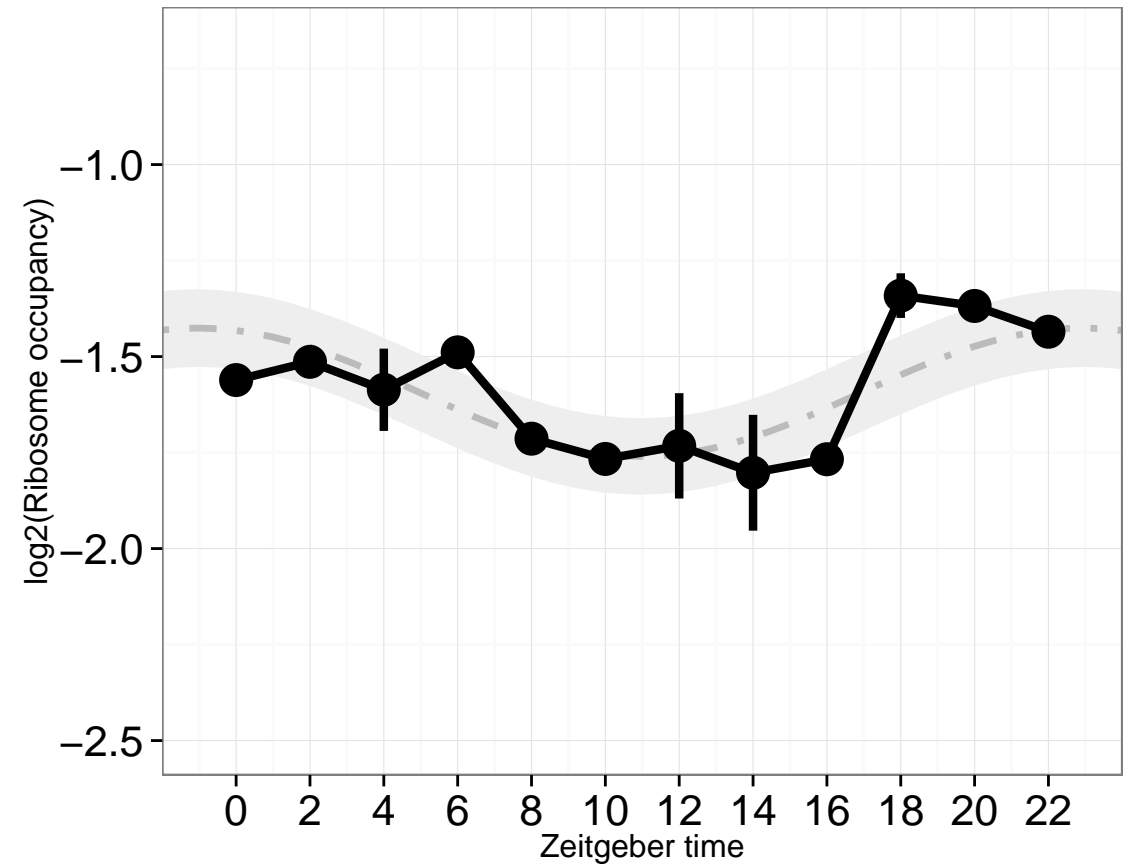

Supplement: Supplementary file 12115 [file 1]

# Cog4

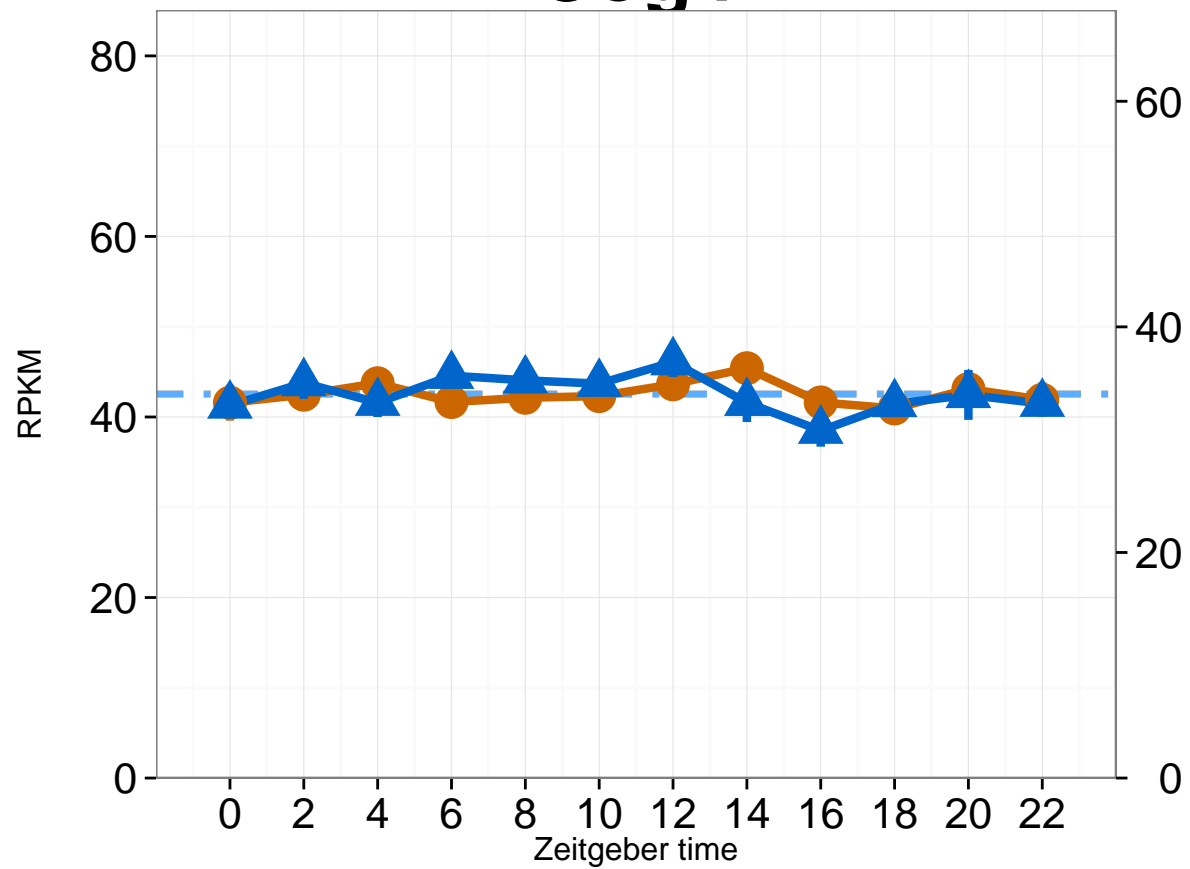

# Cog4

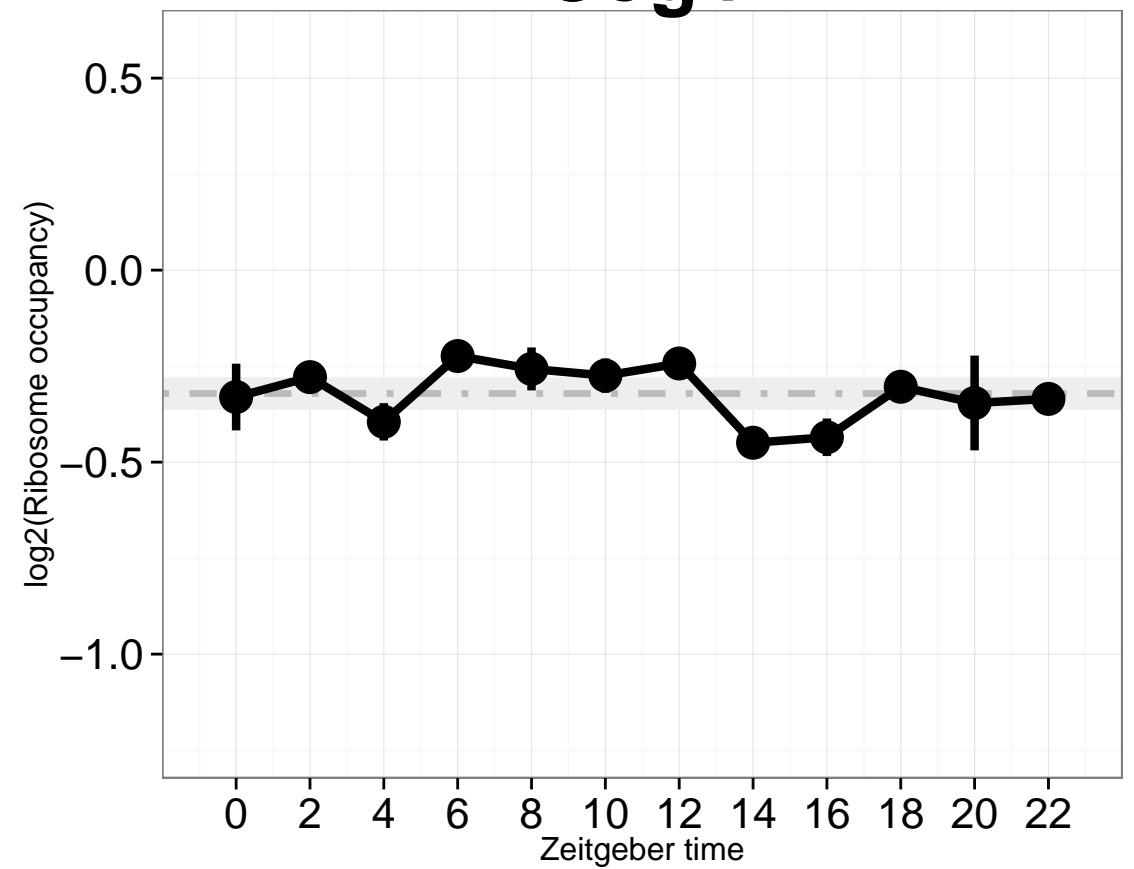

Supplement: Supplementary file 12116 [file 1]

# Spice1

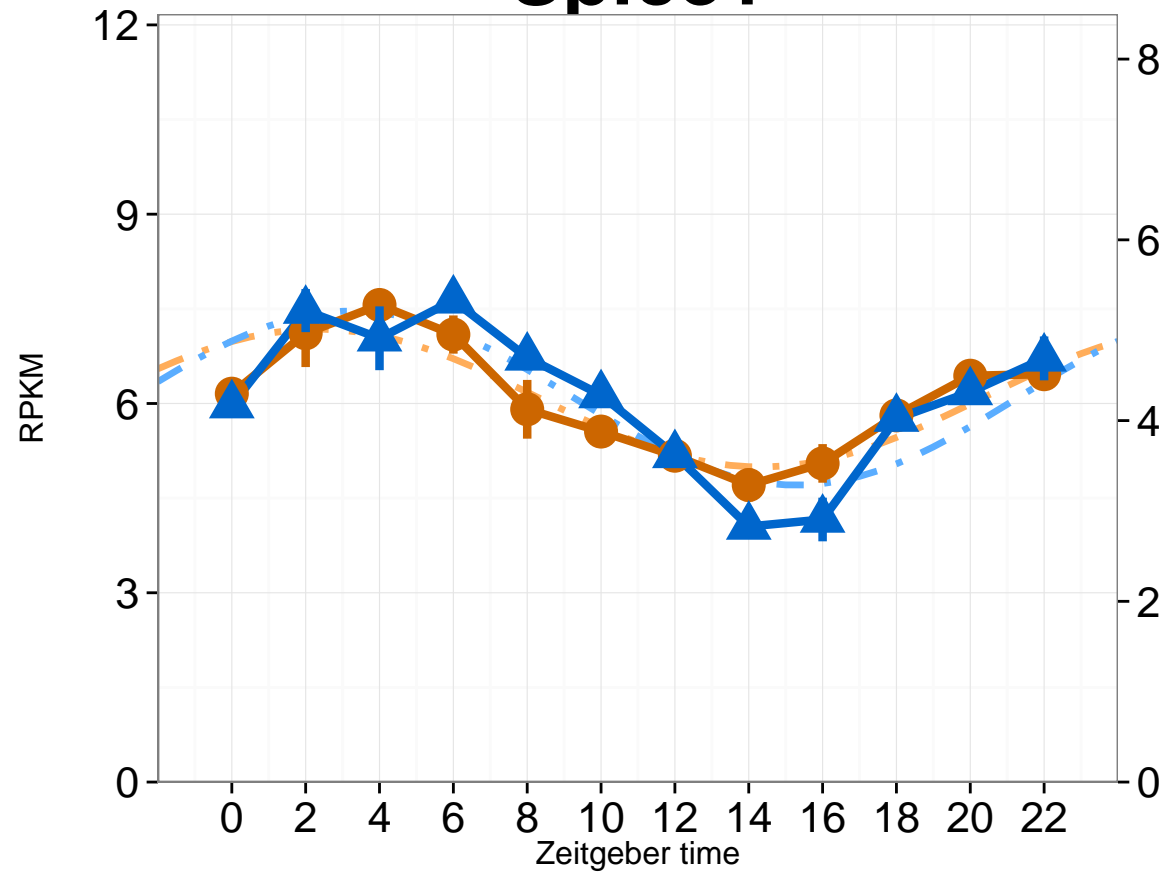

# Spice1

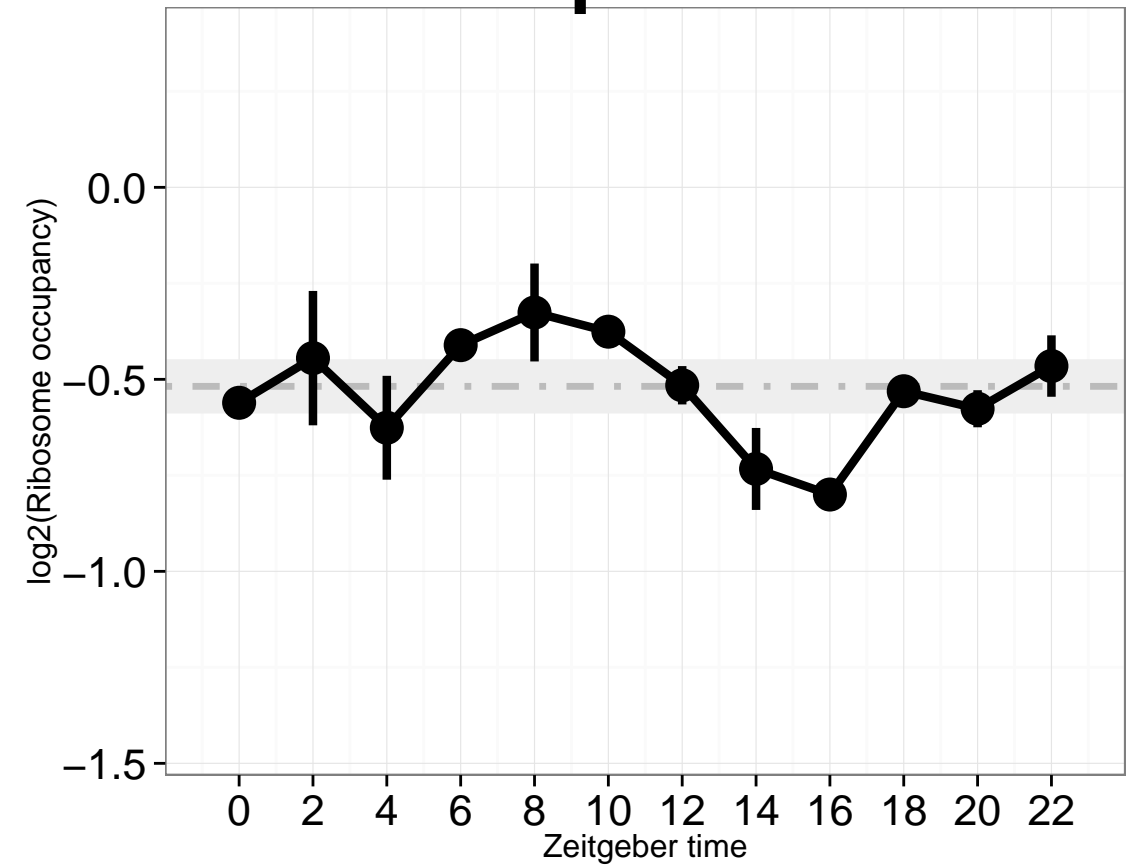

Supplement: Supplementary file 12117 [file 1]

## Nhlrc3

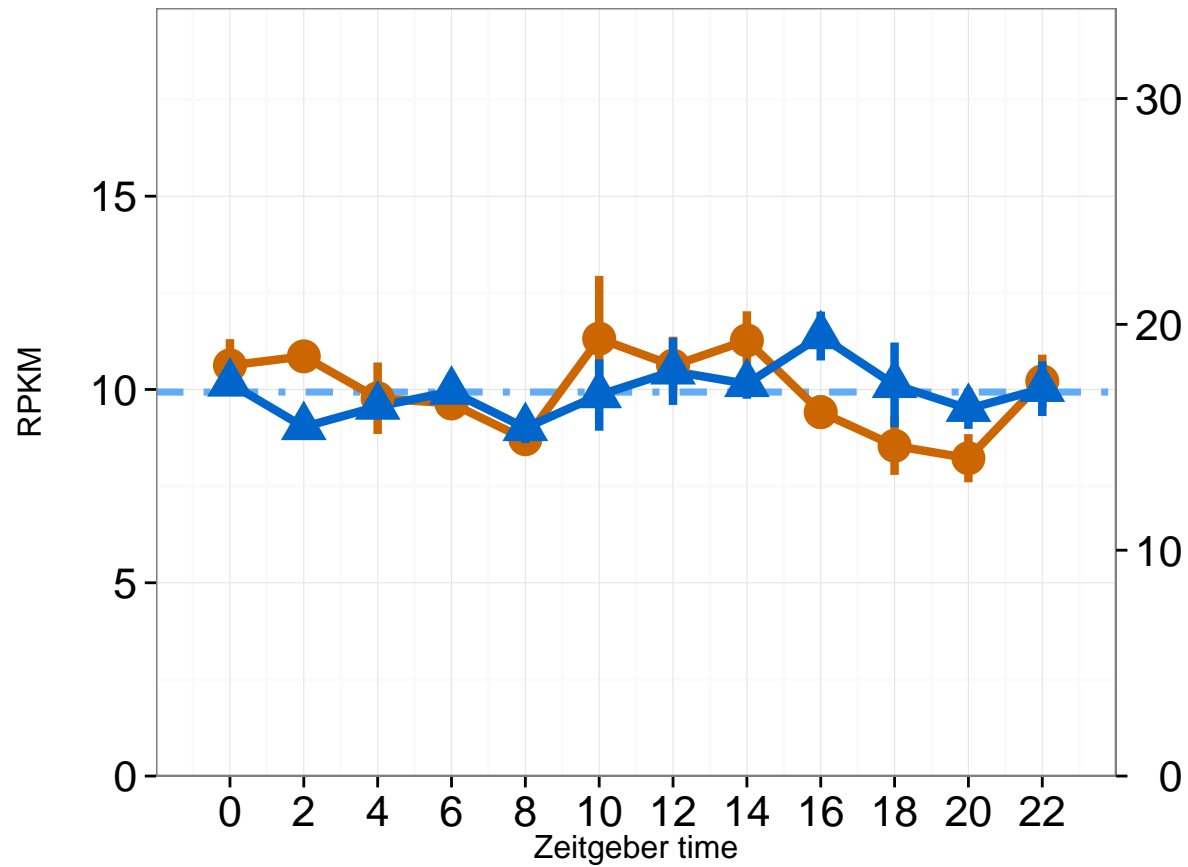

## Nhlrc3

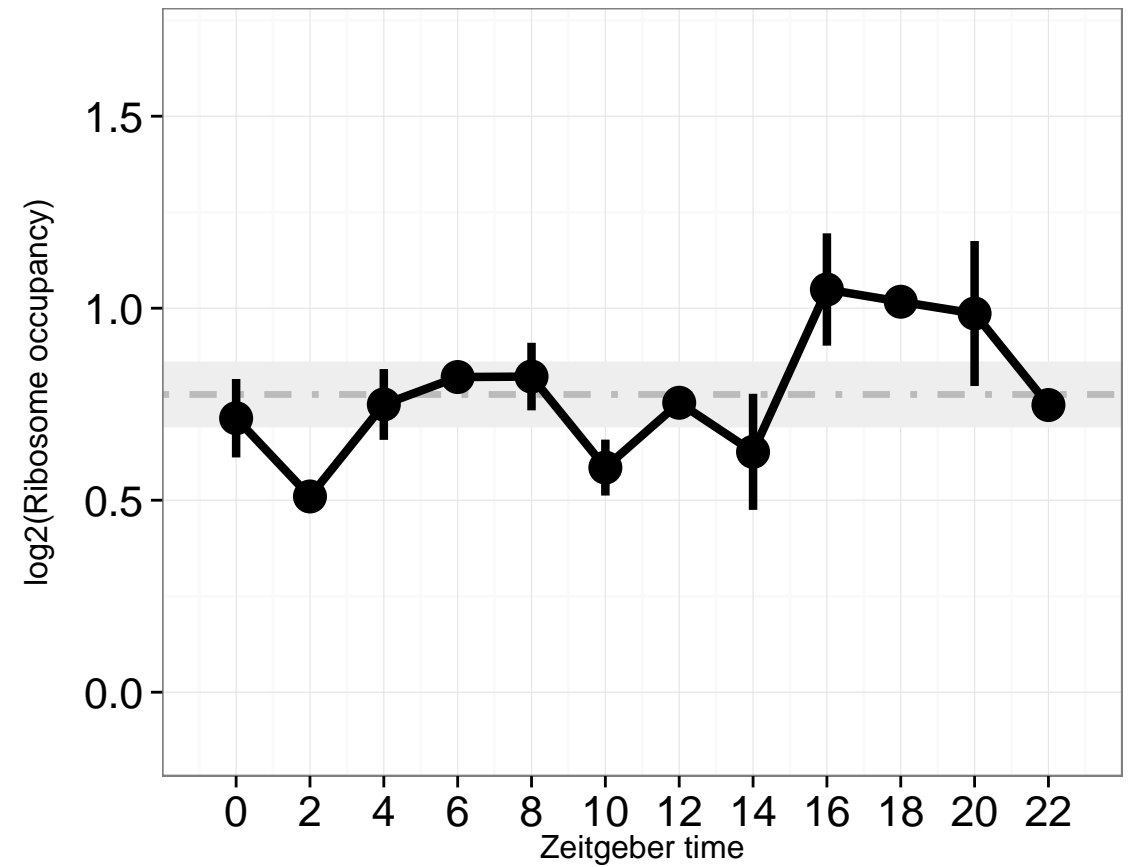

Supplement: Supplementary file 12118 [file 1]

## Eif5b

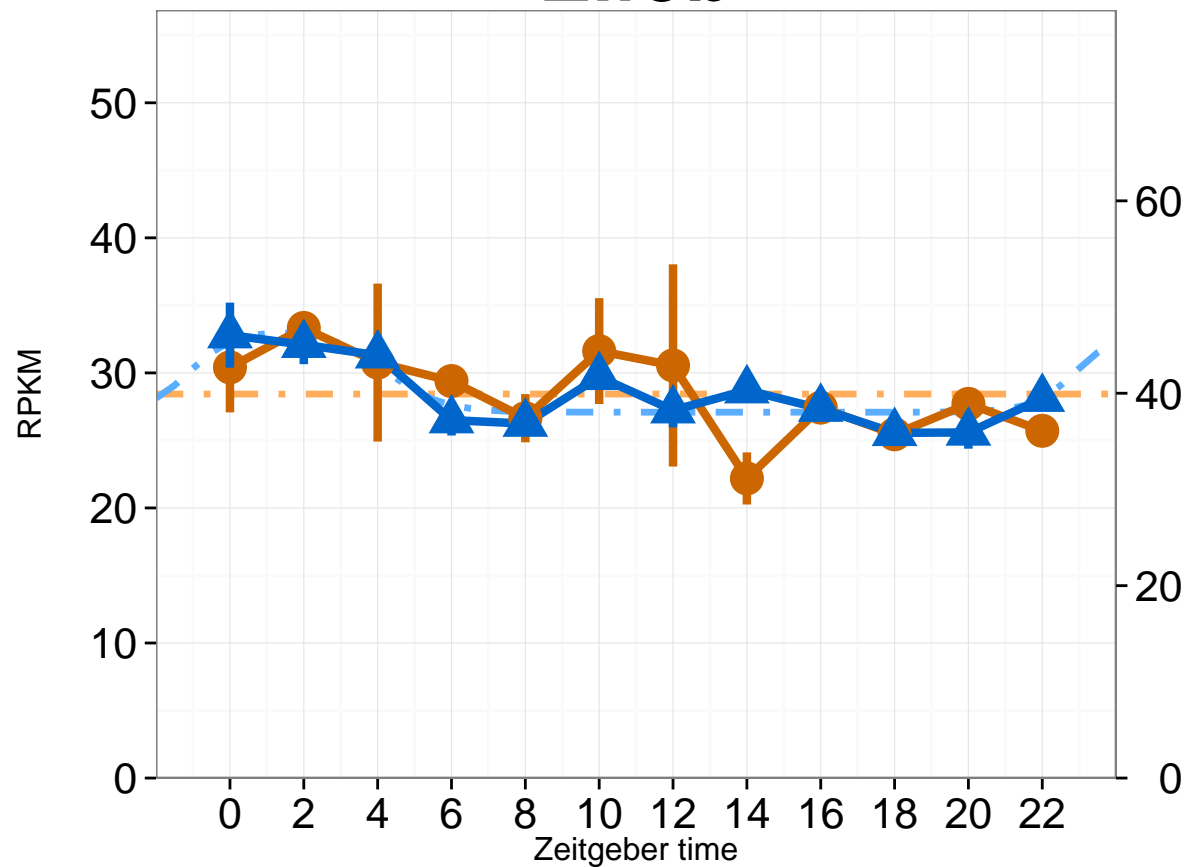

## Eif5b

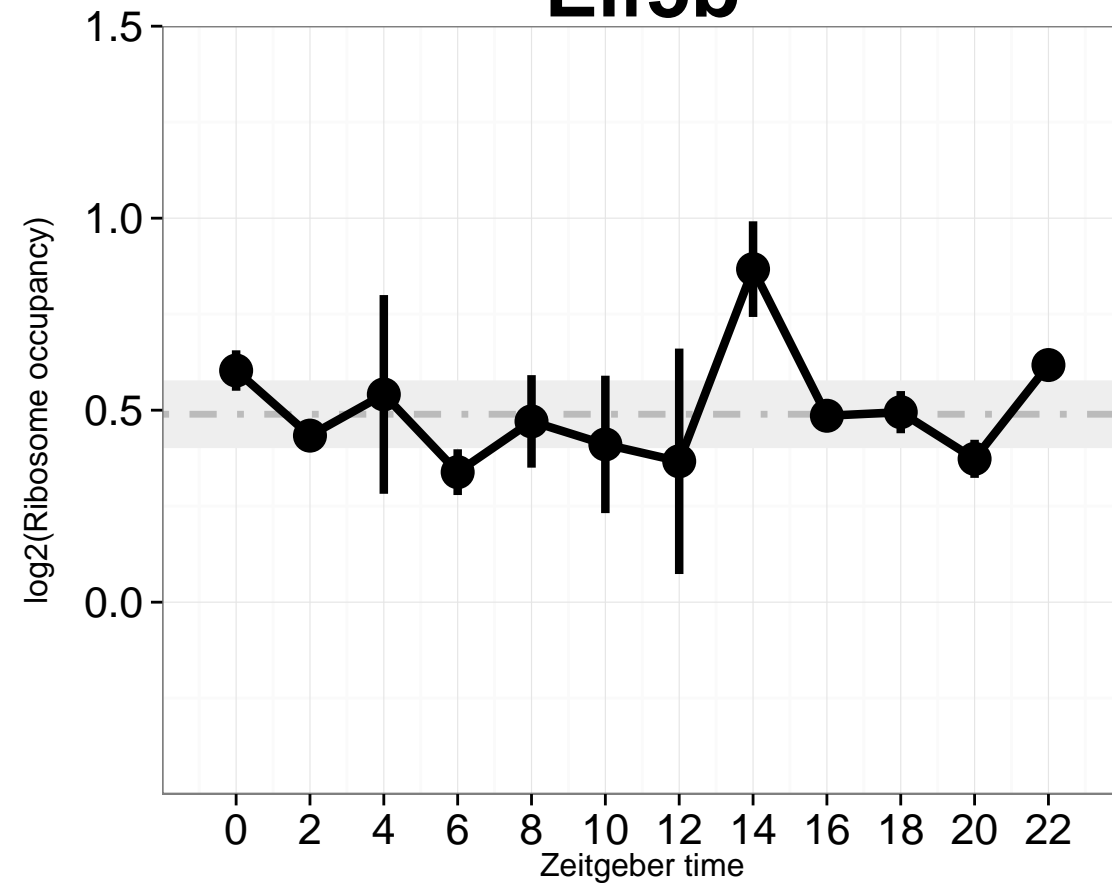

Supplement: Supplementary file 12119 [file 1]

## Pls1

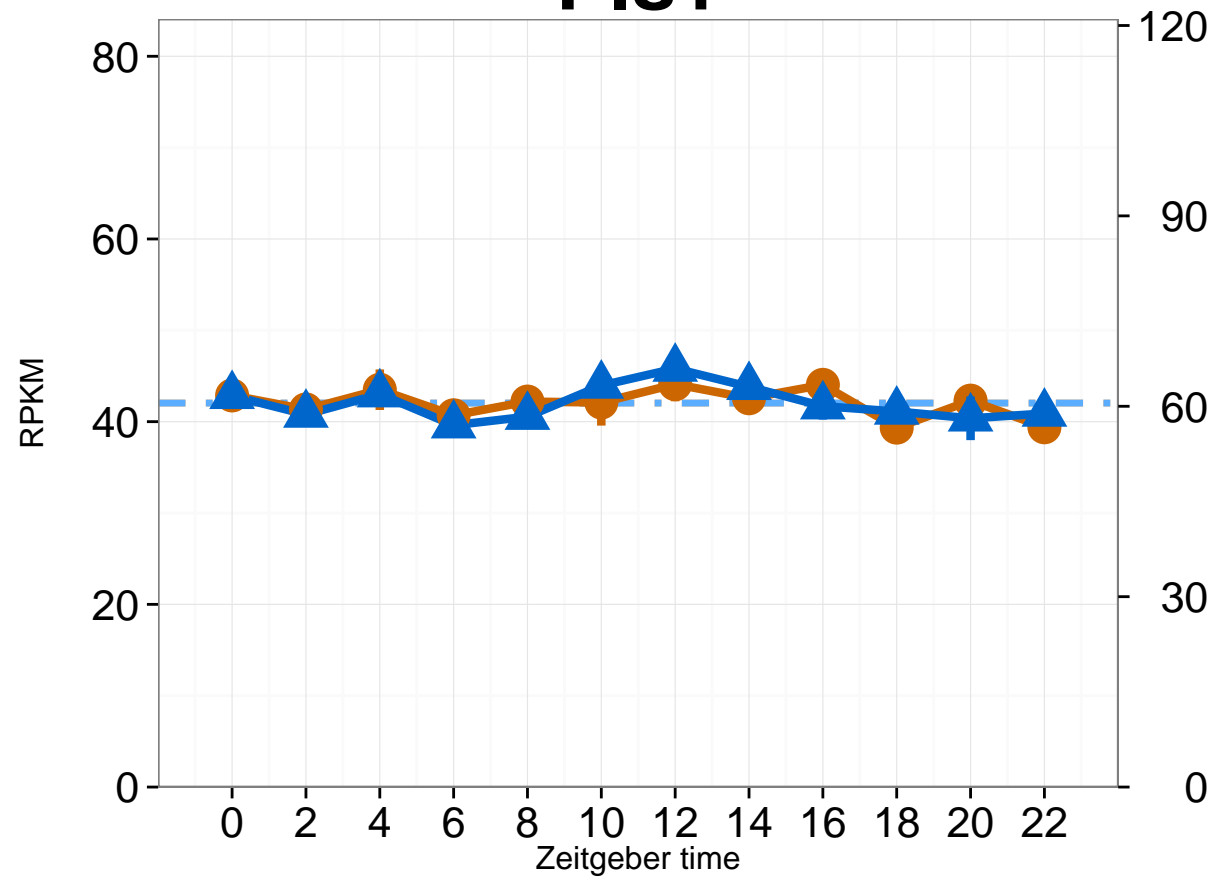

## Pls1

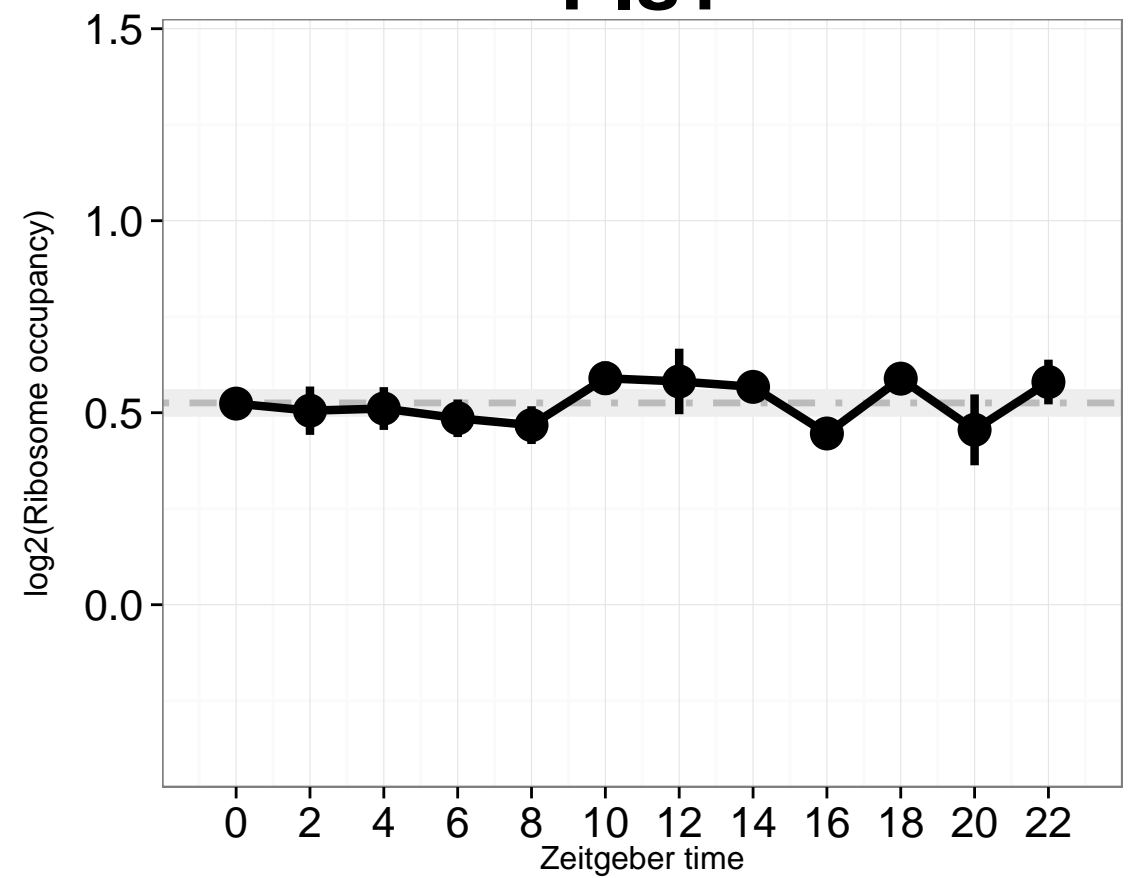

Supplement: Supplementary file 12120 [file 1]

# Gm906

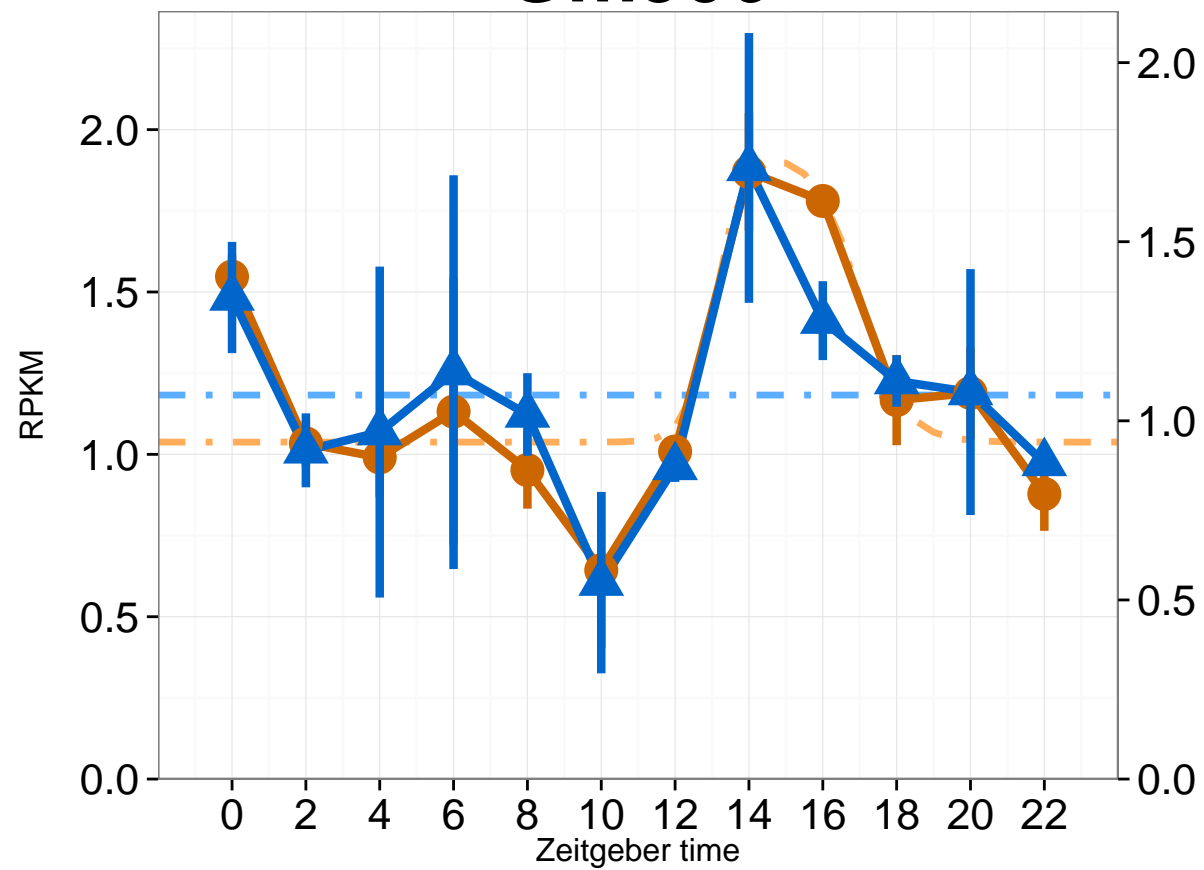

# Gm906

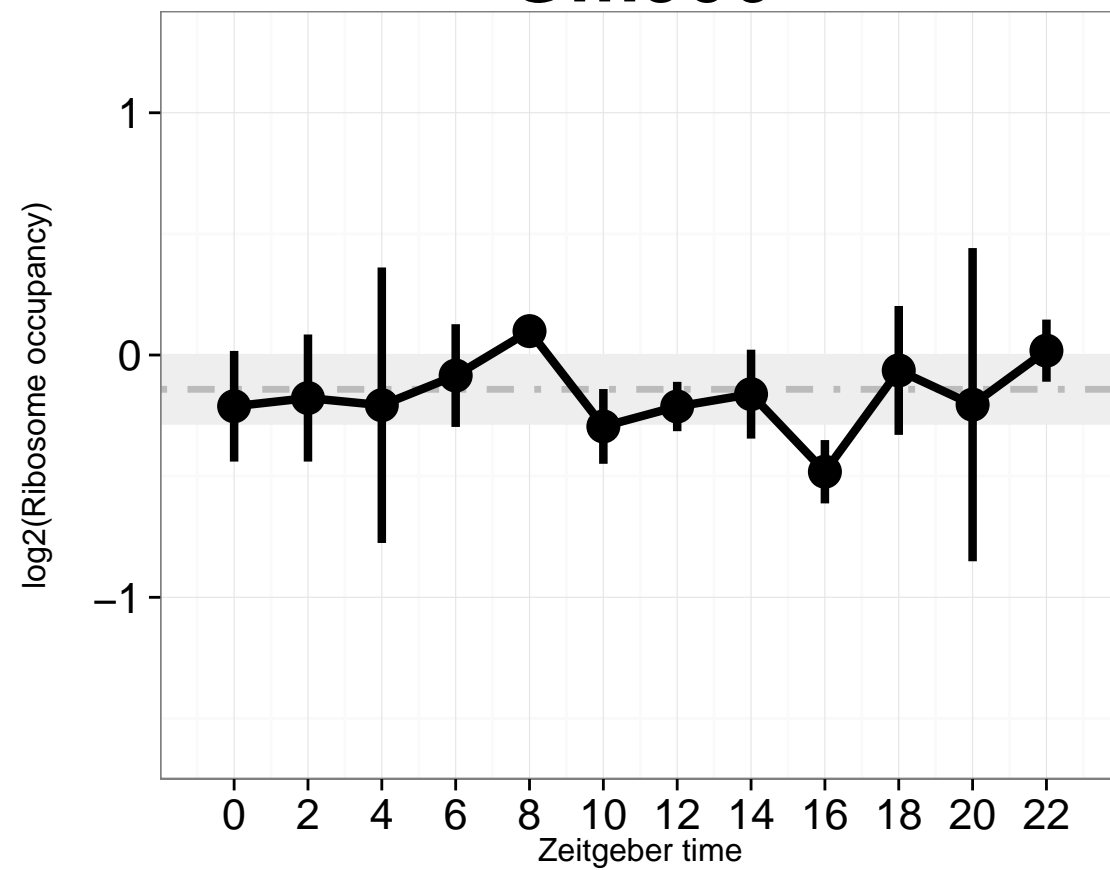

Supplement: Supplementary file 12121 [file 1]

## Ecd

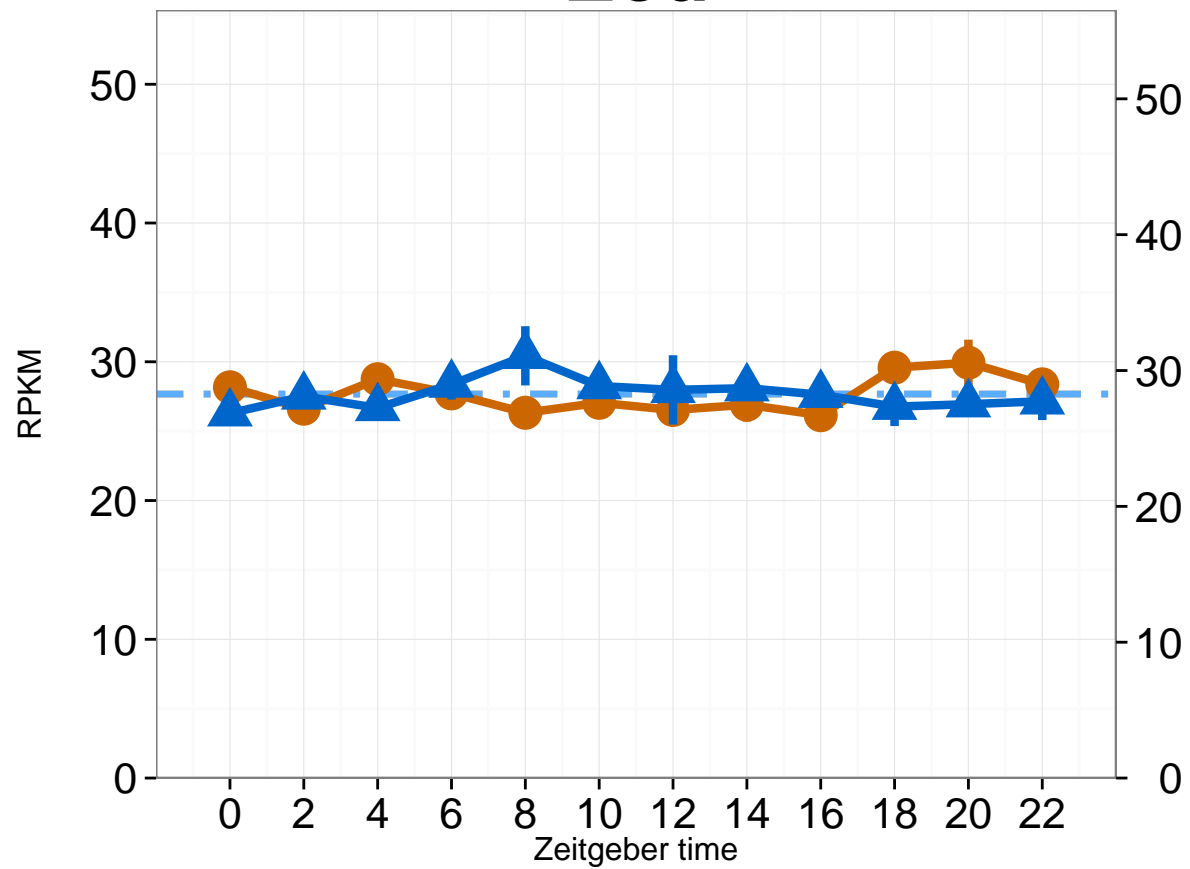

## Ecd

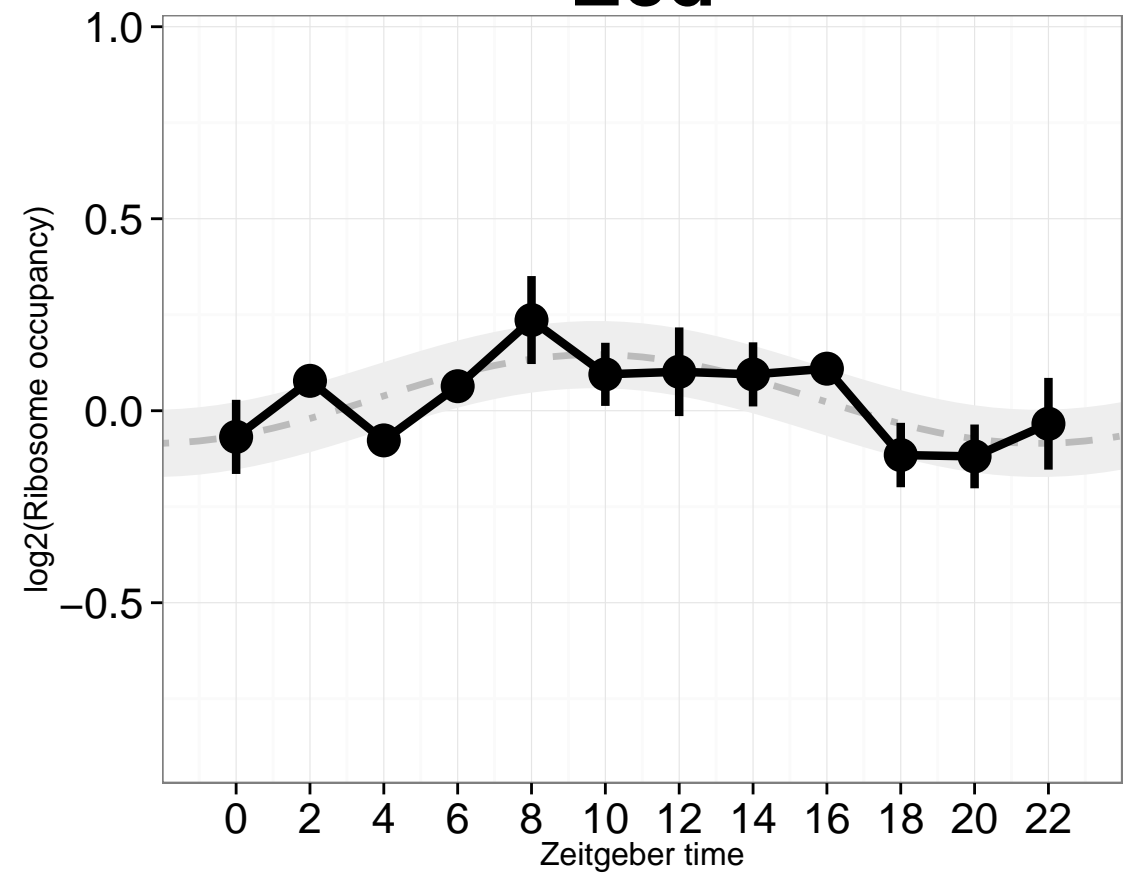

Supplement: Supplementary file 12122 [file 1]

# Chmp2a

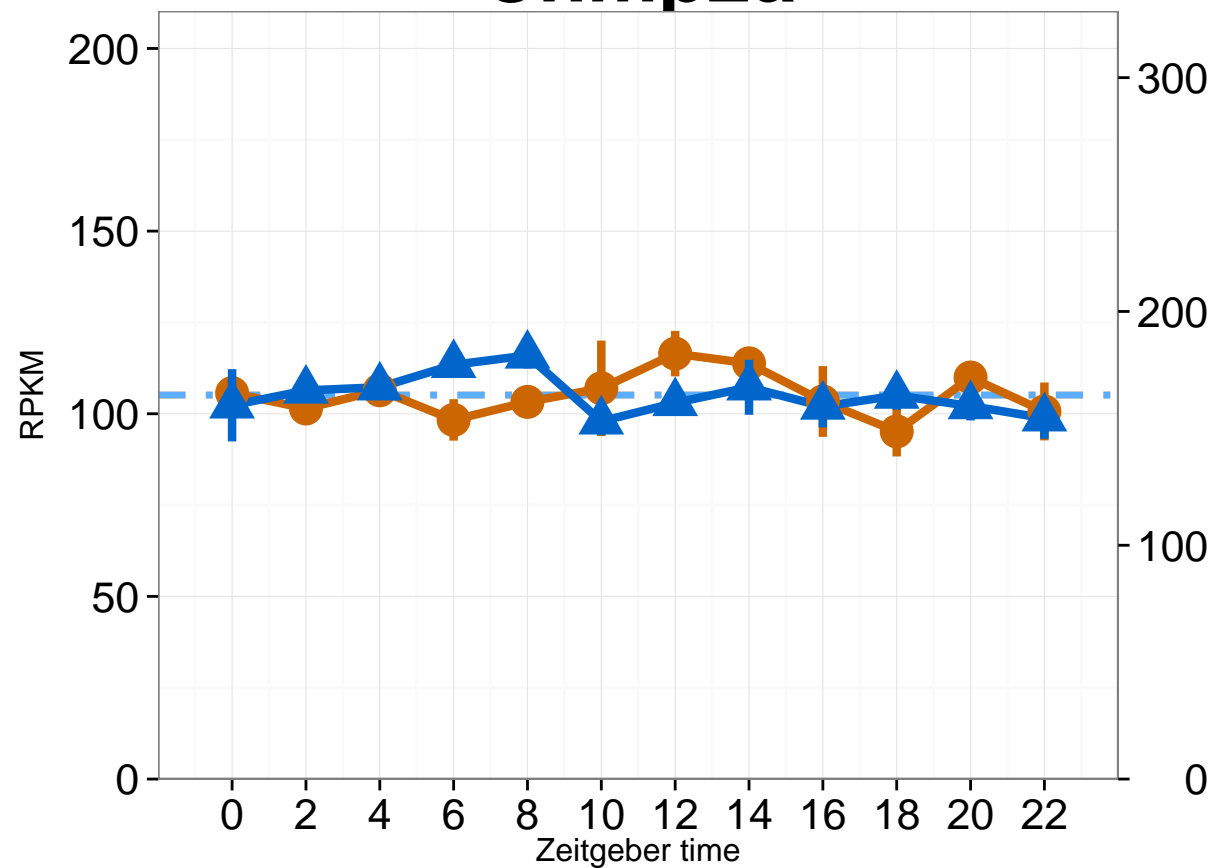

# Chmp2a

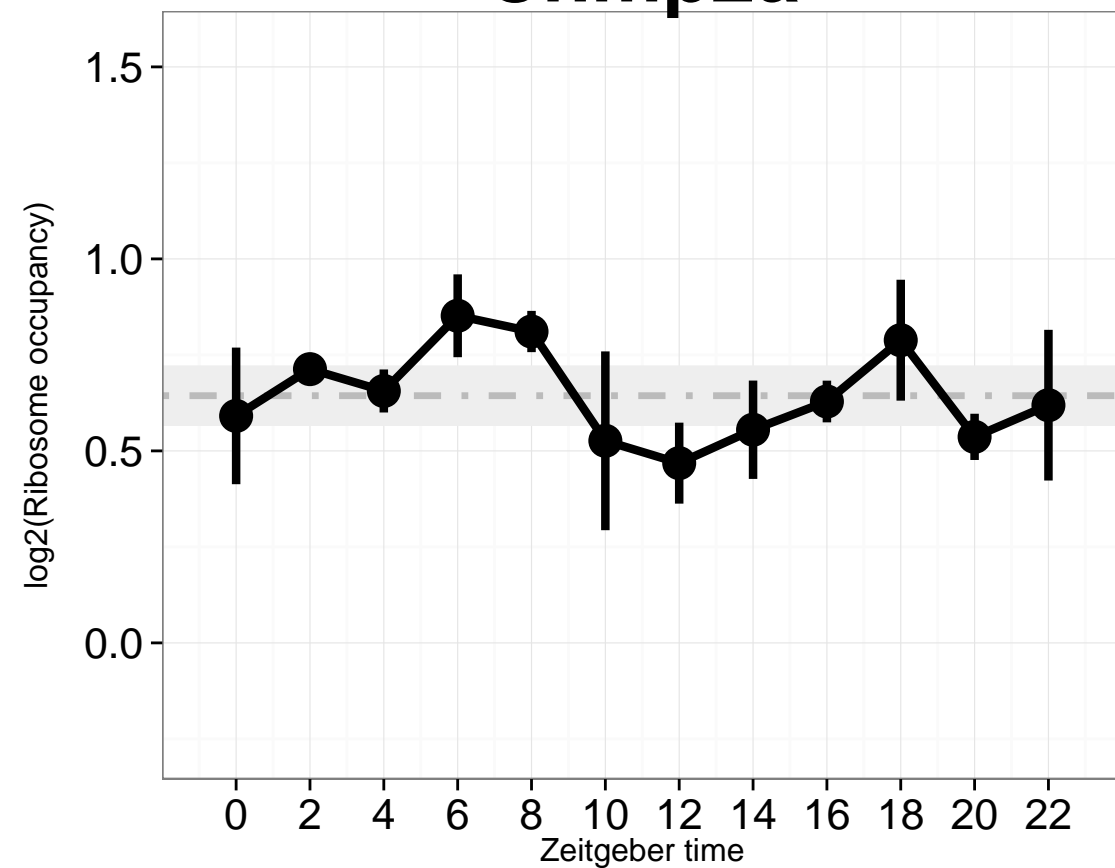

Supplement: Supplementary file 12123 [file 1]

# Dnajc28

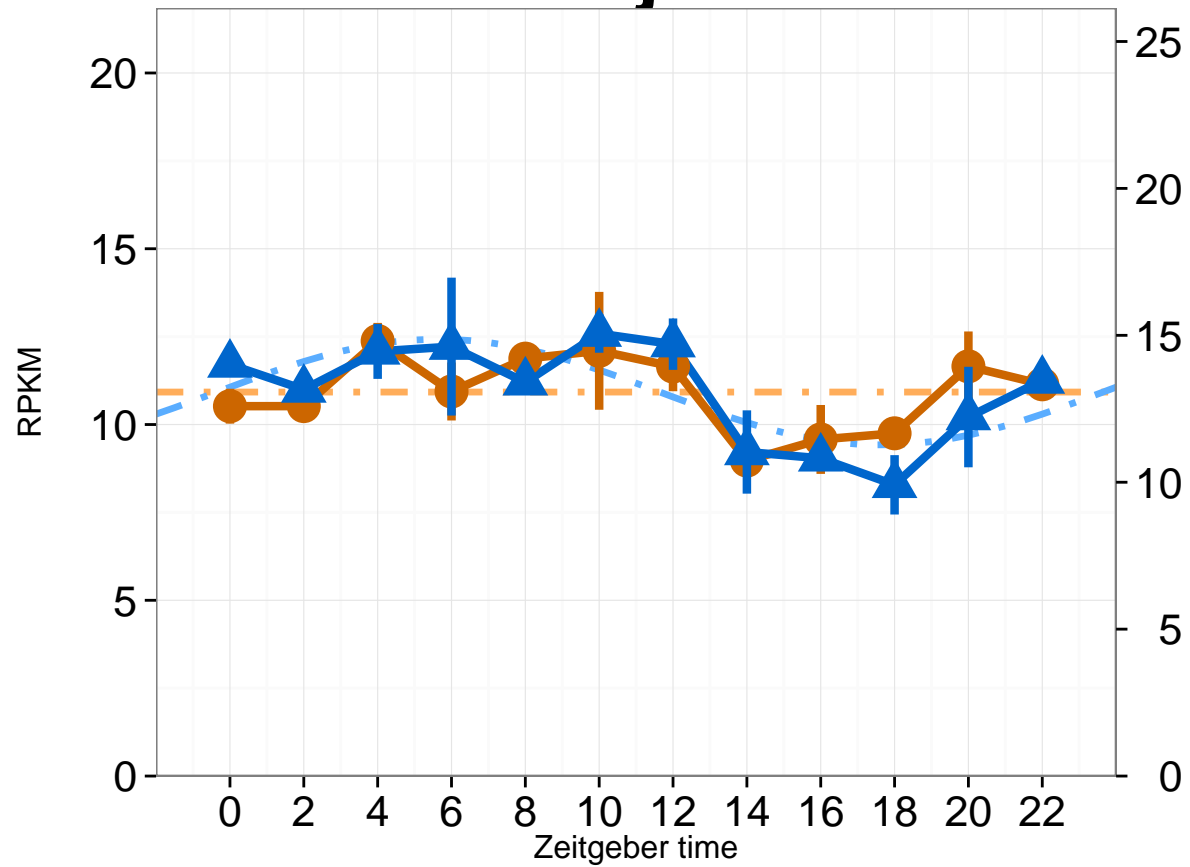

# Dnajc28

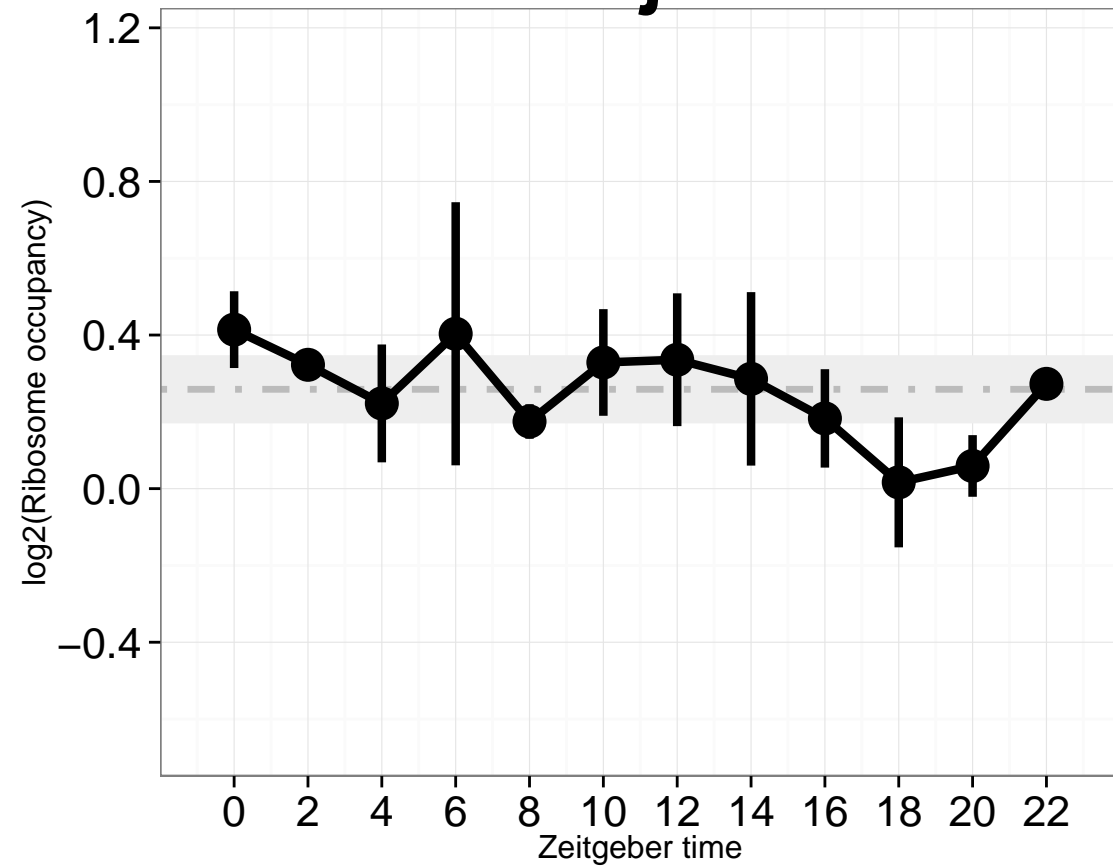

Supplement: Supplementary file 12124 [file 1]

# F2r13

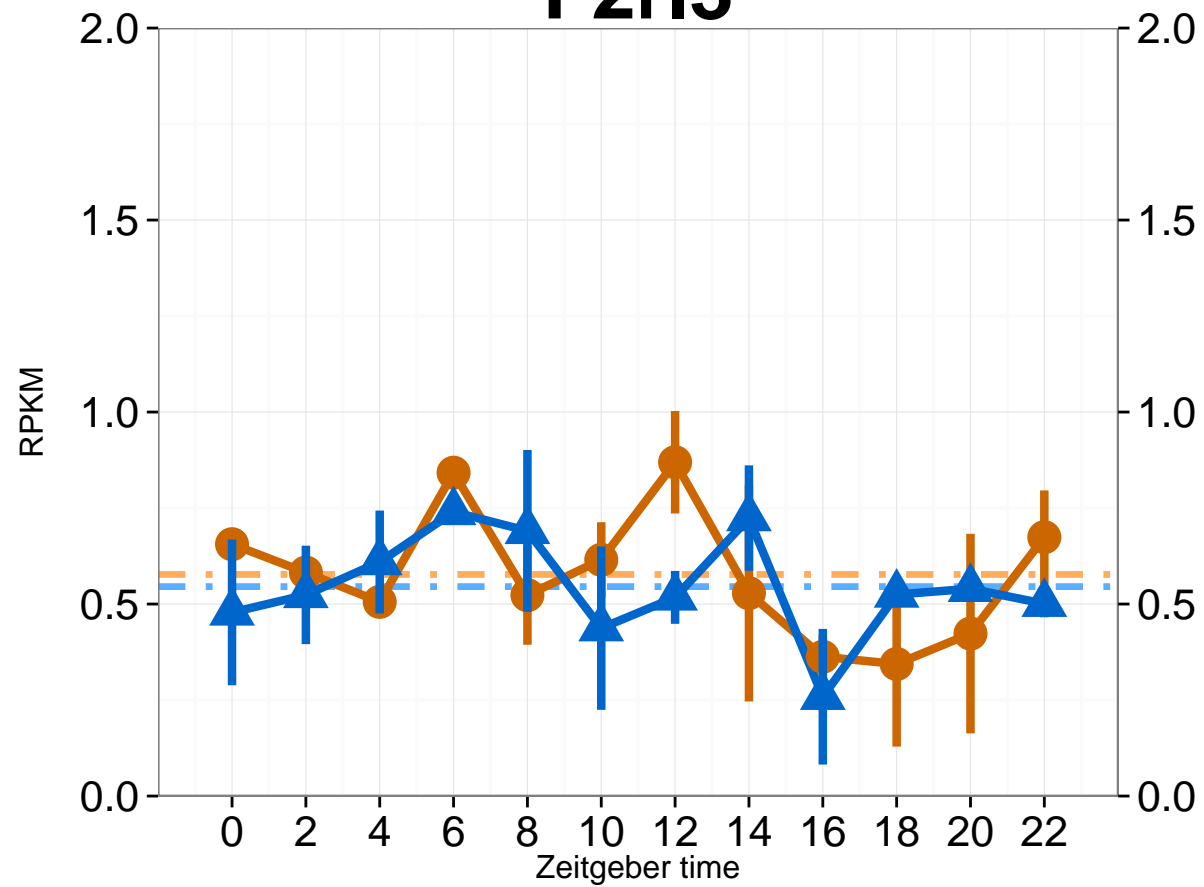

# F2r13

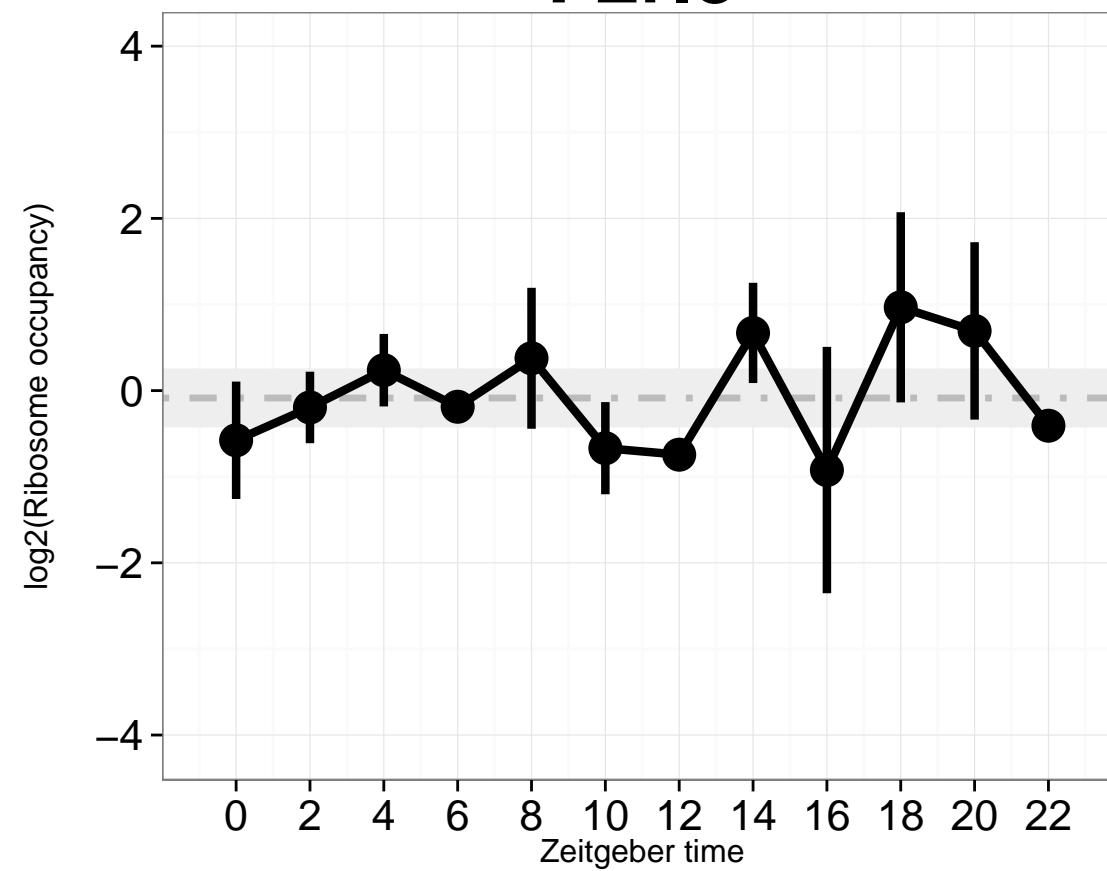

Supplement: Supplementary file 12125 [file 1]

# Smim19

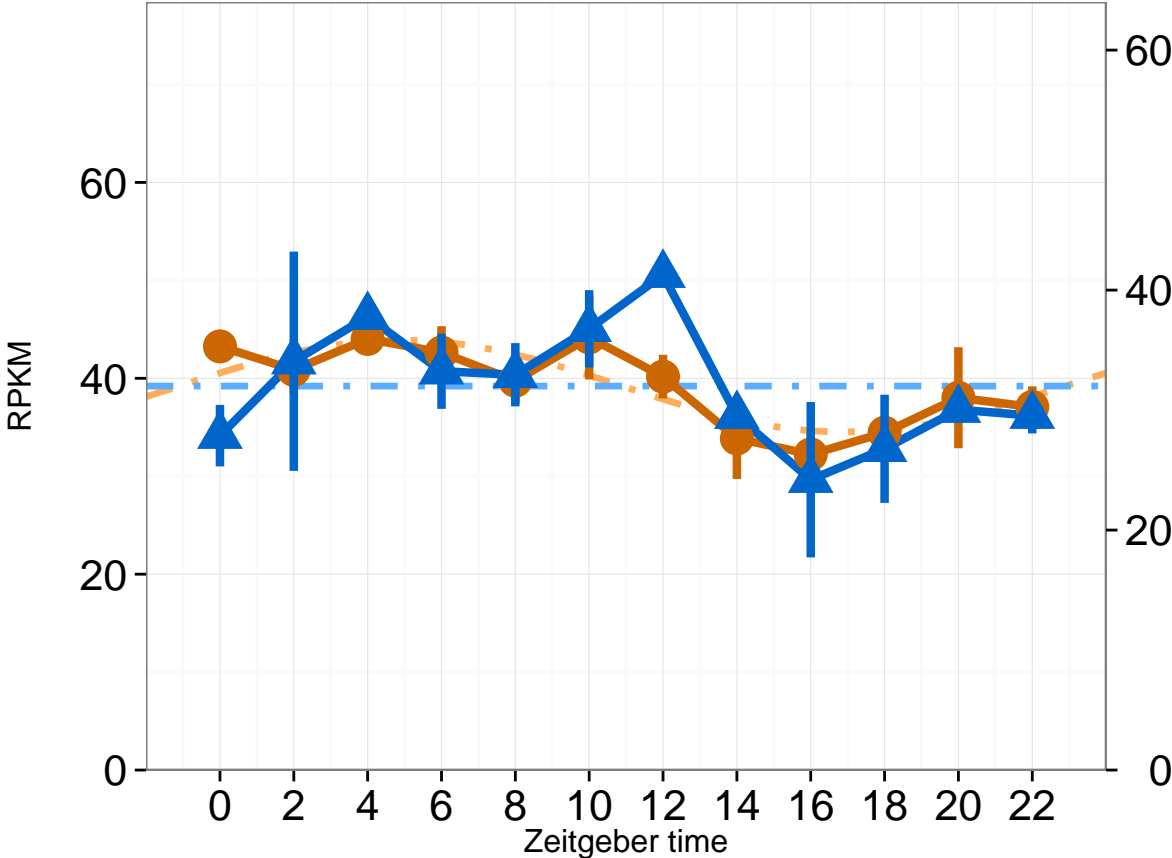

# Smim19

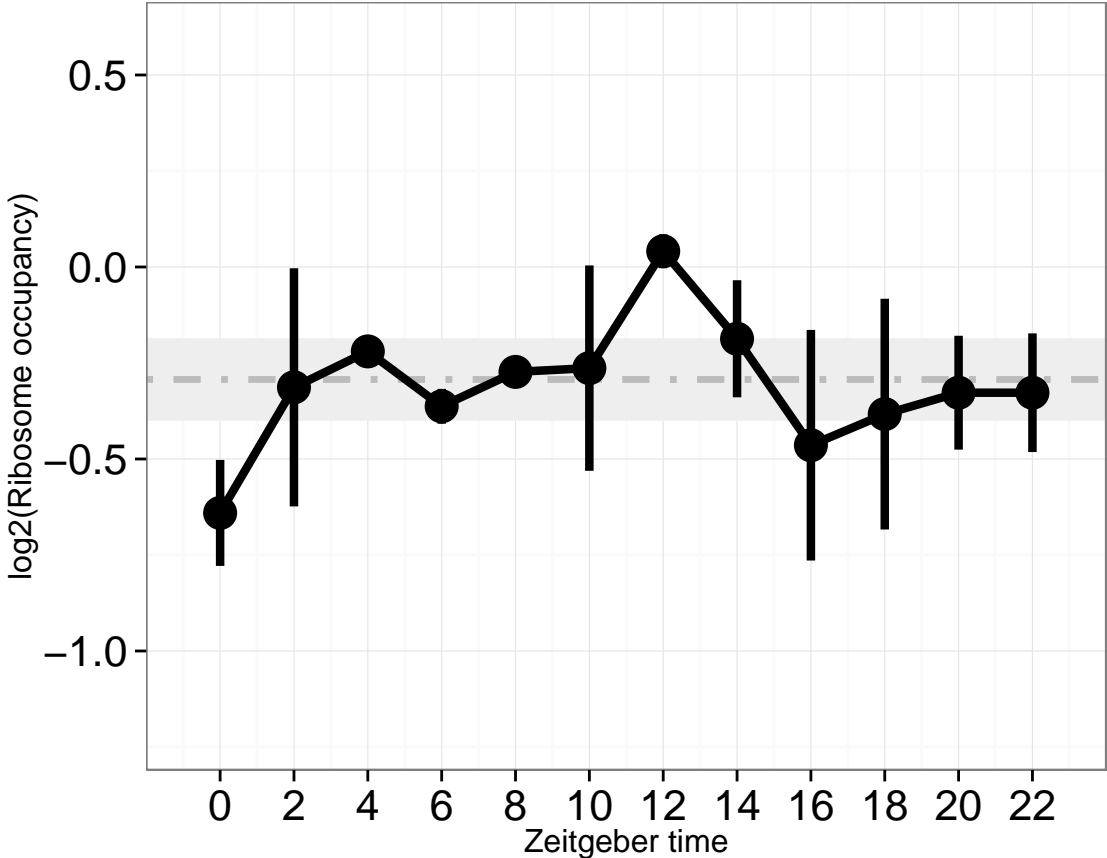

Supplement: Supplementary file 12126 [file 1]

# Aph1c

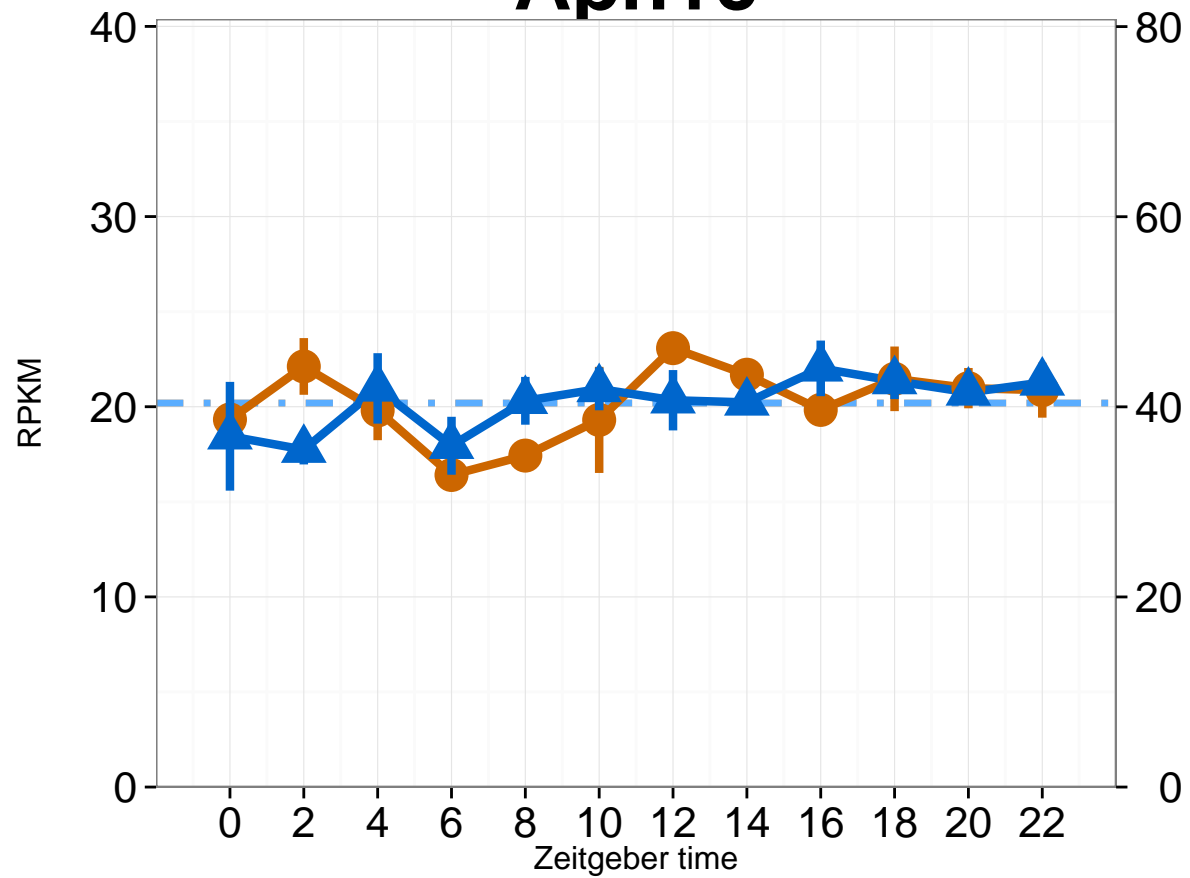

# Aph1c

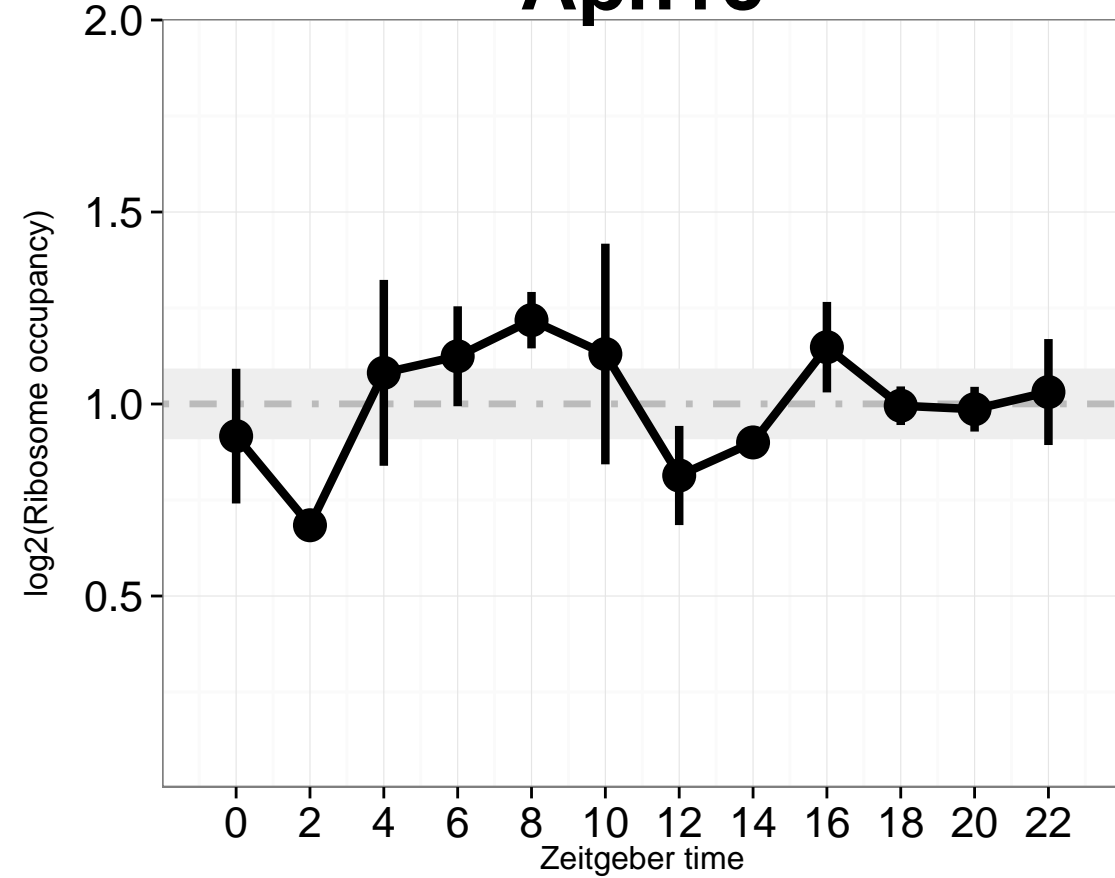

Supplement: Supplementary file 12127 [file 1]

# Gpr125

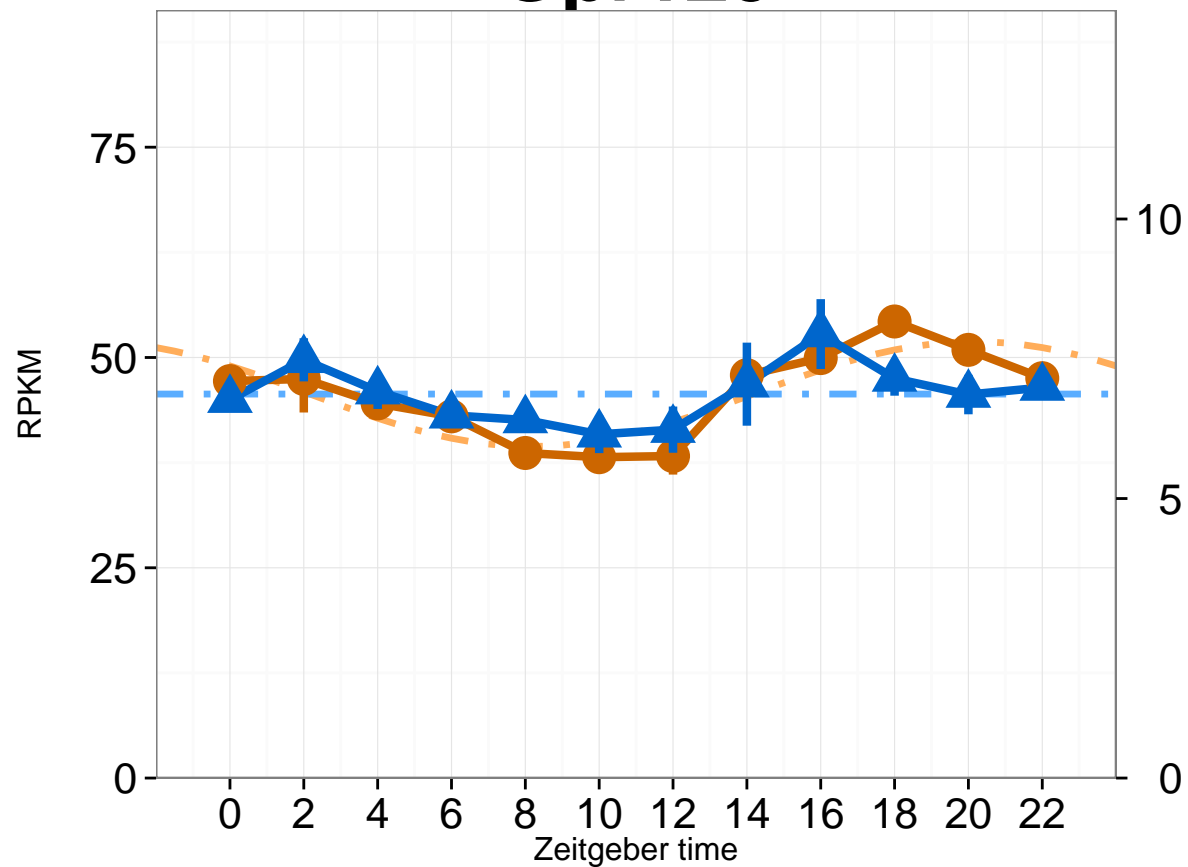

# Gpr125

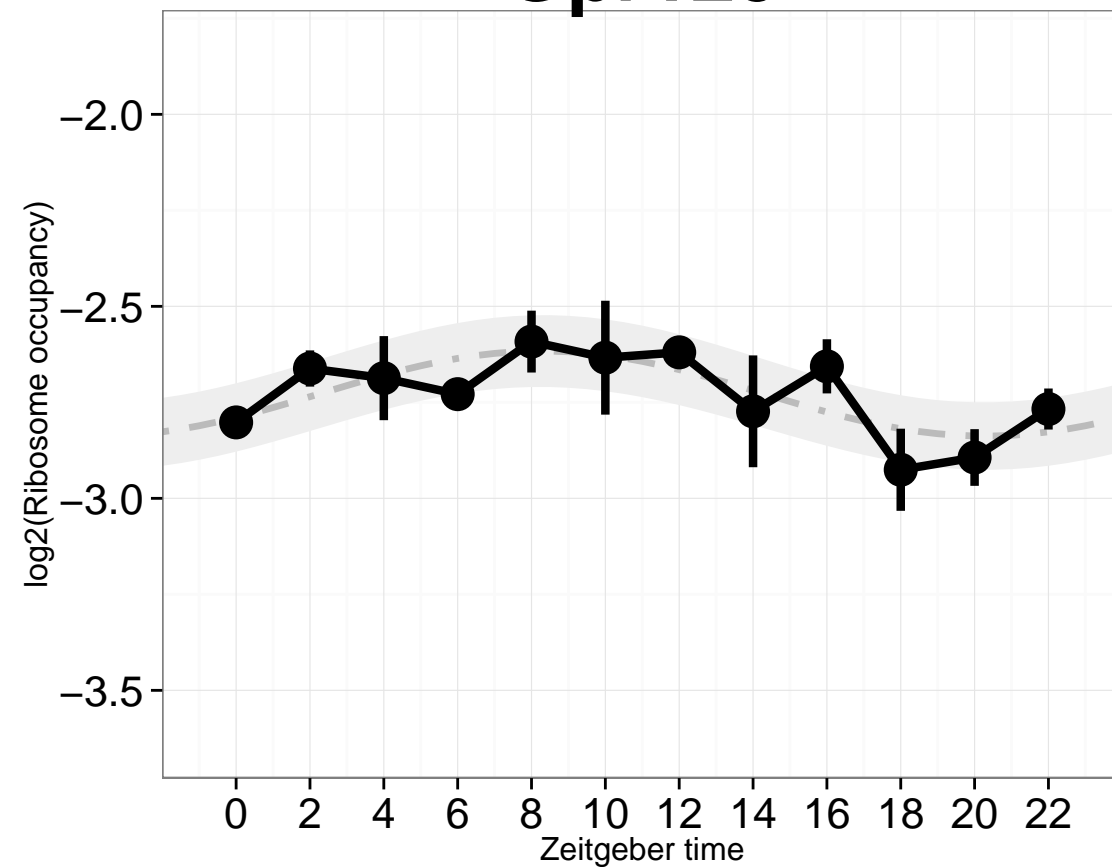

Supplement: Supplementary file 12128 [file 1]

## Cry2

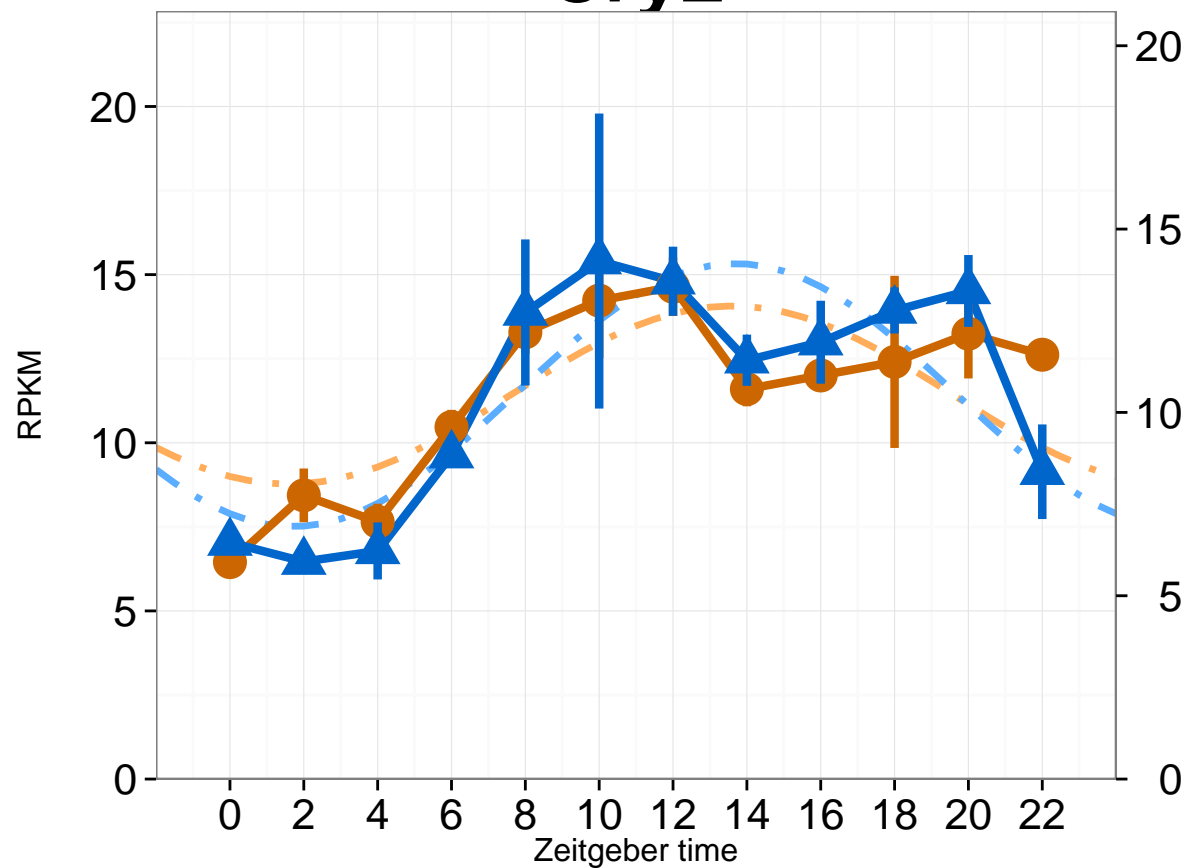

## Cry2

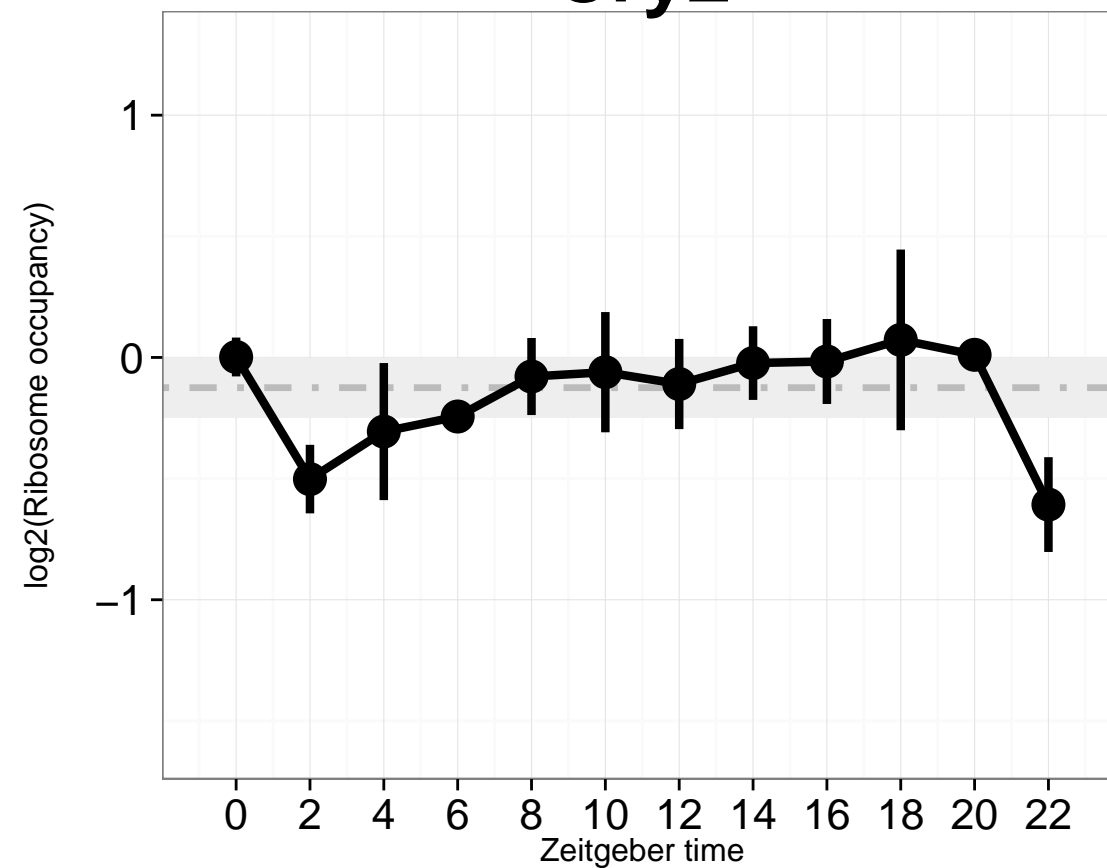

Supplement: Supplementary file 12129 [file 1]

## Tmprss2

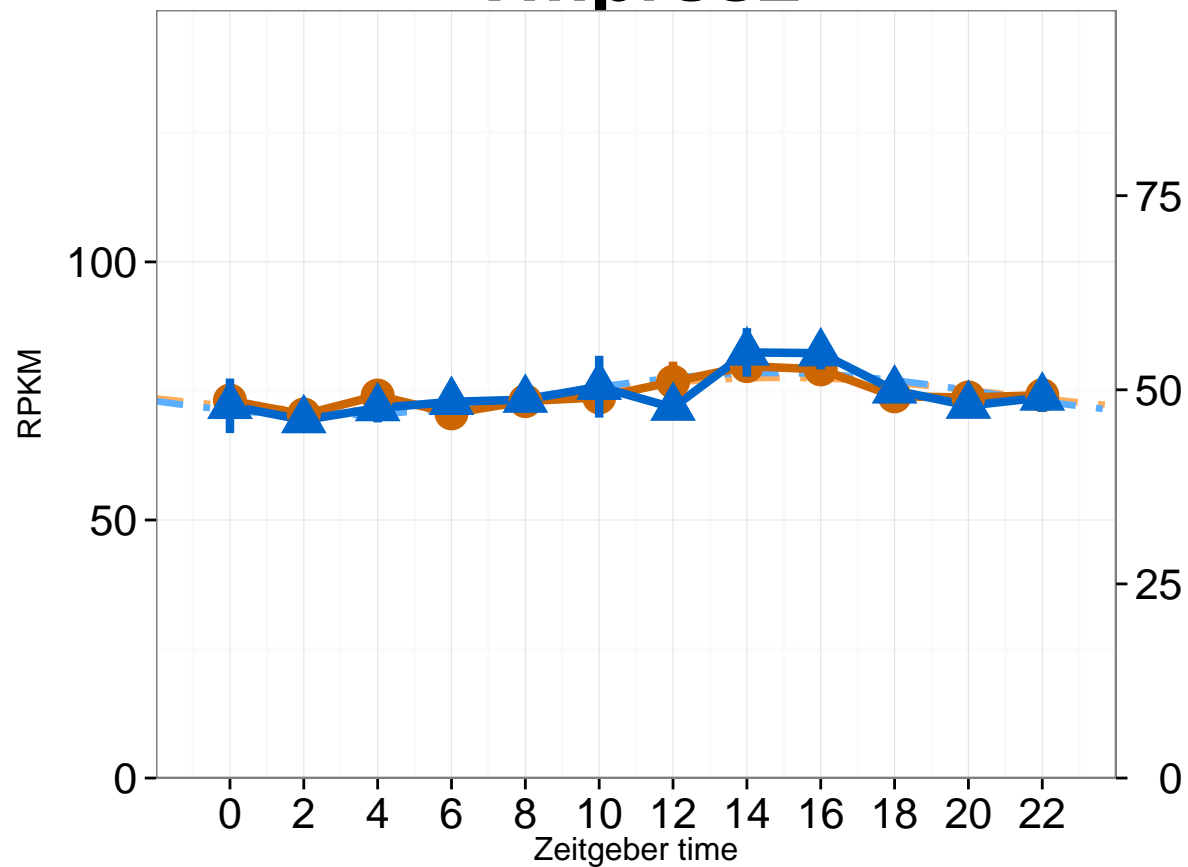

## Tmprss2

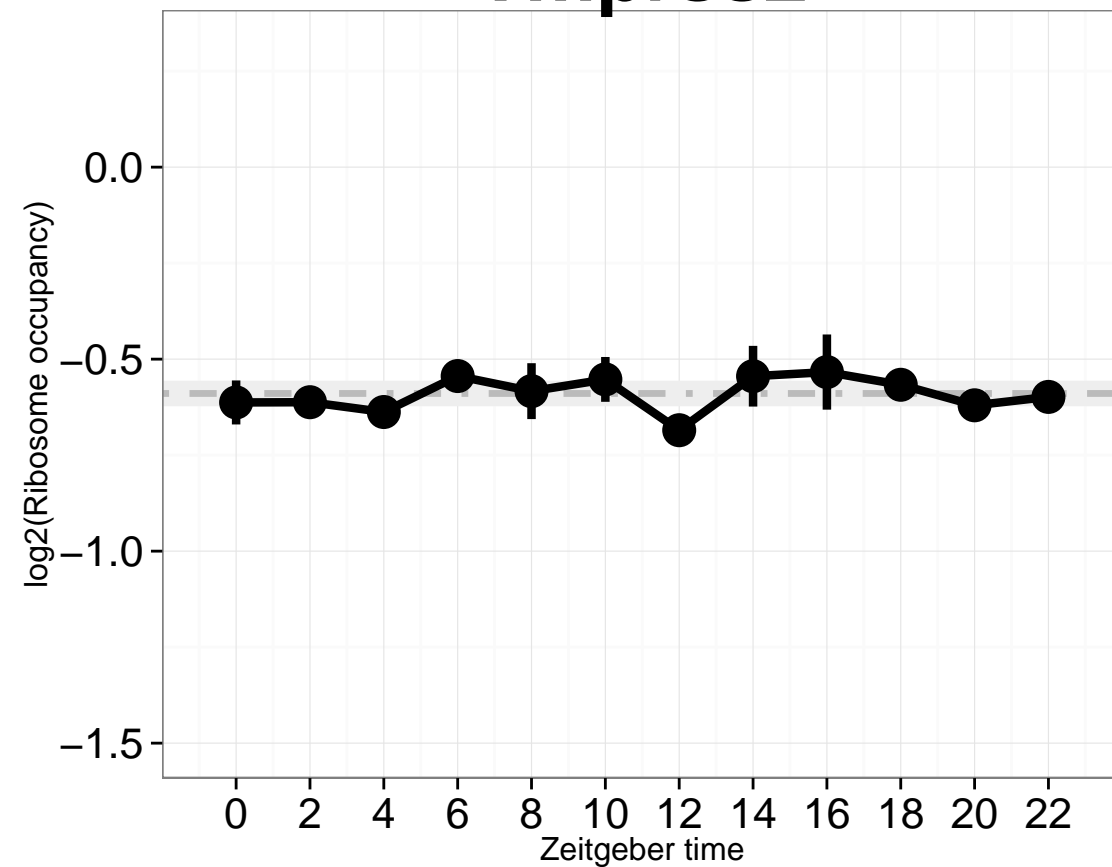

Supplement: Supplementary file 12130 [file 1]

# Ptger1

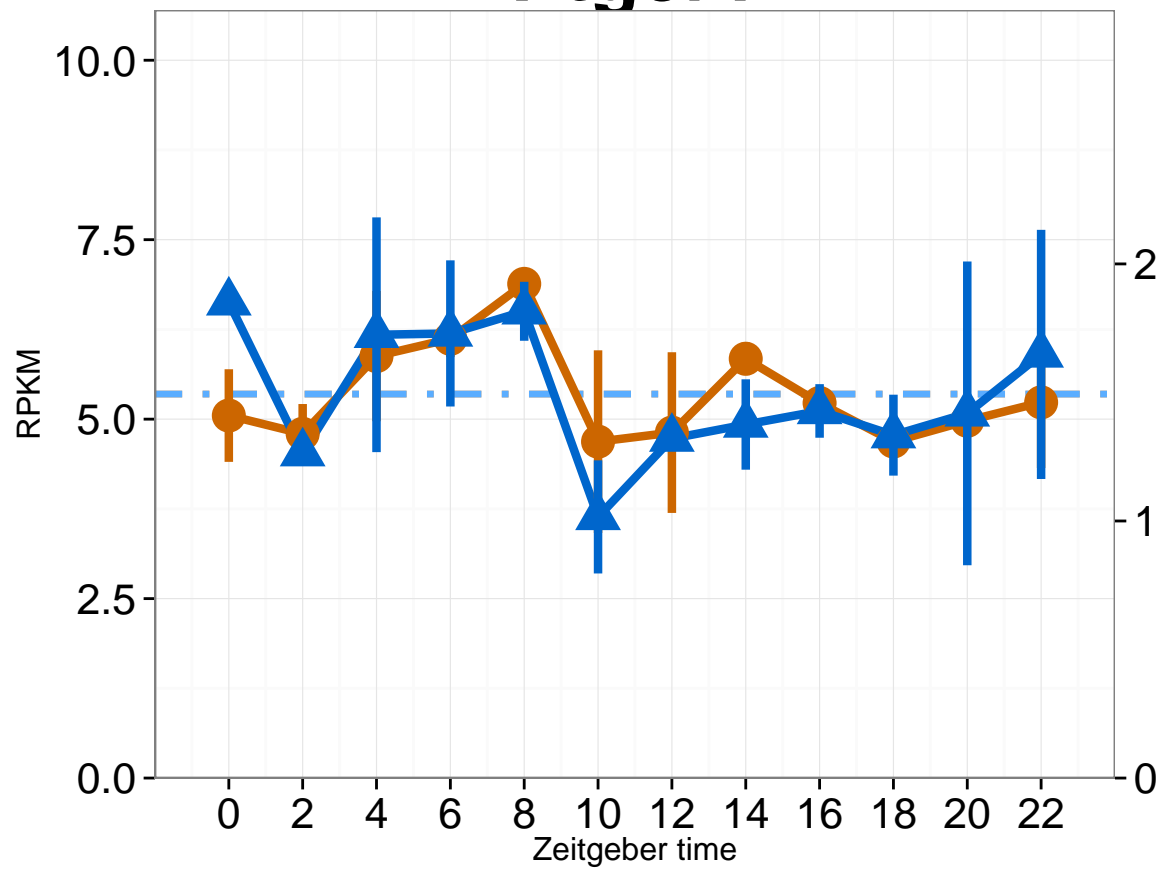

# Ptger1

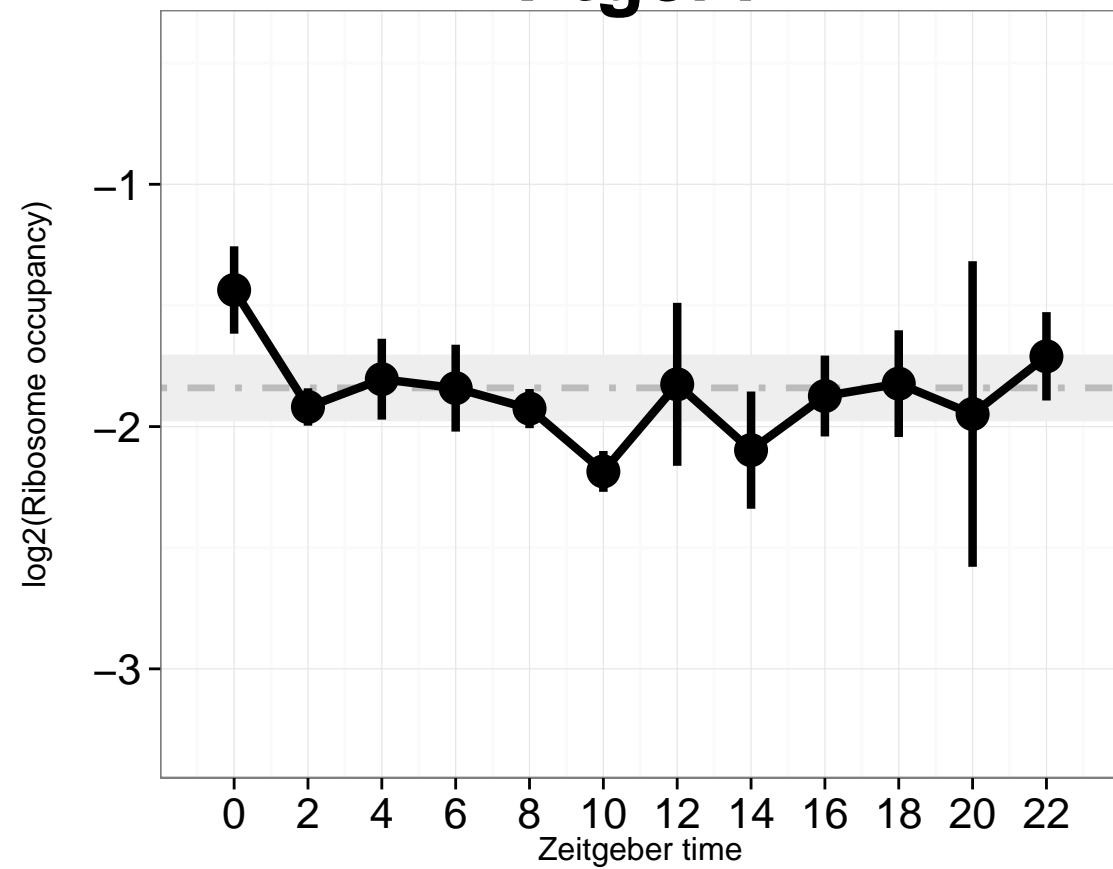

Supplement: Supplementary file 12131 [file 1]

## Ube2cbp

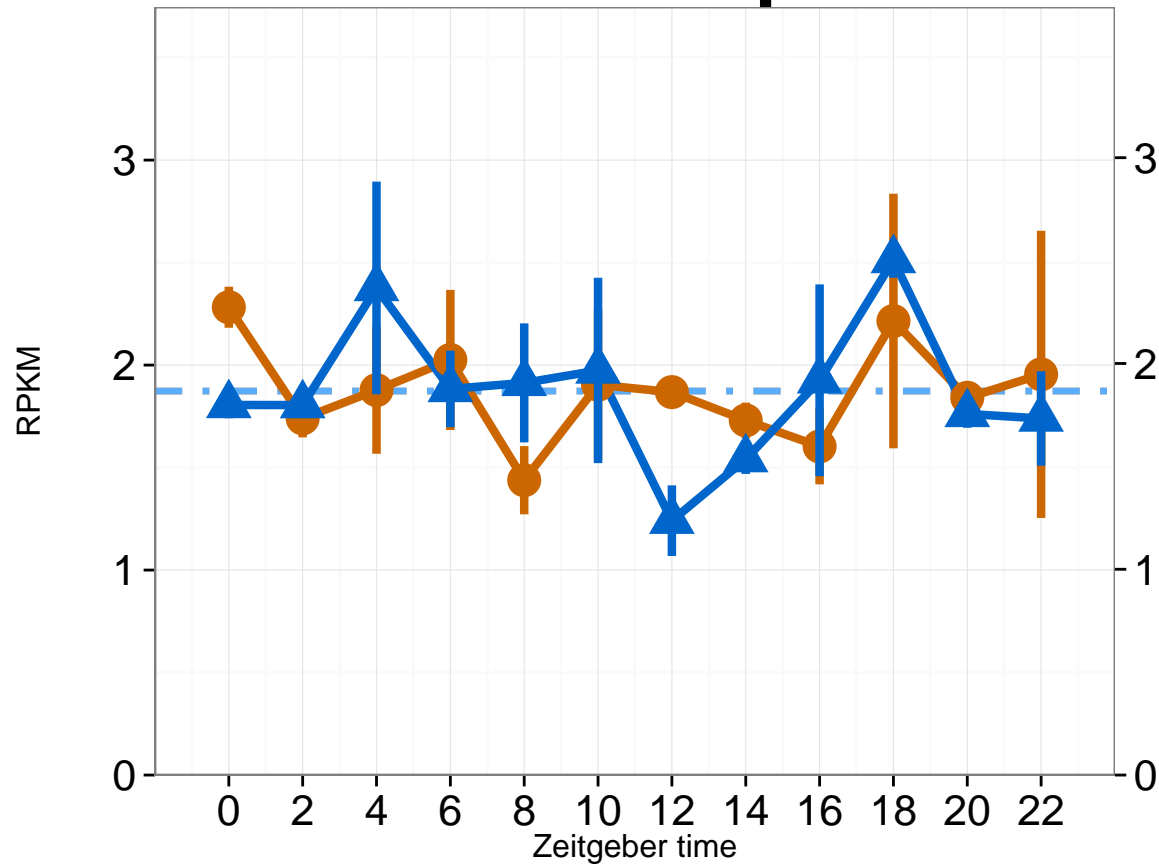

## Ube2cbp

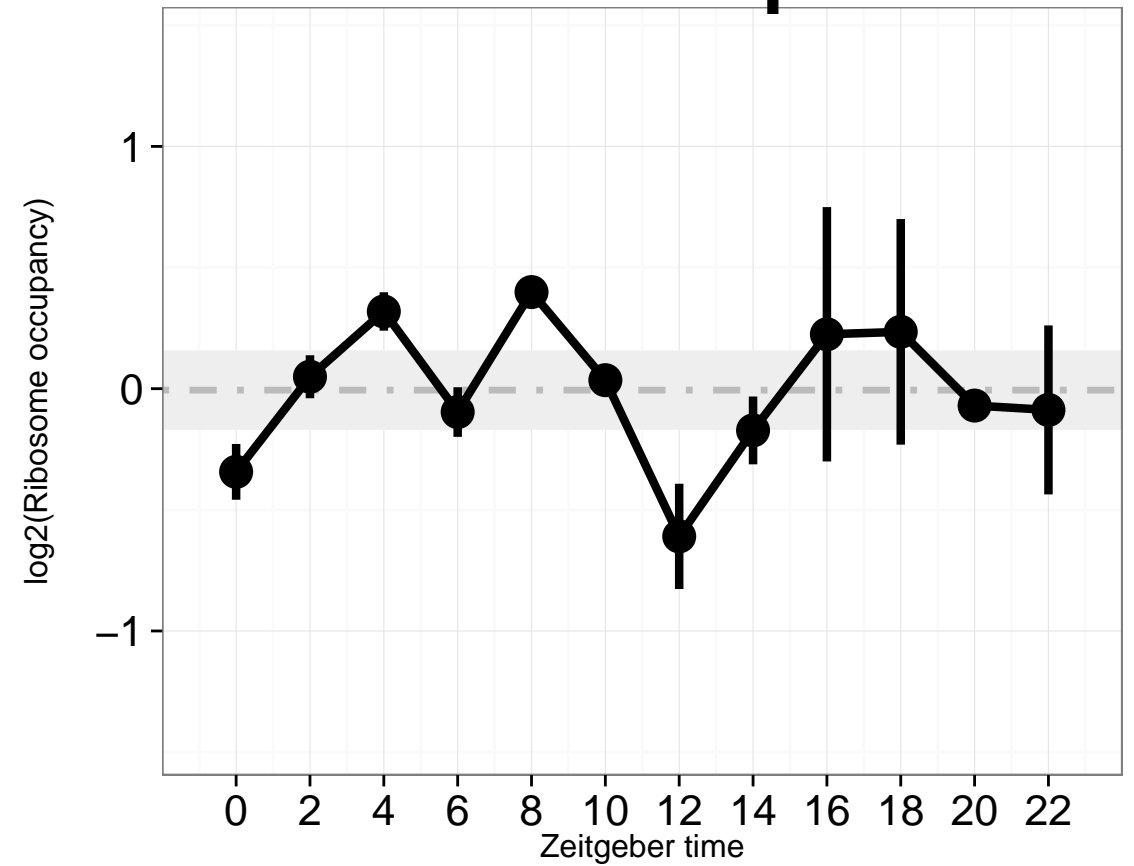

Supplement: Supplementary file 12132 [file 1]

# Phyhd1

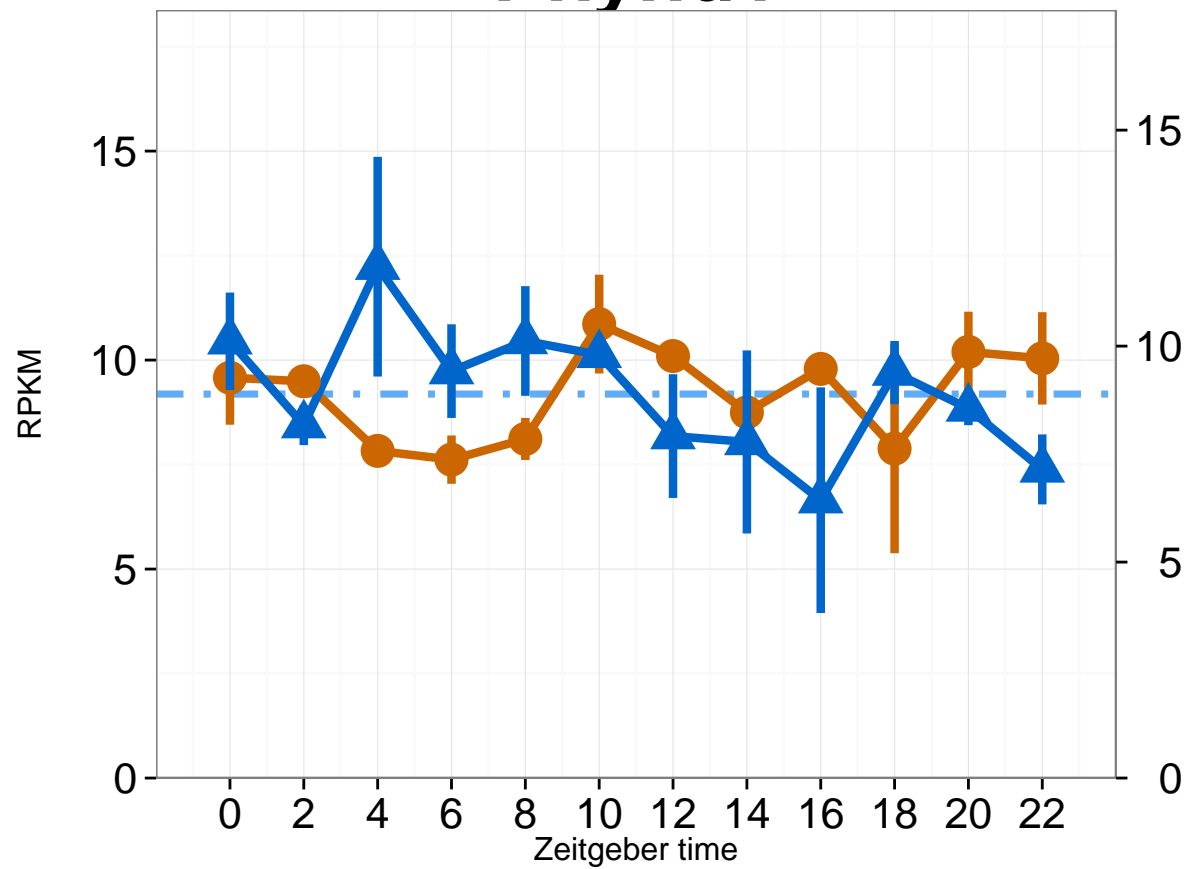

# Phyhd1

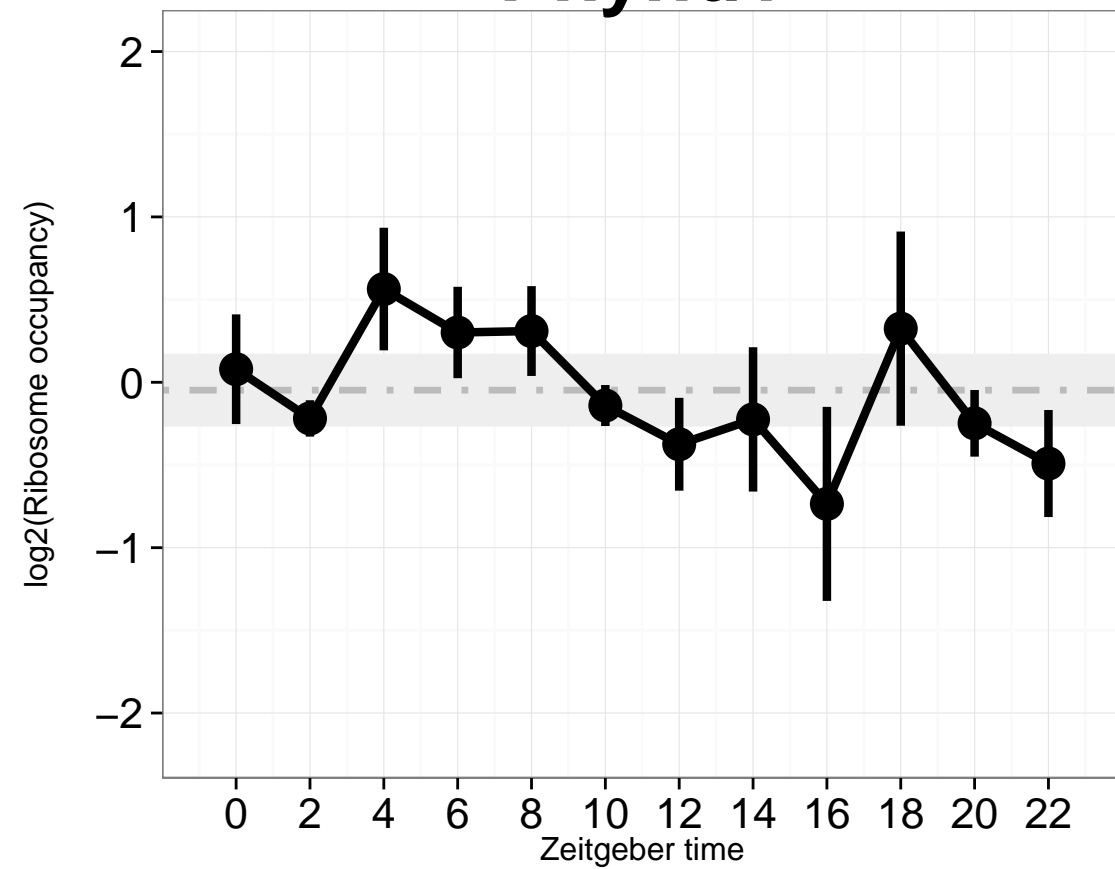

Supplement: Supplementary file 12133 [file 1]

## Glod5

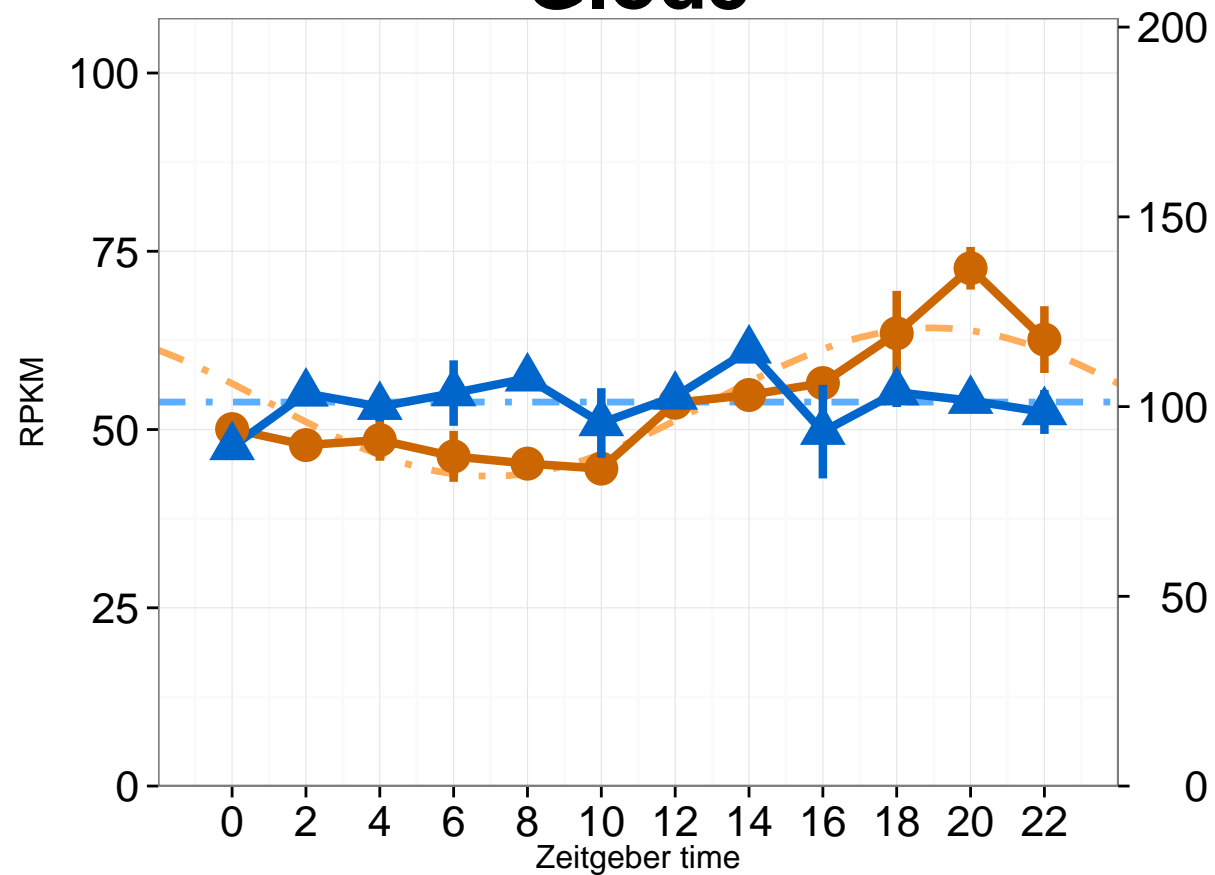

## Glod5

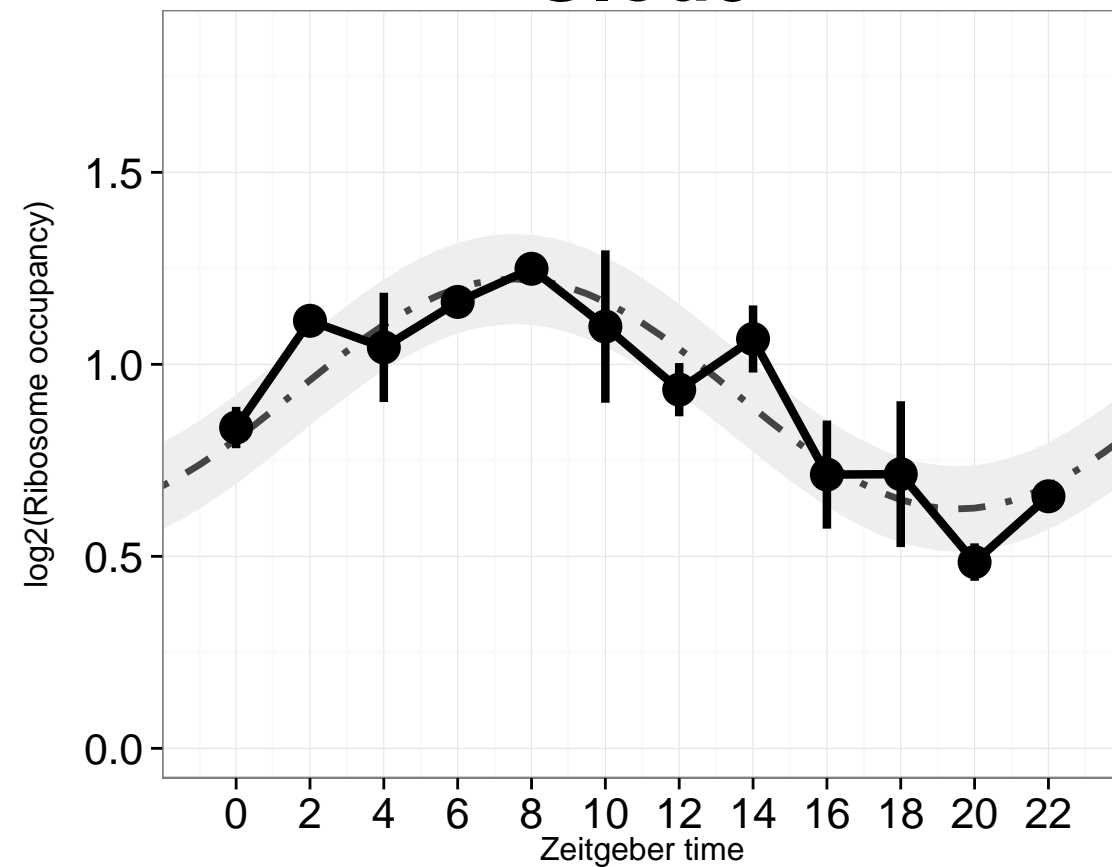

Supplement: Supplementary file 12134 [file 1]

## Sema3d

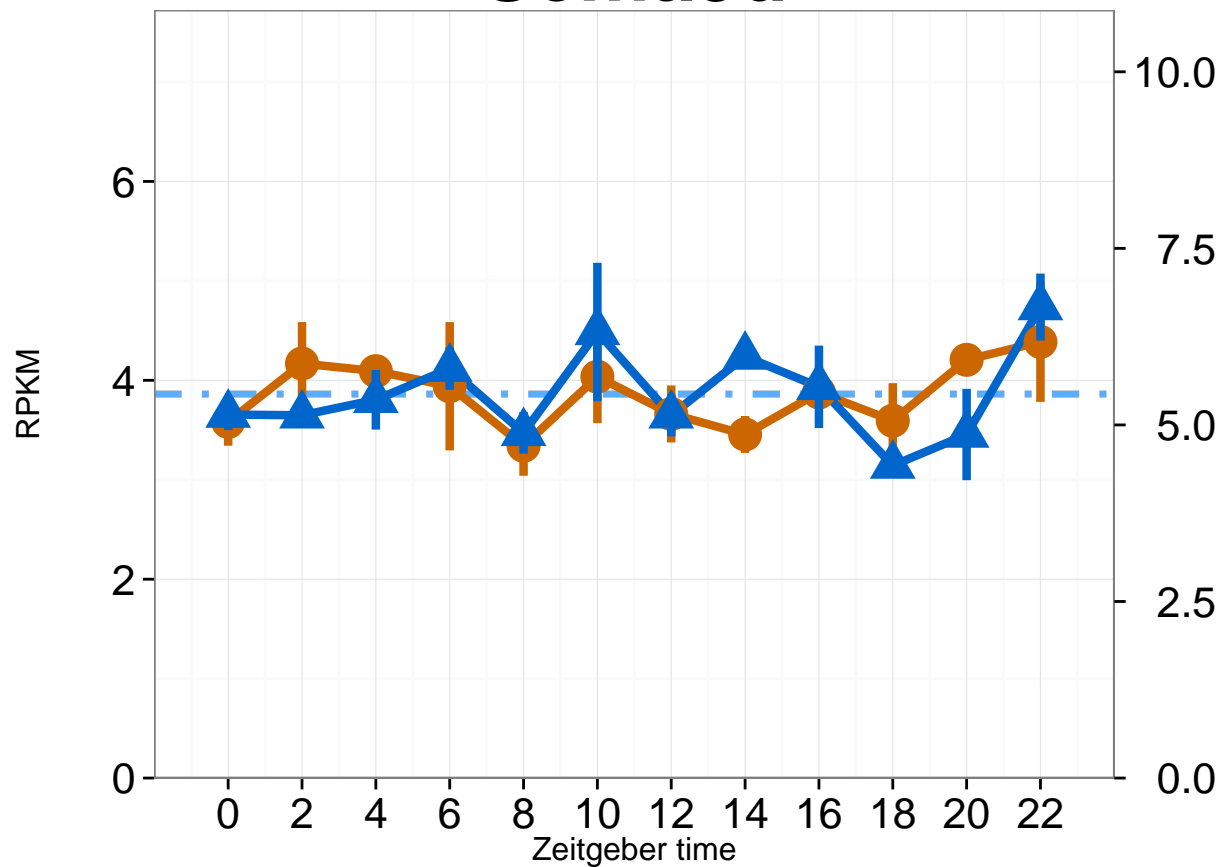

## Sema3d

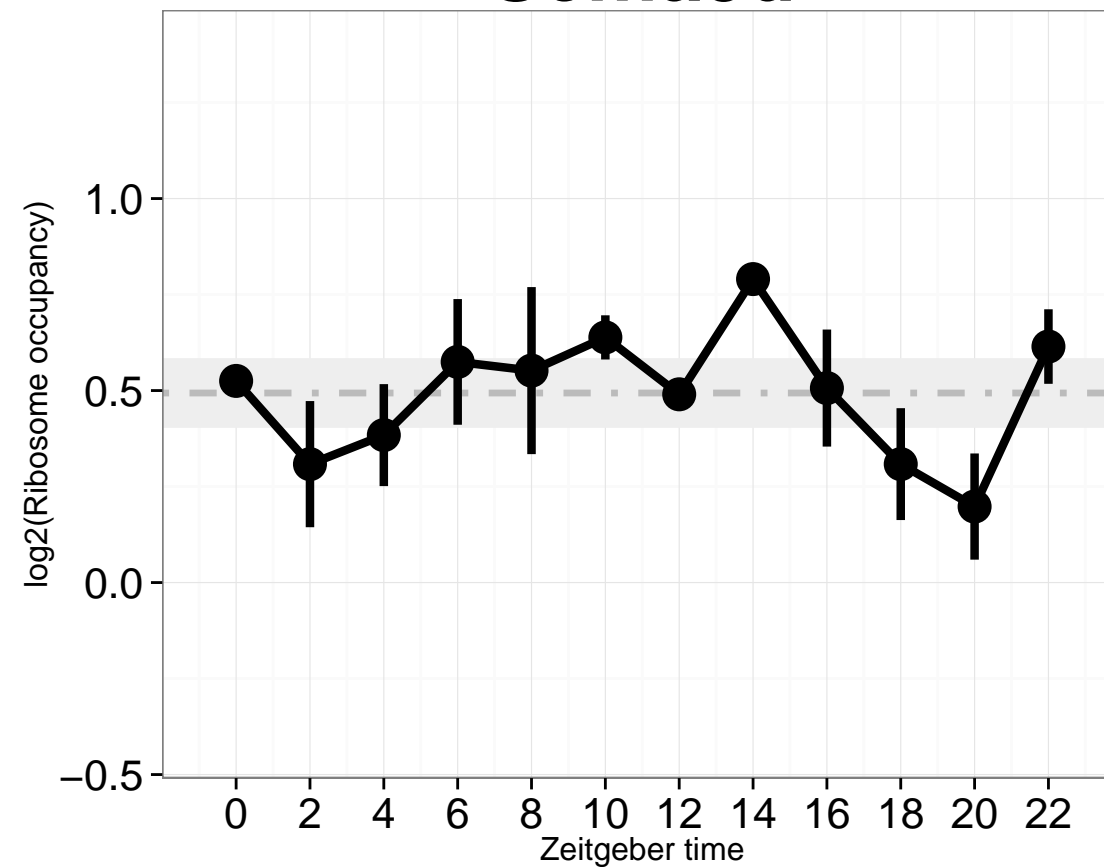

Supplement: Supplementary file 12135 [file 1]

# Hid1

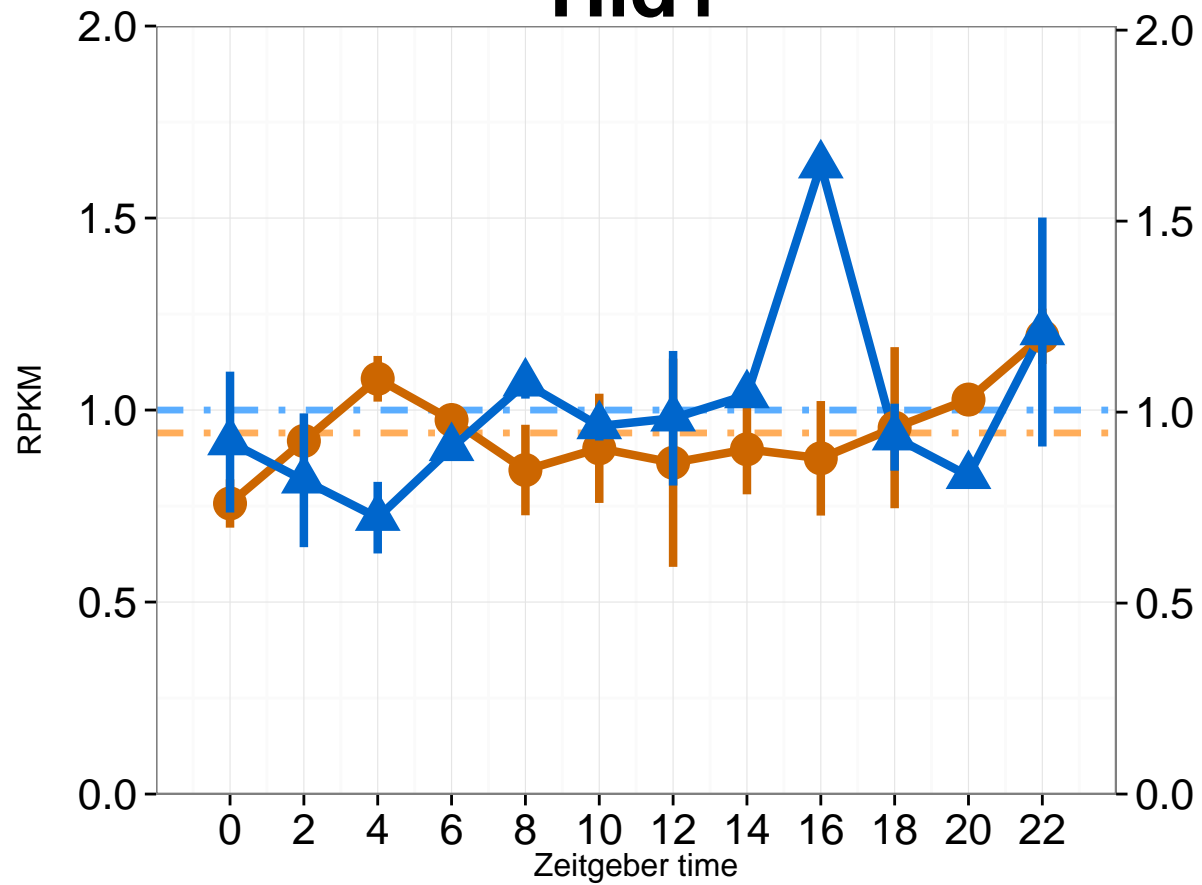

# Hid1

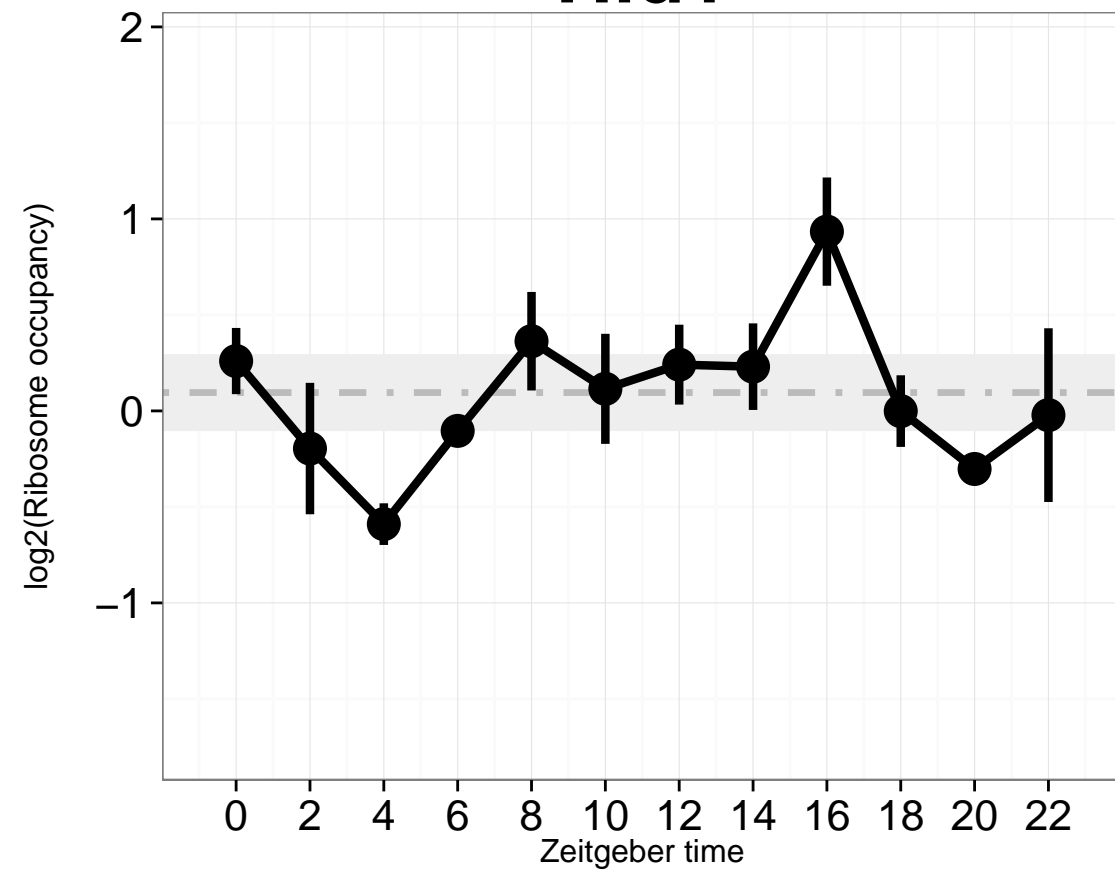

Supplement: Supplementary file 12136 [file 1]

# Zfp608

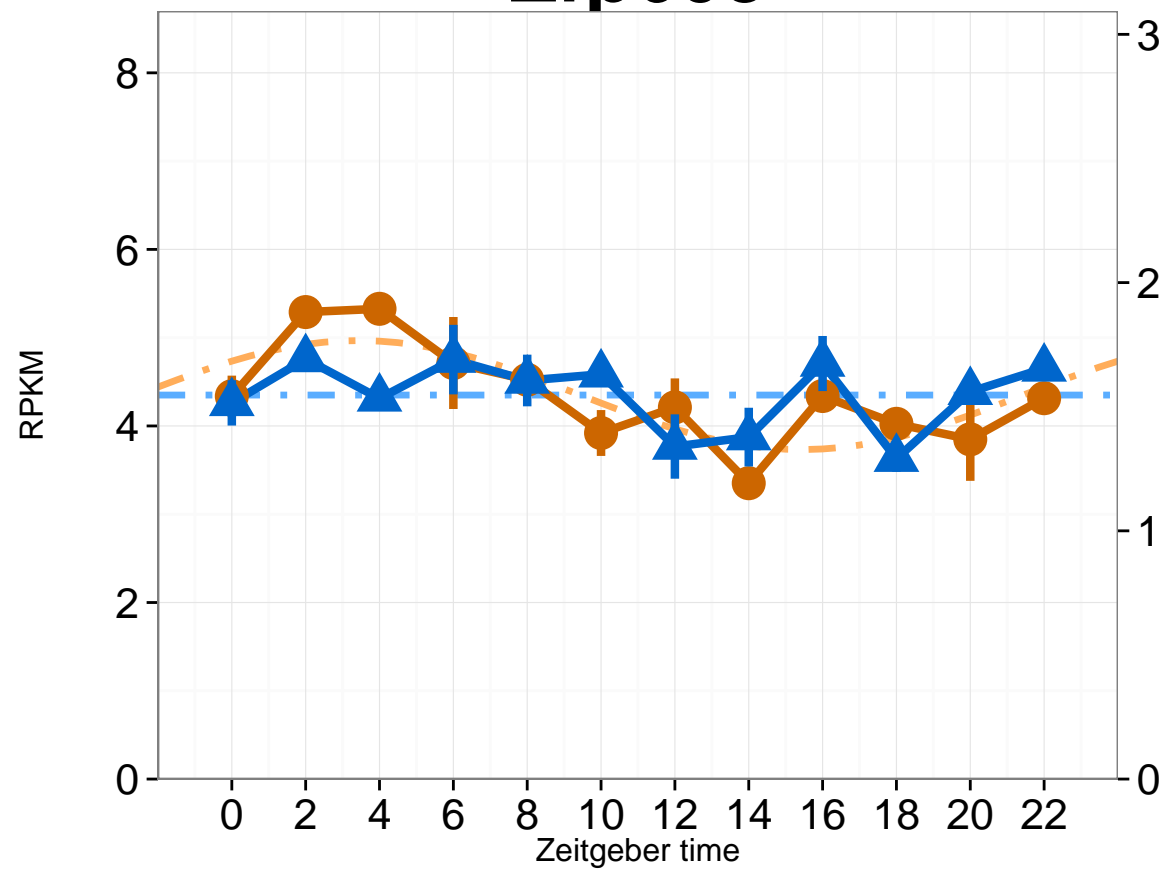

# Zfp608

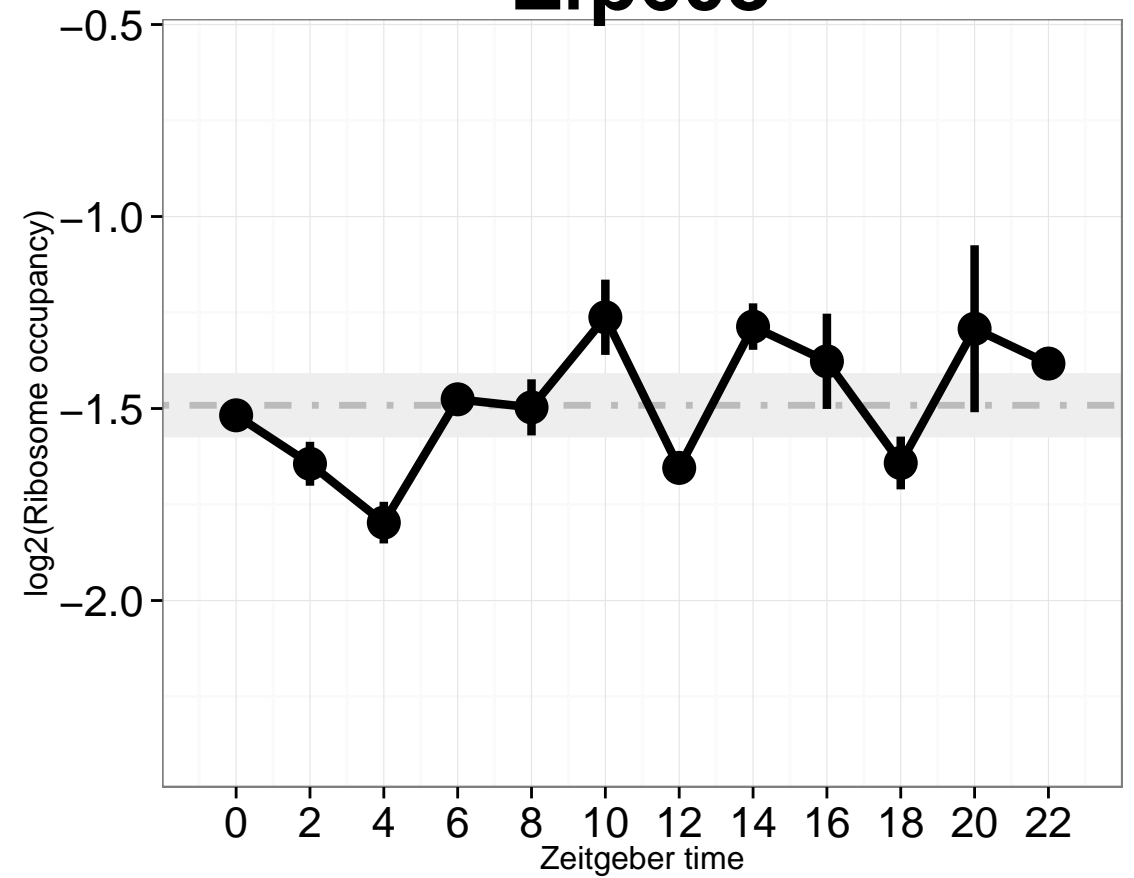

Supplement: Supplementary file 12137 [file 1]

## Ypel2

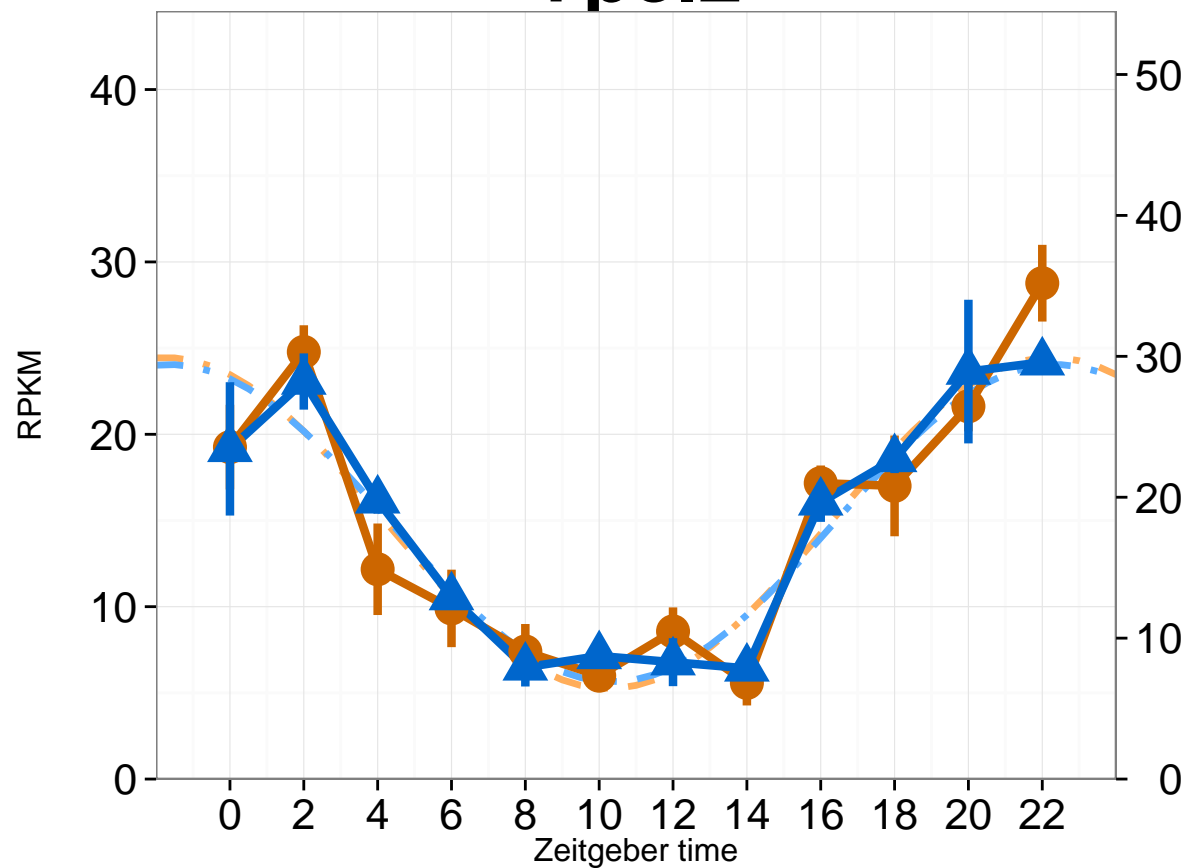

## Ypel2

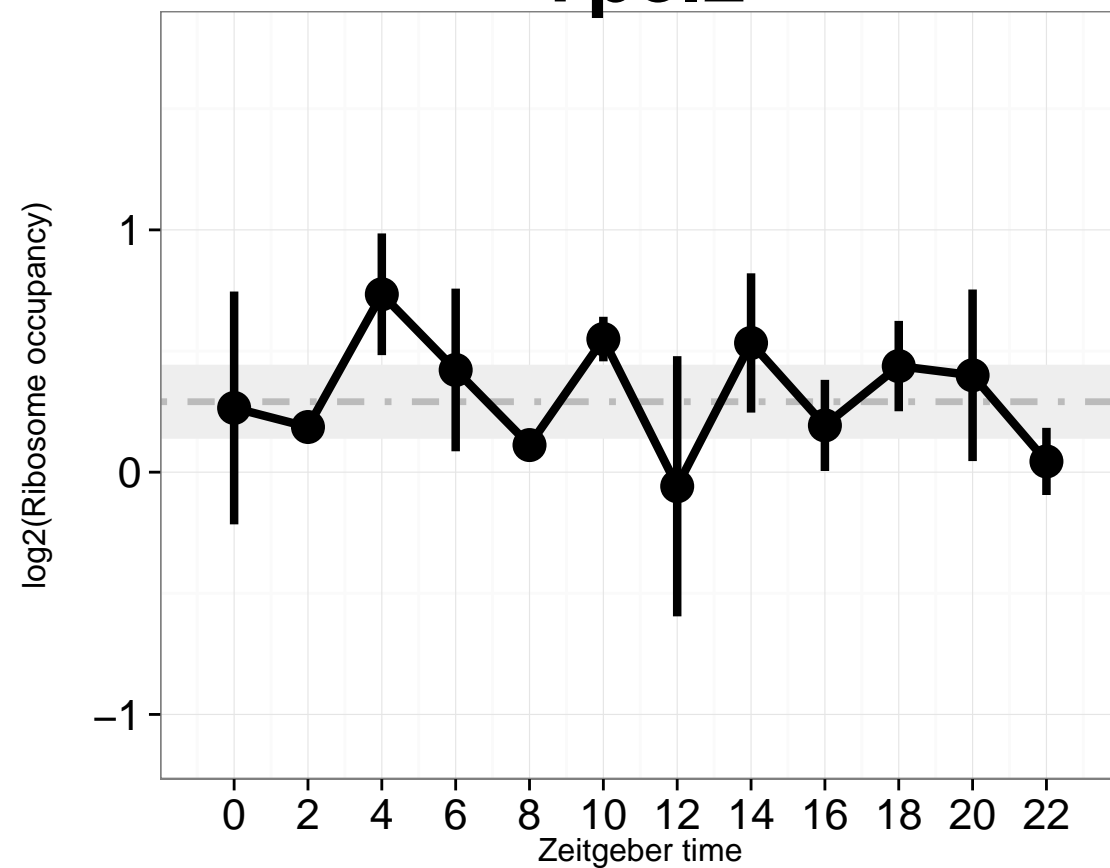

Supplement: Supplementary file 12138 [file 1]

# Mtap

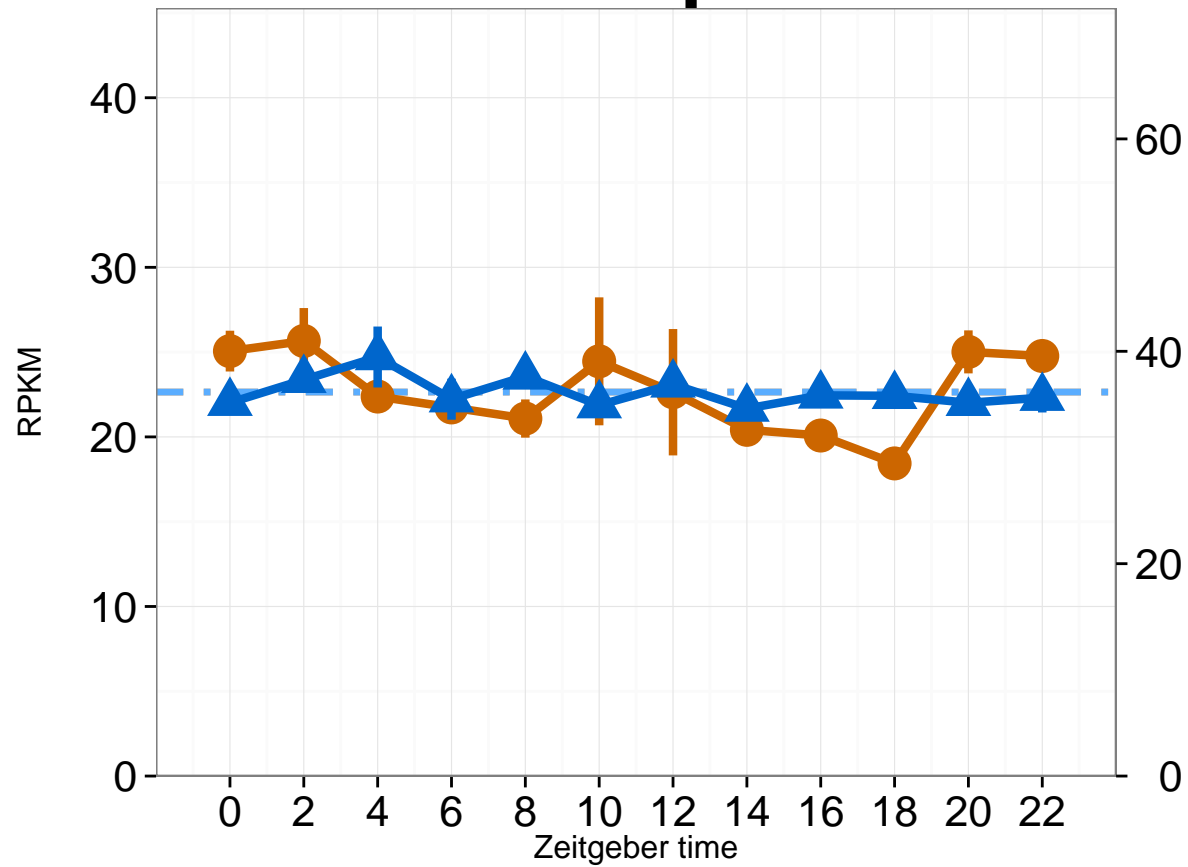

# Mtap

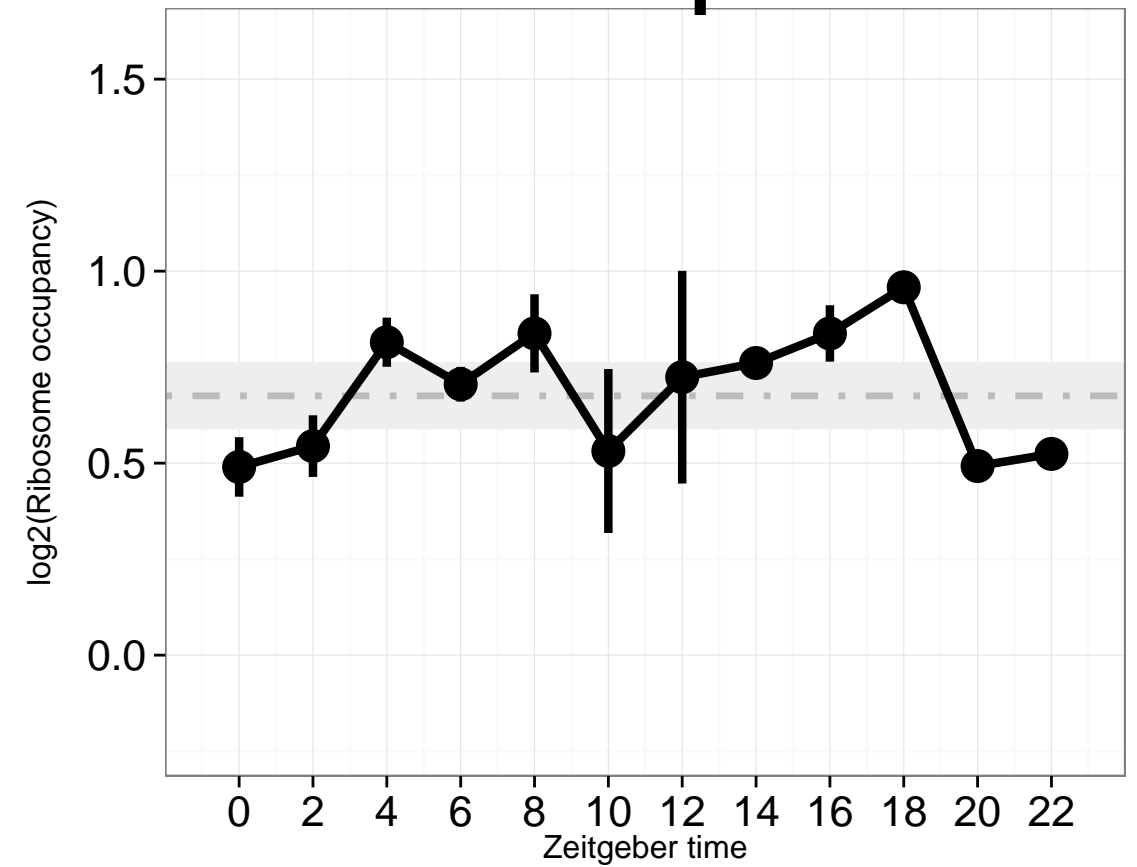

Supplement: Supplementary file 12139 [file 1]

## Gm16432

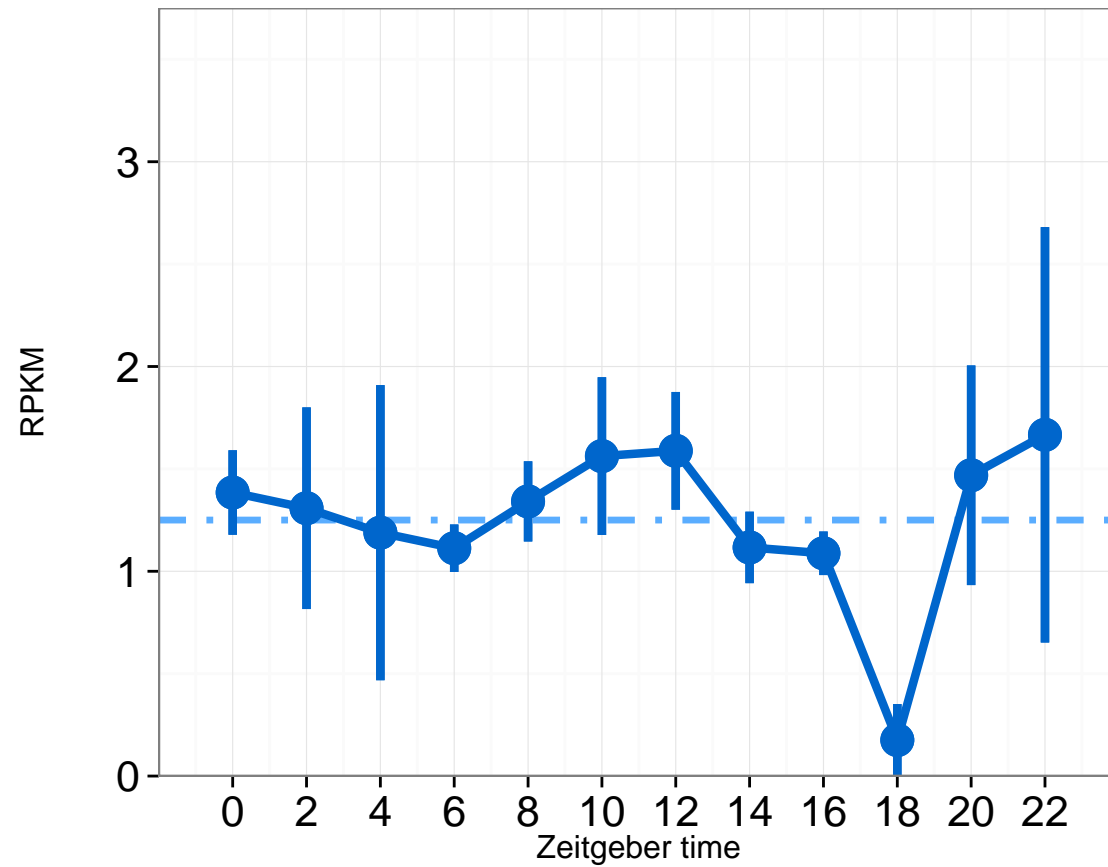

## Gm16432 log2(Ribosome occupanc

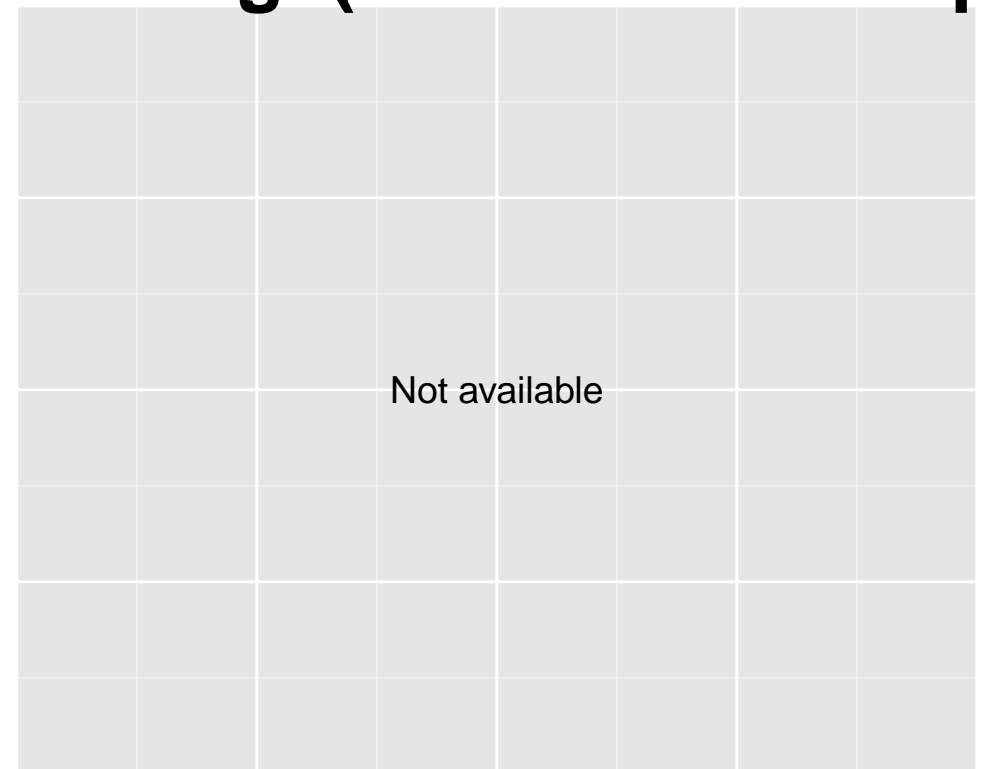

Supplement: Supplementary file 12140 [file 1]

## Hoxb3

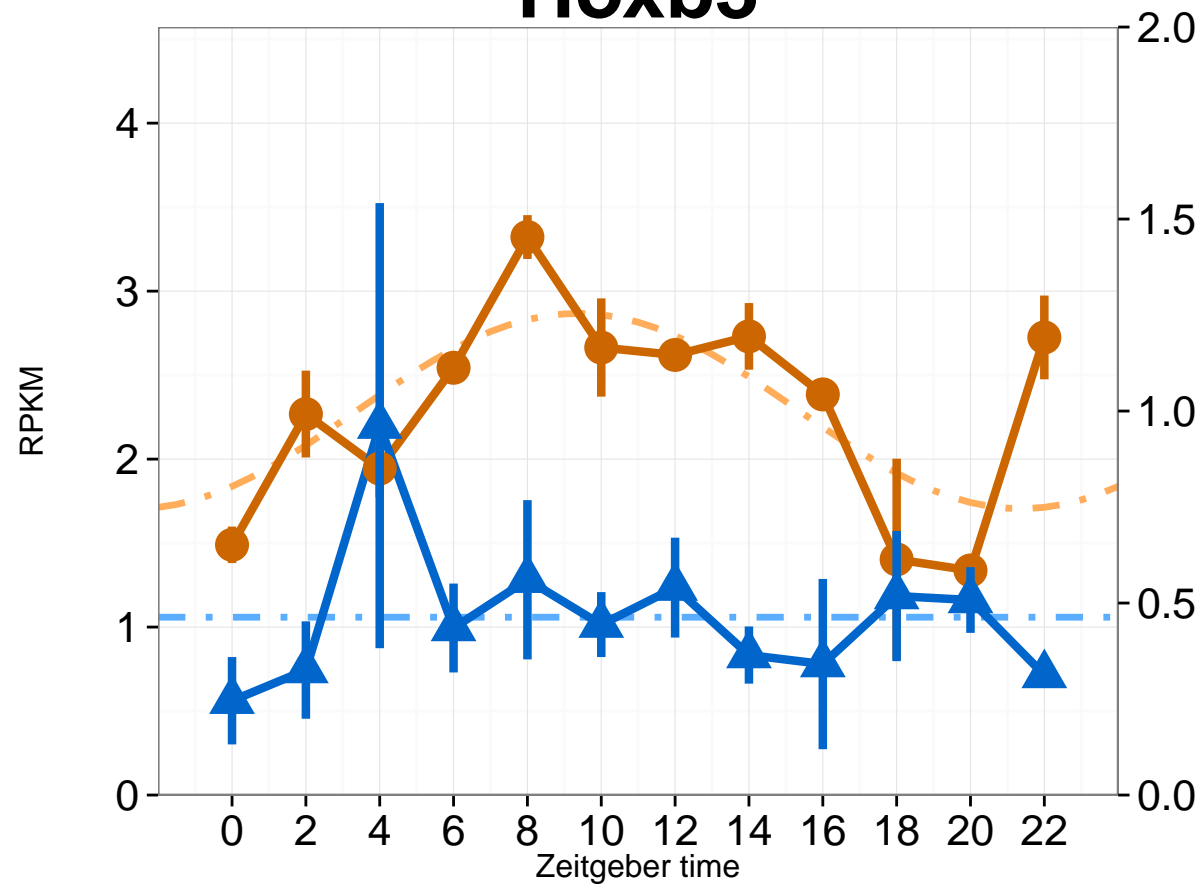

## Hoxb3

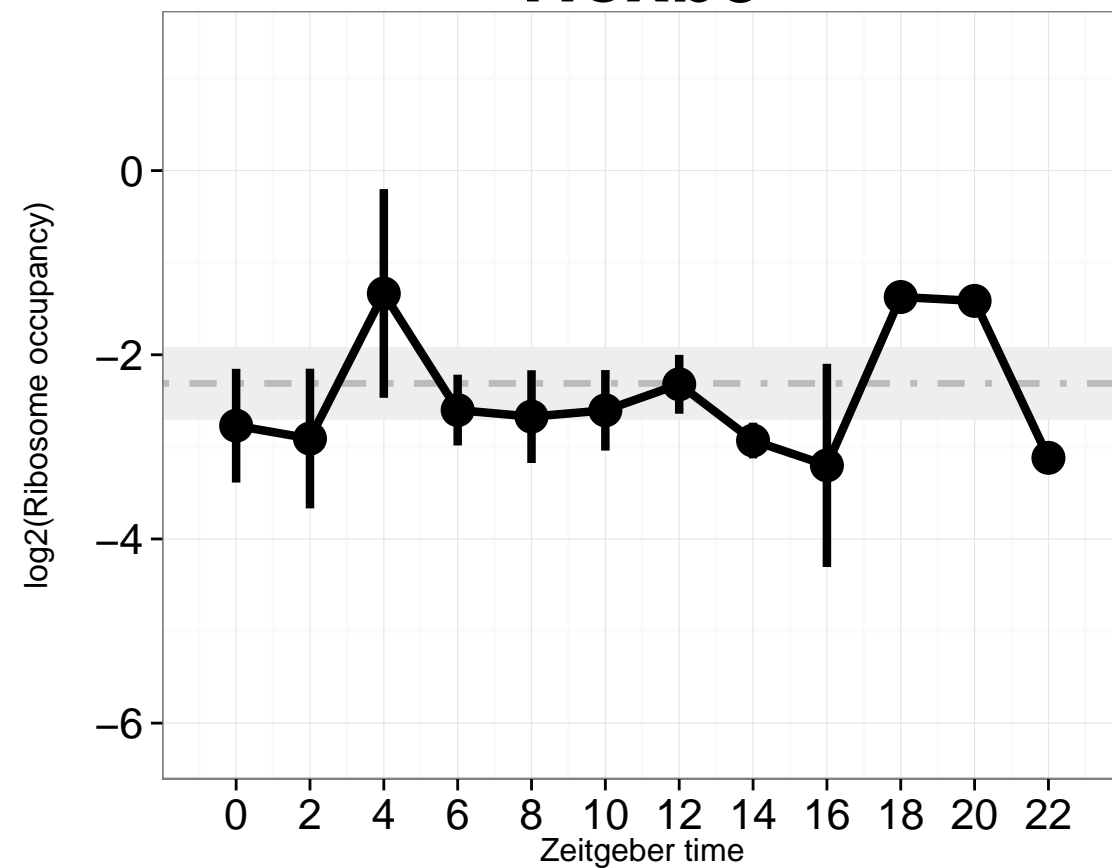

Supplement: Supplementary file 12141 [file 1]

# Fktn

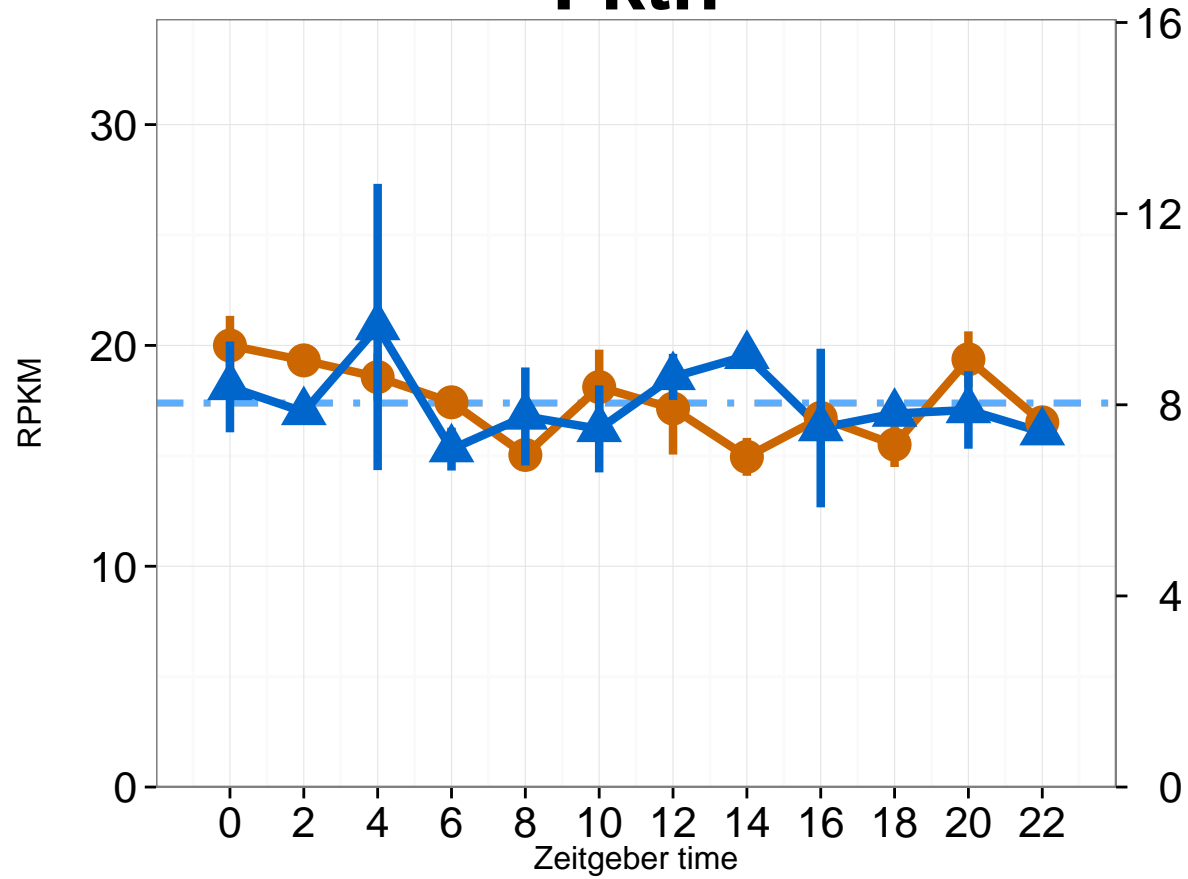

# Fktn

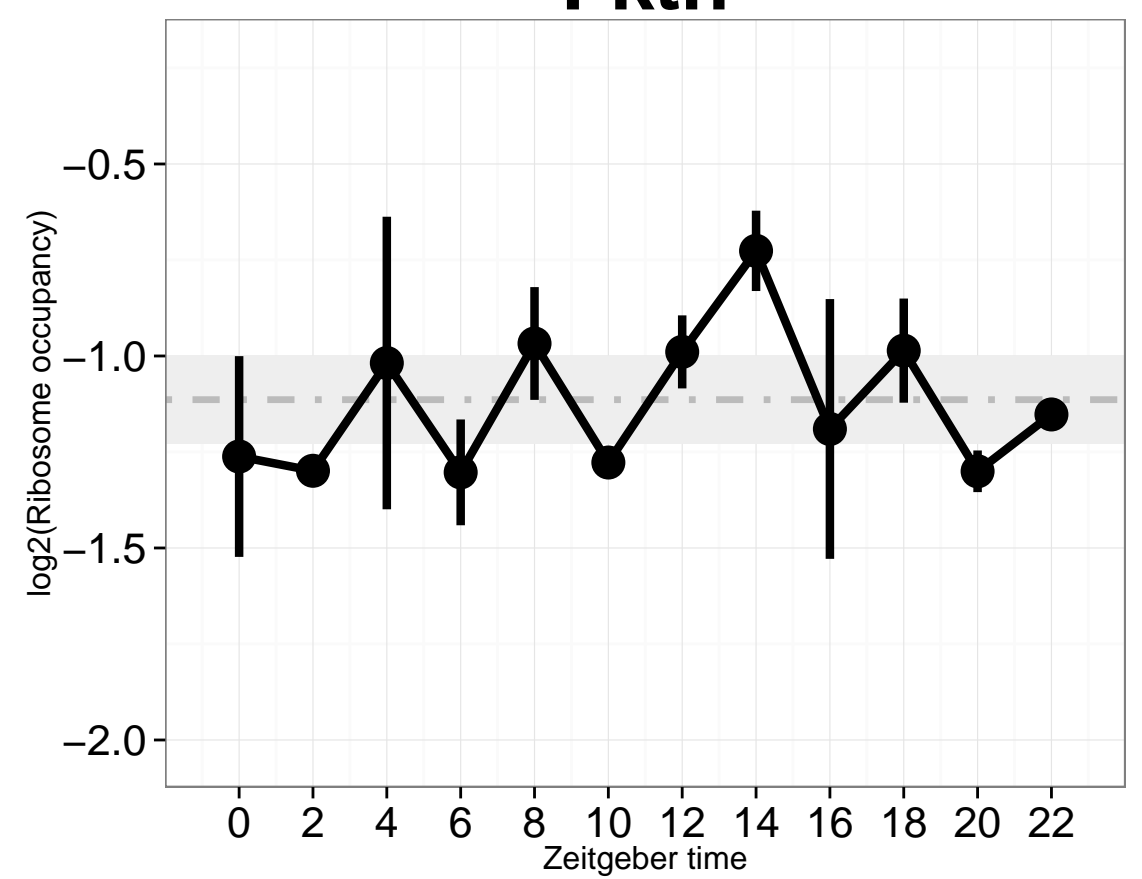

Supplement: Supplementary file 12142 [file 1]

# Ppp1r37

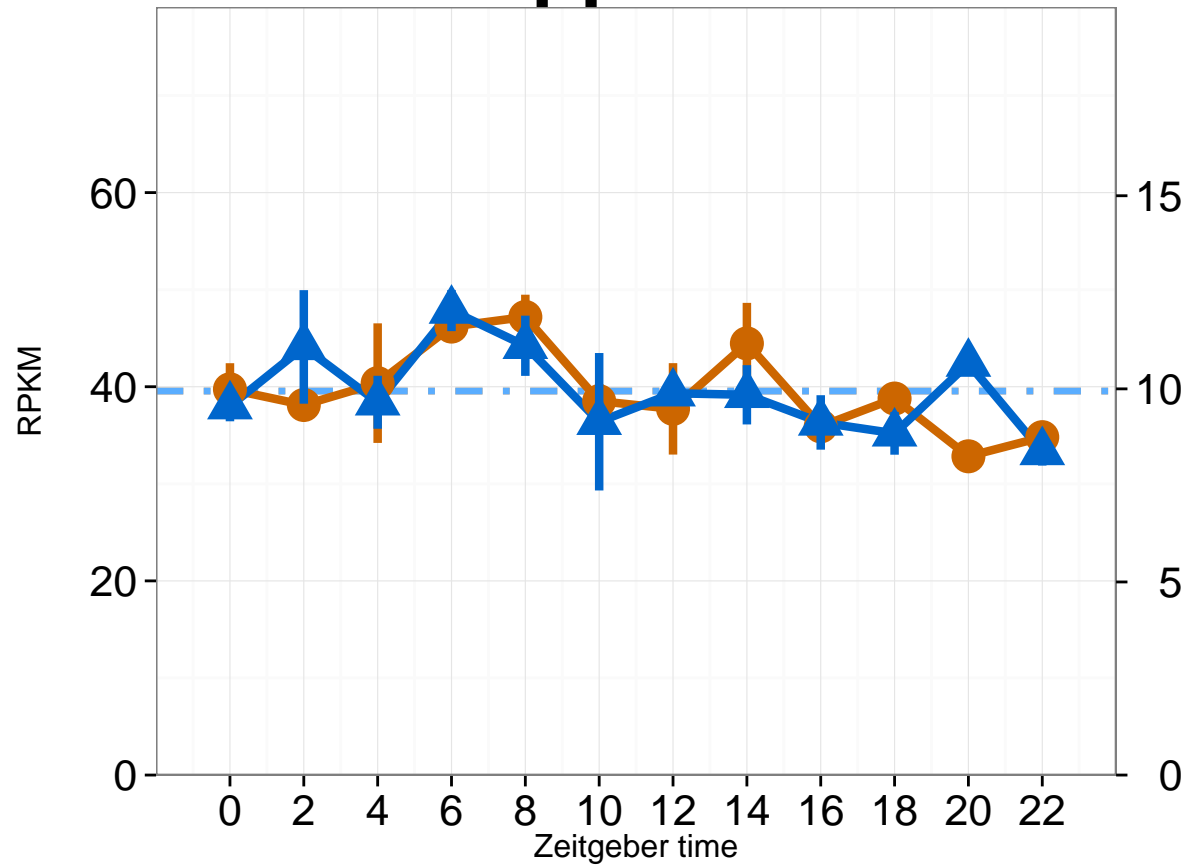

# Ppp1r37

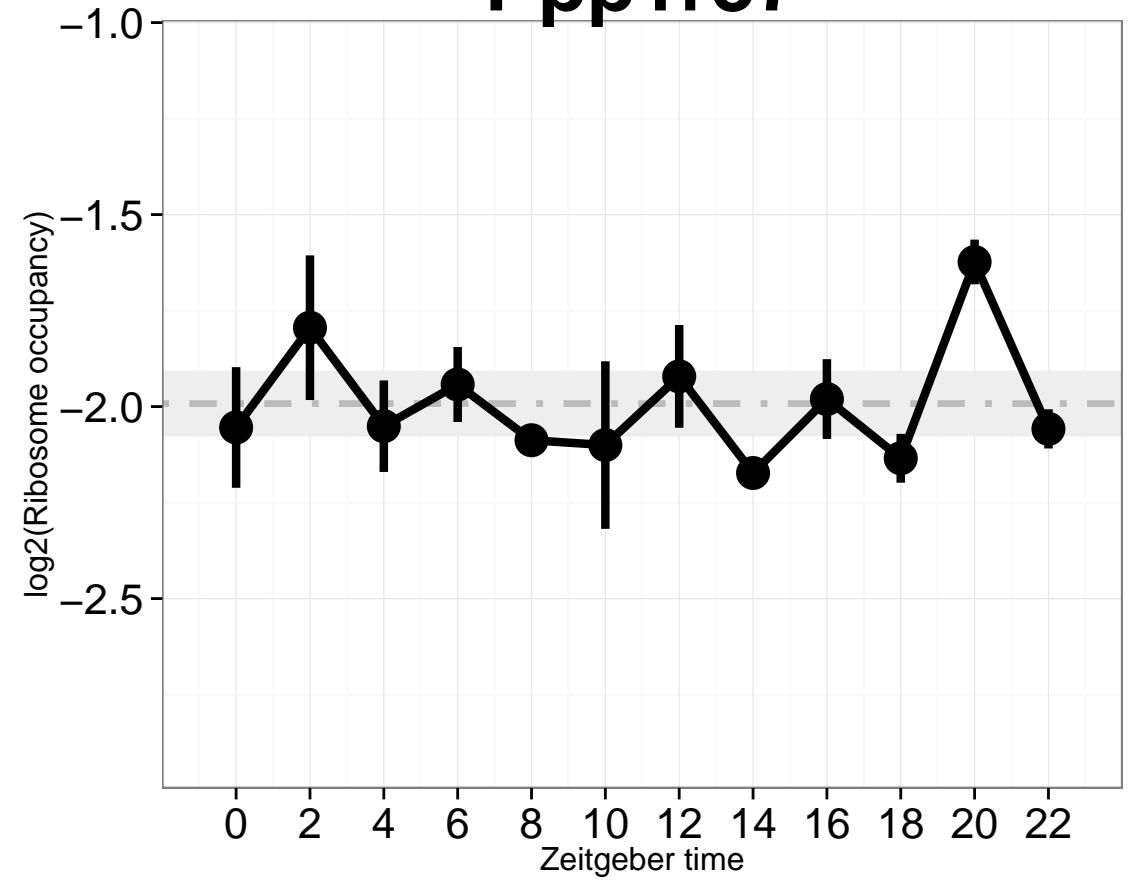

Supplement: Supplementary file 12143 [file 1]

## Arhgef3

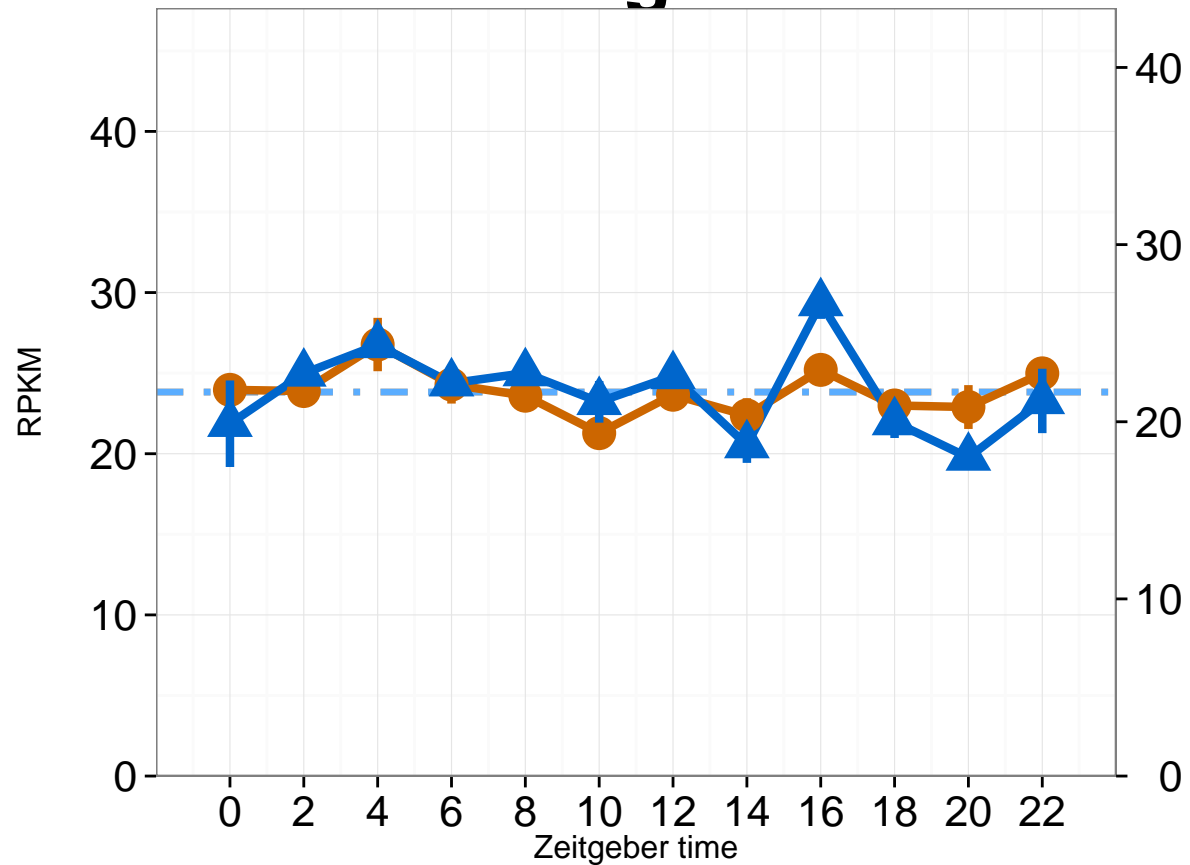

## Arhgef3

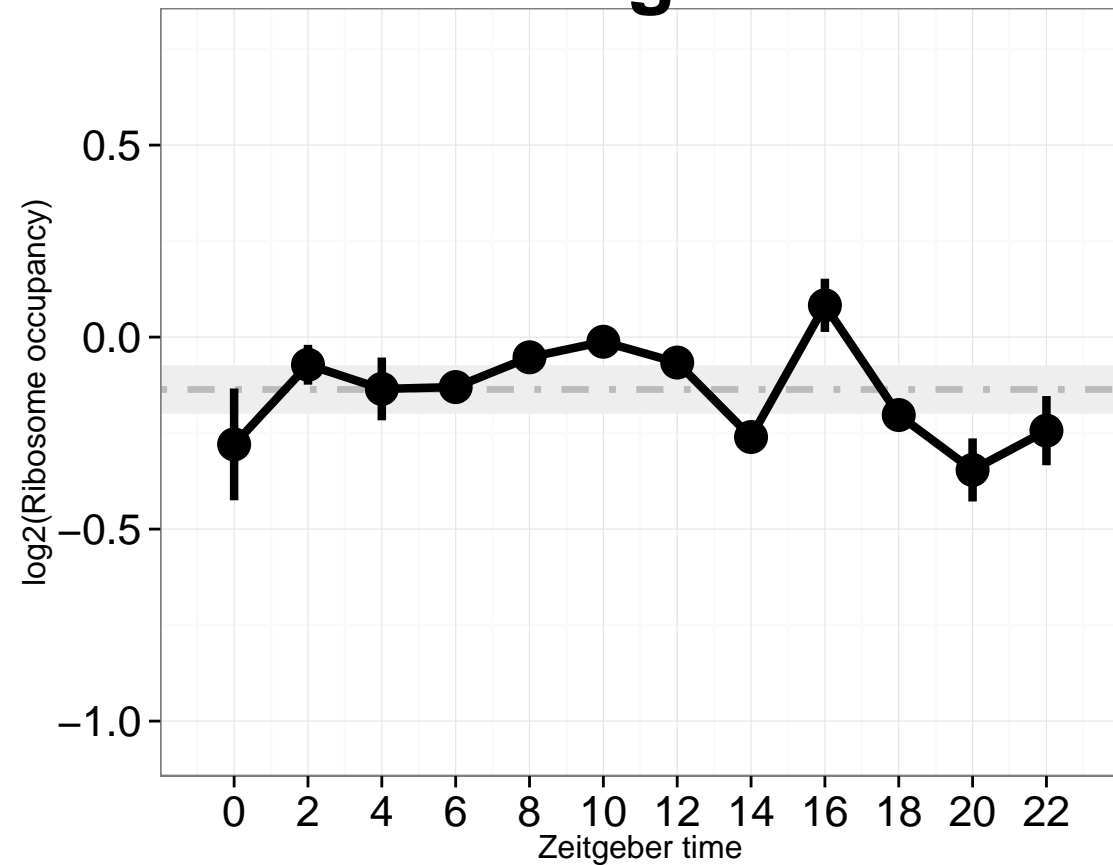

Supplement: Supplementary file 12144 [file 1]
