# Supplementary material (part 122 of 133)
Source: publisher figshare collection journal article supplement (https://springernature.figshare.com/articles/dataset/_/4903193)

# Per3

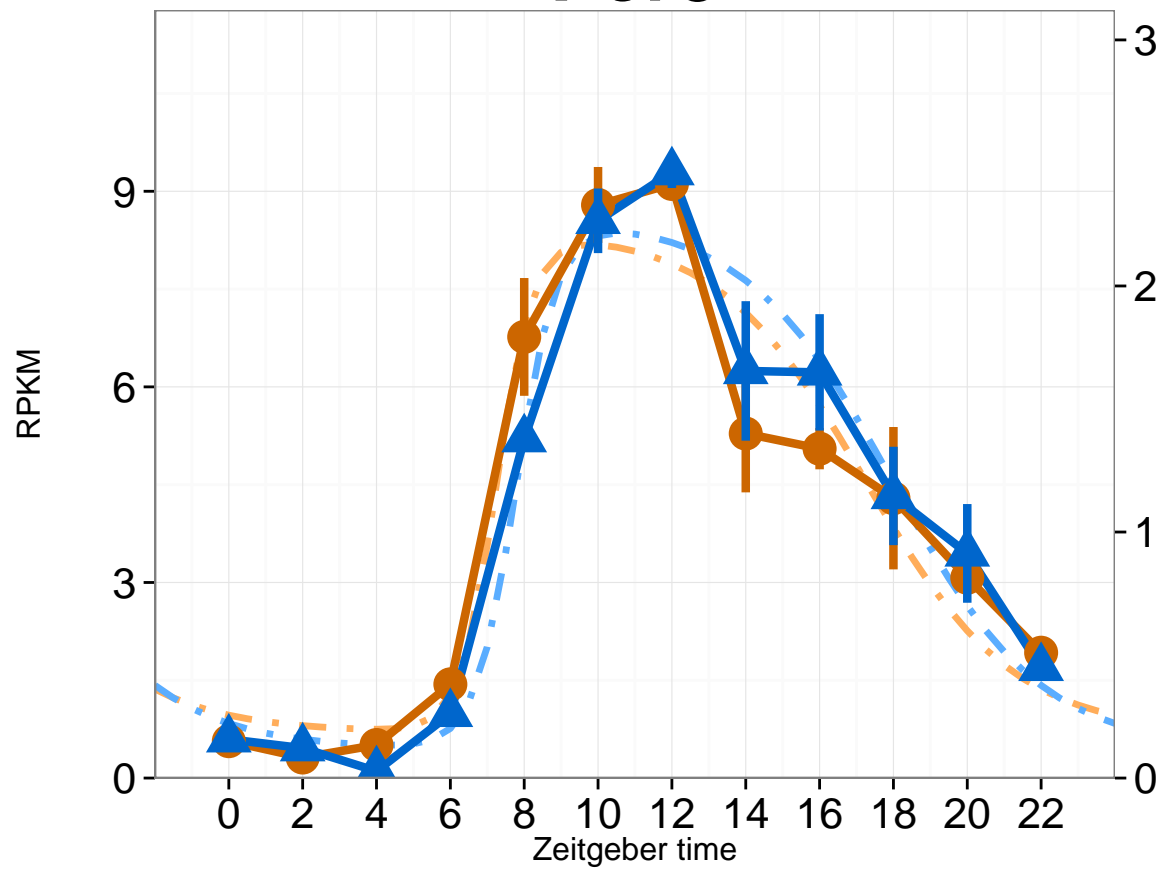

# Per3

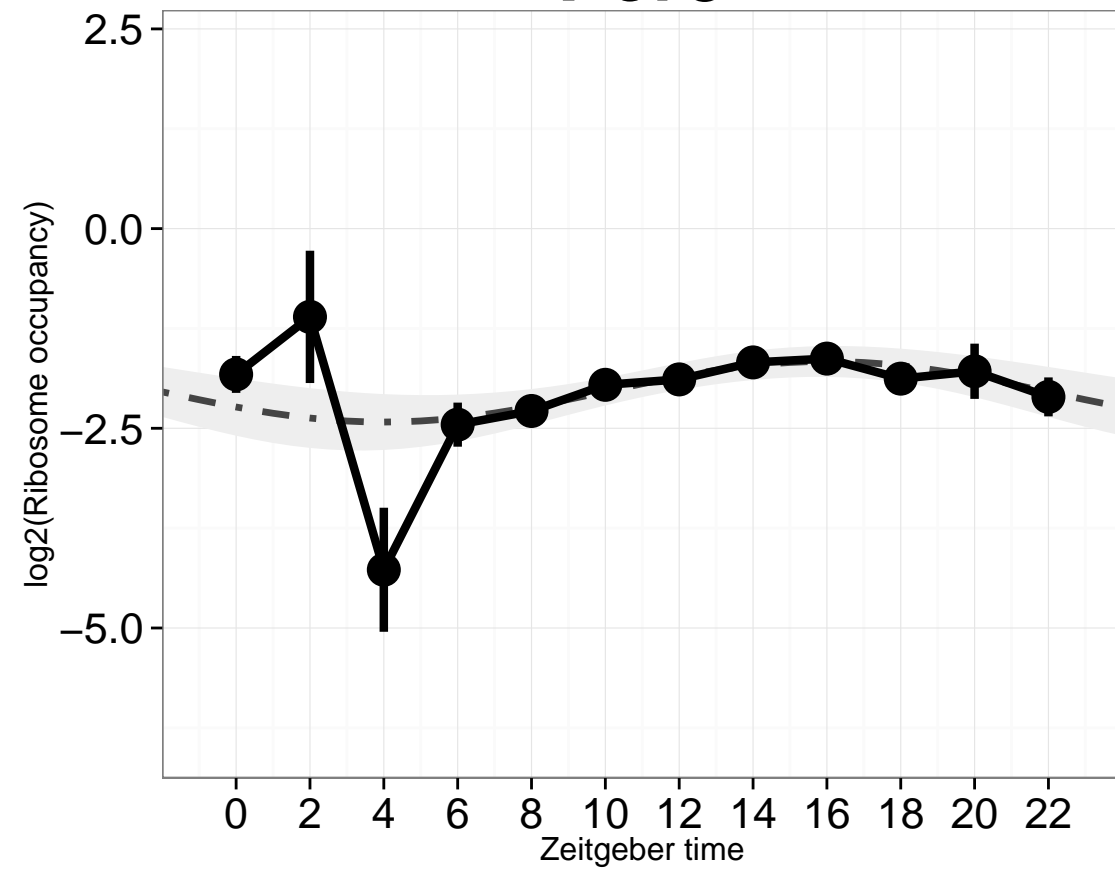

Supplement: Supplementary file 12145 [file 1]

# Fhl3

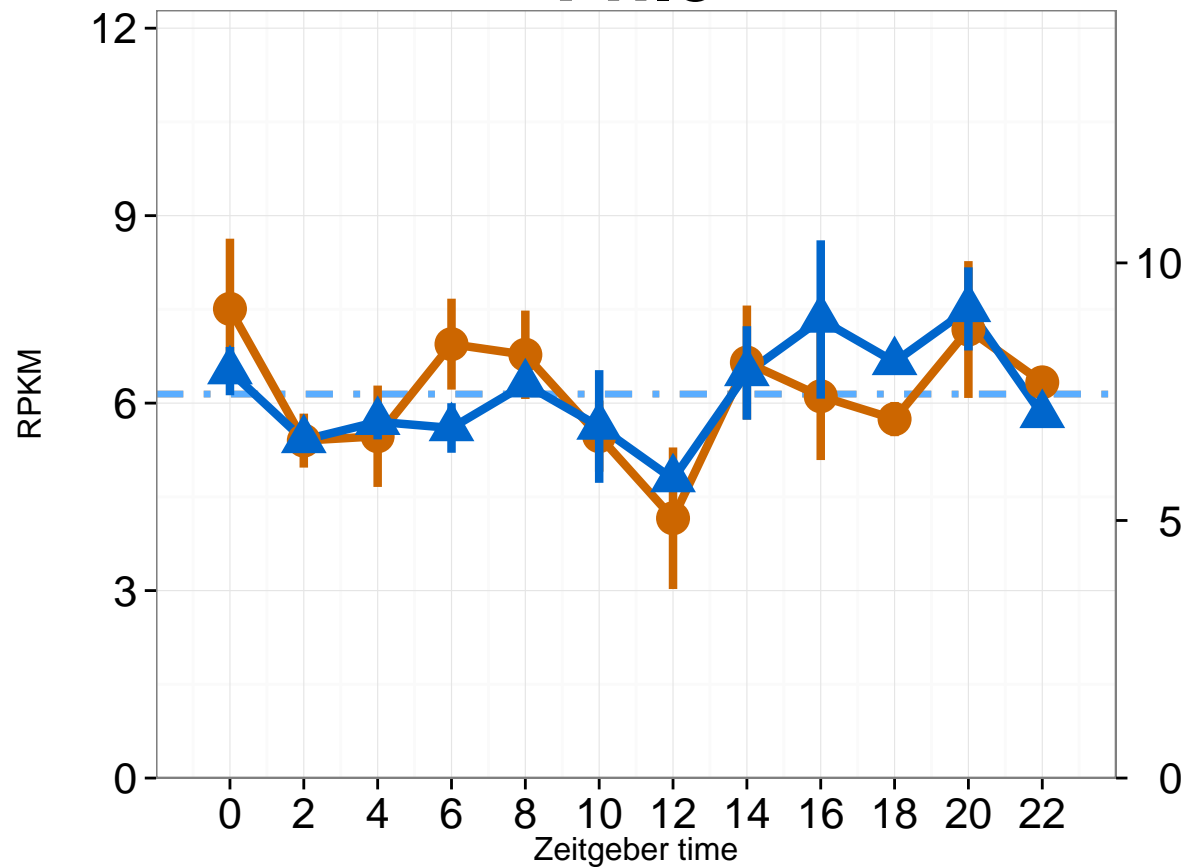

# Fhl3

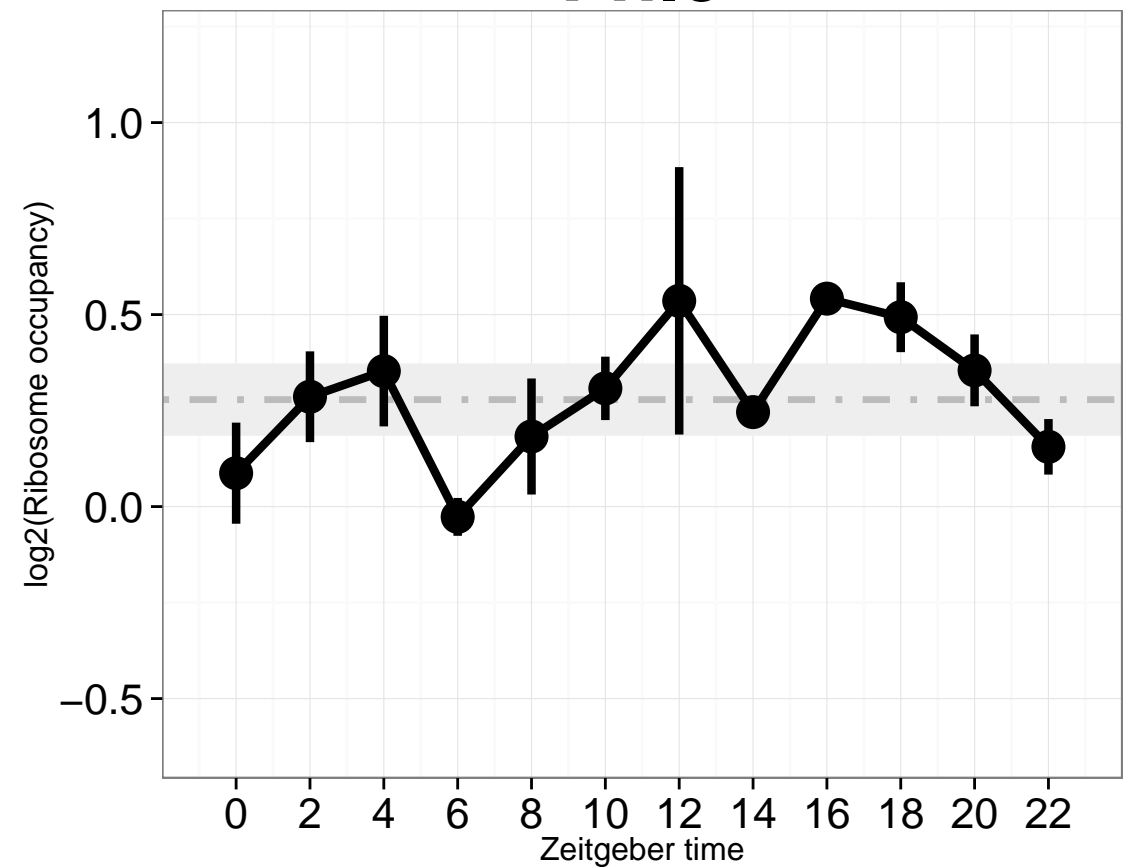

Supplement: Supplementary file 12146 [file 1]

# 5330426P16Rik

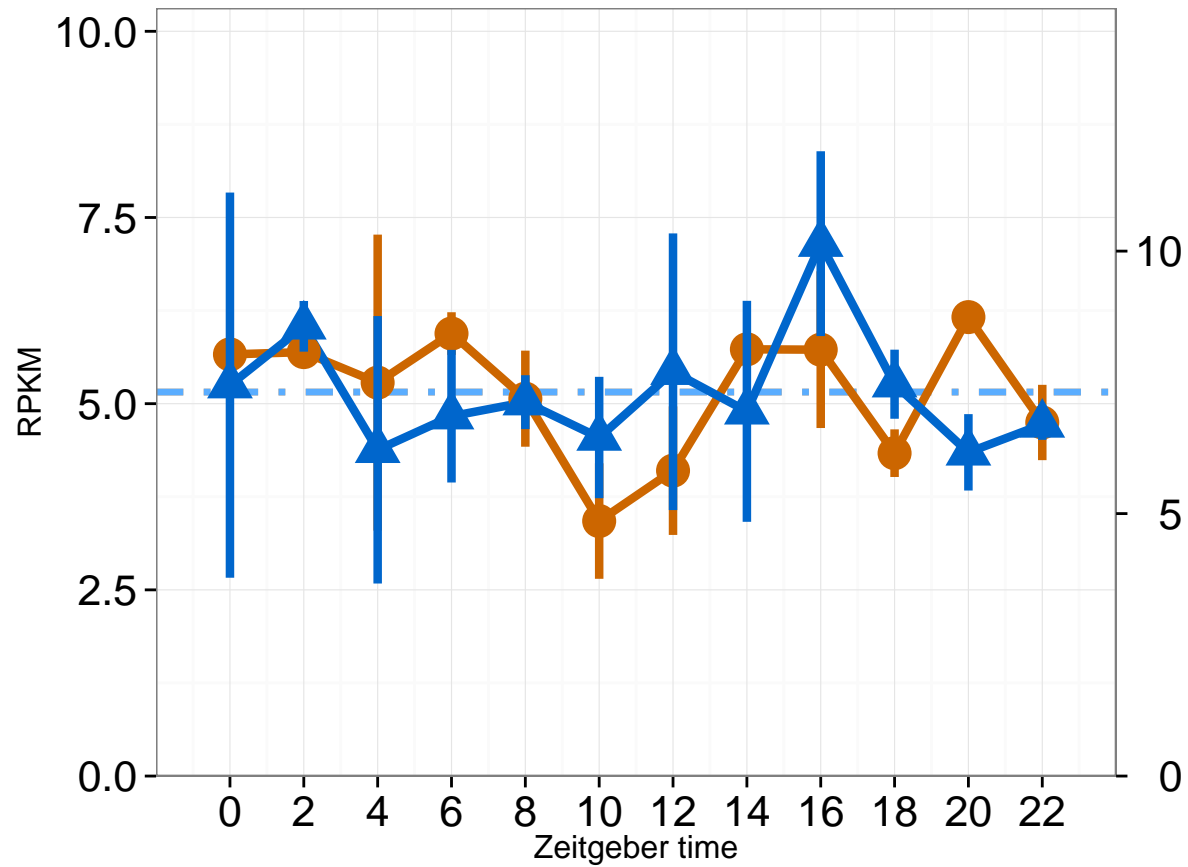

# 5330426P16Rik

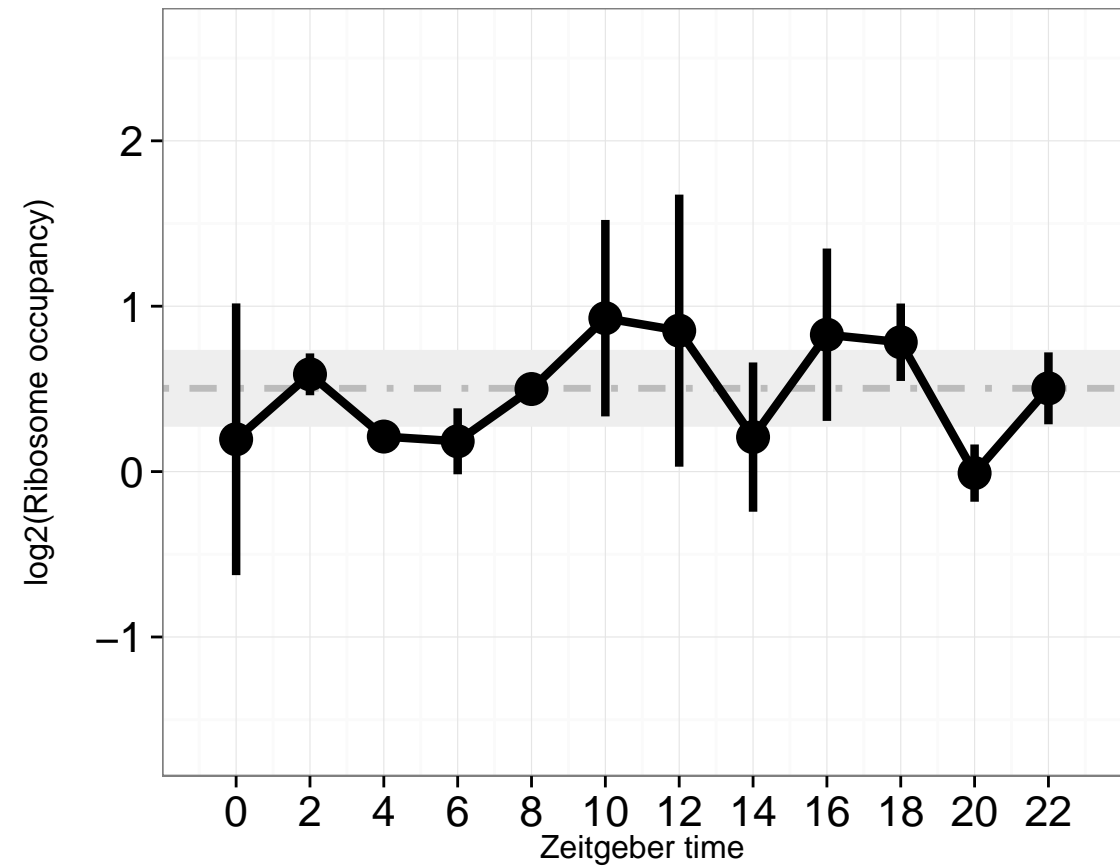

Supplement: Supplementary file 12147 [file 1]

## Msh6

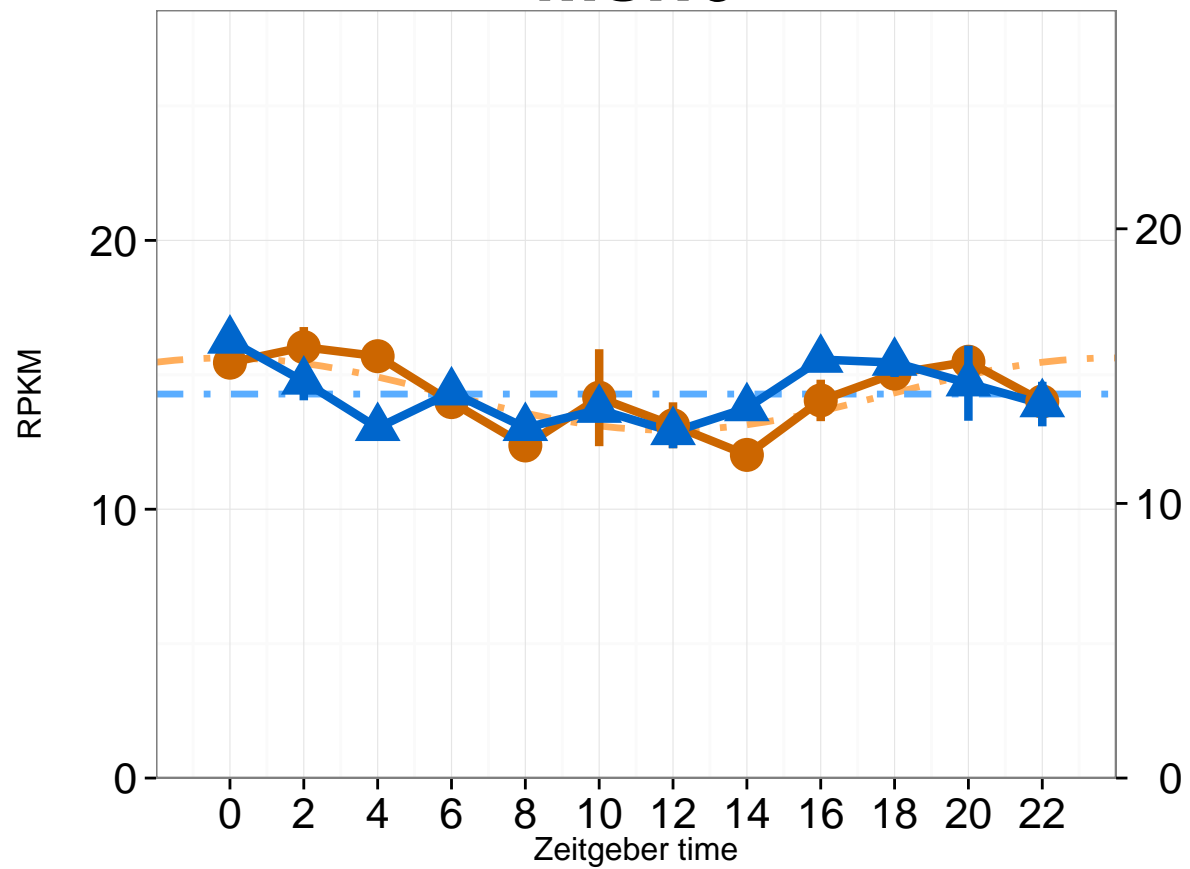

## Msh6

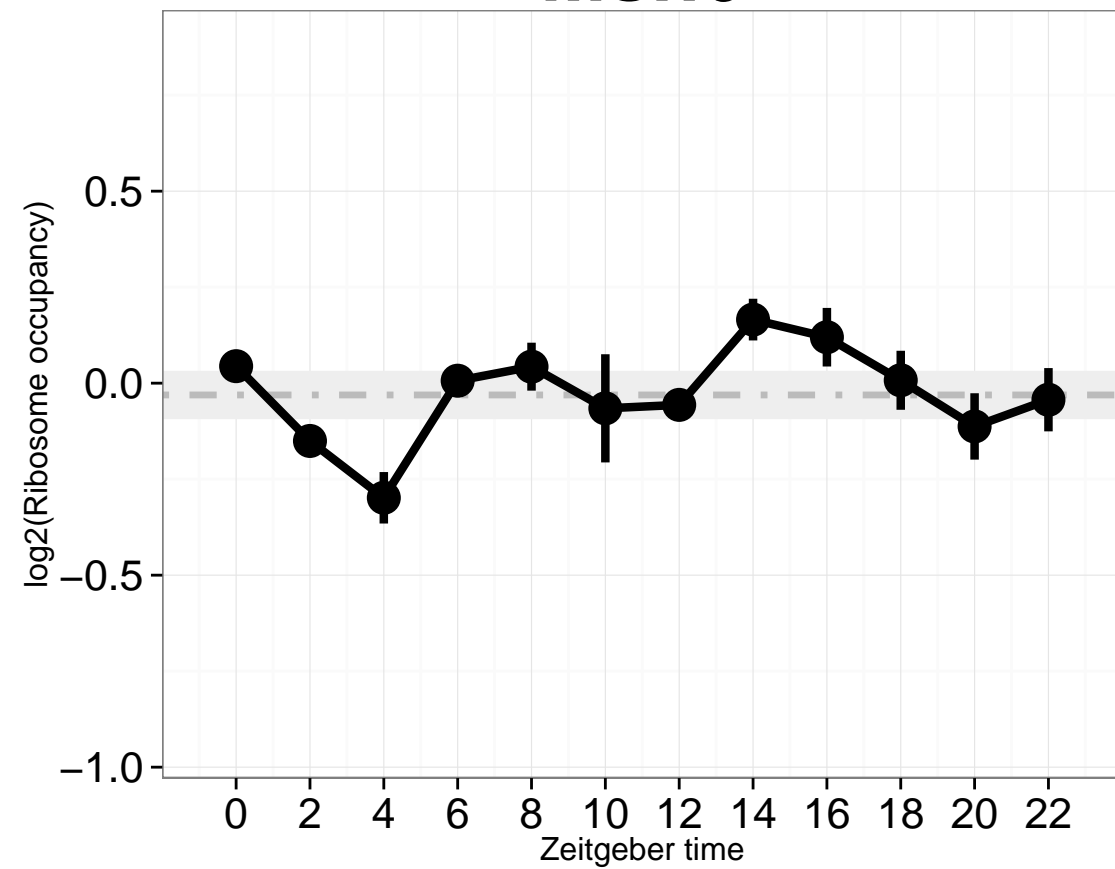

Supplement: Supplementary file 12148 [file 1]

## Emc2

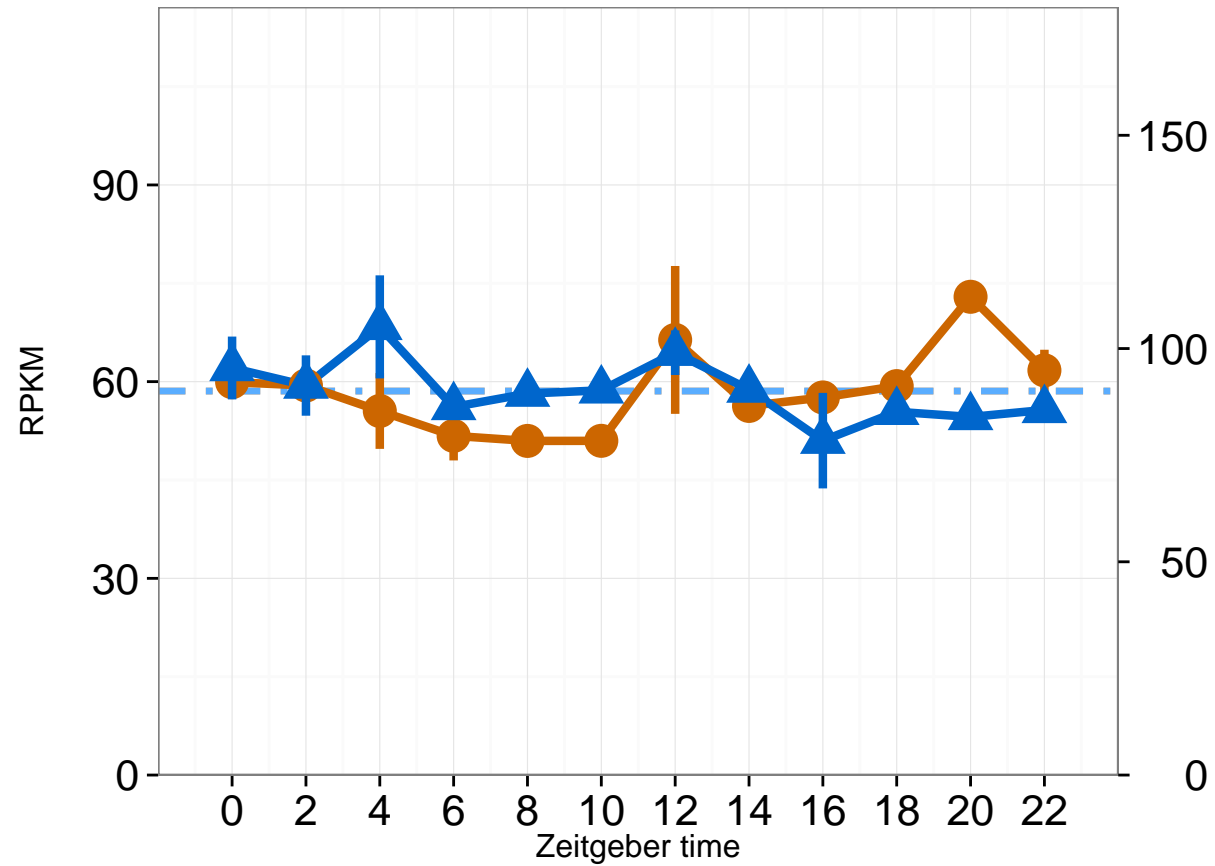

## Emc2

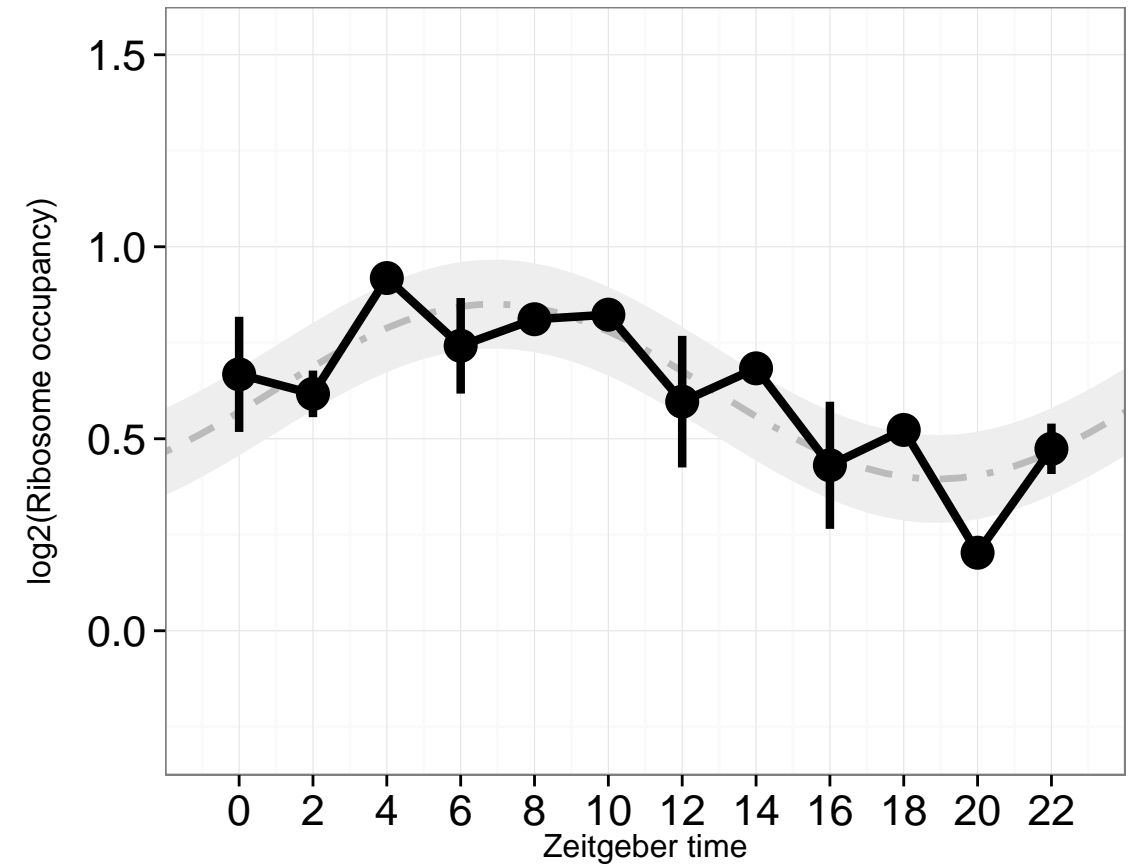

Supplement: Supplementary file 12149 [file 1]

## Adap2

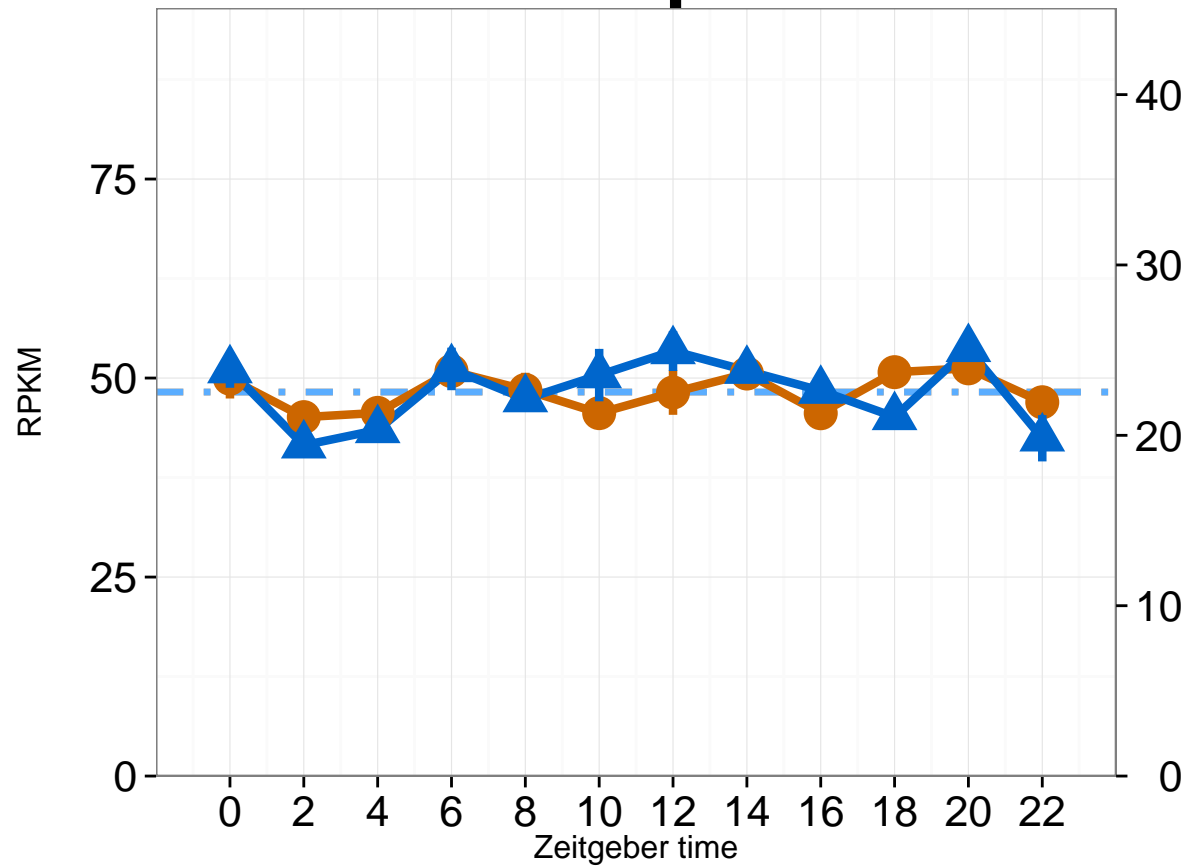

## Adap2

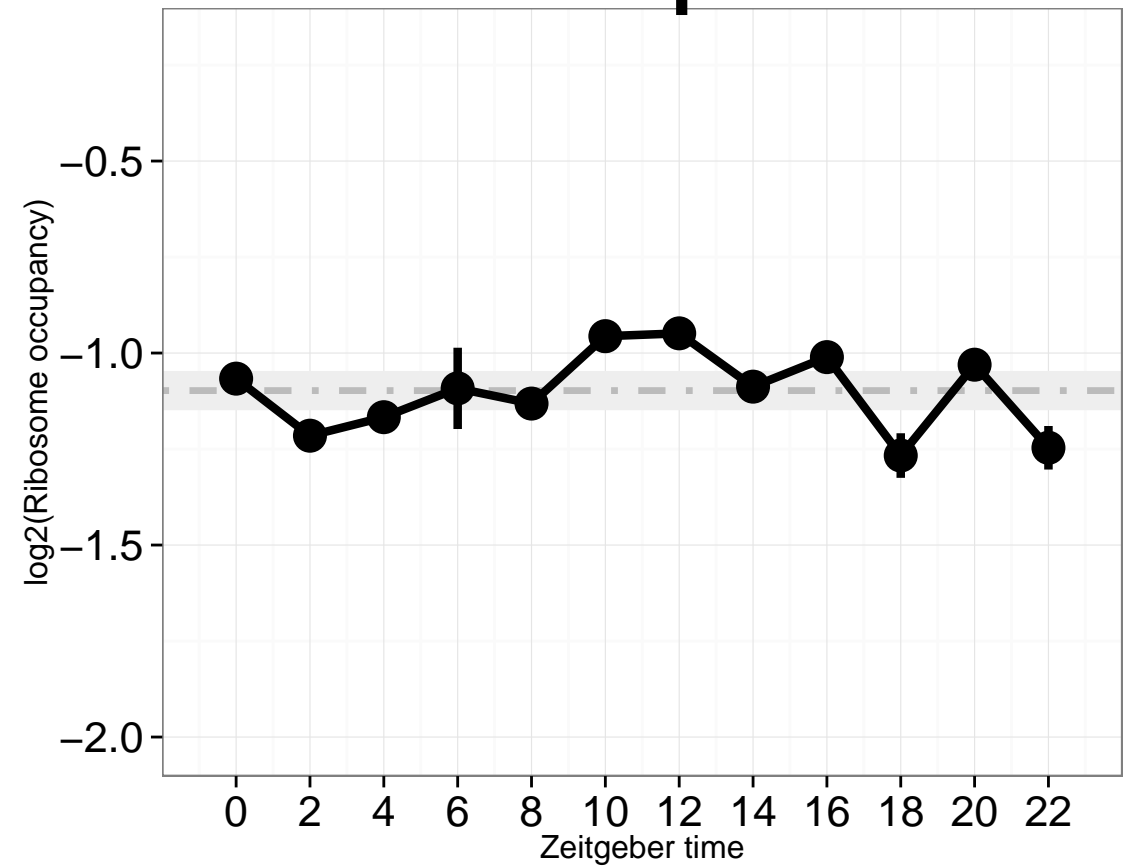

Supplement: Supplementary file 12150 [file 1]

## Ttc36

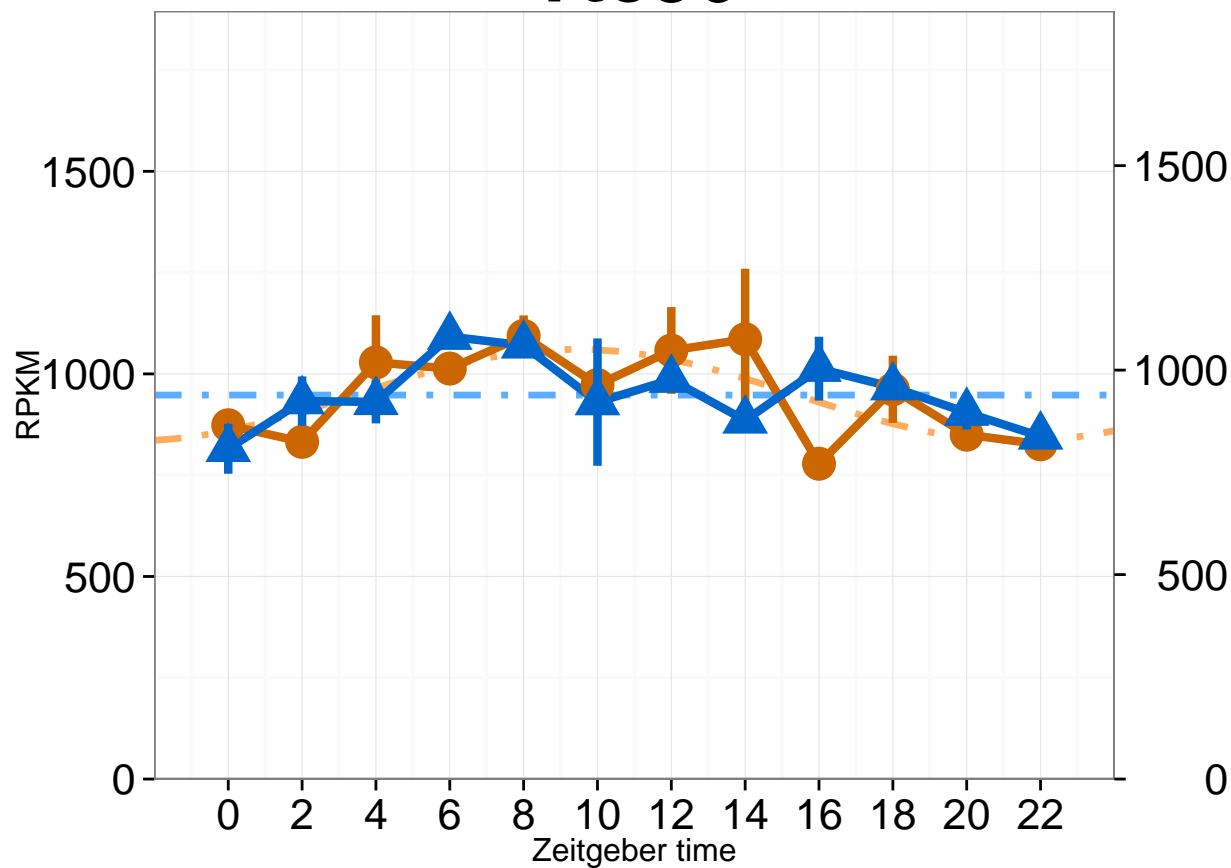

## Ttc36

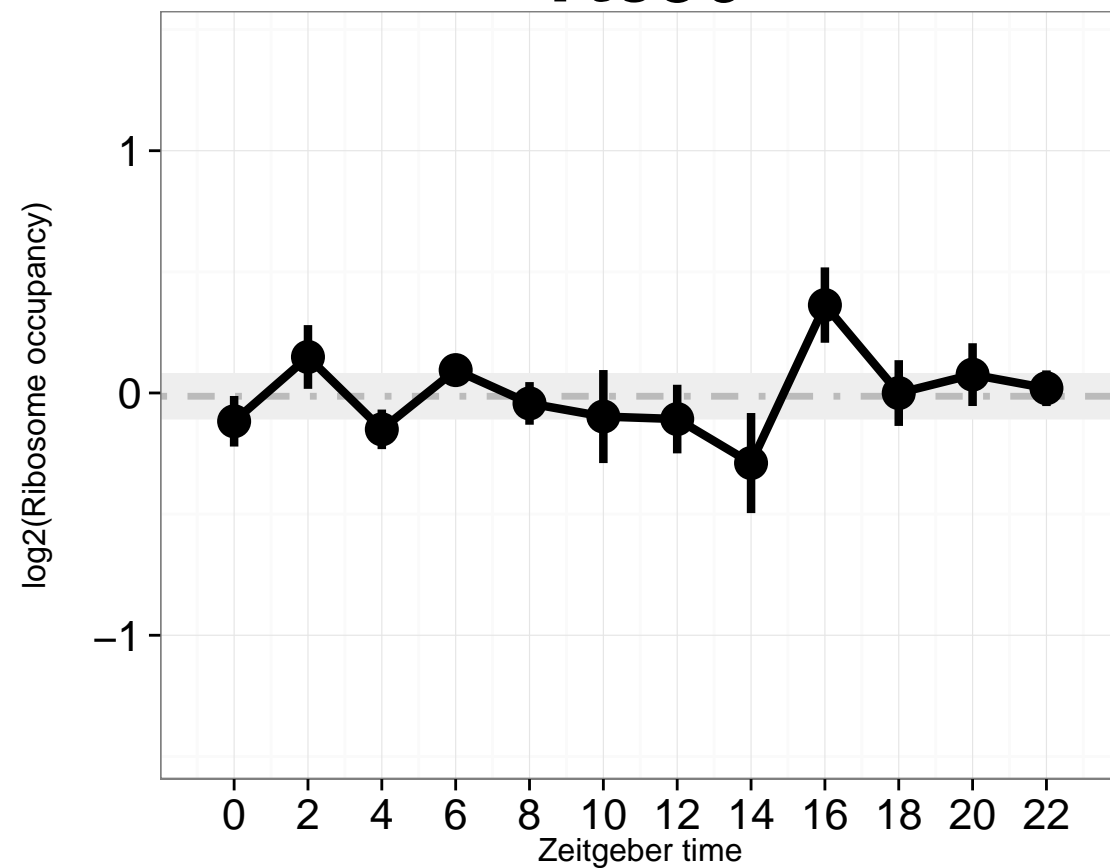

Supplement: Supplementary file 12151 [file 1]

# Fam168b

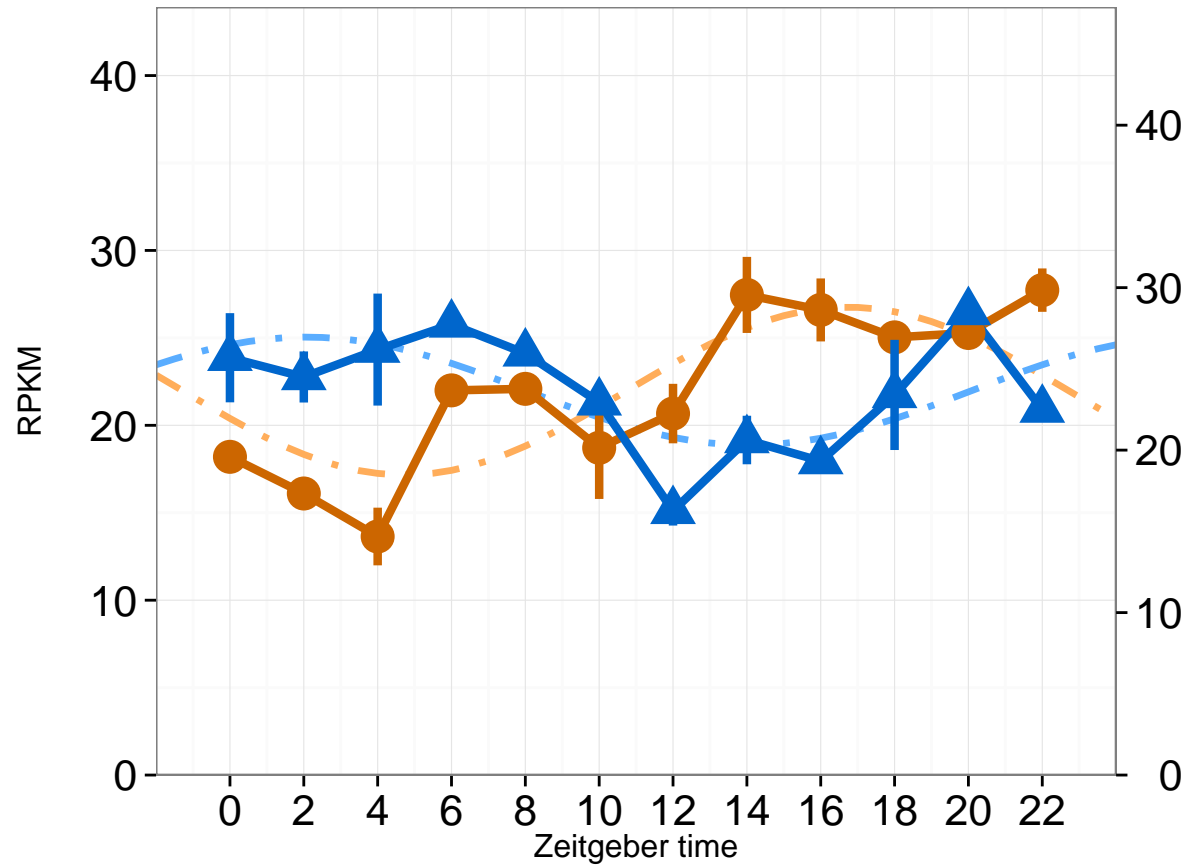

# Fam168b

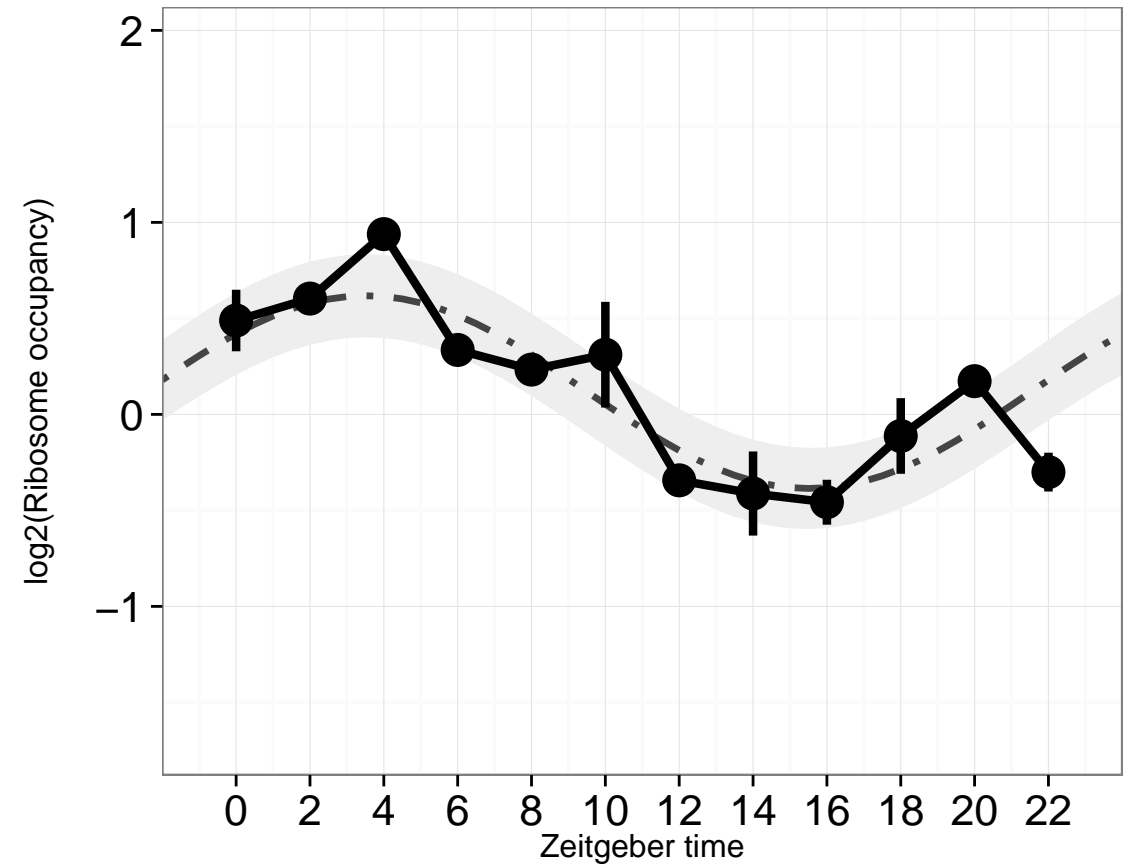

Supplement: Supplementary file 12152 [file 1]

# Hoxa4

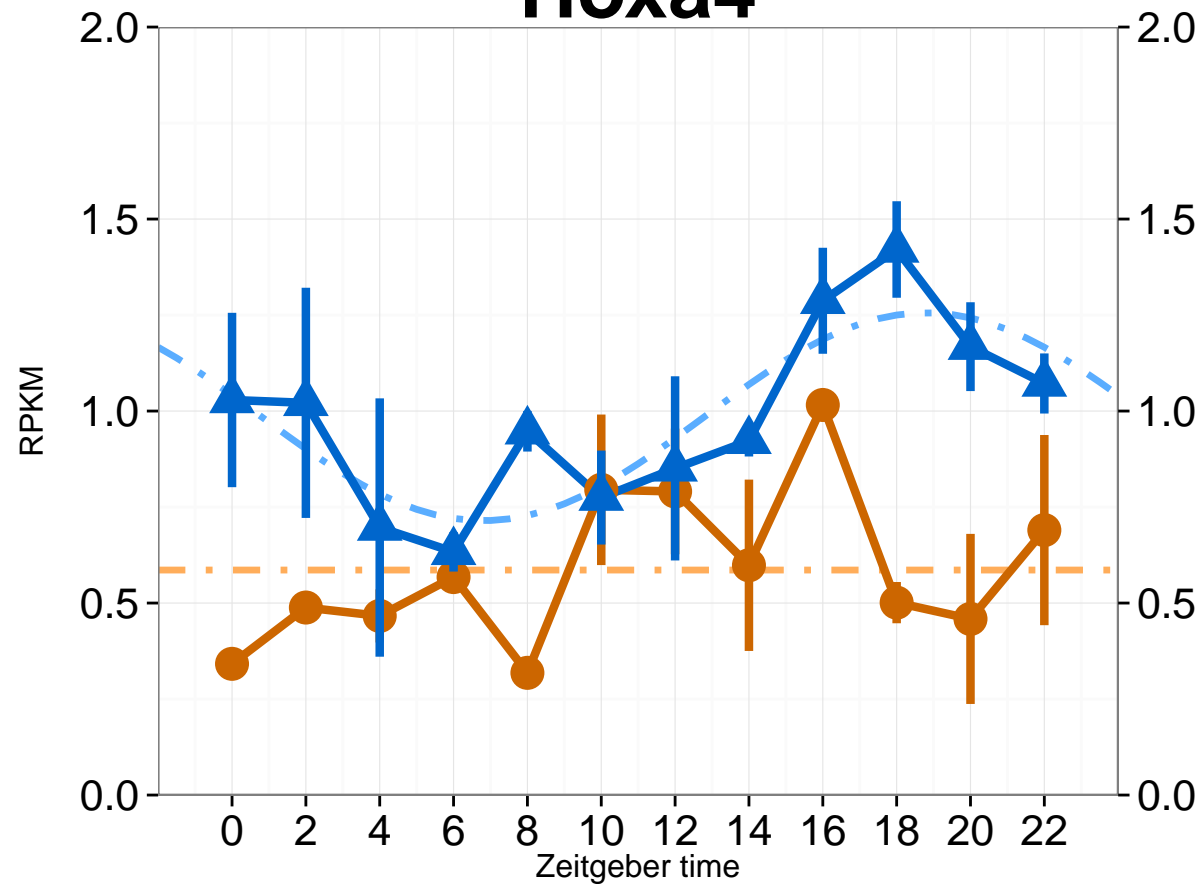

# Hoxa4

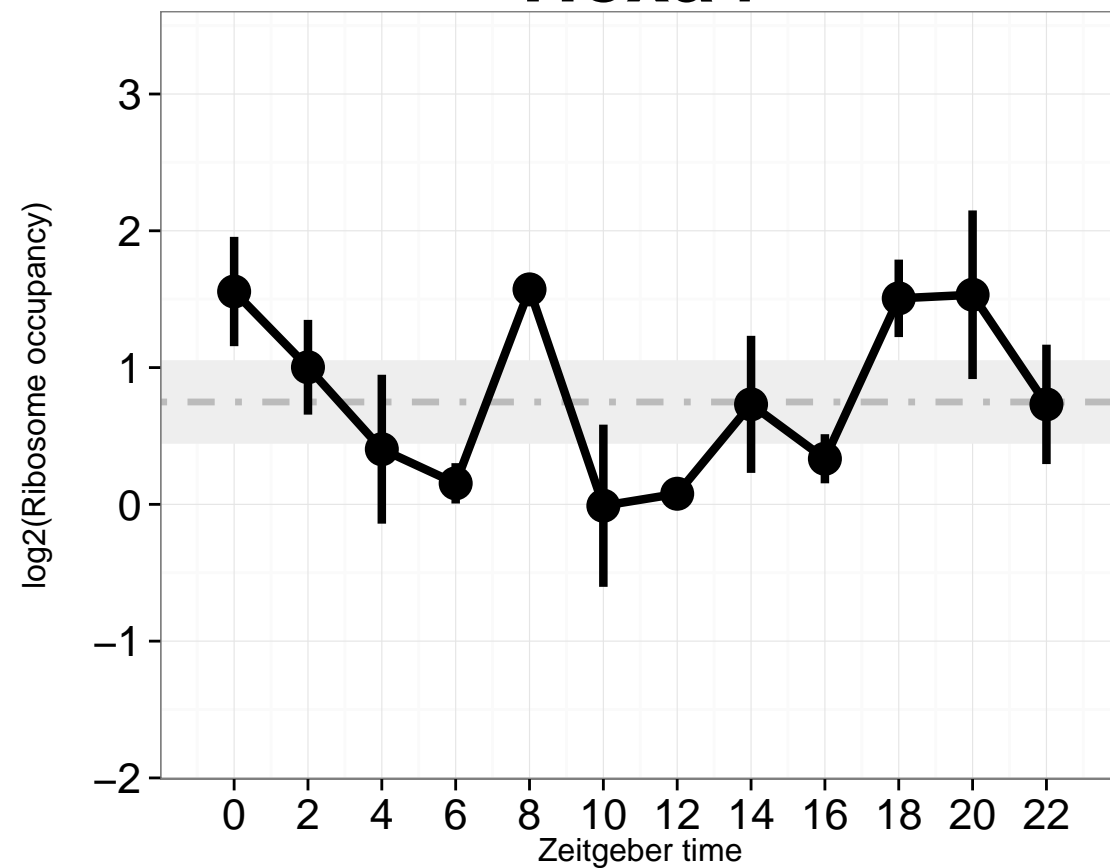

Supplement: Supplementary file 12153 [file 1]

## Dsel

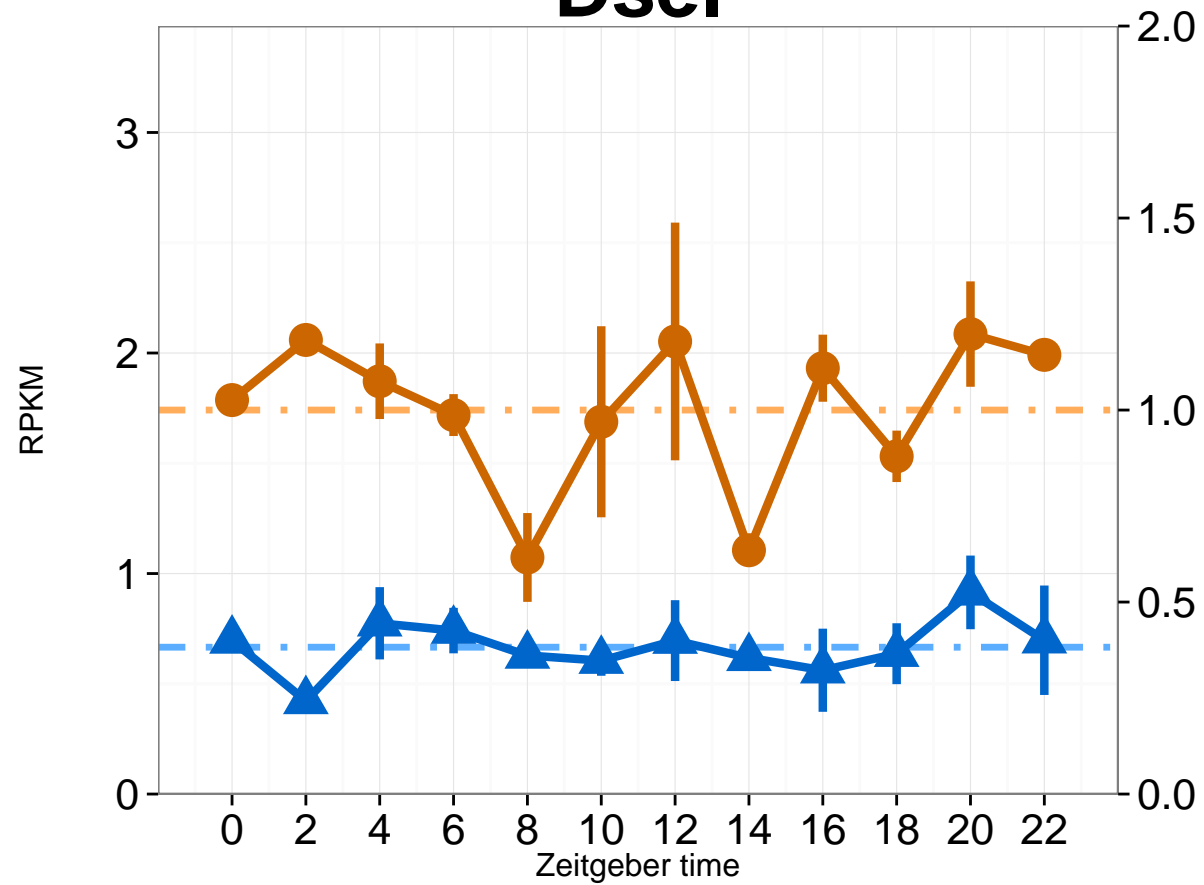

## Dsel

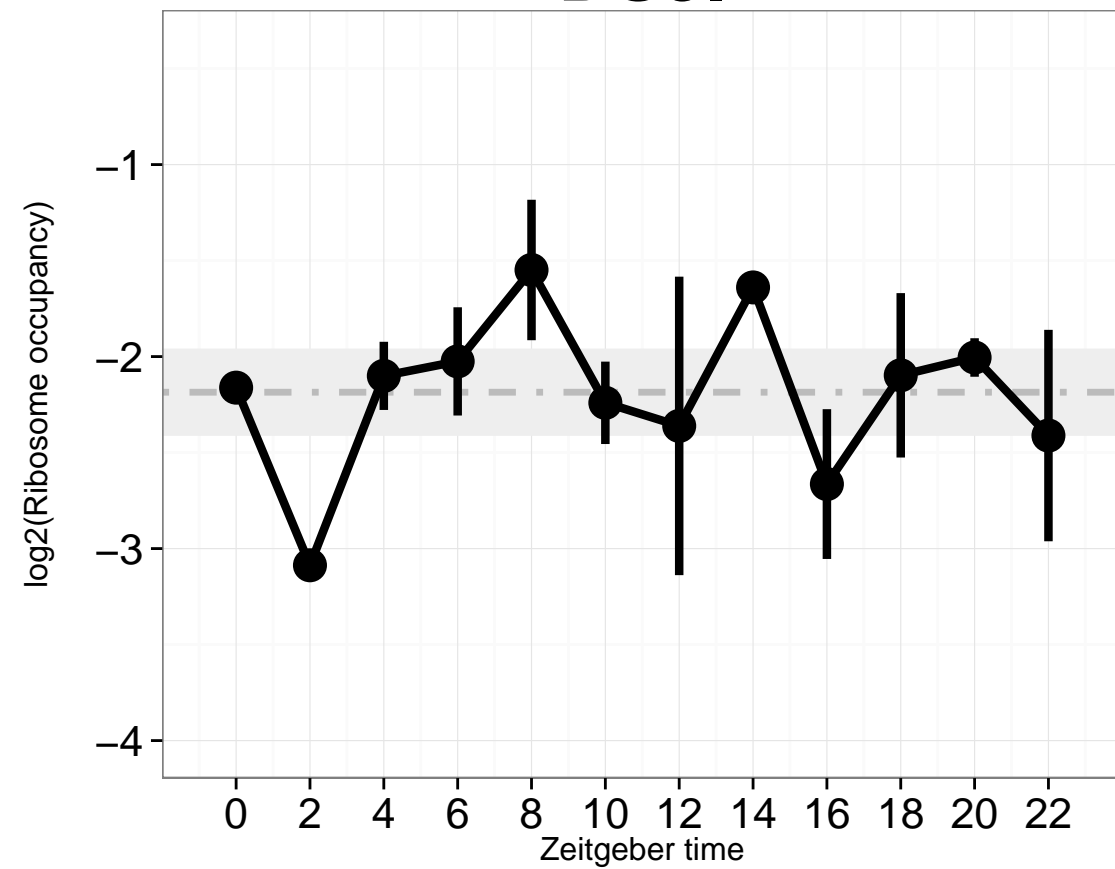

Supplement: Supplementary file 12154 [file 1]

## Scel

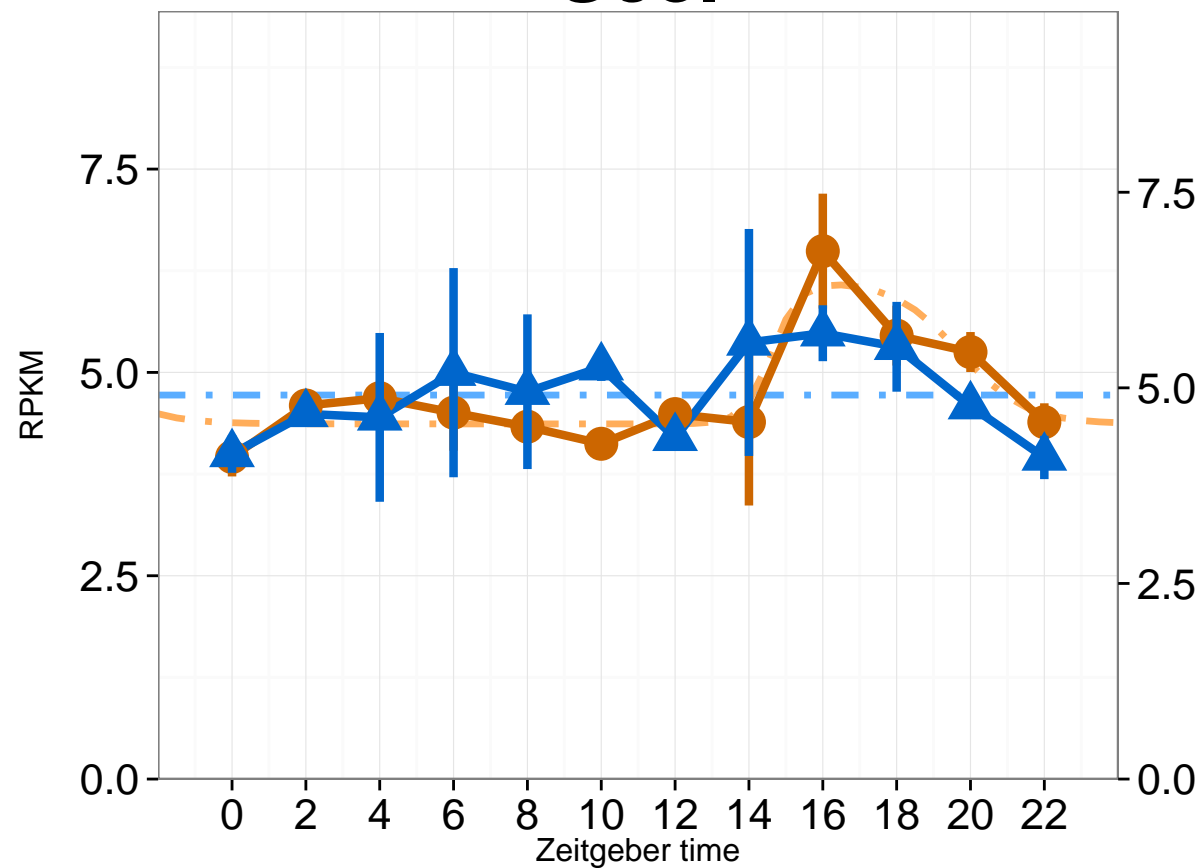

## Scel

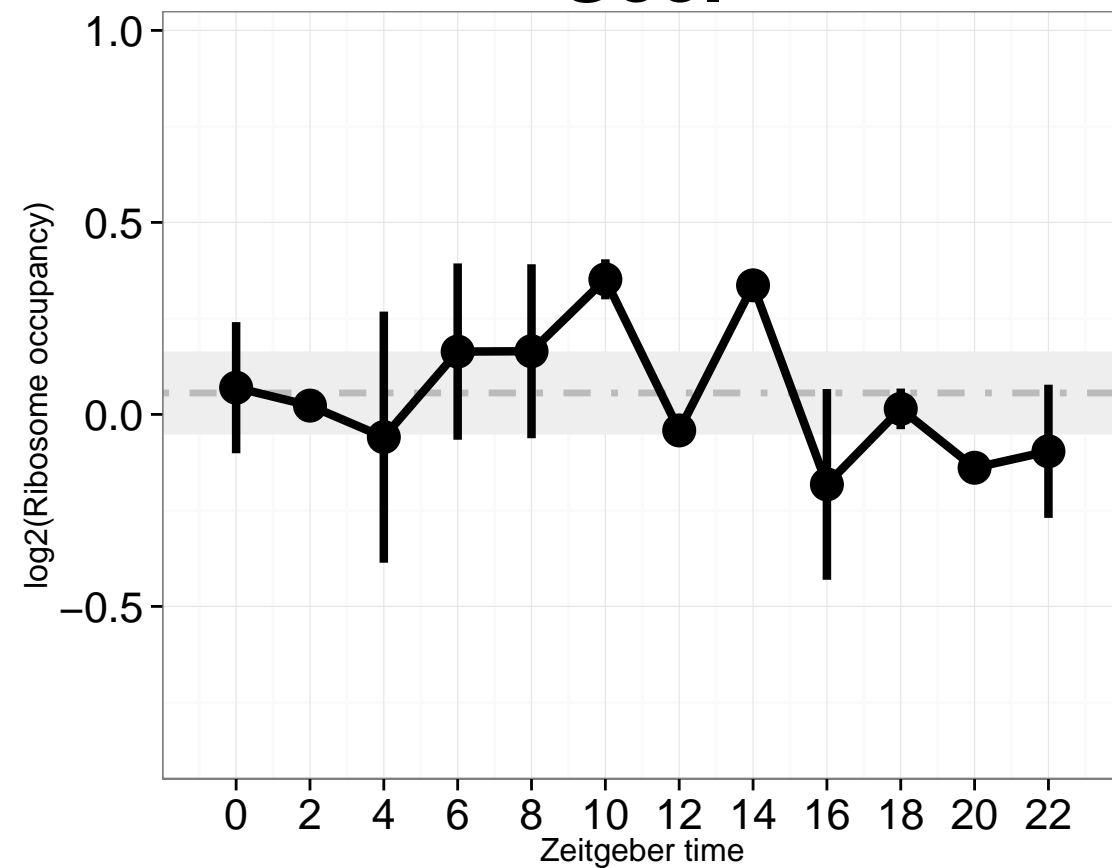

Supplement: Supplementary file 12155 [file 1]

# Elk1

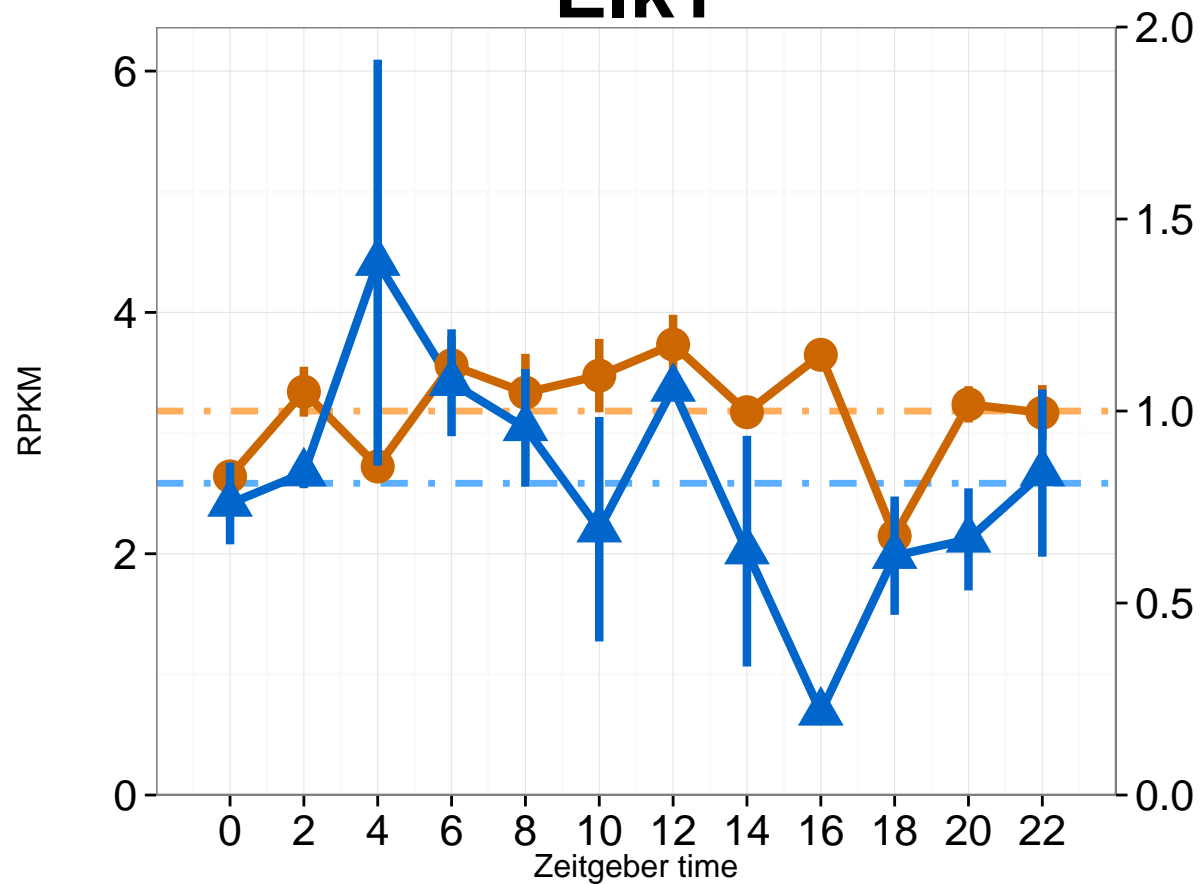

# Elk1

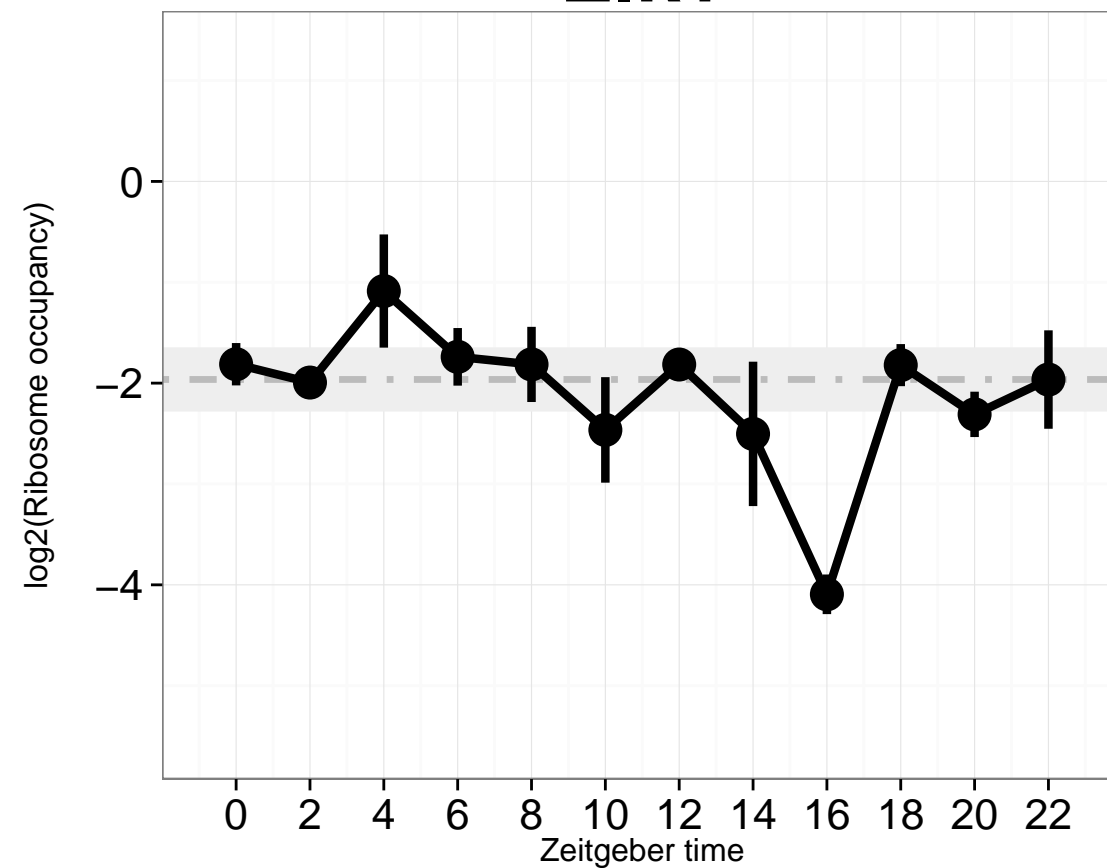

Supplement: Supplementary file 12156 [file 1]

# Atp5g3

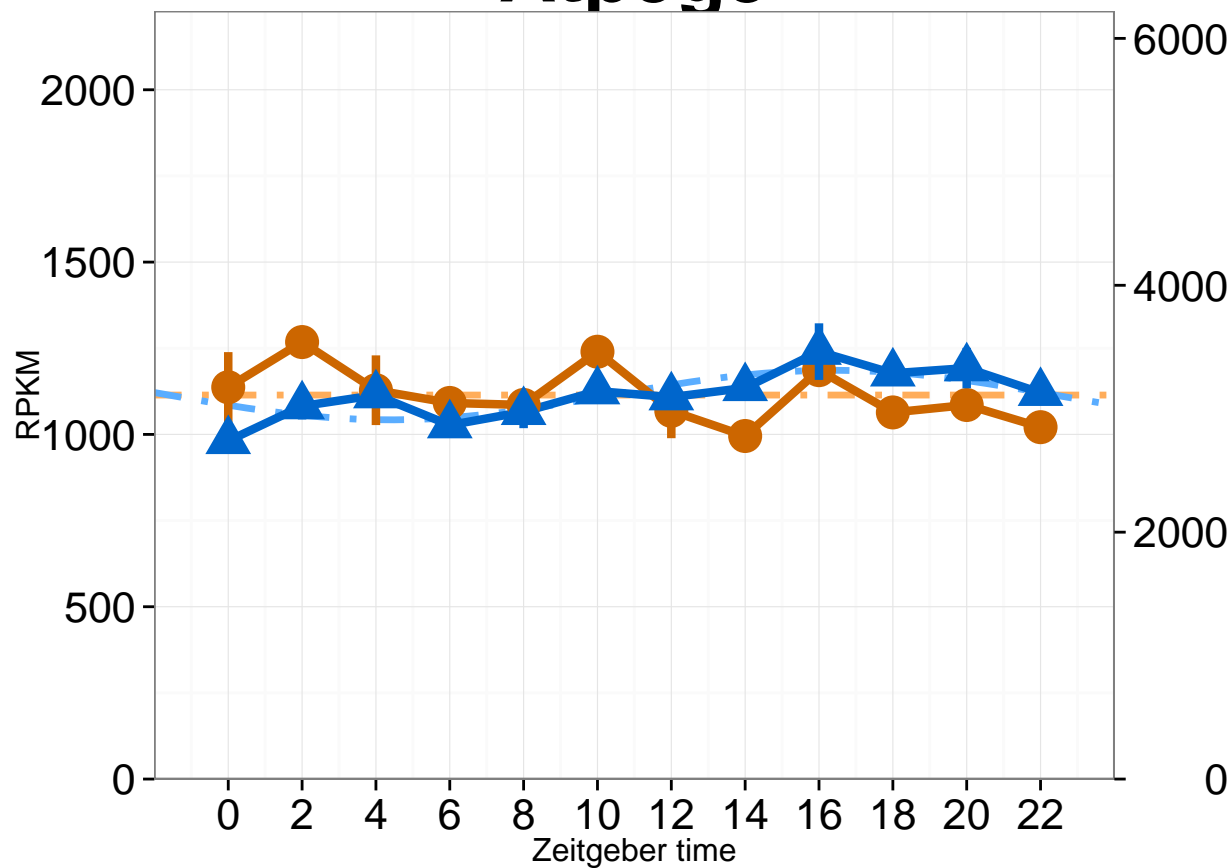

# Atp5g3

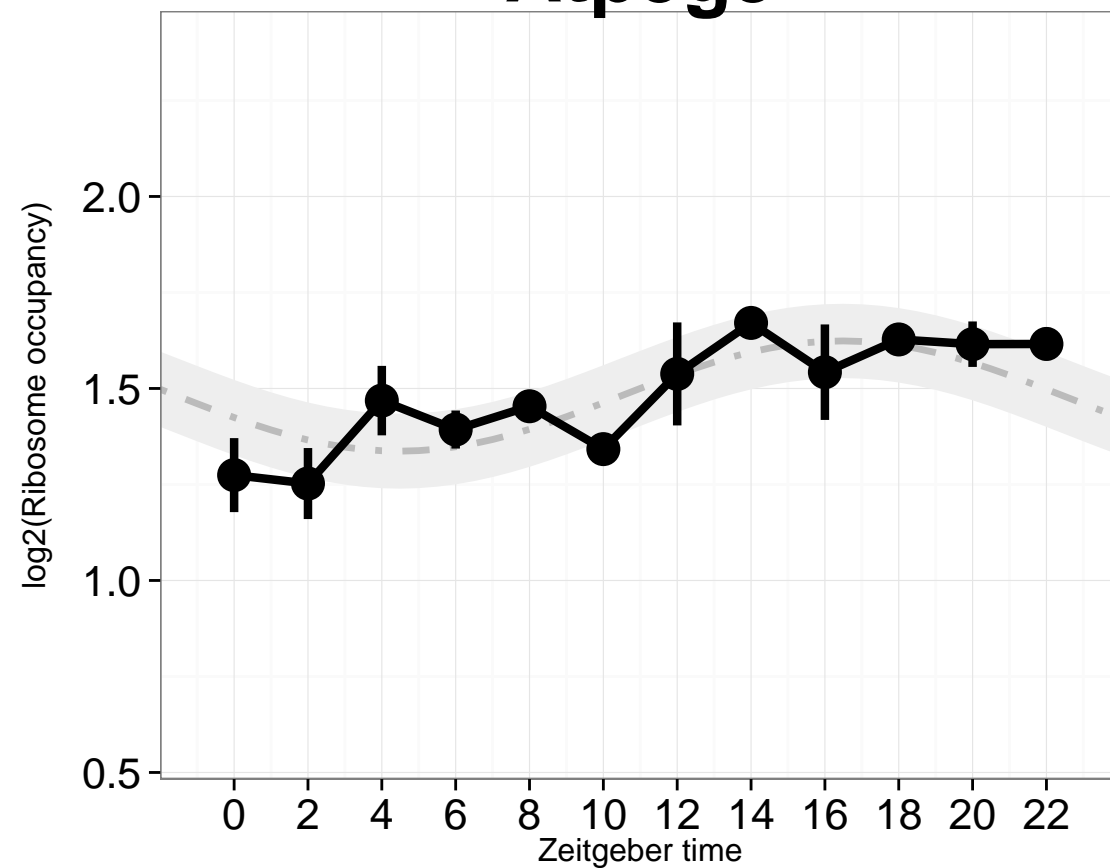

Supplement: Supplementary file 12157 [file 1]

# Col6a6

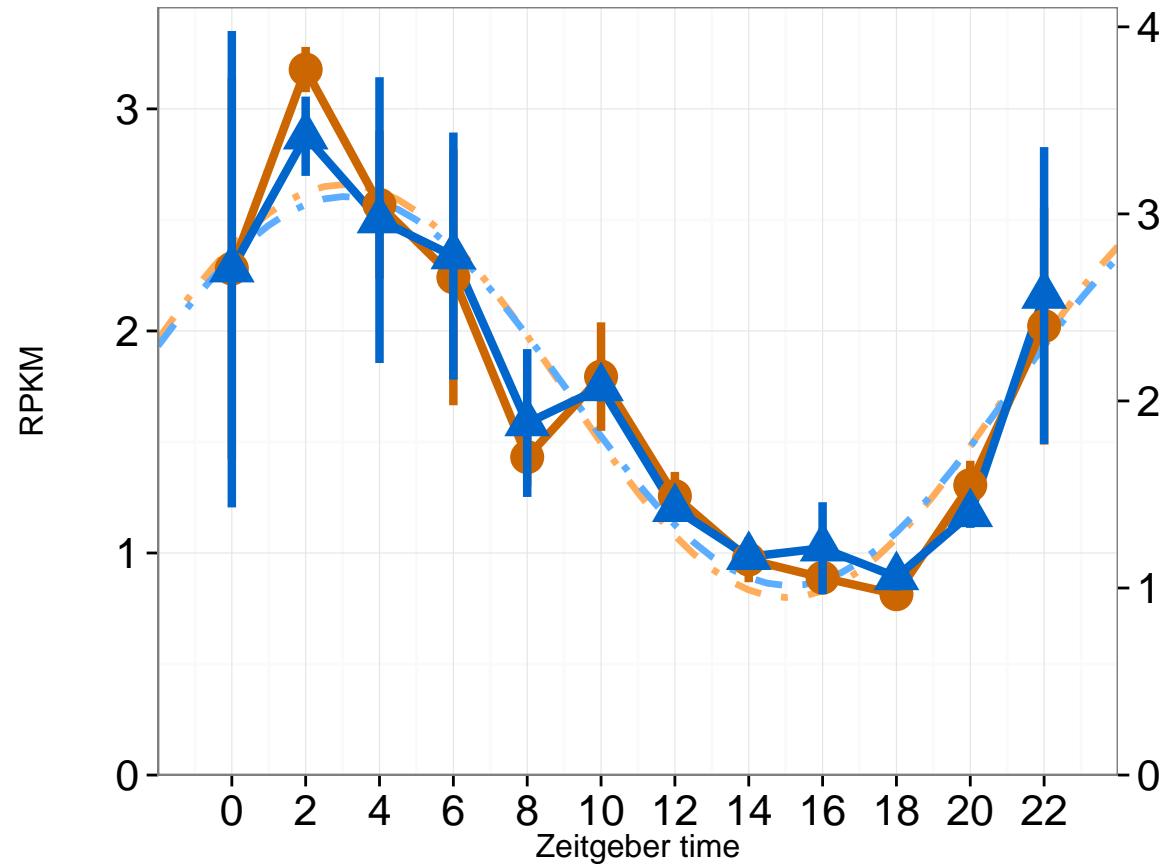

# Col6a6

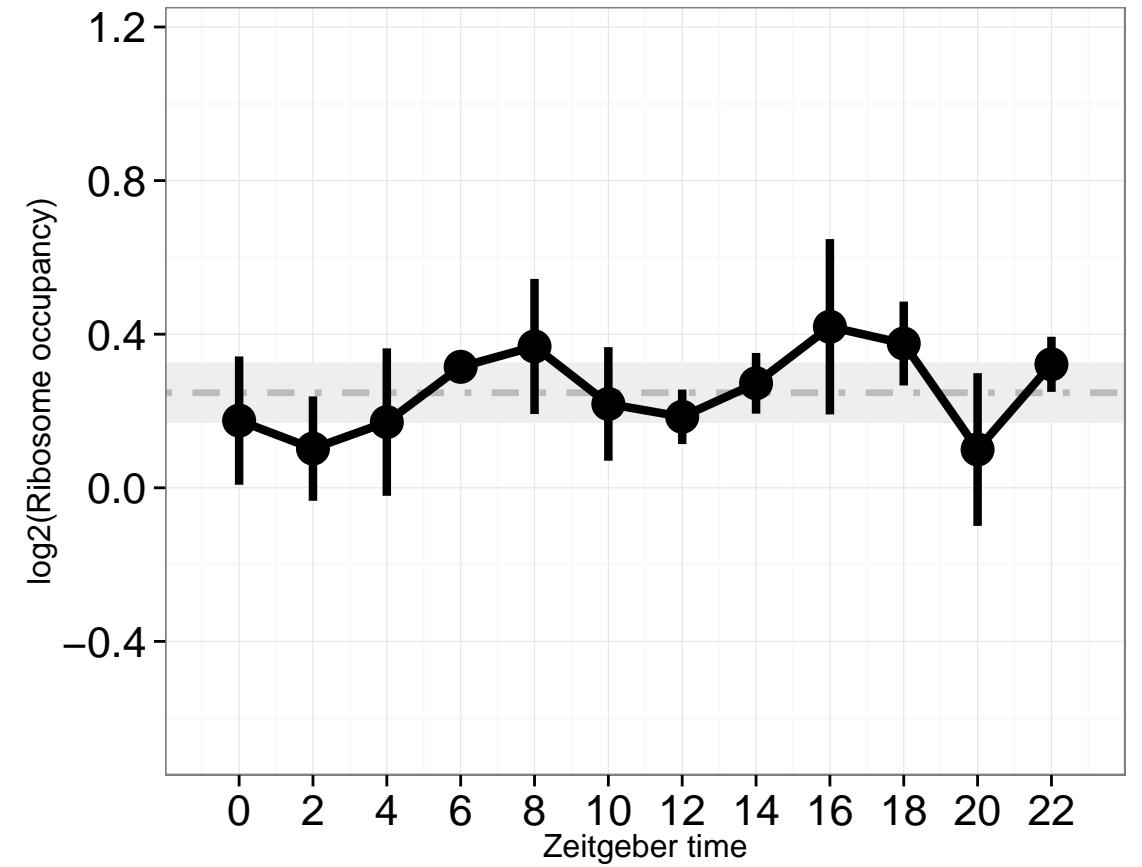

Supplement: Supplementary file 12158 [file 1]

## Aida

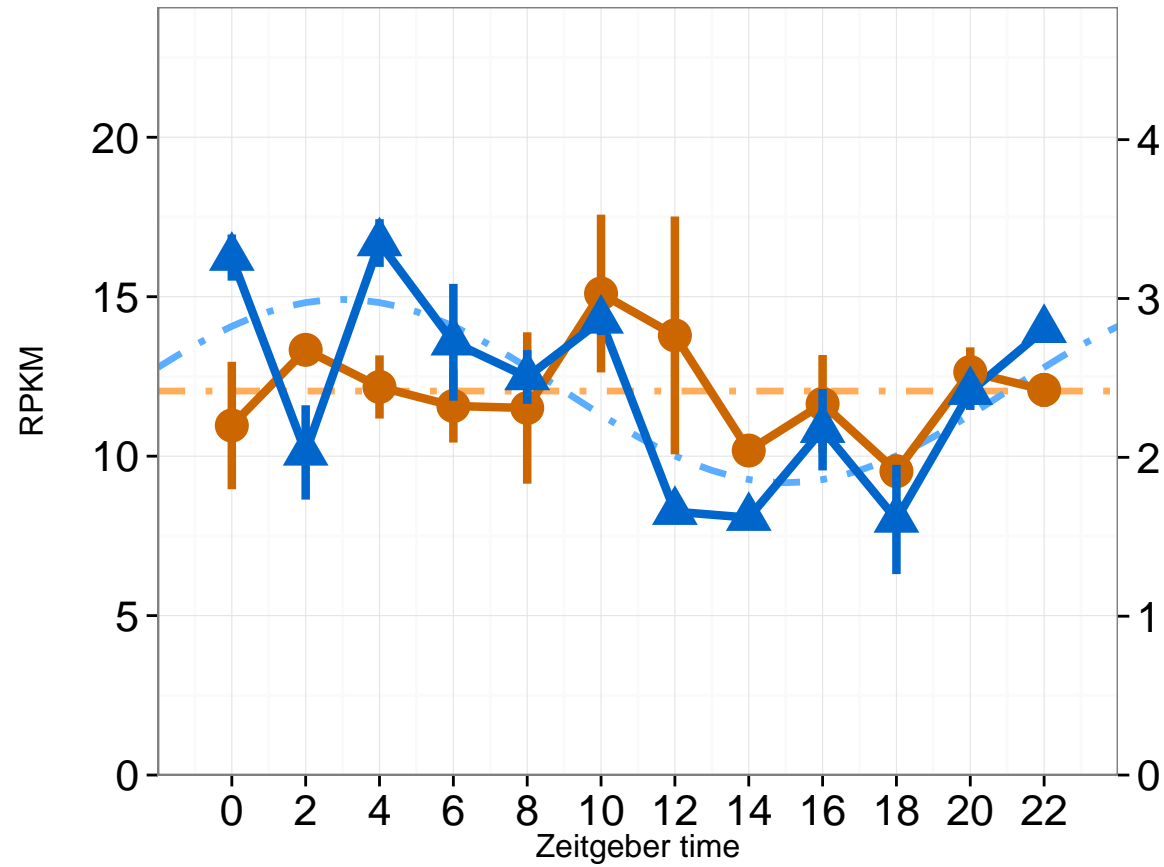

## Aida

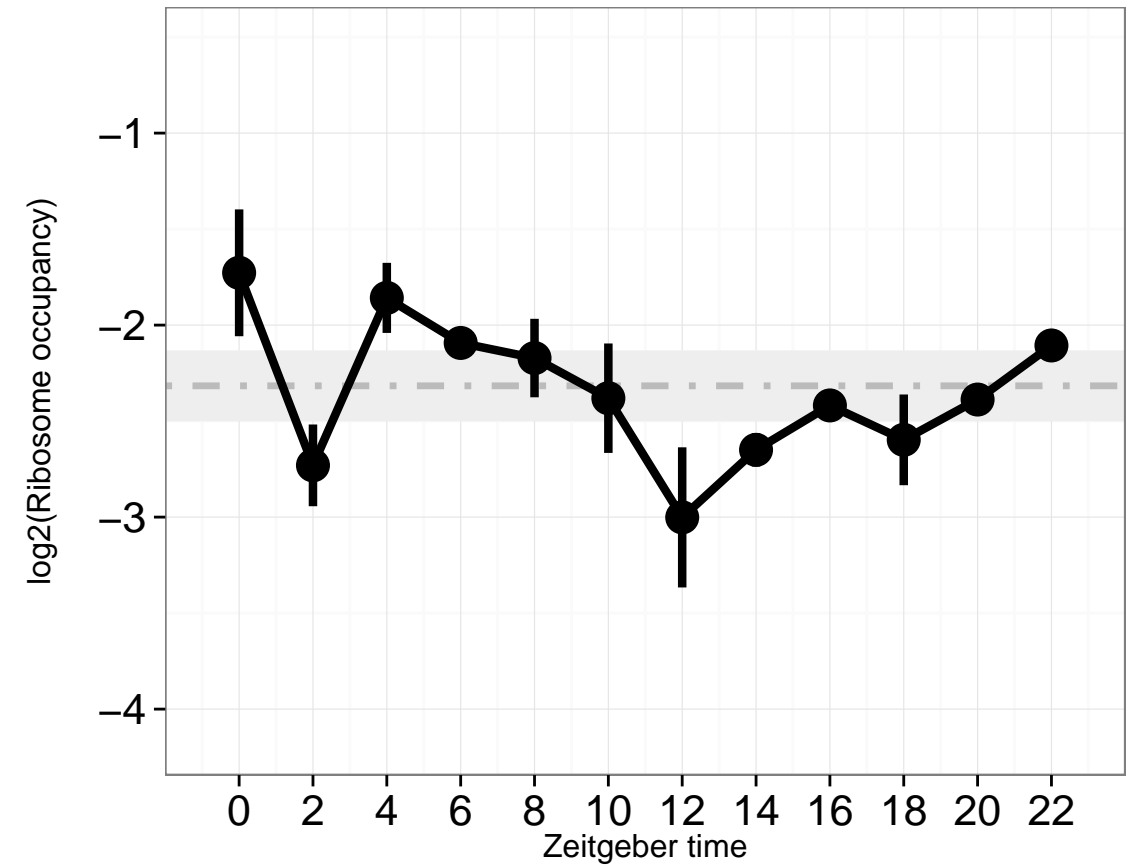

Supplement: Supplementary file 12159 [file 1]

# Ttr

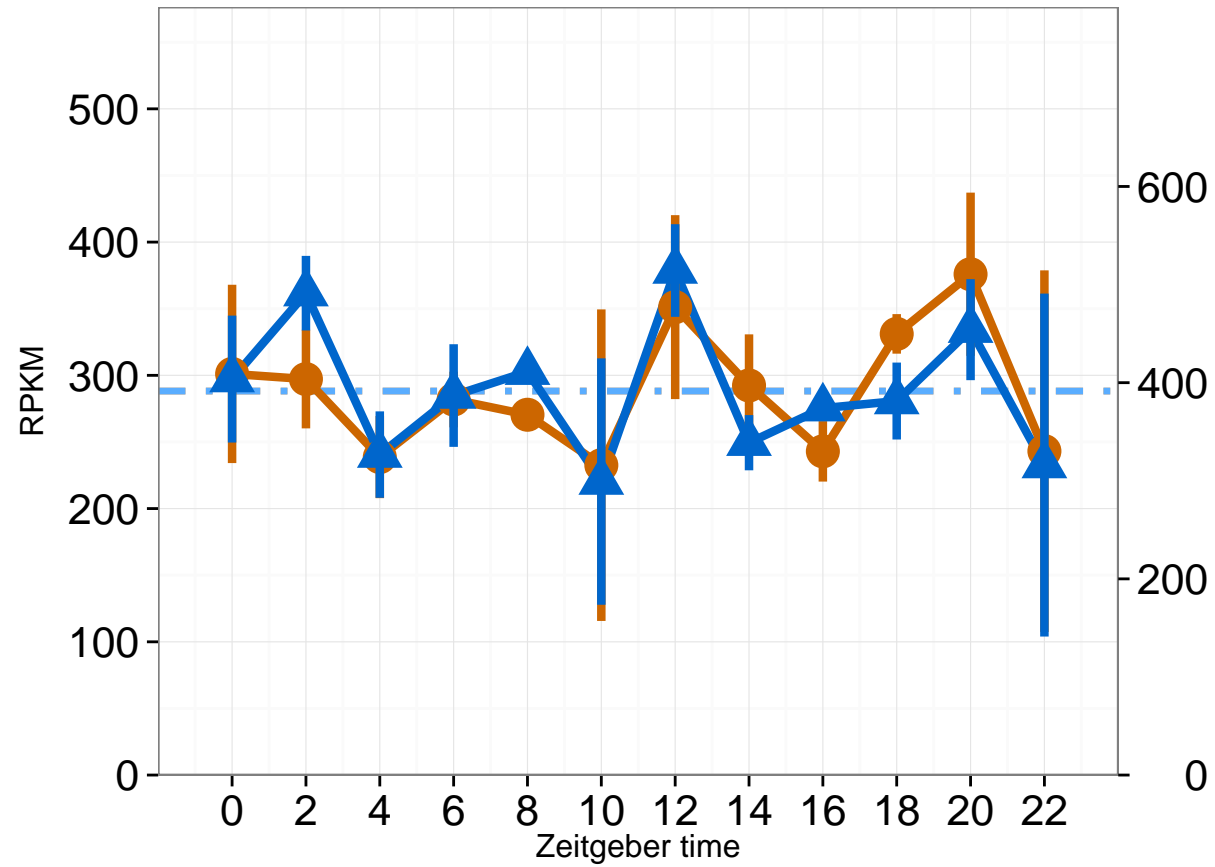

# Ttr

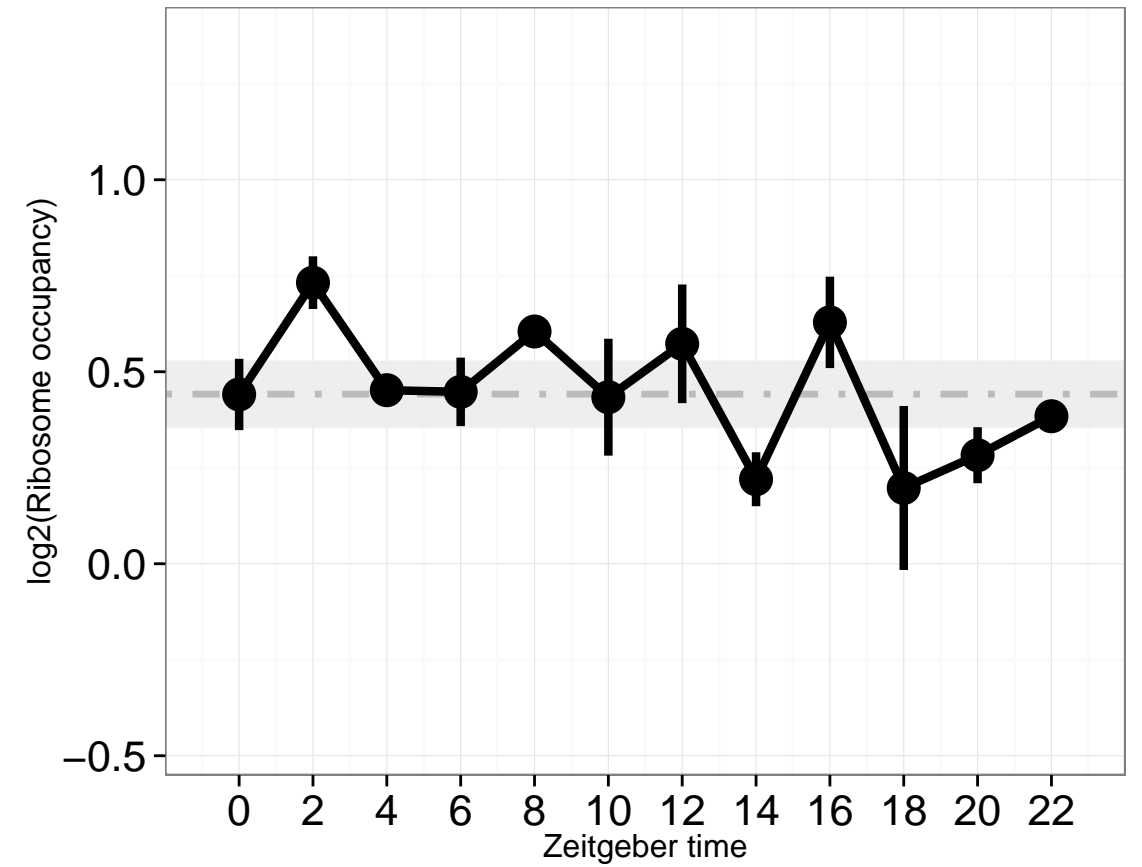

Supplement: Supplementary file 12160 [file 1]

## Slc1a3

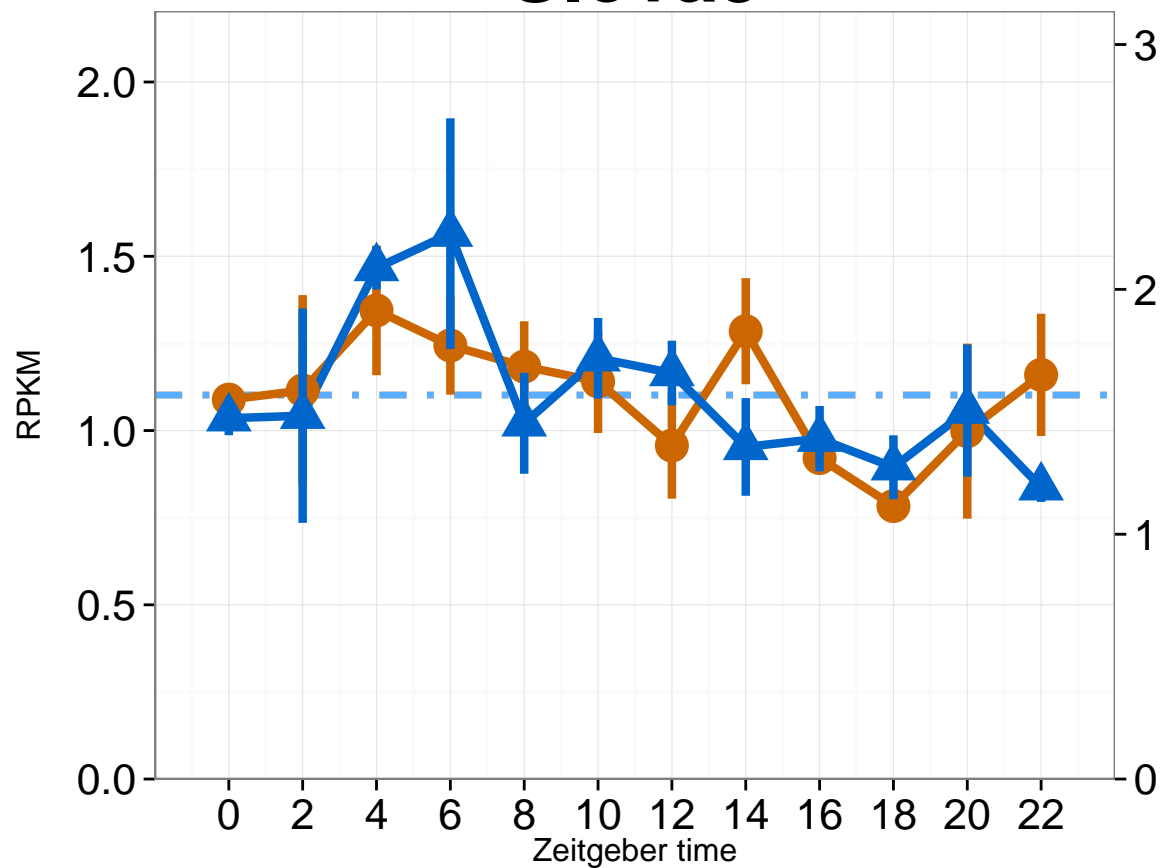

## Slc1a3

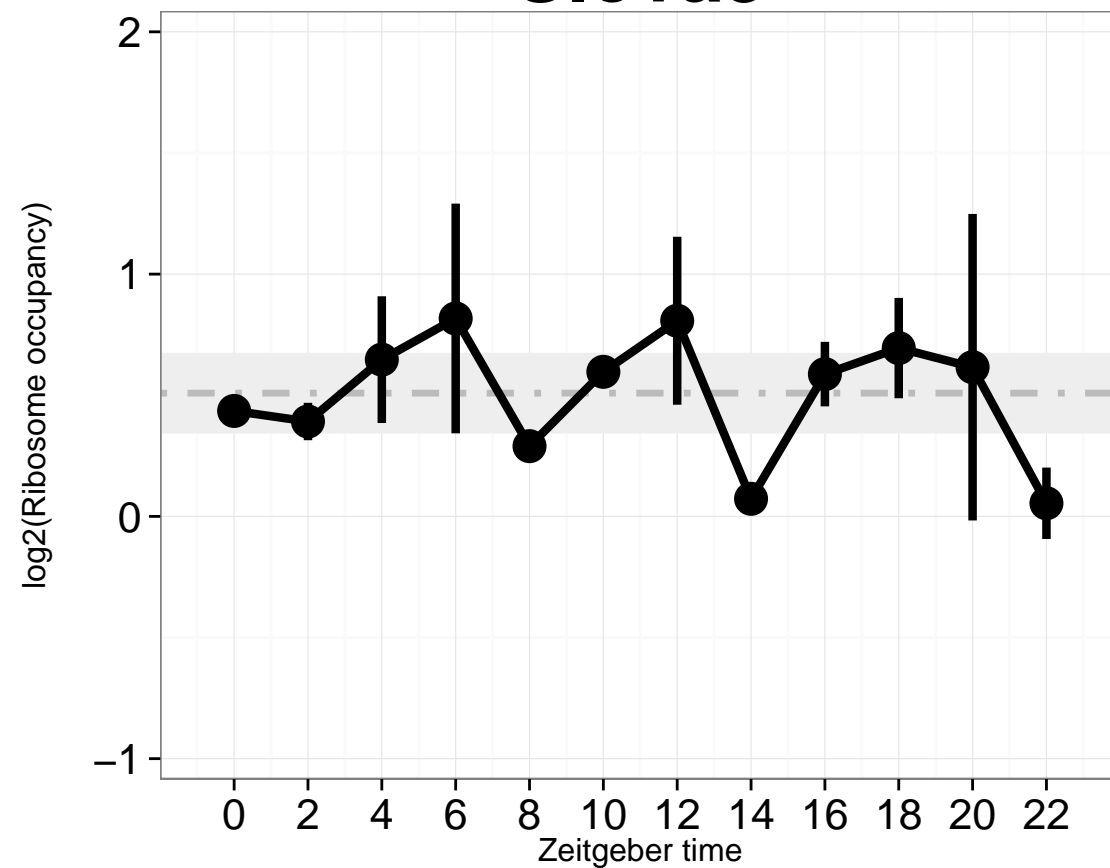

Supplement: Supplementary file 12161 [file 1]

## Golga1

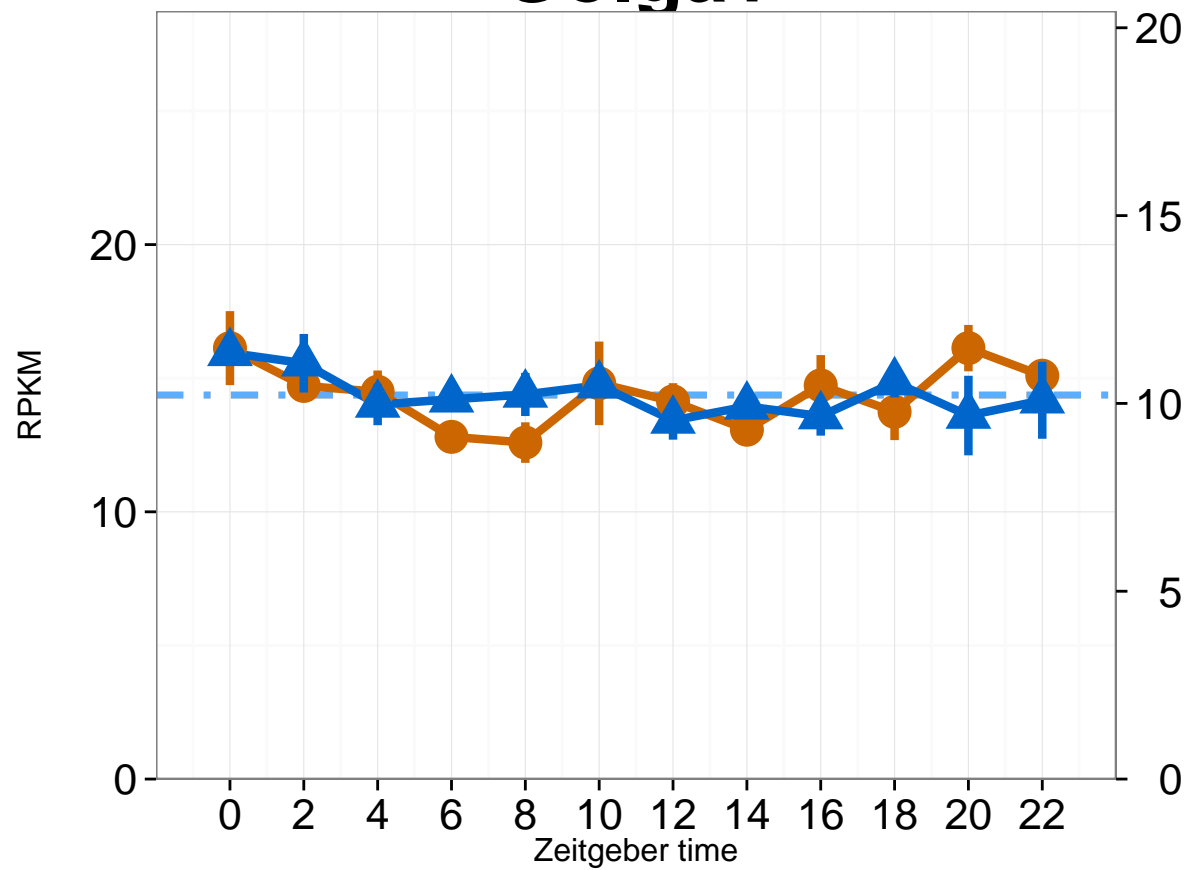

## Golga1

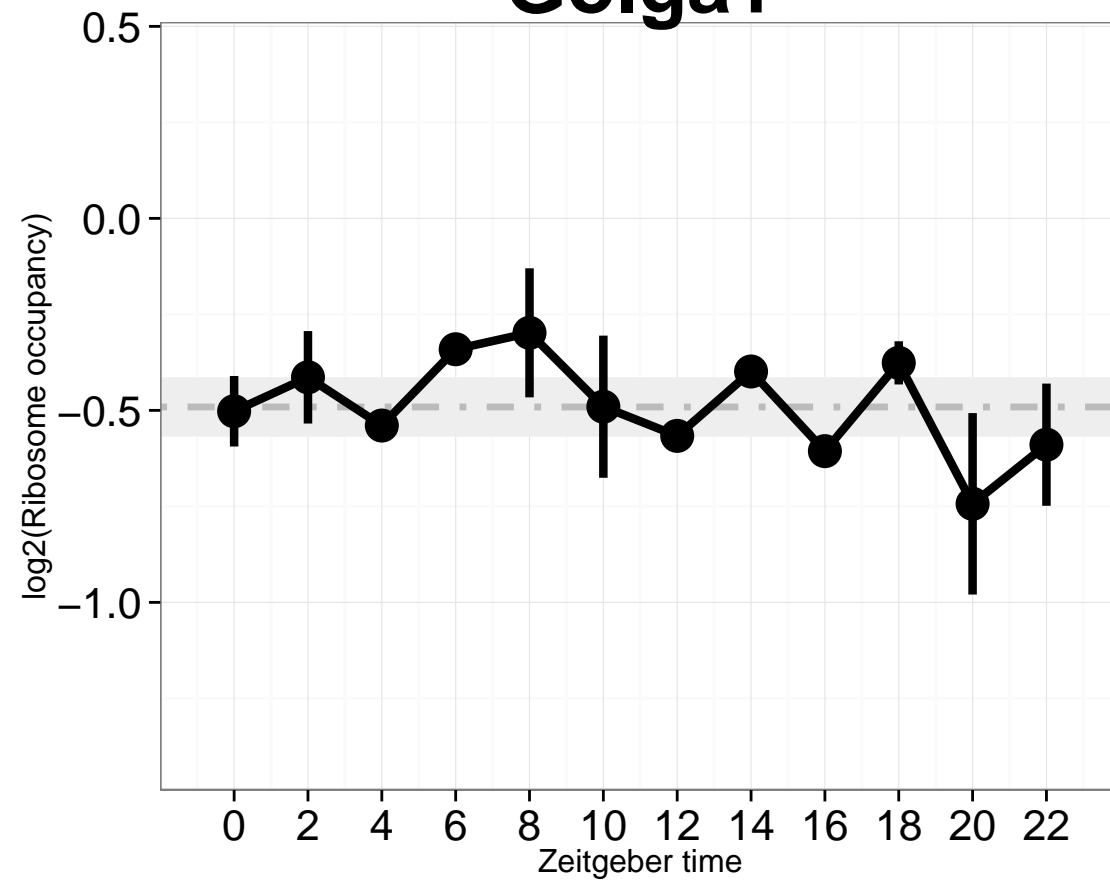

Supplement: Supplementary file 12162 [file 1]

## Decr2

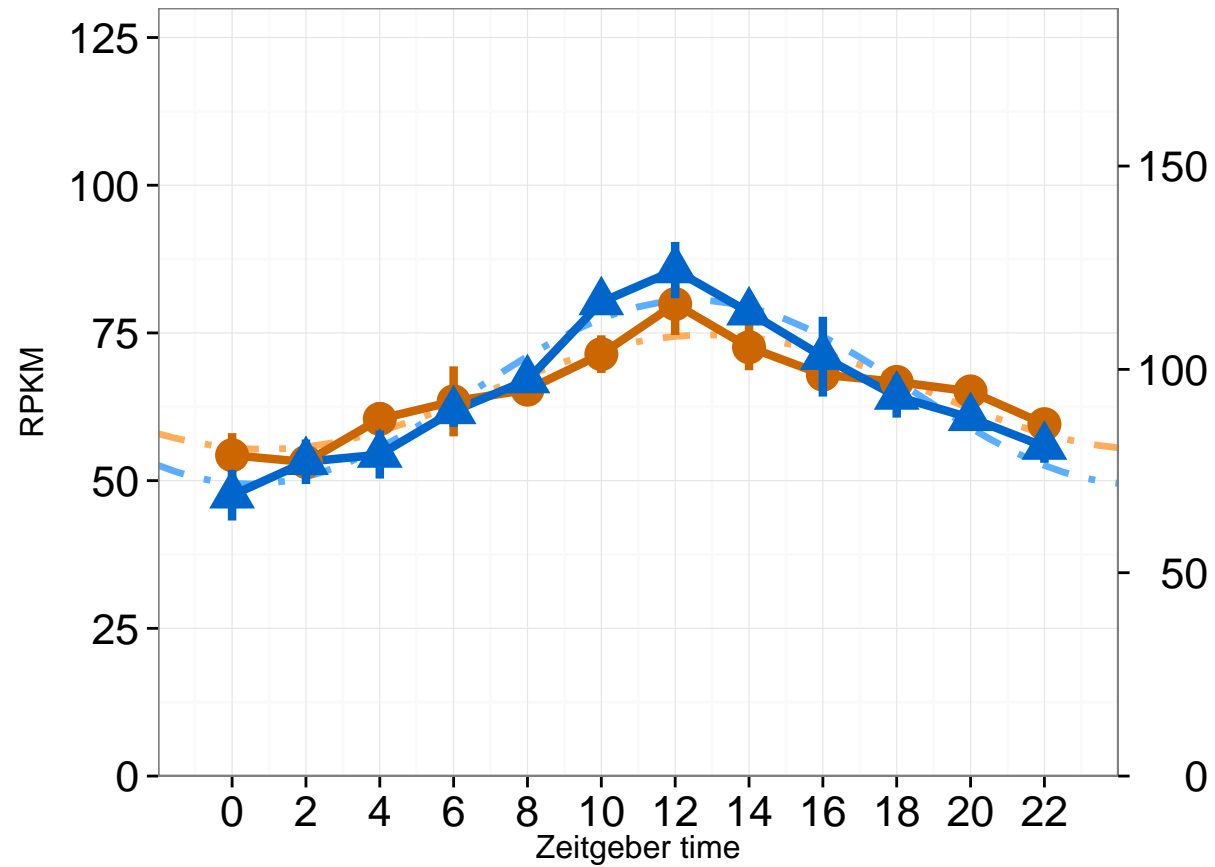

## Decr2

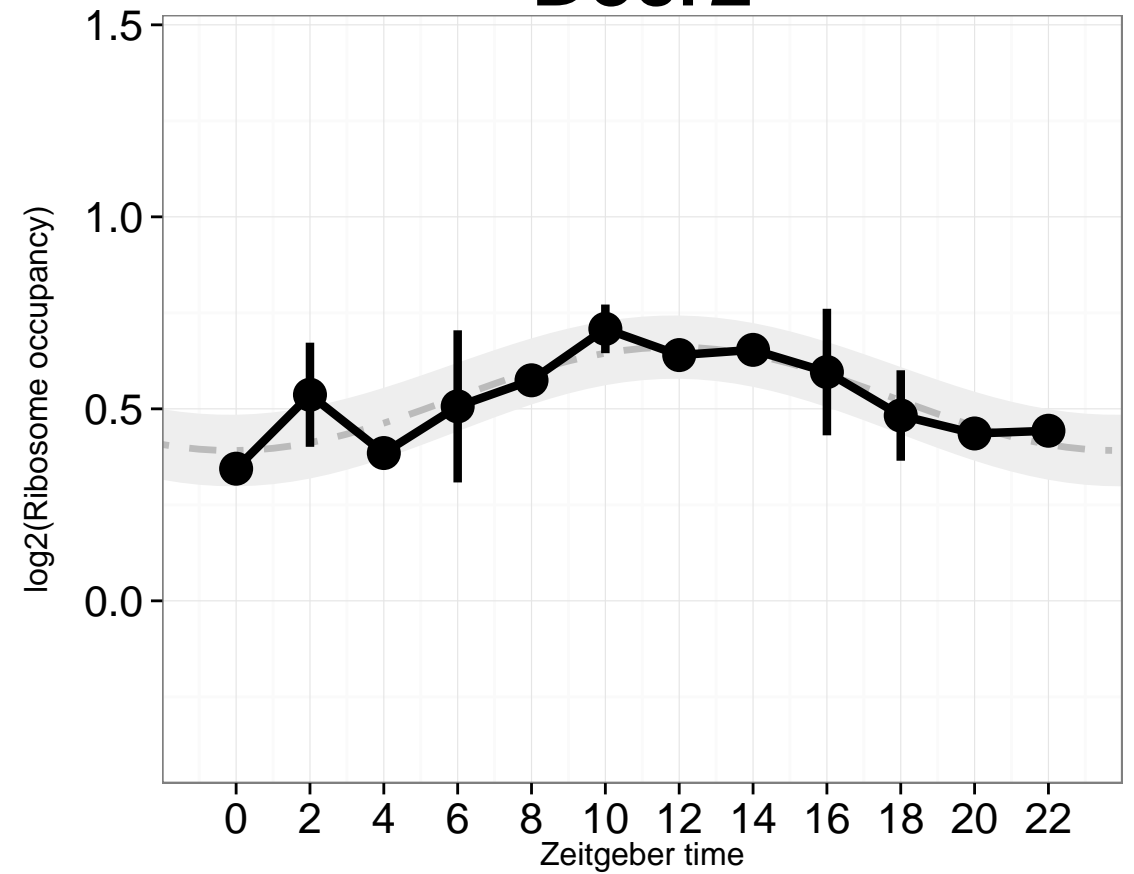

Supplement: Supplementary file 12163 [file 1]

# Zfp593

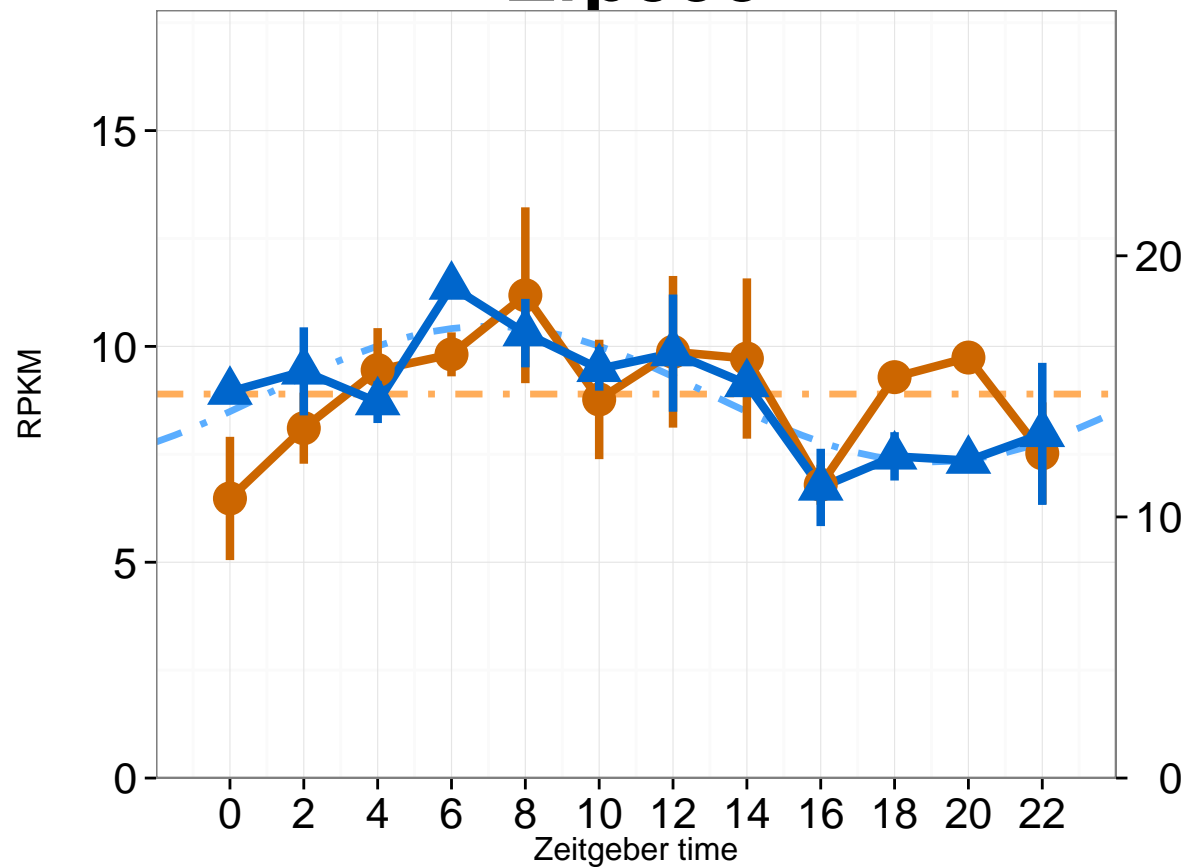

# Zfp593

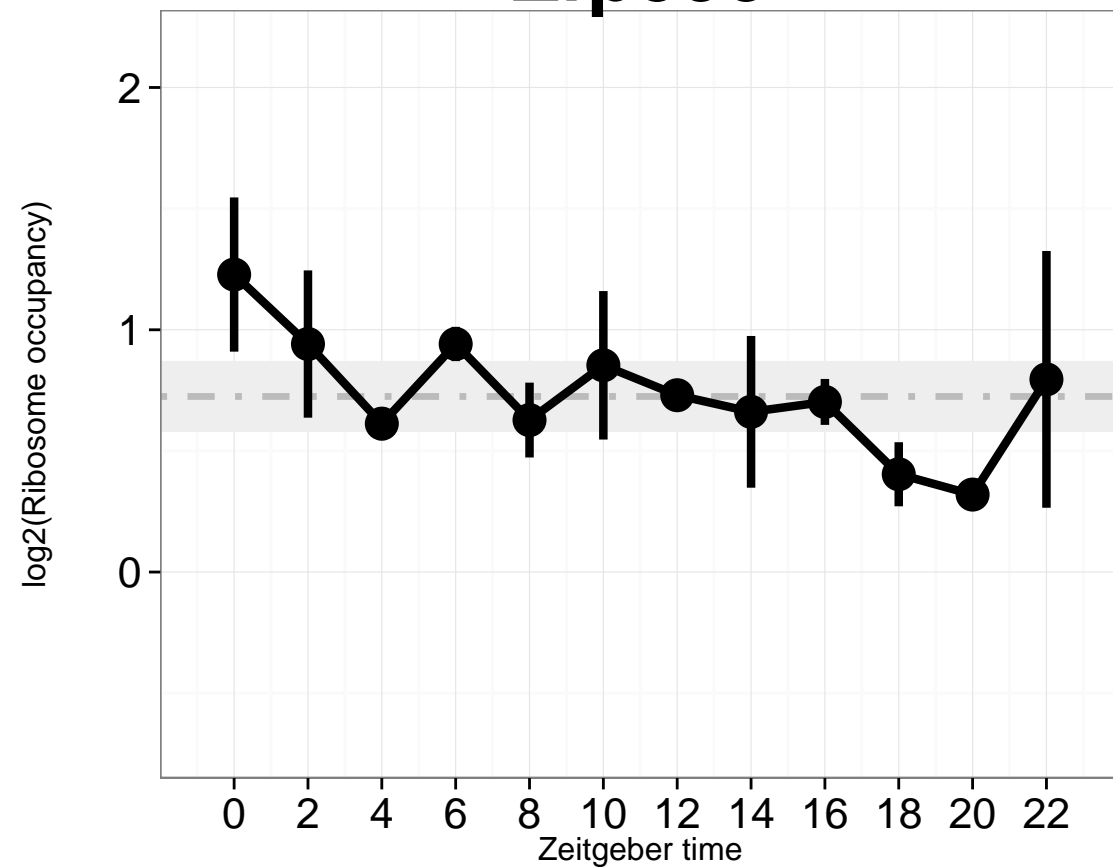

Supplement: Supplementary file 12164 [file 1]

## Dynlt3

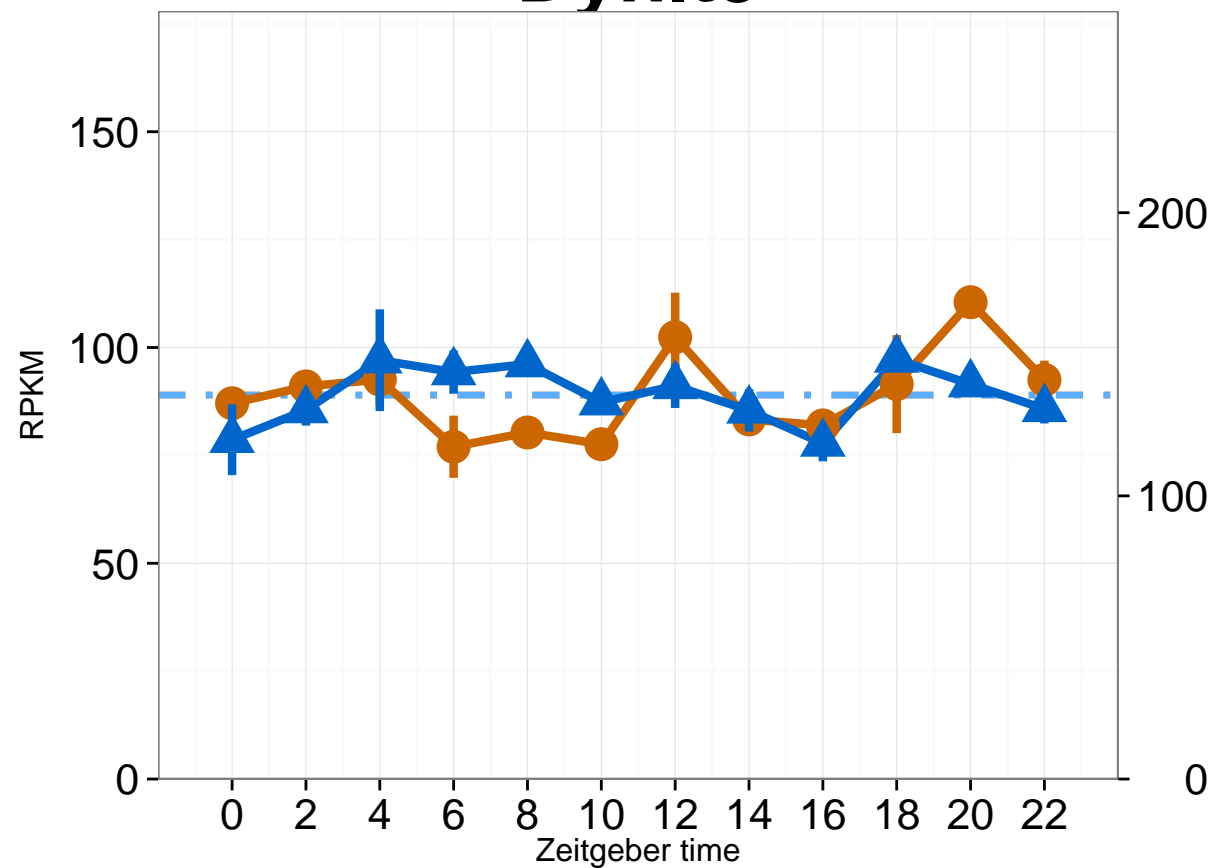

## Dynlt3

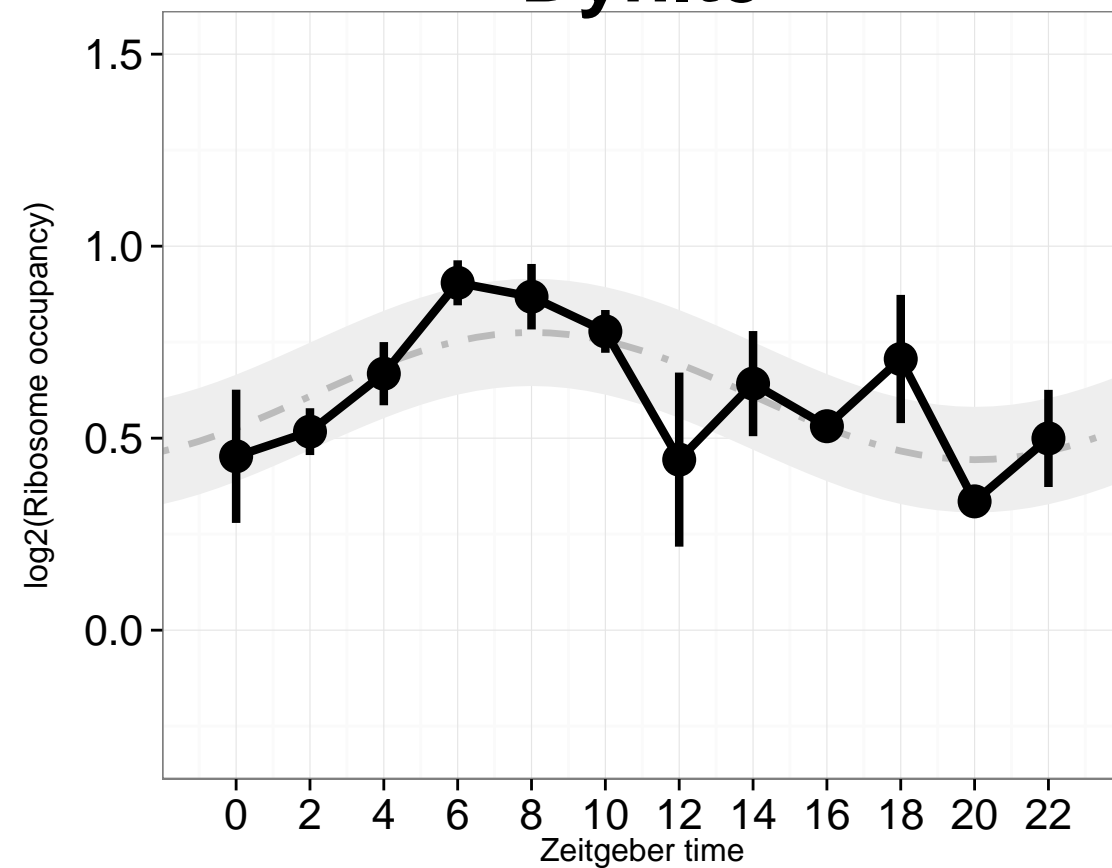

Supplement: Supplementary file 12165 [file 1]

# Prrg2

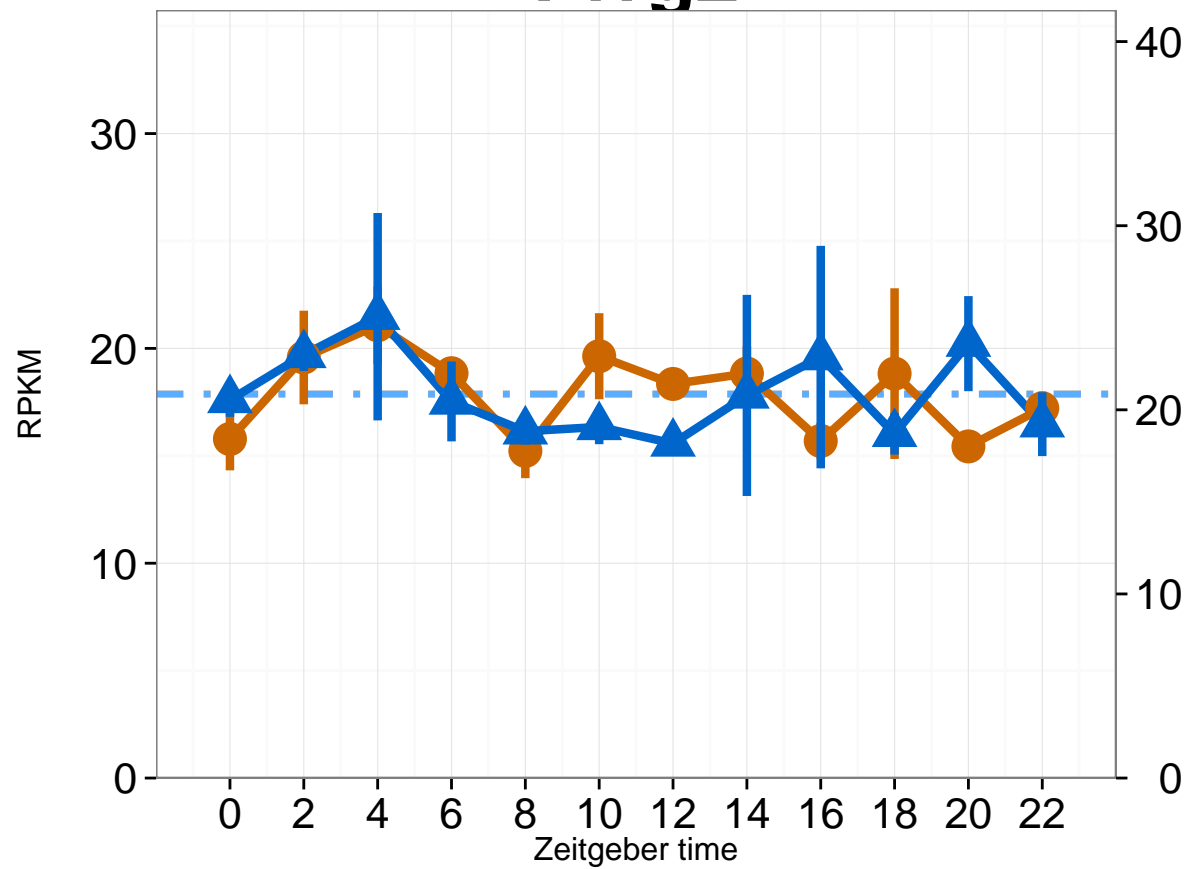

# Prrg2

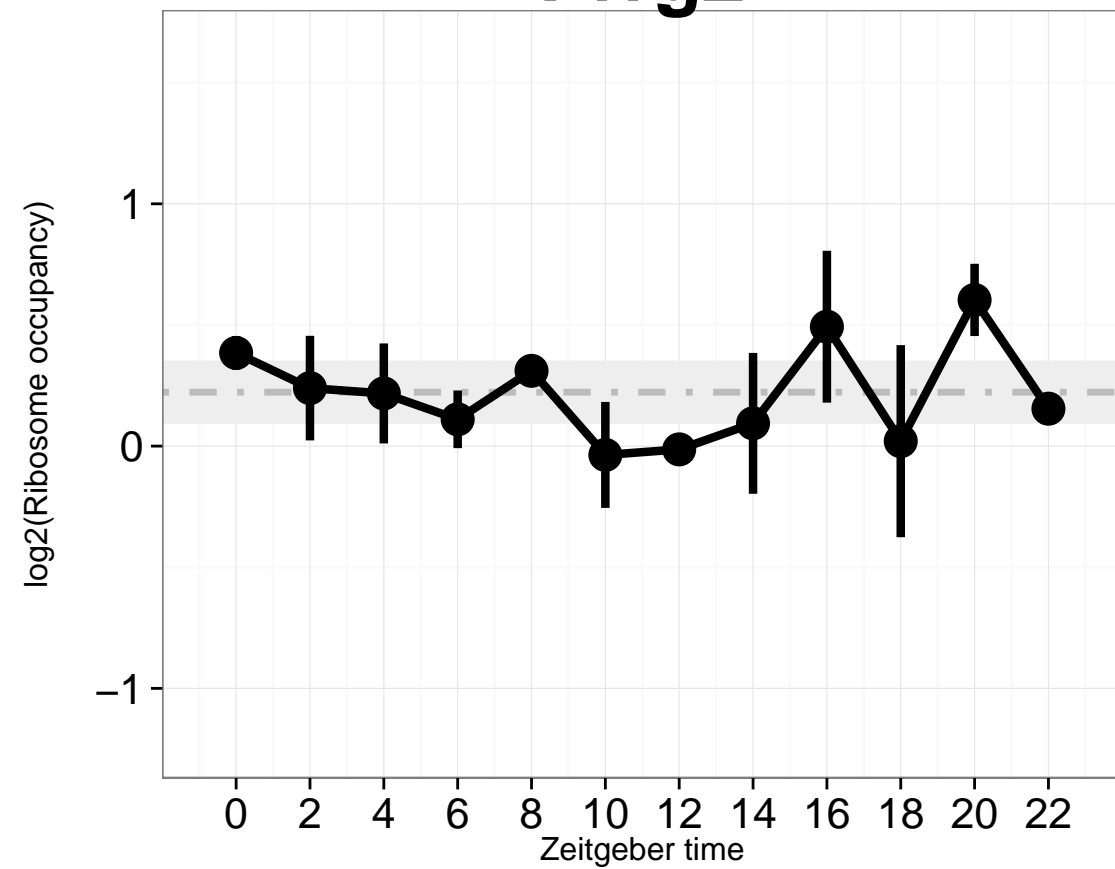

Supplement: Supplementary file 12166 [file 1]

## Meis2

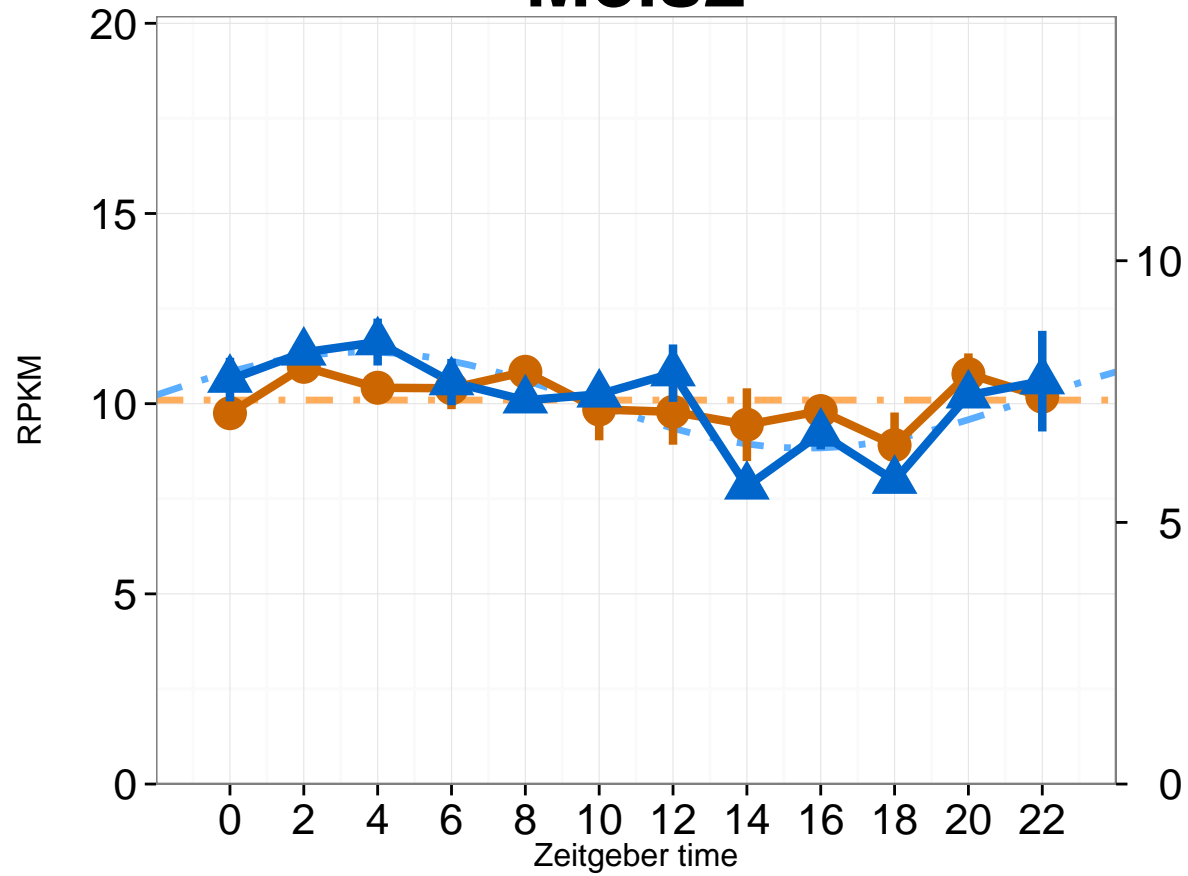

## Meis2

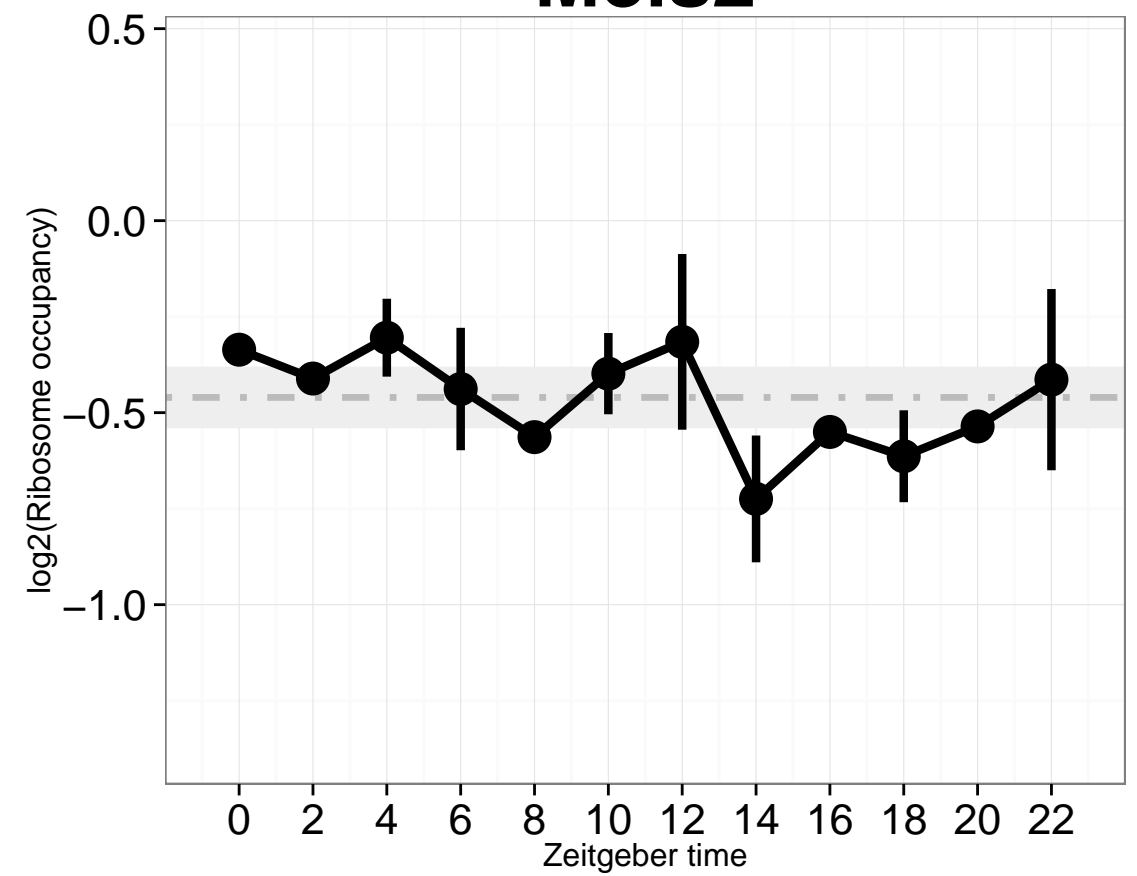

Supplement: Supplementary file 12167 [file 1]

## Klhdc9

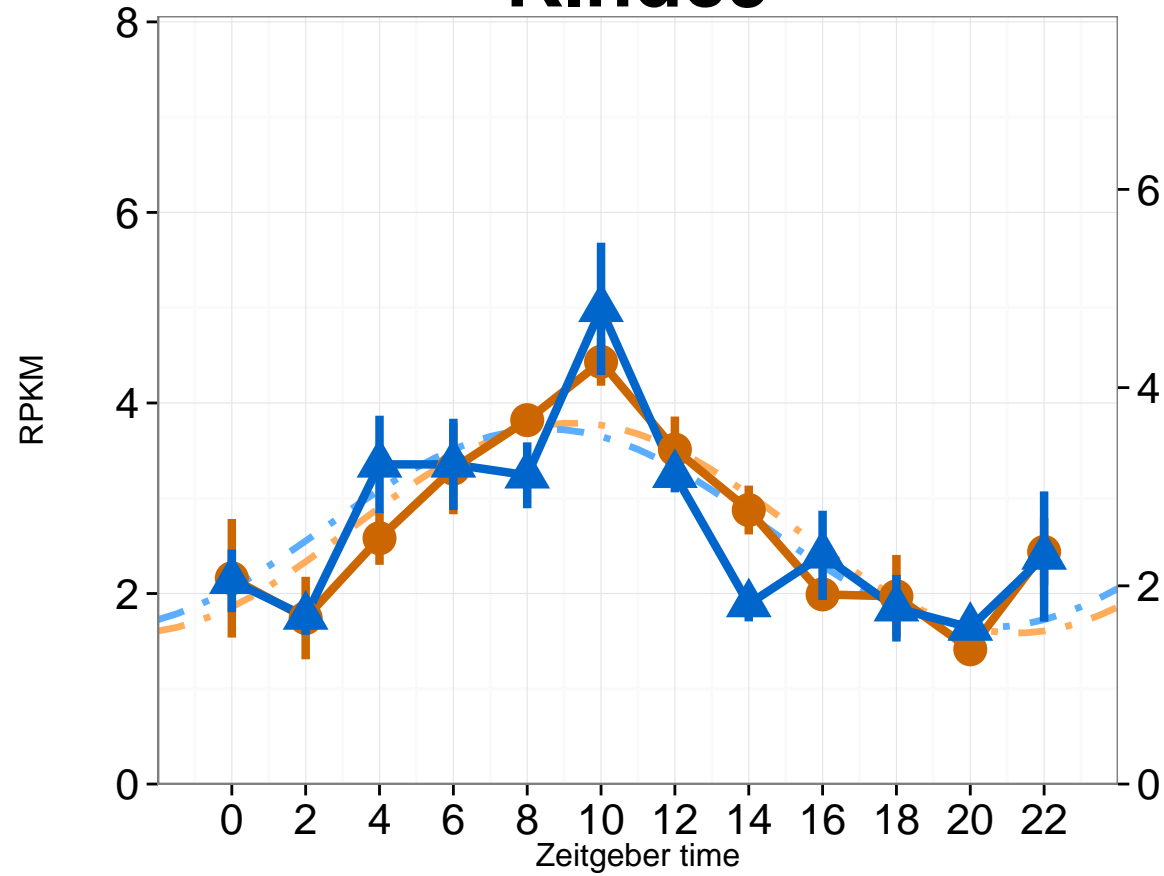

## Klhdc9

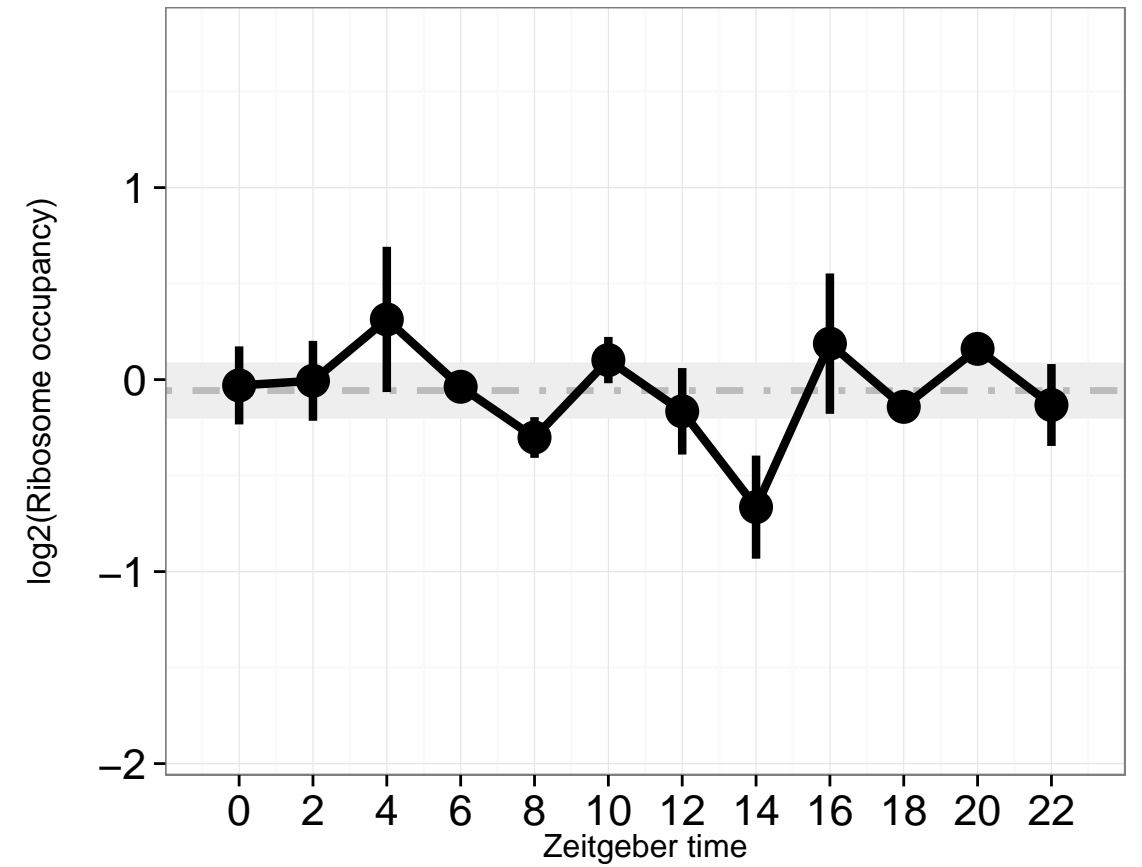

Supplement: Supplementary file 12168 [file 1]

## Epdr1

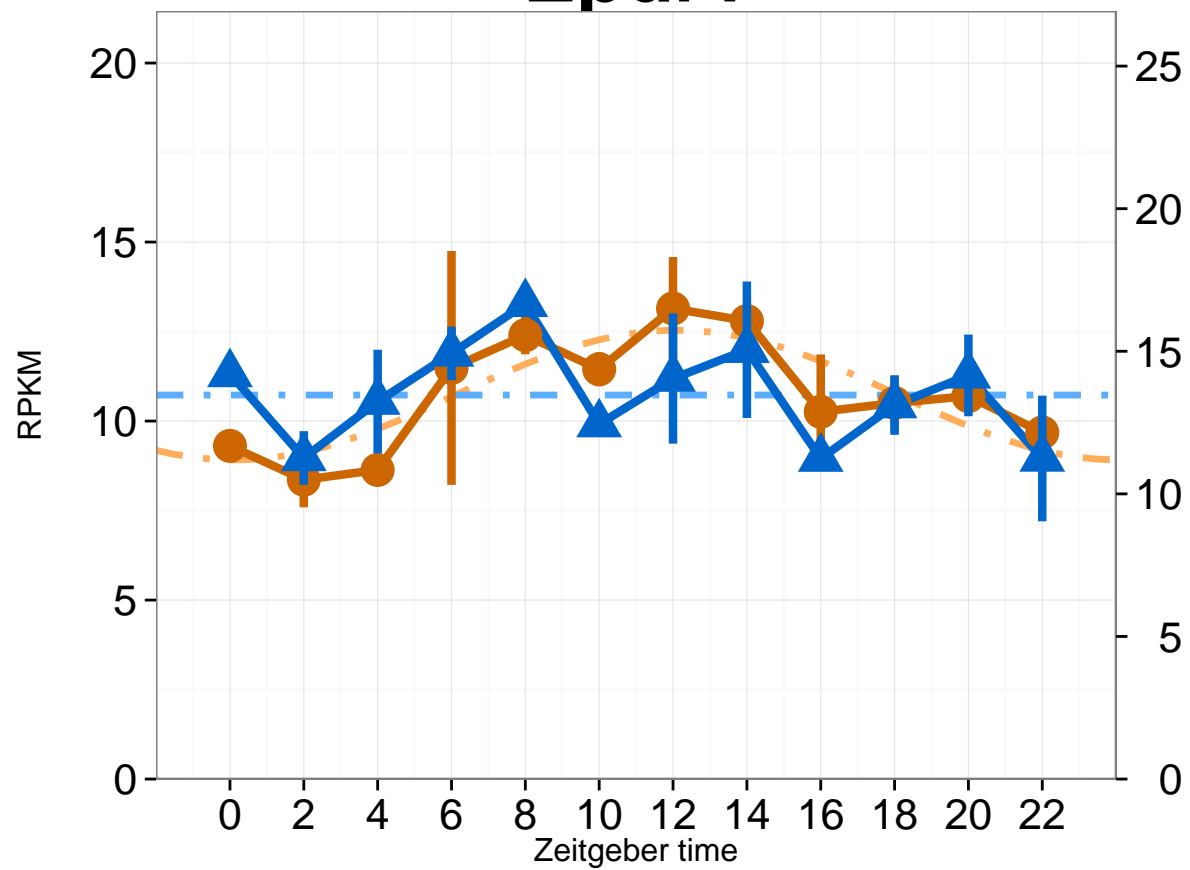

## Epdr1

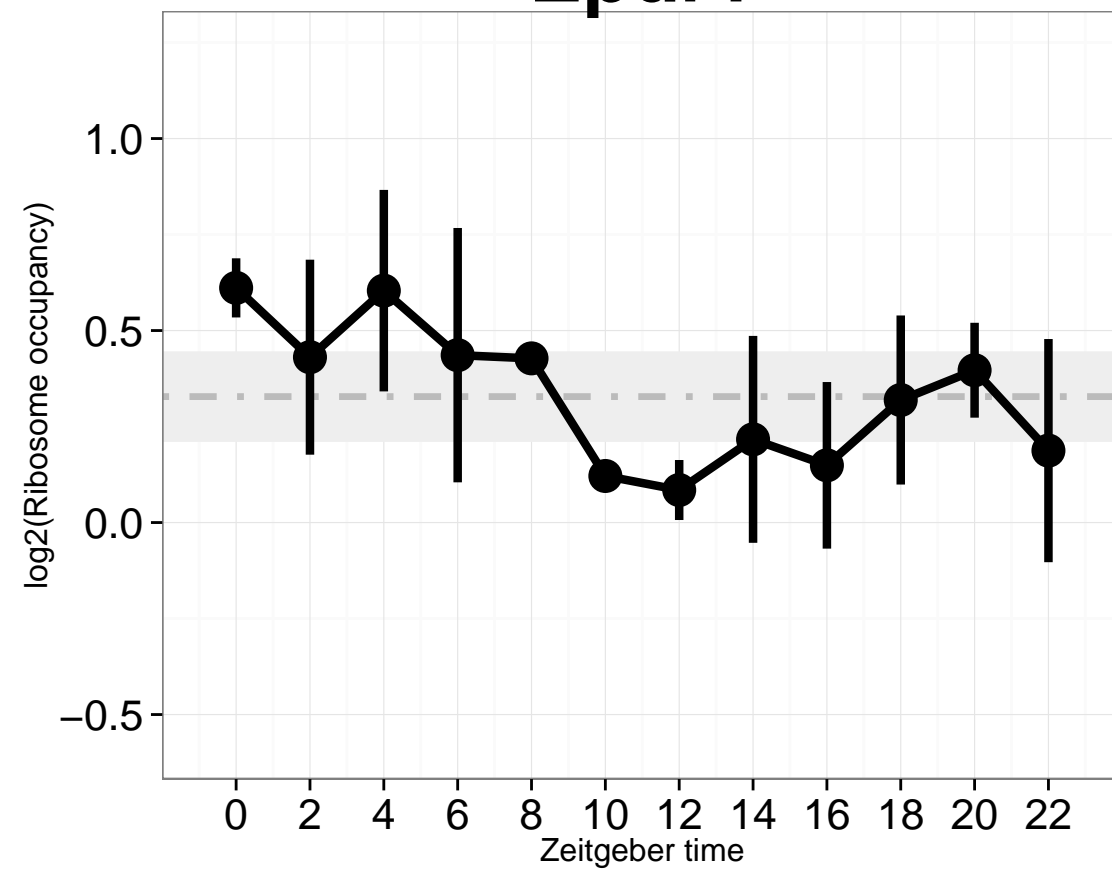

Supplement: Supplementary file 12169 [file 1]

## Gpkow

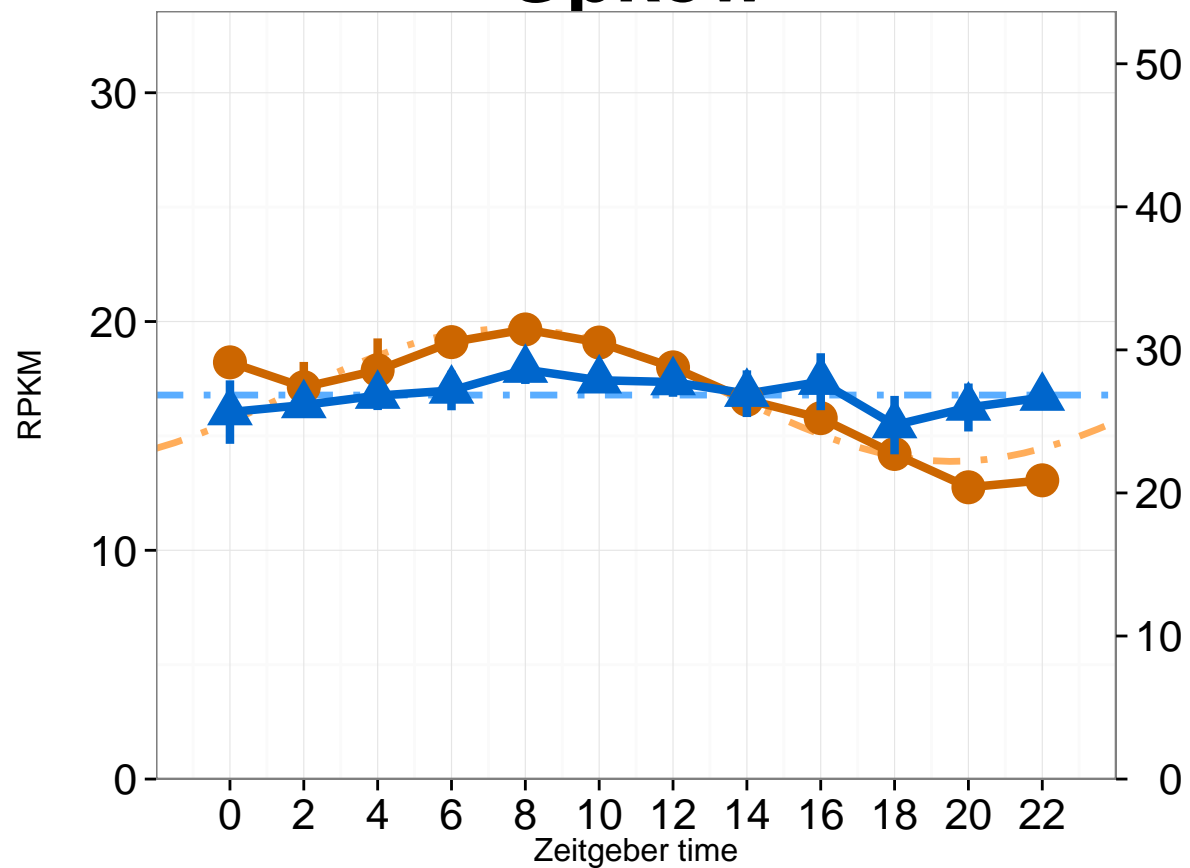

## Gpkow

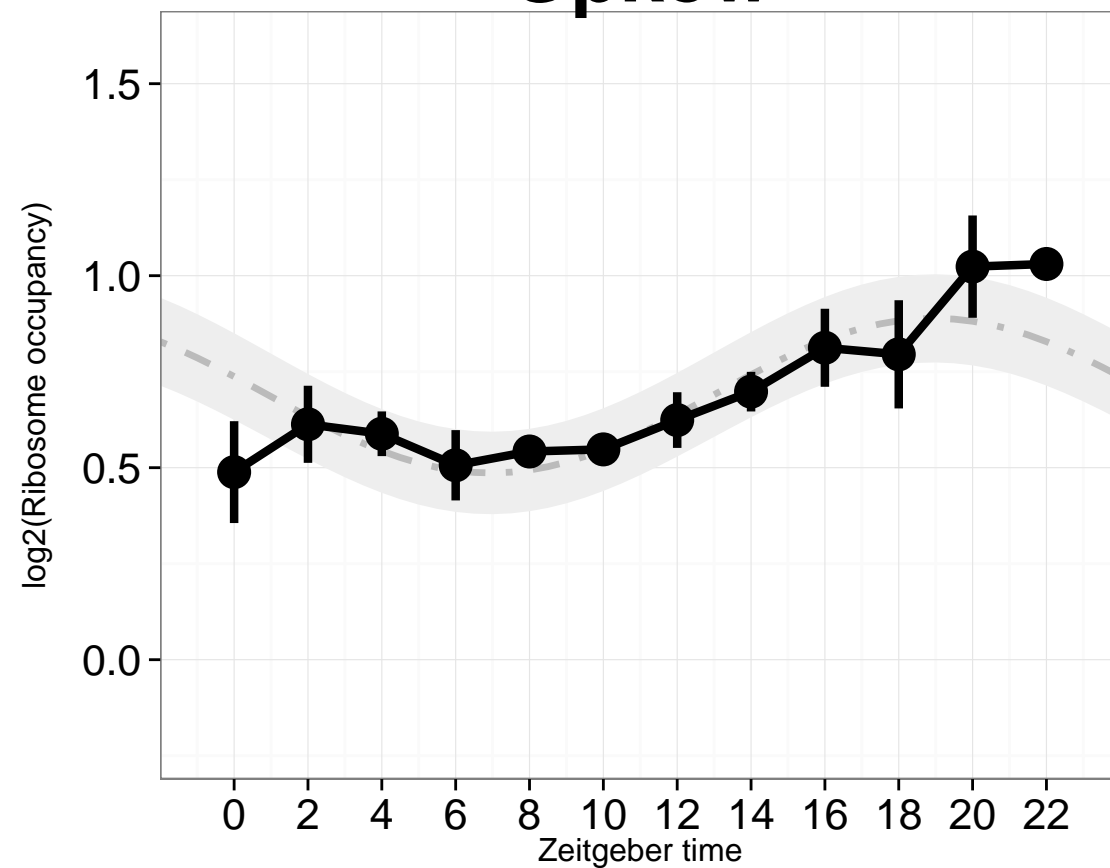

Supplement: Supplementary file 12170 [file 1]

# I7Rn6

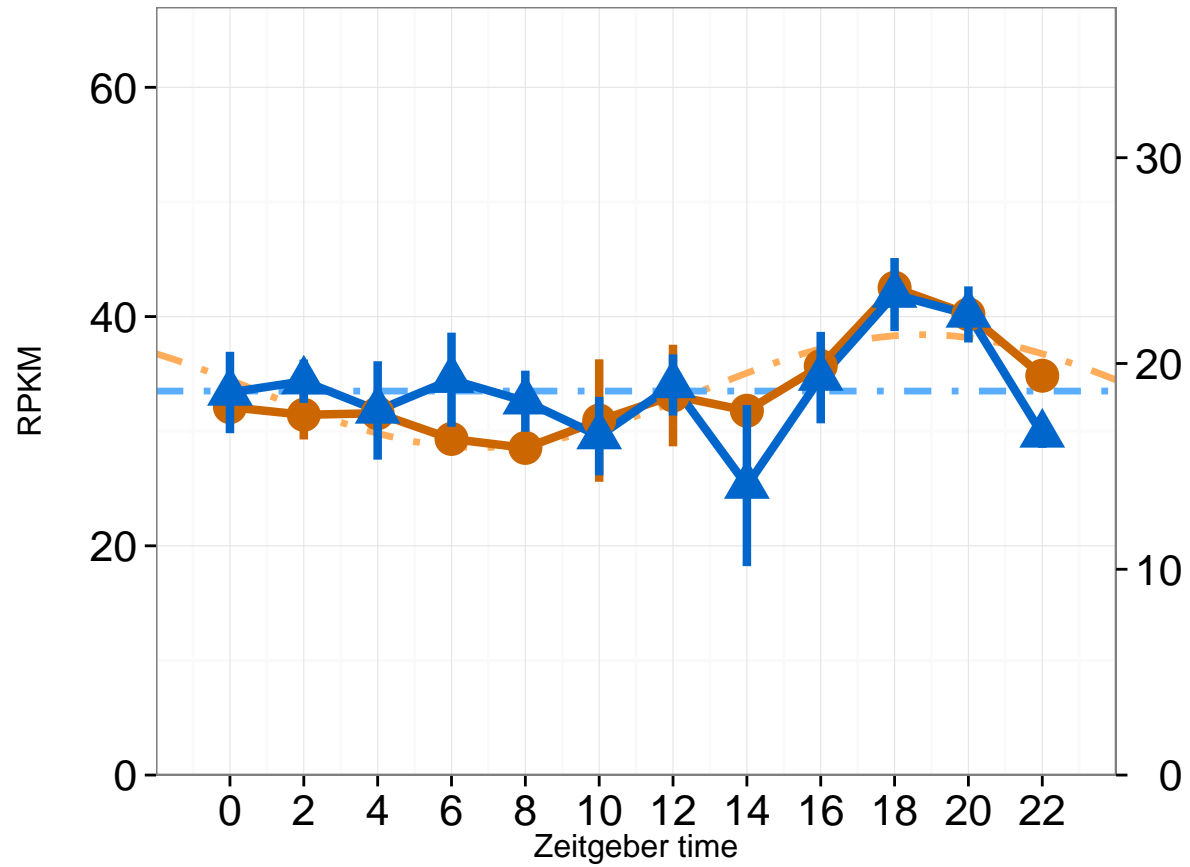

# I7Rn6

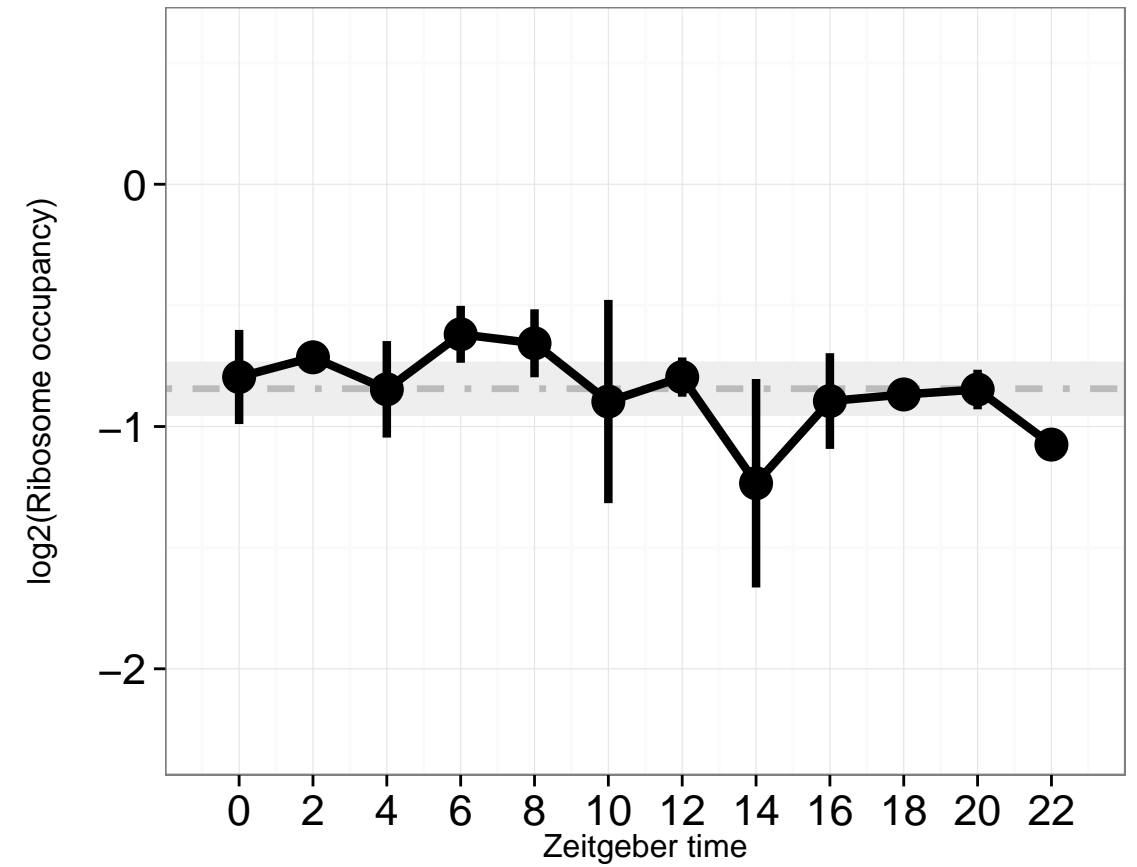

Supplement: Supplementary file 12171 [file 1]

# Zfp426

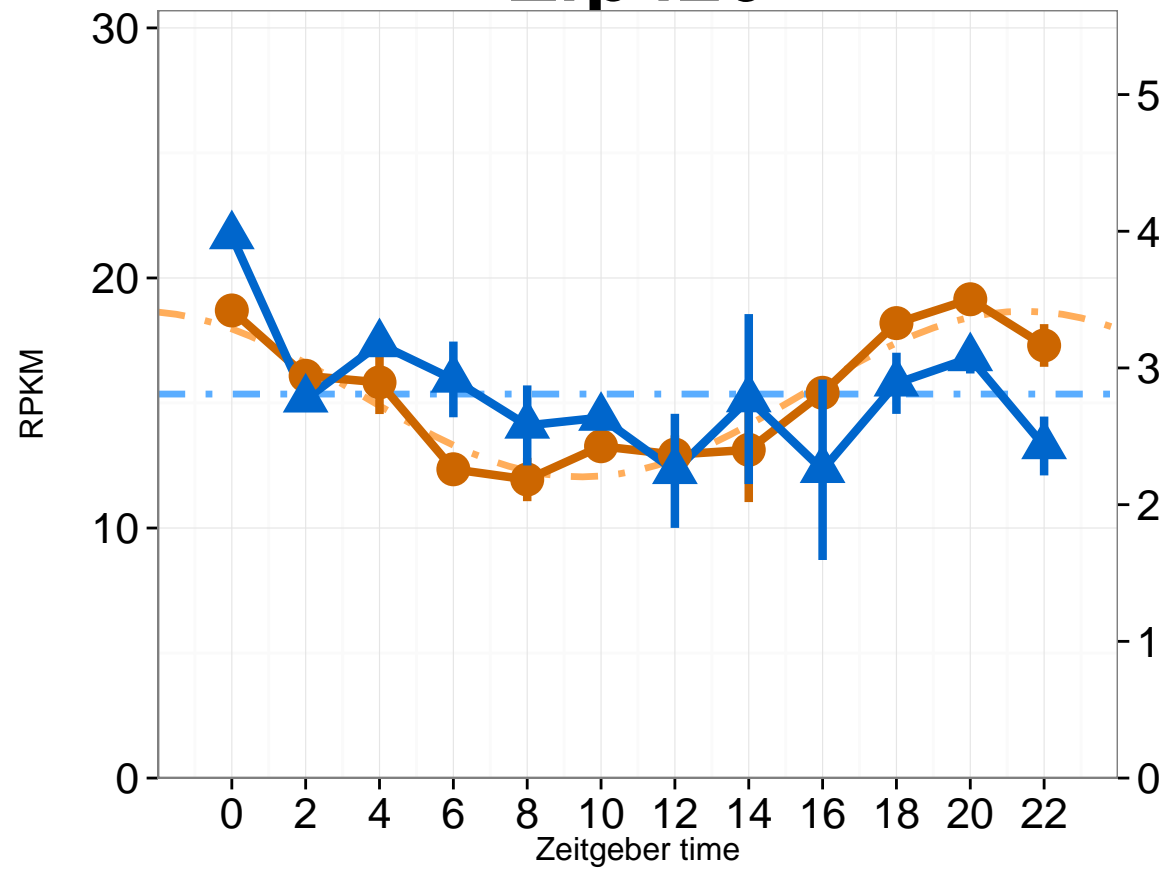

# Zfp426

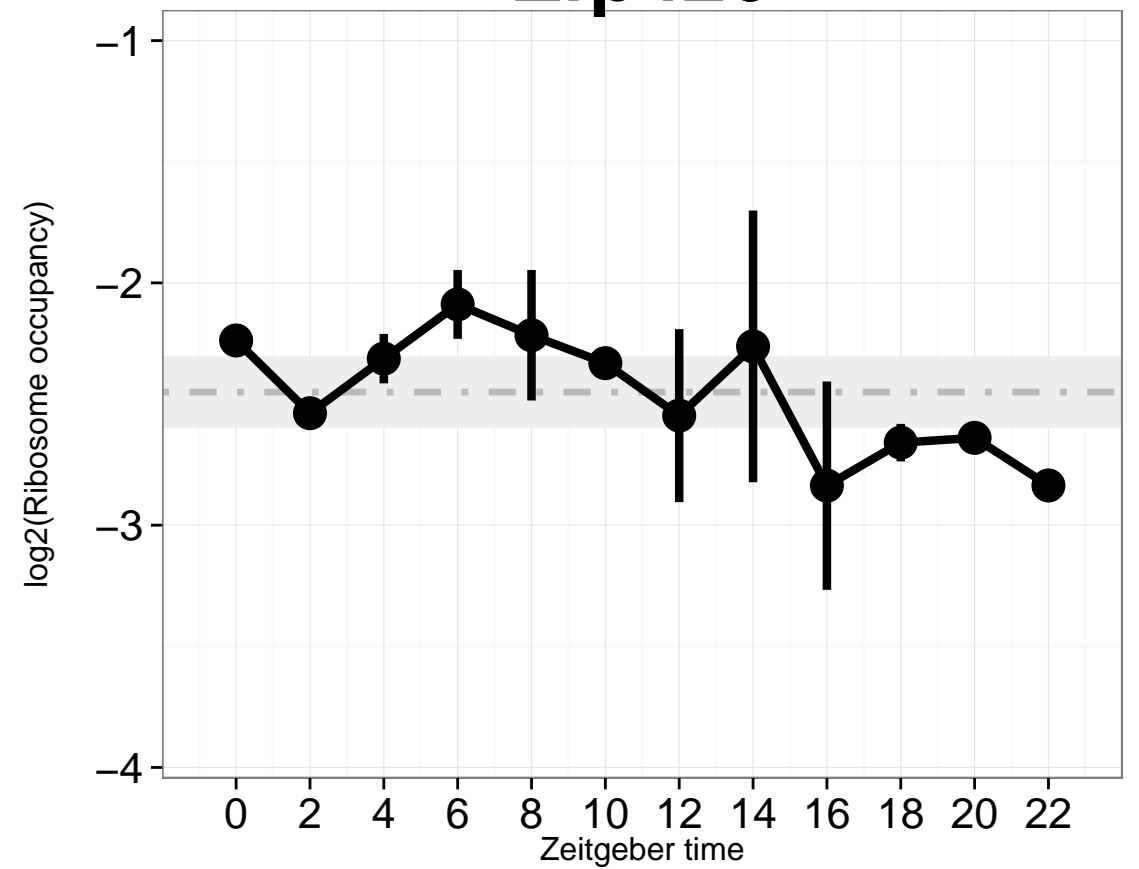

Supplement: Supplementary file 12172 [file 1]

## Etv6

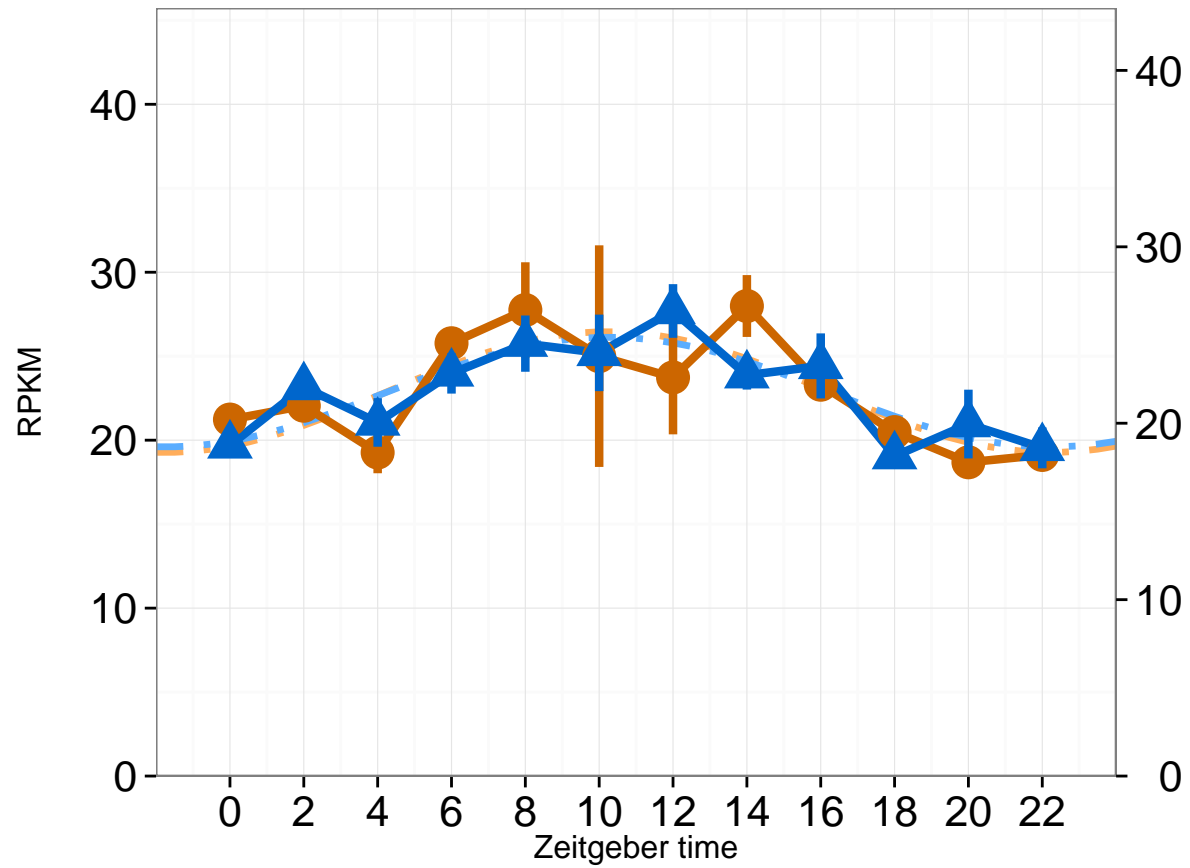

## Etv6

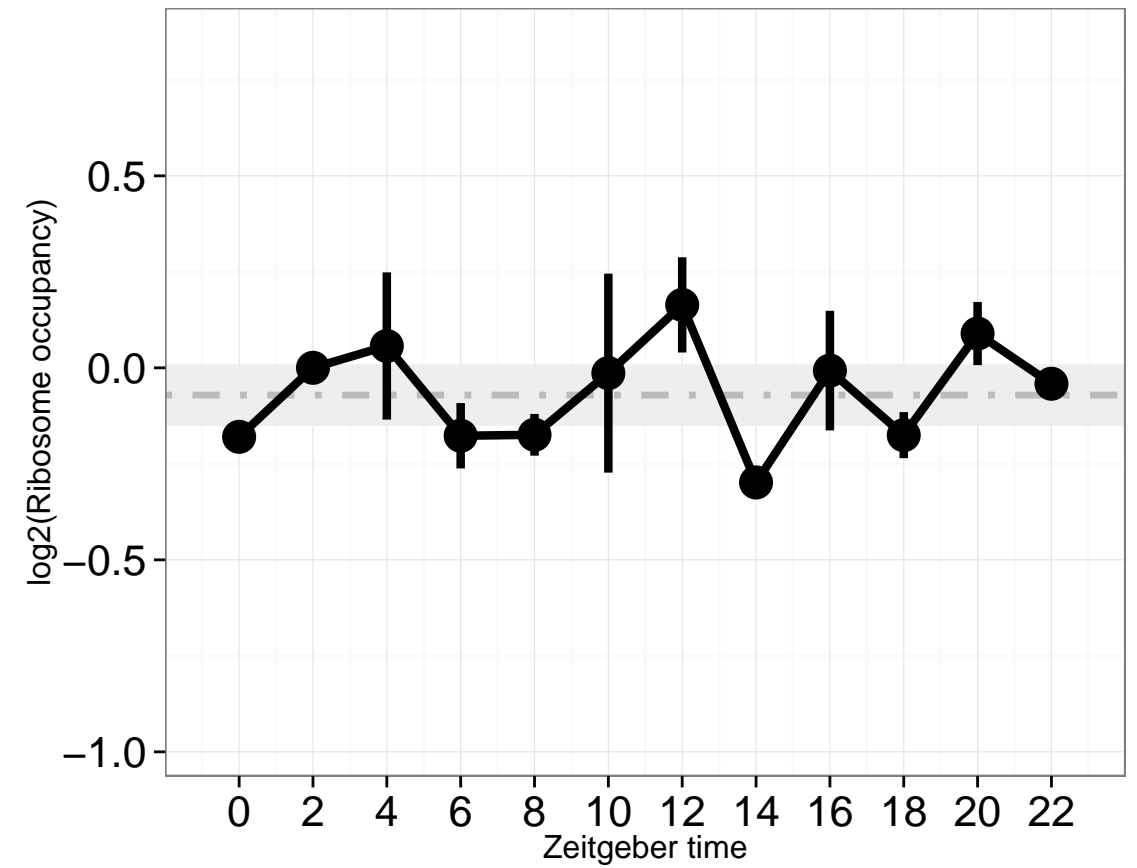

Supplement: Supplementary file 12173 [file 1]

## Mrc2

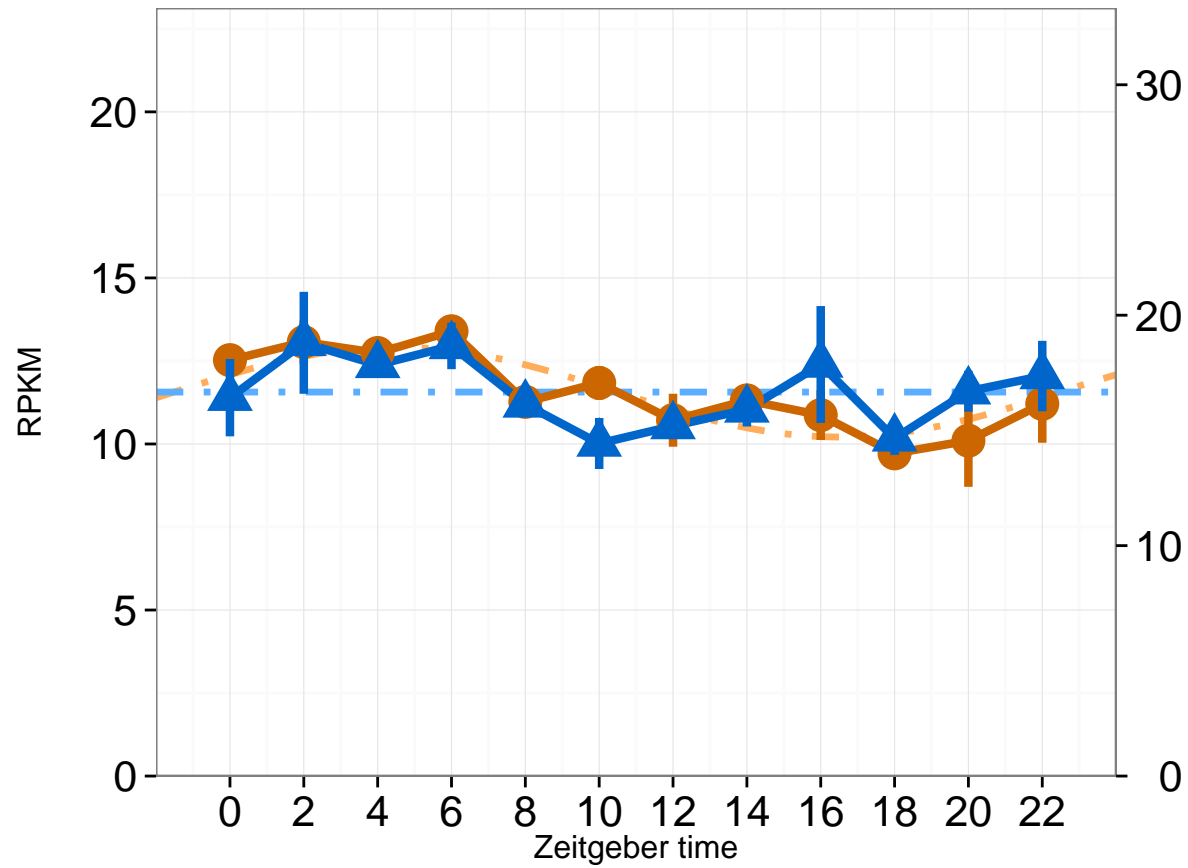

## Mrc2

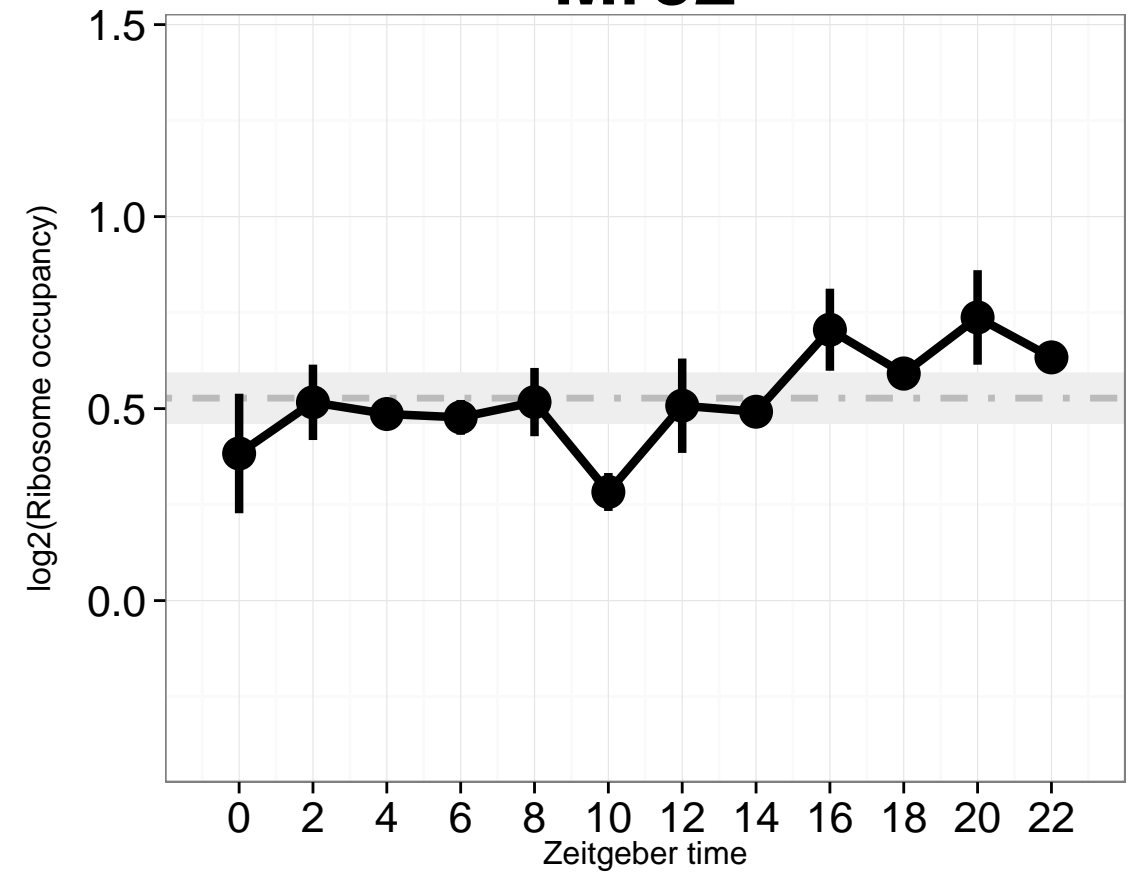

Supplement: Supplementary file 12174 [file 1]

# Clec9a

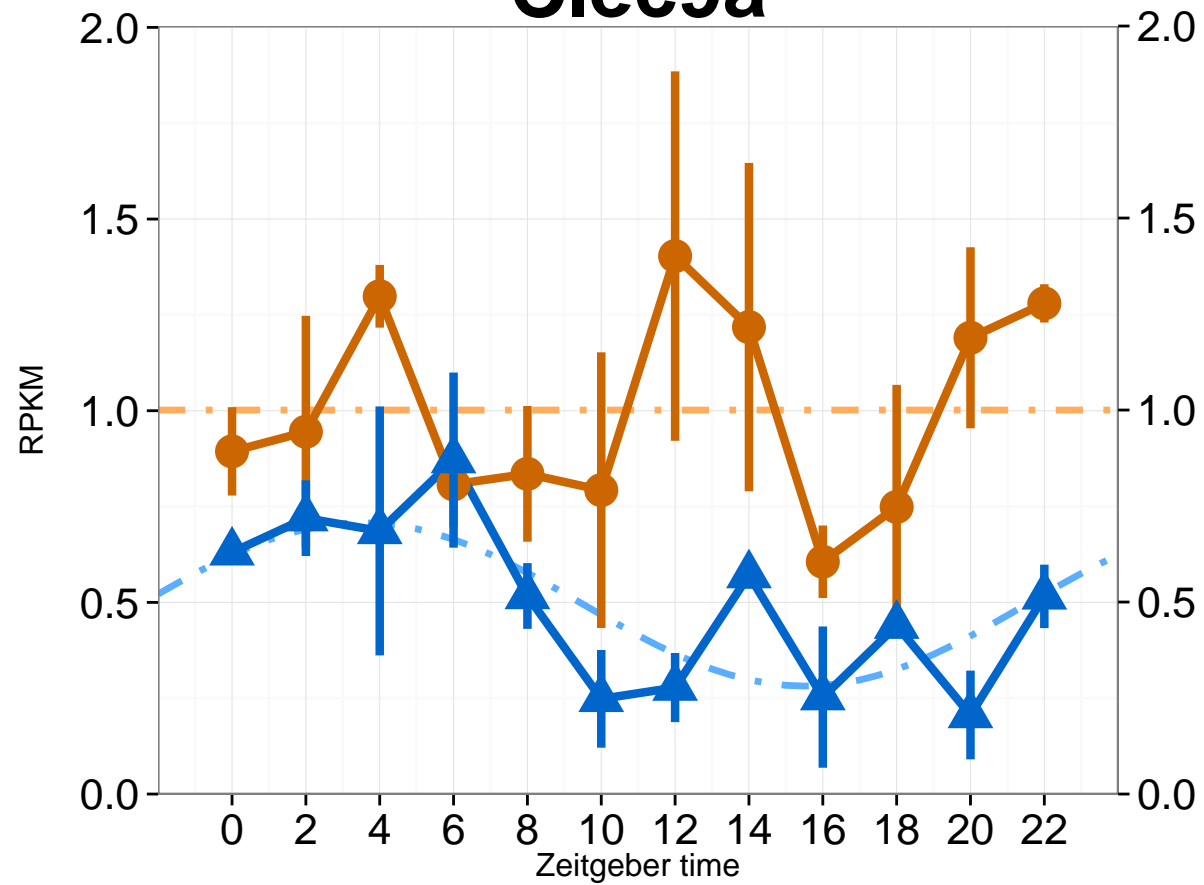

# Clec9a

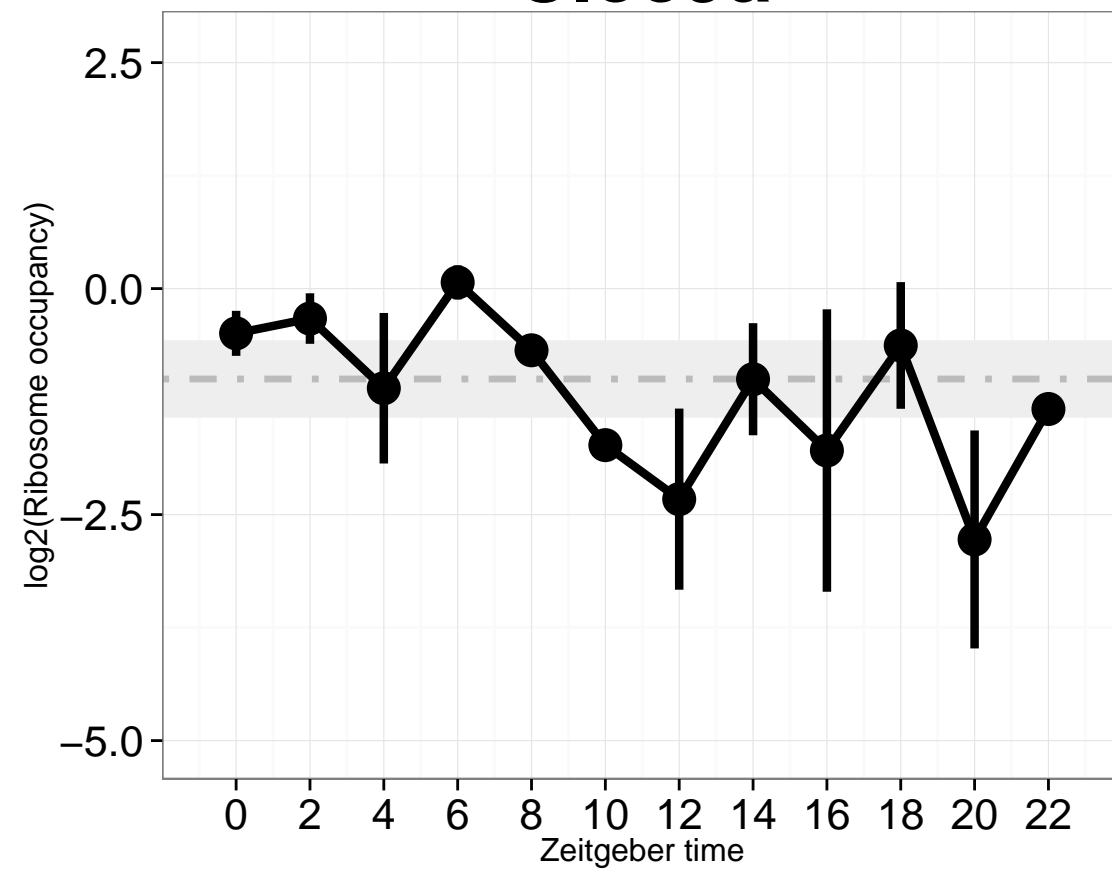

Supplement: Supplementary file 12175 [file 1]

## Zcchc7

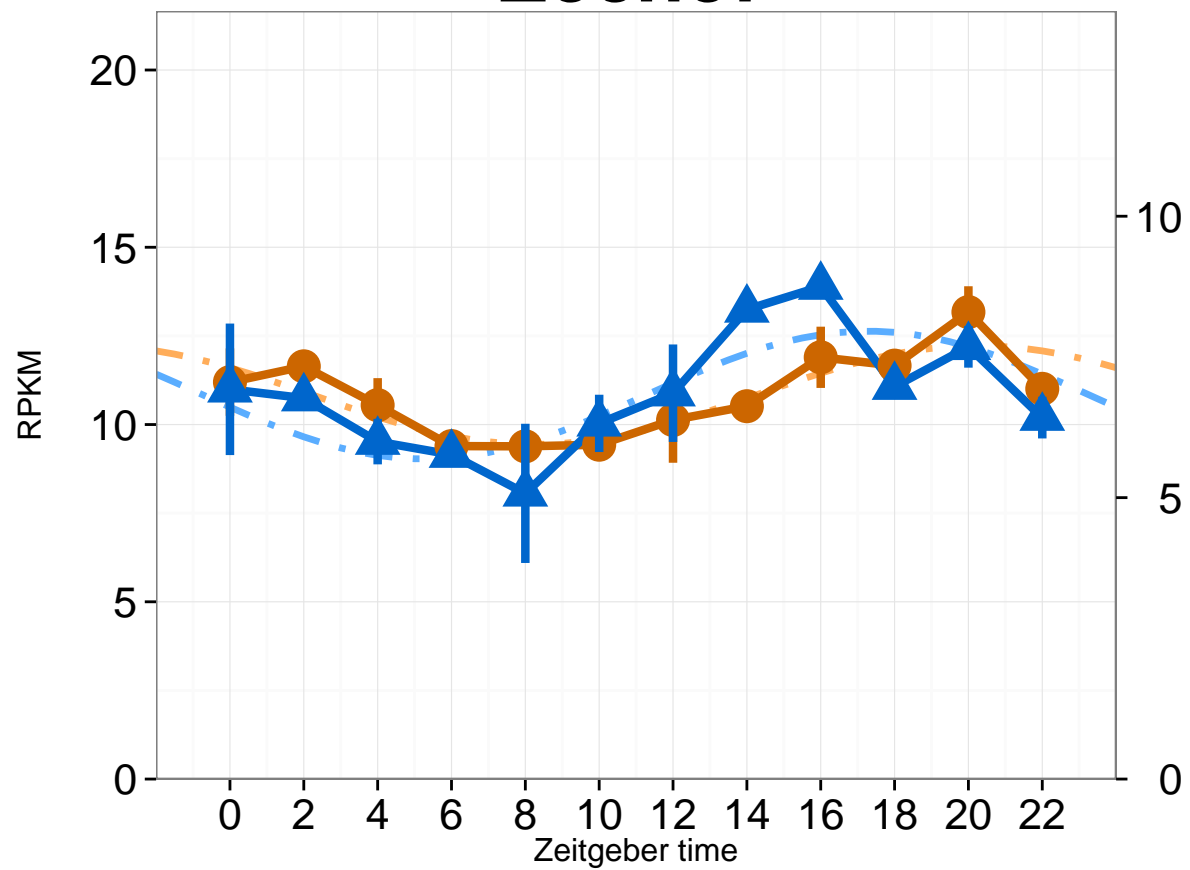

## Zcchc7

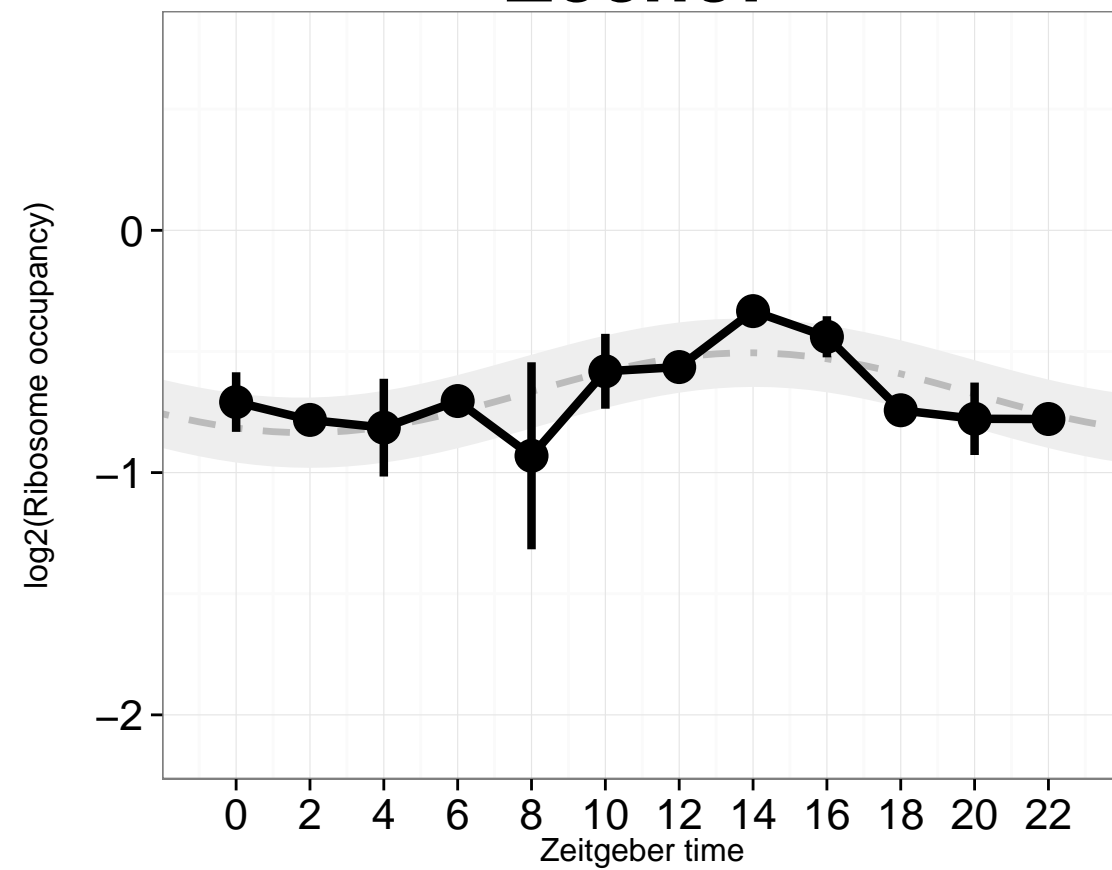

Supplement: Supplementary file 12176 [file 1]

## Rsrc2

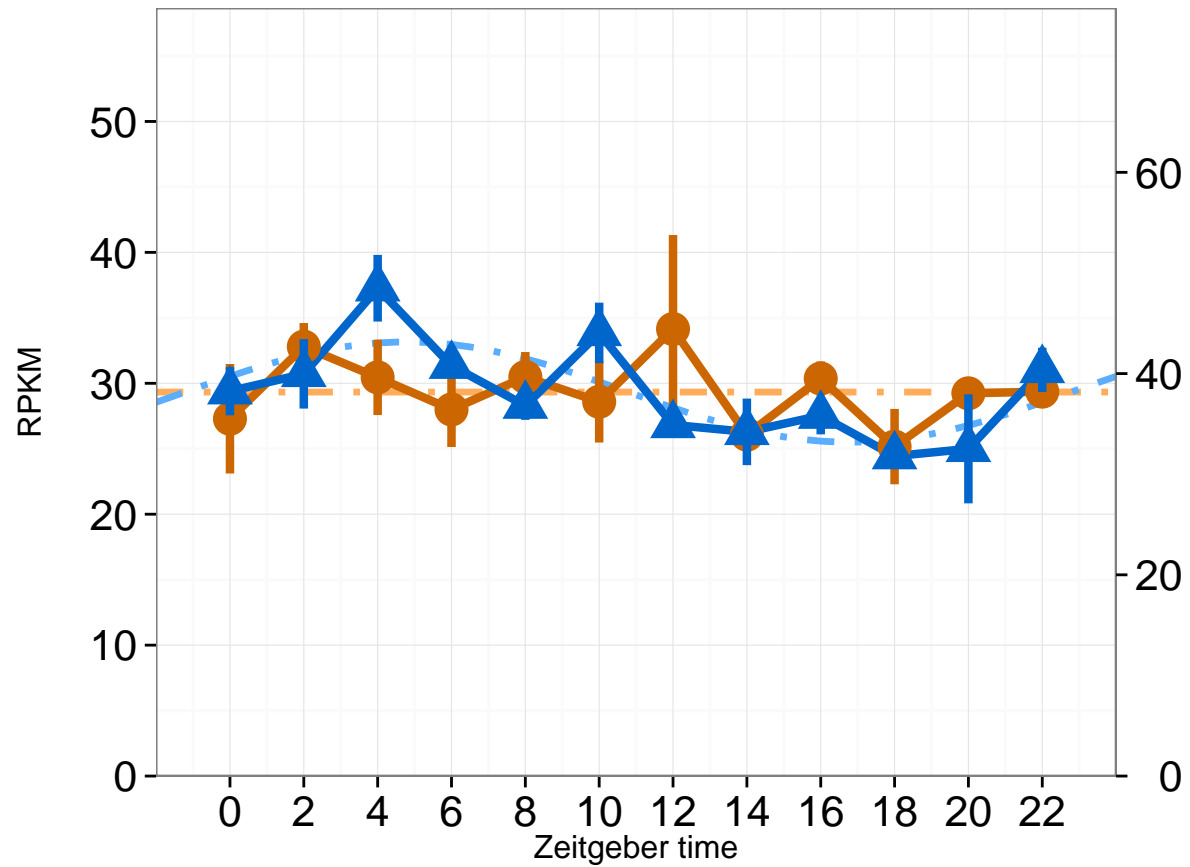

## Rsrc2

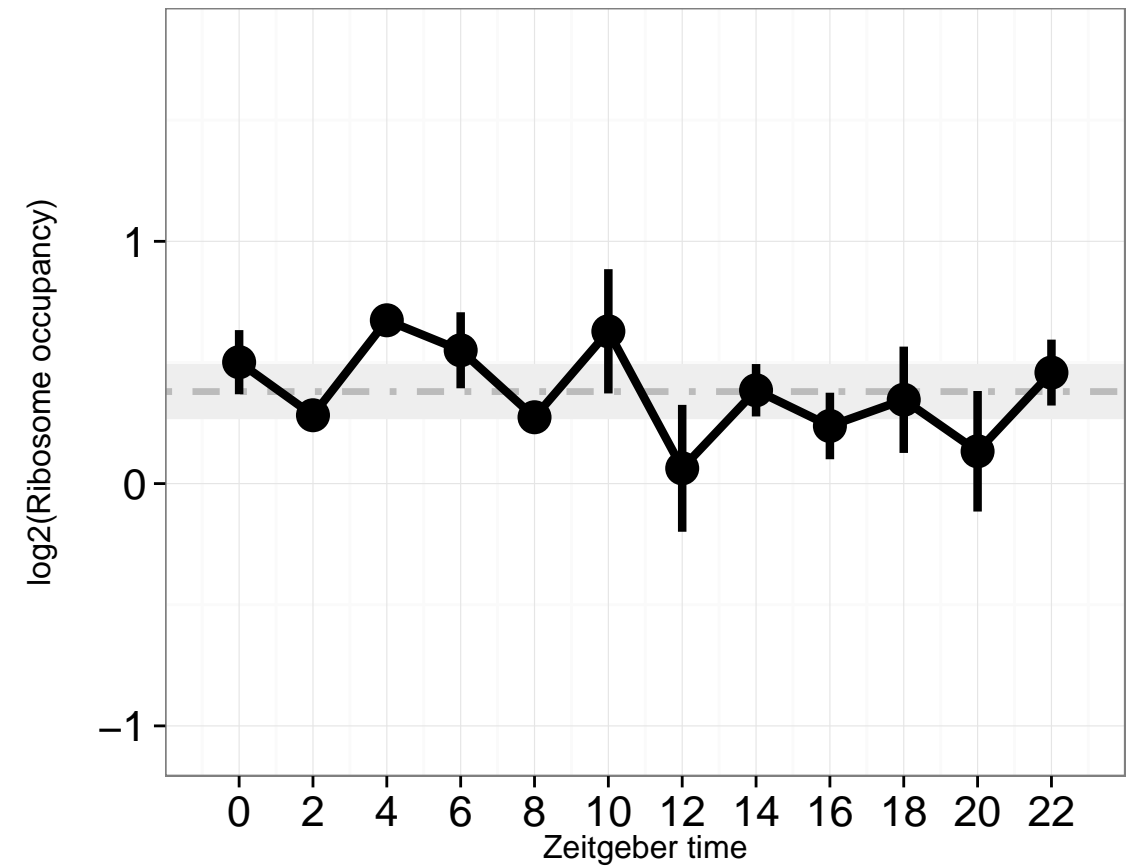

Supplement: Supplementary file 12177 [file 1]

# Fkbp9

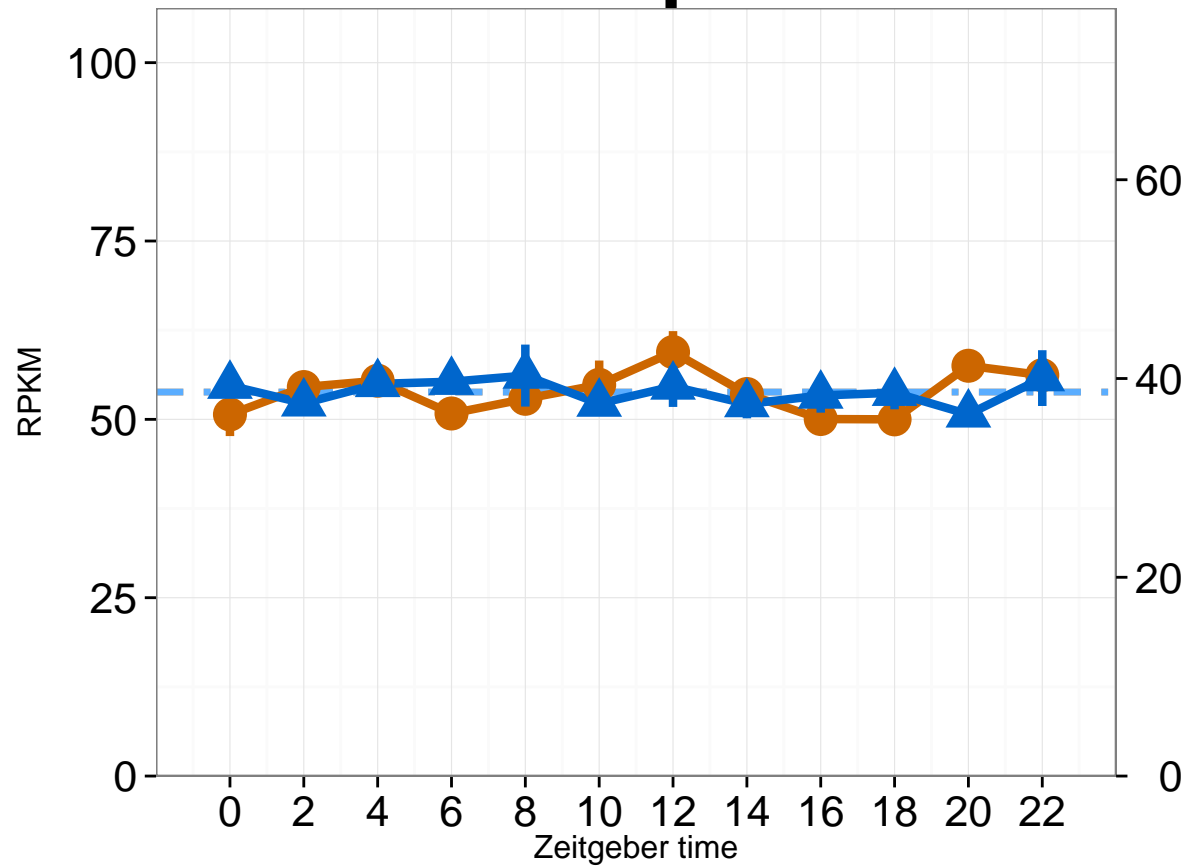

# Fkbp9

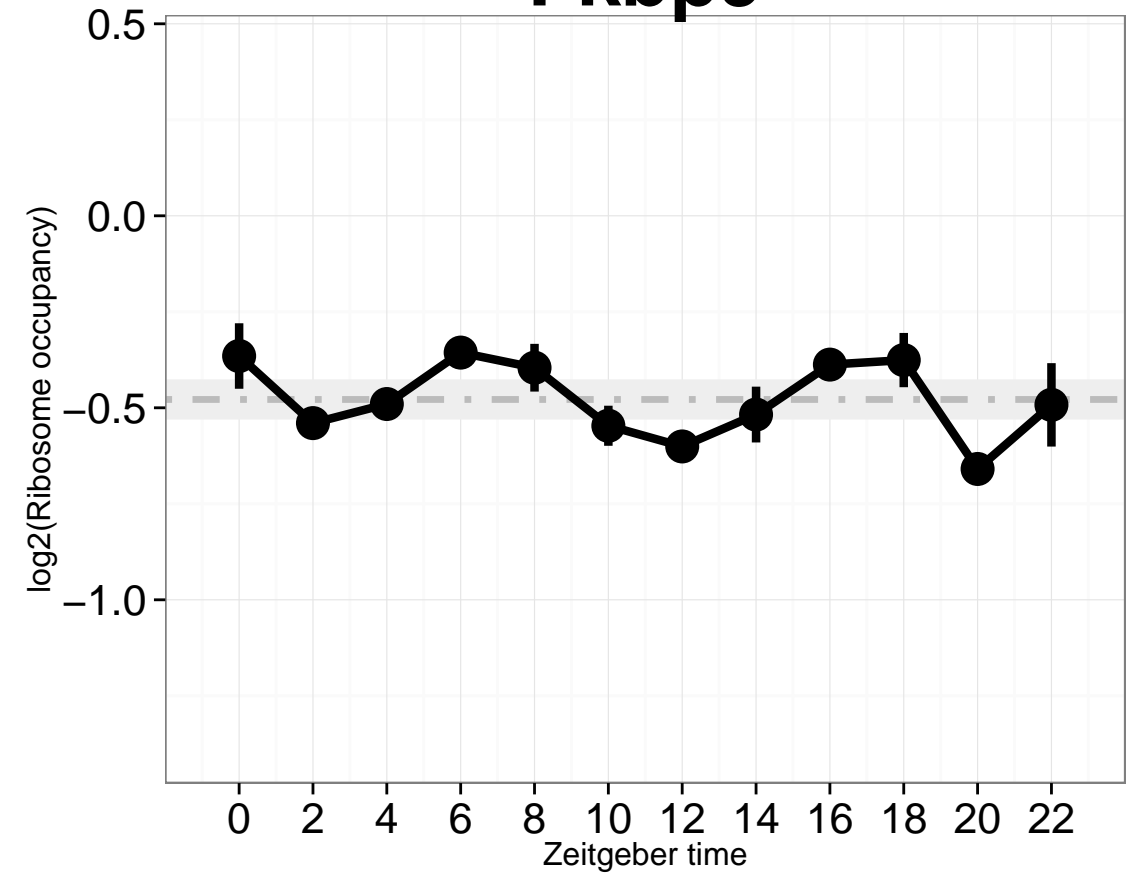

Supplement: Supplementary file 12178 [file 1]

# Opn3

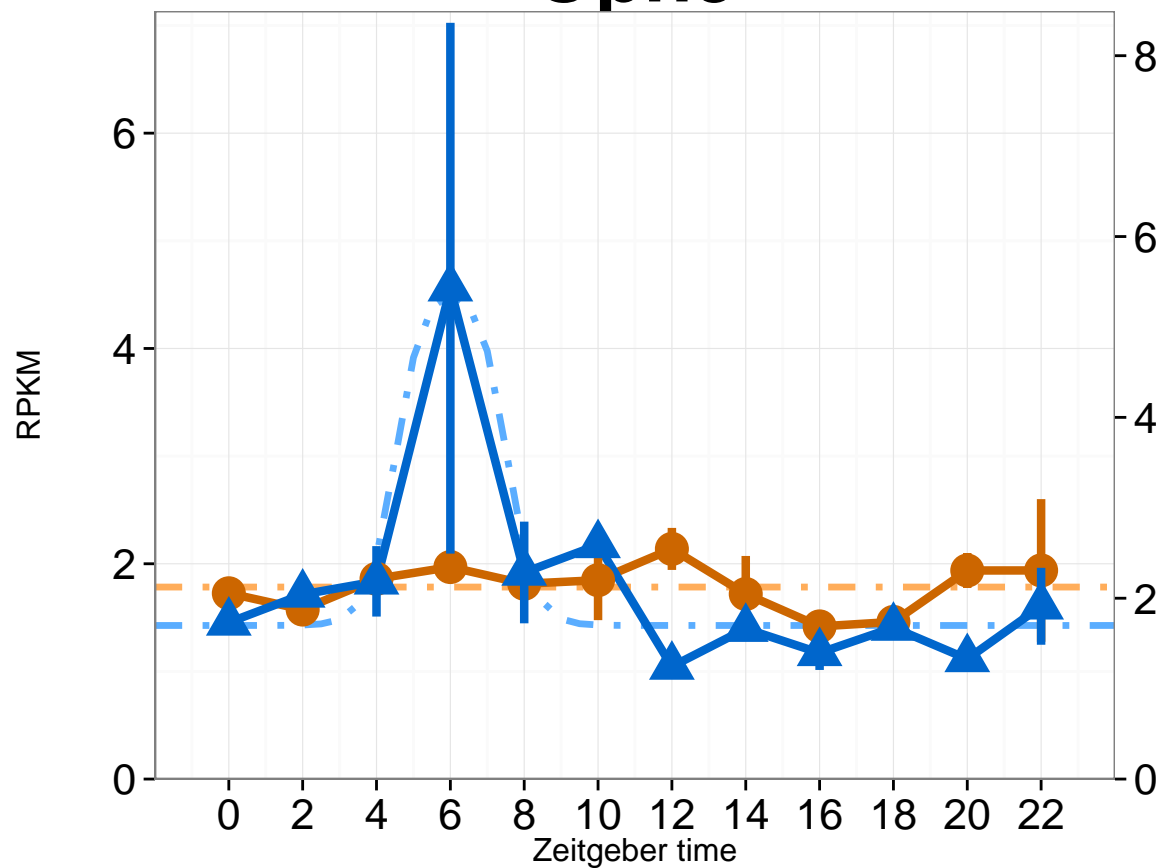

# Opn3

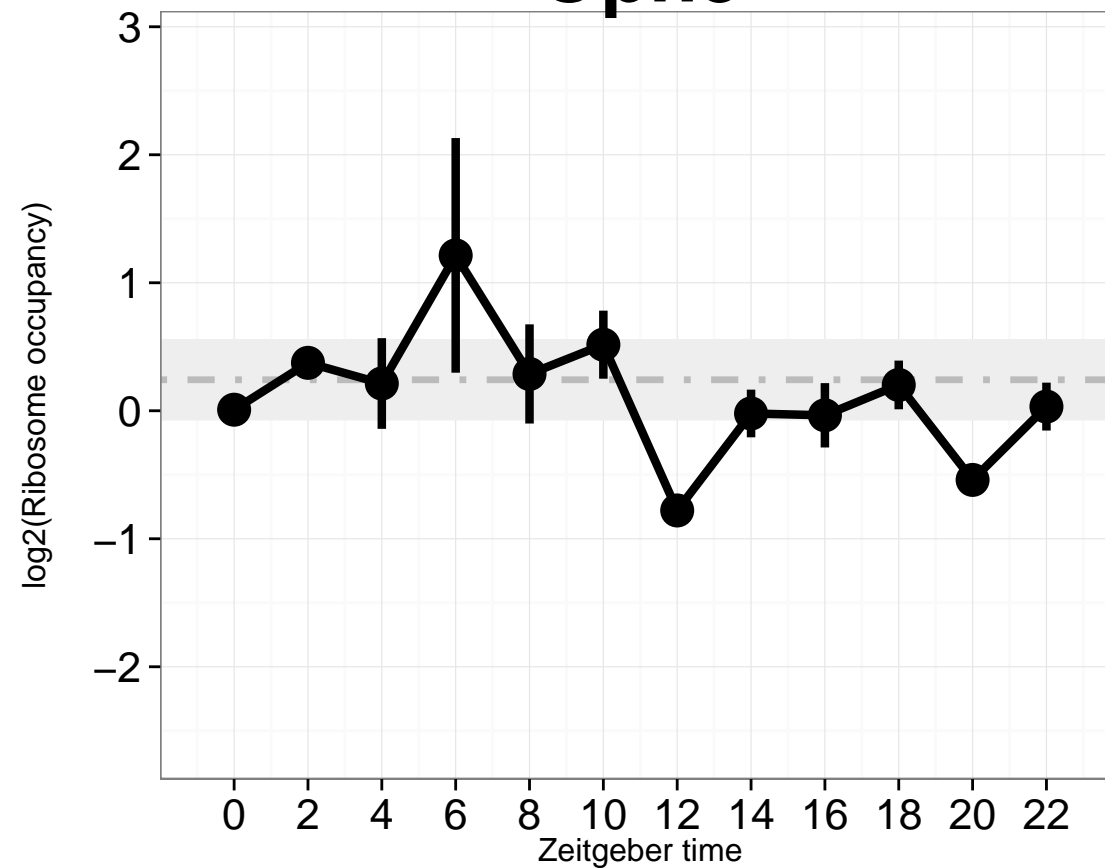

Supplement: Supplementary file 12179 [file 1]

## Rnf144b

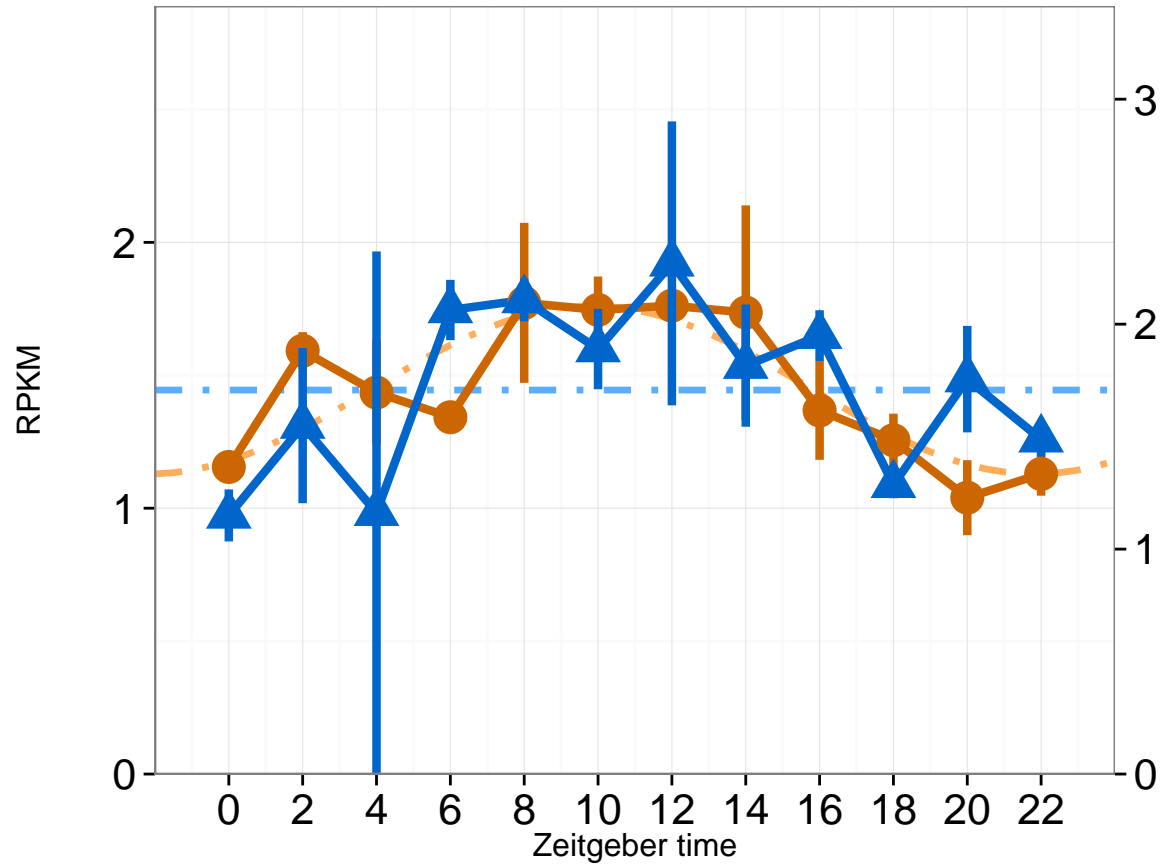

## Rnf144b

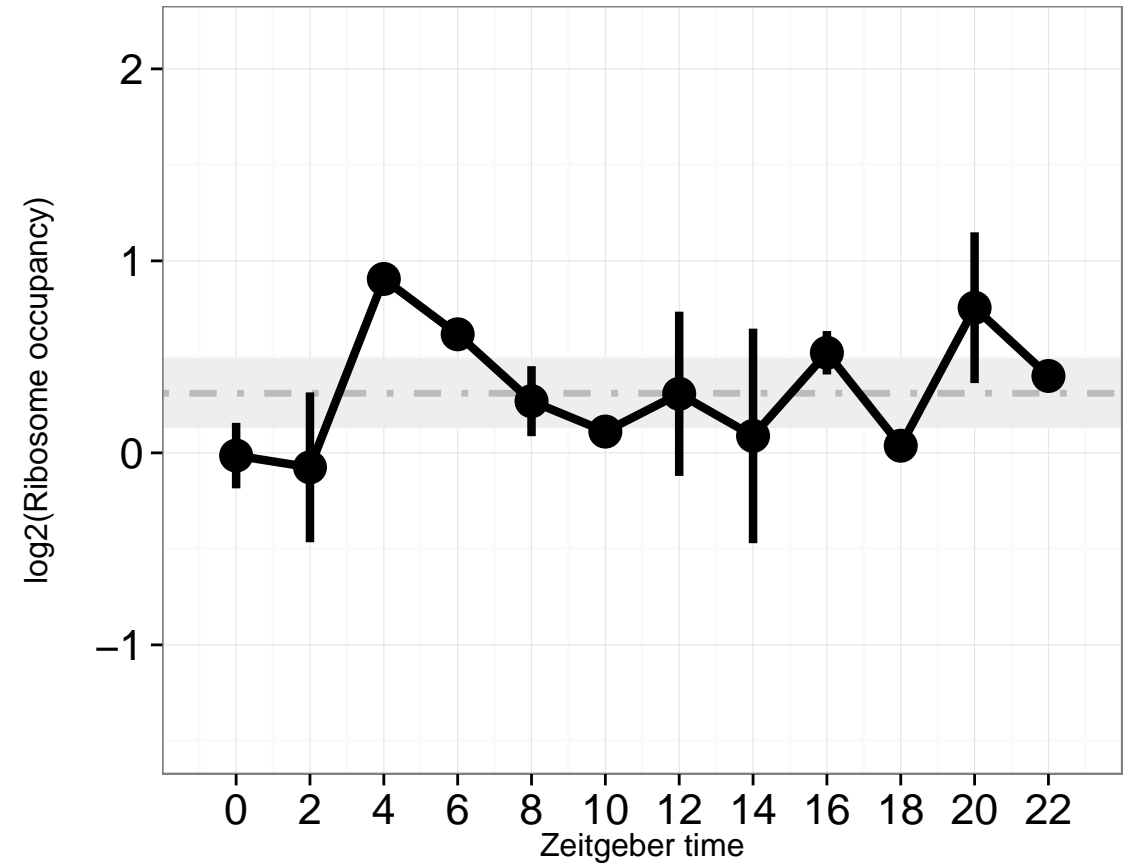

Supplement: Supplementary file 12180 [file 1]

## Dusp4

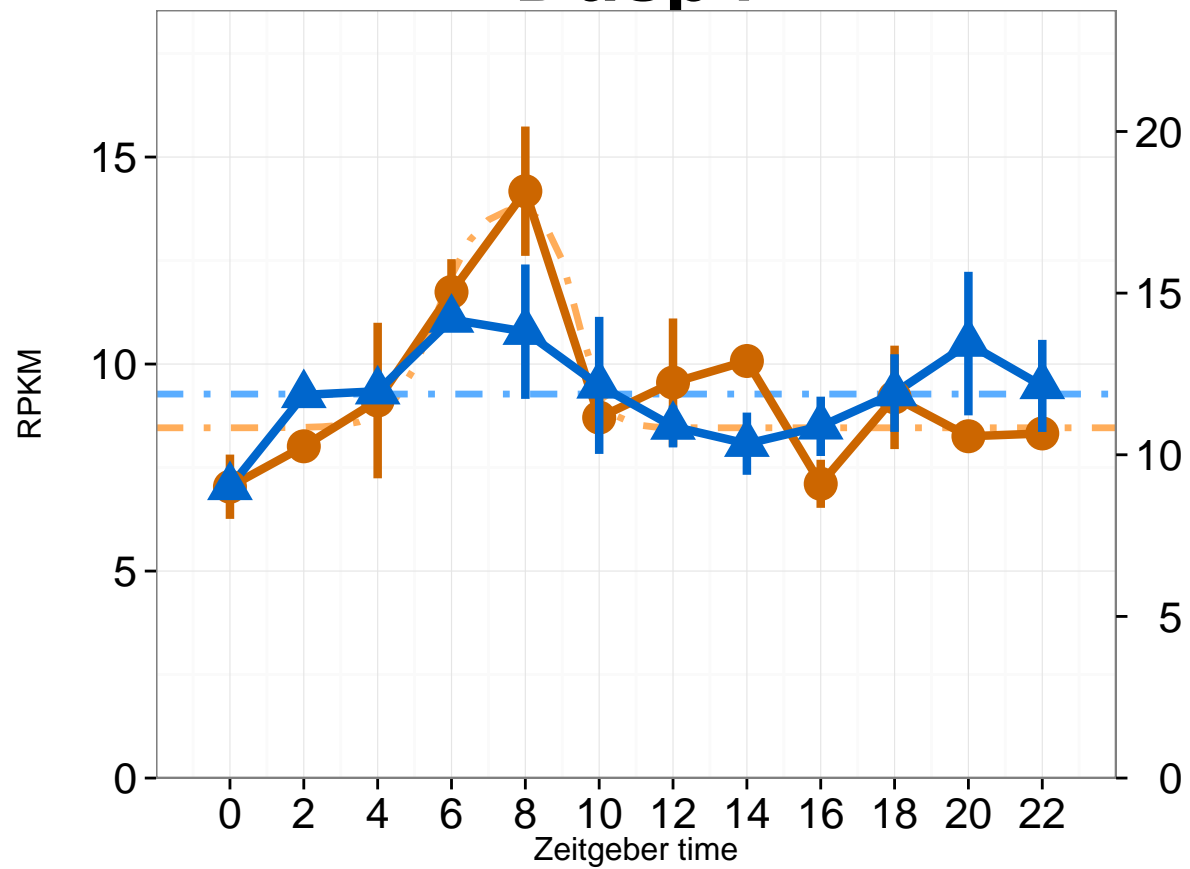

## Dusp4

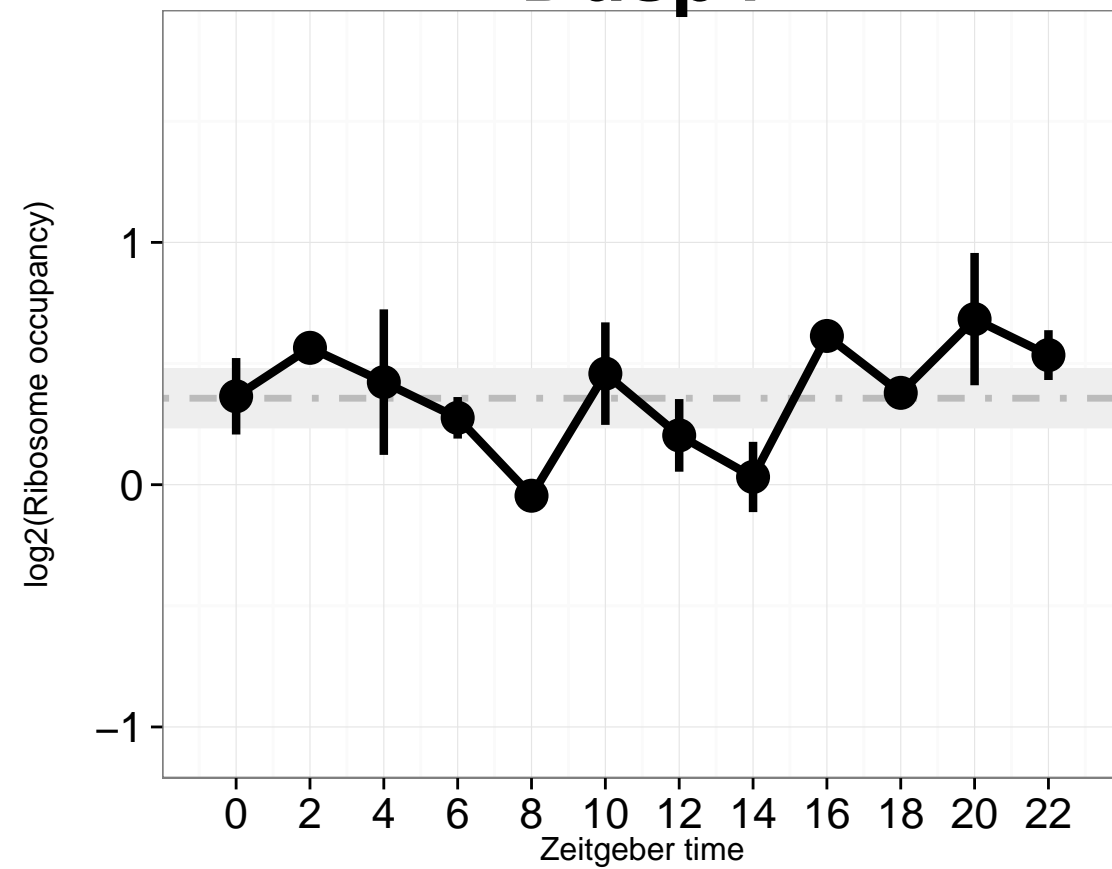

Supplement: Supplementary file 12181 [file 1]

## Cdkn2d

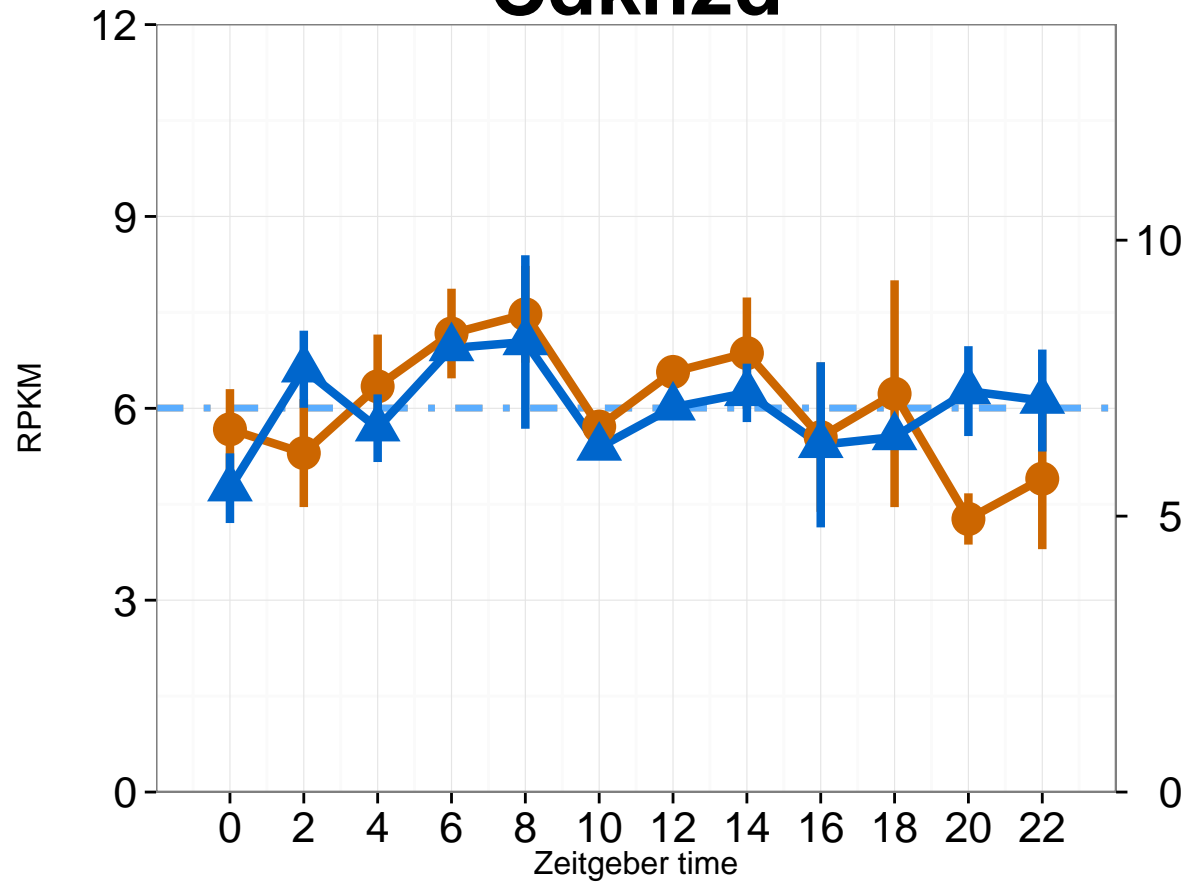

## Cdkn2d

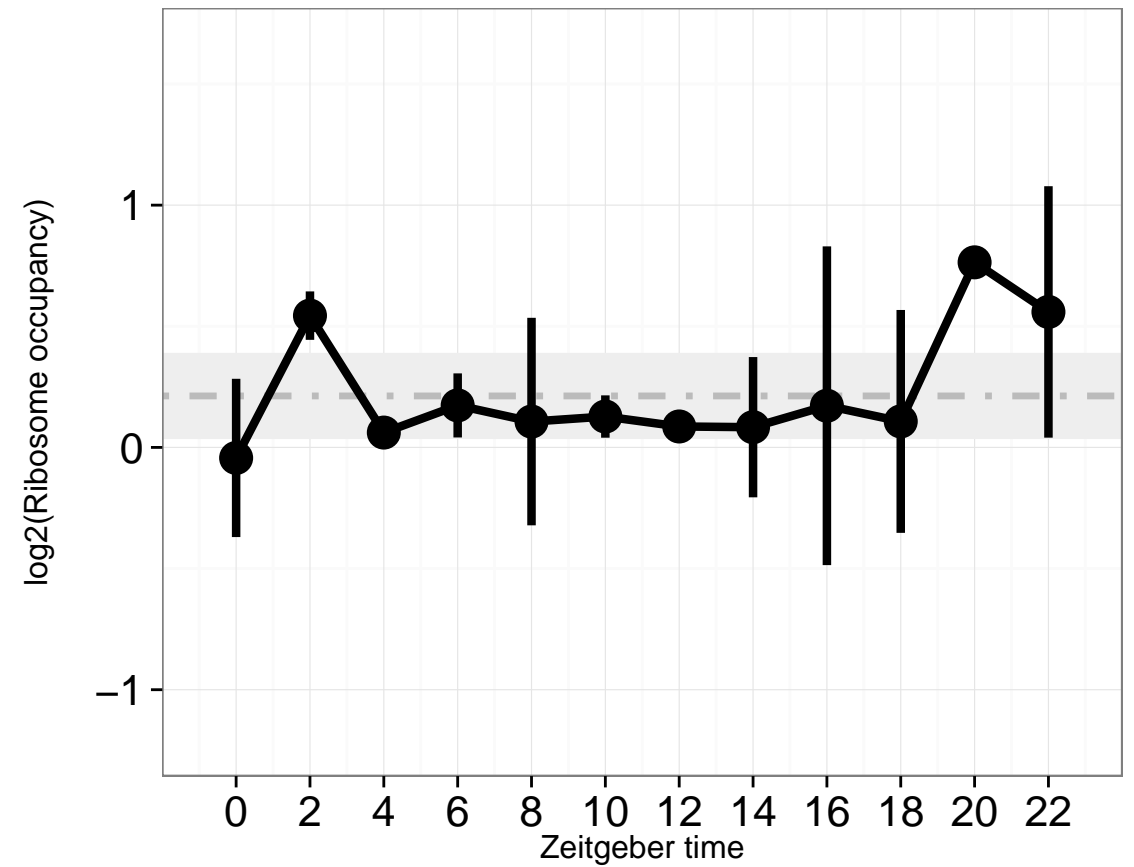

Supplement: Supplementary file 12182 [file 1]

## Map4k3

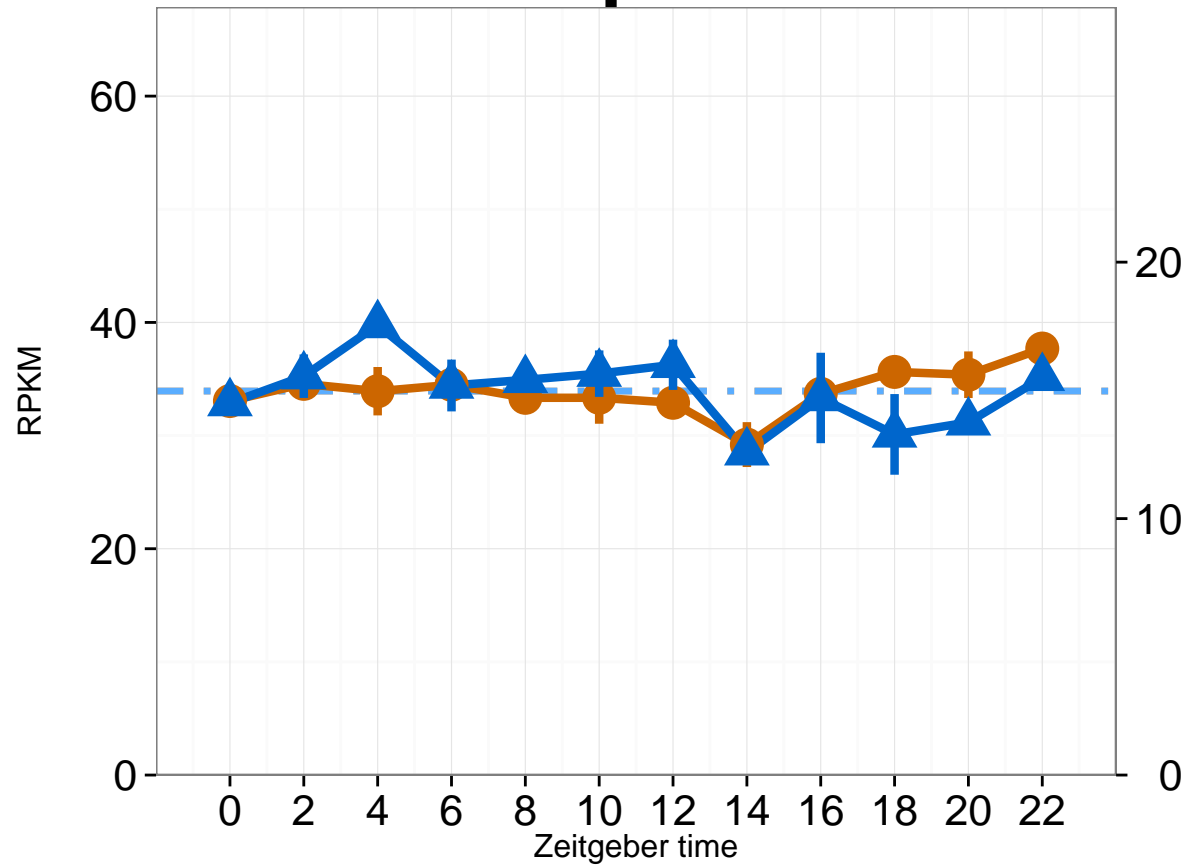

## Map4k3

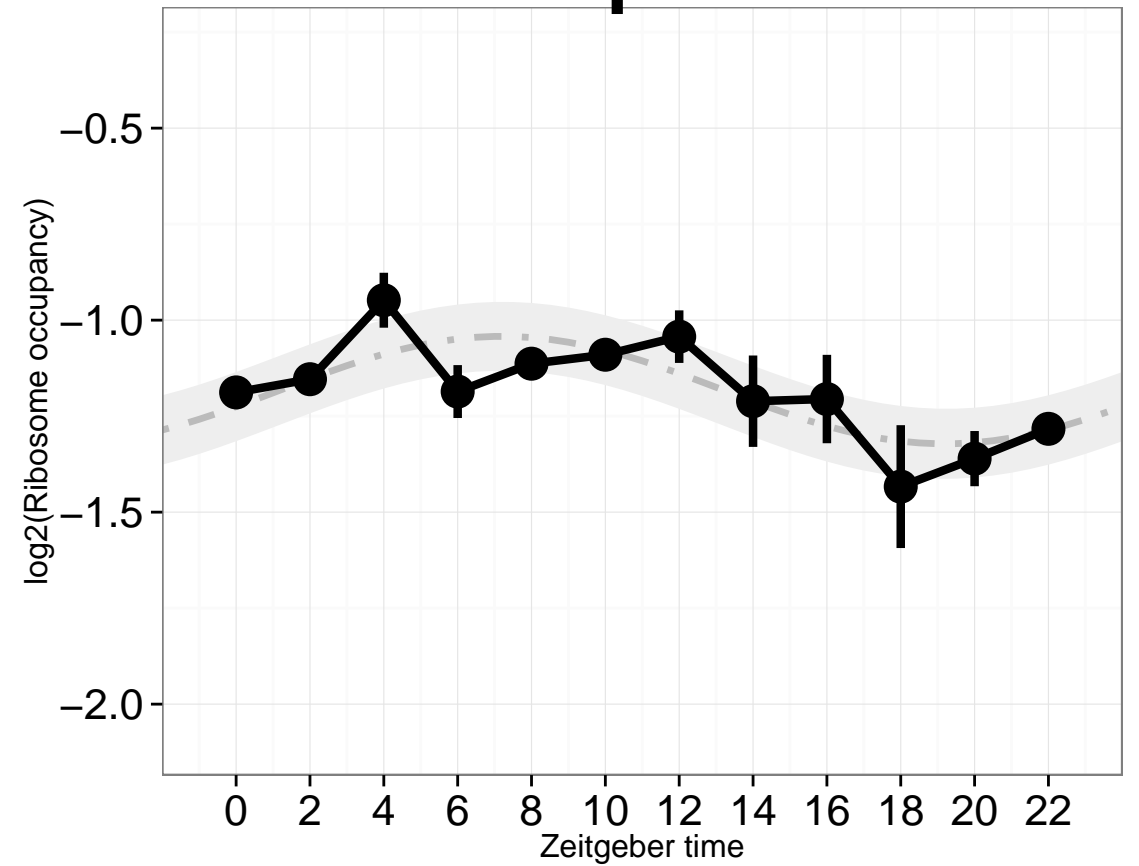

Supplement: Supplementary file 12183 [file 1]

## Peg10

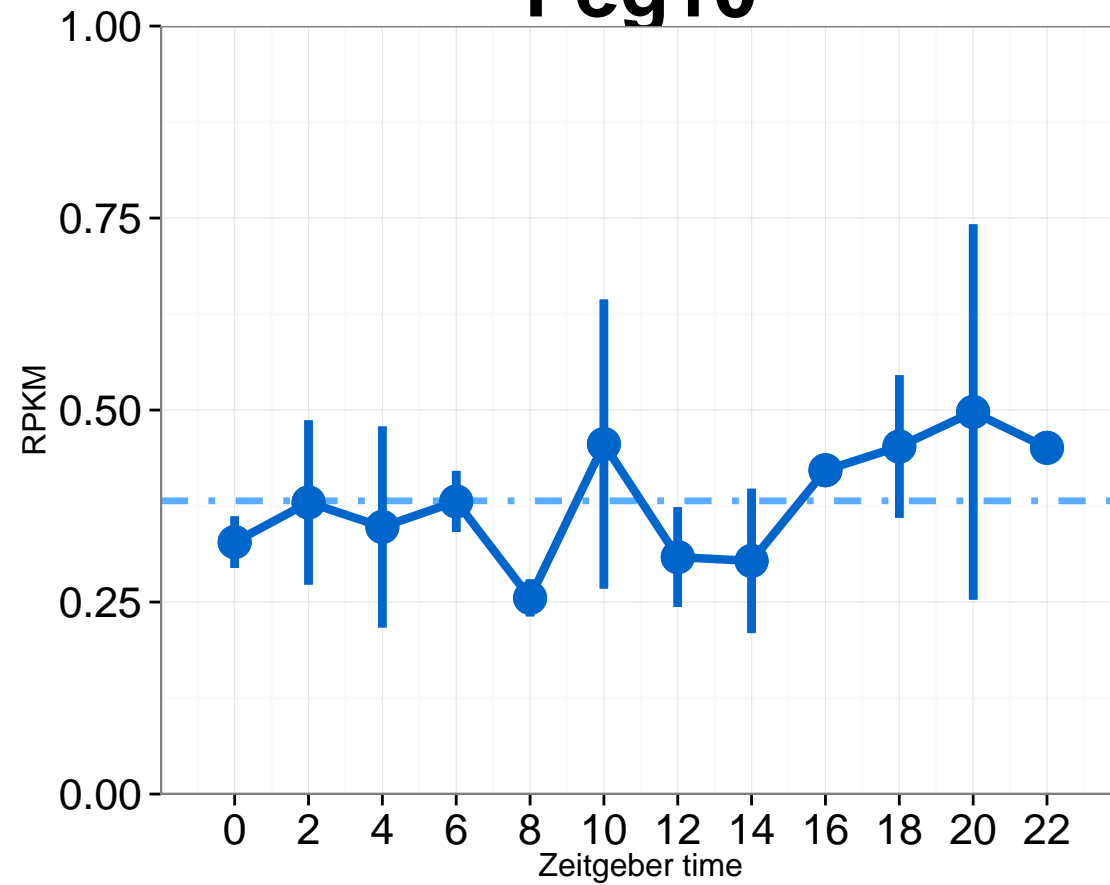

## Peg10 log2(Ribosome occupancy

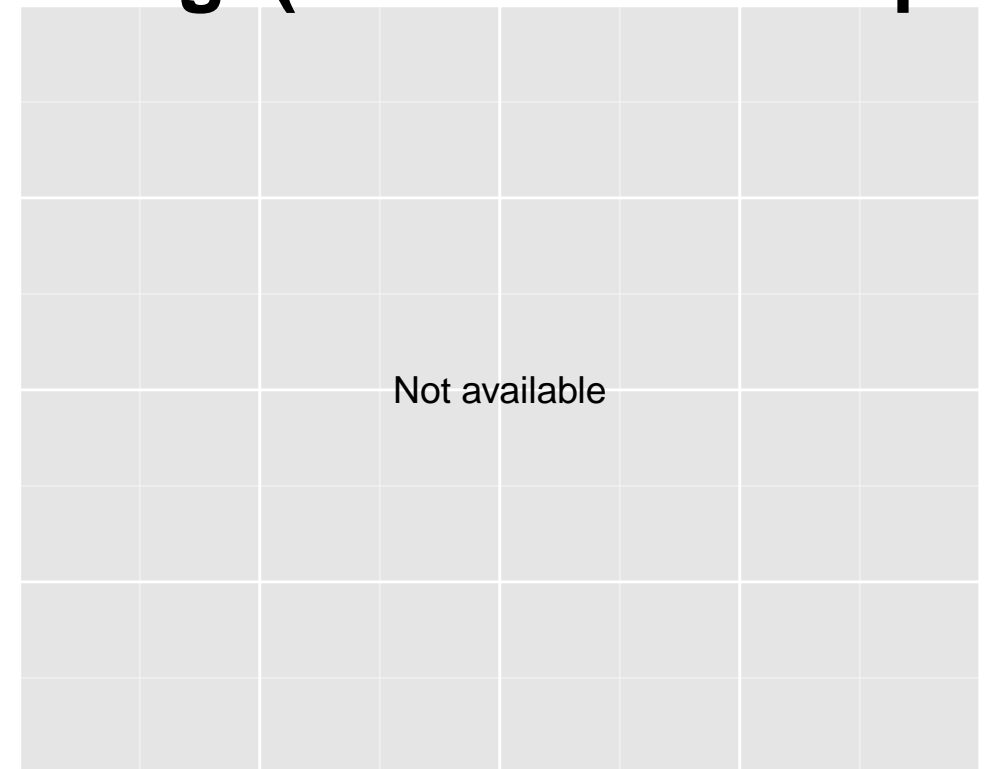

Supplement: Supplementary file 12184 [file 1]

# Irf7

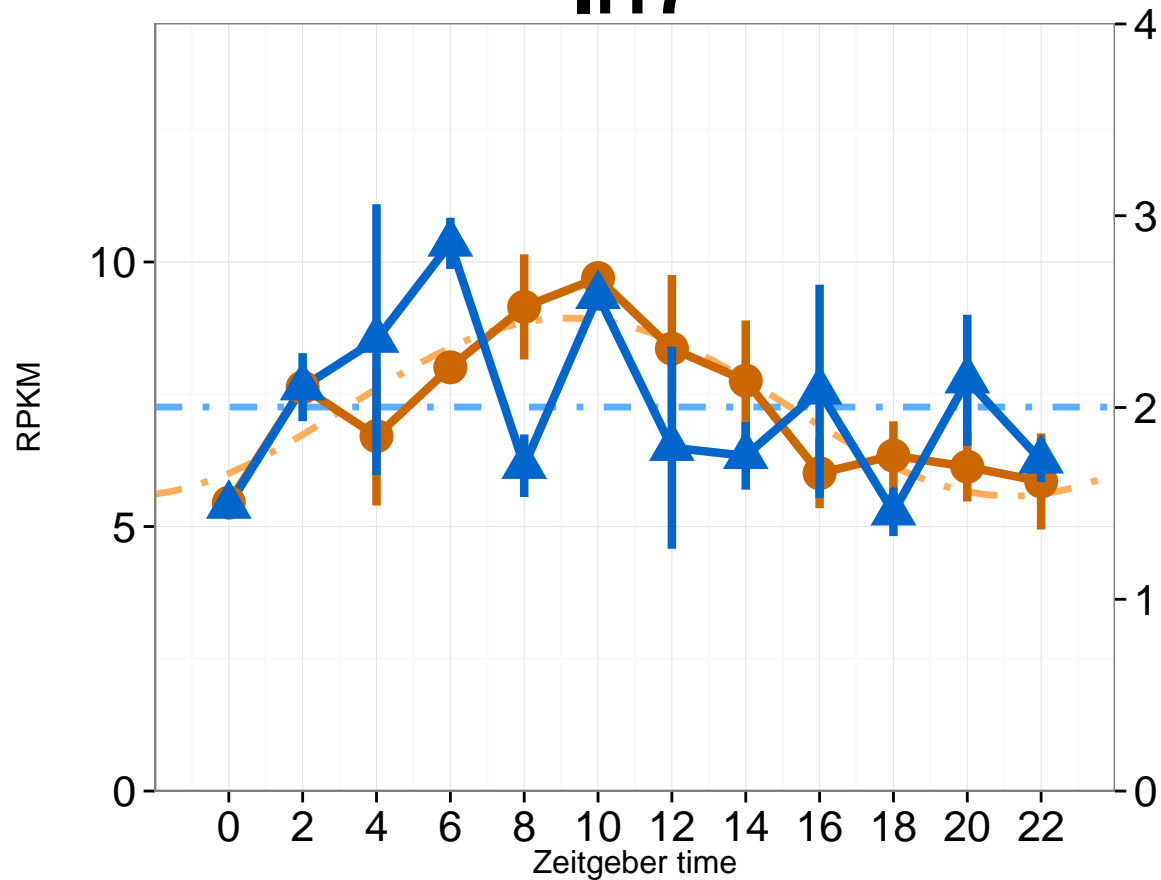

# Irf7

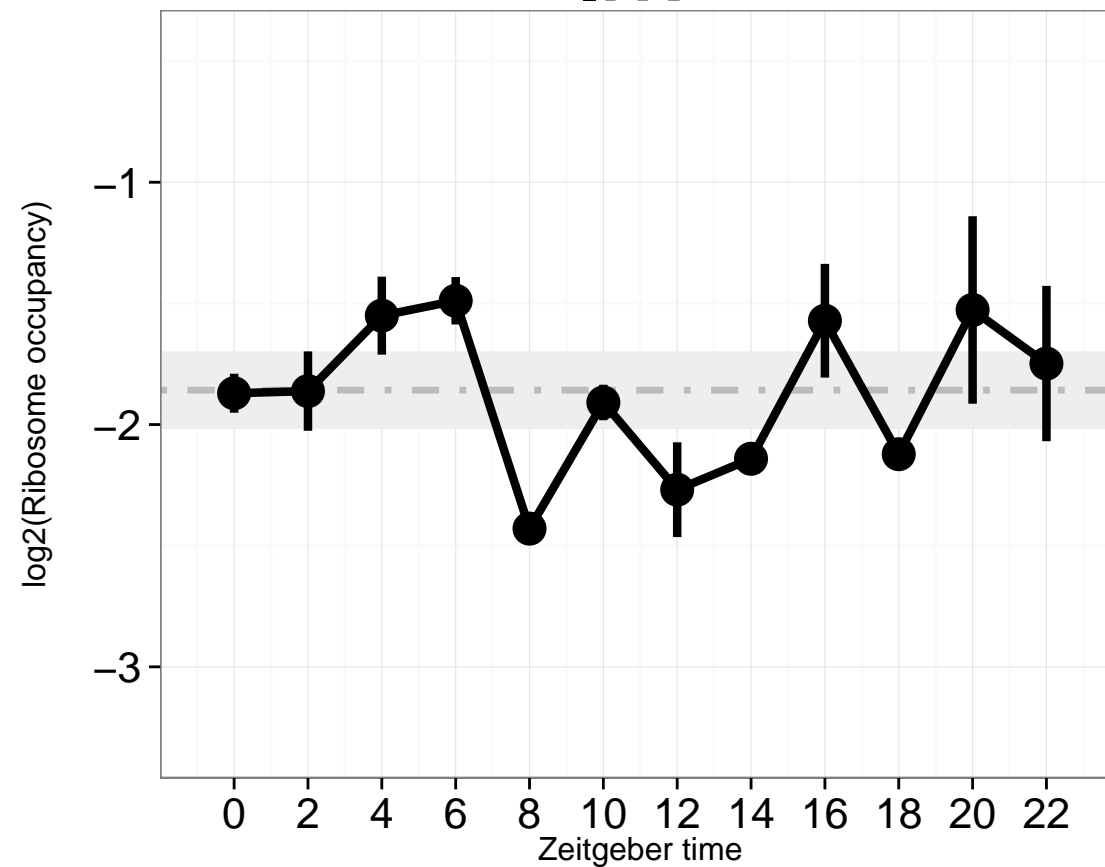

Supplement: Supplementary file 12185 [file 1]

## Cmb1

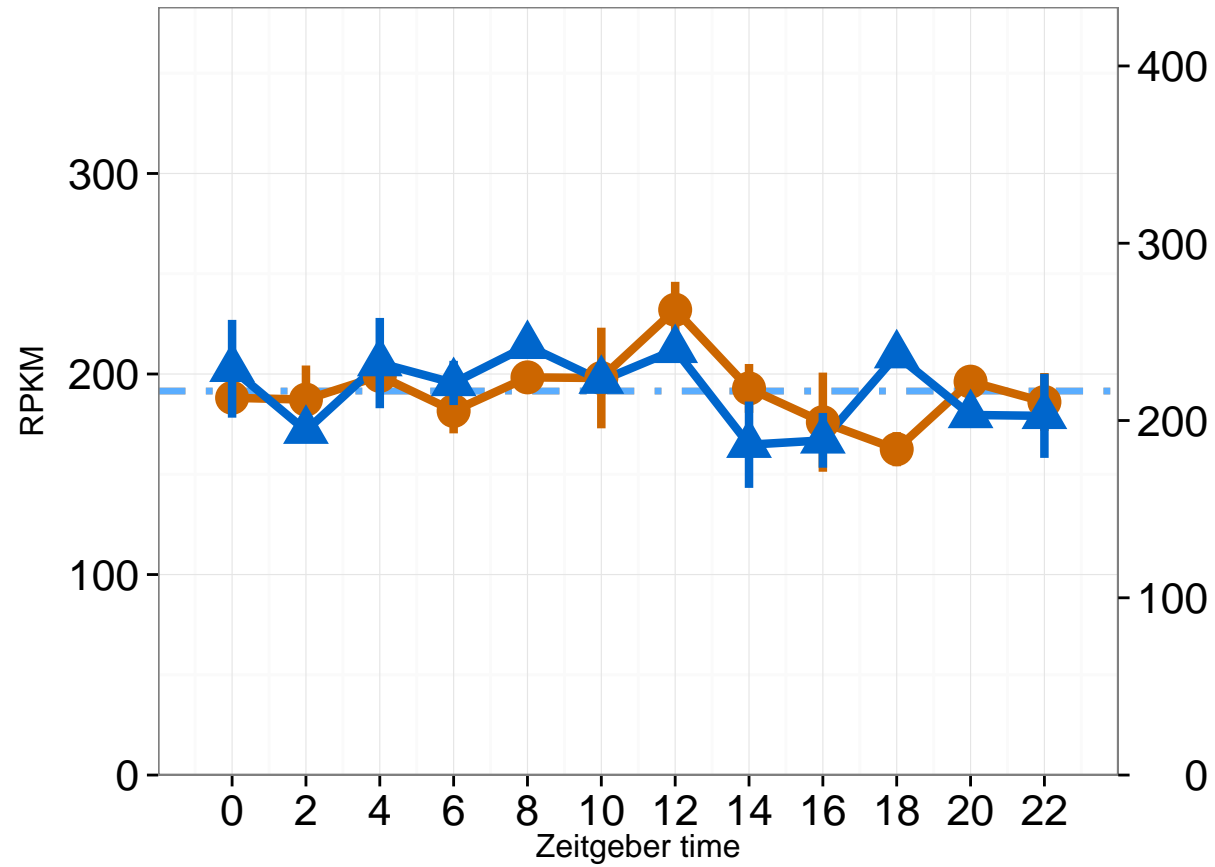

## Cmb1

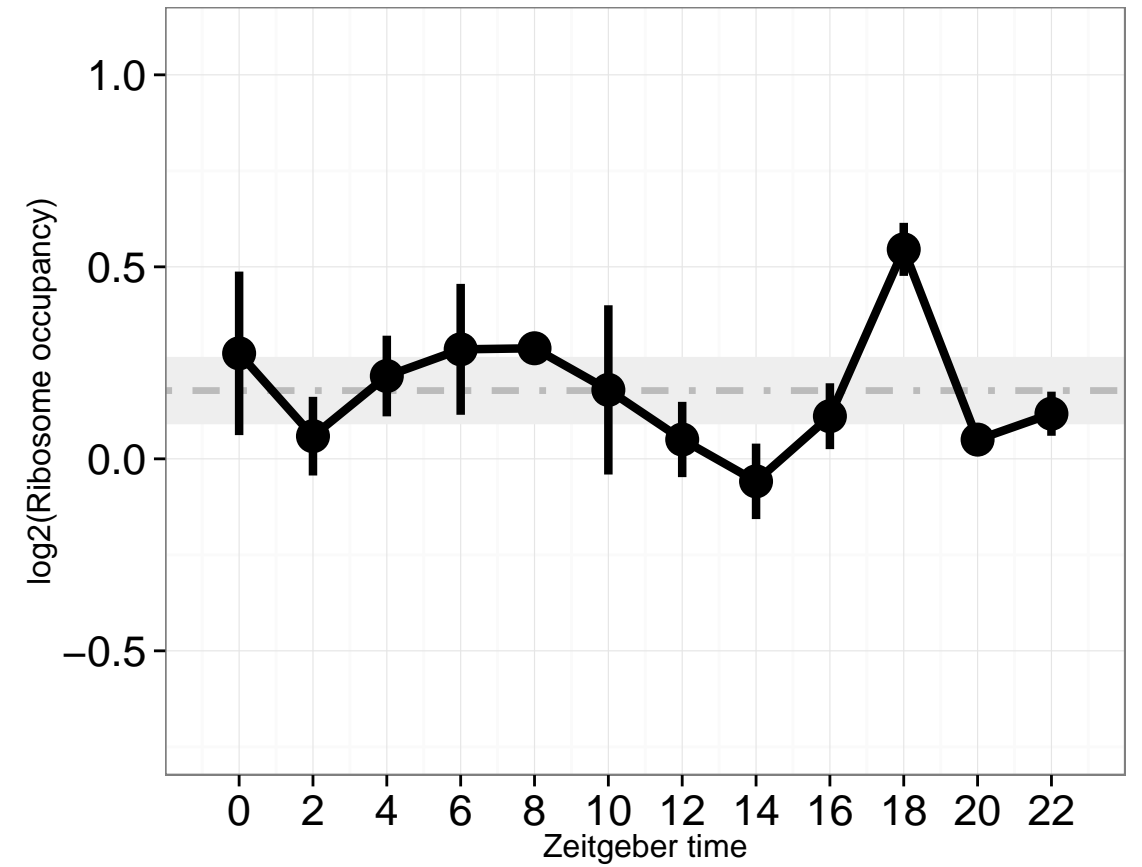

Supplement: Supplementary file 12186 [file 1]

# Dhx16

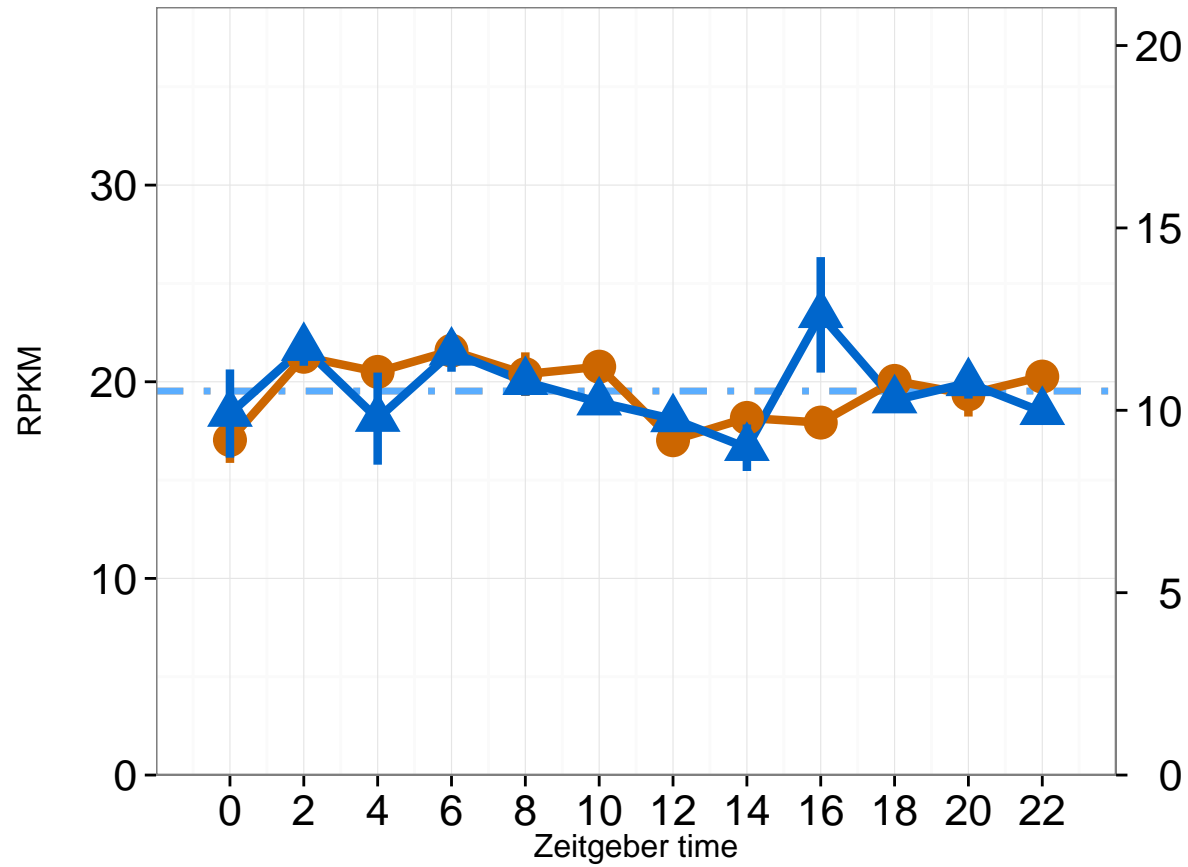

# Dhx16

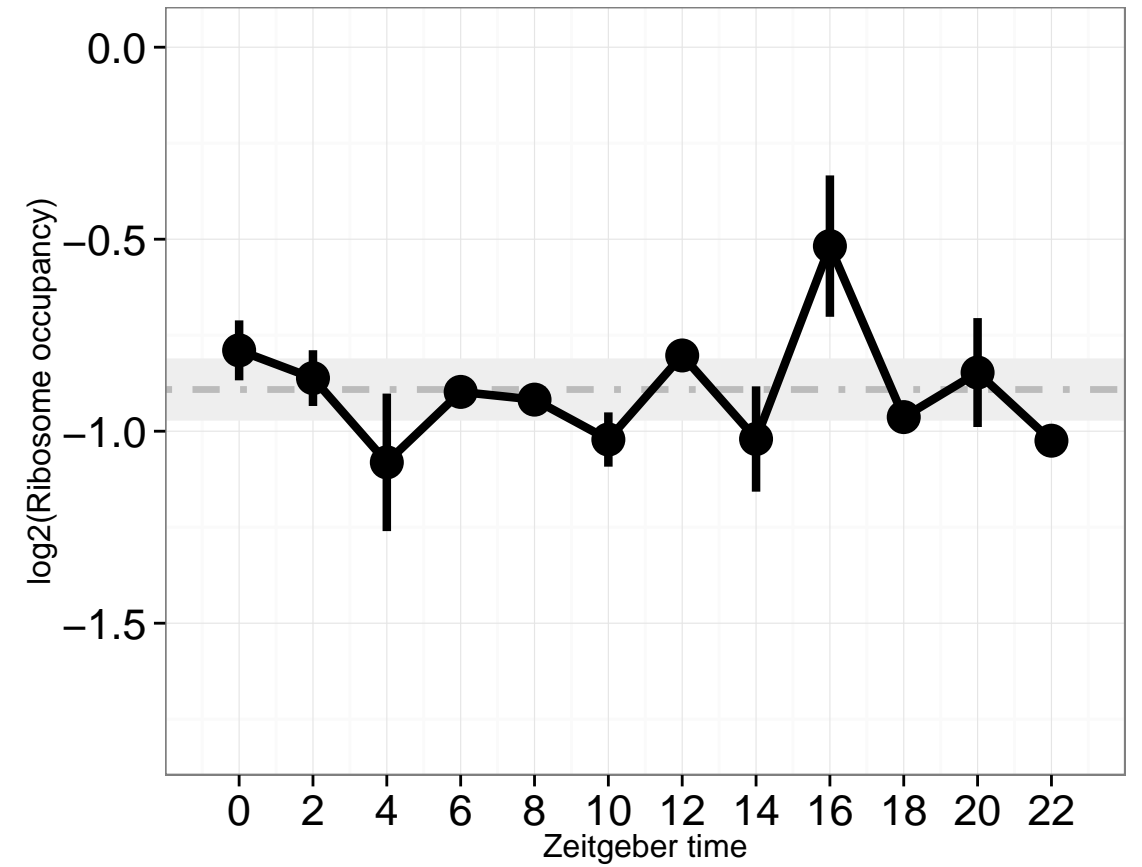

Supplement: Supplementary file 12187 [file 1]

## Sypl

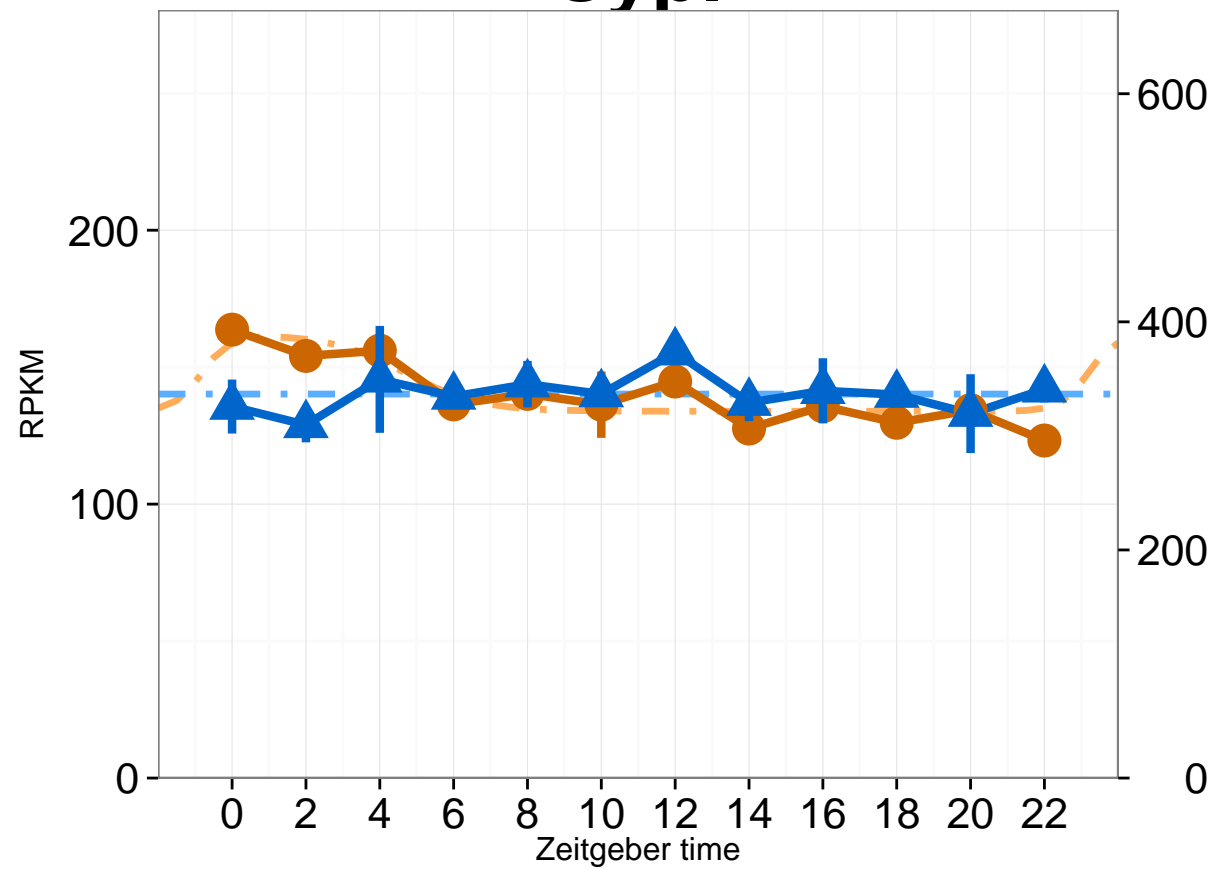

## Sypl

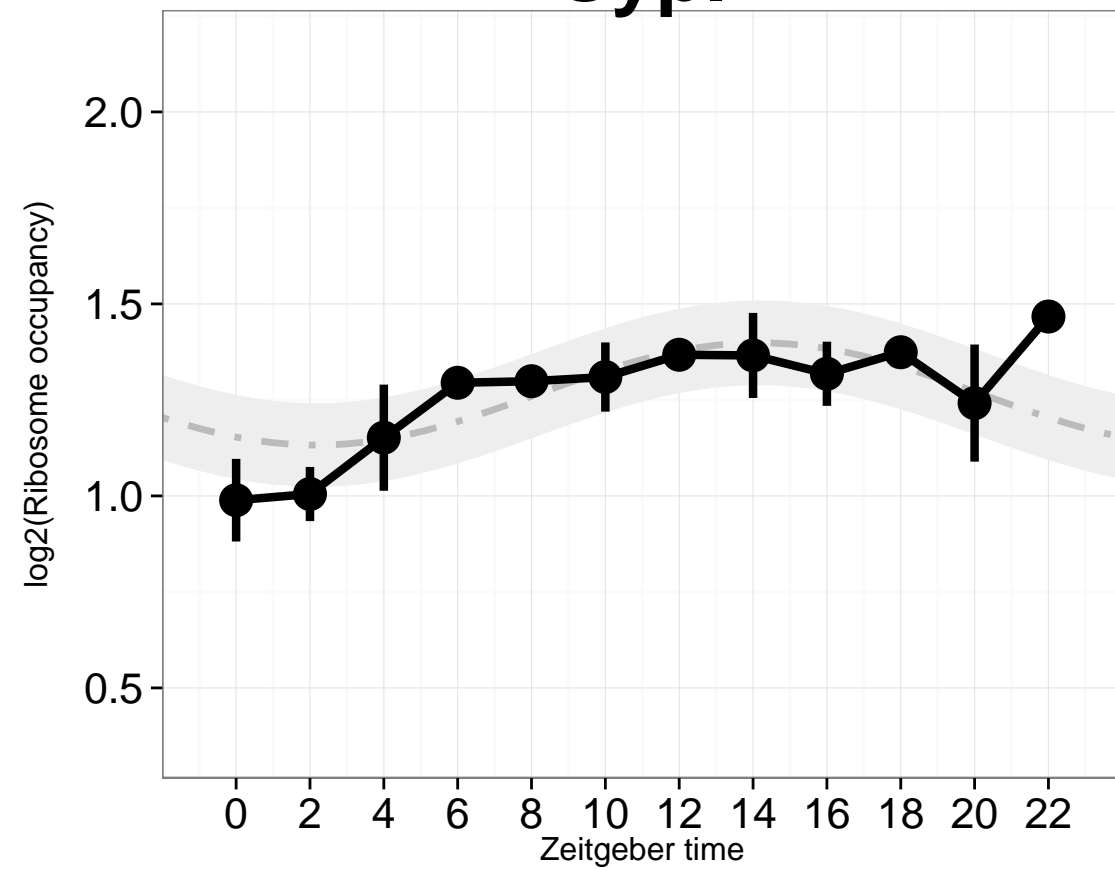

Supplement: Supplementary file 12188 [file 1]

# BC021785

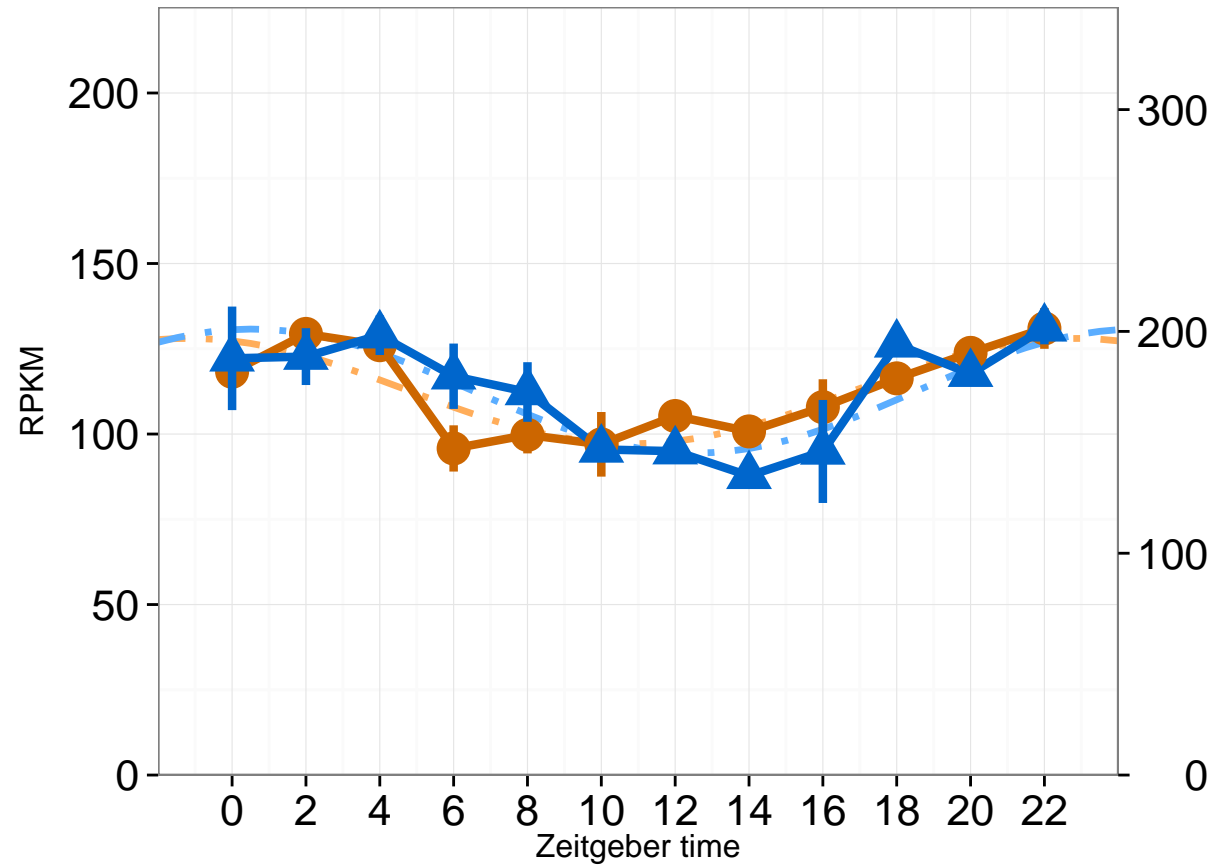

# BC021785

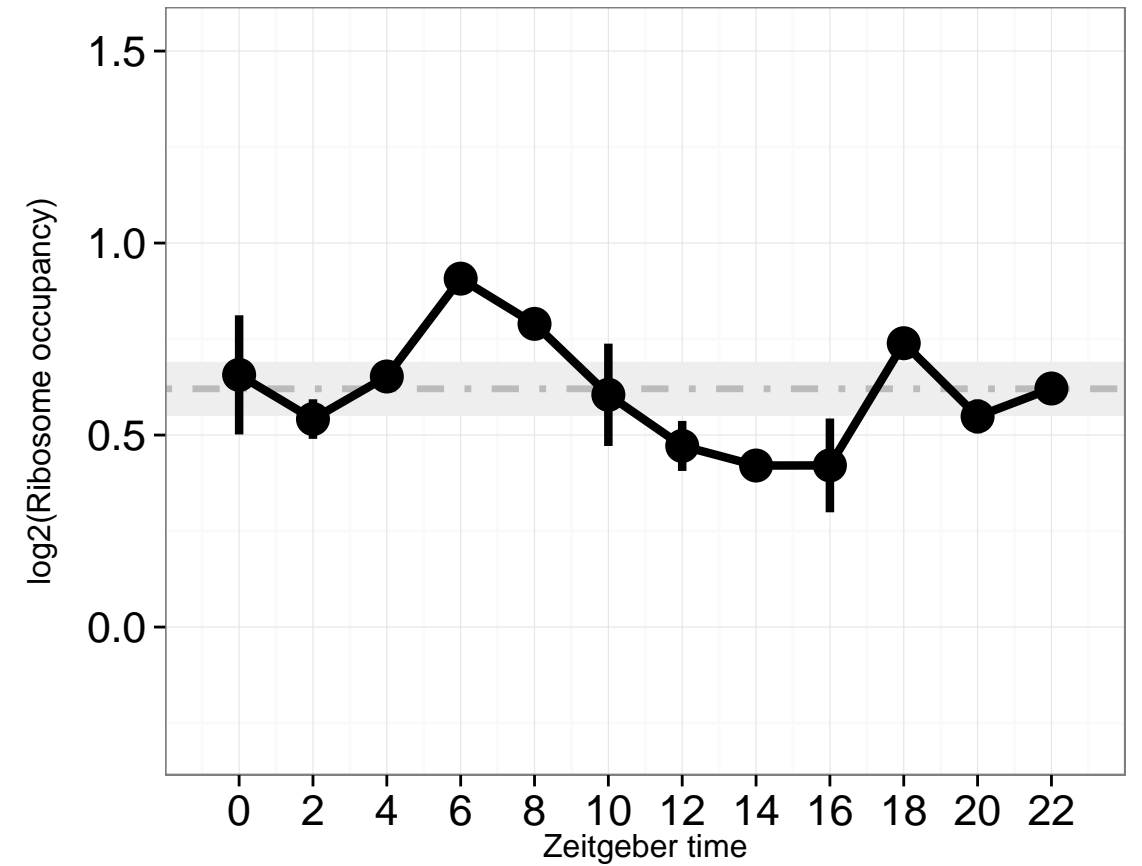

Supplement: Supplementary file 12189 [file 1]

# D17H6S56E-5

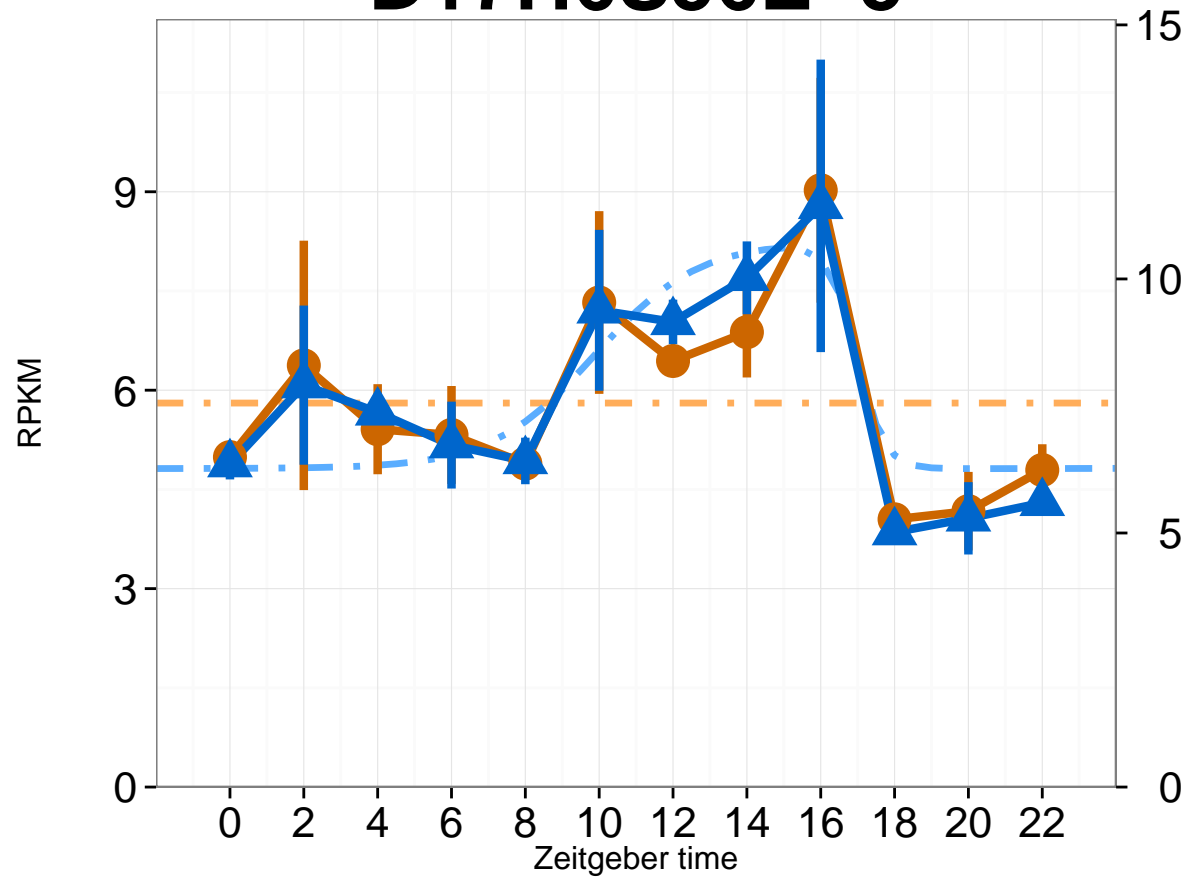

# D17H6S56E-5

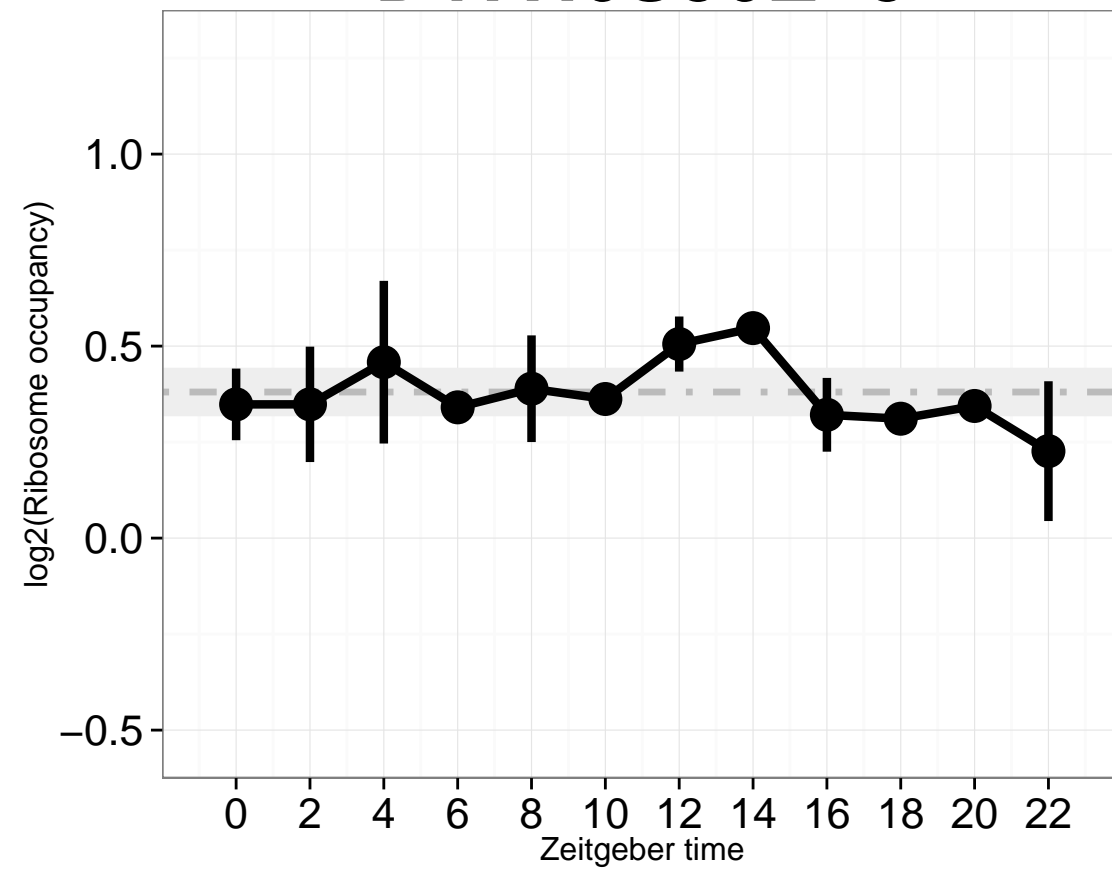

Supplement: Supplementary file 12190 [file 1]

## Wdr45

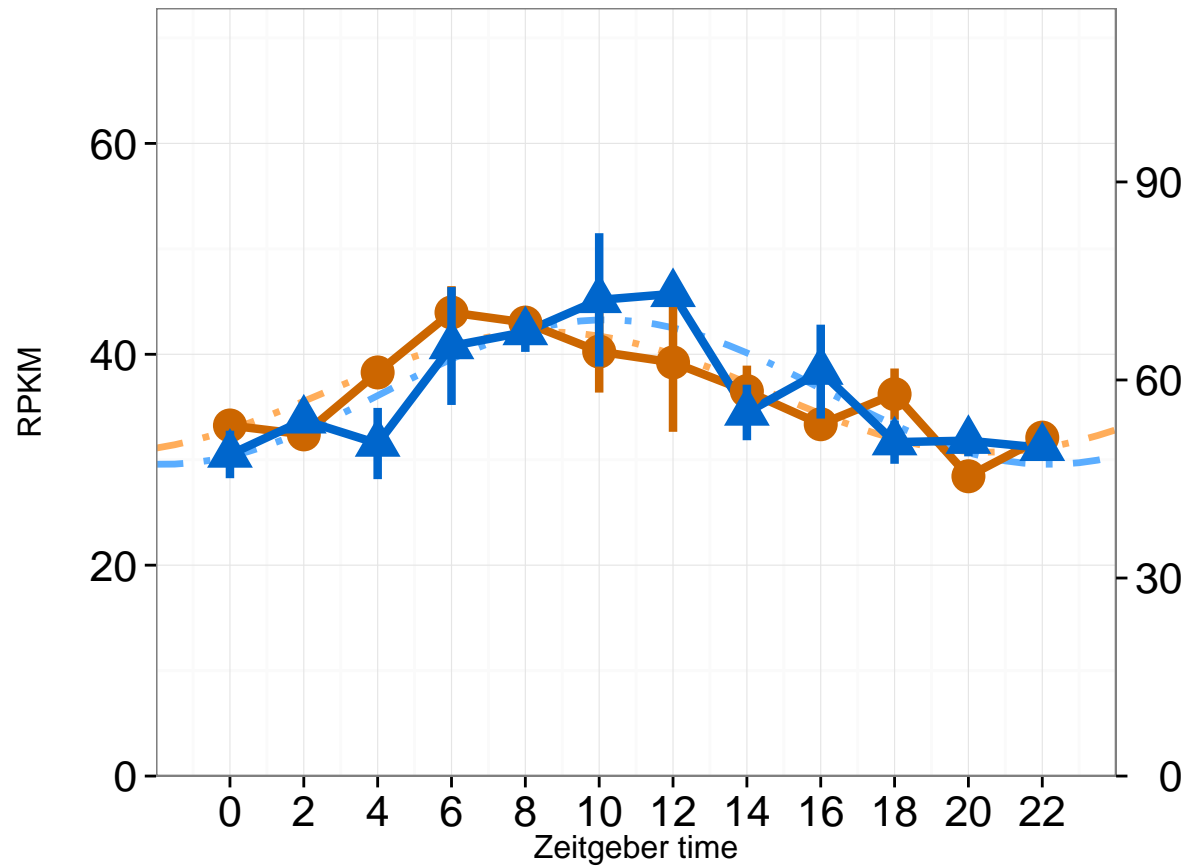

## Wdr45

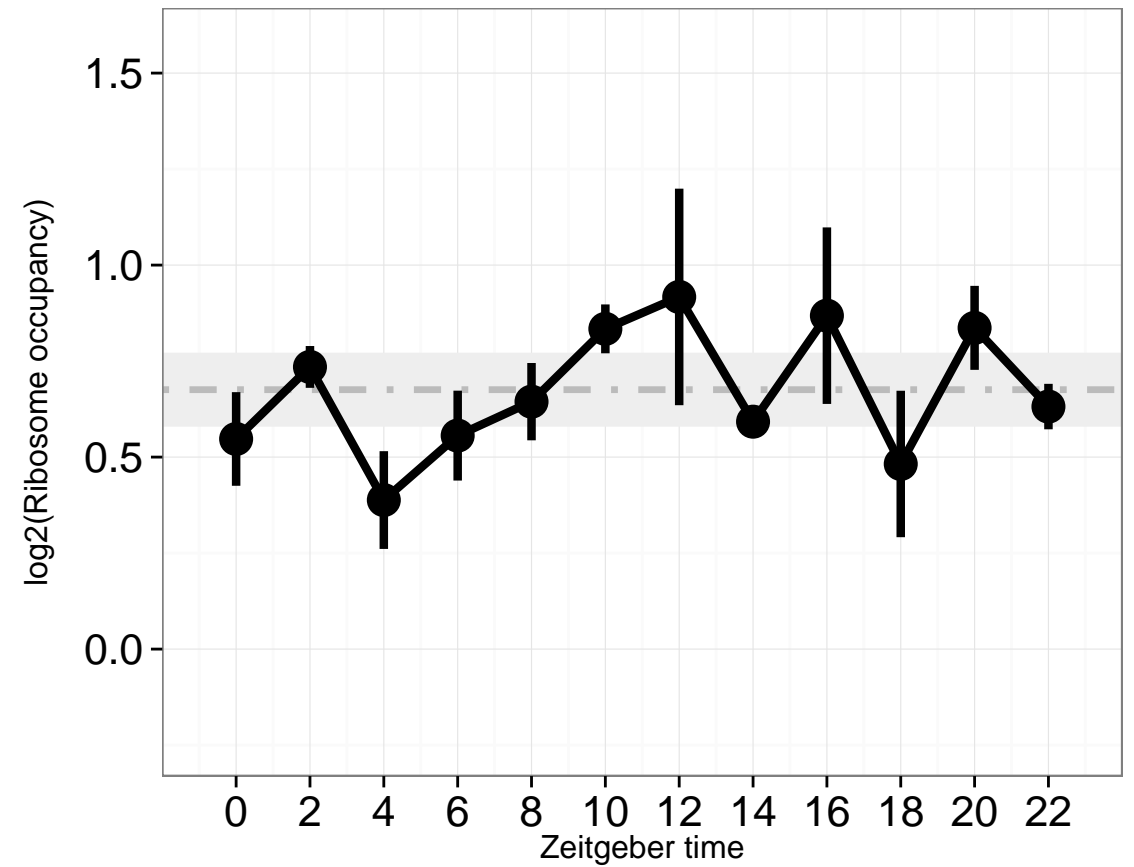

Supplement: Supplementary file 12191 [file 1]

# Fam195a

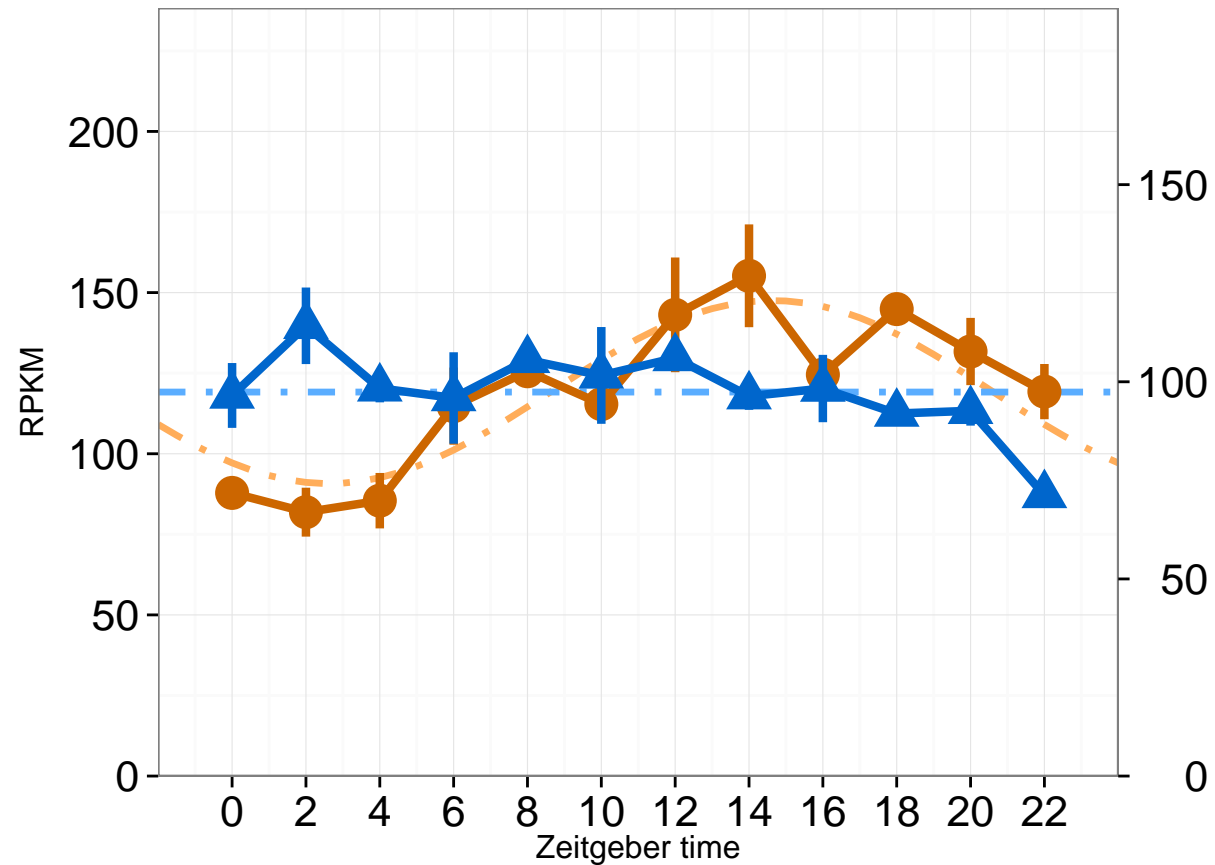

# Fam195a

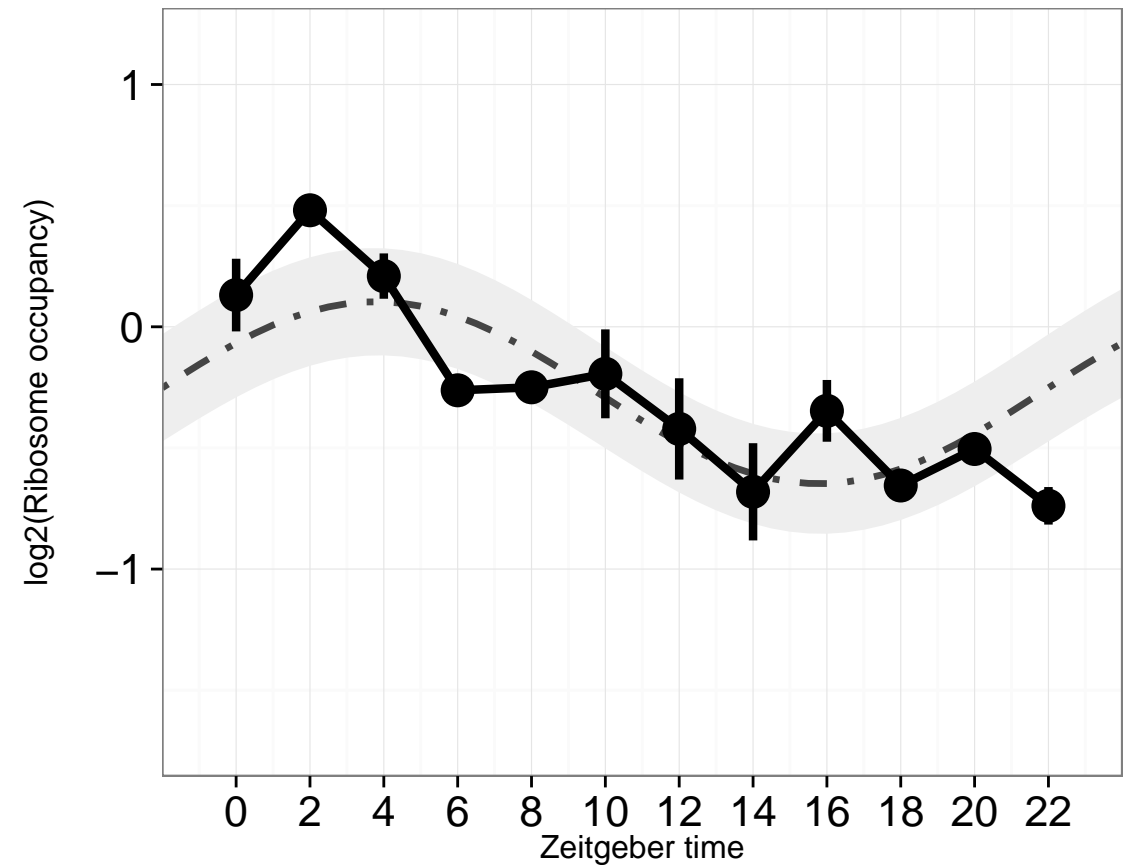

Supplement: Supplementary file 12192 [file 1]

# Cpsf4l

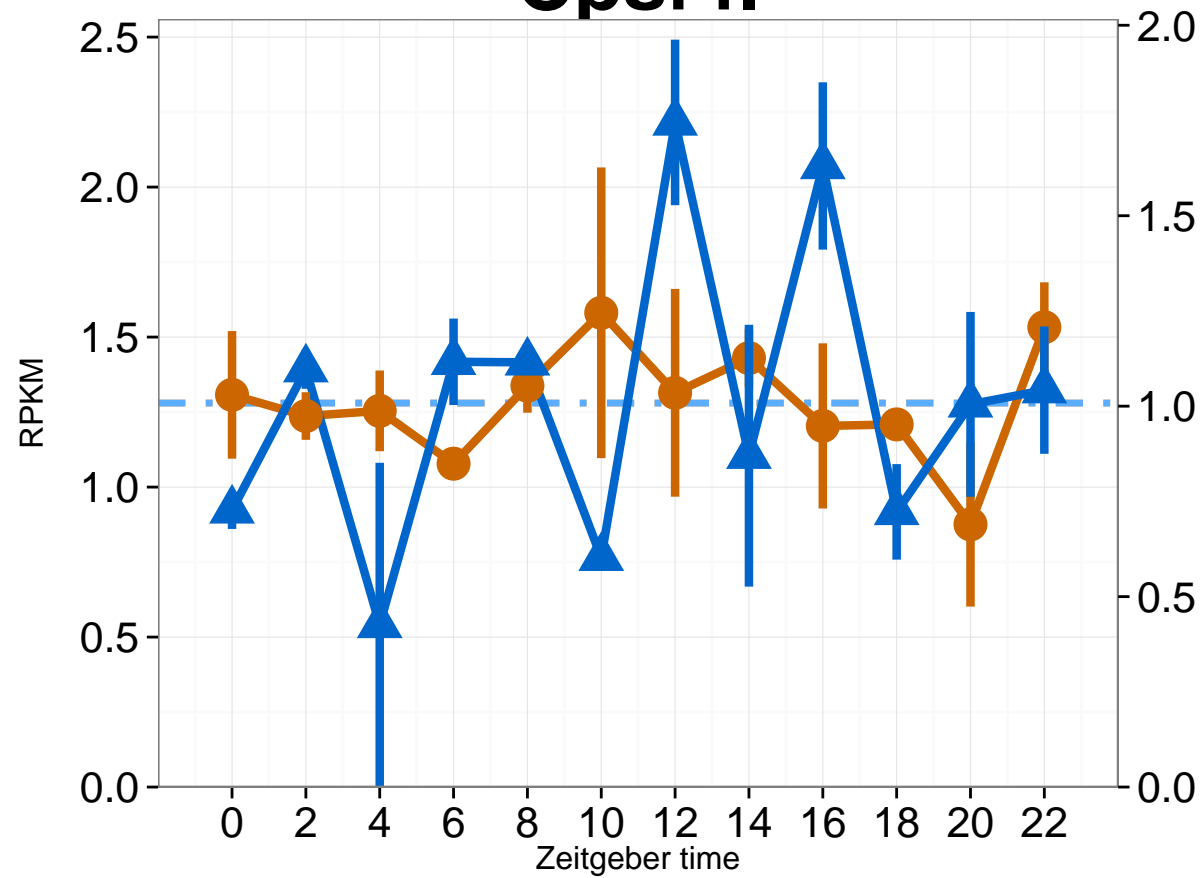

# Cpsf4l

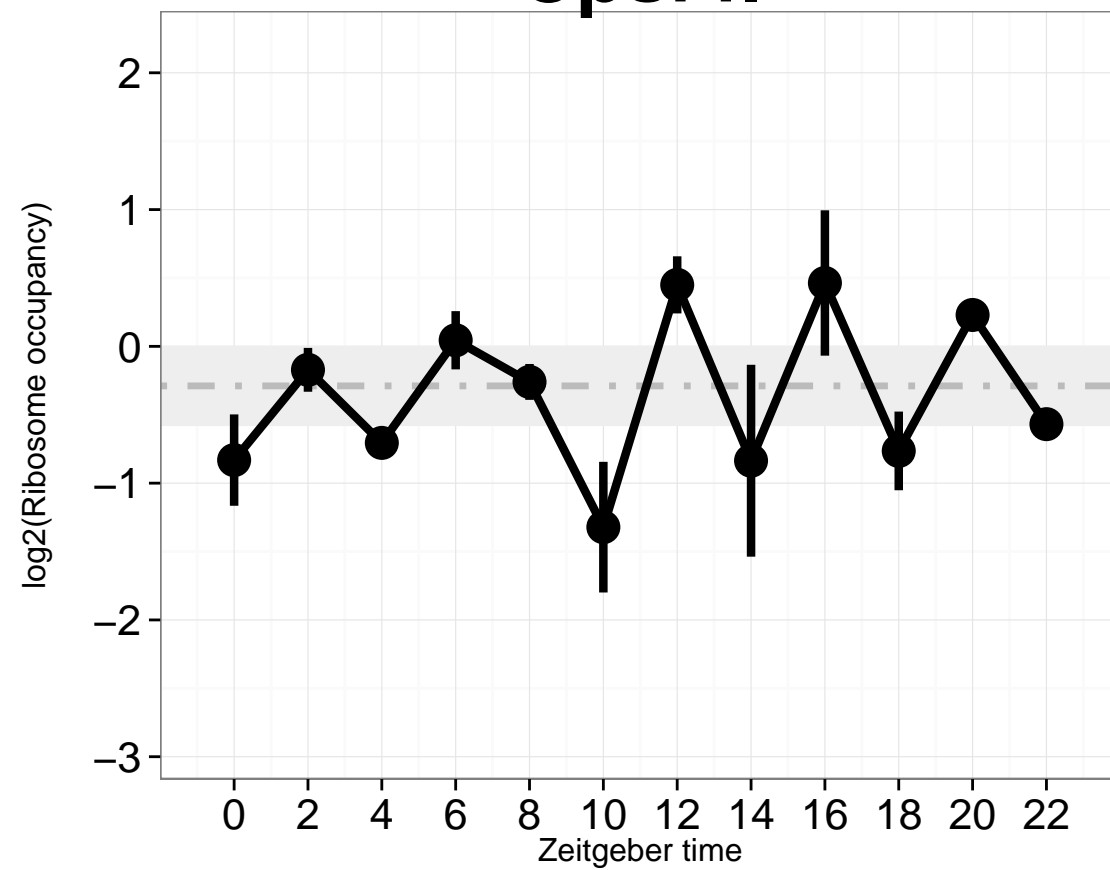

Supplement: Supplementary file 12193 [file 1]

## Prkcb

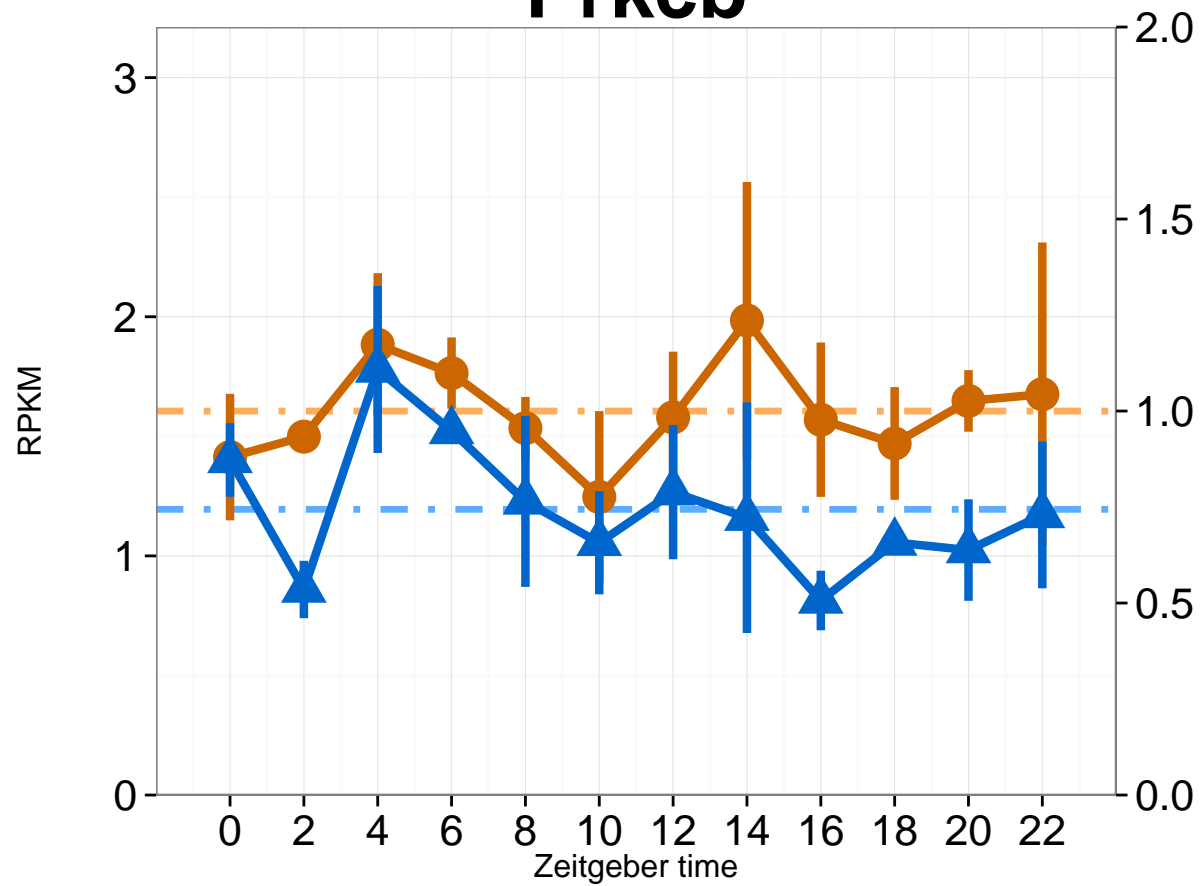

## Prkcb

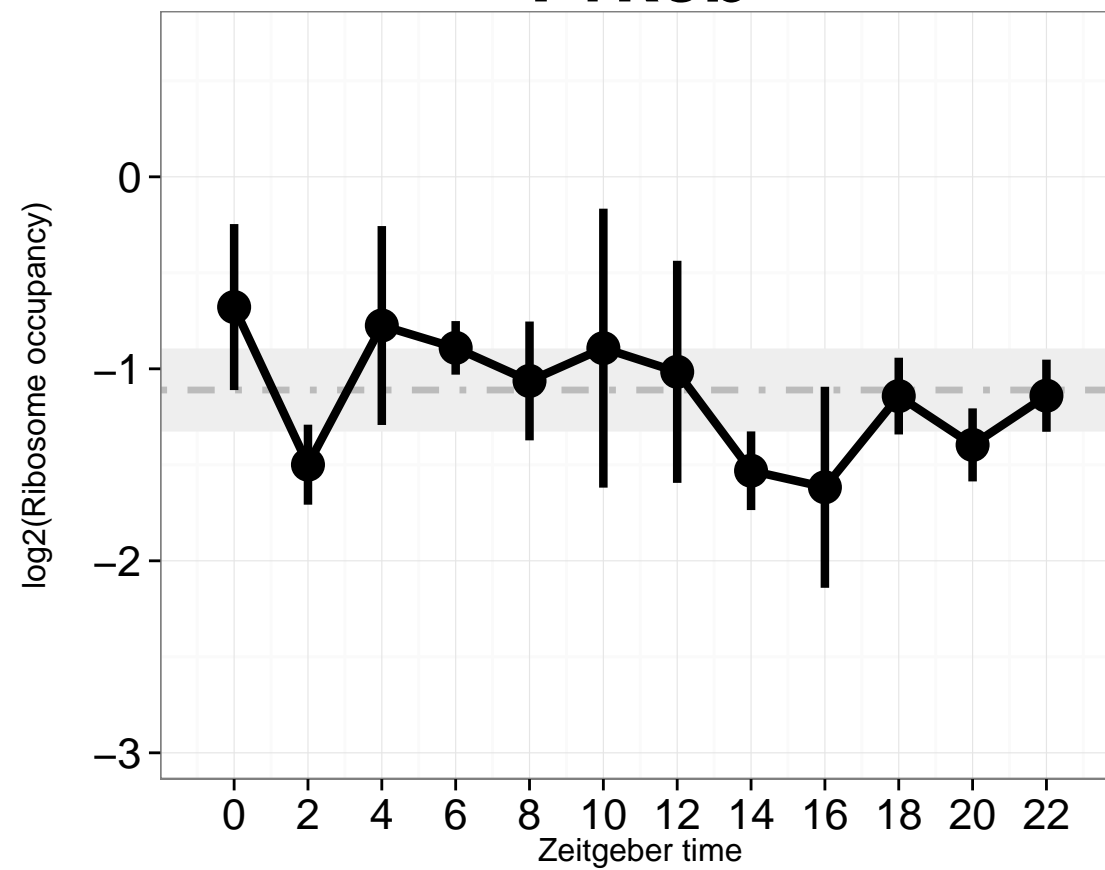

Supplement: Supplementary file 12194 [file 1]

## Dsc2

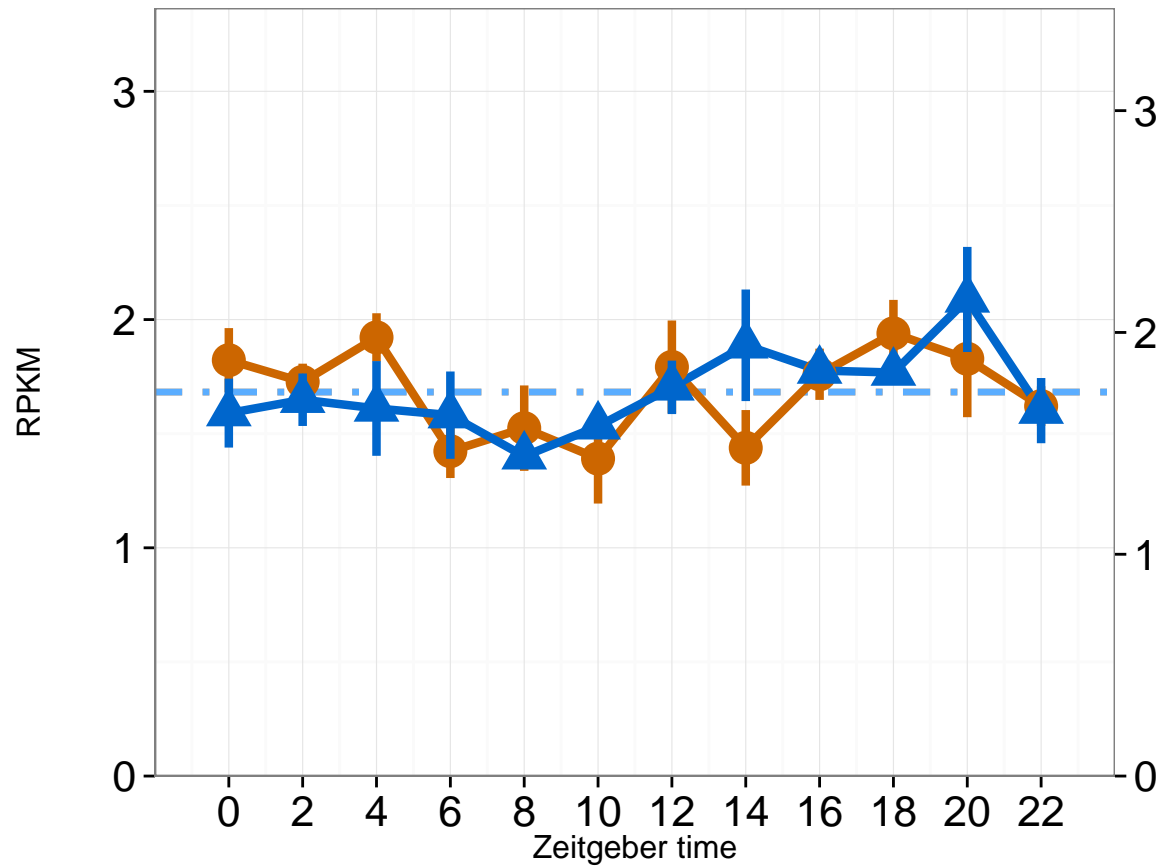

## Dsc2

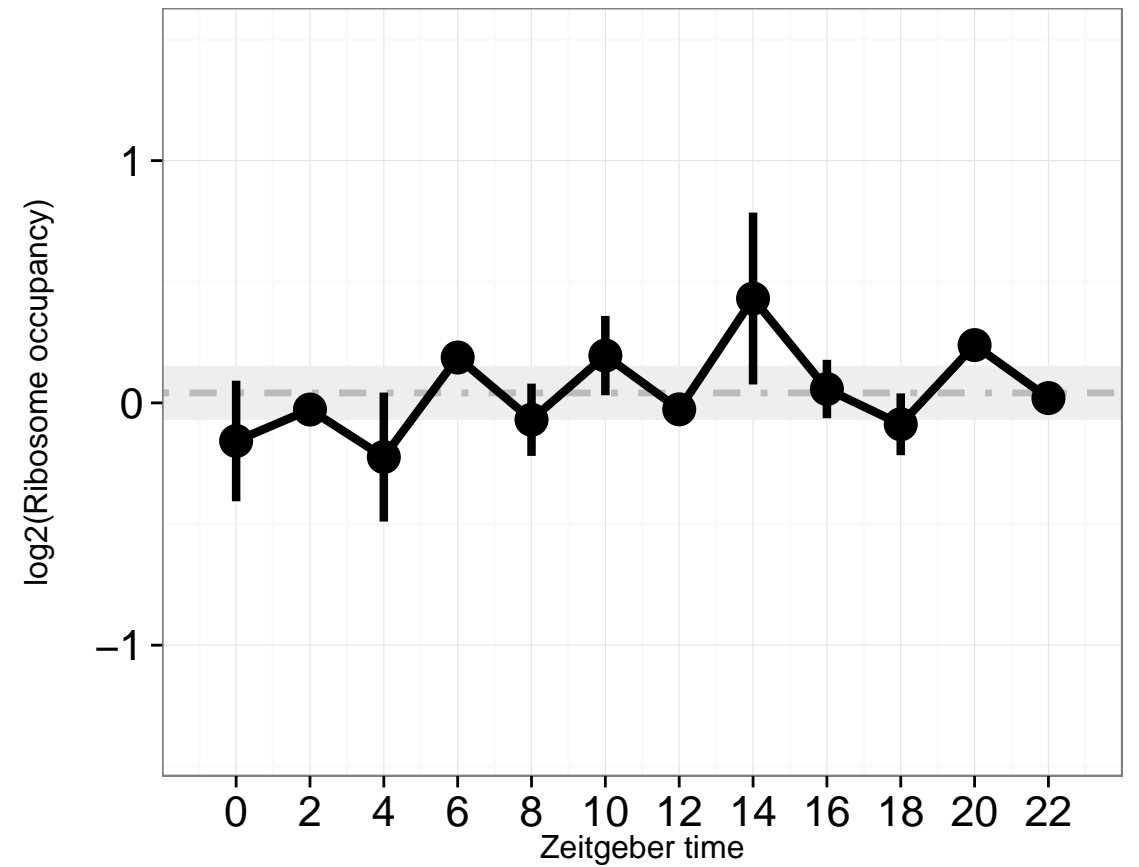

Supplement: Supplementary file 12195 [file 1]

# Zkscan1

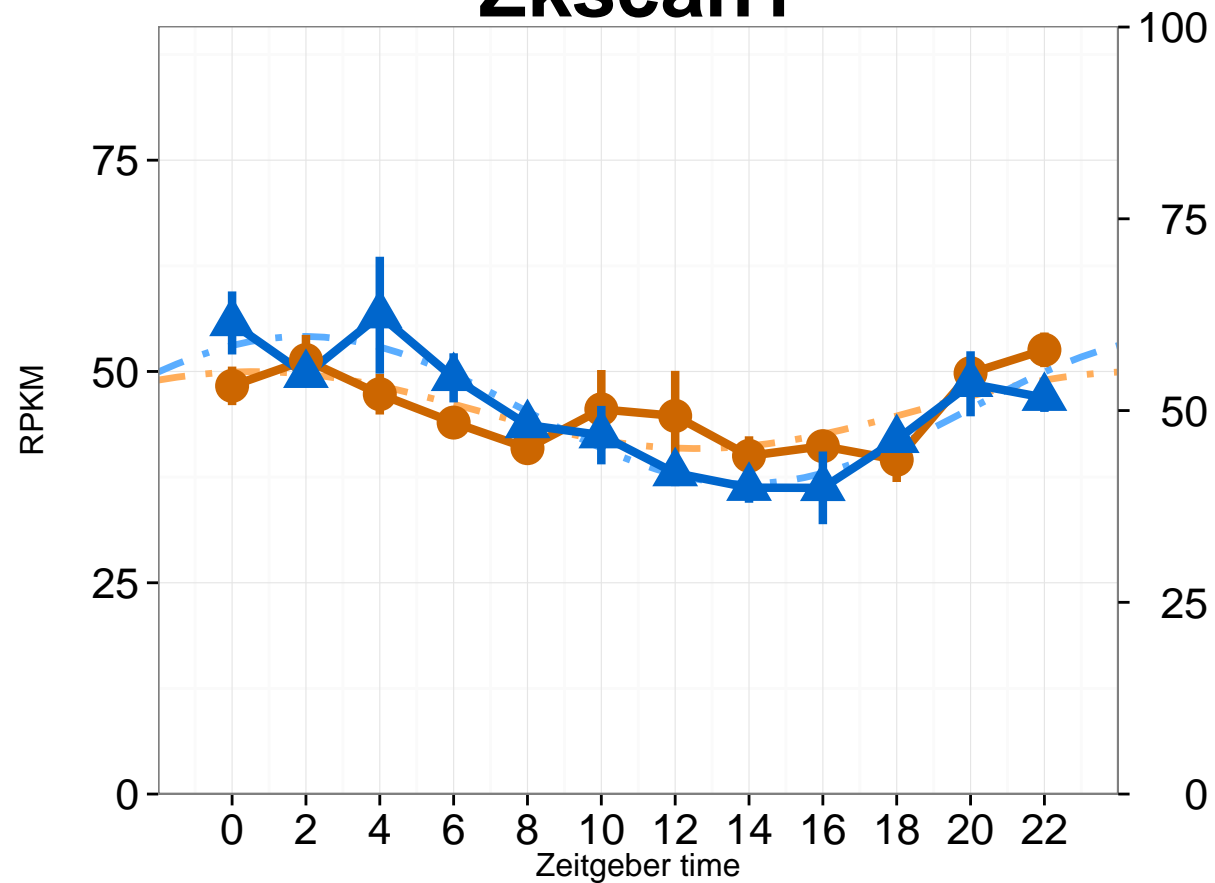

# Zkscan1

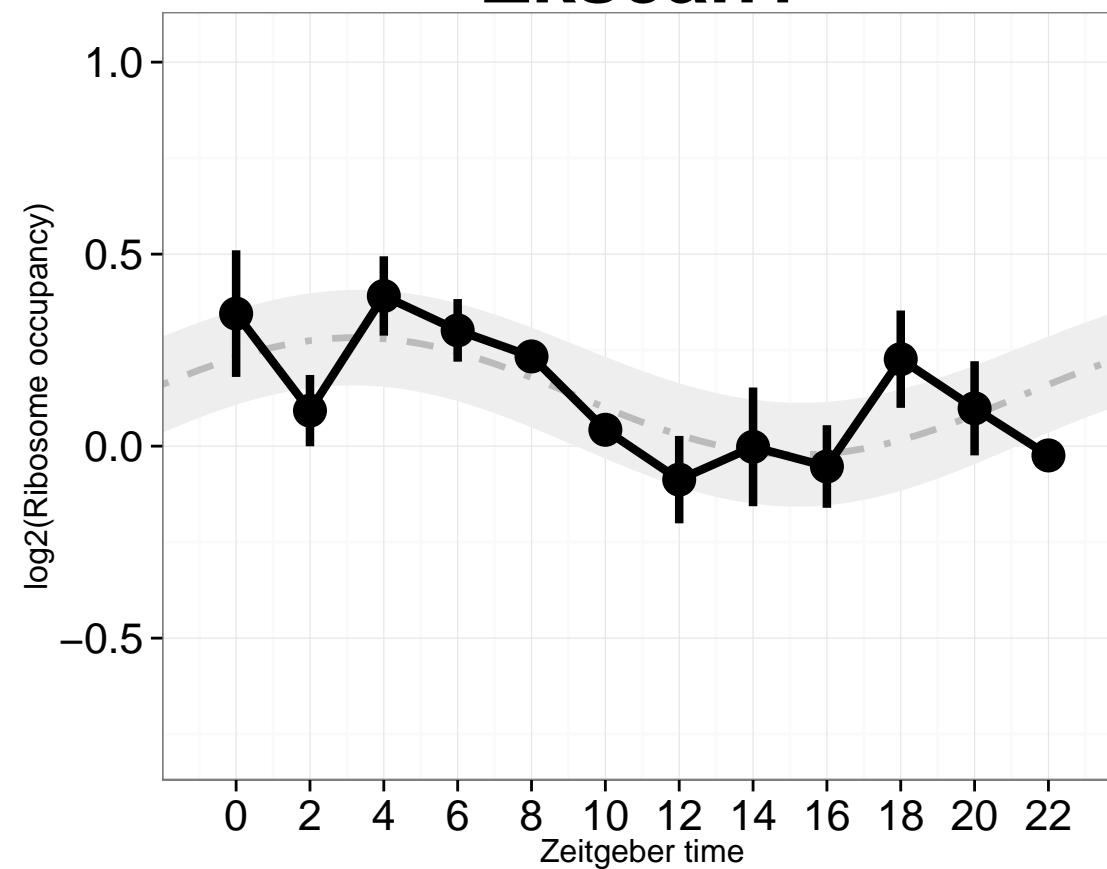

Supplement: Supplementary file 12196 [file 1]

# Lgr4

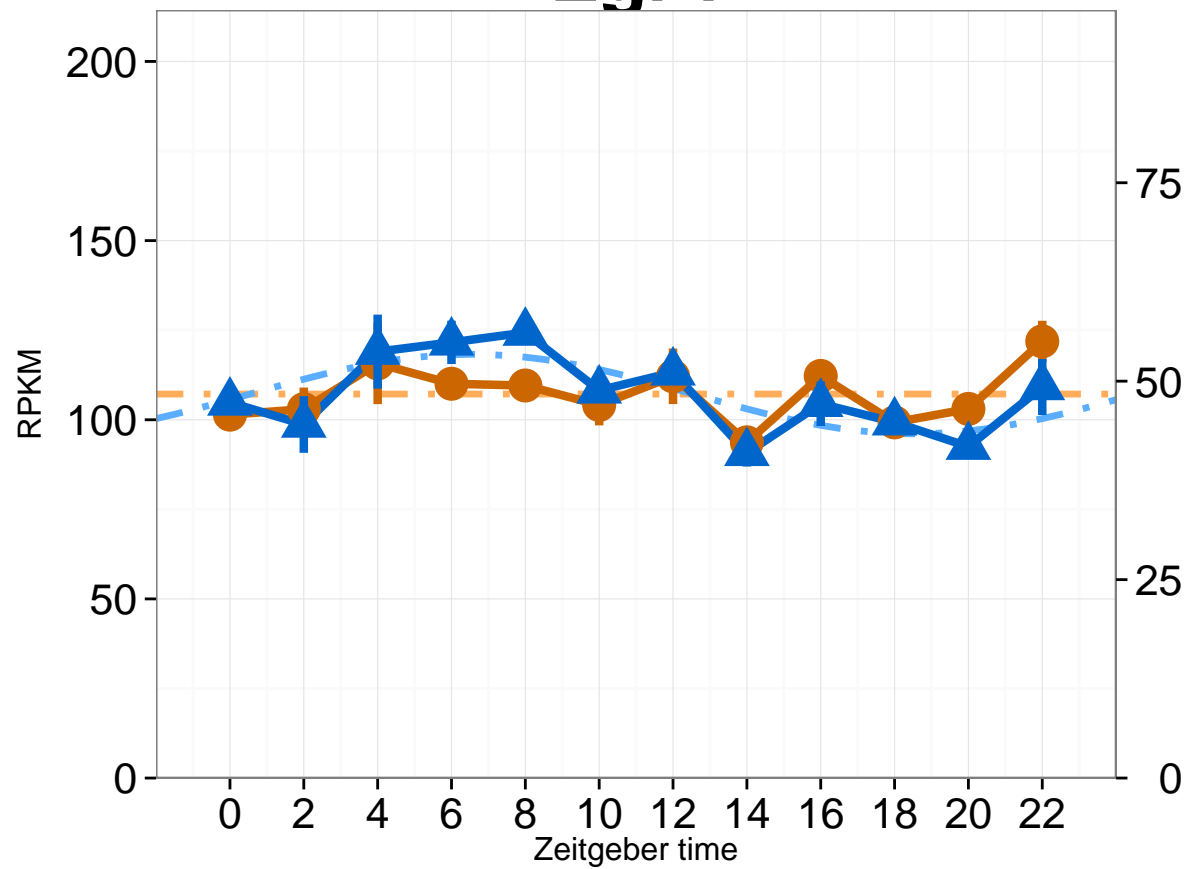

# Lgr4

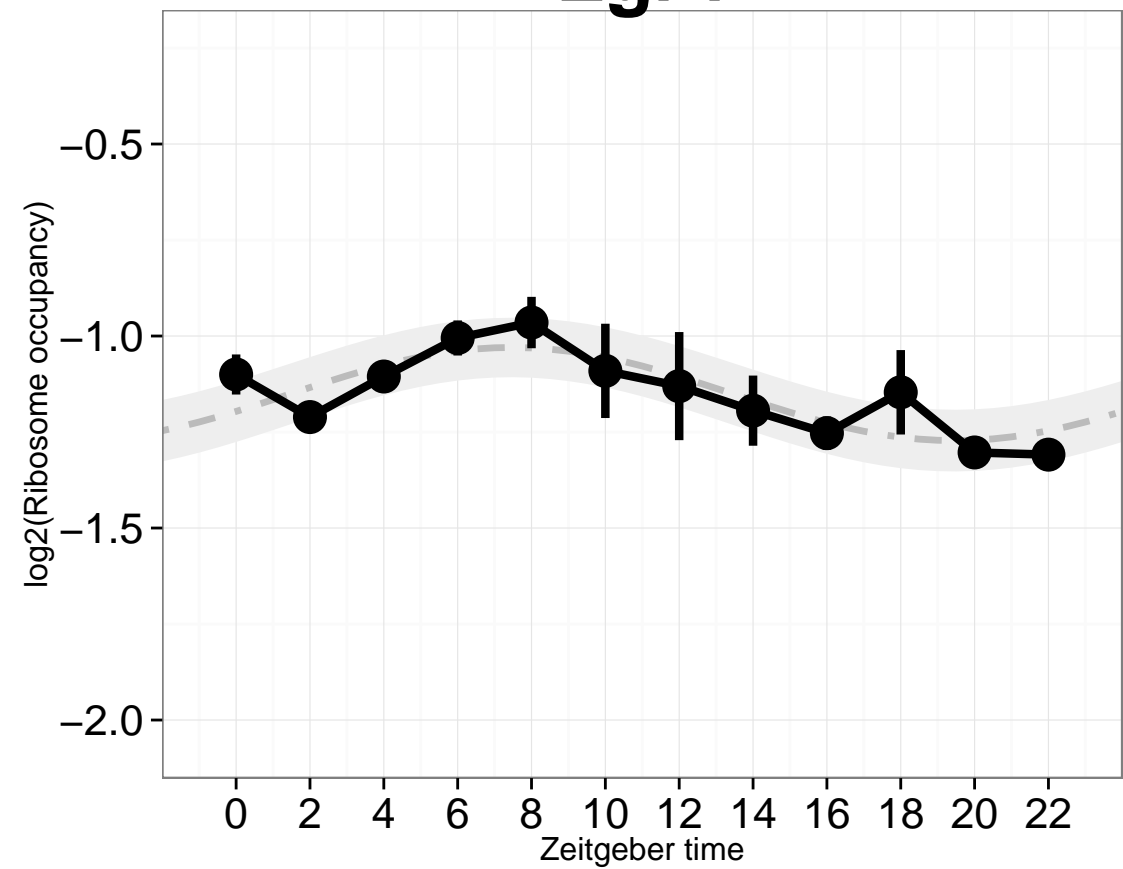

Supplement: Supplementary file 12197 [file 1]

# Fbxl6

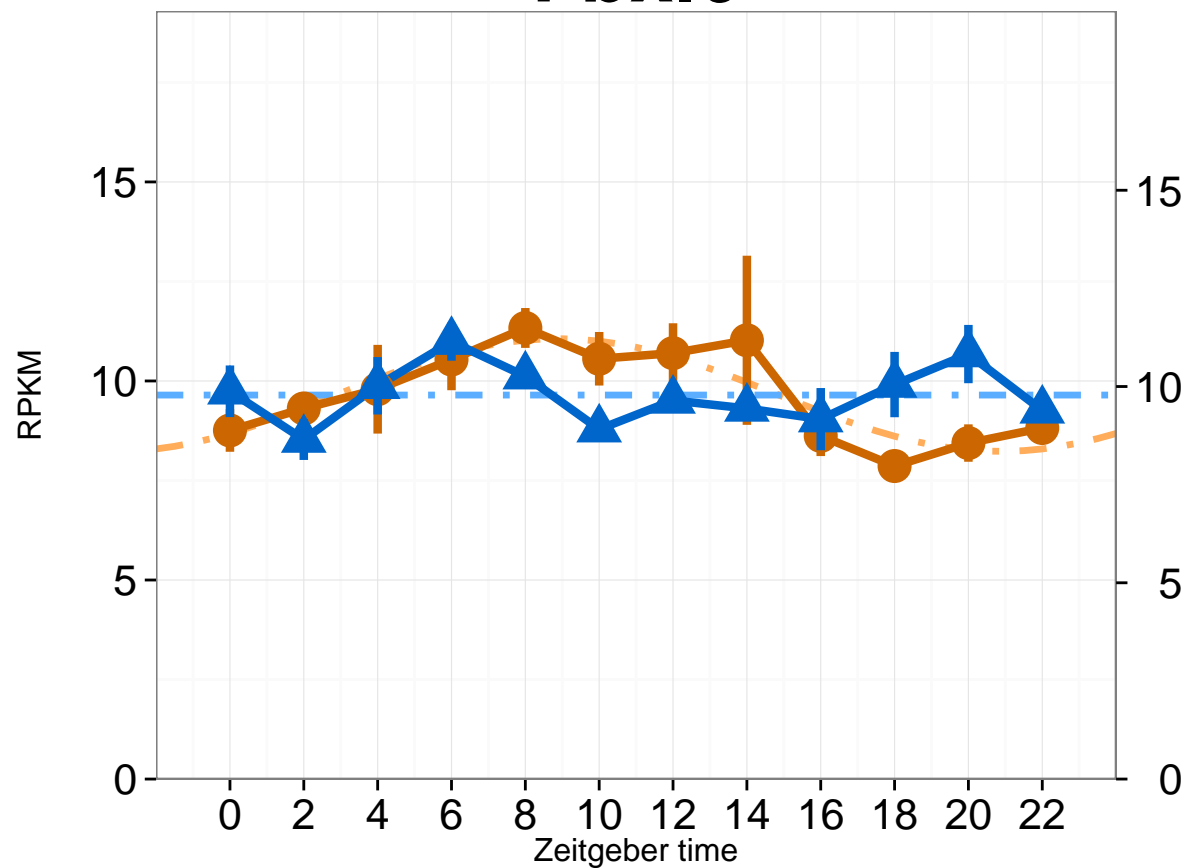

# Fbxl6

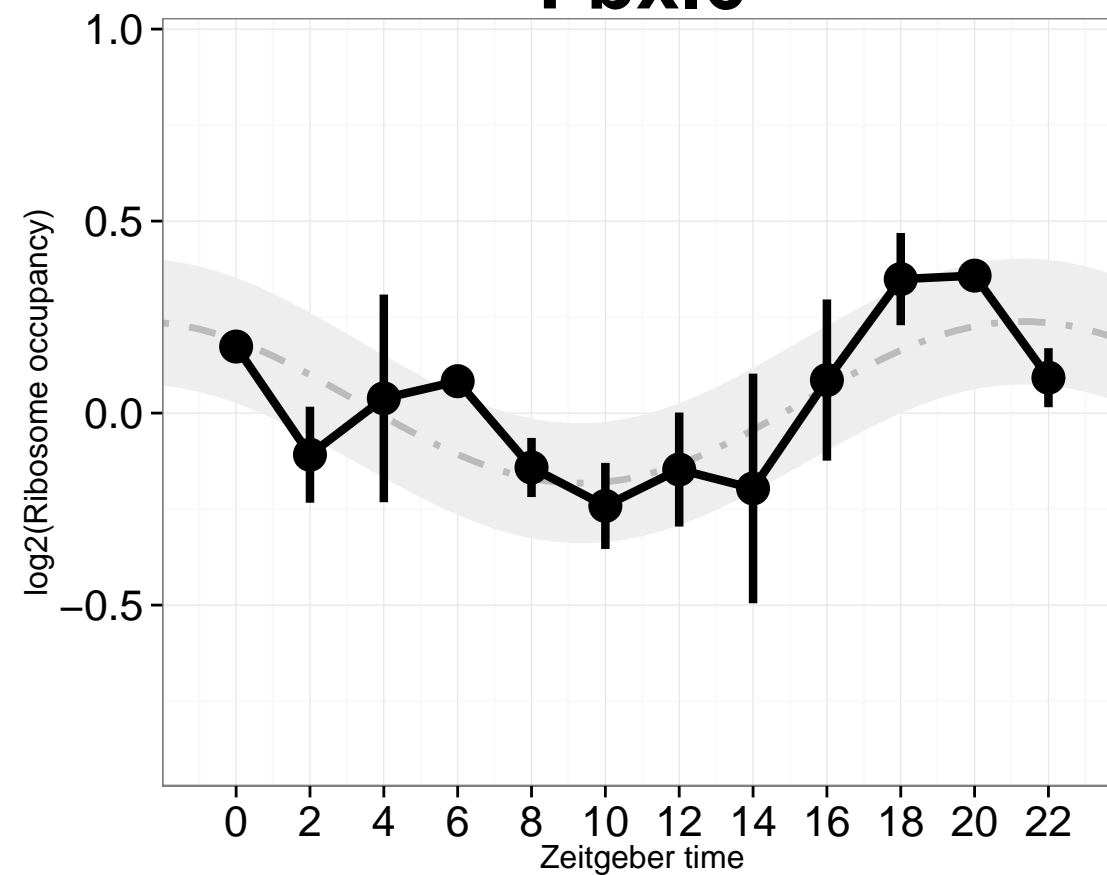

Supplement: Supplementary file 12198 [file 1]

# Cyp2d2

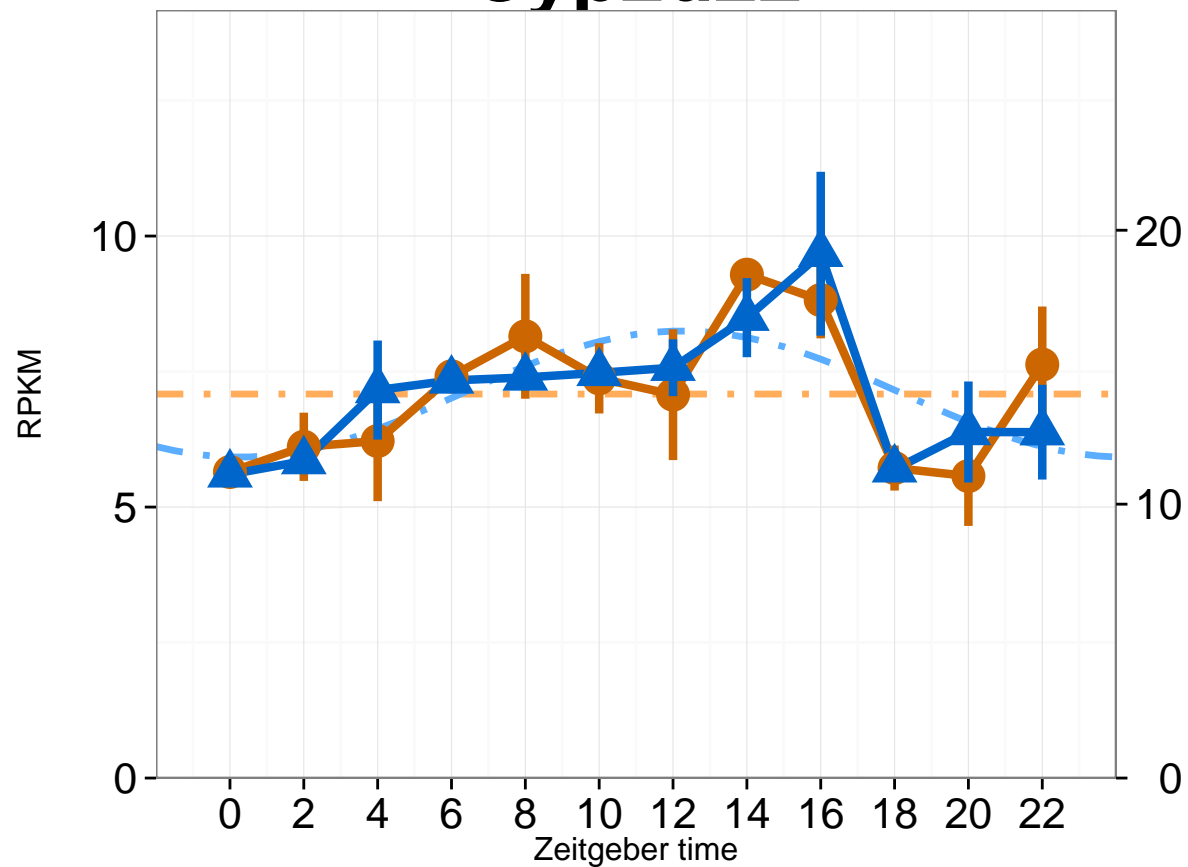

# Cyp2d2

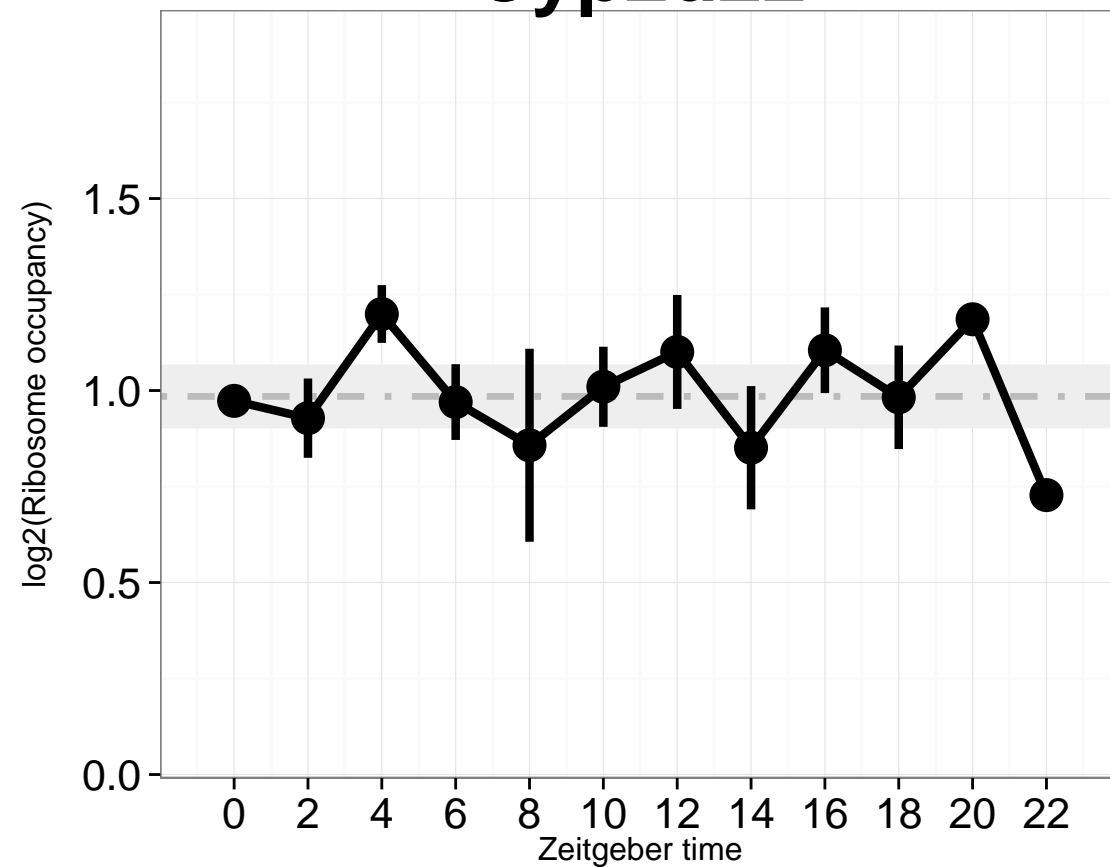

Supplement: Supplementary file 12199 [file 1]

# Lrfn1

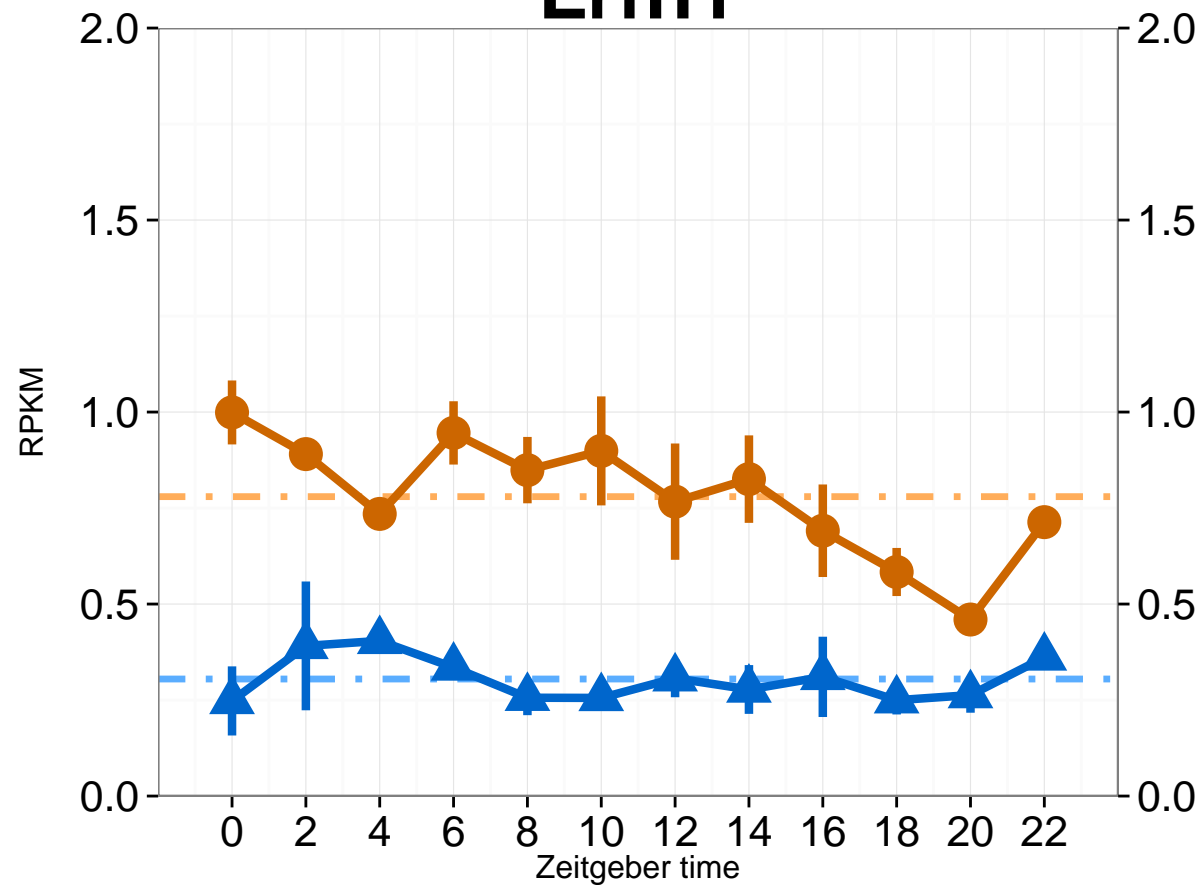

# Lrfn1

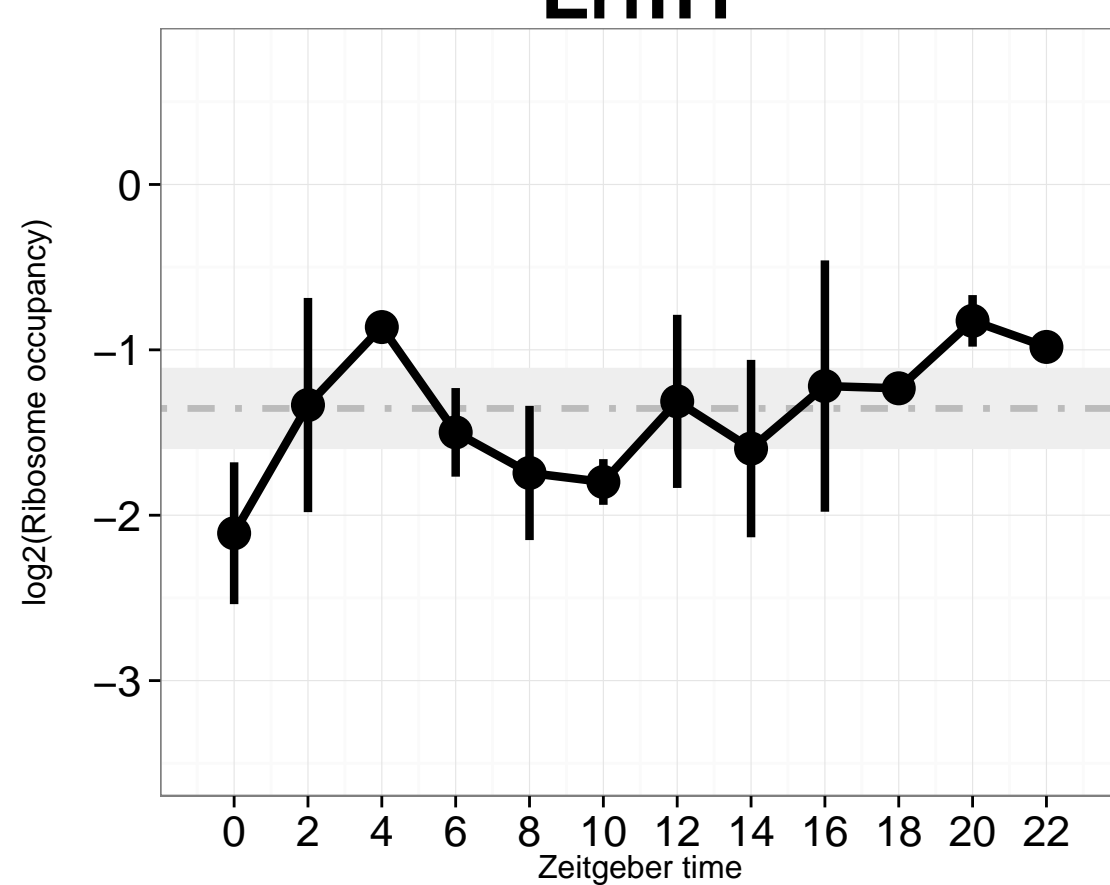

Supplement: Supplementary file 12200 [file 1]

## Safb2

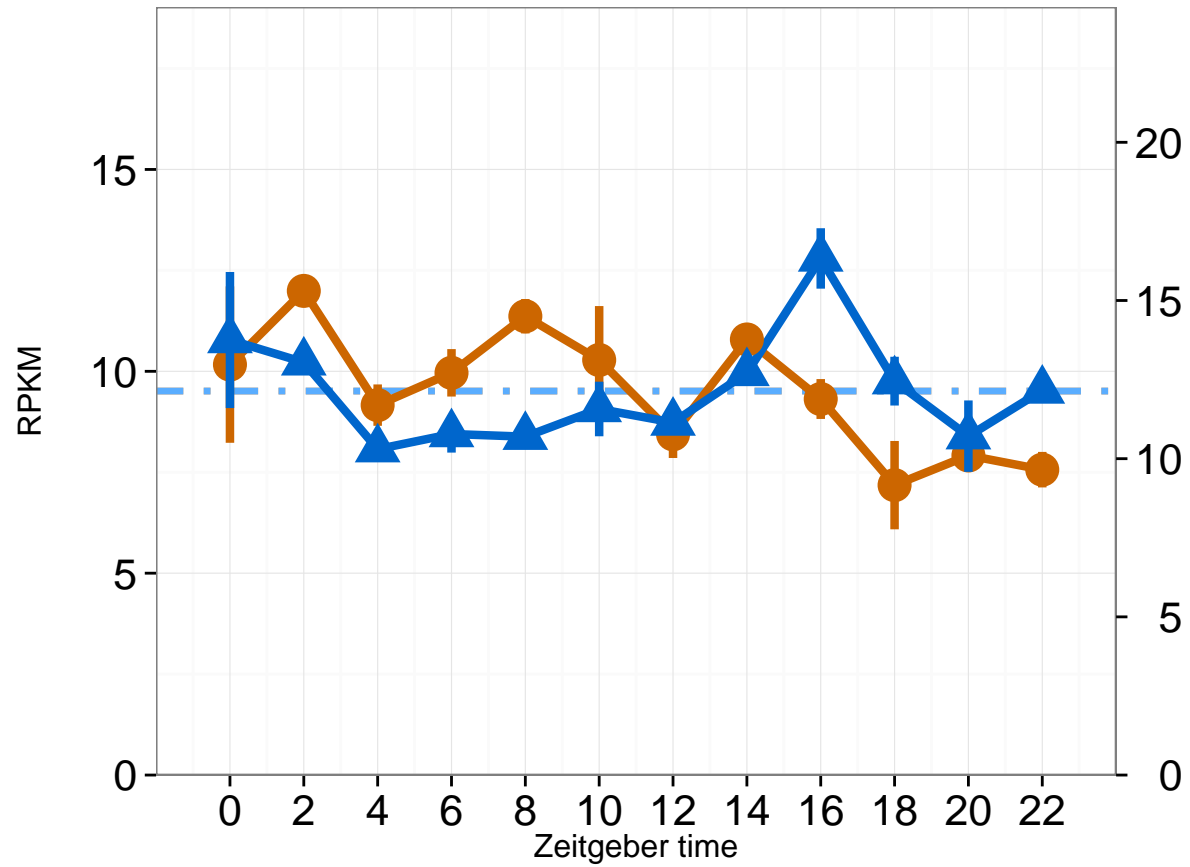

## Safb2

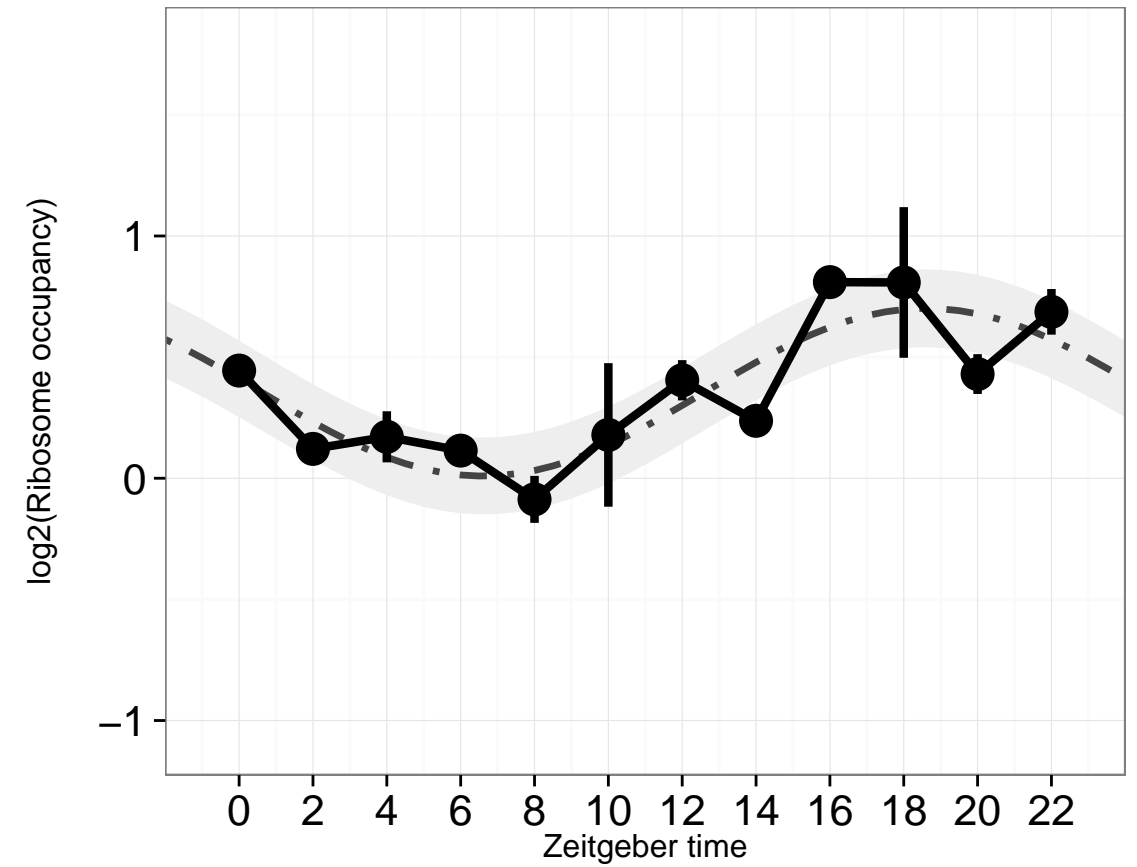

Supplement: Supplementary file 12201 [file 1]

# Tmem115

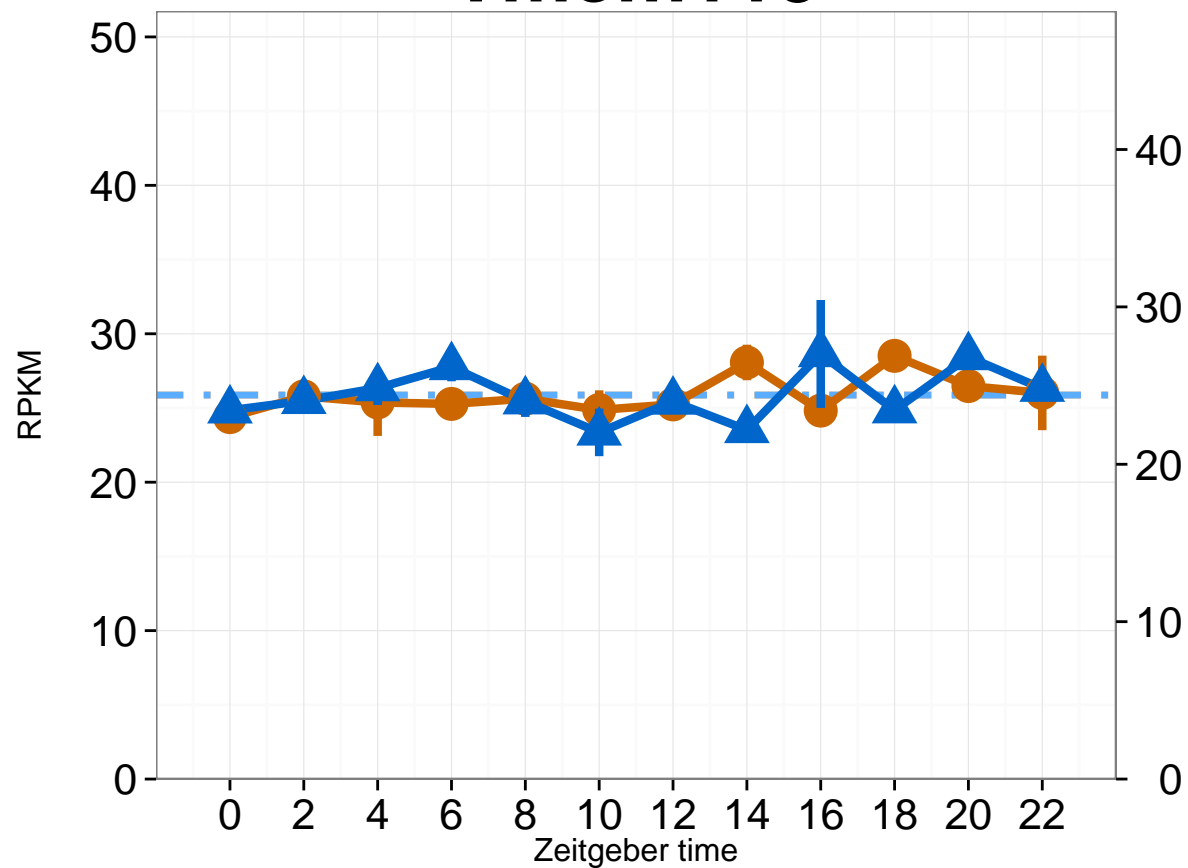

# Tmem115

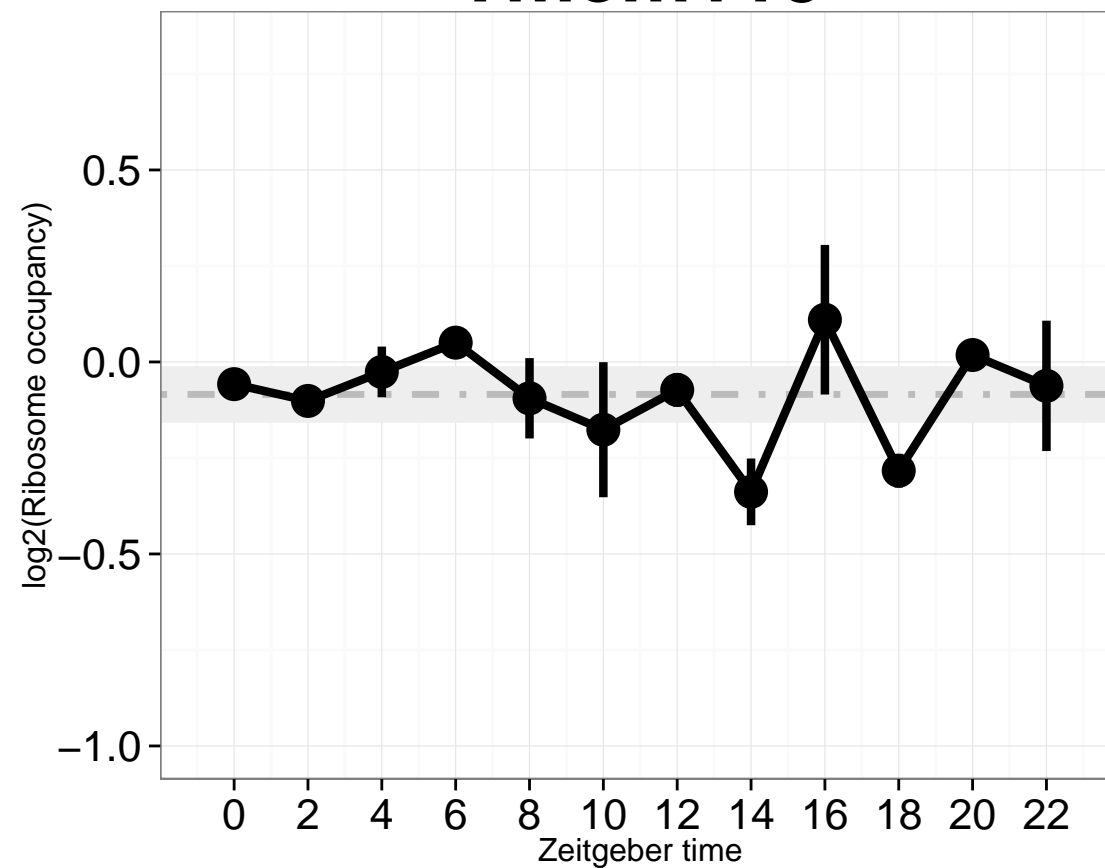

Supplement: Supplementary file 12202 [file 1]

## Mmp15

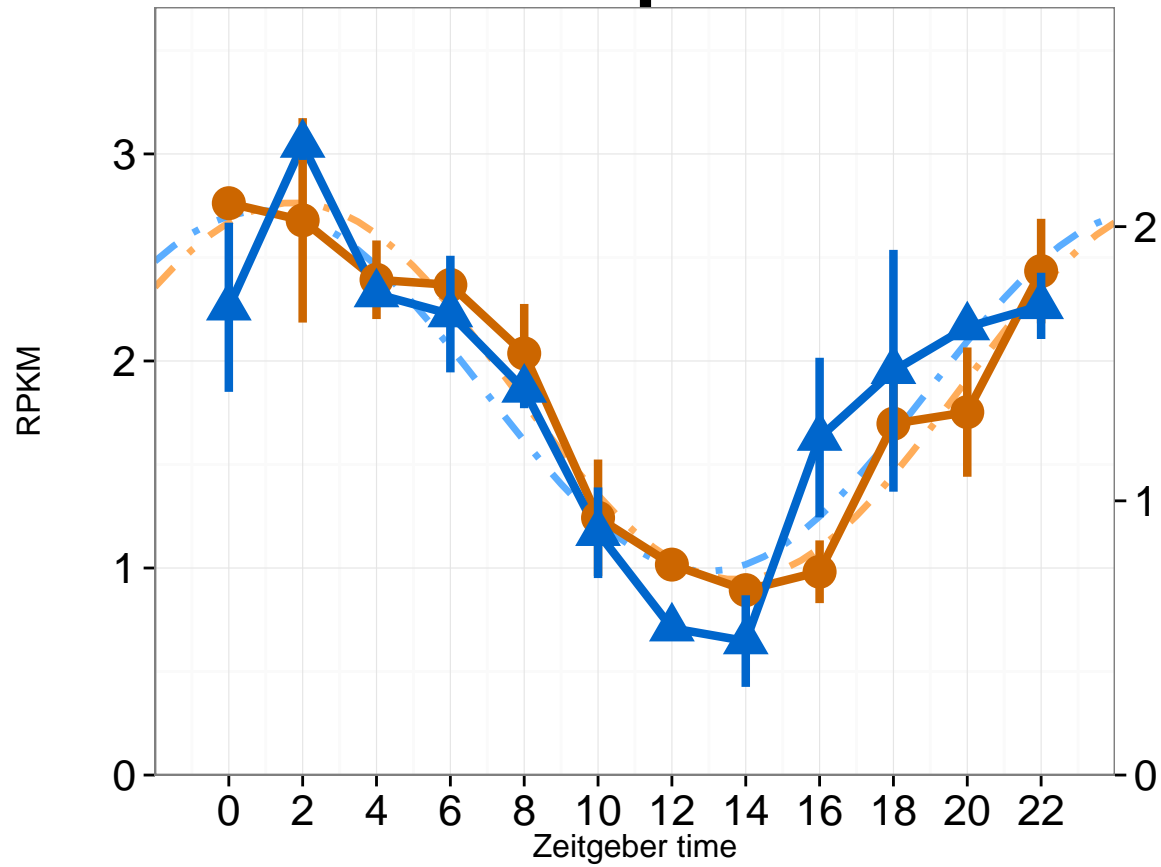

## Mmp15

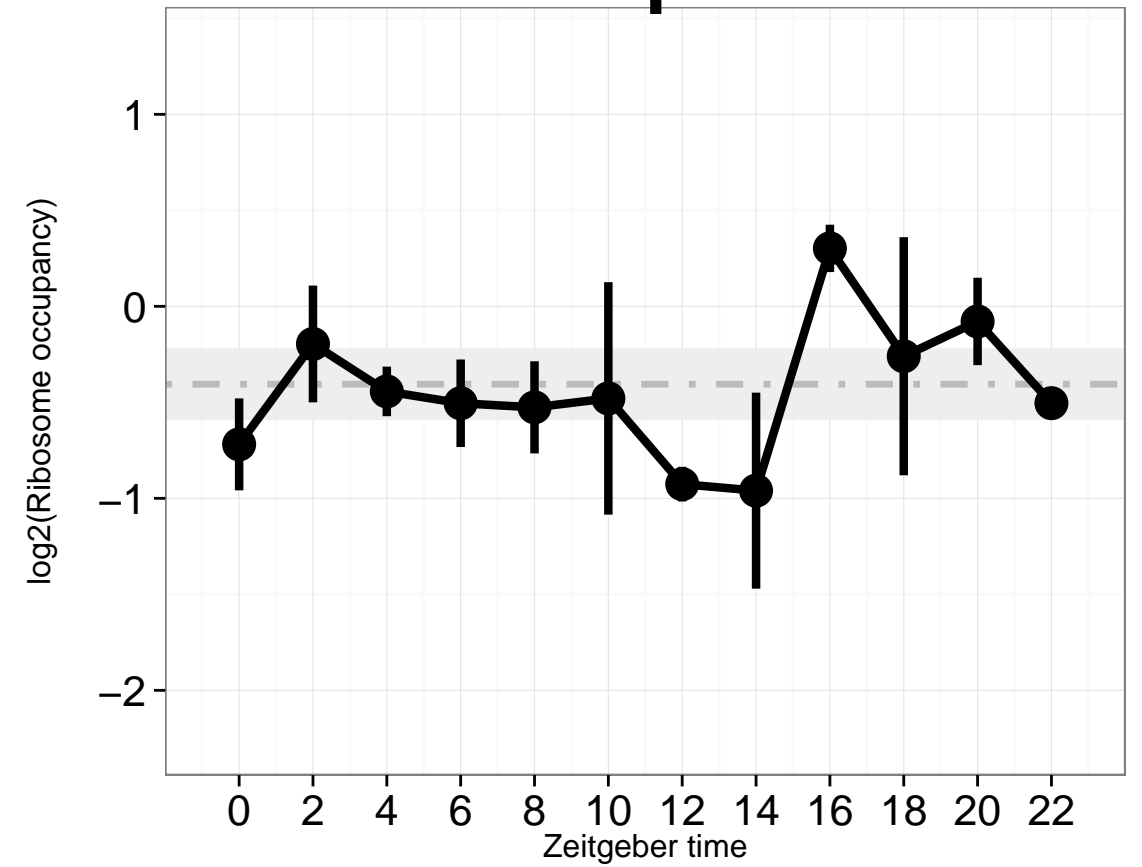

Supplement: Supplementary file 12203 [file 1]

## Hsph1

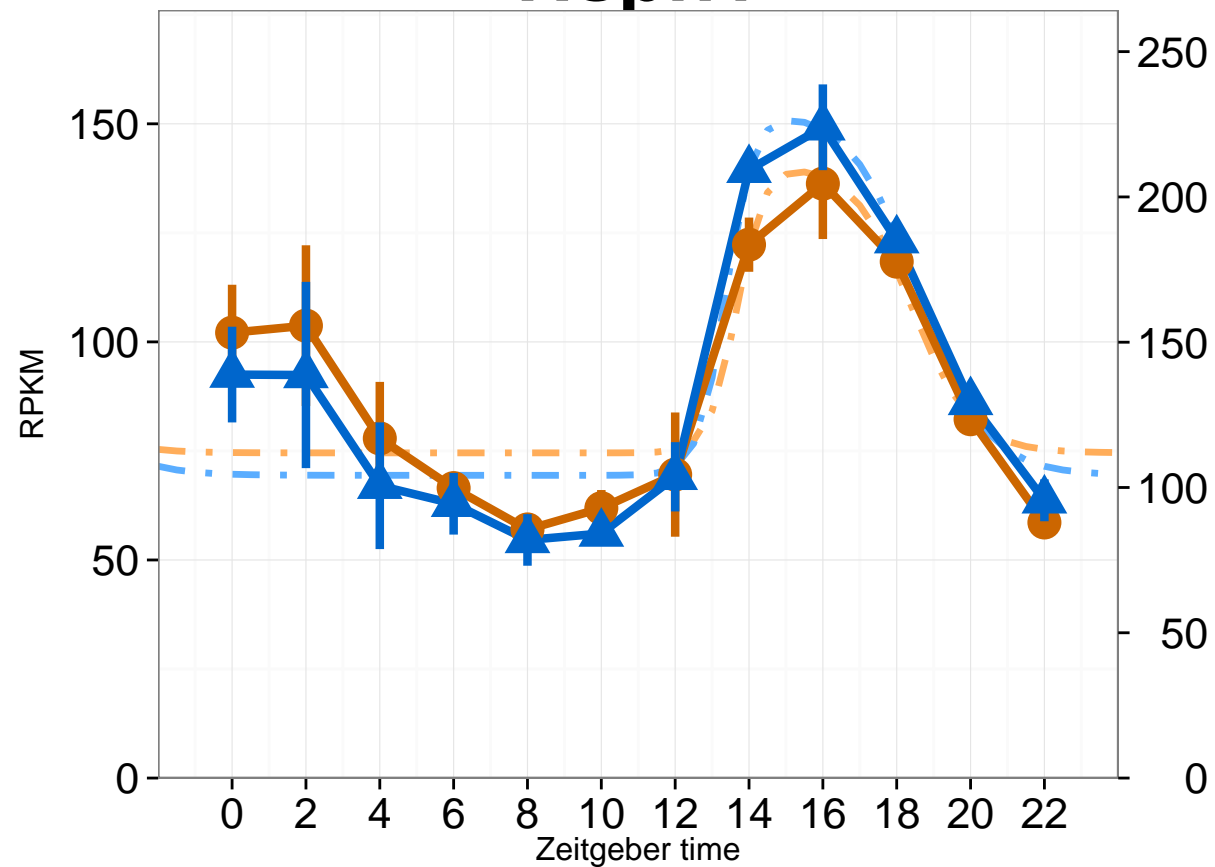

## Hsph1

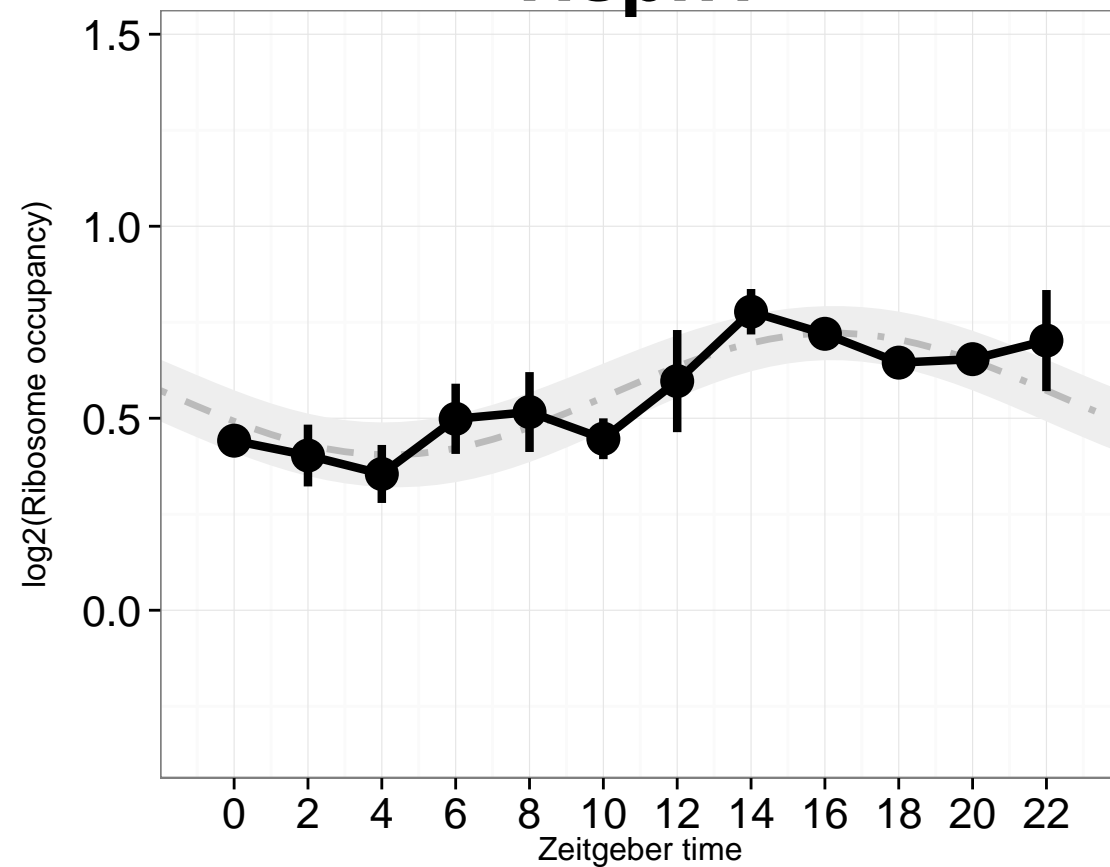

Supplement: Supplementary file 12204 [file 1]

## Vsig2

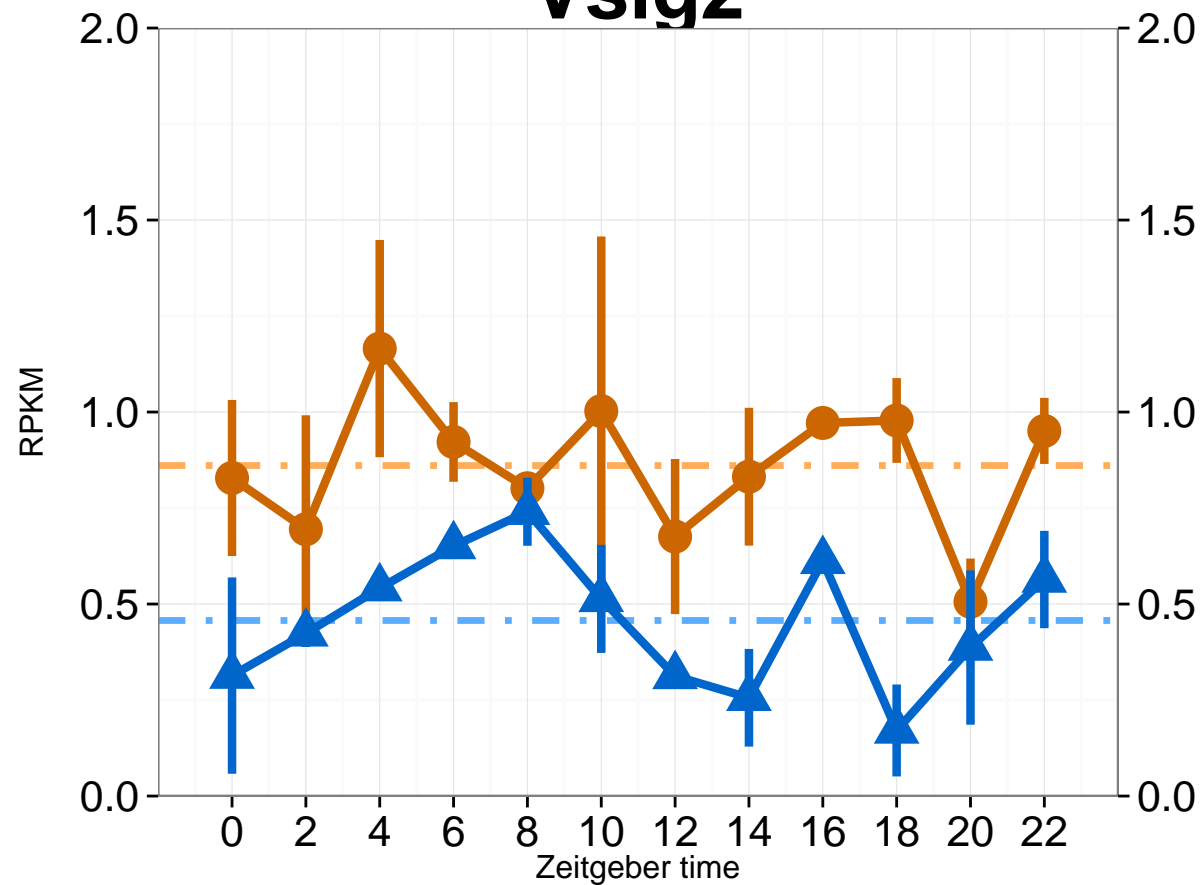

## Vsig2

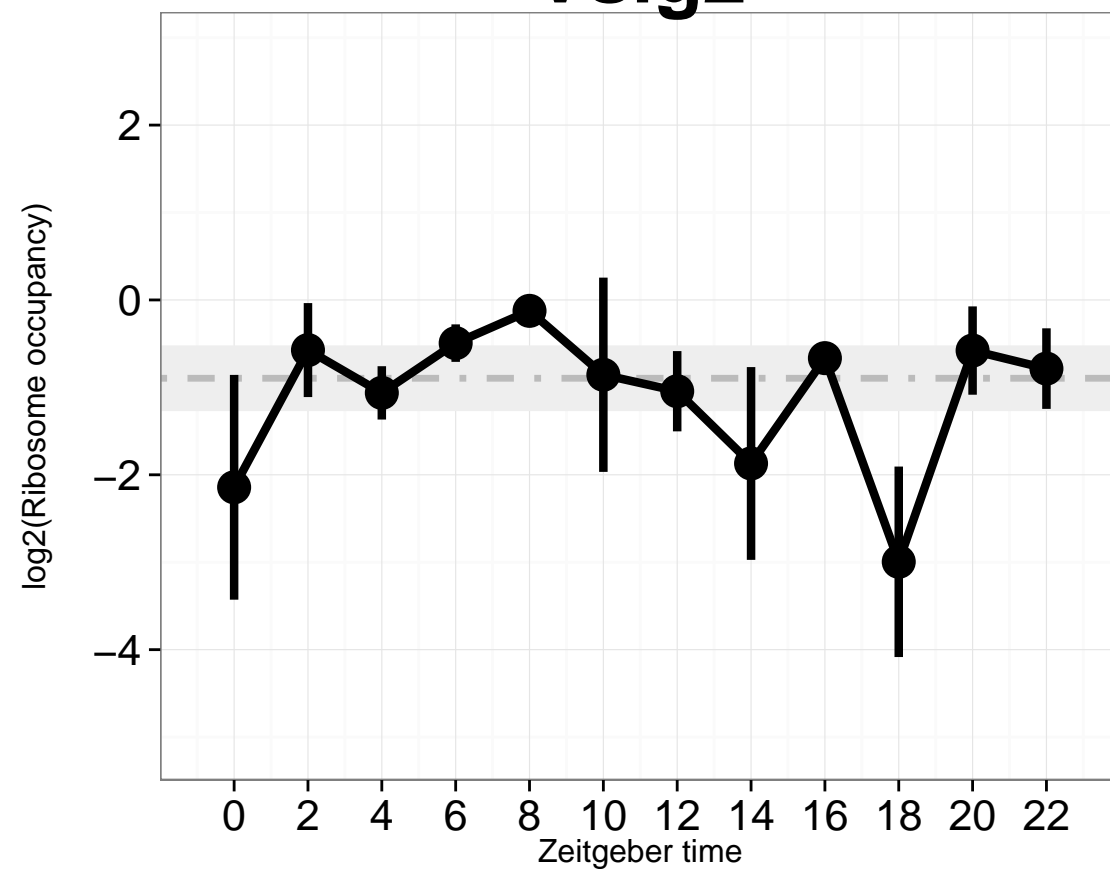

Supplement: Supplementary file 12205 [file 1]

## Prpf6

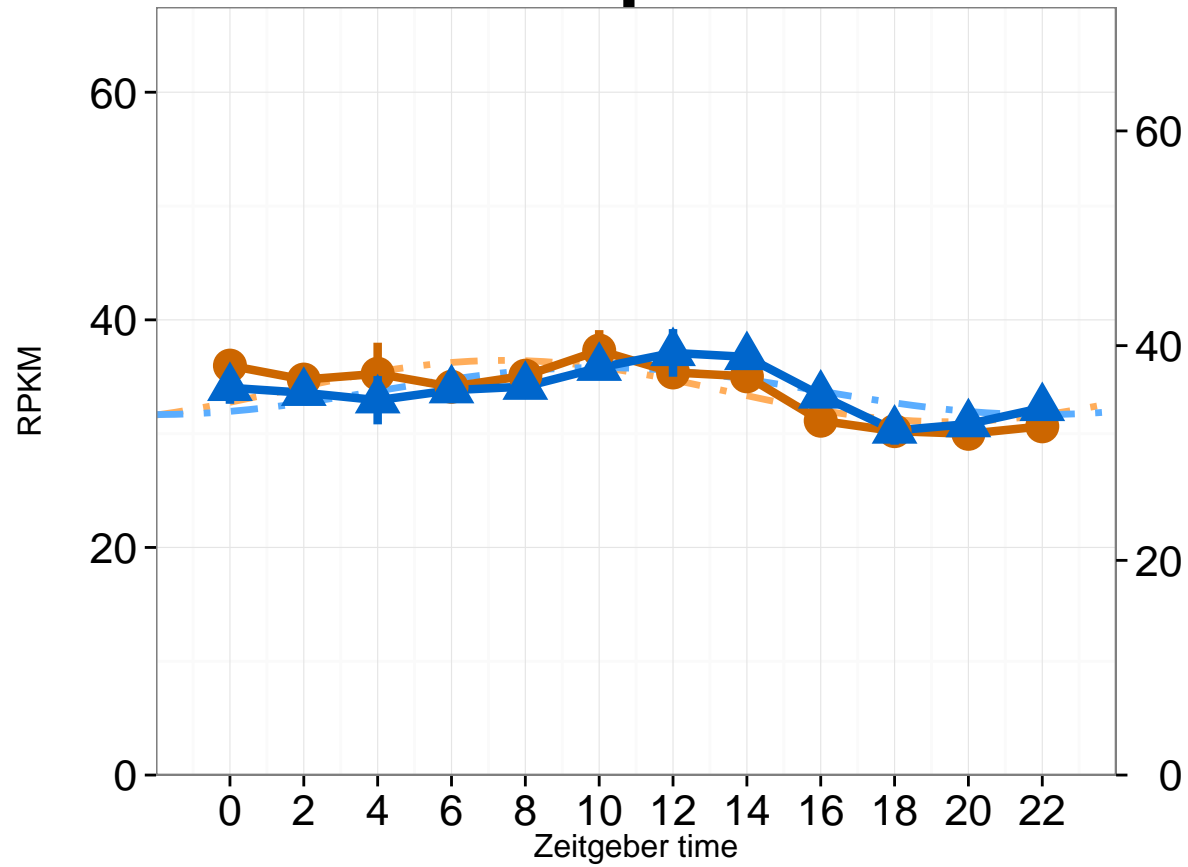

## Prpf6

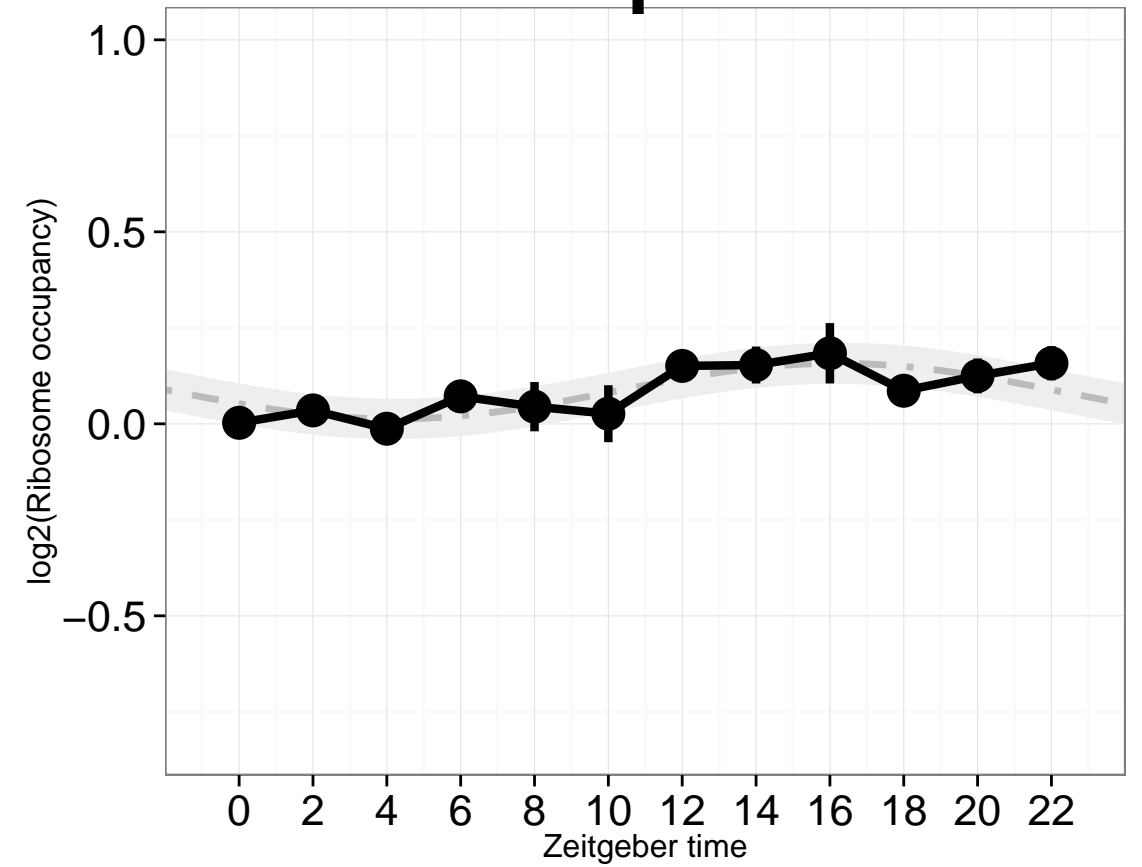

Supplement: Supplementary file 12206 [file 1]

# Tshr

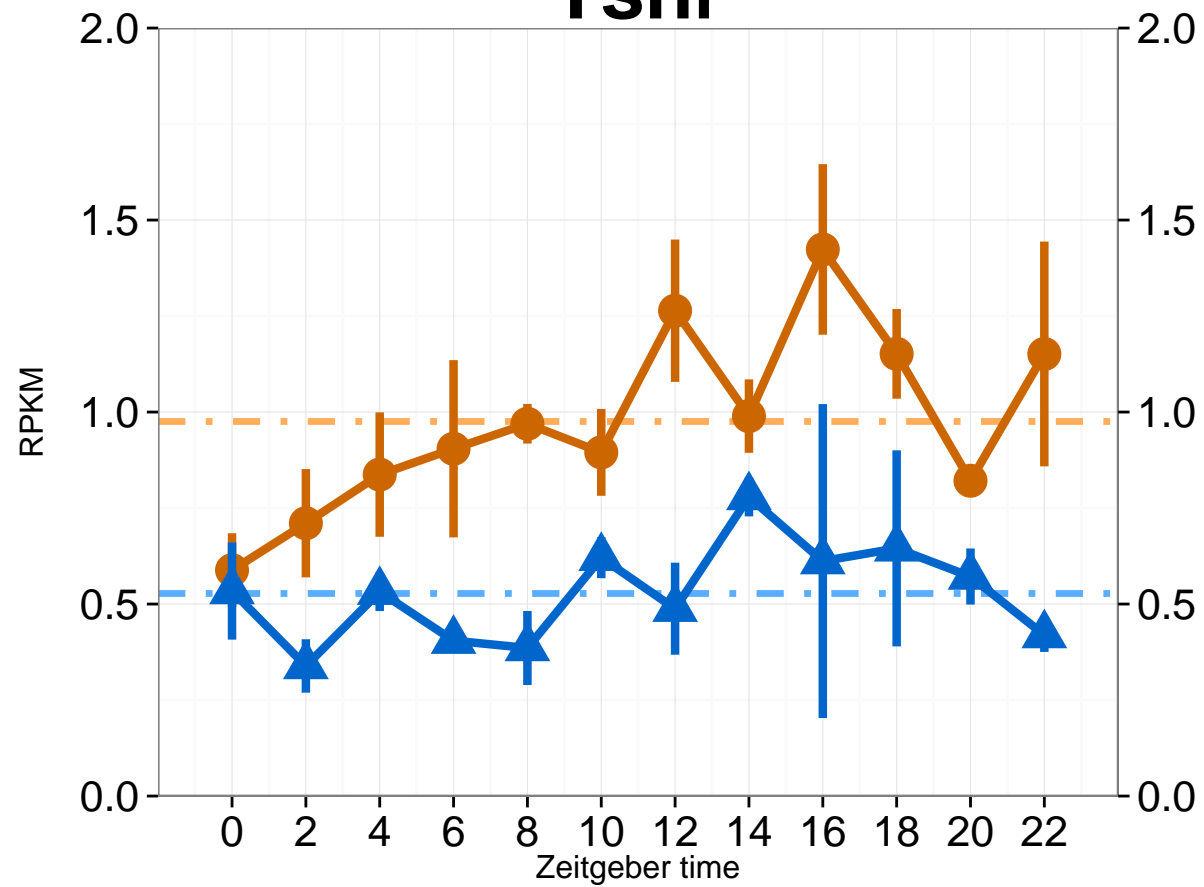

# Tshr

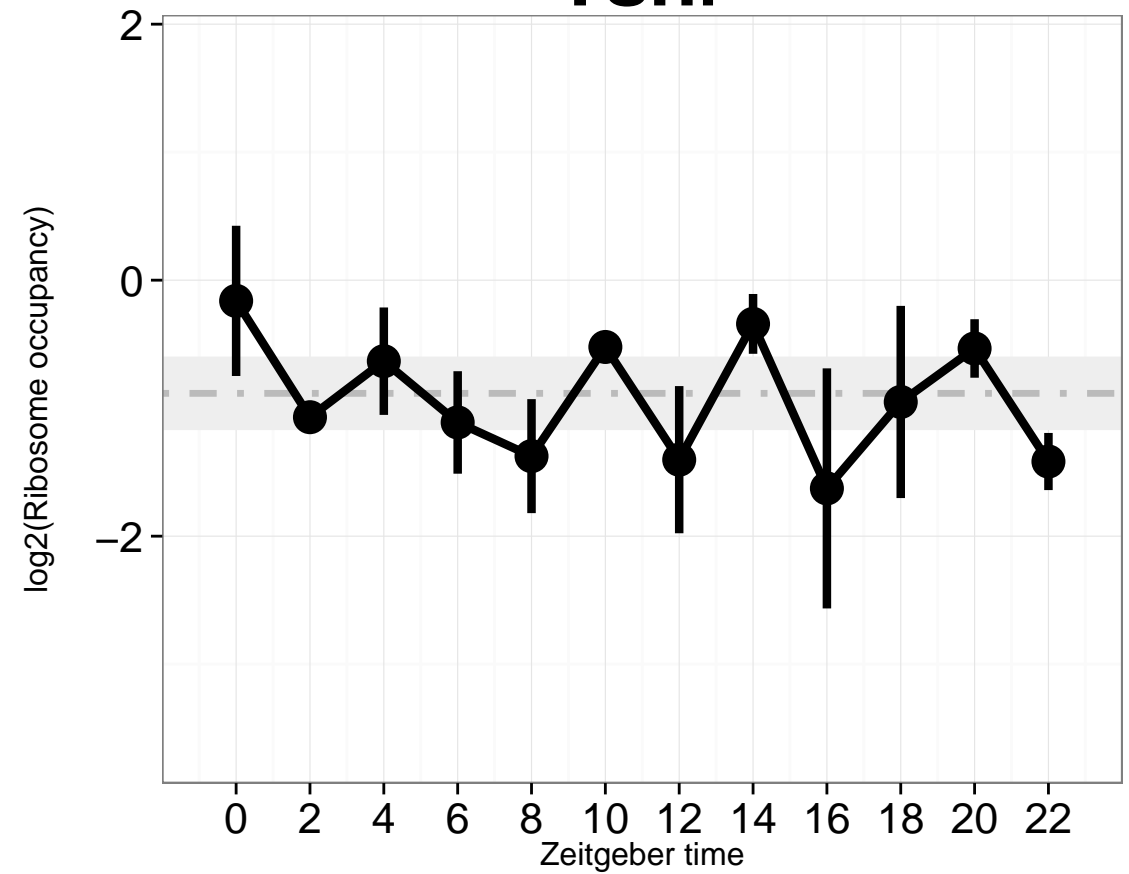

Supplement: Supplementary file 12207 [file 1]

# Slc1a5

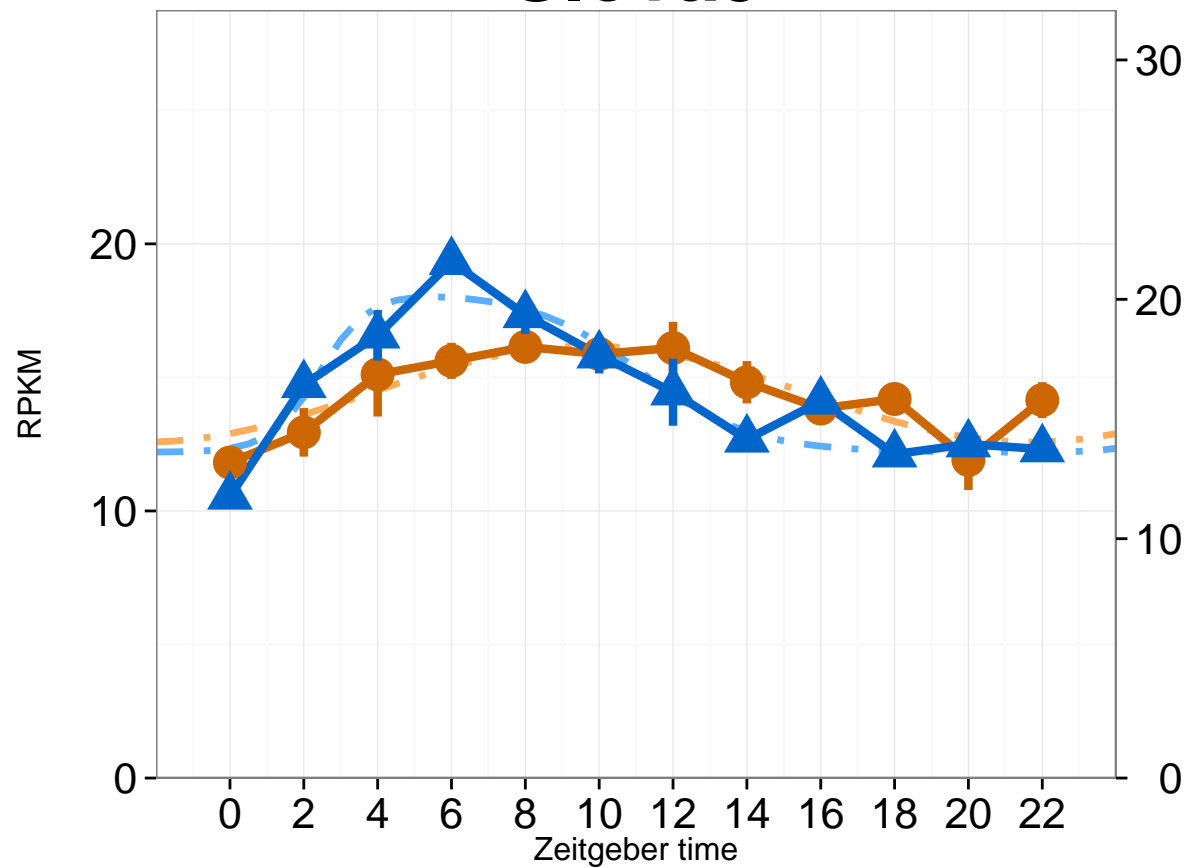

# Slc1a5

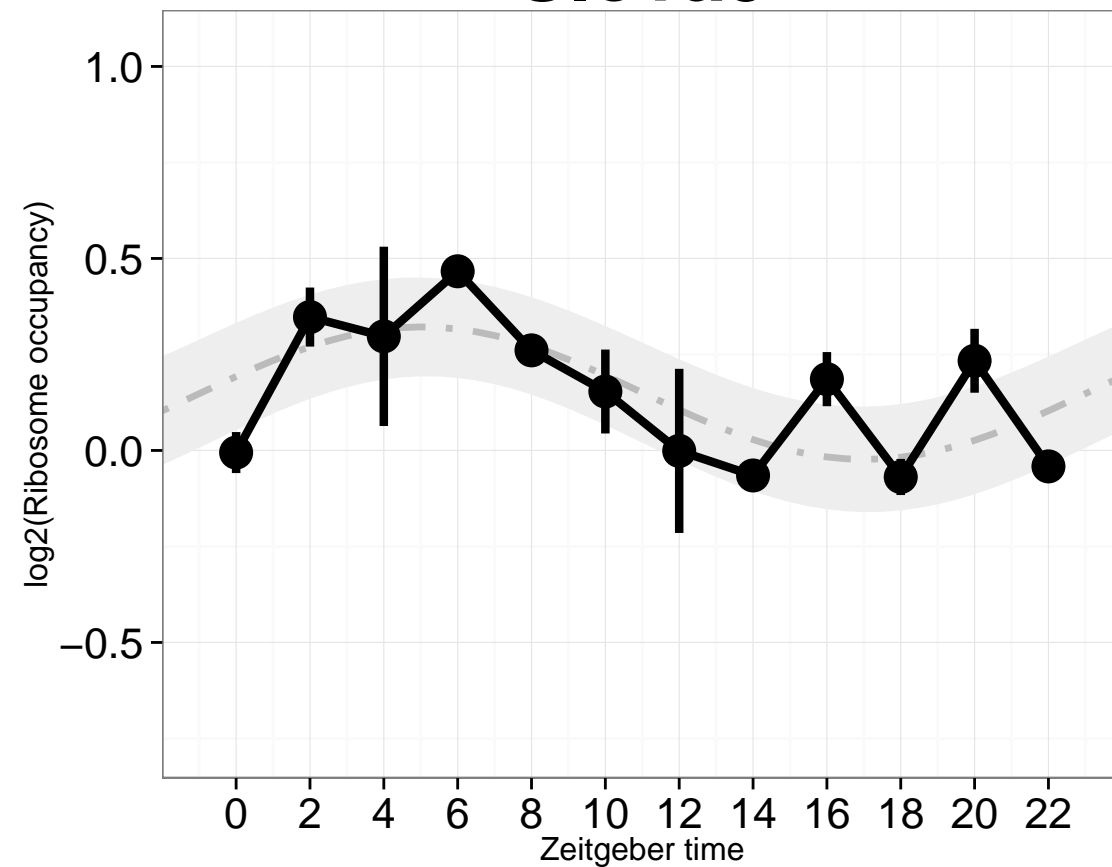

Supplement: Supplementary file 12208 [file 1]

## H2-DMa

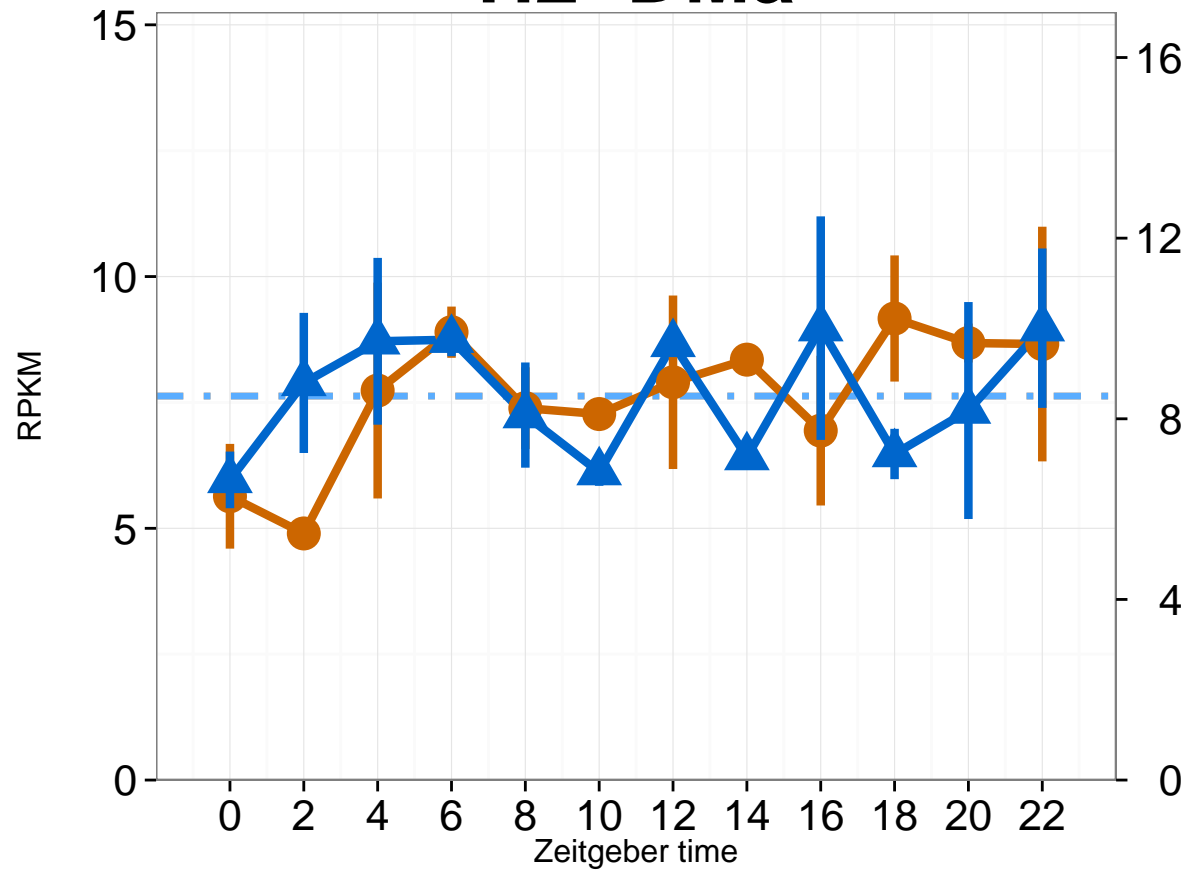

## H2-DMa

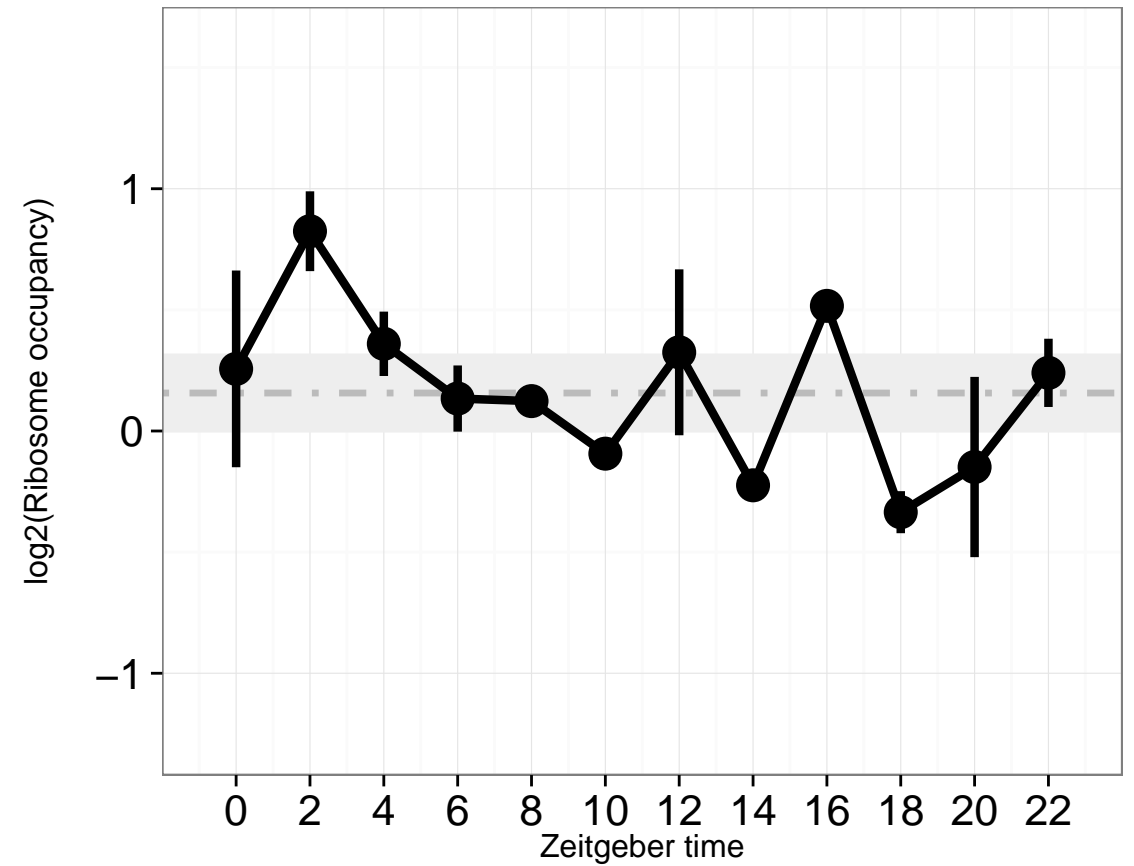

Supplement: Supplementary file 12209 [file 1]

## Ncapg2

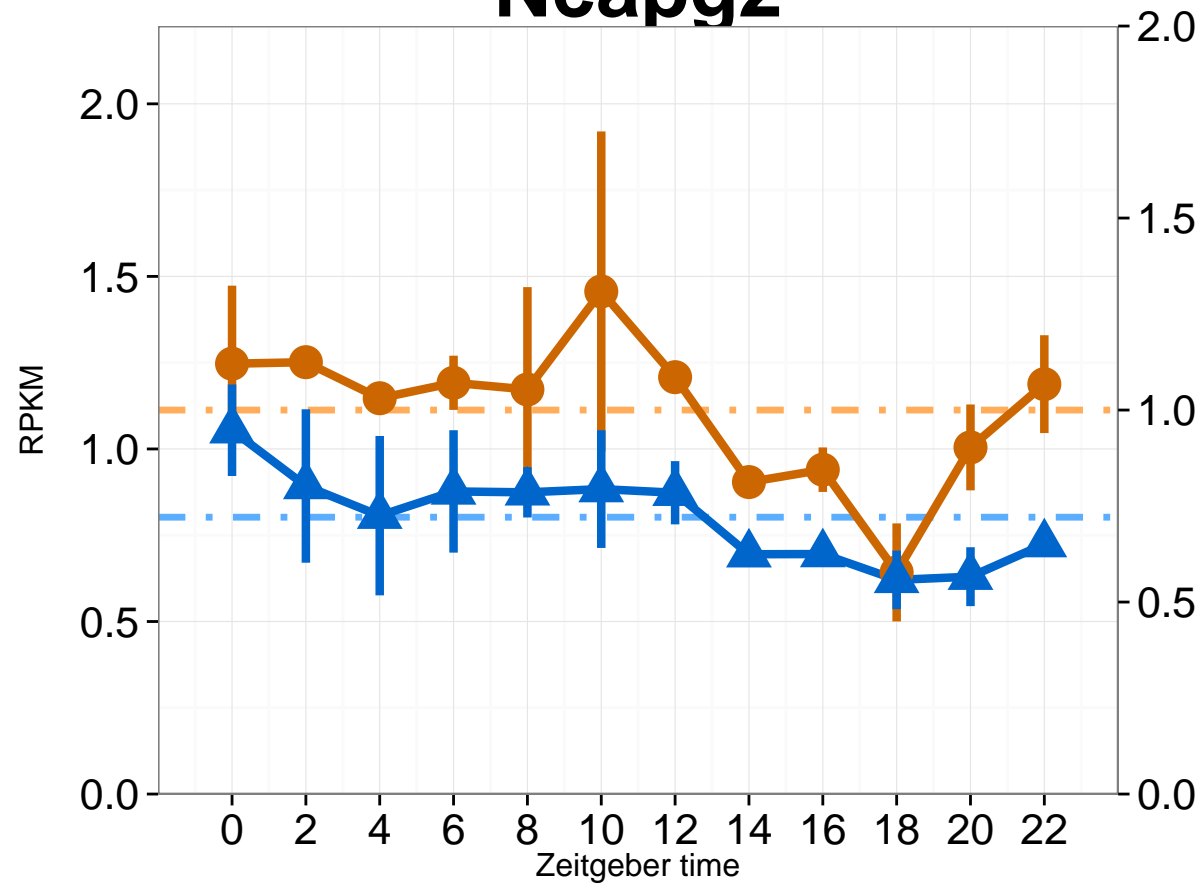

## Ncapg2

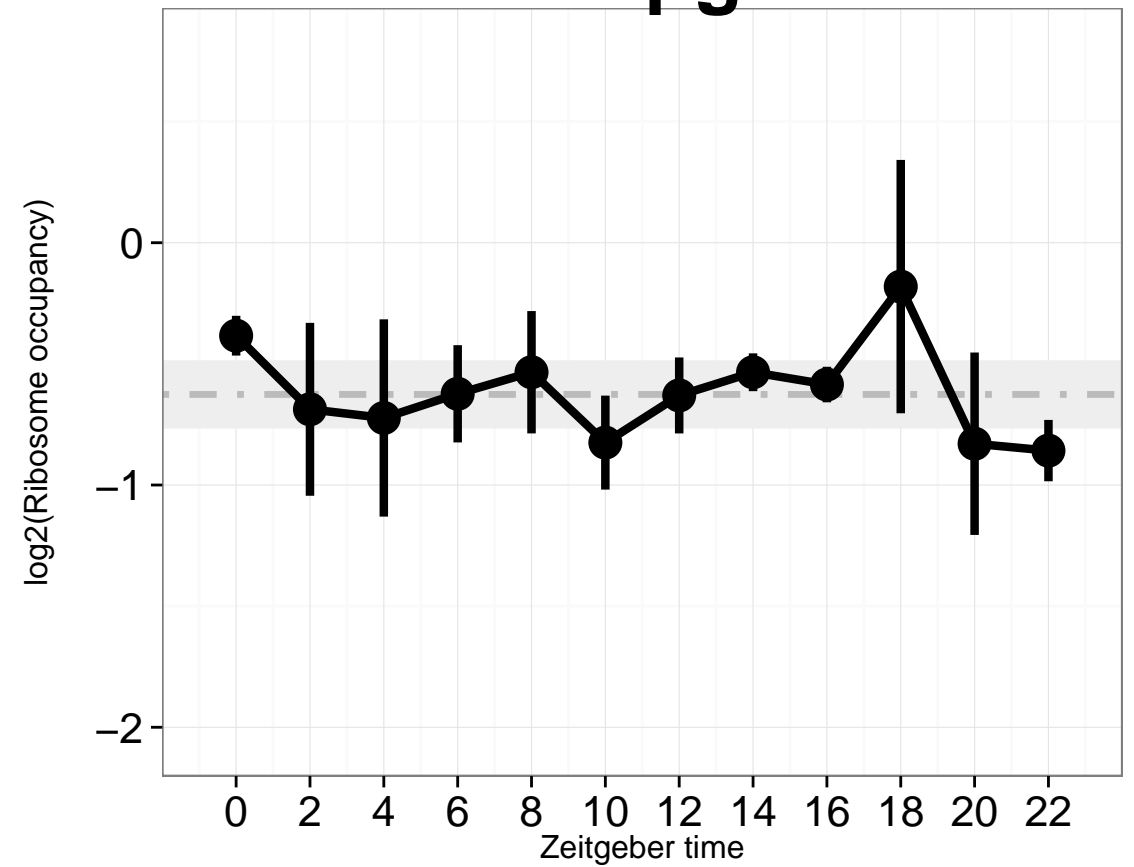

Supplement: Supplementary file 12210 [file 1]

## Prkcq

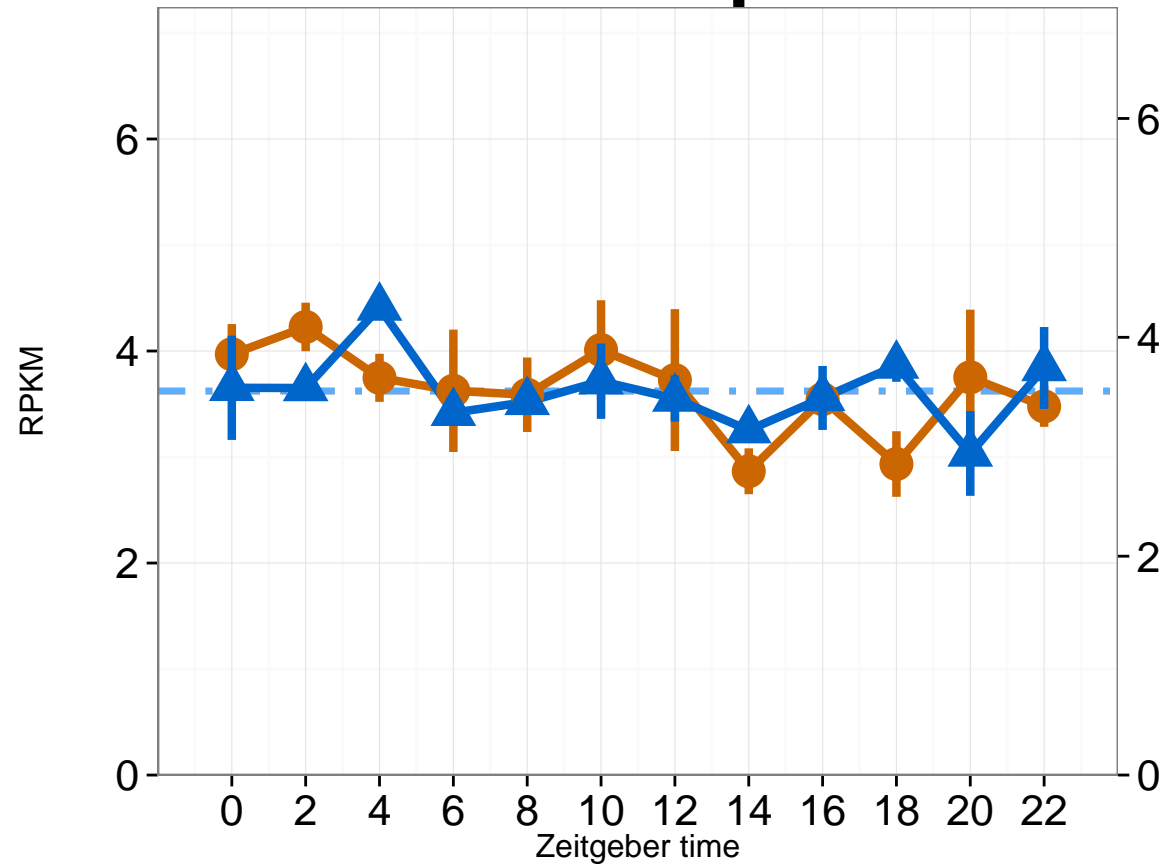

## Prkcq

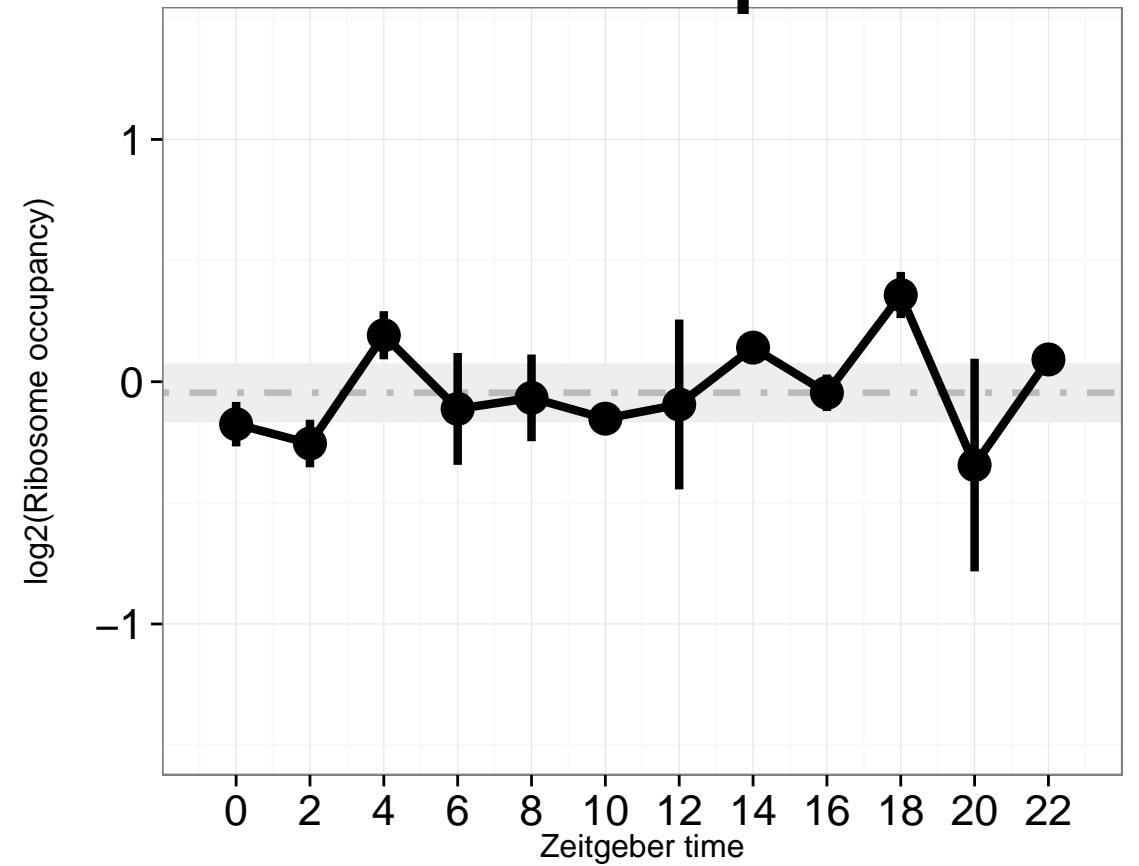

Supplement: Supplementary file 12211 [file 1]

# Sc5d

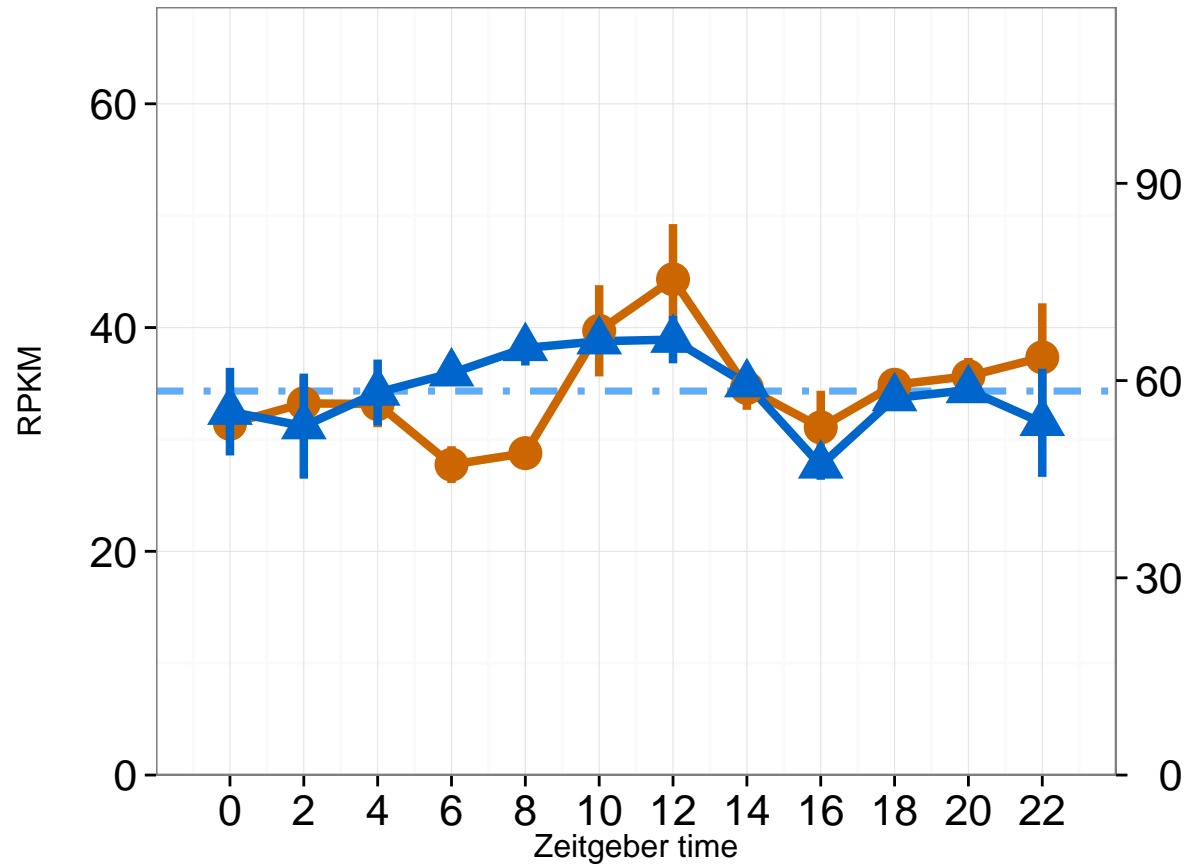

# Sc5d

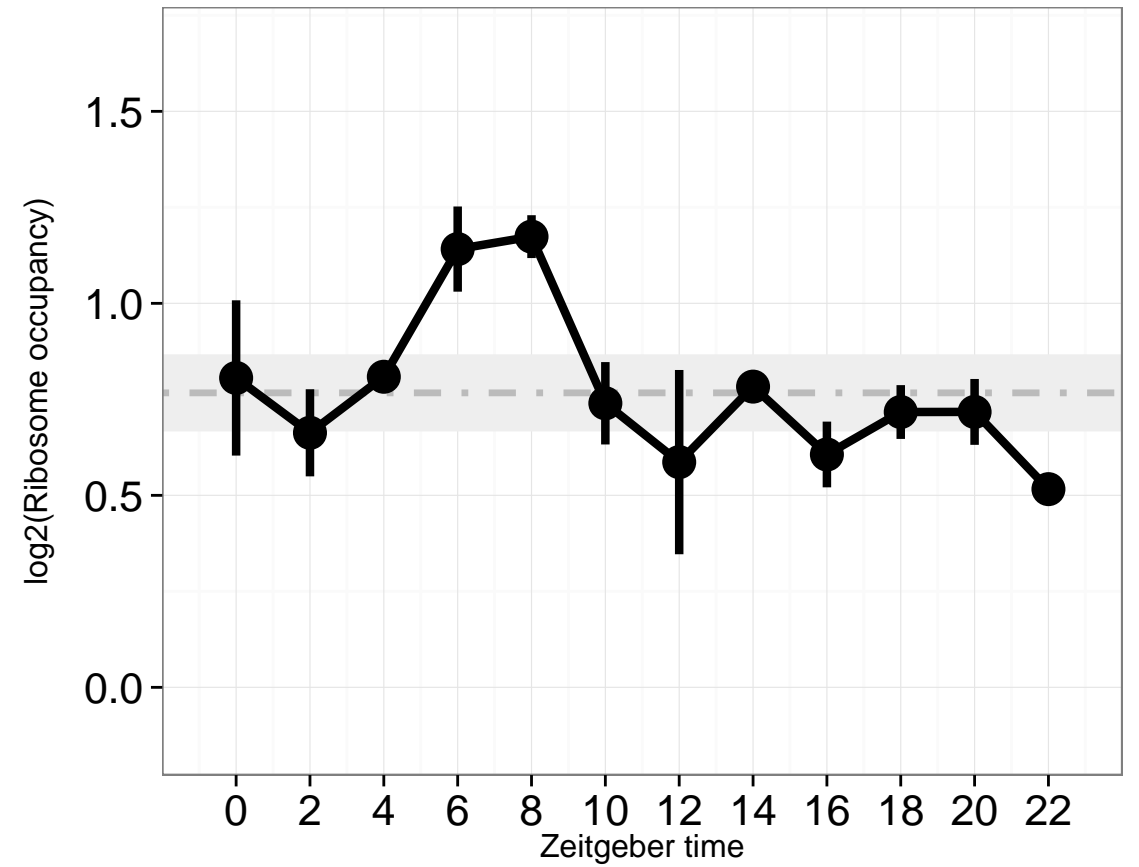

Supplement: Supplementary file 12212 [file 1]

## Nova1

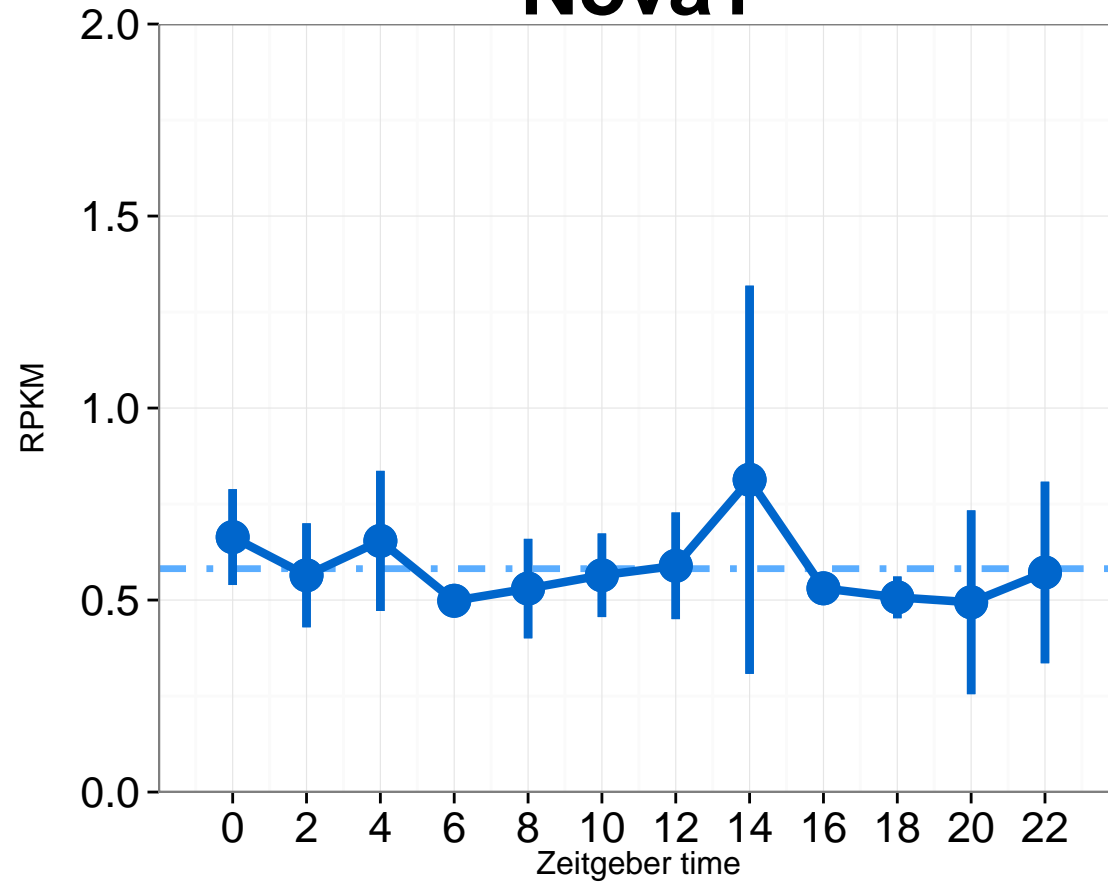

## Nova1 log2(Ribosome occupancy

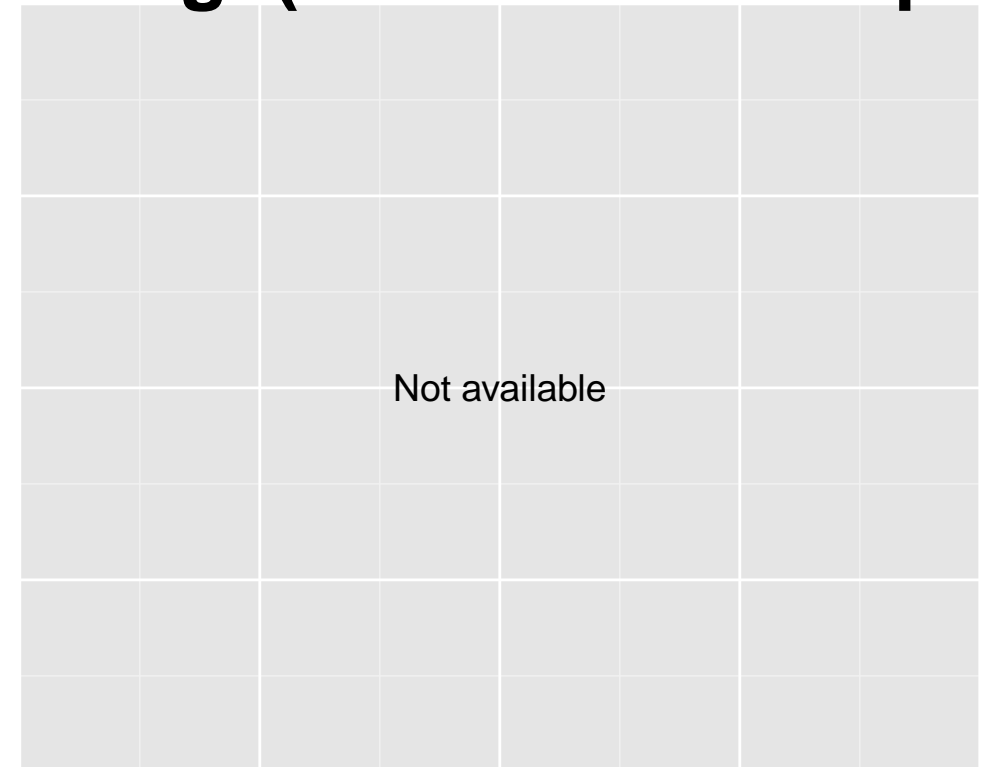

Supplement: Supplementary file 12213 [file 1]

# Myo1g

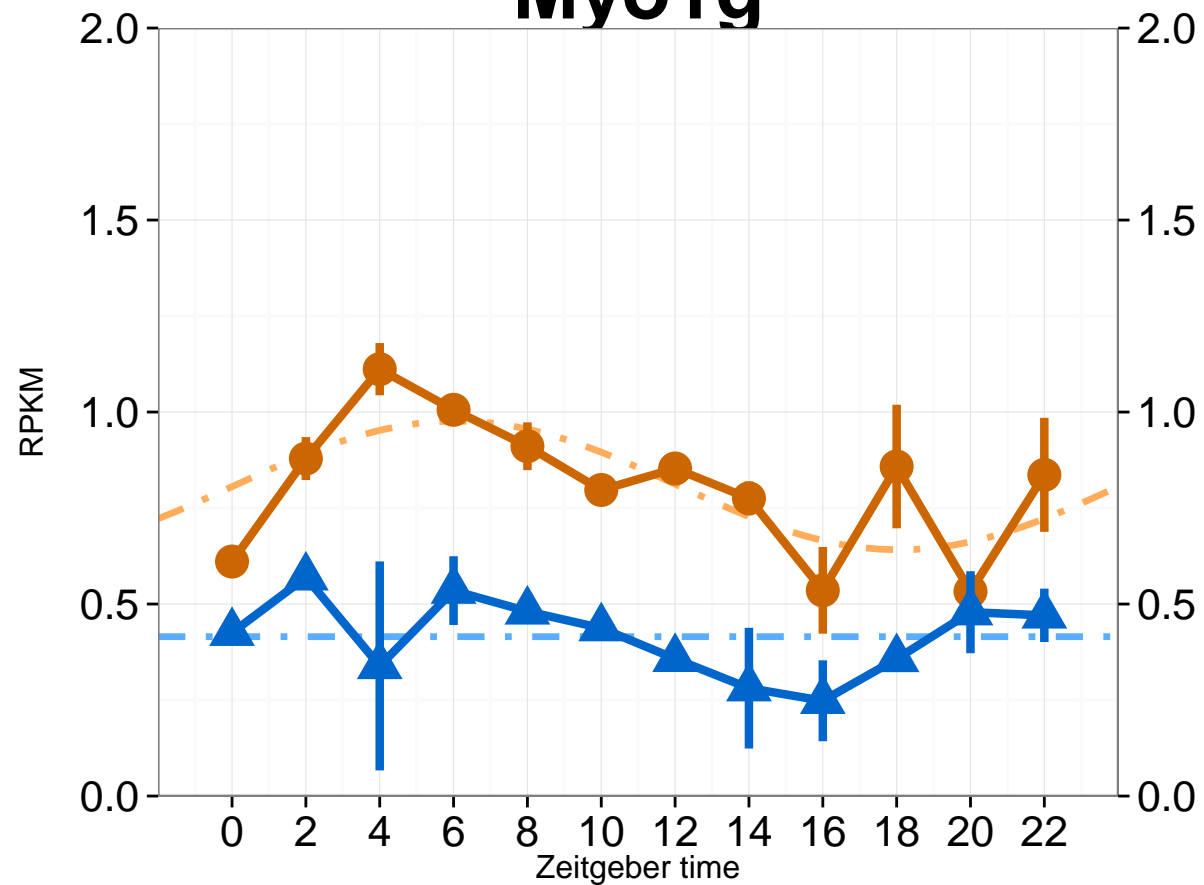

# Myo1g

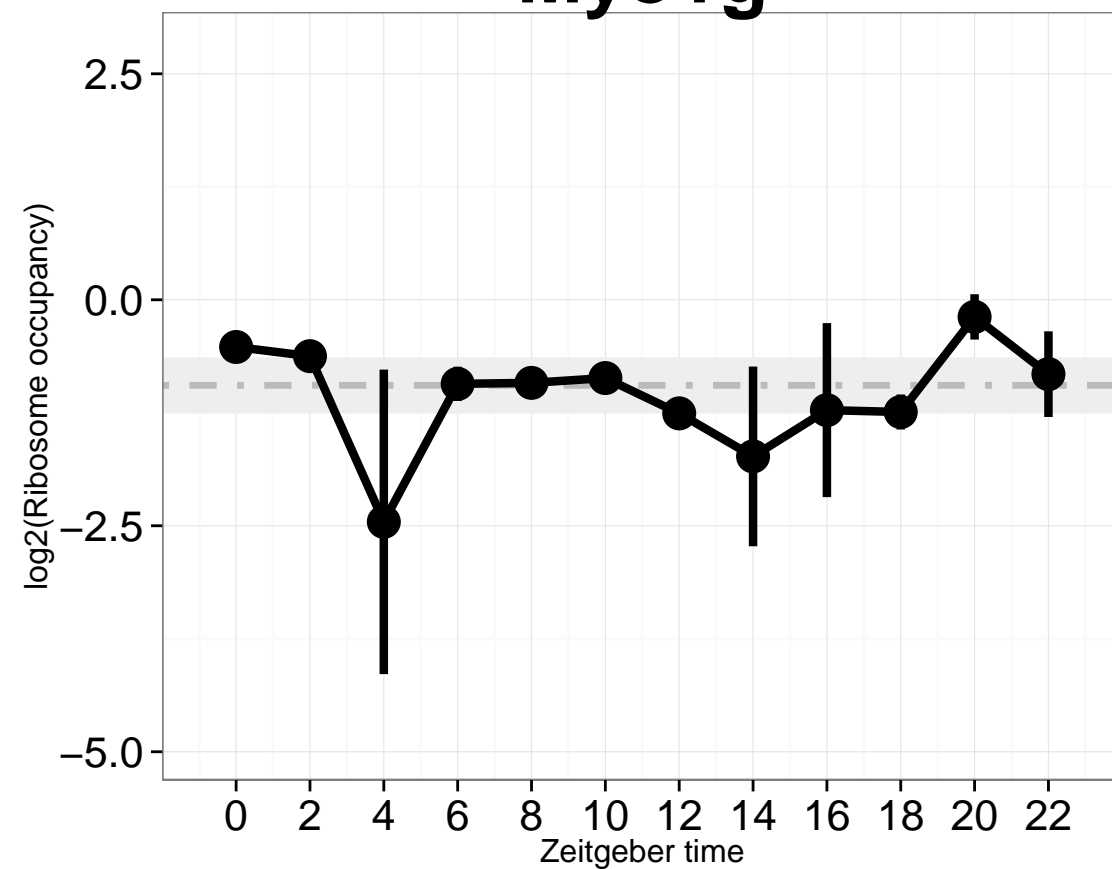

Supplement: Supplementary file 12214 [file 1]

# Pank1

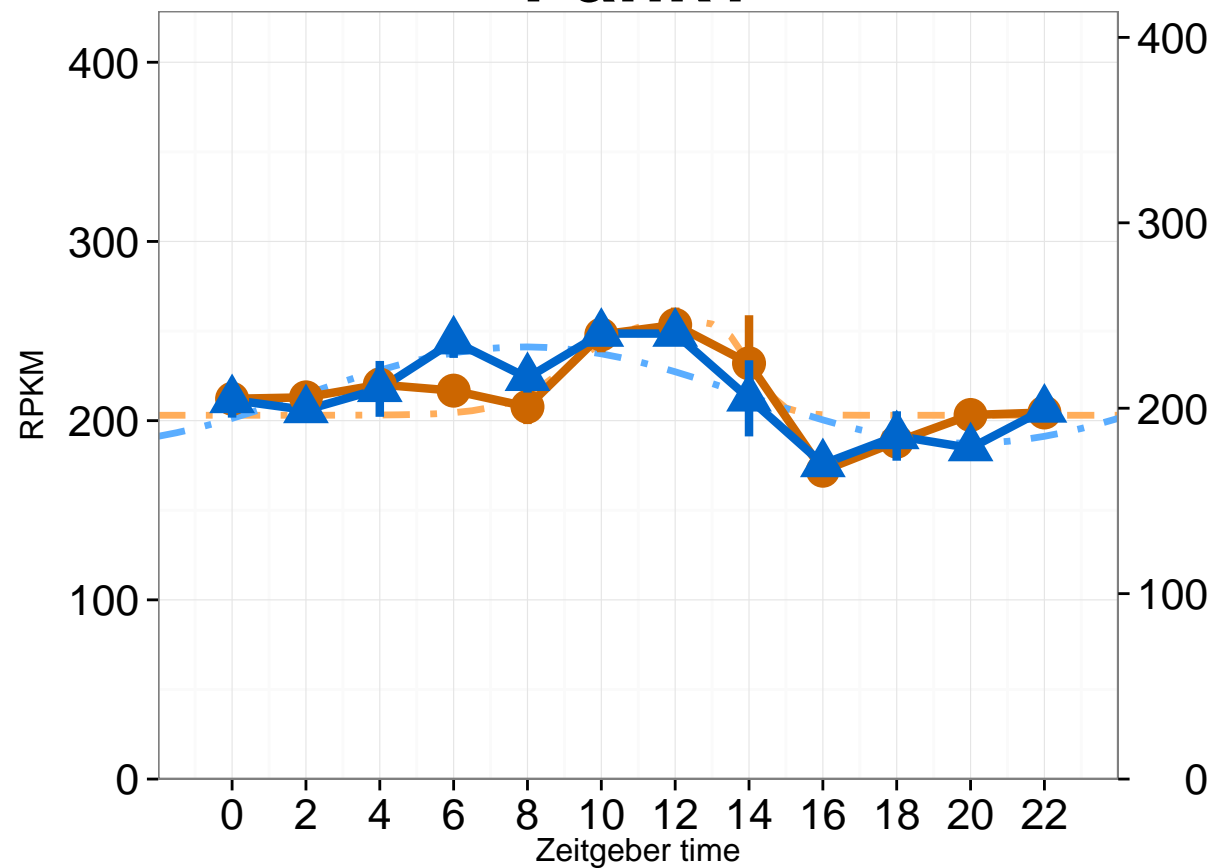

# Pank1

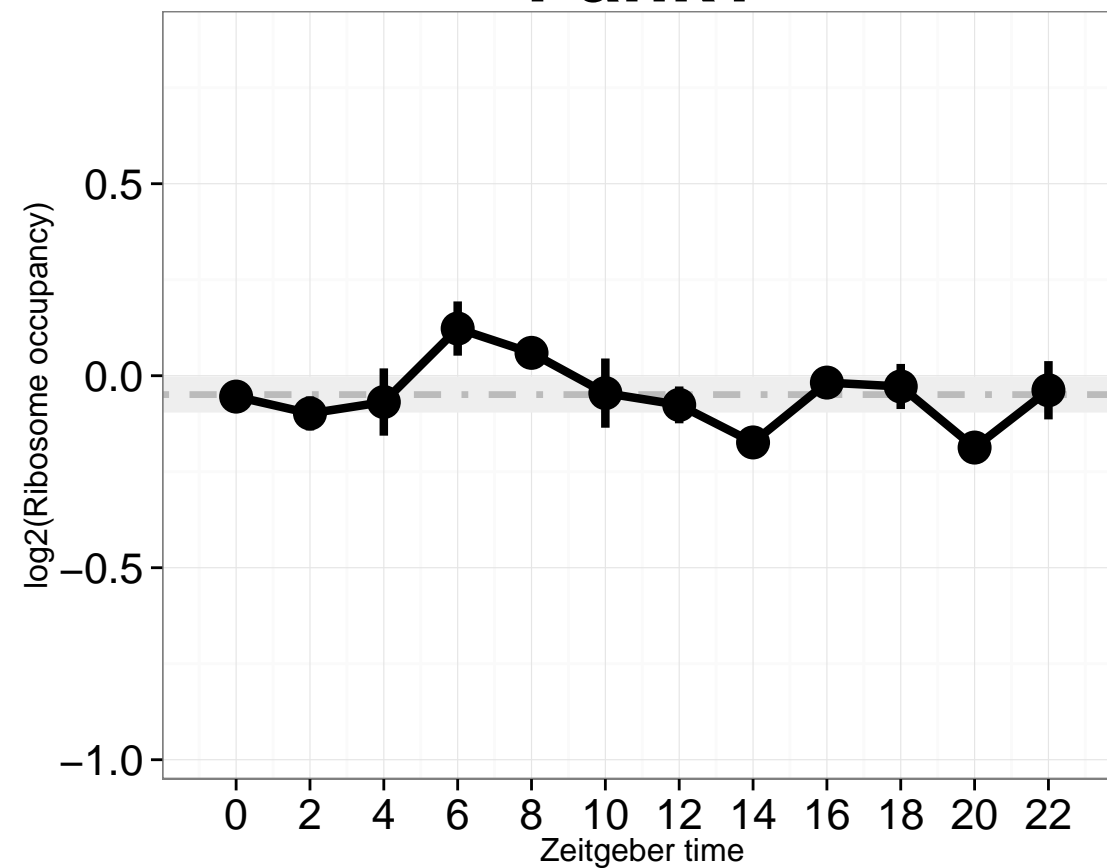

Supplement: Supplementary file 12215 [file 1]

## Rad51d

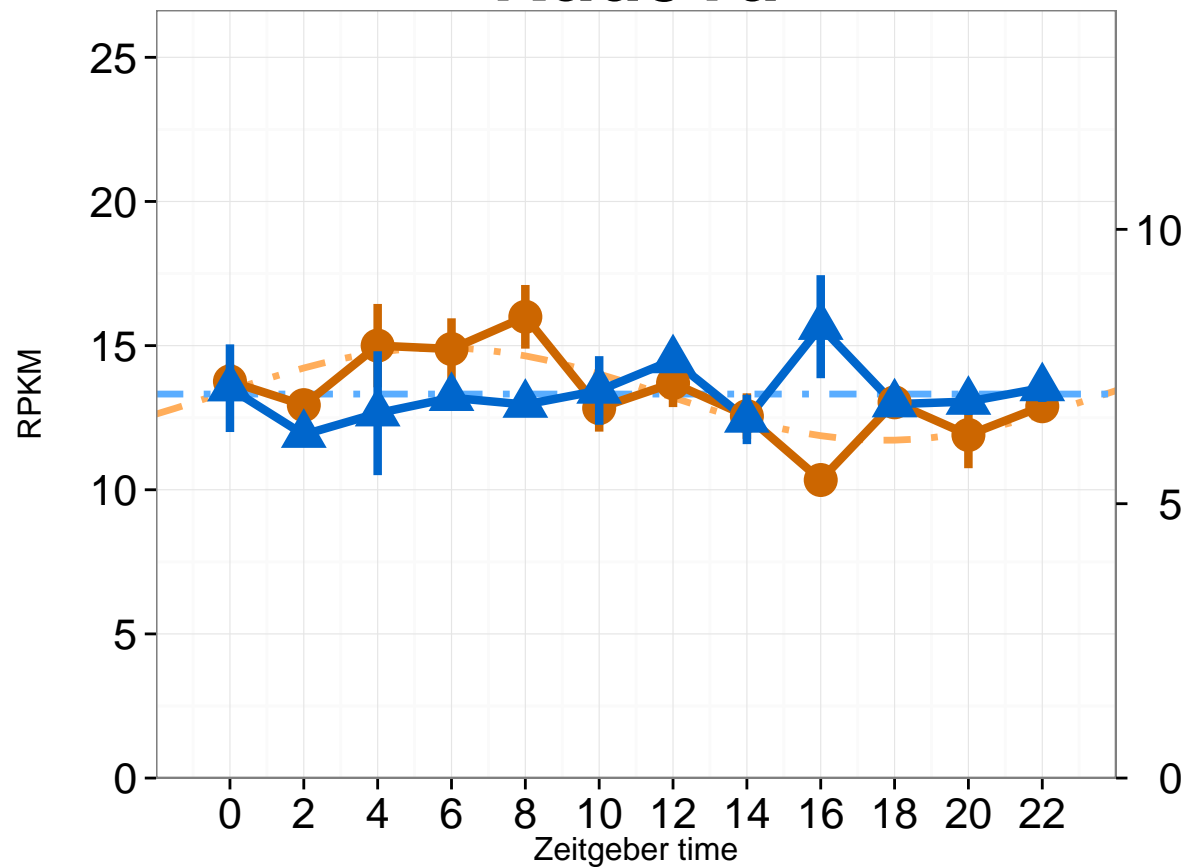

## Rad51d

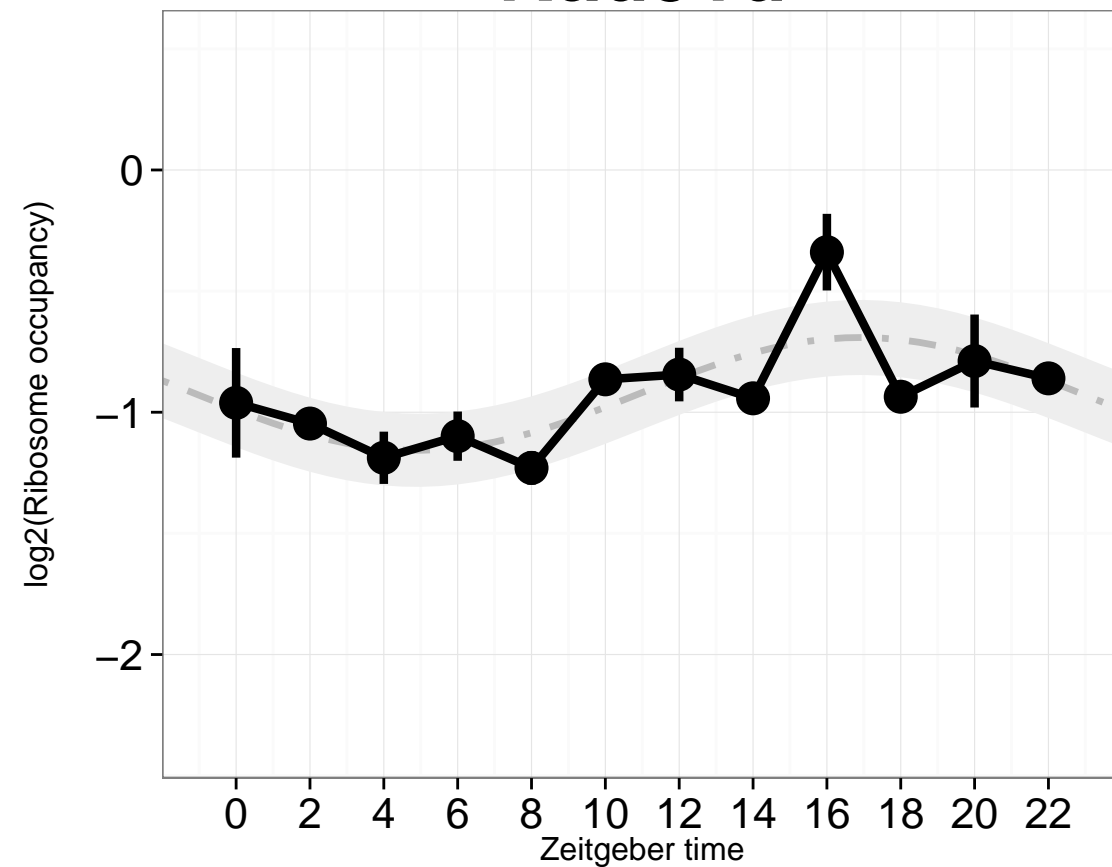

Supplement: Supplementary file 12216 [file 1]

## Ptgir

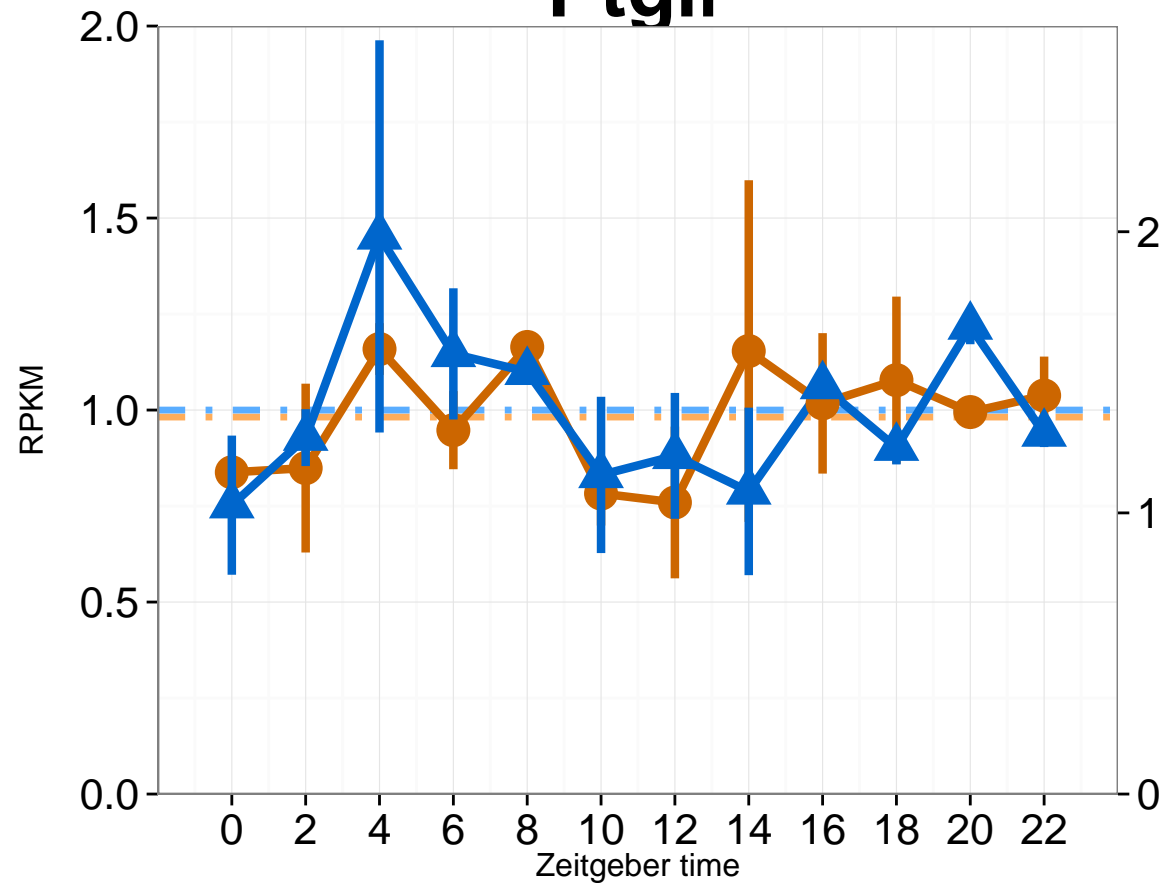

## Ptgir

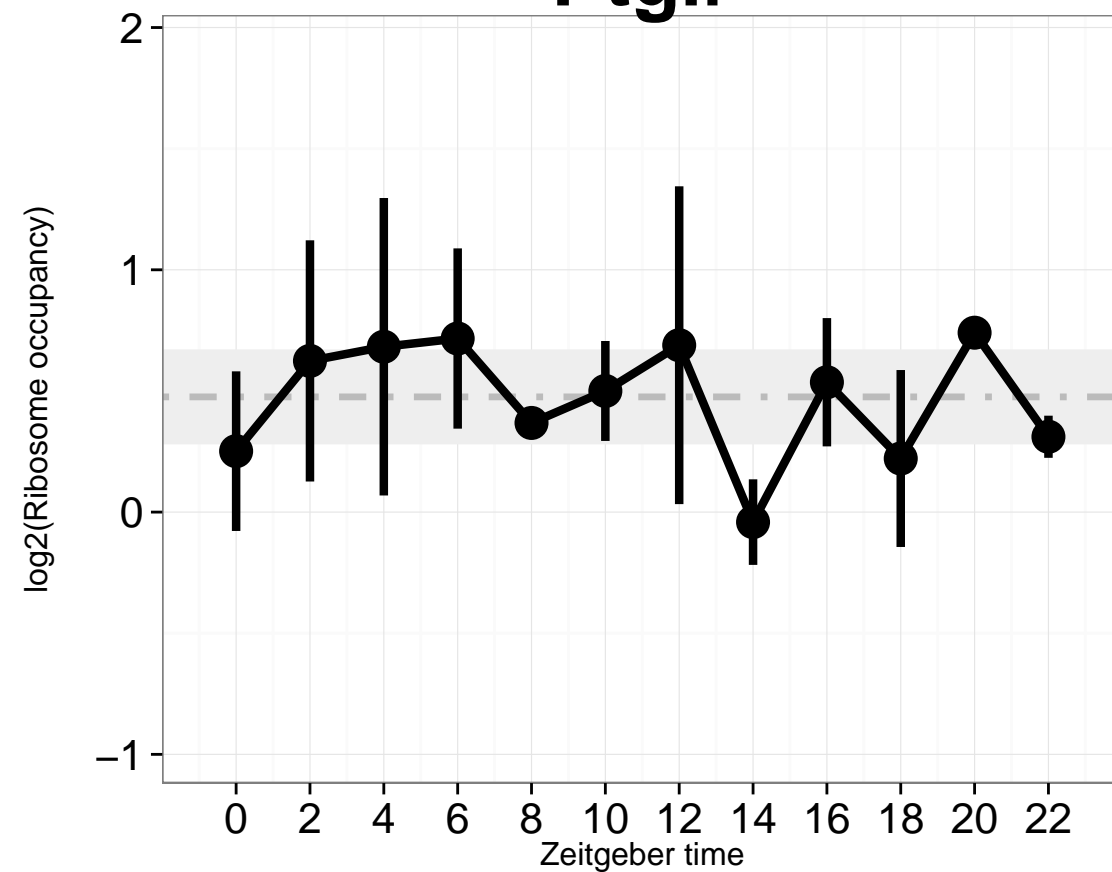

Supplement: Supplementary file 12217 [file 1]

# Htra4

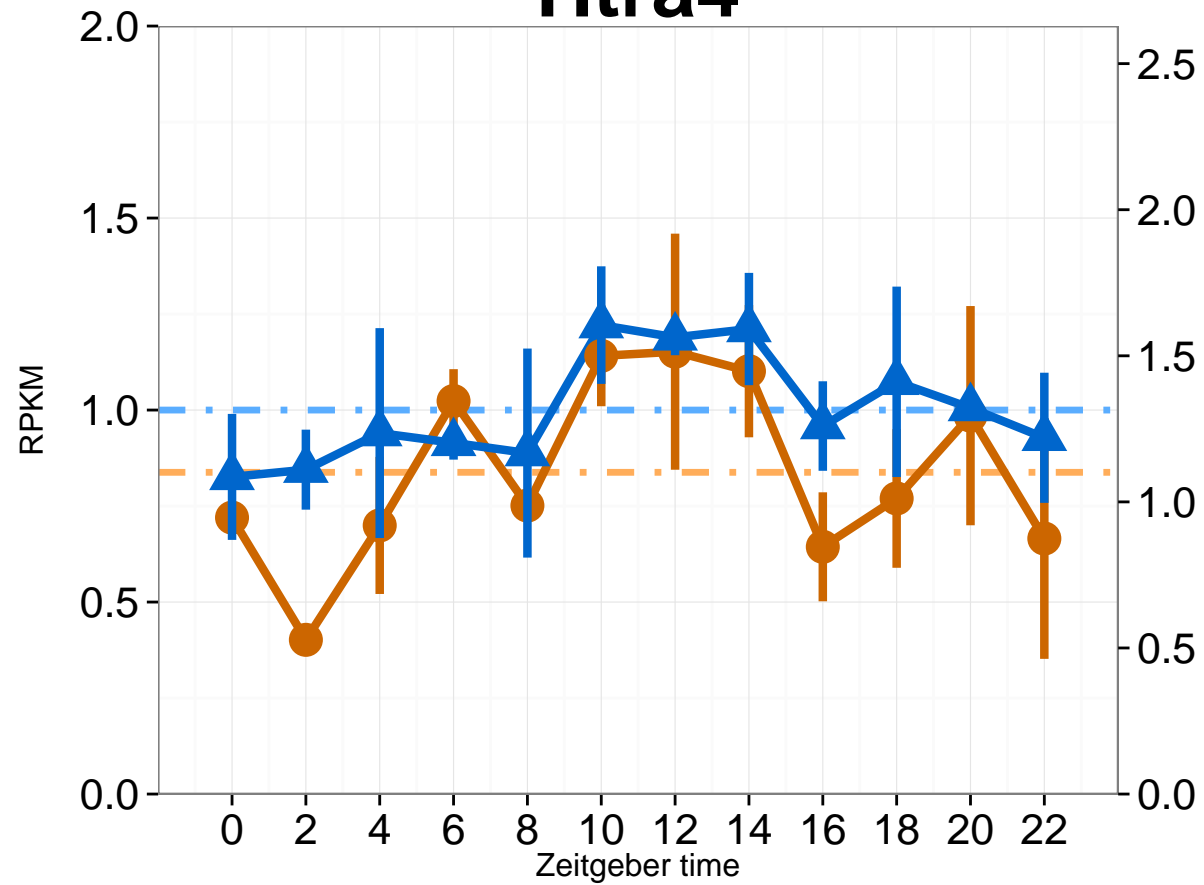

# Htra4

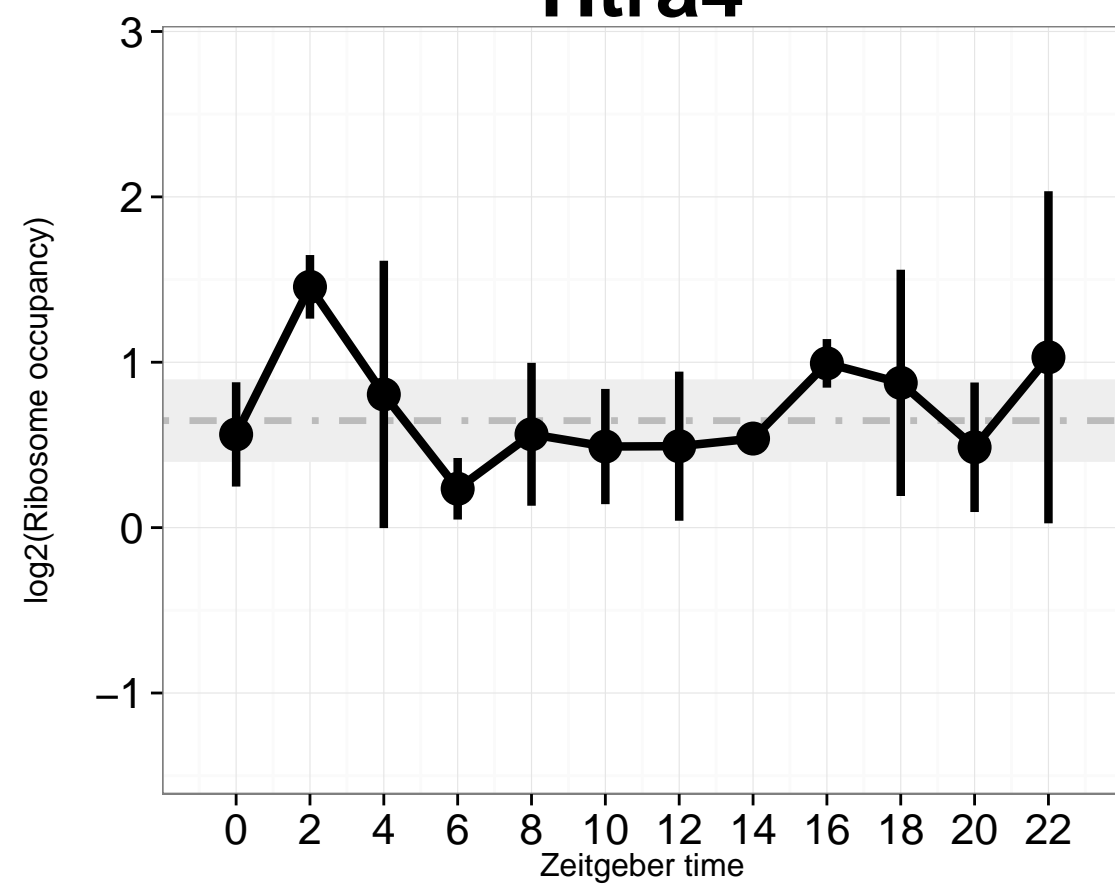

Supplement: Supplementary file 12218 [file 1]

## Aaas

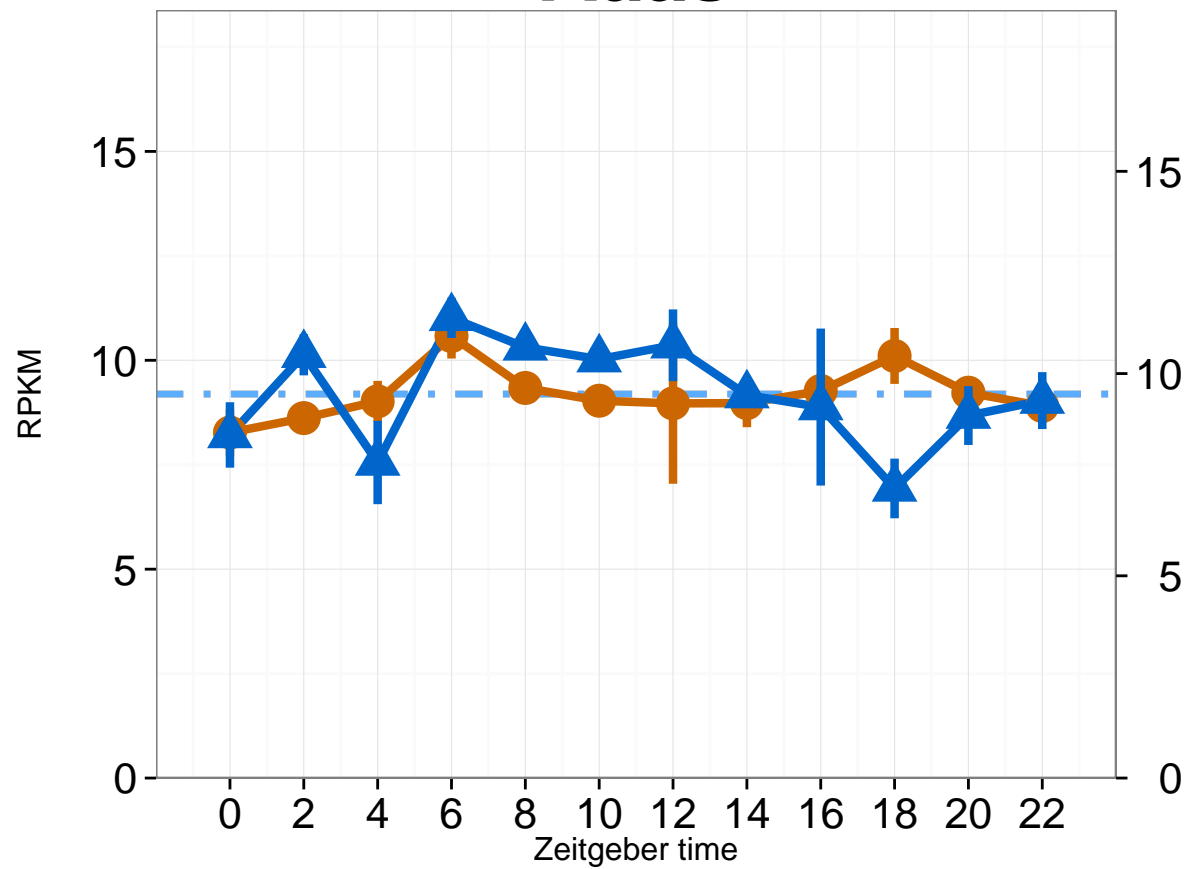

## Aaas

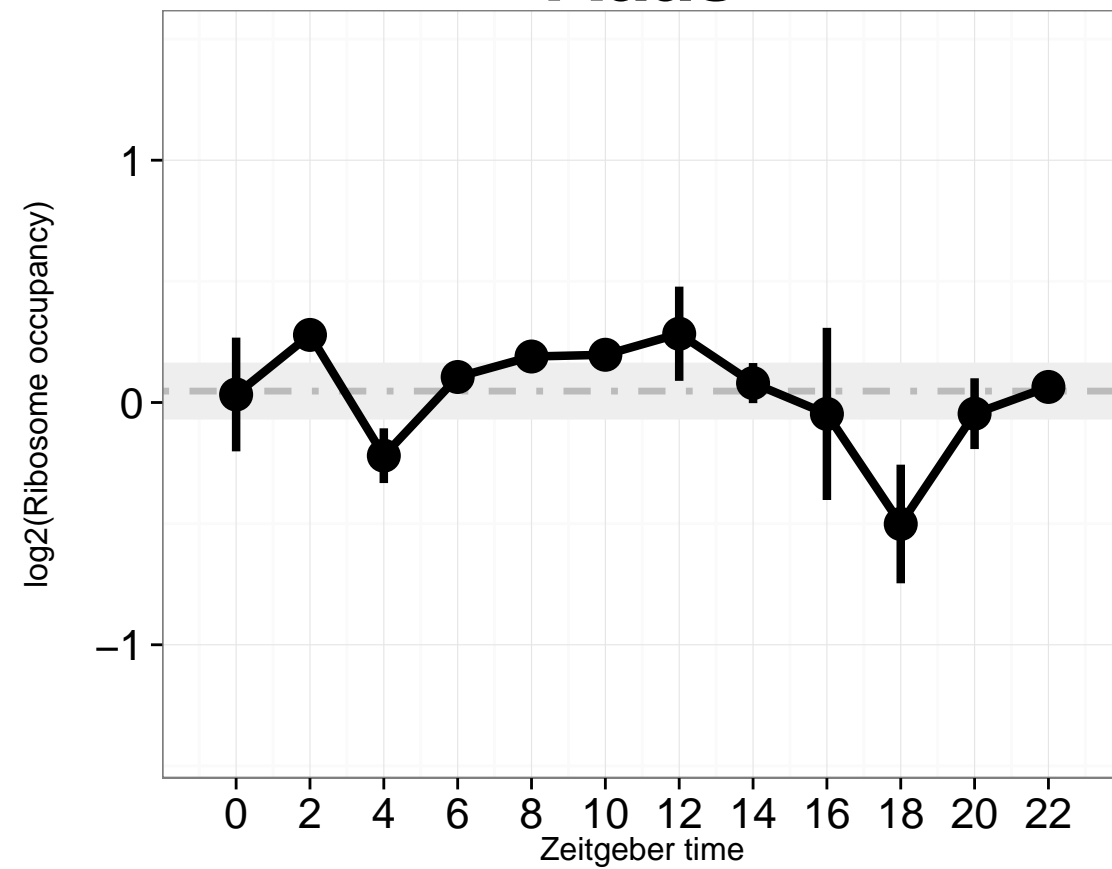

Supplement: Supplementary file 12219 [file 1]

# Leng1

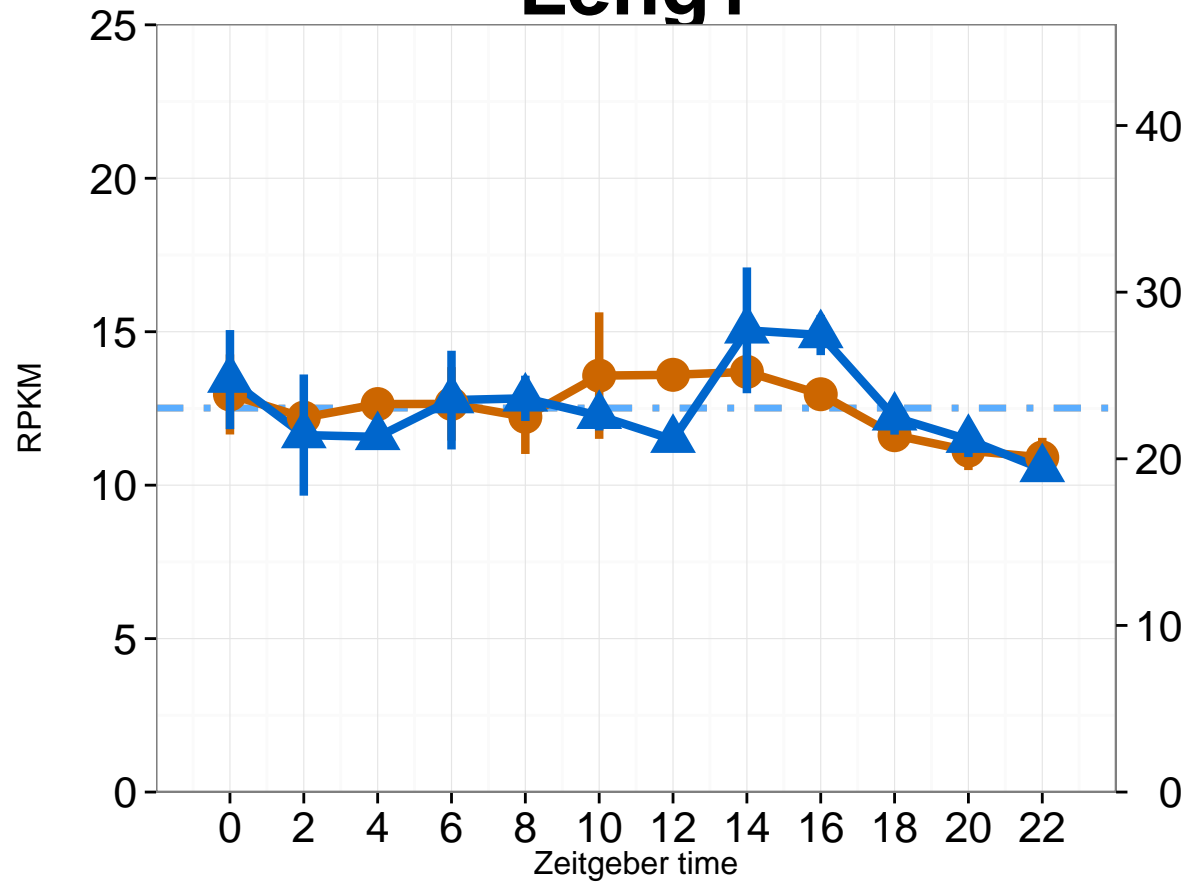

# Leng1

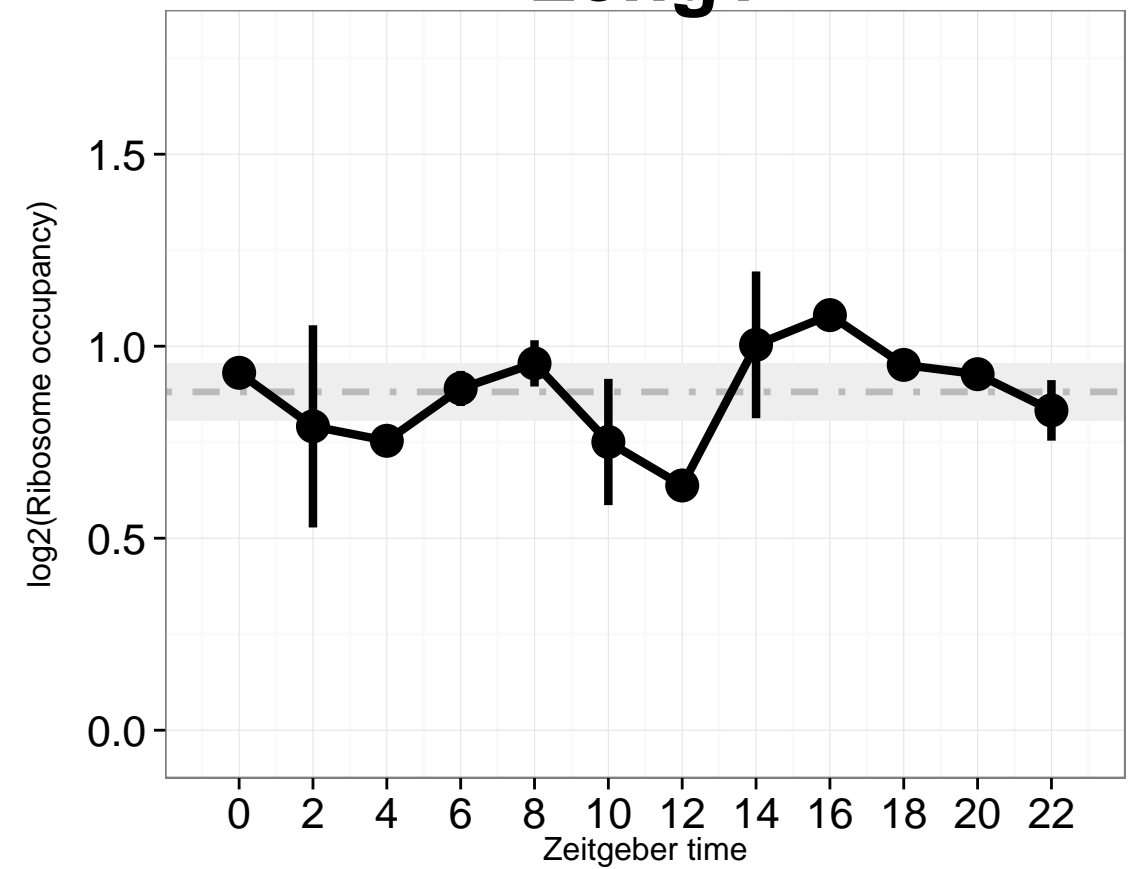

Supplement: Supplementary file 12220 [file 1]

## Myom2

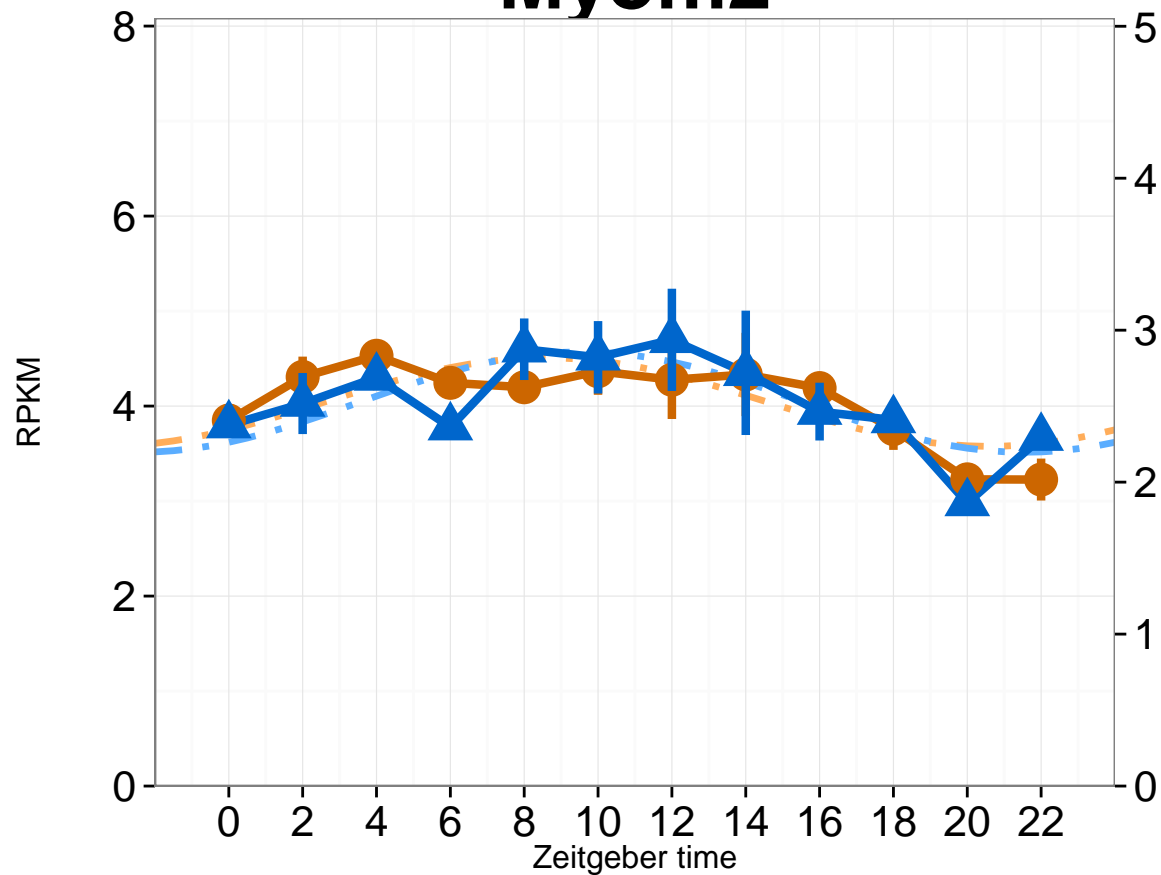

## Myom2

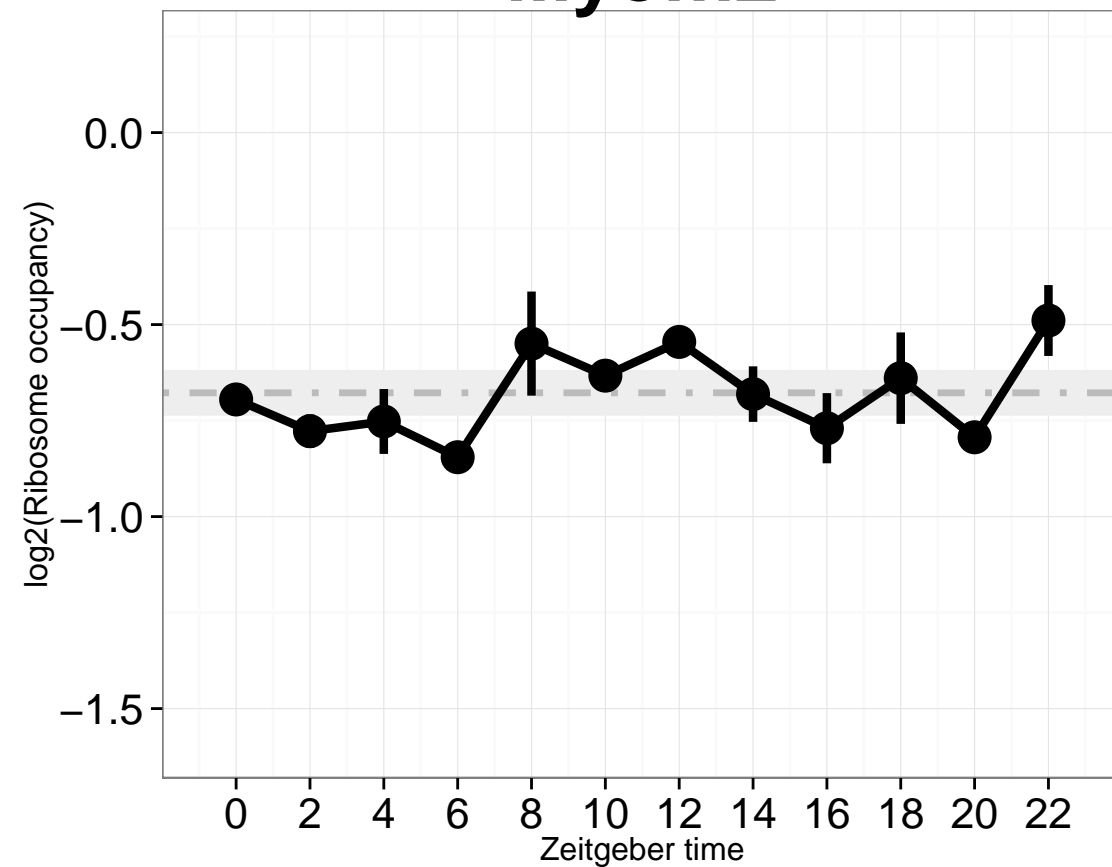

Supplement: Supplementary file 12221 [file 1]

## Ruvbl1

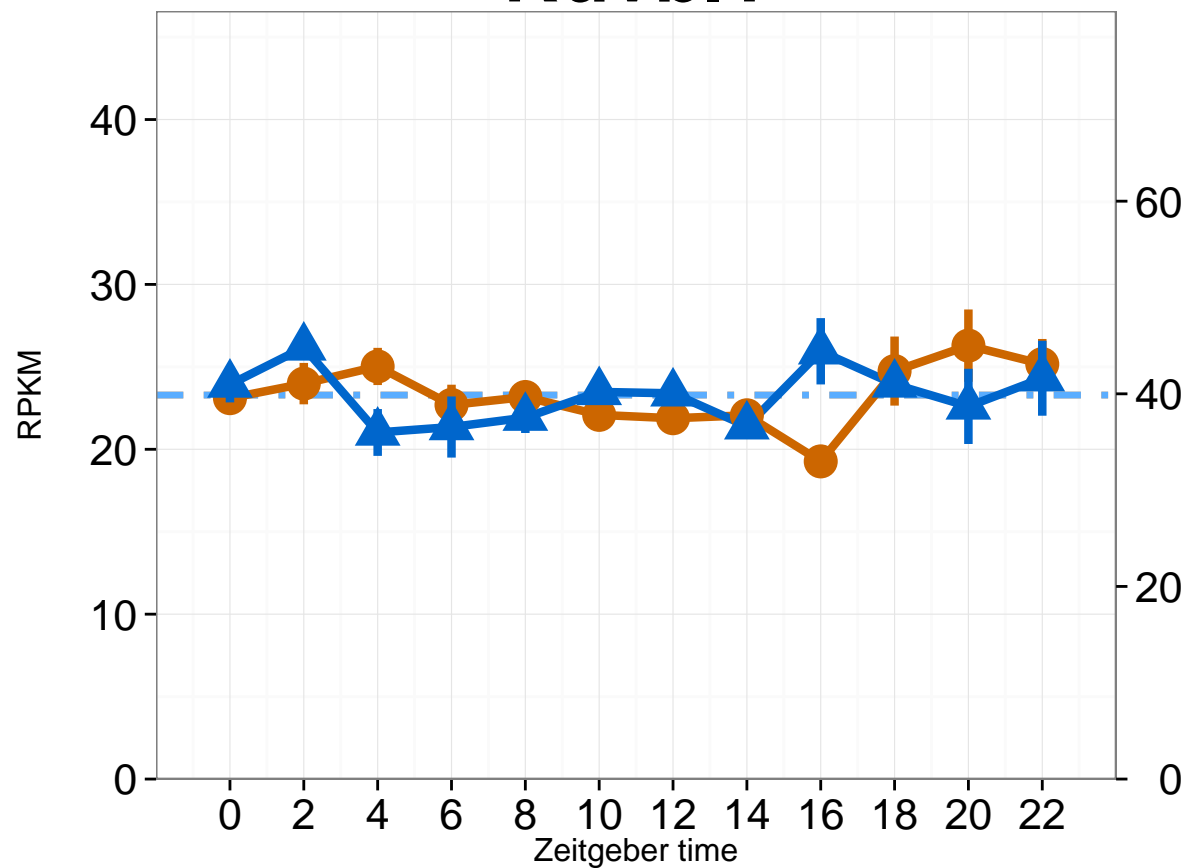

## Ruvbl1

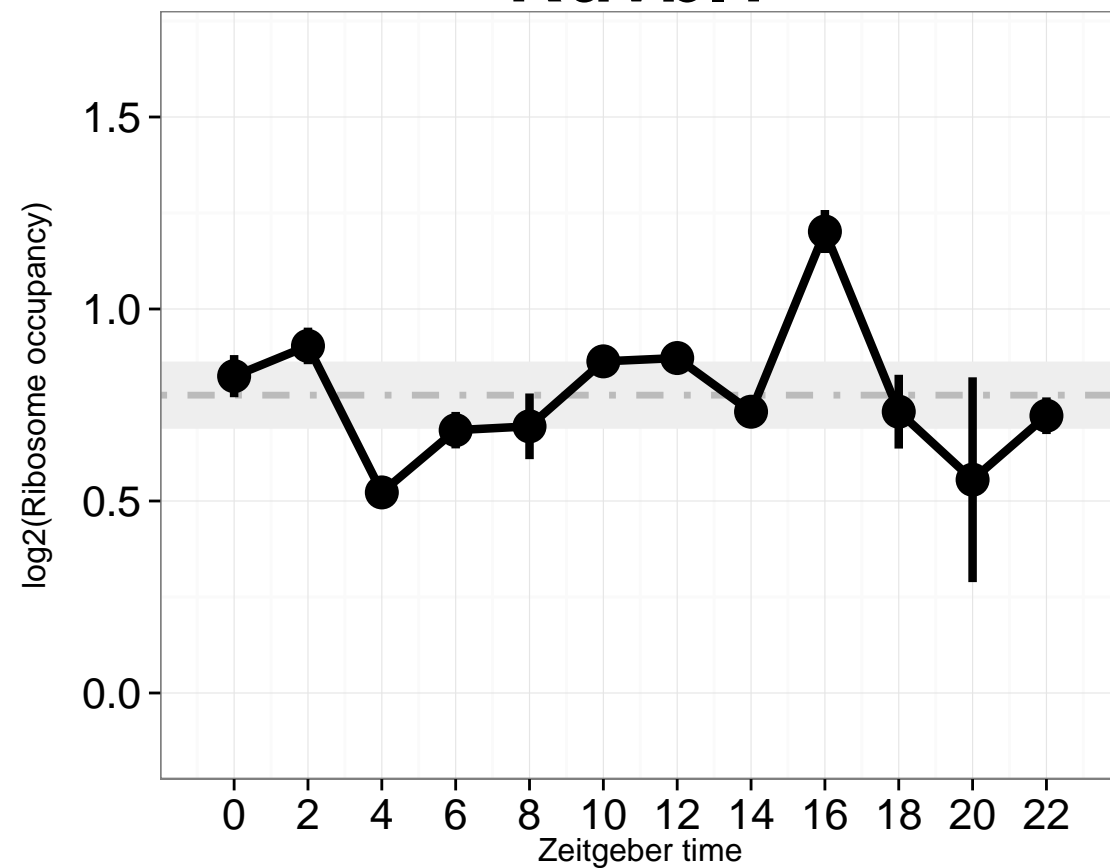

Supplement: Supplementary file 12222 [file 1]

## Slmo2

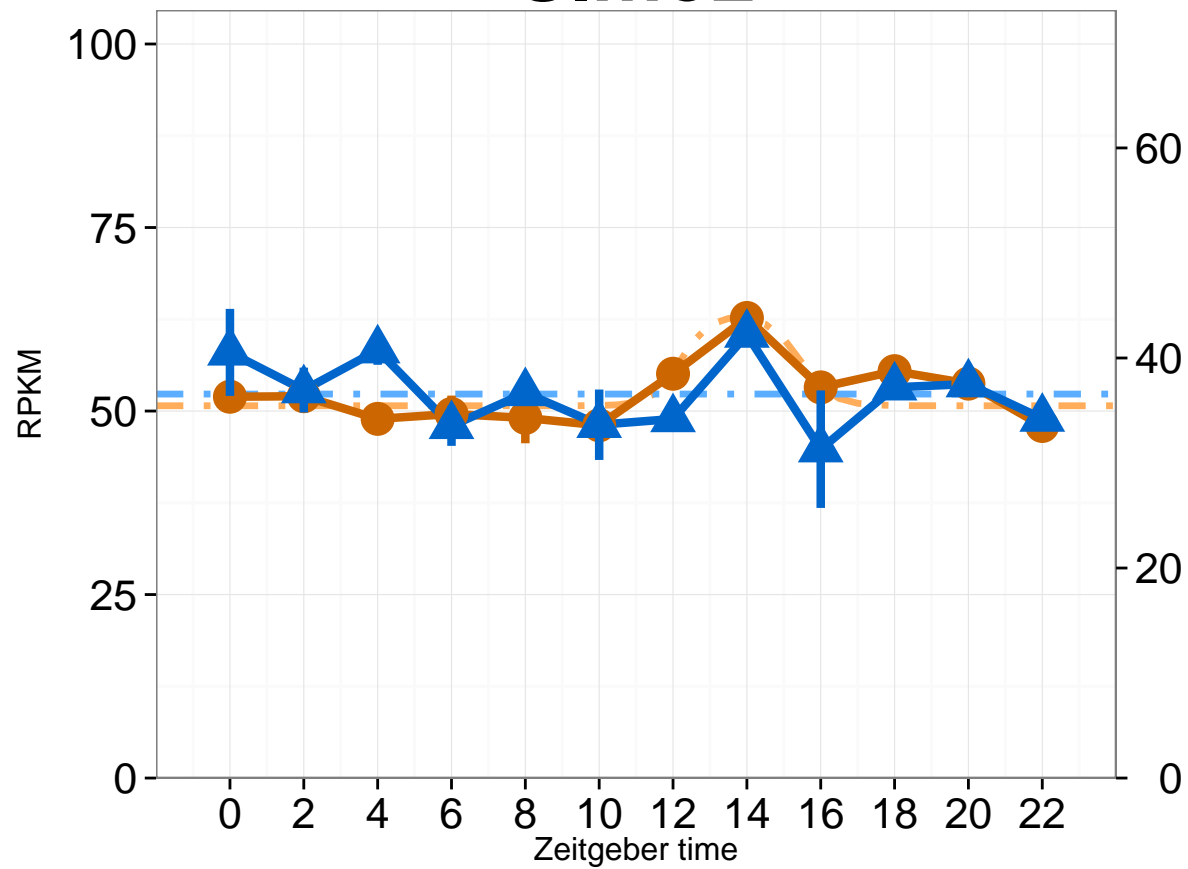

## Slmo2

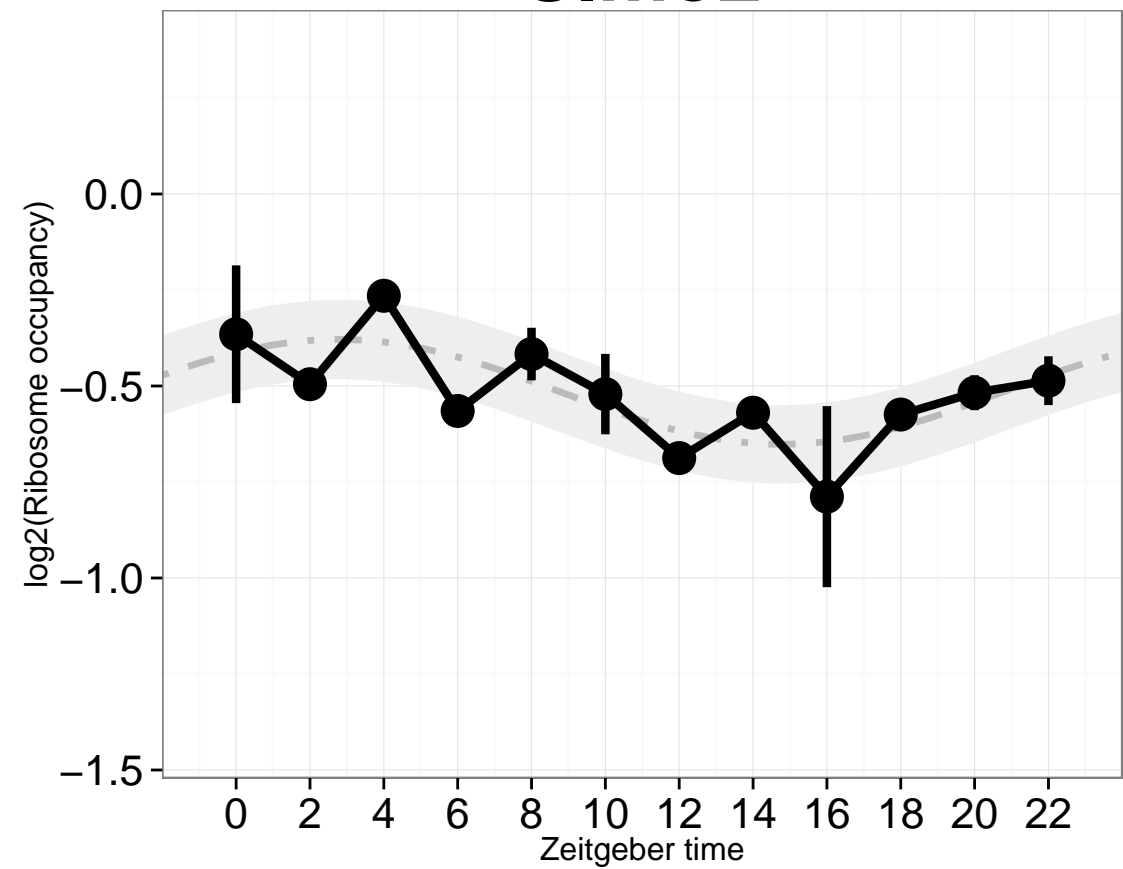

Supplement: Supplementary file 12223 [file 1]

## Gsap

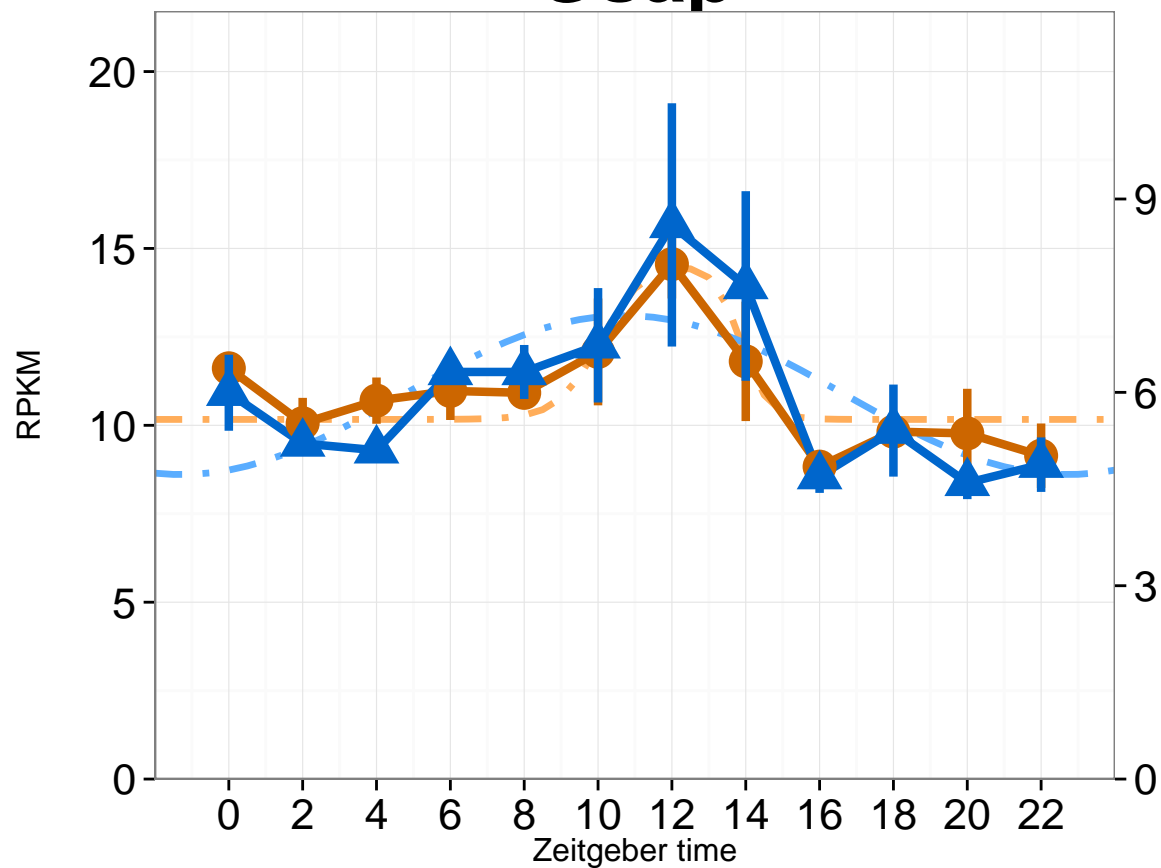

## Gsap

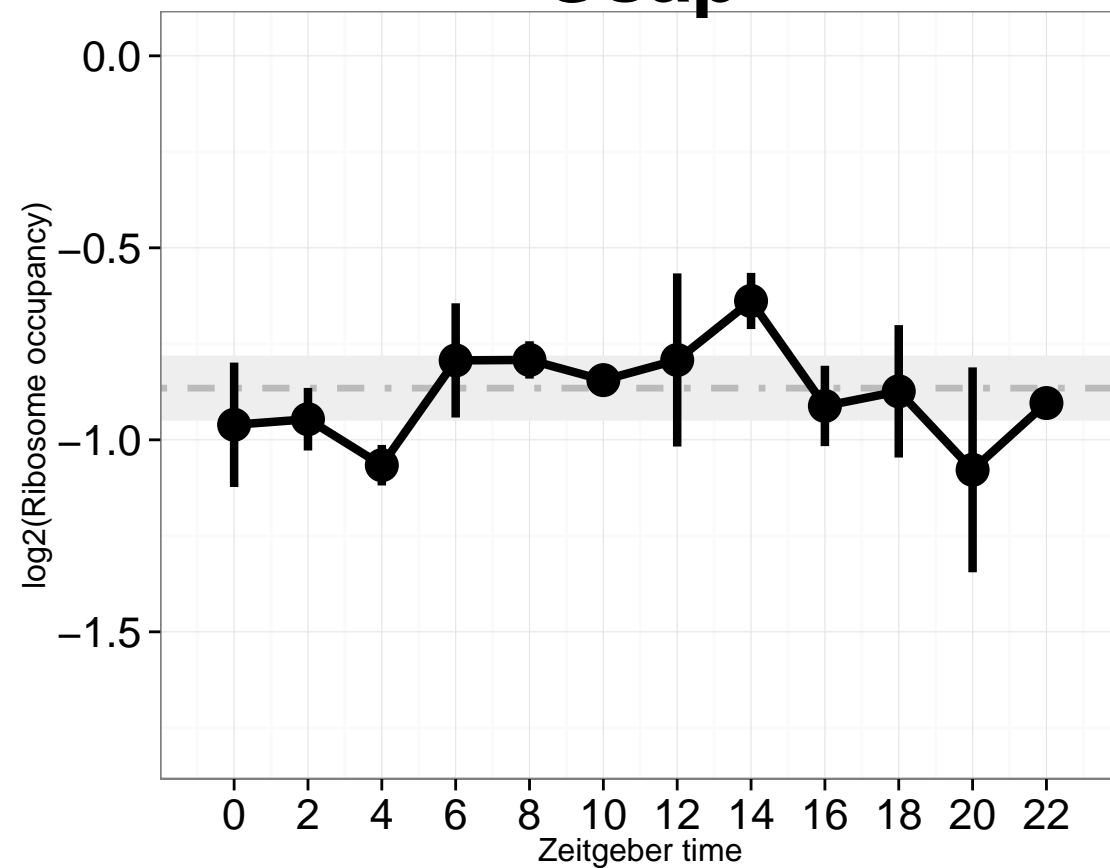

Supplement: Supplementary file 12224 [file 1]

# Nucb1

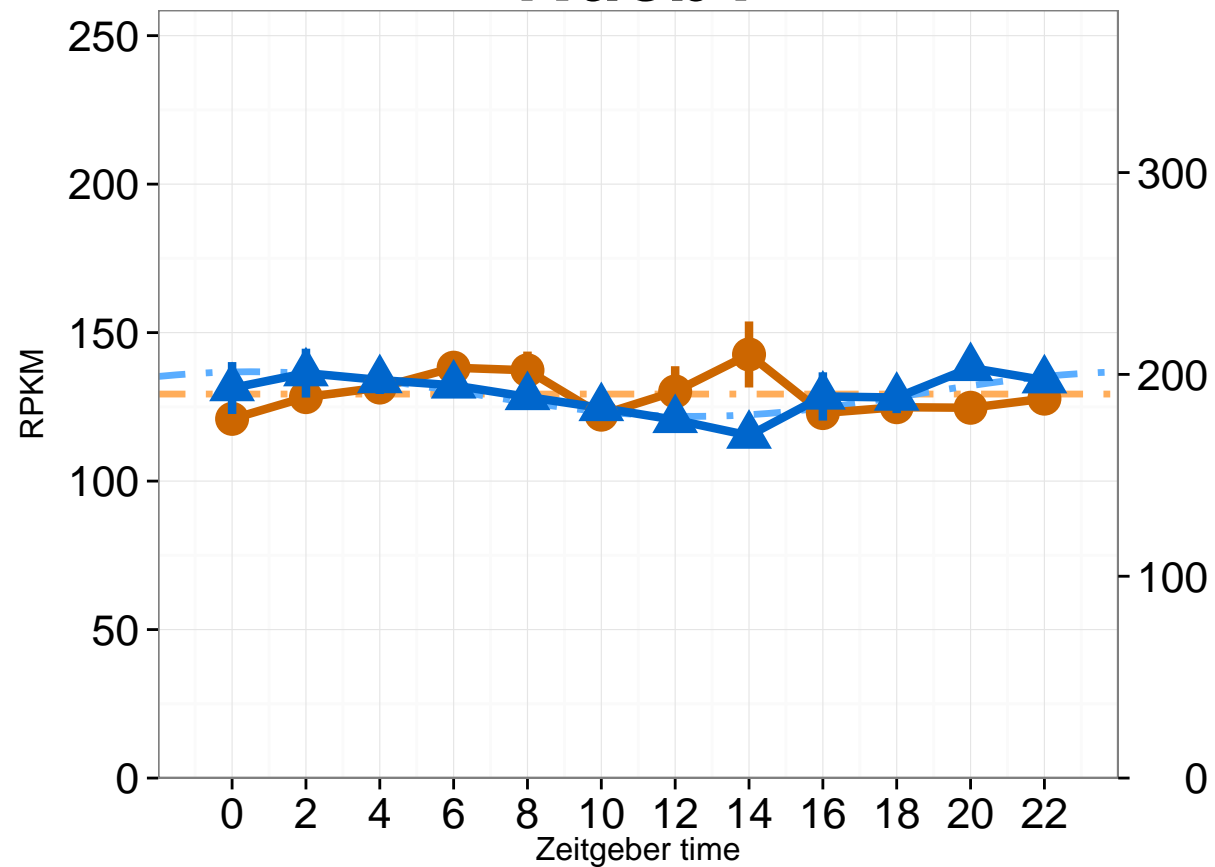

# Nucb1

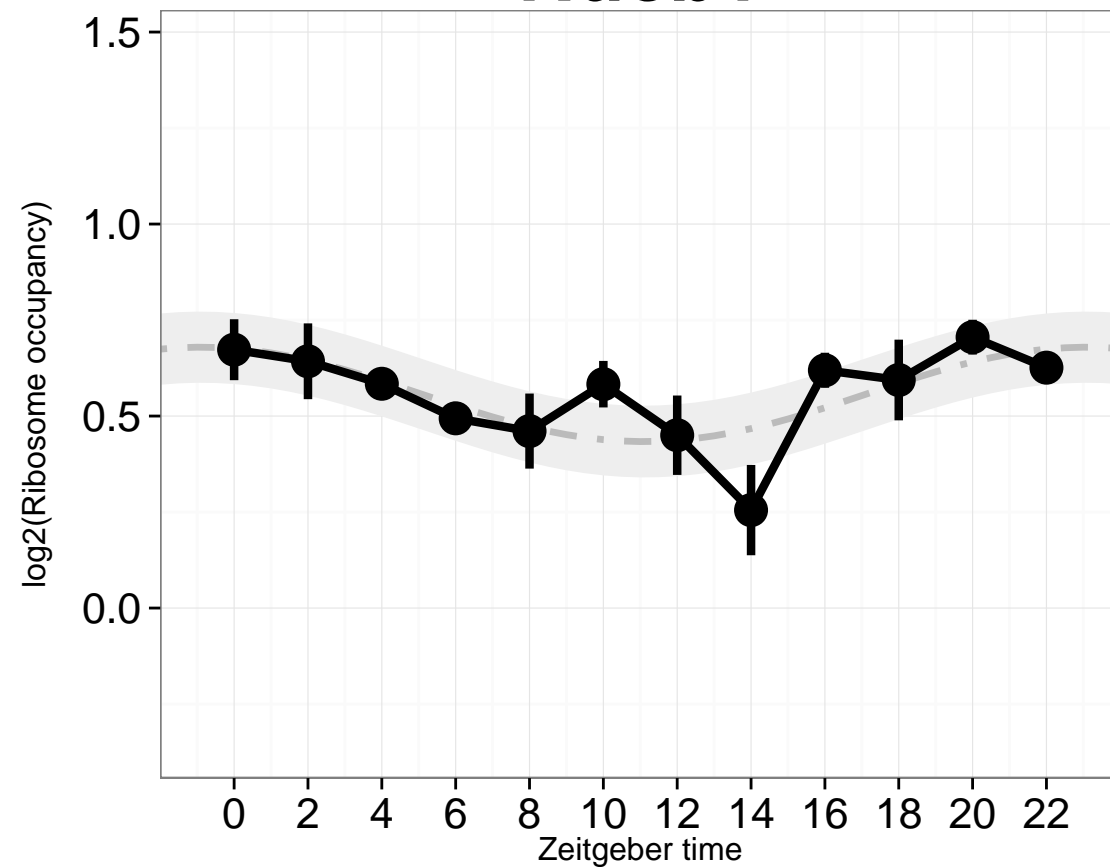

Supplement: Supplementary file 12225 [file 1]

**Igf2 TR**

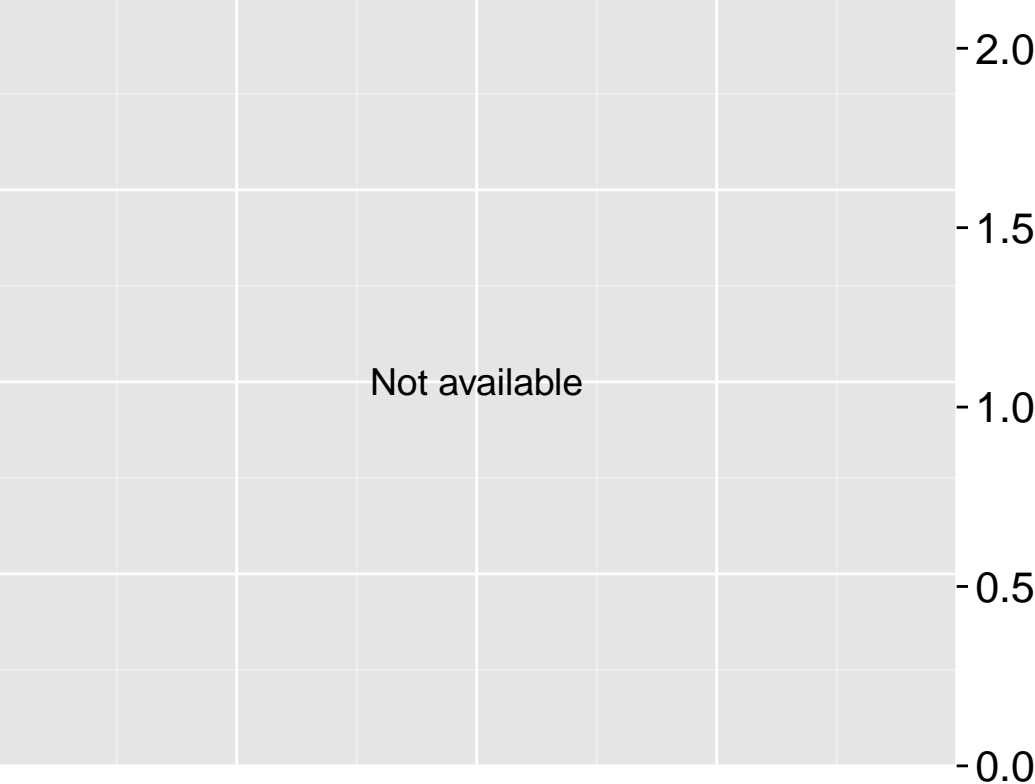

**Igf2 log2(Ribosome occupancy)**

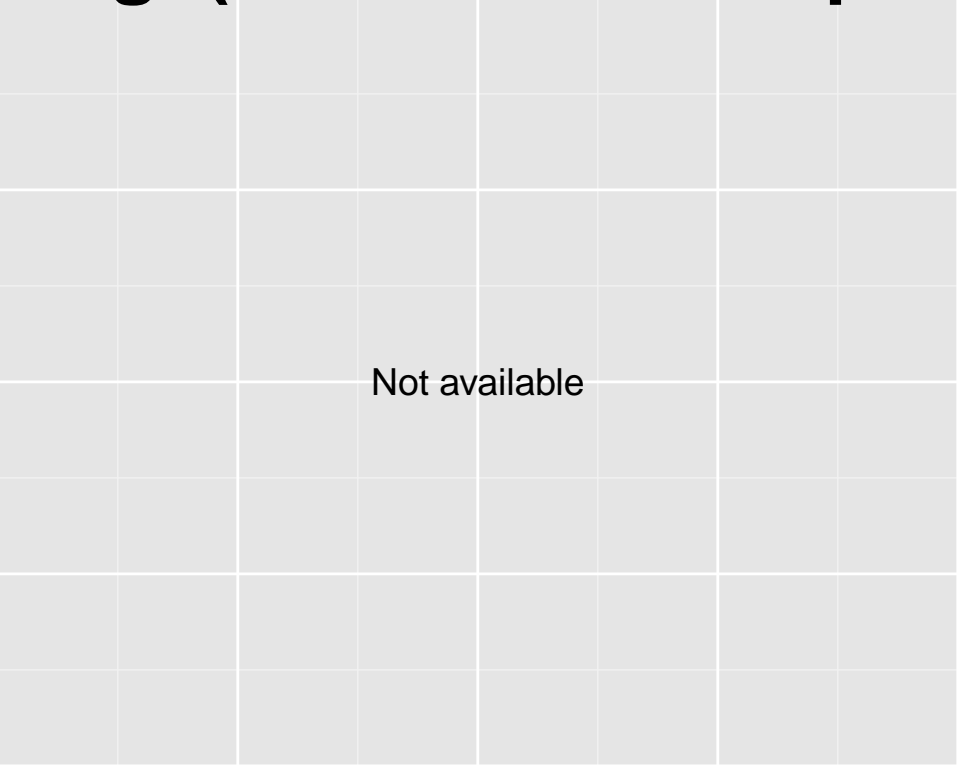

Supplement: Supplementary file 12226 [file 1]

## Bcl2l13

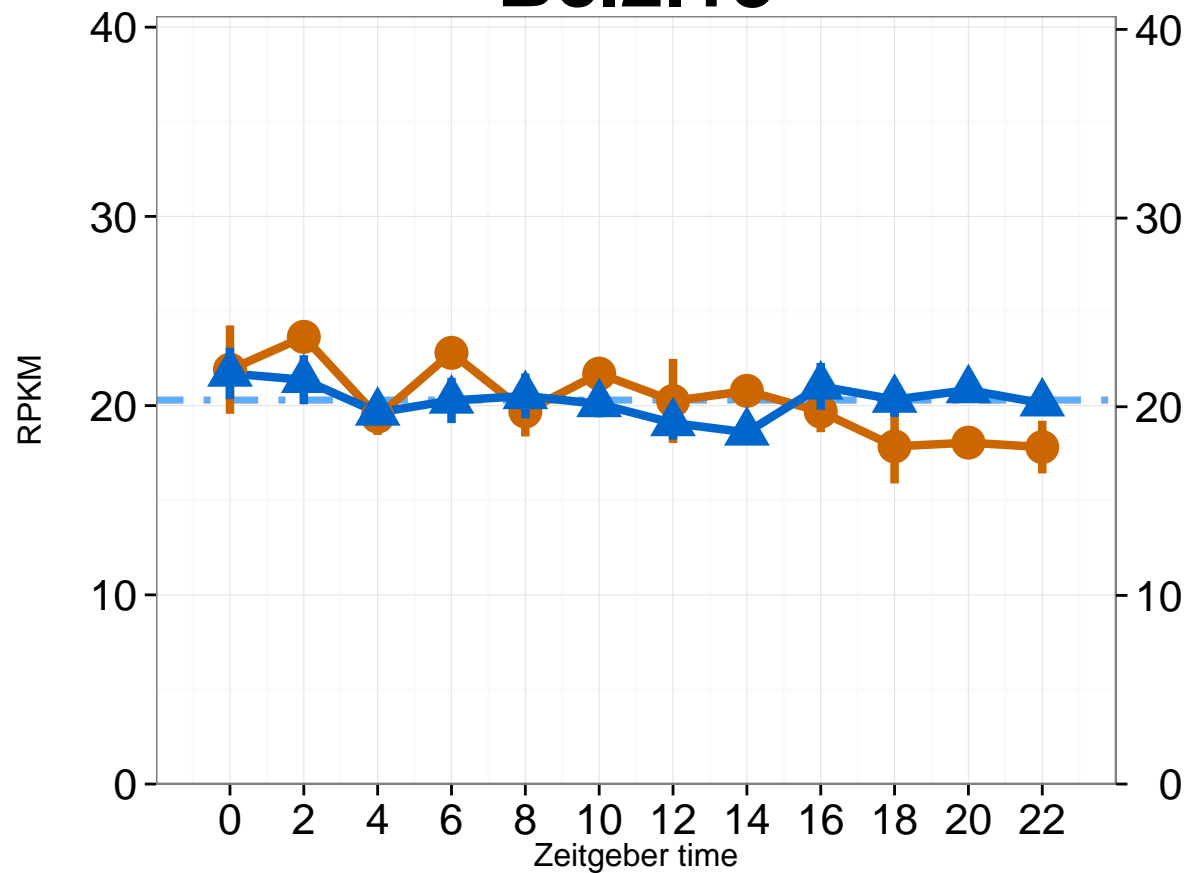

## Bcl2l13

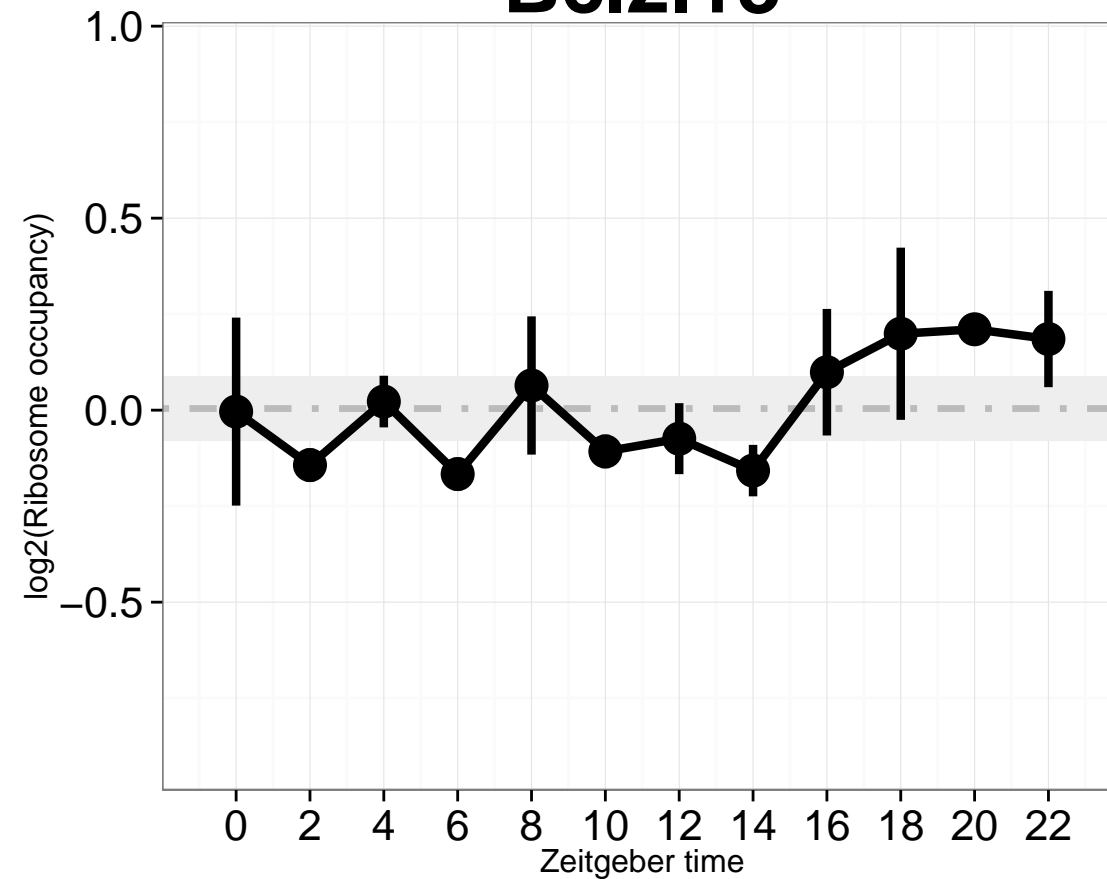

Supplement: Supplementary file 12227 [file 1]

## Sec13

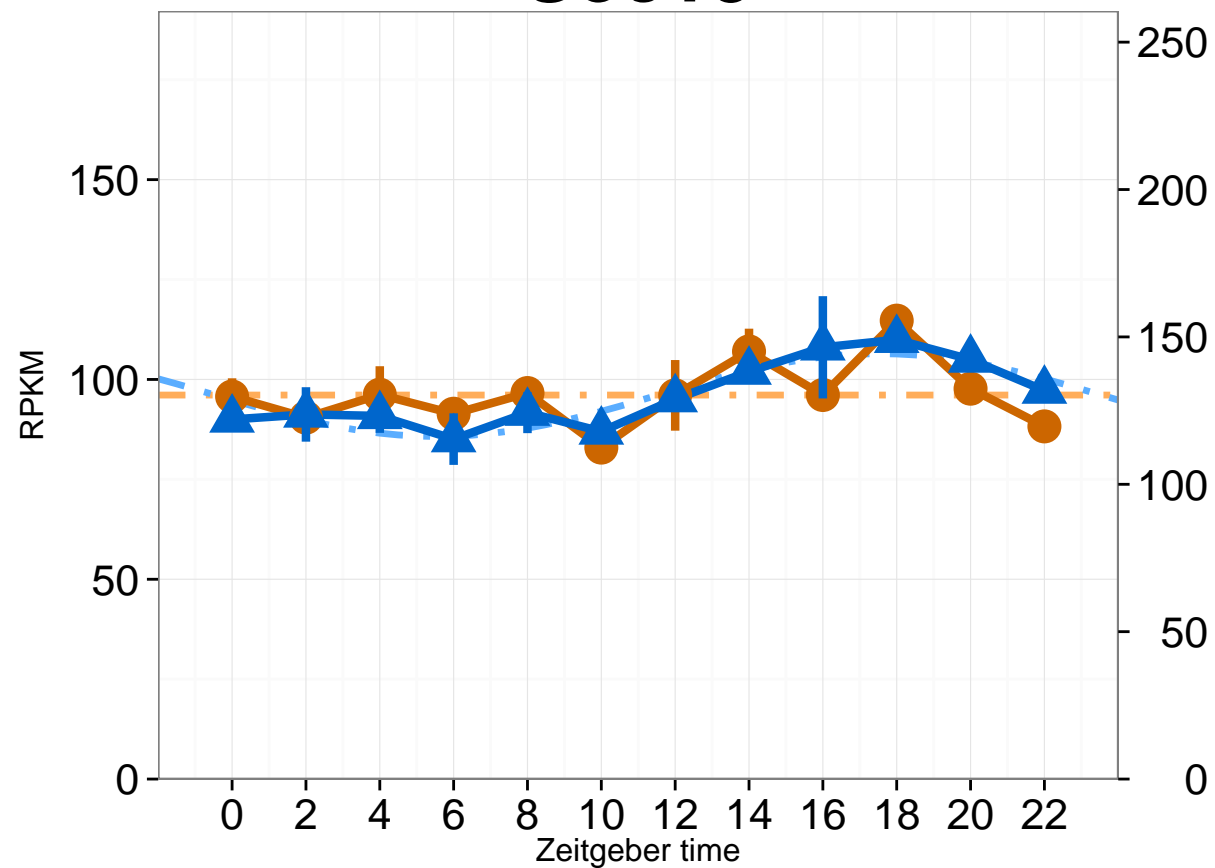

## Sec13

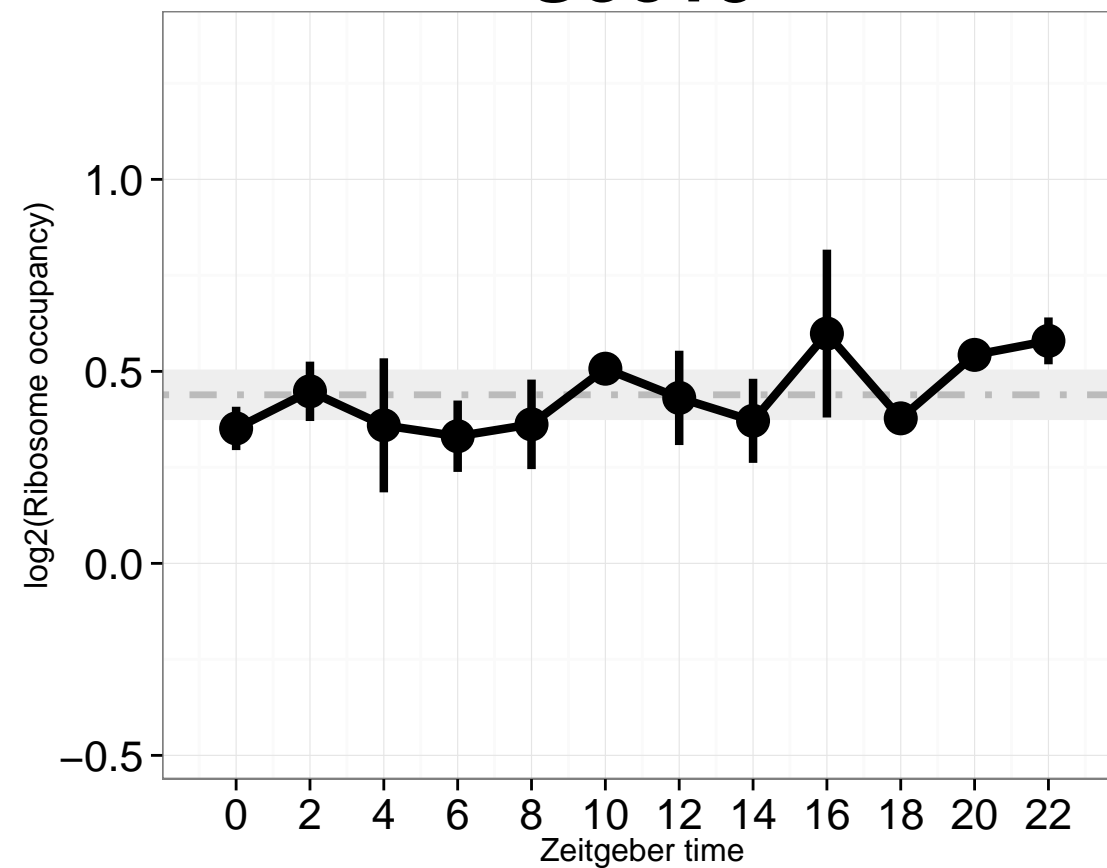

Supplement: Supplementary file 12228 [file 1]

# Paip2

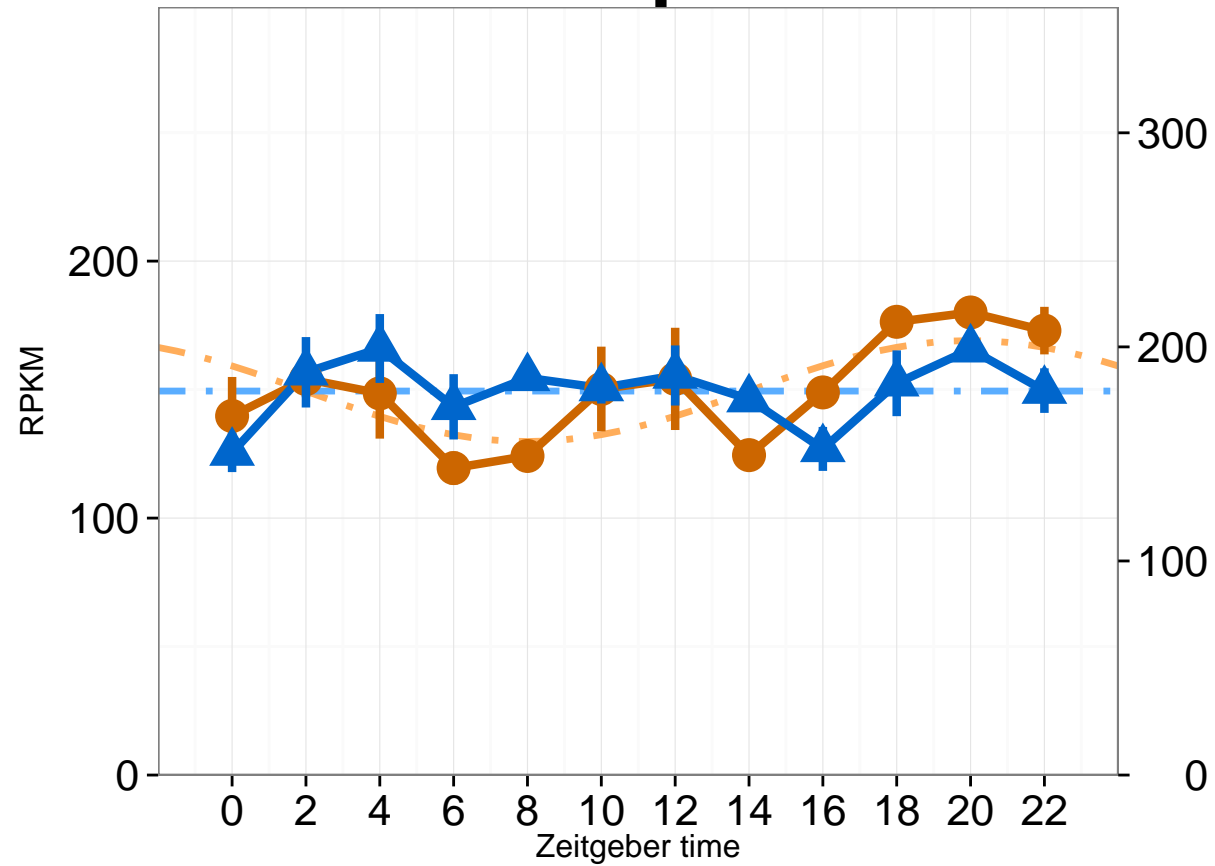

# Paip2

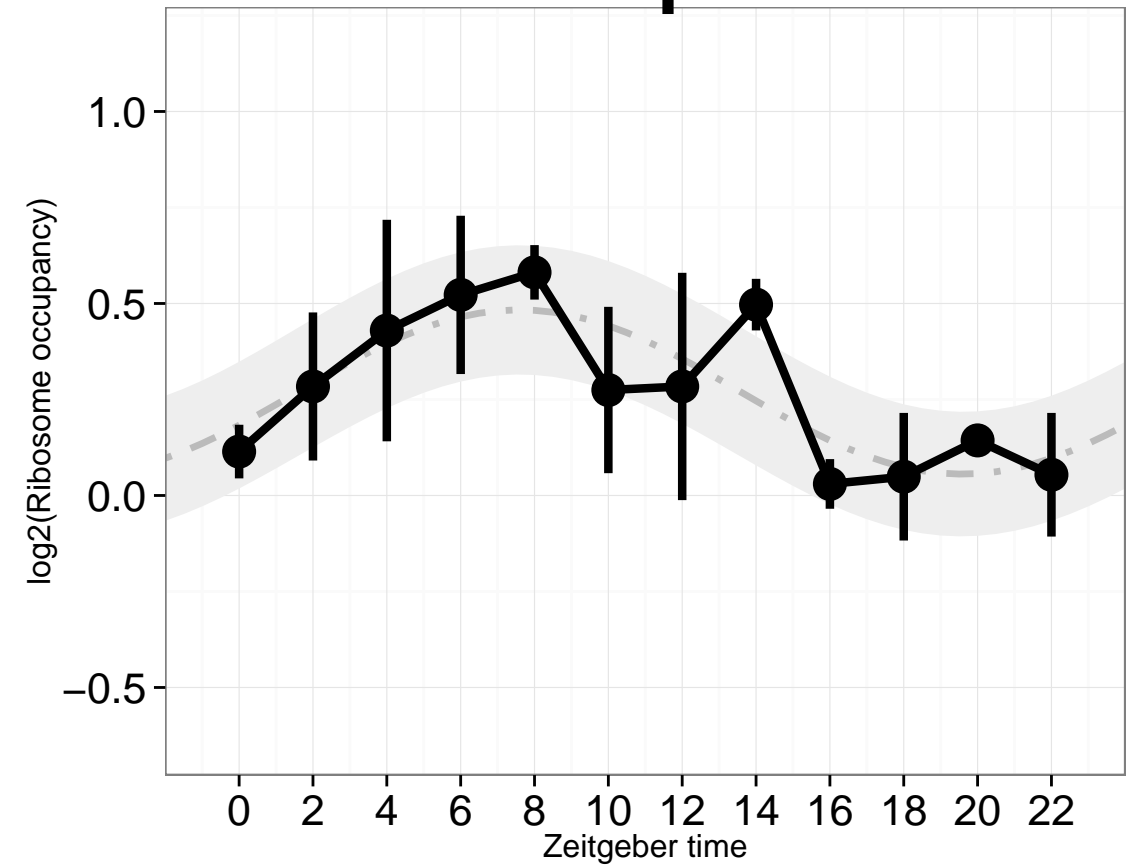

Supplement: Supplementary file 12229 [file 1]

## Gdf10

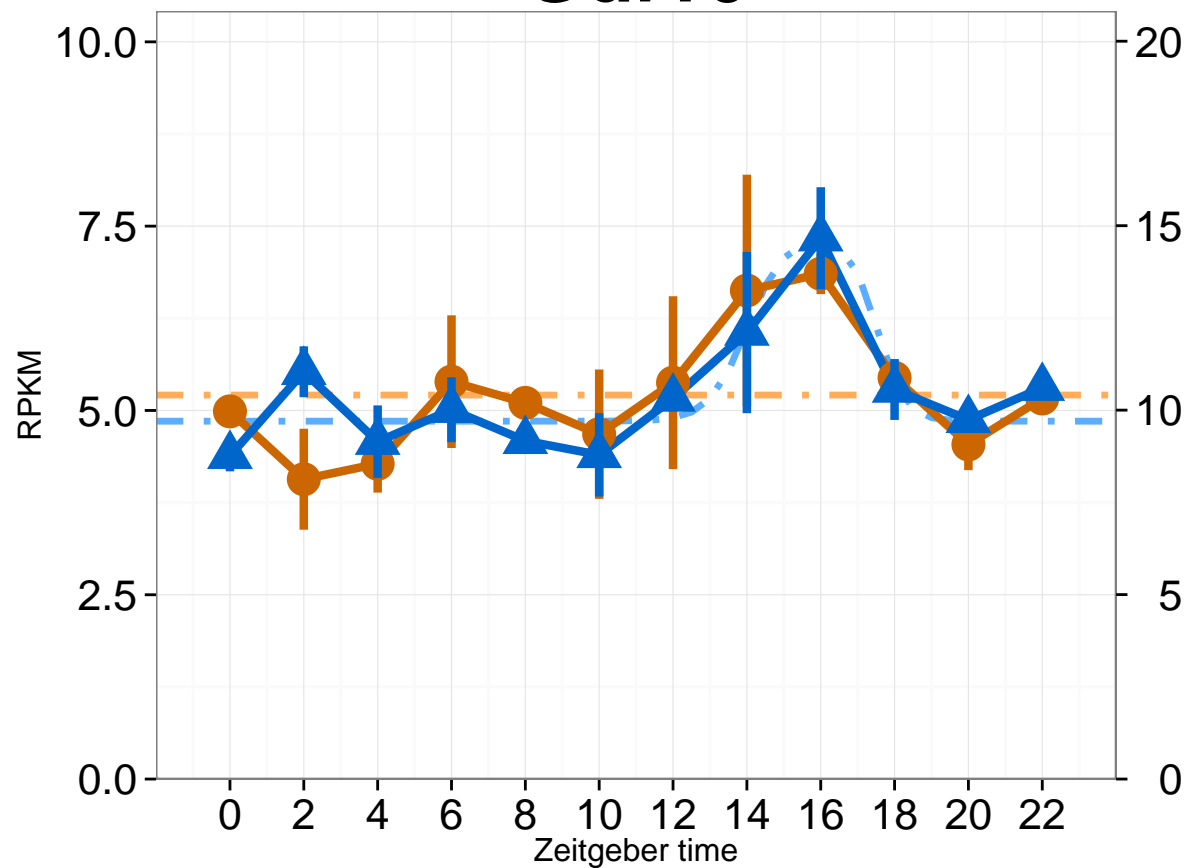

## Gdf10

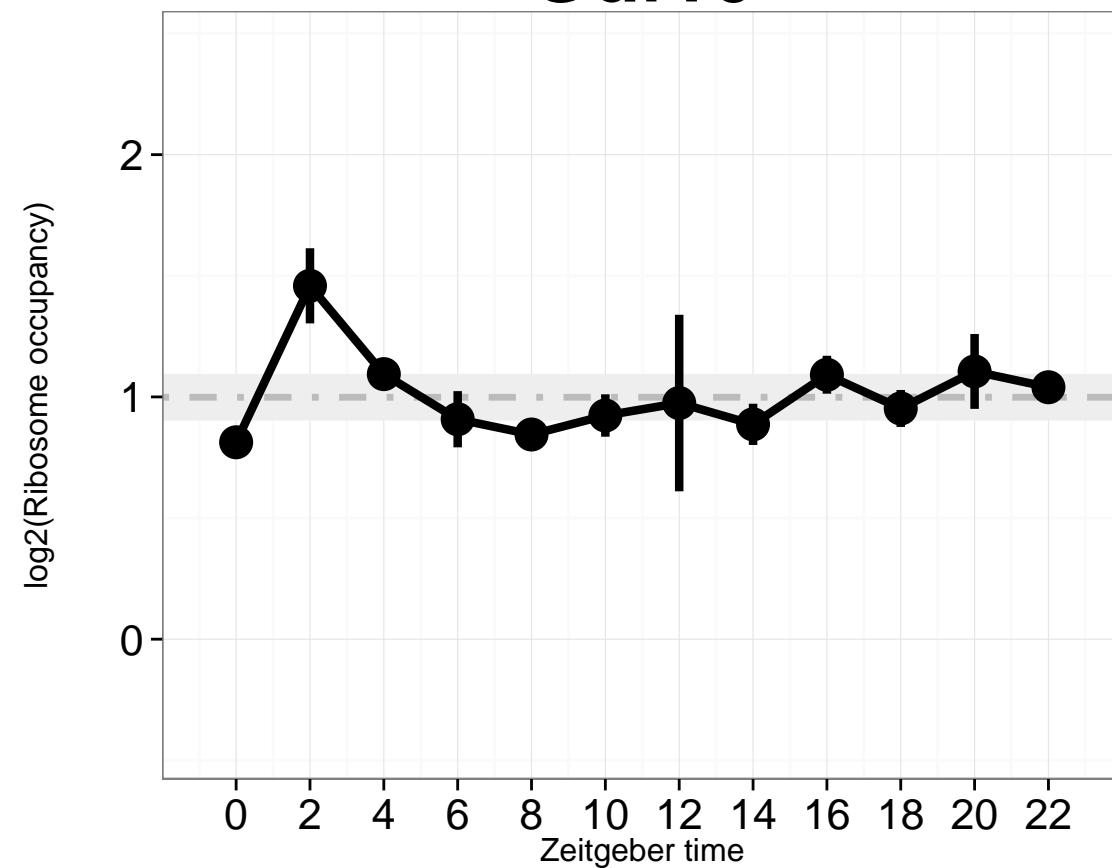

Supplement: Supplementary file 12230 [file 1]

## Nat8

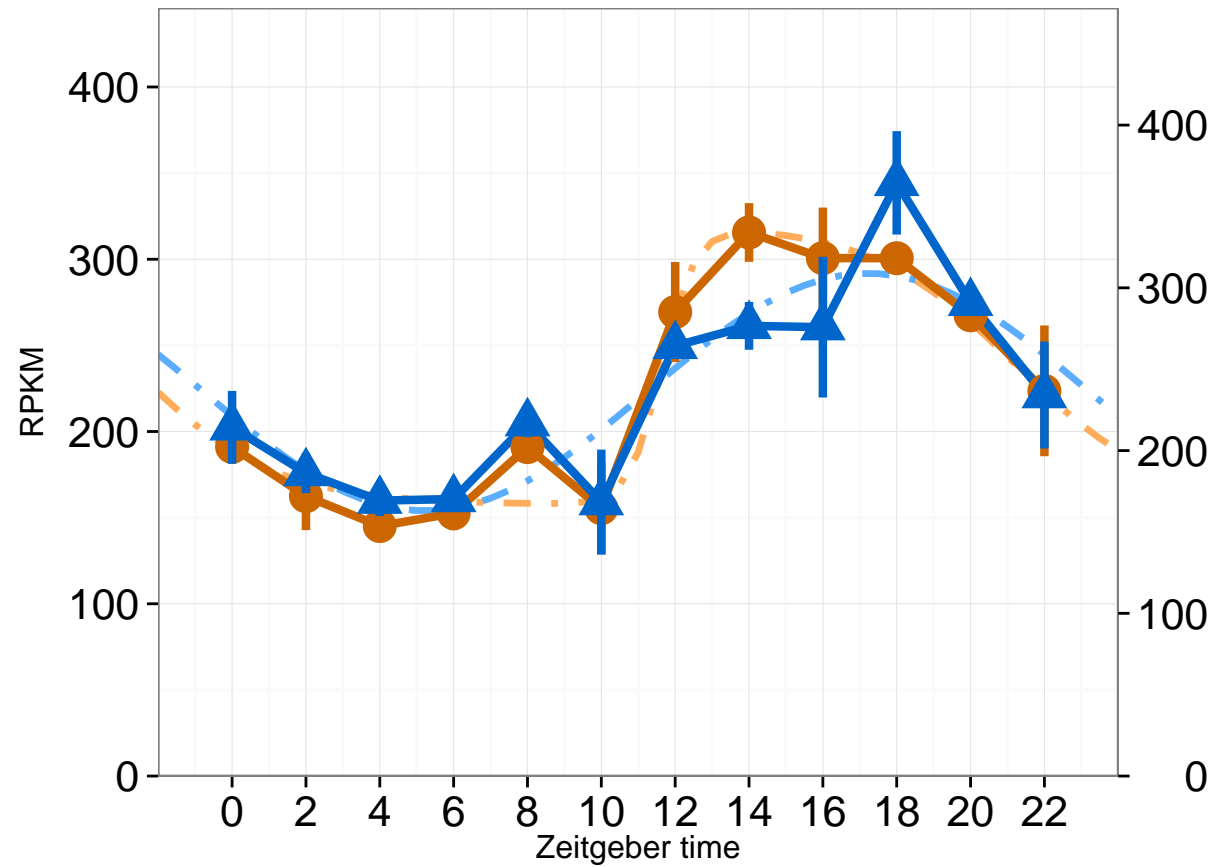

## Nat8

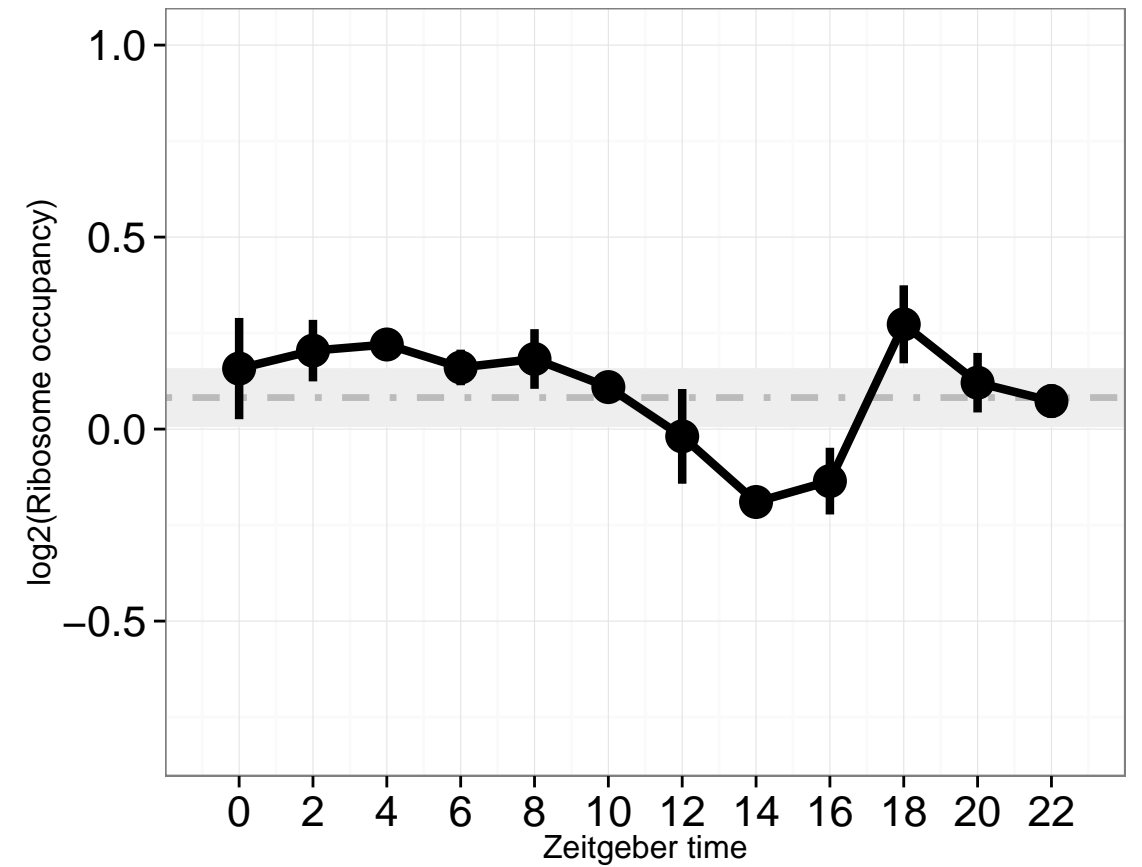

Supplement: Supplementary file 12231 [file 1]

# Slc39a7

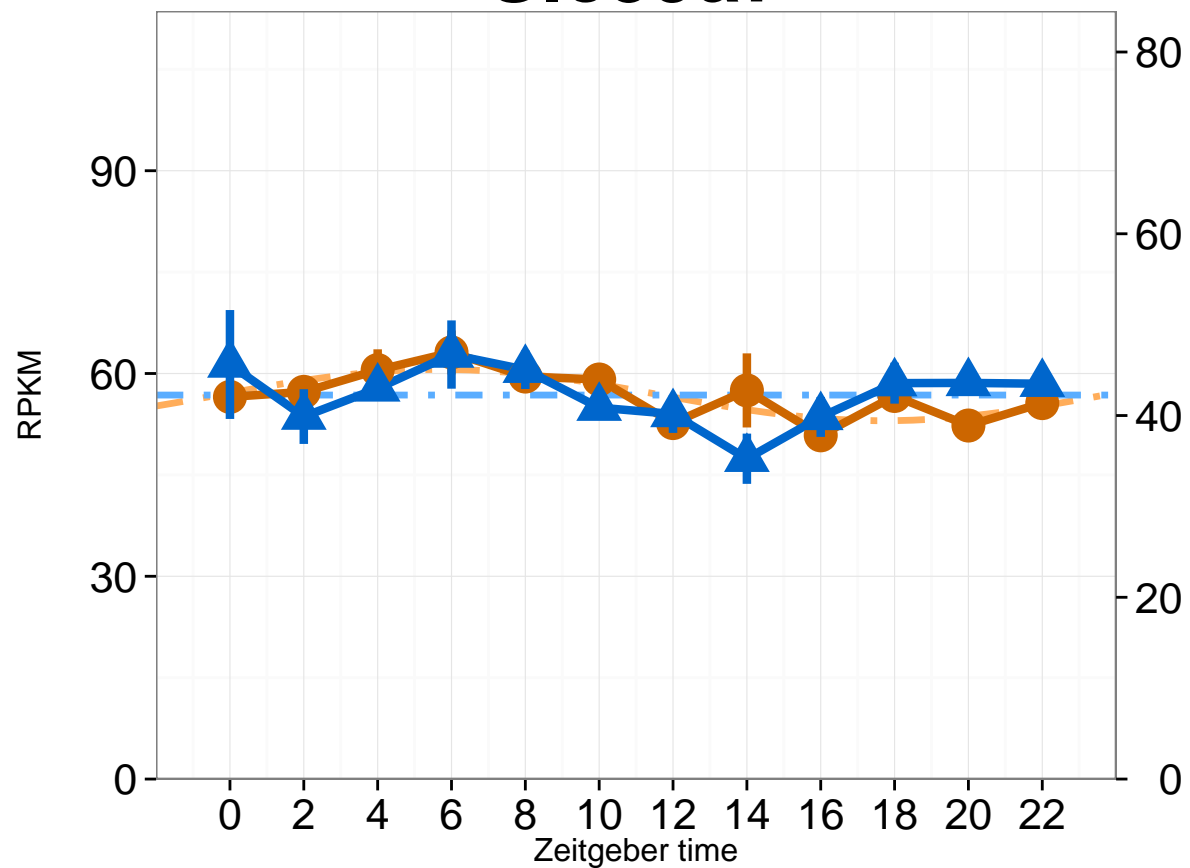

# Slc39a7

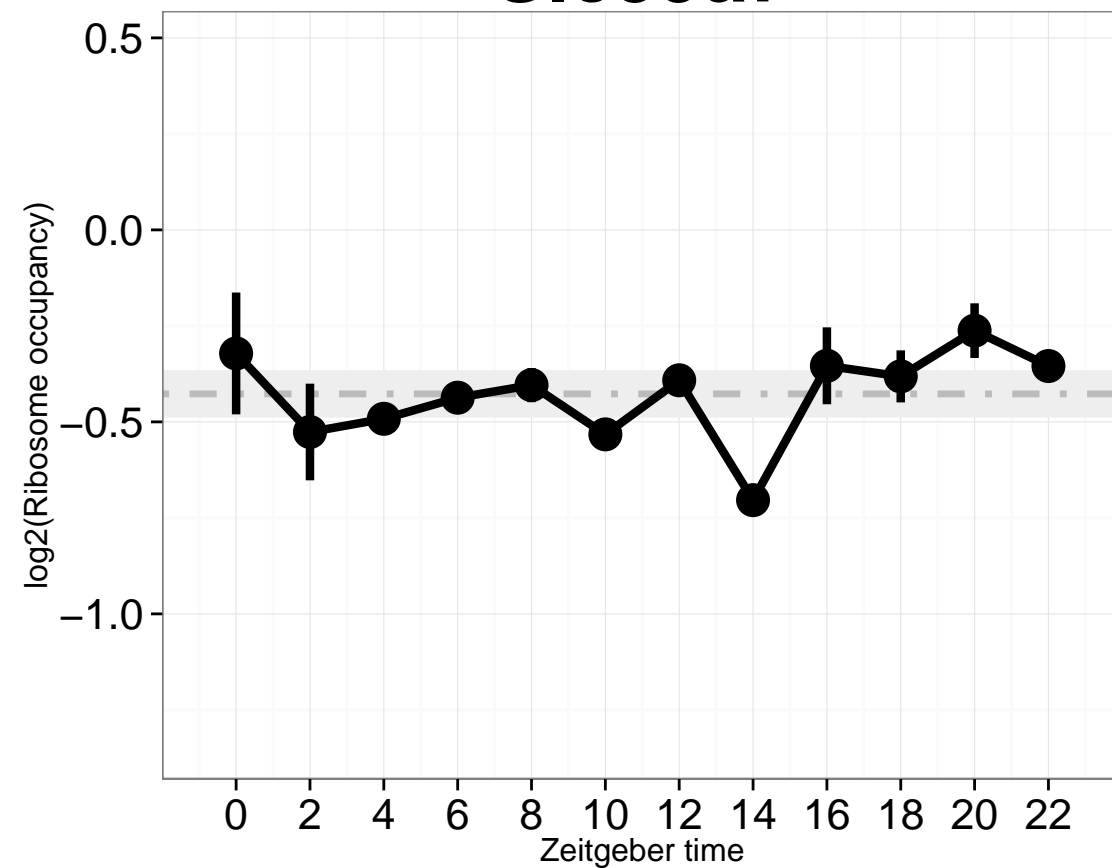

Supplement: Supplementary file 12232 [file 1]

## Usf2

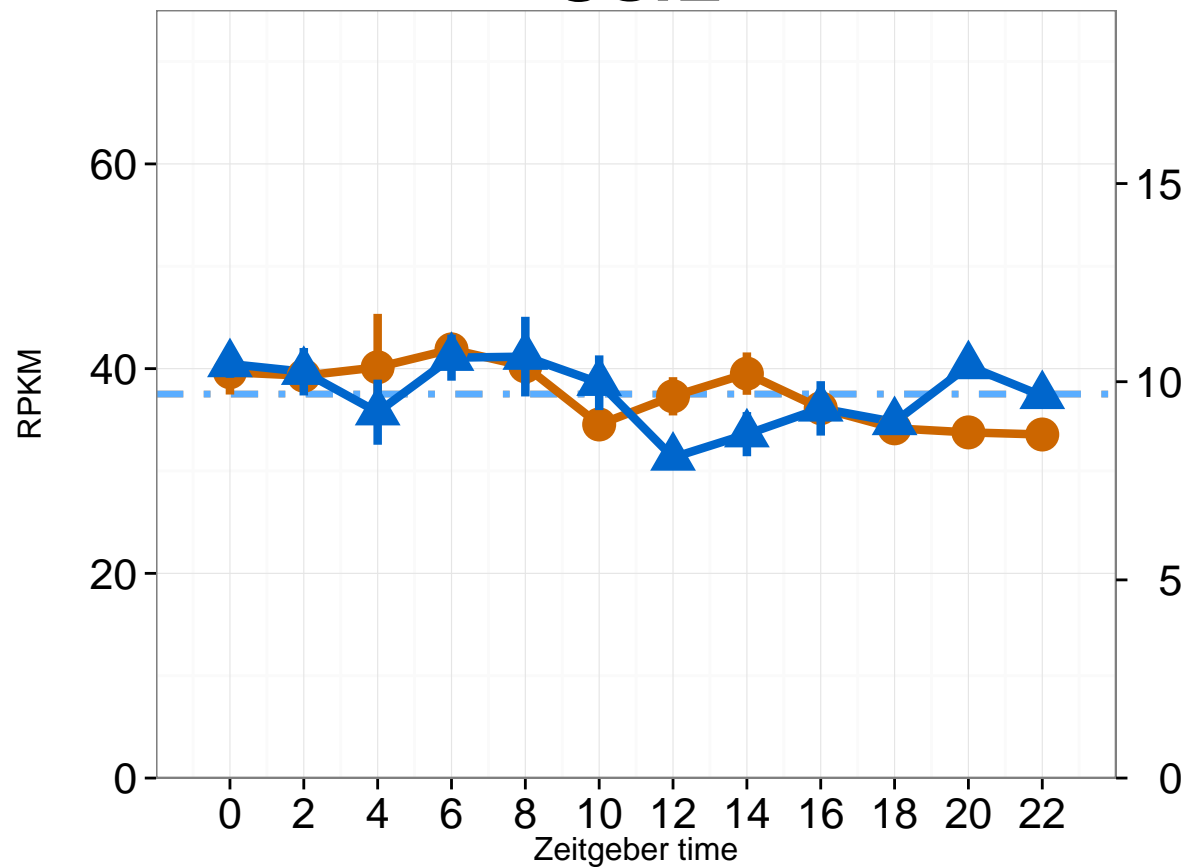

## Usf2

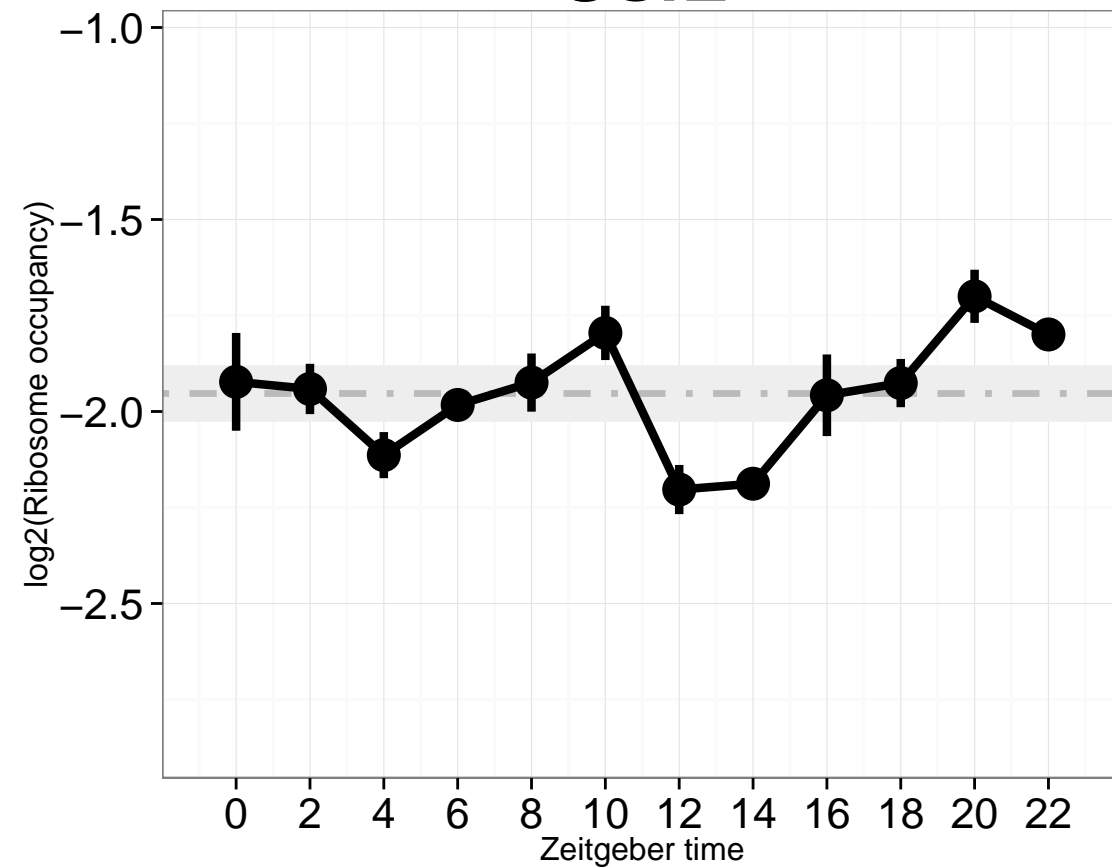

Supplement: Supplementary file 12233 [file 1]

## Rab3d

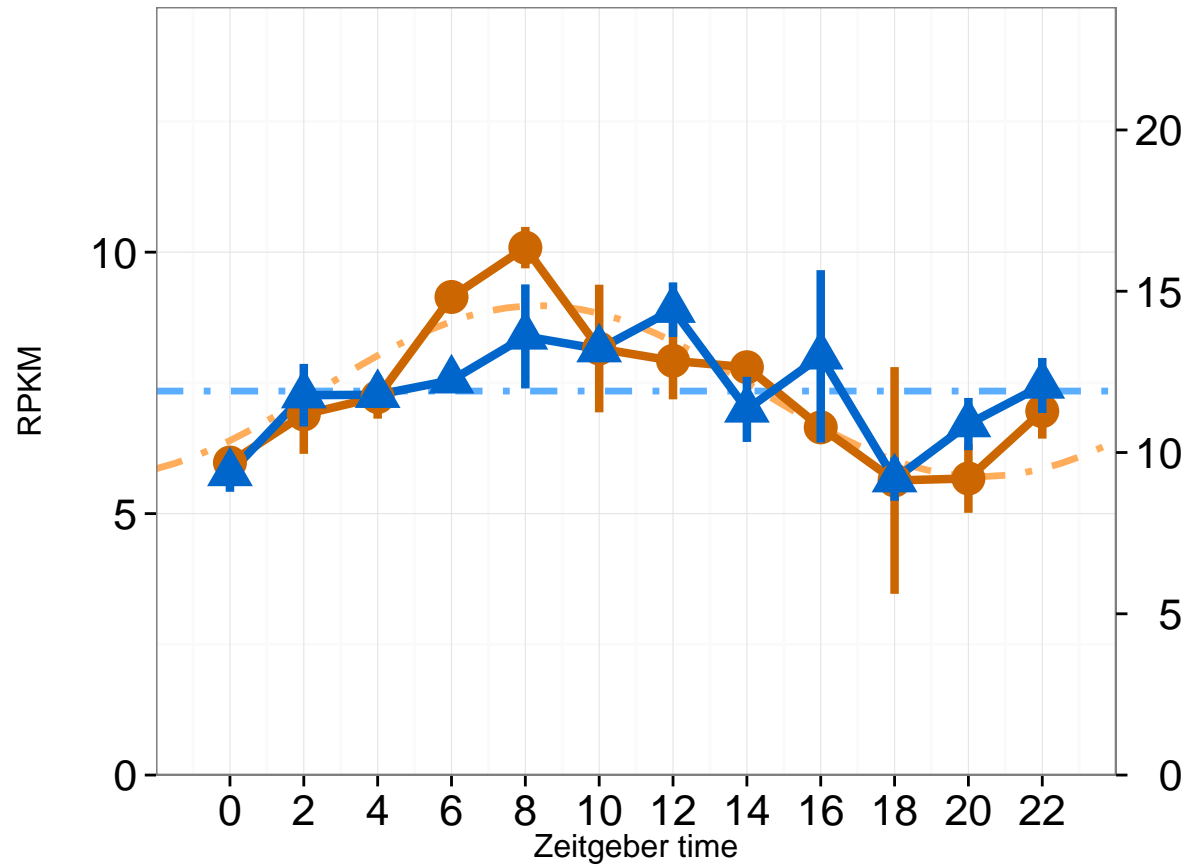

## Rab3d

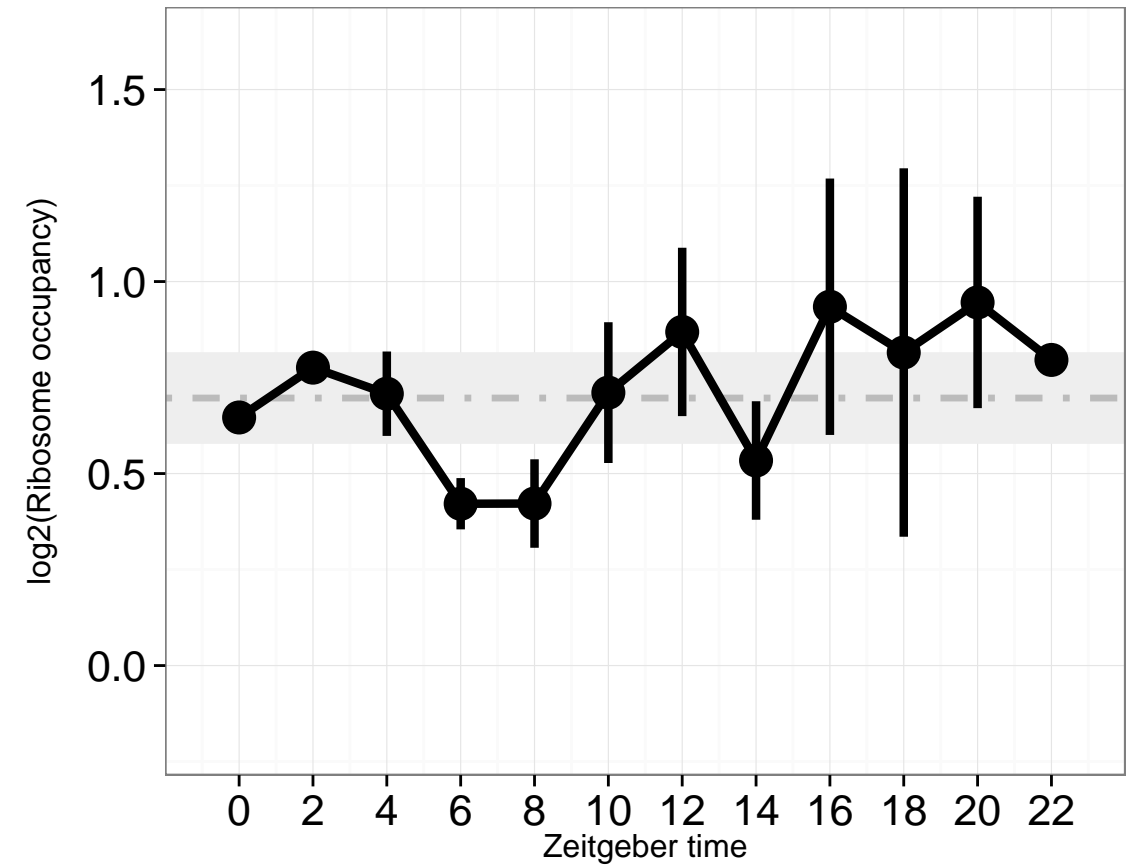

Supplement: Supplementary file 12234 [file 1]

## Ttc25

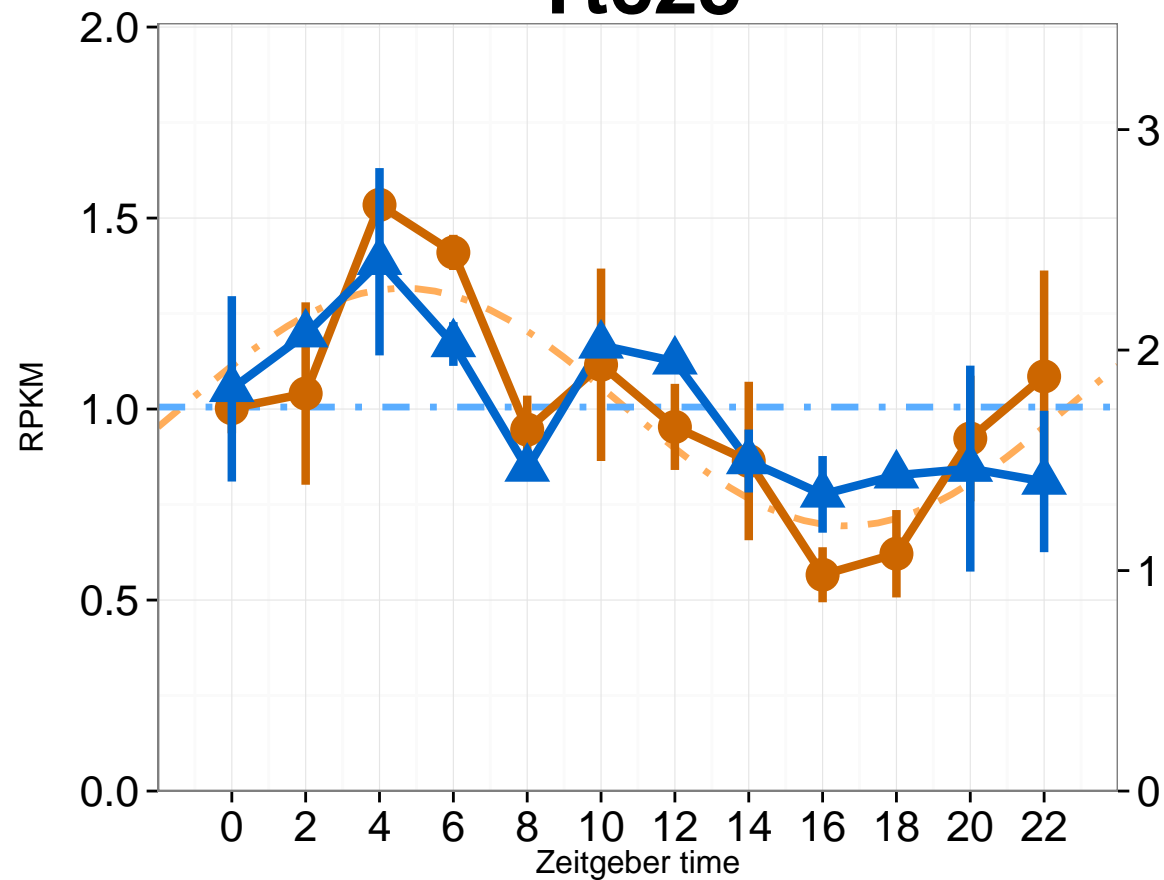

## Ttc25

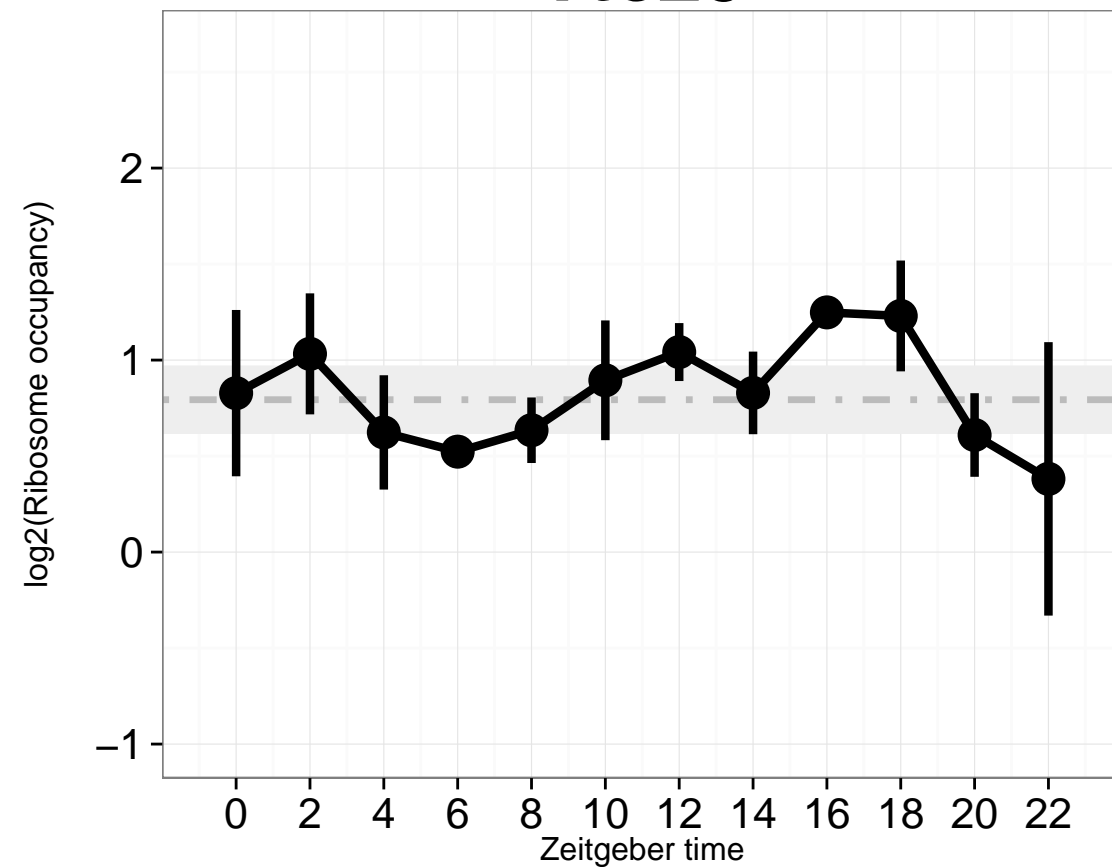

Supplement: Supplementary file 12235 [file 1]

## Rabif

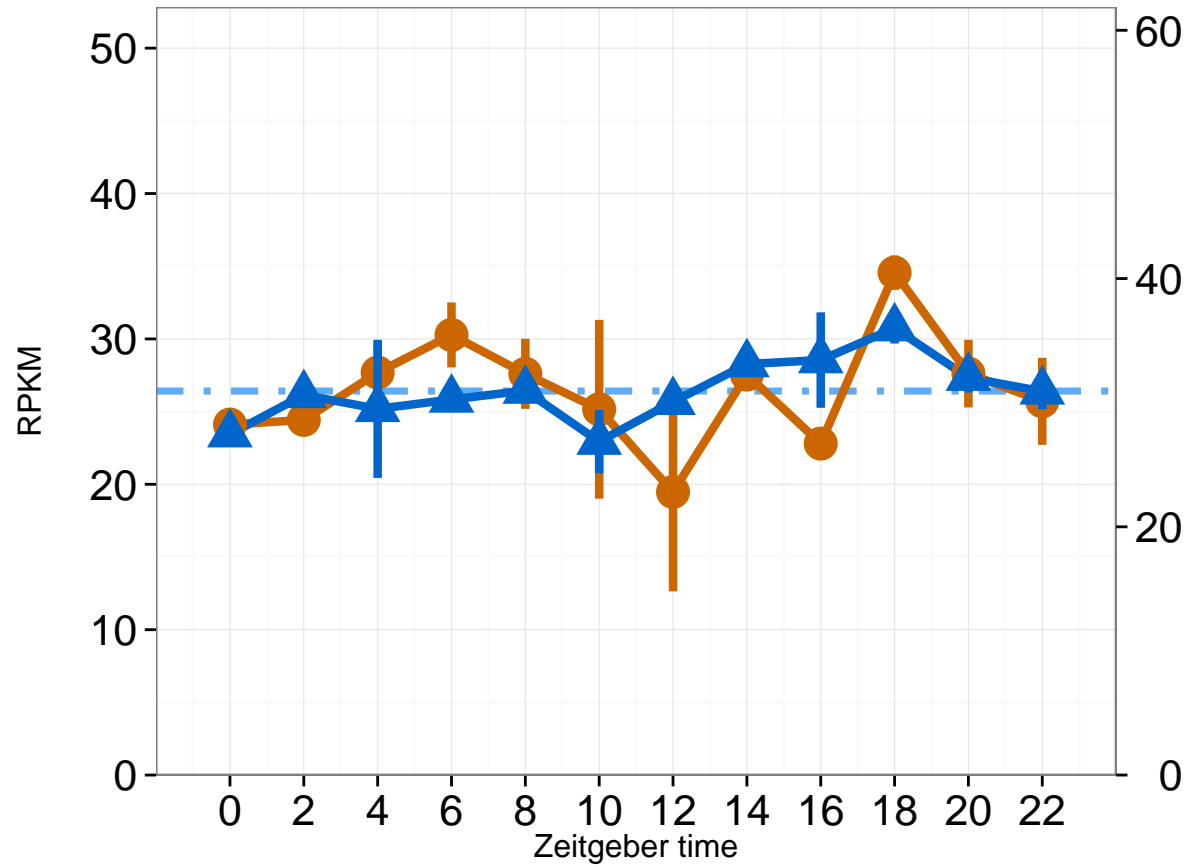

## Rabif

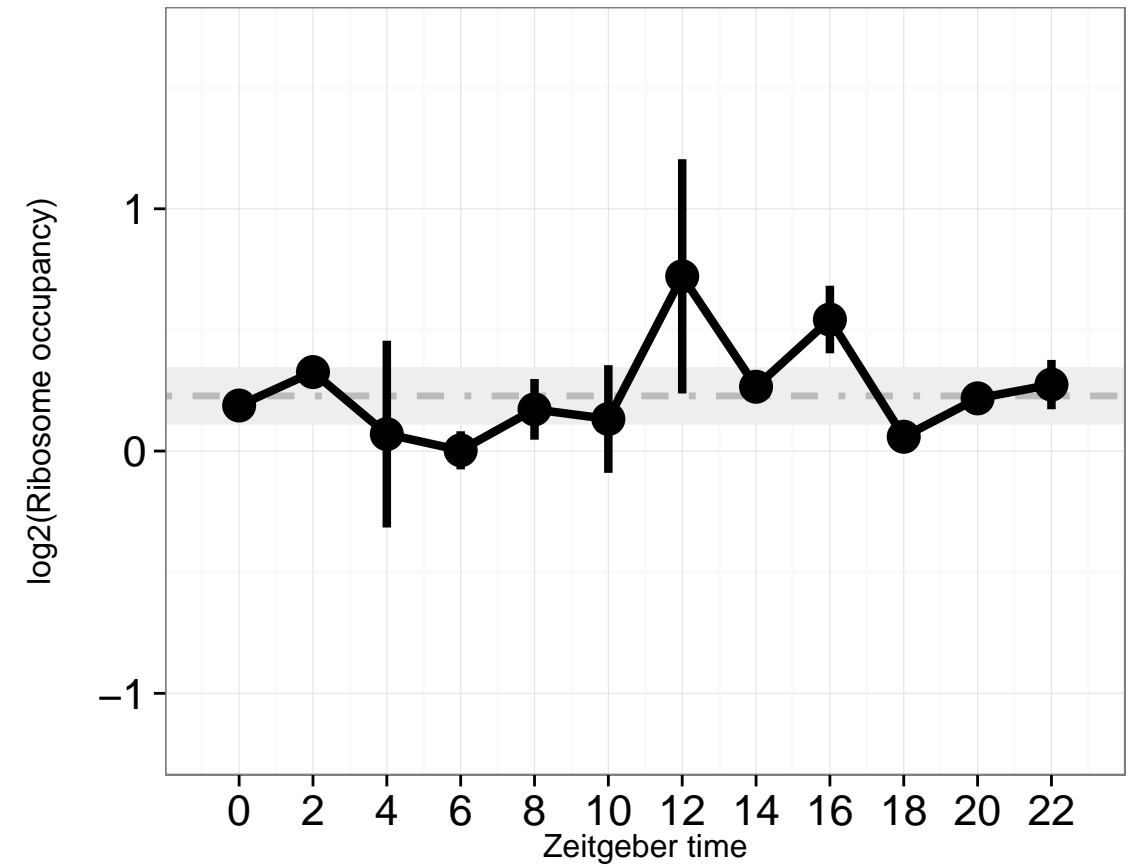

Supplement: Supplementary file 12236 [file 1]

# Bud13

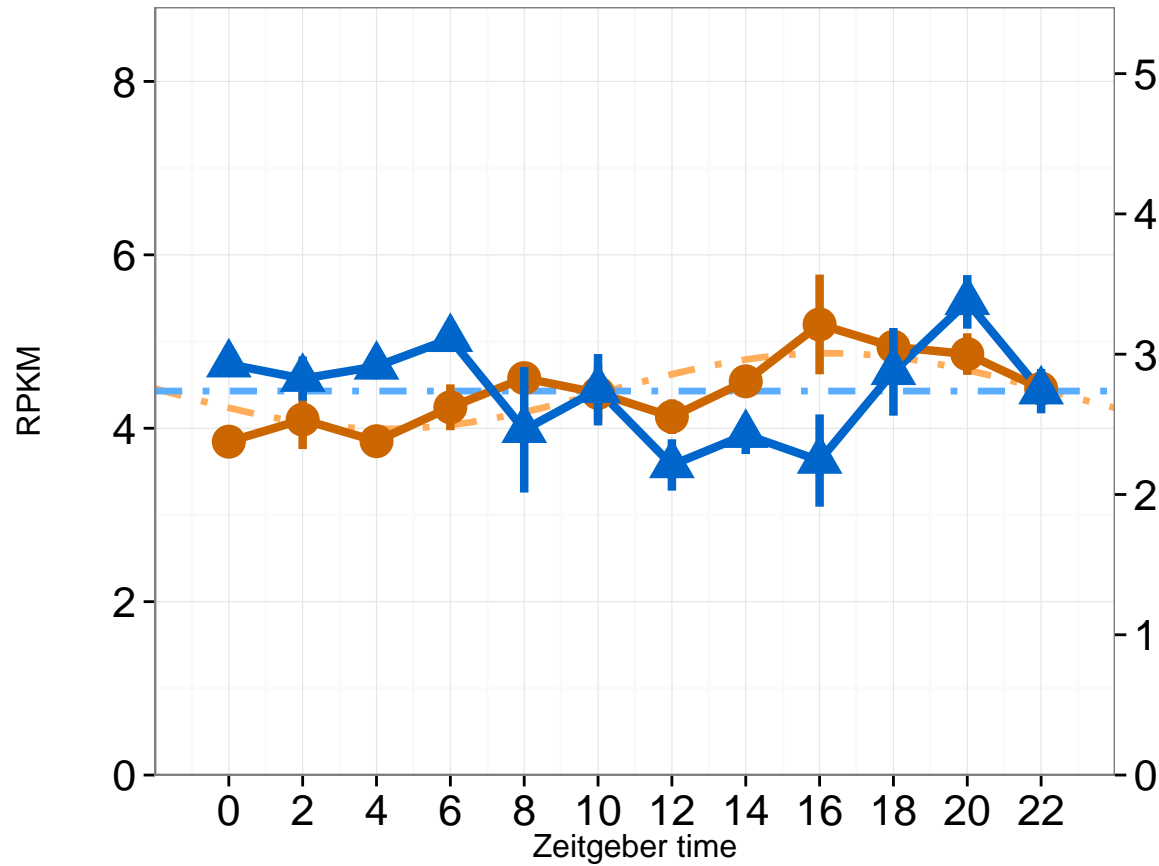

# Bud13

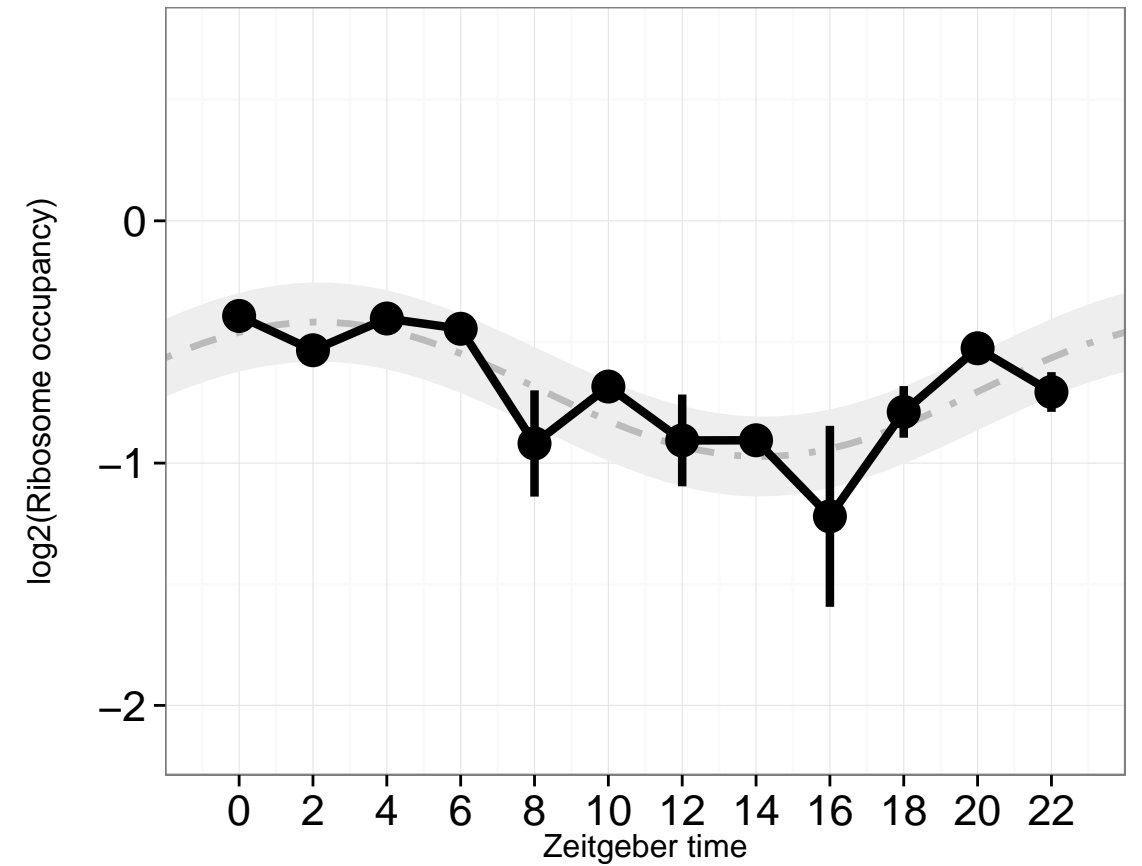

Supplement: Supplementary file 12237 [file 1]

# Hnrnph1

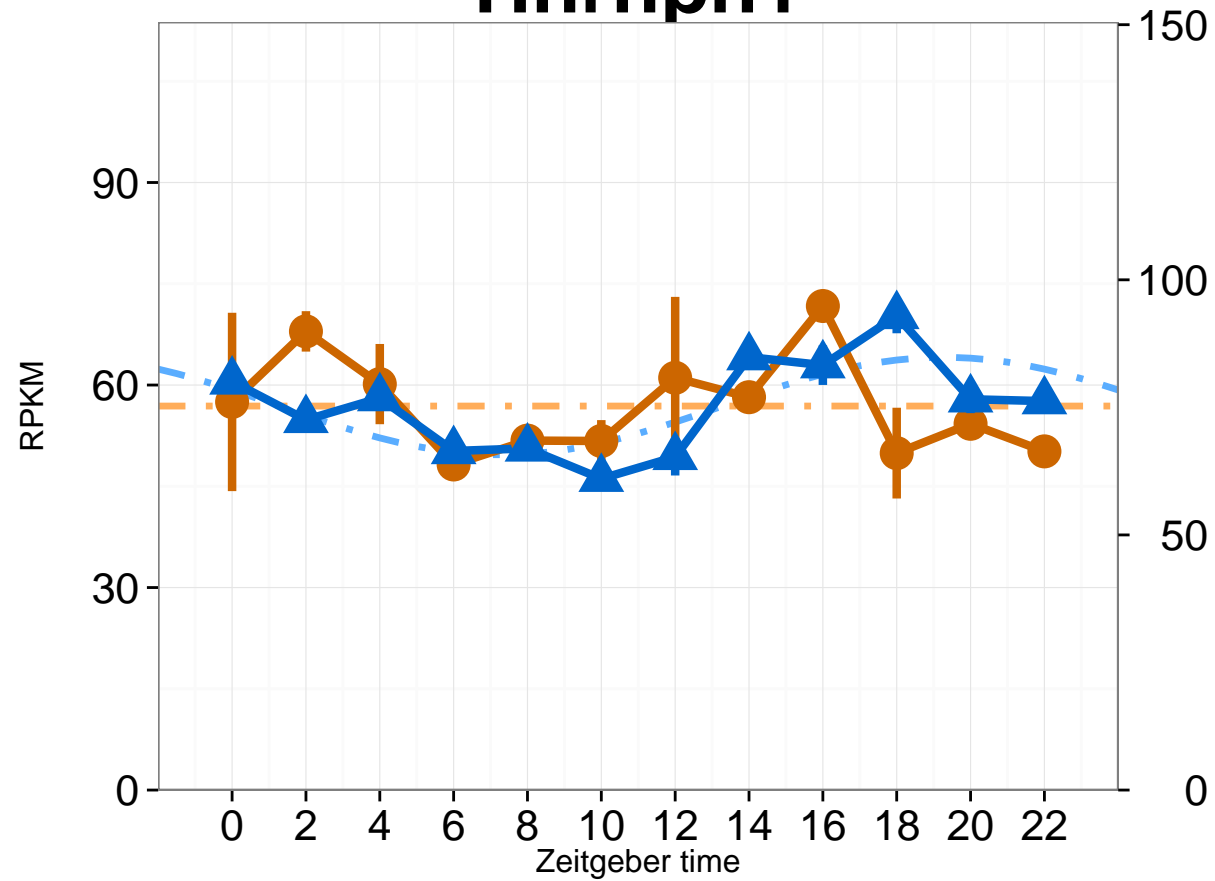

# Hnrnph1

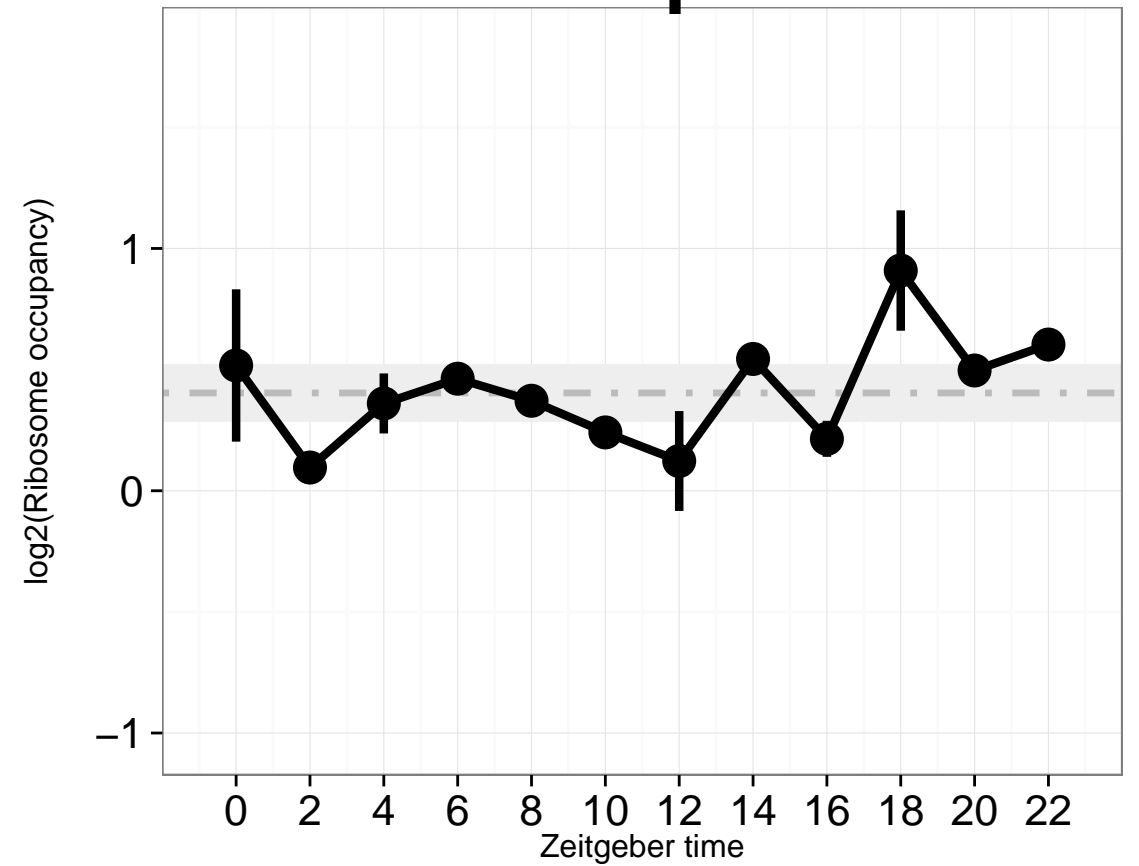

Supplement: Supplementary file 12238 [file 1]

# Lpar6

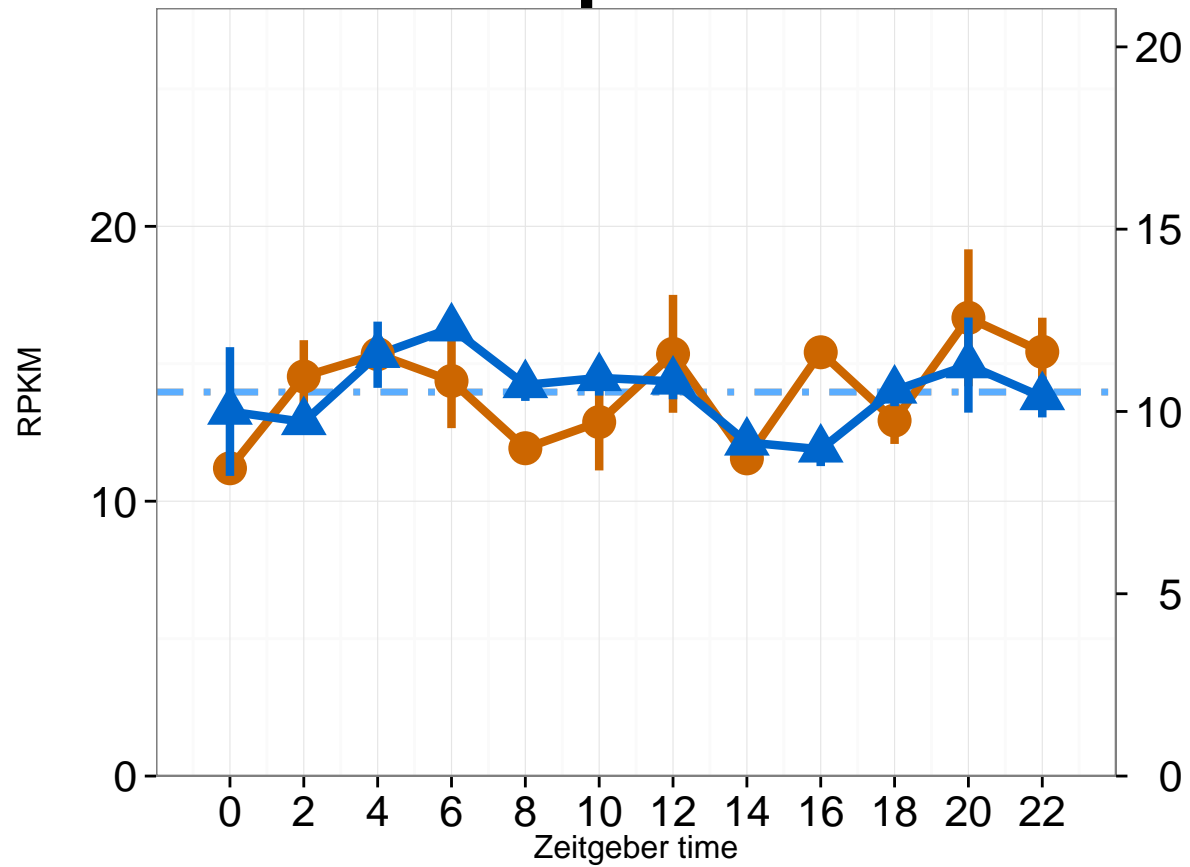

# Lpar6

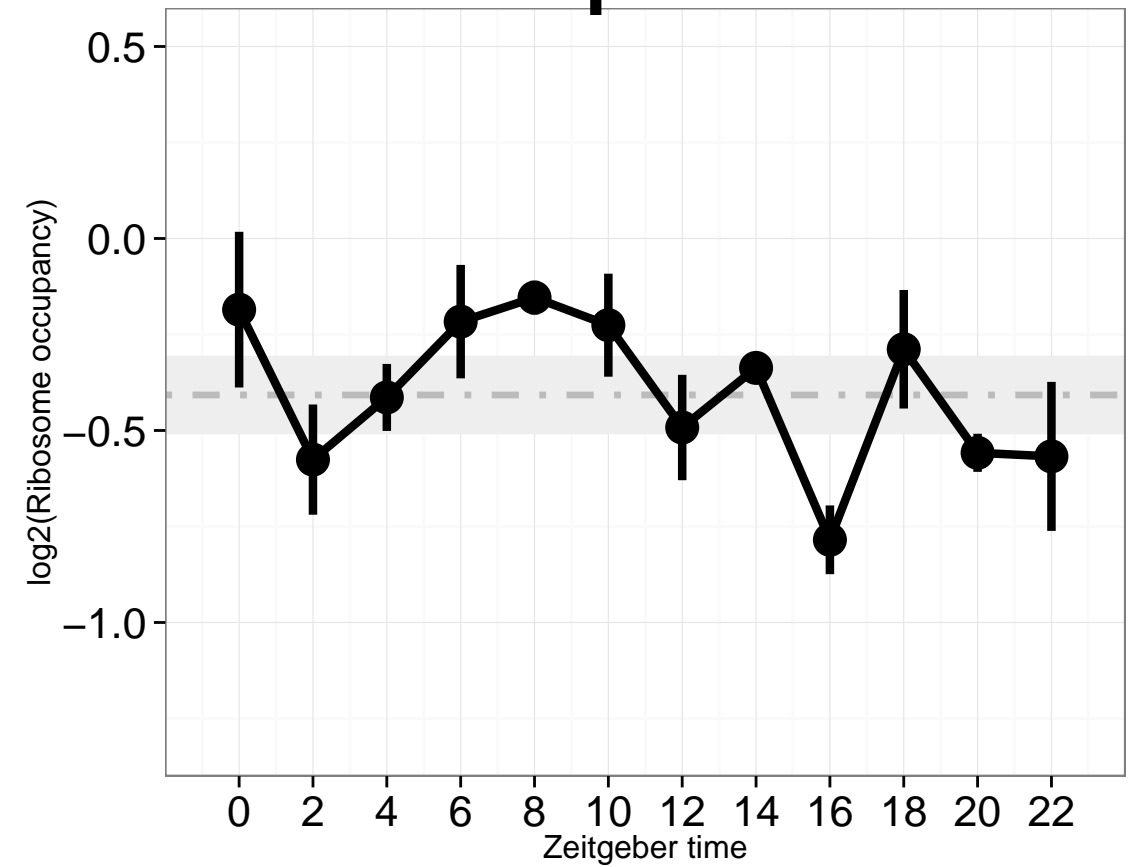

Supplement: Supplementary file 12239 [file 1]

# Heatr6

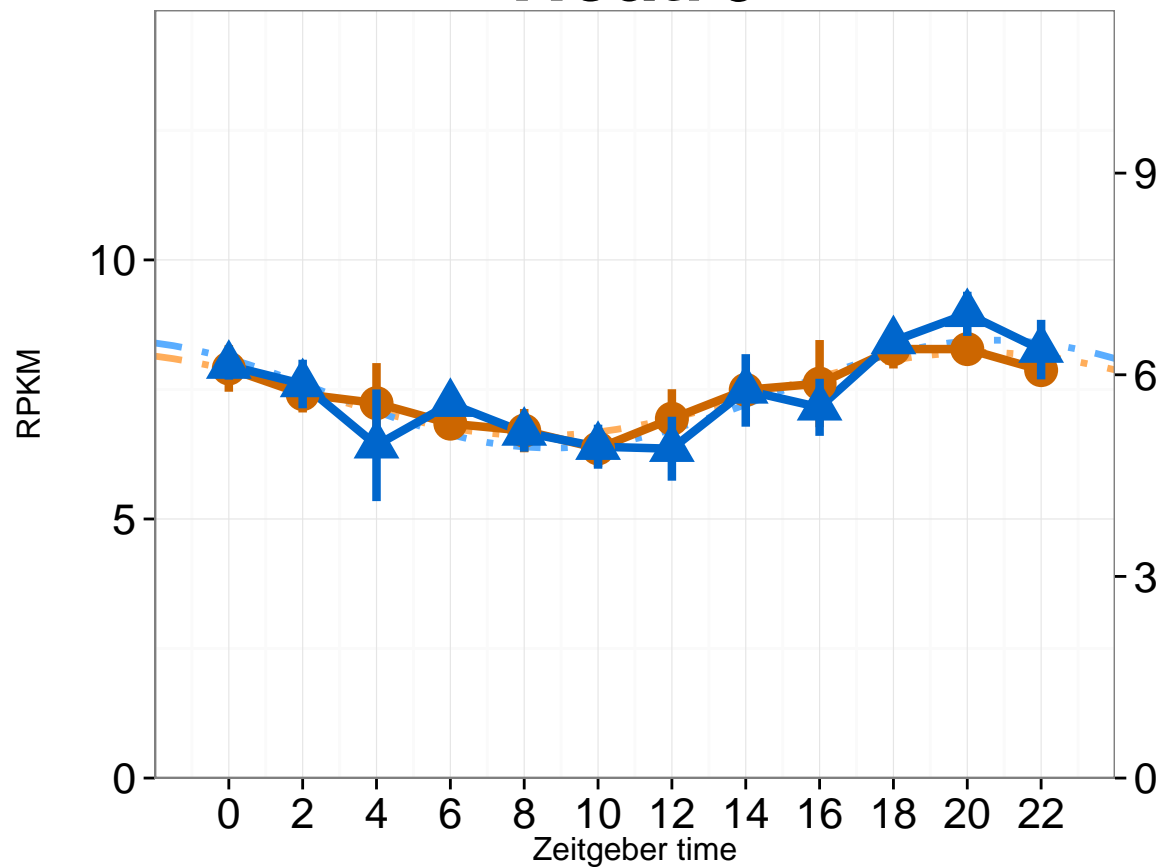

# Heatr6

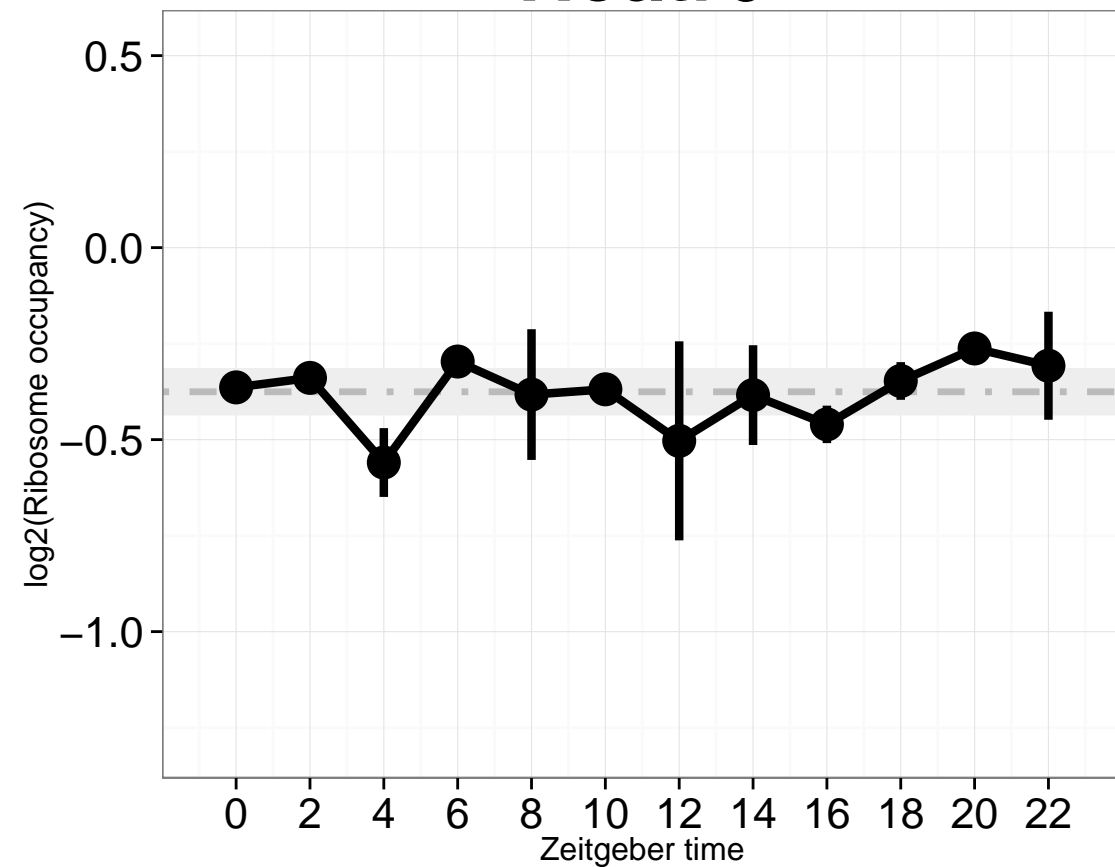

Supplement: Supplementary file 12240 [file 1]

## Cdr2

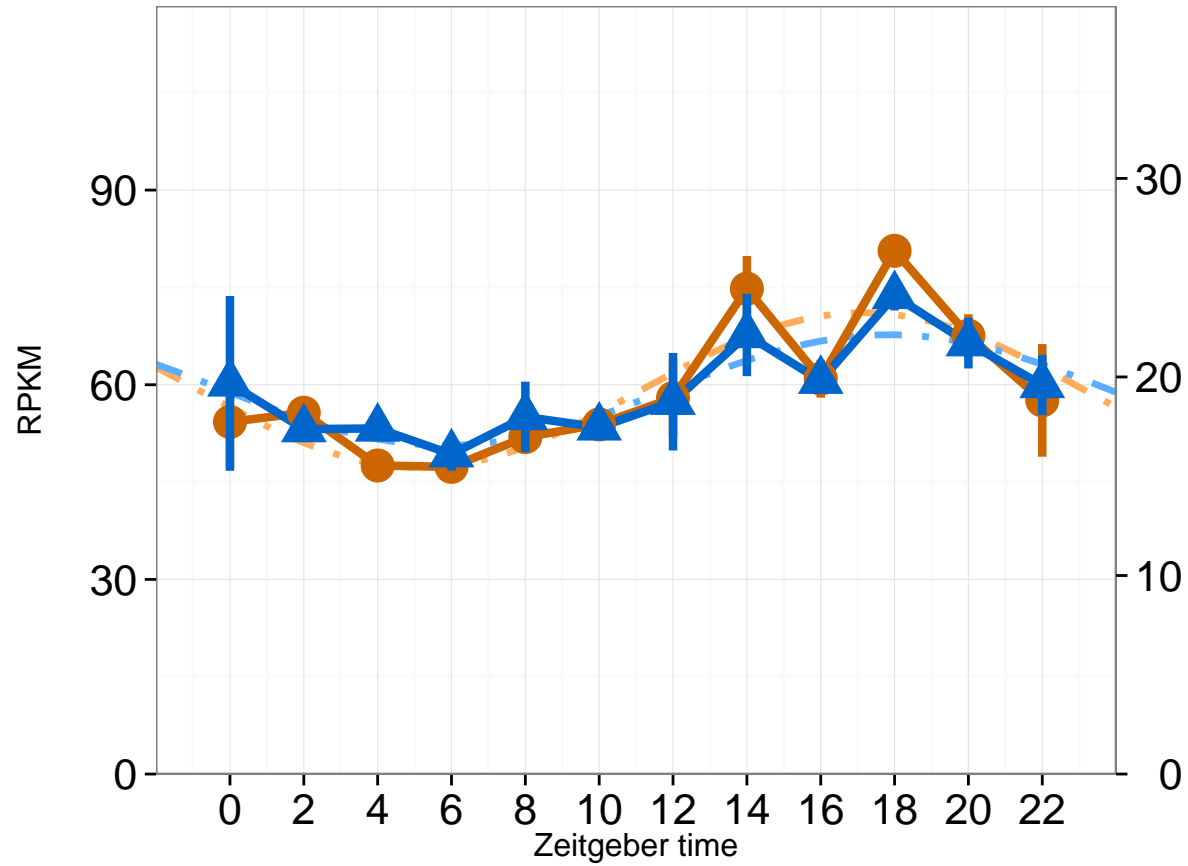

## Cdr2

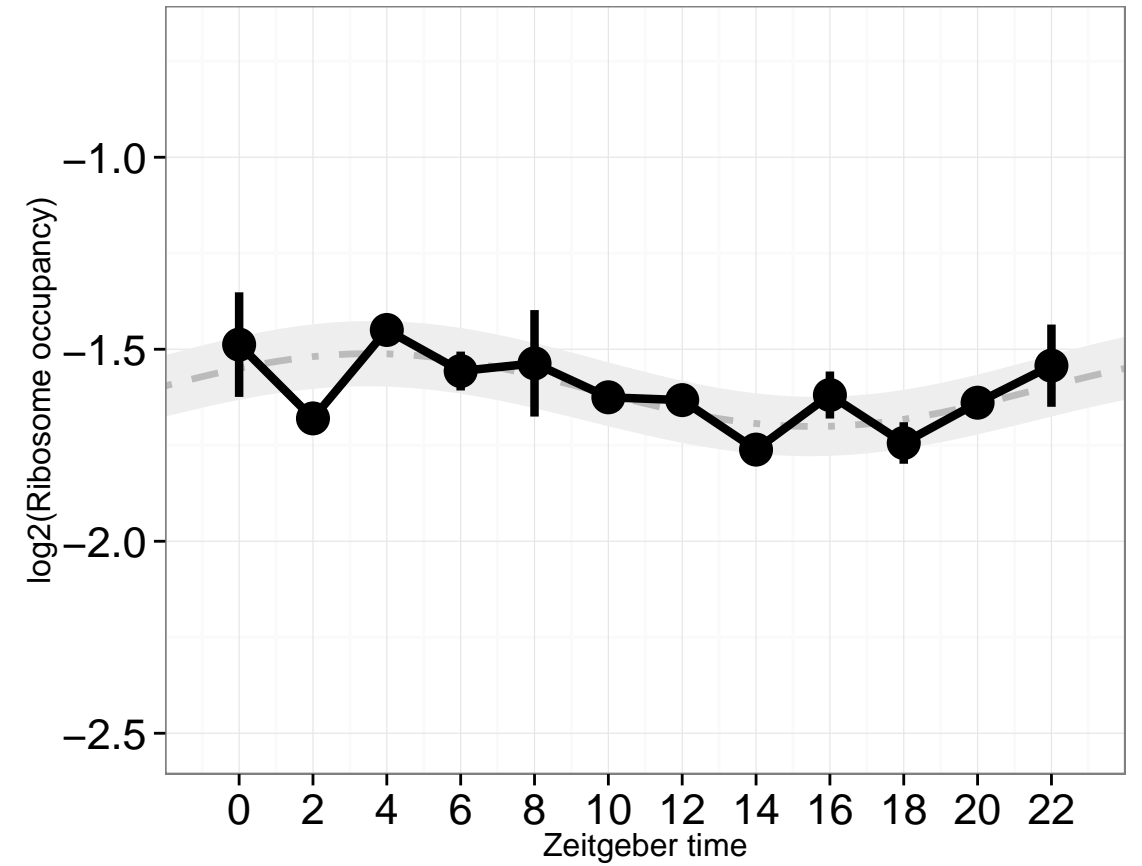

Supplement: Supplementary file 12241 [file 1]

# Gpr179

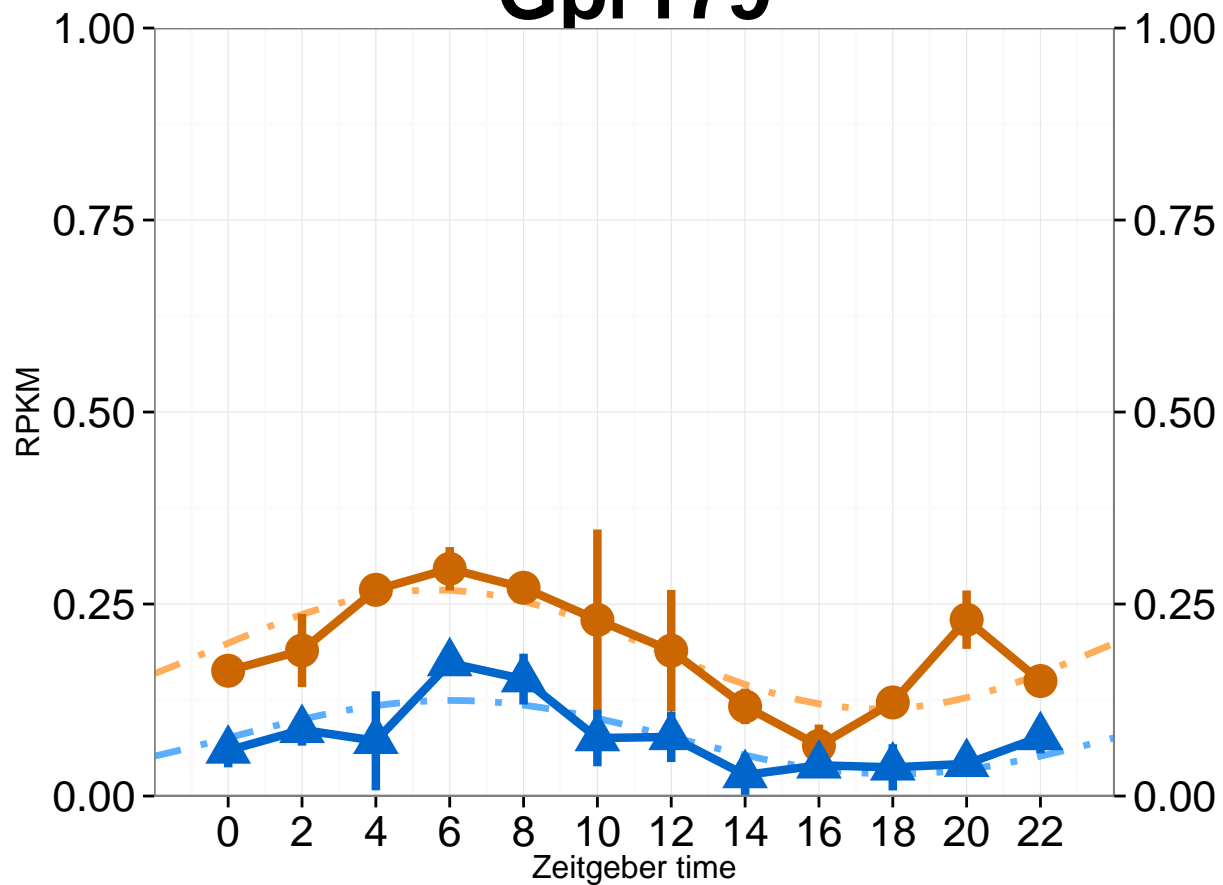

# Gpr179

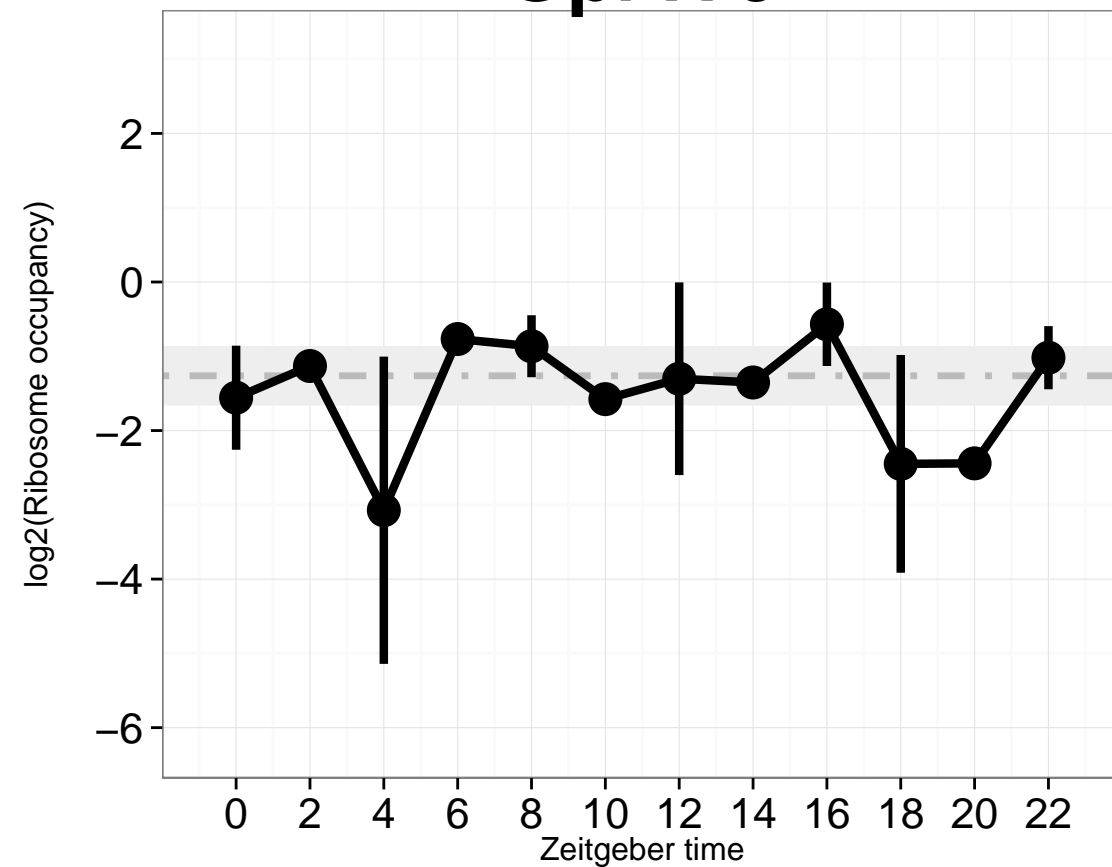

Supplement: Supplementary file 12242 [file 1]

# Fbxo2

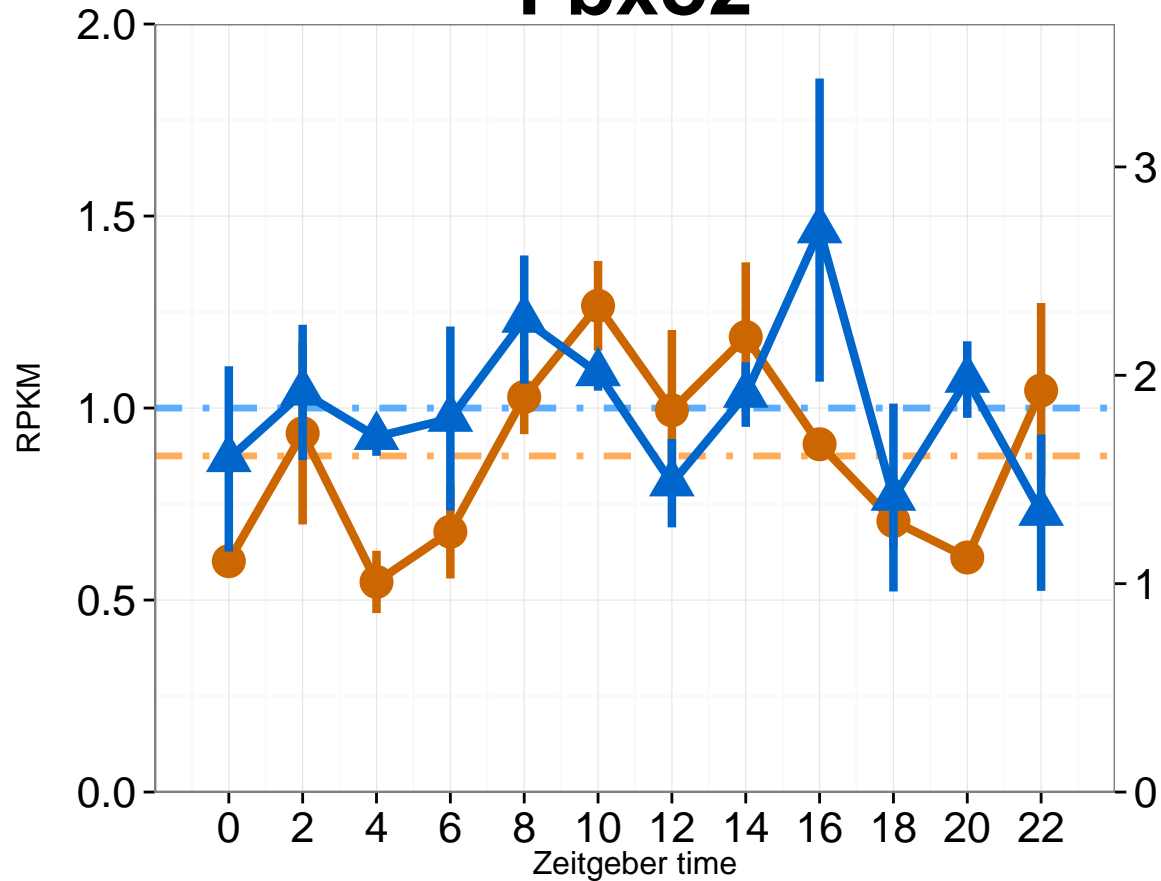

# Fbxo2

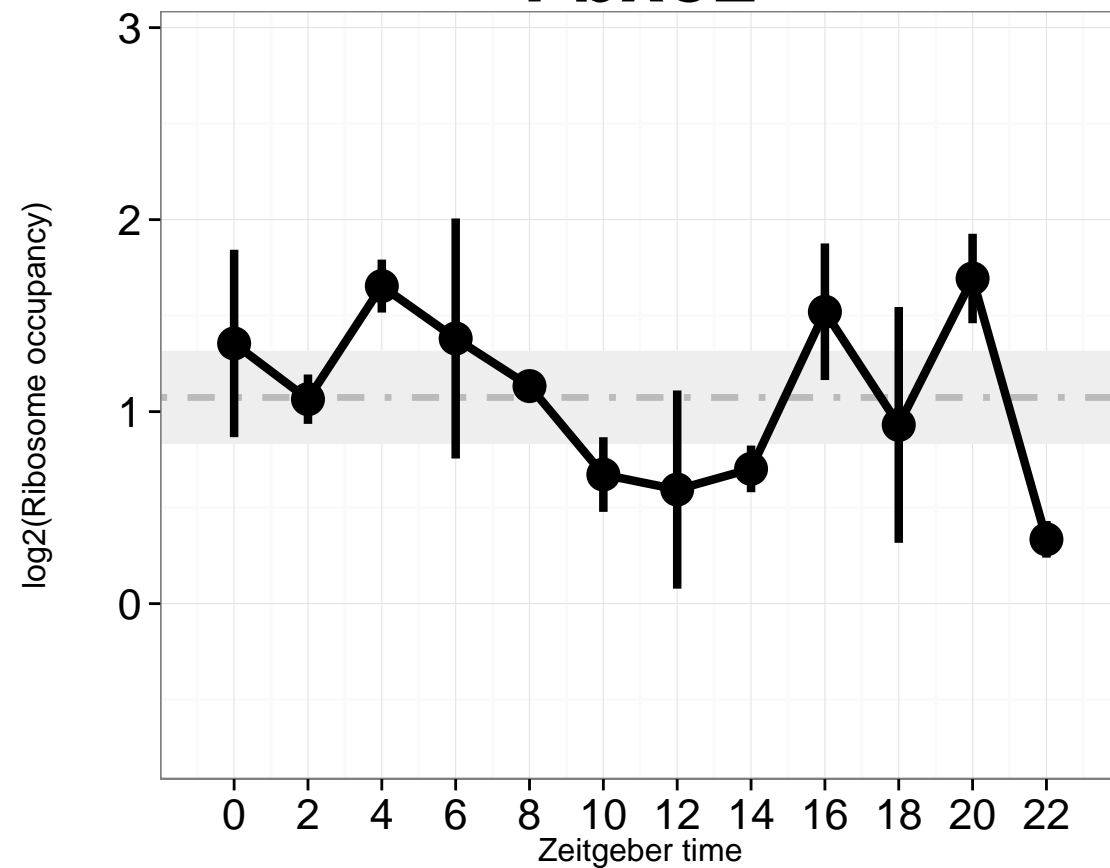

Supplement: Supplementary file 12243 [file 1]

# Zfp367

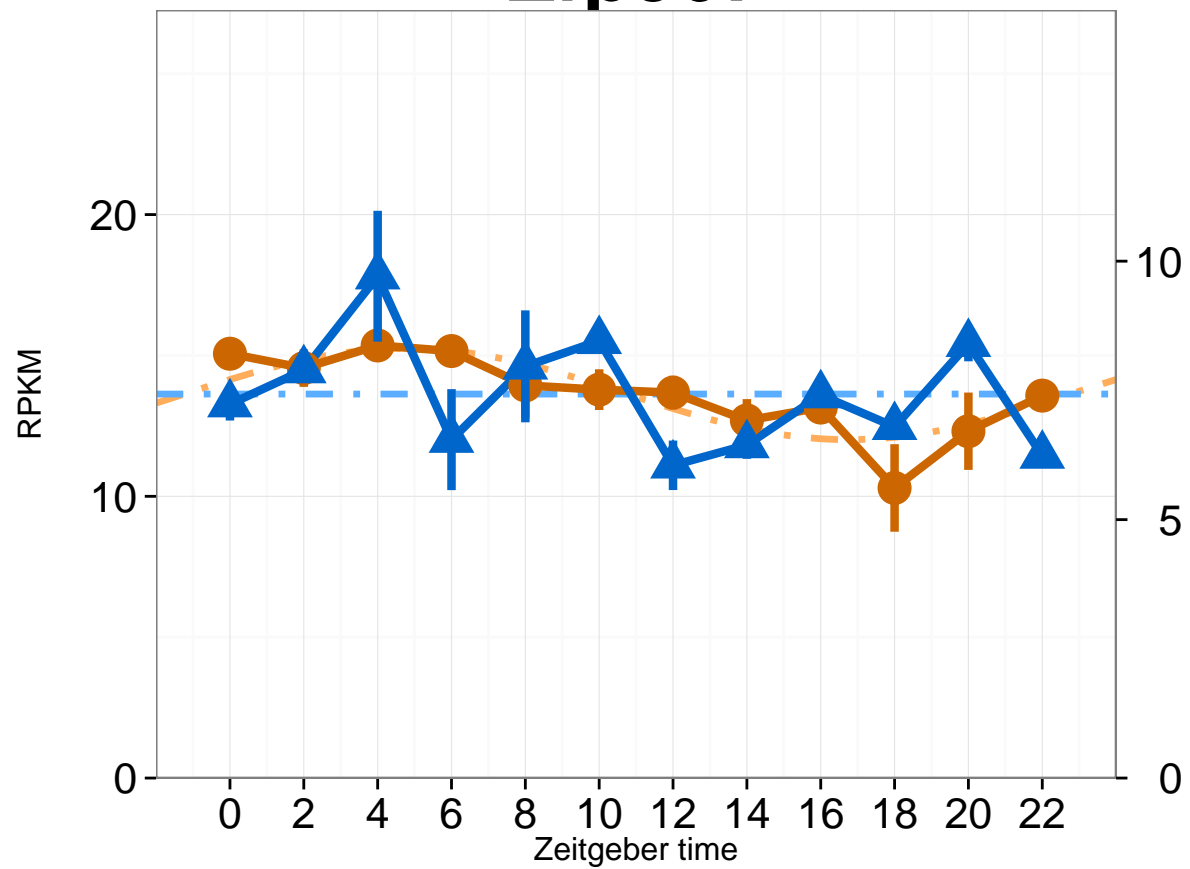

# Zfp367

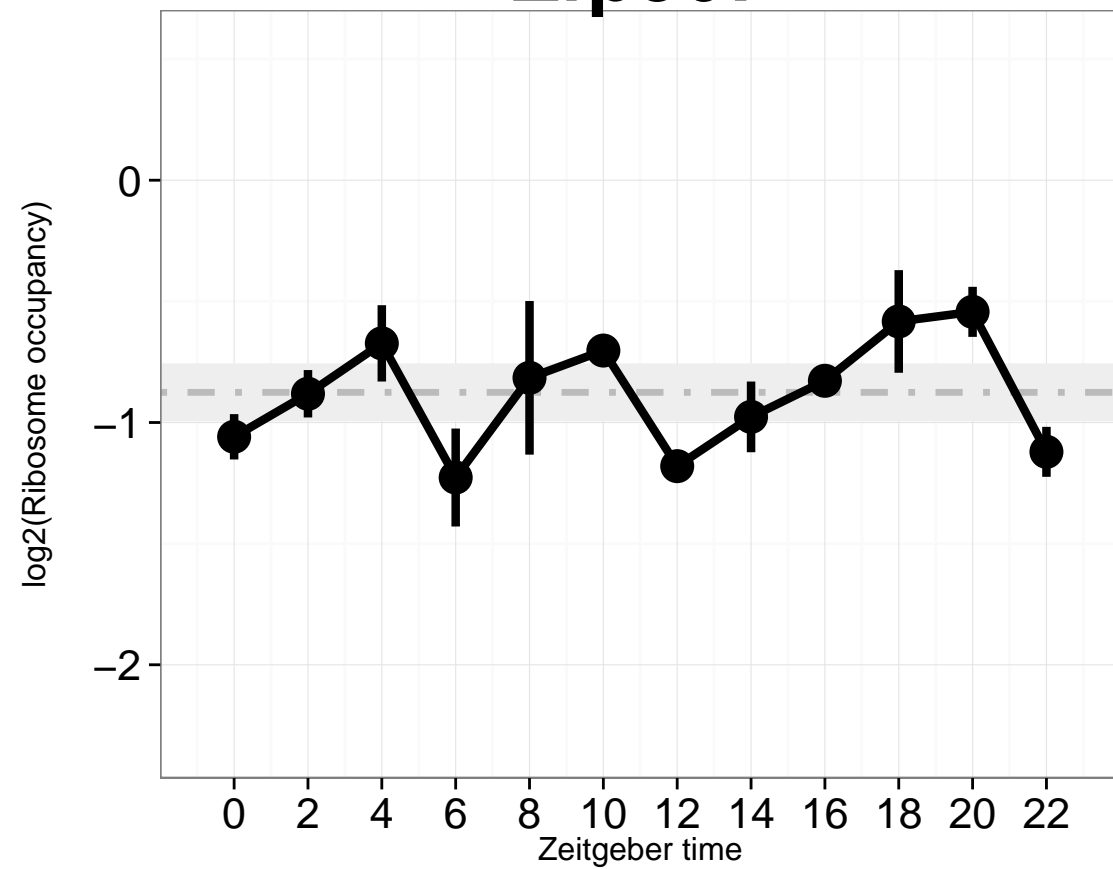

Supplement: Supplementary file 12244 [file 1]
