# Supplementary material (part 123 of 133)
Source: publisher figshare collection journal article supplement (https://springernature.figshare.com/articles/dataset/_/4903193)

# Mrfap1

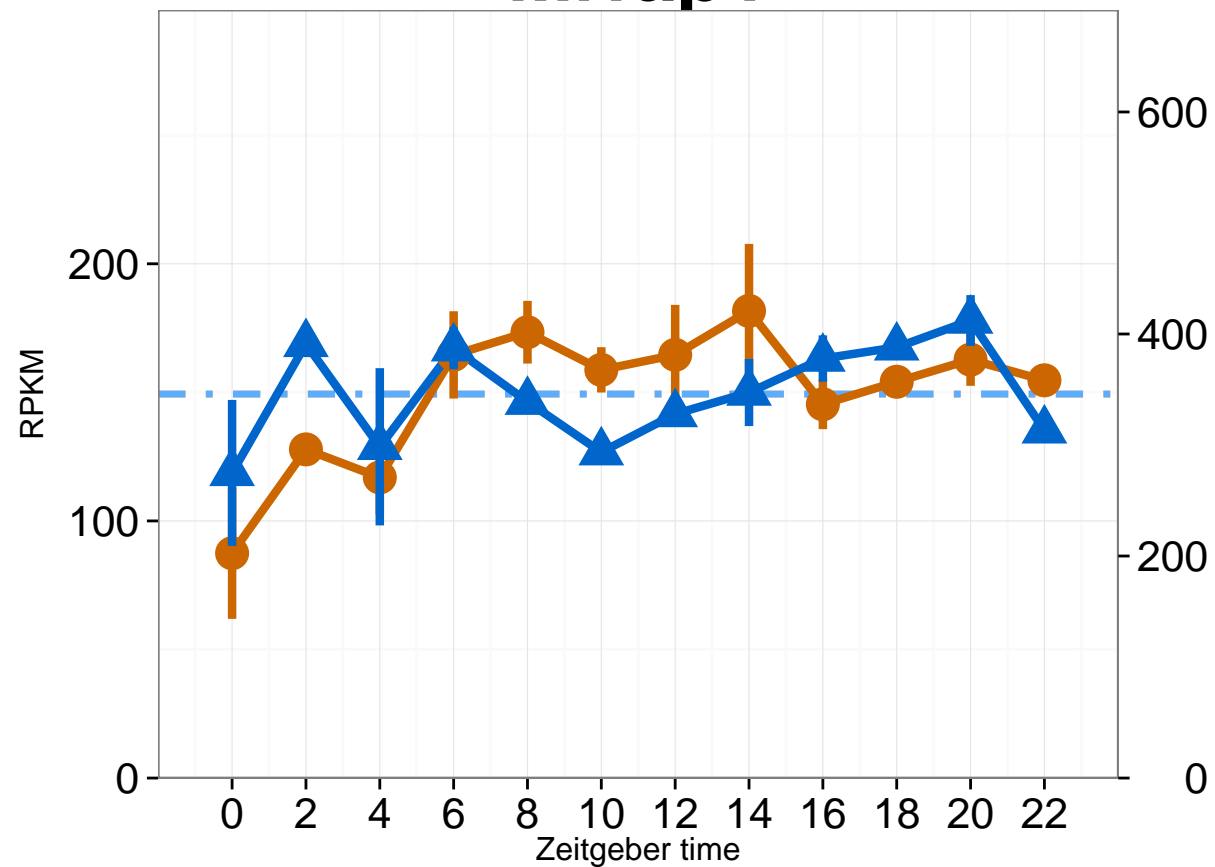

# Mrfap1

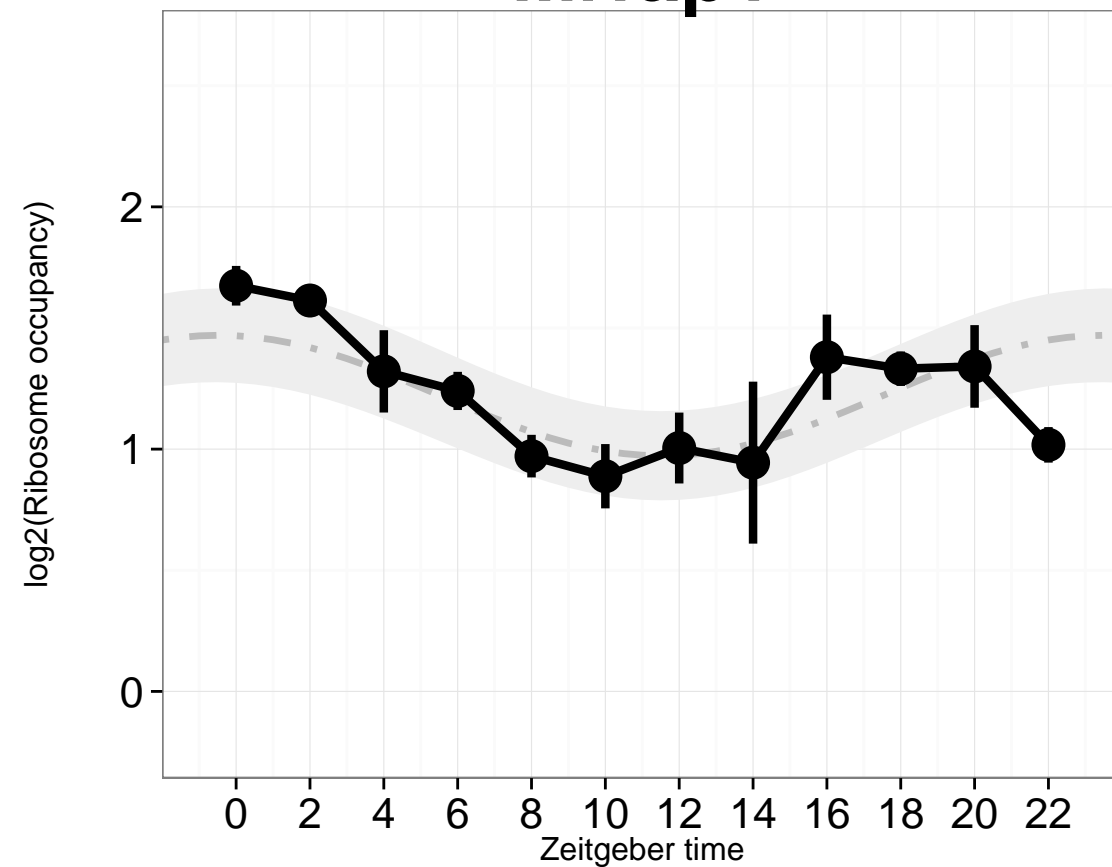

Supplement: Supplementary file 12245 [file 1]

# Task2

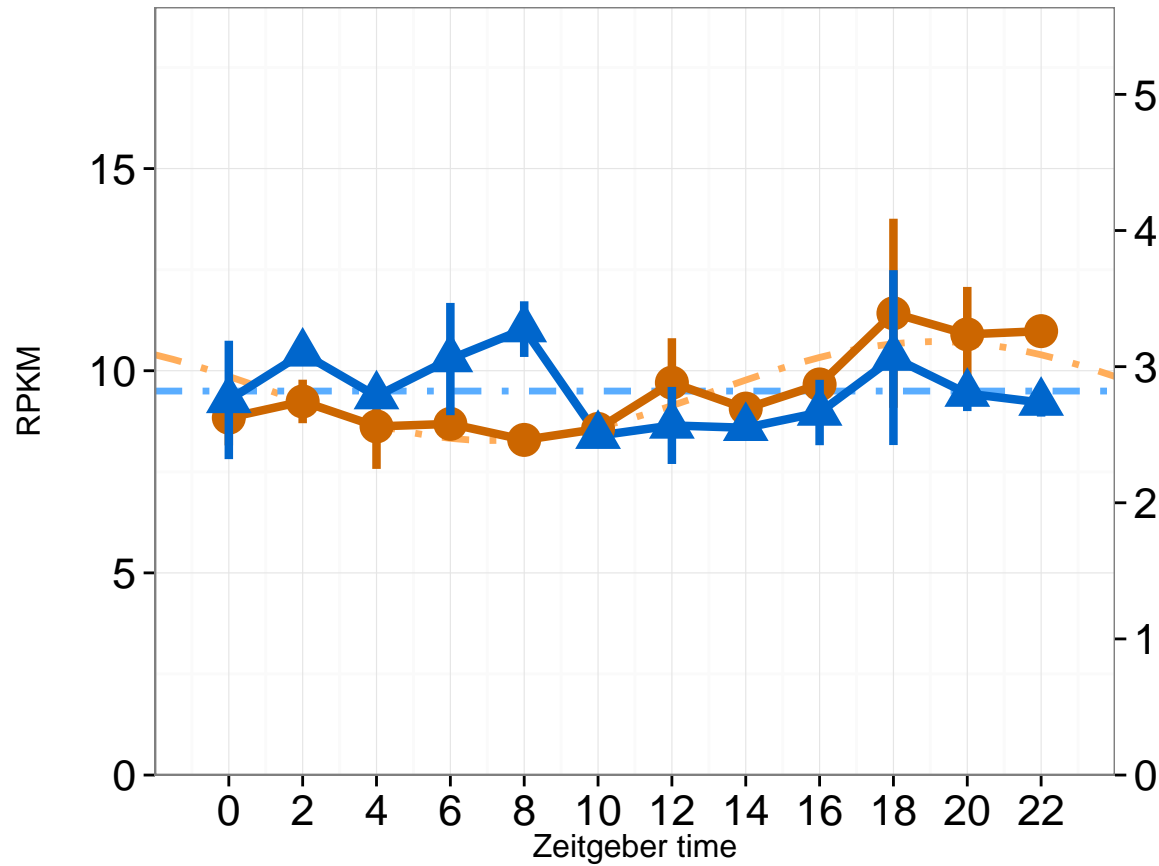

# Task2

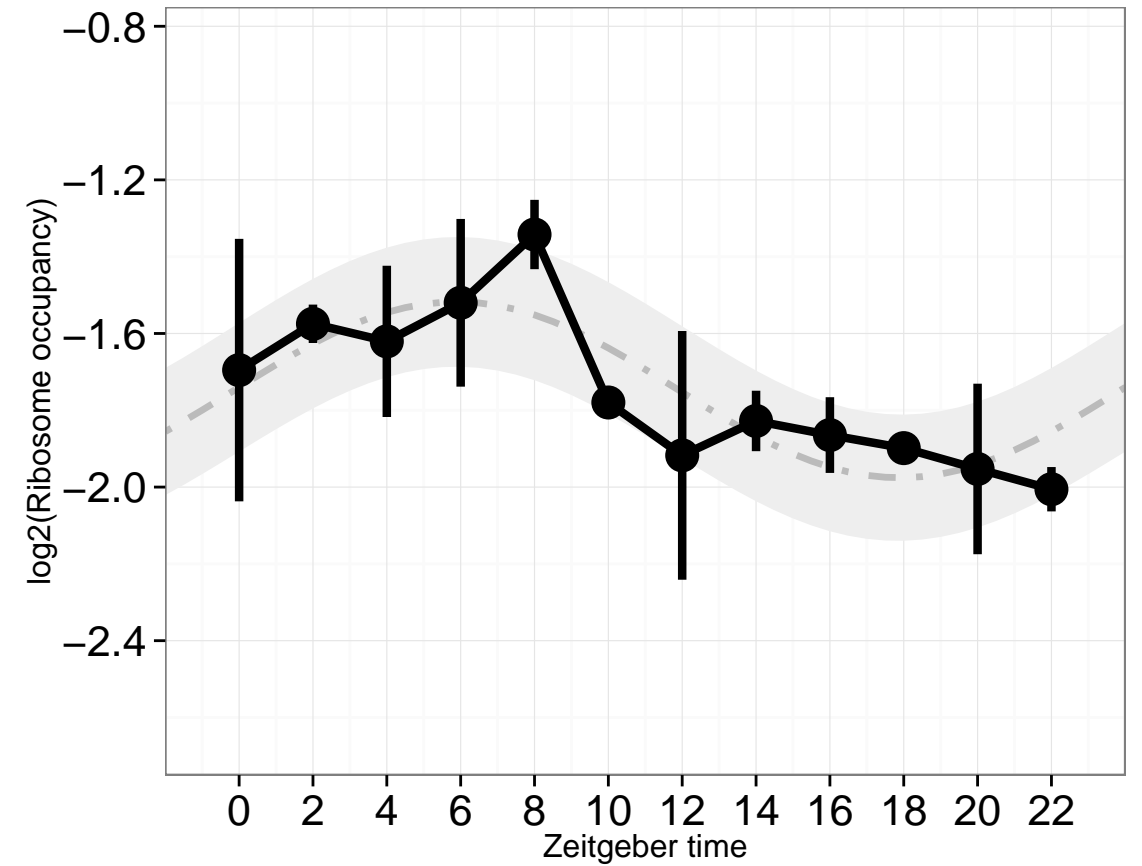

Supplement: Supplementary file 12246 [file 1]

# Ophn1

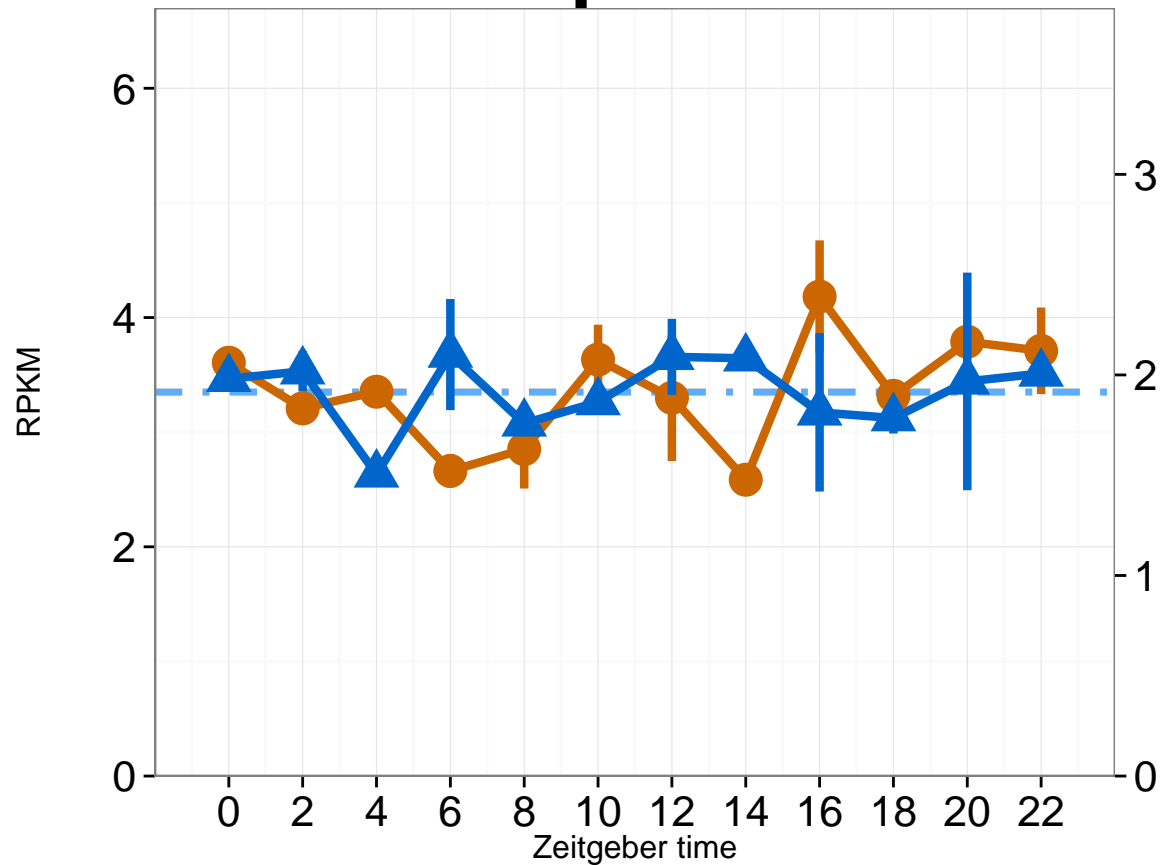

# Ophn1

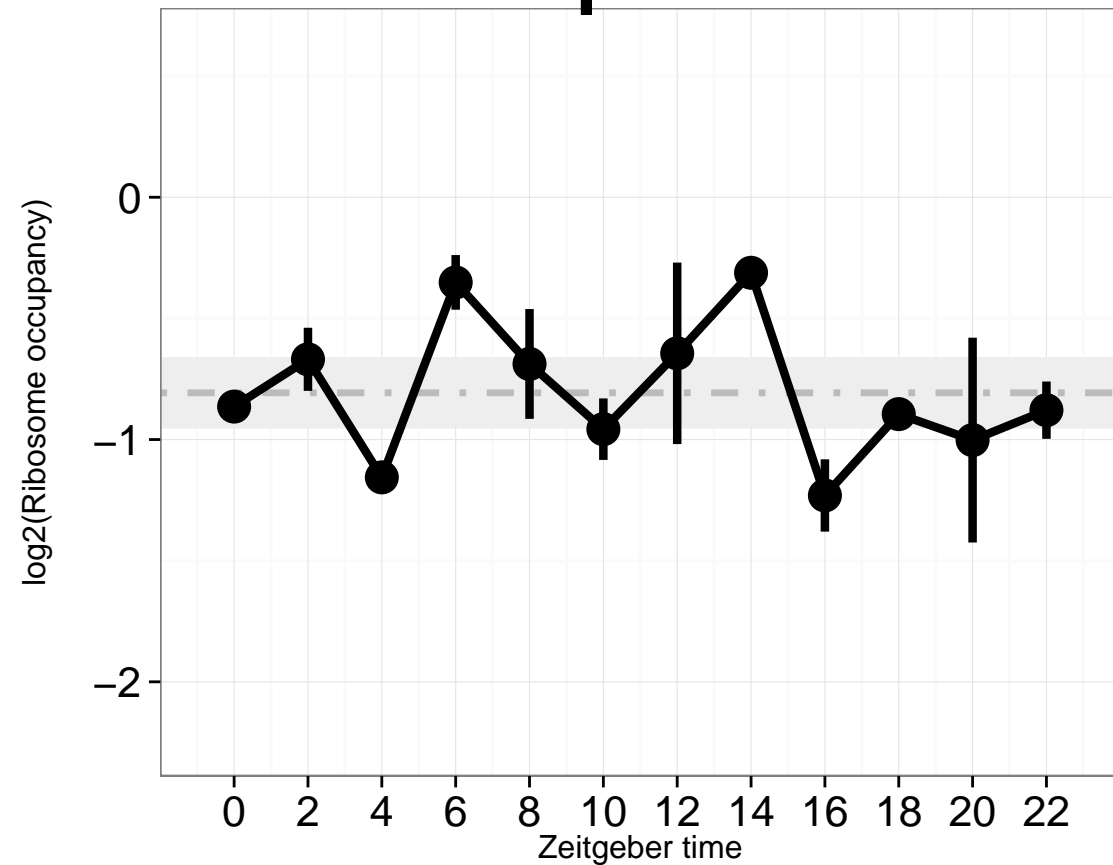

Supplement: Supplementary file 12247 [file 1]

# Impdh1

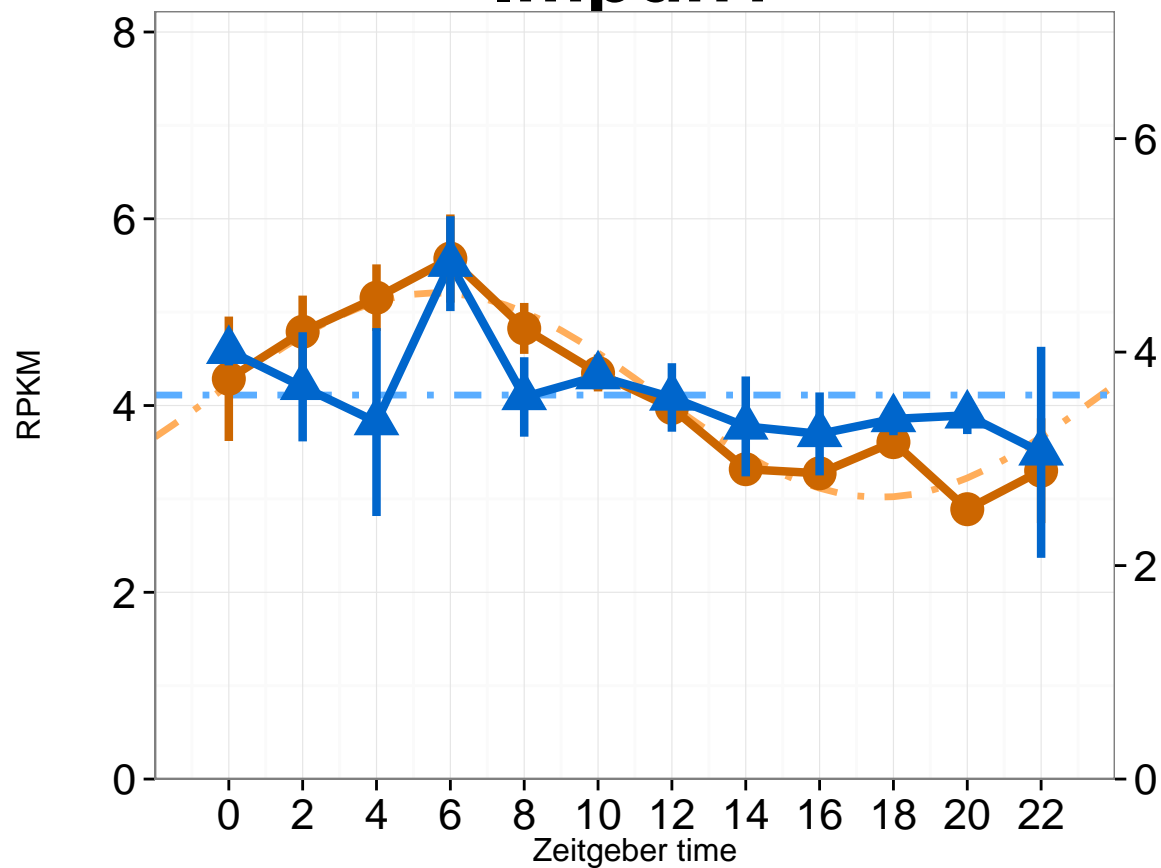

# Impdh1

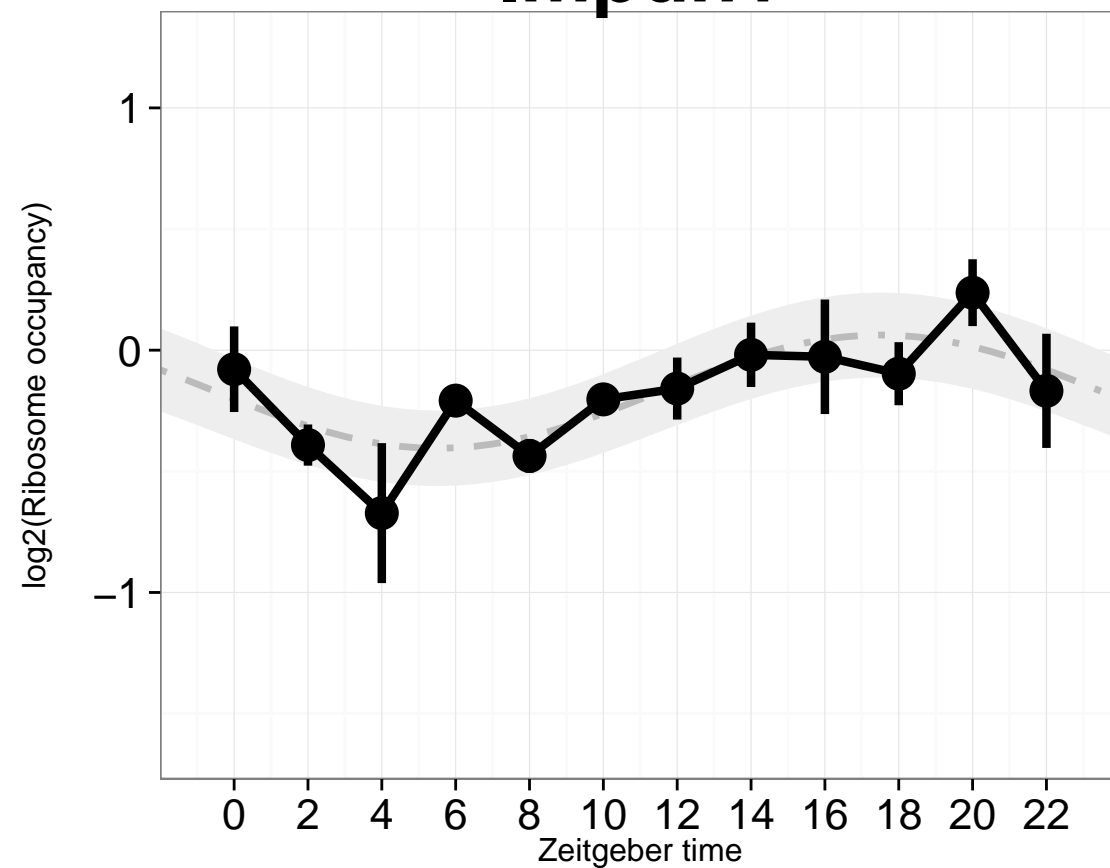

Supplement: Supplementary file 12248 [file 1]

## C78339

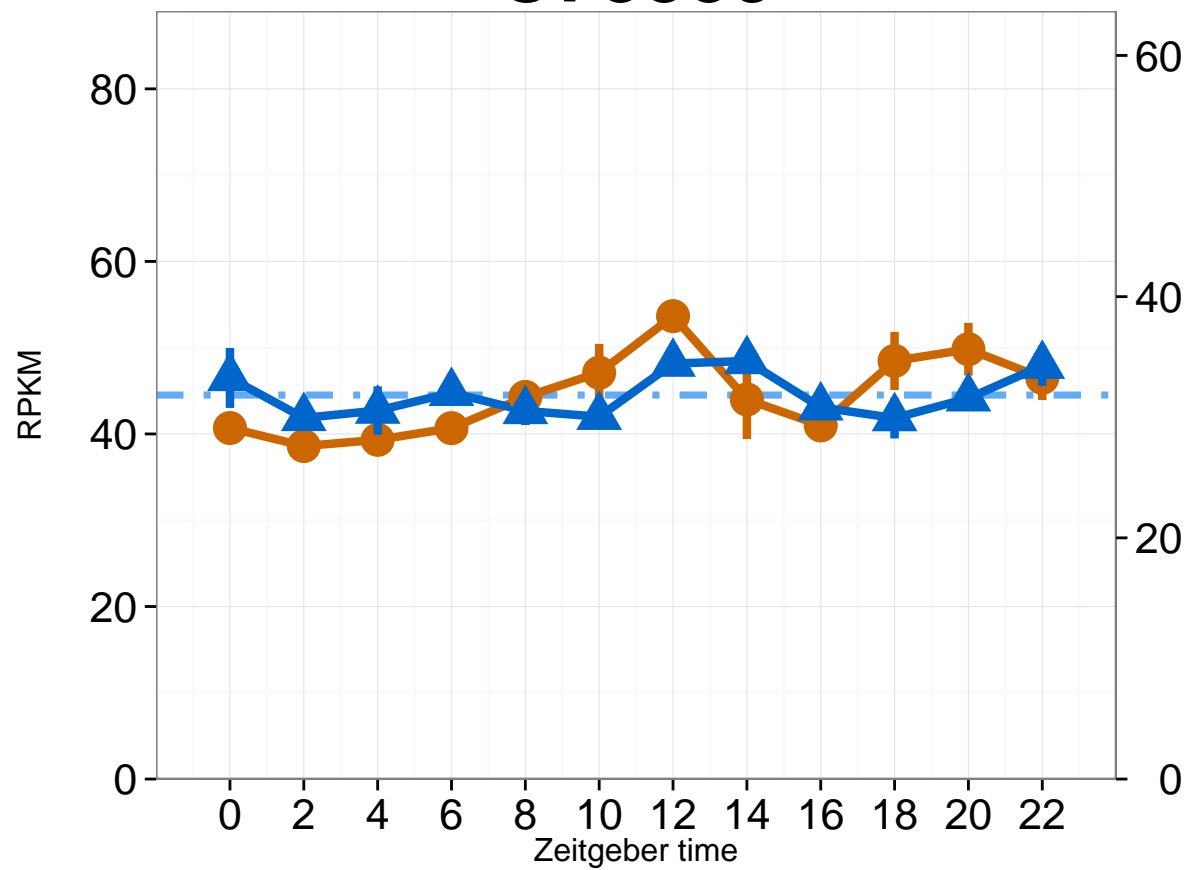

## C78339

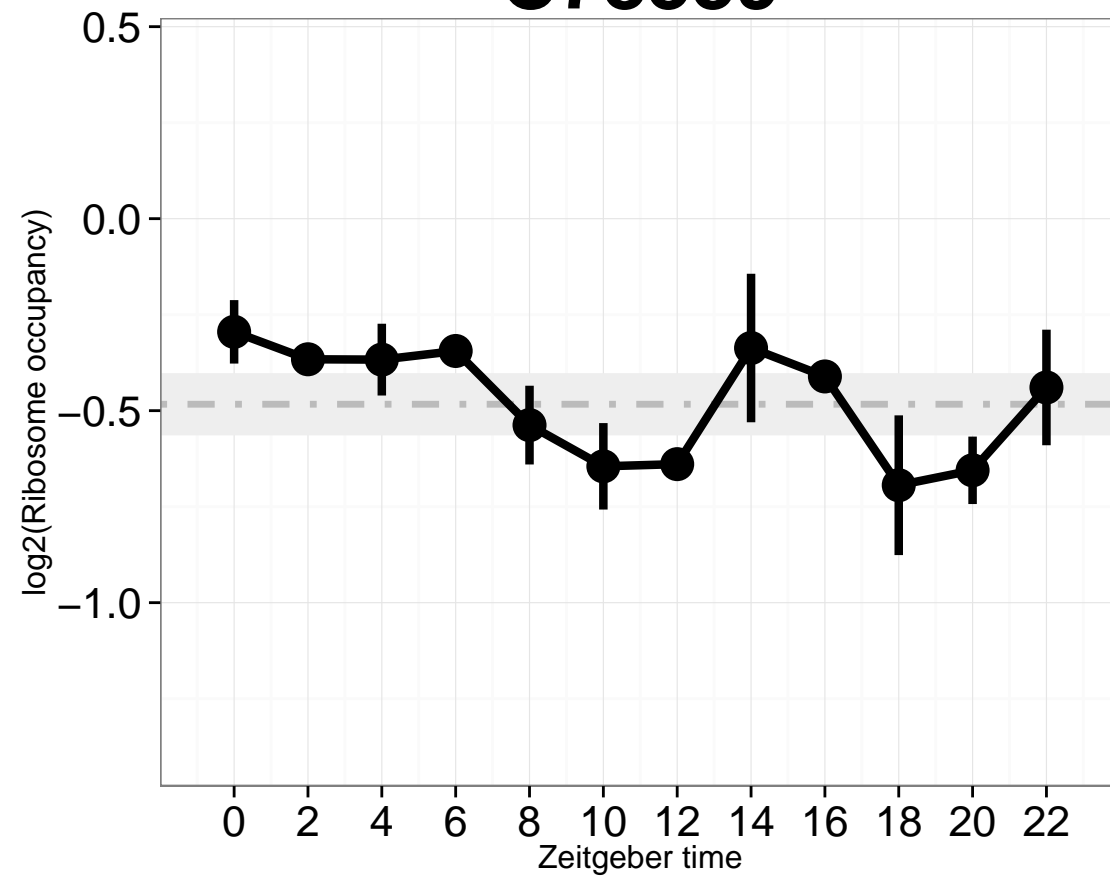

Supplement: Supplementary file 12249 [file 1]

## Amot

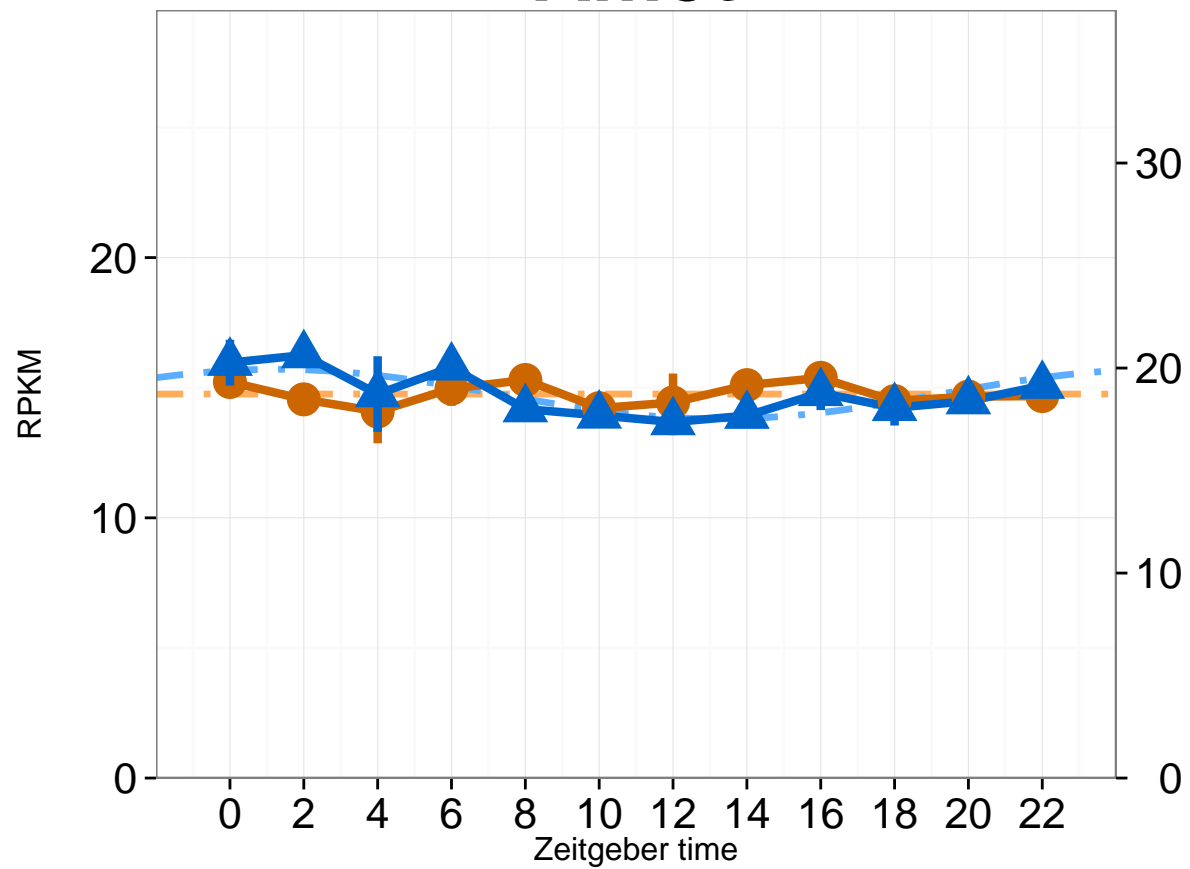

## Amot

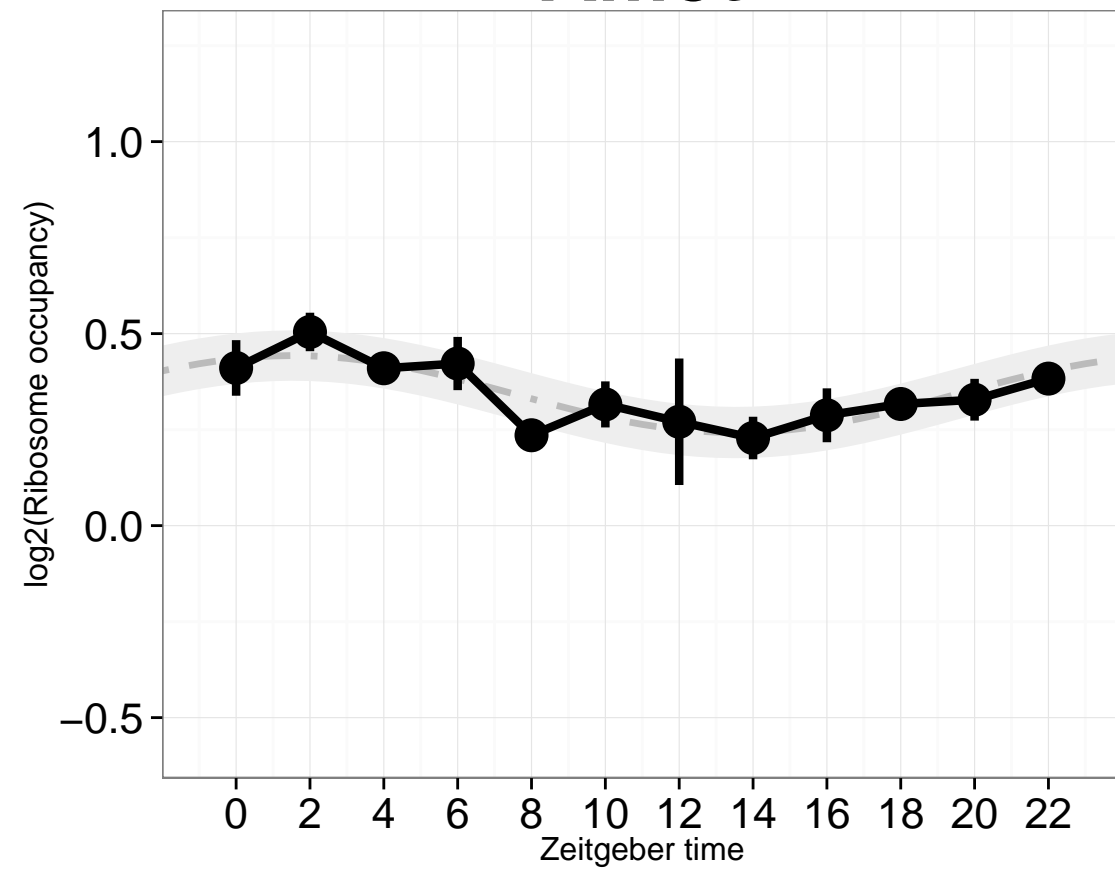

Supplement: Supplementary file 12250 [file 1]

## Ubac2

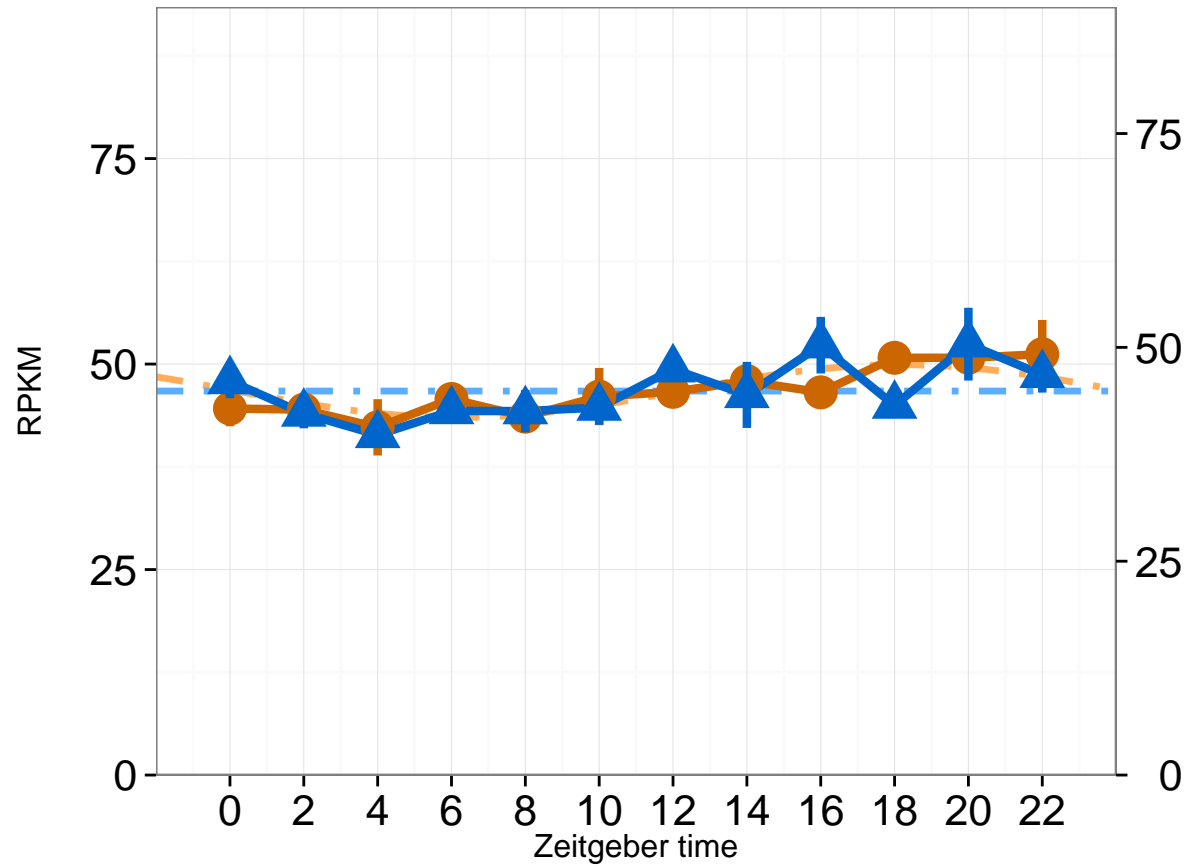

## Ubac2

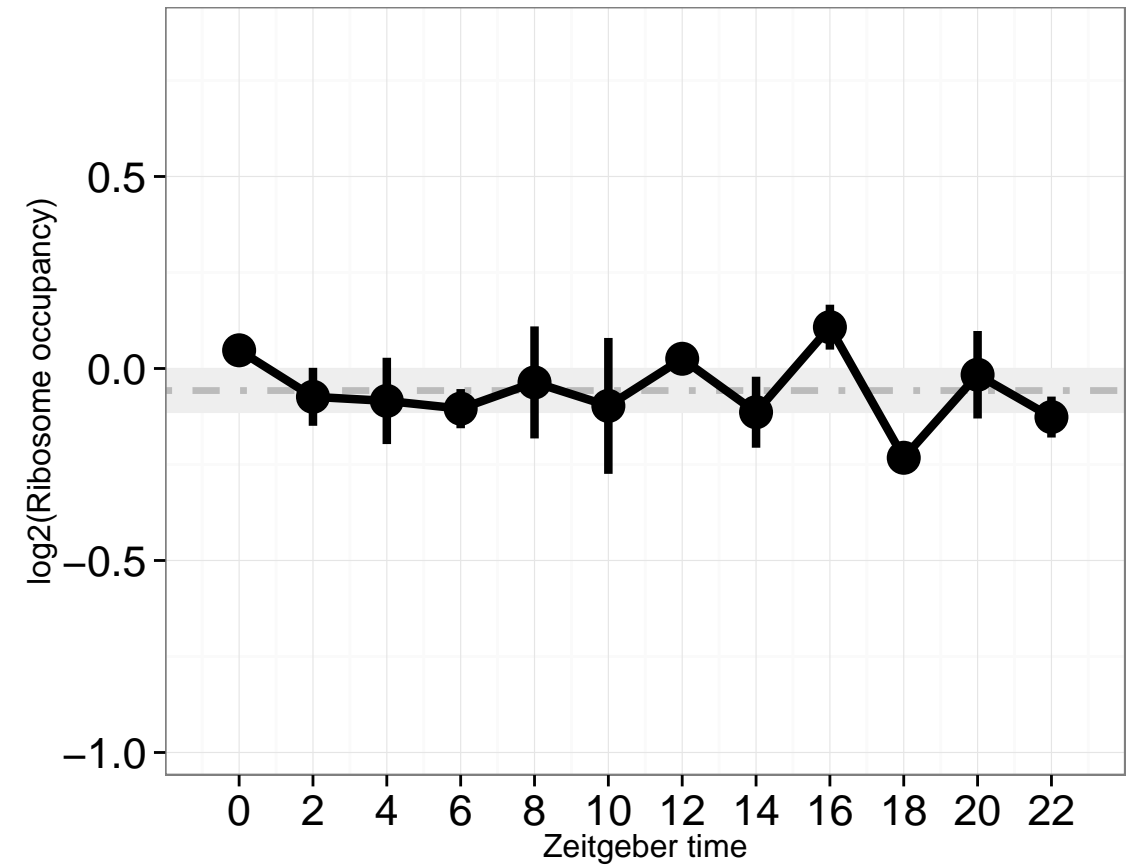

Supplement: Supplementary file 12251 [file 1]

## Ston1

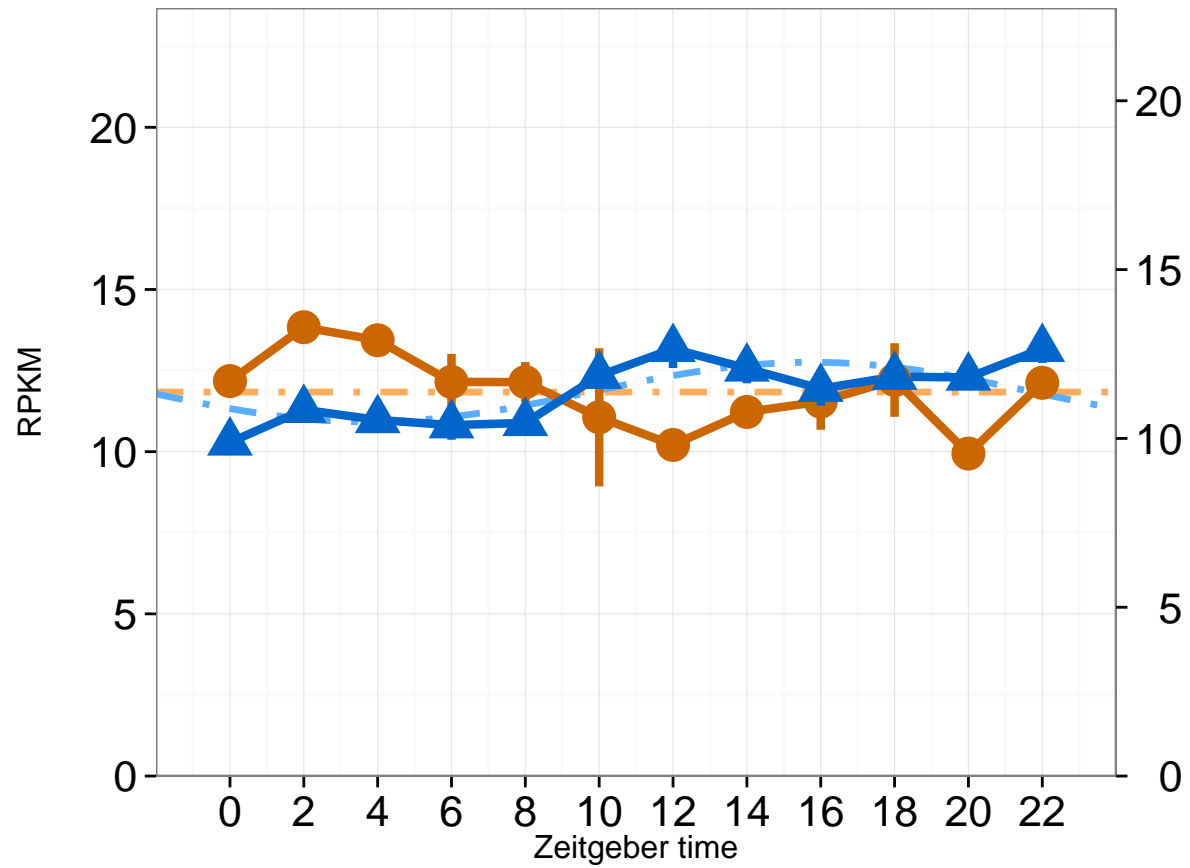

## Ston1

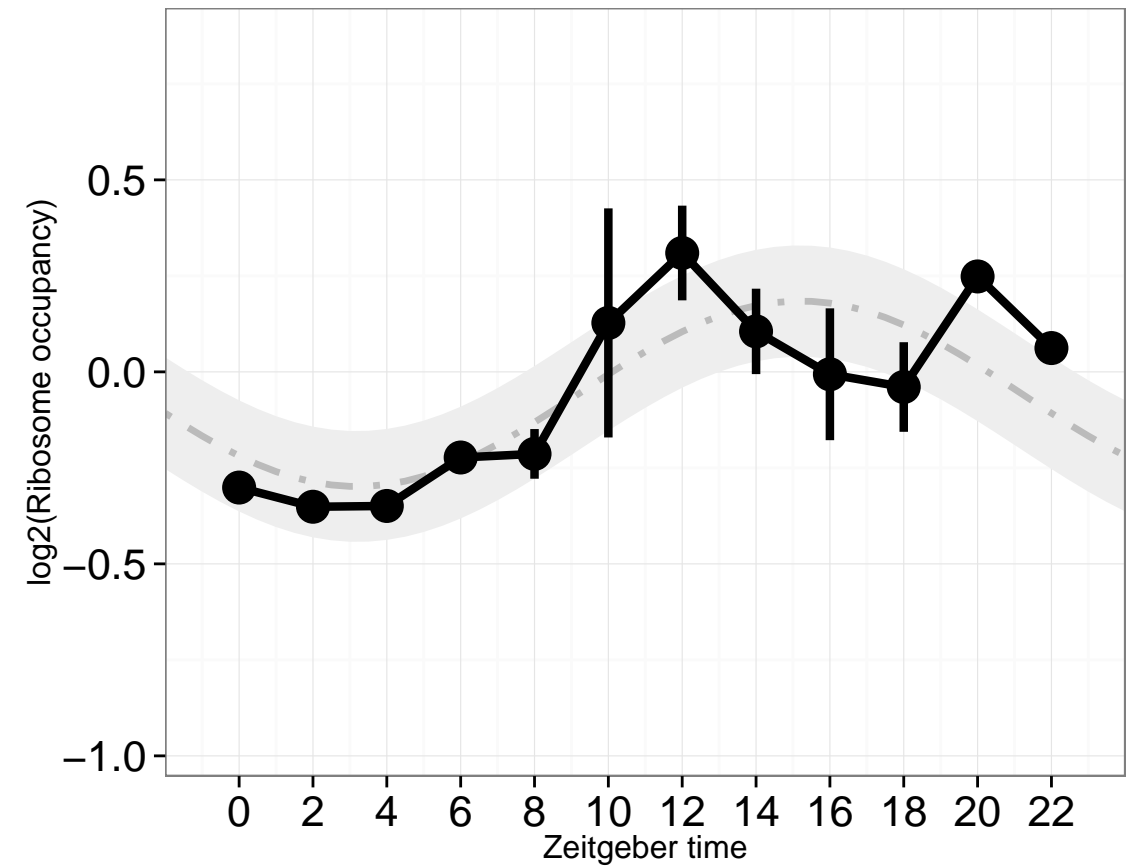

Supplement: Supplementary file 12252 [file 1]

## Rock1

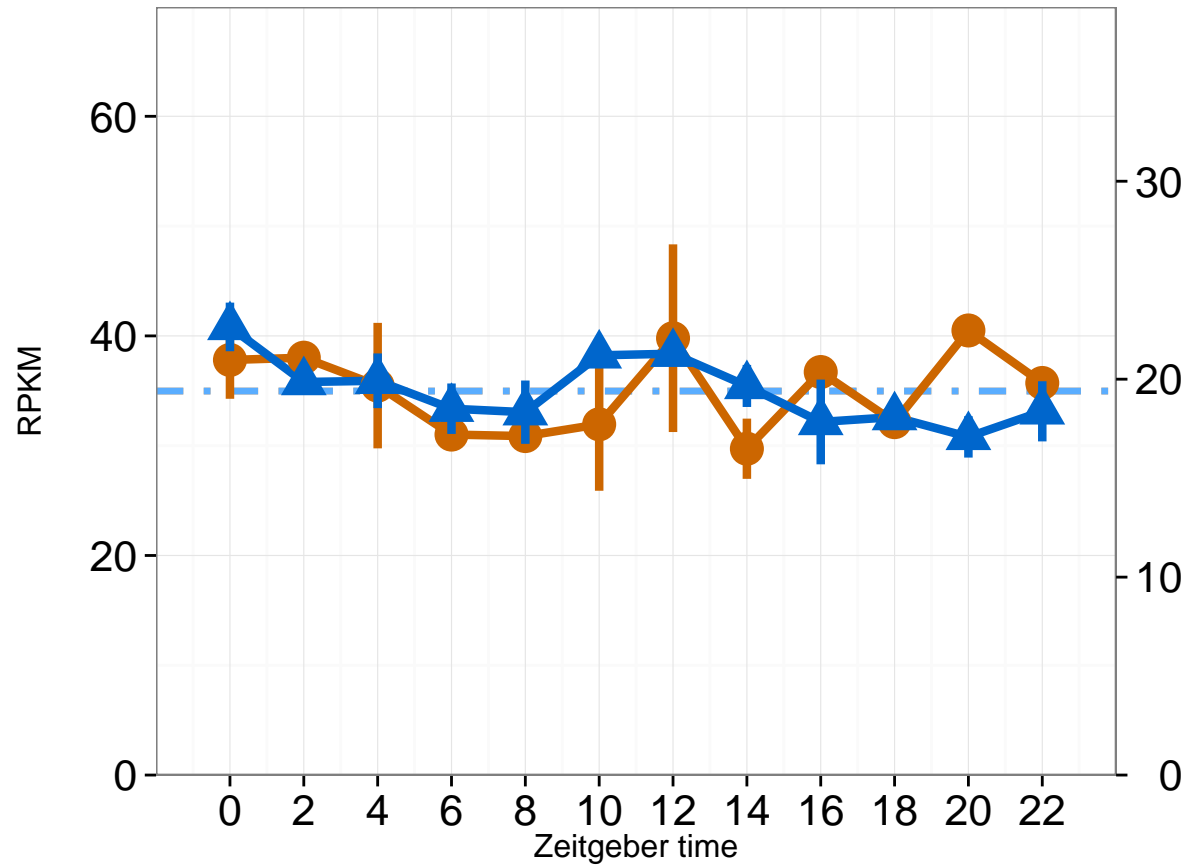

## Rock1

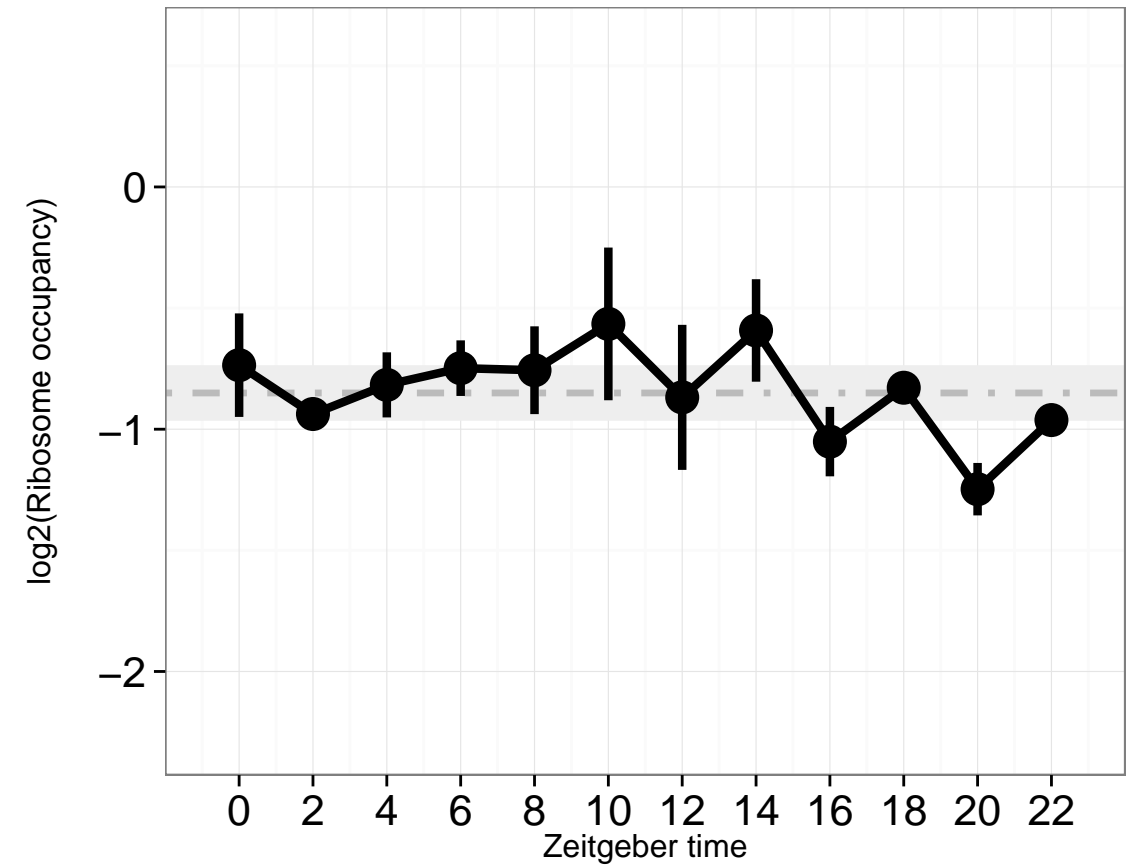

Supplement: Supplementary file 12253 [file 1]

# Dok7

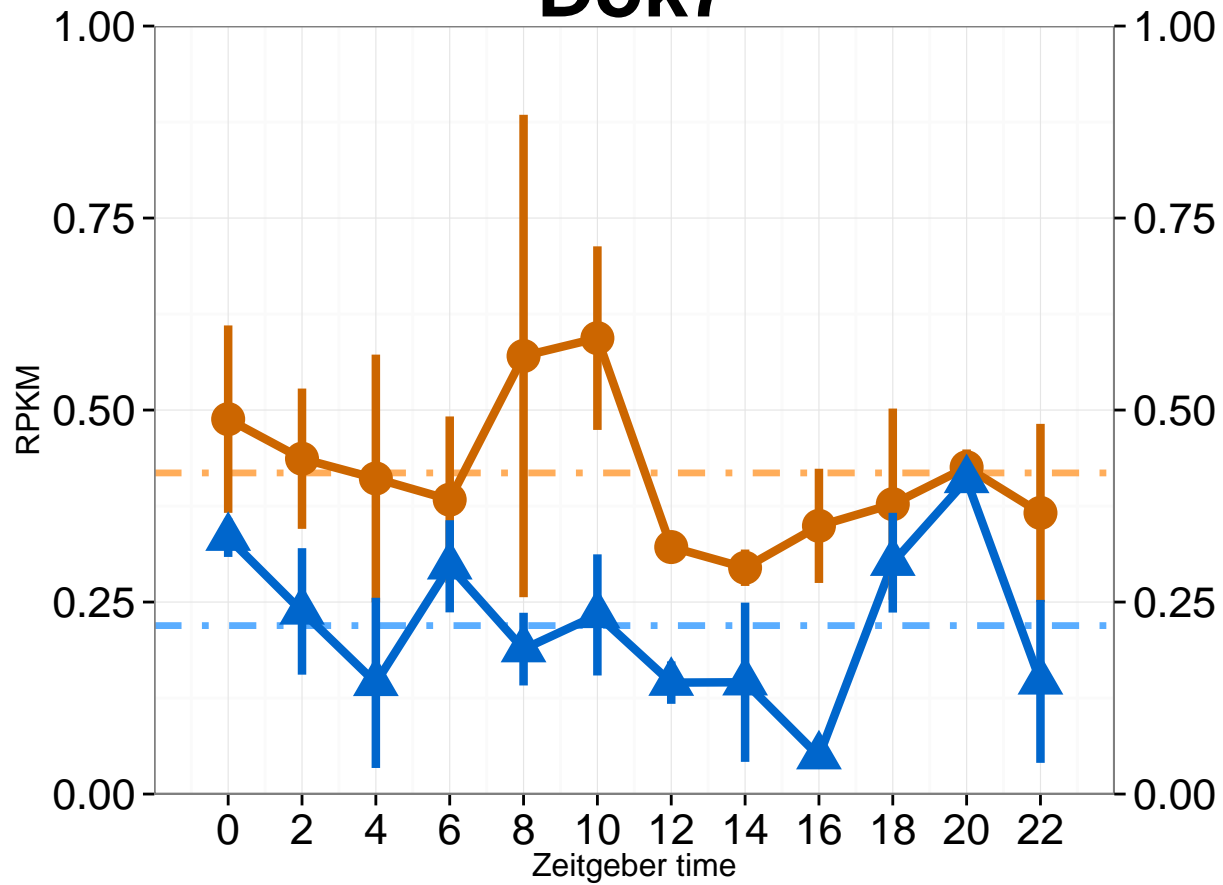

# Dok7

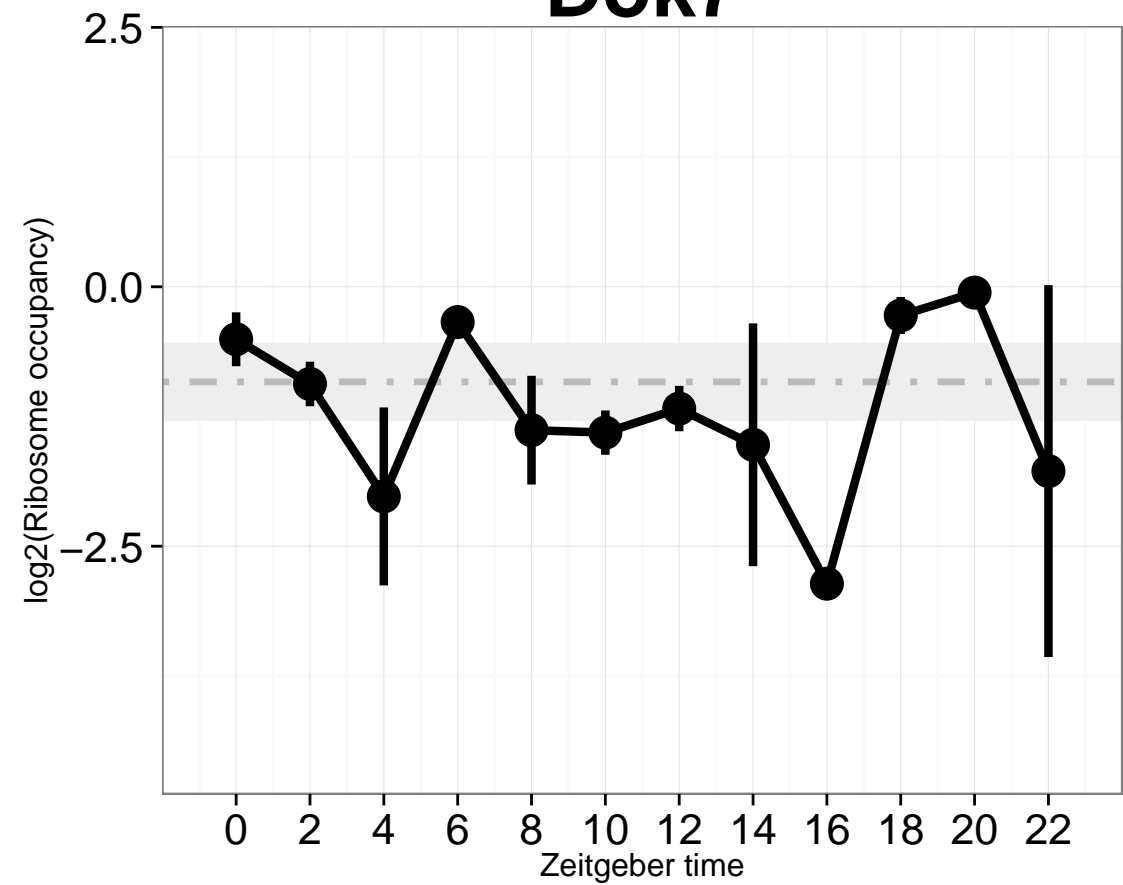

Supplement: Supplementary file 12254 [file 1]

# Ccdc39

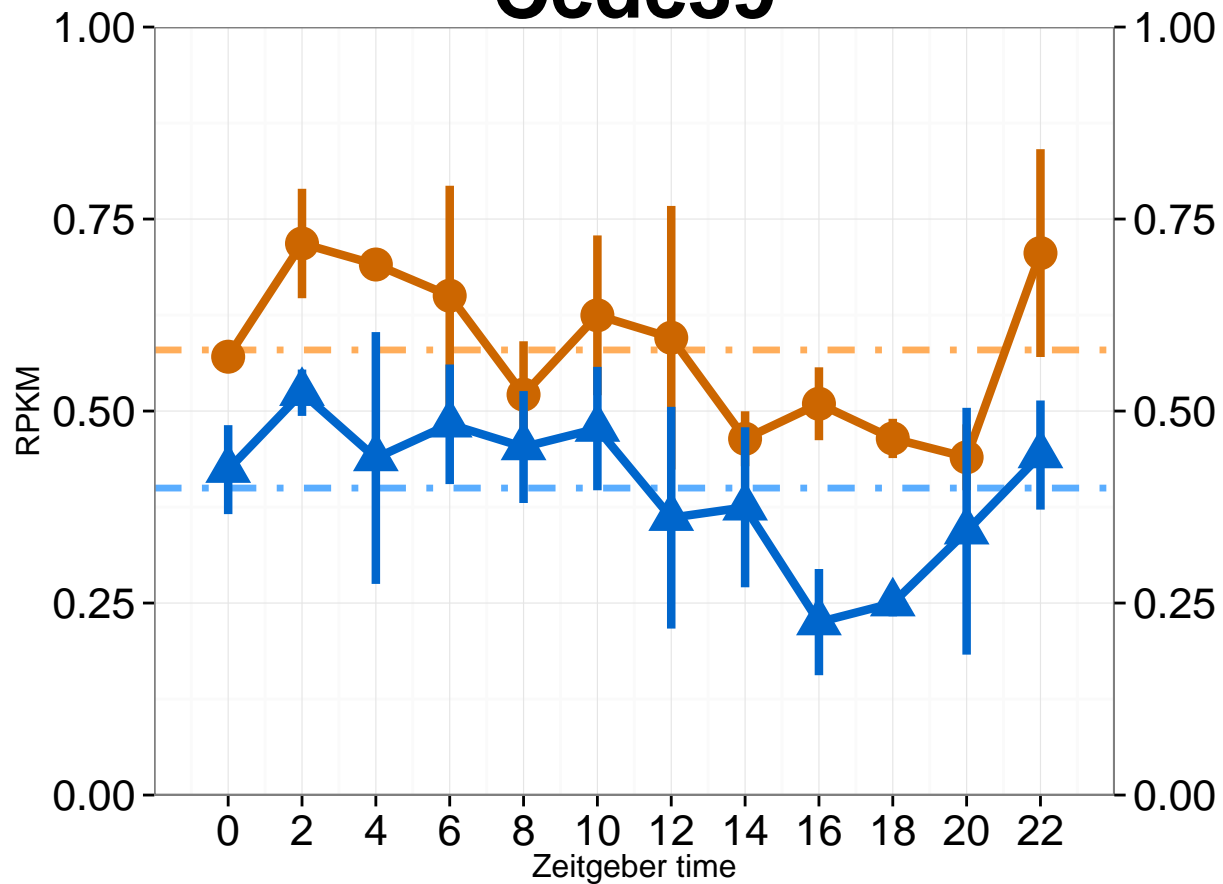

# Ccdc39

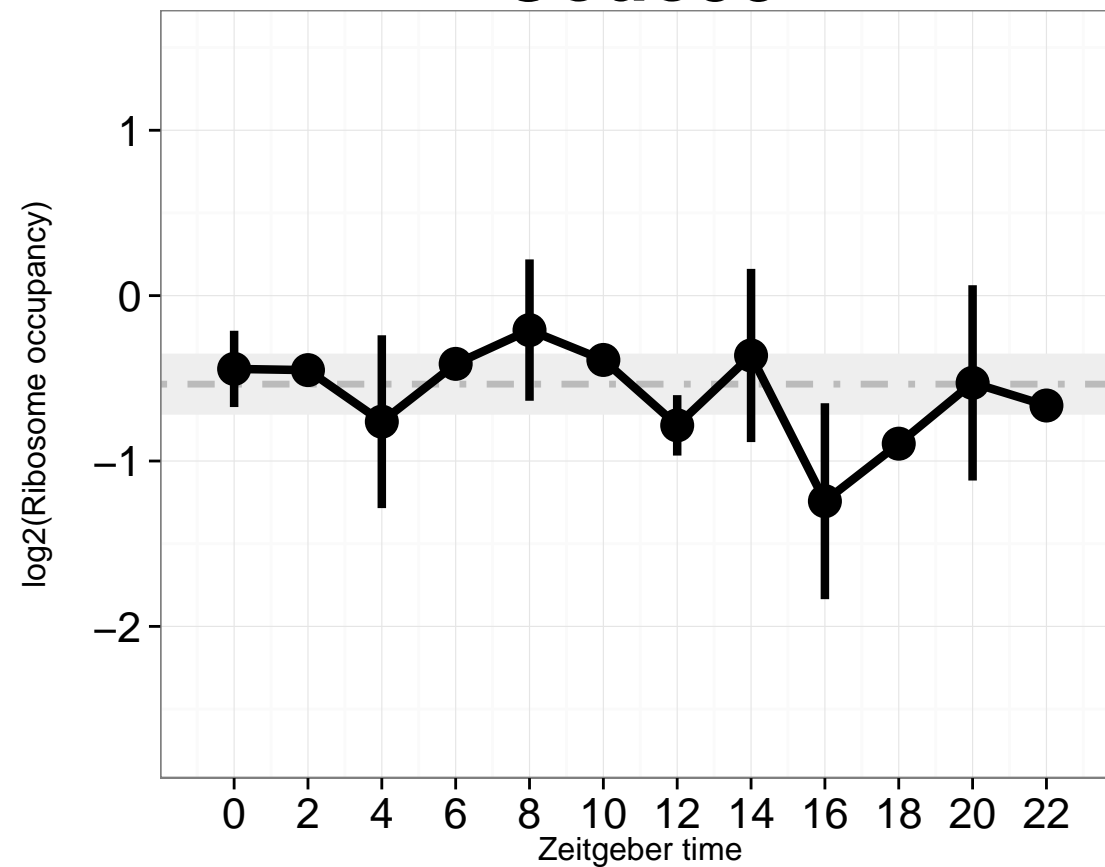

Supplement: Supplementary file 12255 [file 1]

## Cradd

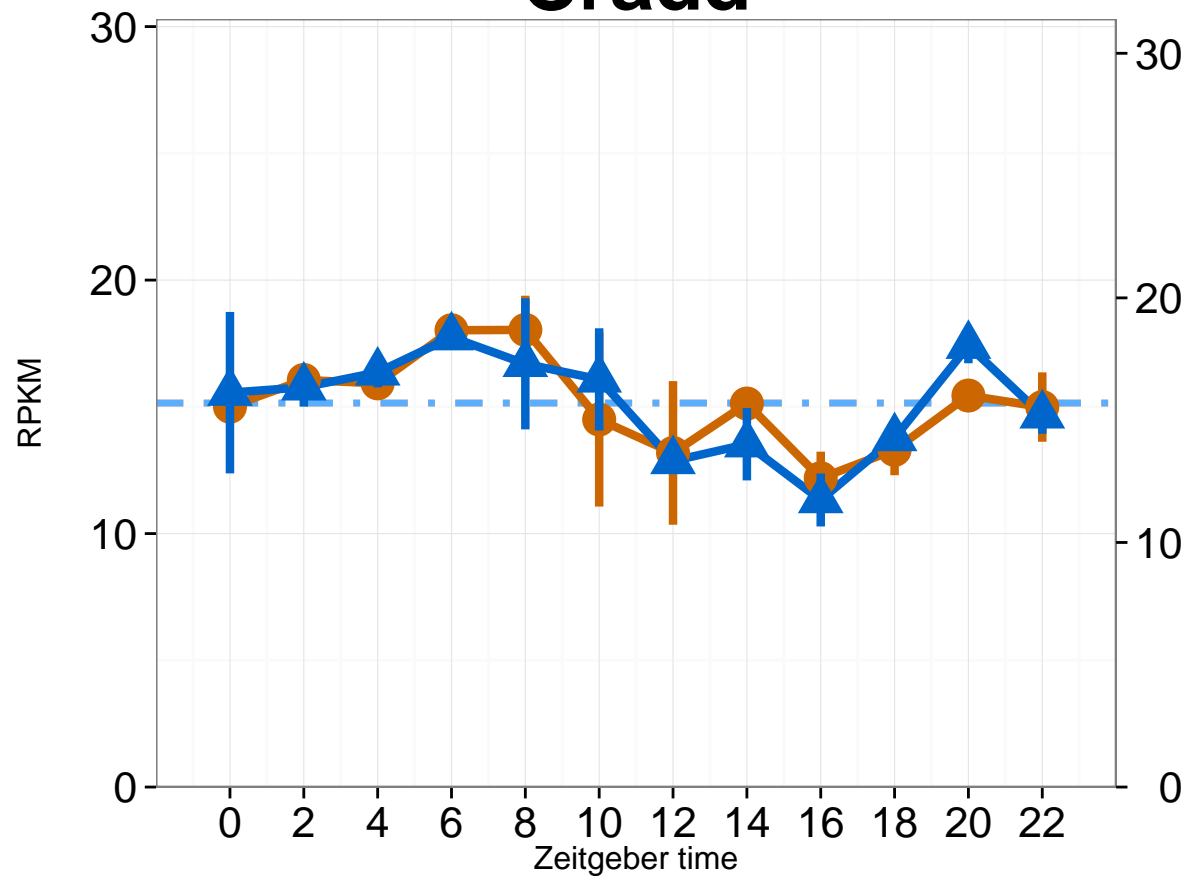

## Cradd

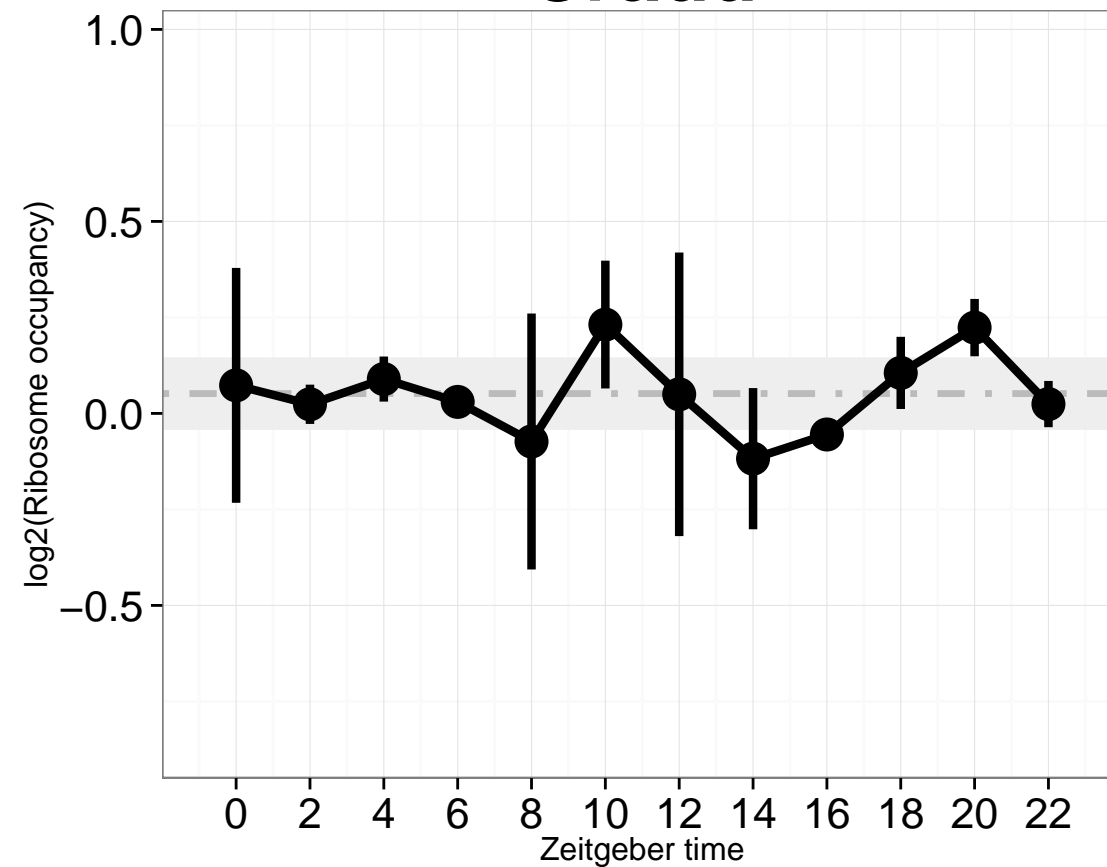

Supplement: Supplementary file 12256 [file 1]

# Mrpl46

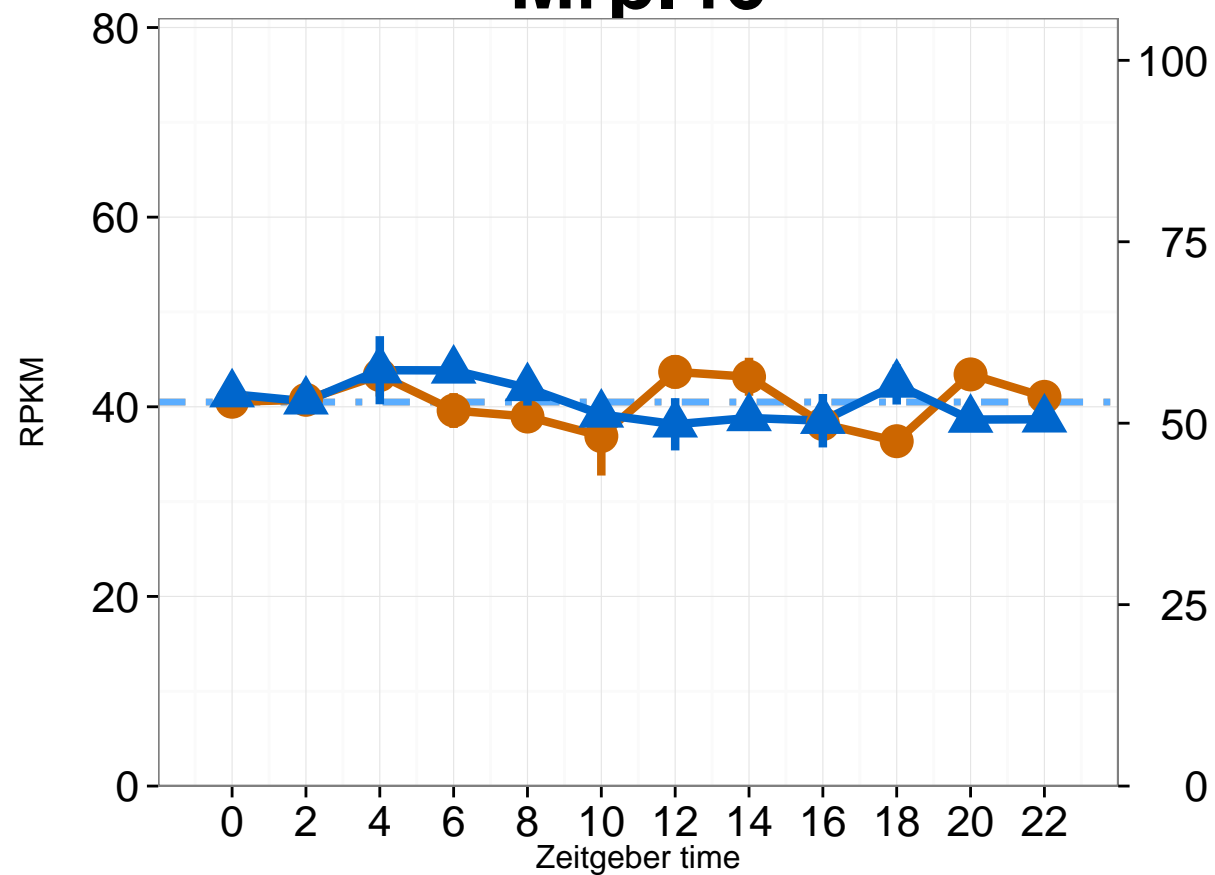

# Mrpl46

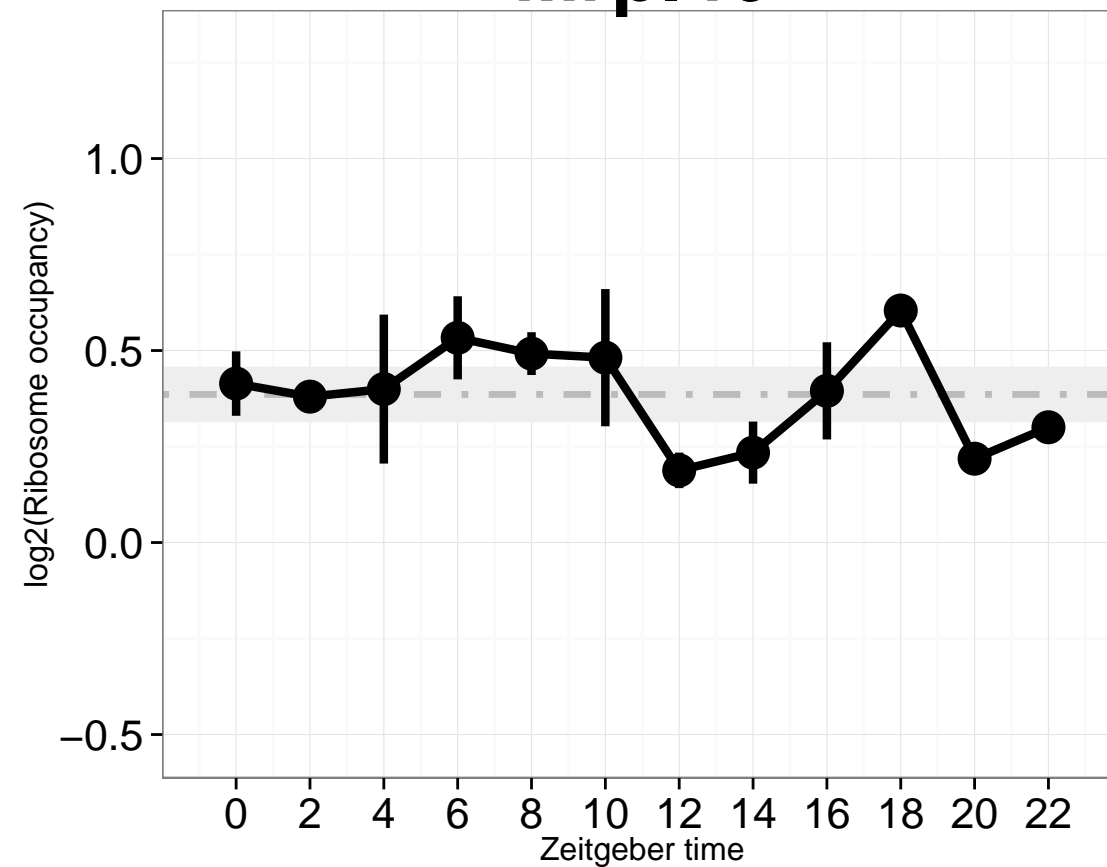

Supplement: Supplementary file 12257 [file 1]

## Akt1

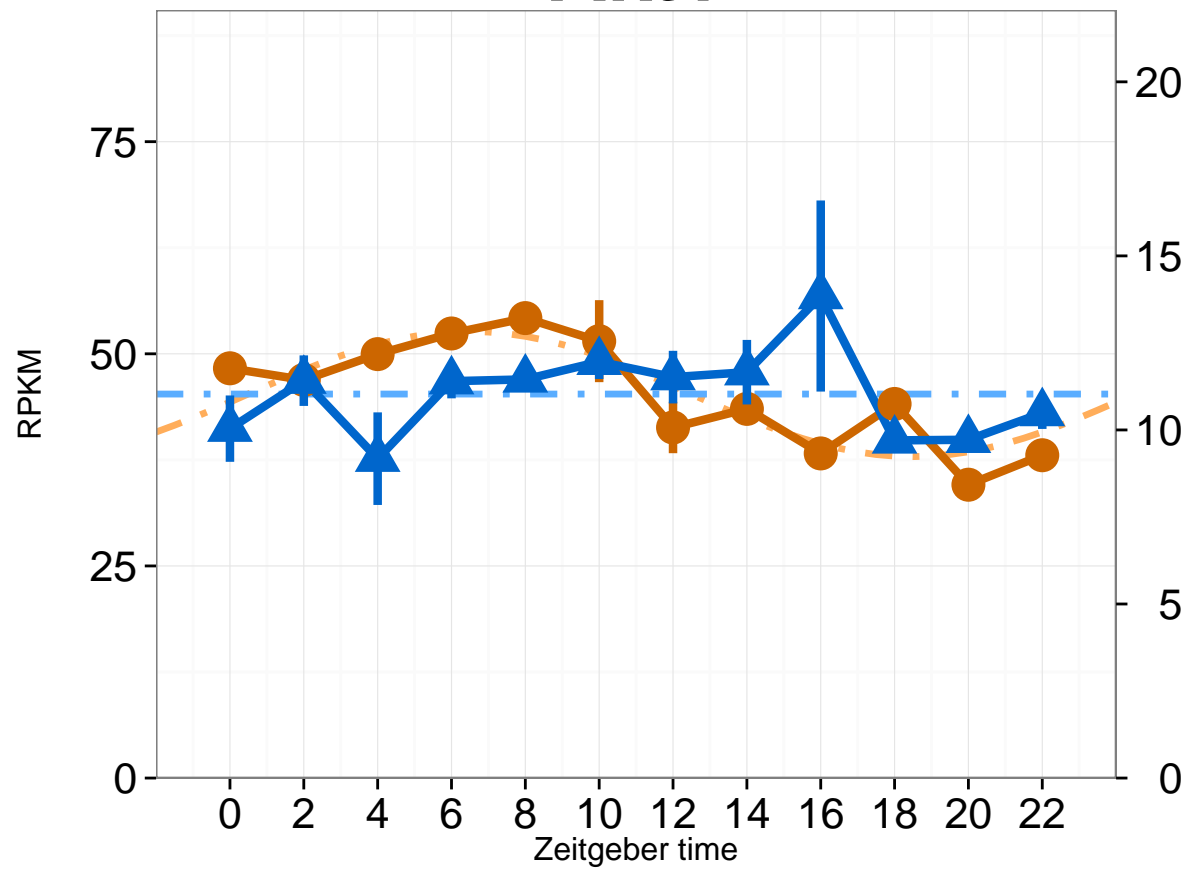

## Akt1

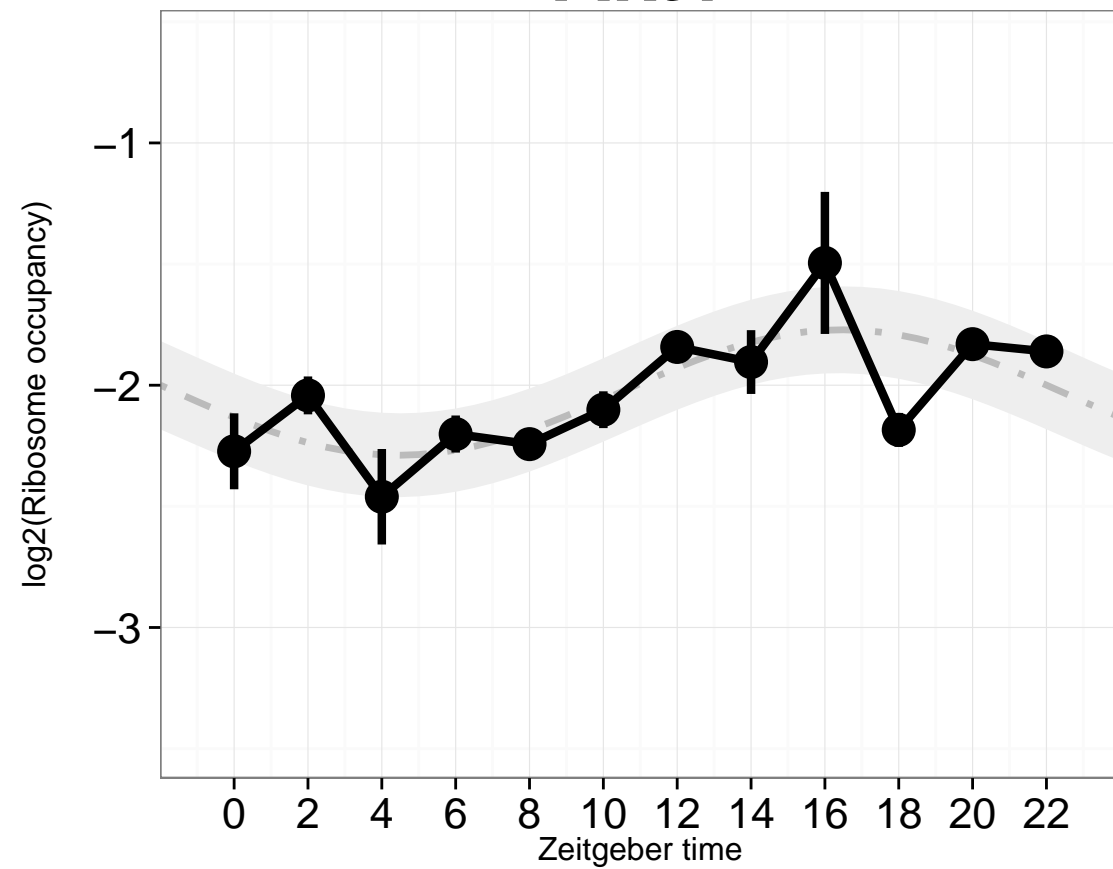

Supplement: Supplementary file 12258 [file 1]

## Dhps

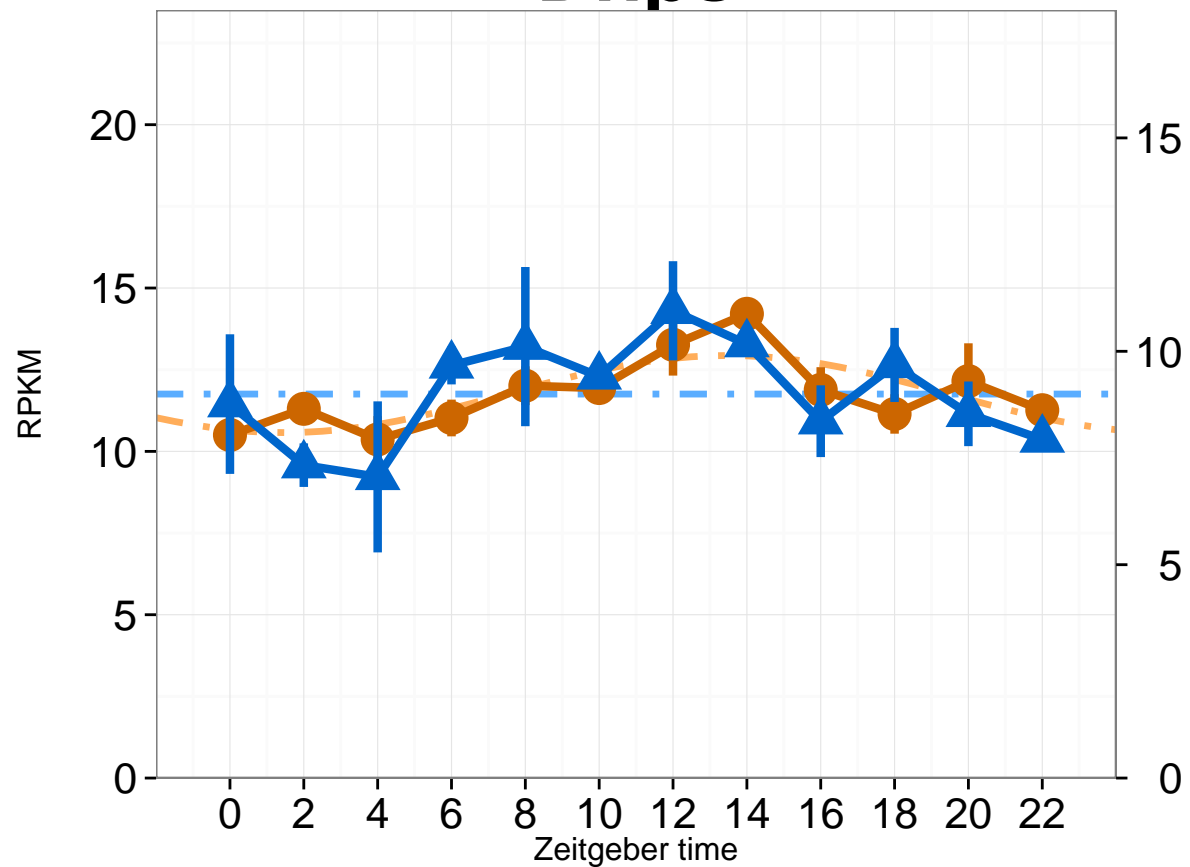

## Dhps

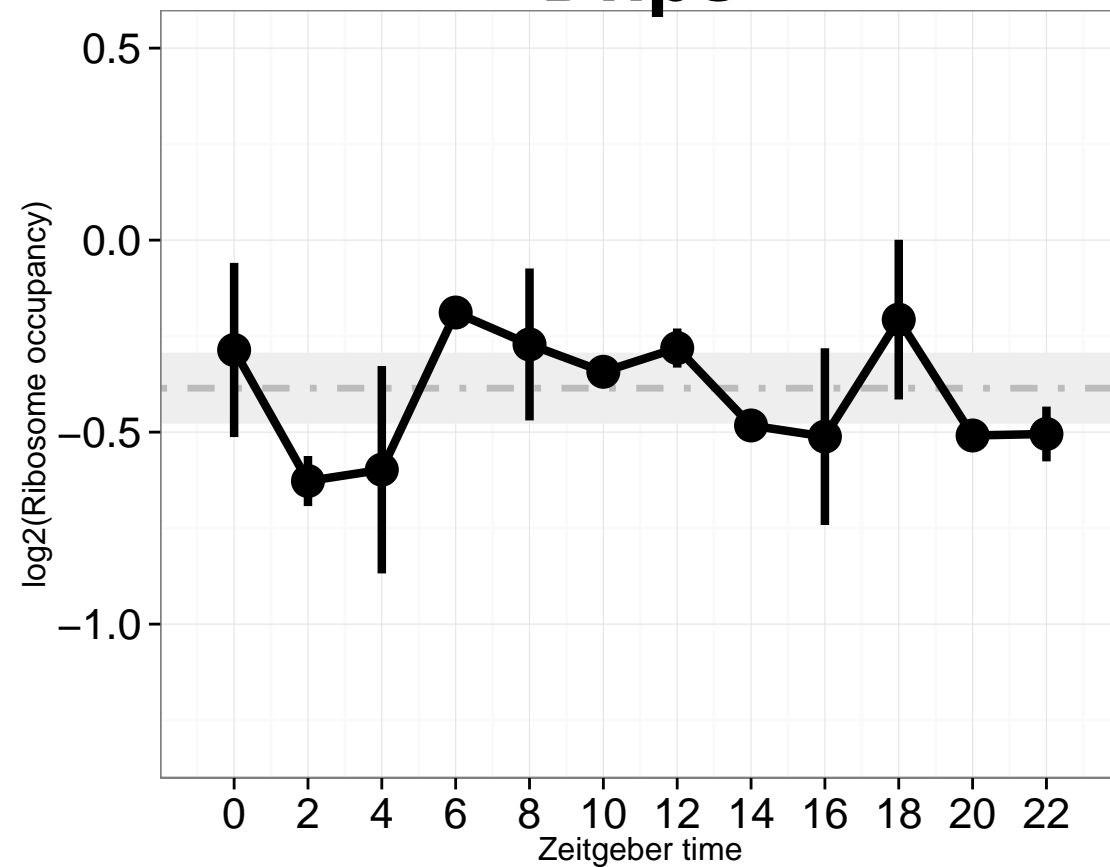

Supplement: Supplementary file 12259 [file 1]

## Elf2

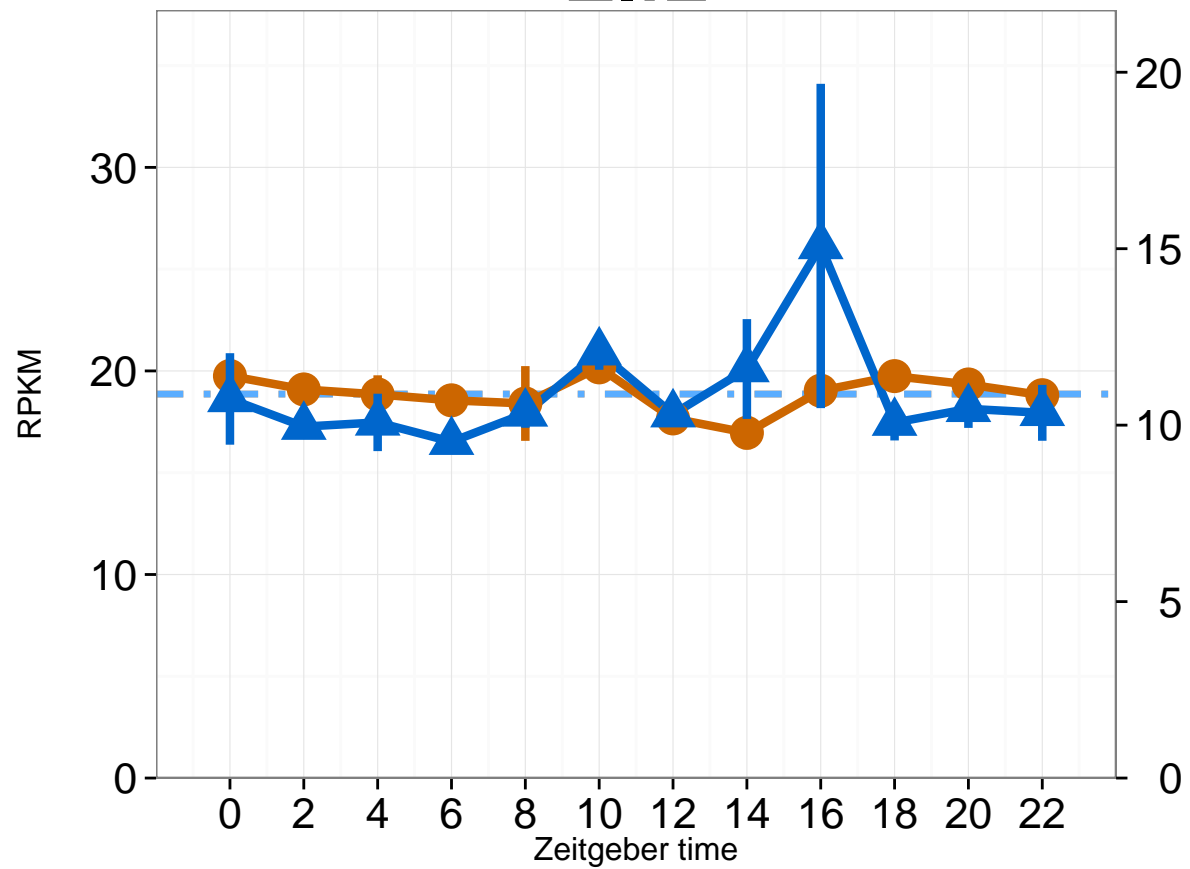

## Elf2

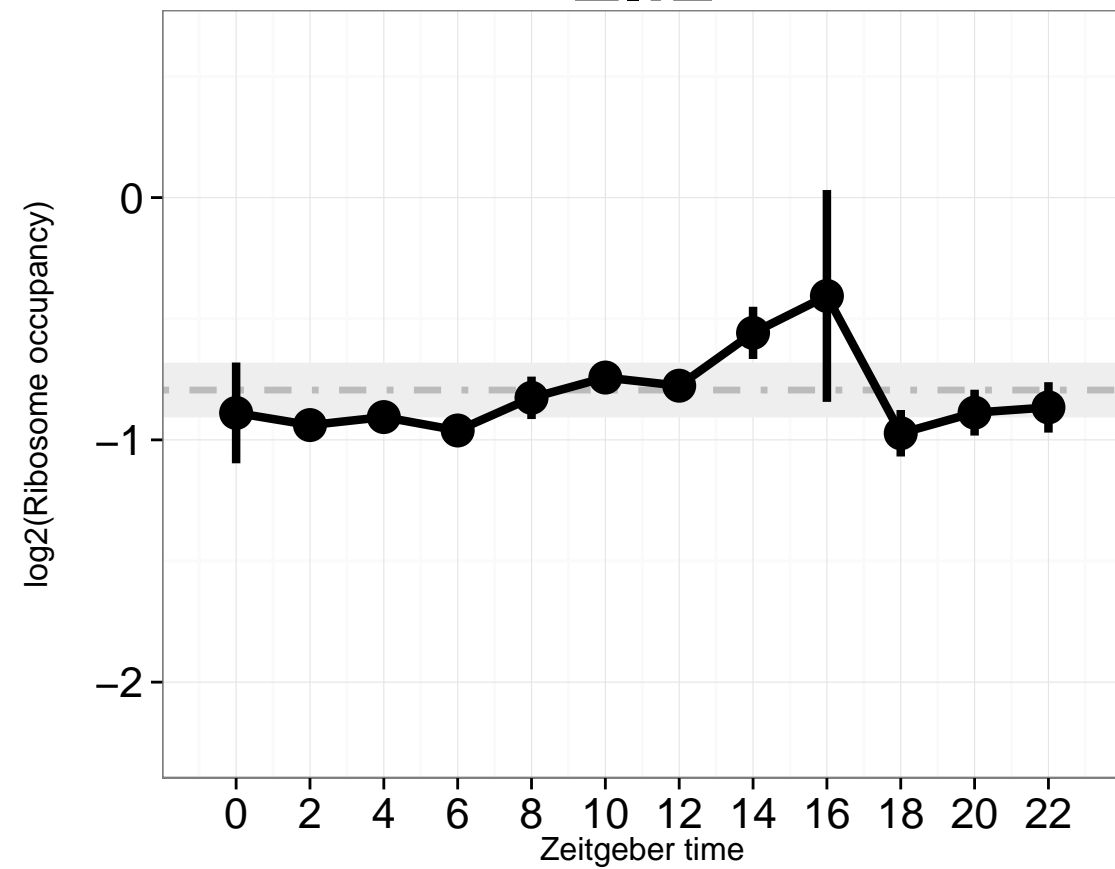

Supplement: Supplementary file 12260 [file 1]

## Ripk2

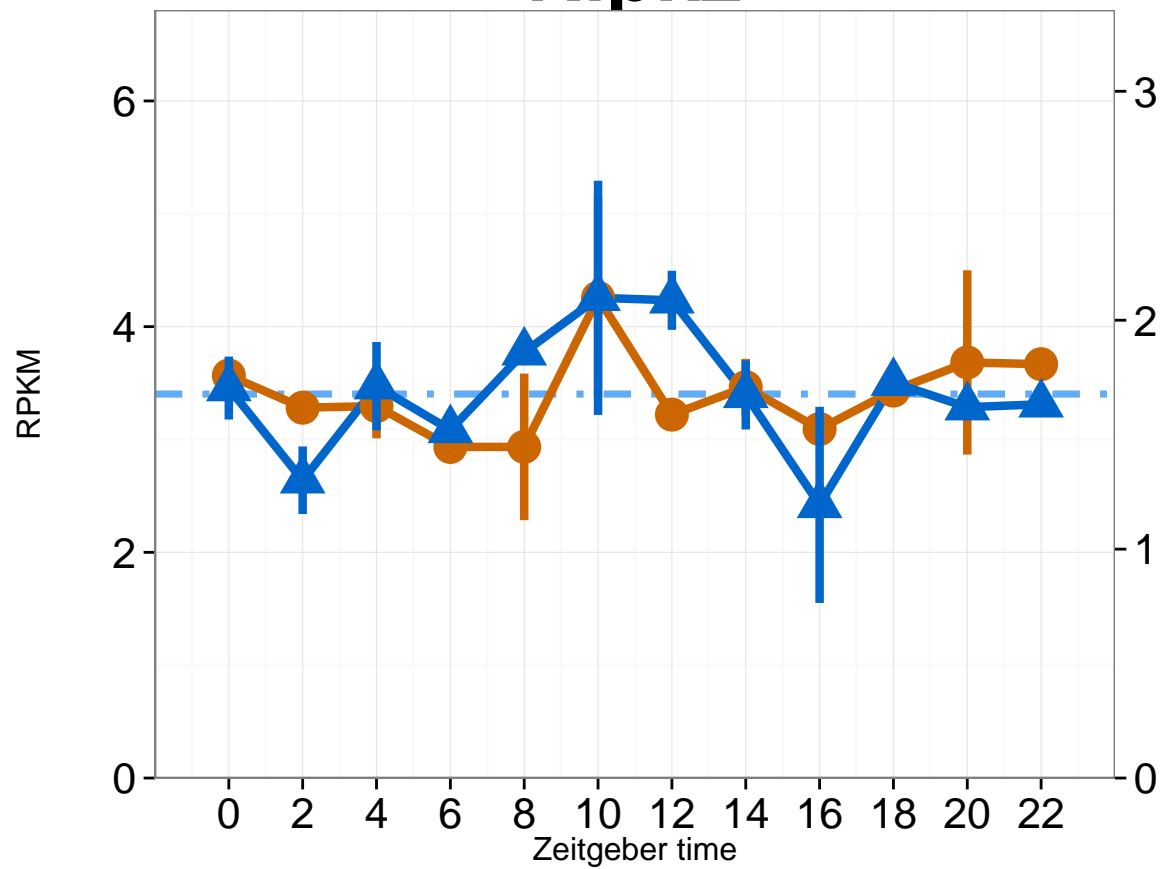

## Ripk2

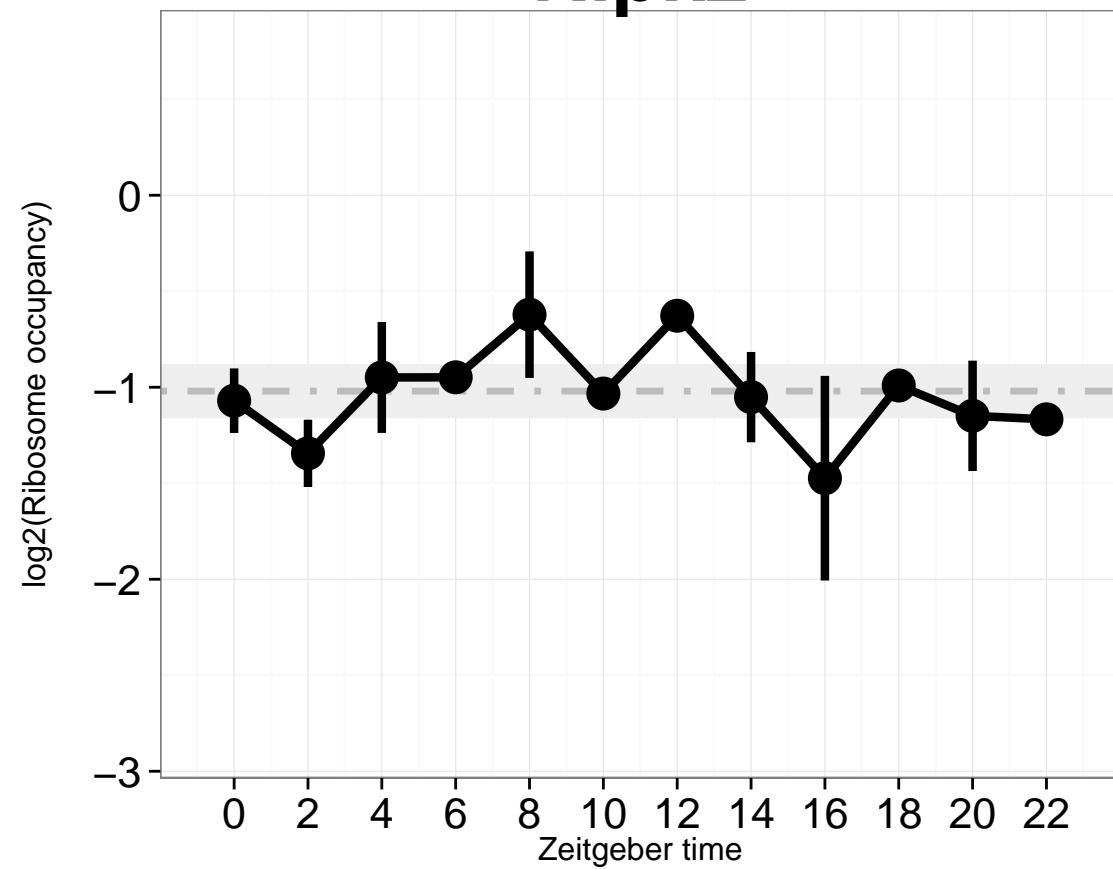

Supplement: Supplementary file 12261 [file 1]

# D430042O09Rik

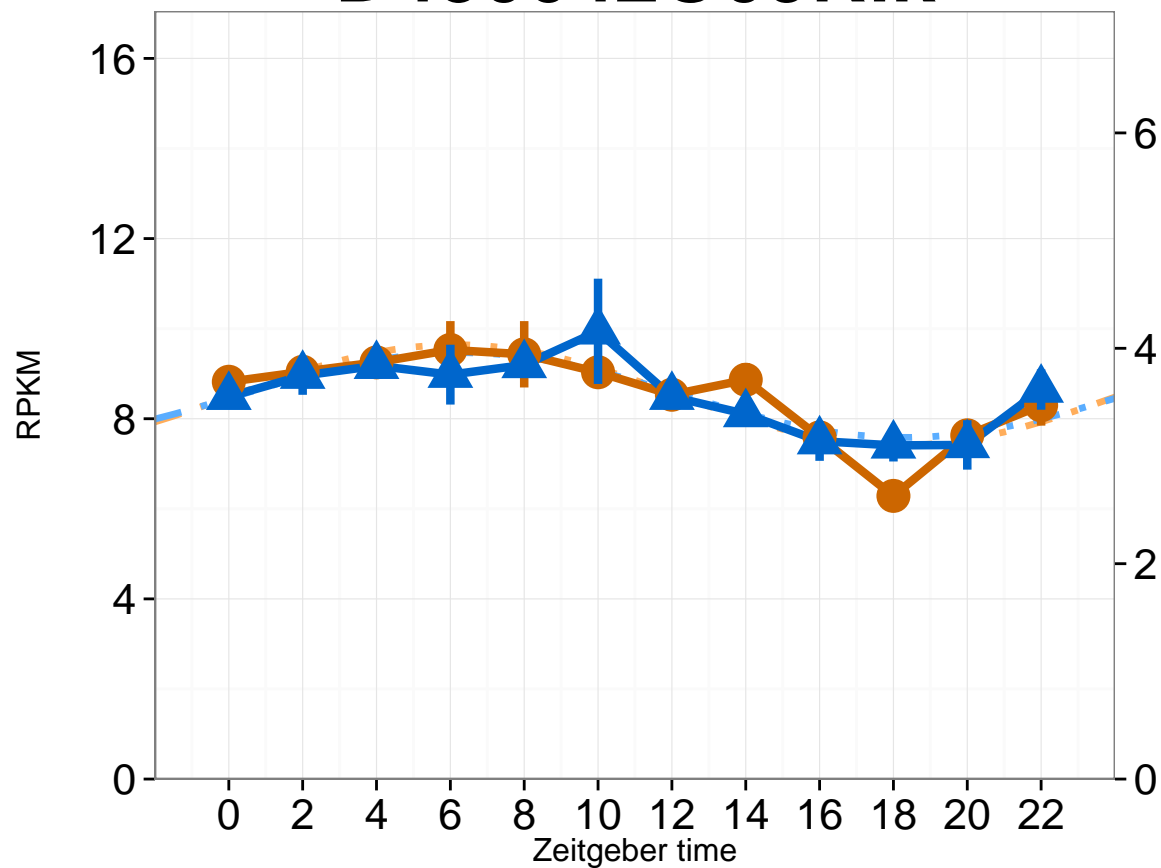

# D430042O09Rik

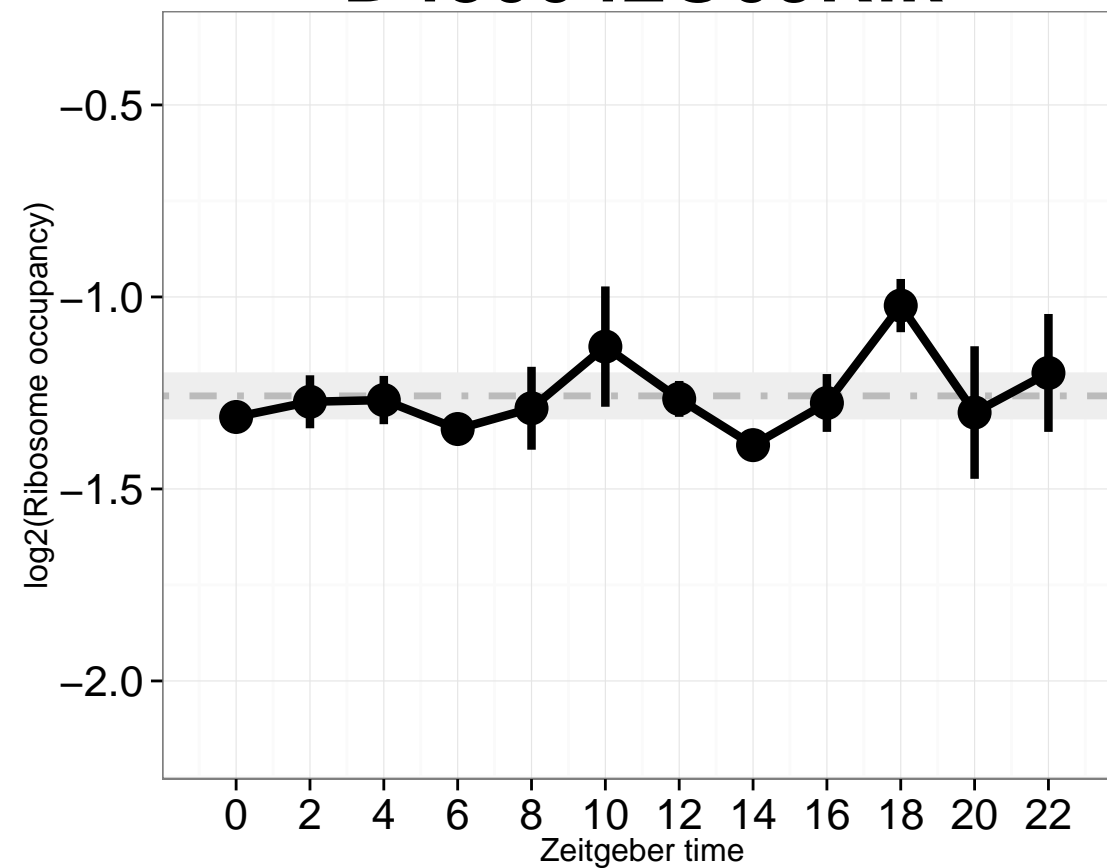

Supplement: Supplementary file 12262 [file 1]

## Ppp6r3

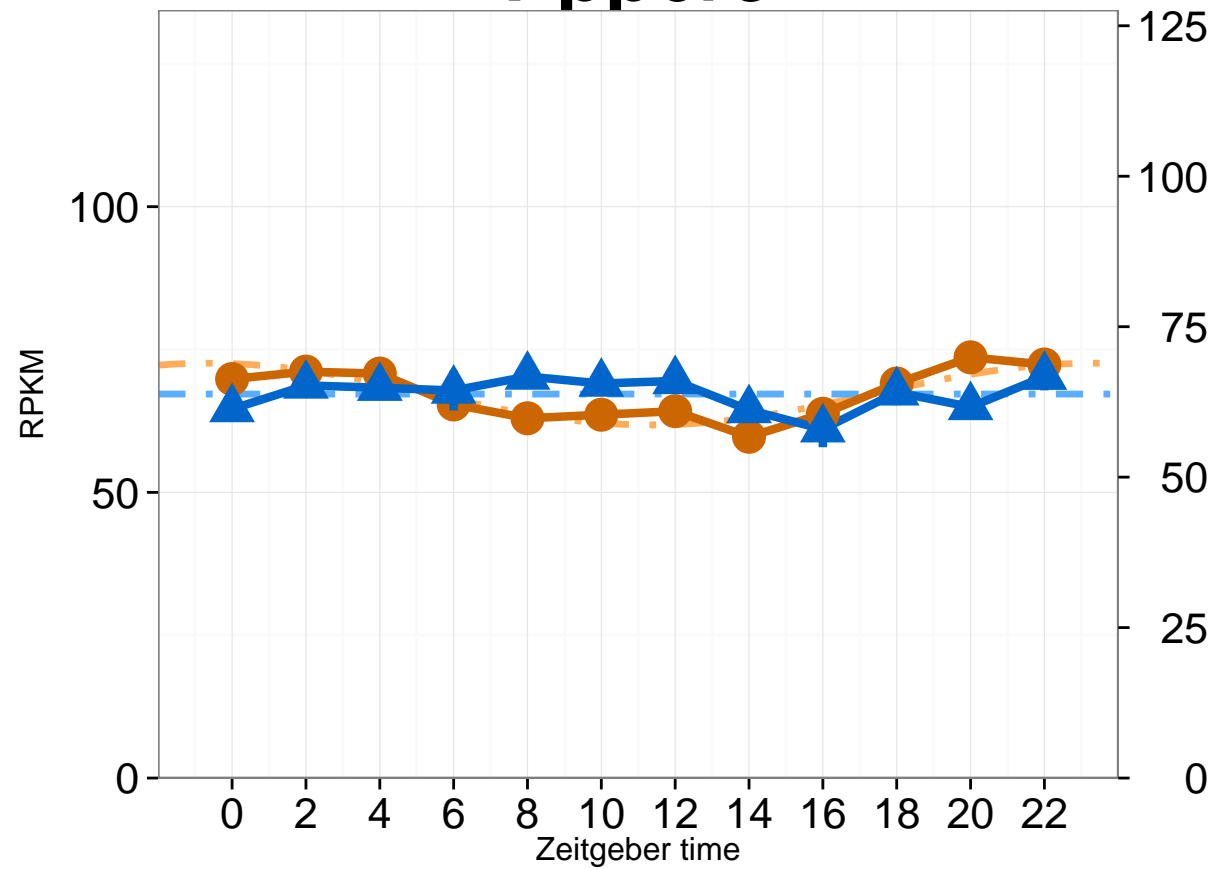

## Ppp6r3

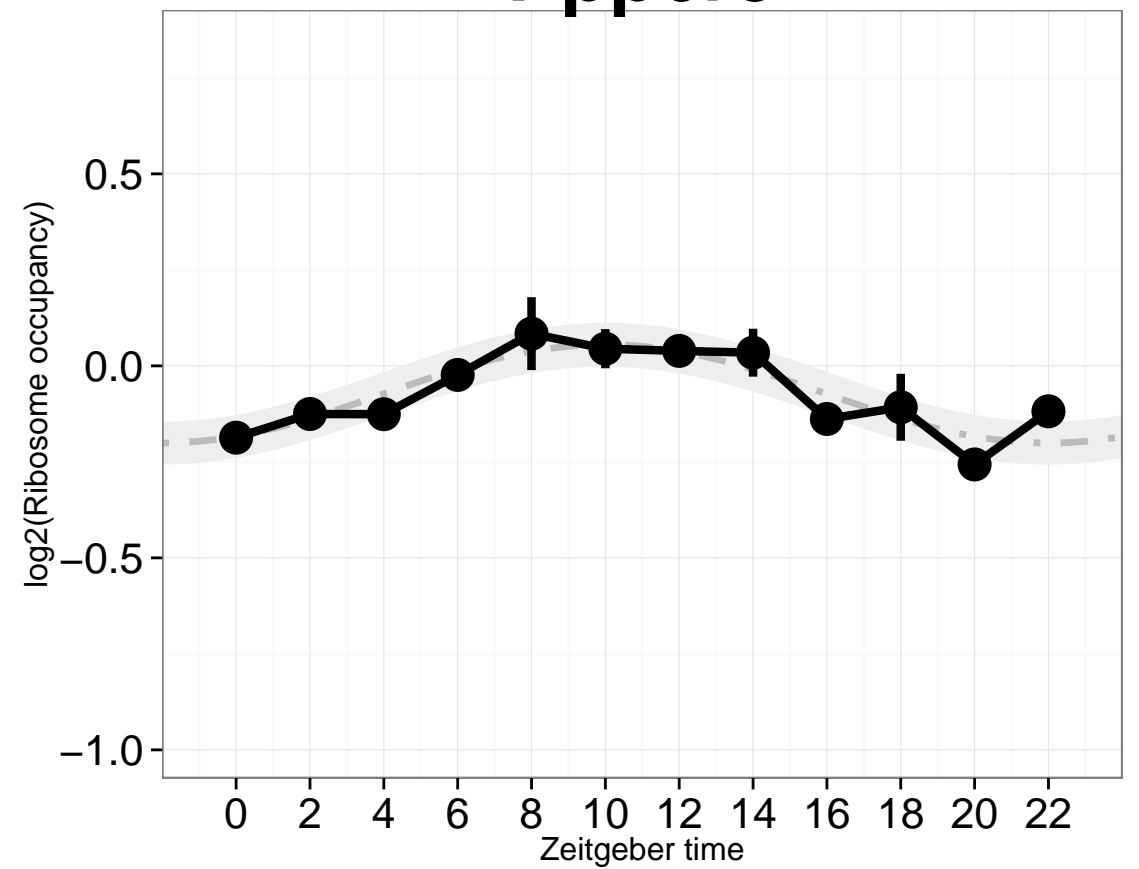

Supplement: Supplementary file 12263 [file 1]

# Col4a3

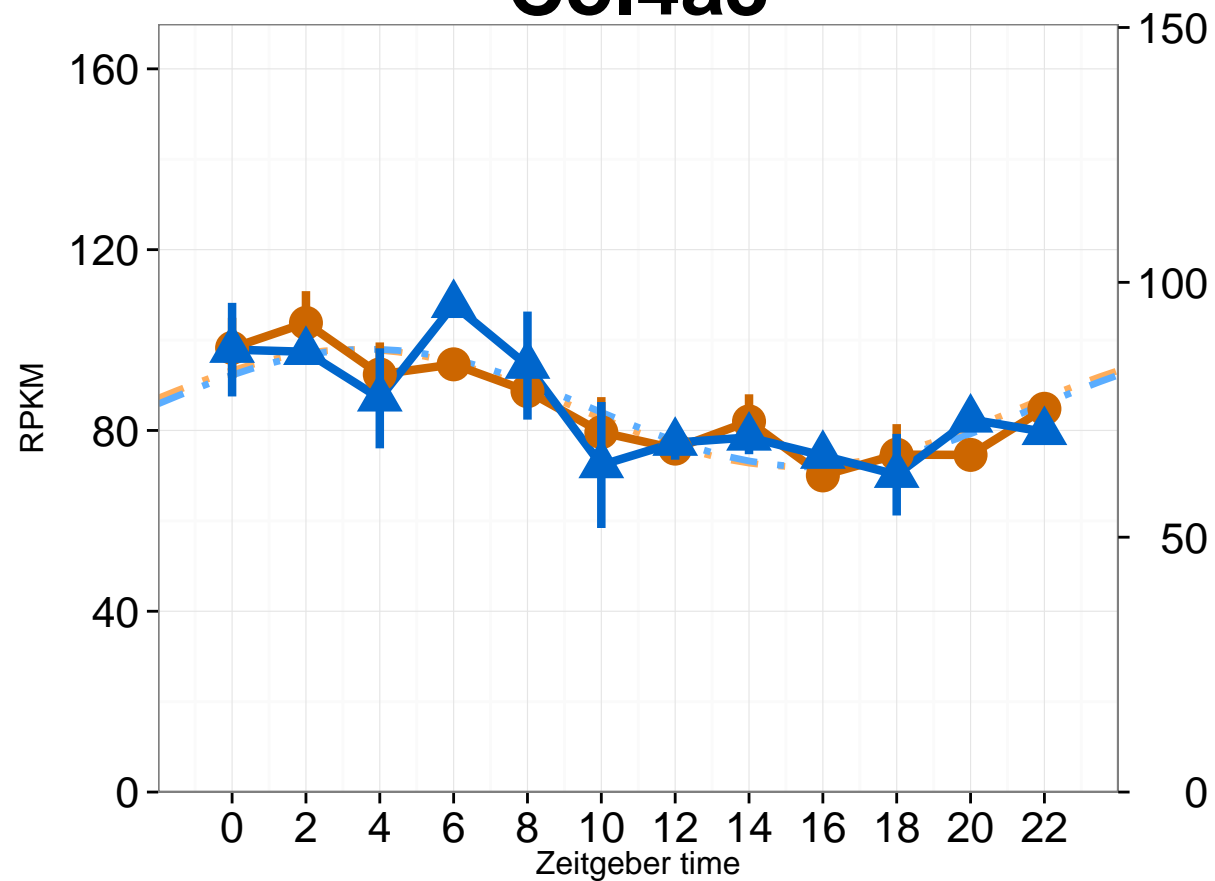

# Col4a3

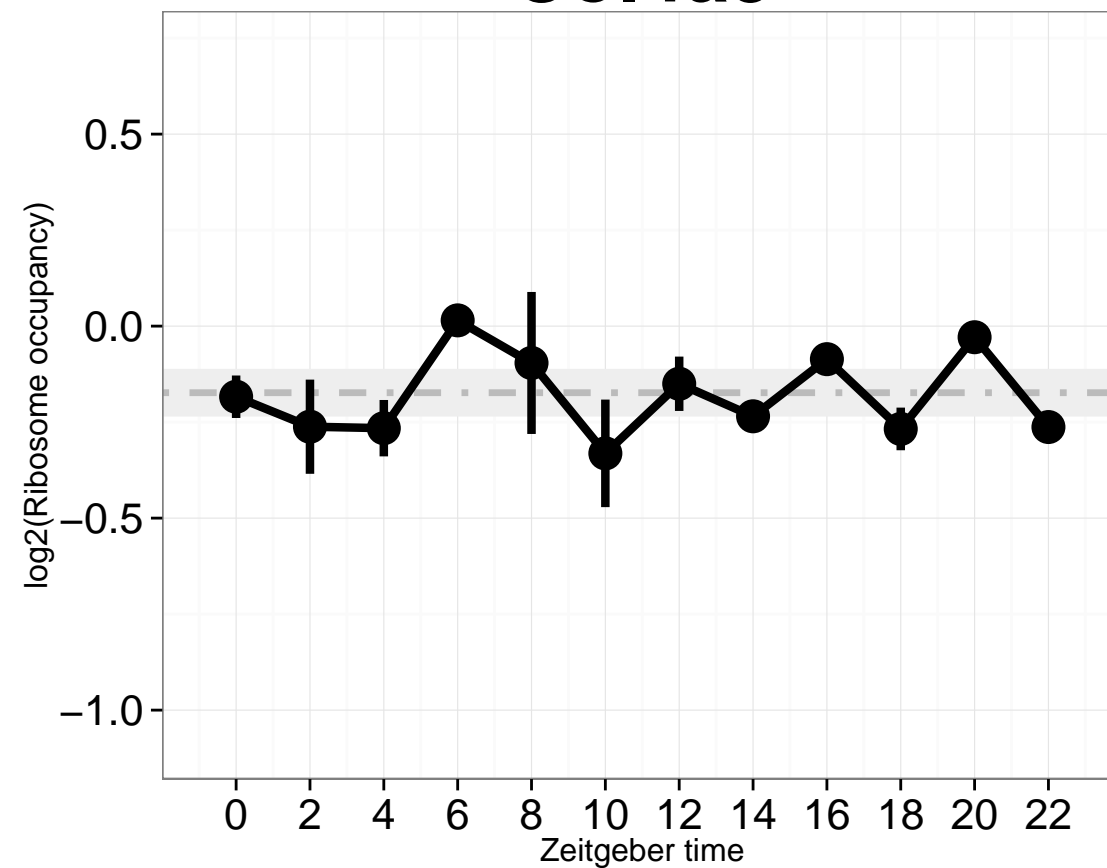

Supplement: Supplementary file 12264 [file 1]

## Sik2

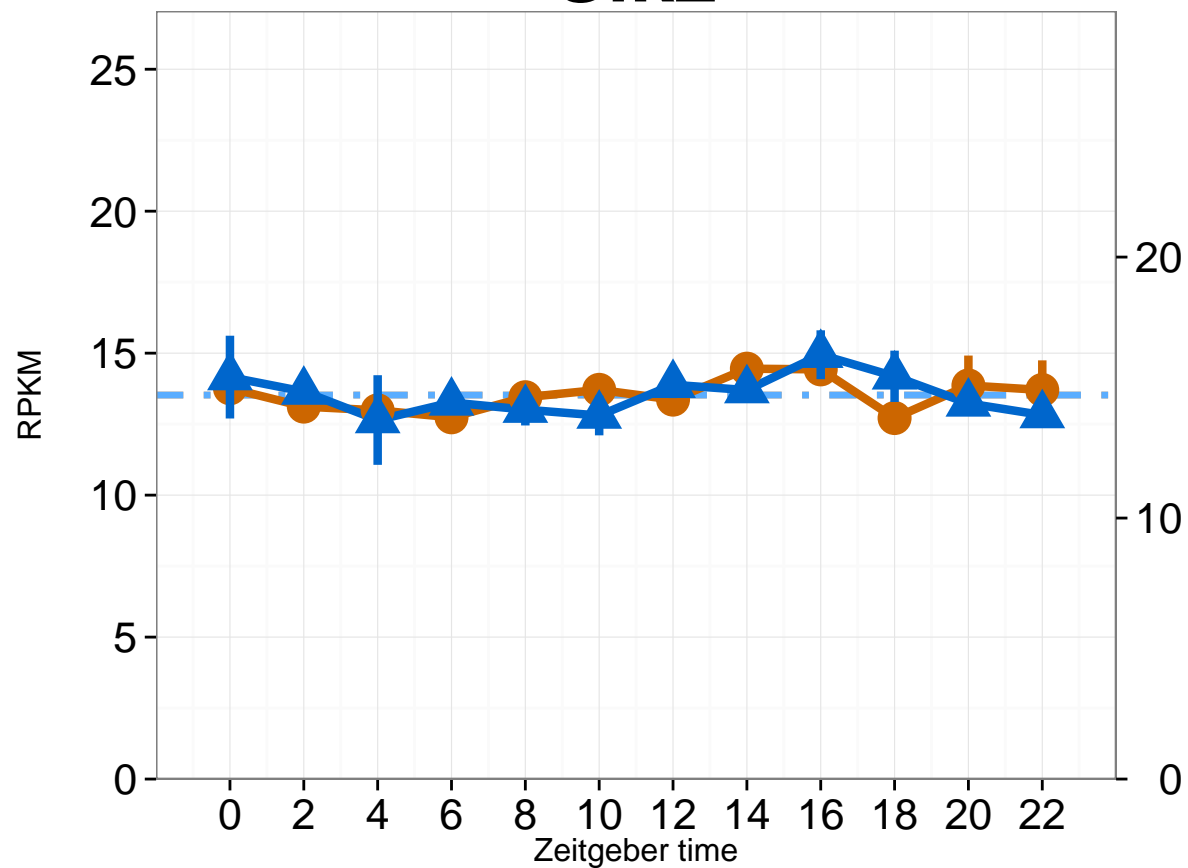

## Sik2

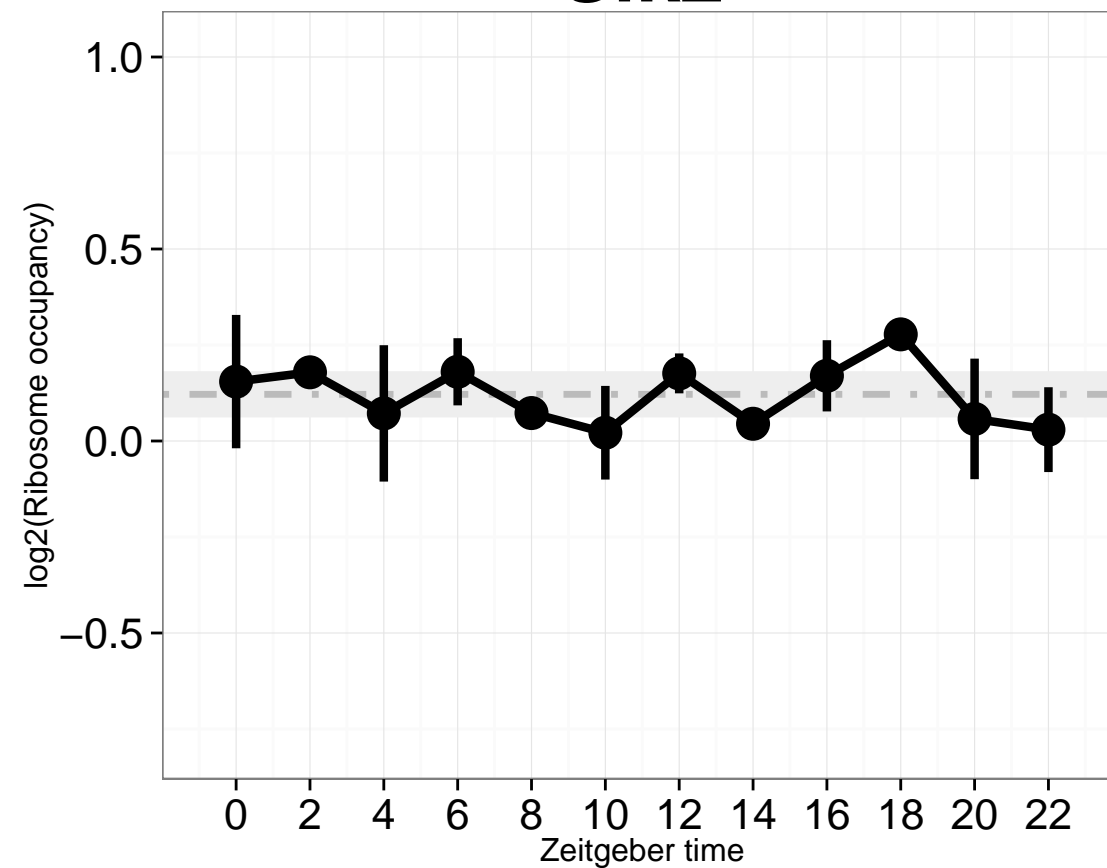

Supplement: Supplementary file 12265 [file 1]

# Zfp639

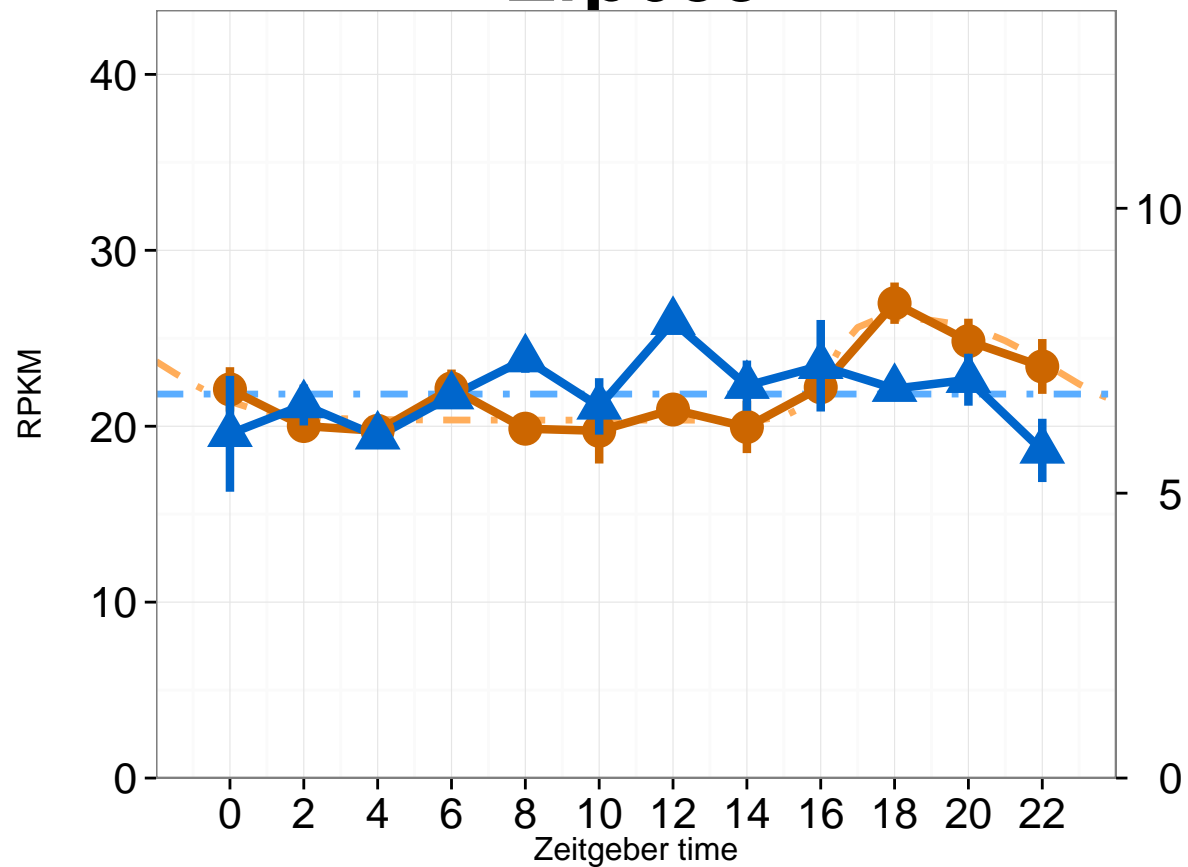

# Zfp639

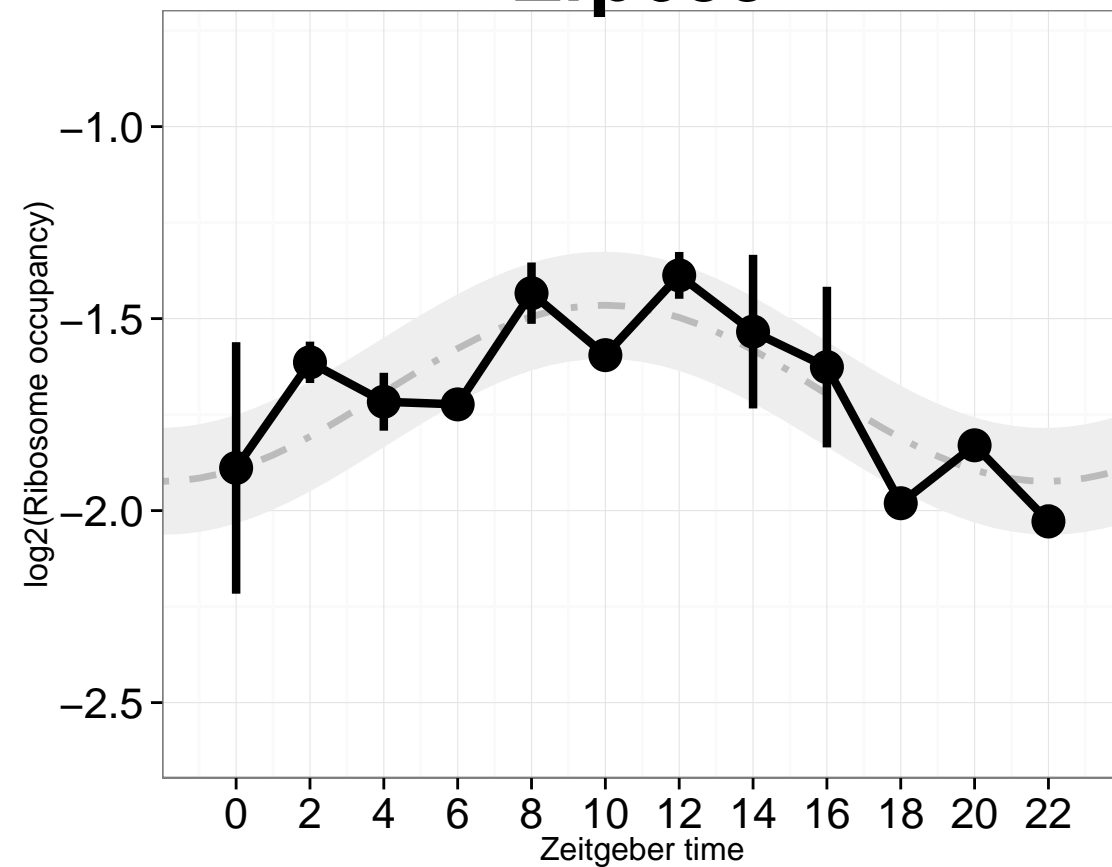

Supplement: Supplementary file 12266 [file 1]

## Chchd10

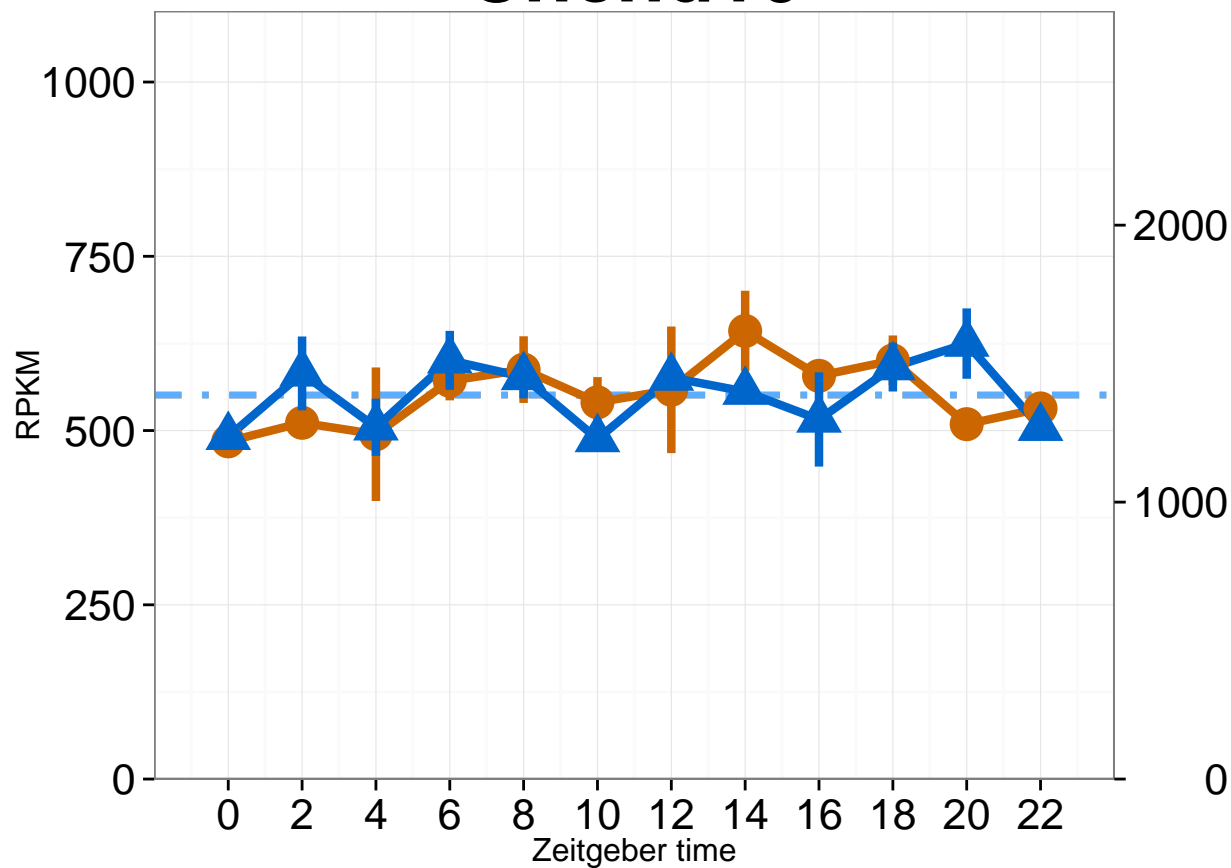

## Chchd10

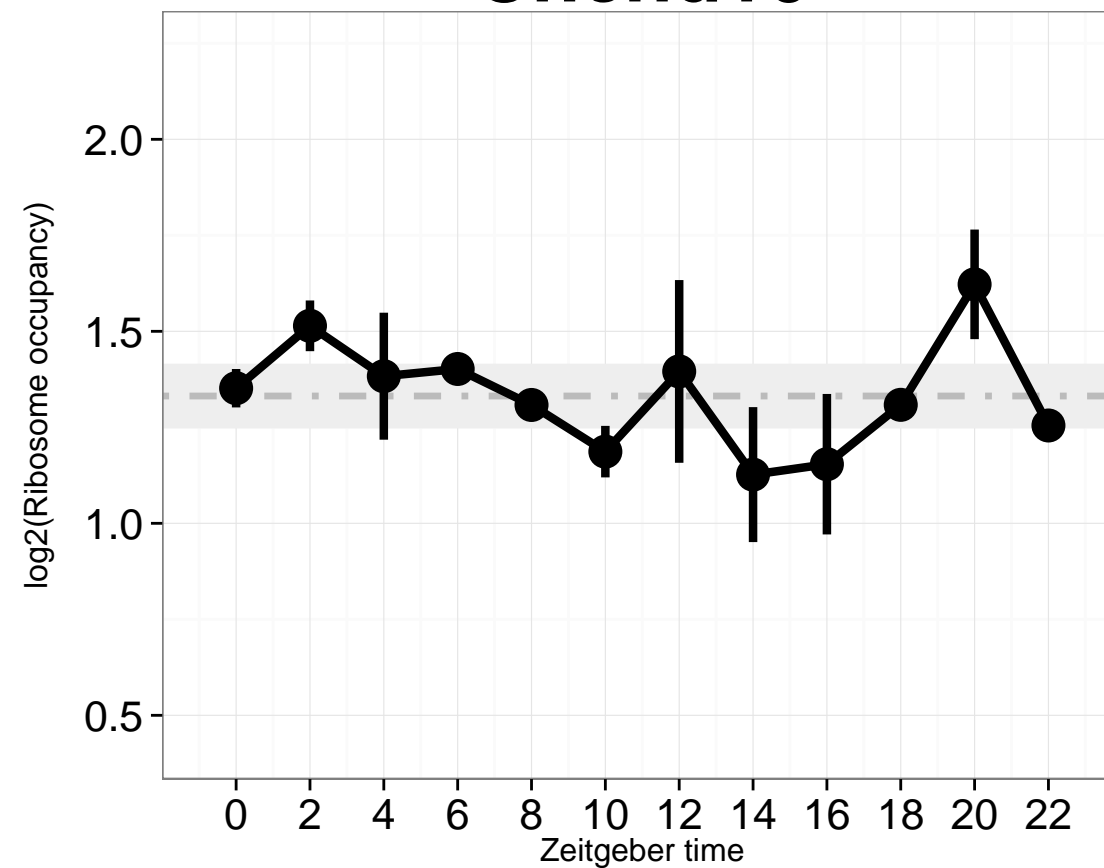

Supplement: Supplementary file 12267 [file 1]

## Ubr4

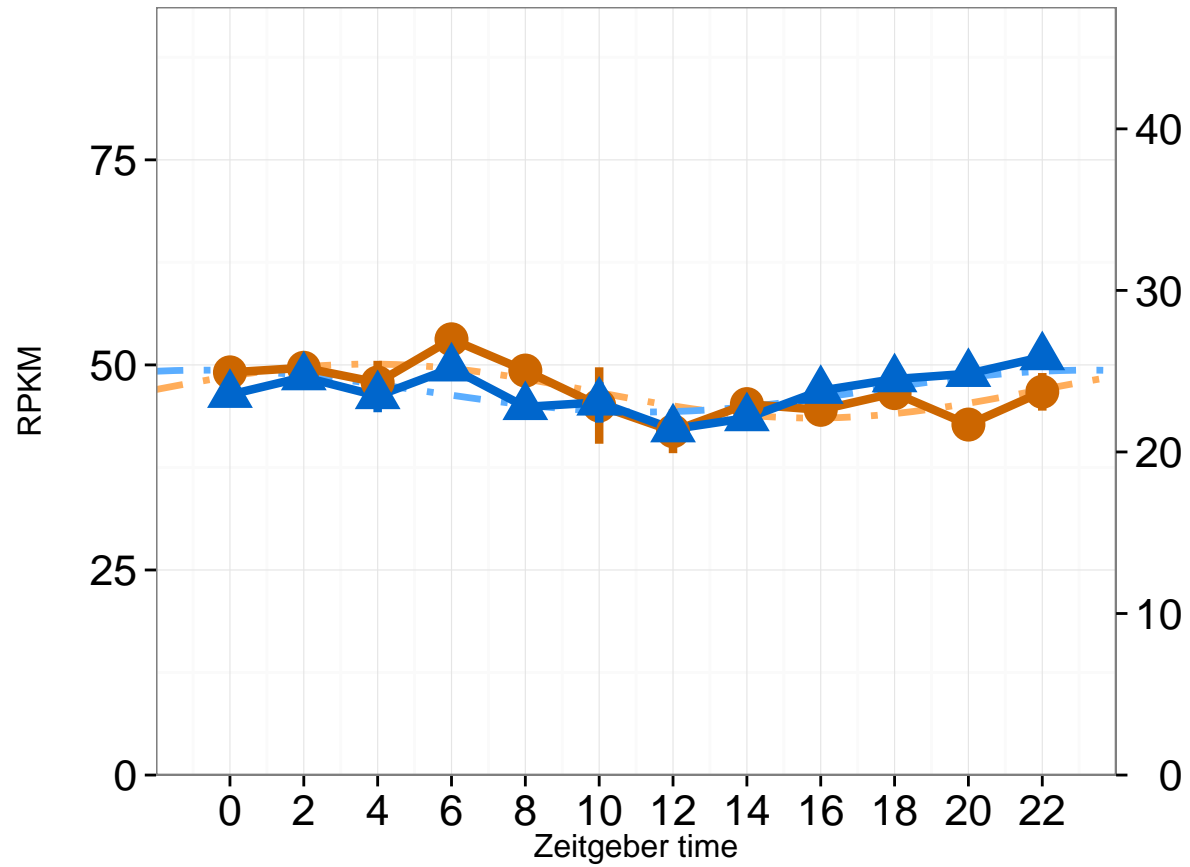

## Ubr4

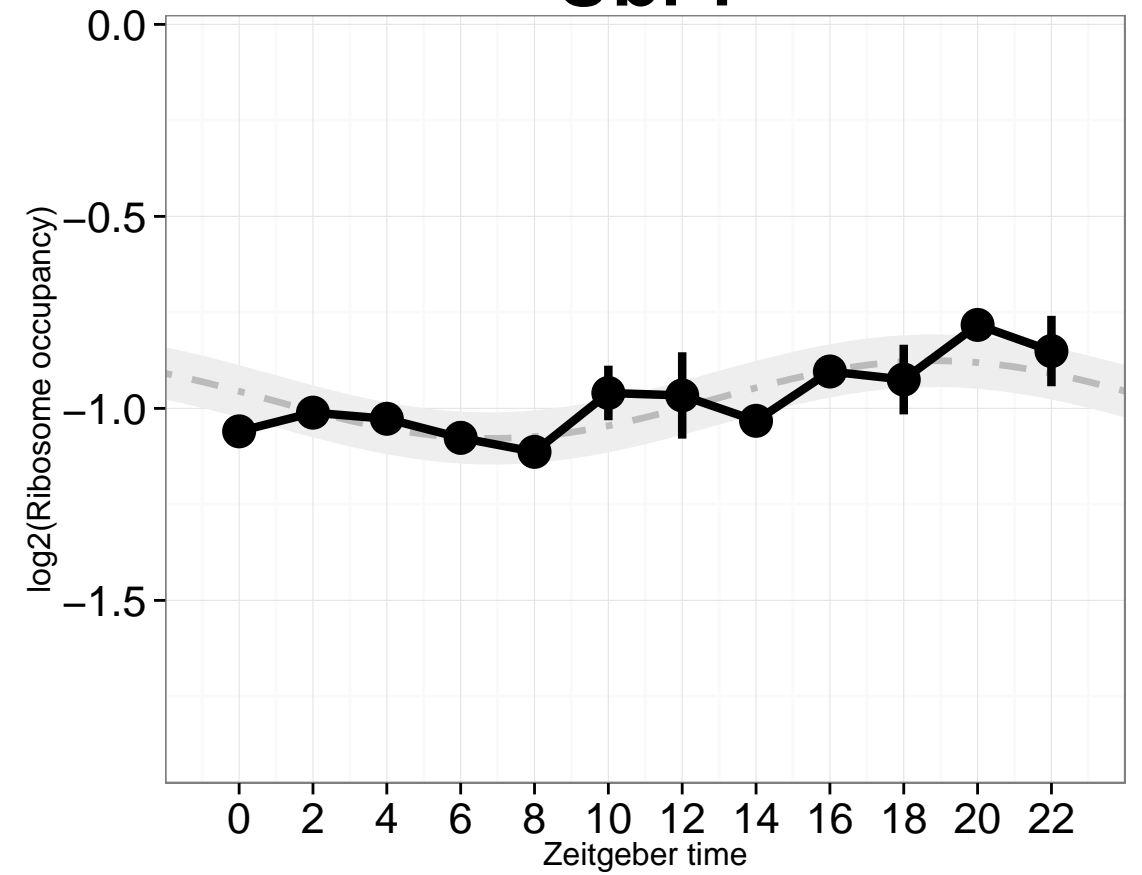

Supplement: Supplementary file 12268 [file 1]

# Pla2g12a

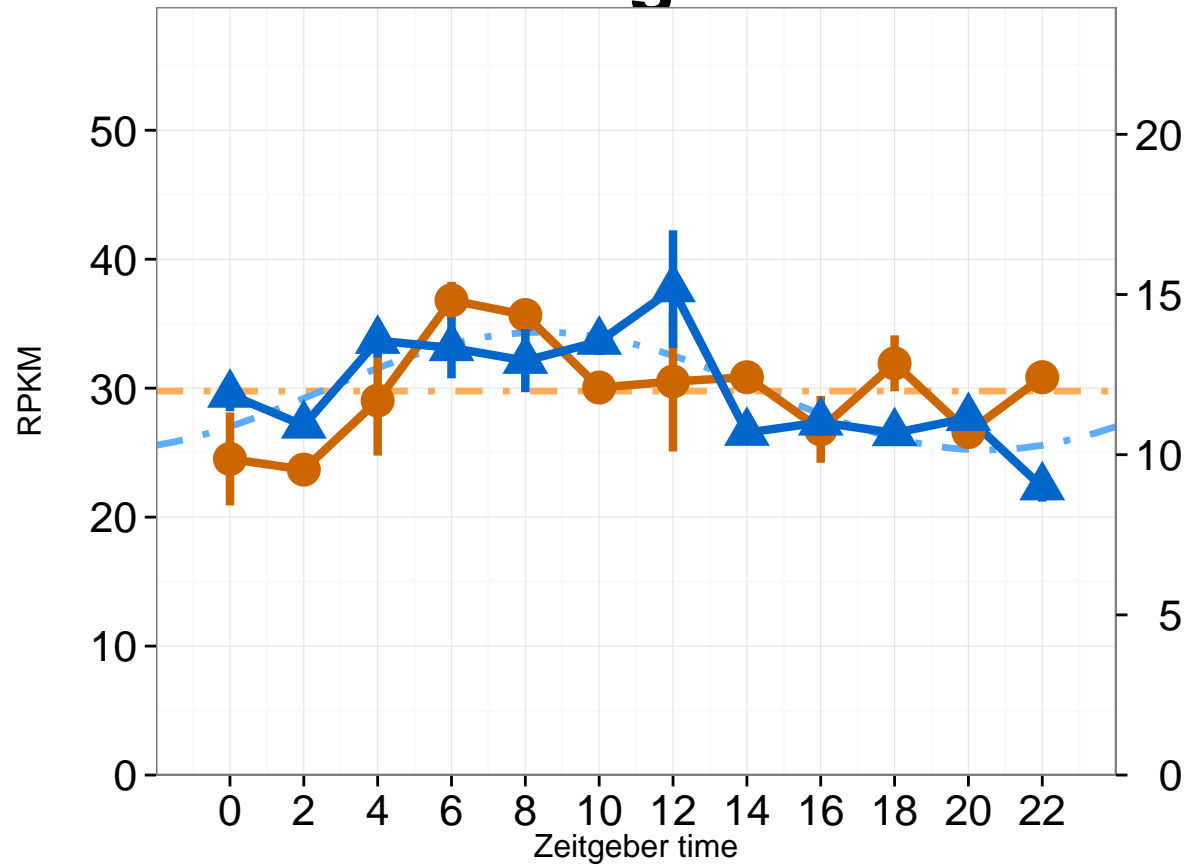

# Pla2g12a

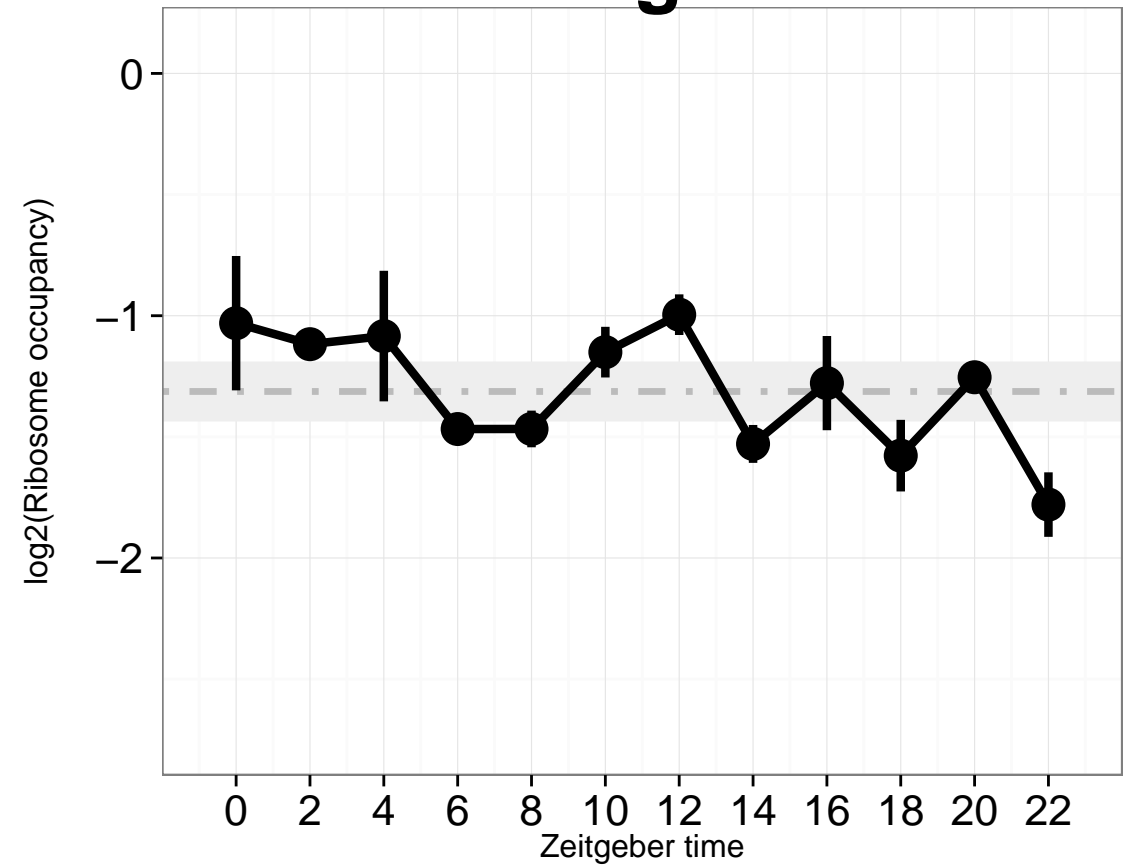

Supplement: Supplementary file 12269 [file 1]

## Sema4c

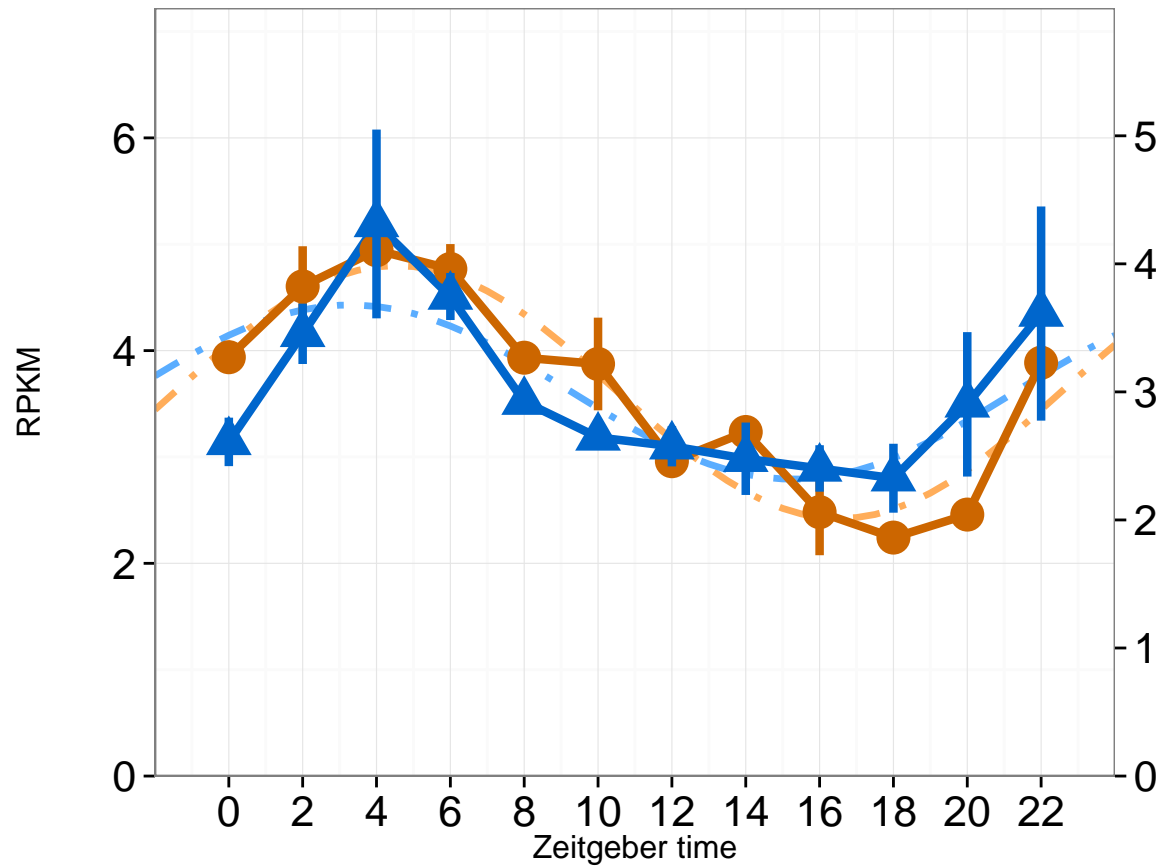

## Sema4c

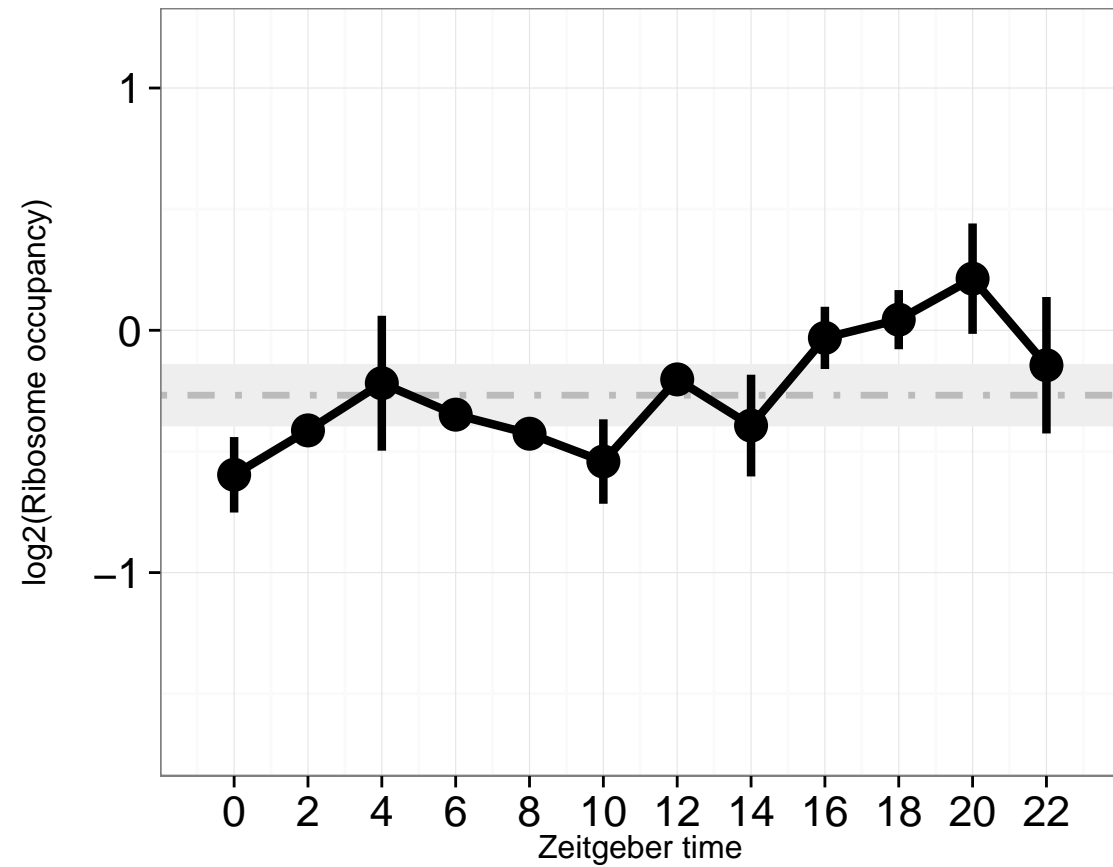

Supplement: Supplementary file 12270 [file 1]

## Samd1

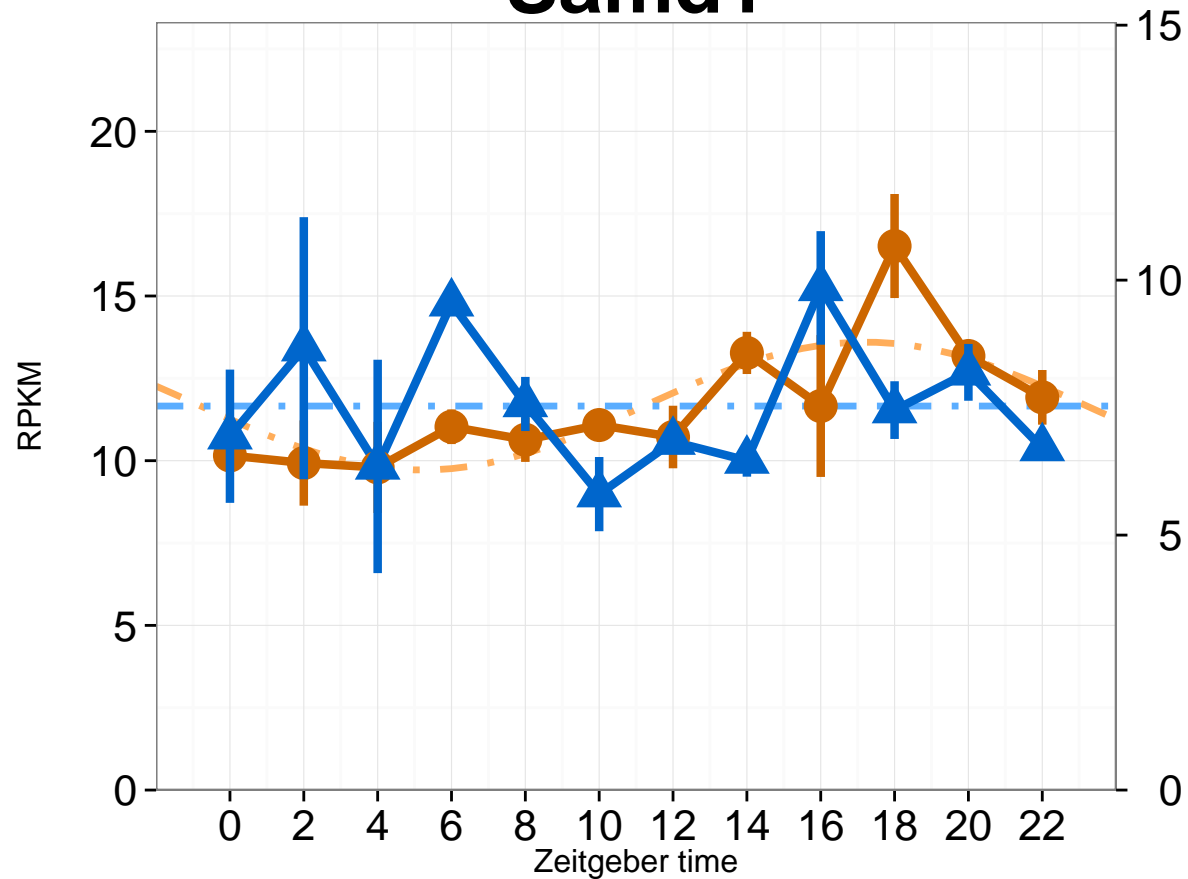

## Samd1

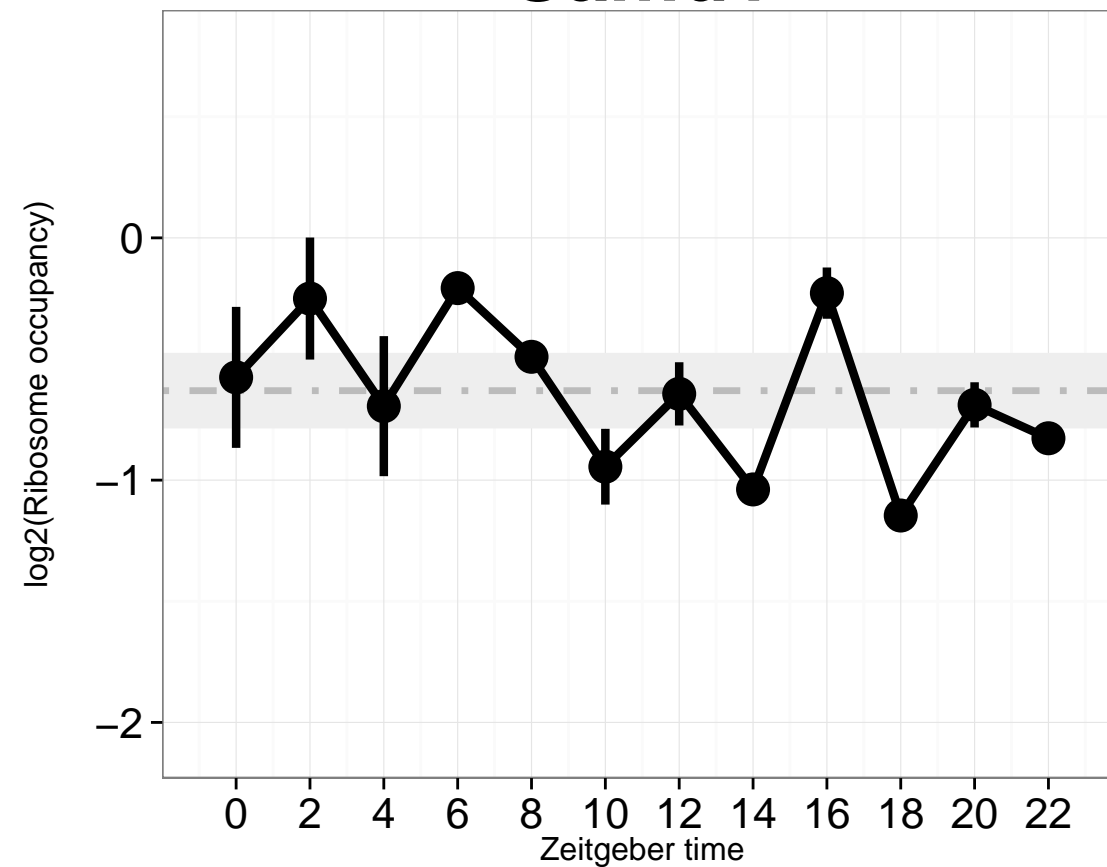

Supplement: Supplementary file 12271 [file 1]

## Kif21a

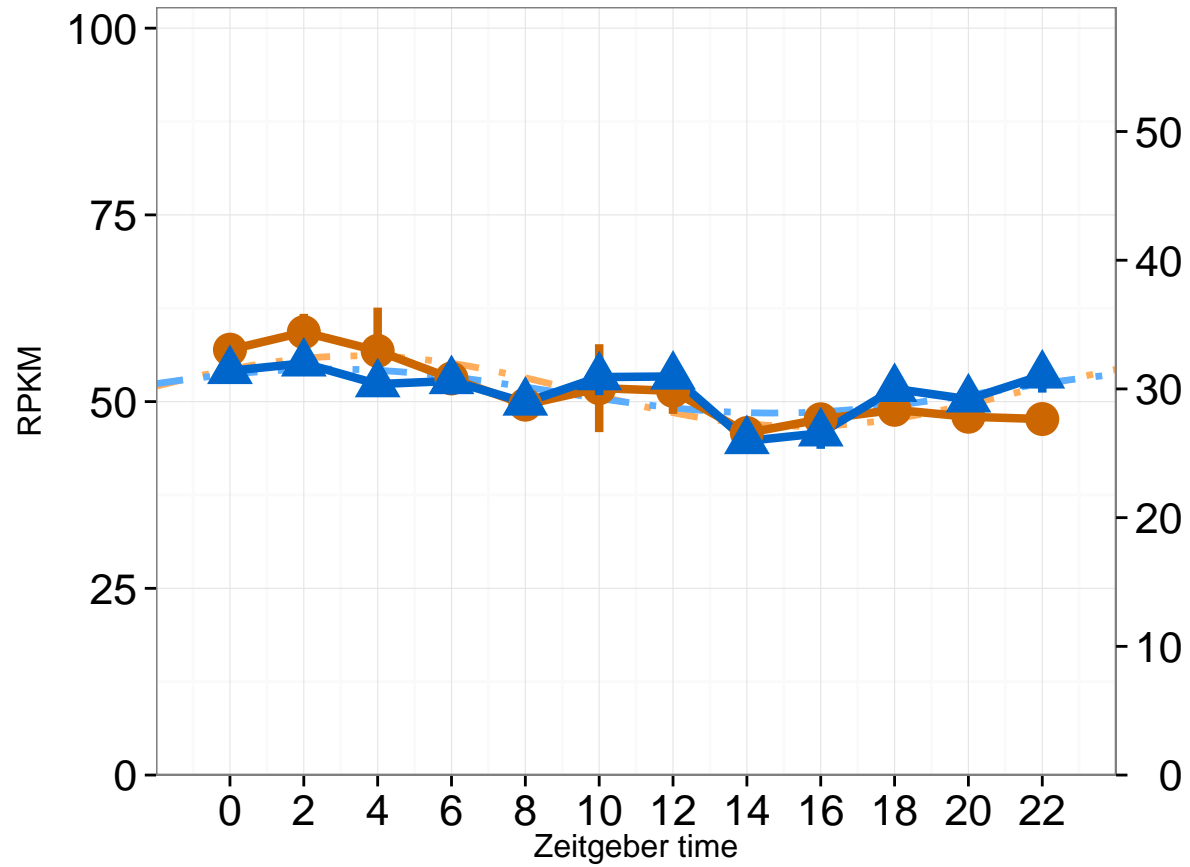

## Kif21a

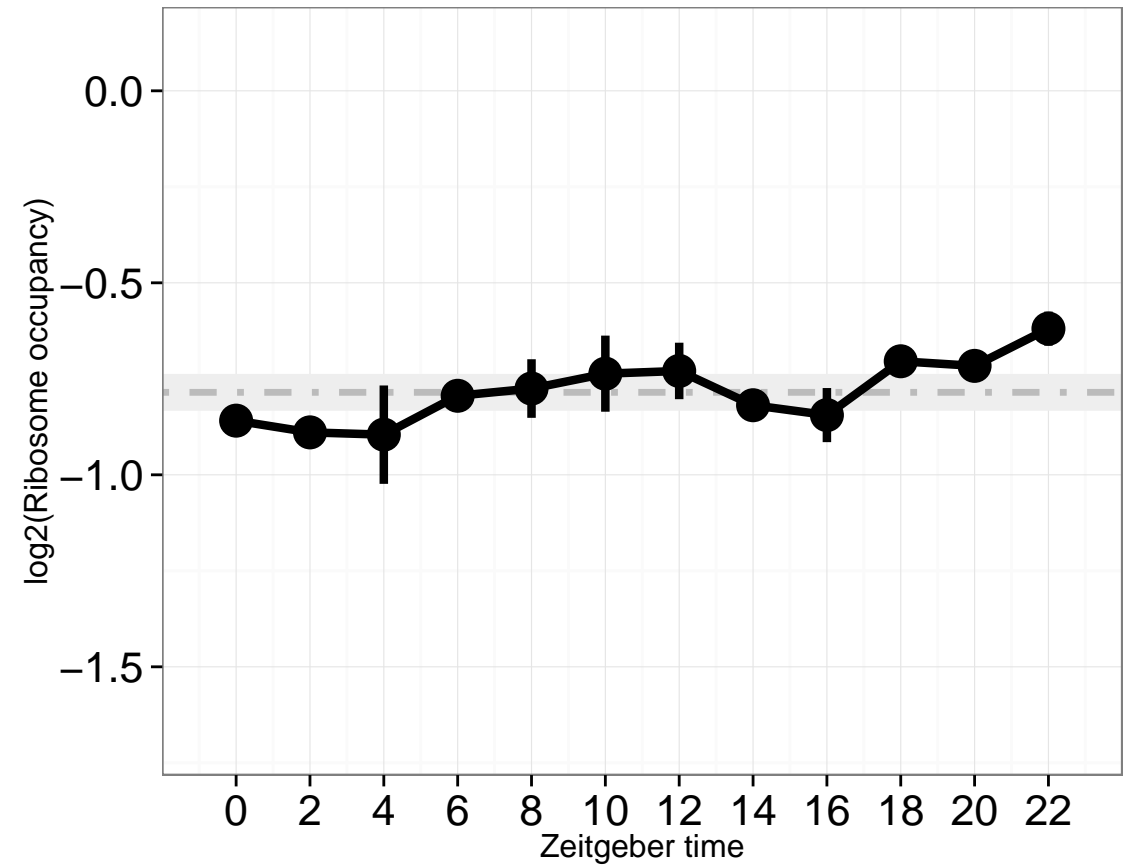

Supplement: Supplementary file 12272 [file 1]

## Hltf

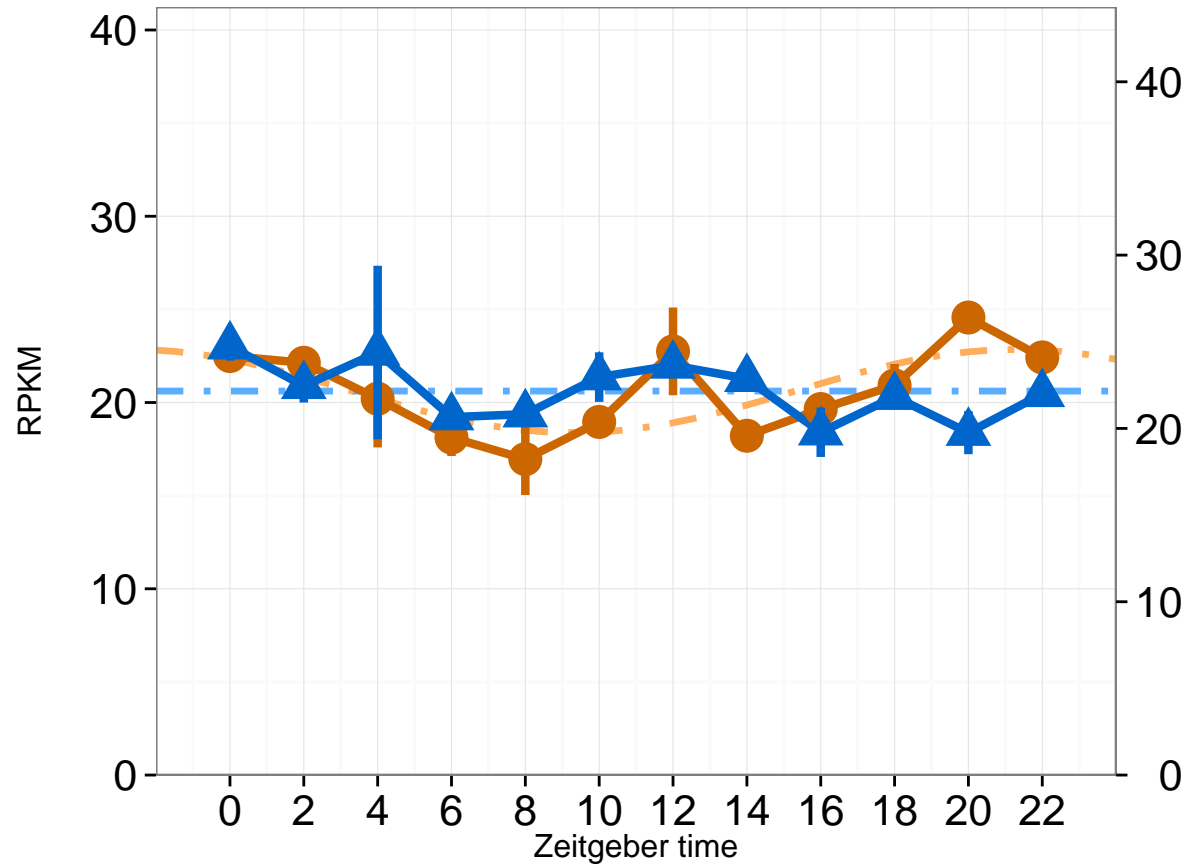

## Hltf

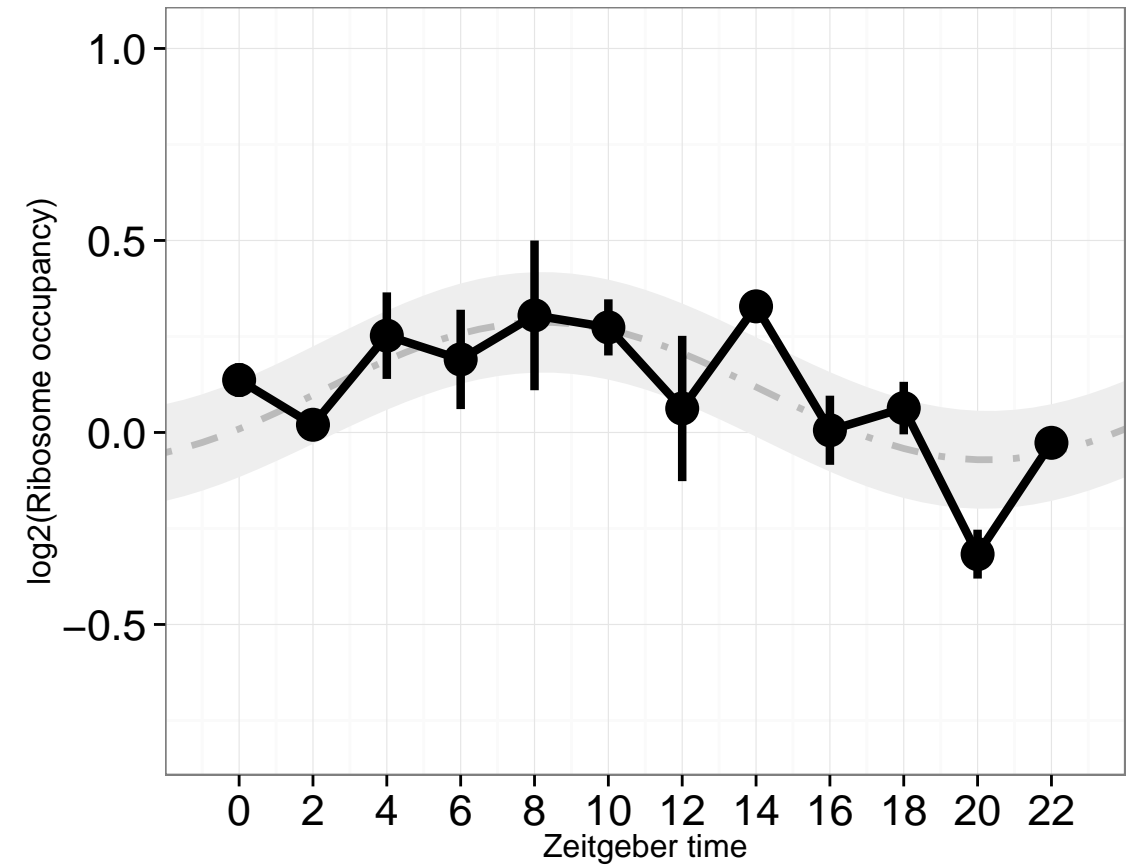

Supplement: Supplementary file 12273 [file 1]

# Dlg5

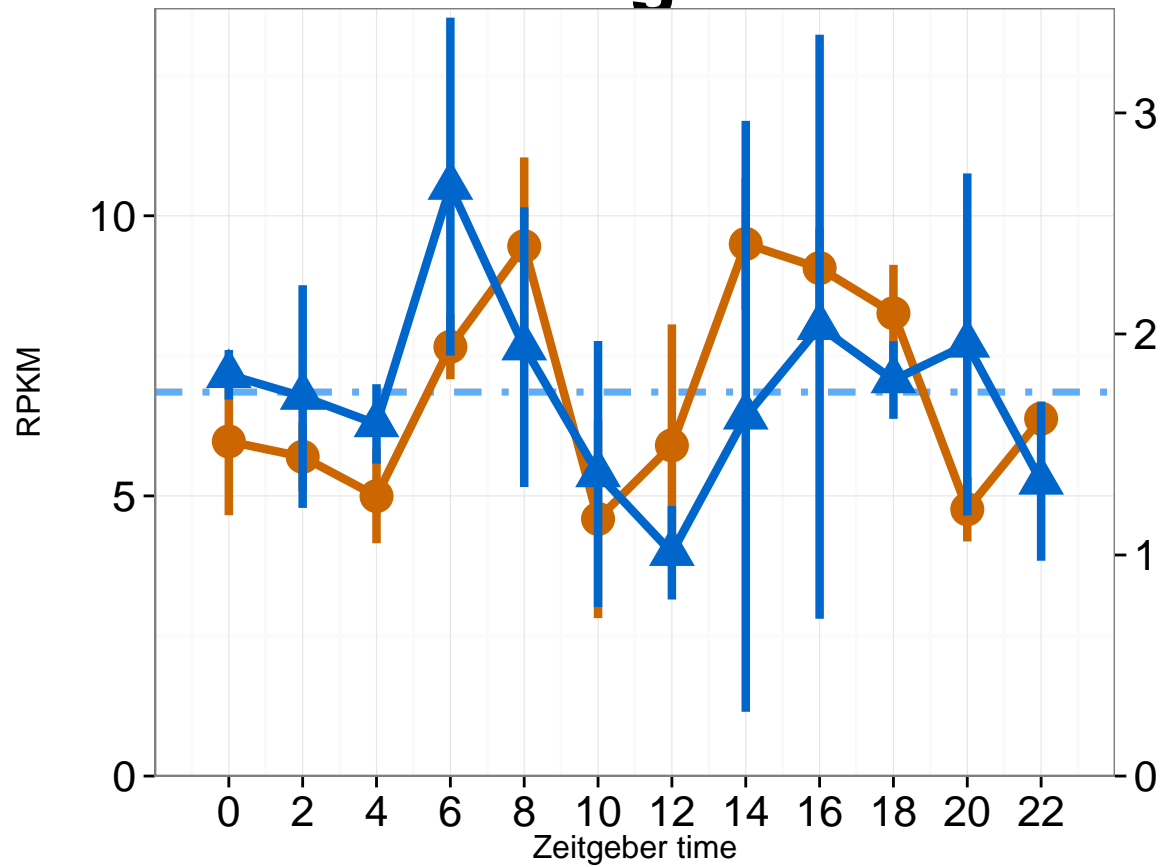

# Dlg5

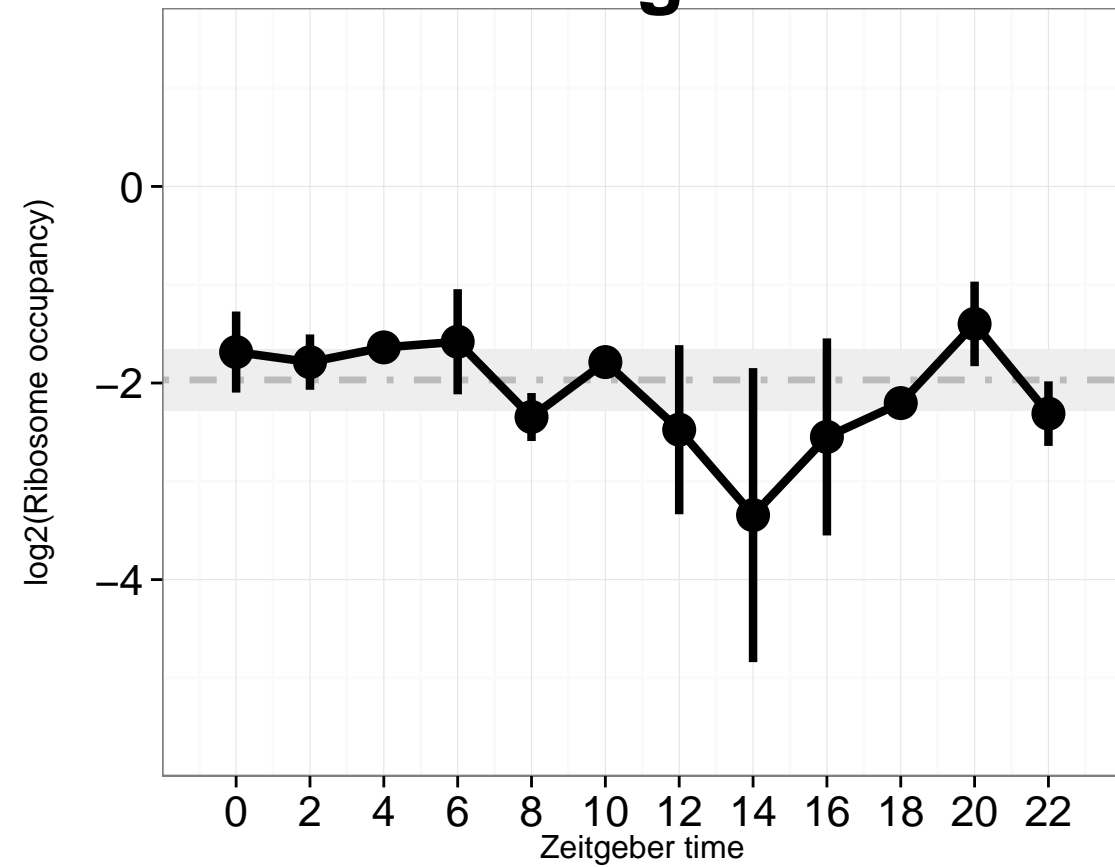

Supplement: Supplementary file 12274 [file 1]

## Pdlim7

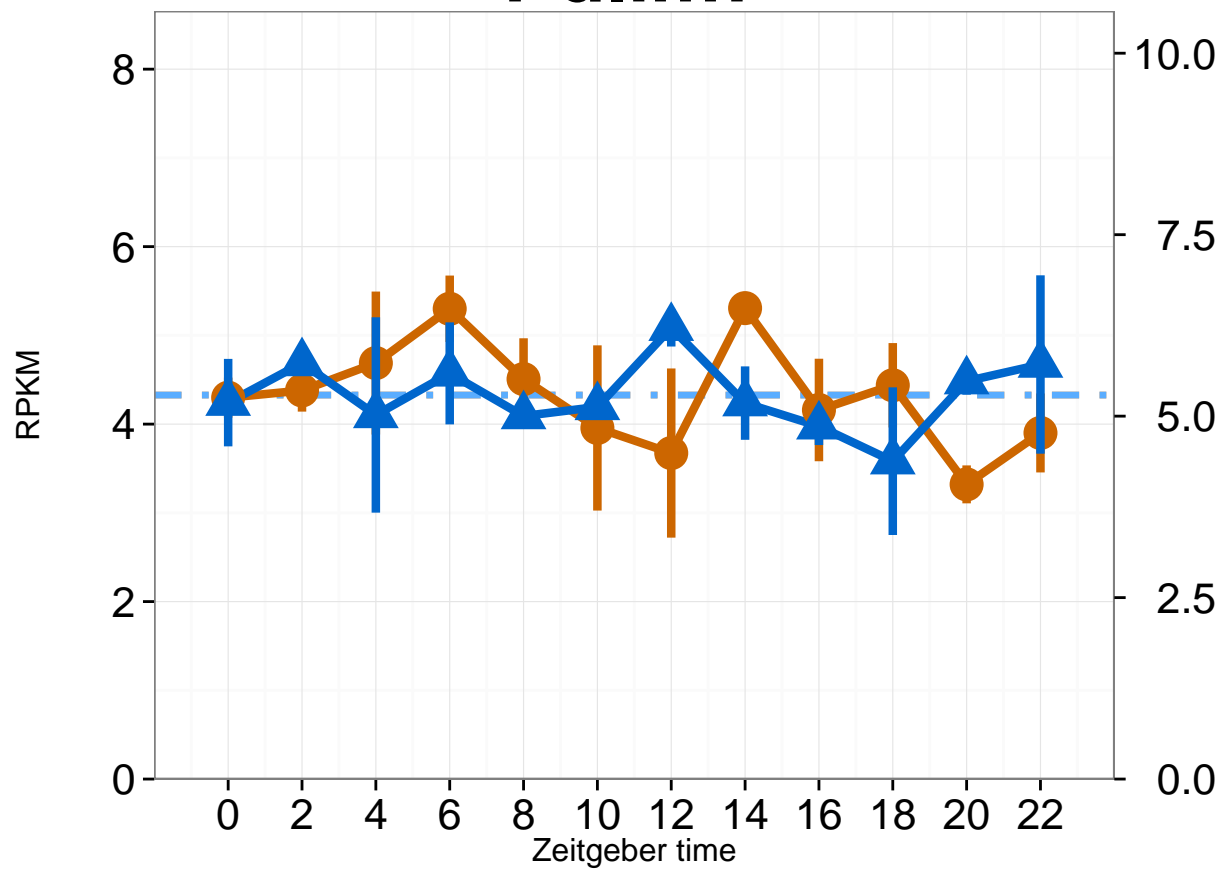

## Pdlim7

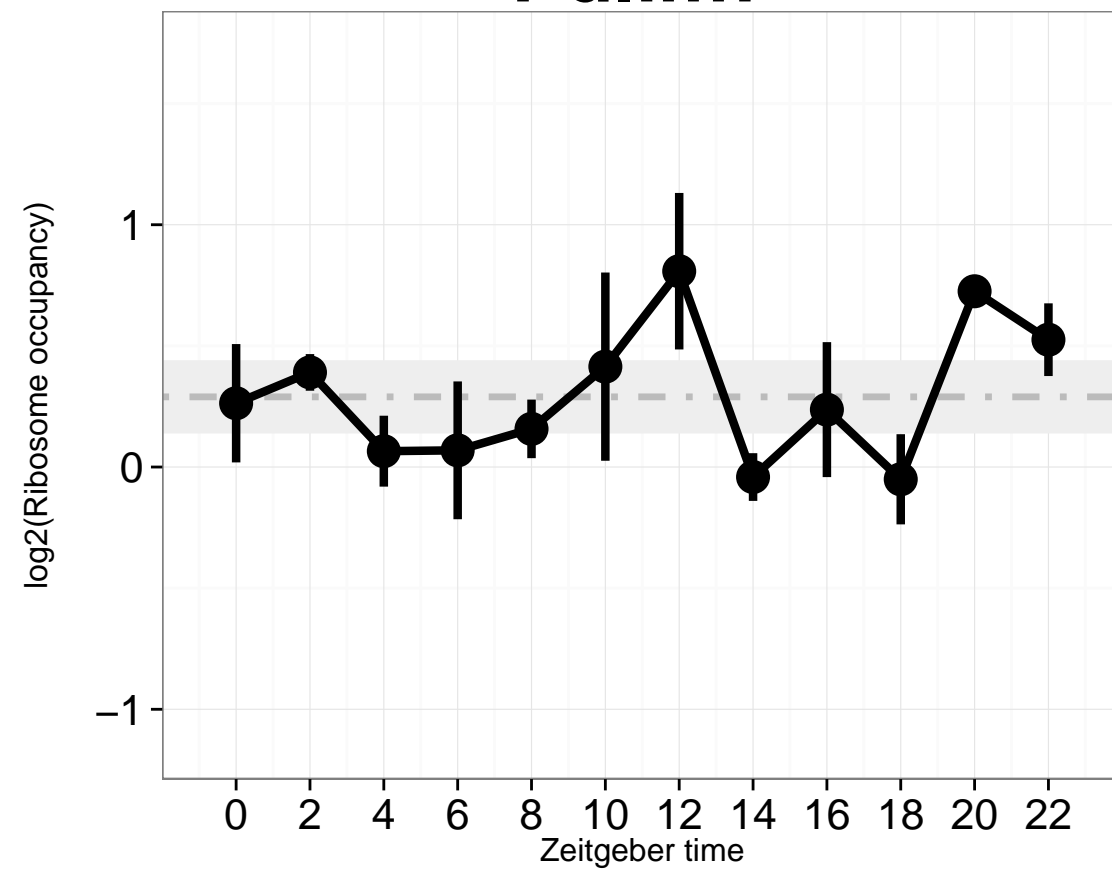

Supplement: Supplementary file 12275 [file 1]

# DnaI1

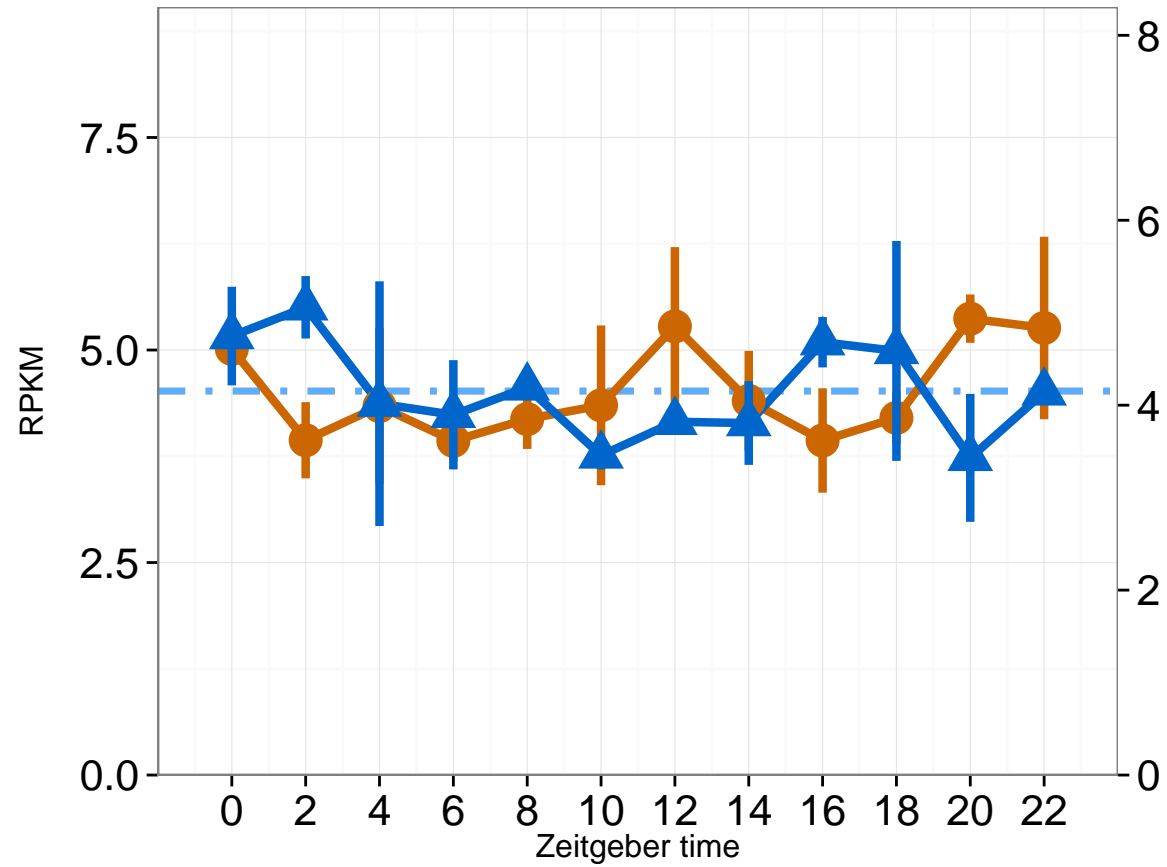

# DnaI1

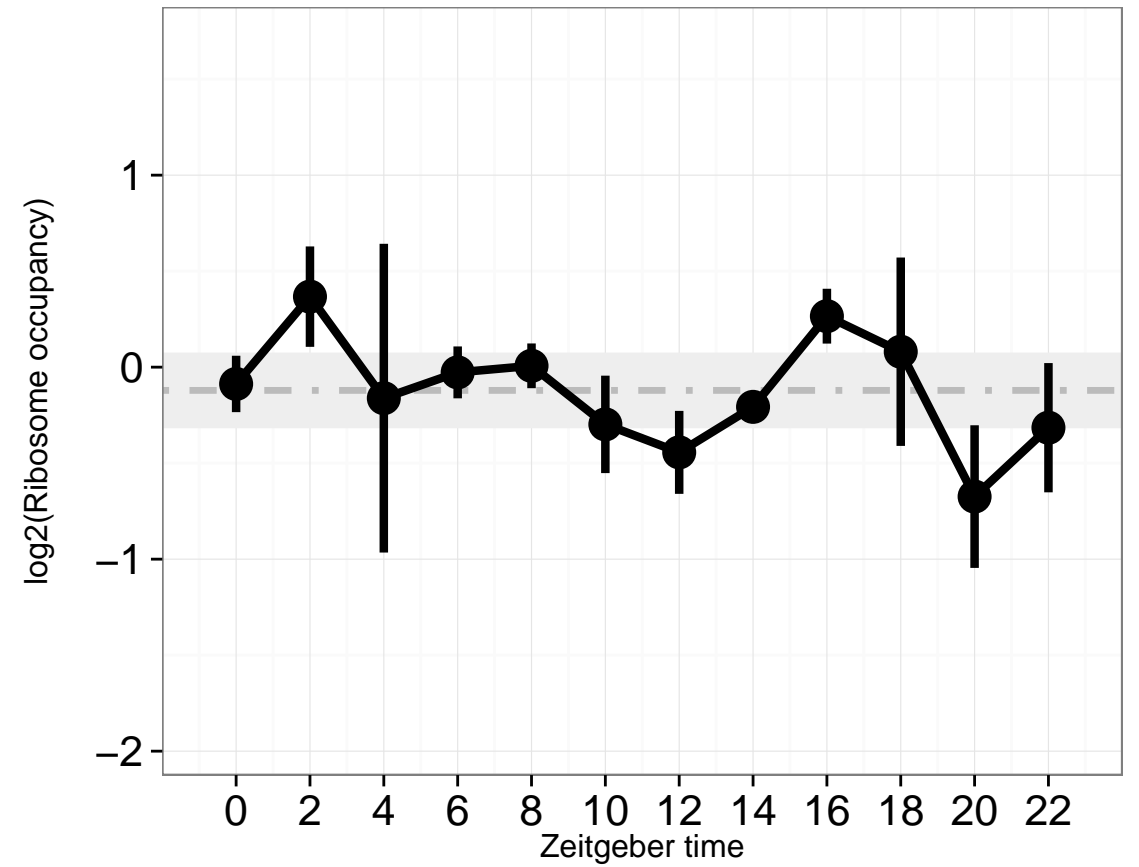

Supplement: Supplementary file 12276 [file 1]

## Gpr63

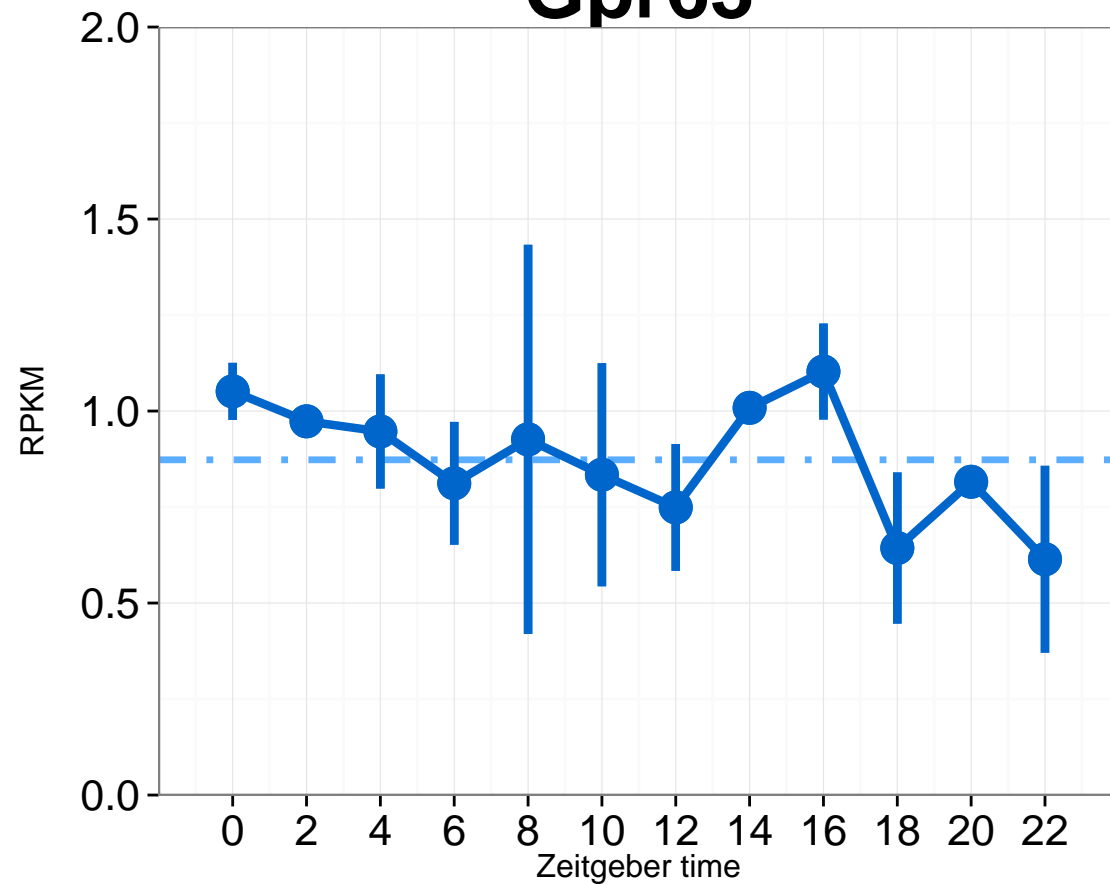

## Gpr63 log2(Ribosome occupancy

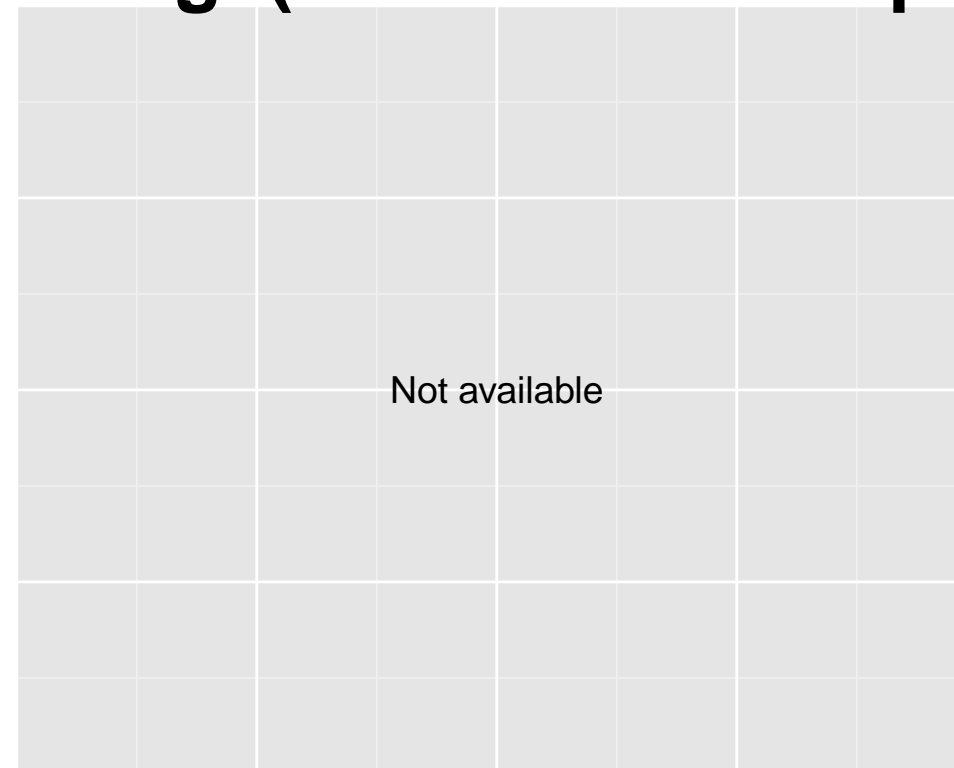

Supplement: Supplementary file 12277 [file 1]

## Plxnc1

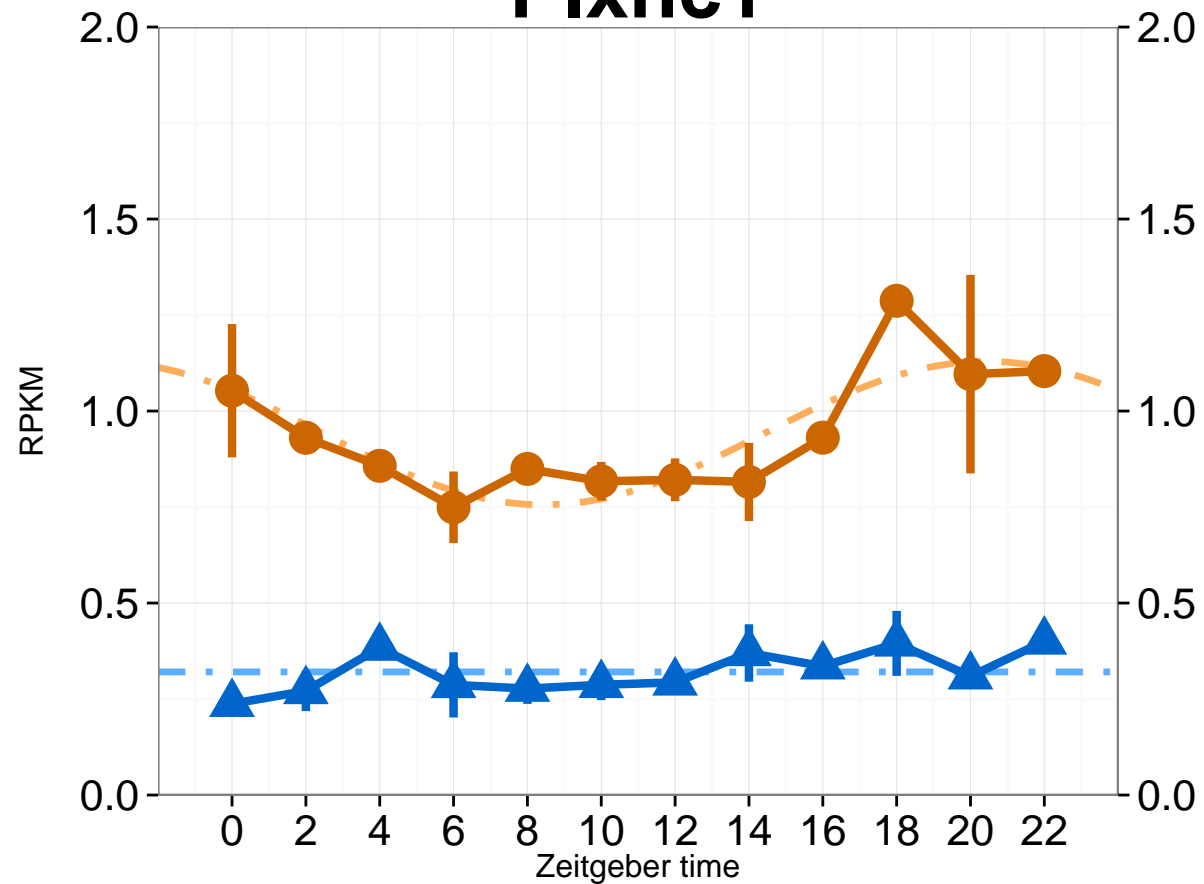

## Plxnc1

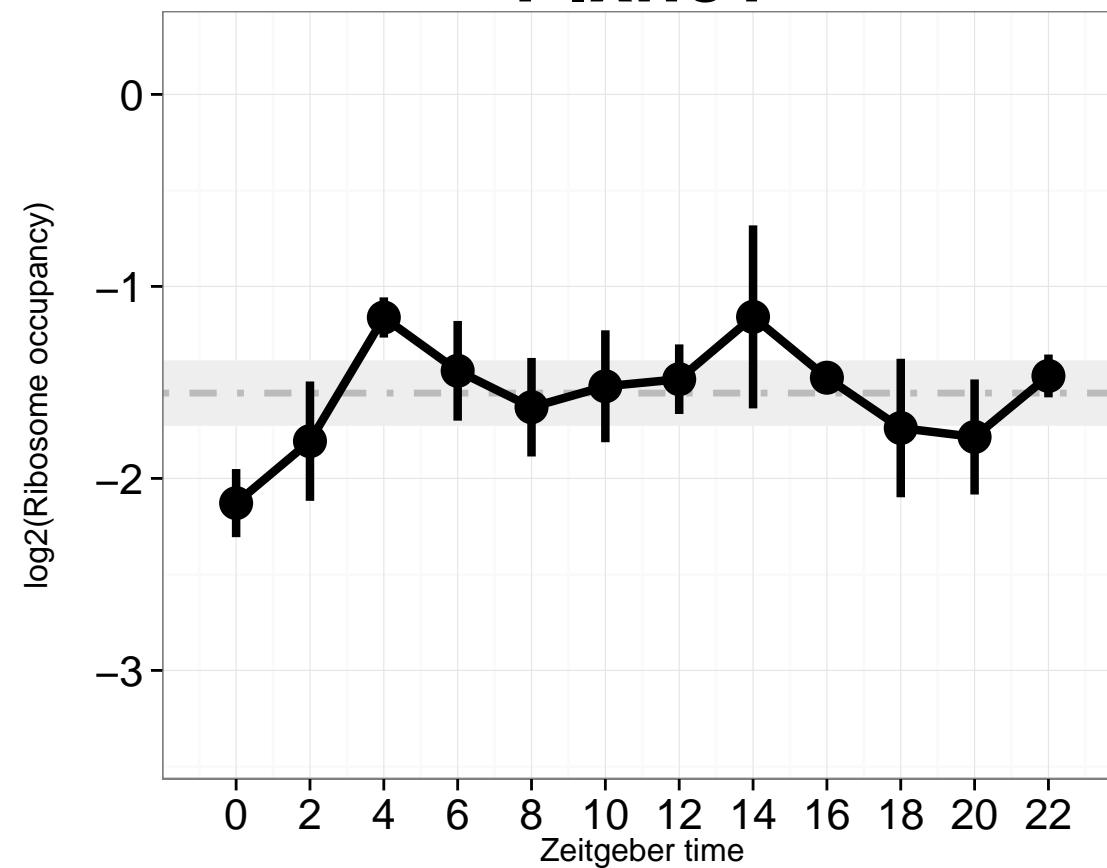

Supplement: Supplementary file 12278 [file 1]

## Dedd

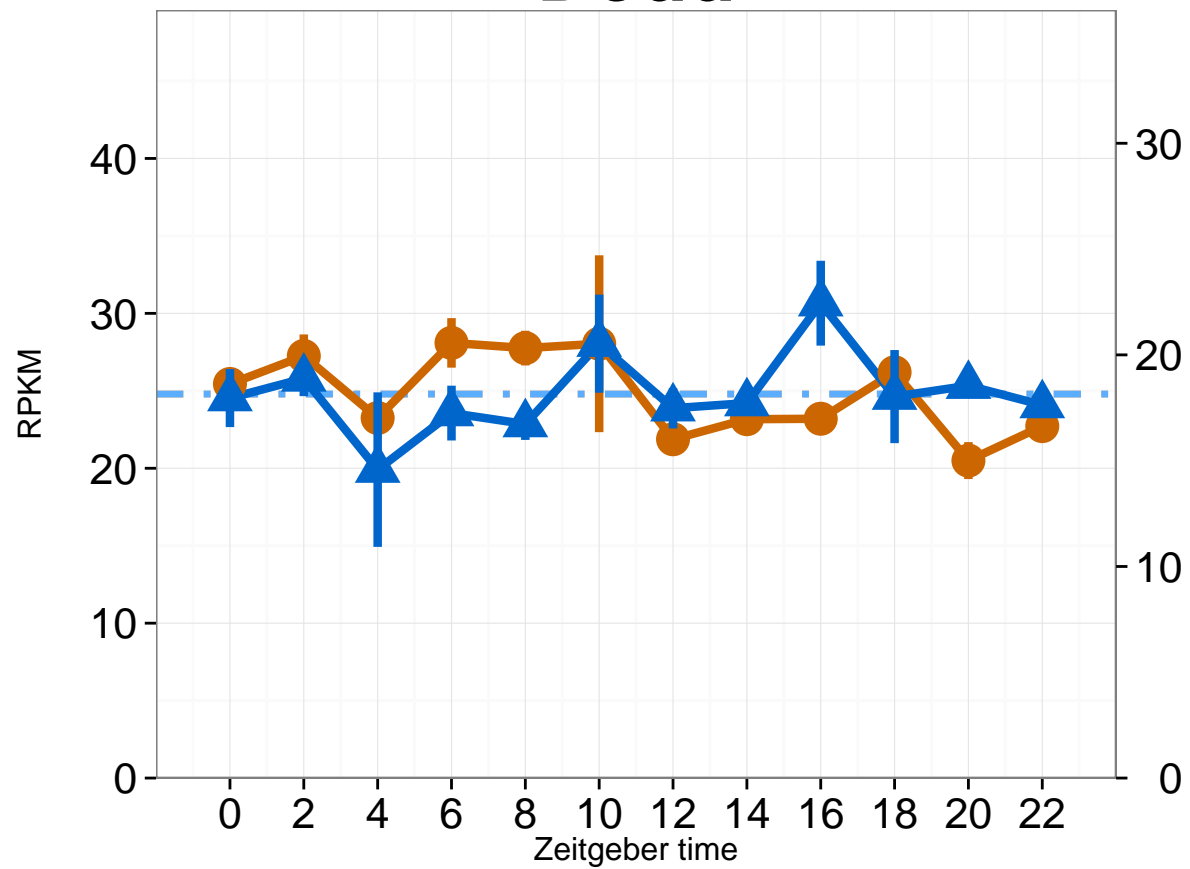

## Dedd

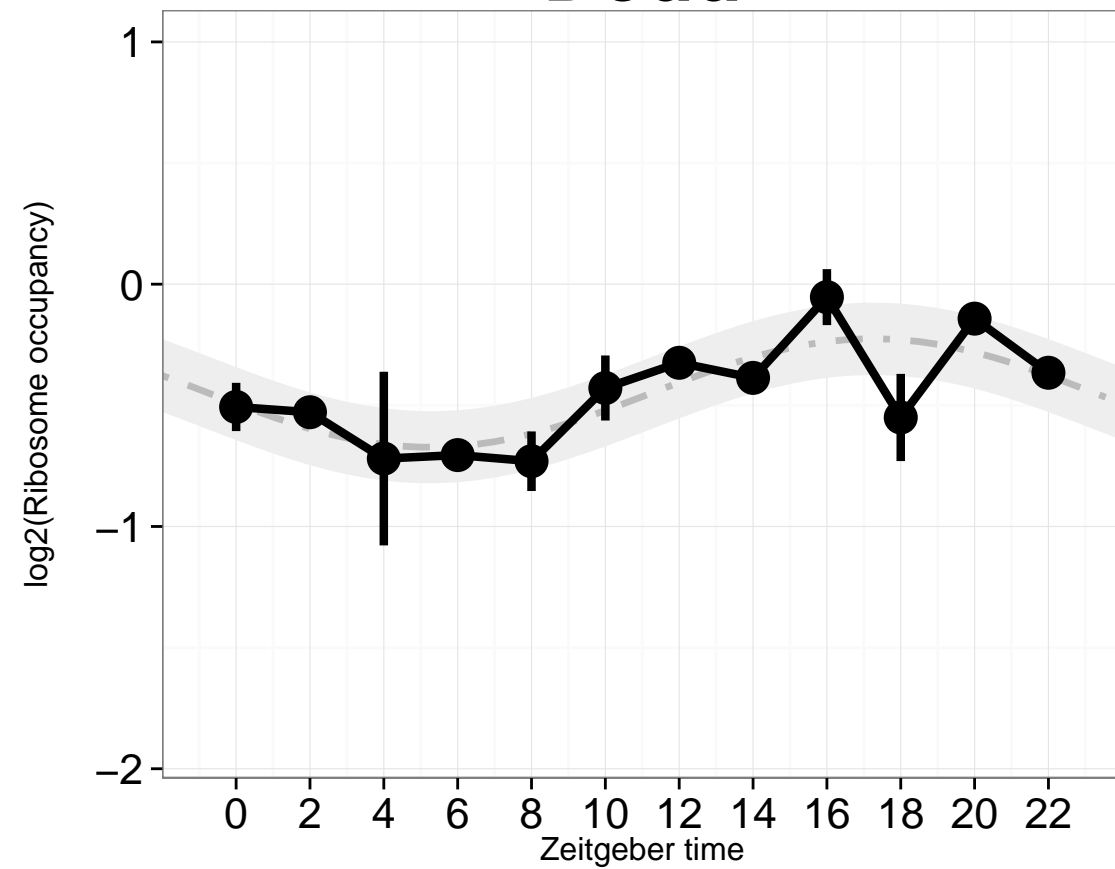

Supplement: Supplementary file 12279 [file 1]

## Rbks

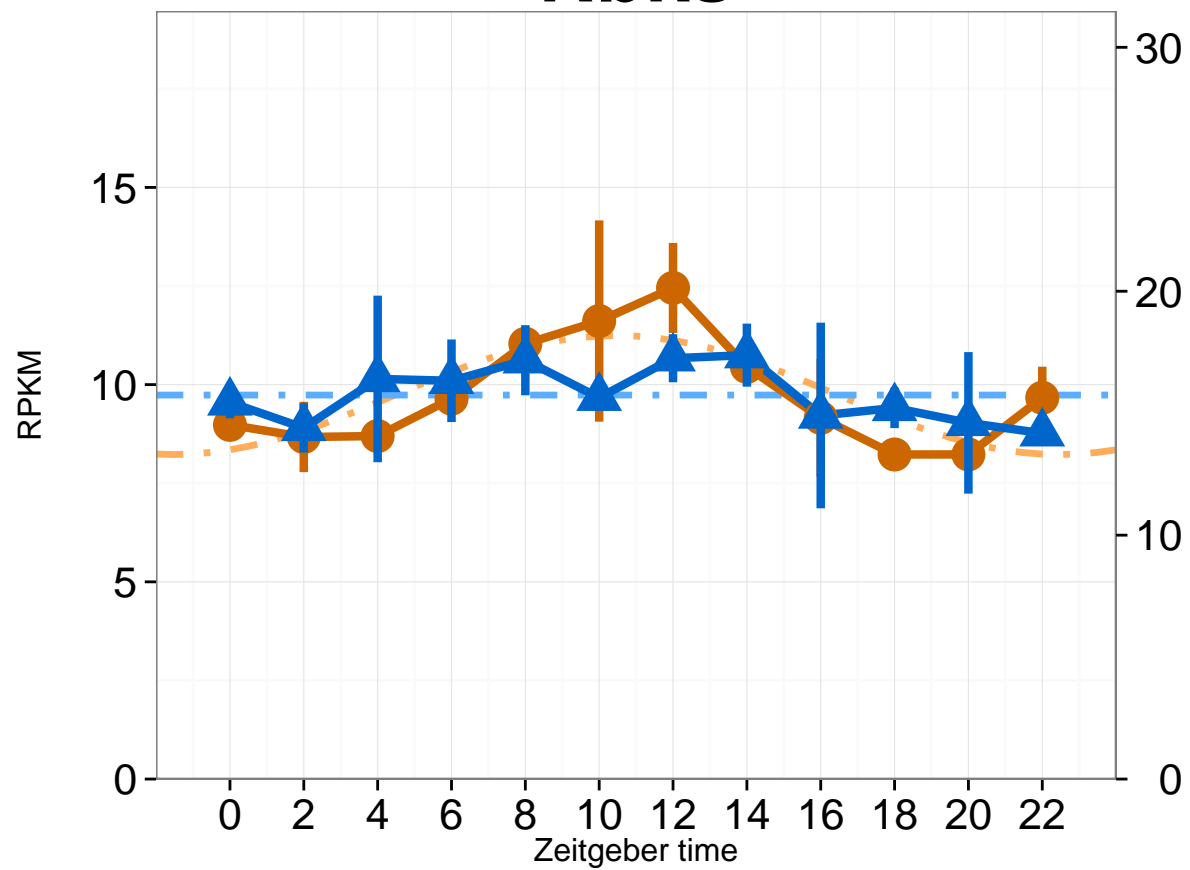

## Rbks

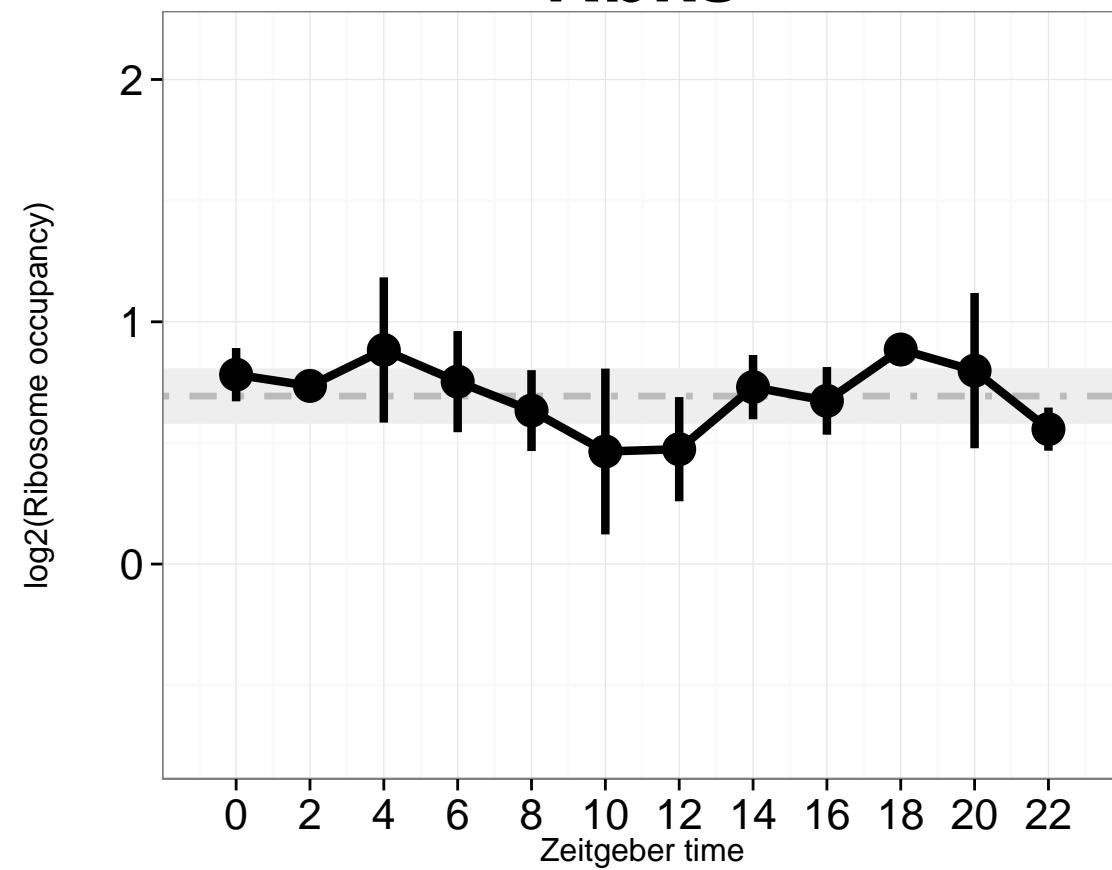

Supplement: Supplementary file 12280 [file 1]

## Vwa5a

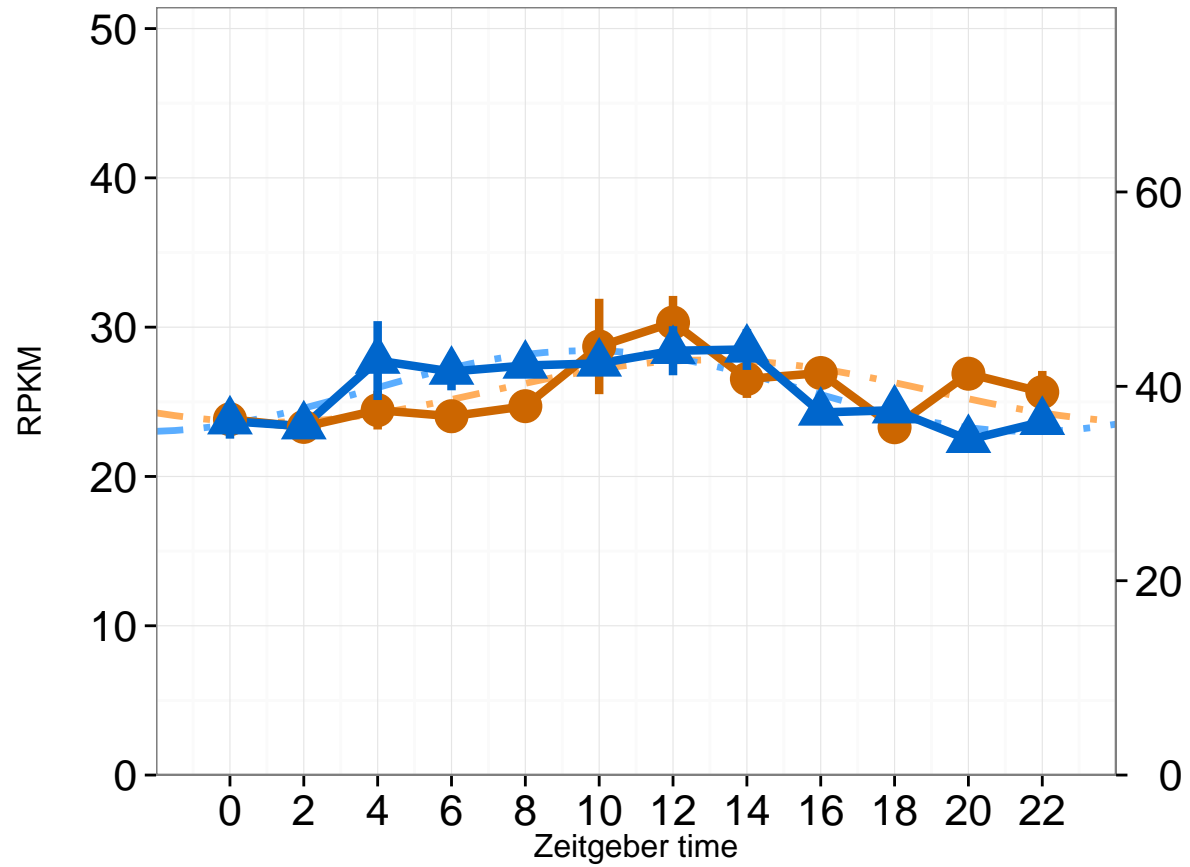

## Vwa5a

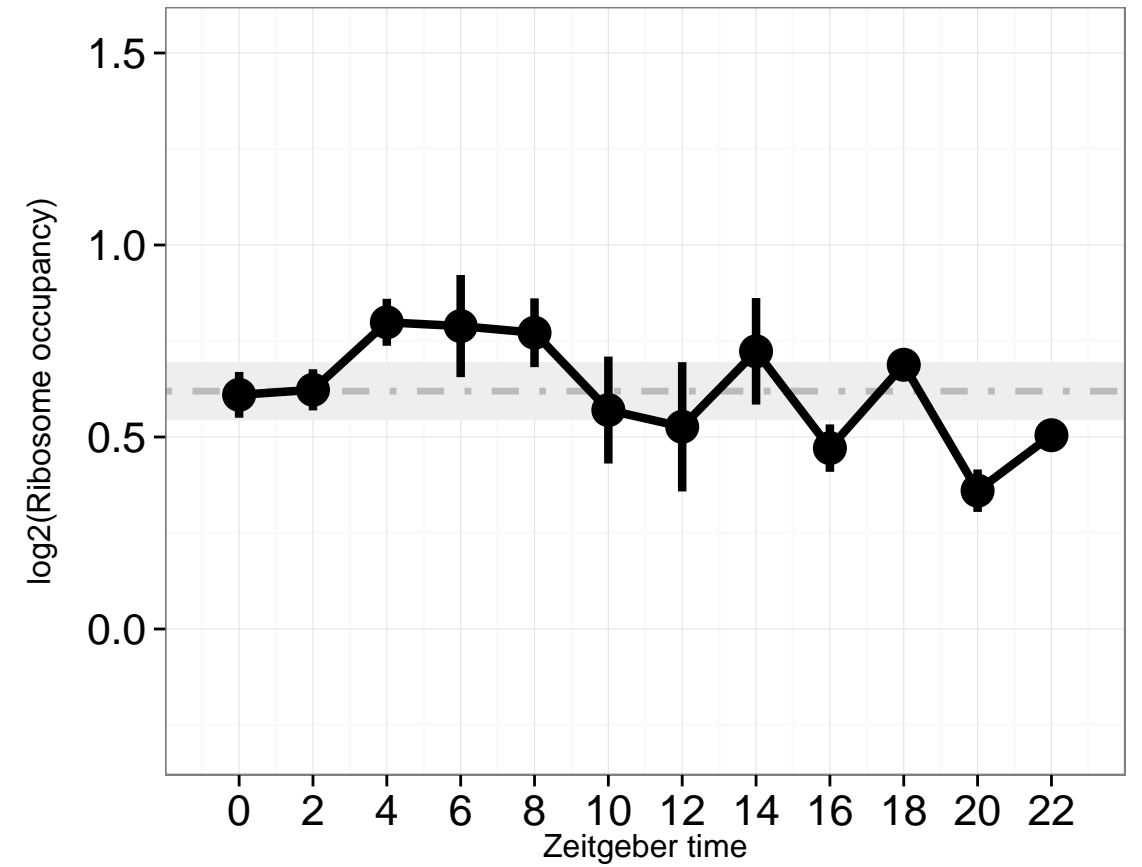

Supplement: Supplementary file 12281 [file 1]

mt-Nd5

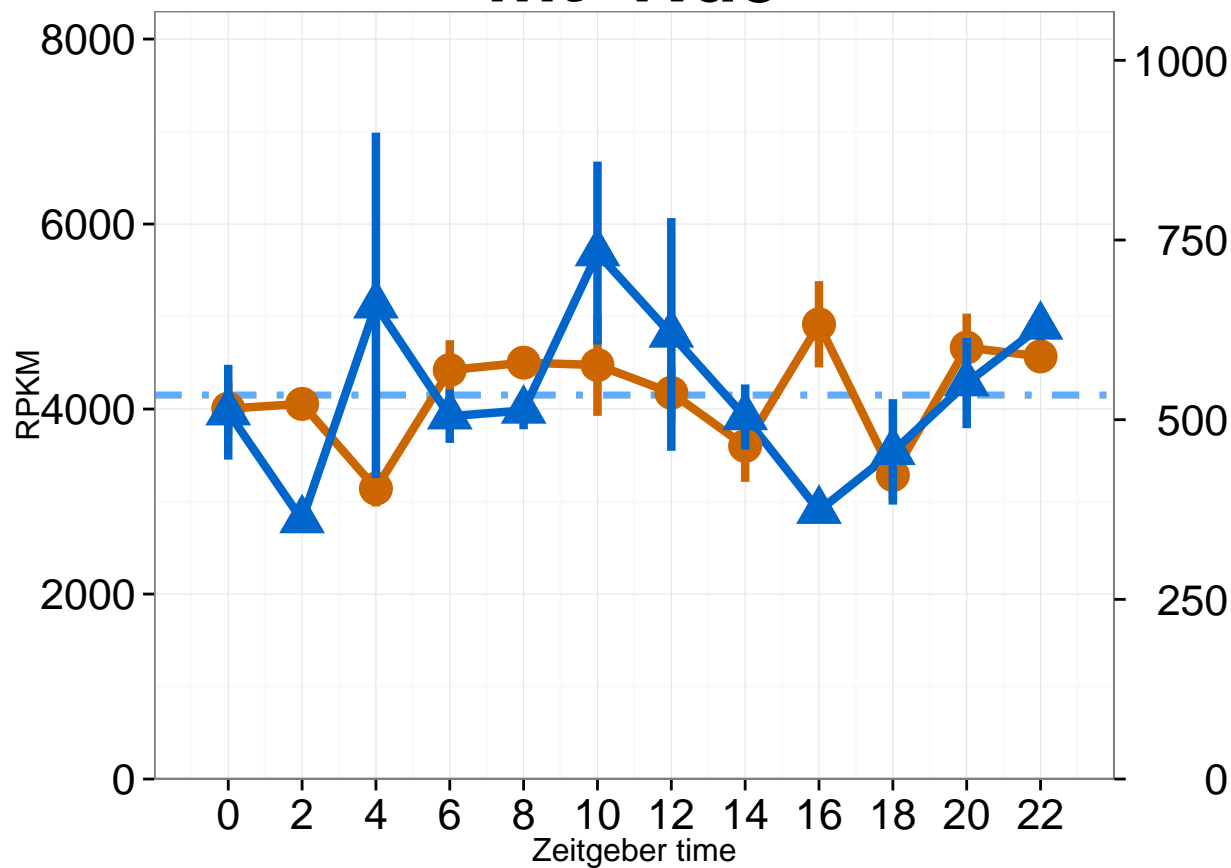

mt-Nd5

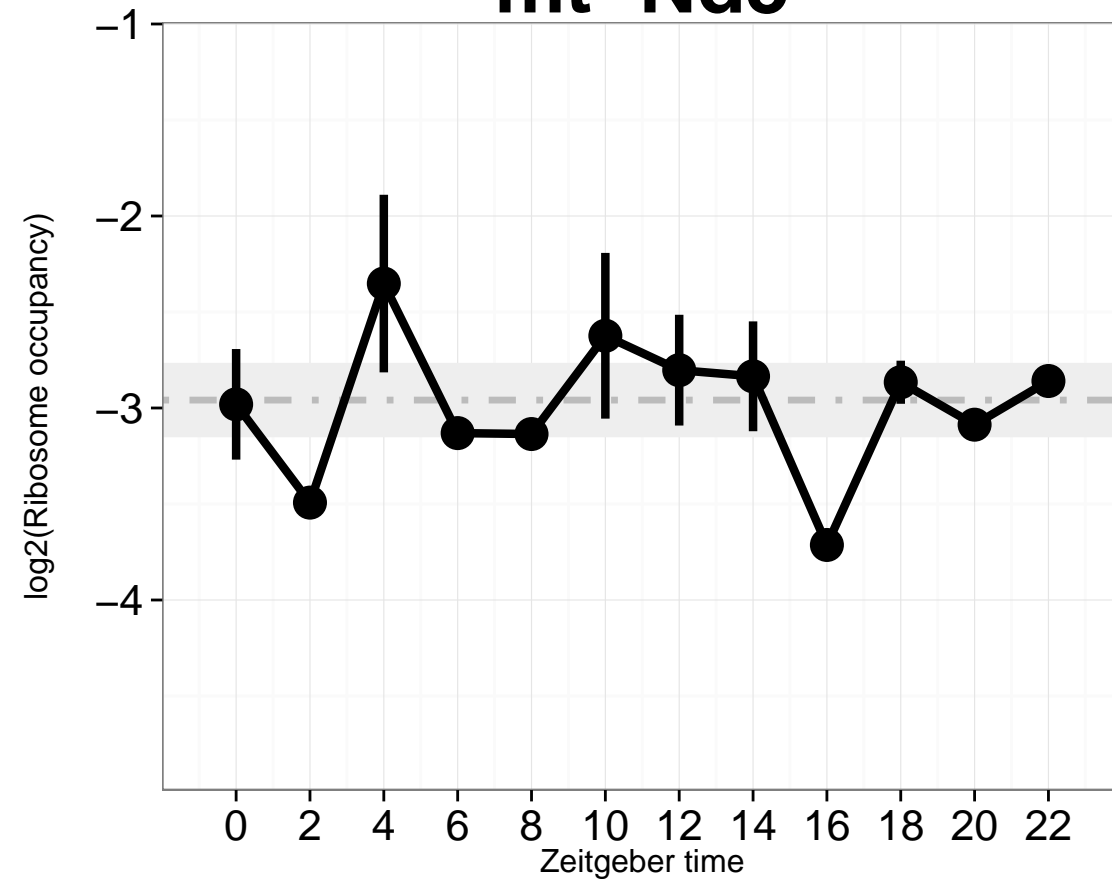

Supplement: Supplementary file 12282 [file 1]

## Sav1

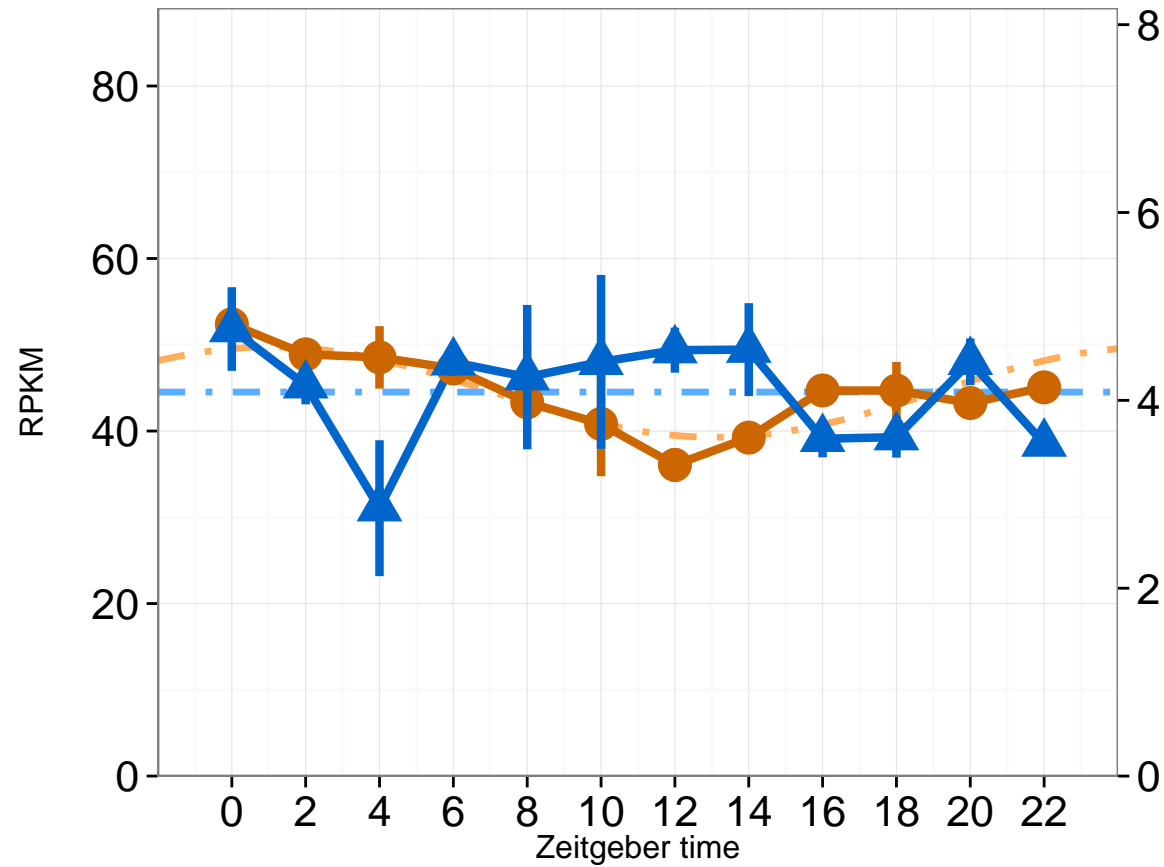

## Sav1

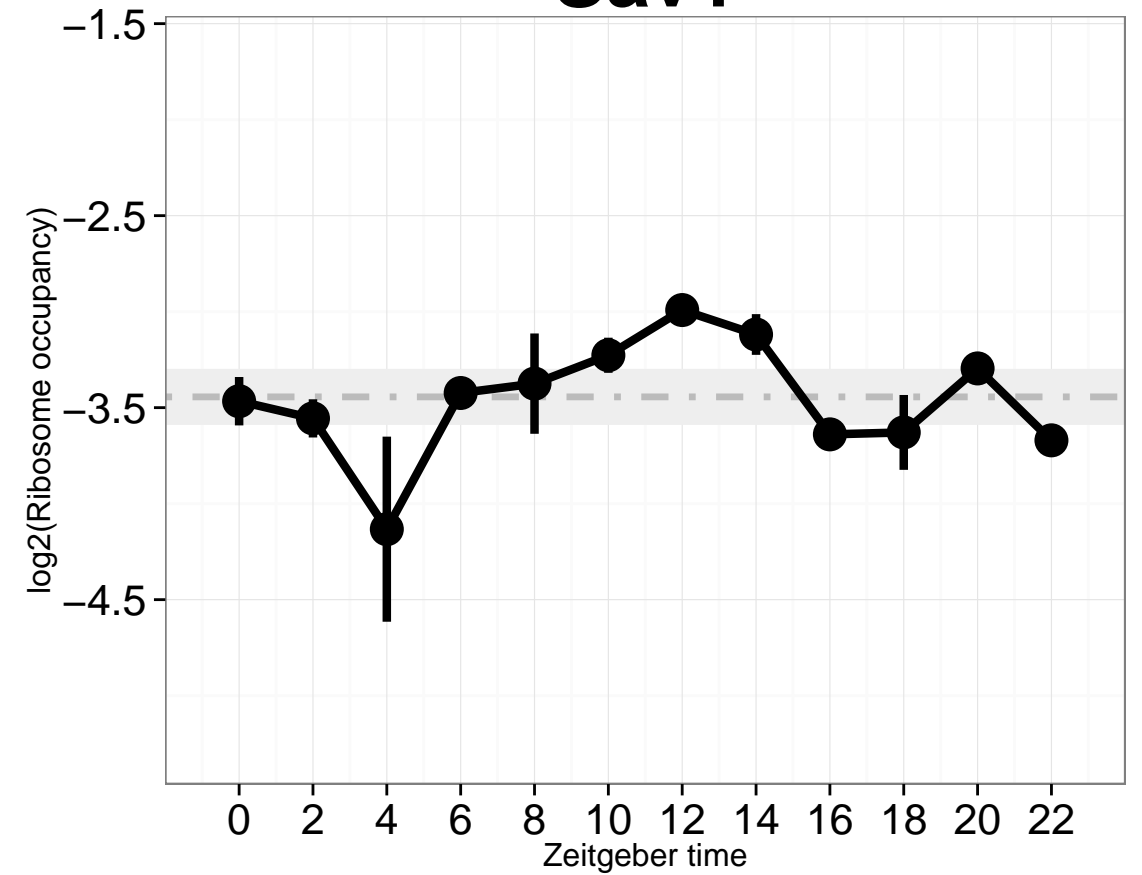

Supplement: Supplementary file 12283 [file 1]

## Nsd1

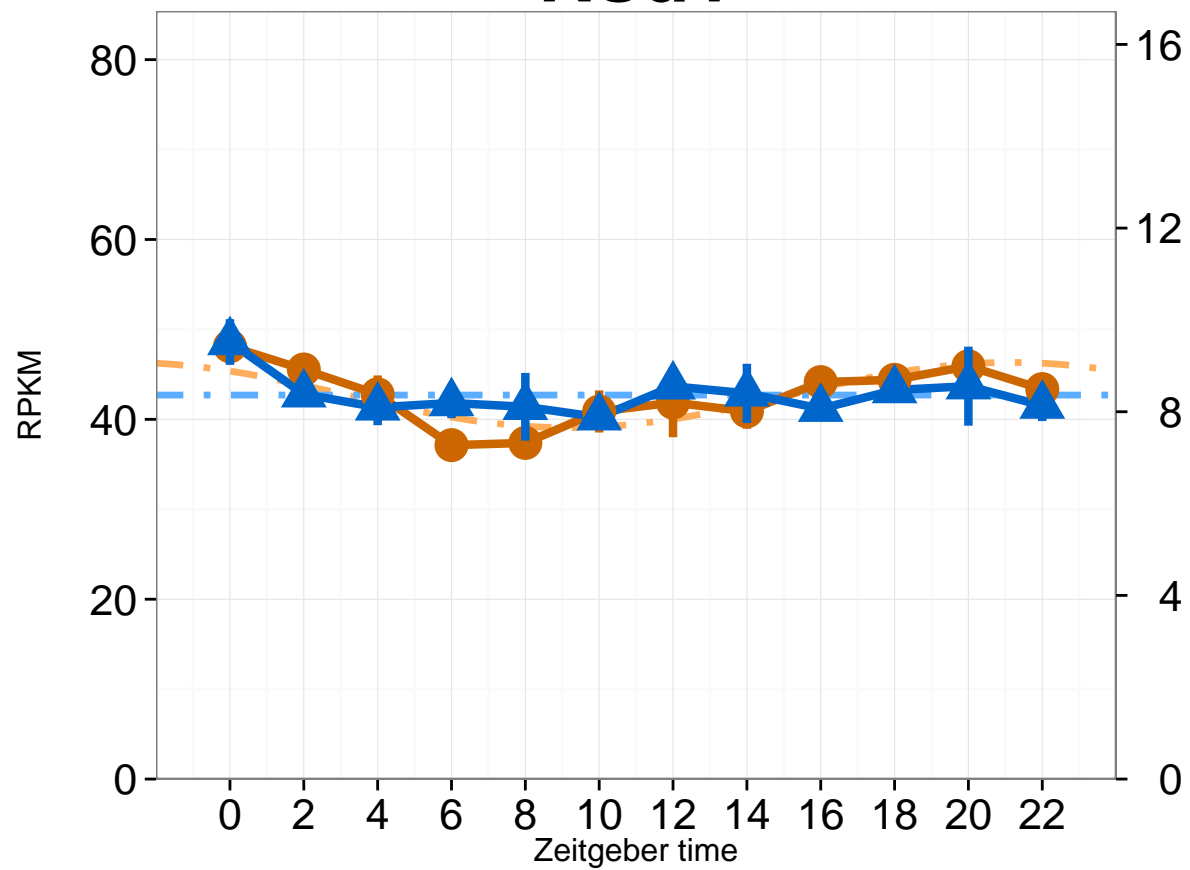

## Nsd1

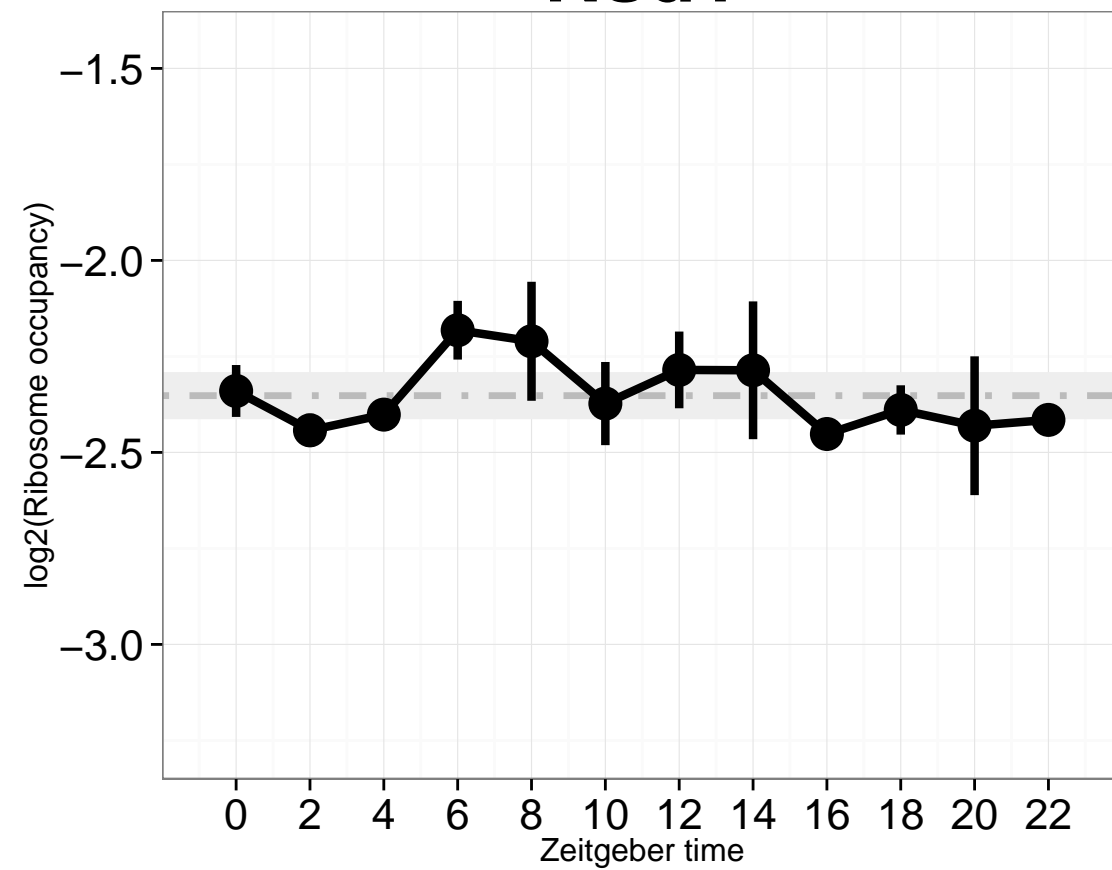

Supplement: Supplementary file 12284 [file 1]

# Sox7

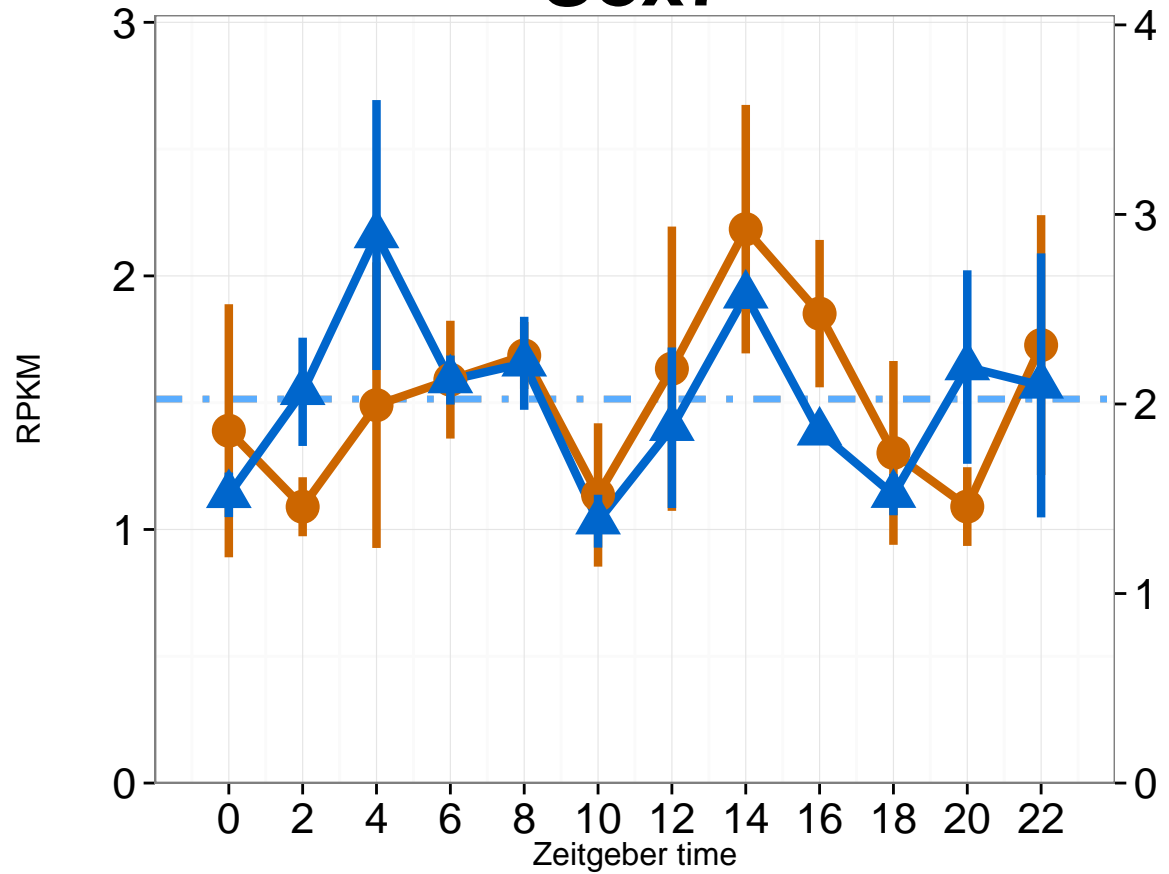

# Sox7

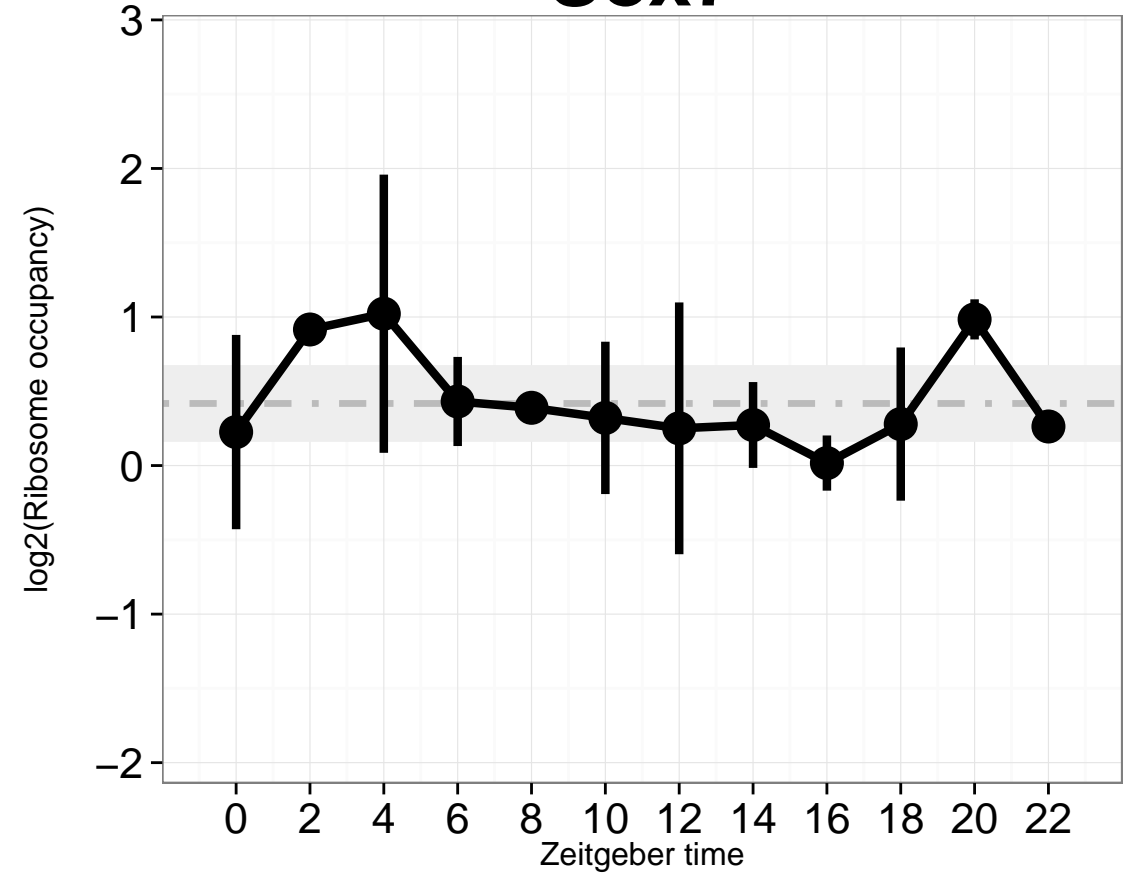

Supplement: Supplementary file 12285 [file 1]

## Dach1

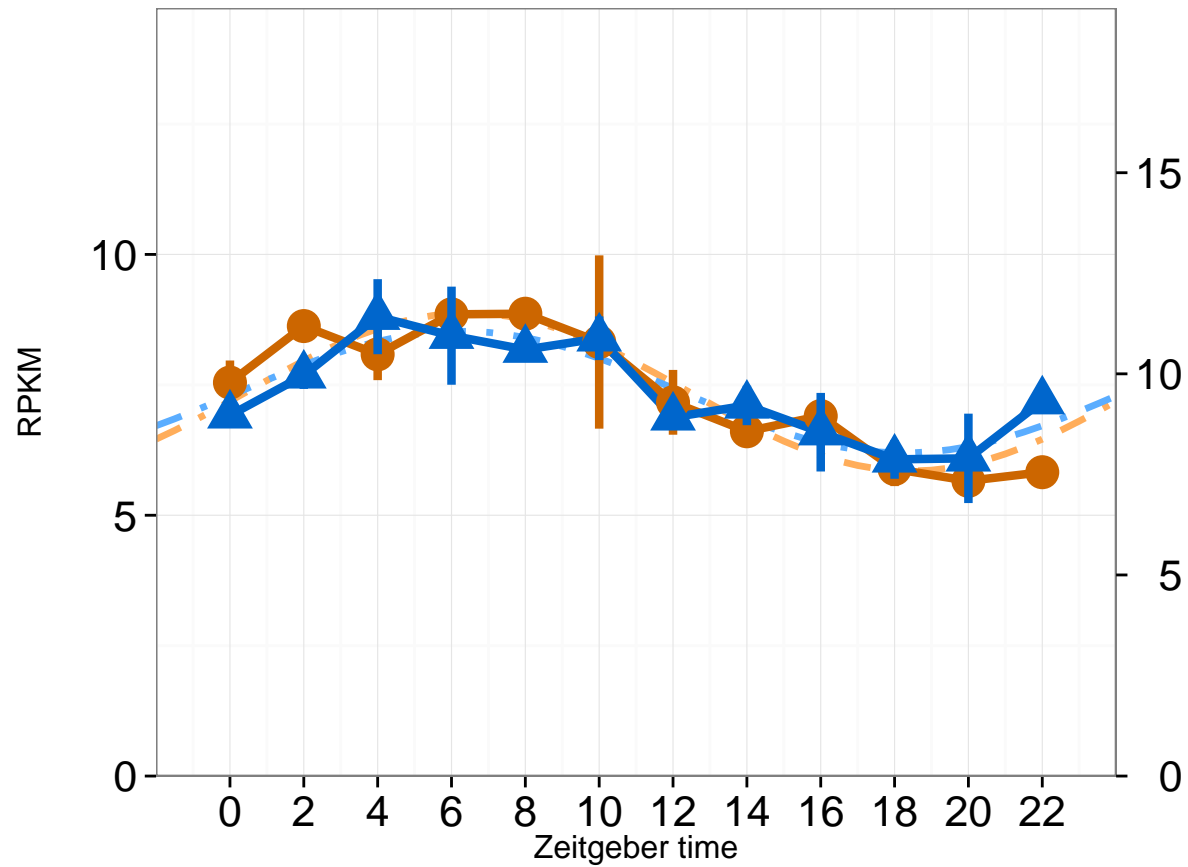

## Dach1

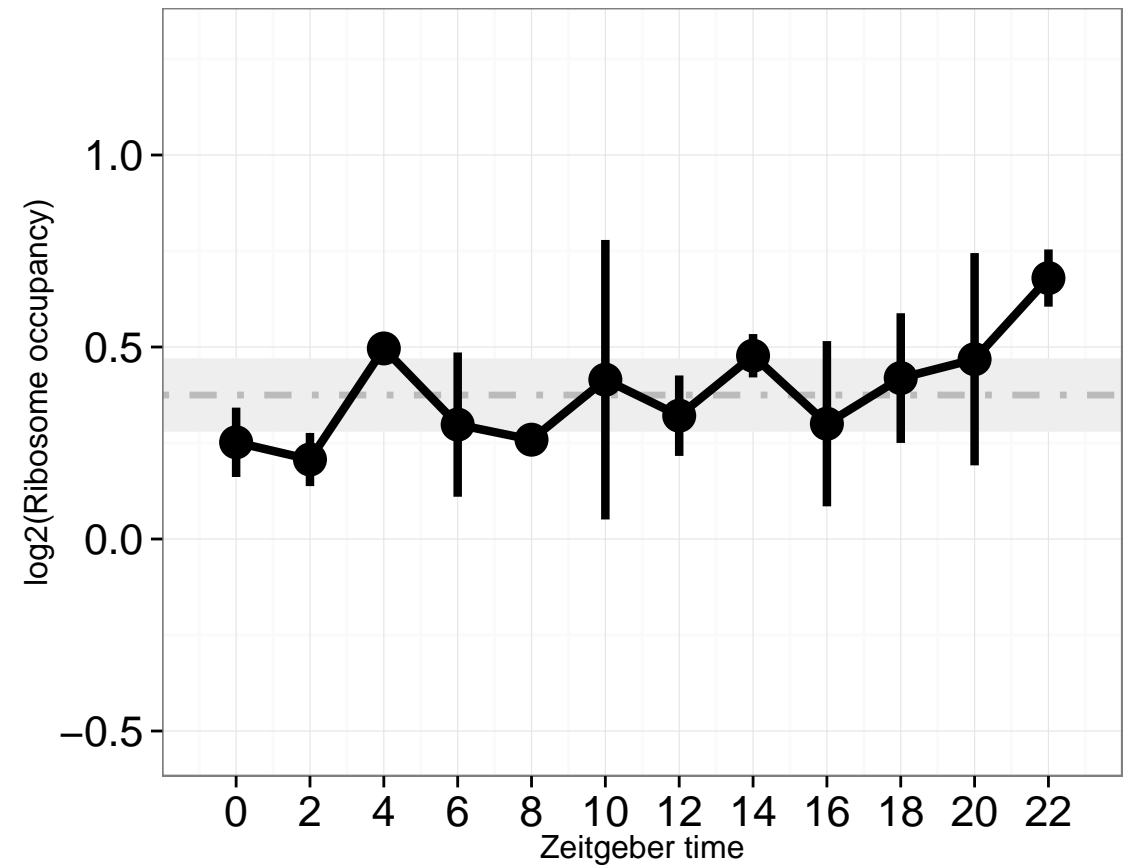

Supplement: Supplementary file 12286 [file 1]

**Tbc1d31**

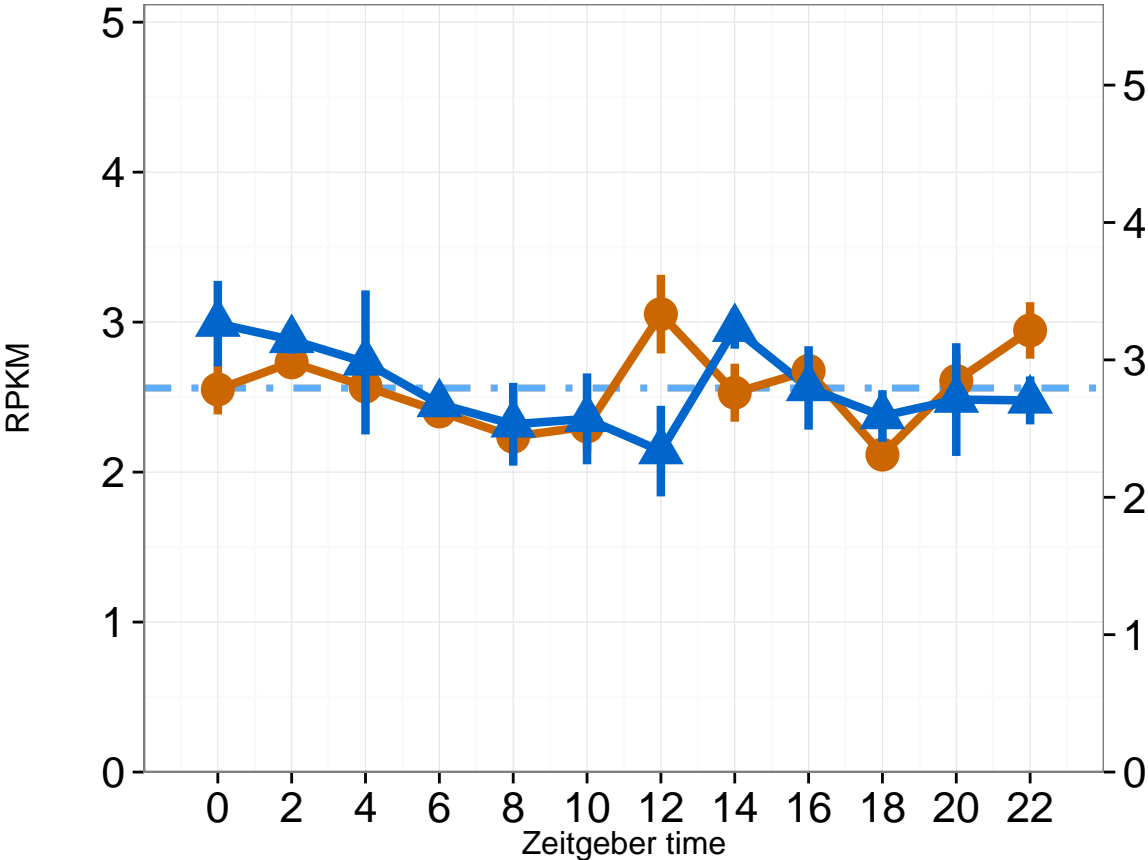

**Tbc1d31**

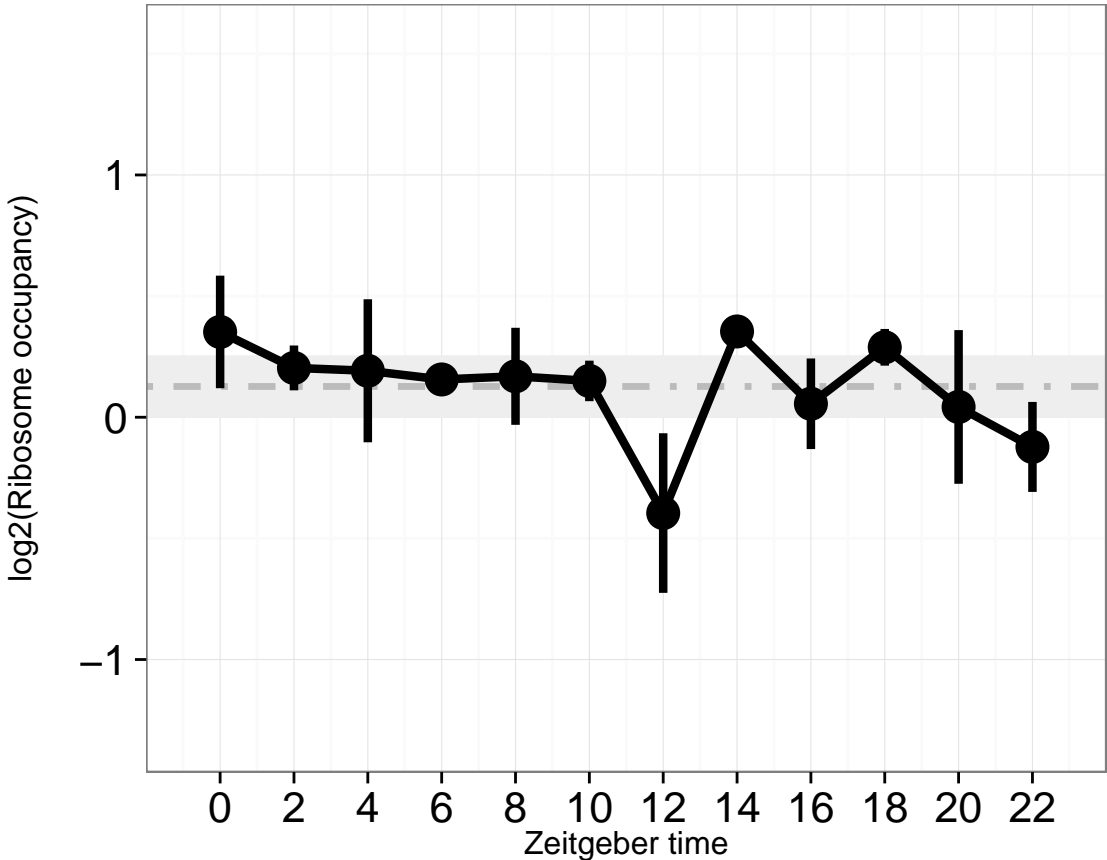

Supplement: Supplementary file 12287 [file 1]

# Hspa9

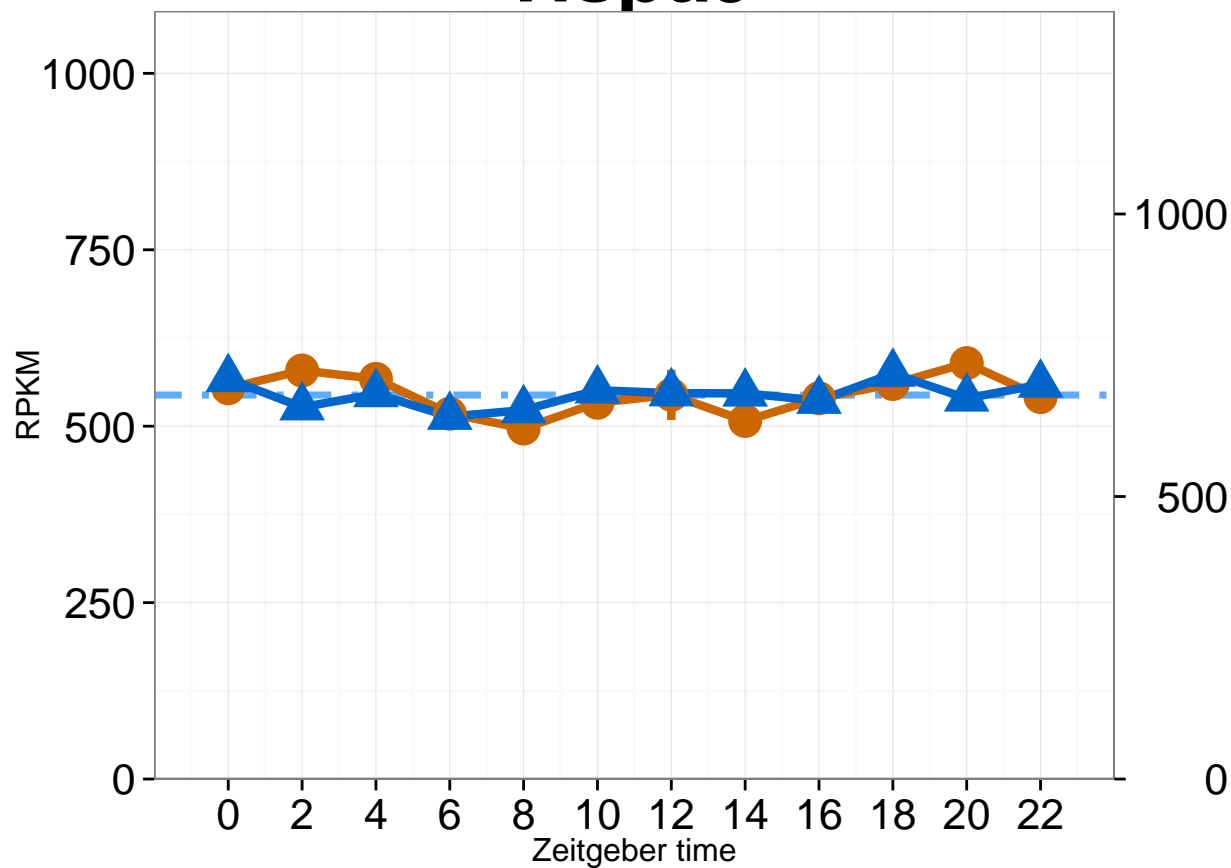

# Hspa9

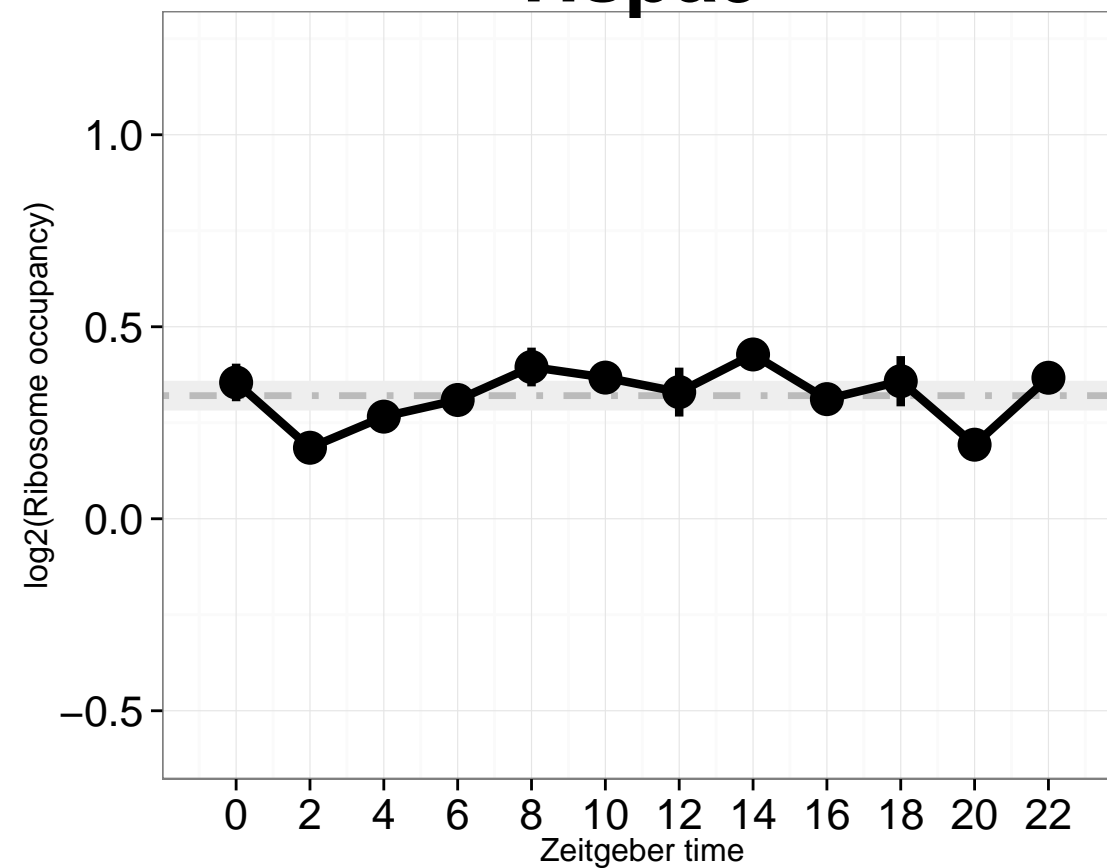

Supplement: Supplementary file 12288 [file 1]

## Gli3

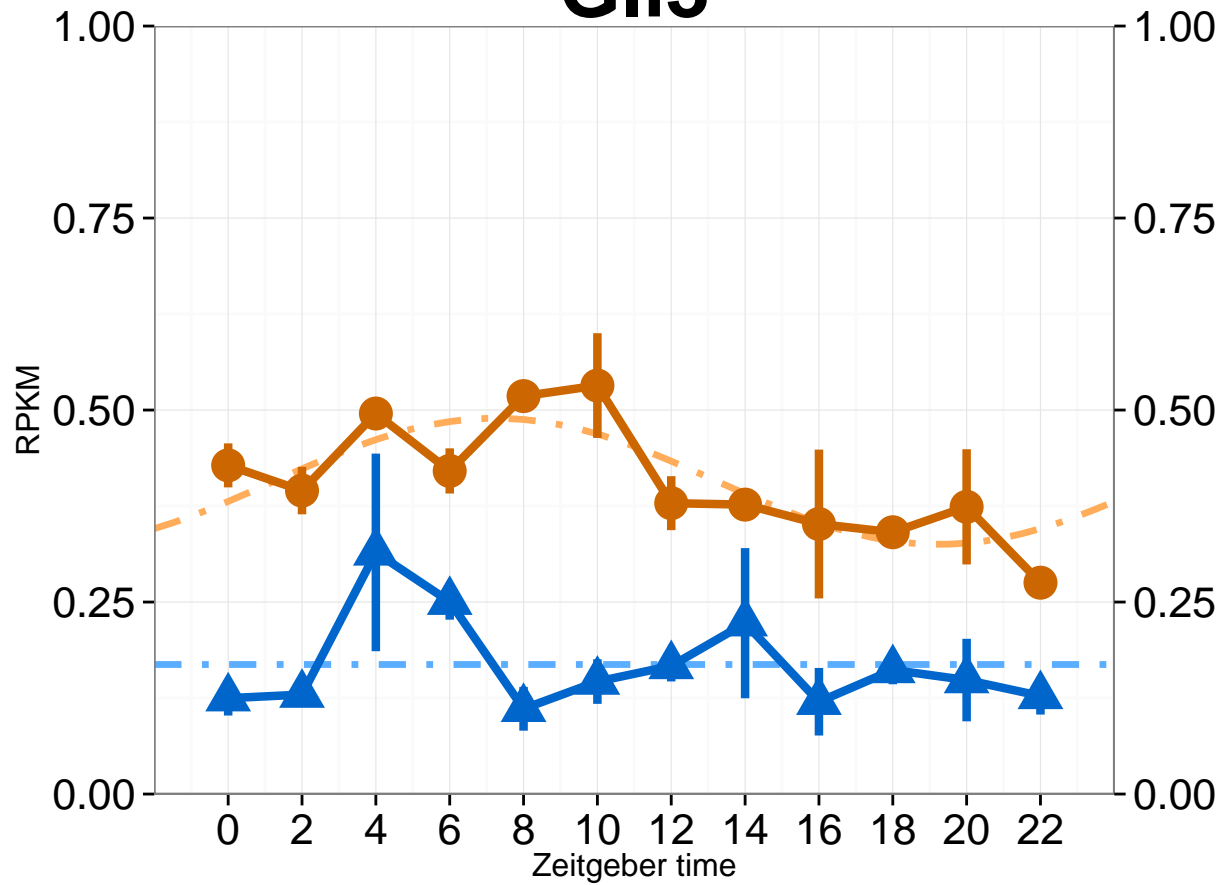

## Gli3

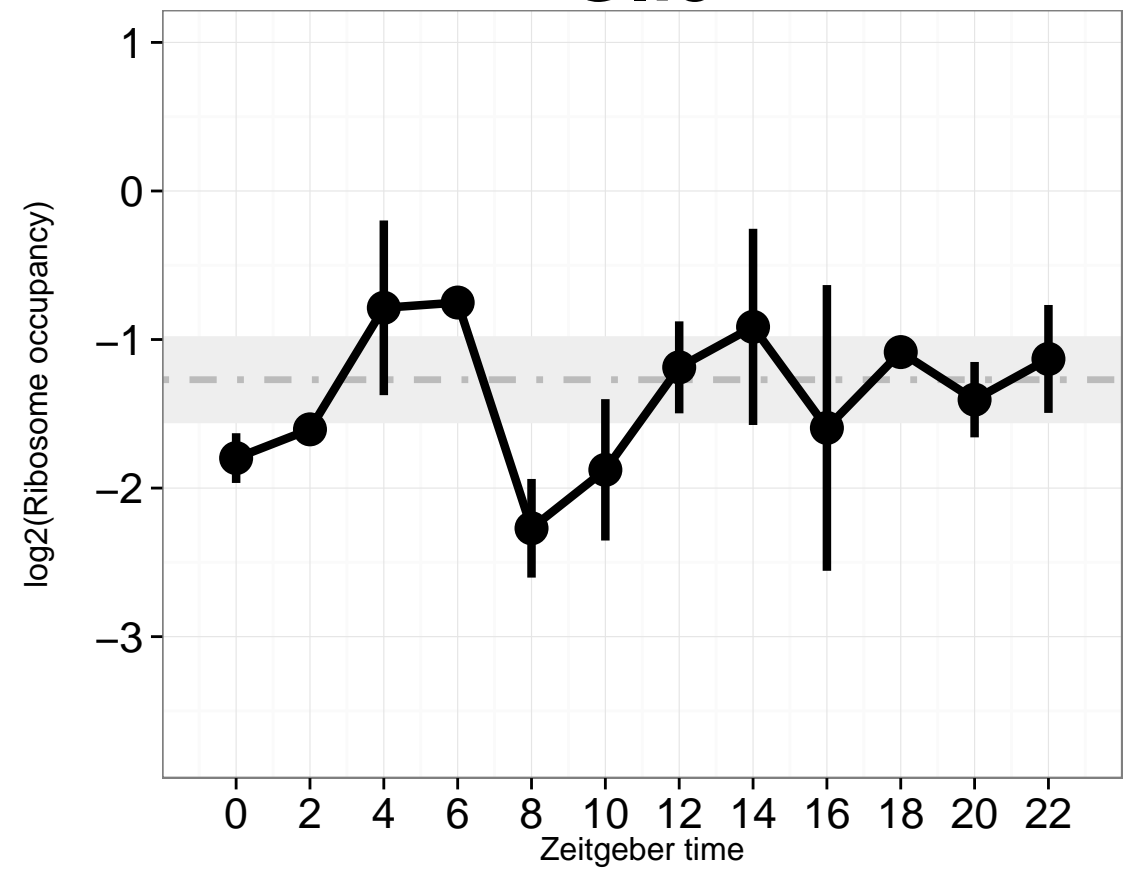

Supplement: Supplementary file 12289 [file 1]

## Xpot

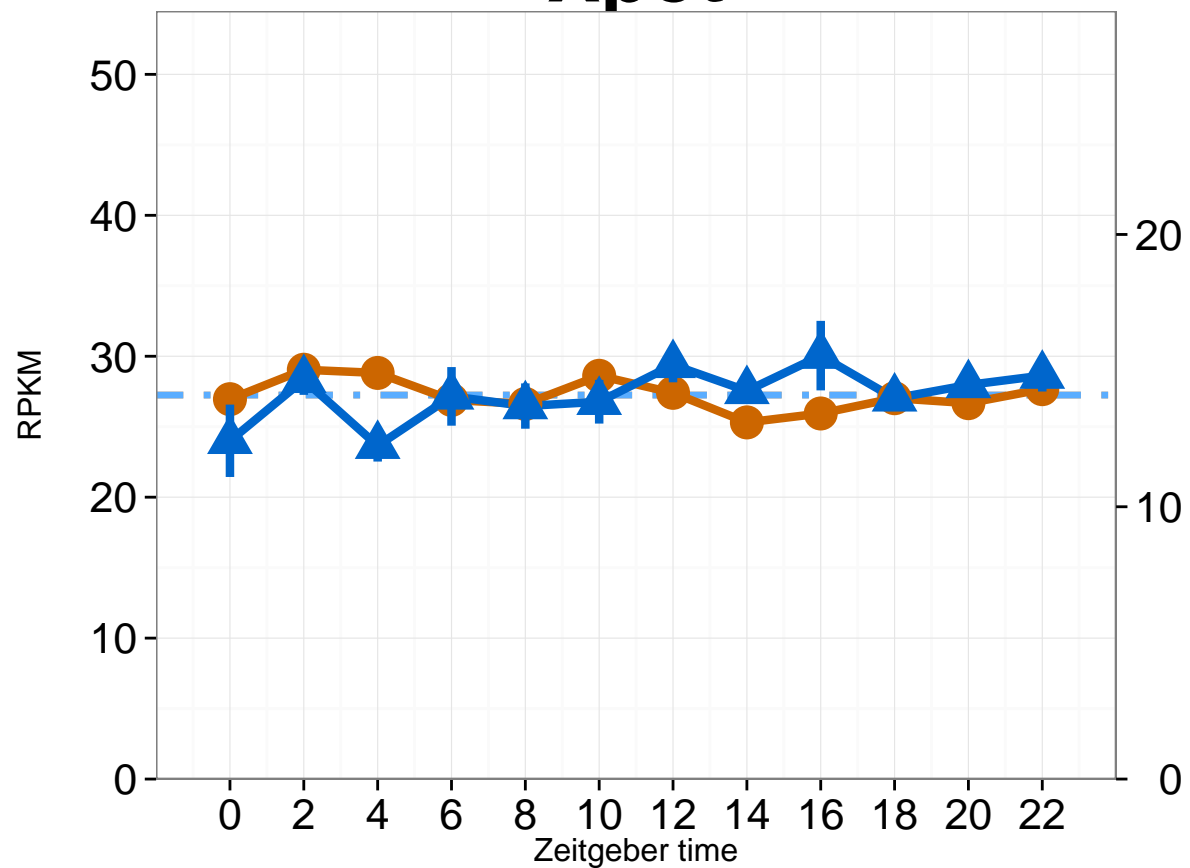

## Xpot

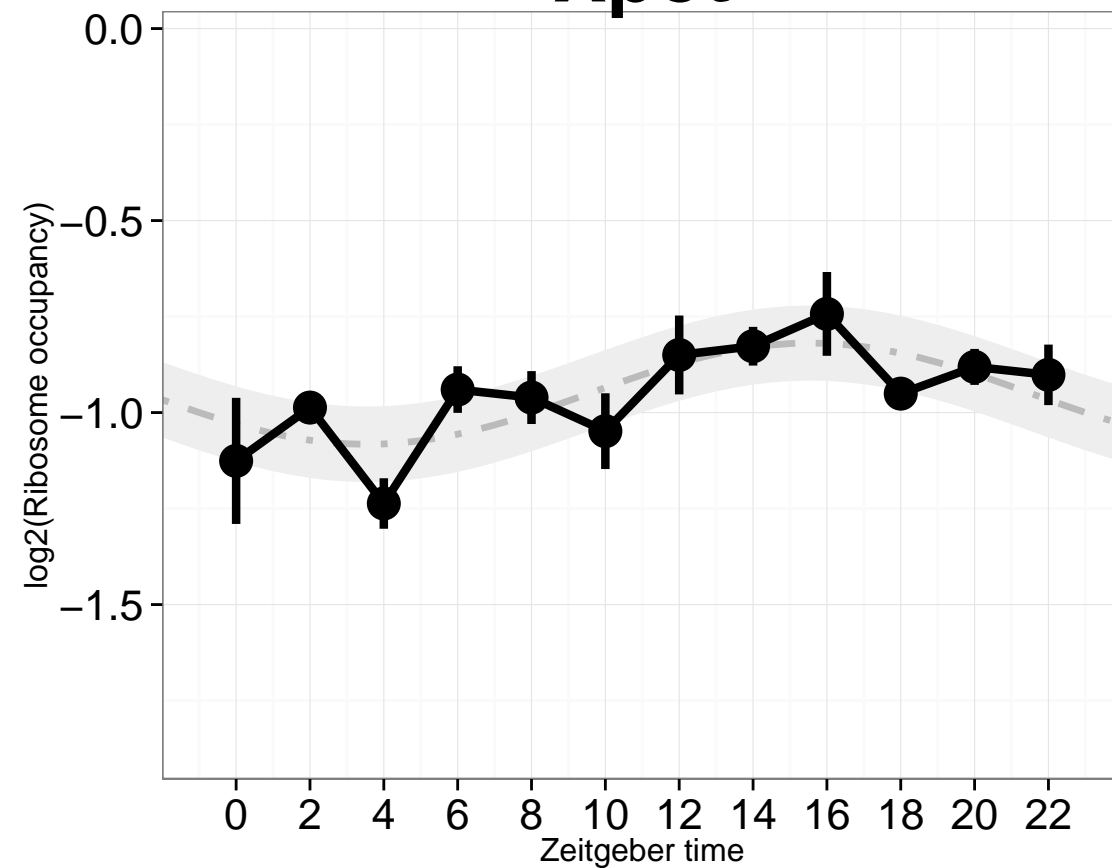

Supplement: Supplementary file 12290 [file 1]

## Cuta

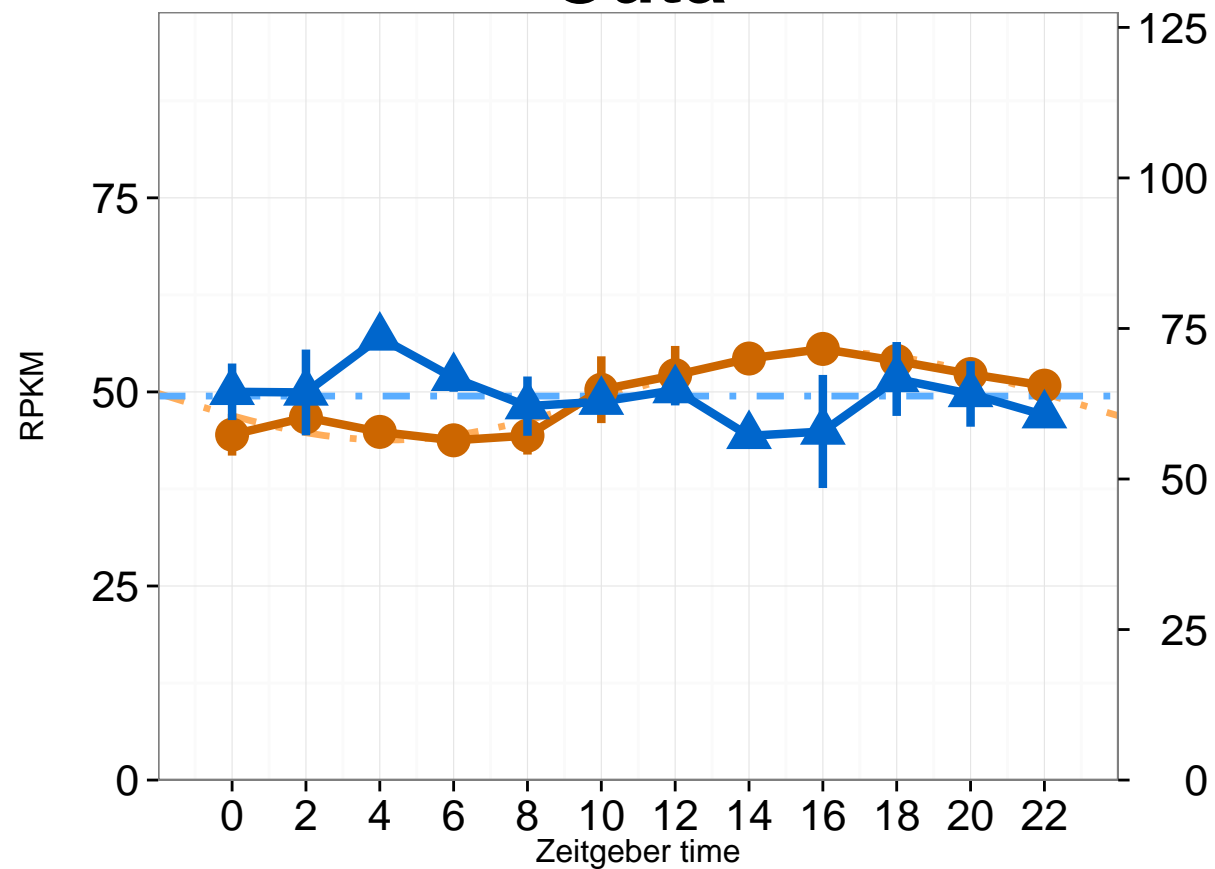

## Cuta

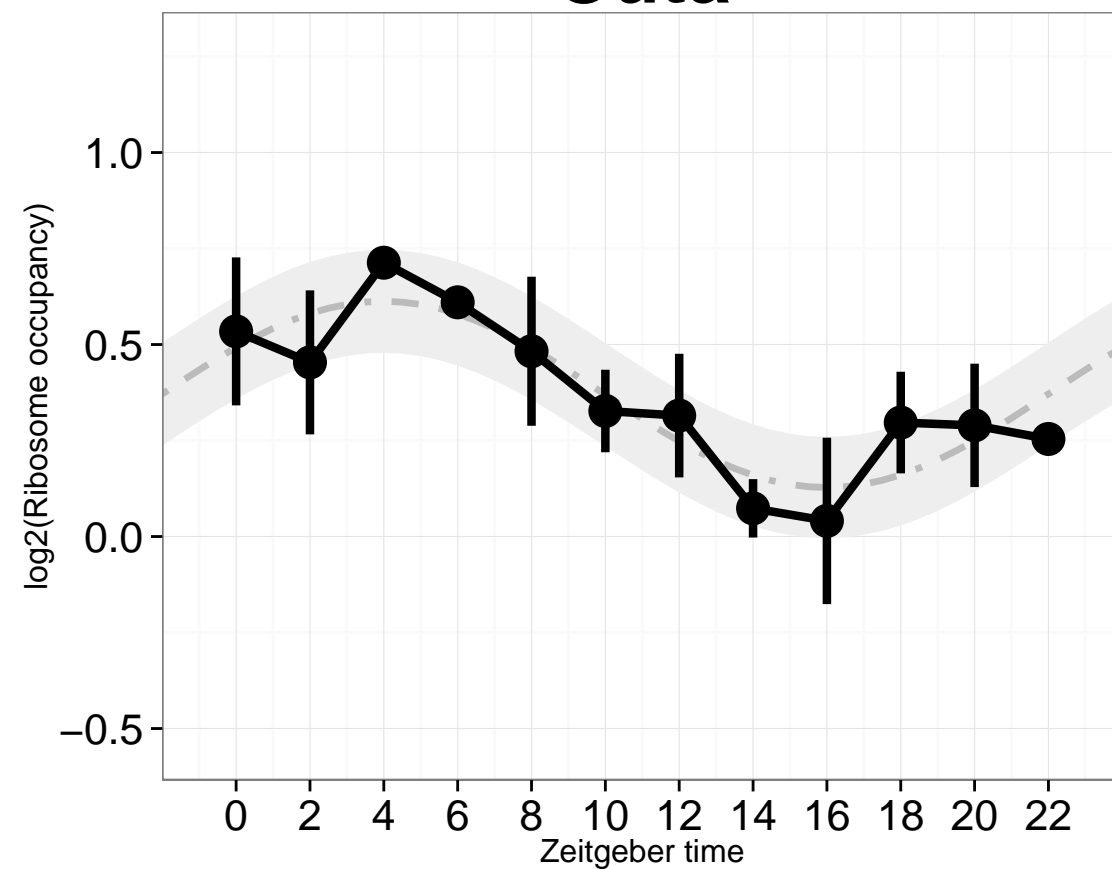

Supplement: Supplementary file 12291 [file 1]

# Fgfr2

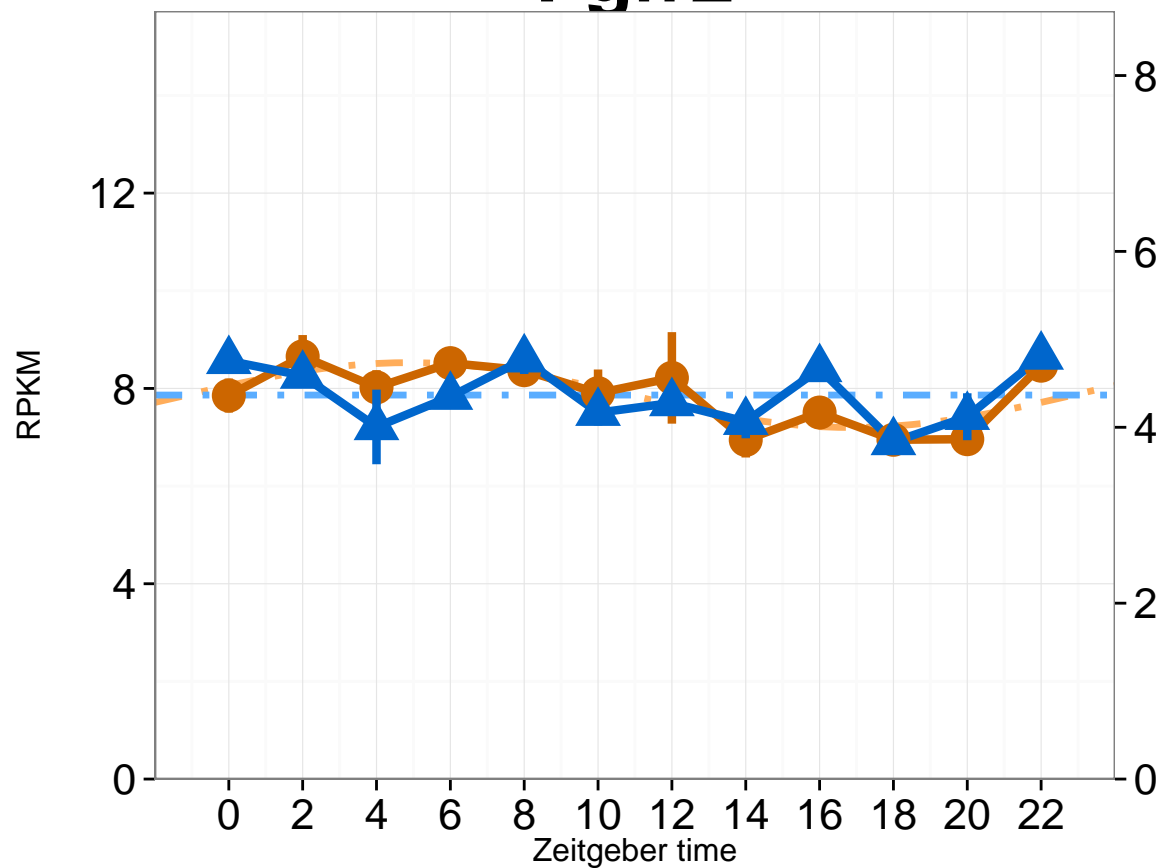

# Fgfr2

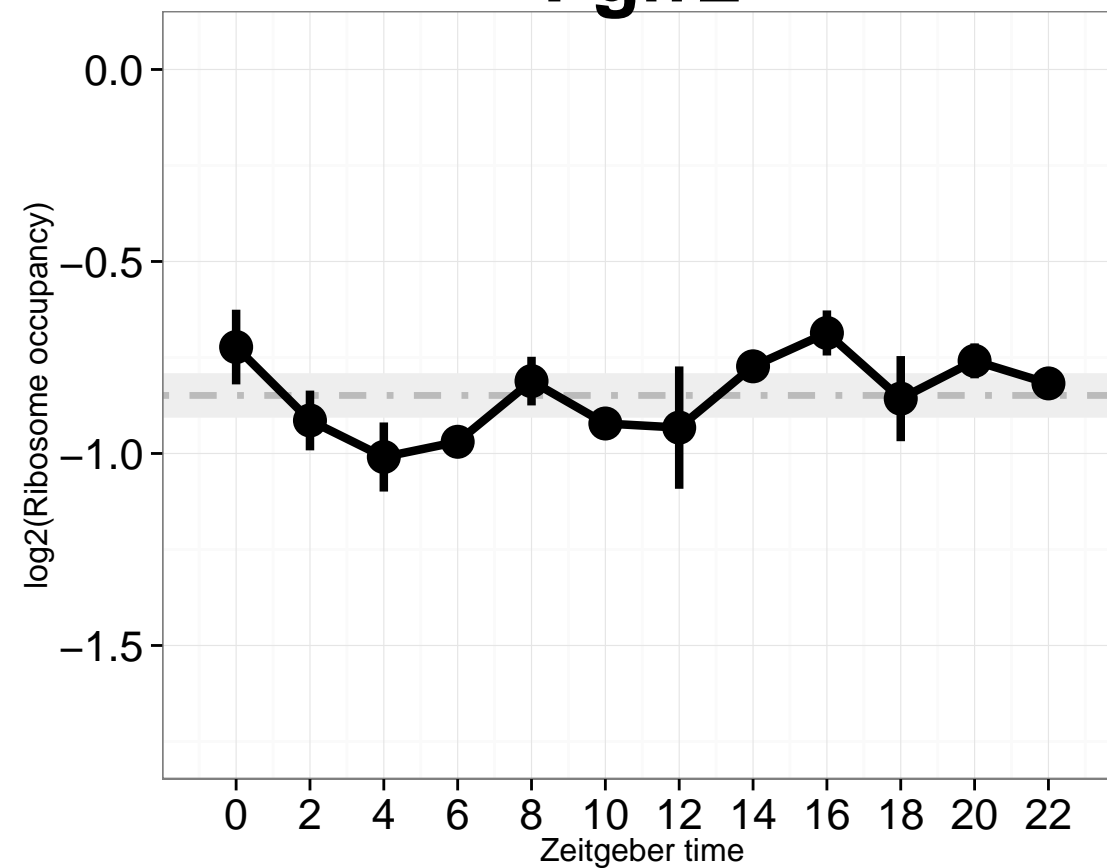

Supplement: Supplementary file 12292 [file 1]

# Ddx60

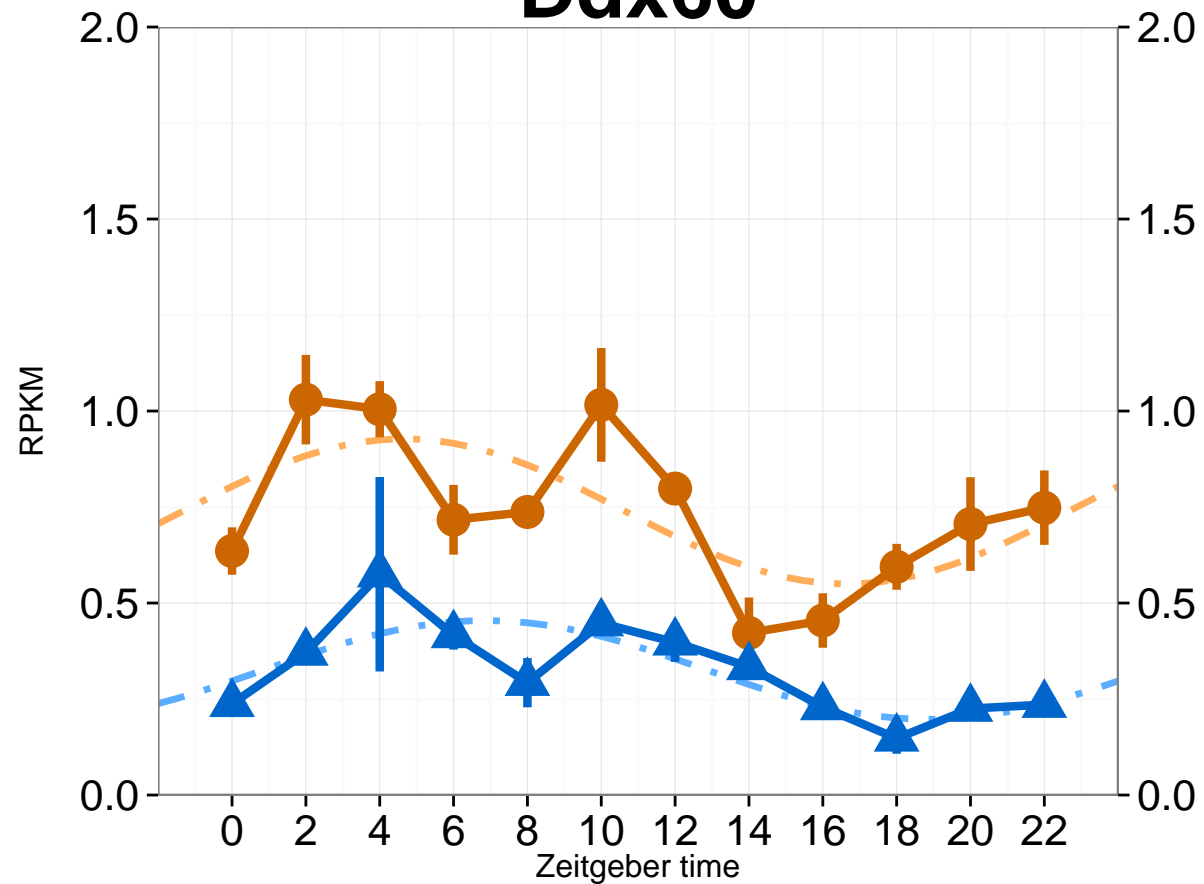

# Ddx60

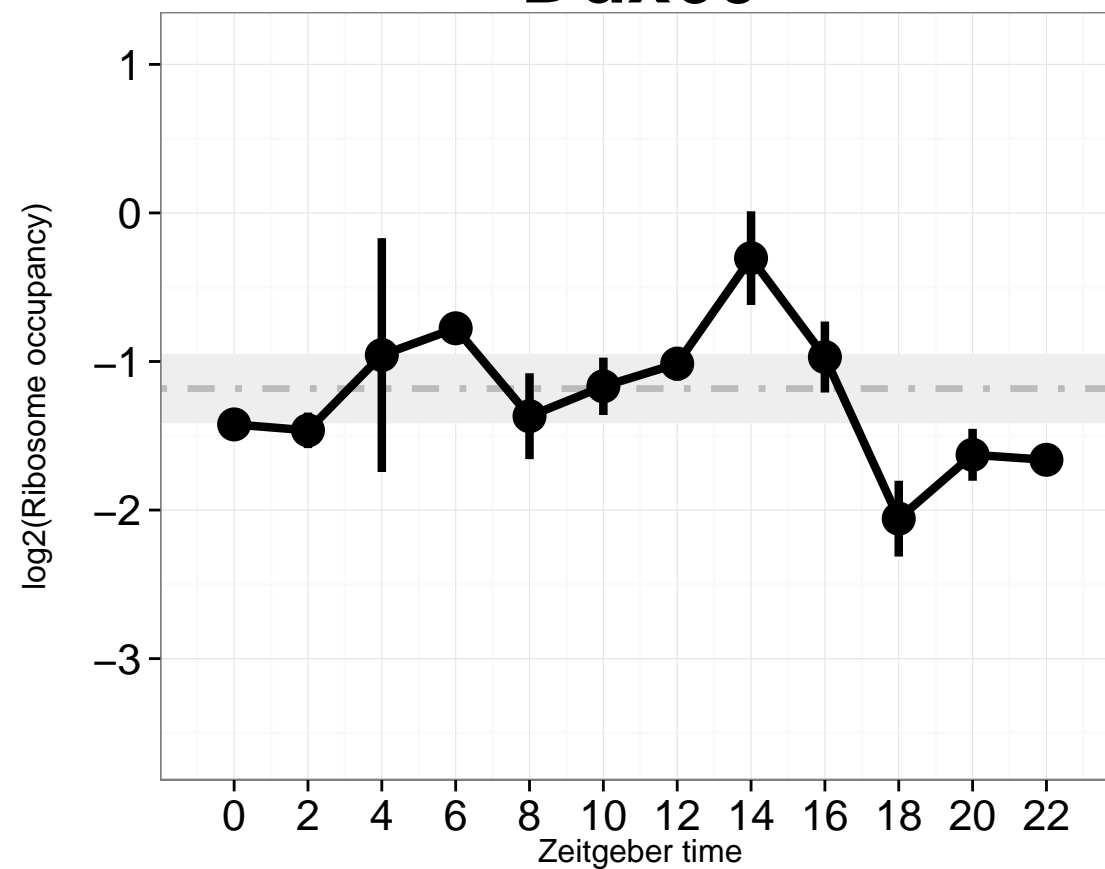

Supplement: Supplementary file 12293 [file 1]

## Pcdh18

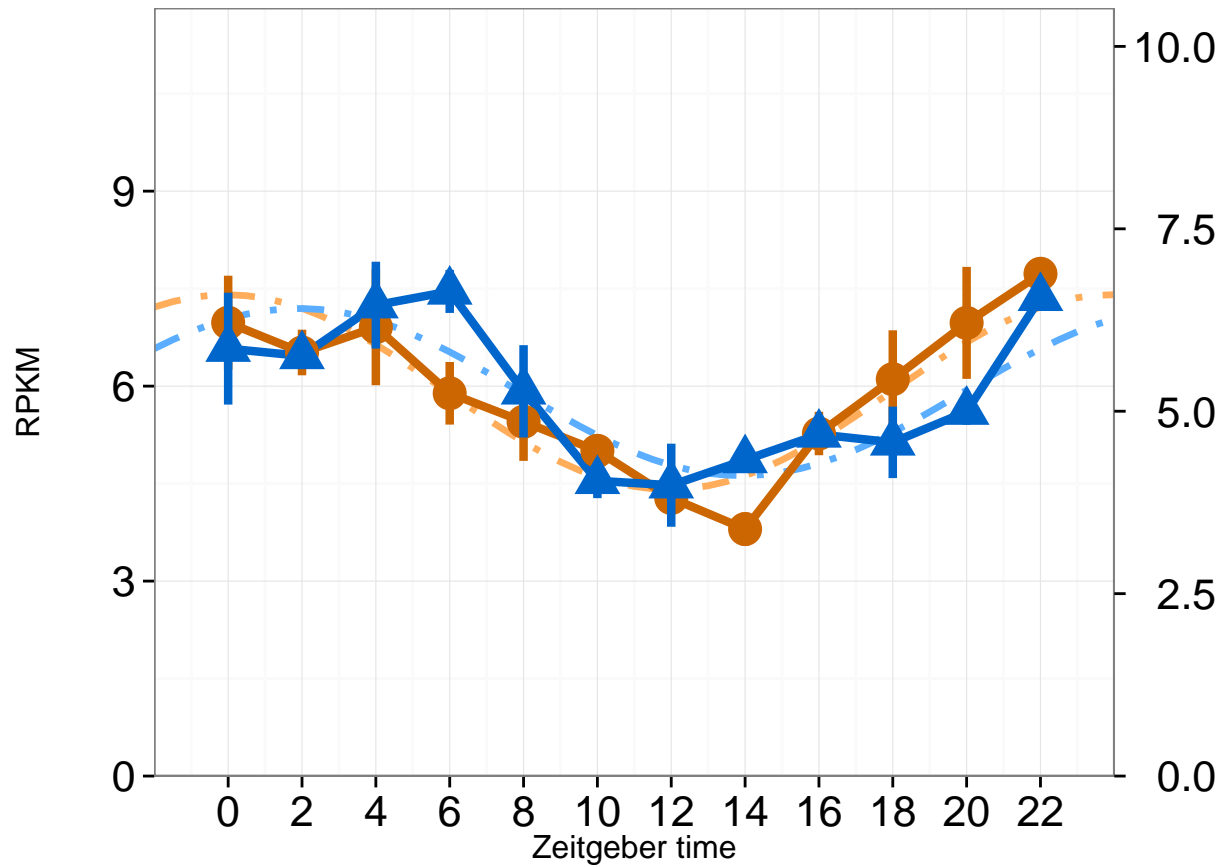

## Pcdh18

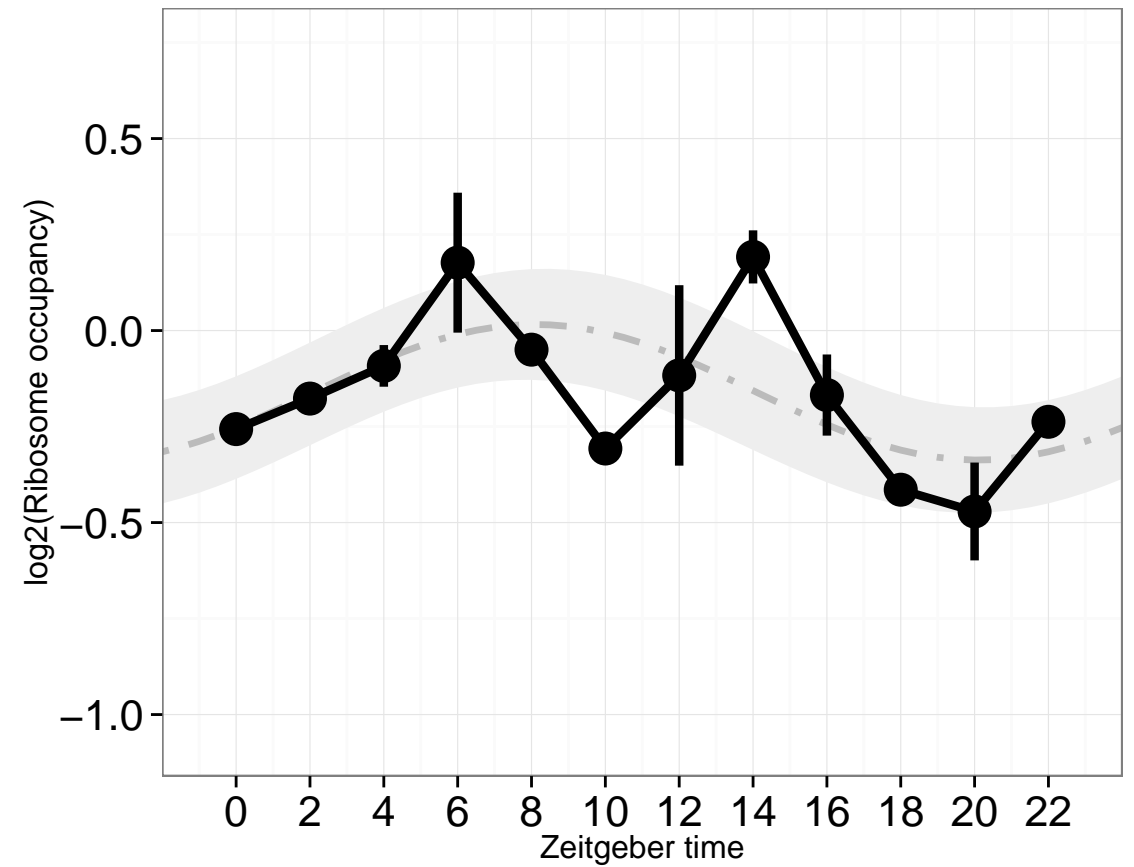

Supplement: Supplementary file 12294 [file 1]

## Exoc7

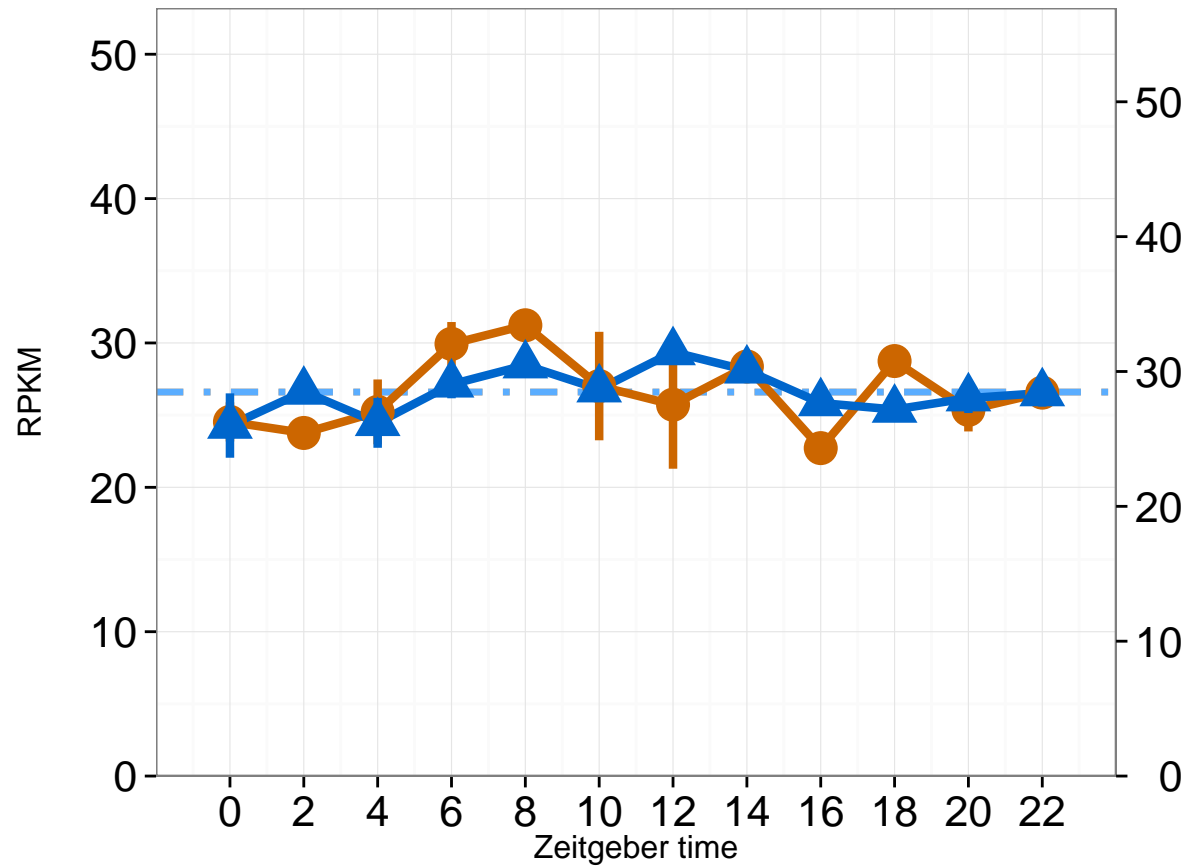

## Exoc7

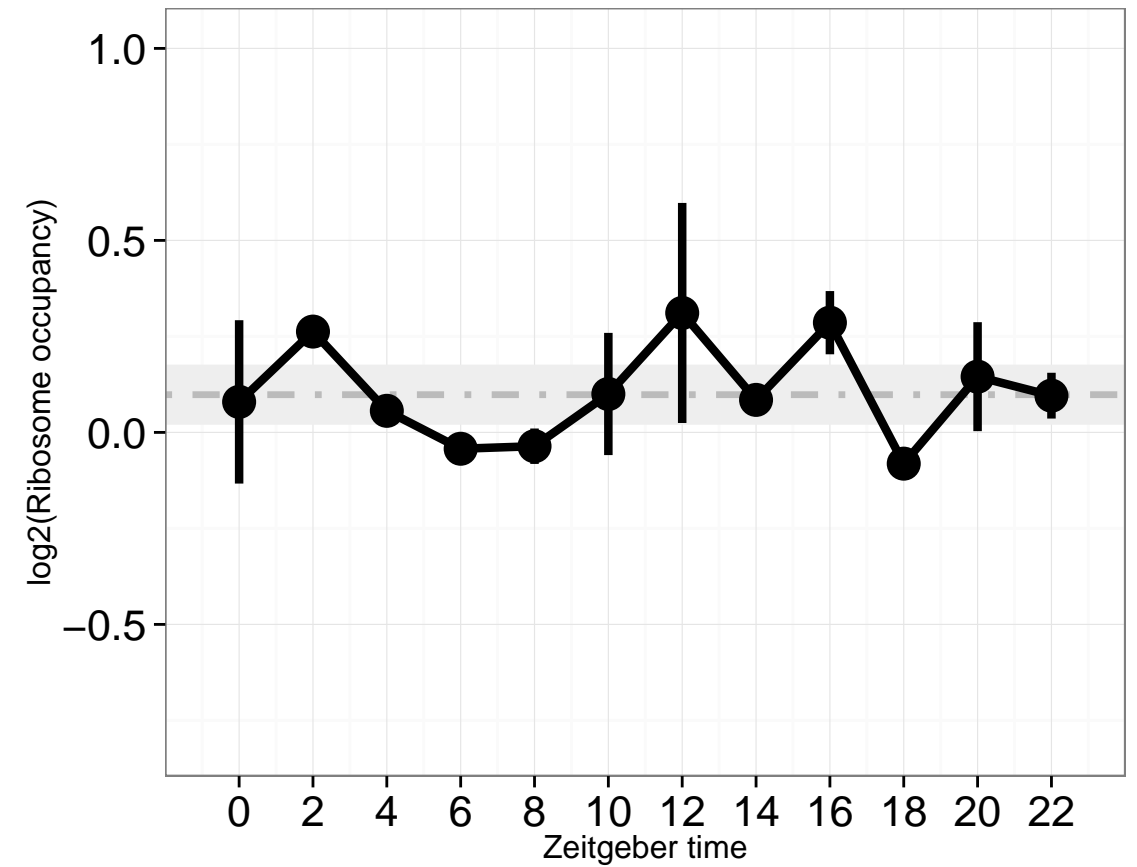

Supplement: Supplementary file 12295 [file 1]

## Mkl

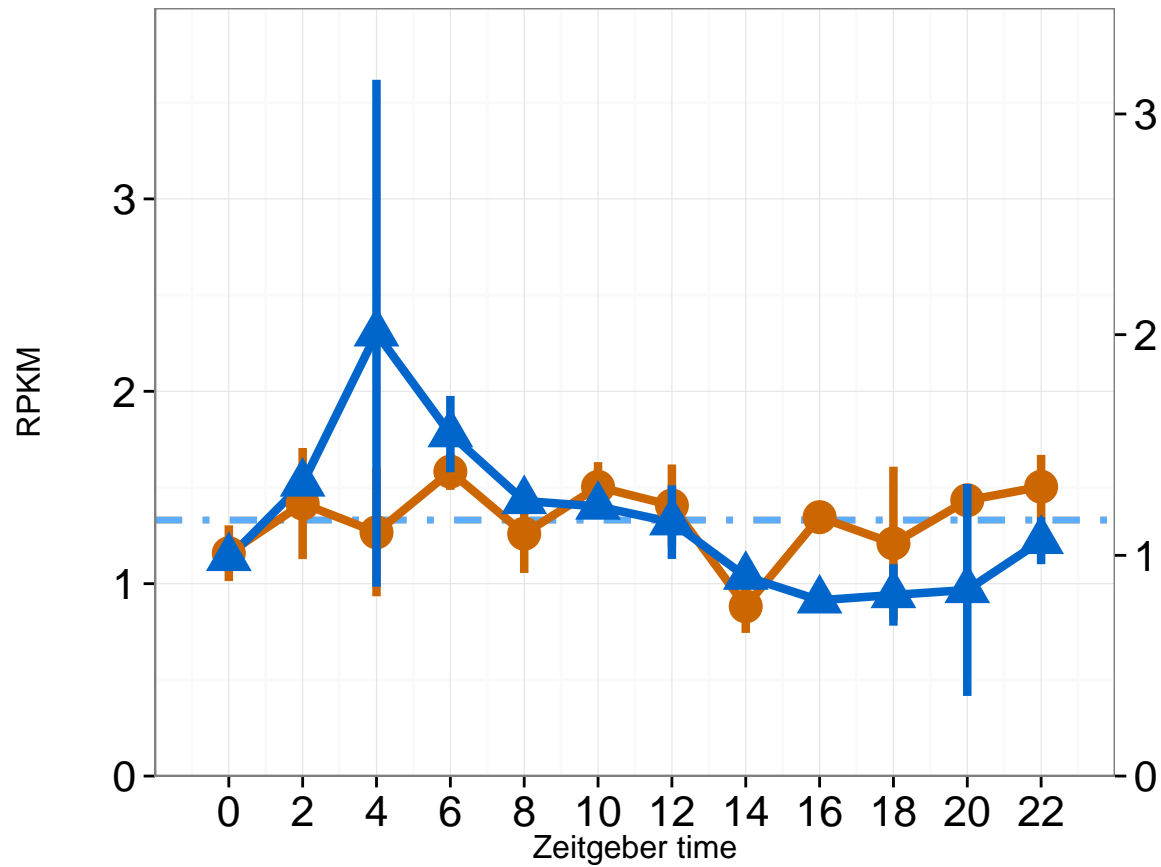

## Mkl

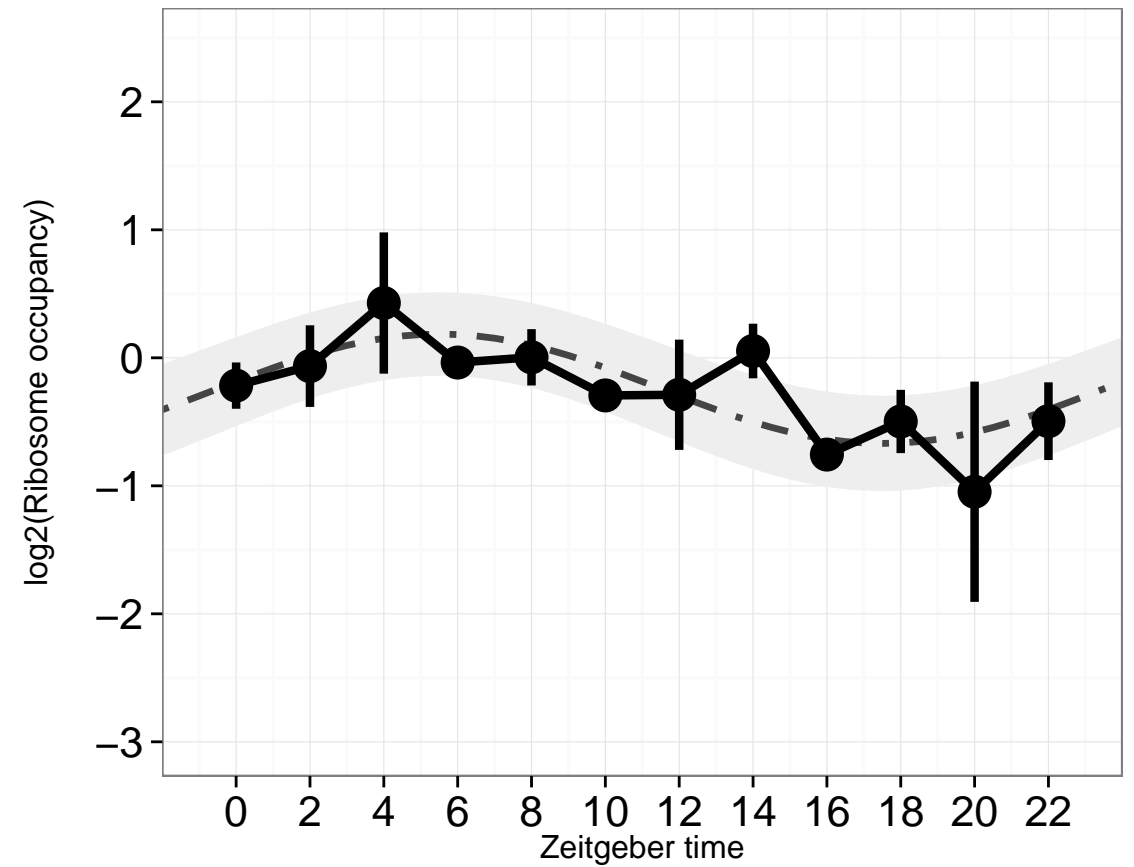

Supplement: Supplementary file 12296 [file 1]

## Ctsf

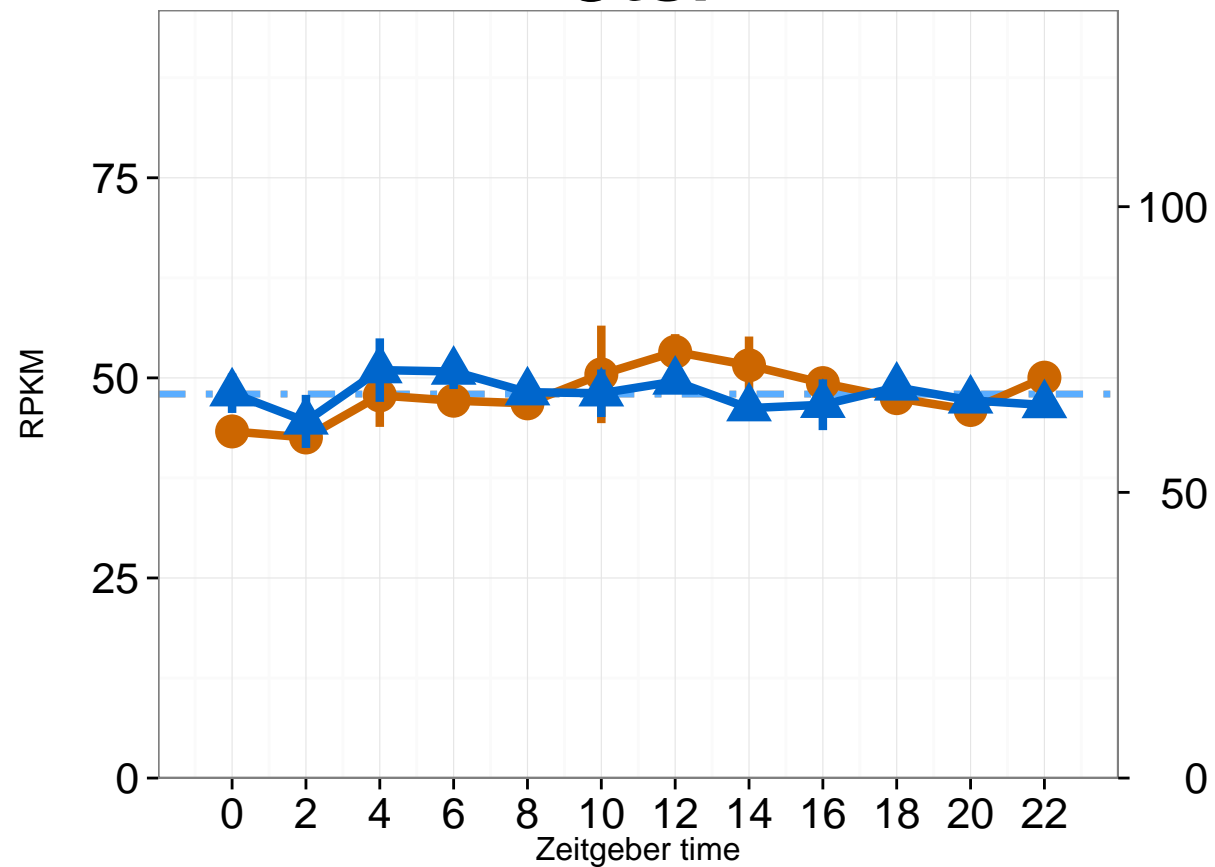

## Ctsf

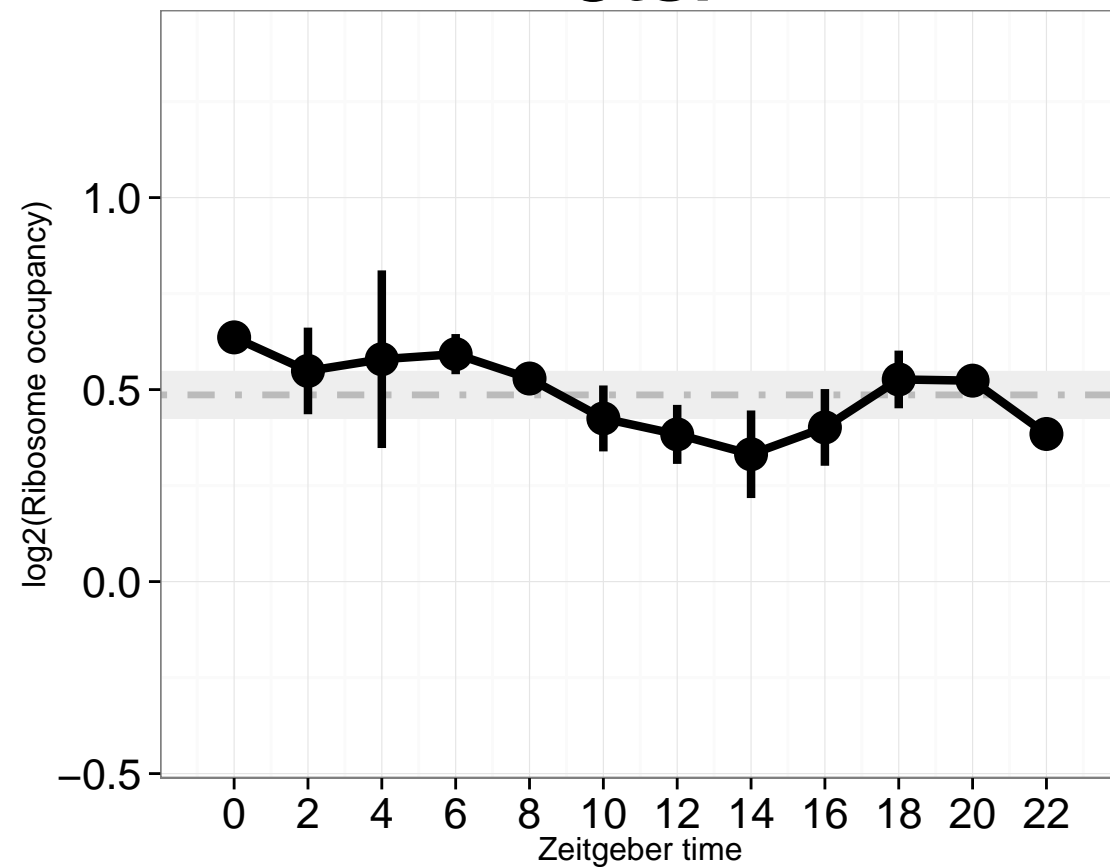

Supplement: Supplementary file 12297 [file 1]

## Mre11a

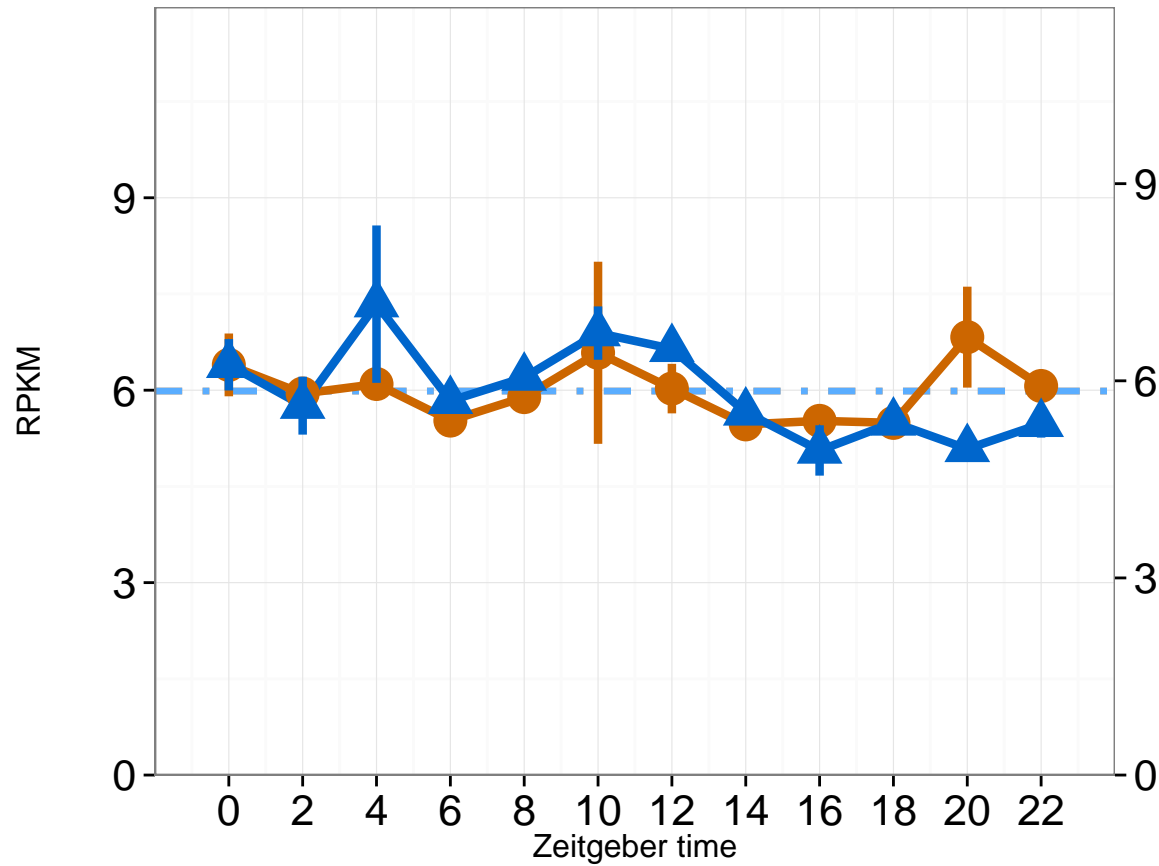

## Mre11a

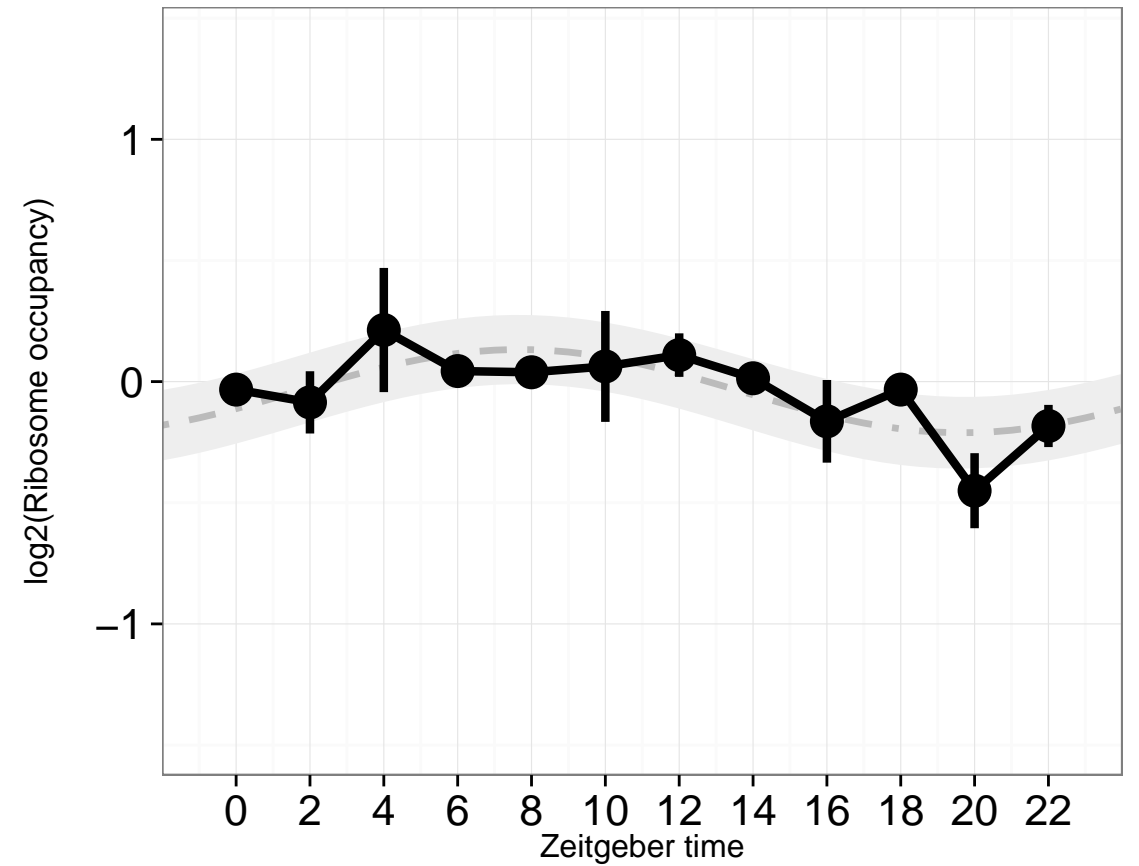

Supplement: Supplementary file 12298 [file 1]

## Tsg101

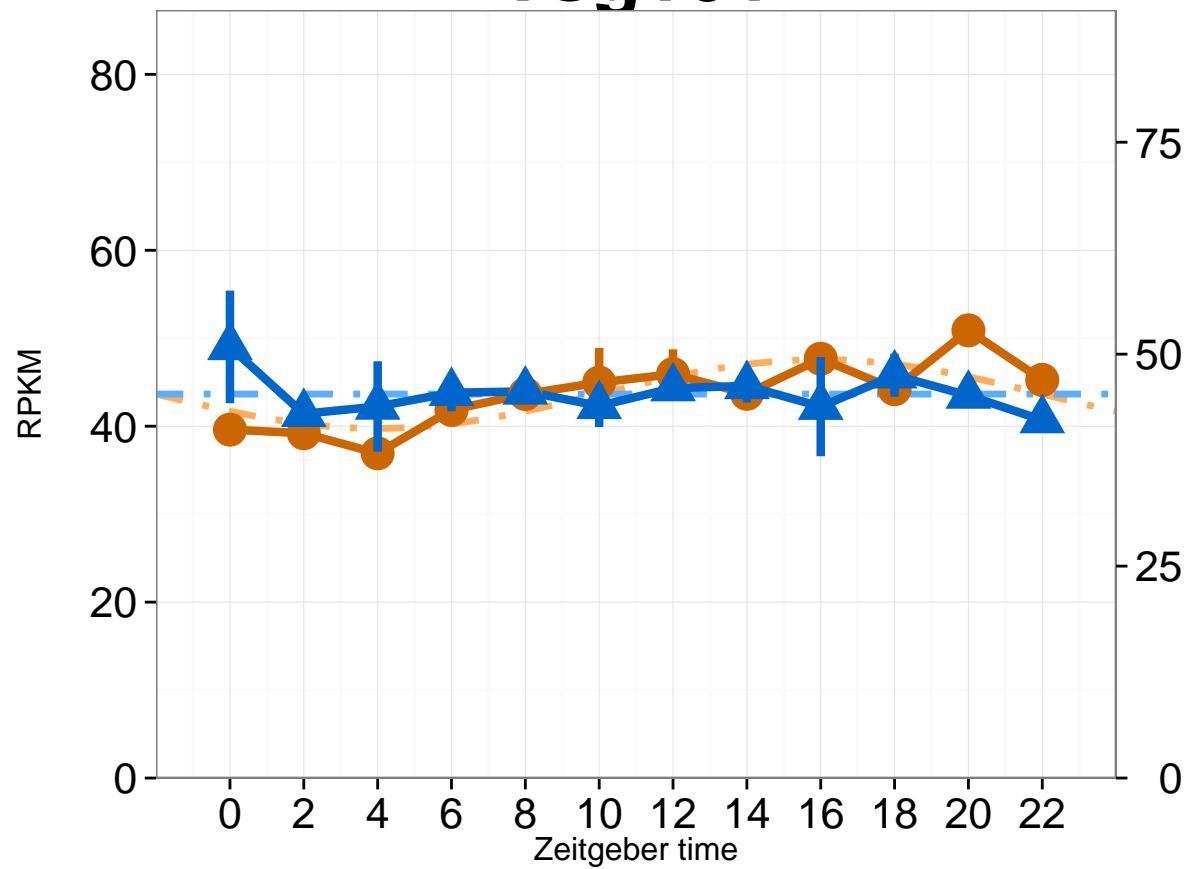

## Tsg101

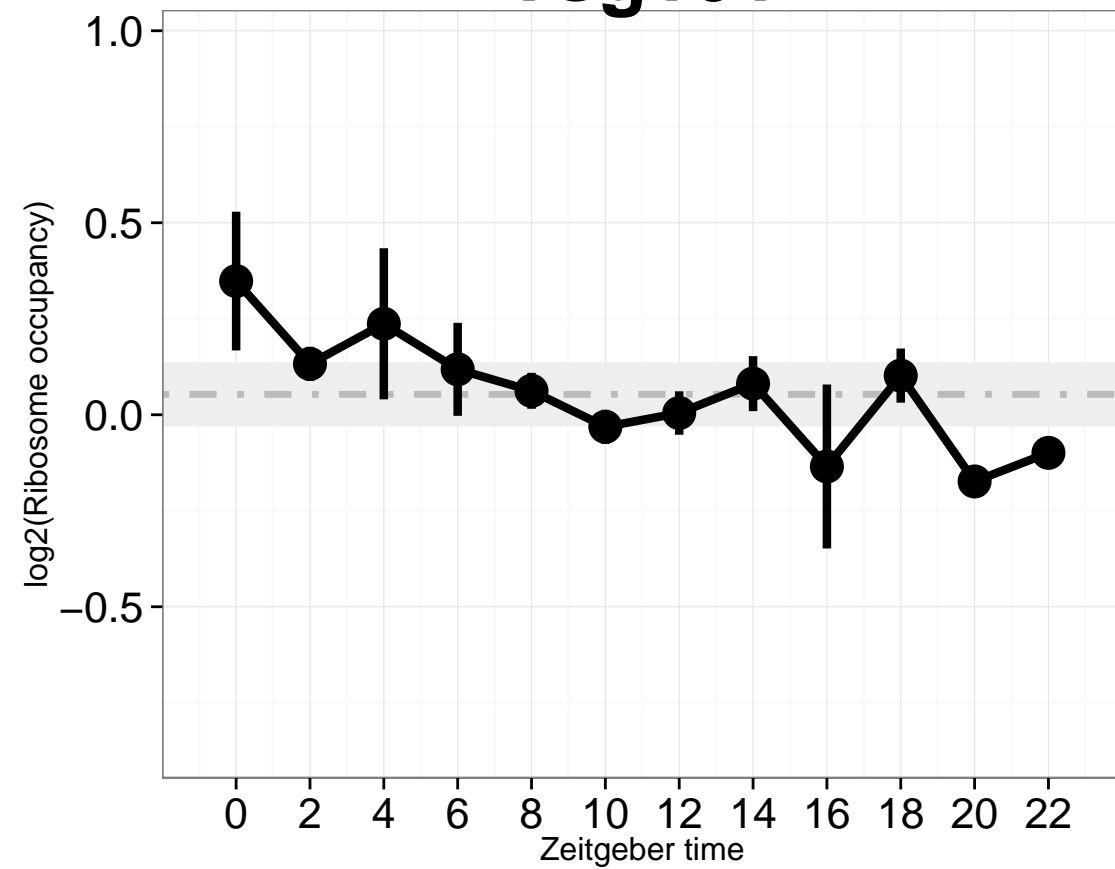

Supplement: Supplementary file 12299 [file 1]

## Pycrl

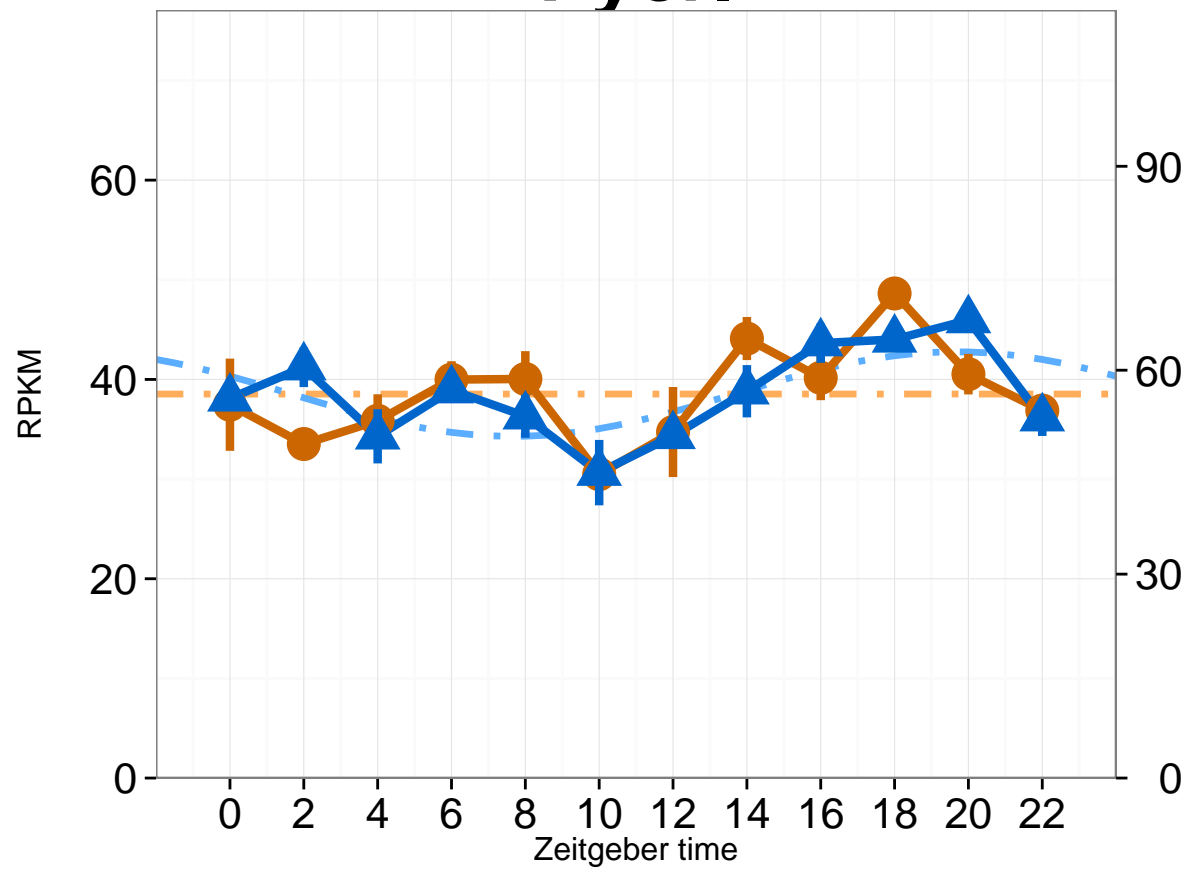

## Pycrl

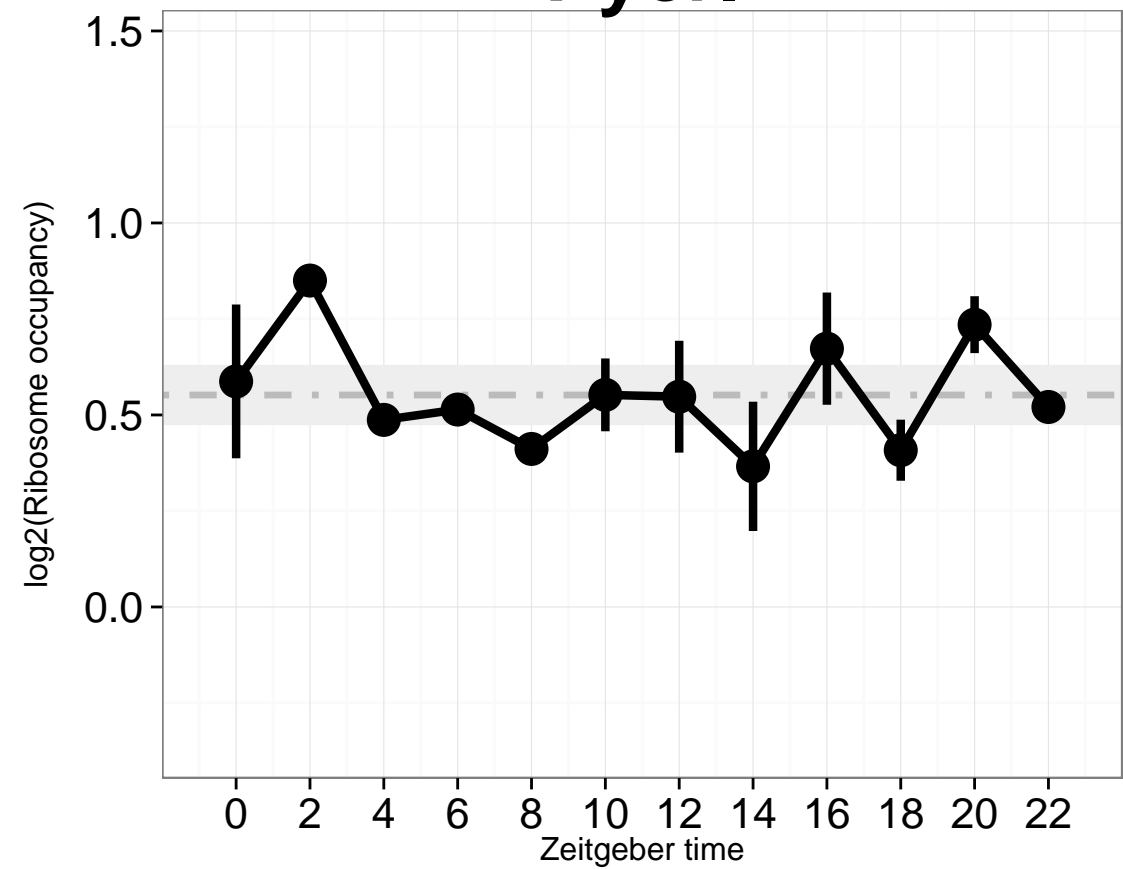

Supplement: Supplementary file 12300 [file 1]

## Zik1

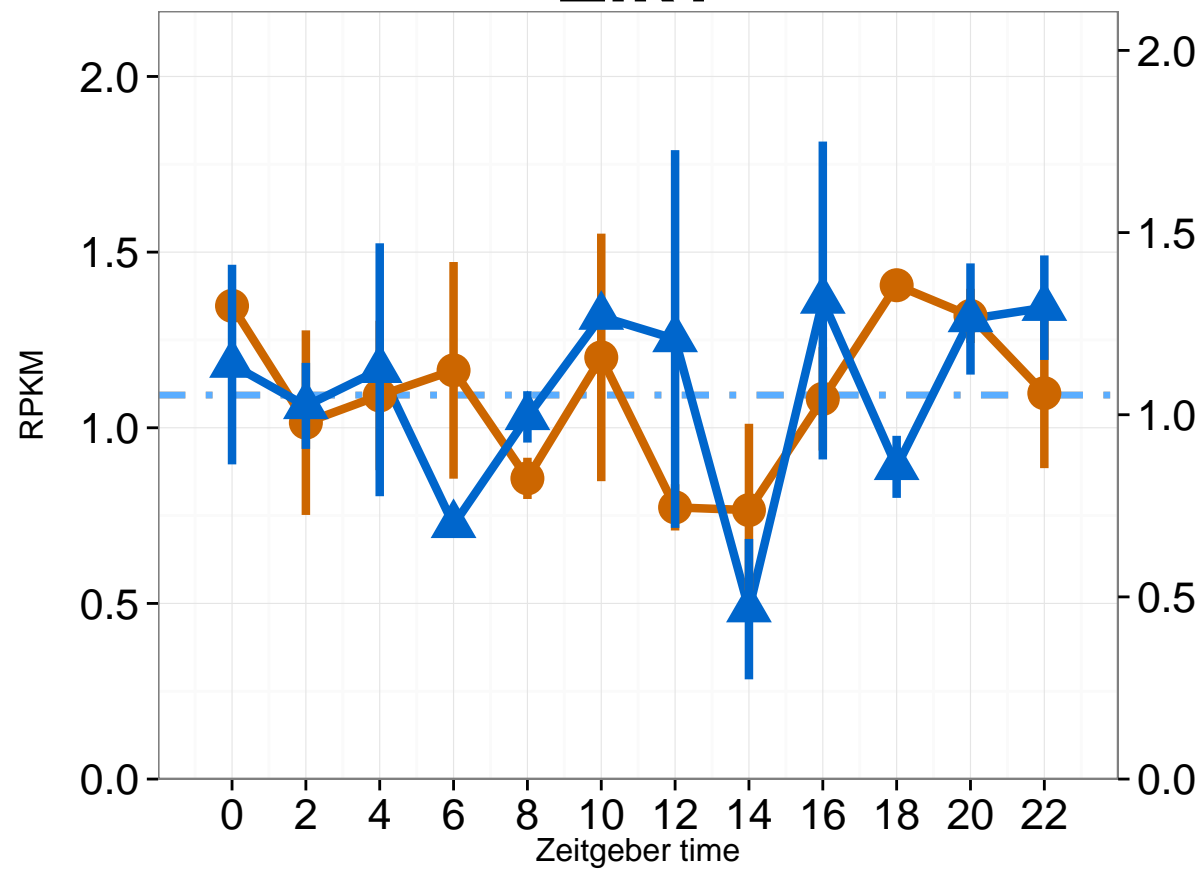

## Zik1

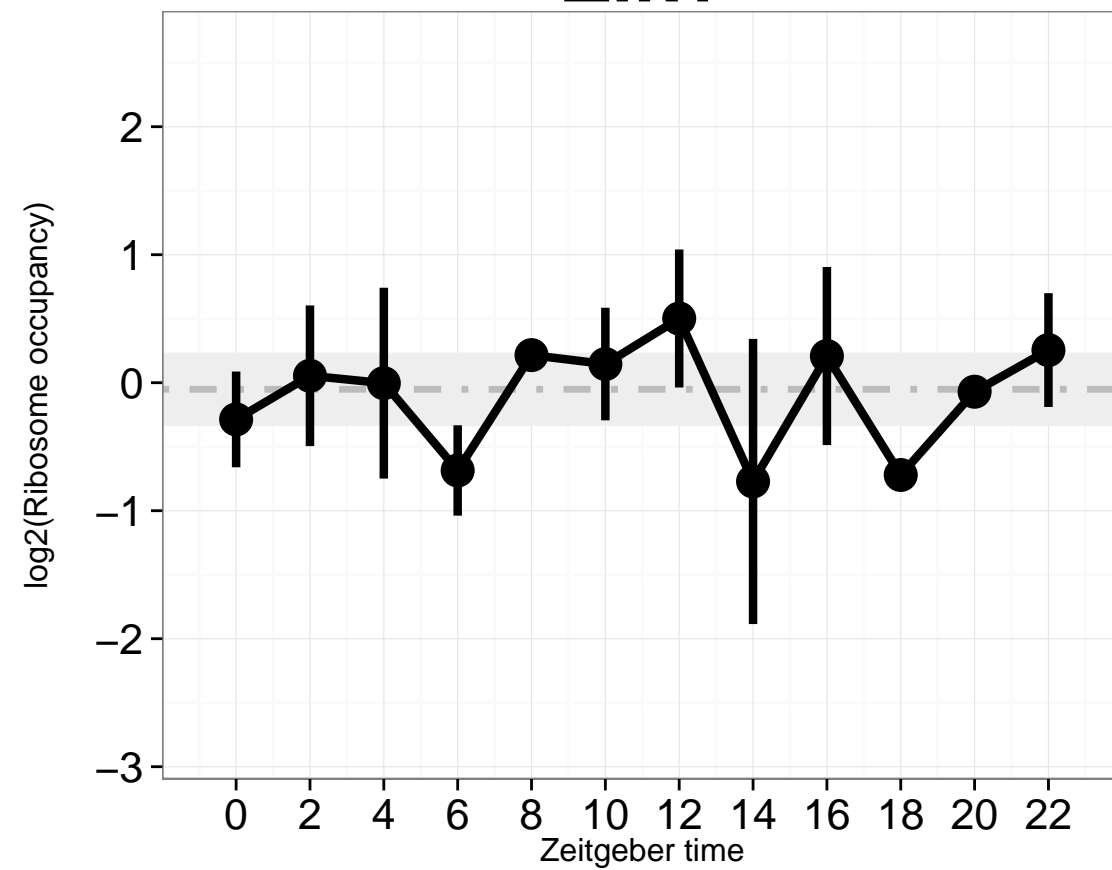

Supplement: Supplementary file 12301 [file 1]

## Nacad

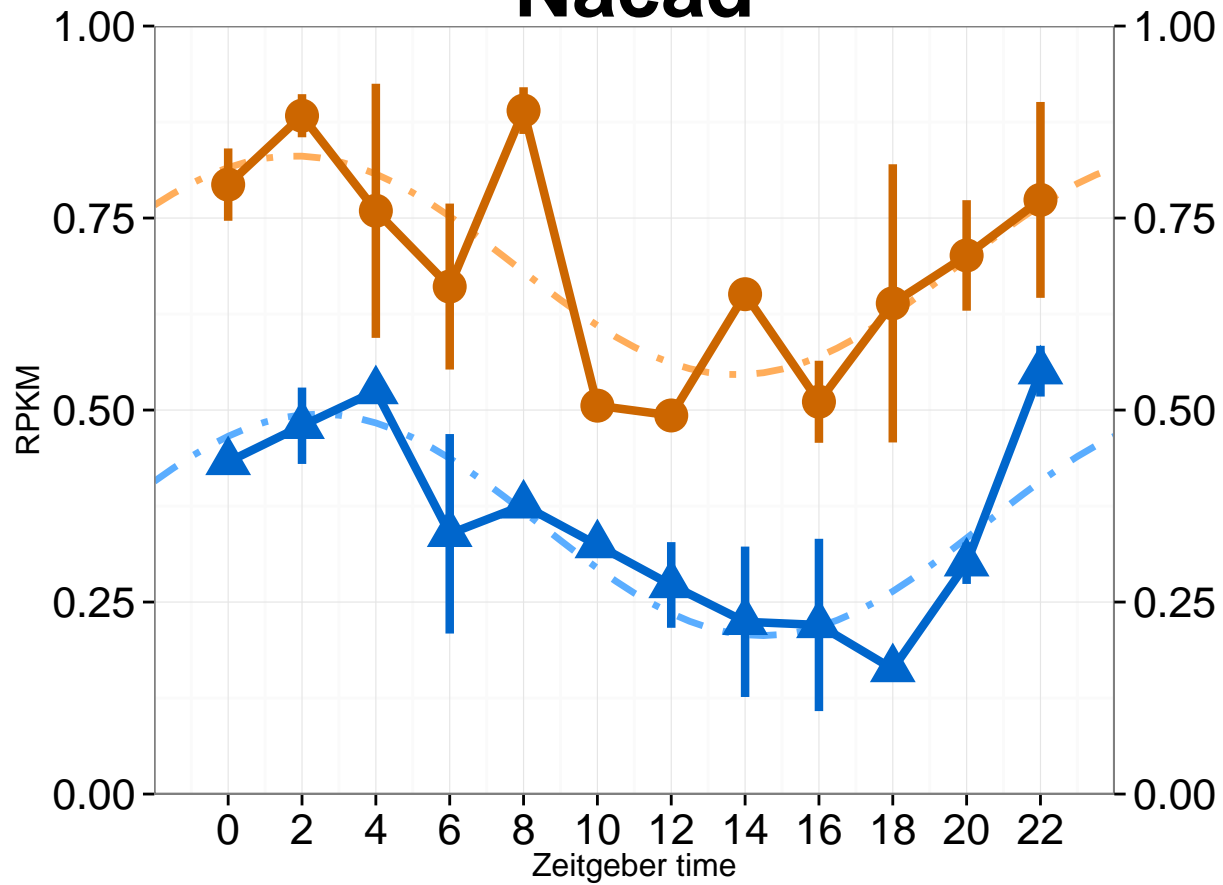

## Nacad

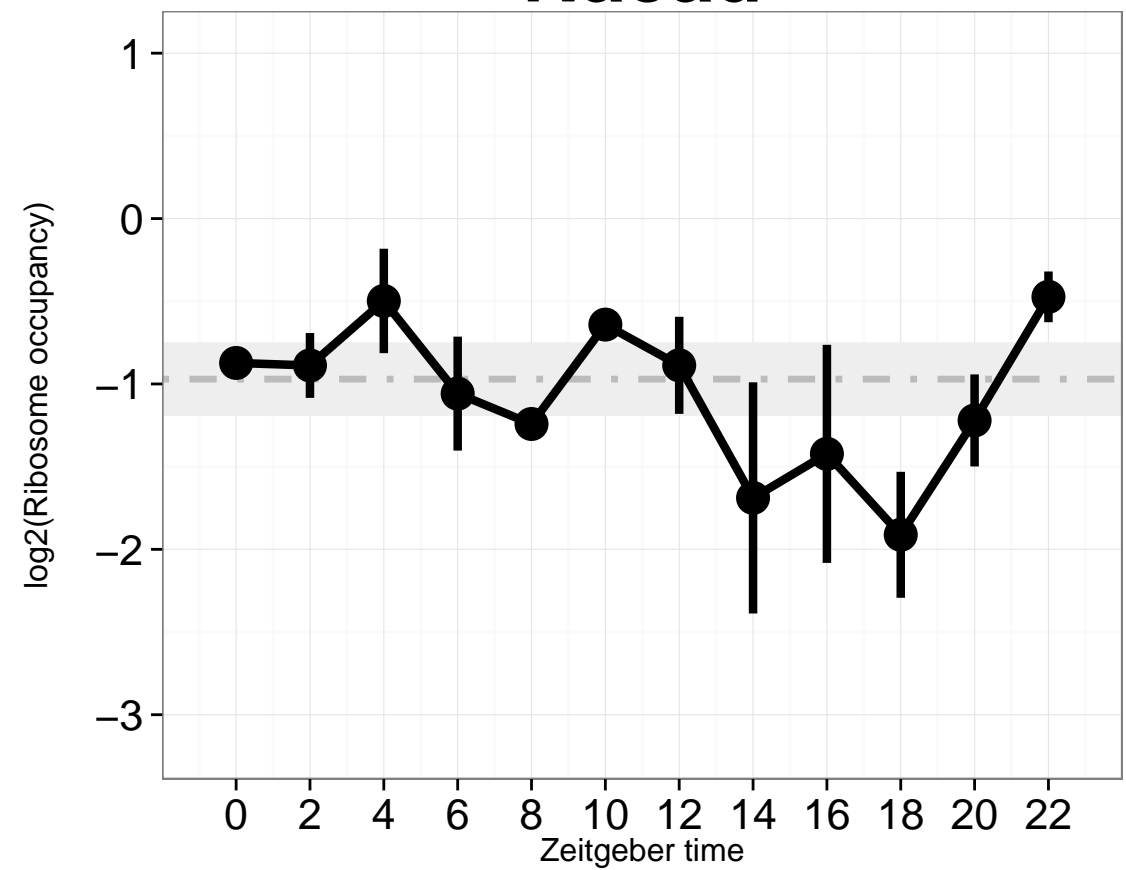

Supplement: Supplementary file 12302 [file 1]

# Gprin3

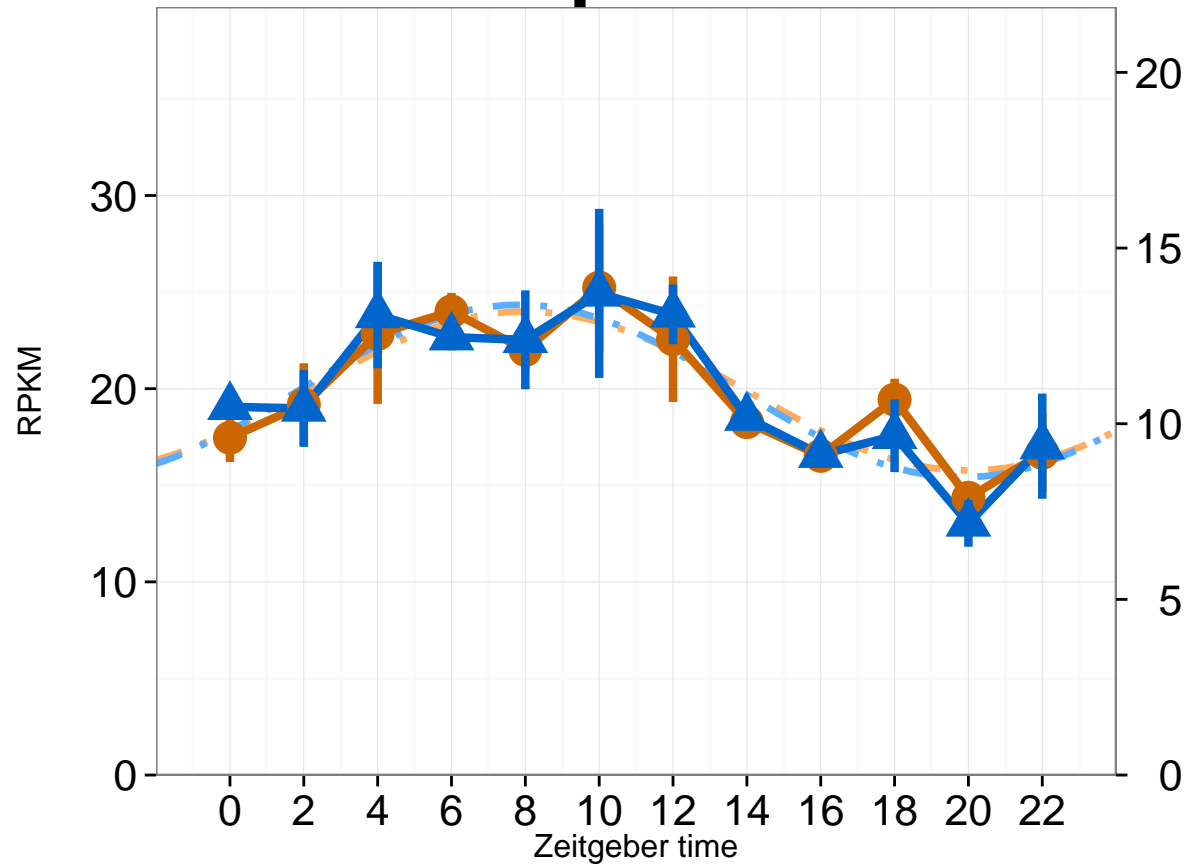

# Gprin3

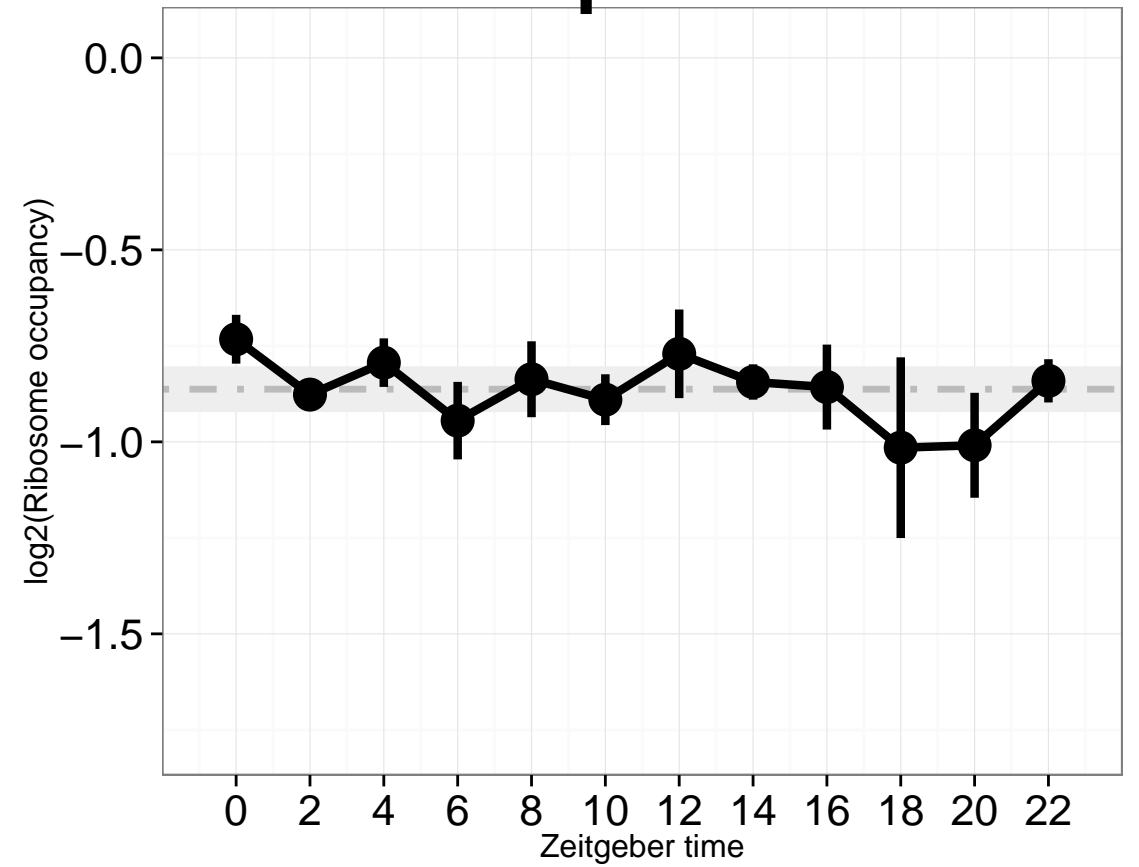

Supplement: Supplementary file 12303 [file 1]

## Celf2

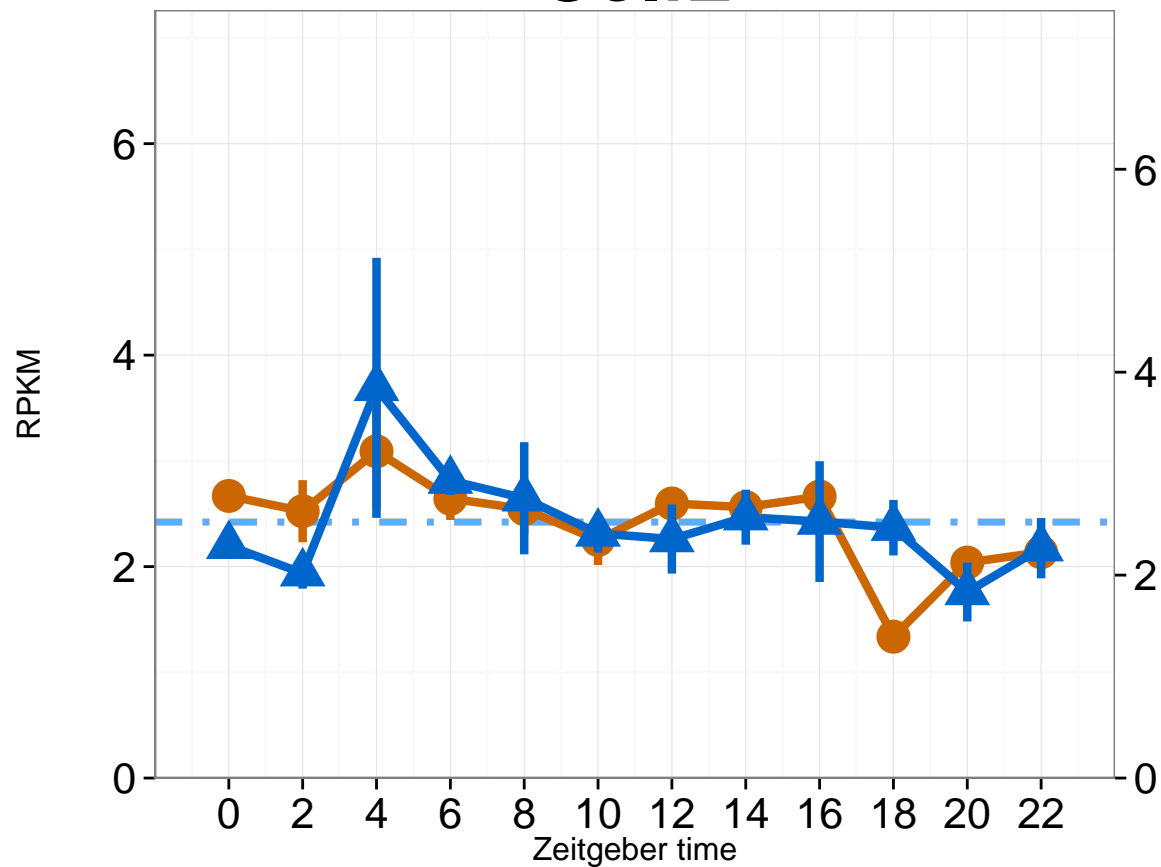

## Celf2

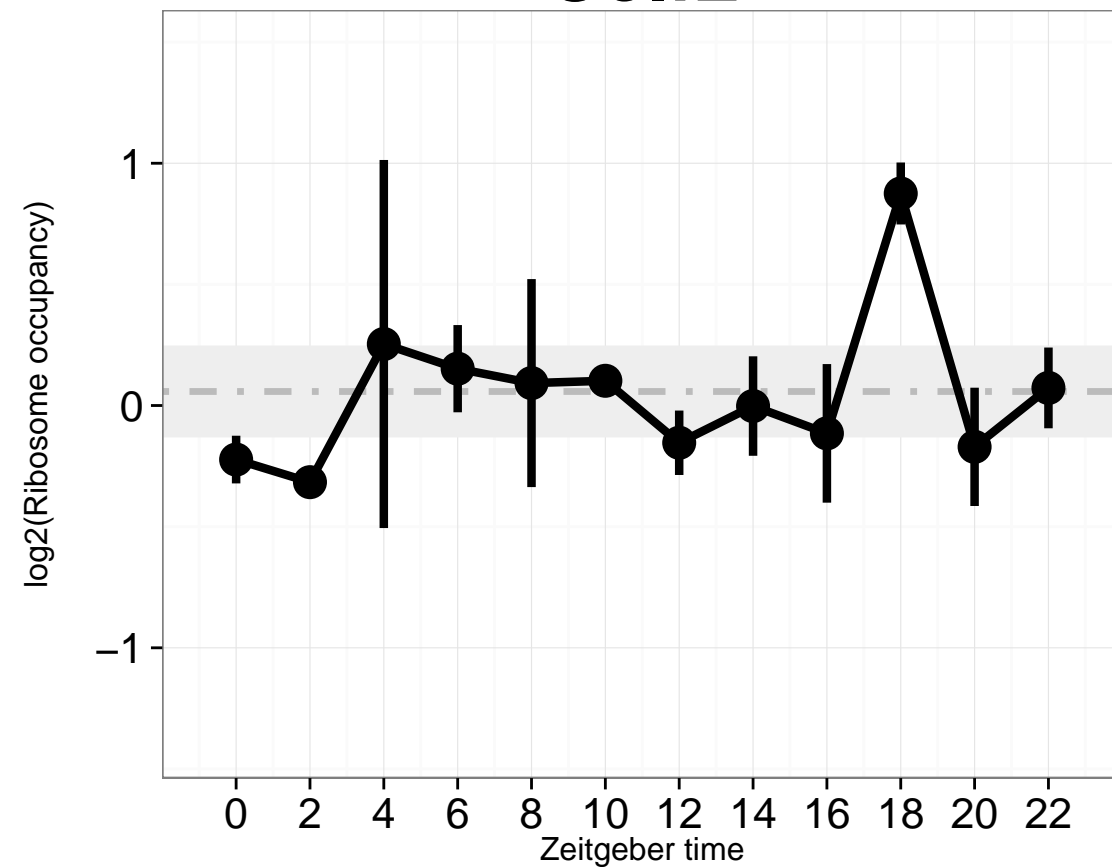

Supplement: Supplementary file 12304 [file 1]

# Fam162a

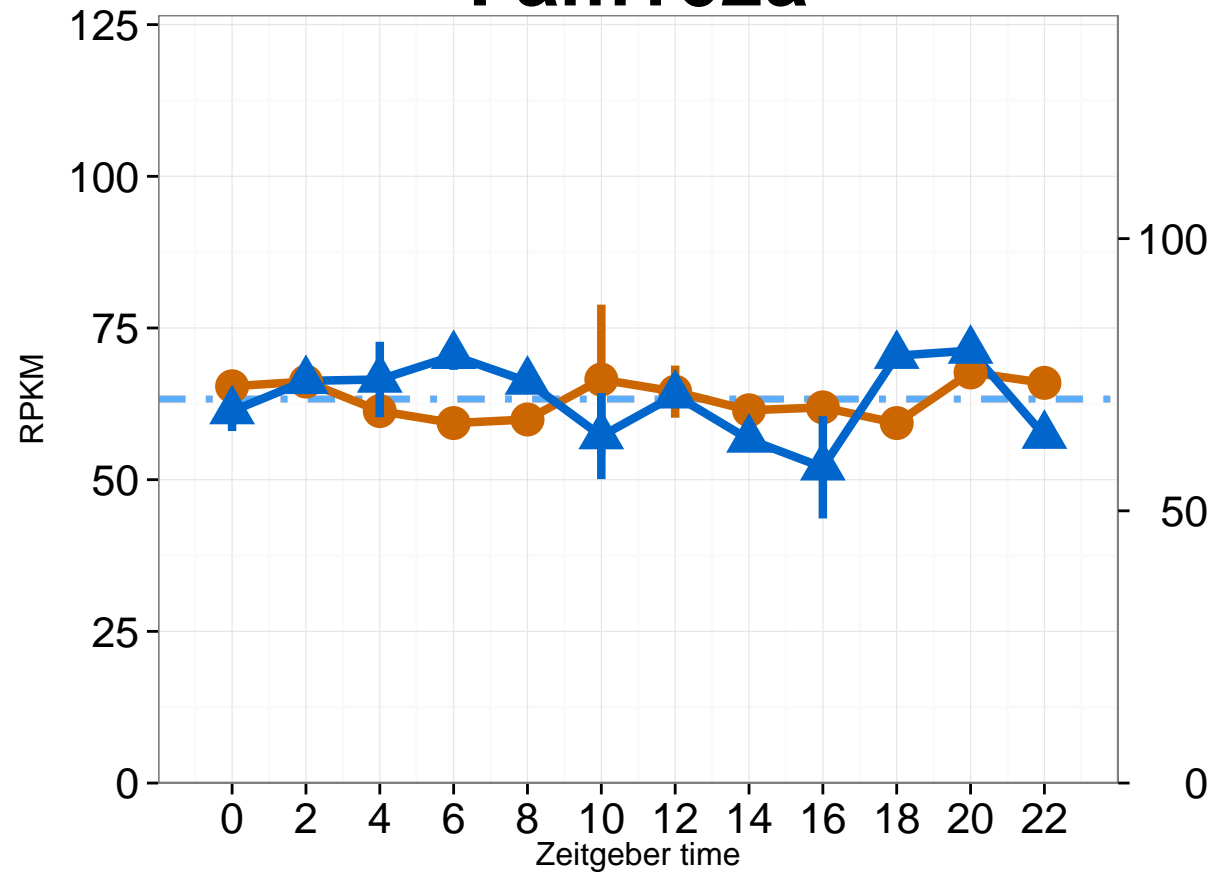

# Fam162a

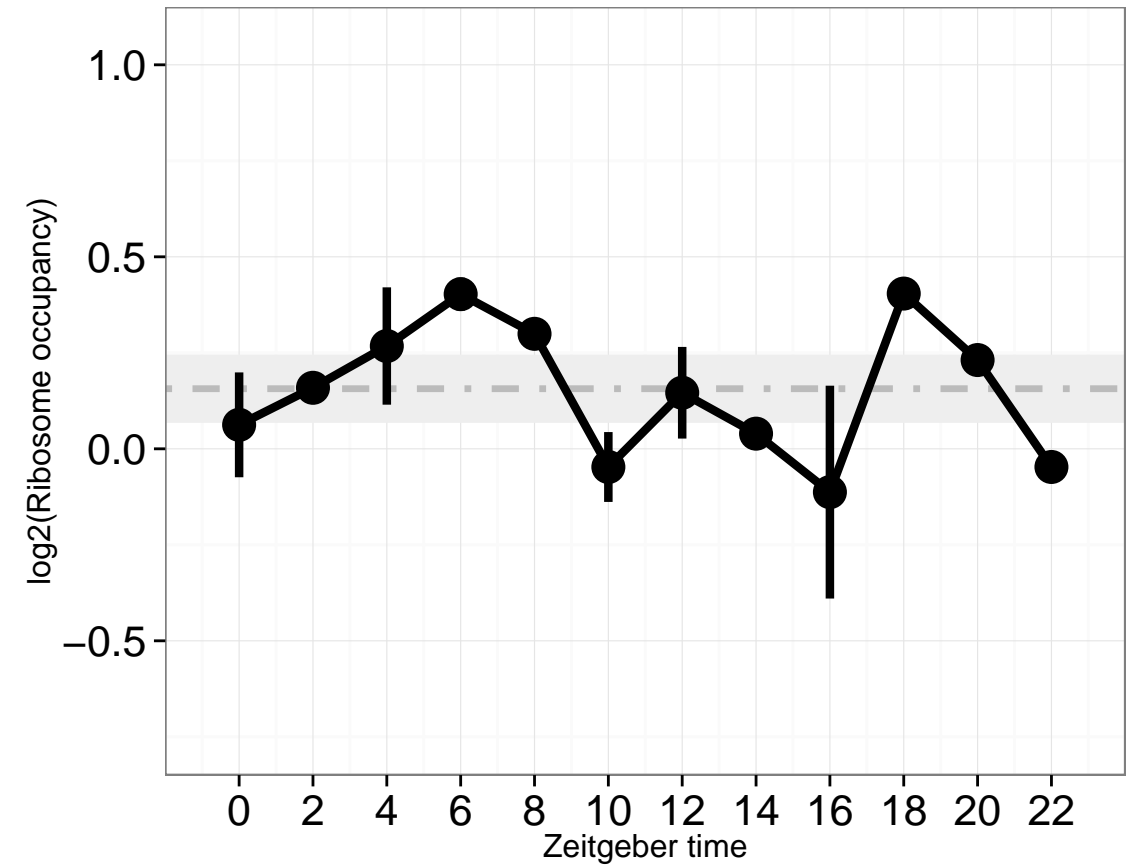

Supplement: Supplementary file 12305 [file 1]

## Ddb1

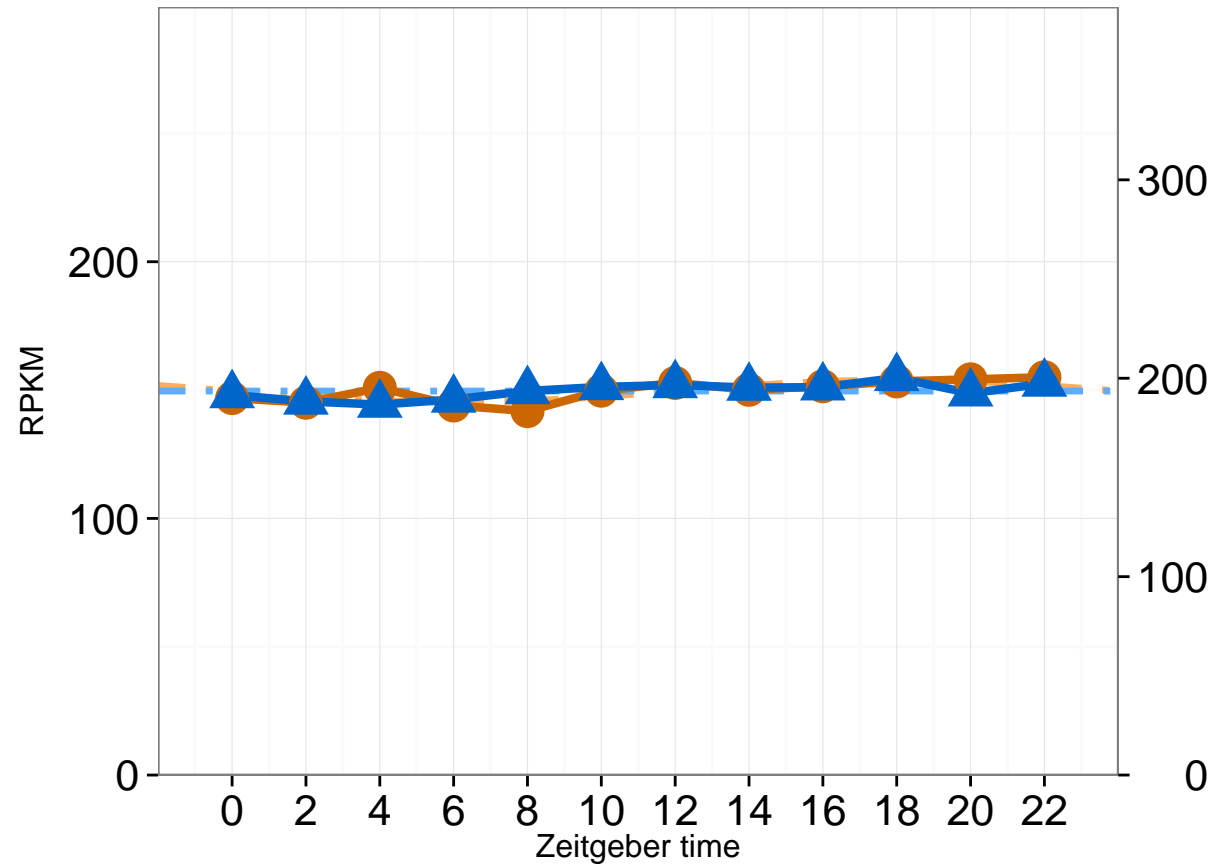

## Ddb1

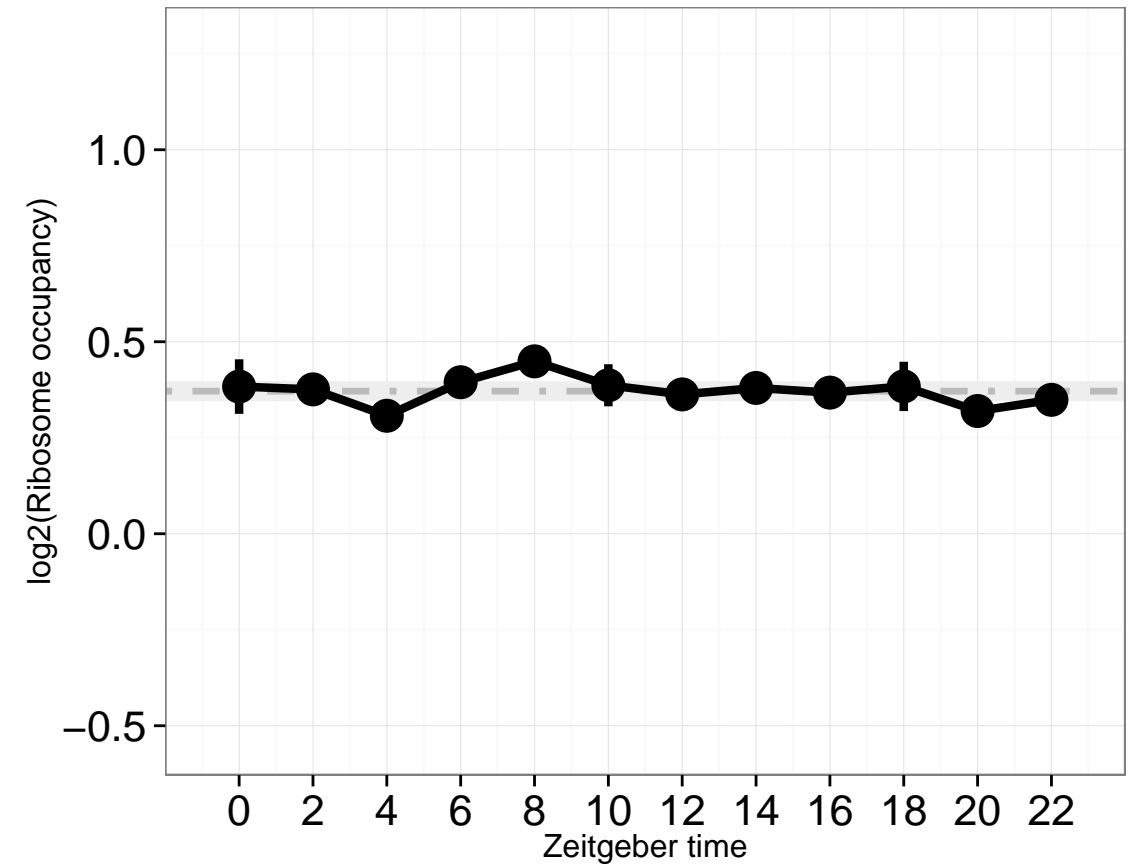

Supplement: Supplementary file 12306 [file 1]

## Stat4

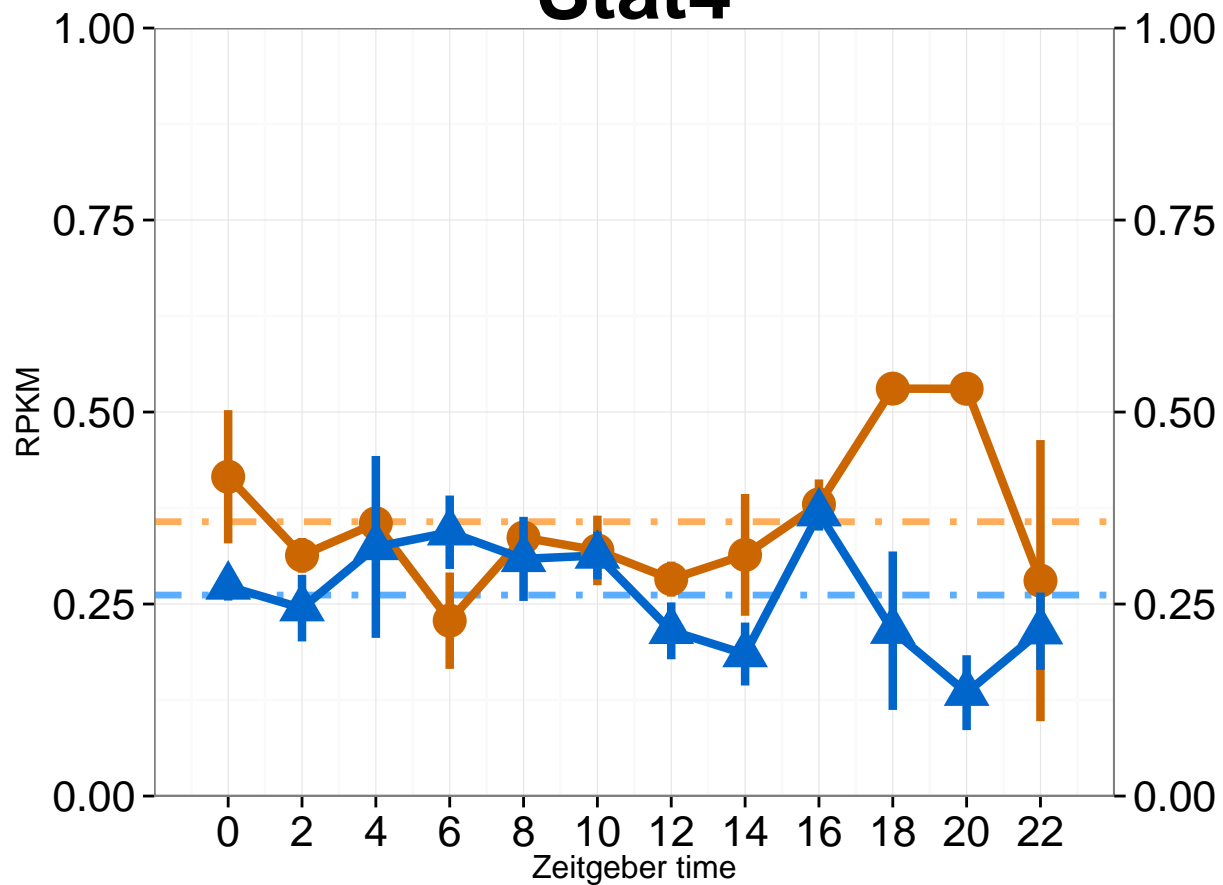

## Stat4

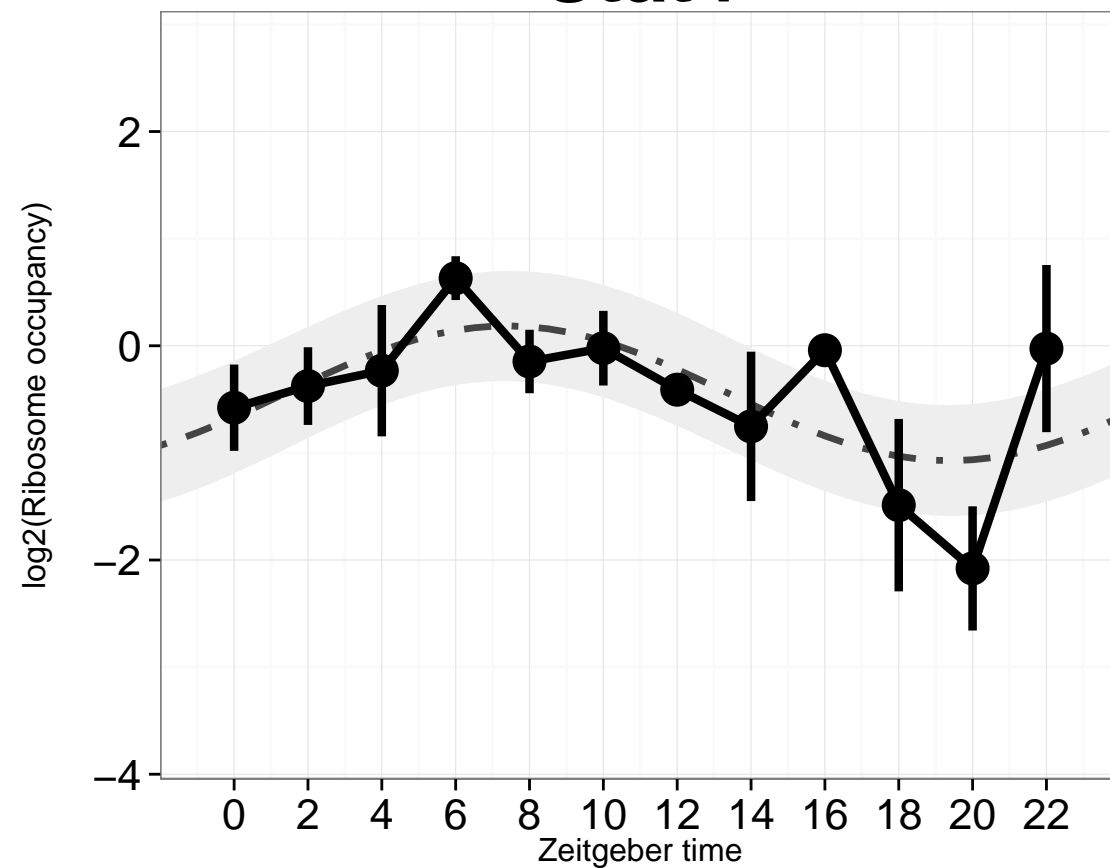

Supplement: Supplementary file 12307 [file 1]

# Cd300a

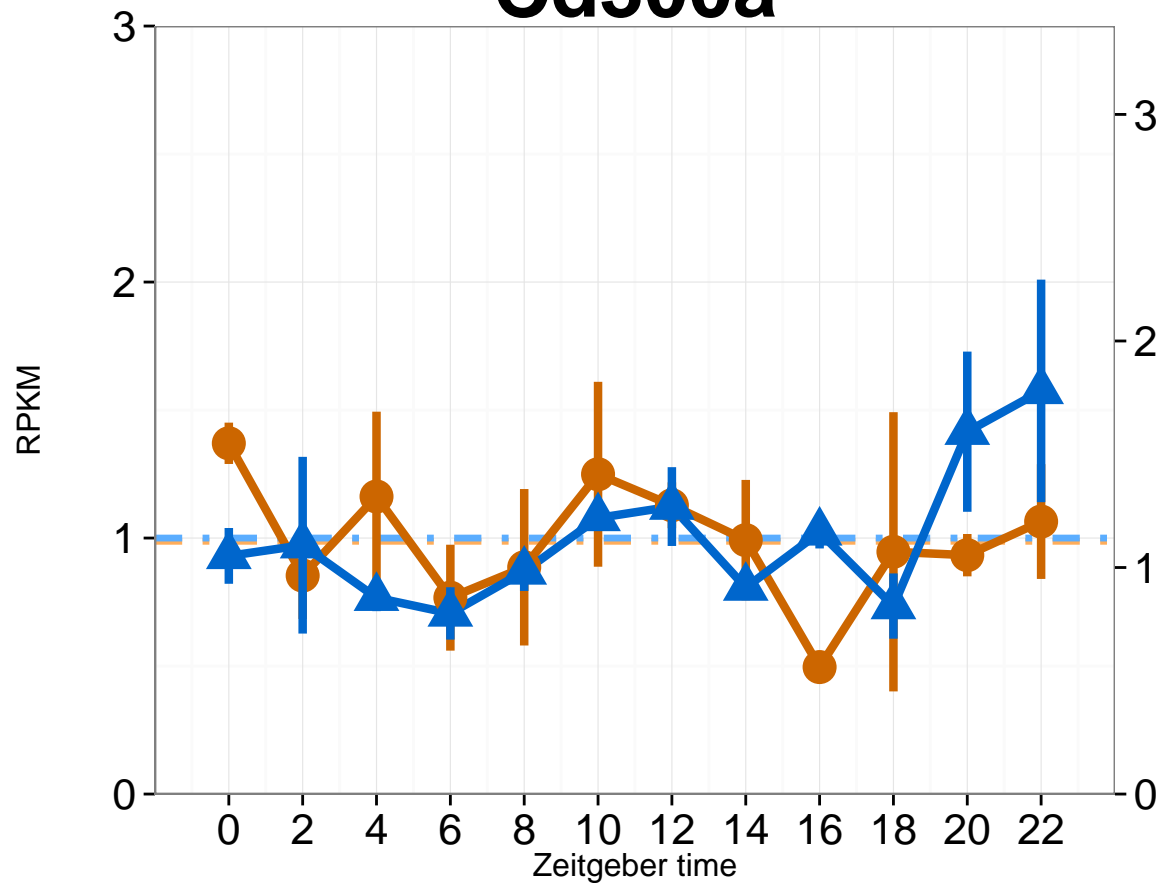

# Cd300a

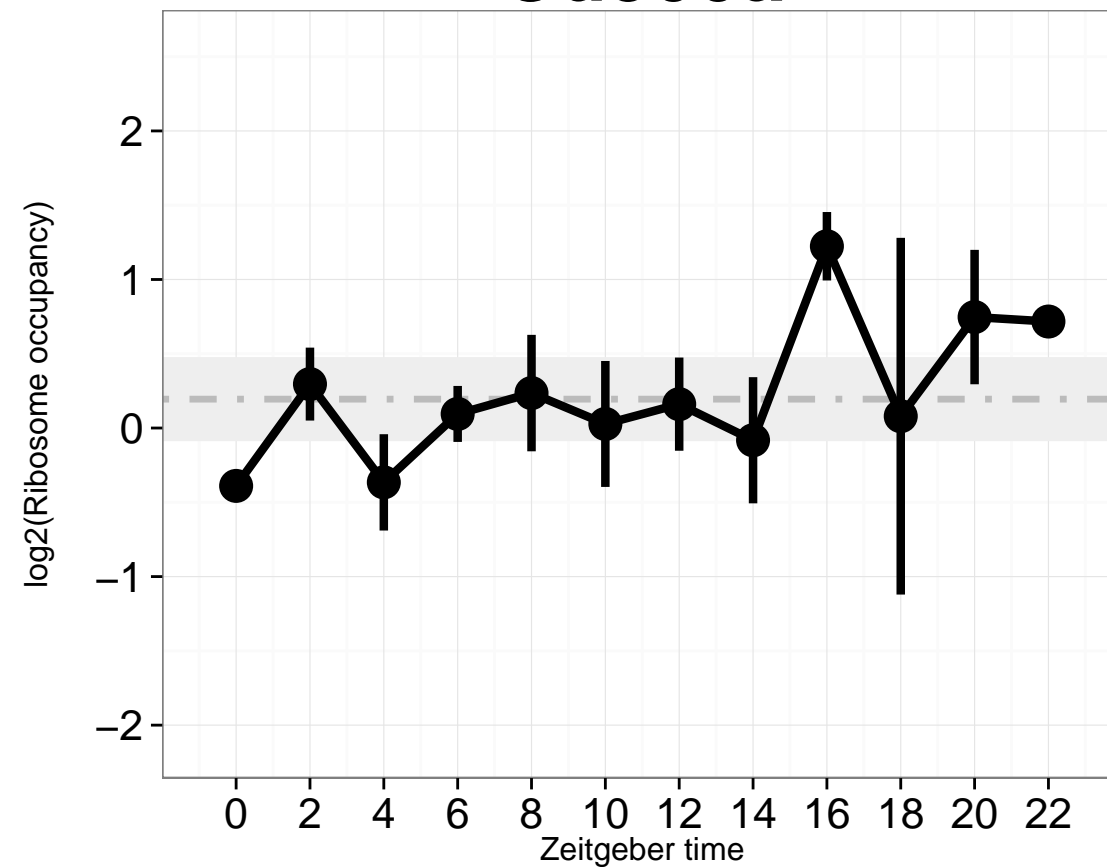

Supplement: Supplementary file 12308 [file 1]

# Acaa1a

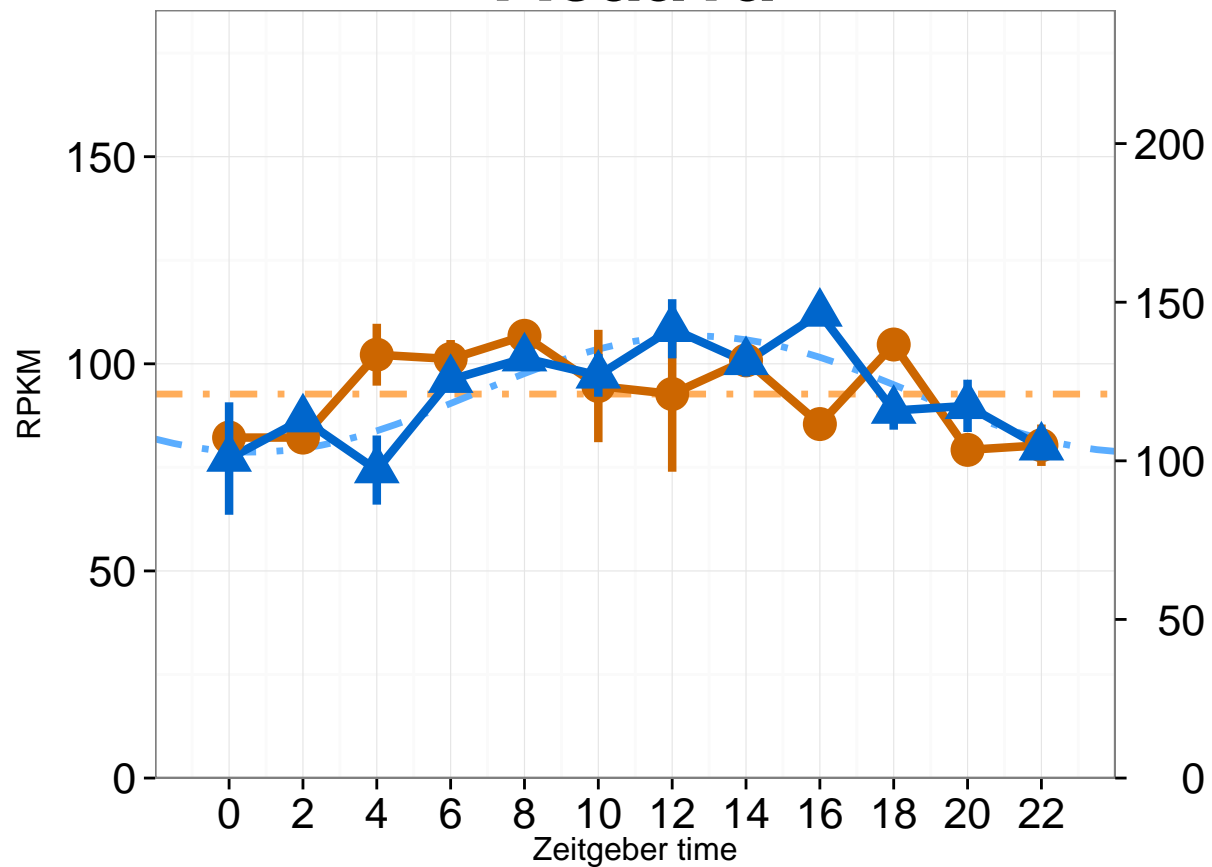

# Acaa1a

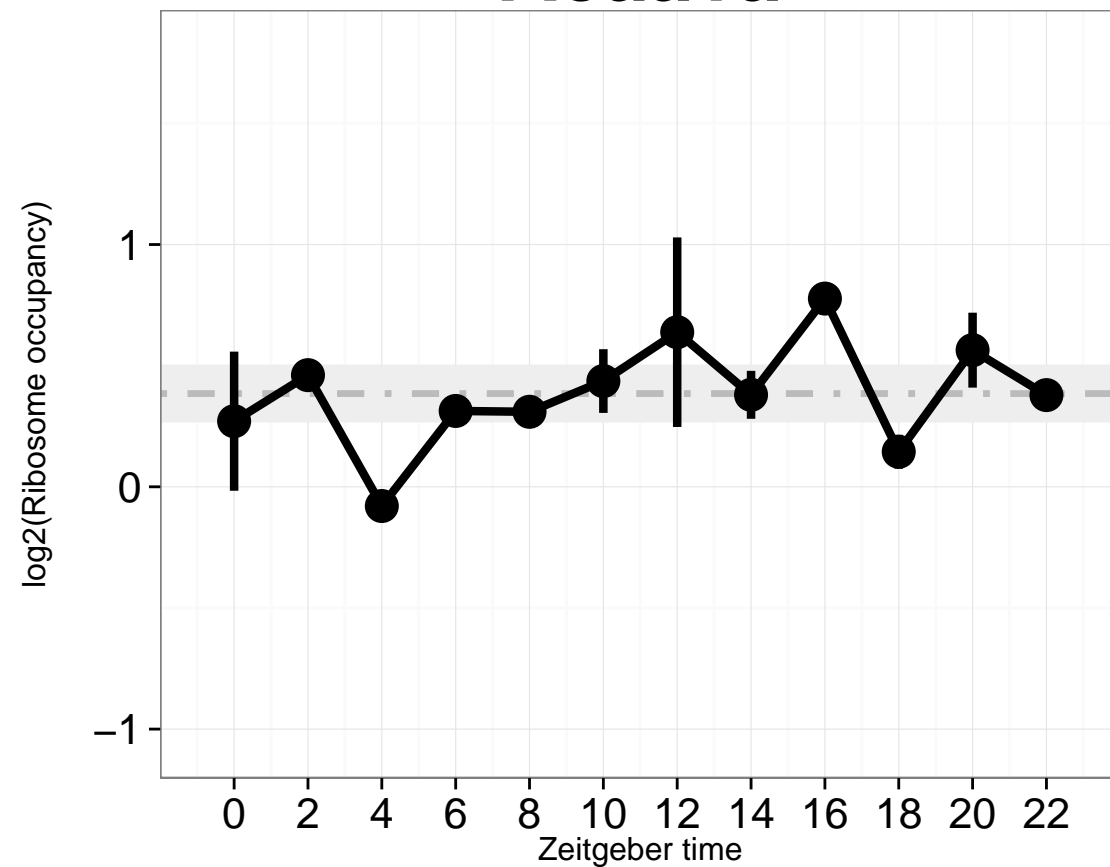

Supplement: Supplementary file 12309 [file 1]

# Dapp1

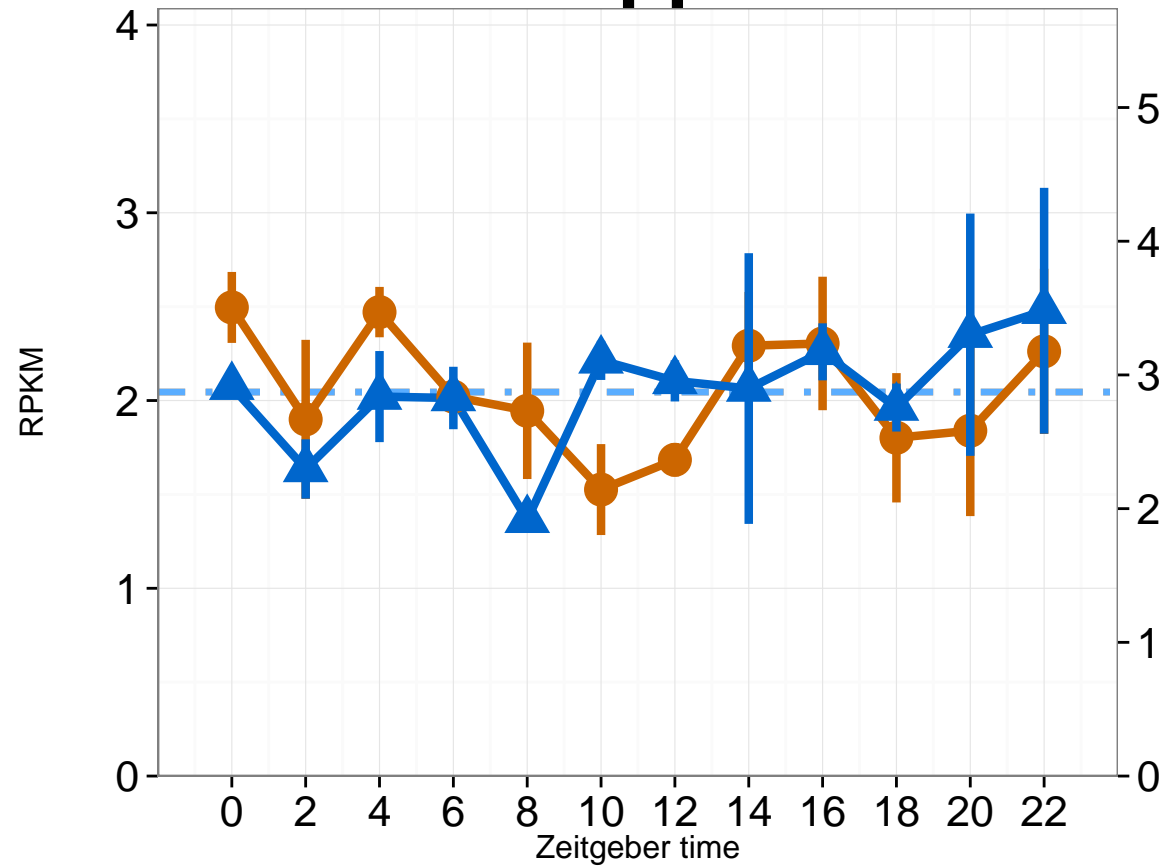

# Dapp1

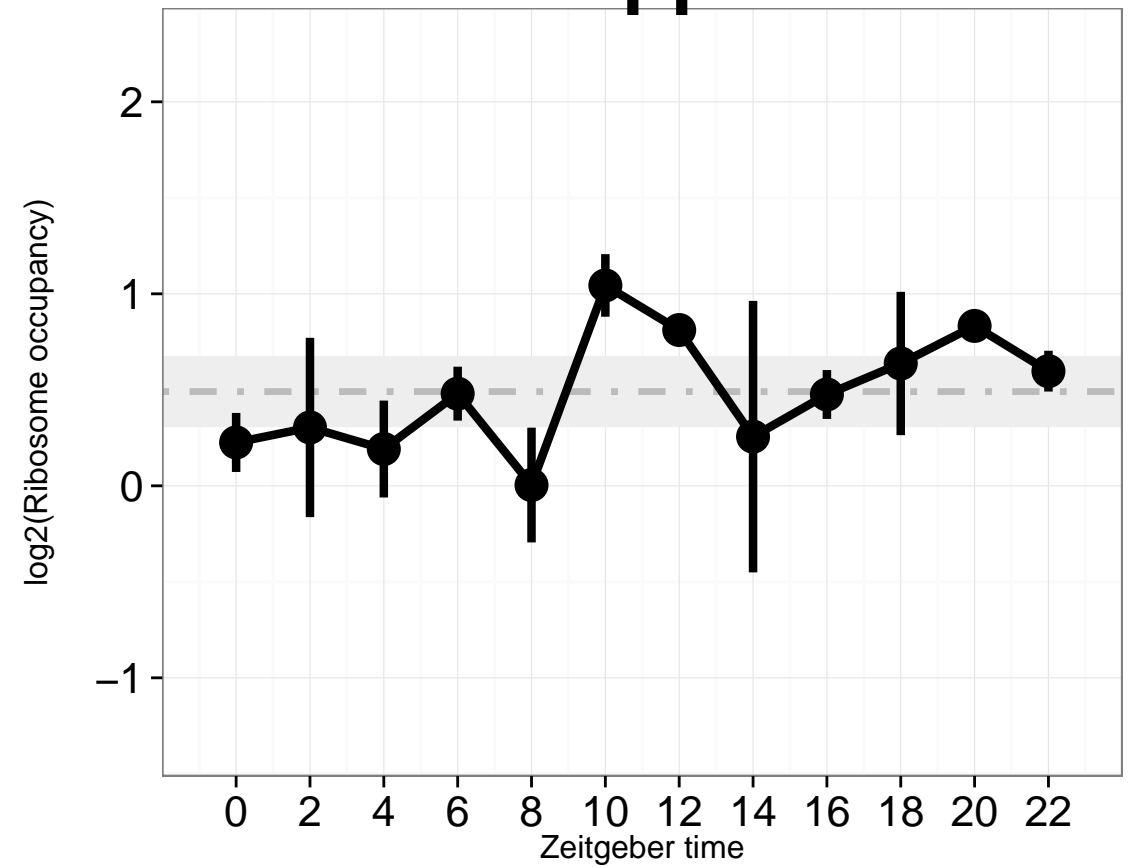

Supplement: Supplementary file 12310 [file 1]

## Elov11

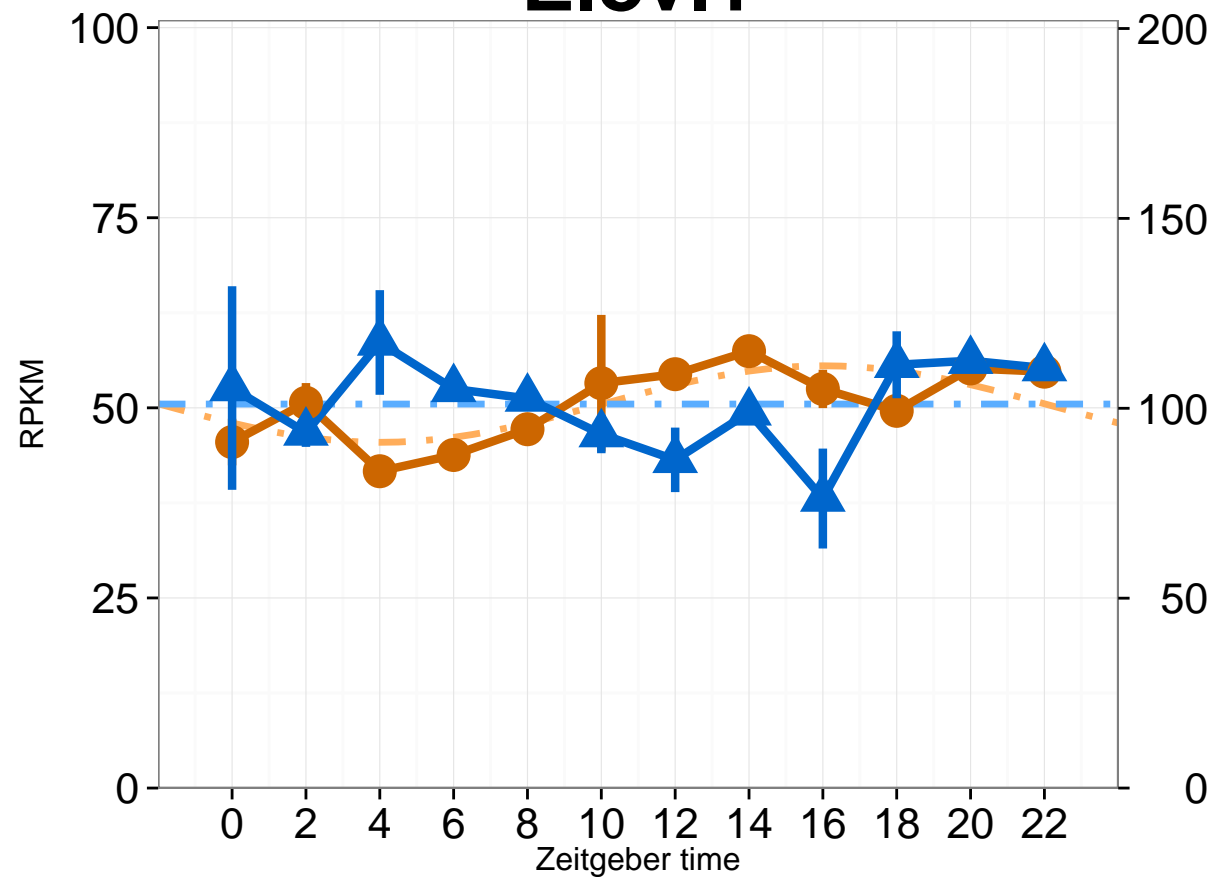

## Elov11

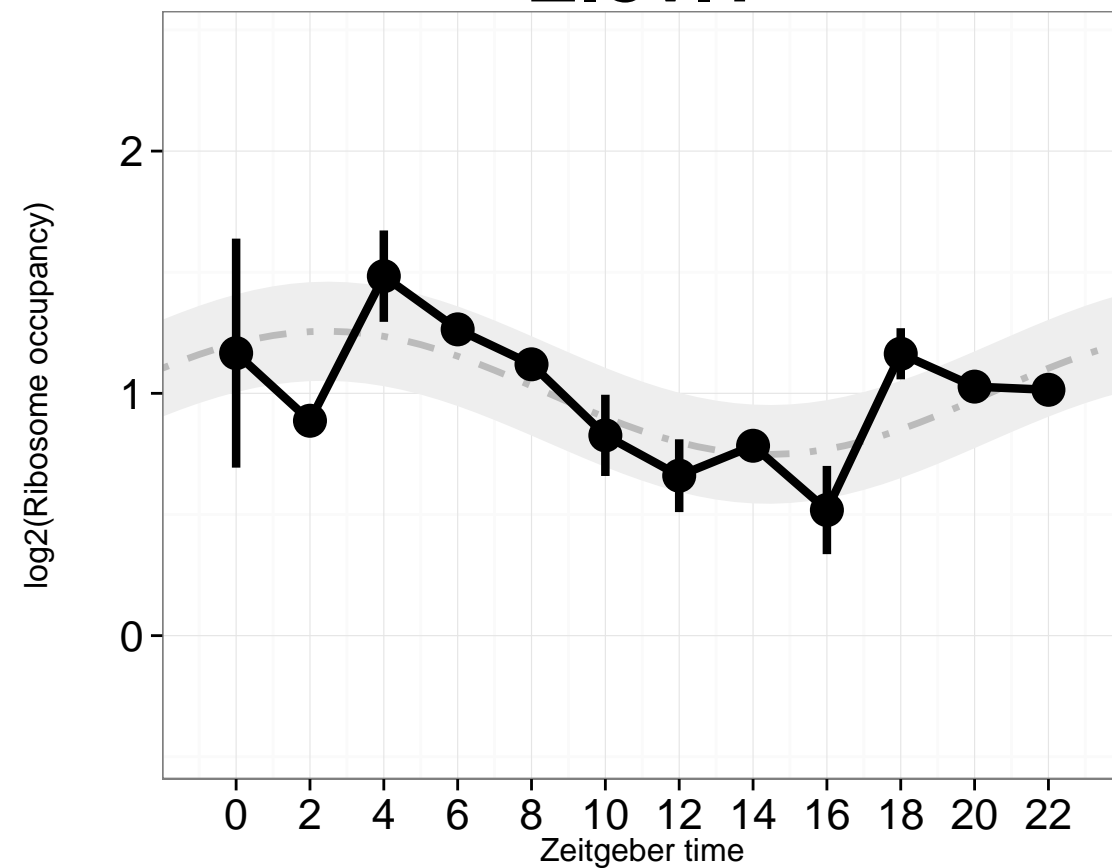

Supplement: Supplementary file 12311 [file 1]

# Phip

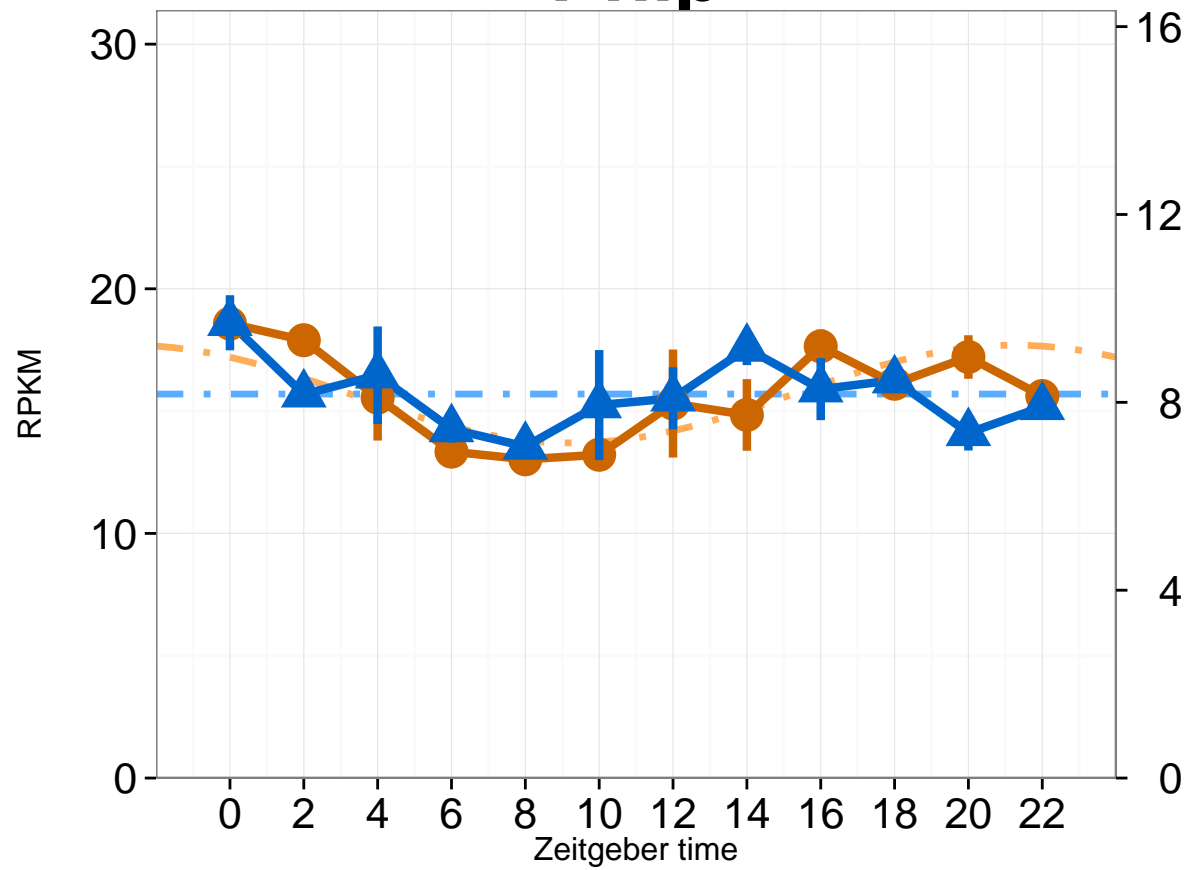

# Phip

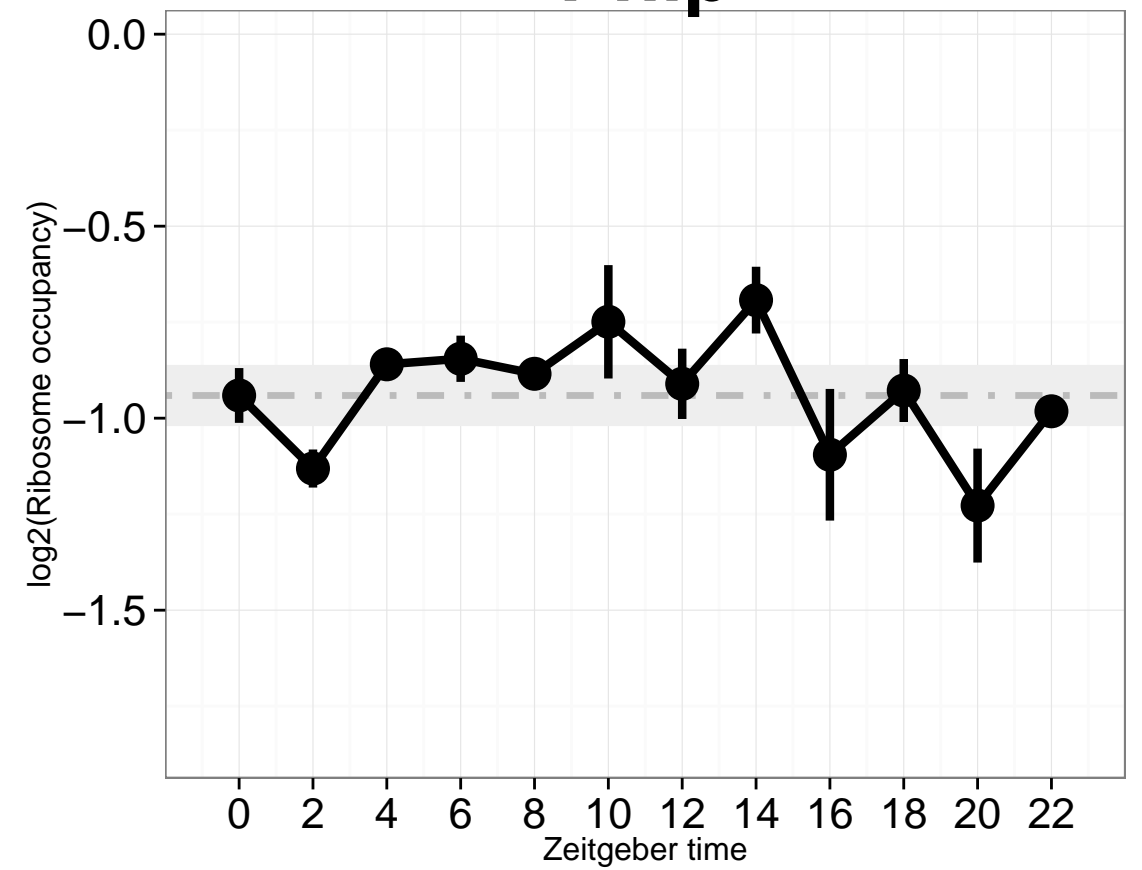

Supplement: Supplementary file 12312 [file 1]

## Ndc80

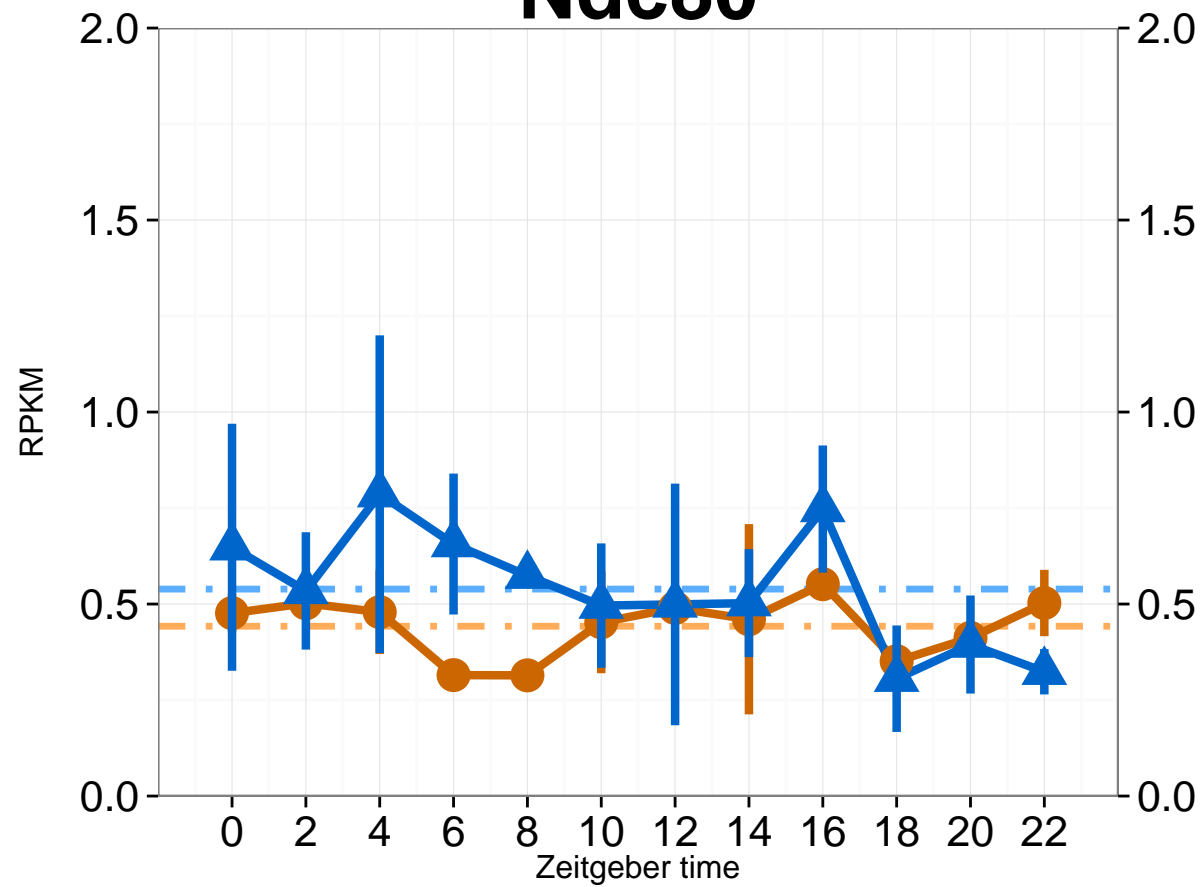

## Ndc80

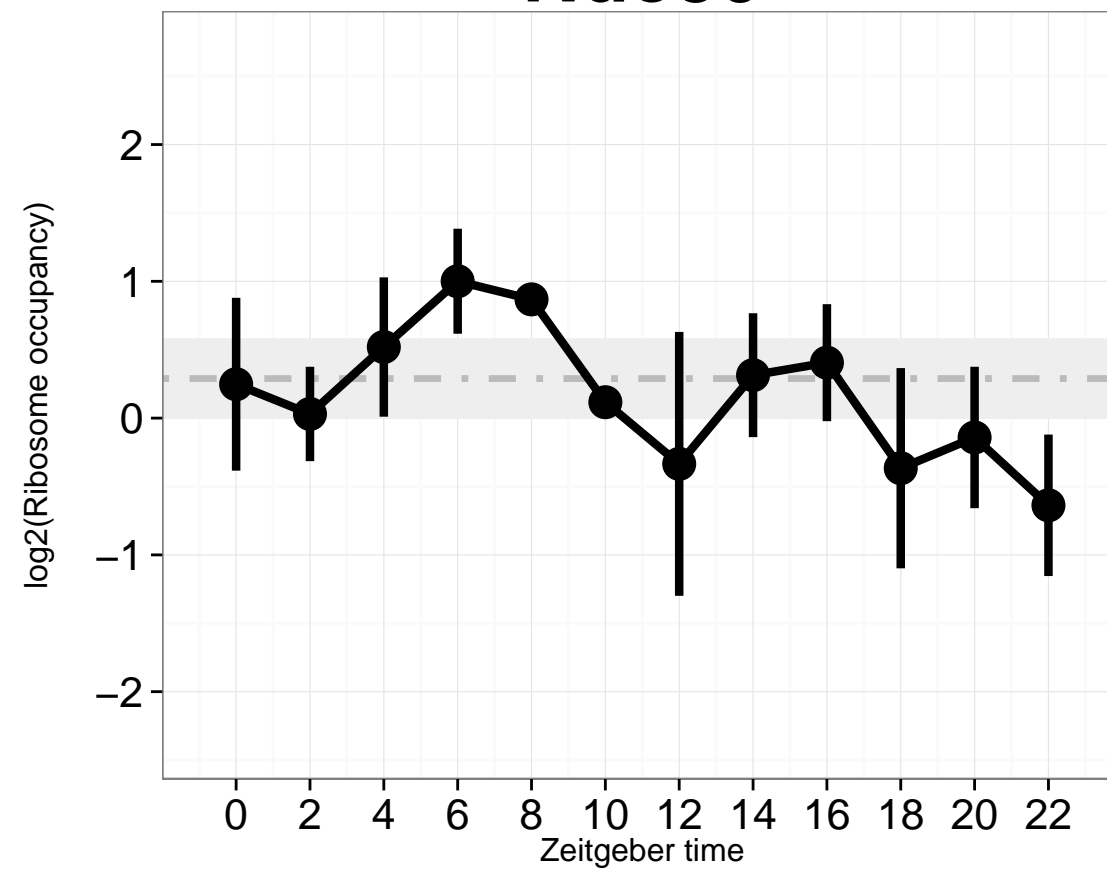

Supplement: Supplementary file 12313 [file 1]

# Dpy19l1

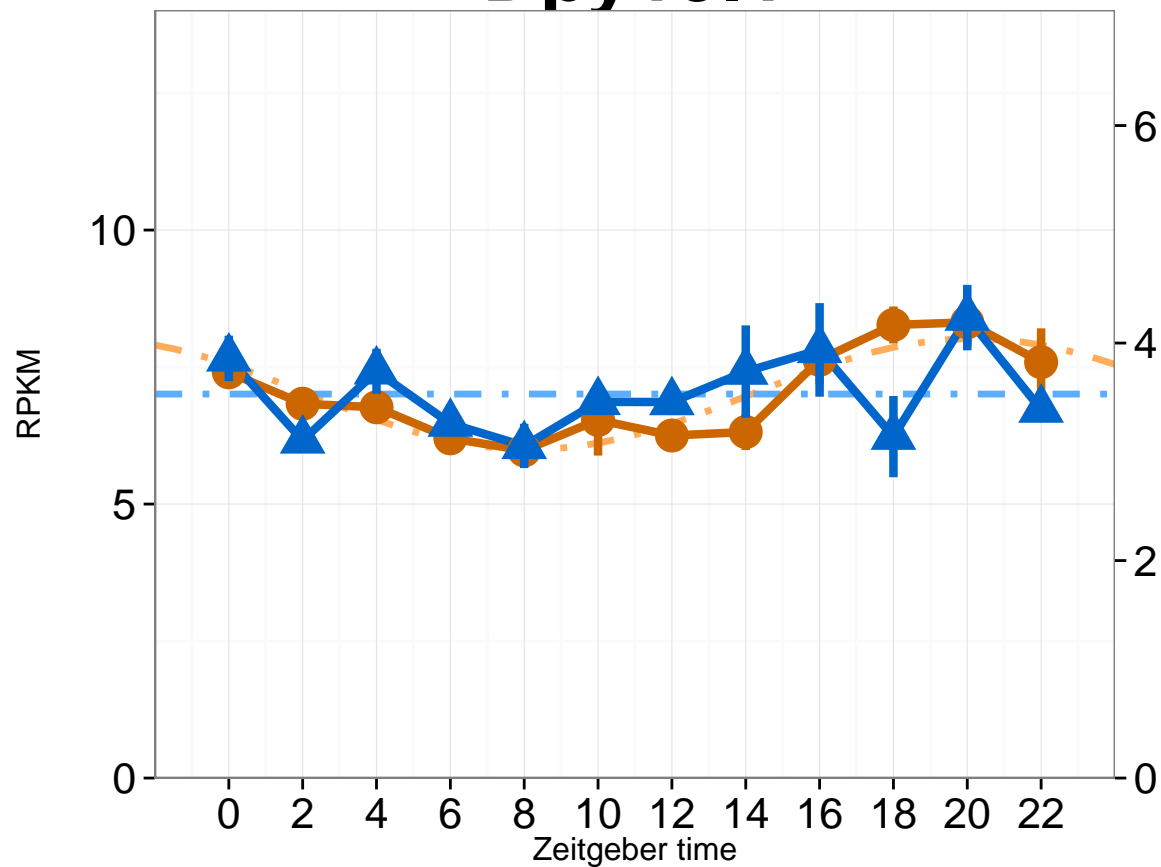

# Dpy19l1

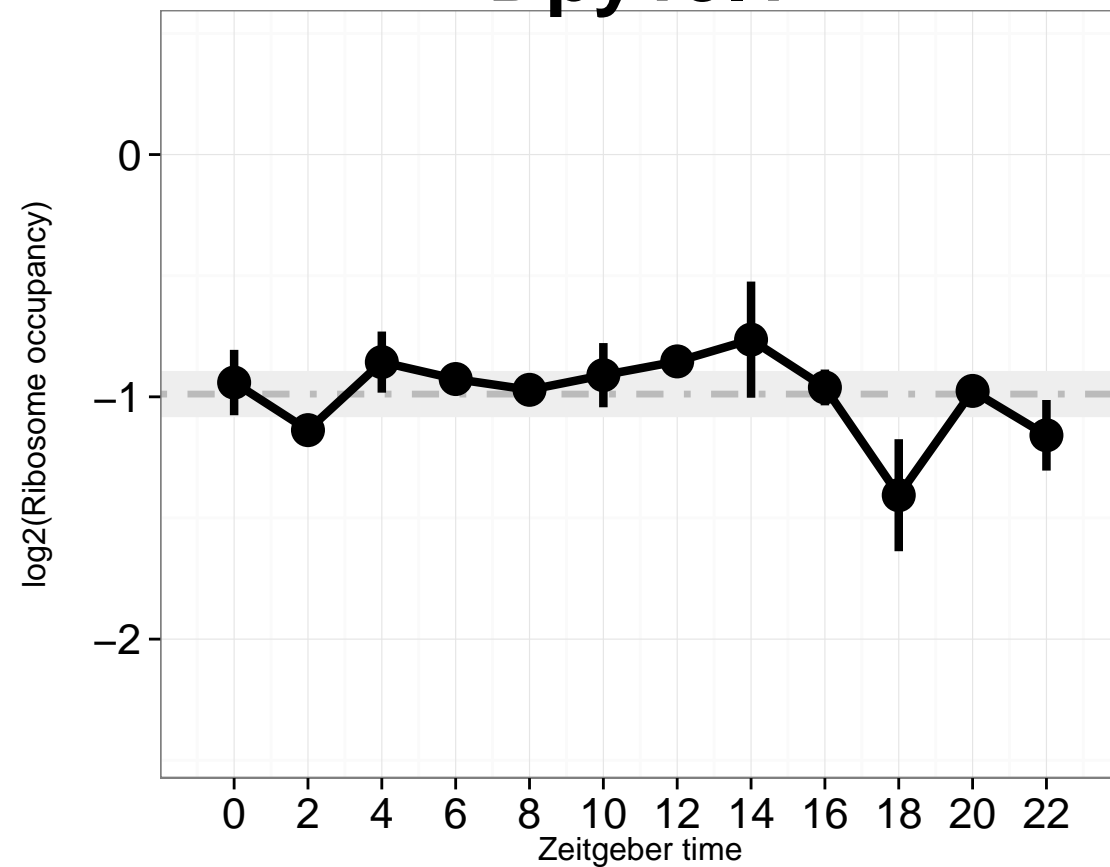

Supplement: Supplementary file 12314 [file 1]

## Dcxr

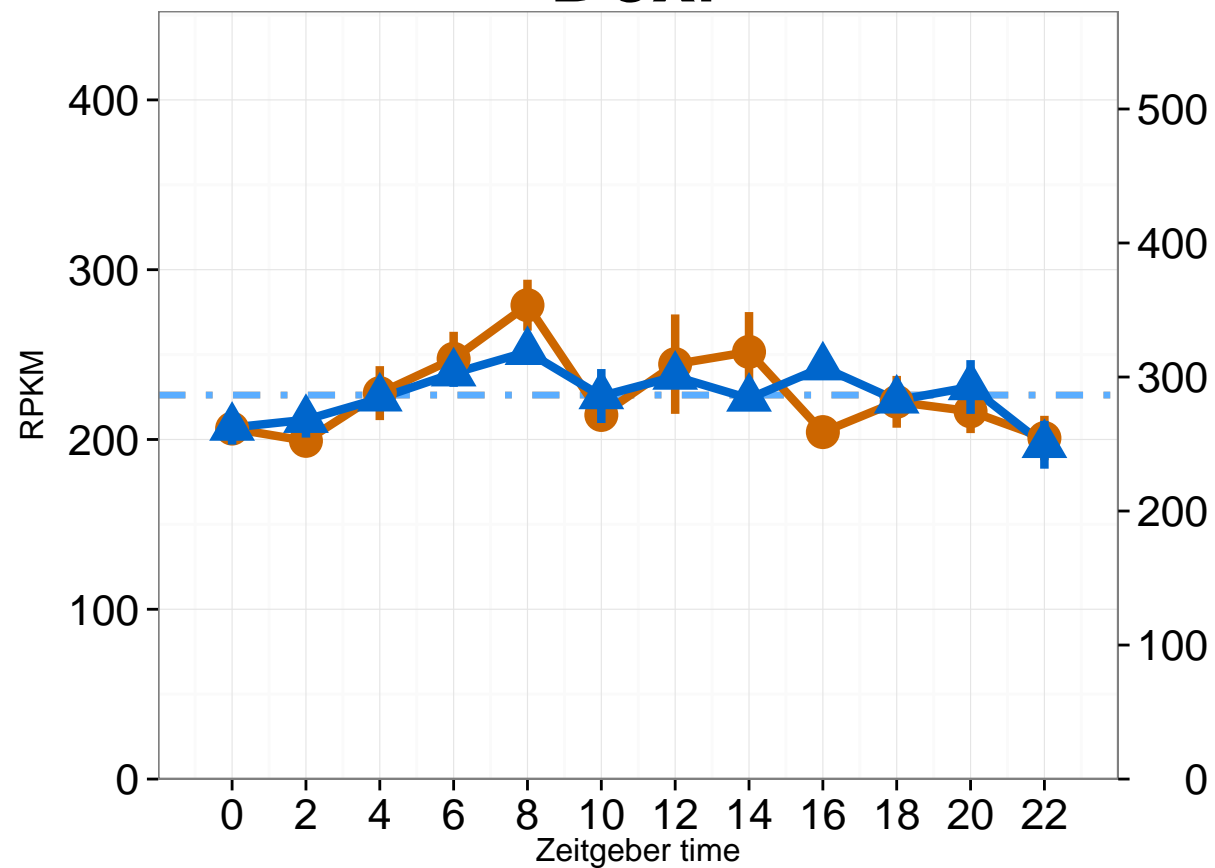

## Dcxr

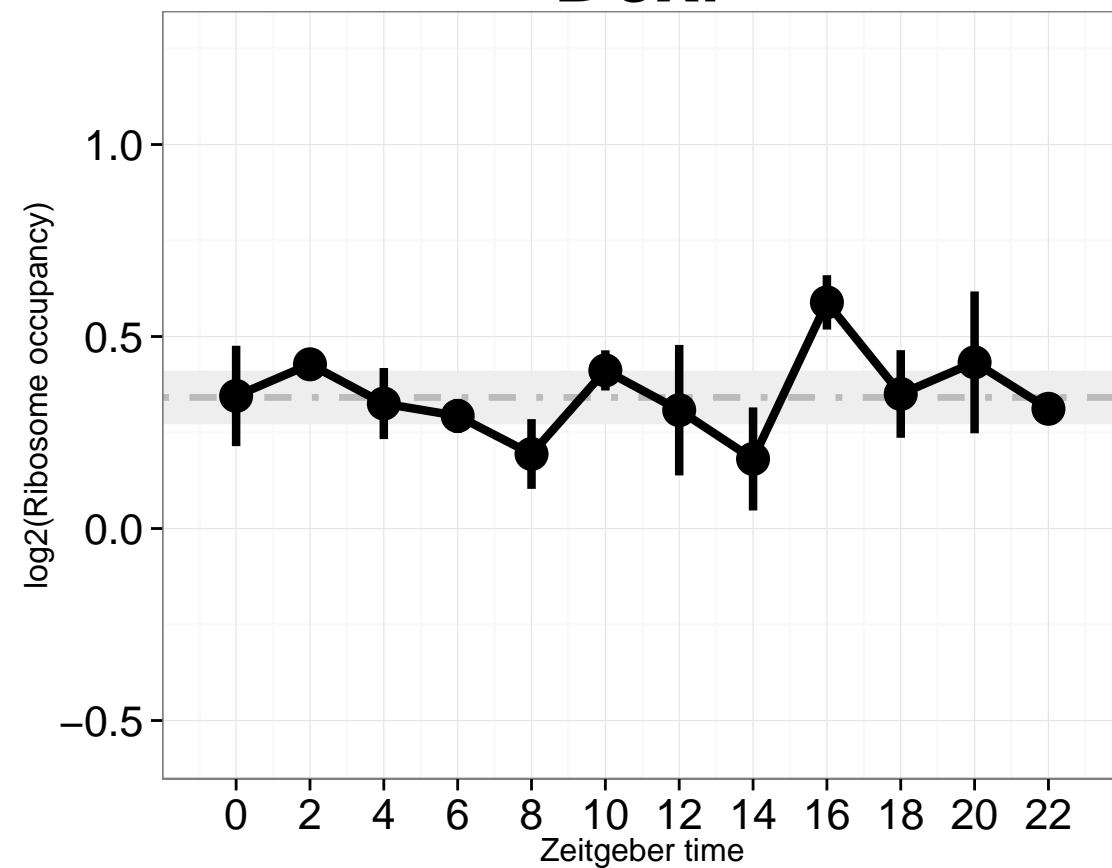

Supplement: Supplementary file 12315 [file 1]

## Atg5

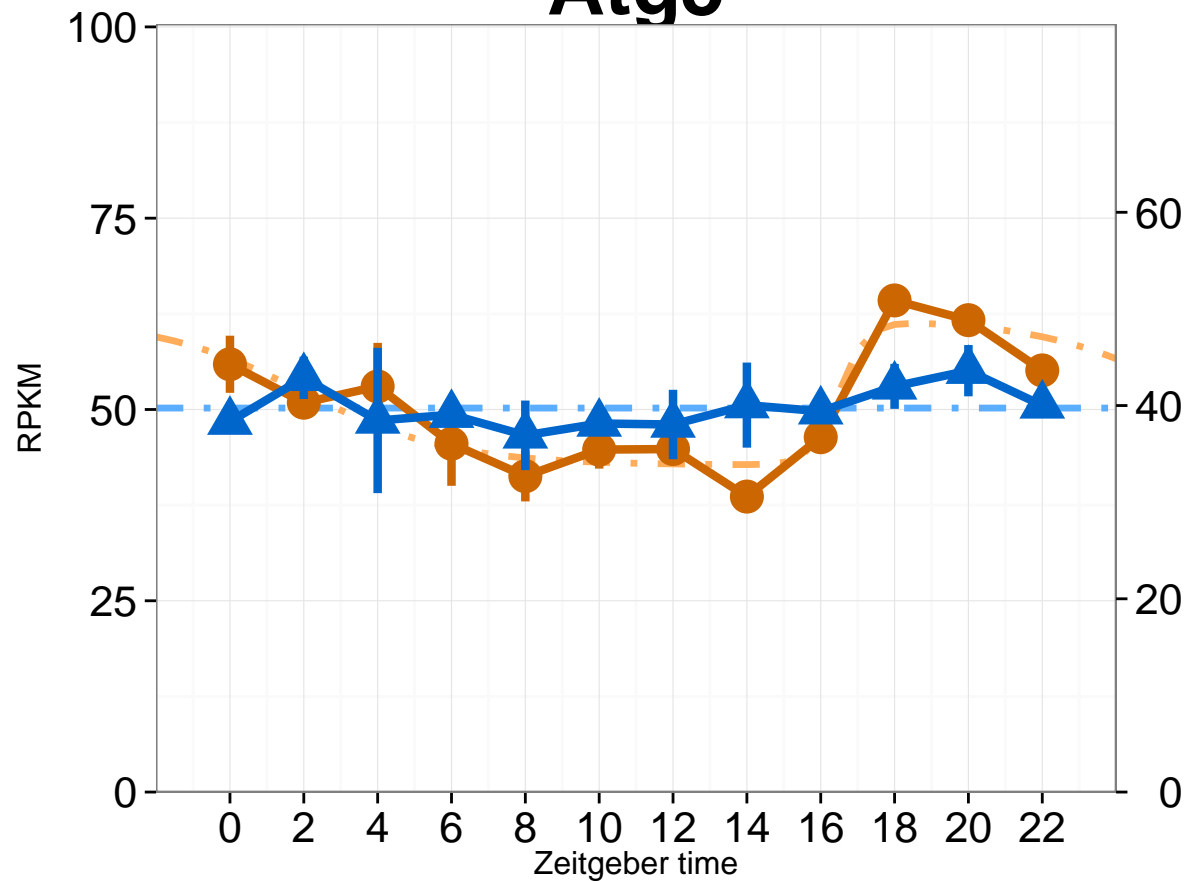

## Atg5

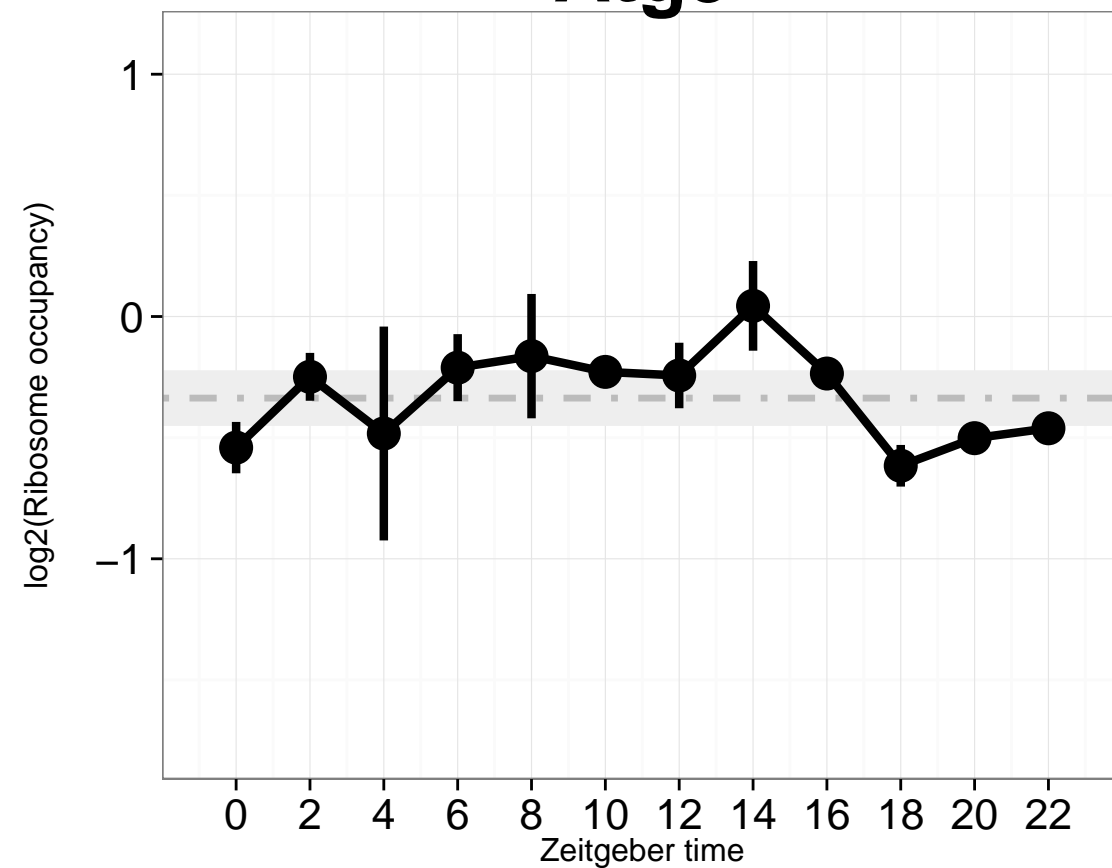

Supplement: Supplementary file 12316 [file 1]

## Cers6

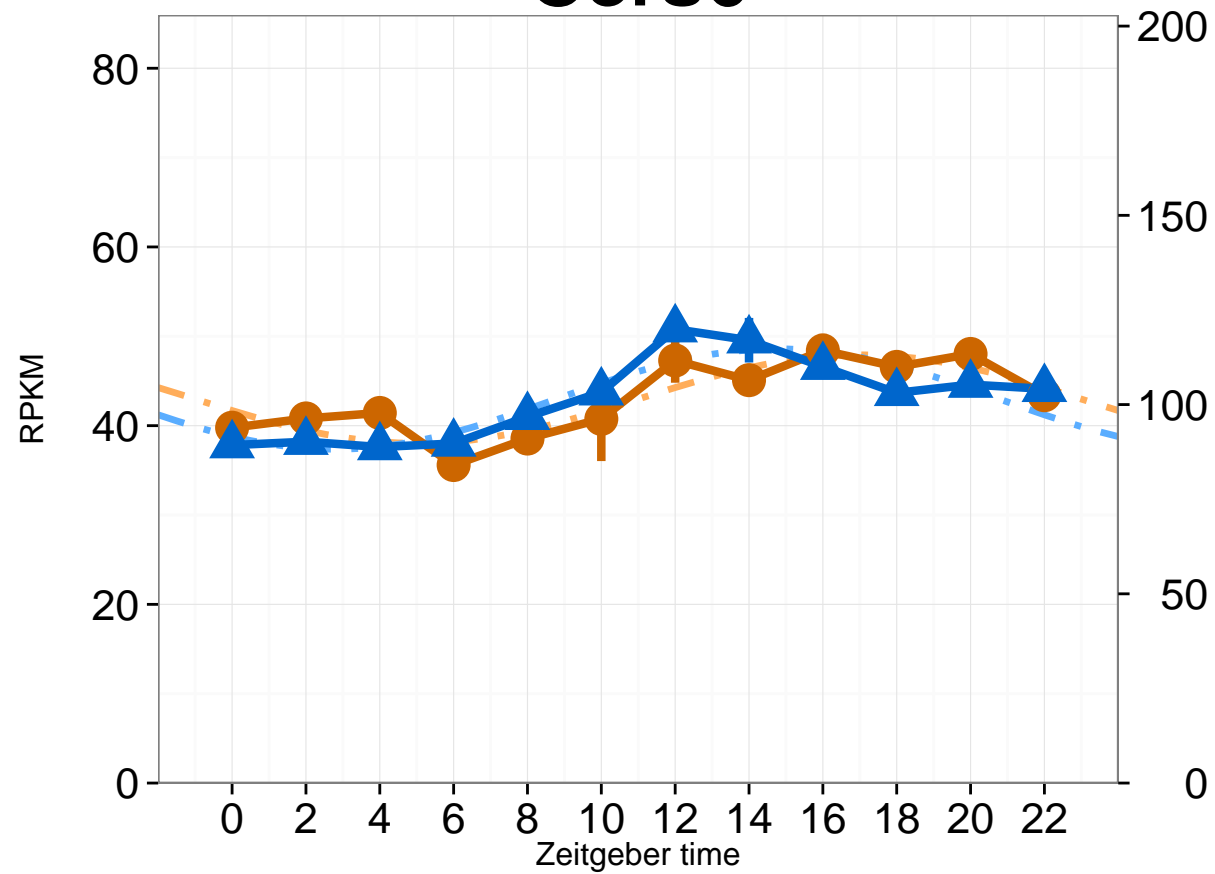

## Cers6

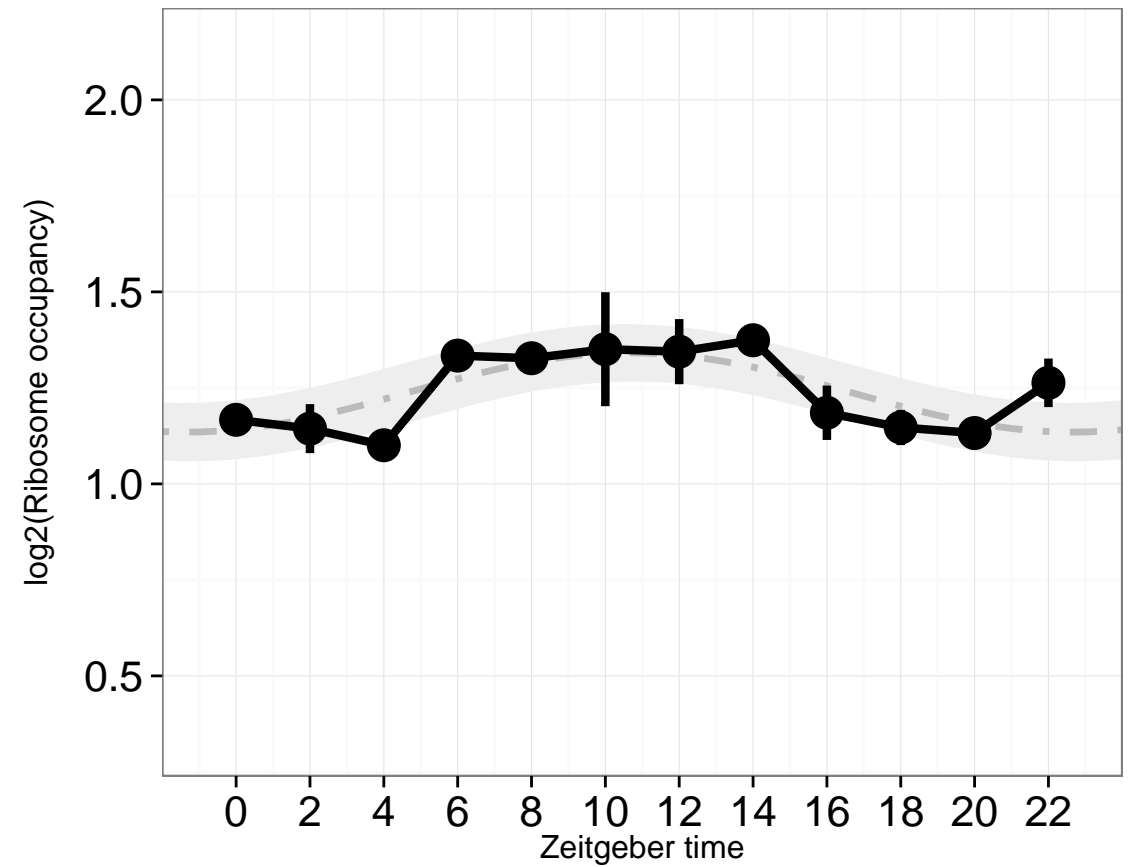

Supplement: Supplementary file 12317 [file 1]

## Eef1e1

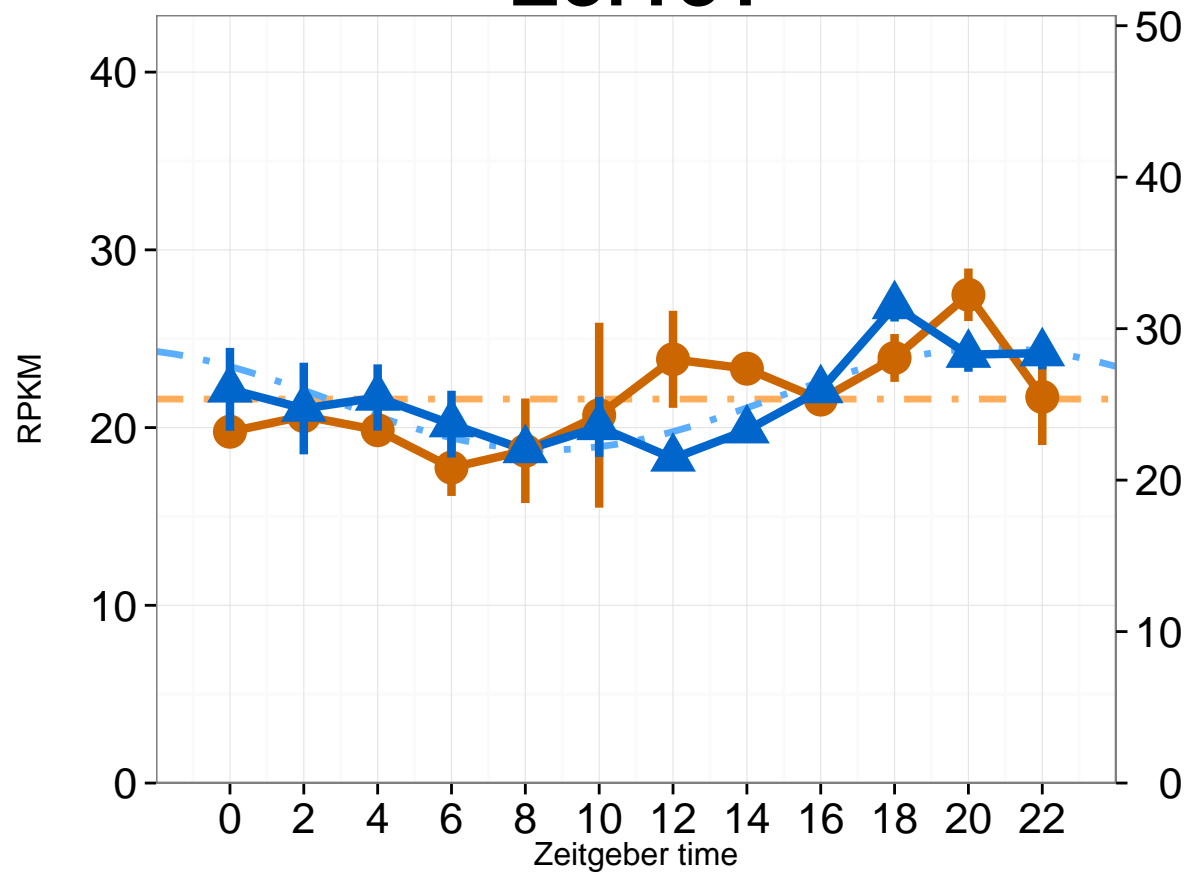

## Eef1e1

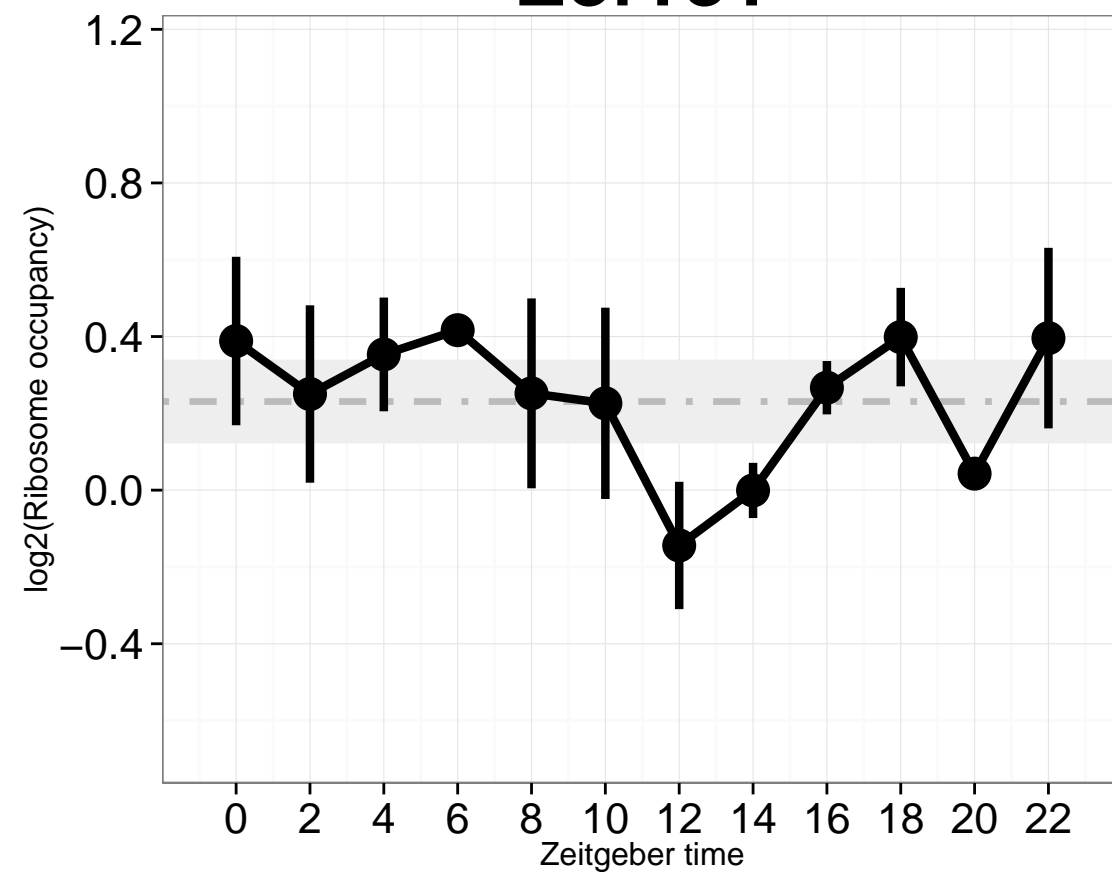

Supplement: Supplementary file 12318 [file 1]

## Slc39a14

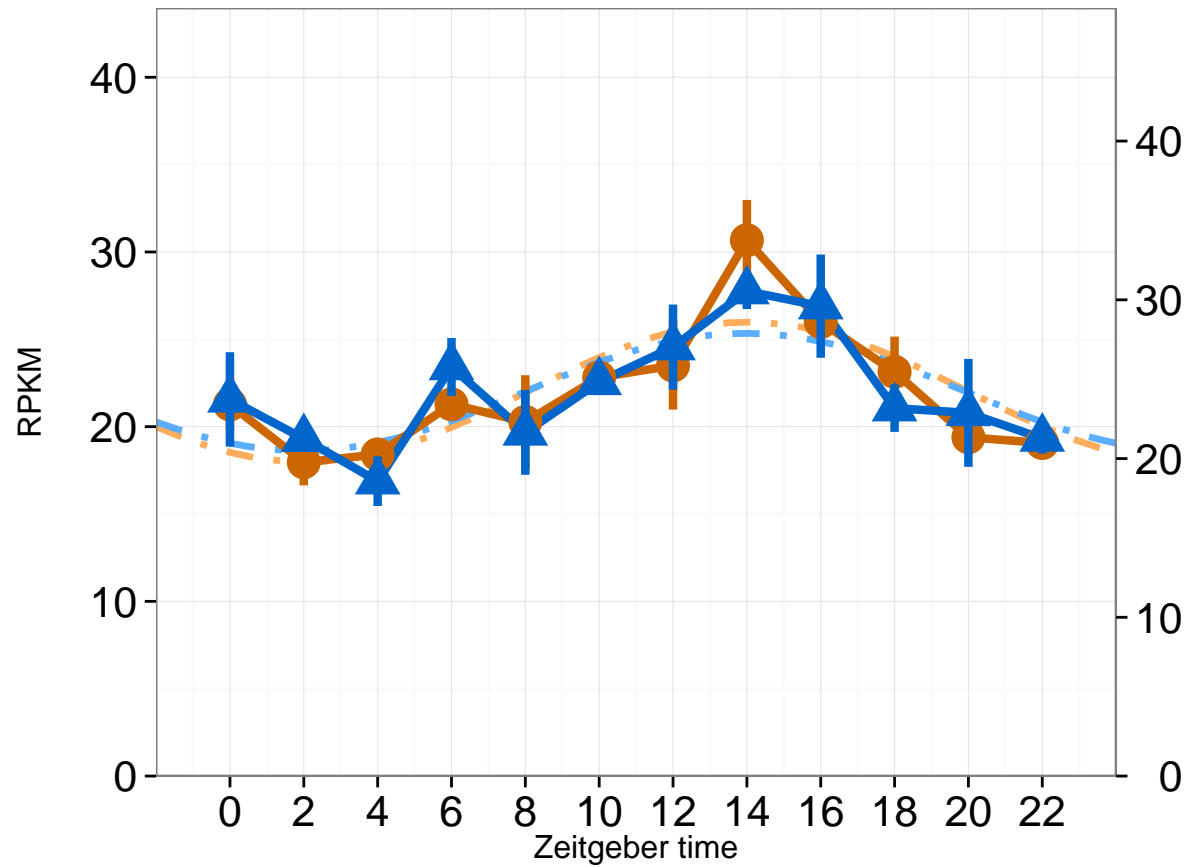

## Slc39a14

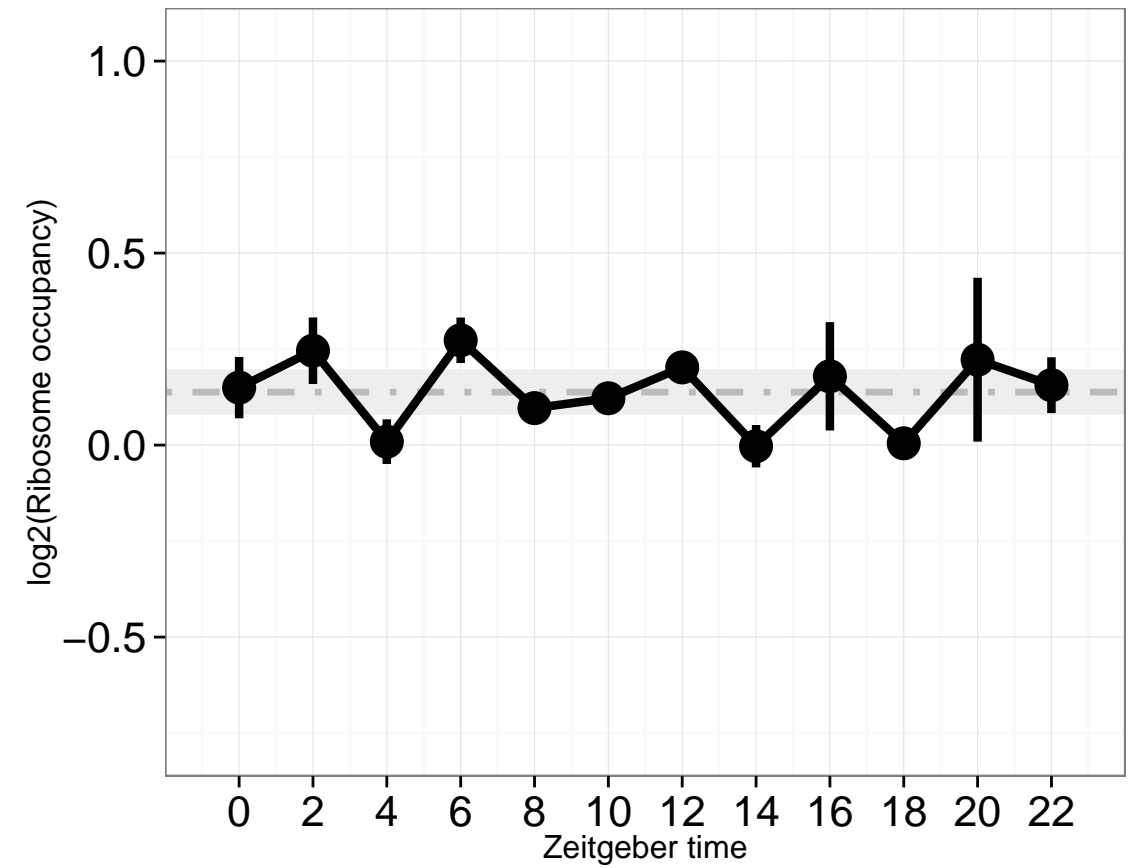

Supplement: Supplementary file 12319 [file 1]

## Mecr

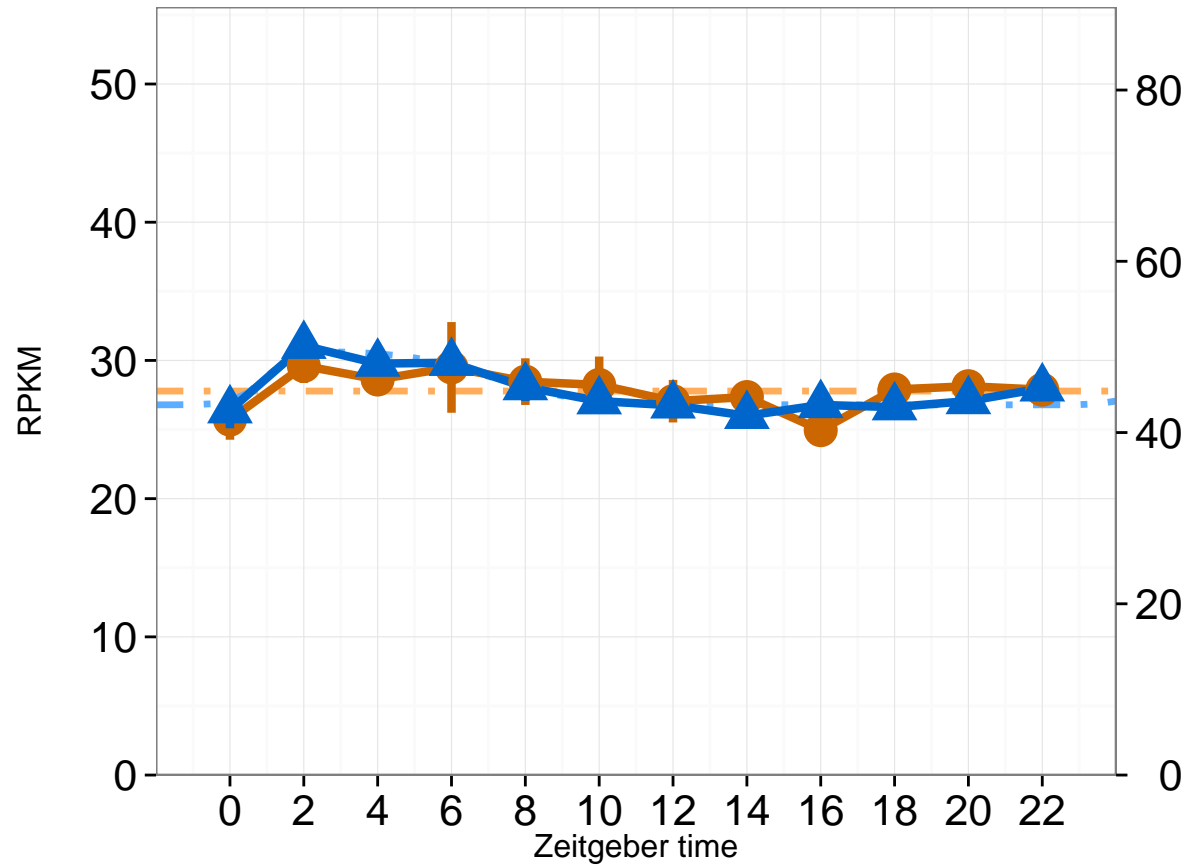

## Mecr

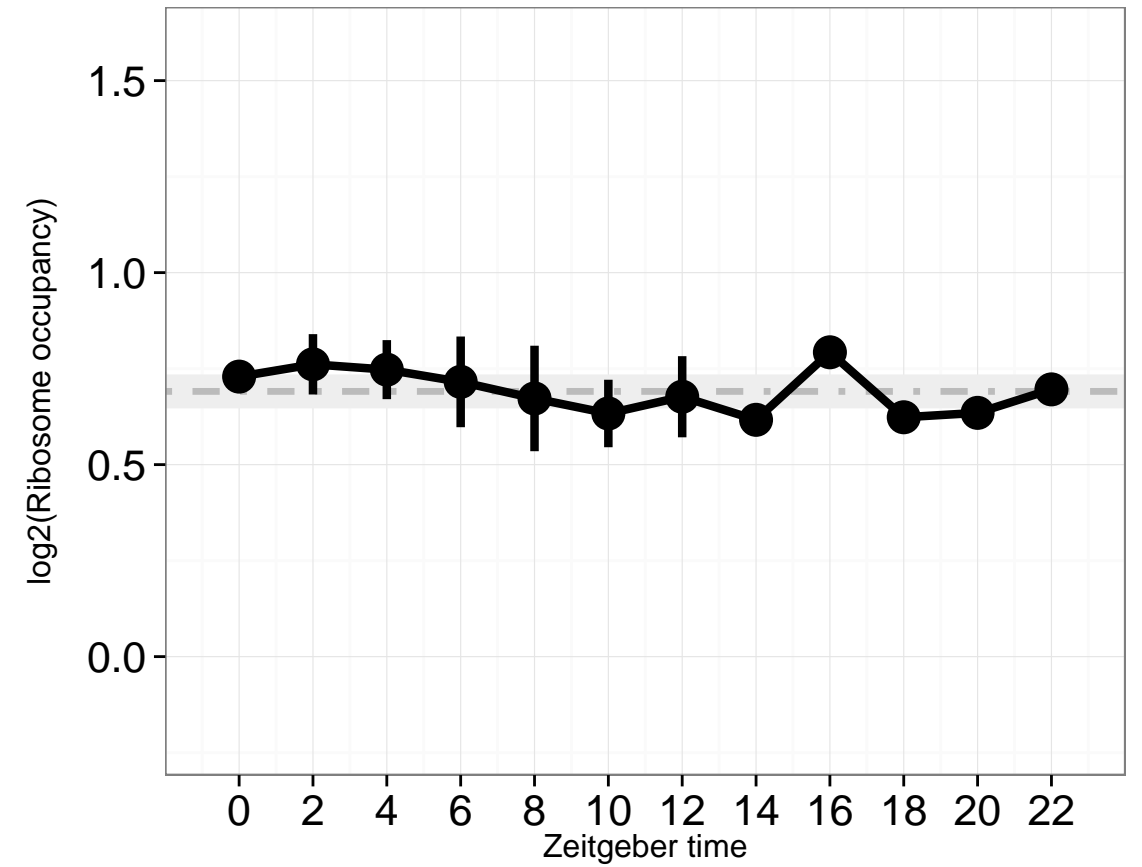

Supplement: Supplementary file 12320 [file 1]

## Zbtb22

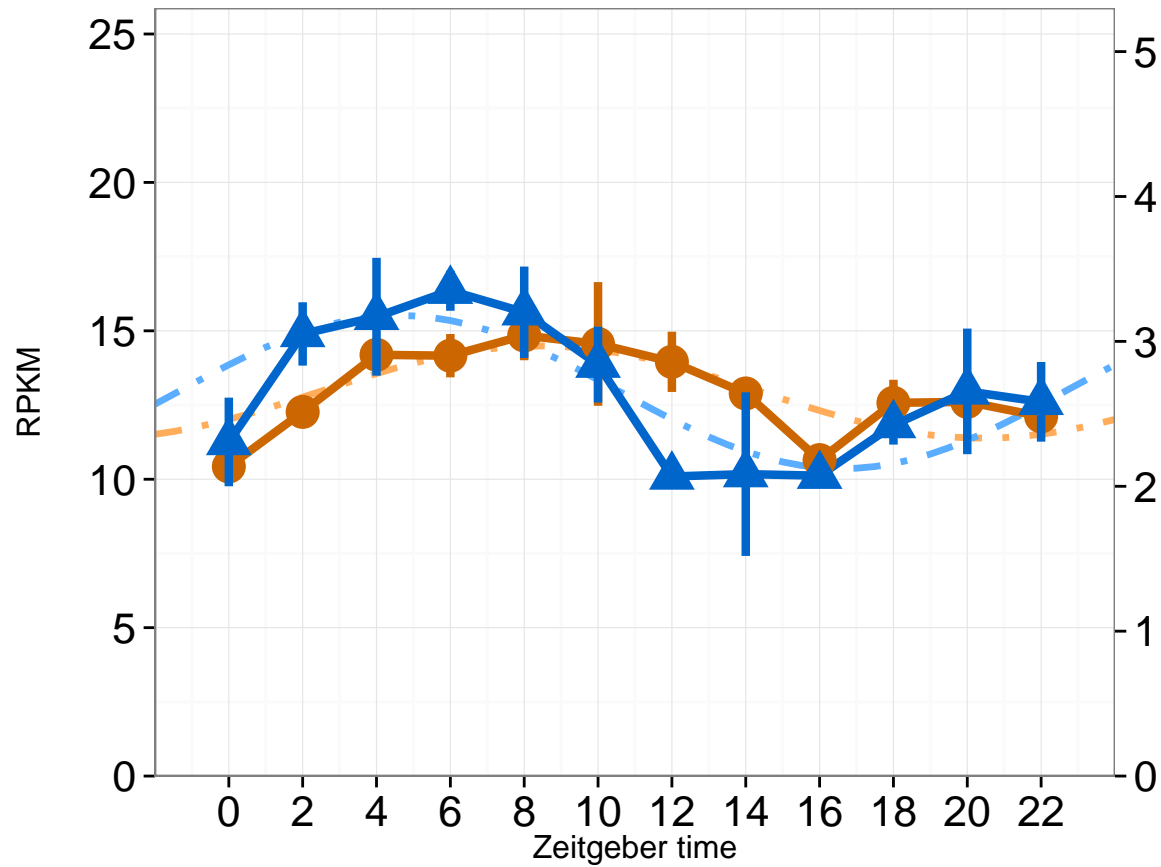

## Zbtb22

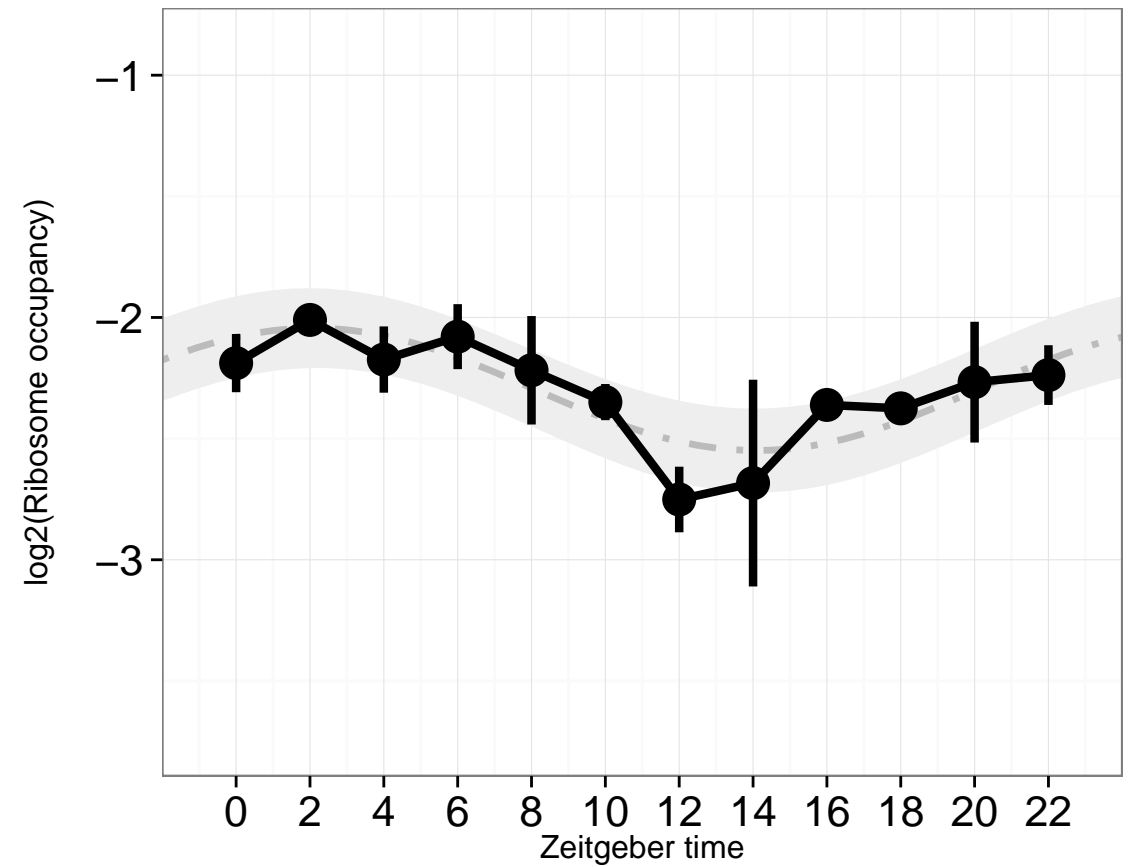

Supplement: Supplementary file 12321 [file 1]

# Tmem52b

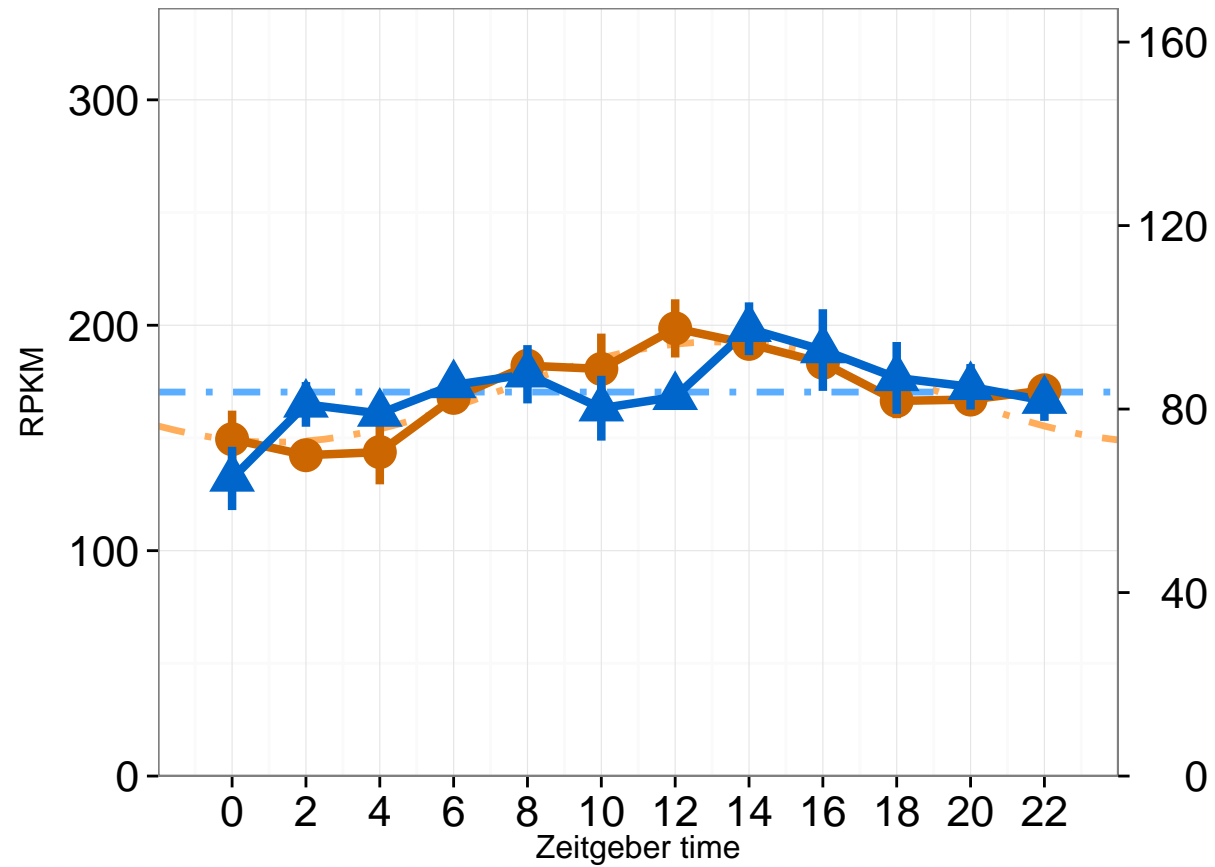

# Tmem52b

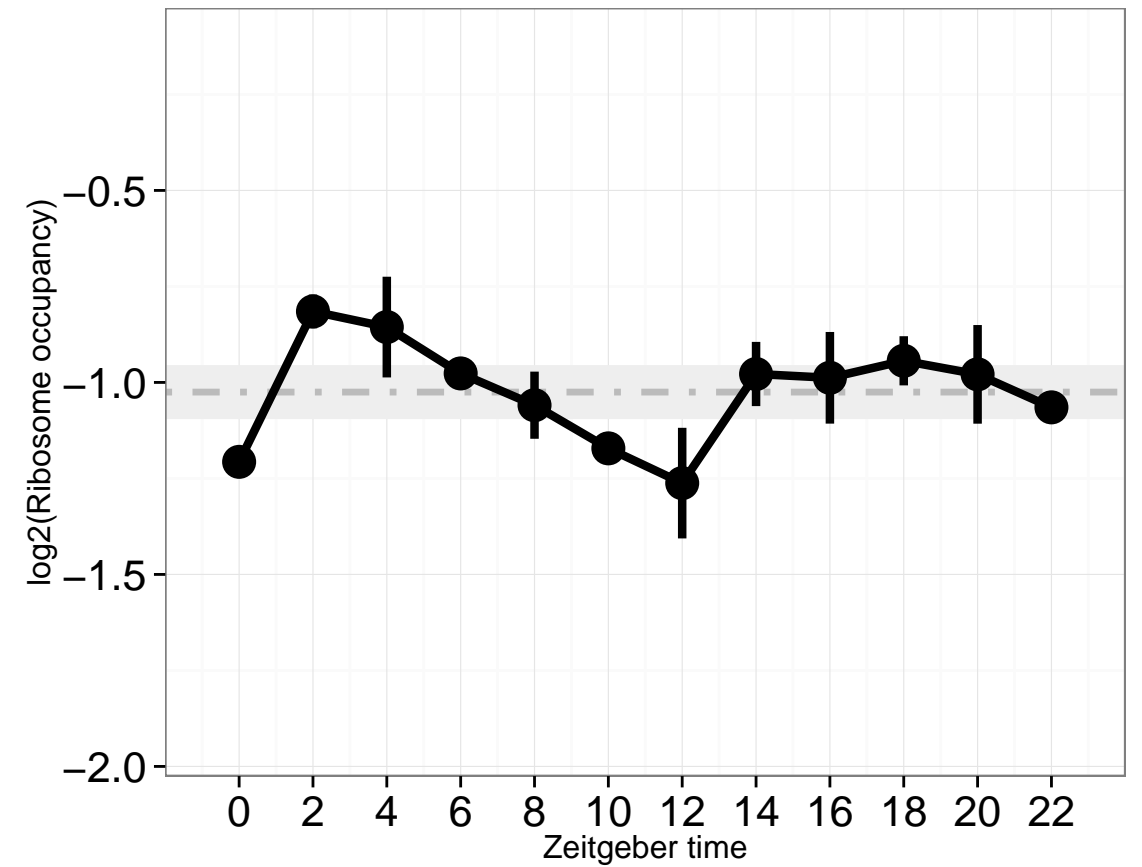

Supplement: Supplementary file 12322 [file 1]

# Fbxw11

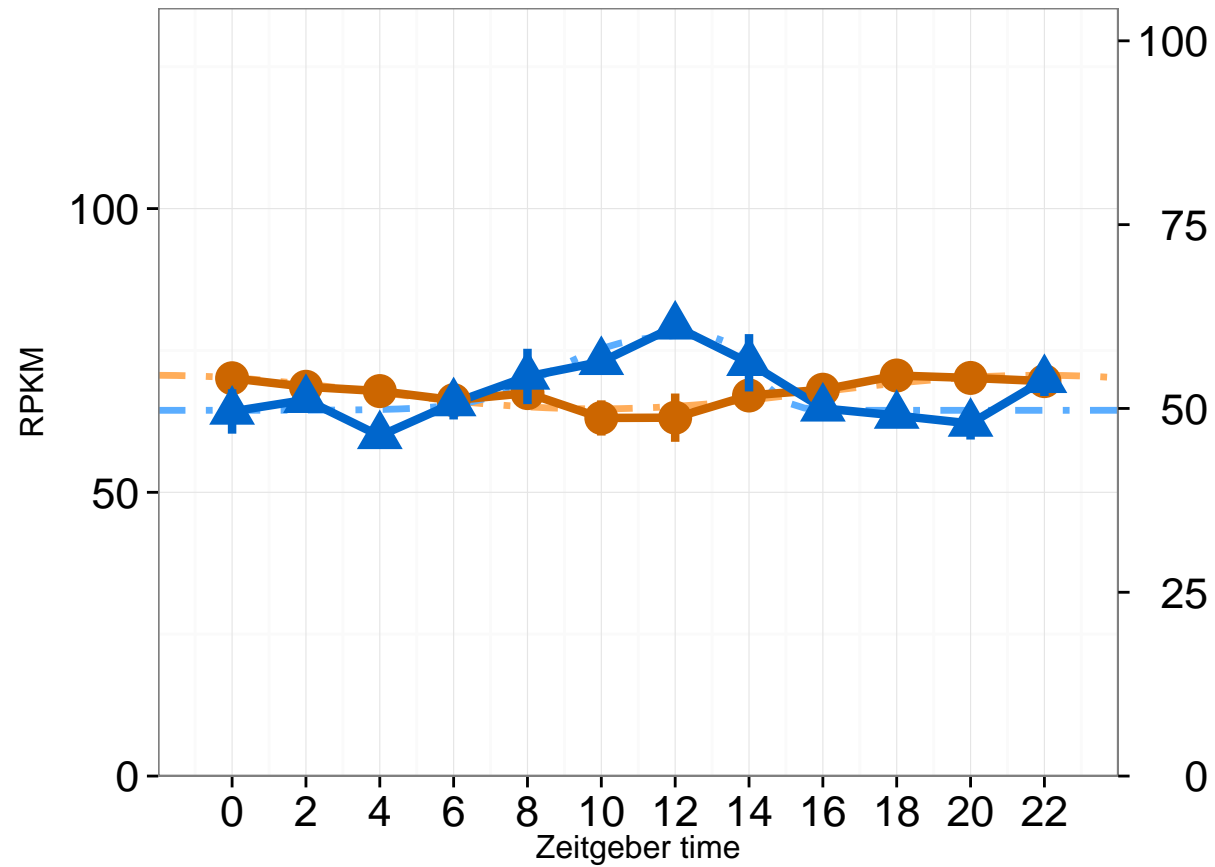

# Fbxw11

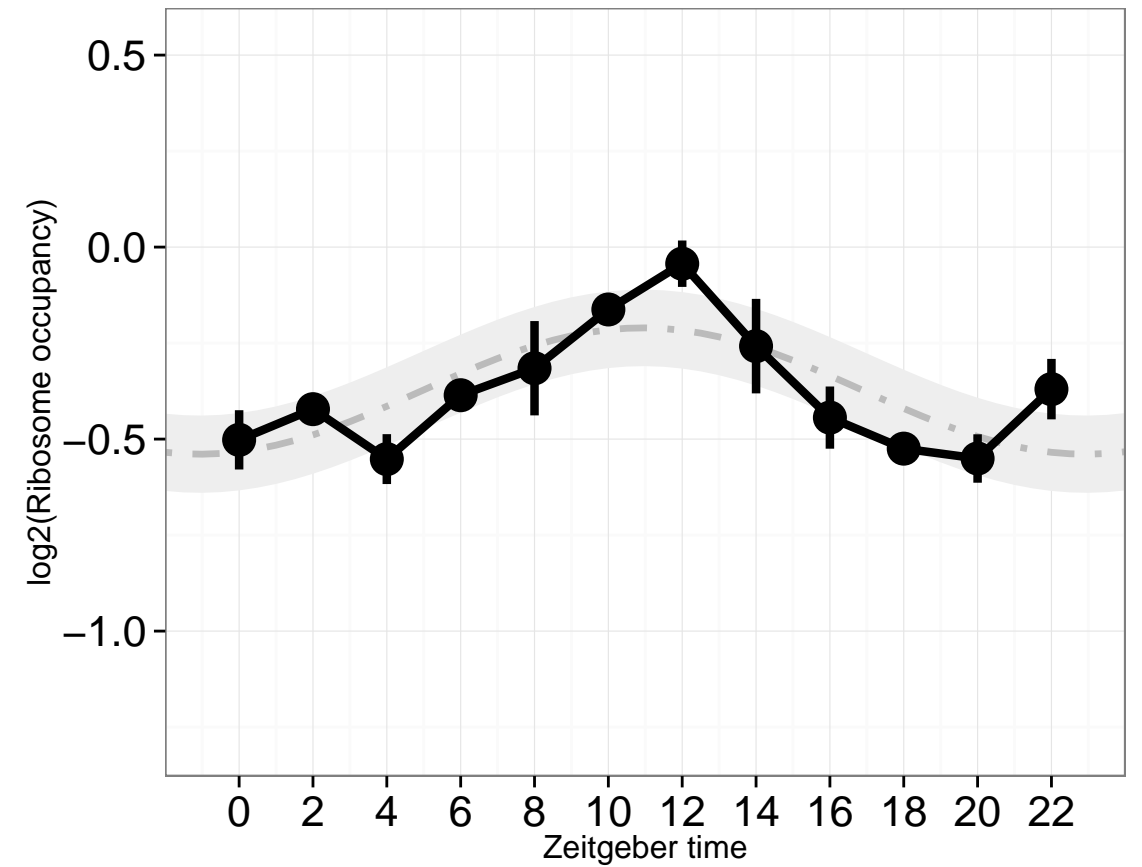

Supplement: Supplementary file 12323 [file 1]

## Med8

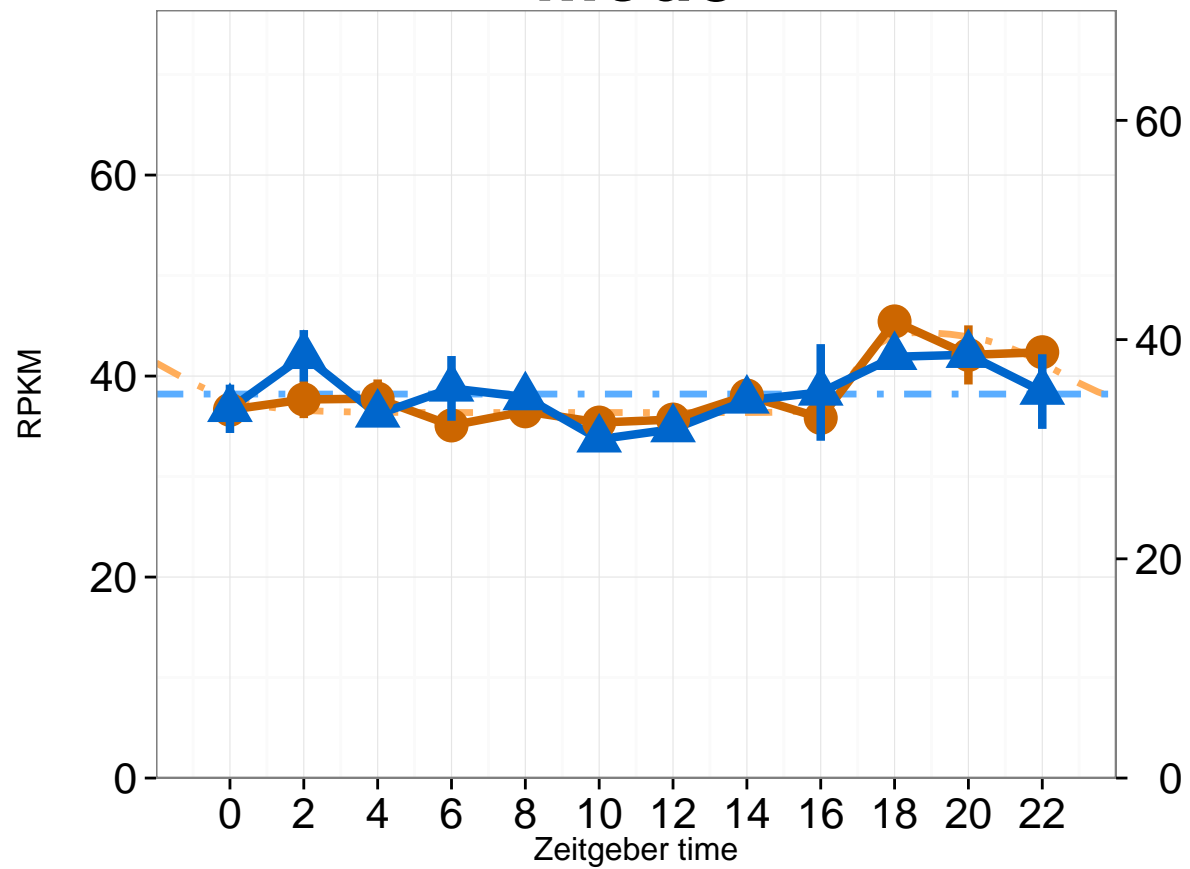

## Med8

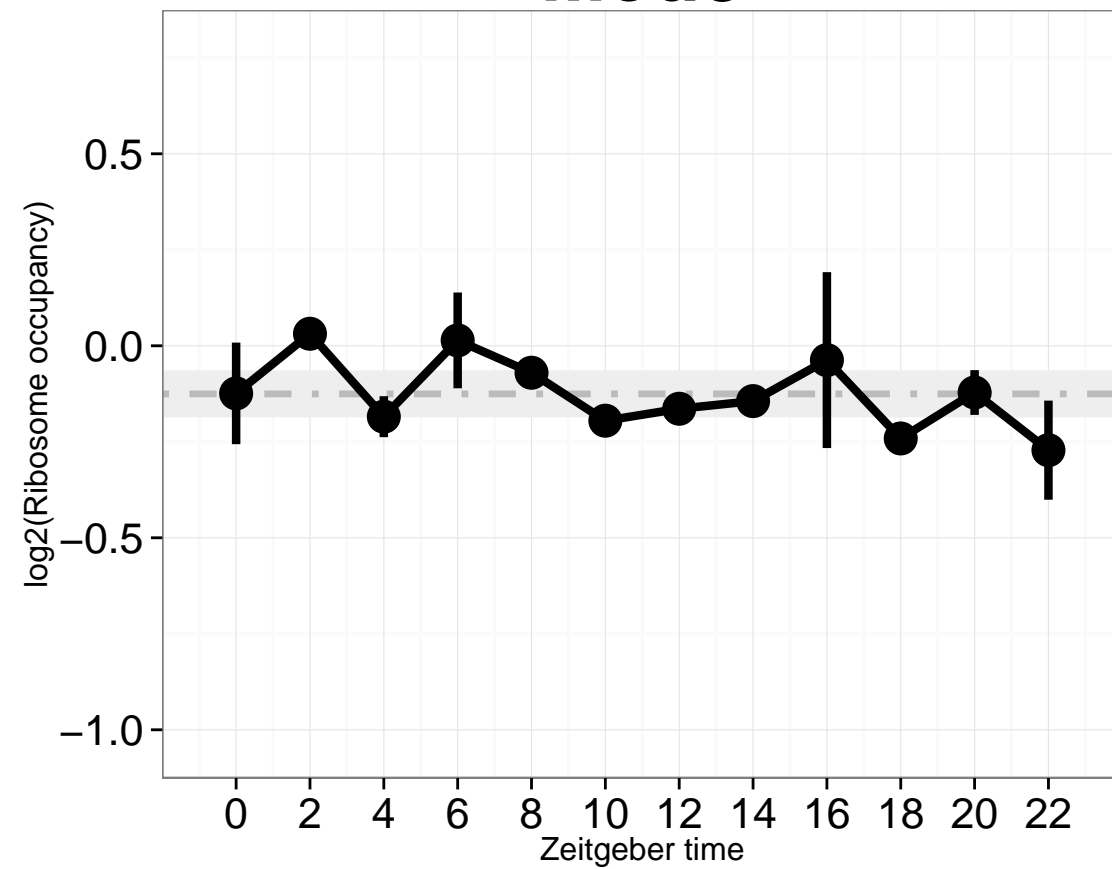

Supplement: Supplementary file 12324 [file 1]

# Pde7a

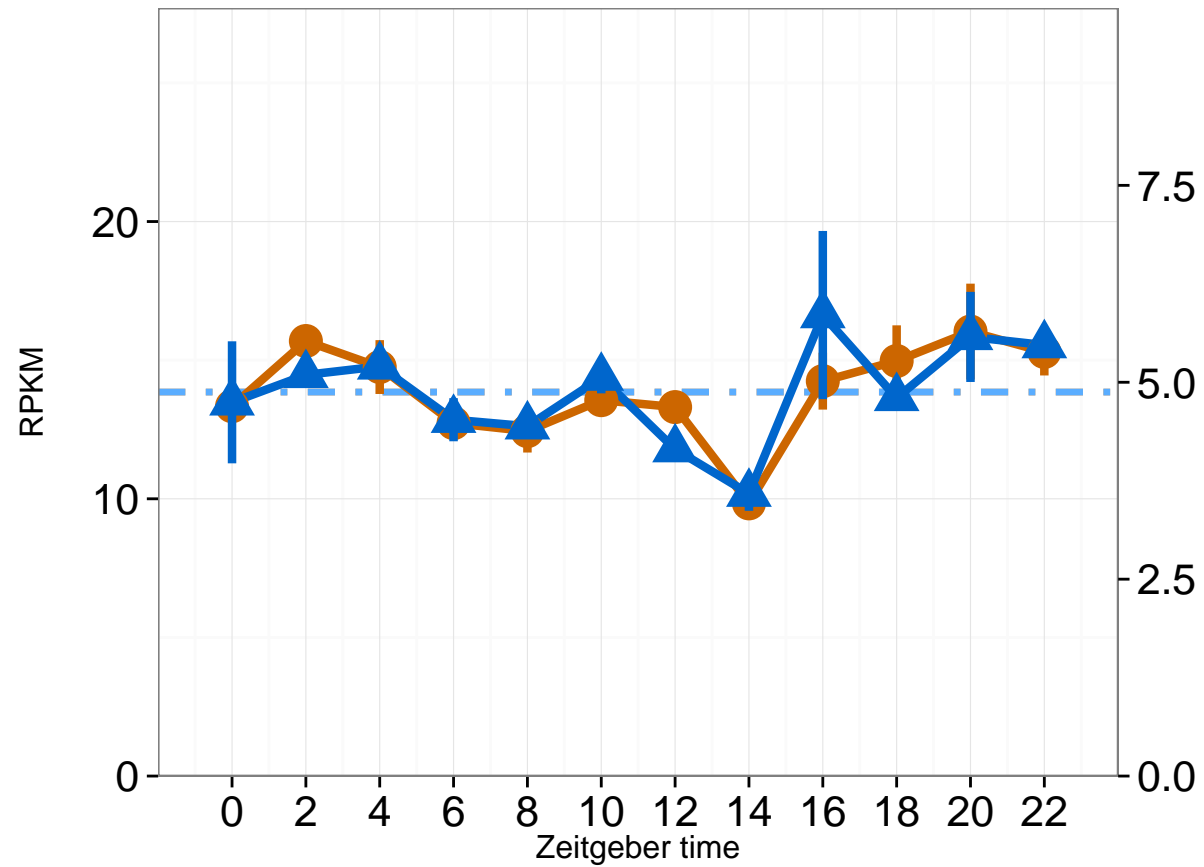

# Pde7a

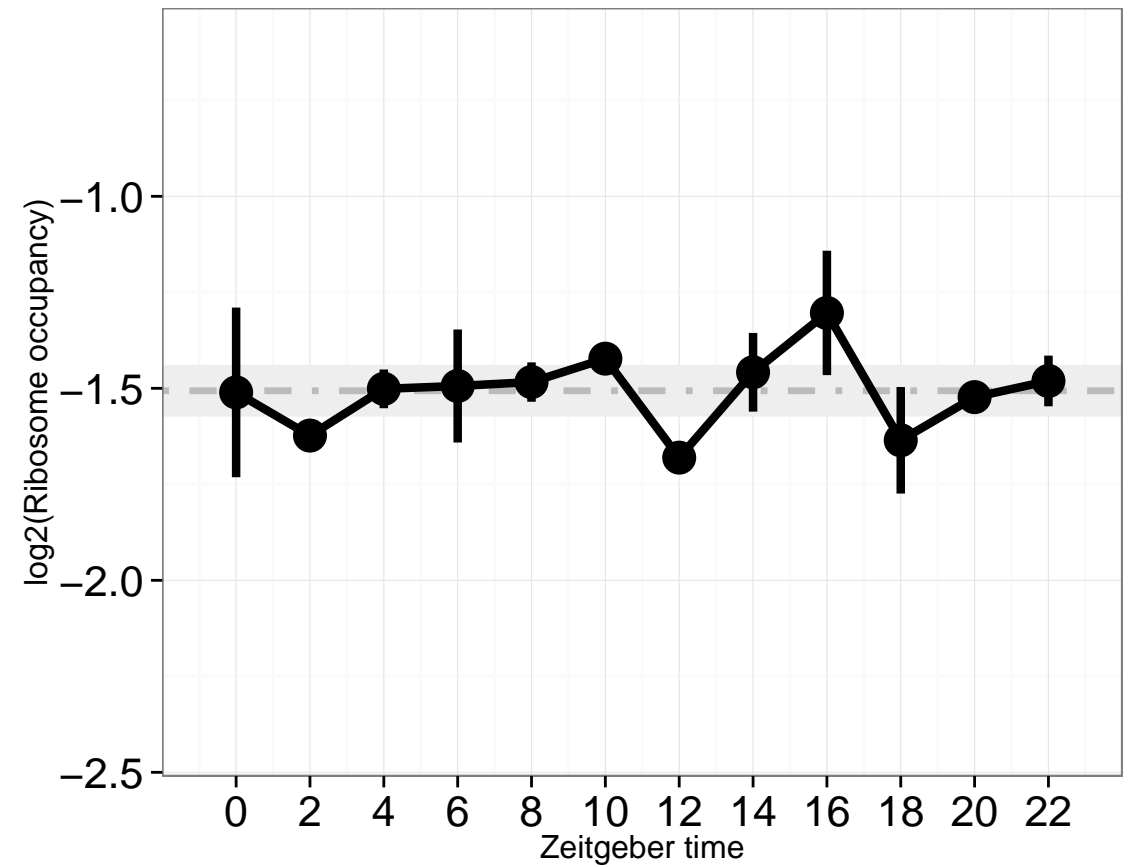

Supplement: Supplementary file 12325 [file 1]

## Ppard

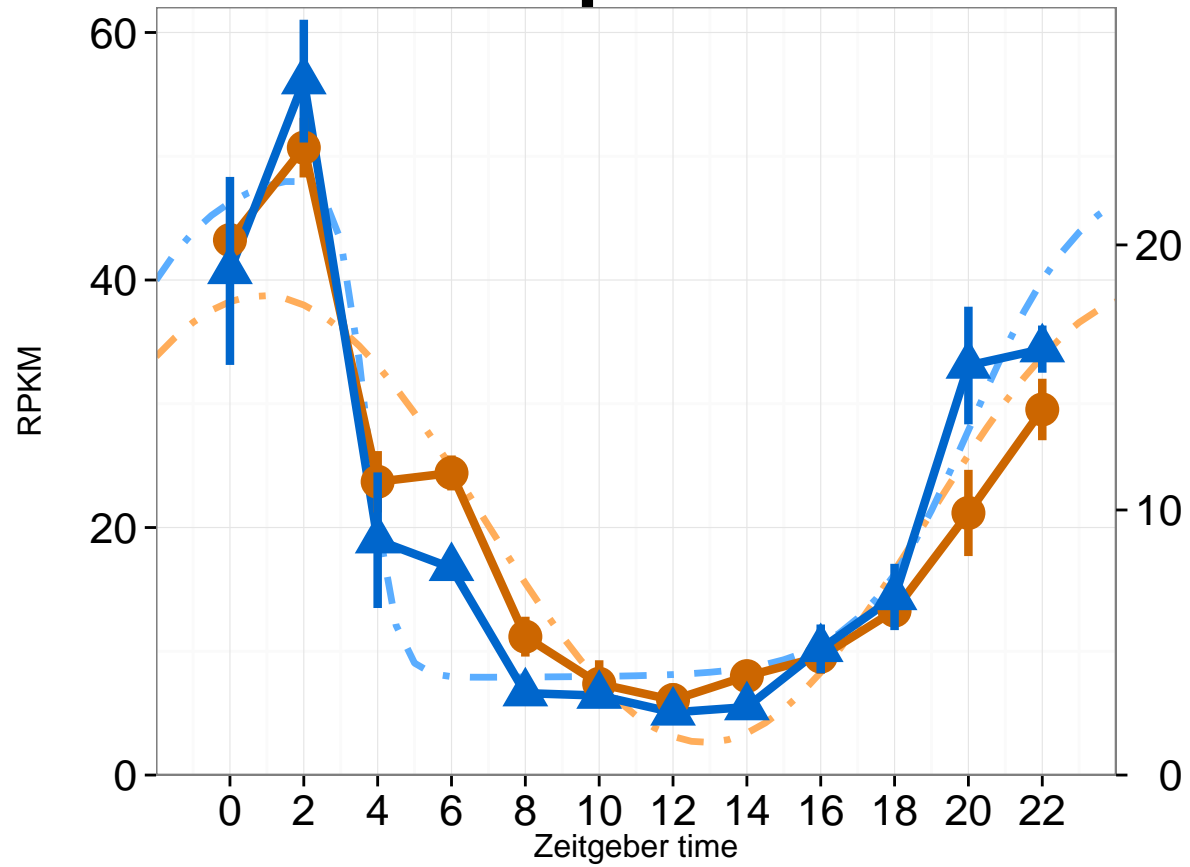

## Ppard

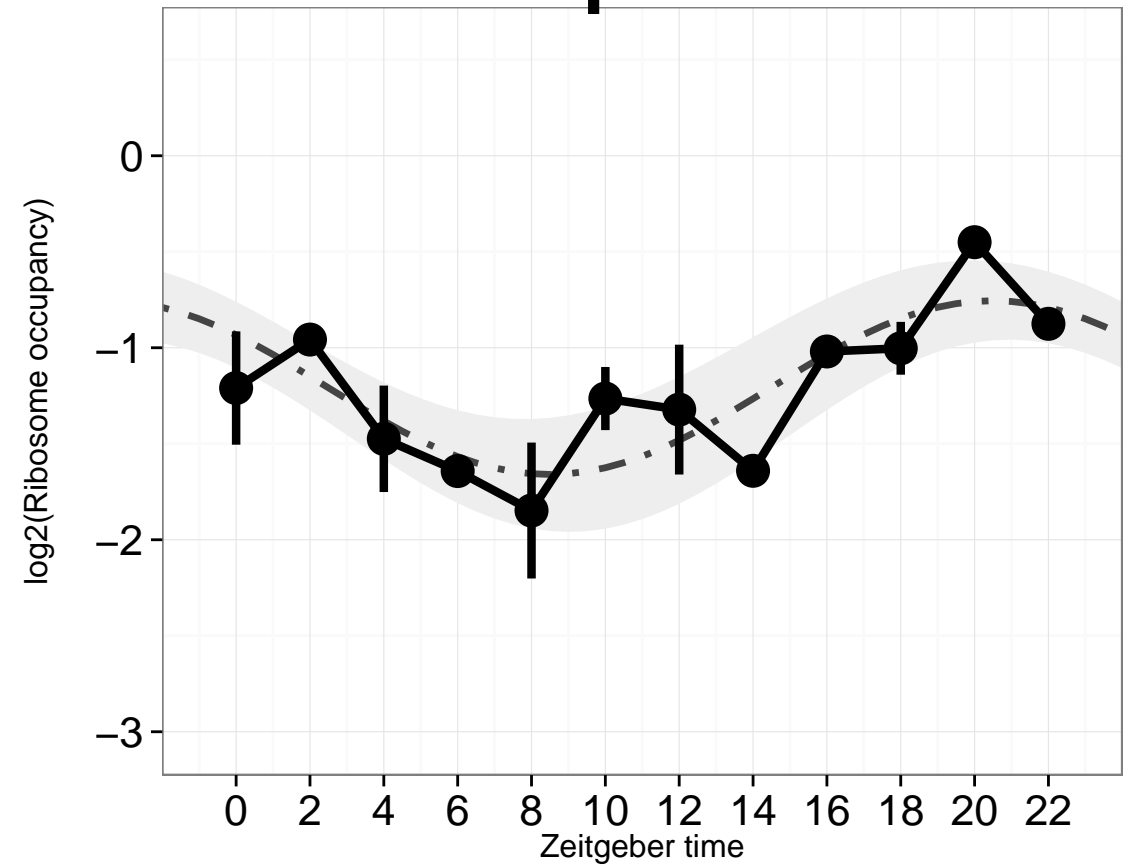

Supplement: Supplementary file 12326 [file 1]

## Dscr3

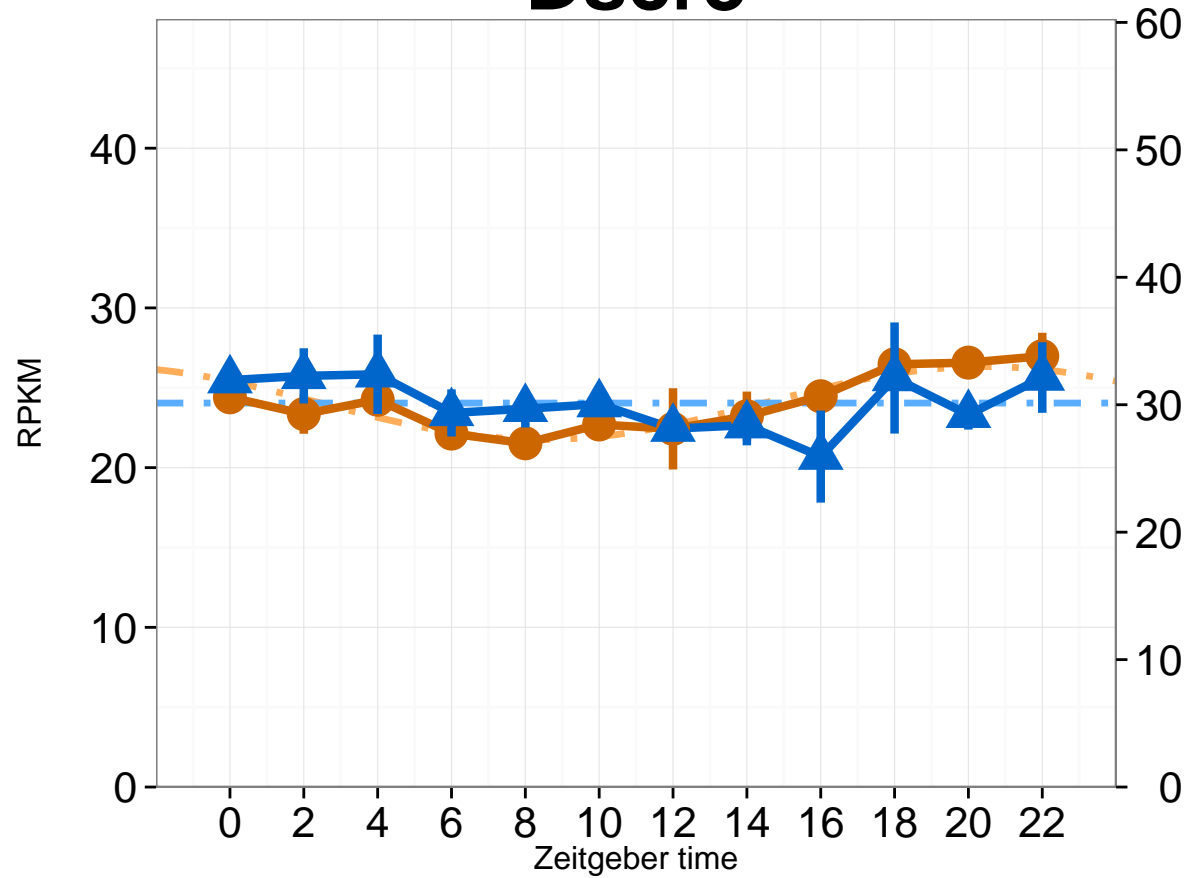

## Dscr3

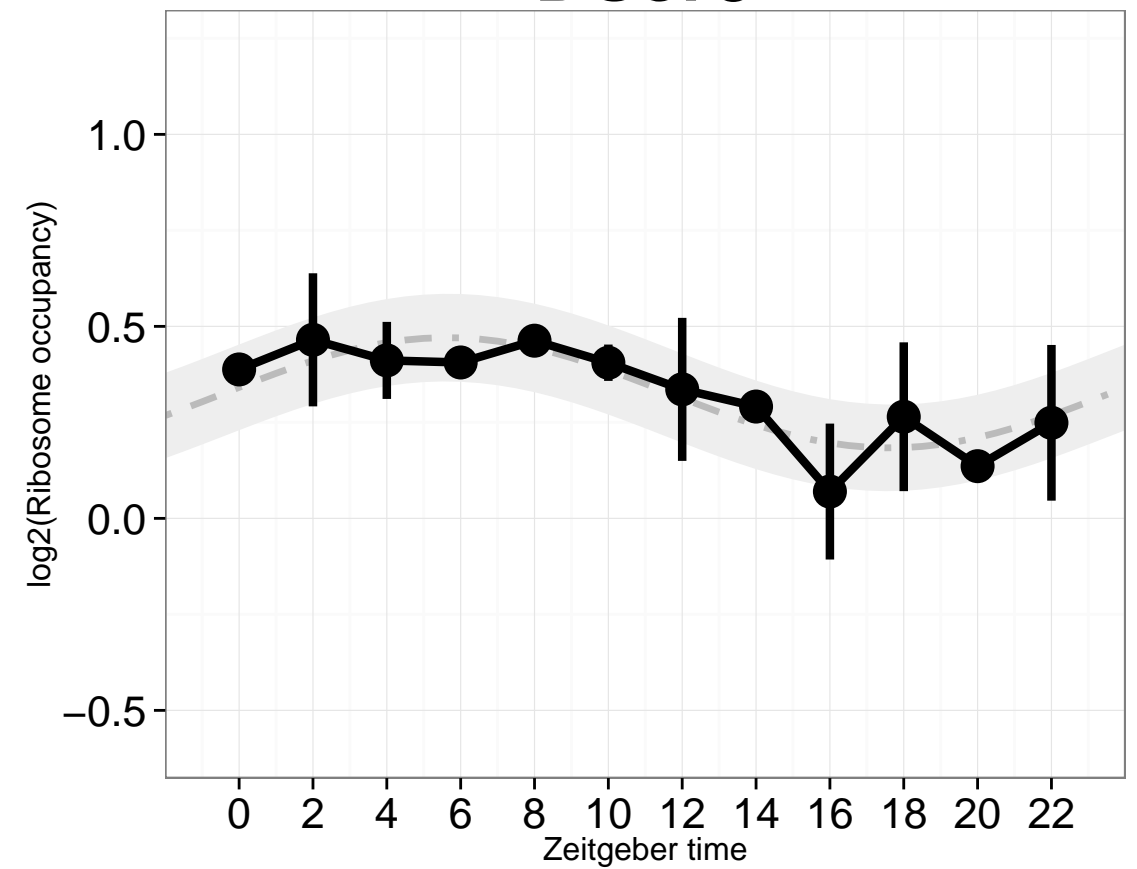

Supplement: Supplementary file 12327 [file 1]

# Fam179b

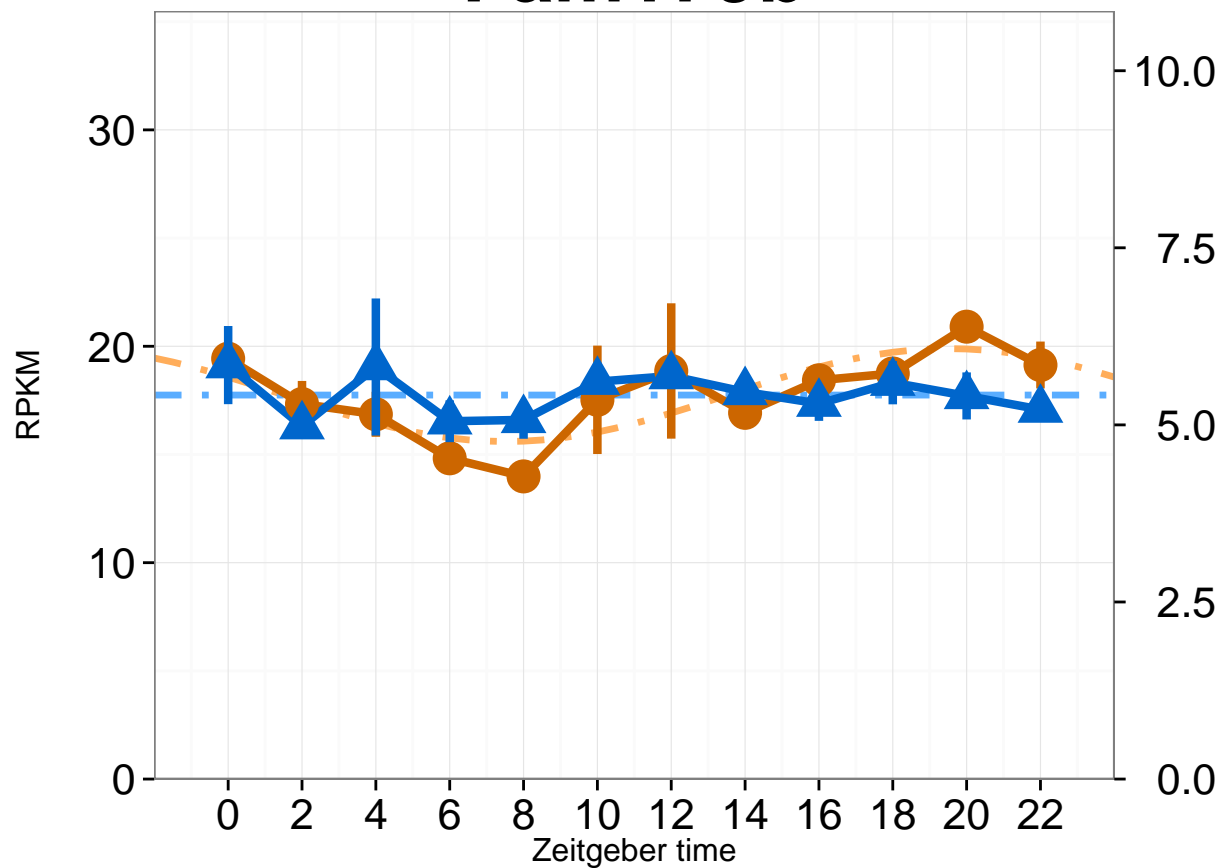

# Fam179b

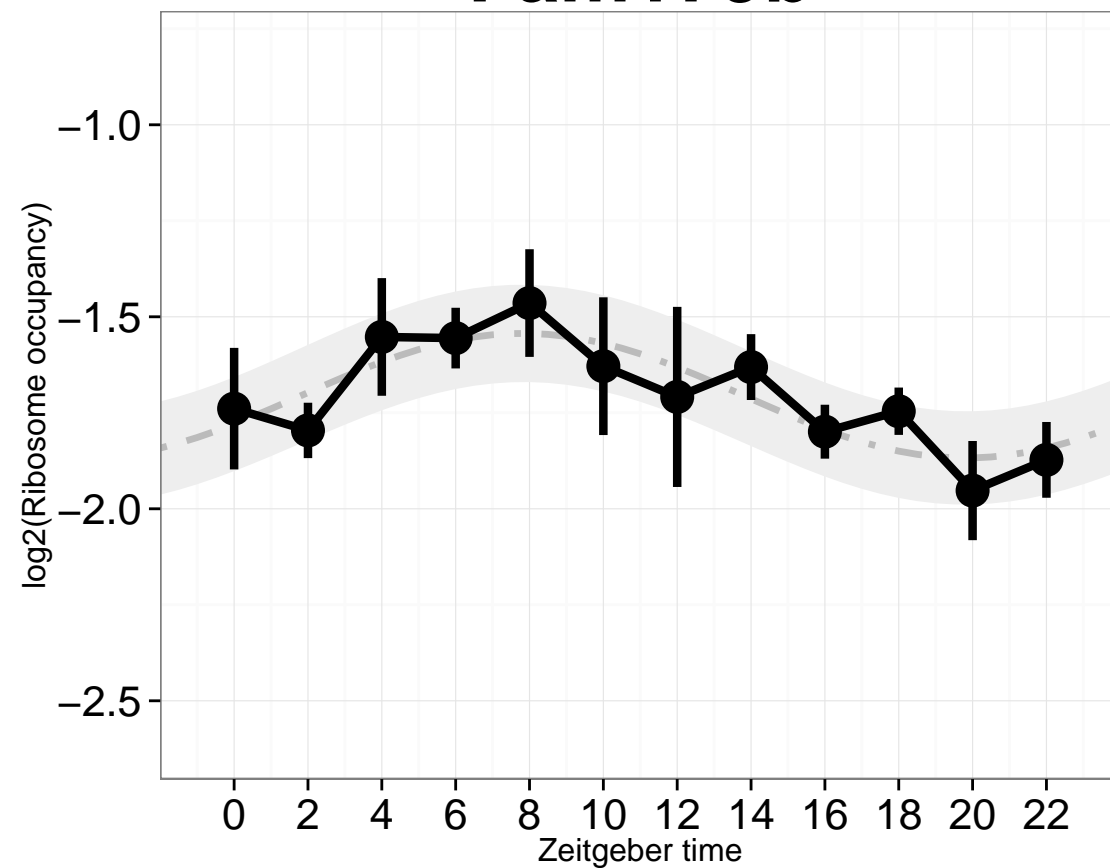

Supplement: Supplementary file 12328 [file 1]

# Hp

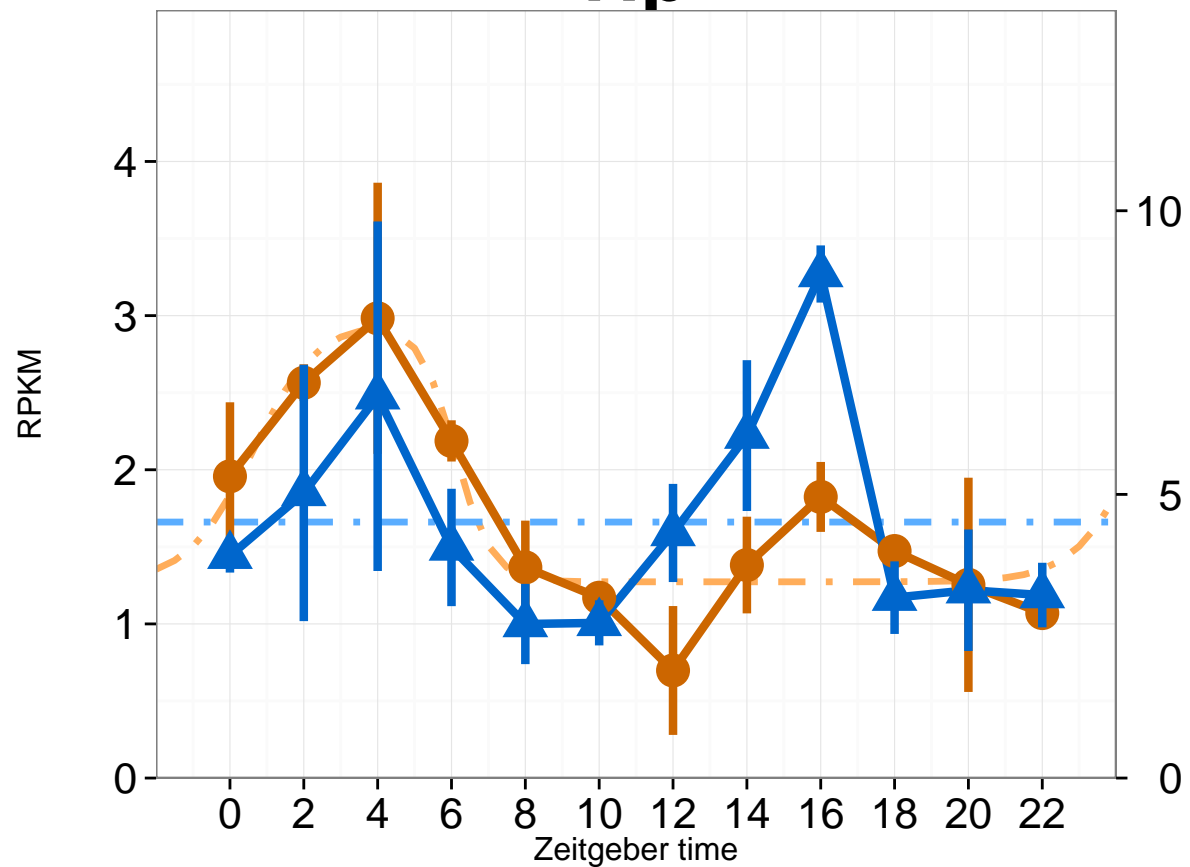

# Hp

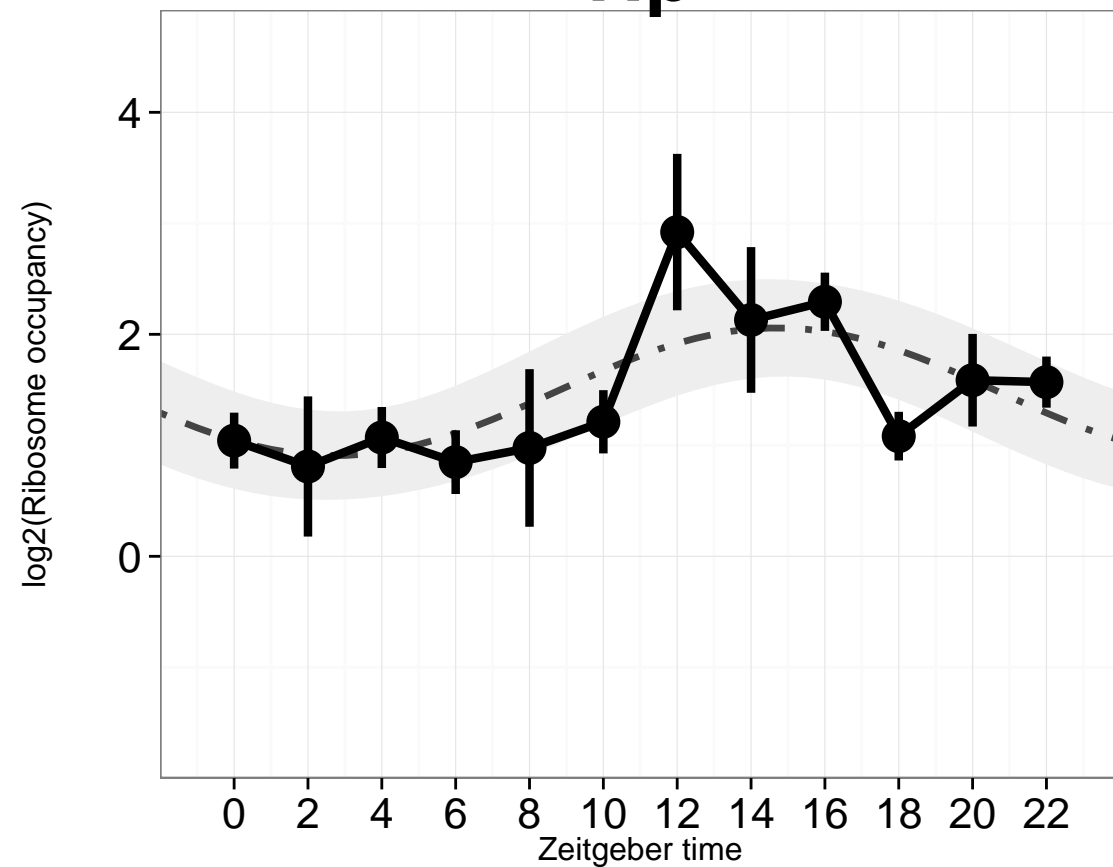

Supplement: Supplementary file 12329 [file 1]

## lspd

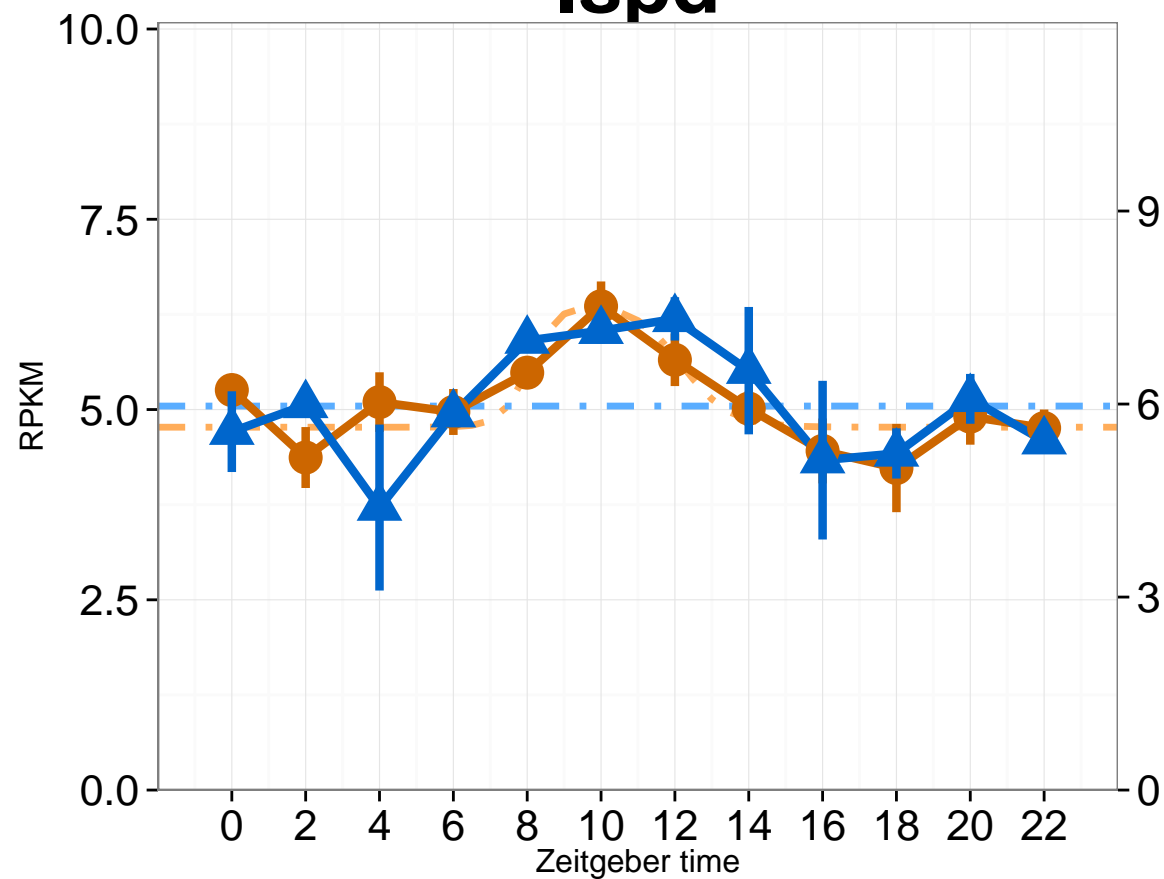

## lspd

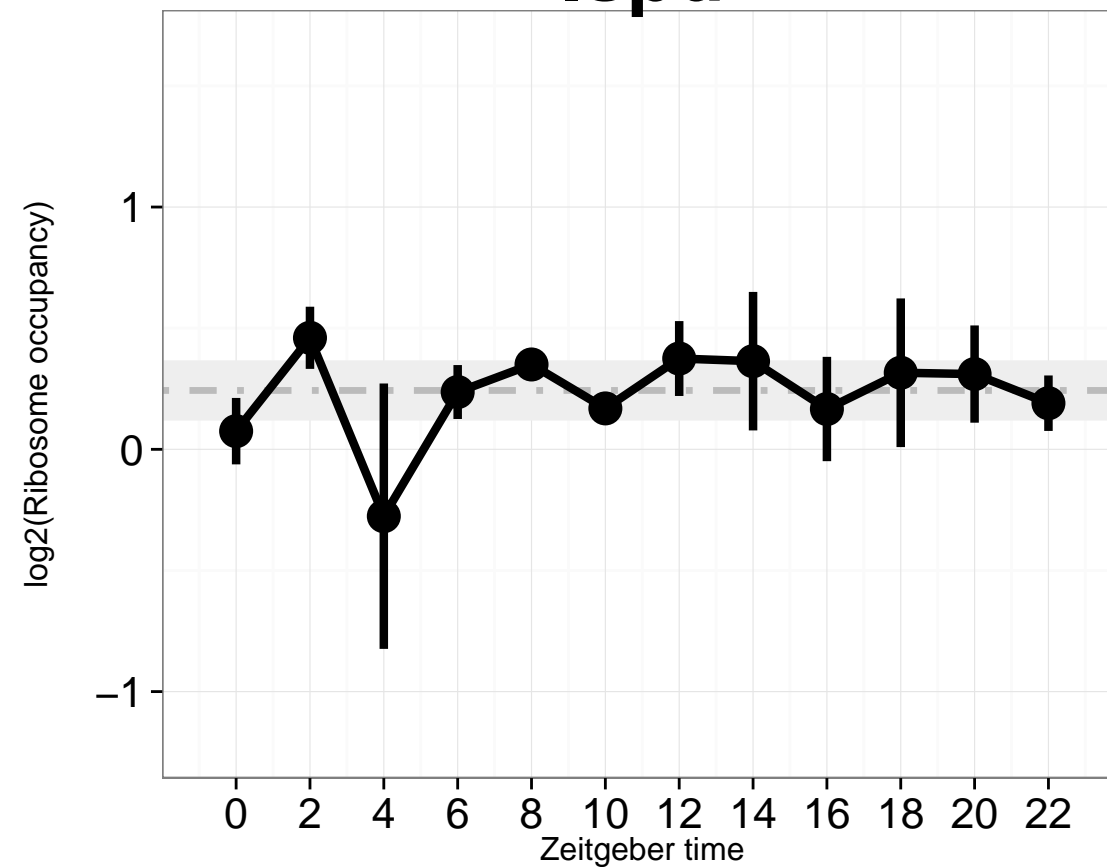

Supplement: Supplementary file 12330 [file 1]

# Sh3bgrl3

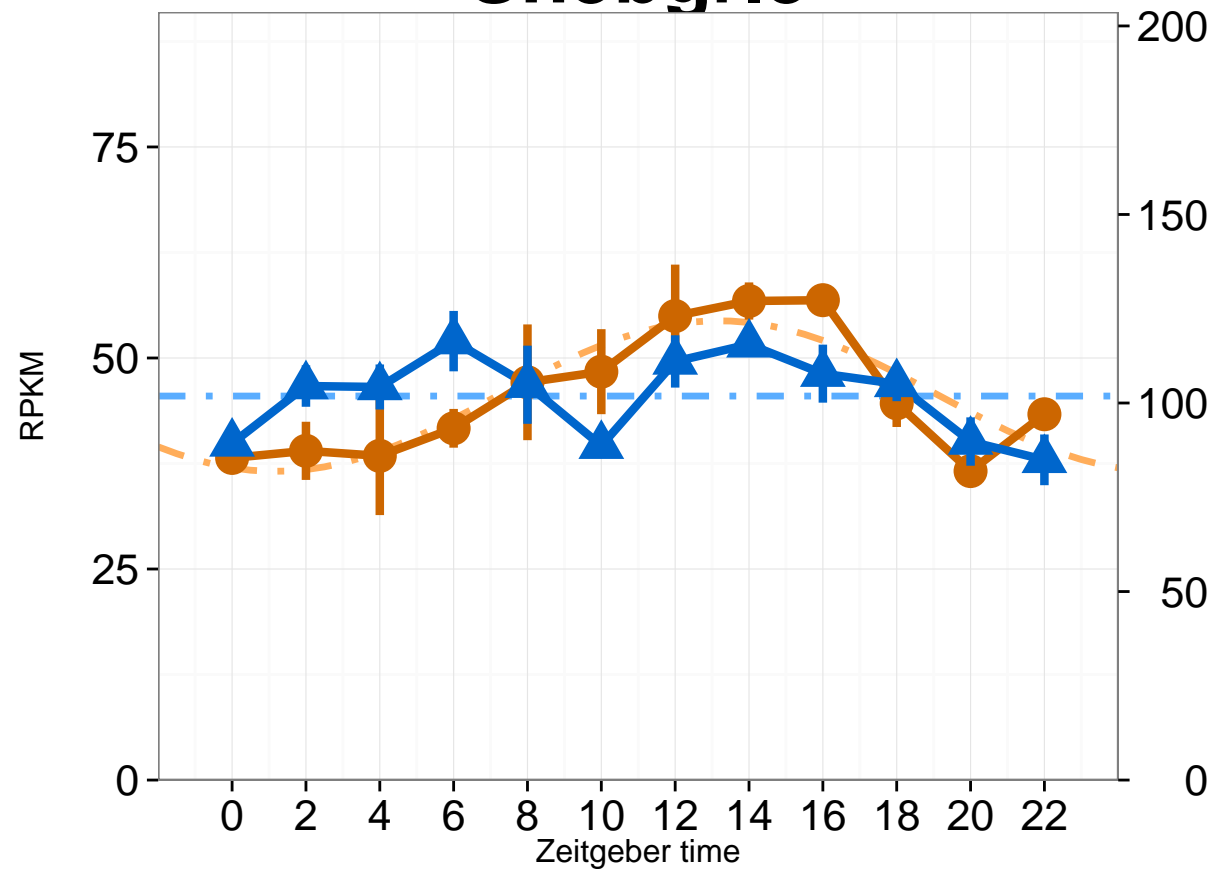

# Sh3bgrl3

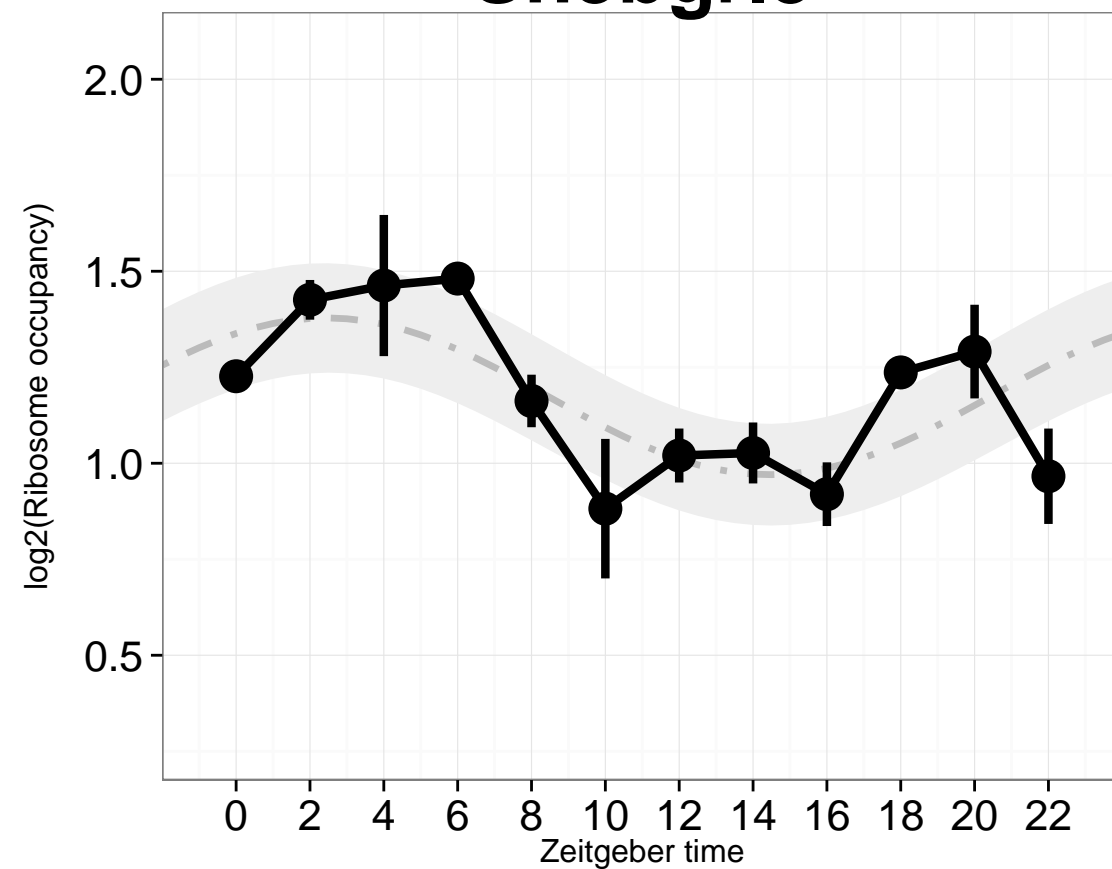

Supplement: Supplementary file 12331 [file 1]

## Urah

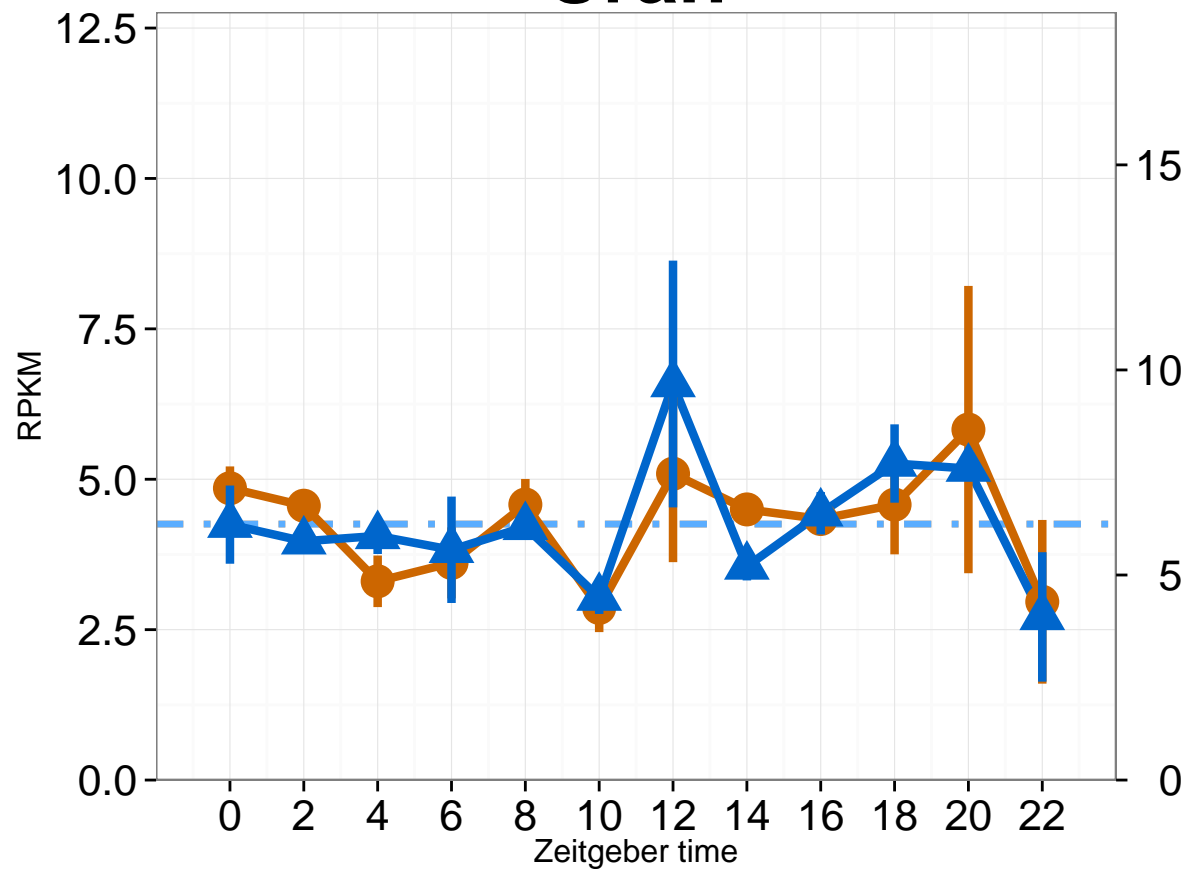

## Urah

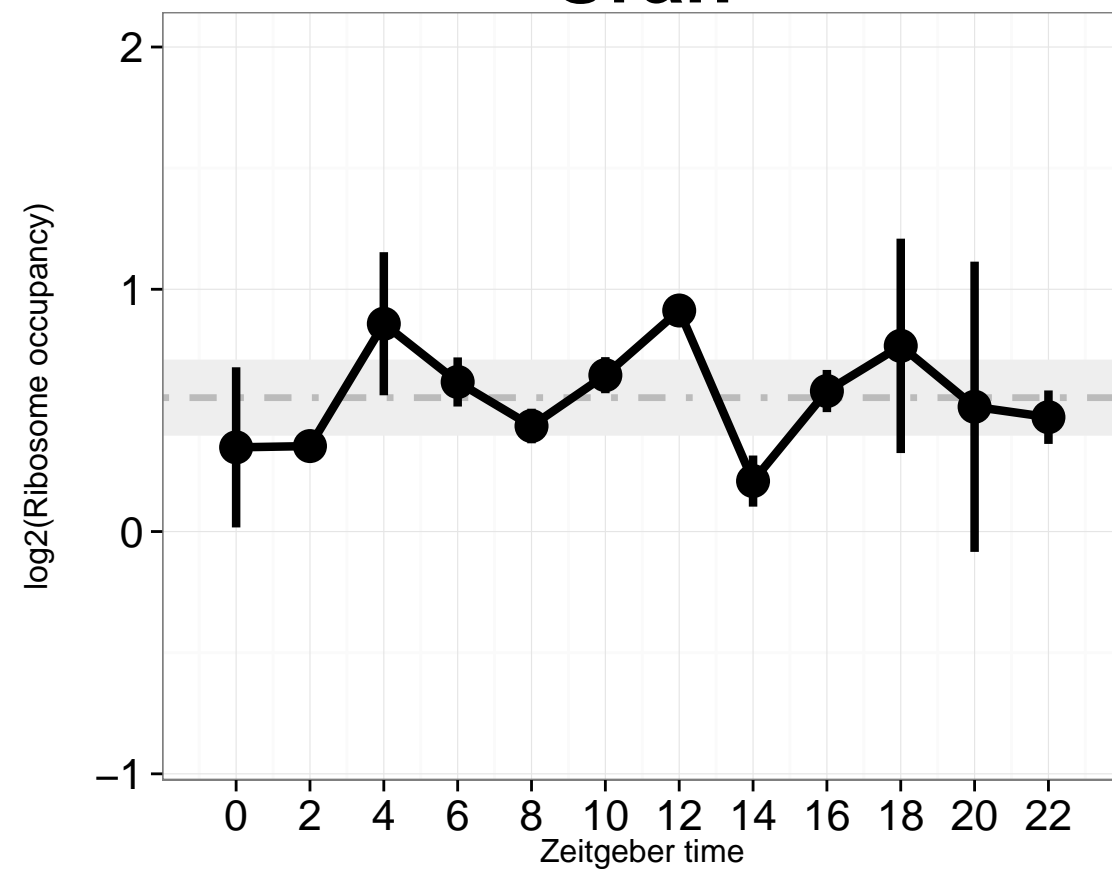

Supplement: Supplementary file 12332 [file 1]

## Scly

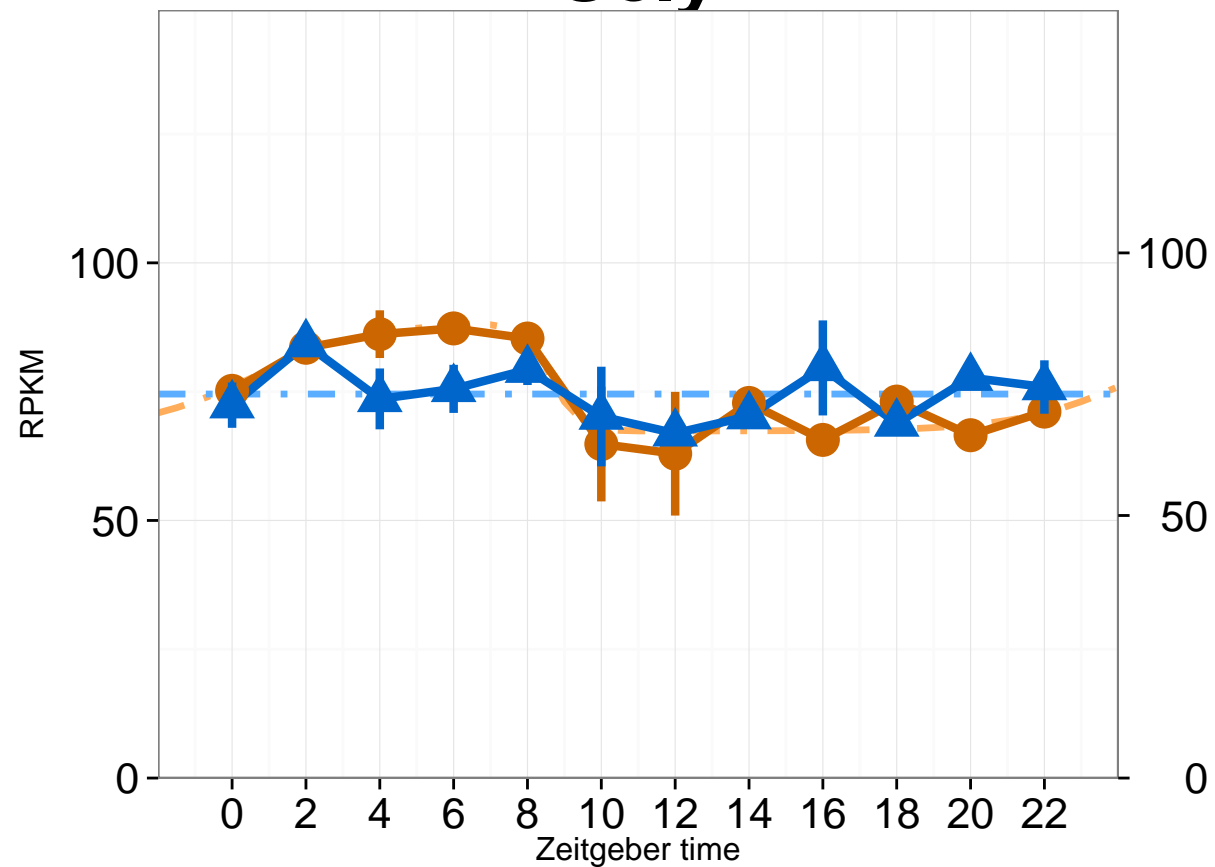

## Scly

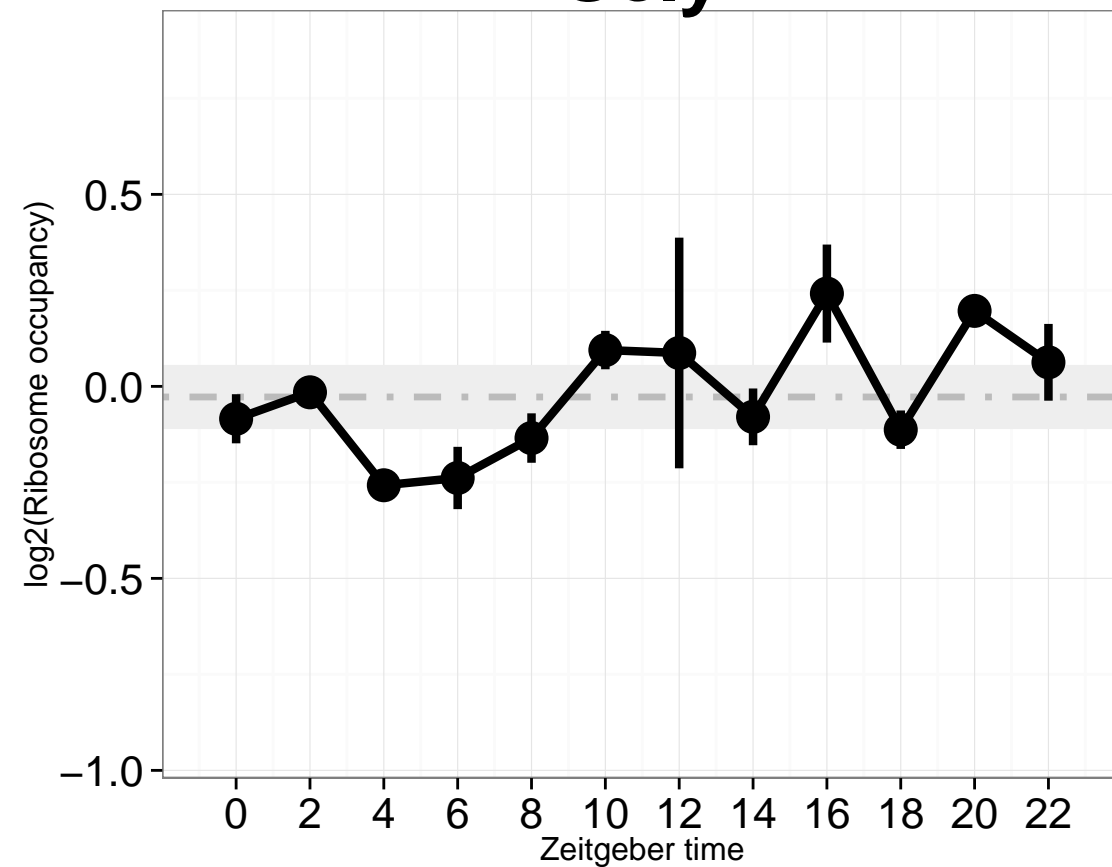

Supplement: Supplementary file 12333 [file 1]

# Atp5b

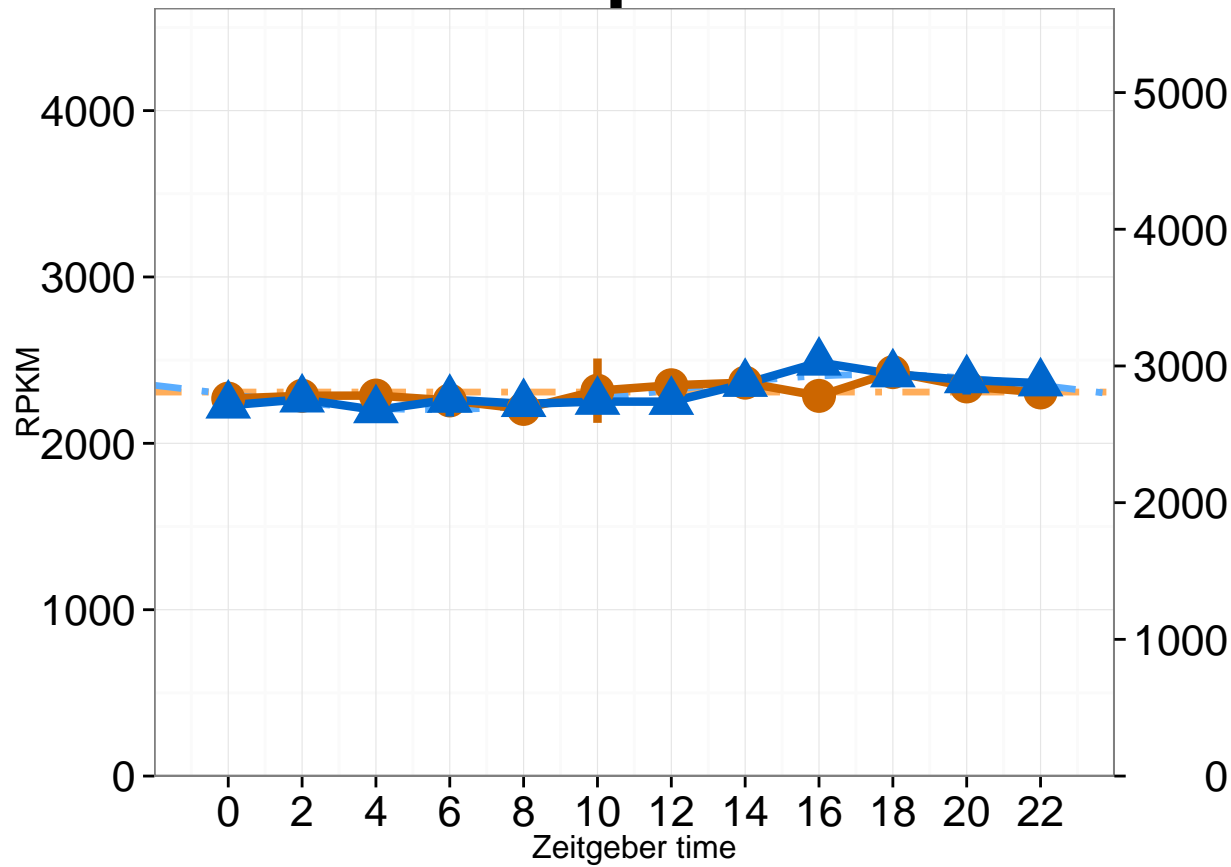

# Atp5b

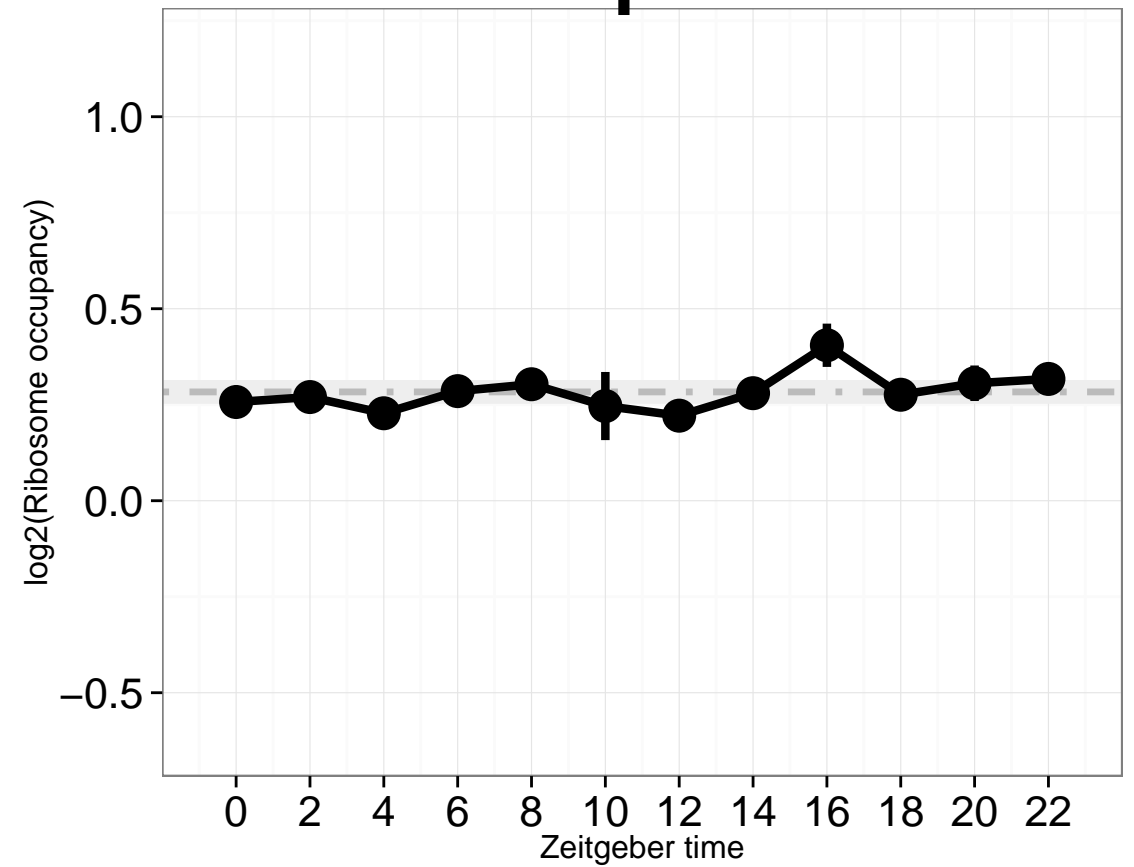

Supplement: Supplementary file 12334 [file 1]

# Ralgapa2

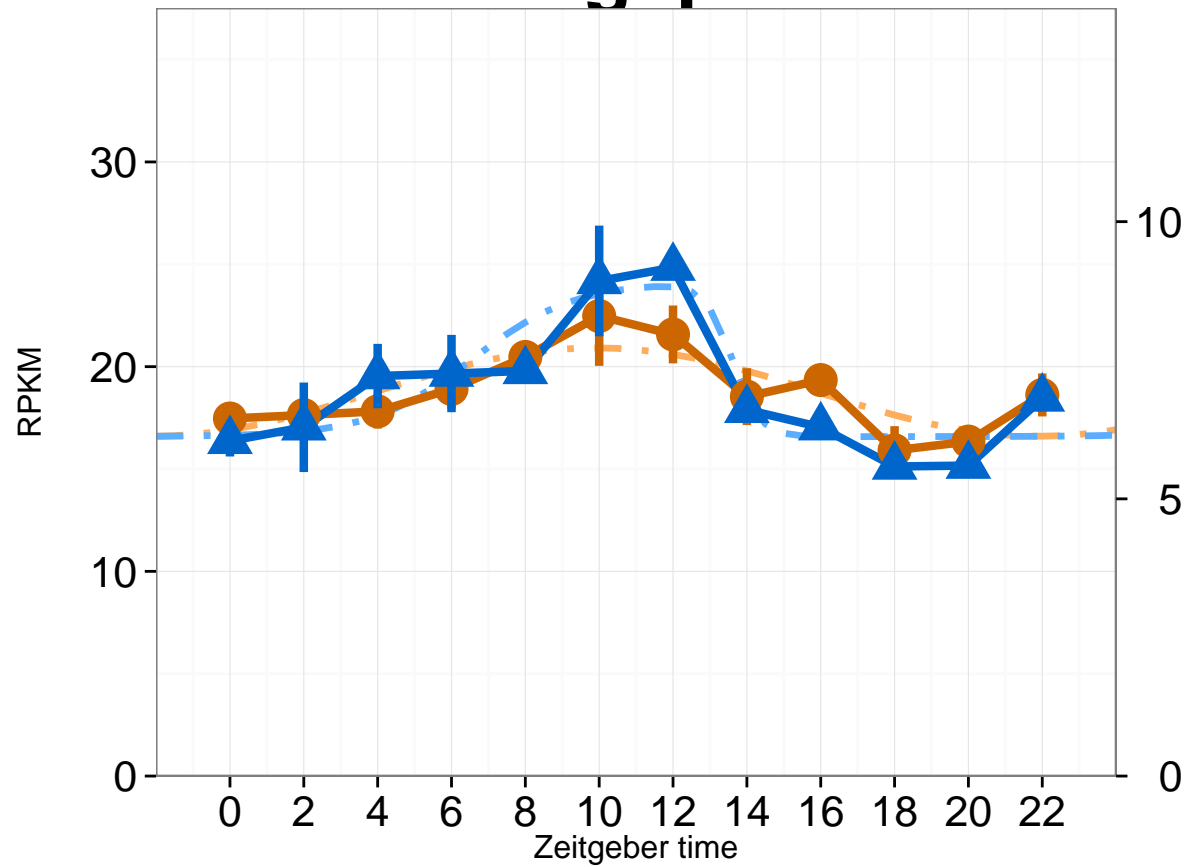

# Ralgapa2

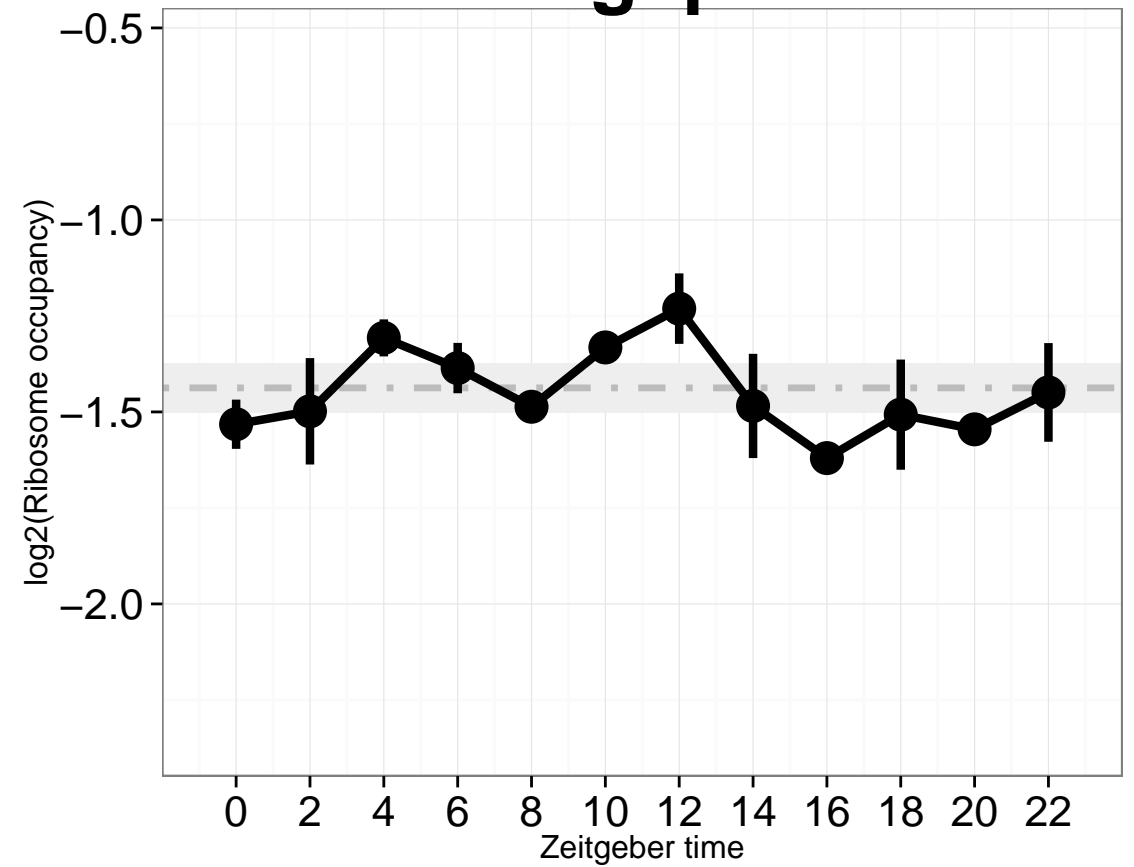

Supplement: Supplementary file 12335 [file 1]

## Kif7

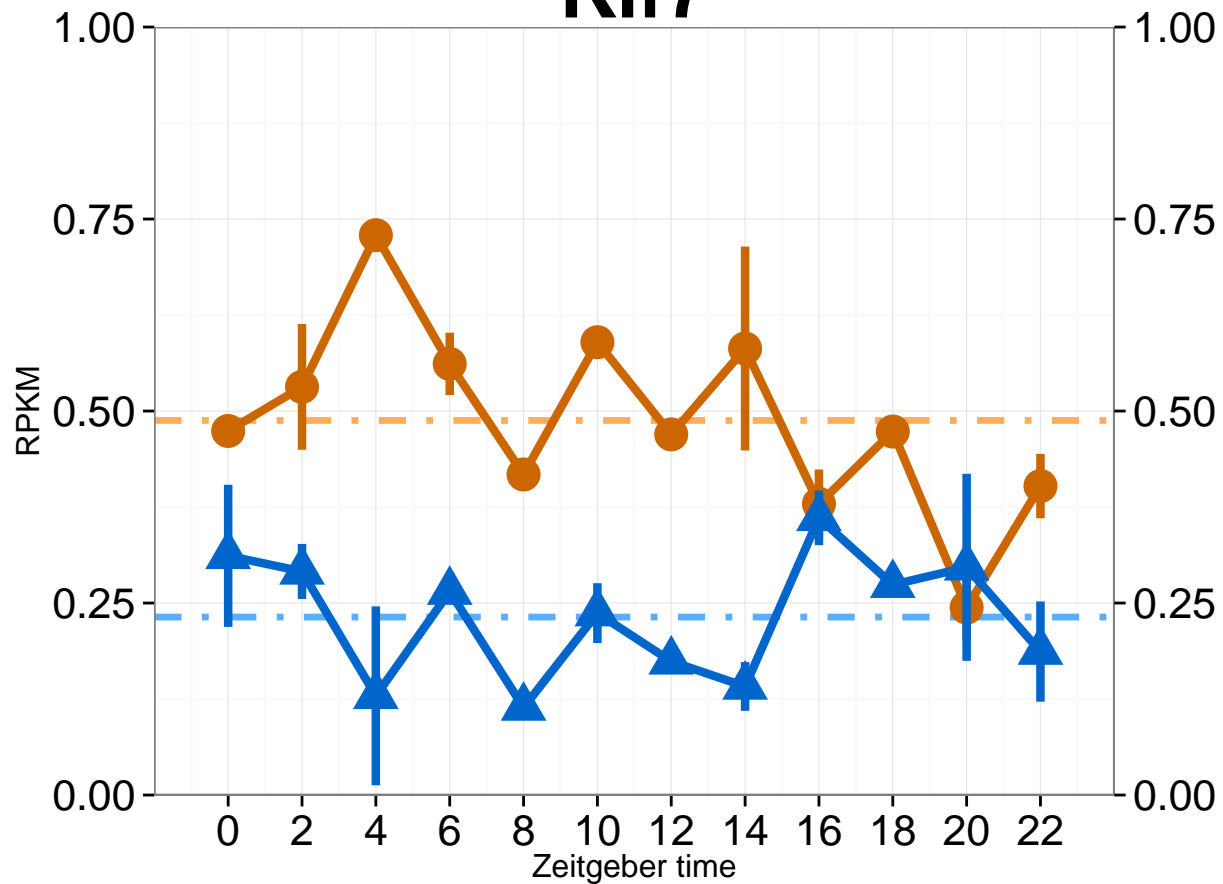

## Kif7

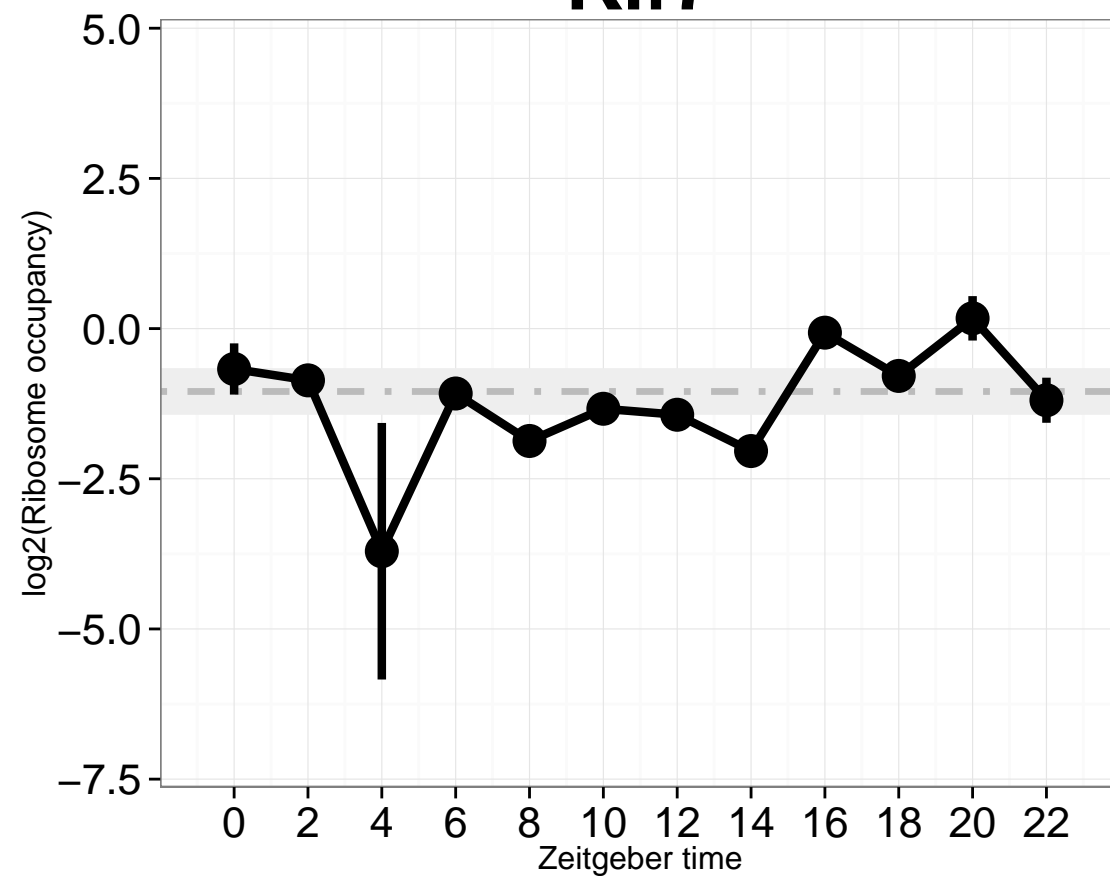

Supplement: Supplementary file 12336 [file 1]

# Prima1

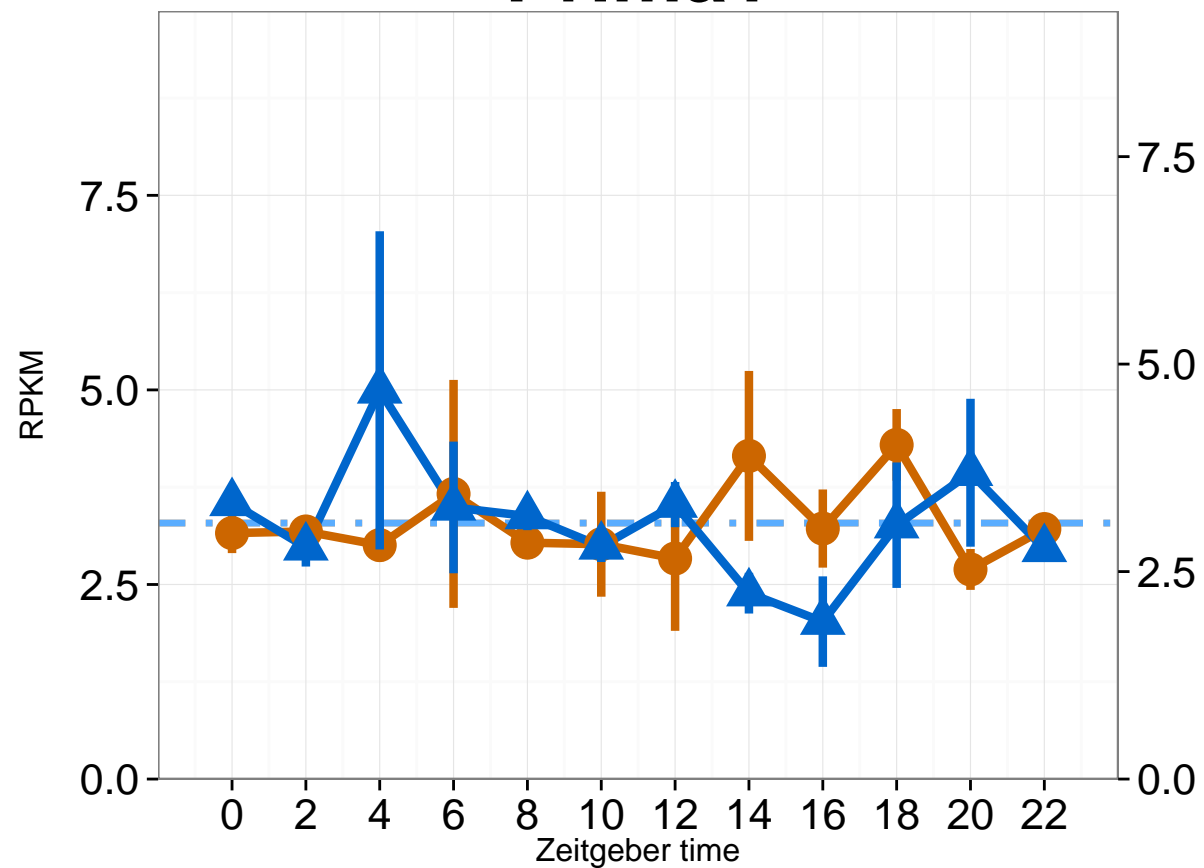

# Prima1

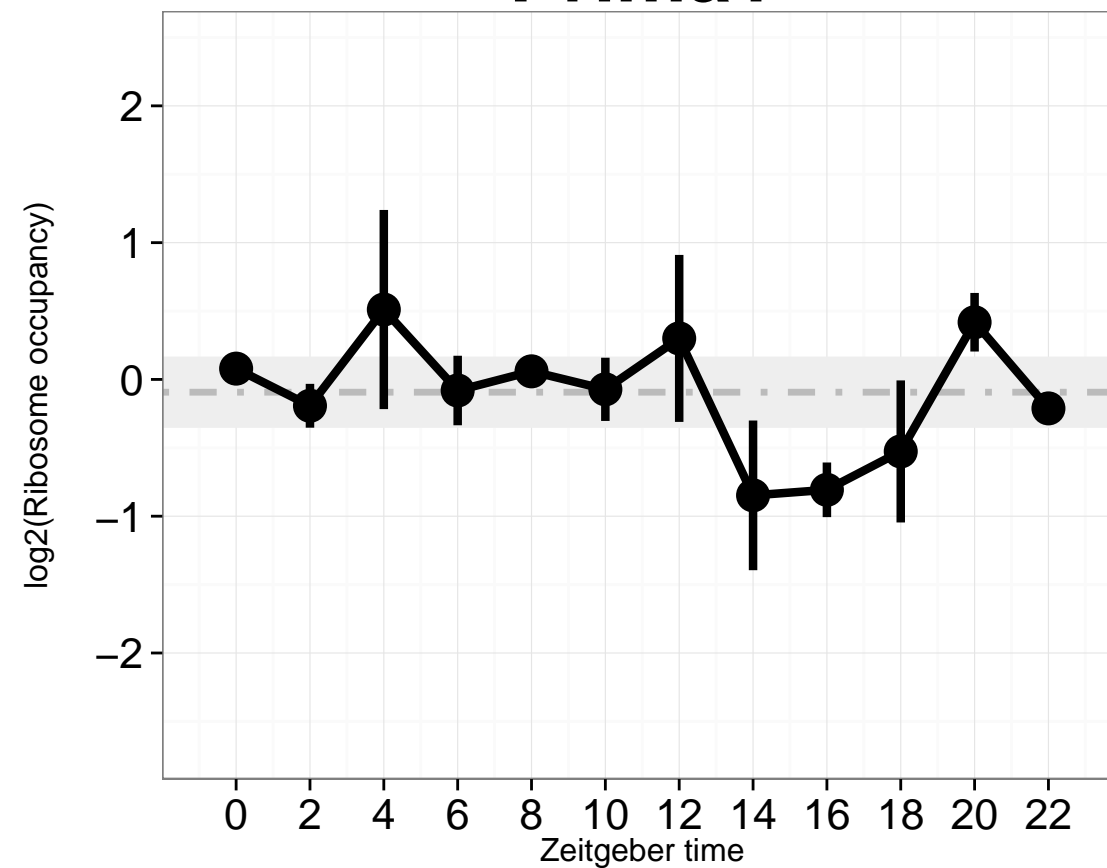

Supplement: Supplementary file 12337 [file 1]

# Fam221a

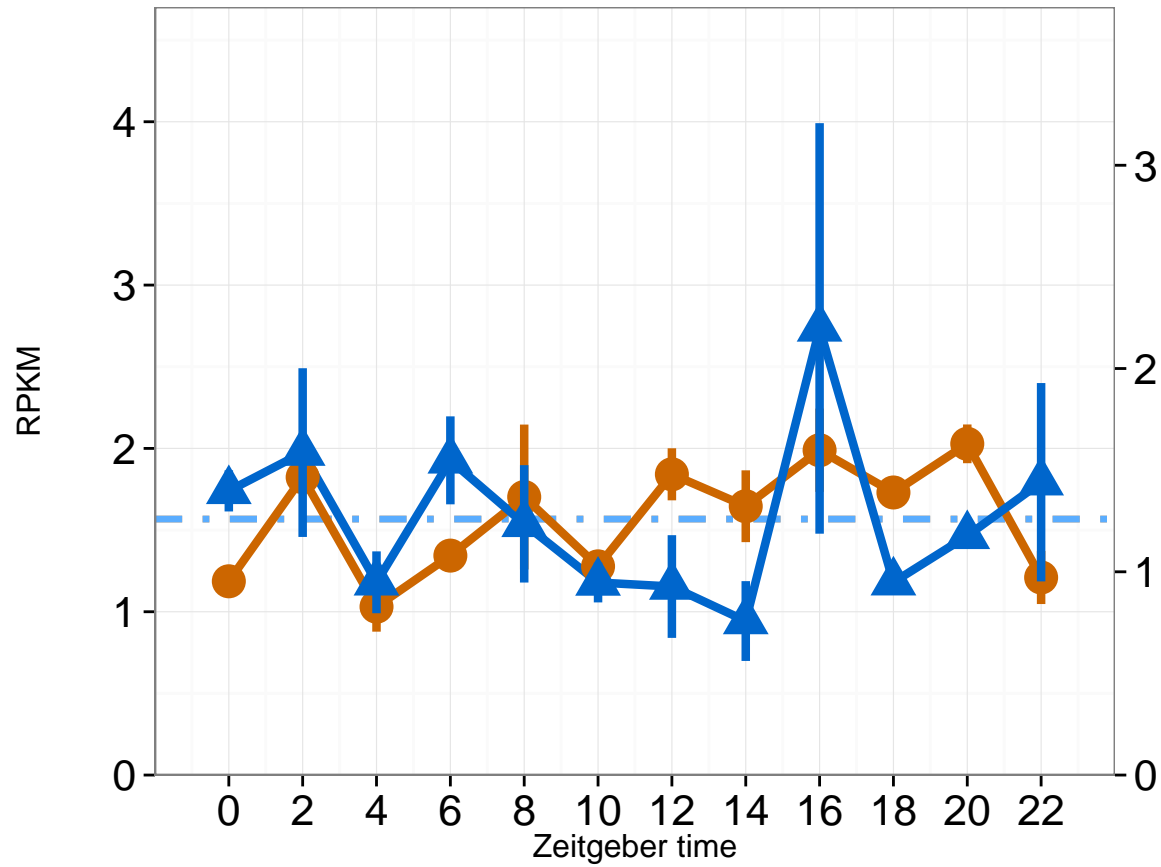

# Fam221a

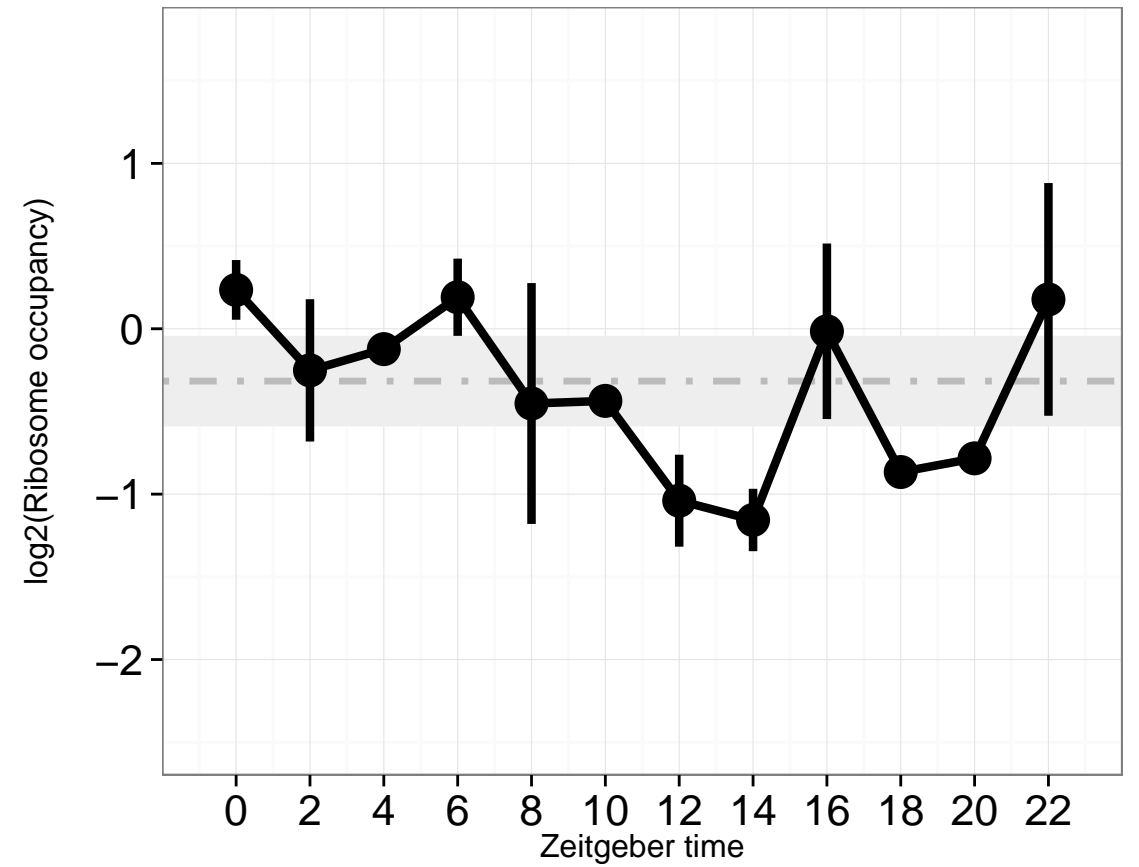

Supplement: Supplementary file 12338 [file 1]

## Mcmbp

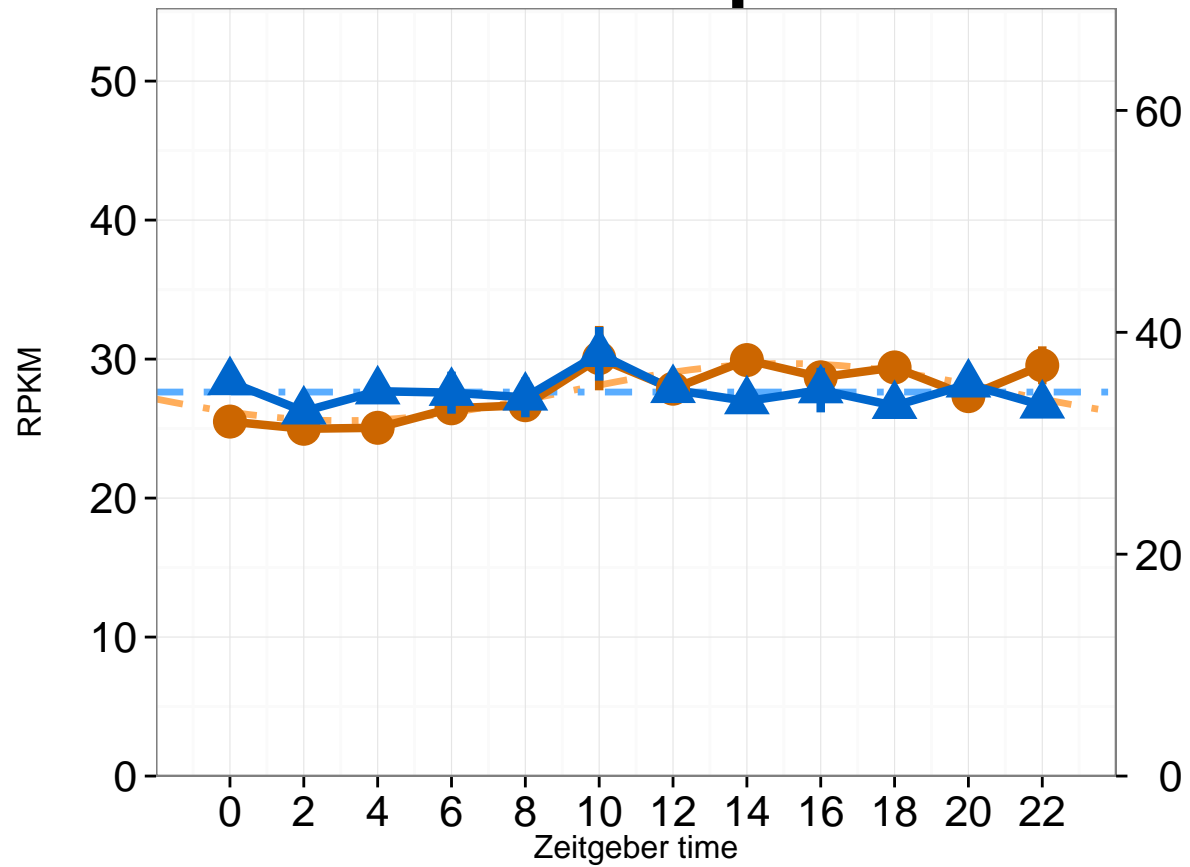

## Mcmbp

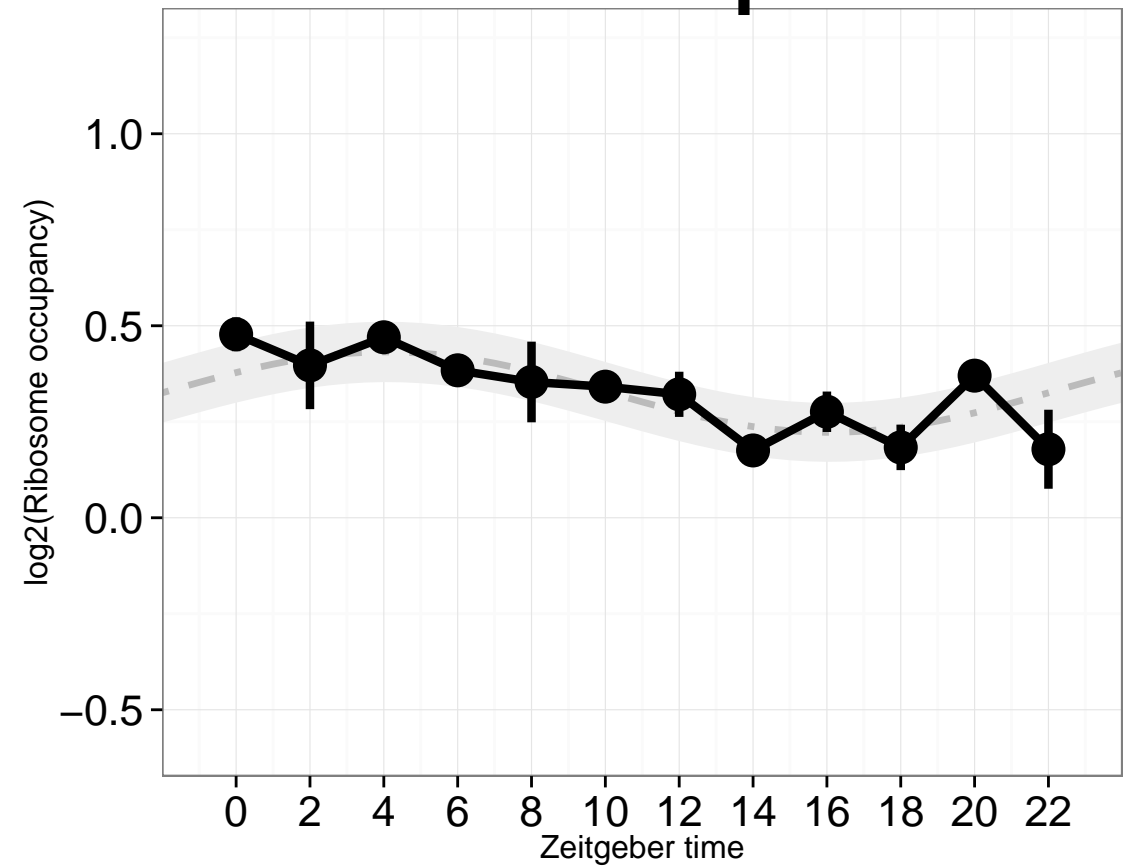

Supplement: Supplementary file 12339 [file 1]

# Mnd1

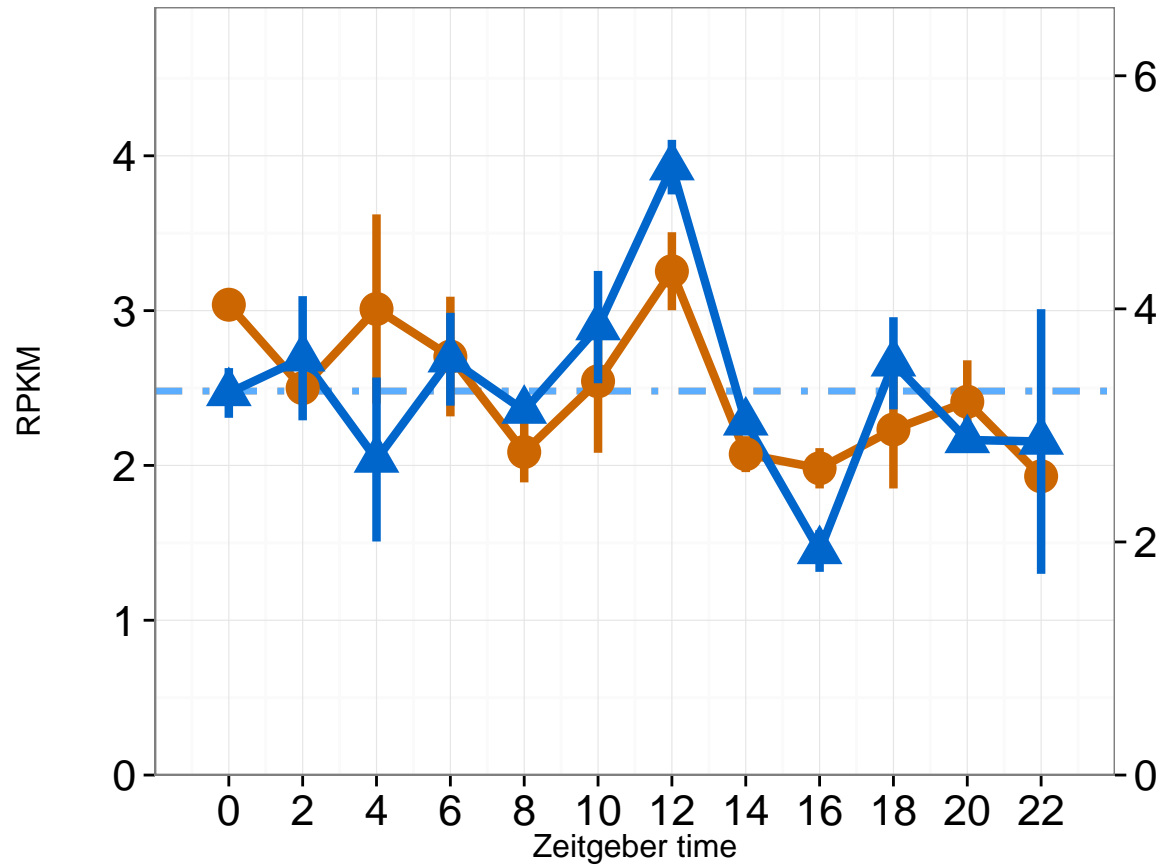

# Mnd1

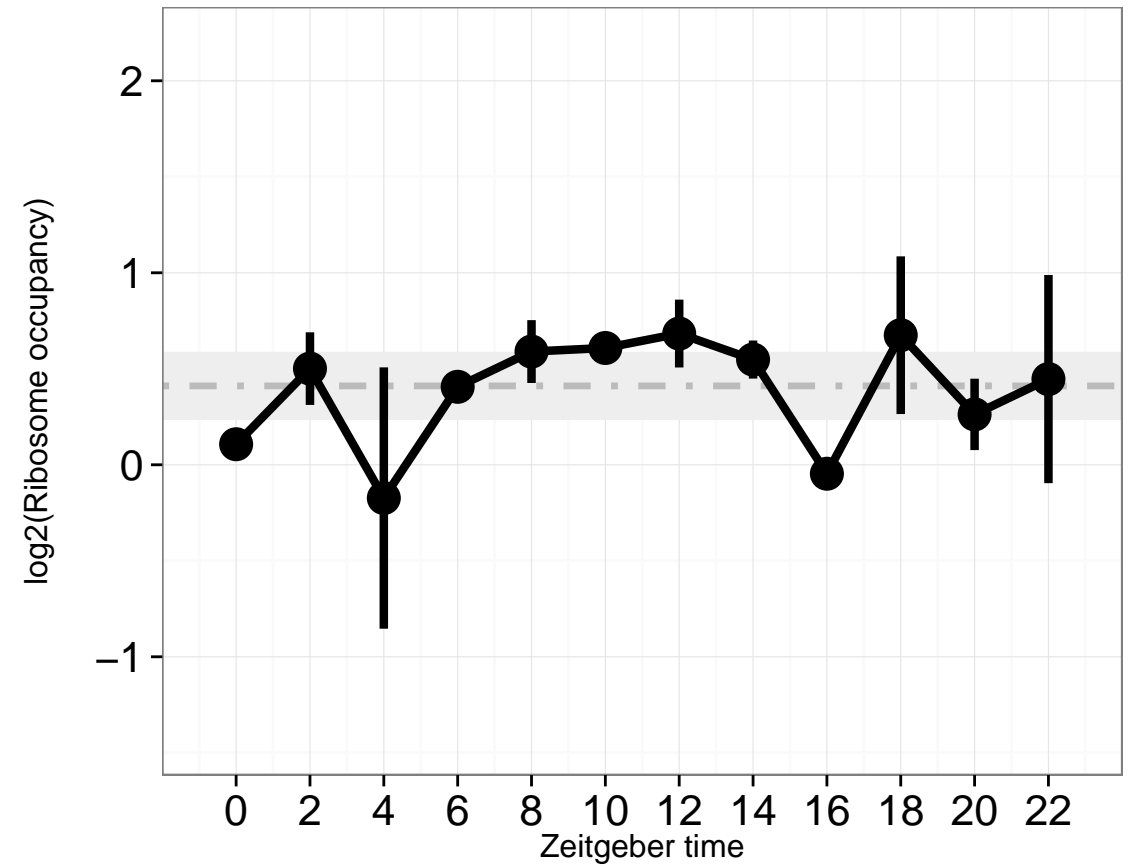

Supplement: Supplementary file 12340 [file 1]

## Foxp4

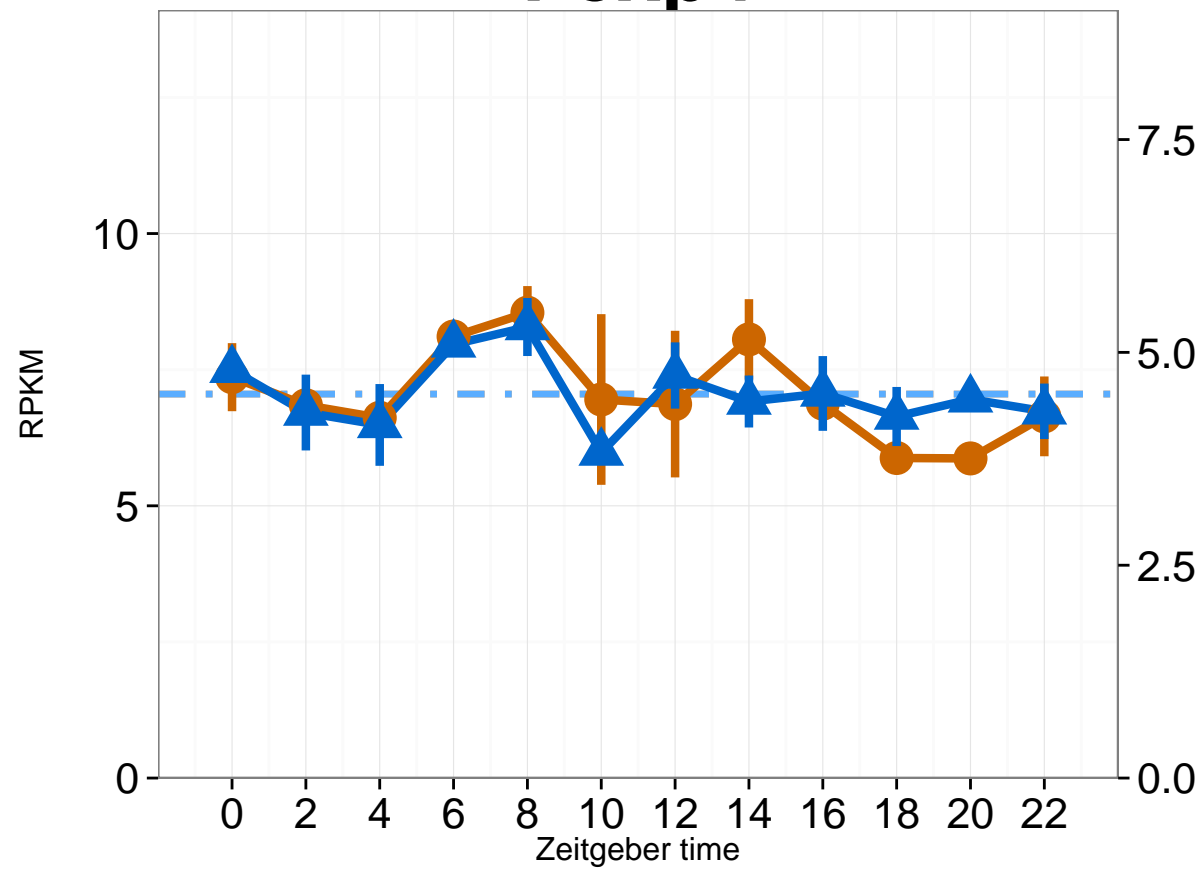

## Foxp4

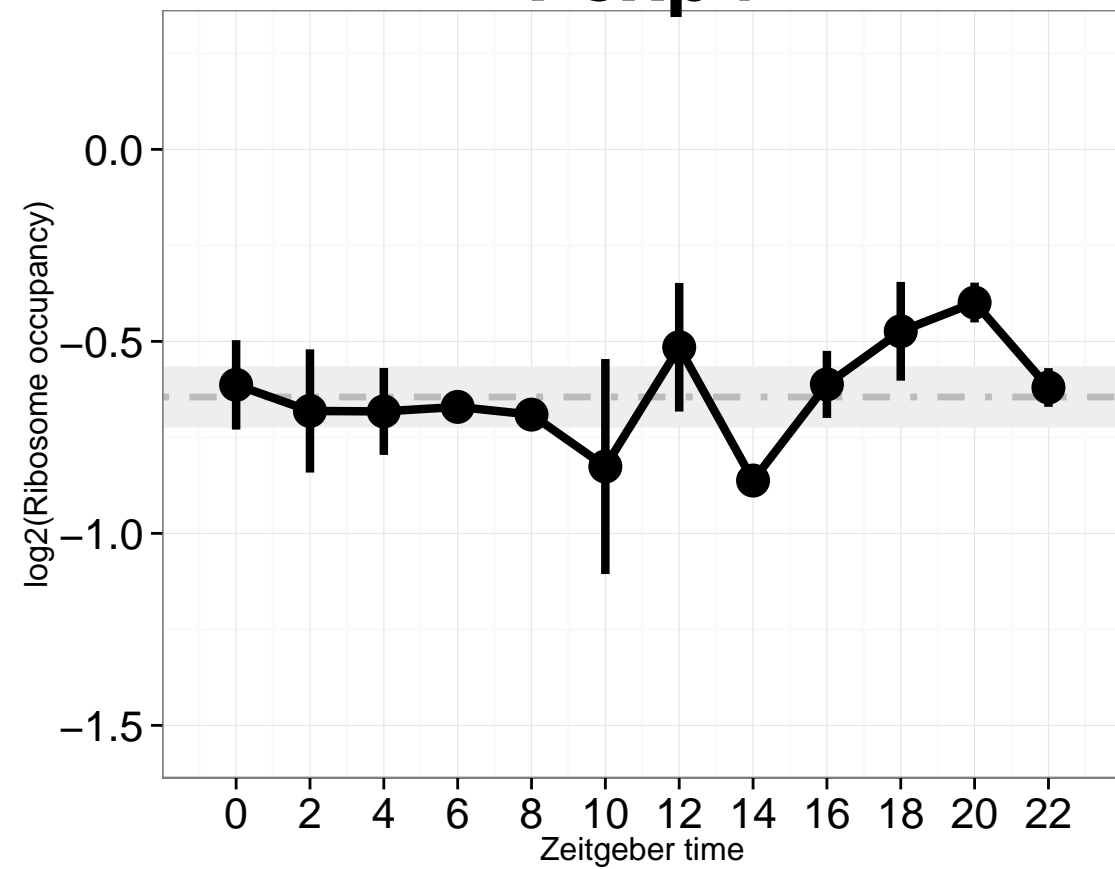

Supplement: Supplementary file 12341 [file 1]

## Vezt

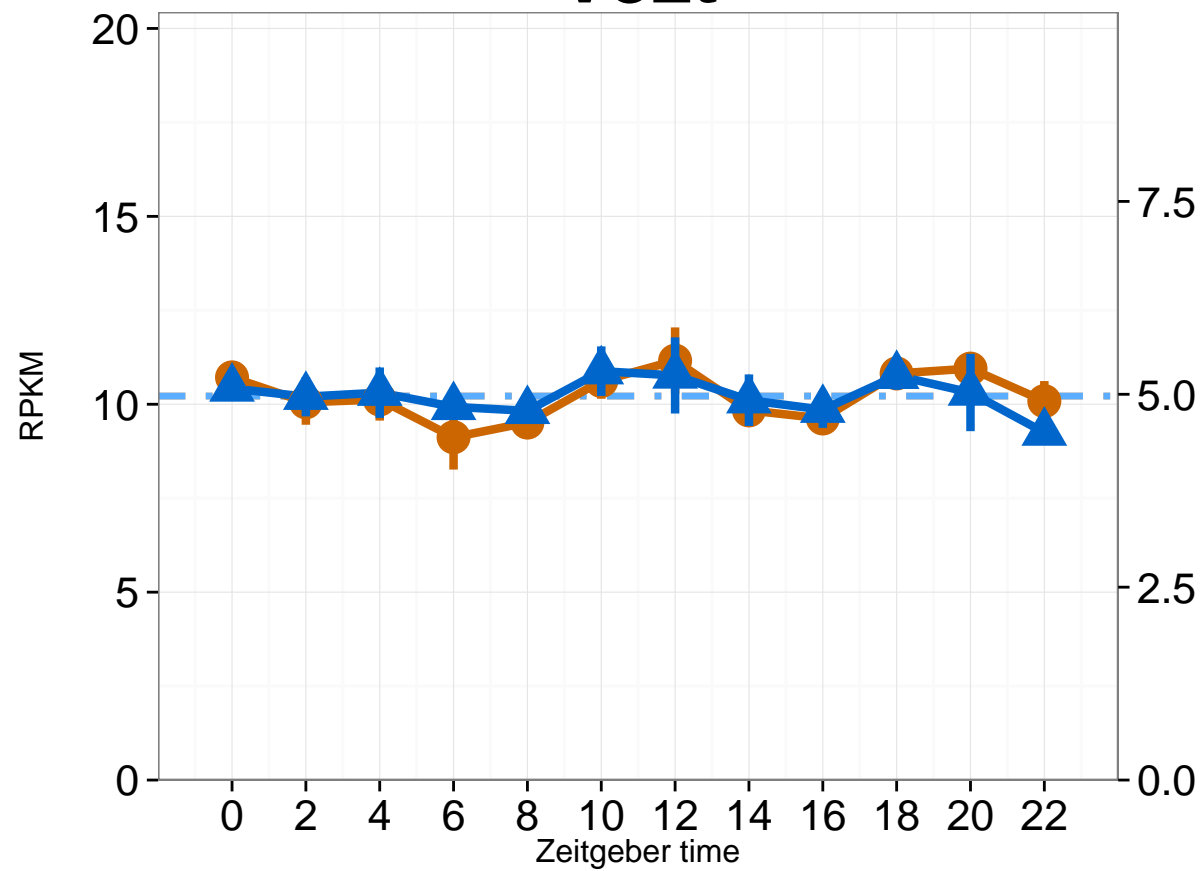

## Vezt

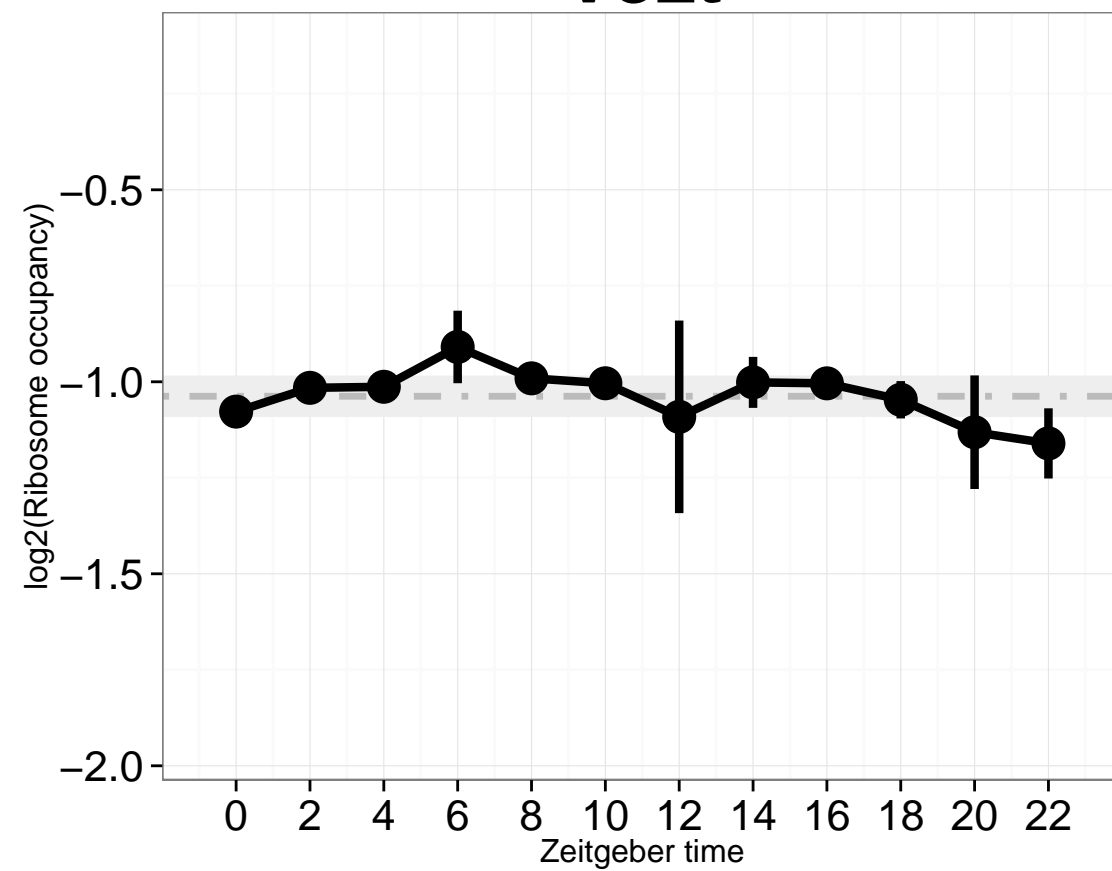

Supplement: Supplementary file 12342 [file 1]

# Gulo TR

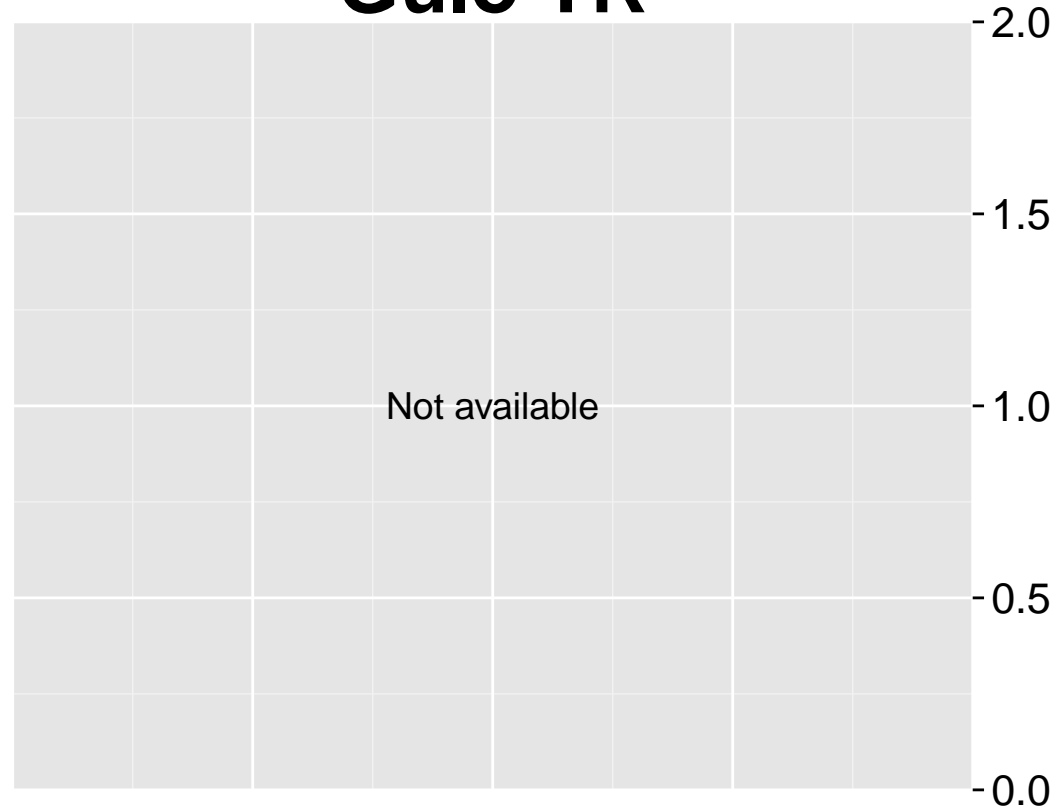

# Gulo log2(Ribosome occupancy)

Supplement: Supplementary file 12343 [file 1]

# Rbm3

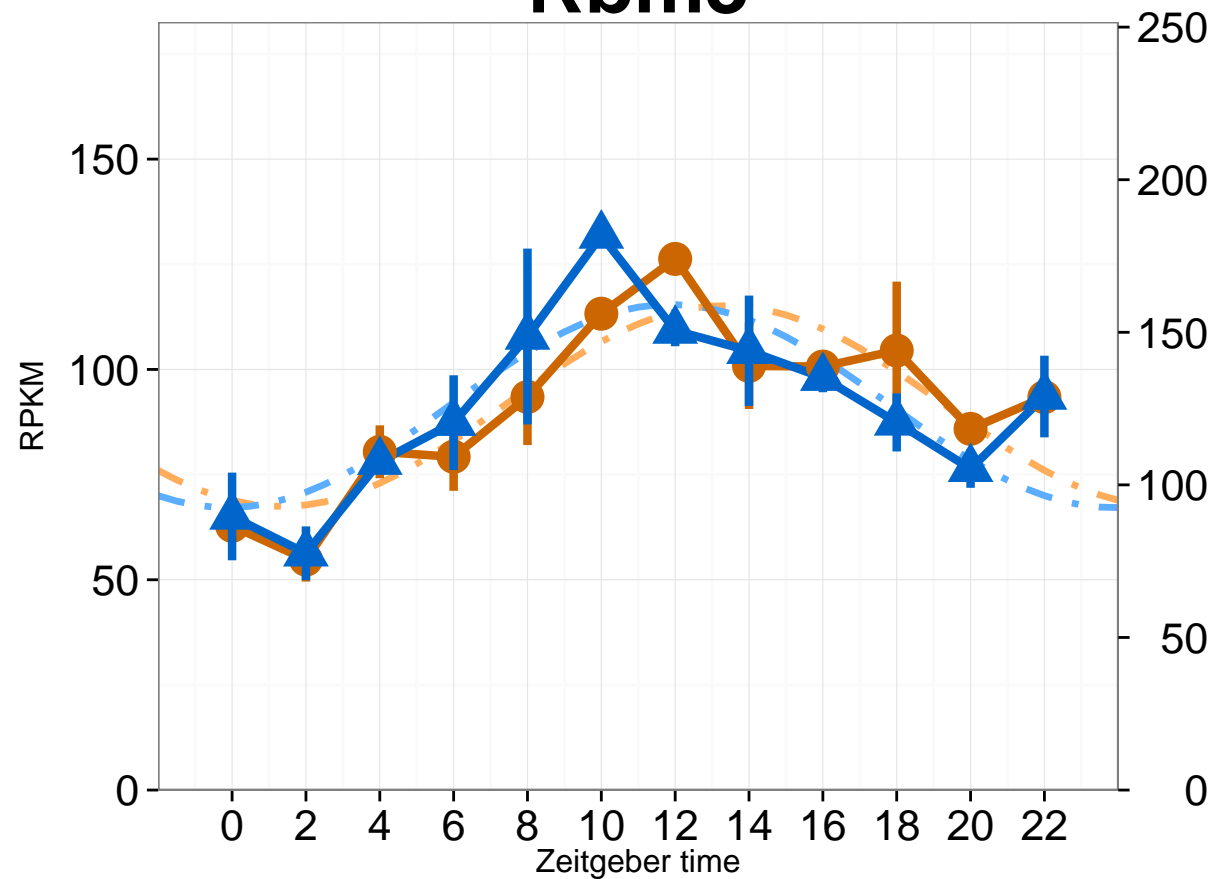

# Rbm3

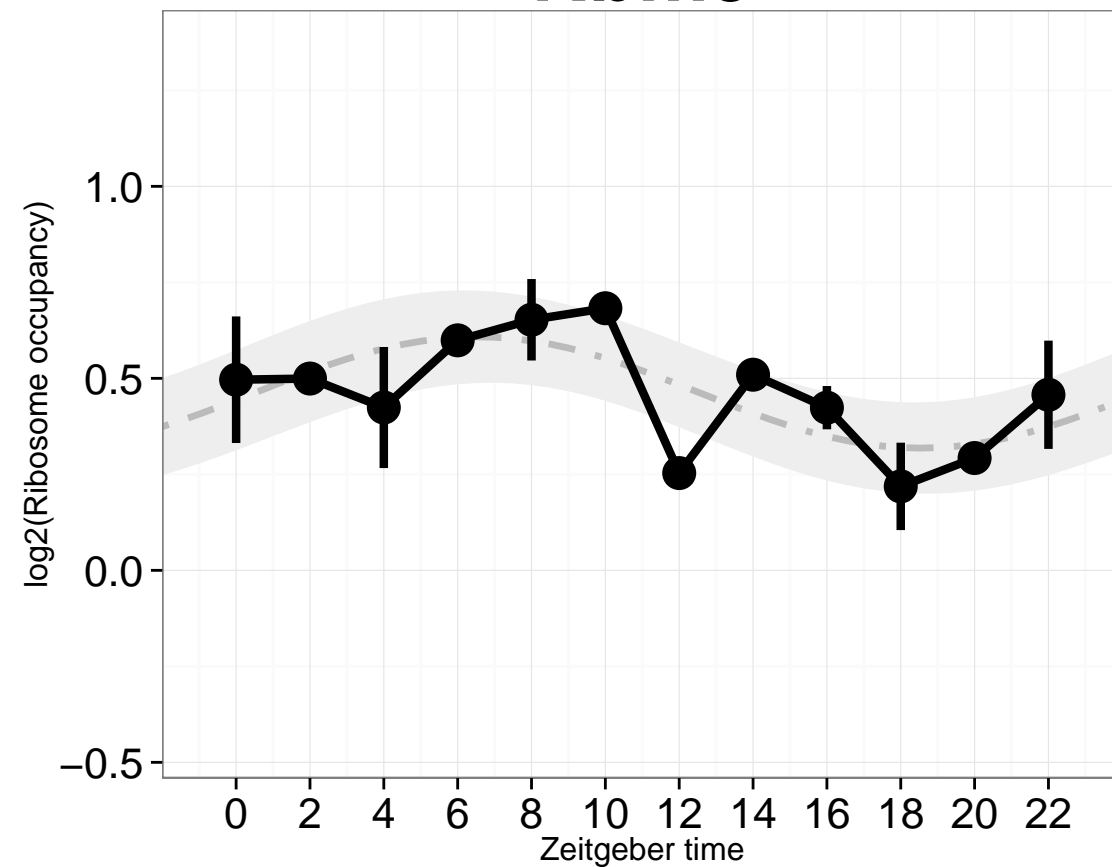

Supplement: Supplementary file 12344 [file 1]
