# Supplementary material (part 124 of 133)
Source: publisher figshare collection journal article supplement (https://springernature.figshare.com/articles/dataset/_/4903193)

# Mreg

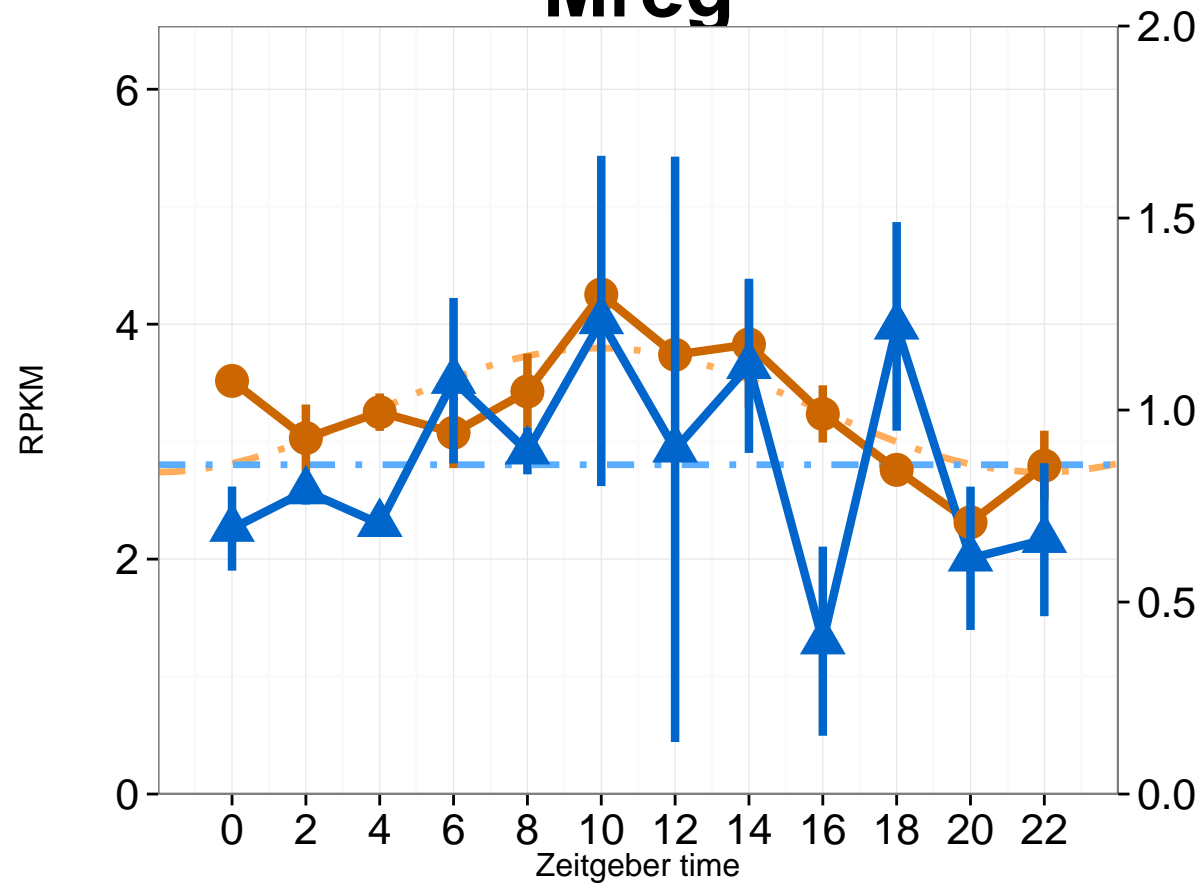

# Mreg

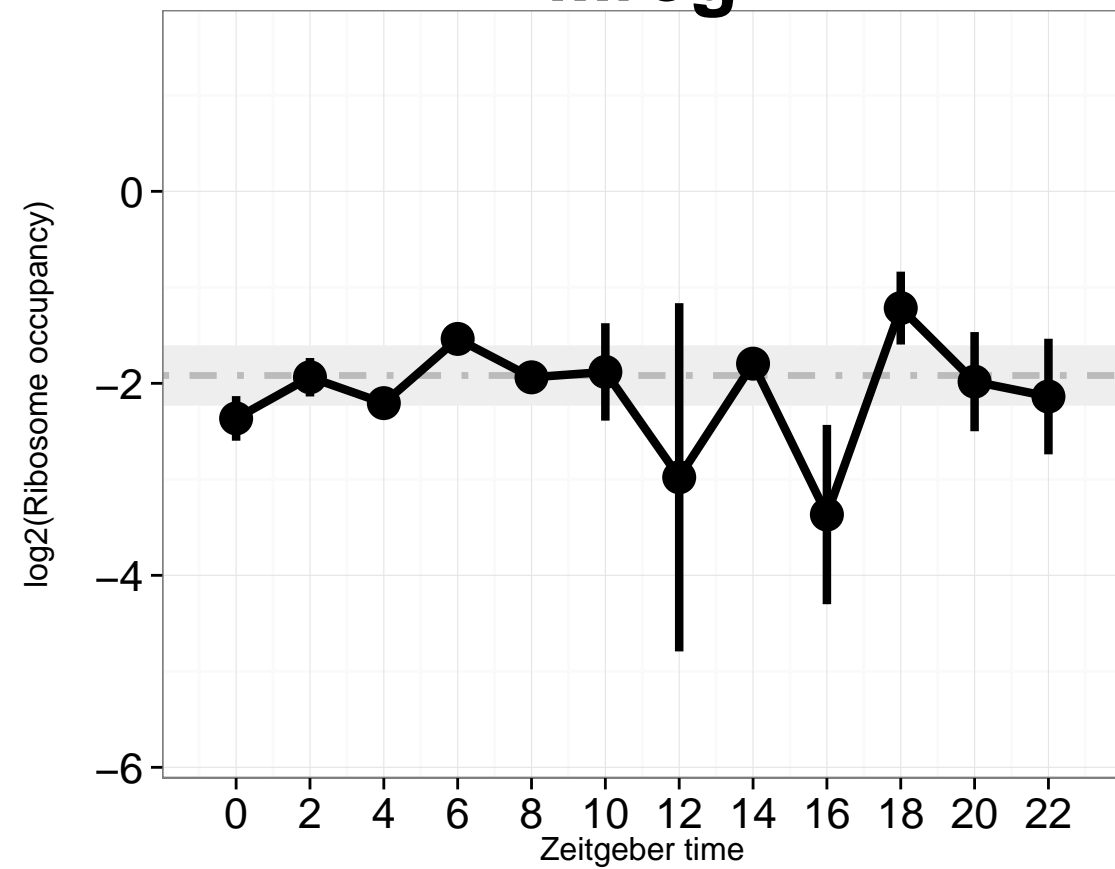

Supplement: Supplementary file 12345 [file 1]

# Zfp746

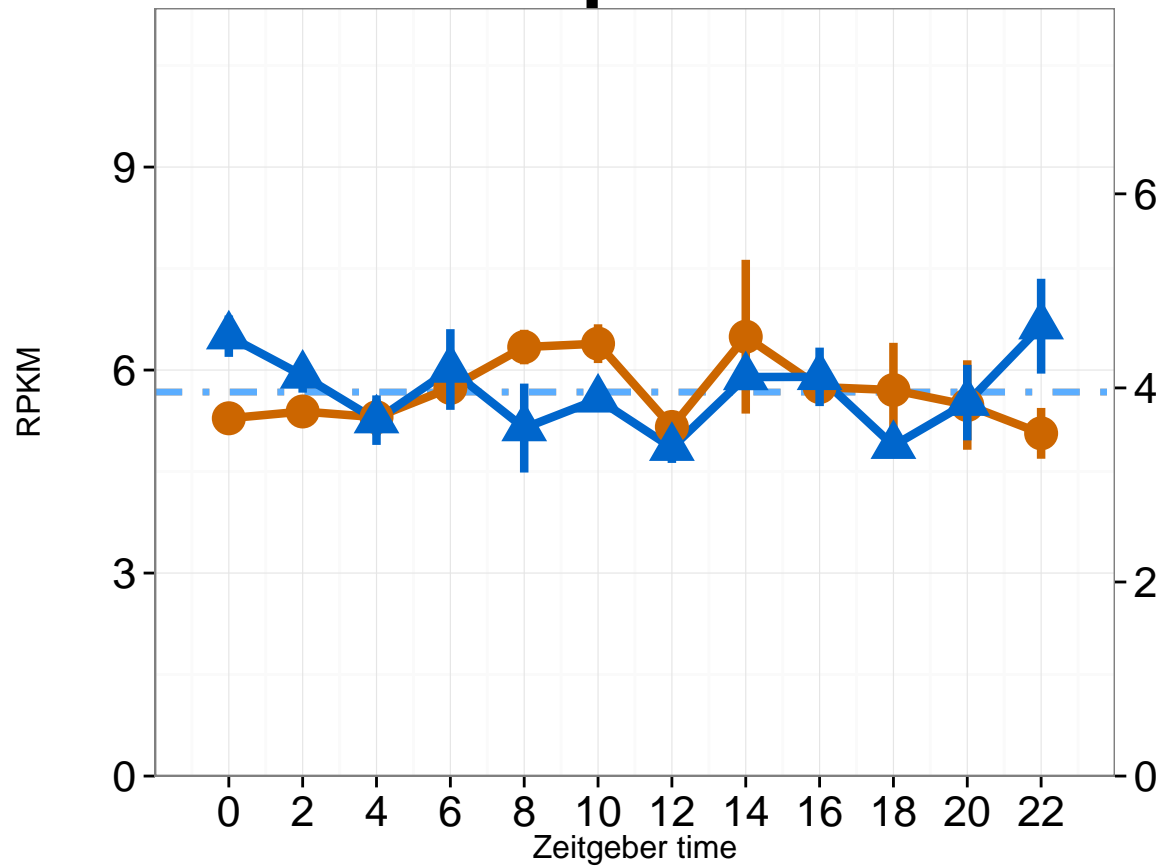

# Zfp746

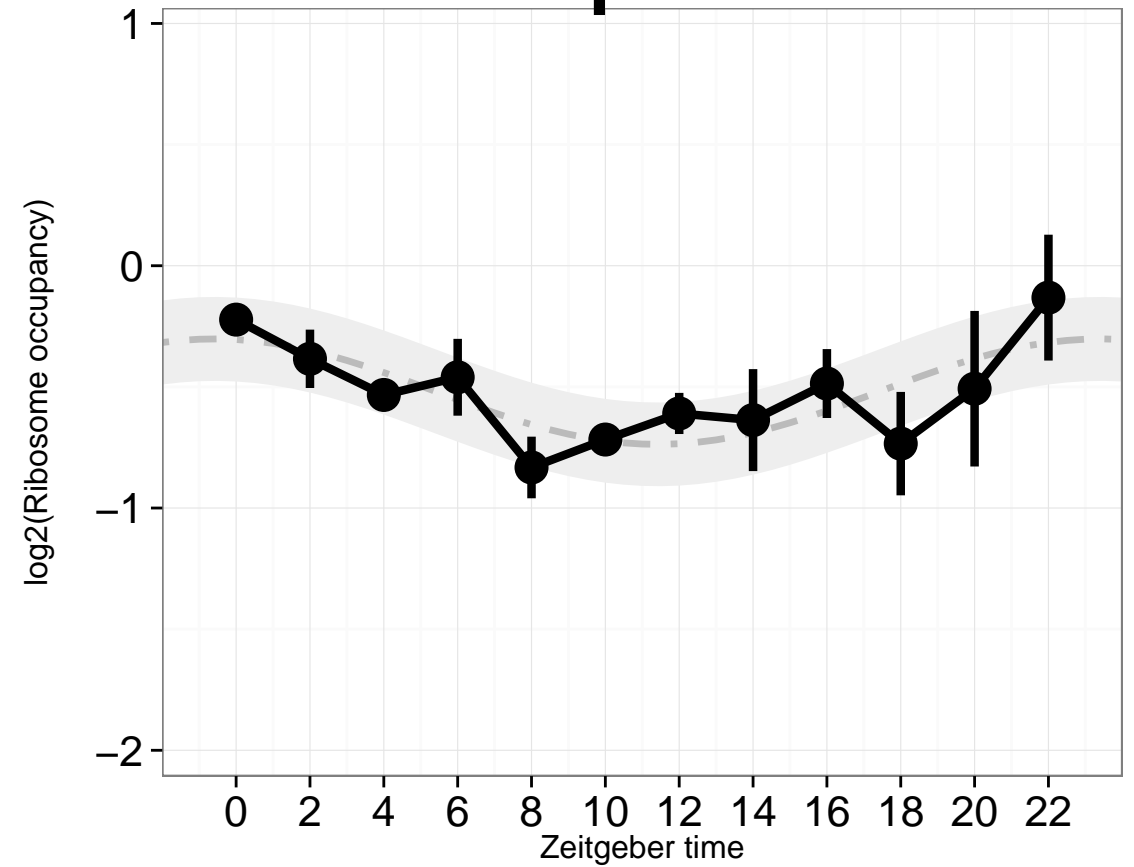

Supplement: Supplementary file 12346 [file 1]

## Chst7

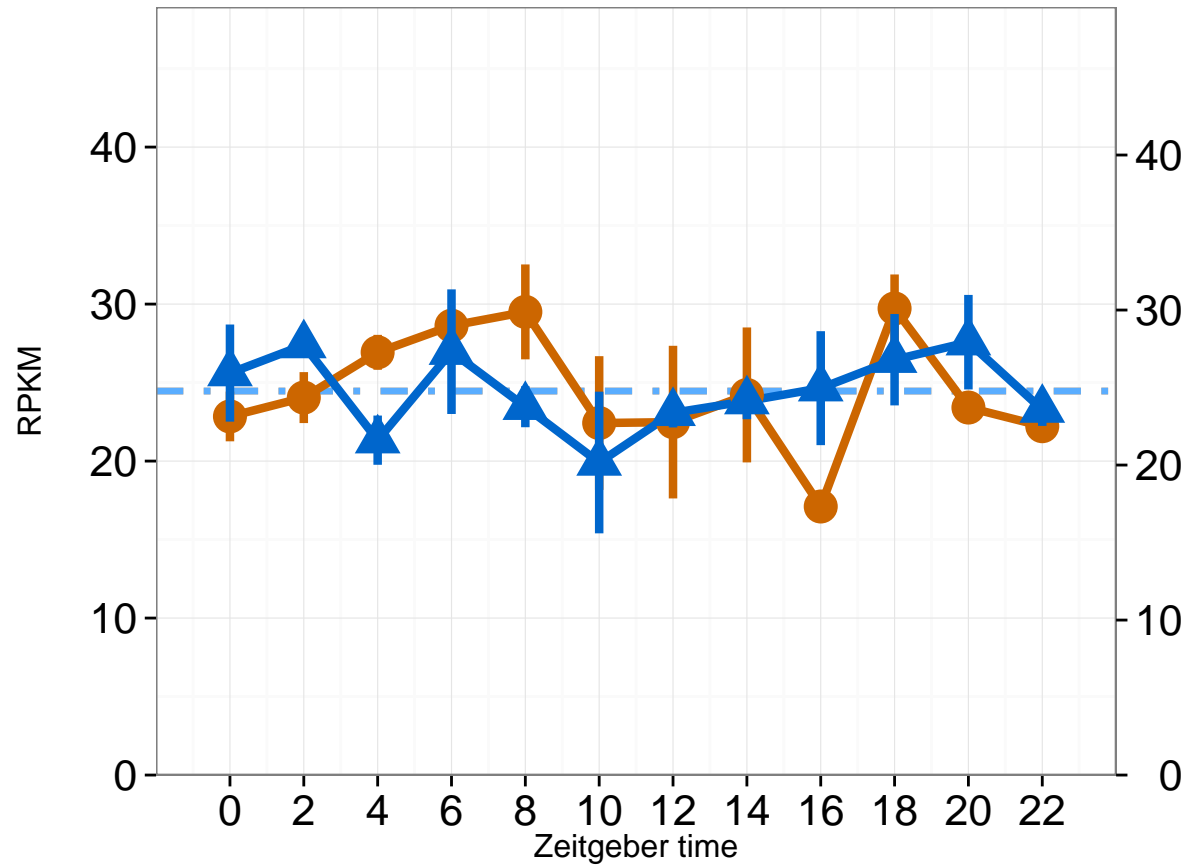

## Chst7

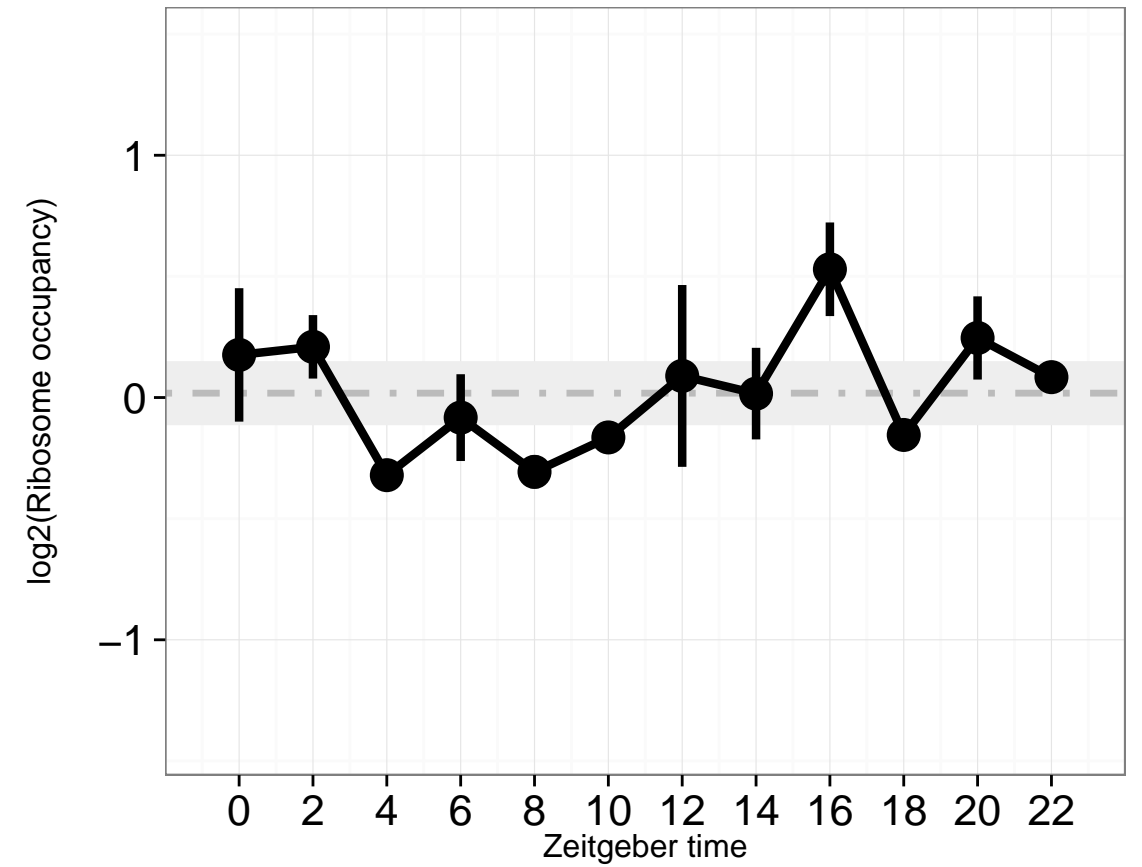

Supplement: Supplementary file 12347 [file 1]

# Dnajc14

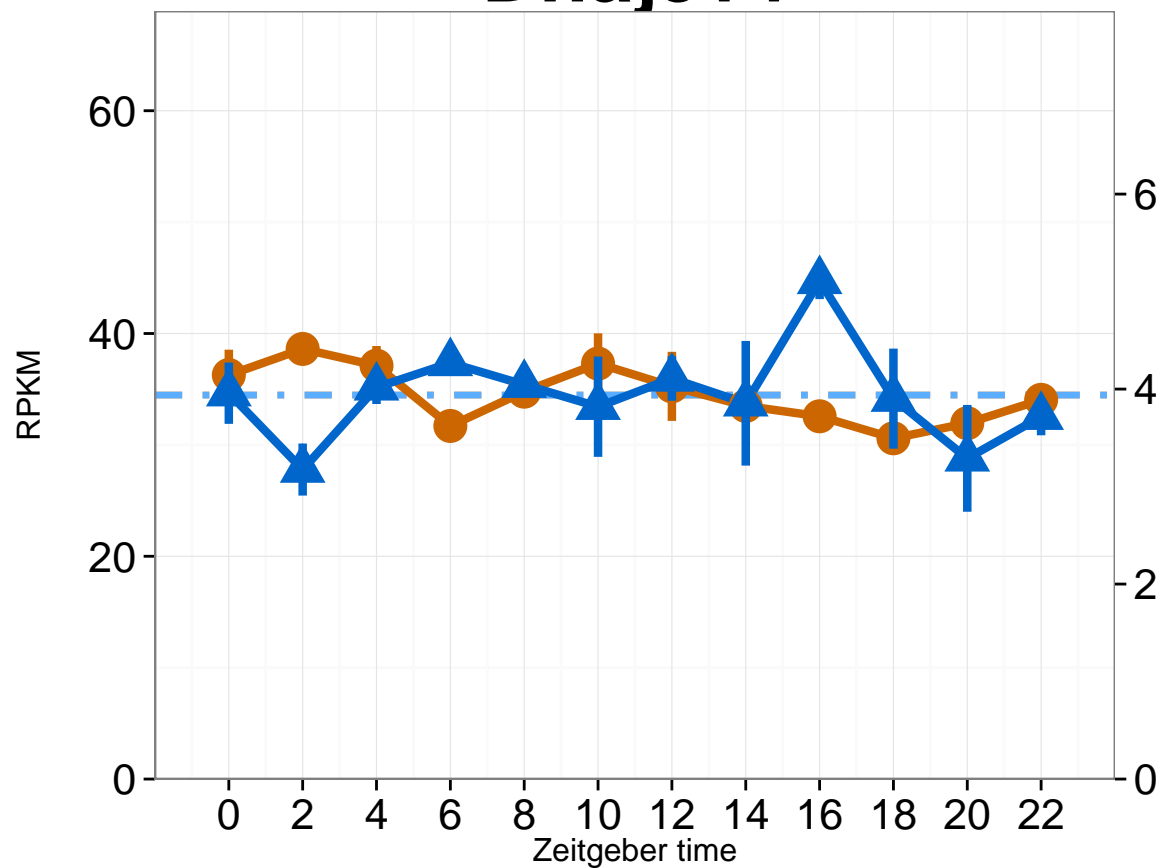

# Dnajc14

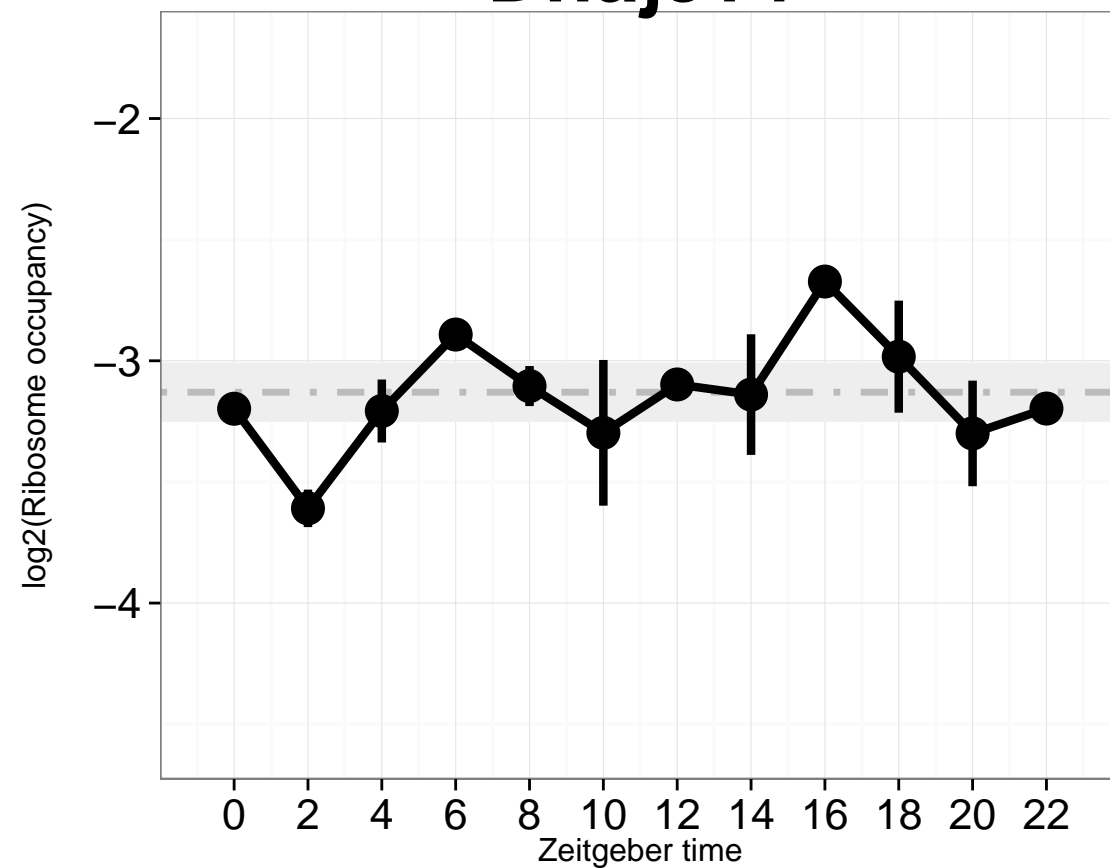

Supplement: Supplementary file 12348 [file 1]

## Crem

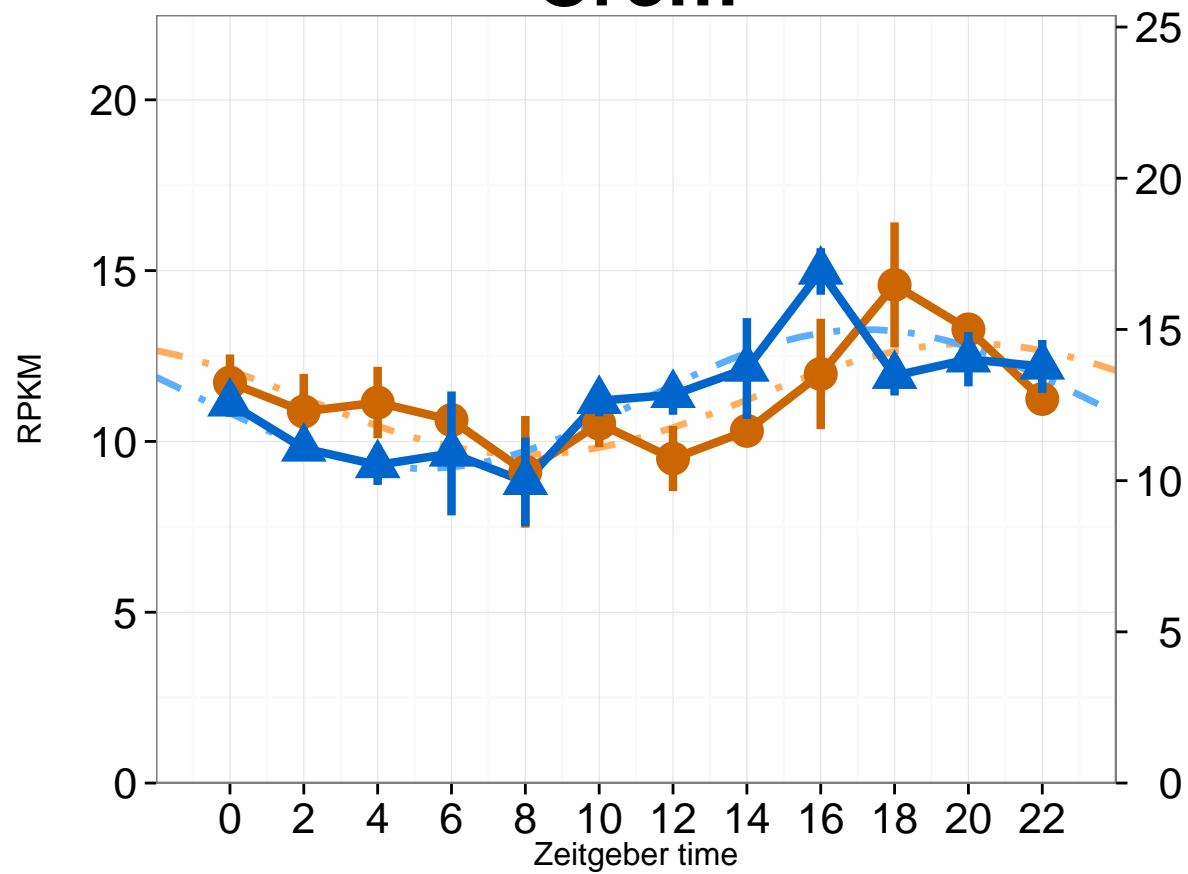

## Crem

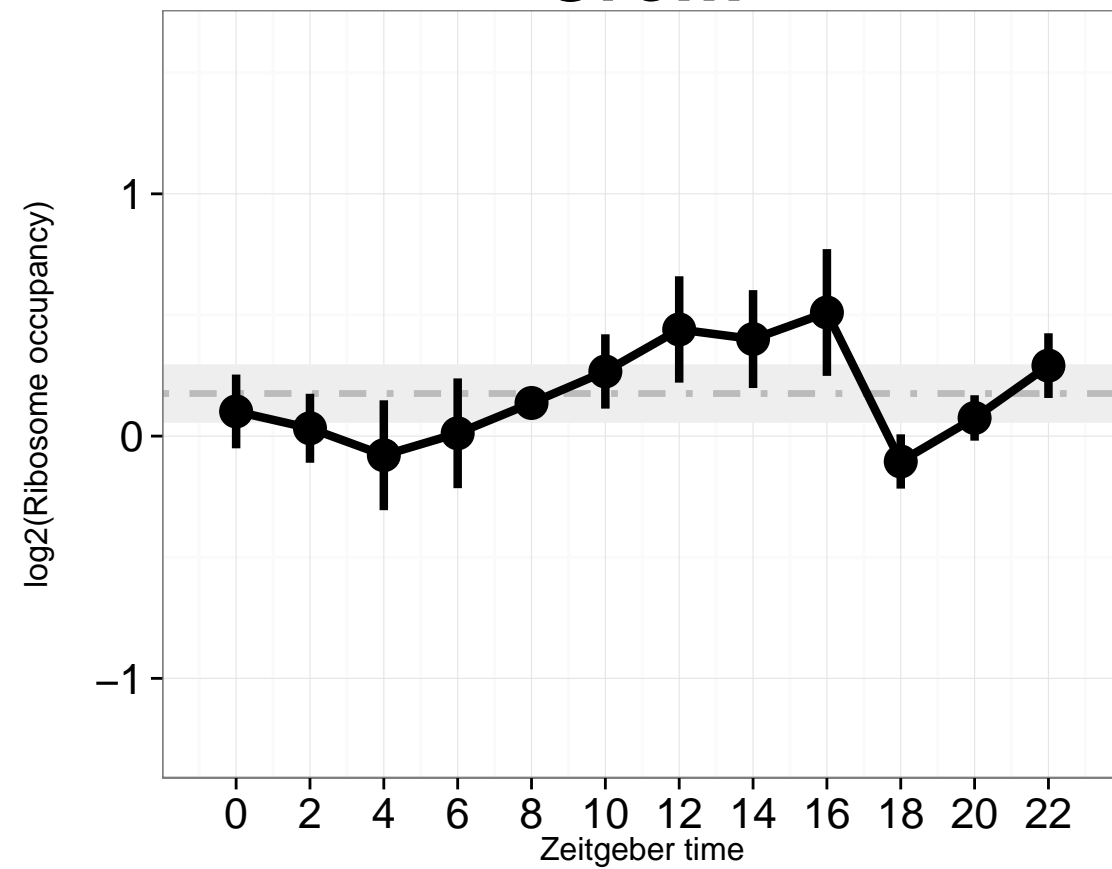

Supplement: Supplementary file 12349 [file 1]

# Efcab14

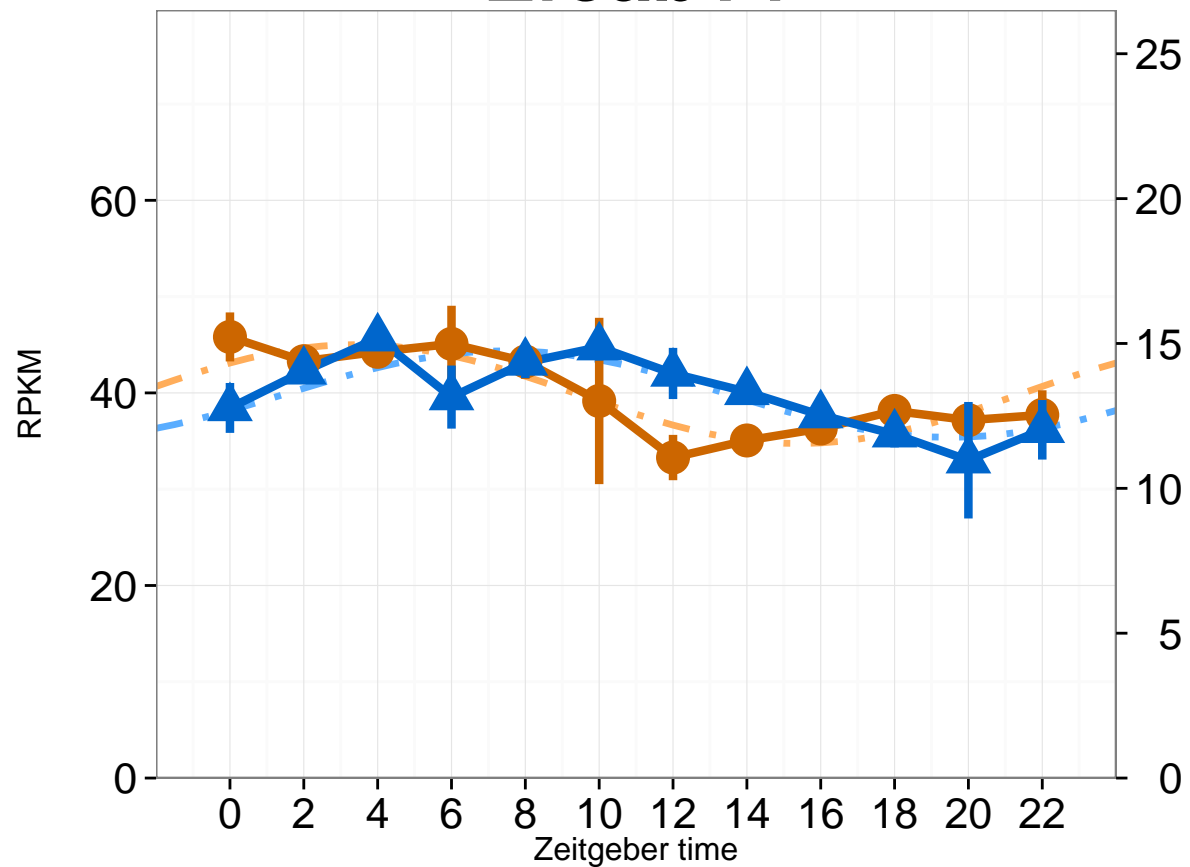

# Efcab14

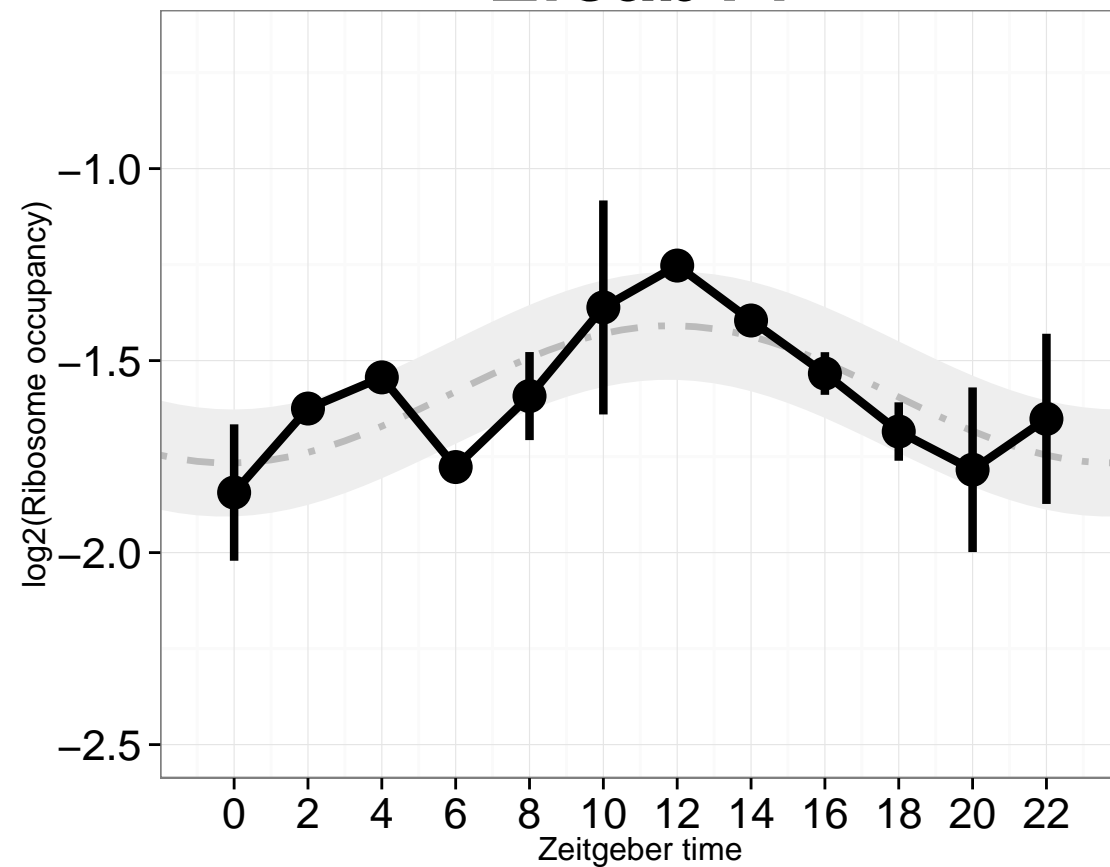

Supplement: Supplementary file 12350 [file 1]

# Sigmar1

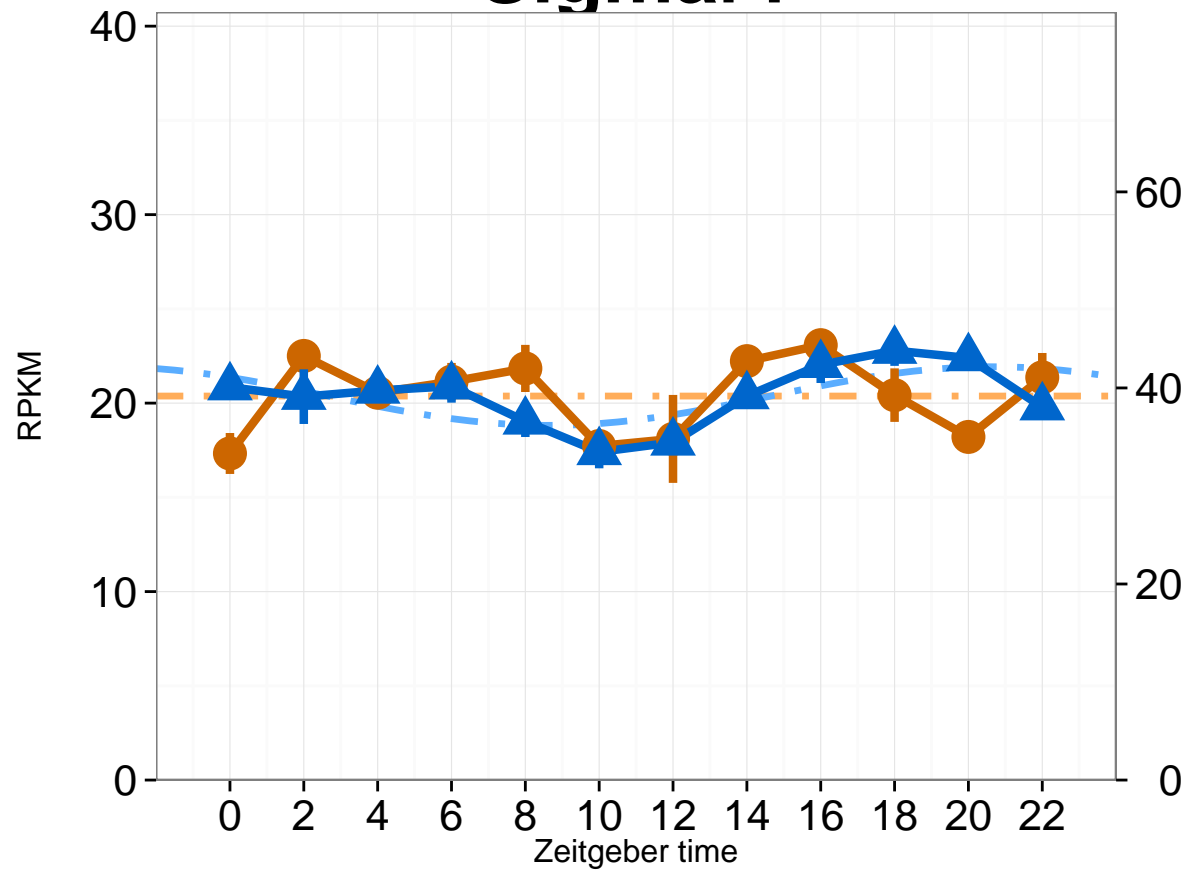

# Sigmar1

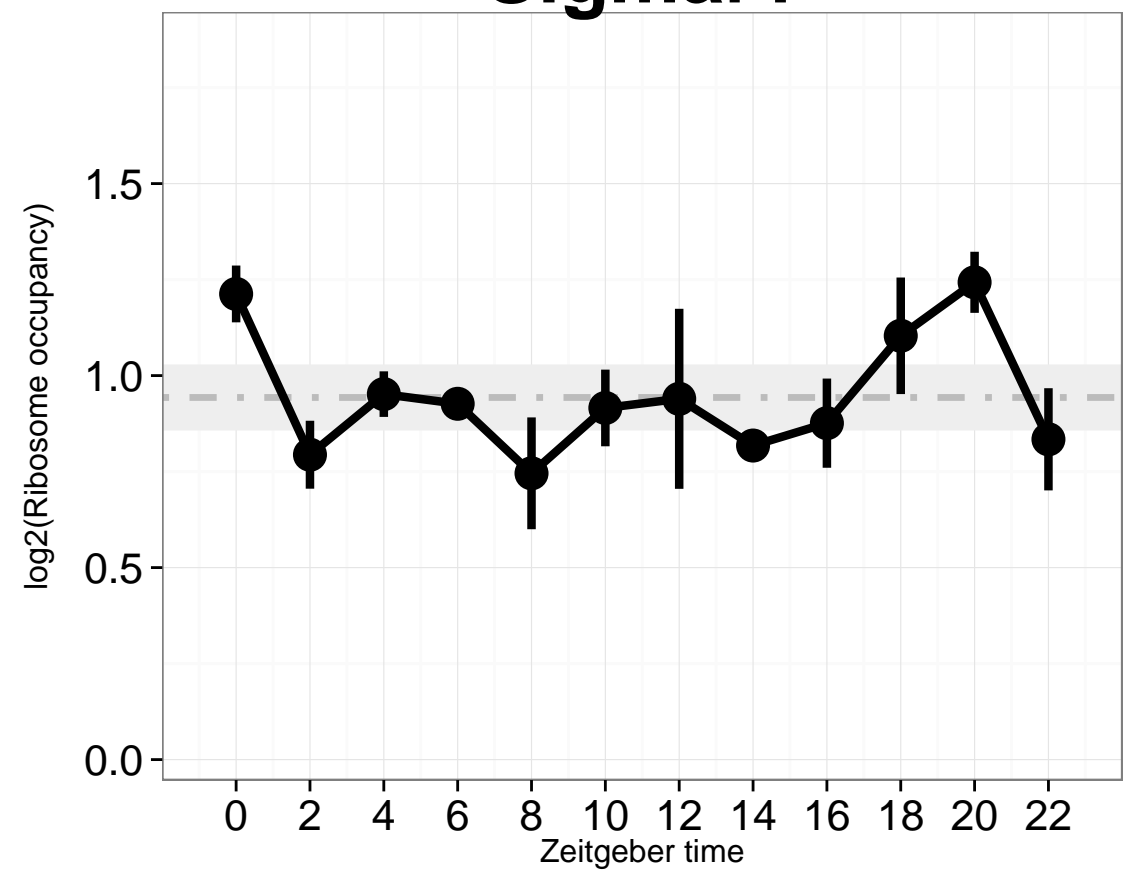

Supplement: Supplementary file 12351 [file 1]

## Mkks

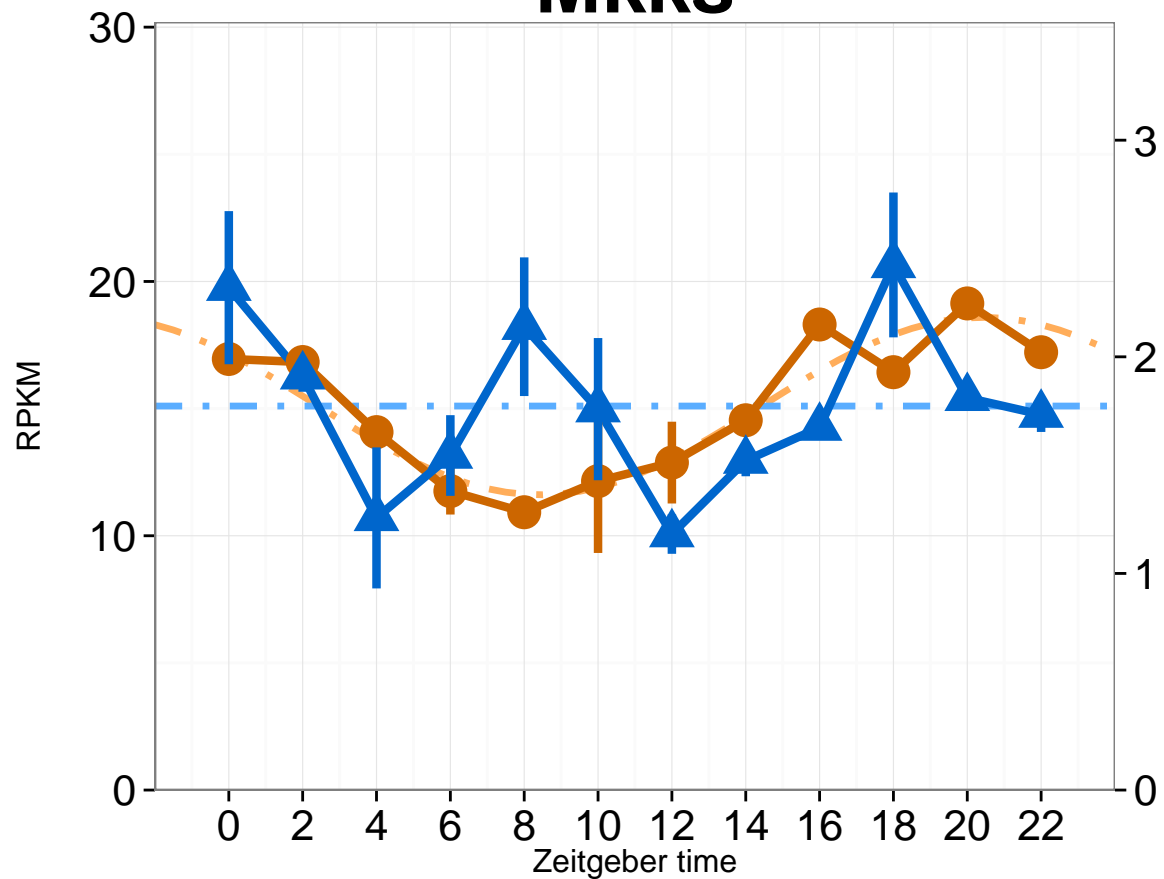

## Mkks

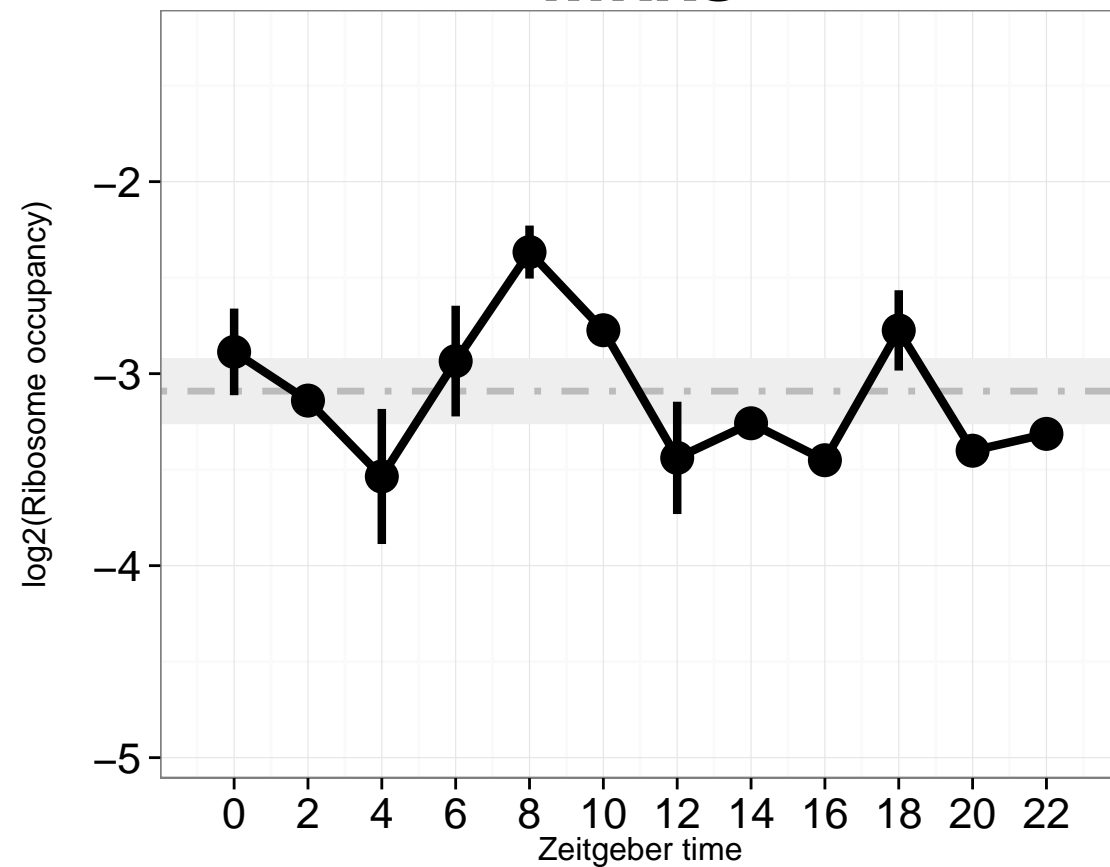

Supplement: Supplementary file 12352 [file 1]

## Rab1

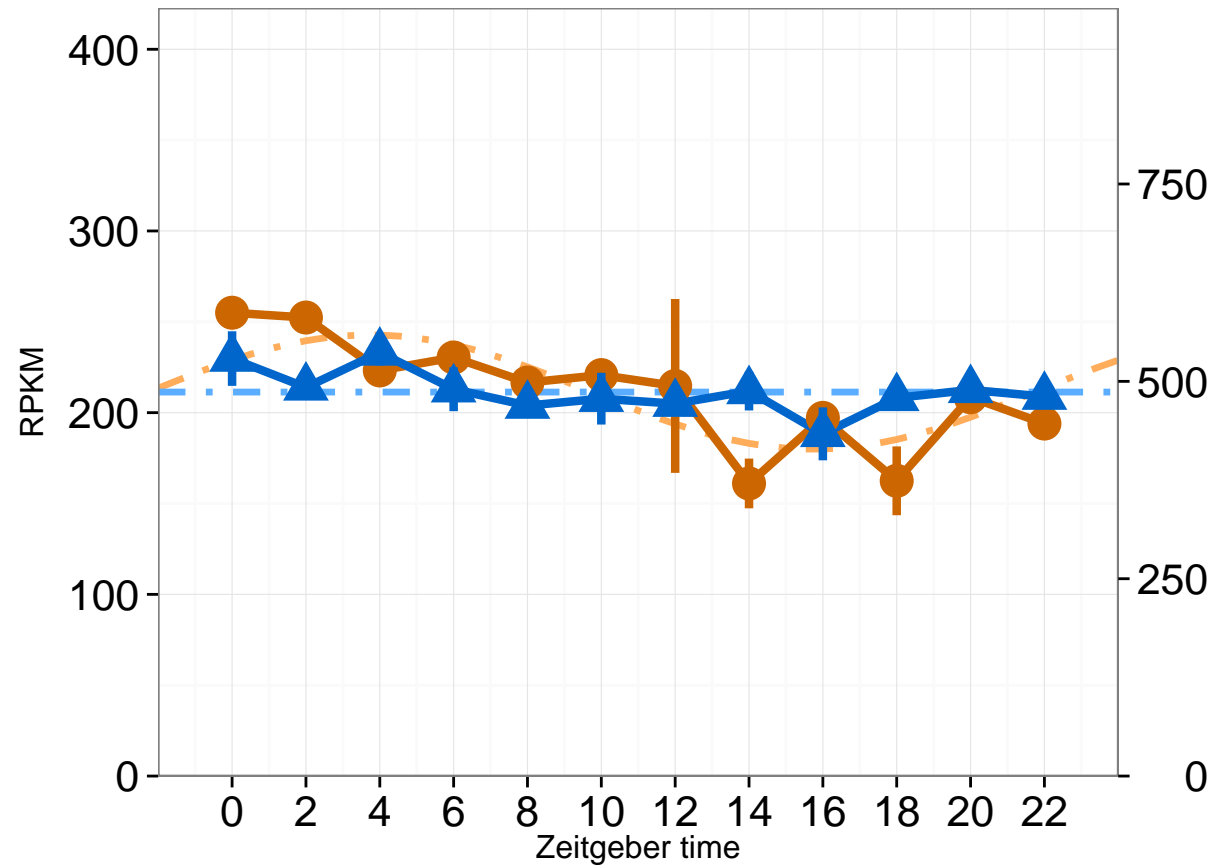

## Rab1

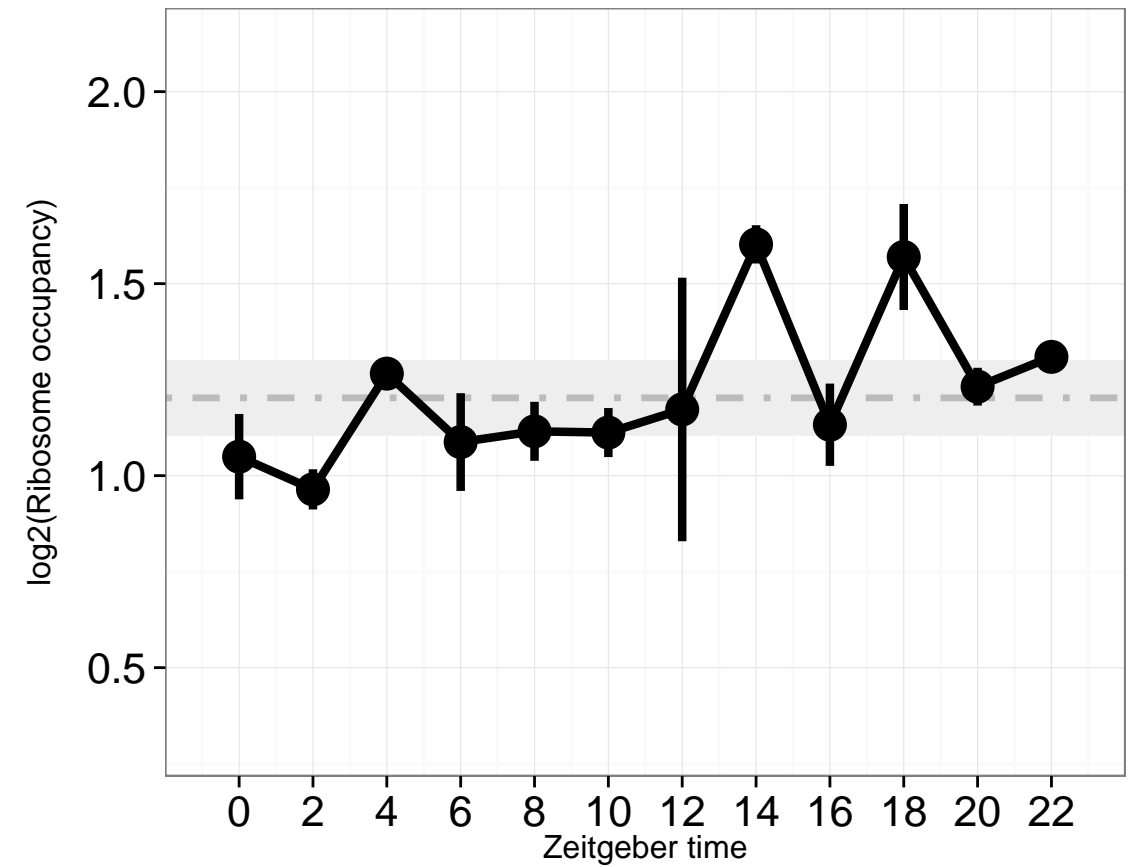

Supplement: Supplementary file 12353 [file 1]

## Taf9

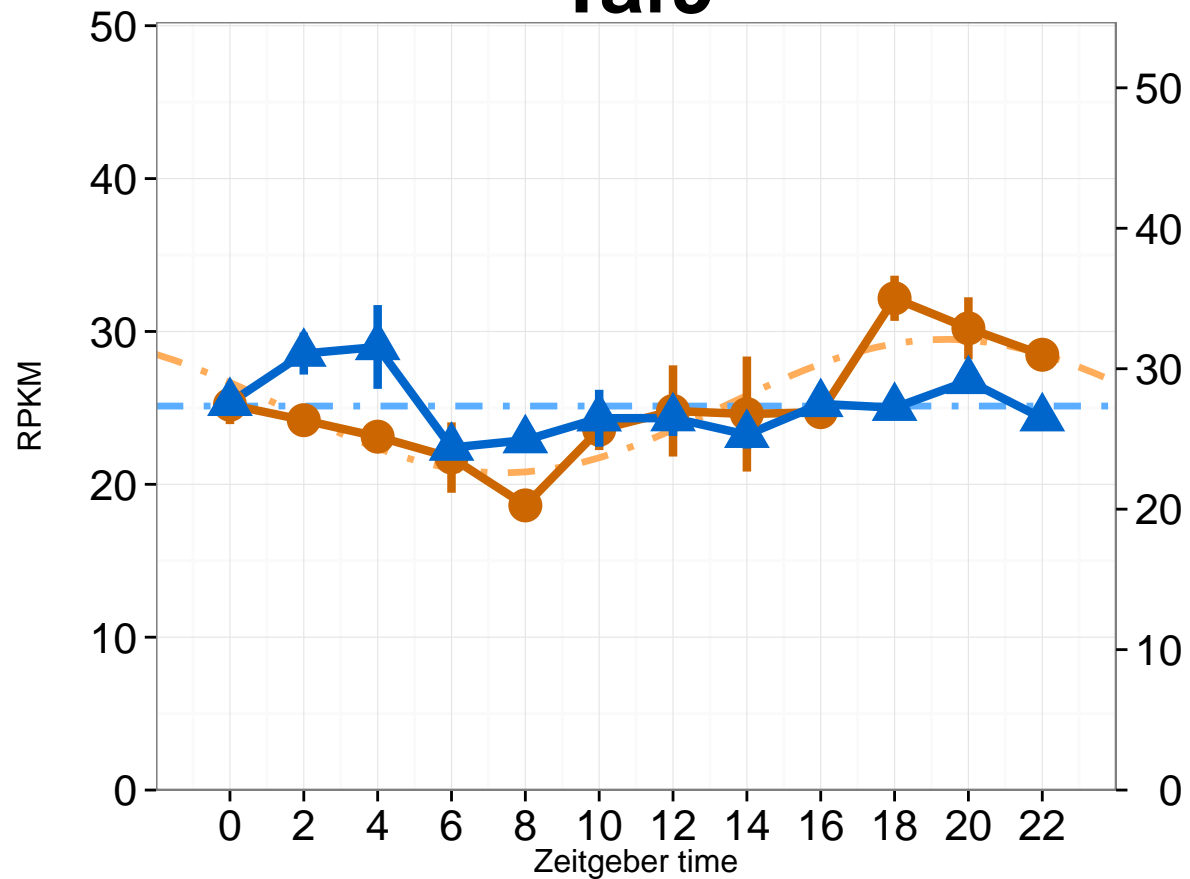

## Taf9

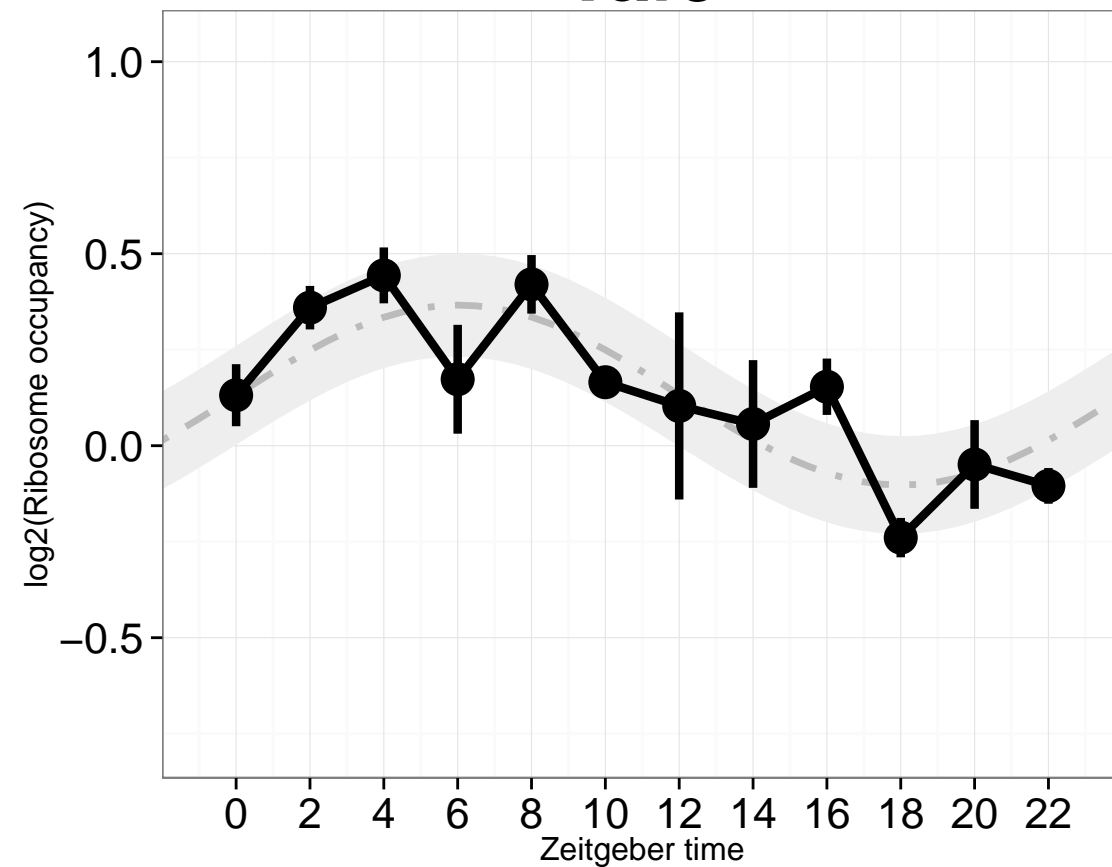

Supplement: Supplementary file 12354 [file 1]

## Dera

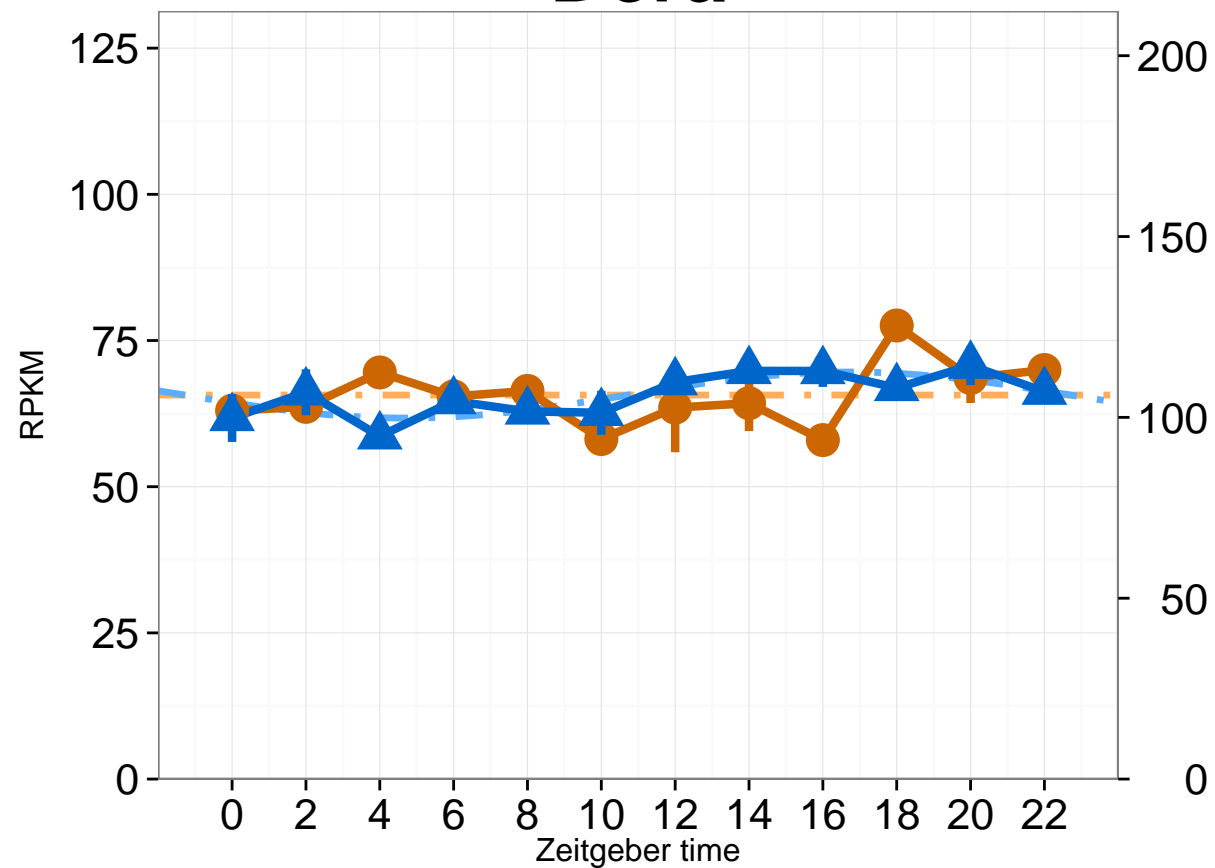

## Dera

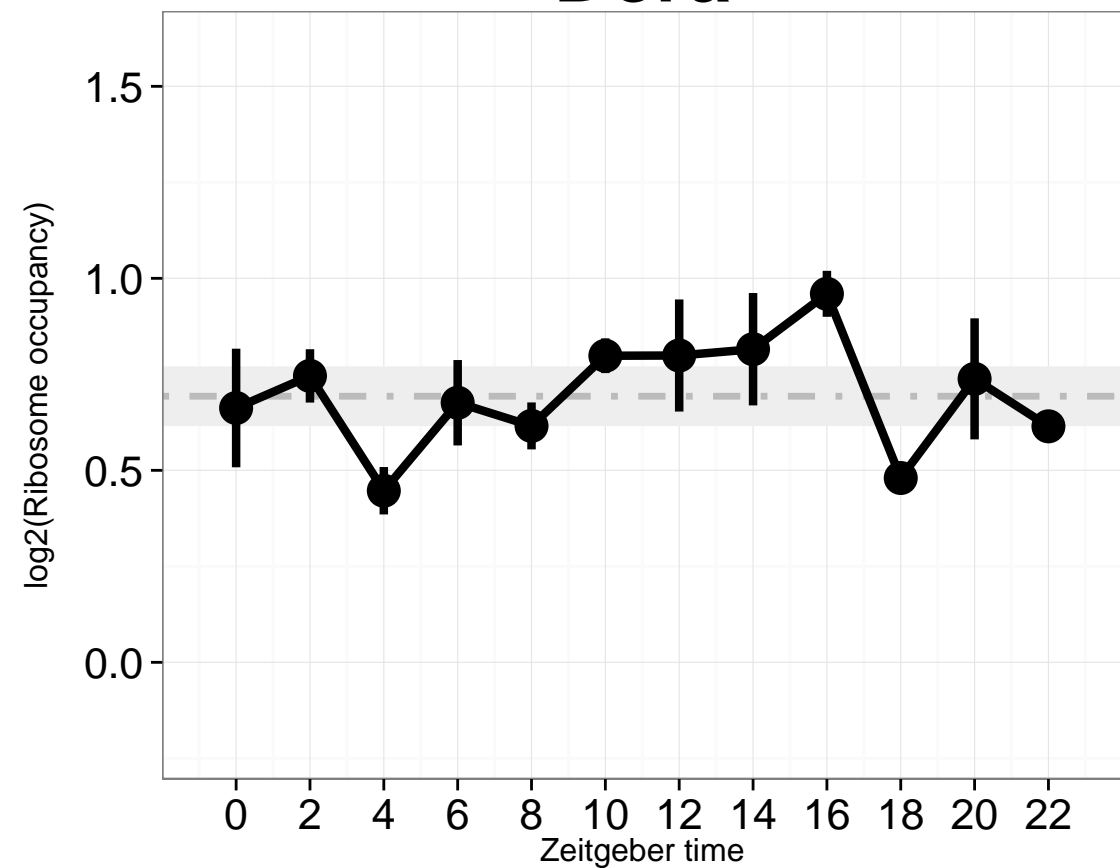

Supplement: Supplementary file 12355 [file 1]

## Sgol2

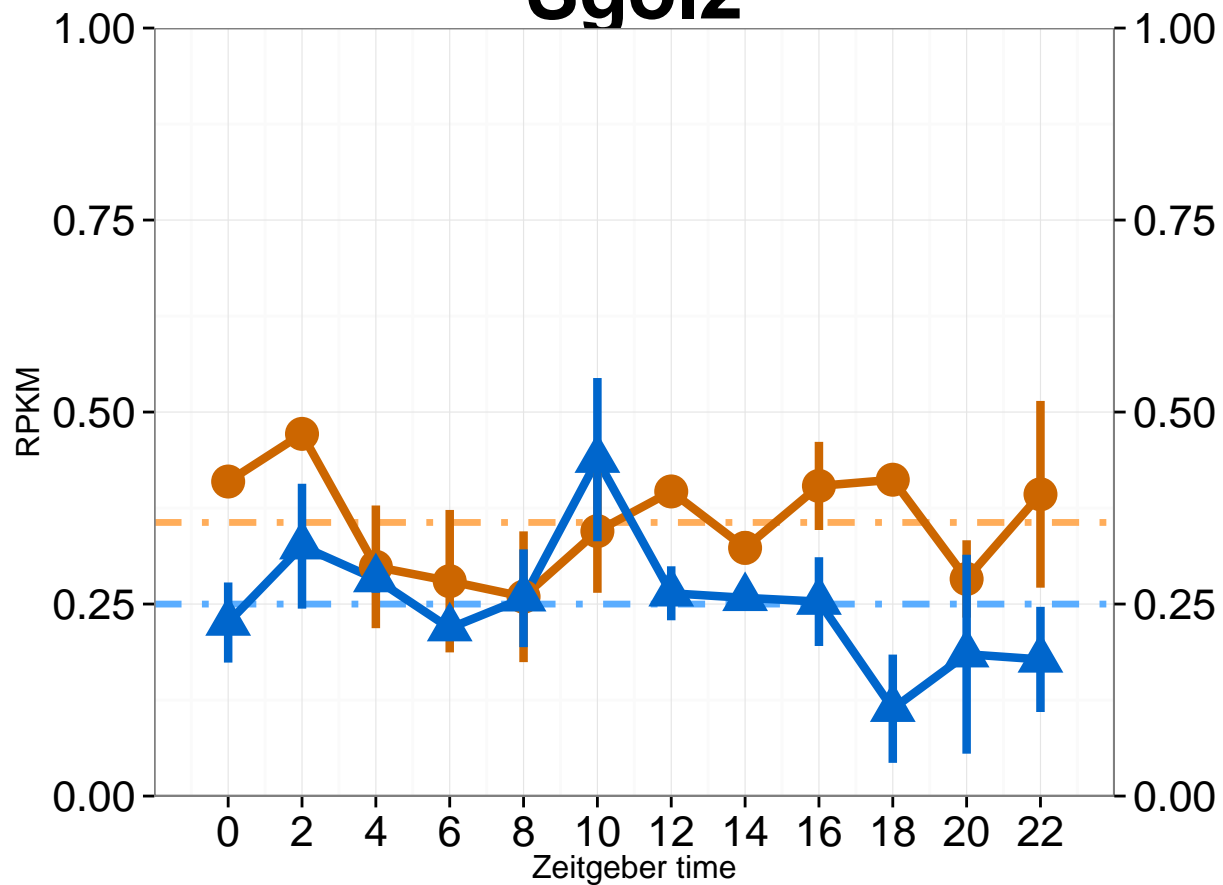

## Sgol2

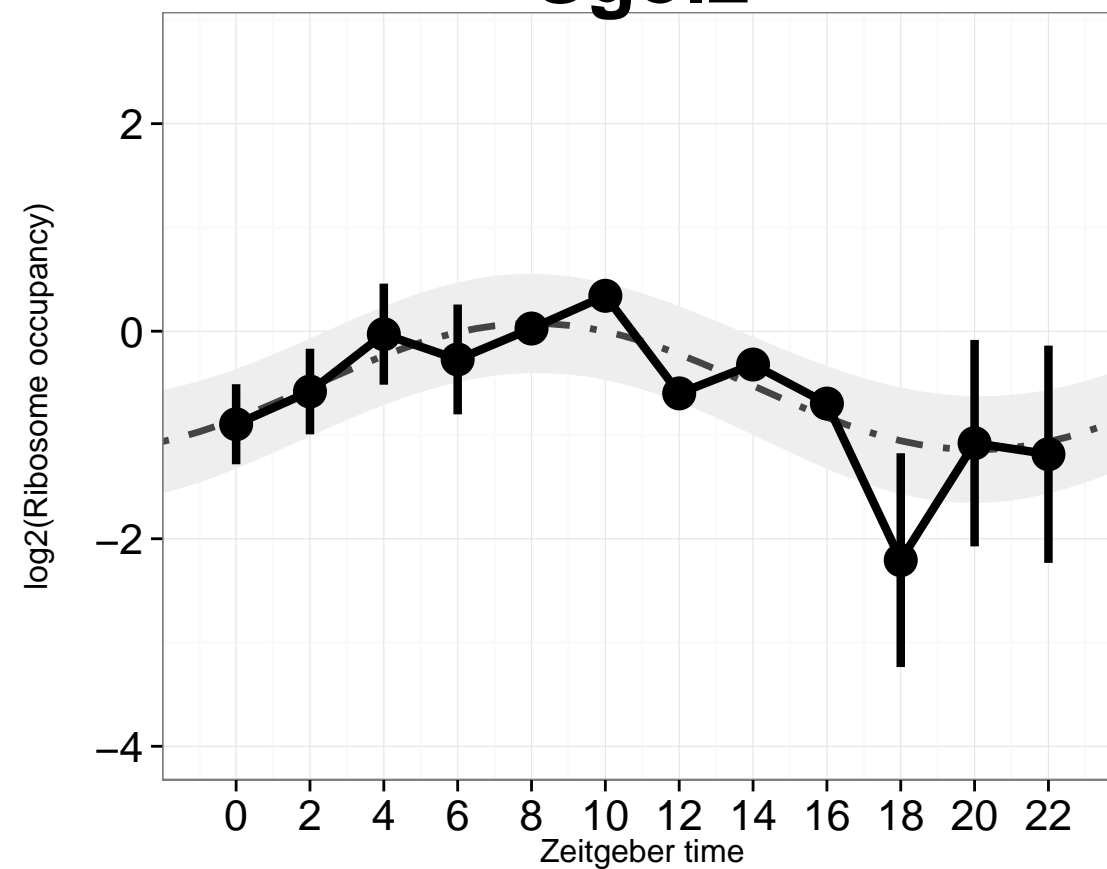

Supplement: Supplementary file 12356 [file 1]

## Selk

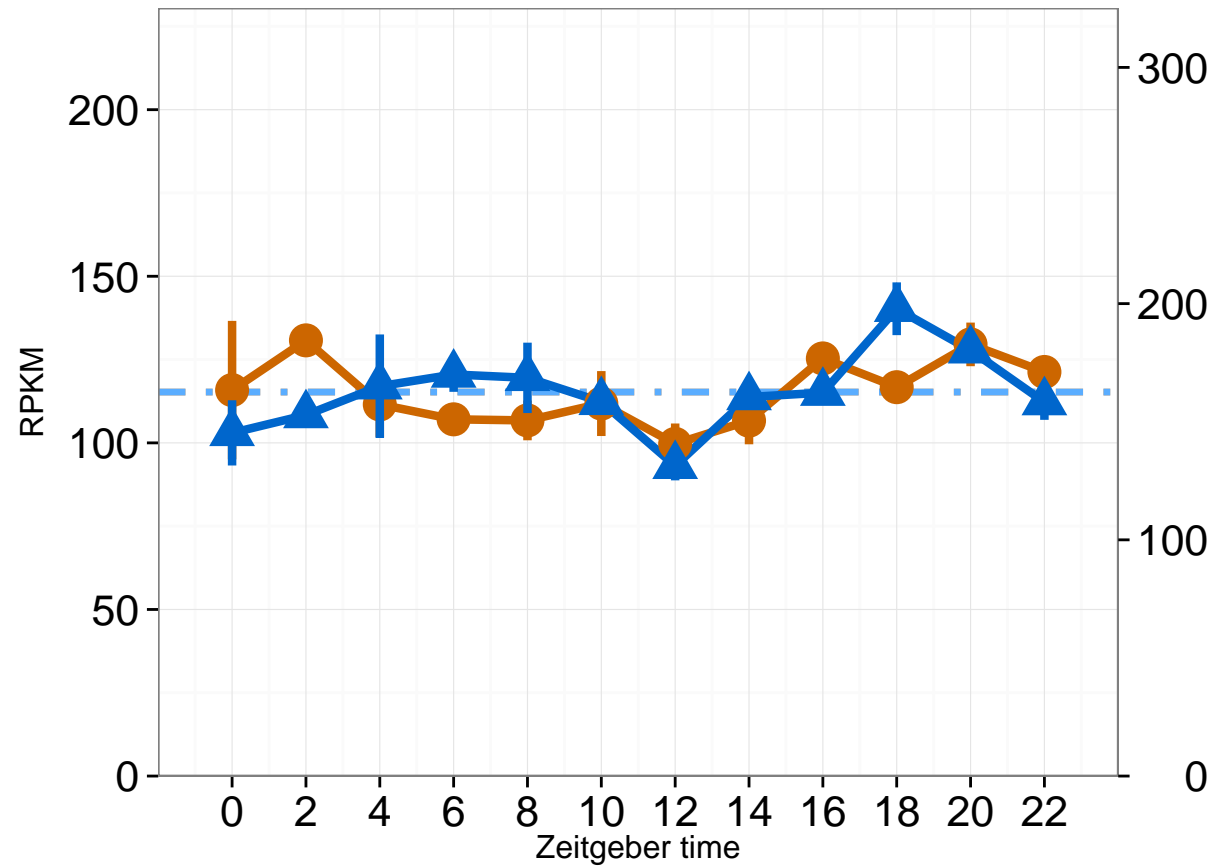

## Selk

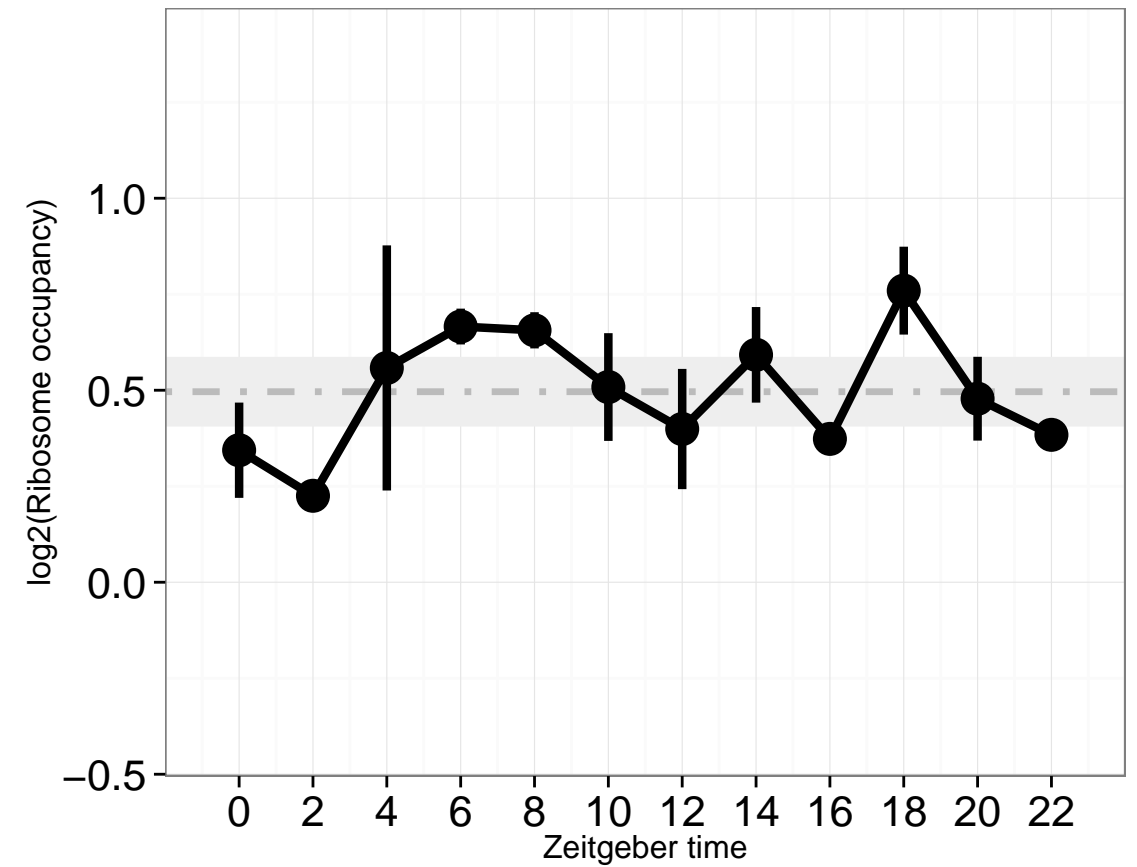

Supplement: Supplementary file 12357 [file 1]

# Rbm48

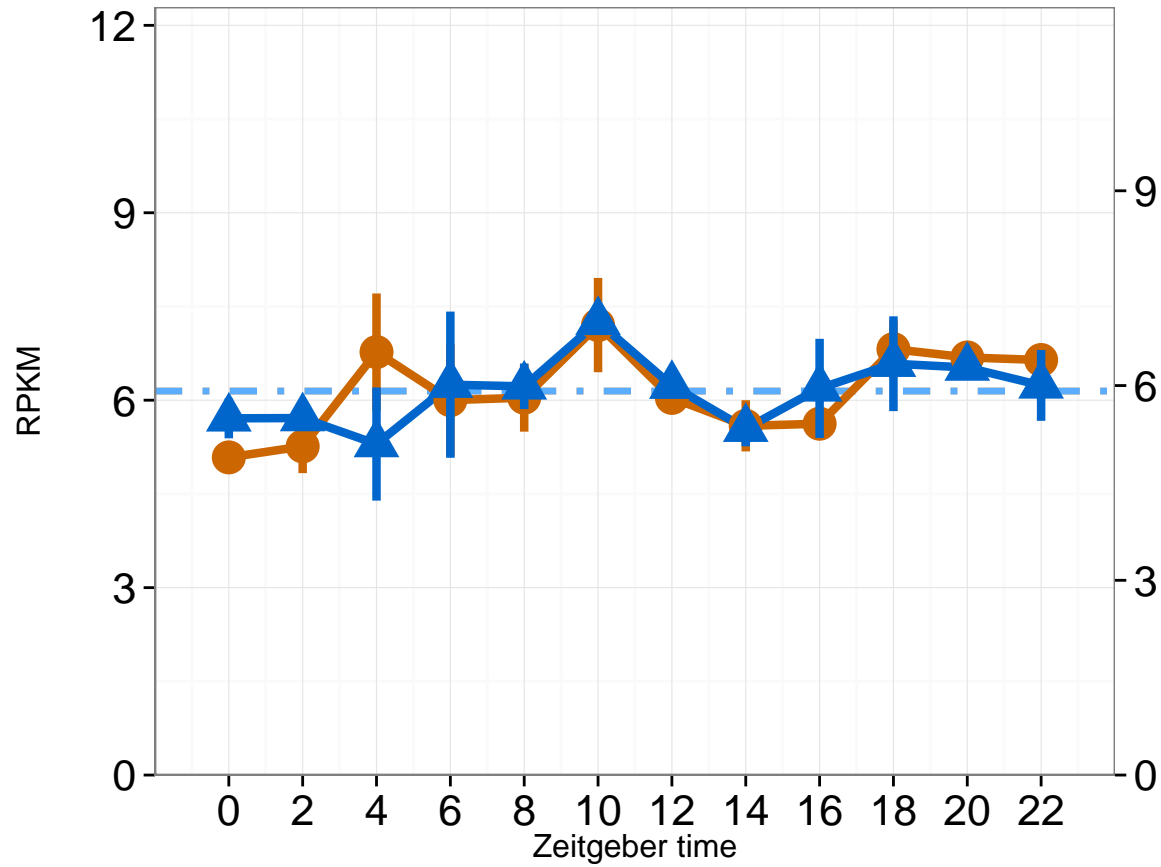

# Rbm48

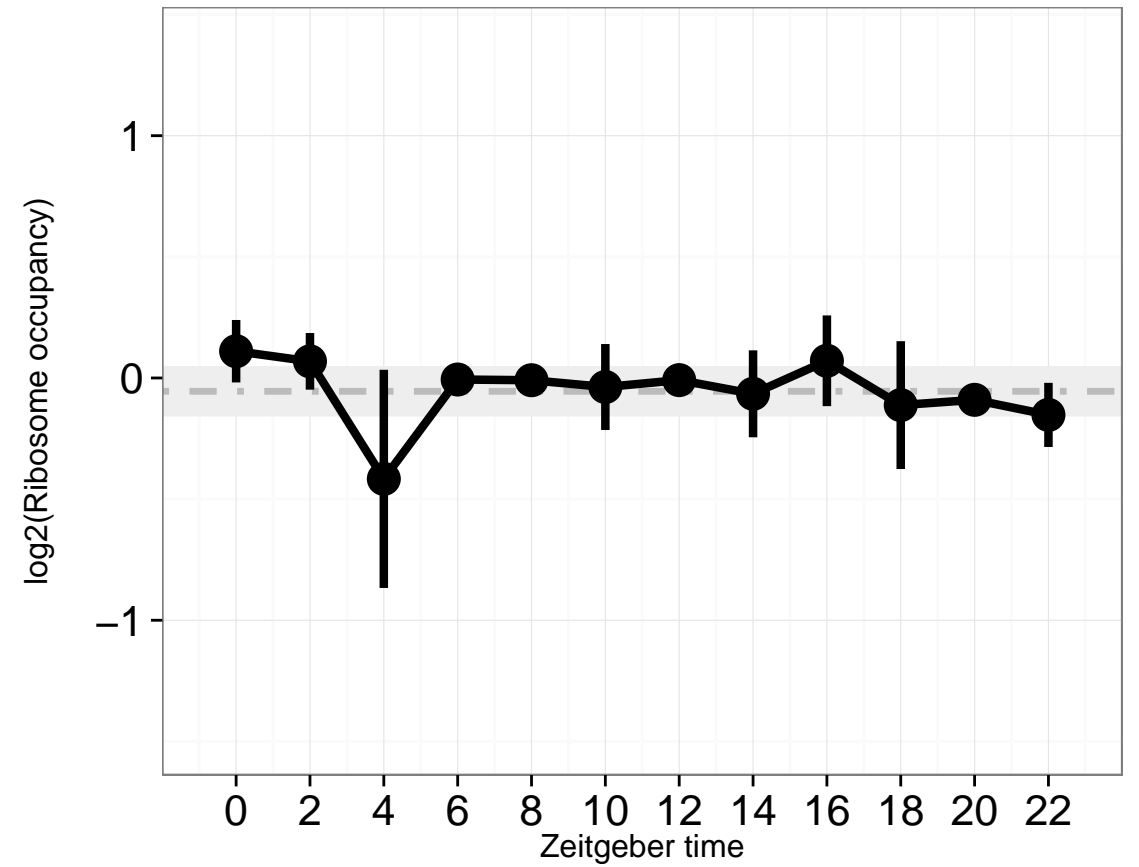

Supplement: Supplementary file 12358 [file 1]

## Prim2

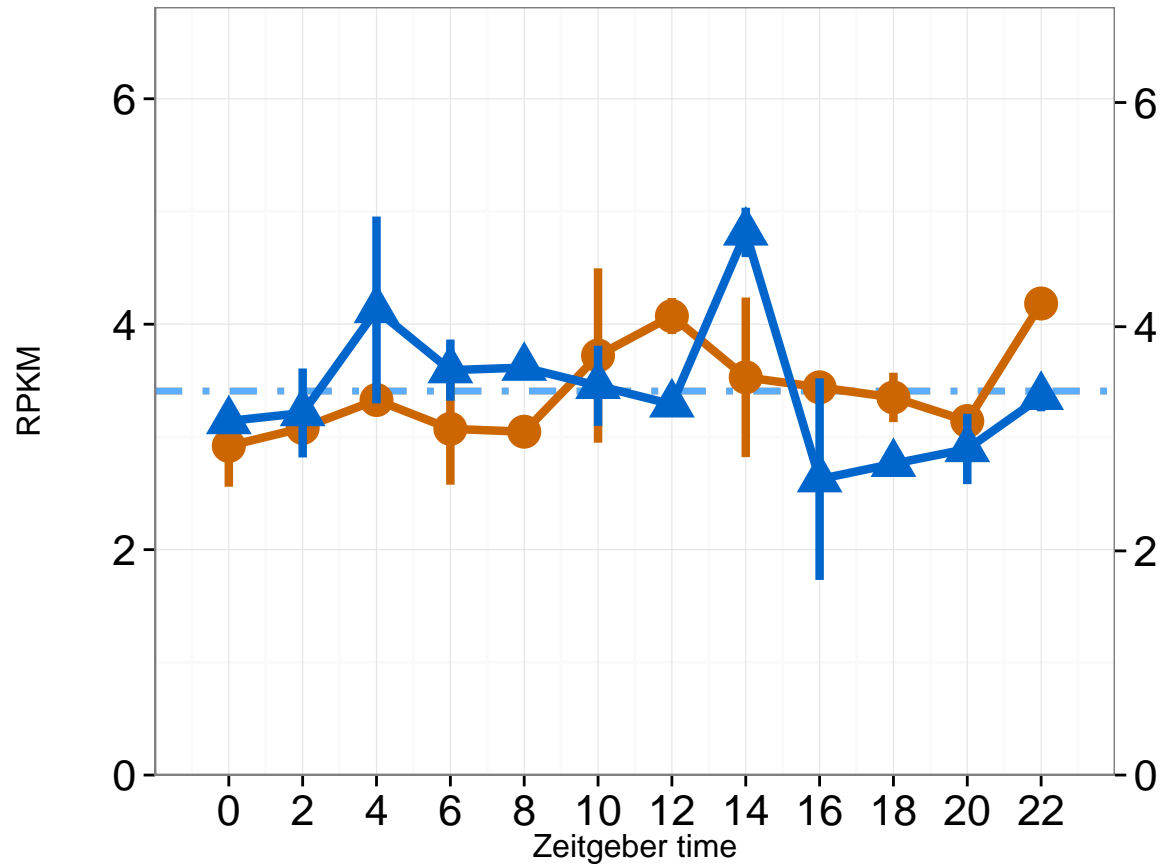

## Prim2

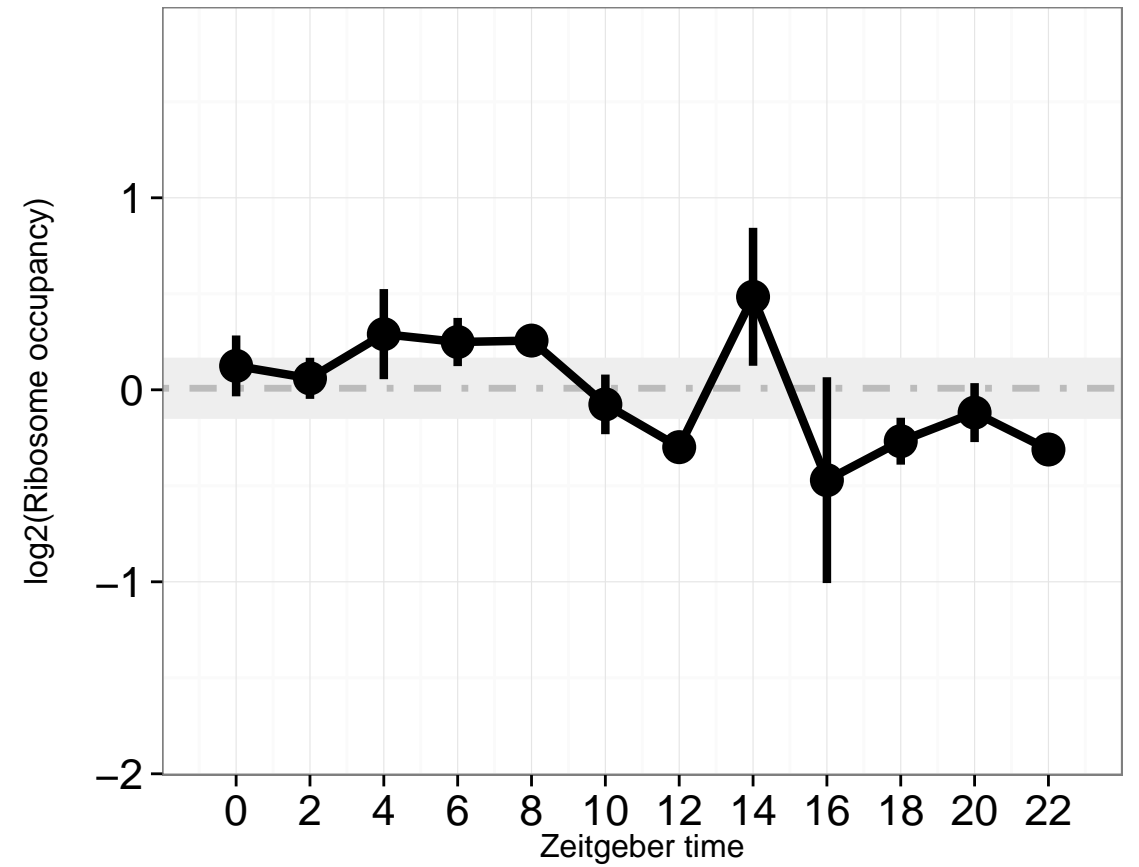

Supplement: Supplementary file 12359 [file 1]

## Nxn

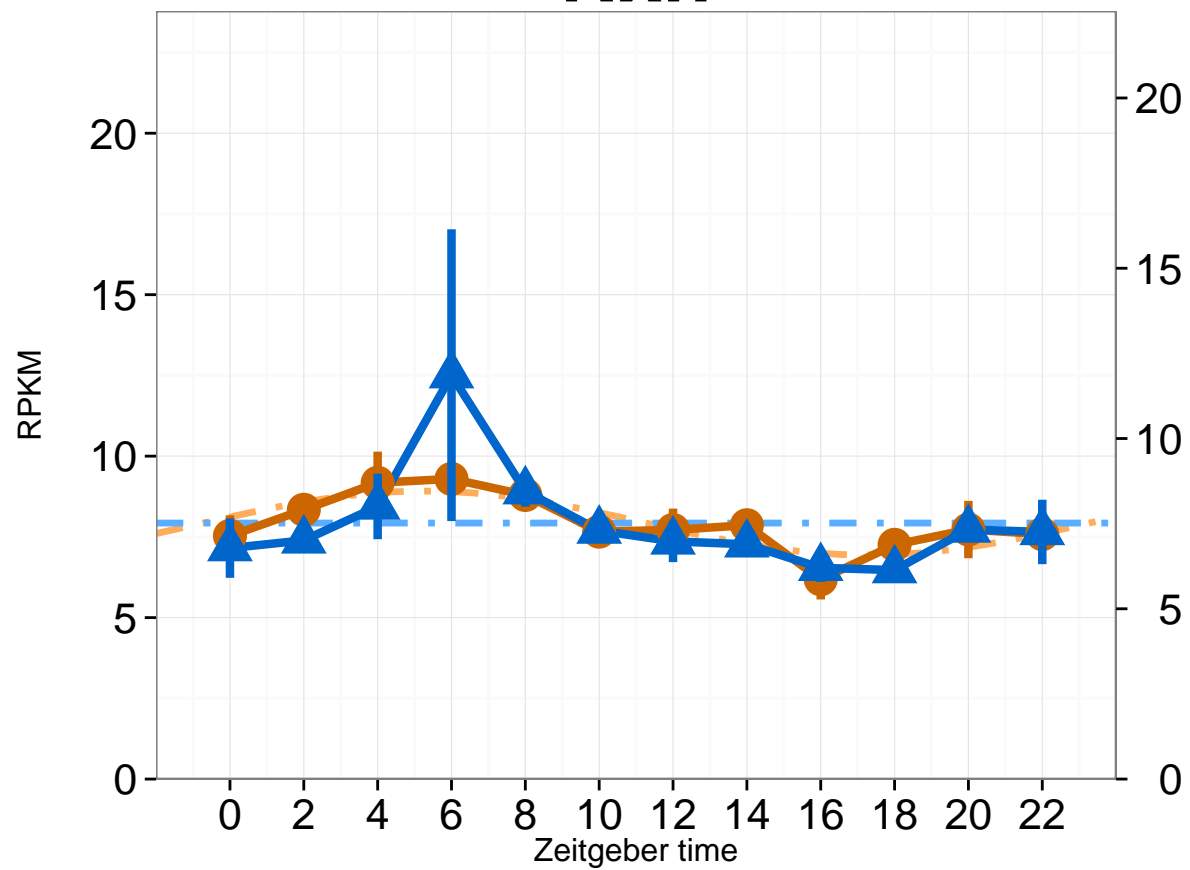

## Nxn

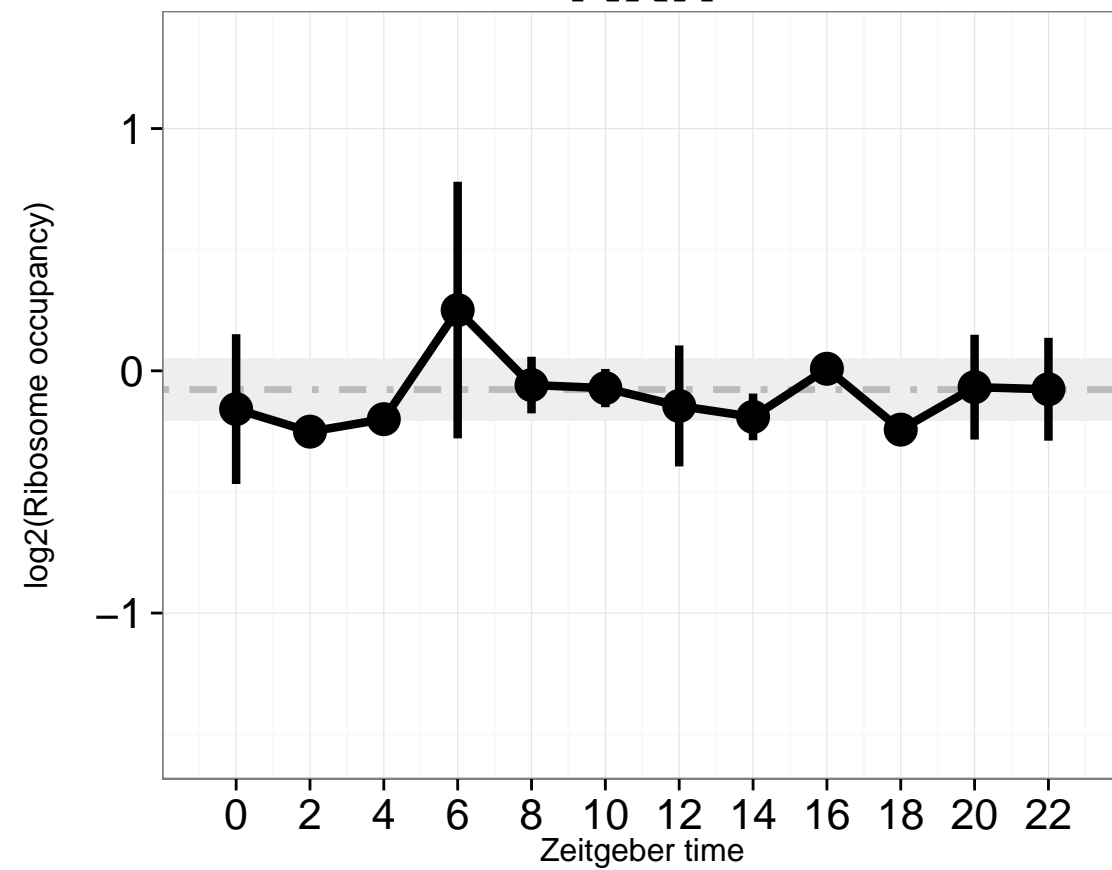

Supplement: Supplementary file 12360 [file 1]

# Tmem19

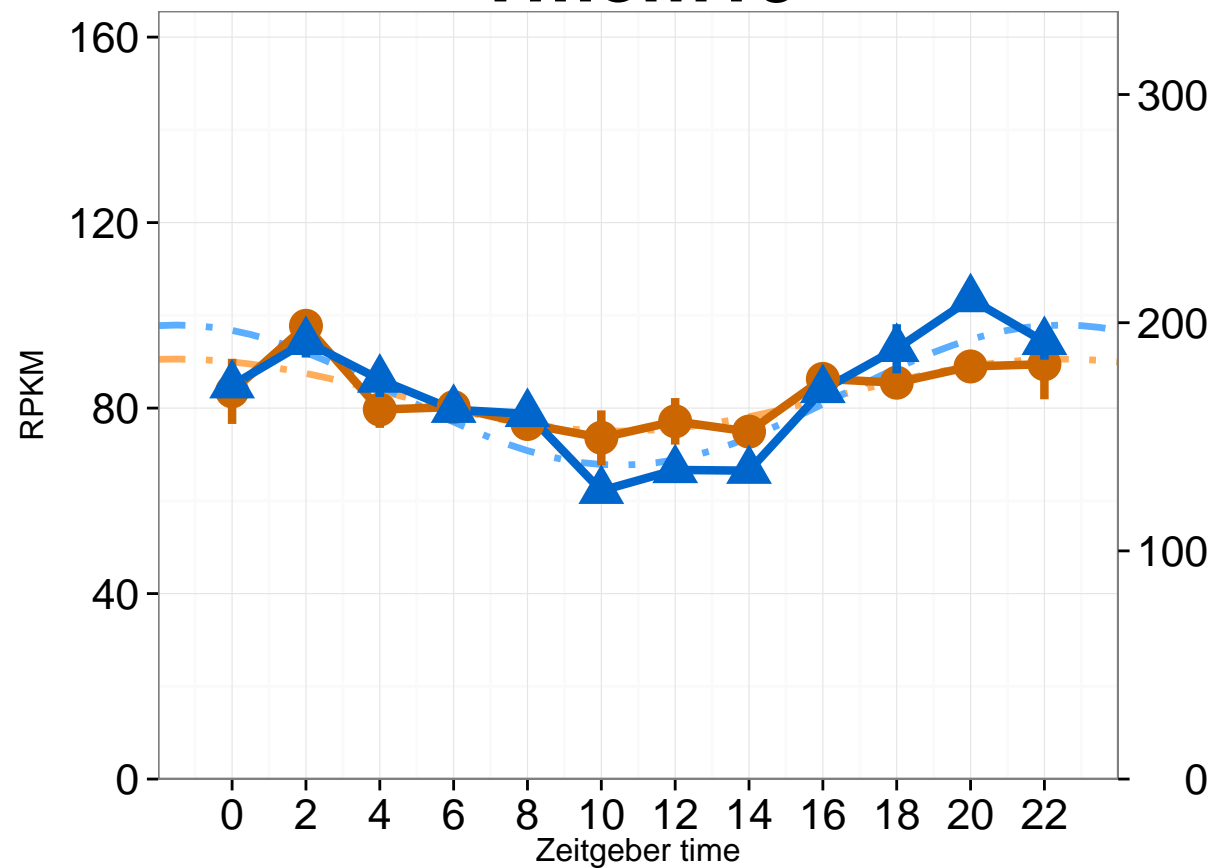

# Tmem19

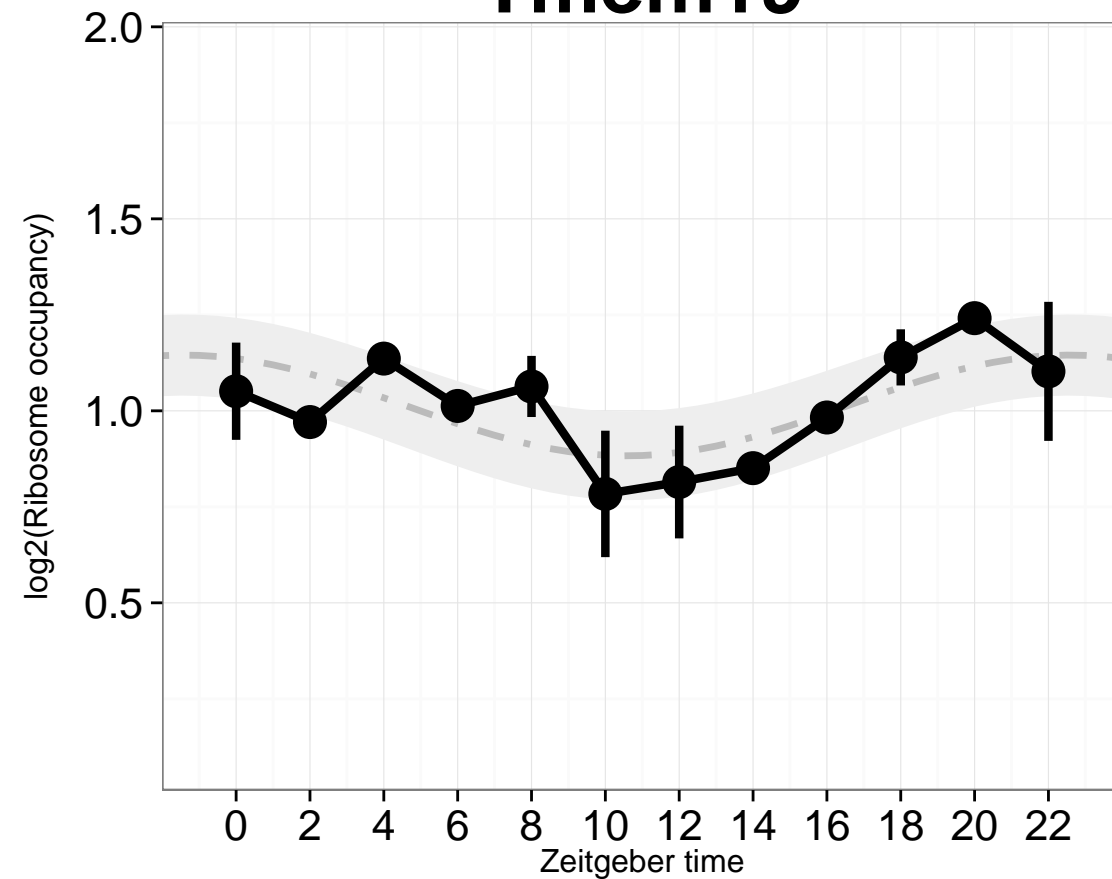

Supplement: Supplementary file 12361 [file 1]

# Cyp2s1

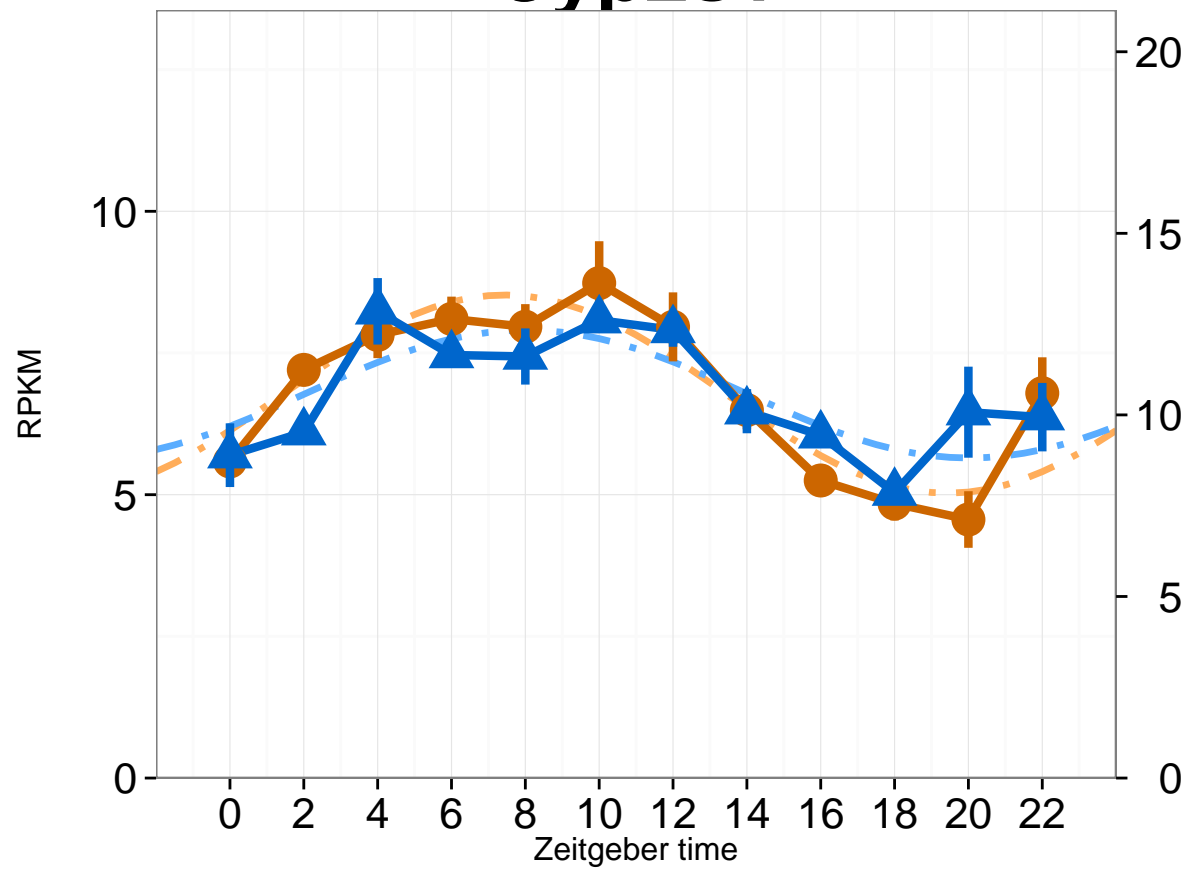

# Cyp2s1

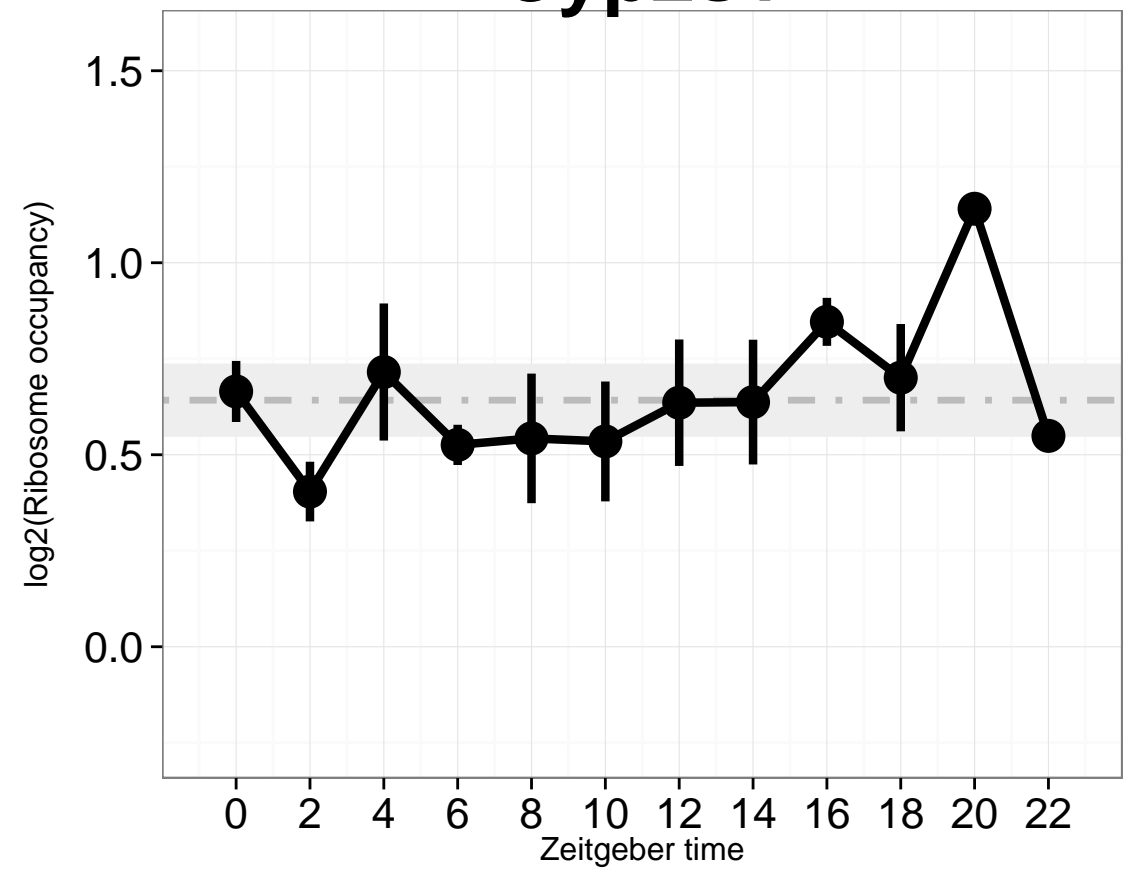

Supplement: Supplementary file 12362 [file 1]

# Tmem158

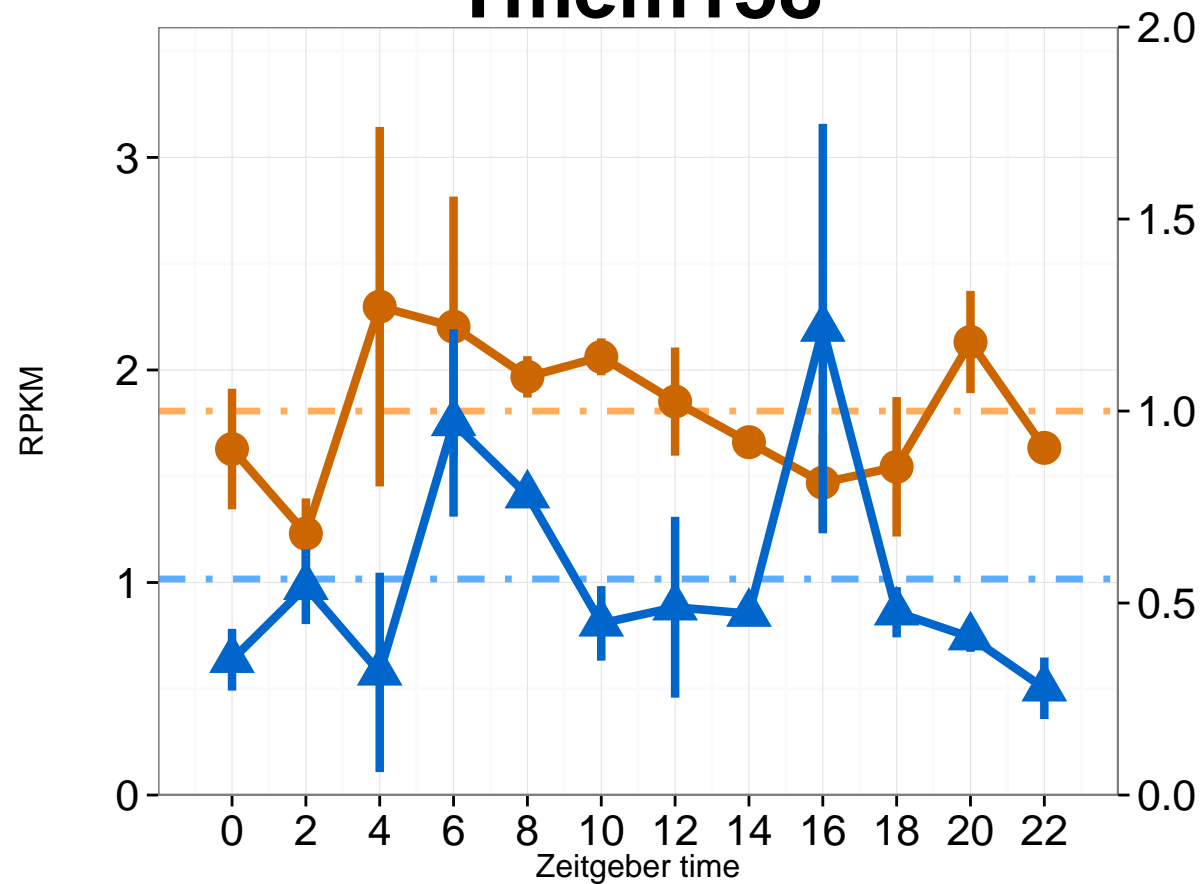

# Tmem158

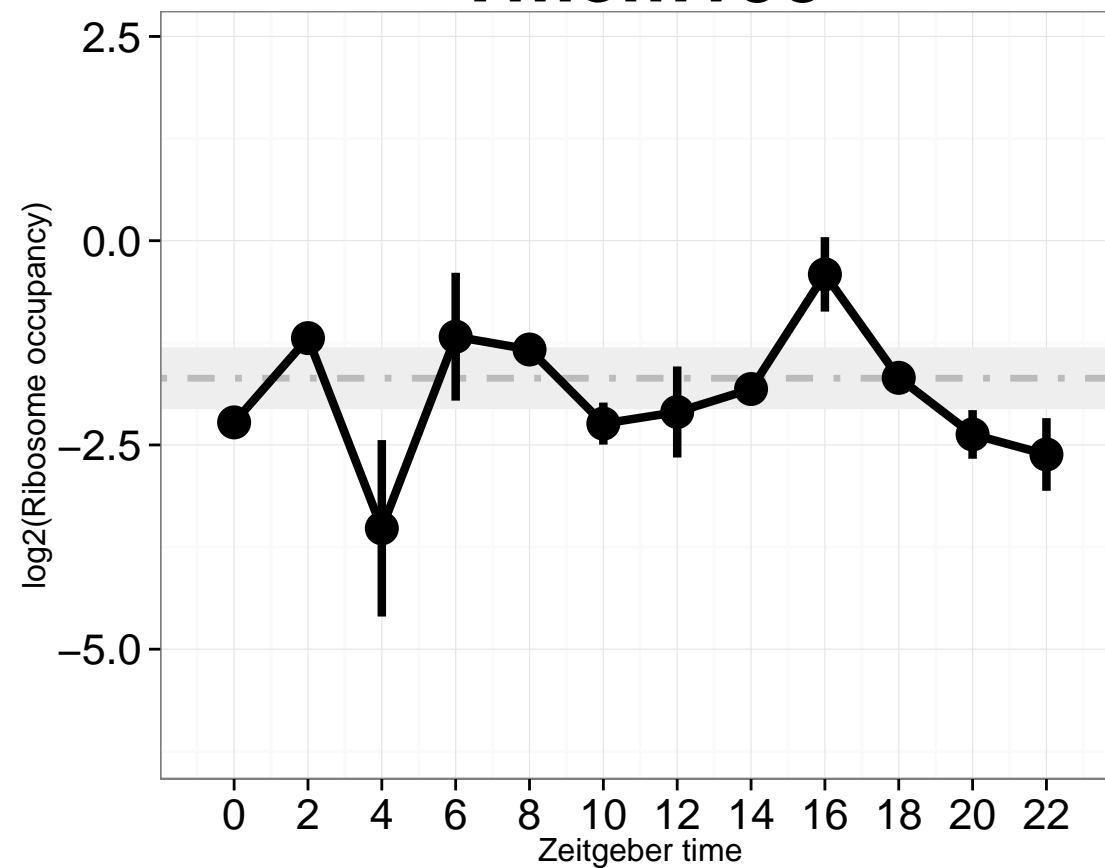

Supplement: Supplementary file 12363 [file 1]

## 4922501C03Rik

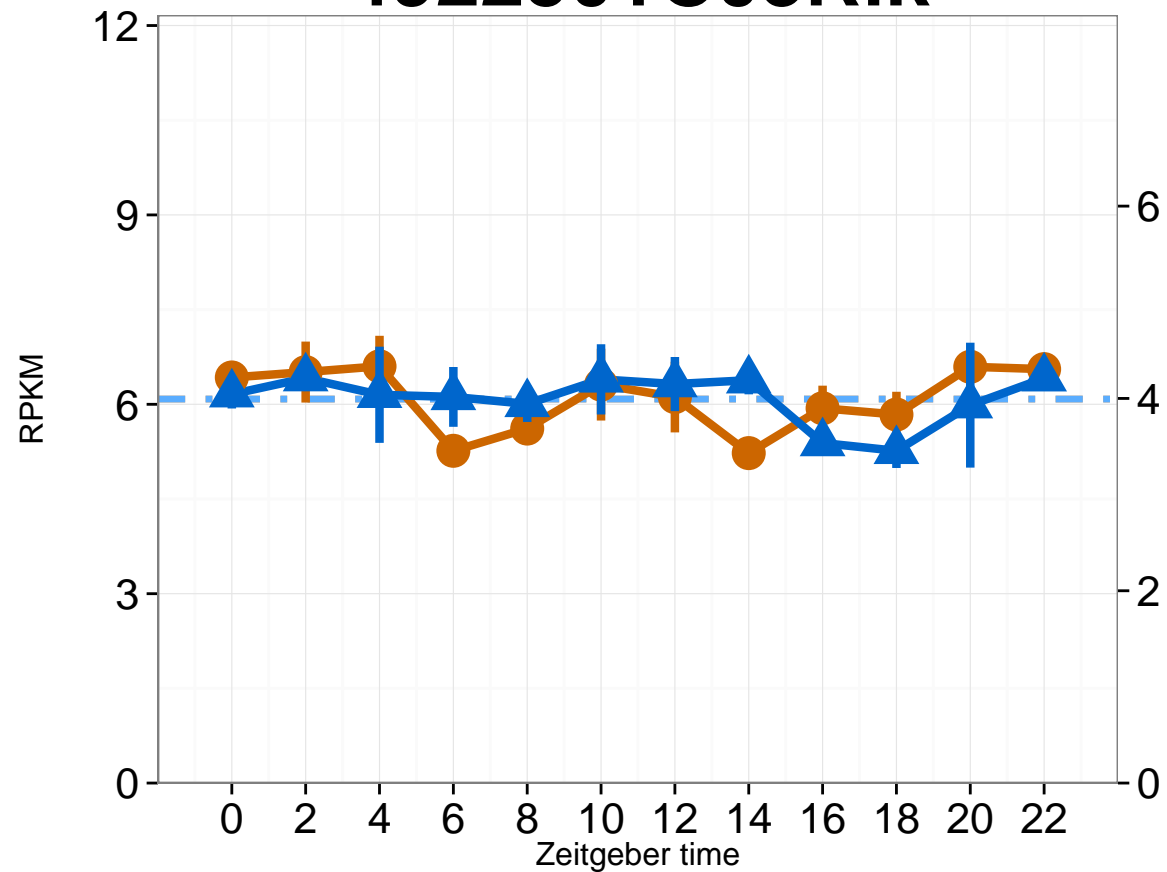

## 4922501C03Rik

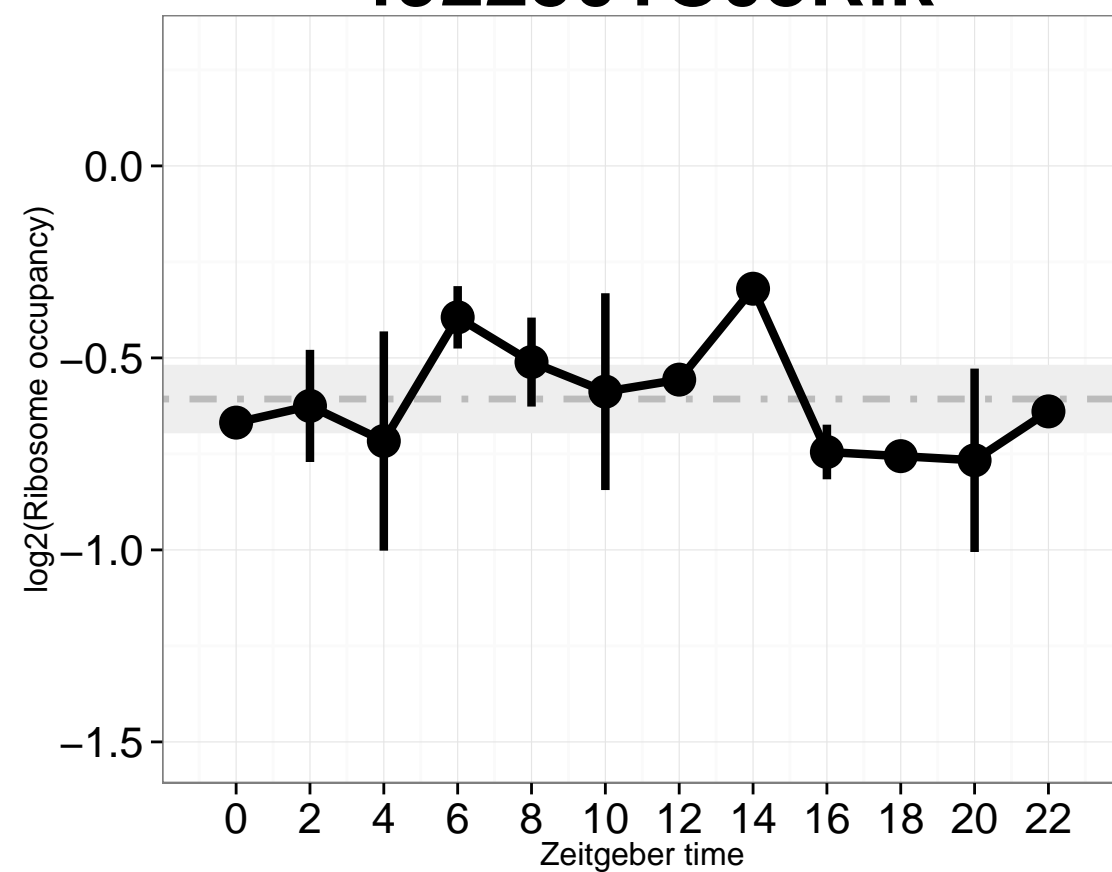

Supplement: Supplementary file 12364 [file 1]

## Plcd3

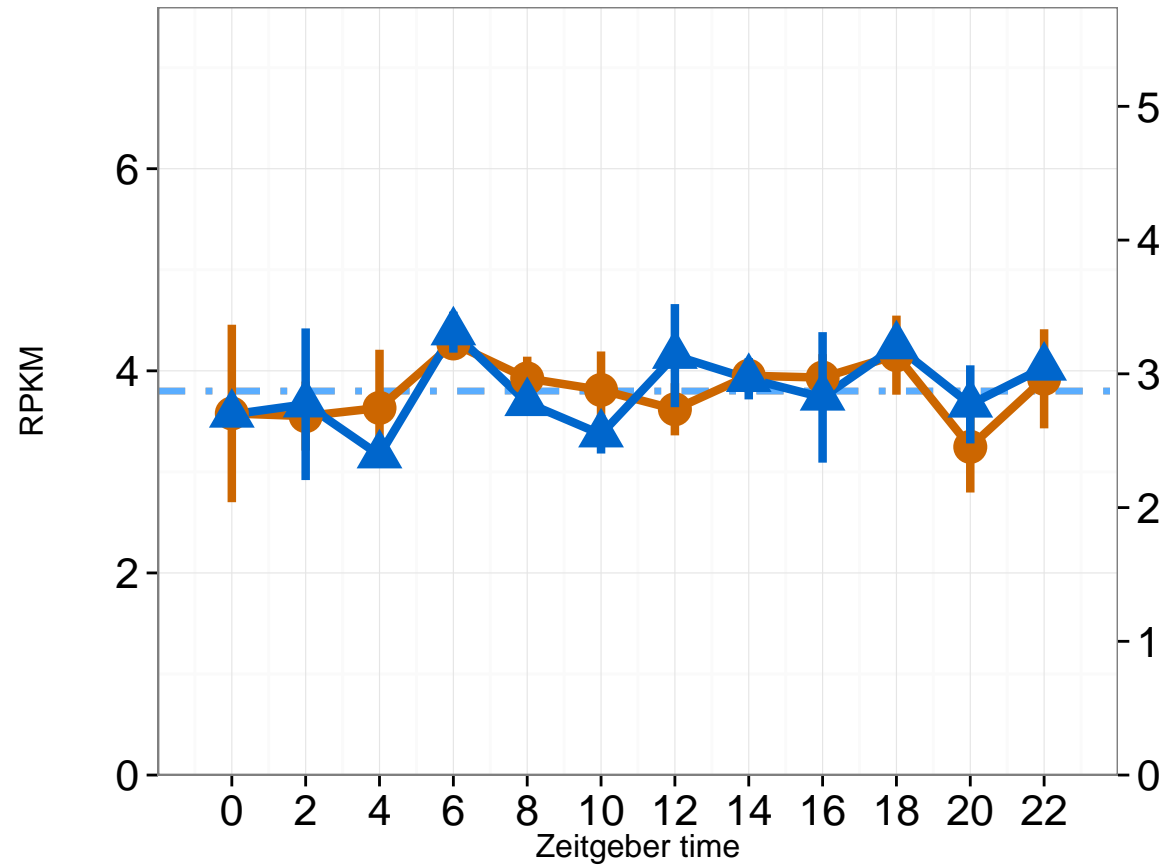

## Plcd3

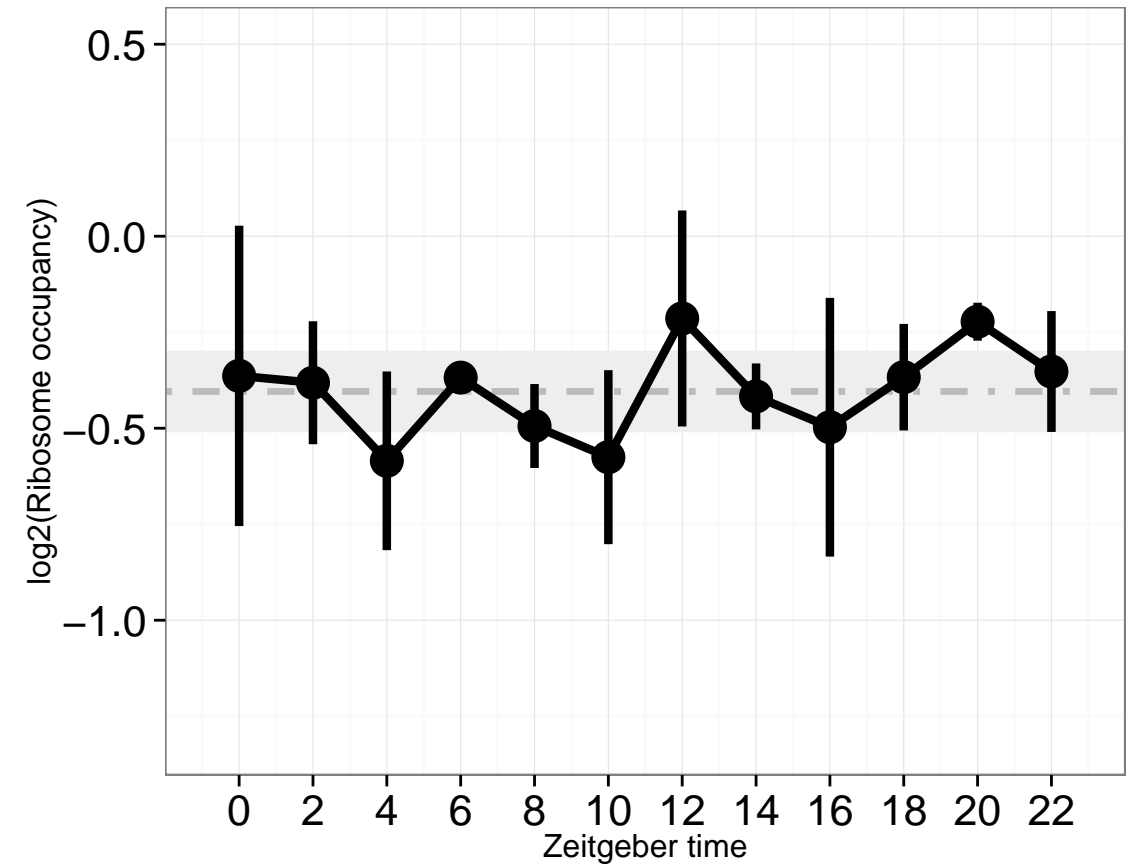

Supplement: Supplementary file 12365 [file 1]

## Tbx3

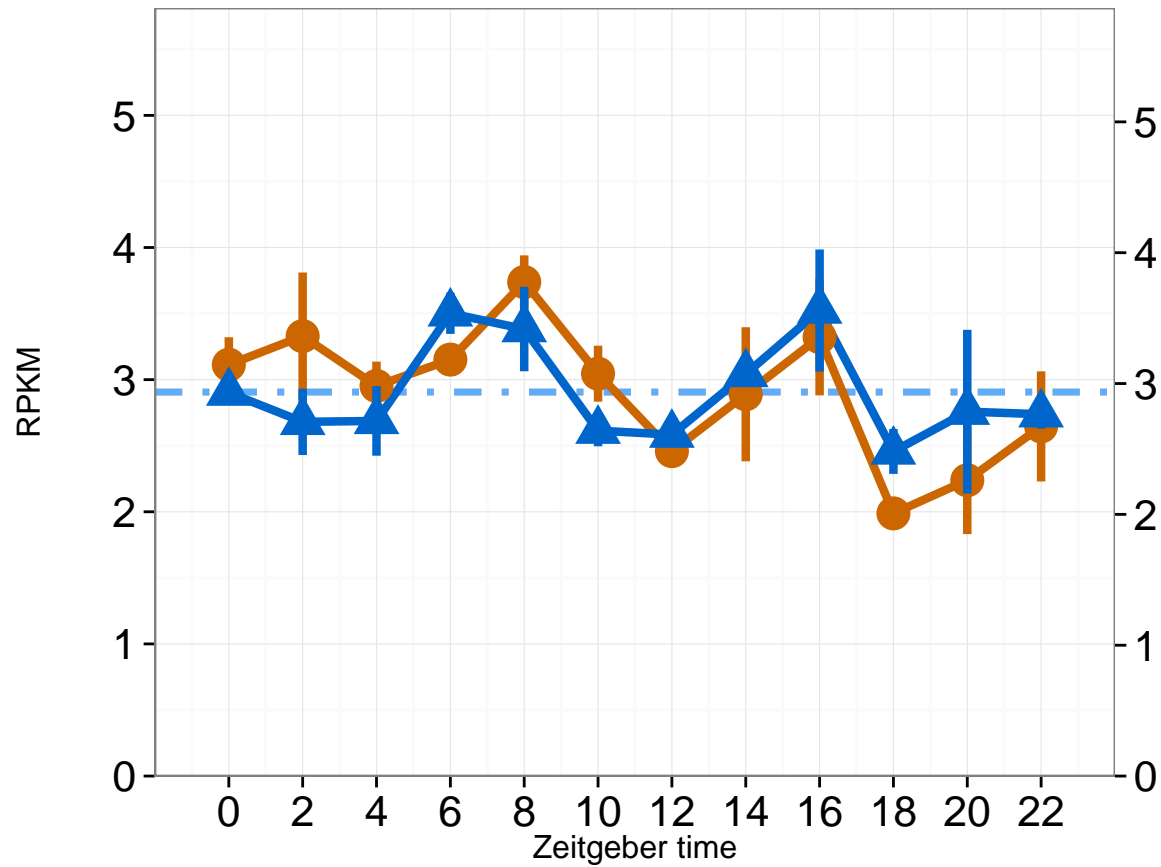

## Tbx3

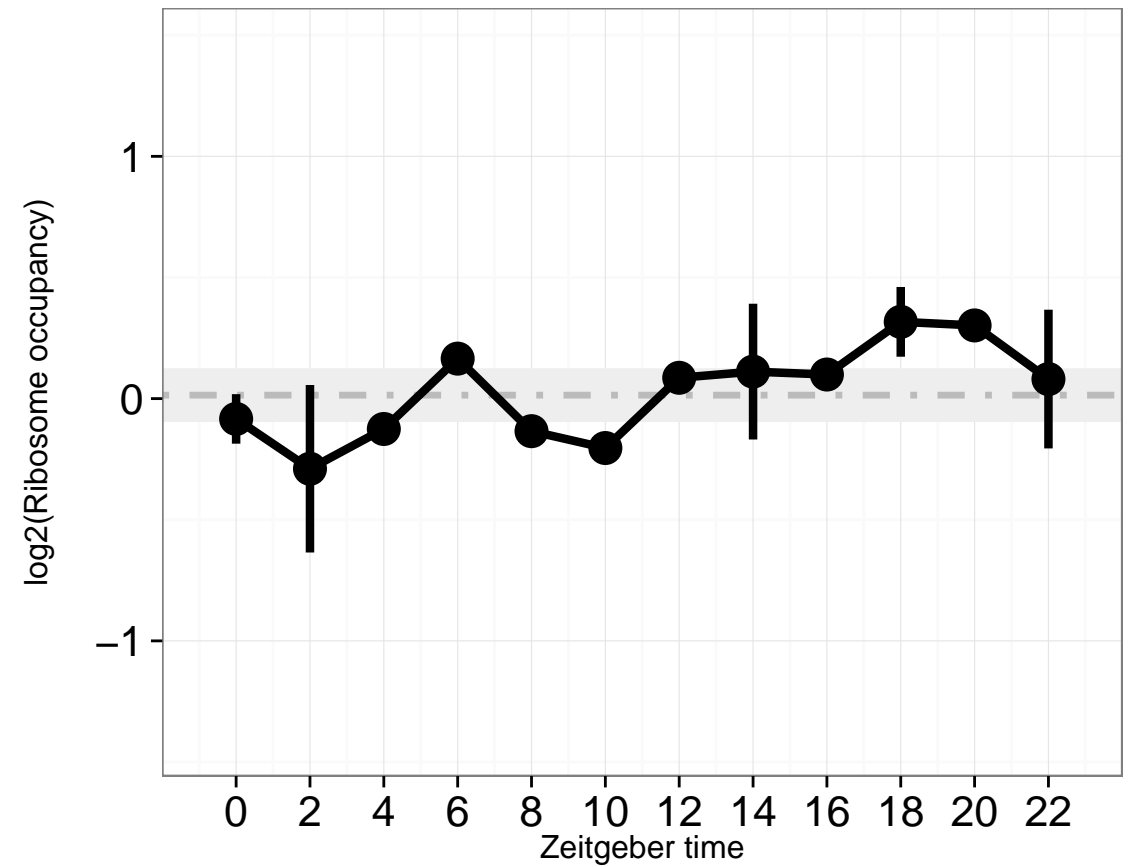

Supplement: Supplementary file 12366 [file 1]

# Gramd1c

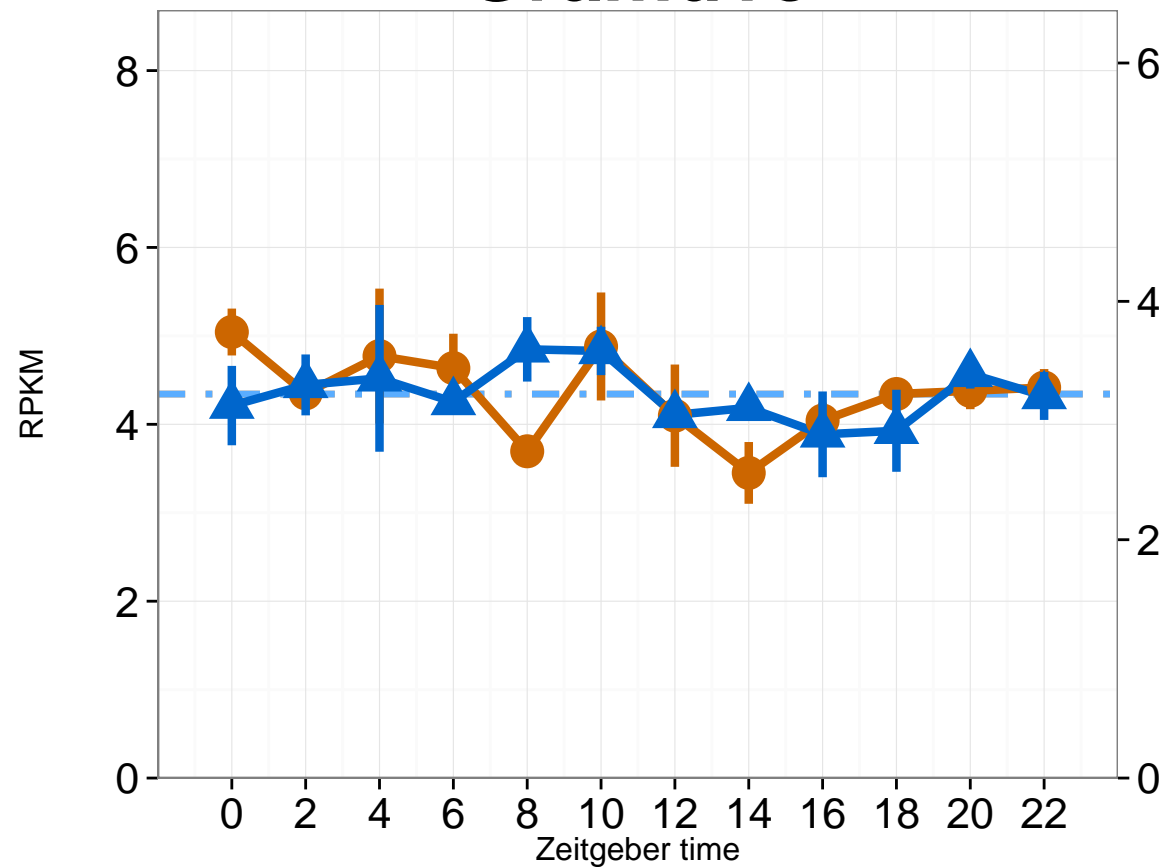

# Gramd1c

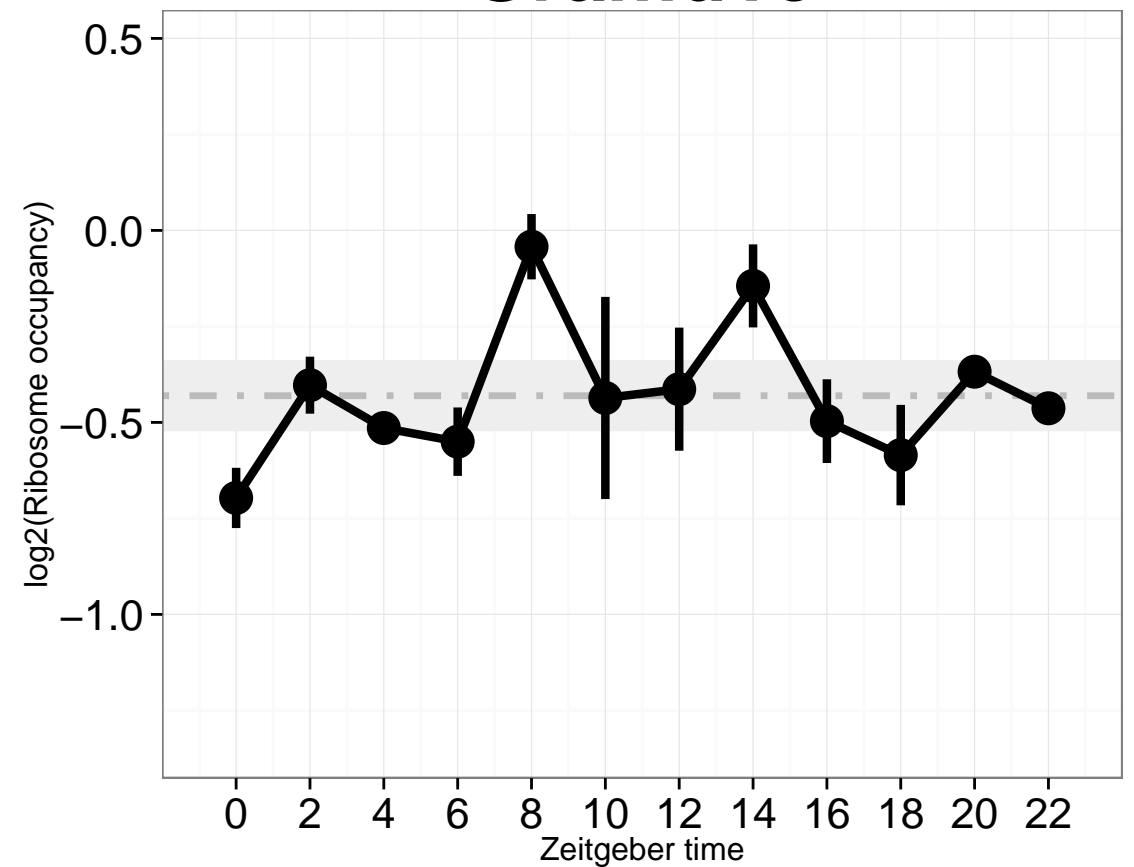

Supplement: Supplementary file 12367 [file 1]

## Clock

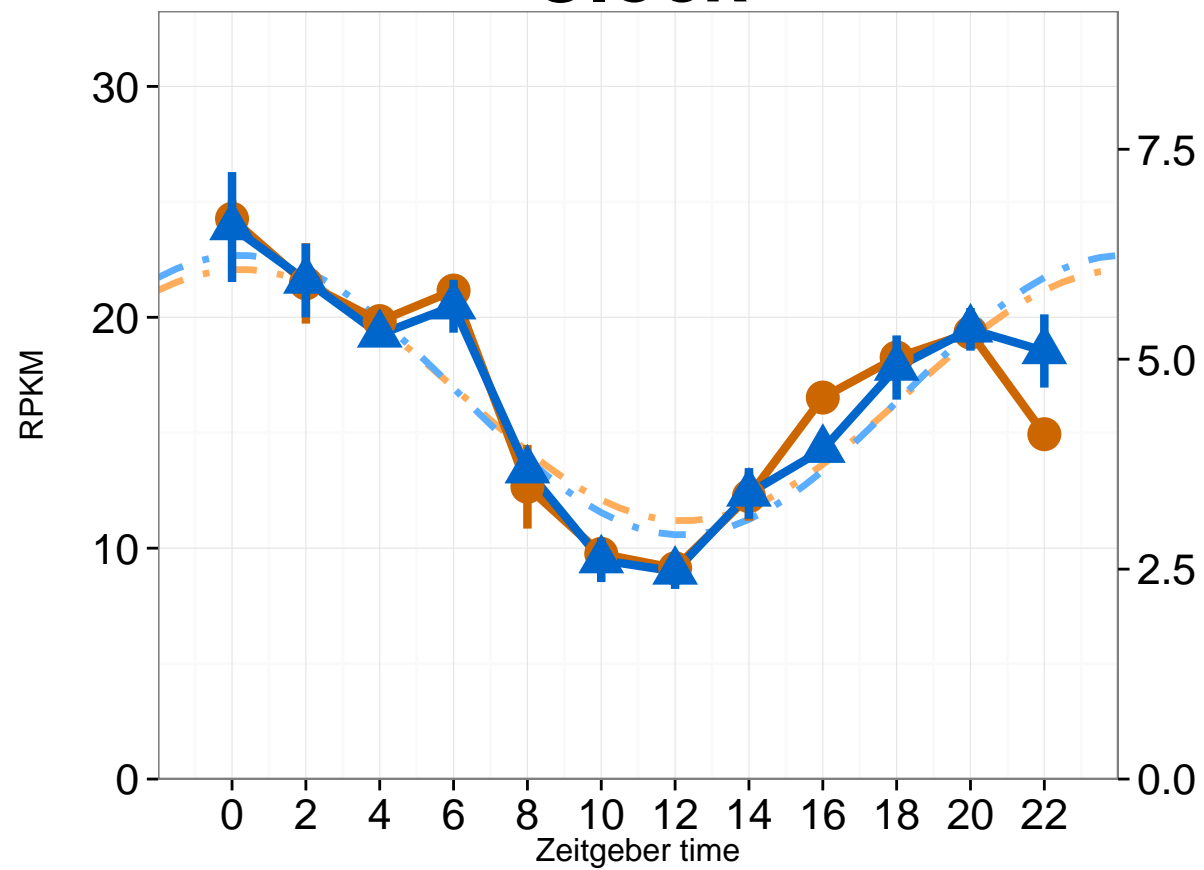

## Clock

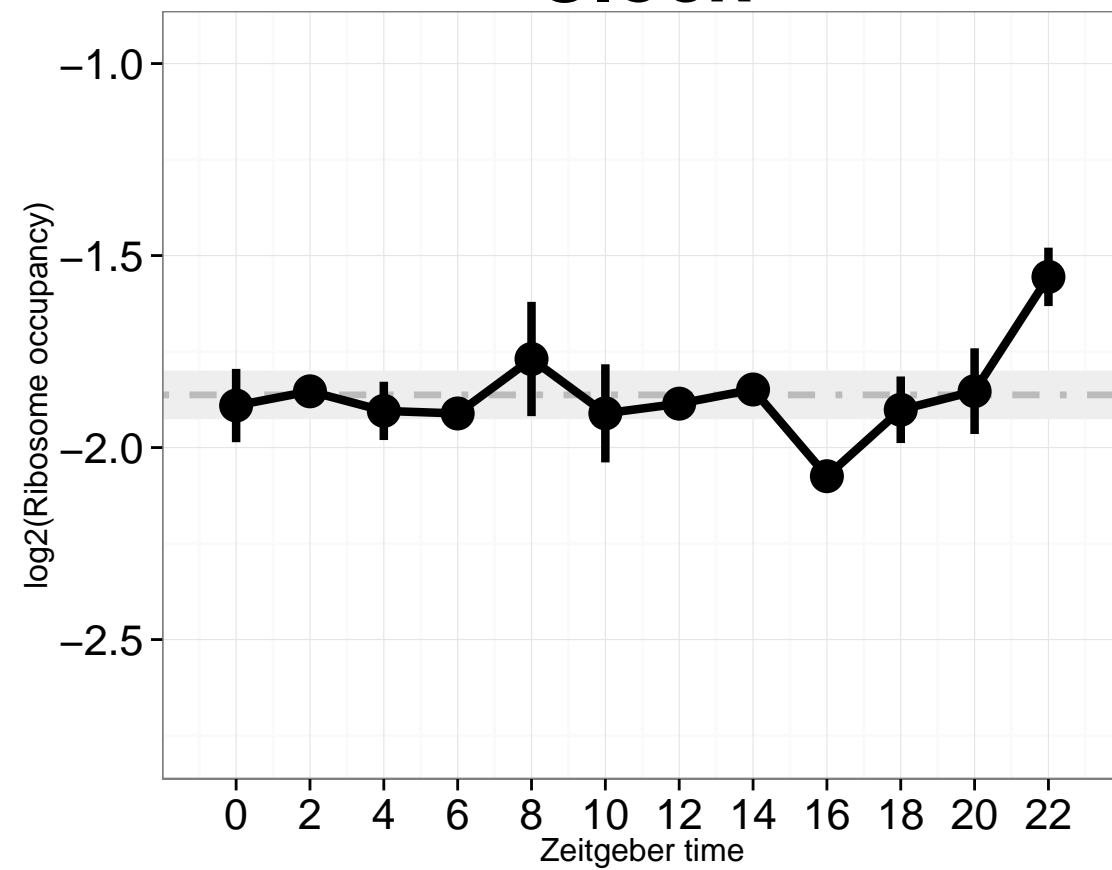

Supplement: Supplementary file 12368 [file 1]

## Rasa2

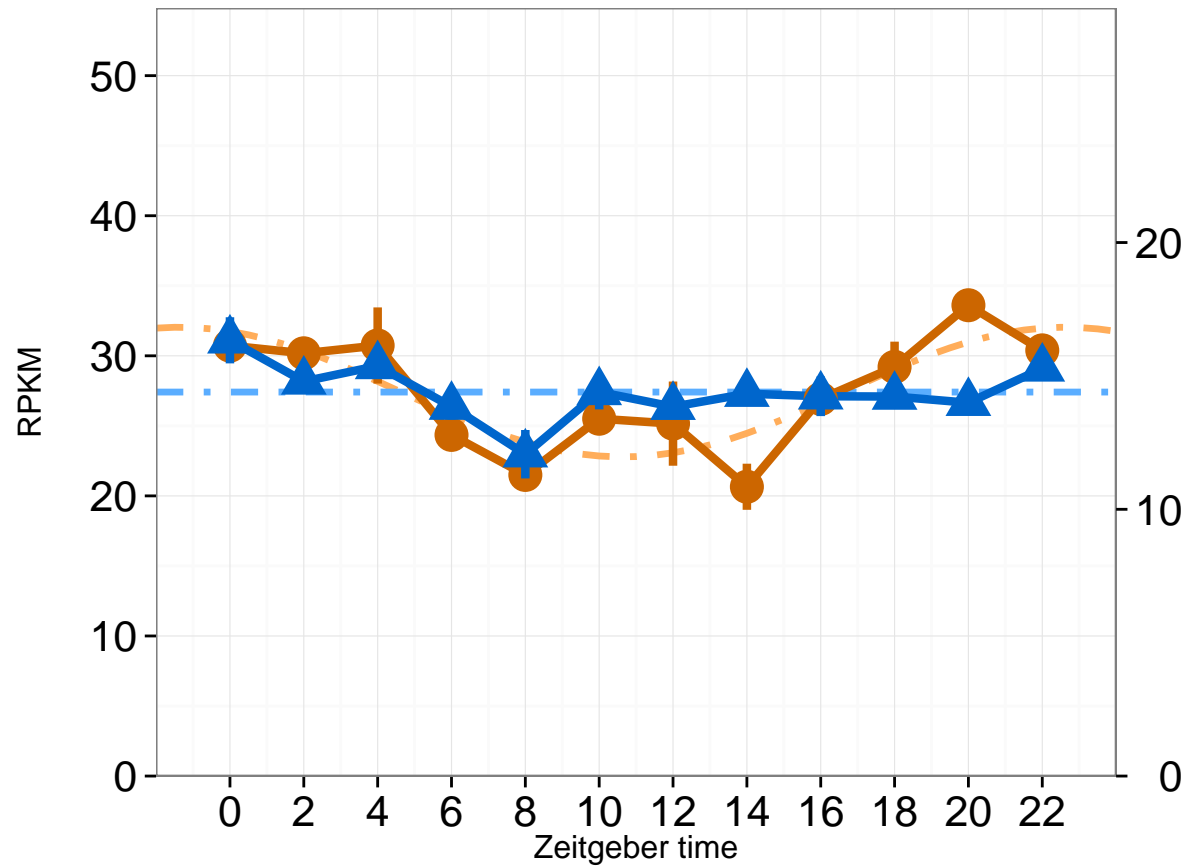

## Rasa2

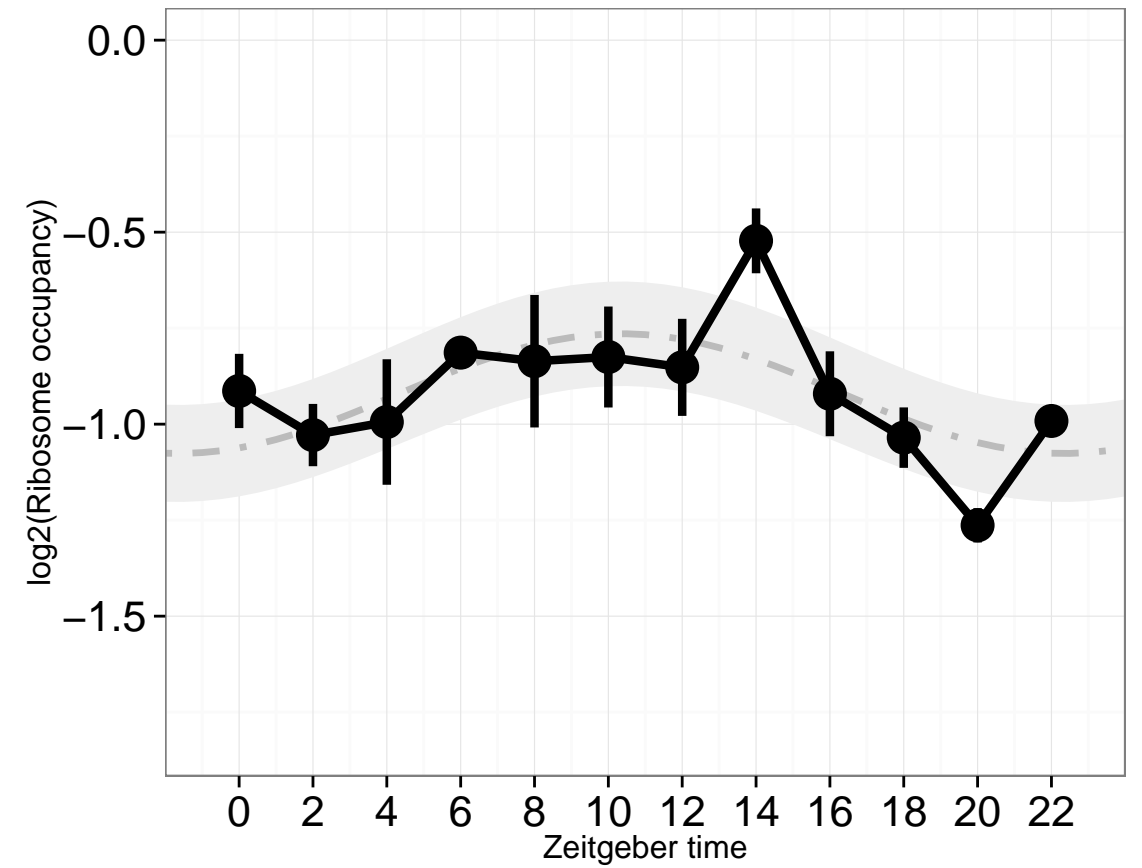

Supplement: Supplementary file 12369 [file 1]

## Fndc4

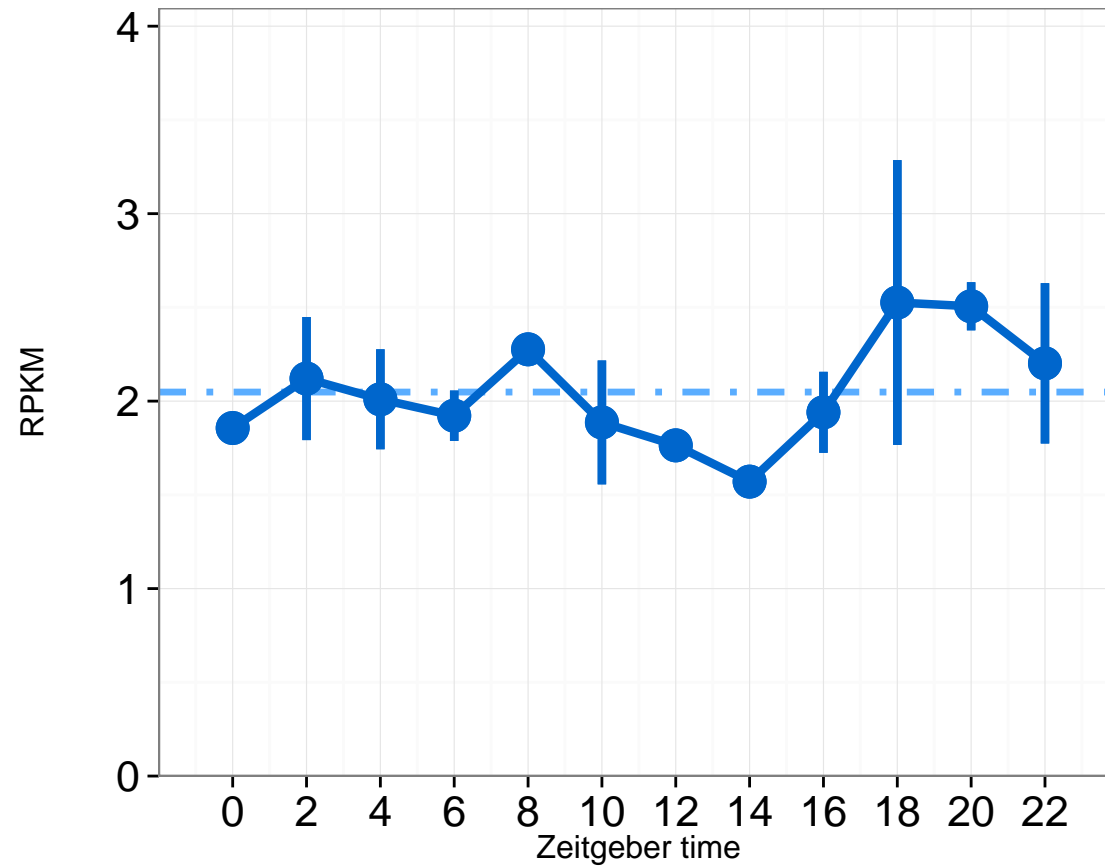

## Fndc4 log2(Ribosome occupancy

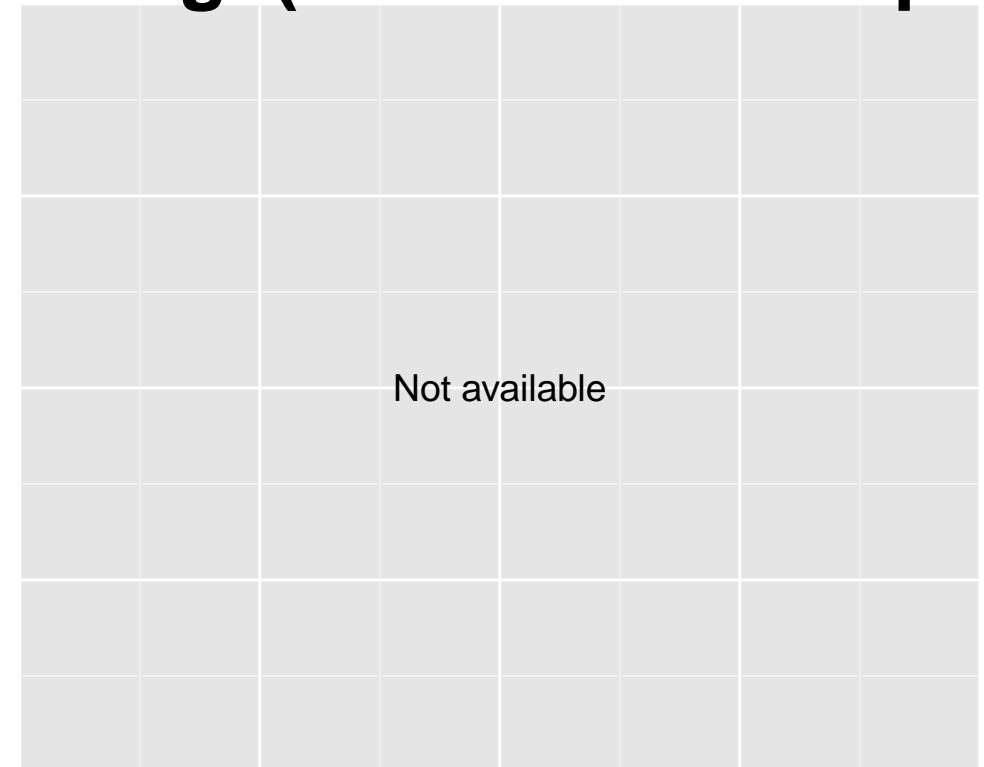

Supplement: Supplementary file 12370 [file 1]

## Mcm5

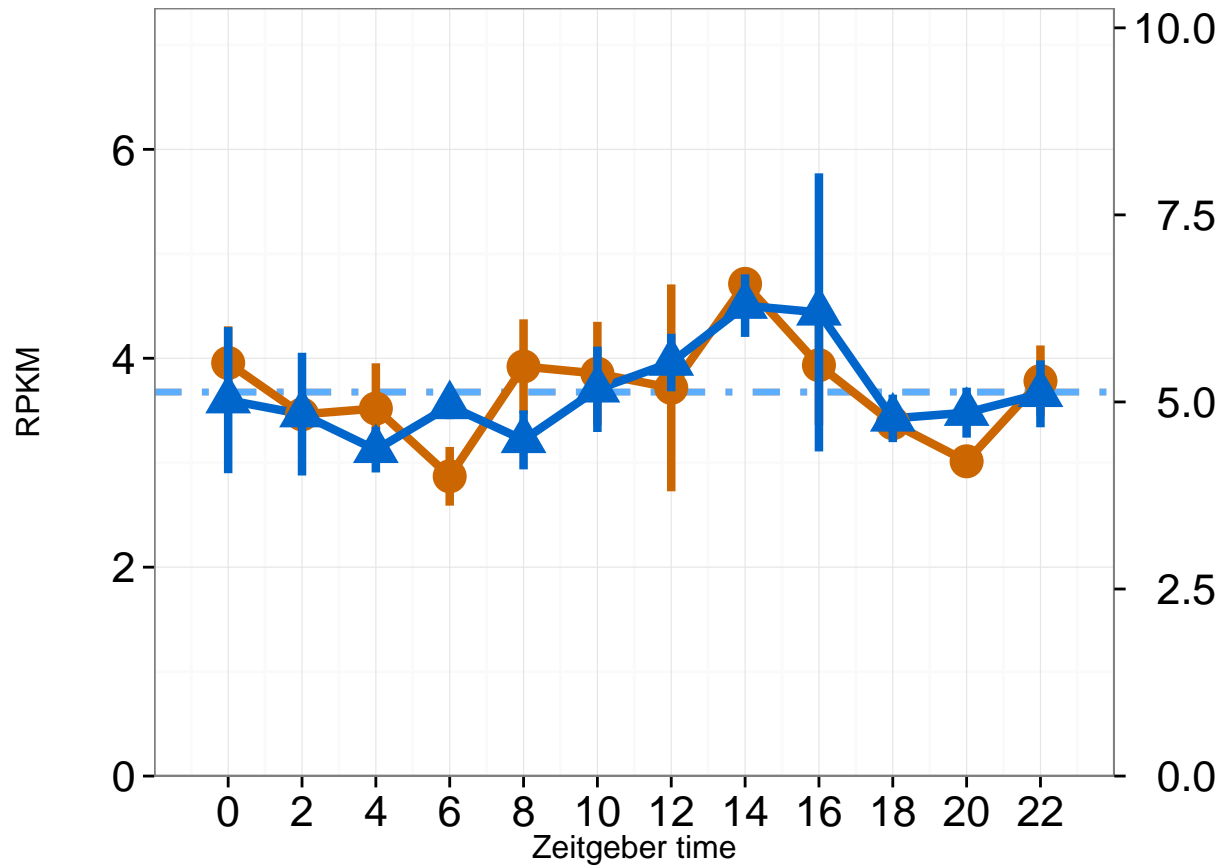

## Mcm5

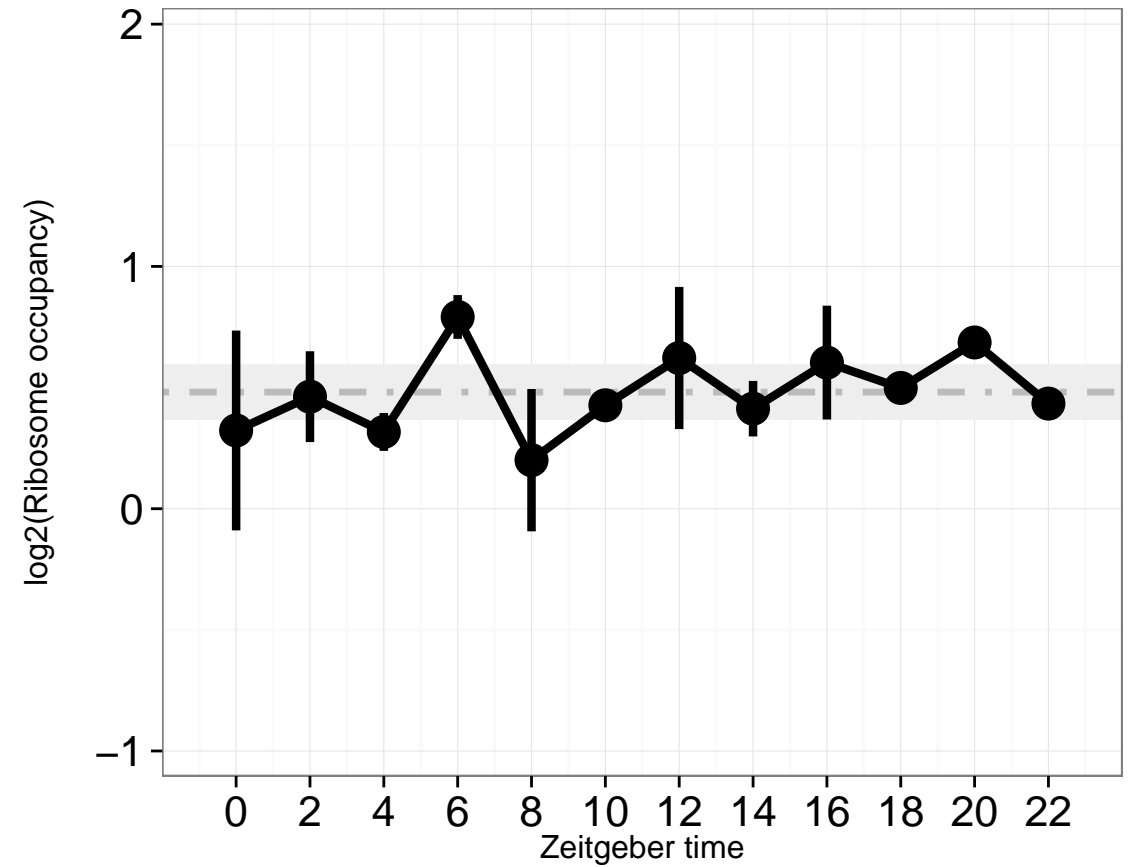

Supplement: Supplementary file 12371 [file 1]

## Adamts15

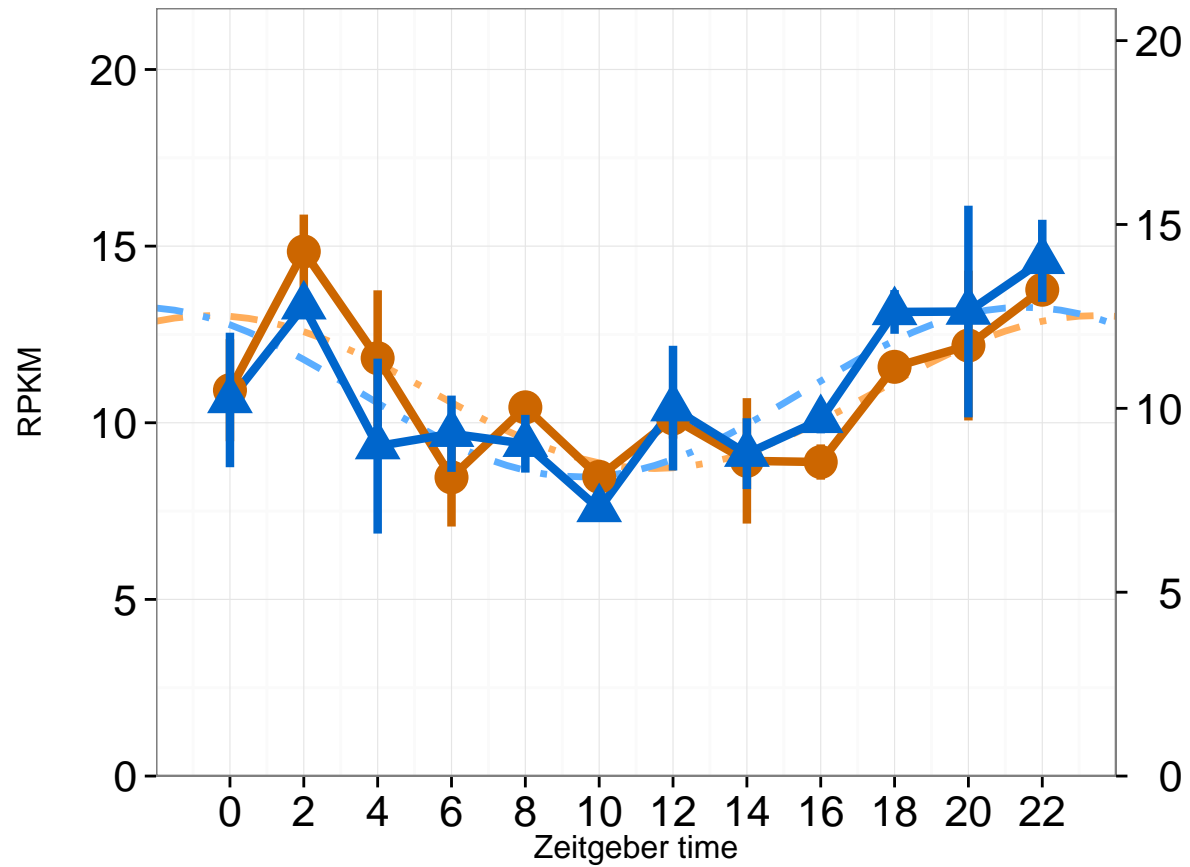

## Adamts15

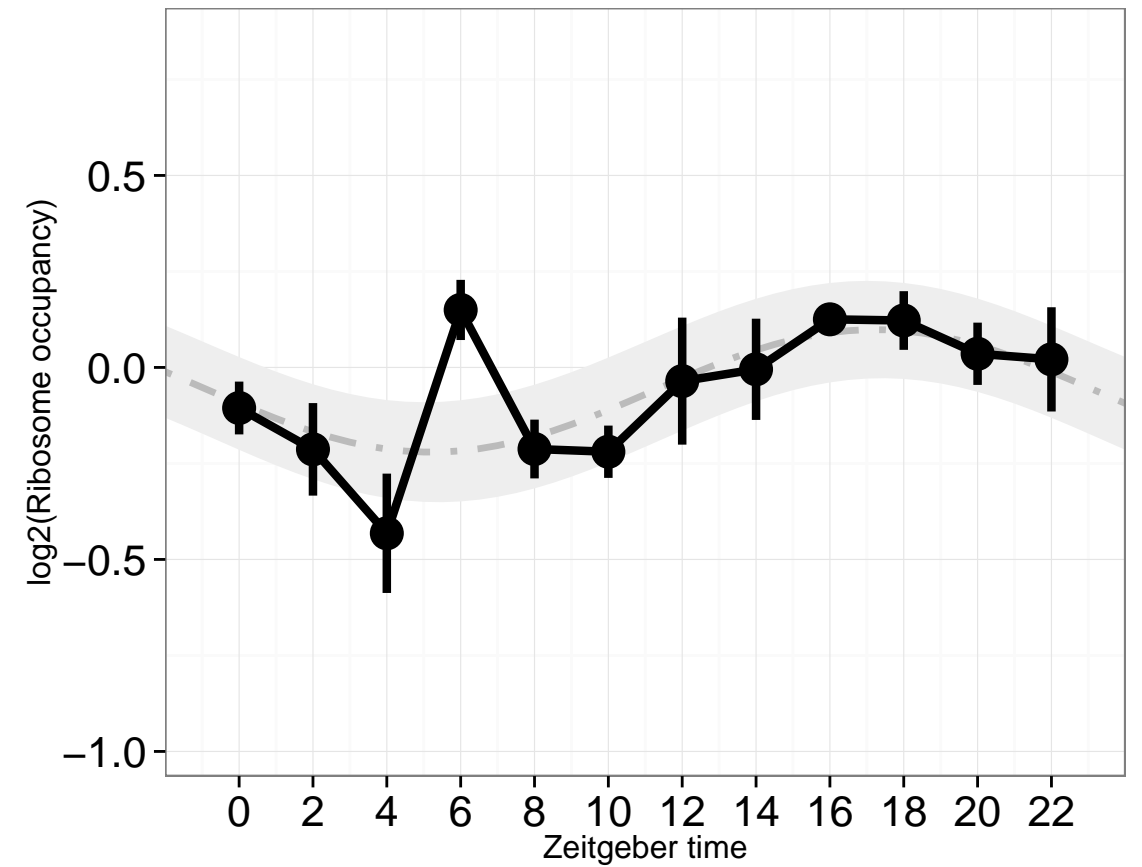

Supplement: Supplementary file 12372 [file 1]

## Rhbdf2

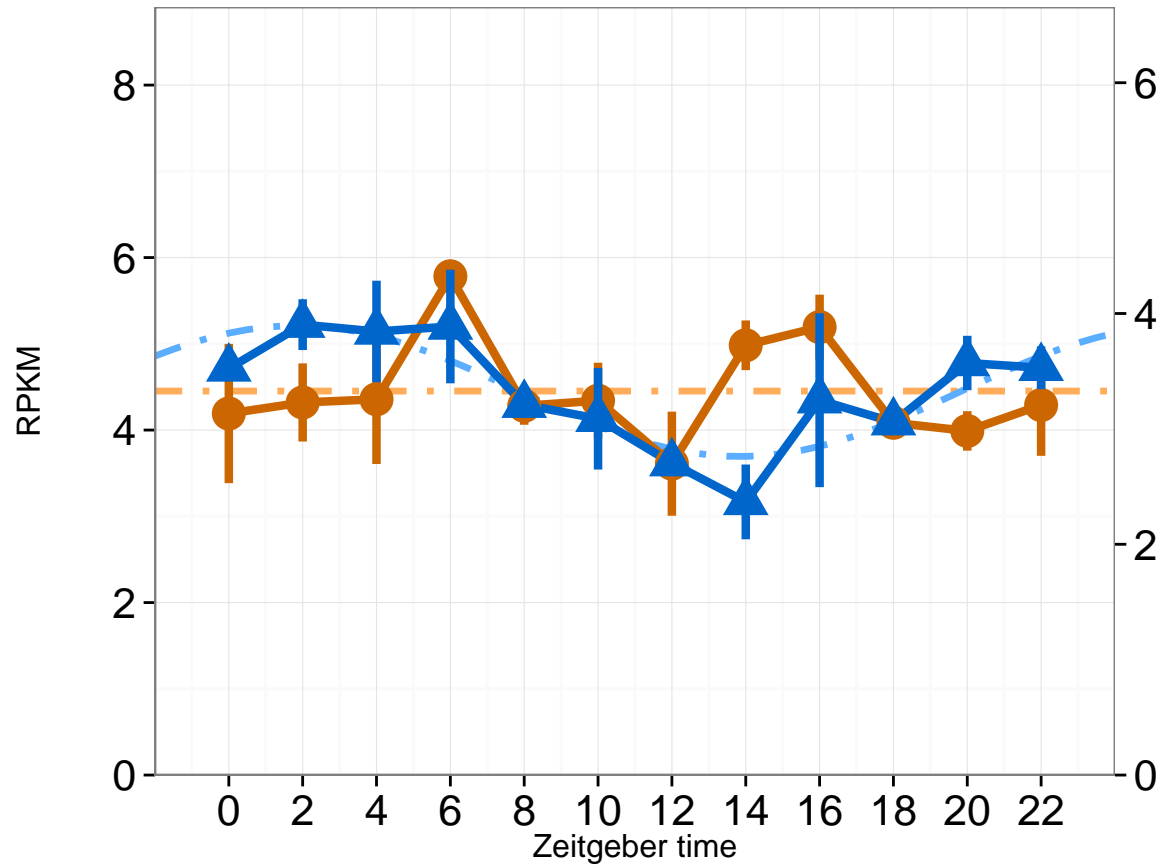

## Rhbdf2

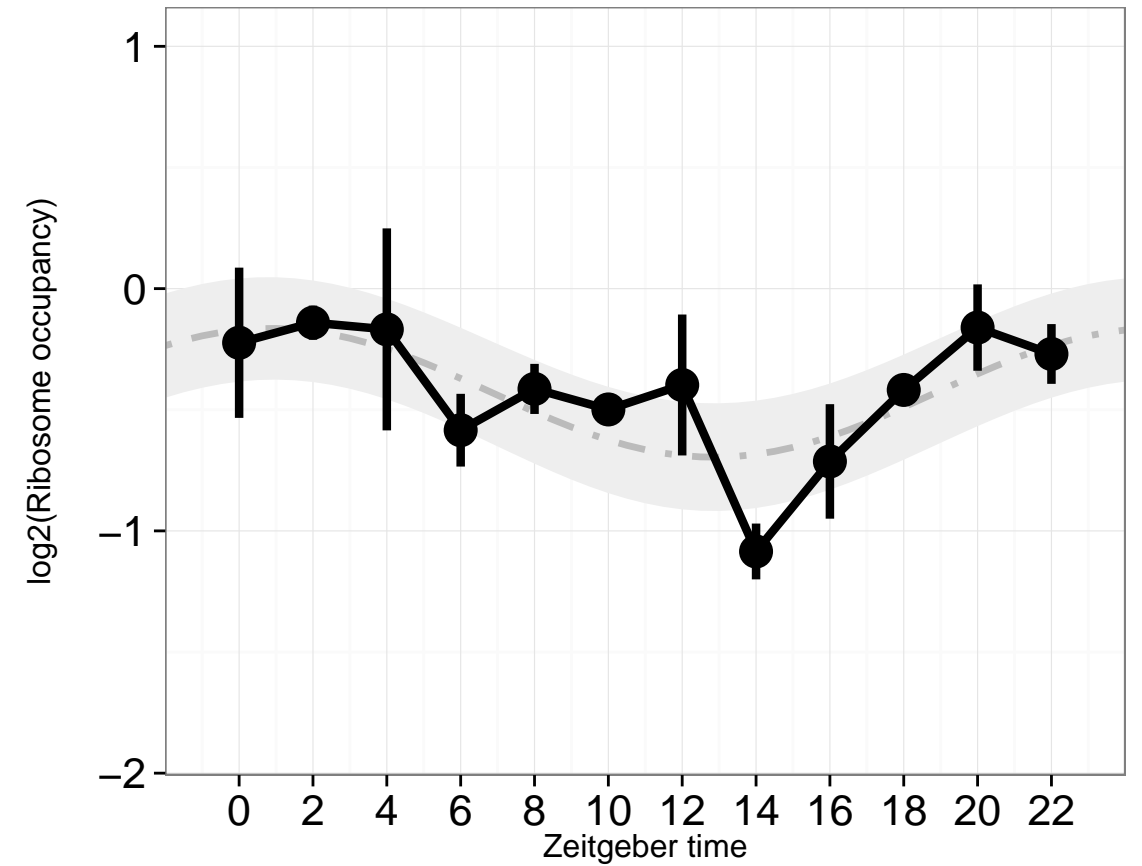

Supplement: Supplementary file 12373 [file 1]

## Olfm4

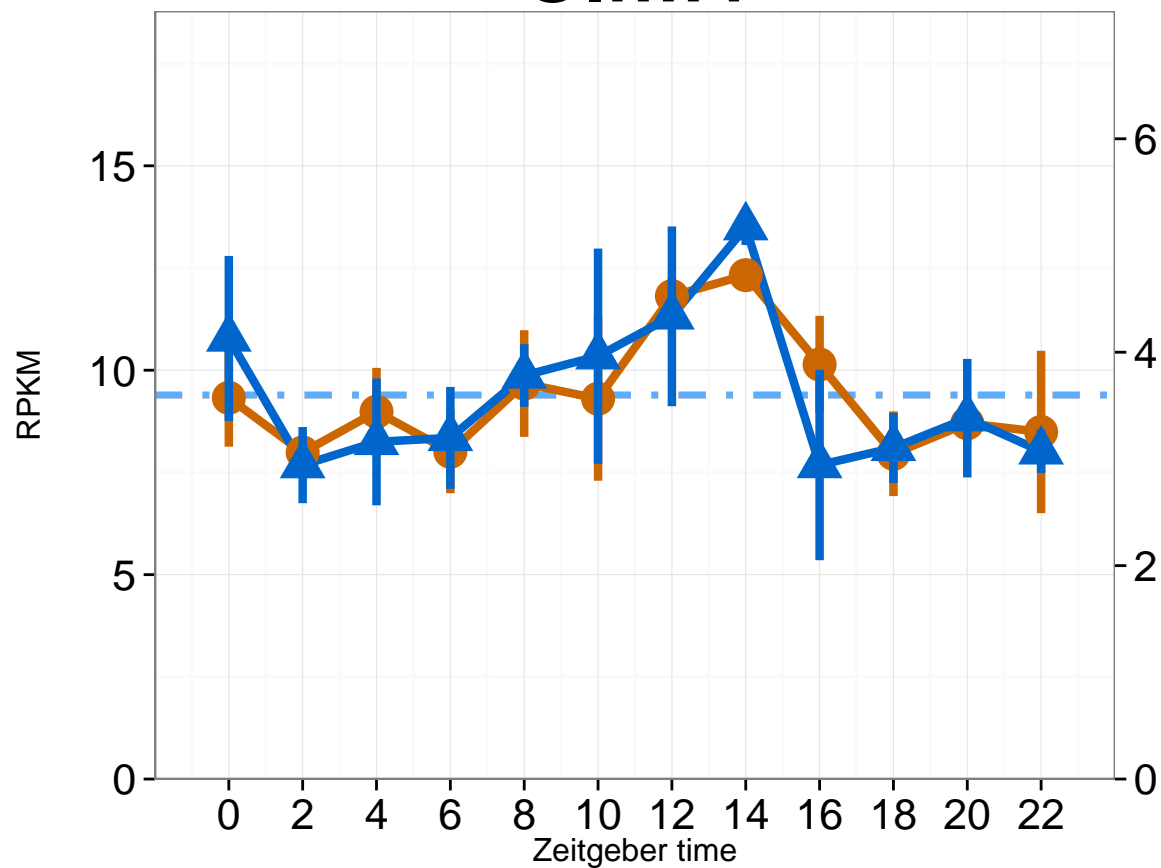

## Olfm4

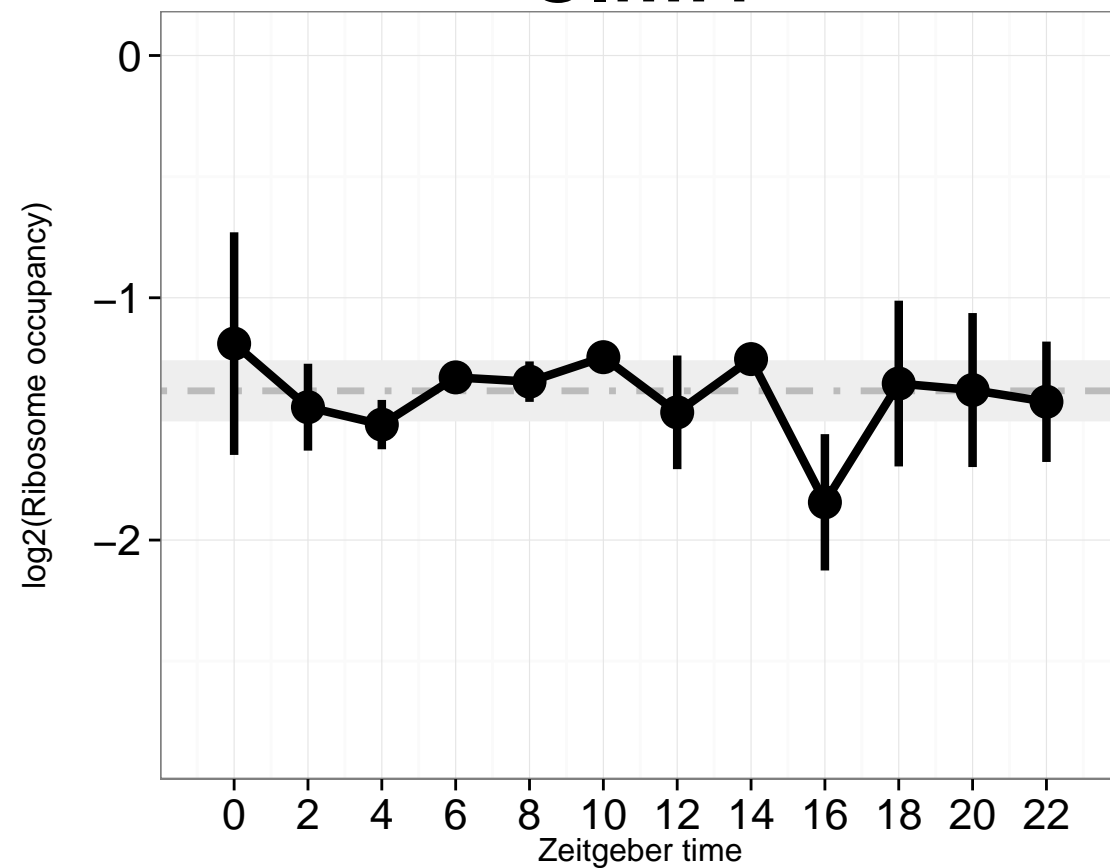

Supplement: Supplementary file 12374 [file 1]

# Fkbp14

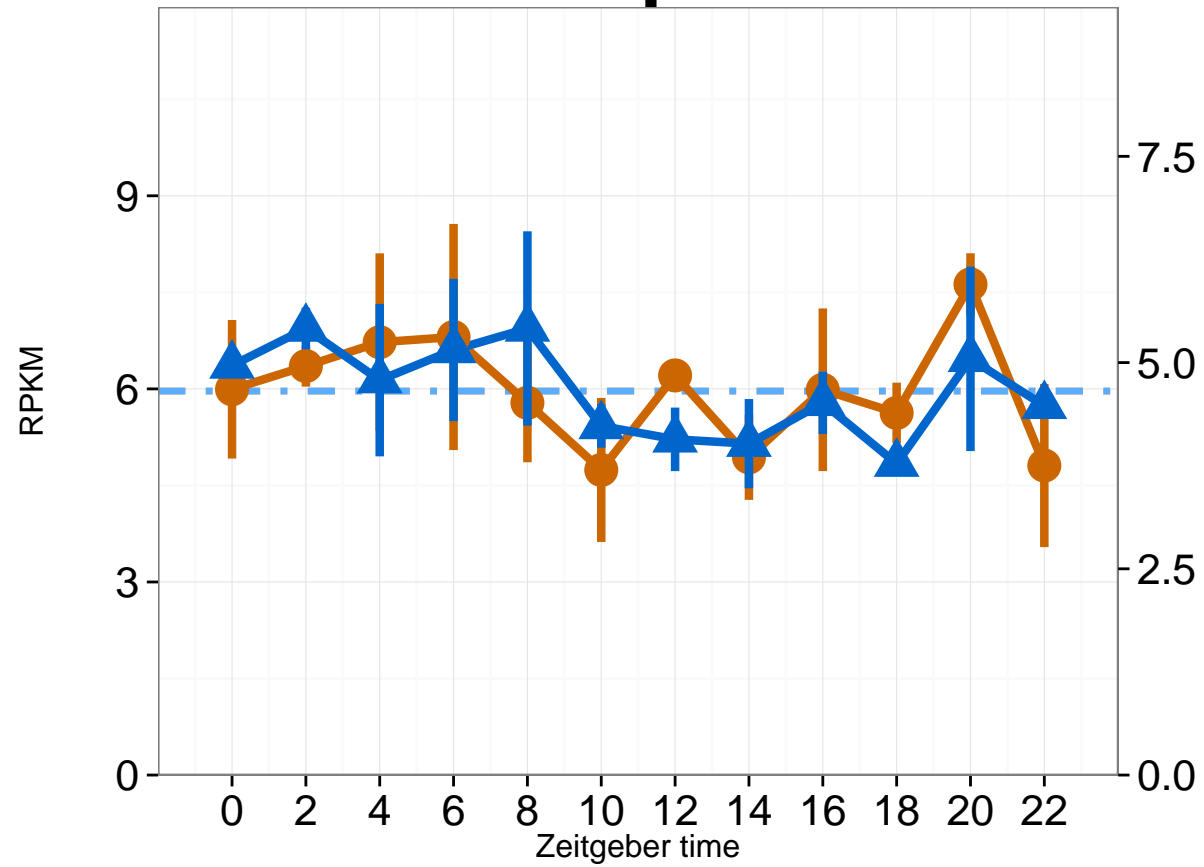

# Fkbp14

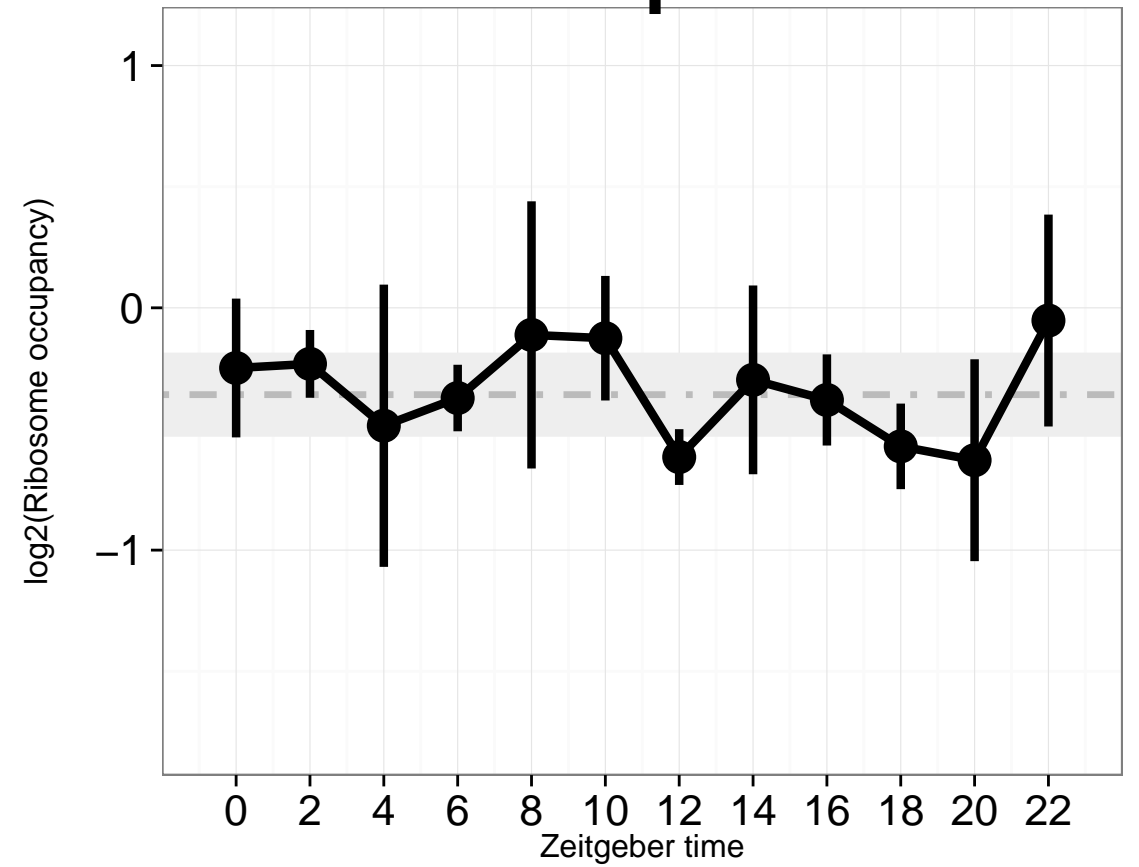

Supplement: Supplementary file 12375 [file 1]

# Mocs1

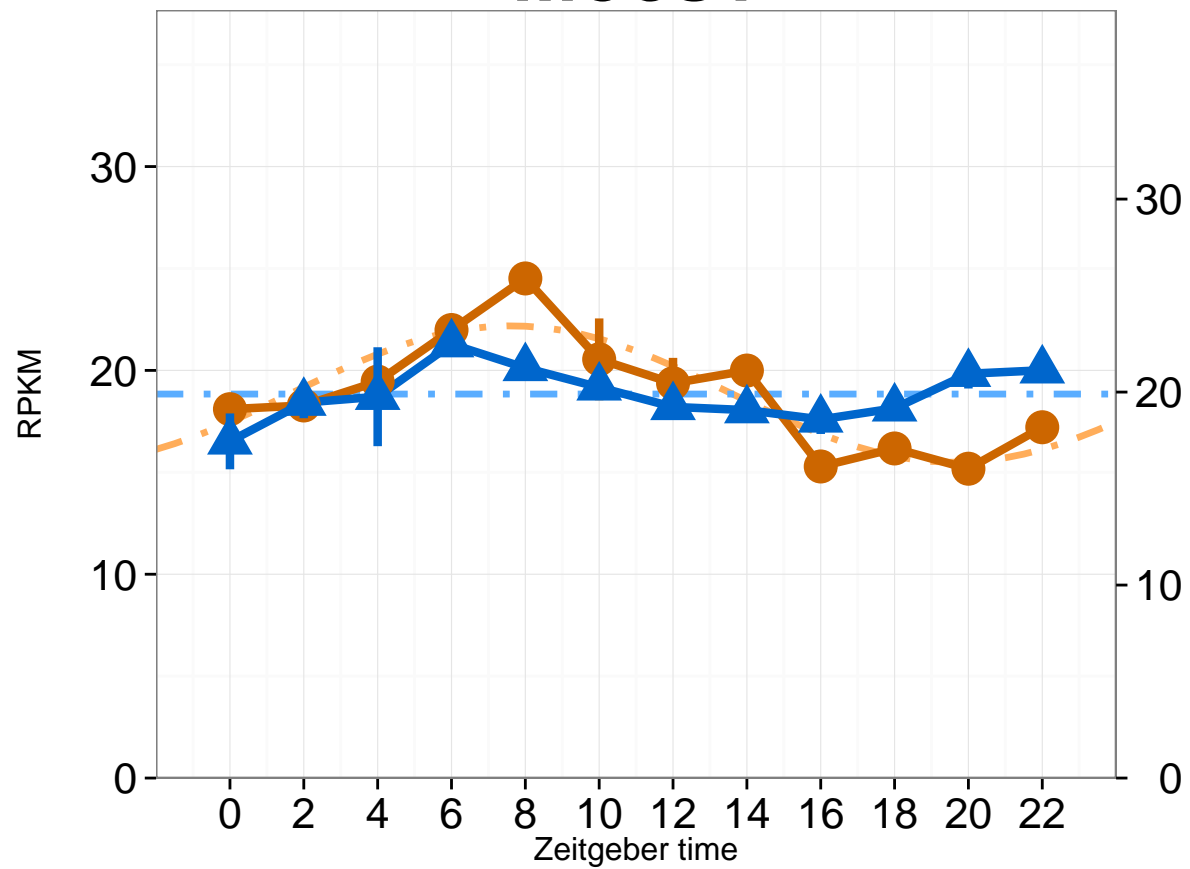

# Mocs1

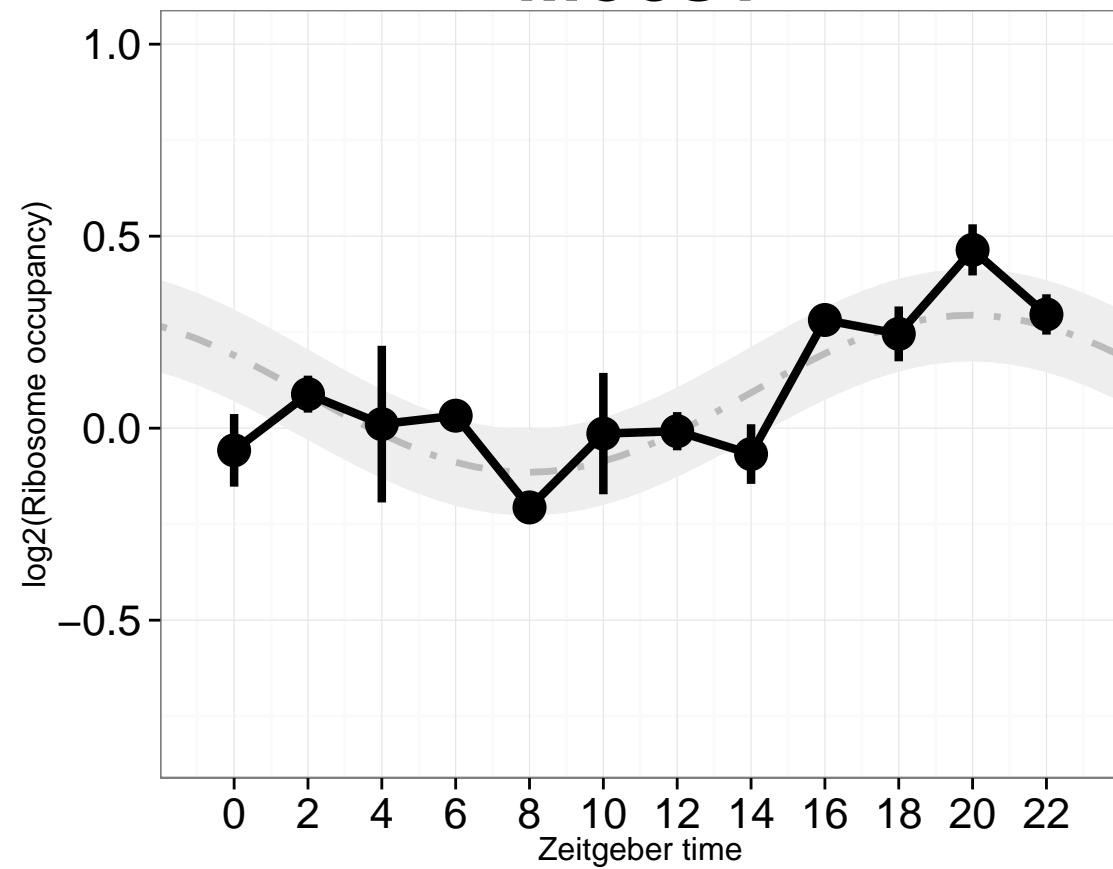

Supplement: Supplementary file 12376 [file 1]

## Rbl2

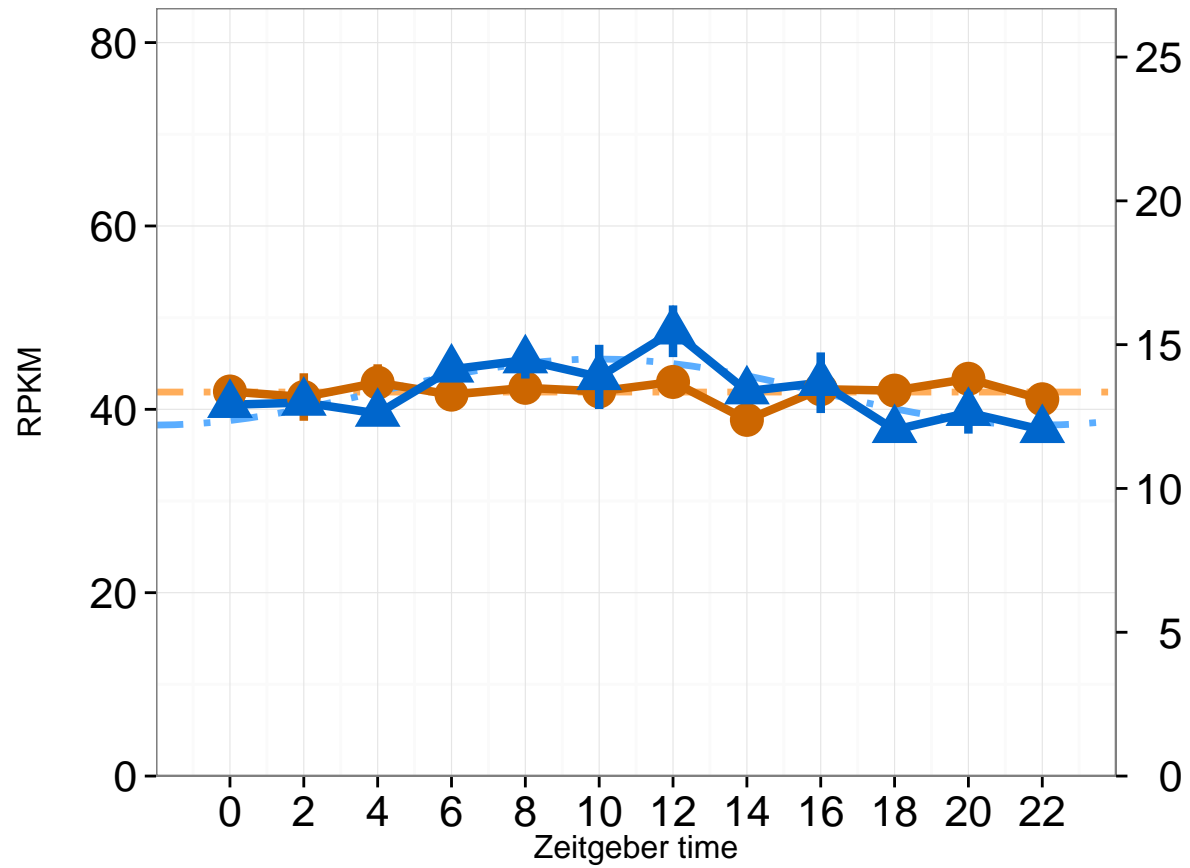

## Rbl2

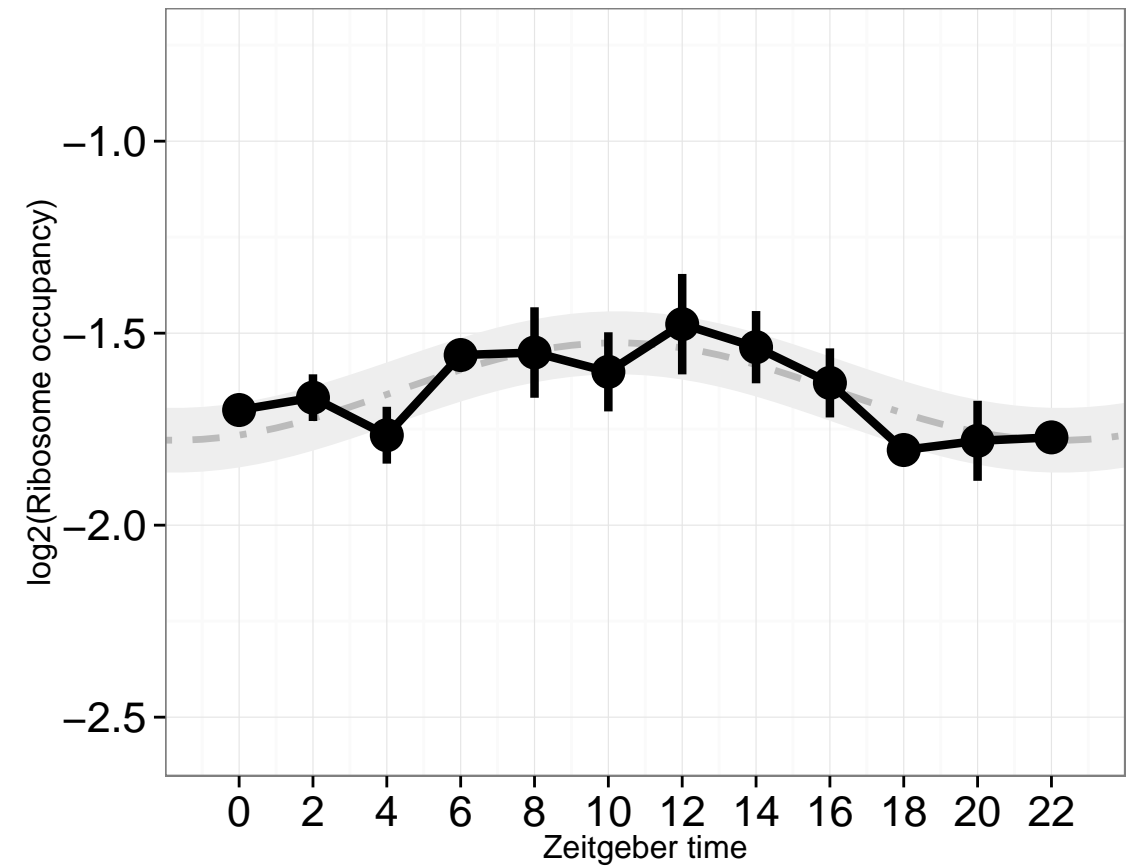

Supplement: Supplementary file 12377 [file 1]

## Prss23

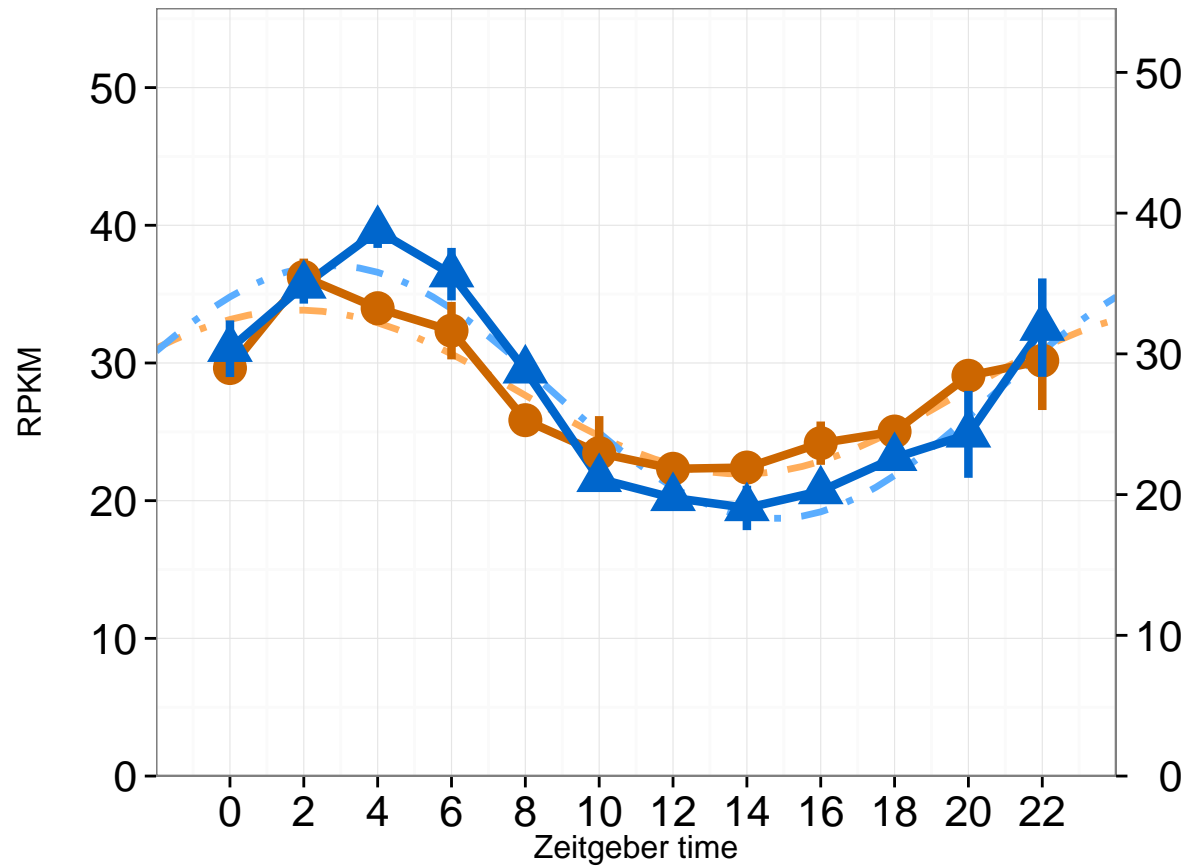

## Prss23

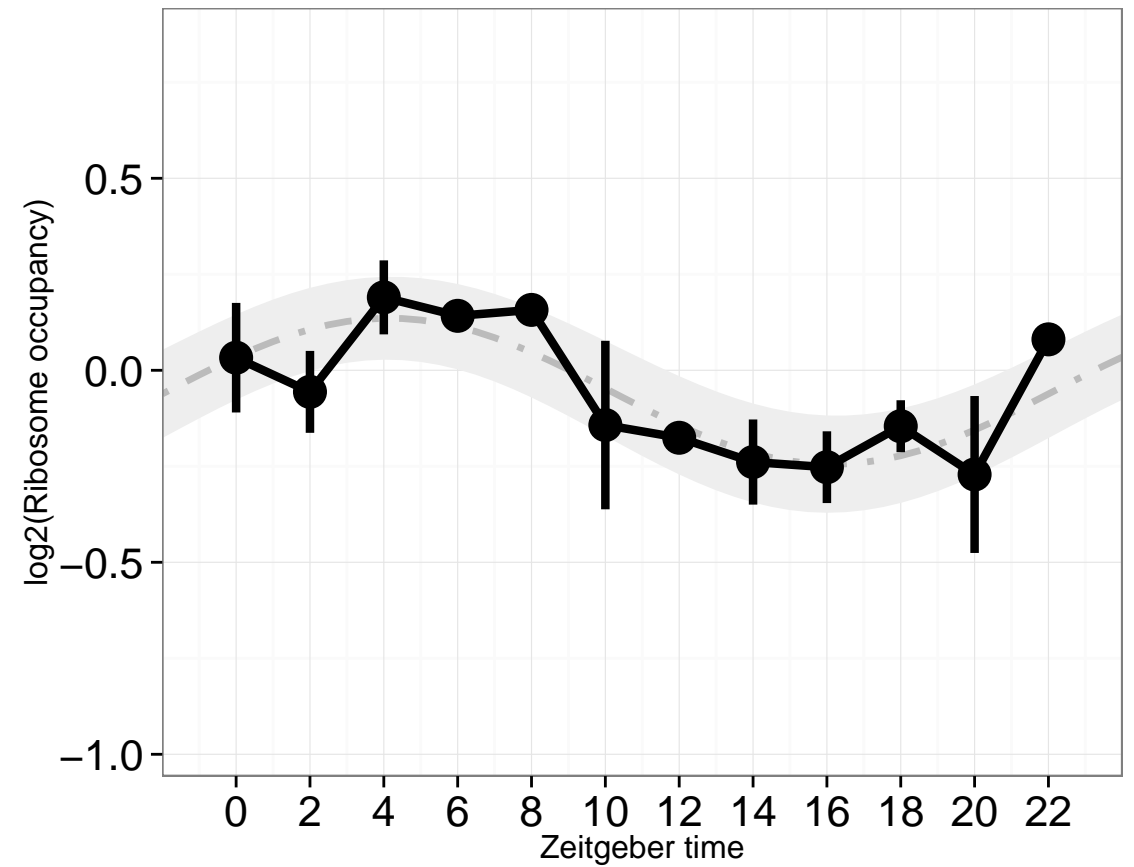

Supplement: Supplementary file 12378 [file 1]

**A730020M07Rik TR**

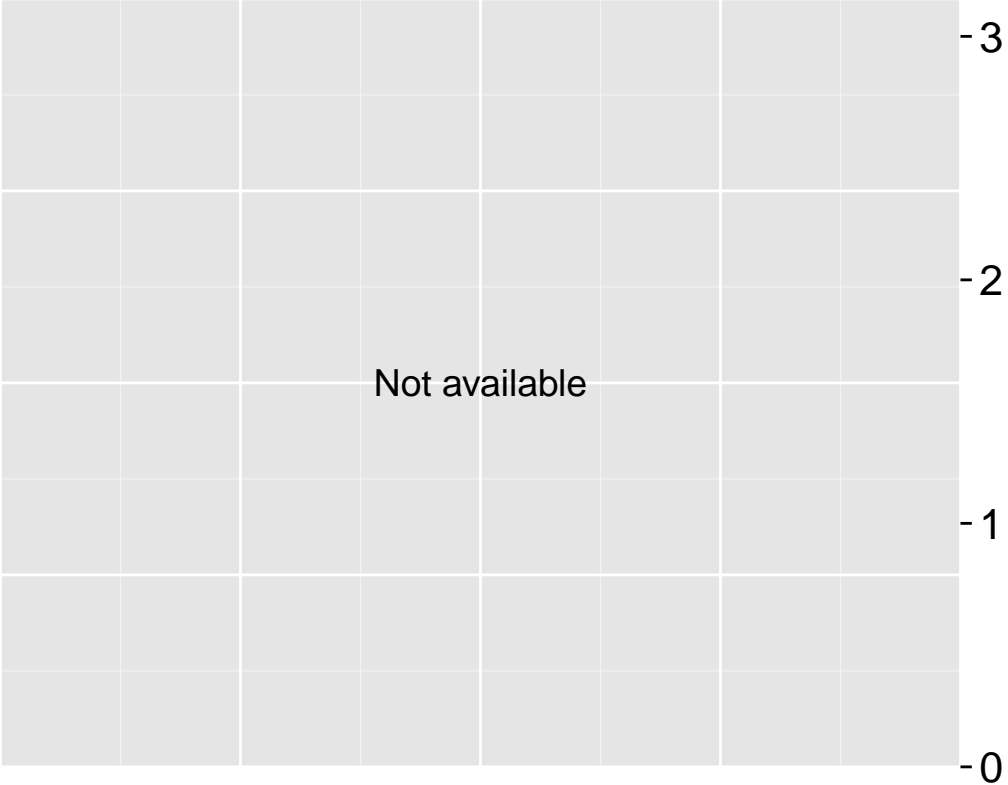

**A730020M07Rik log2(Ribosome occup**

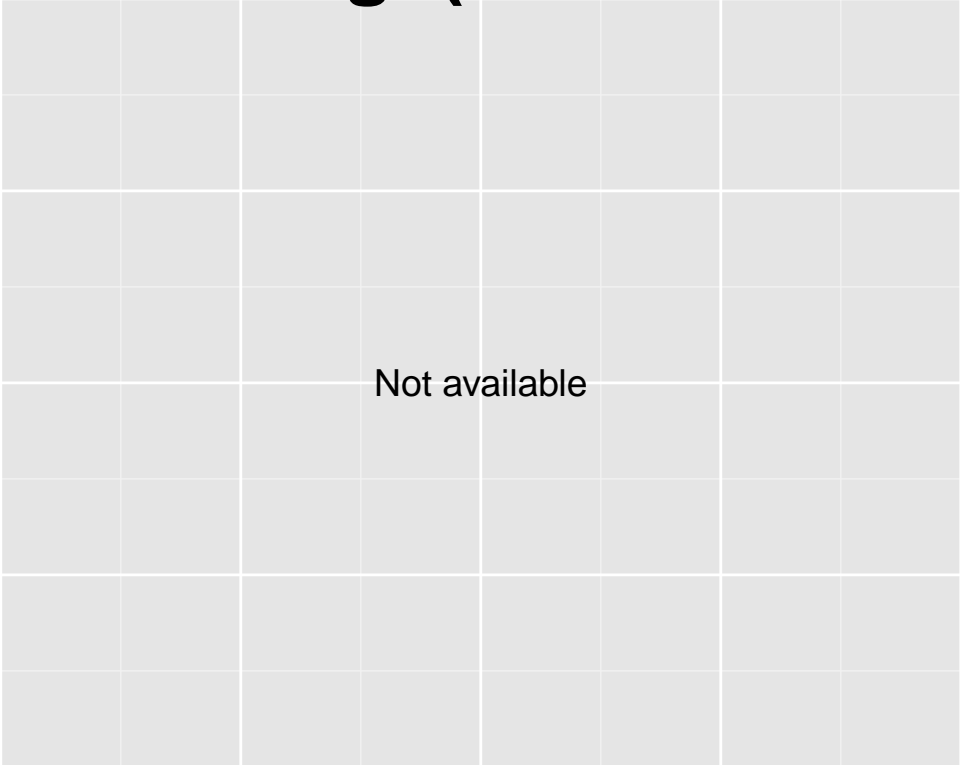

Supplement: Supplementary file 12379 [file 1]

# Tmprss9

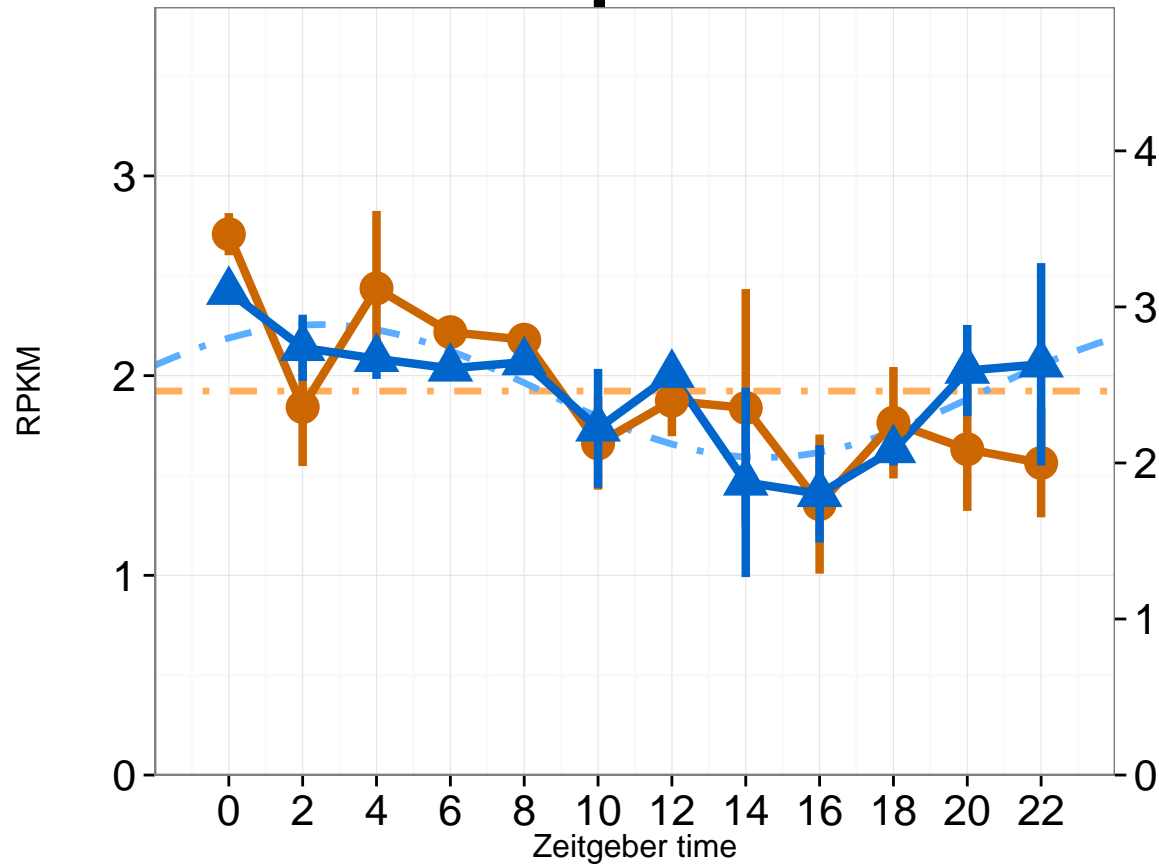

# Tmprss9

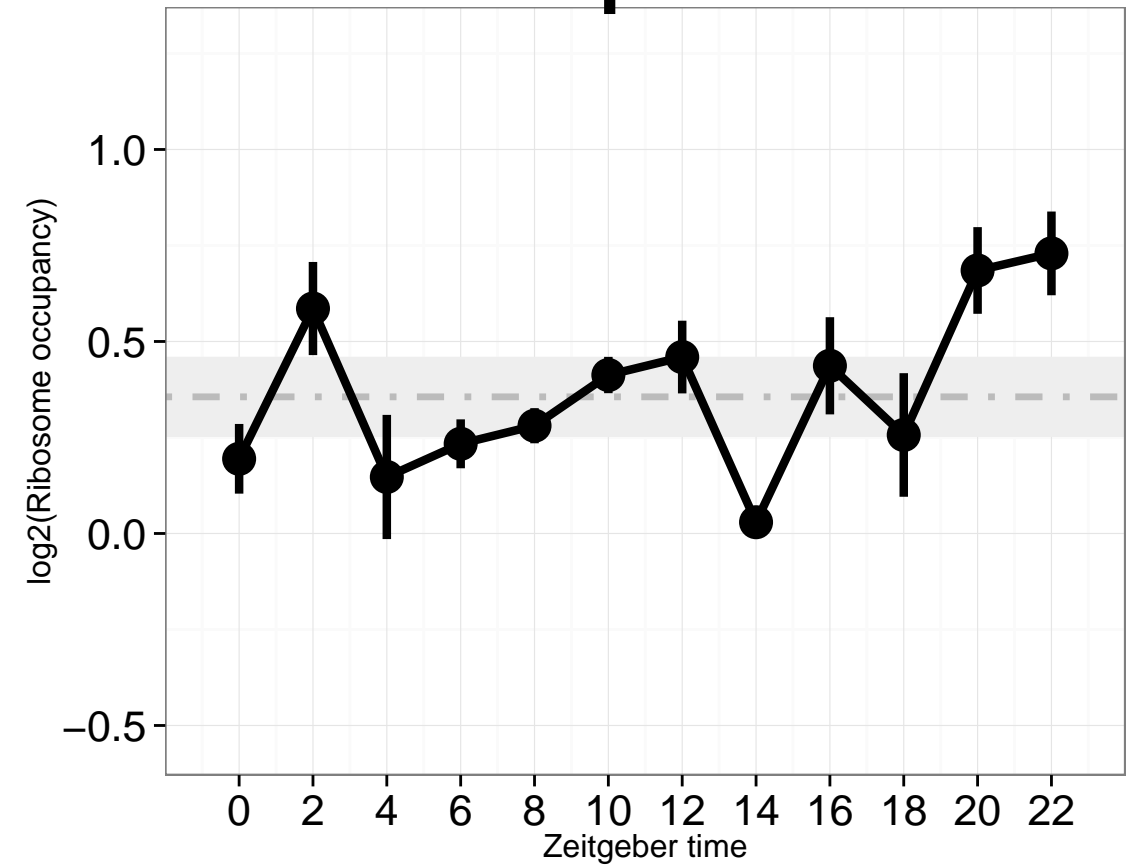

Supplement: Supplementary file 12380 [file 1]

## Ssh3

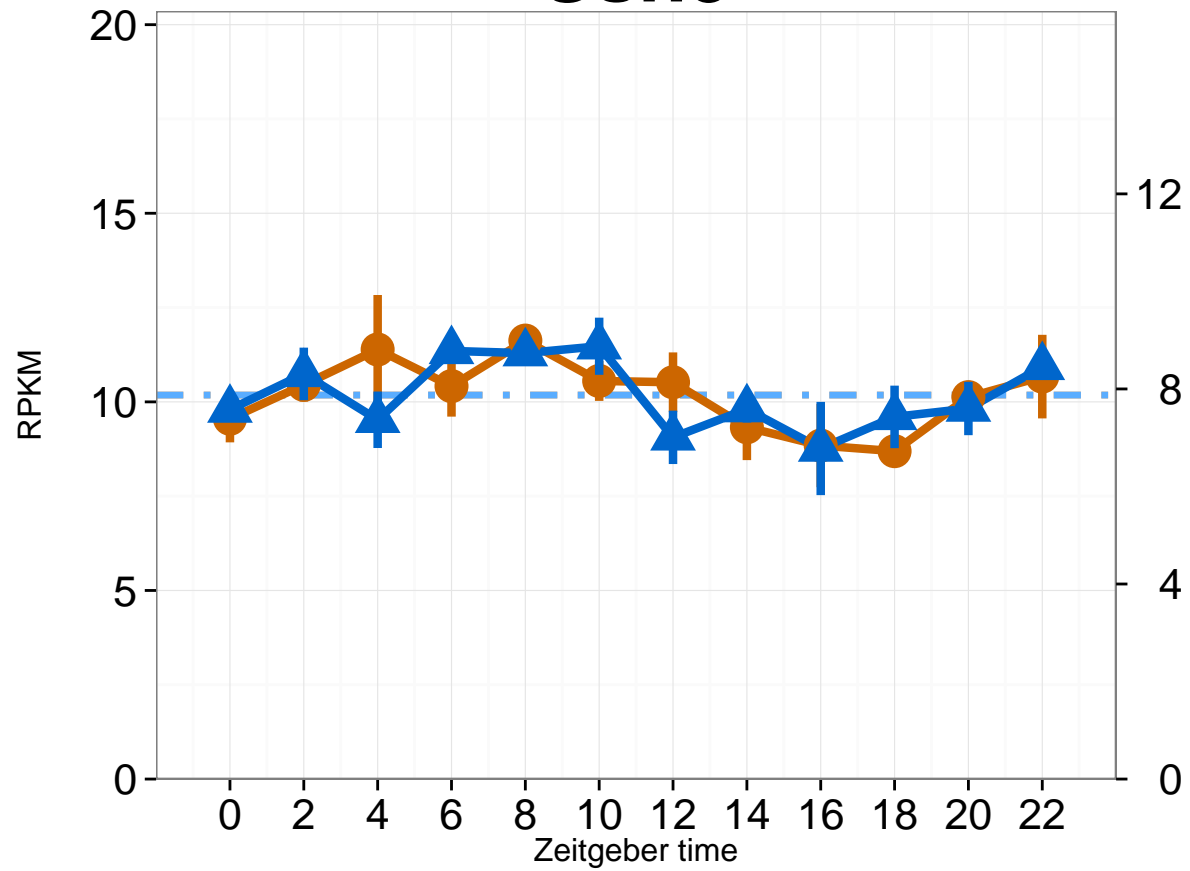

## Ssh3

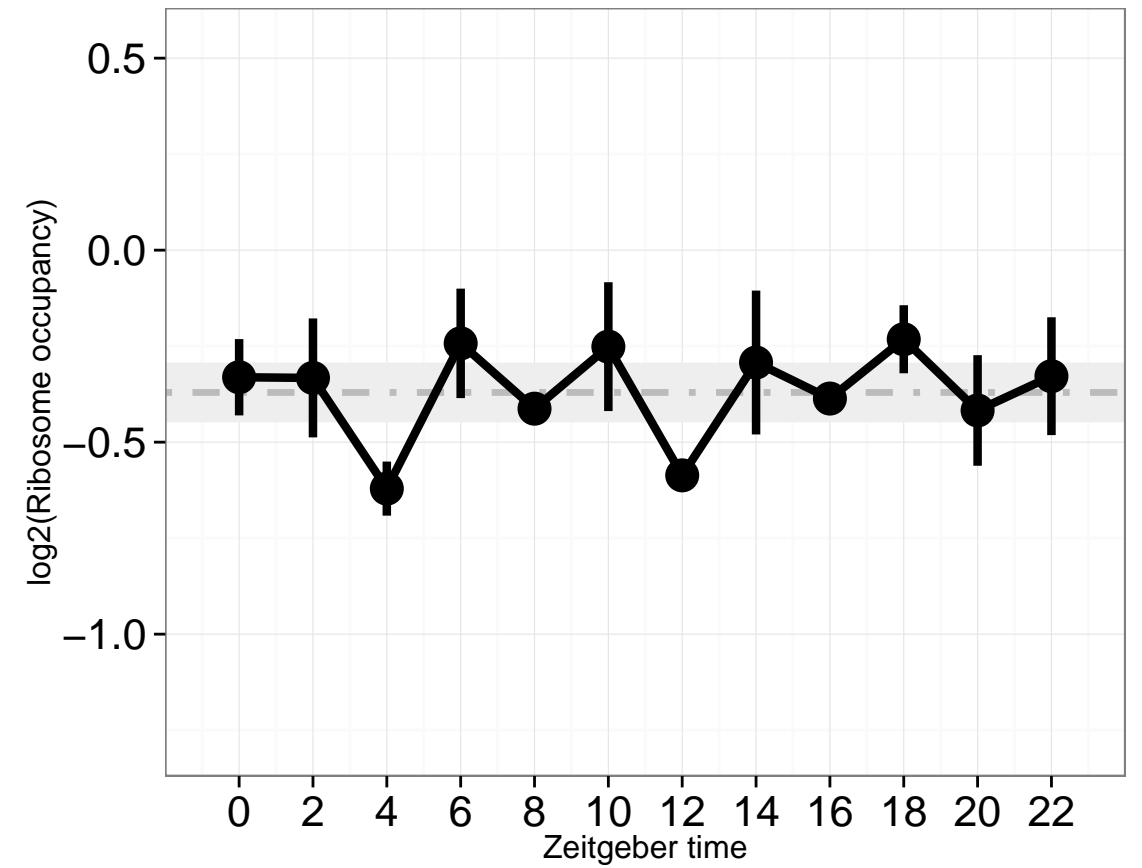

Supplement: Supplementary file 12381 [file 1]

# 1700067K01Rik

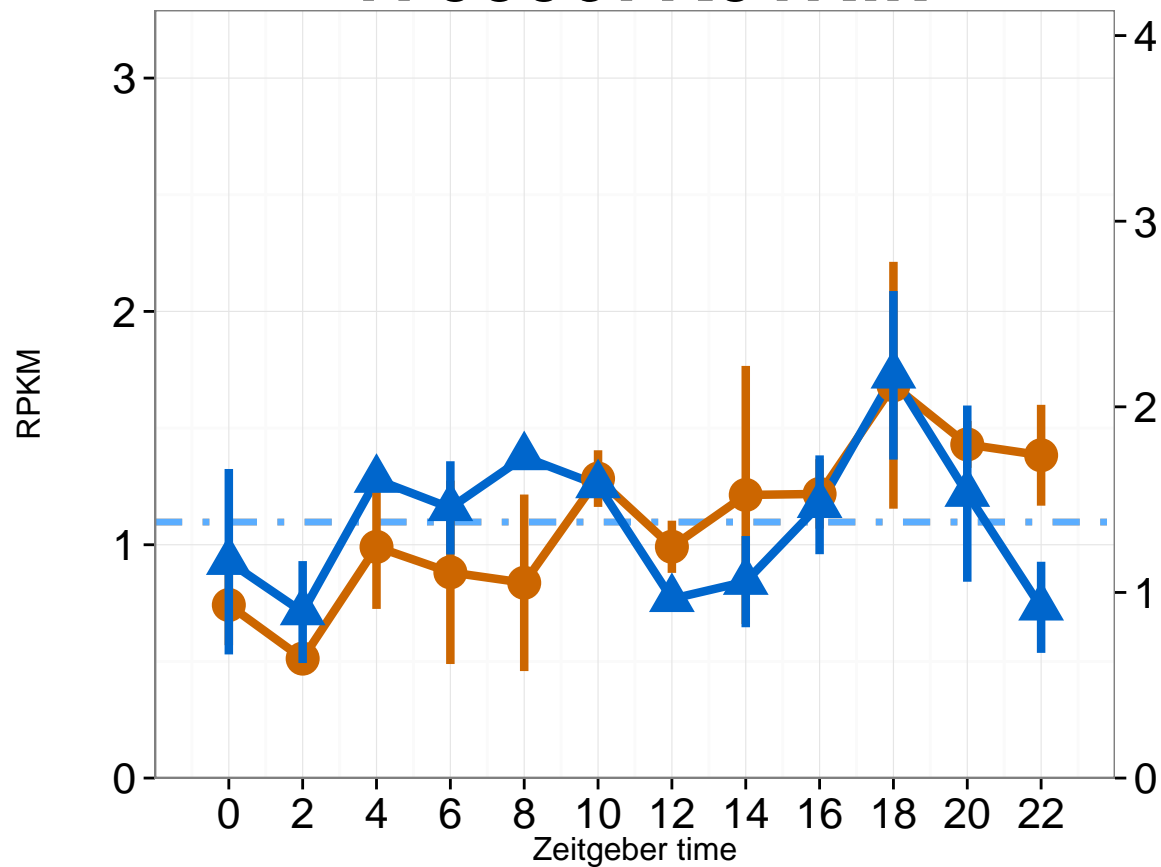

# 1700067K01Rik

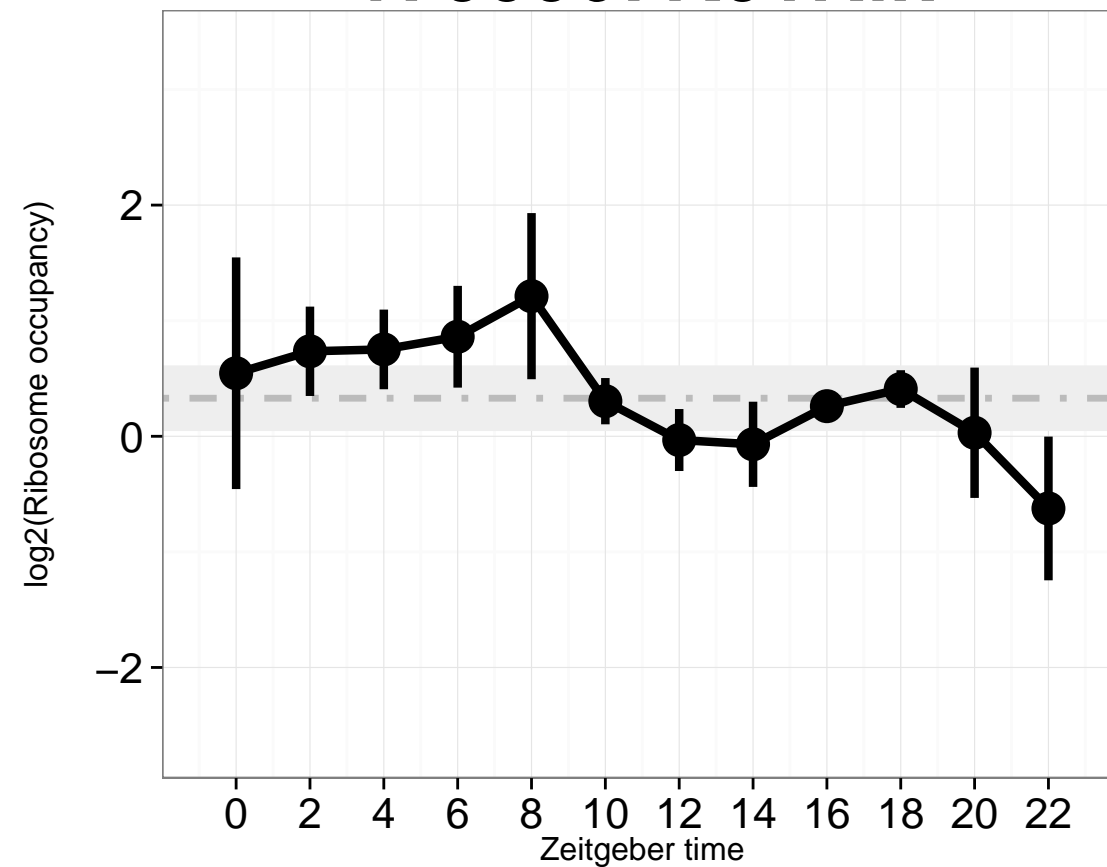

Supplement: Supplementary file 12382 [file 1]

# L1cam

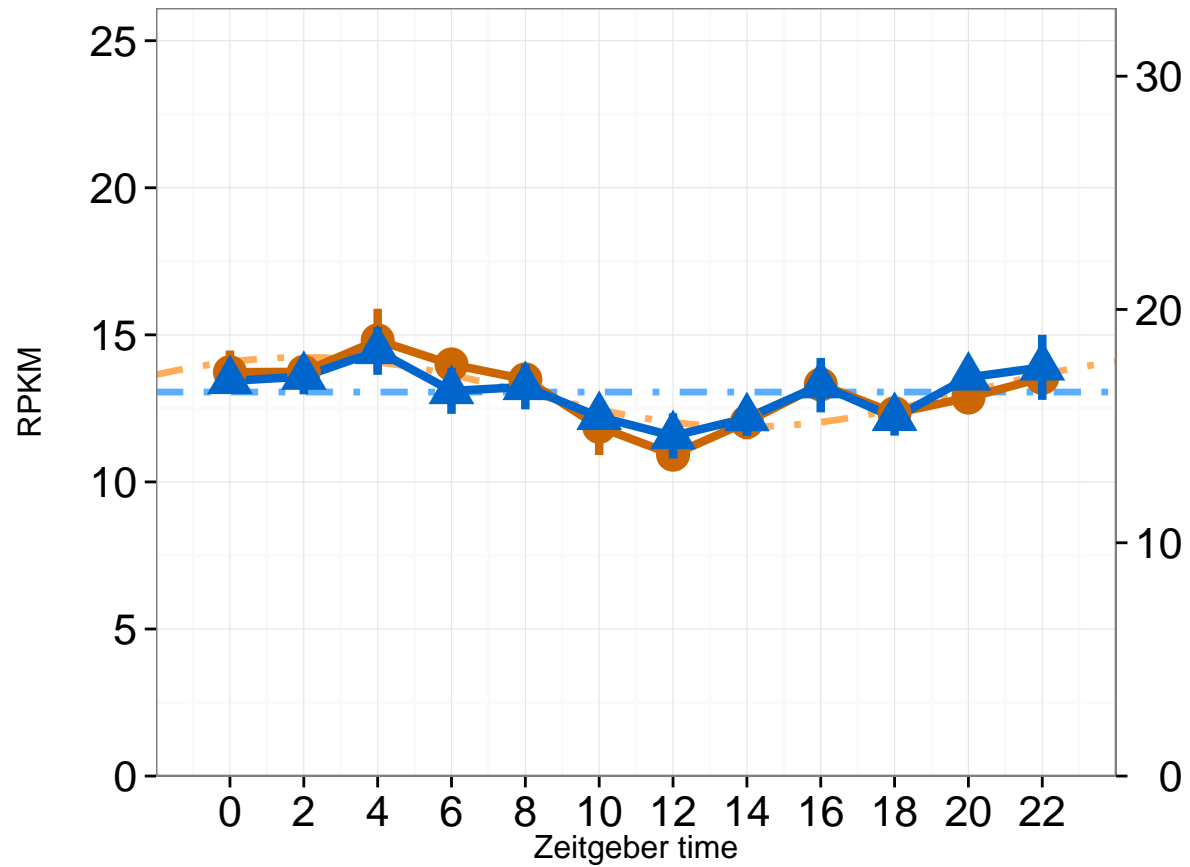

# L1cam

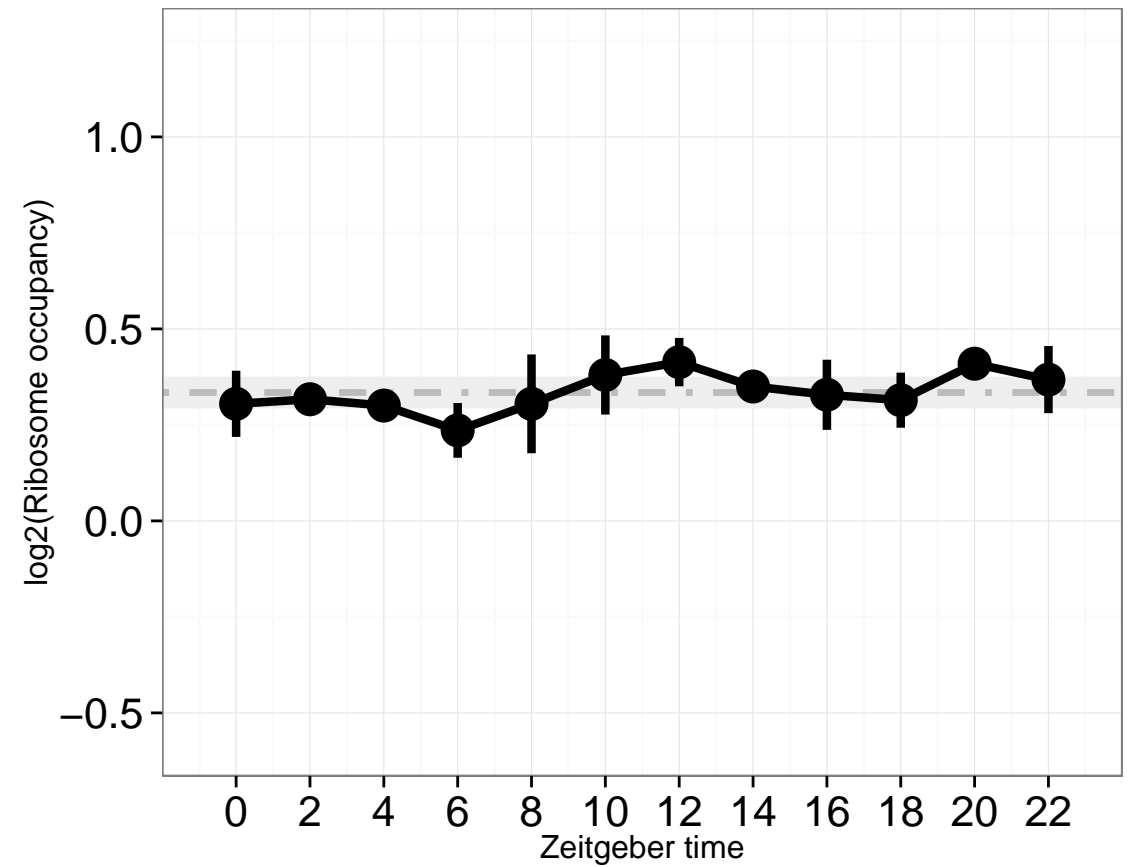

Supplement: Supplementary file 12383 [file 1]

## Gda

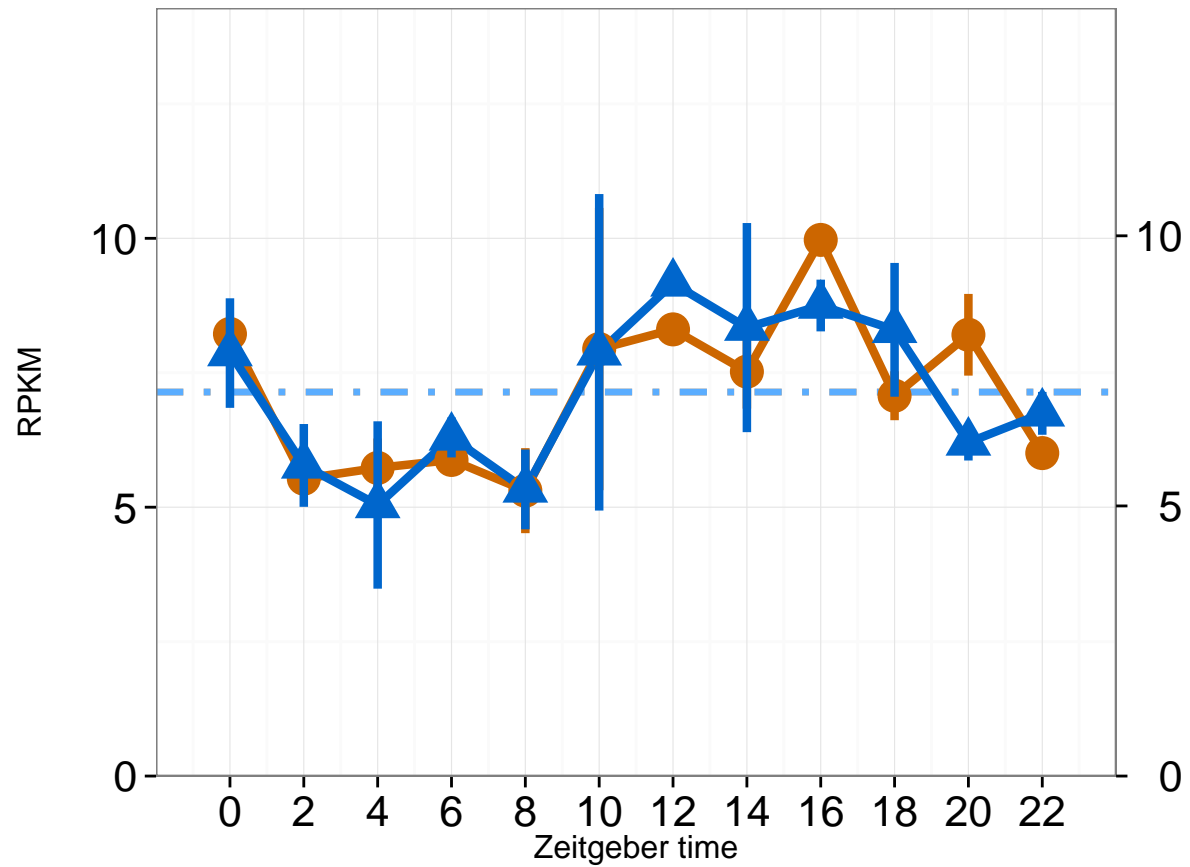

## Gda

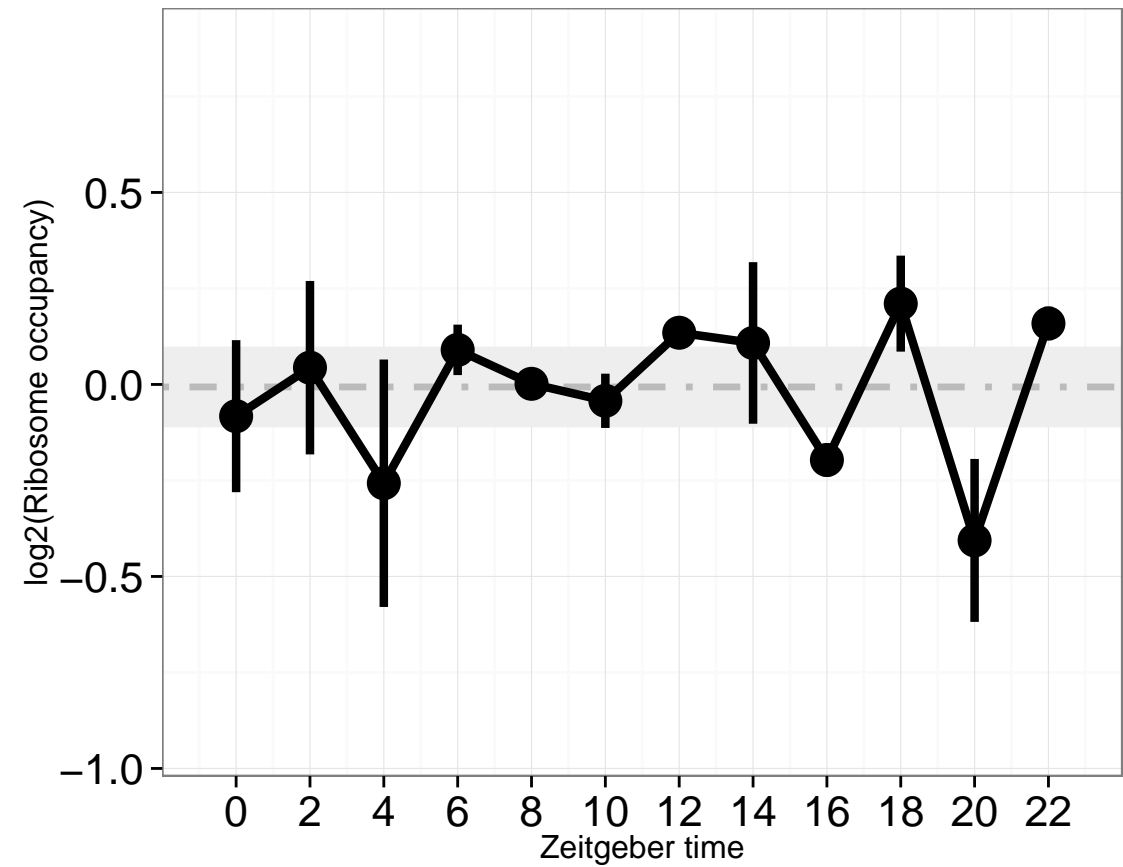

Supplement: Supplementary file 12384 [file 1]

# Hist1h1b

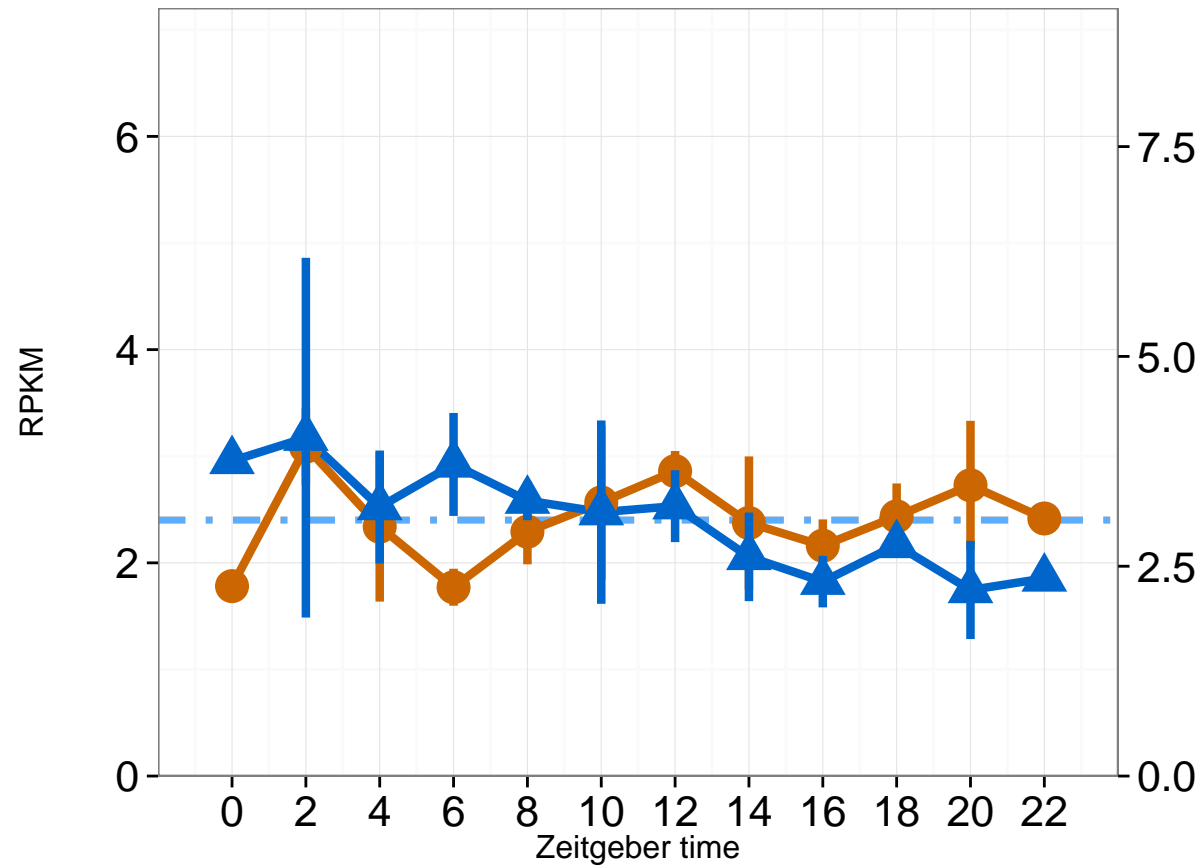

# Hist1h1b

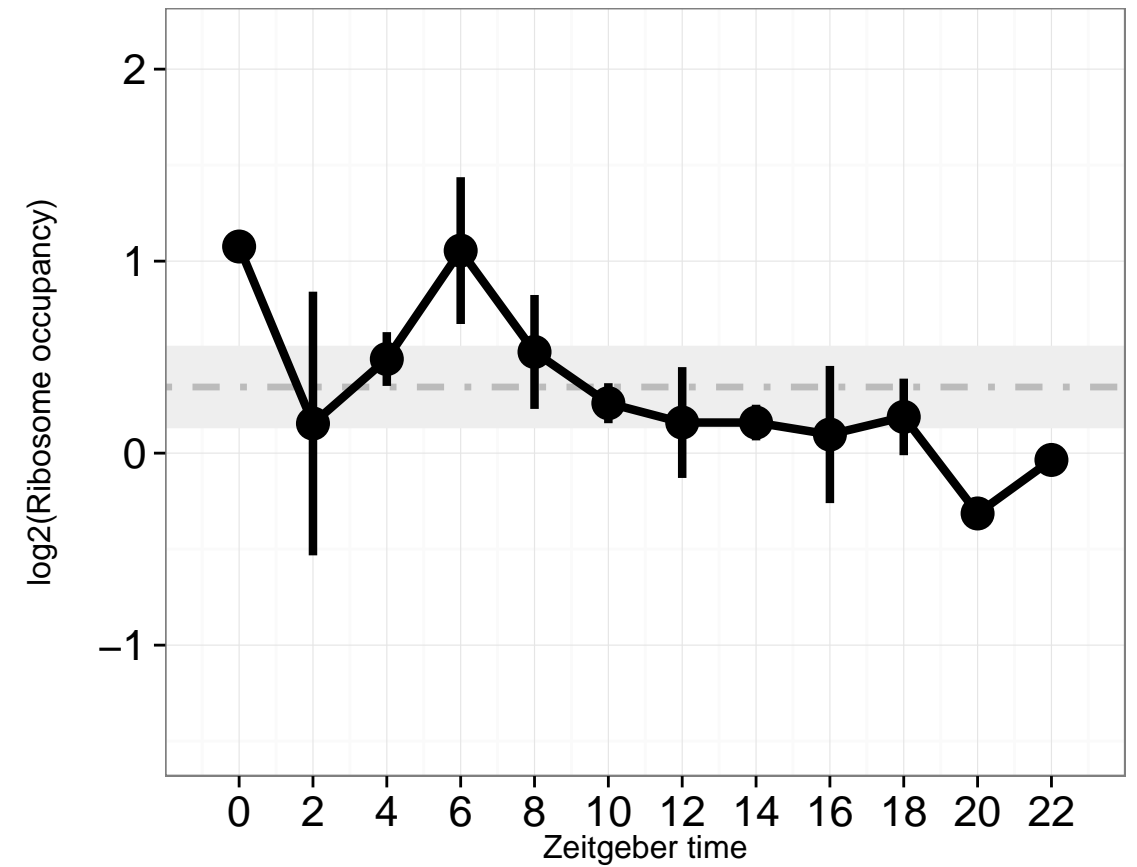

Supplement: Supplementary file 12385 [file 1]

# Igfbp5

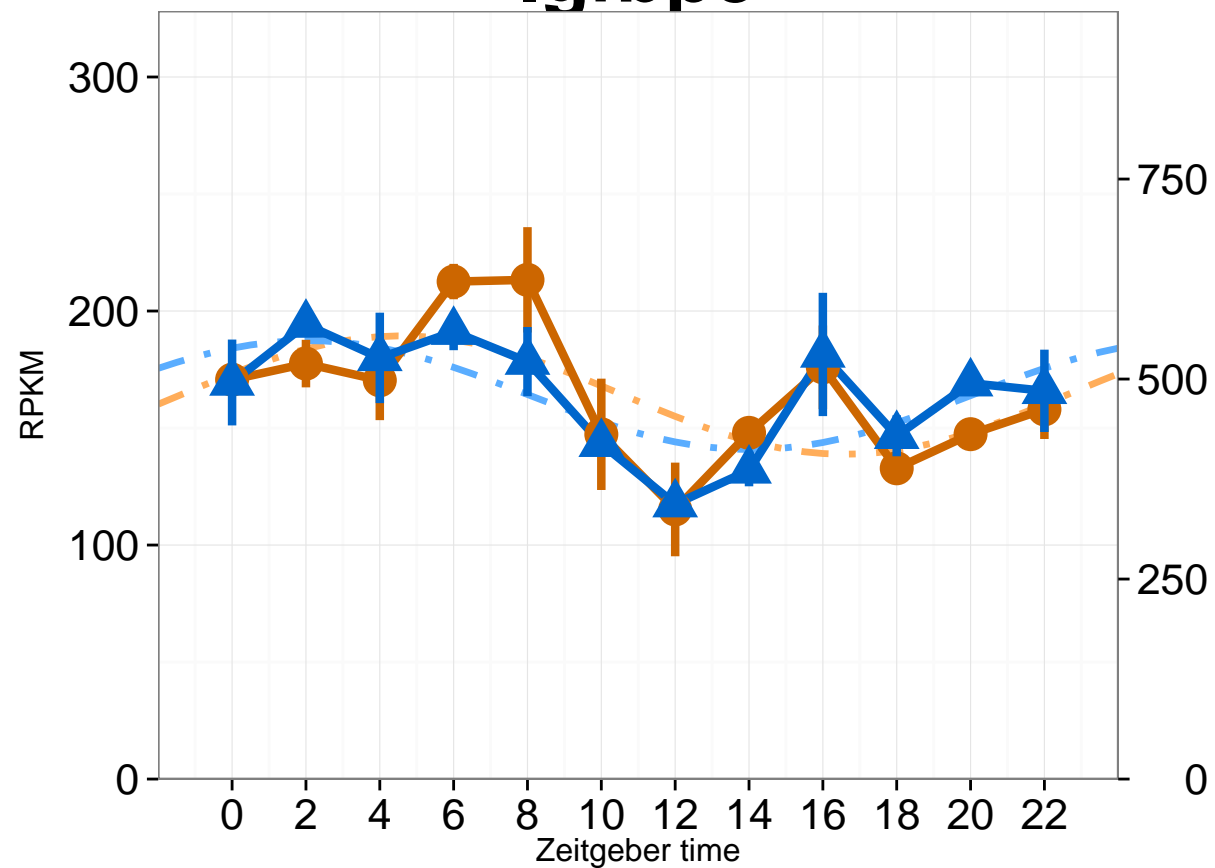

# Igfbp5

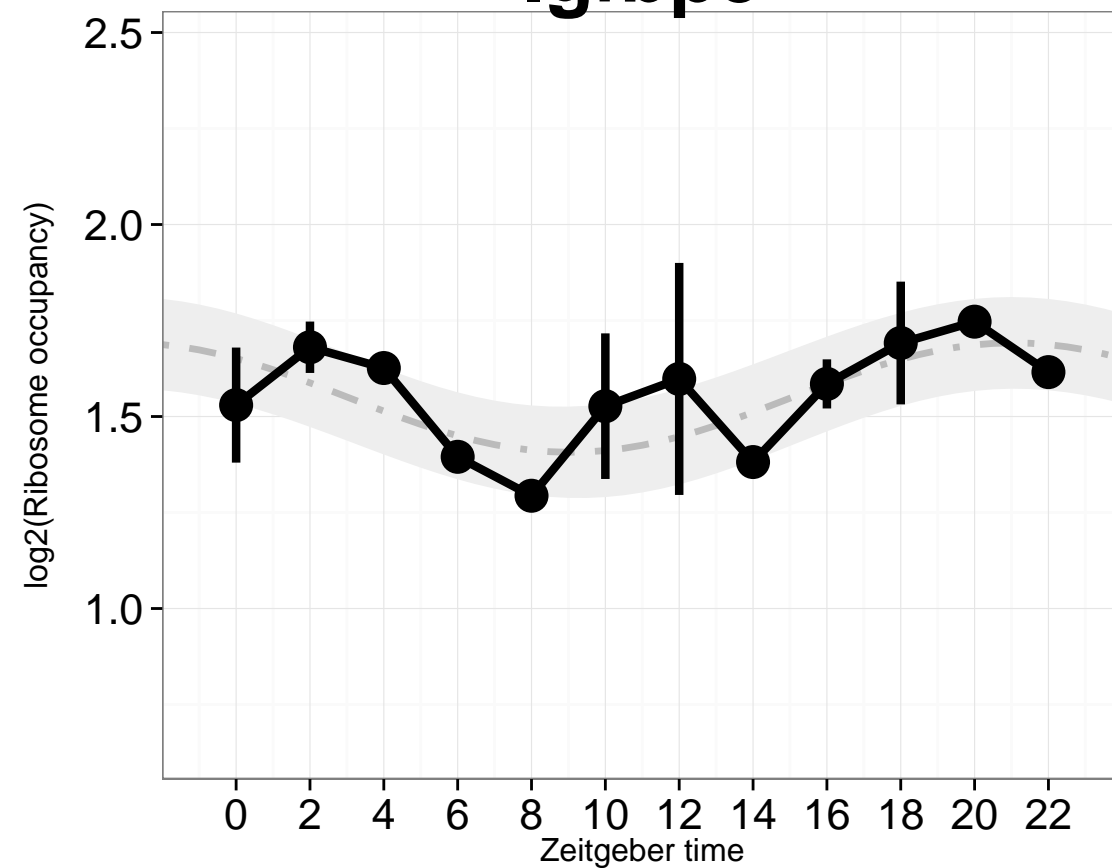

Supplement: Supplementary file 12386 [file 1]

## Yipf2

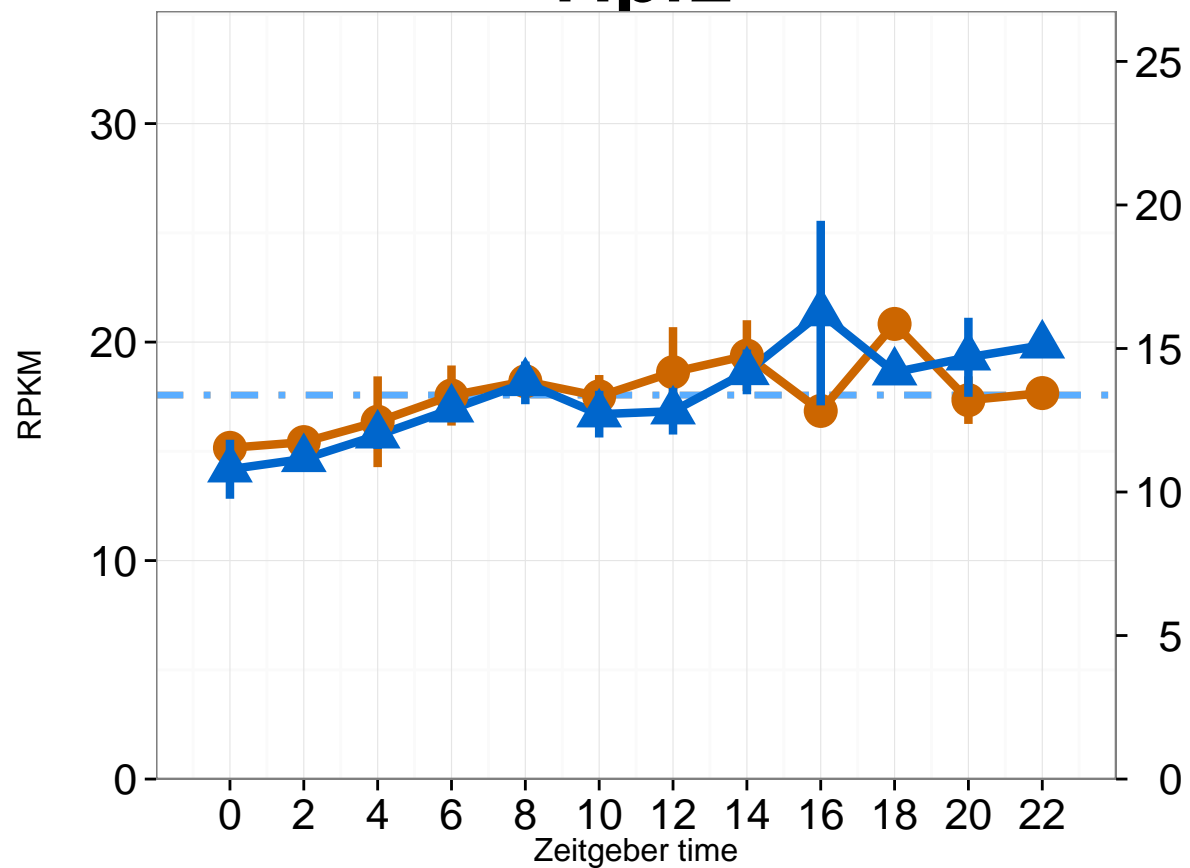

## Yipf2

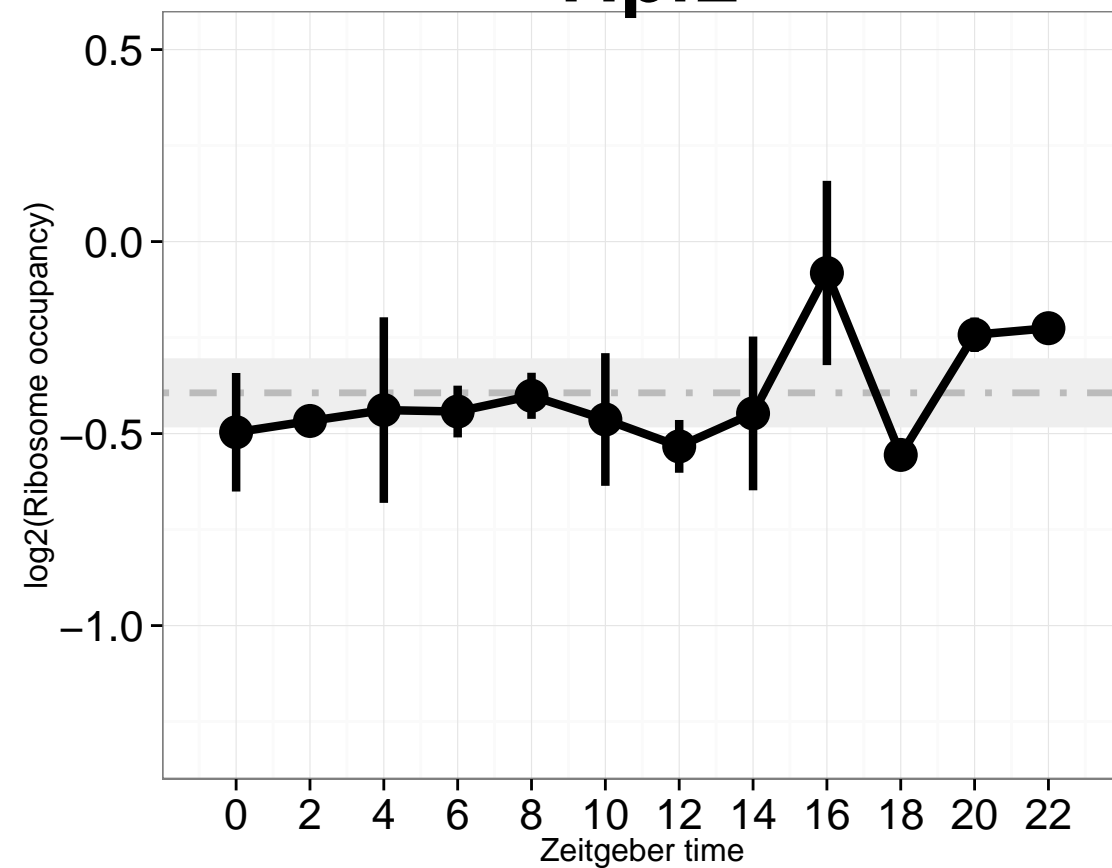

Supplement: Supplementary file 12387 [file 1]

# Zfp354a

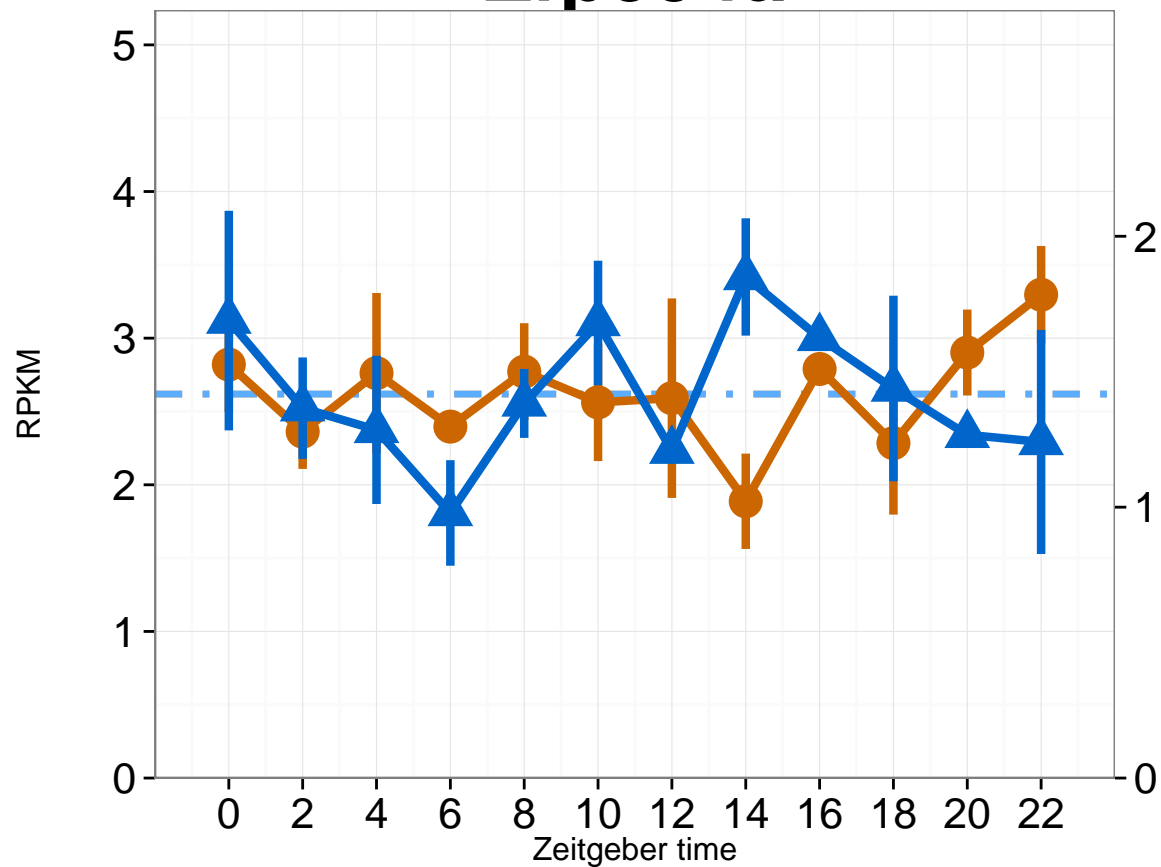

# Zfp354a

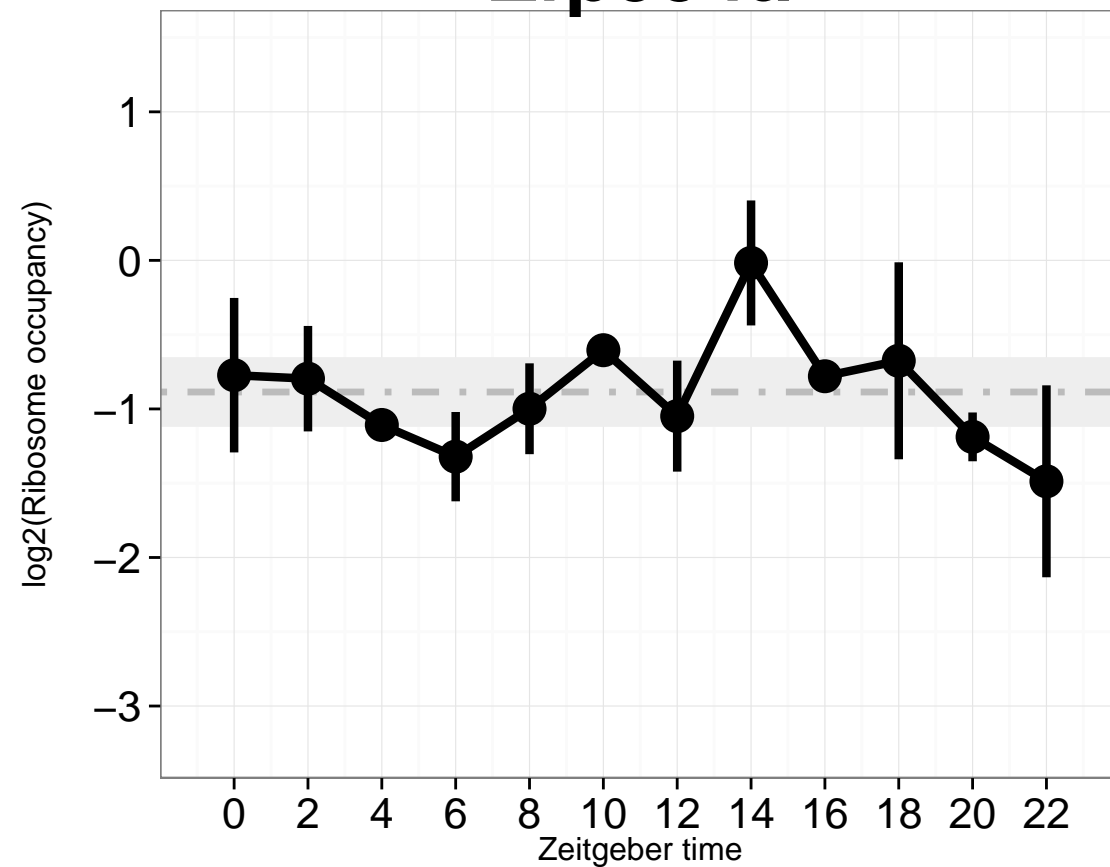

Supplement: Supplementary file 12388 [file 1]

# Abca6

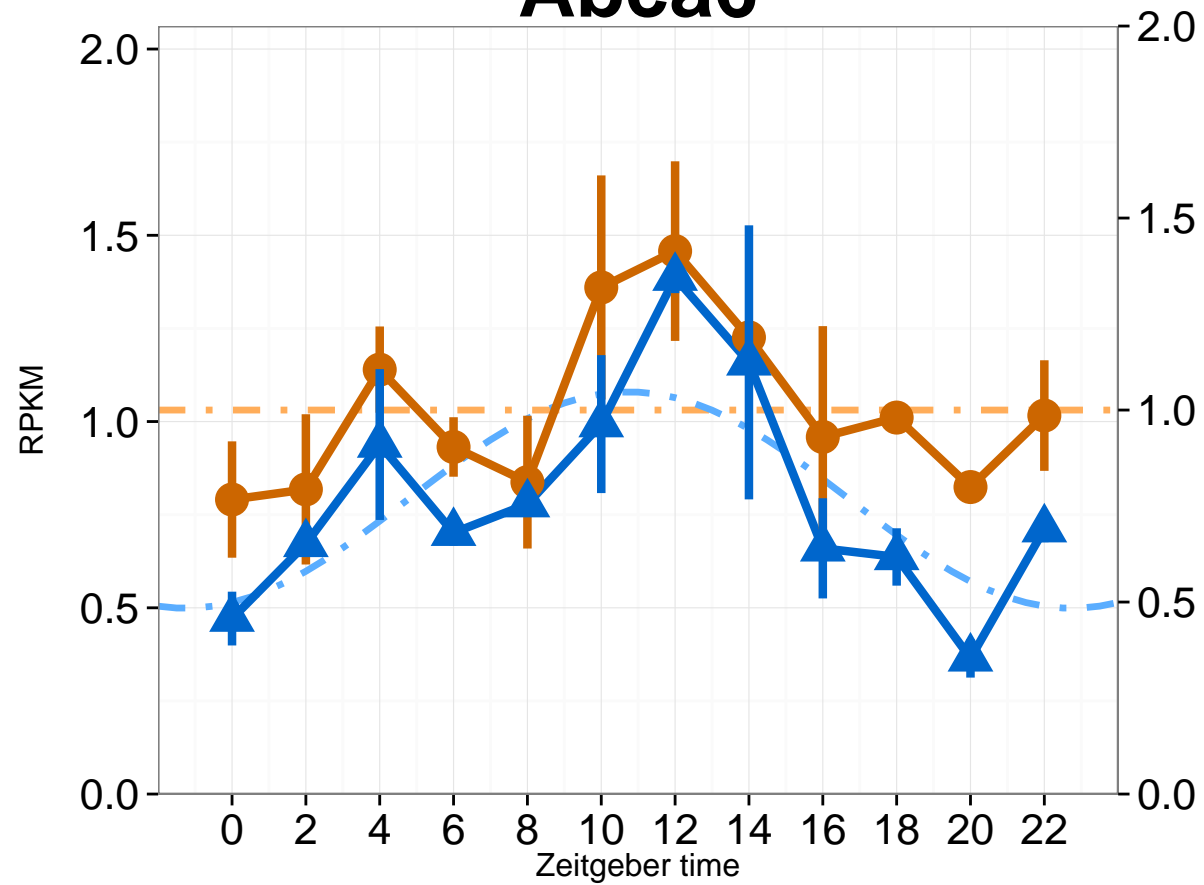

# Abca6

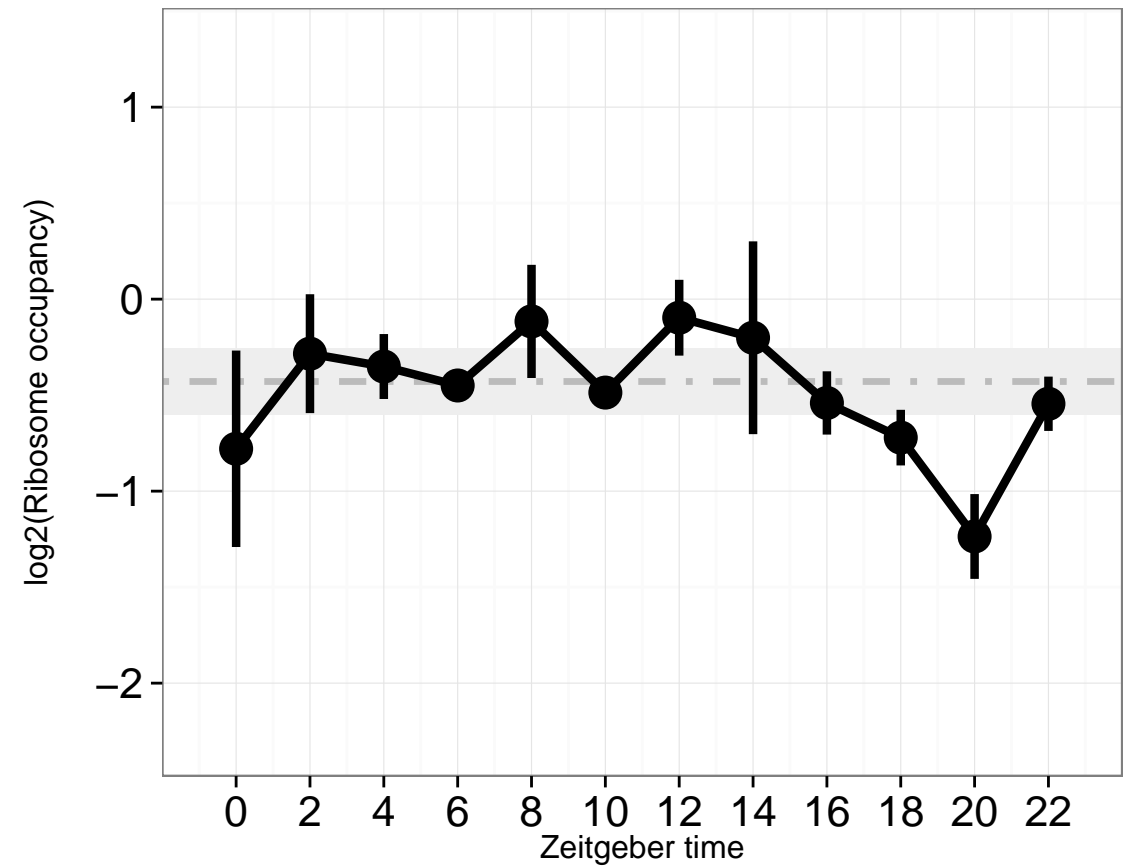

Supplement: Supplementary file 12389 [file 1]

## Tmem98

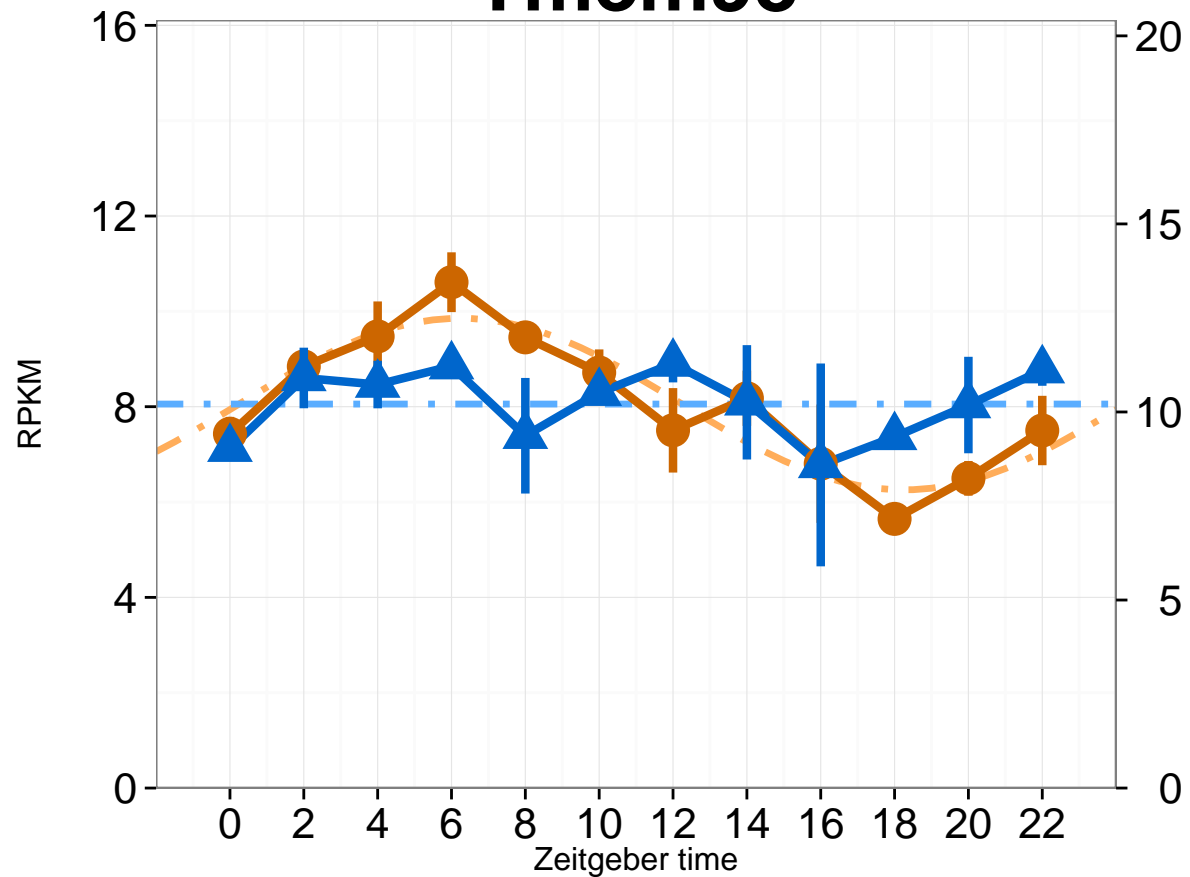

## Tmem98

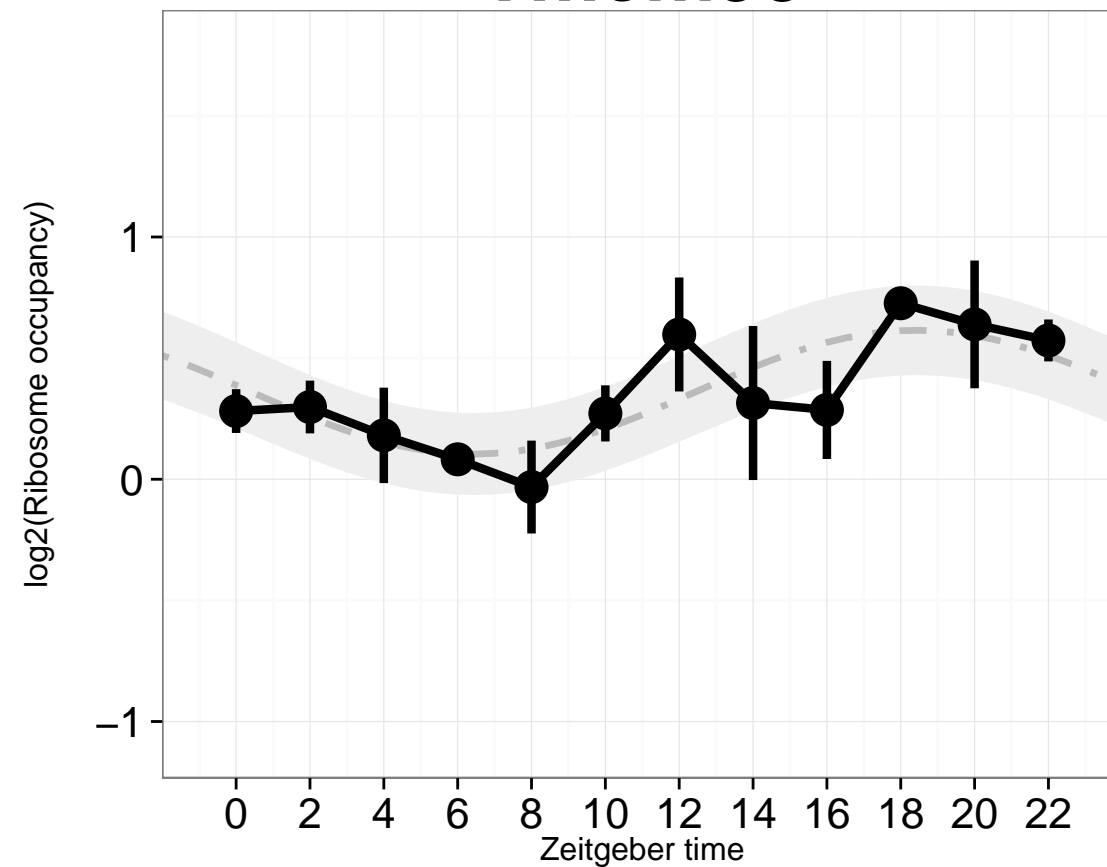

Supplement: Supplementary file 12390 [file 1]

## Smlr1

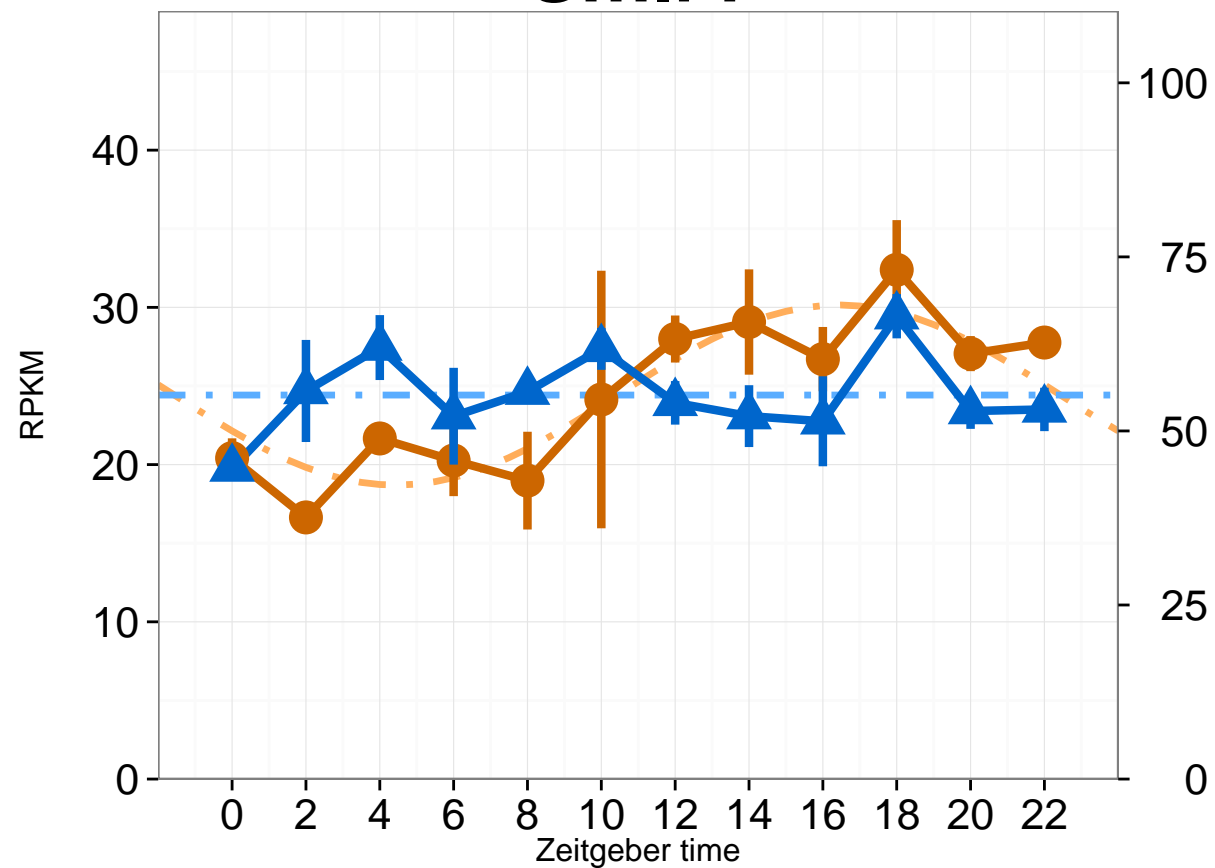

## Smlr1

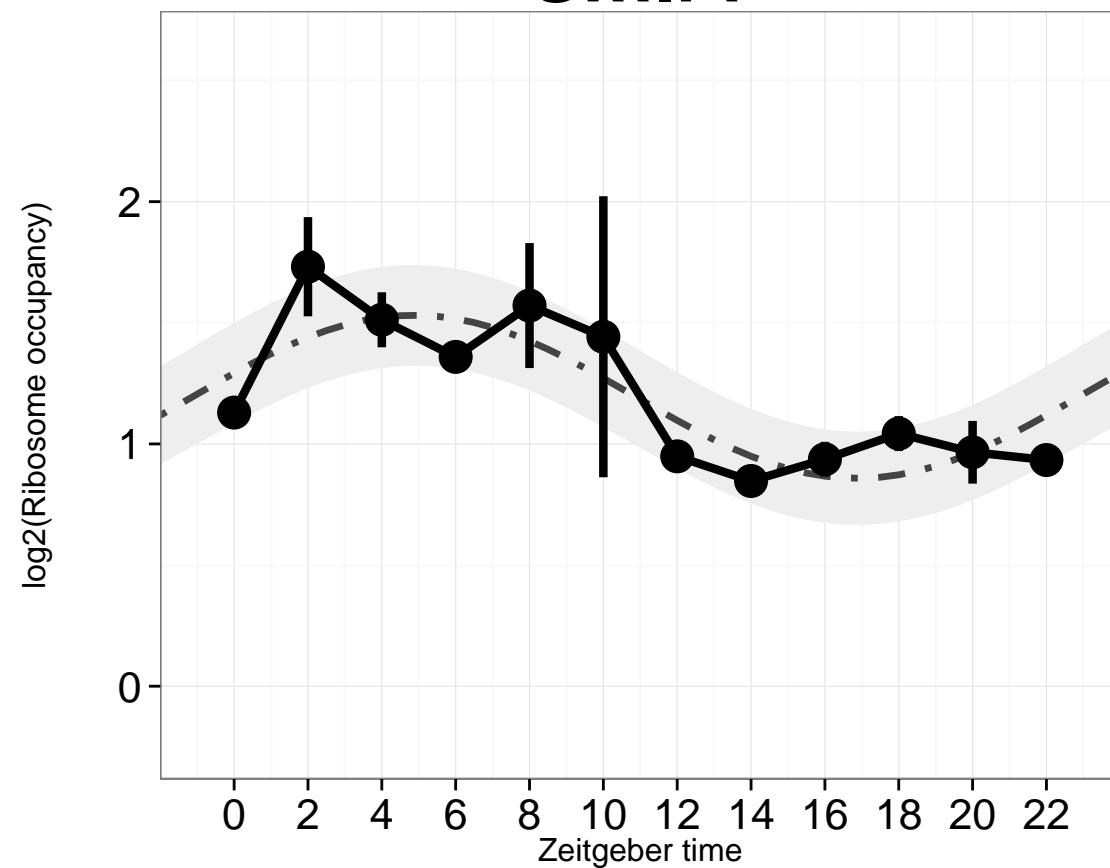

Supplement: Supplementary file 12391 [file 1]

# Fam13b

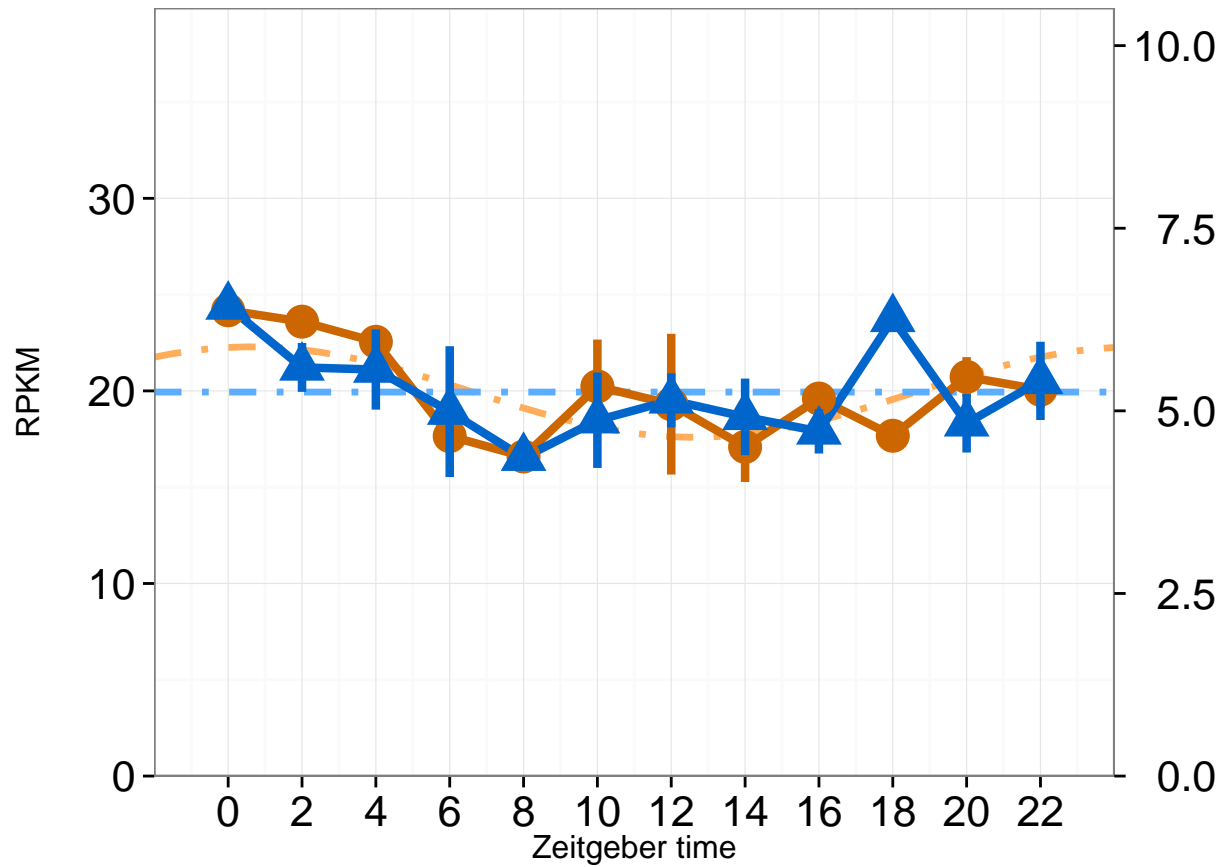

# Fam13b

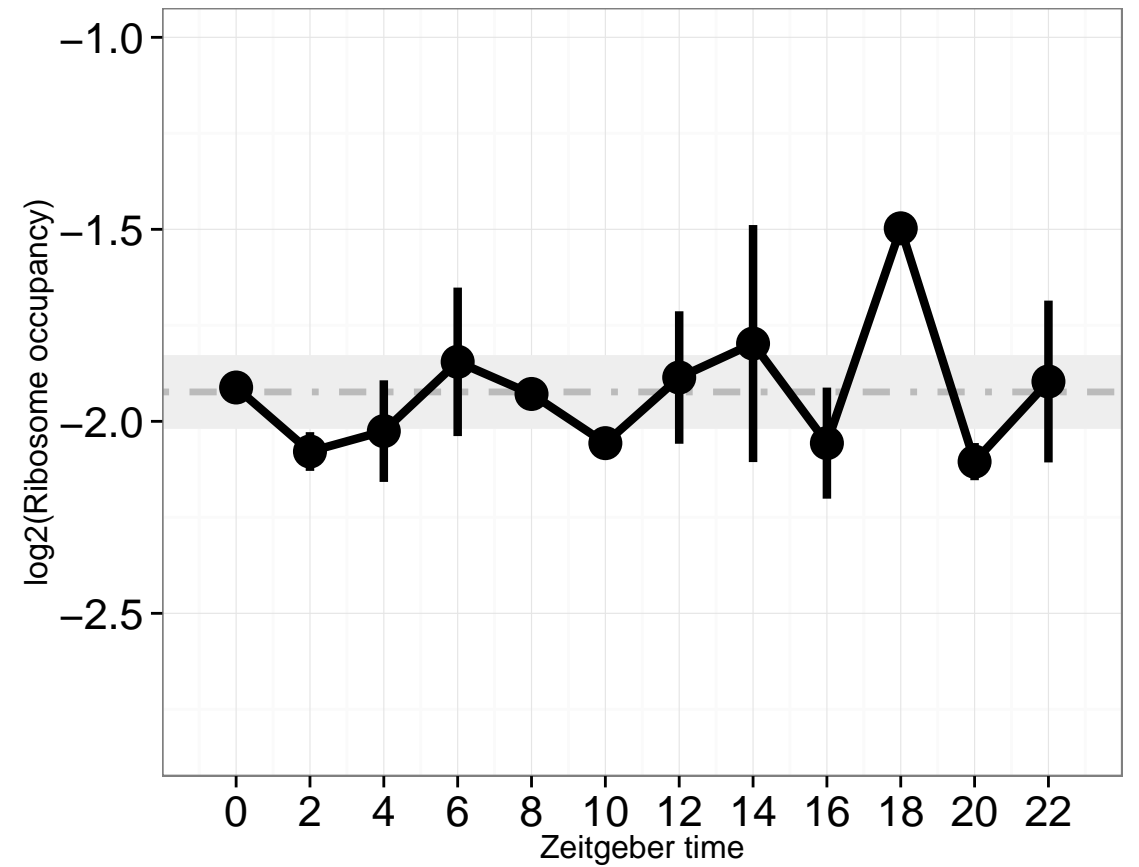

Supplement: Supplementary file 12392 [file 1]

# Ppap2b

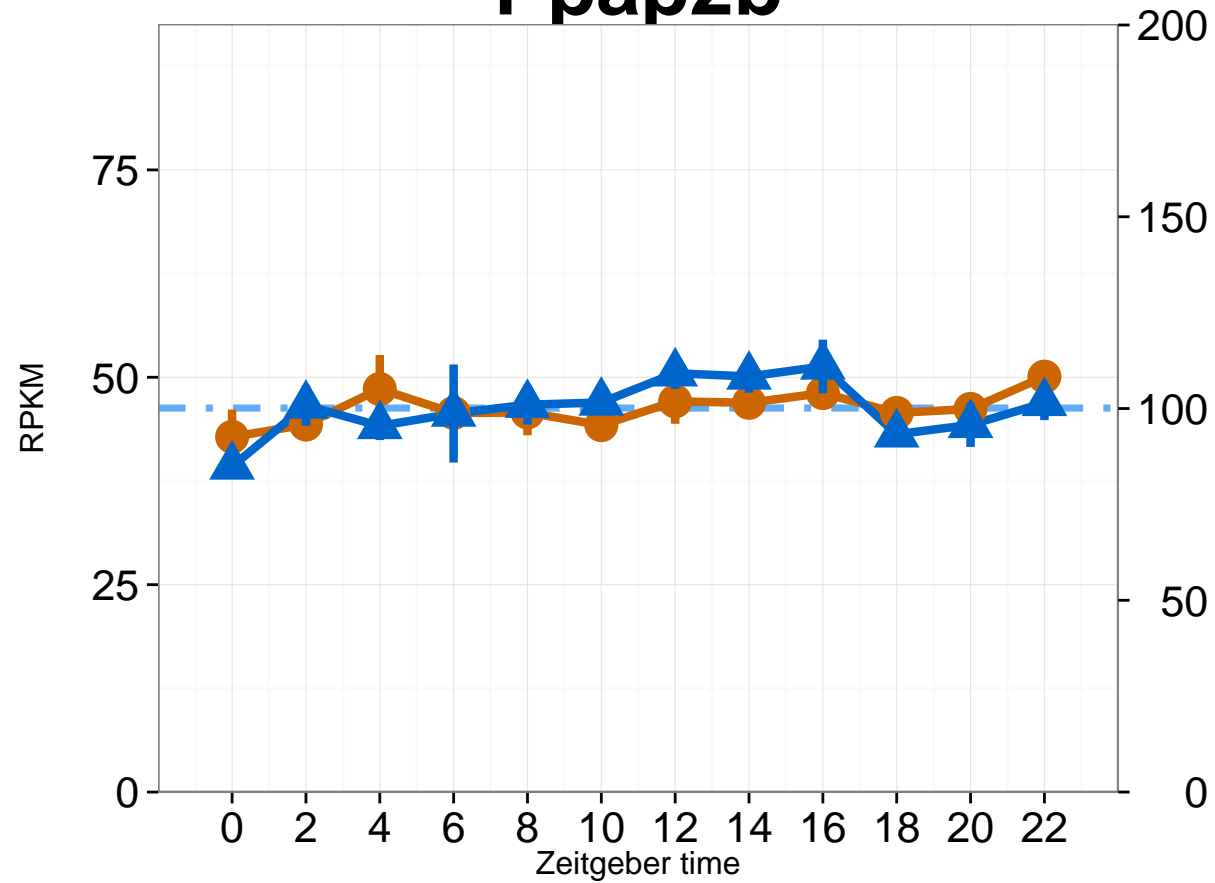

# Ppap2b

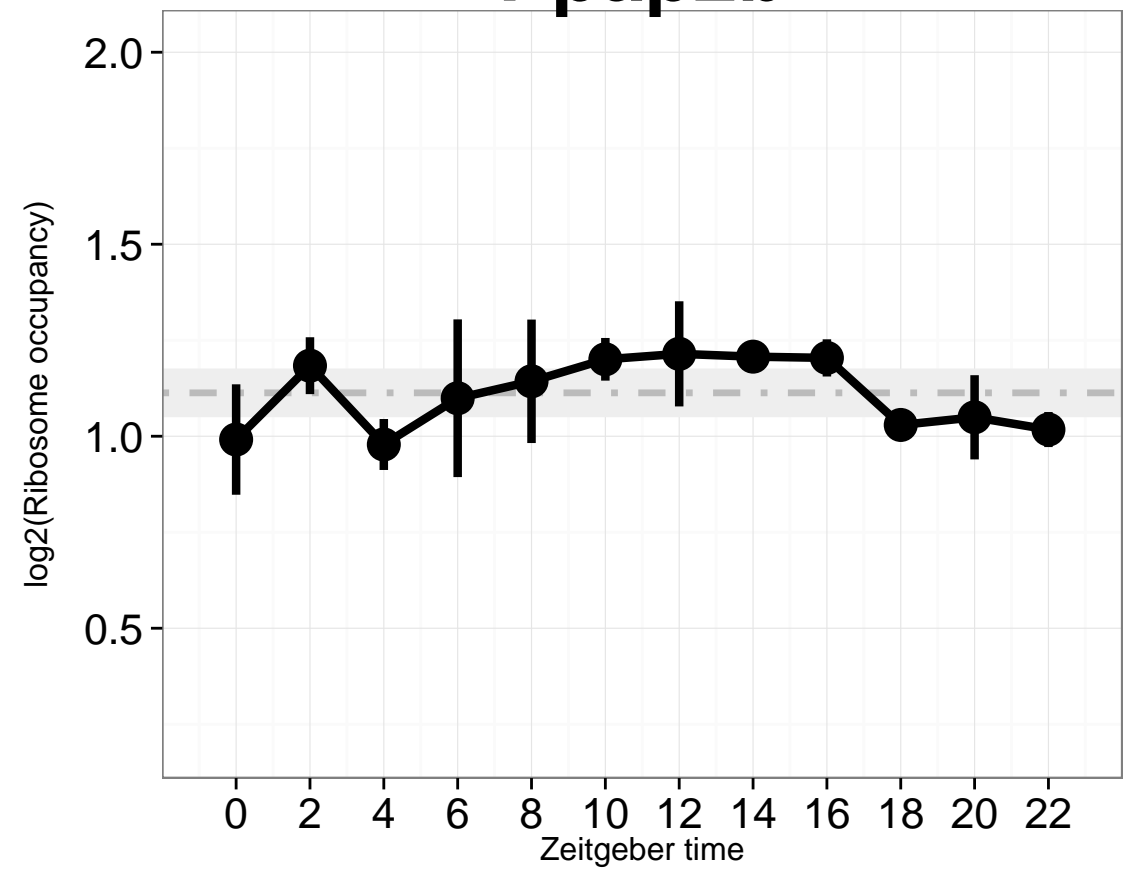

Supplement: Supplementary file 12393 [file 1]

## Lias

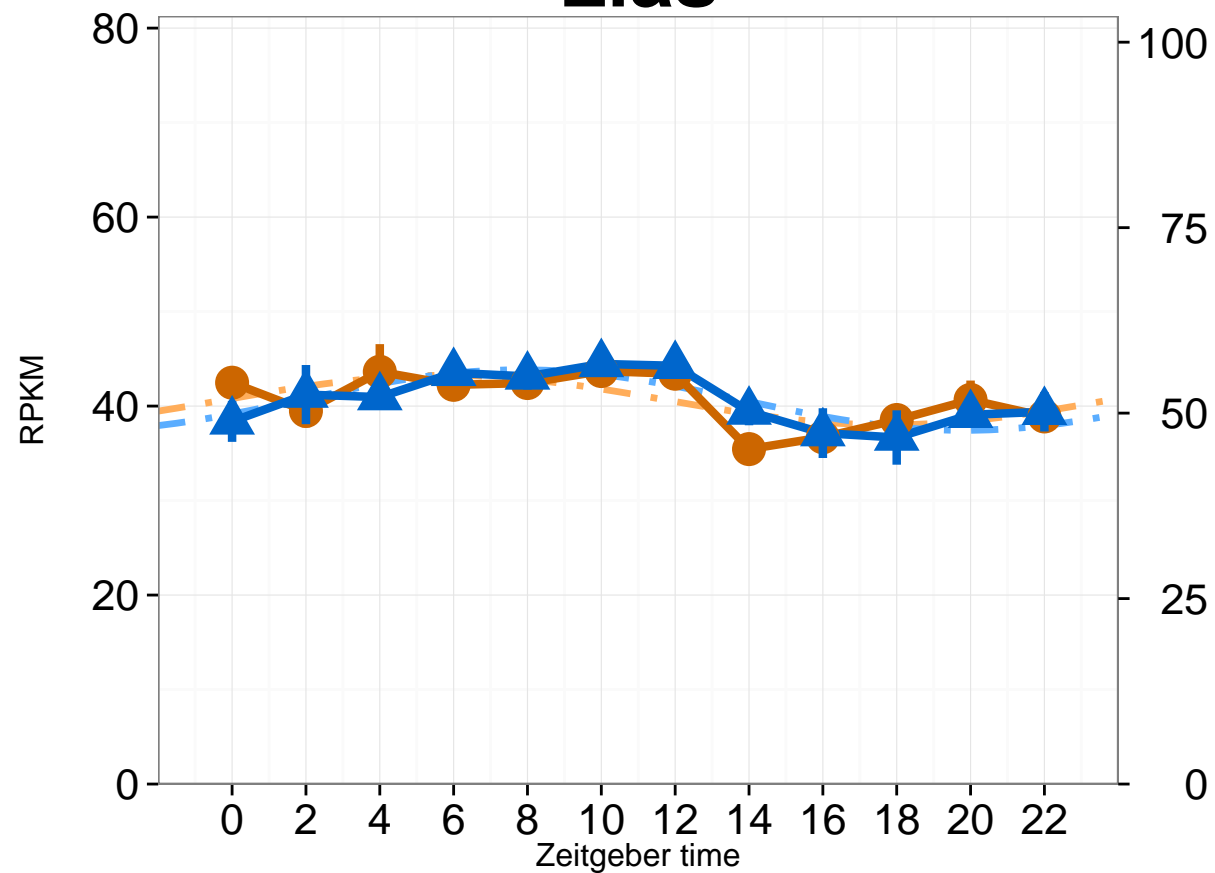

## Lias

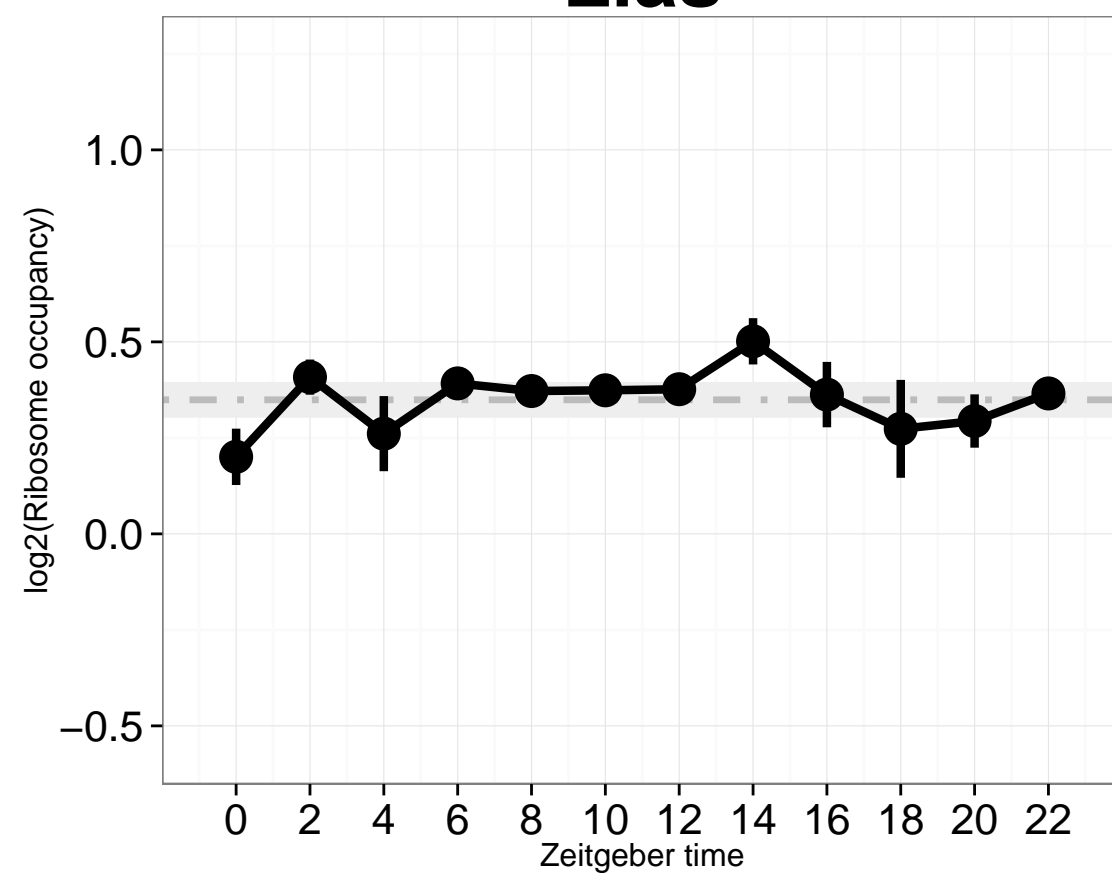

Supplement: Supplementary file 12394 [file 1]

# Arfgef1

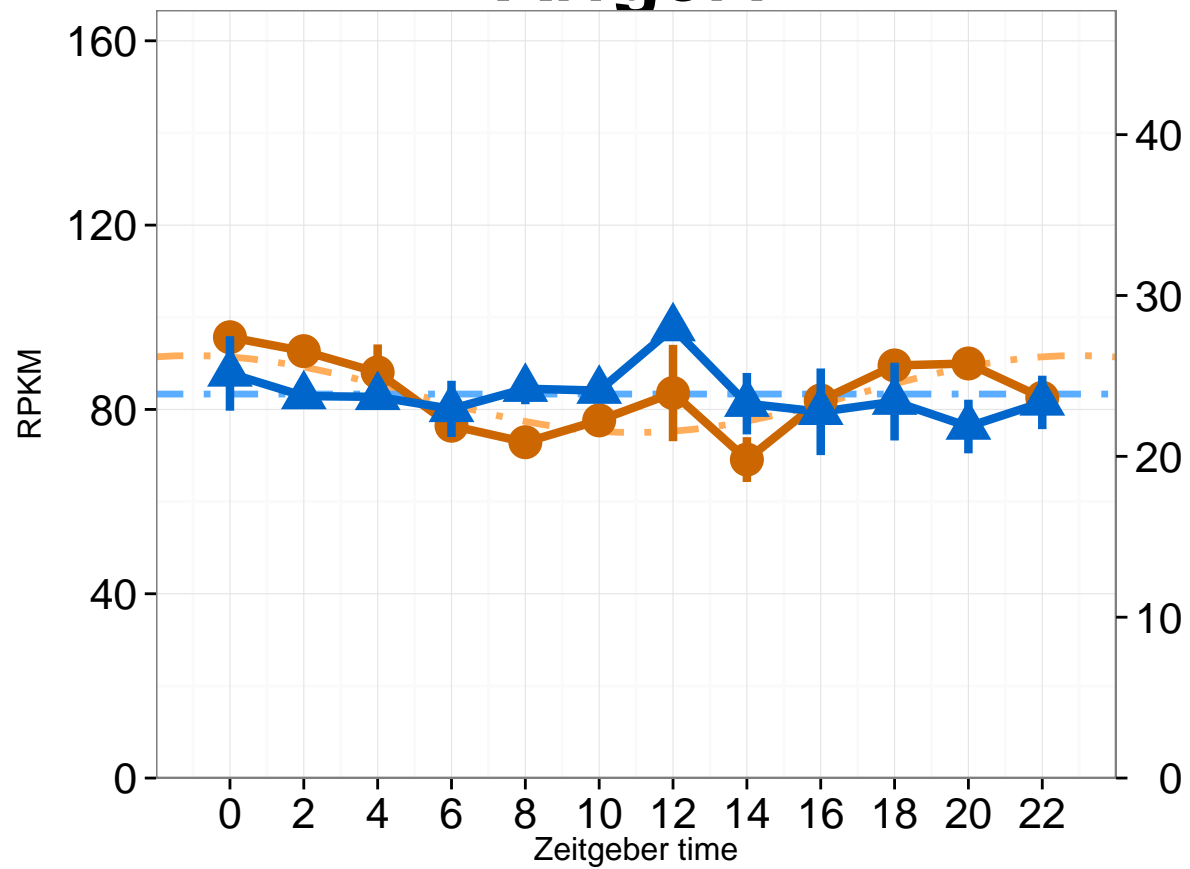

# Arfgef1

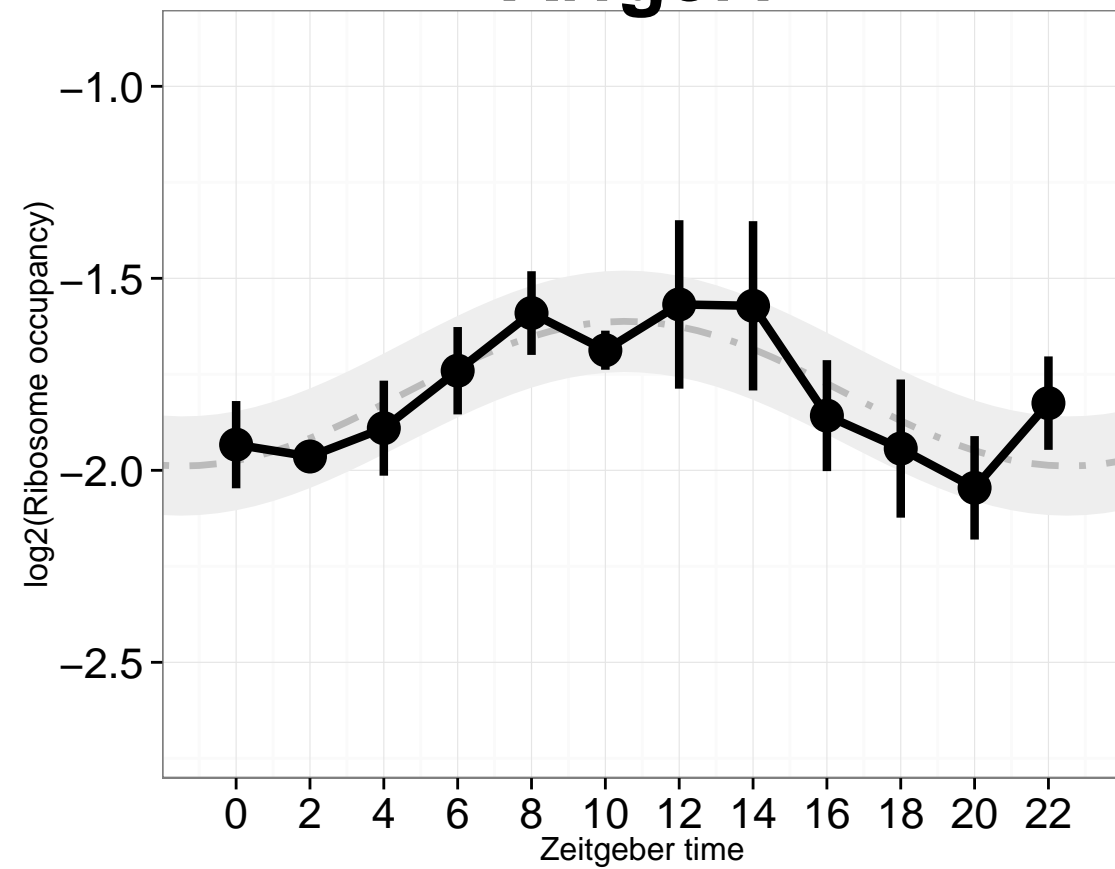

Supplement: Supplementary file 12395 [file 1]

## Rnf6

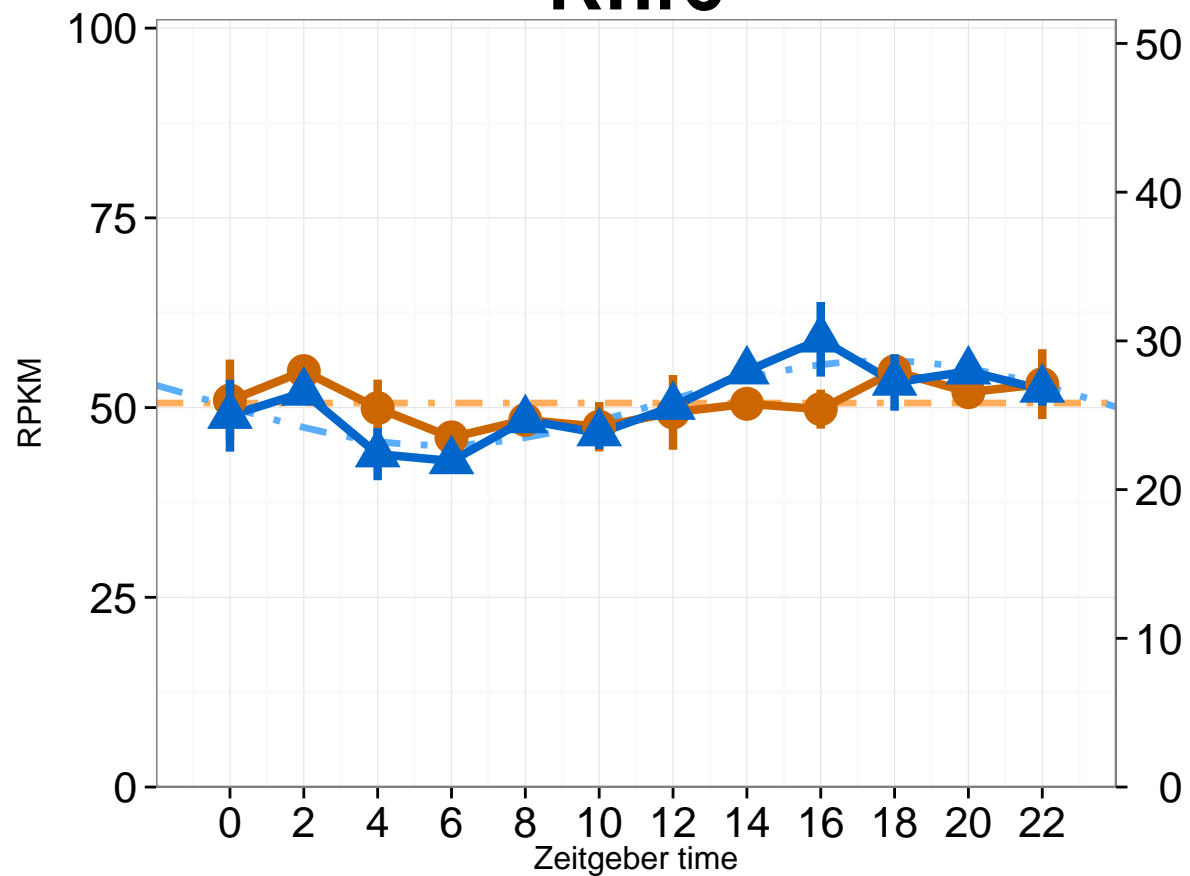

## Rnf6

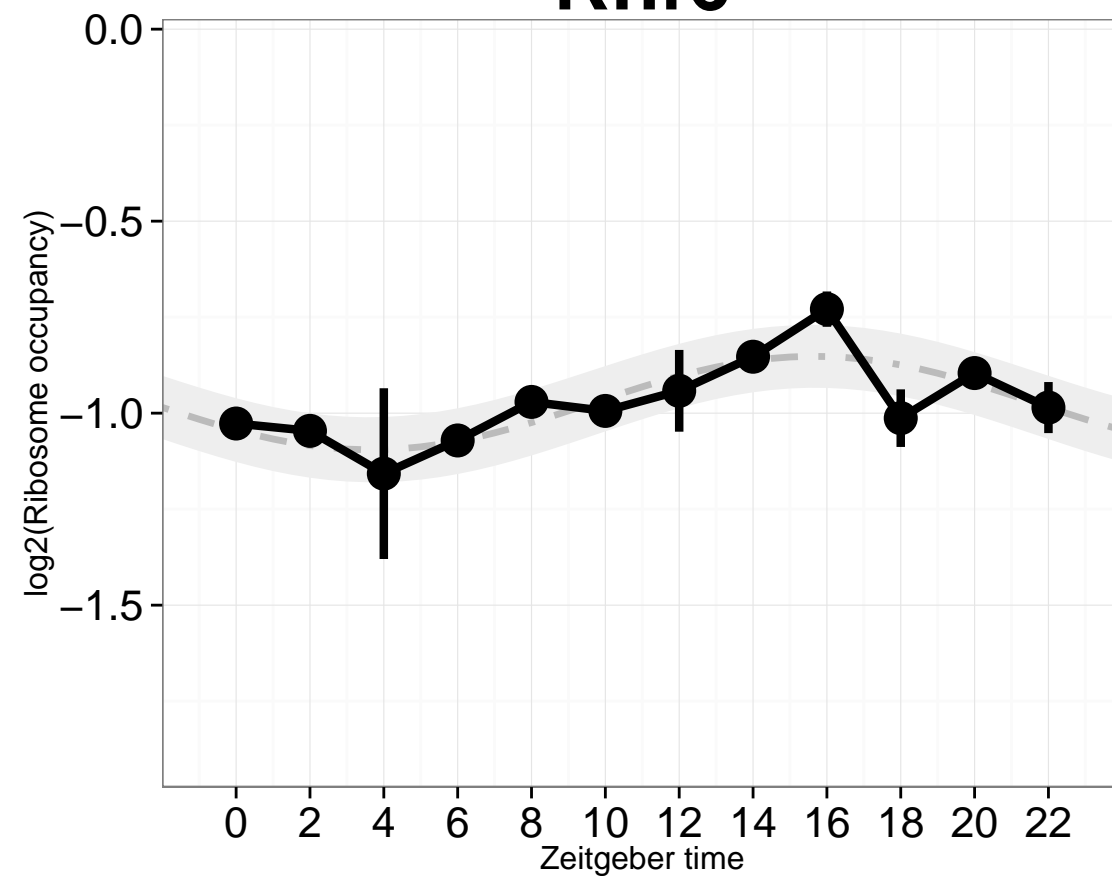

Supplement: Supplementary file 12396 [file 1]

Scamp1

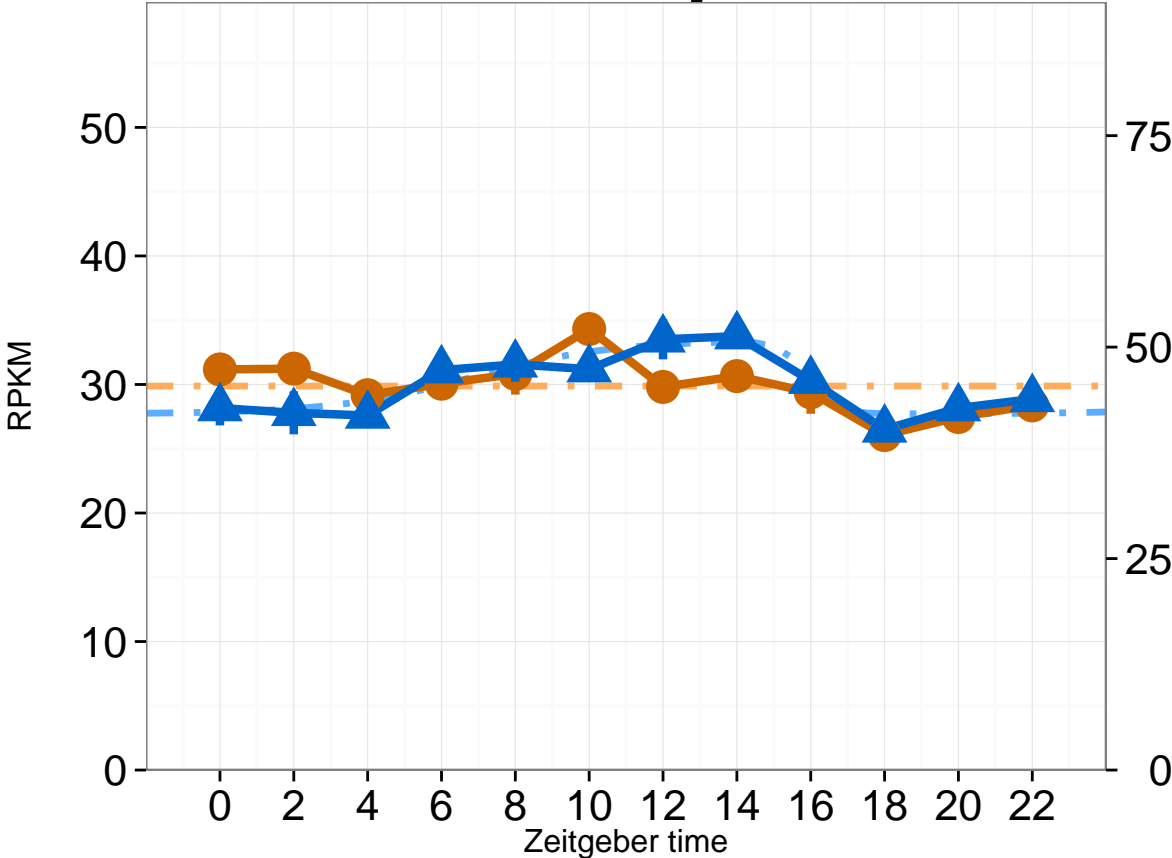

Scamp1

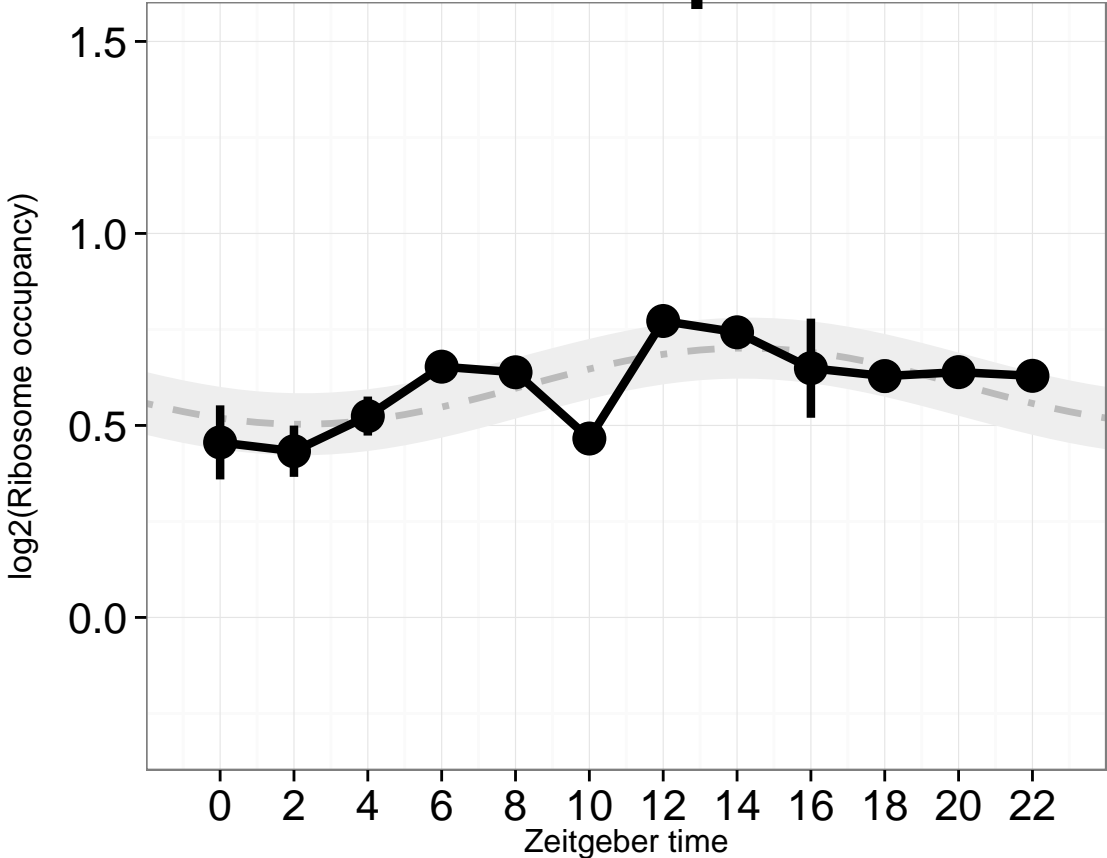

Supplement: Supplementary file 12397 [file 1]

# Tnfrsf10b

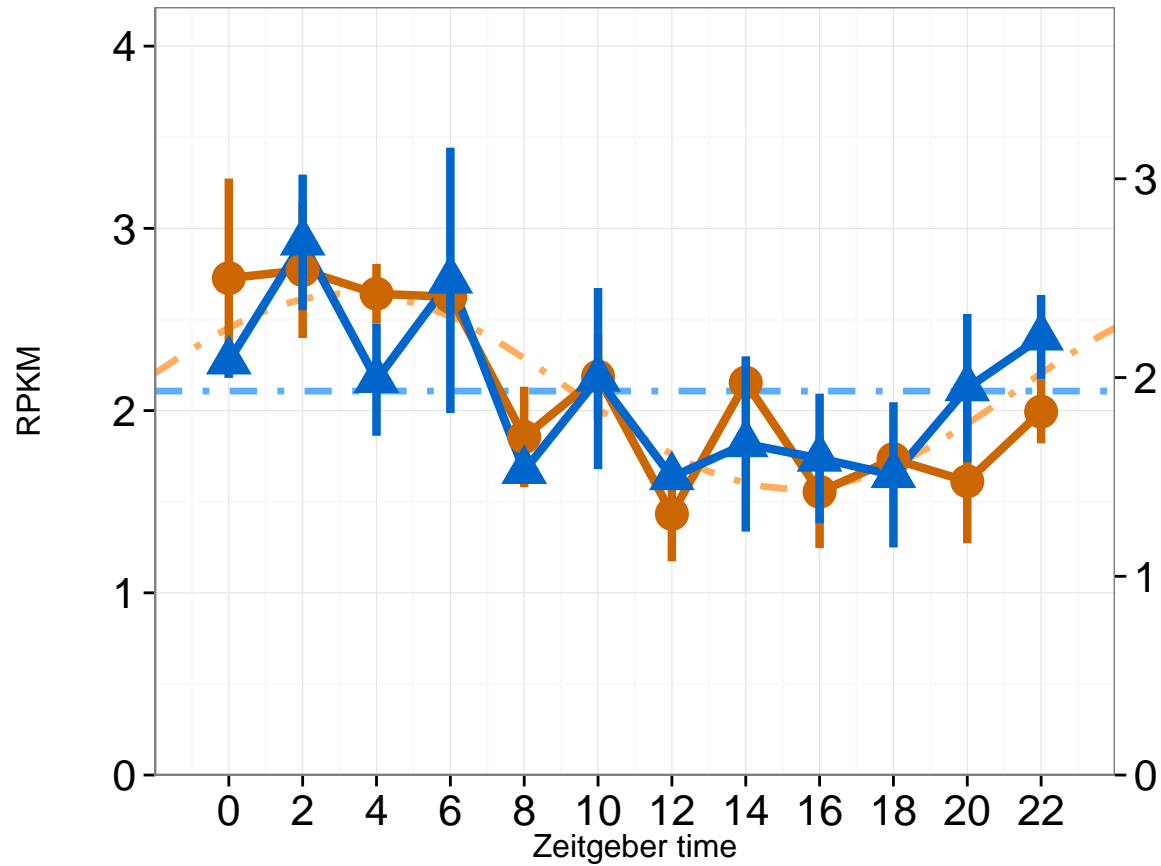

# Tnfrsf10b

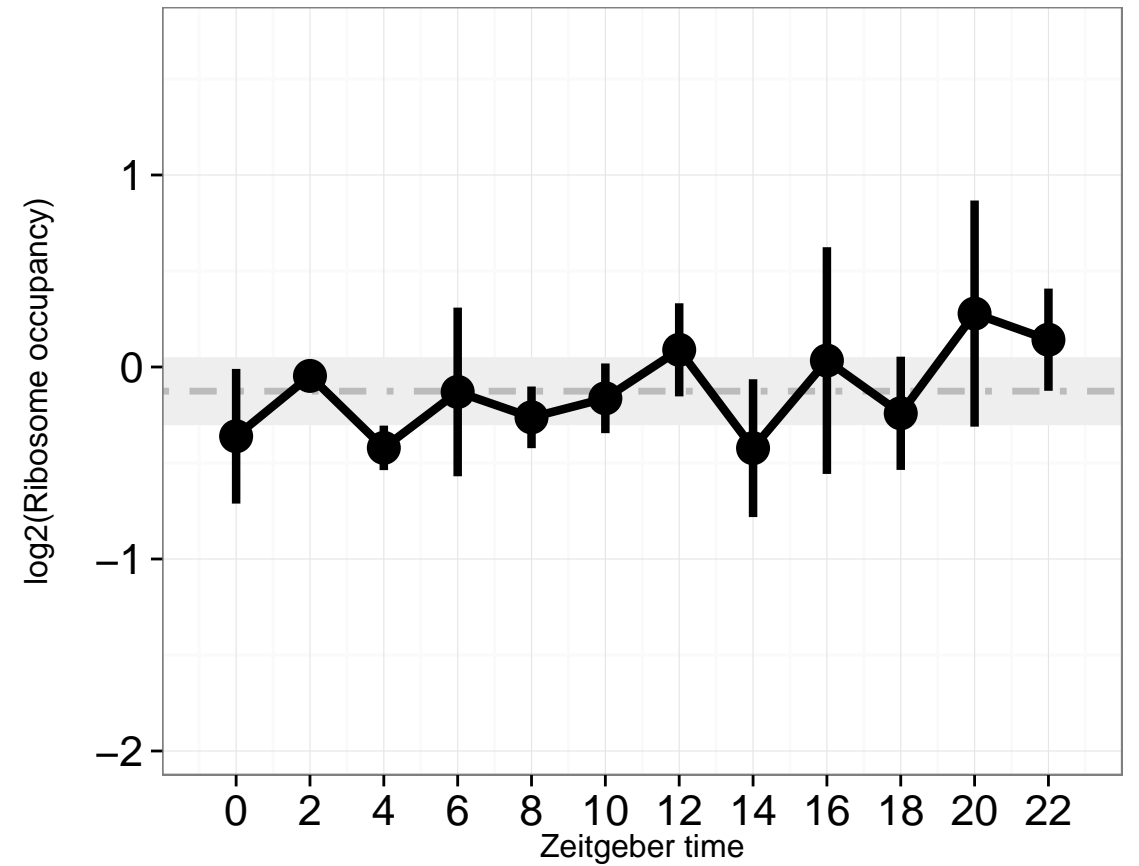

Supplement: Supplementary file 12398 [file 1]

# Cnn3

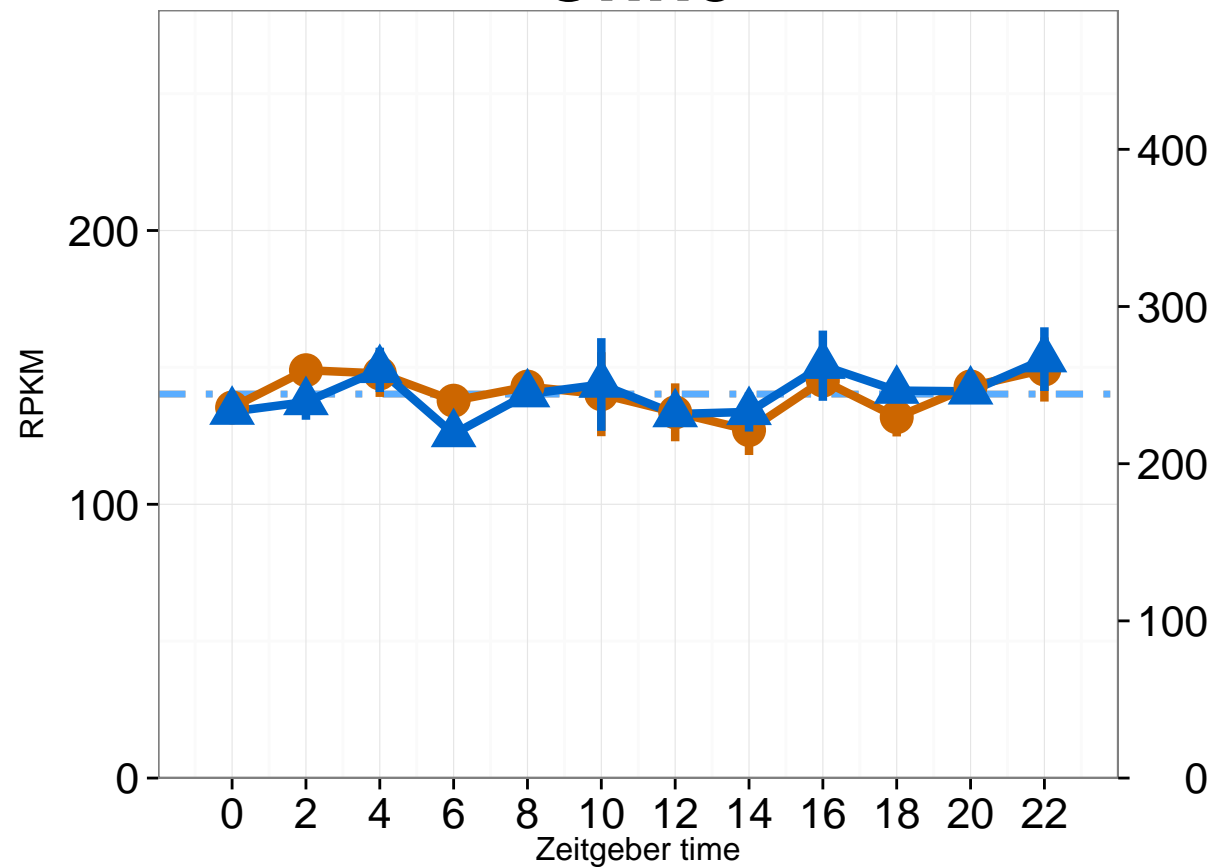

# Cnn3

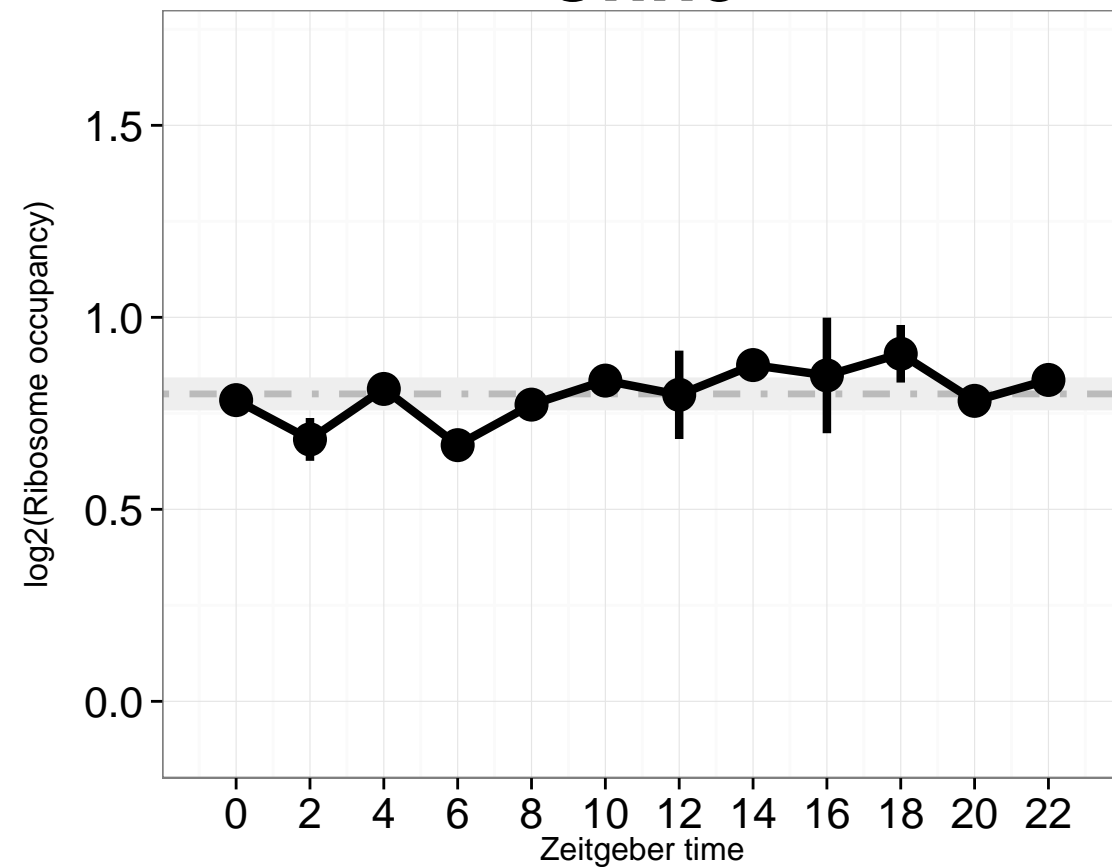

Supplement: Supplementary file 12399 [file 1]

## March6

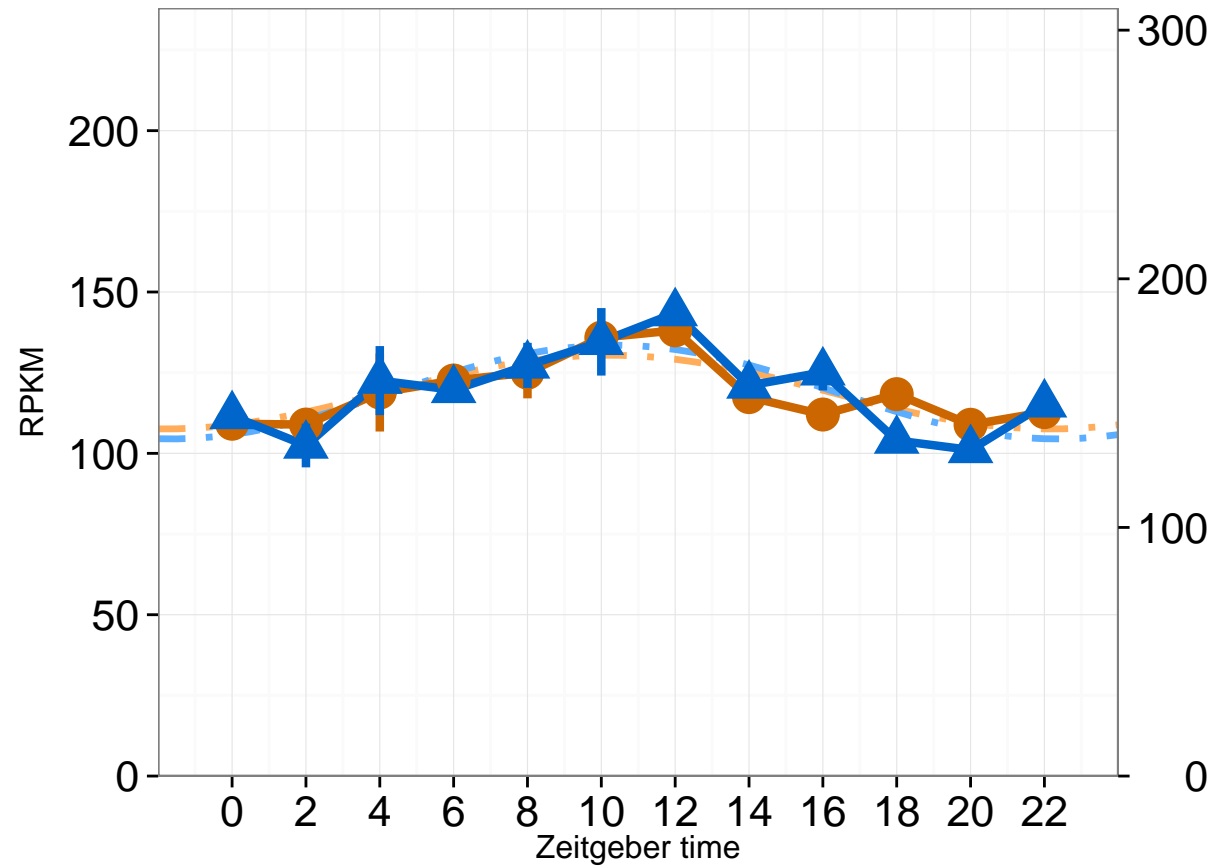

## March6

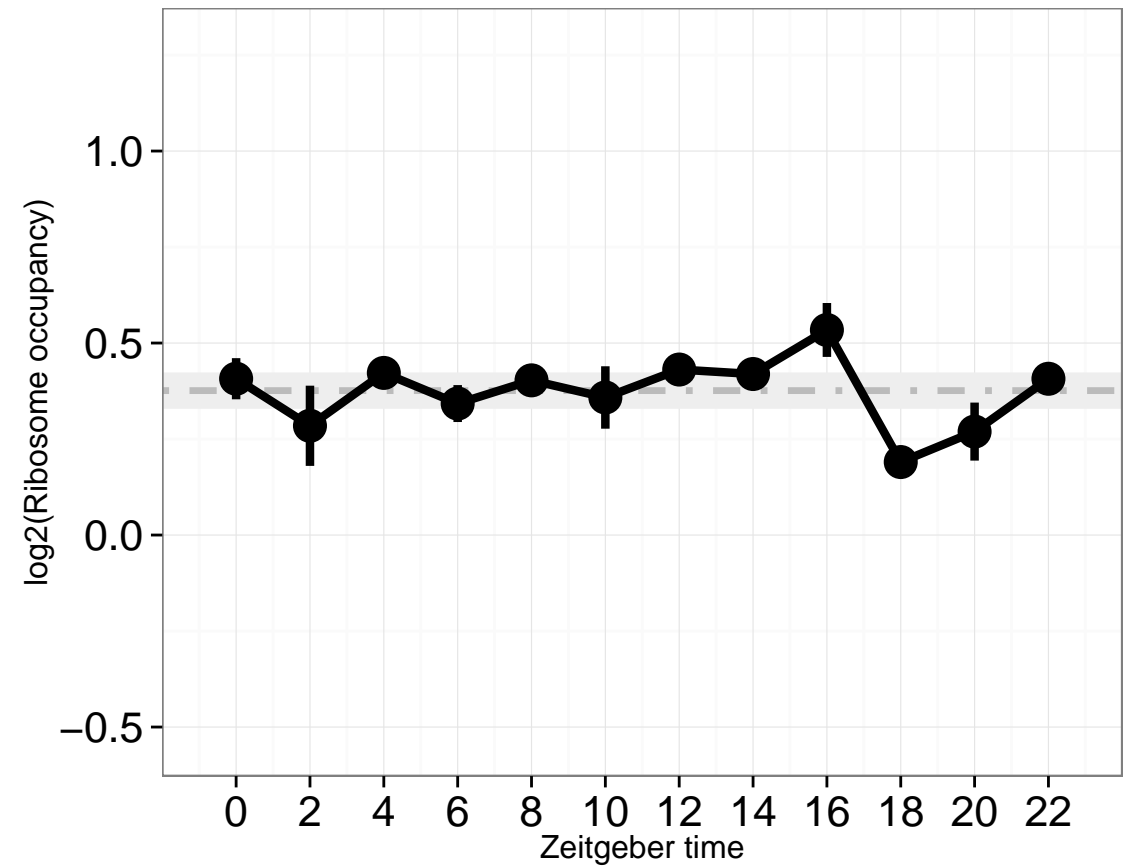

Supplement: Supplementary file 12400 [file 1]

# Selenbp1

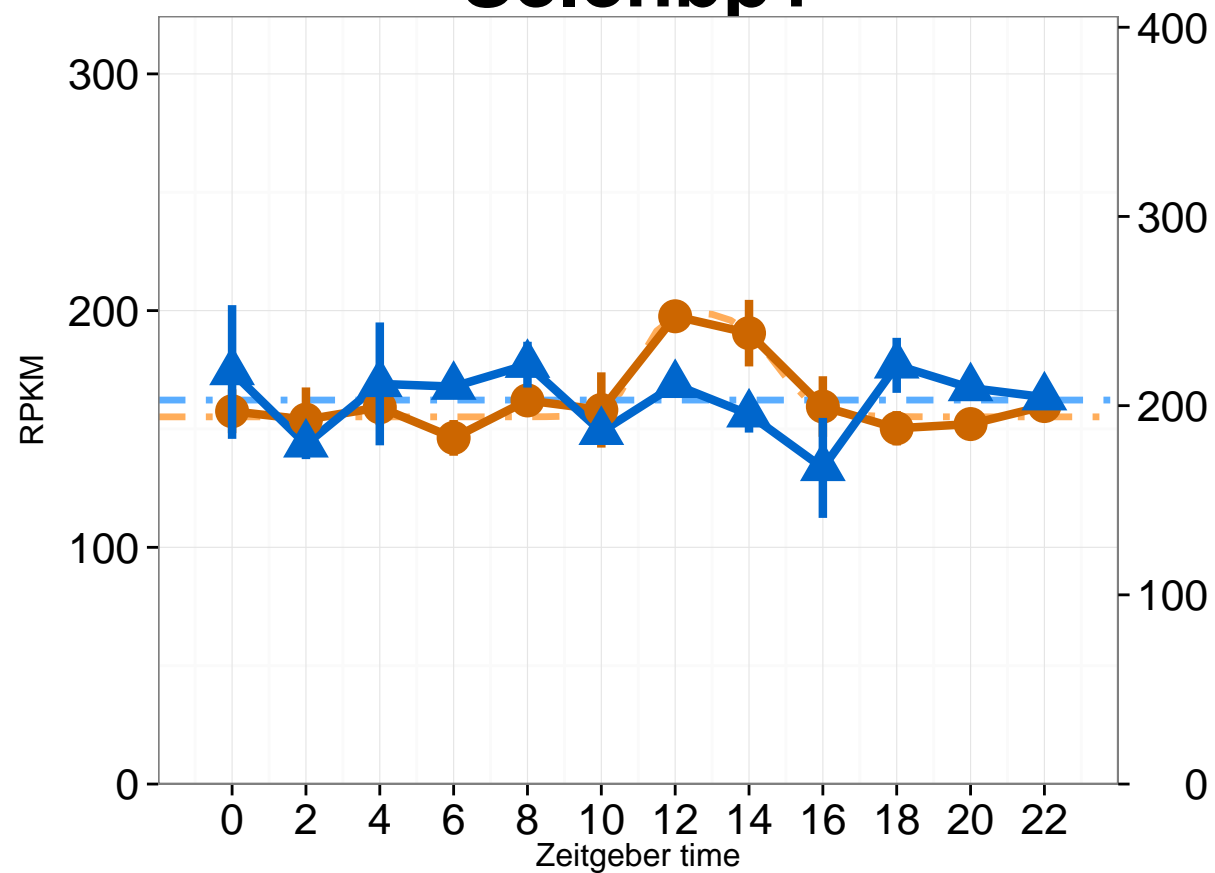

# Selenbp1

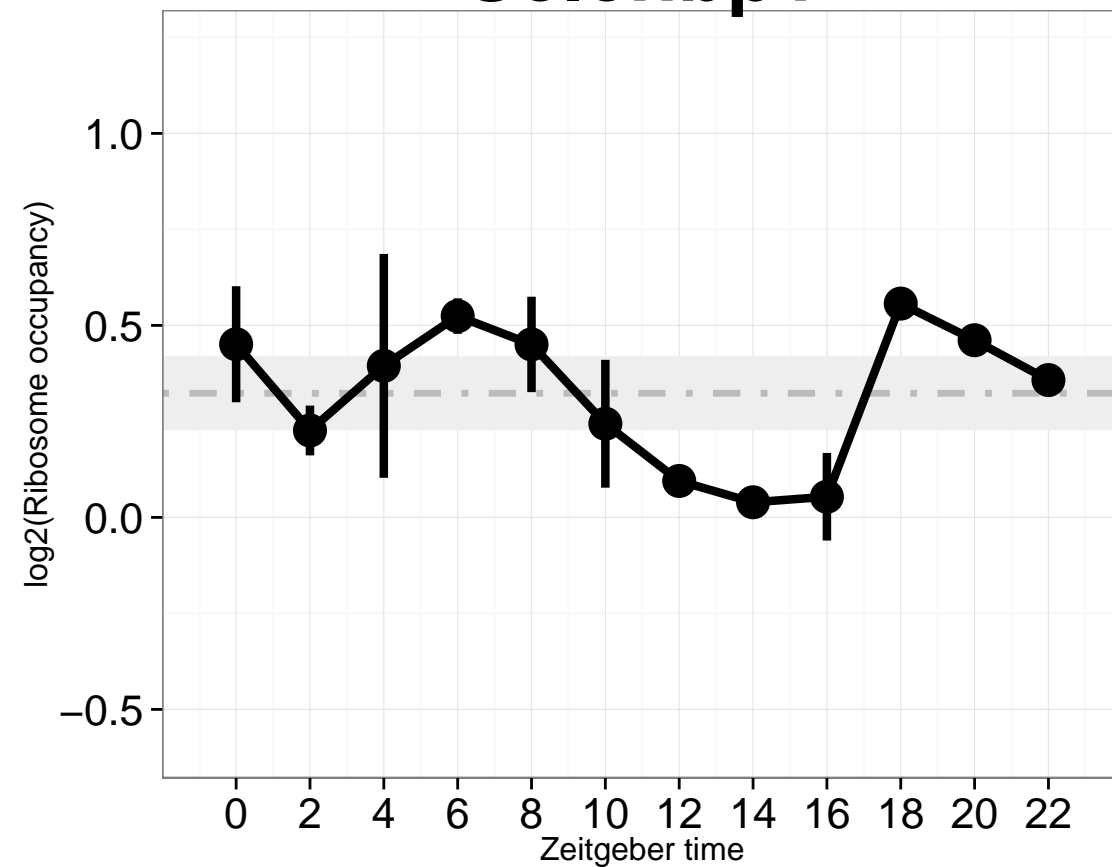

Supplement: Supplementary file 12401 [file 1]

## Slitrk4

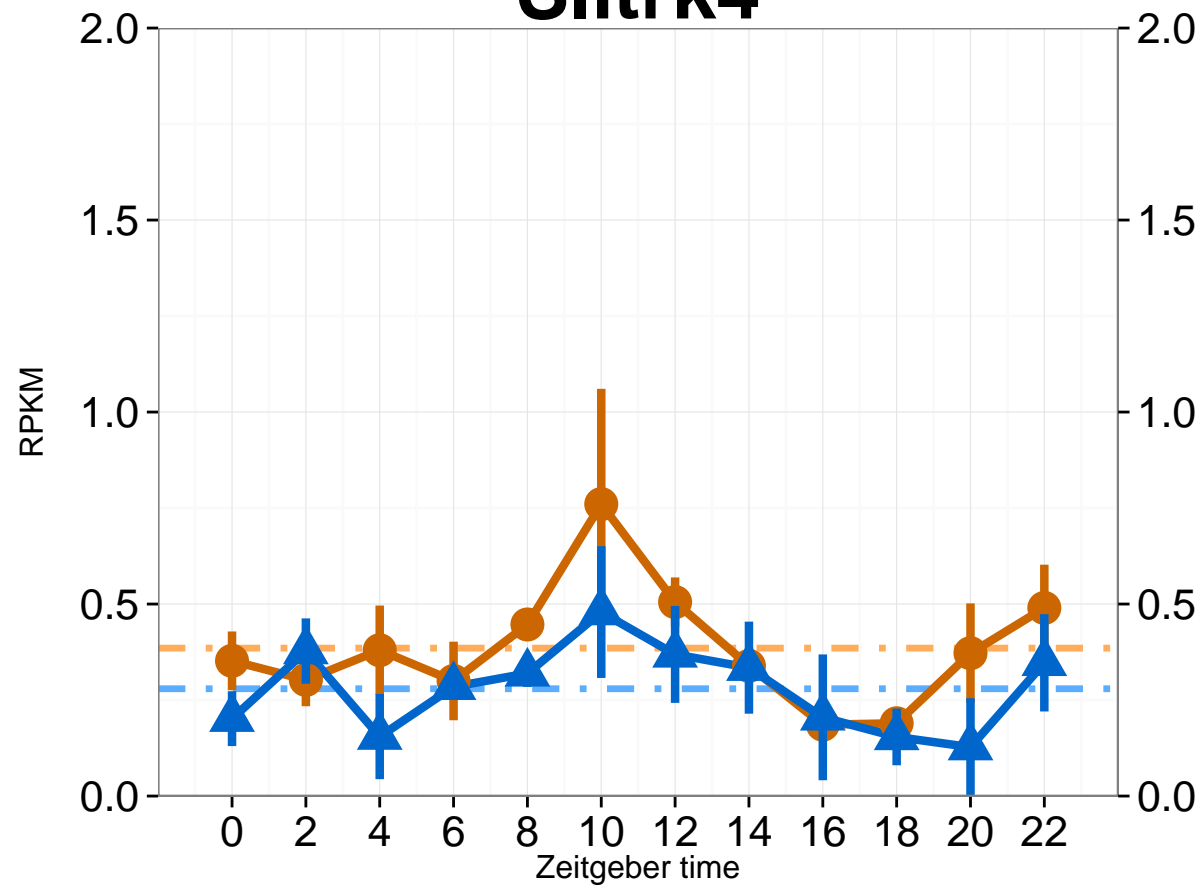

## Slitrk4

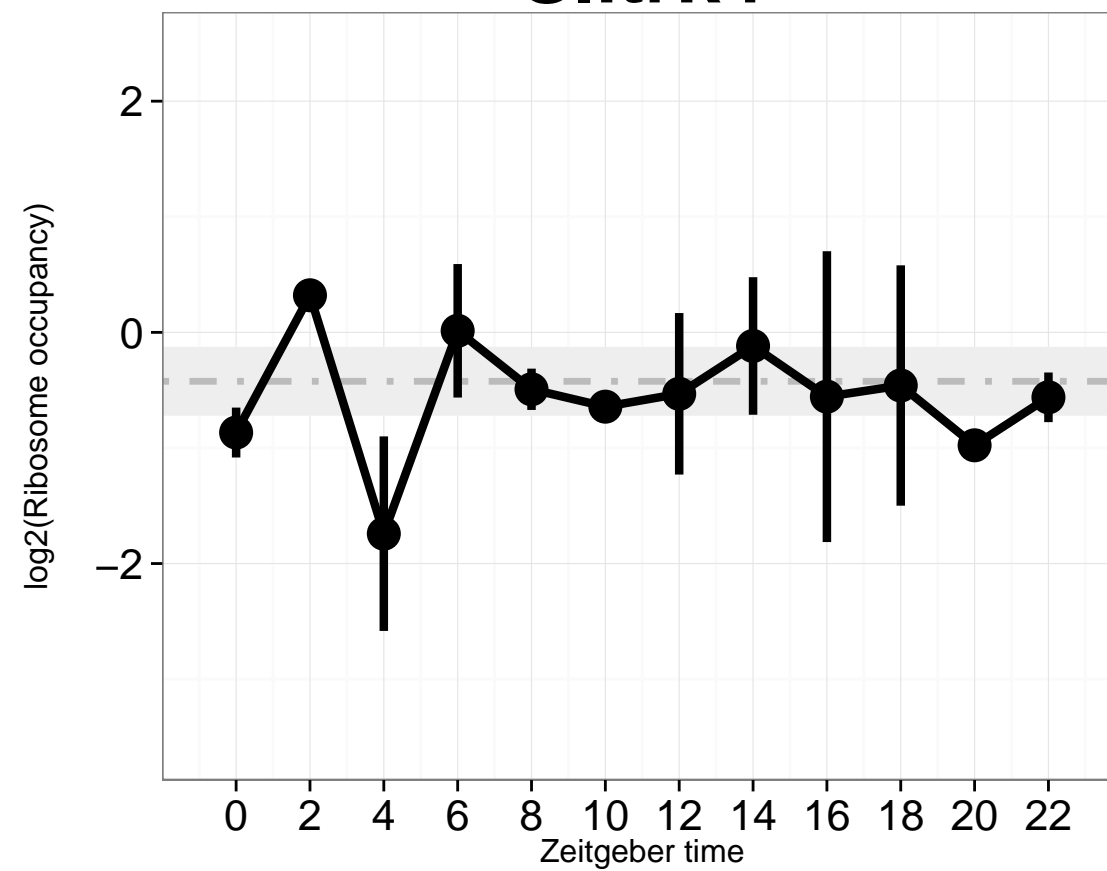

Supplement: Supplementary file 12402 [file 1]

## Ube2j1

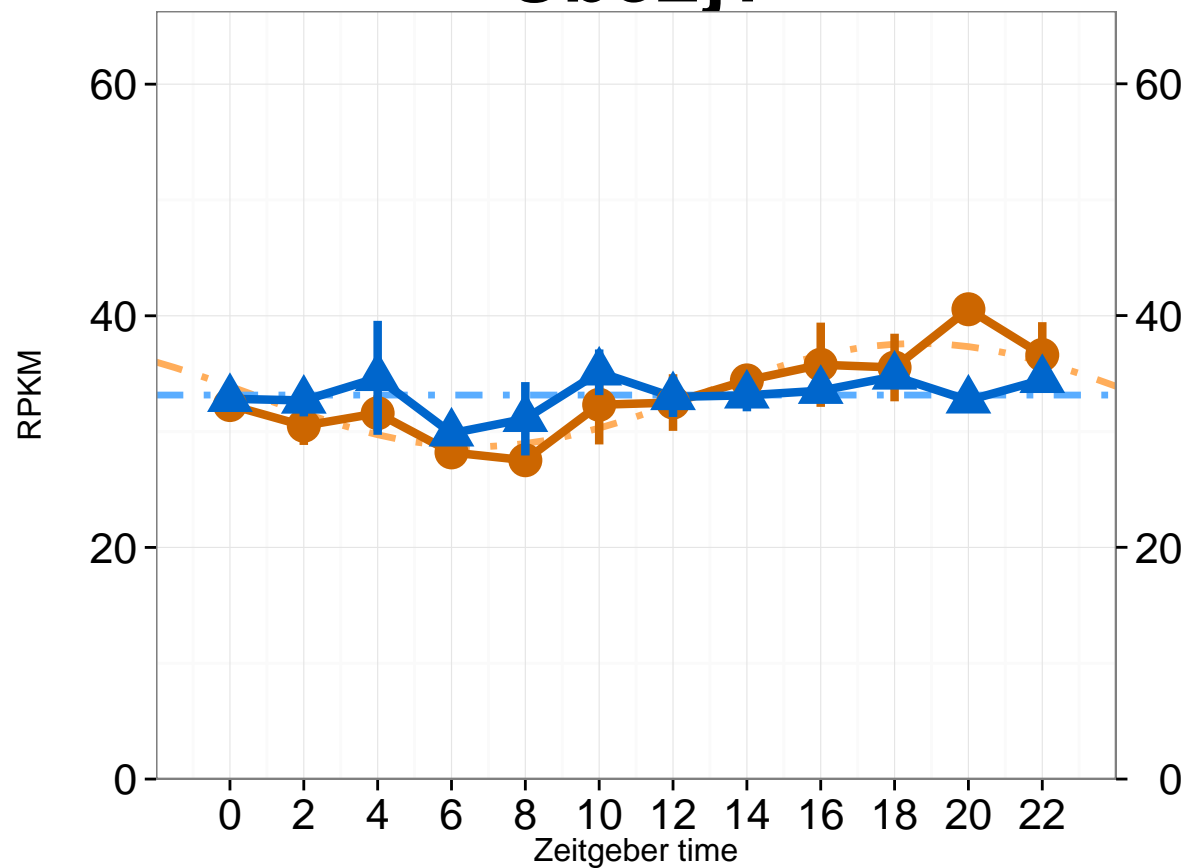

## Ube2j1

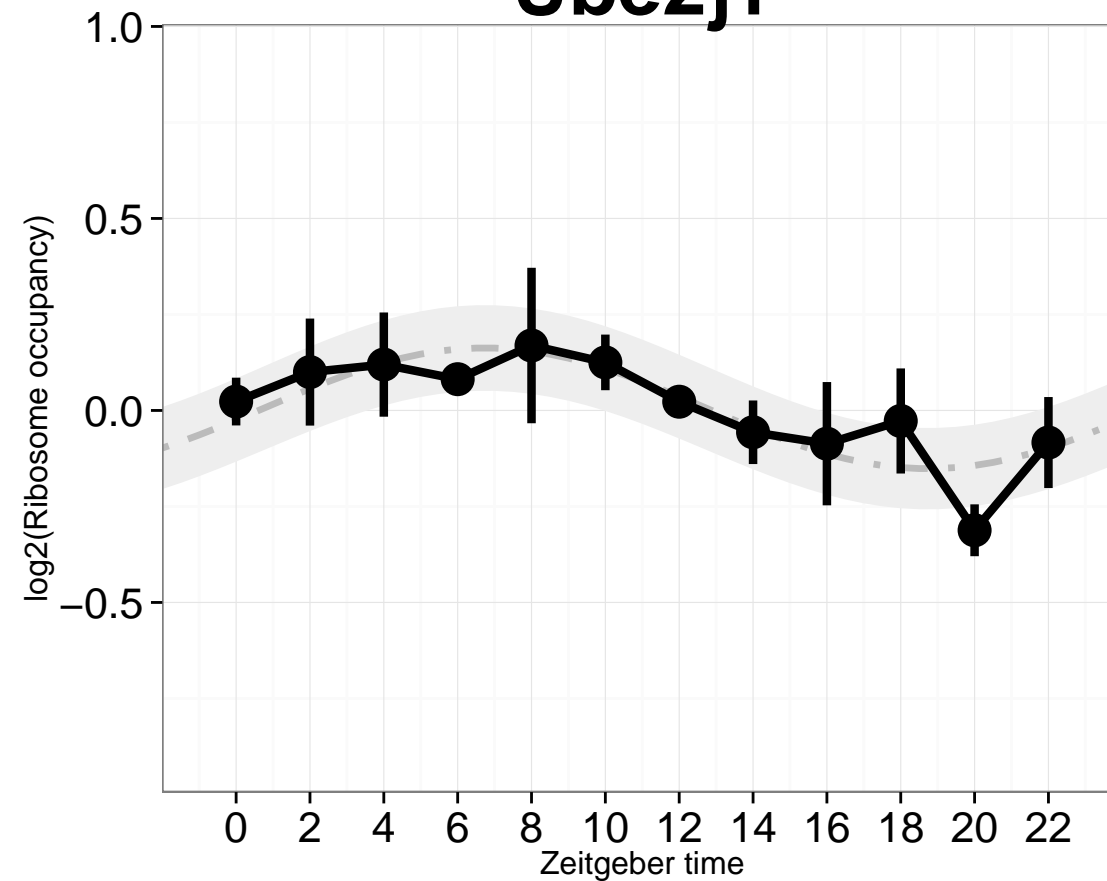

Supplement: Supplementary file 12403 [file 1]

## Hnrrnpm

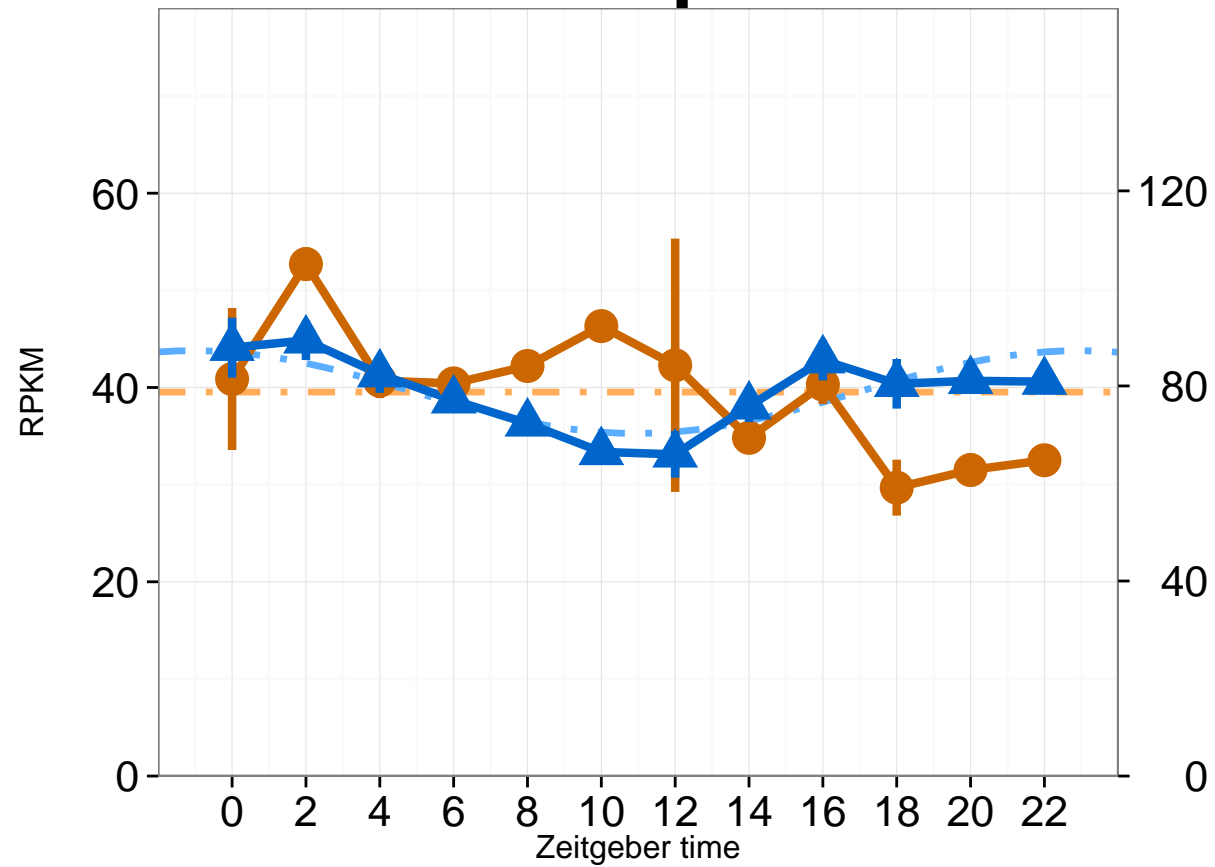

## Hnrrnpm

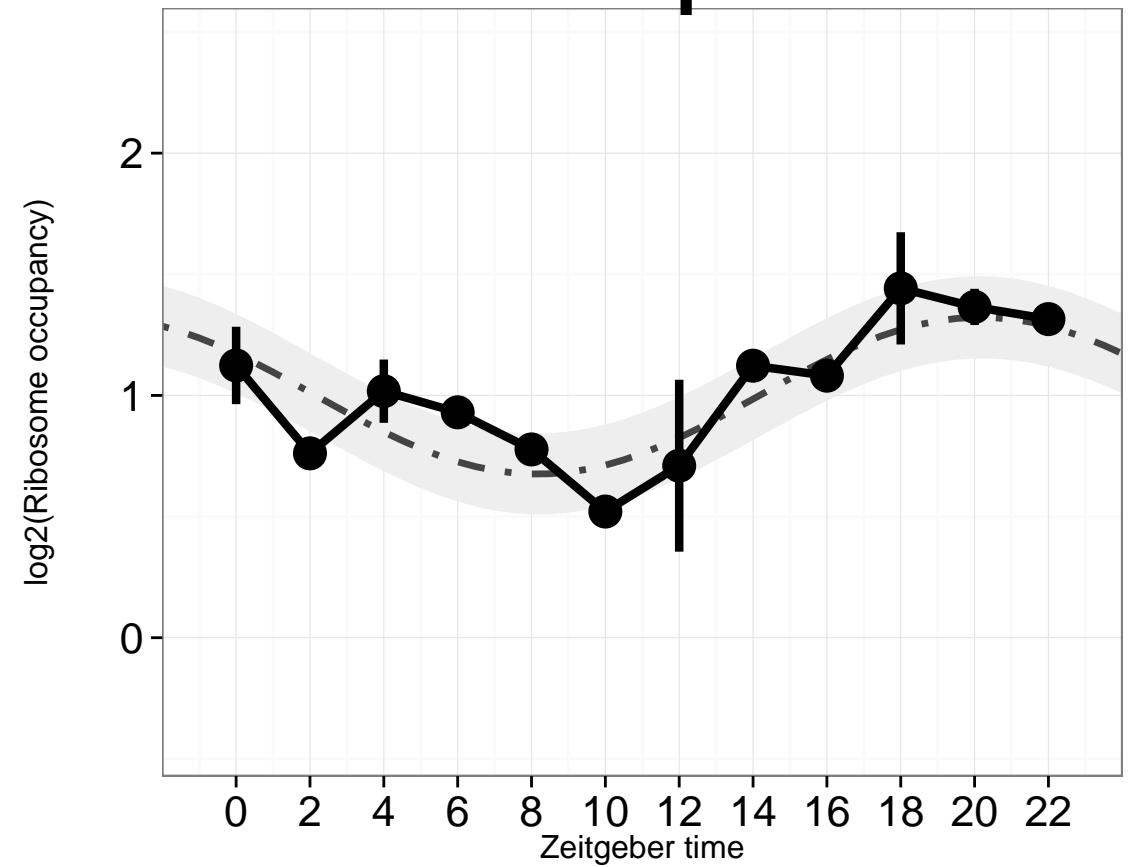

Supplement: Supplementary file 12404 [file 1]

# Enox1

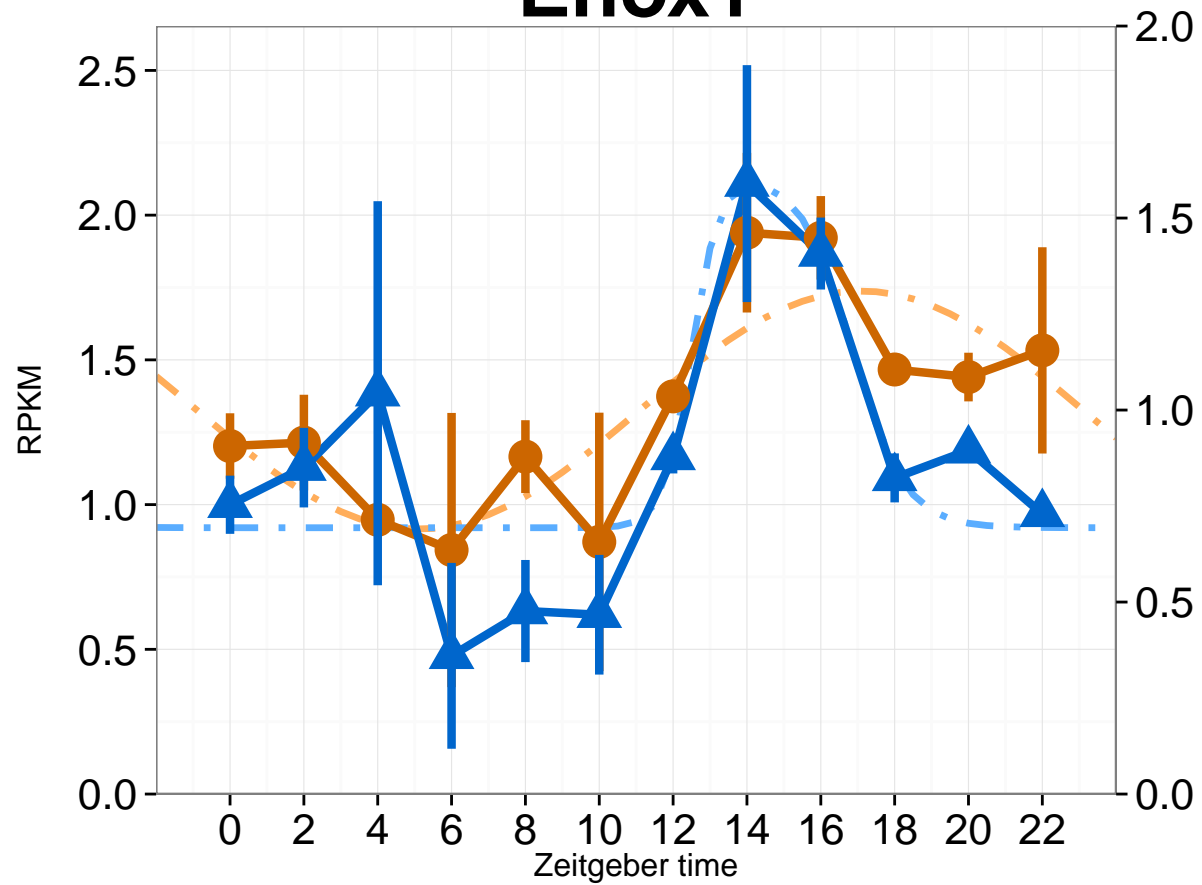

# Enox1

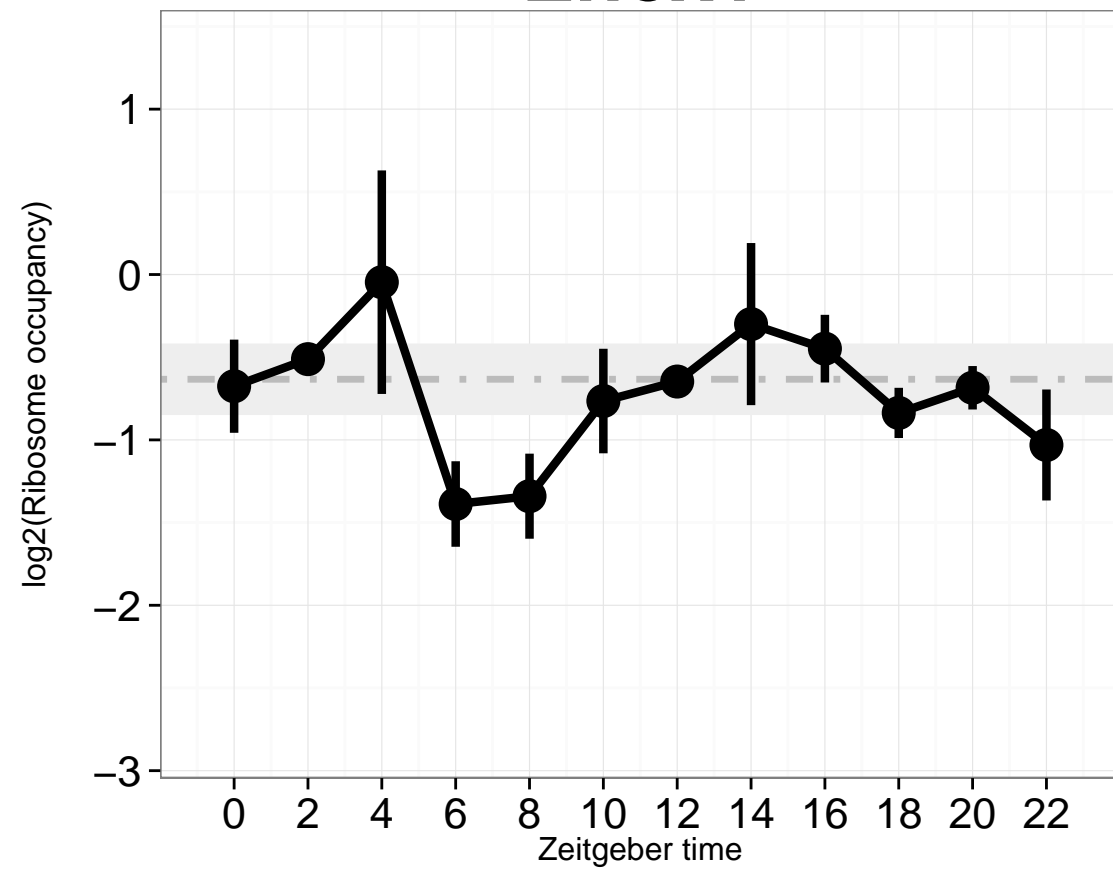

Supplement: Supplementary file 12405 [file 1]

## Aktip

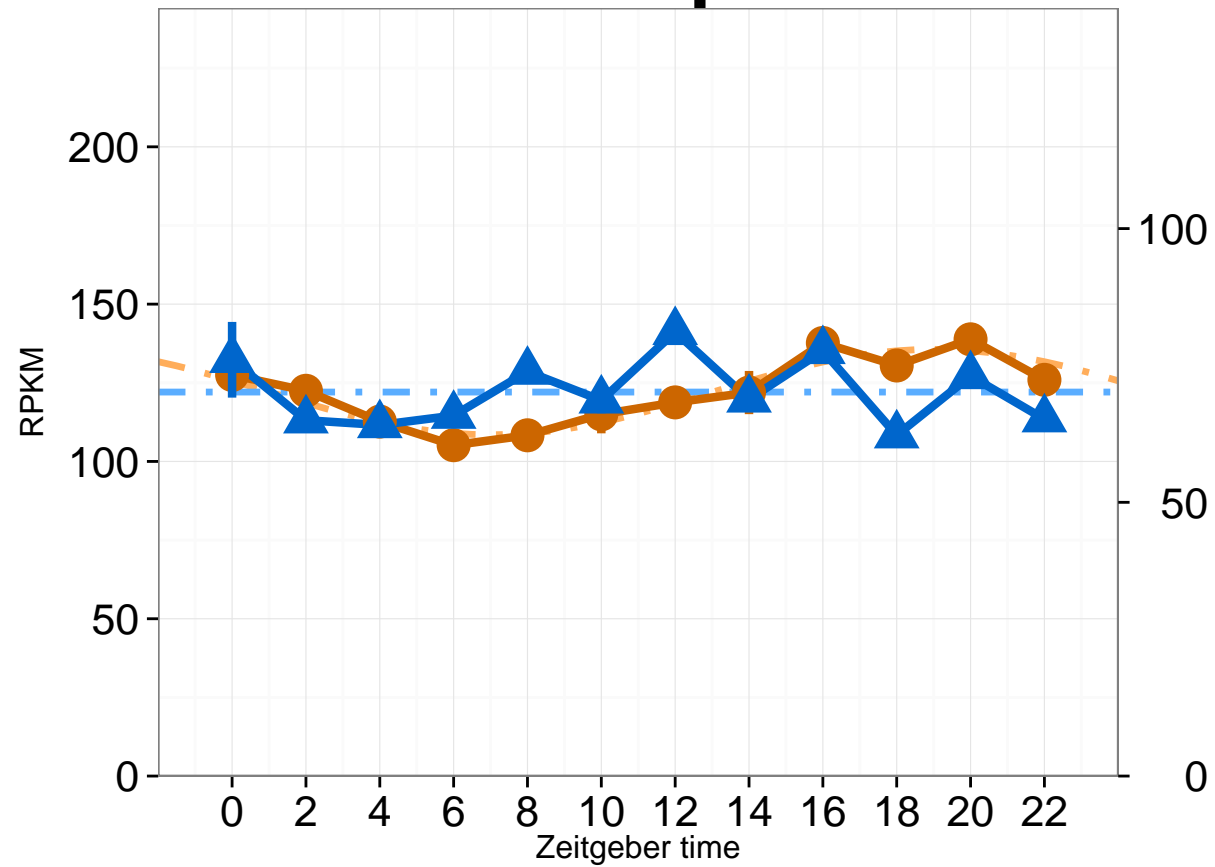

## Aktip

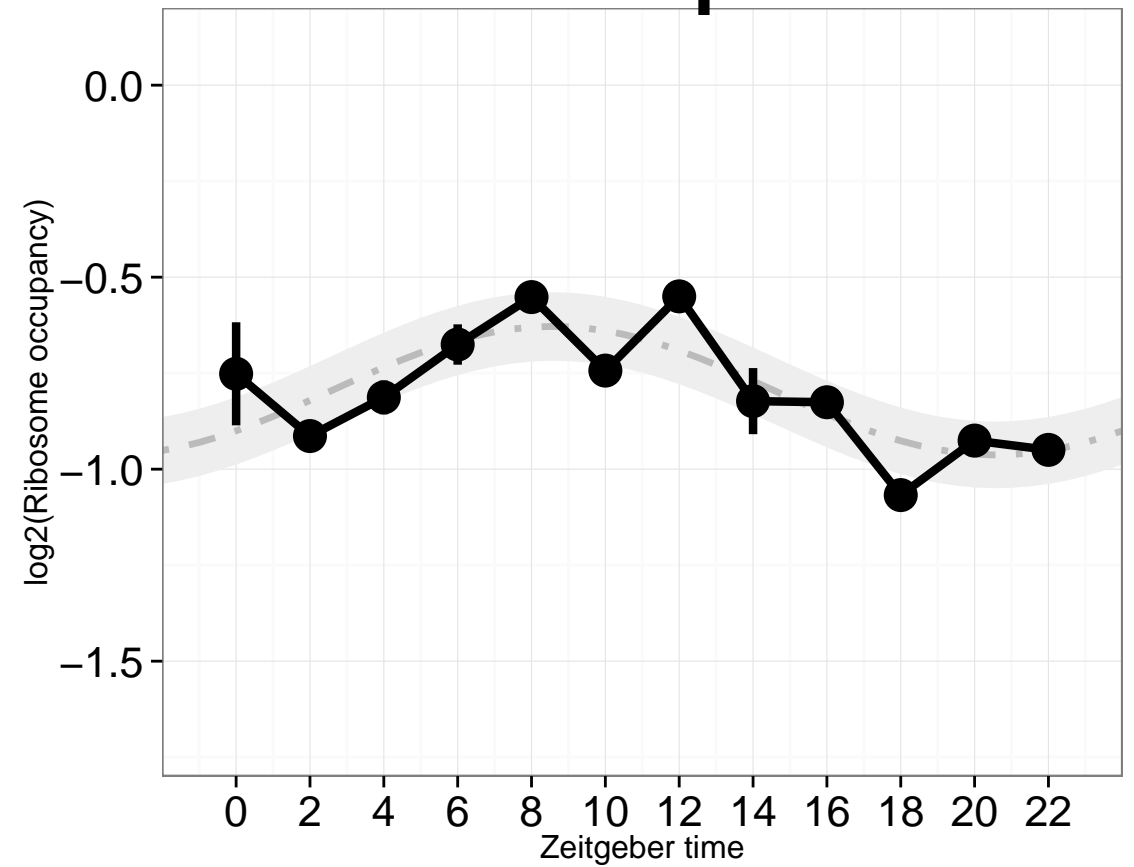

Supplement: Supplementary file 12406 [file 1]

# Sdad1

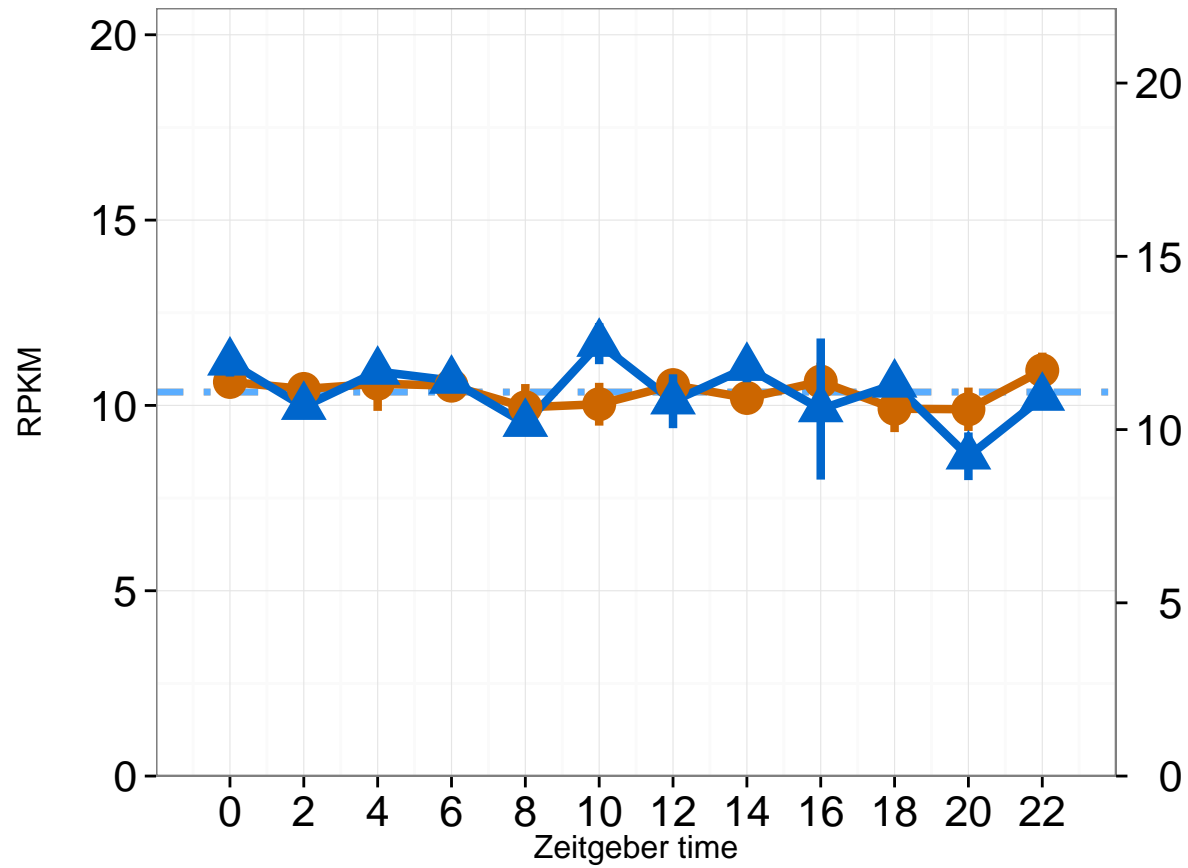

# Sdad1

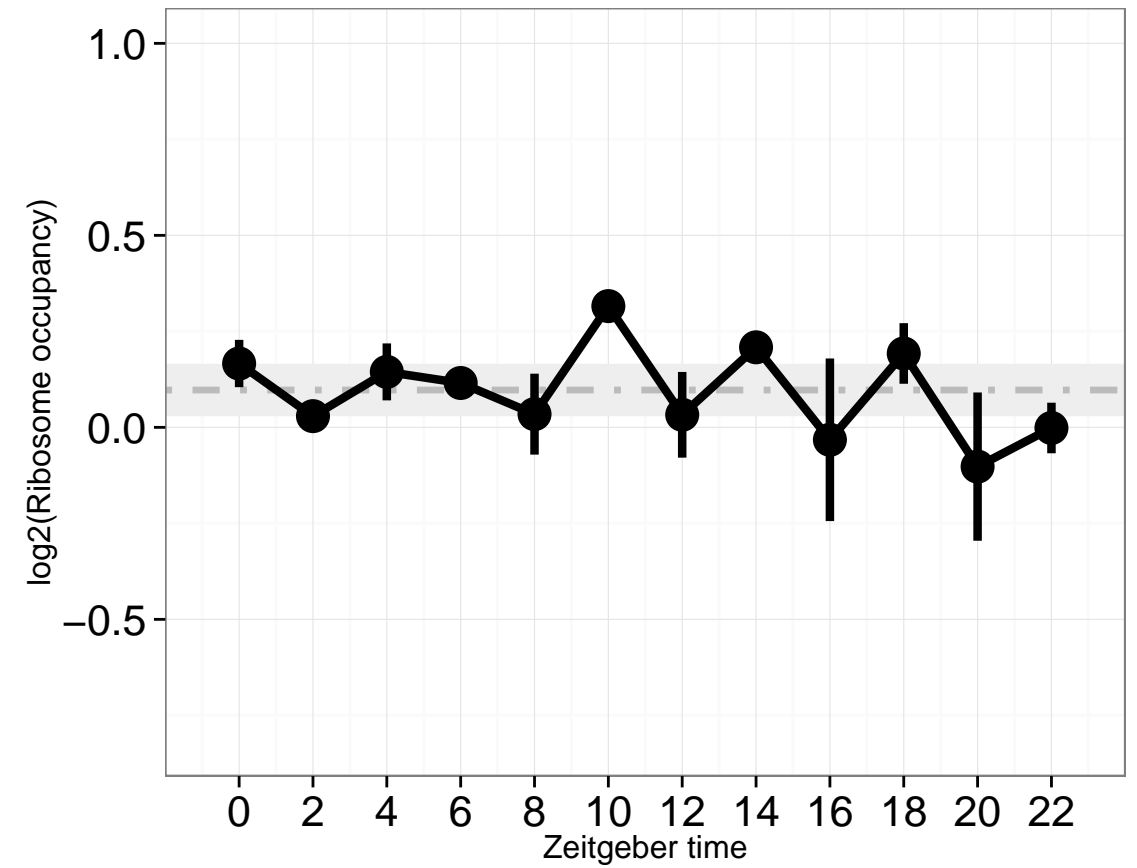

Supplement: Supplementary file 12407 [file 1]

## Tle2

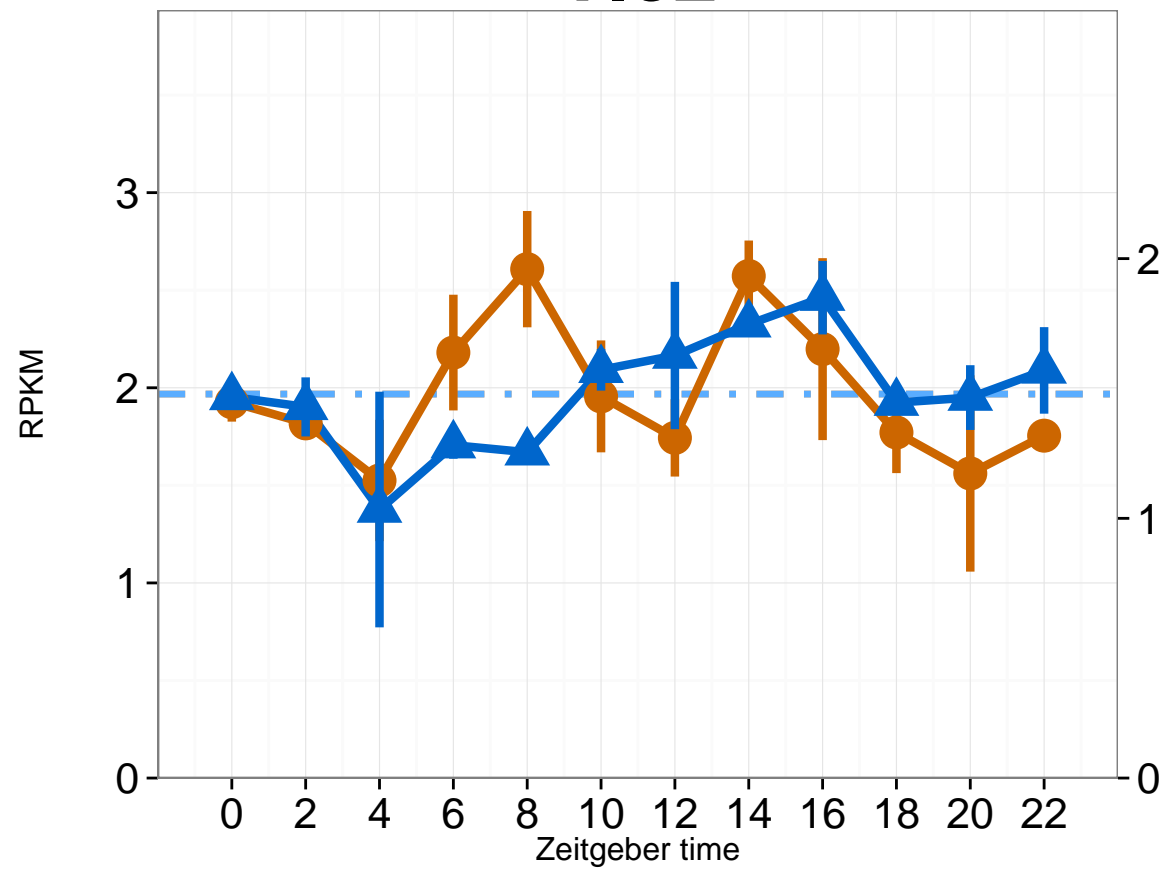

## Tle2

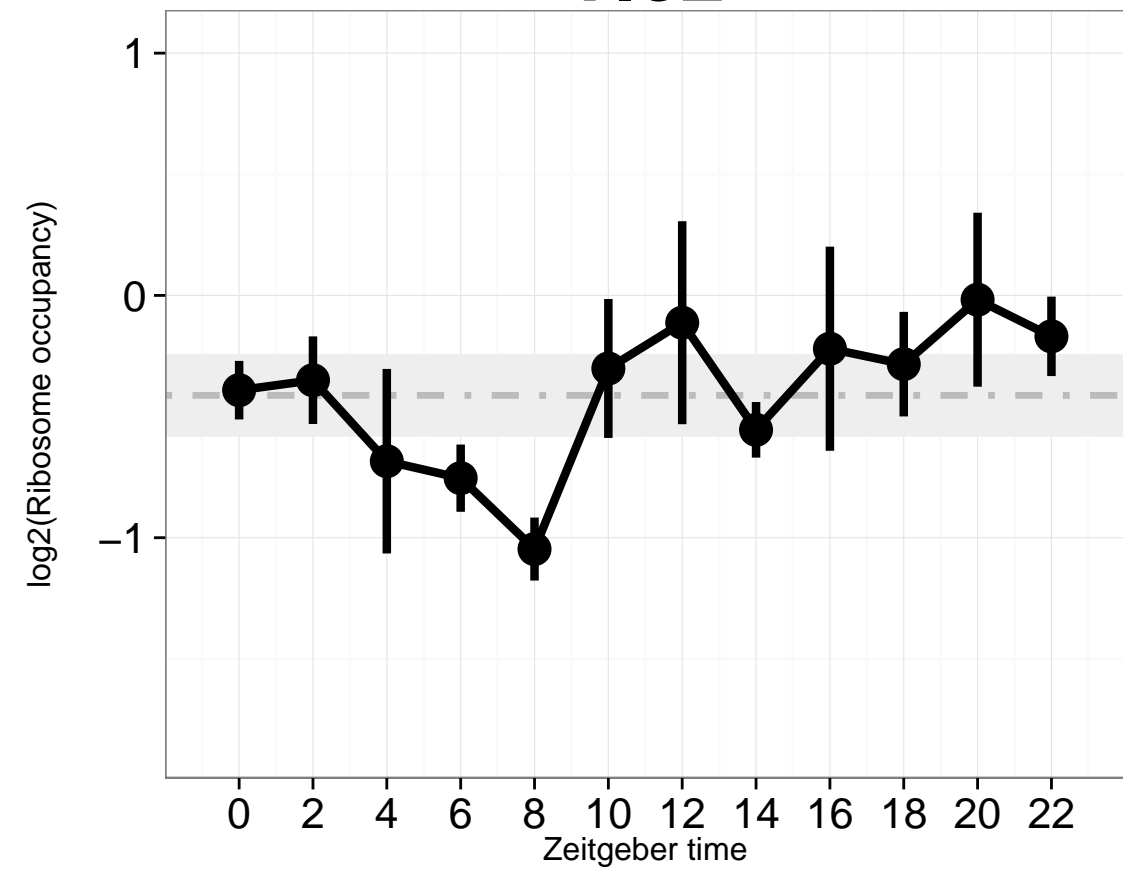

Supplement: Supplementary file 12408 [file 1]

## Bmyc

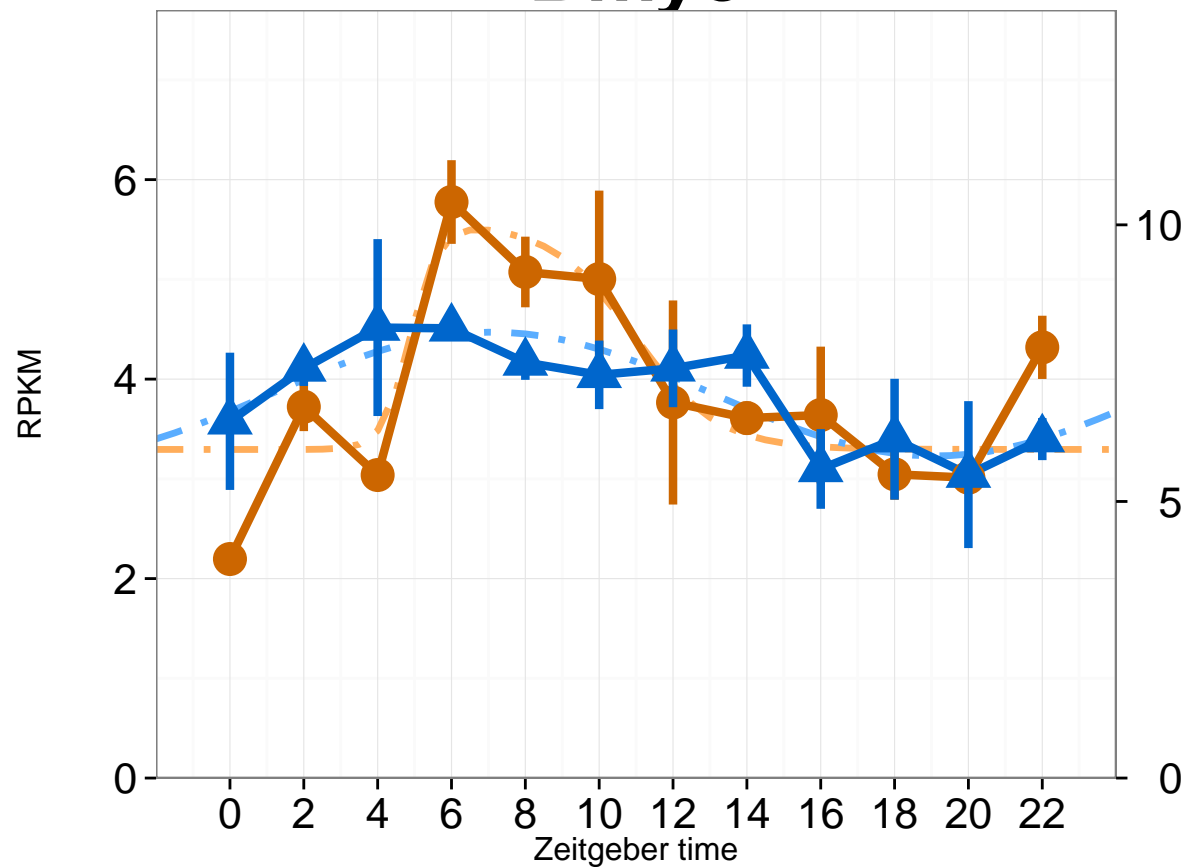

## Bmyc

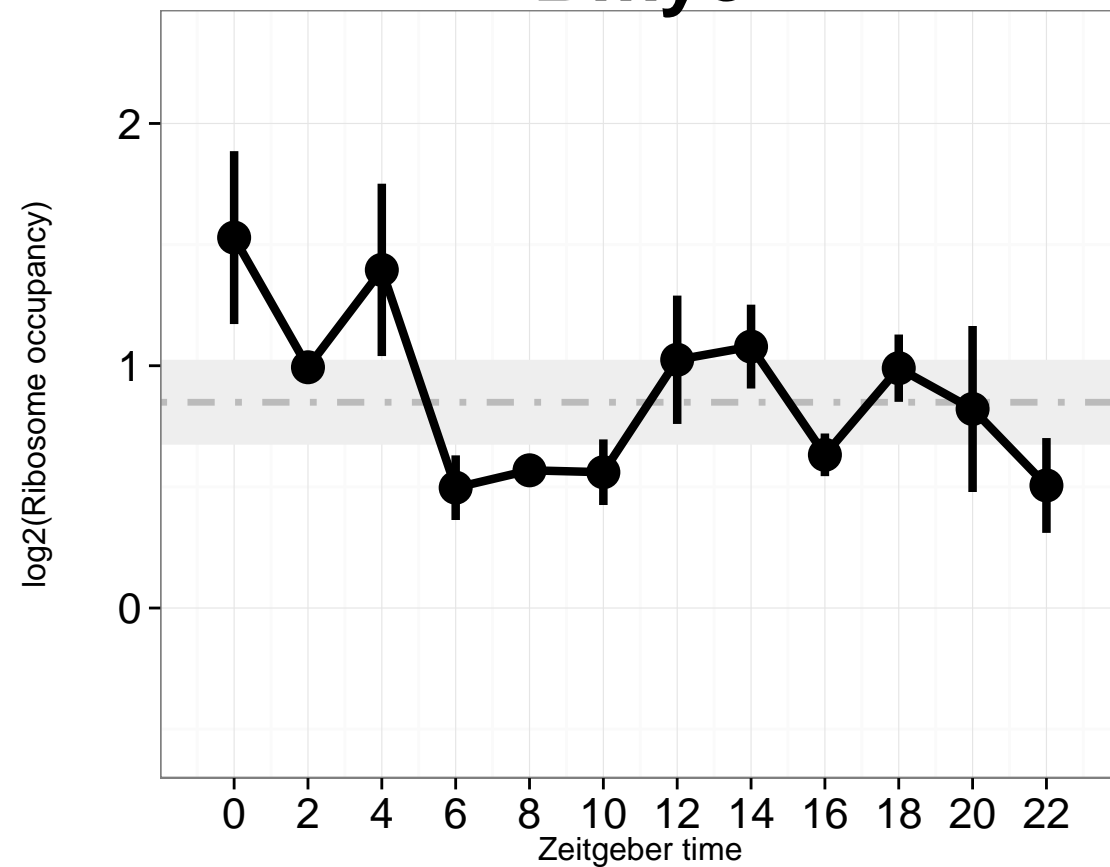

Supplement: Supplementary file 12409 [file 1]

## Gemin2

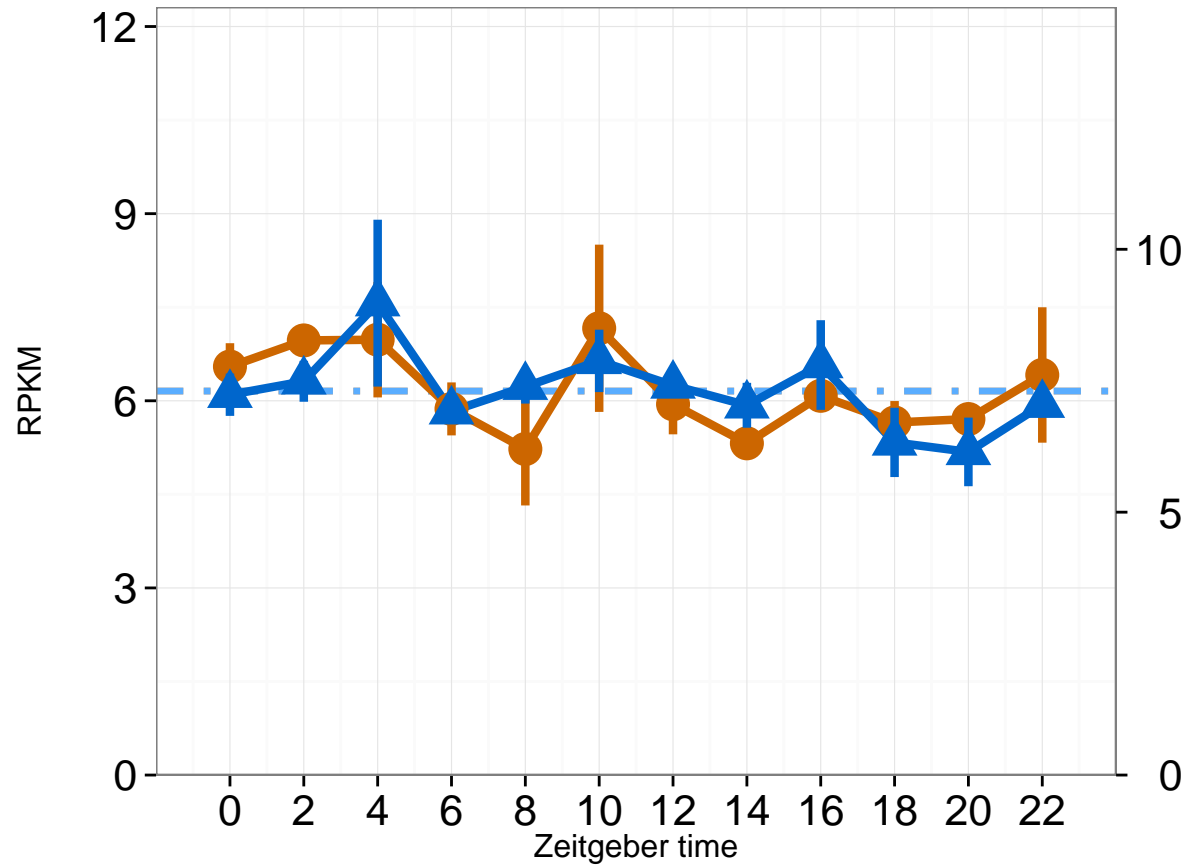

## Gemin2

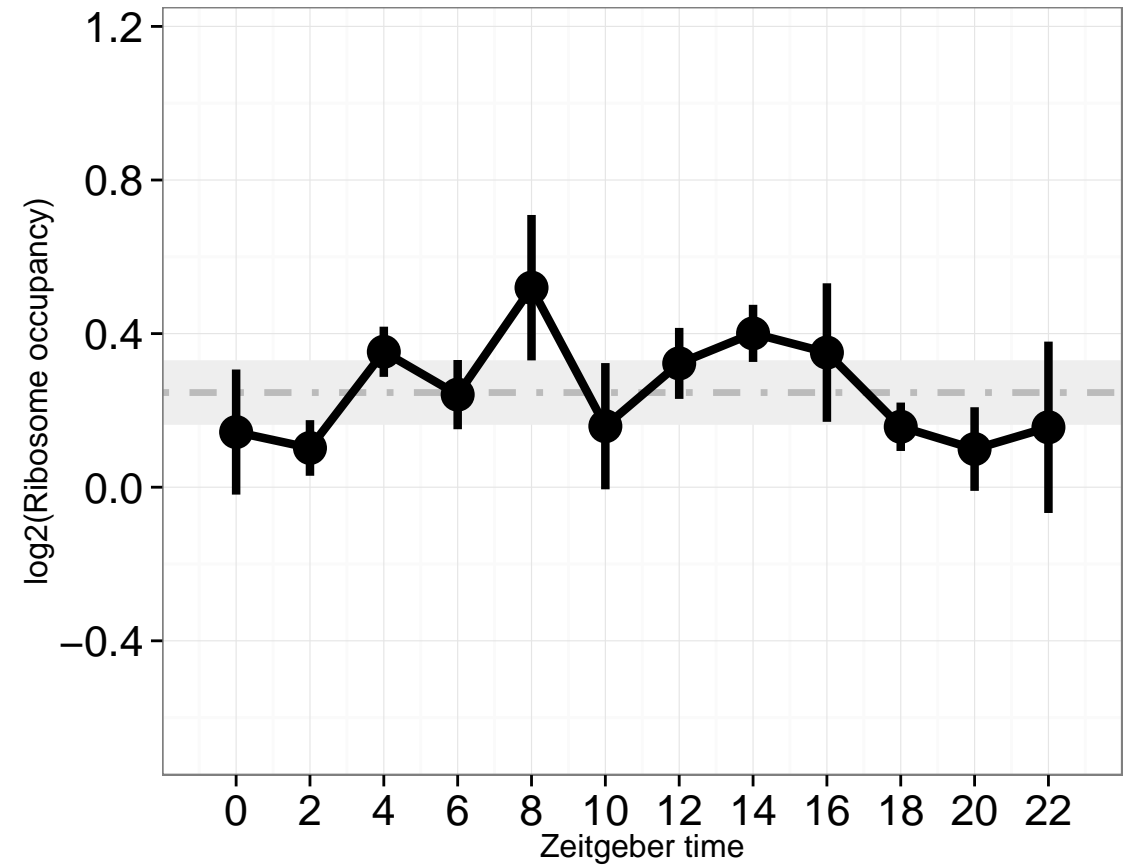

Supplement: Supplementary file 12410 [file 1]

## Shisa7

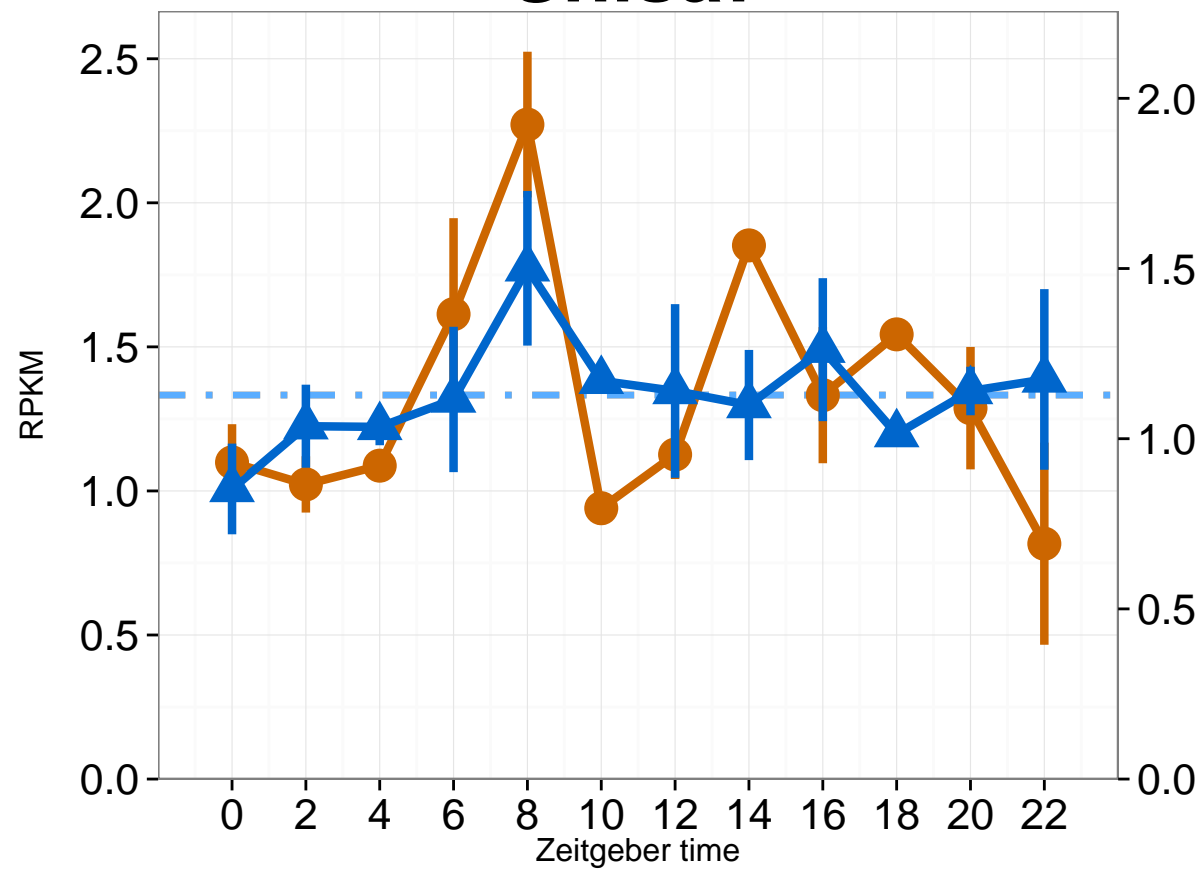

## Shisa7

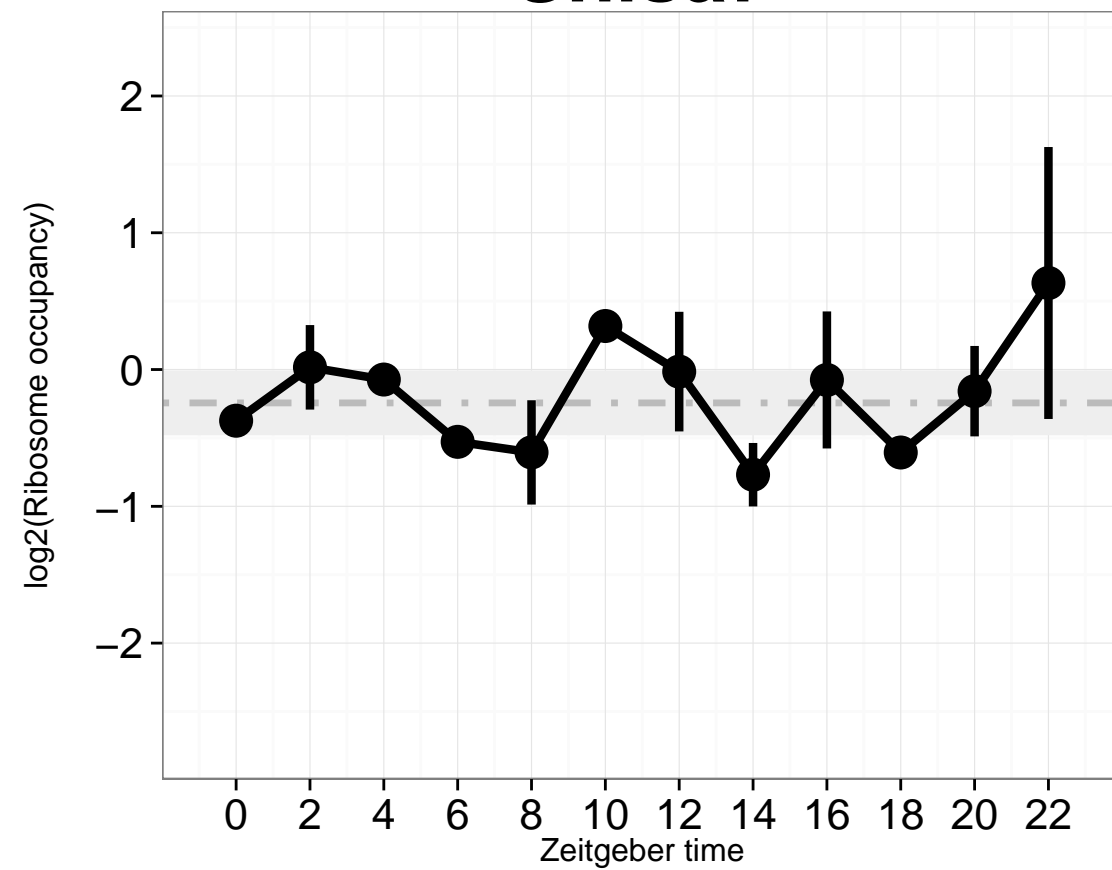

Supplement: Supplementary file 12411 [file 1]

# C87436

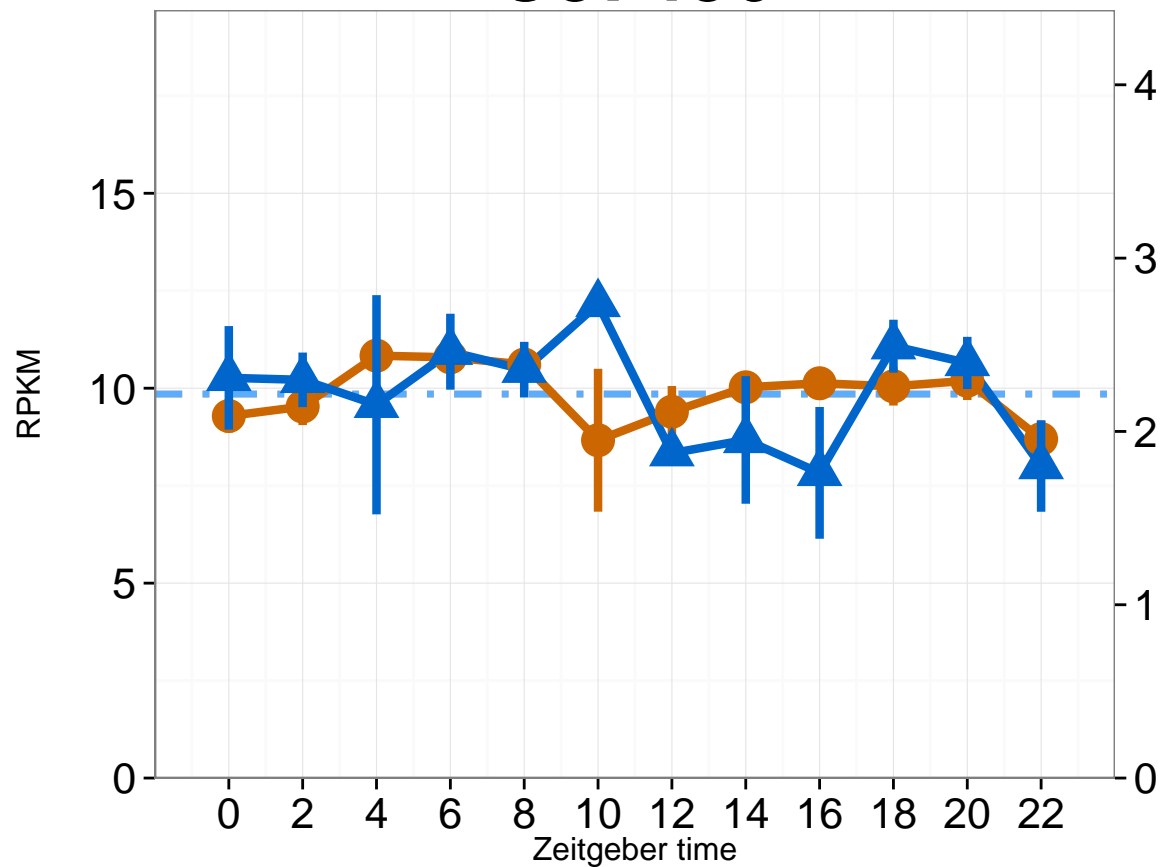

# C87436

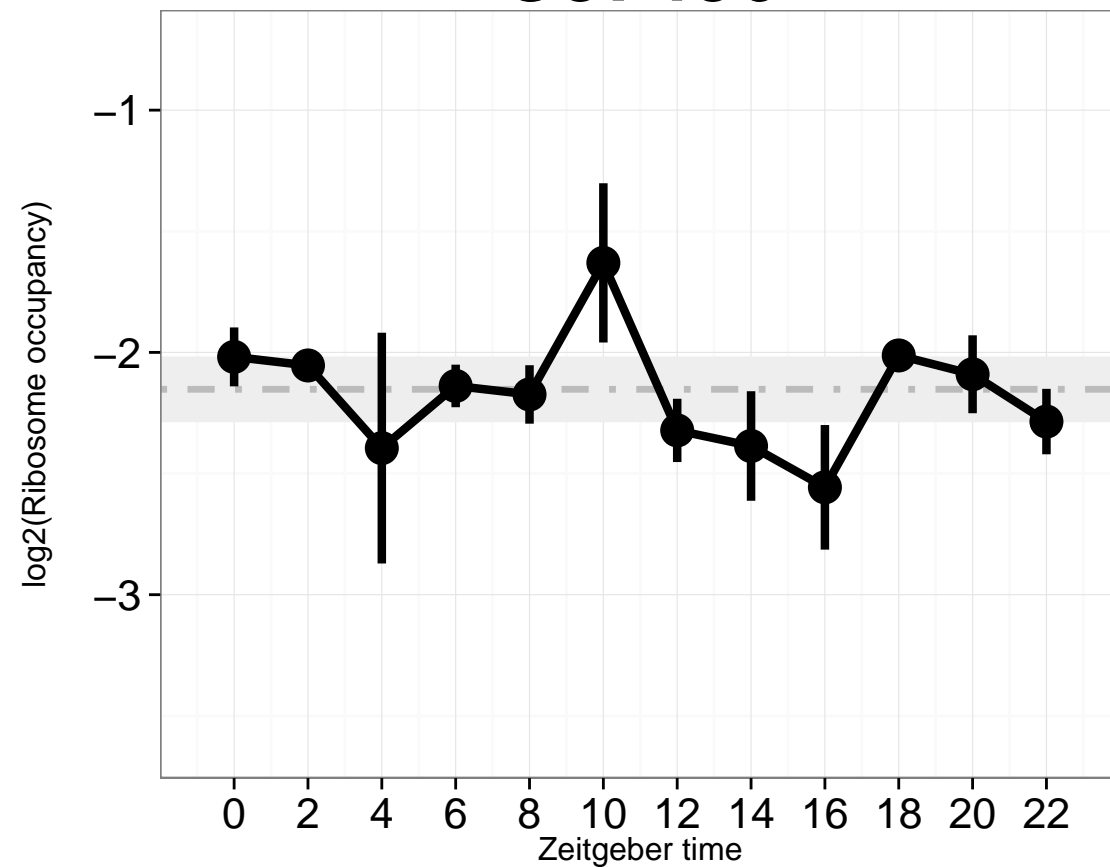

Supplement: Supplementary file 12412 [file 1]

# AI987944

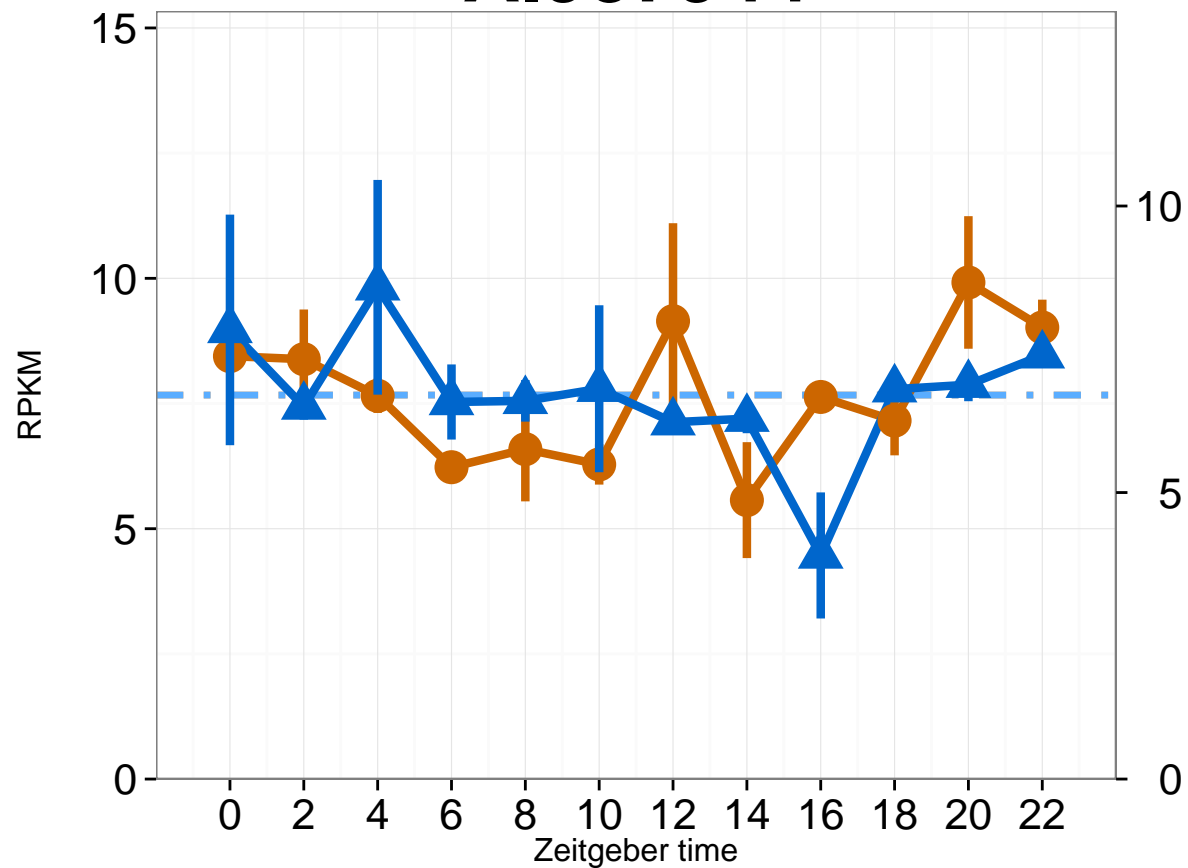

# AI987944

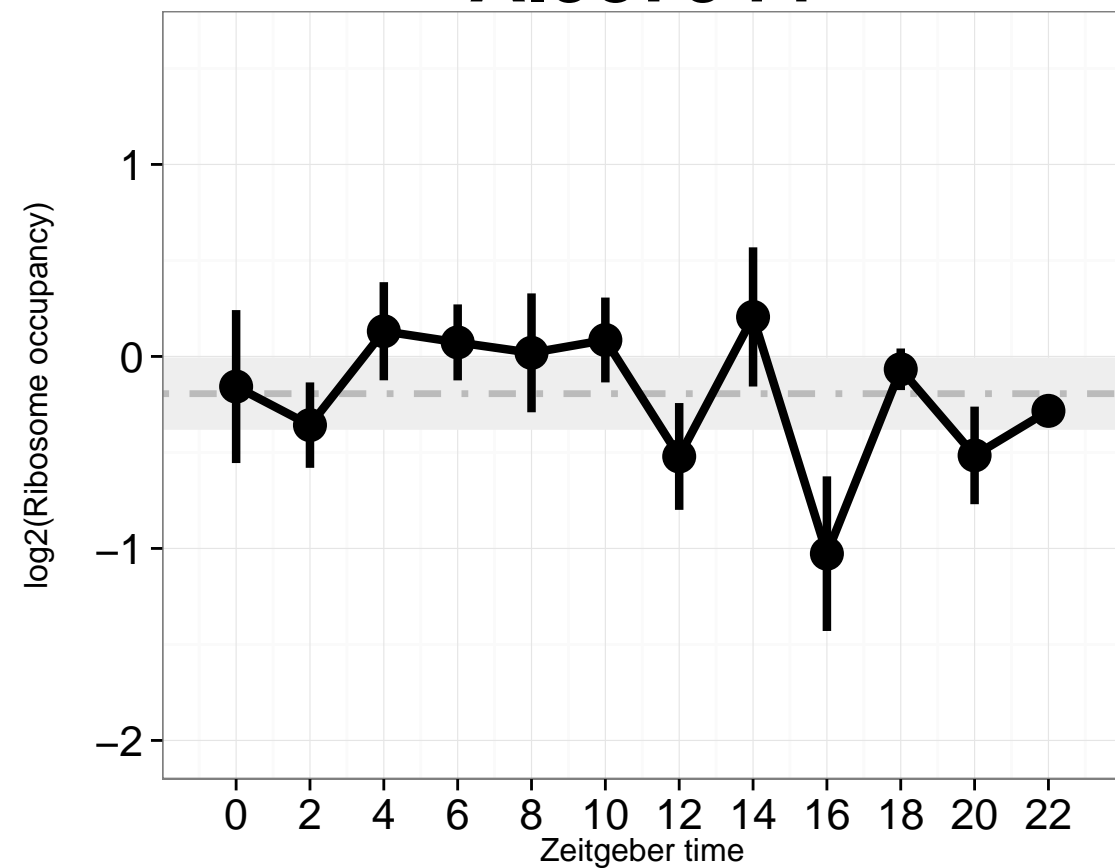

Supplement: Supplementary file 12413 [file 1]

# Baz1a

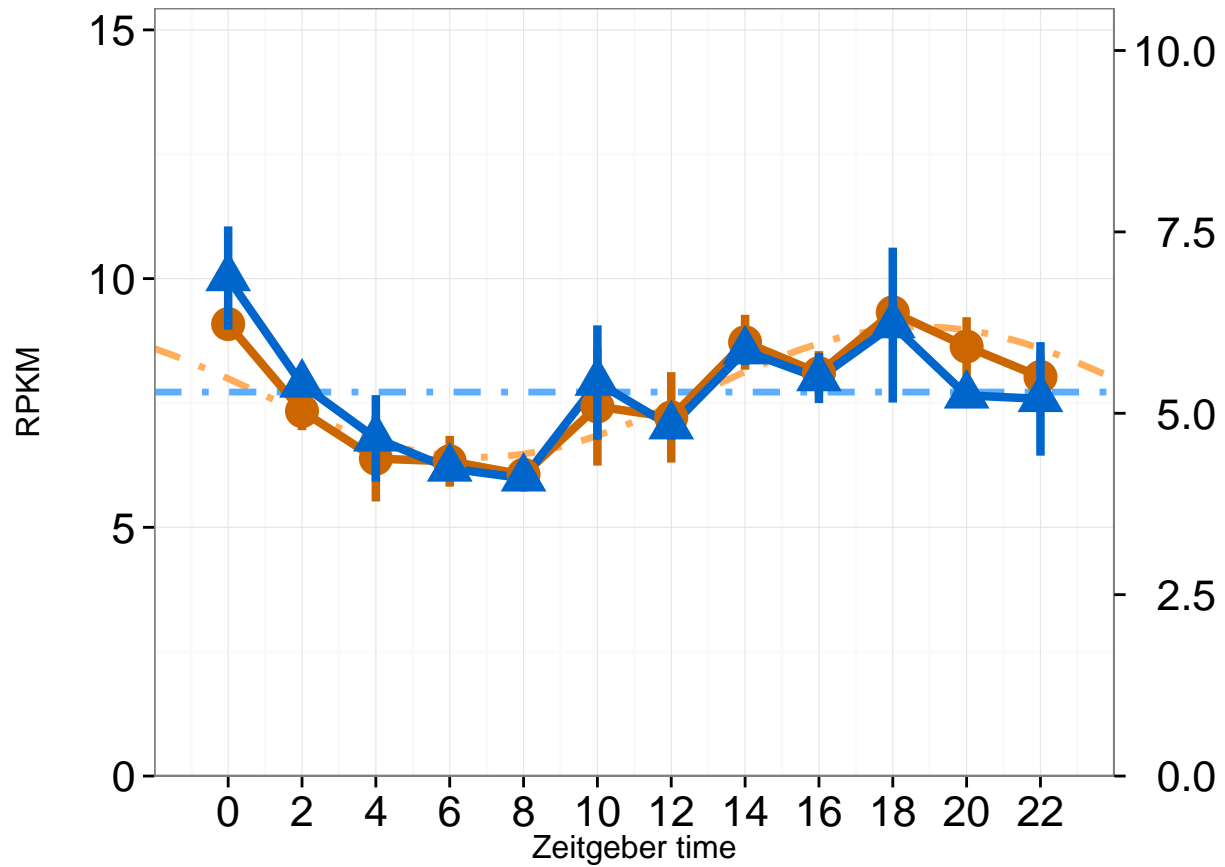

# Baz1a

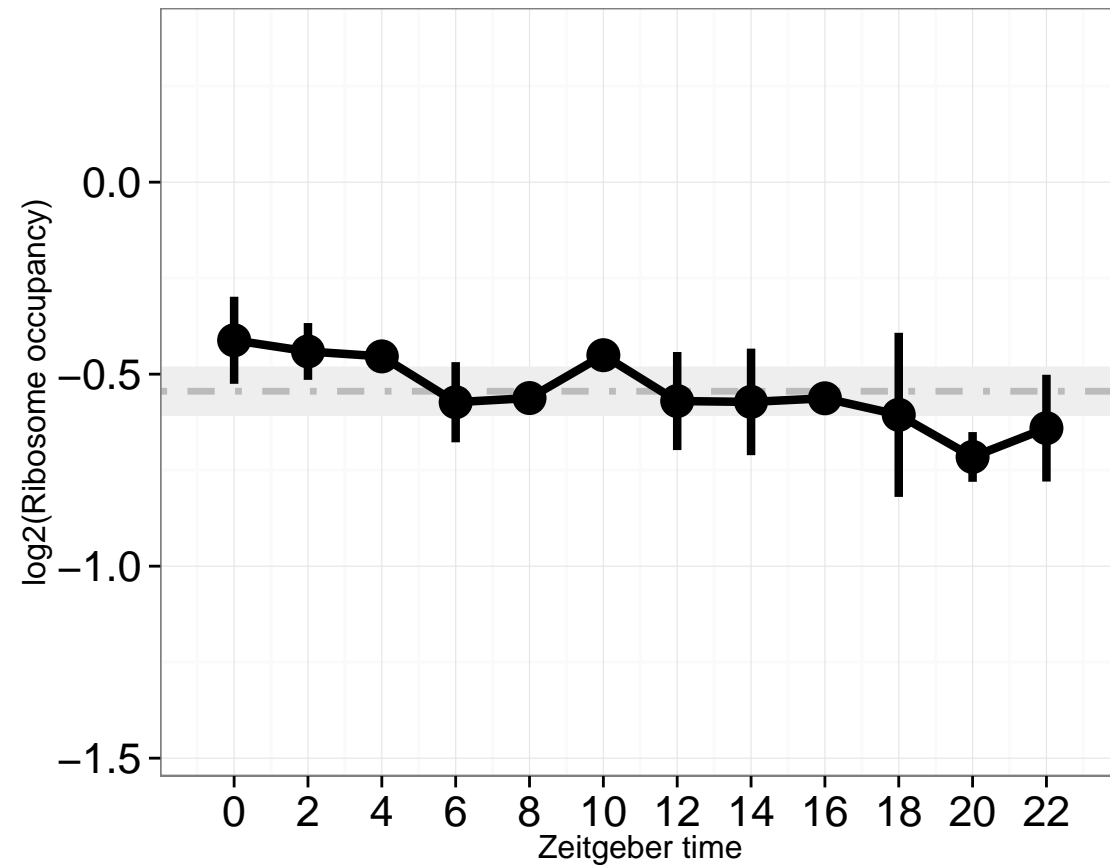

Supplement: Supplementary file 12414 [file 1]

# Lonrf1

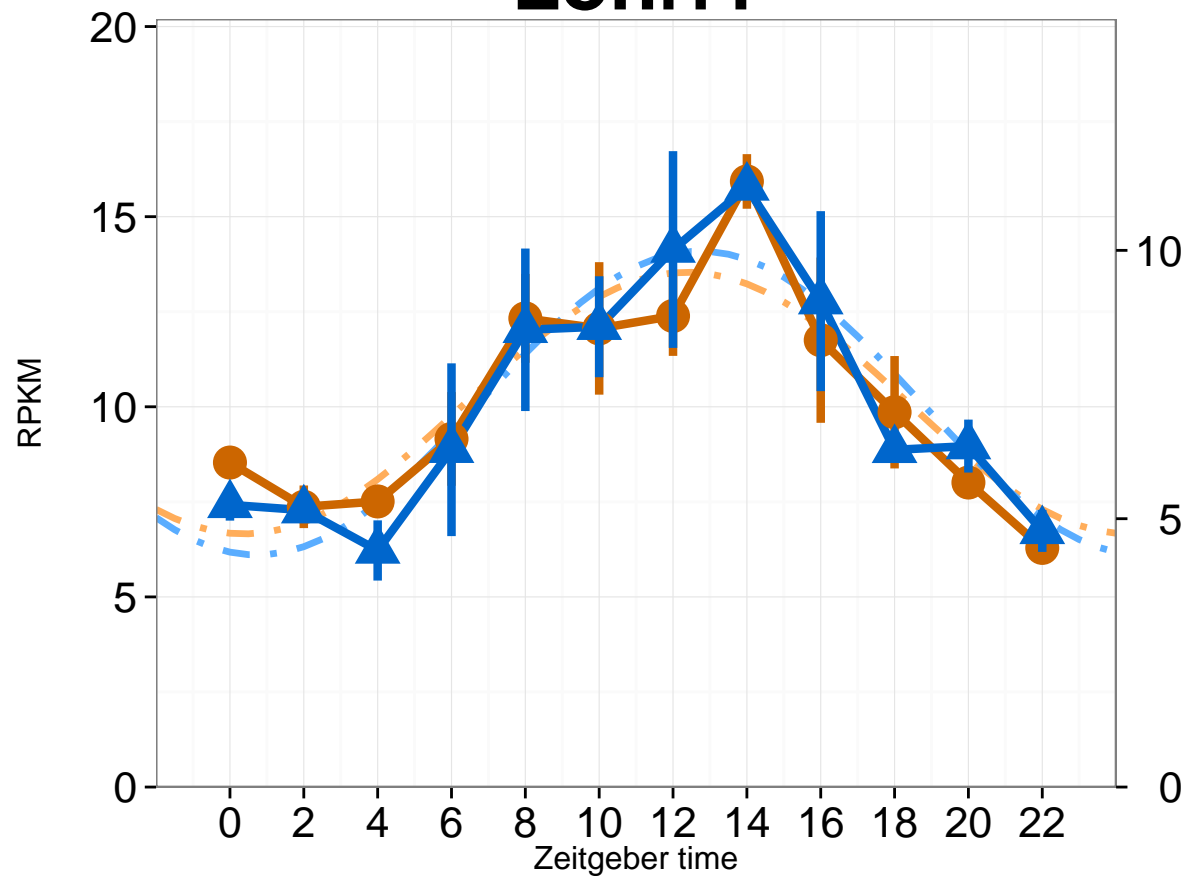

# Lonrf1

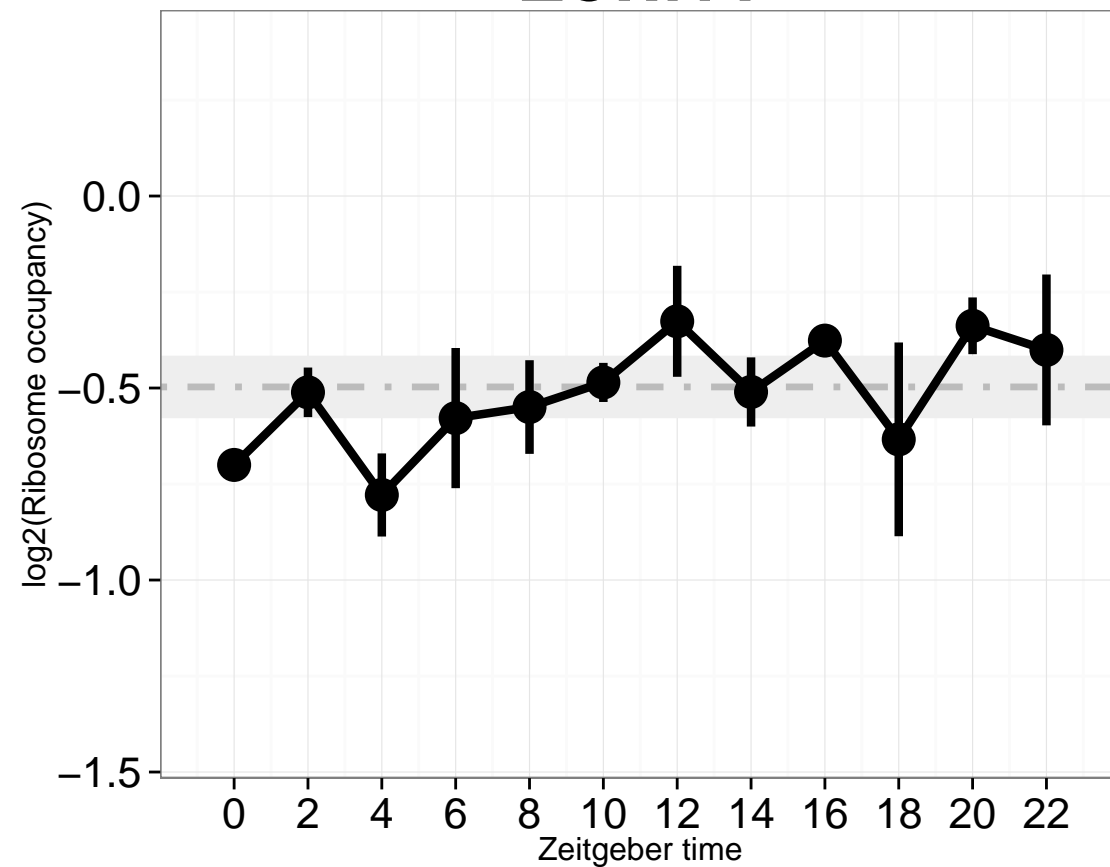

Supplement: Supplementary file 12415 [file 1]

## Dnajb2

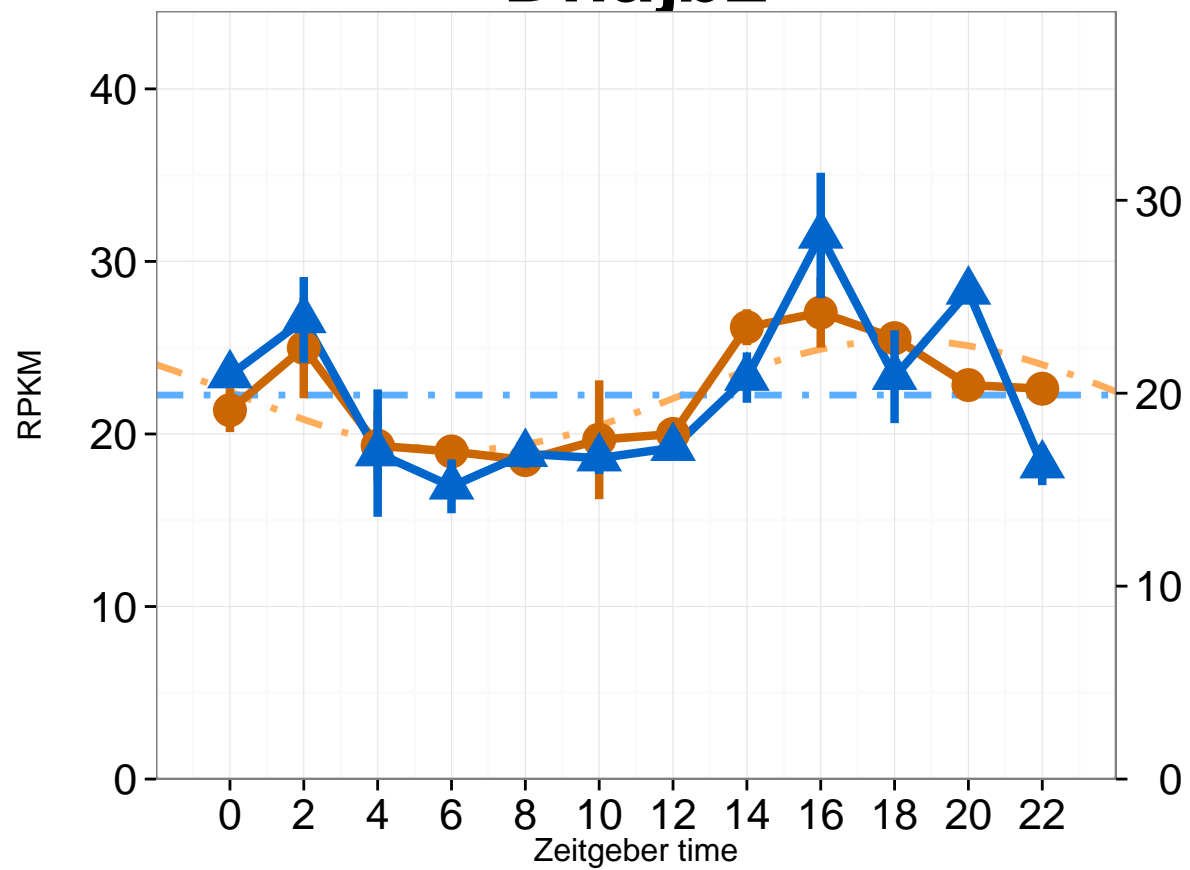

## Dnajb2

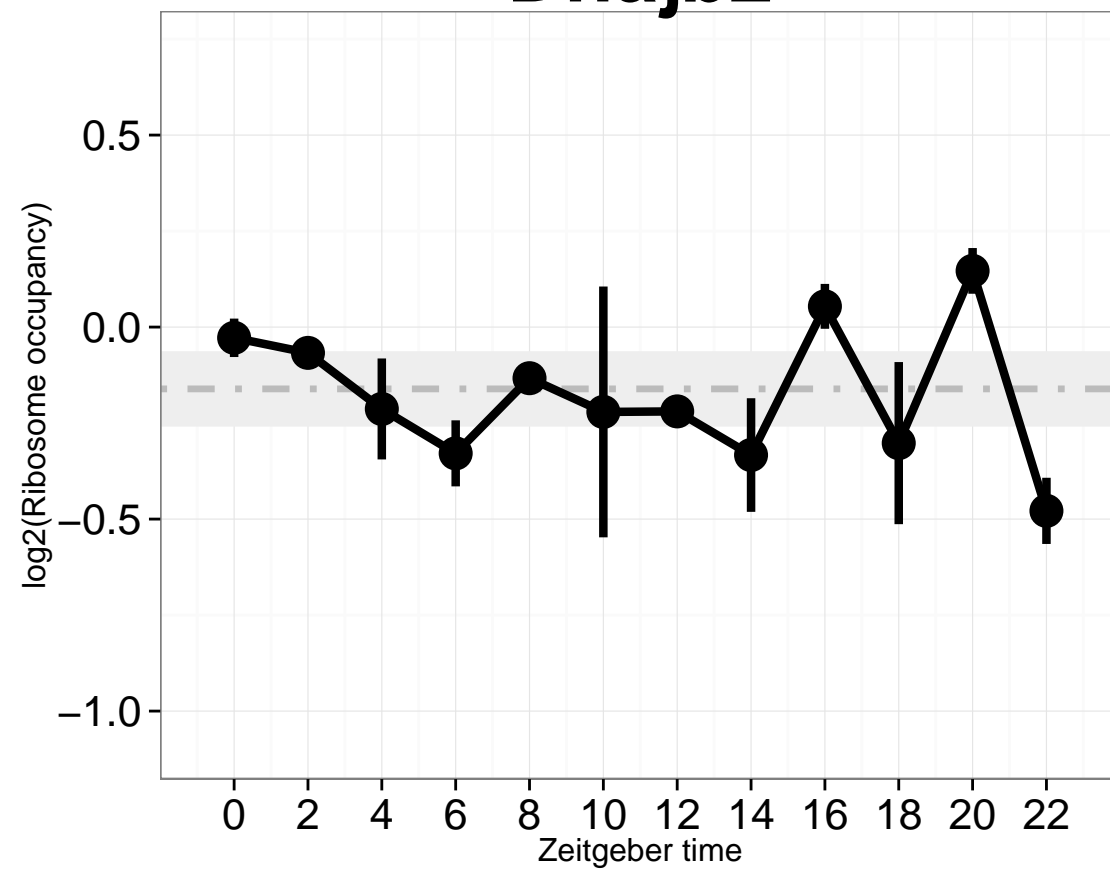

Supplement: Supplementary file 12416 [file 1]

# Fam58b

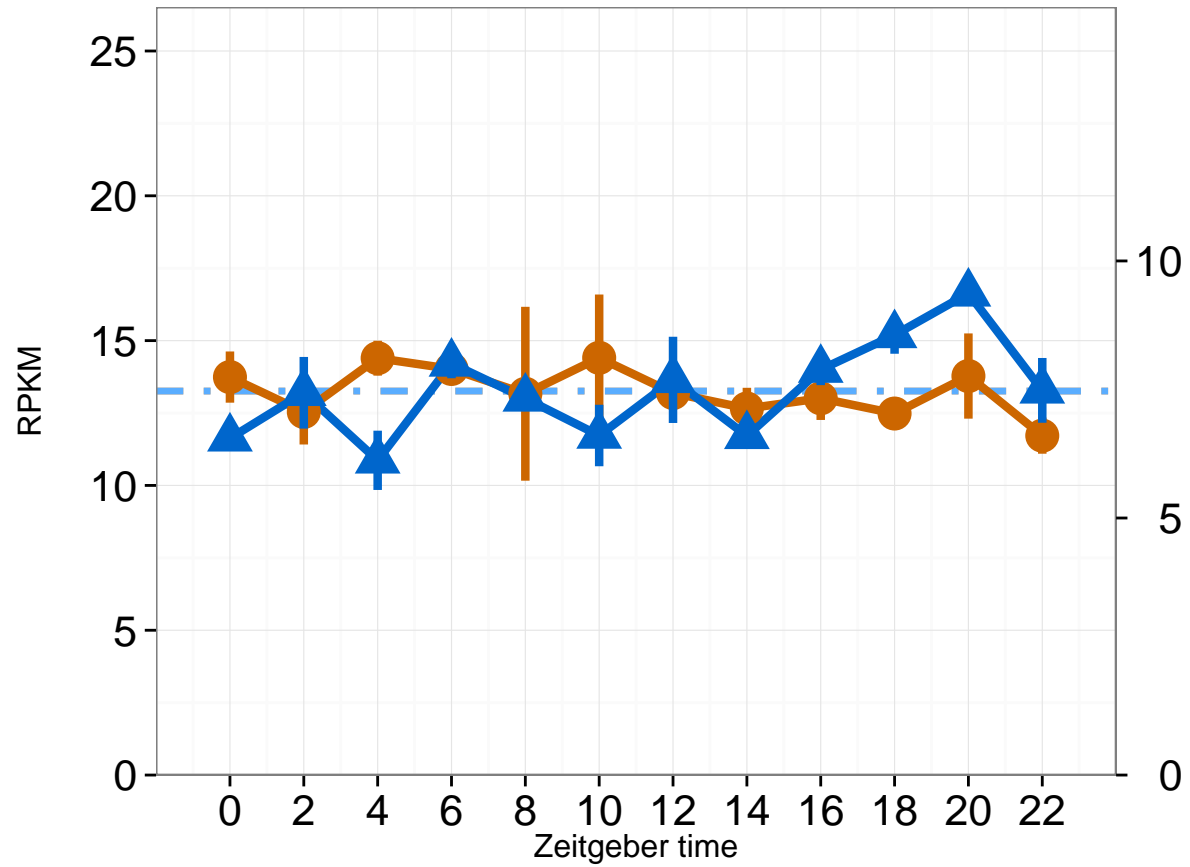

# Fam58b

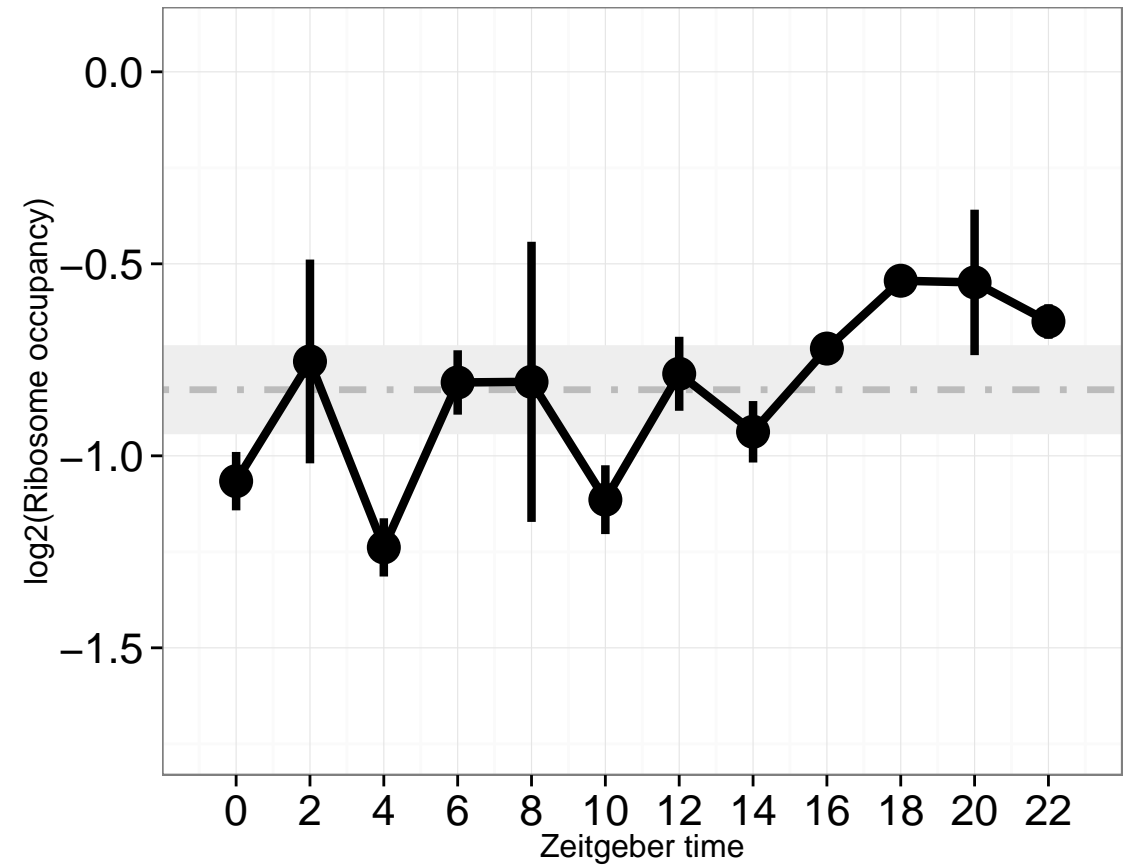

Supplement: Supplementary file 12417 [file 1]

# Dhrs7b

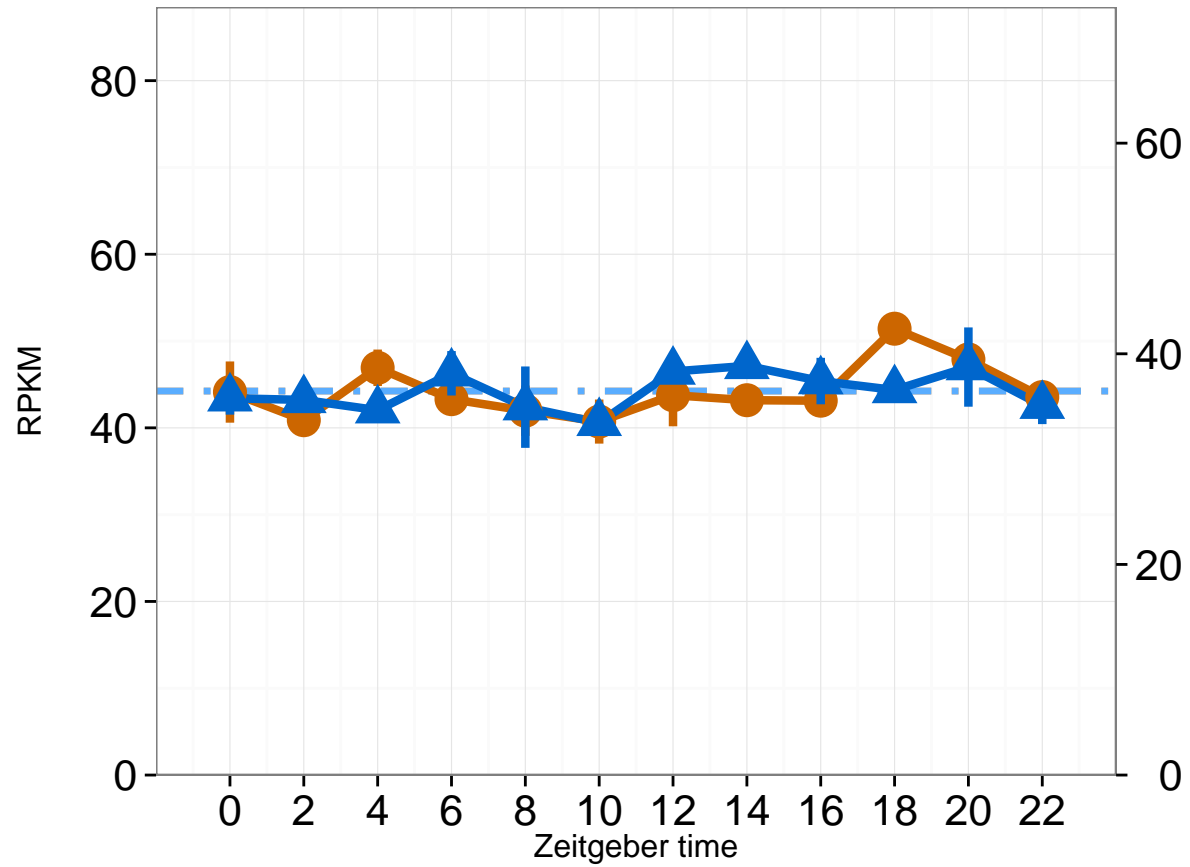

# Dhrs7b

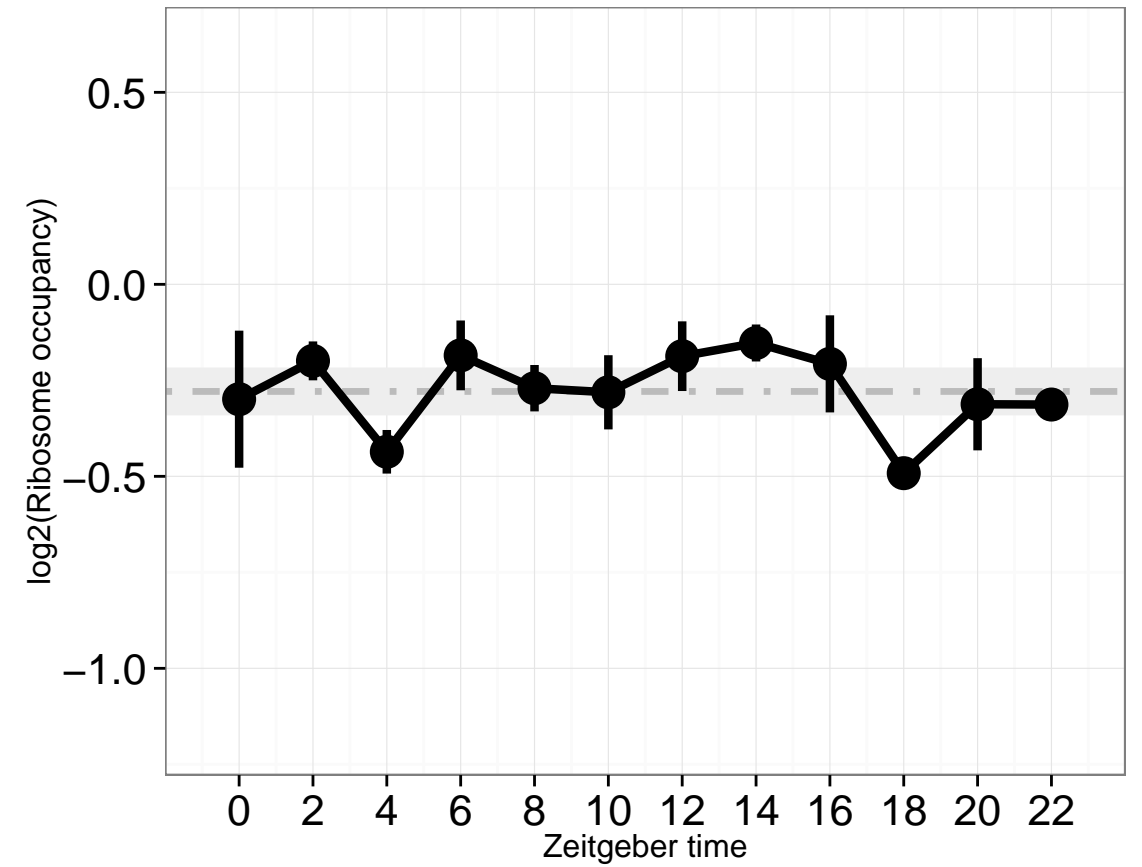

Supplement: Supplementary file 12418 [file 1]

## Usp45

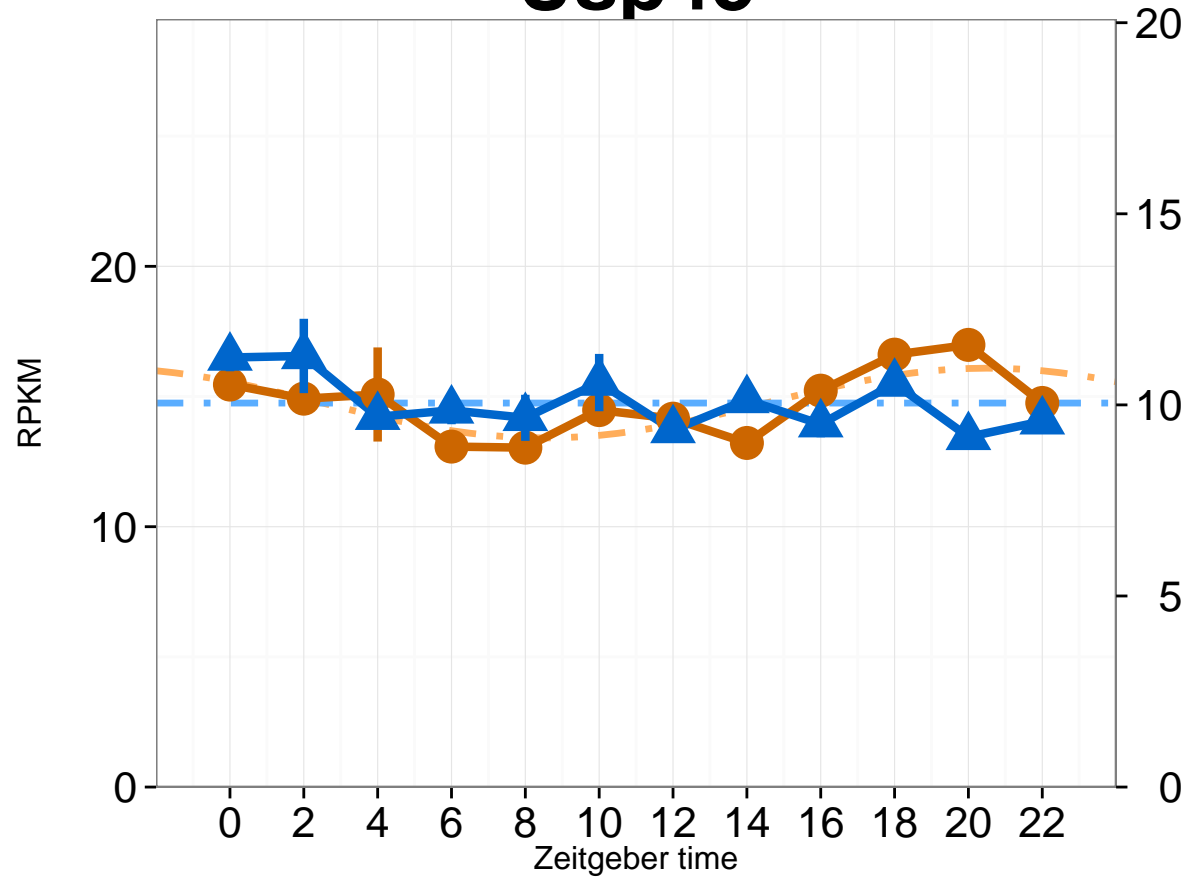

## Usp45

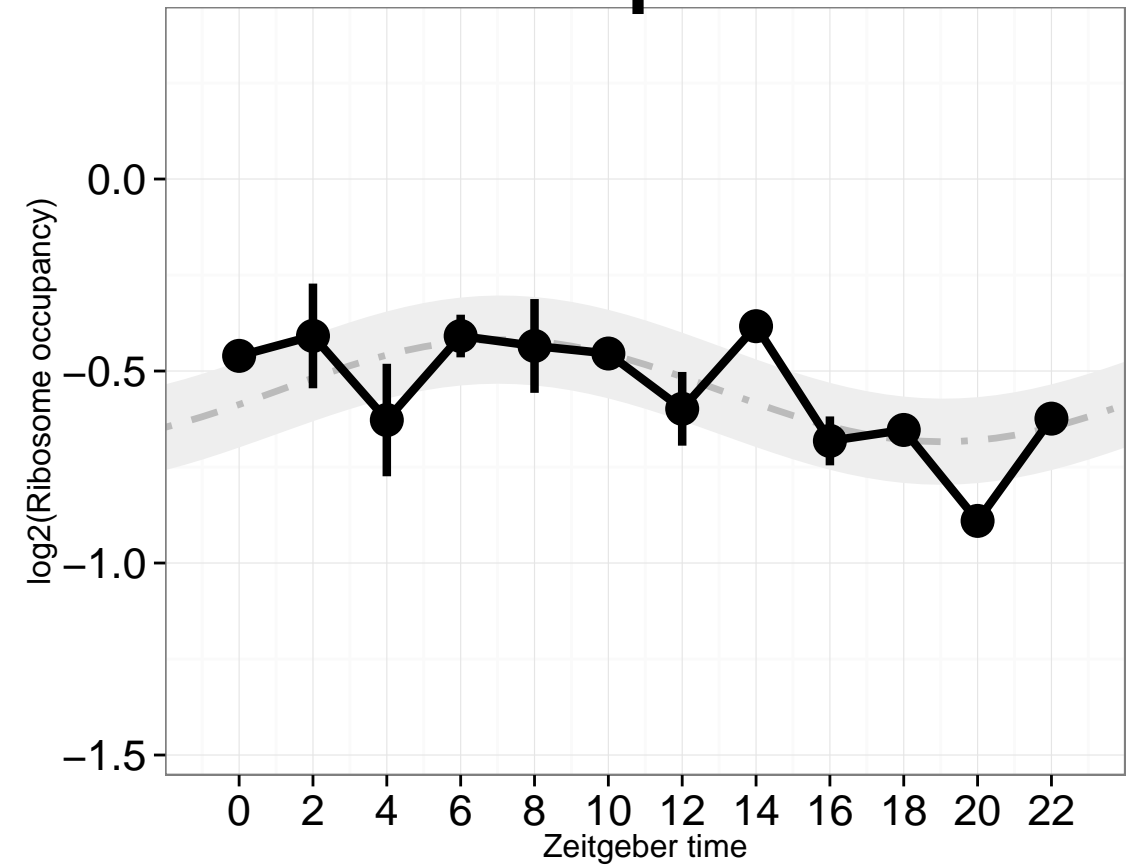

Supplement: Supplementary file 12419 [file 1]

## Slc22a23

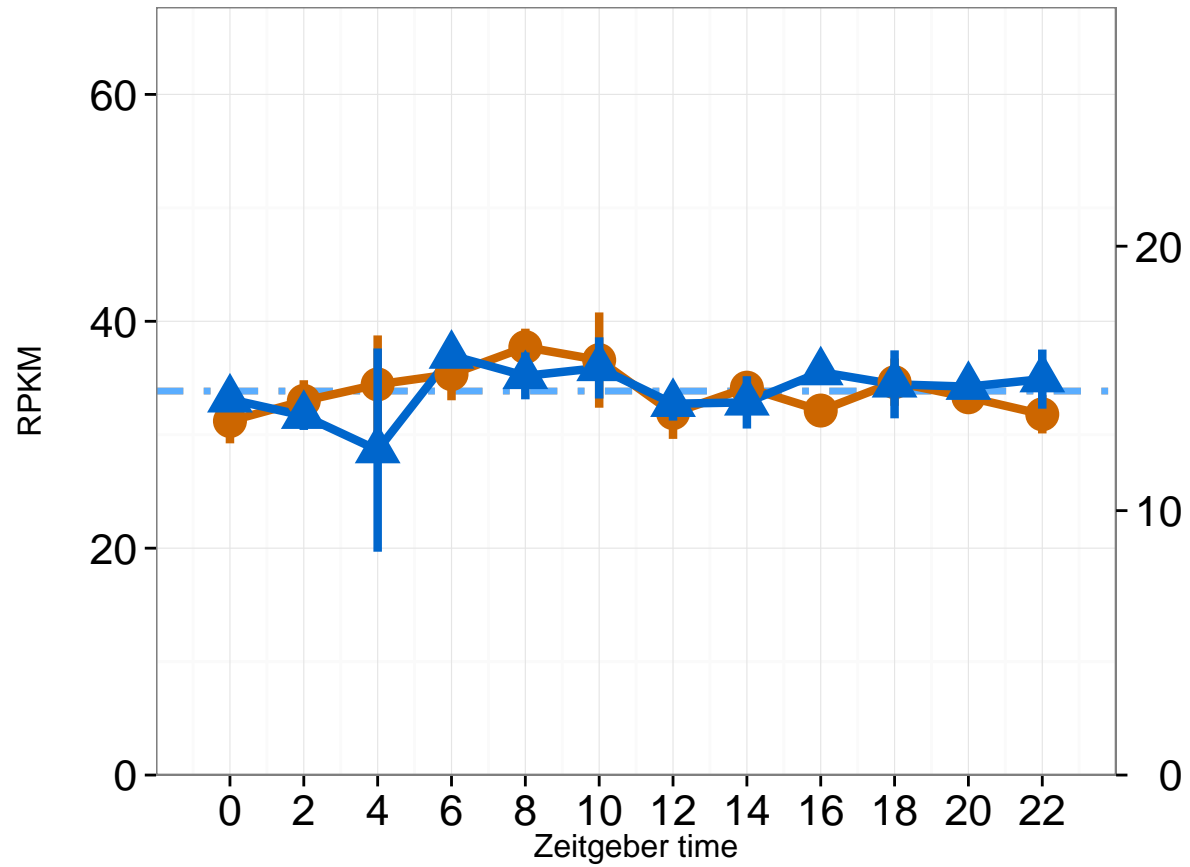

## Slc22a23

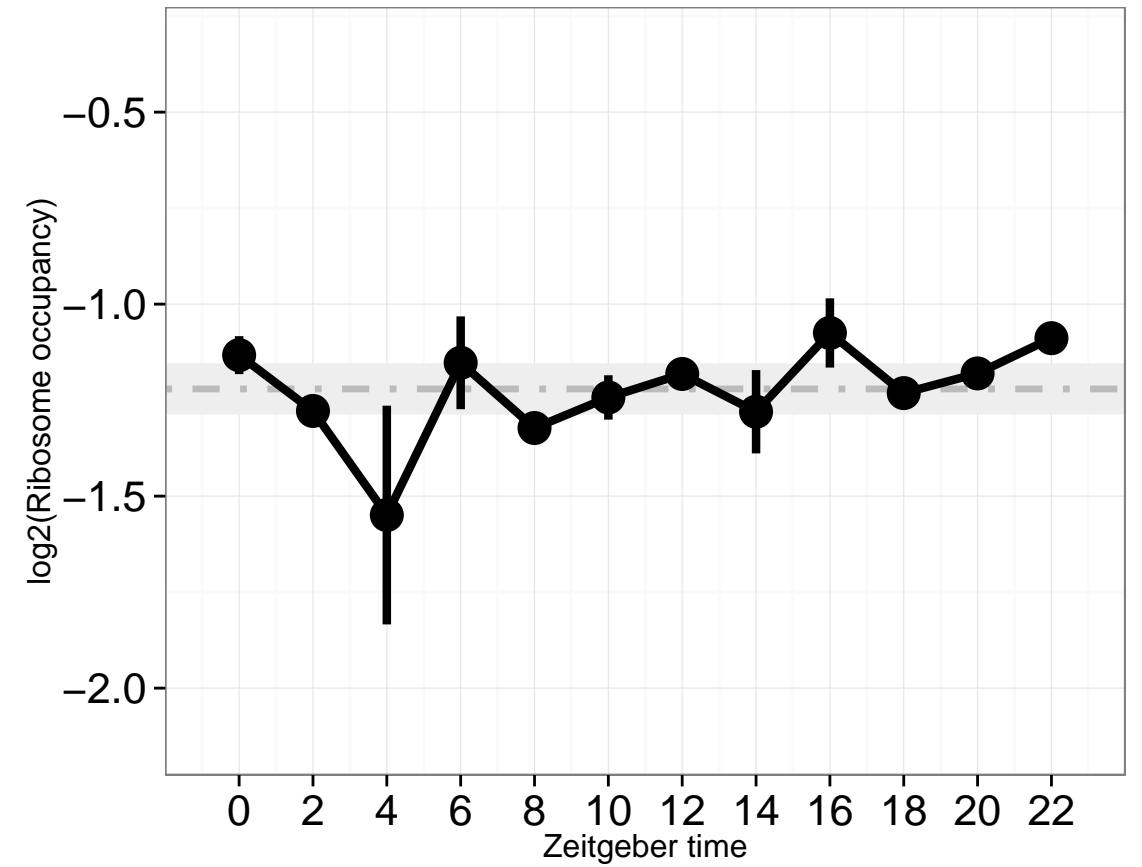

Supplement: Supplementary file 12420 [file 1]

# Rpl37

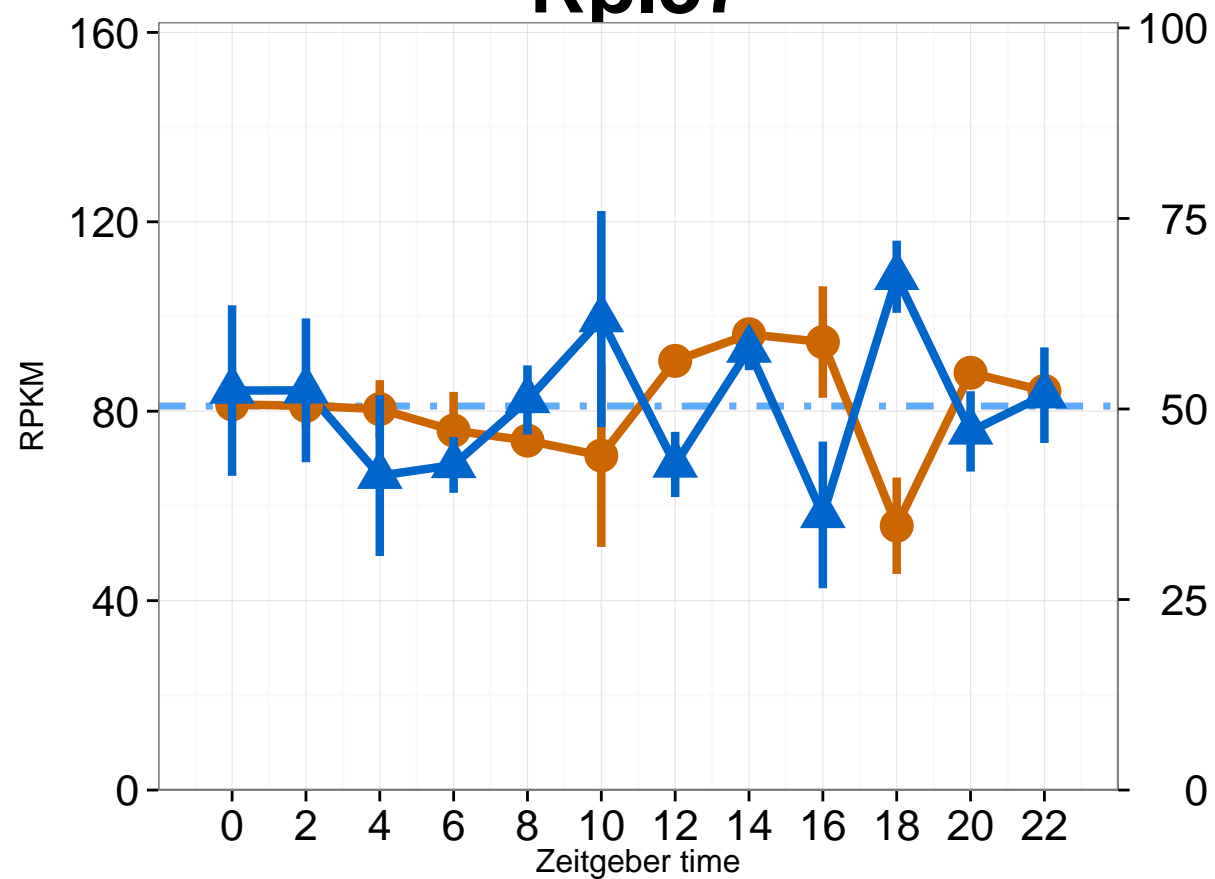

# Rpl37

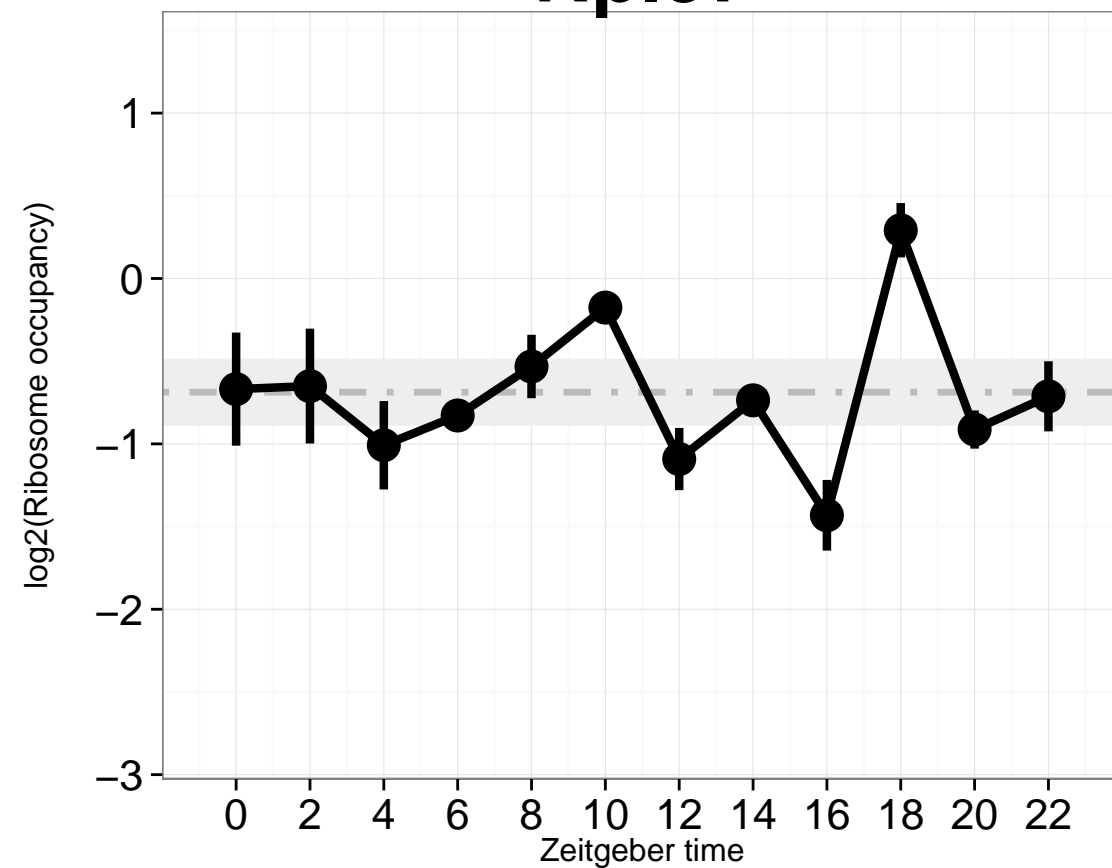

Supplement: Supplementary file 12421 [file 1]

# Yeats2

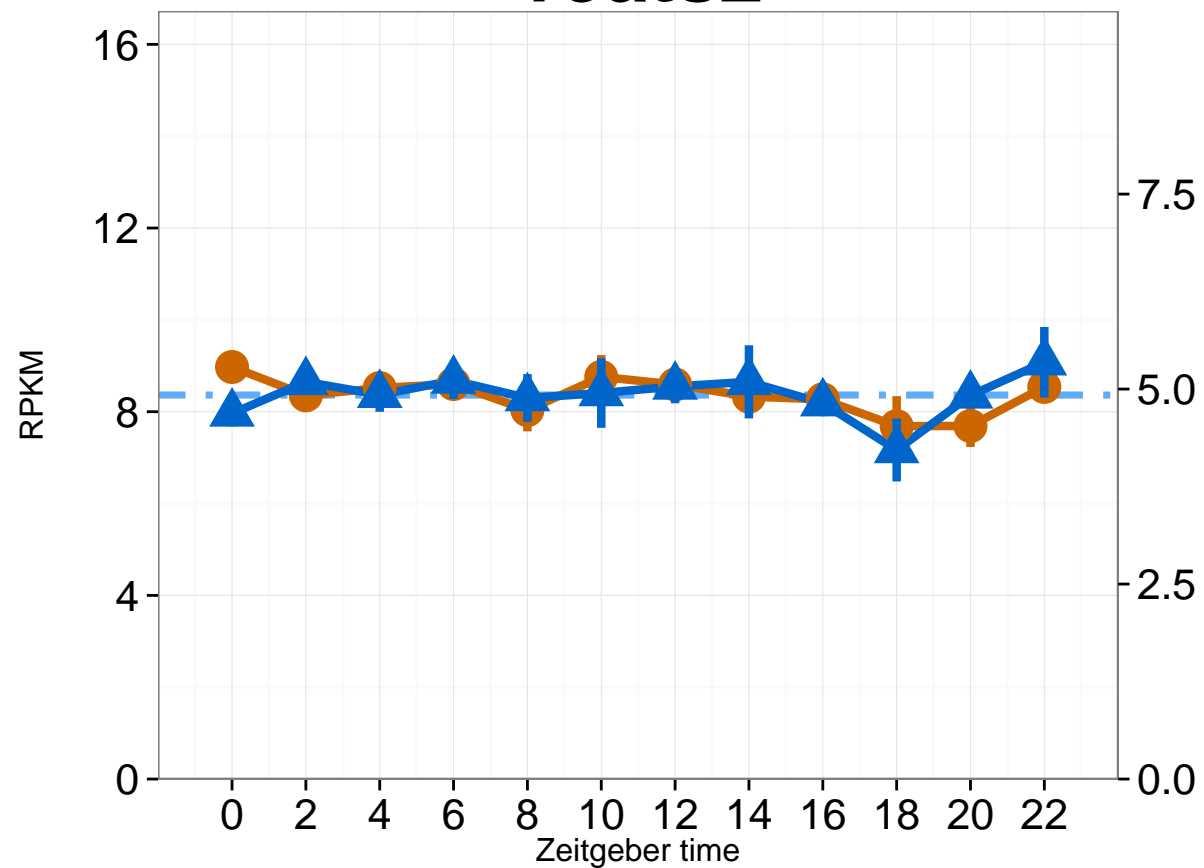

# Yeats2

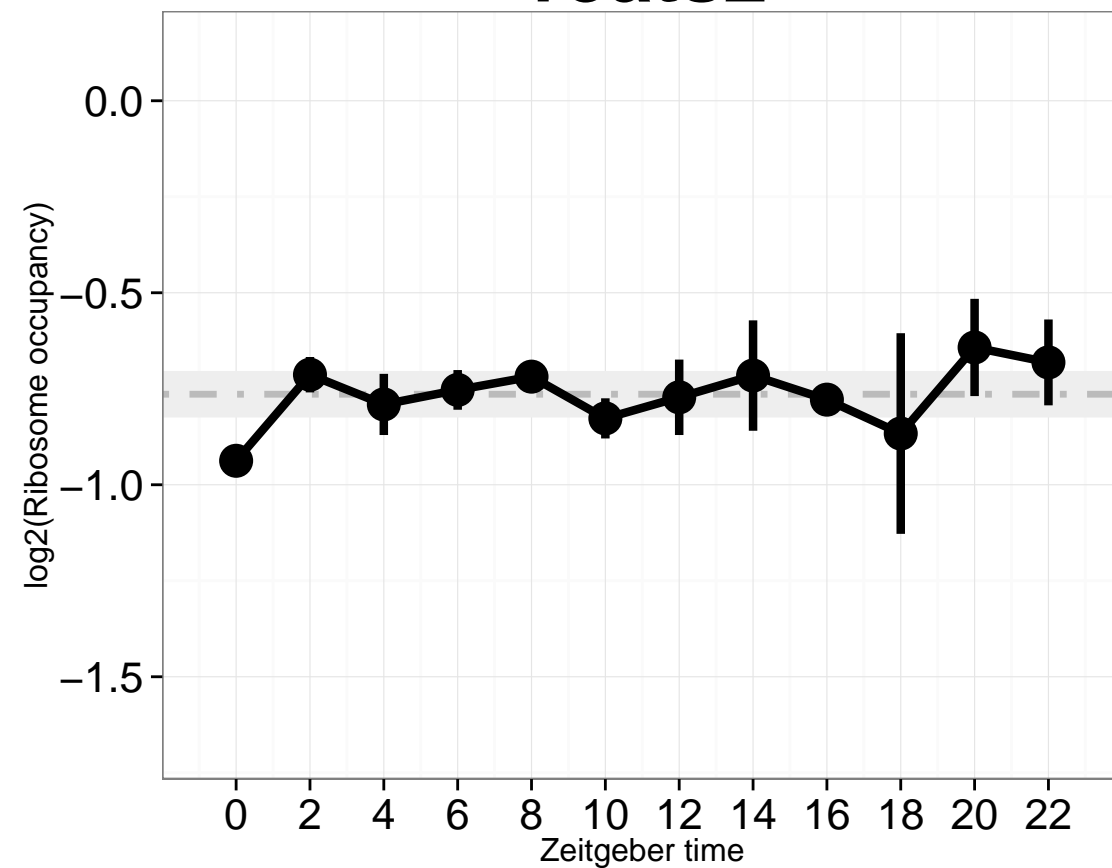

Supplement: Supplementary file 12422 [file 1]

## Herc2

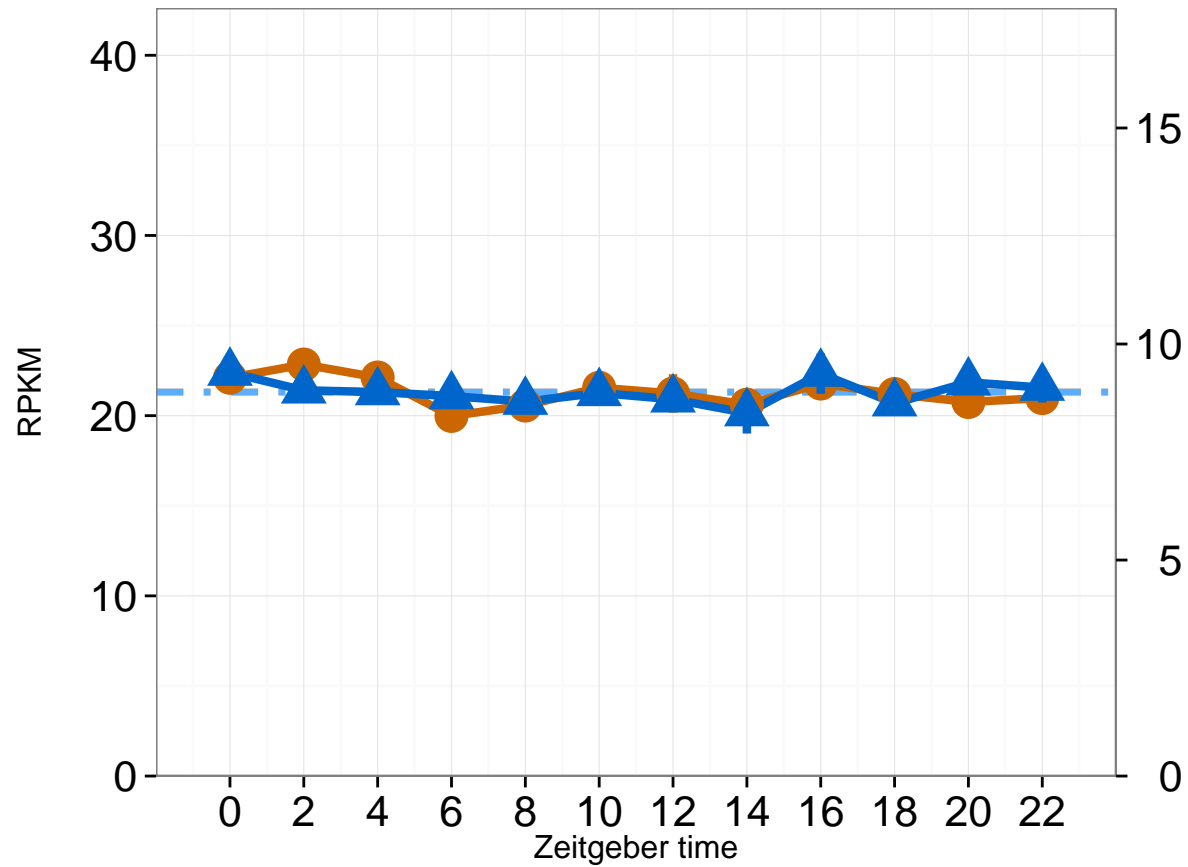

## Herc2

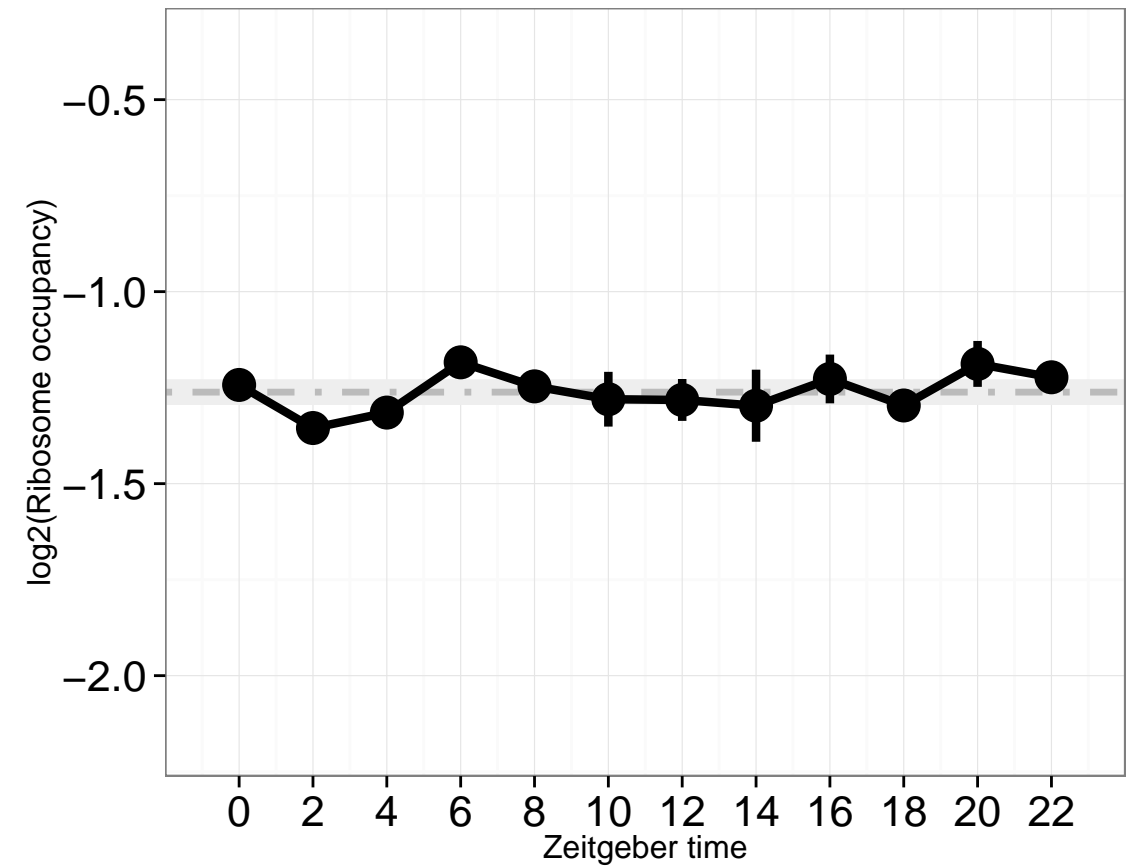

Supplement: Supplementary file 12423 [file 1]

# Mgat4b

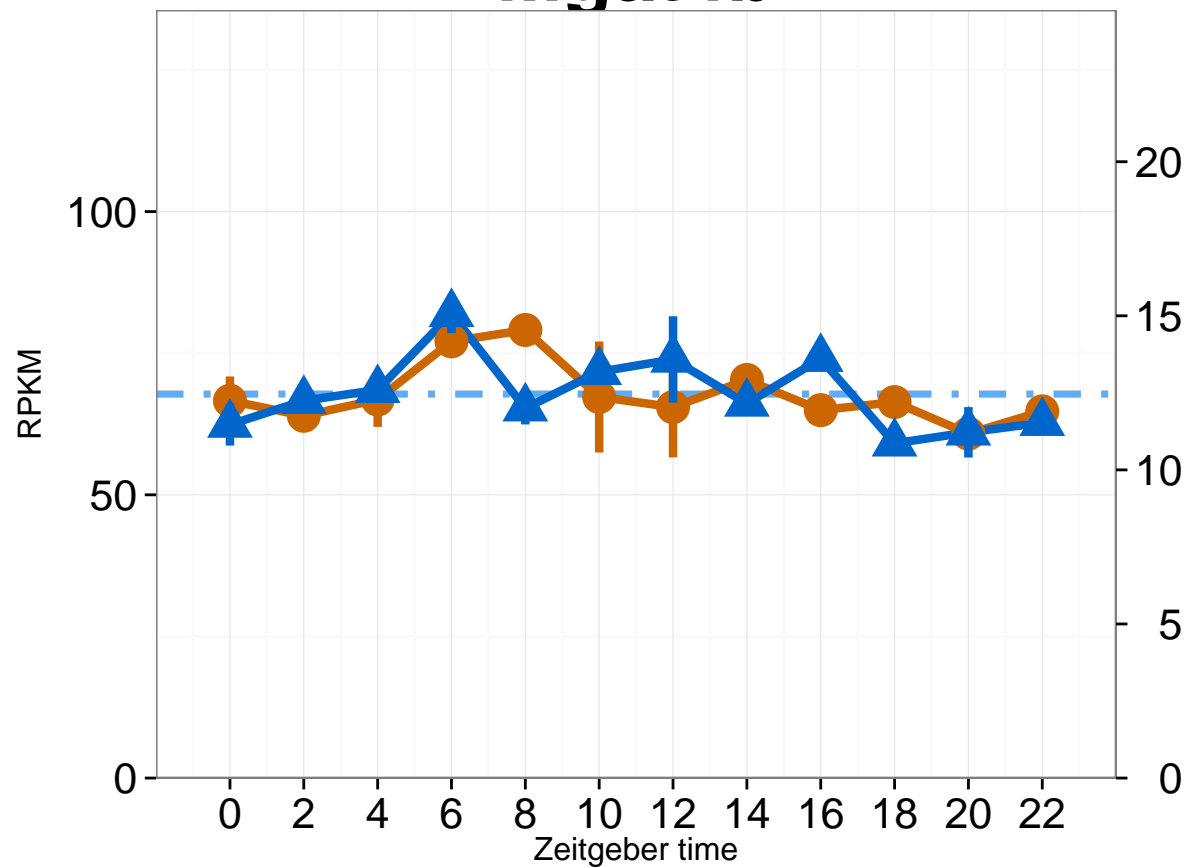

# Mgat4b

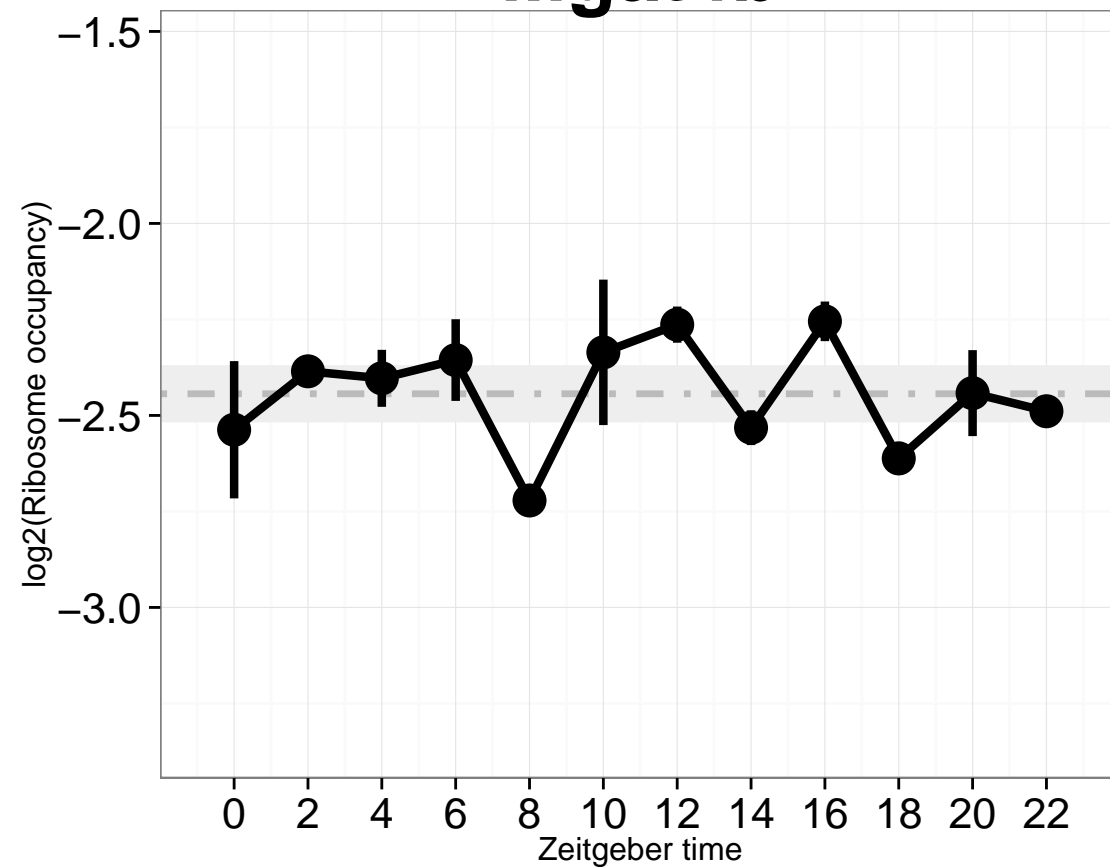

Supplement: Supplementary file 12424 [file 1]

# Tmppe

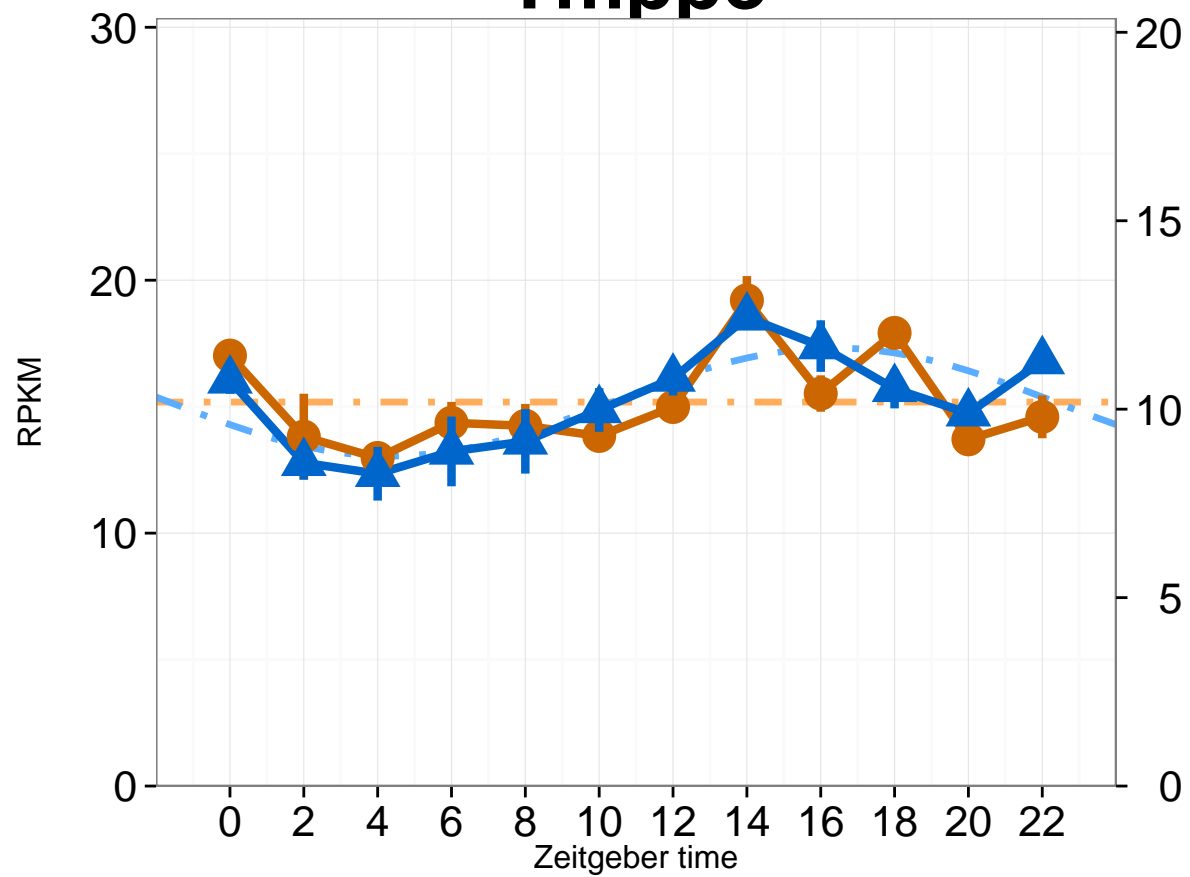

# Tmppe

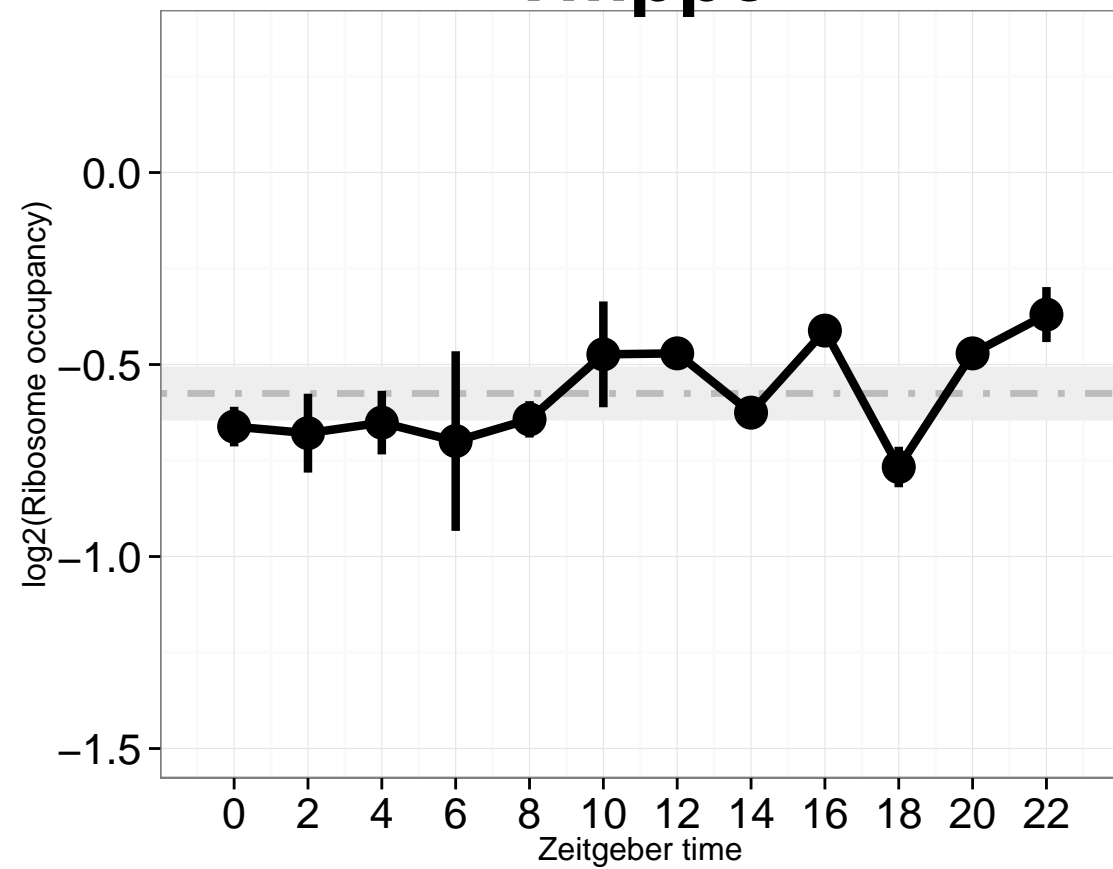

Supplement: Supplementary file 12425 [file 1]

# Stag2

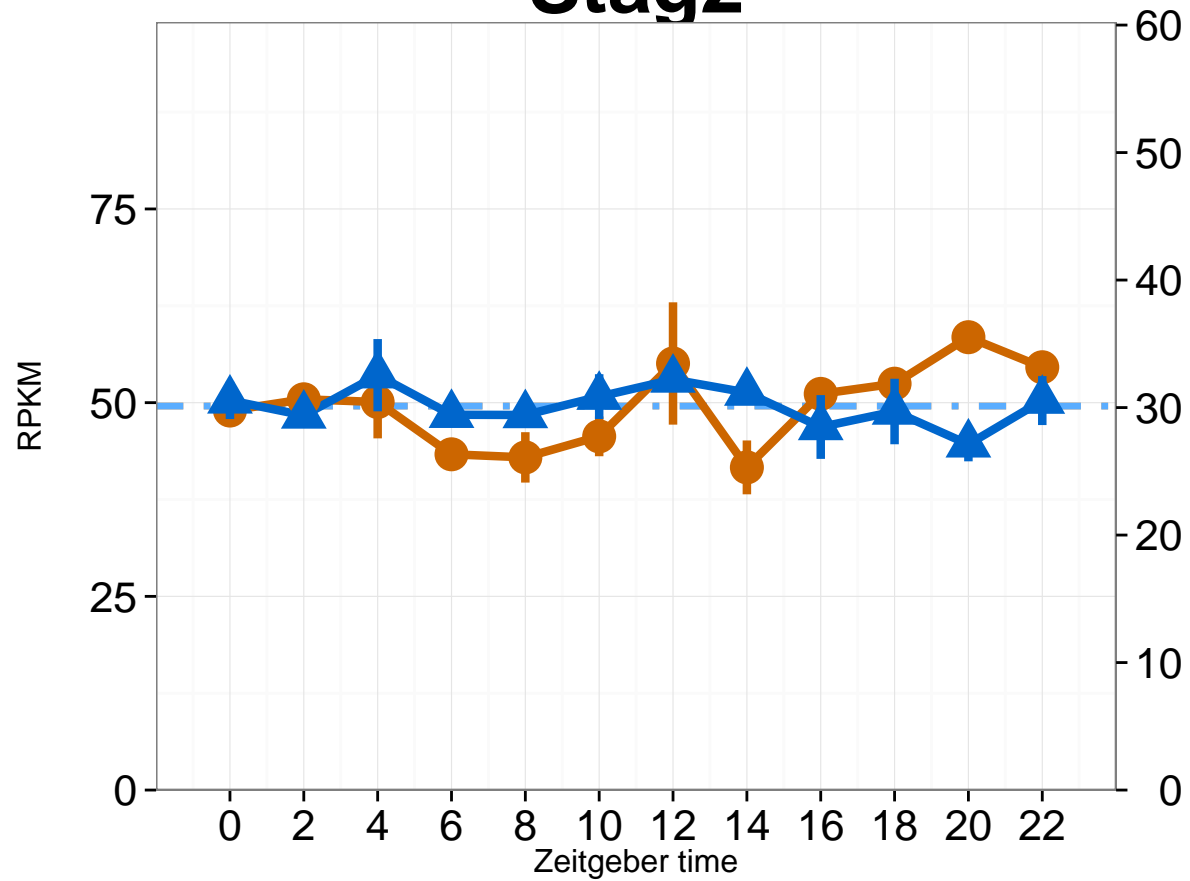

# Stag2

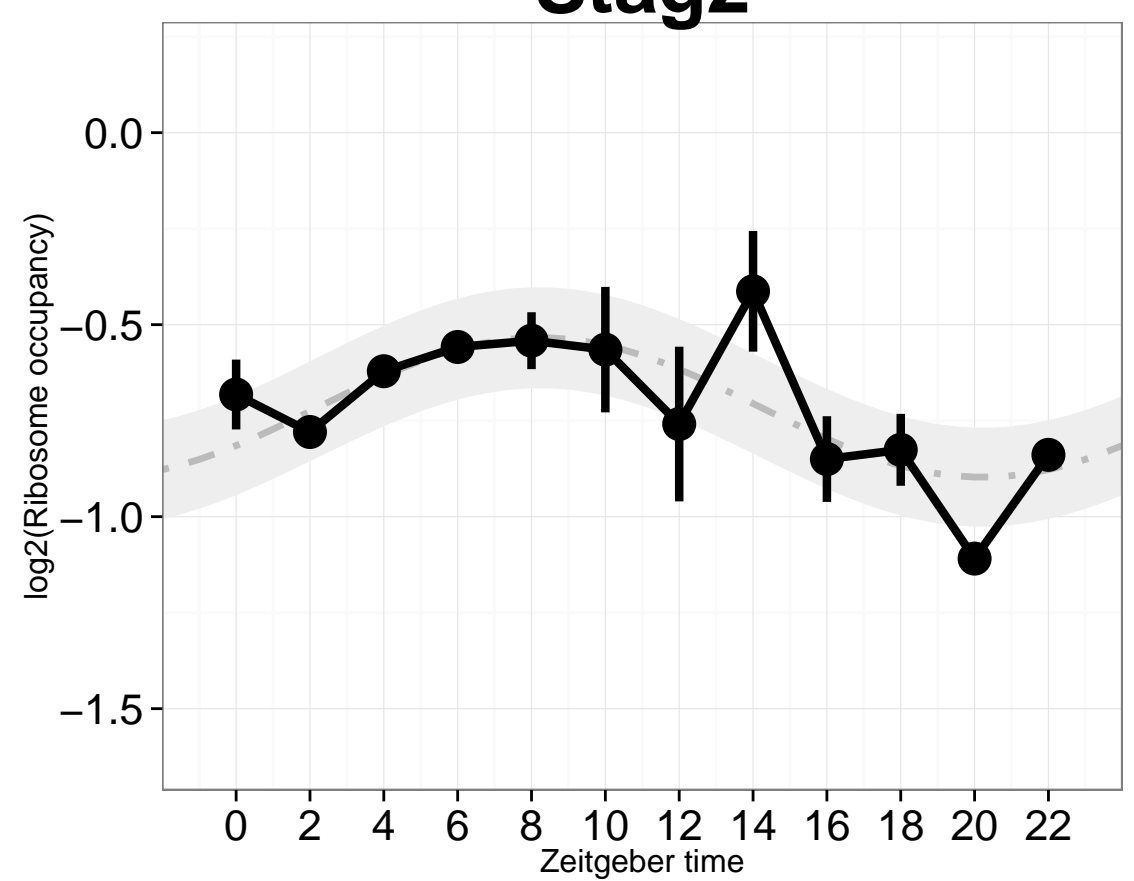

Supplement: Supplementary file 12426 [file 1]

# Scrn1

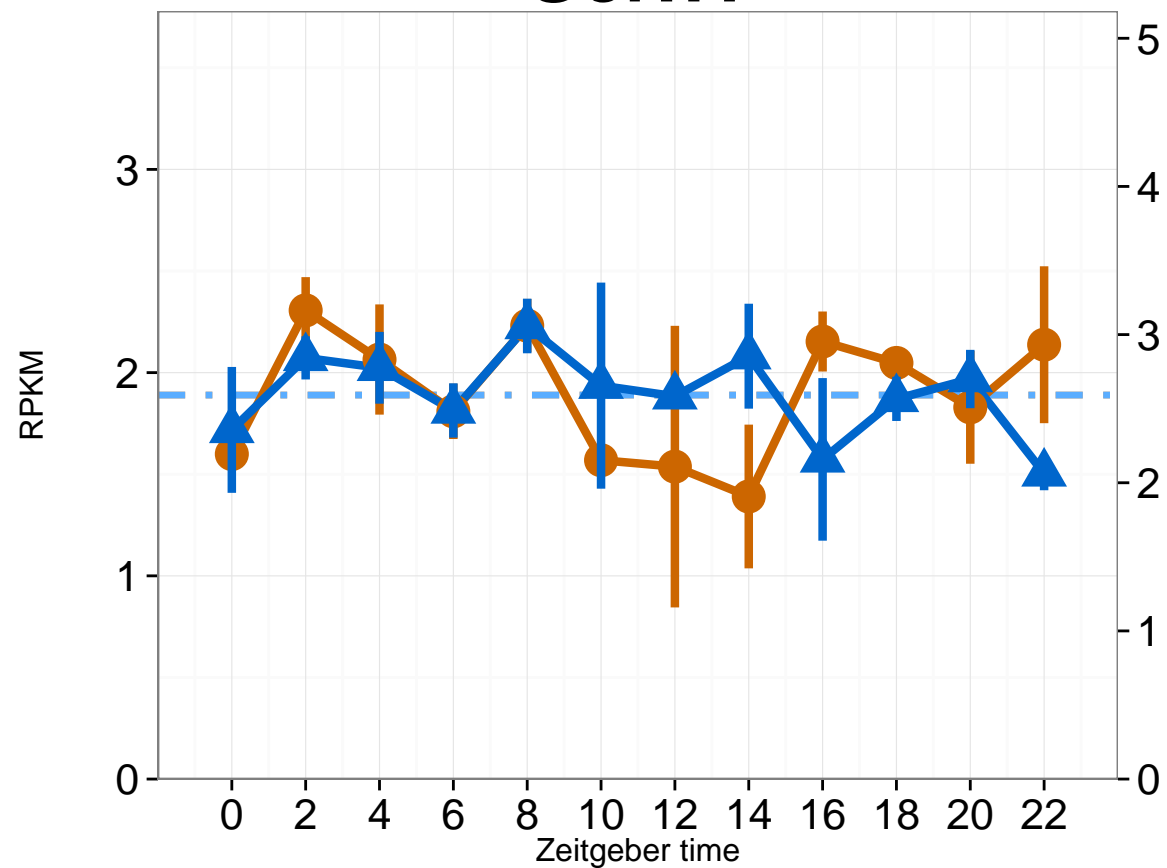

# Scrn1

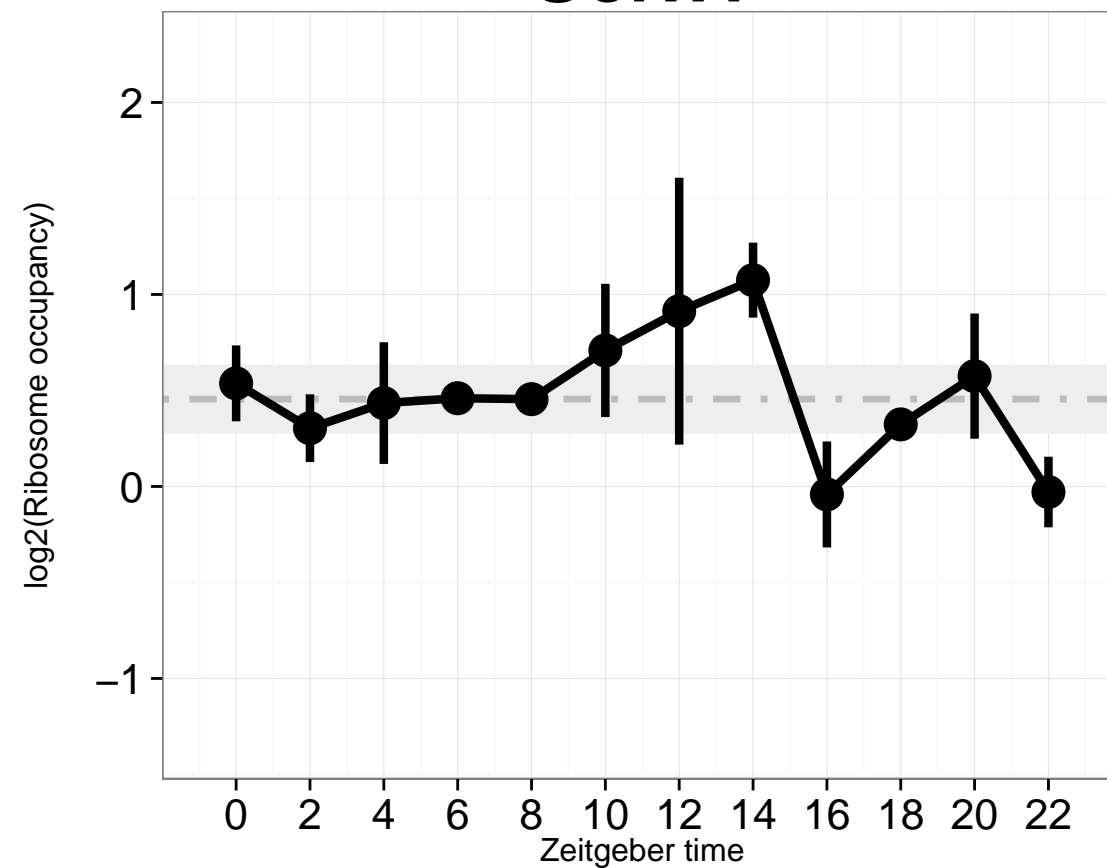

Supplement: Supplementary file 12427 [file 1]

## Enpp4

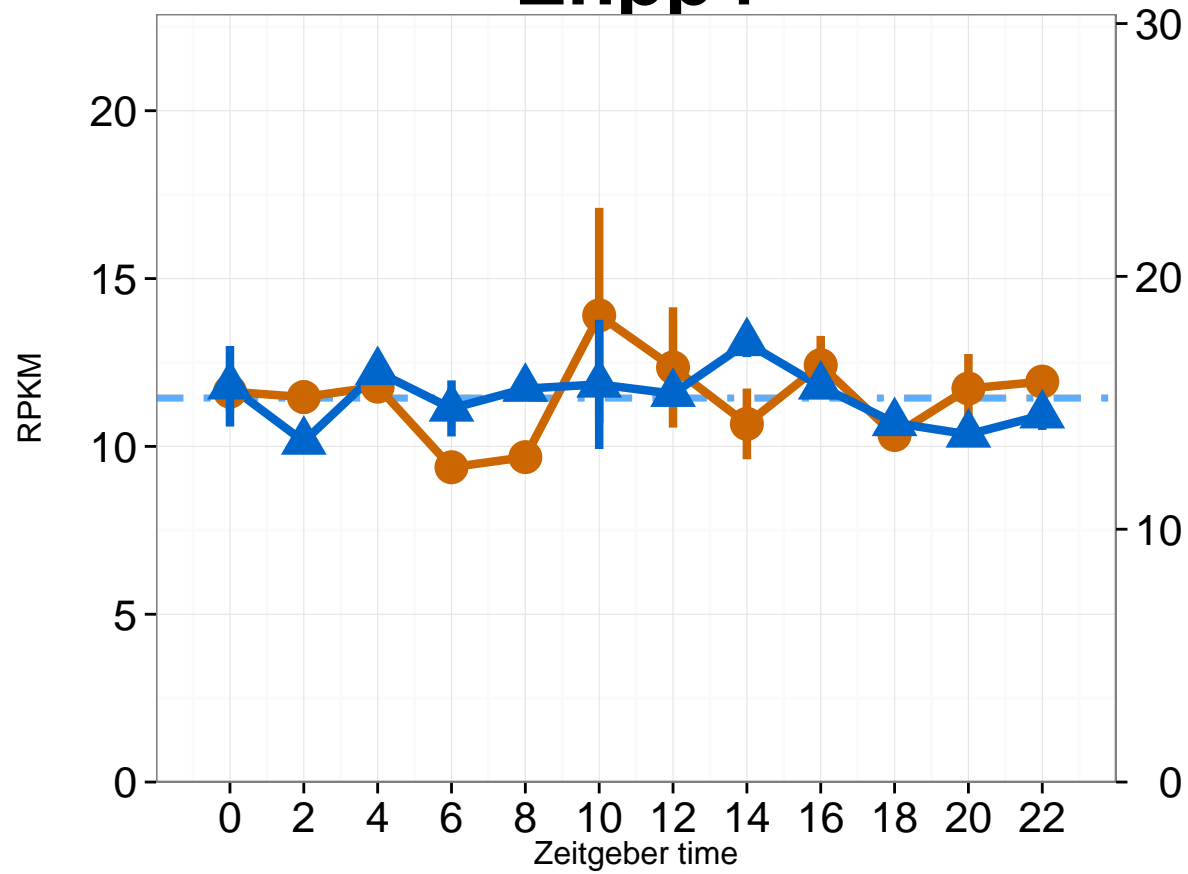

## Enpp4

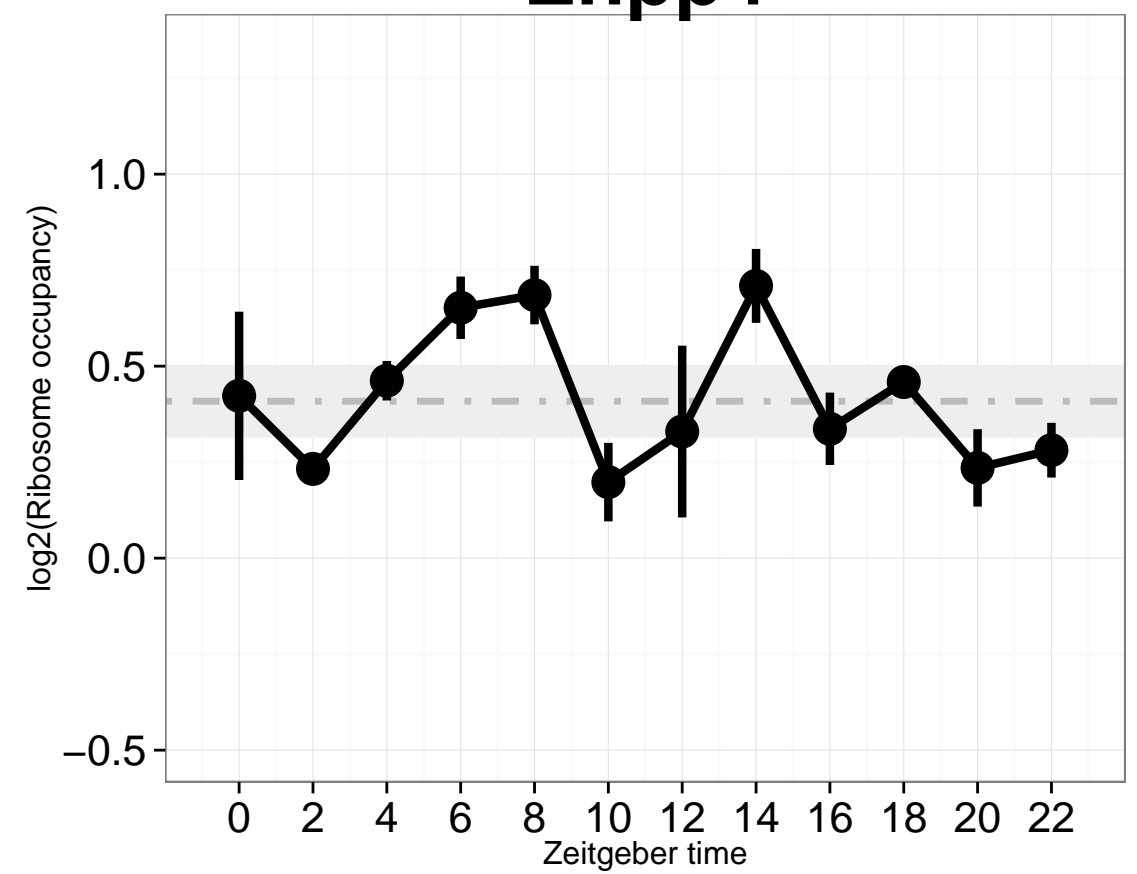

Supplement: Supplementary file 12428 [file 1]

## Krt8

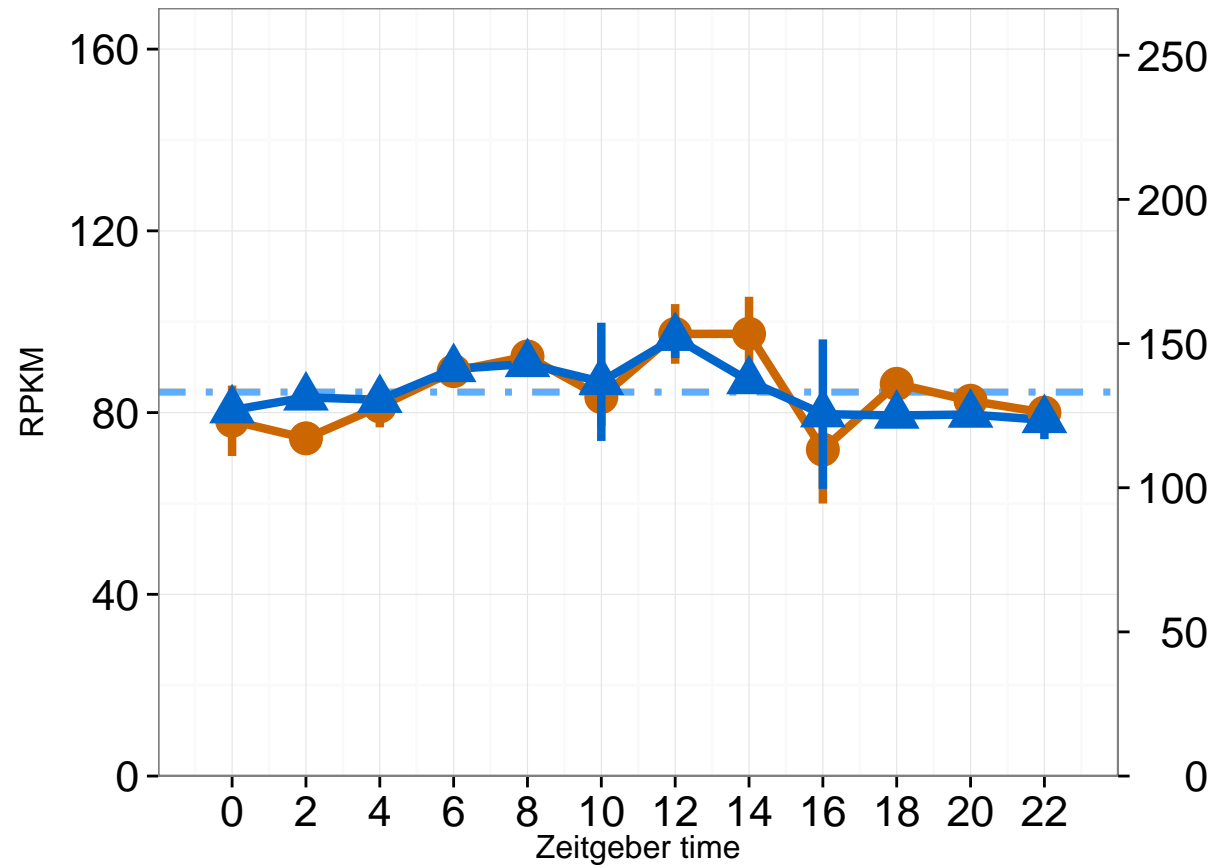

## Krt8

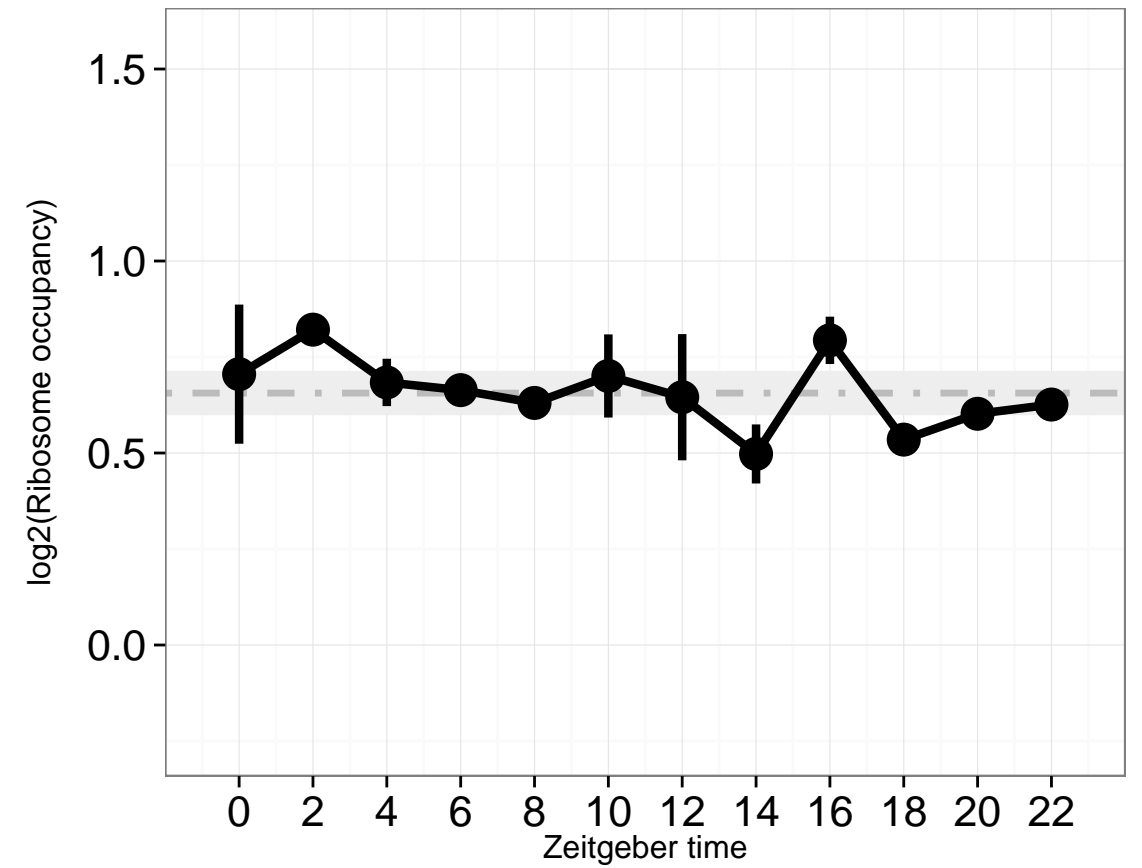

Supplement: Supplementary file 12429 [file 1]

# Tmem243

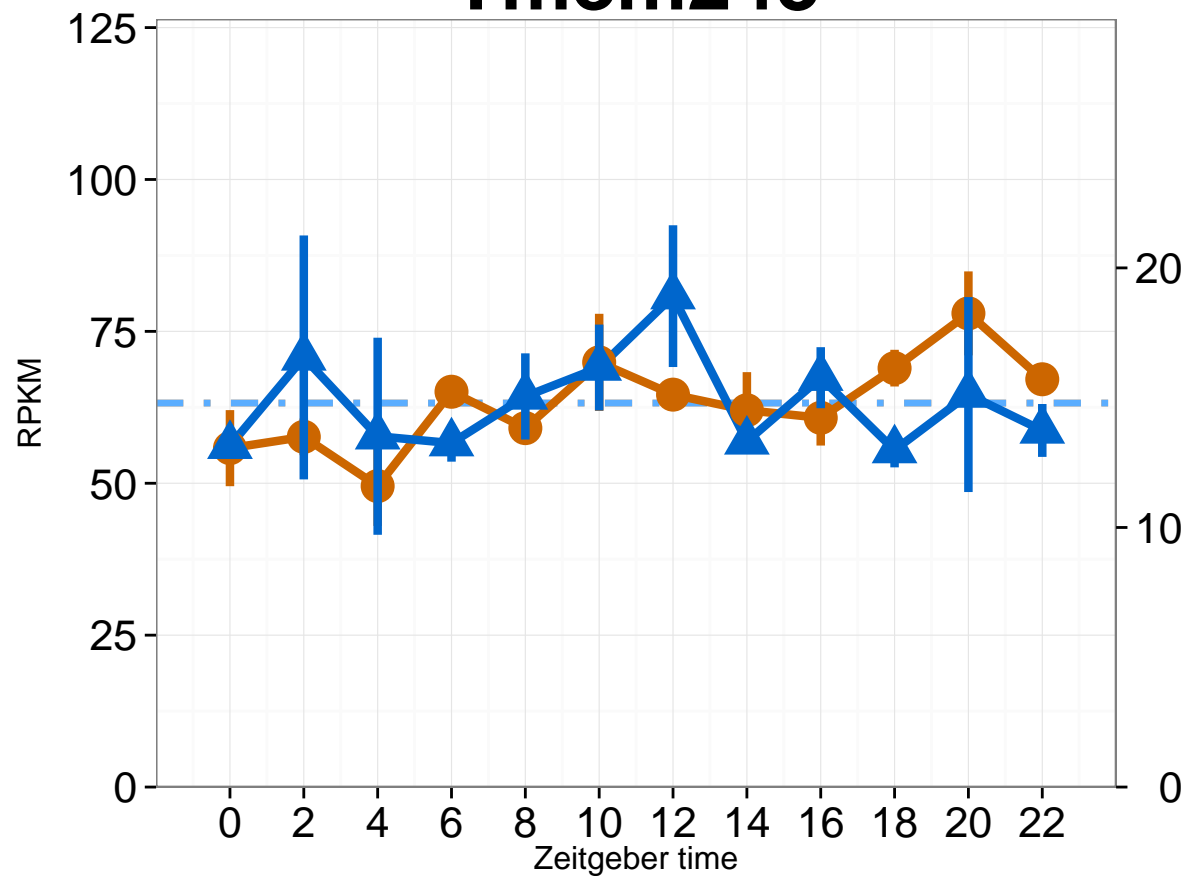

# Tmem243

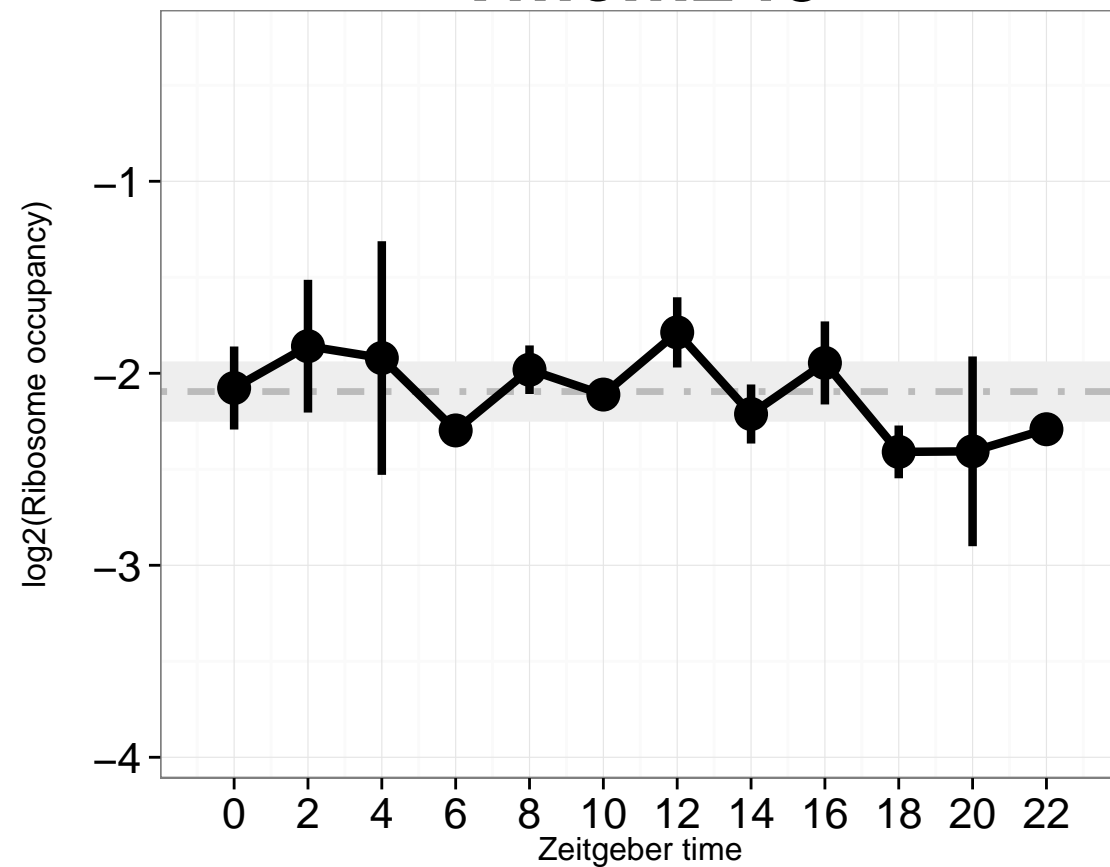

Supplement: Supplementary file 12430 [file 1]

# Gpr137b

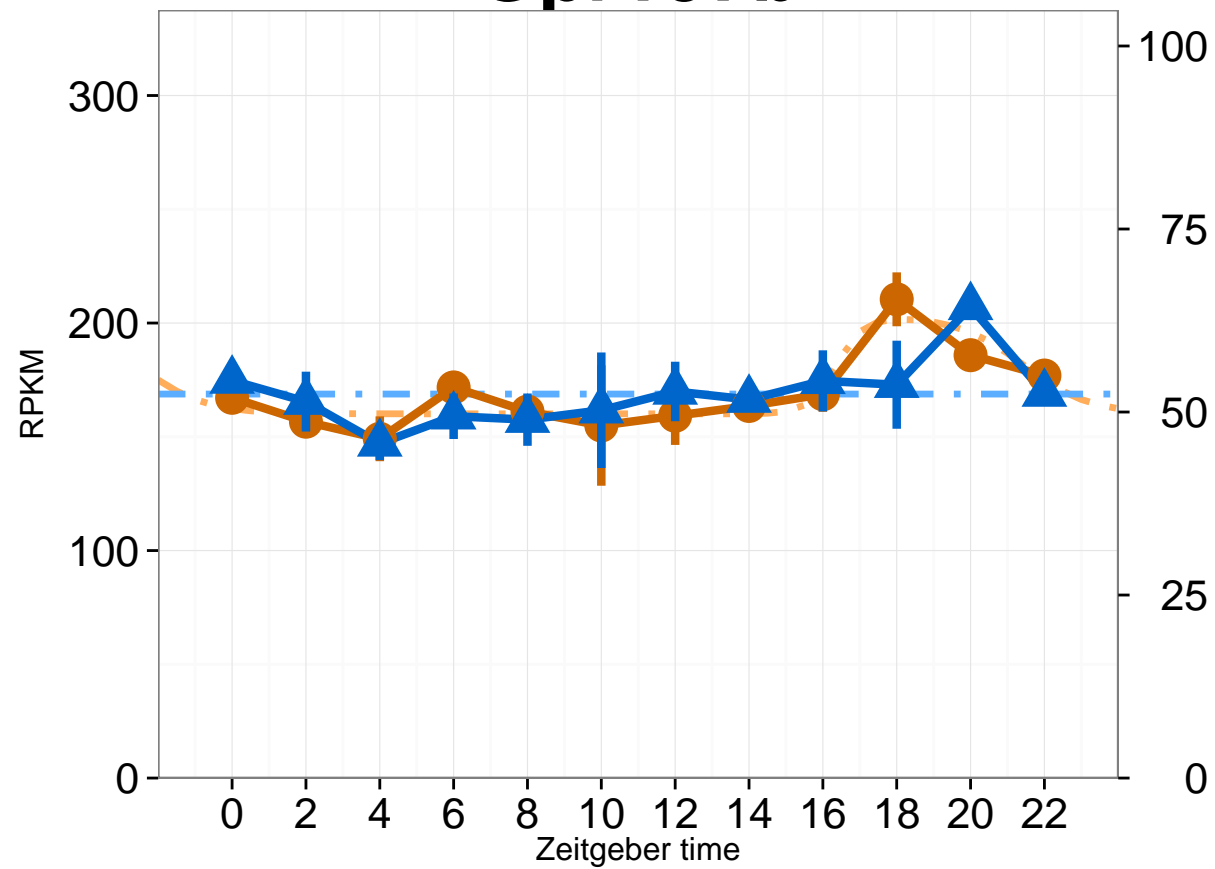

# Gpr137b

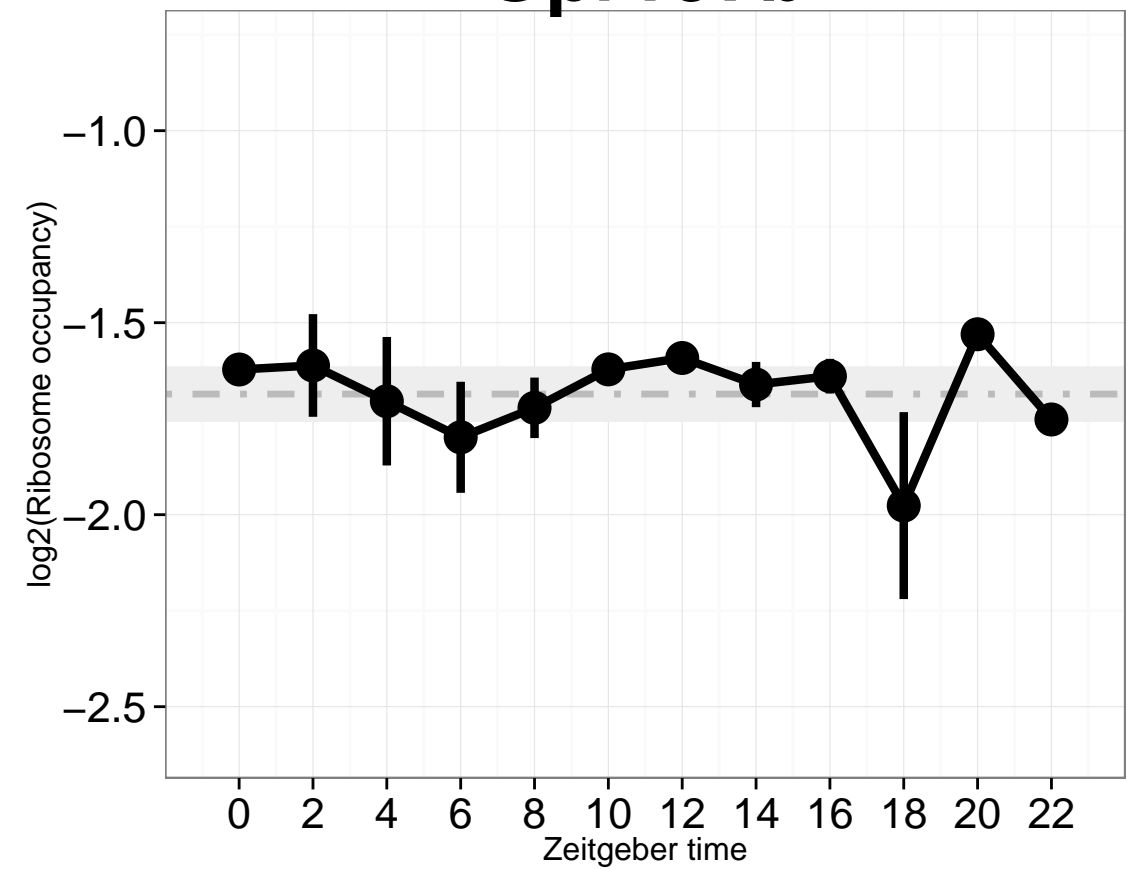

Supplement: Supplementary file 12431 [file 1]

# Bmp3

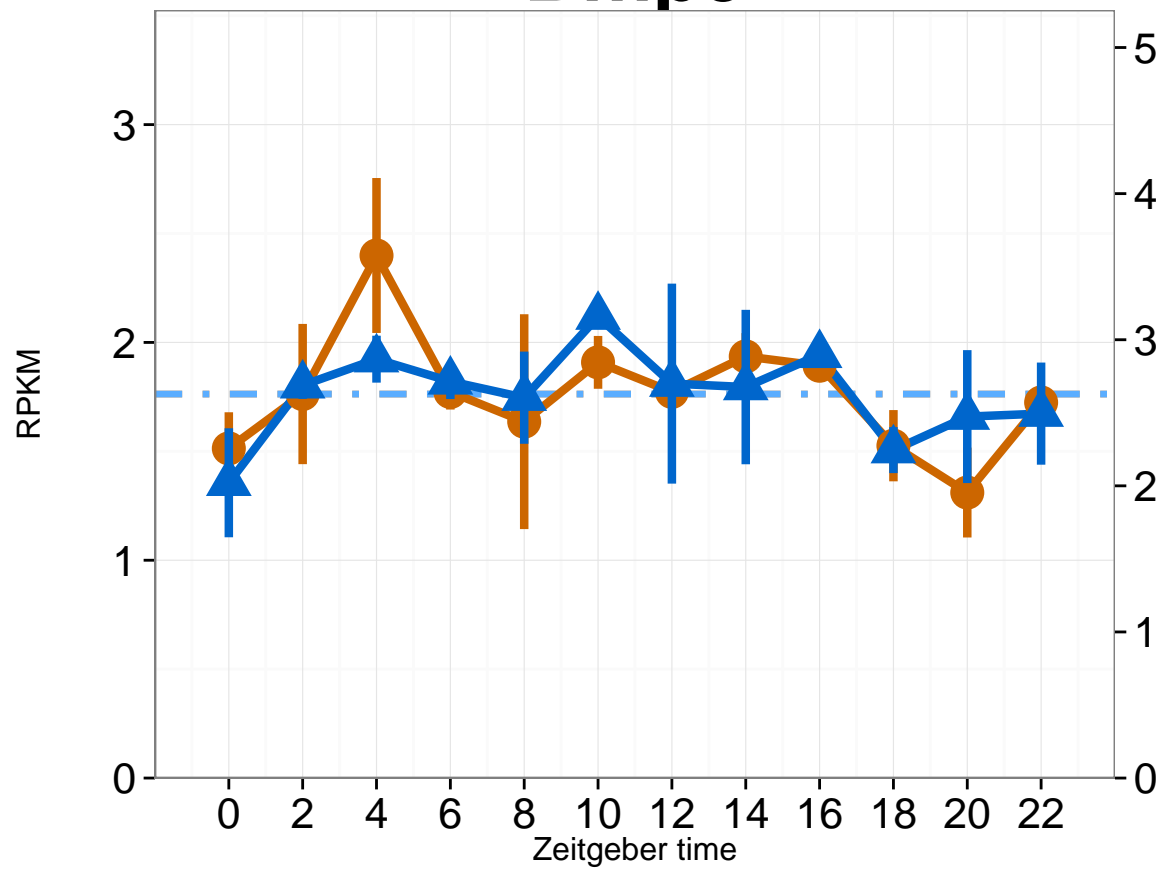

# Bmp3

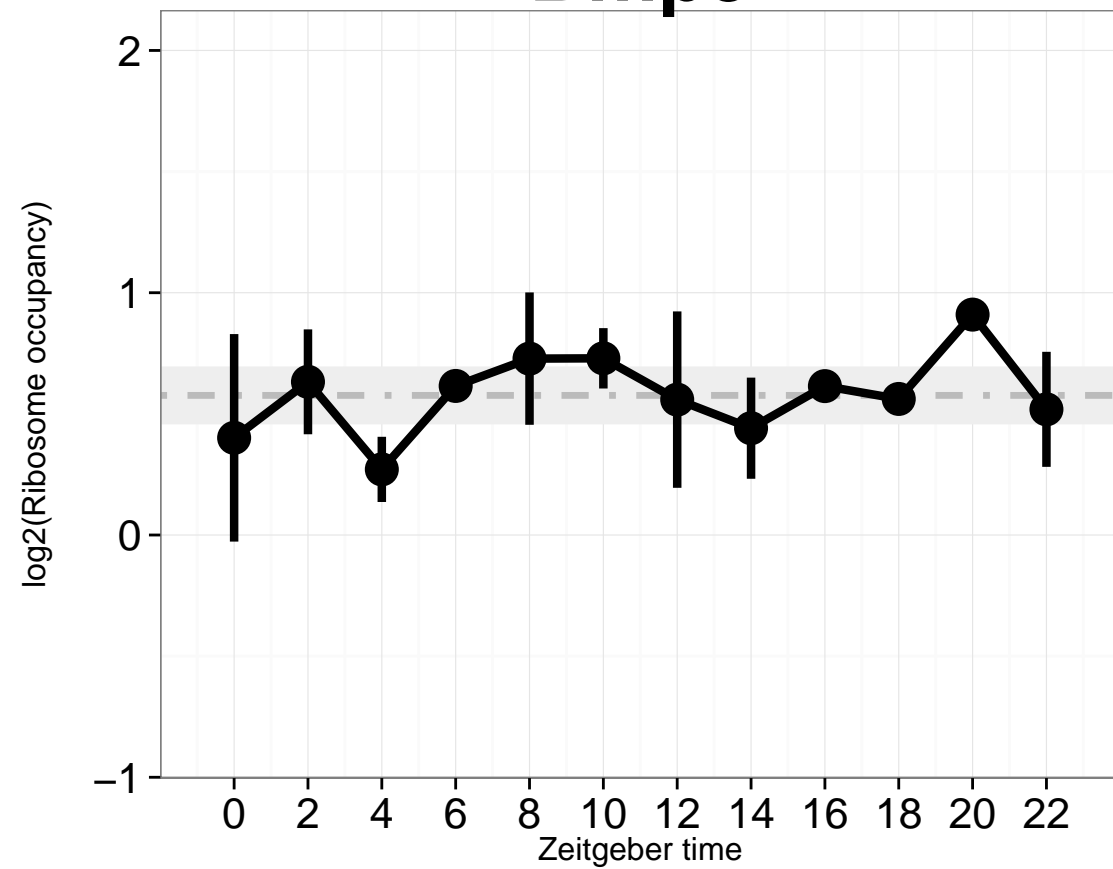

Supplement: Supplementary file 12432 [file 1]

## Npm1

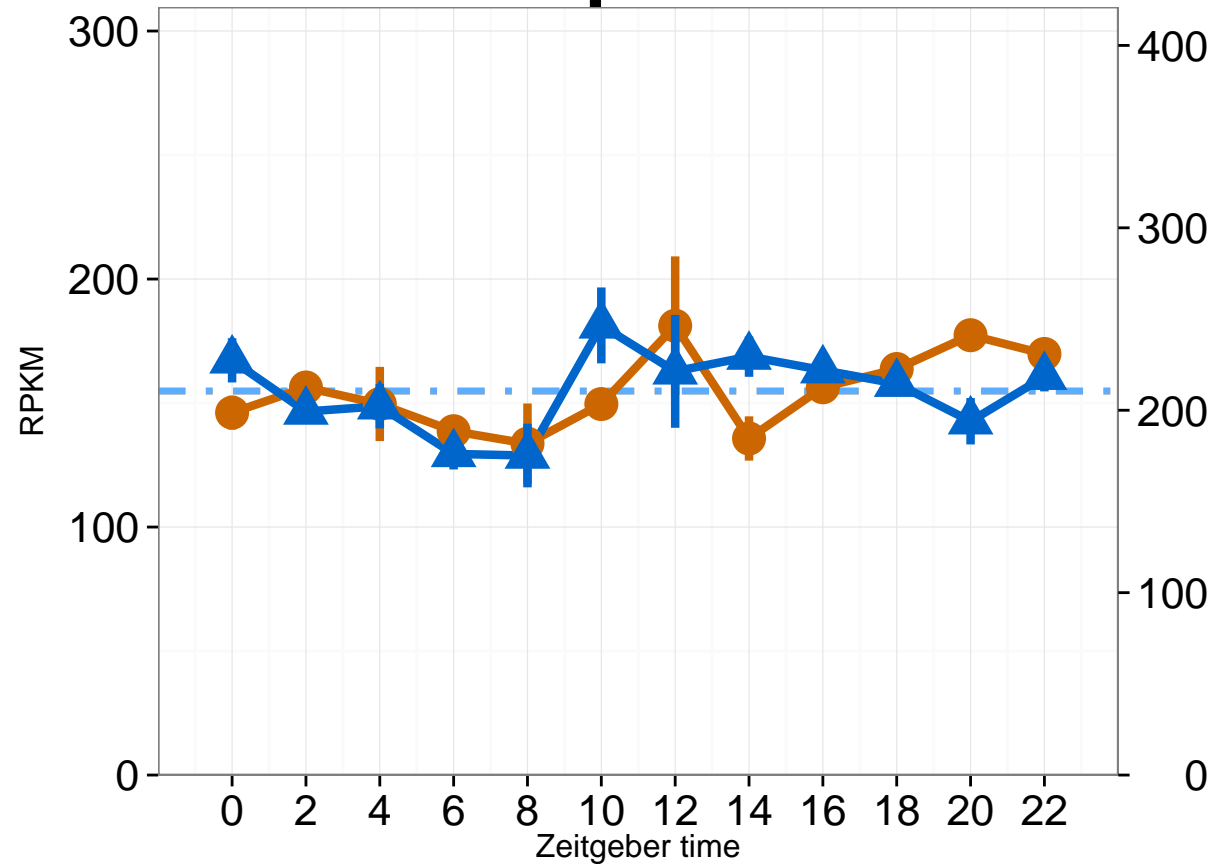

## Npm1

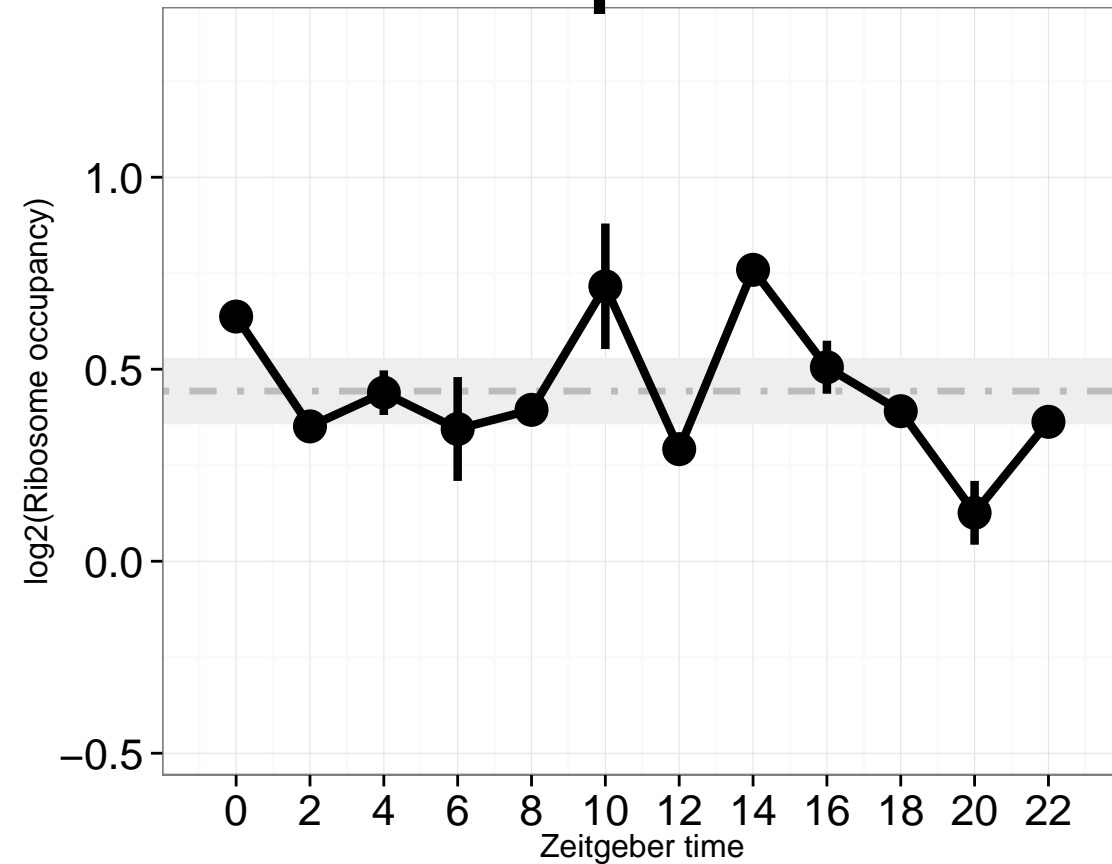

Supplement: Supplementary file 12433 [file 1]

# Celsr1

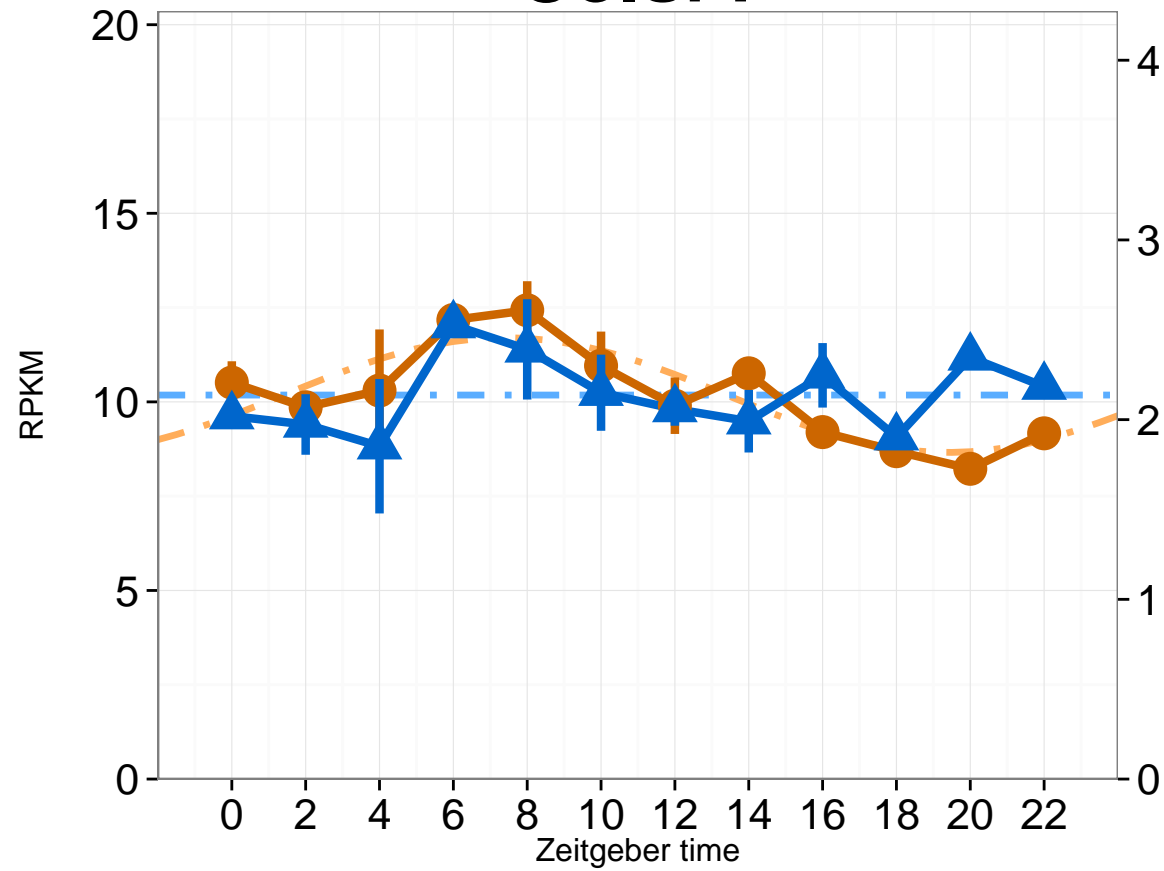

# Celsr1

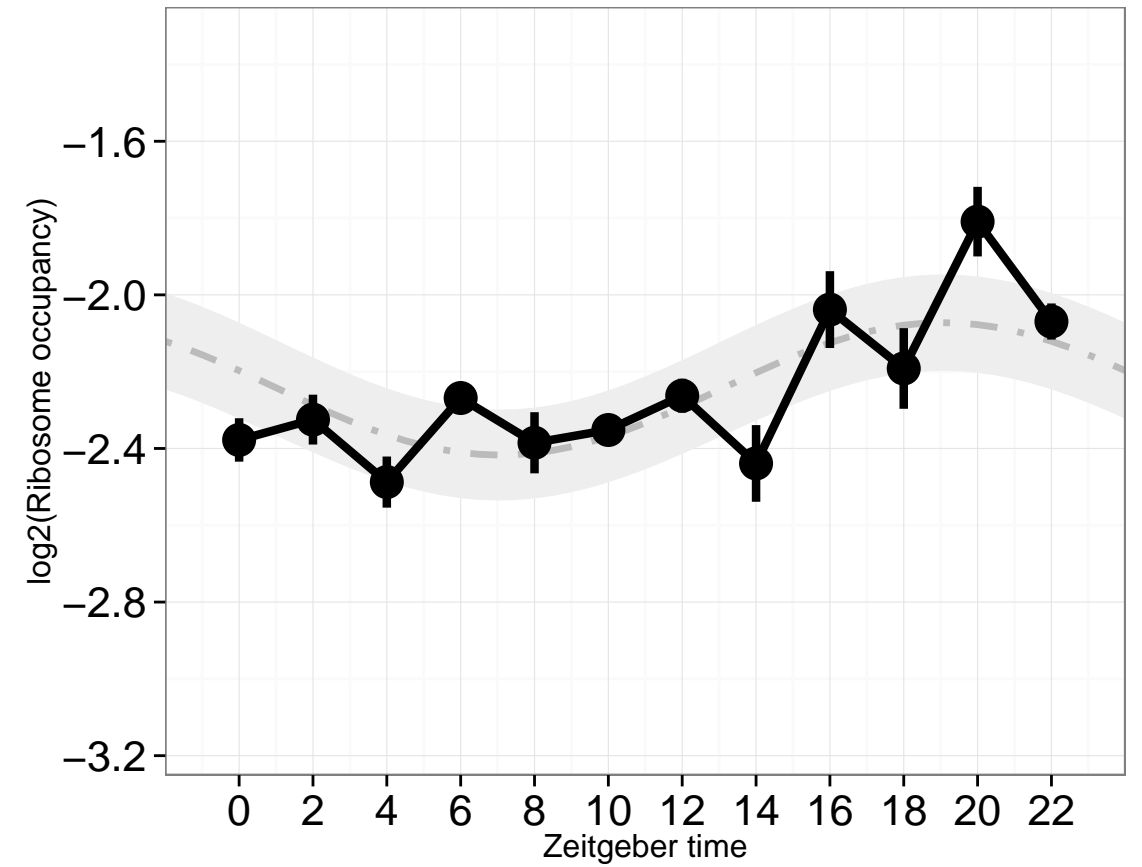

Supplement: Supplementary file 12434 [file 1]

# Samd12

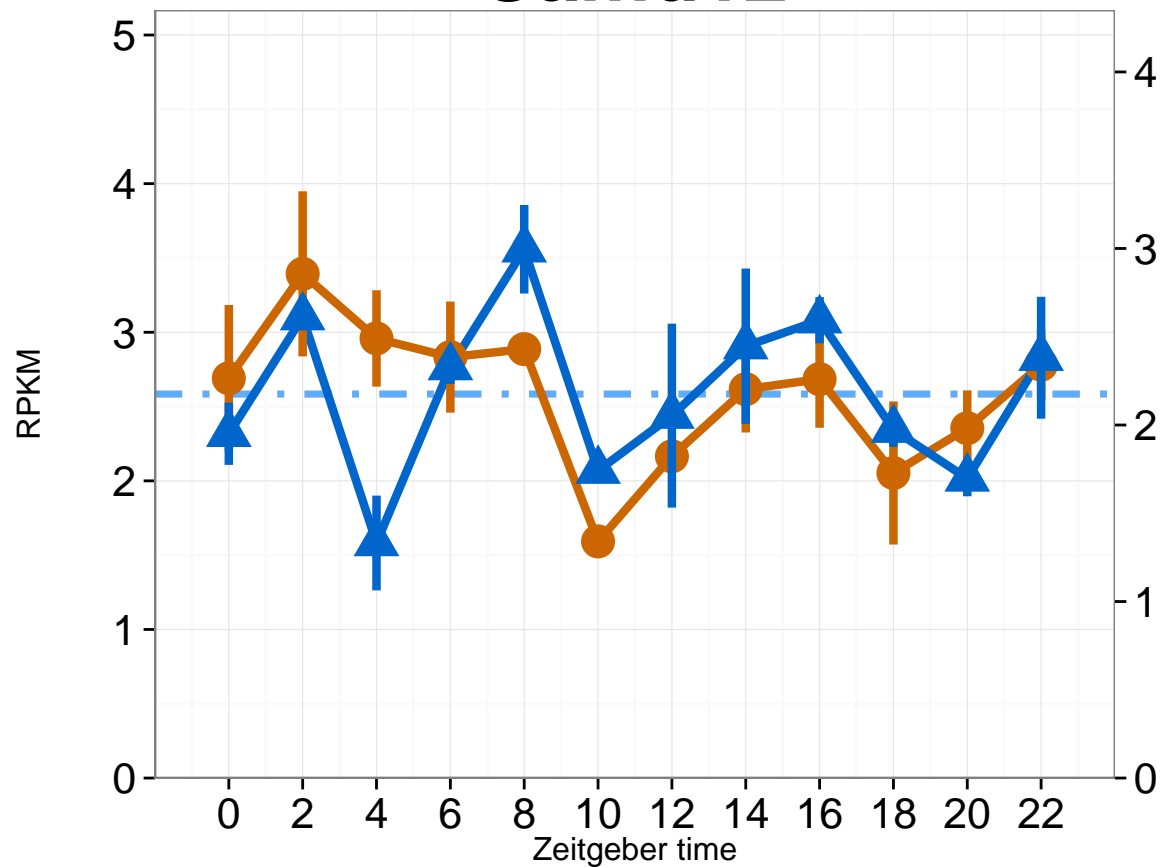

# Samd12

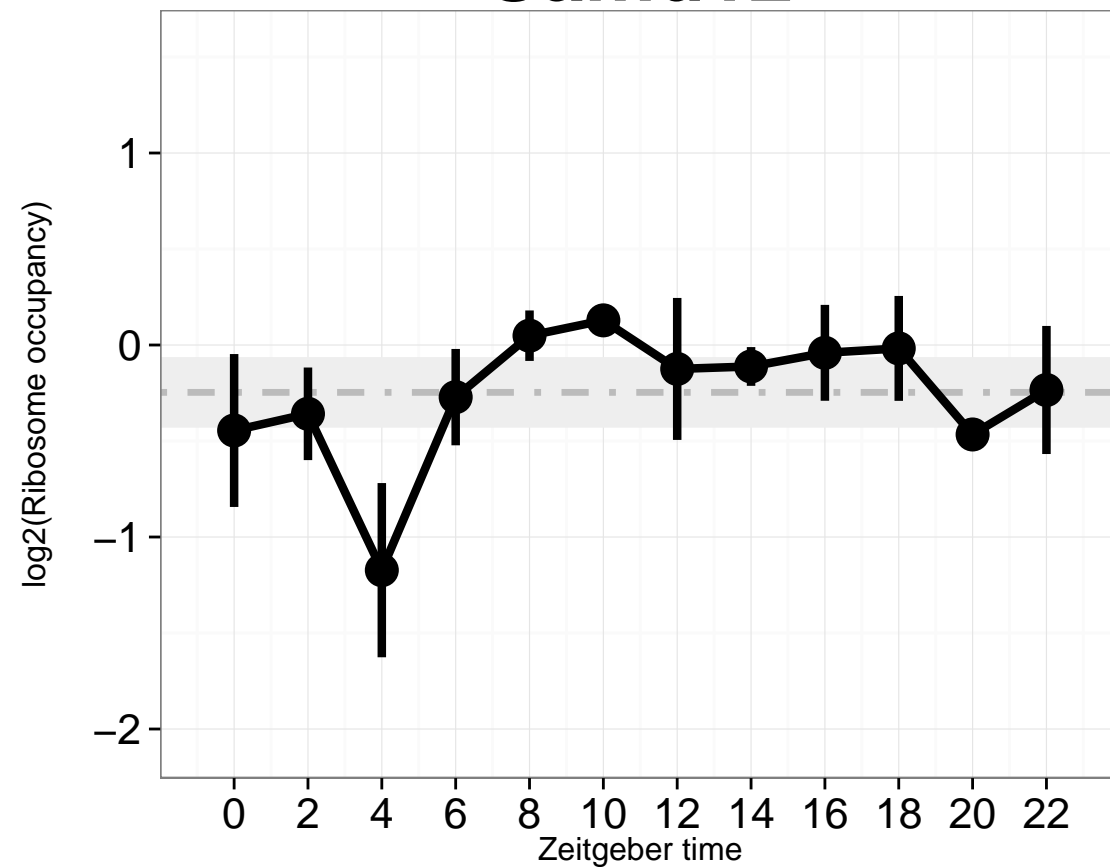

Supplement: Supplementary file 12435 [file 1]

## Dcbld1

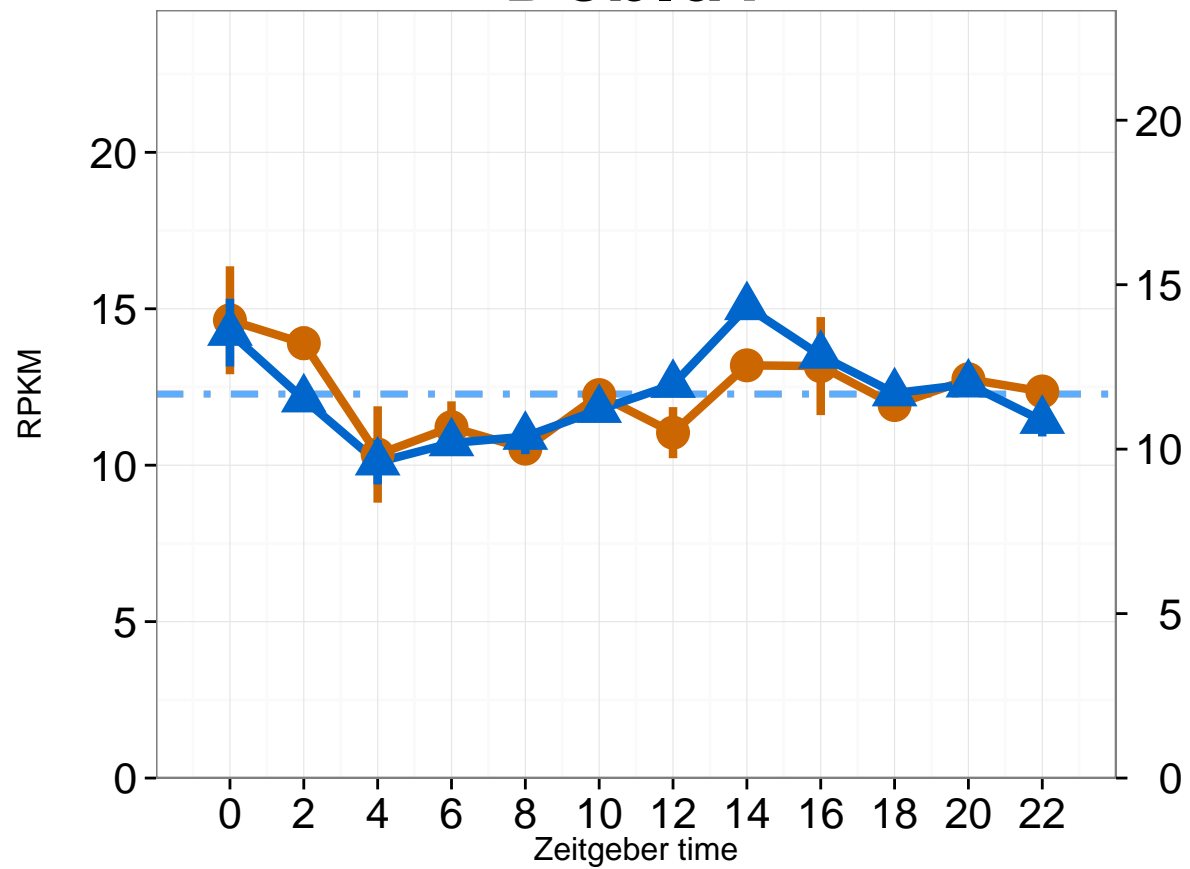

## Dcbld1

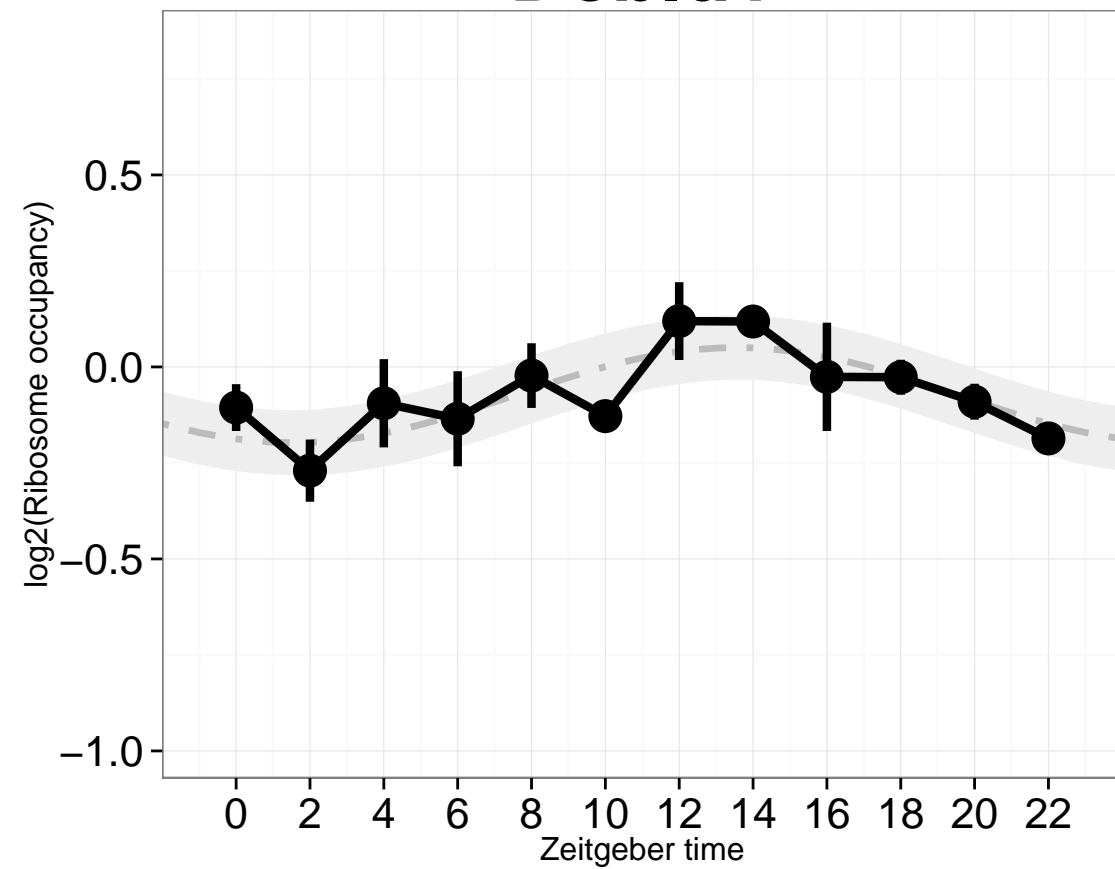

Supplement: Supplementary file 12436 [file 1]

## Taf7

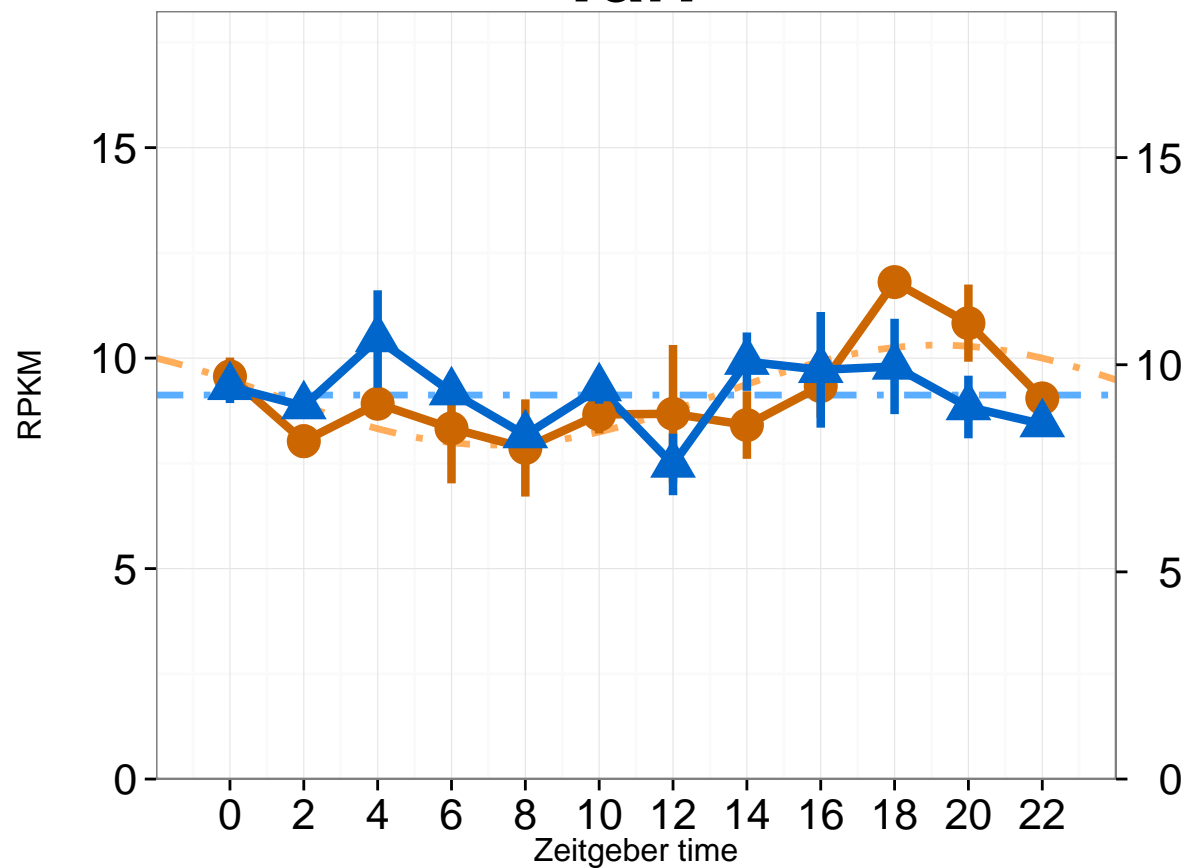

## Taf7

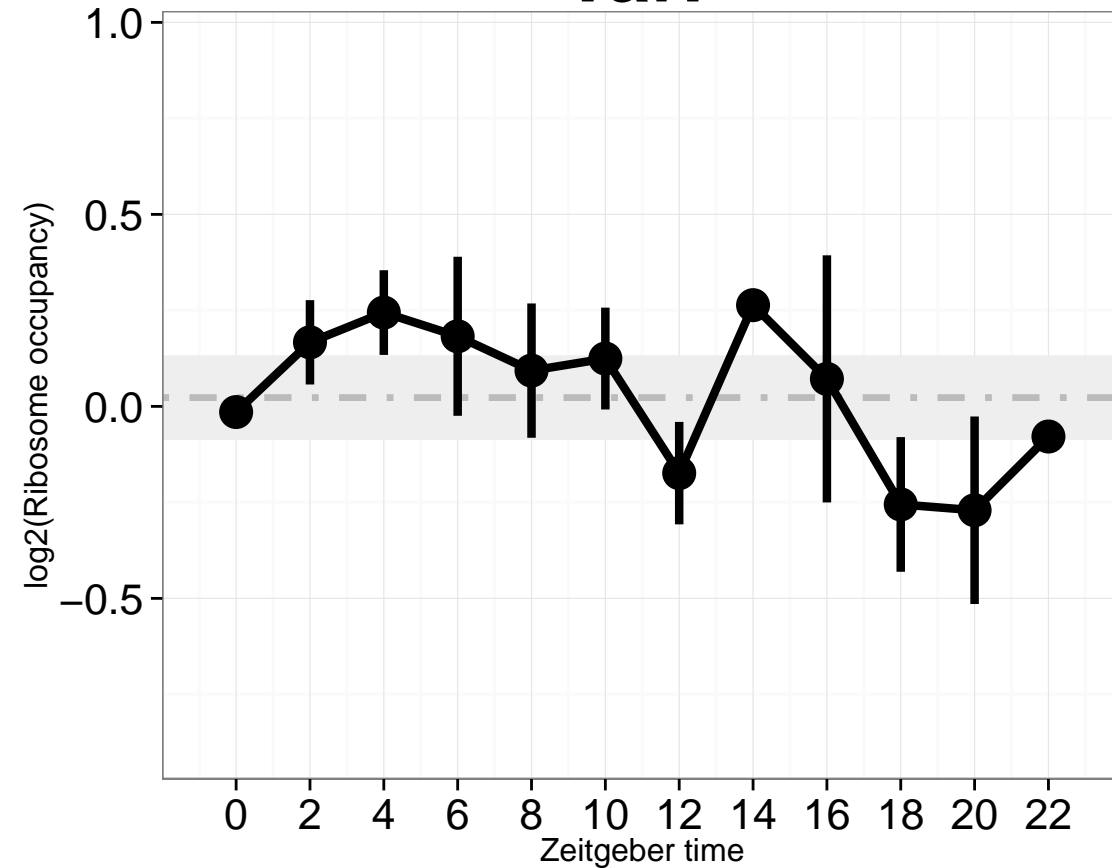

Supplement: Supplementary file 12437 [file 1]

## Rbmxl1

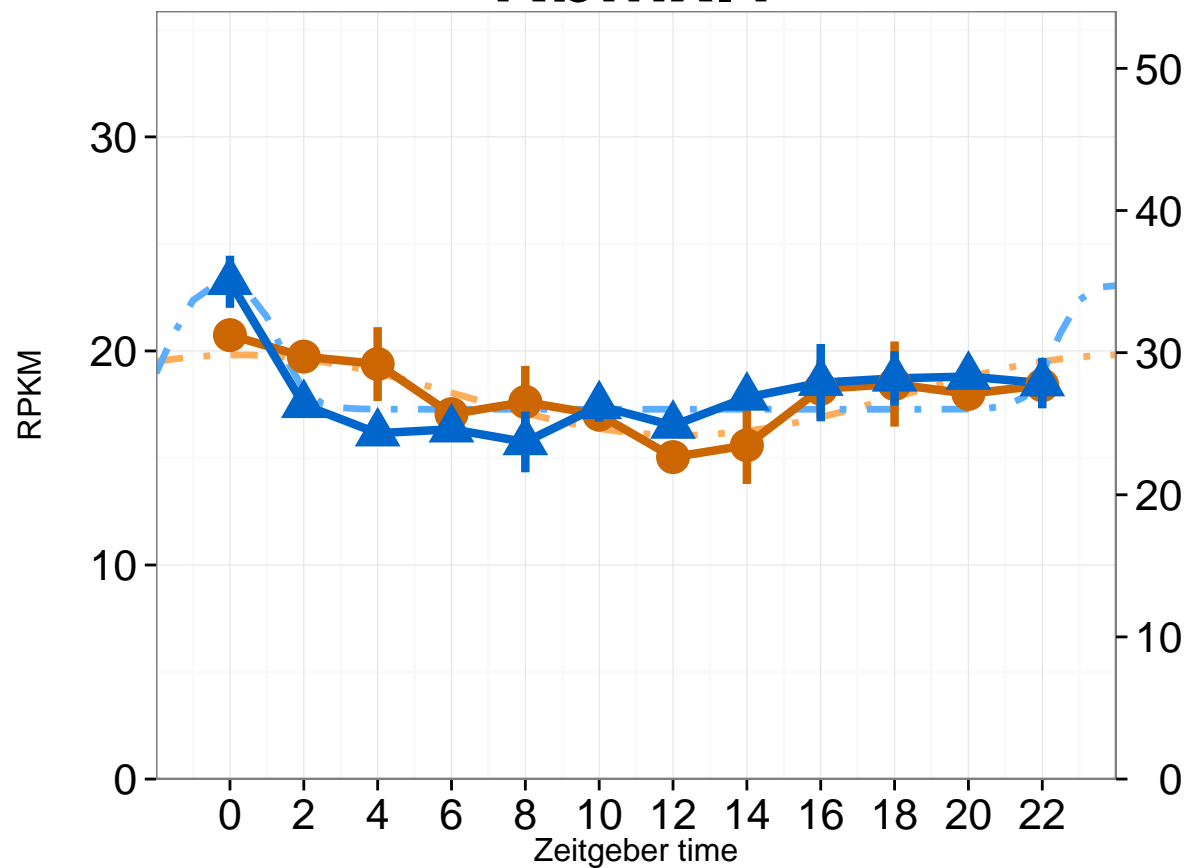

## Rbmxl1

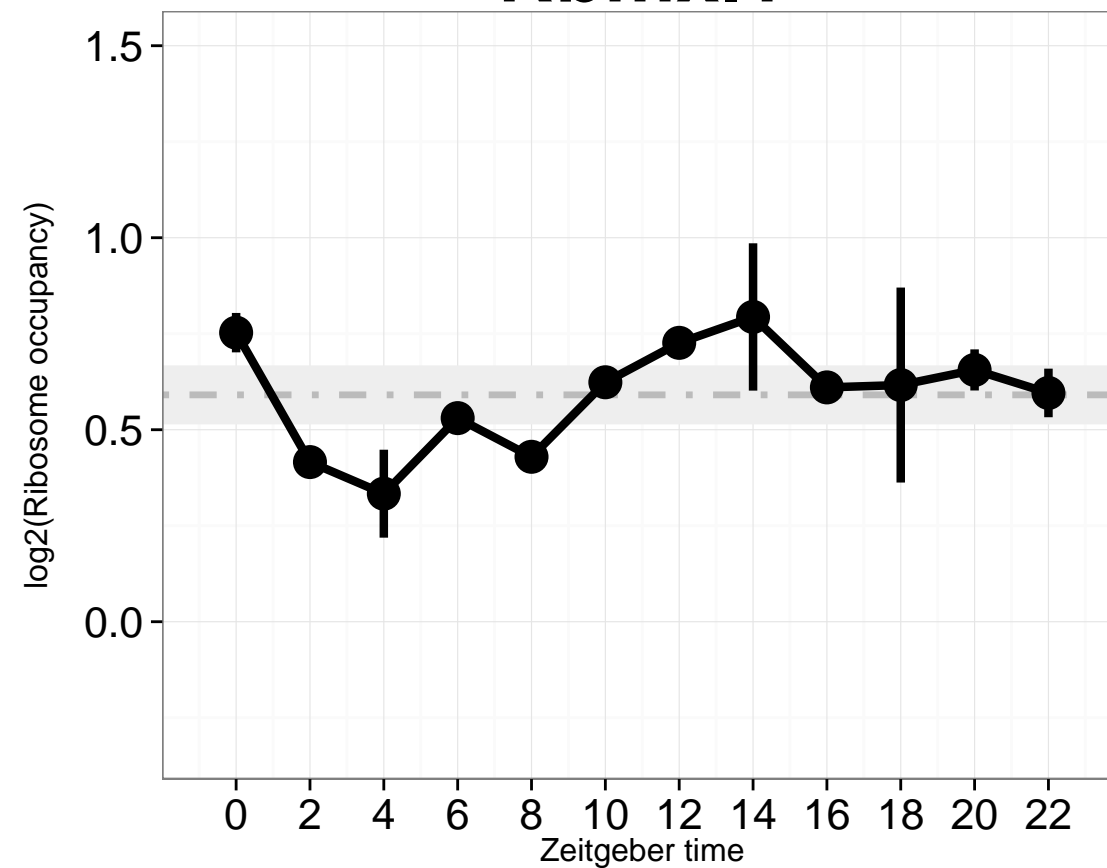

Supplement: Supplementary file 12438 [file 1]

## Pbld2

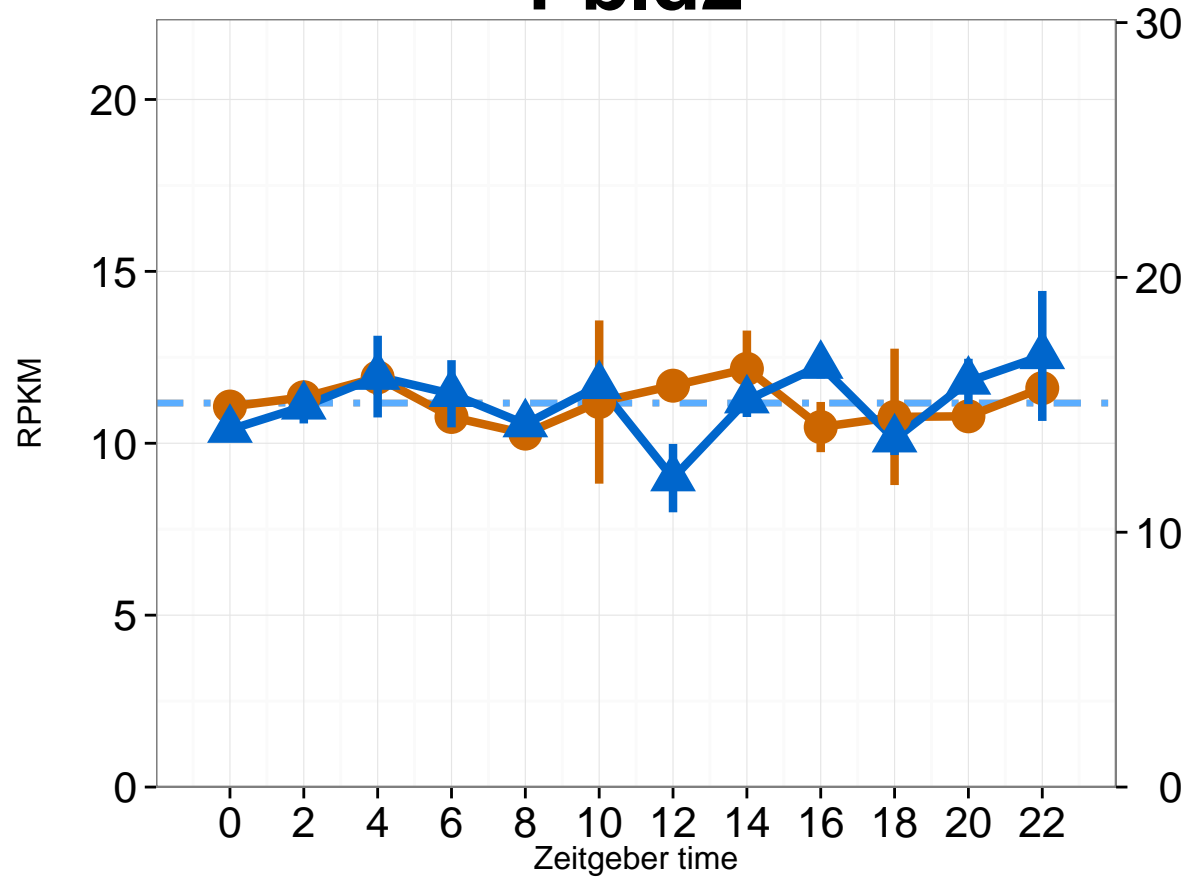

## Pbld2

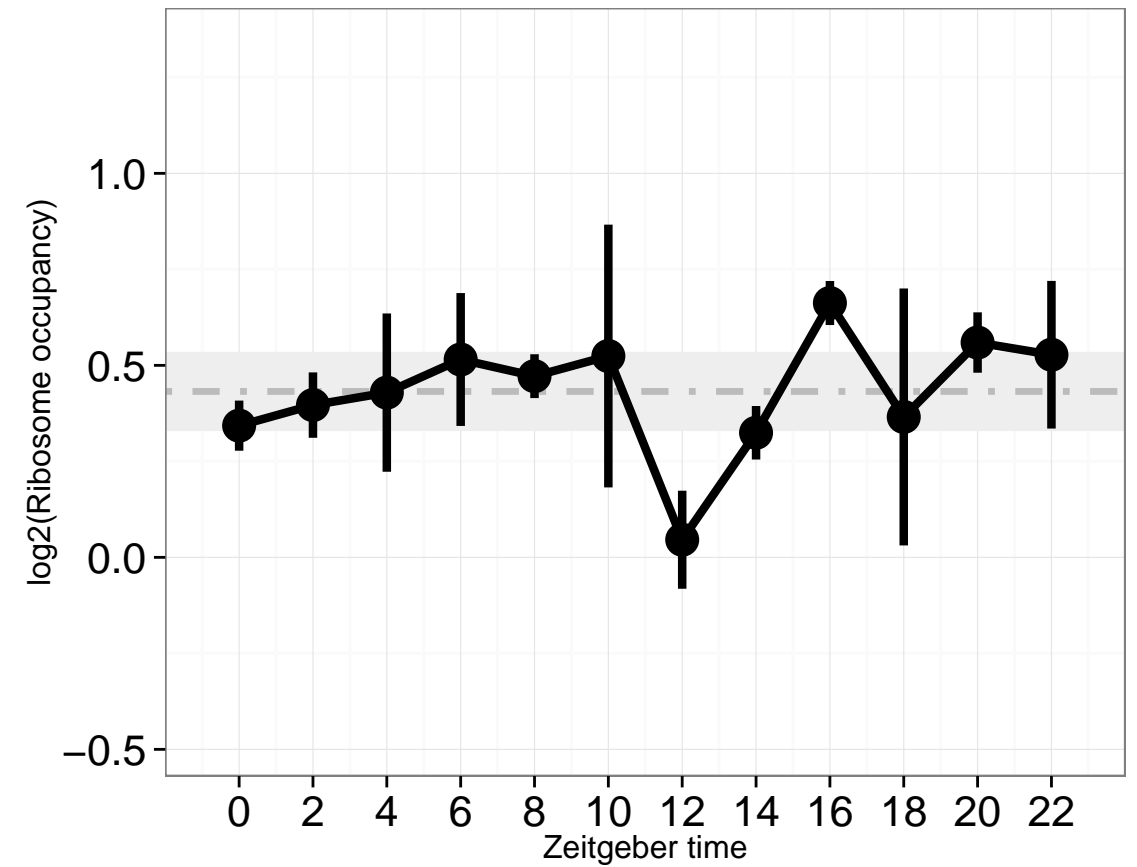

Supplement: Supplementary file 12439 [file 1]

# Pdzd4

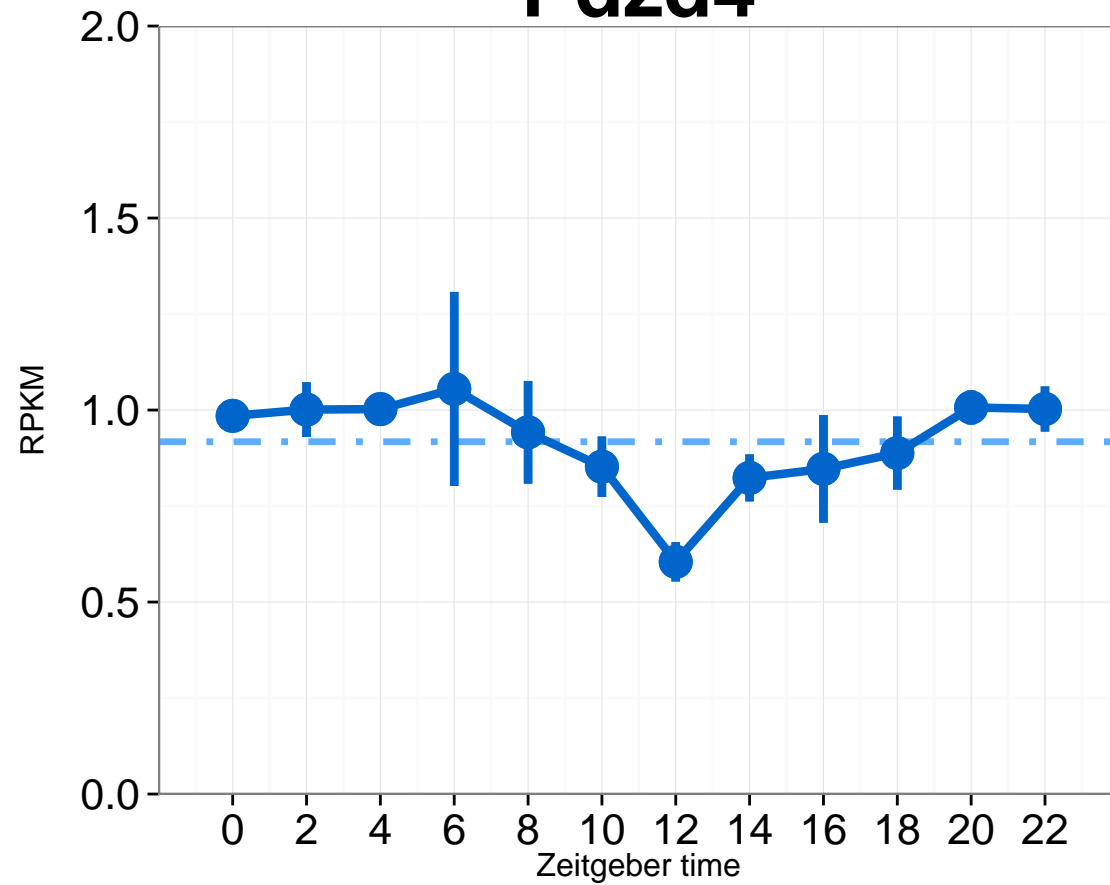

# Pdzd4 log2(Ribosome occupancy

Supplement: Supplementary file 12440 [file 1]

## Snx2

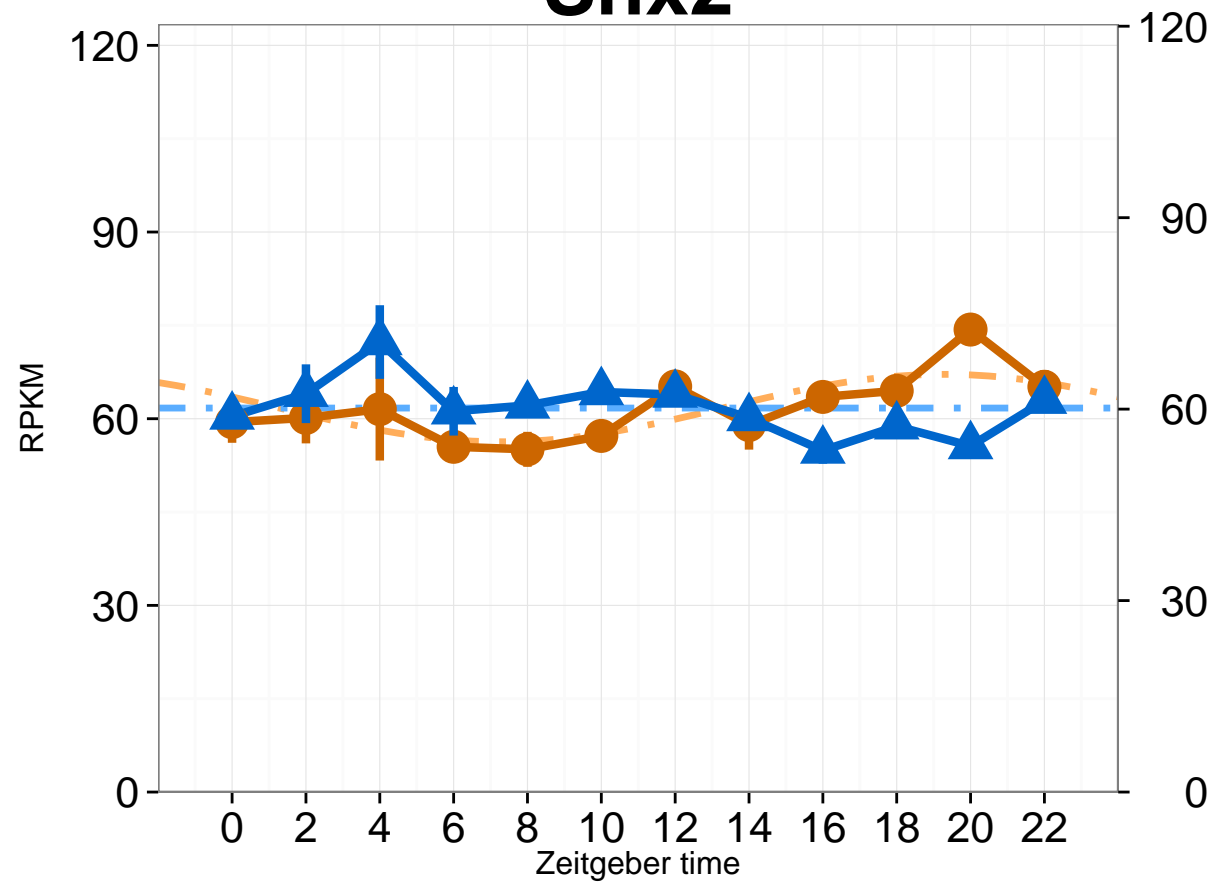

## Snx2

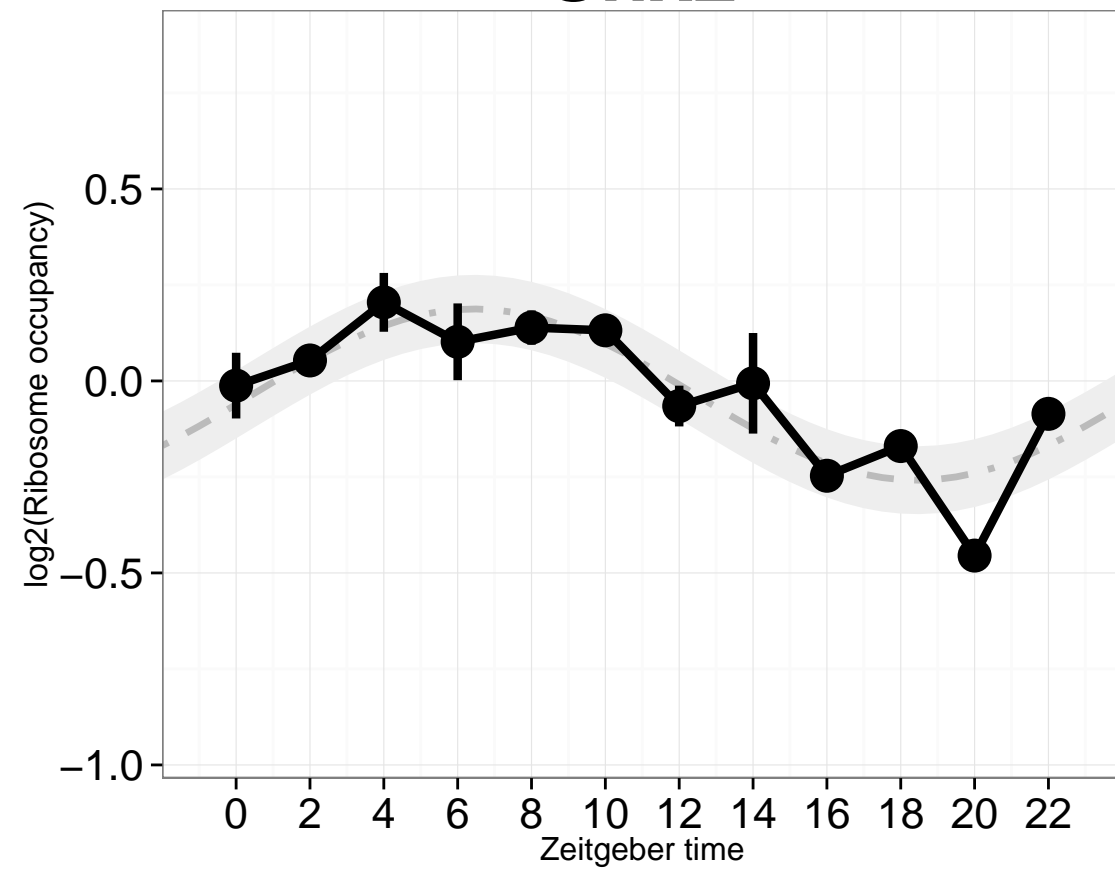

Supplement: Supplementary file 12441 [file 1]

# Kcnt1

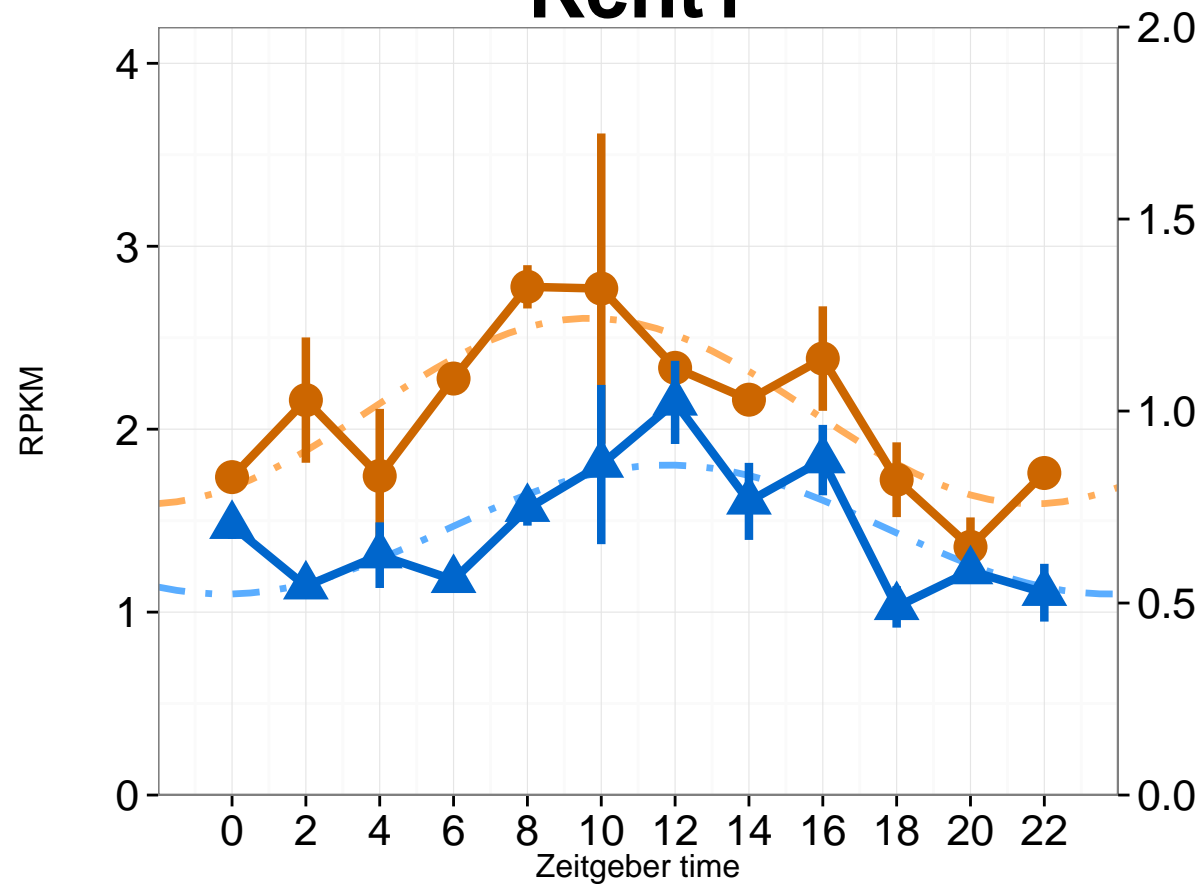

# Kcnt1

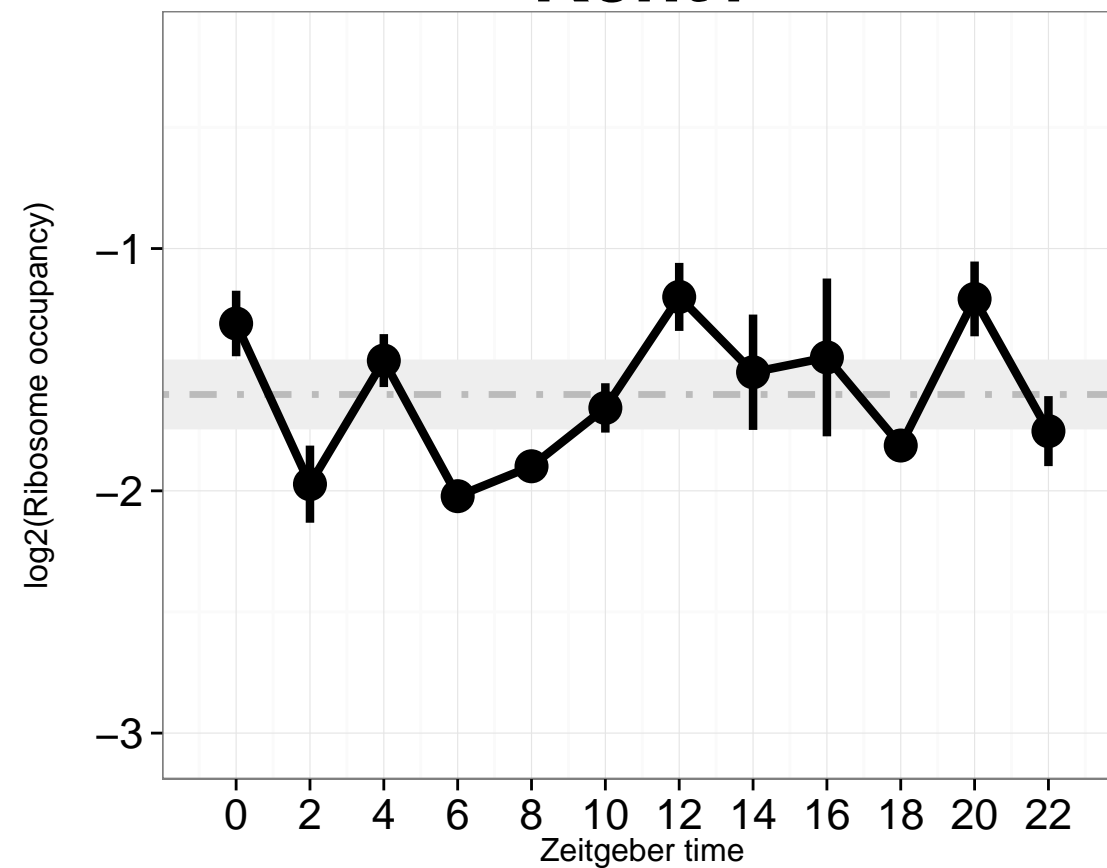

Supplement: Supplementary file 12442 [file 1]

## Kras

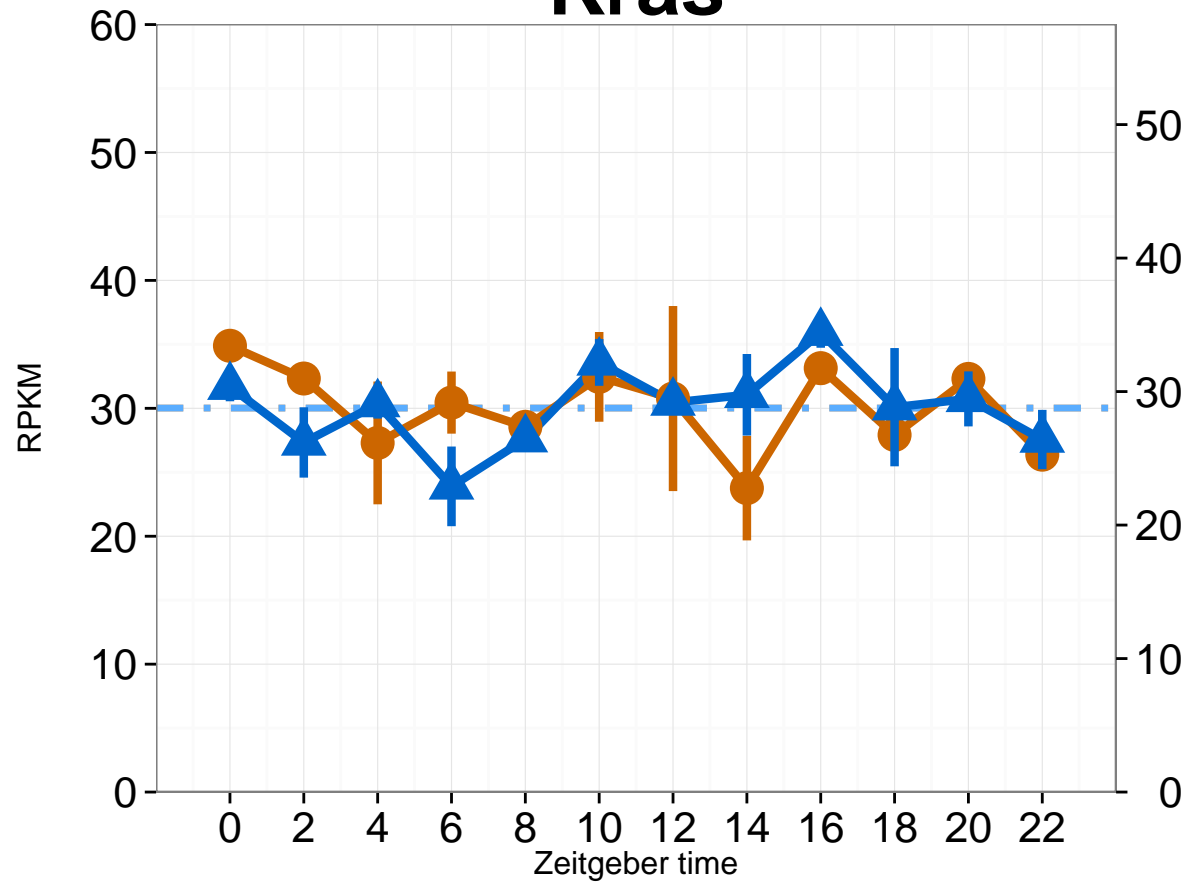

## Kras

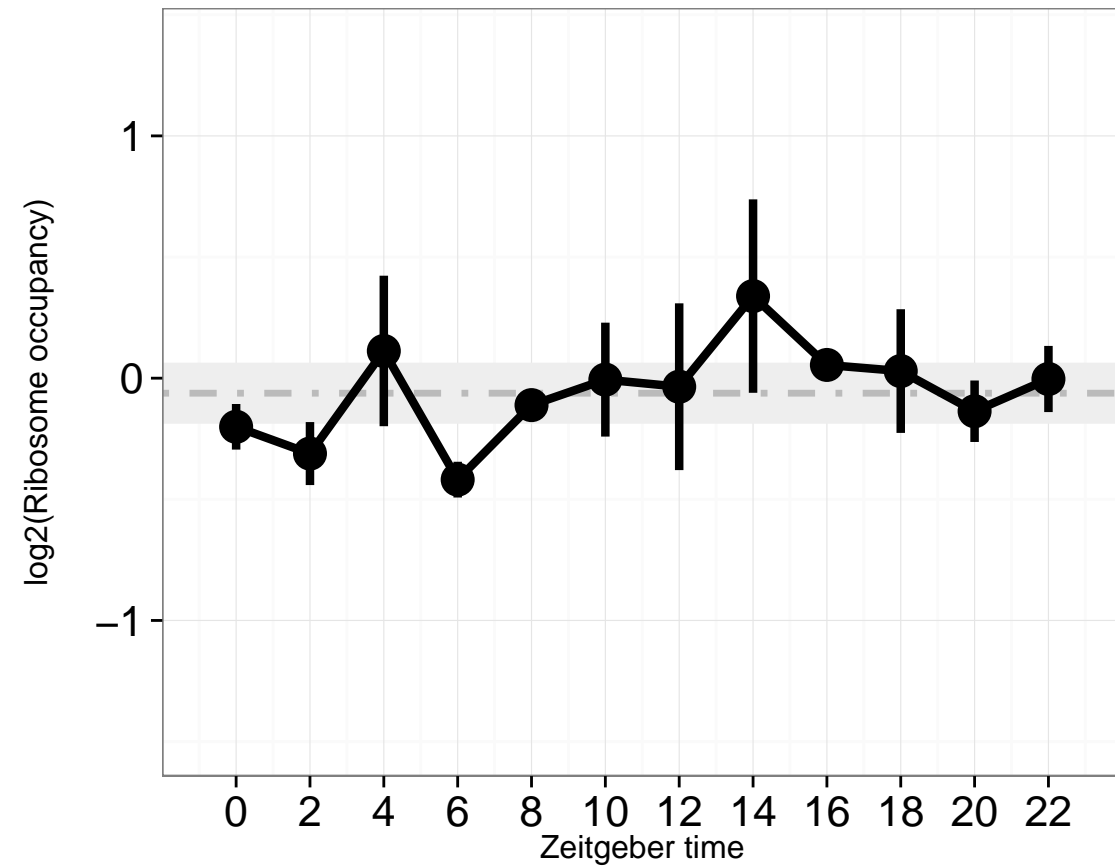

Supplement: Supplementary file 12443 [file 1]

## Crb3

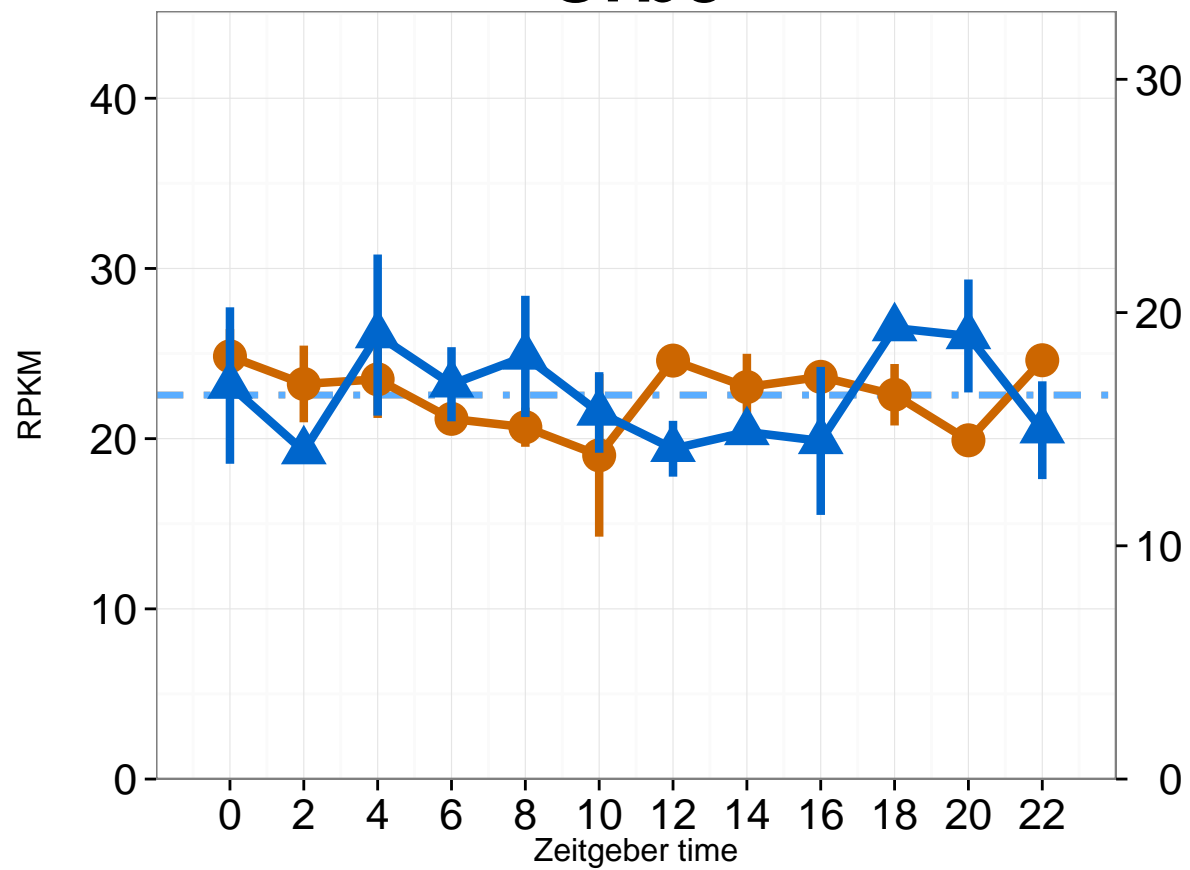

## Crb3

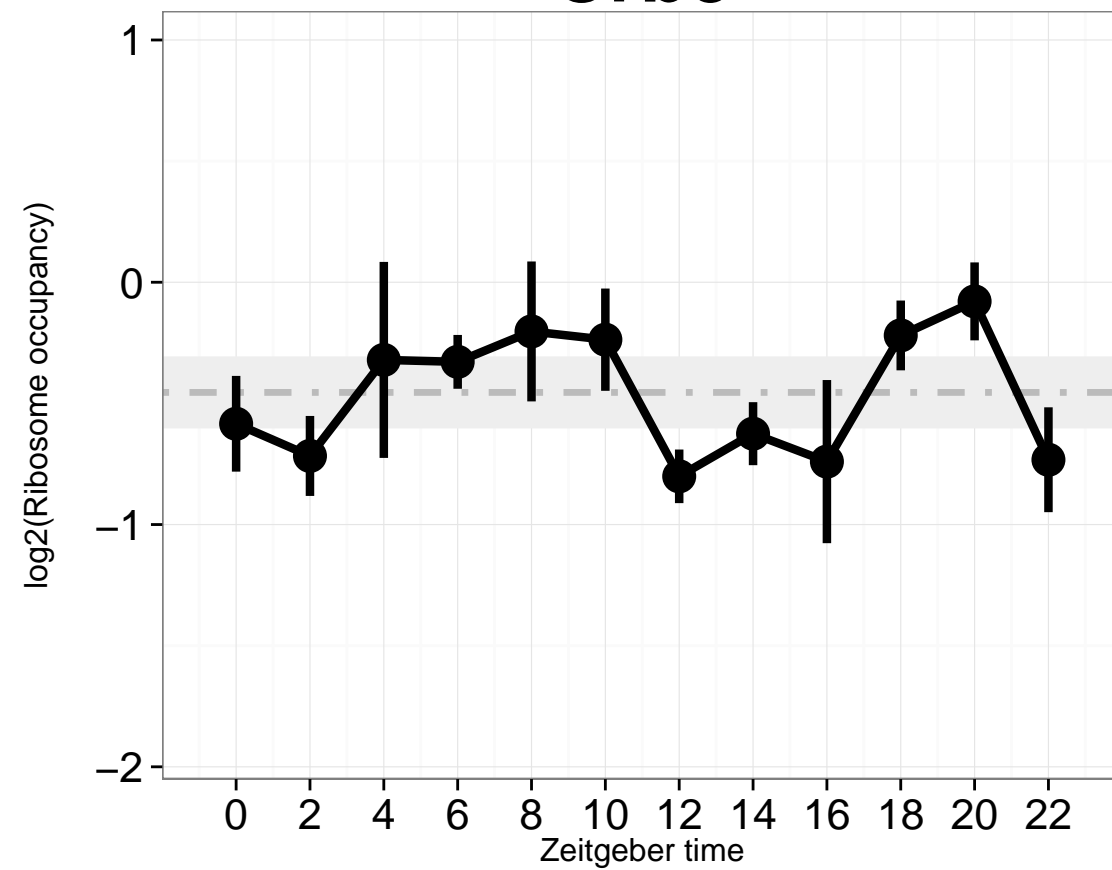

Supplement: Supplementary file 12444 [file 1]
