# Supplementary material (part 125 of 133)
Source: publisher figshare collection journal article supplement (https://springernature.figshare.com/articles/dataset/_/4903193)

## Kctd18

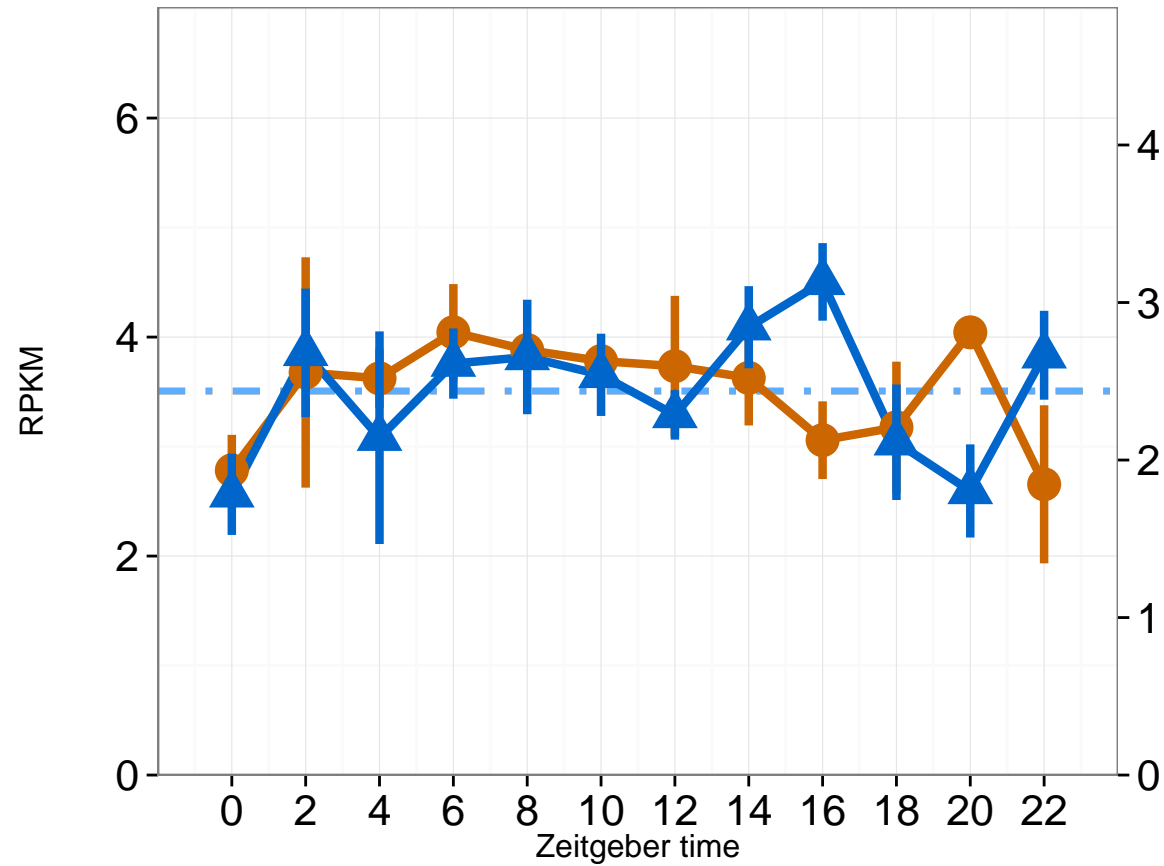

## Kctd18

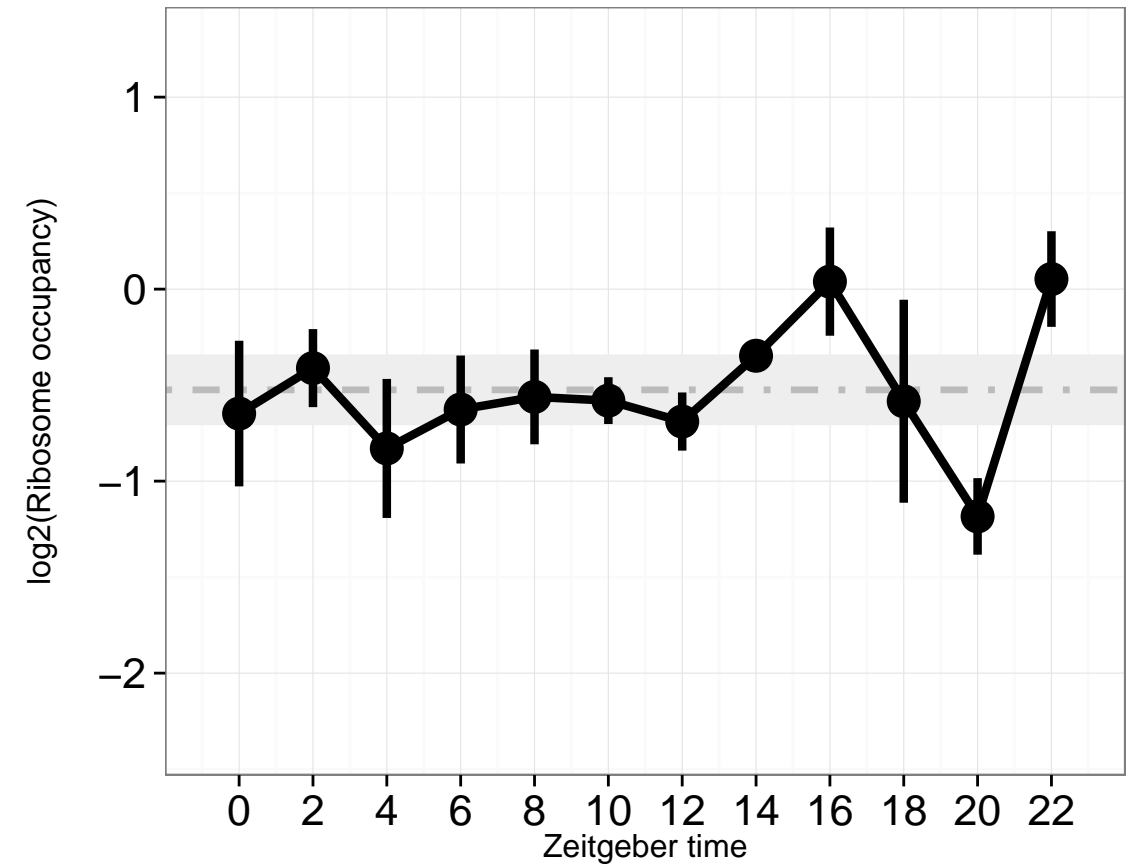

Supplement: Supplementary file 12445 [file 1]

## Klk8

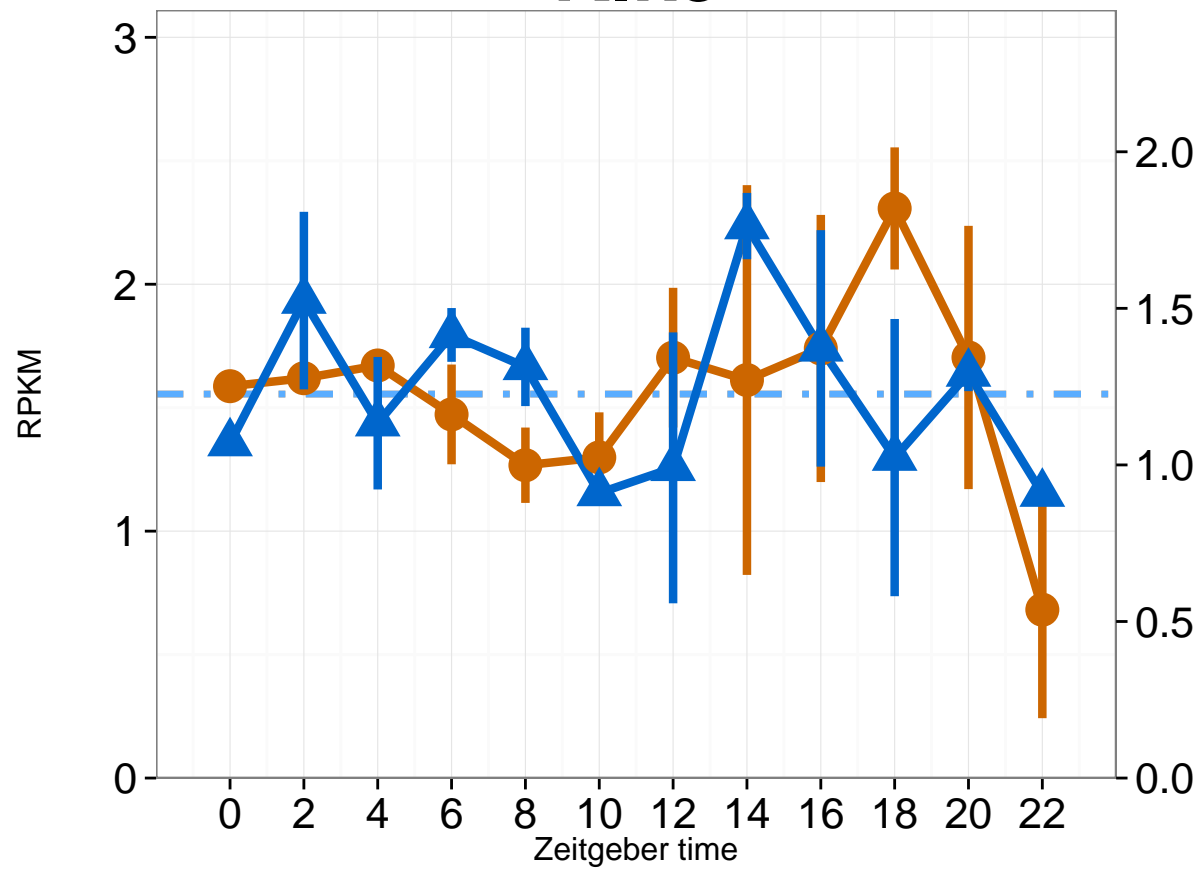

## Klk8

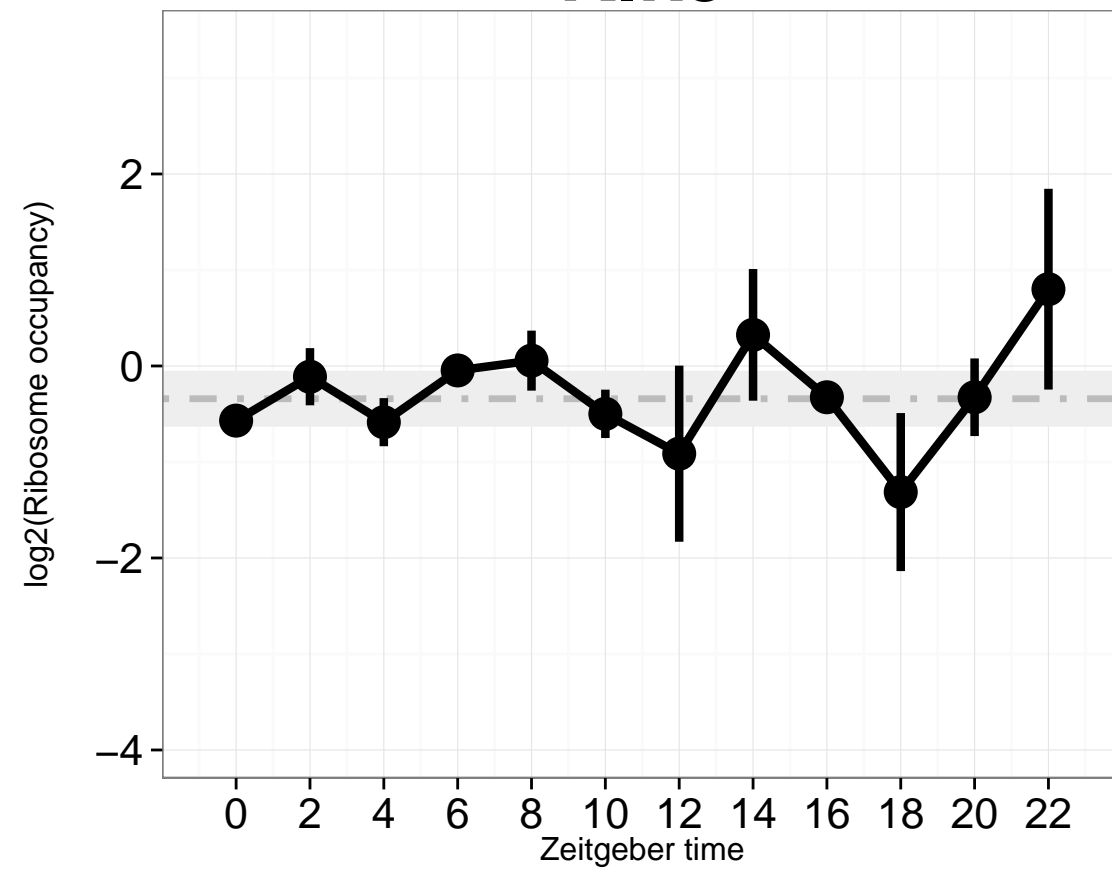

Supplement: Supplementary file 12446 [file 1]

## Nampt

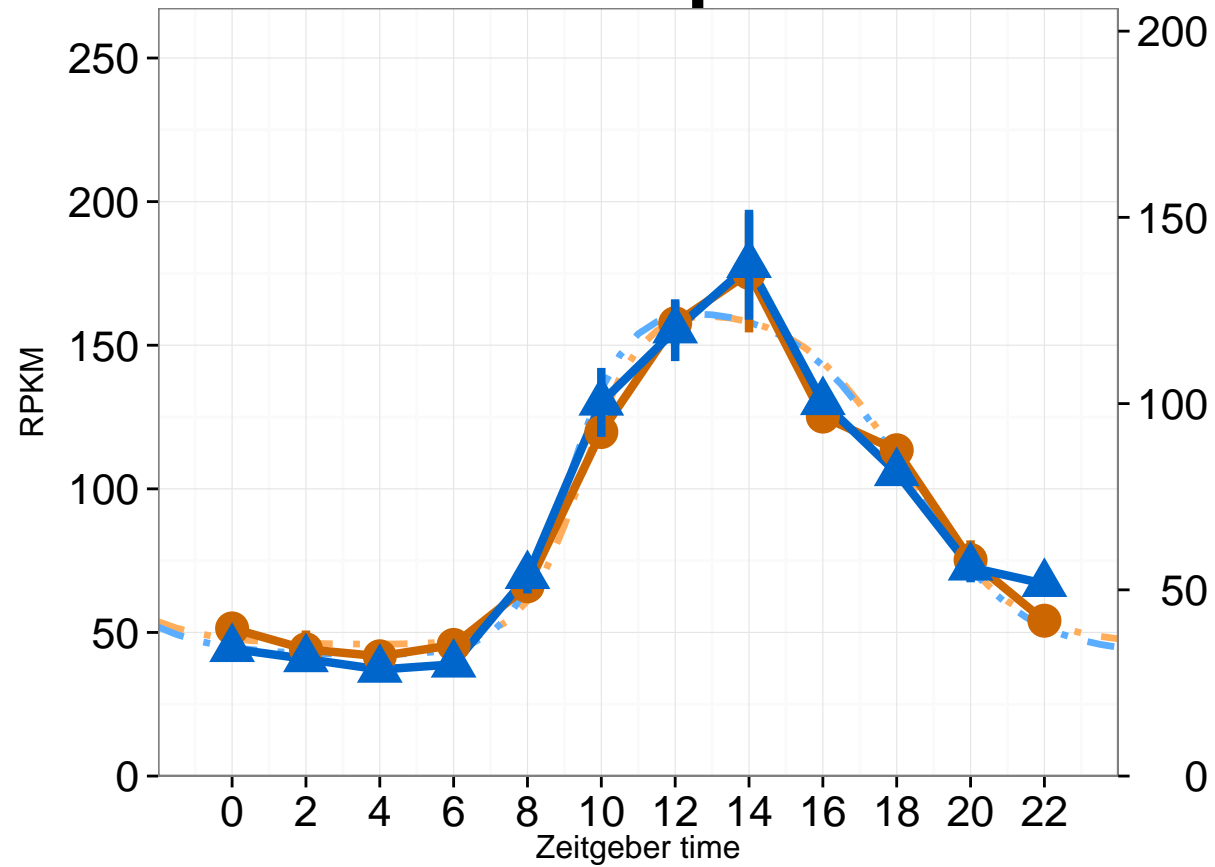

## Nampt

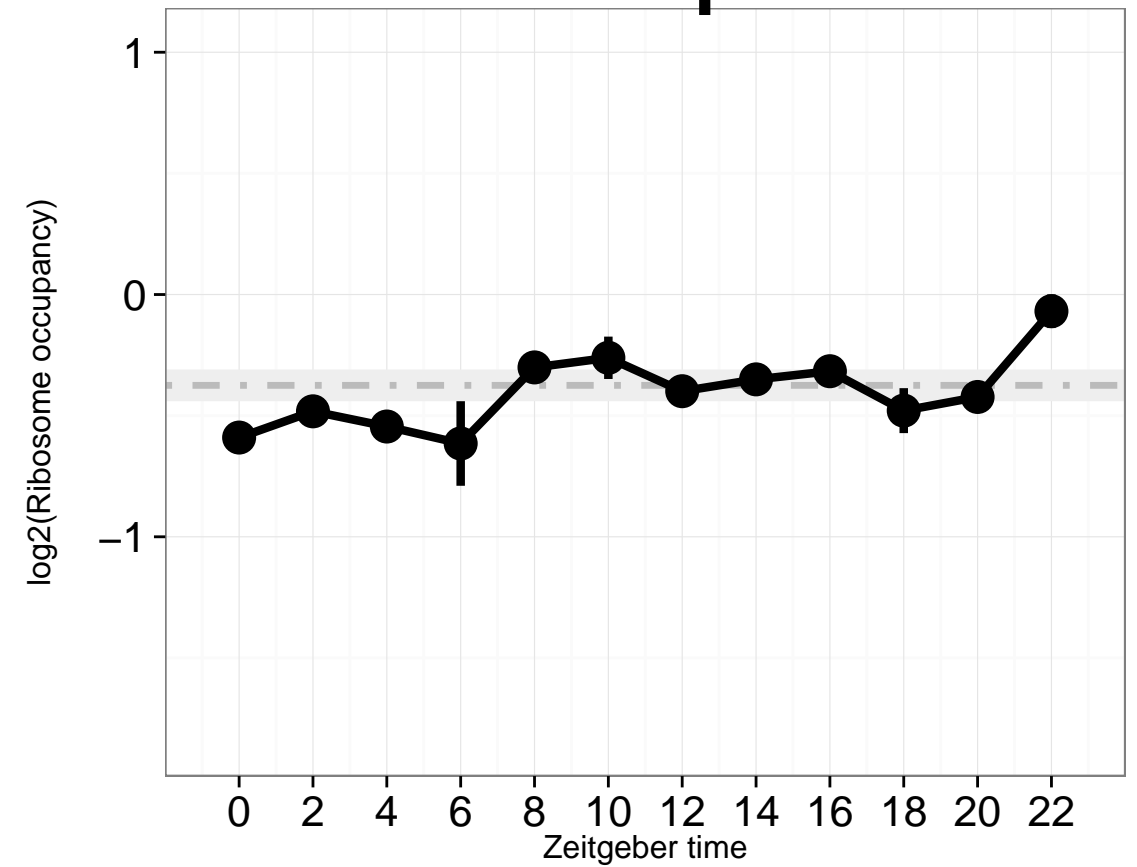

Supplement: Supplementary file 12447 [file 1]

# Cd59b

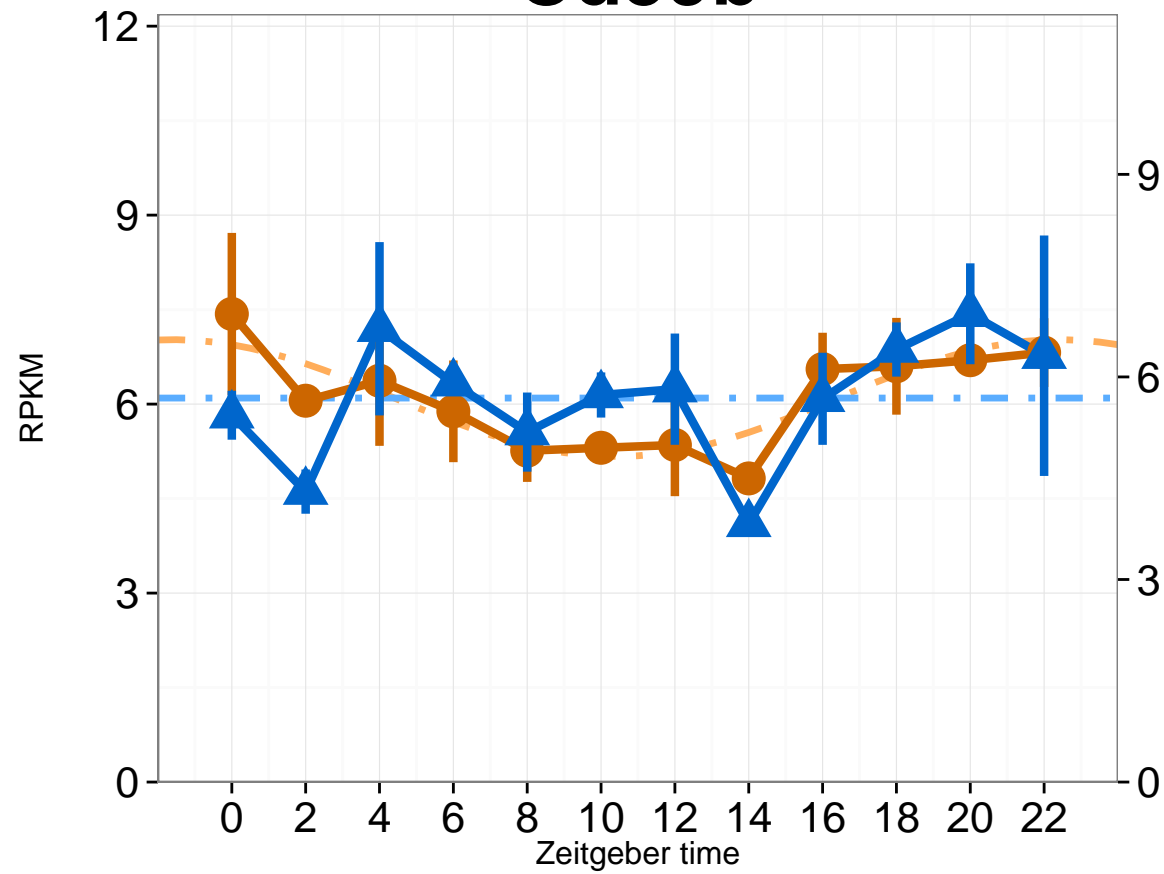

# Cd59b

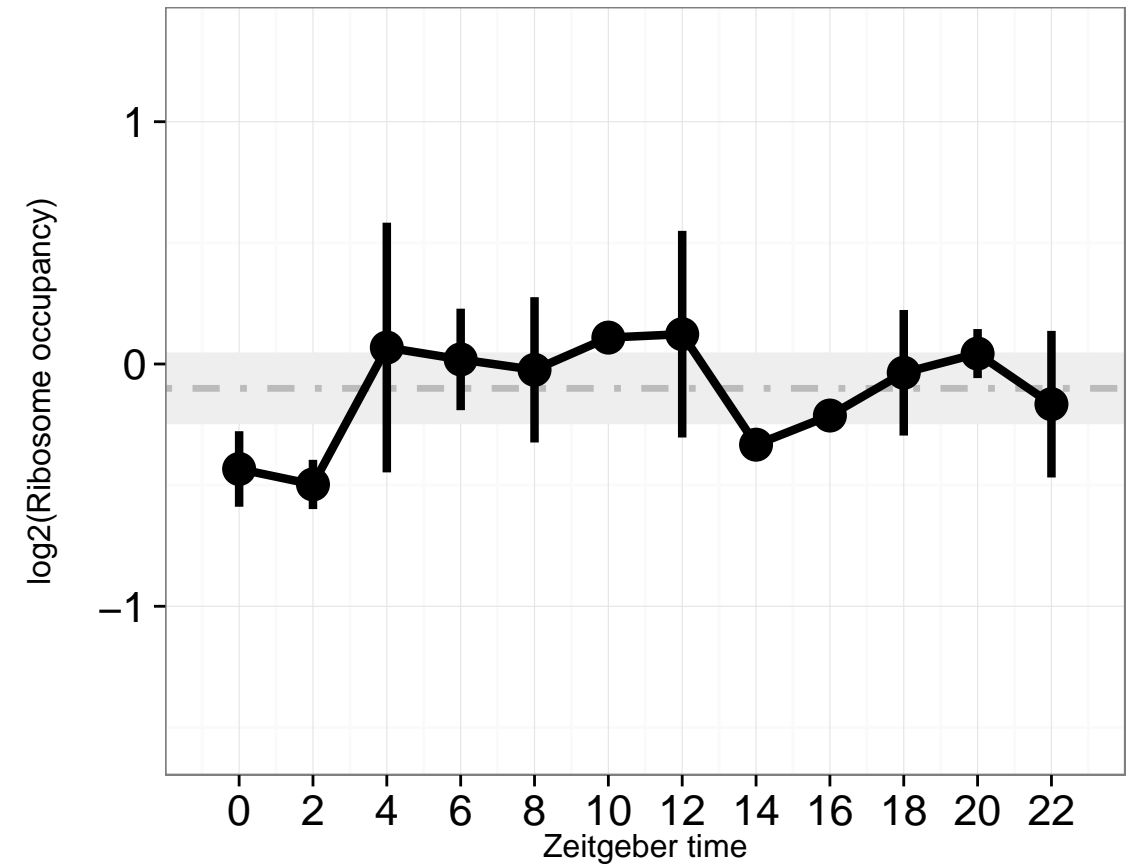

Supplement: Supplementary file 12448 [file 1]

## Mtrr

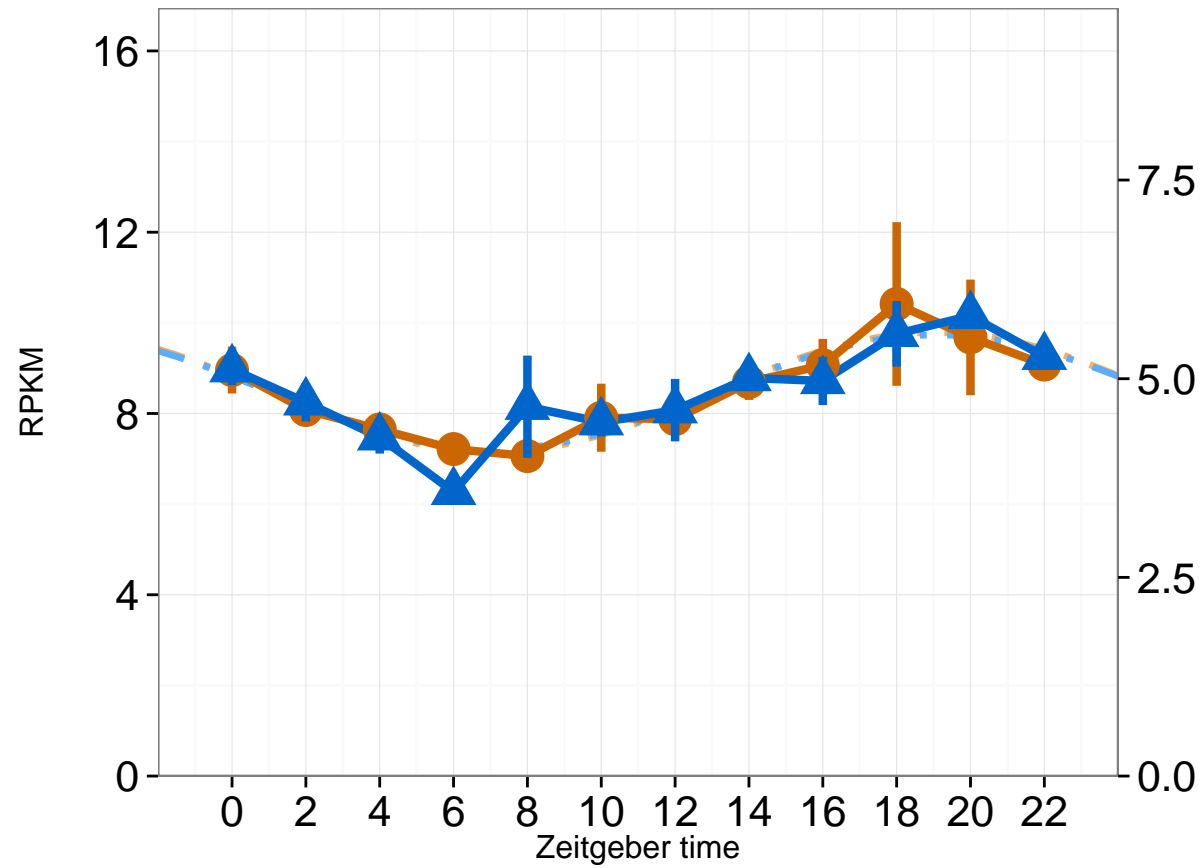

## Mtrr

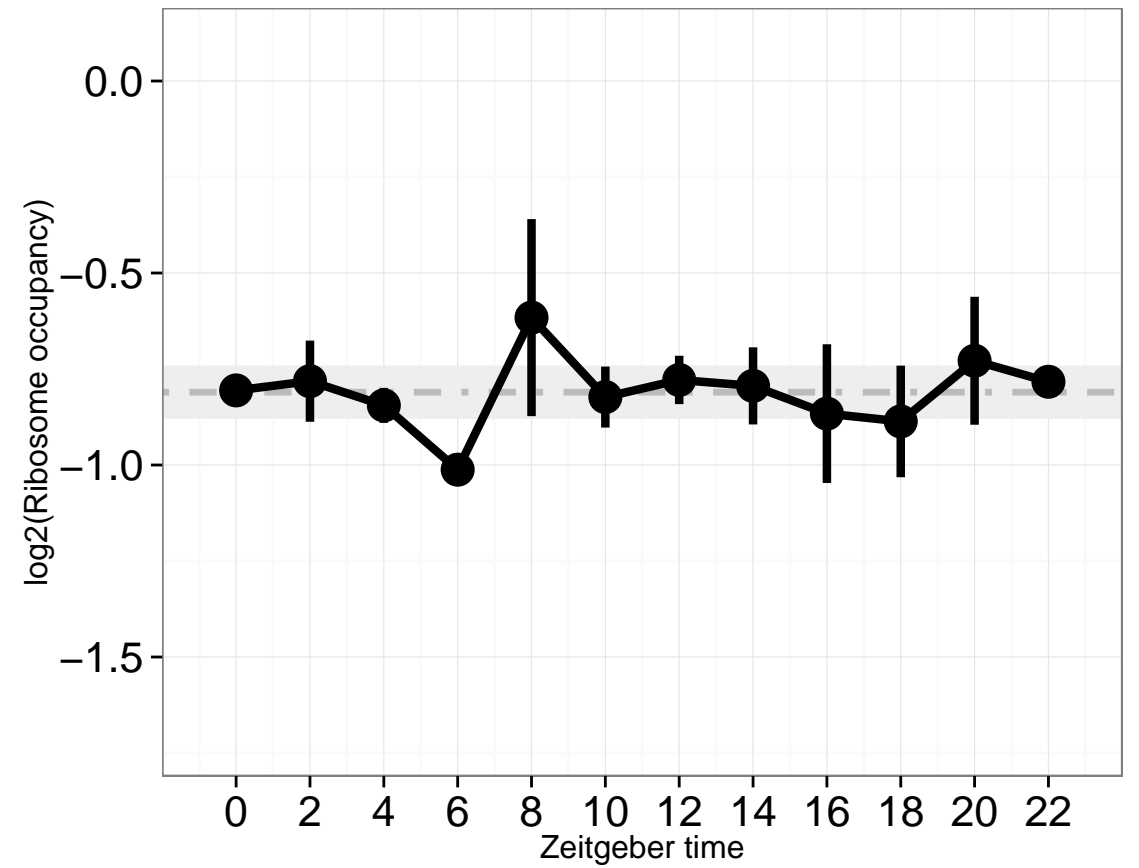

Supplement: Supplementary file 12449 [file 1]

## Gm7694

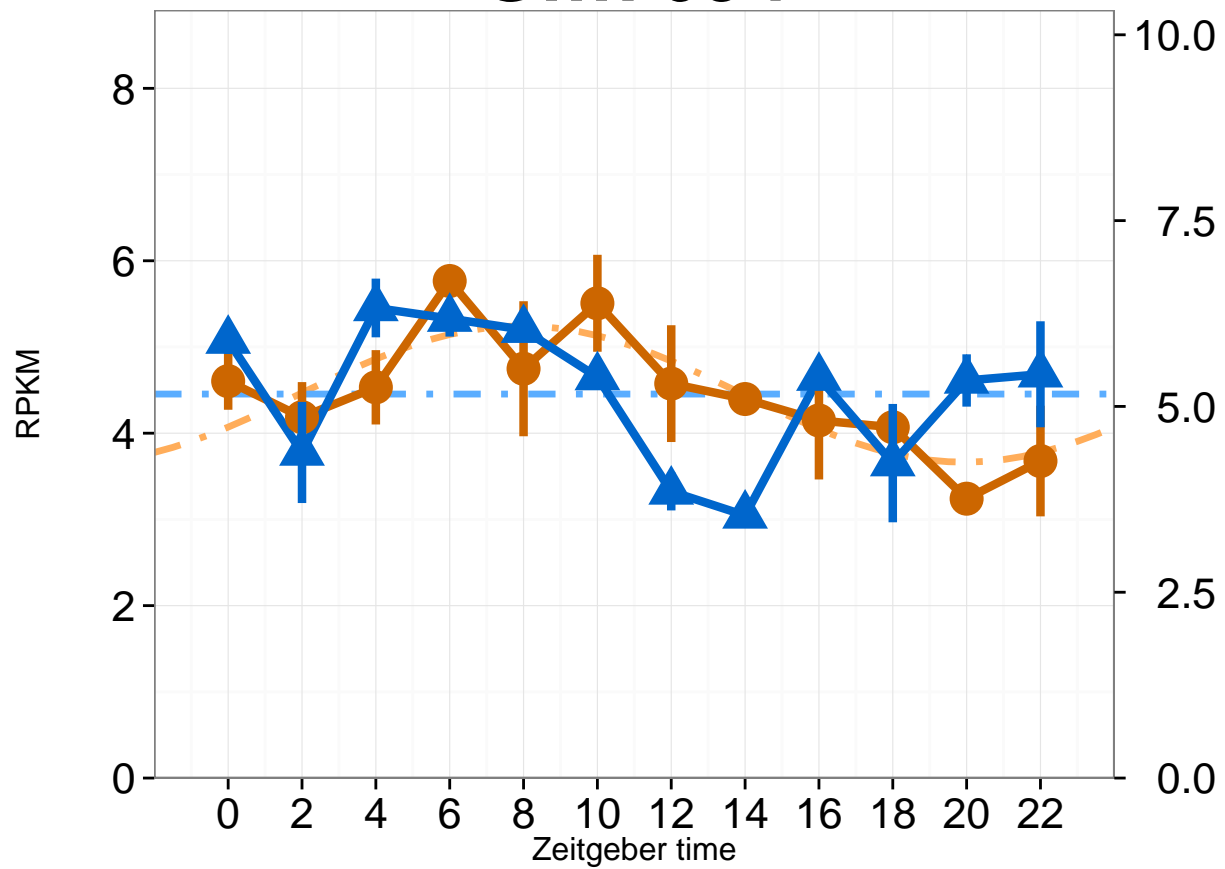

## Gm7694

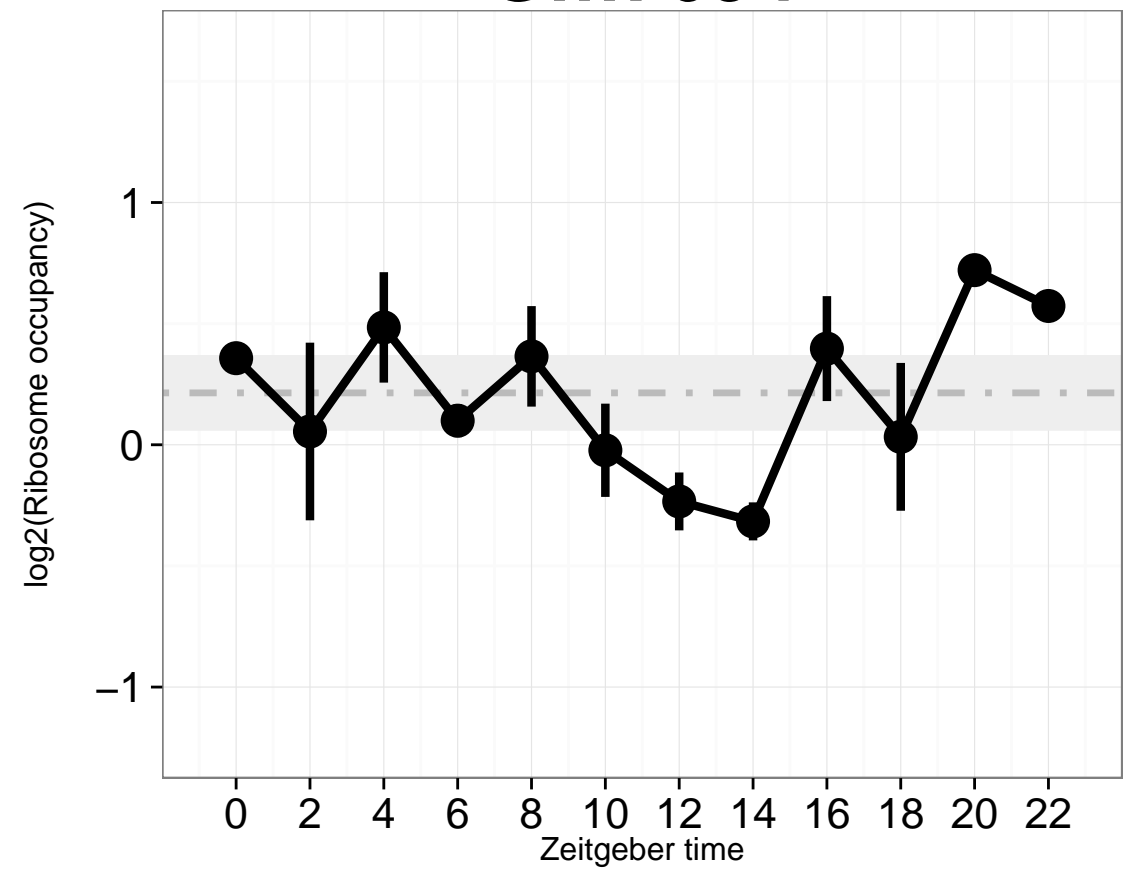

Supplement: Supplementary file 12450 [file 1]

## Klk1b11

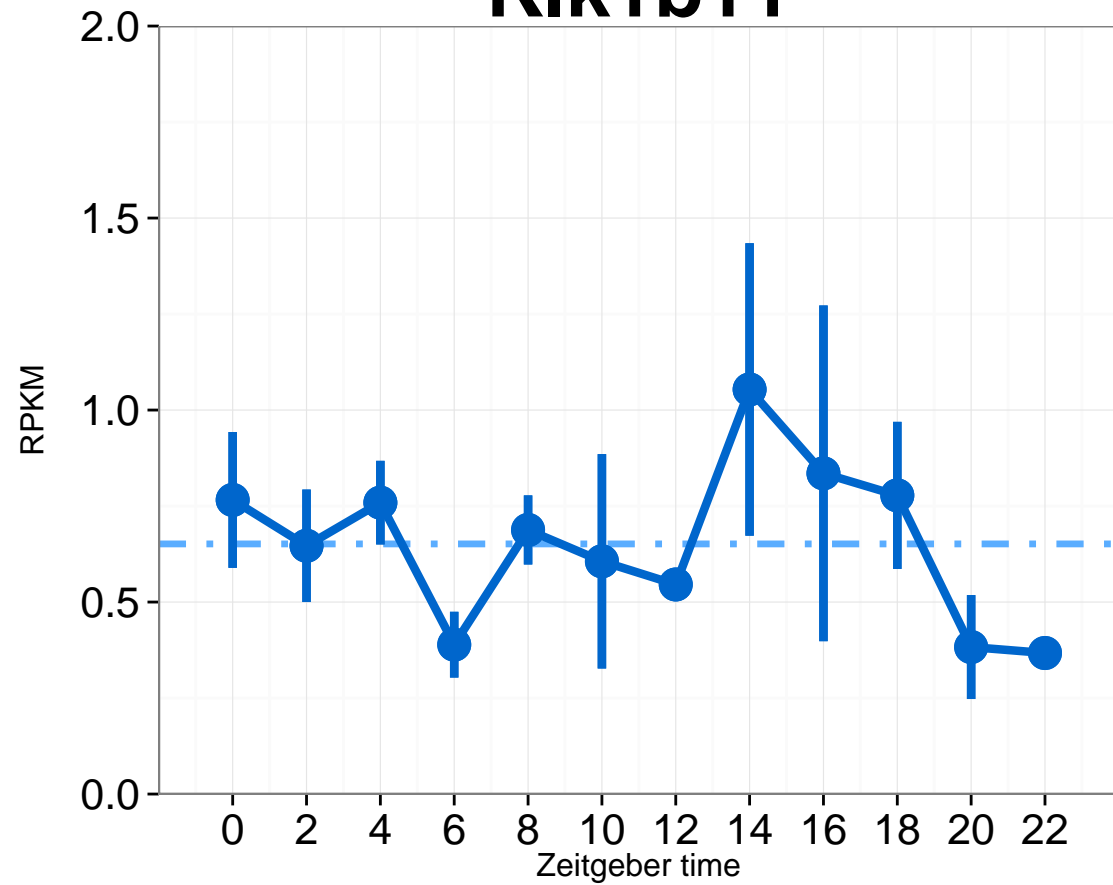

## Klk1b11 log2(Ribosome occupancy)

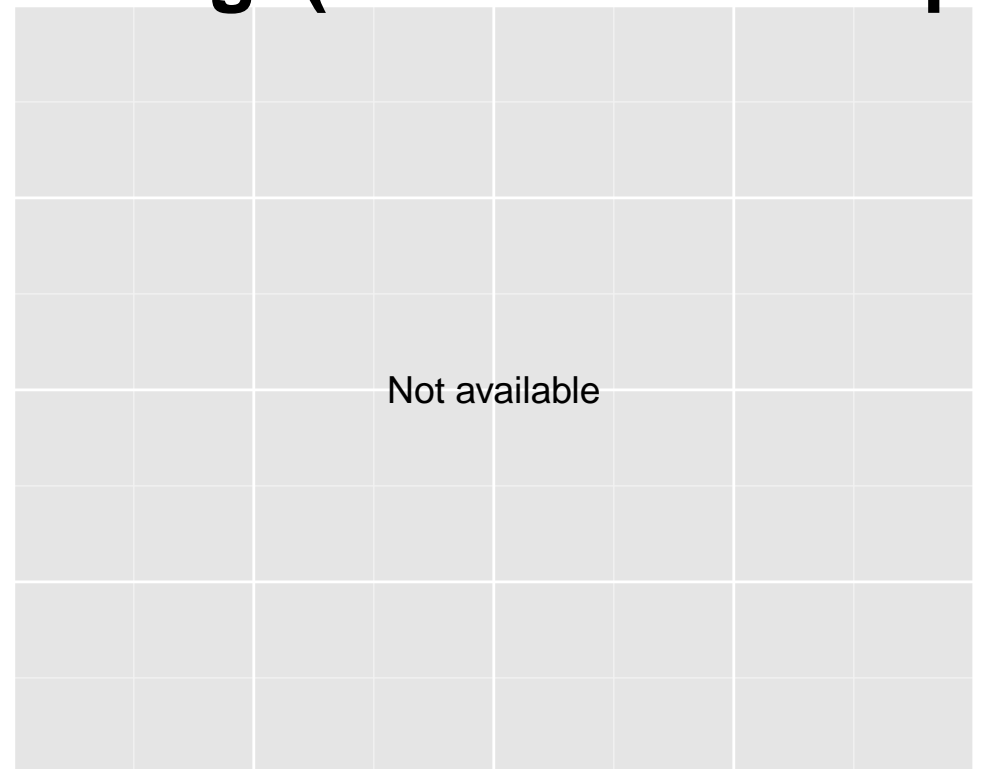

Supplement: Supplementary file 12451 [file 1]

# Wbp4

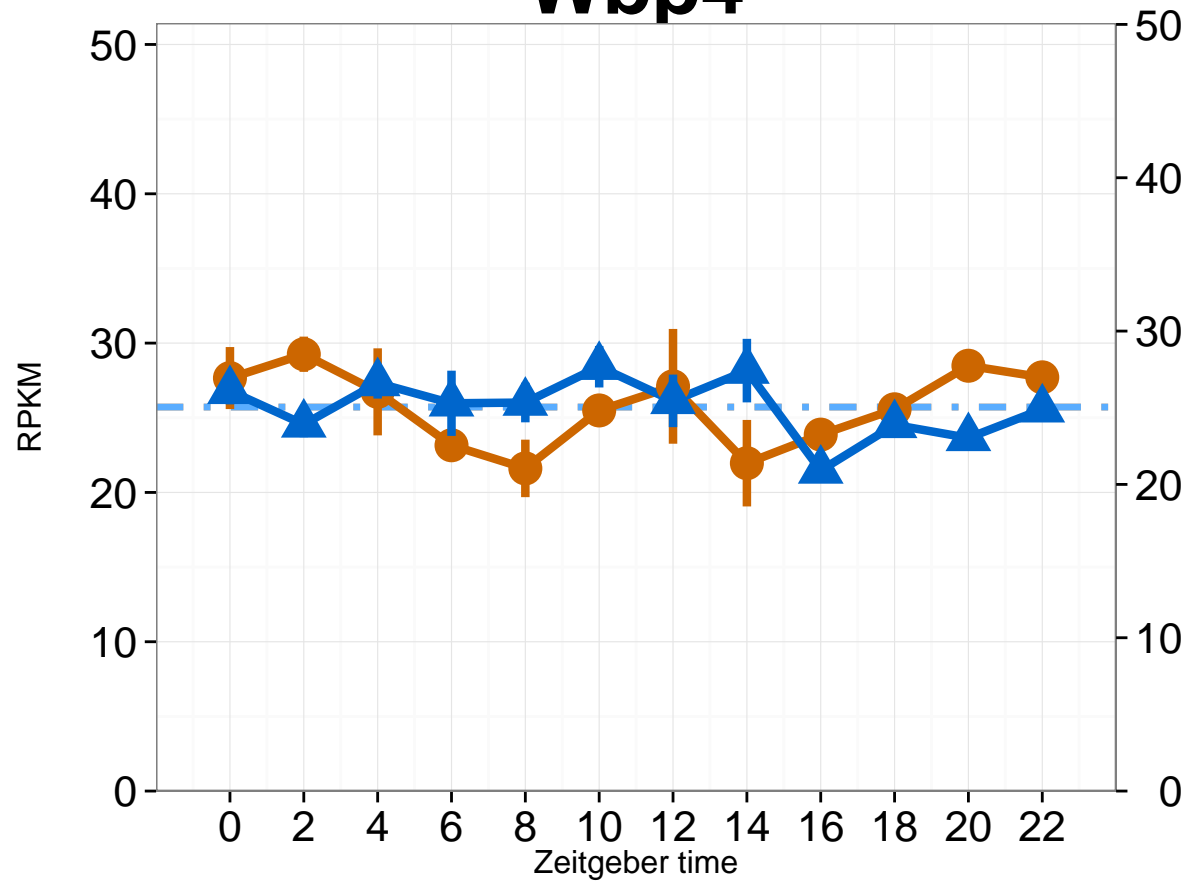

# Wbp4

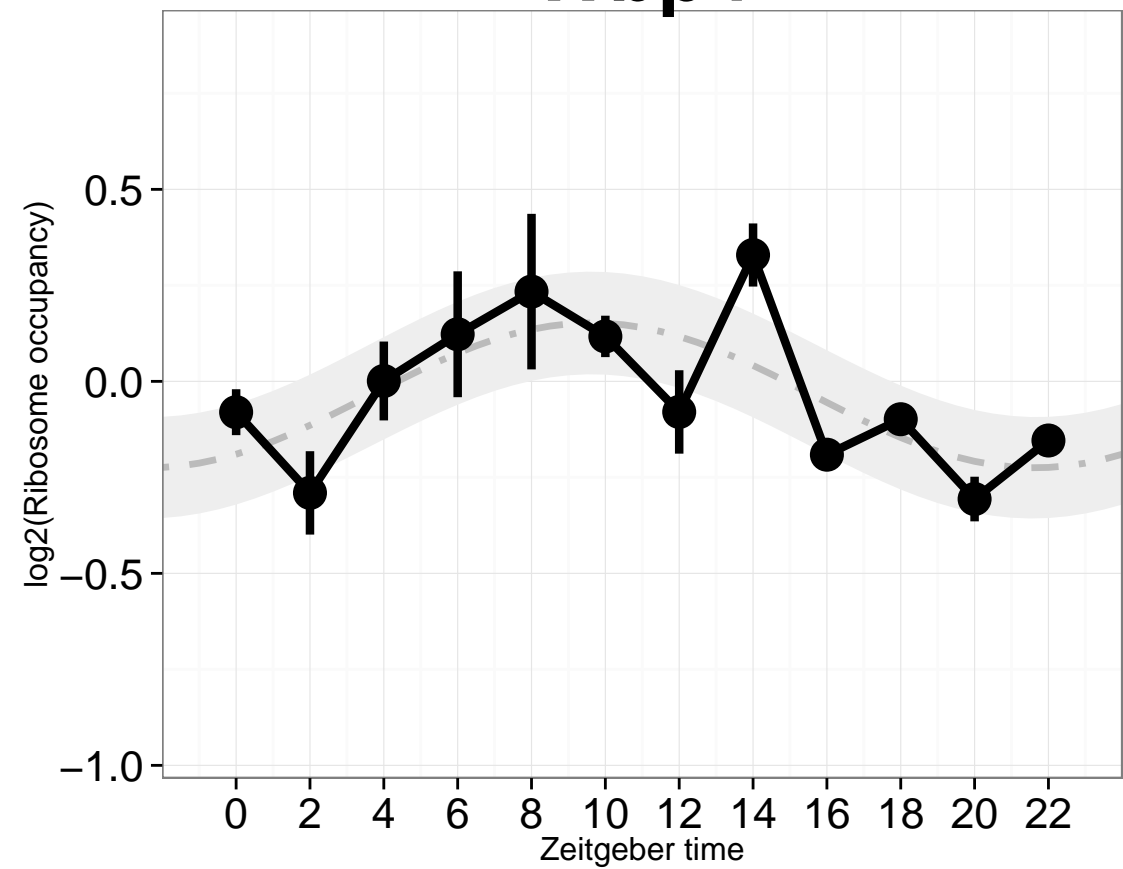

Supplement: Supplementary file 12452 [file 1]

# Zfp879

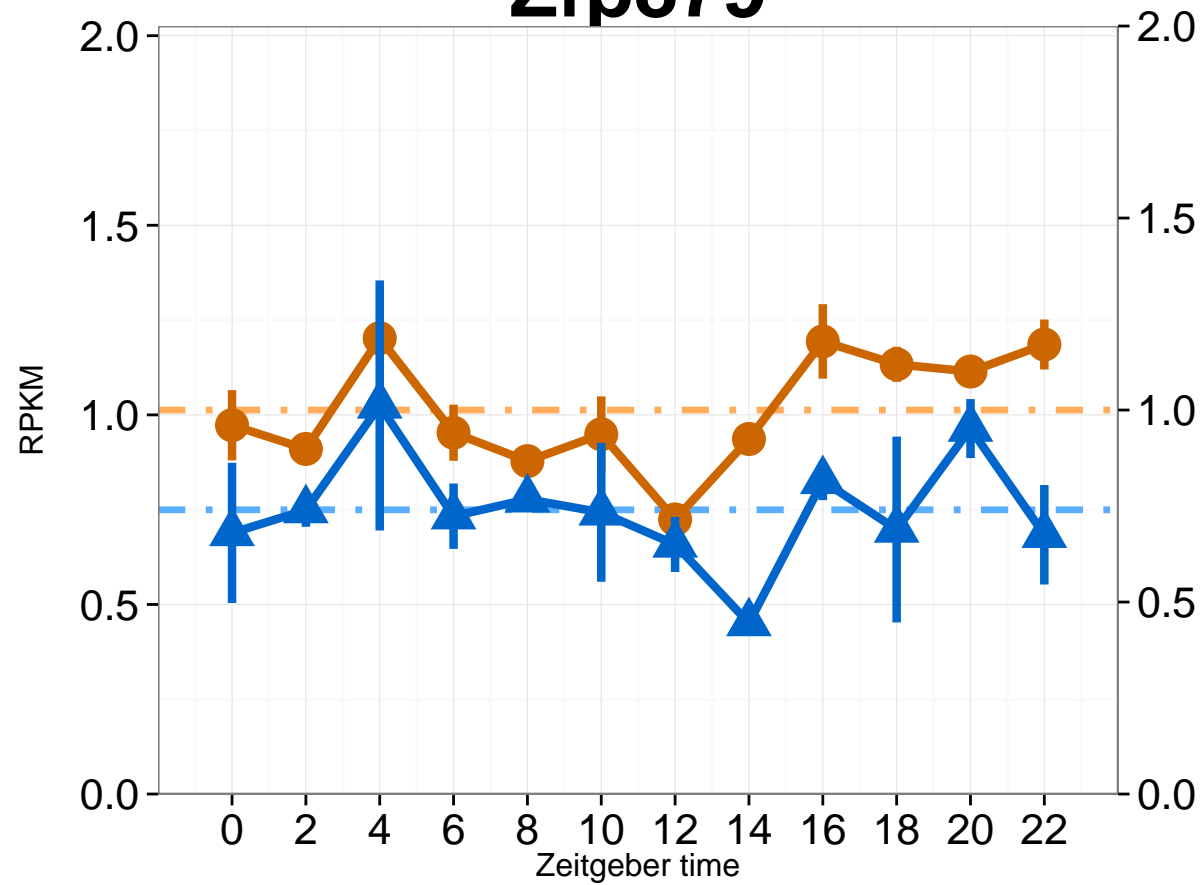

# Zfp879

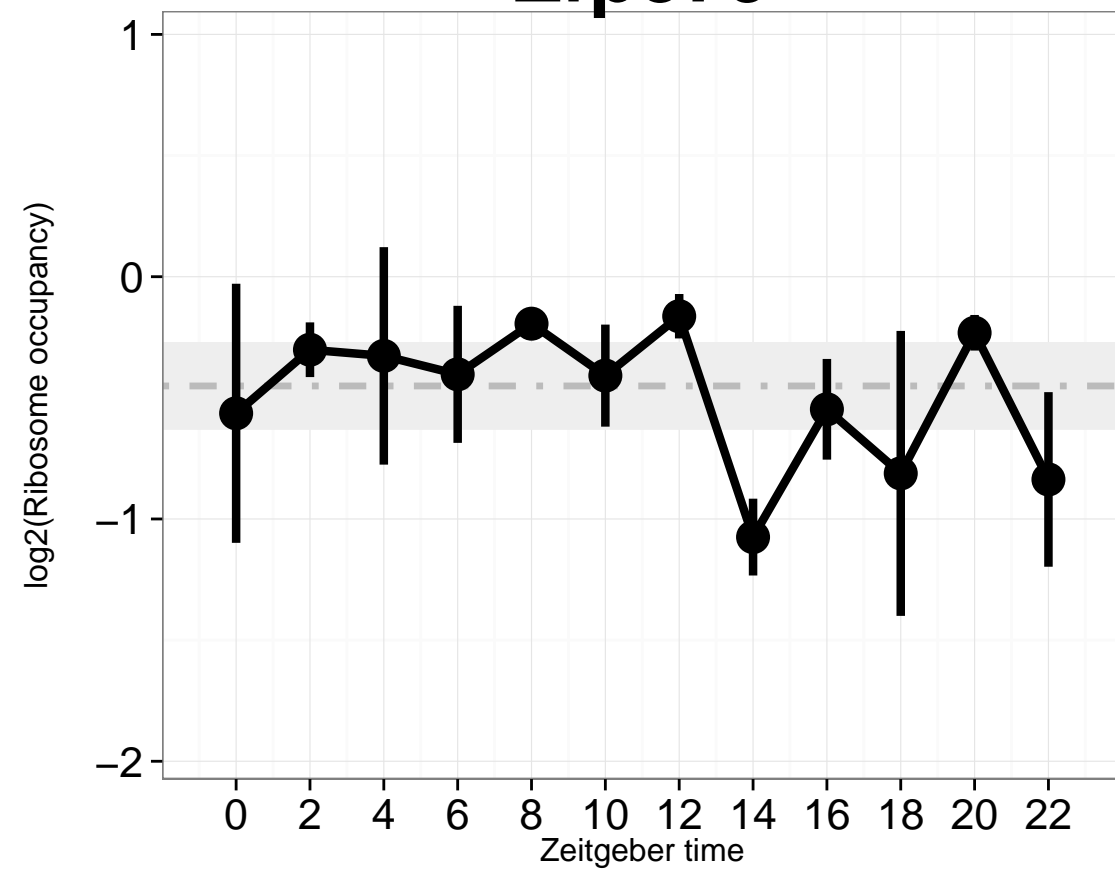

Supplement: Supplementary file 12453 [file 1]

# Pomt1

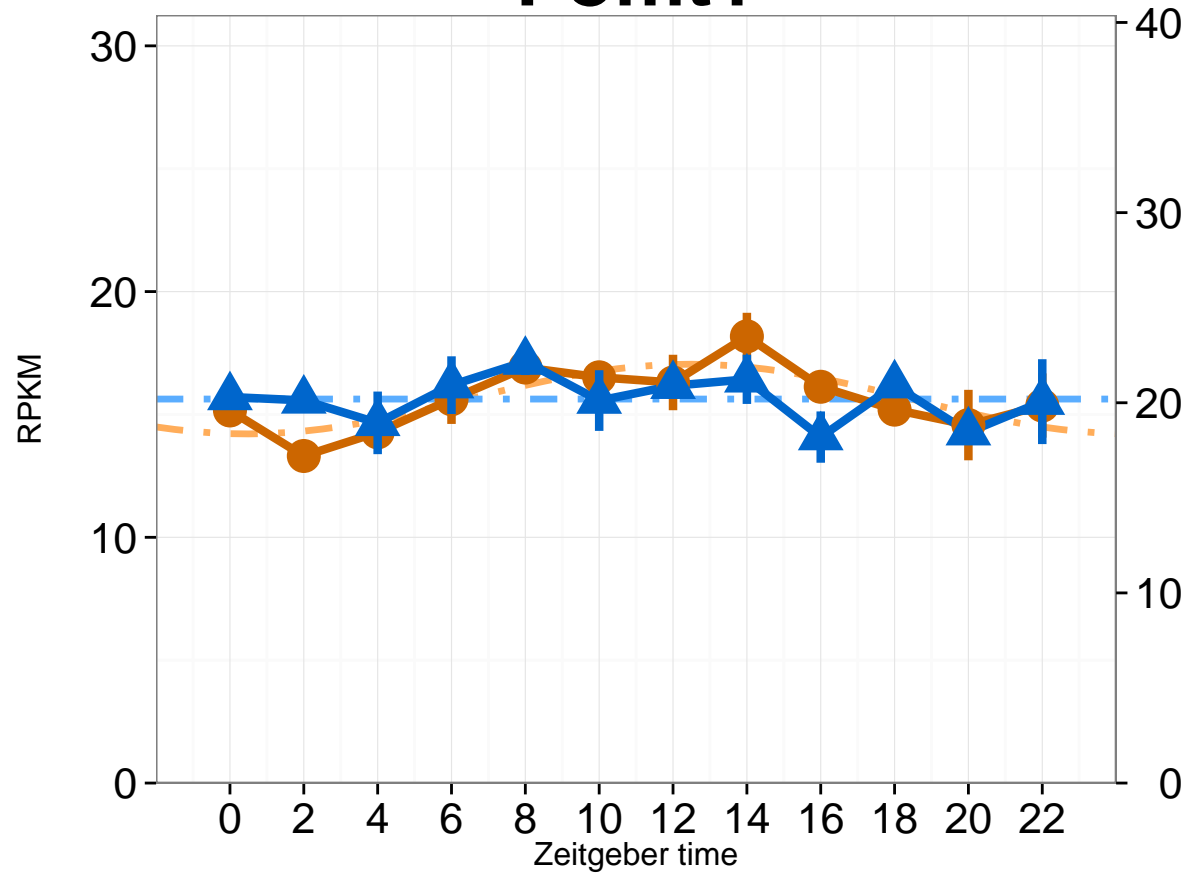

# Pomt1

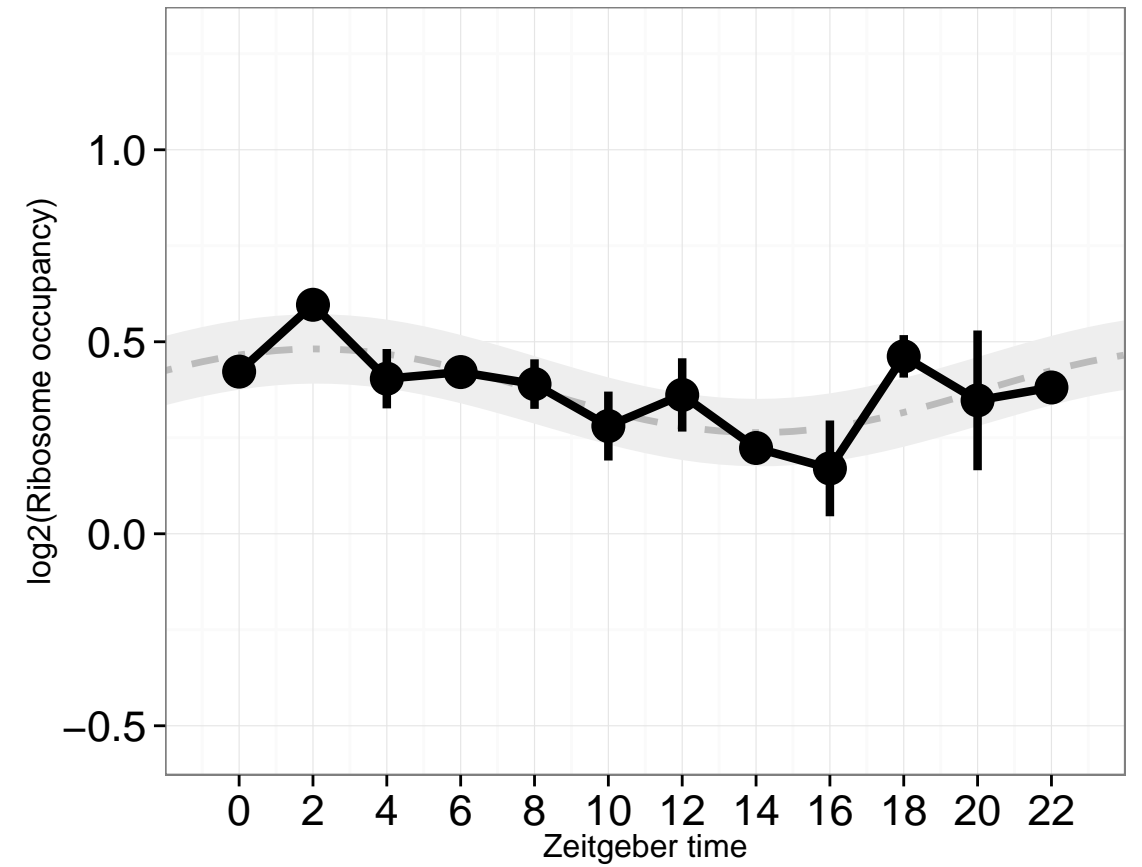

Supplement: Supplementary file 12454 [file 1]

# Scn1b

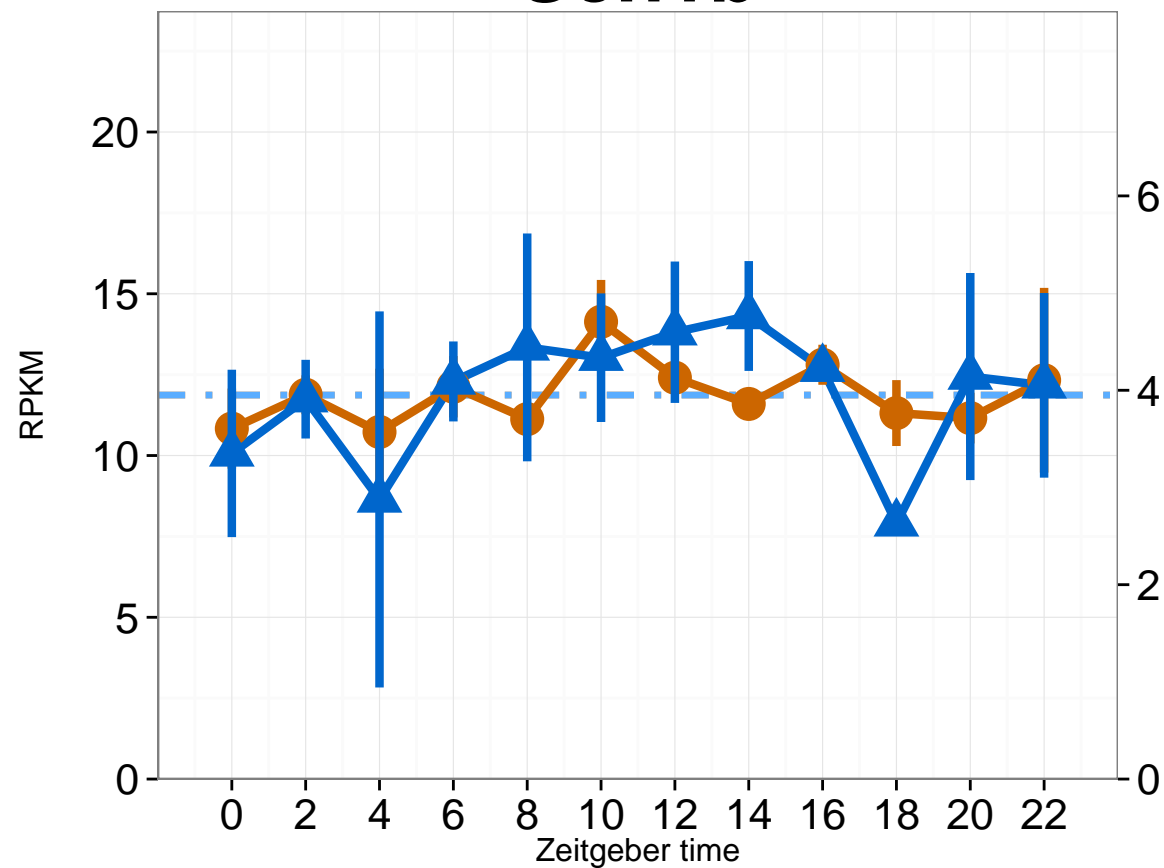

# Scn1b

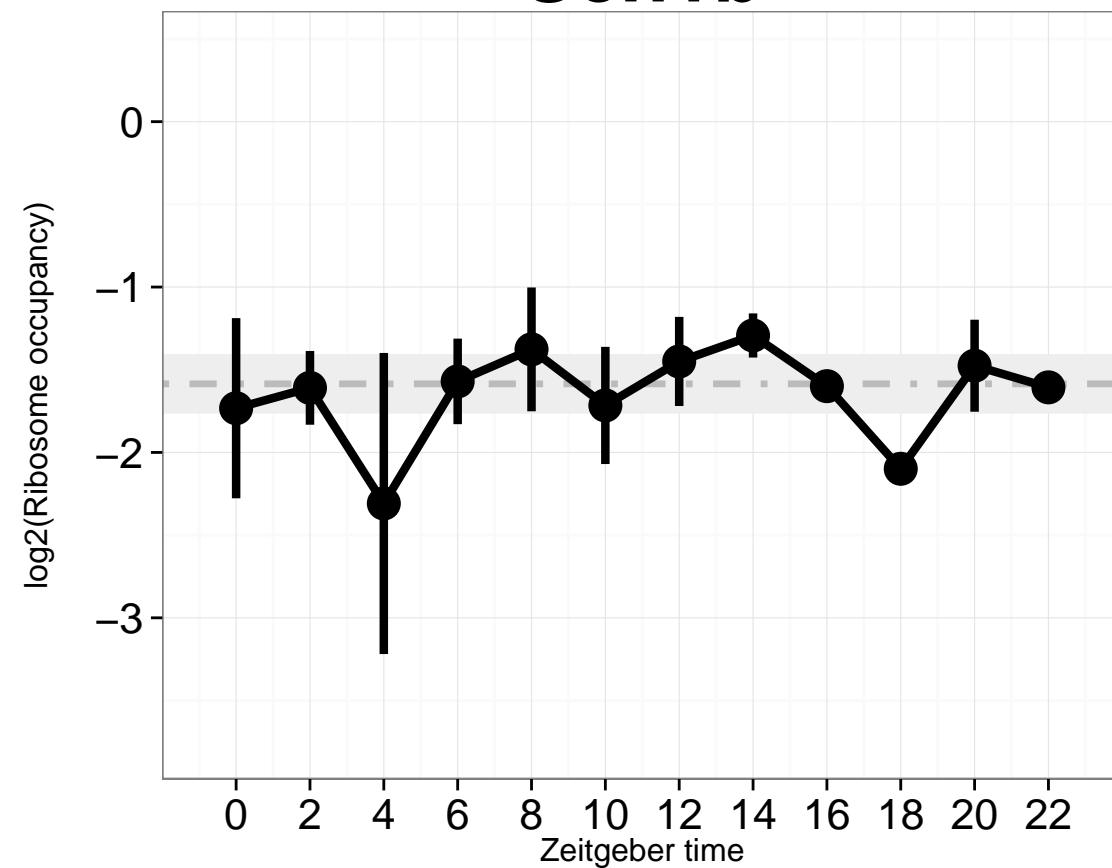

Supplement: Supplementary file 12455 [file 1]

## Slc11a2

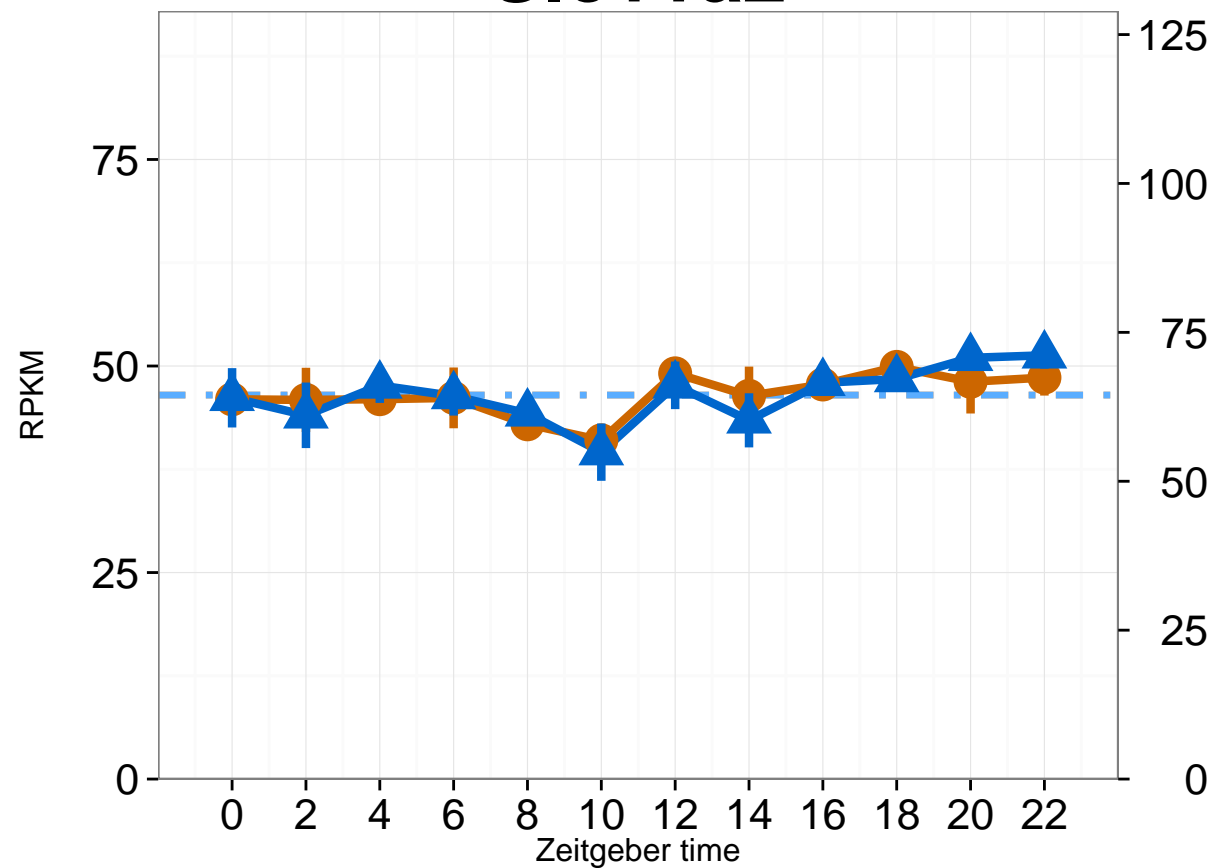

## Slc11a2

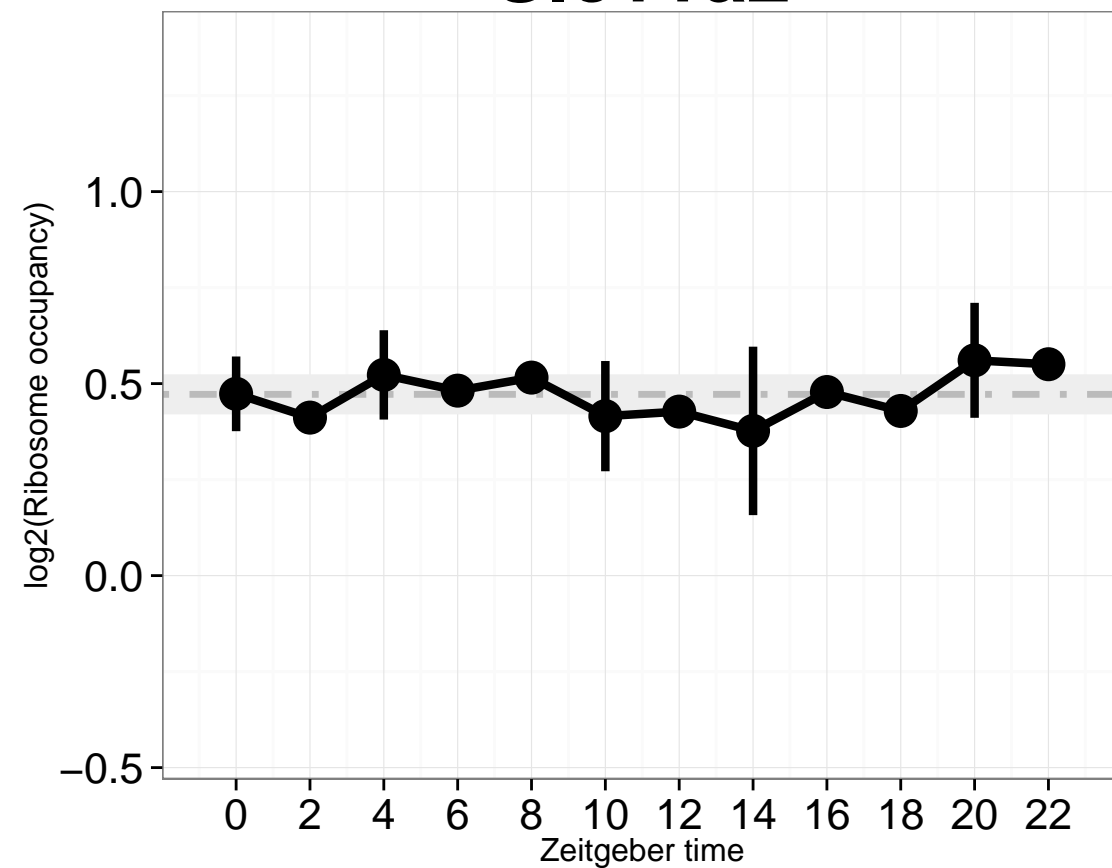

Supplement: Supplementary file 12456 [file 1]

# Hba-a2

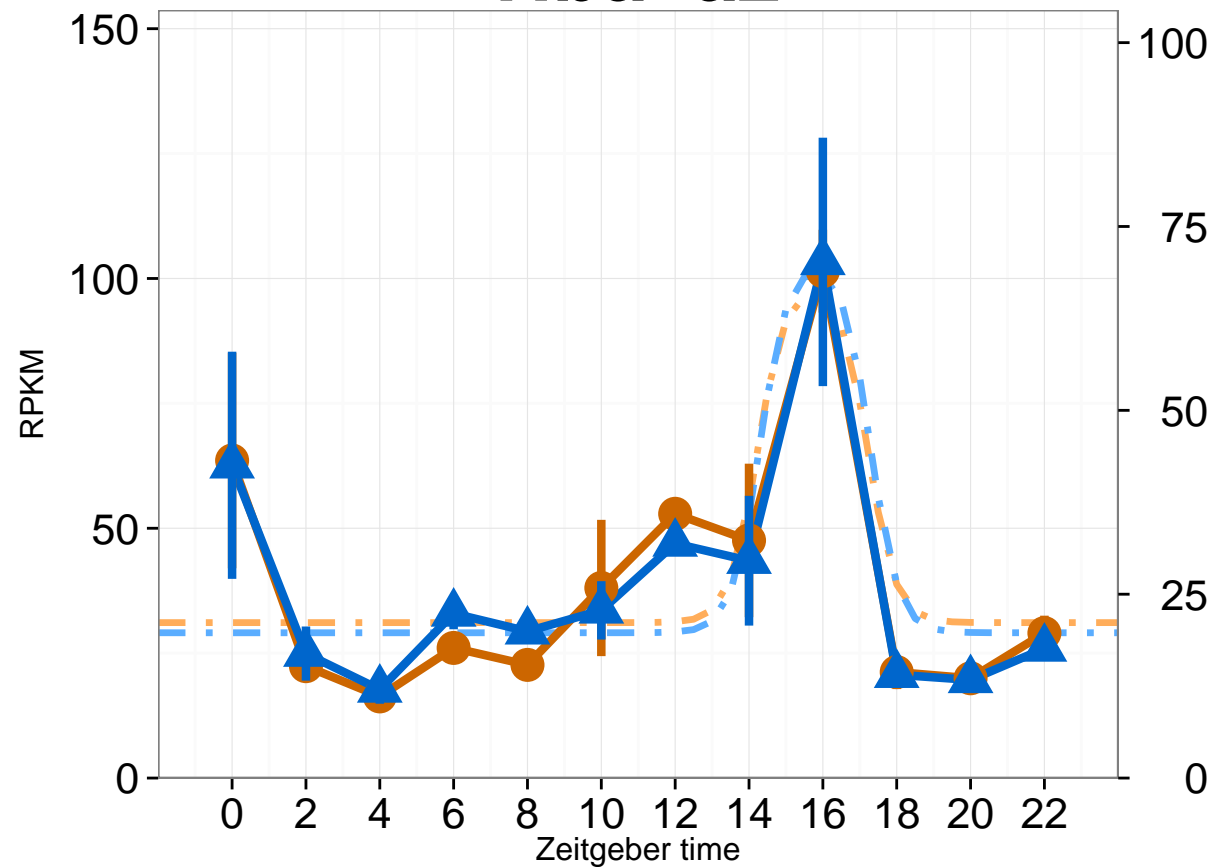

# Hba-a2

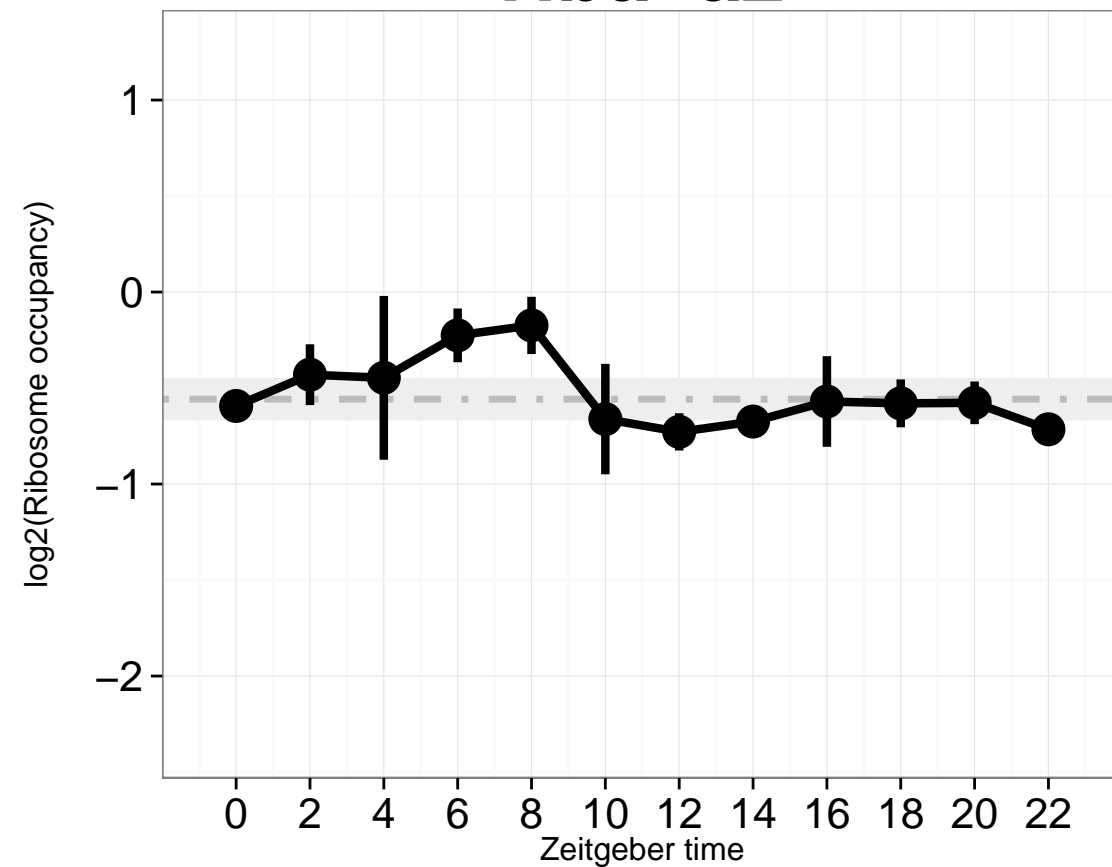

Supplement: Supplementary file 12457 [file 1]

# Psmc1

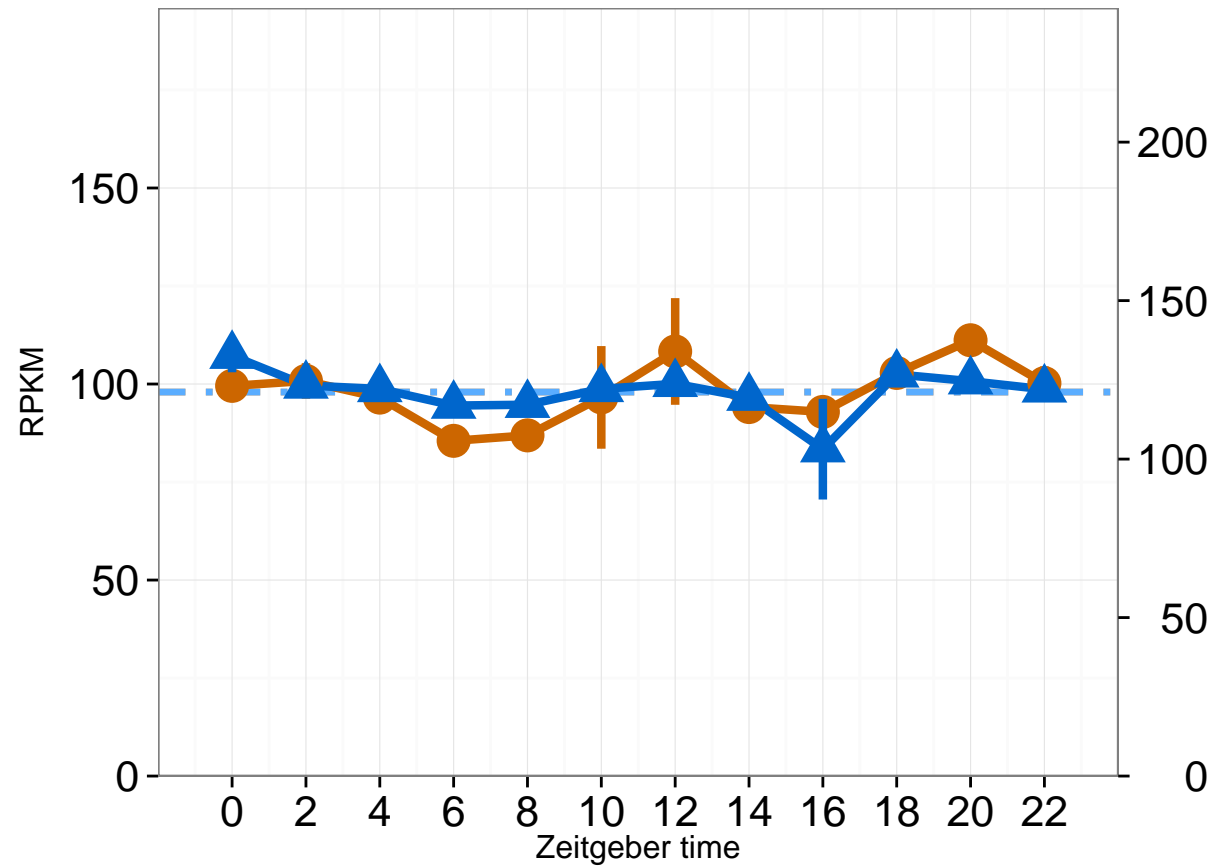

# Psmc1

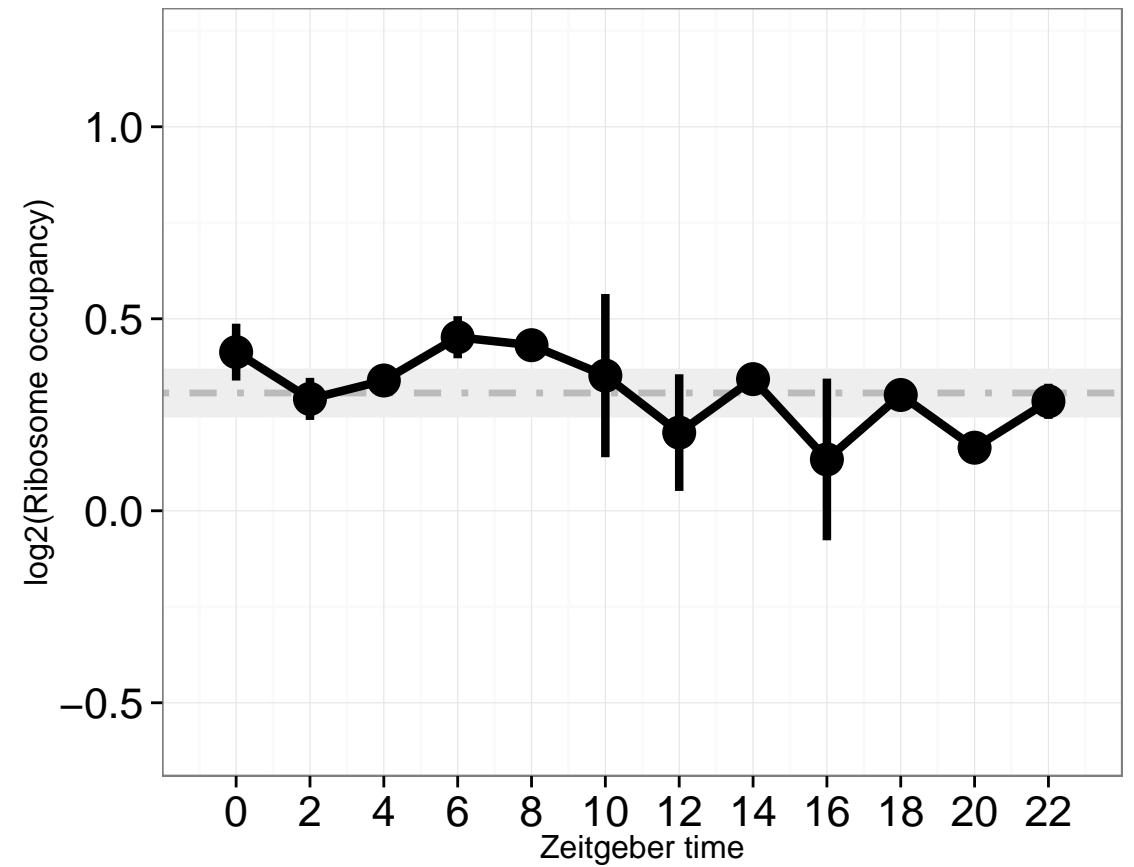

Supplement: Supplementary file 12458 [file 1]

# Cdc42ep5

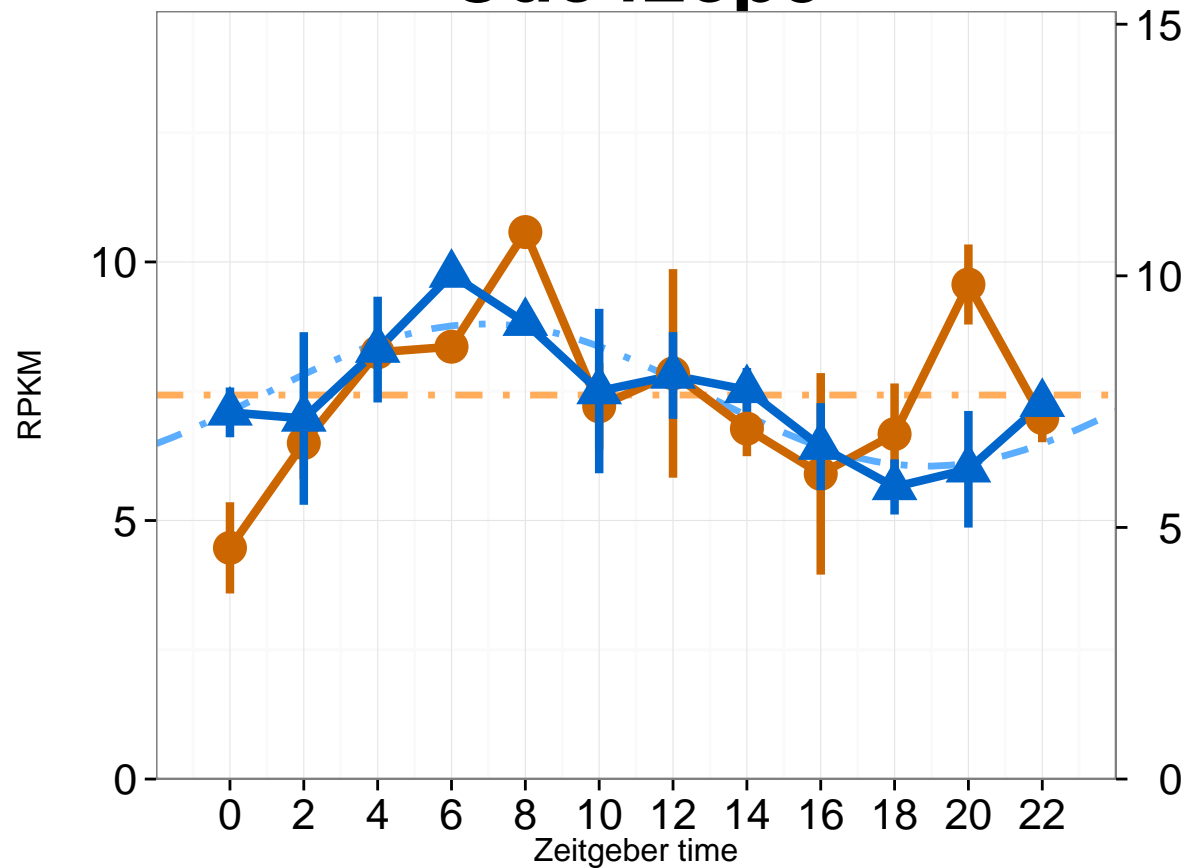

# Cdc42ep5

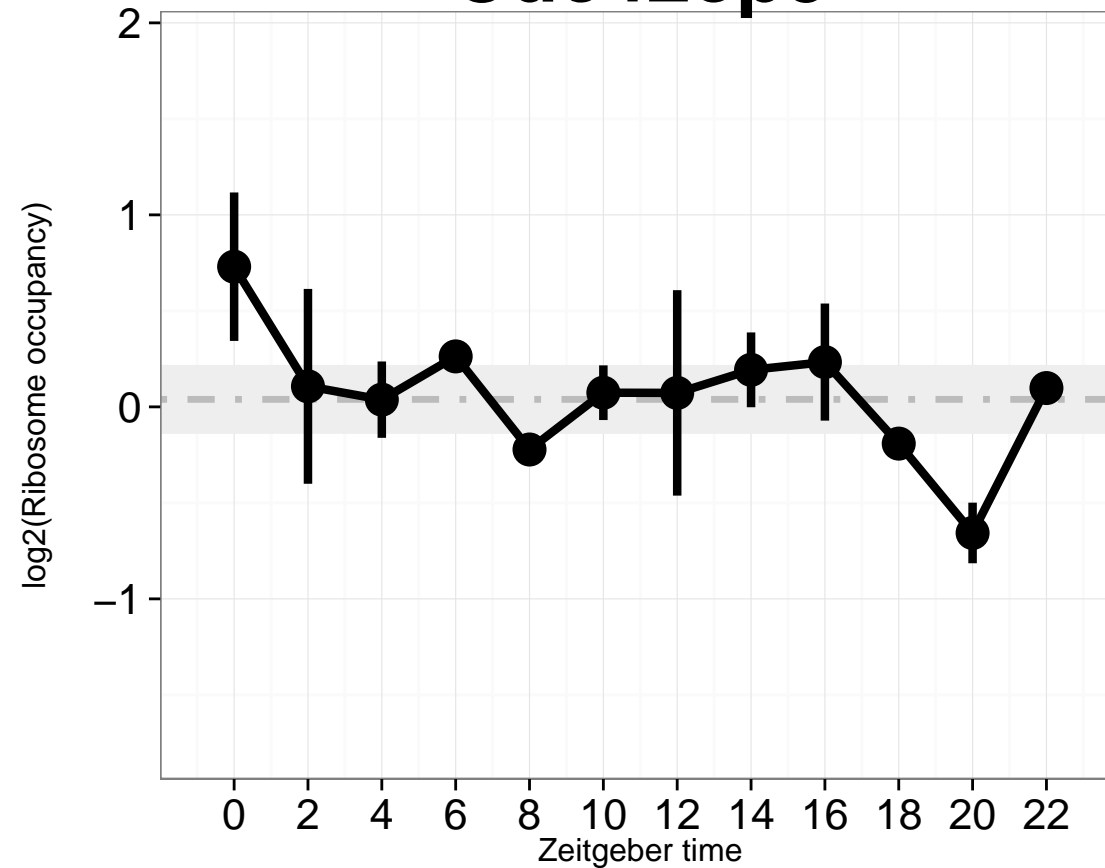

Supplement: Supplementary file 12459 [file 1]

## Cdc23

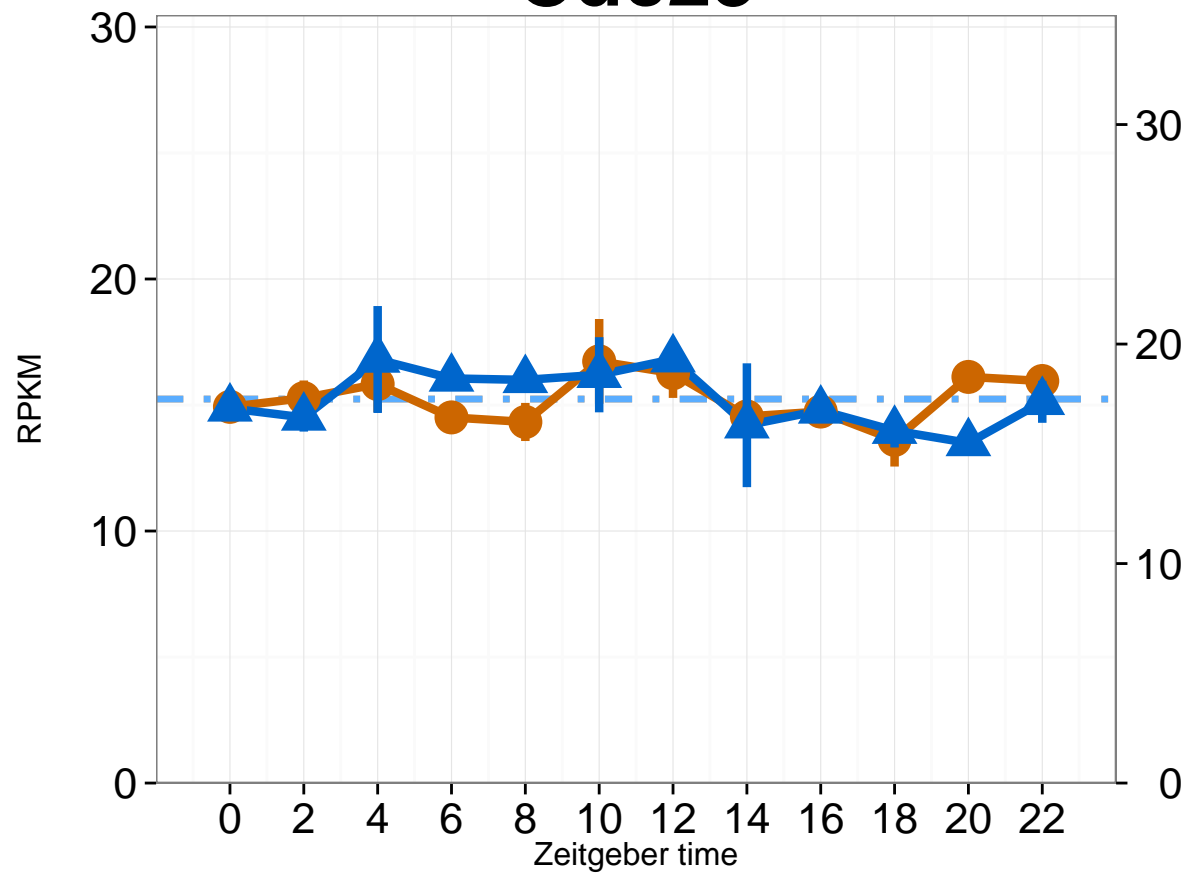

## Cdc23

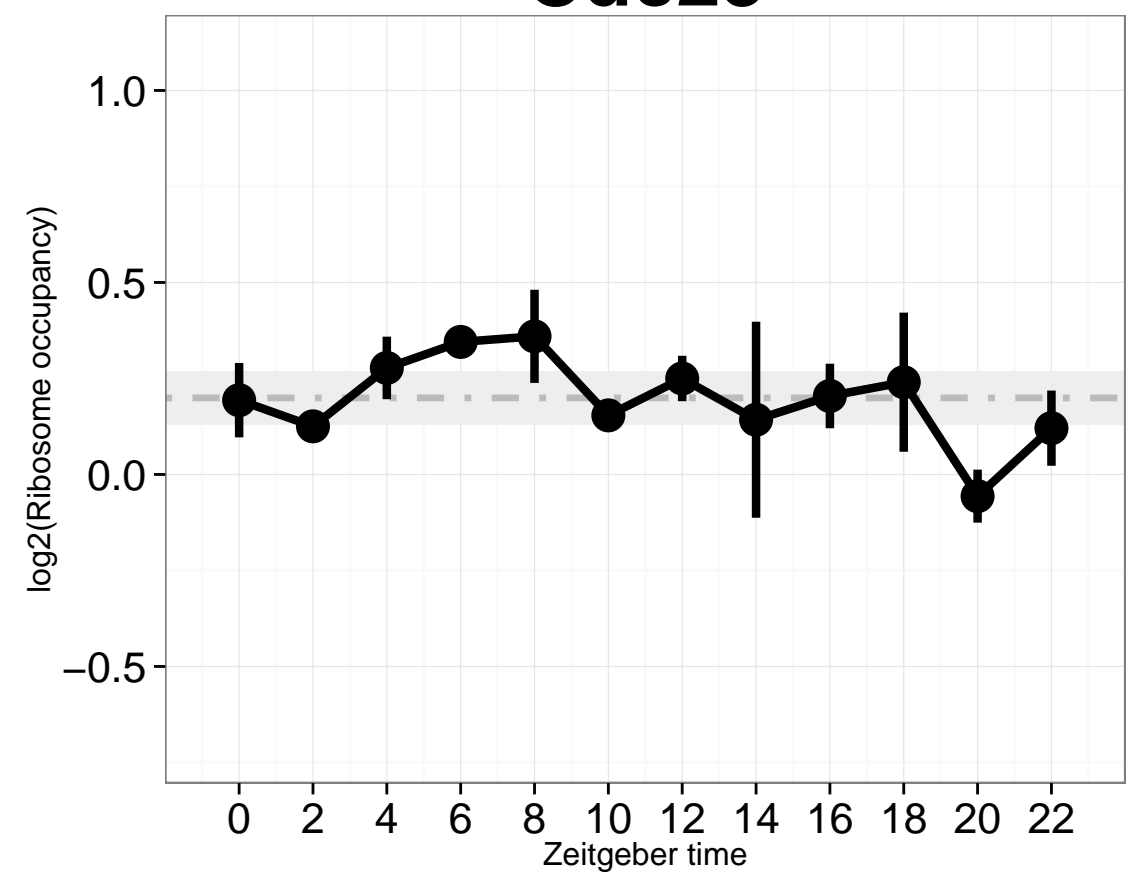

Supplement: Supplementary file 12460 [file 1]

## Wdr18

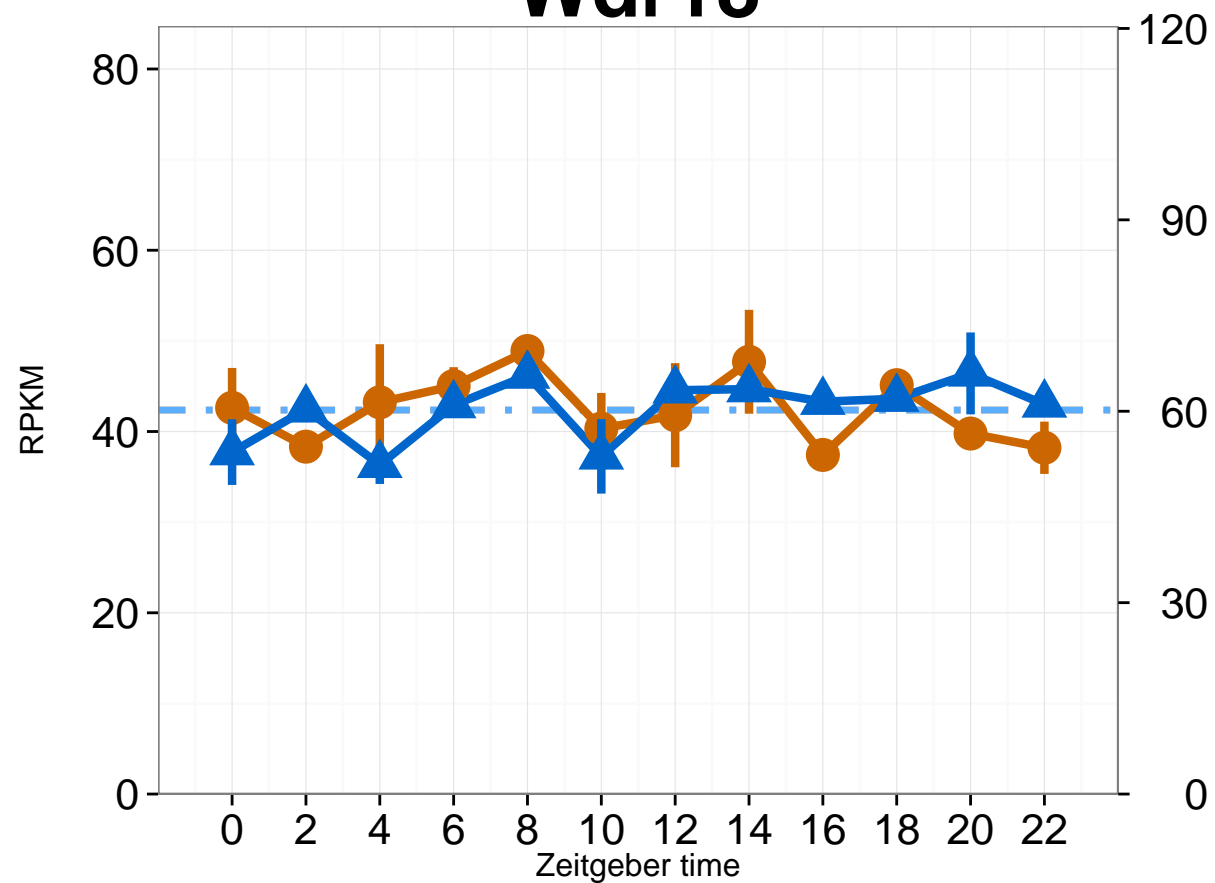

## Wdr18

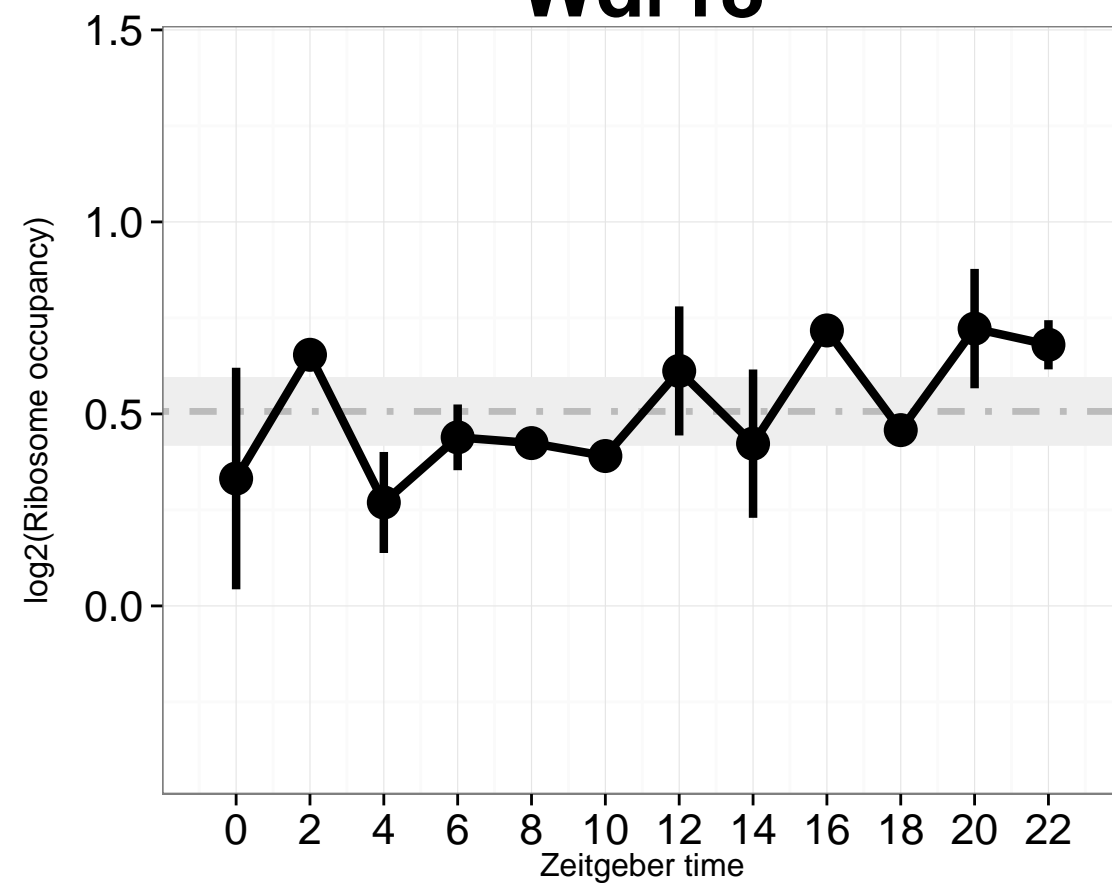

Supplement: Supplementary file 12461 [file 1]

# Acvr1

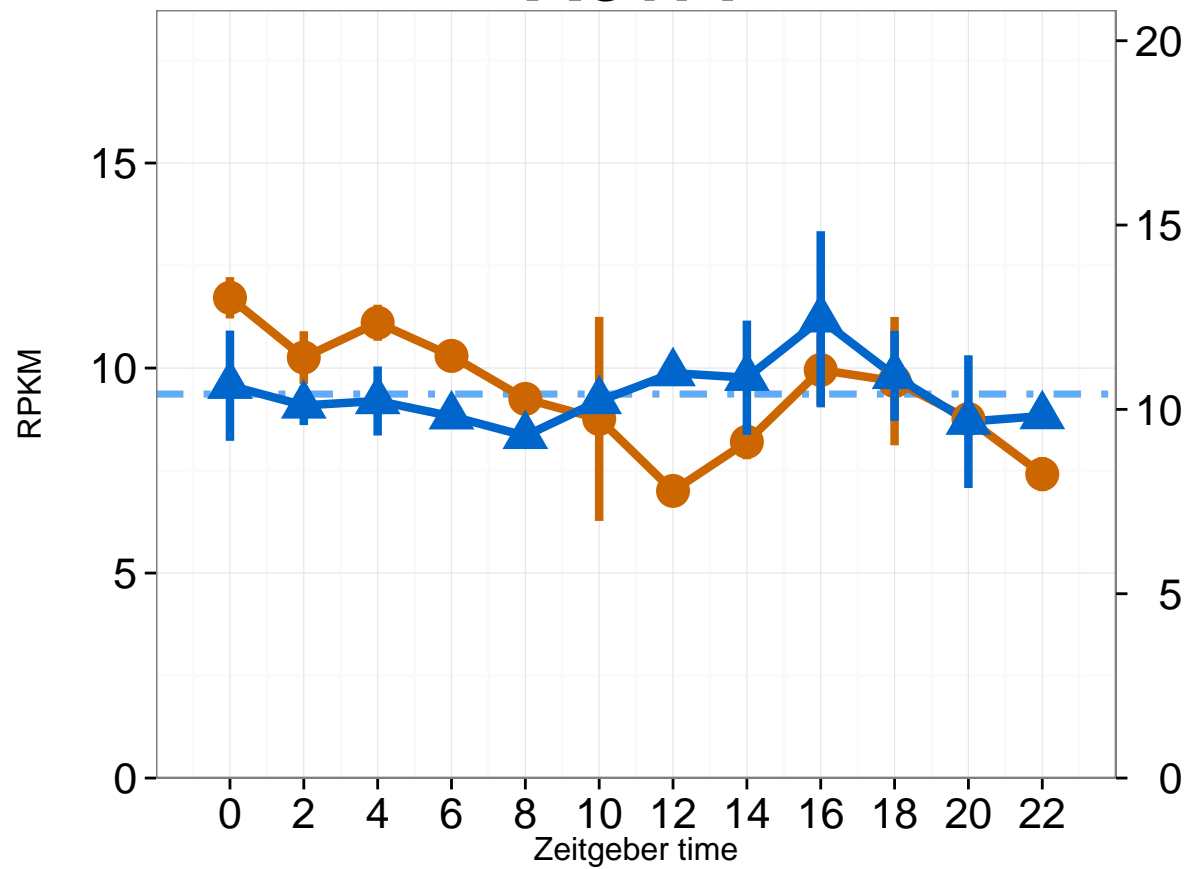

# Acvr1

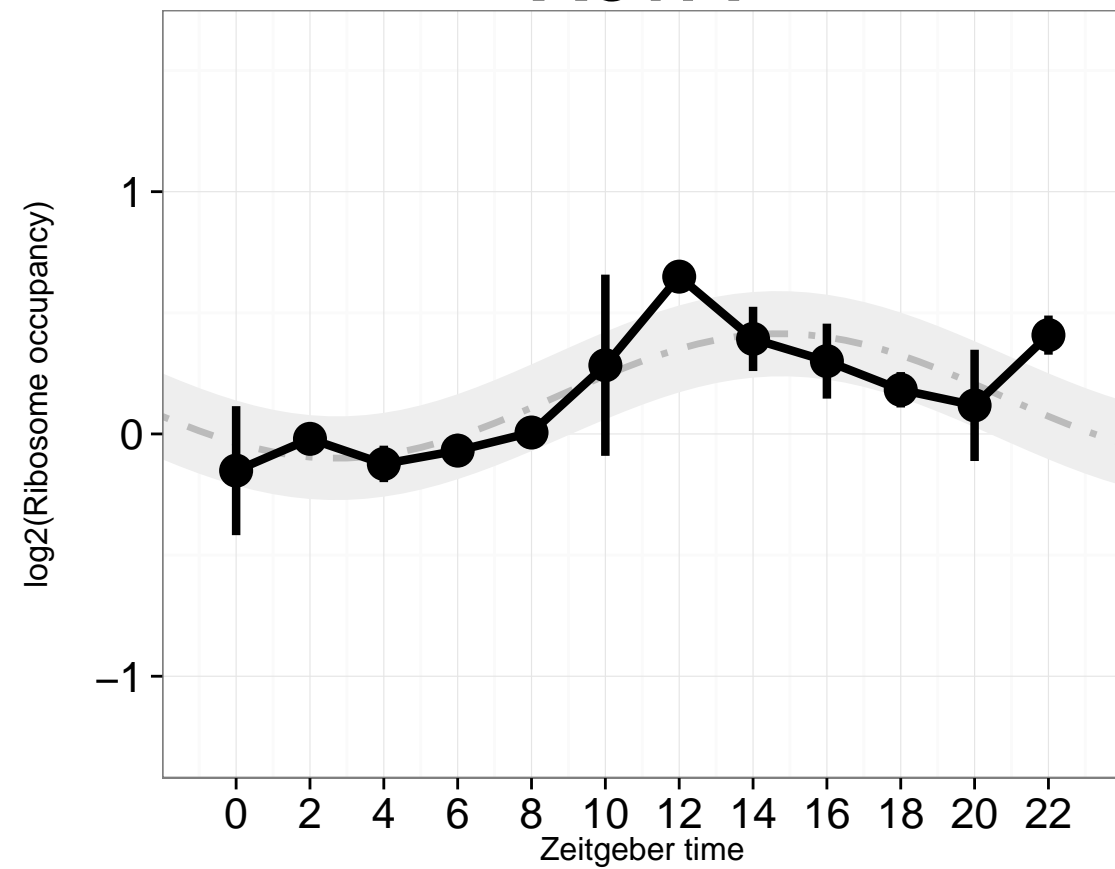

Supplement: Supplementary file 12462 [file 1]

# Rmdn3

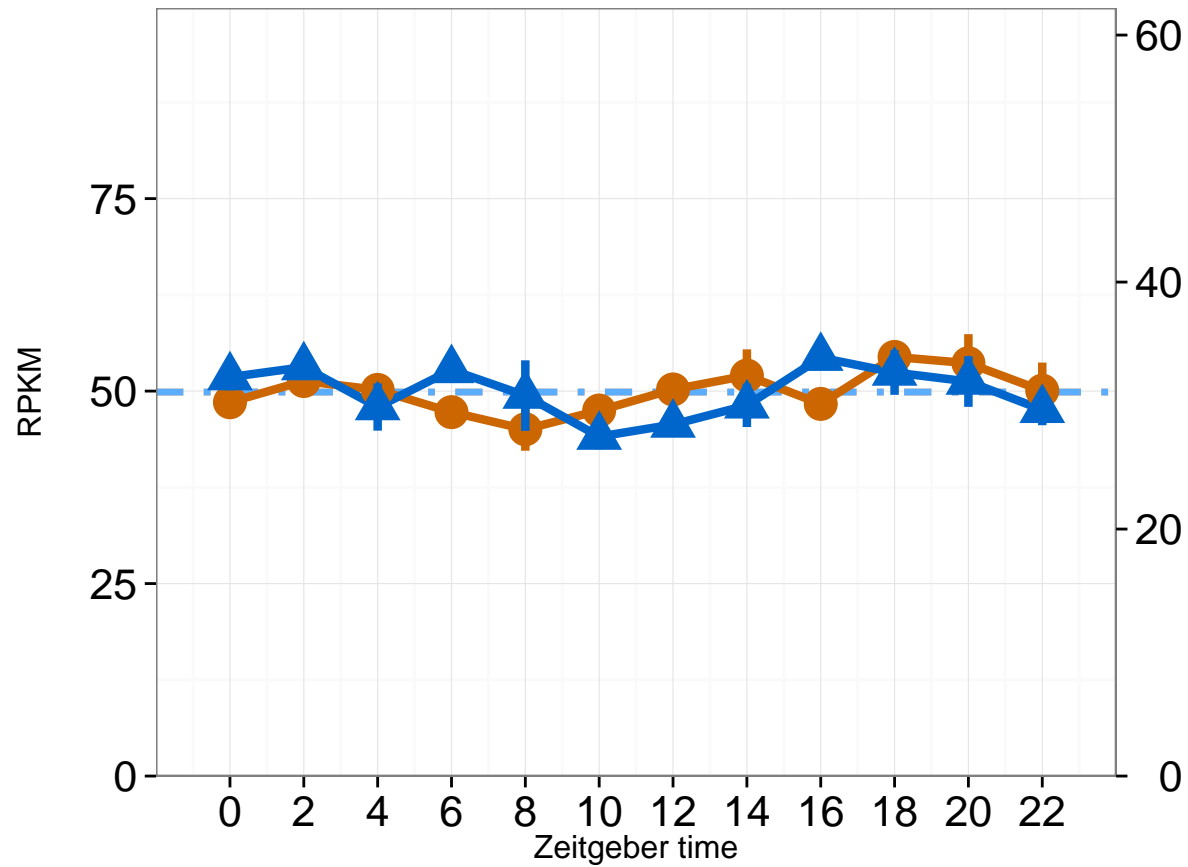

# Rmdn3

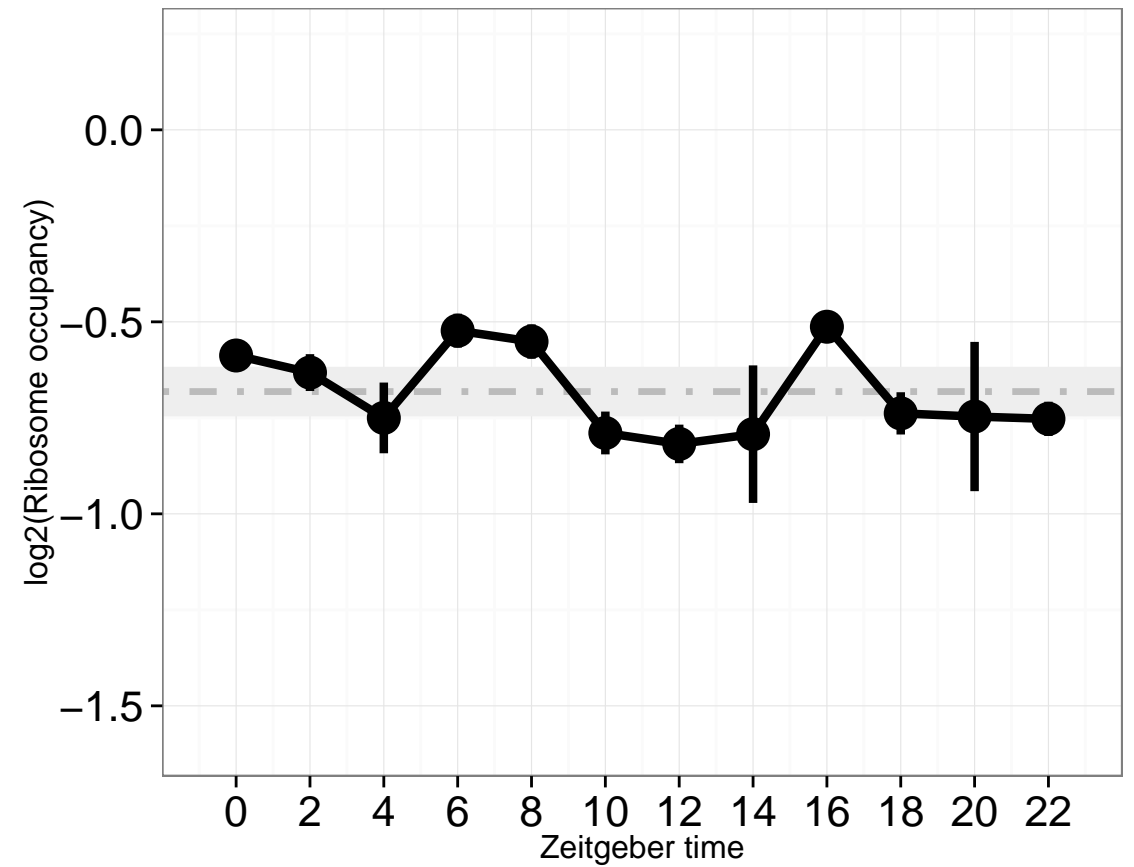

Supplement: Supplementary file 12463 [file 1]

## Cd200

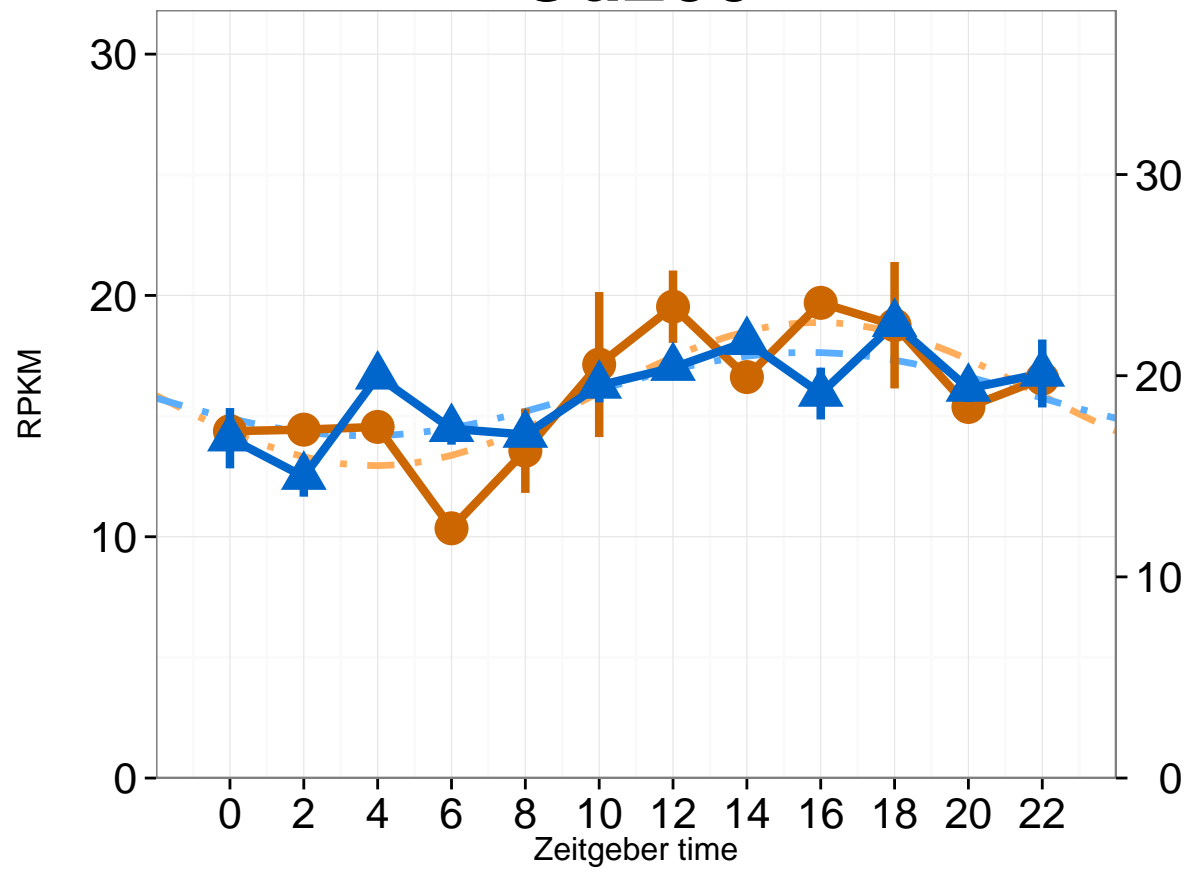

## Cd200

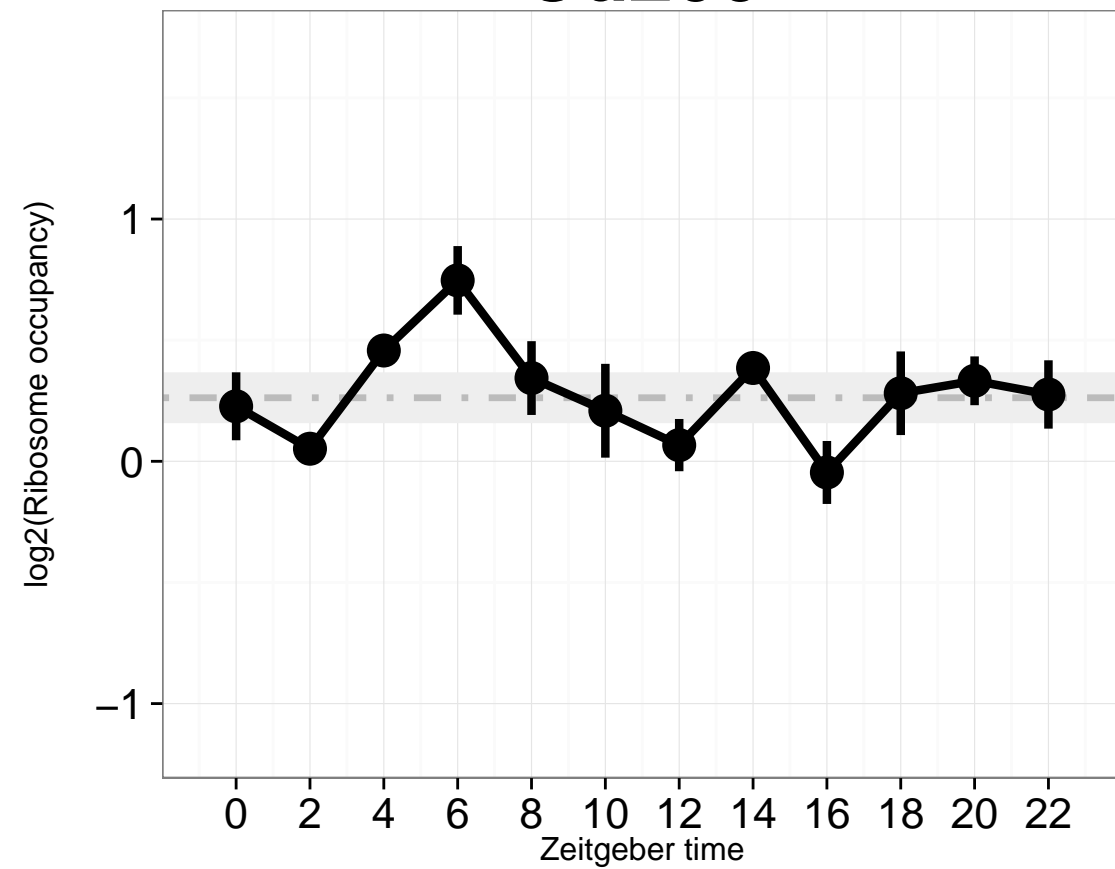

Supplement: Supplementary file 12464 [file 1]

## Nin

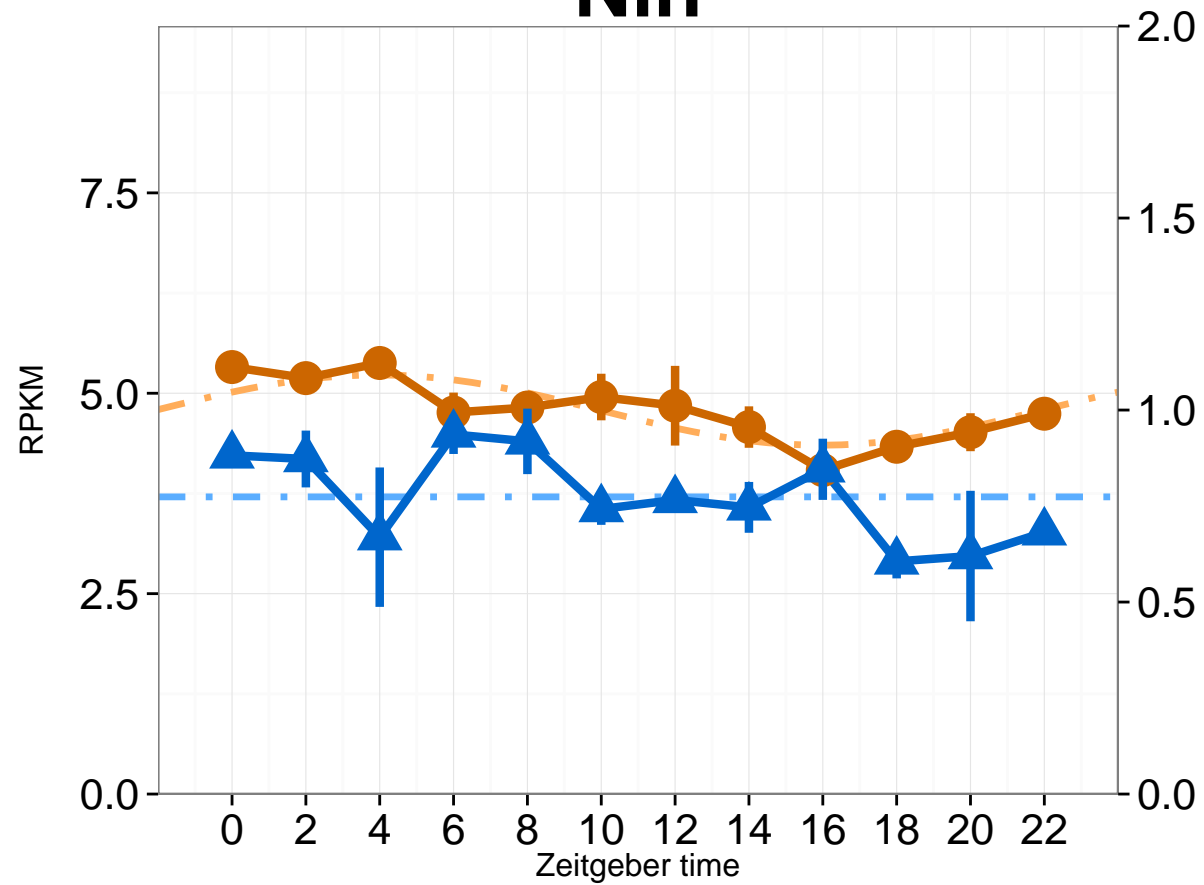

## Nin

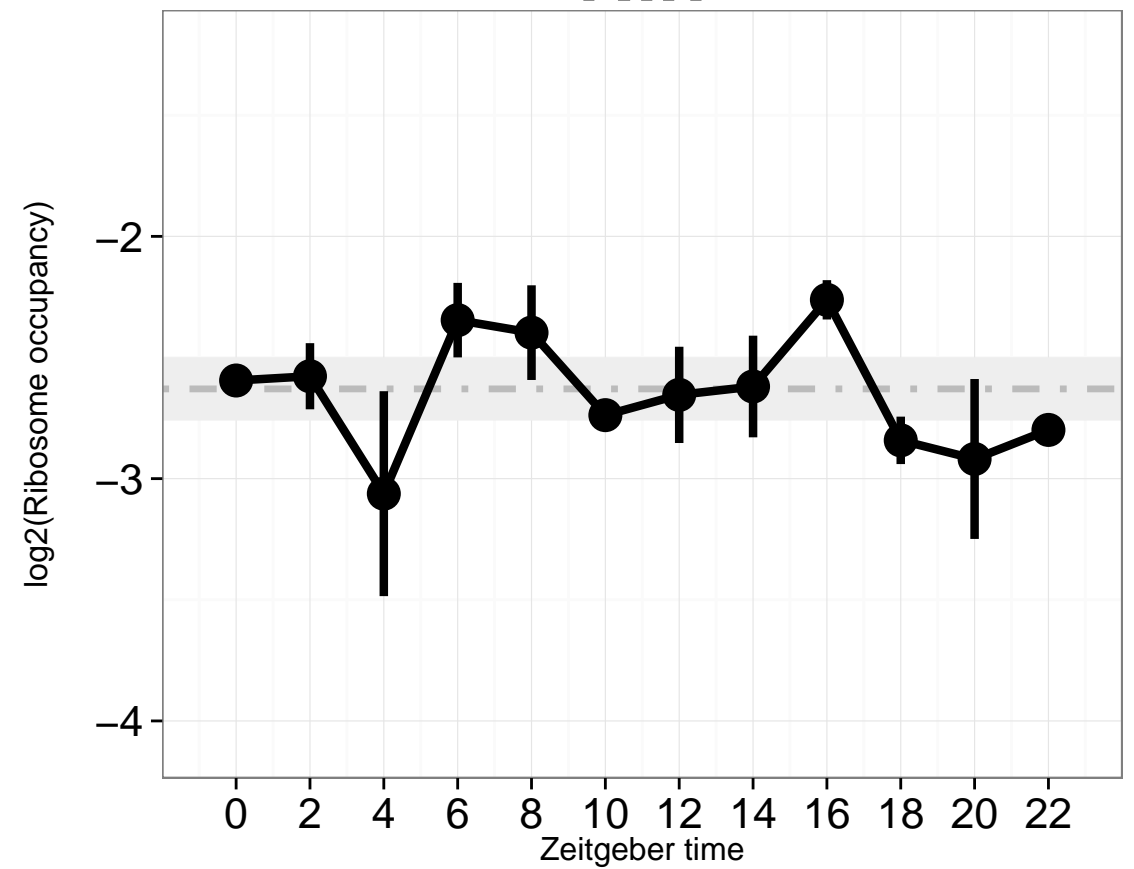

Supplement: Supplementary file 12465 [file 1]

## Pclo

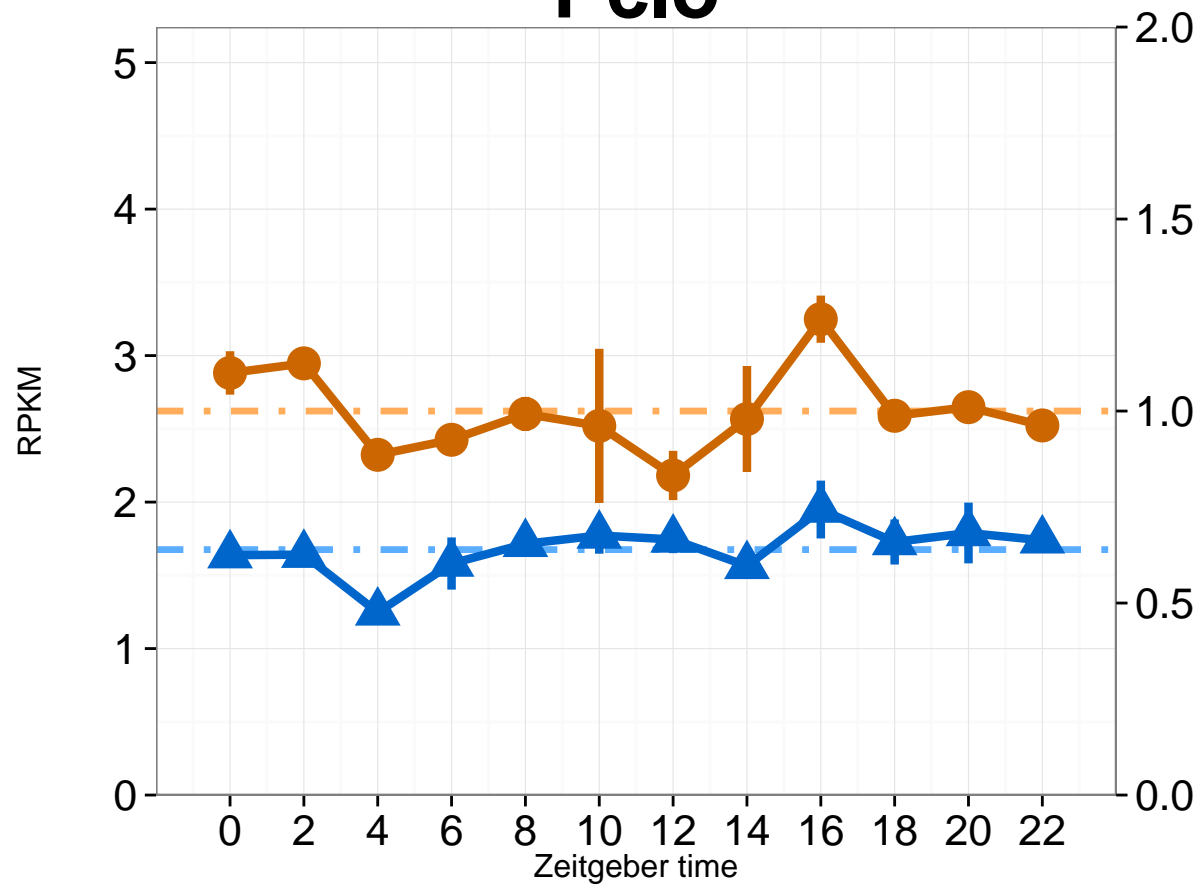

## Pclo

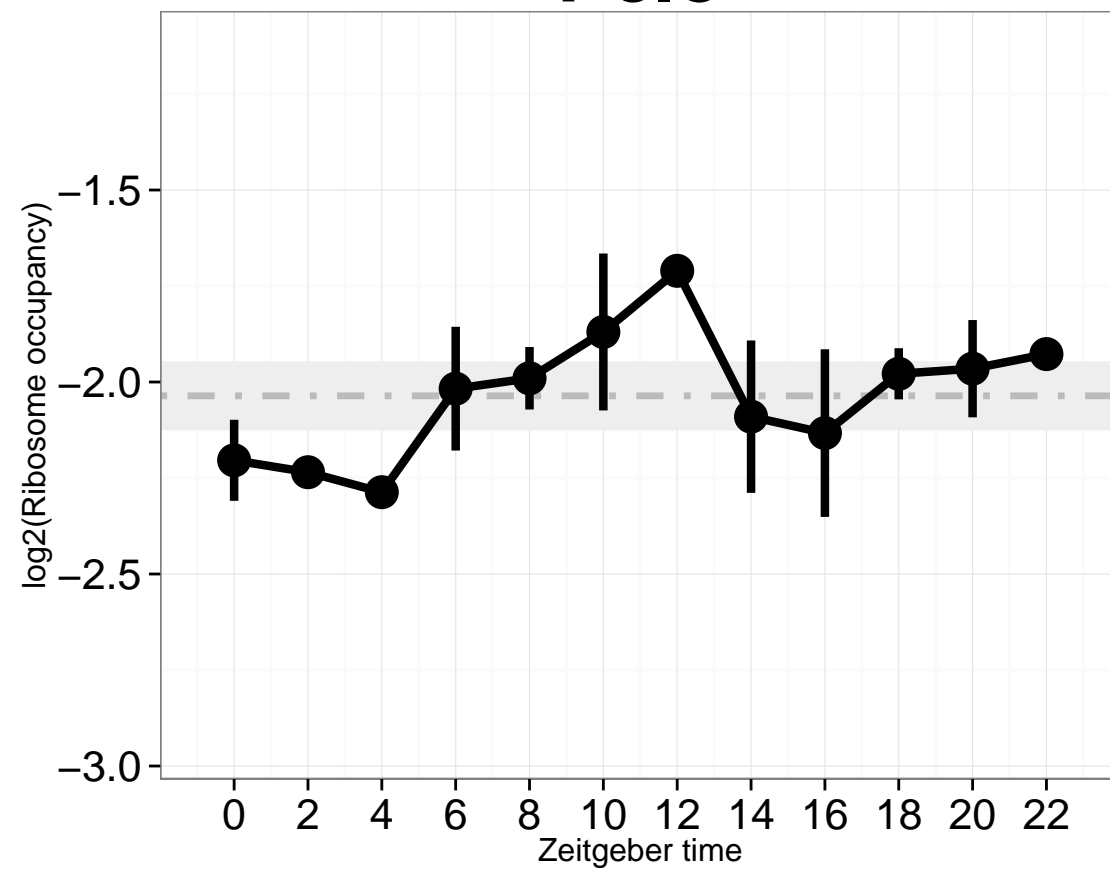

Supplement: Supplementary file 12466 [file 1]

## Ctsz

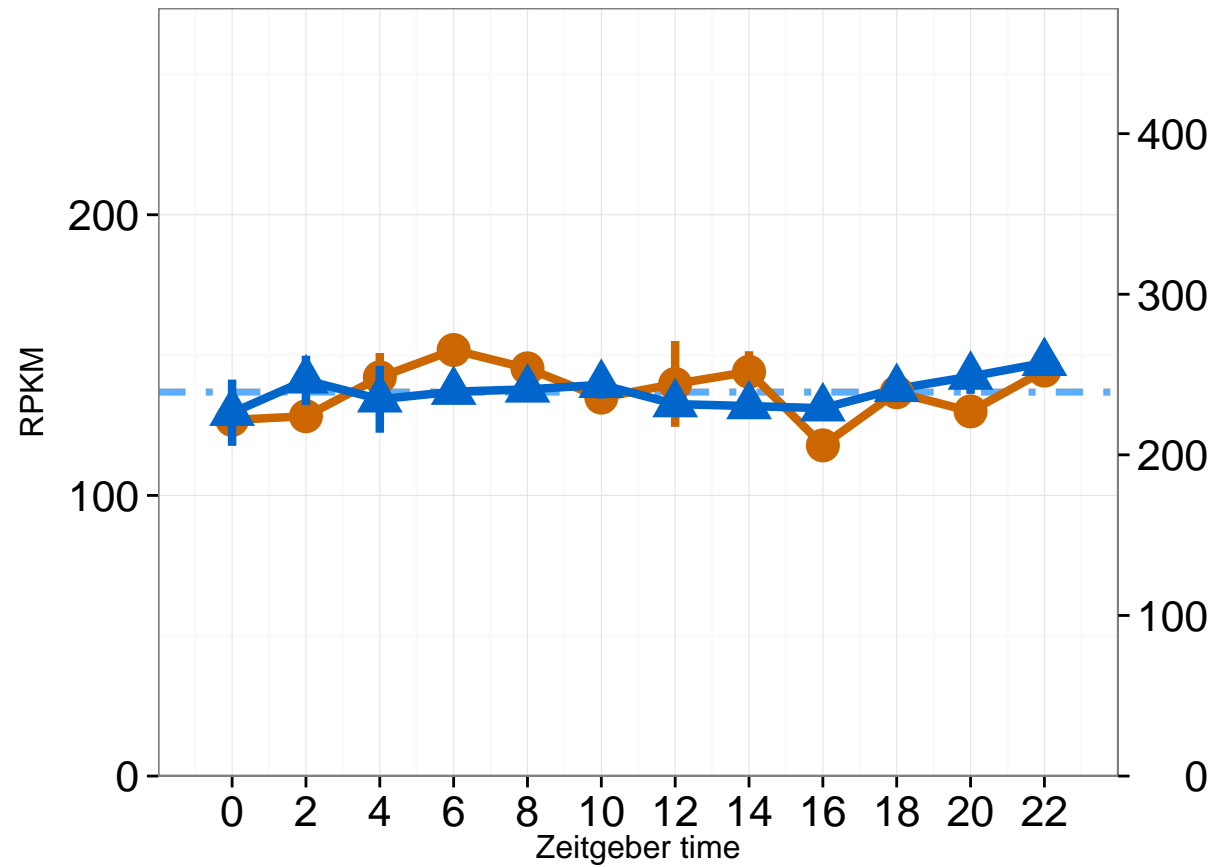

## Ctsz

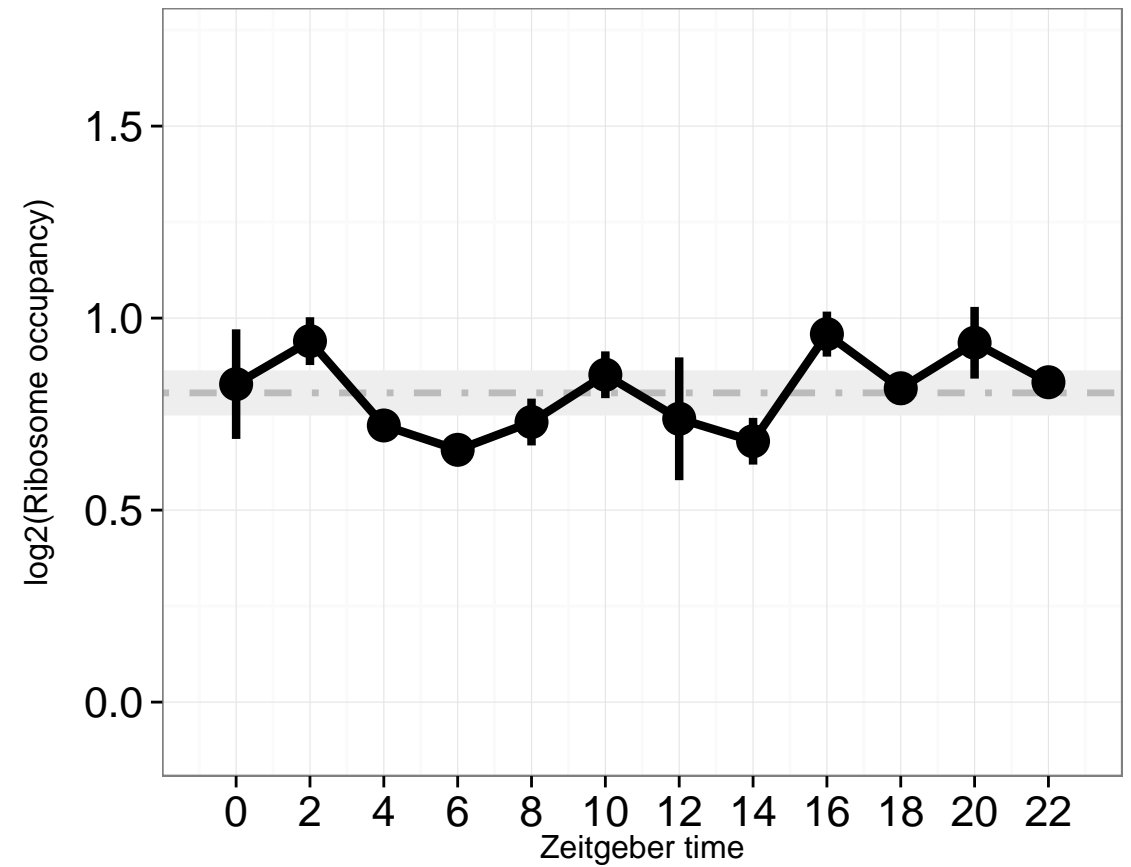

Supplement: Supplementary file 12467 [file 1]

# Nxpe3

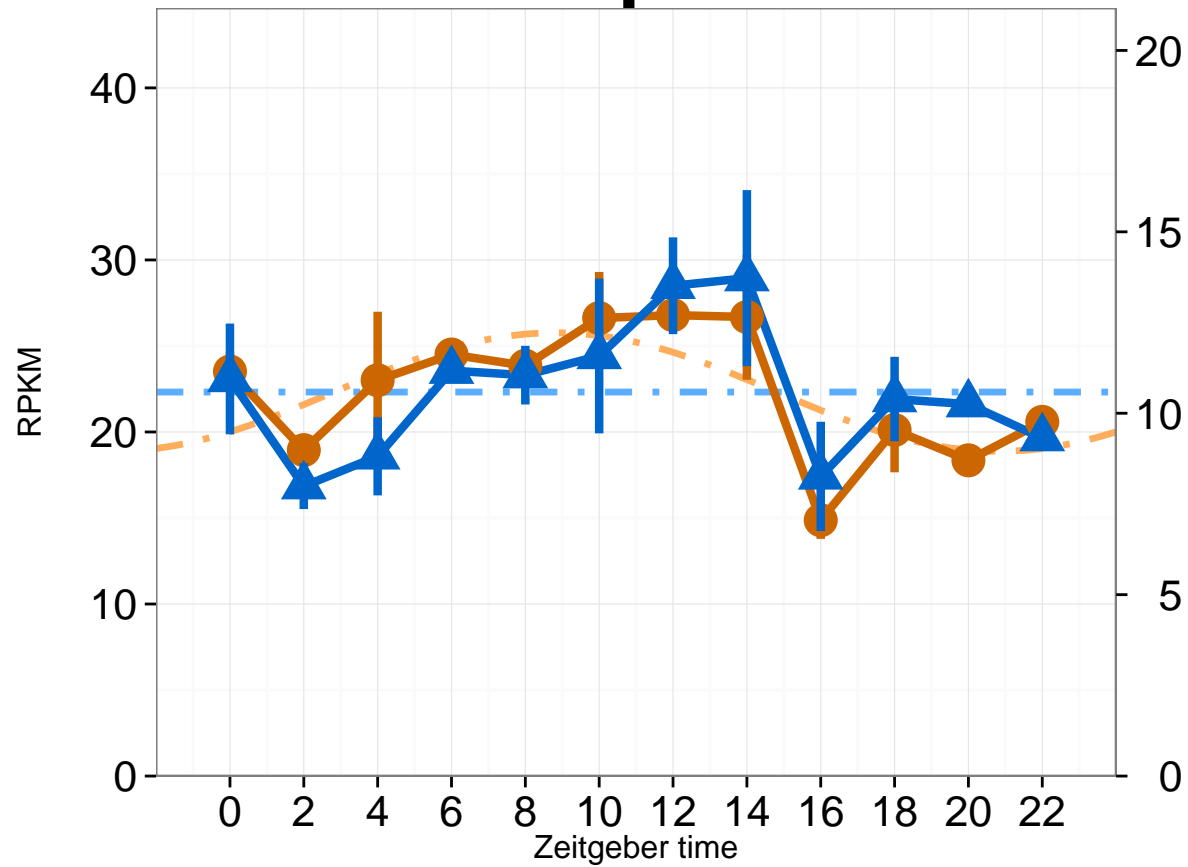

# Nxpe3

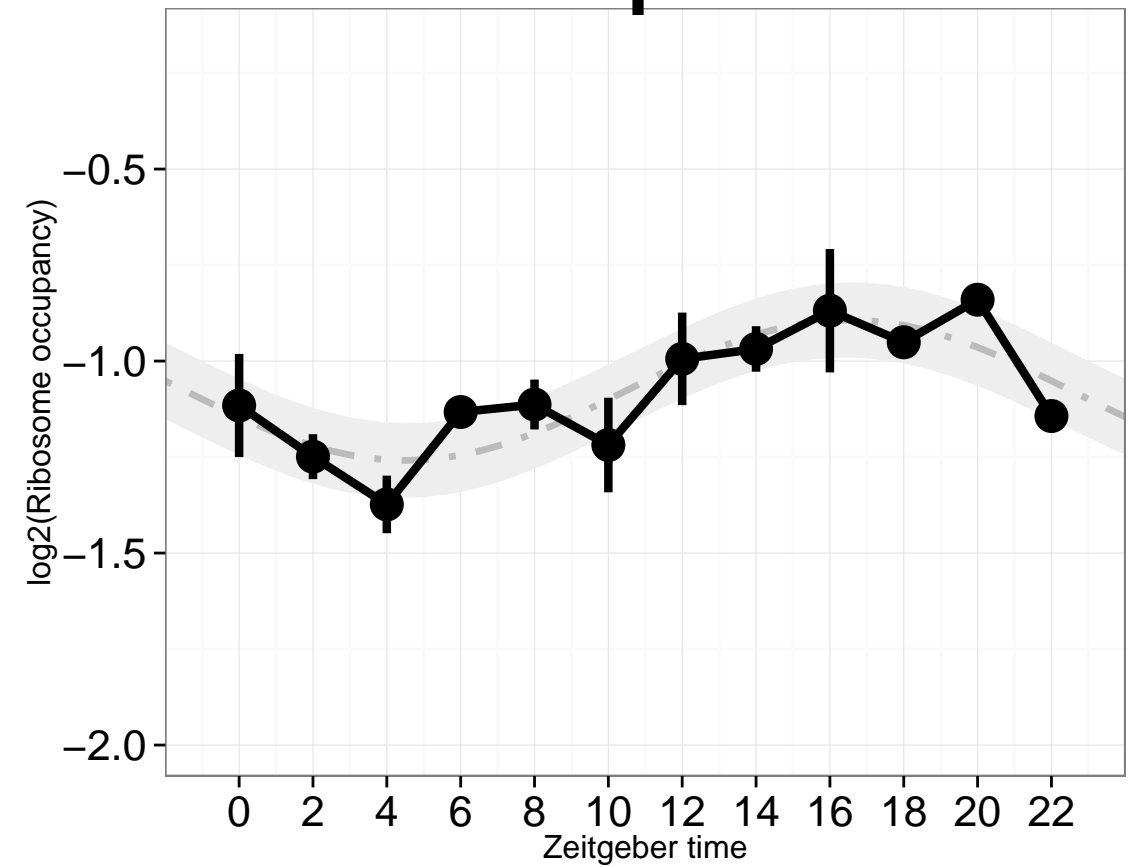

Supplement: Supplementary file 12468 [file 1]

## Stxbp4

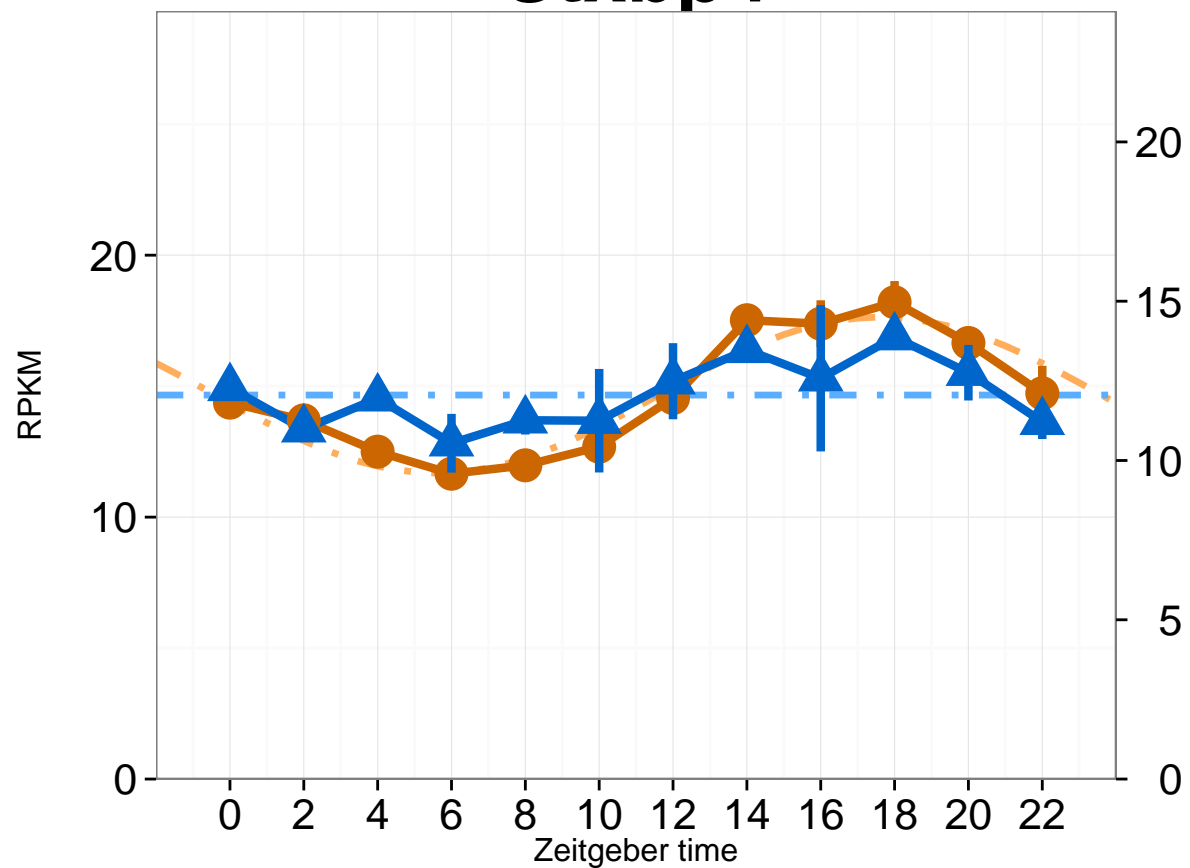

## Stxbp4

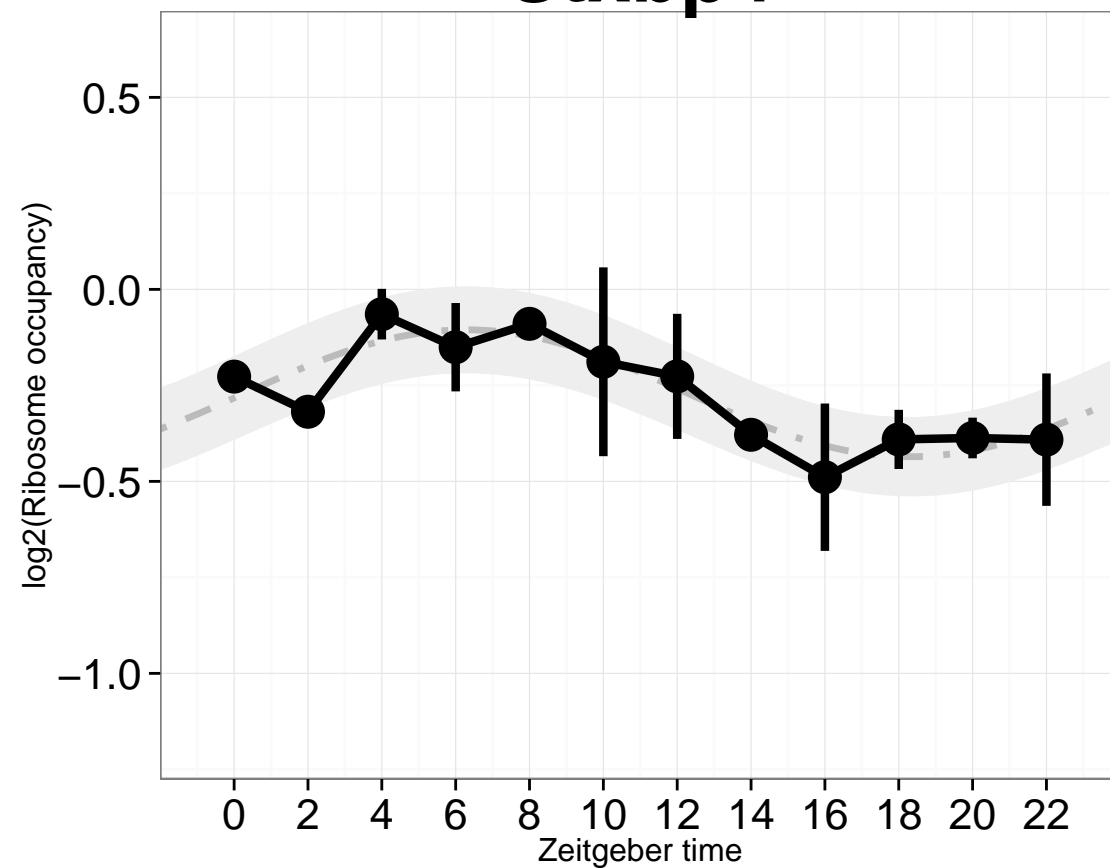

Supplement: Supplementary file 12469 [file 1]

## Dync1li1

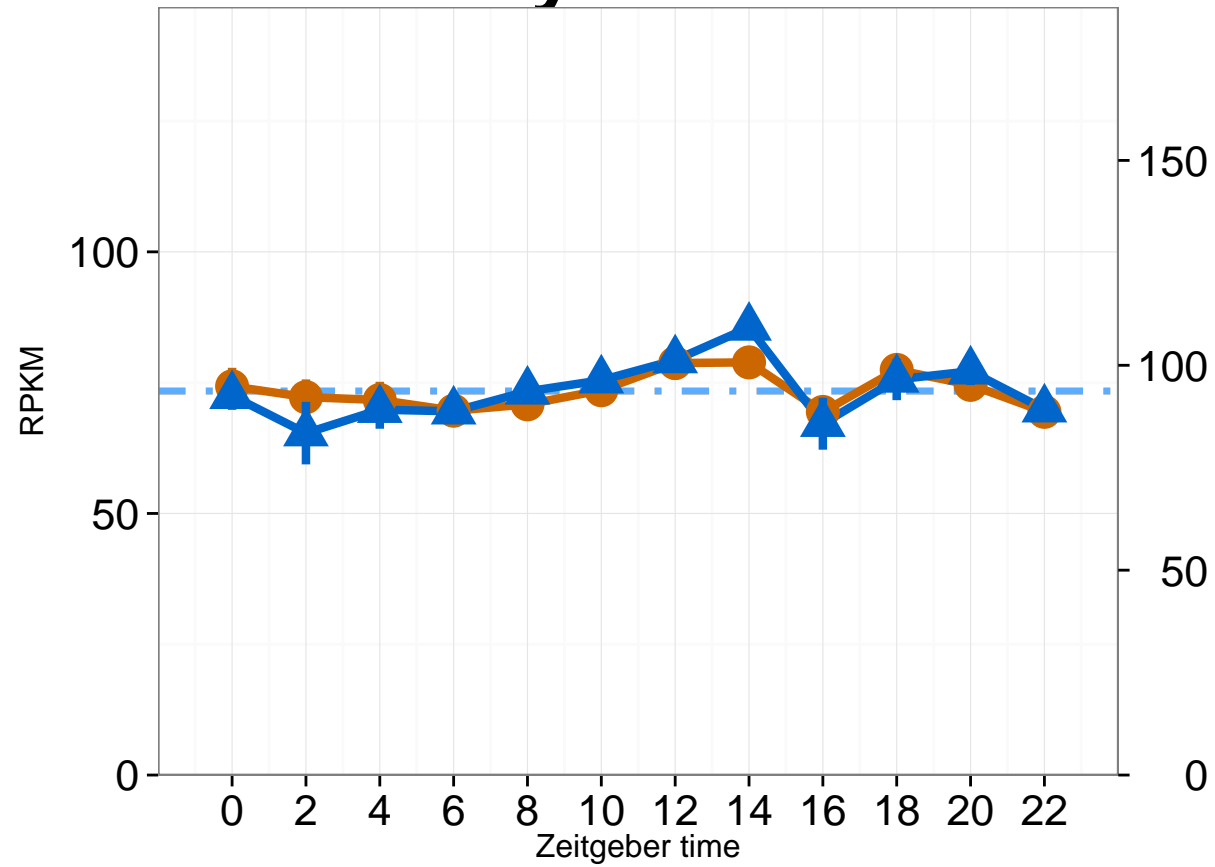

## Dync1li1

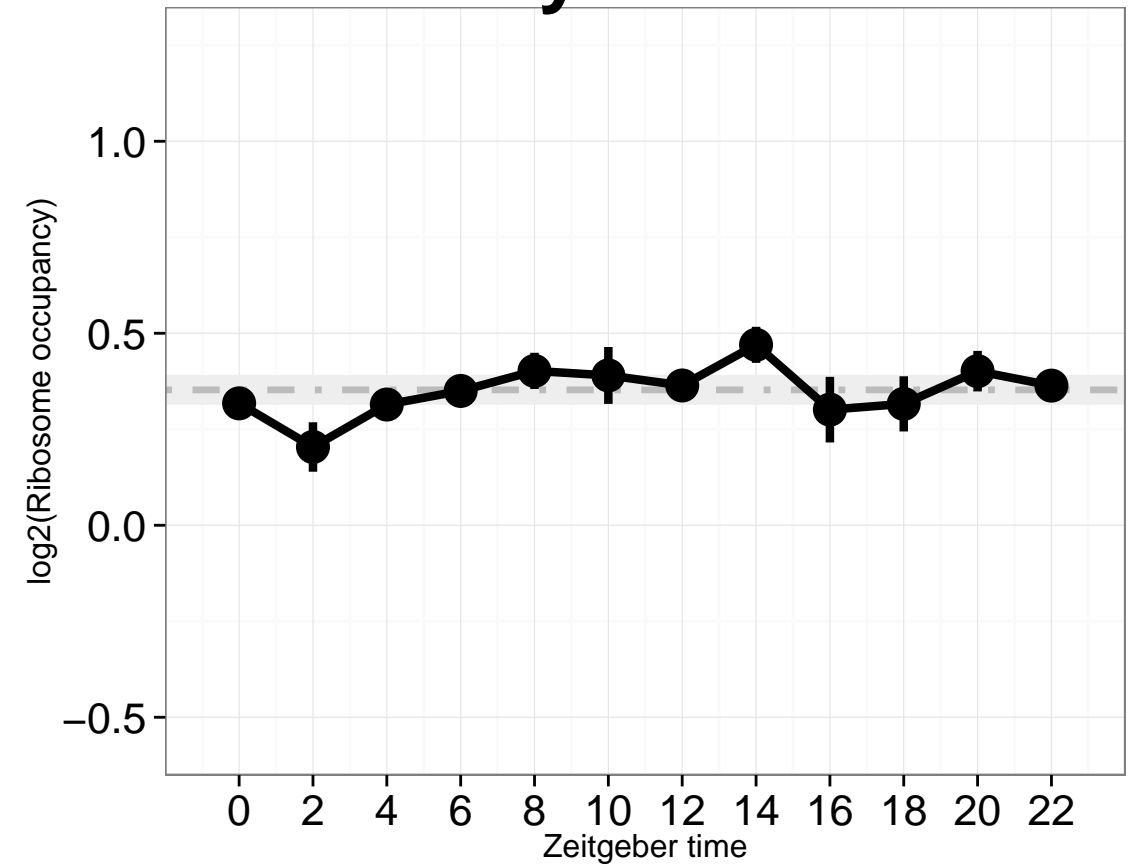

Supplement: Supplementary file 12470 [file 1]

# D10Jhu81e

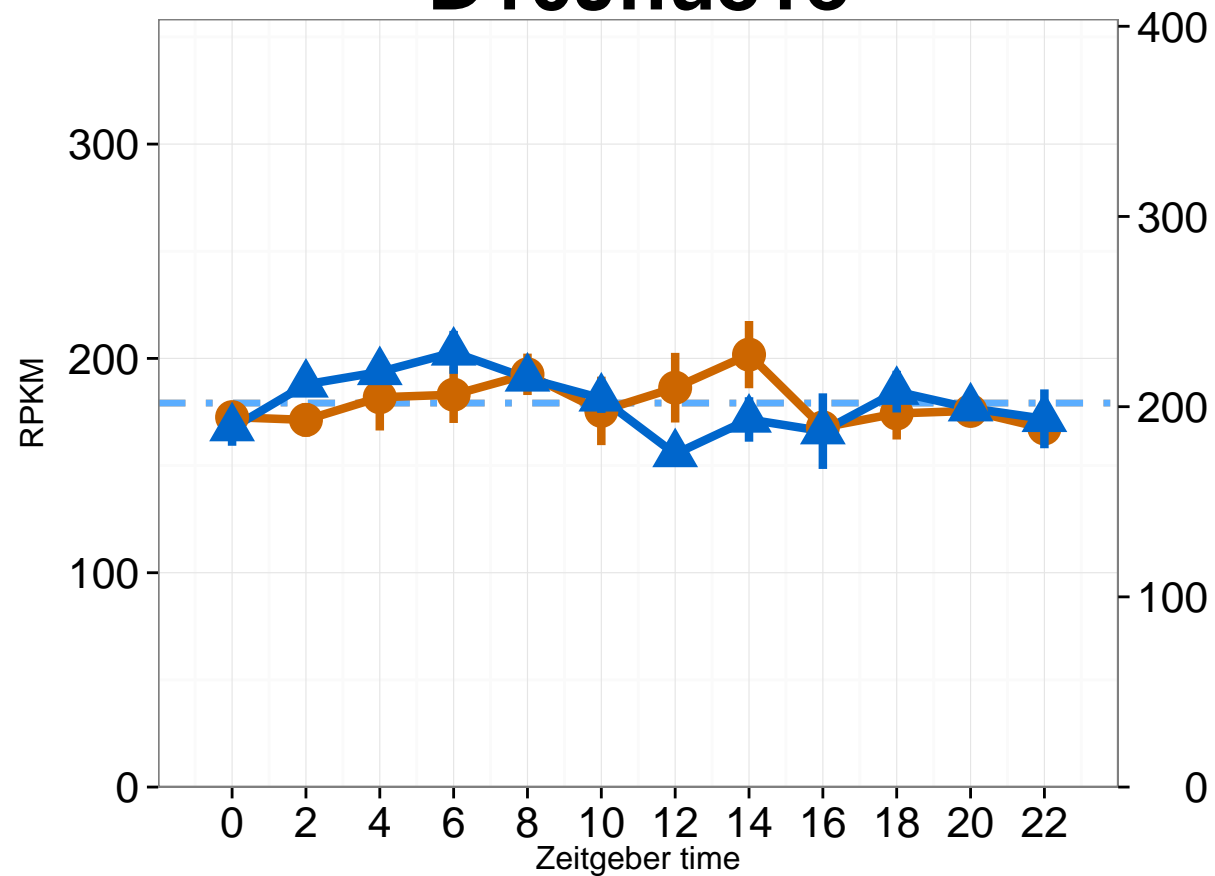

# D10Jhu81e

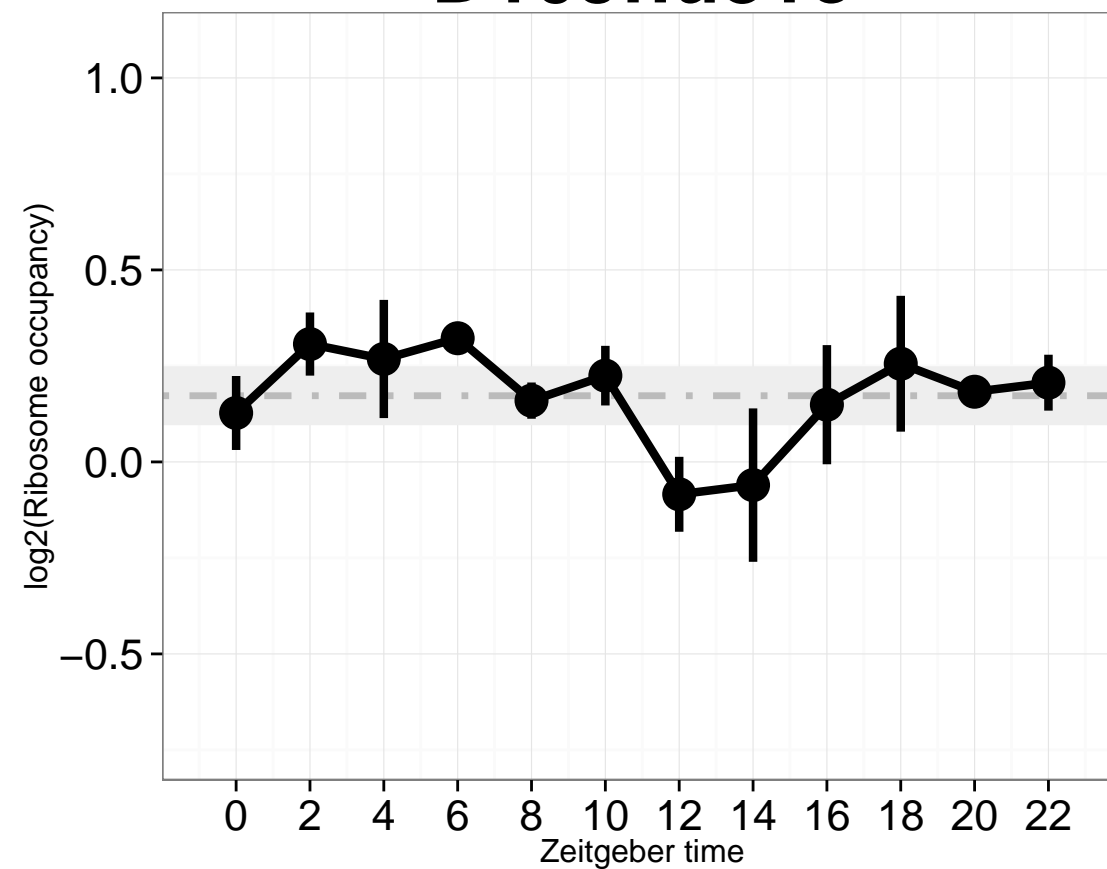

Supplement: Supplementary file 12471 [file 1]

Ccdc149

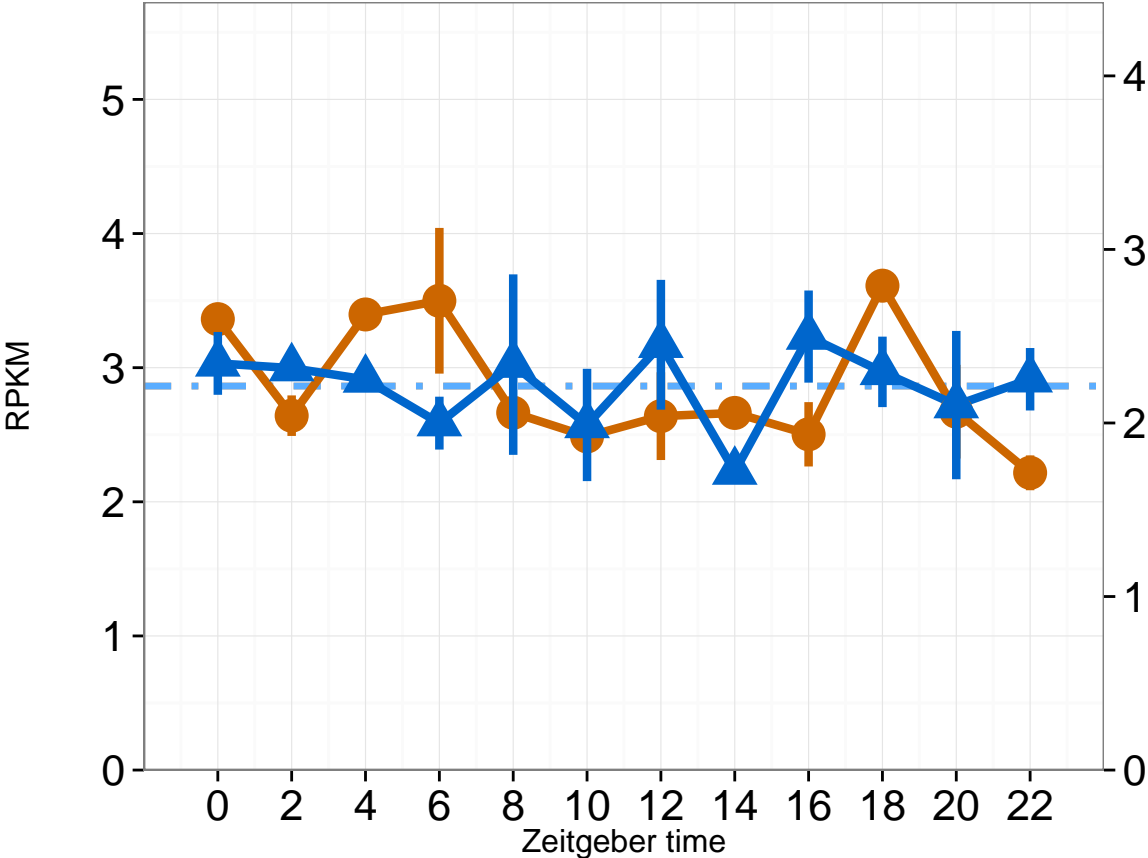

Ccdc149

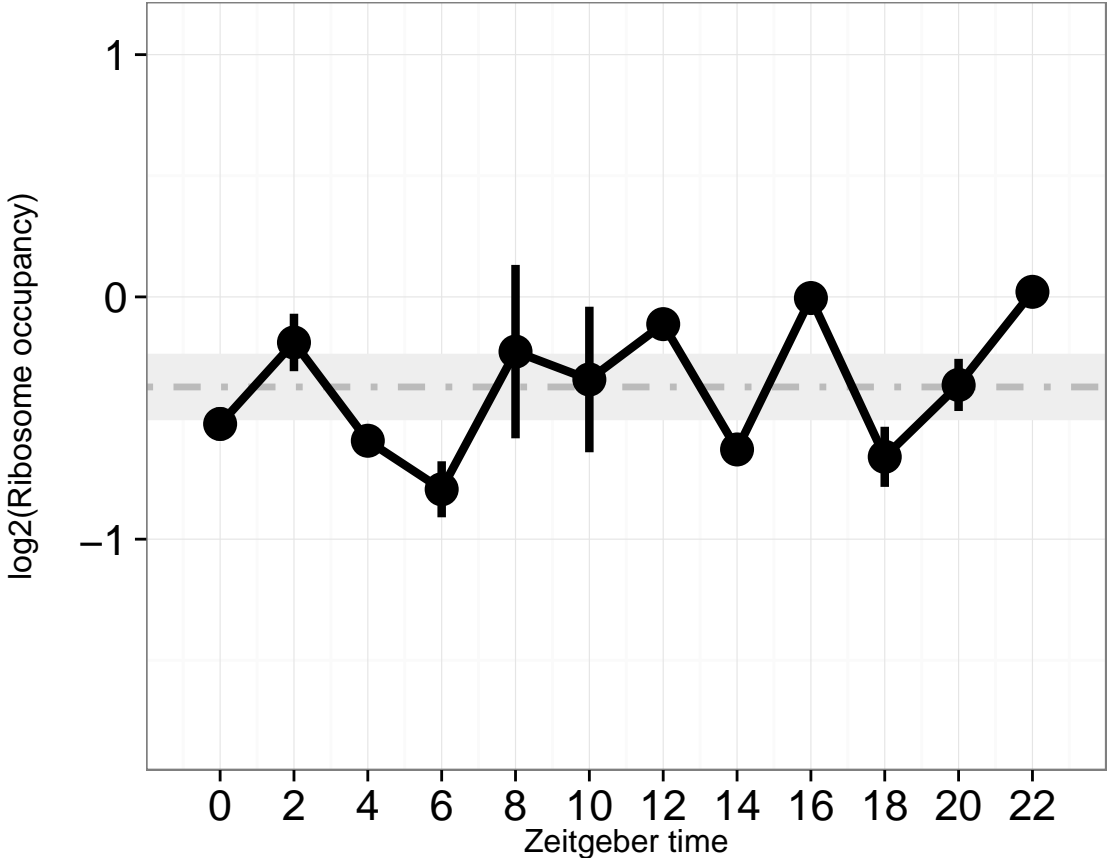

Supplement: Supplementary file 12472 [file 1]

## Sytl2

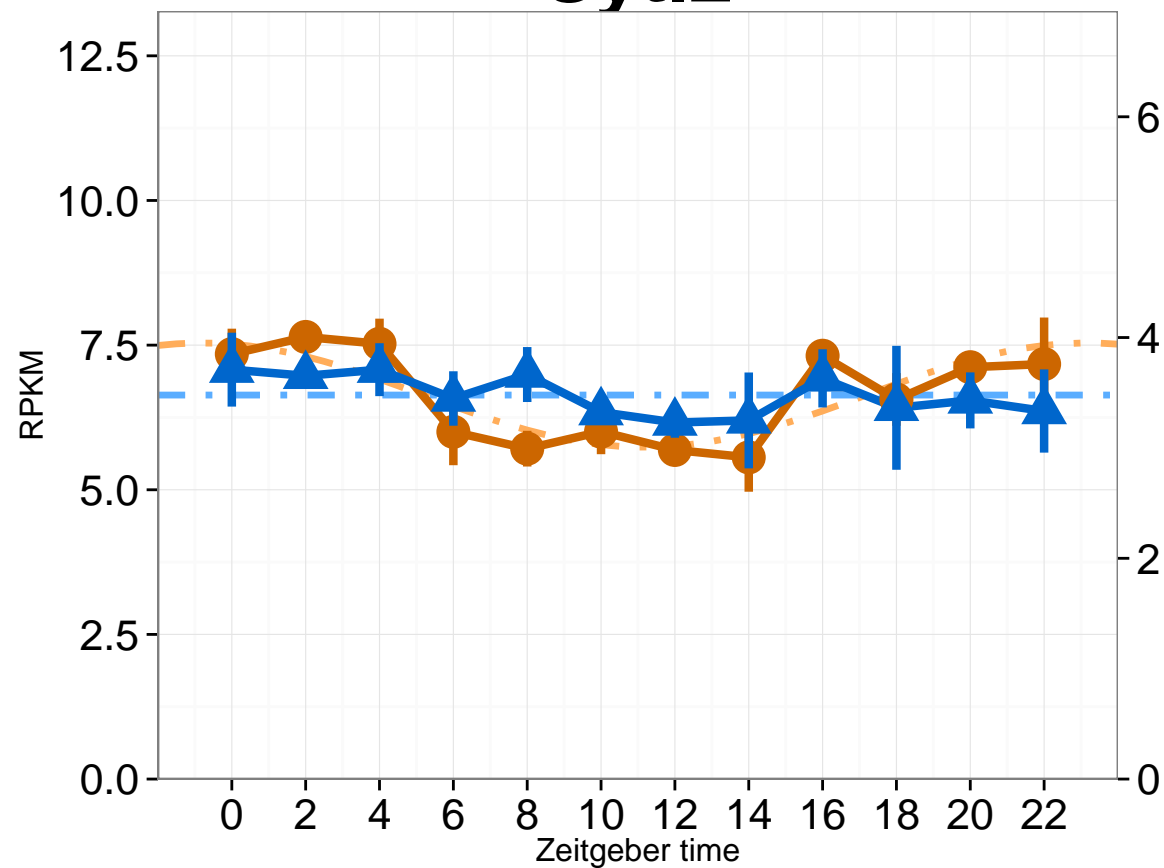

## Sytl2

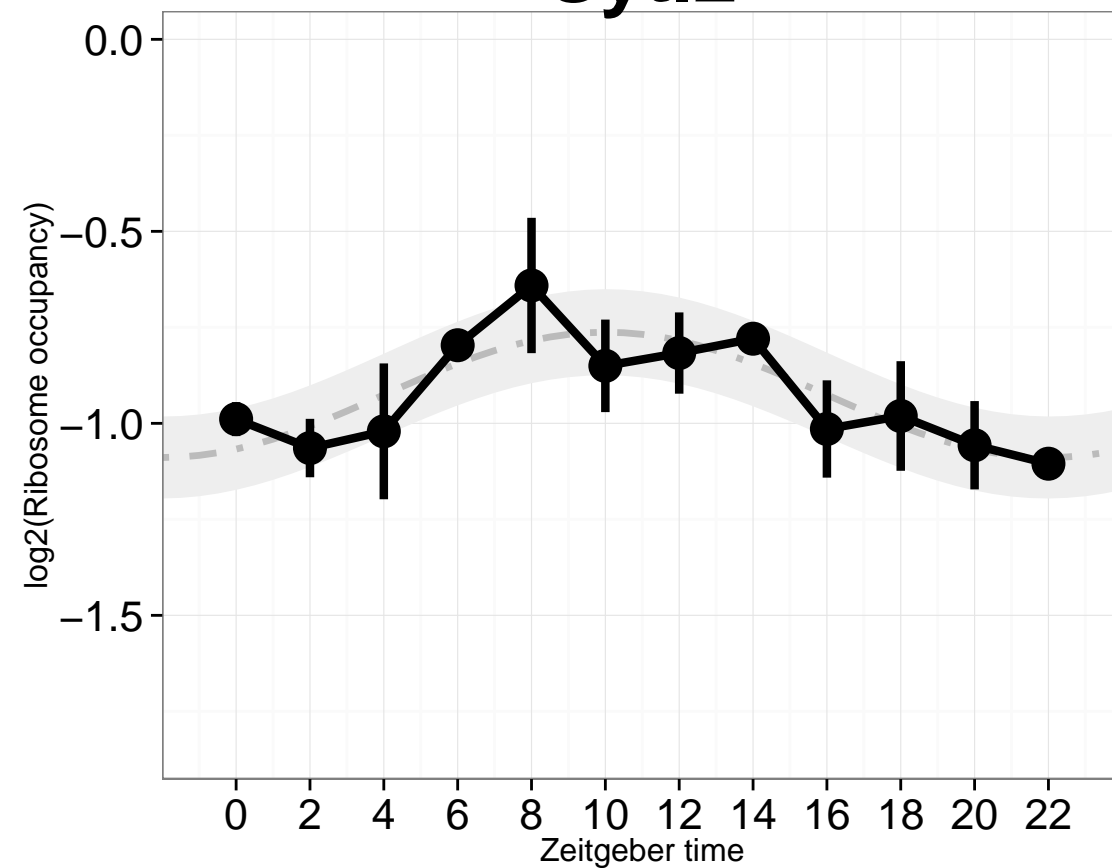

Supplement: Supplementary file 12473 [file 1]

## Fstl3

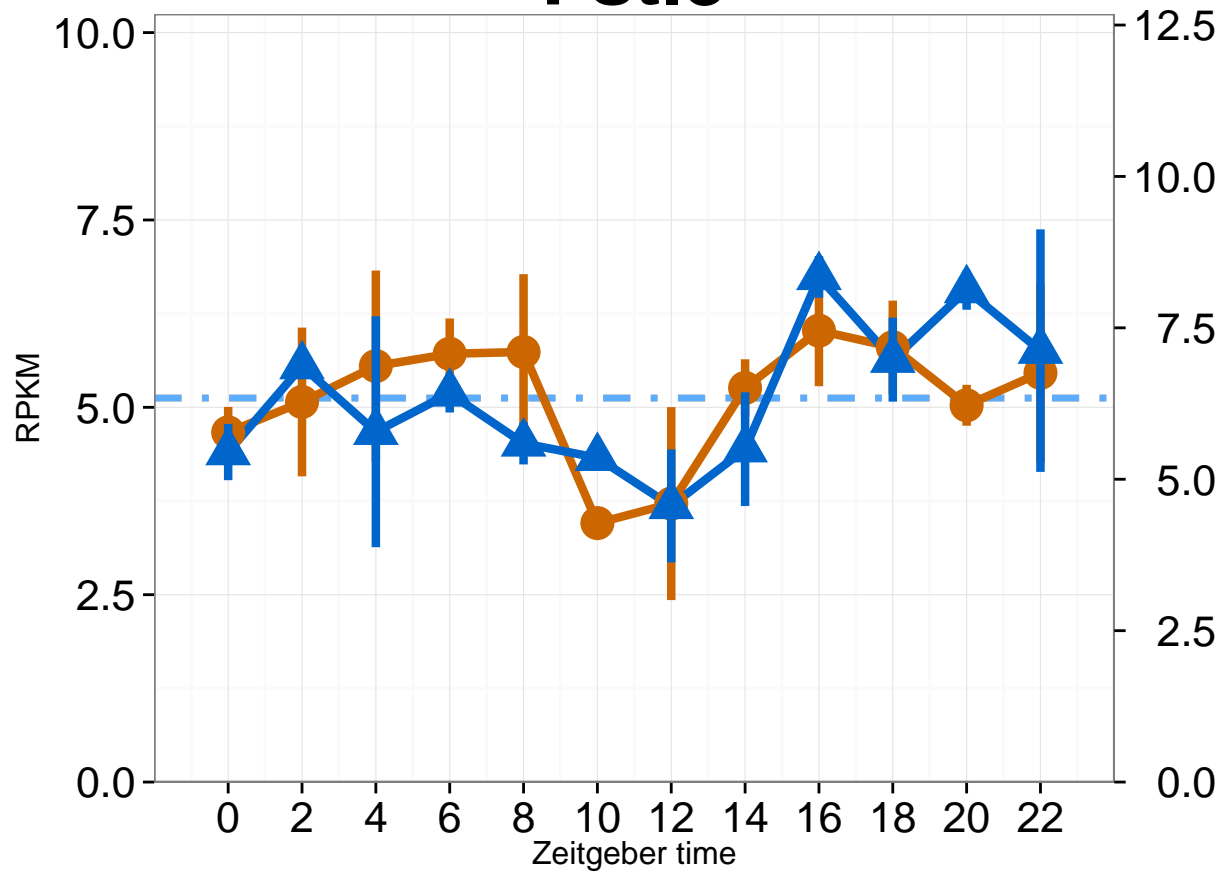

## Fstl3

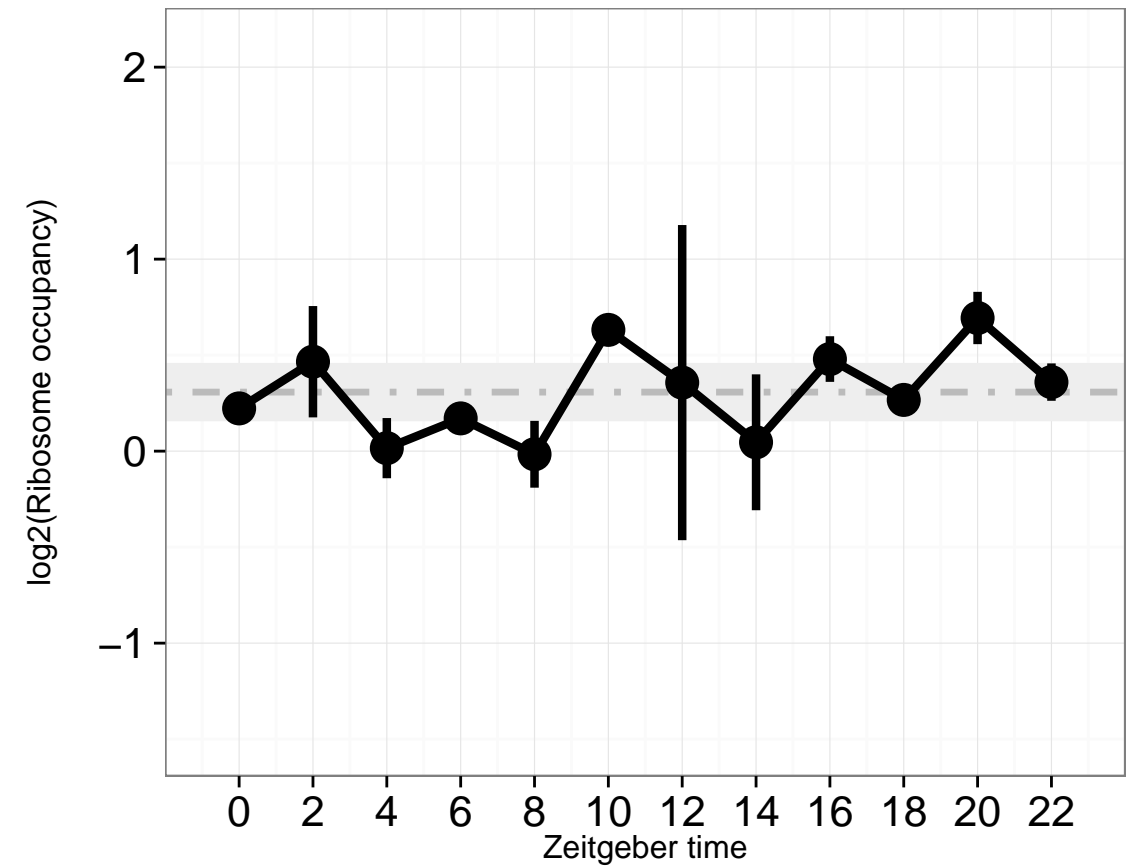

Supplement: Supplementary file 12474 [file 1]

## Serinc2

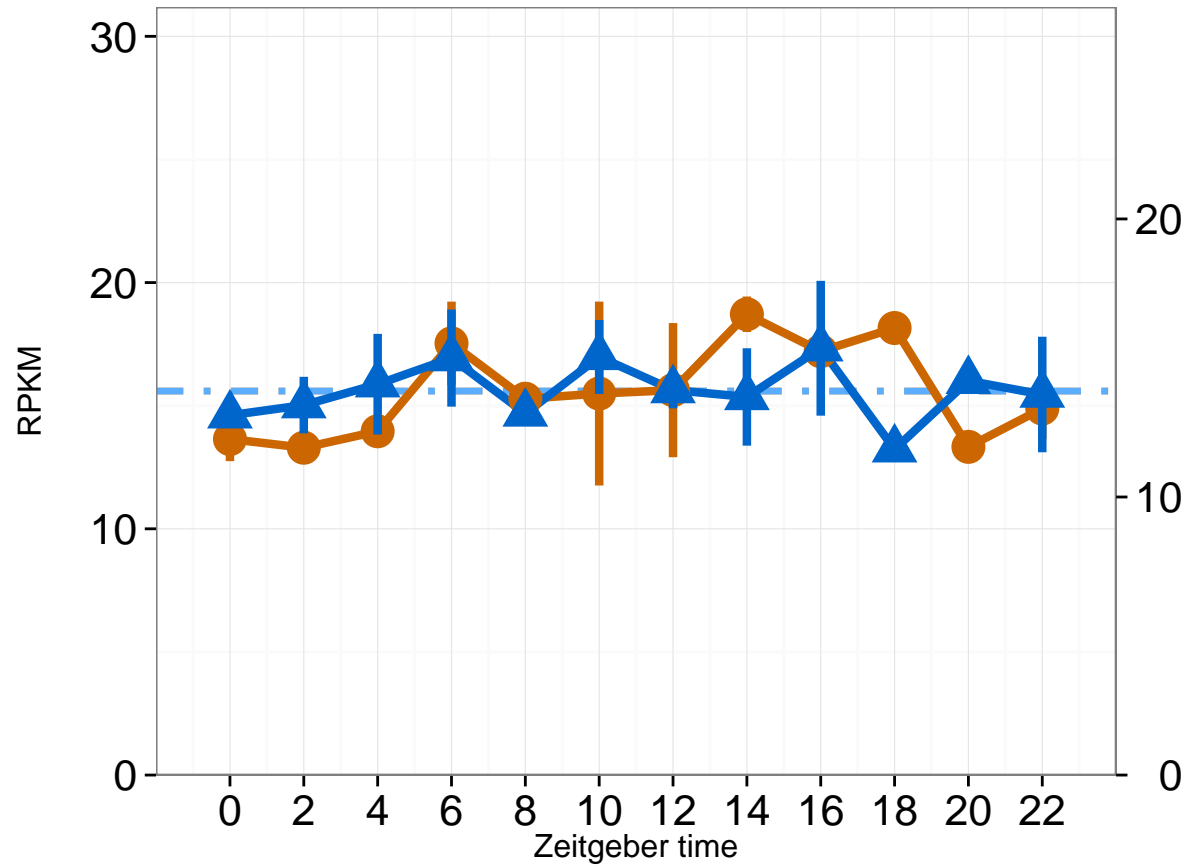

## Serinc2

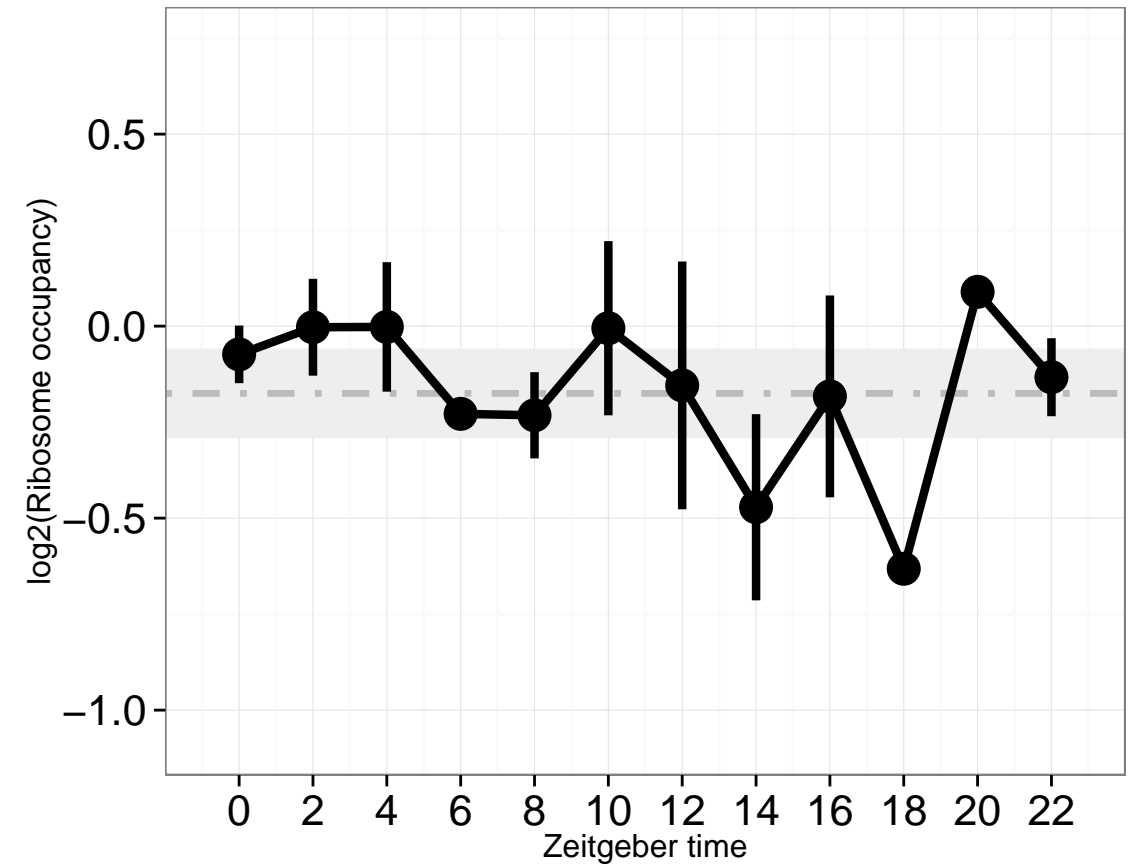

Supplement: Supplementary file 12475 [file 1]

## Agk

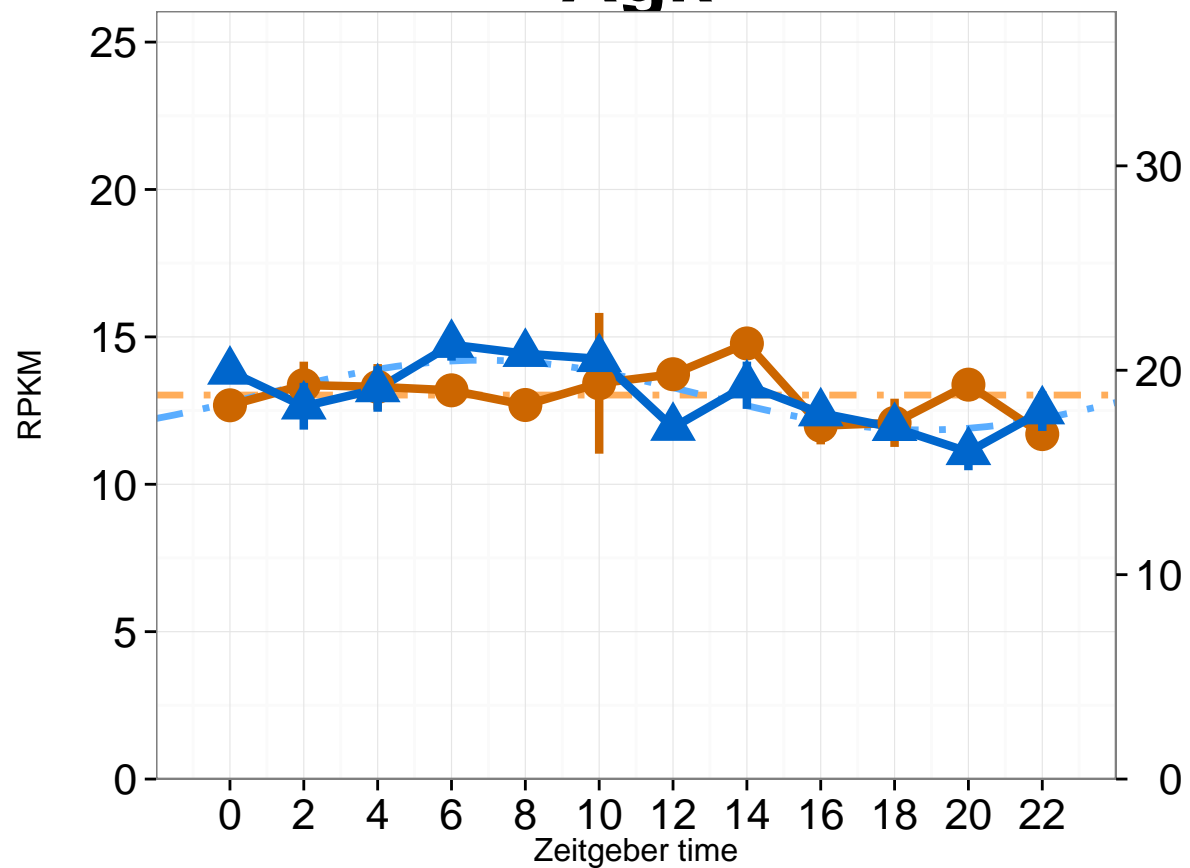

## Agk

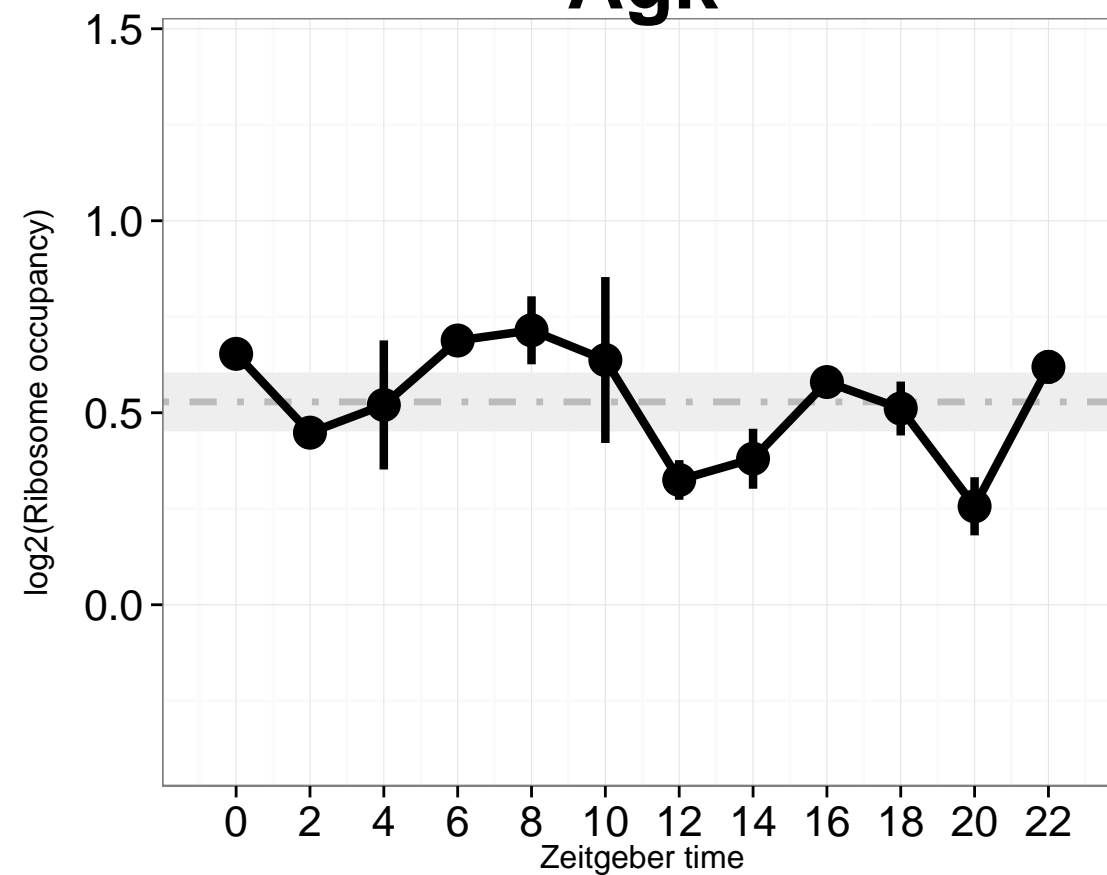

Supplement: Supplementary file 12476 [file 1]

## Hoxa2

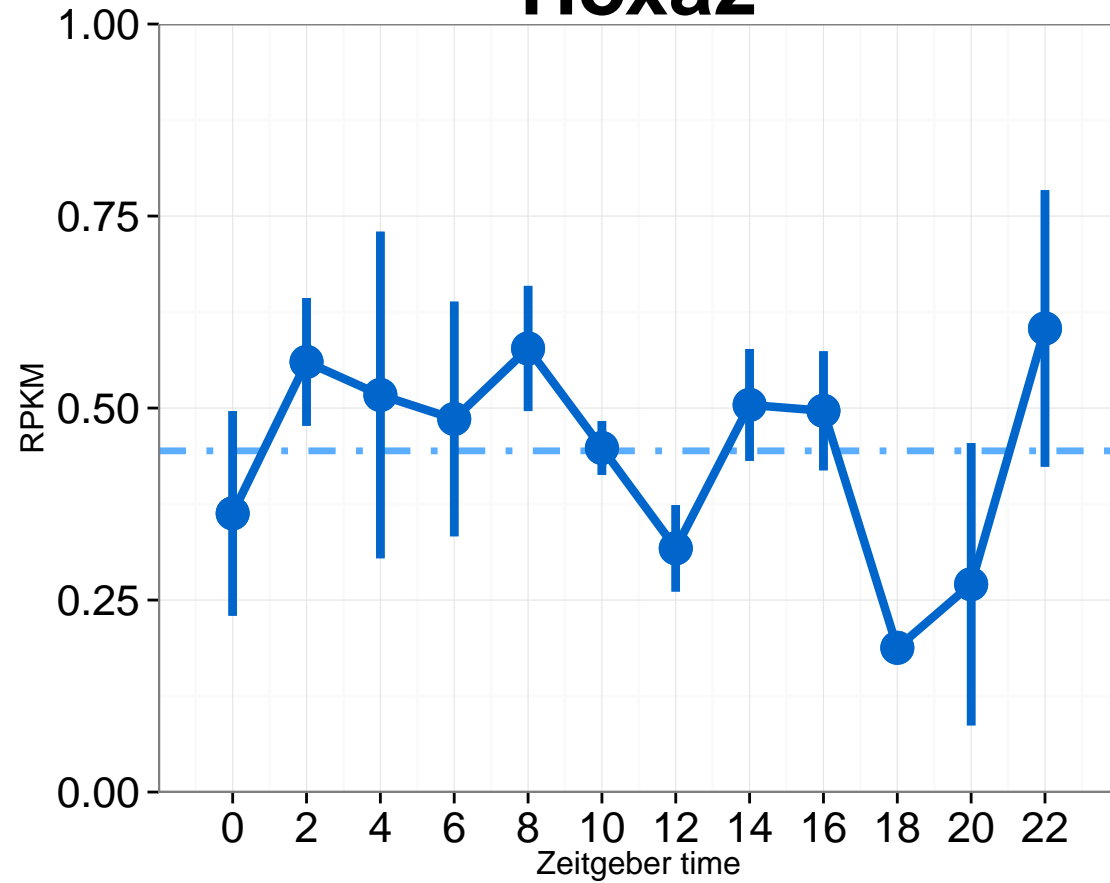

## Hoxa2 log2(Ribosome occupancy

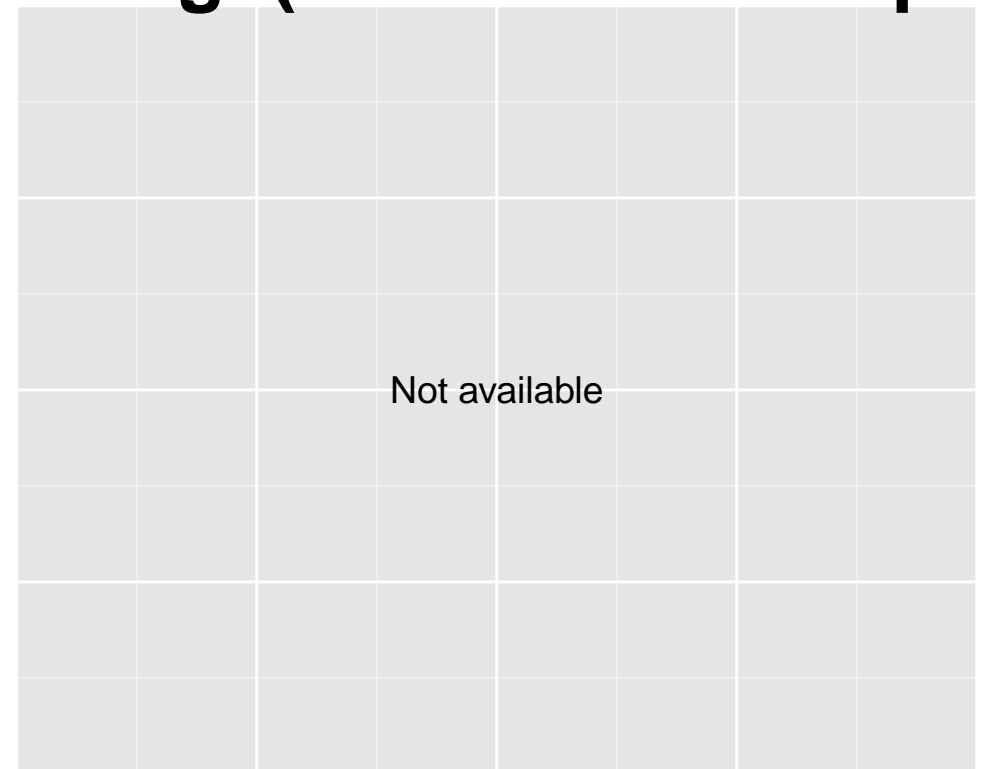

Supplement: Supplementary file 12477 [file 1]

## GltP

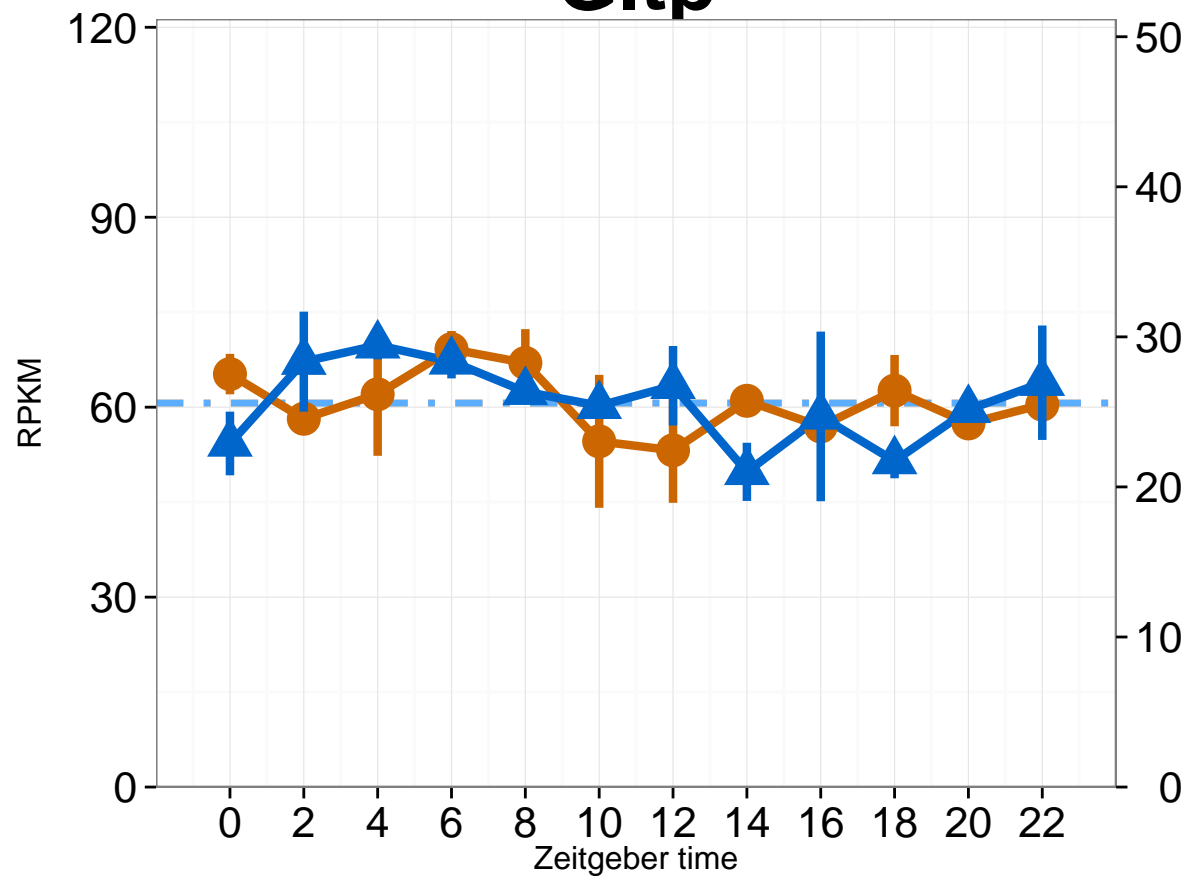

## GltP

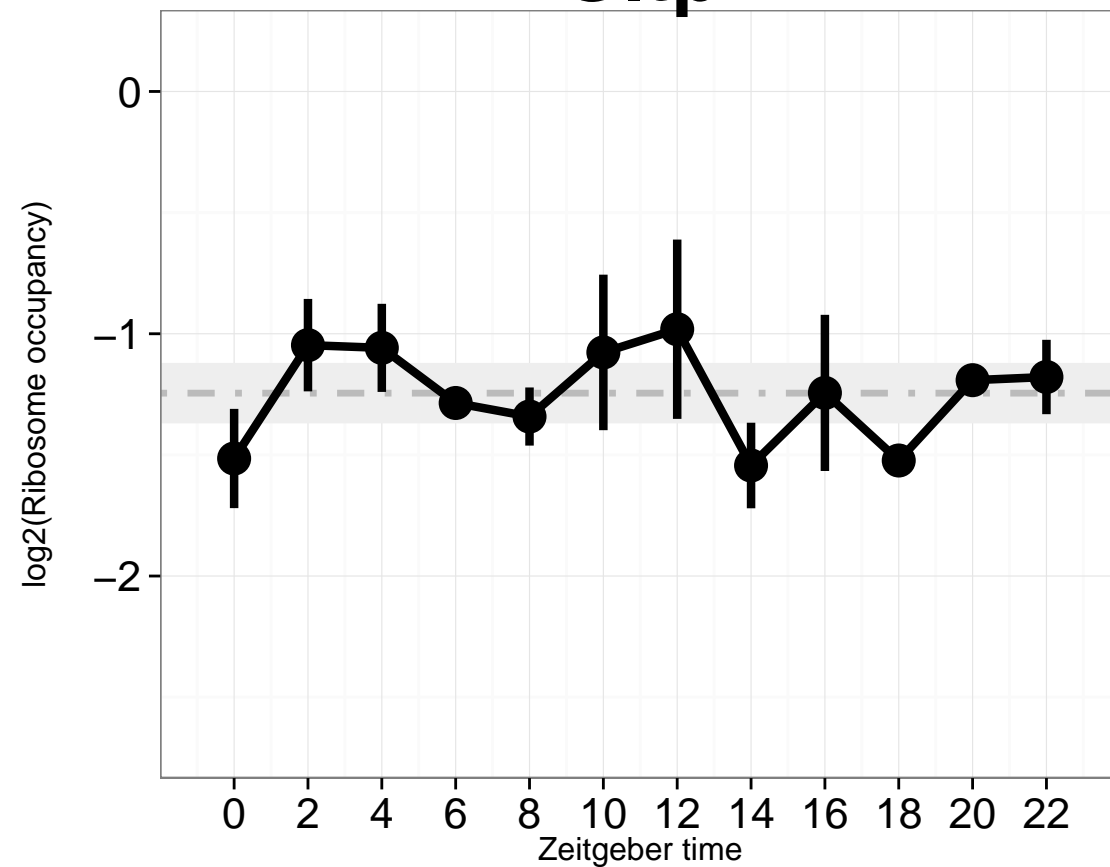

Supplement: Supplementary file 12478 [file 1]

## Nfat5

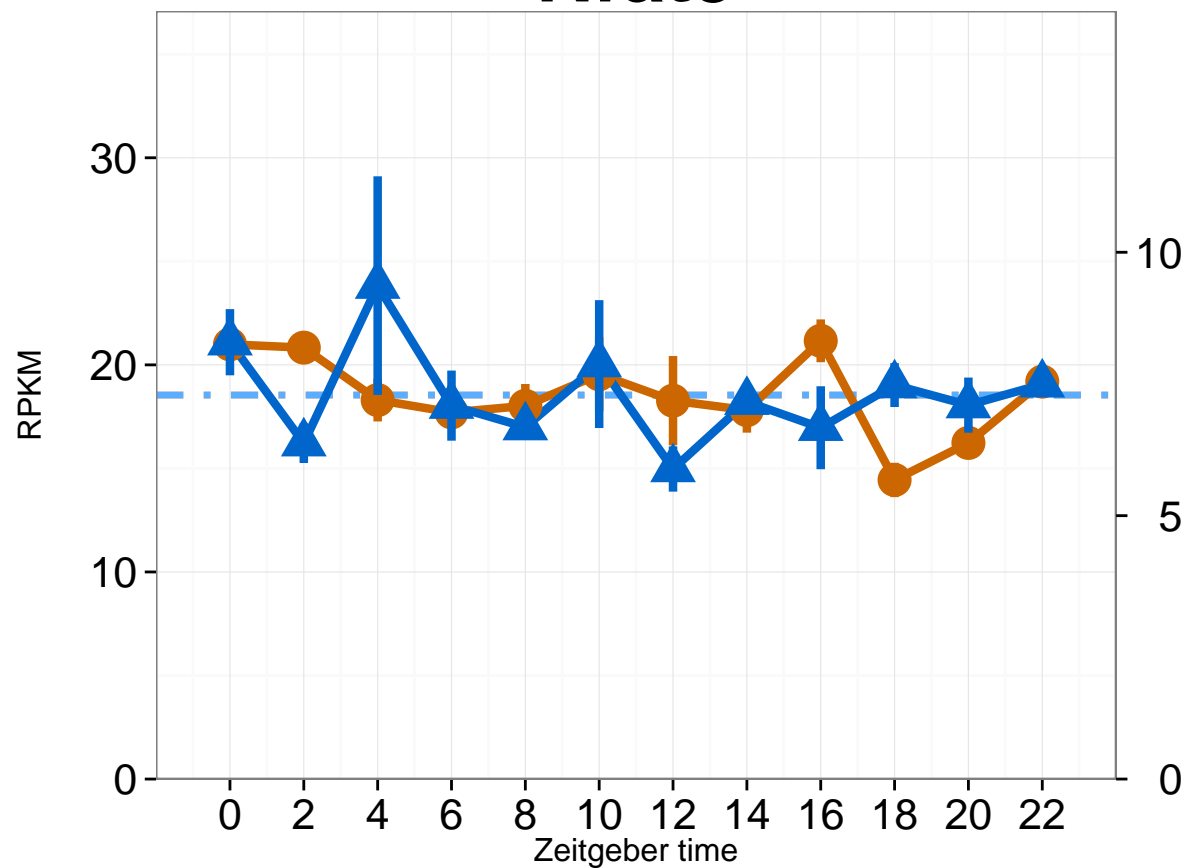

## Nfat5

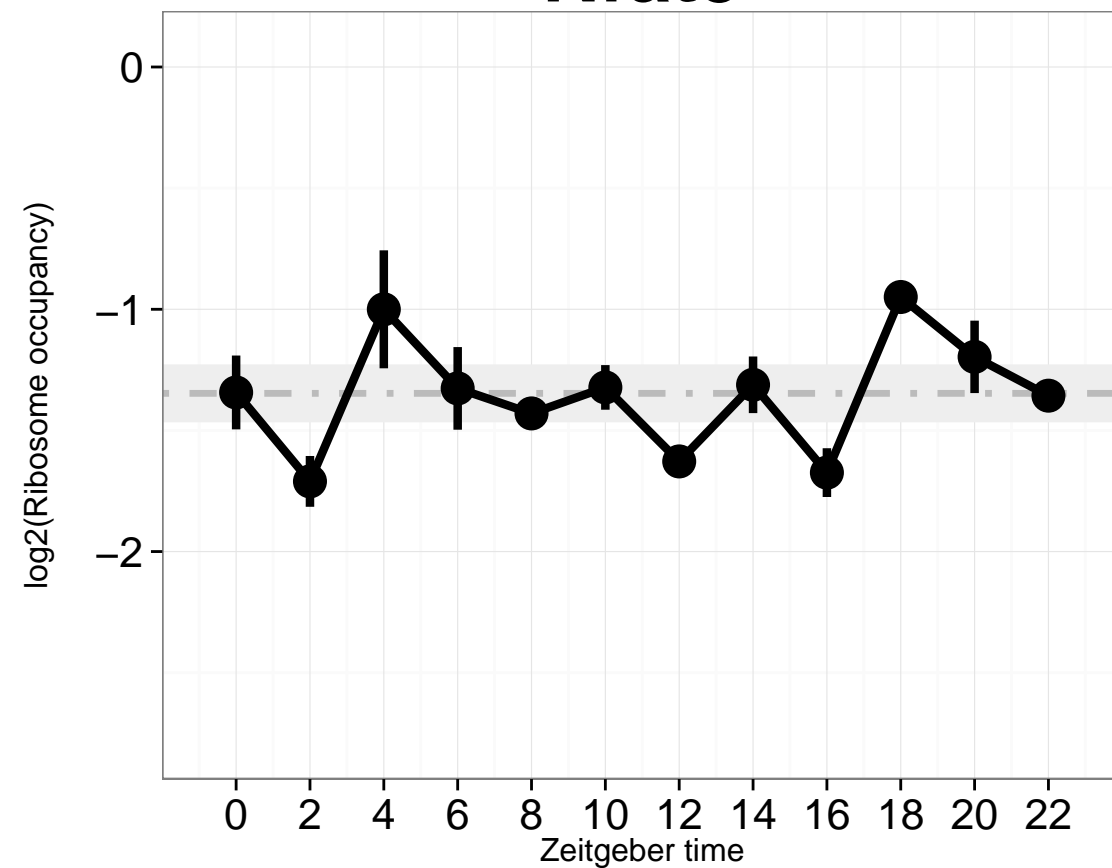

Supplement: Supplementary file 12479 [file 1]

# Tjp1

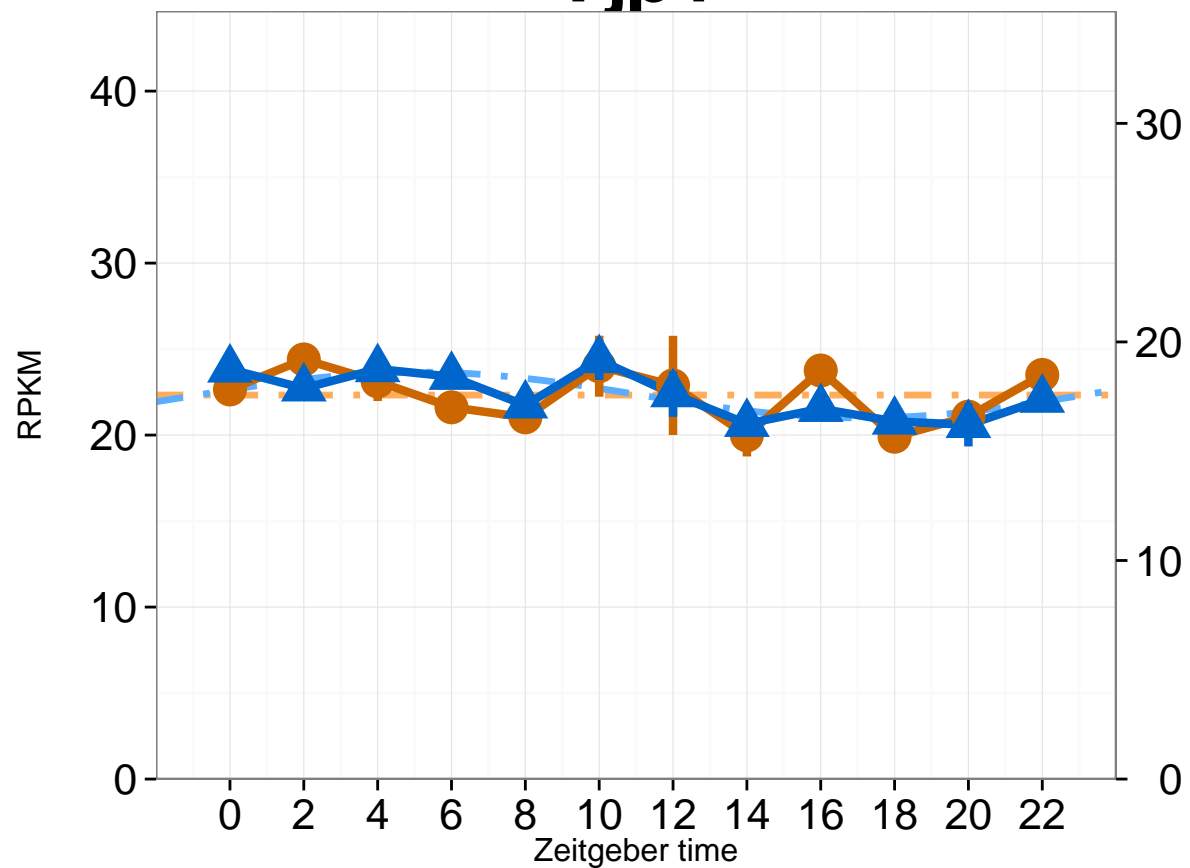

# Tjp1

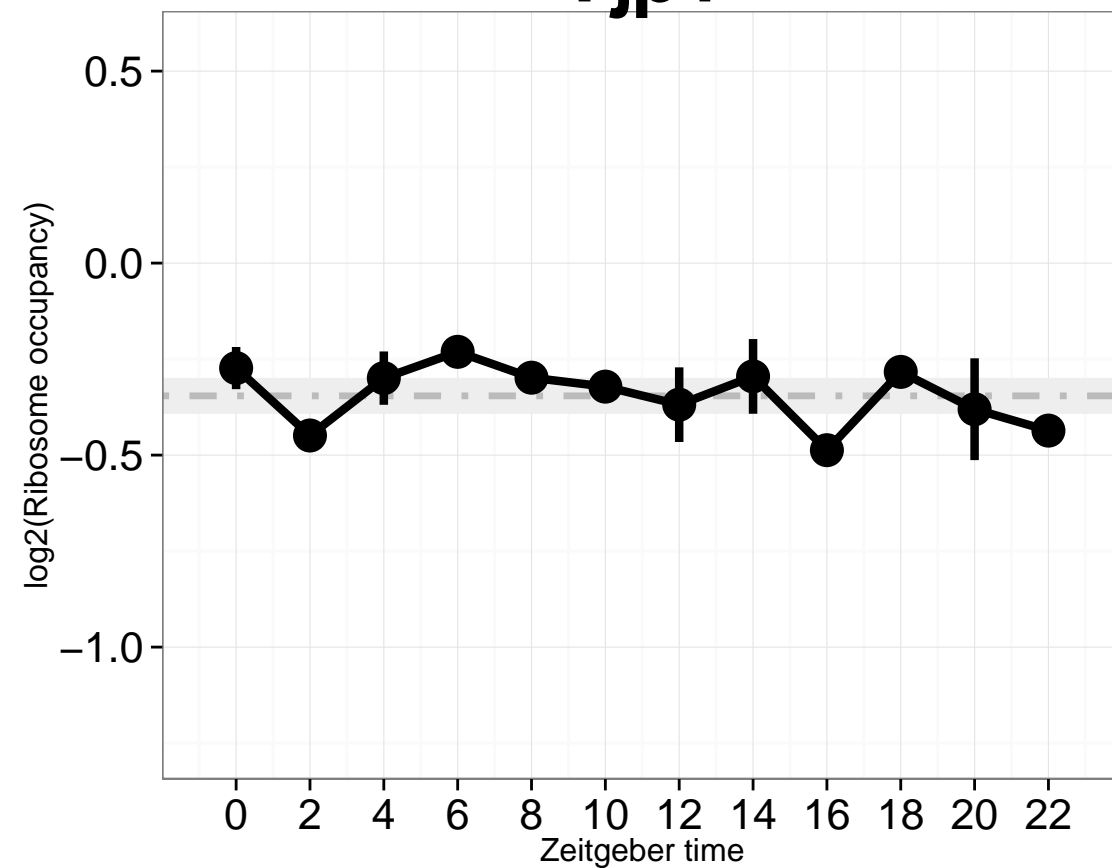

Supplement: Supplementary file 12480 [file 1]

## 9330151L19Rik

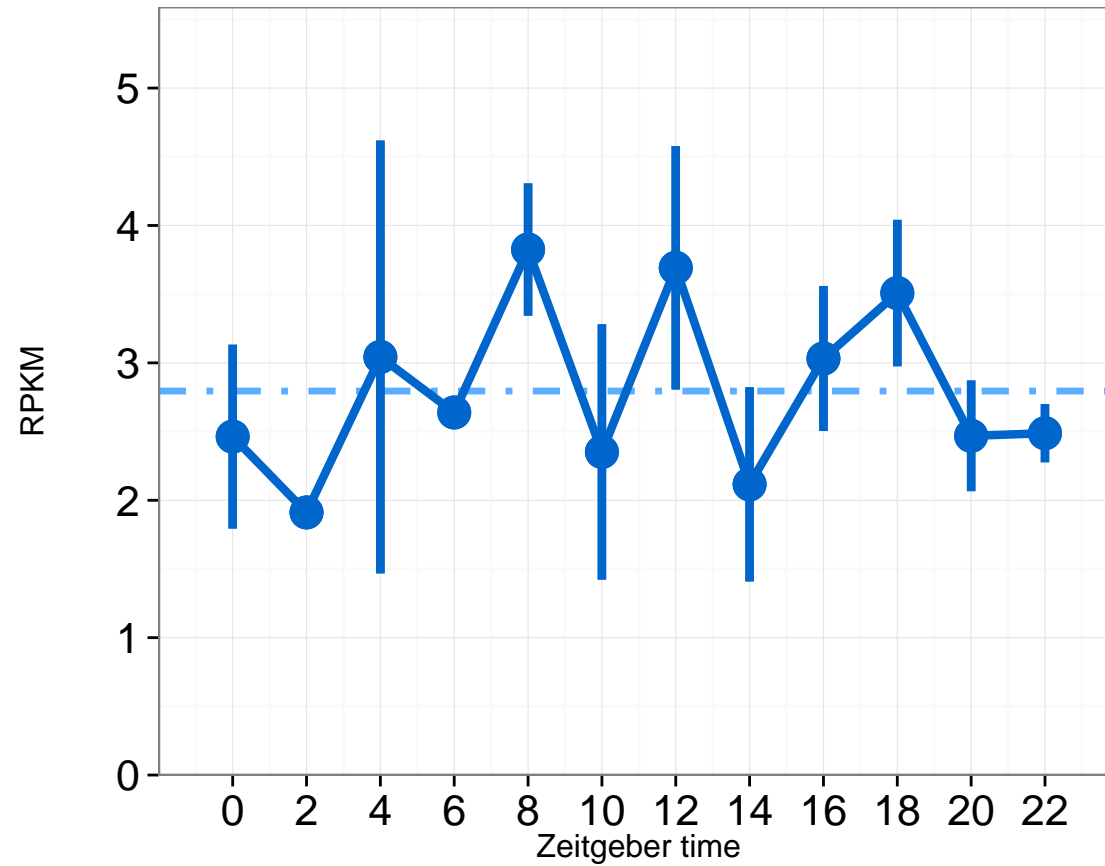

## 9330151L19Rik log2(Ribosome occupancy)

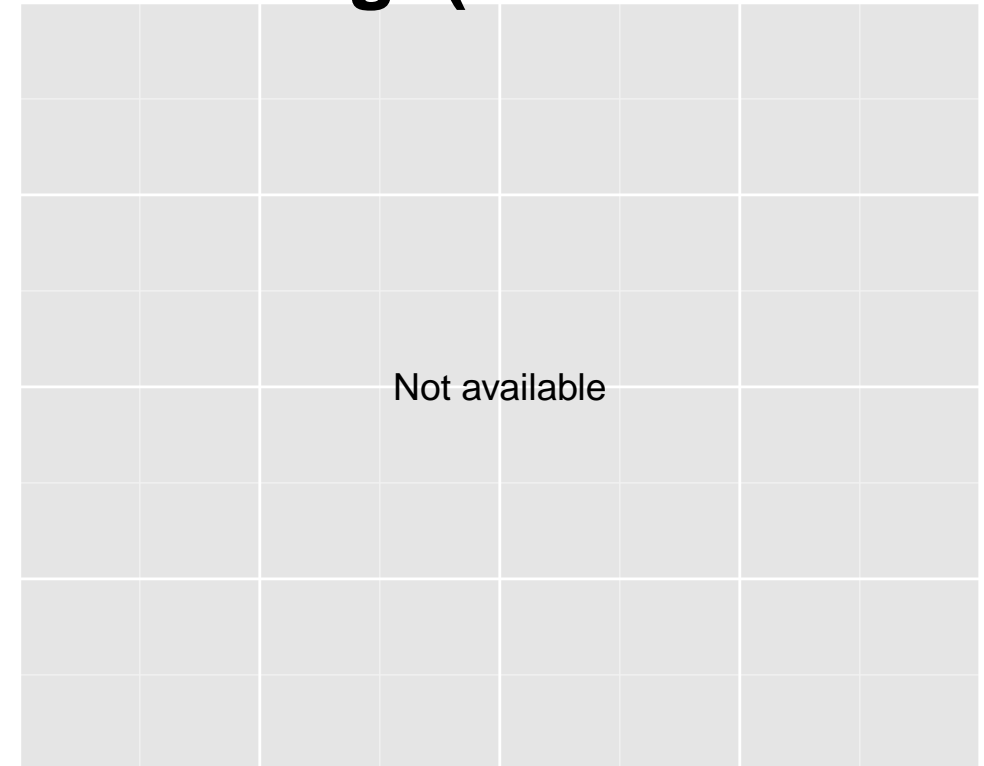

Supplement: Supplementary file 12481 [file 1]

## Slc4a7

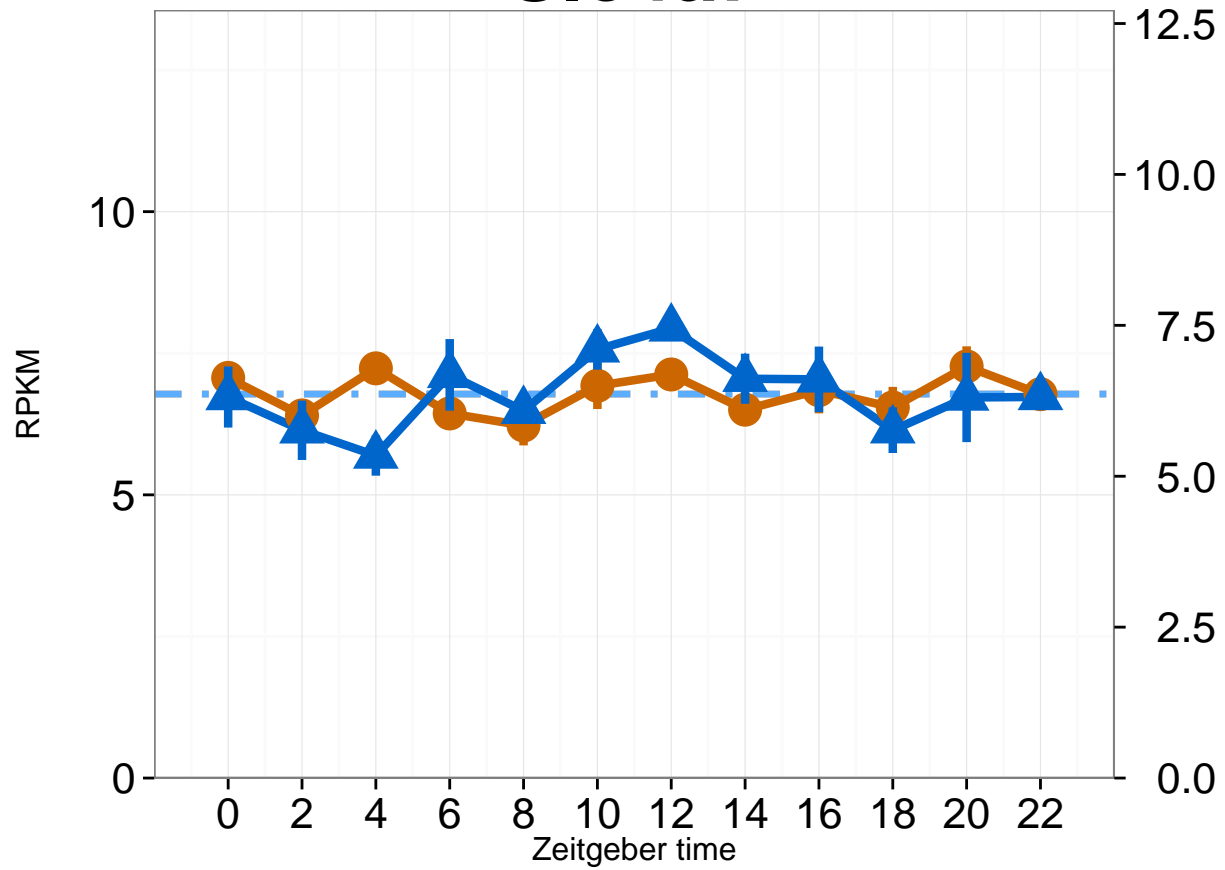

## Slc4a7

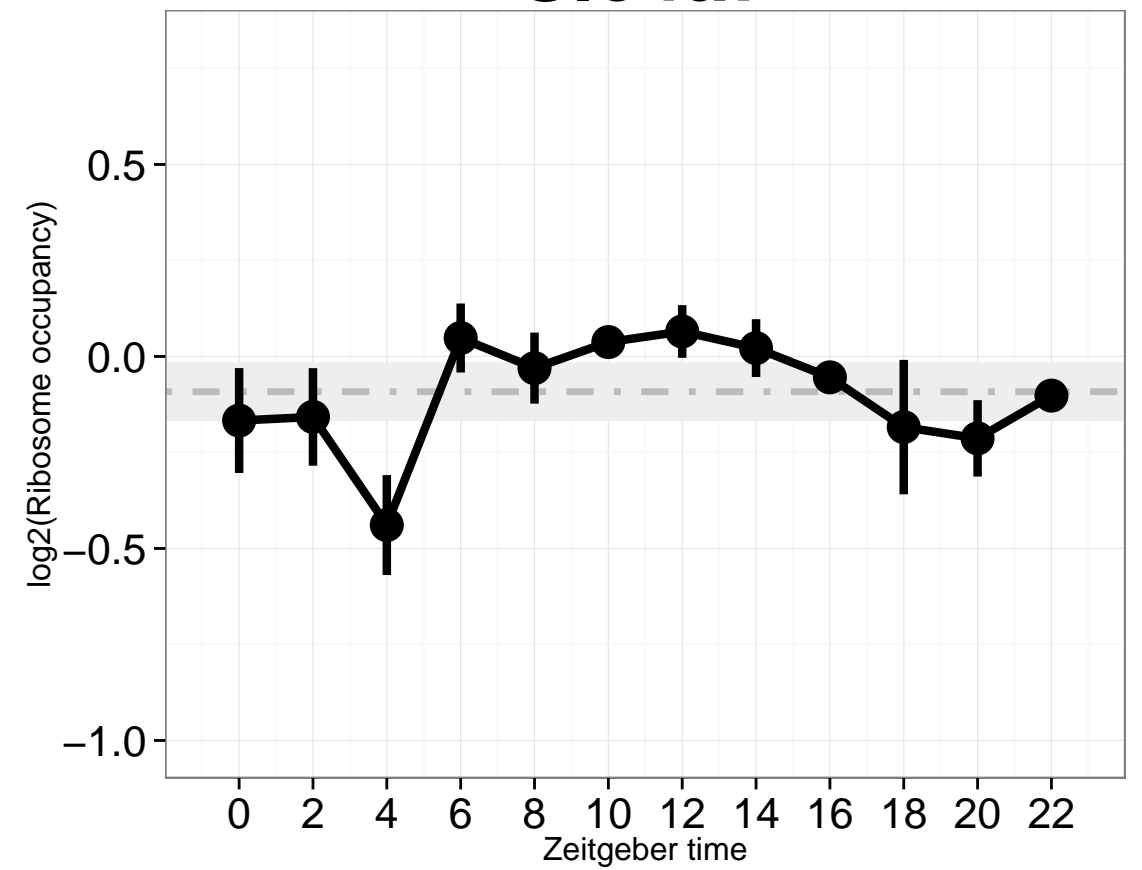

Supplement: Supplementary file 12482 [file 1]

## Gstz1

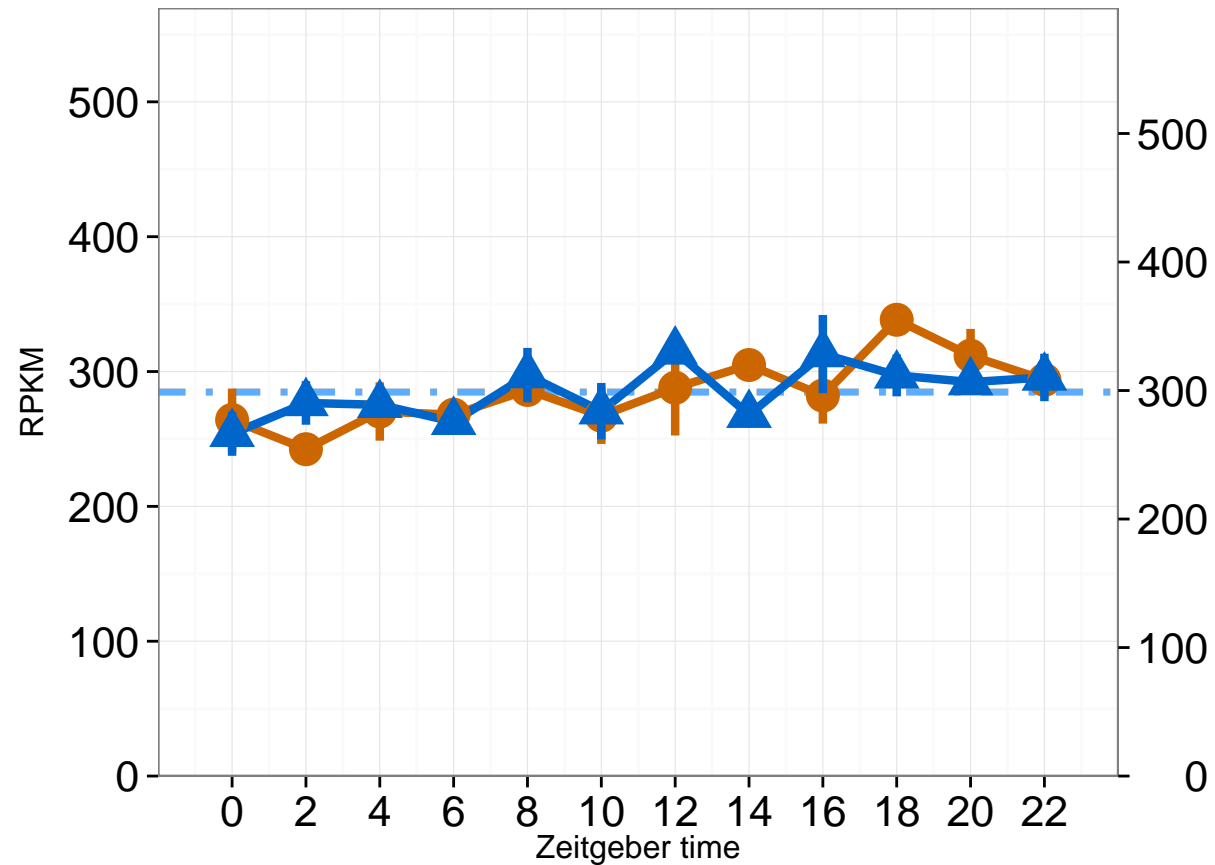

## Gstz1

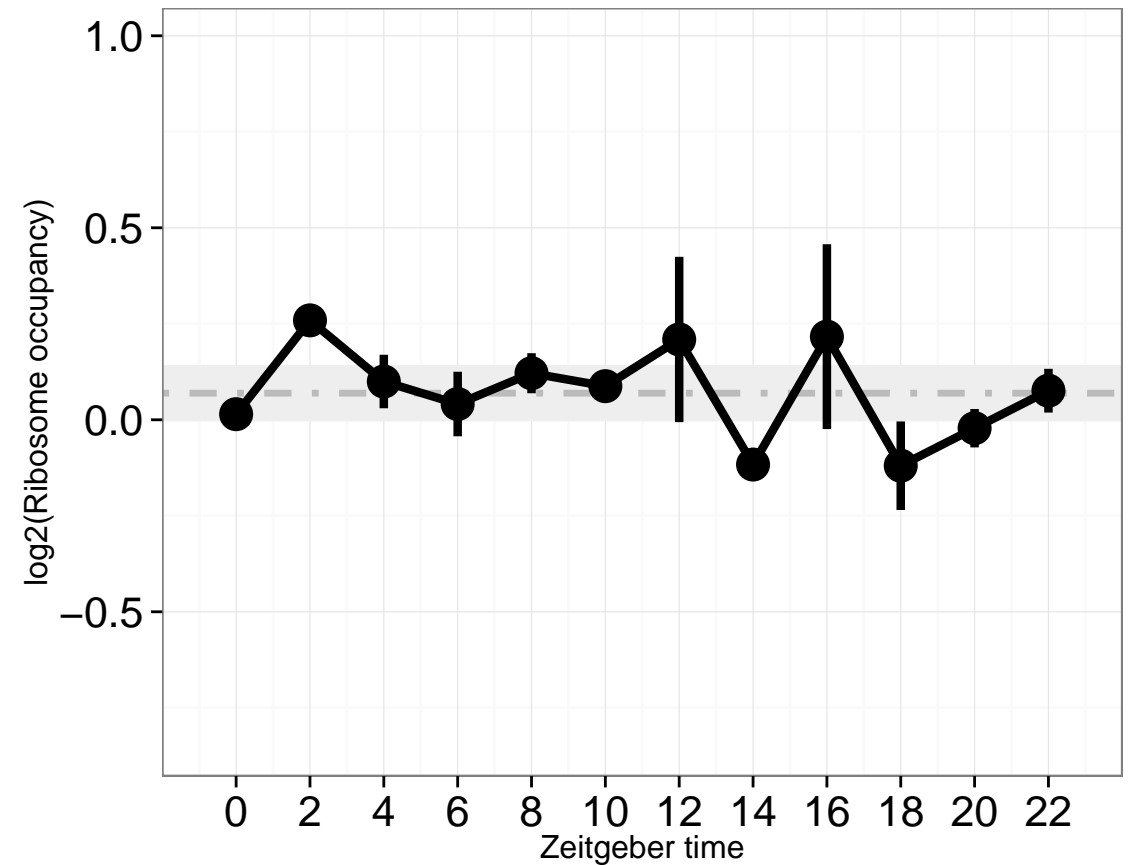

Supplement: Supplementary file 12483 [file 1]

# Gm17555

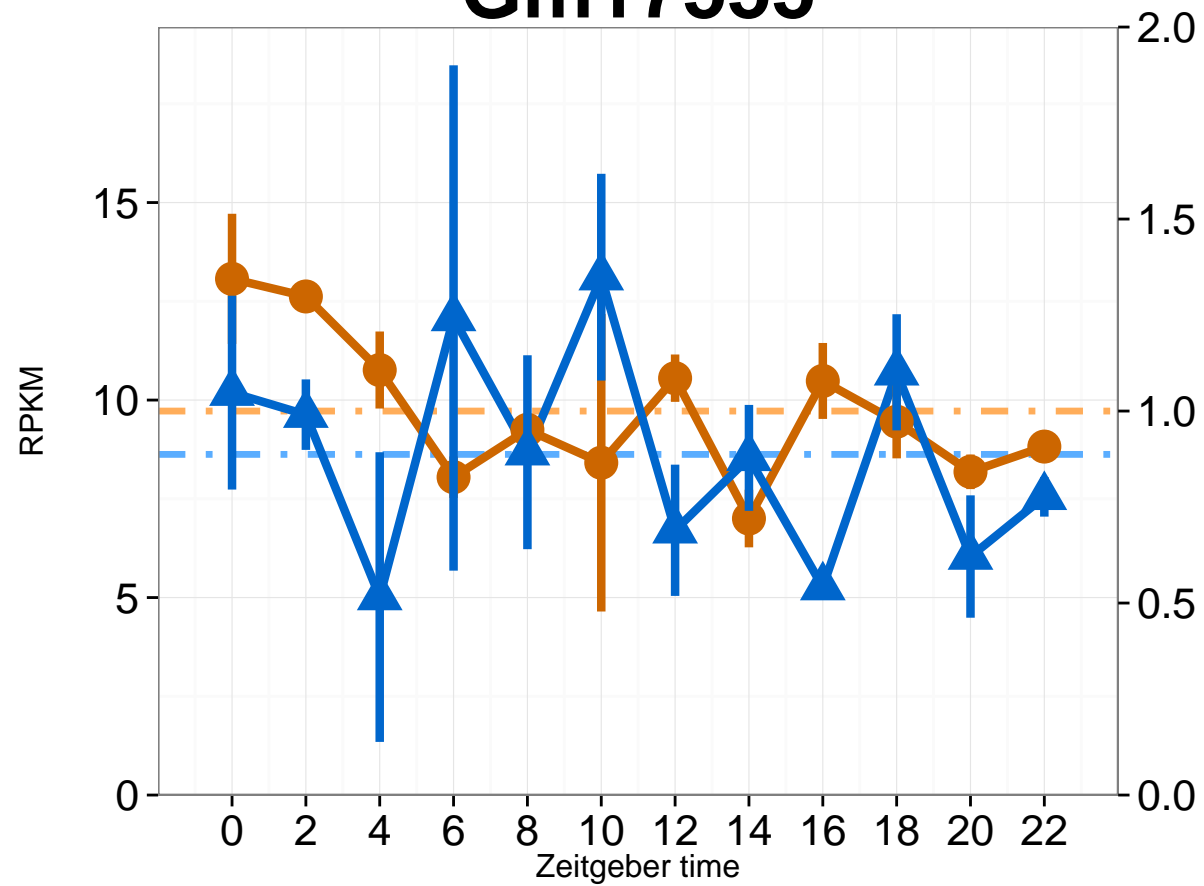

# Gm17555

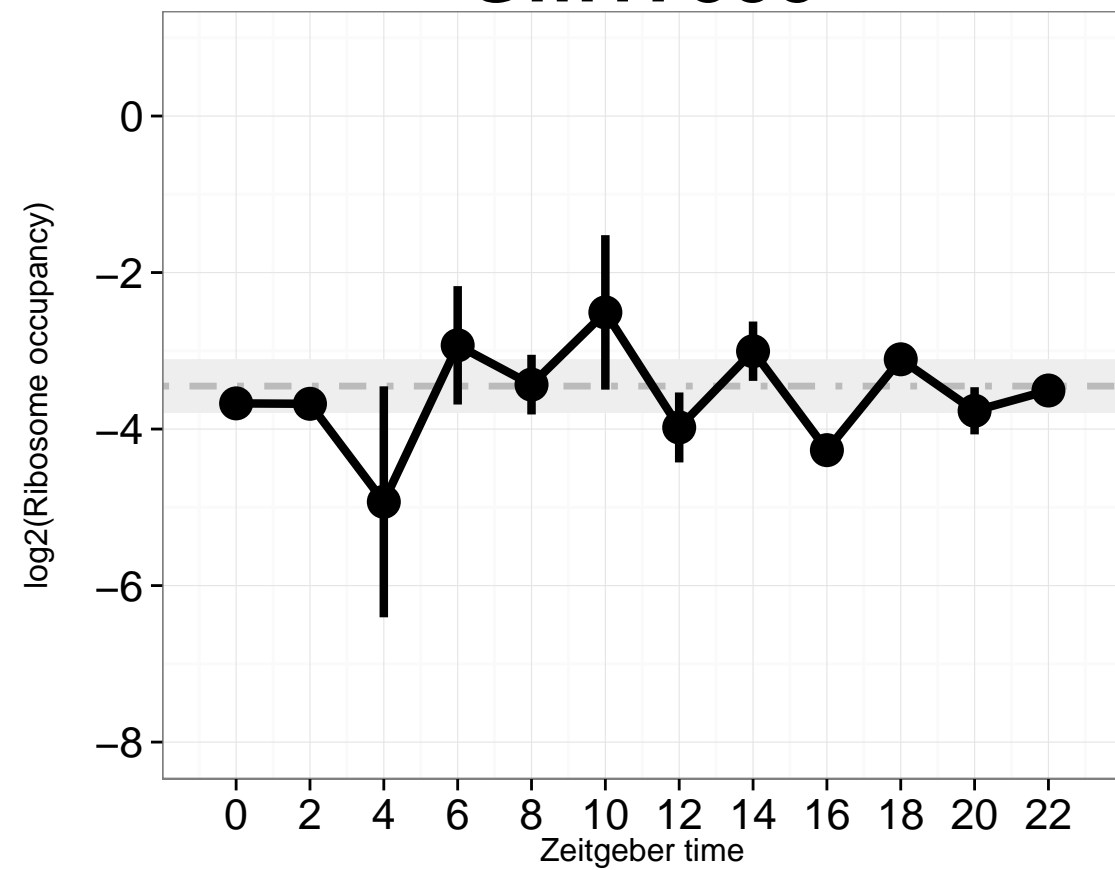

Supplement: Supplementary file 12484 [file 1]

## Ddx31

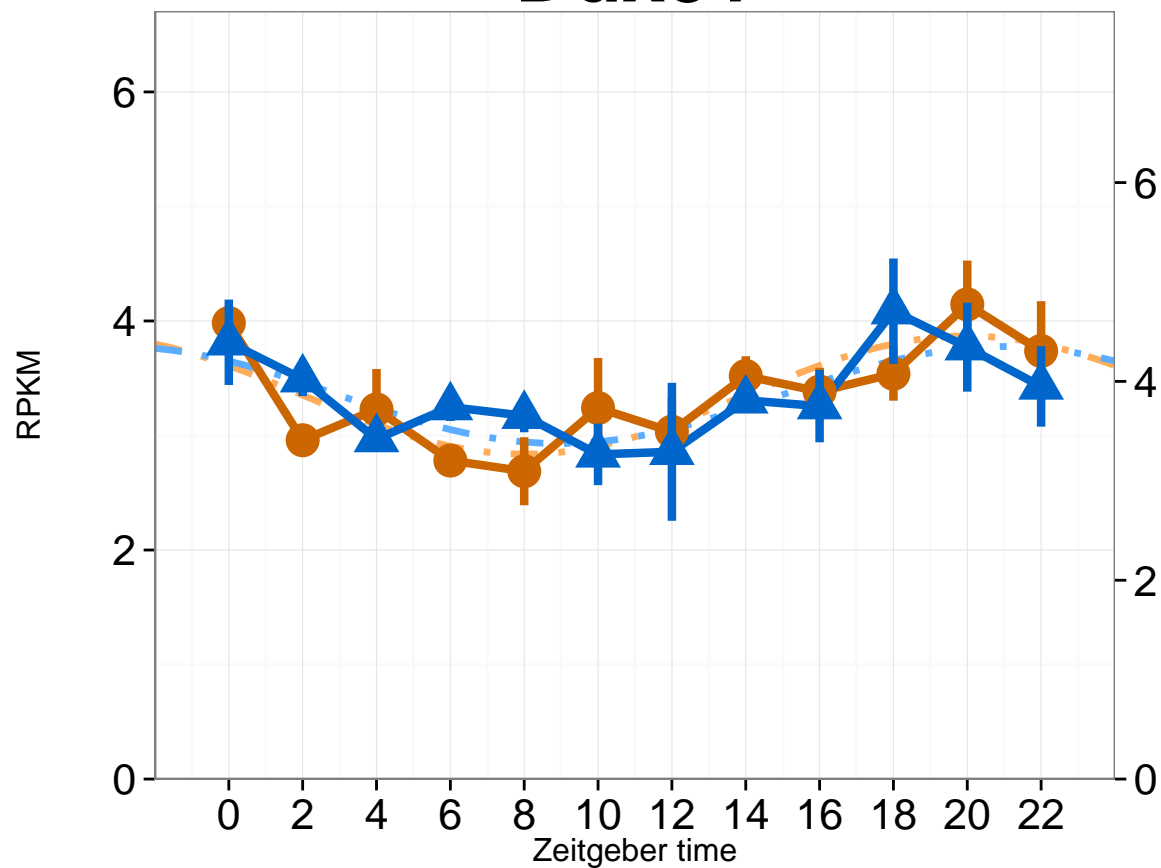

## Ddx31

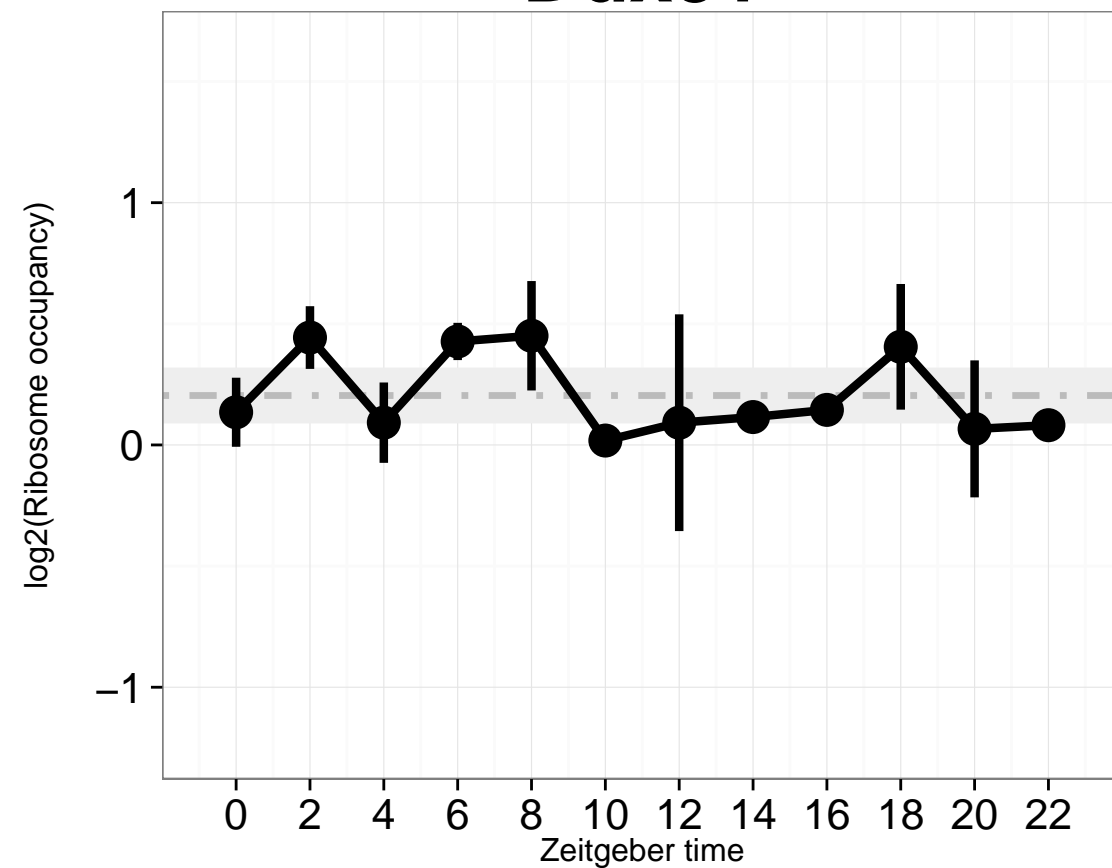

Supplement: Supplementary file 12485 [file 1]

## Rarg

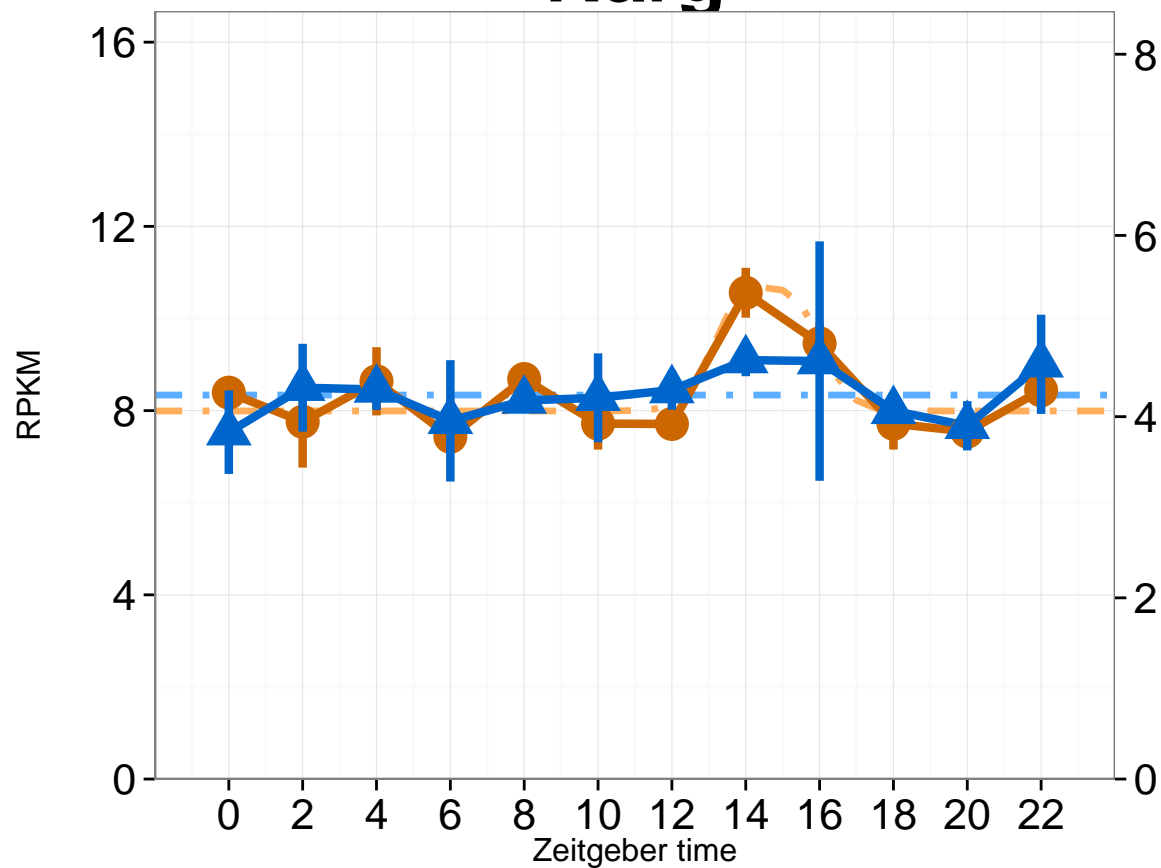

## Rarg

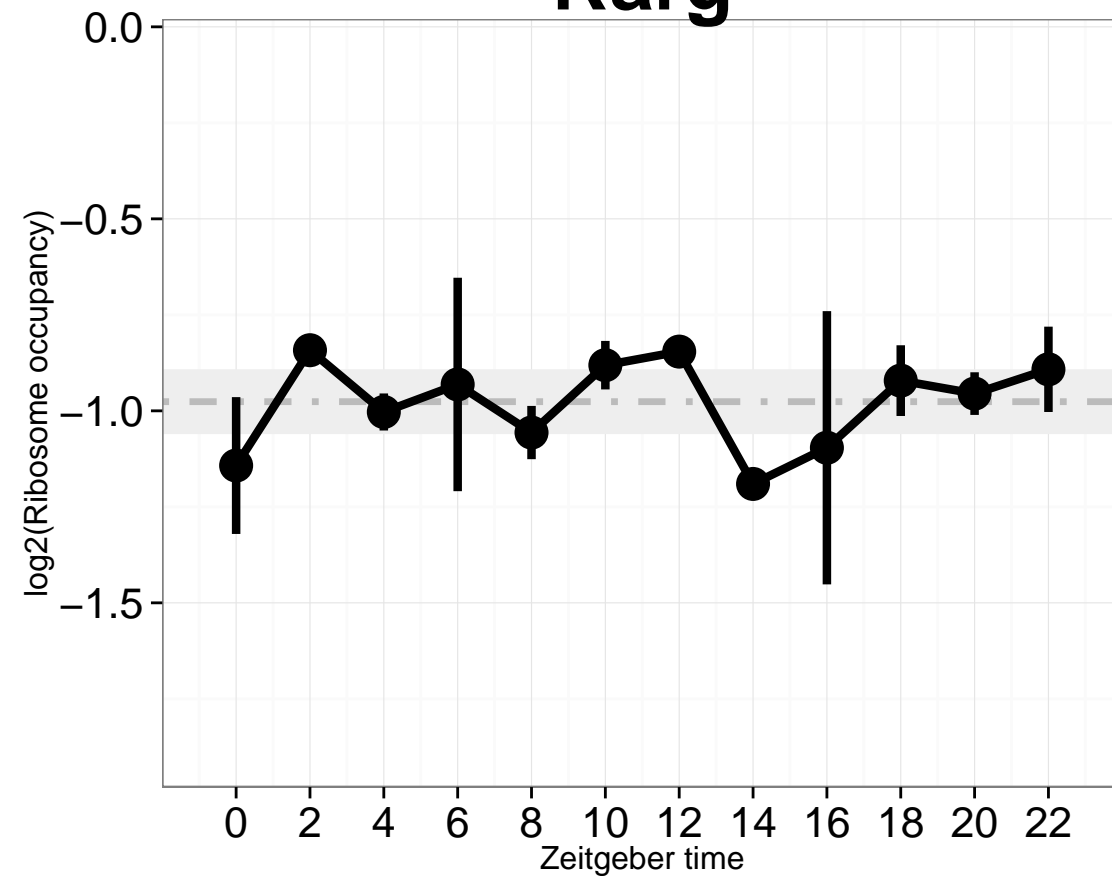

Supplement: Supplementary file 12486 [file 1]

## Rac2

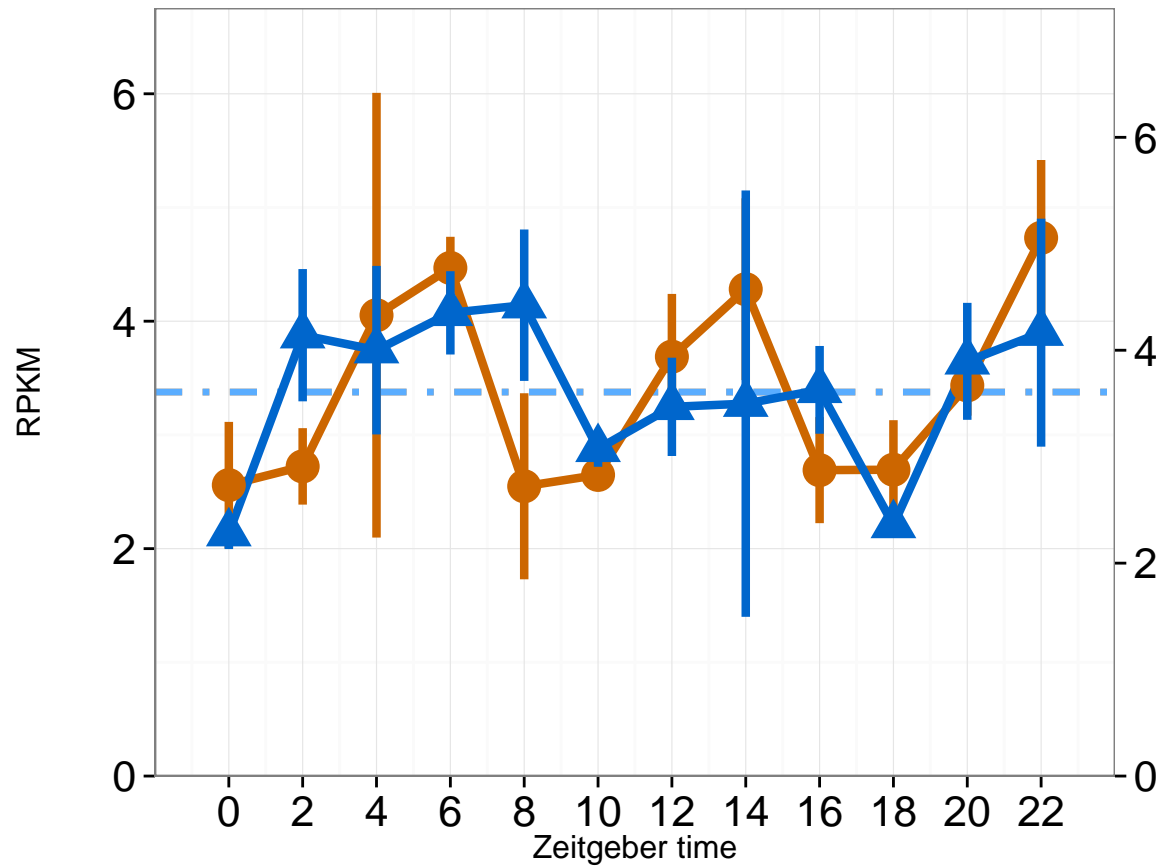

## Rac2

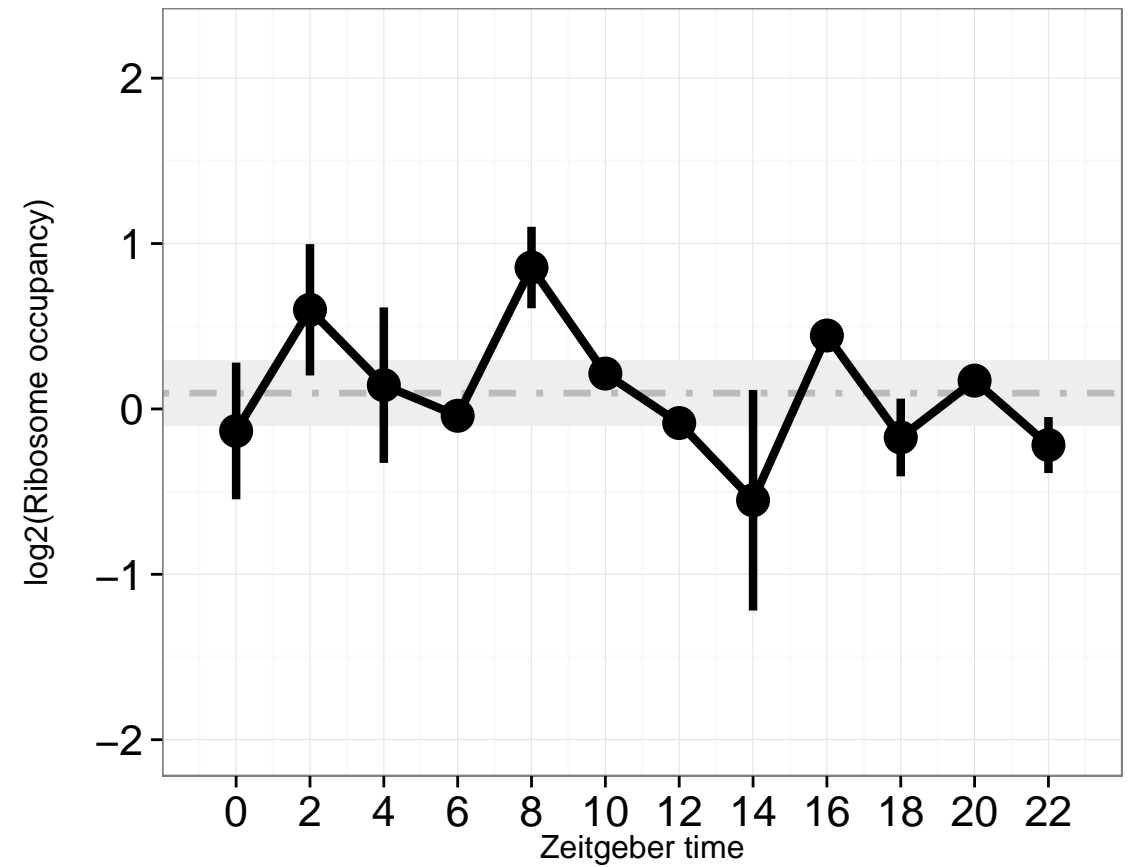

Supplement: Supplementary file 12487 [file 1]

# Rpl7

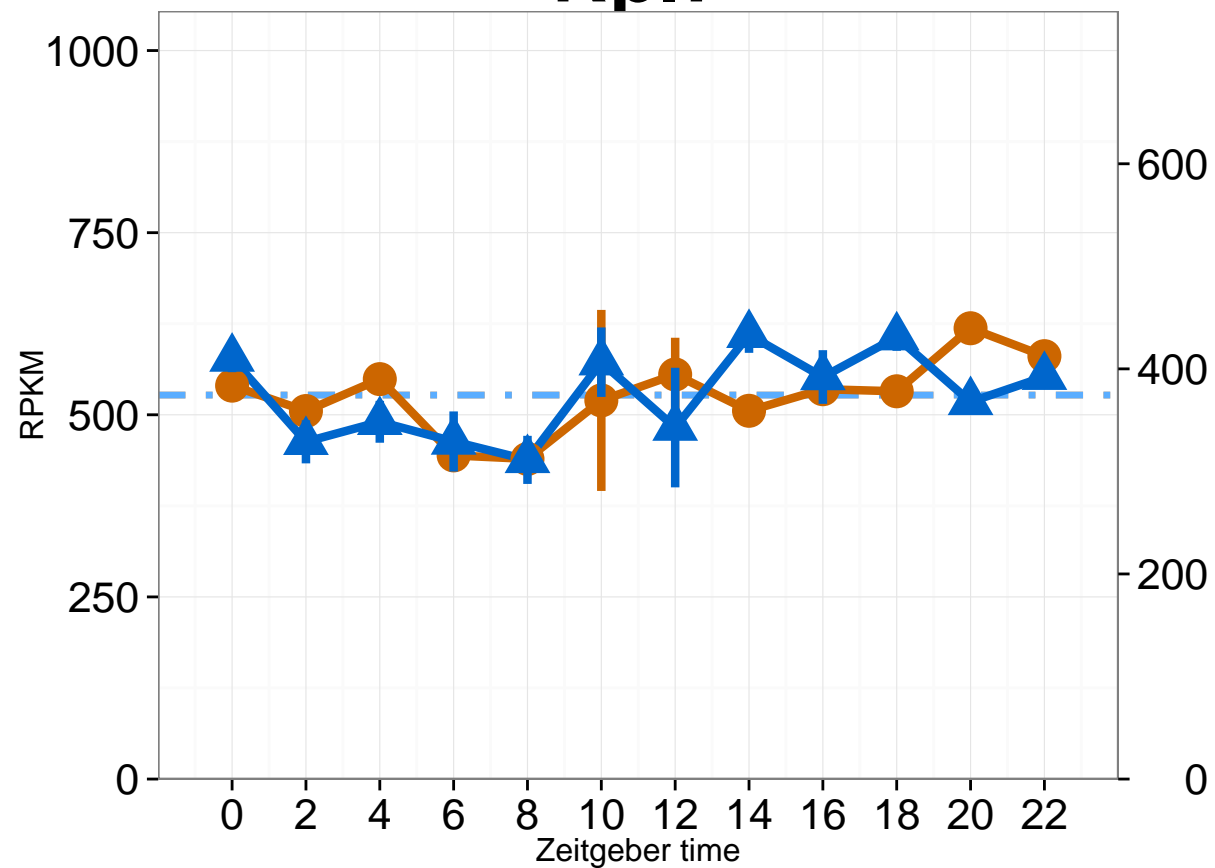

# Rpl7

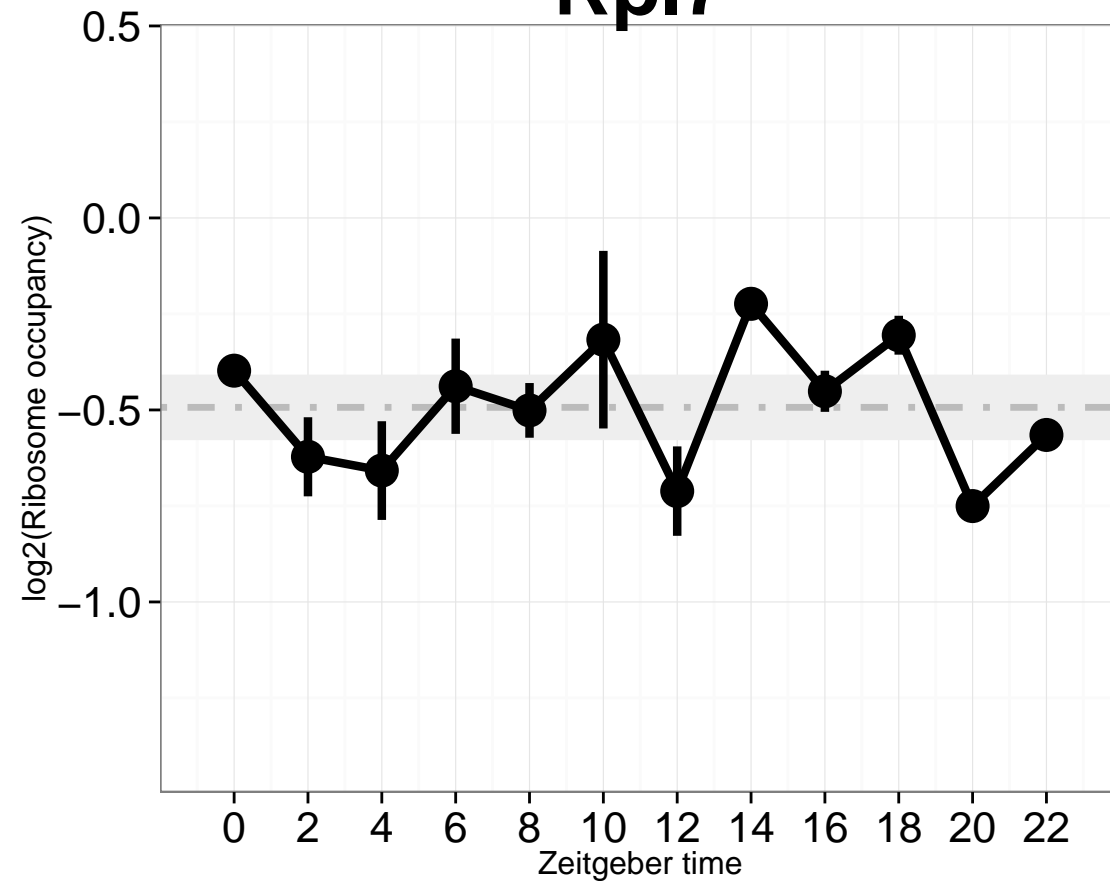

Supplement: Supplementary file 12488 [file 1]

# Eif1ad

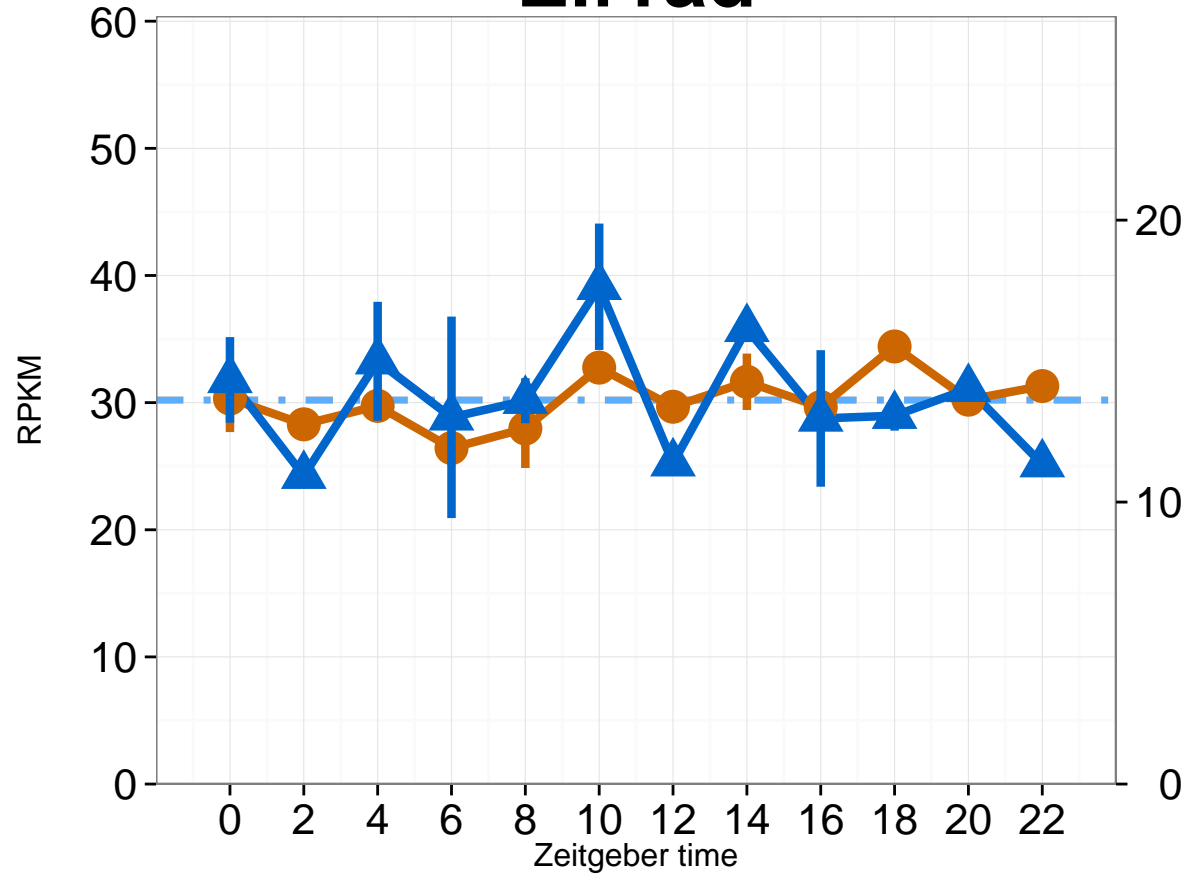

# Eif1ad

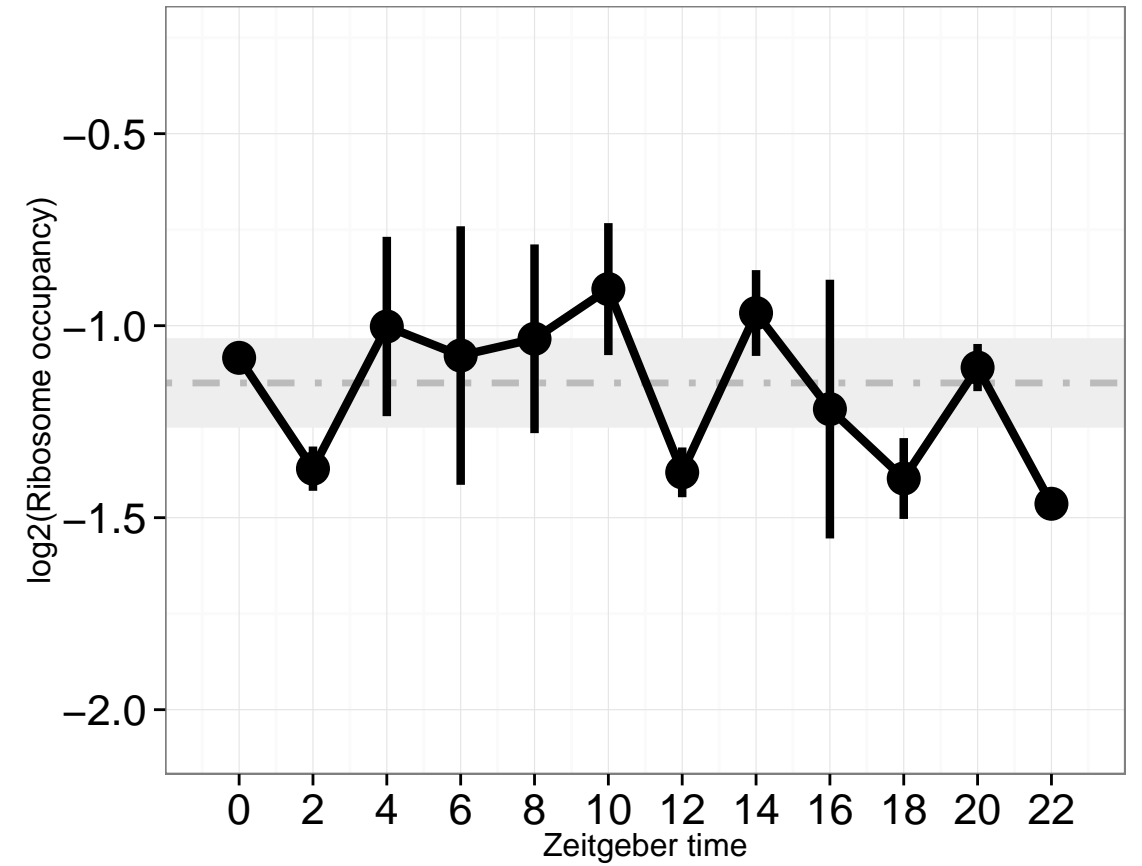

Supplement: Supplementary file 12489 [file 1]

# Hspb11

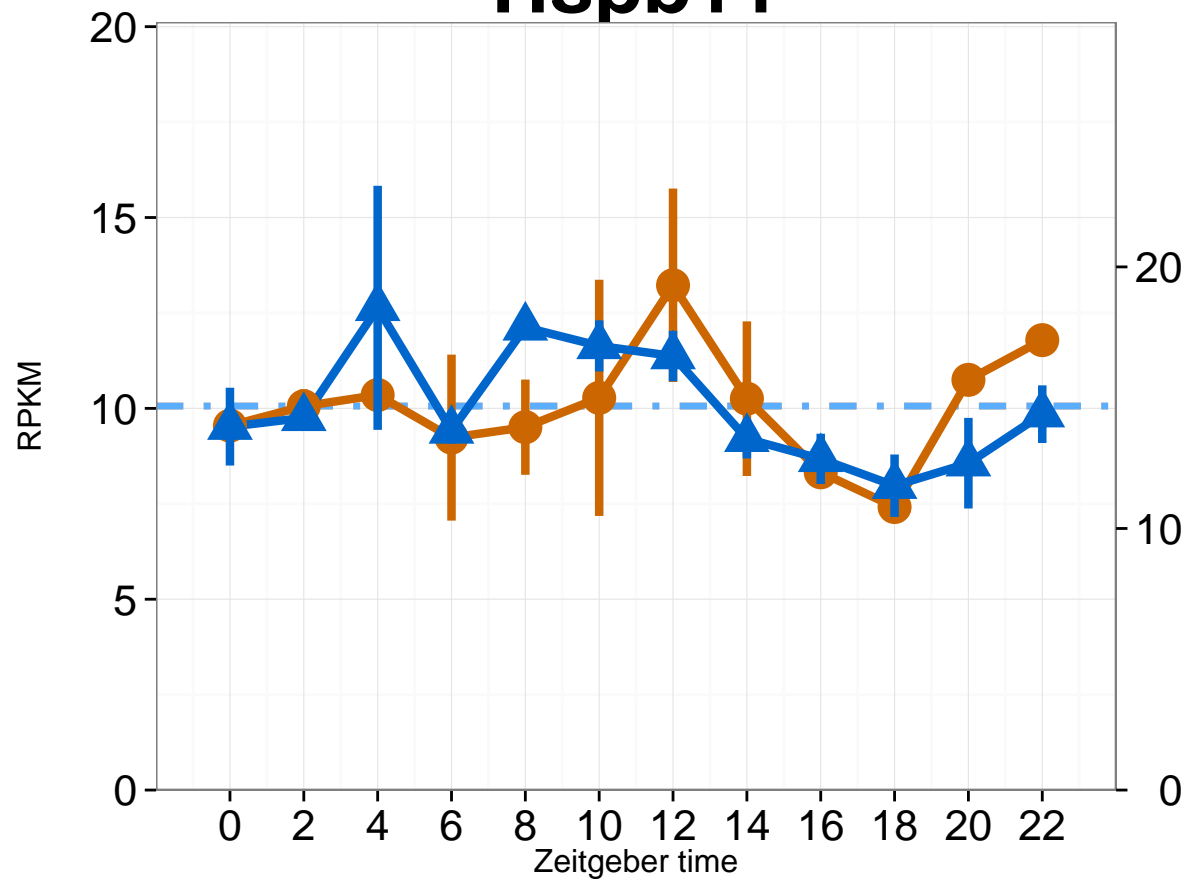

# Hspb11

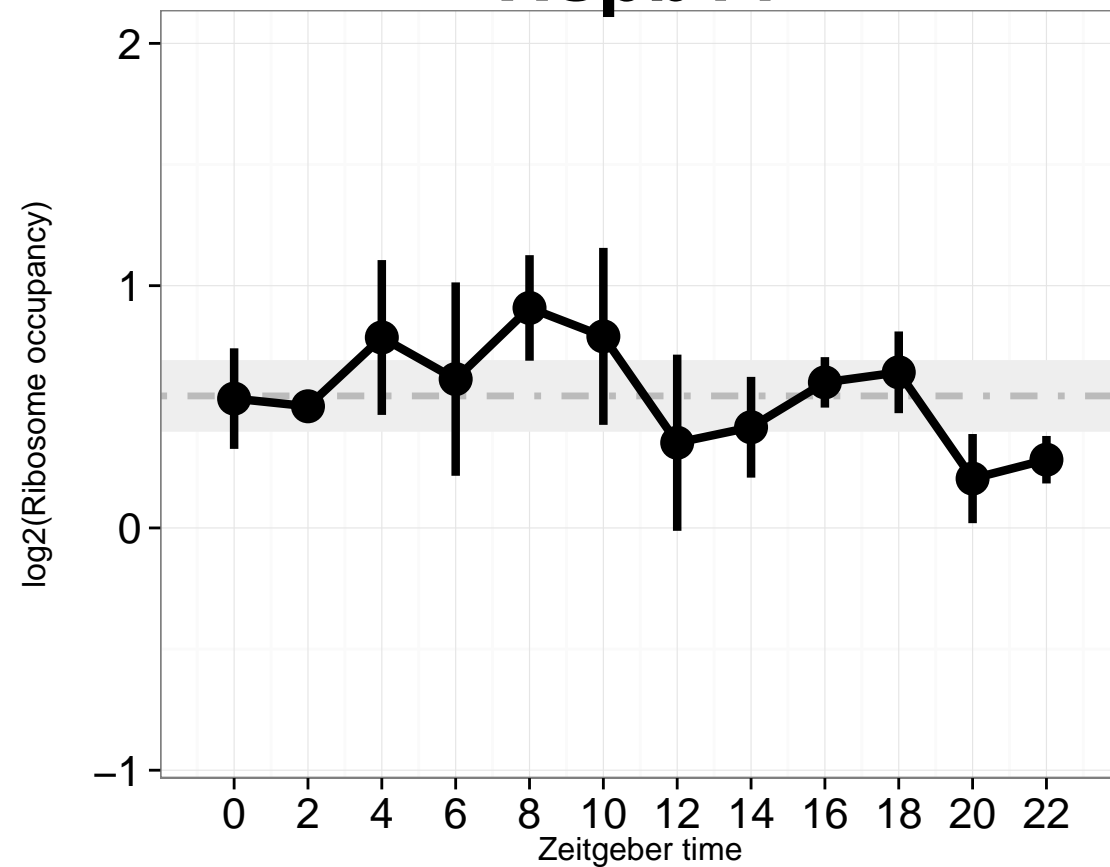

Supplement: Supplementary file 12490 [file 1]

# Rps29

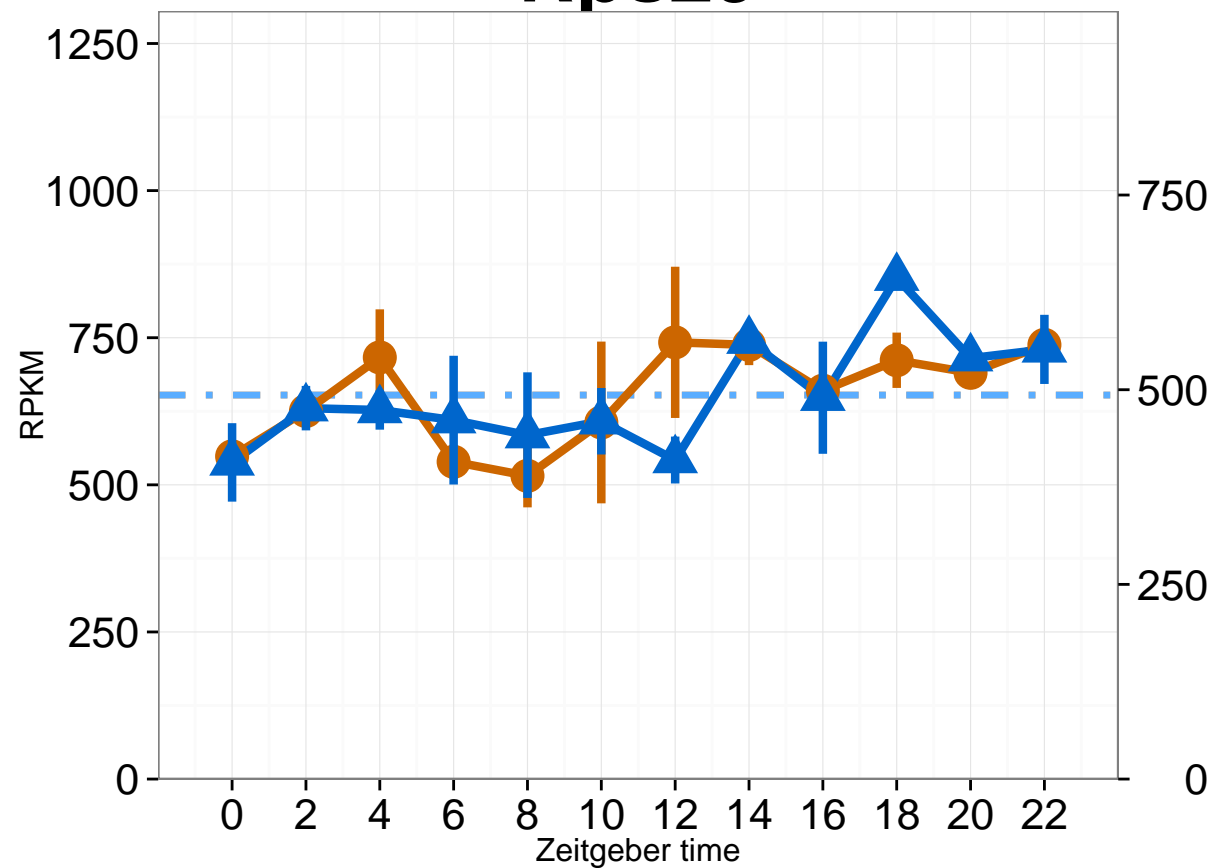

# Rps29

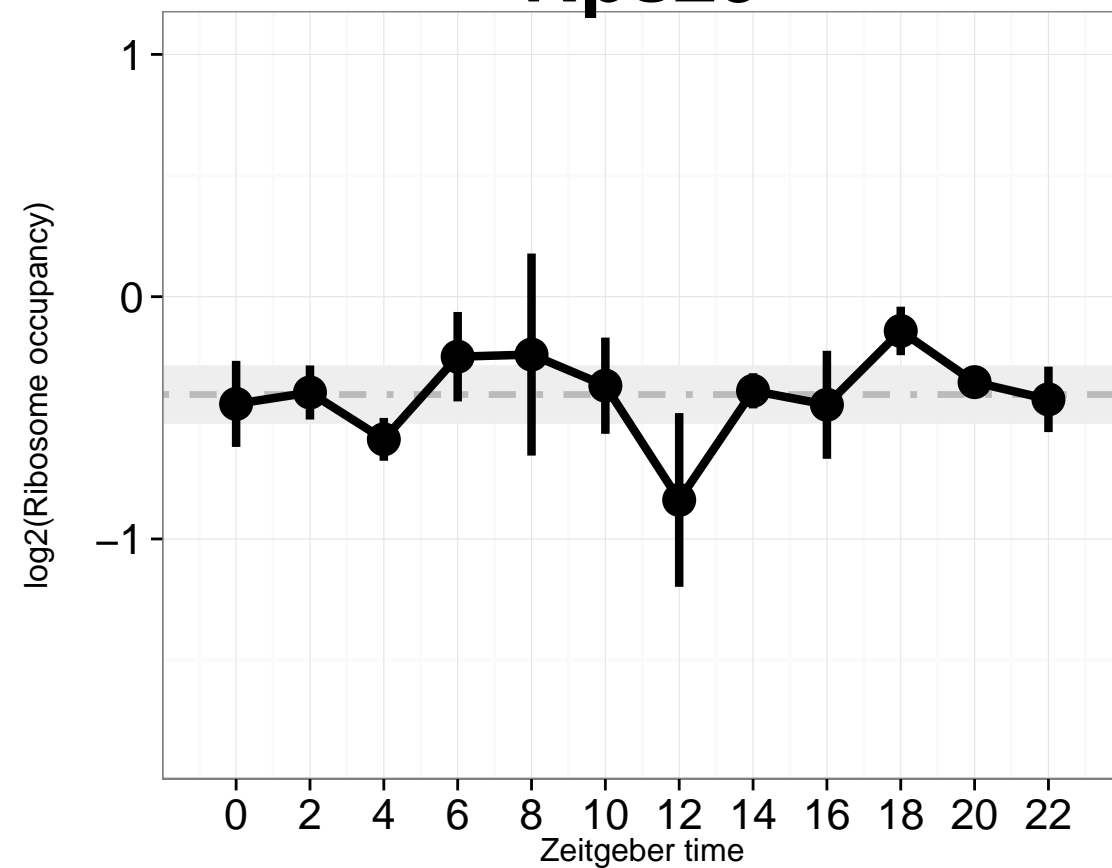

Supplement: Supplementary file 12491 [file 1]

# Myo7a

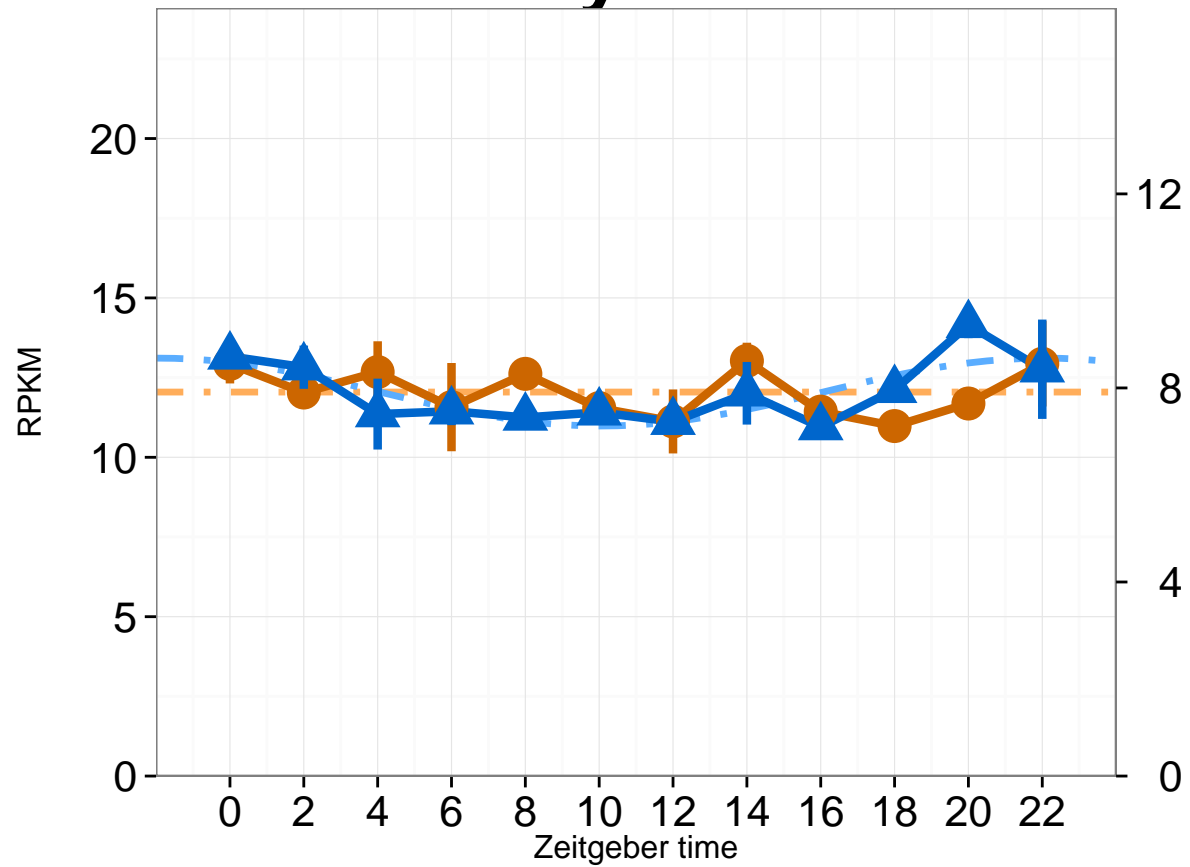

# Myo7a

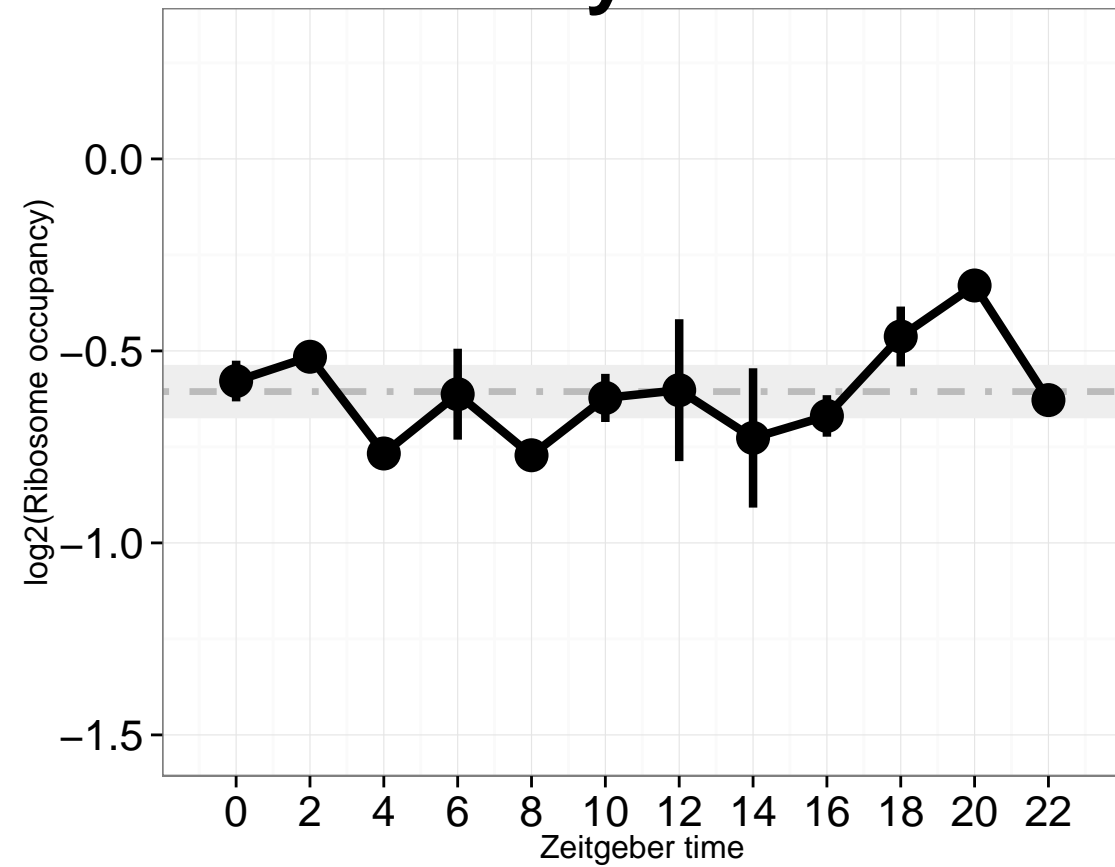

Supplement: Supplementary file 12492 [file 1]

# Fam46a

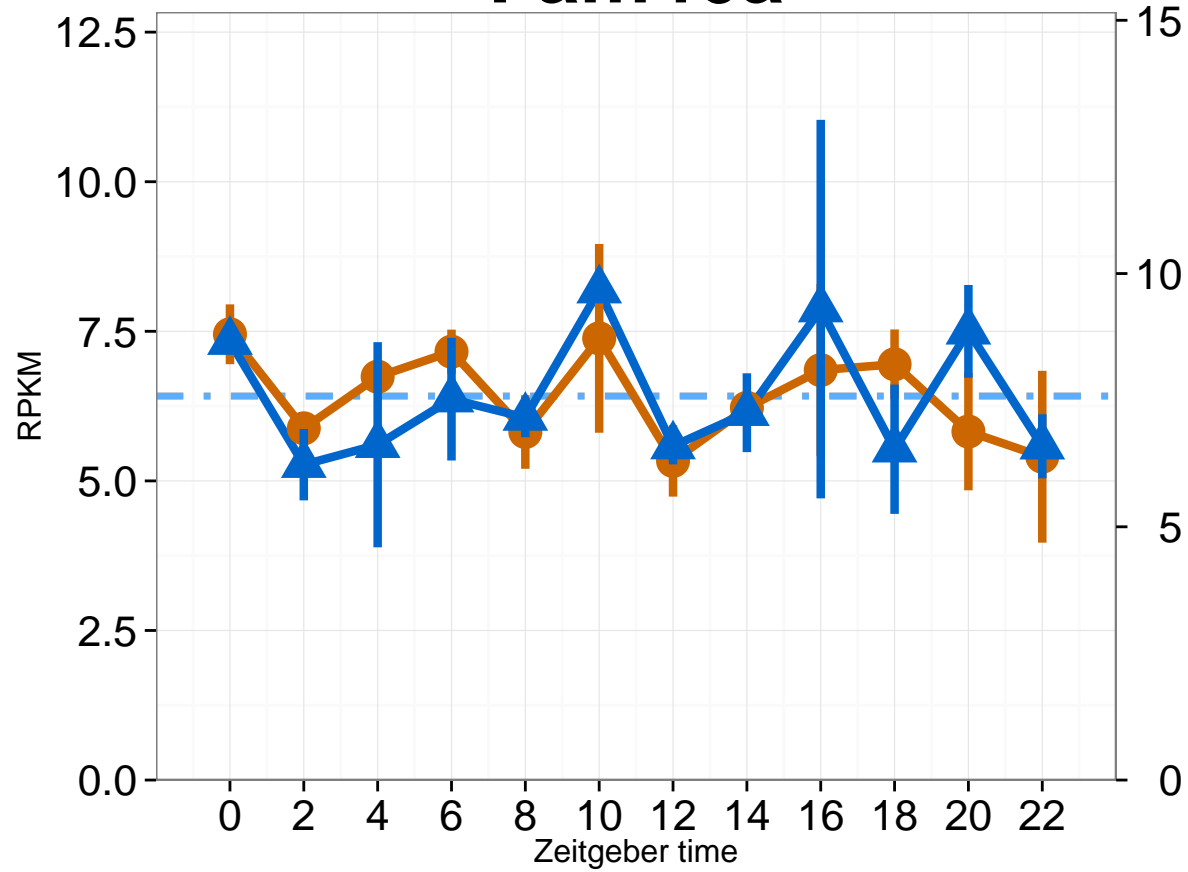

# Fam46a

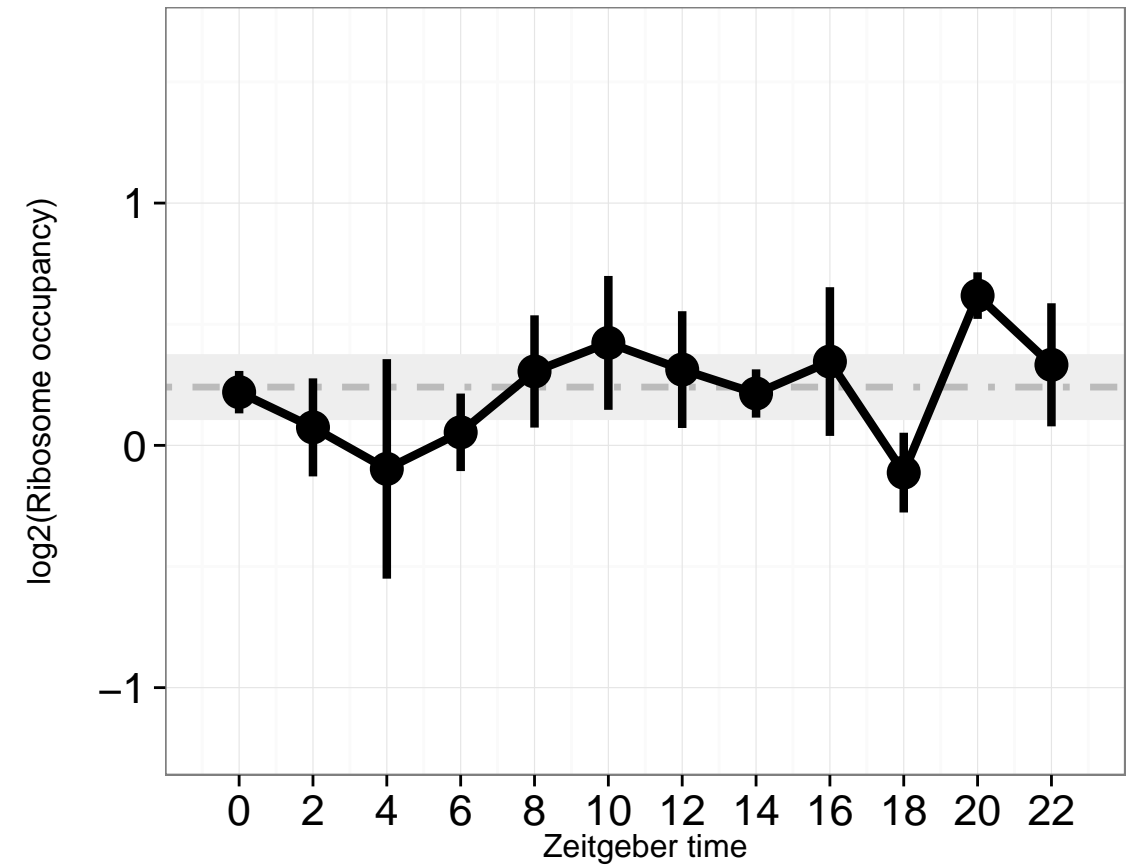

Supplement: Supplementary file 12493 [file 1]

# Sepn1

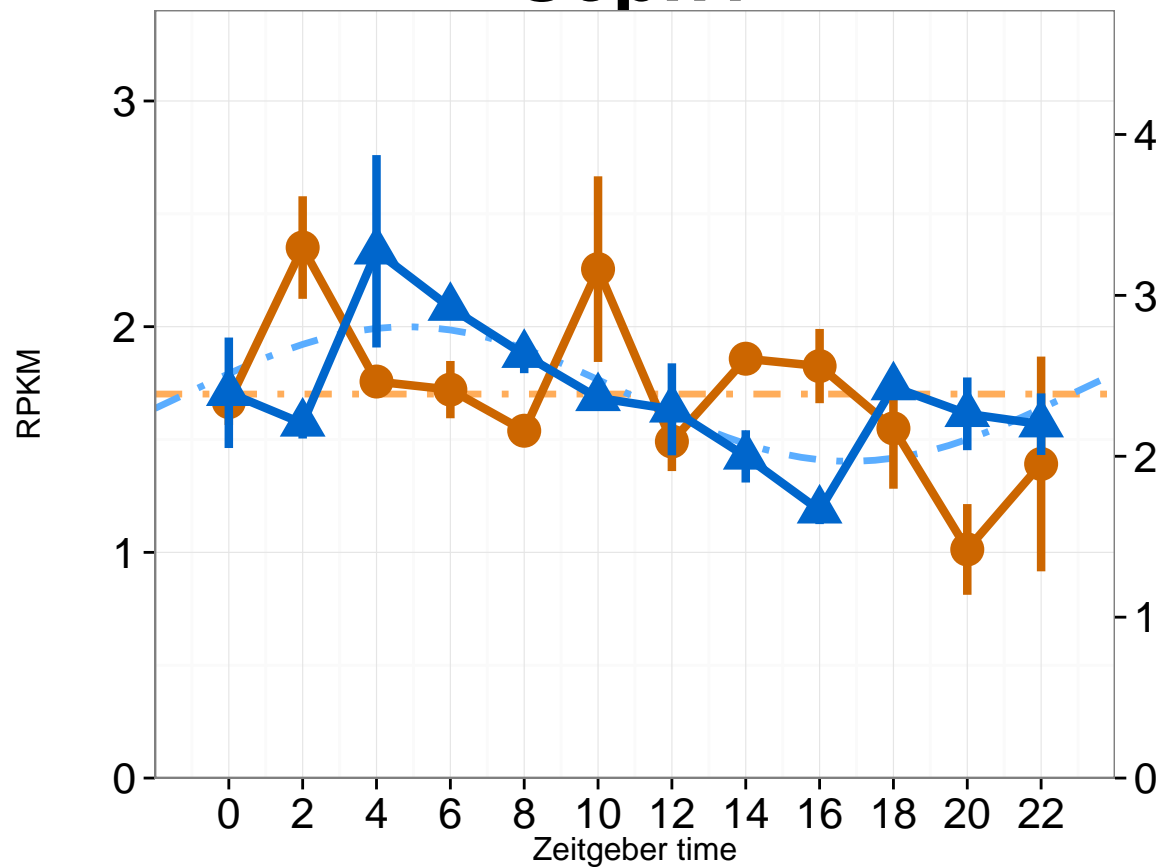

# Sepn1

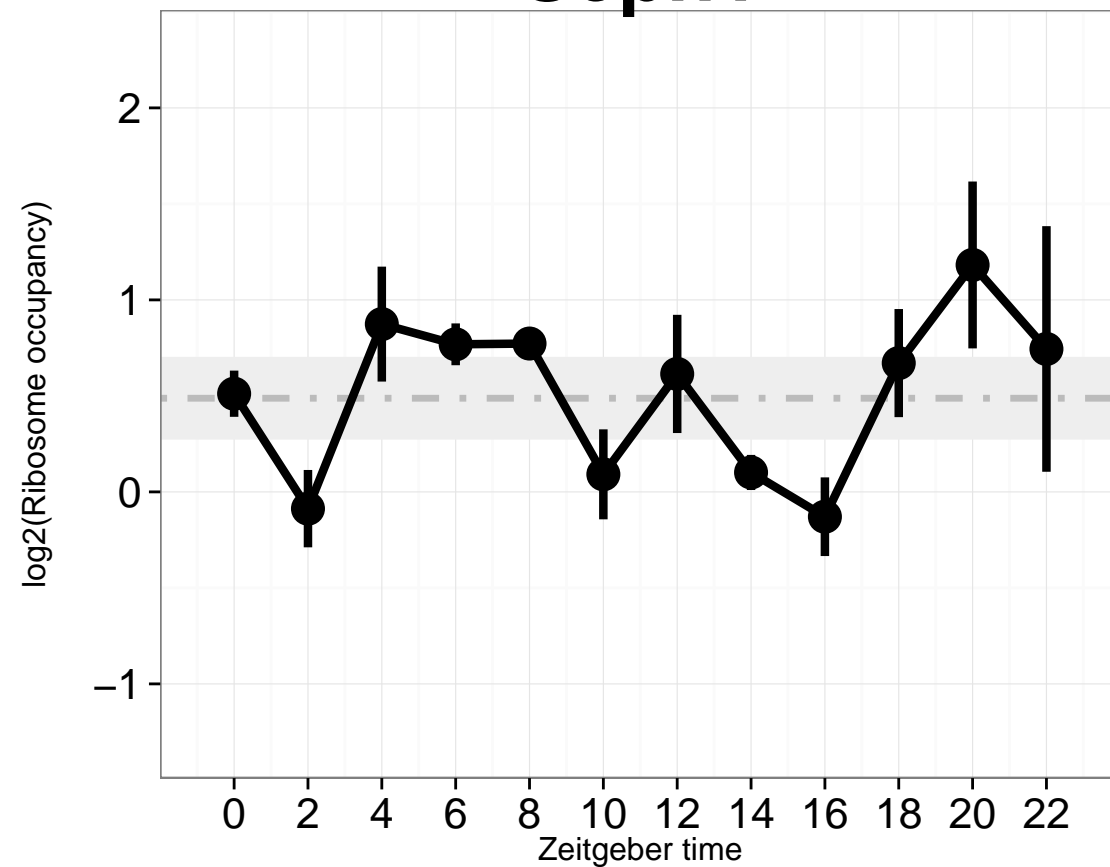

Supplement: Supplementary file 12494 [file 1]

# lqgap1

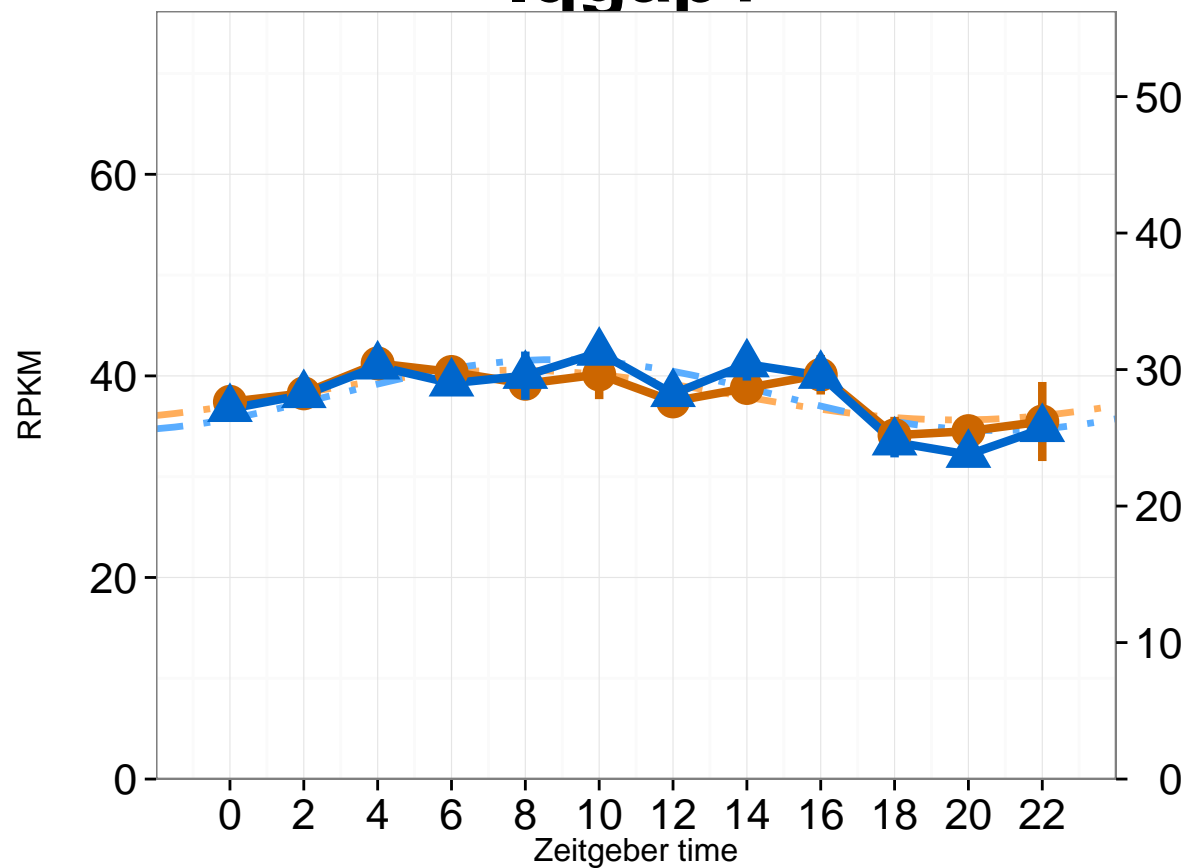

# lqgap1

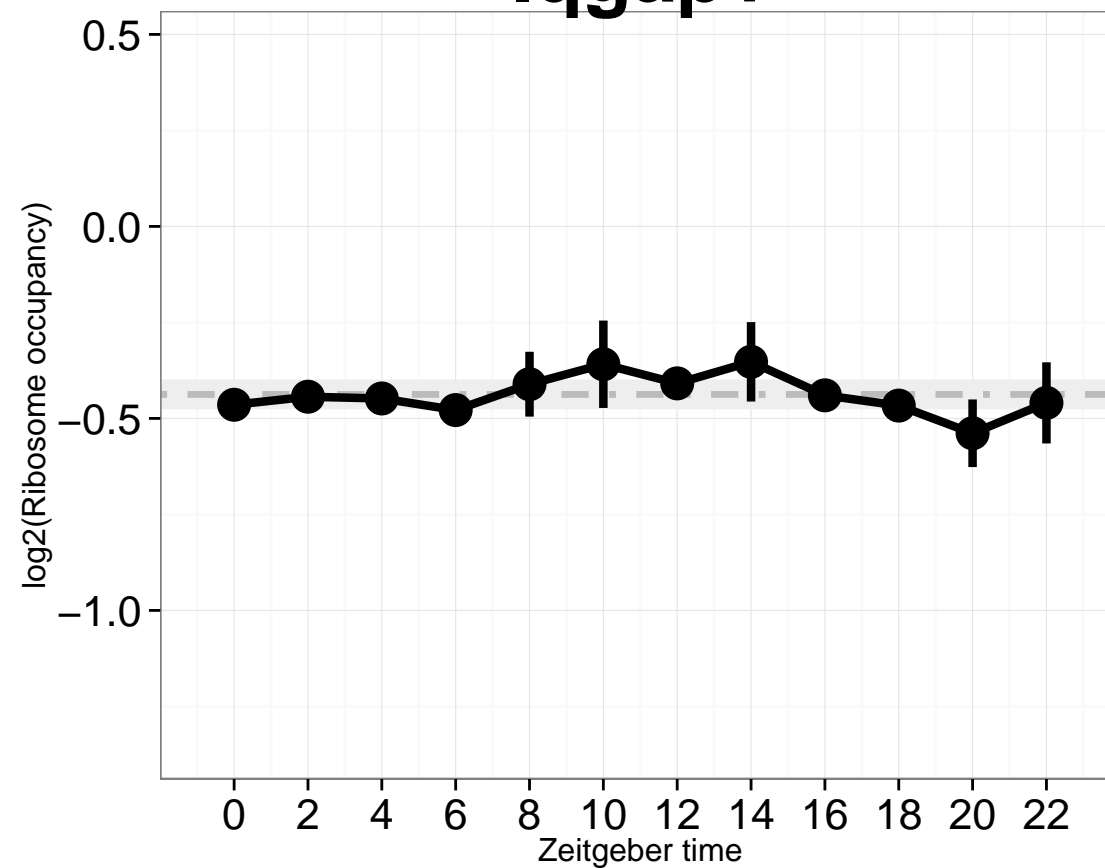

Supplement: Supplementary file 12495 [file 1]

# Myo19

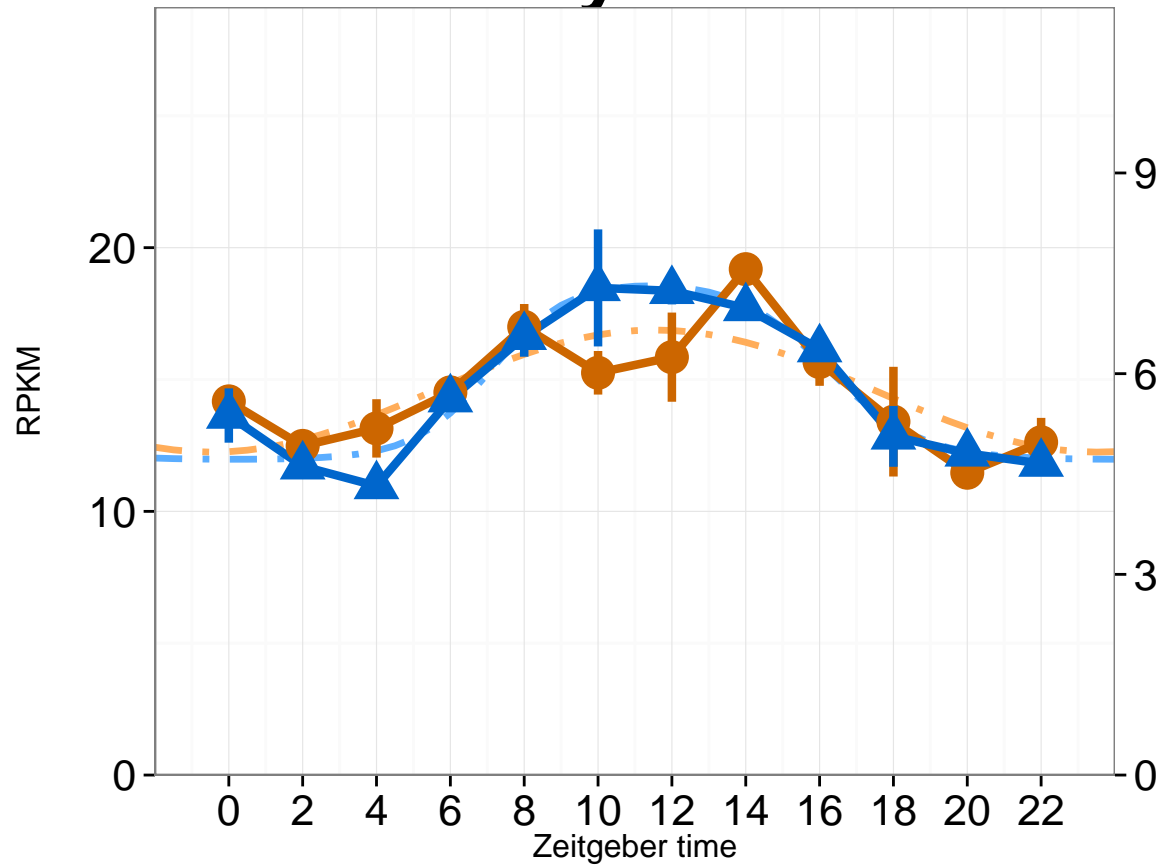

# Myo19

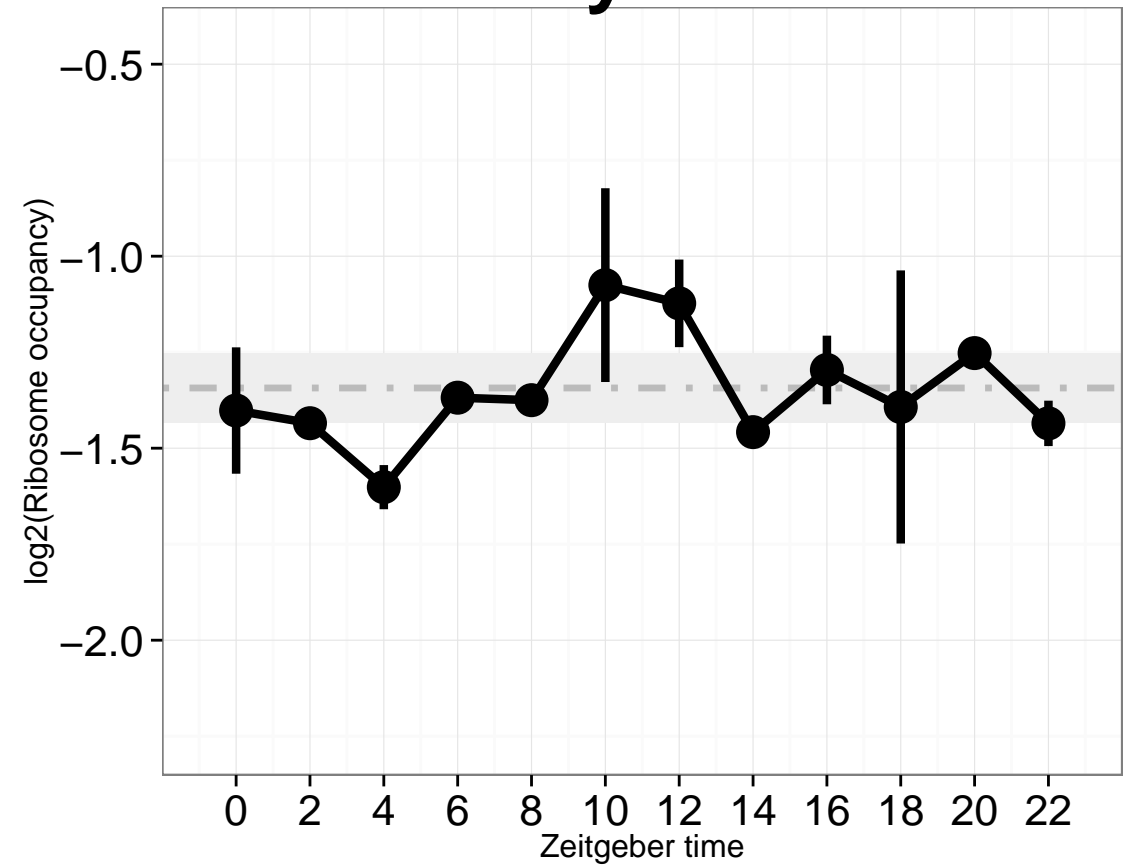

Supplement: Supplementary file 12496 [file 1]

## Klc3

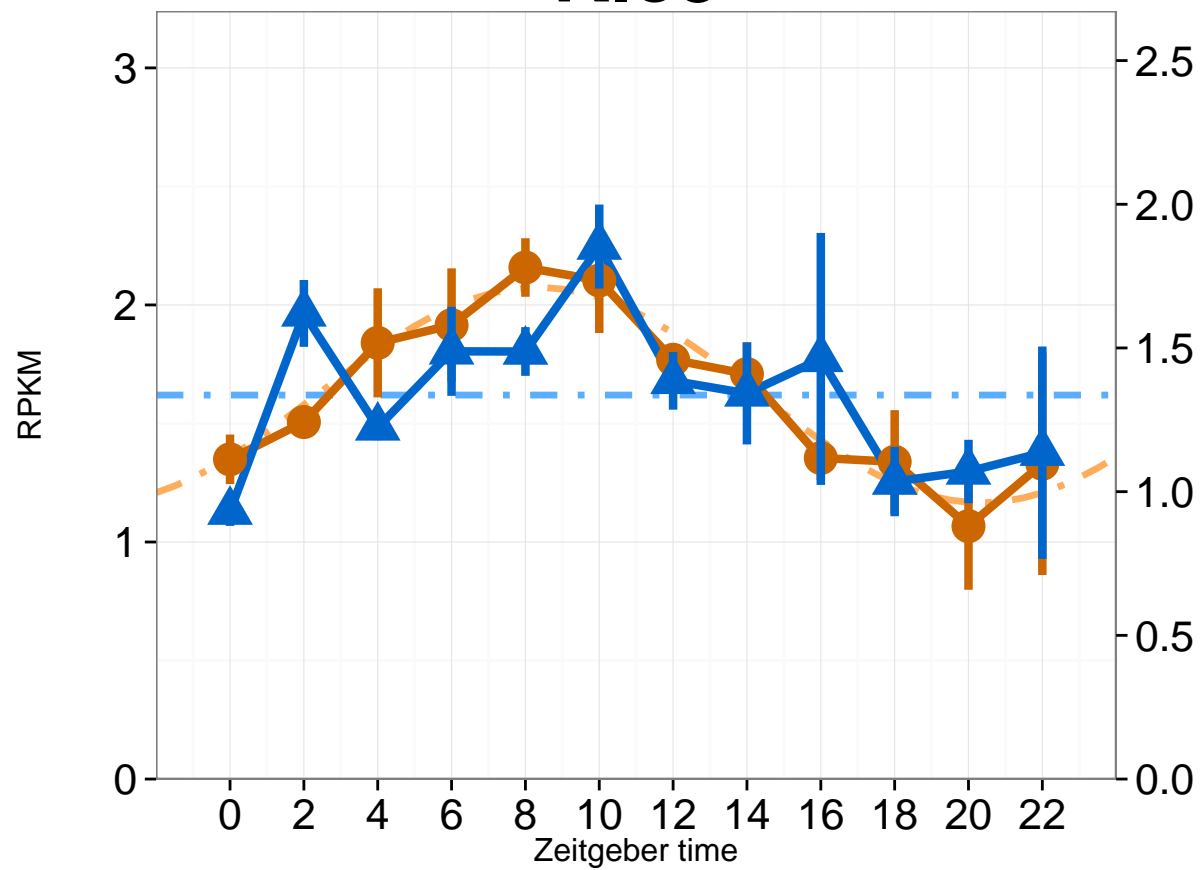

## Klc3

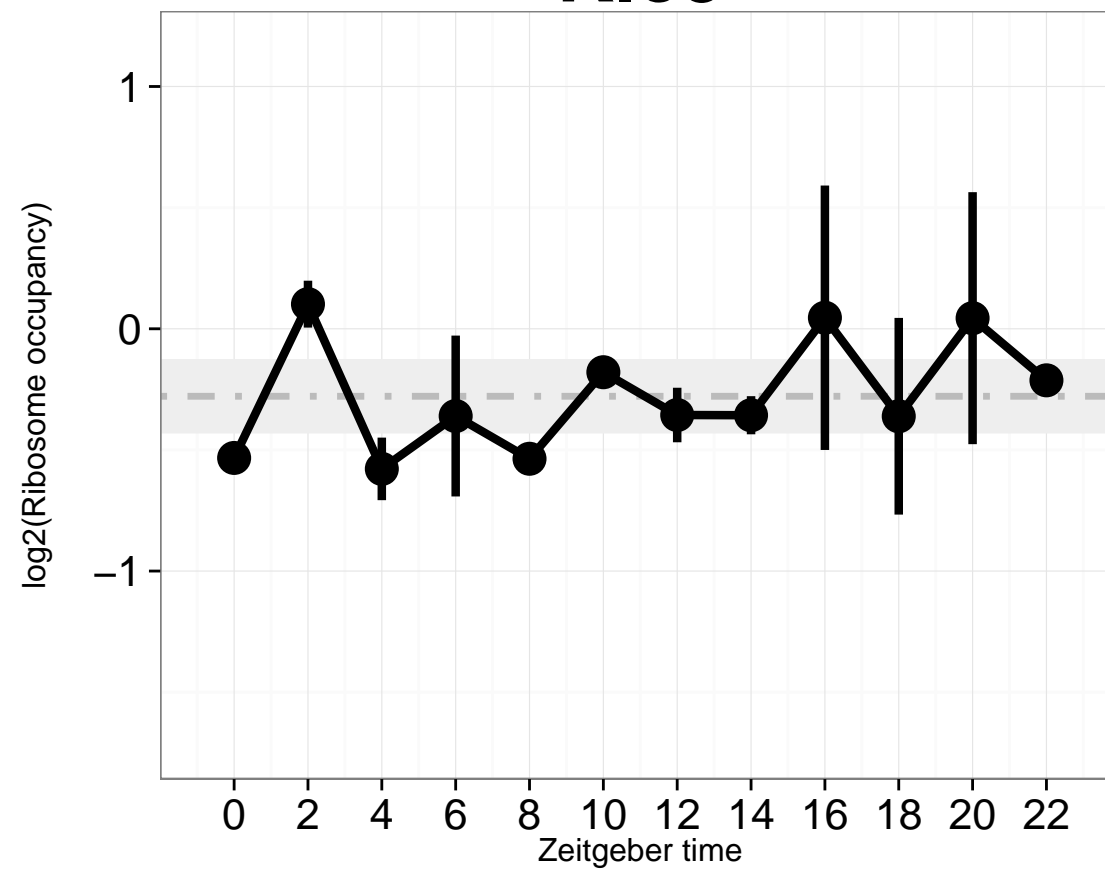

Supplement: Supplementary file 12497 [file 1]

## Usf1

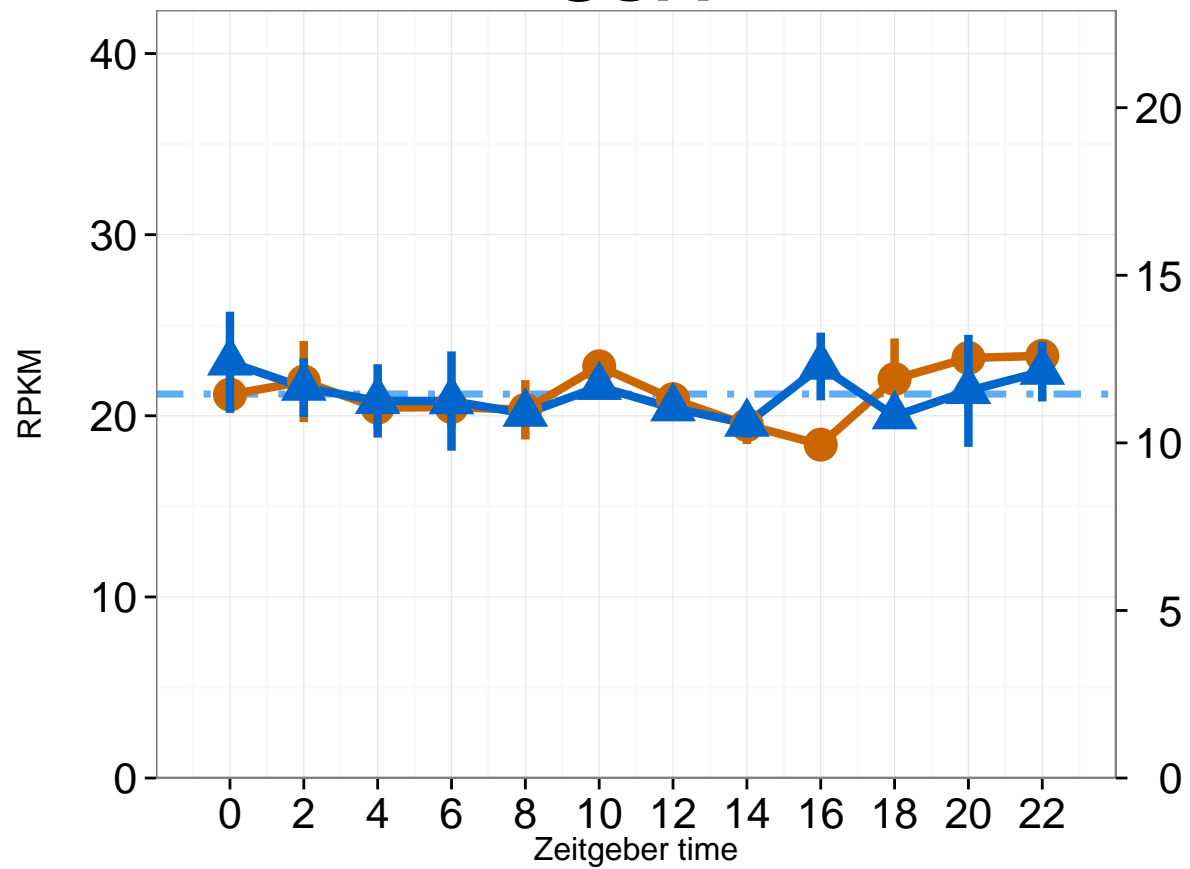

## Usf1

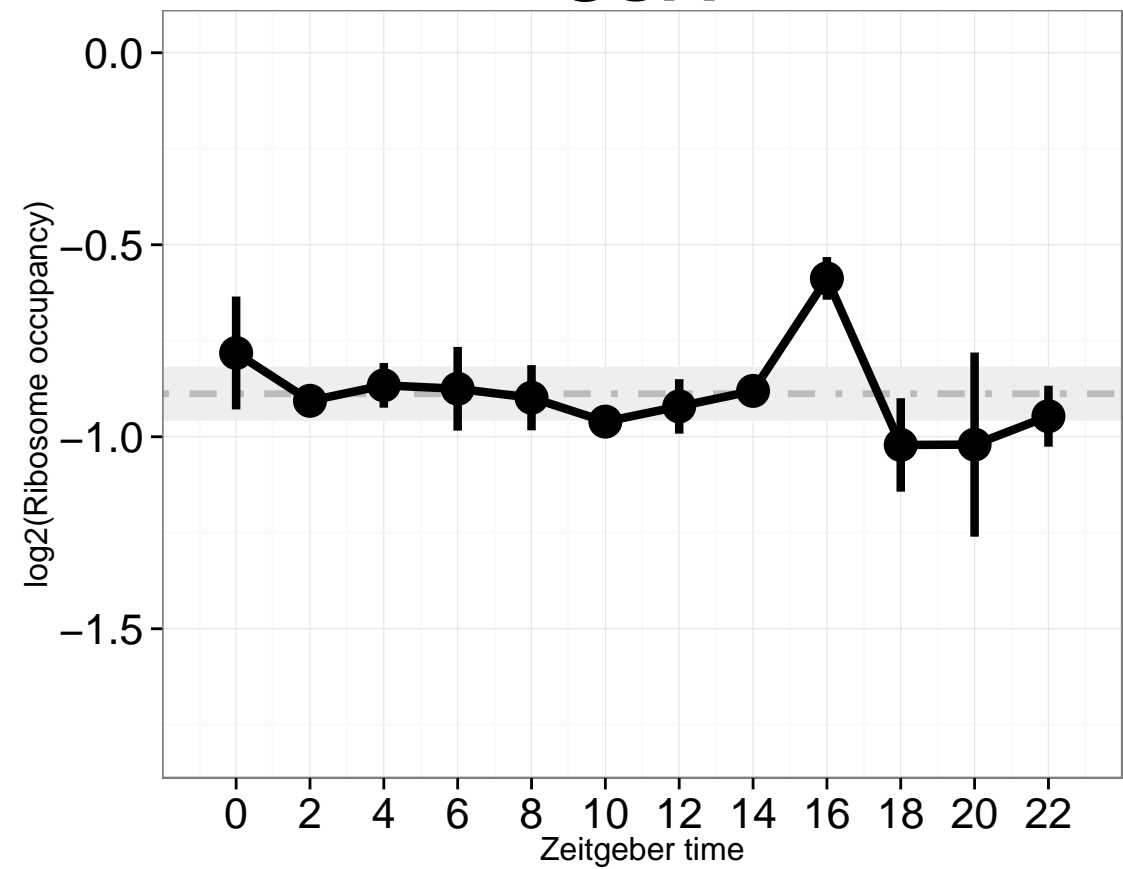

Supplement: Supplementary file 12498 [file 1]

## Cnot6l

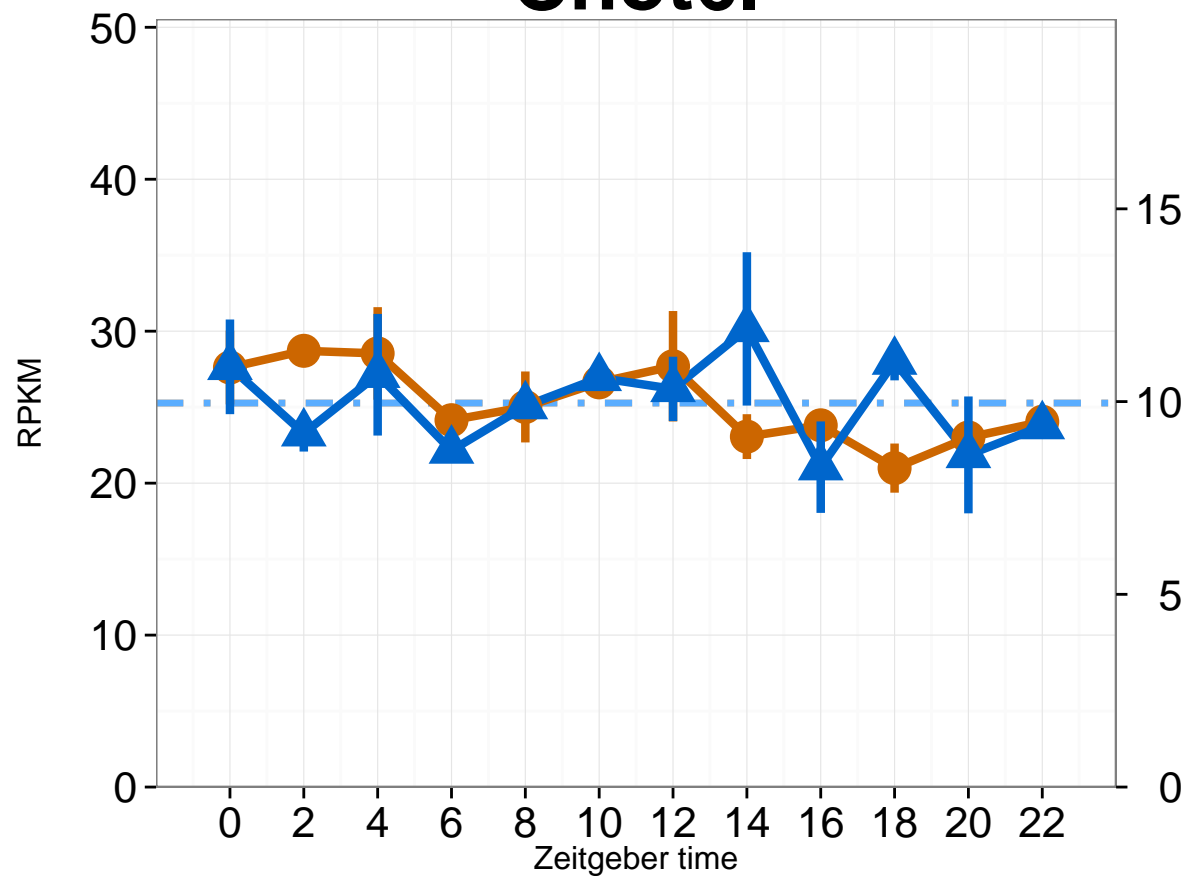

## Cnot6l

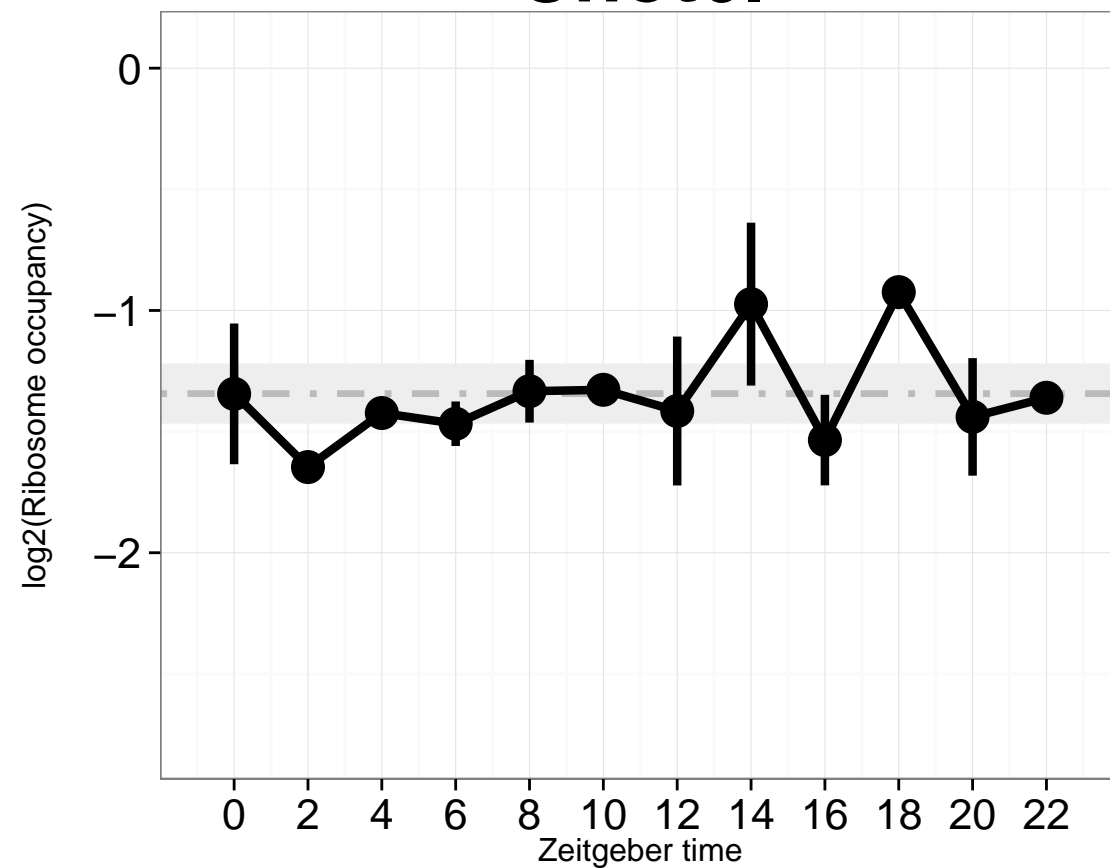

Supplement: Supplementary file 12499 [file 1]

# F830016B08Rik

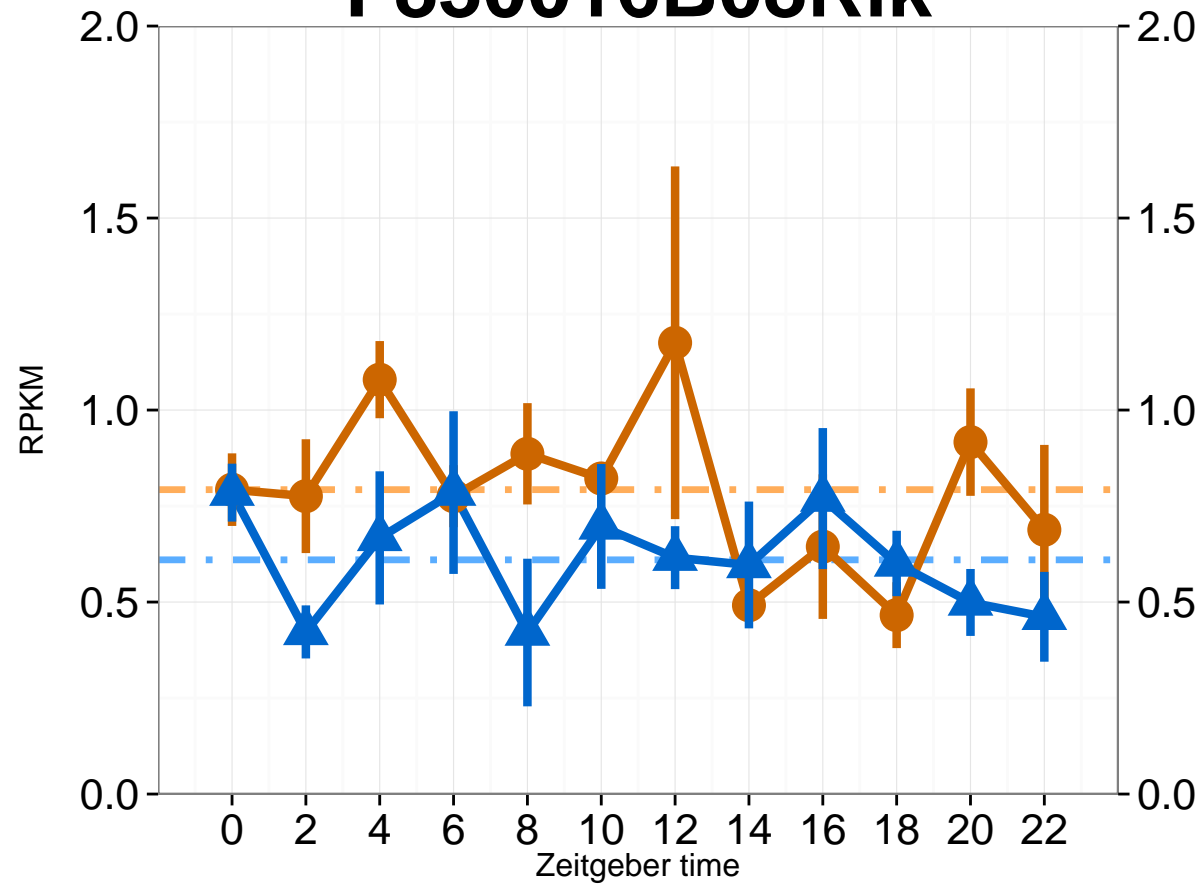

# F830016B08Rik

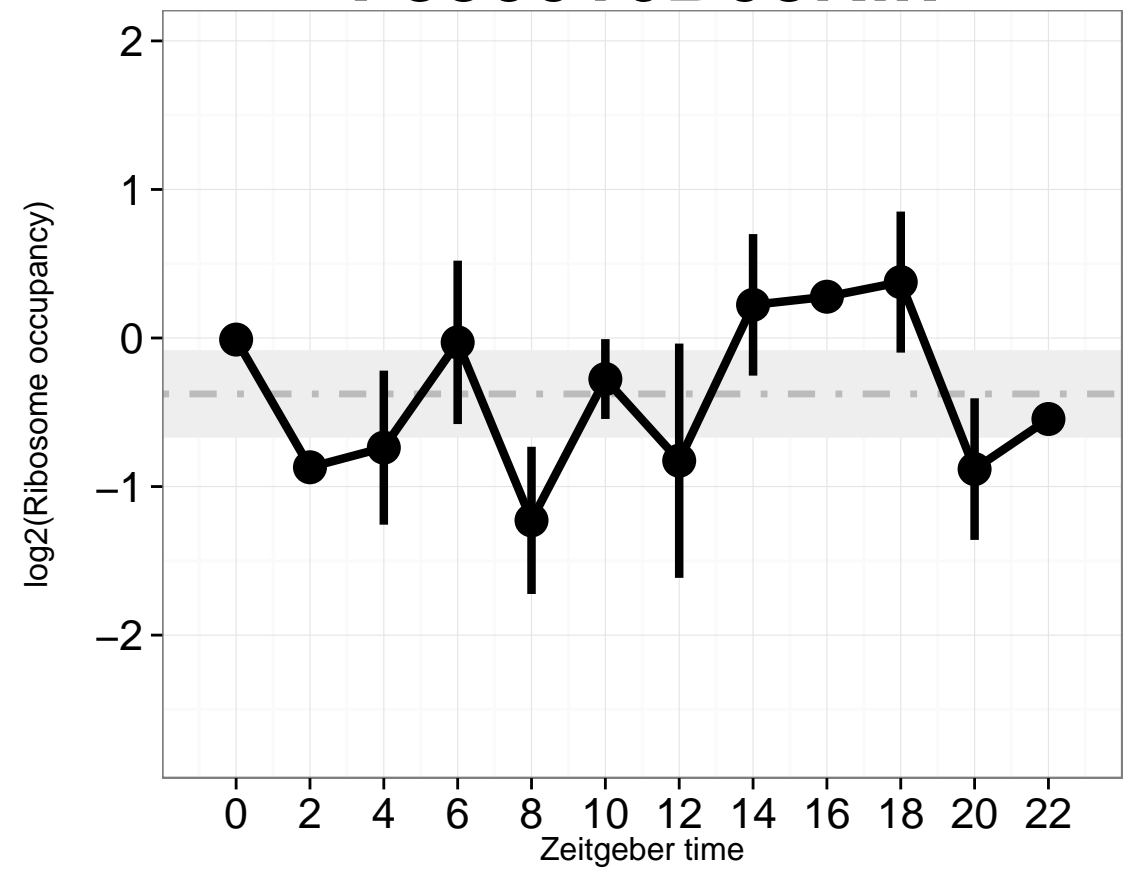

Supplement: Supplementary file 12500 [file 1]

## lcmt

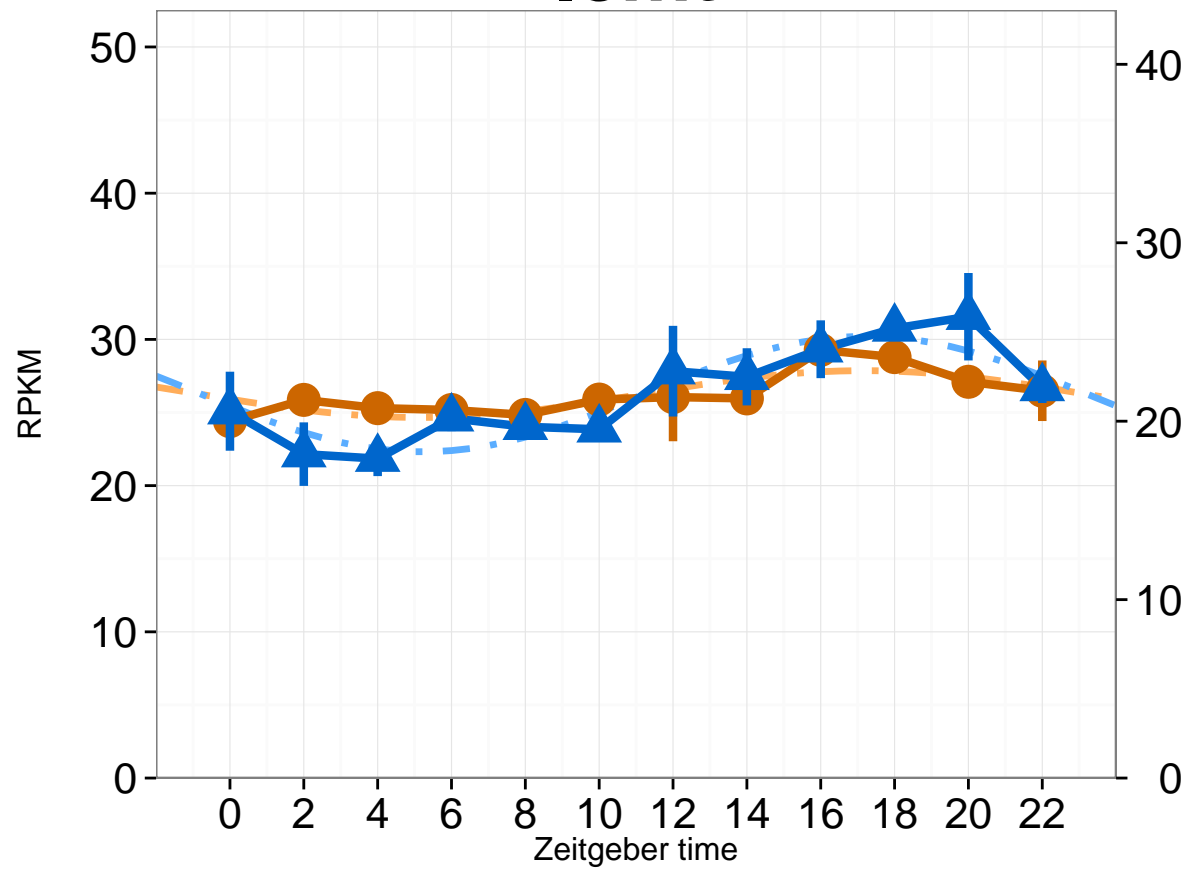

## lcmt

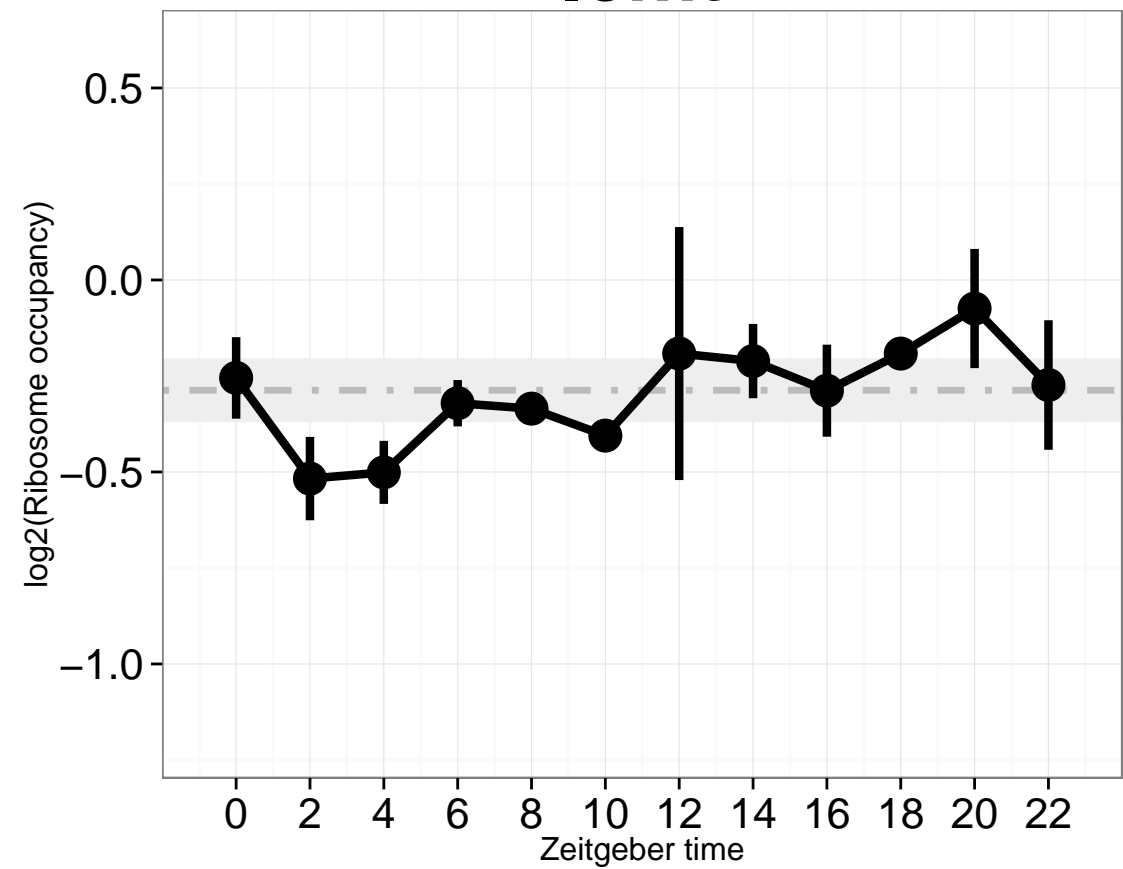

Supplement: Supplementary file 12501 [file 1]

## Grb10

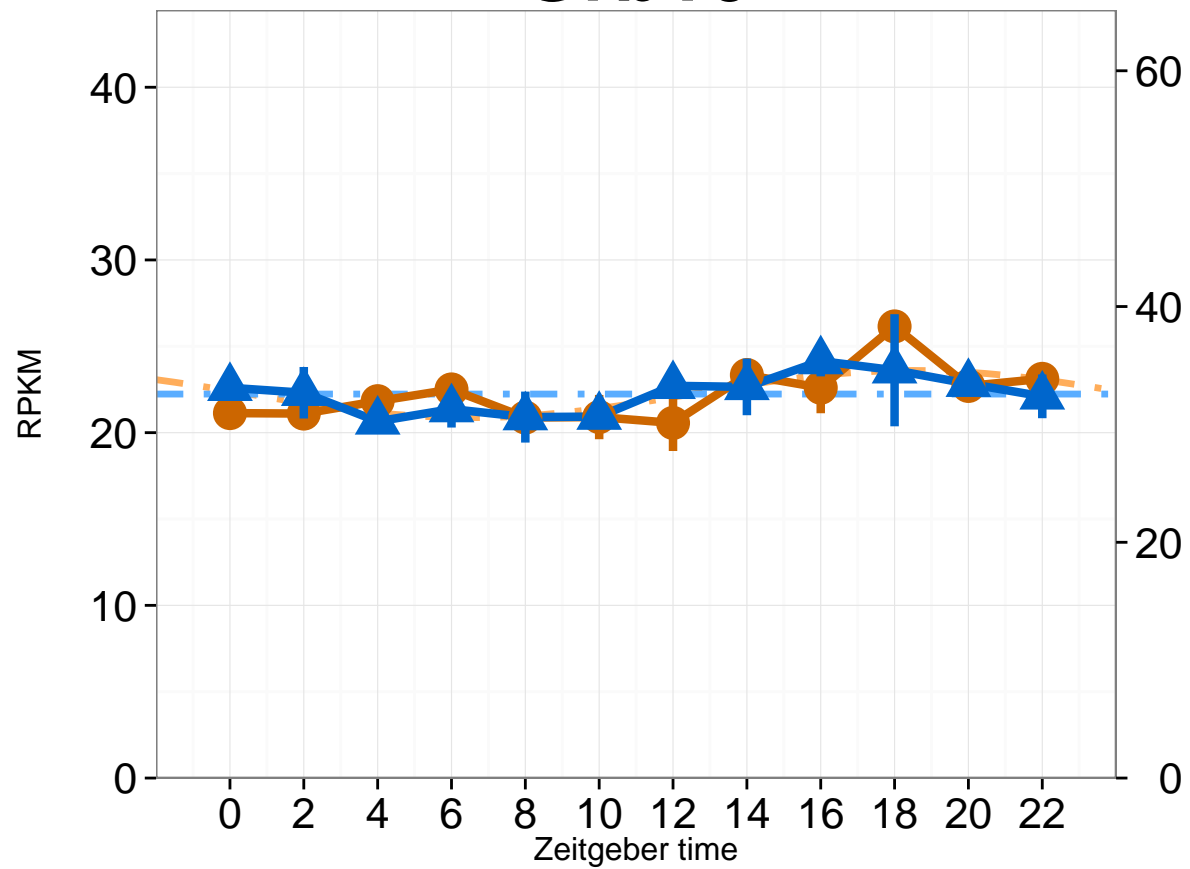

## Grb10

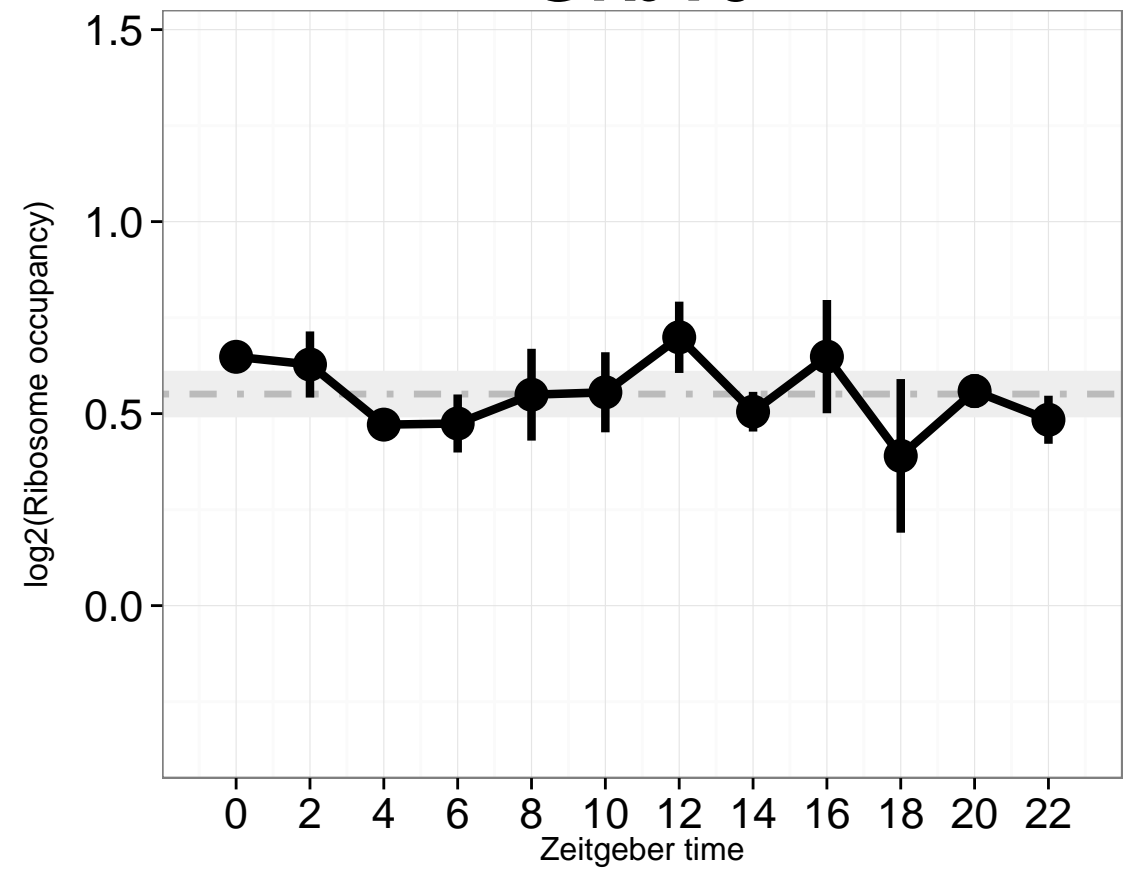

Supplement: Supplementary file 12502 [file 1]

# Enkd1

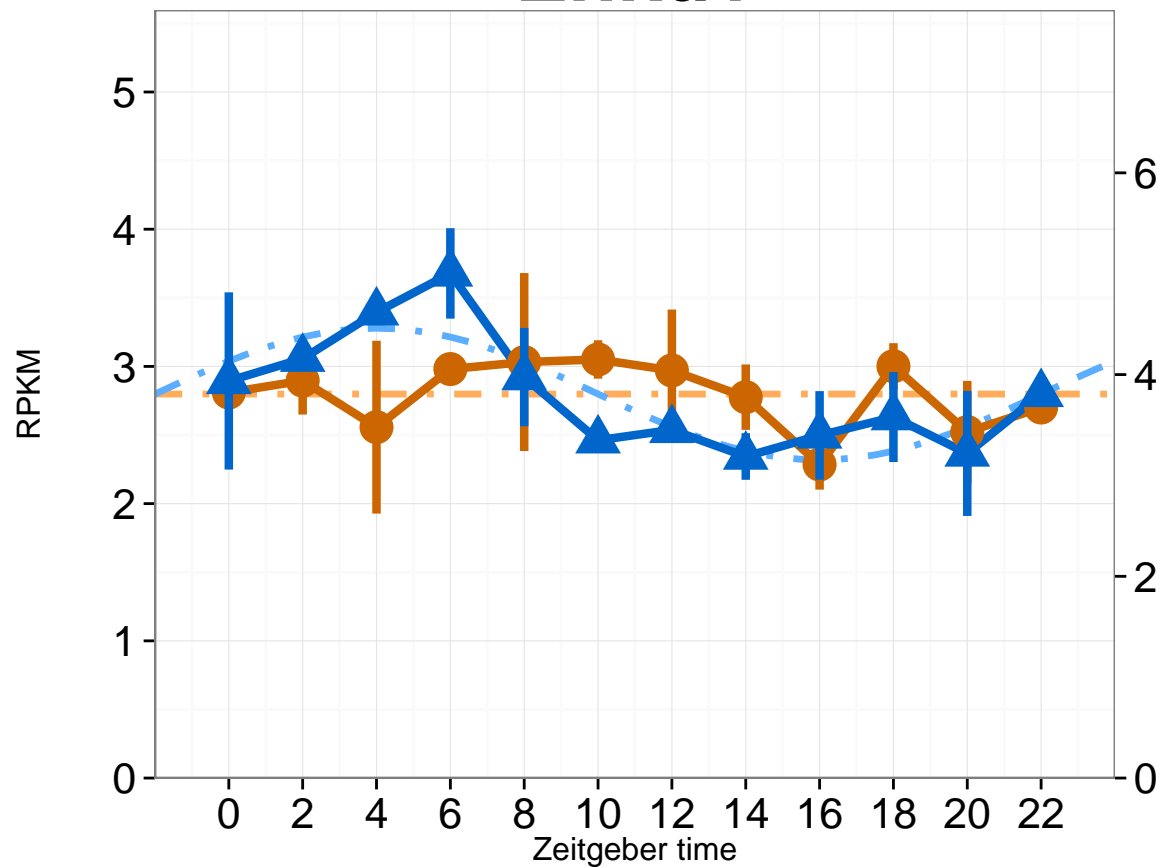

# Enkd1

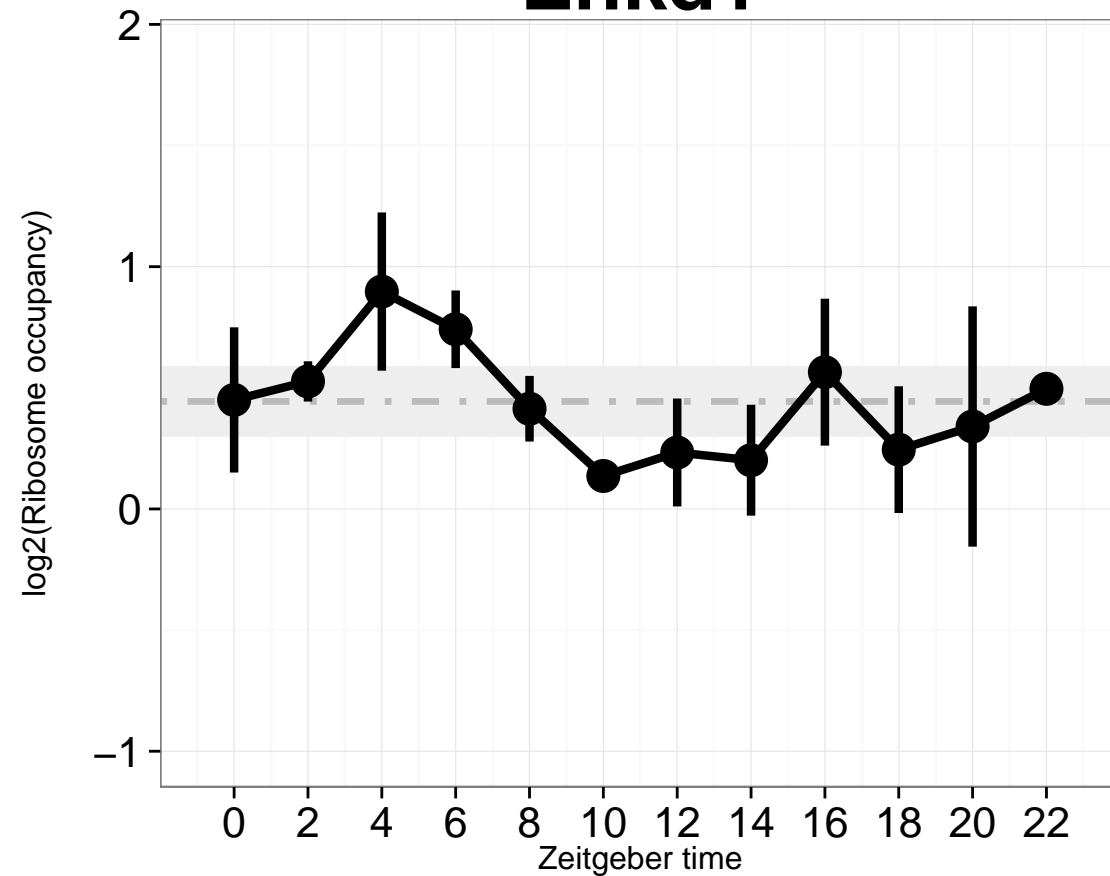

Supplement: Supplementary file 12503 [file 1]

## Rspry1

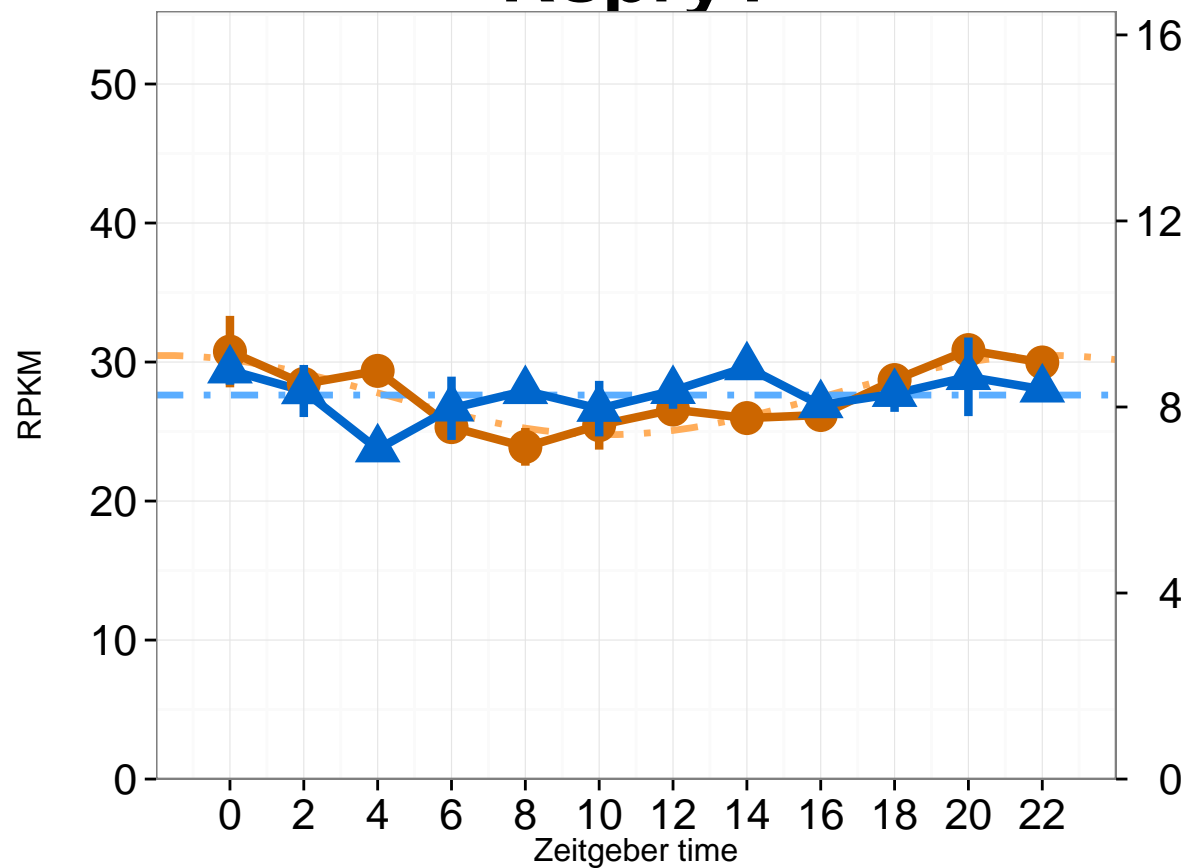

## Rspry1

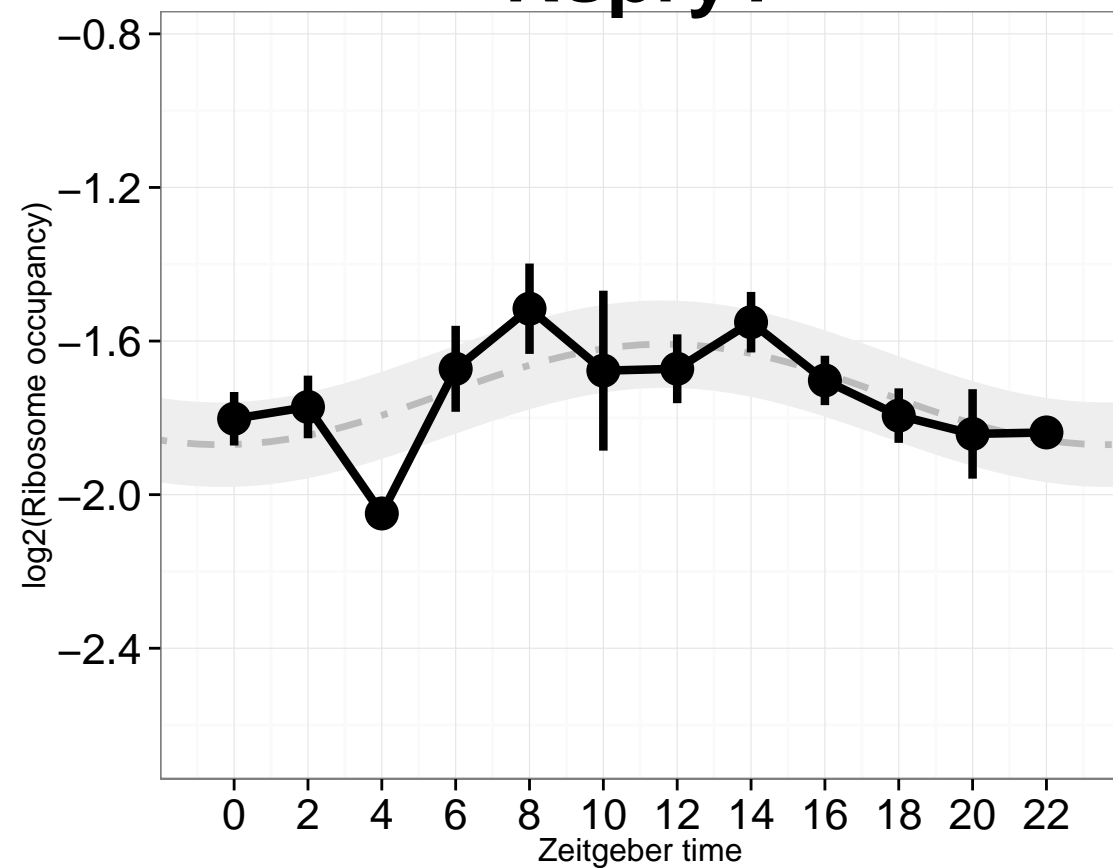

Supplement: Supplementary file 12504 [file 1]

# Rnf122

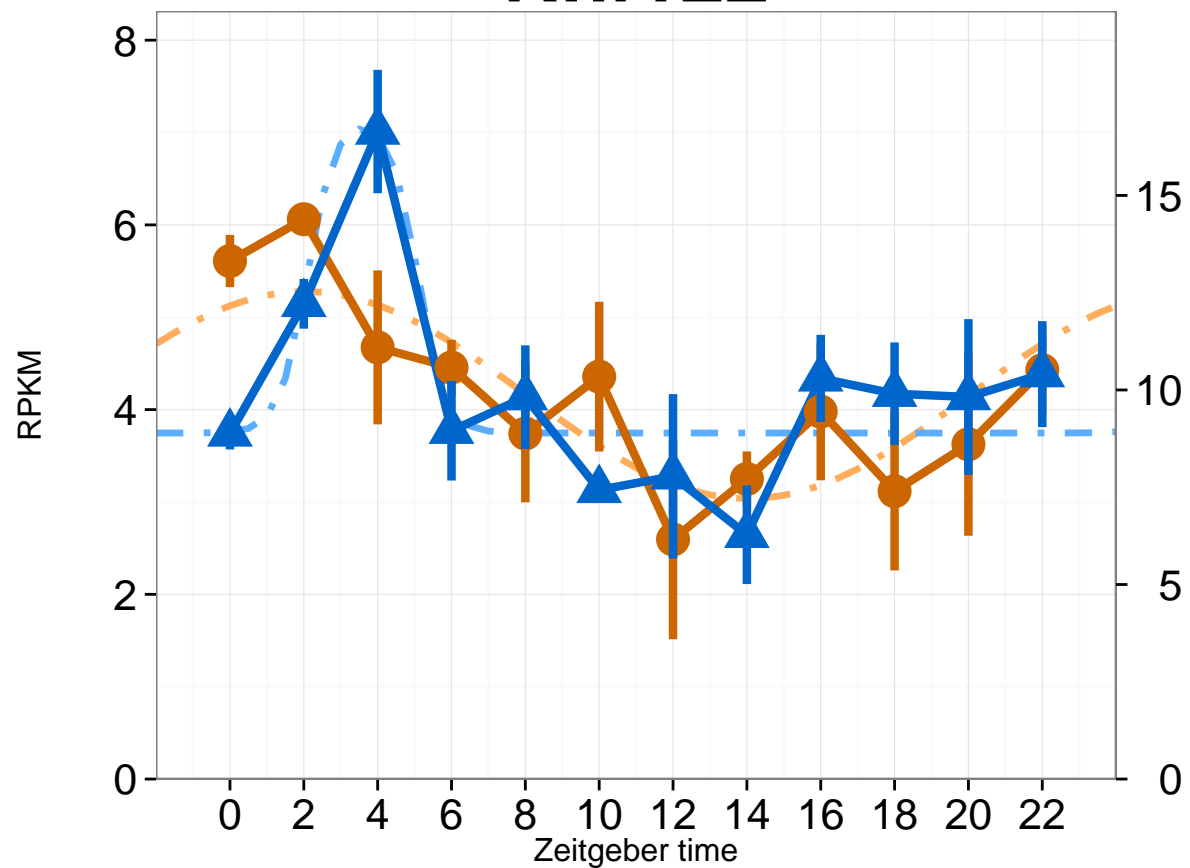

# Rnf122

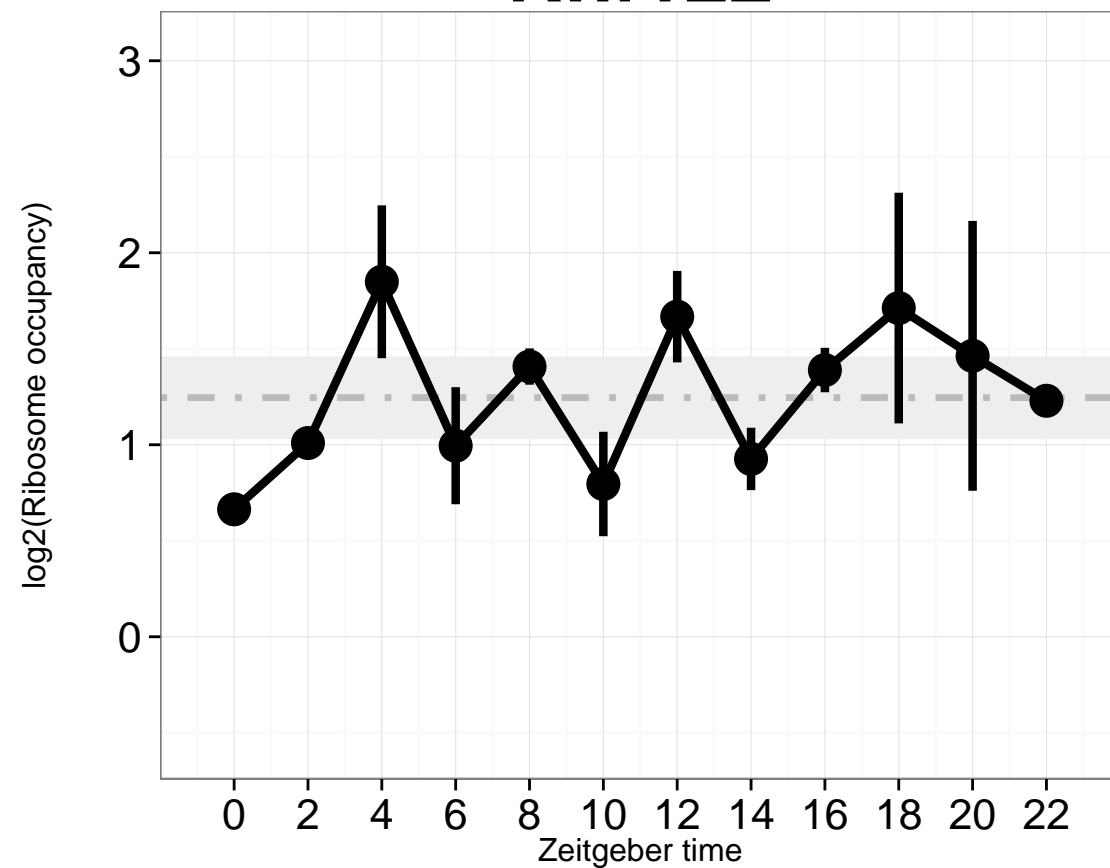

Supplement: Supplementary file 12505 [file 1]

## Pfn1

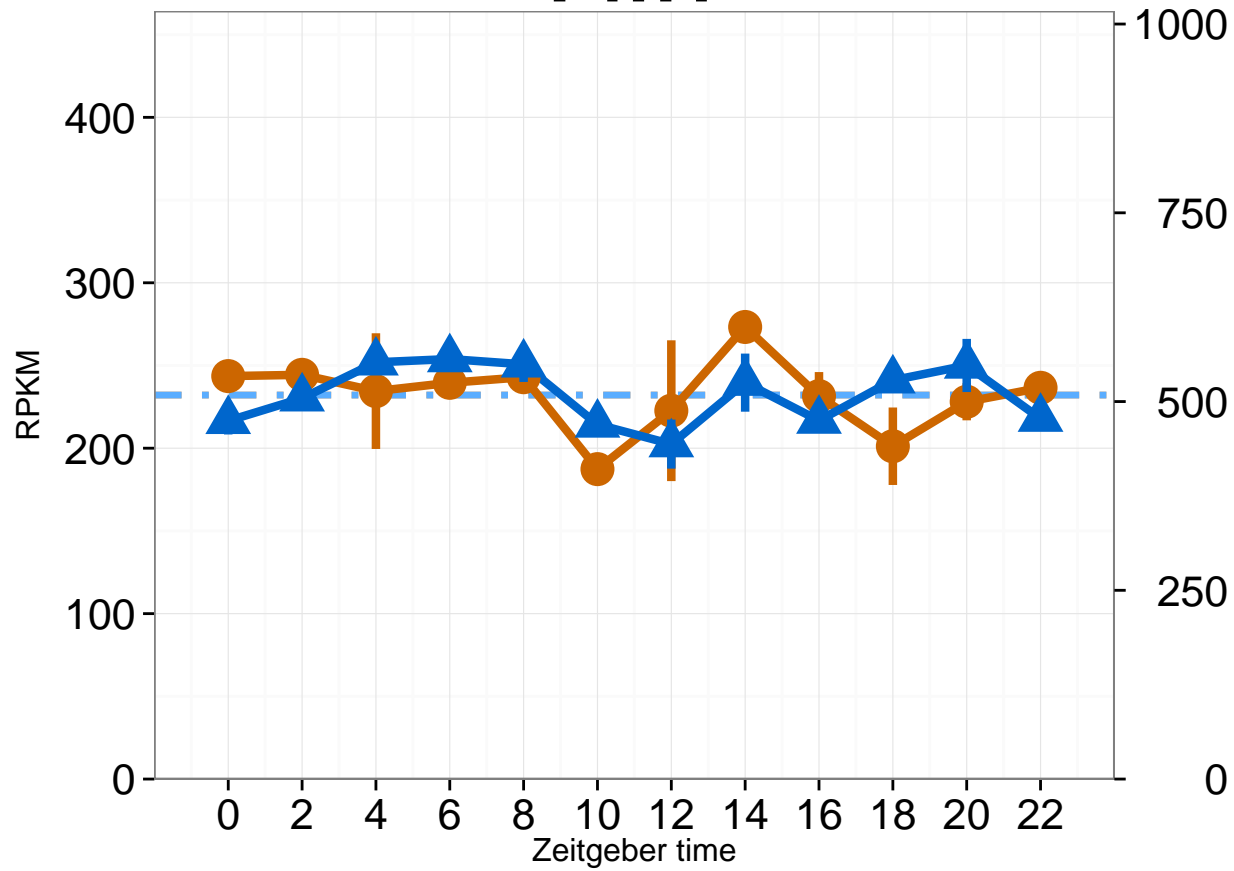

## Pfn1

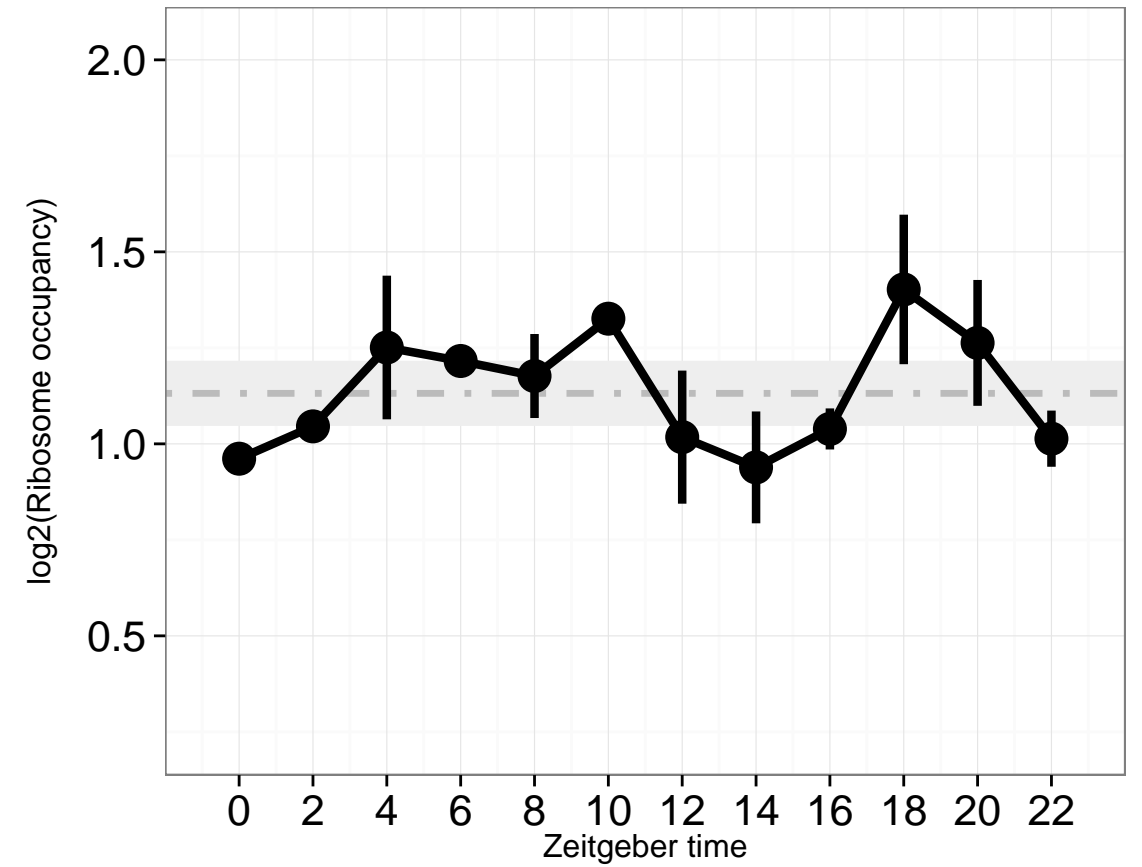

Supplement: Supplementary file 12506 [file 1]

# Cox6a1

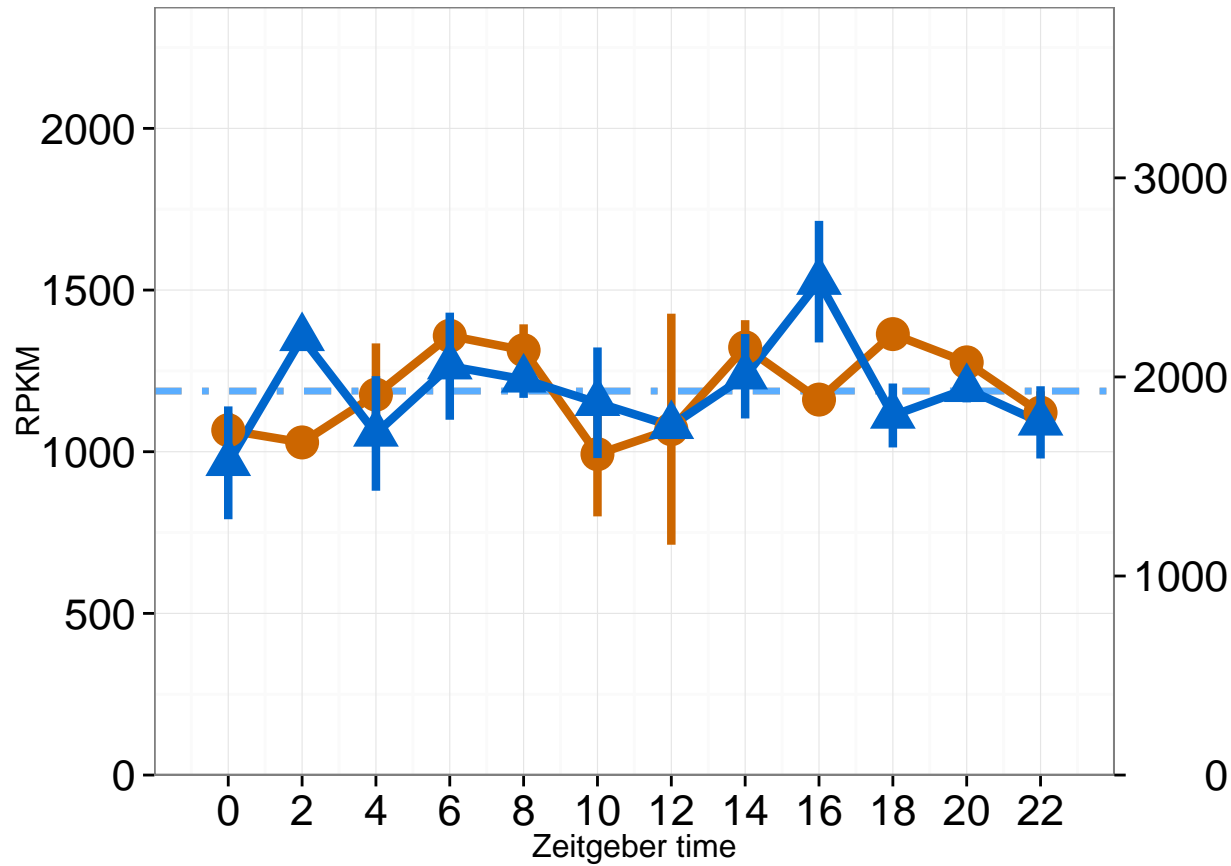

# Cox6a1

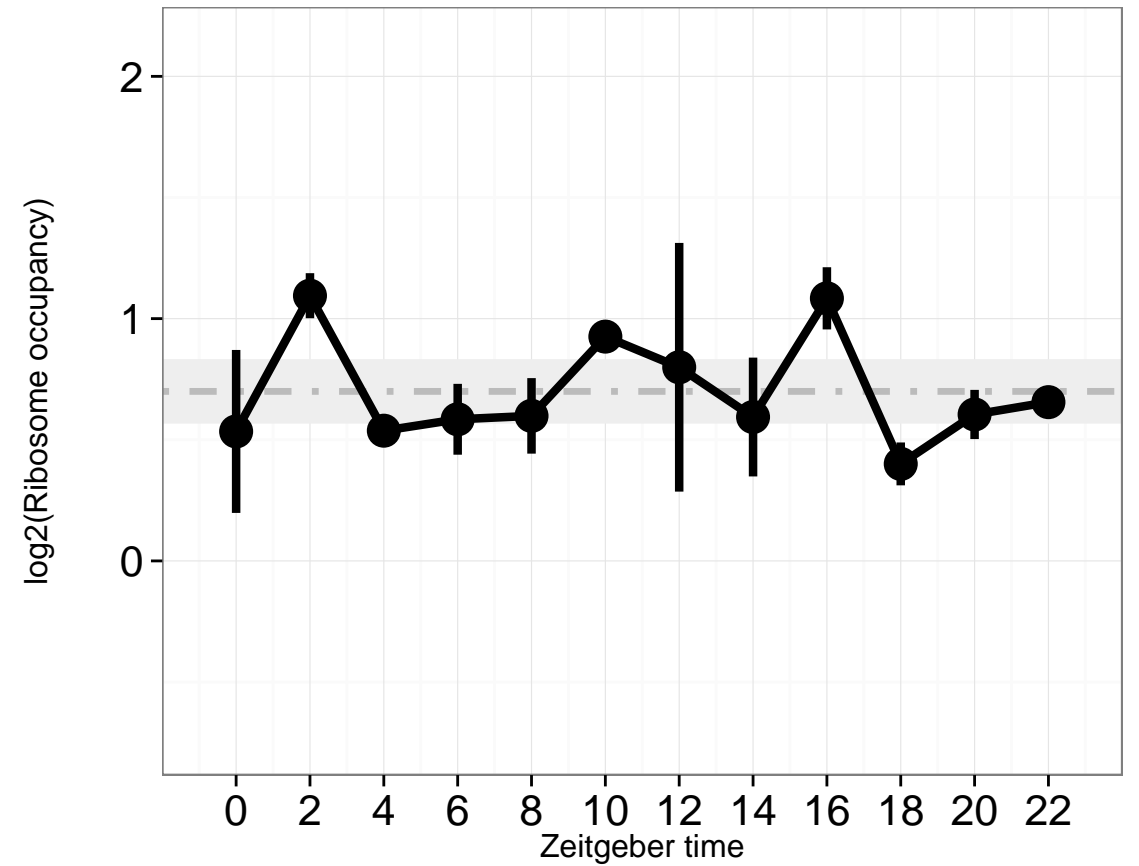

Supplement: Supplementary file 12507 [file 1]

# Ppme1

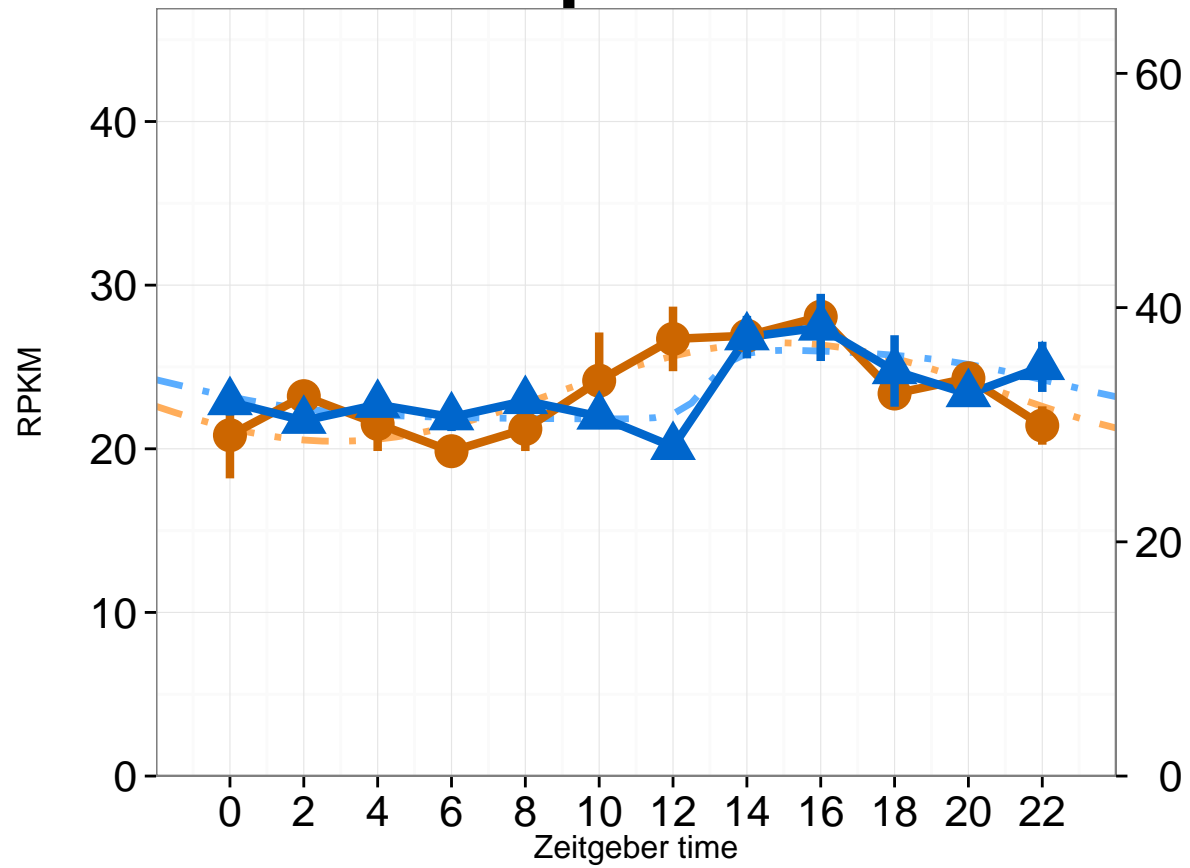

# Ppme1

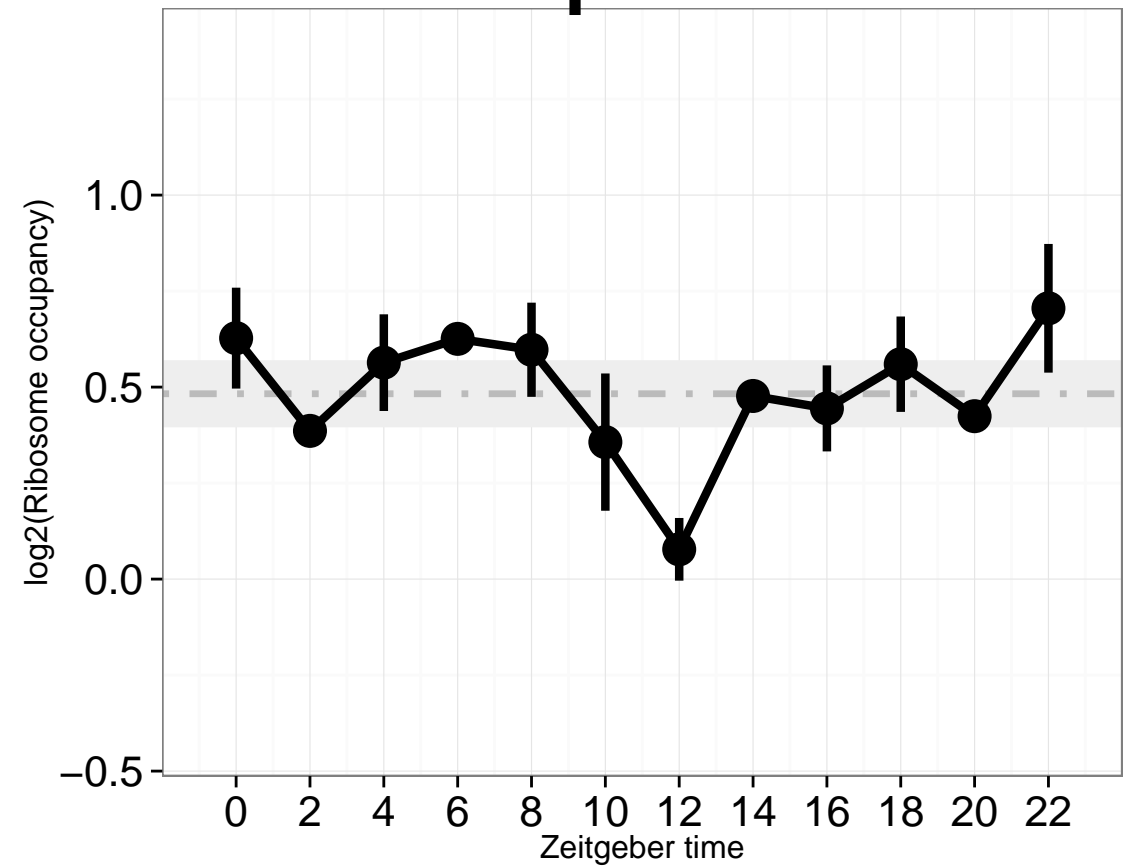

Supplement: Supplementary file 12508 [file 1]

## Klf12

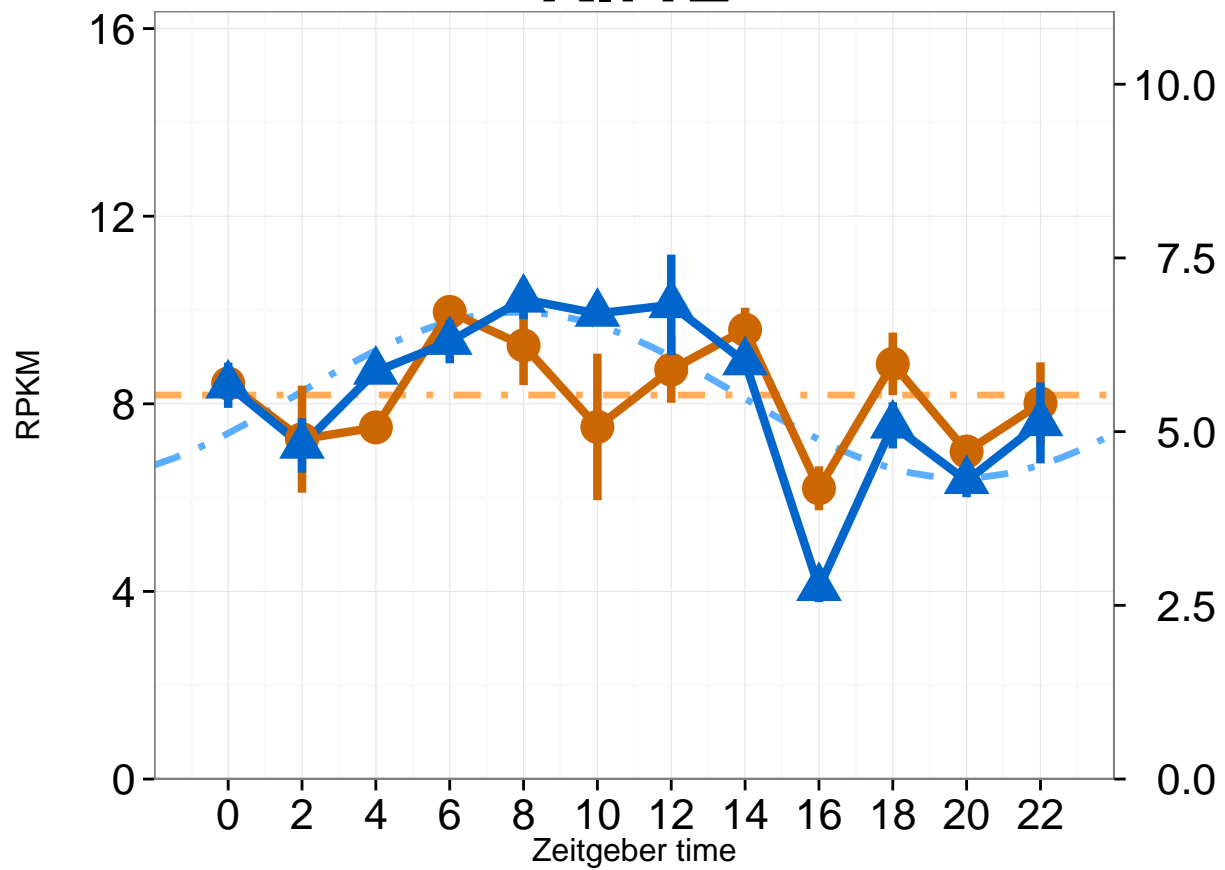

## Klf12

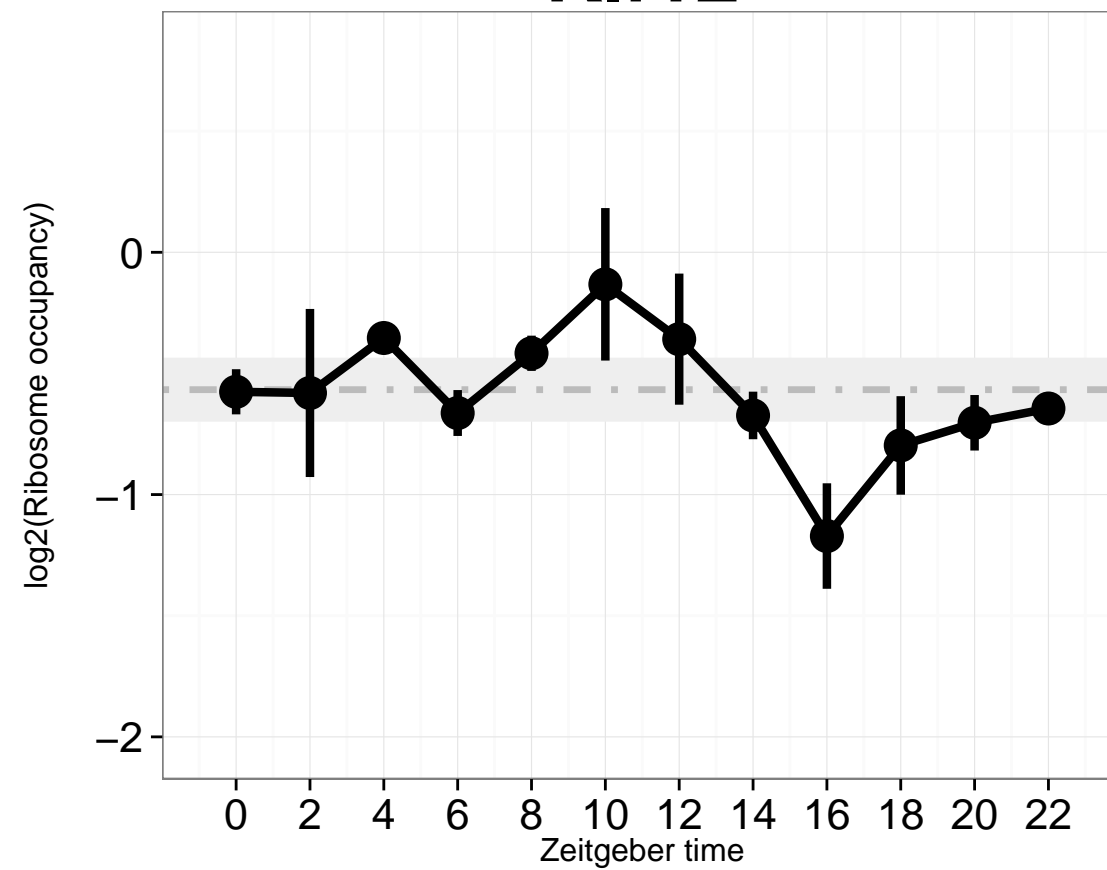

Supplement: Supplementary file 12509 [file 1]

# Vstm4

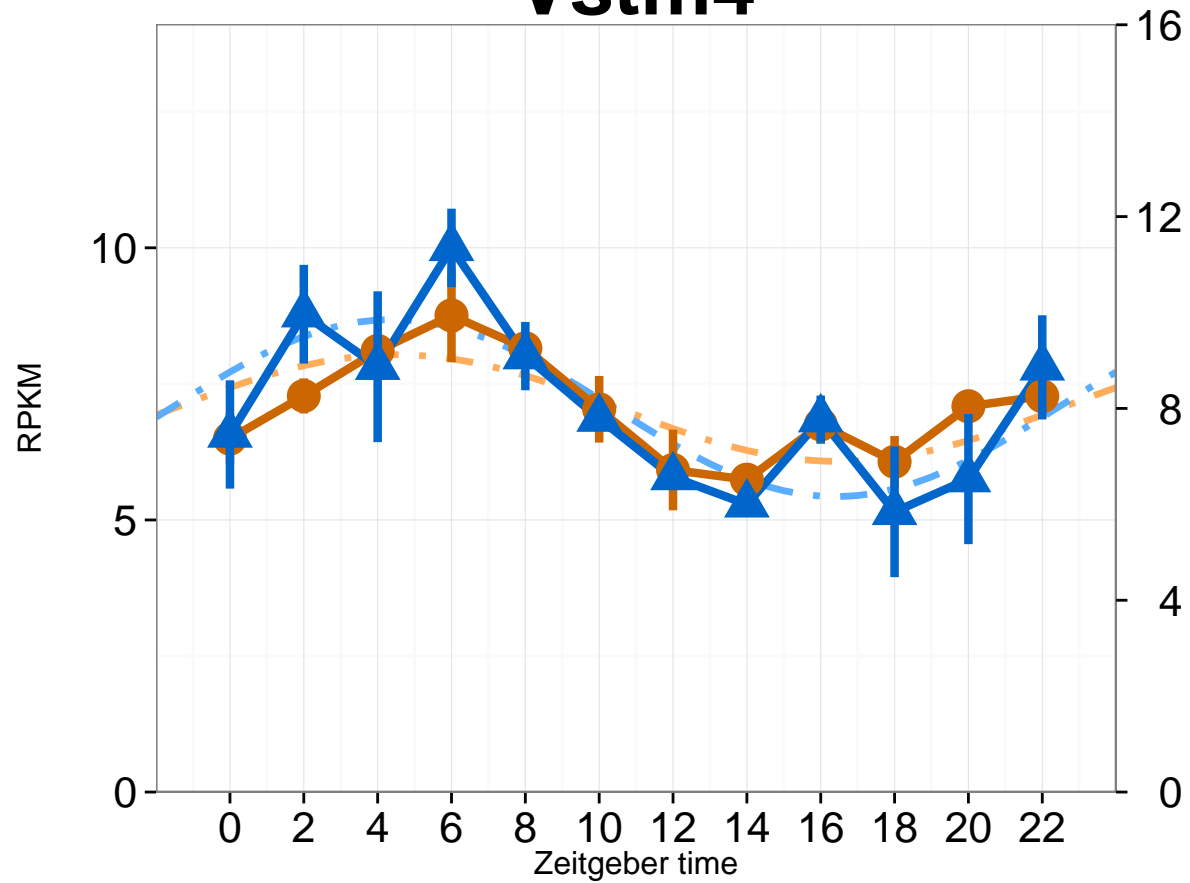

# Vstm4

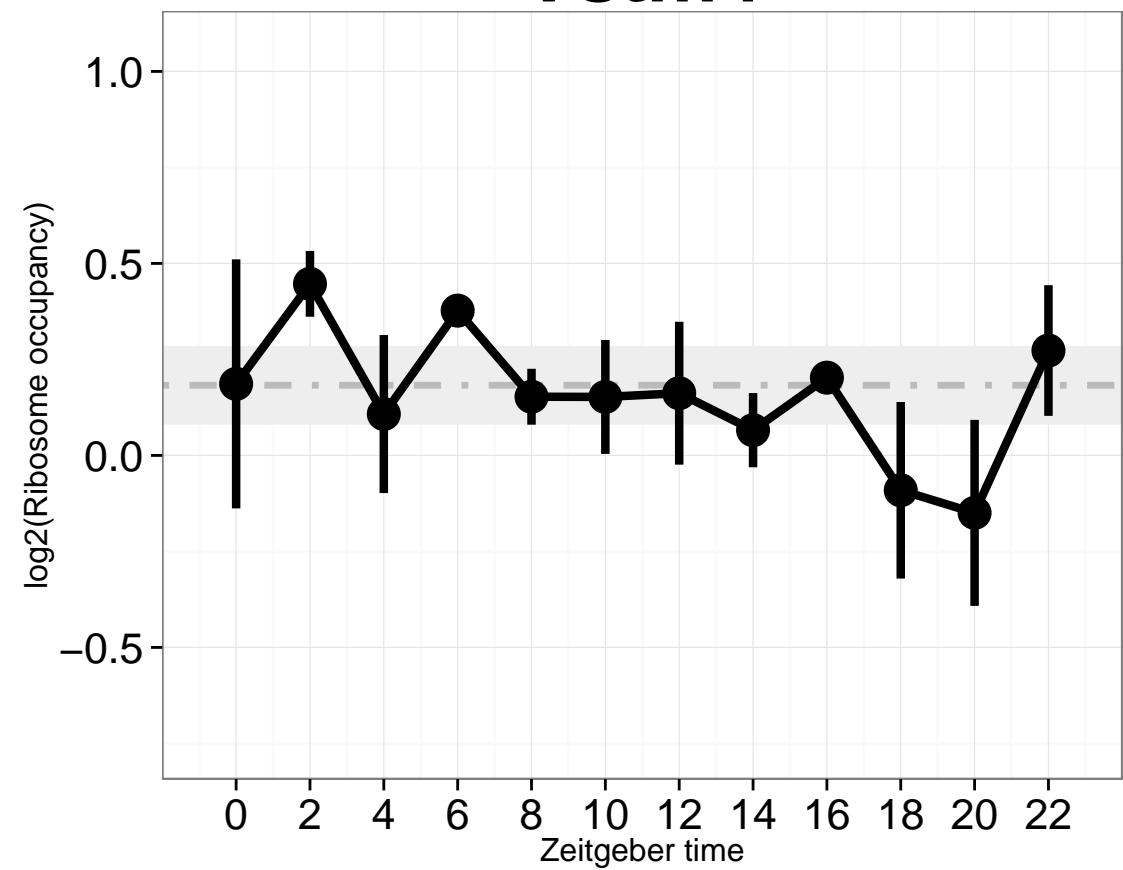

Supplement: Supplementary file 12510 [file 1]

**Ar**

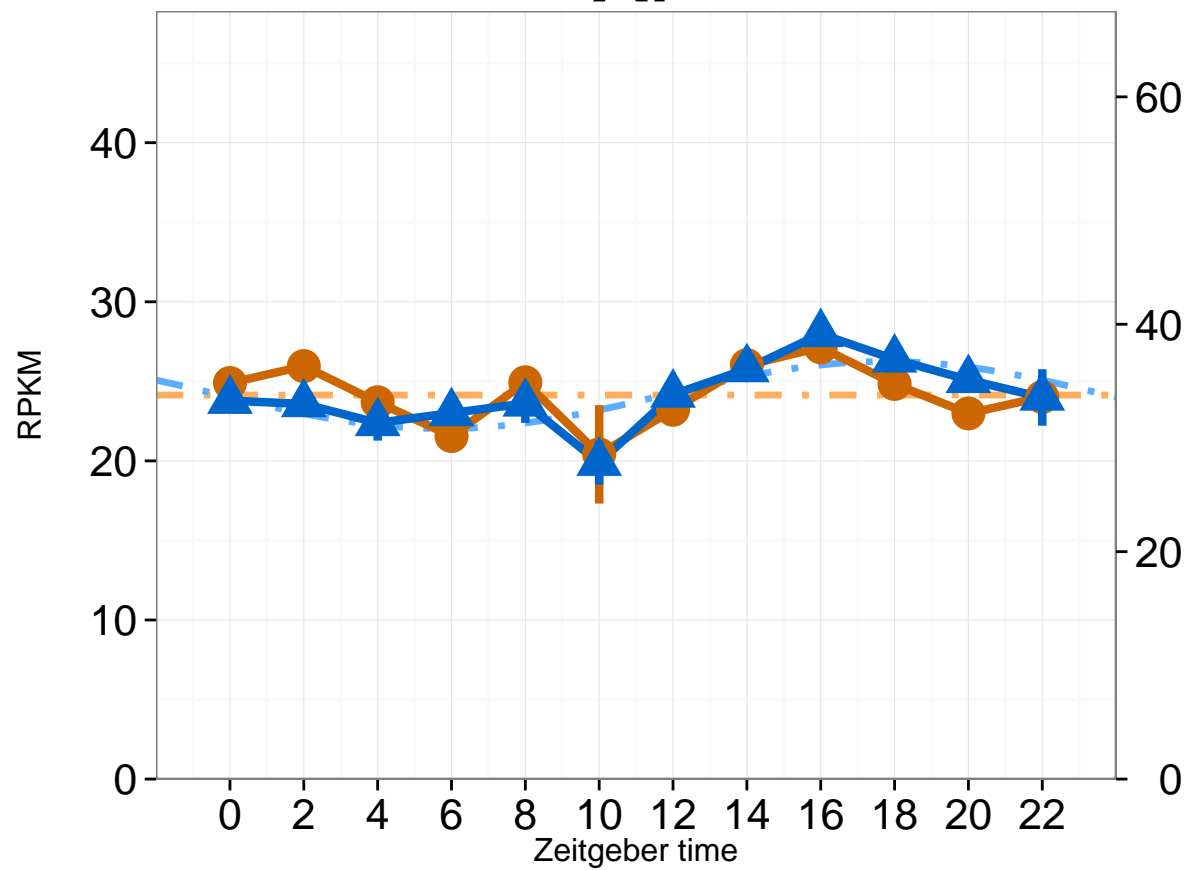

**Ar**

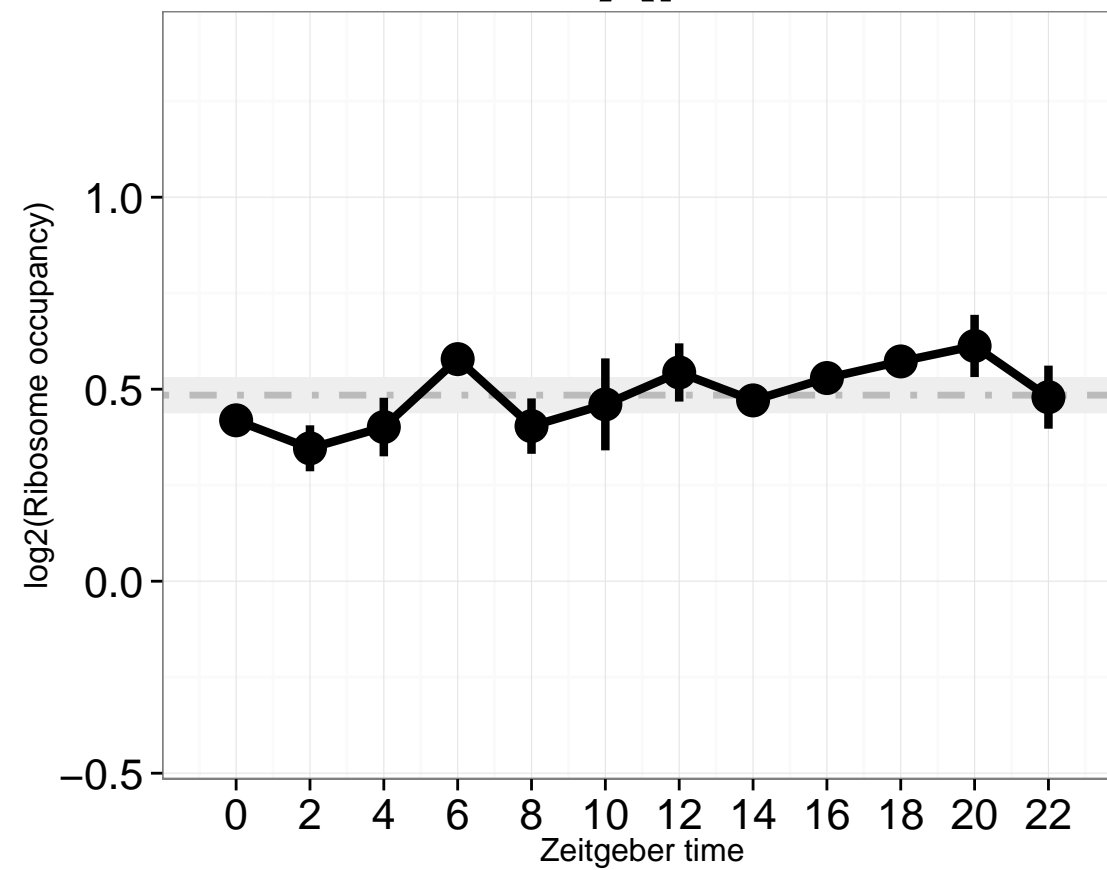

Supplement: Supplementary file 12511 [file 1]

## Pdia3

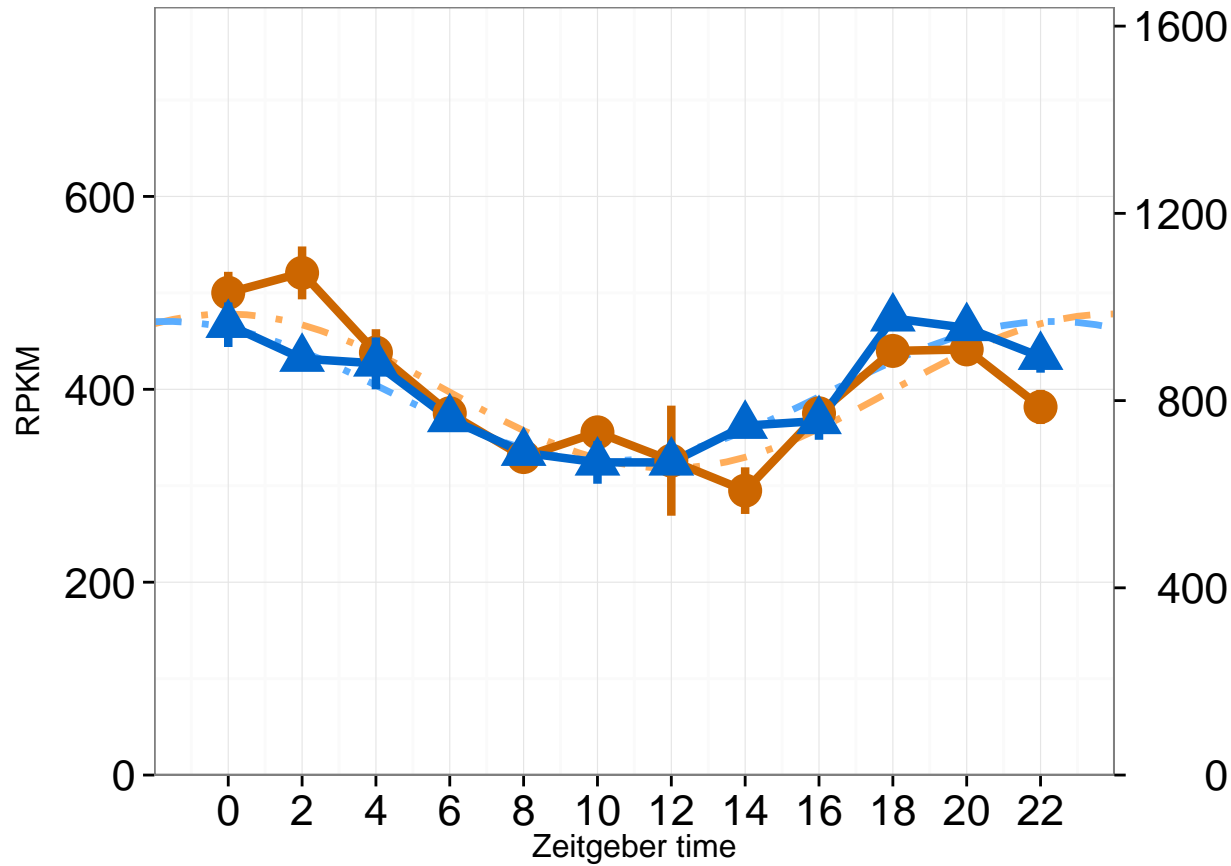

## Pdia3

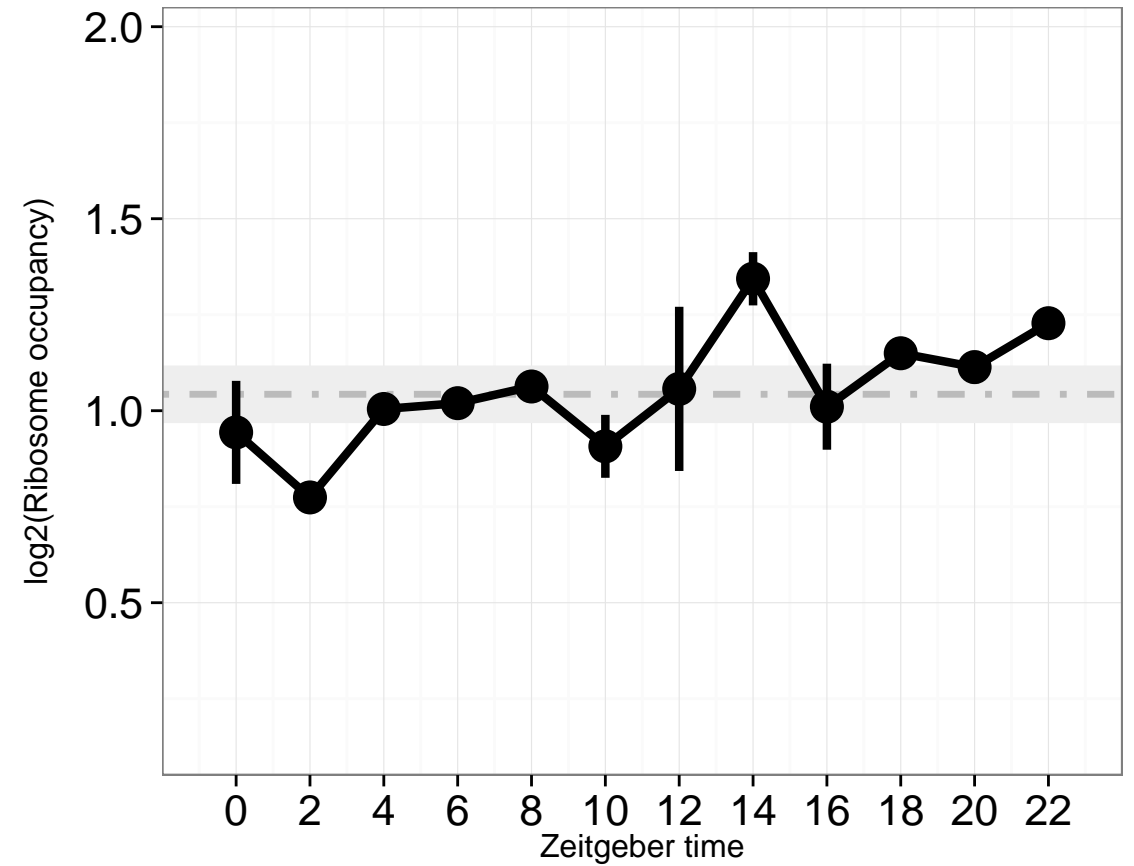

Supplement: Supplementary file 12512 [file 1]

# C1d

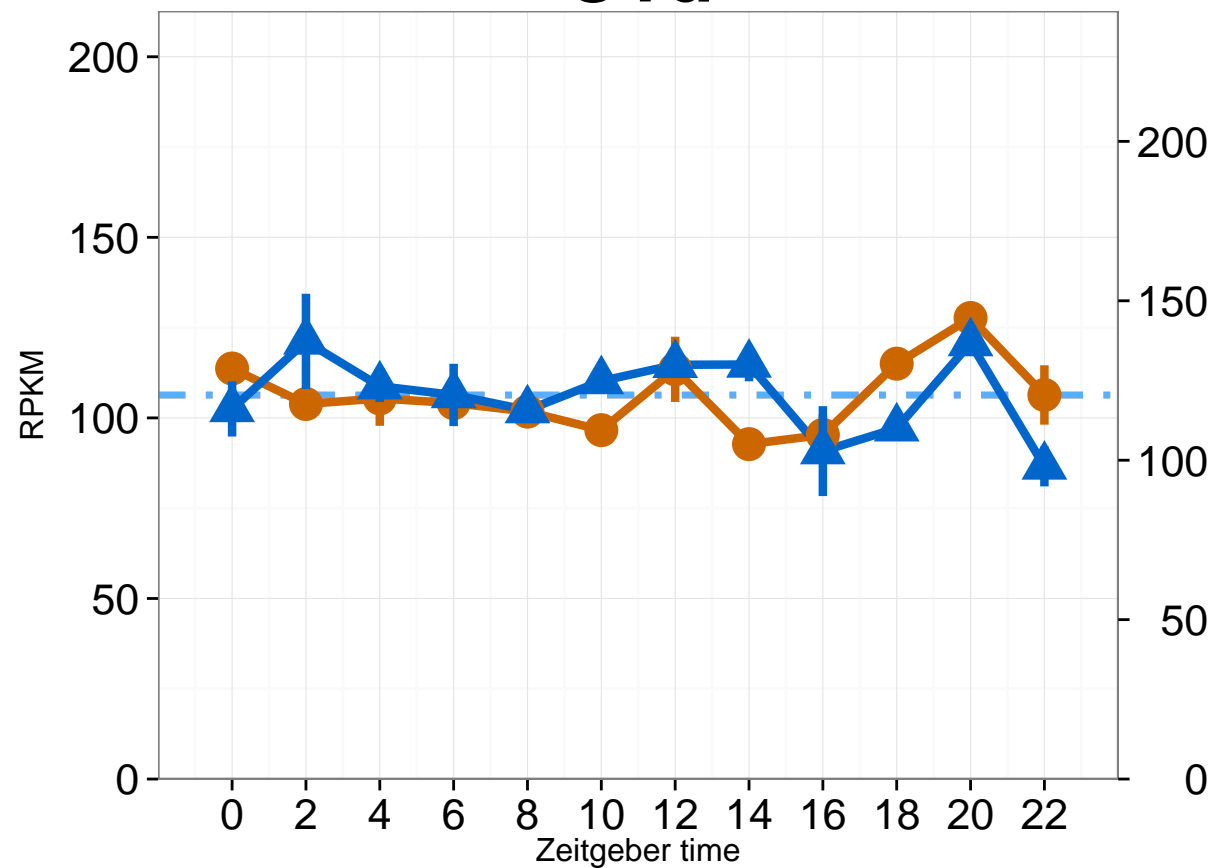

# C1d

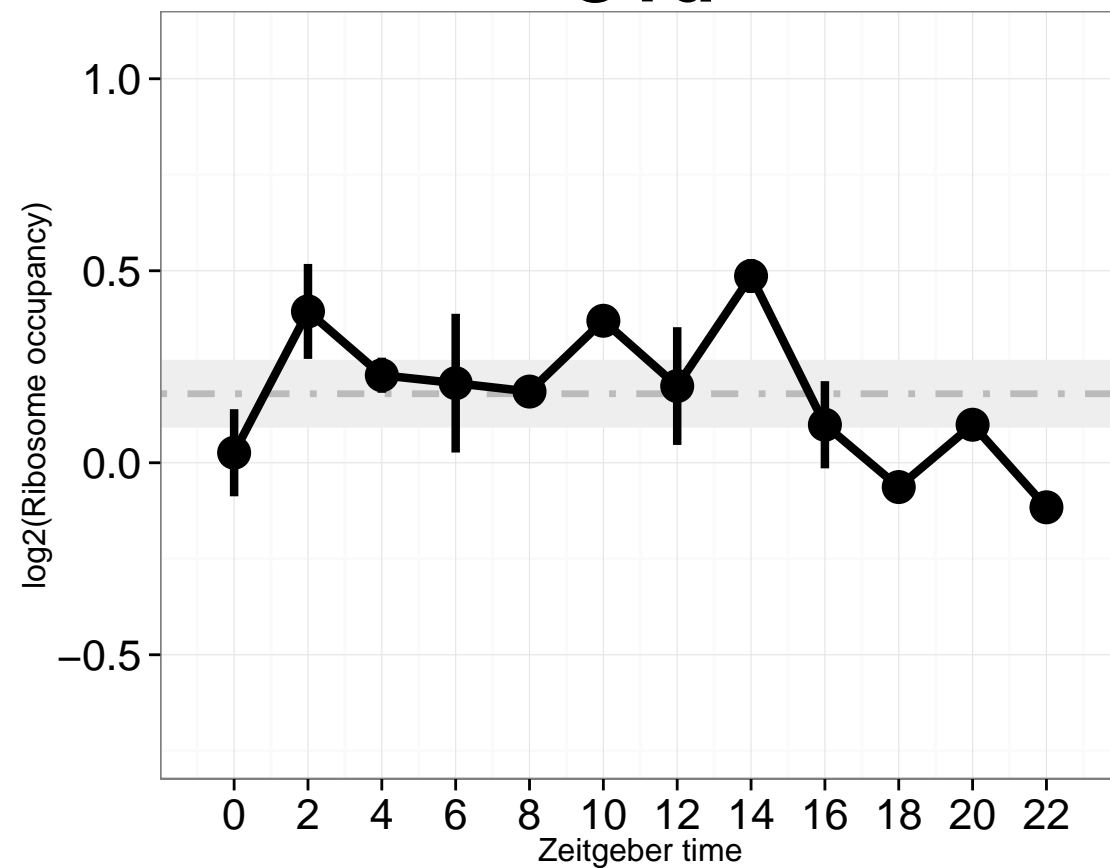

Supplement: Supplementary file 12513 [file 1]

## Lsm12

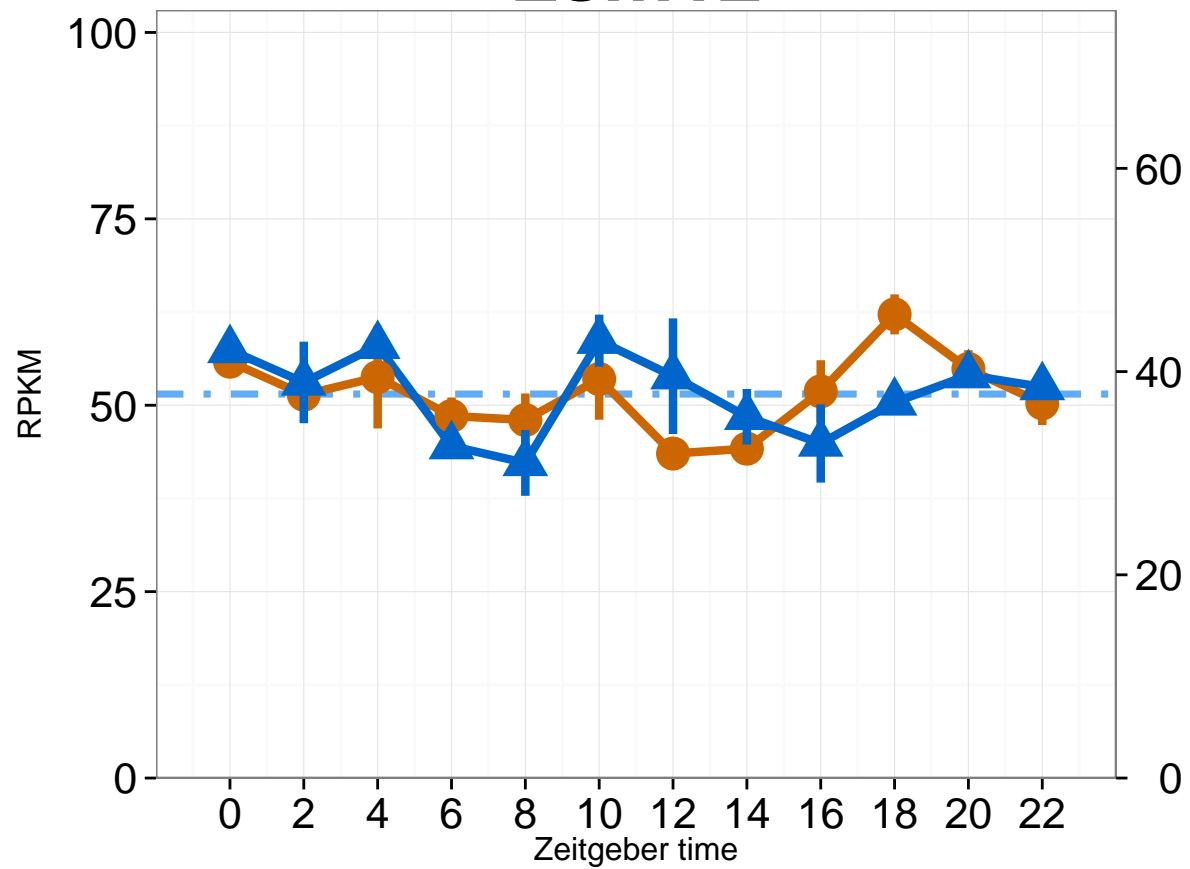

## Lsm12

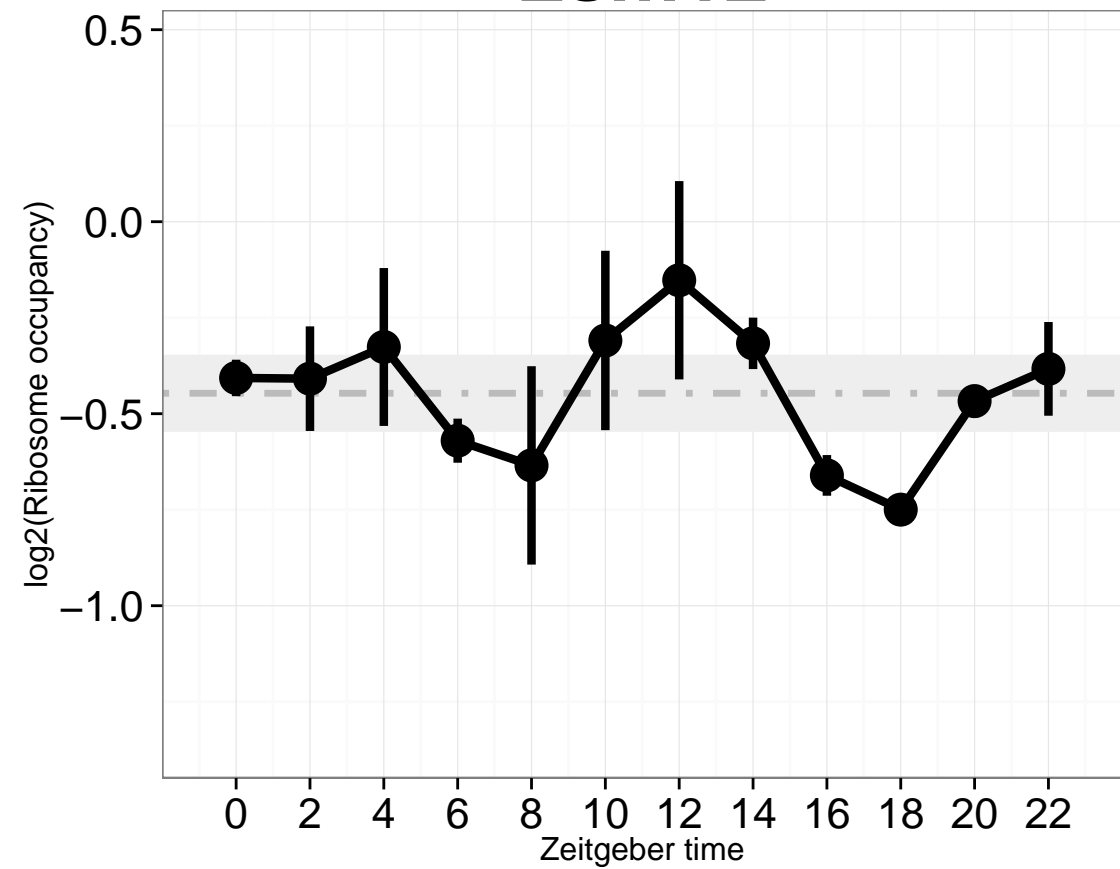

Supplement: Supplementary file 12514 [file 1]

## Gatad1

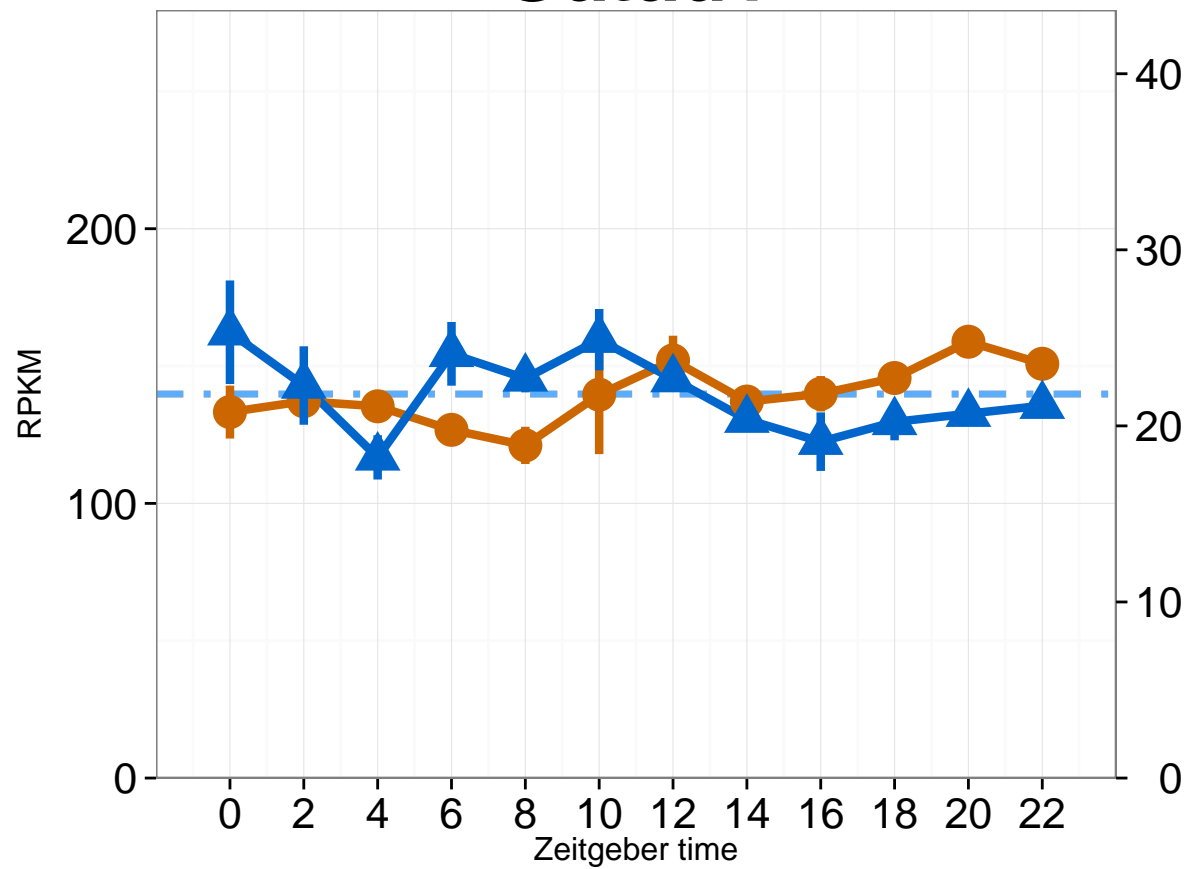

## Gatad1

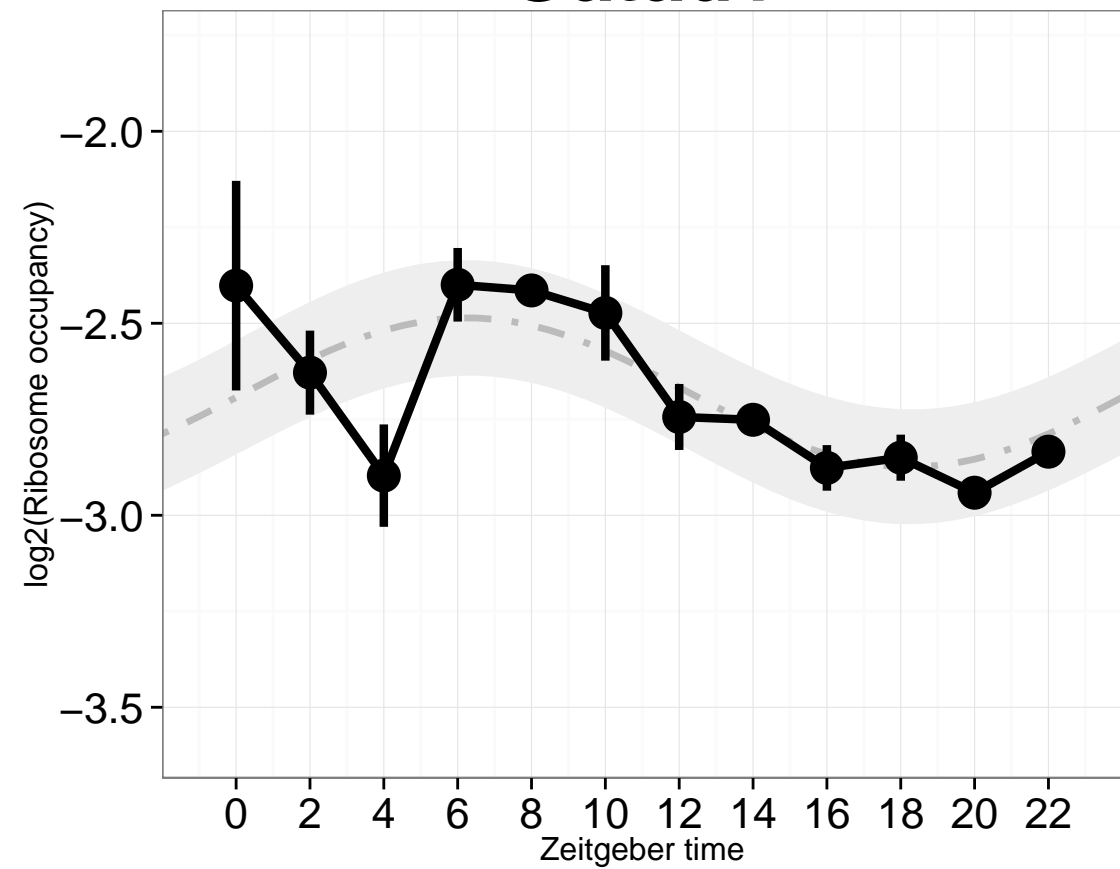

Supplement: Supplementary file 12515 [file 1]

# Psmd9

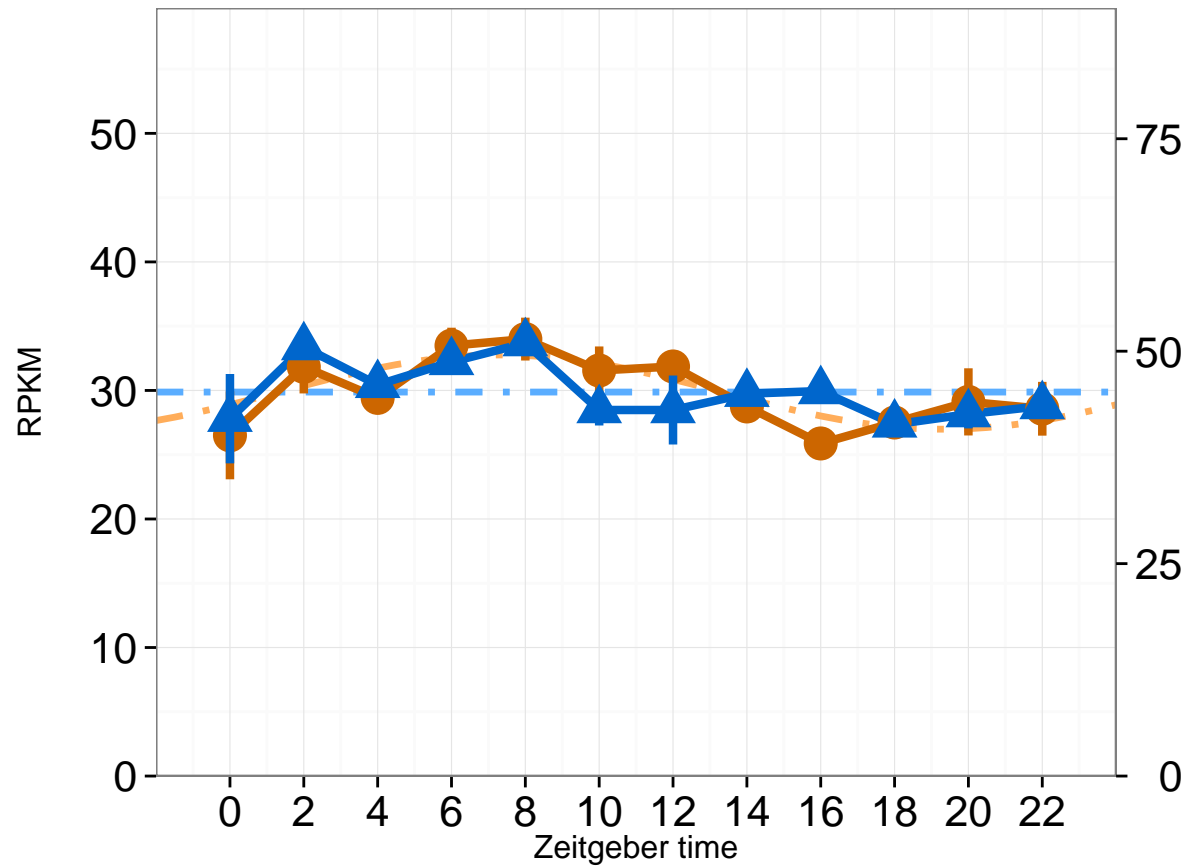

# Psmd9

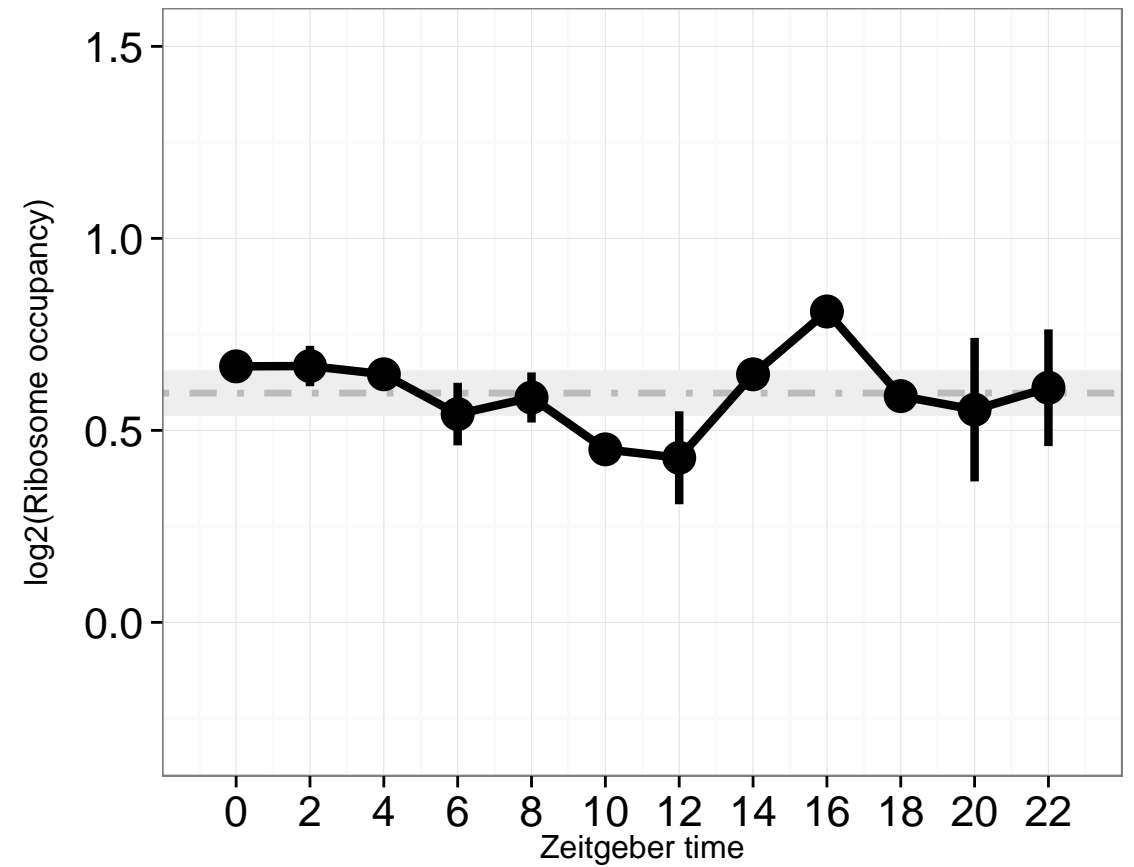

Supplement: Supplementary file 12516 [file 1]

# Huwe1

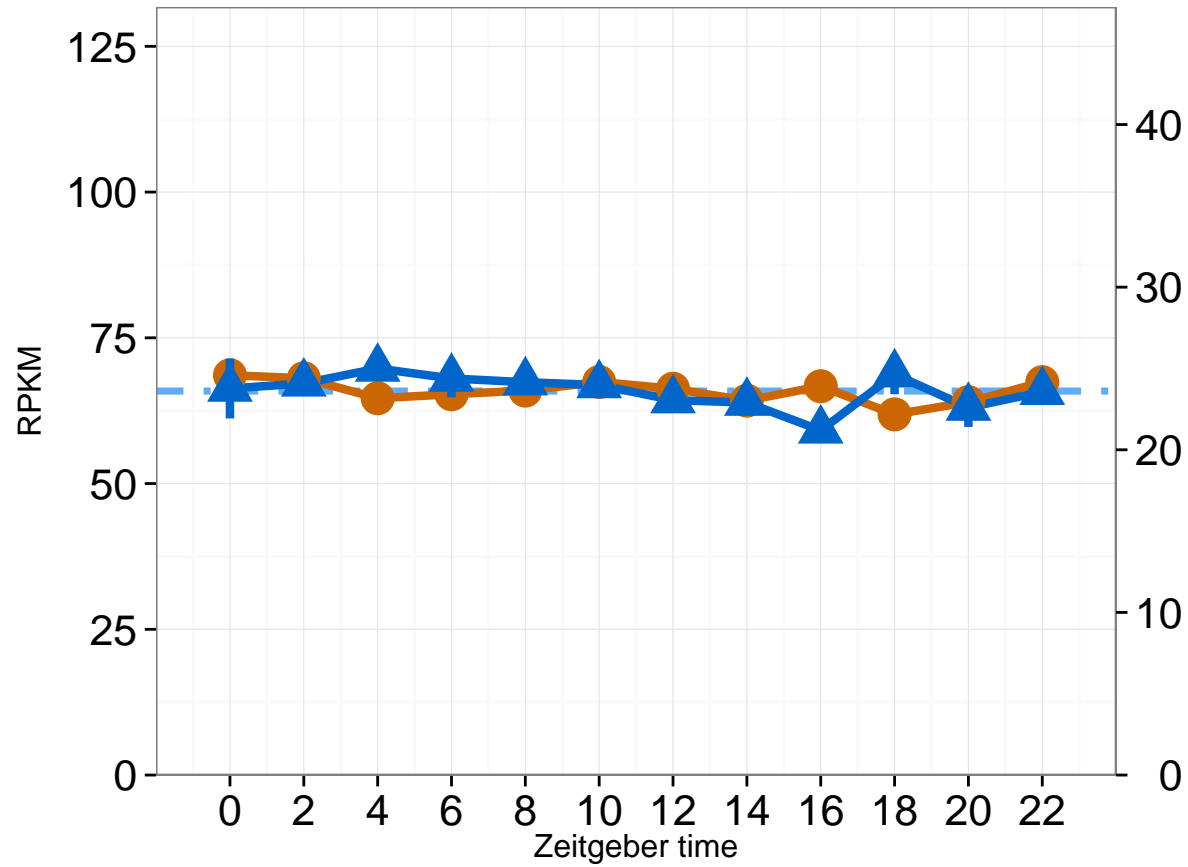

# Huwe1

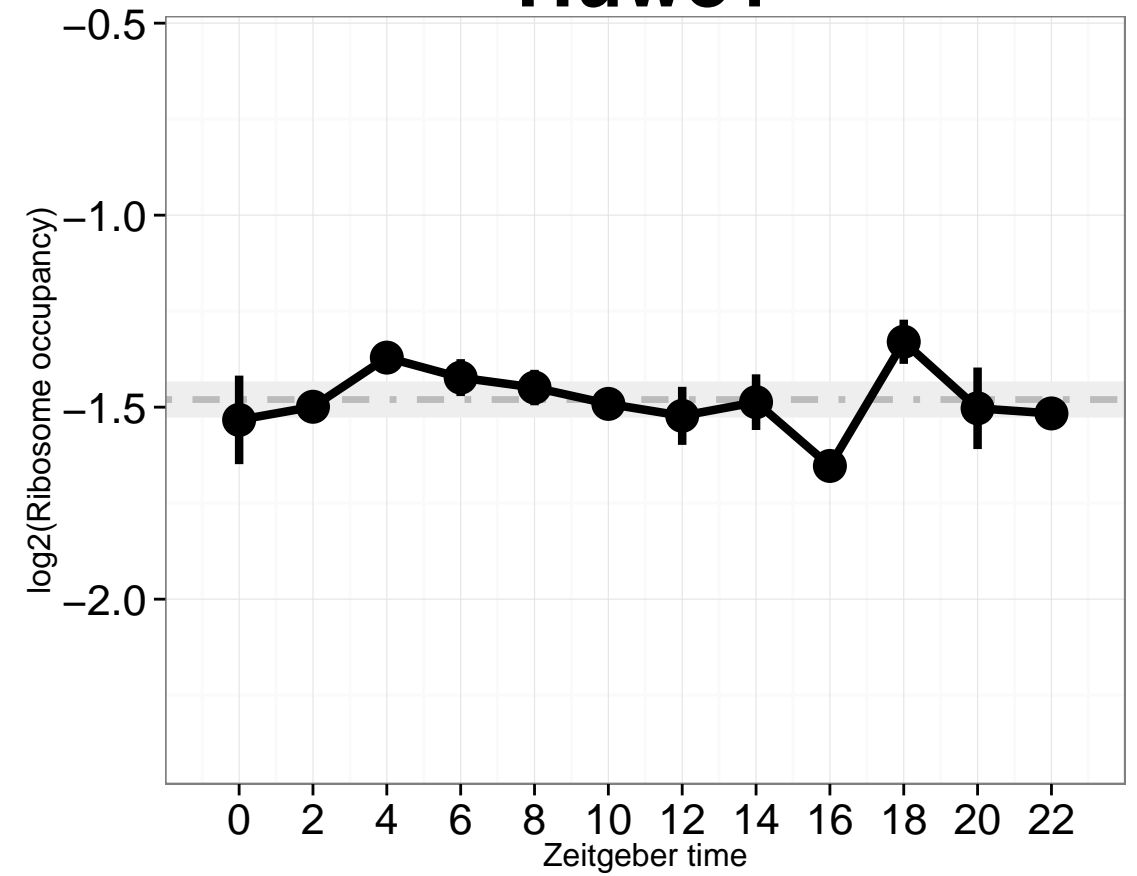

Supplement: Supplementary file 12517 [file 1]

## Rbbp5

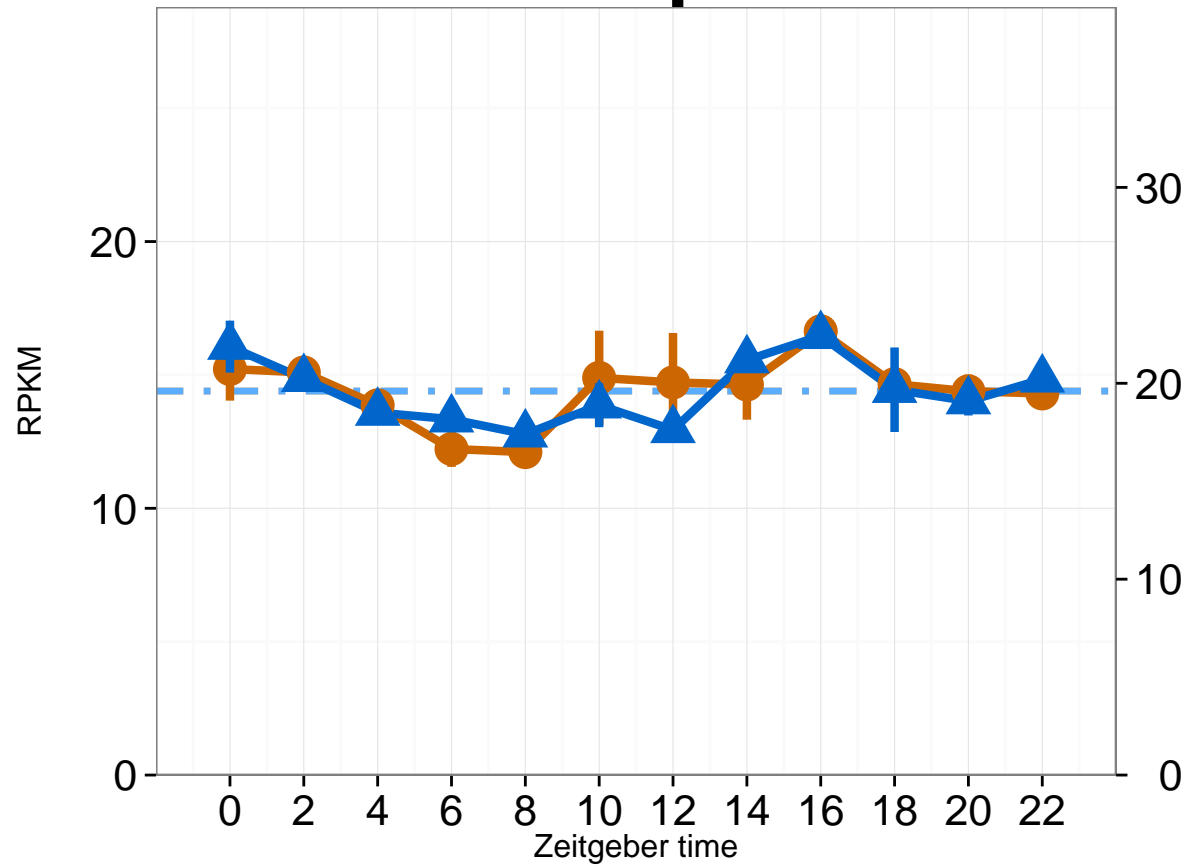

## Rbbp5

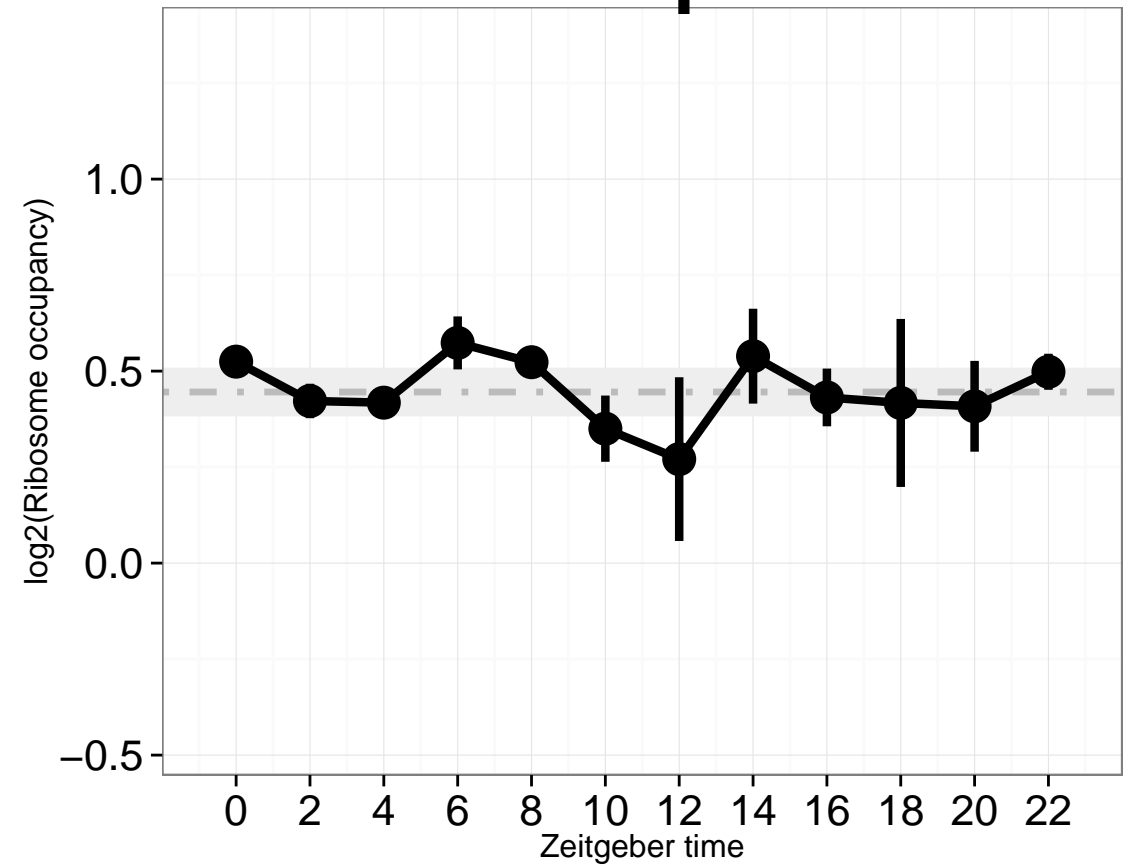

Supplement: Supplementary file 12518 [file 1]

## Brf2

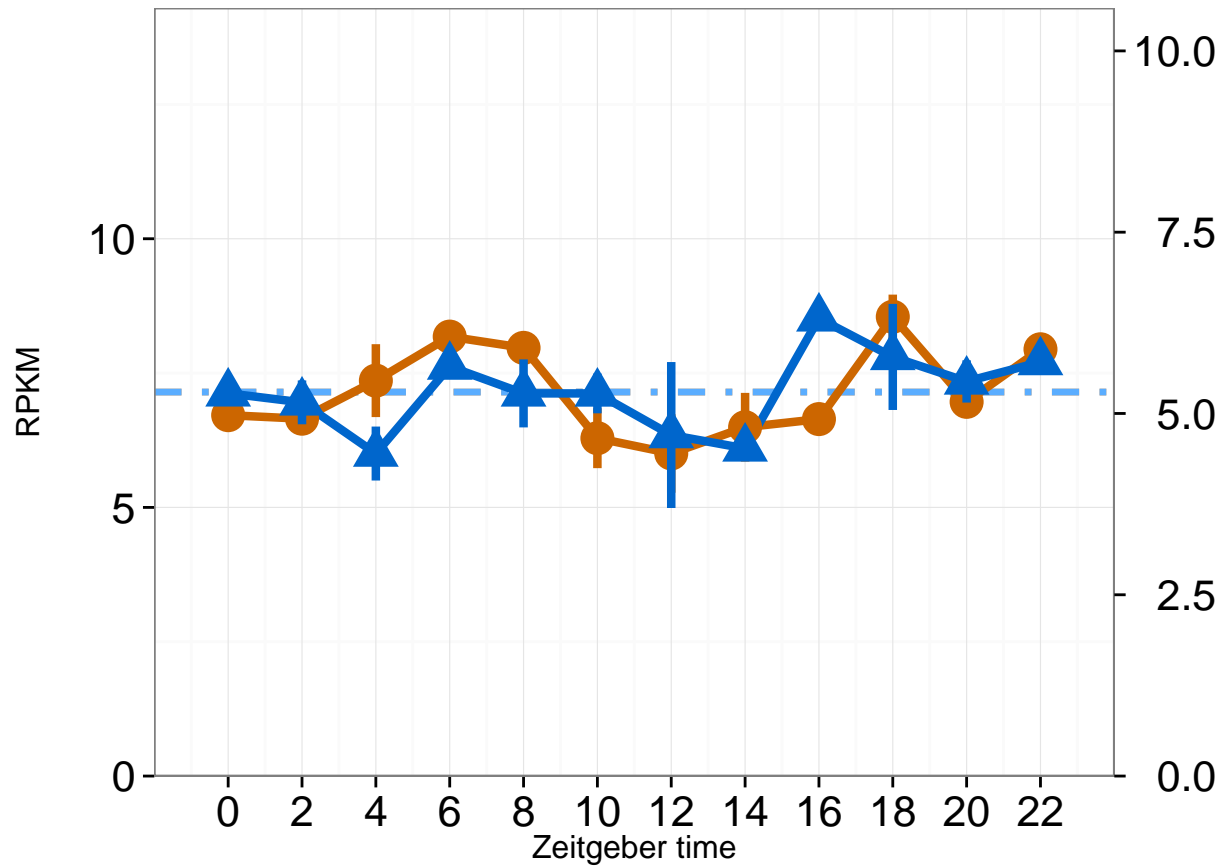

## Brf2

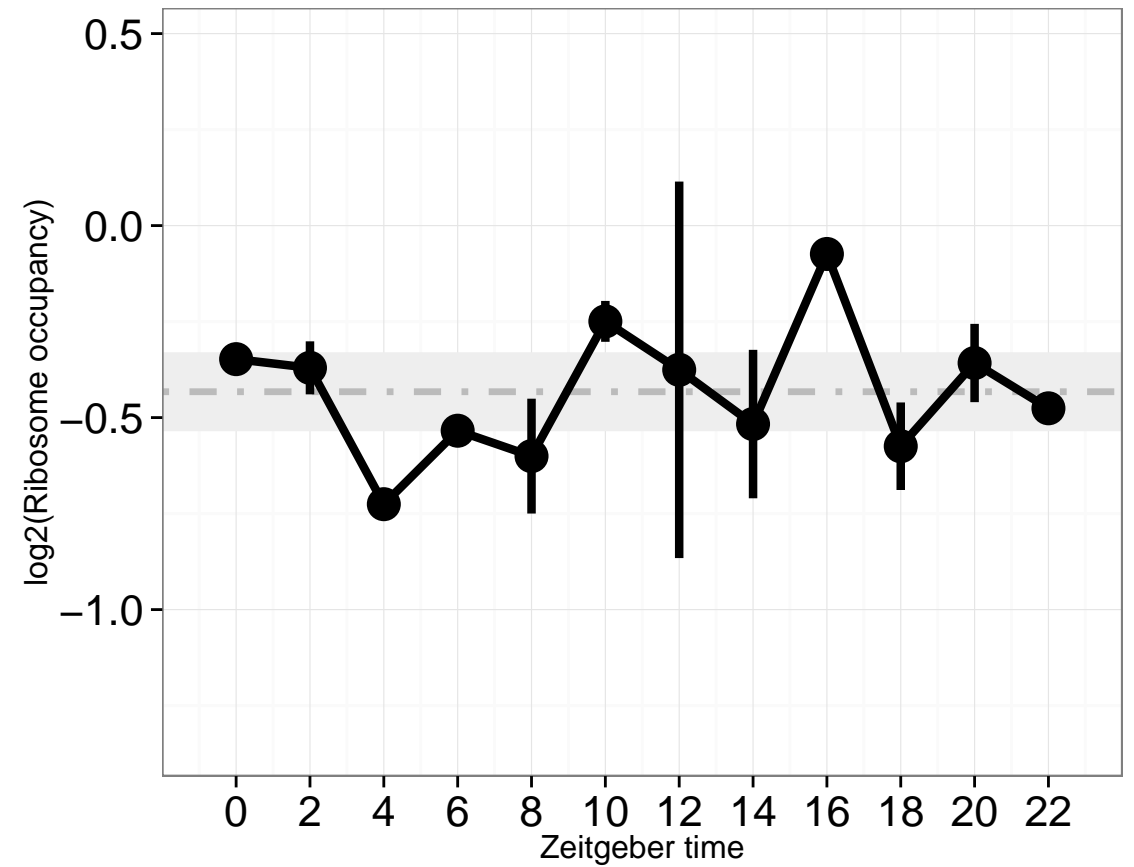

Supplement: Supplementary file 12519 [file 1]

## Bbox1

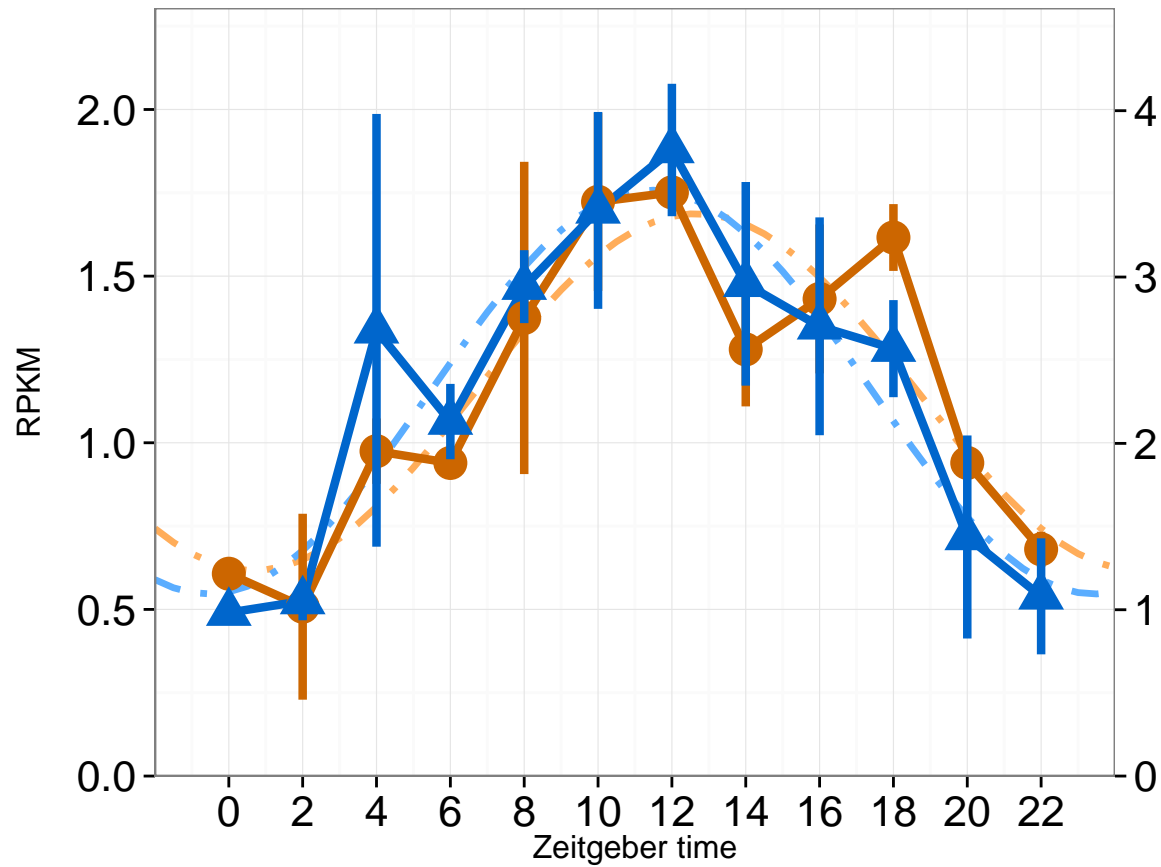

## Bbox1

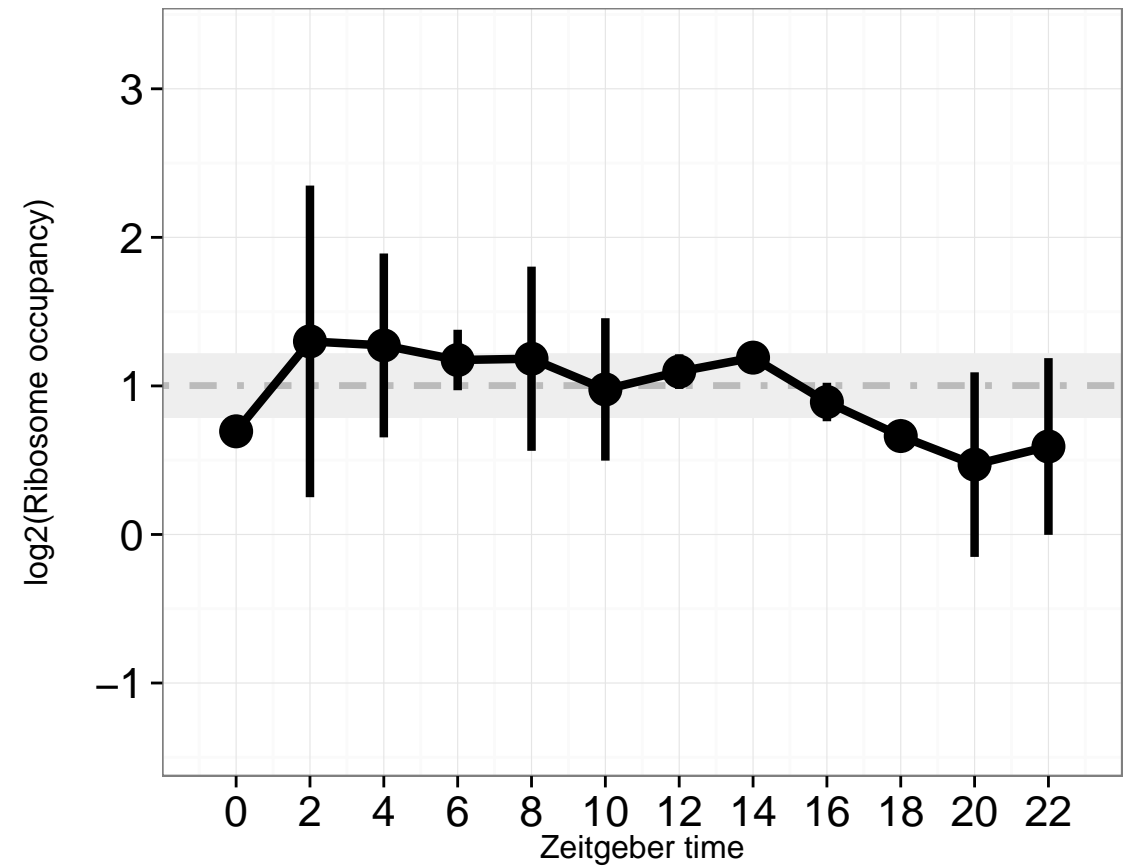

Supplement: Supplementary file 12520 [file 1]

## Nim1

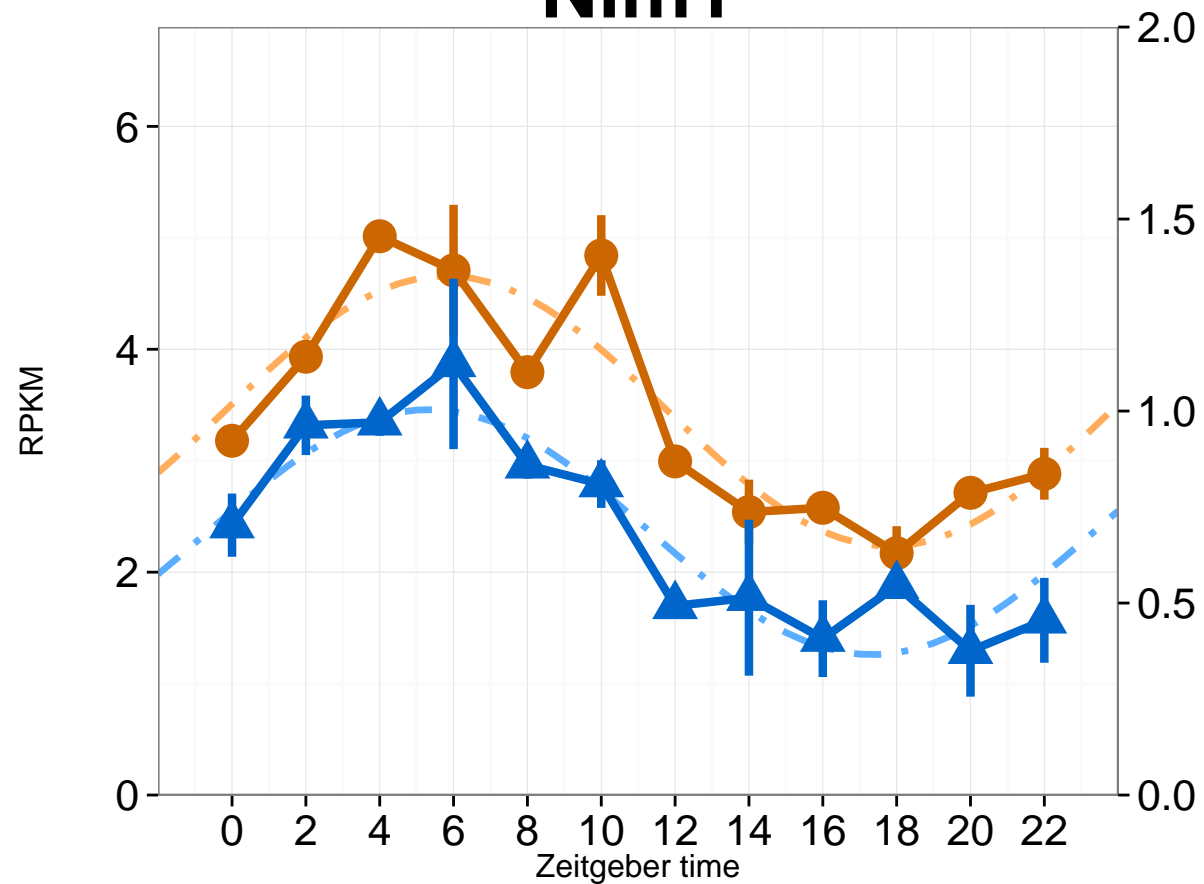

## Nim1

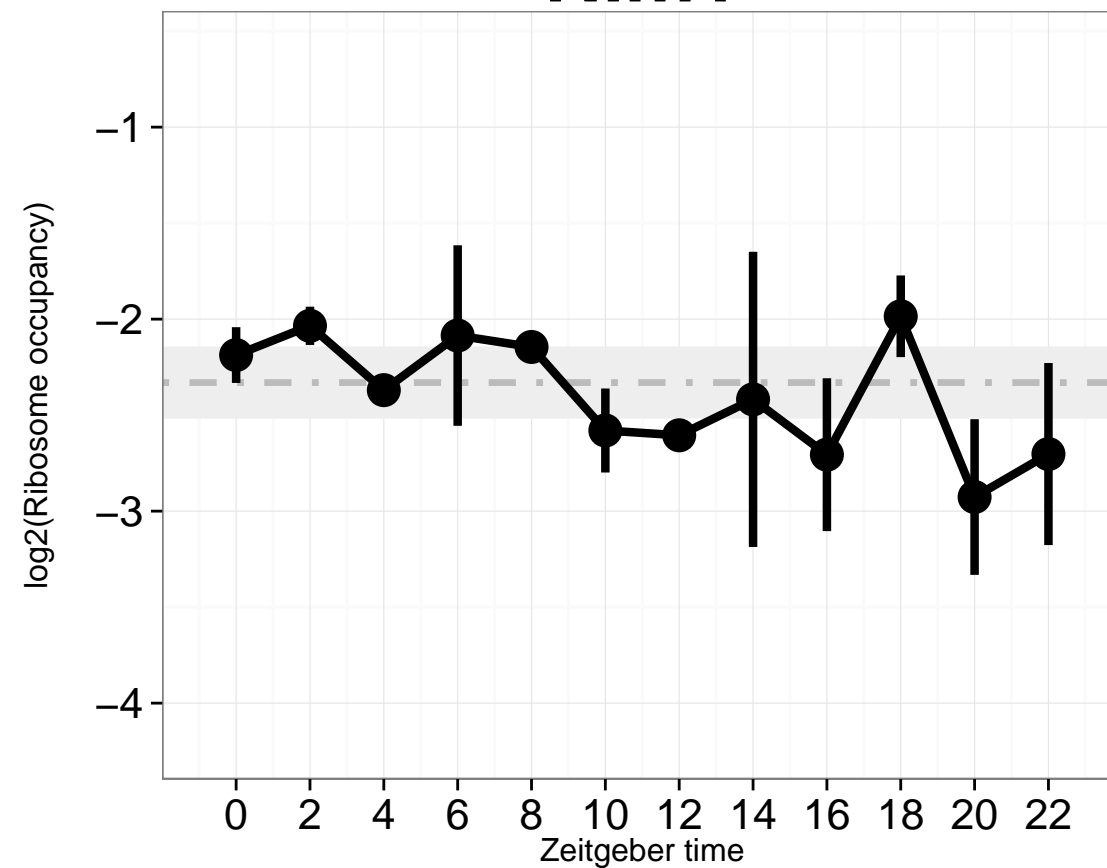

Supplement: Supplementary file 12521 [file 1]

# Kcnn3

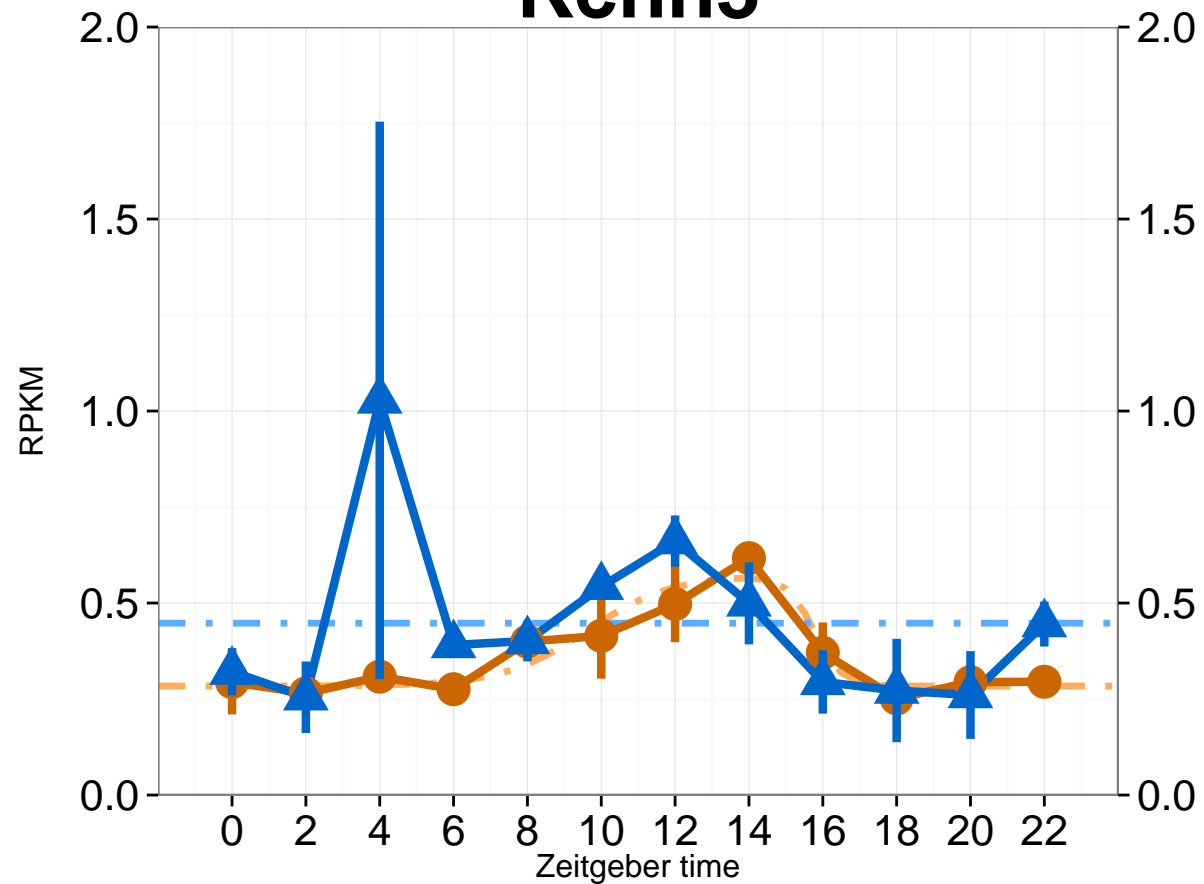

# Kcnn3

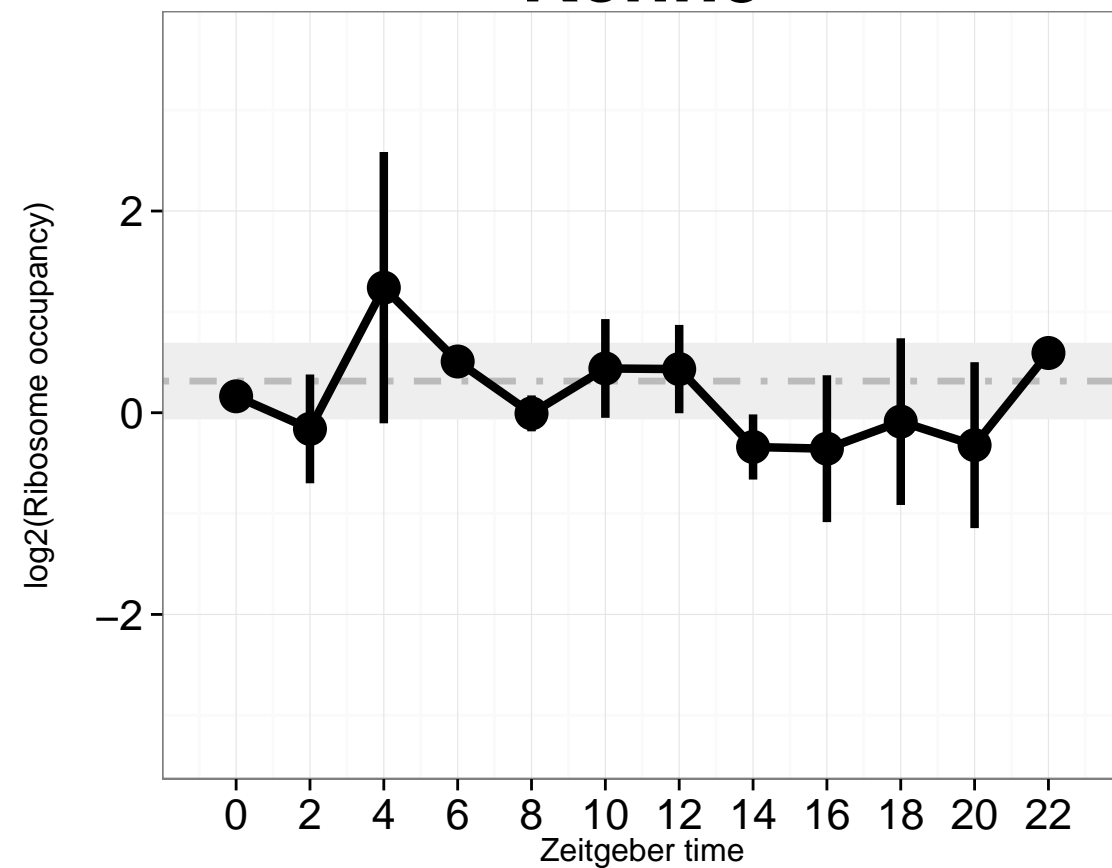

Supplement: Supplementary file 12522 [file 1]

## Nsmf

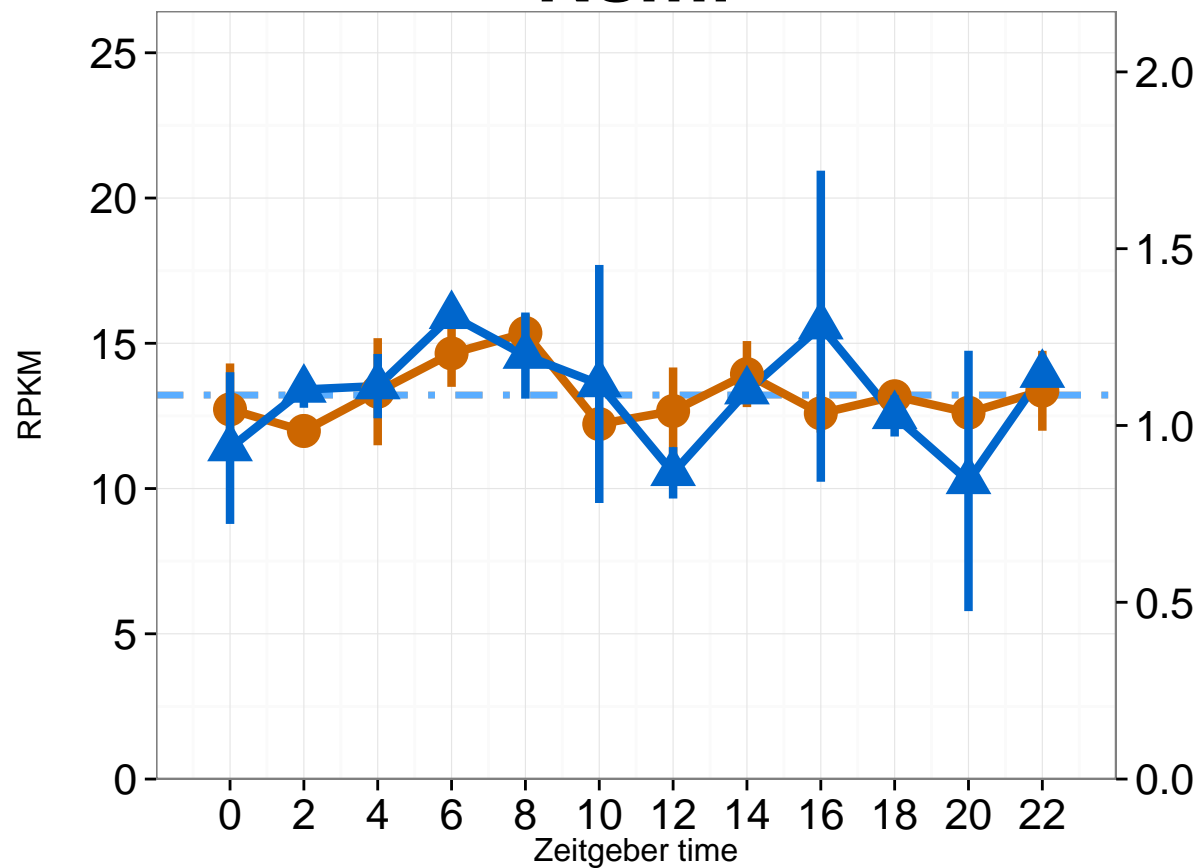

## Nsmf

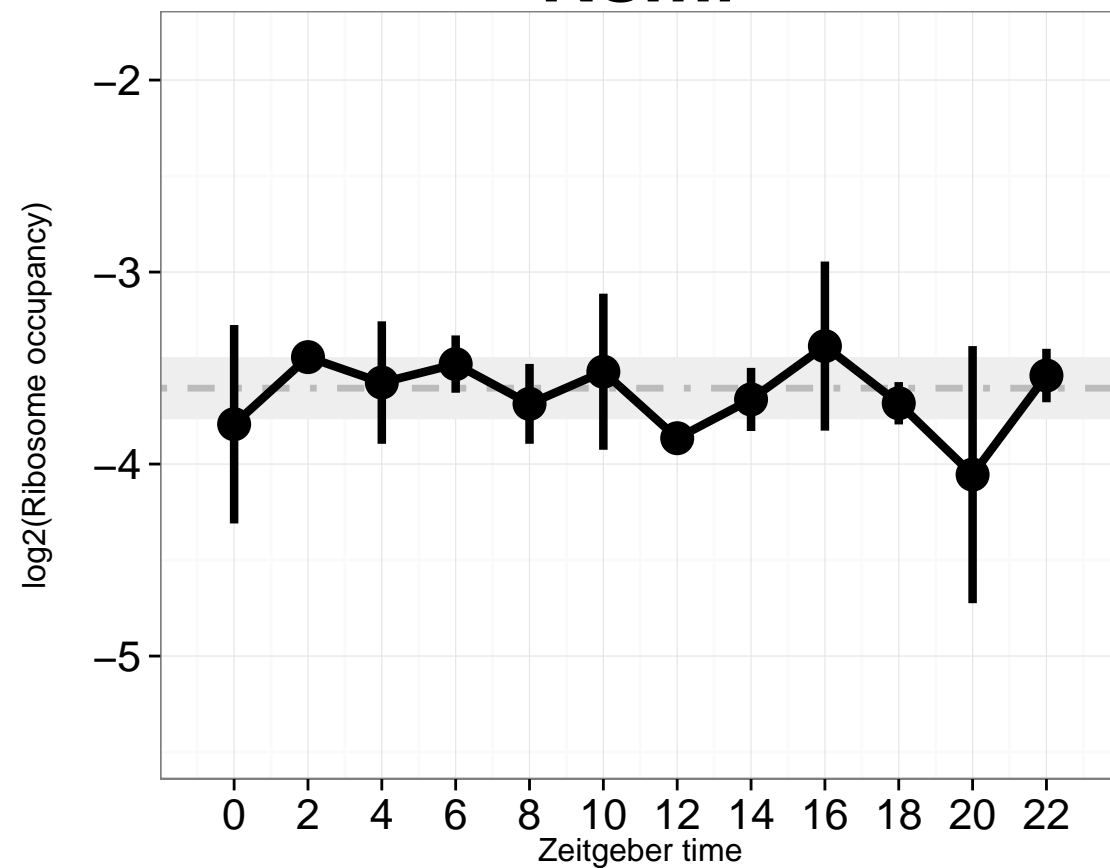

Supplement: Supplementary file 12523 [file 1]

# Lgr6

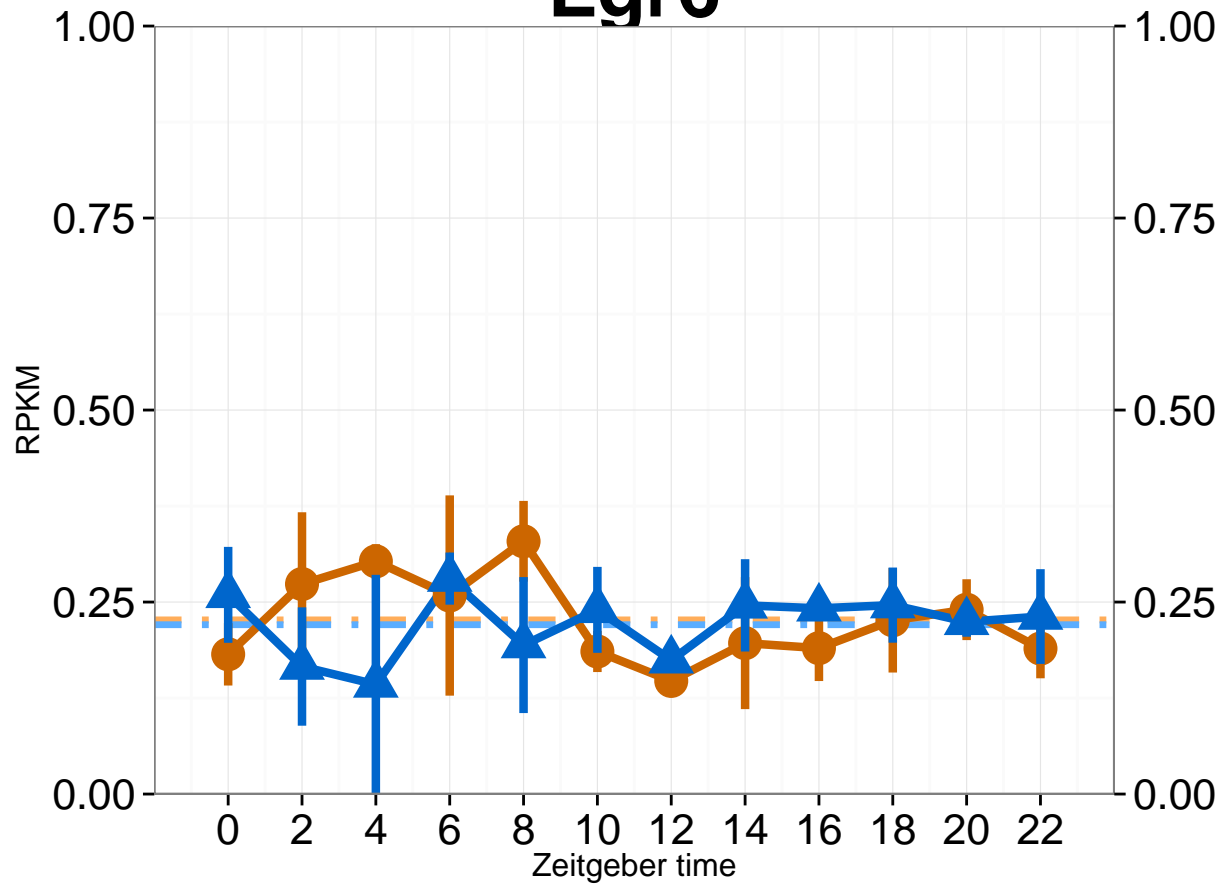

# Lgr6

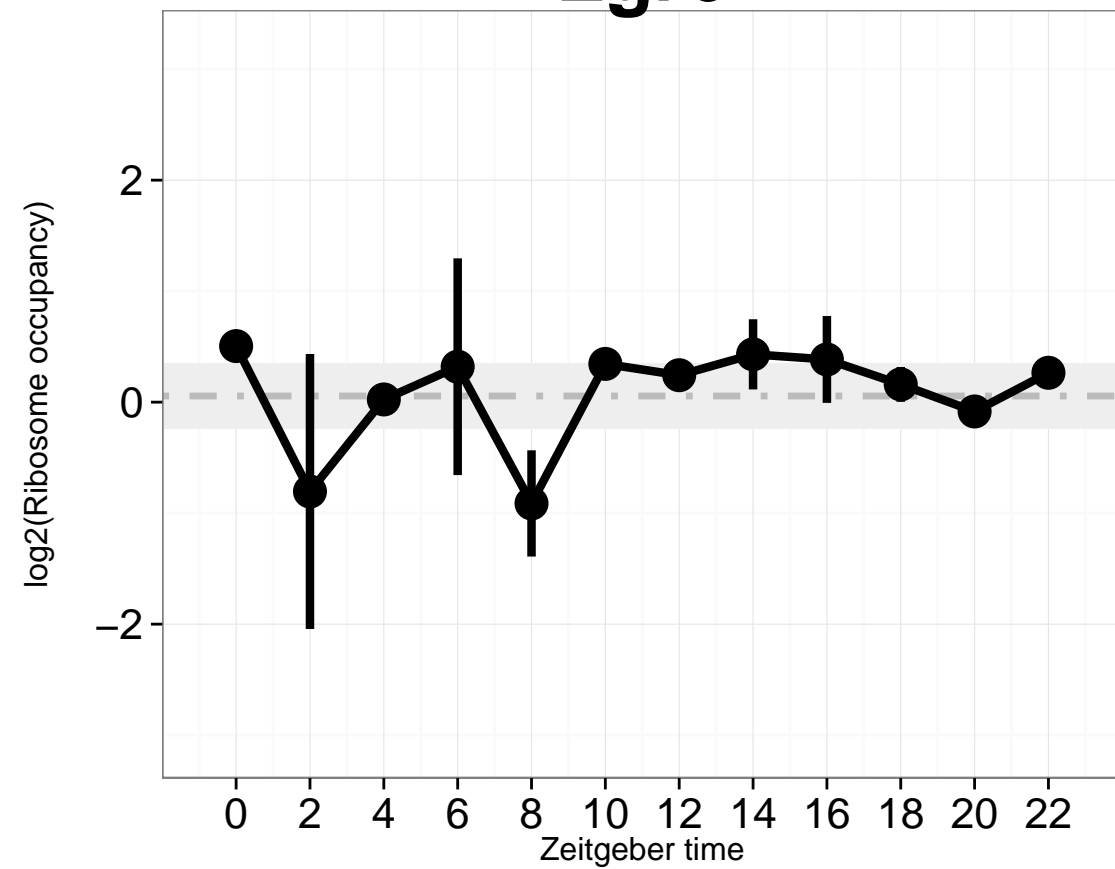

Supplement: Supplementary file 12524 [file 1]

## Ncam1

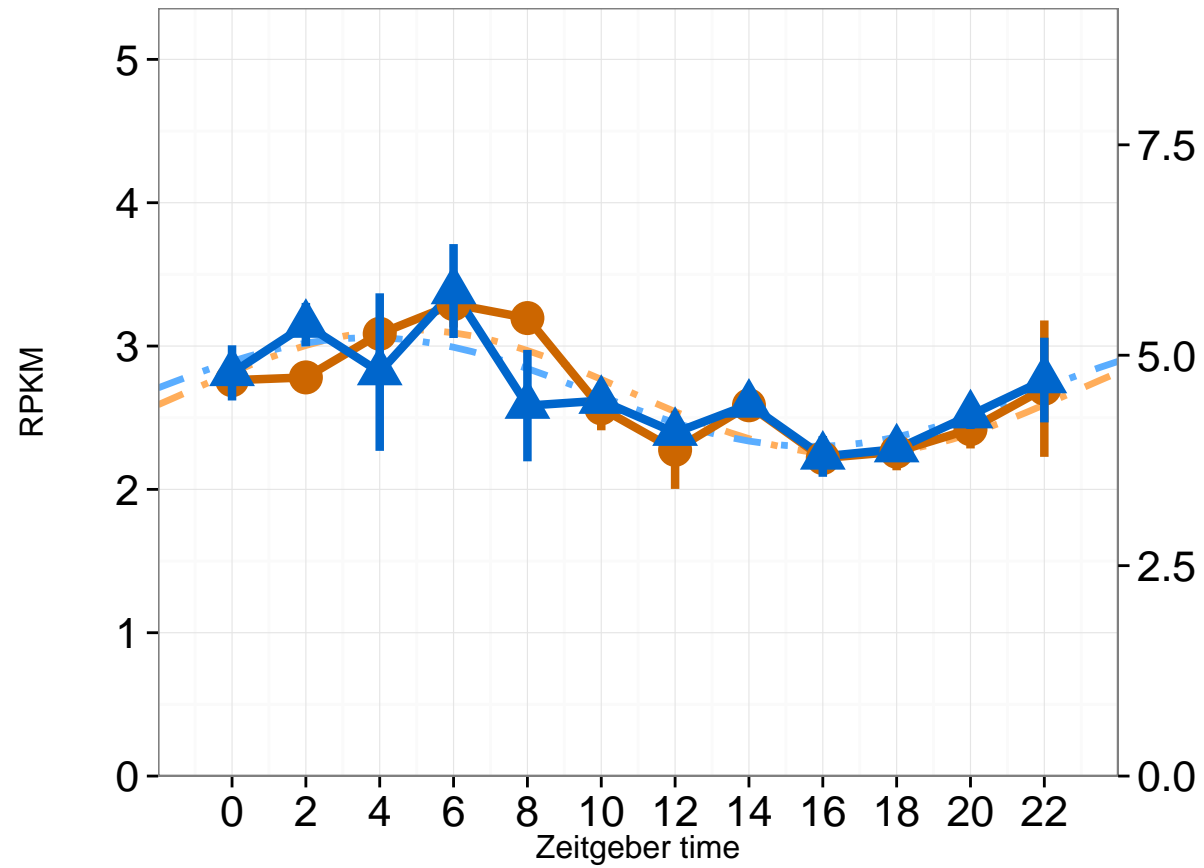

## Ncam1

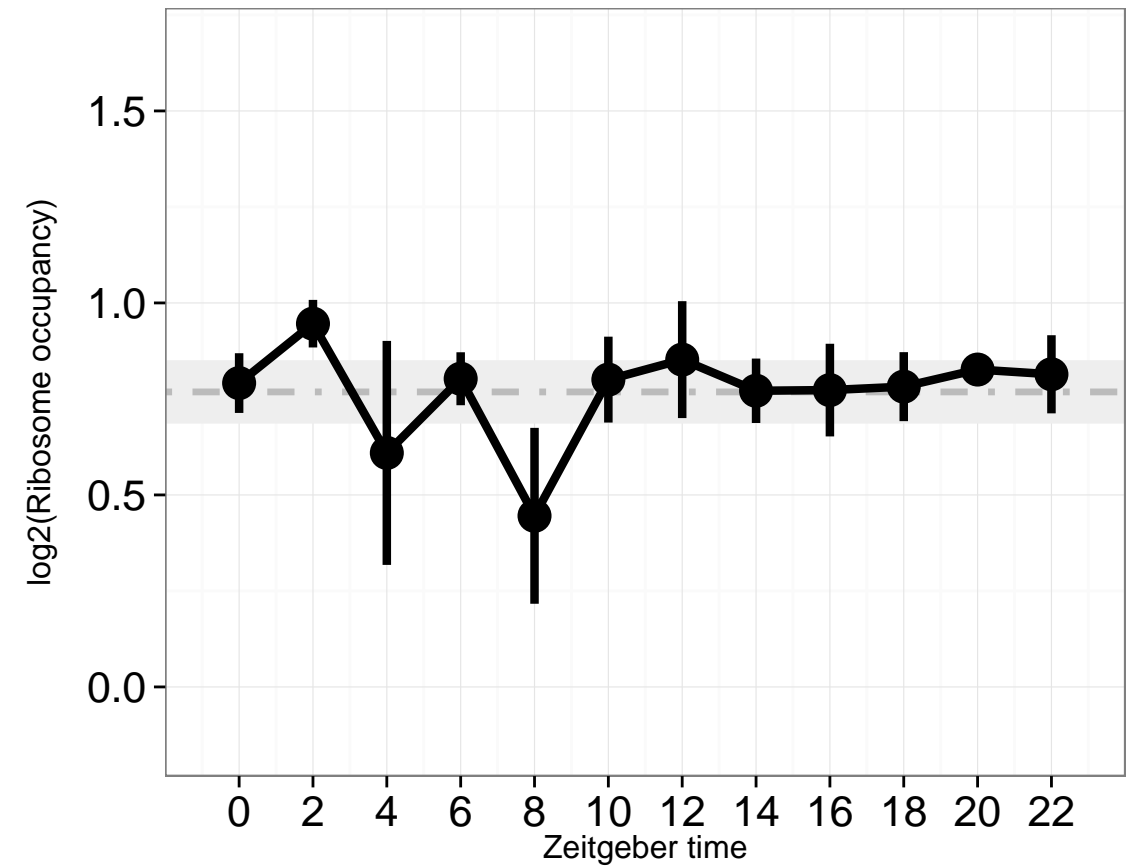

Supplement: Supplementary file 12525 [file 1]

## Slc20a2

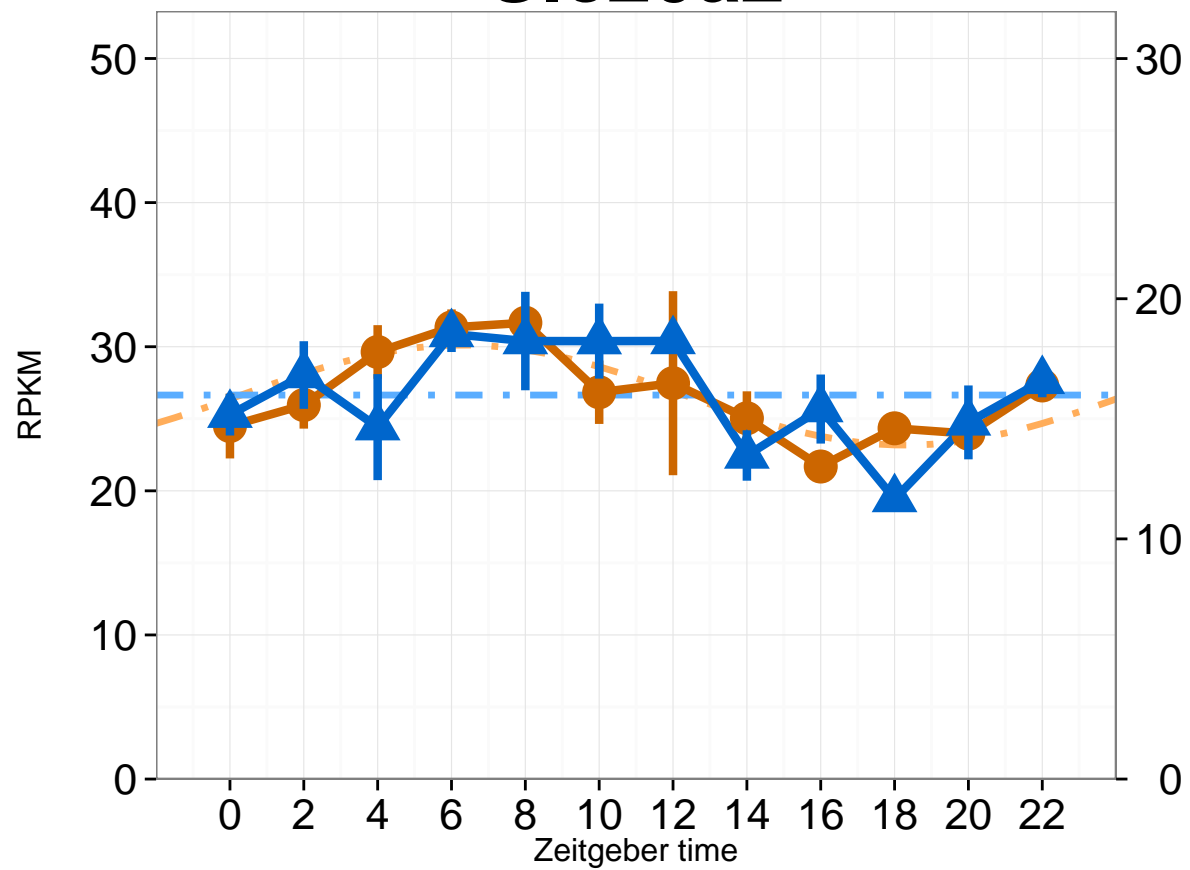

## Slc20a2

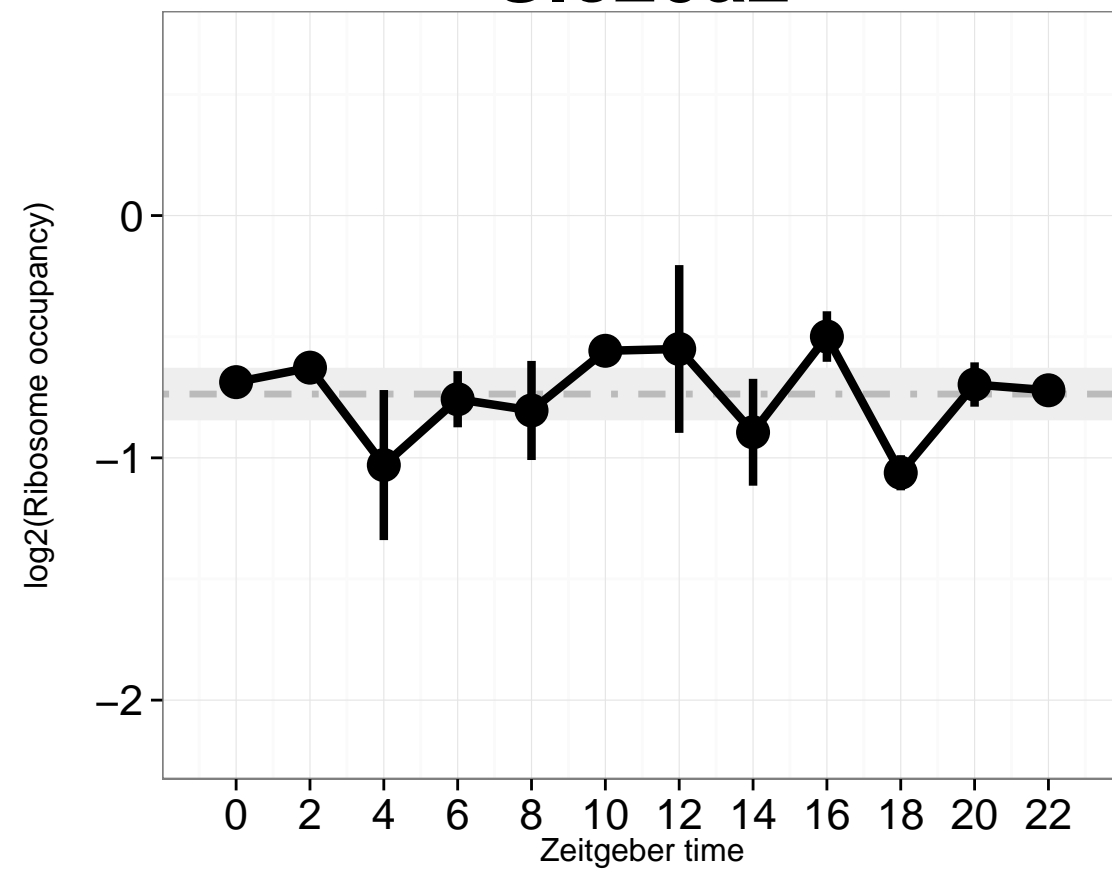

Supplement: Supplementary file 12526 [file 1]

# Ctdp1

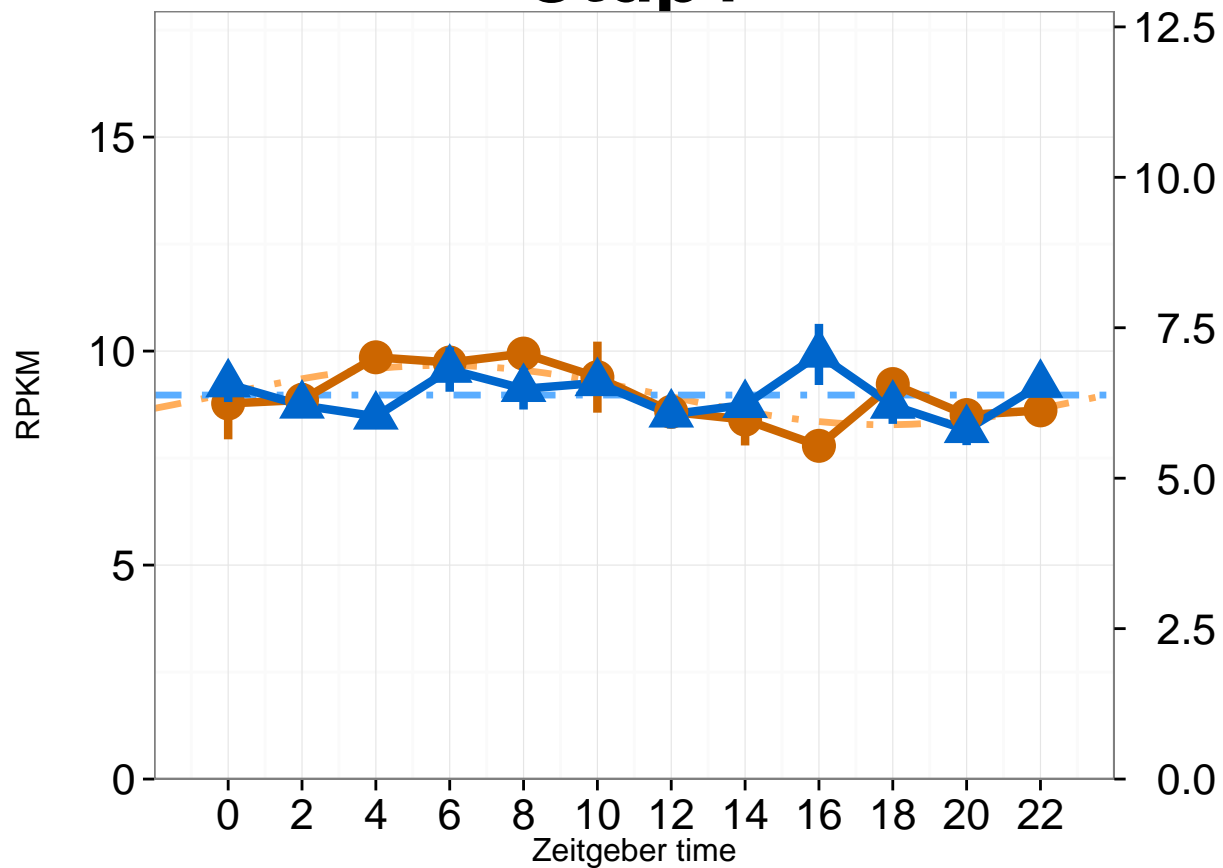

# Ctdp1

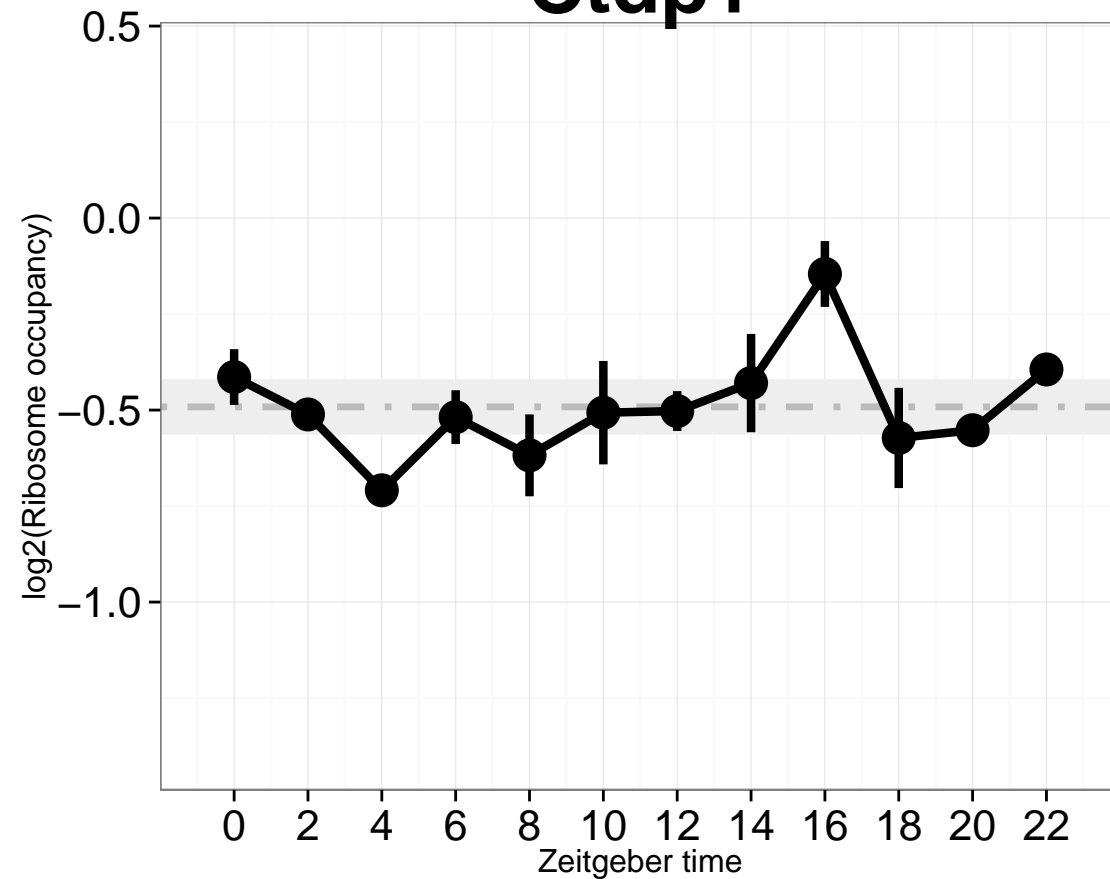

Supplement: Supplementary file 12527 [file 1]

## Suco

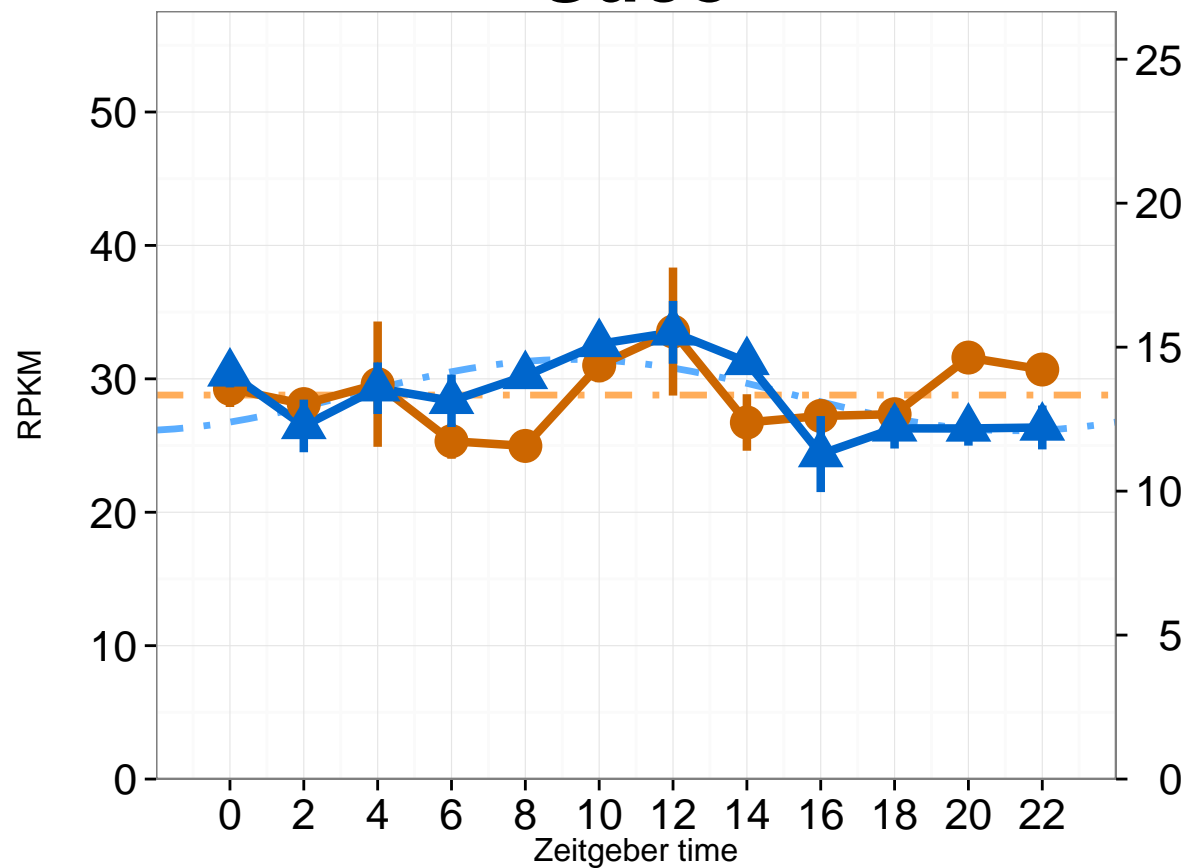

## Suco

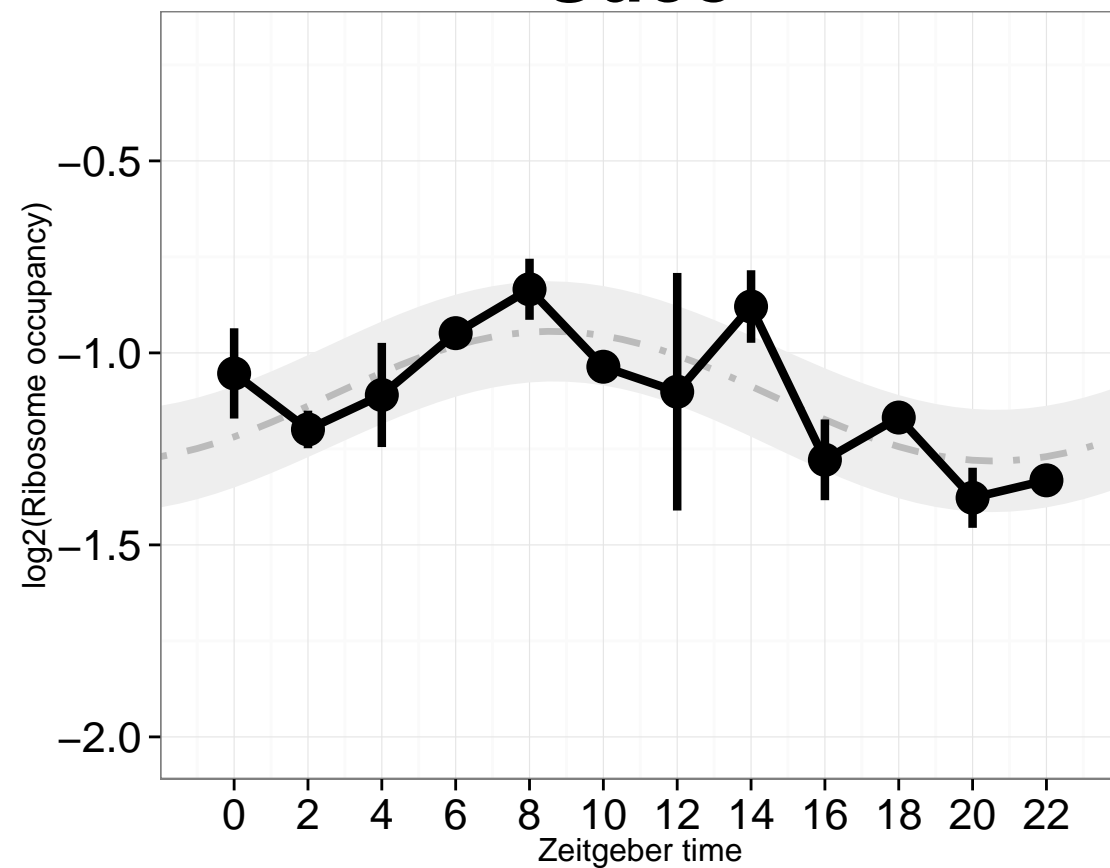

Supplement: Supplementary file 12528 [file 1]

# Atp2a3

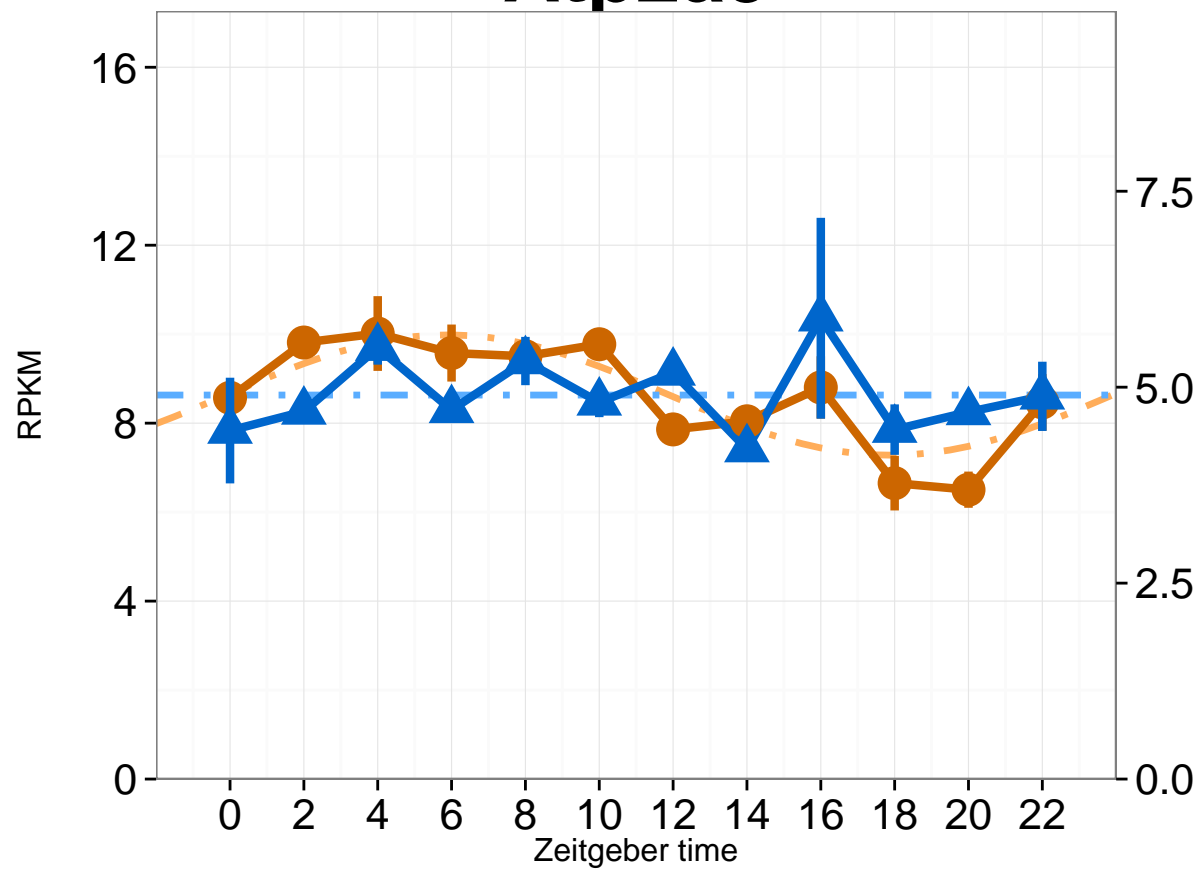

# Atp2a3

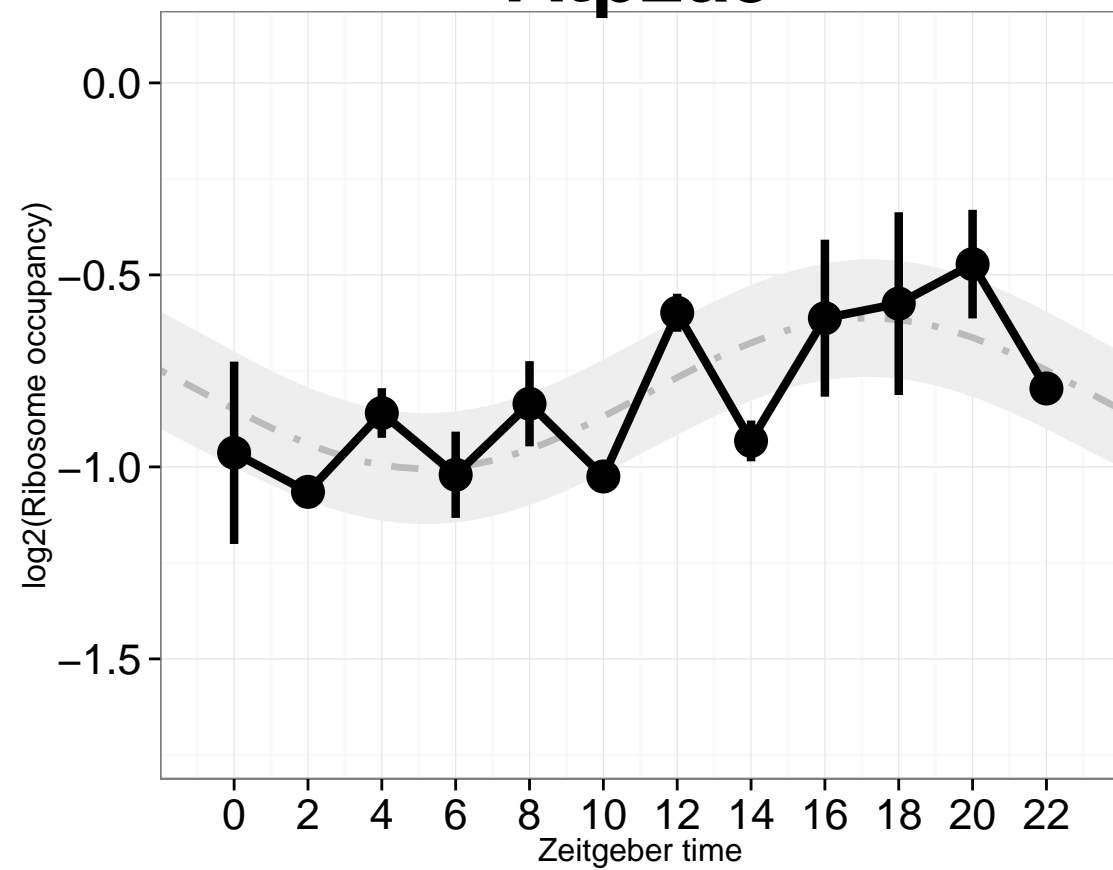

Supplement: Supplementary file 12529 [file 1]

# Ahr

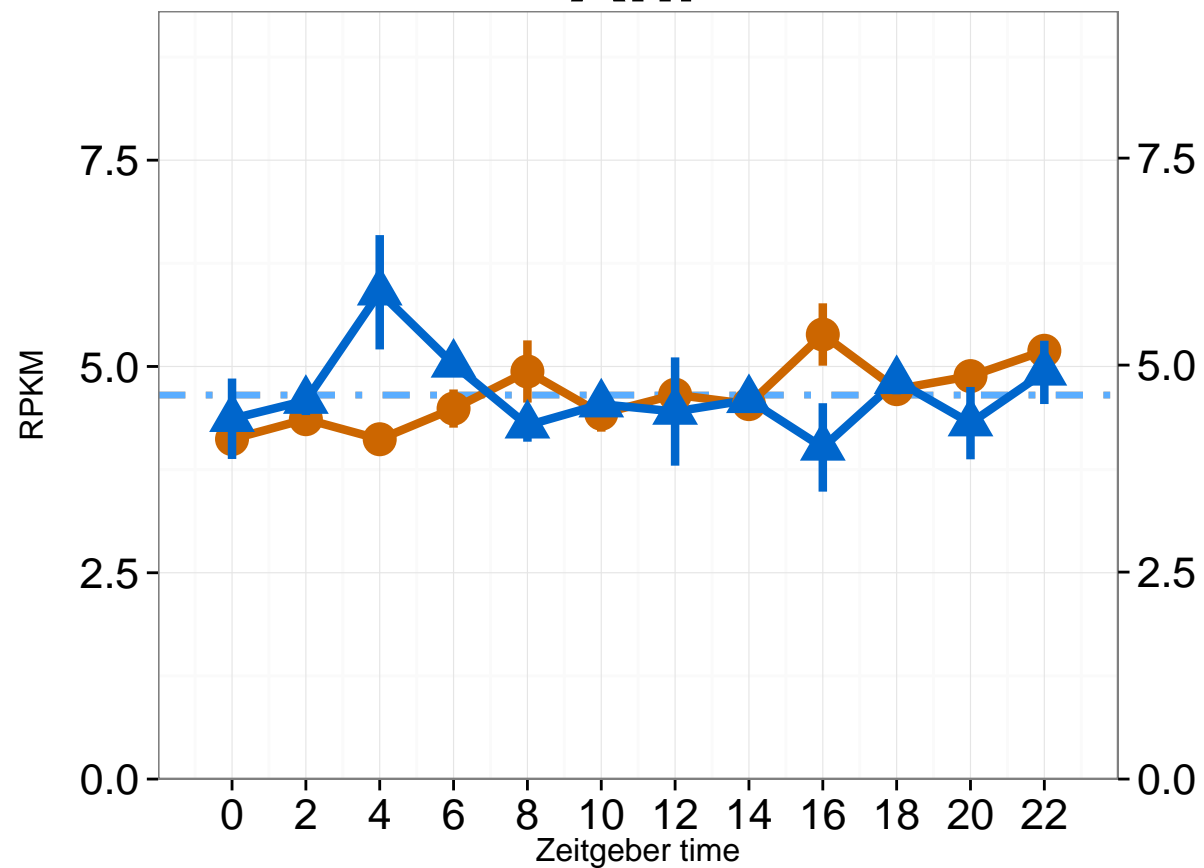

# Ahr

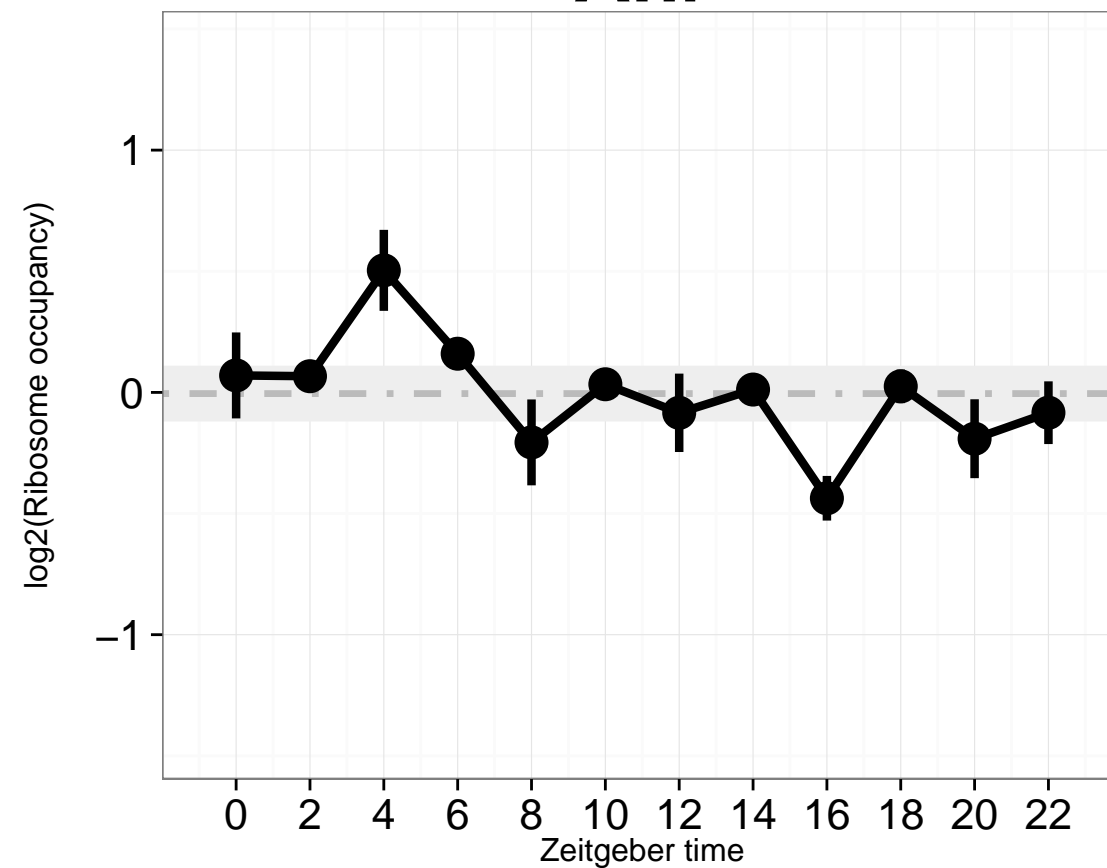

Supplement: Supplementary file 12530 [file 1]

## Cuedc2

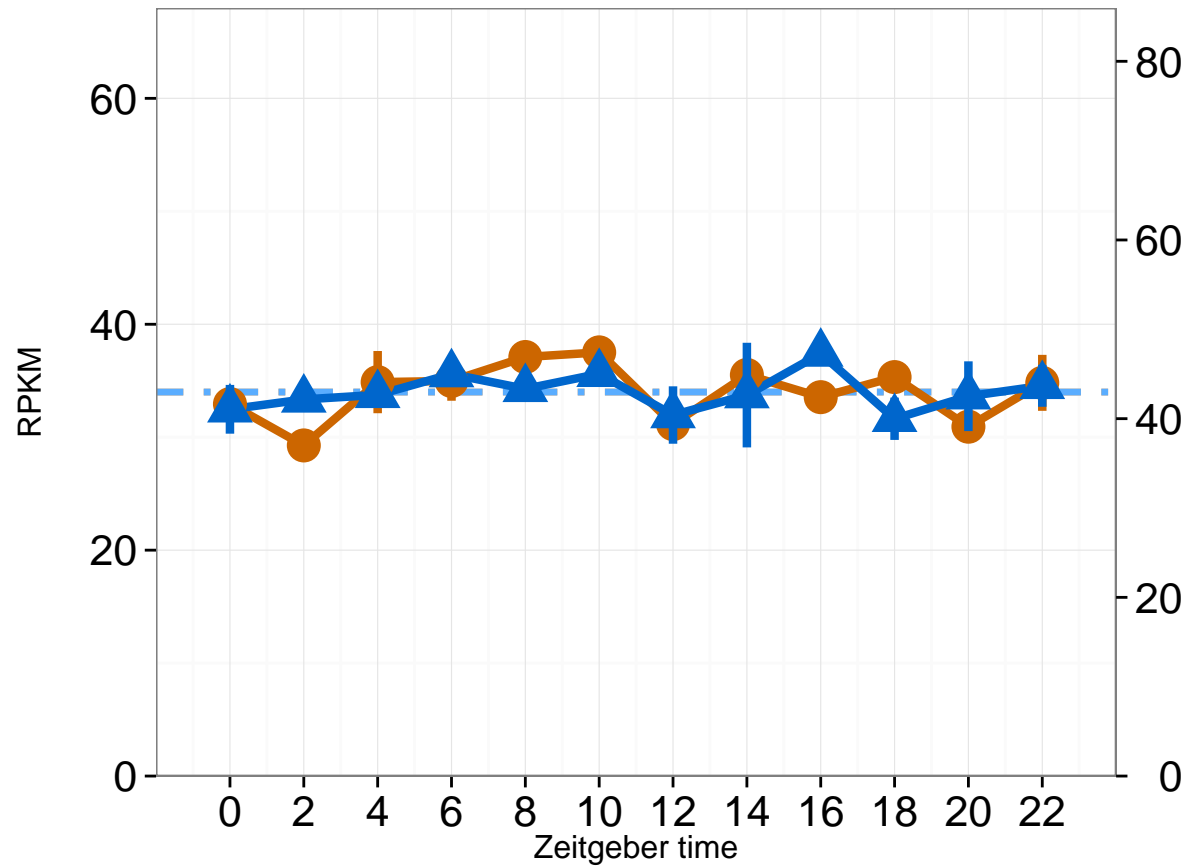

## Cuedc2

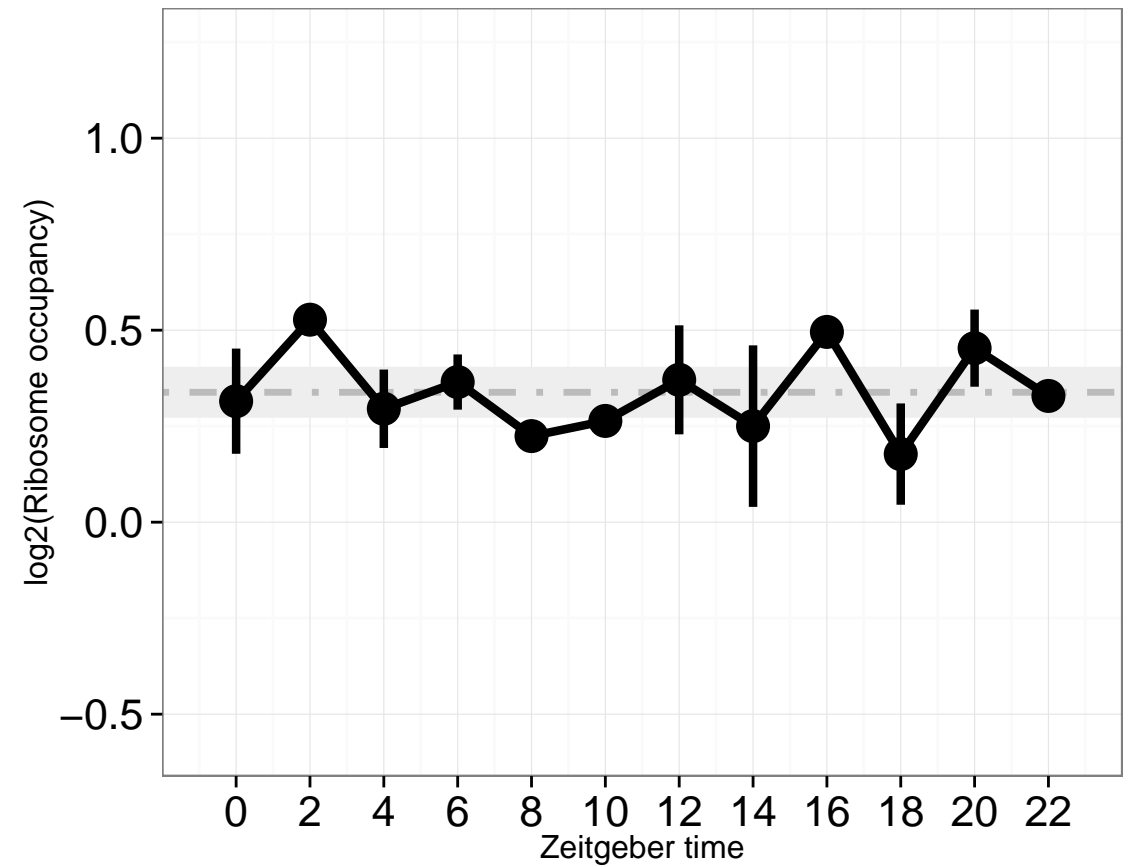

Supplement: Supplementary file 12531 [file 1]

## Tyro3

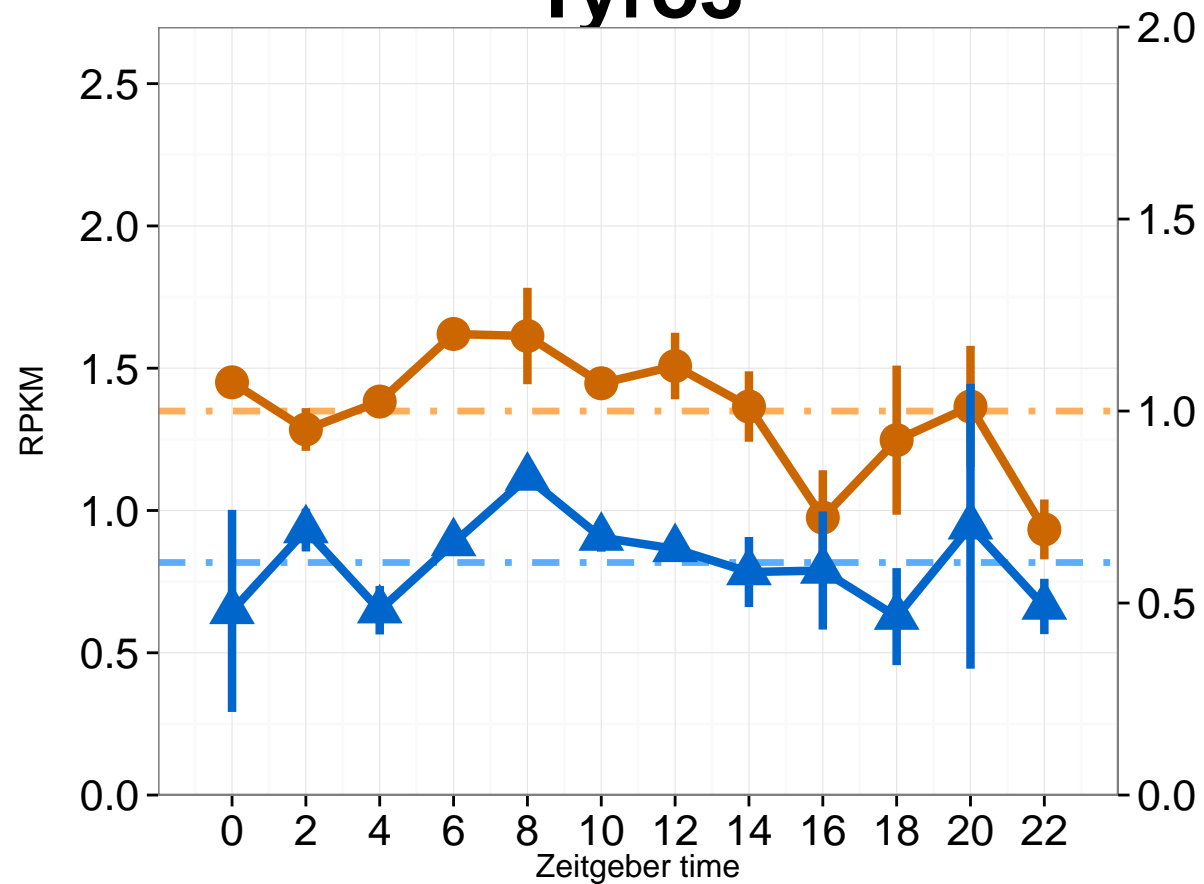

## Tyro3

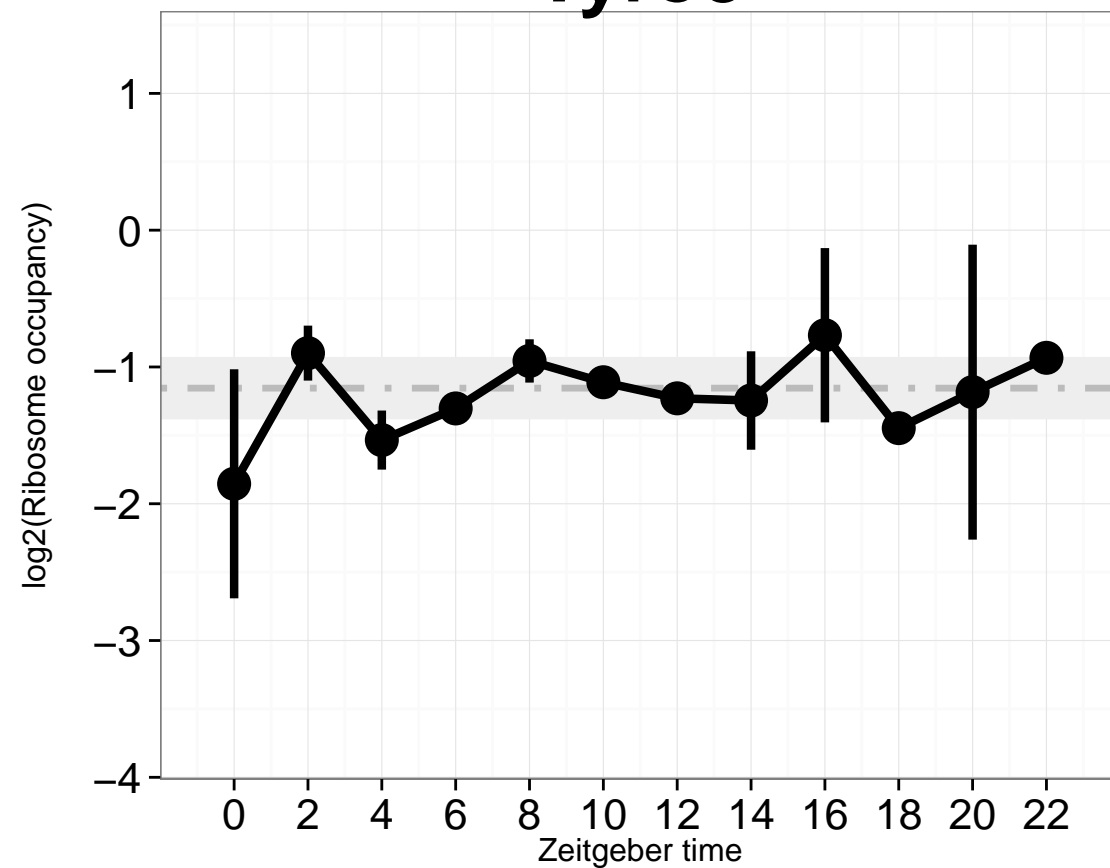

Supplement: Supplementary file 12532 [file 1]

## Tnfrsf1a

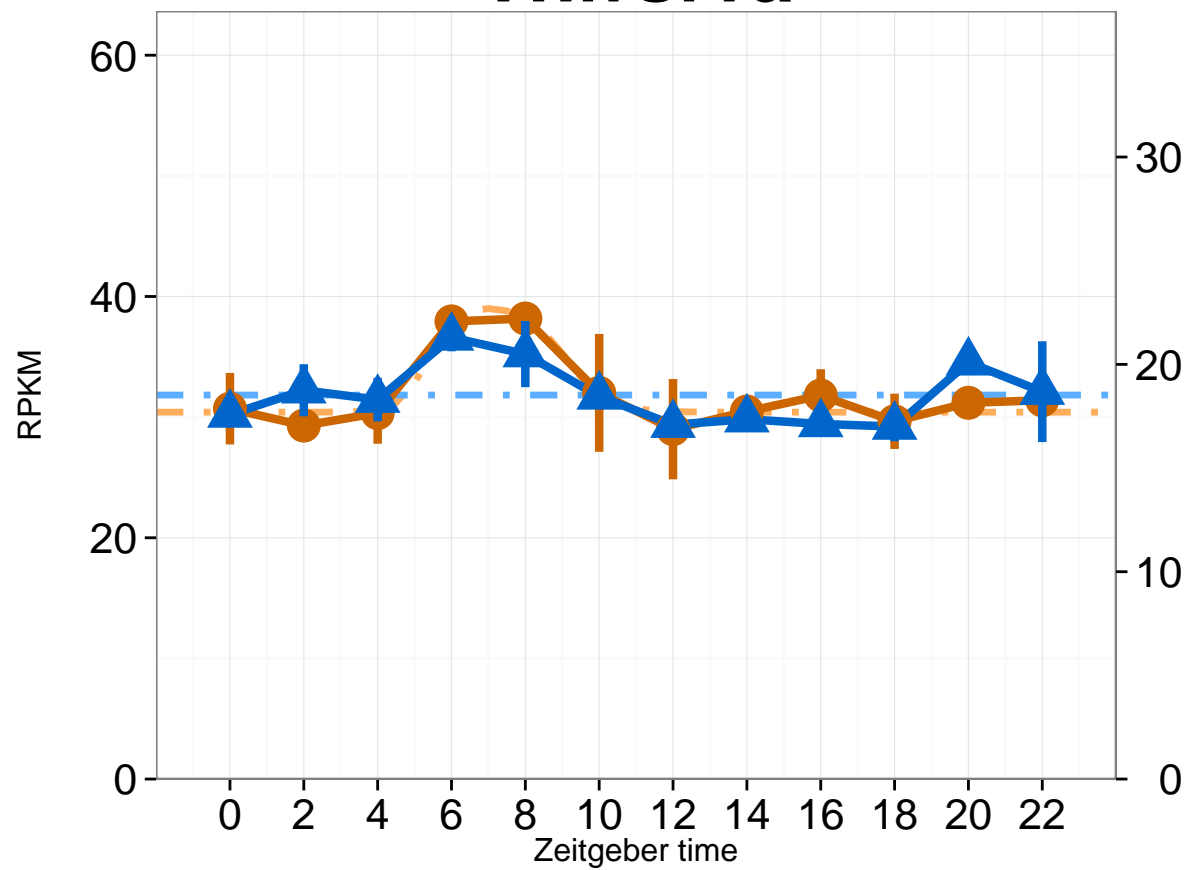

## Tnfrsf1a

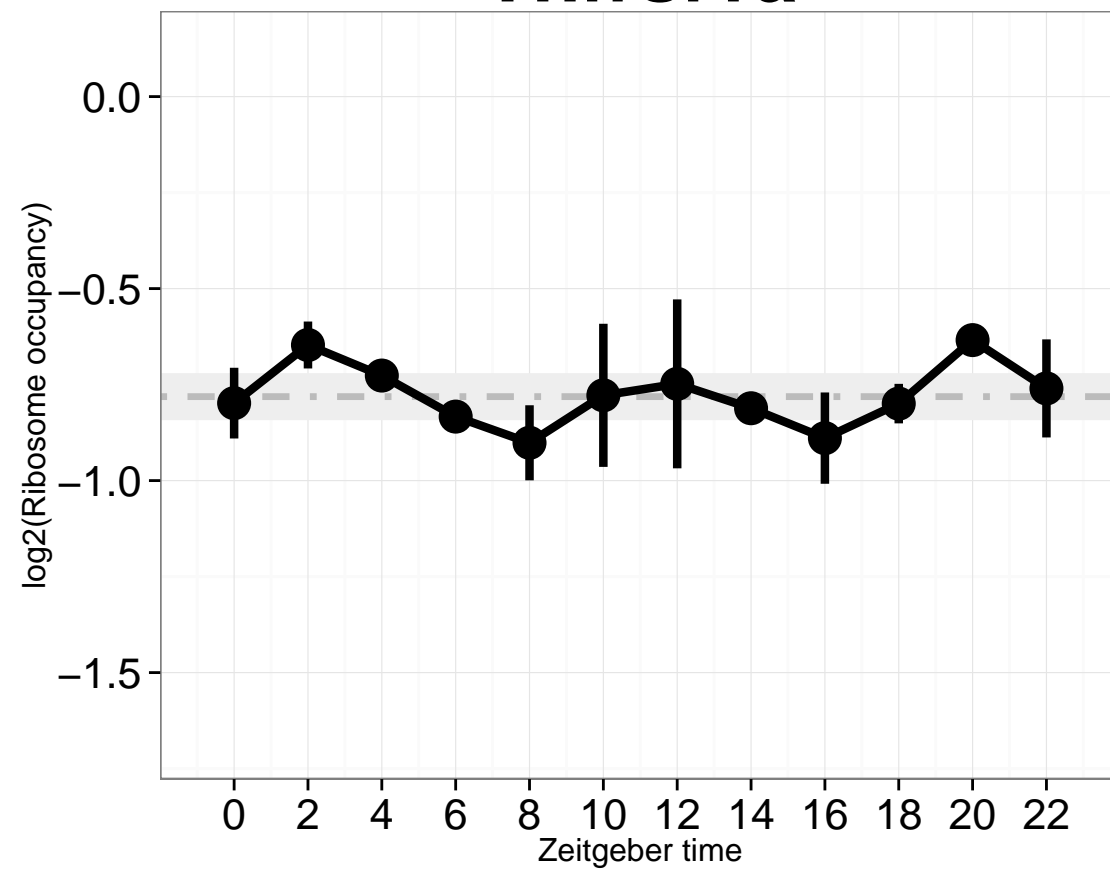

Supplement: Supplementary file 12533 [file 1]

## Akt1s1

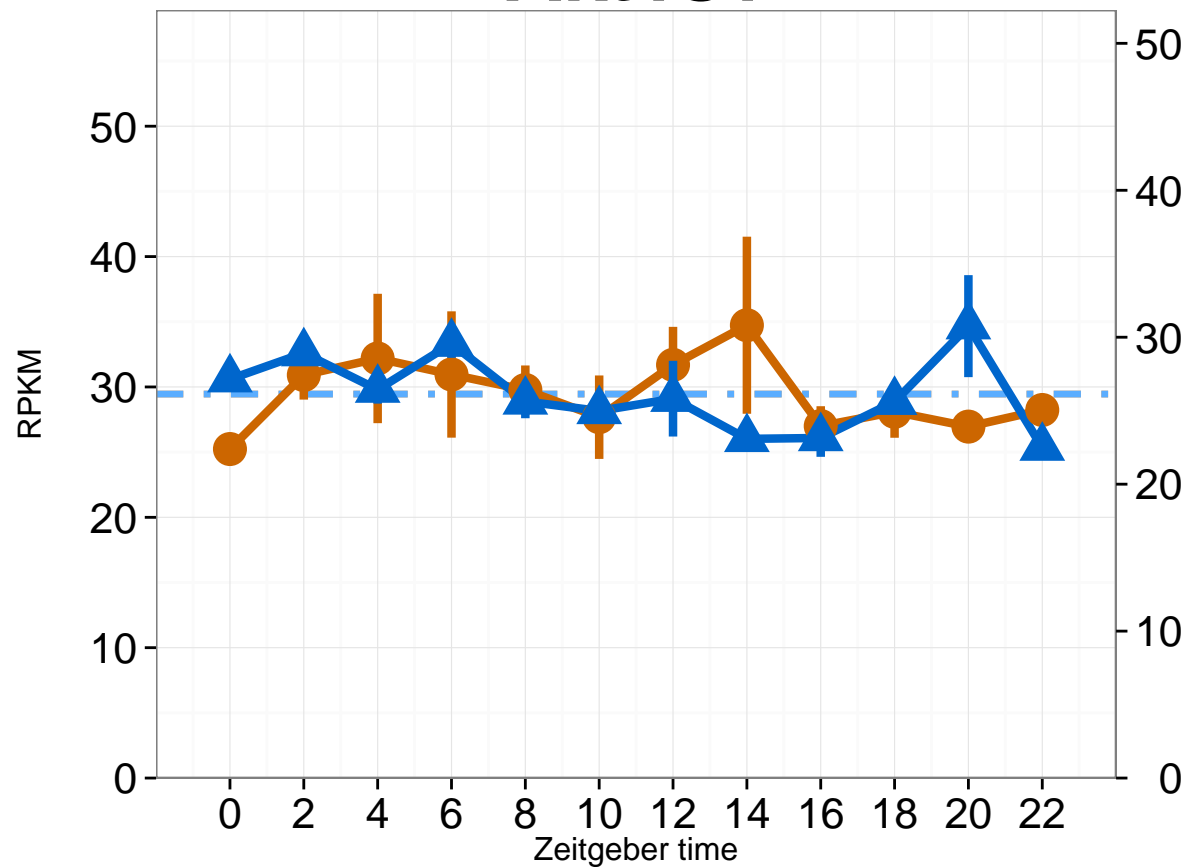

## Akt1s1

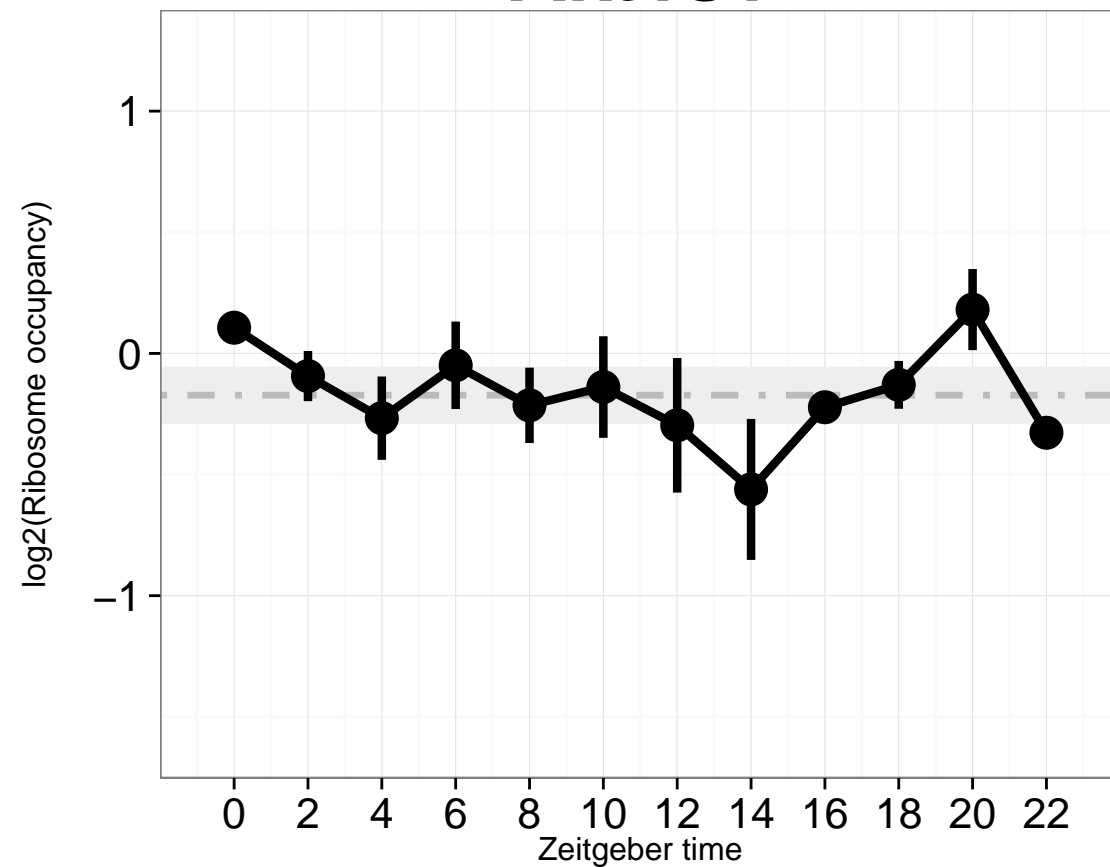

Supplement: Supplementary file 12534 [file 1]

## Tgfbr3

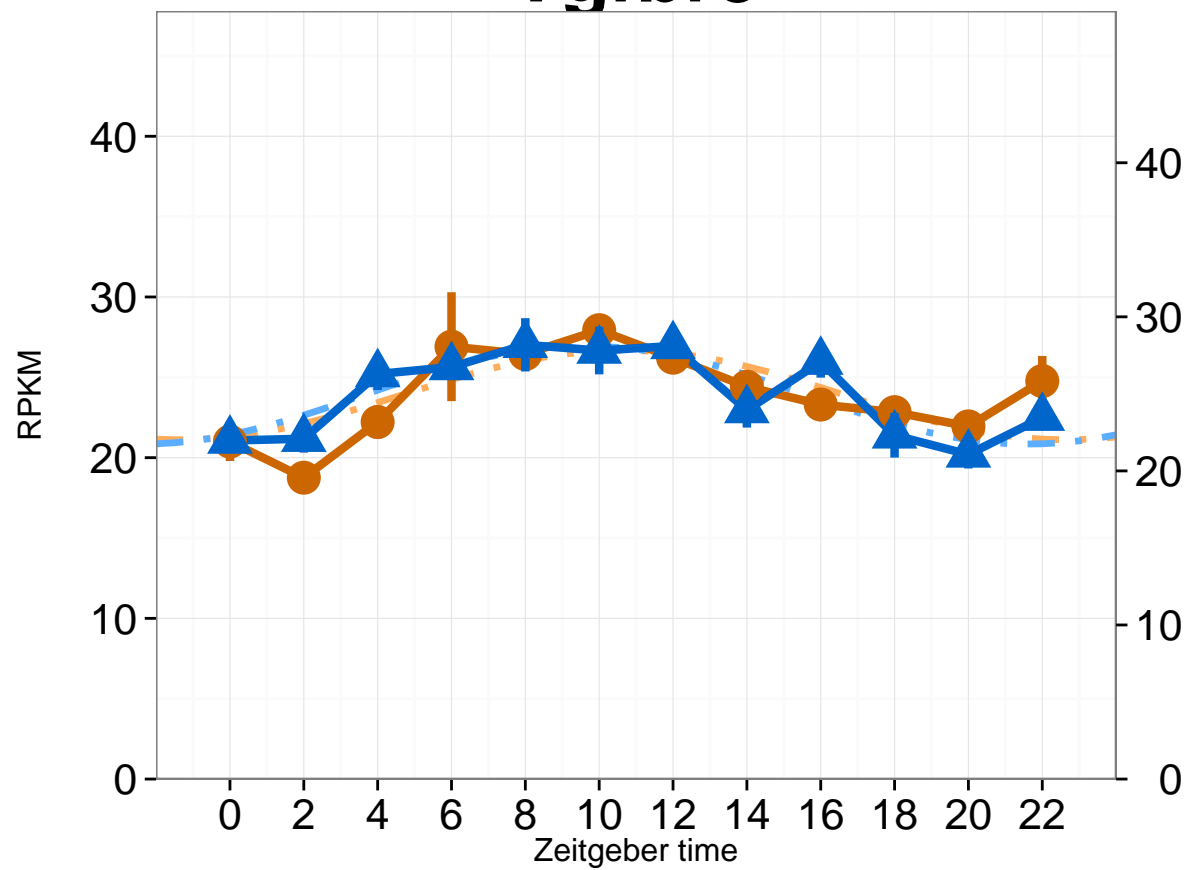

## Tgfbr3

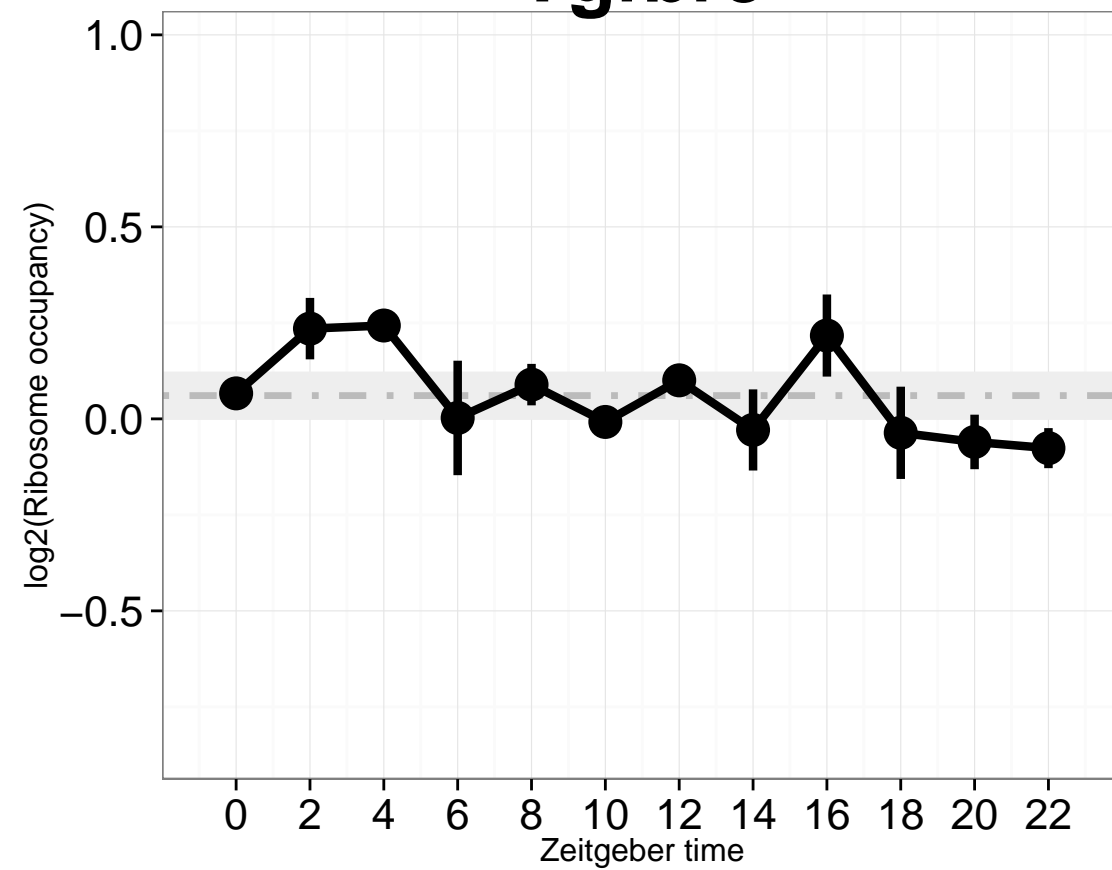

Supplement: Supplementary file 12535 [file 1]

# Fam134b

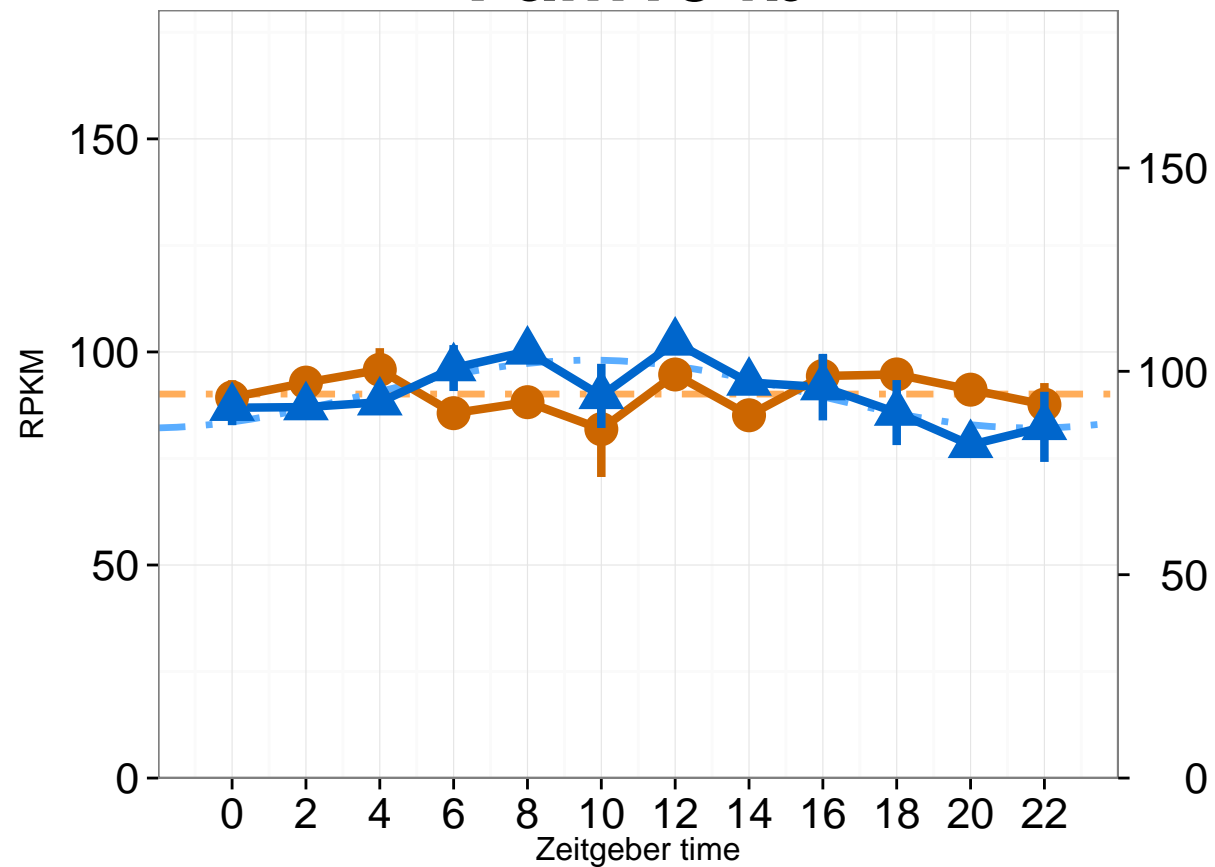

# Fam134b

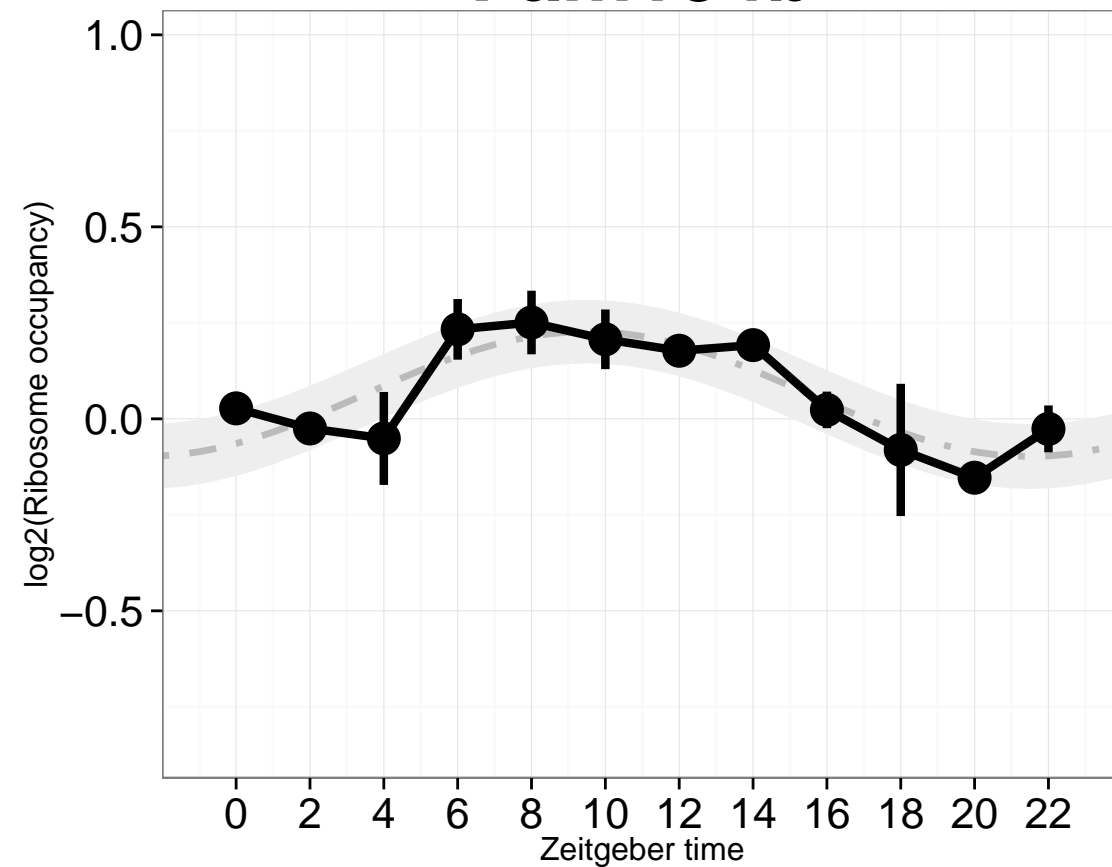

Supplement: Supplementary file 12536 [file 1]

## Sirt4

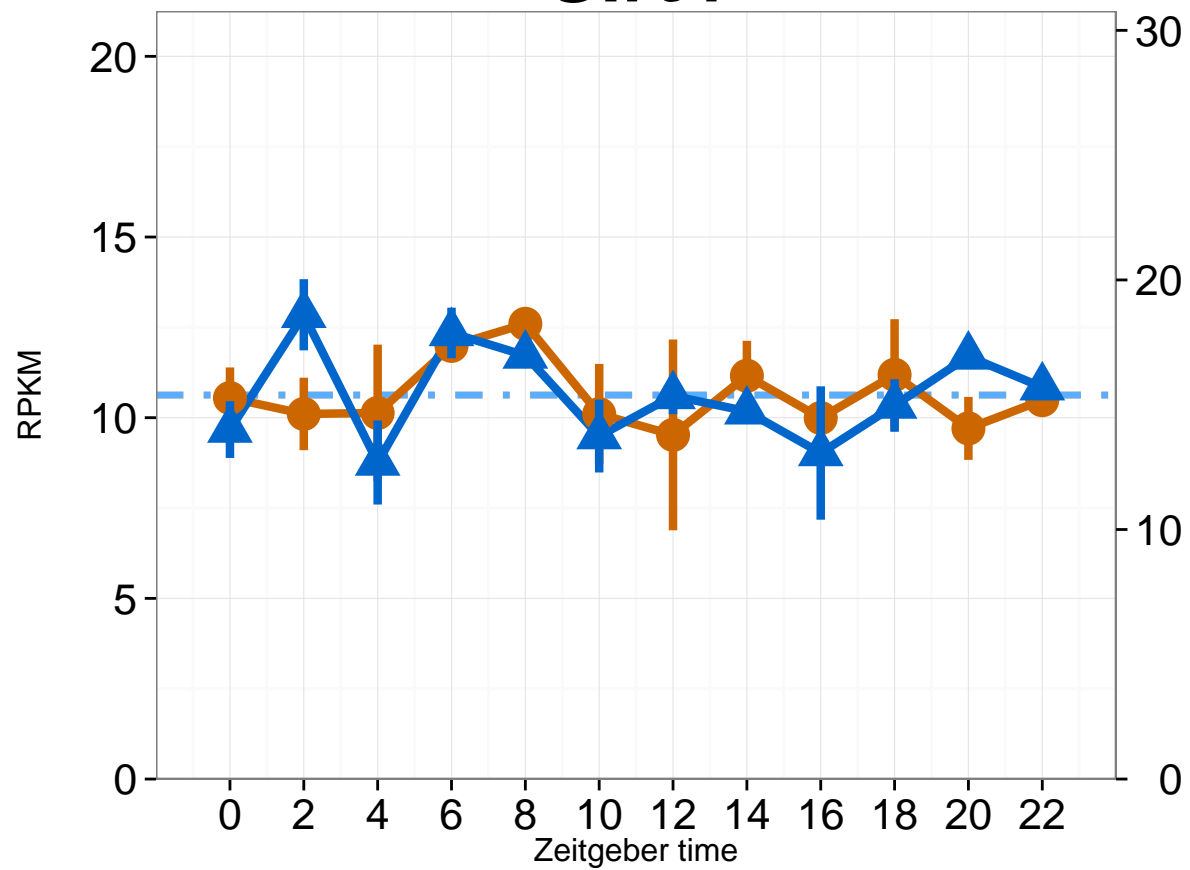

## Sirt4

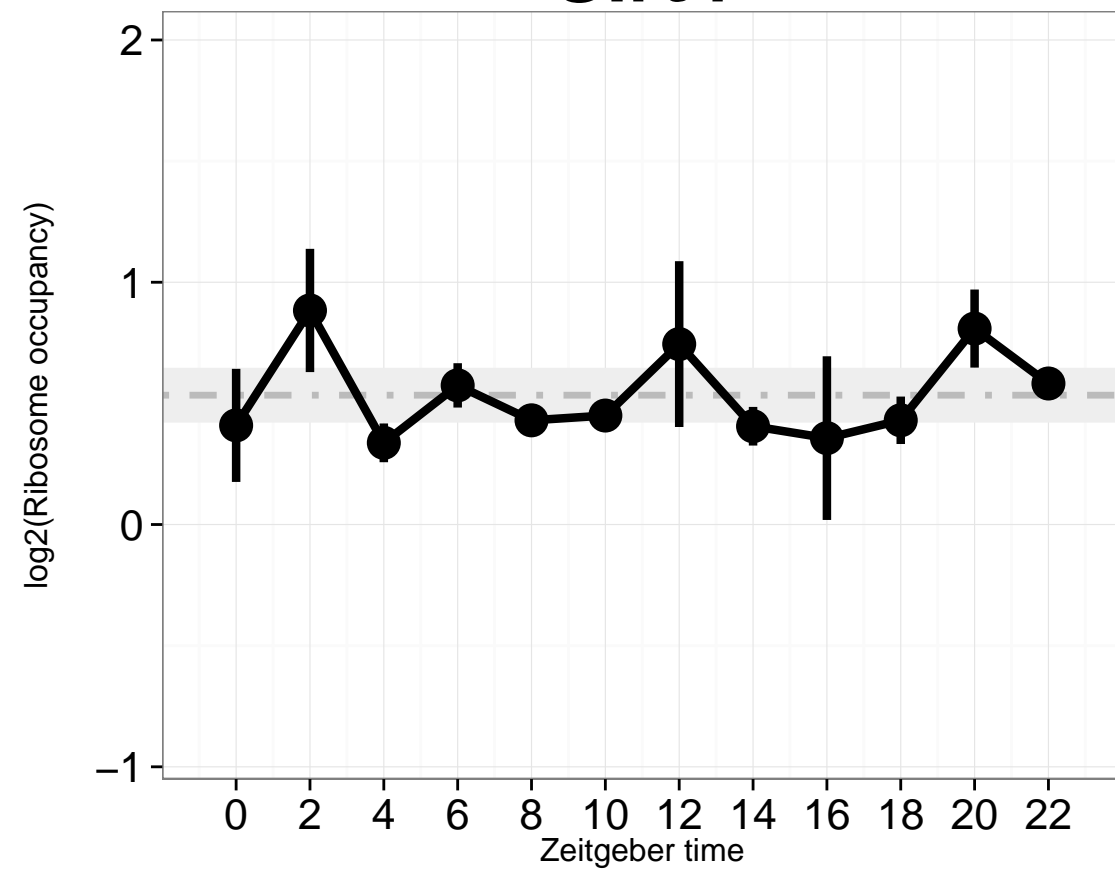

Supplement: Supplementary file 12537 [file 1]

# Ptges3

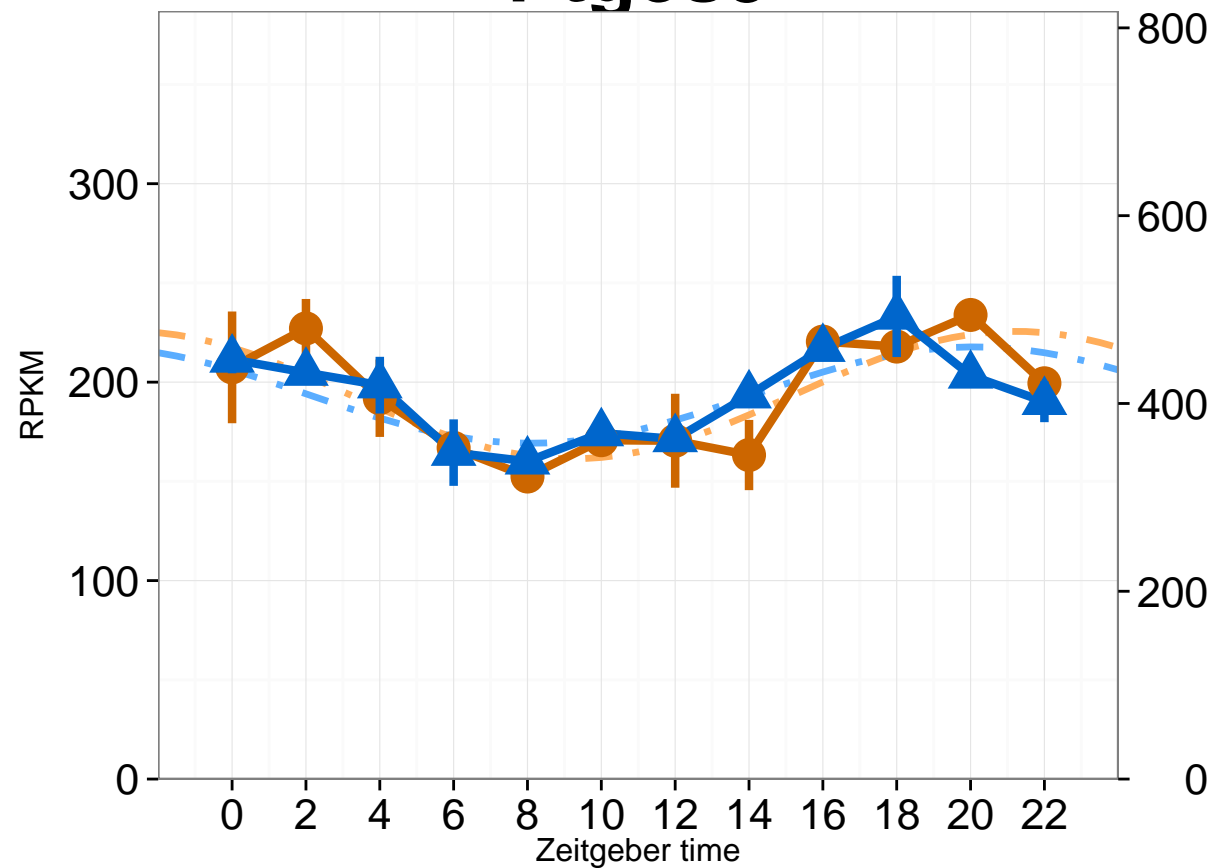

# Ptges3

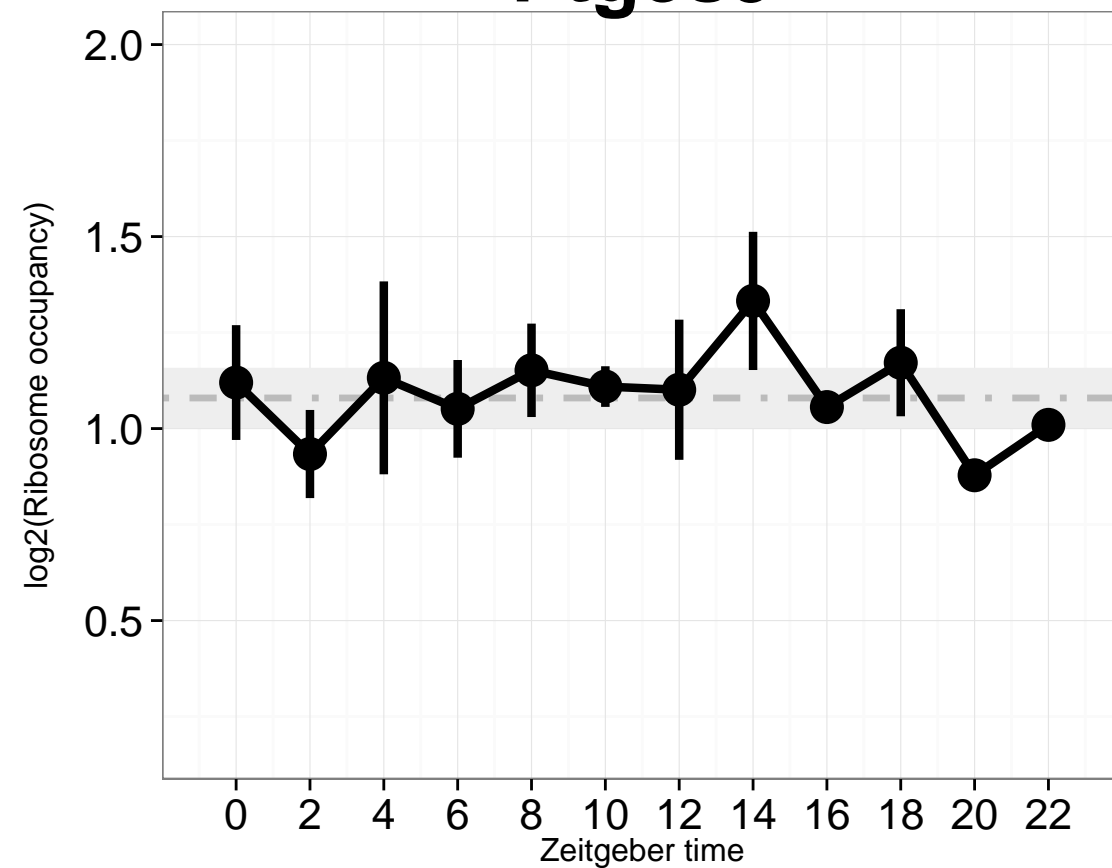

Supplement: Supplementary file 12538 [file 1]

**Cers3 TR**

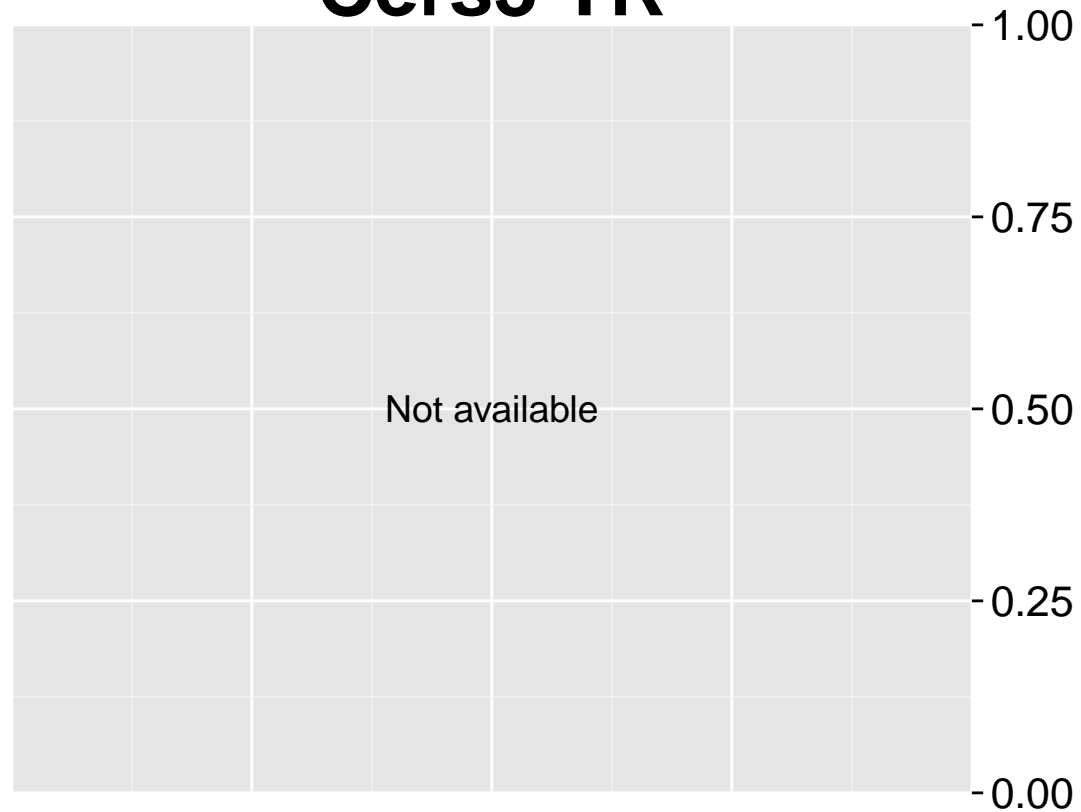

**Cers3 log2(Ribosome occupancy**

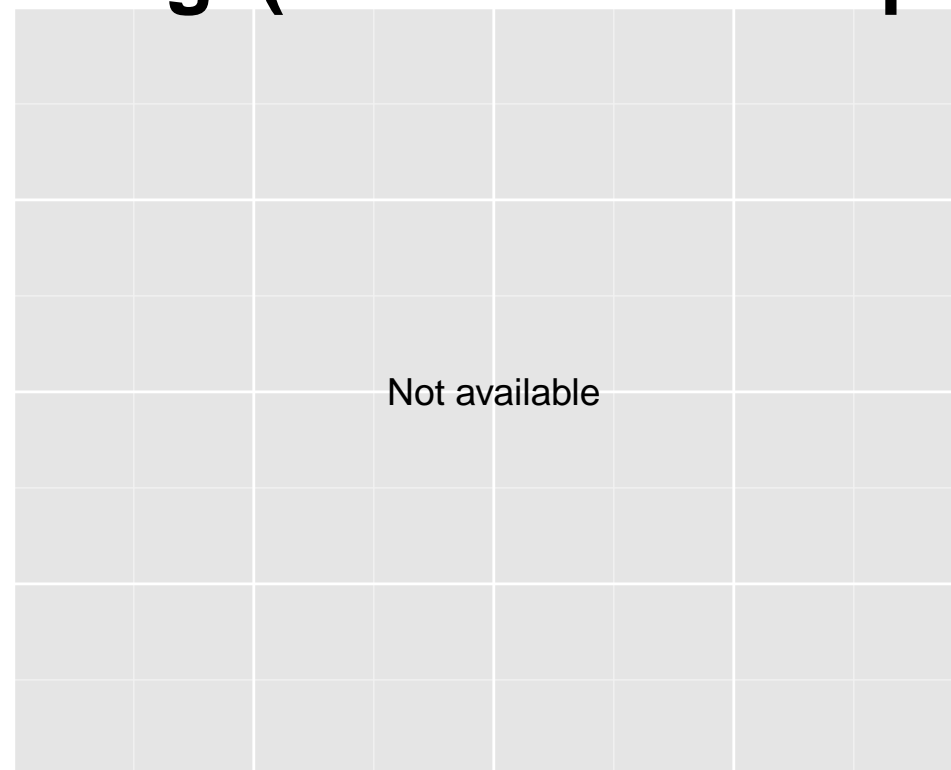

Supplement: Supplementary file 12539 [file 1]

## Myof

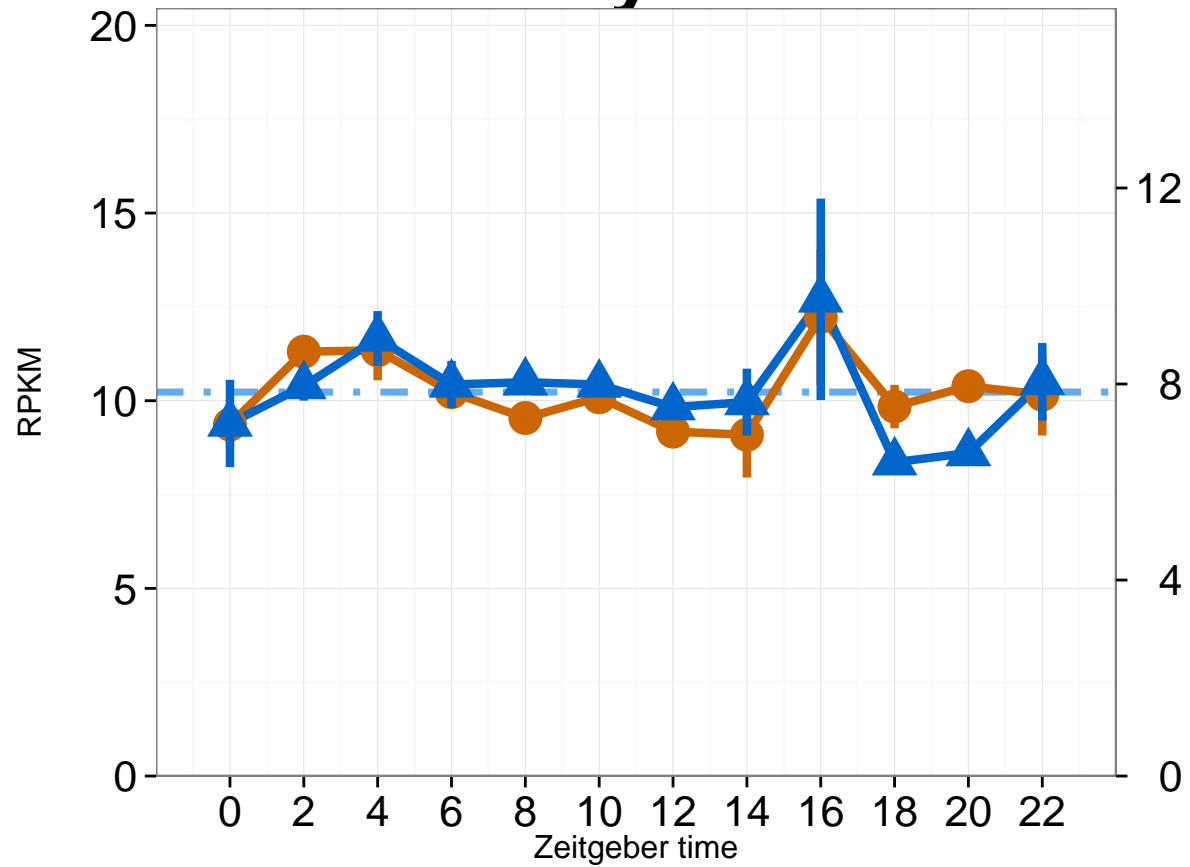

## Myof

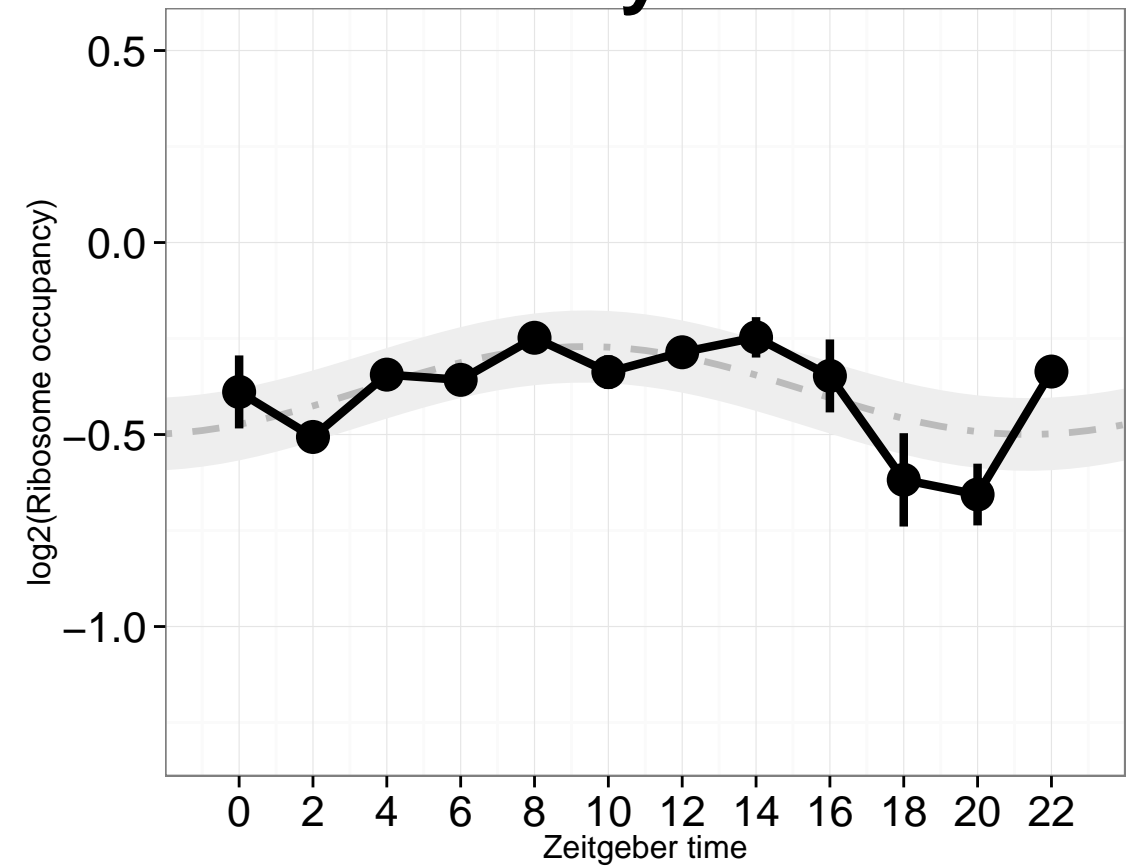

Supplement: Supplementary file 12540 [file 1]

## Recql

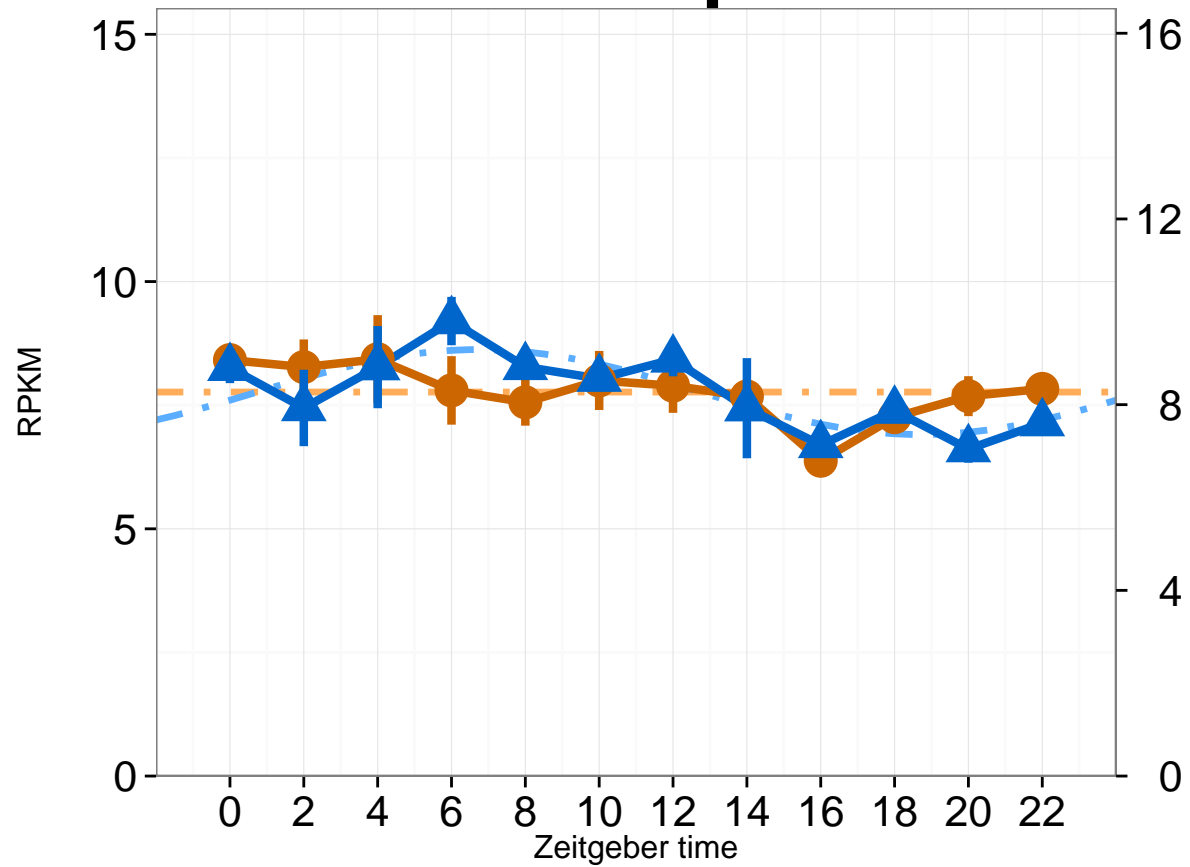

## Recql

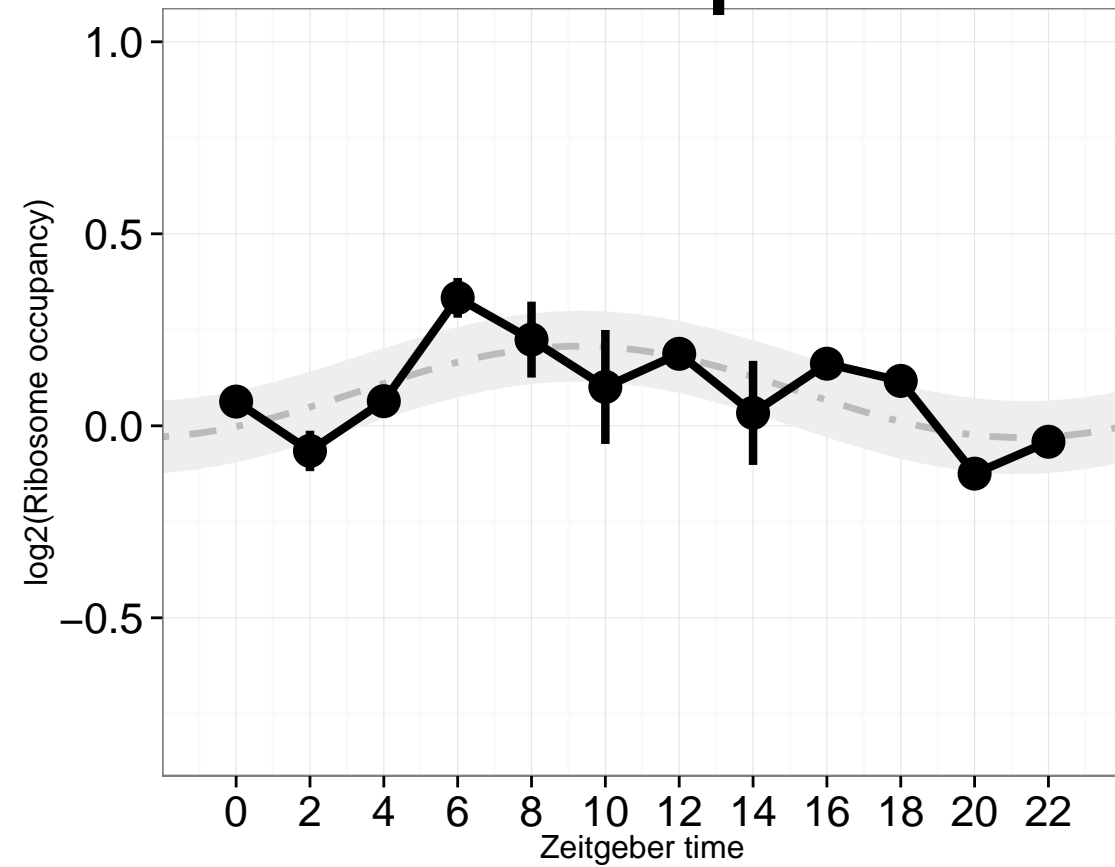

Supplement: Supplementary file 12541 [file 1]

# Capn13

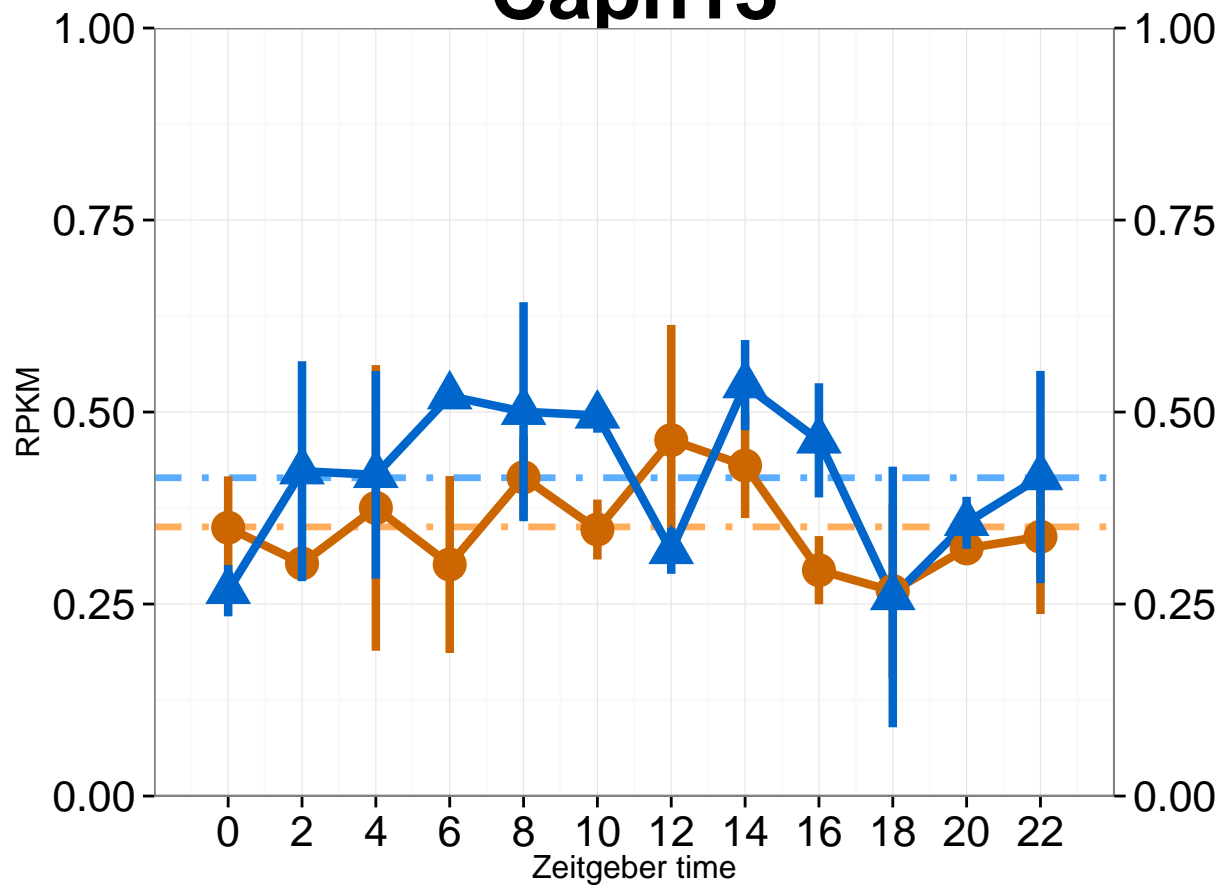

# Capn13

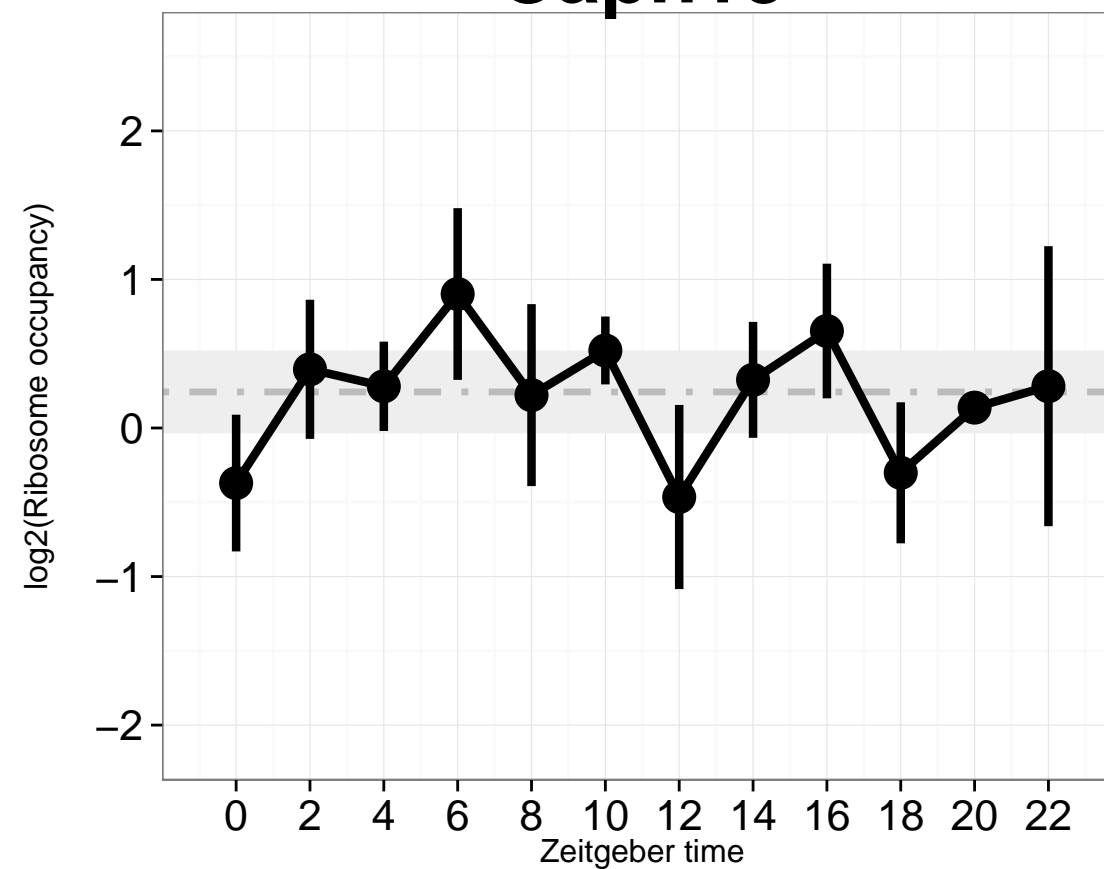

Supplement: Supplementary file 12542 [file 1]

## Mpi

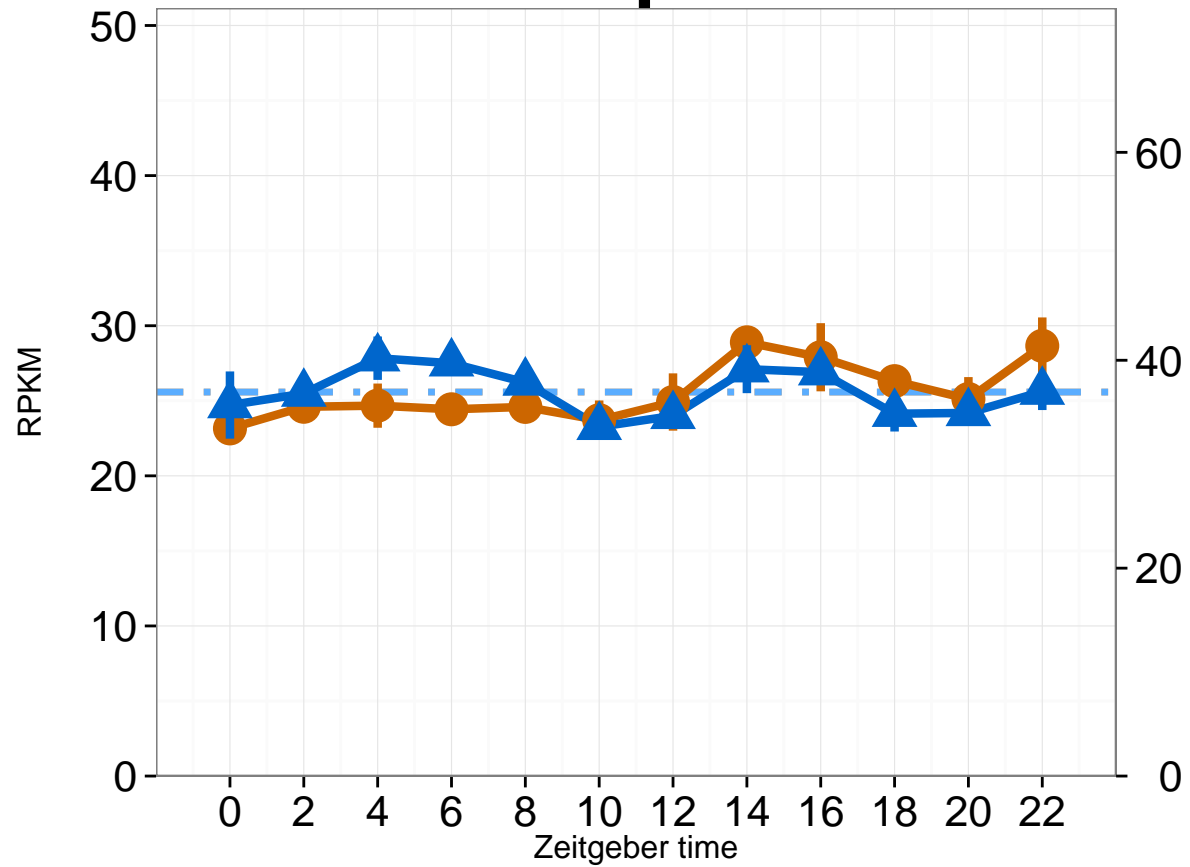

## Mpi

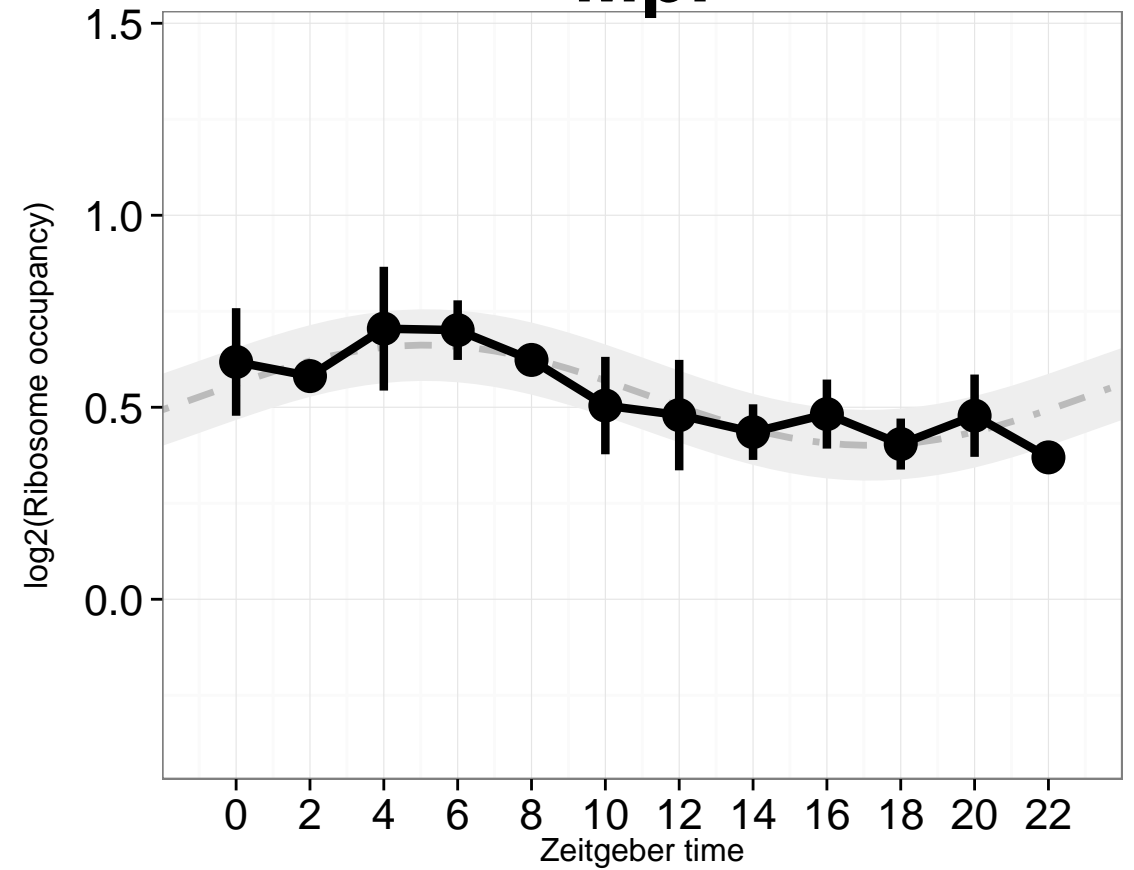

Supplement: Supplementary file 12543 [file 1]

# Lrfn3

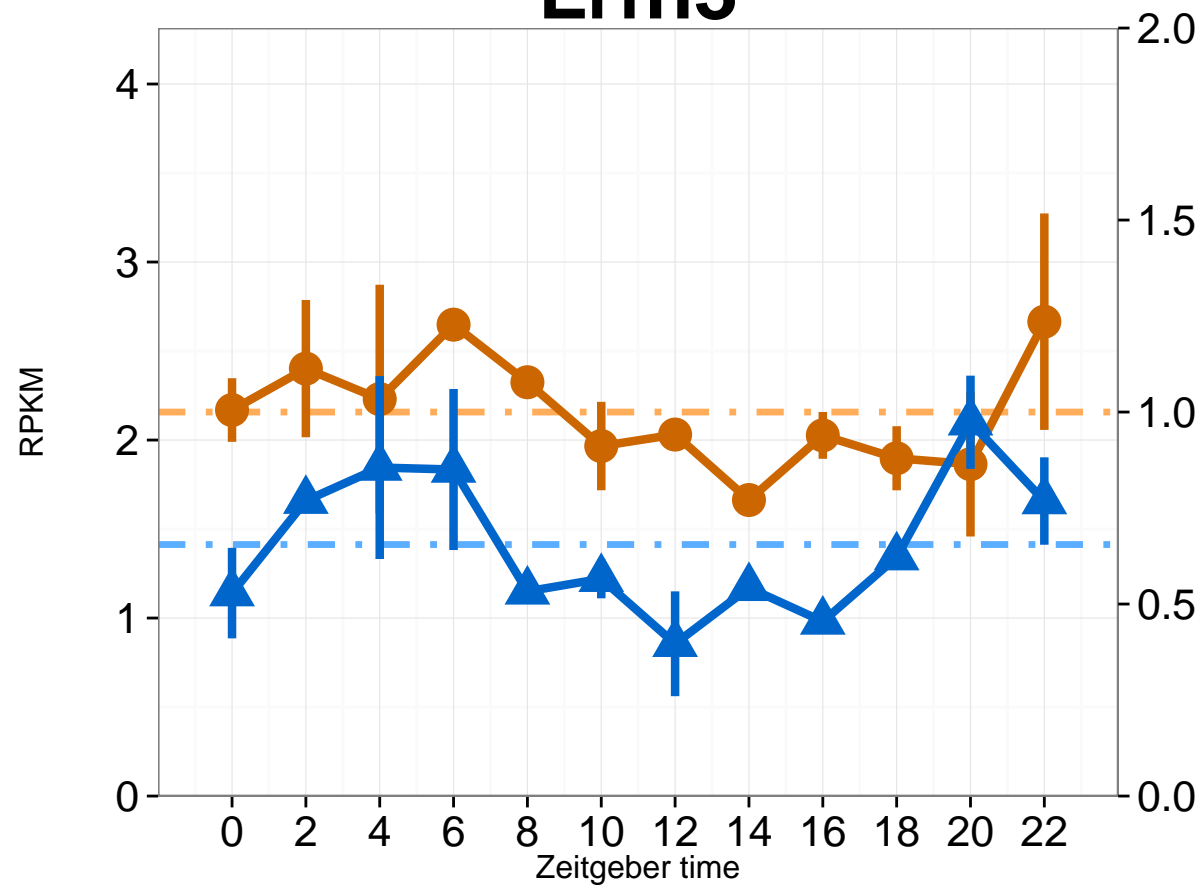

# Lrfn3

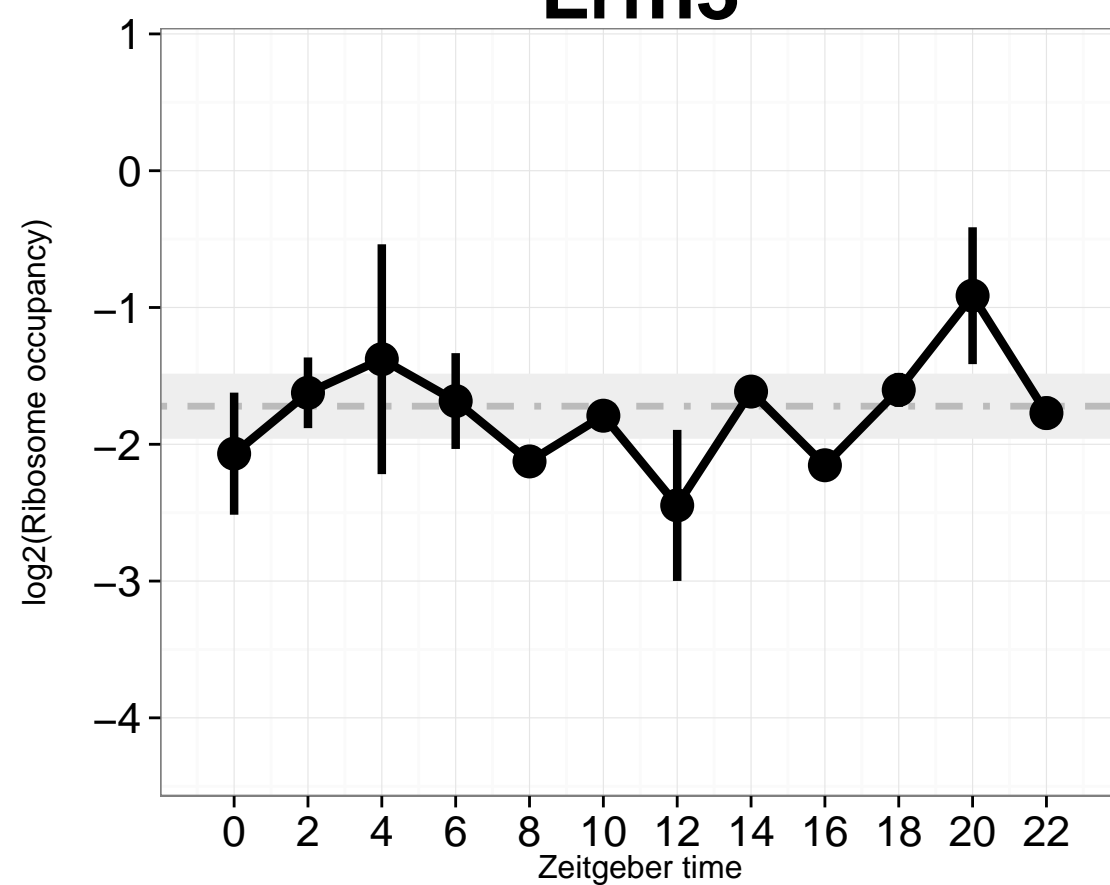

Supplement: Supplementary file 12544 [file 1]
