# Supplementary material (part 126 of 133)
Source: publisher figshare collection journal article supplement (https://springernature.figshare.com/articles/dataset/_/4903193)

## Nfkb2

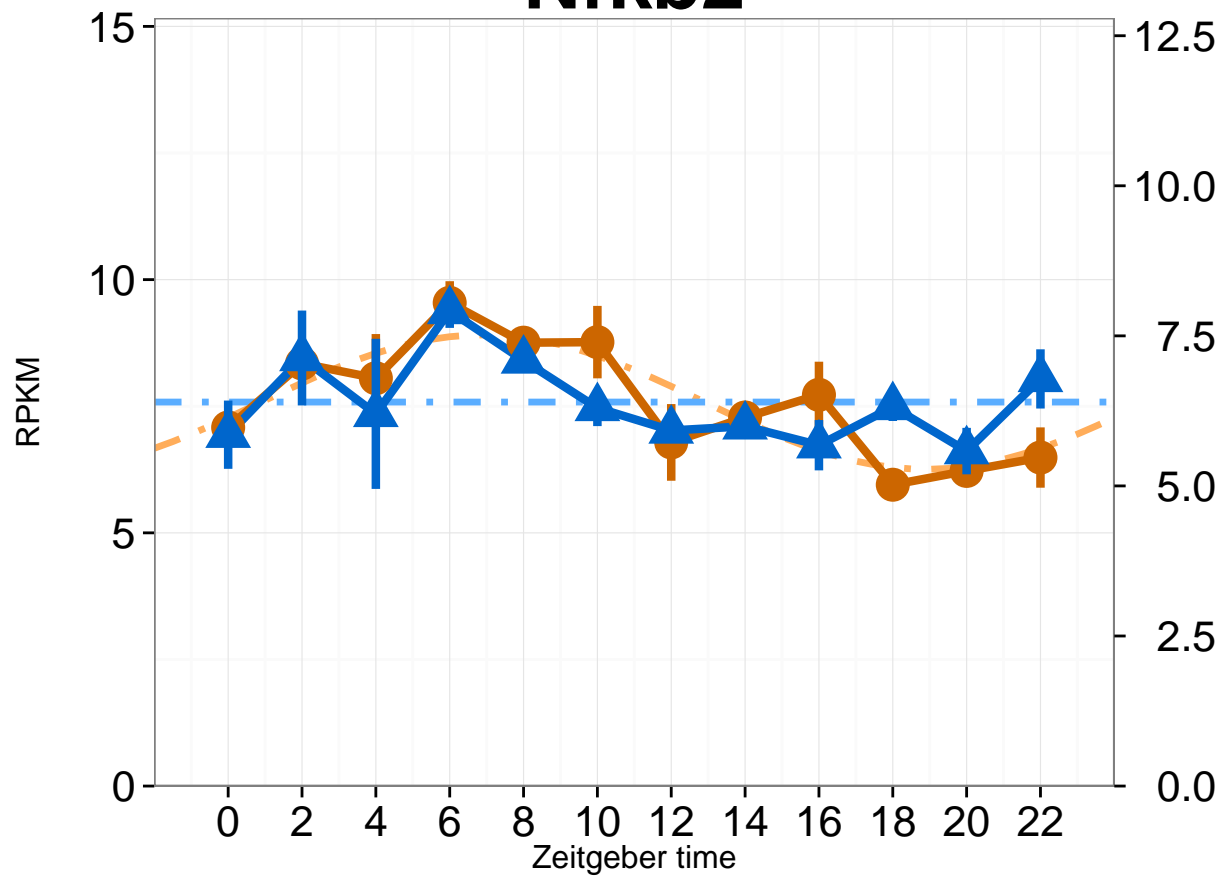

## Nfkb2

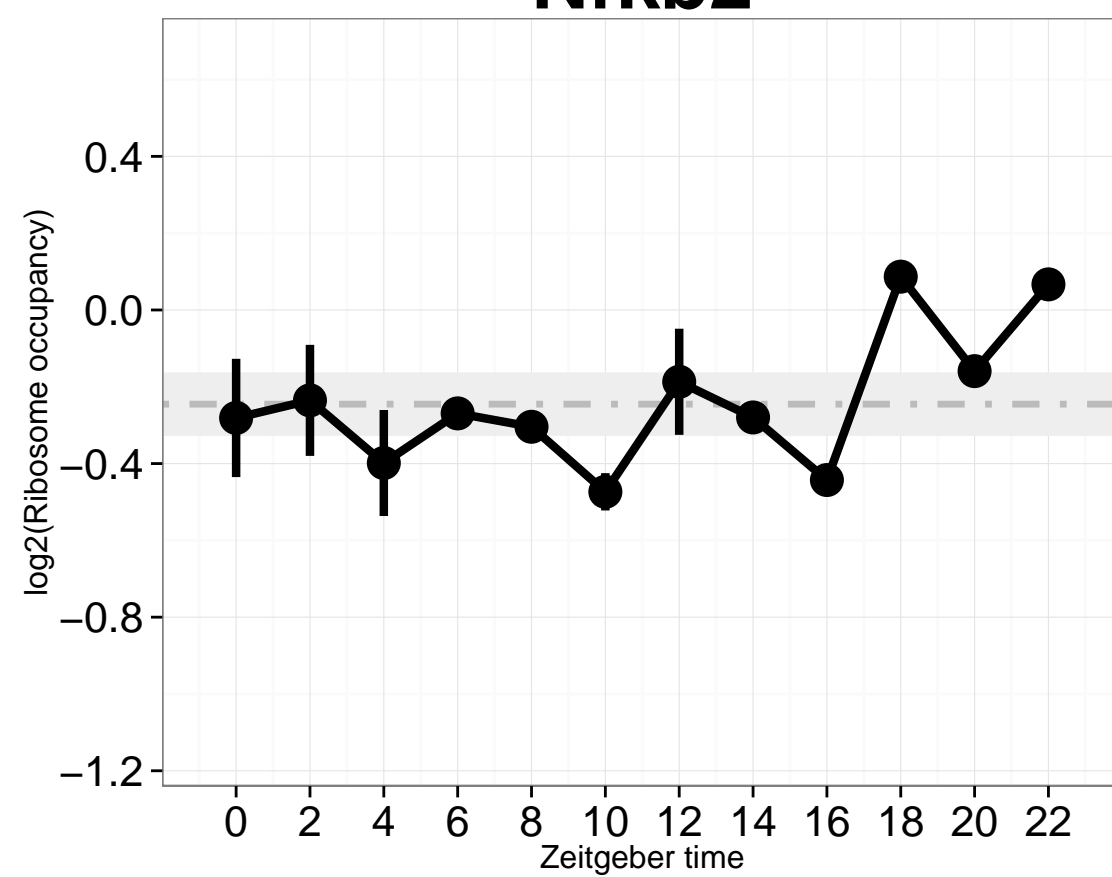

Supplement: Supplementary file 12545 [file 1]

## Ipo13

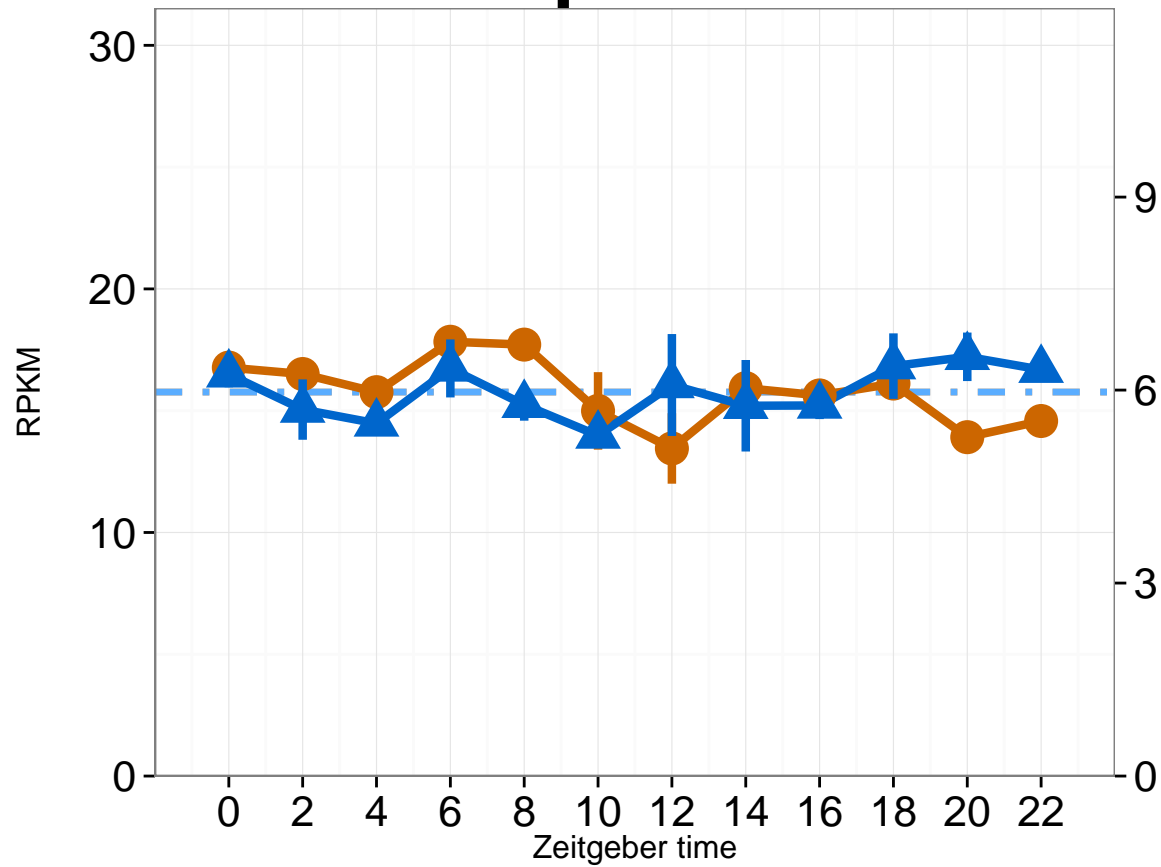

## Ipo13

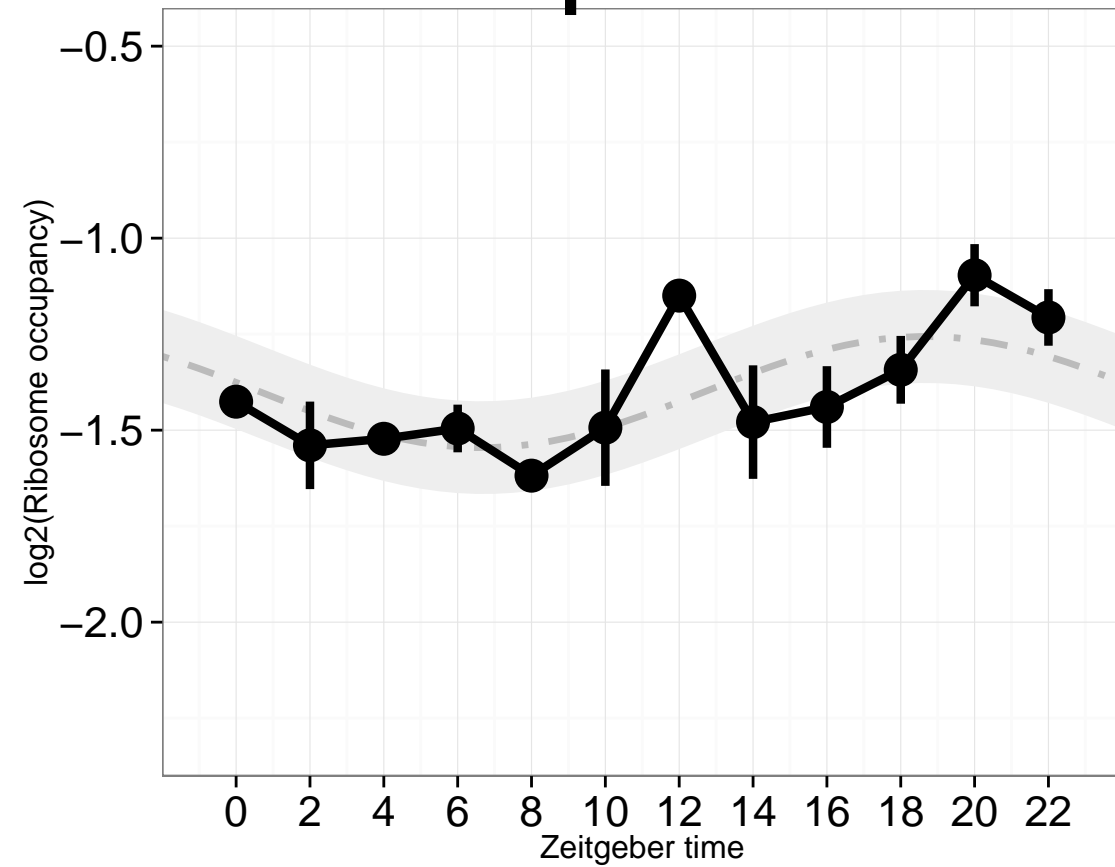

Supplement: Supplementary file 12546 [file 1]

## Amacr

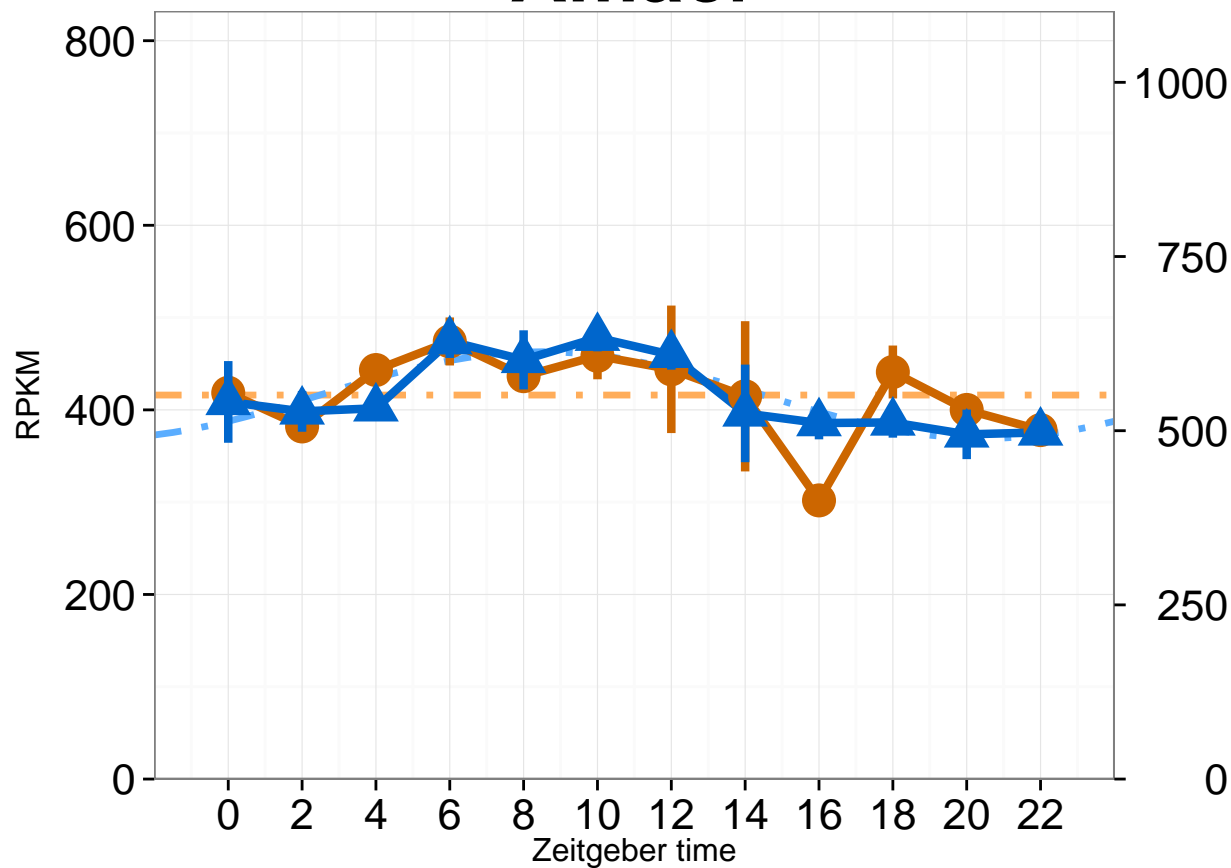

## Amacr

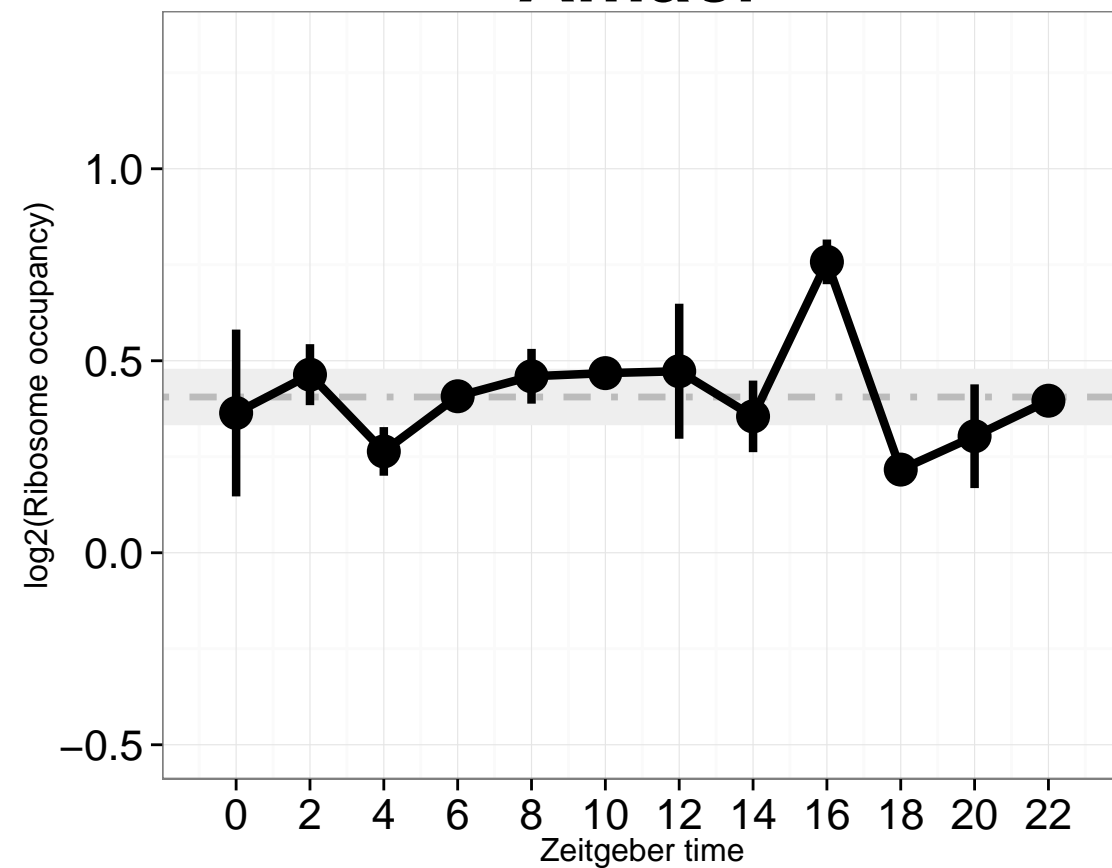

Supplement: Supplementary file 12547 [file 1]

# Zfp617

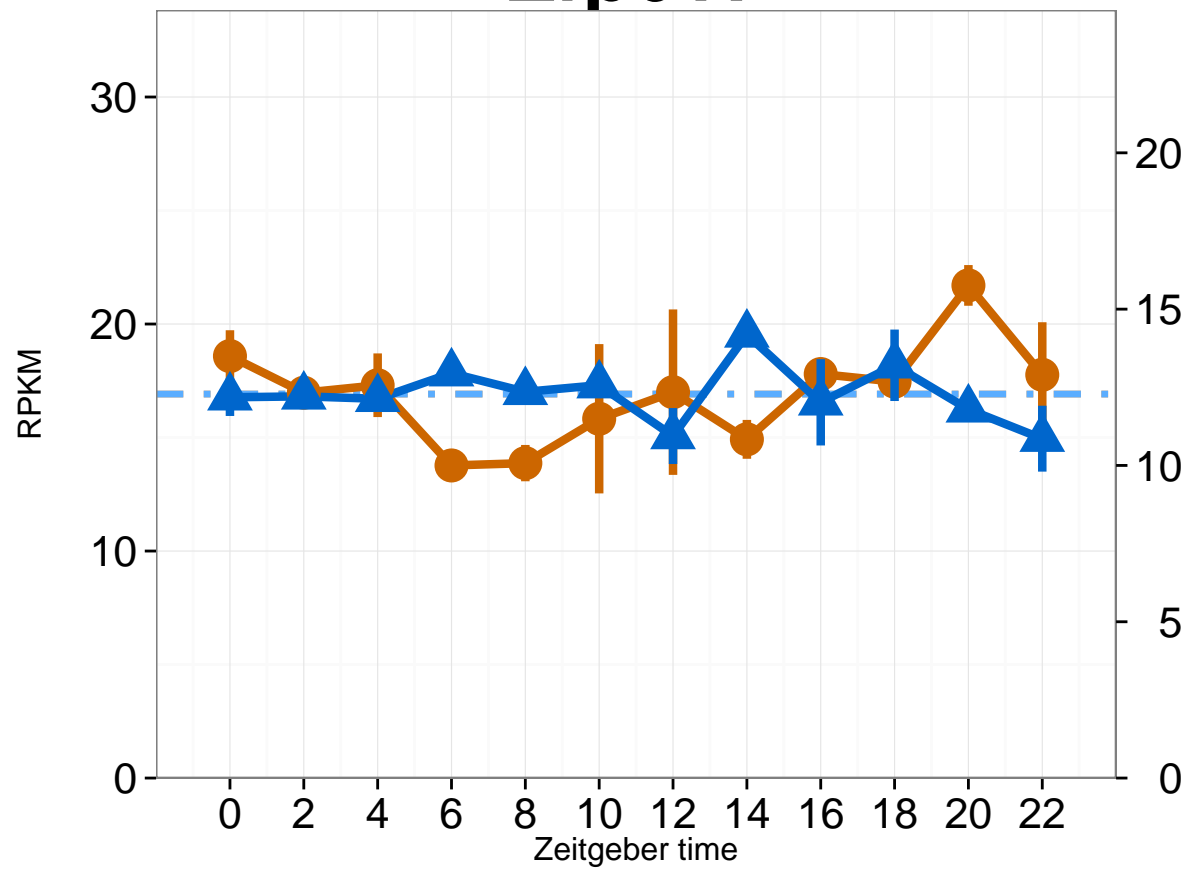

# Zfp617

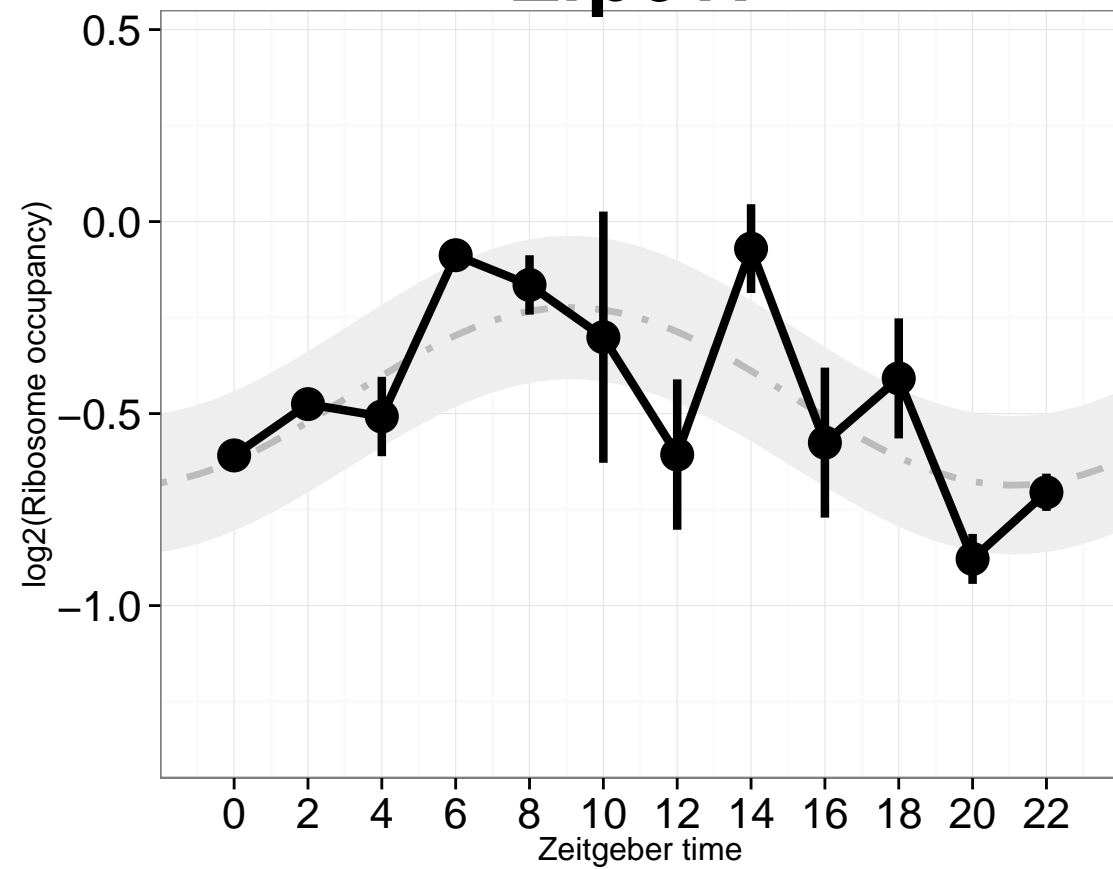

Supplement: Supplementary file 12548 [file 1]

# Isoc2b

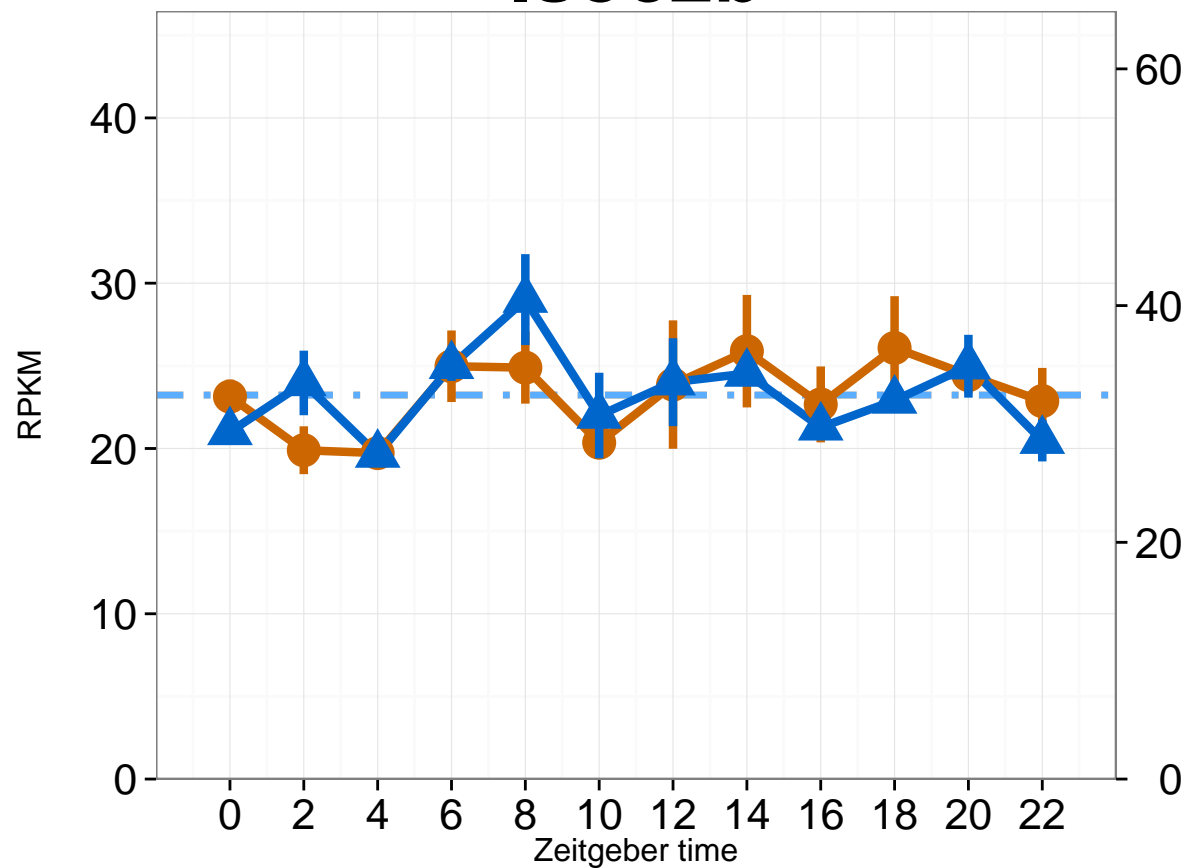

# Isoc2b

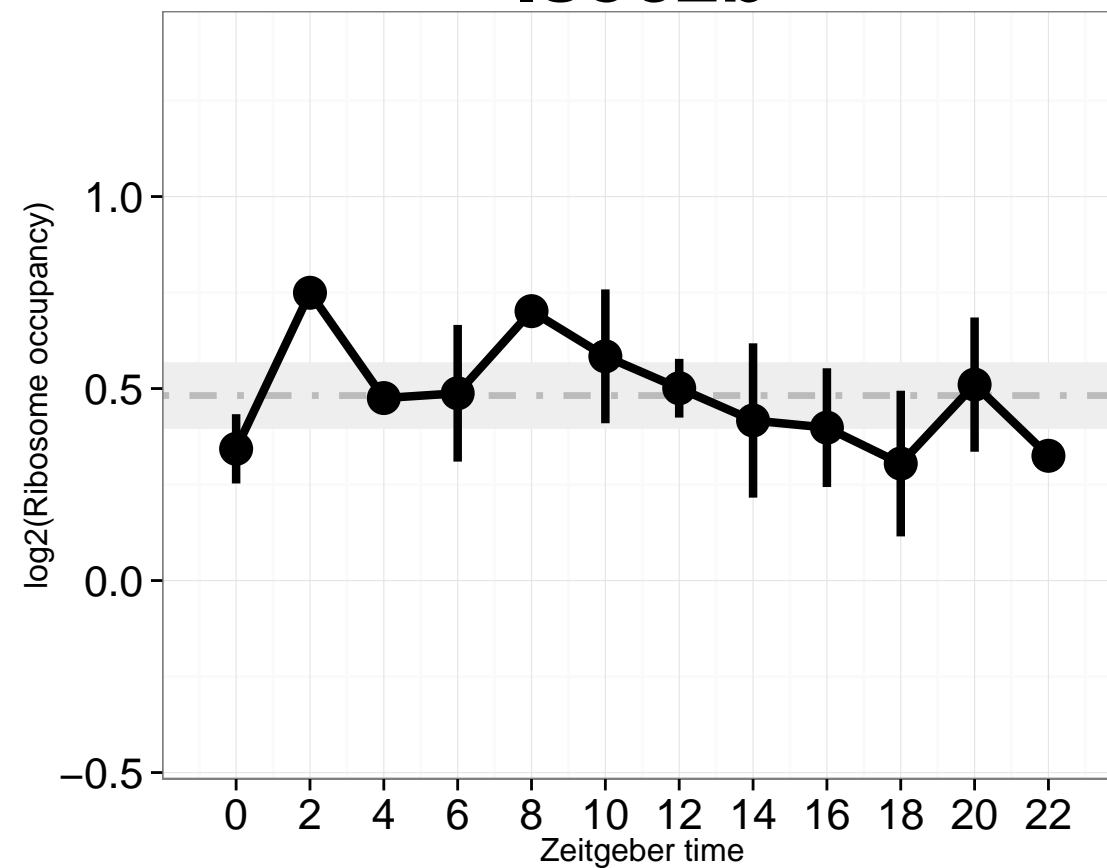

Supplement: Supplementary file 12549 [file 1]

# Cxx1a

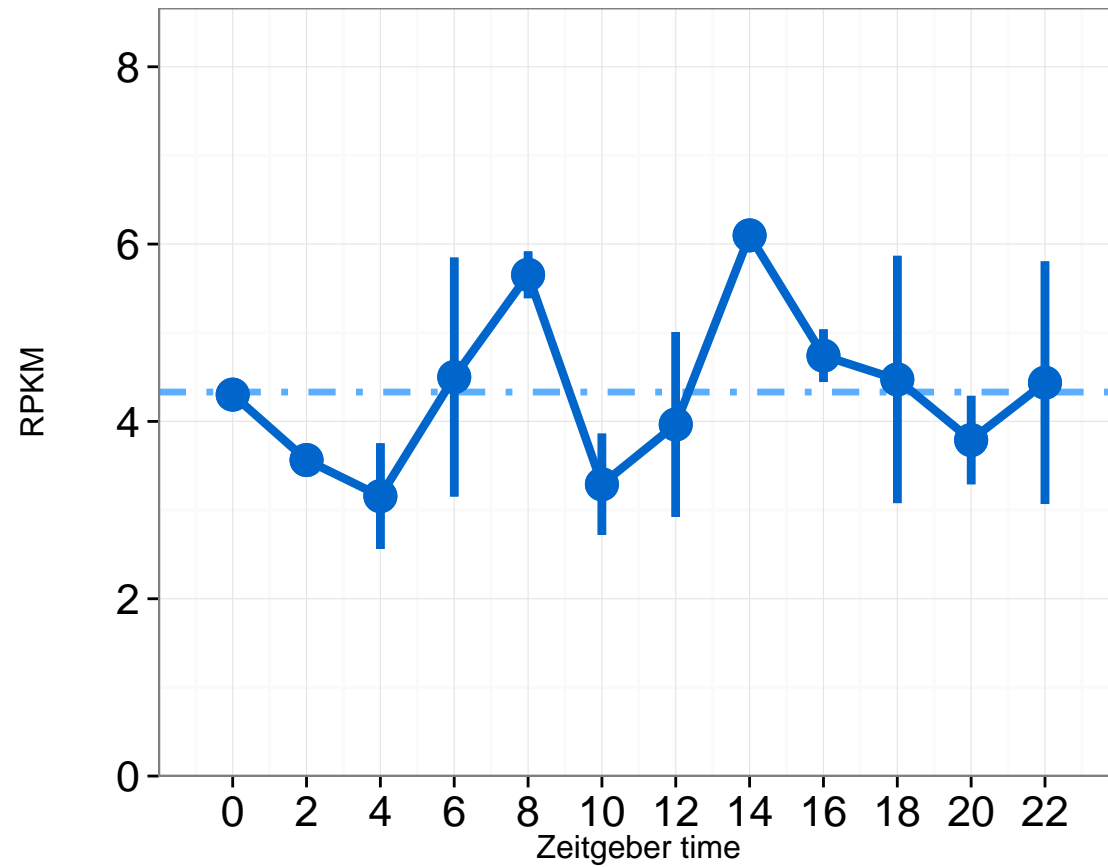

# Cxx1a log2(Ribosome occupancy

Supplement: Supplementary file 12550 [file 1]

## Gpx3

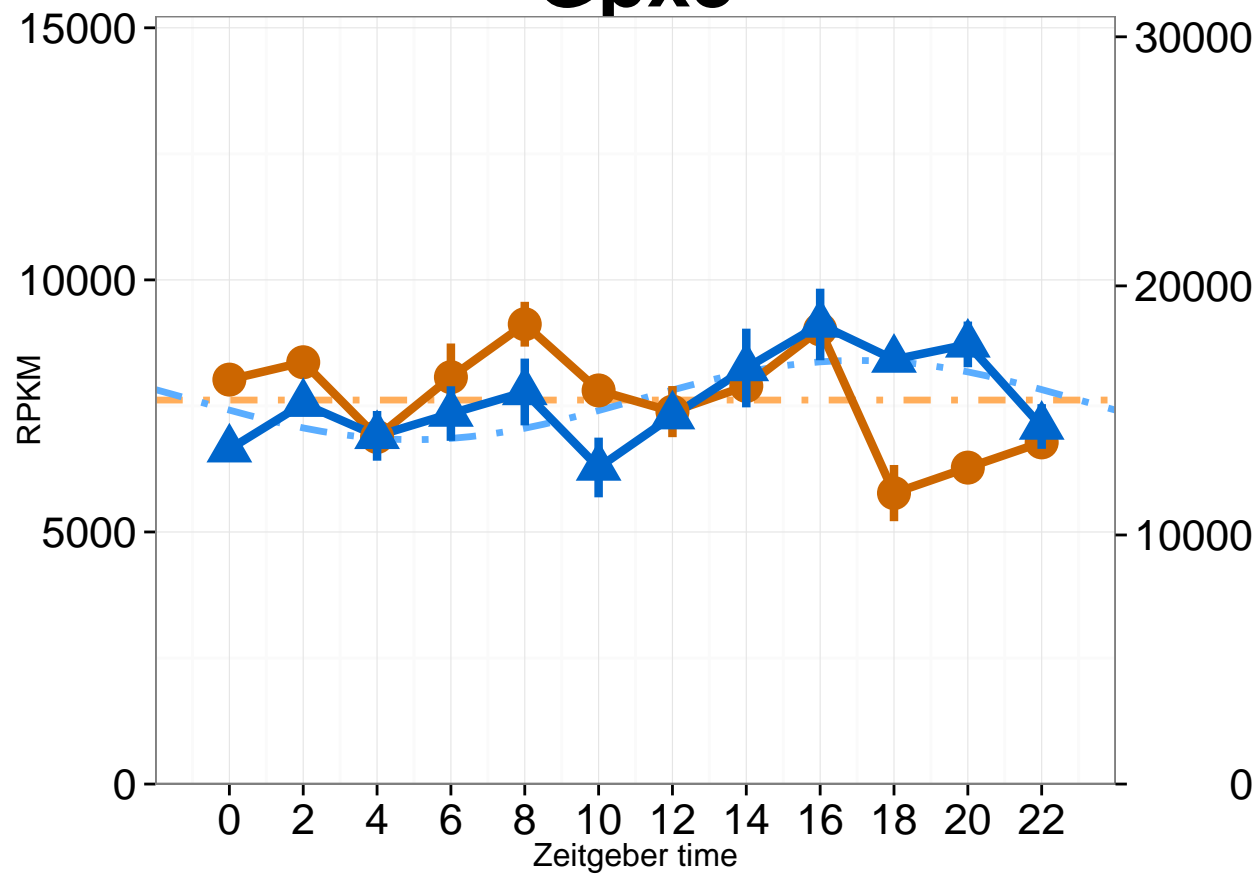

## Gpx3

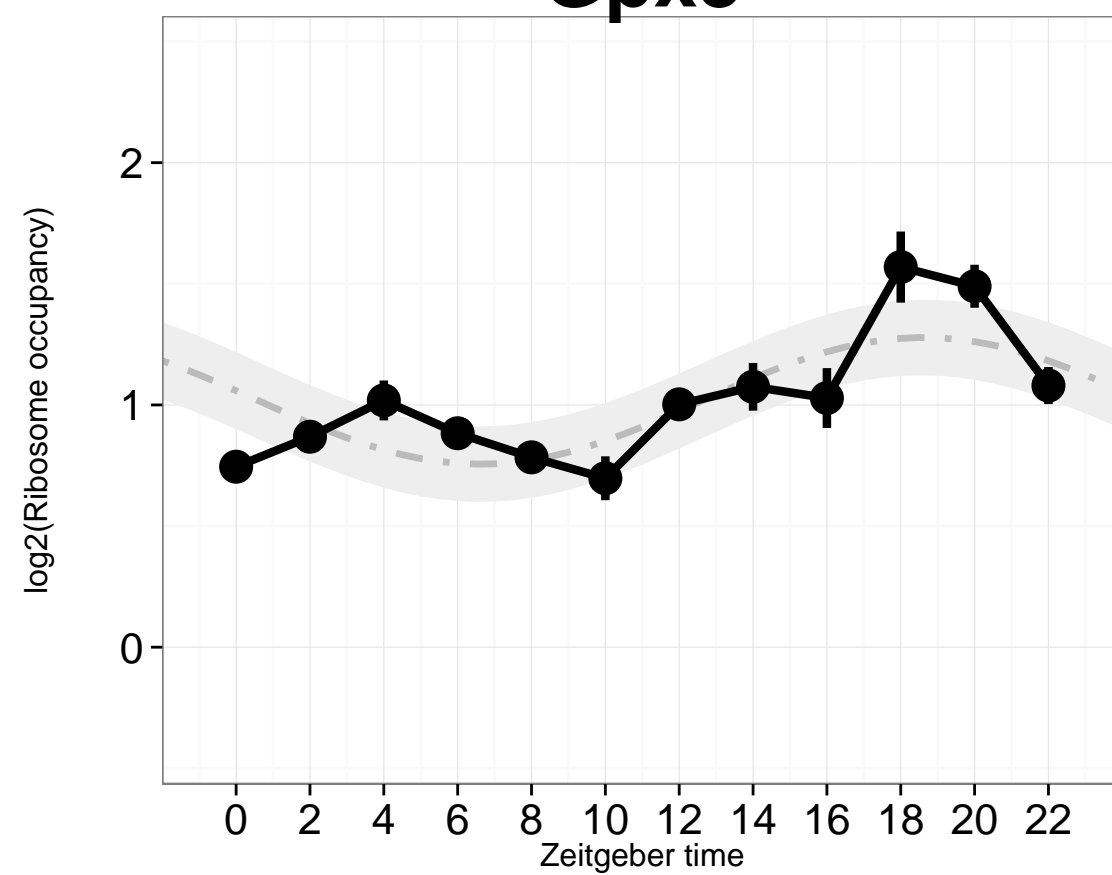

Supplement: Supplementary file 12551 [file 1]

# Zfp518a

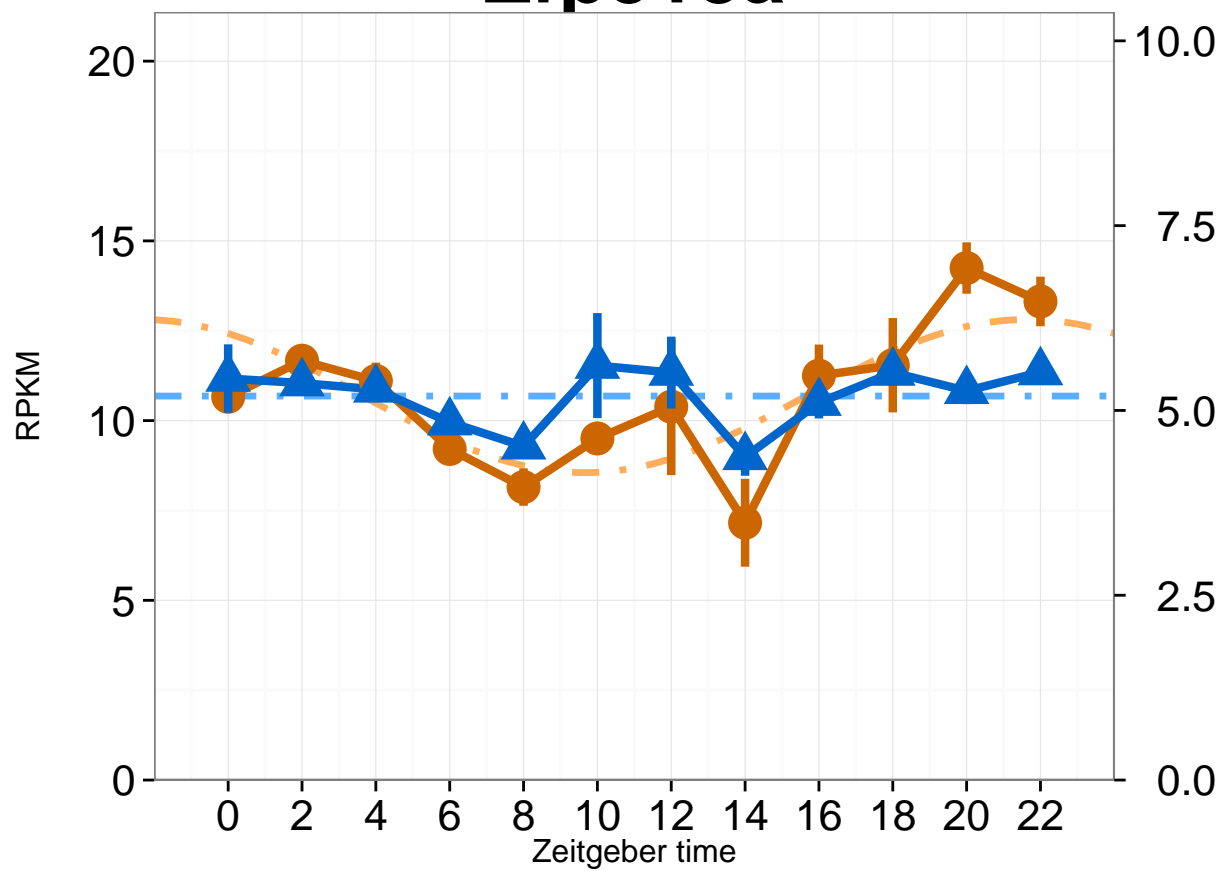

# Zfp518a

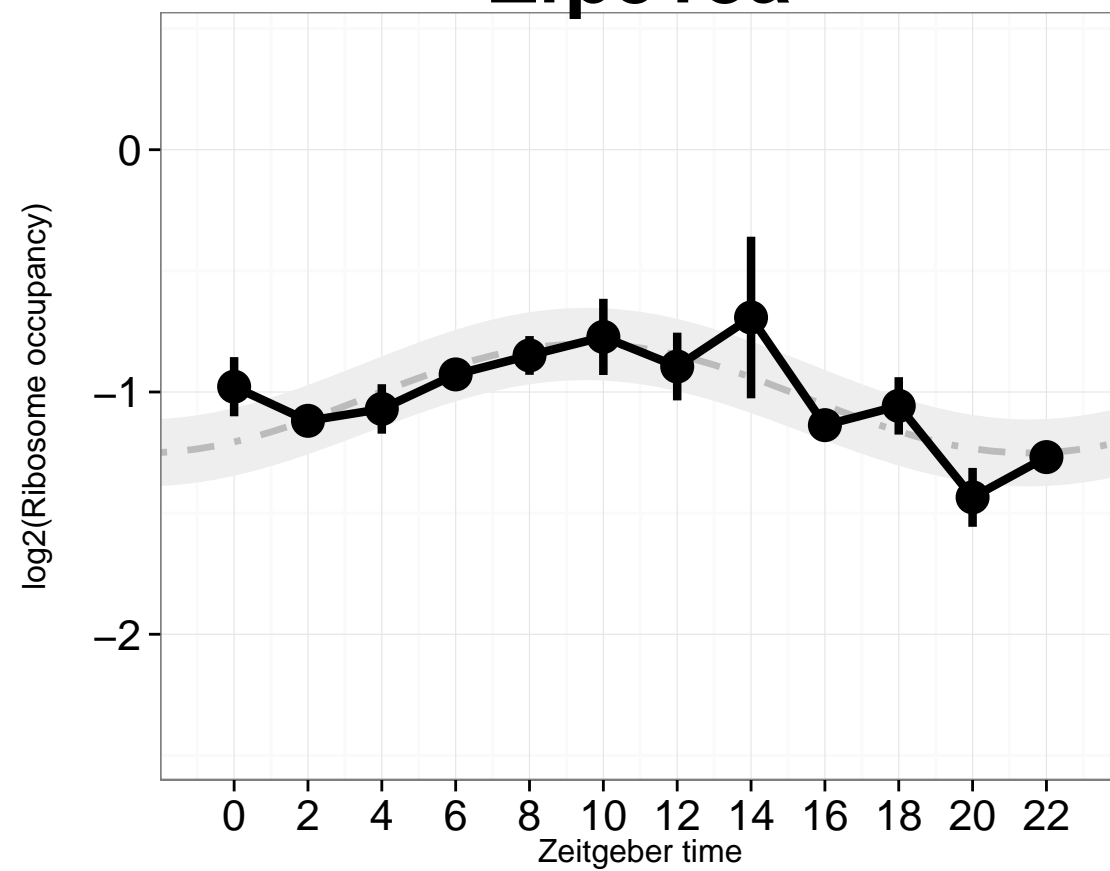

Supplement: Supplementary file 12552 [file 1]

## Adh5

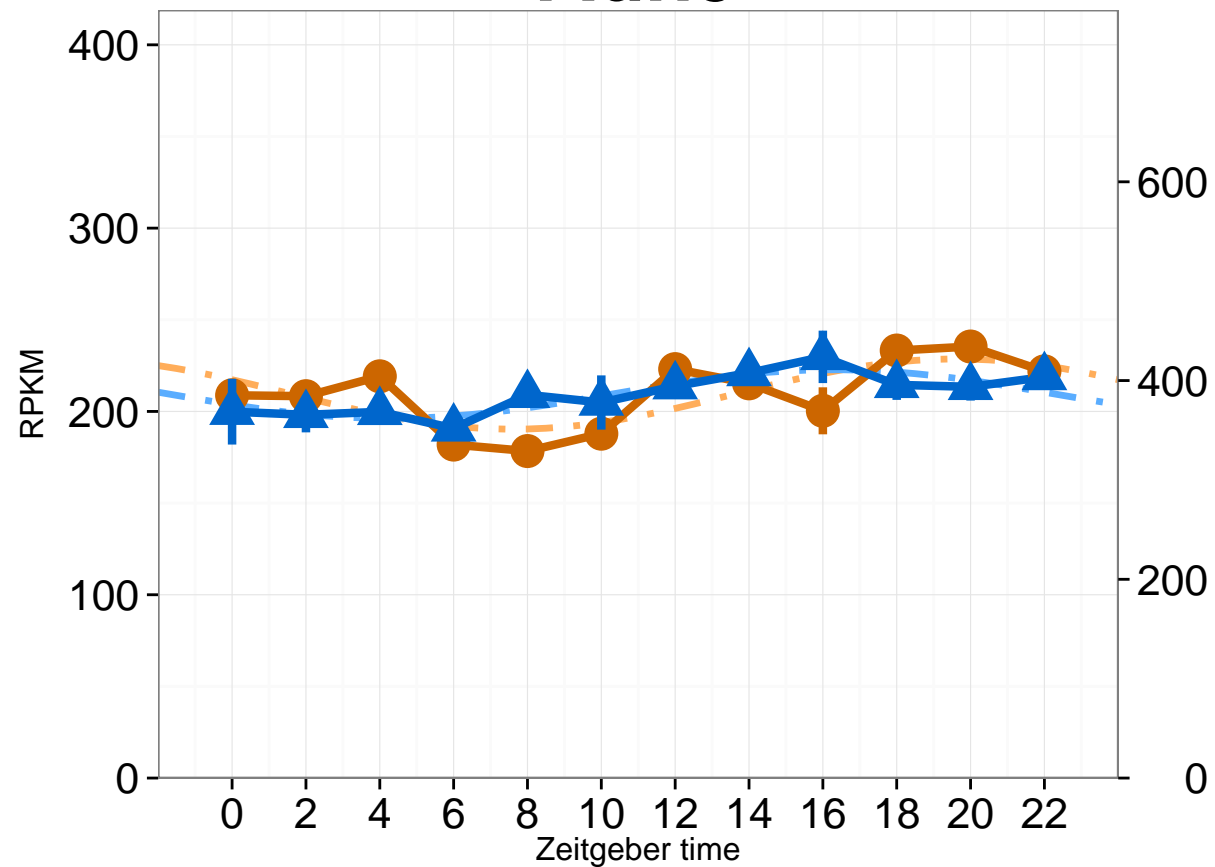

## Adh5

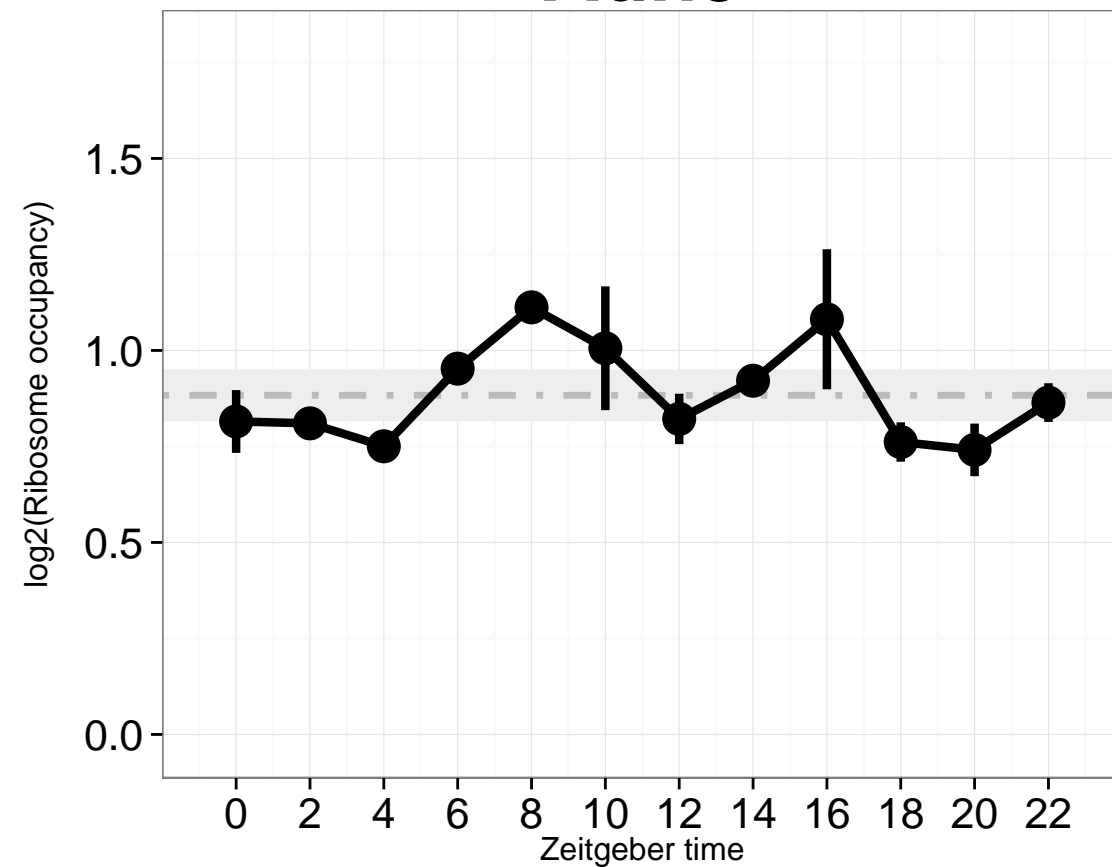

Supplement: Supplementary file 12553 [file 1]

# G6pdx

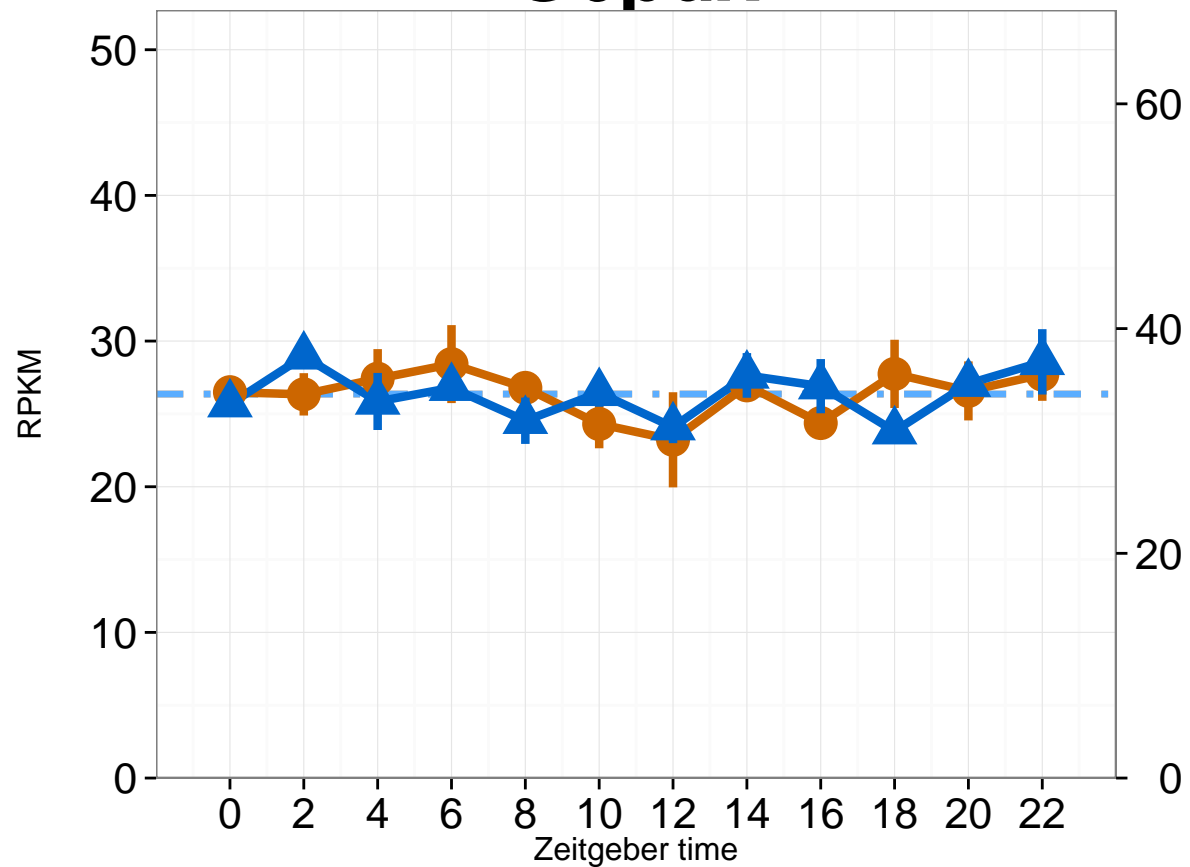

# G6pdx

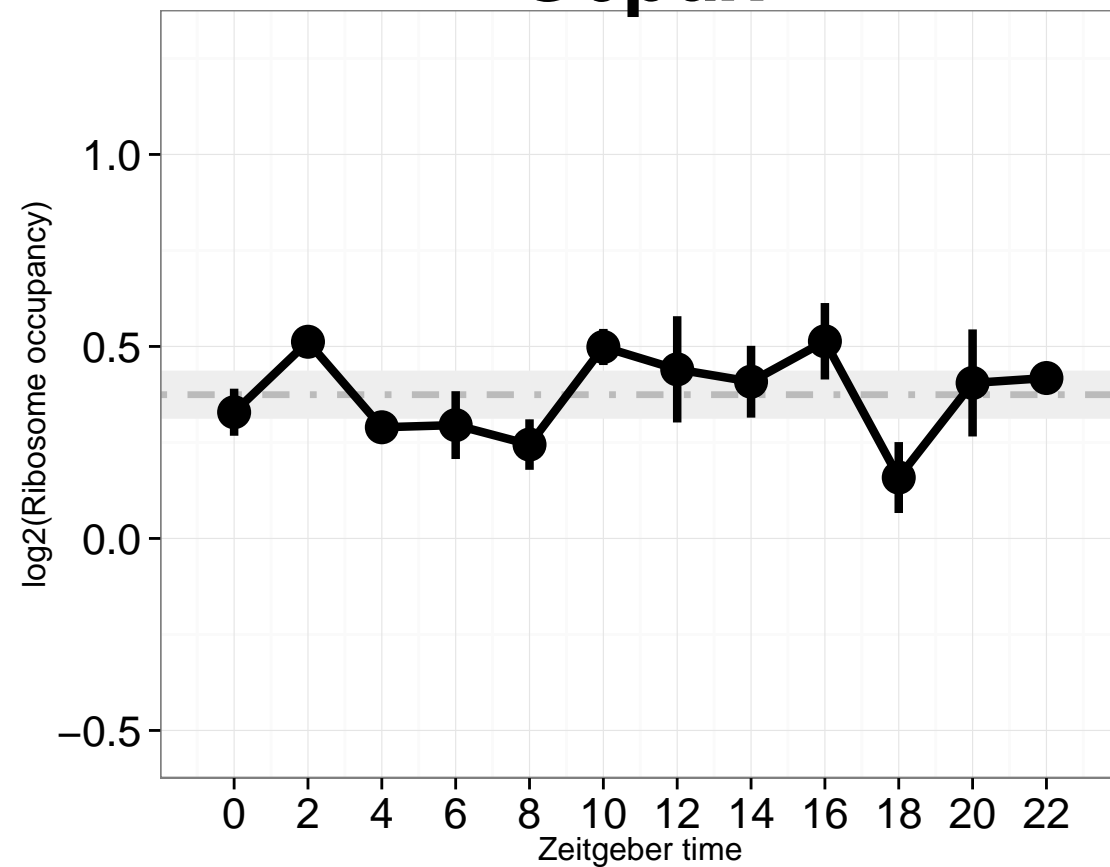

Supplement: Supplementary file 12554 [file 1]

## Vkorc1

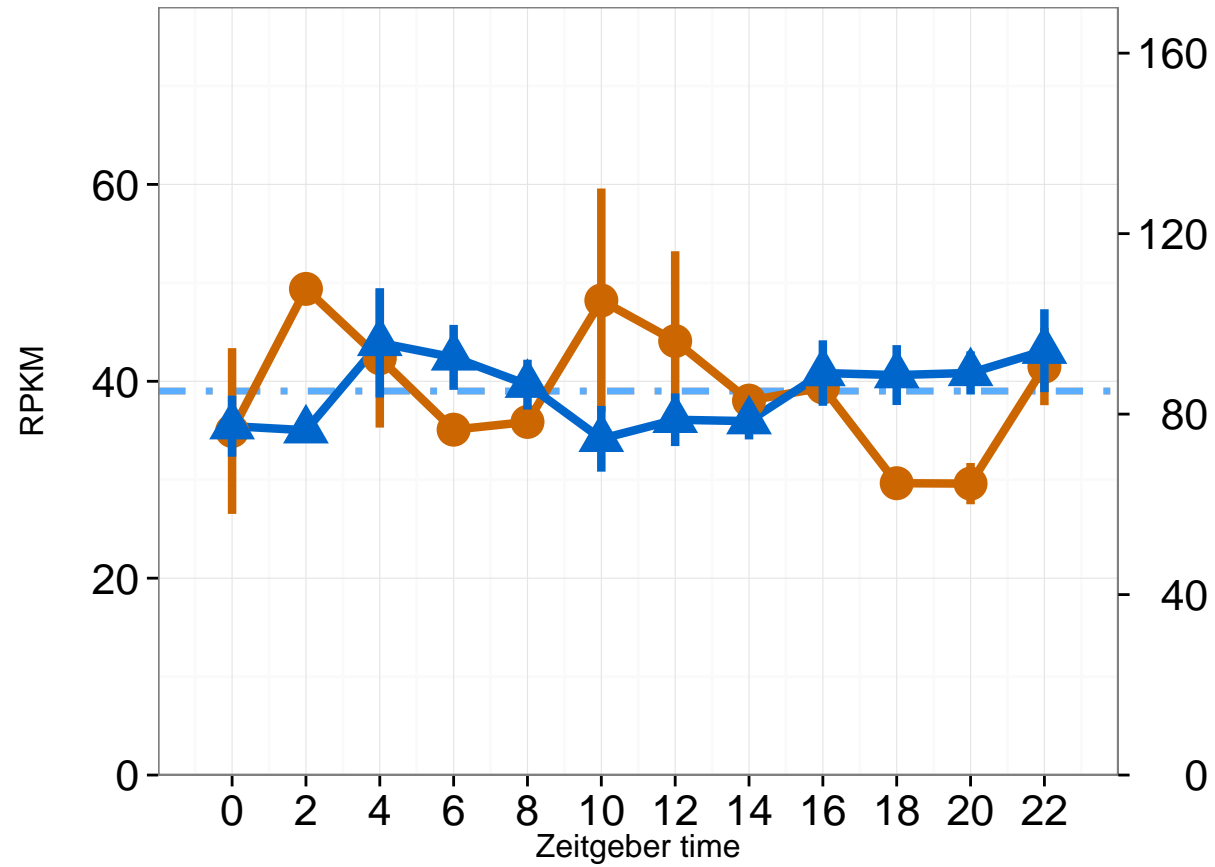

## Vkorc1

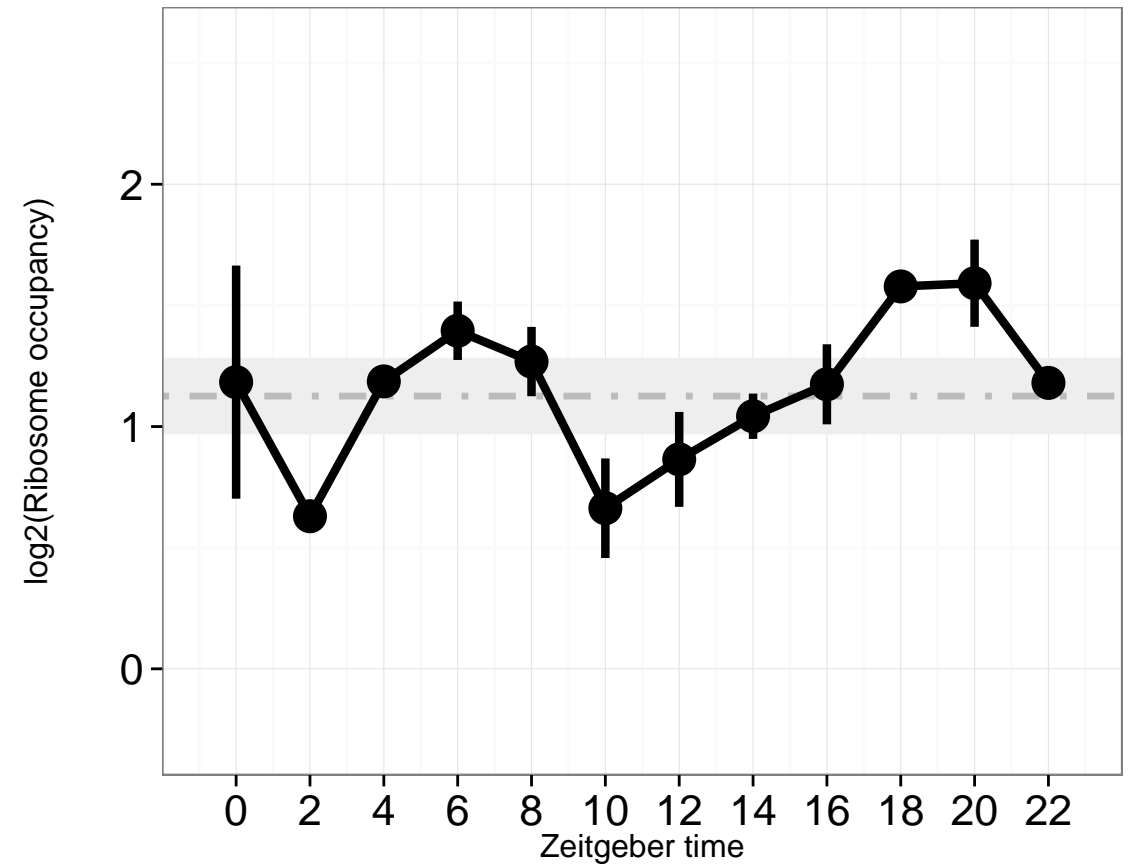

Supplement: Supplementary file 12555 [file 1]

## Kctd10

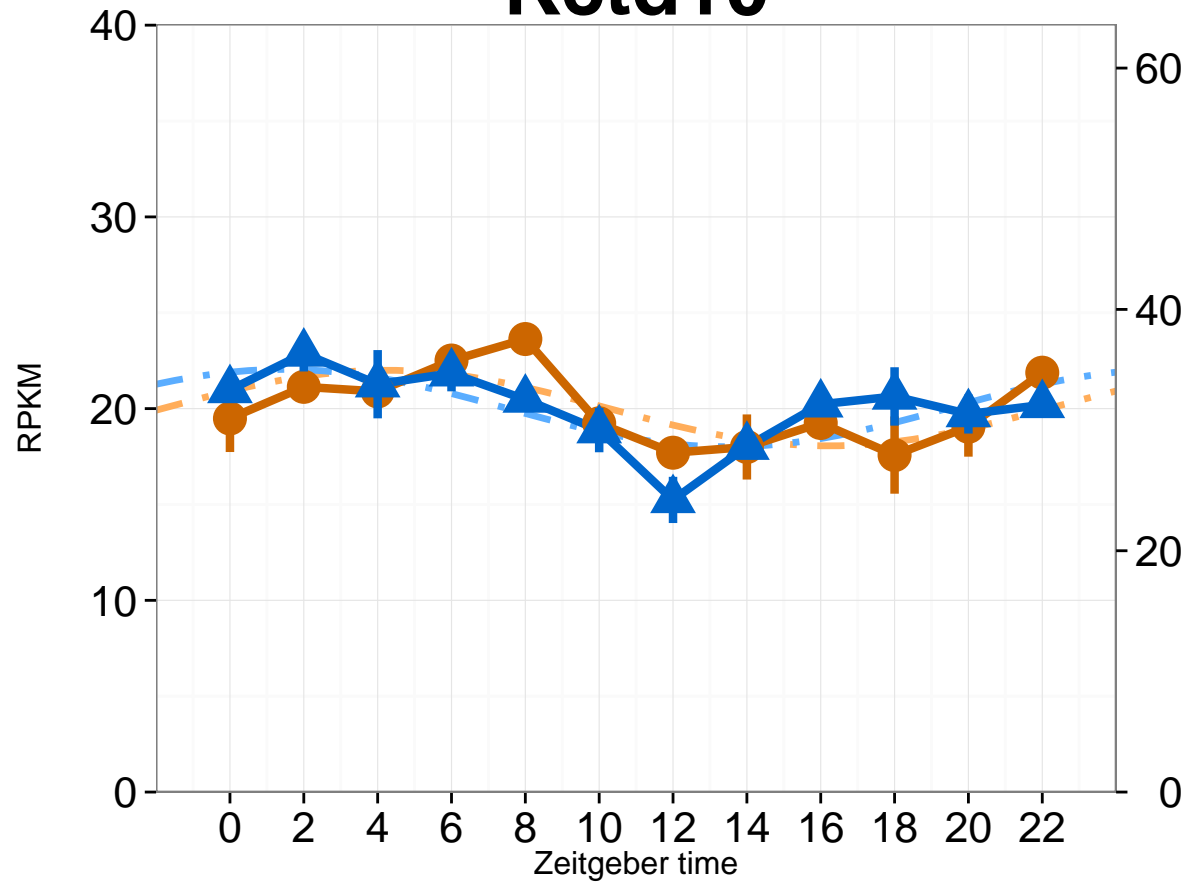

## Kctd10

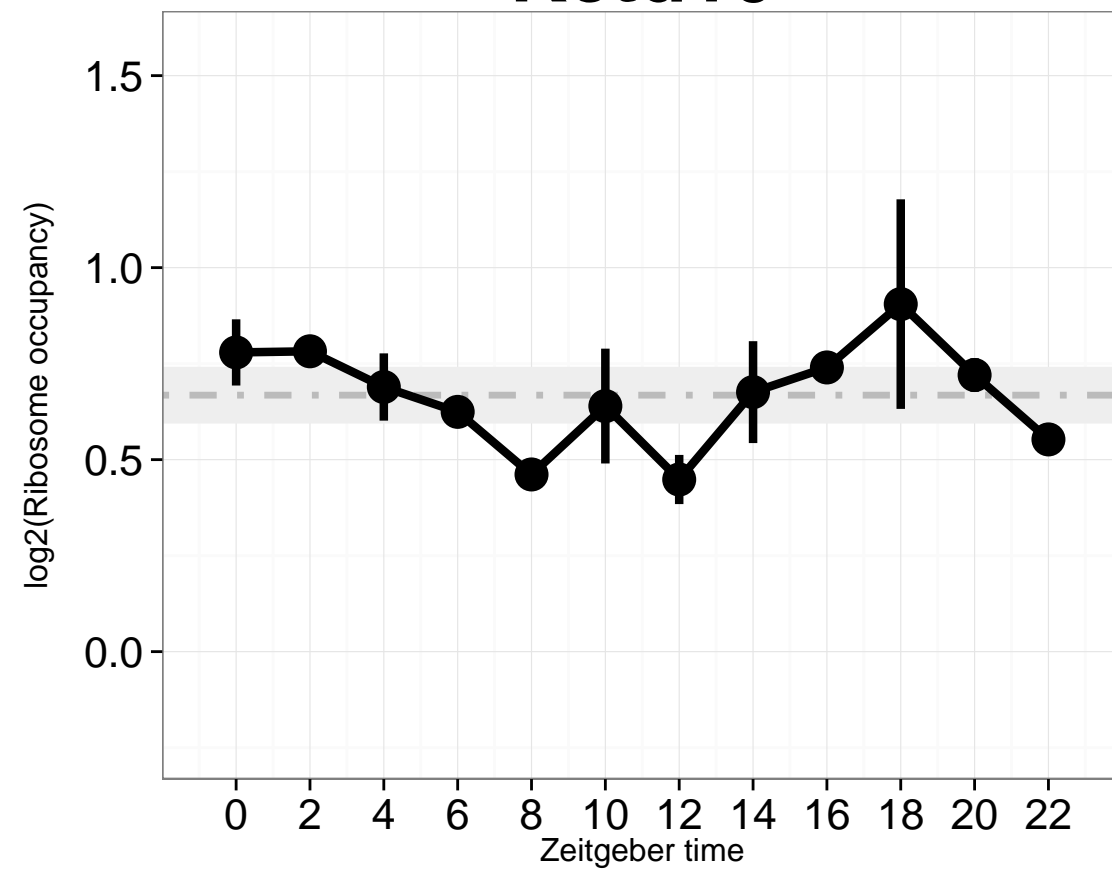

Supplement: Supplementary file 12556 [file 1]

## Ccdc43

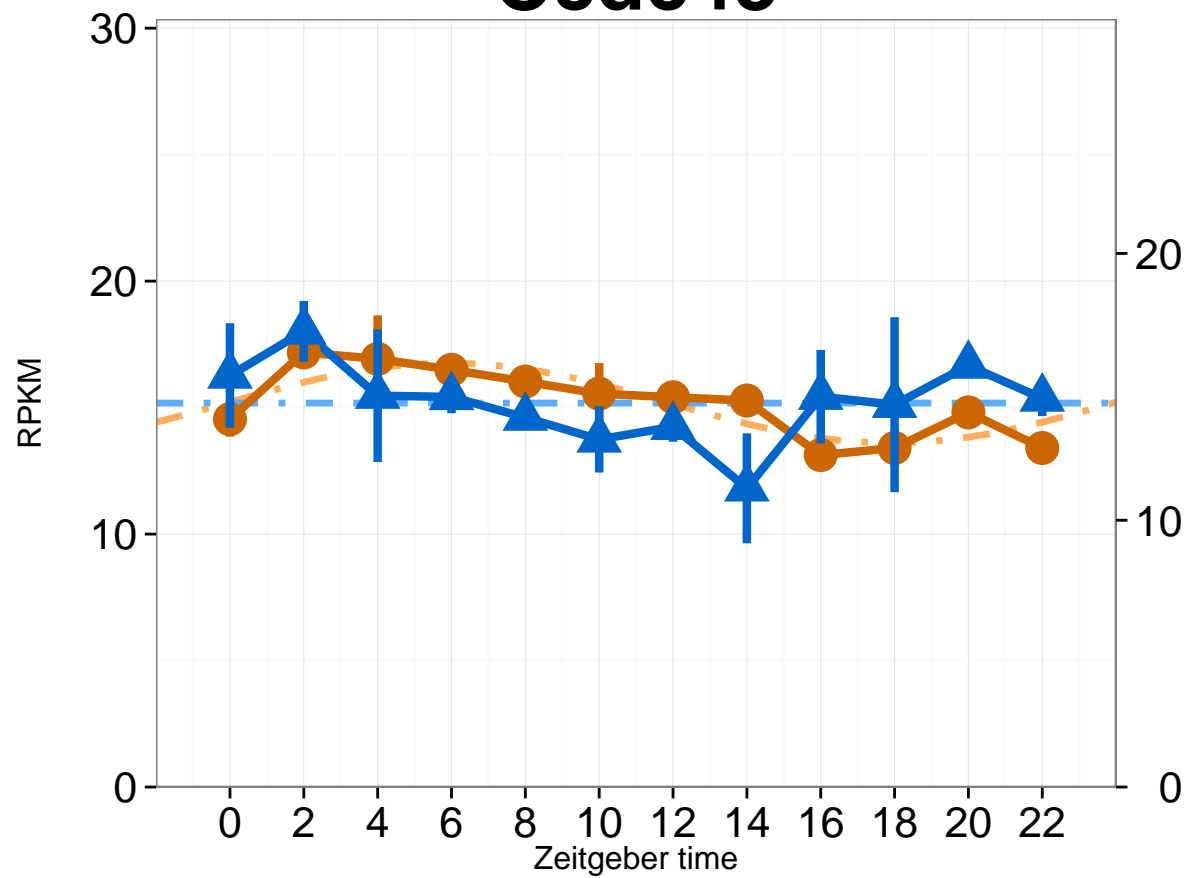

## Ccdc43

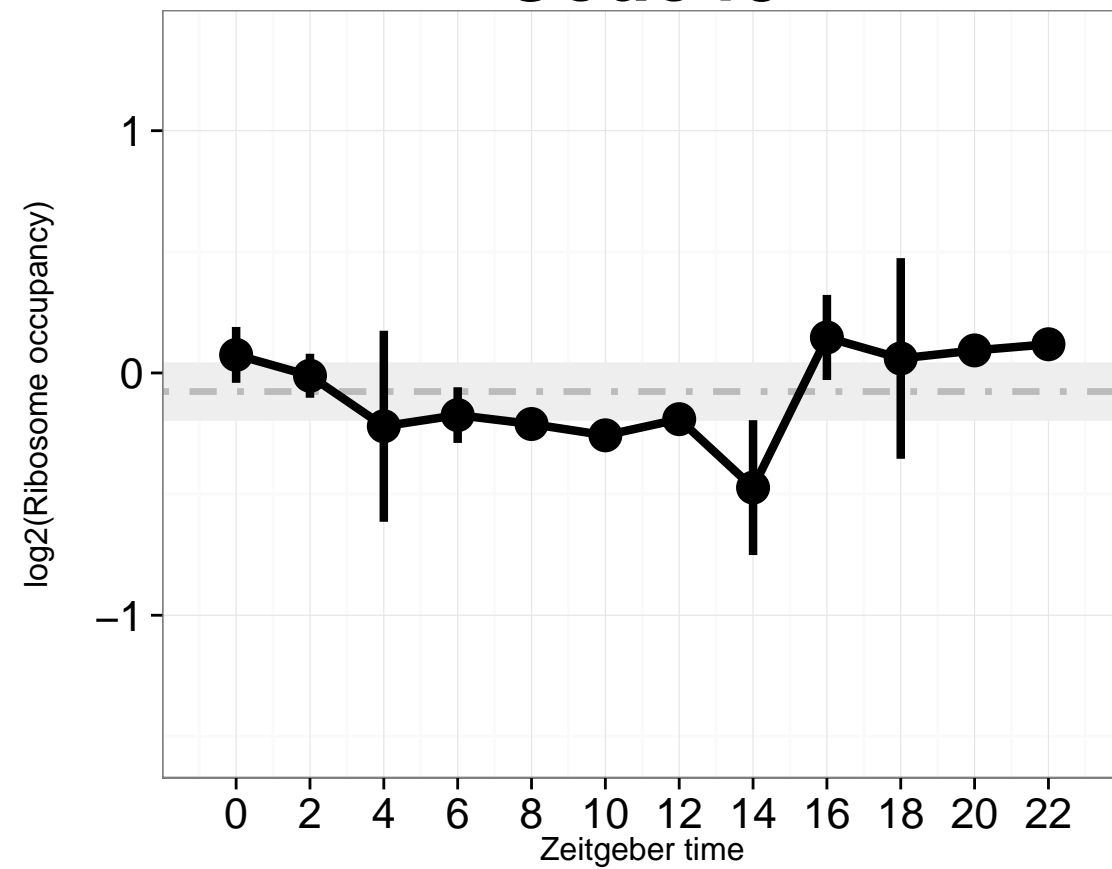

Supplement: Supplementary file 12557 [file 1]

## Dctn3

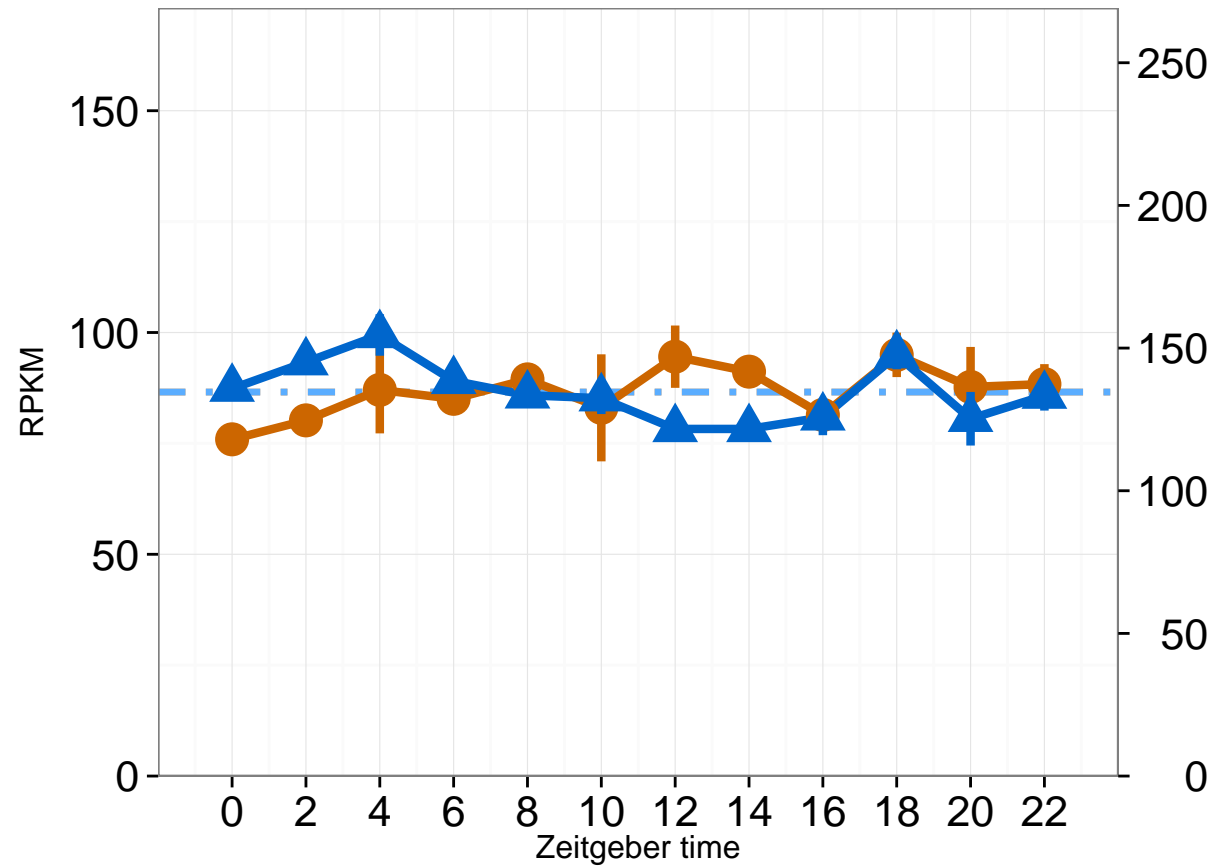

## Dctn3

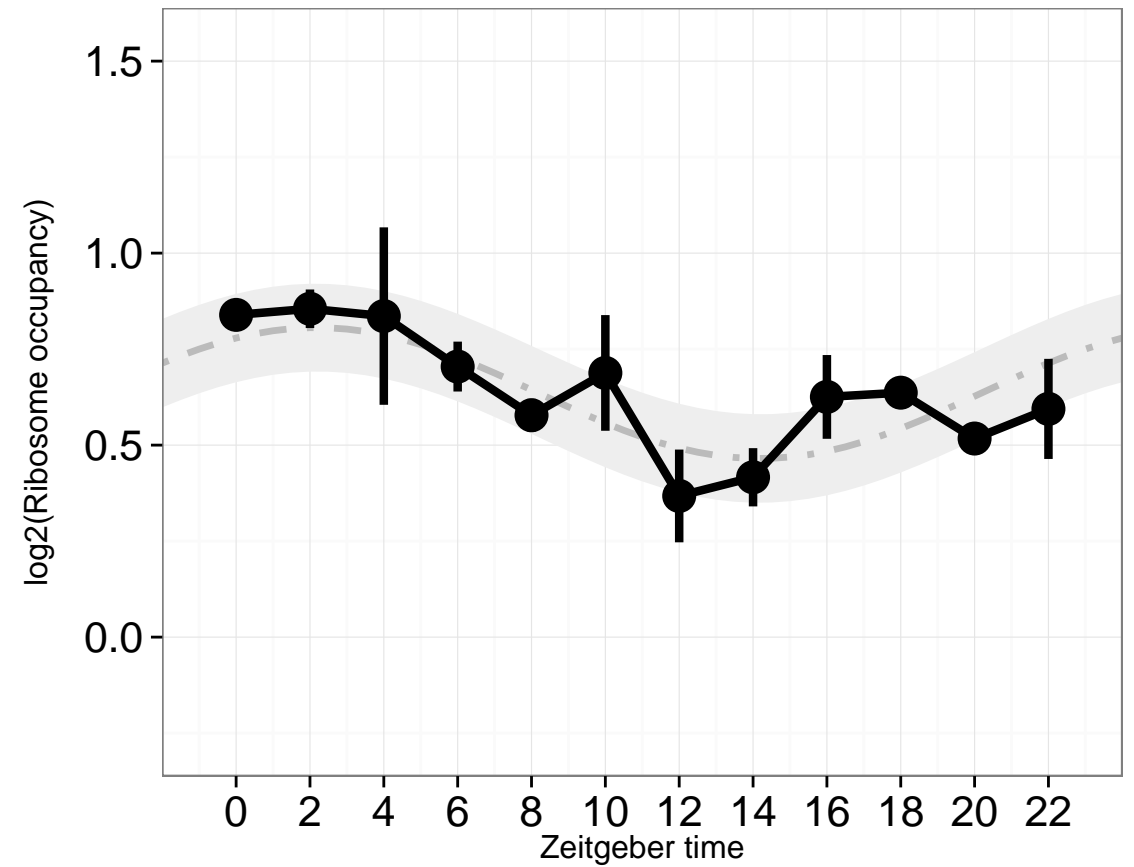

Supplement: Supplementary file 12558 [file 1]

## Rrad

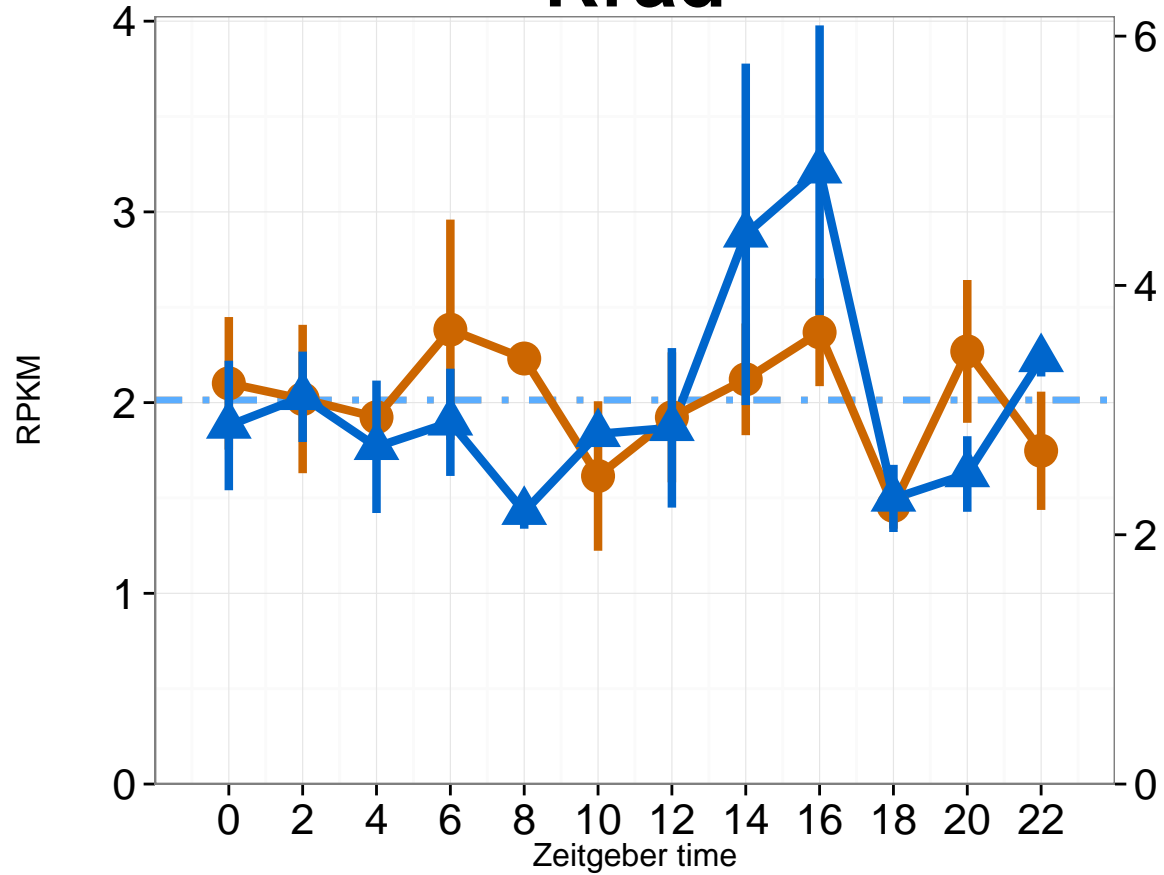

## Rrad

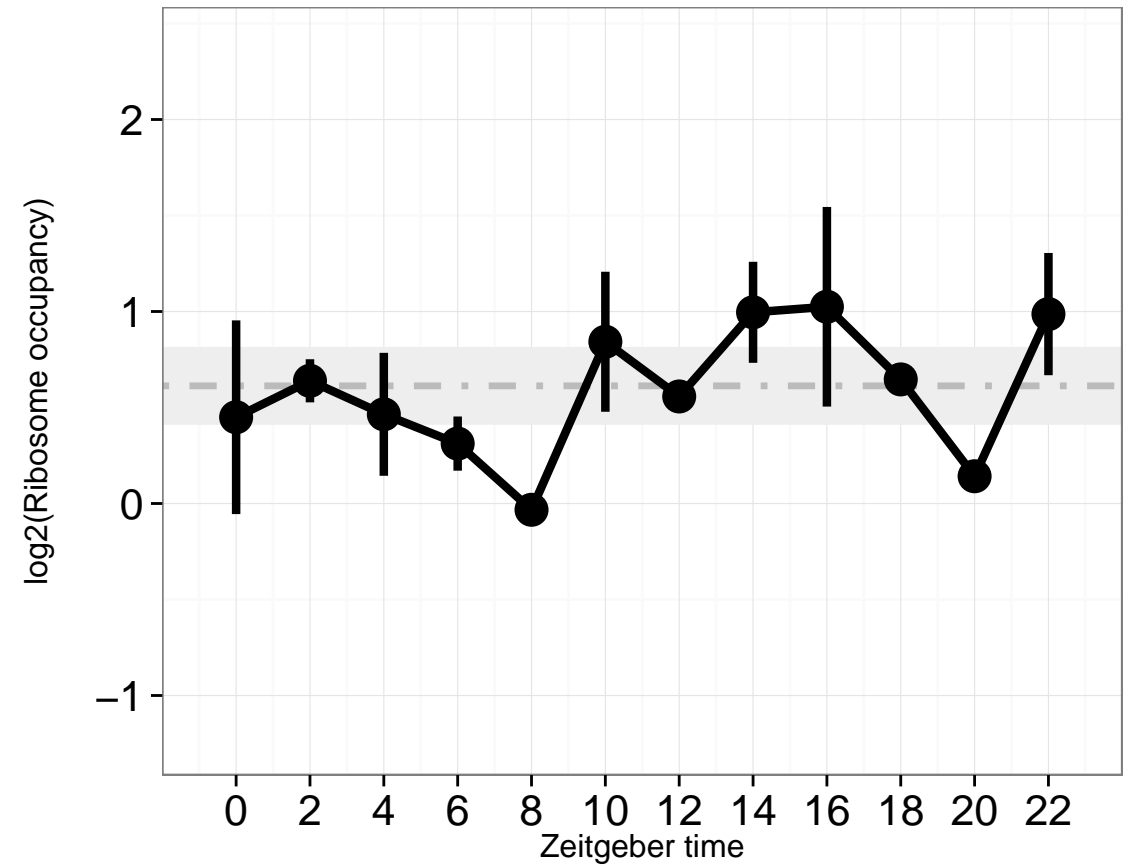

Supplement: Supplementary file 12559 [file 1]

# Ppp2r1a

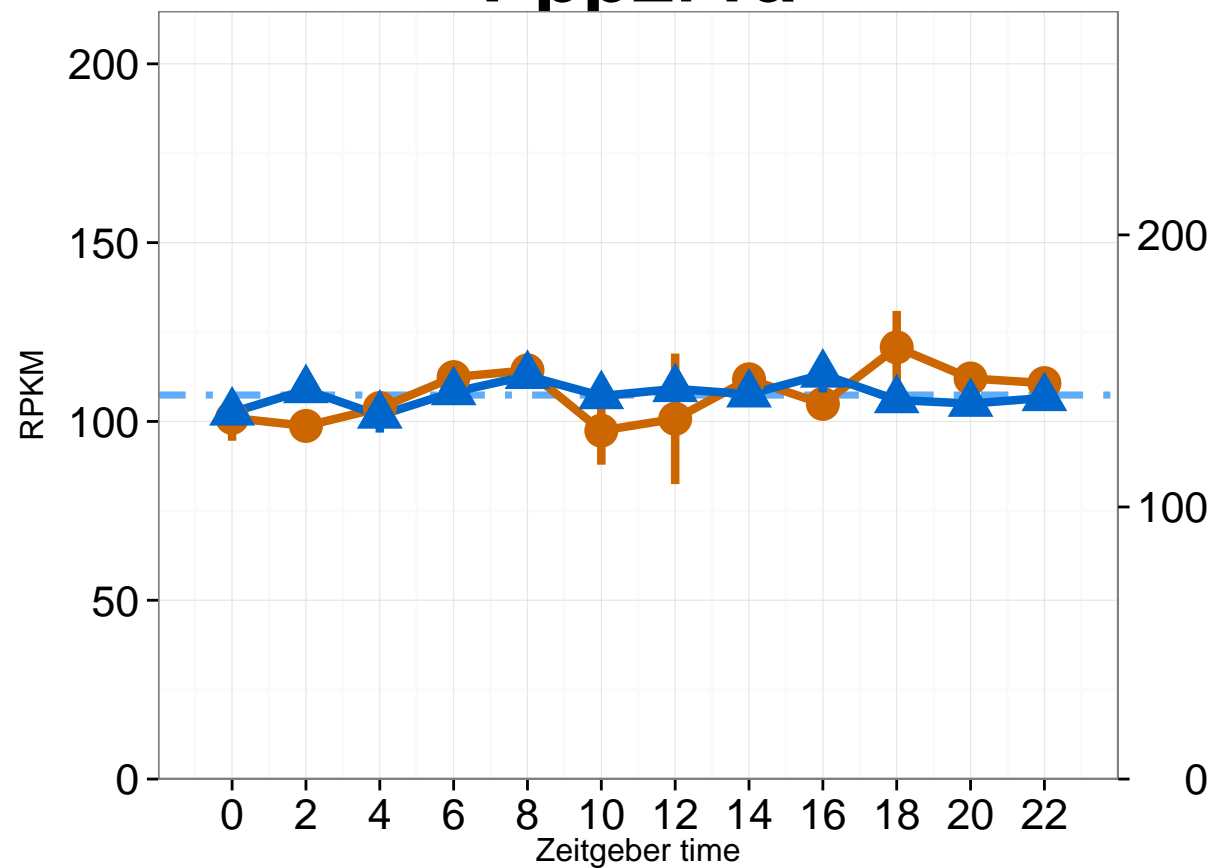

# Ppp2r1a

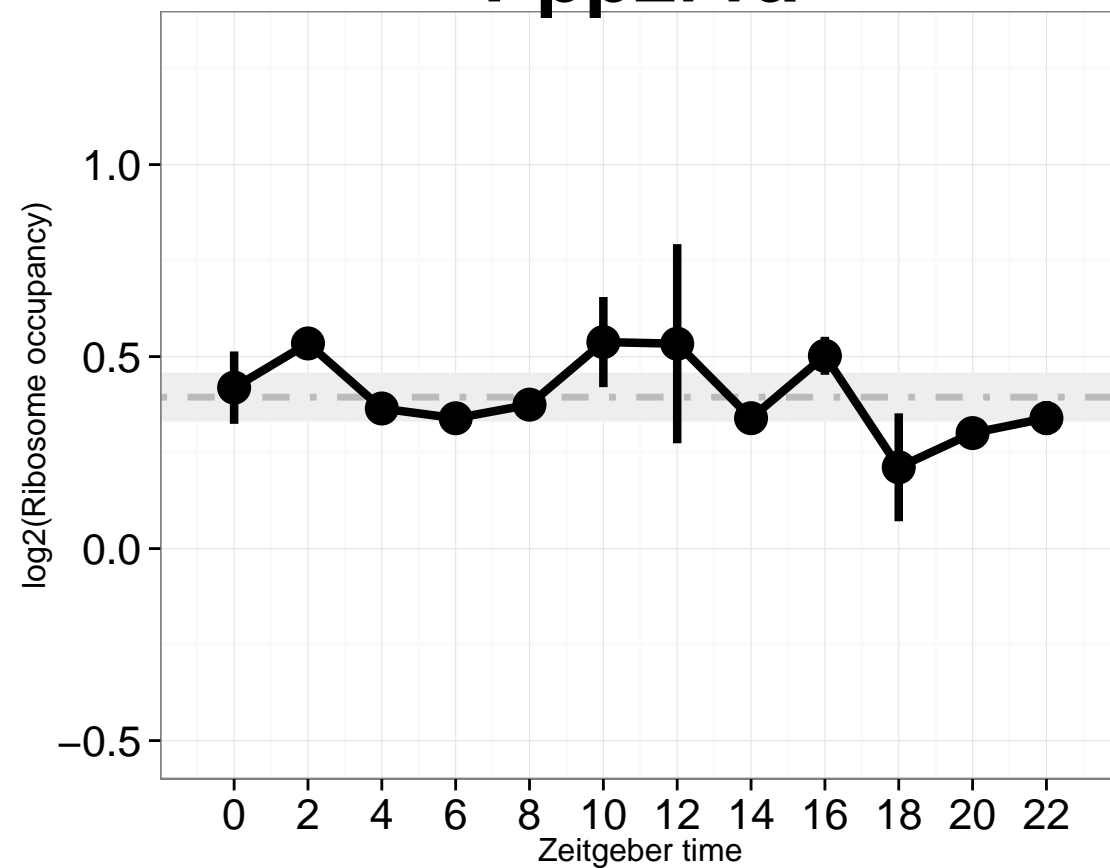

Supplement: Supplementary file 12560 [file 1]

## Prpf31

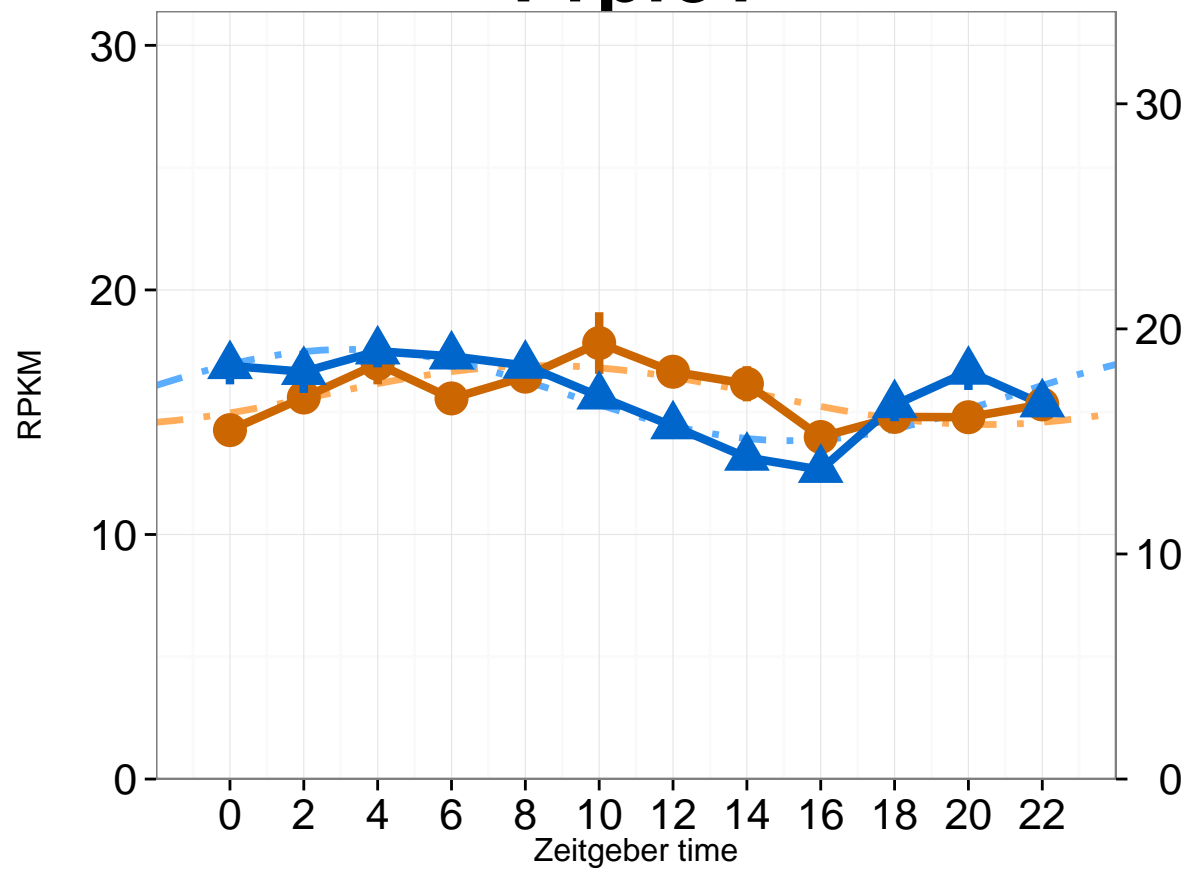

## Prpf31

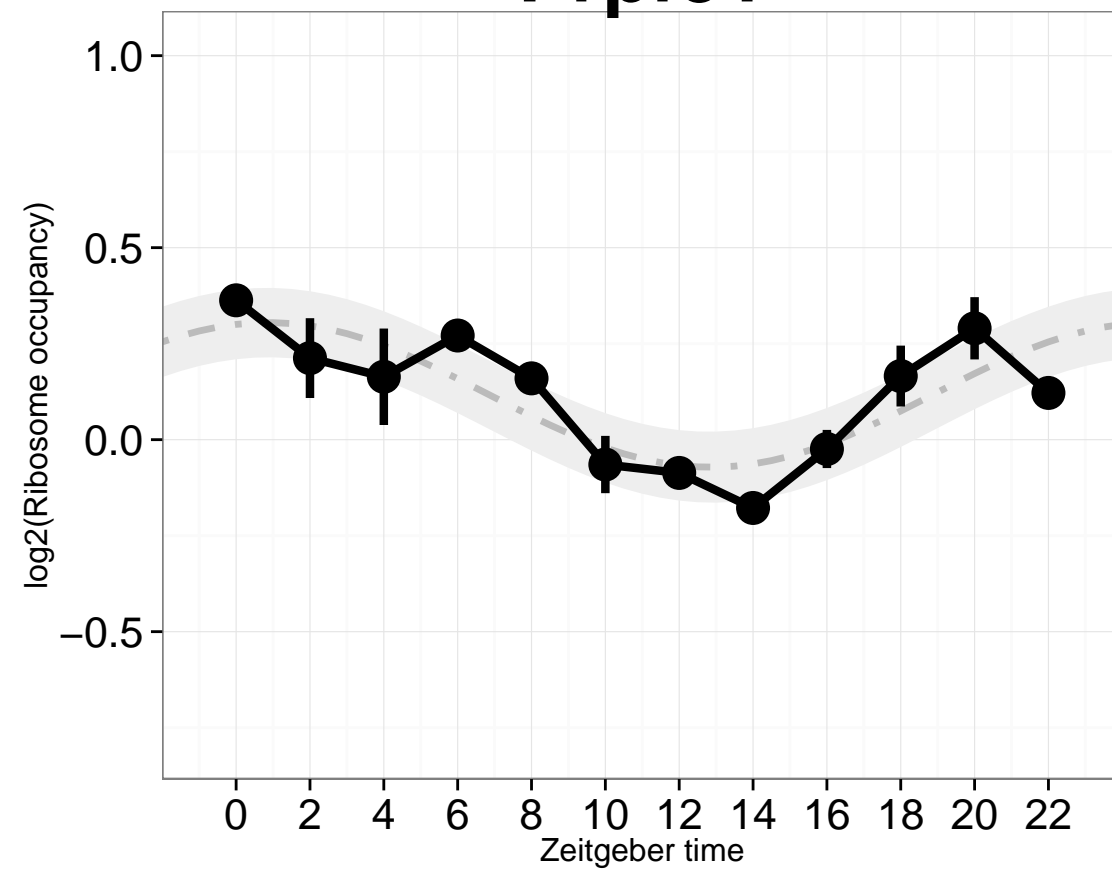

Supplement: Supplementary file 12561 [file 1]

**H2-Q10 TR**

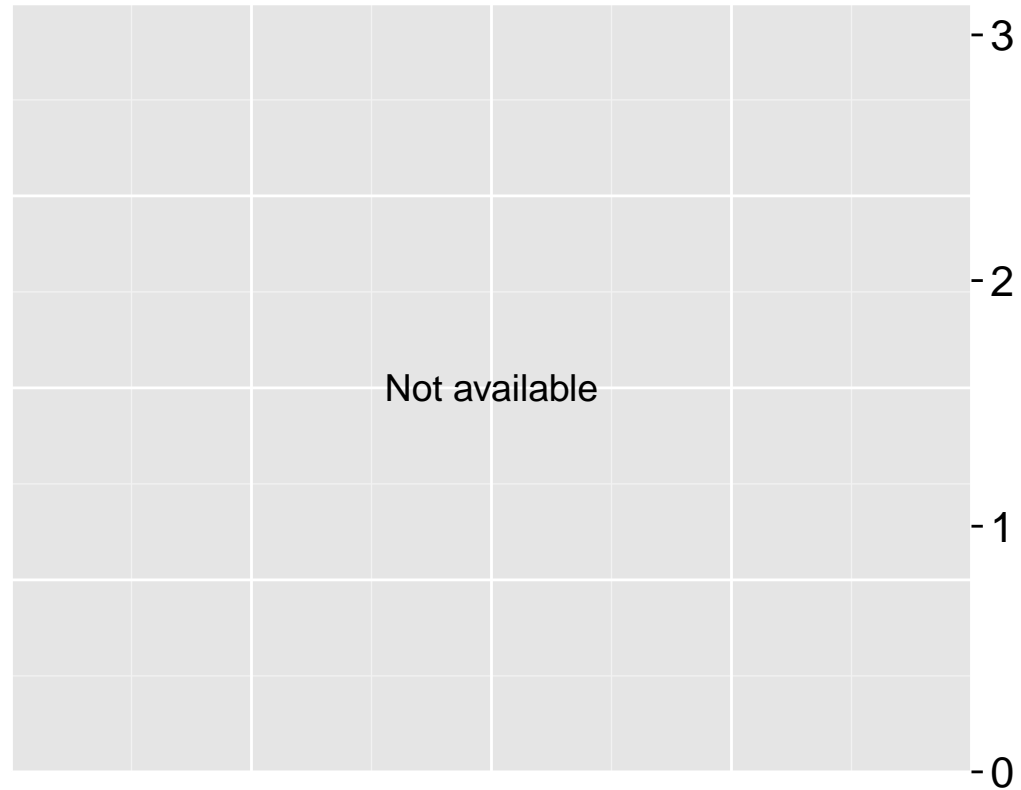

**H2-Q10  $\log_2$ (Ribosome occupancy)**

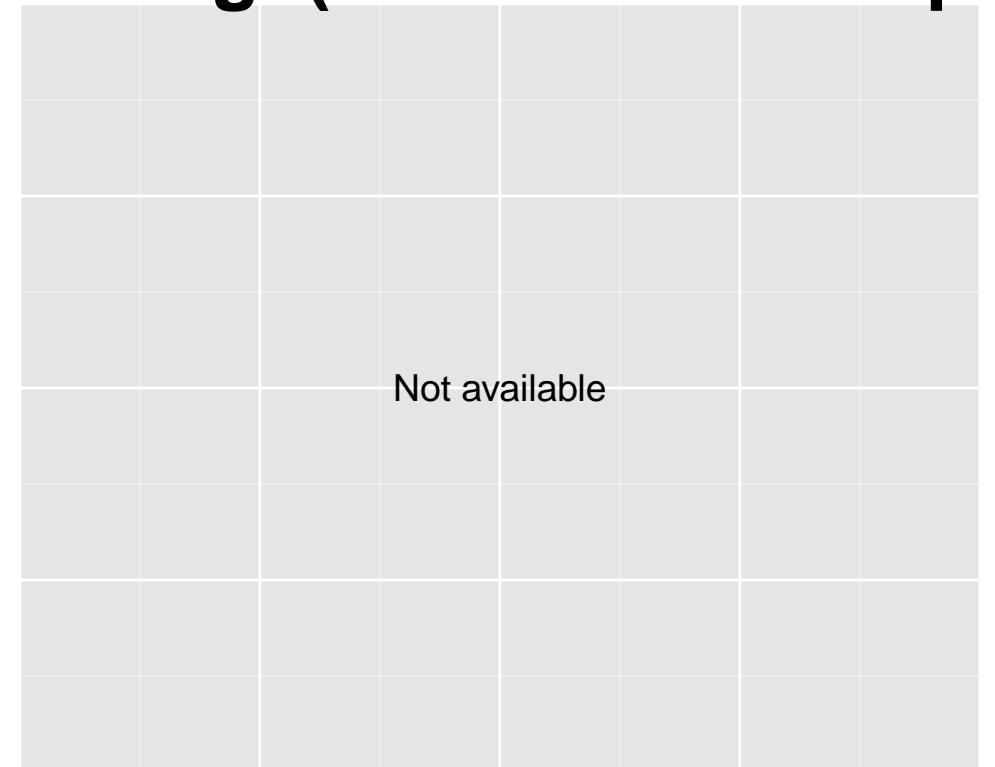

Supplement: Supplementary file 12562 [file 1]

# Myo1b

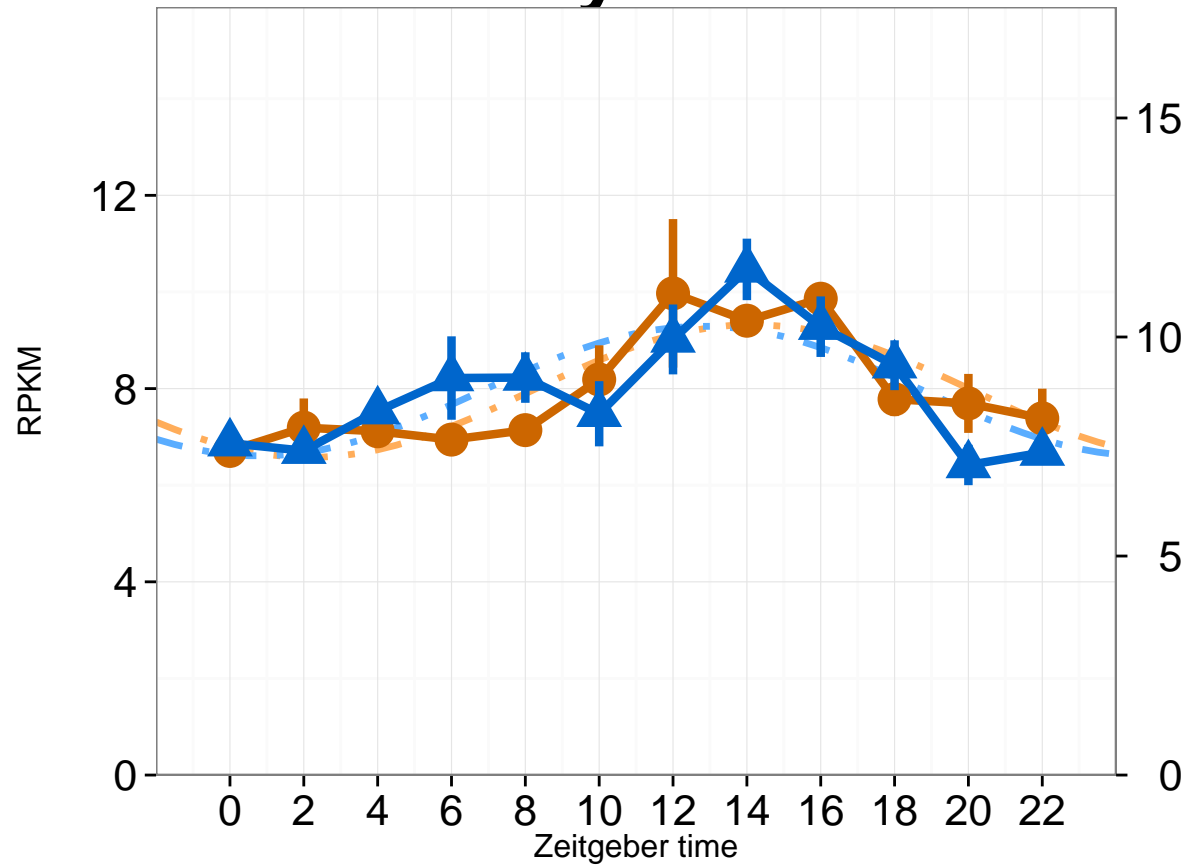

# Myo1b

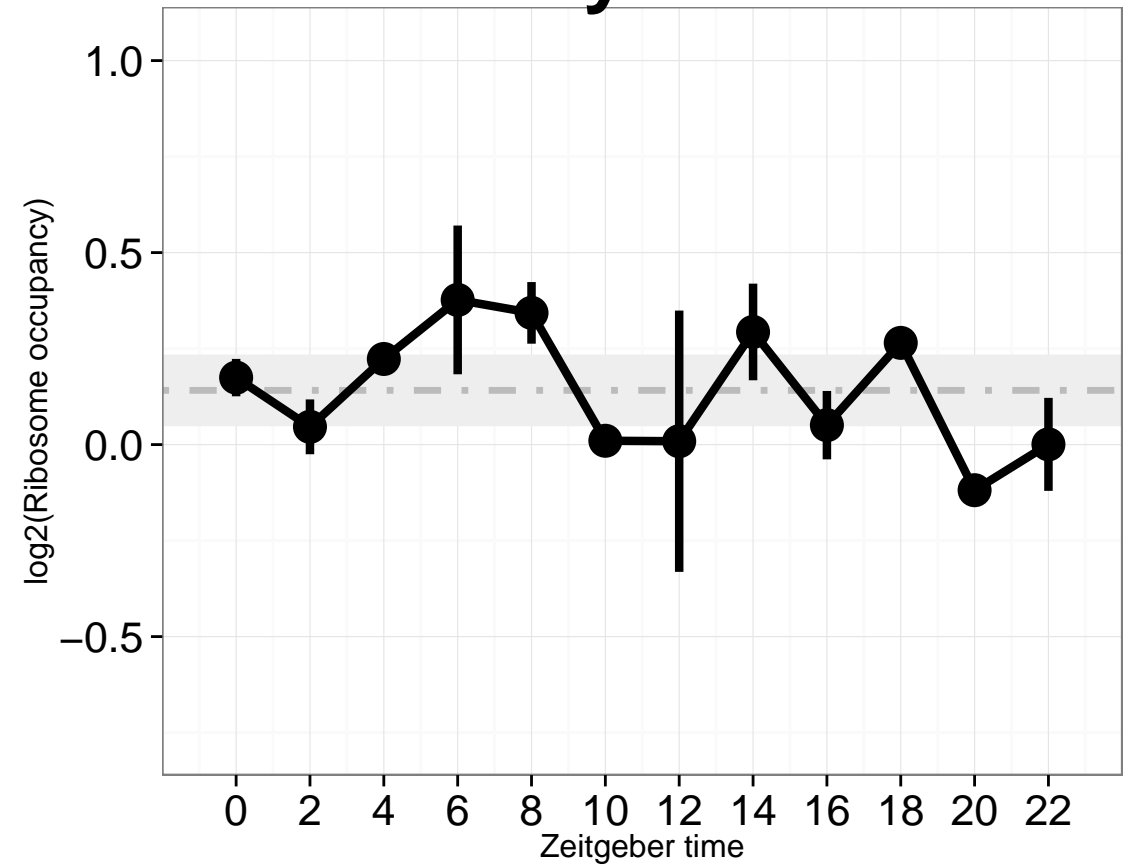

Supplement: Supplementary file 12563 [file 1]

## Prdx4

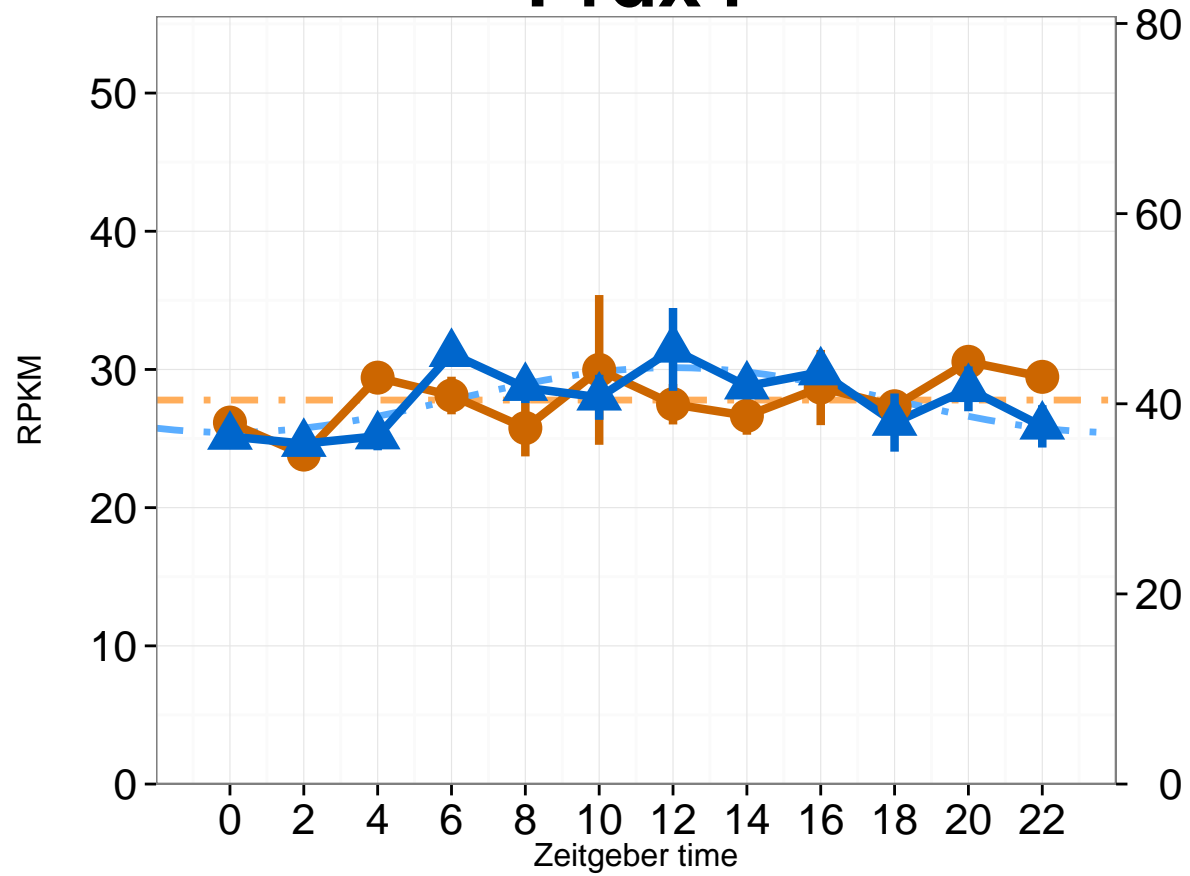

## Prdx4

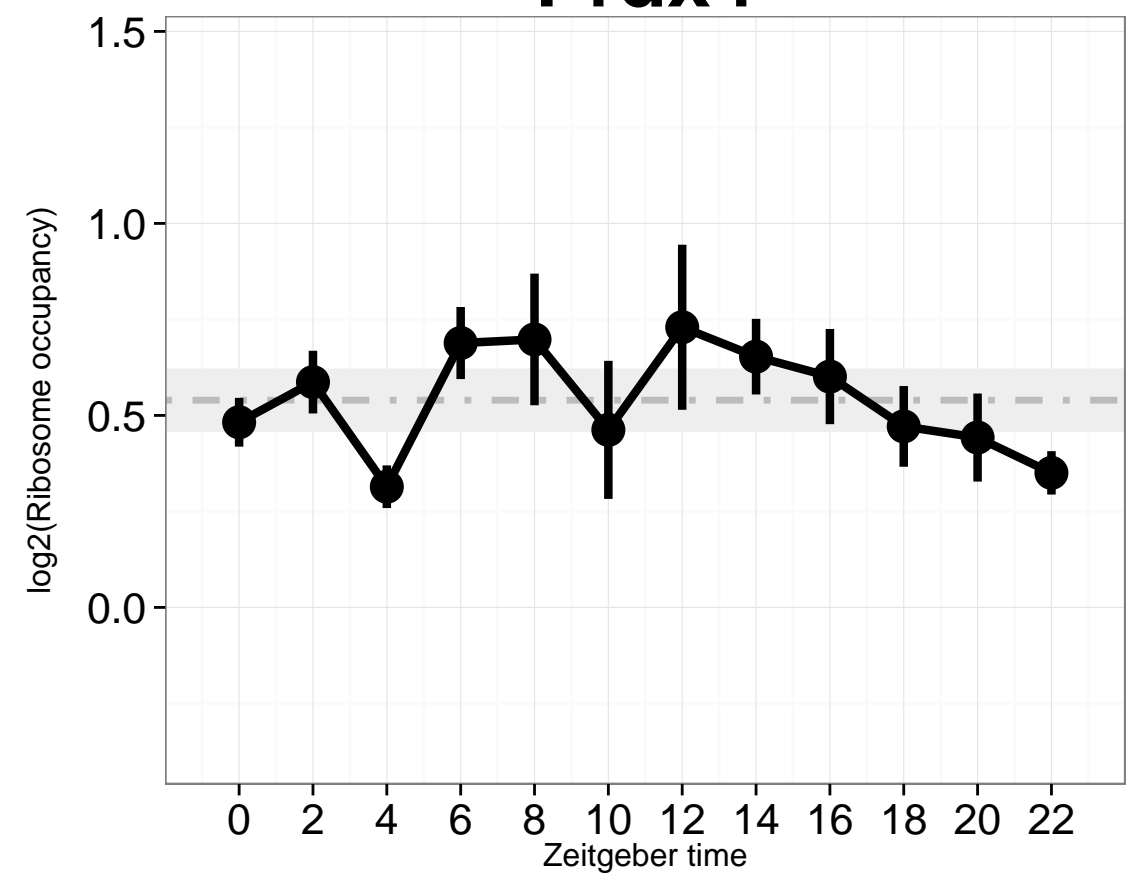

Supplement: Supplementary file 12564 [file 1]

# Ptprk

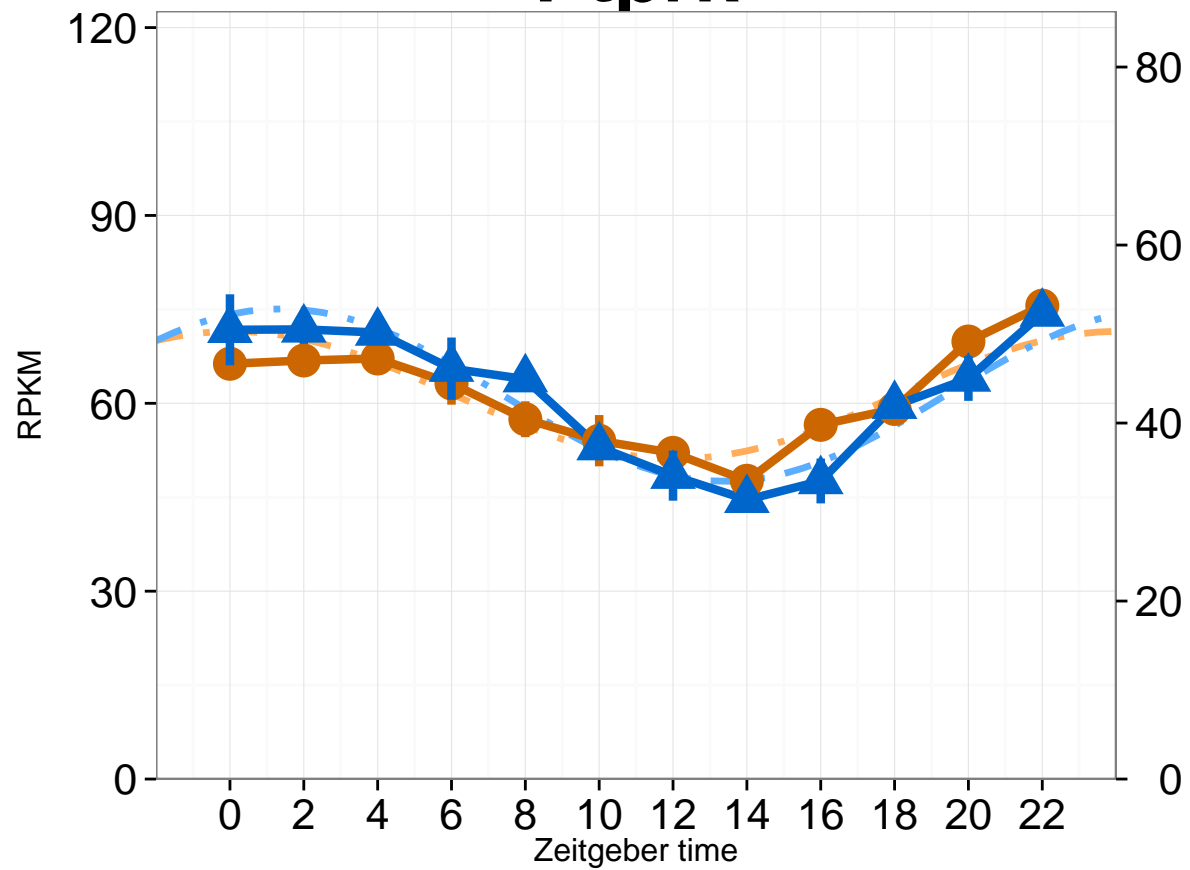

# Ptprk

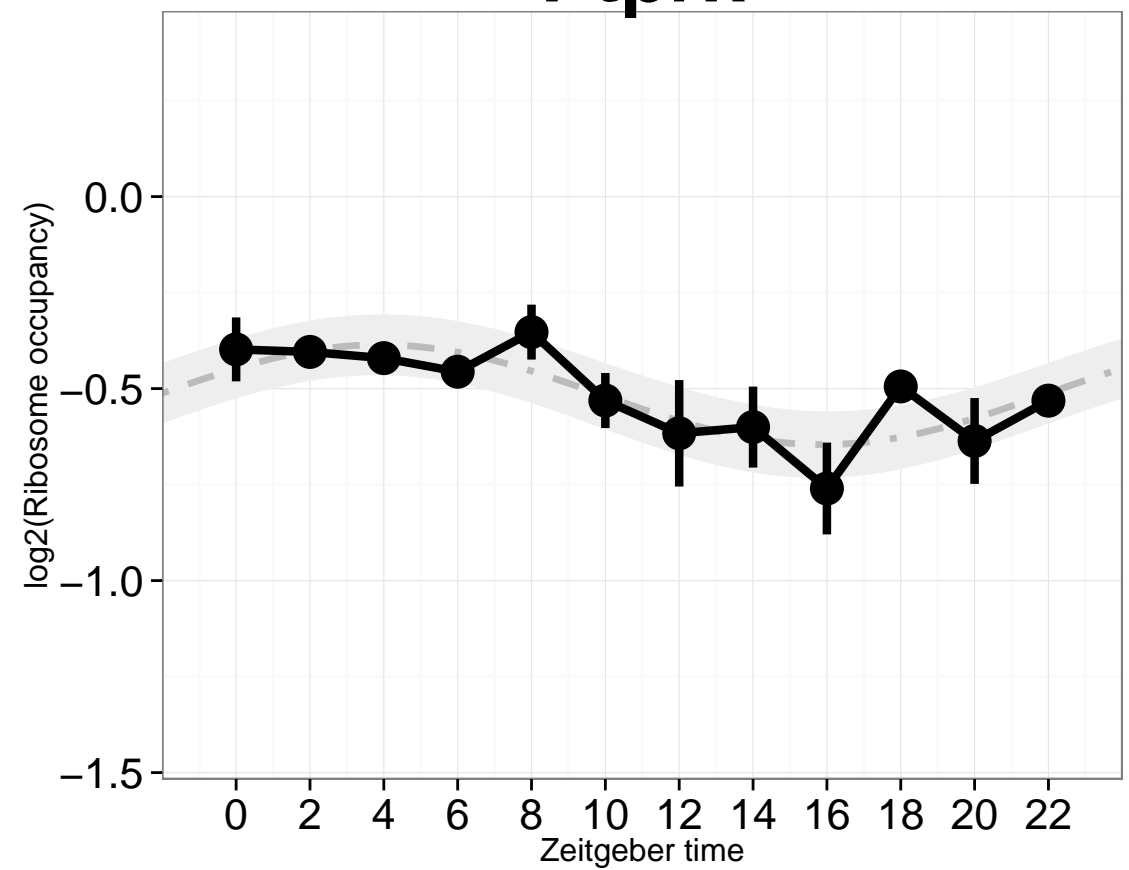

Supplement: Supplementary file 12565 [file 1]

# Zfp568

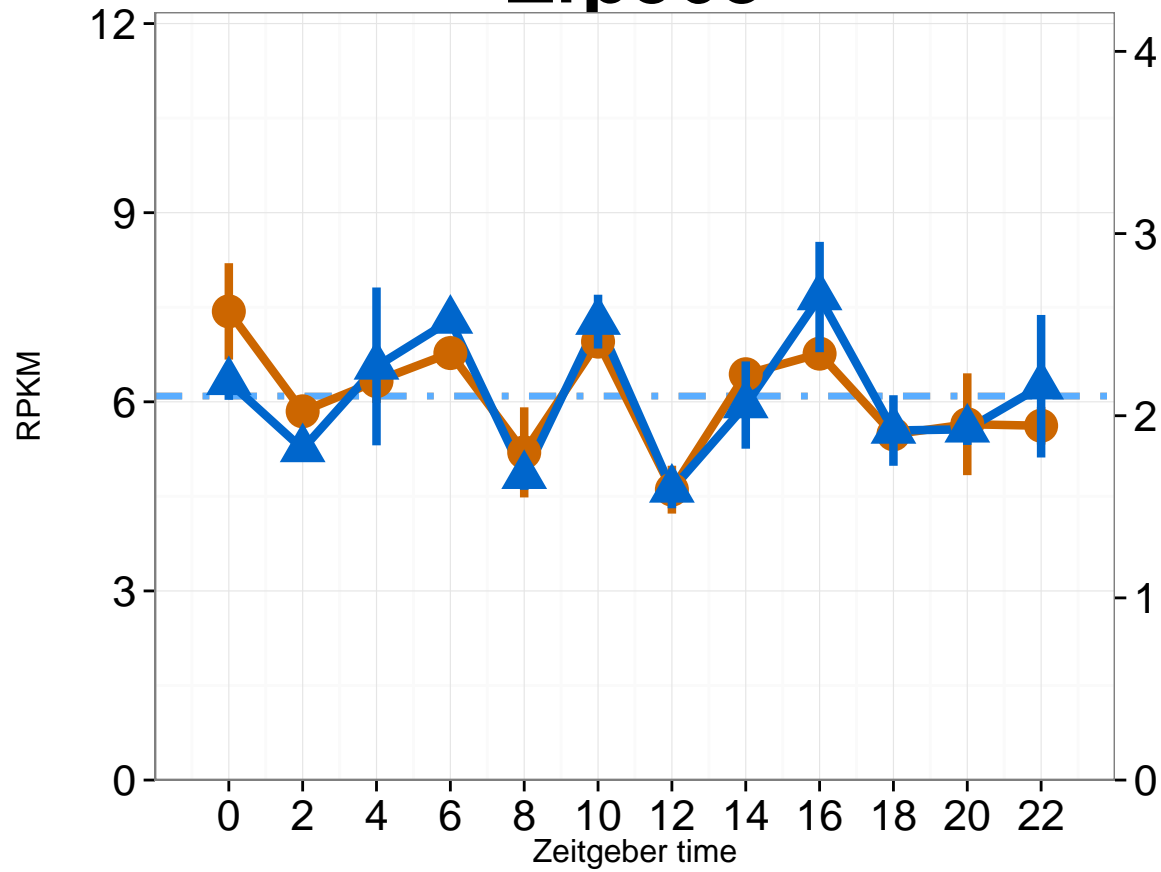

# Zfp568

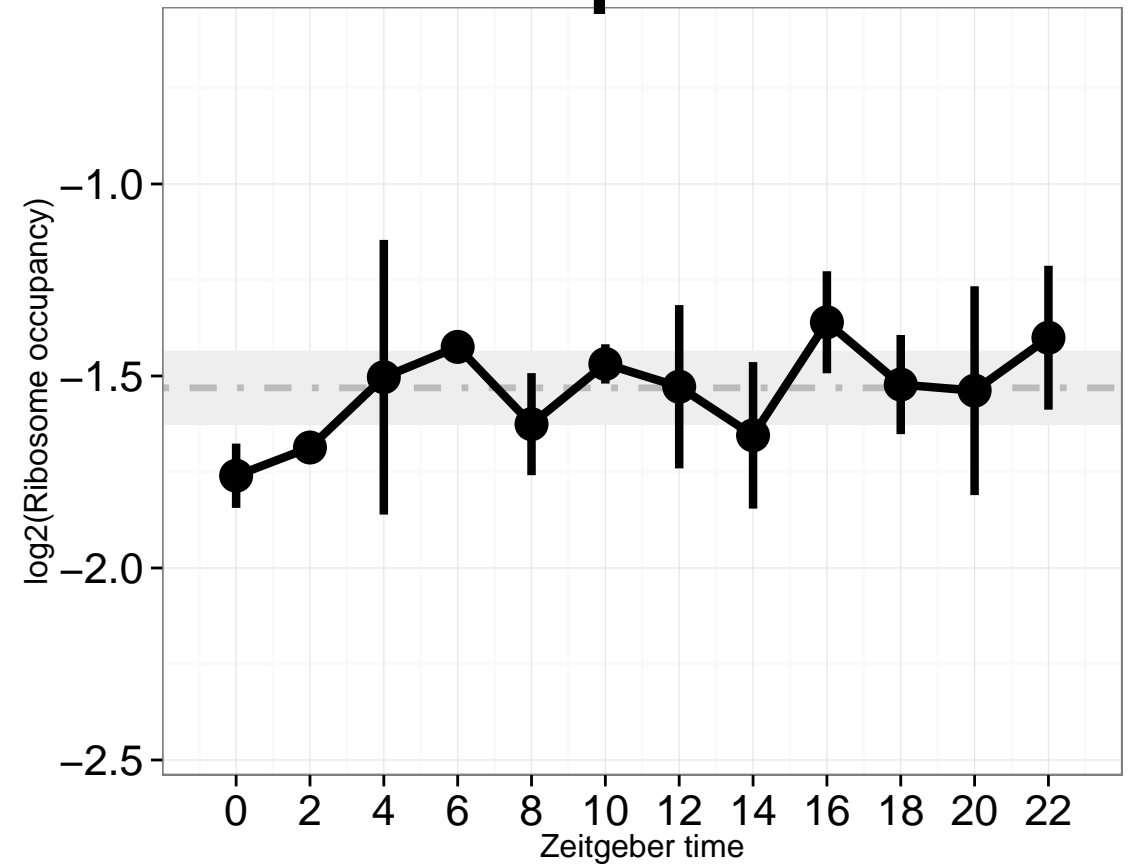

Supplement: Supplementary file 12566 [file 1]

## Slit3

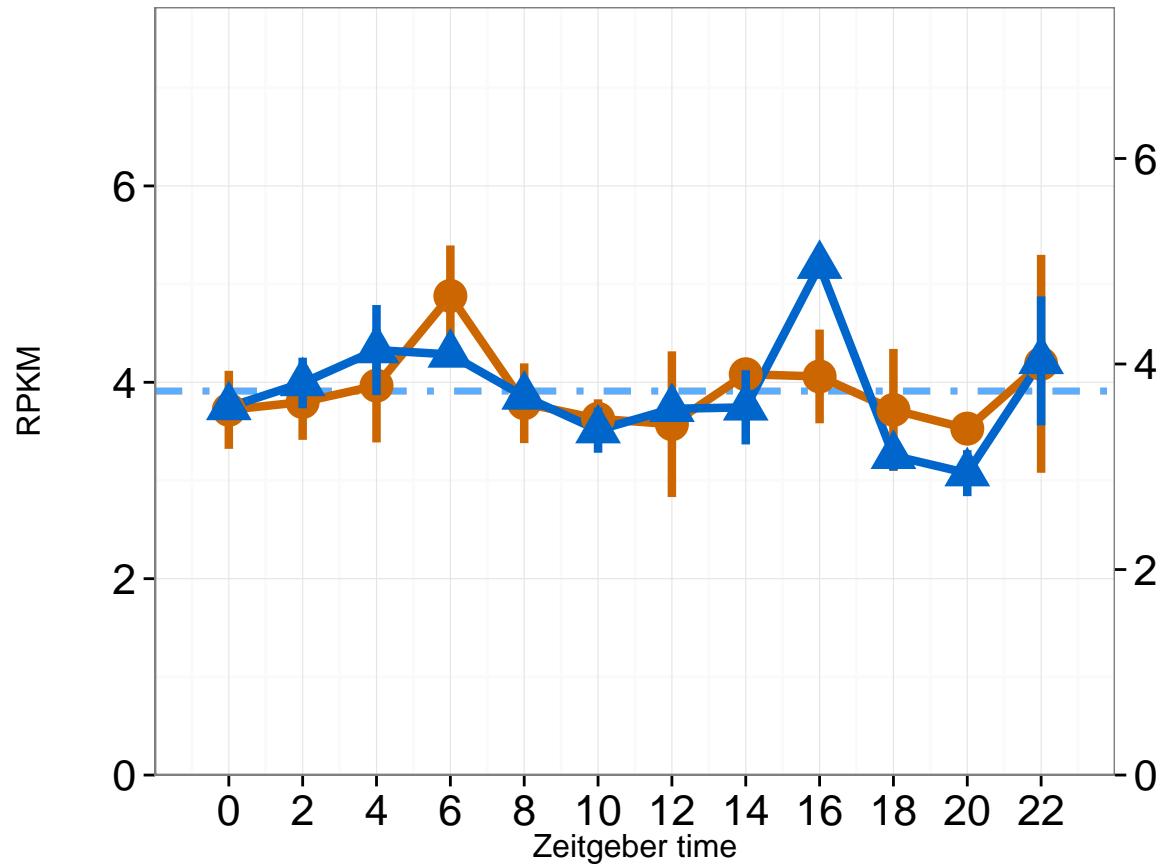

## Slit3

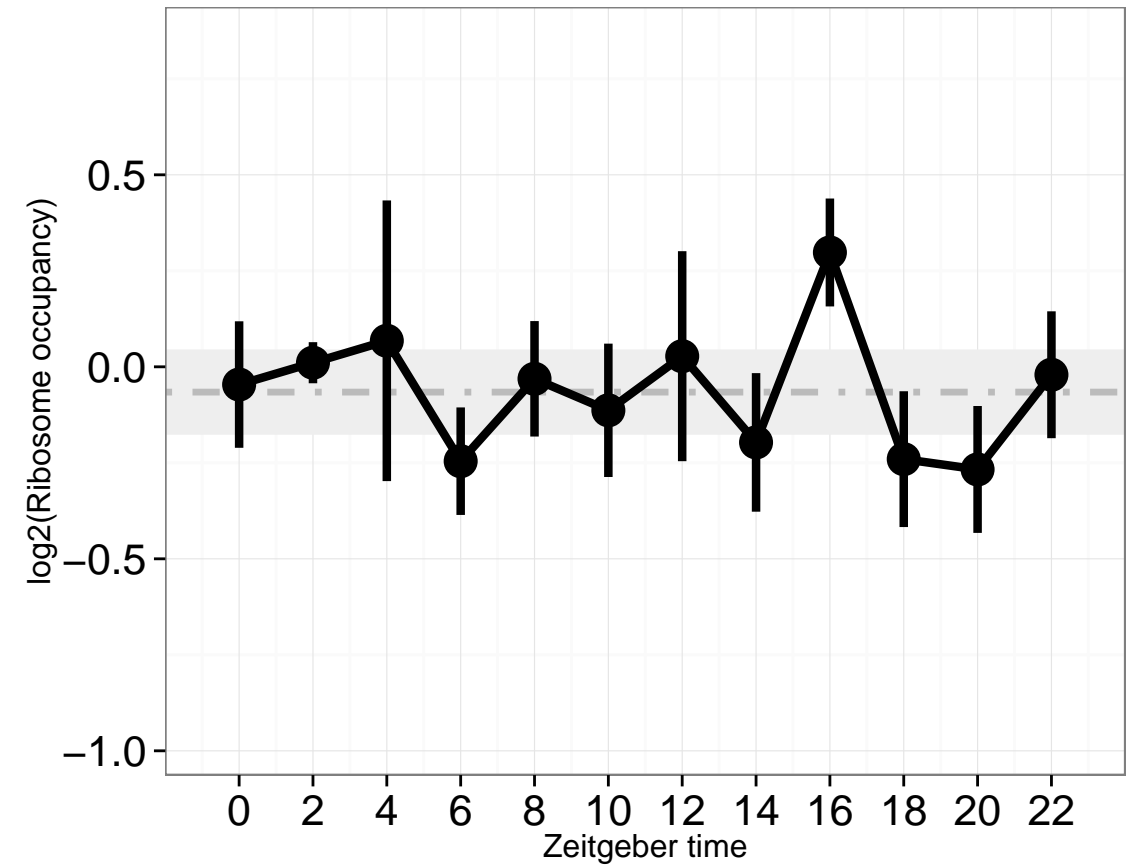

Supplement: Supplementary file 12567 [file 1]

# Ercc8

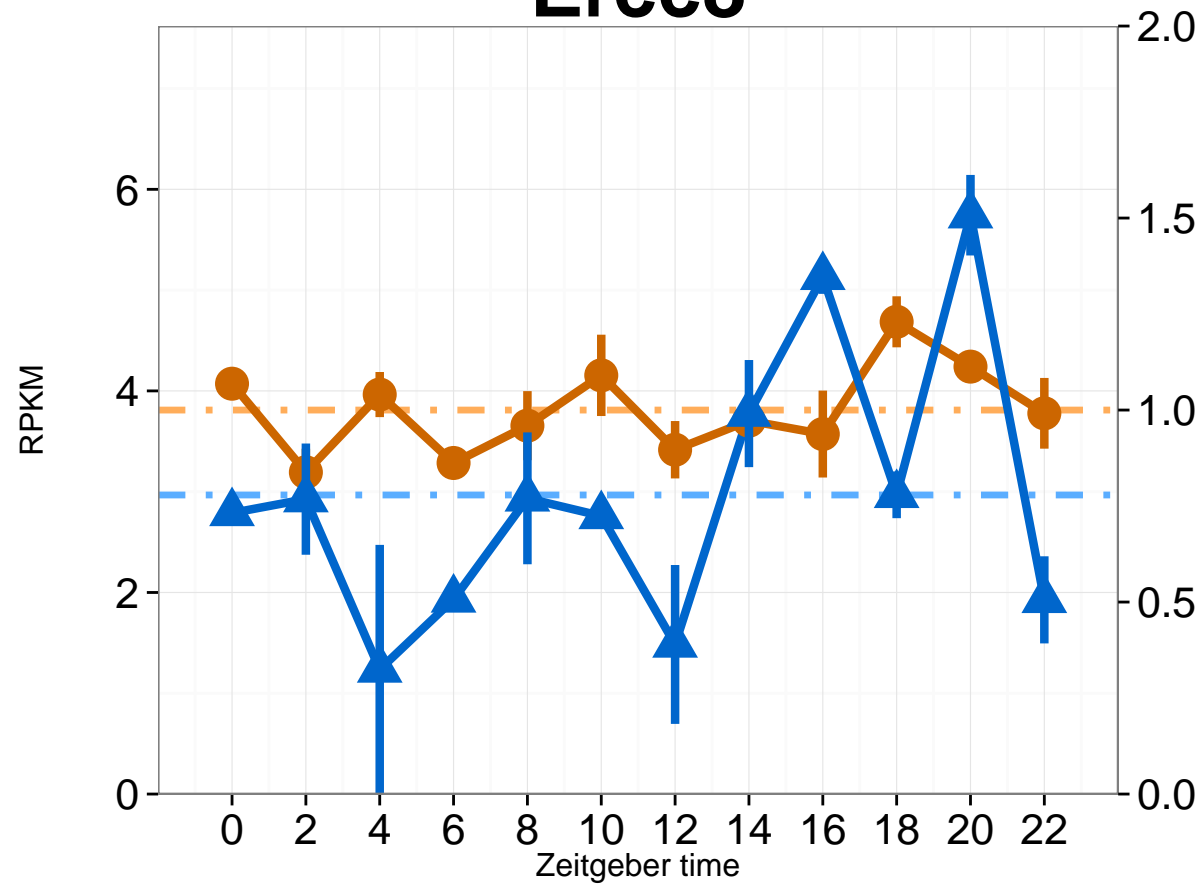

# Ercc8

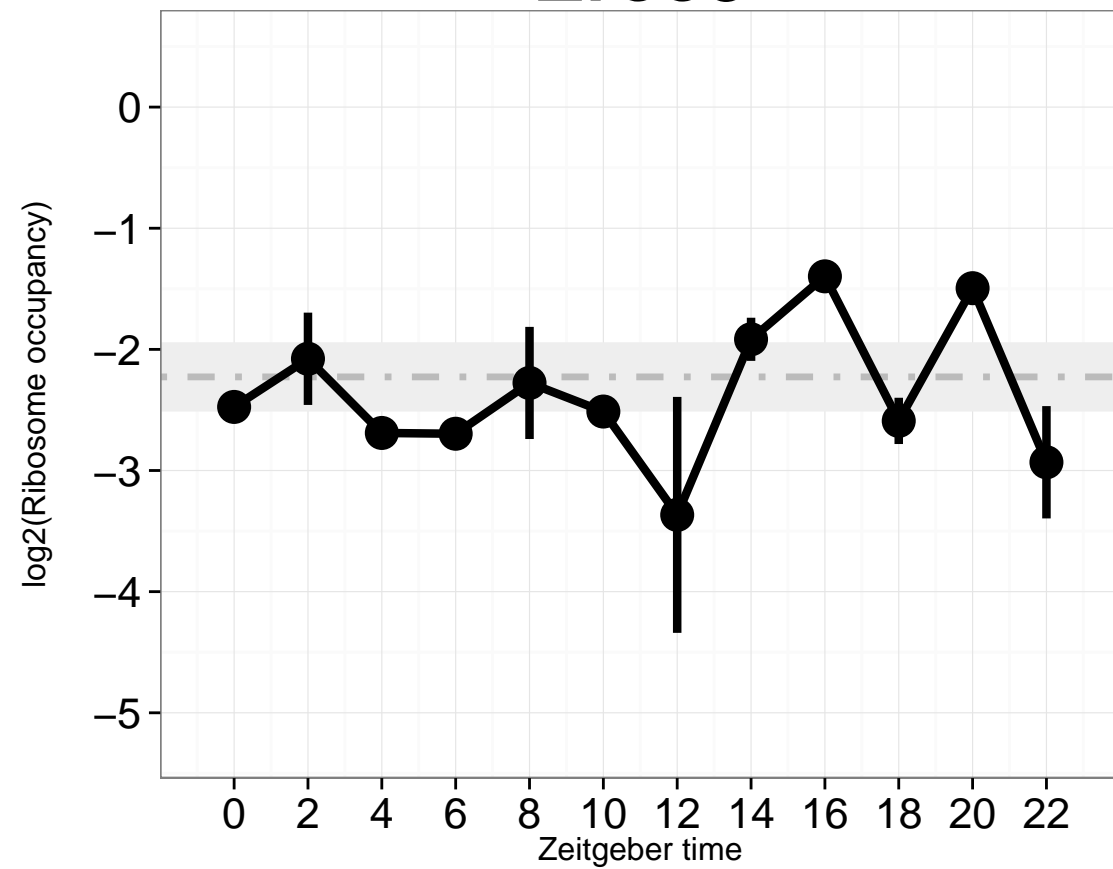

Supplement: Supplementary file 12568 [file 1]

# Prdm16

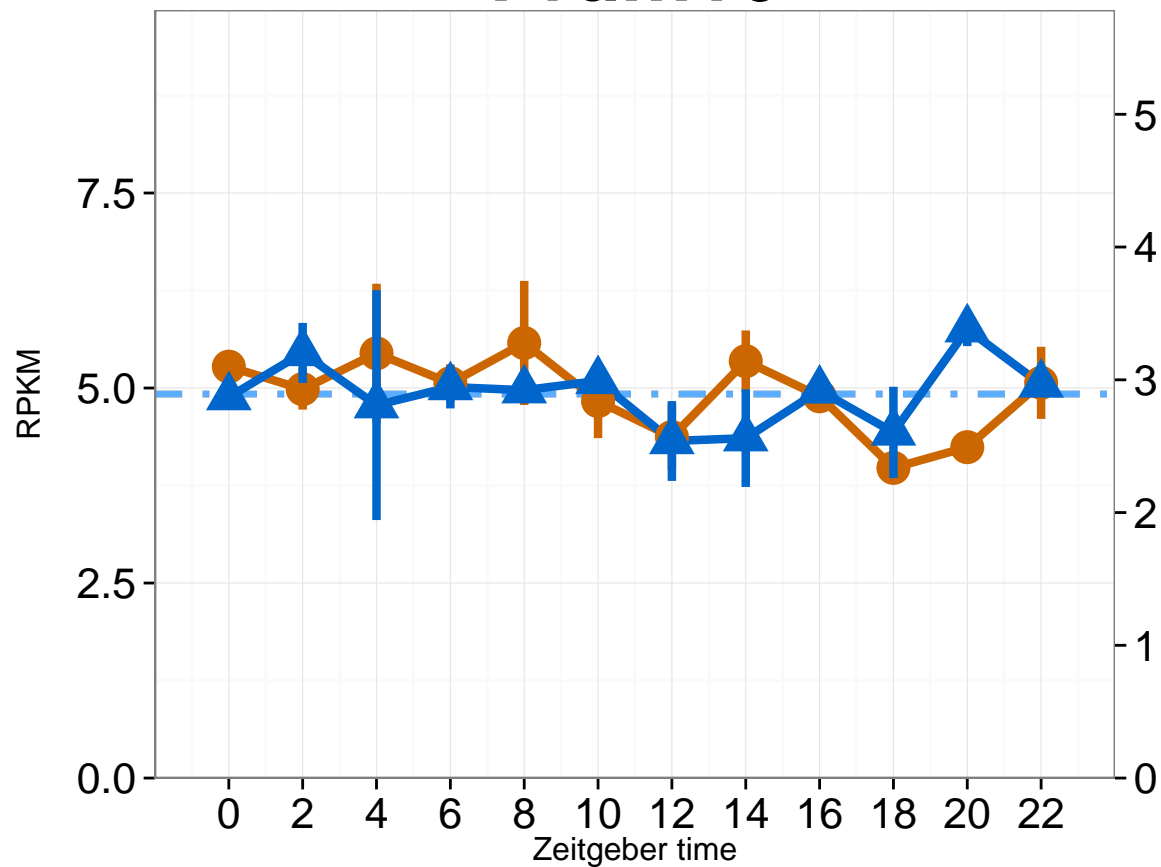

# Prdm16

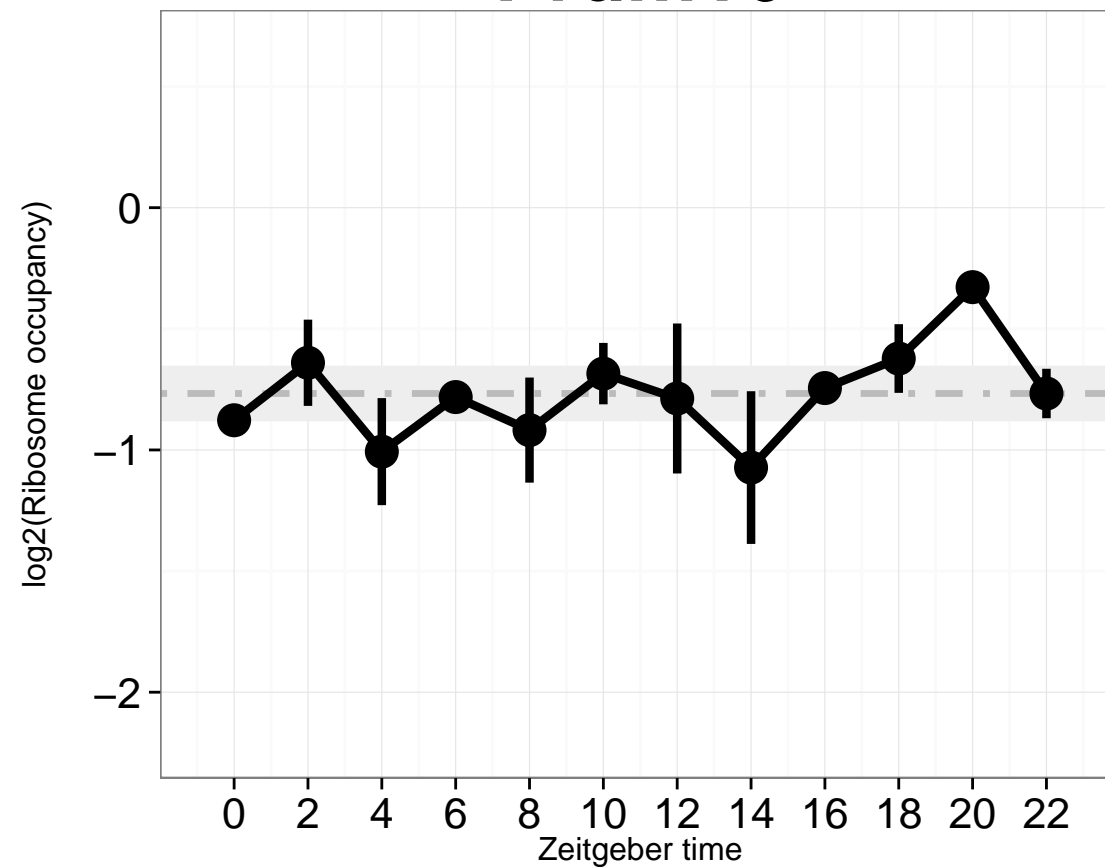

Supplement: Supplementary file 12569 [file 1]

## II17rc

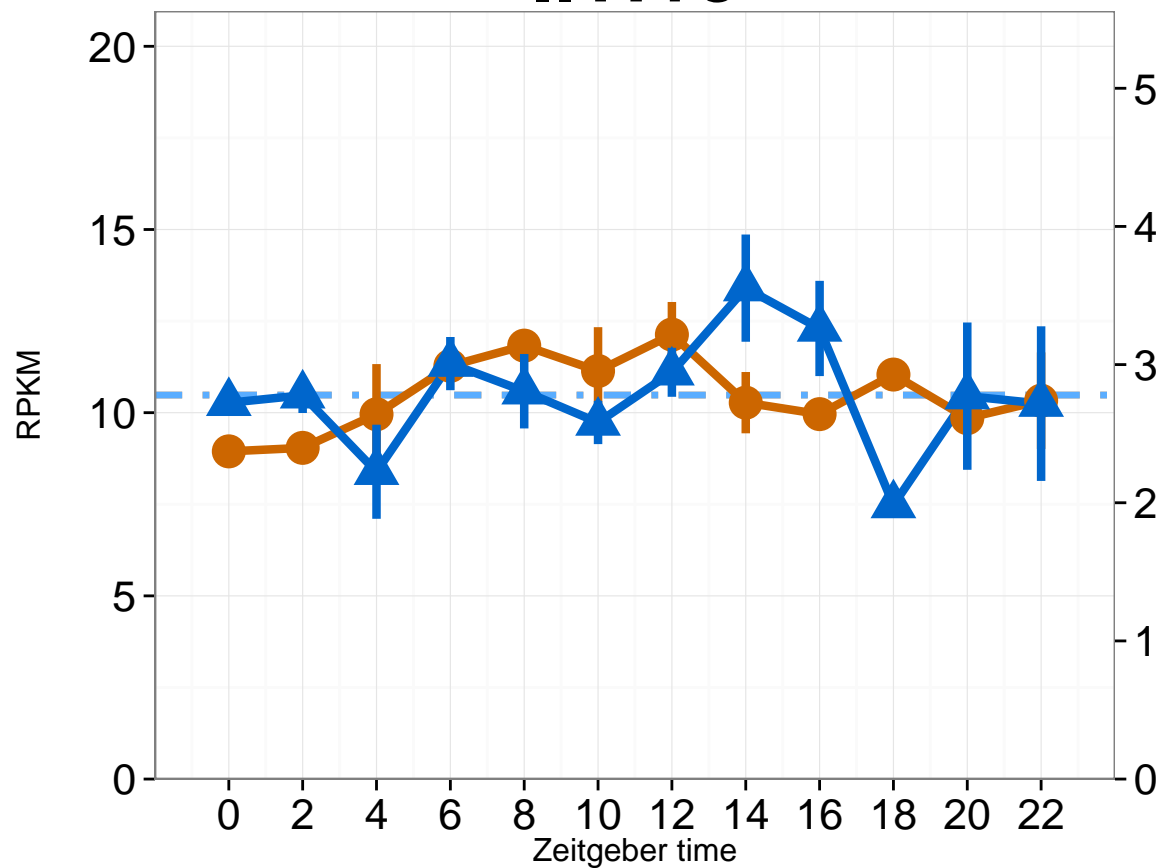

## II17rc

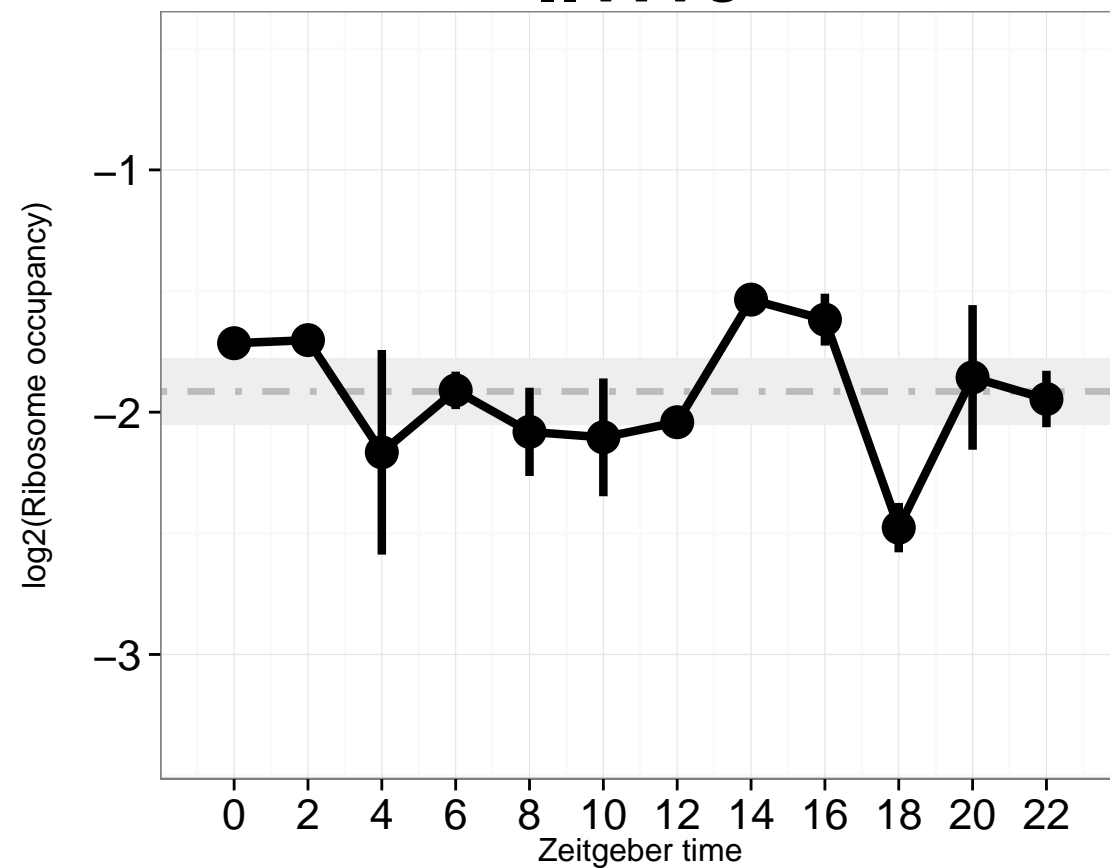

Supplement: Supplementary file 12570 [file 1]

# Sf3a1

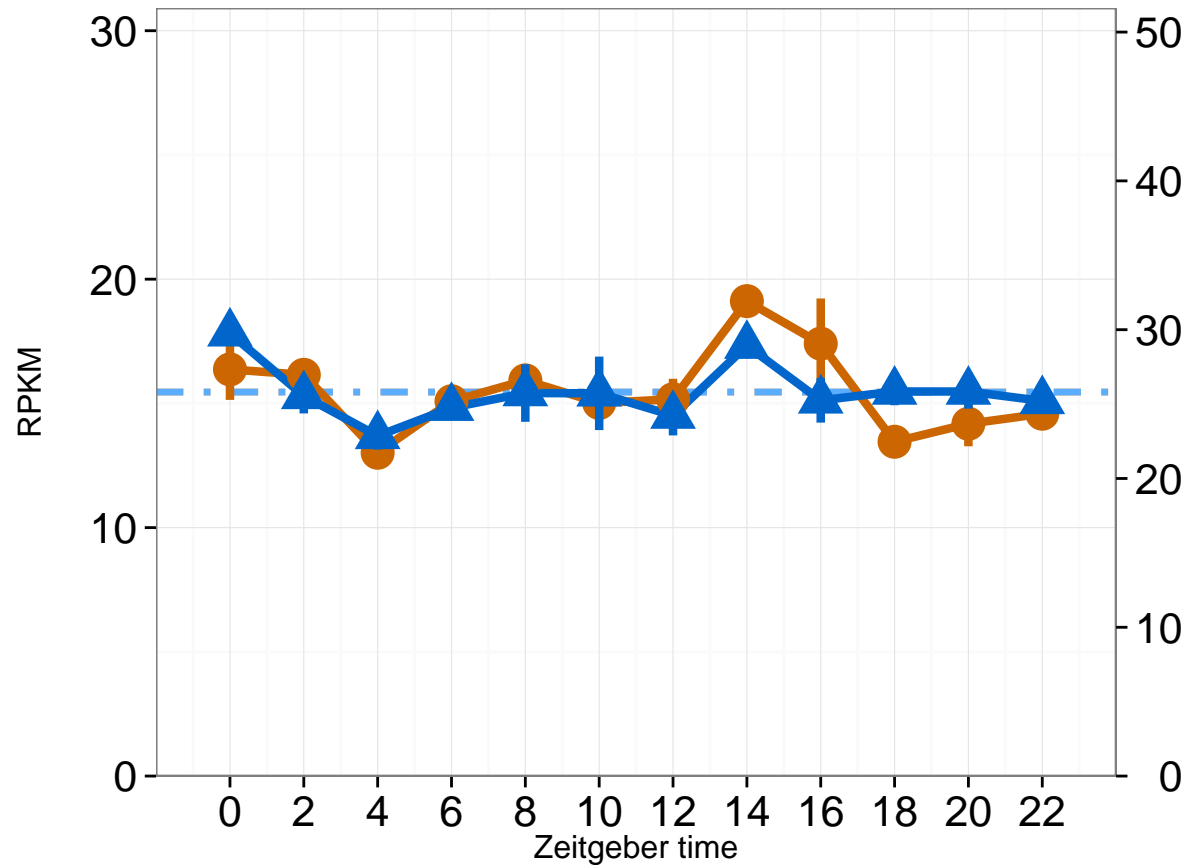

# Sf3a1

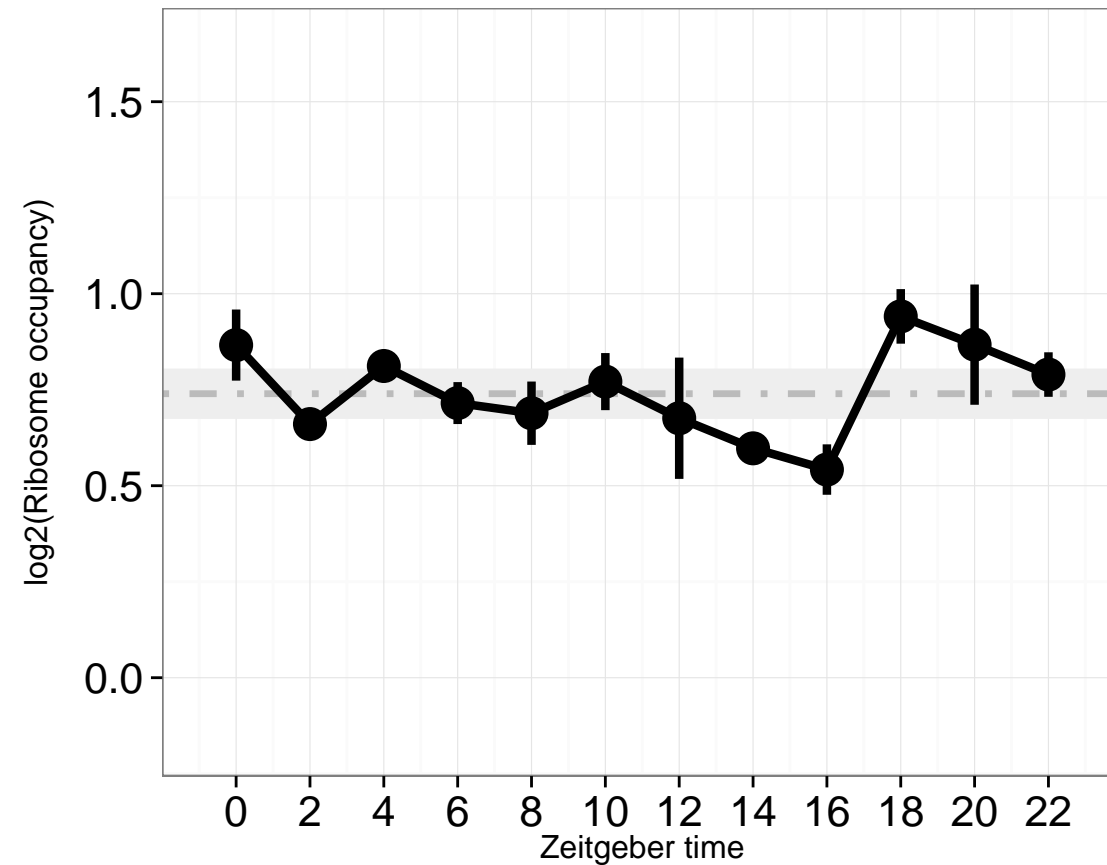

Supplement: Supplementary file 12571 [file 1]

## Stc1

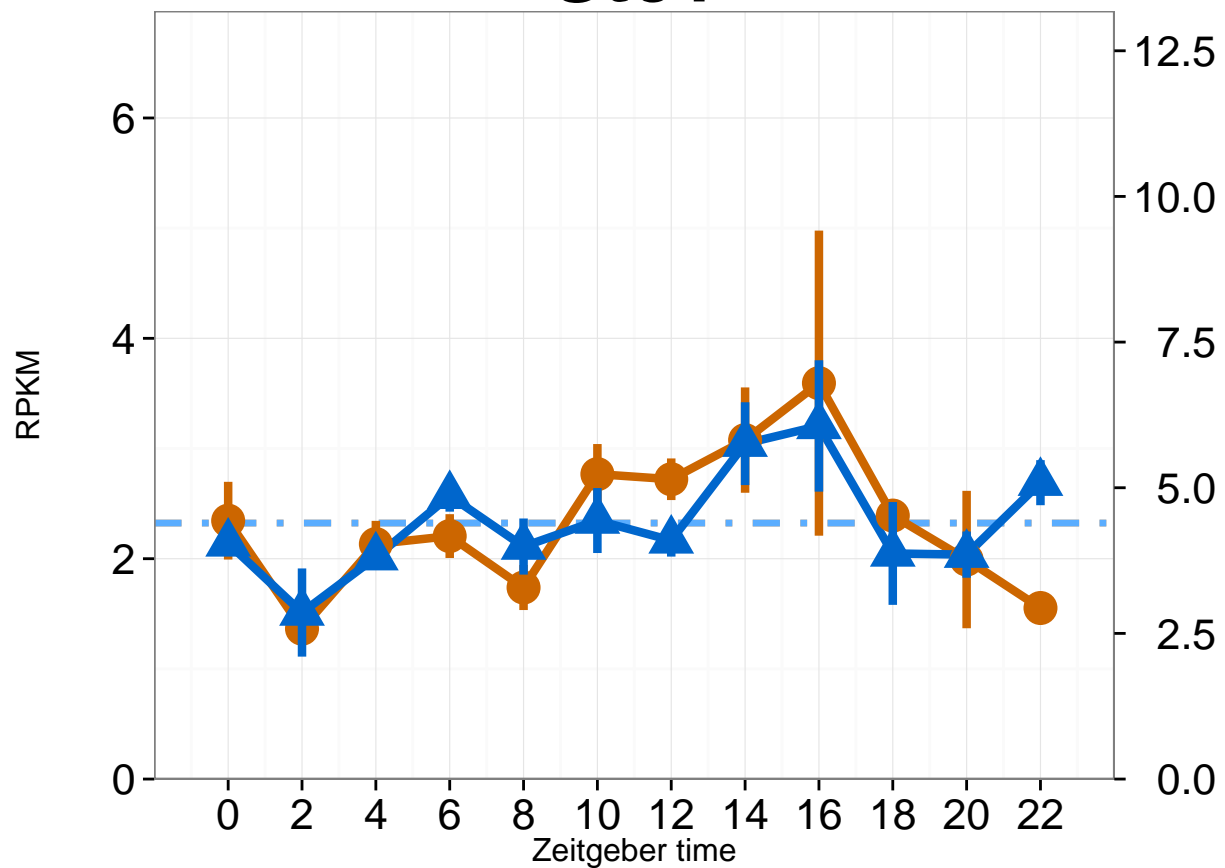

## Stc1

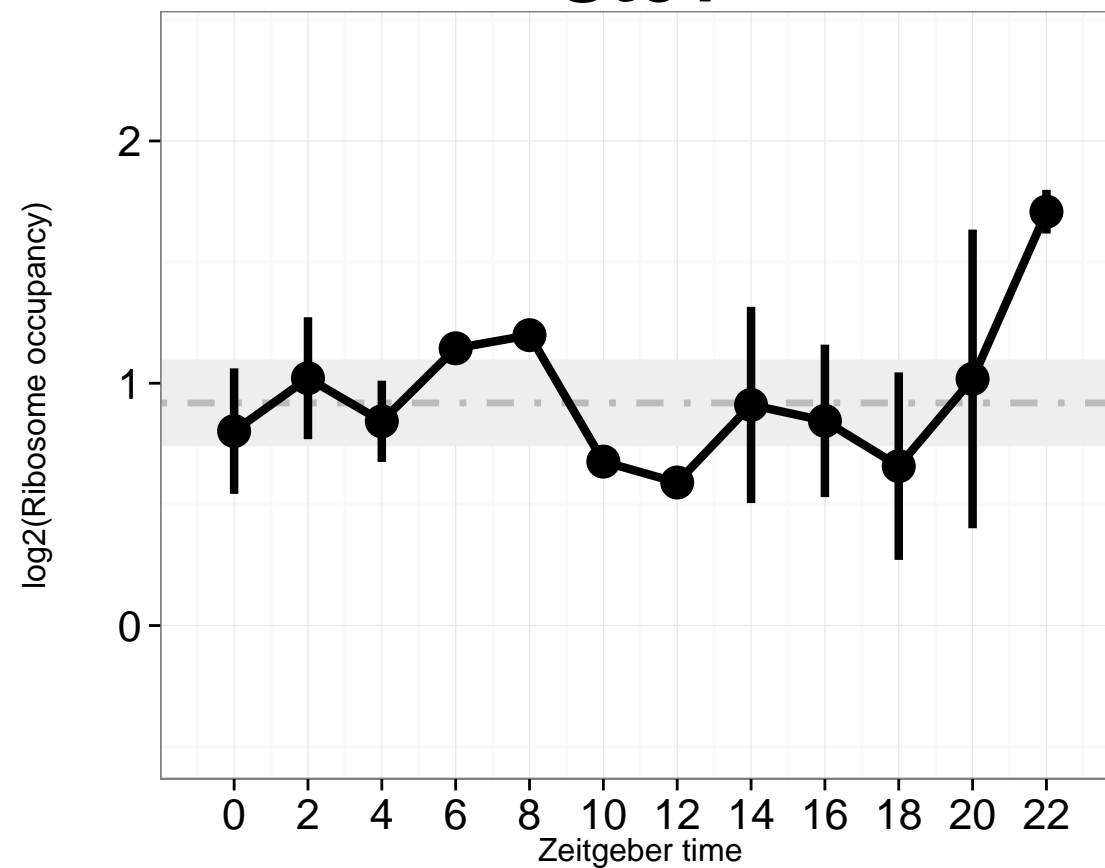

Supplement: Supplementary file 12572 [file 1]

# Pex11b

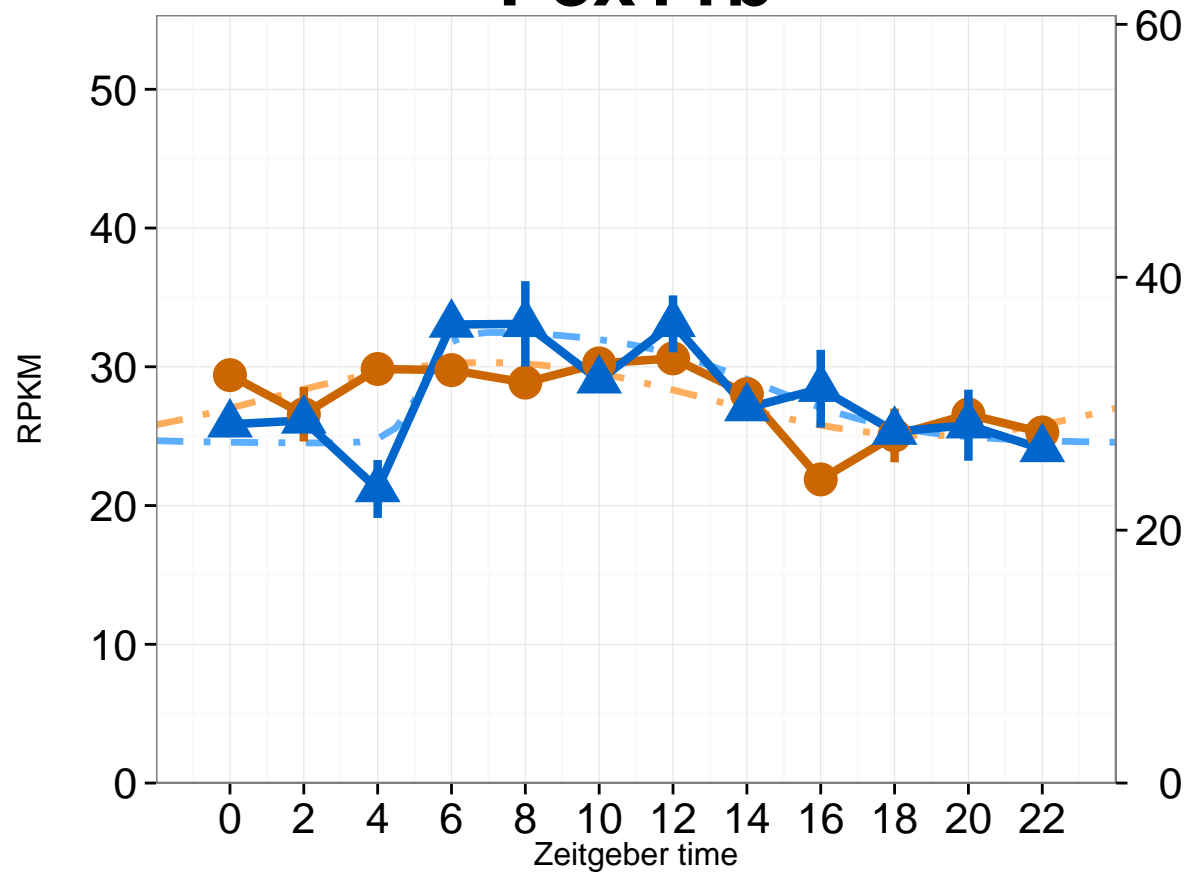

# Pex11b

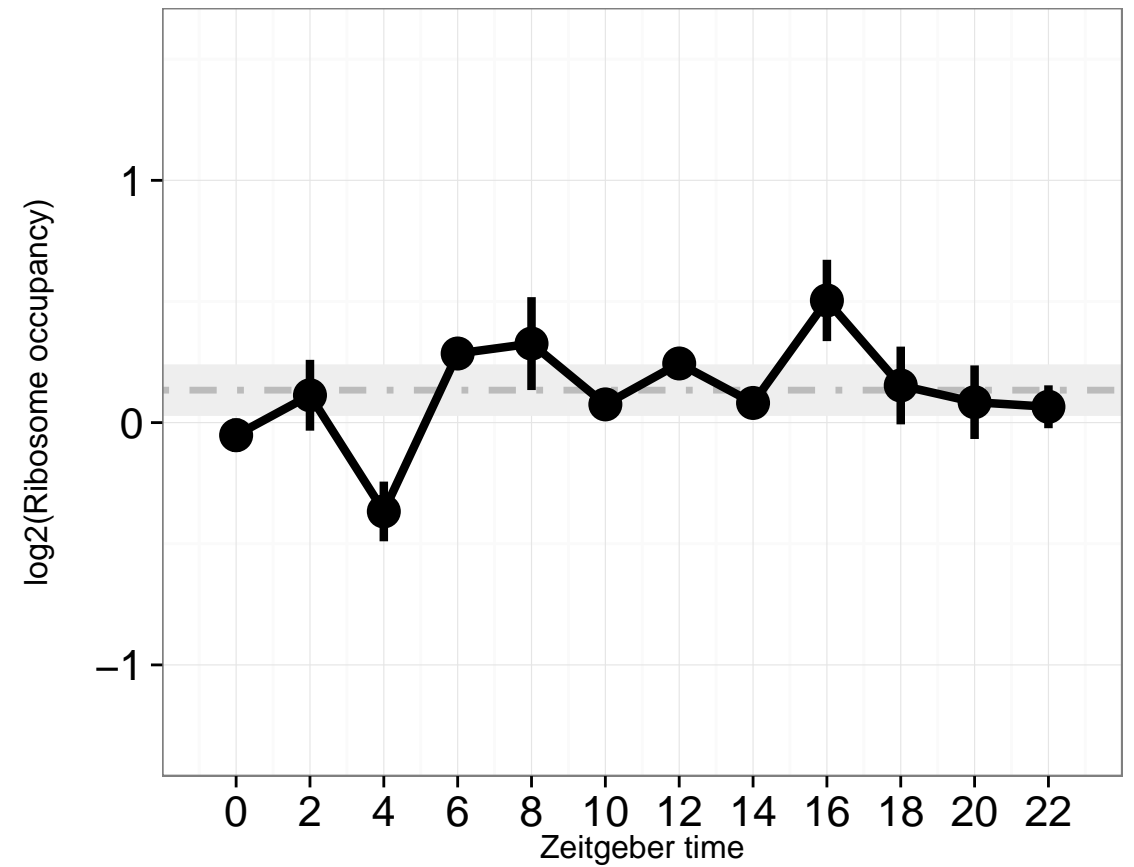

Supplement: Supplementary file 12573 [file 1]

# Tenm4

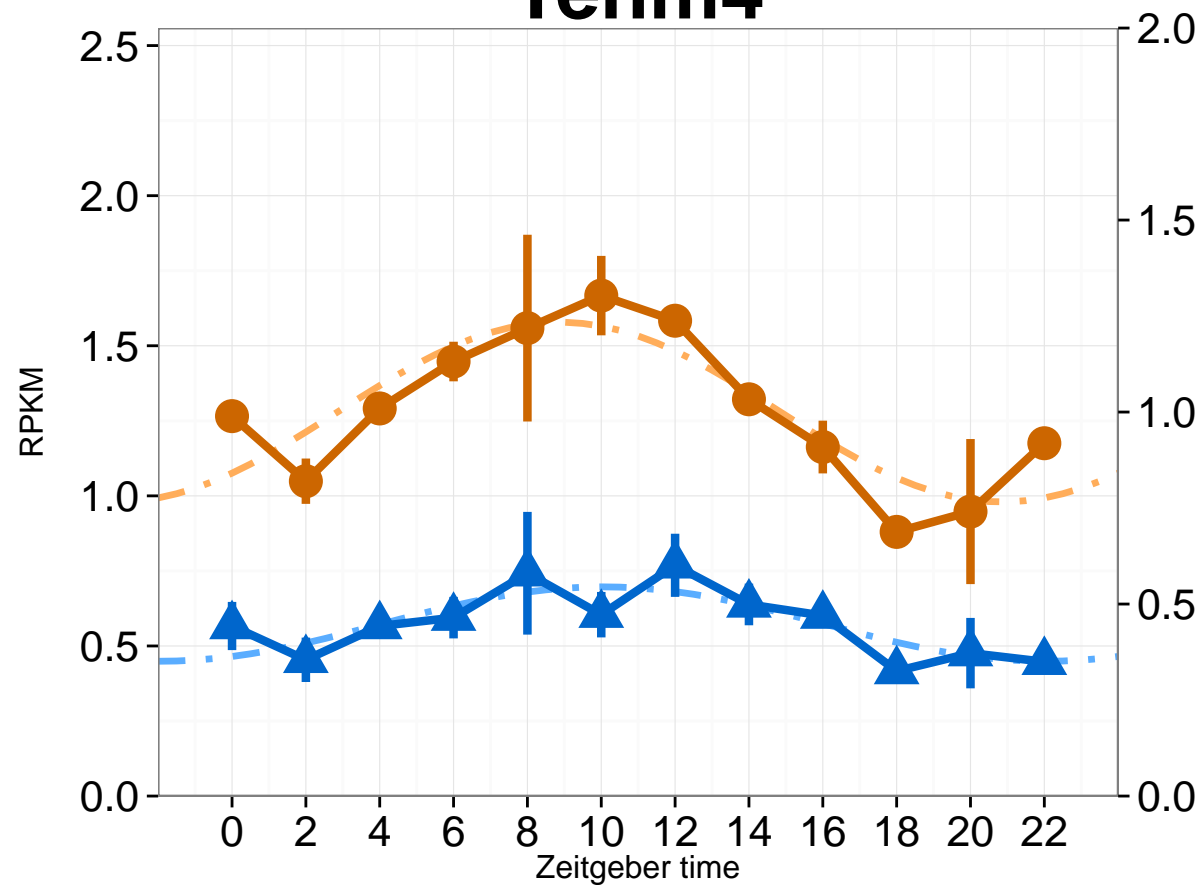

# Tenm4

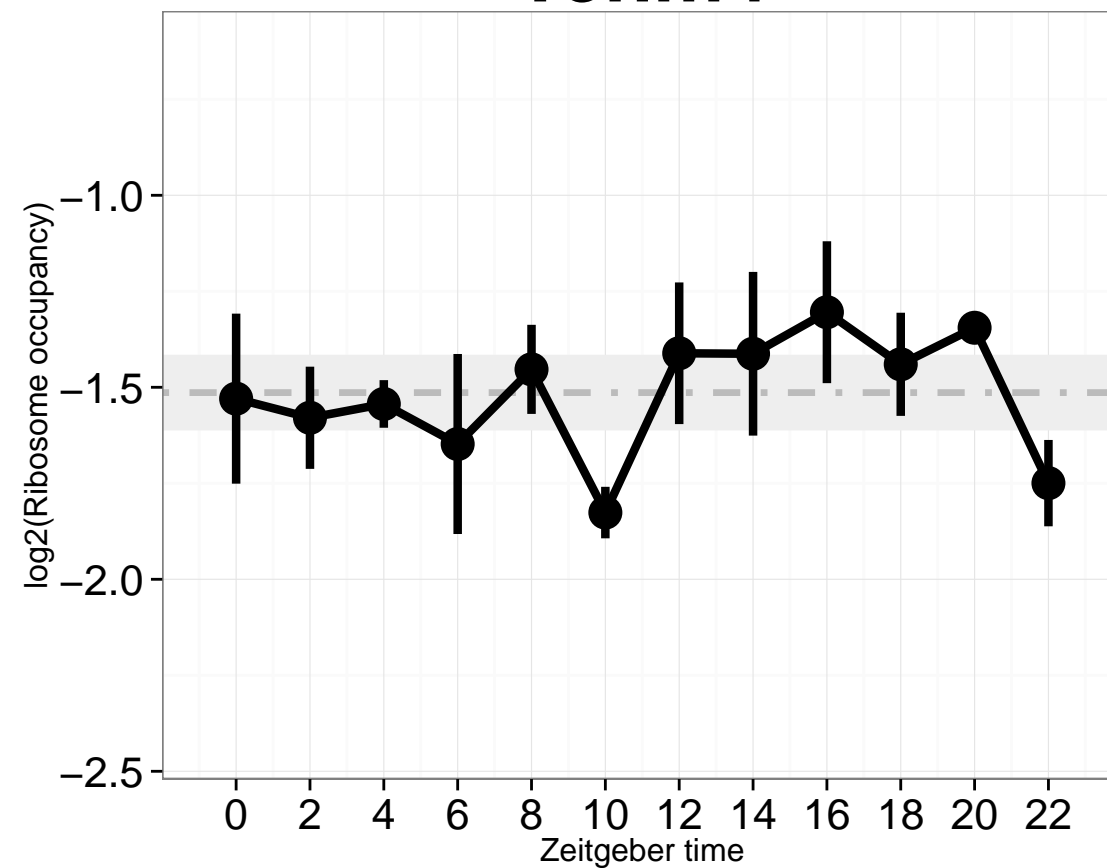

Supplement: Supplementary file 12574 [file 1]

## Sdhb

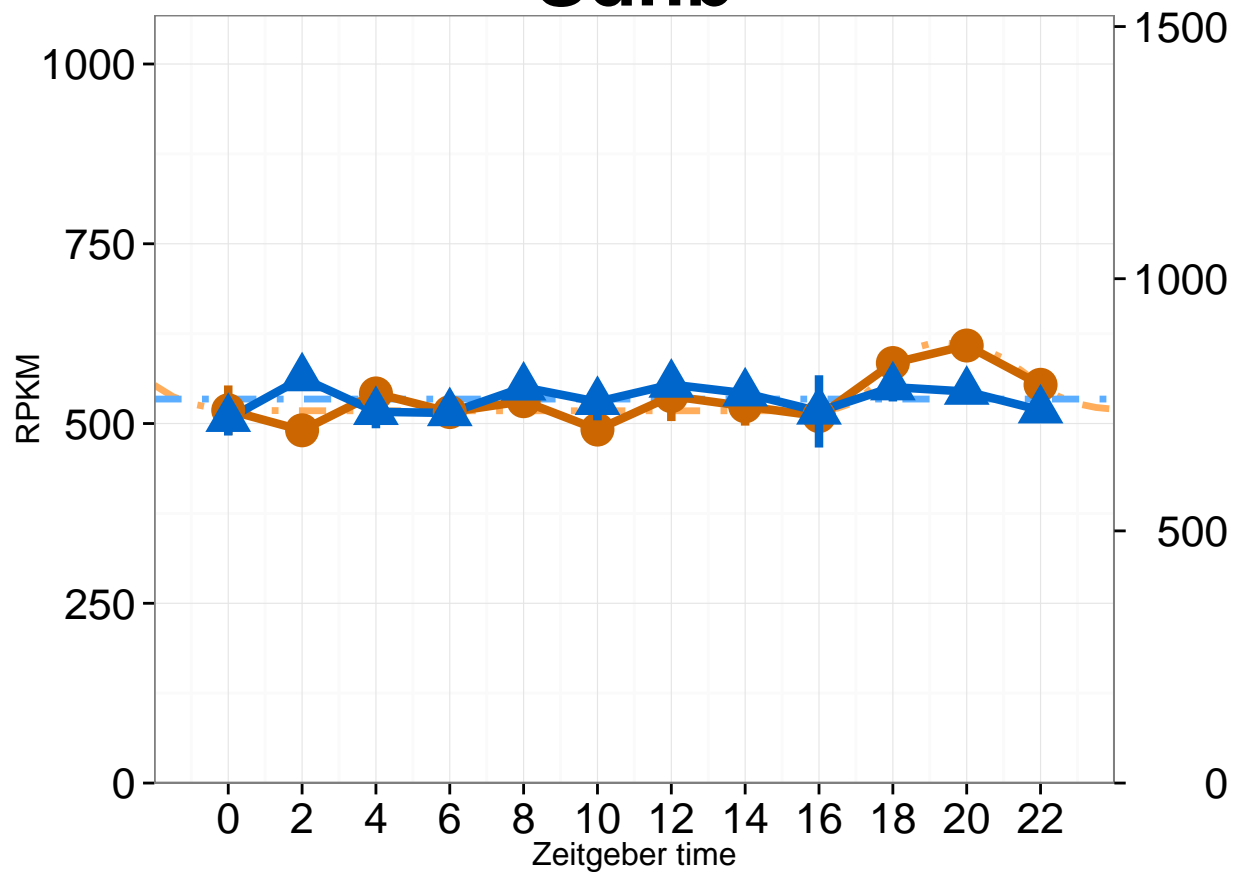

## Sdhb

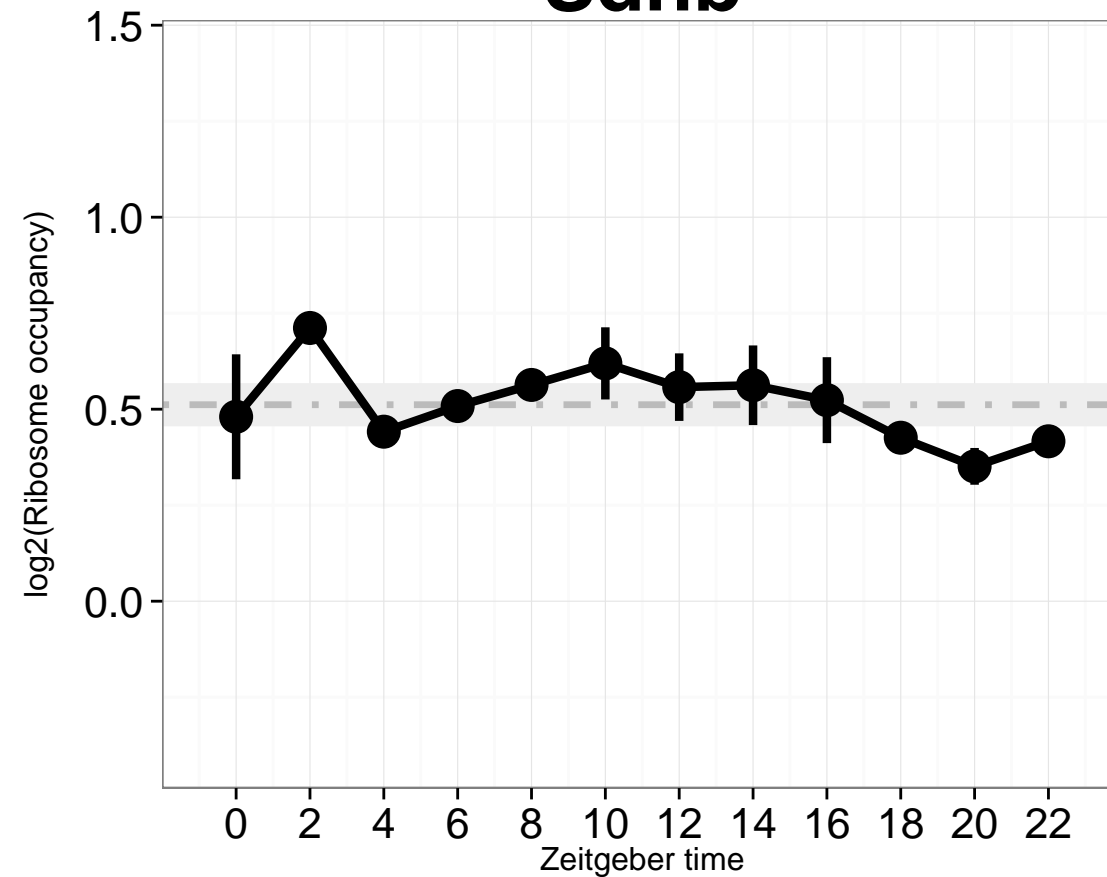

Supplement: Supplementary file 12575 [file 1]

# Dpf3

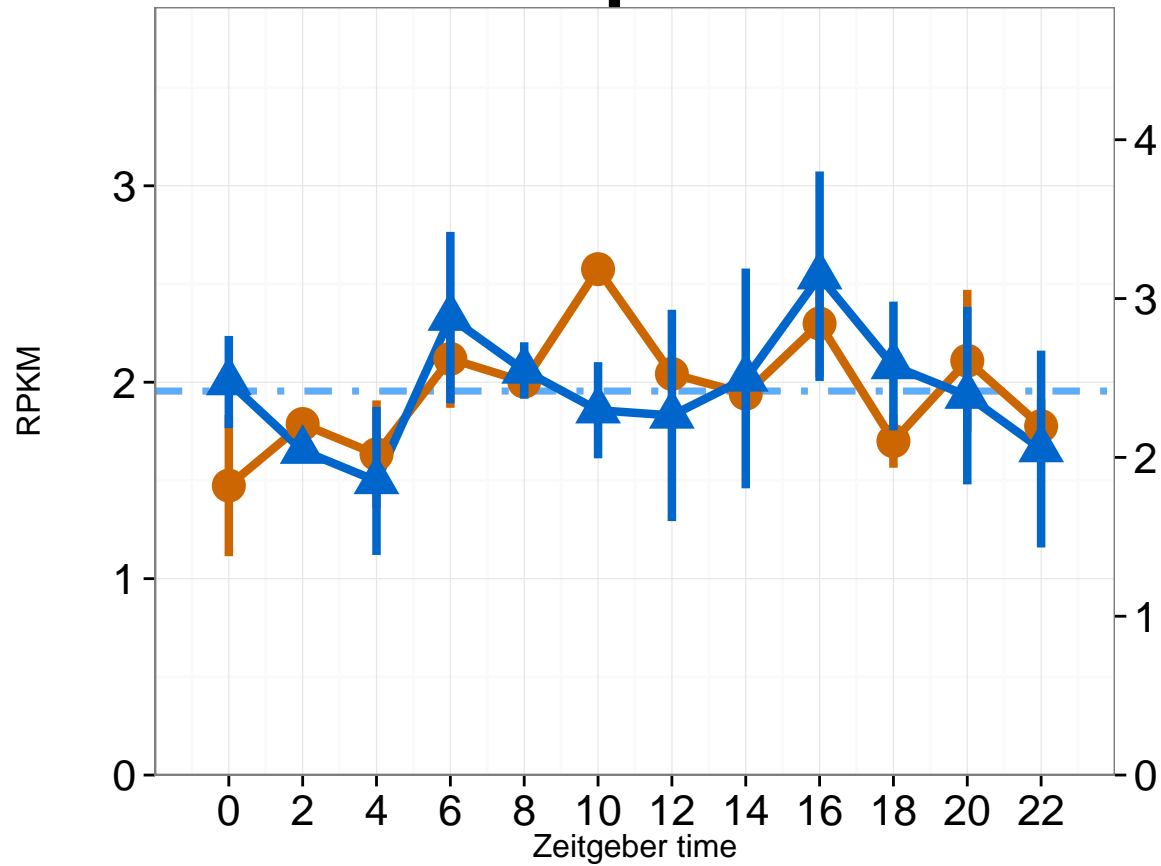

# Dpf3

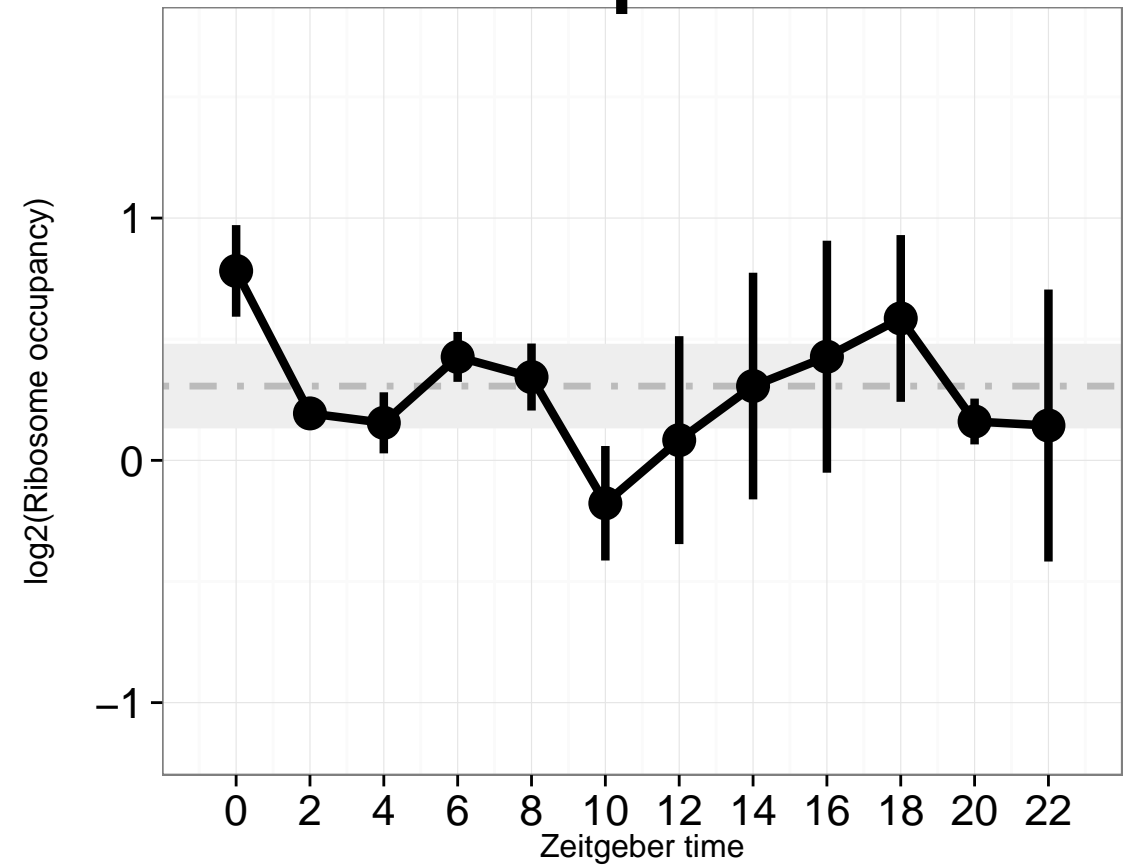

Supplement: Supplementary file 12576 [file 1]

# Tcf7l1

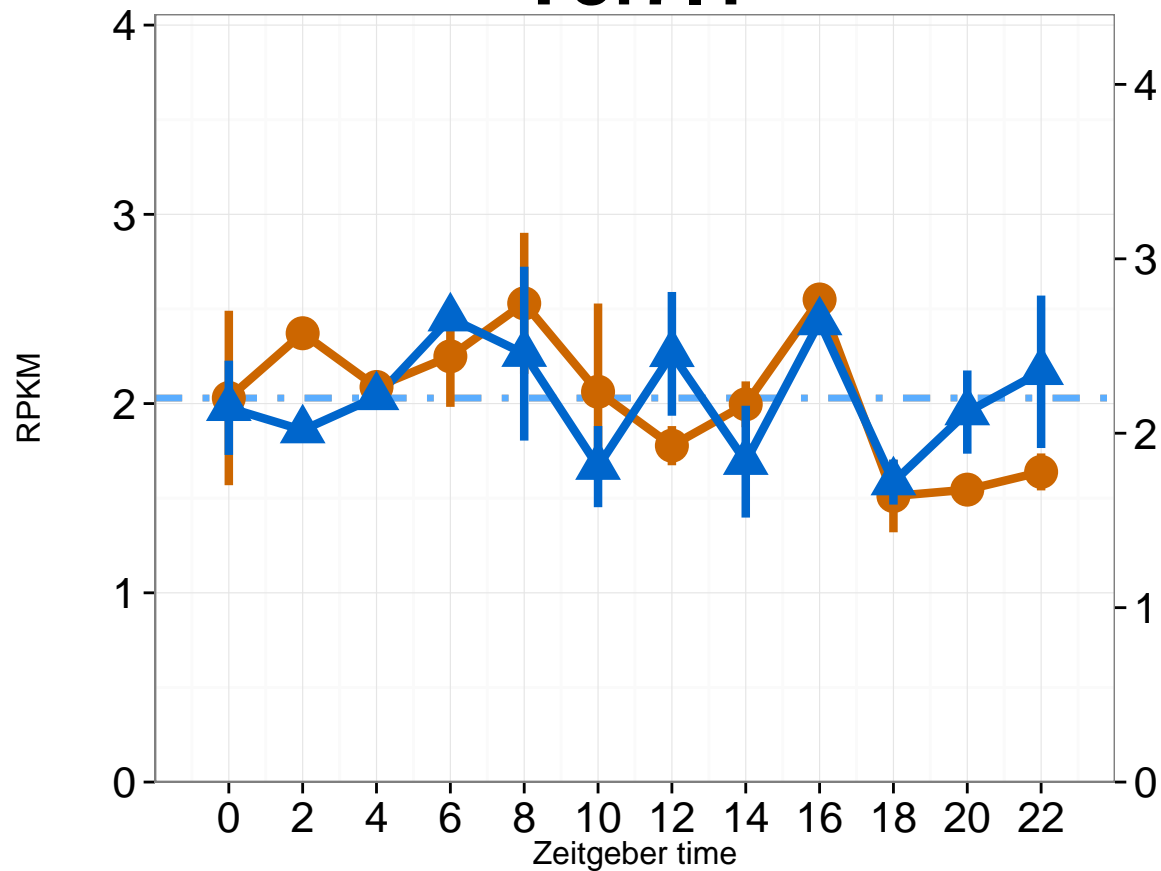

# Tcf7l1

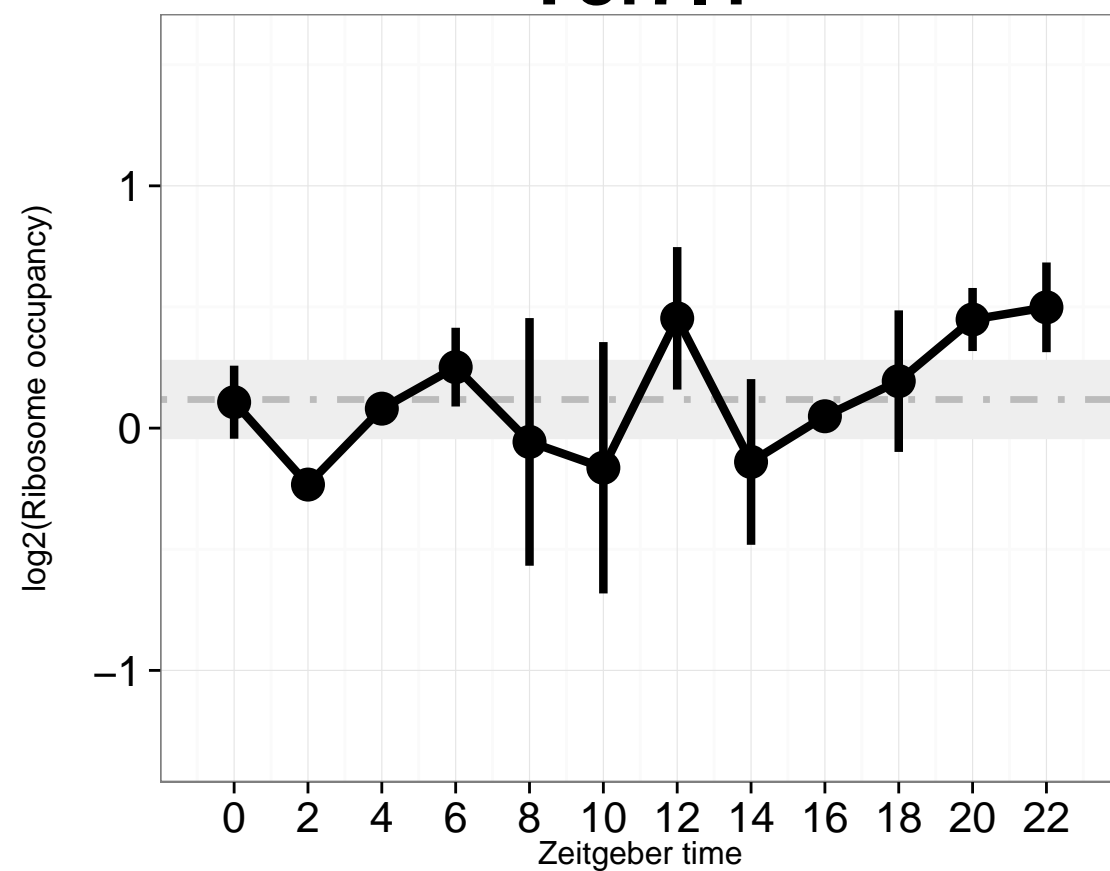

Supplement: Supplementary file 12577 [file 1]

## Polr2c

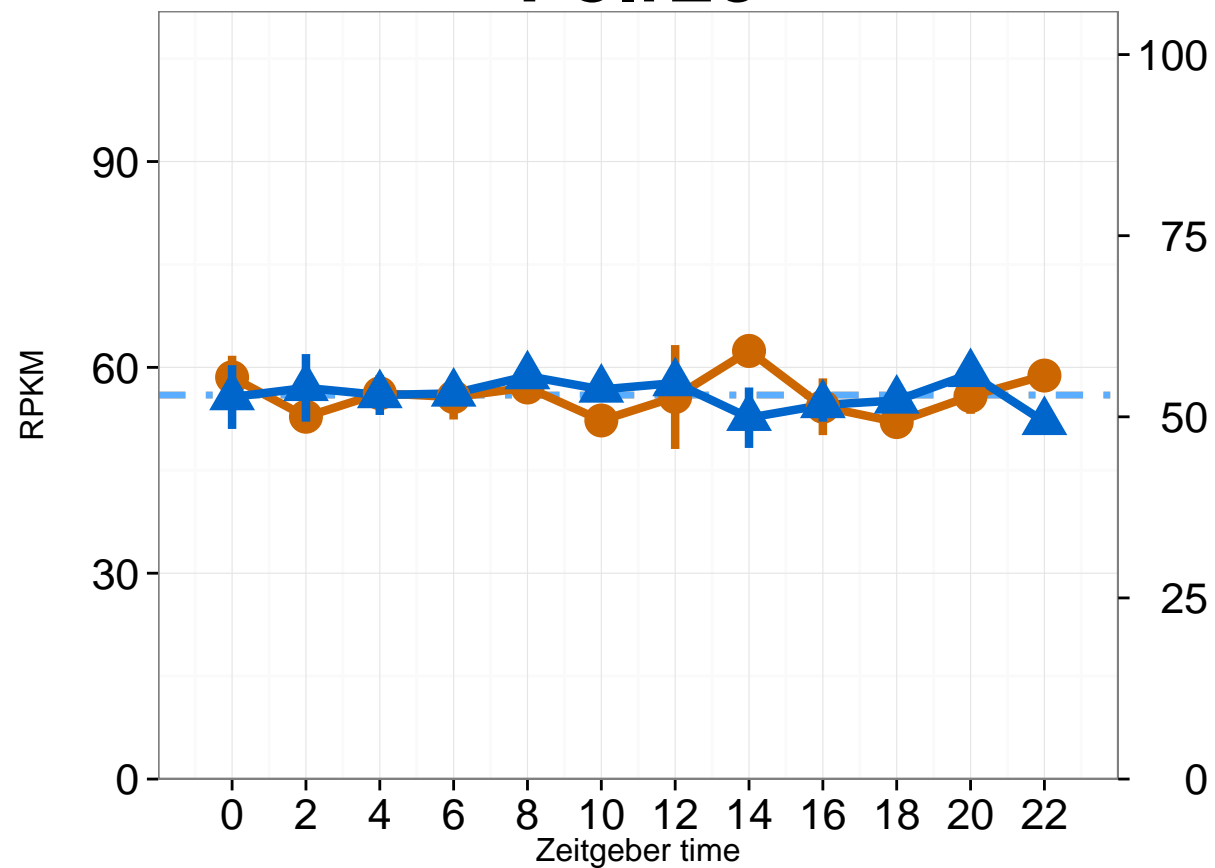

## Polr2c

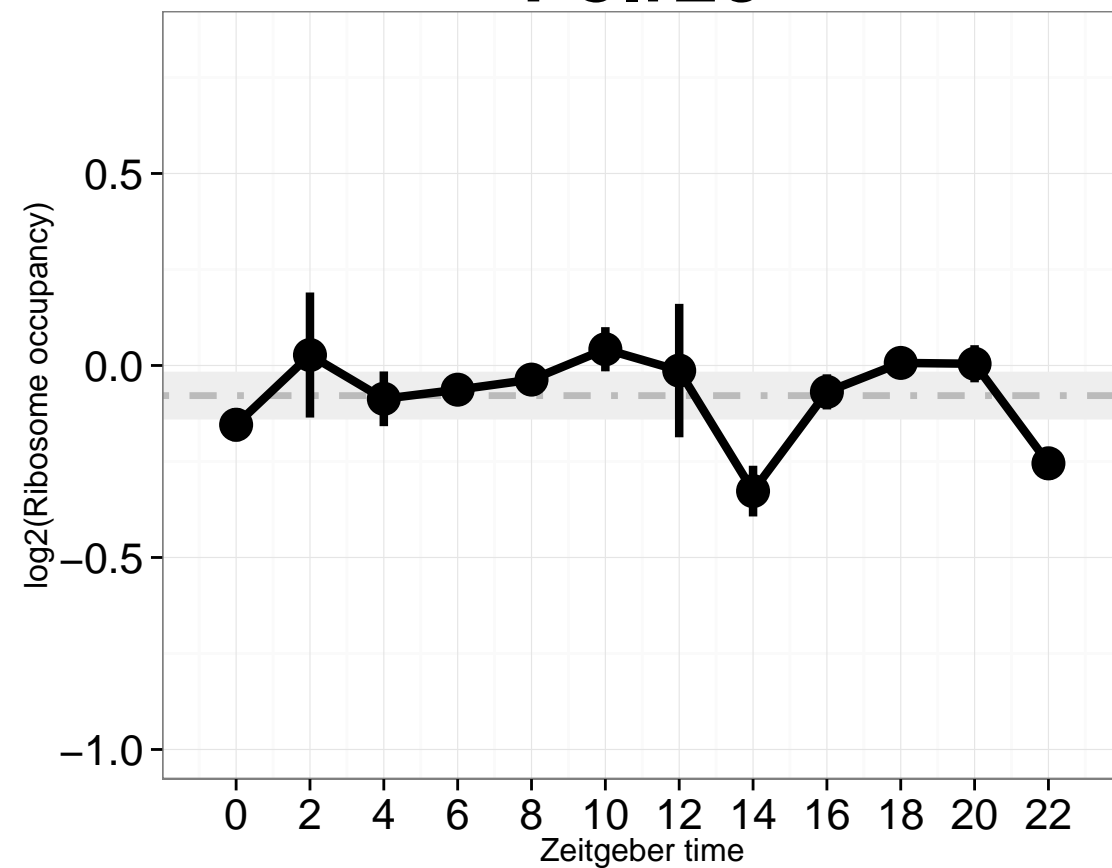

Supplement: Supplementary file 12578 [file 1]

# Ttbk1

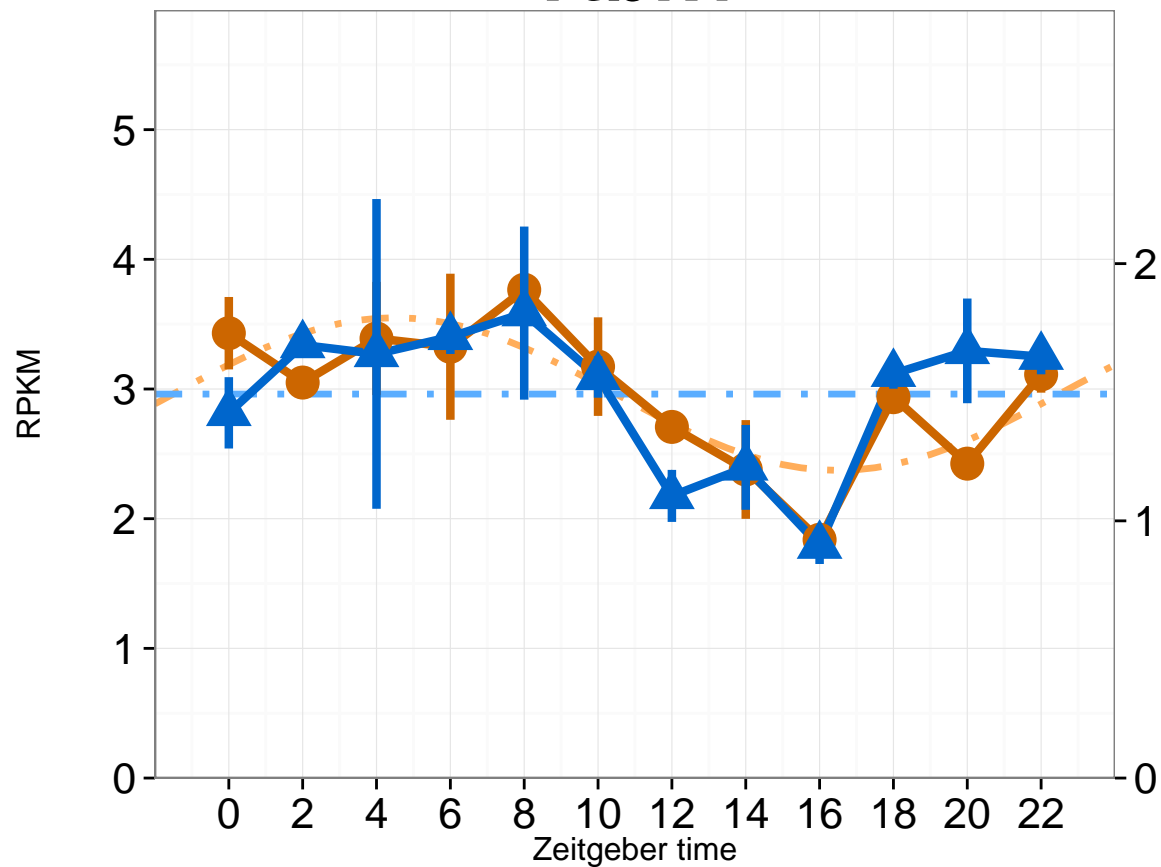

# Ttbk1

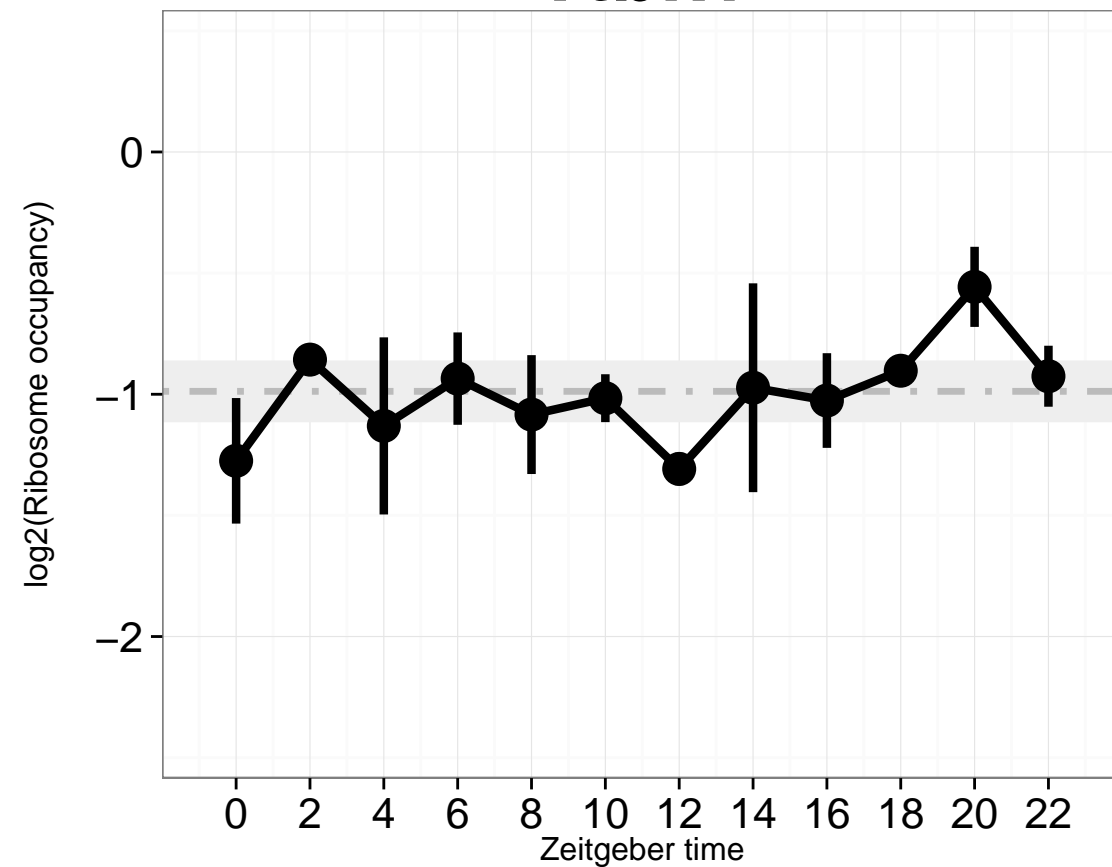

Supplement: Supplementary file 12579 [file 1]

# Tpbg

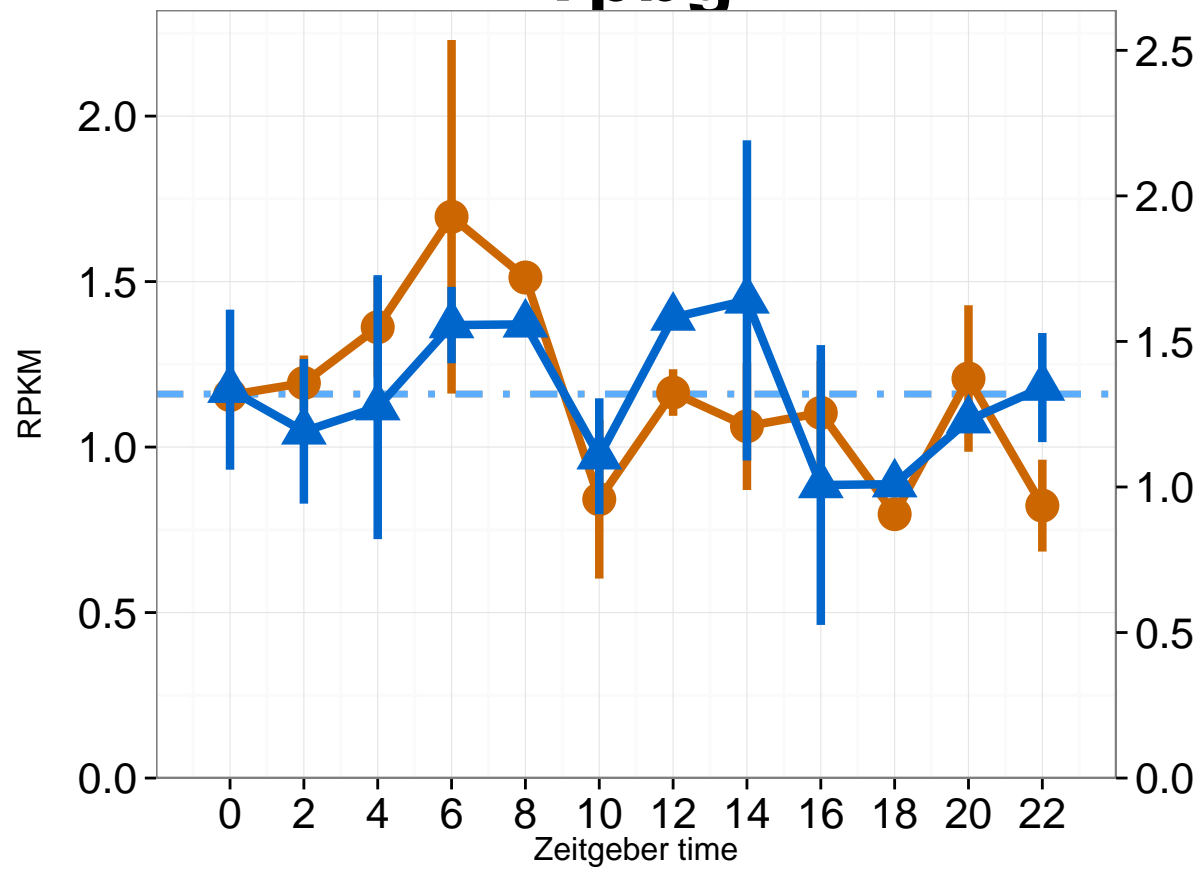

# Tpbg

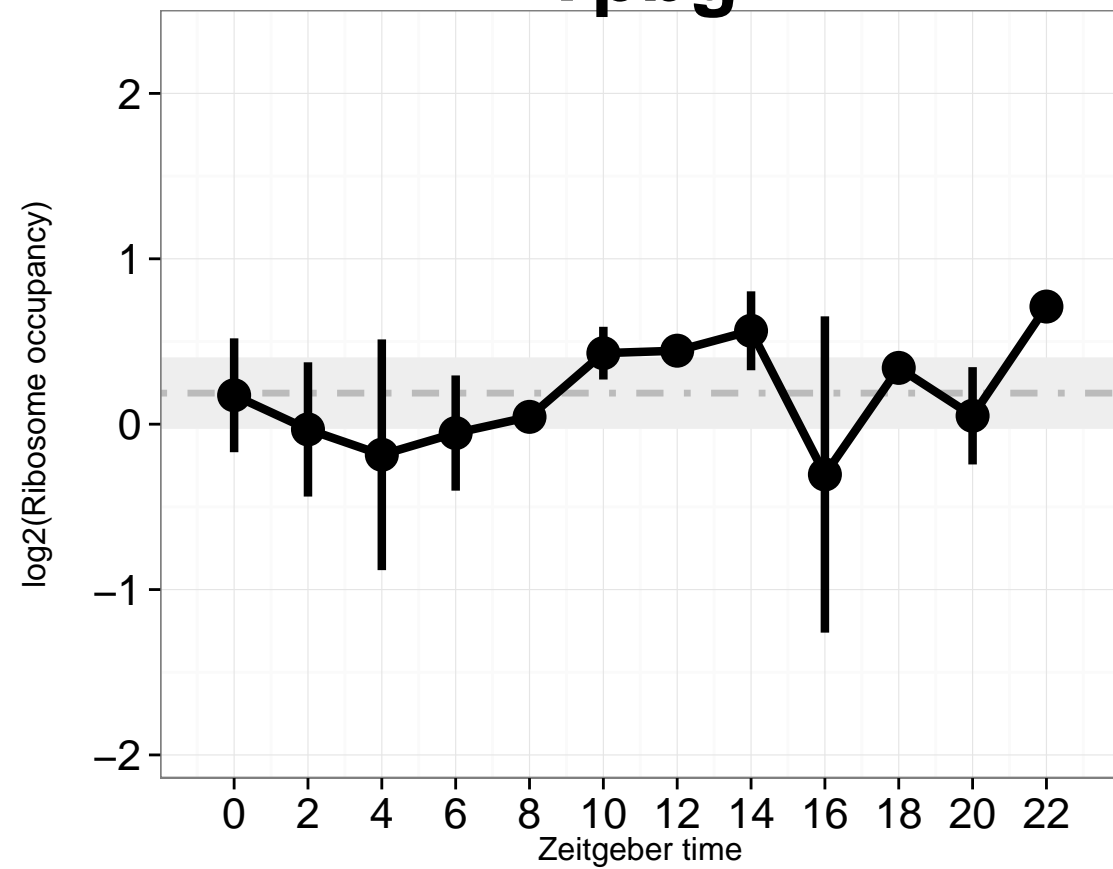

Supplement: Supplementary file 12580 [file 1]

## Slc25a23

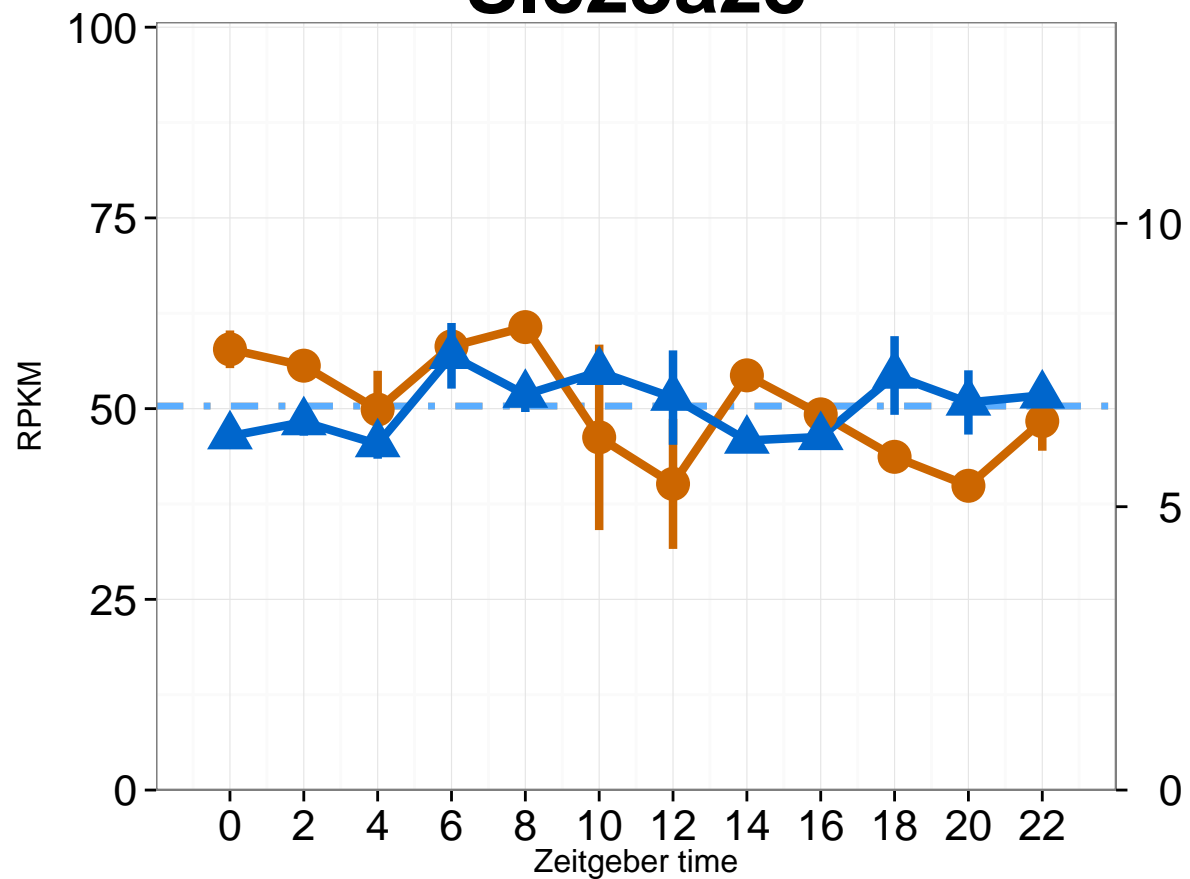

## Slc25a23

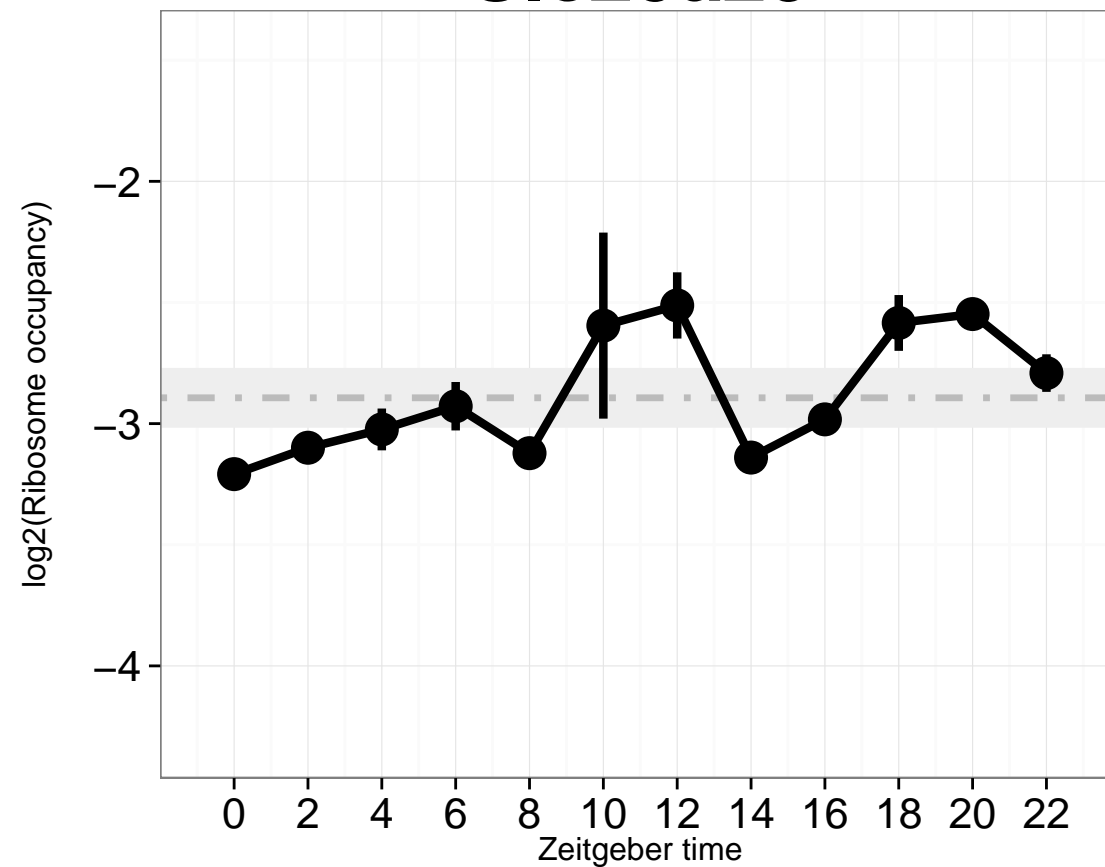

Supplement: Supplementary file 12581 [file 1]

## Gk5

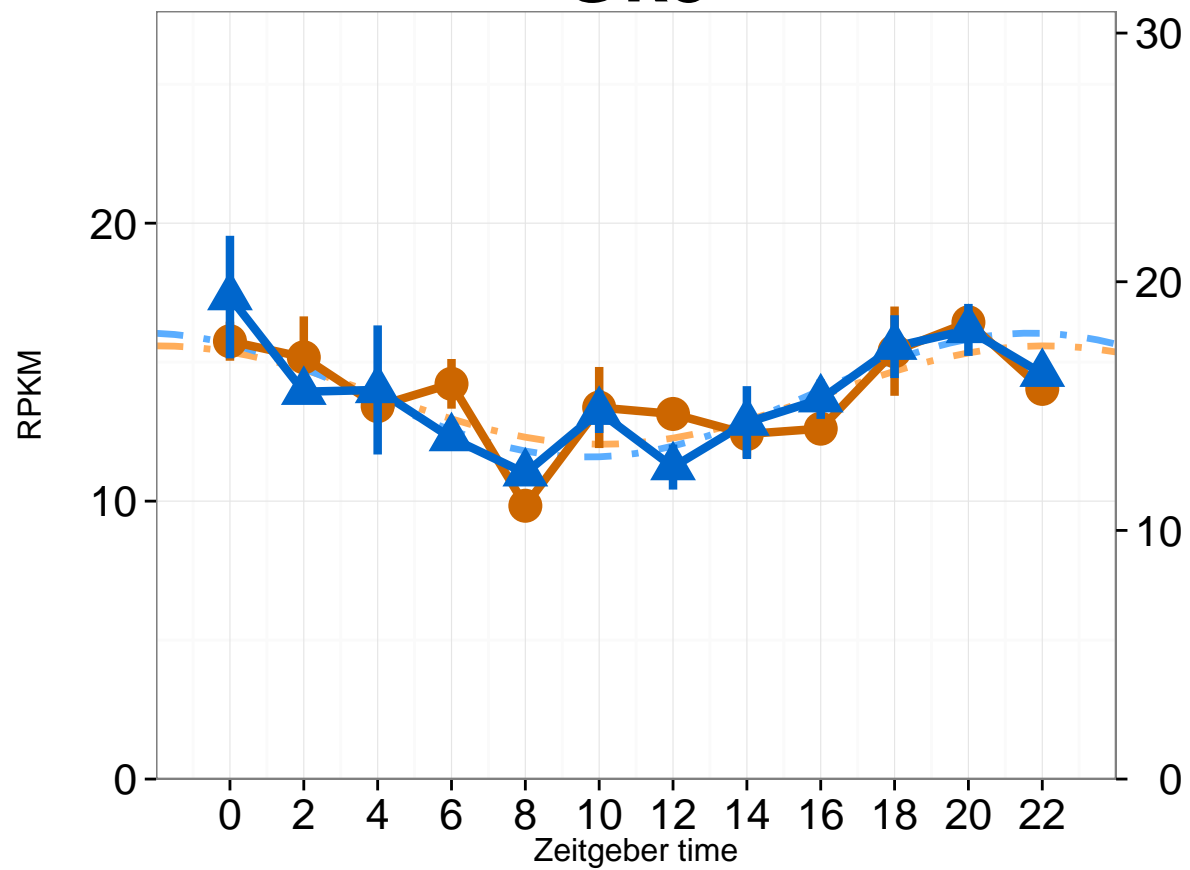

## Gk5

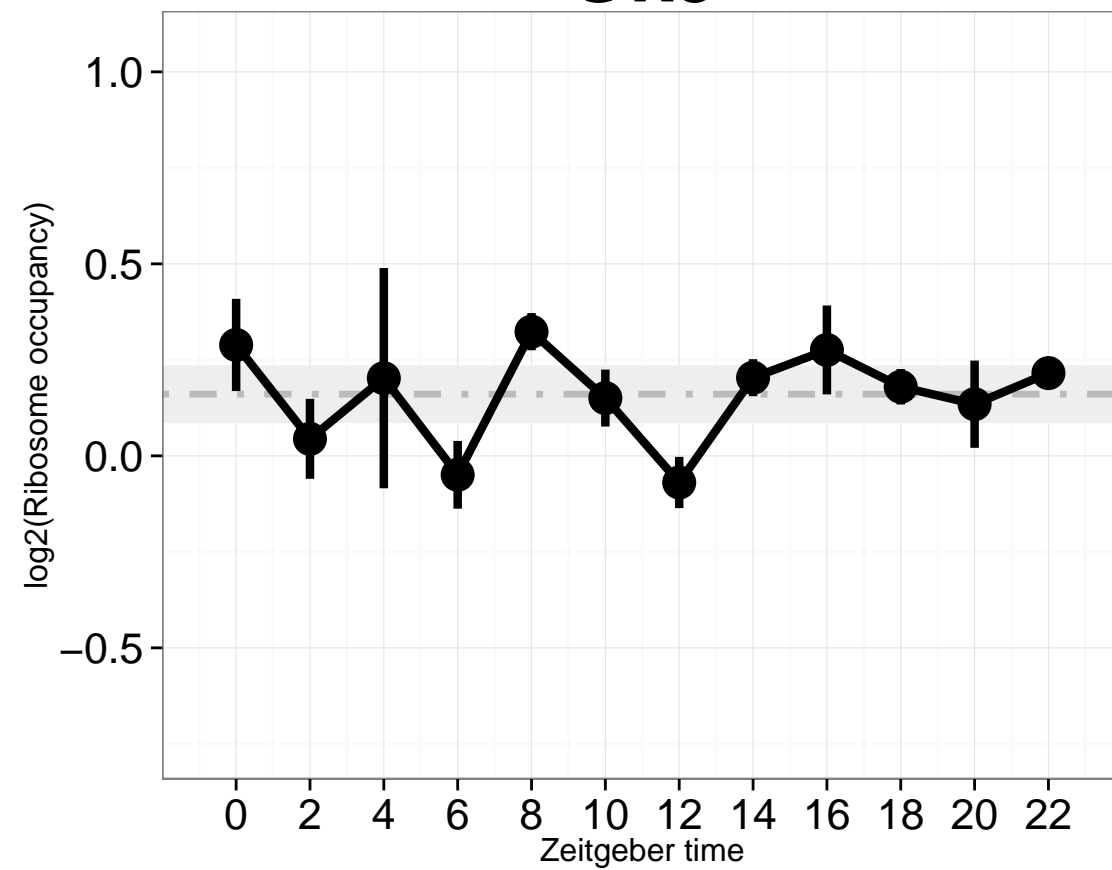

Supplement: Supplementary file 12582 [file 1]

## Ccdc84

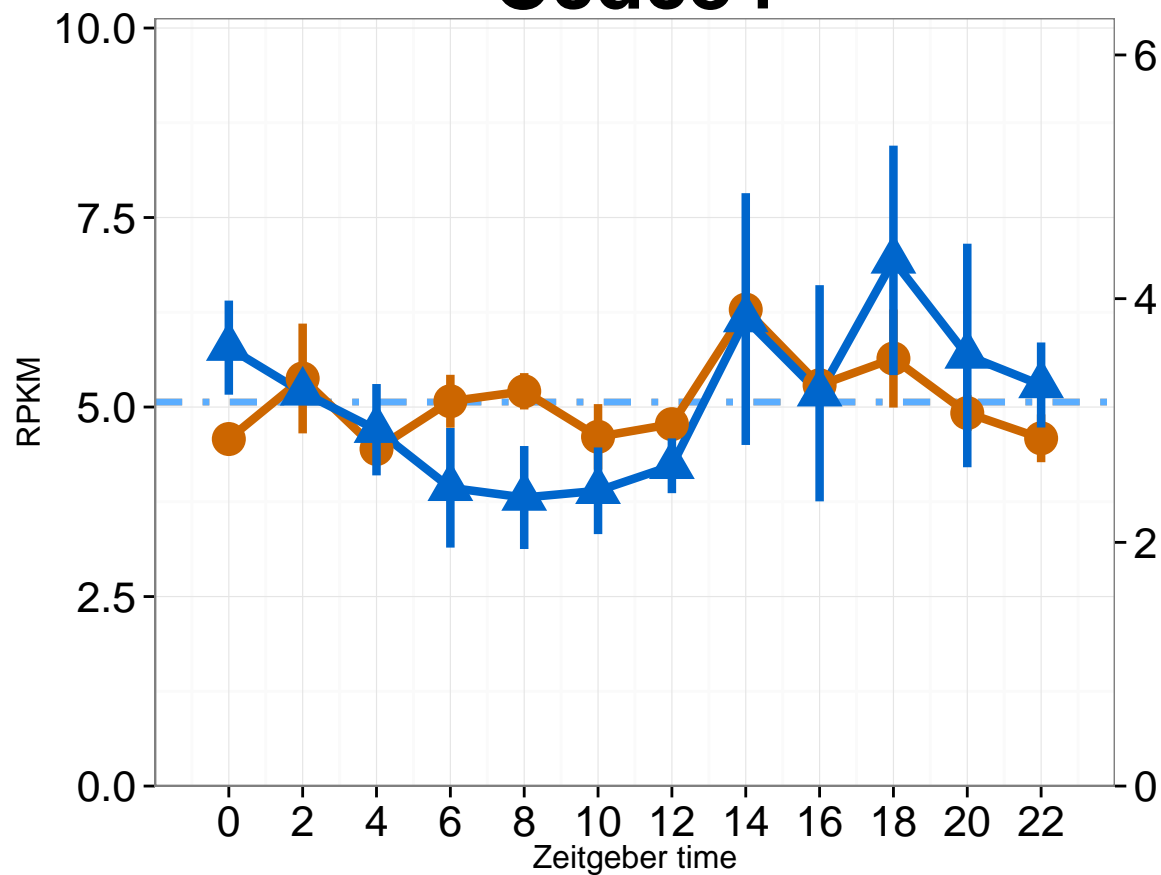

## Ccdc84

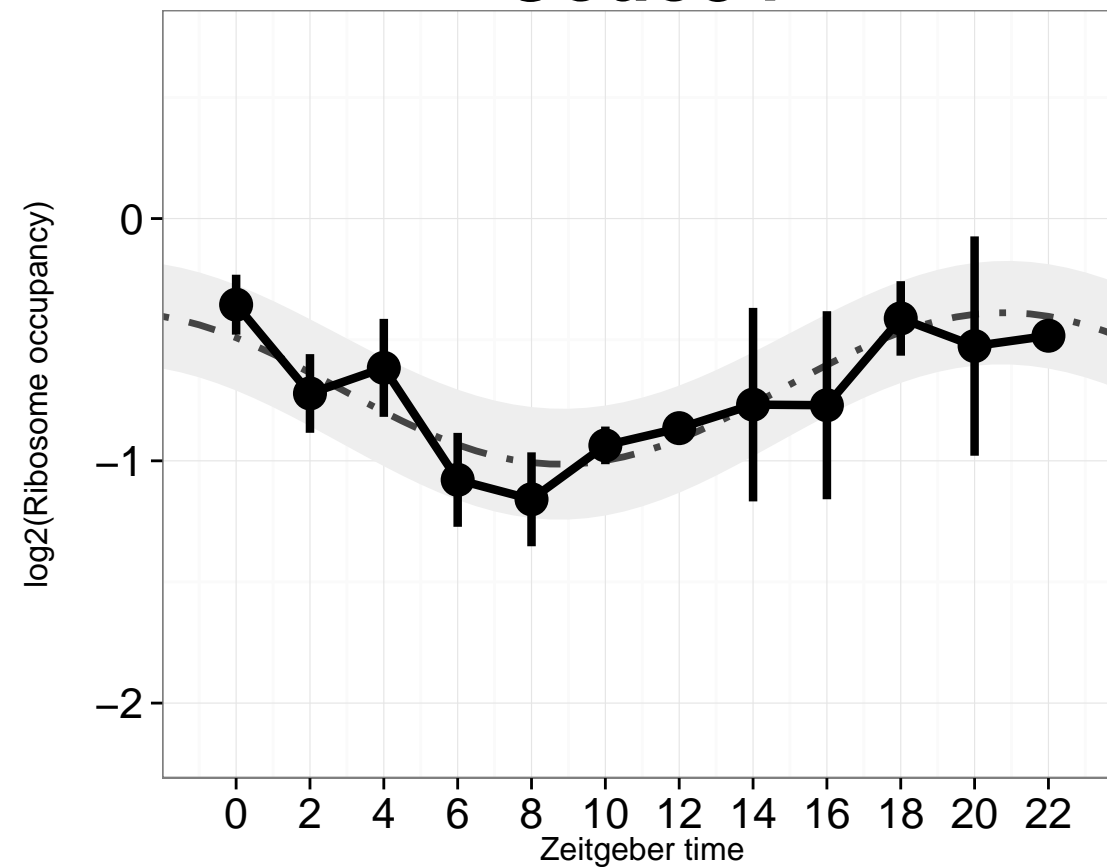

Supplement: Supplementary file 12583 [file 1]

## Zc3h10

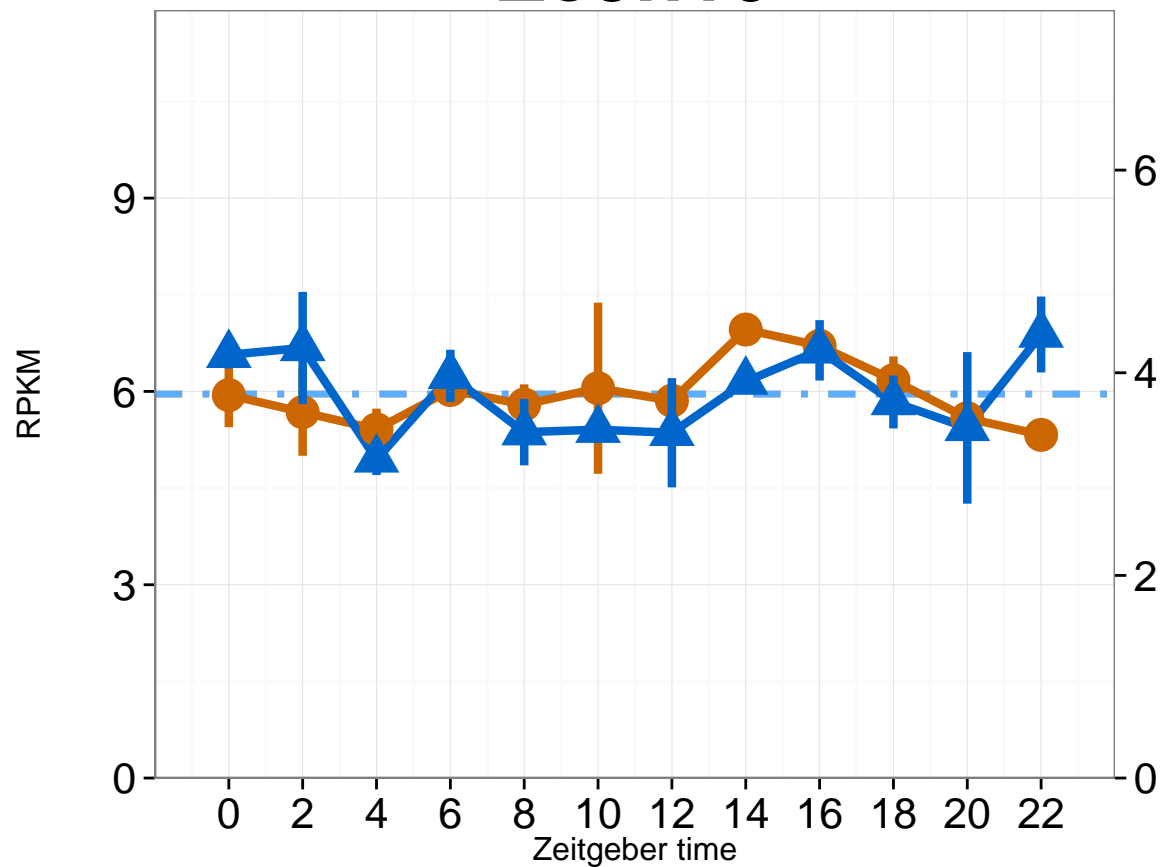

## Zc3h10

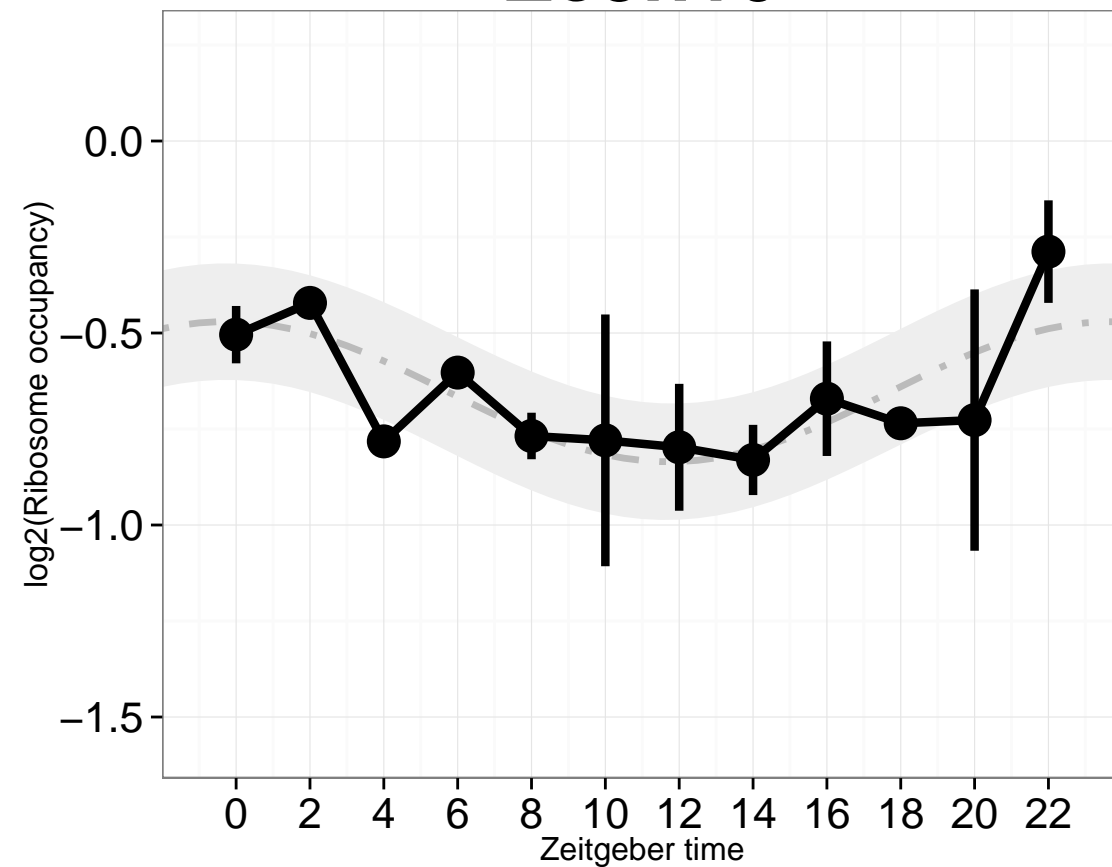

Supplement: Supplementary file 12584 [file 1]

# Glt1d1

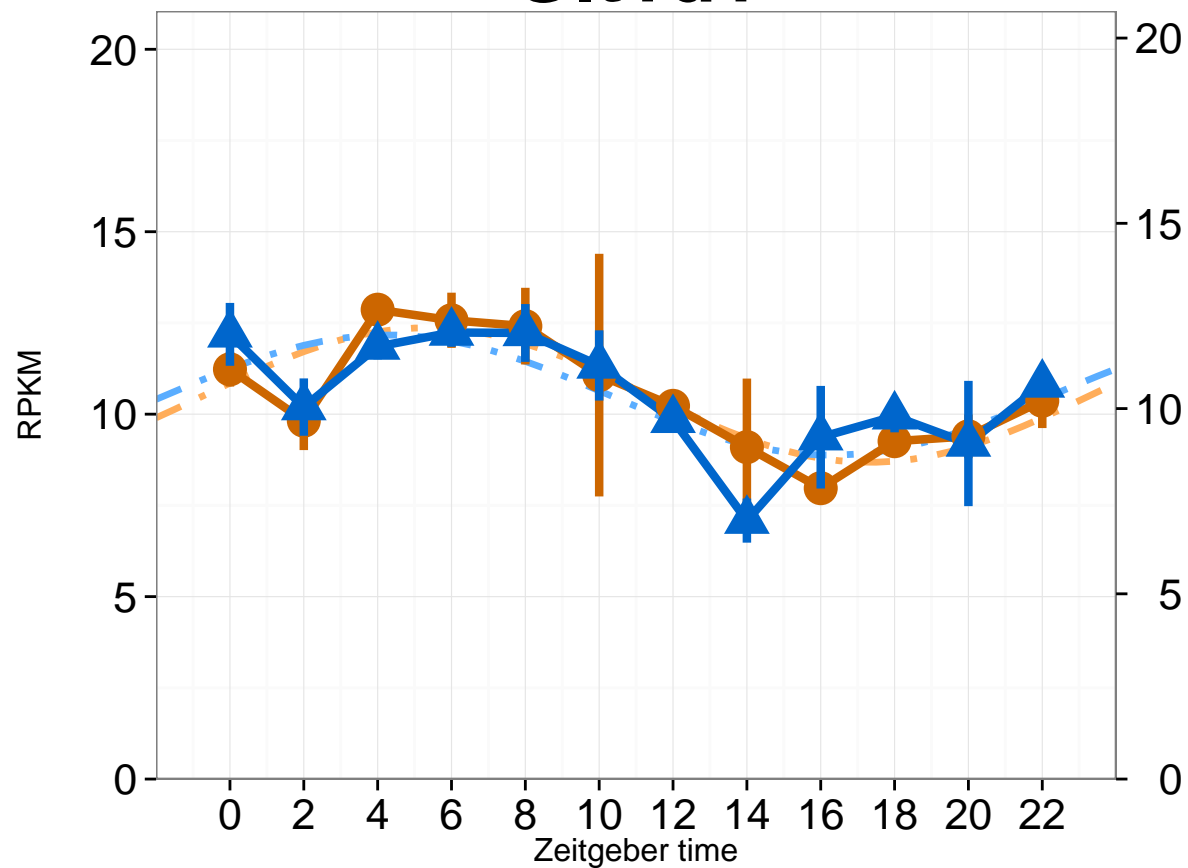

# Glt1d1

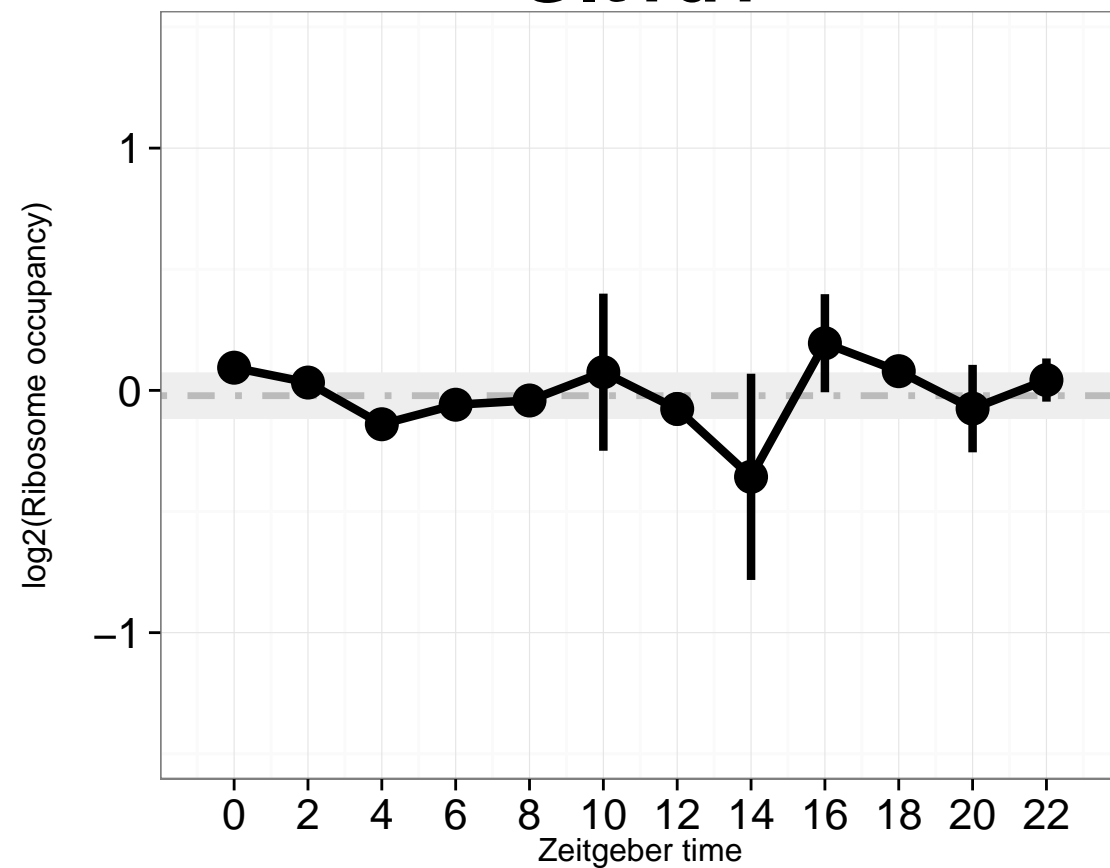

Supplement: Supplementary file 12585 [file 1]

## Hmces

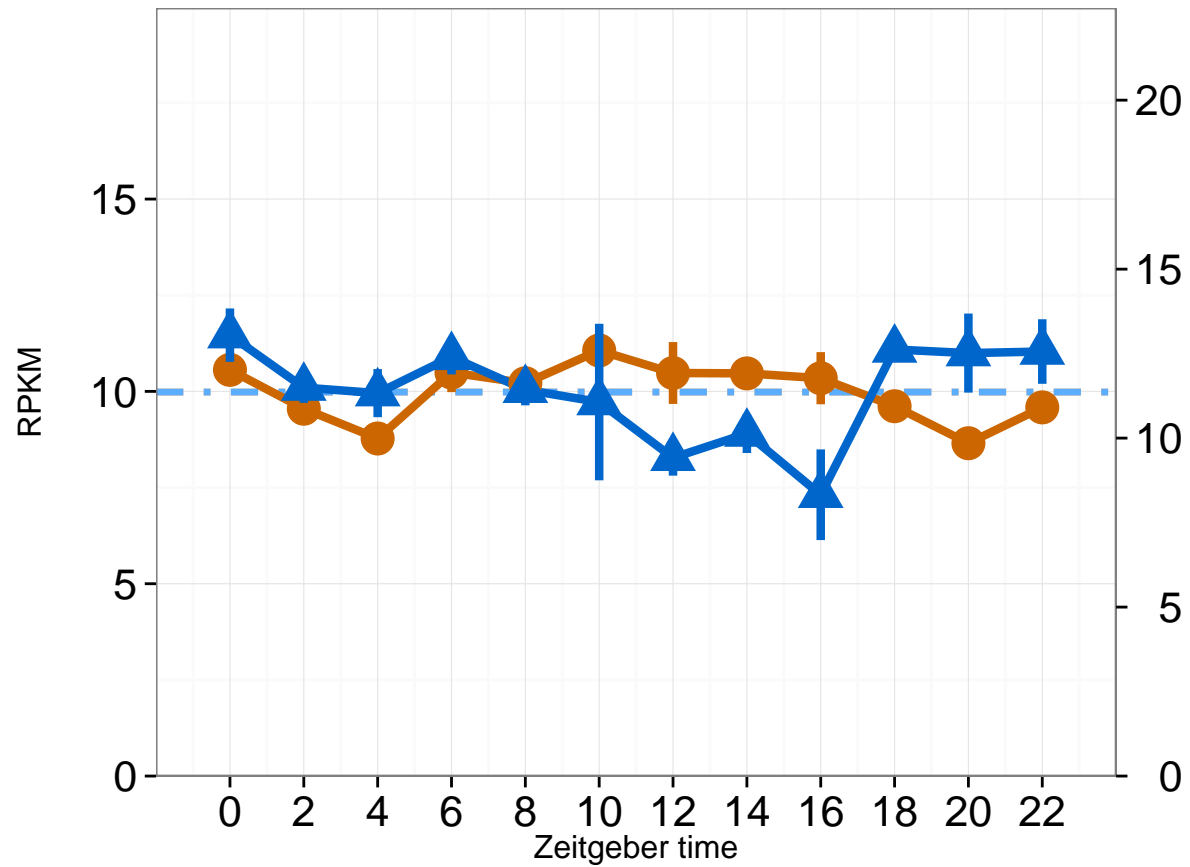

## Hmces

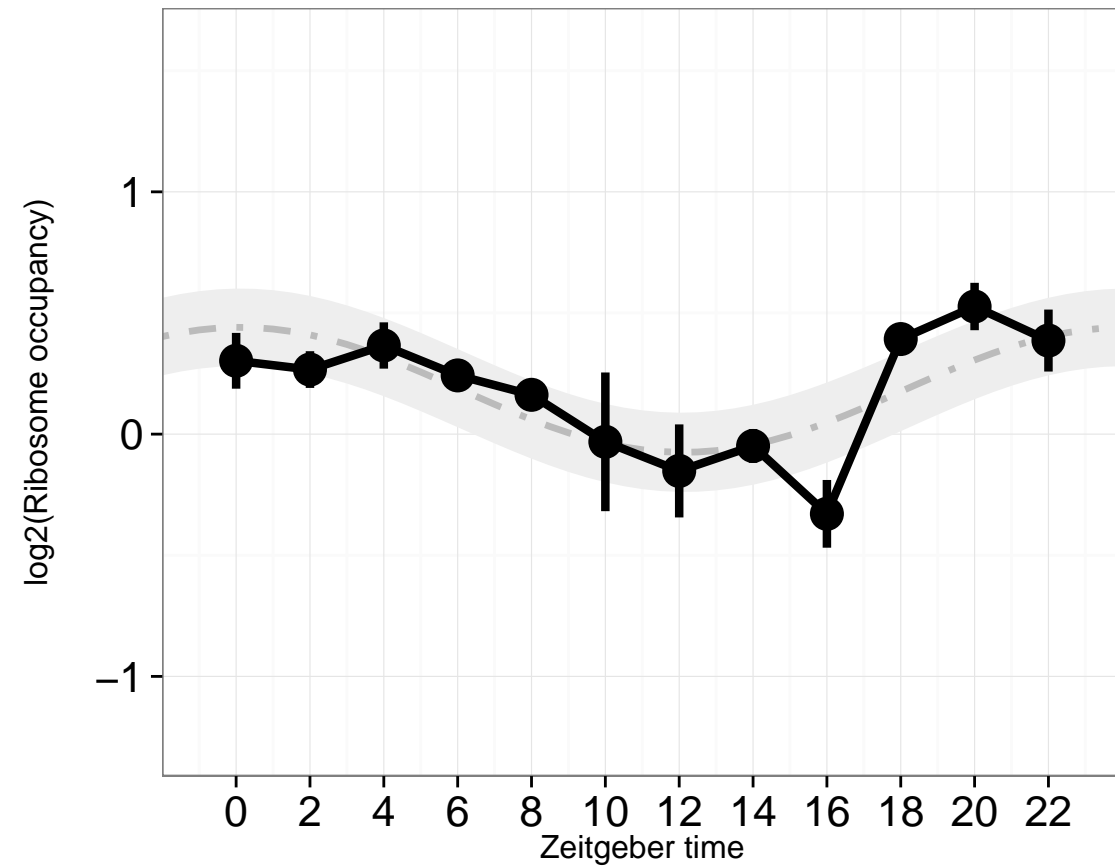

Supplement: Supplementary file 12586 [file 1]

**Spr**

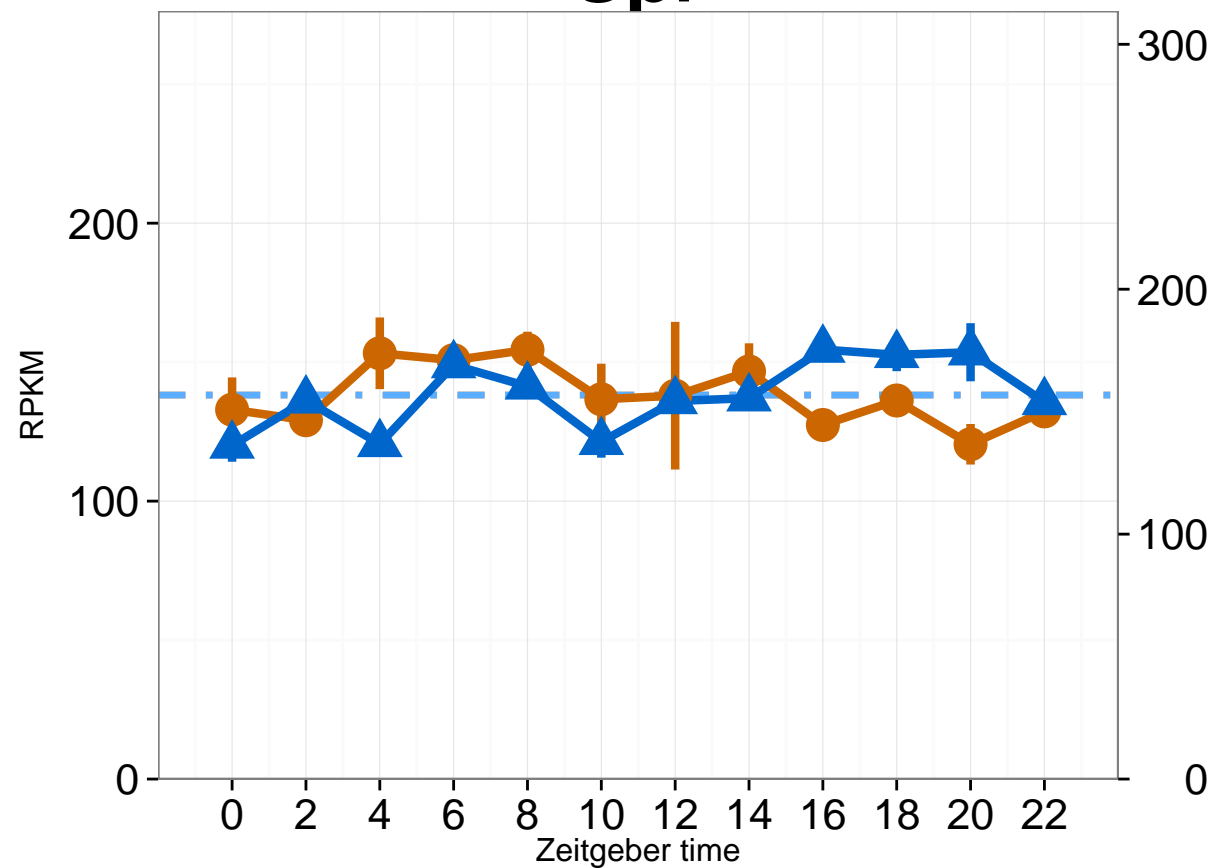

**Spr**

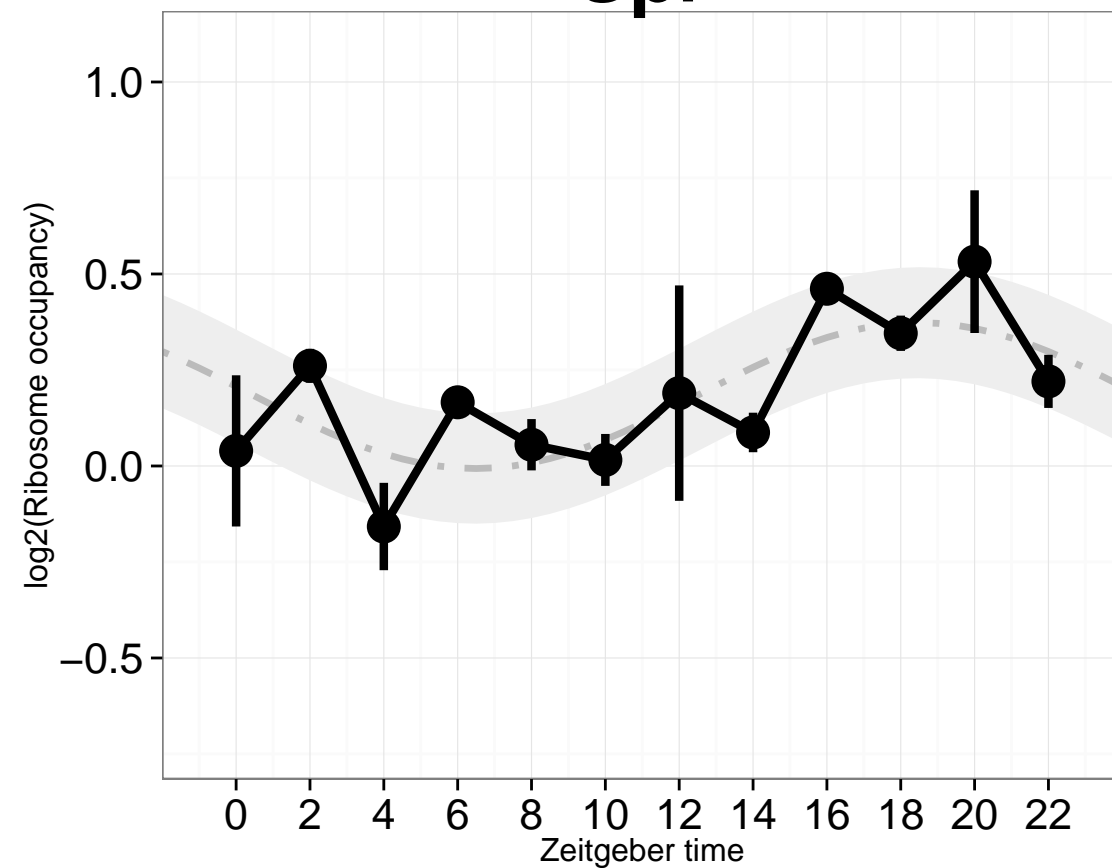

Supplement: Supplementary file 12587 [file 1]

## Znhit6

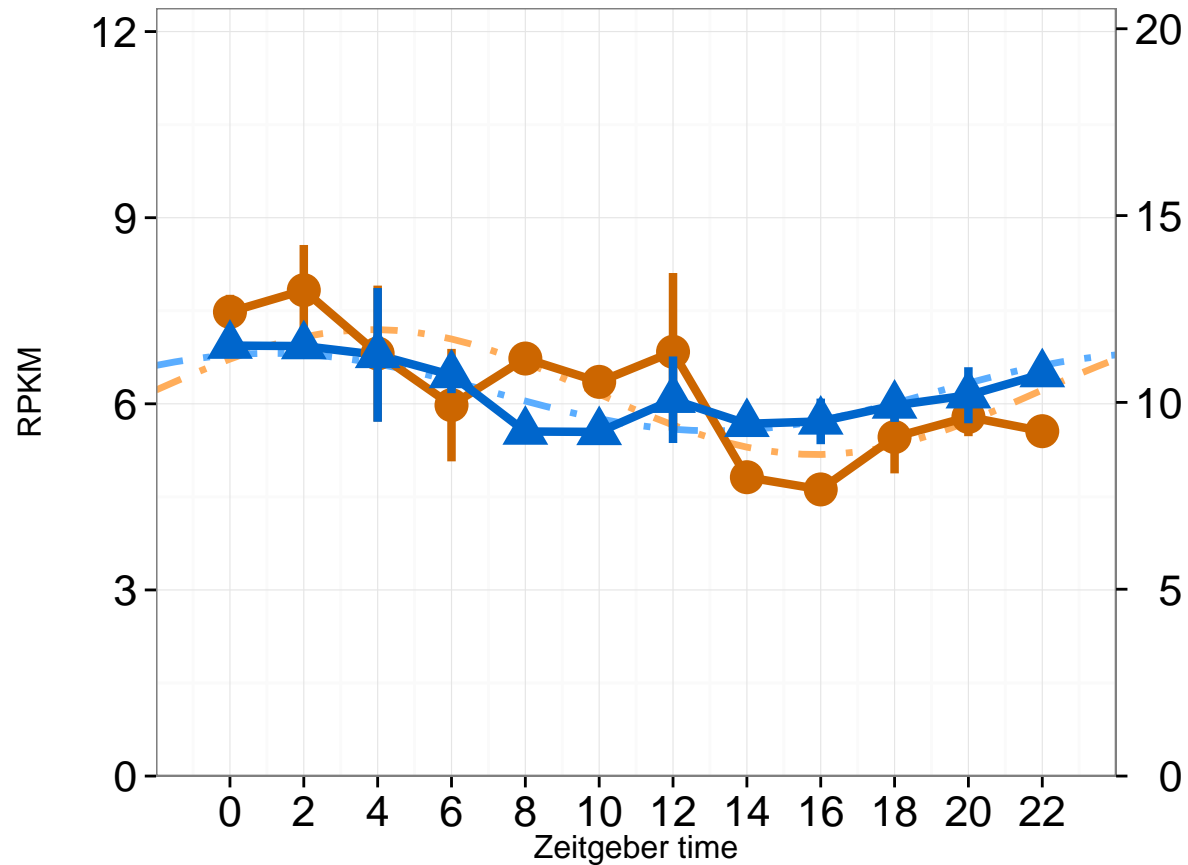

## Znhit6

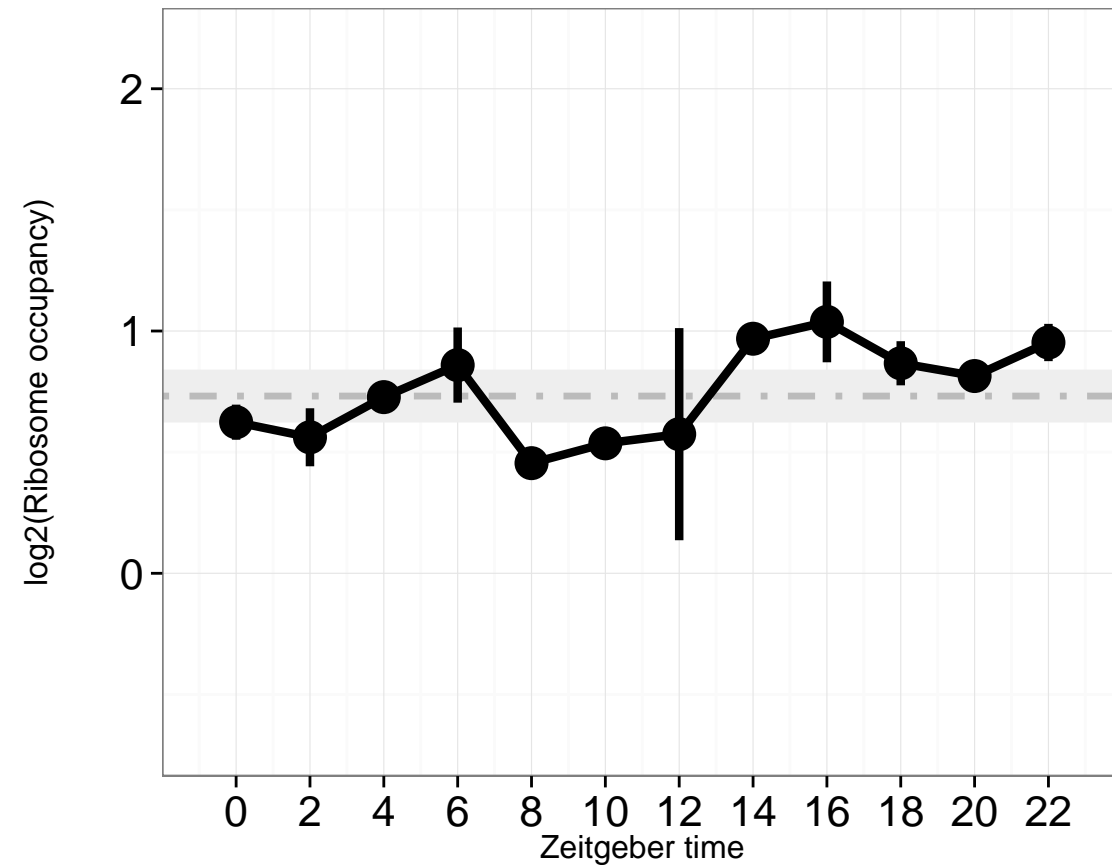

Supplement: Supplementary file 12588 [file 1]

## Med31

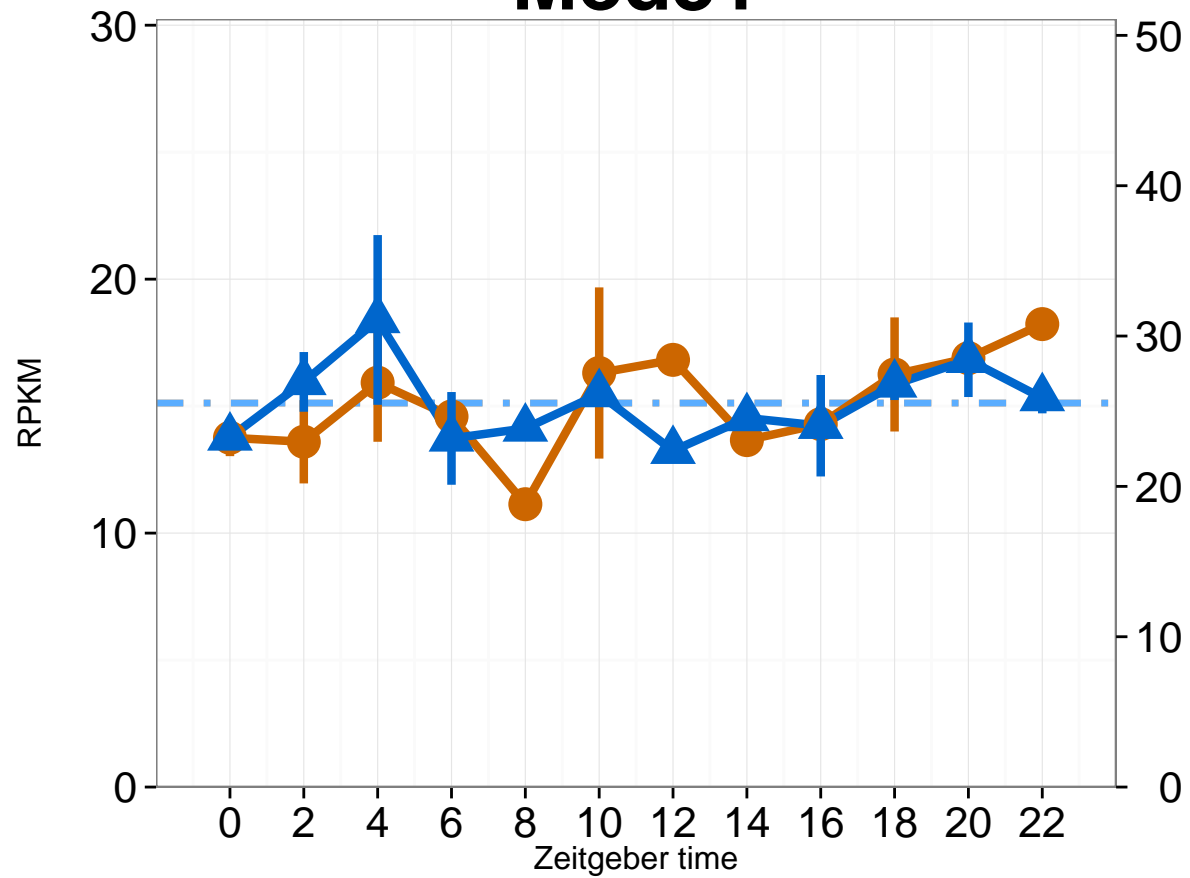

## Med31

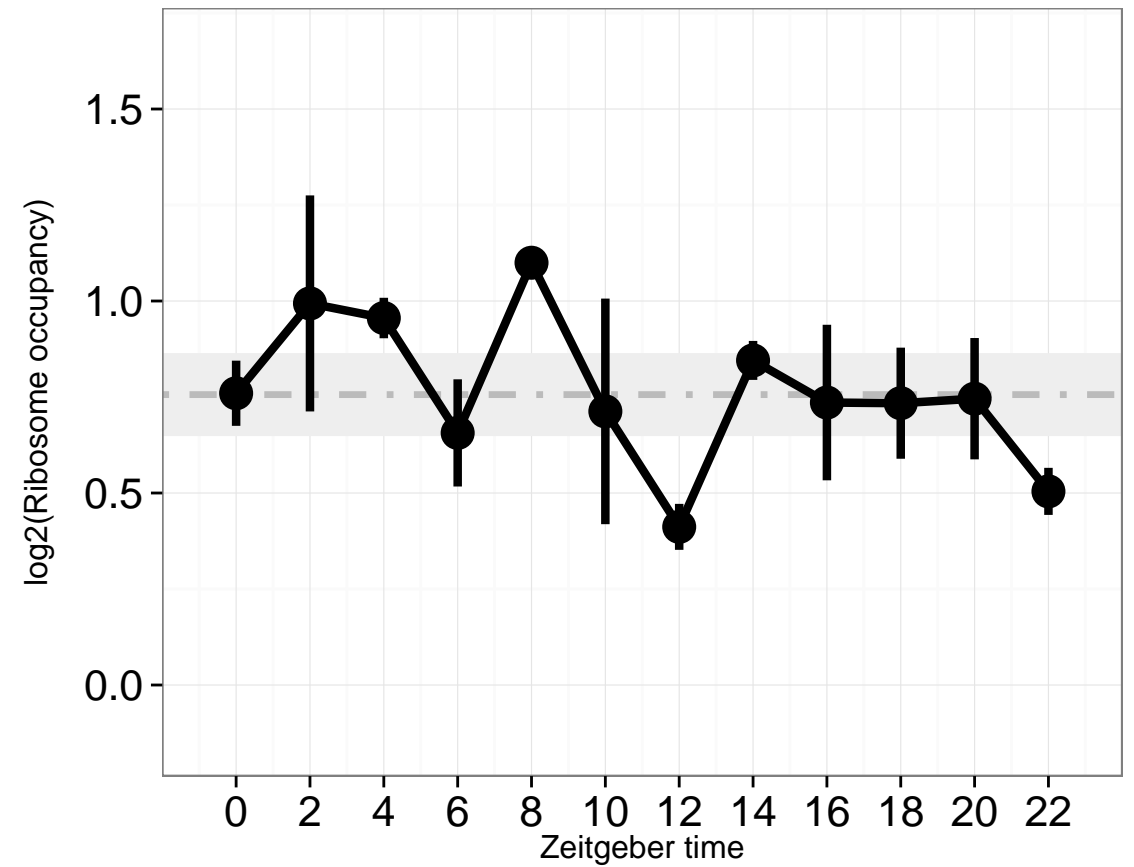

Supplement: Supplementary file 12589 [file 1]

# Ppp1r9b

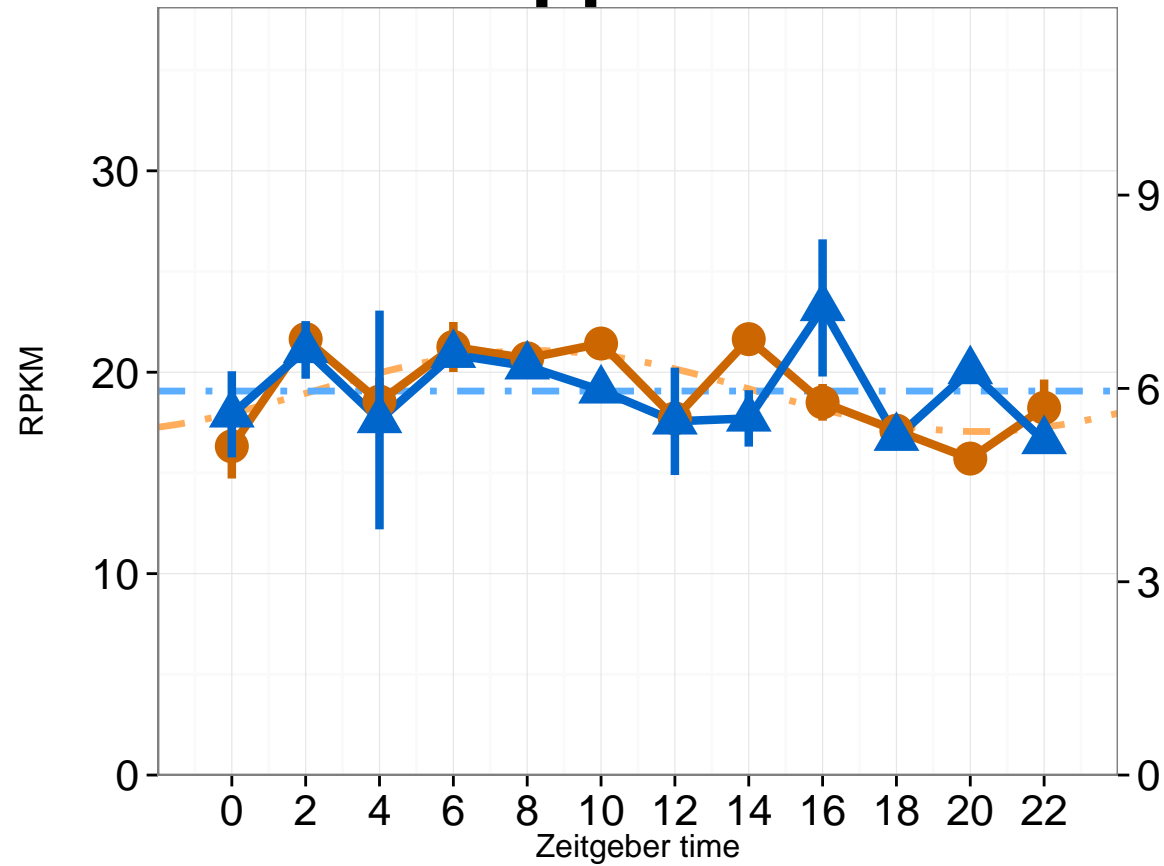

# Ppp1r9b

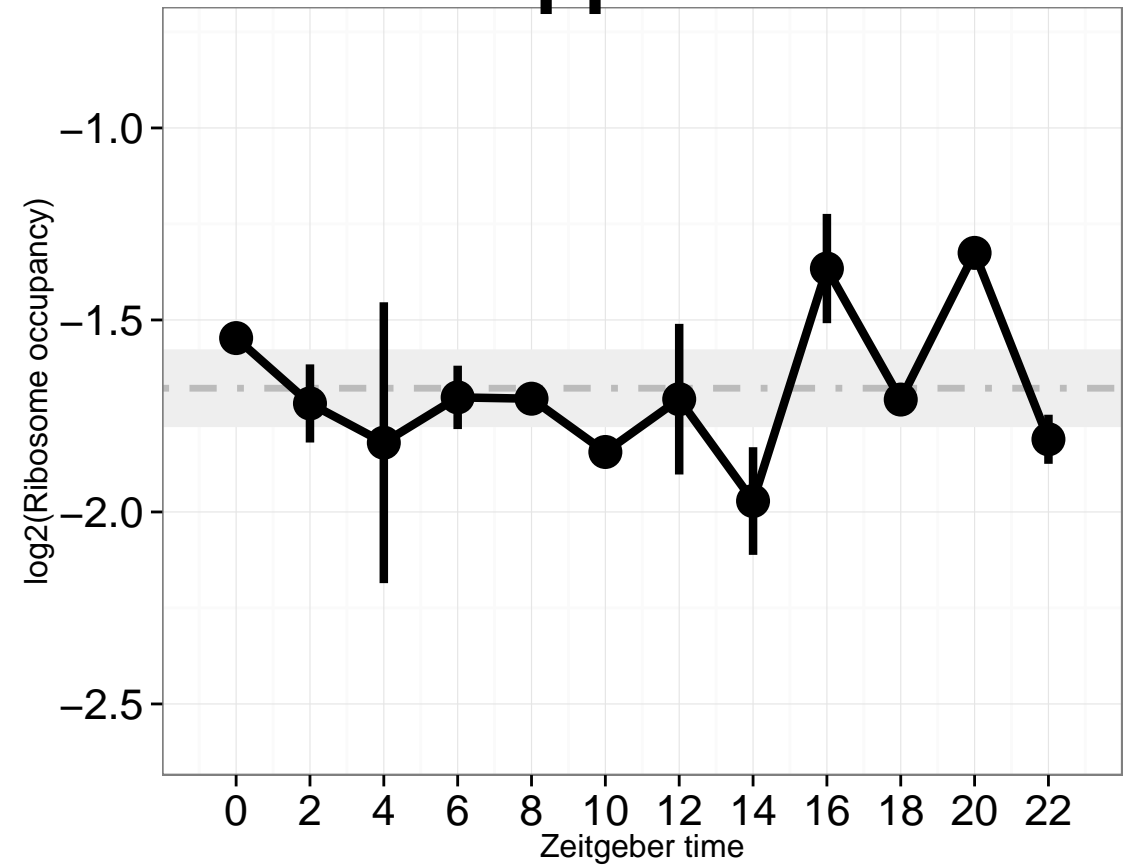

Supplement: Supplementary file 12590 [file 1]

## Ttc12

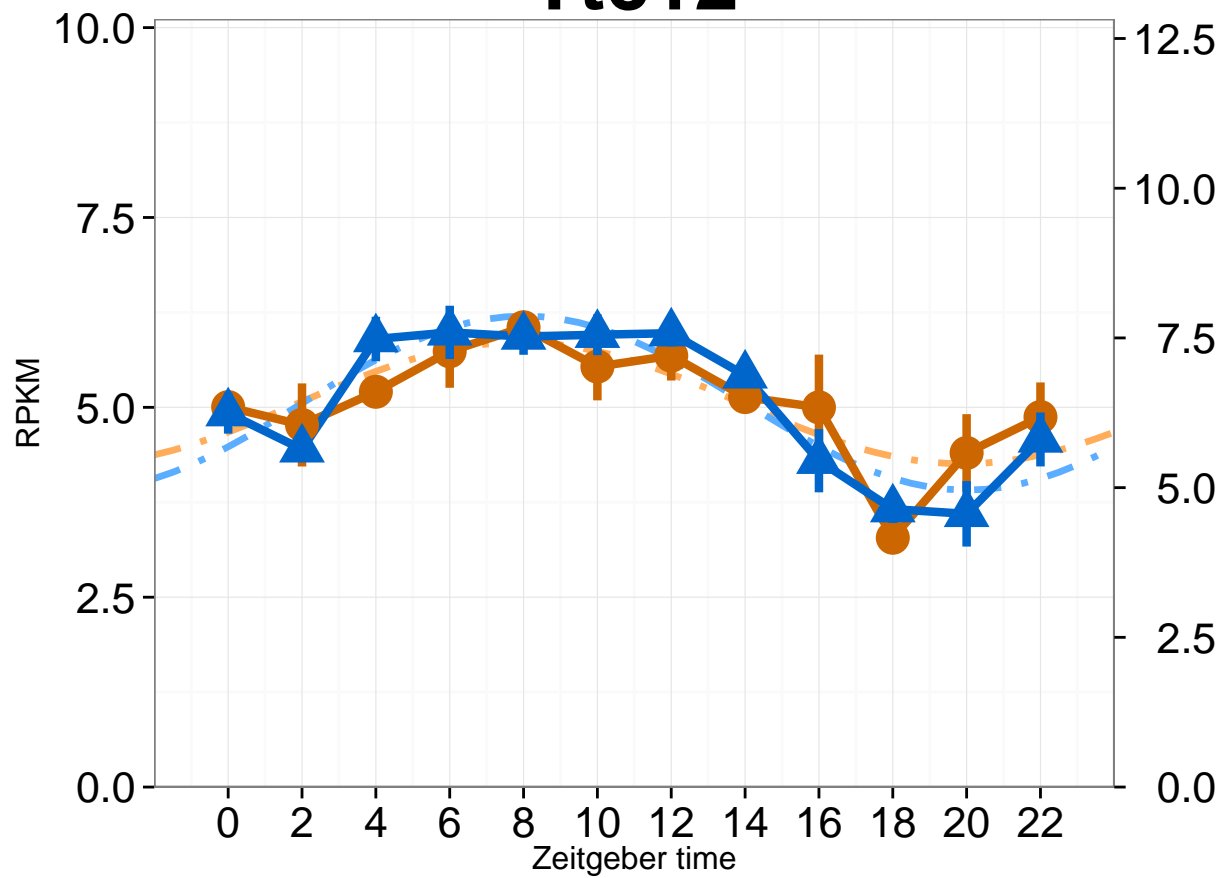

## Ttc12

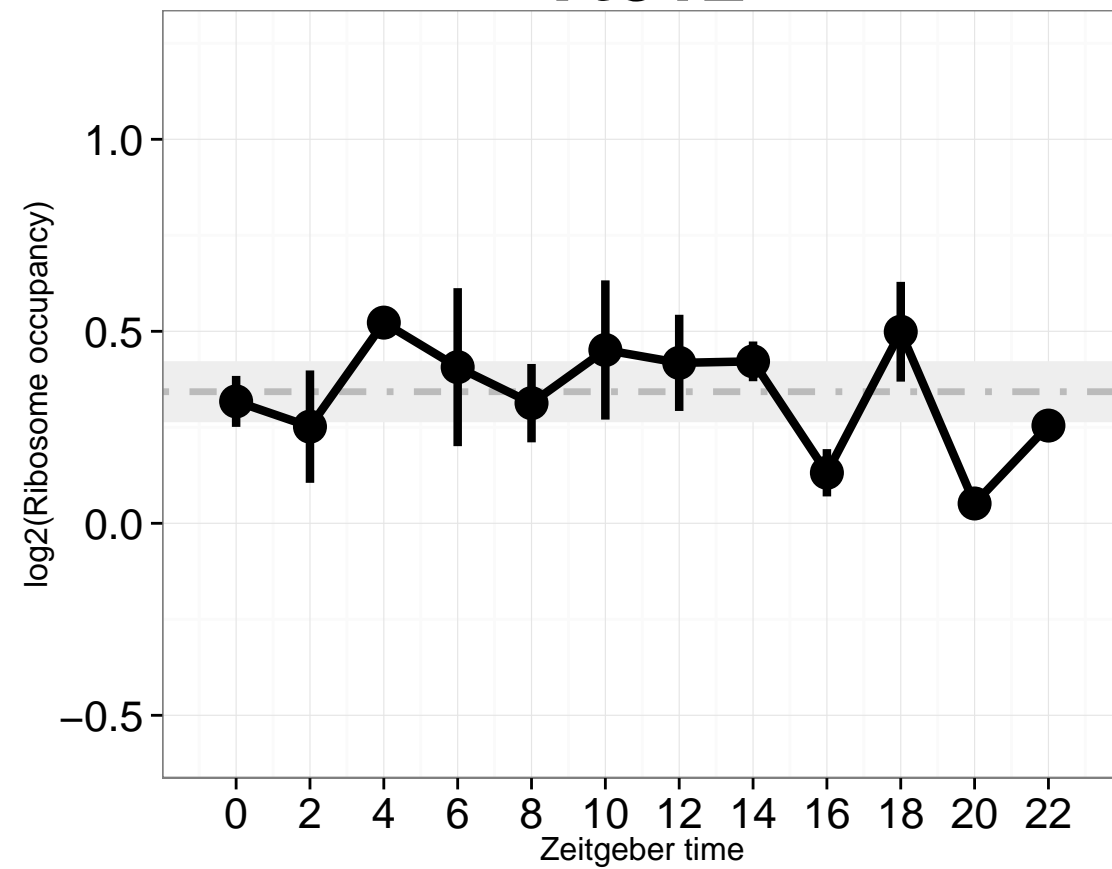

Supplement: Supplementary file 12591 [file 1]

## Ubd

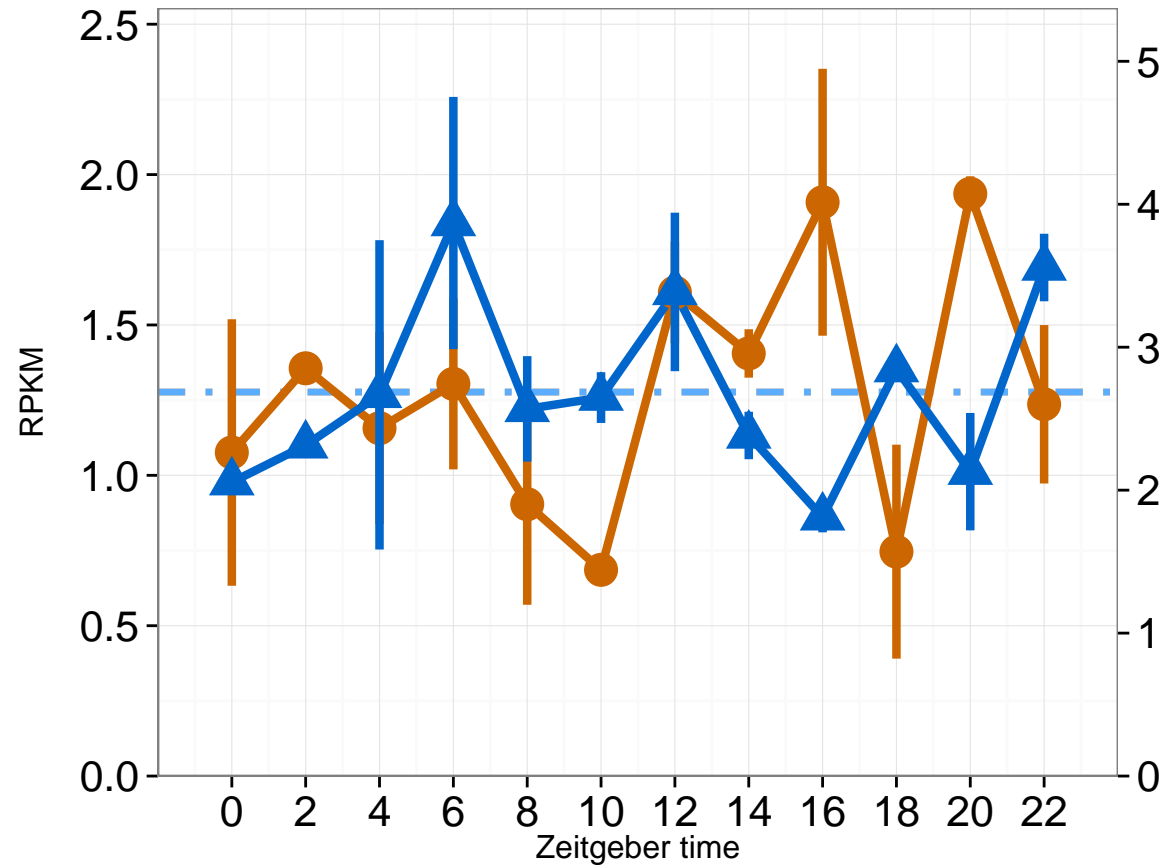

## Ubd

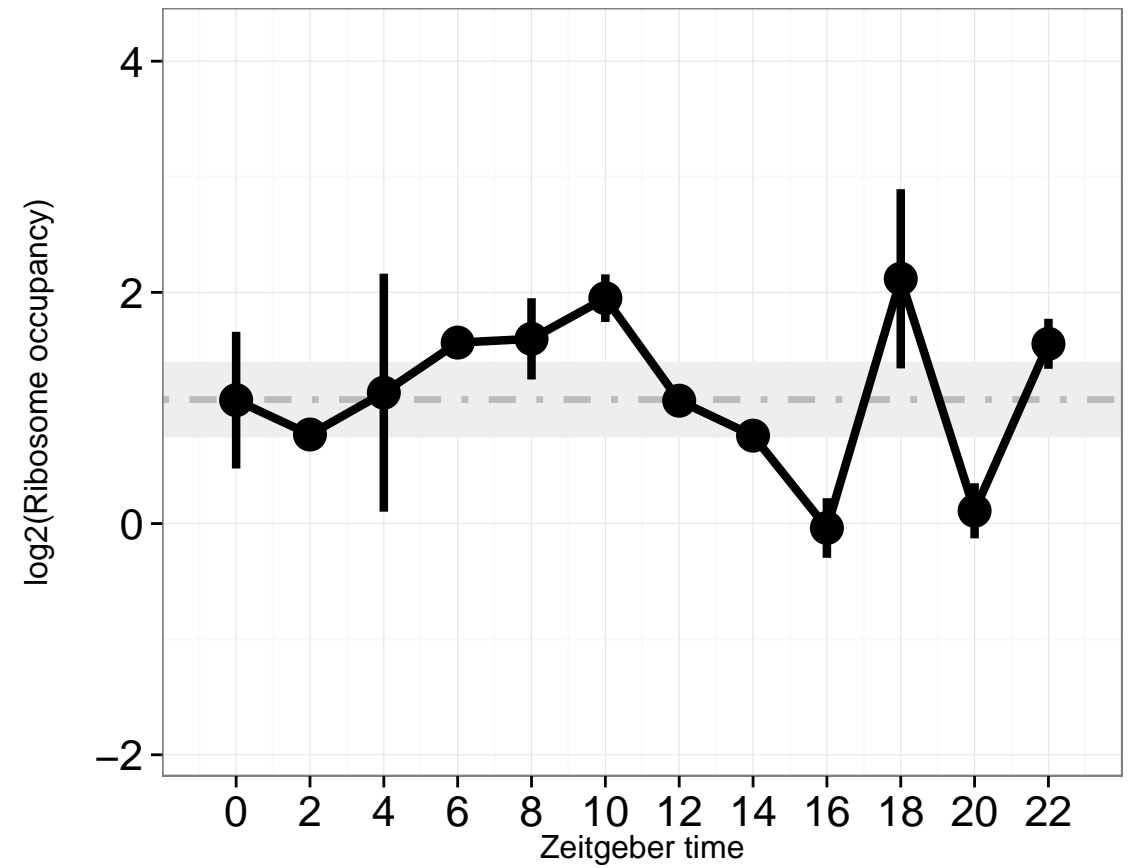

Supplement: Supplementary file 12592 [file 1]

## Cdcp1

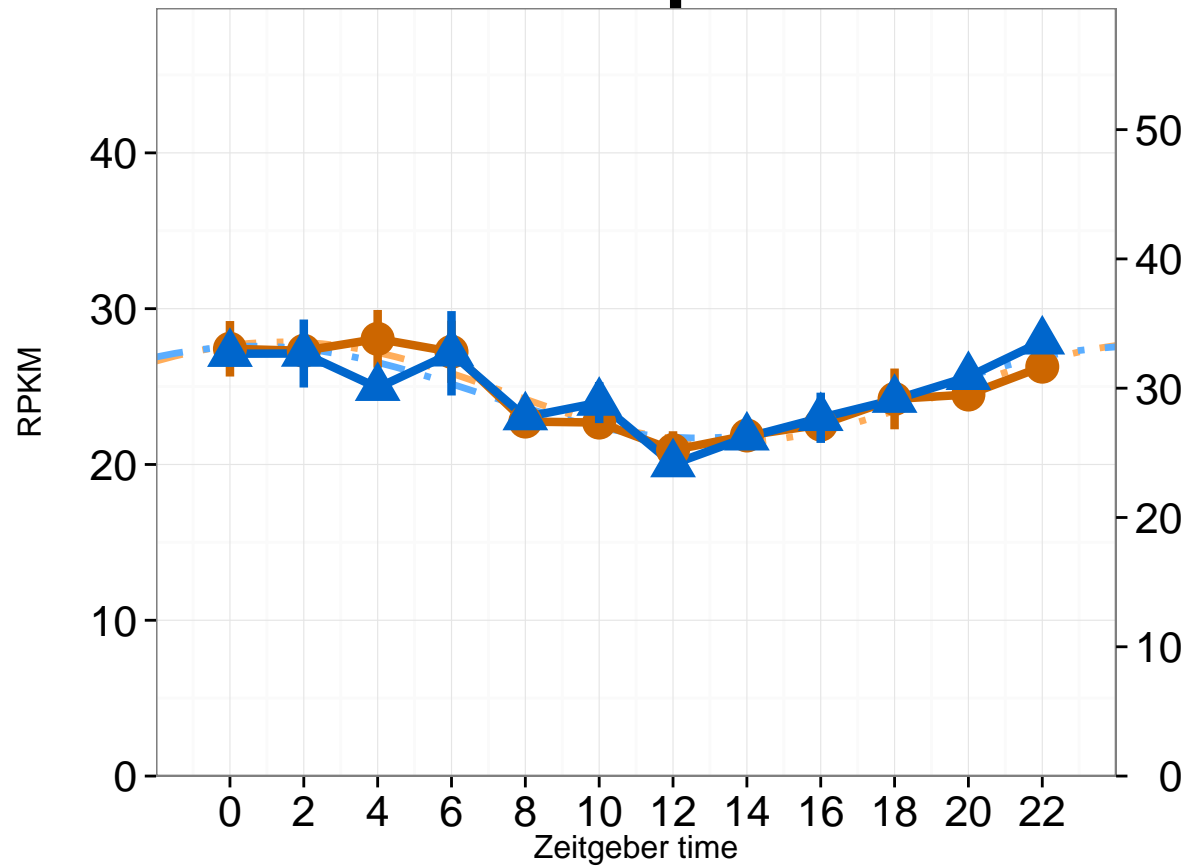

## Cdcp1

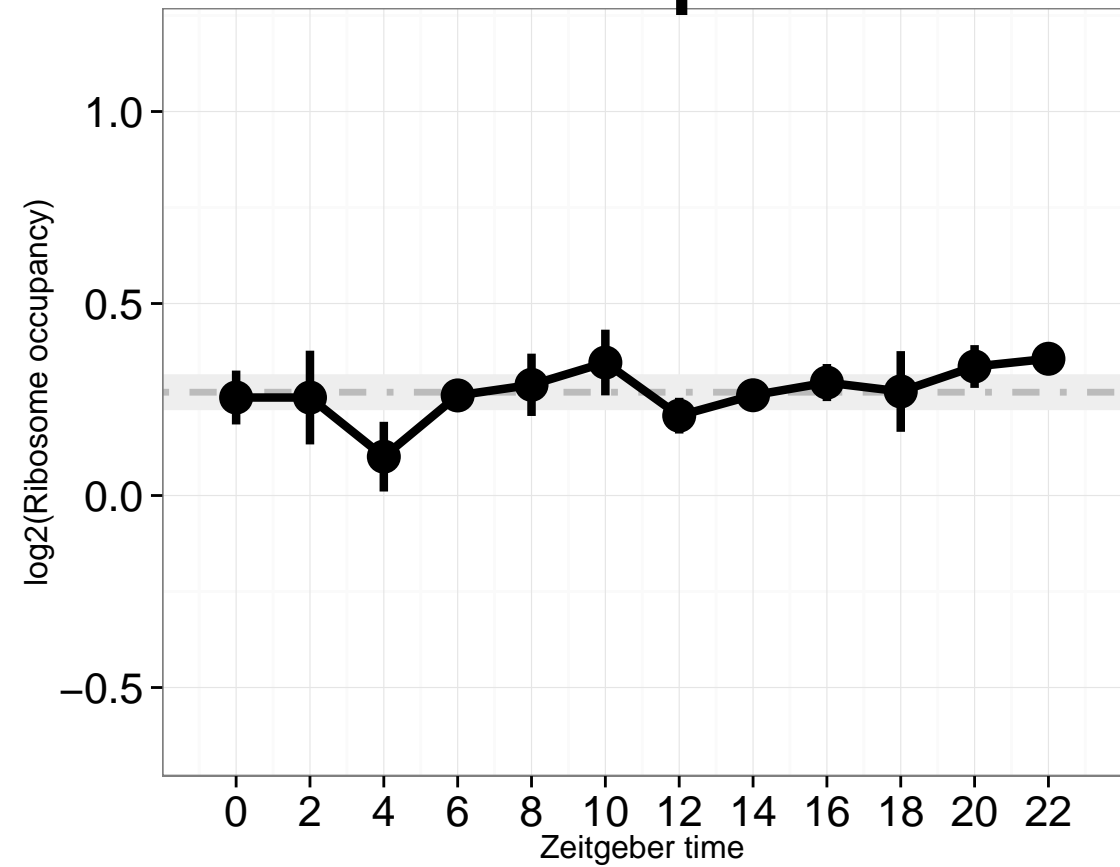

Supplement: Supplementary file 12593 [file 1]

## Mme

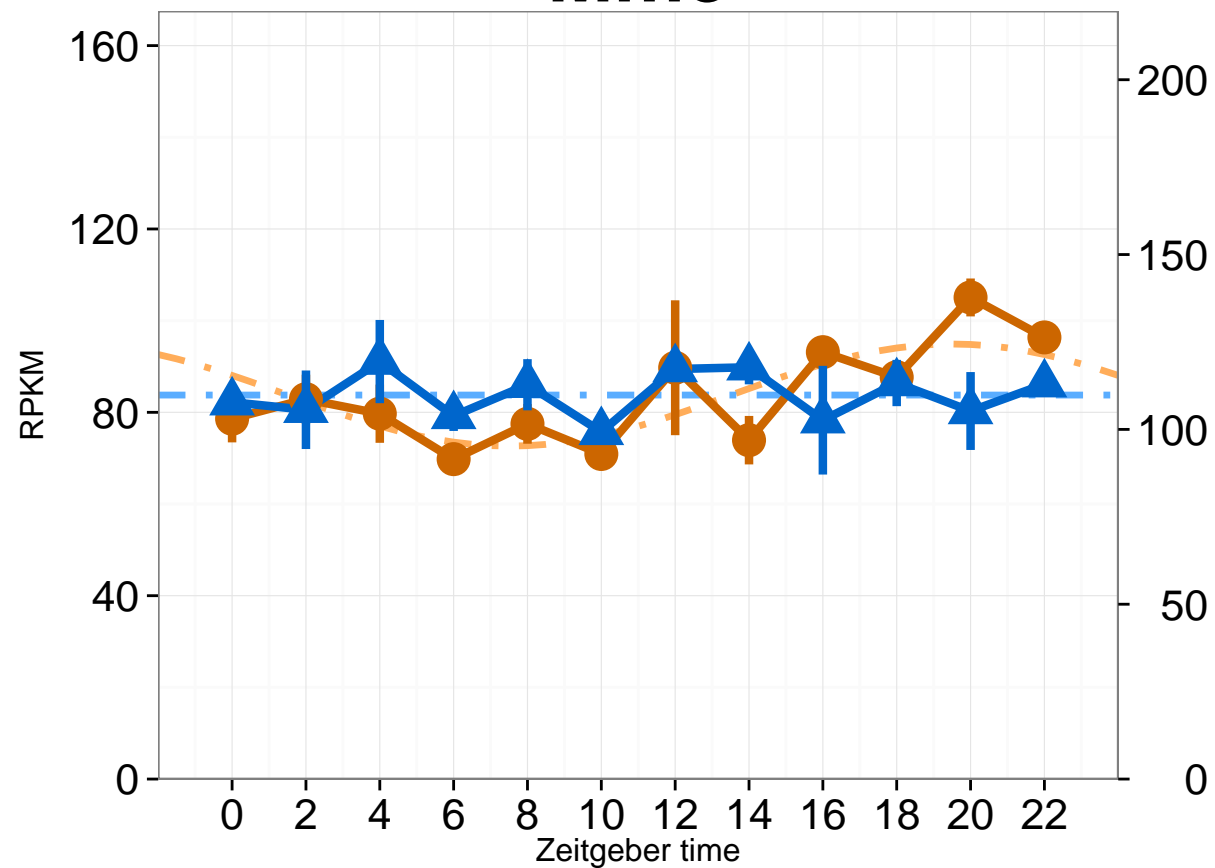

## Mme

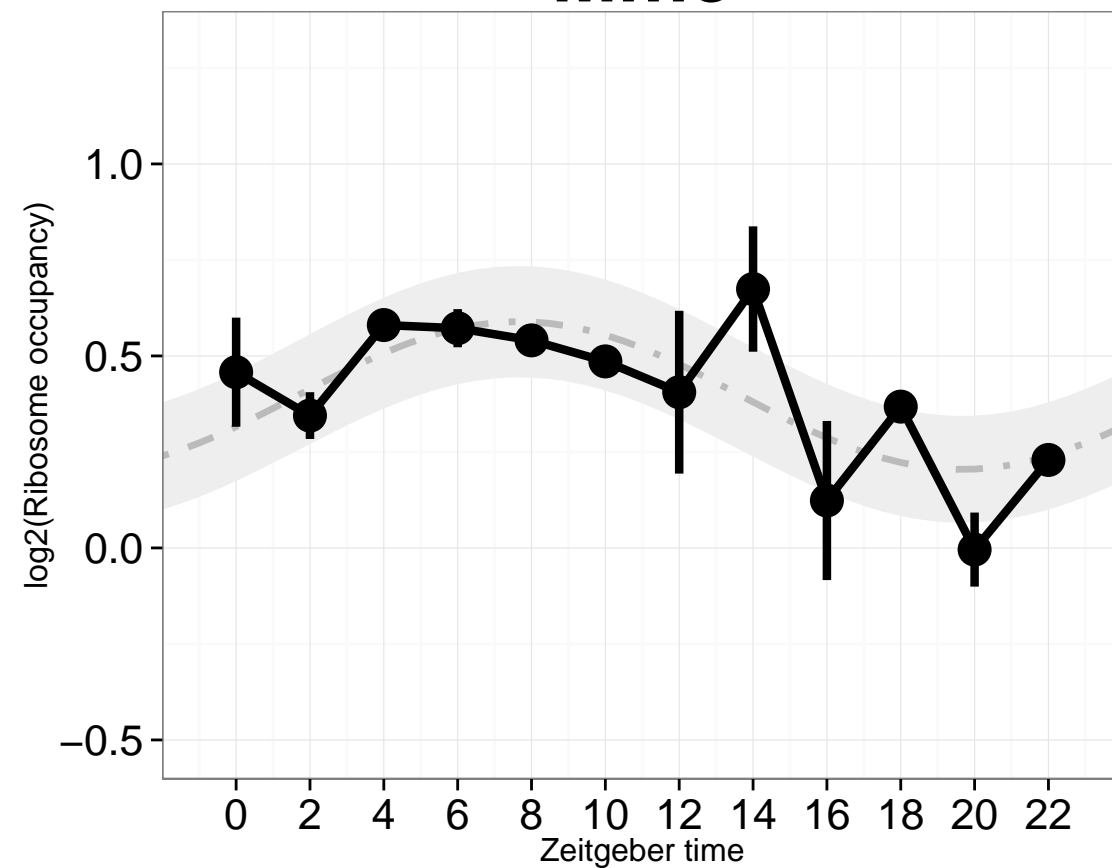

Supplement: Supplementary file 12594 [file 1]

## Nelfcd

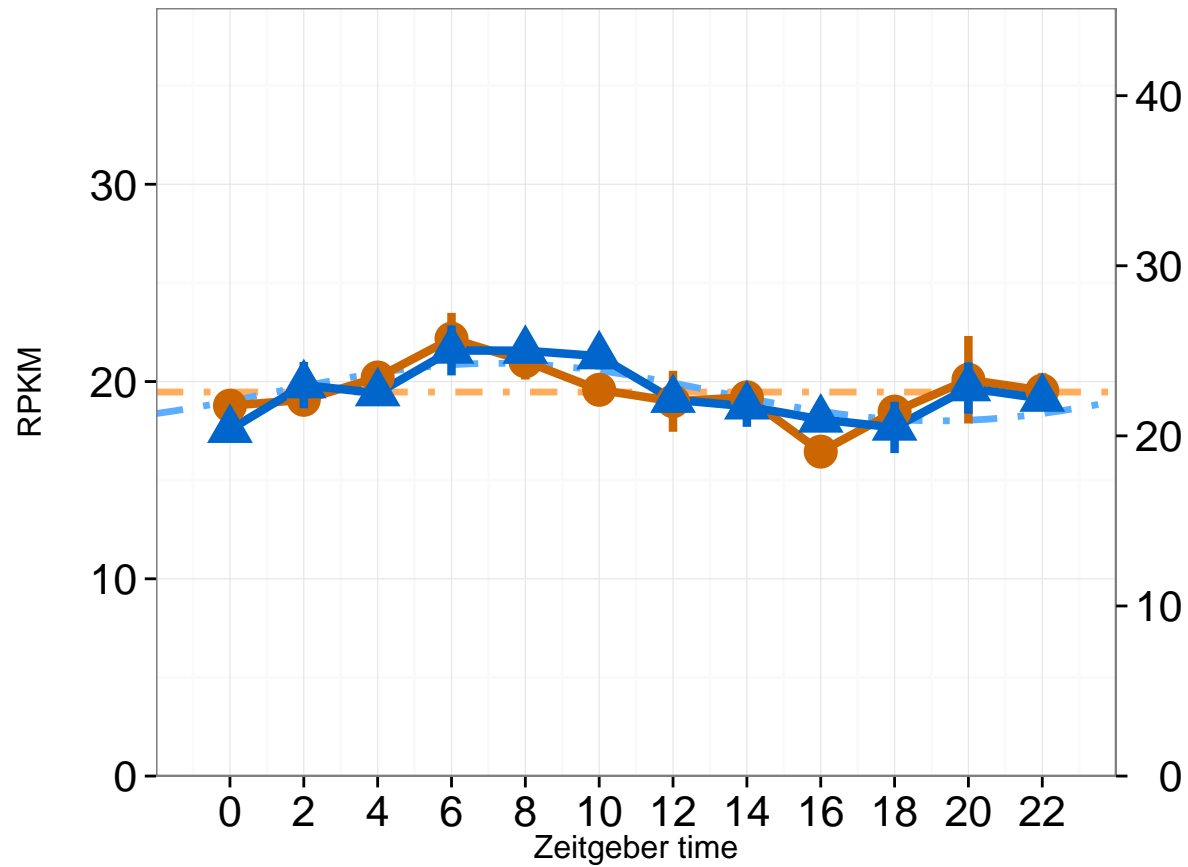

## Nelfcd

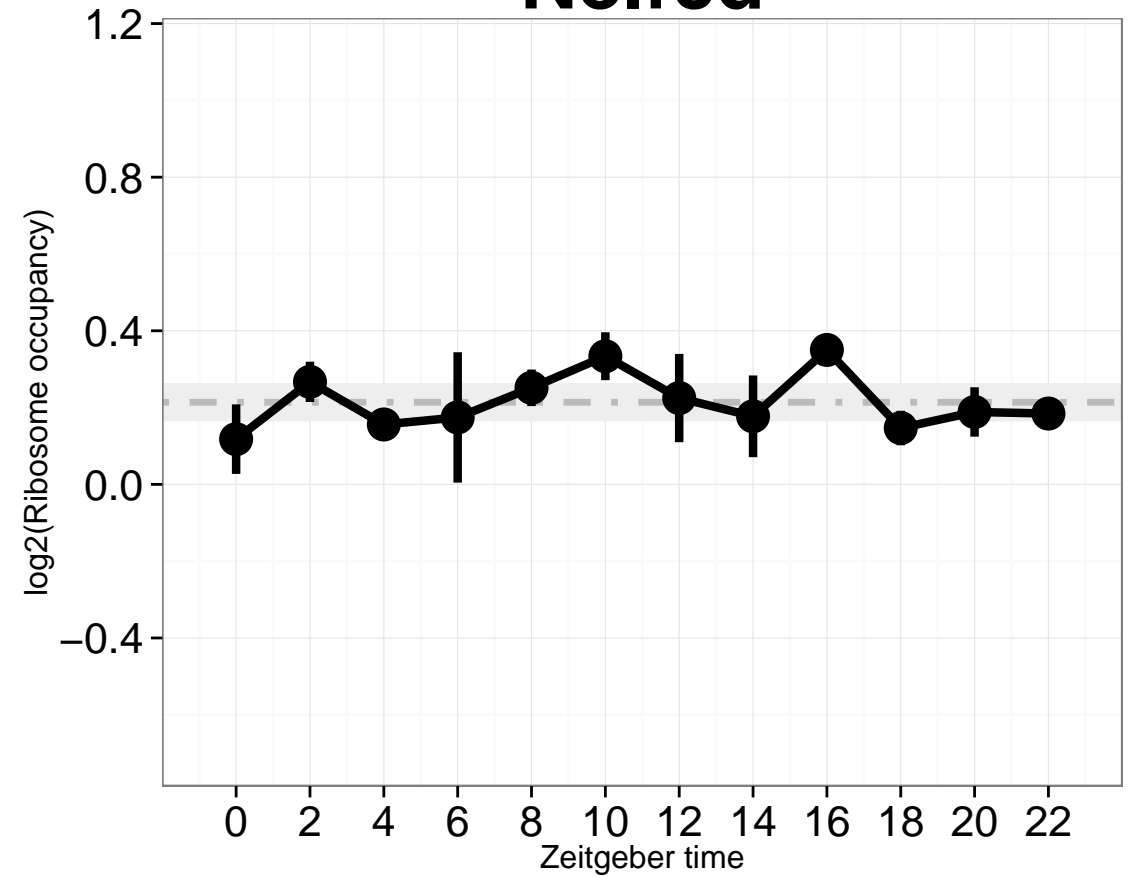

Supplement: Supplementary file 12595 [file 1]

## Pddc1

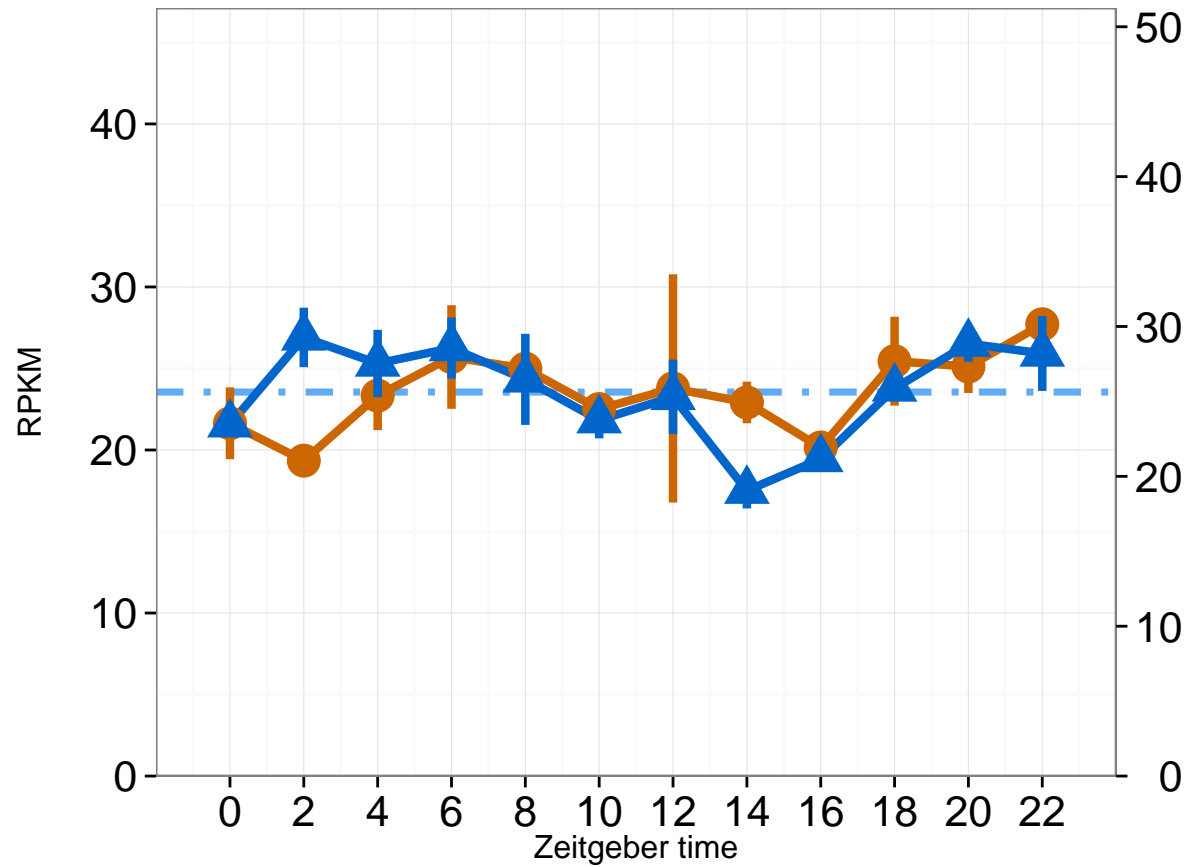

## Pddc1

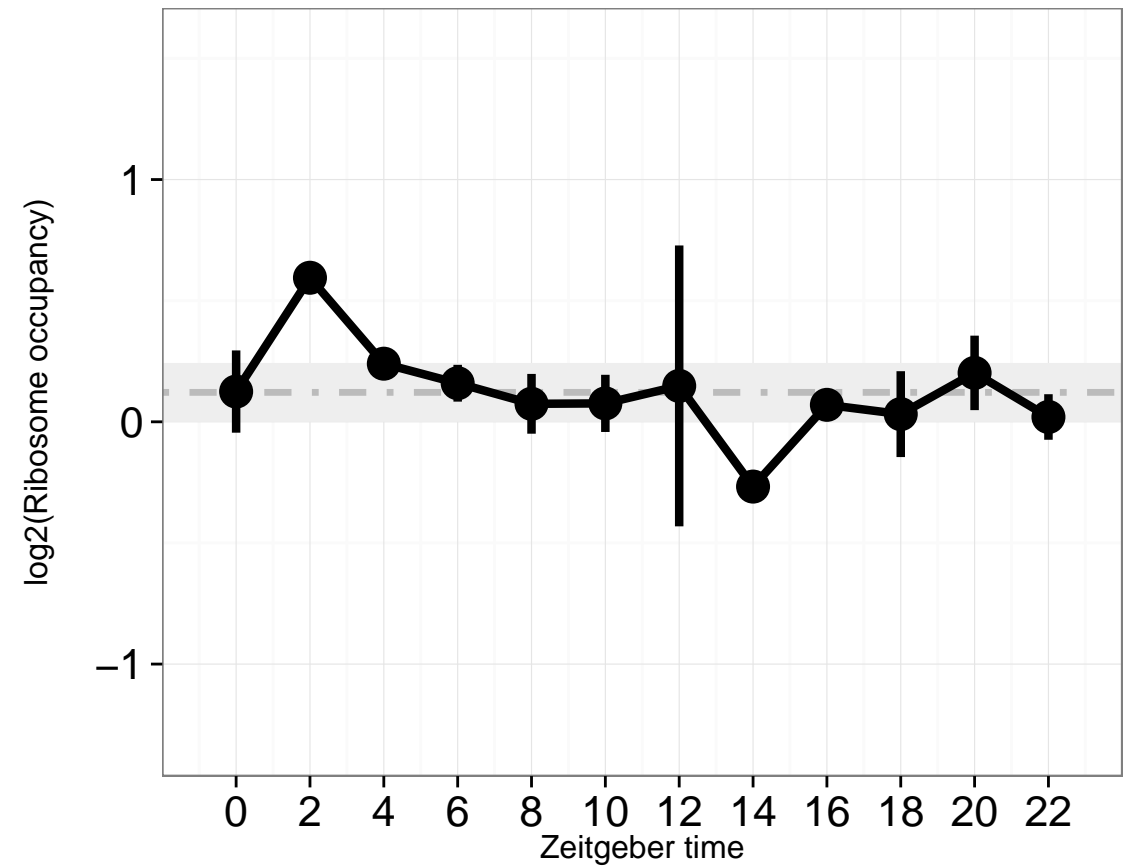

Supplement: Supplementary file 12596 [file 1]

## Pigu

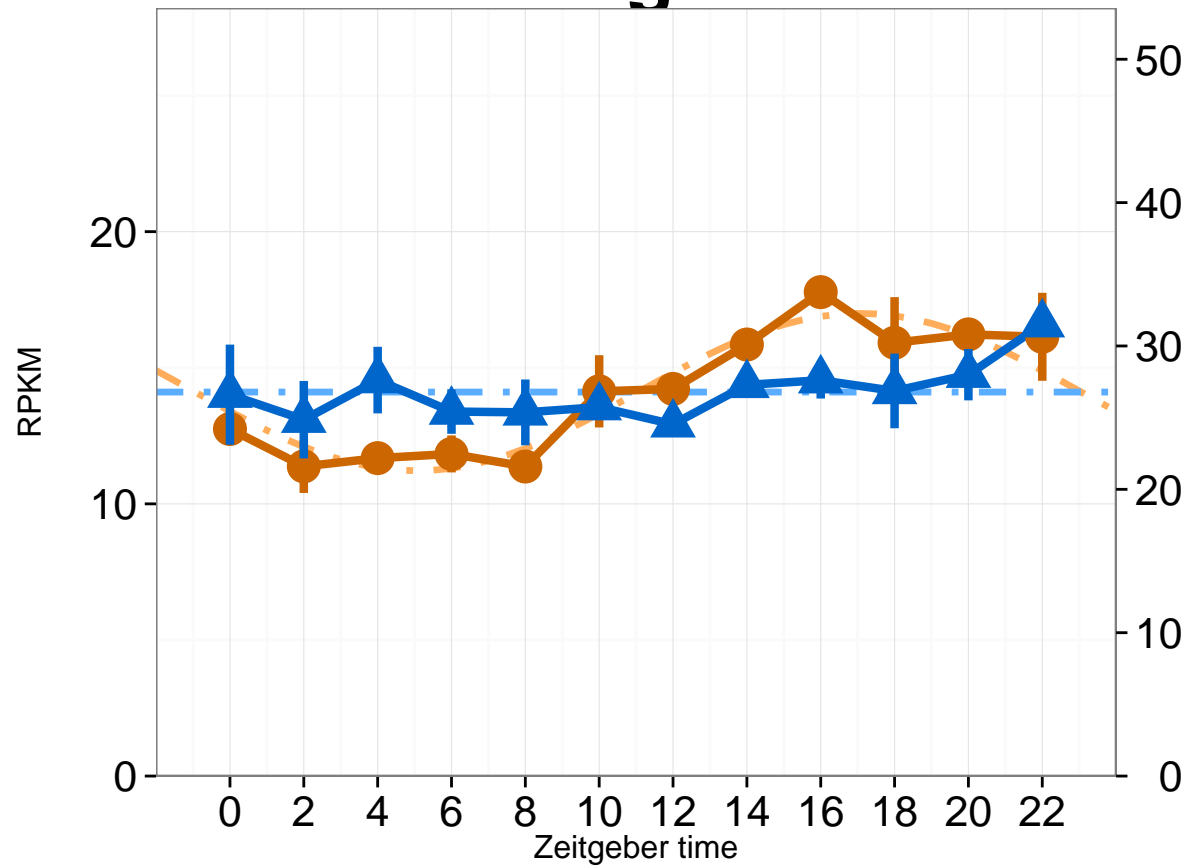

## Pigu

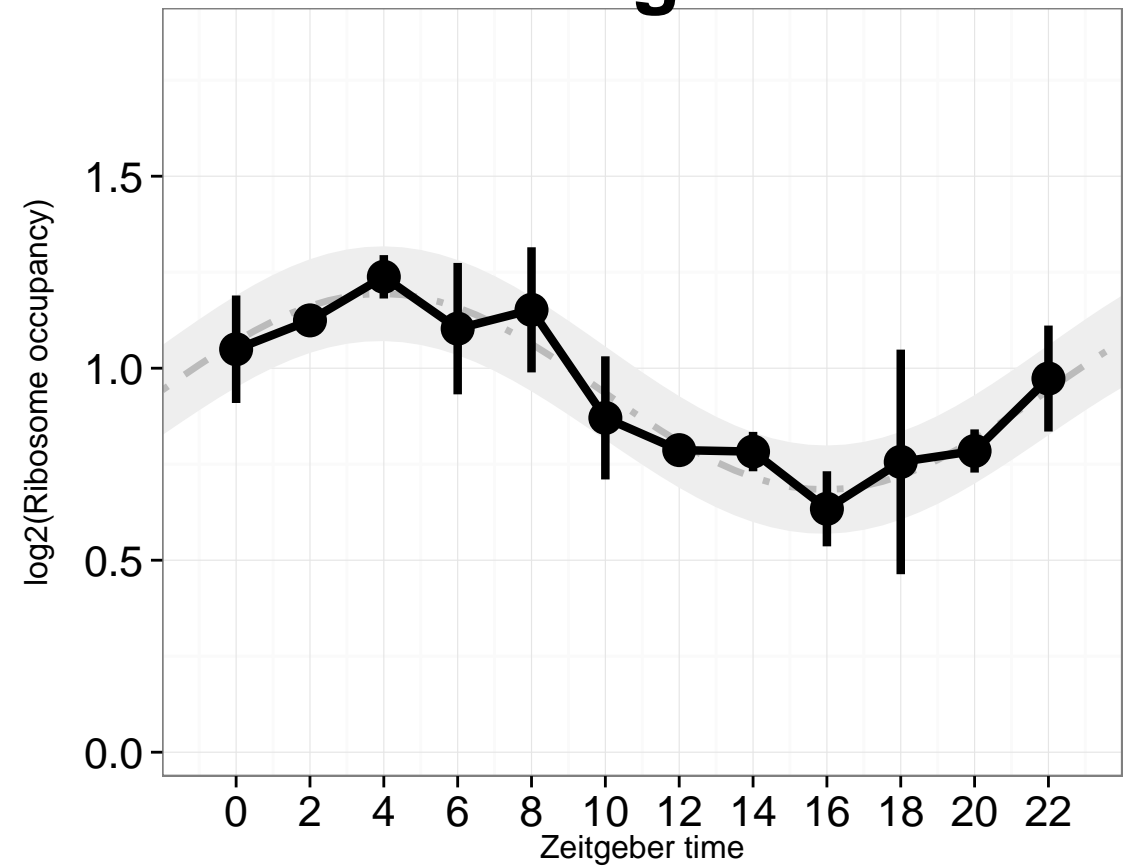

Supplement: Supplementary file 12597 [file 1]

## Glyctk

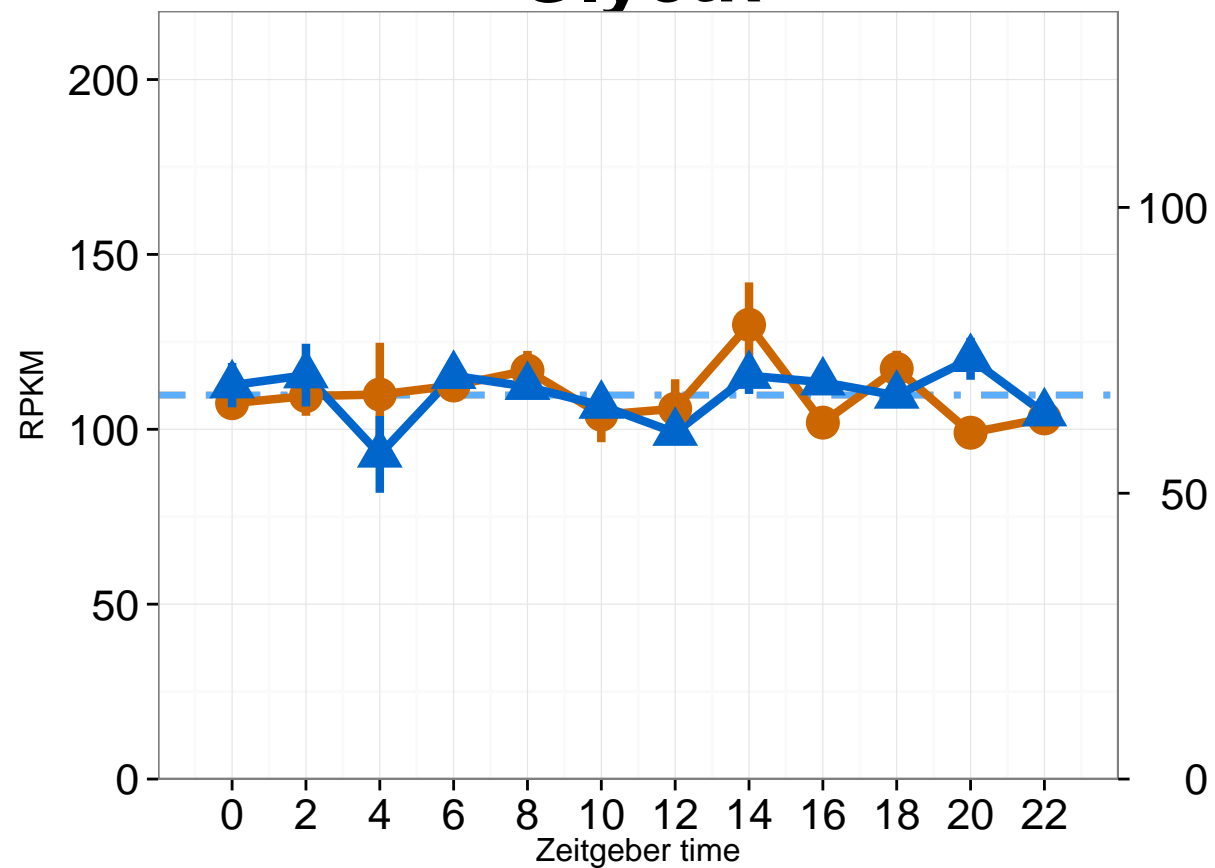

## Glyctk

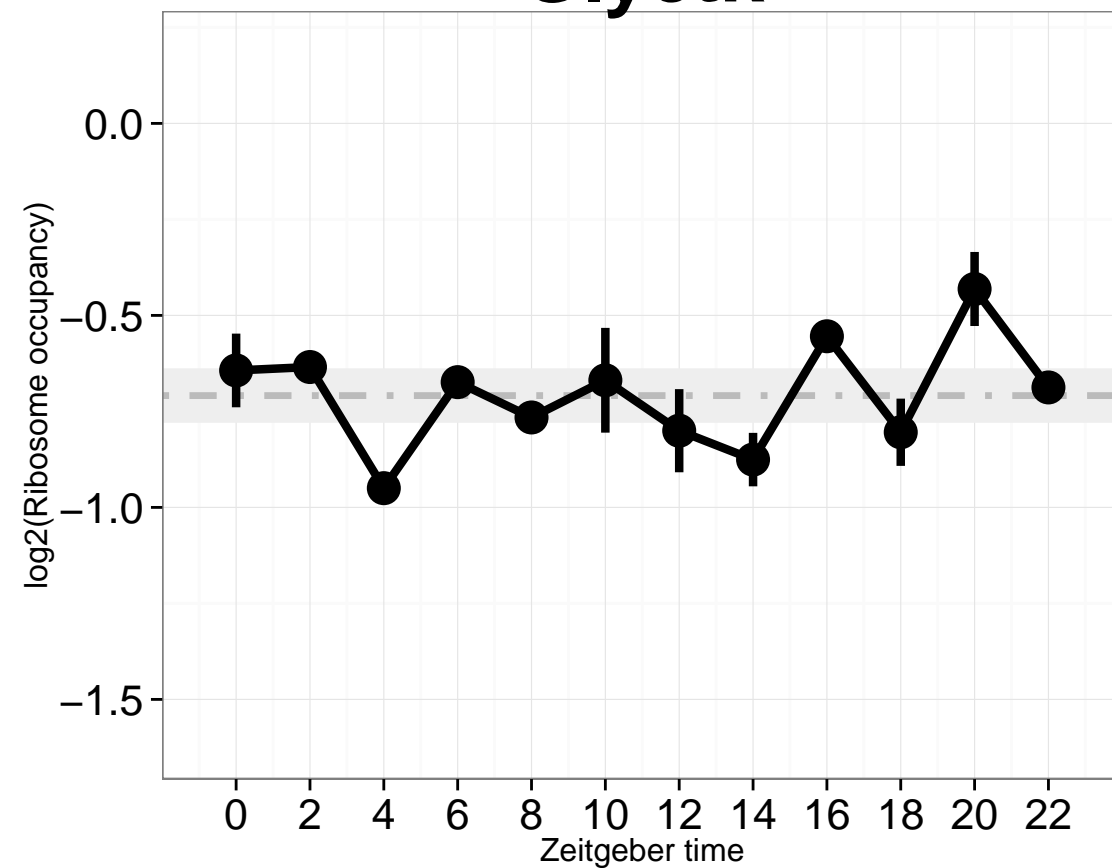

Supplement: Supplementary file 12598 [file 1]

# Tmc8

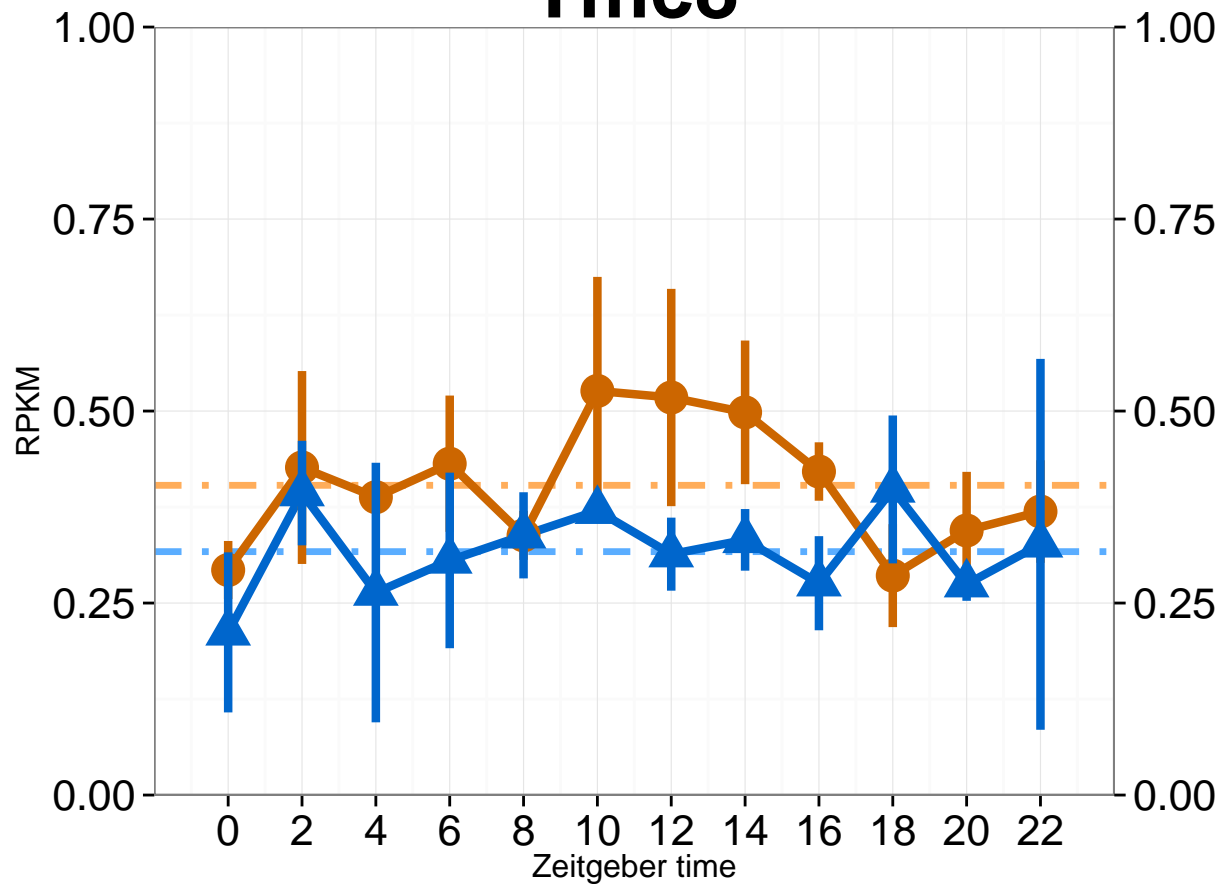

# Tmc8

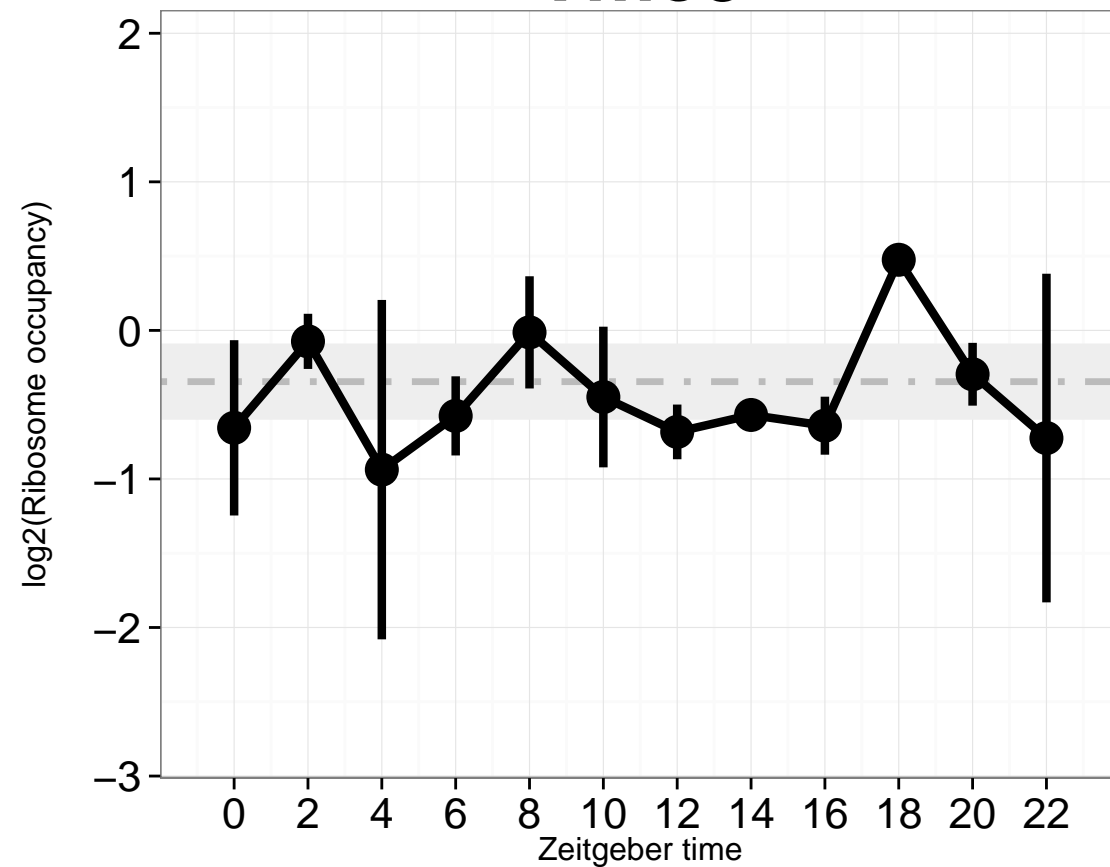

Supplement: Supplementary file 12599 [file 1]

## Clcn7

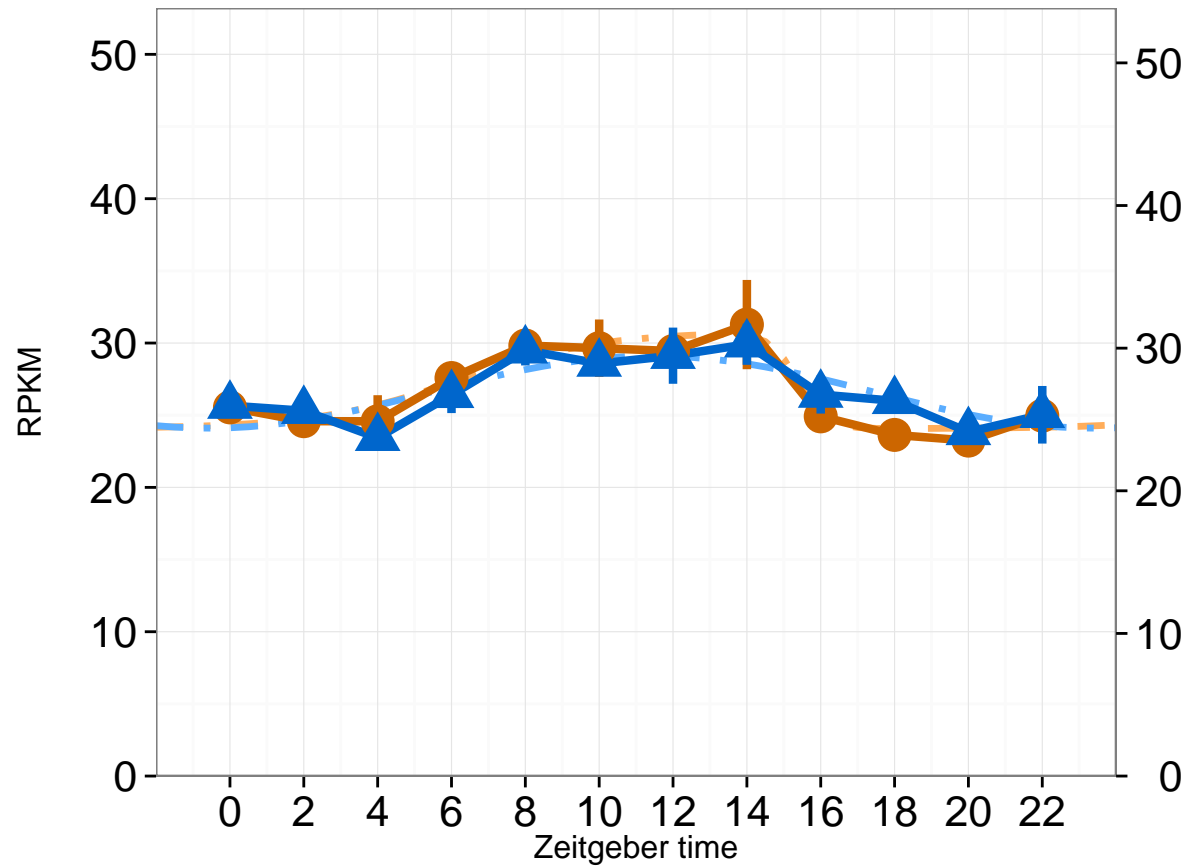

## Clcn7

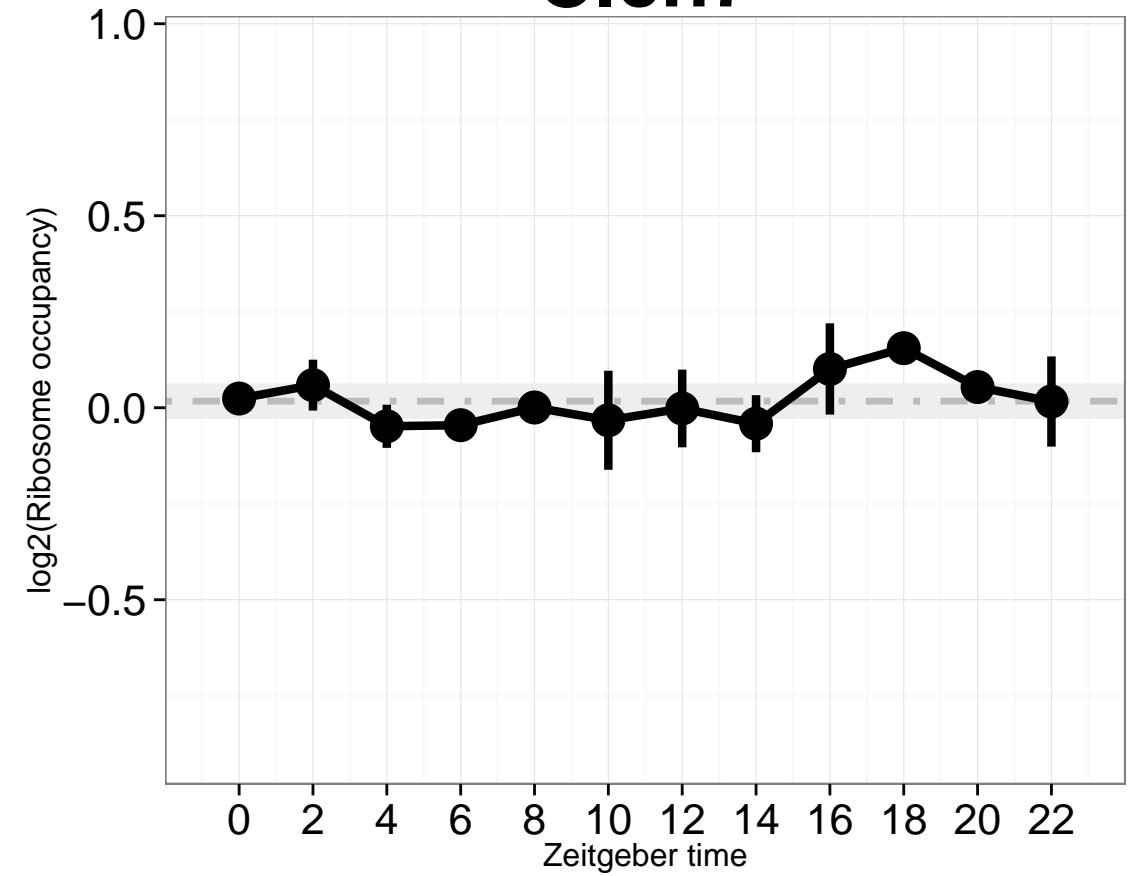

Supplement: Supplementary file 12600 [file 1]

# Gm14296

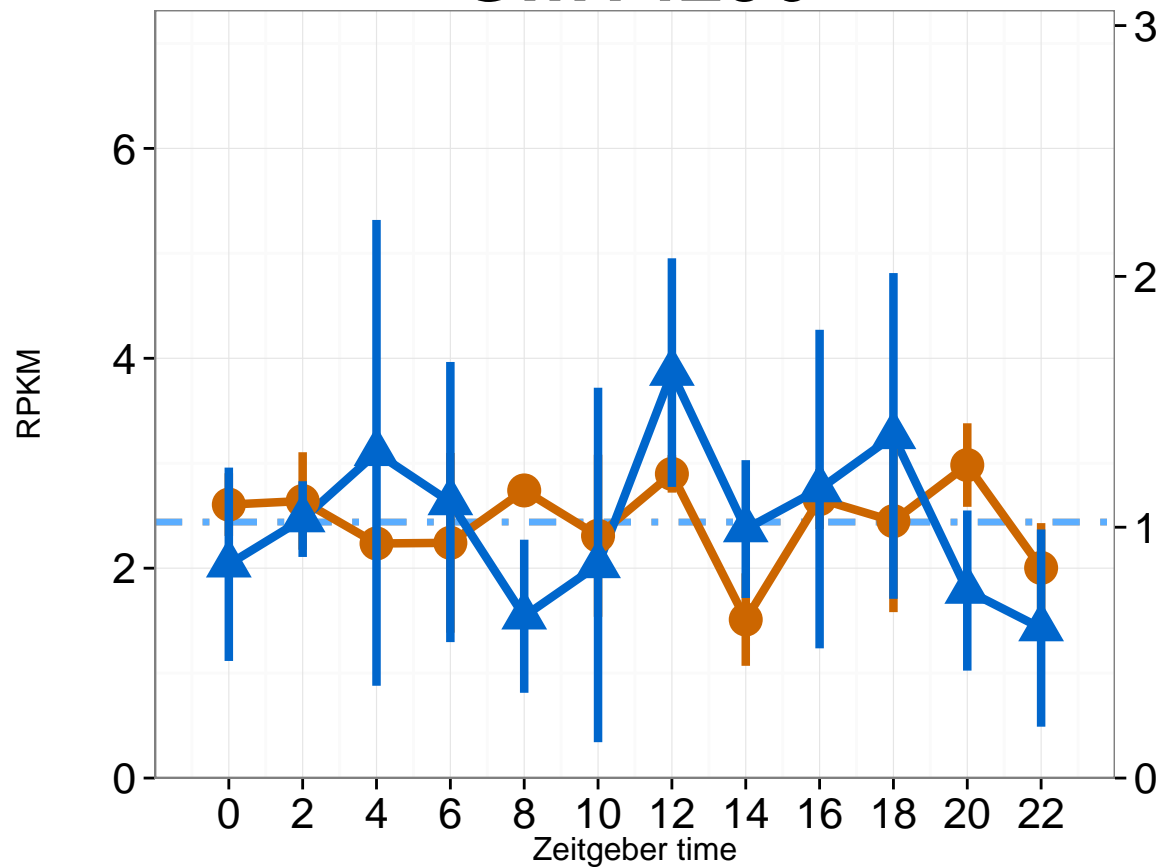

# Gm14296

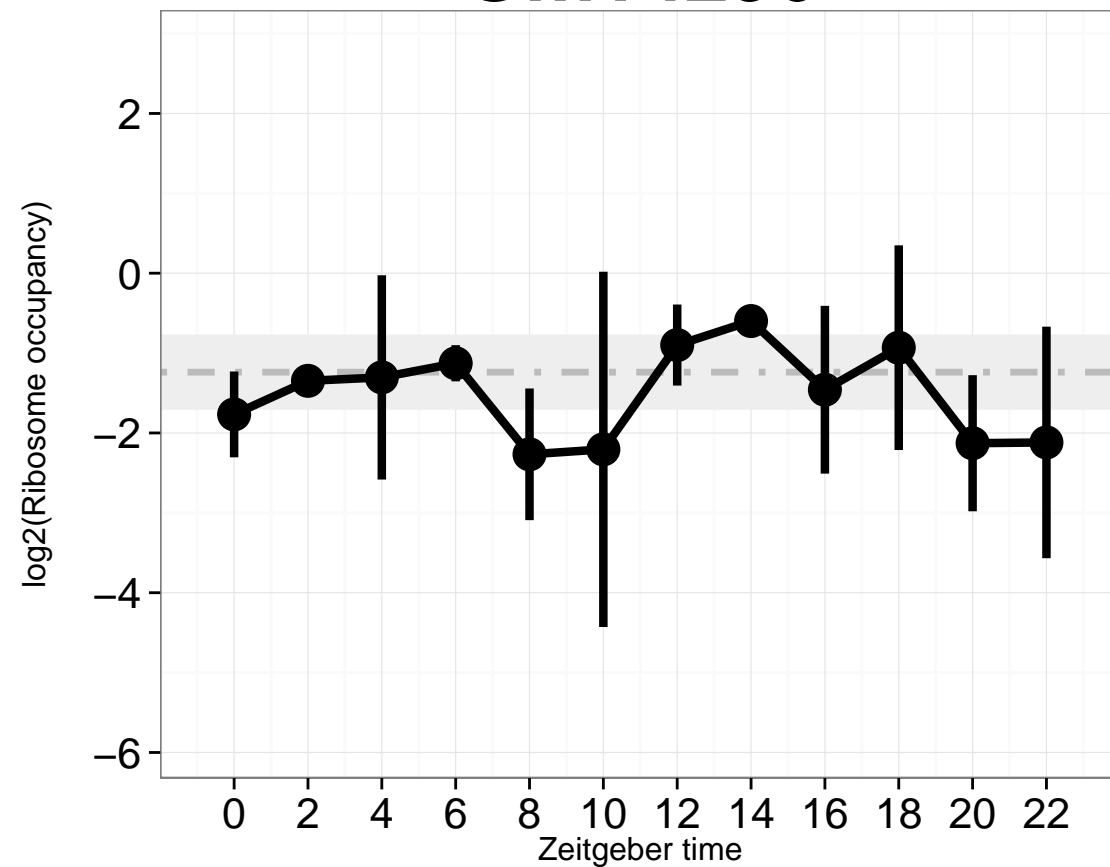

Supplement: Supplementary file 12601 [file 1]

## Taz

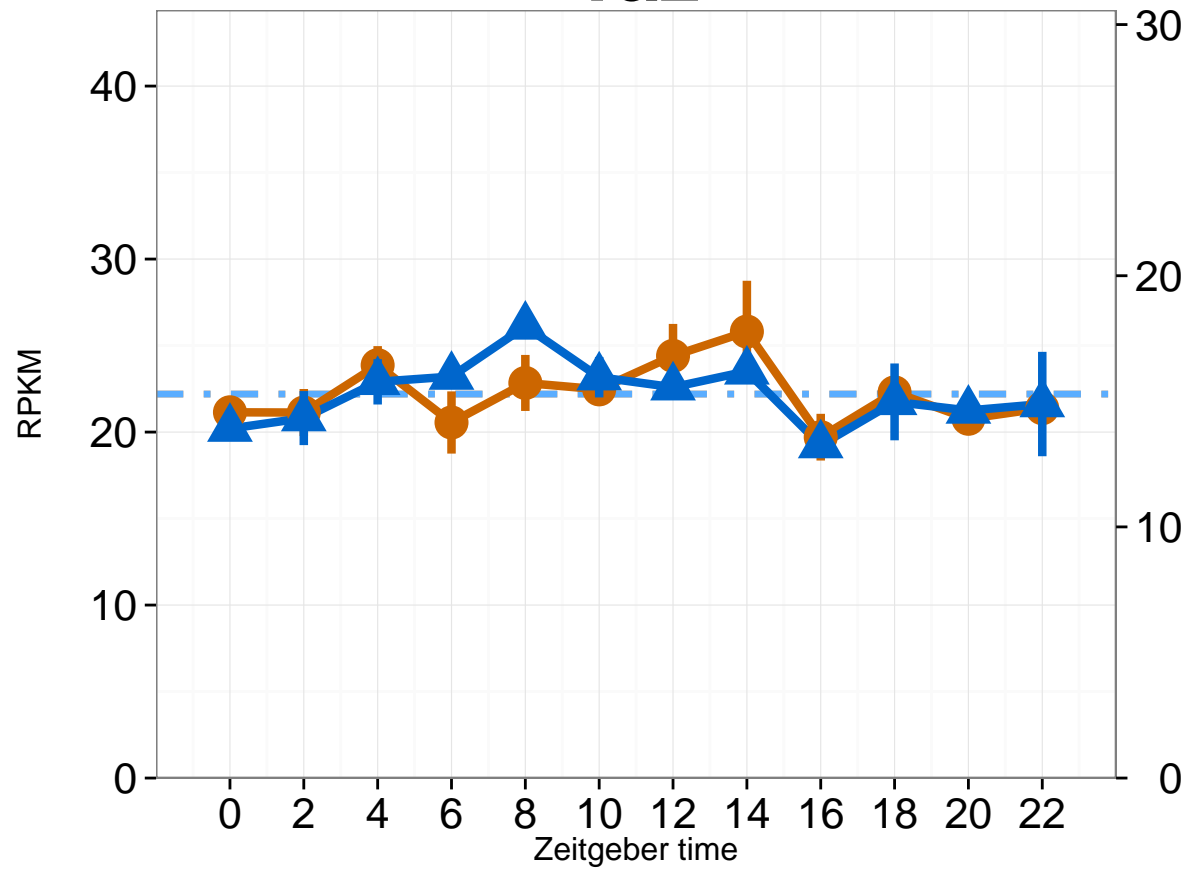

## Taz

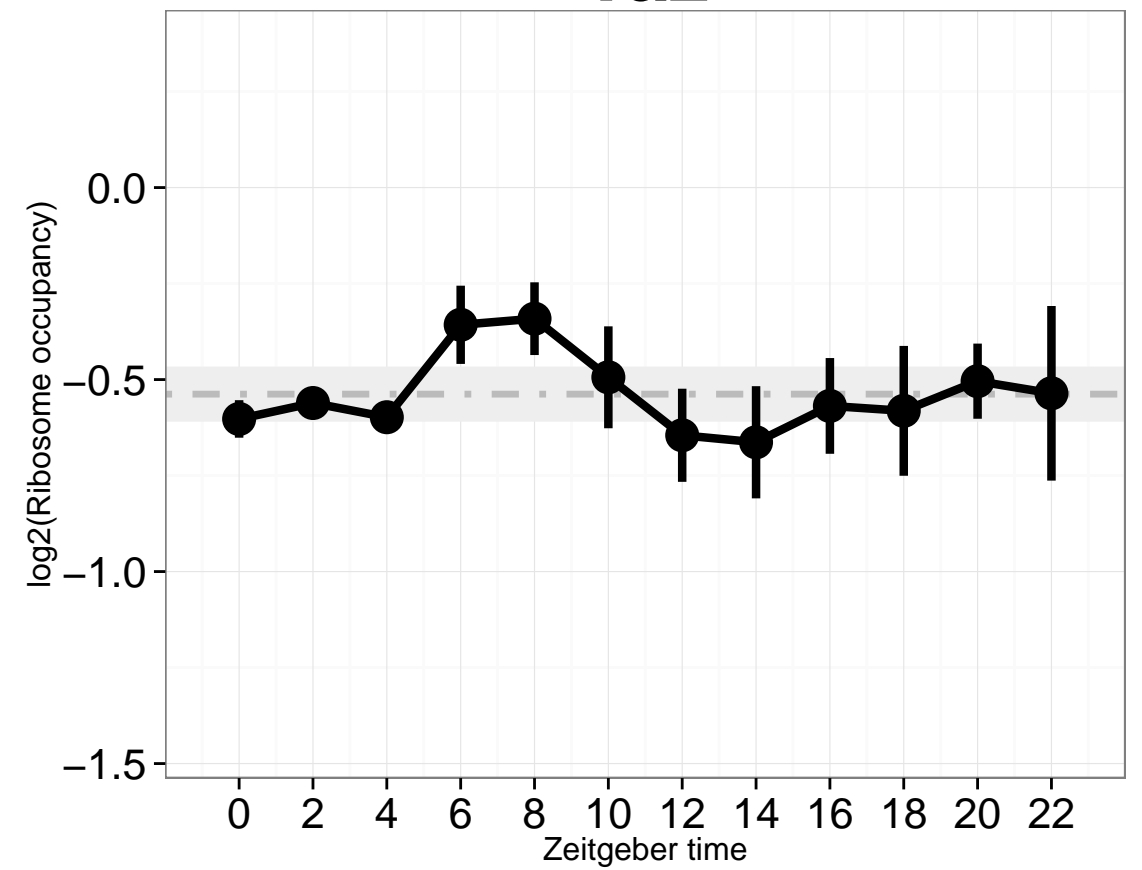

Supplement: Supplementary file 12602 [file 1]

## Skiv2l

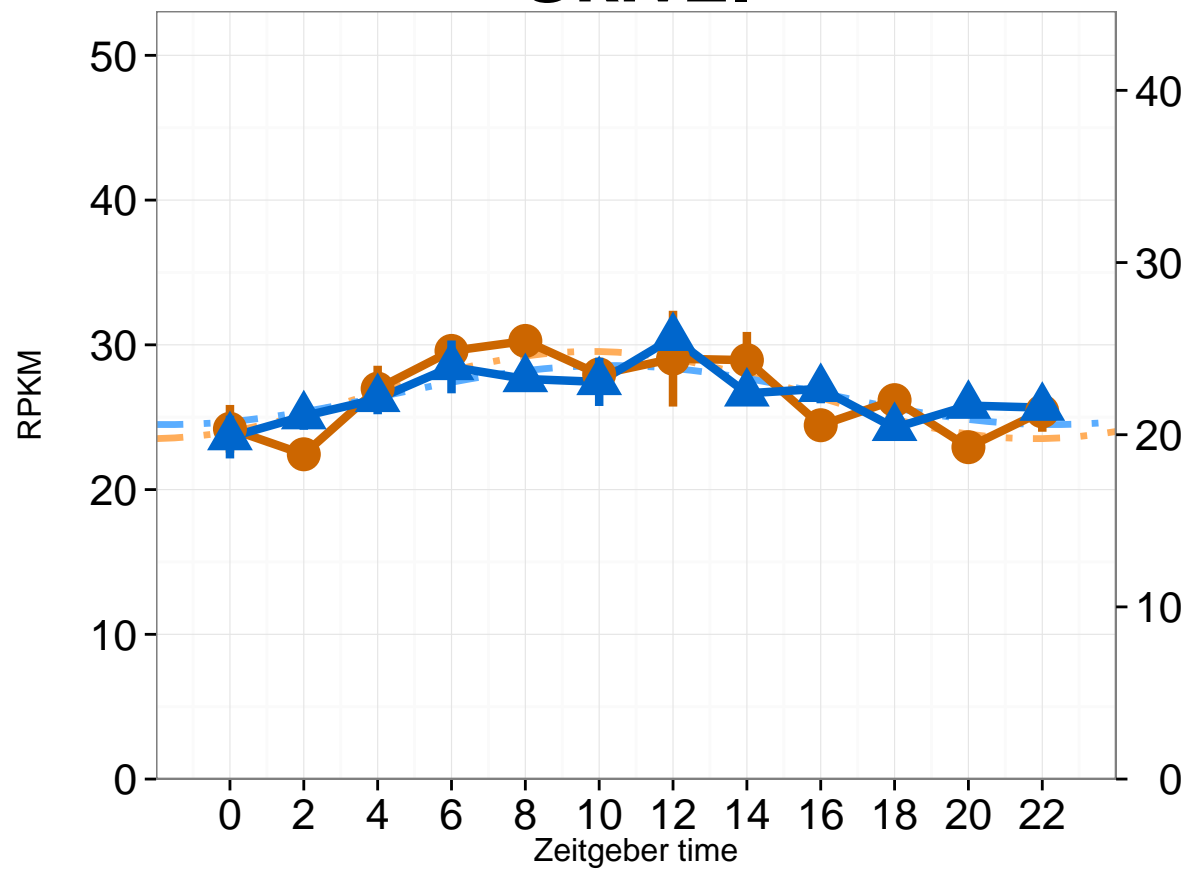

## Skiv2l

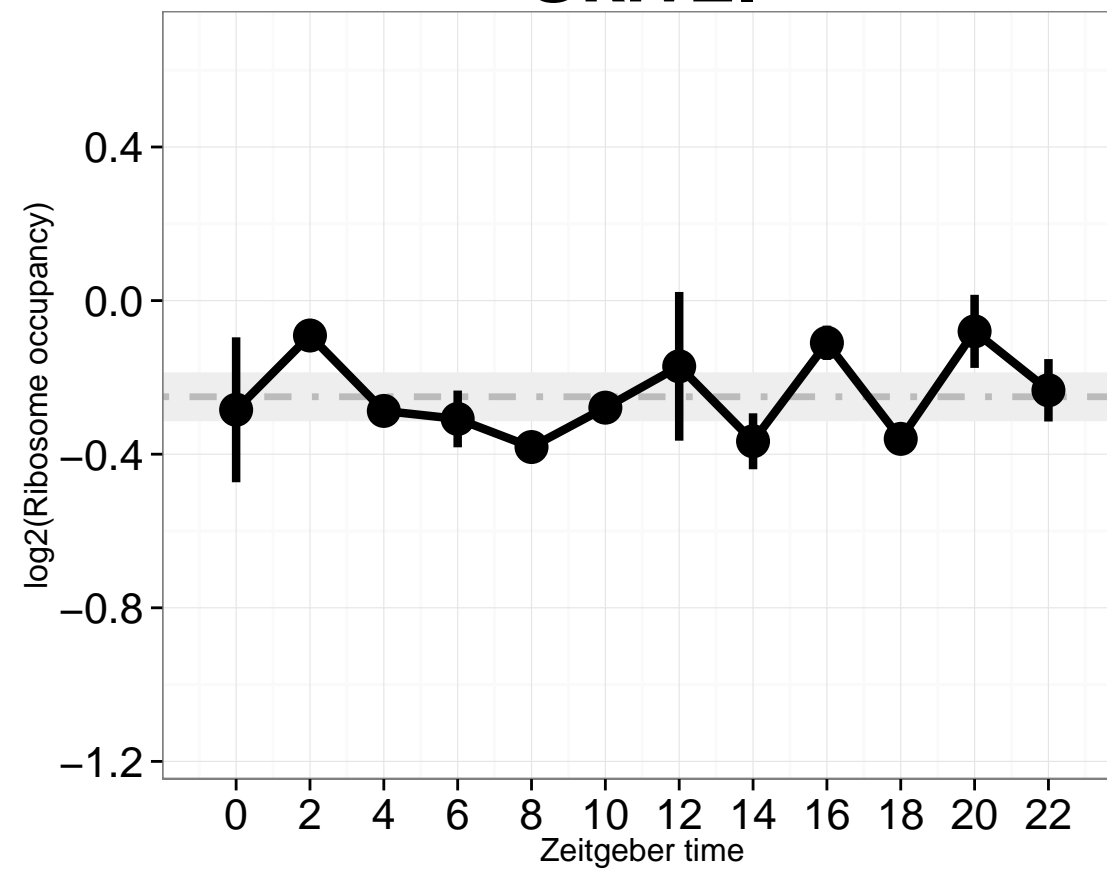

Supplement: Supplementary file 12603 [file 1]

## Ngfr

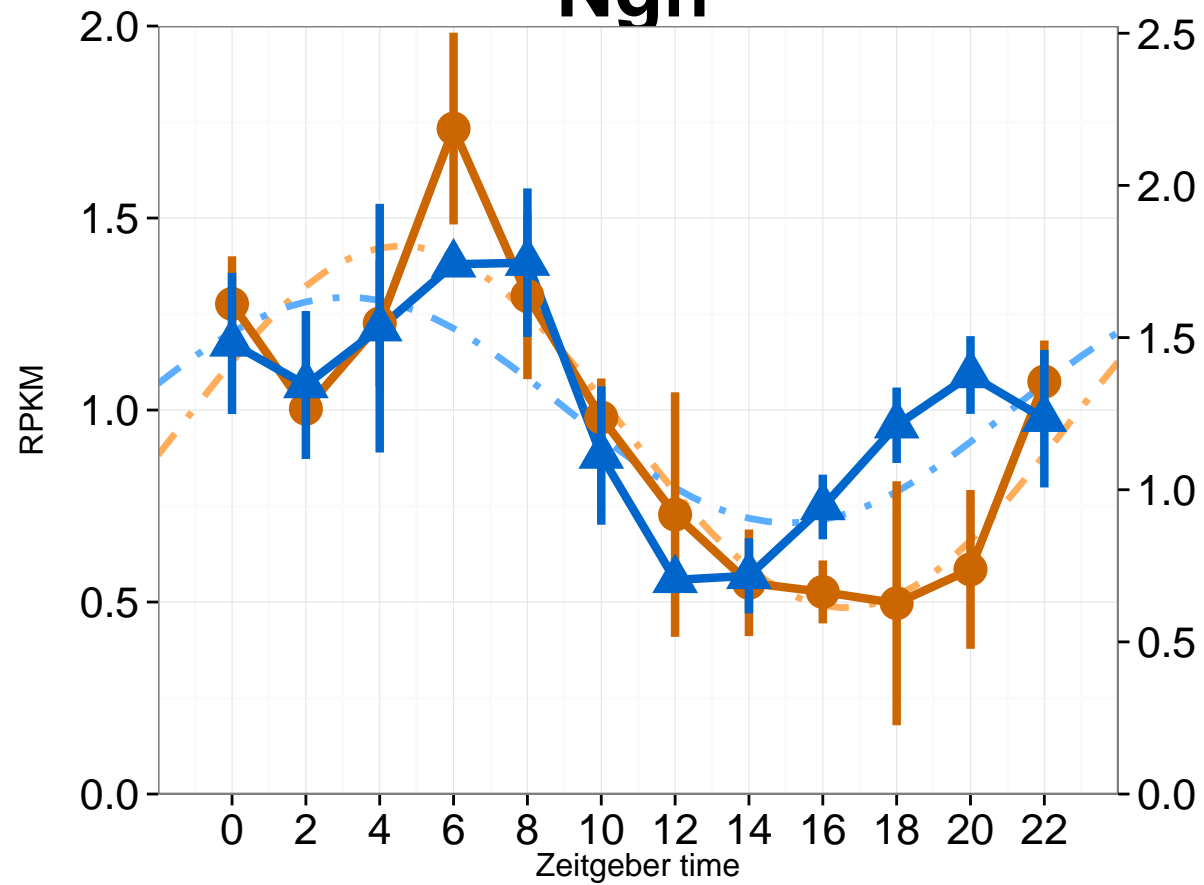

## Ngfr

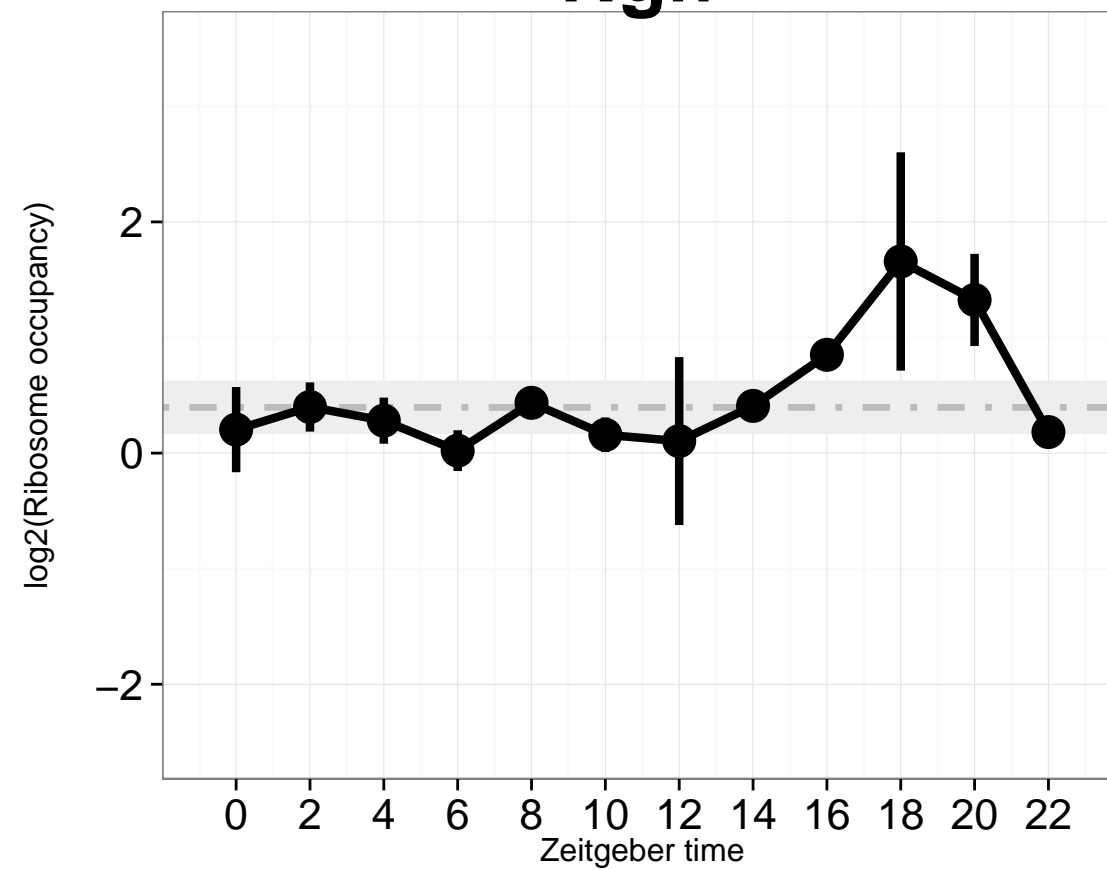

Supplement: Supplementary file 12604 [file 1]

# Fam110c

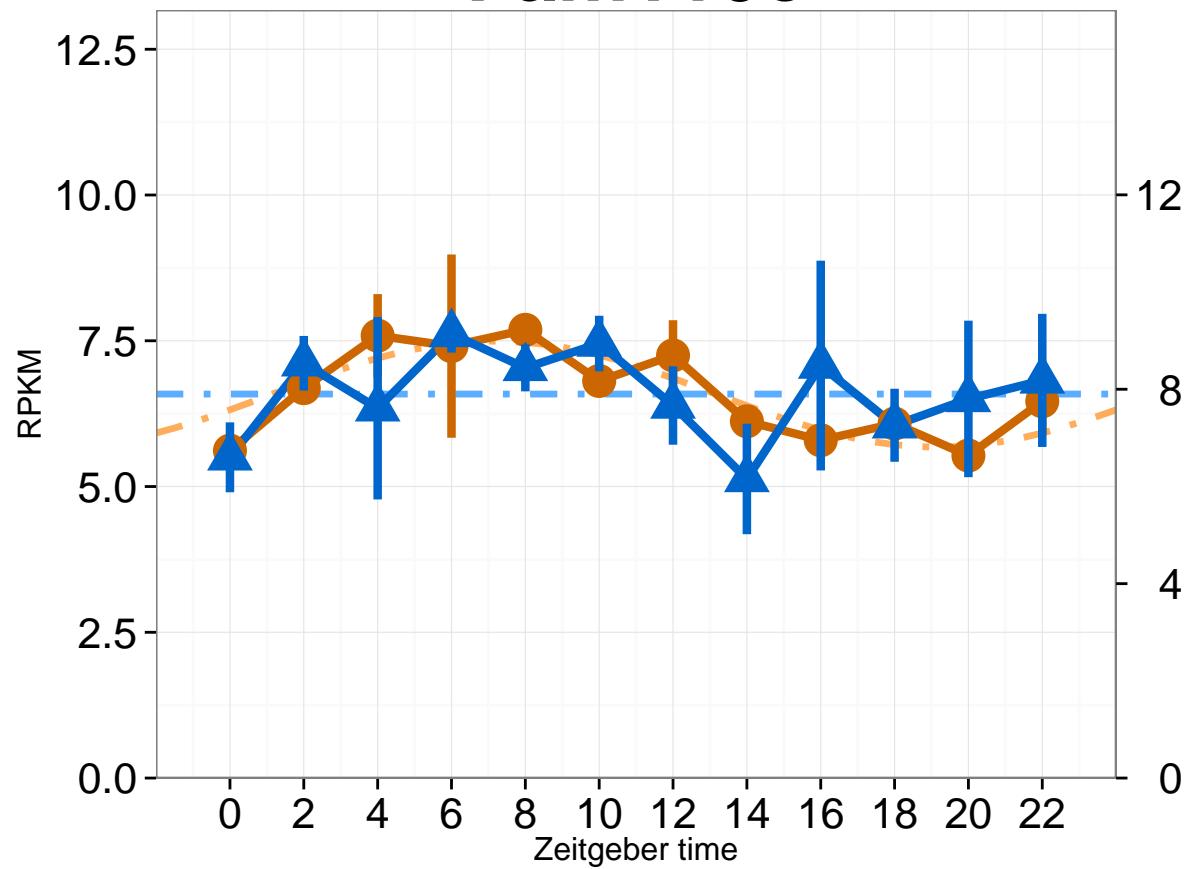

# Fam110c

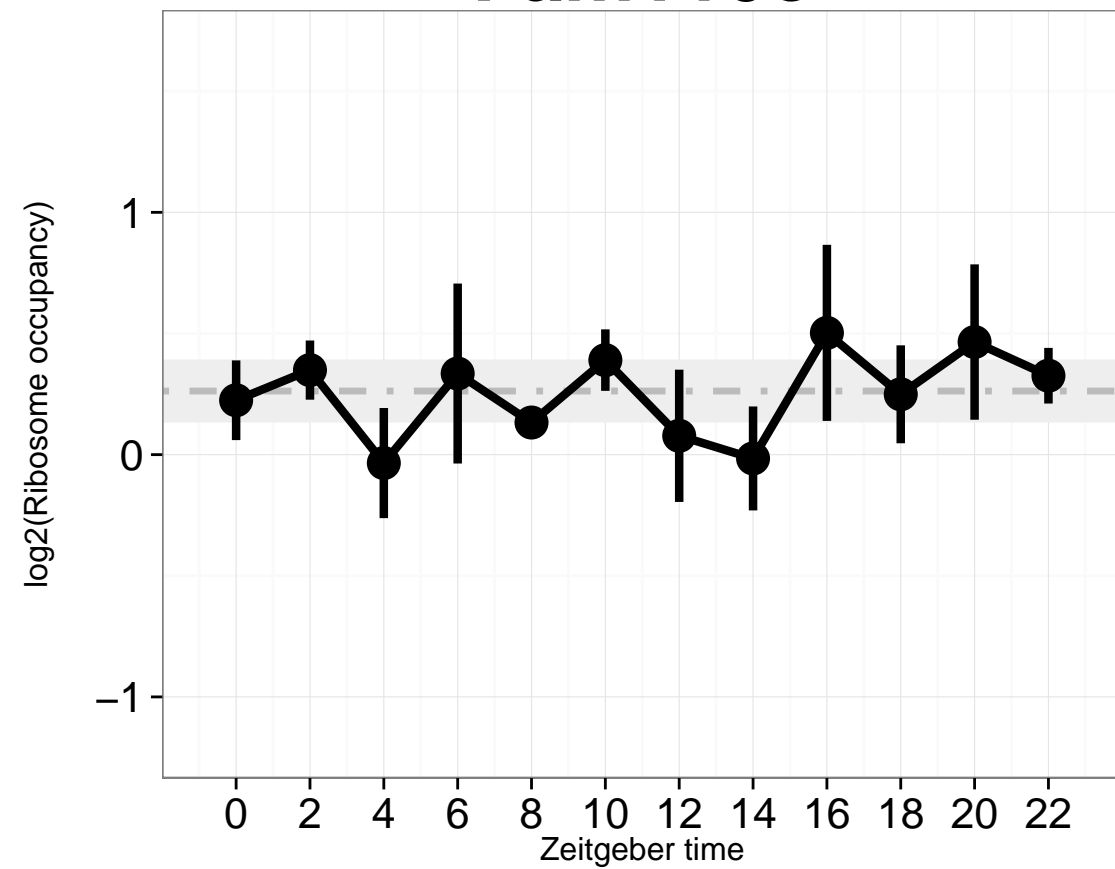

Supplement: Supplementary file 12605 [file 1]

## Slc25a42

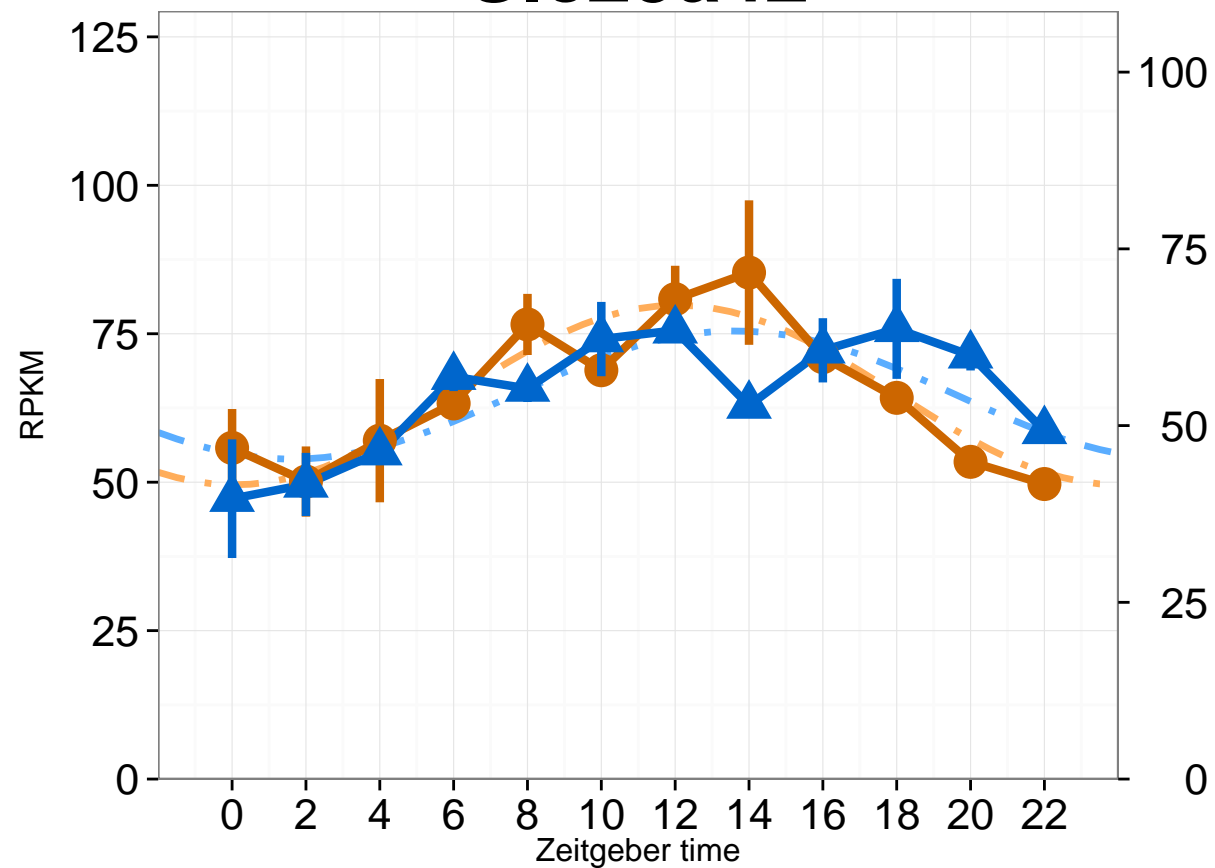

## Slc25a42

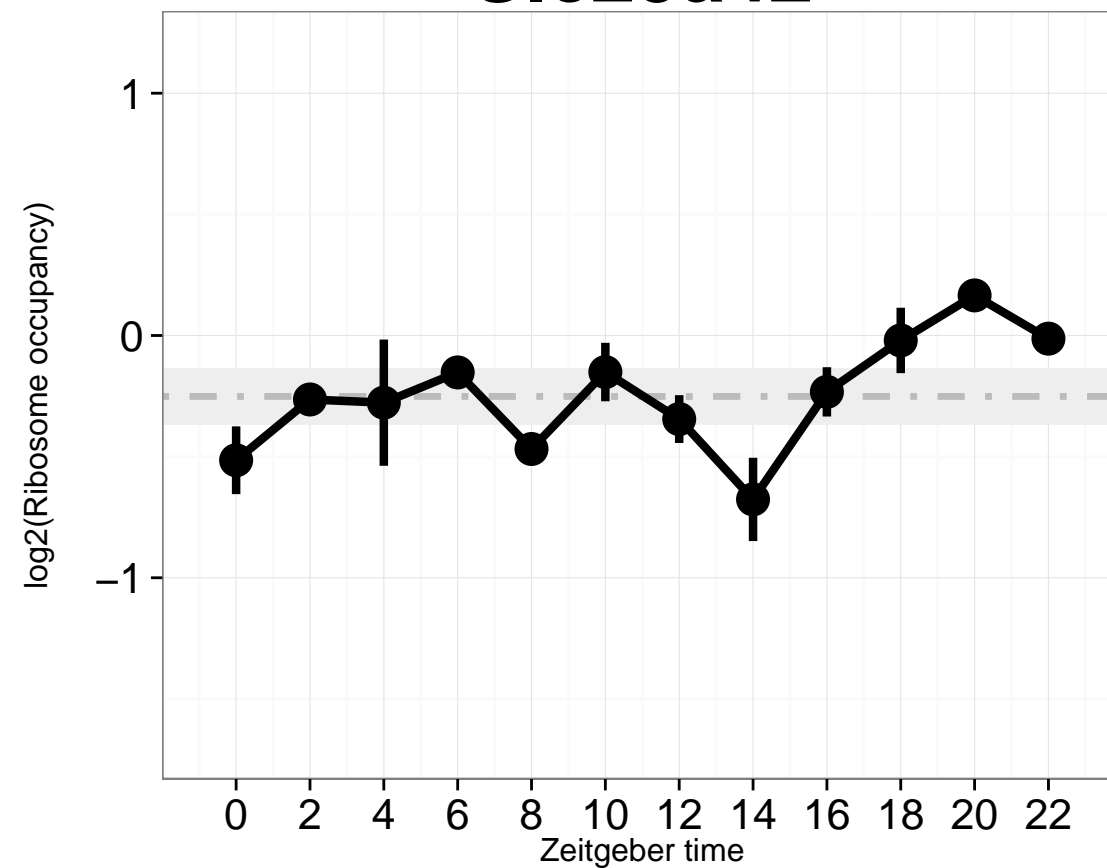

Supplement: Supplementary file 12606 [file 1]

# Slc39a9

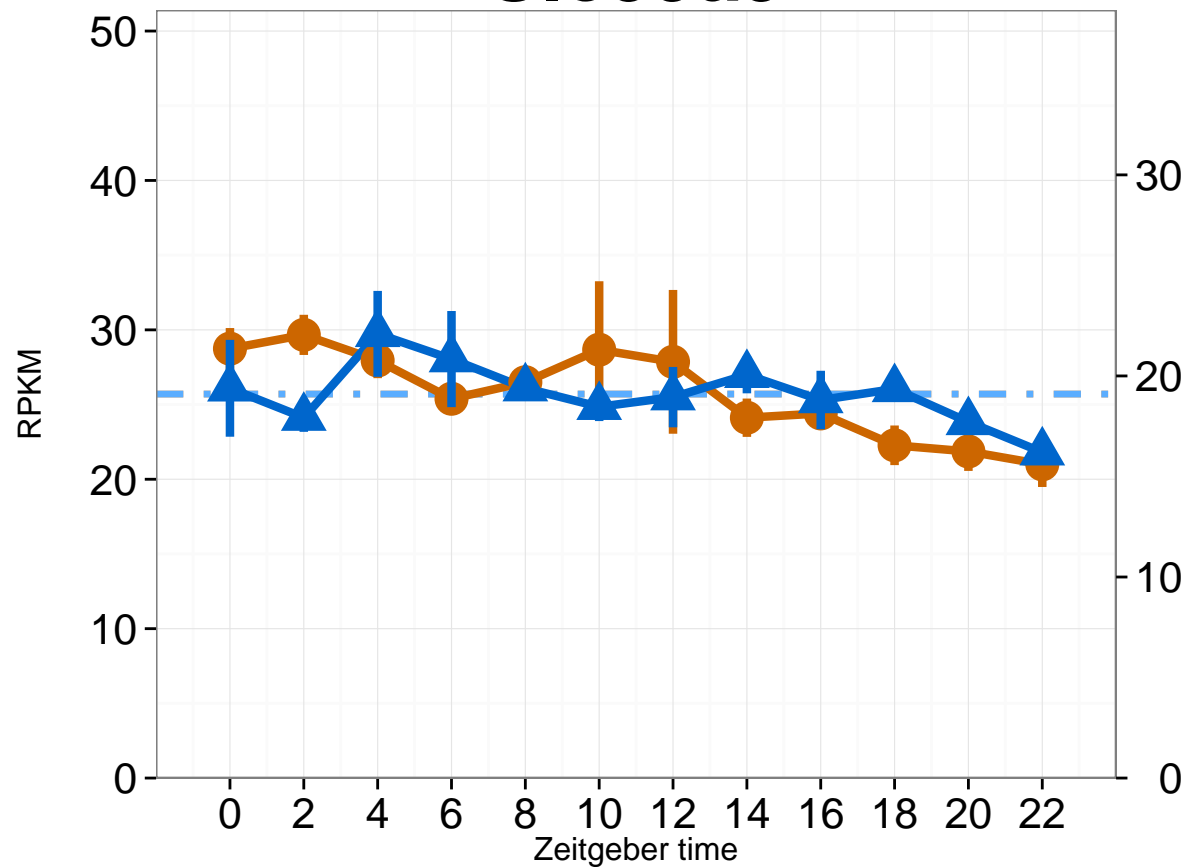

# Slc39a9

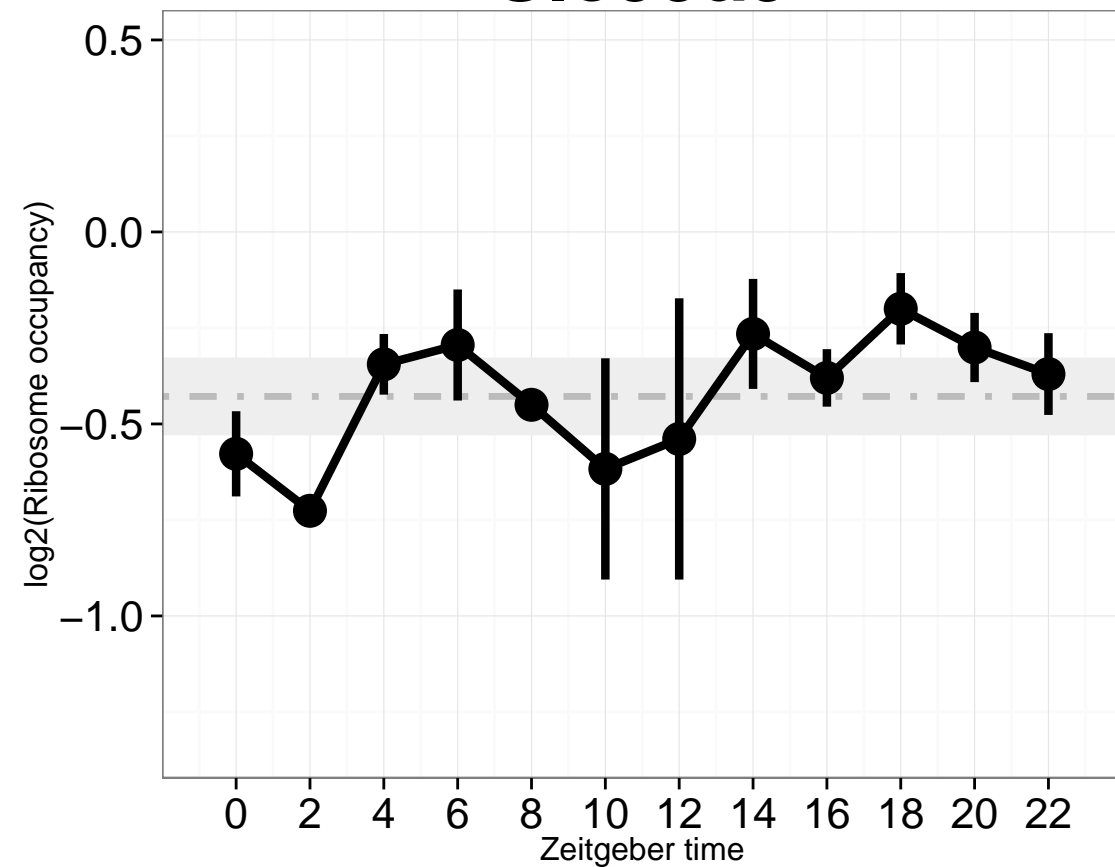

Supplement: Supplementary file 12607 [file 1]

## Prr24

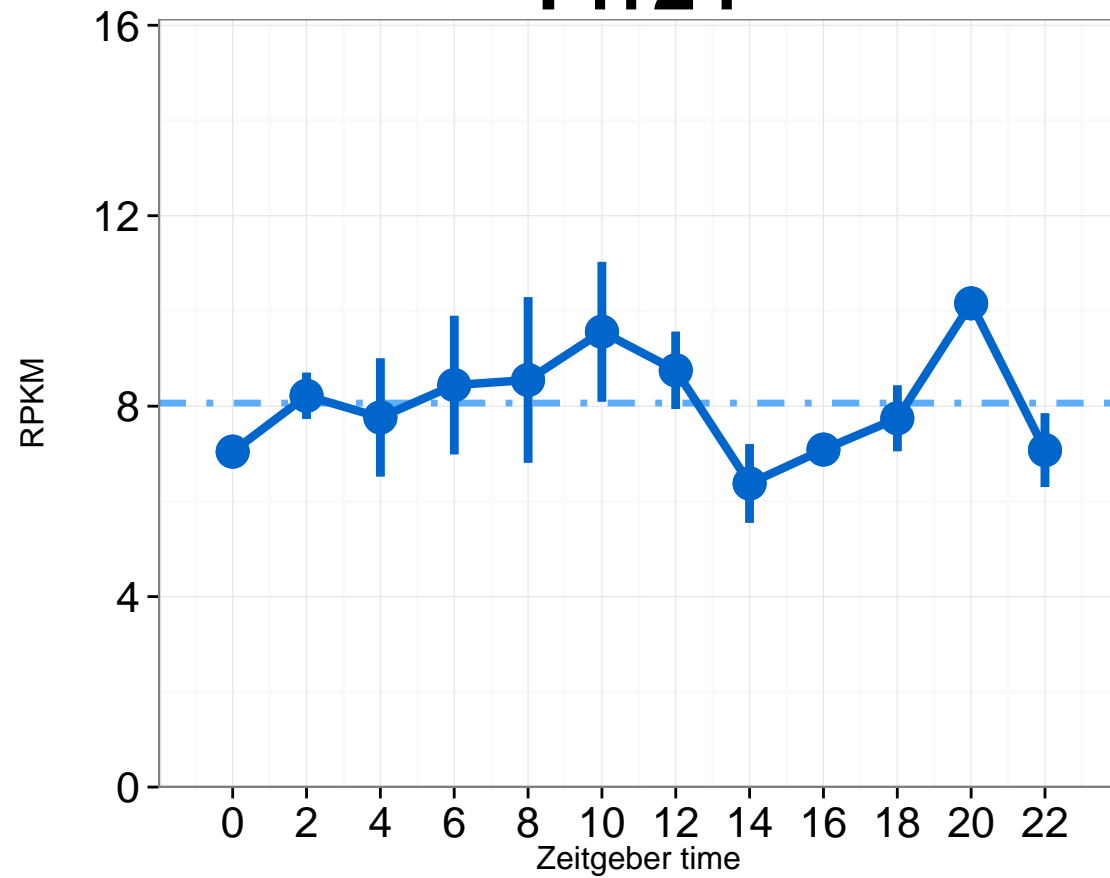

## Prr24 log2(Ribosome occupancy)

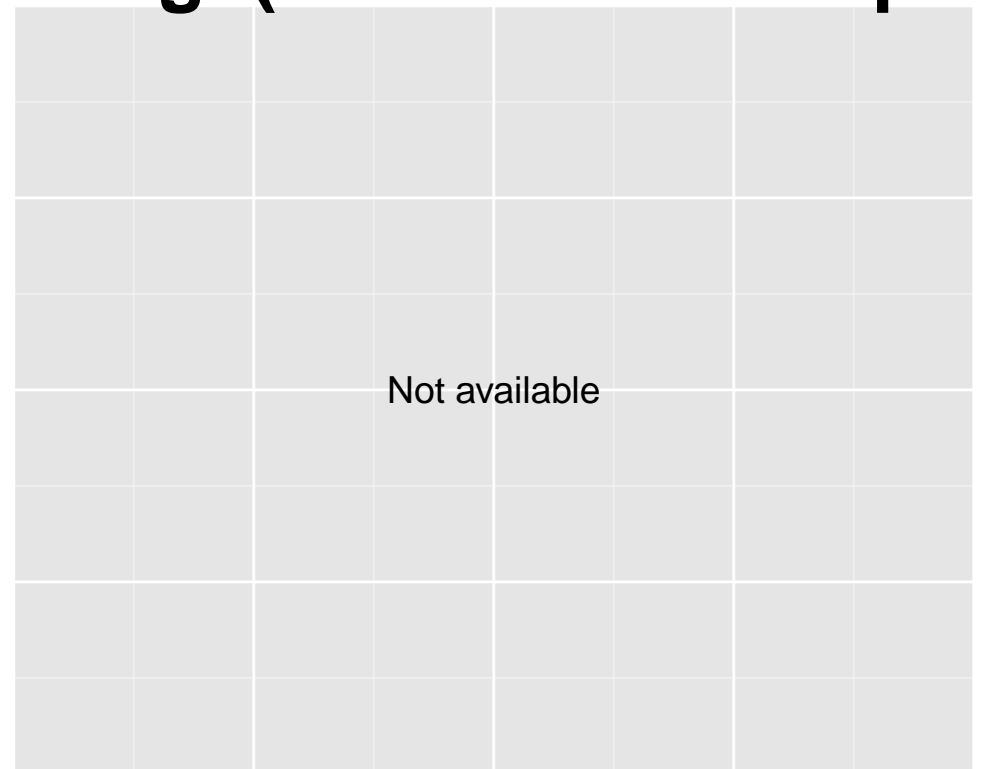

Supplement: Supplementary file 12608 [file 1]

# Tmem259

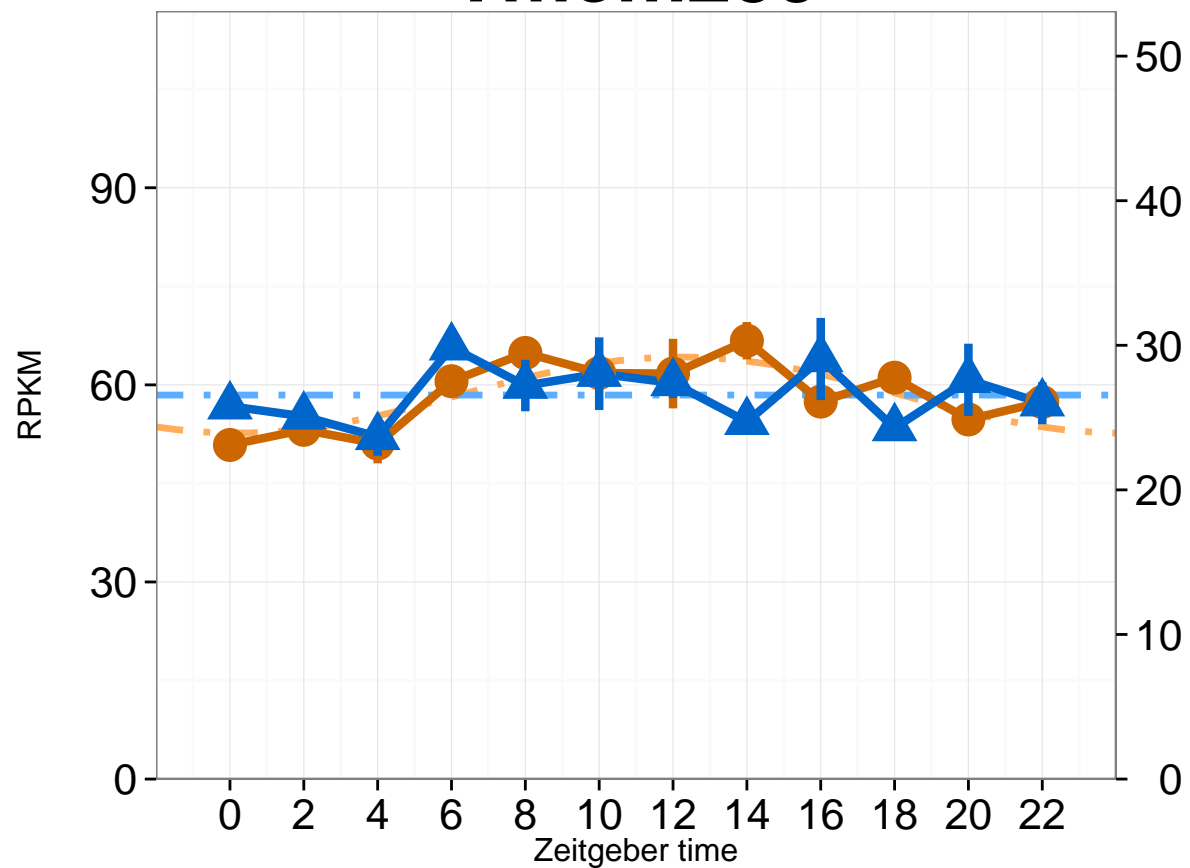

# Tmem259

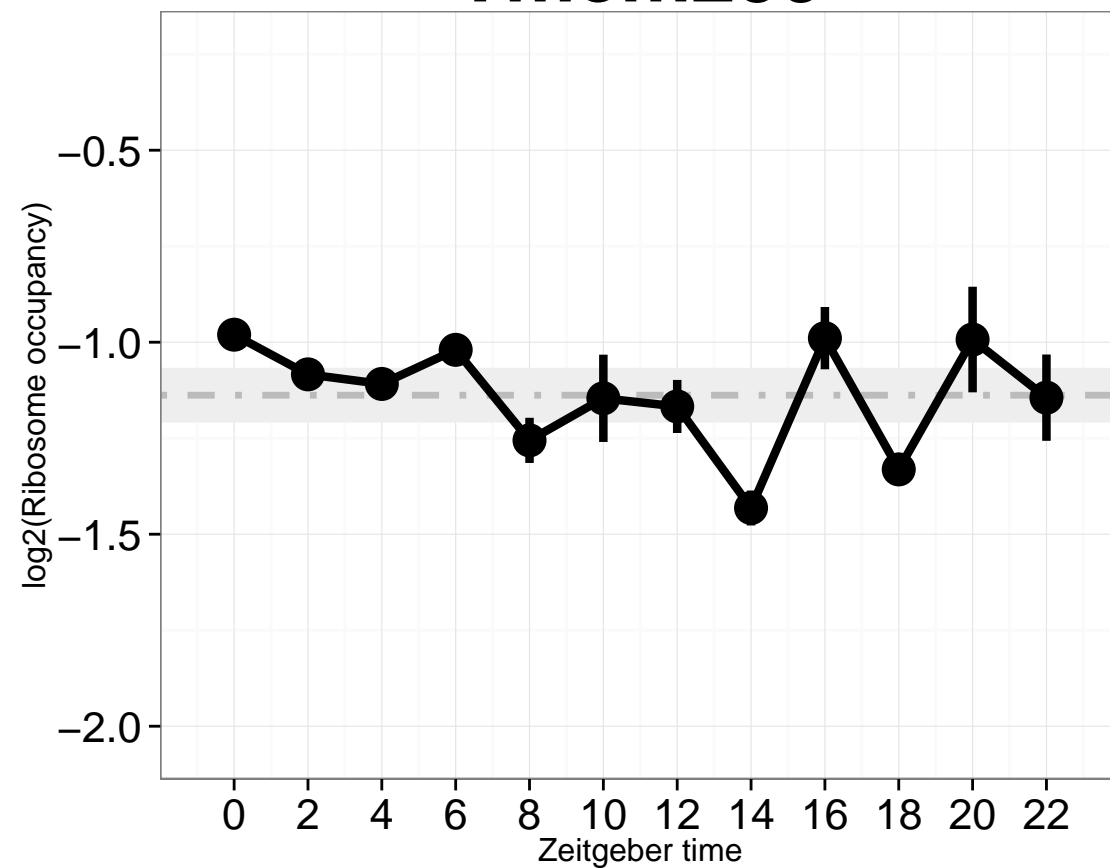

Supplement: Supplementary file 12609 [file 1]

# Mrpl49

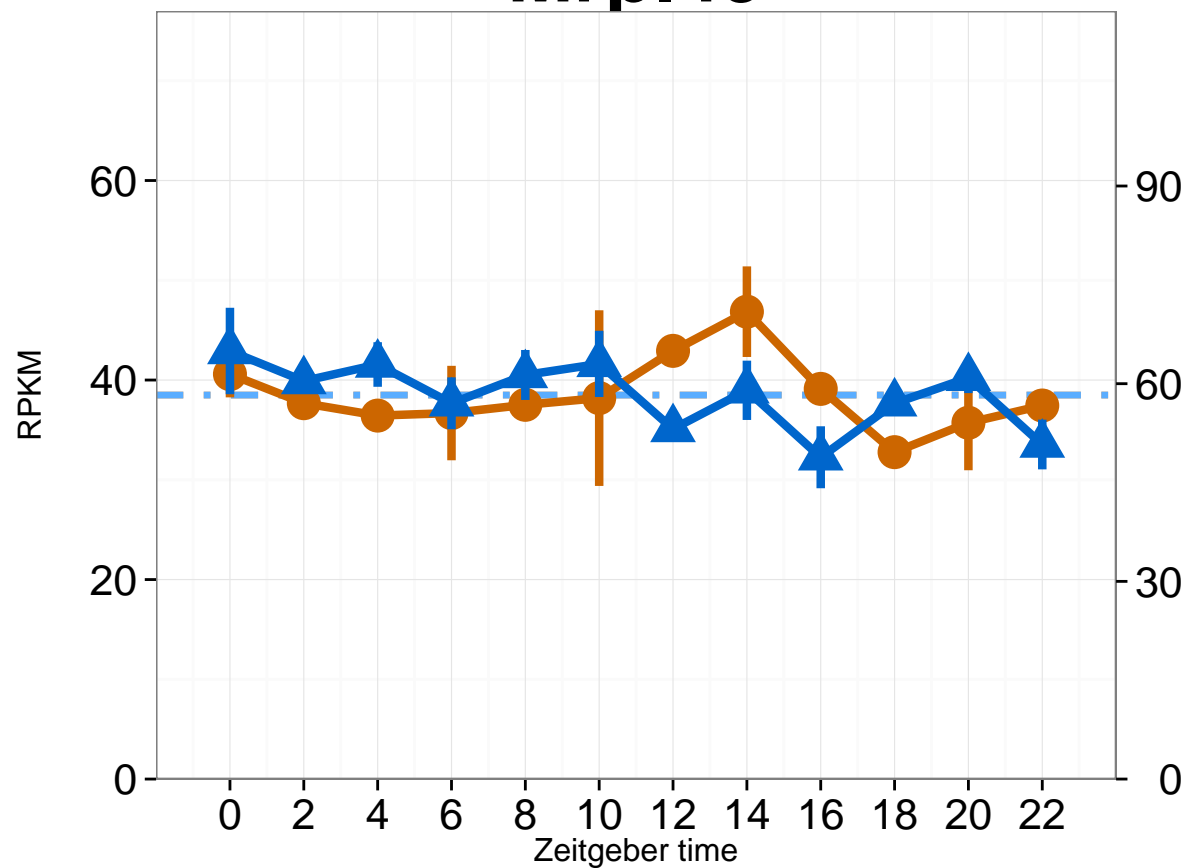

# Mrpl49

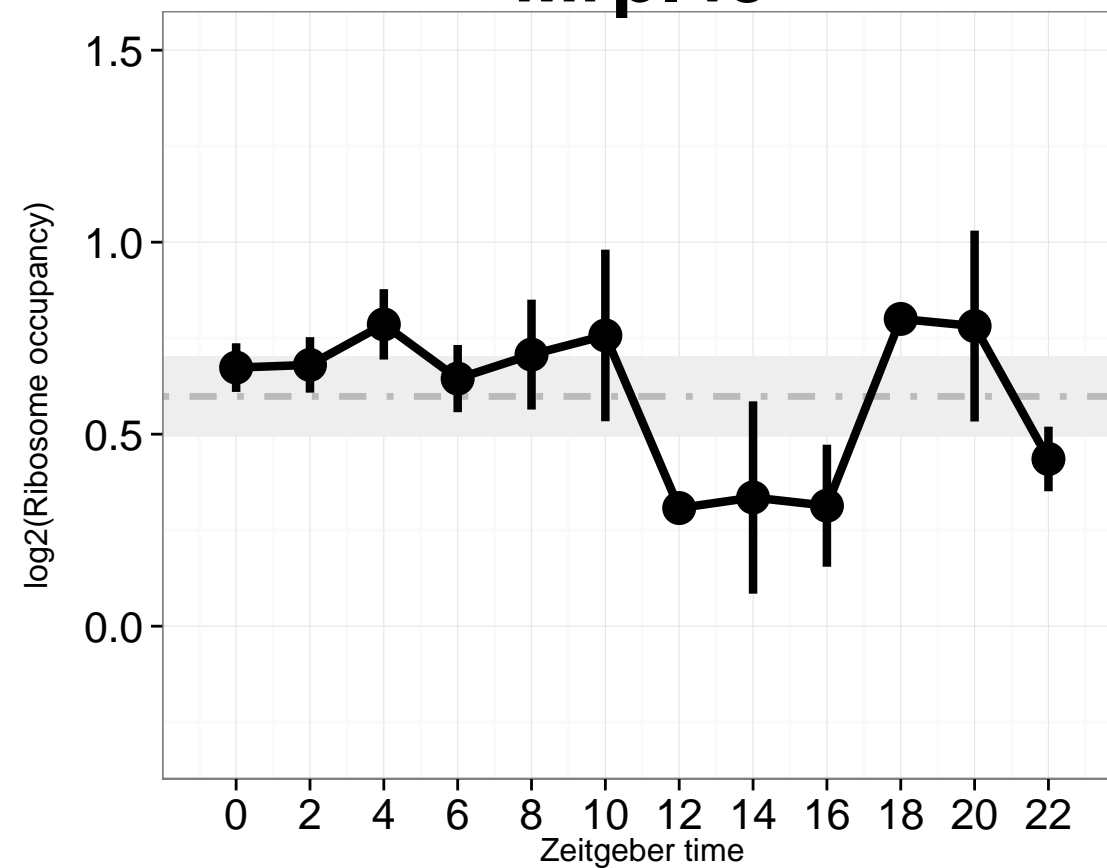

Supplement: Supplementary file 12610 [file 1]

# Neurl1b

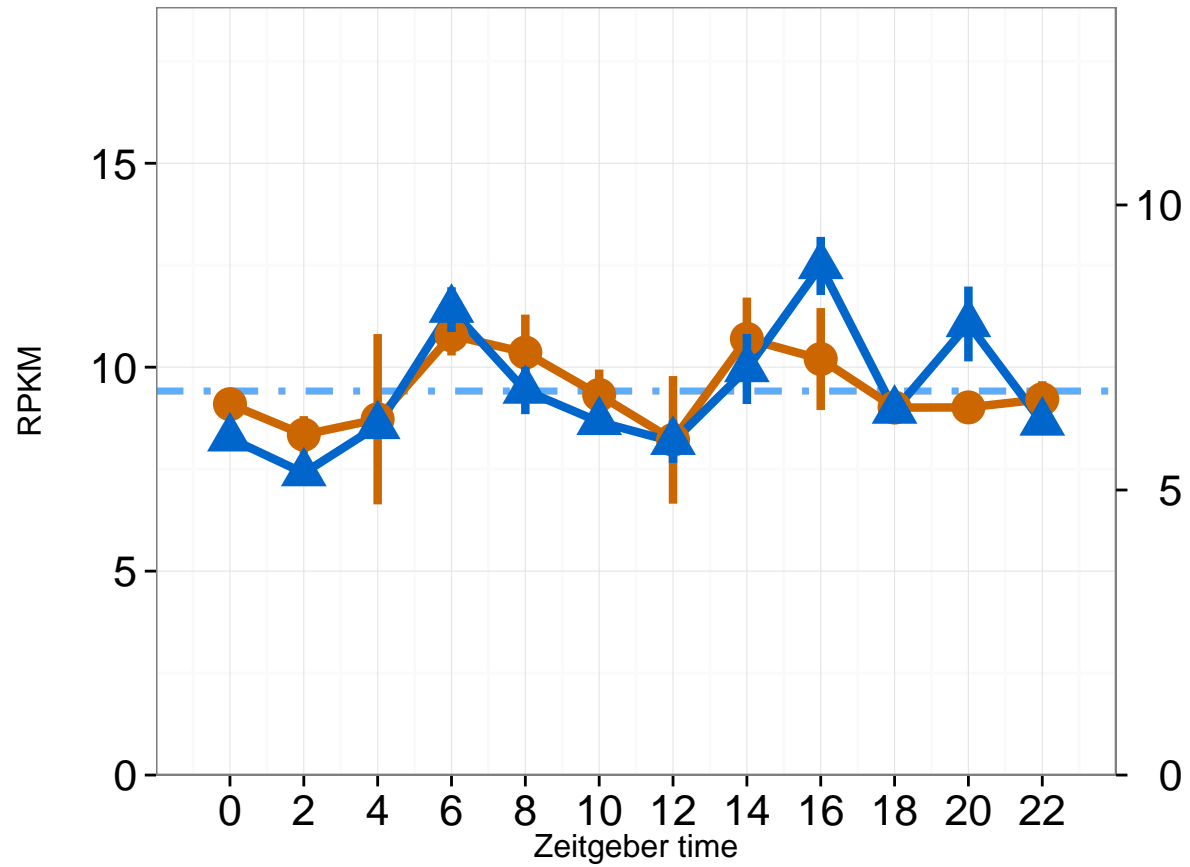

# Neurl1b

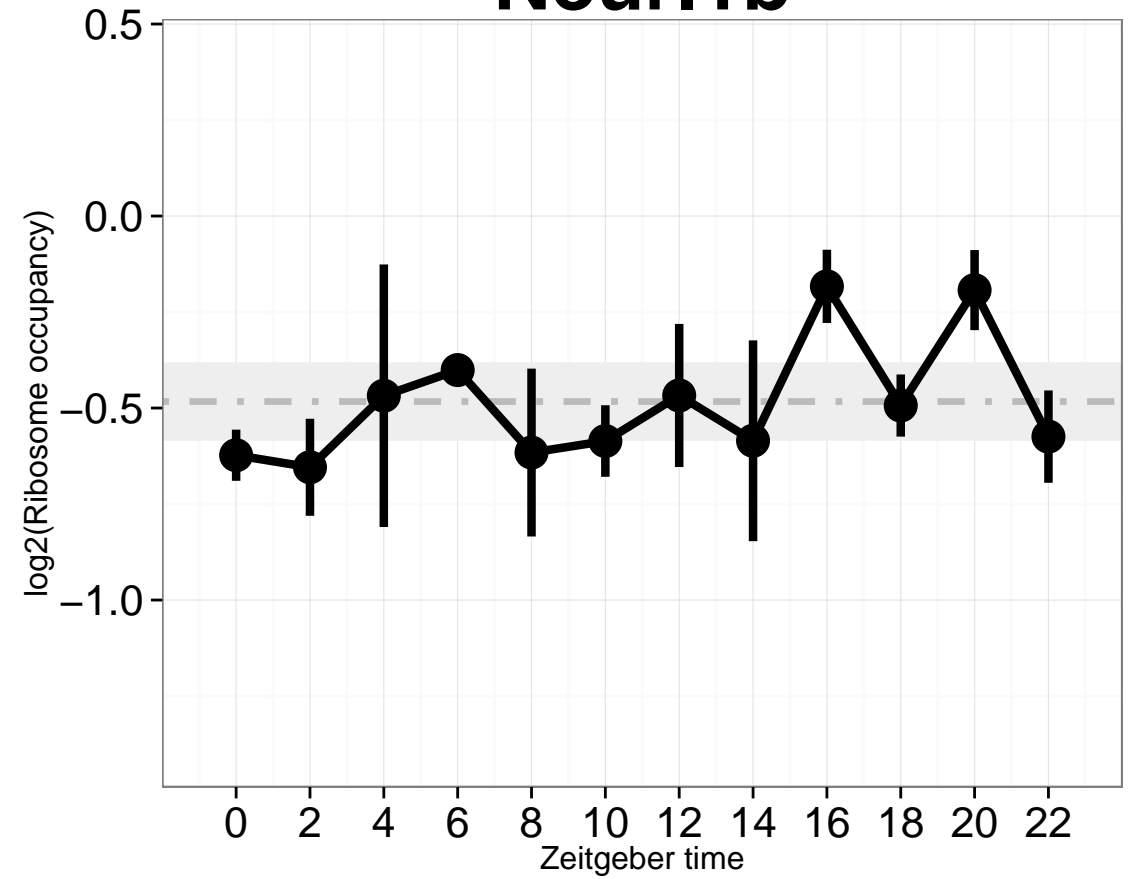

Supplement: Supplementary file 12611 [file 1]

# Triap1

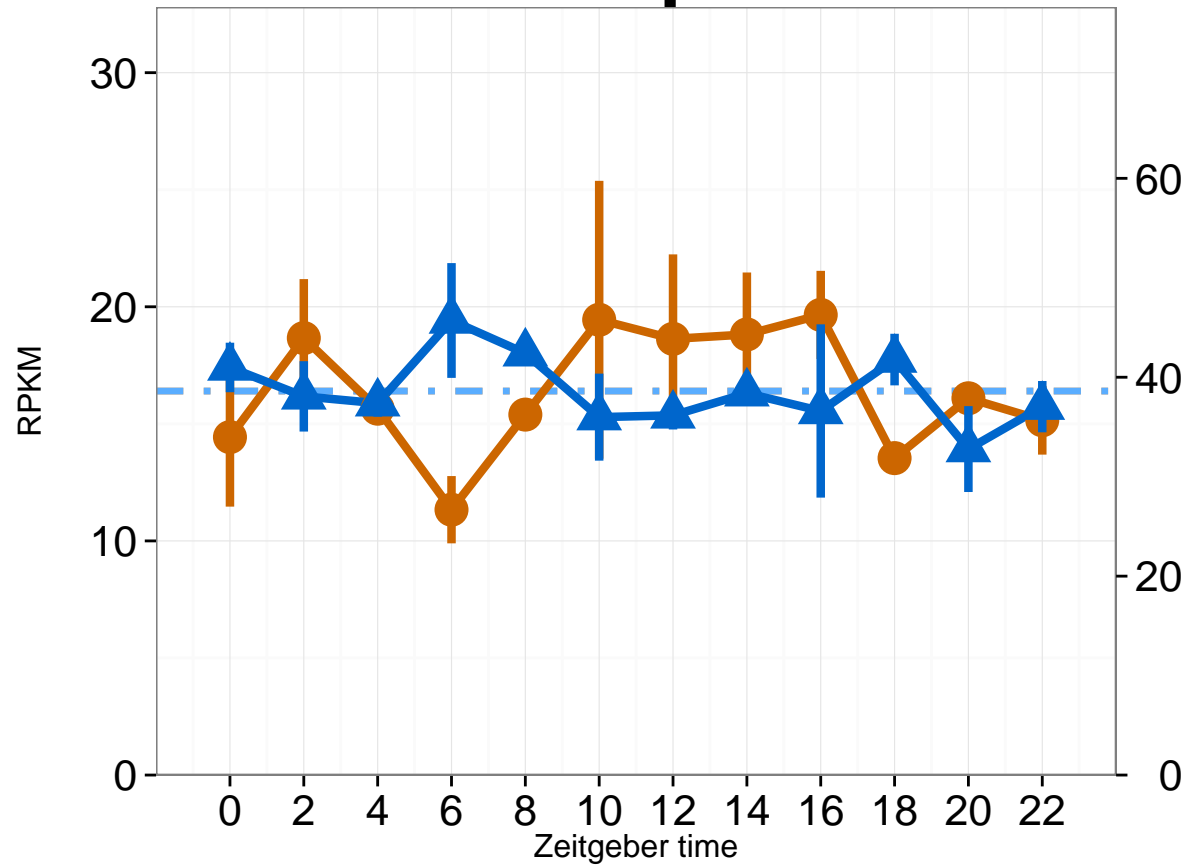

# Triap1

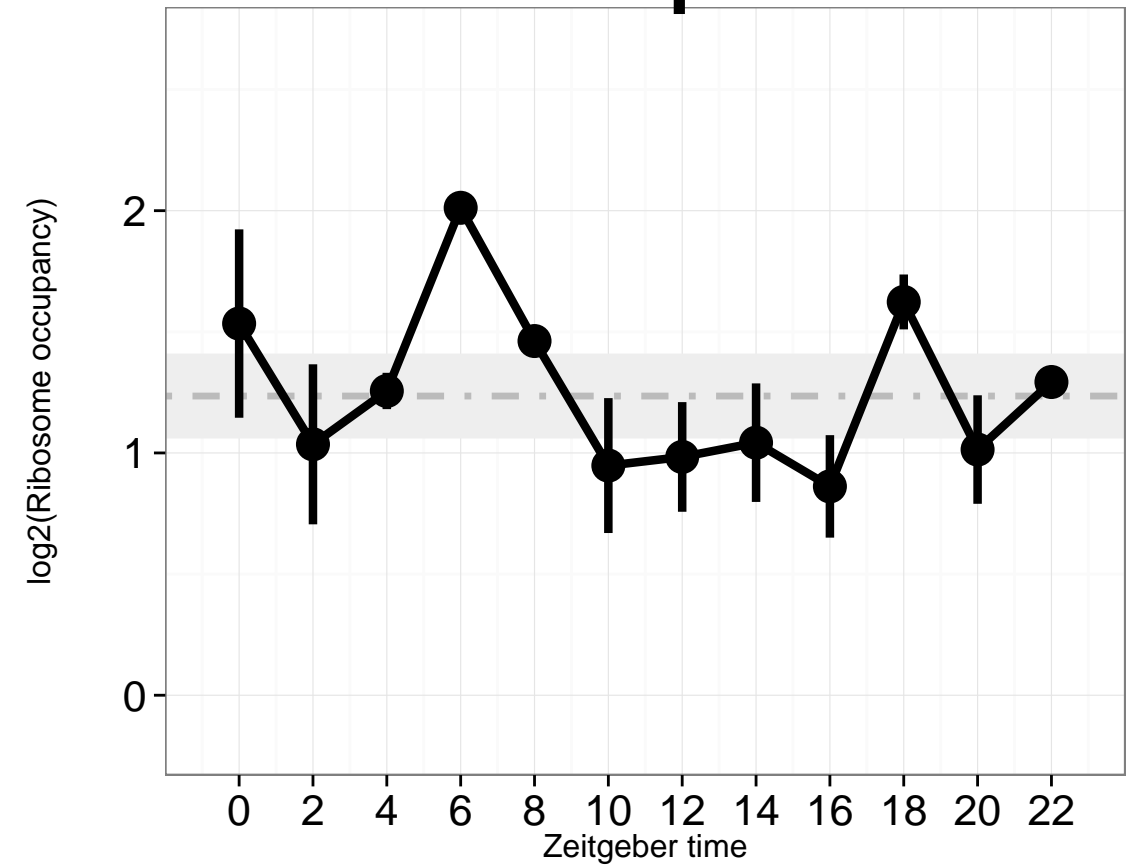

Supplement: Supplementary file 12612 [file 1]

## Dhdds

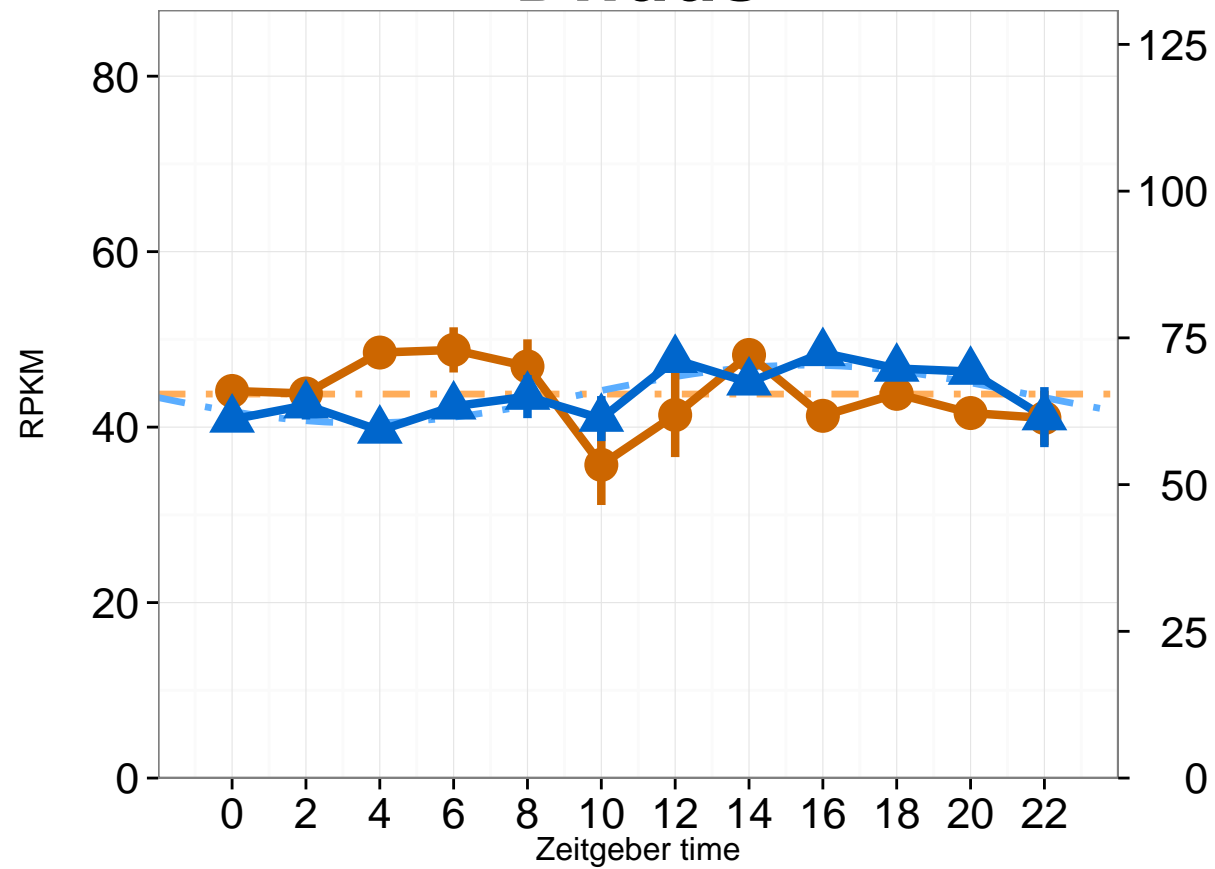

## Dhdds

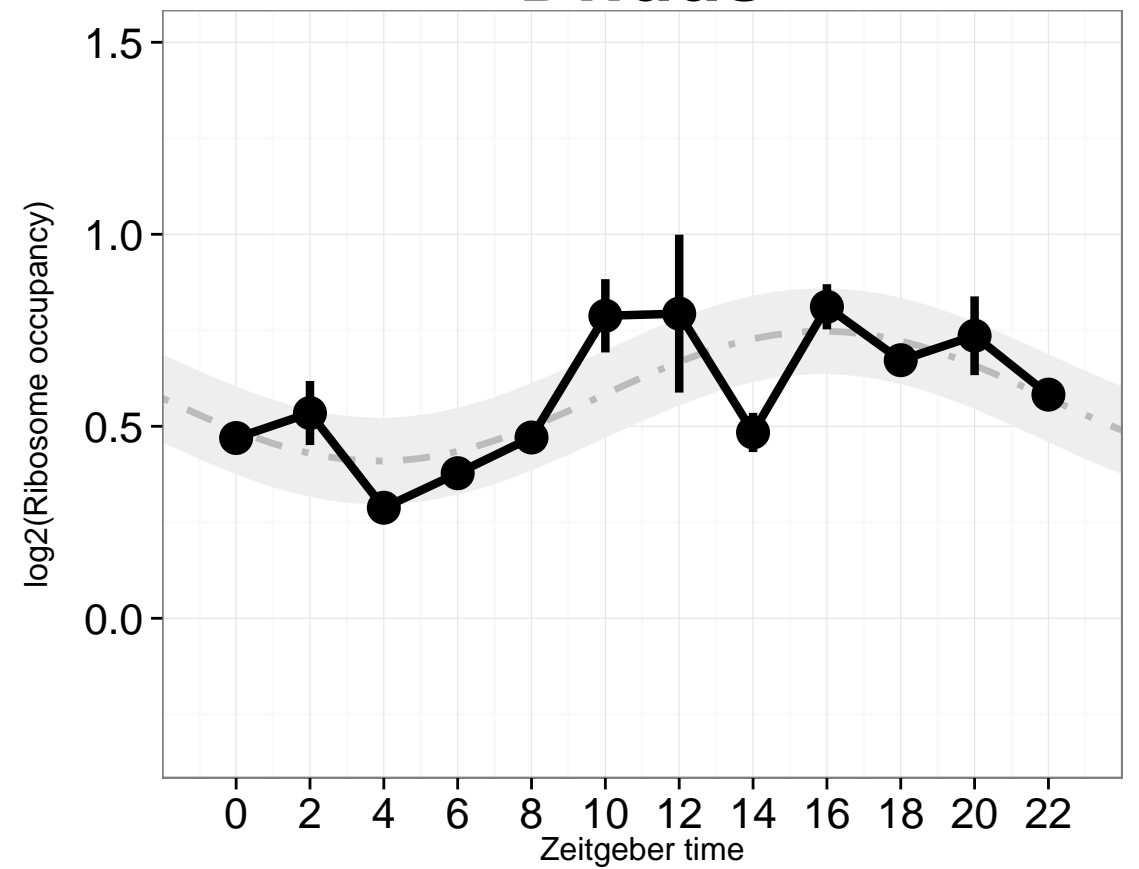

Supplement: Supplementary file 12613 [file 1]

## Ubp1

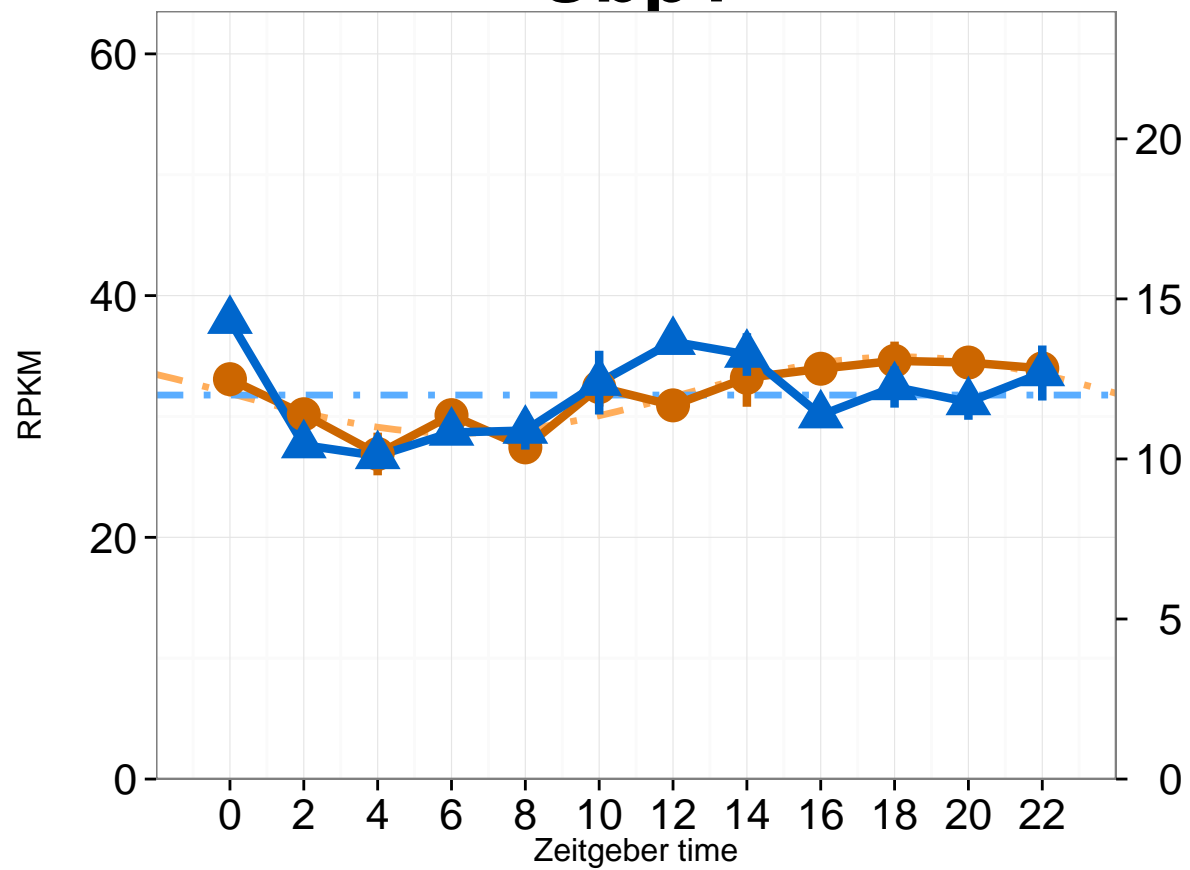

## Ubp1

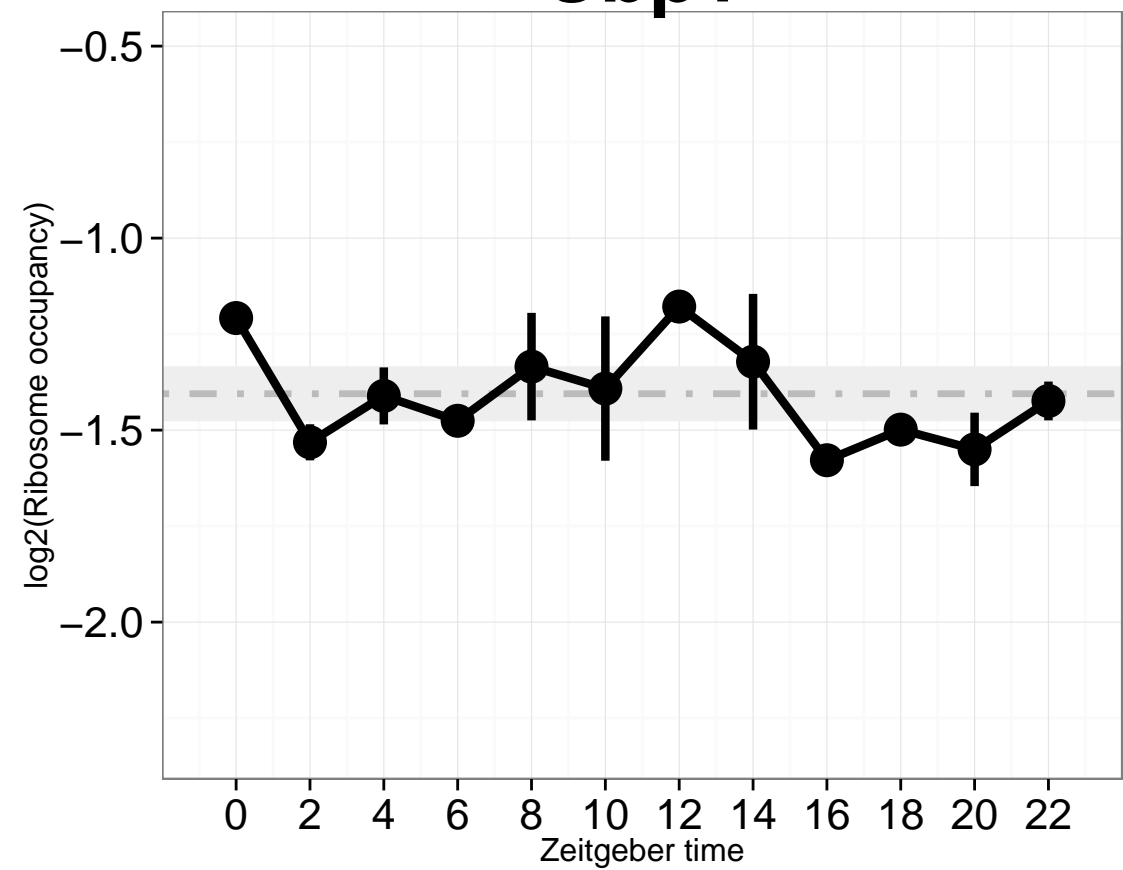

Supplement: Supplementary file 12614 [file 1]

## Flii

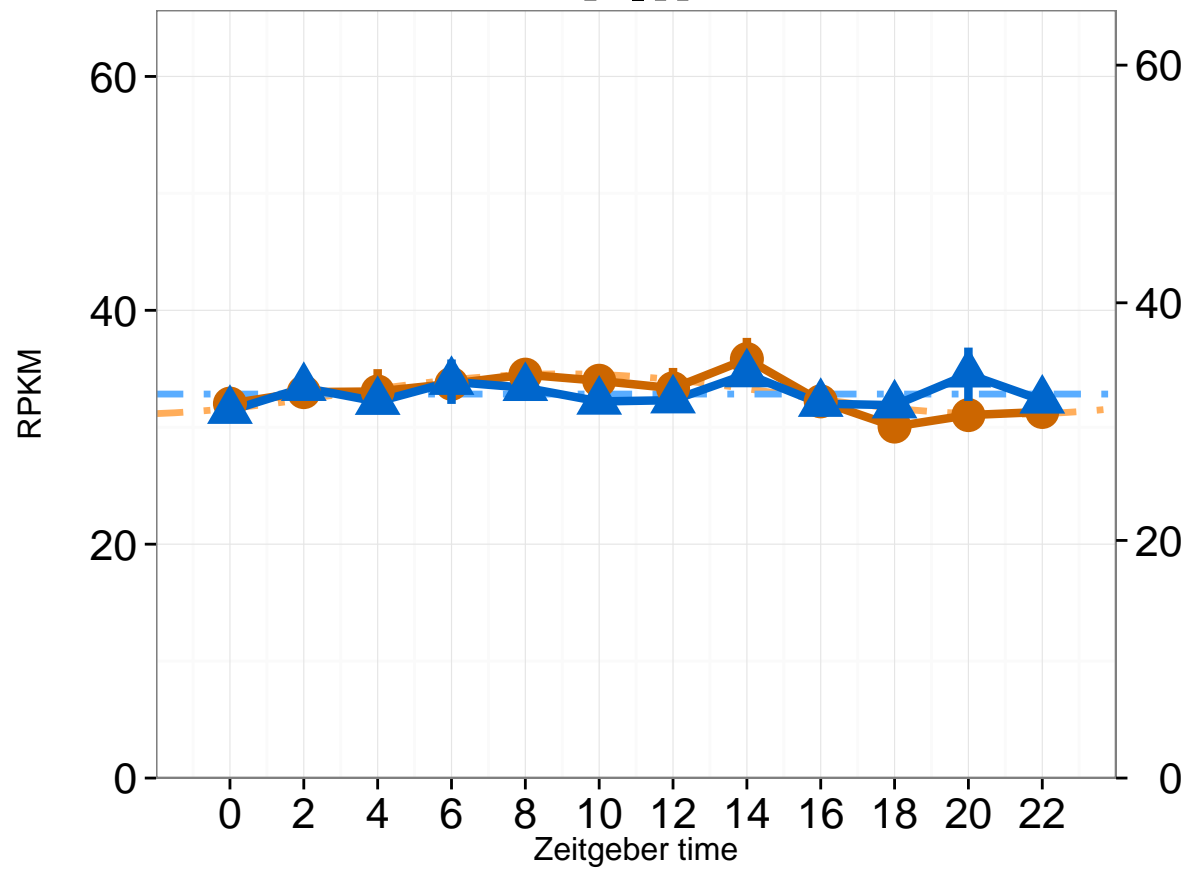

## Flii

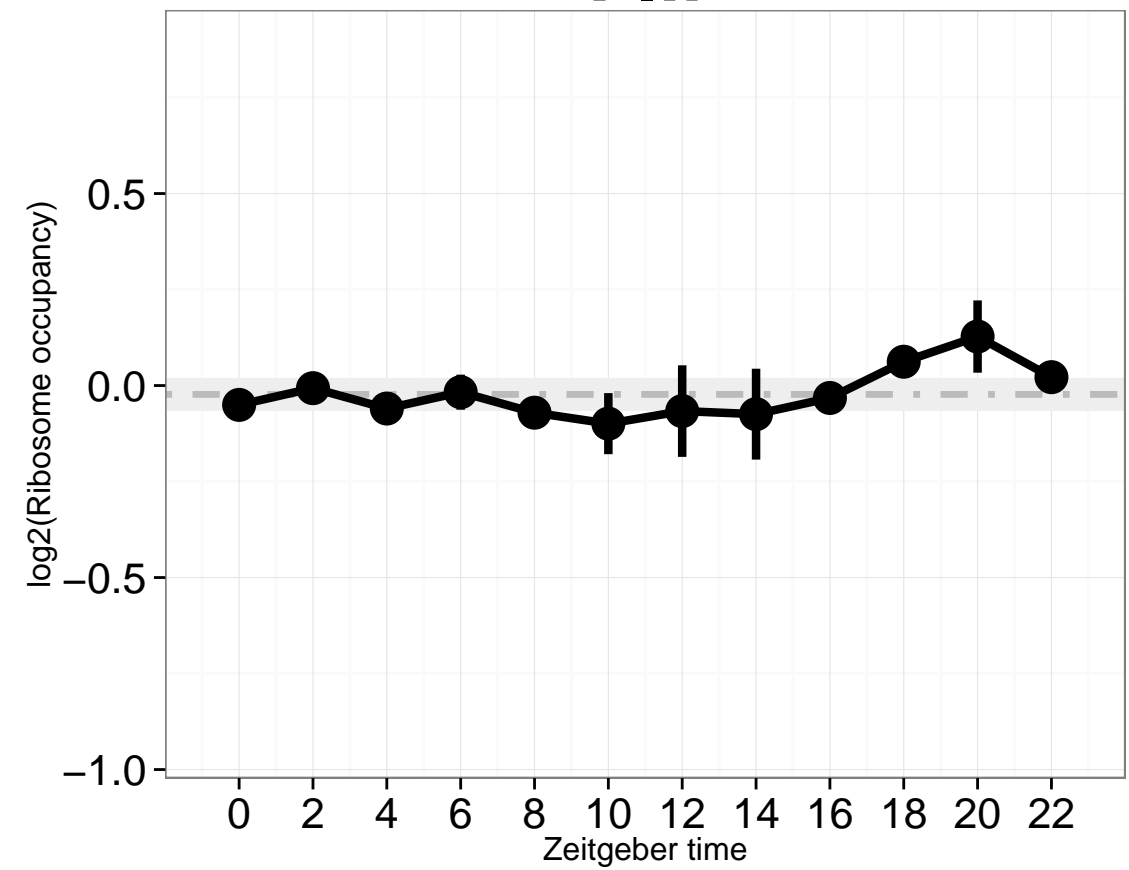

Supplement: Supplementary file 12615 [file 1]

## Pmm1

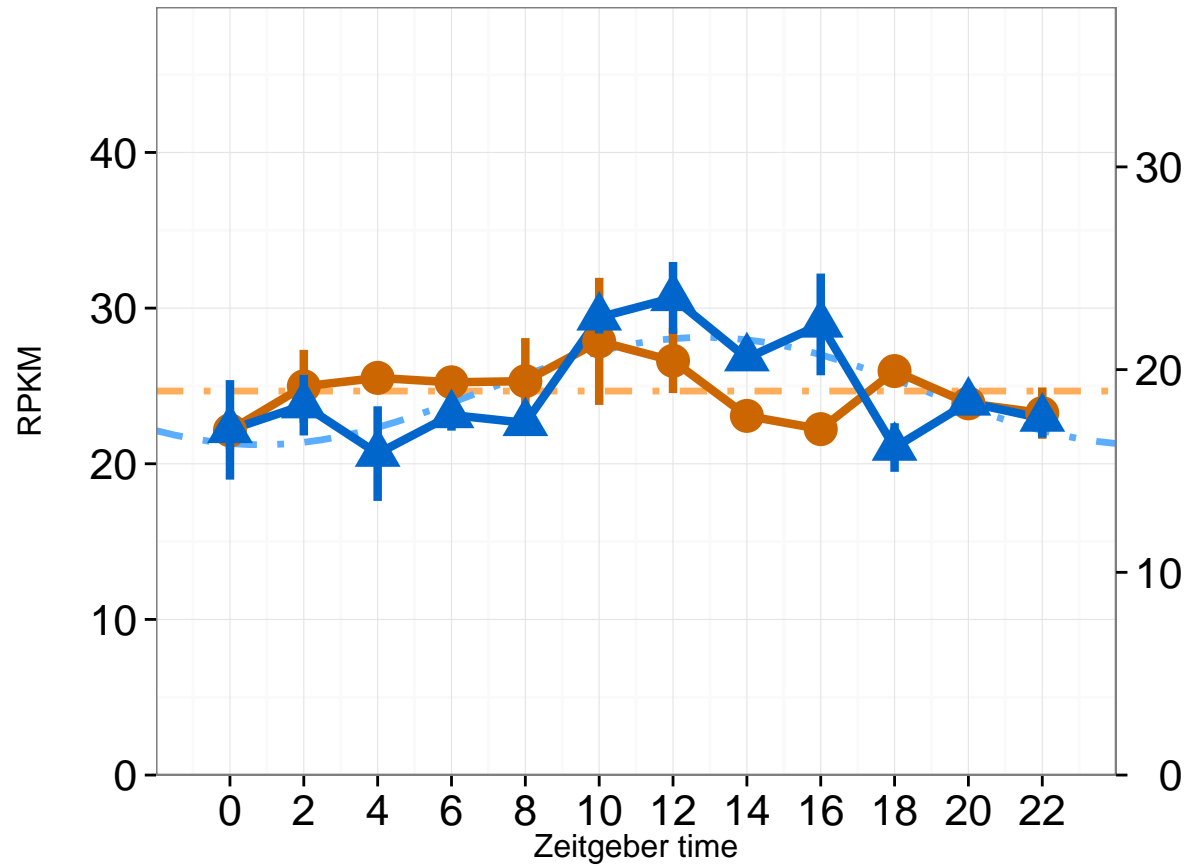

## Pmm1

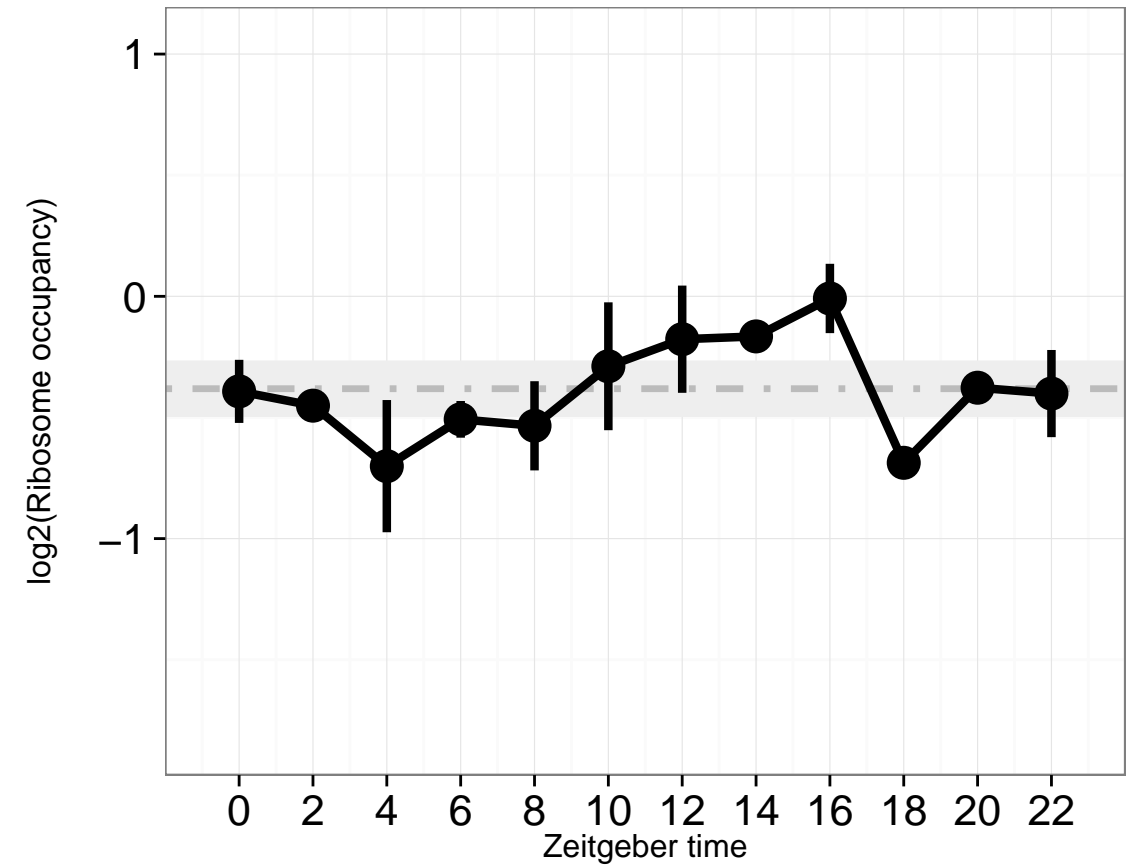

Supplement: Supplementary file 12616 [file 1]

## Cebpb

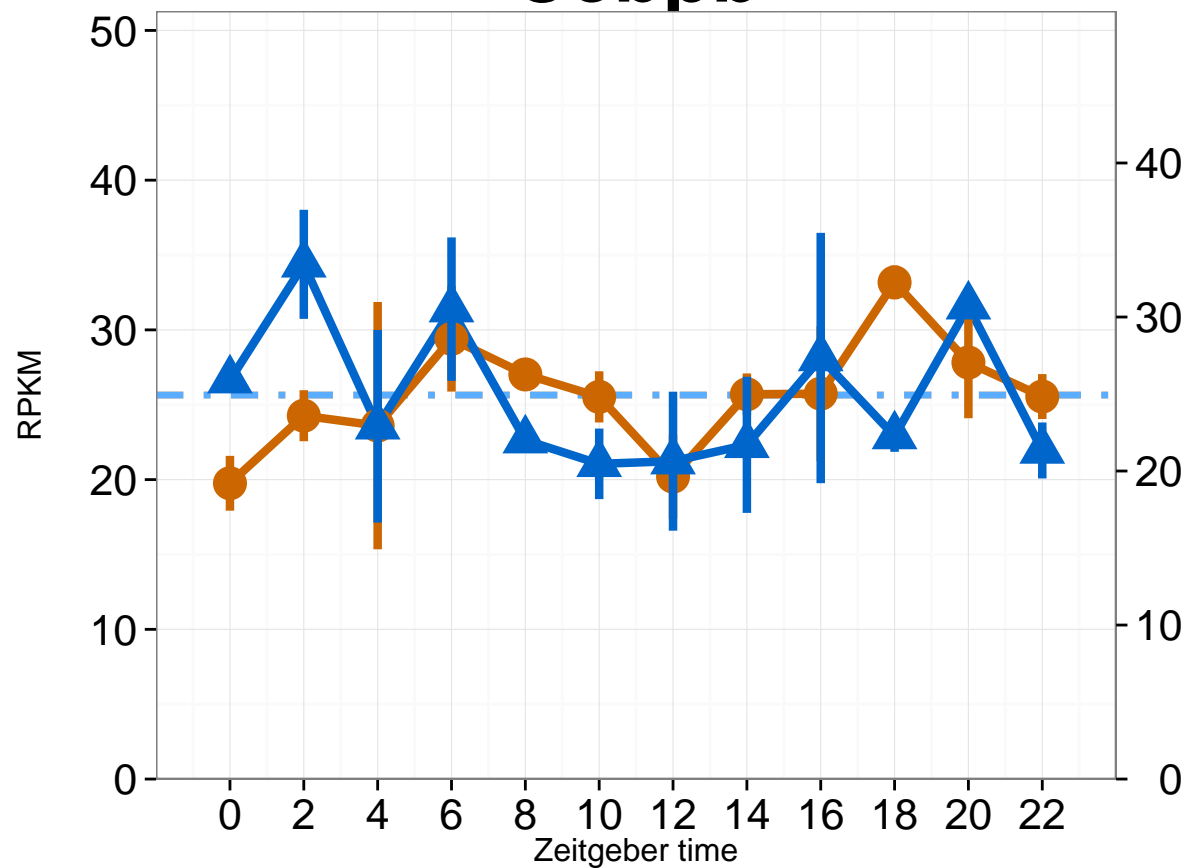

## Cebpb

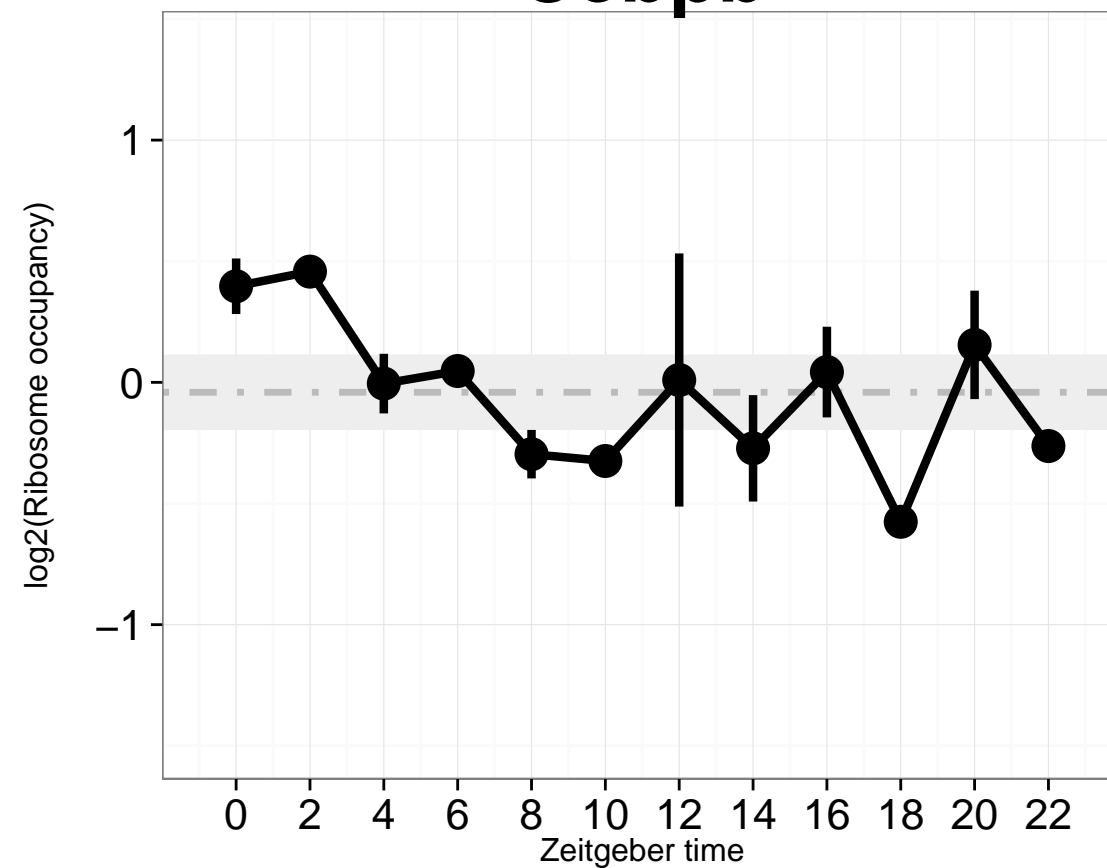

Supplement: Supplementary file 12617 [file 1]

# Ttc13

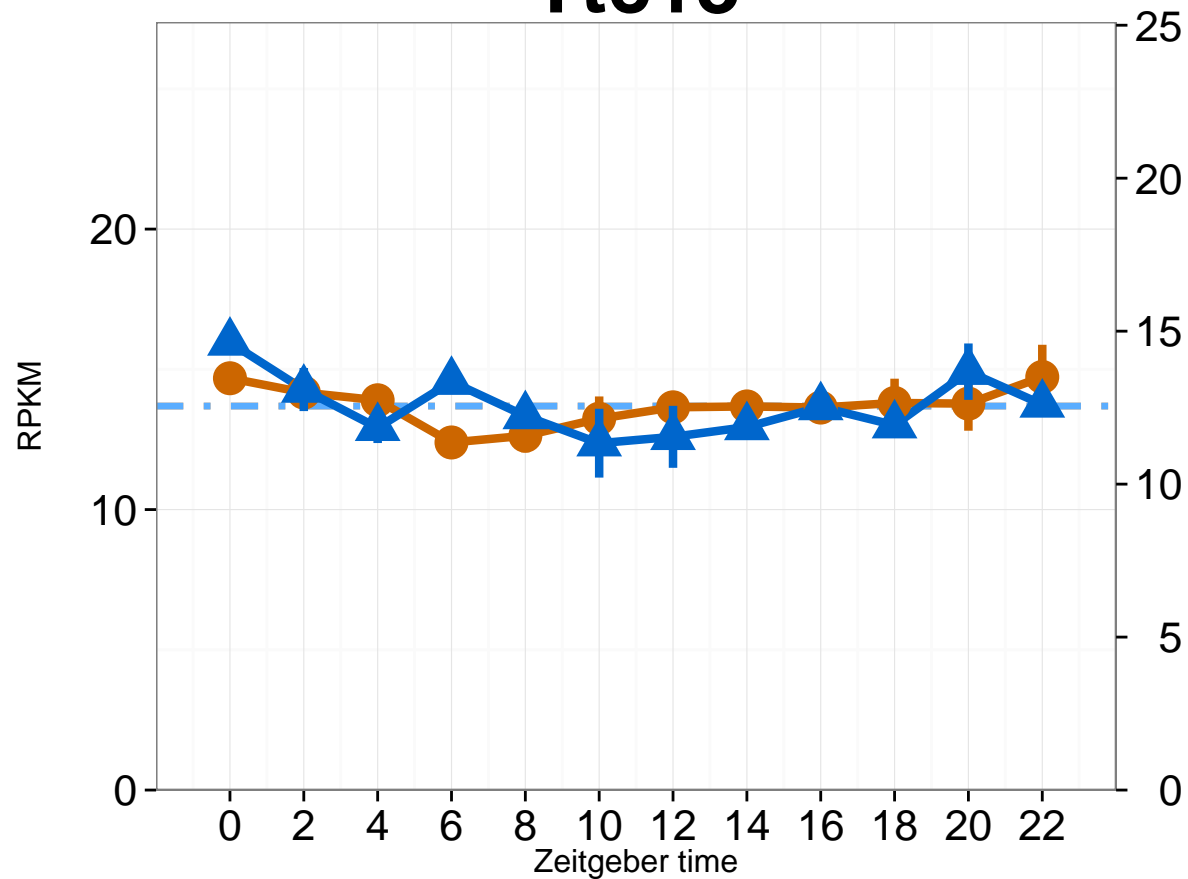

# Ttc13

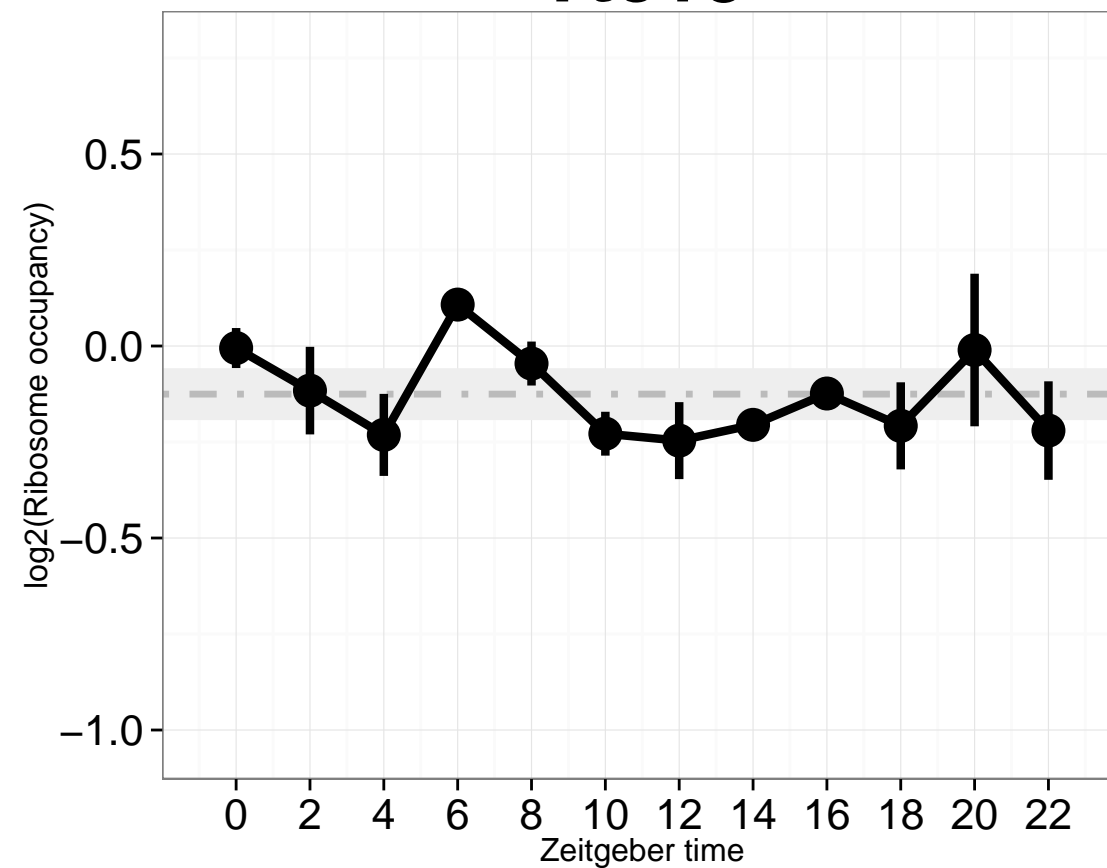

Supplement: Supplementary file 12618 [file 1]

# Ptprm

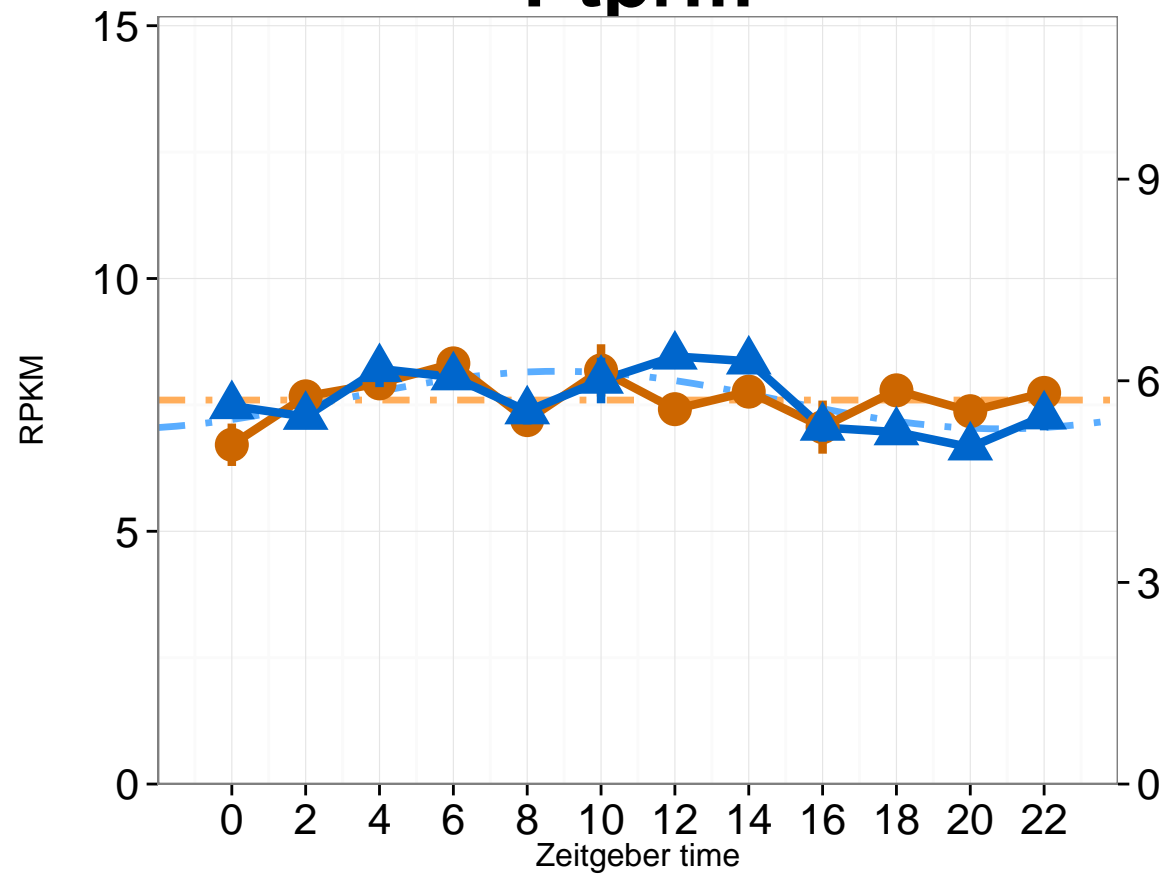

# Ptprm

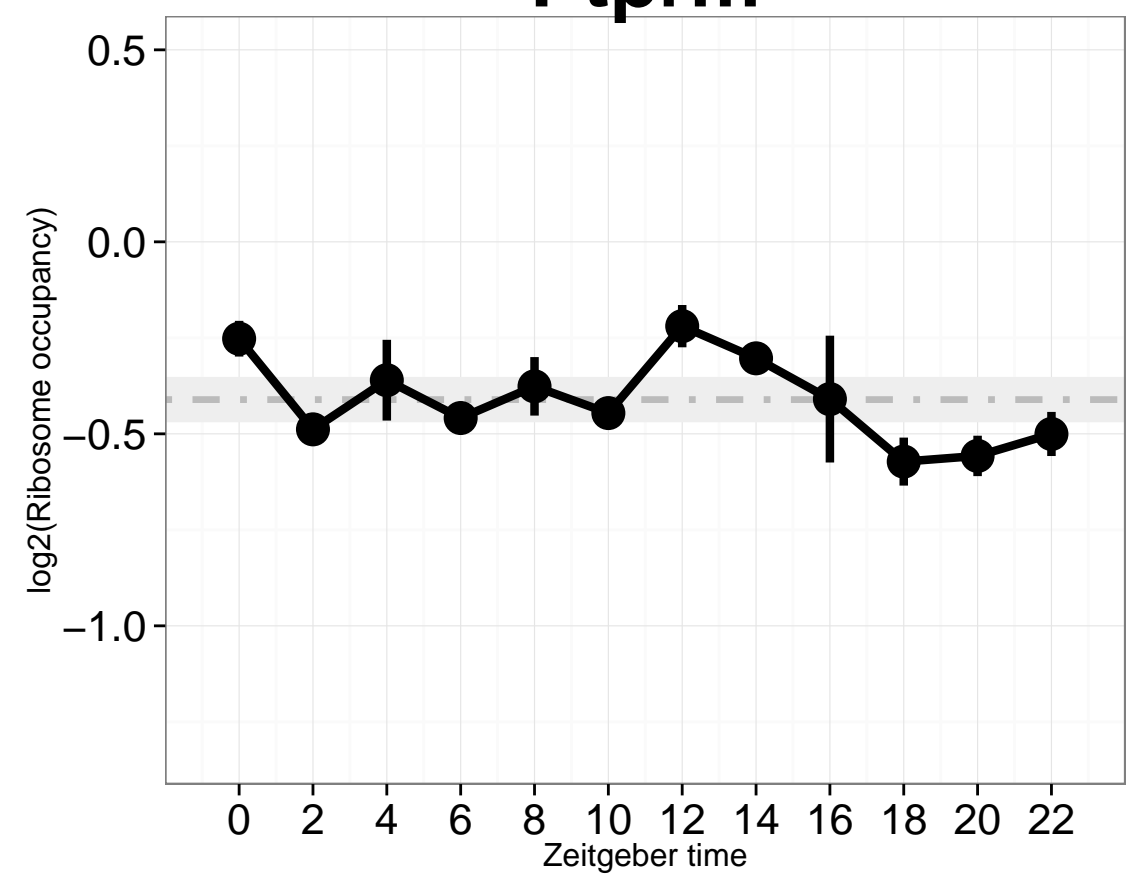

Supplement: Supplementary file 12619 [file 1]

# Gpr126

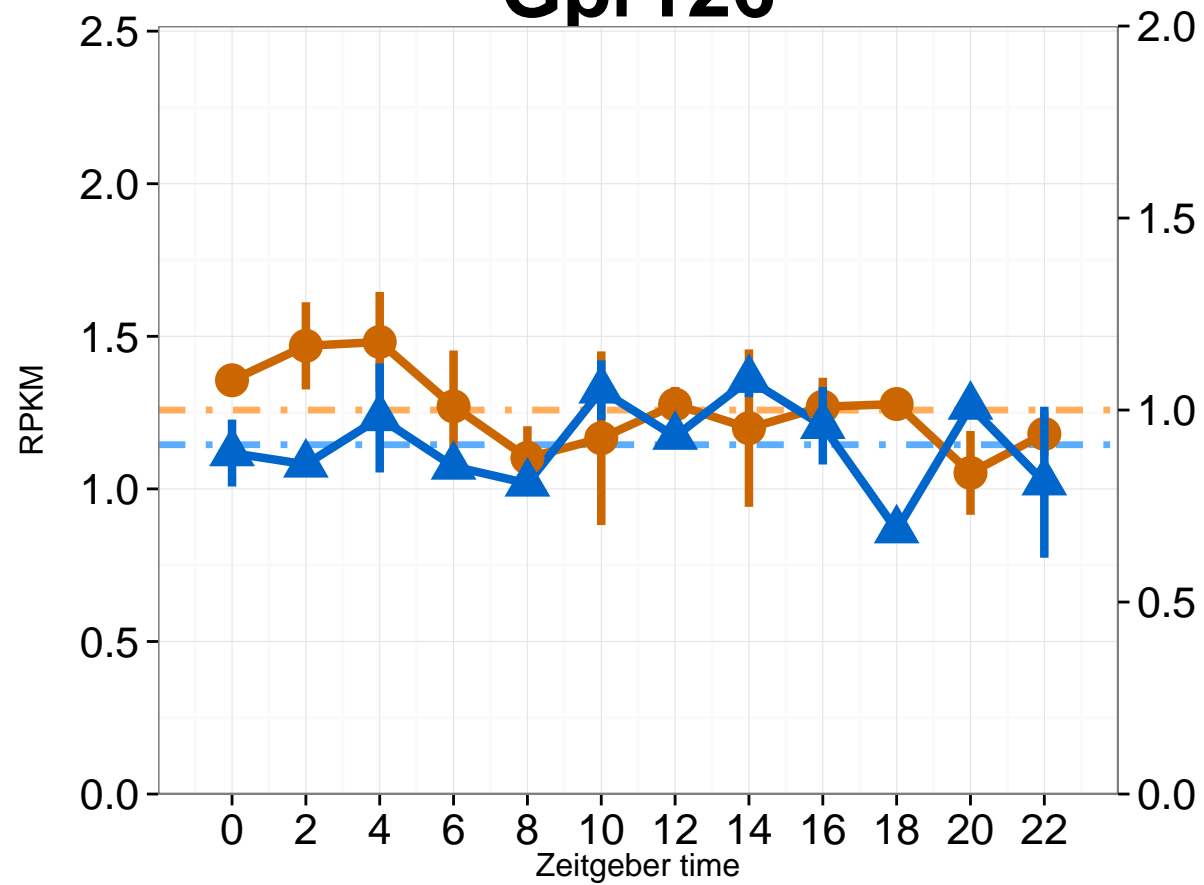

# Gpr126

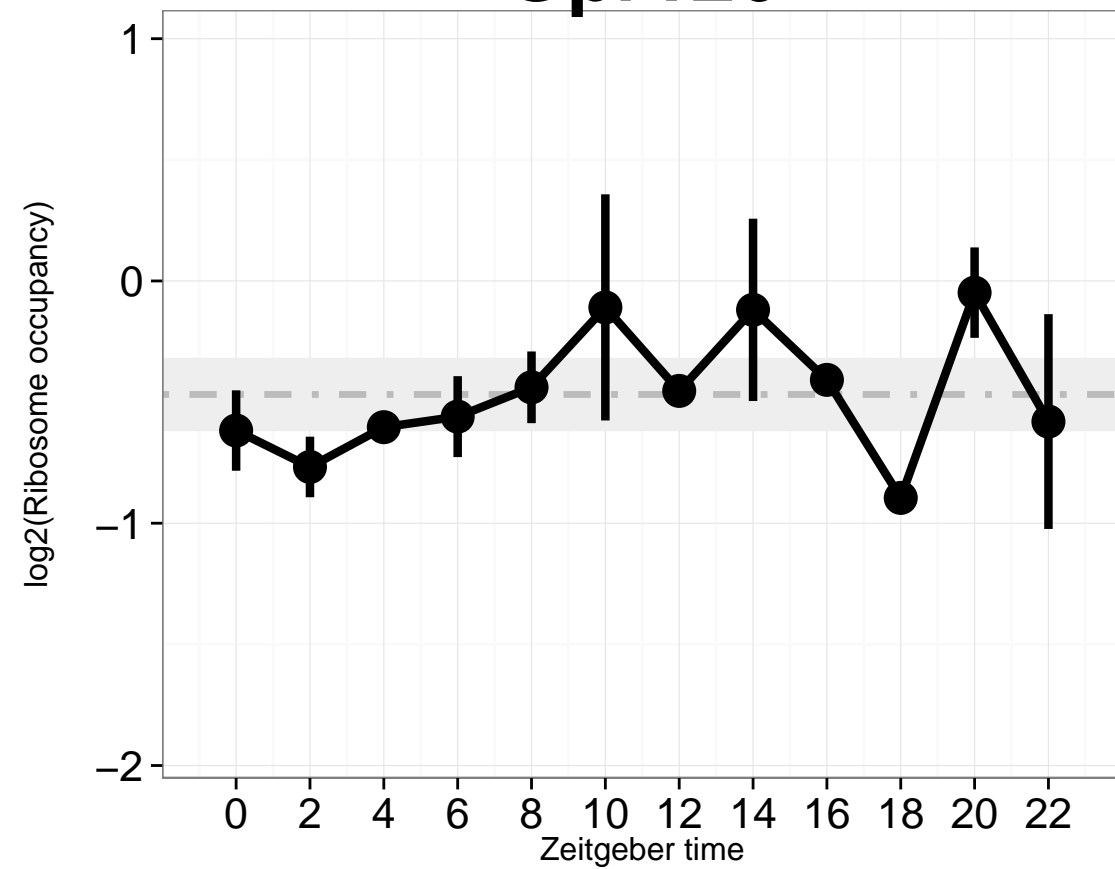

Supplement: Supplementary file 12620 [file 1]

## Bach1

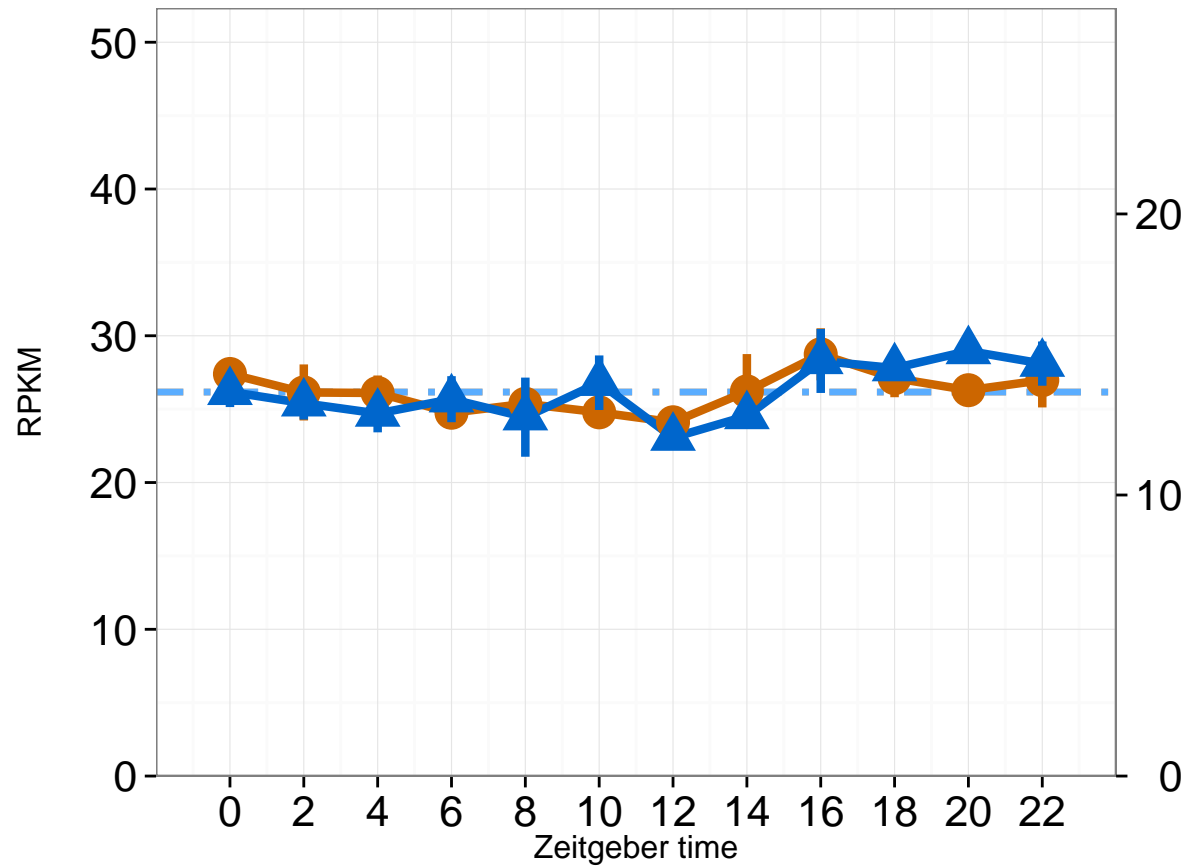

## Bach1

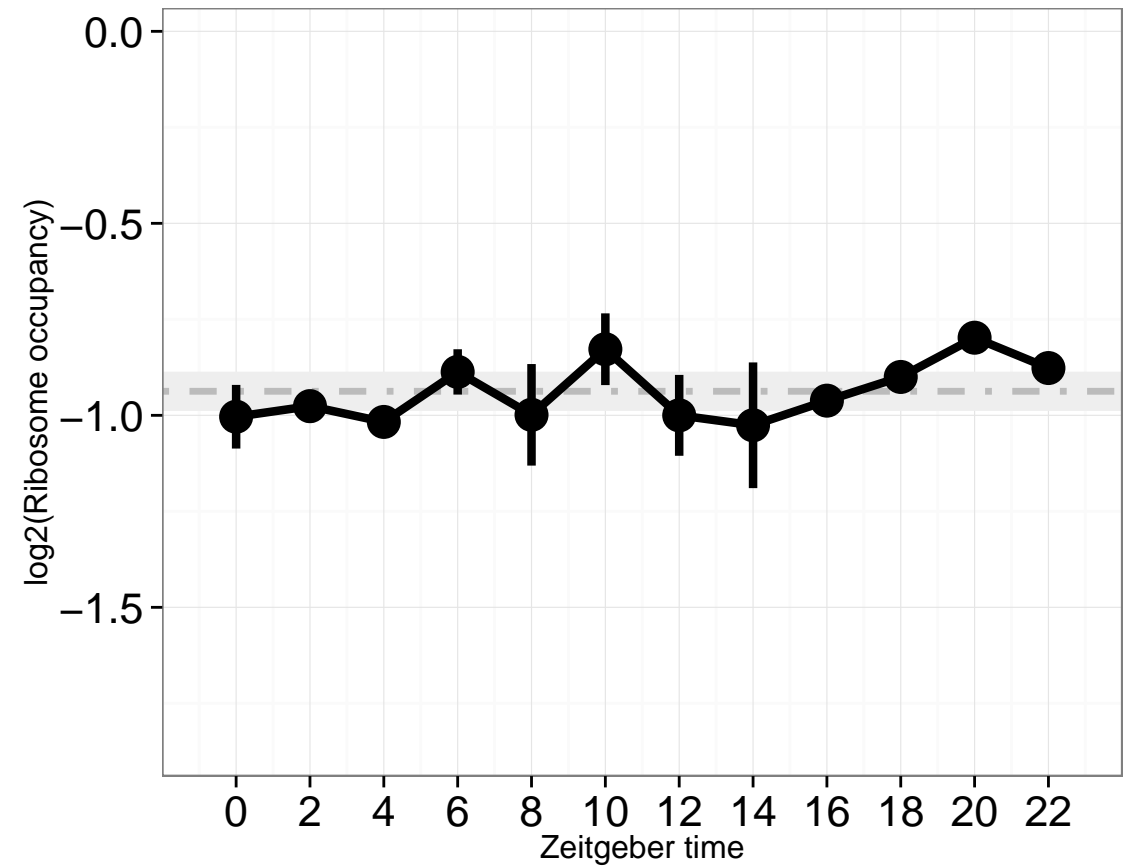

Supplement: Supplementary file 12621 [file 1]

## Elf3

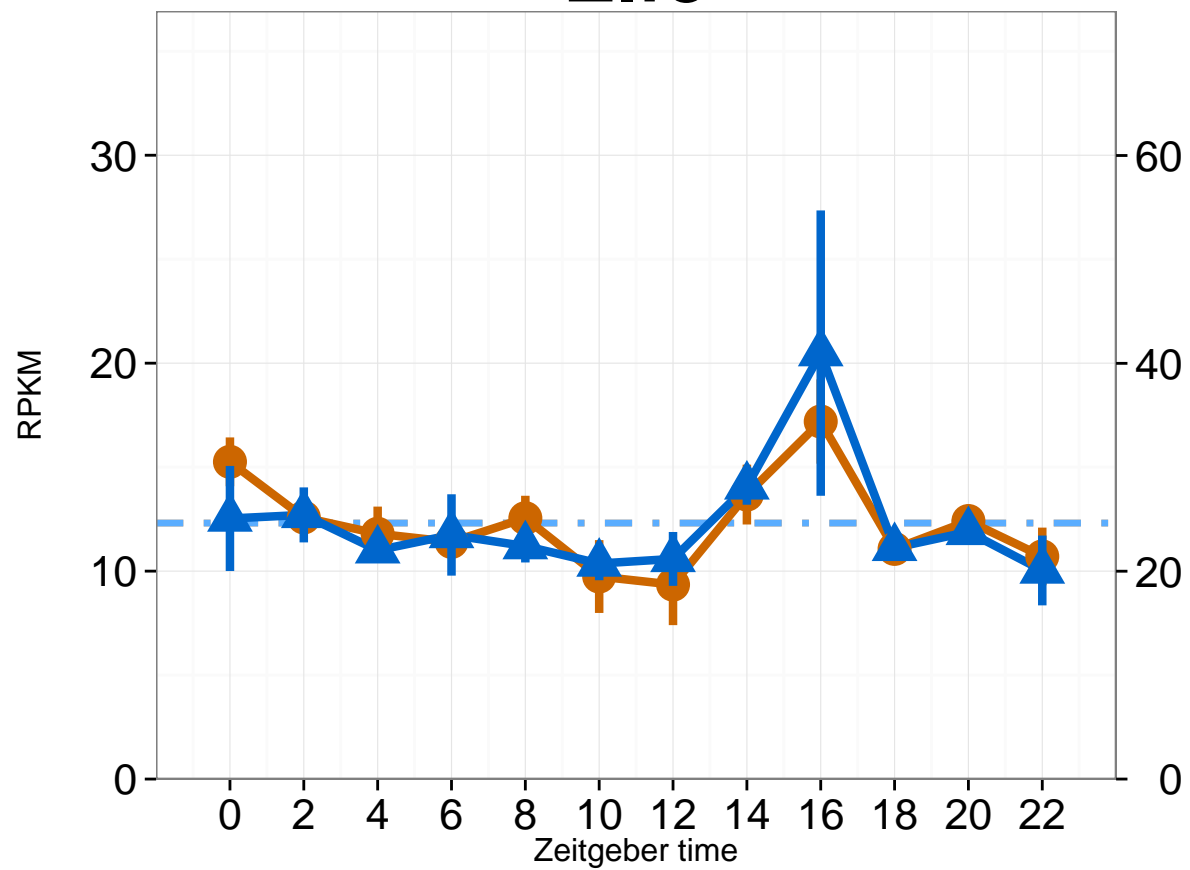

## Elf3

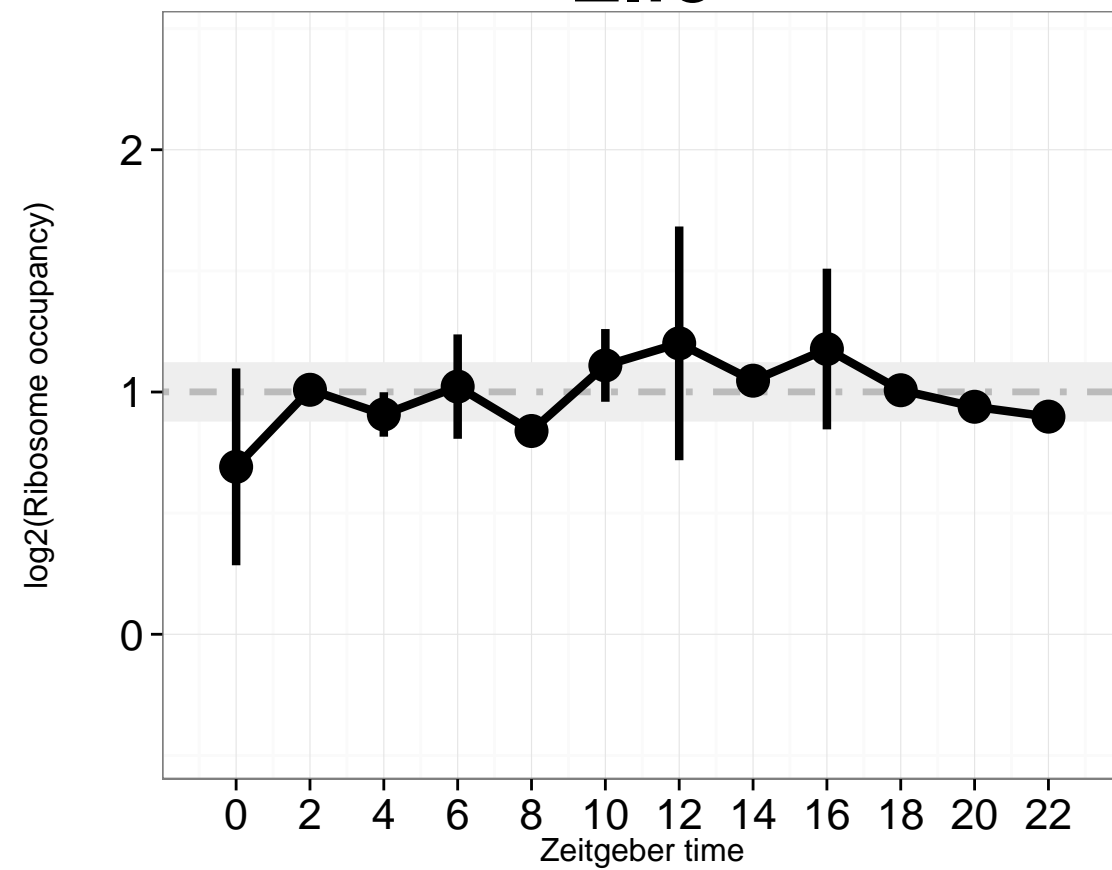

Supplement: Supplementary file 12622 [file 1]

## Usp5

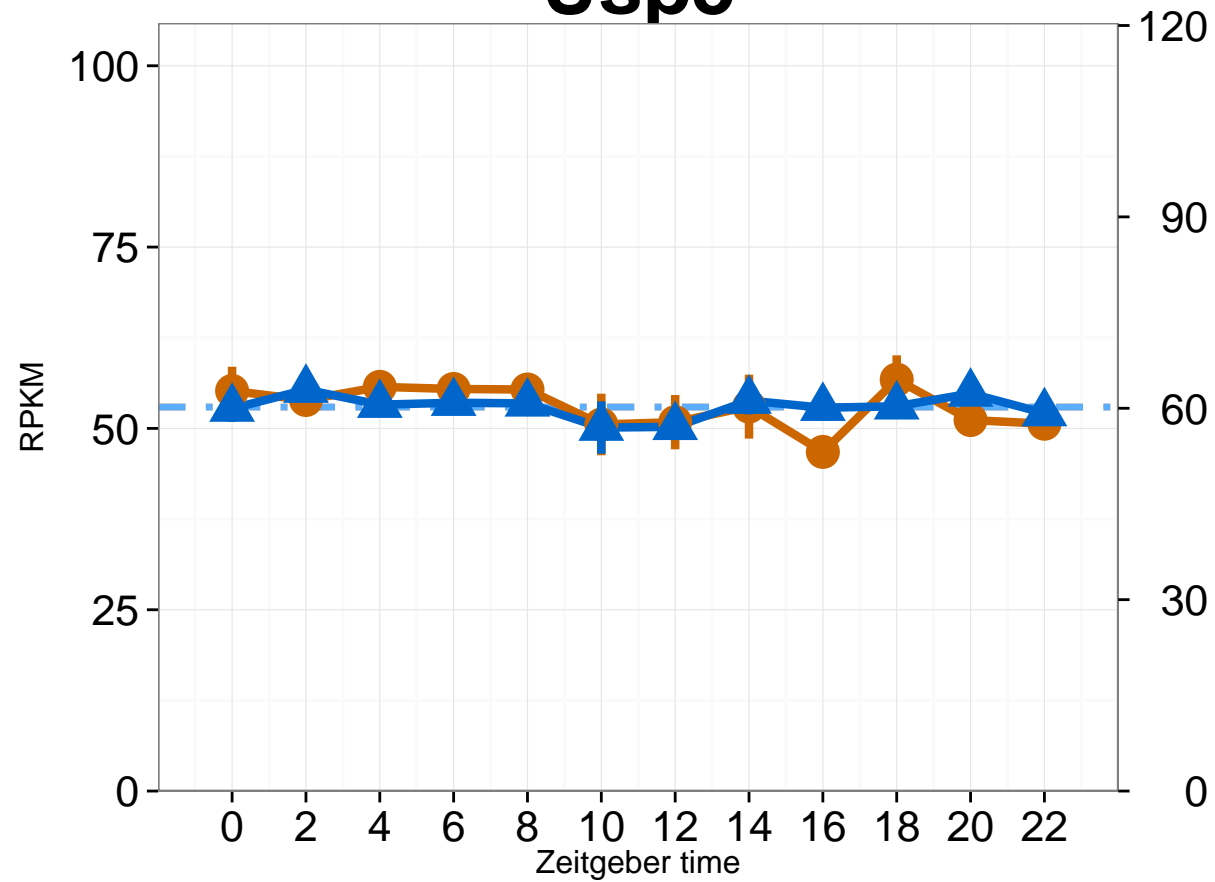

## Usp5

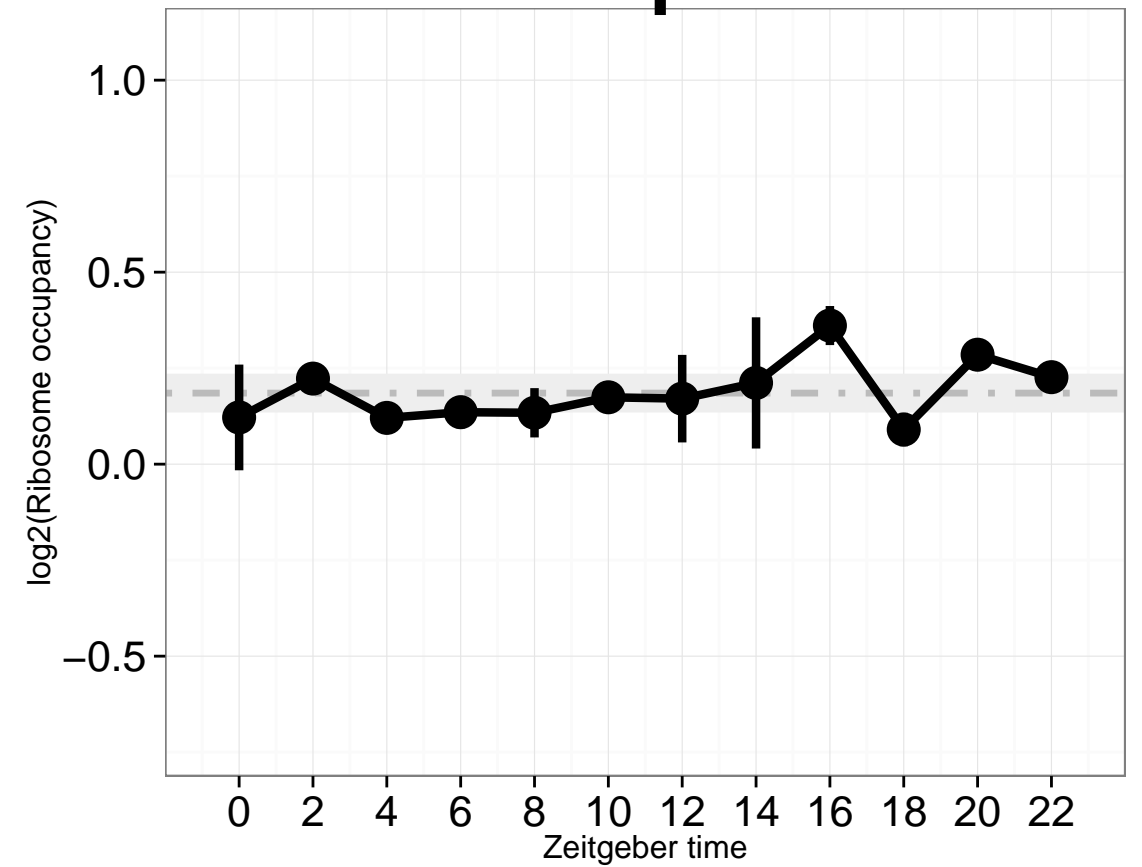

Supplement: Supplementary file 12623 [file 1]

# Srrm2

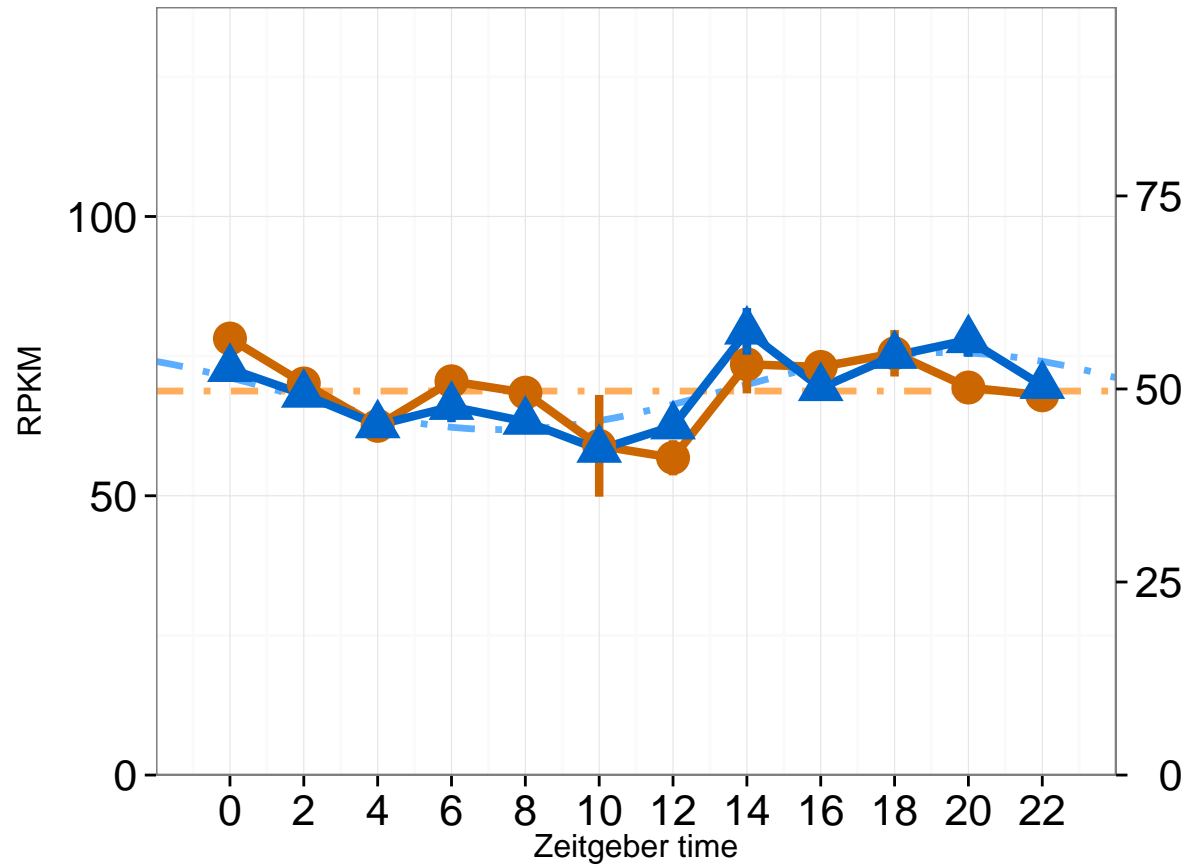

# Srrm2

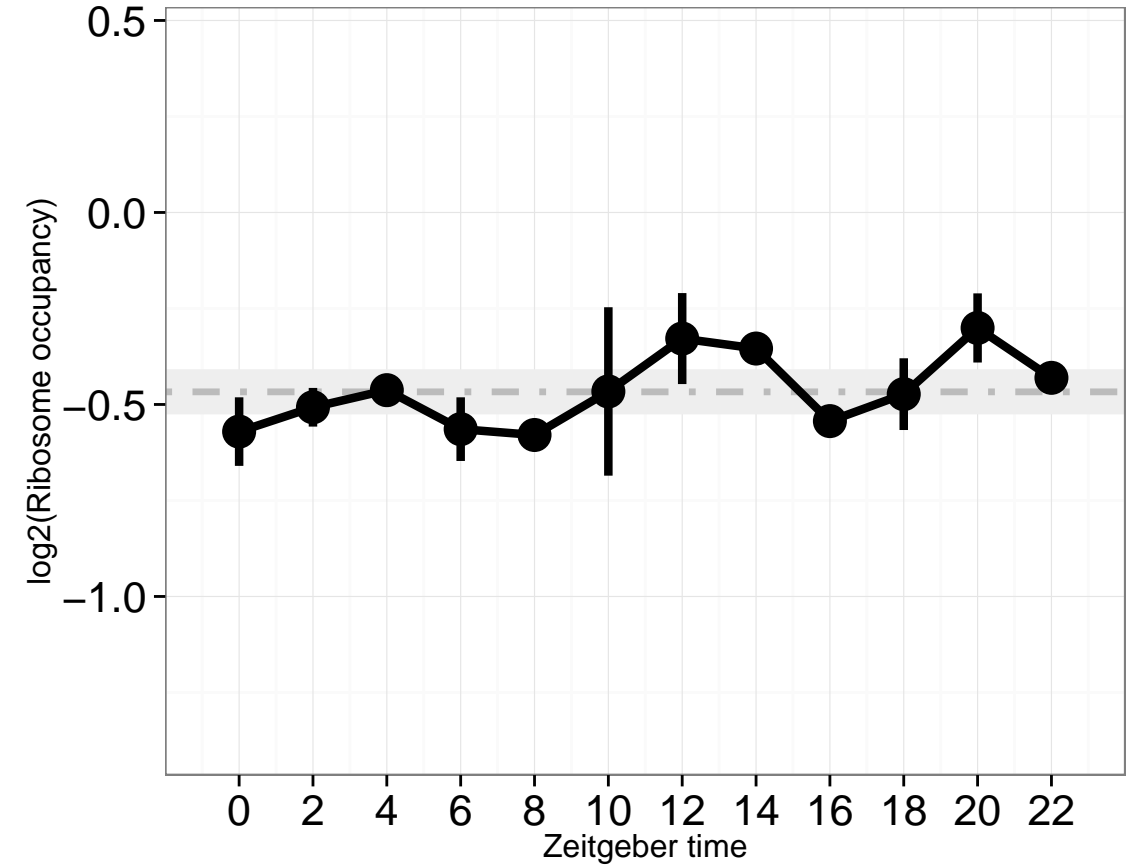

Supplement: Supplementary file 12624 [file 1]

**Rimkla TR**

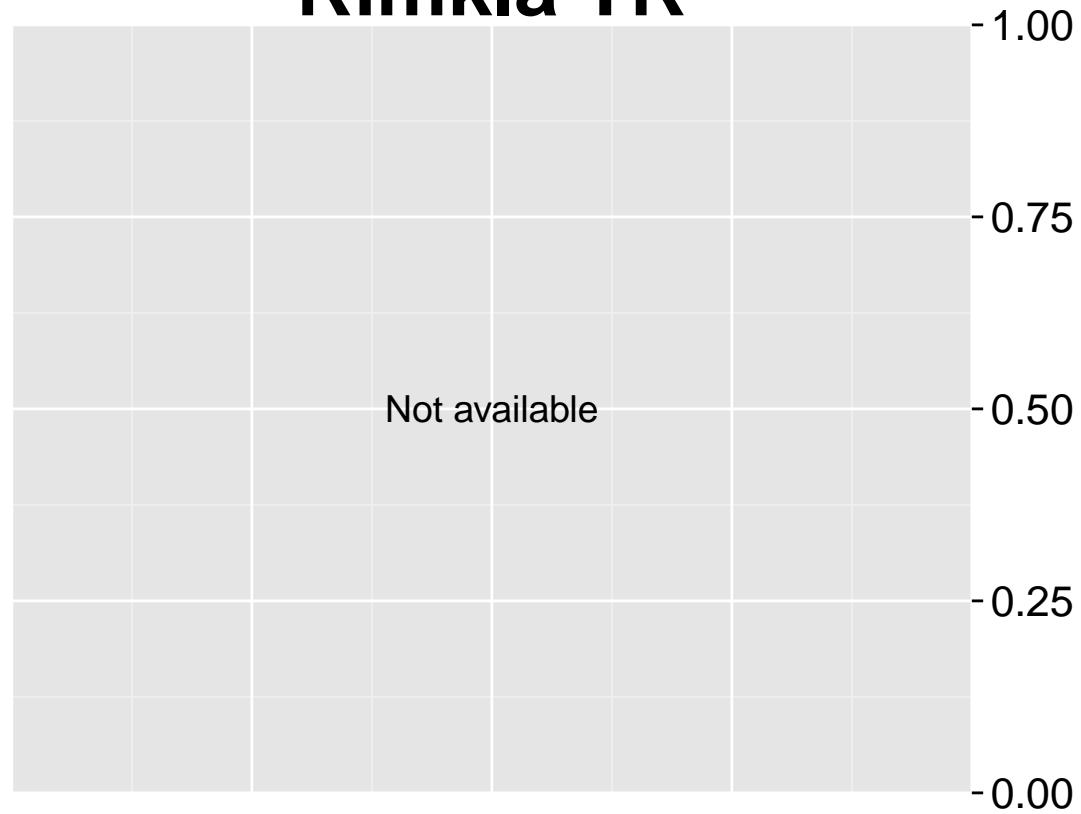

**Rimkla log2(Ribosome occupancy**

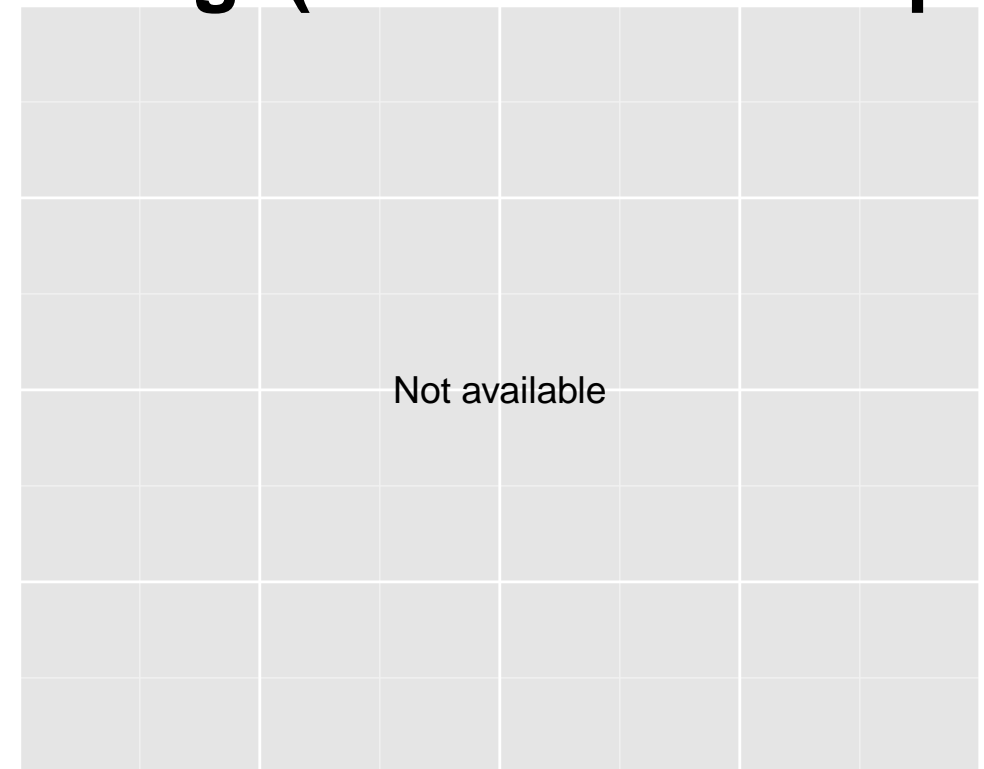

Supplement: Supplementary file 12625 [file 1]

## Chd9

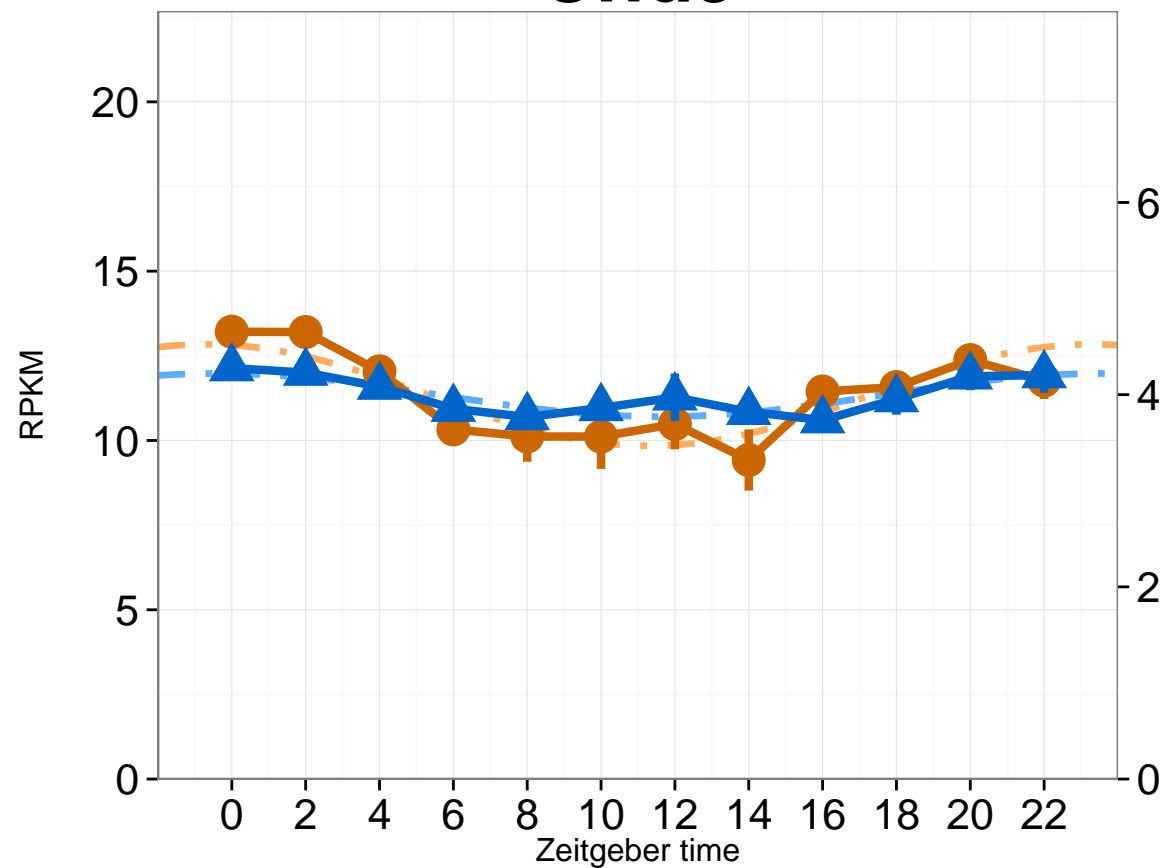

## Chd9

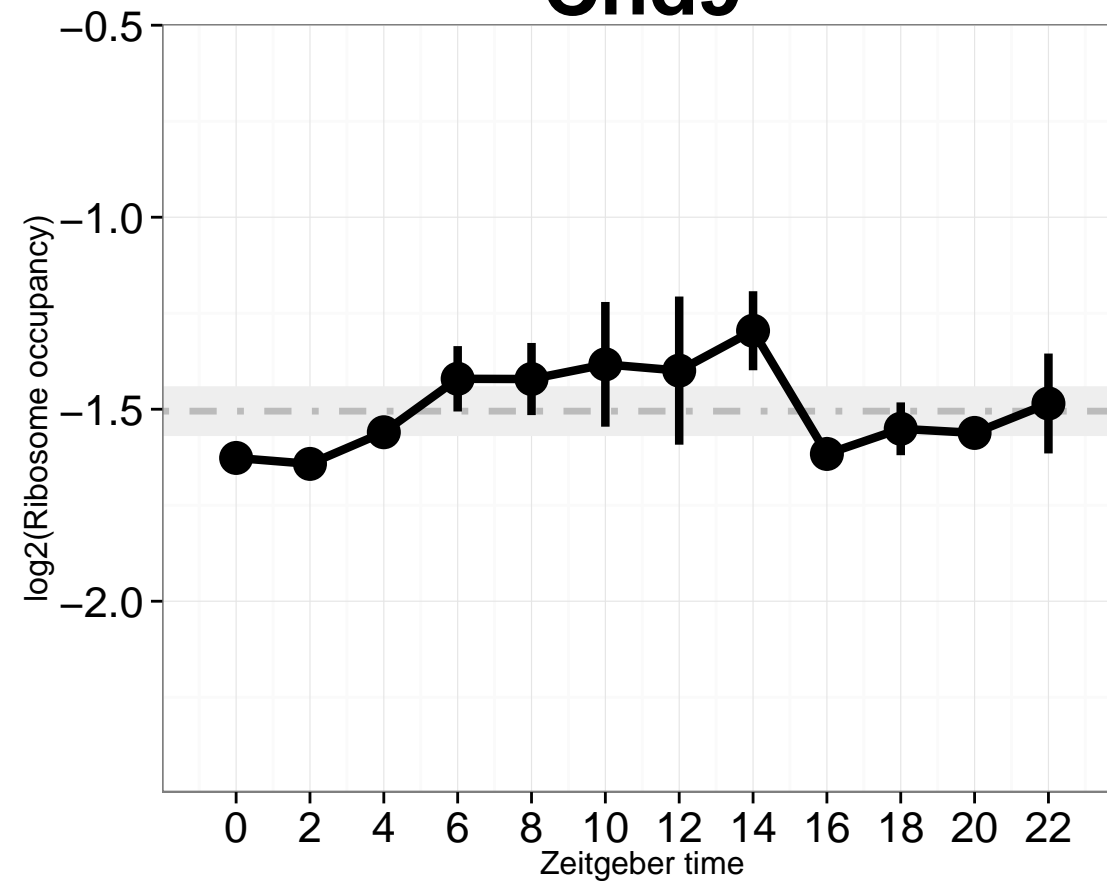

Supplement: Supplementary file 12626 [file 1]

## Ddx20

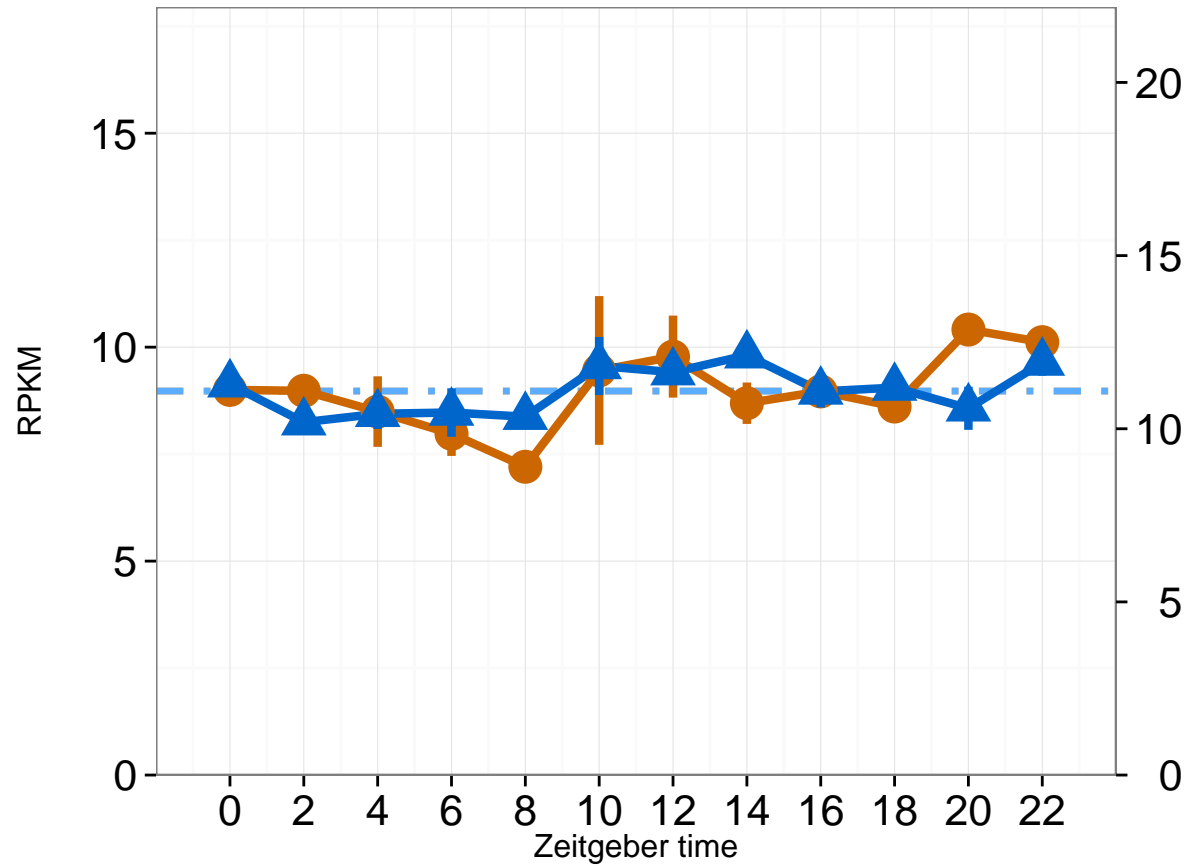

## Ddx20

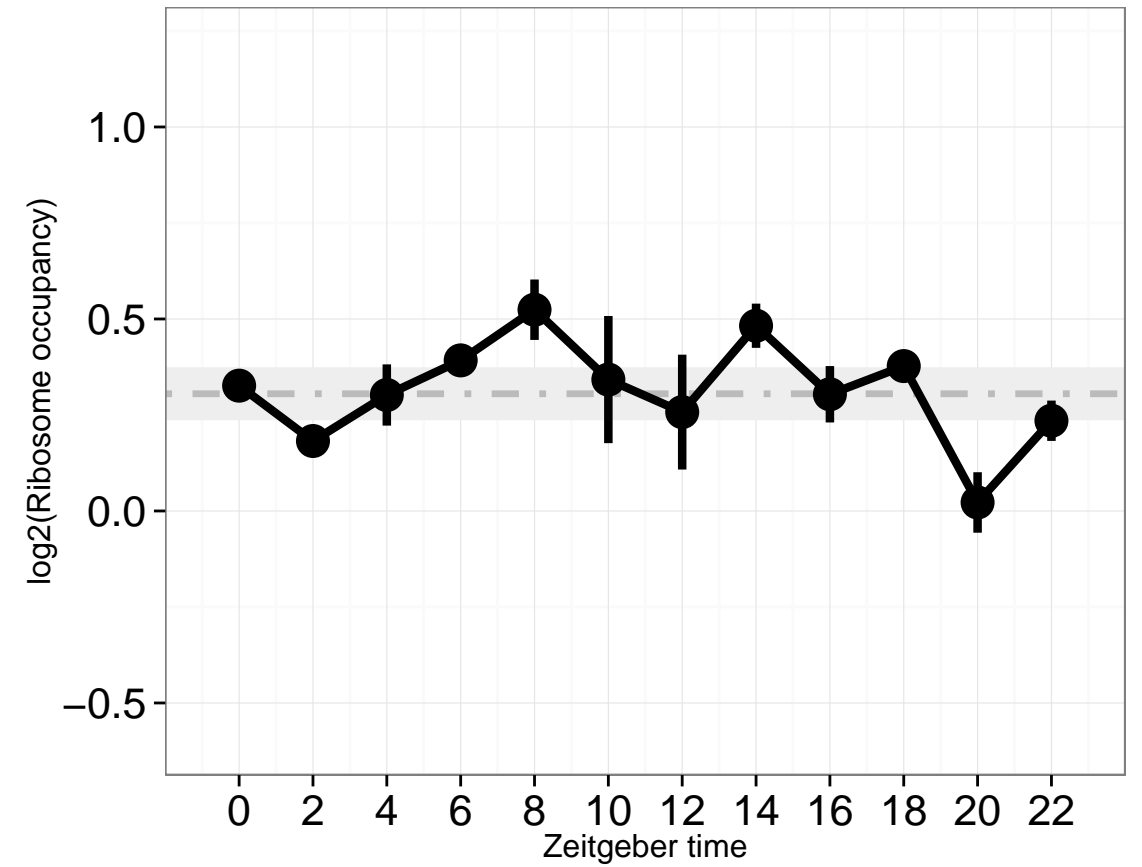

Supplement: Supplementary file 12627 [file 1]

# Zfp446

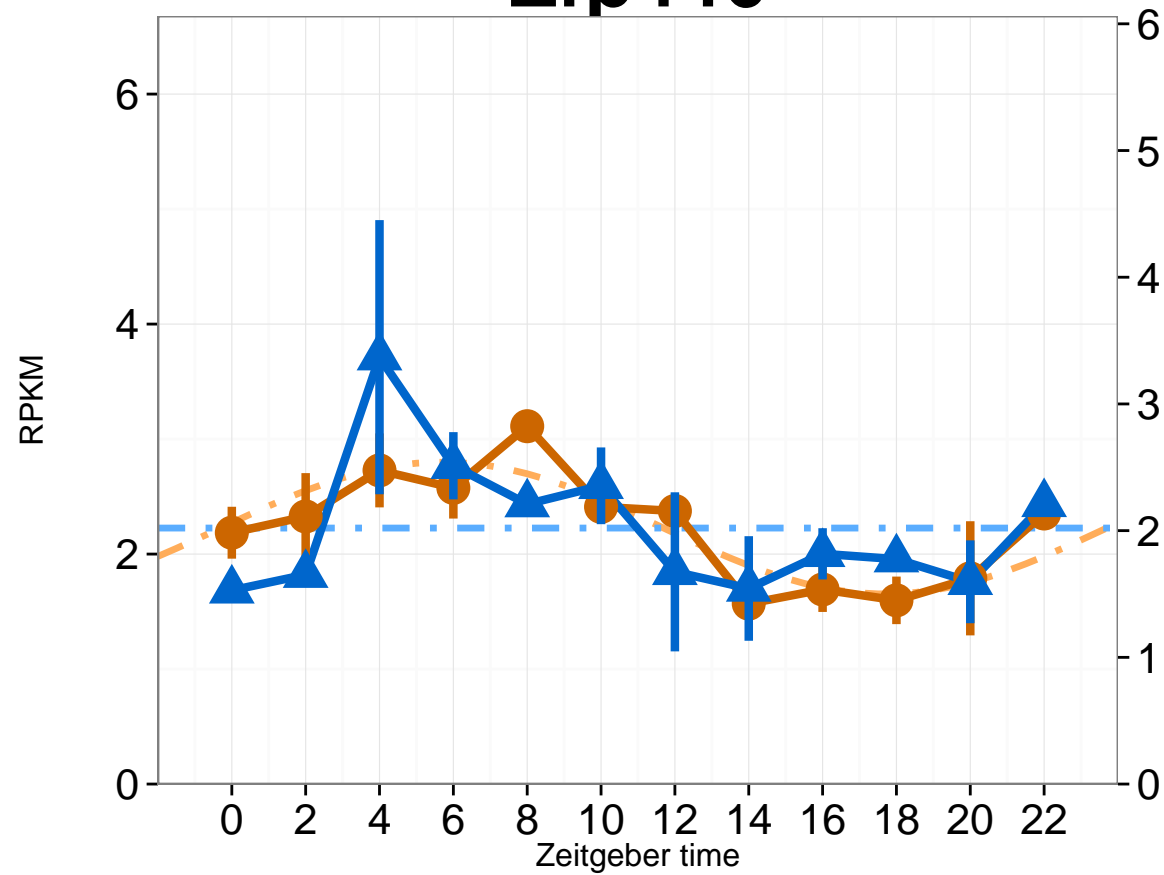

# Zfp446

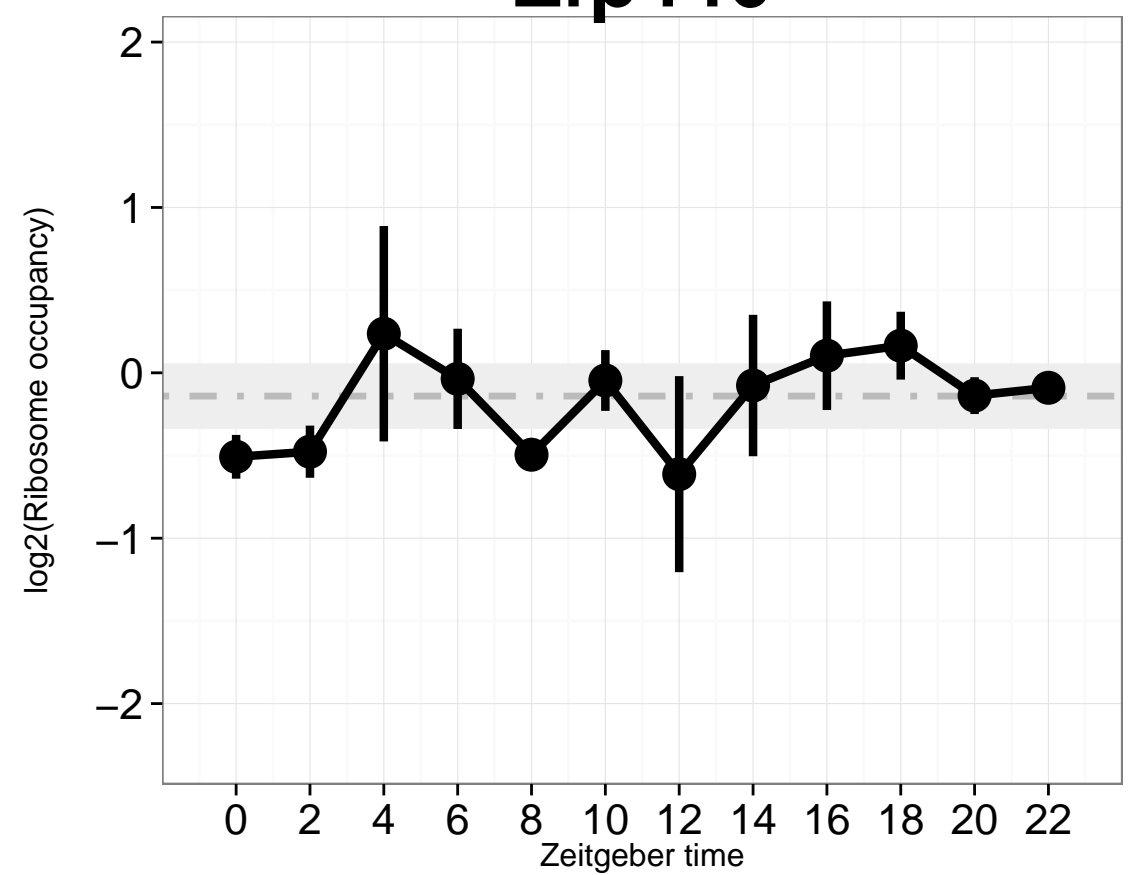

Supplement: Supplementary file 12628 [file 1]

# Ankrd1

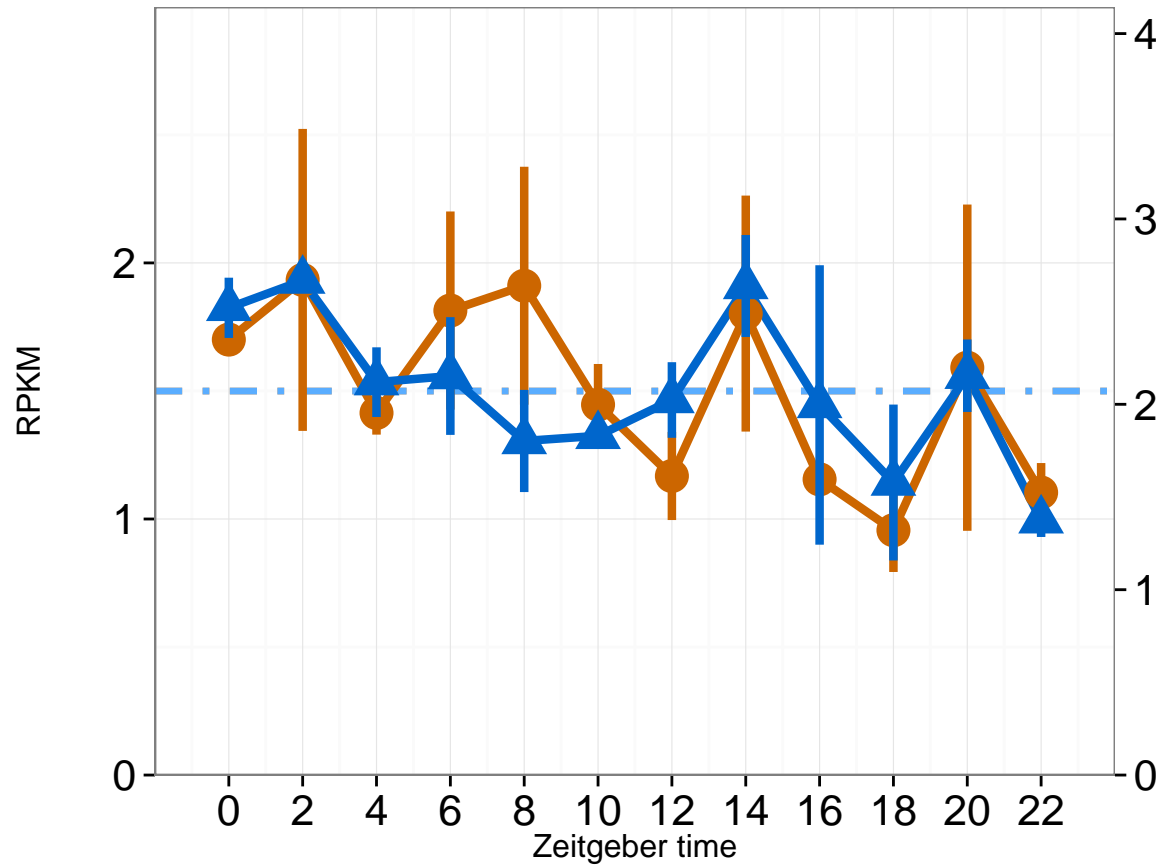

# Ankrd1

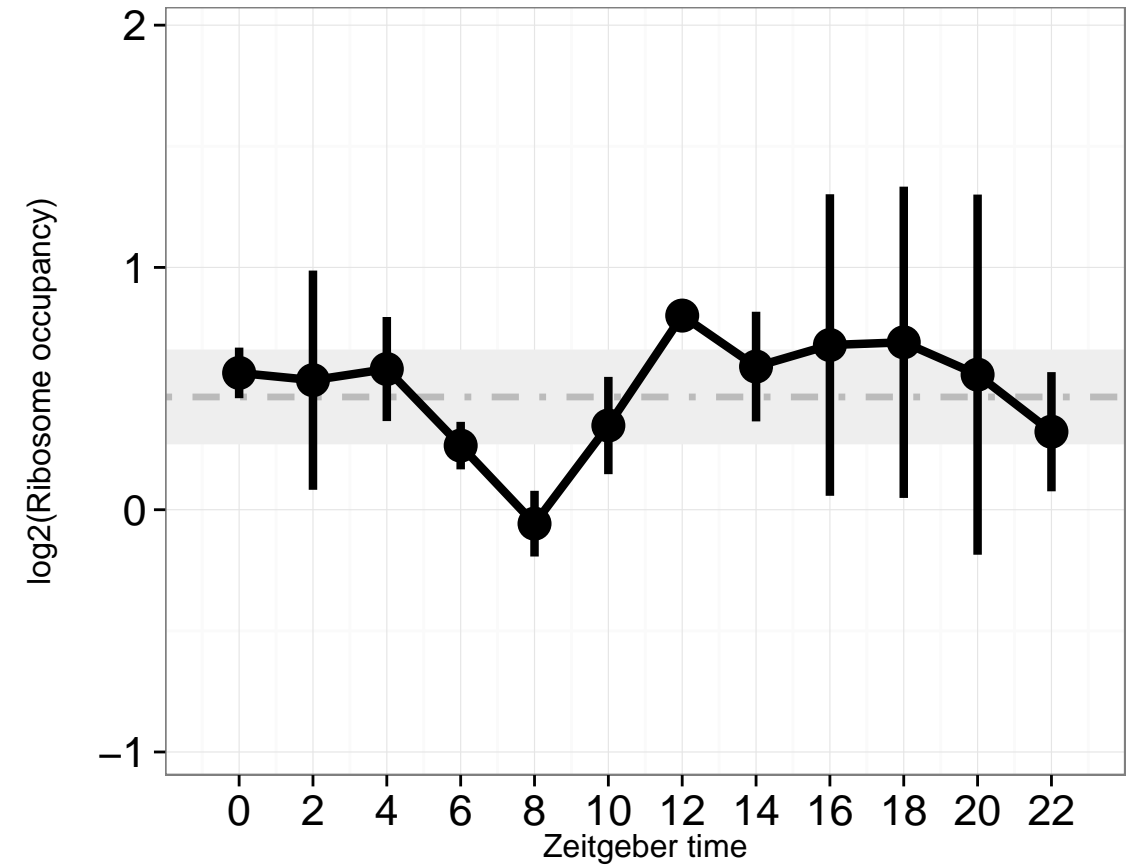

Supplement: Supplementary file 12629 [file 1]

# Sub1

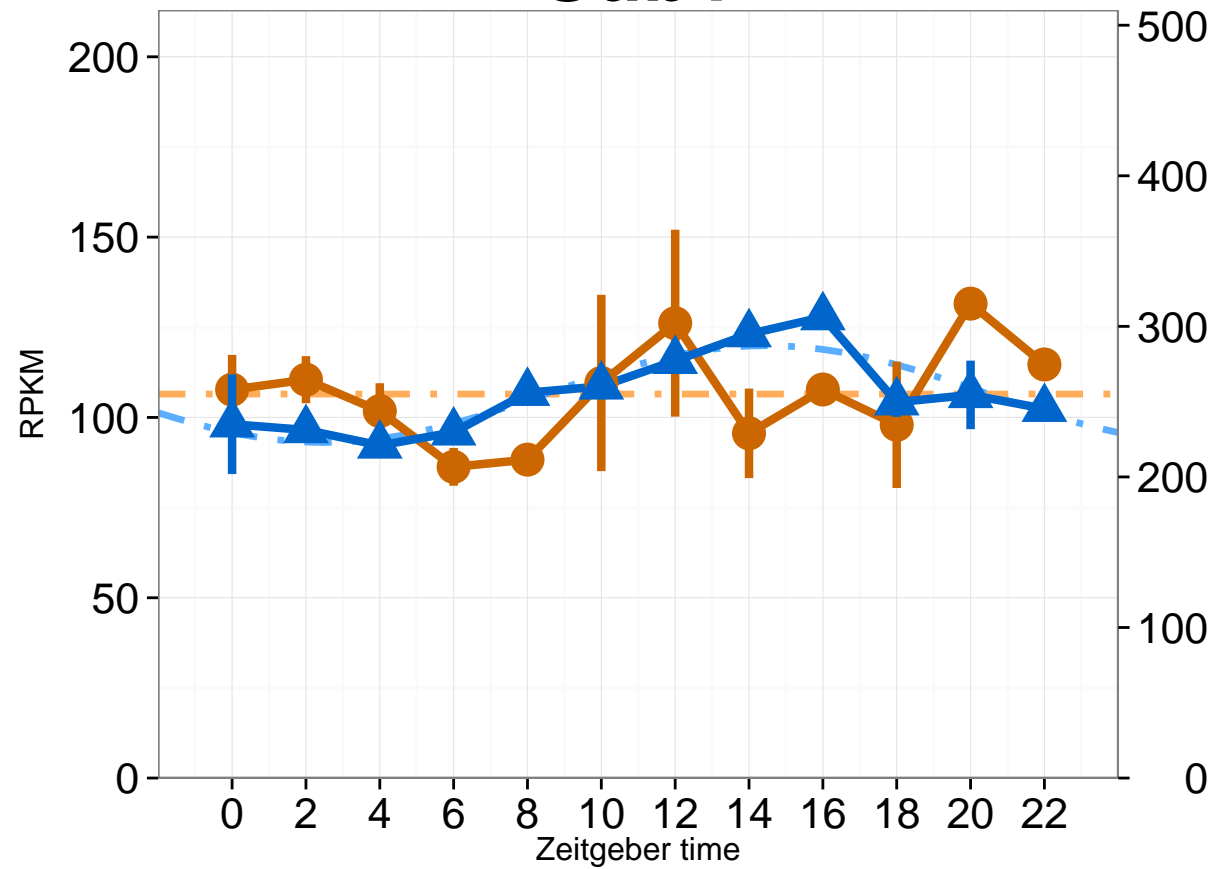

# Sub1

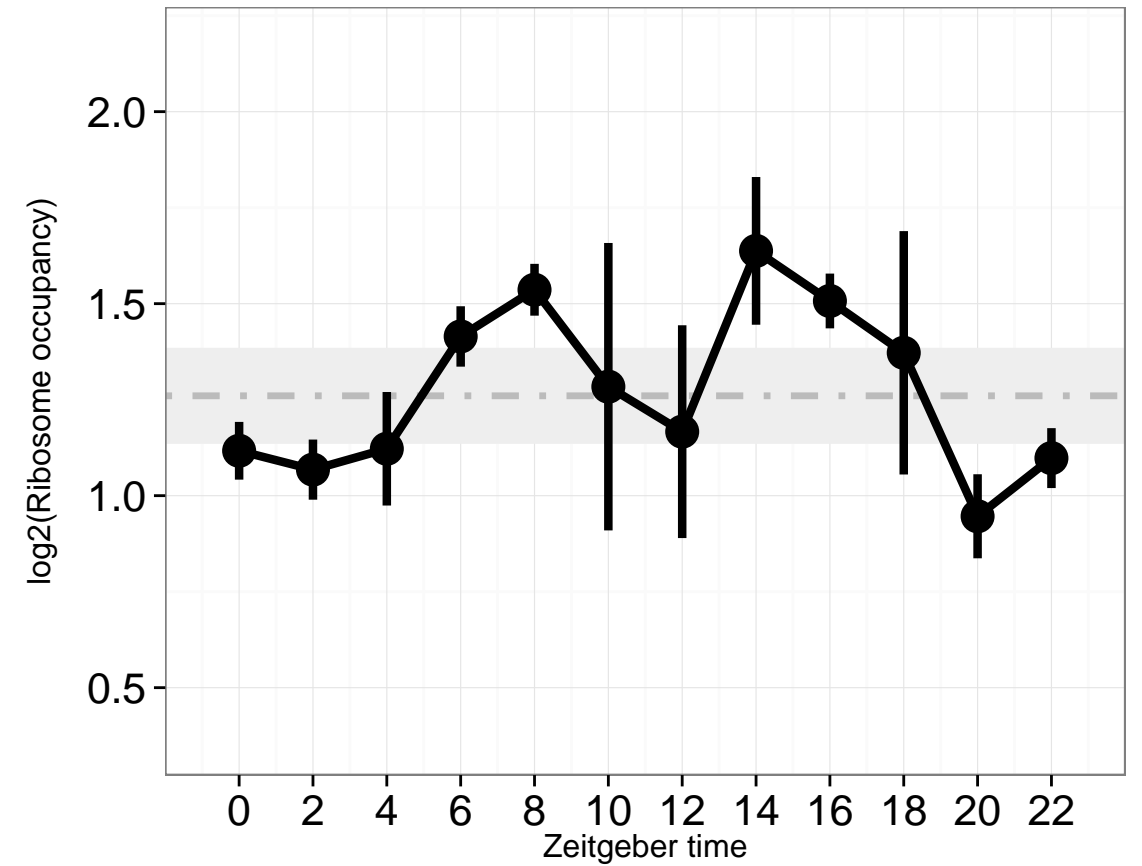

Supplement: Supplementary file 12630 [file 1]

## Plch1

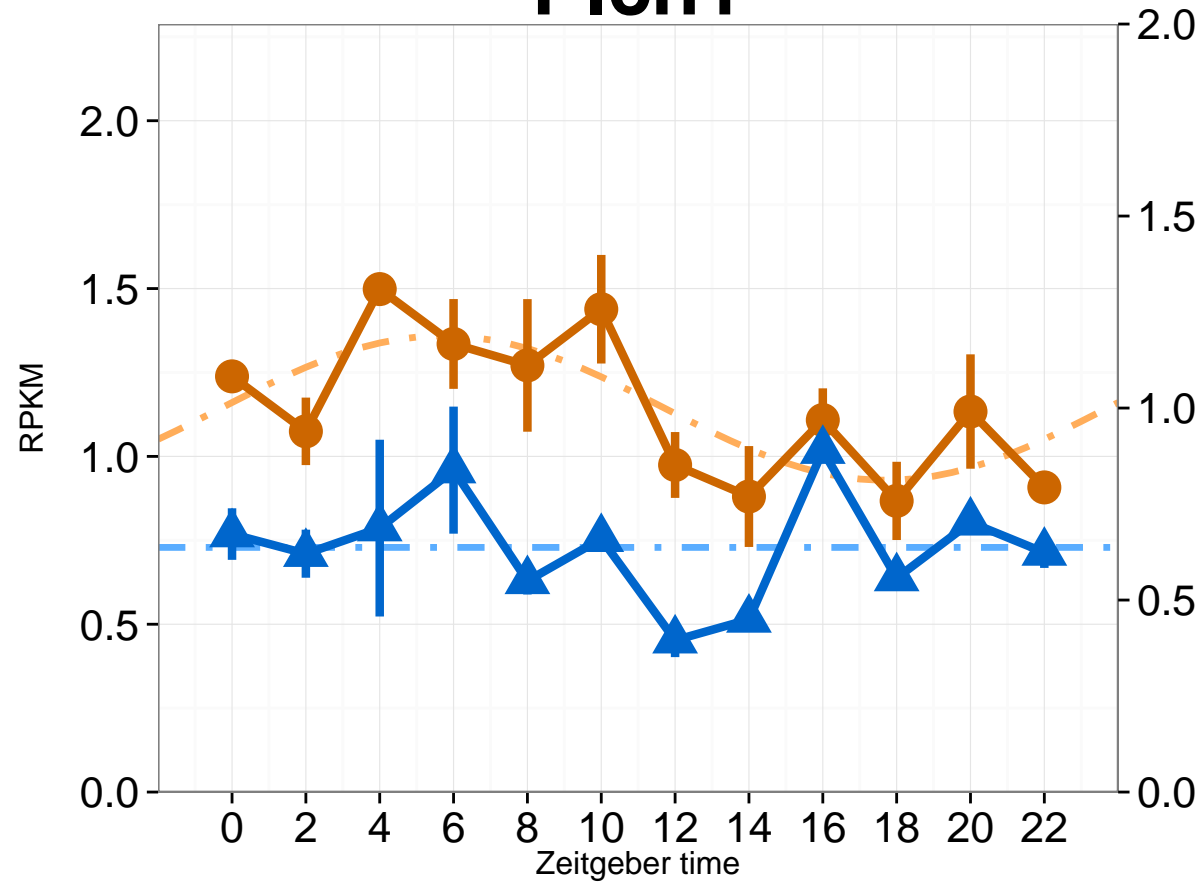

## Plch1

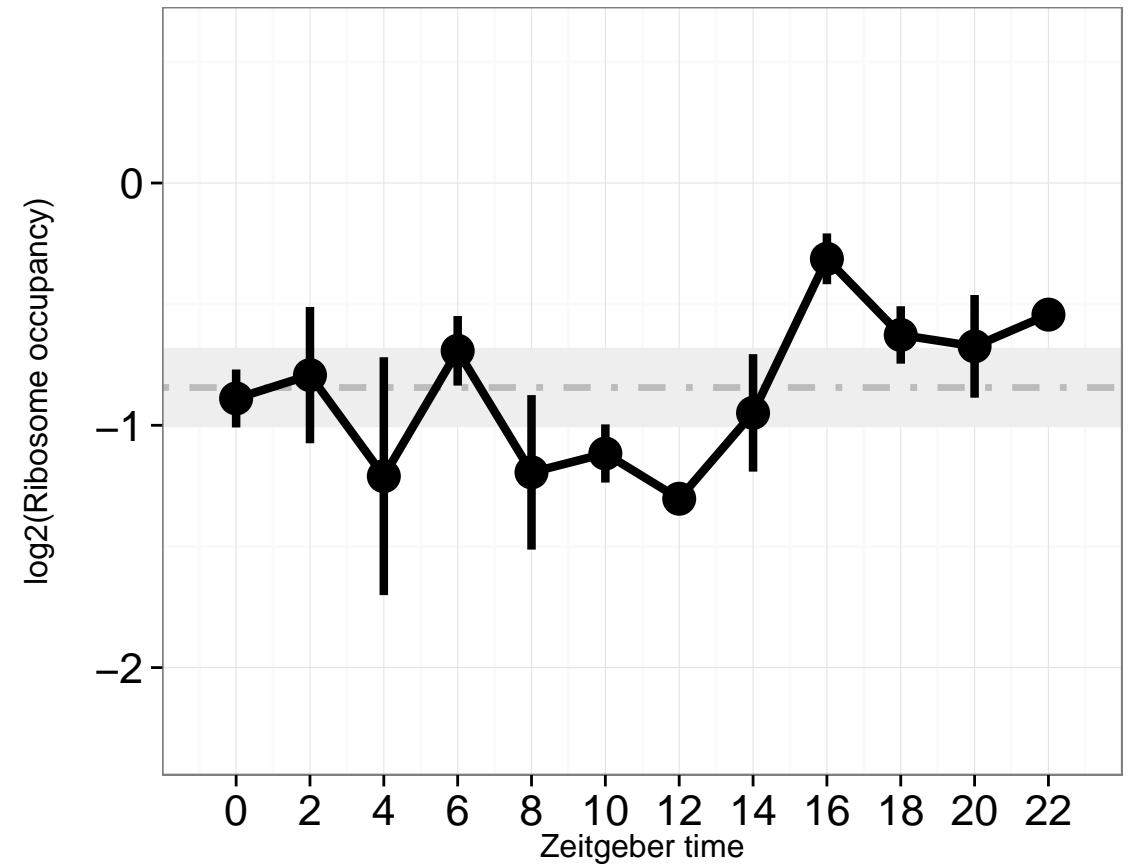

Supplement: Supplementary file 12631 [file 1]

## Vdac1

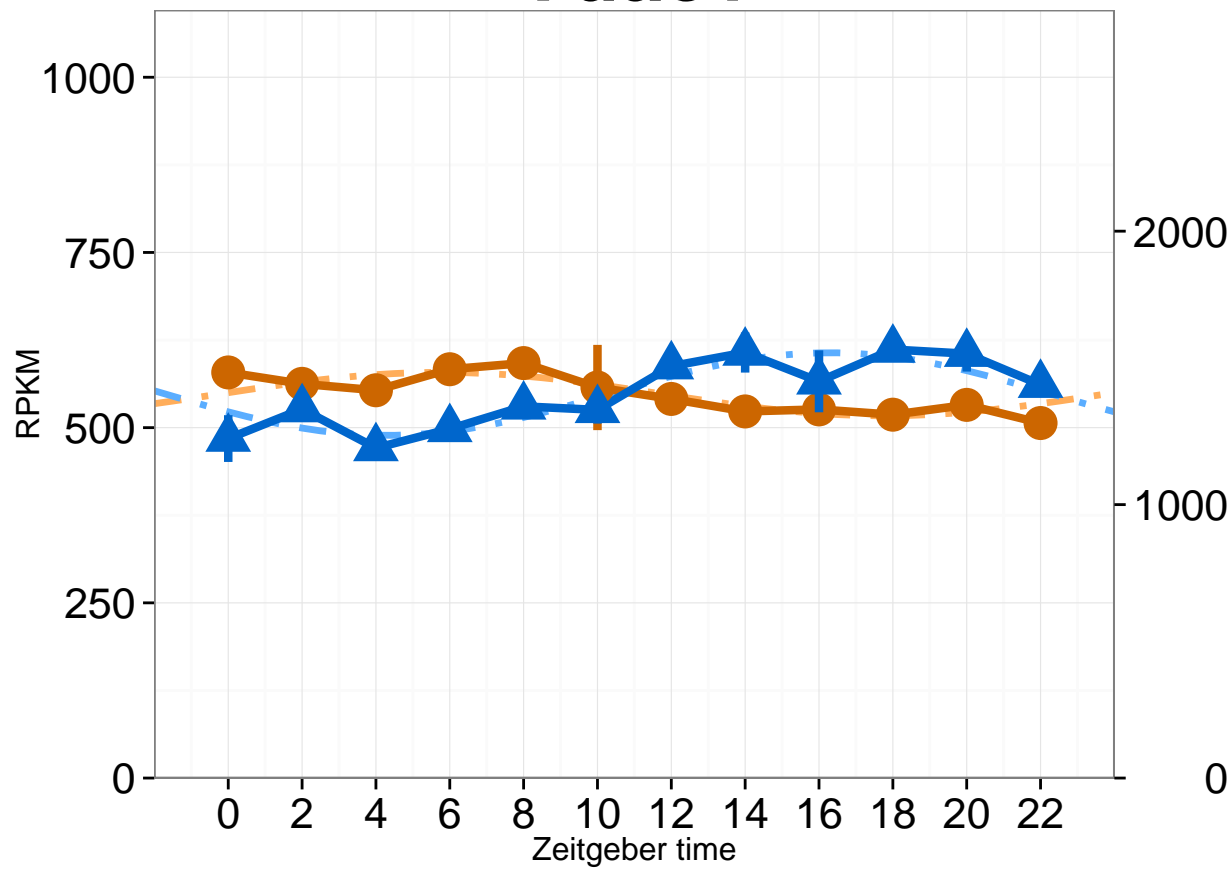

## Vdac1

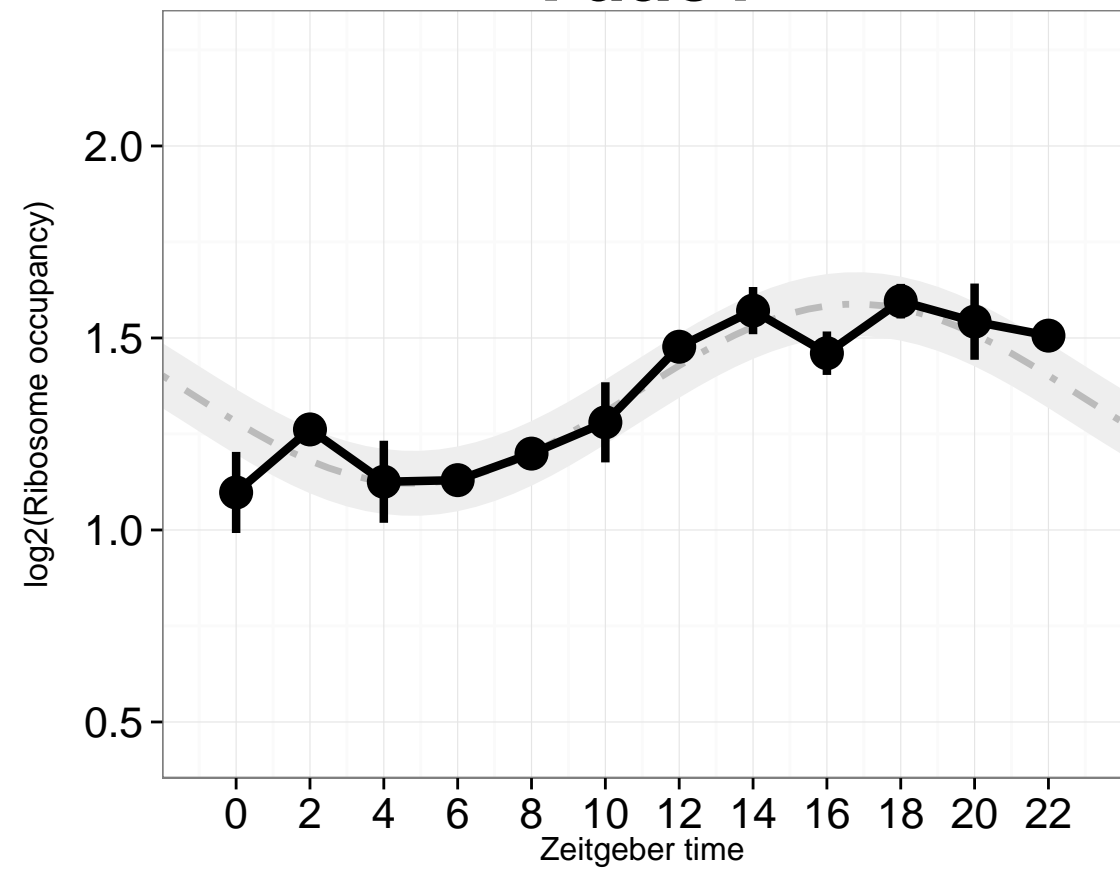

Supplement: Supplementary file 12632 [file 1]

## Amz2

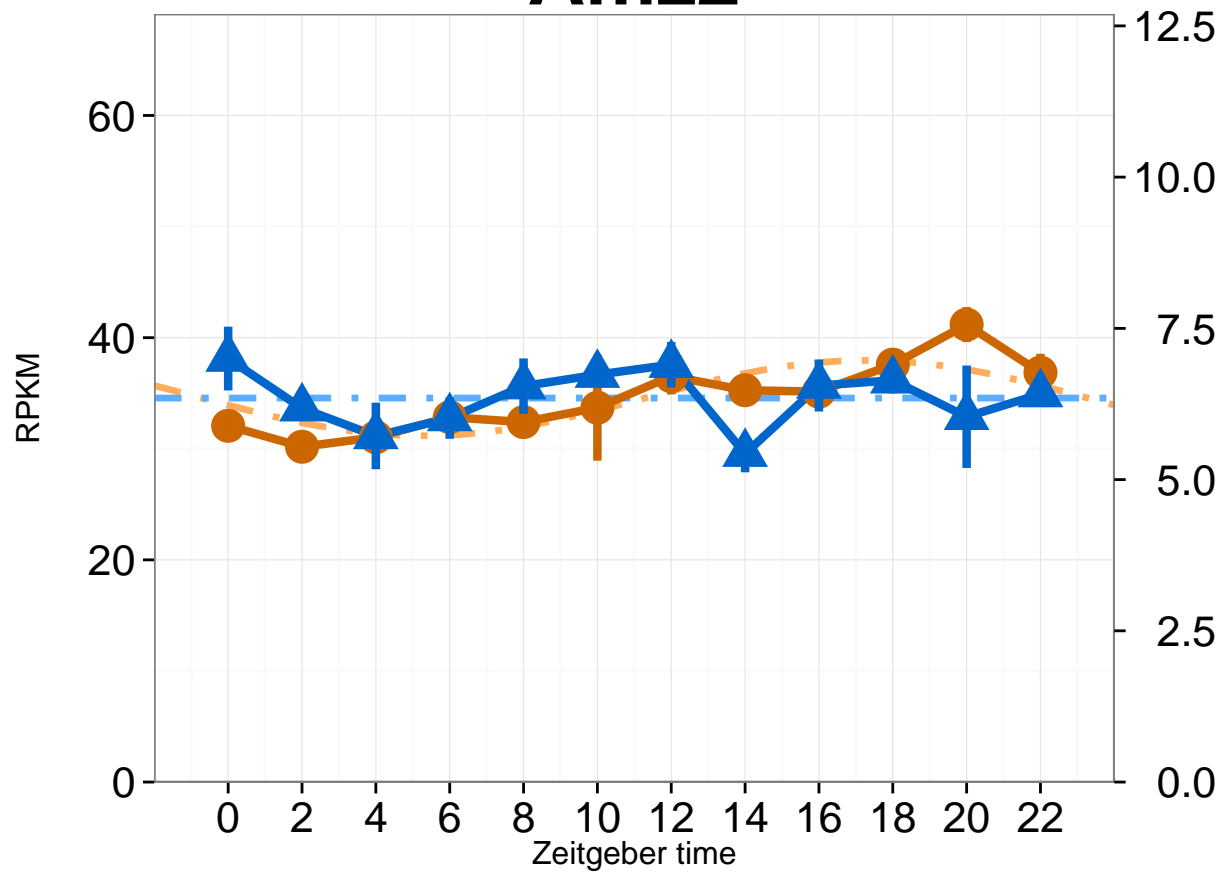

## Amz2

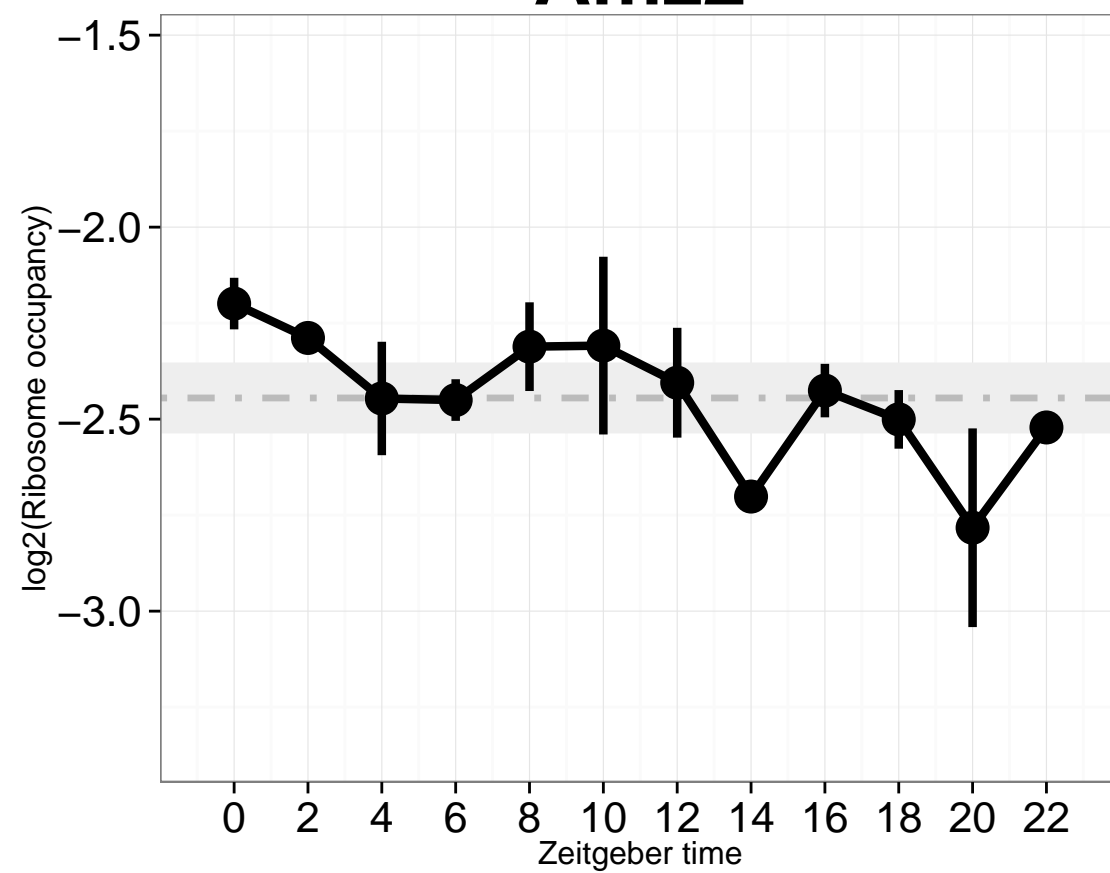

Supplement: Supplementary file 12633 [file 1]

# Gadd45g

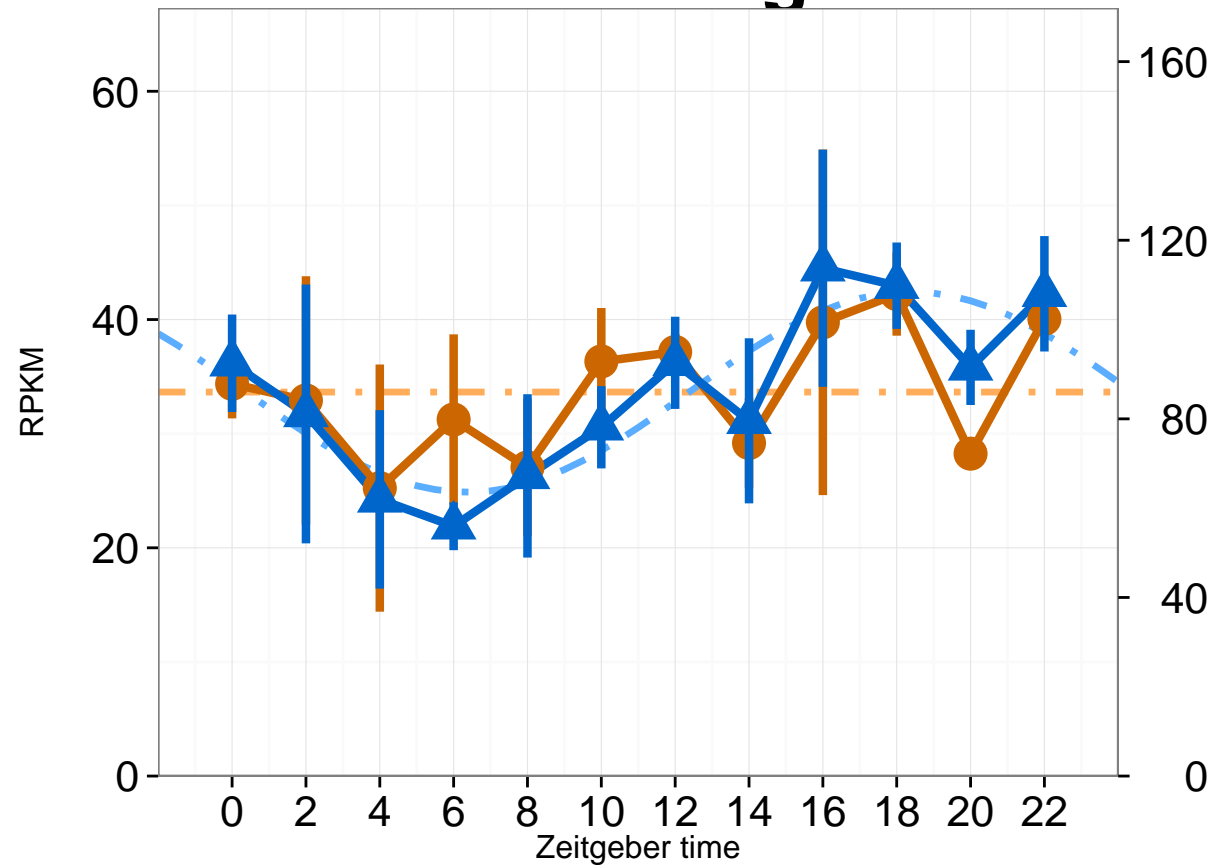

# Gadd45g

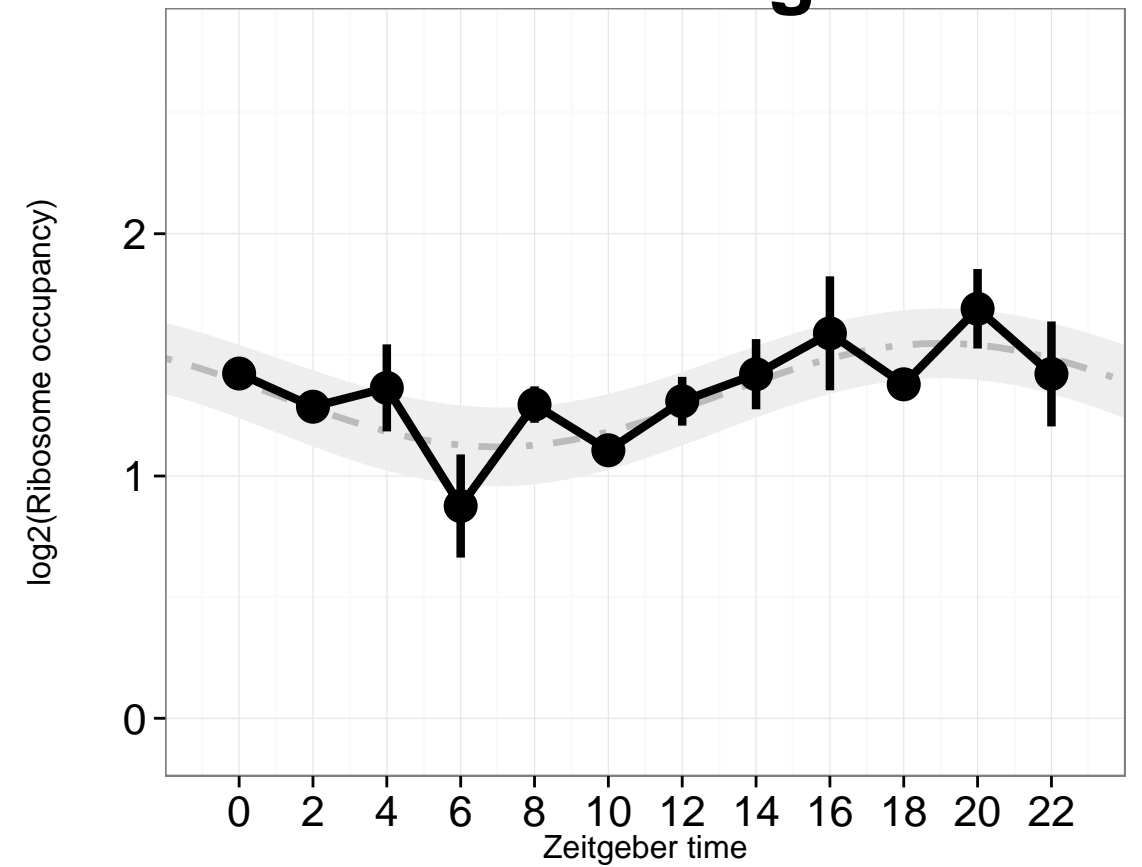

Supplement: Supplementary file 12634 [file 1]

# Dscam11

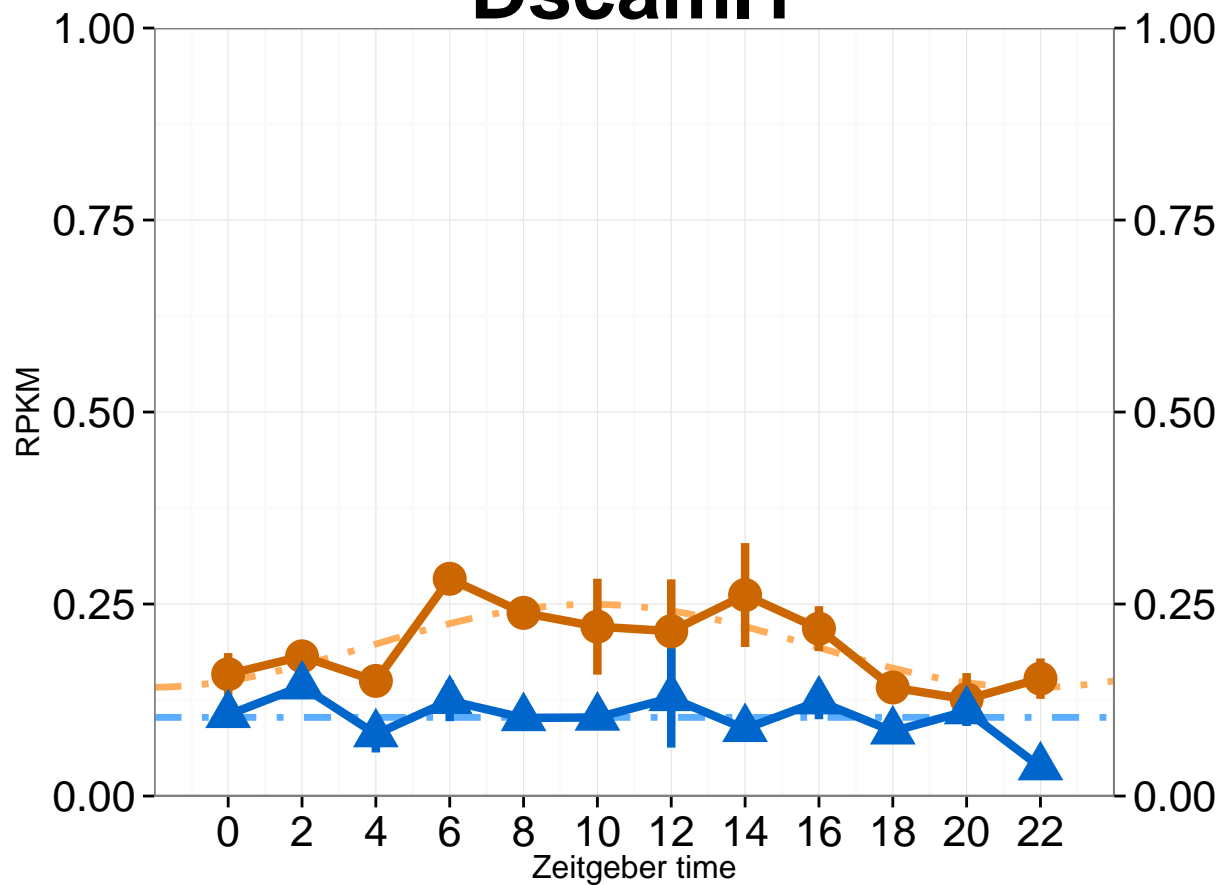

# Dscam11

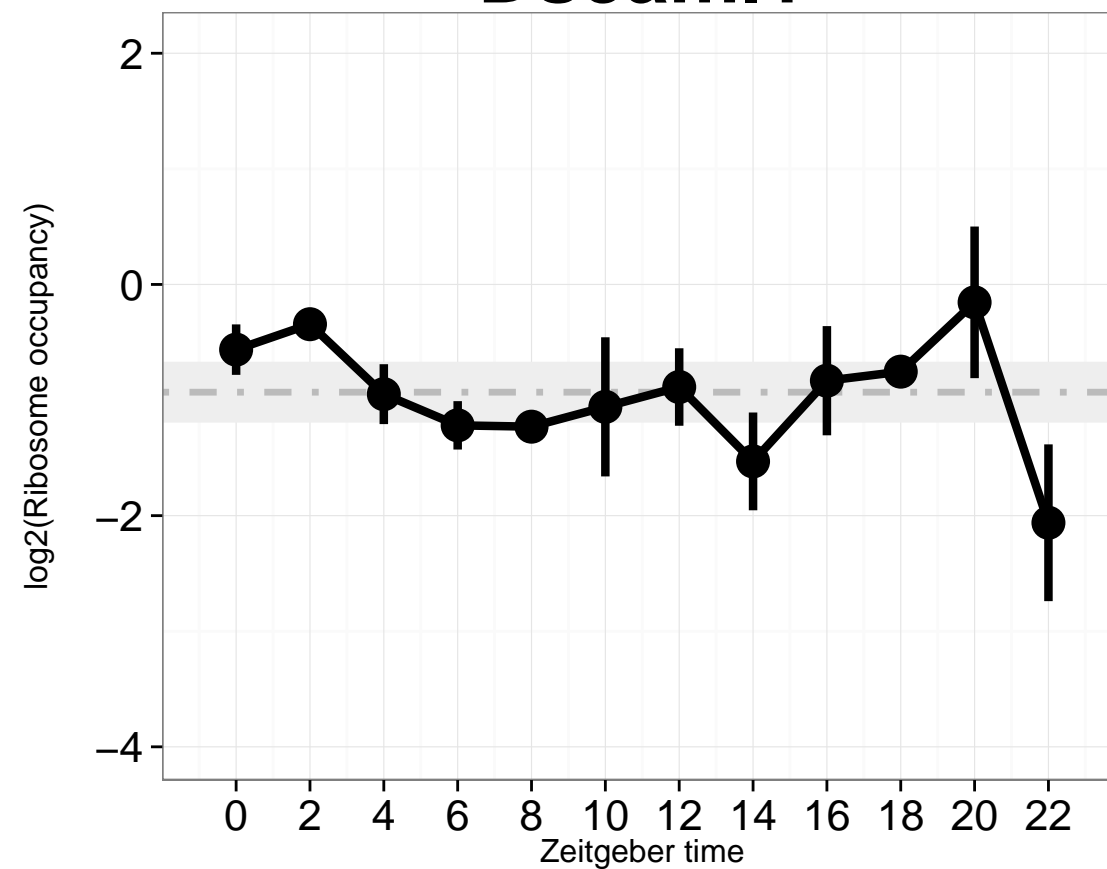

Supplement: Supplementary file 12635 [file 1]

# Zfp182

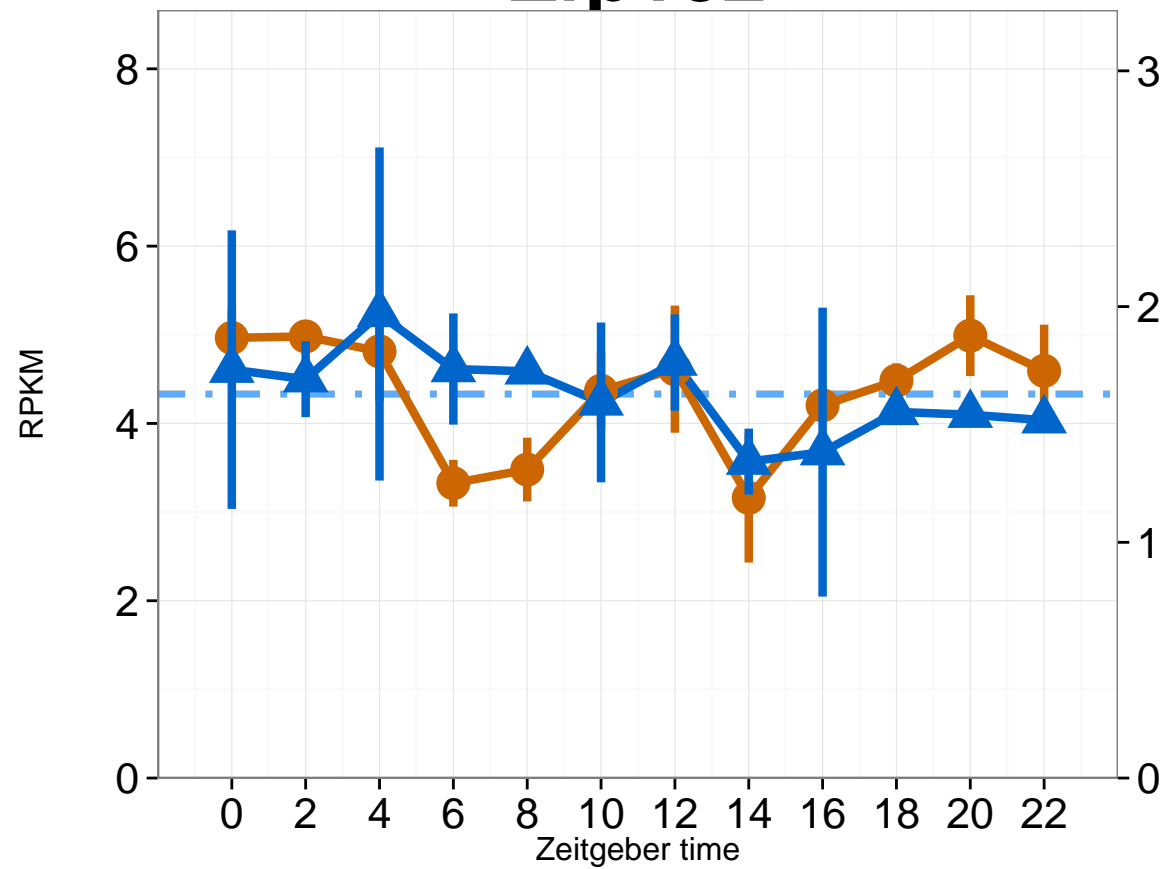

# Zfp182

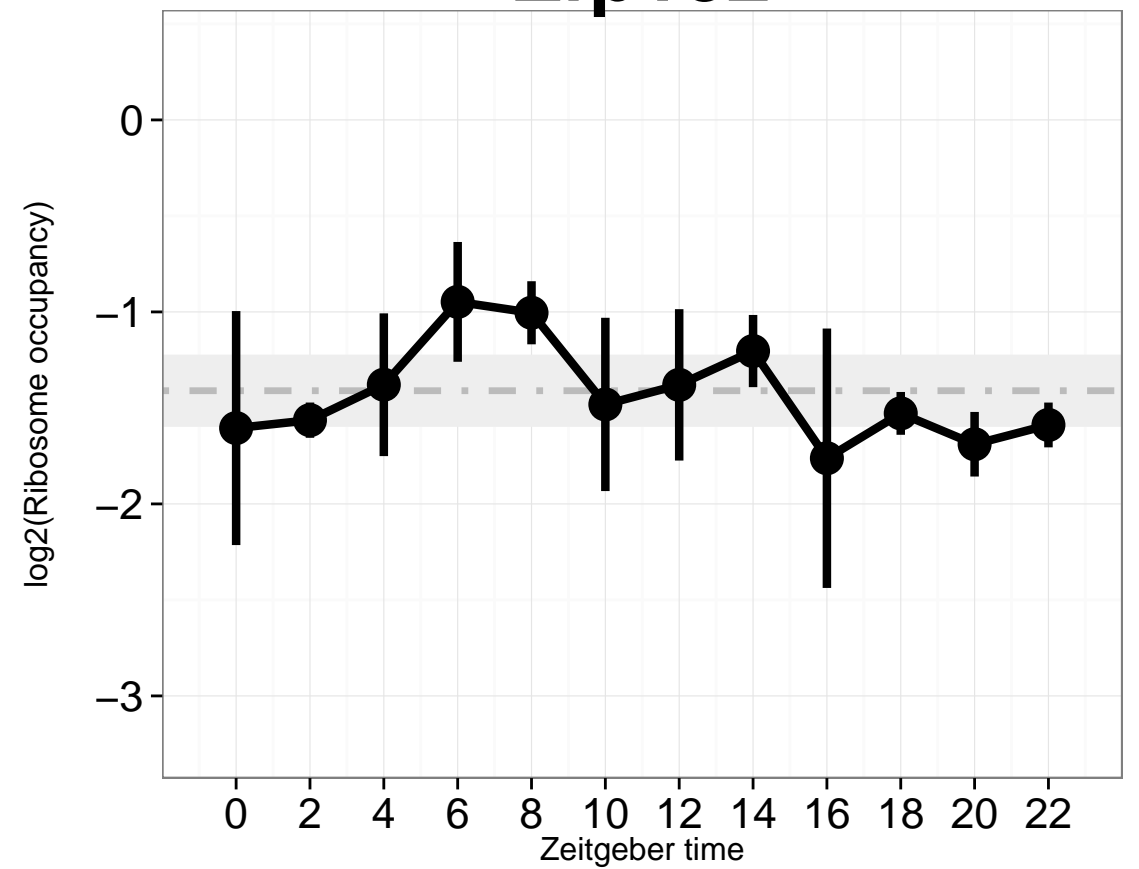

Supplement: Supplementary file 12636 [file 1]

# Coq9

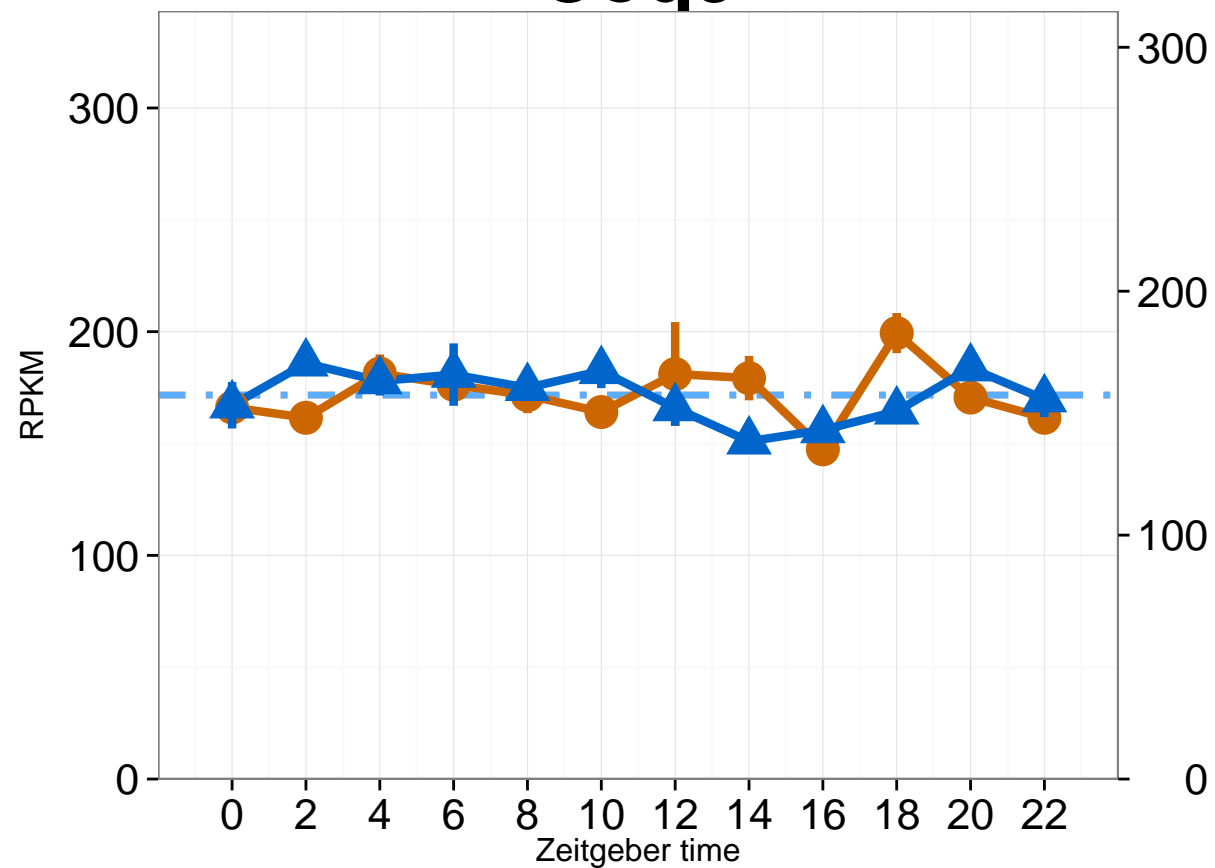

# Coq9

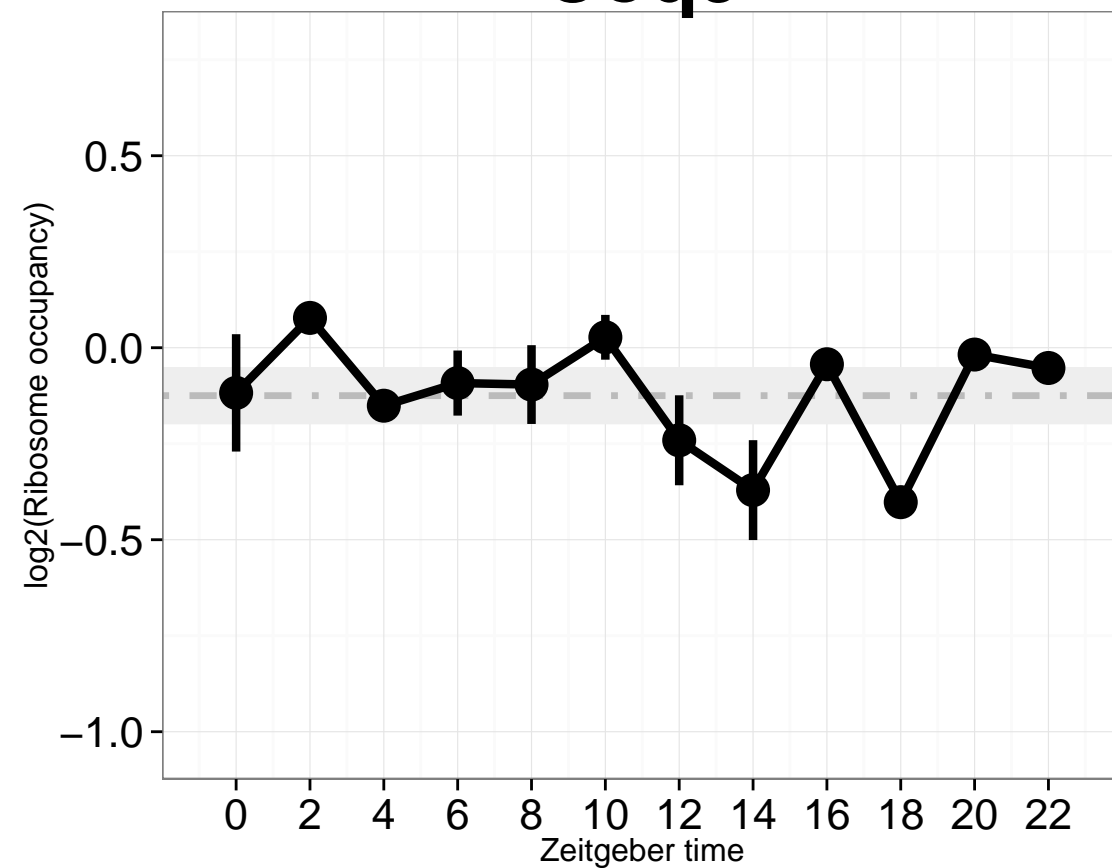

Supplement: Supplementary file 12637 [file 1]

# Cep72

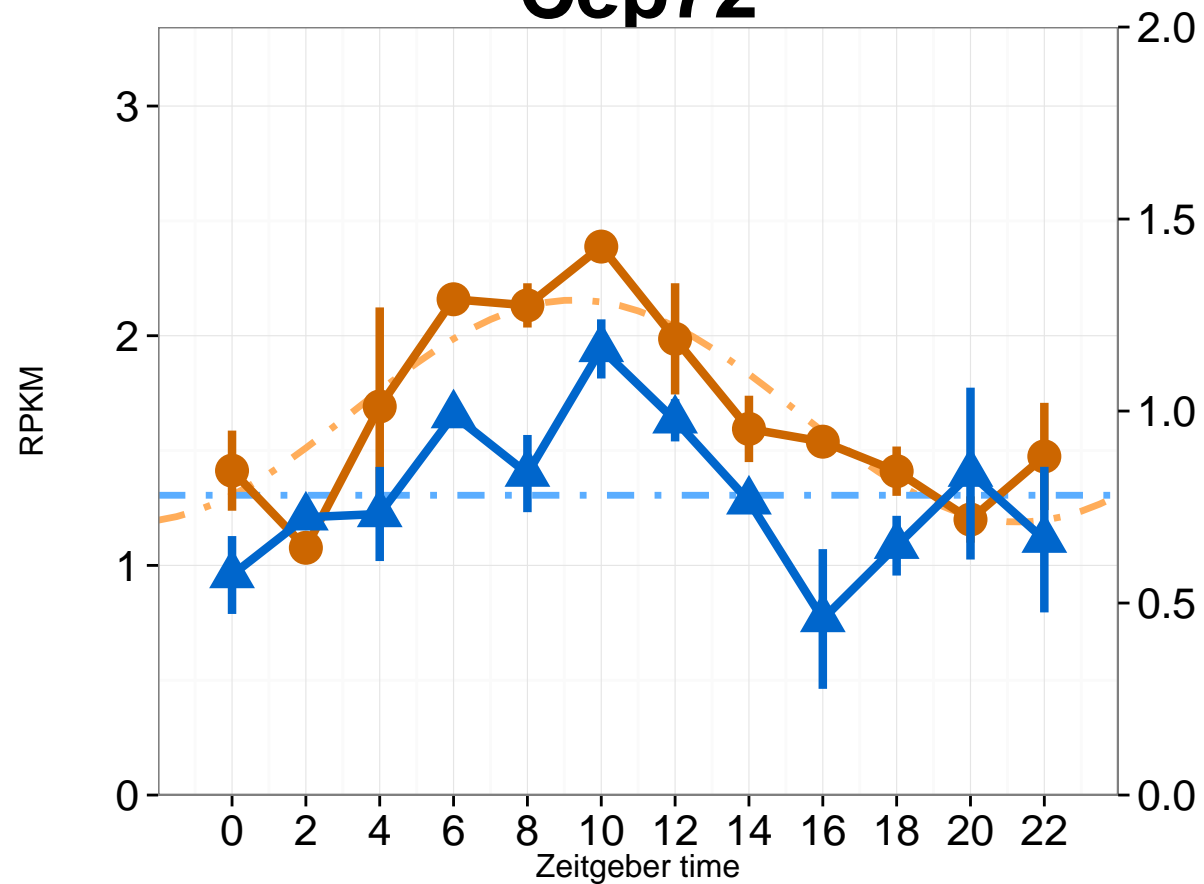

# Cep72

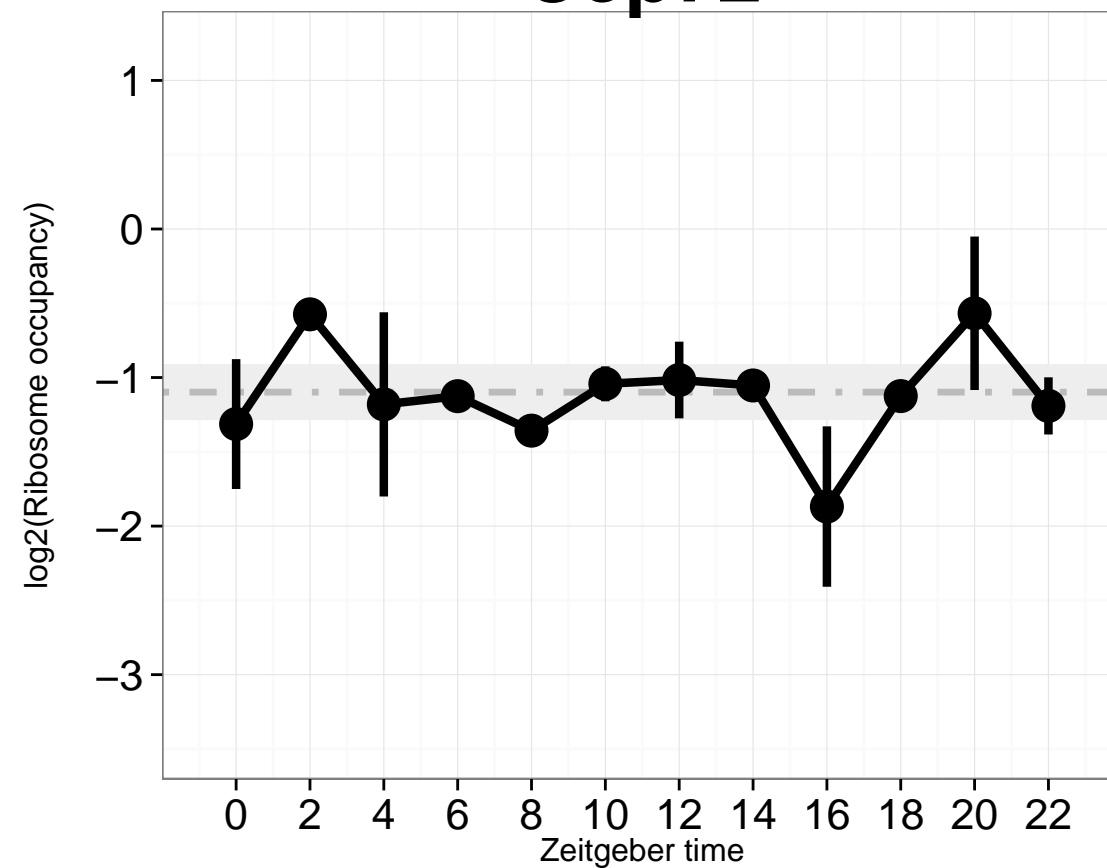

Supplement: Supplementary file 12638 [file 1]

# Hist1h2be

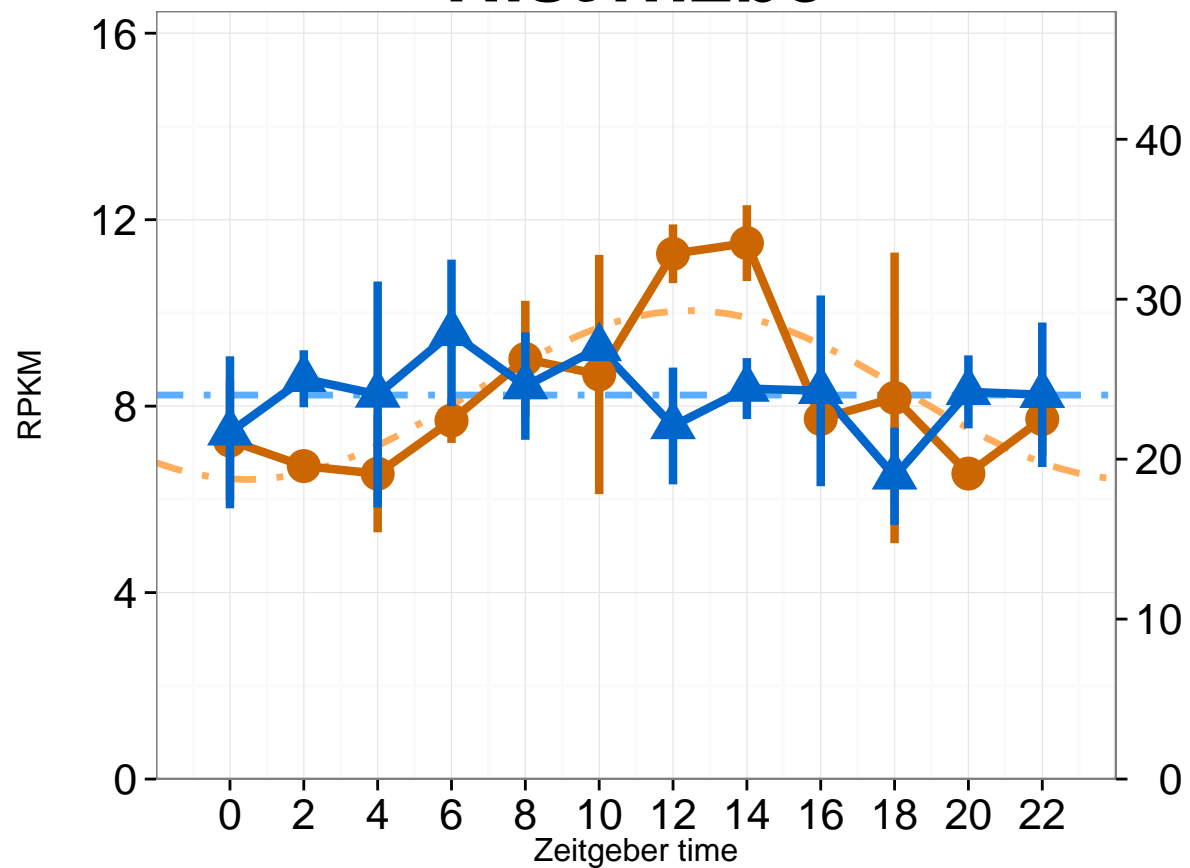

# Hist1h2be

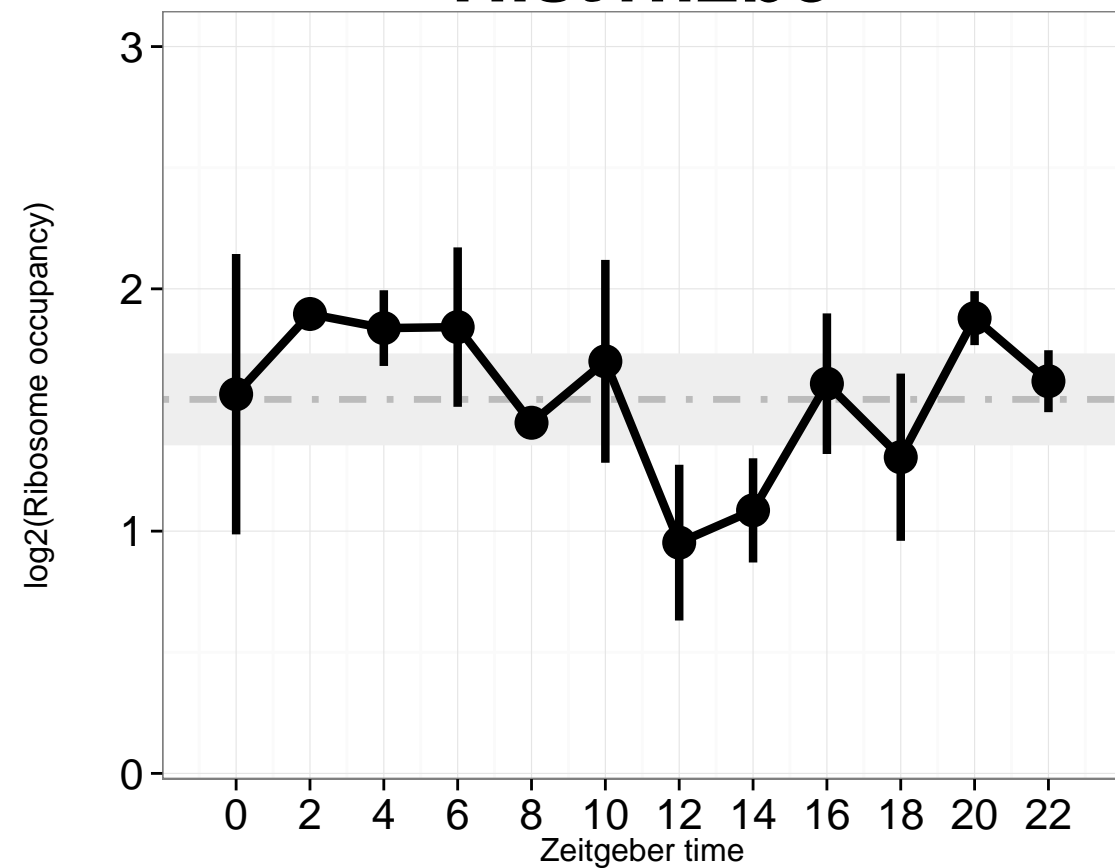

Supplement: Supplementary file 12639 [file 1]

# Sh3kbp1

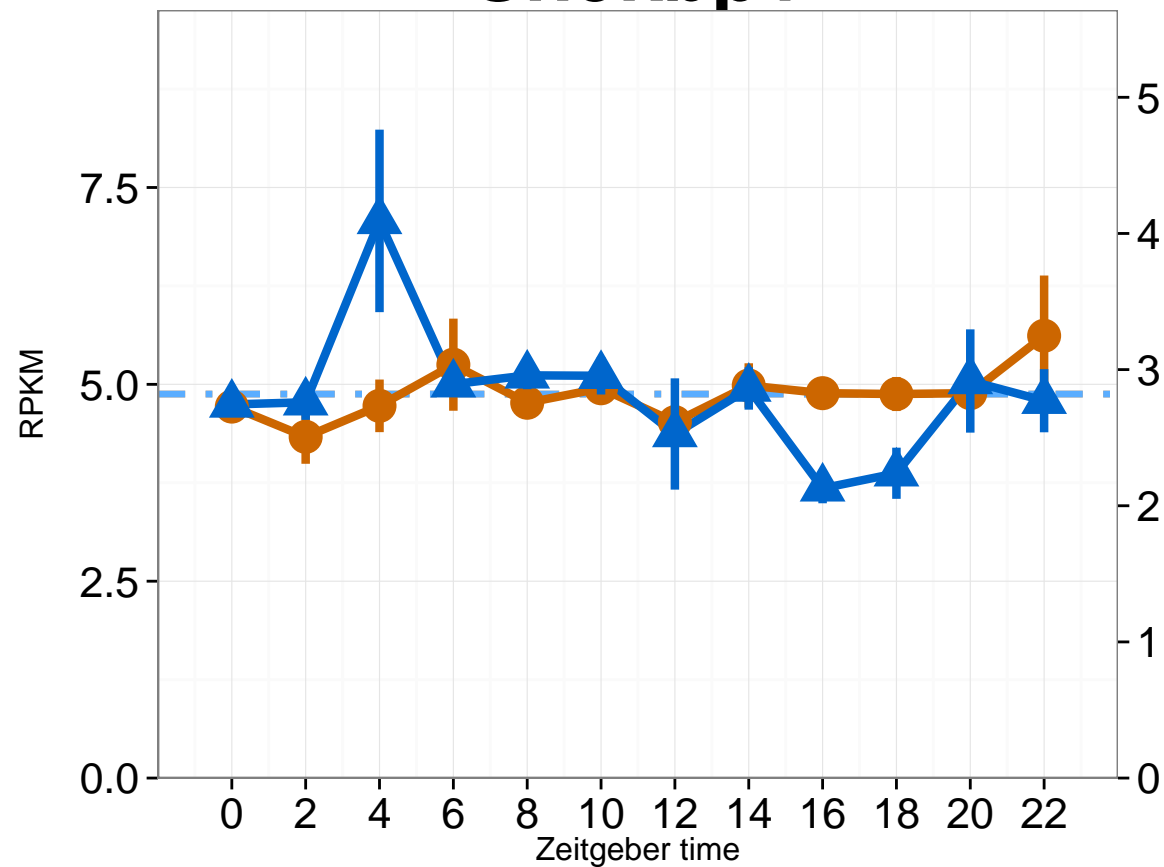

# Sh3kbp1

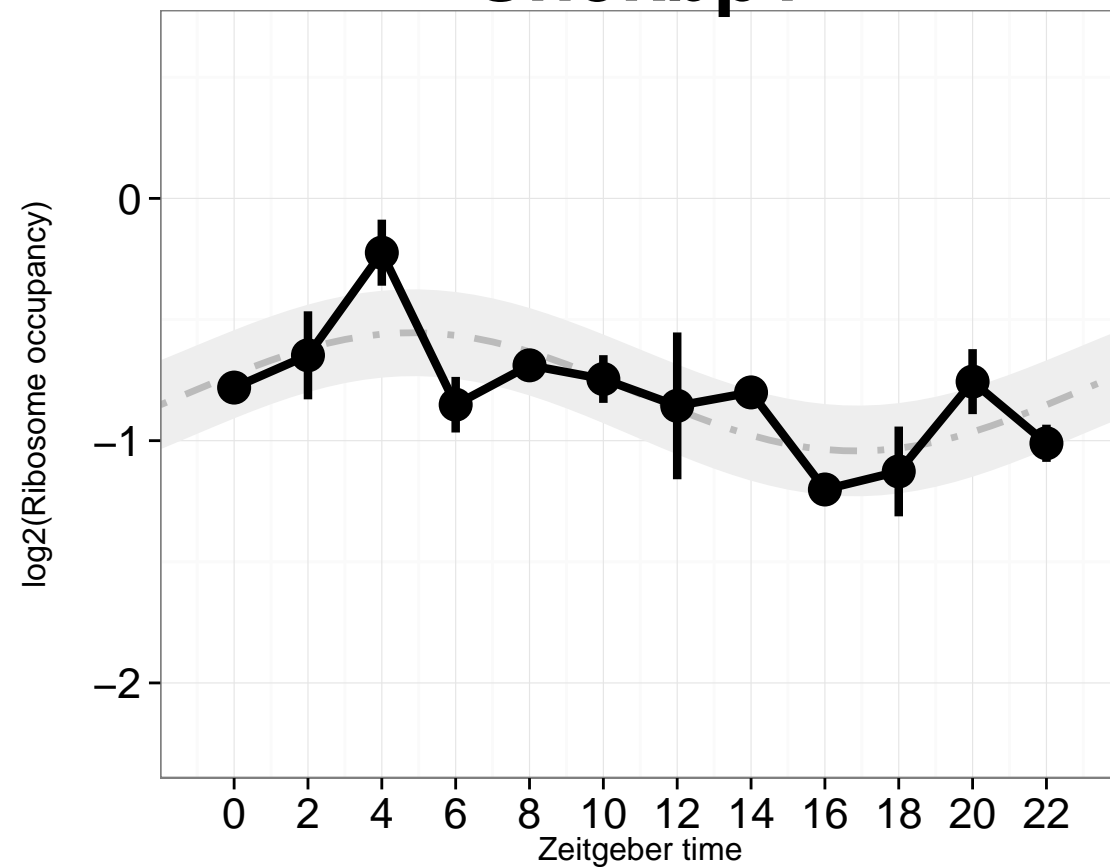

Supplement: Supplementary file 12640 [file 1]

## Mettl9

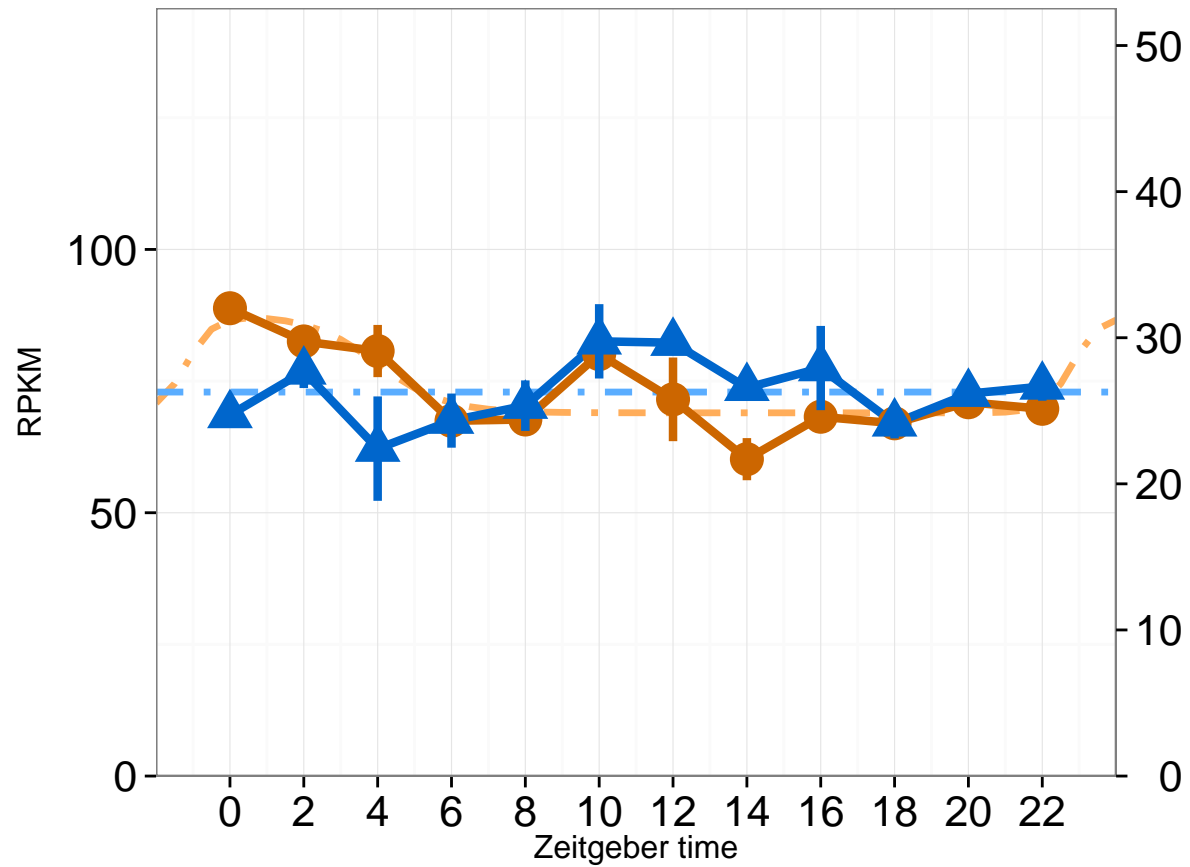

## Mettl9

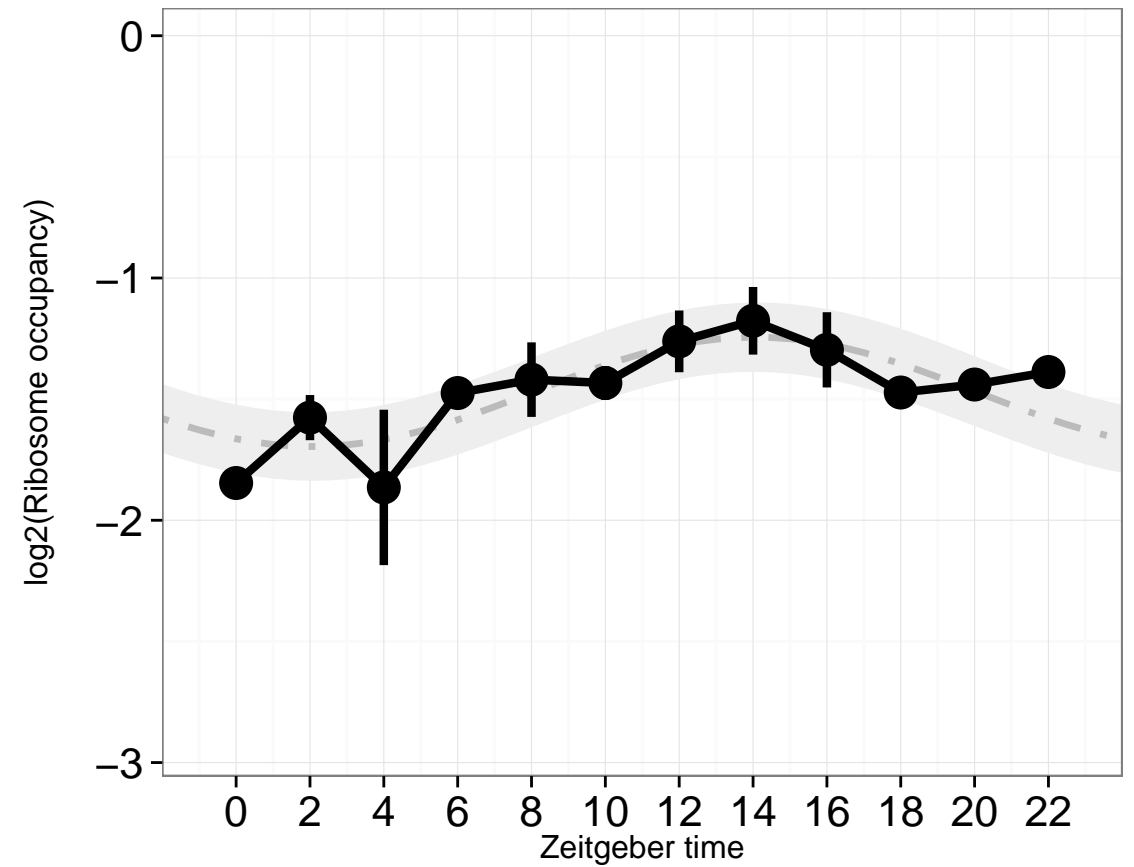

Supplement: Supplementary file 12641 [file 1]

# Comtd1

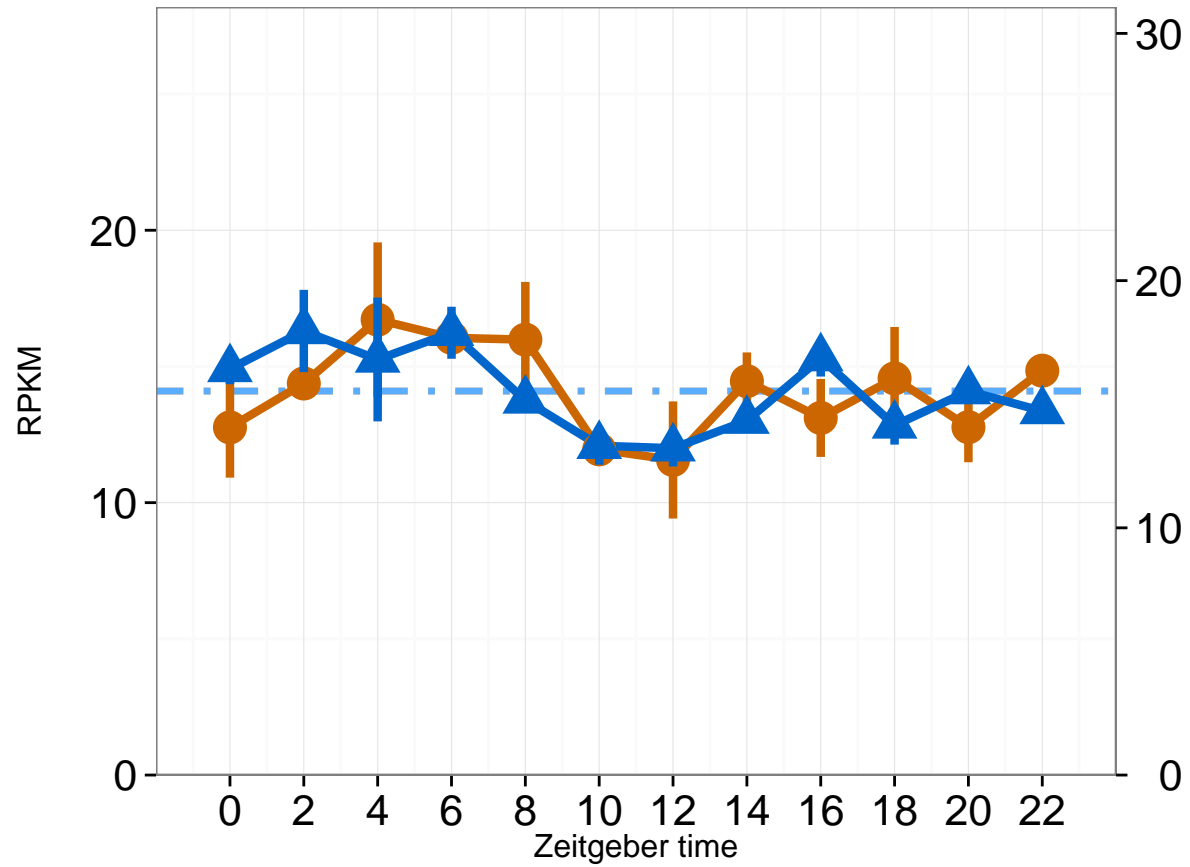

# Comtd1

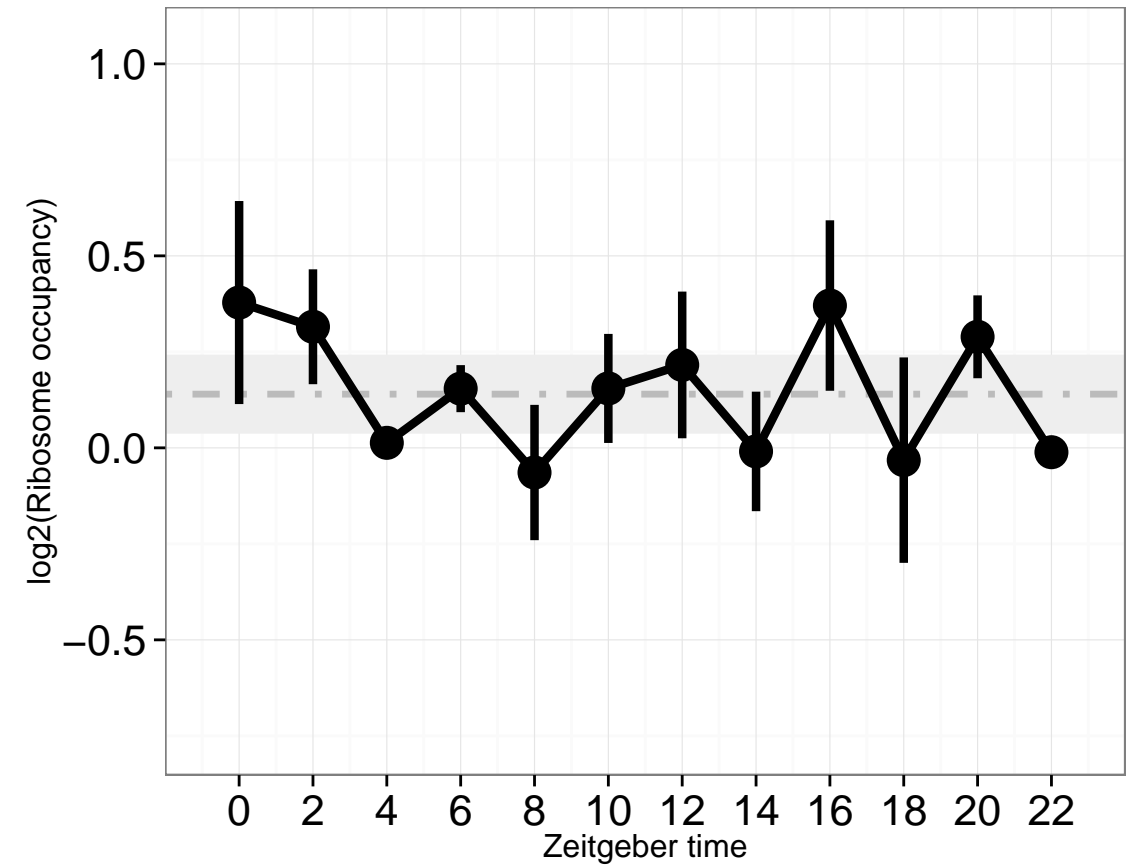

Supplement: Supplementary file 12642 [file 1]

## Echdc1

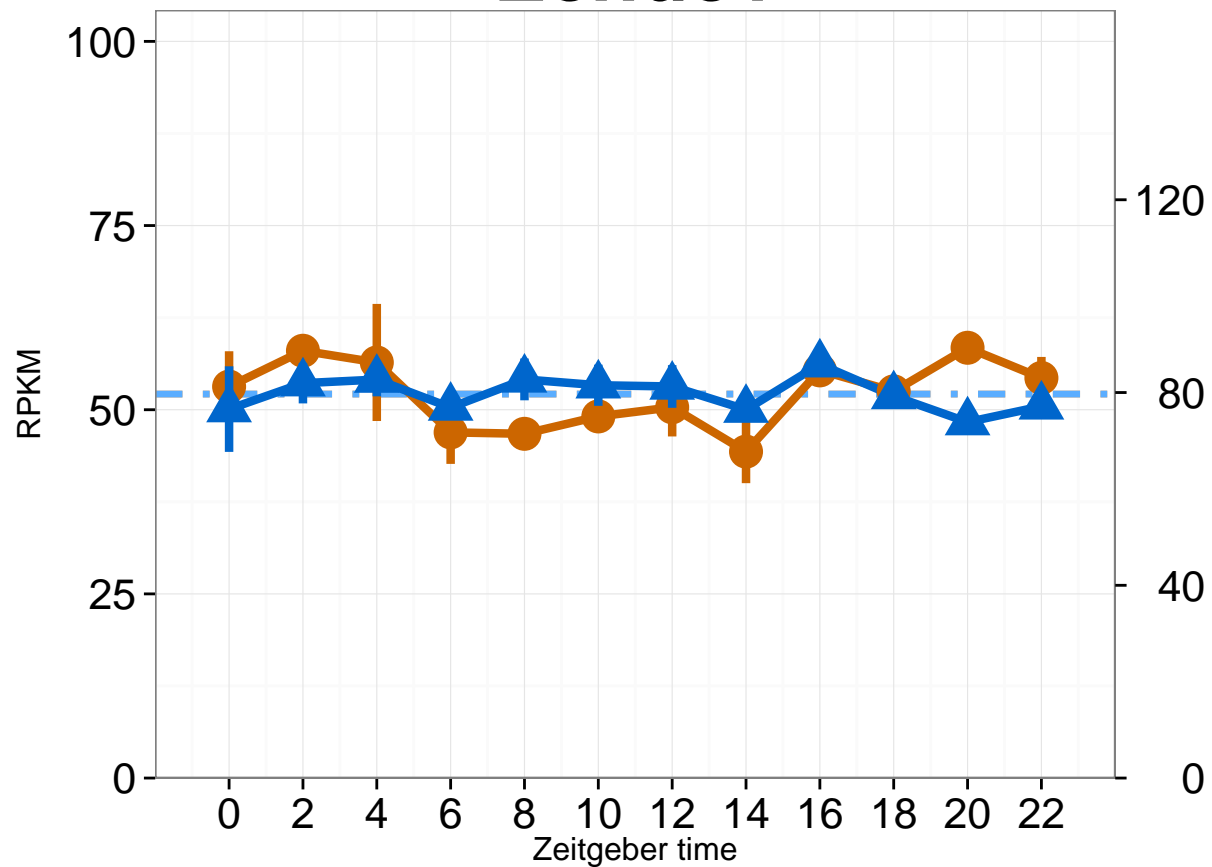

## Echdc1

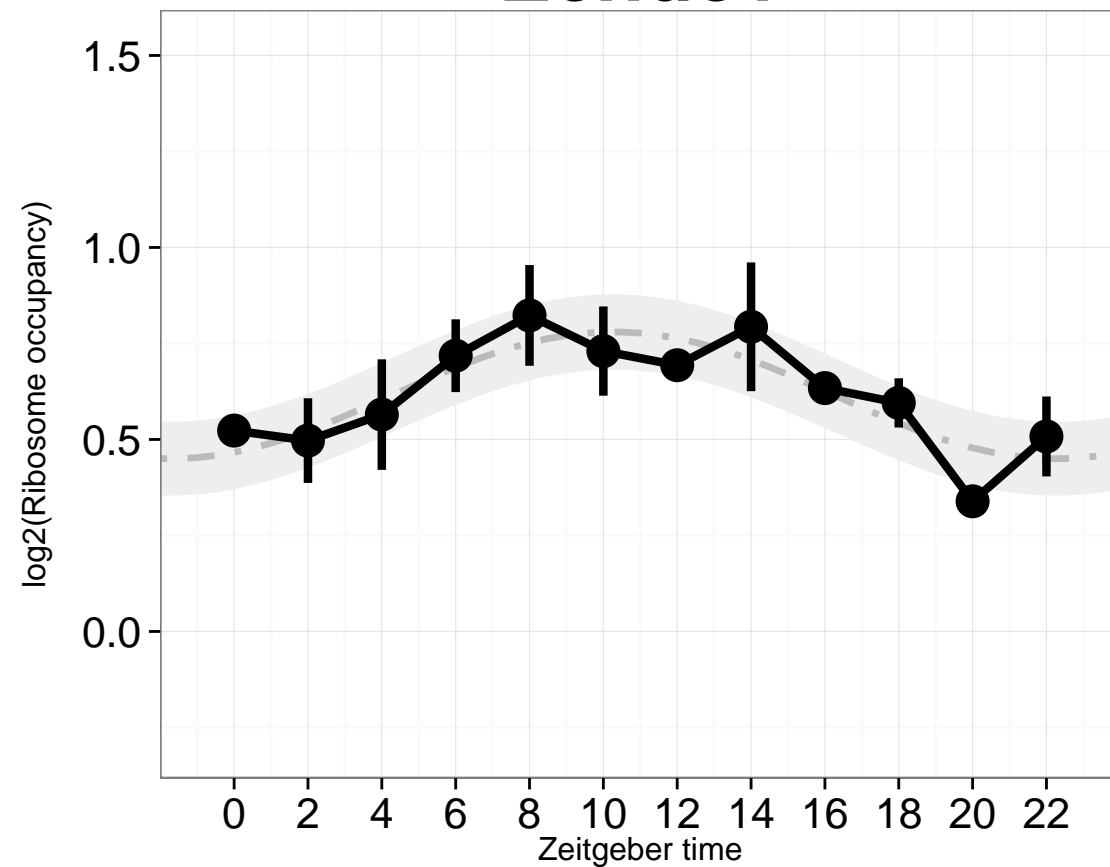

Supplement: Supplementary file 12643 [file 1]

## Stxbp2

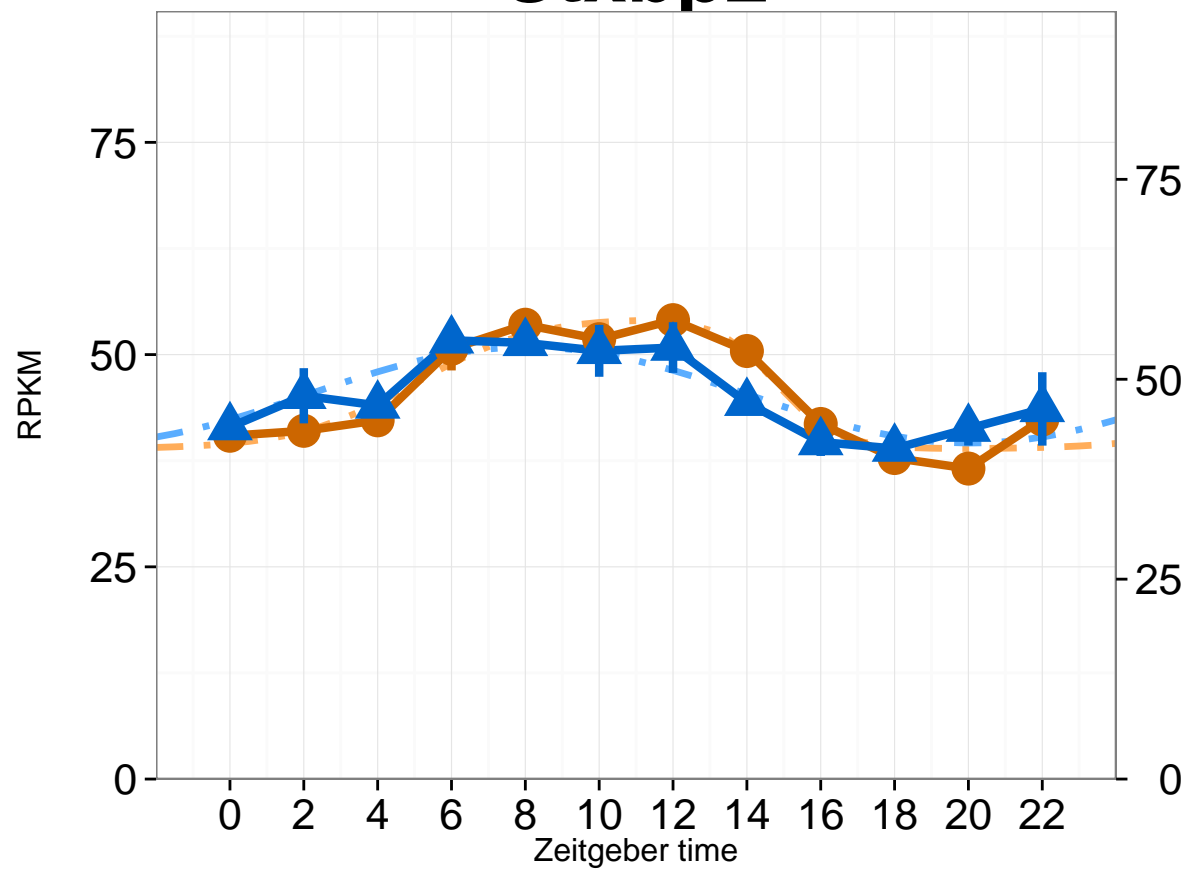

## Stxbp2

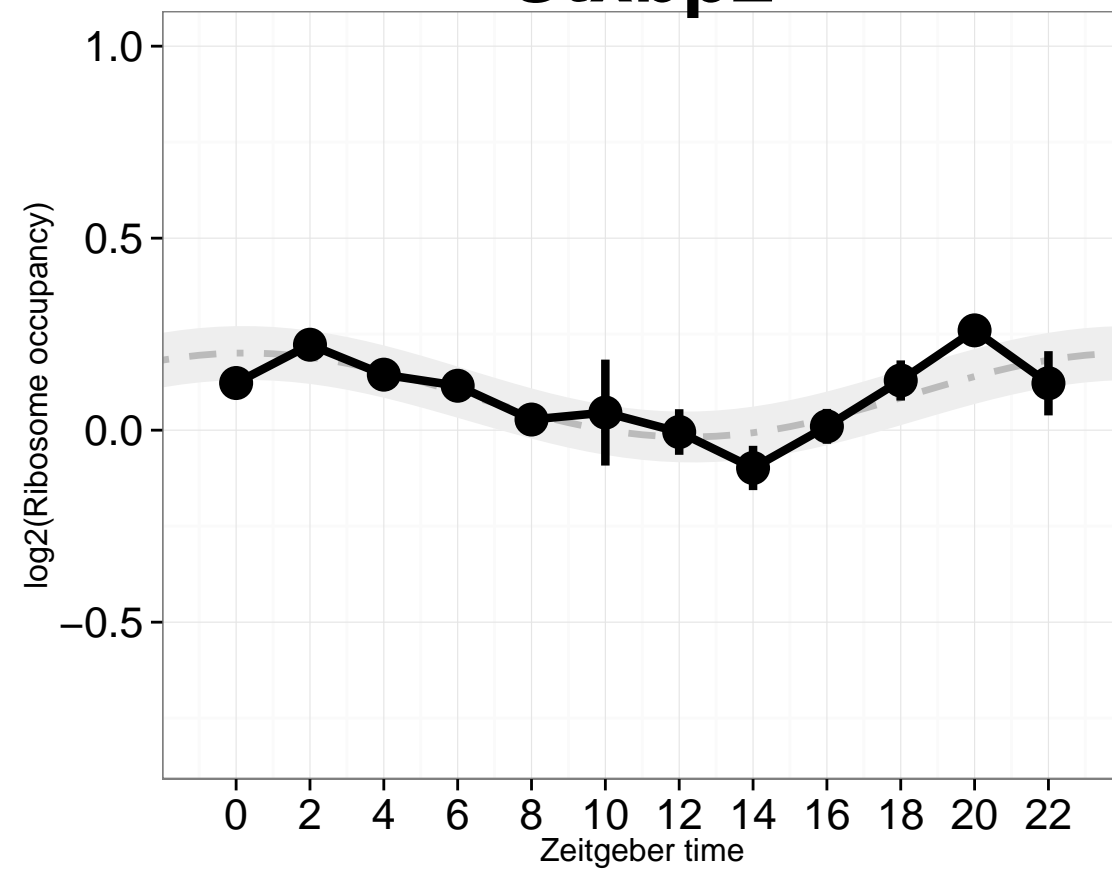

Supplement: Supplementary file 12644 [file 1]
