# Supplementary material (part 127 of 133)
Source: publisher figshare collection journal article supplement (https://springernature.figshare.com/articles/dataset/_/4903193)

# Per1

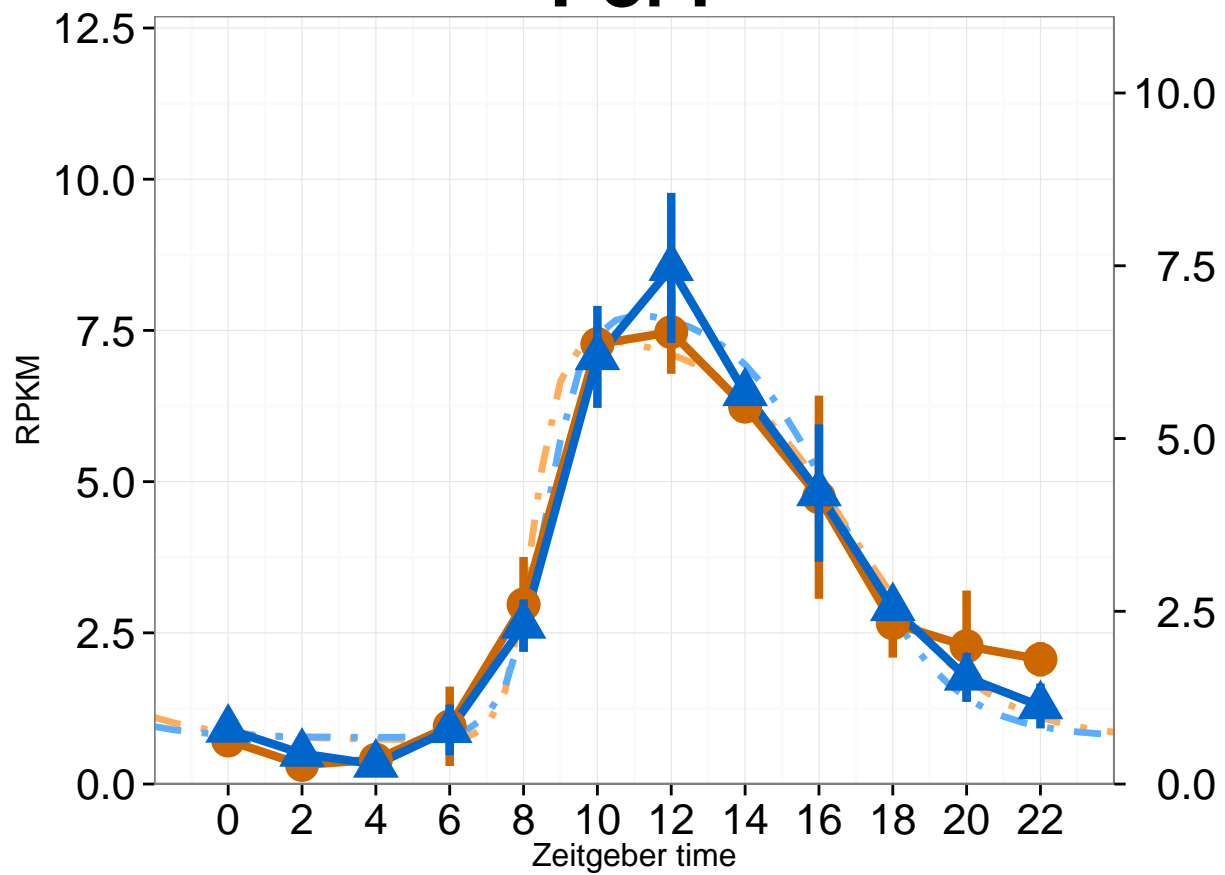

# Per1

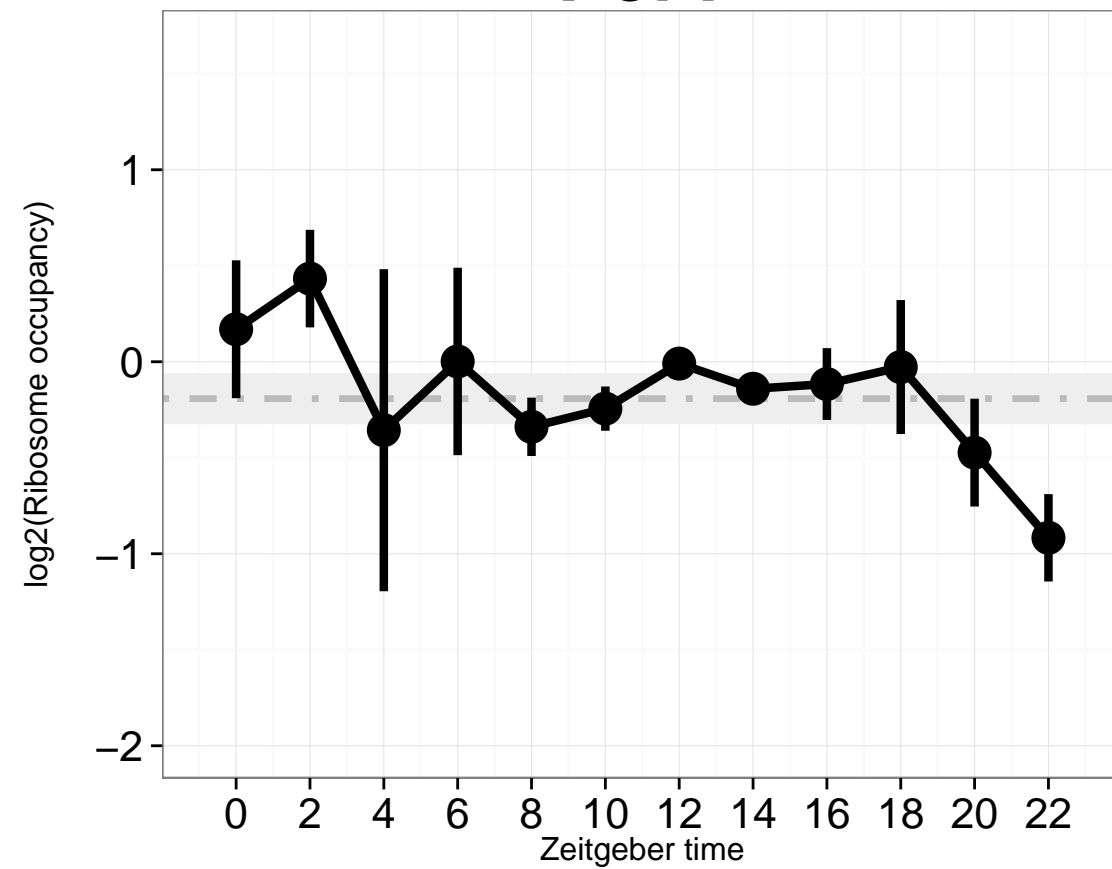

Supplement: Supplementary file 12645 [file 1]

## Il3ra

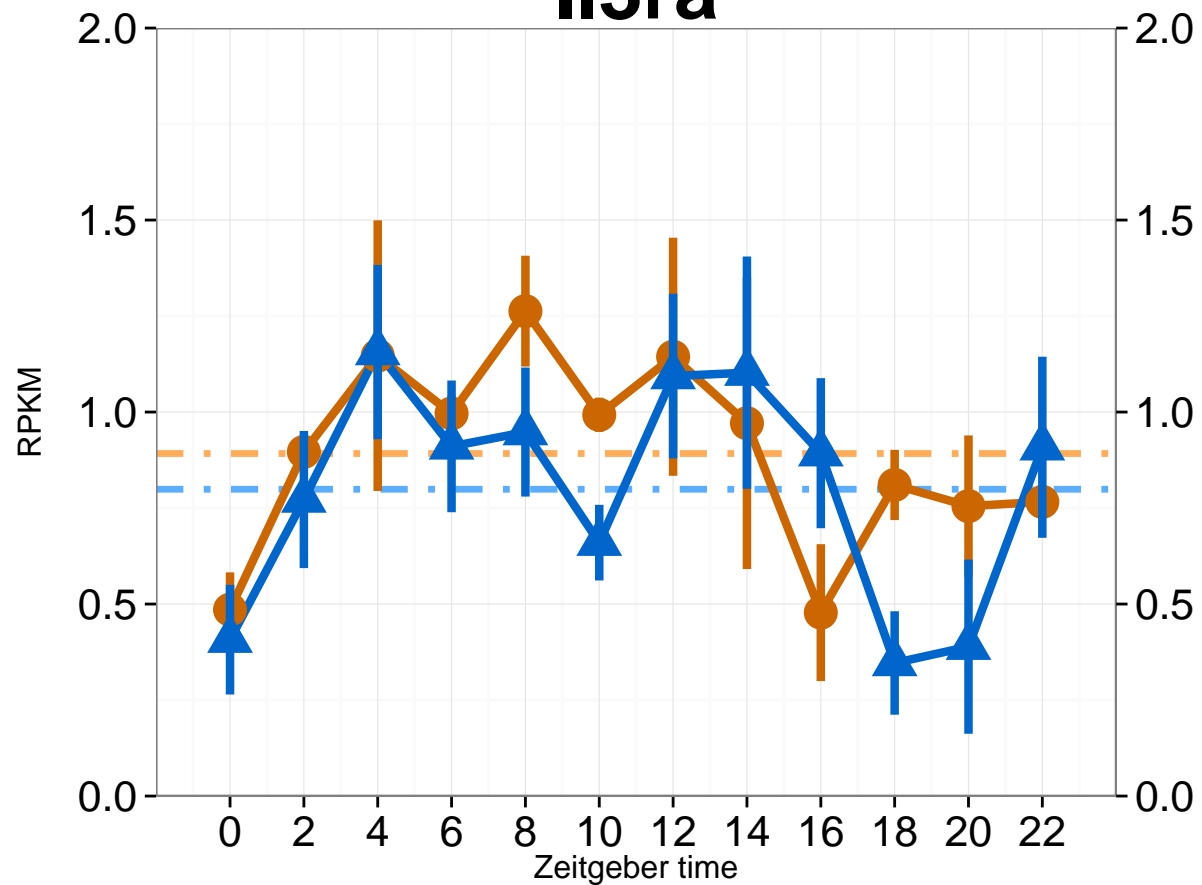

## Il3ra

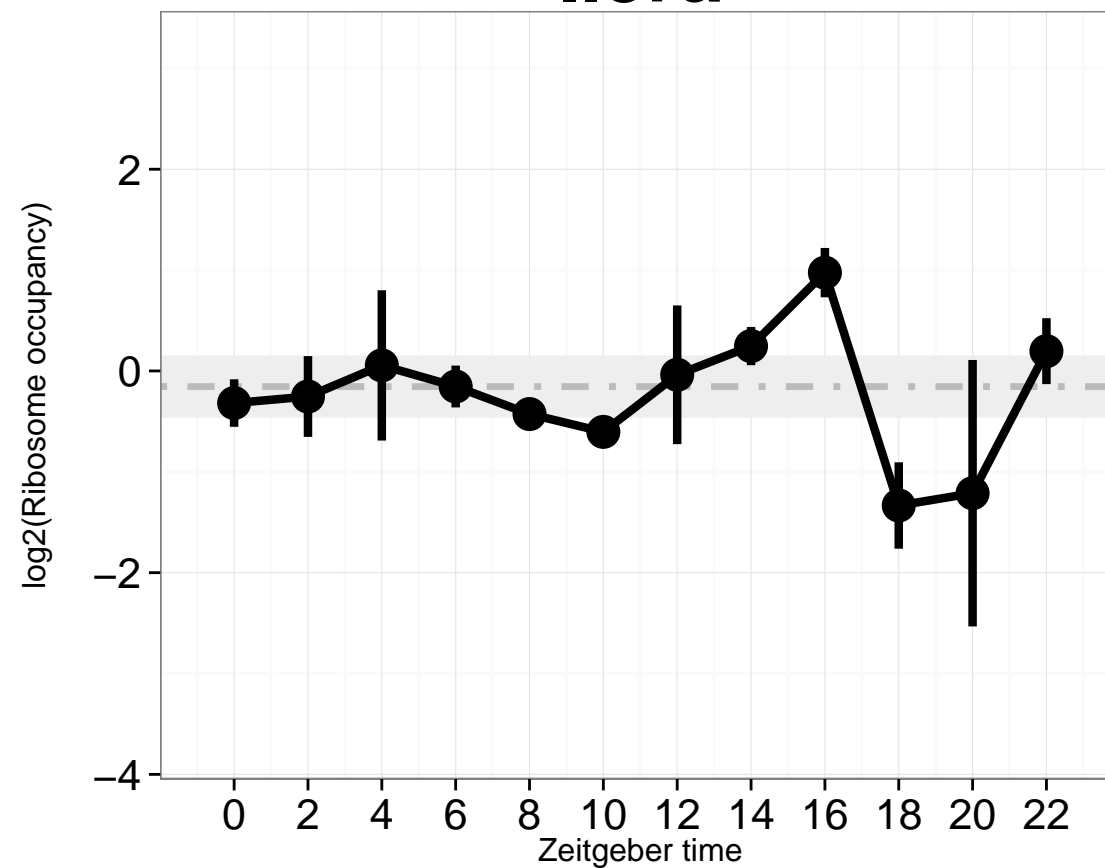

Supplement: Supplementary file 12646 [file 1]

# Fam175a

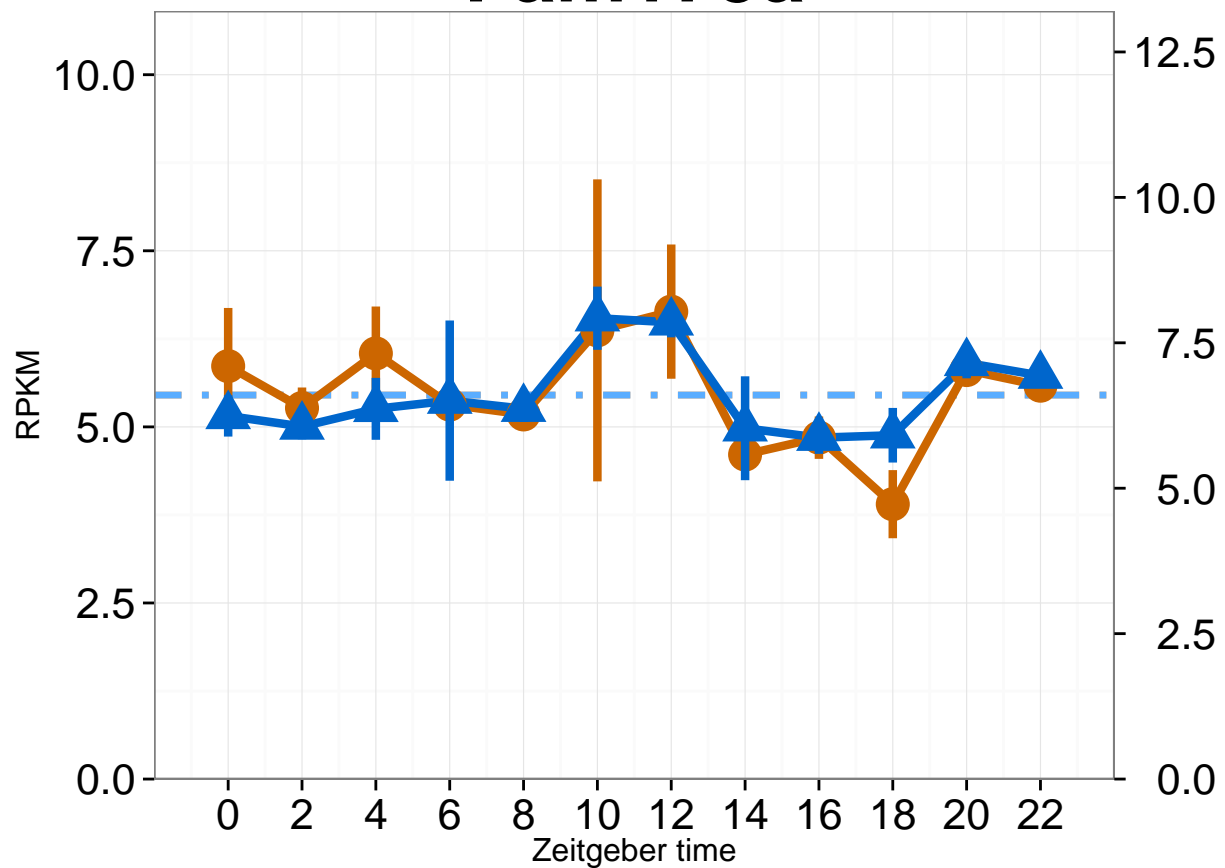

# Fam175a

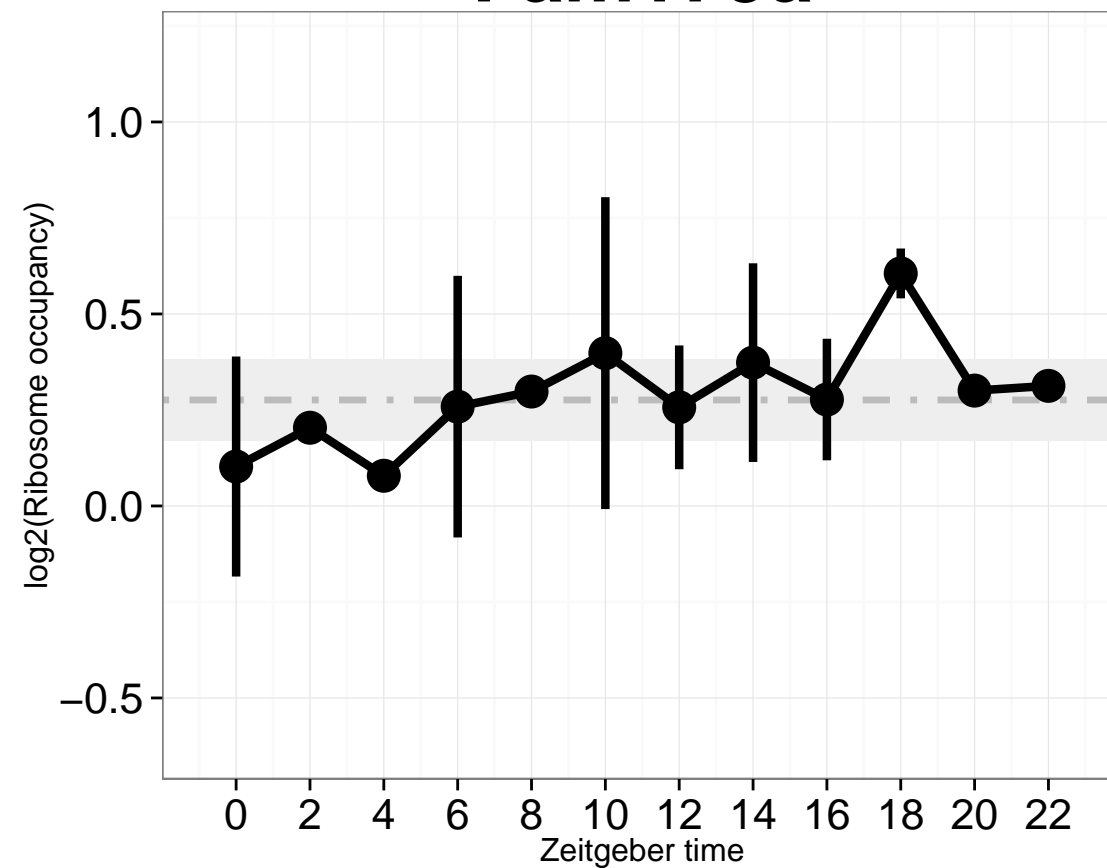

Supplement: Supplementary file 12647 [file 1]

## Zap70

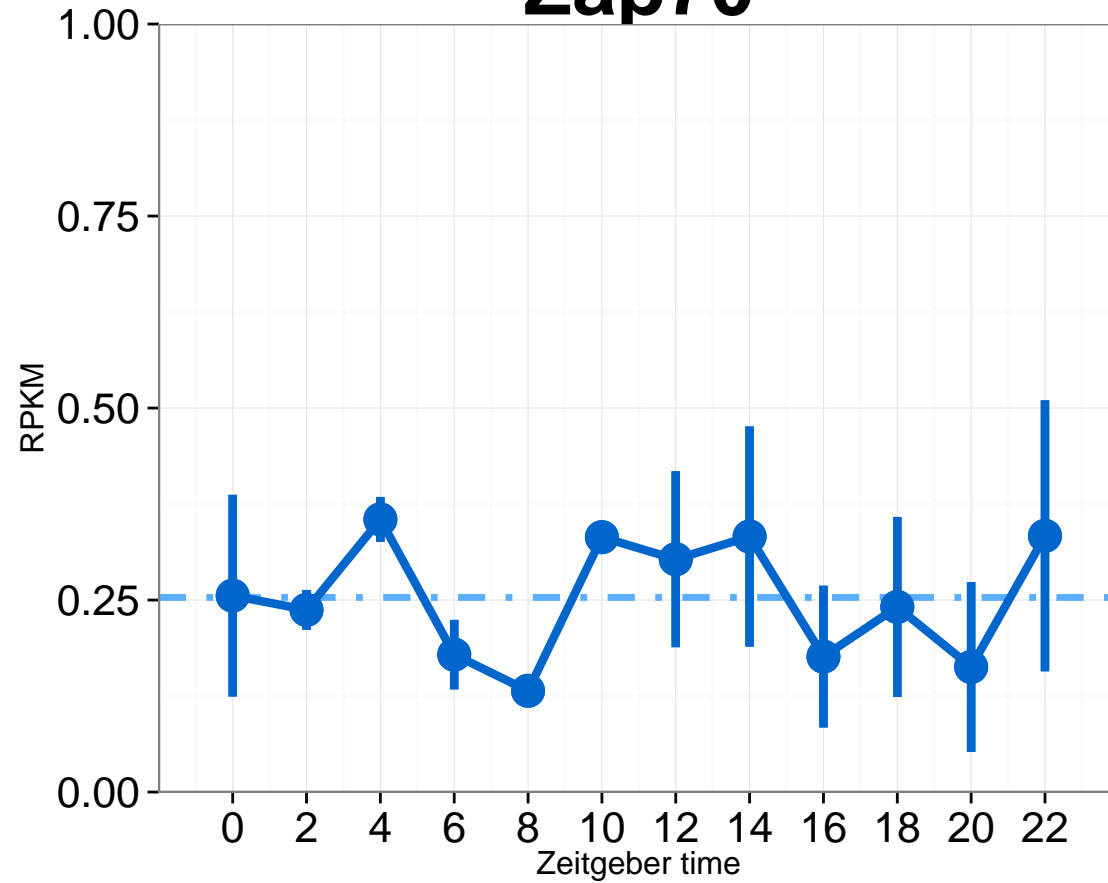

## Zap70 log2(Ribosome occupancy

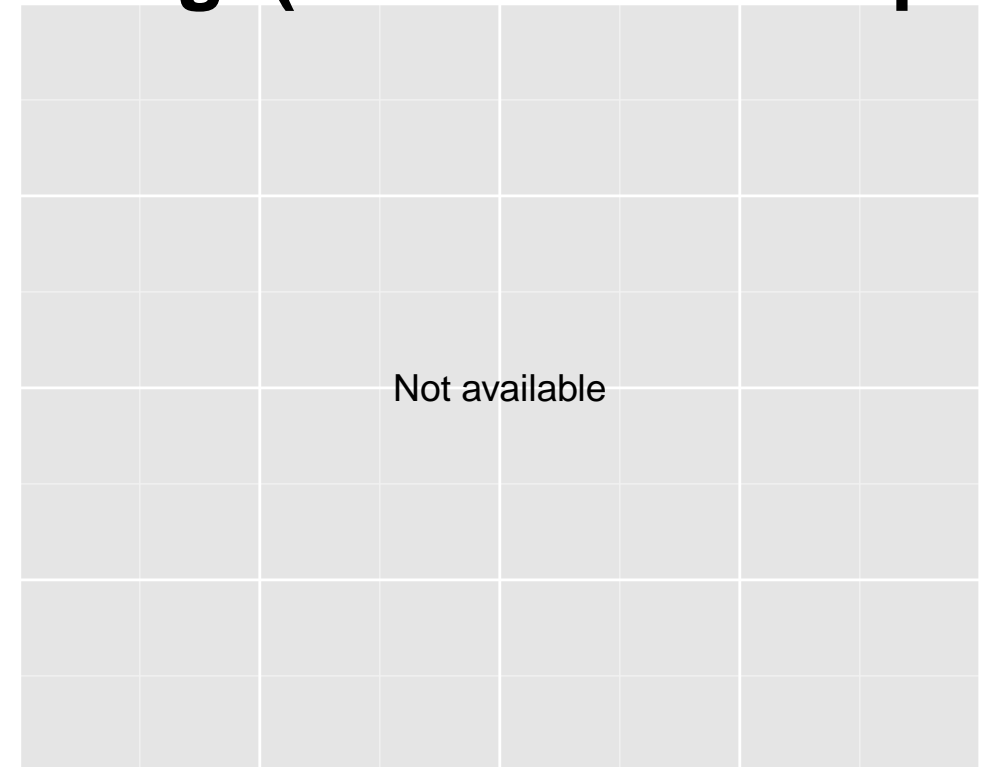

Supplement: Supplementary file 12648 [file 1]

# Bmf

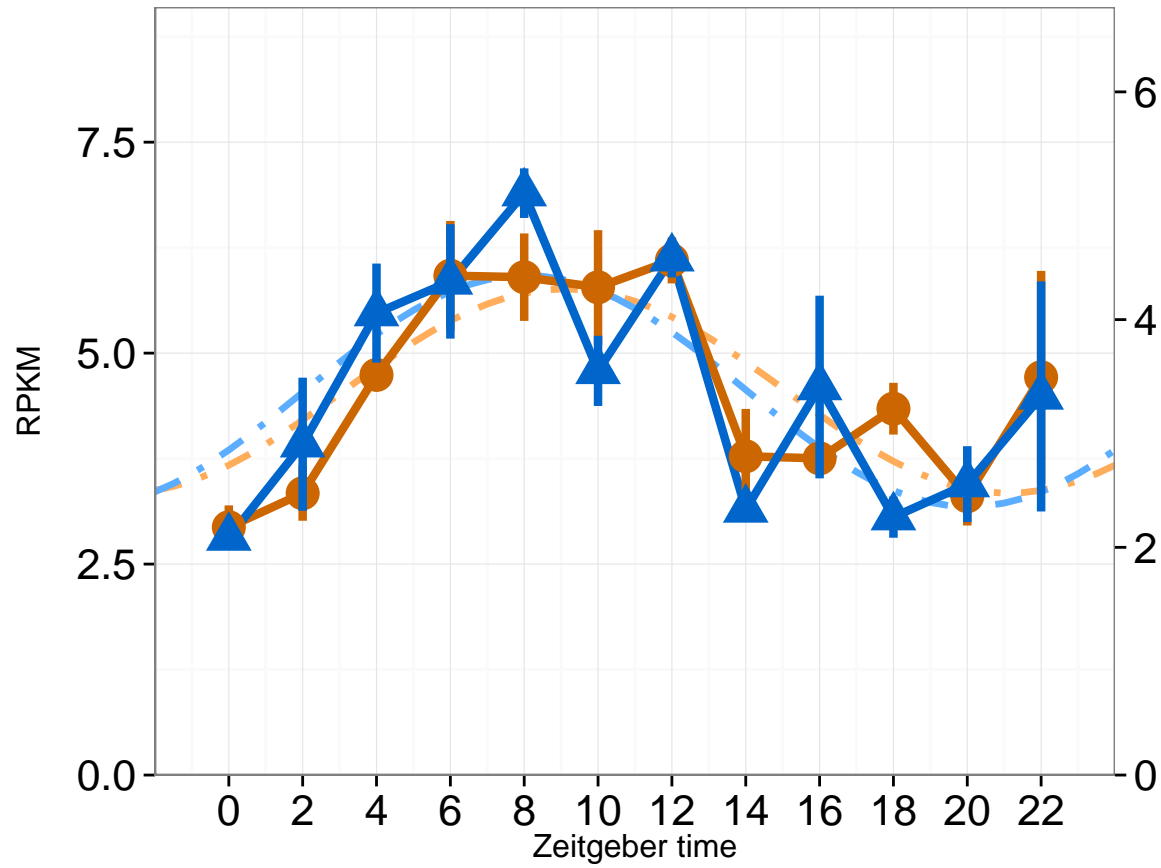

# Bmf

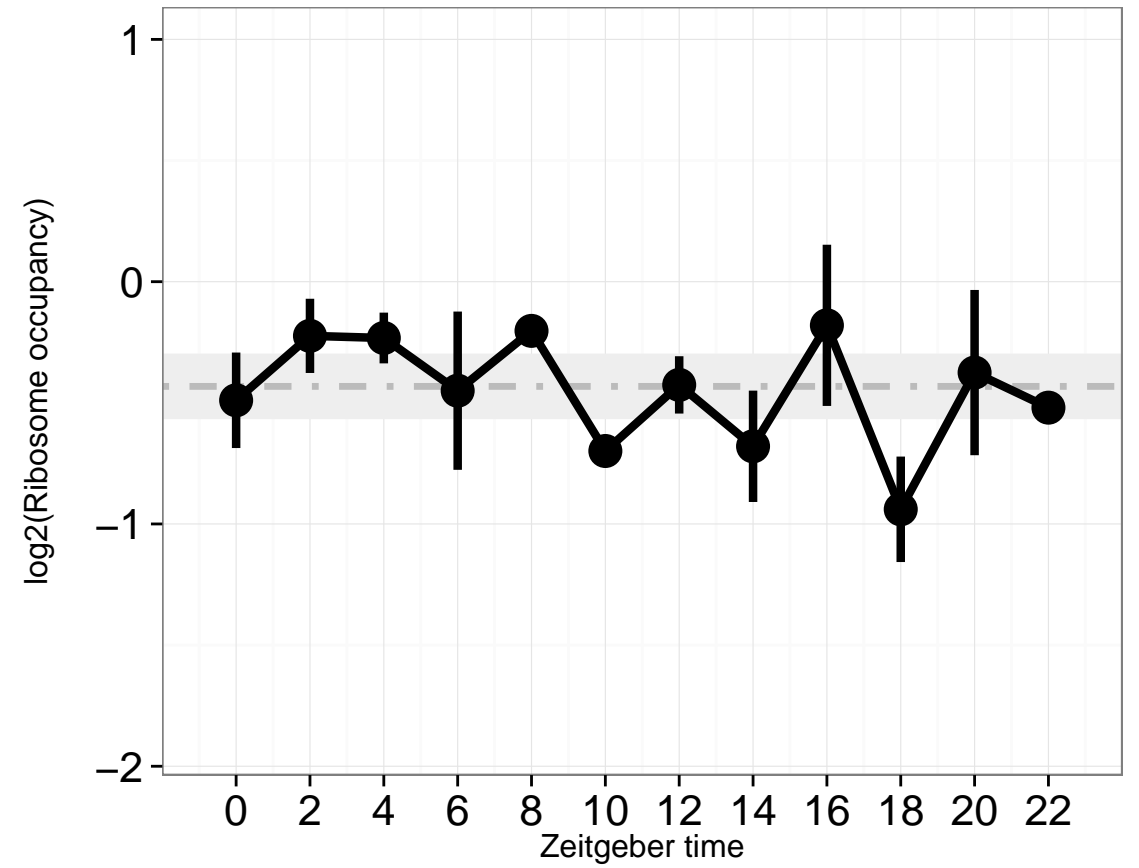

Supplement: Supplementary file 12649 [file 1]

## Rnf34

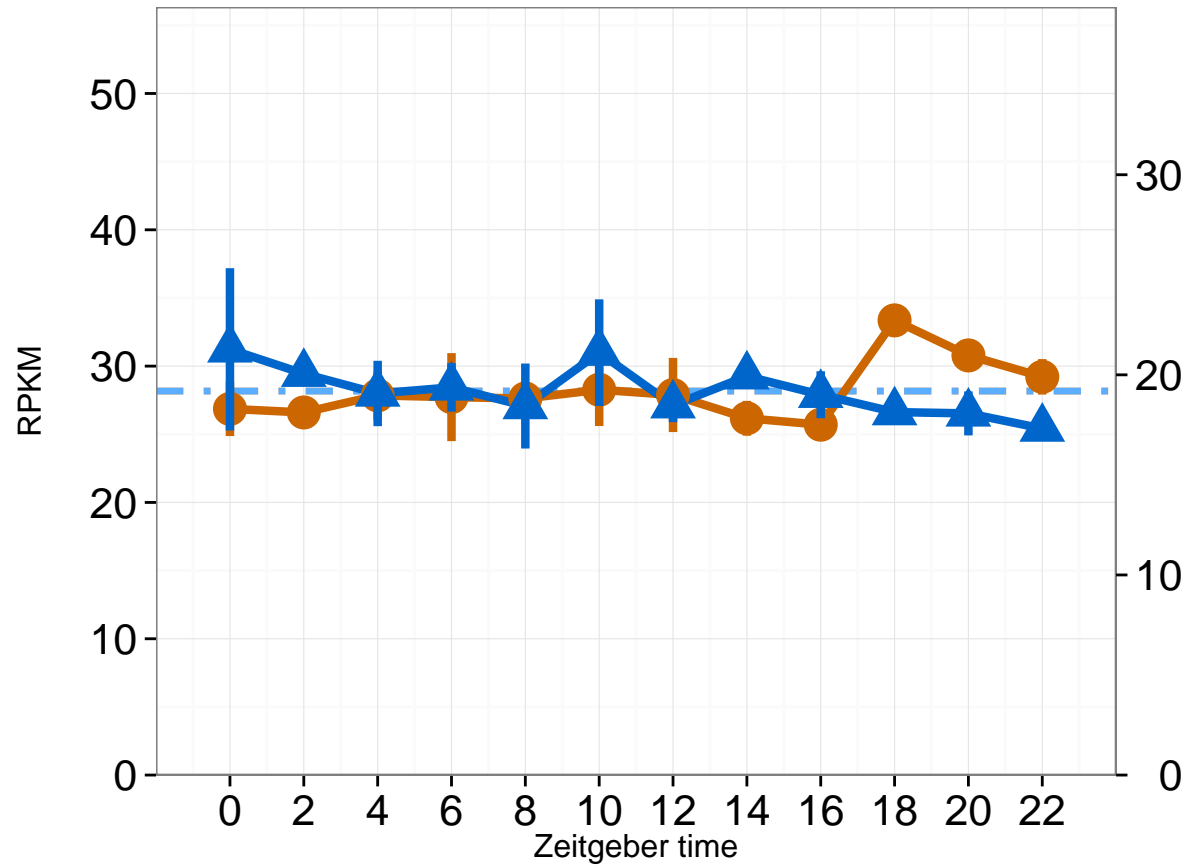

## Rnf34

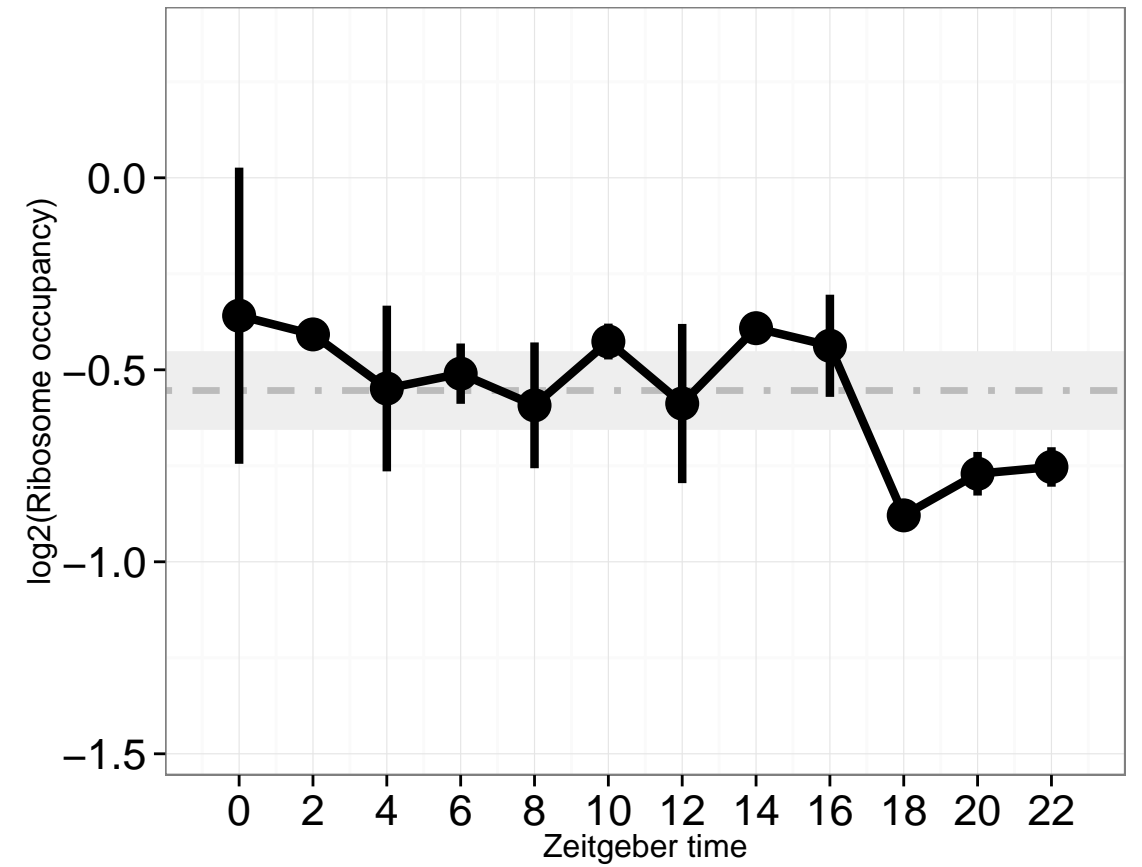

Supplement: Supplementary file 12650 [file 1]

## Fancm

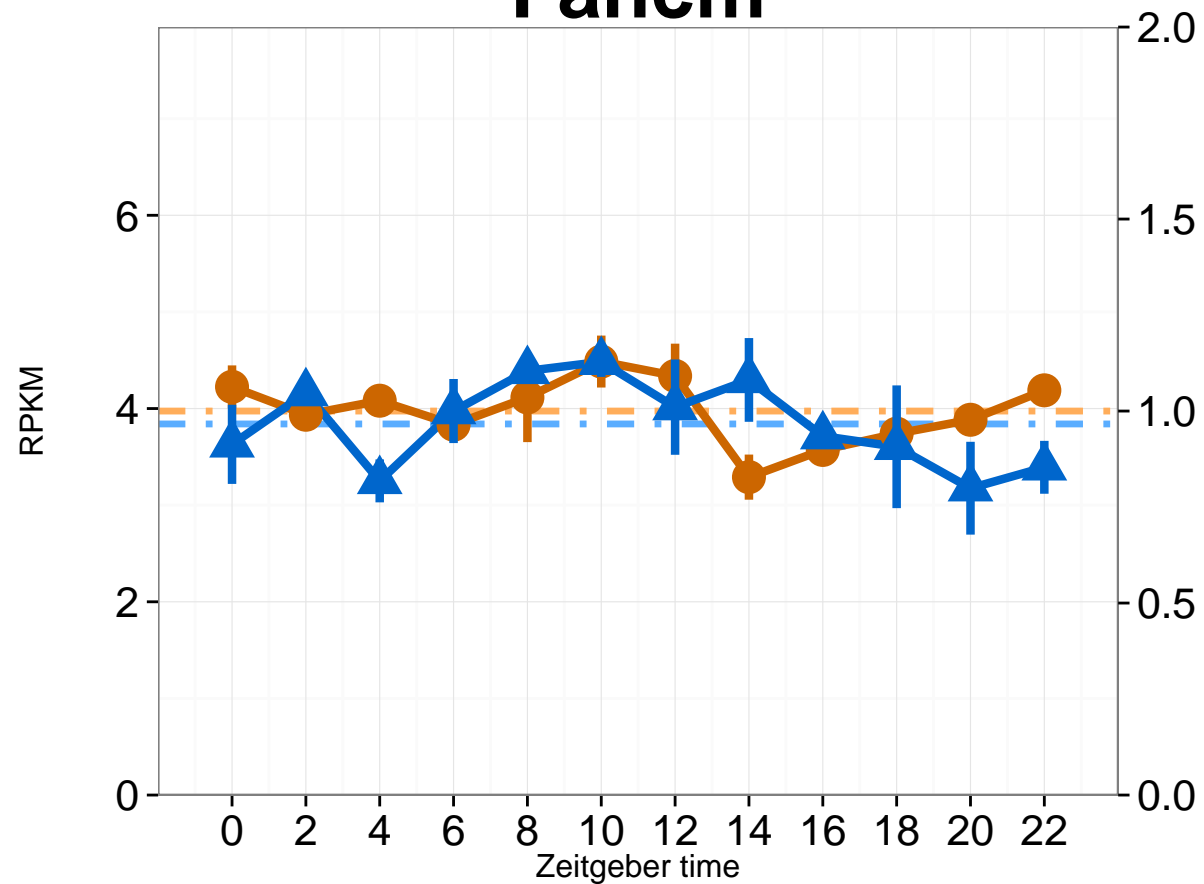

## Fancm

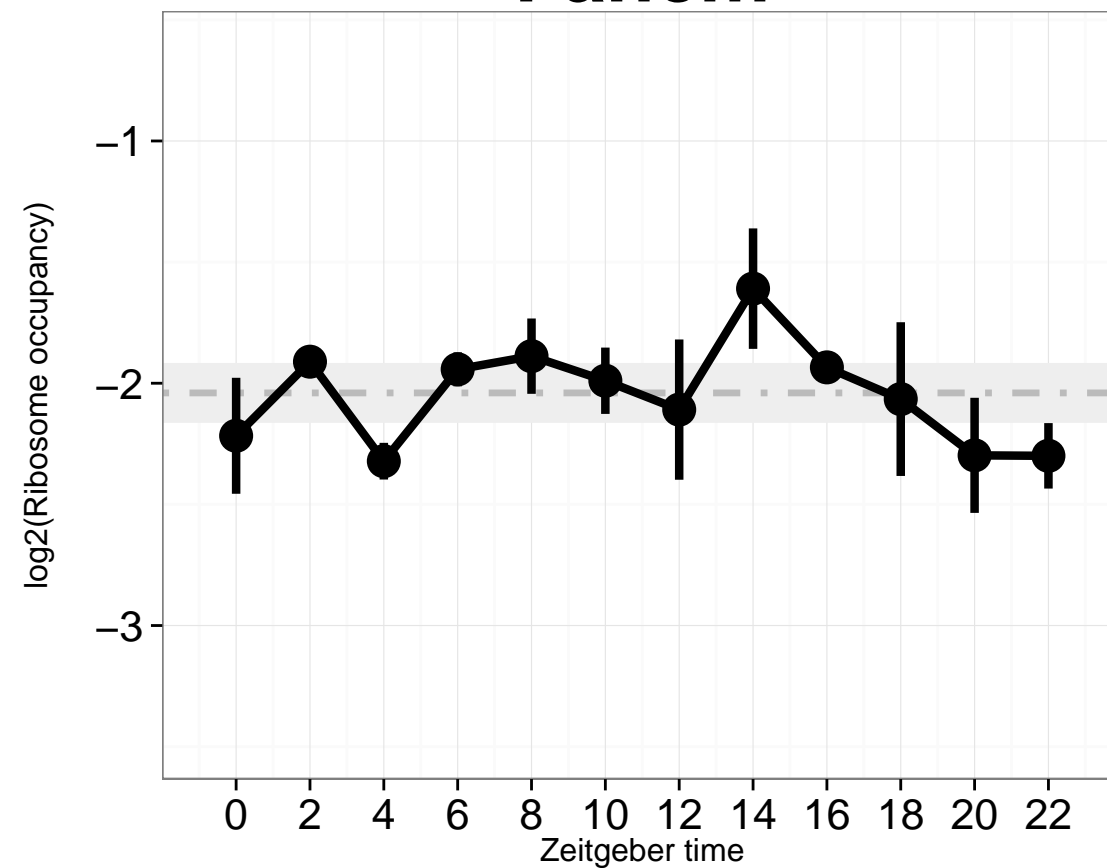

Supplement: Supplementary file 12651 [file 1]

# Poc1a

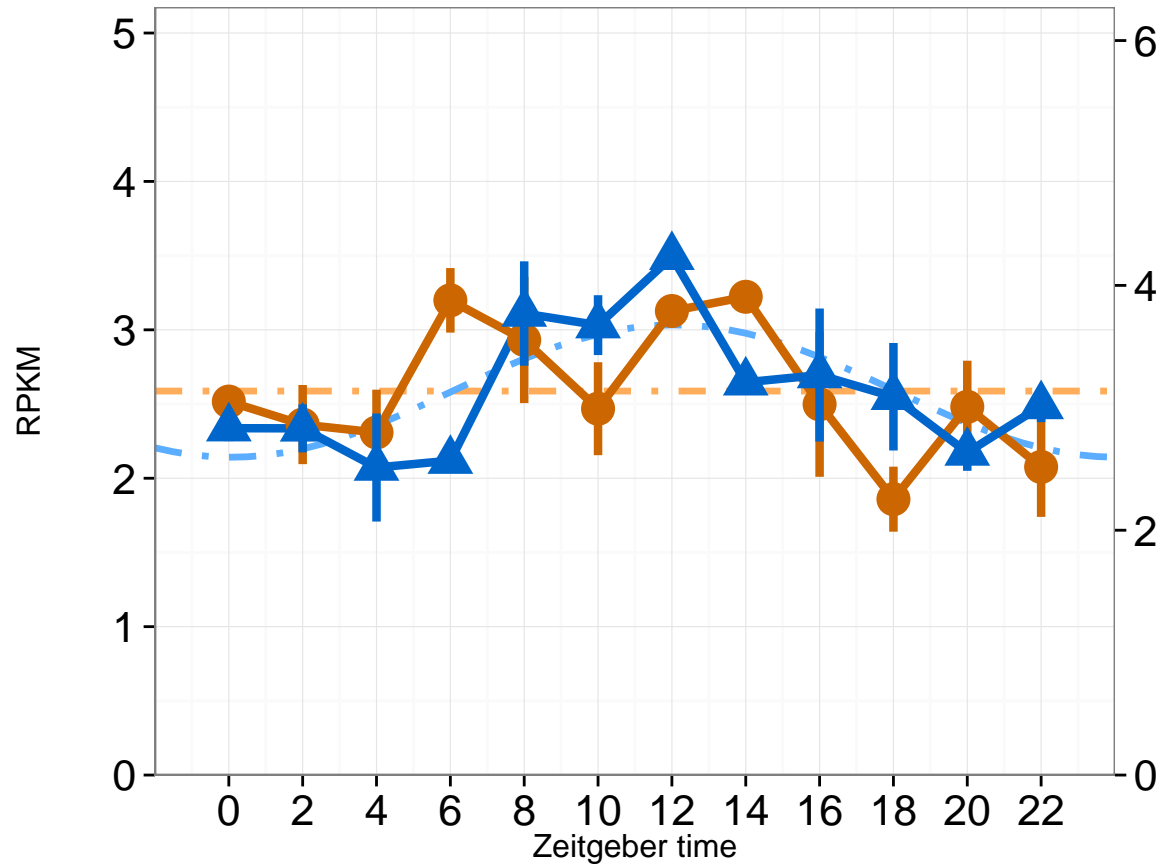

# Poc1a

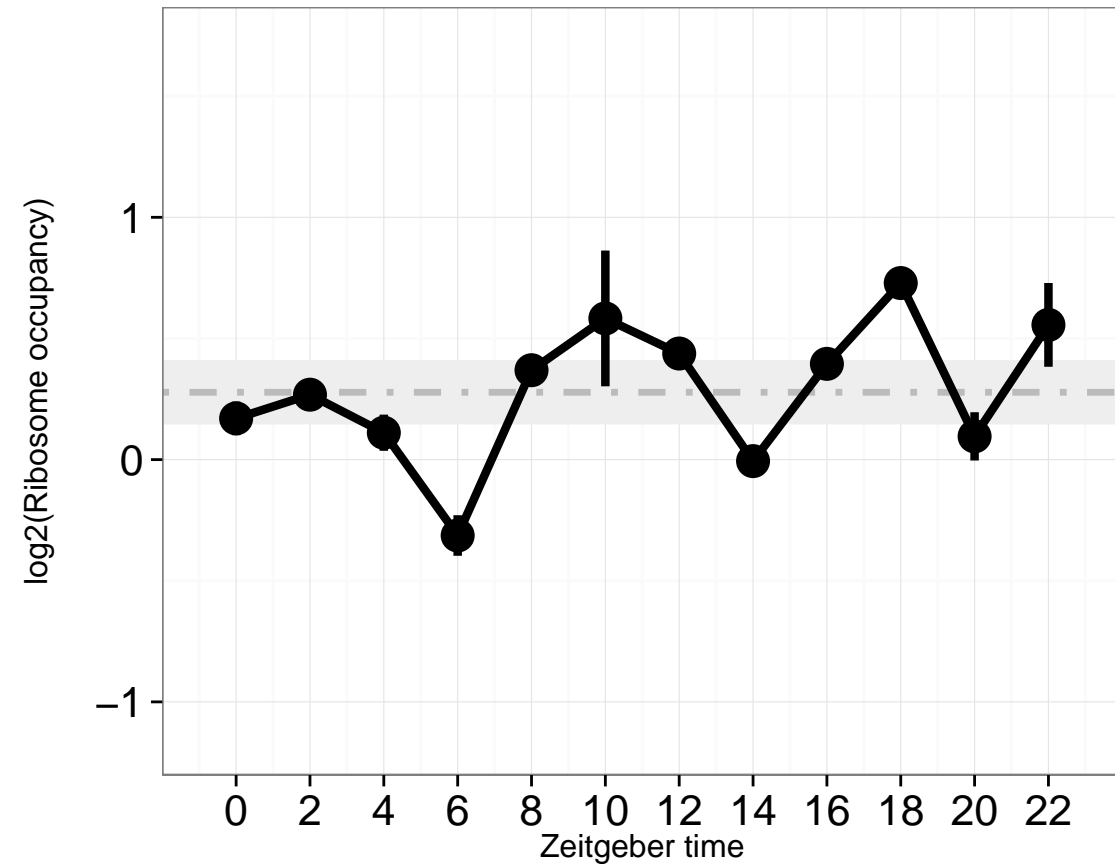

Supplement: Supplementary file 12652 [file 1]

# Zfp946

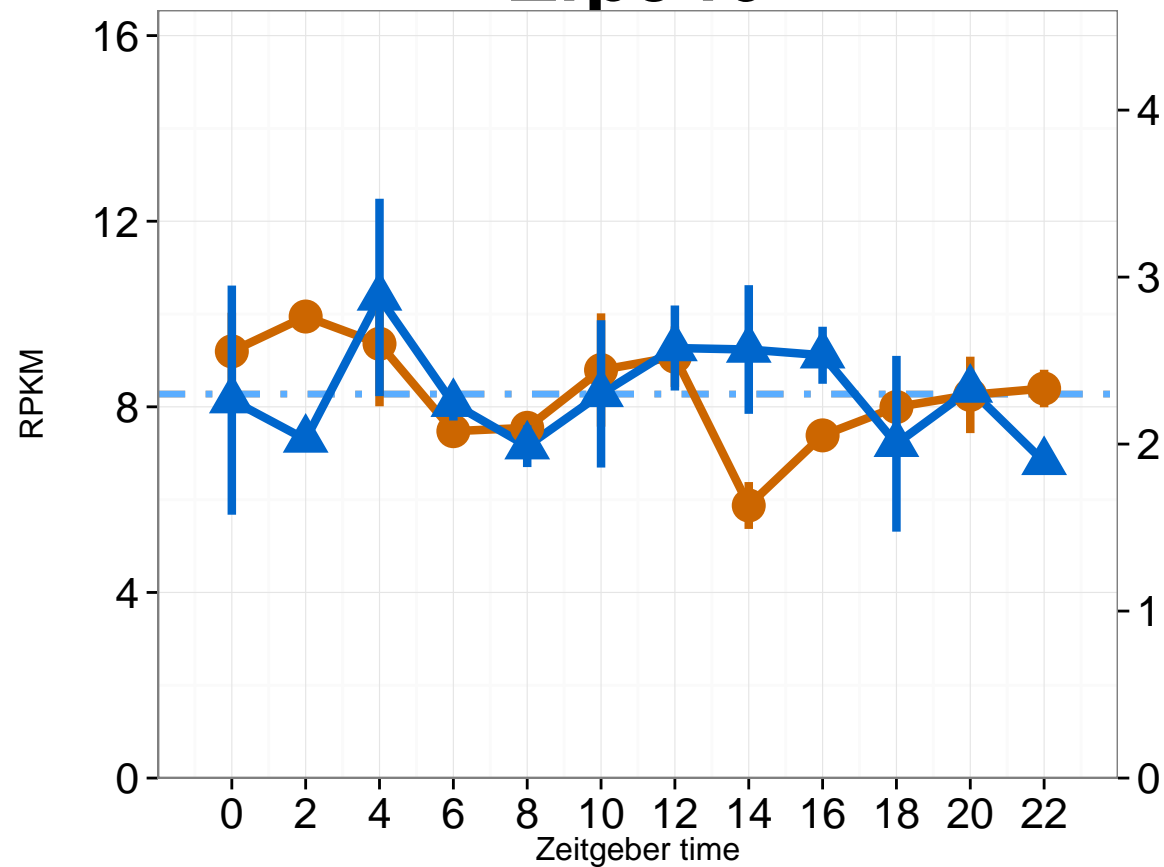

# Zfp946

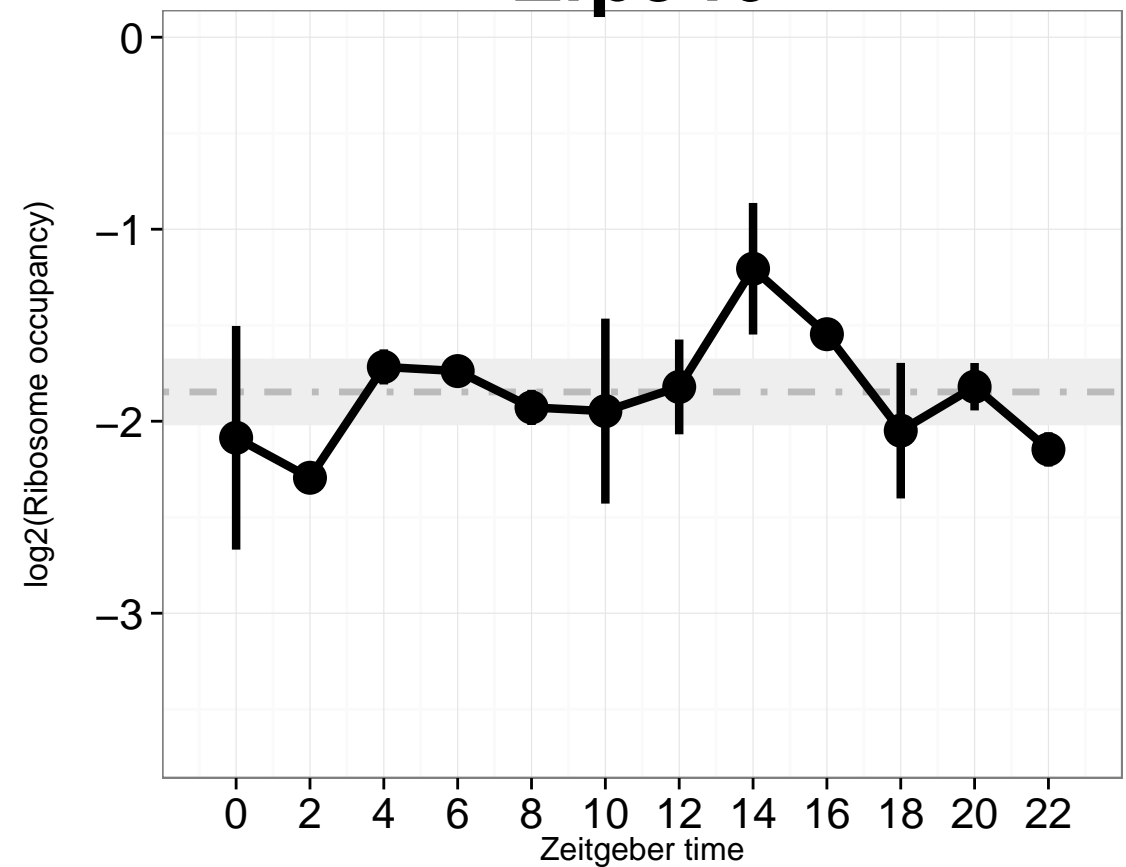

Supplement: Supplementary file 12653 [file 1]

## Bcl6

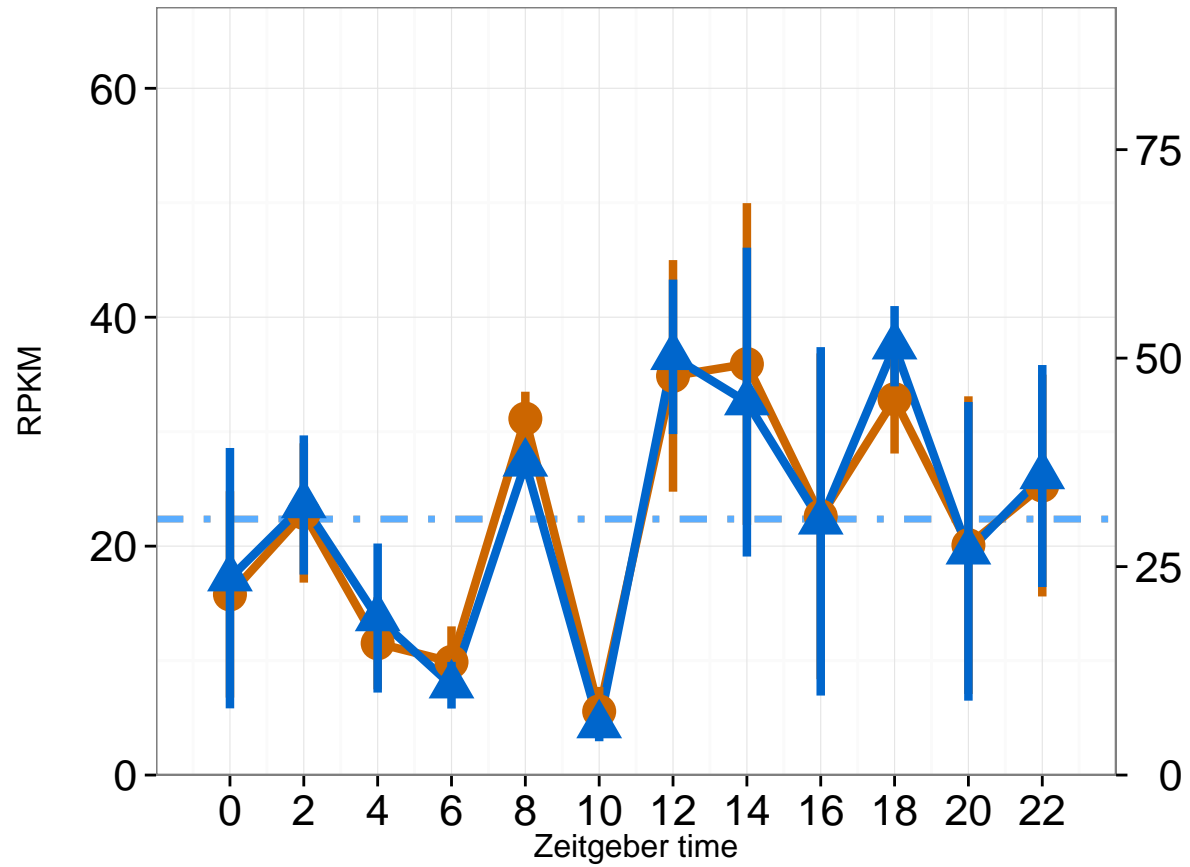

## Bcl6

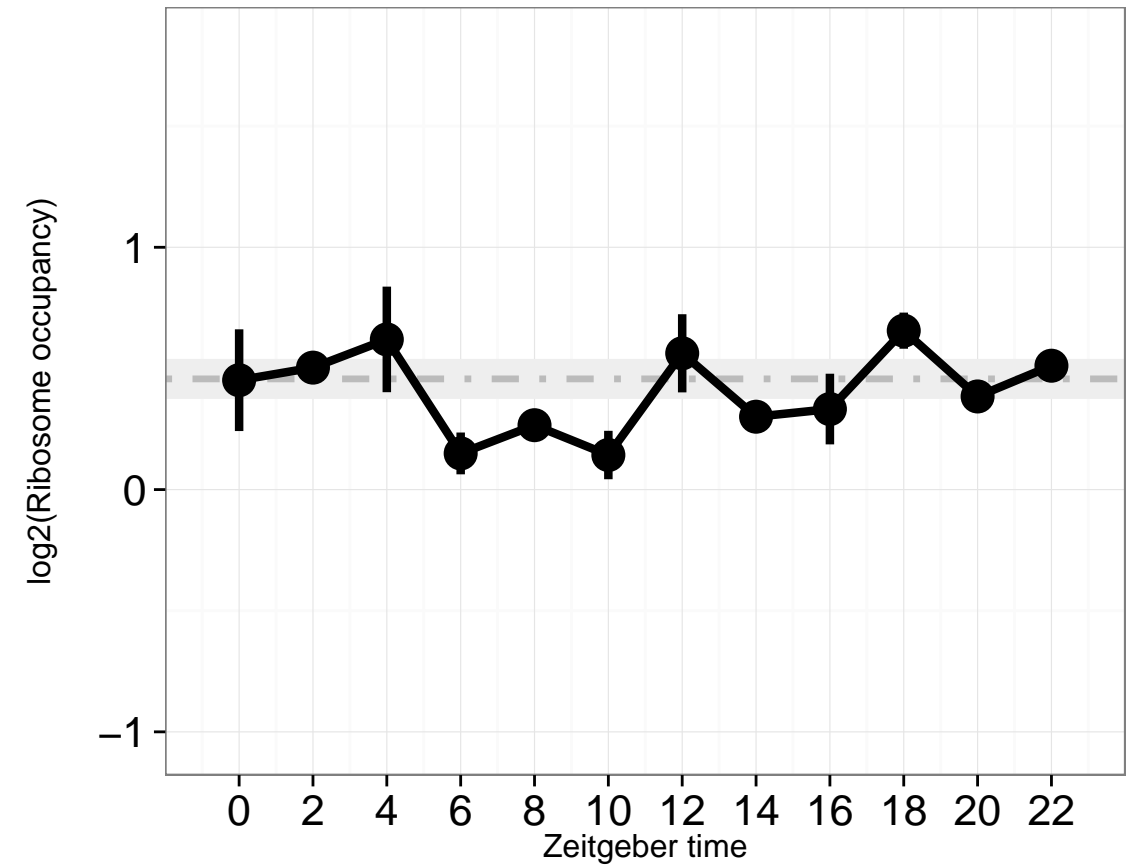

Supplement: Supplementary file 12654 [file 1]

## Tnnc1

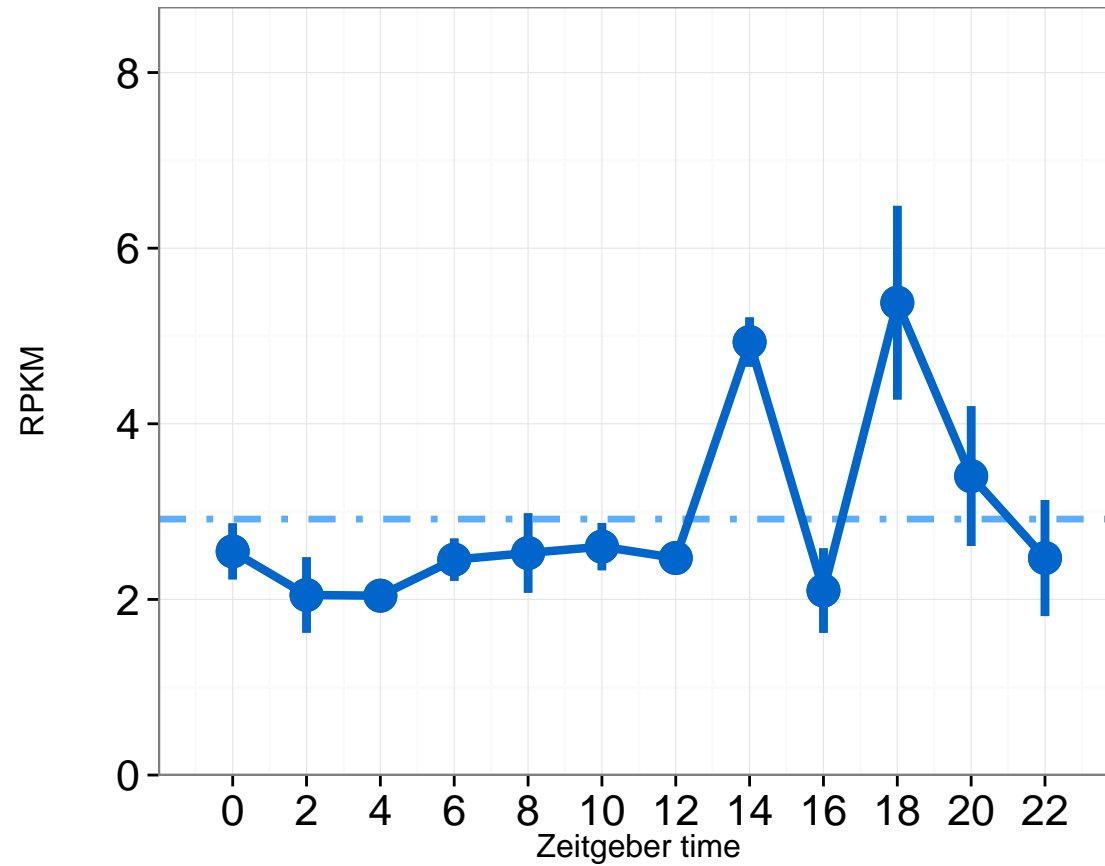

## Tnnc1 log2(Ribosome occupancy

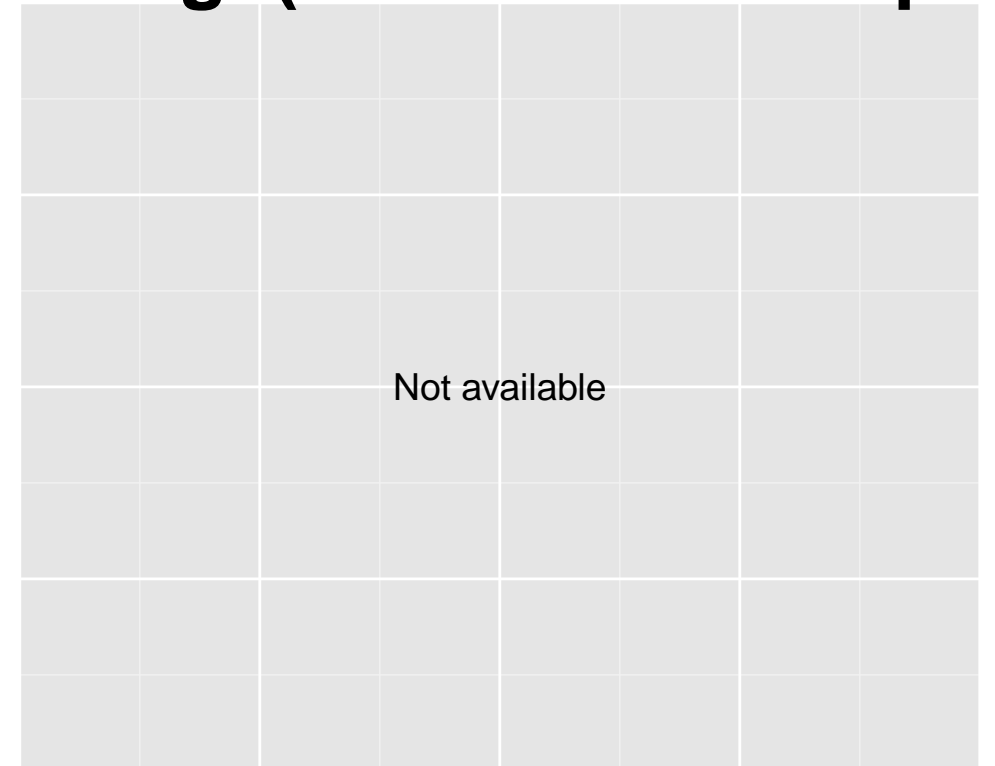

Supplement: Supplementary file 12655 [file 1]

## Snapc2

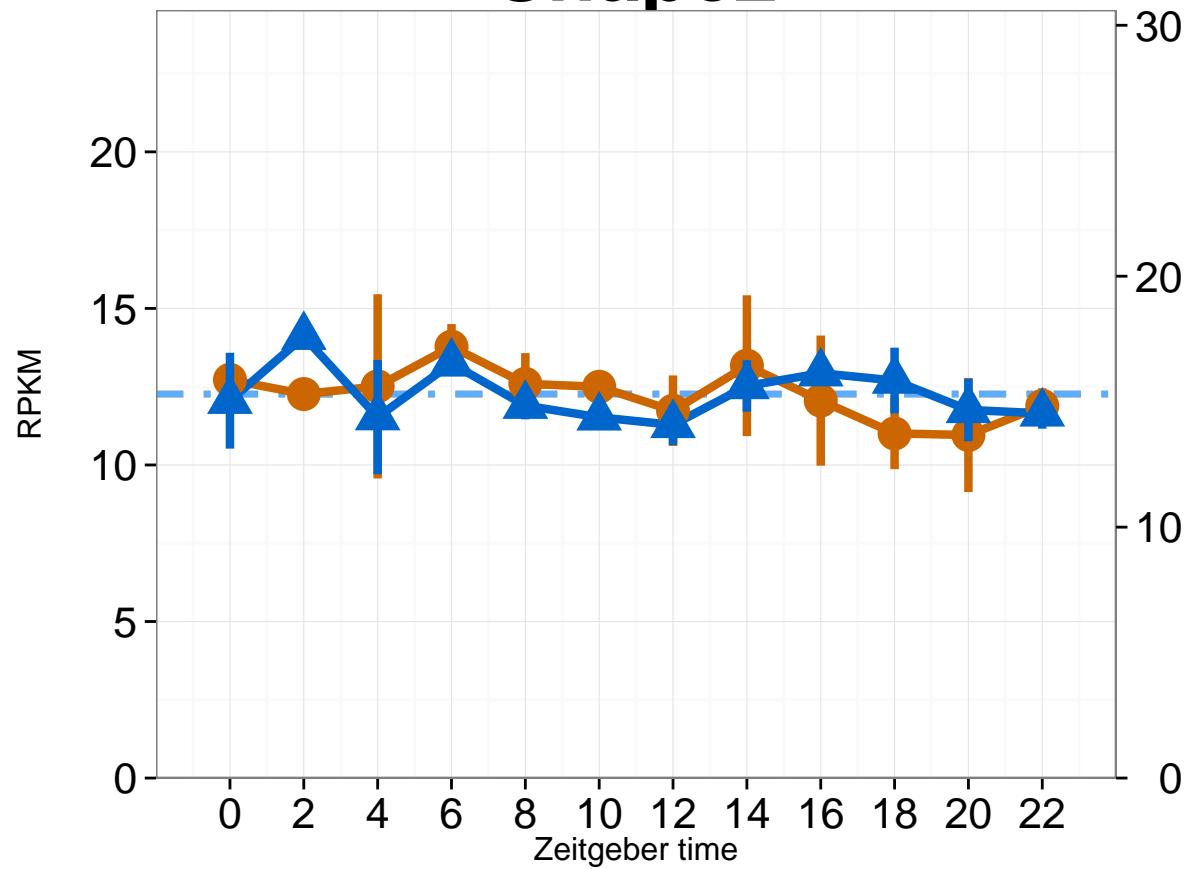

## Snapc2

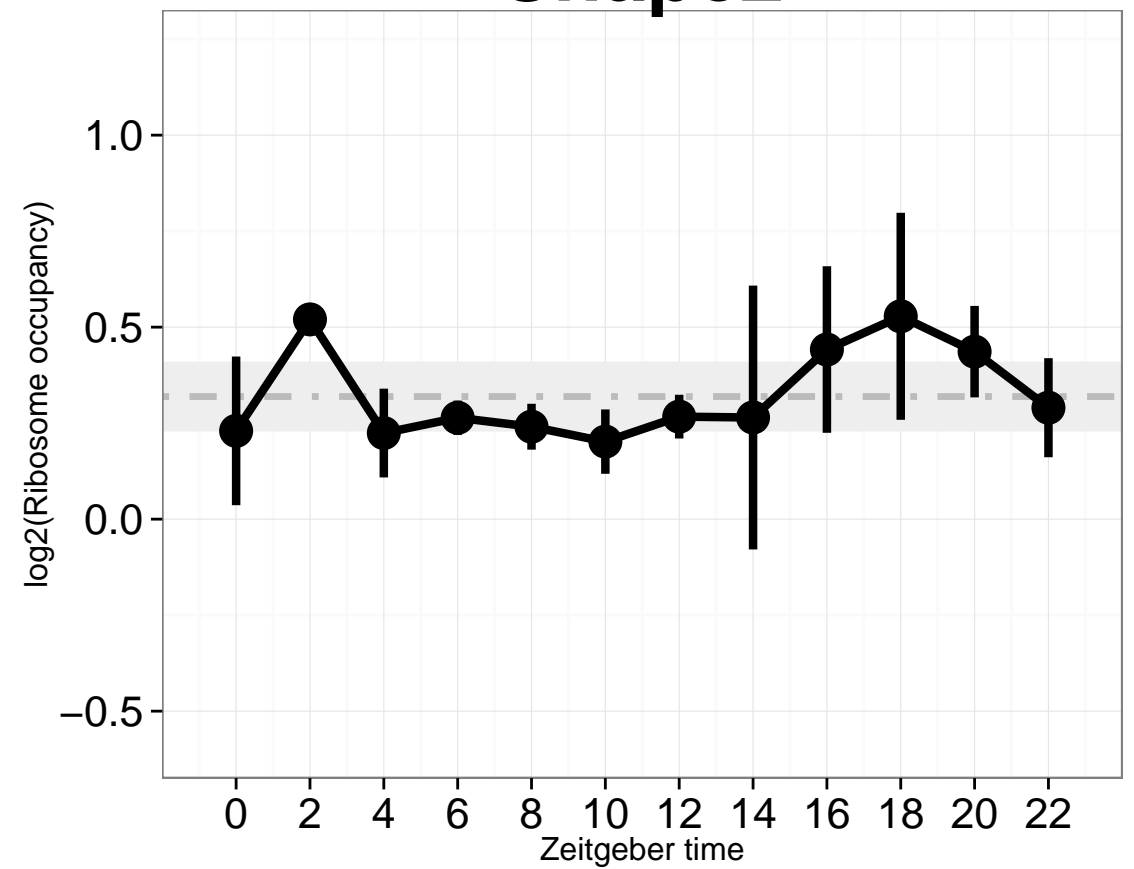

Supplement: Supplementary file 12656 [file 1]

# Abcb4

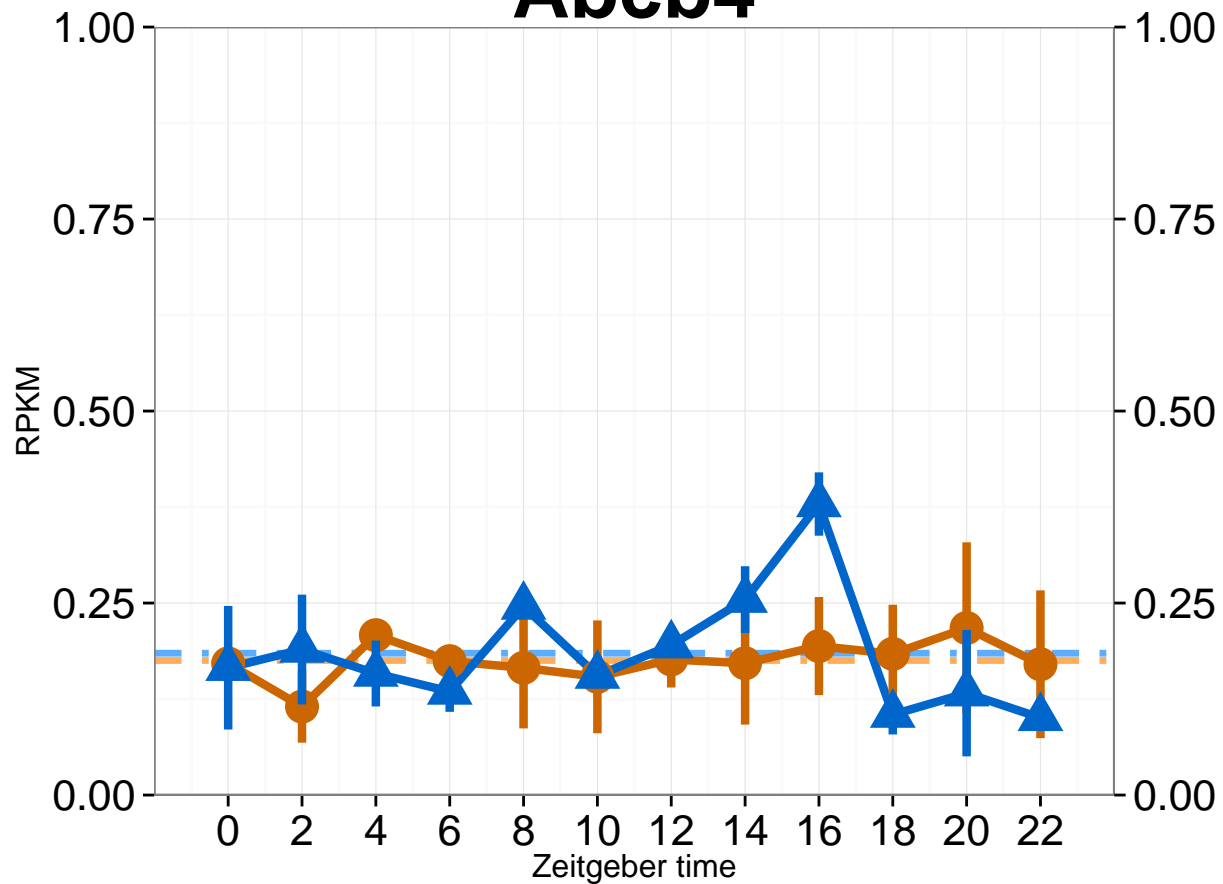

# Abcb4

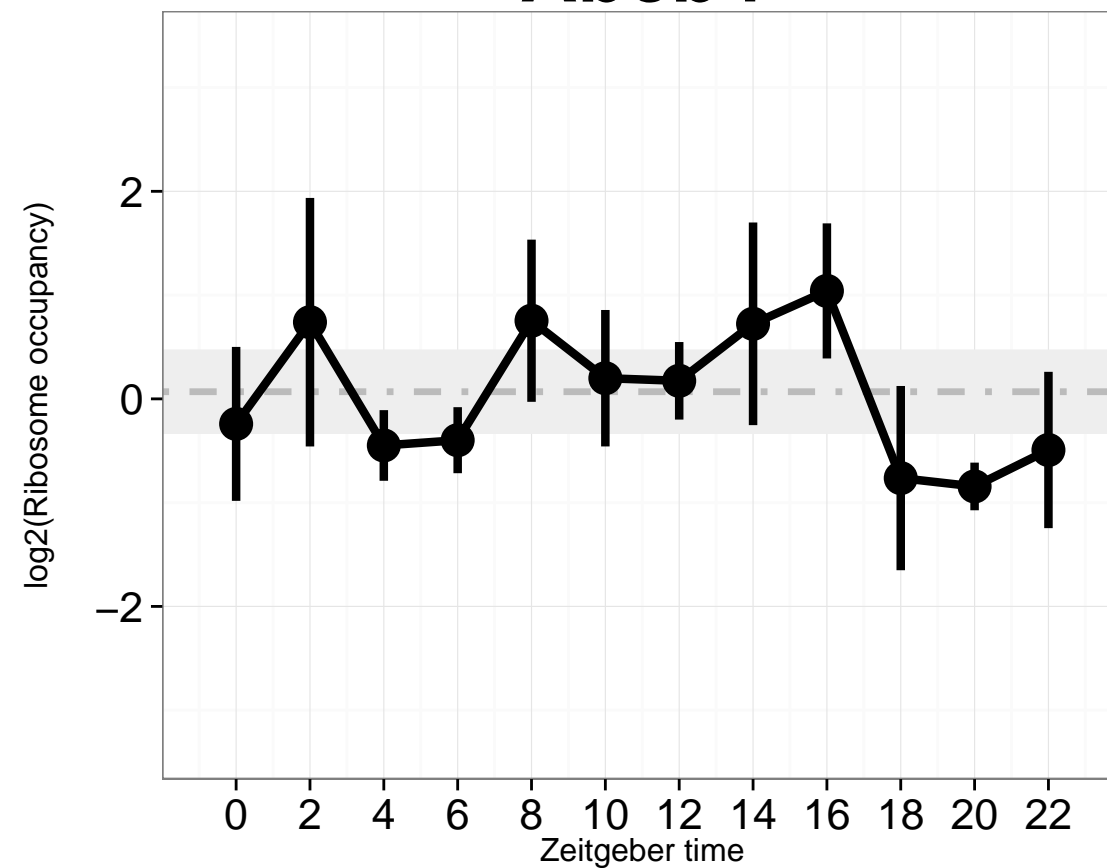

Supplement: Supplementary file 12657 [file 1]

## Chuk

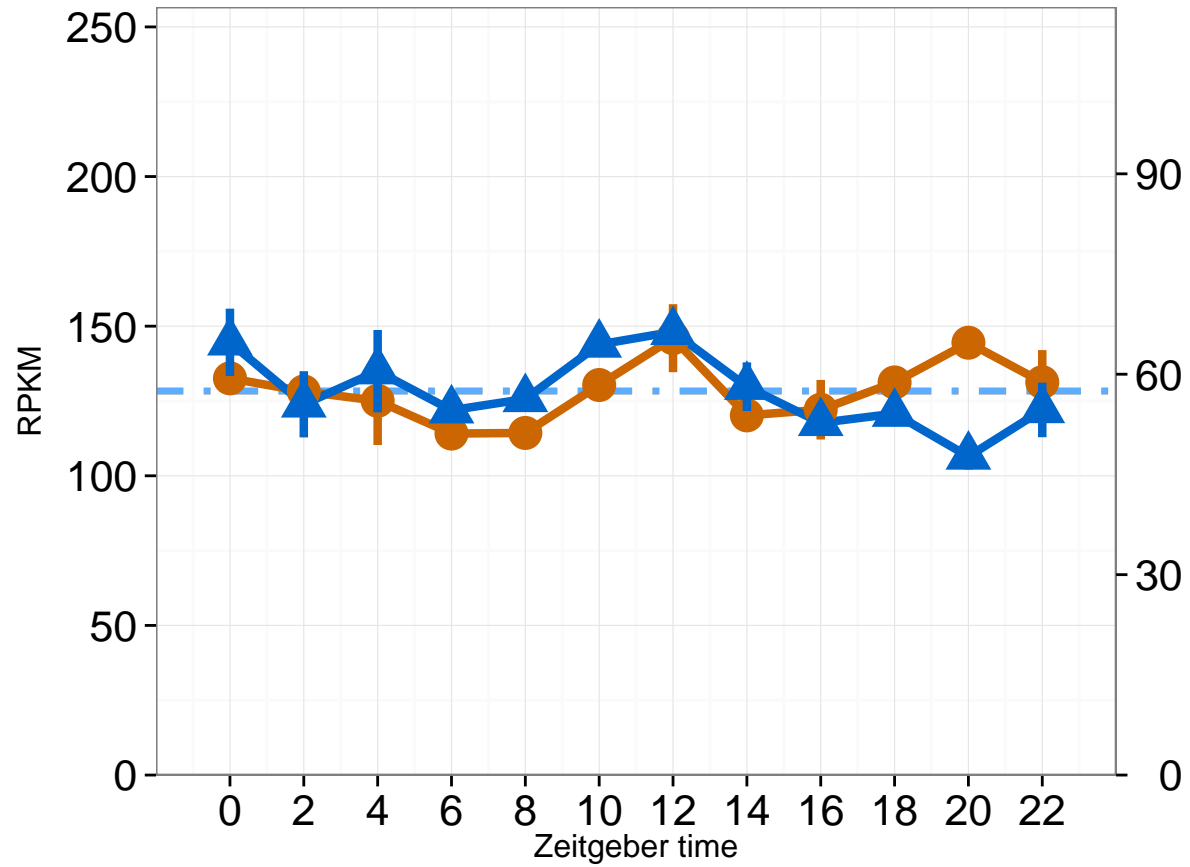

## Chuk

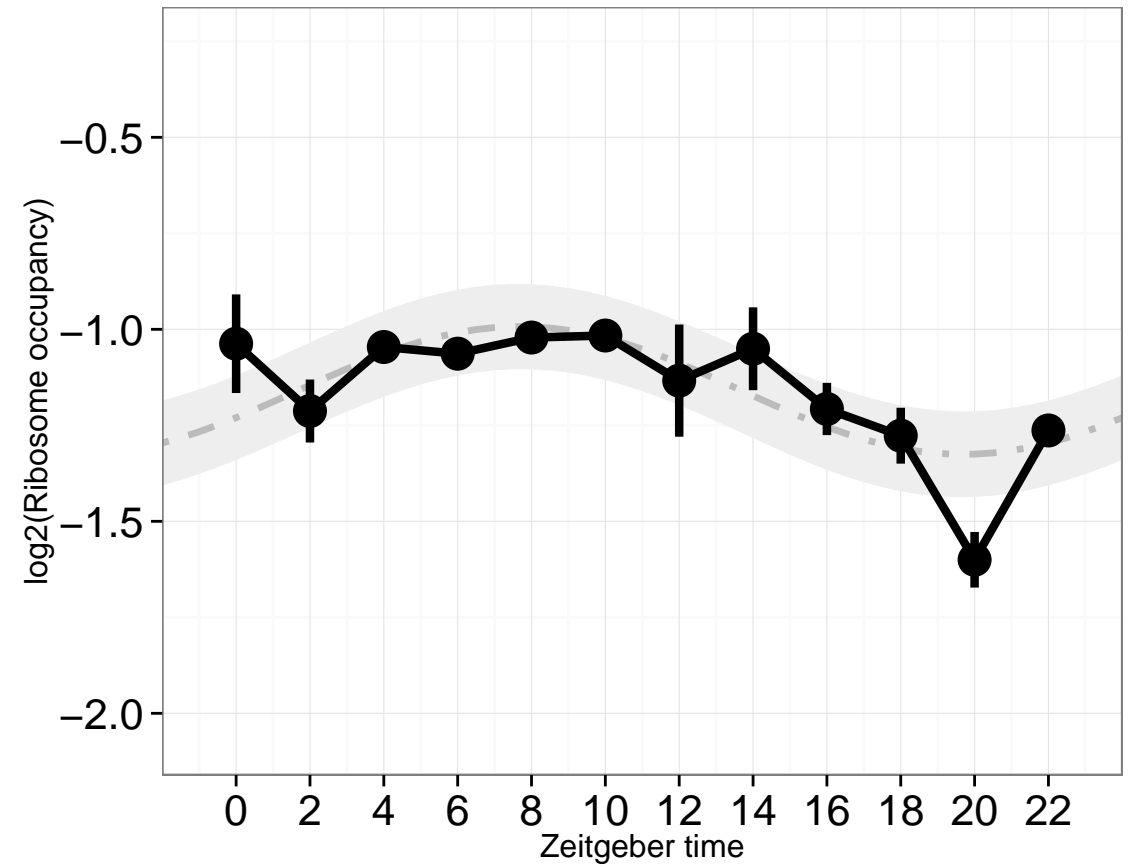

Supplement: Supplementary file 12658 [file 1]

## Myliip

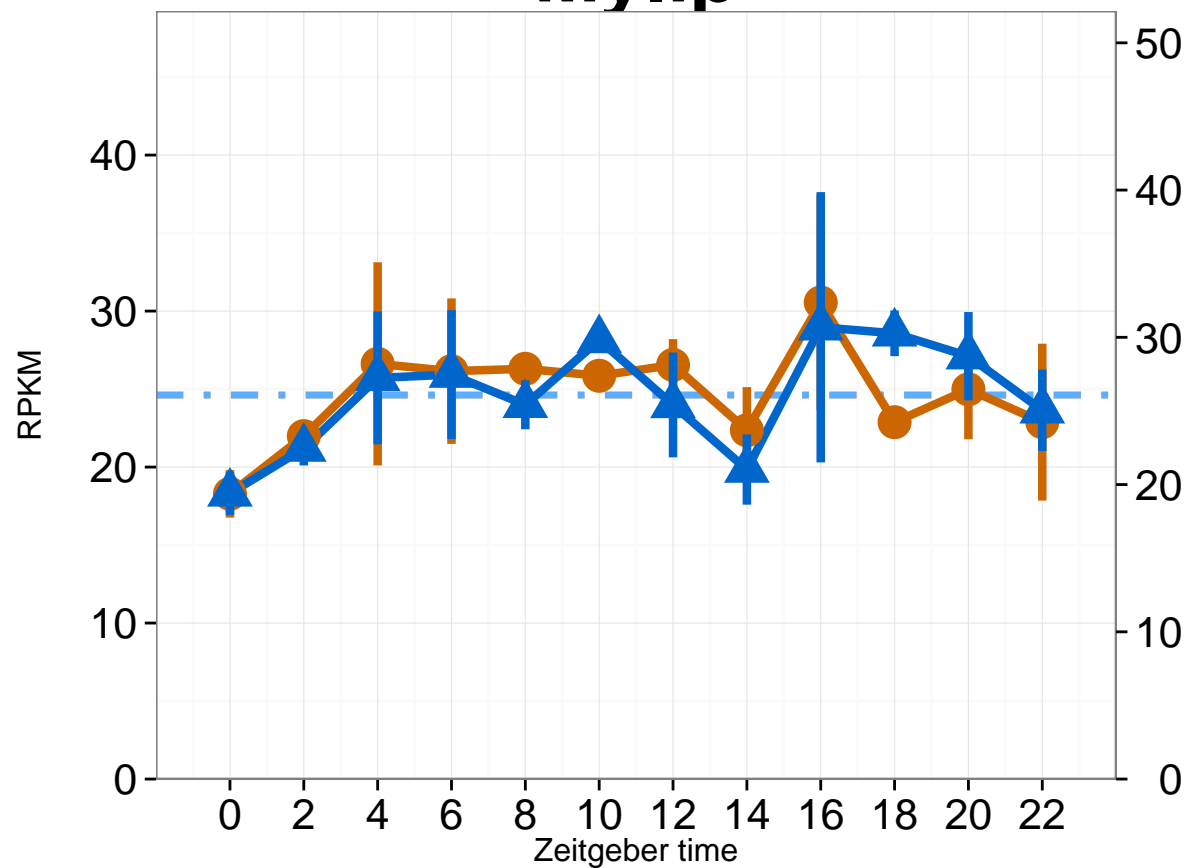

## Myliip

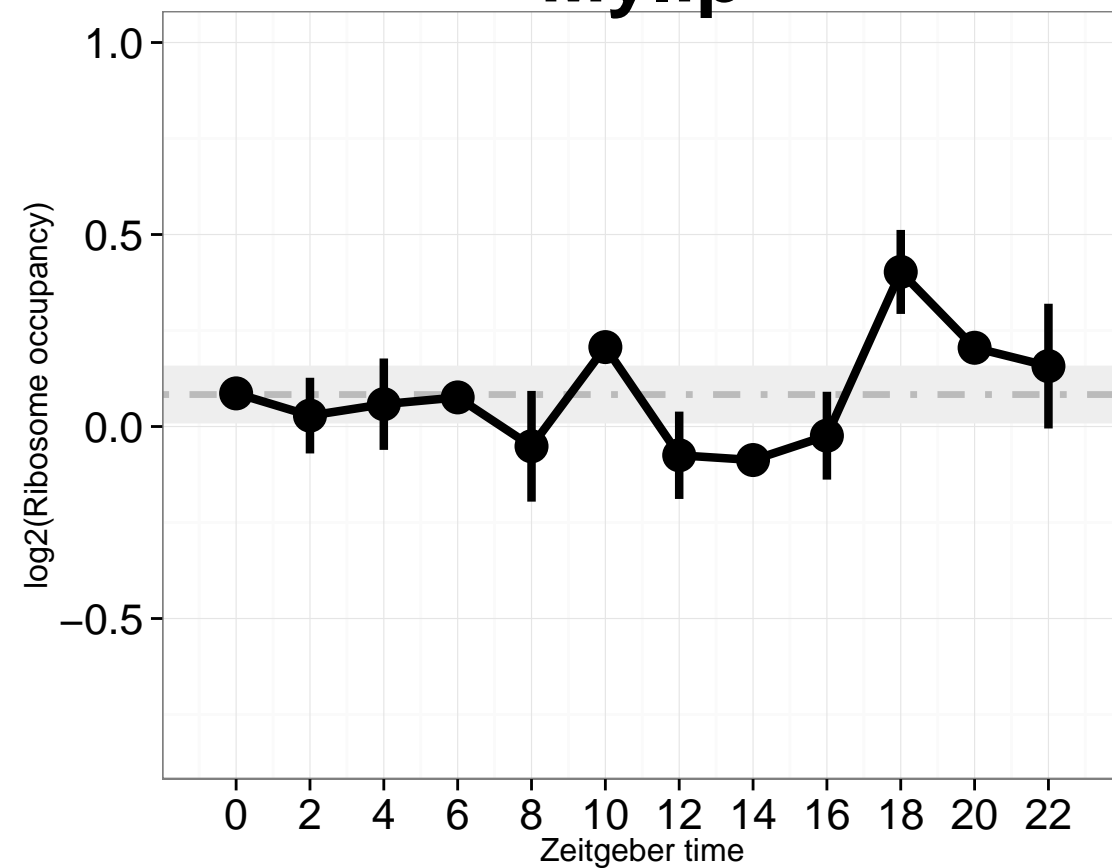

Supplement: Supplementary file 12659 [file 1]

## Avl9

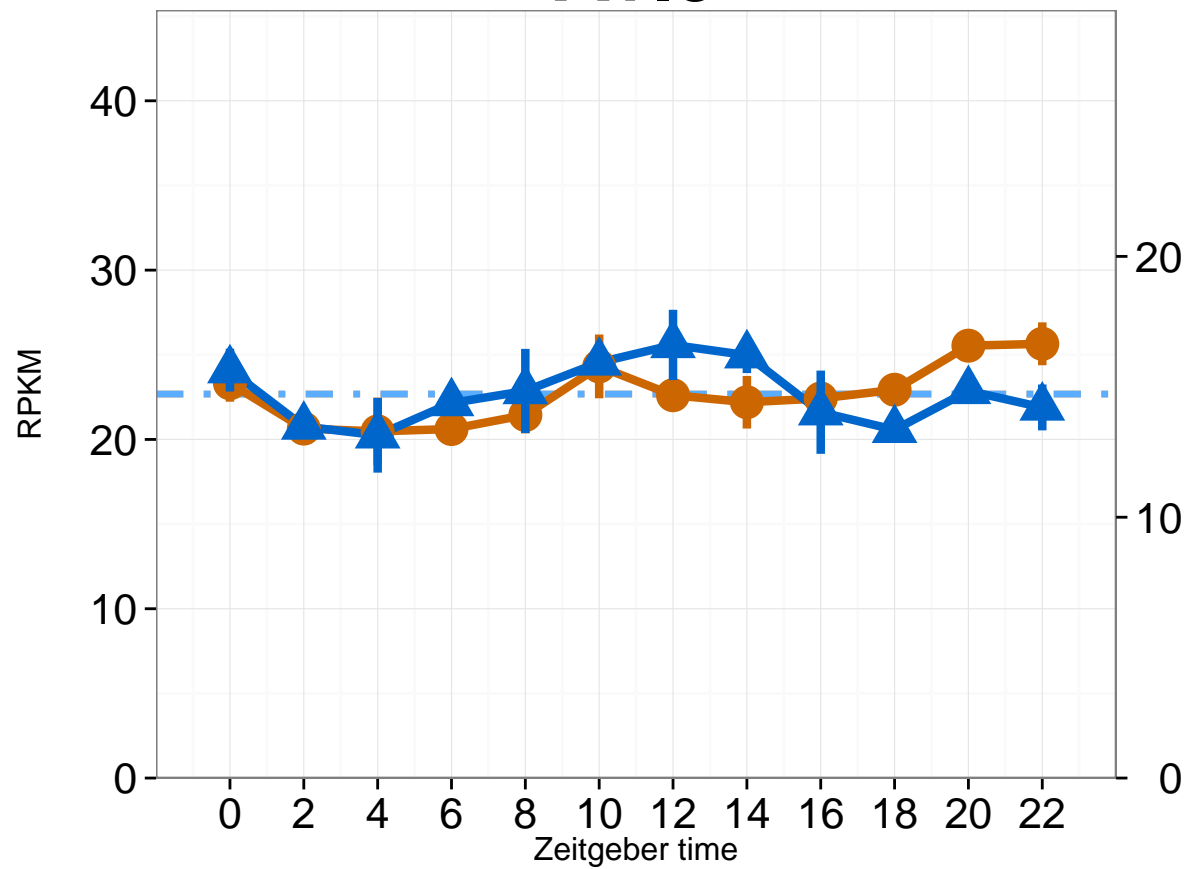

## Avl9

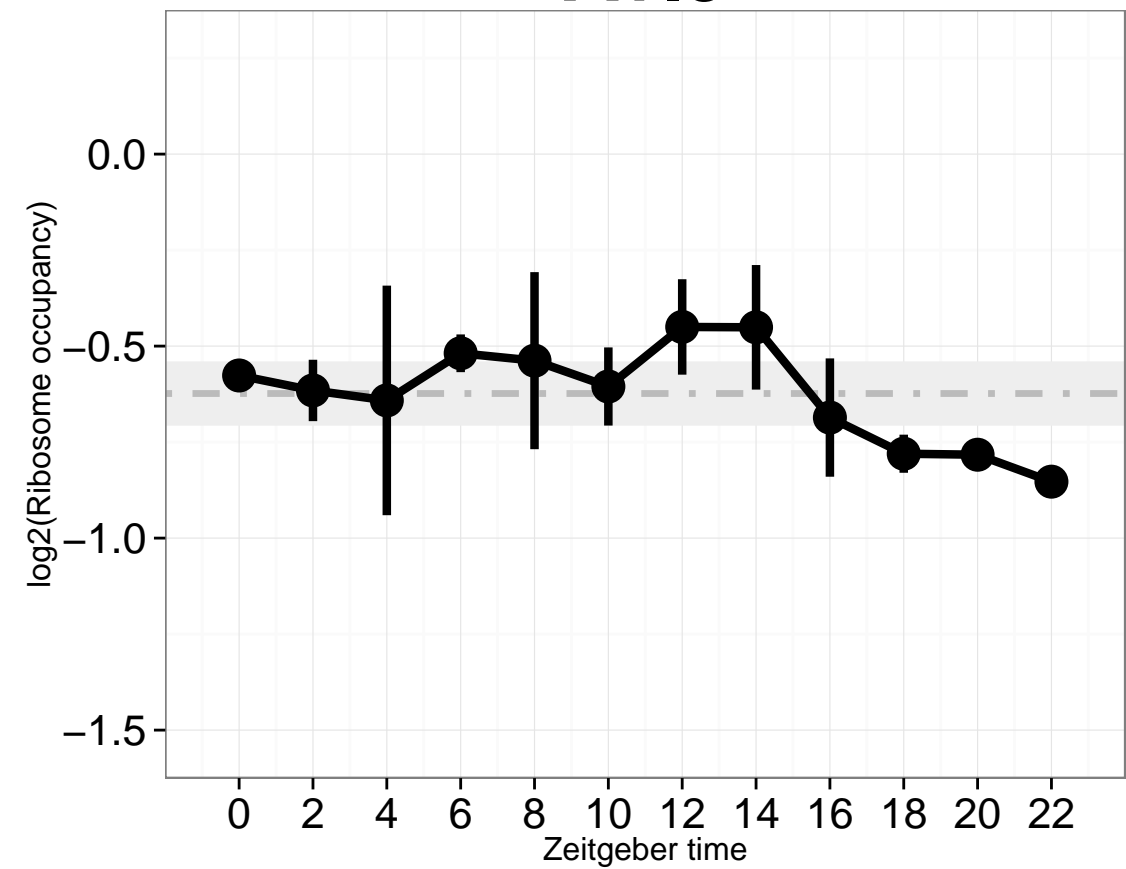

Supplement: Supplementary file 12660 [file 1]

# Fam104a

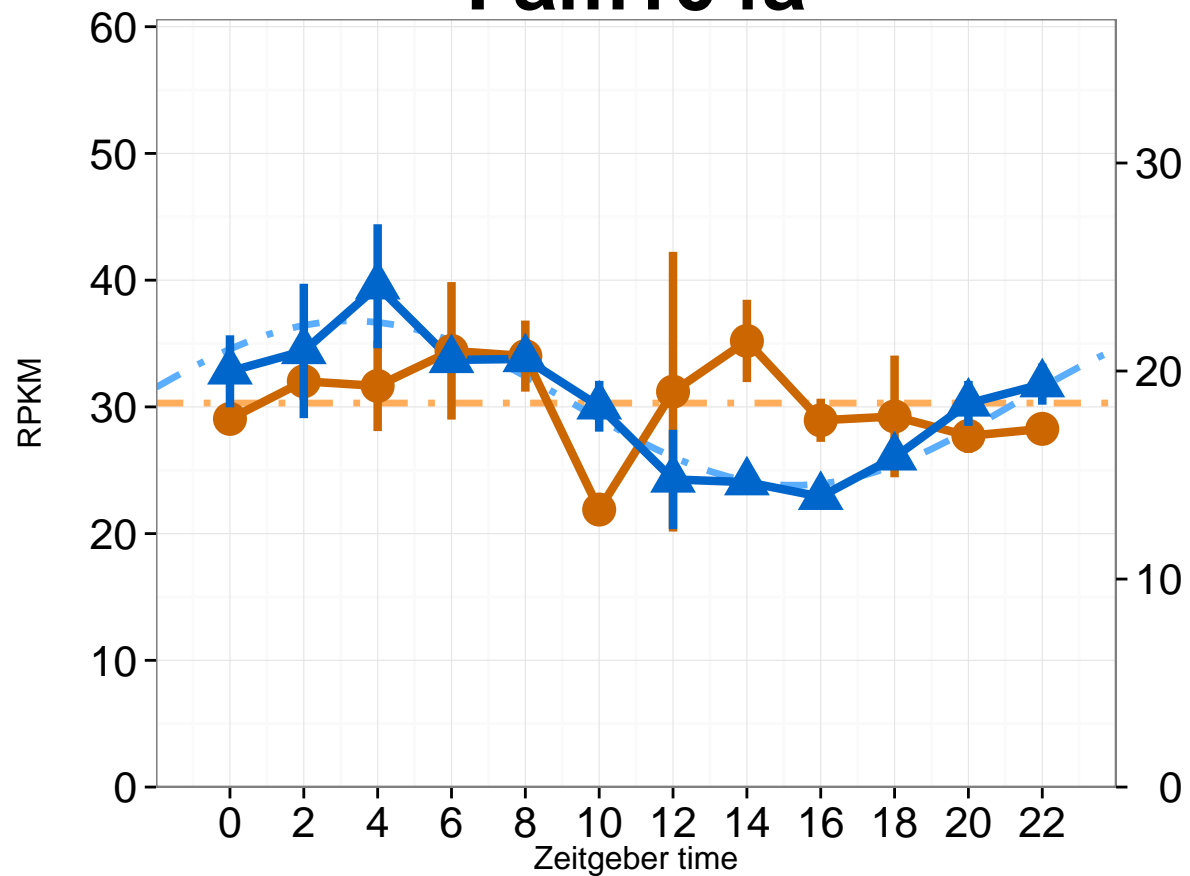

# Fam104a

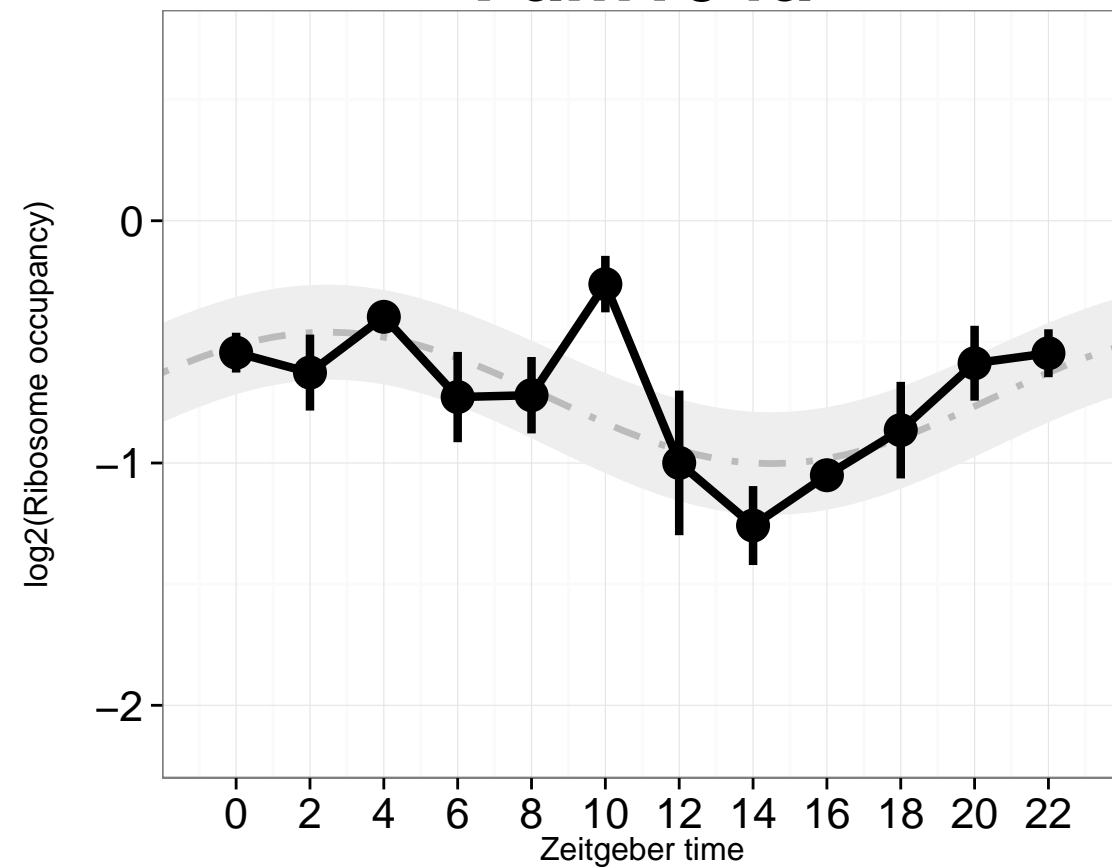

Supplement: Supplementary file 12661 [file 1]

## Sphk2

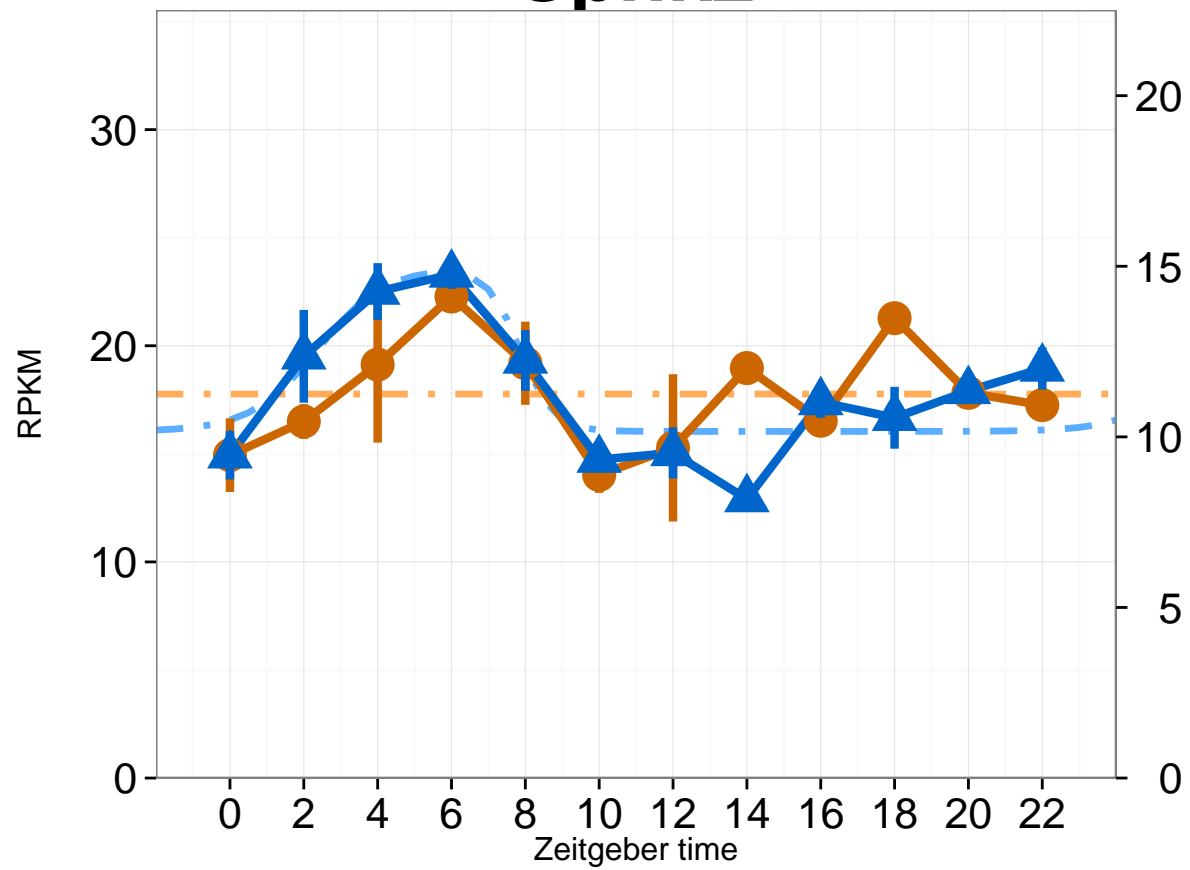

## Sphk2

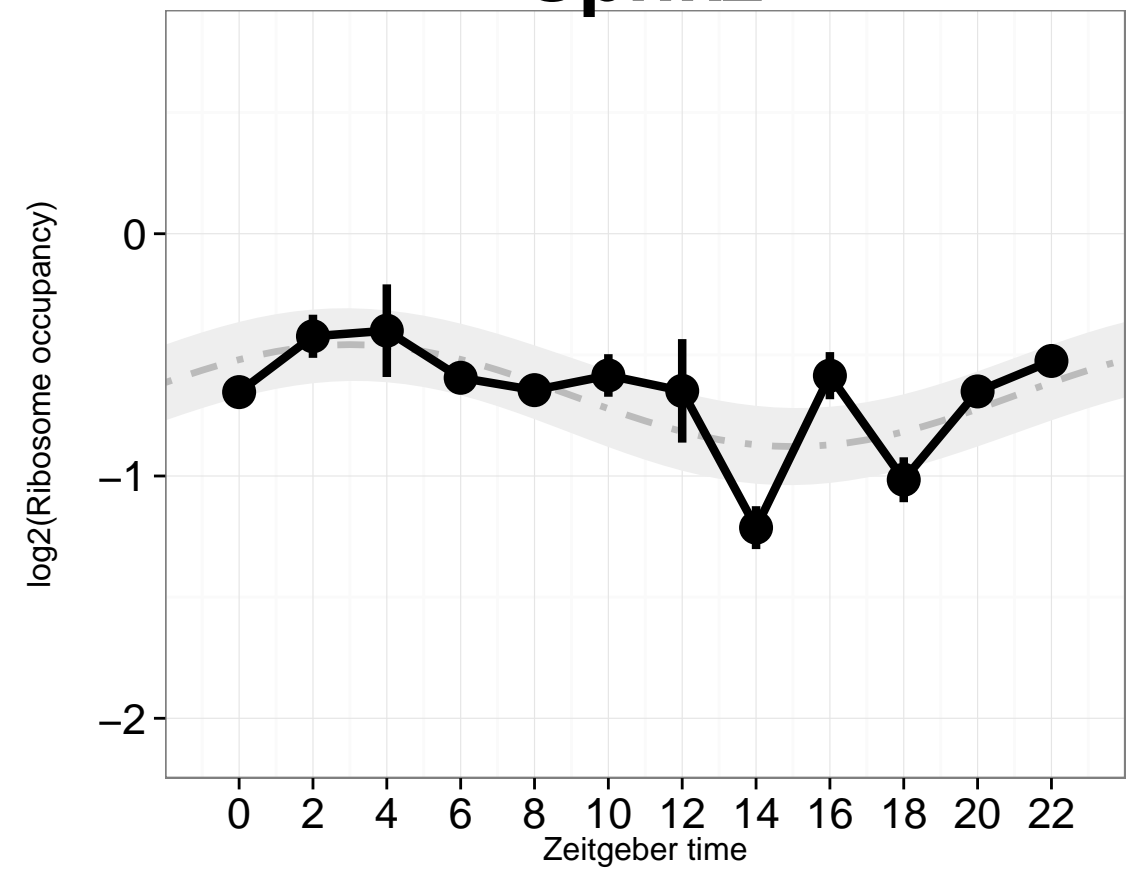

Supplement: Supplementary file 12662 [file 1]

## Cfh

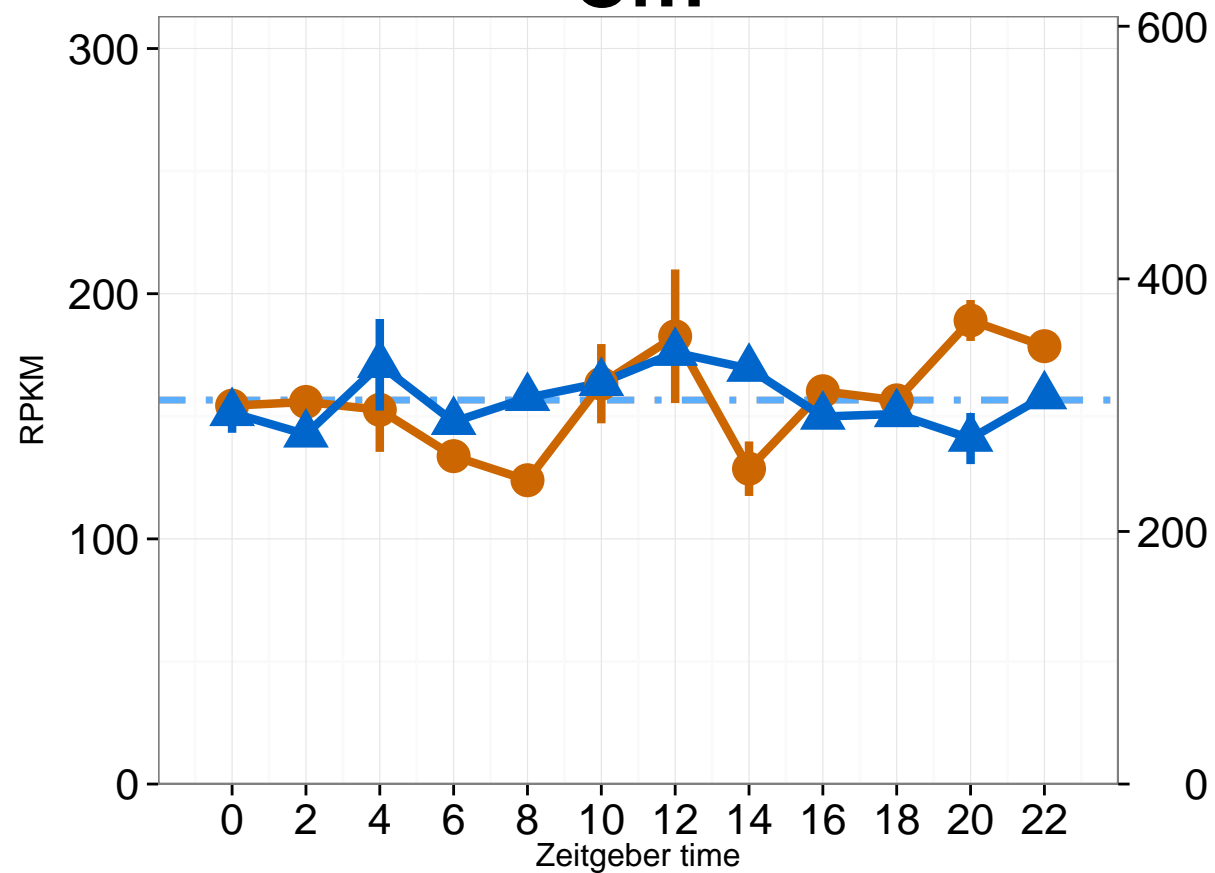

## Cfh

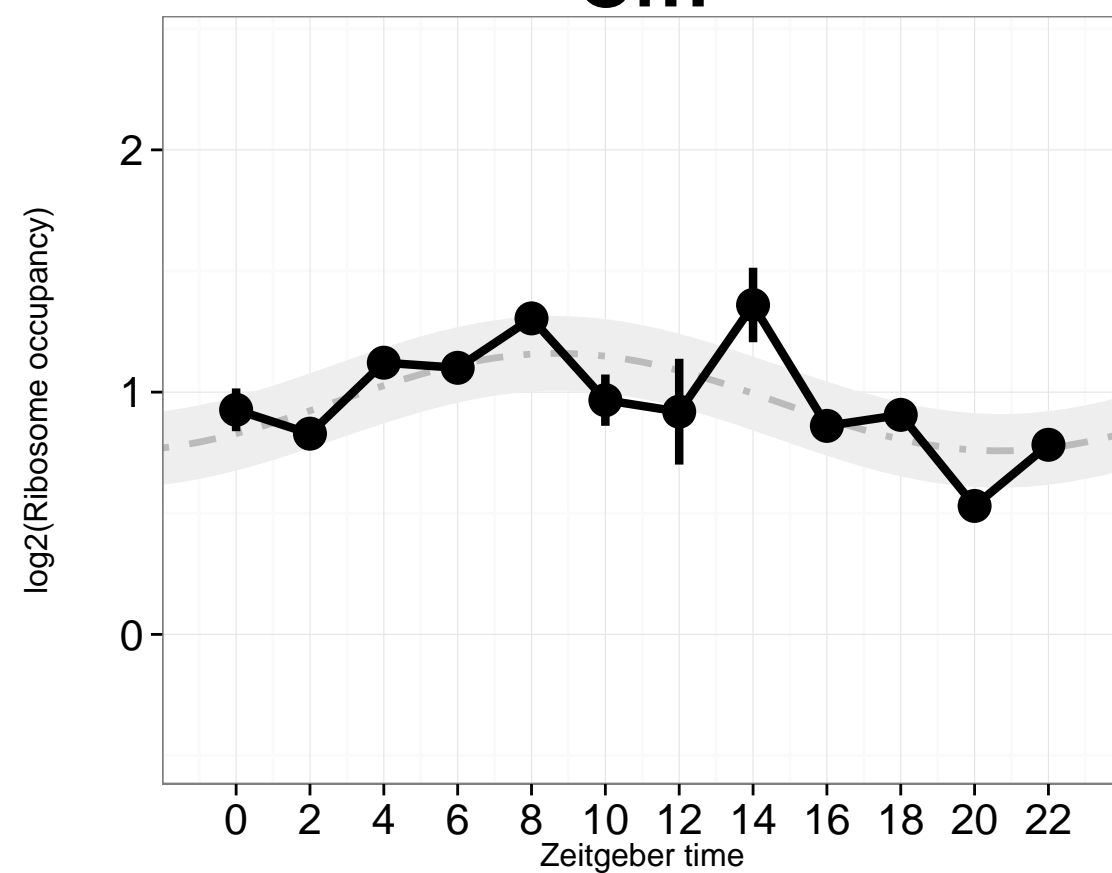

Supplement: Supplementary file 12663 [file 1]

## Apool

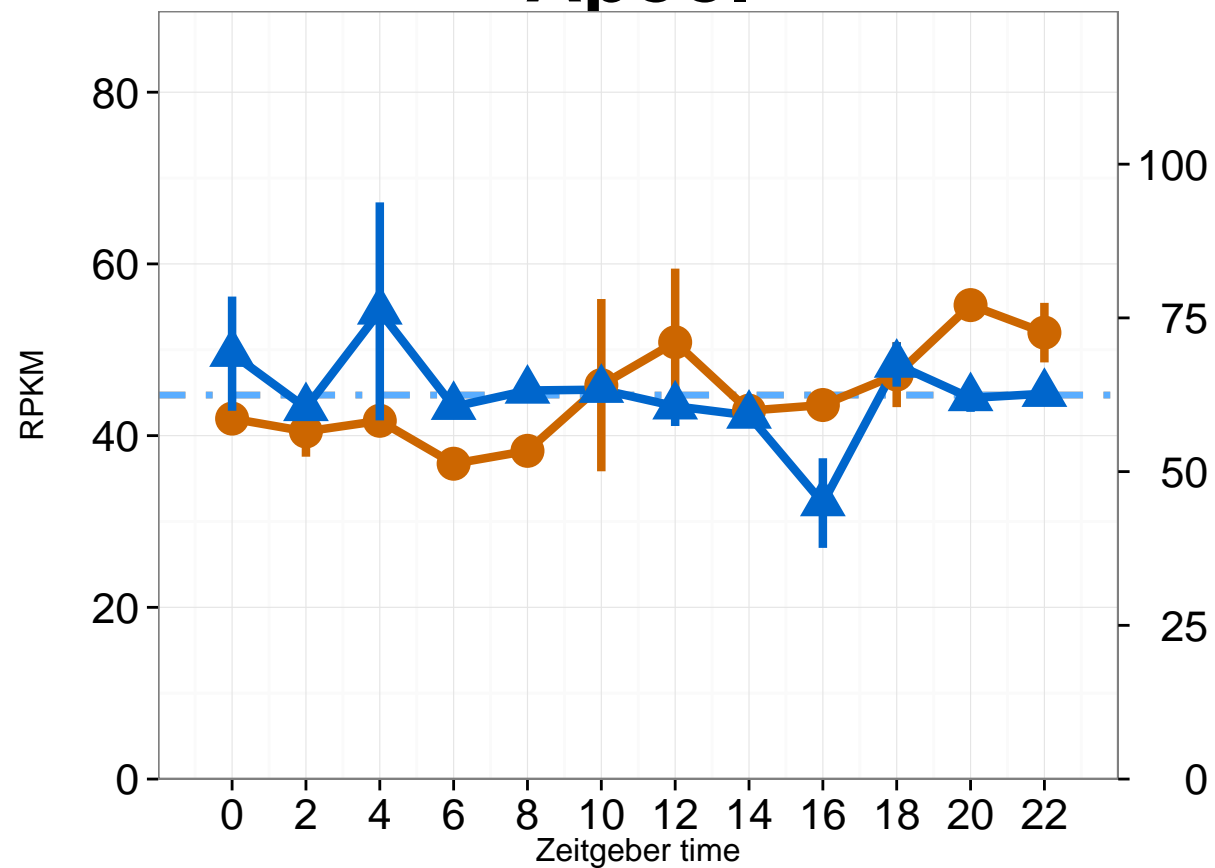

## Apool

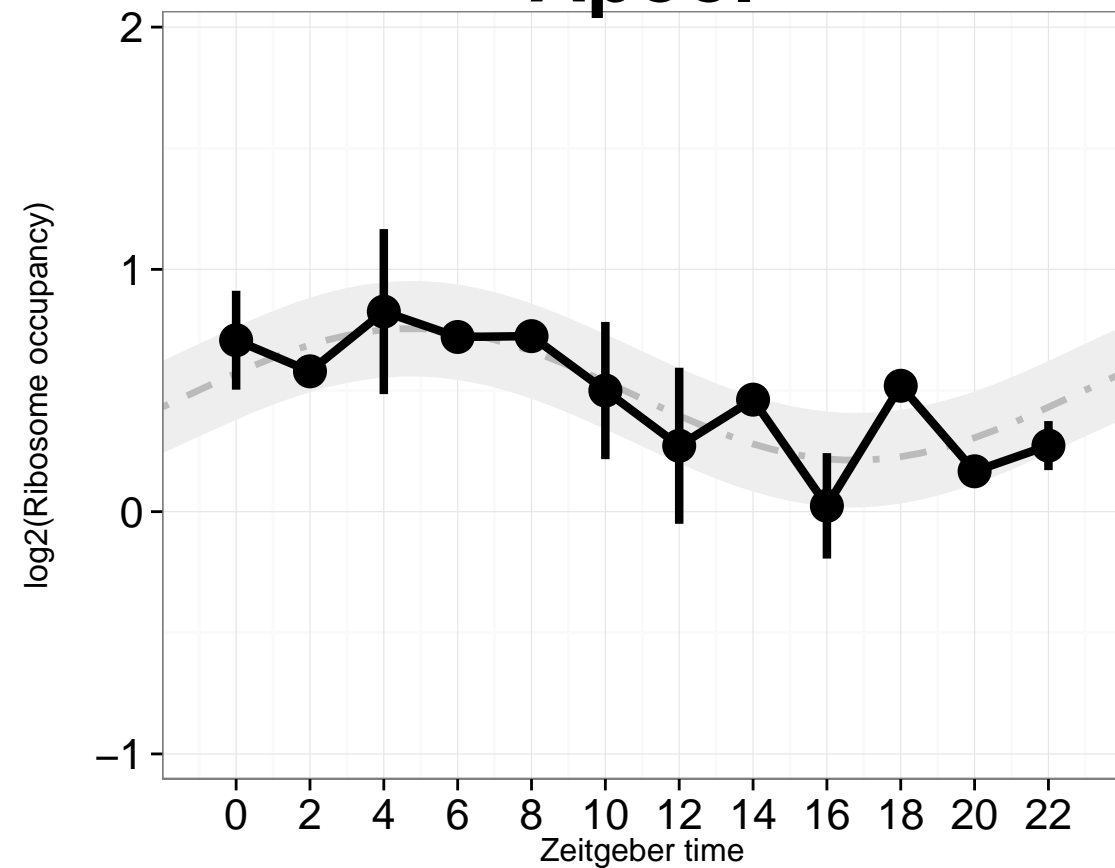

Supplement: Supplementary file 12664 [file 1]

# Fxyd4

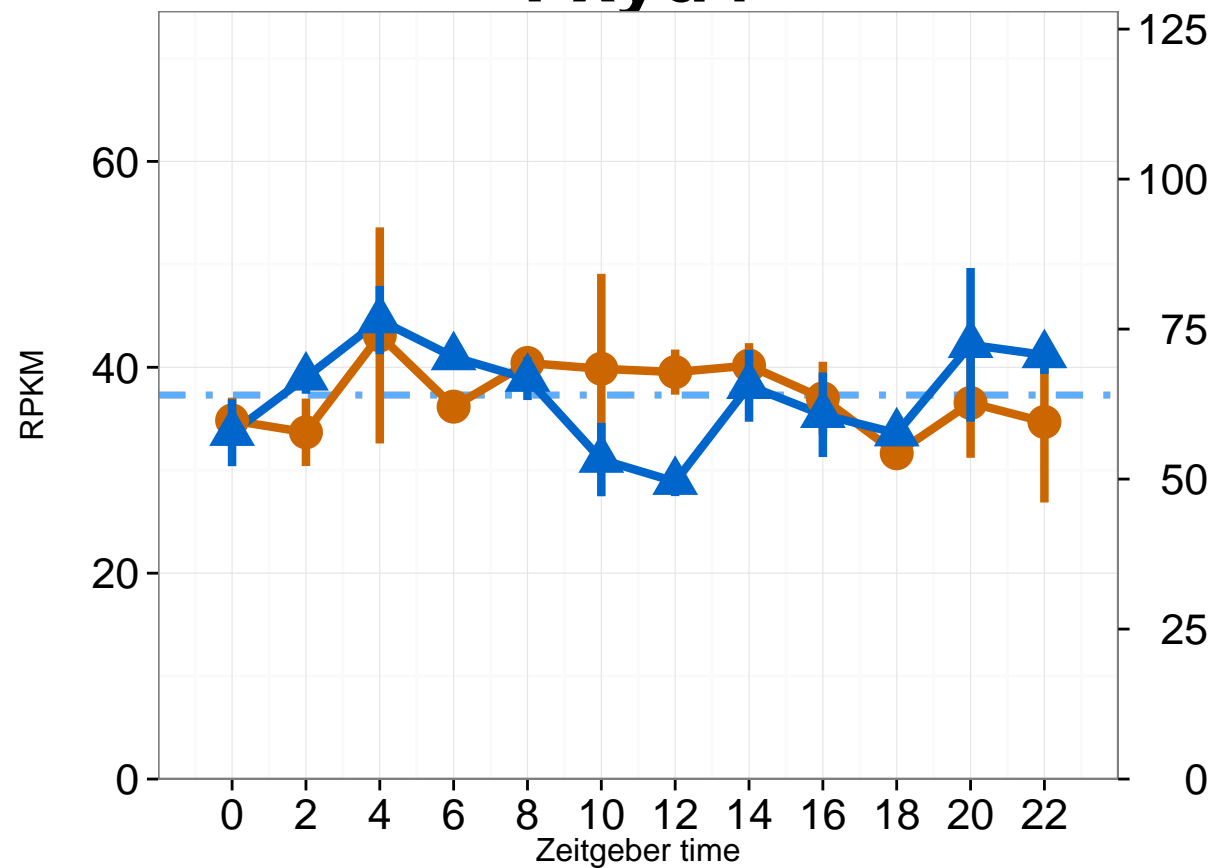

# Fxyd4

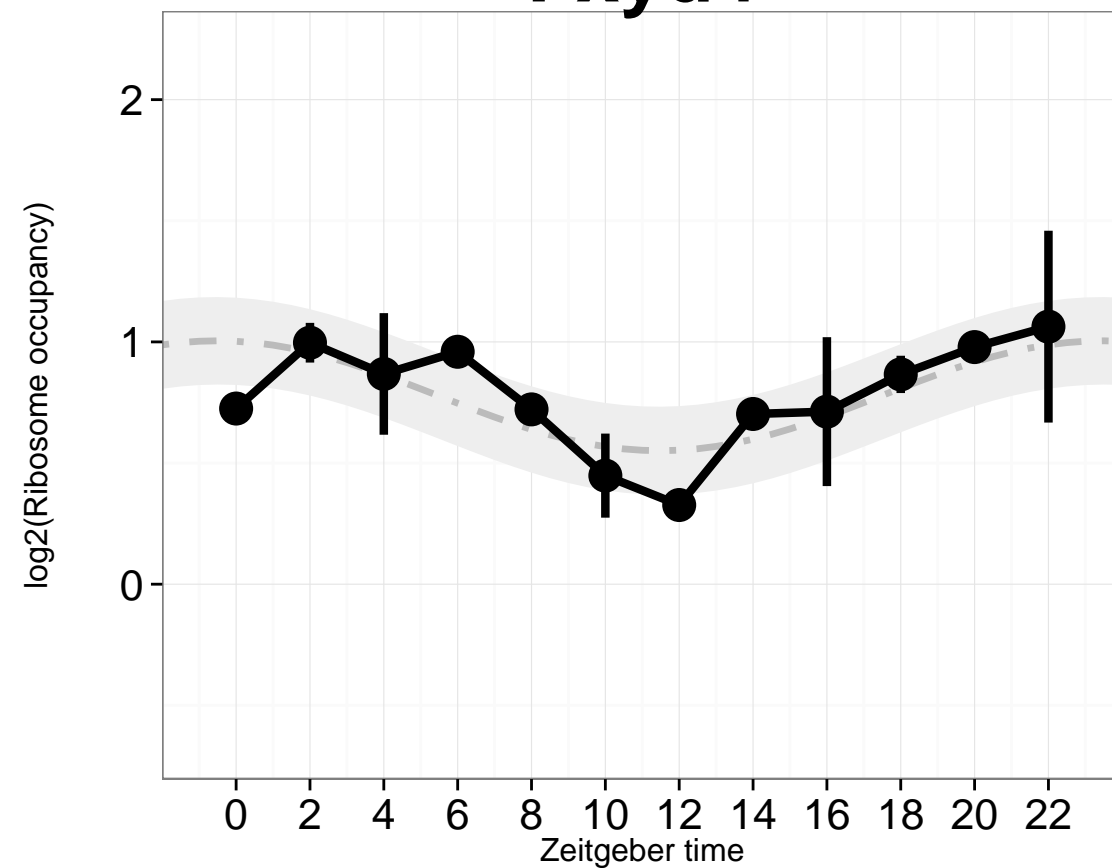

Supplement: Supplementary file 12665 [file 1]

# Parp11

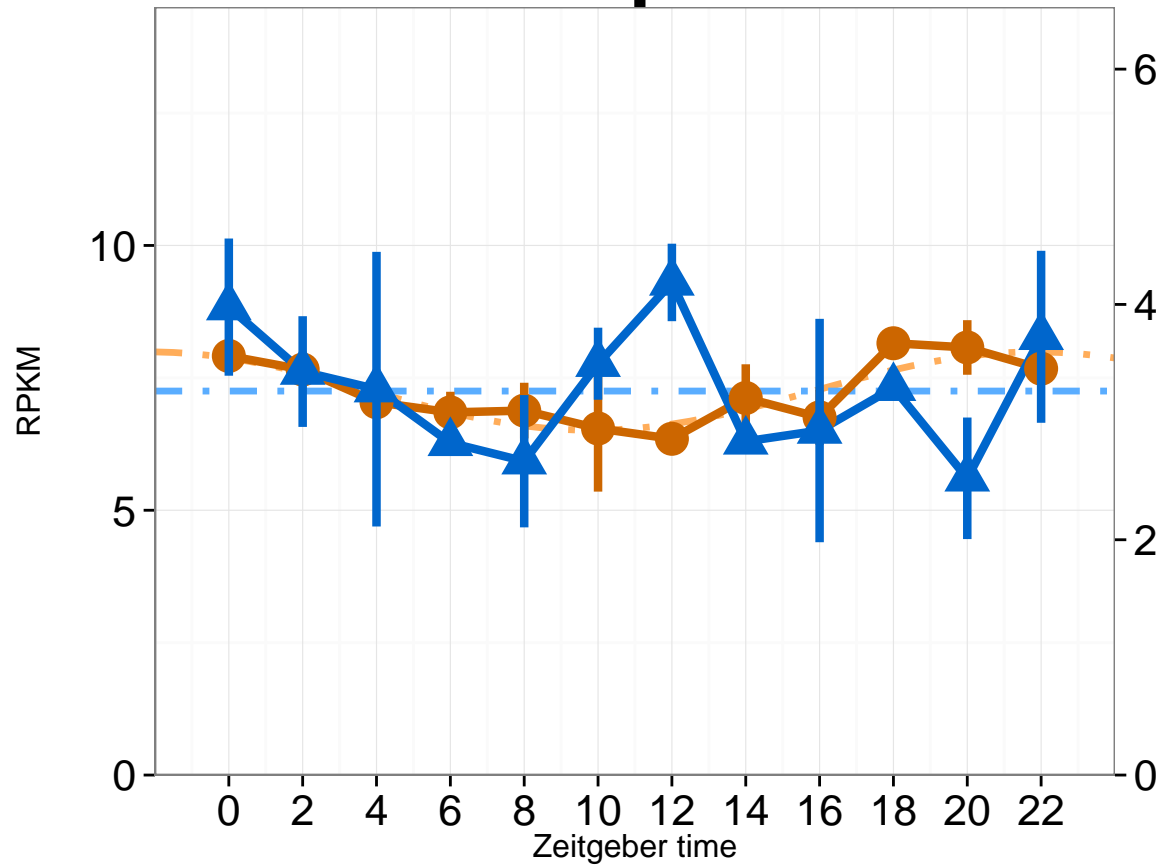

# Parp11

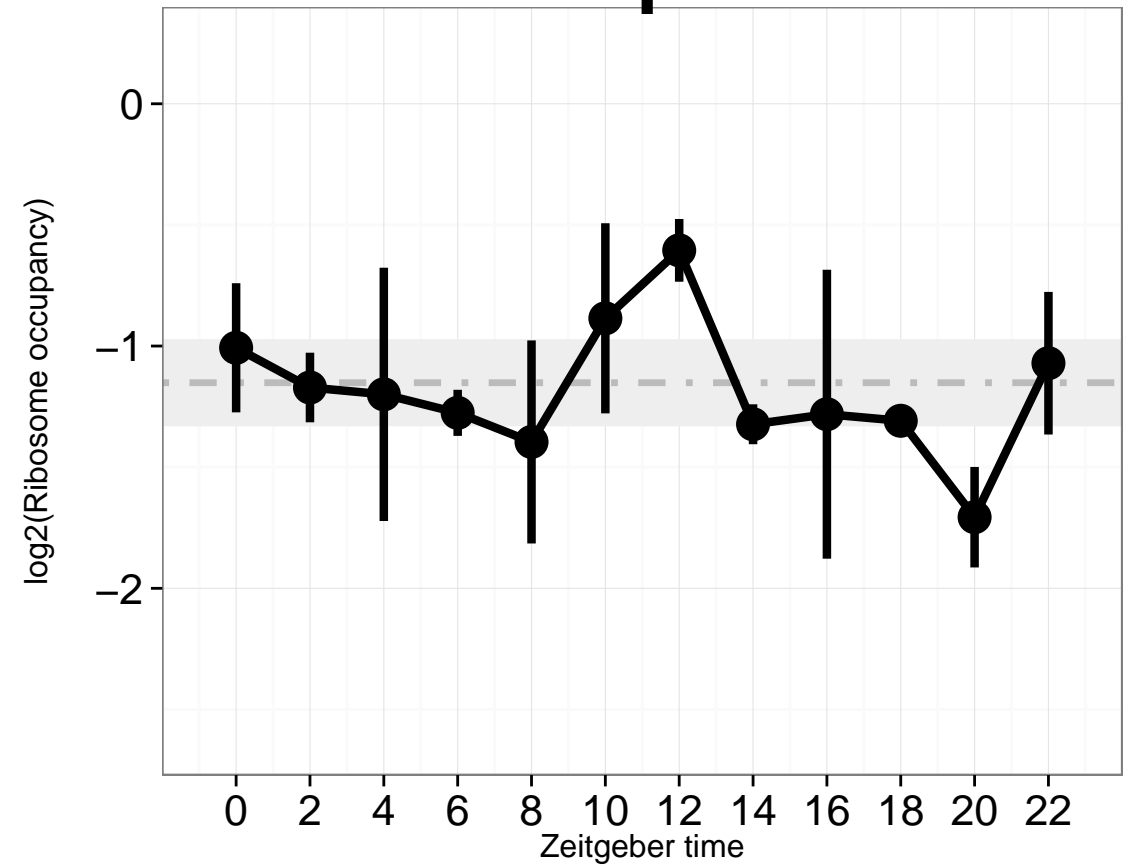

Supplement: Supplementary file 12666 [file 1]

# Cox20

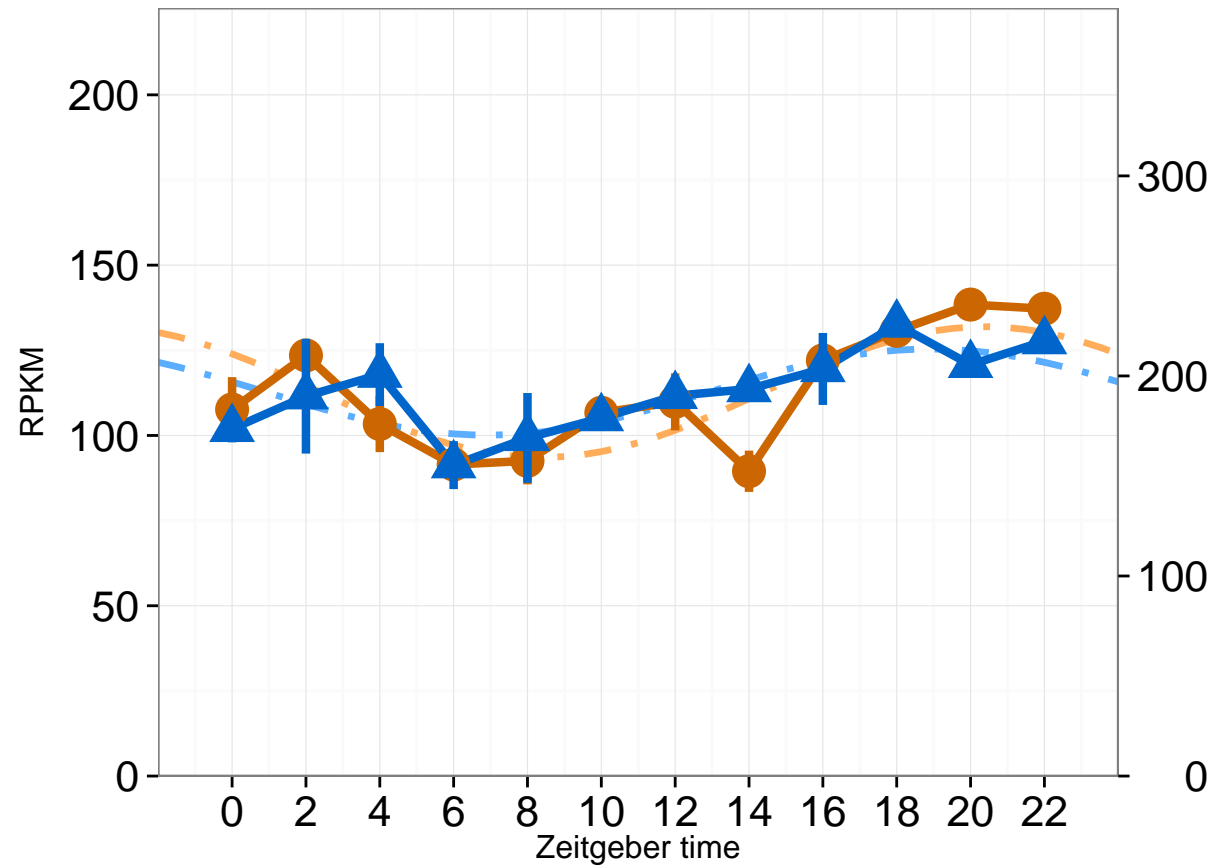

# Cox20

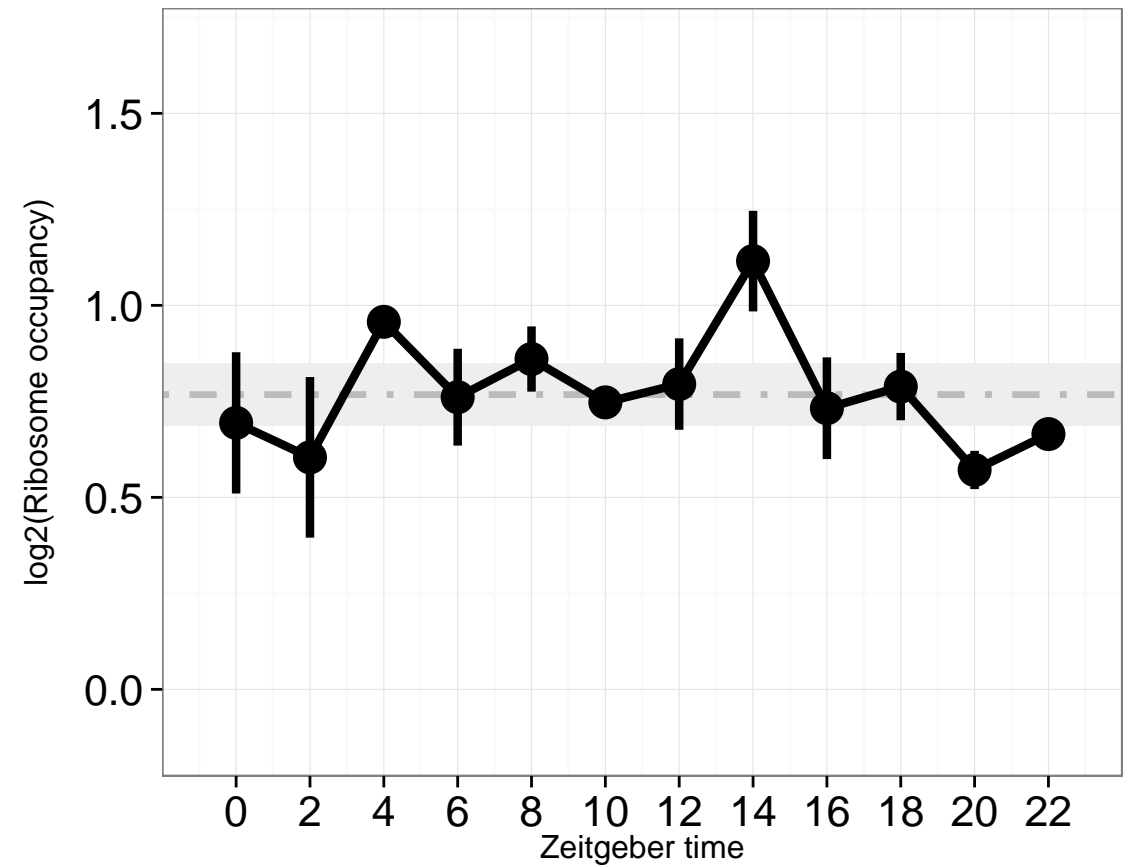

Supplement: Supplementary file 12667 [file 1]

## Qsox2

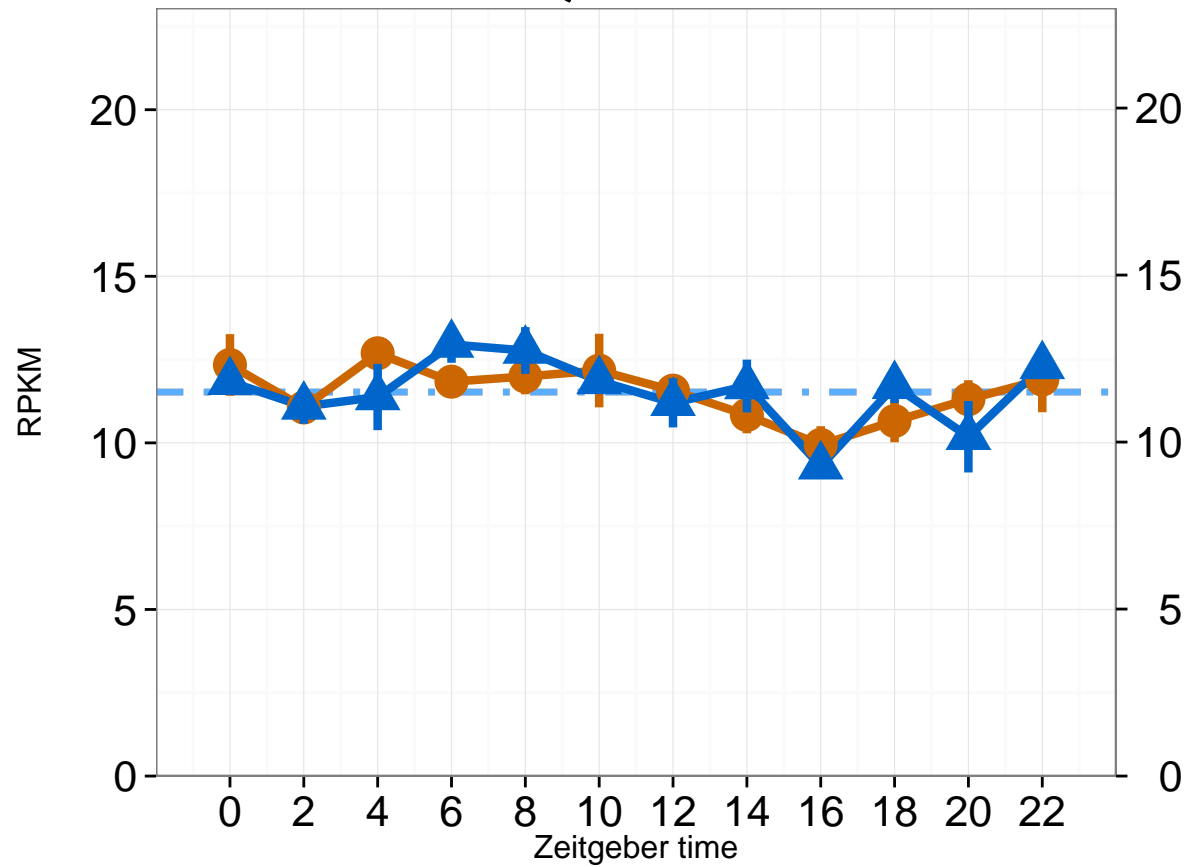

## Qsox2

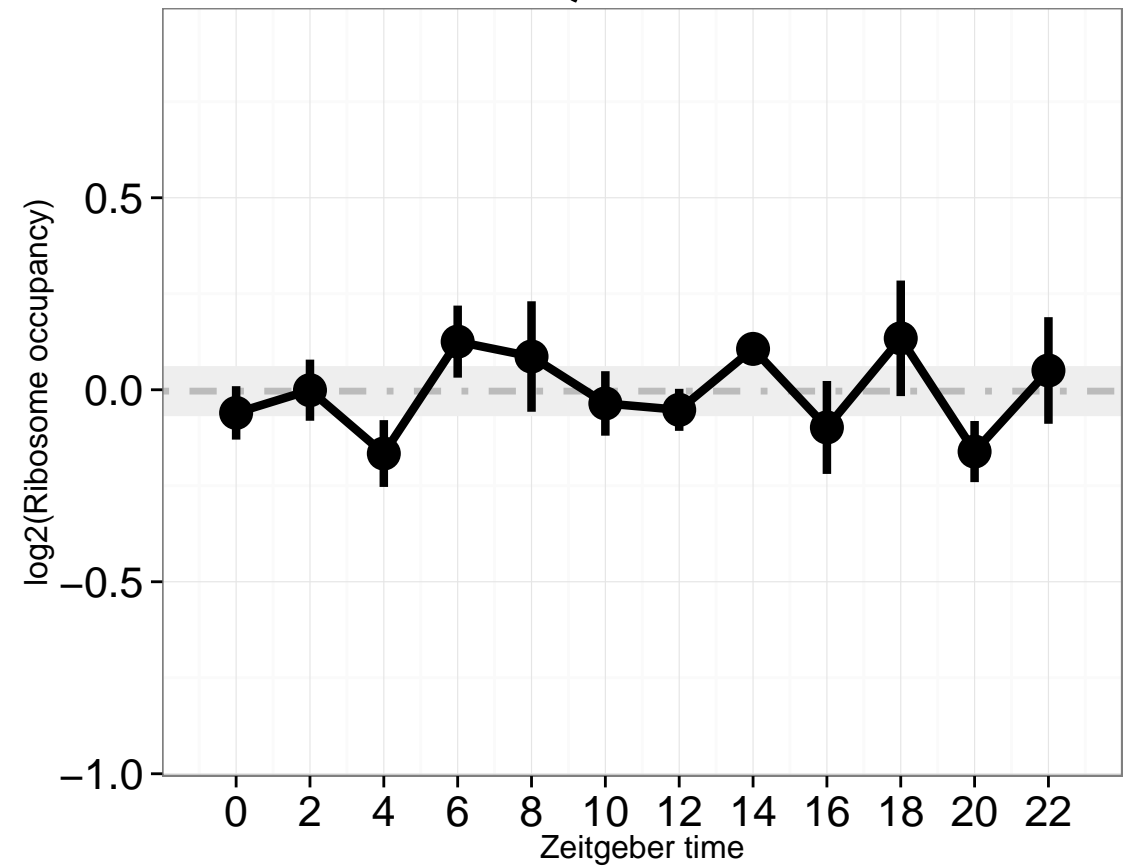

Supplement: Supplementary file 12668 [file 1]

# St3gal1

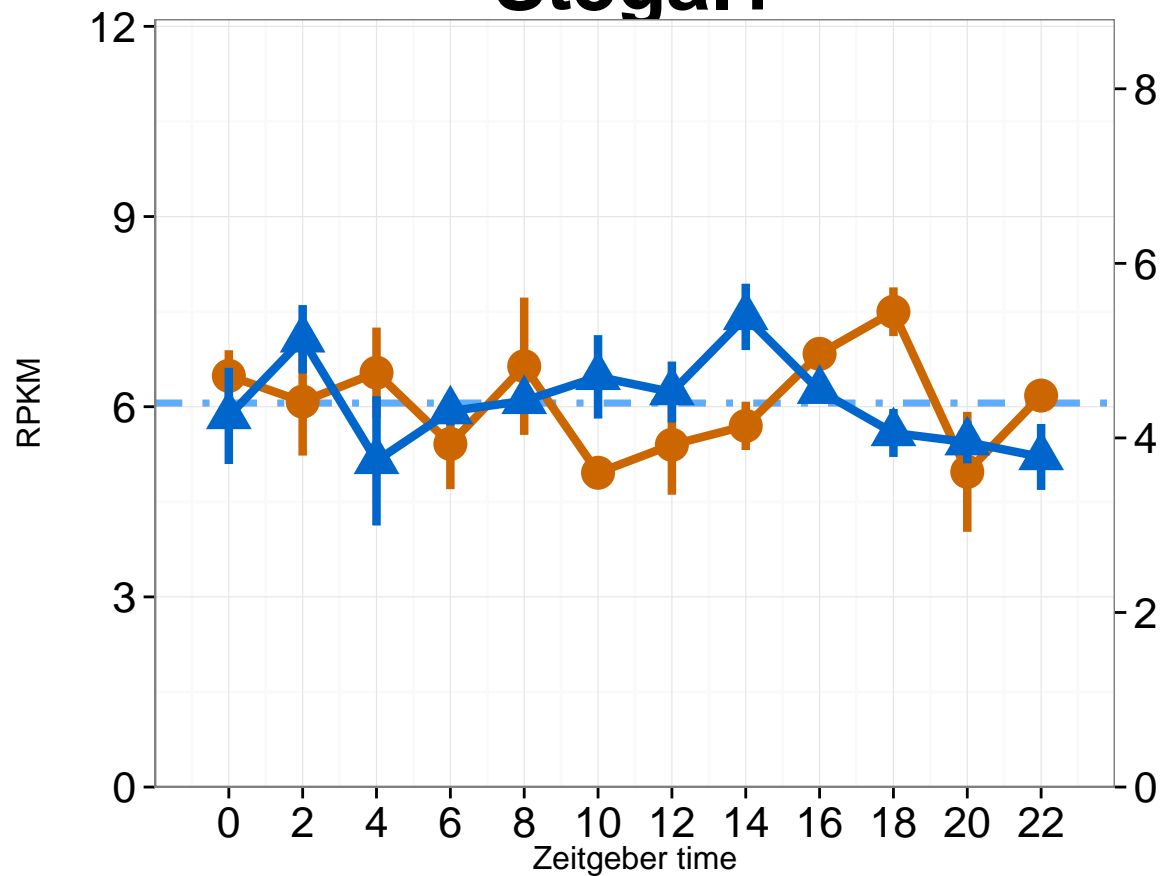

# St3gal1

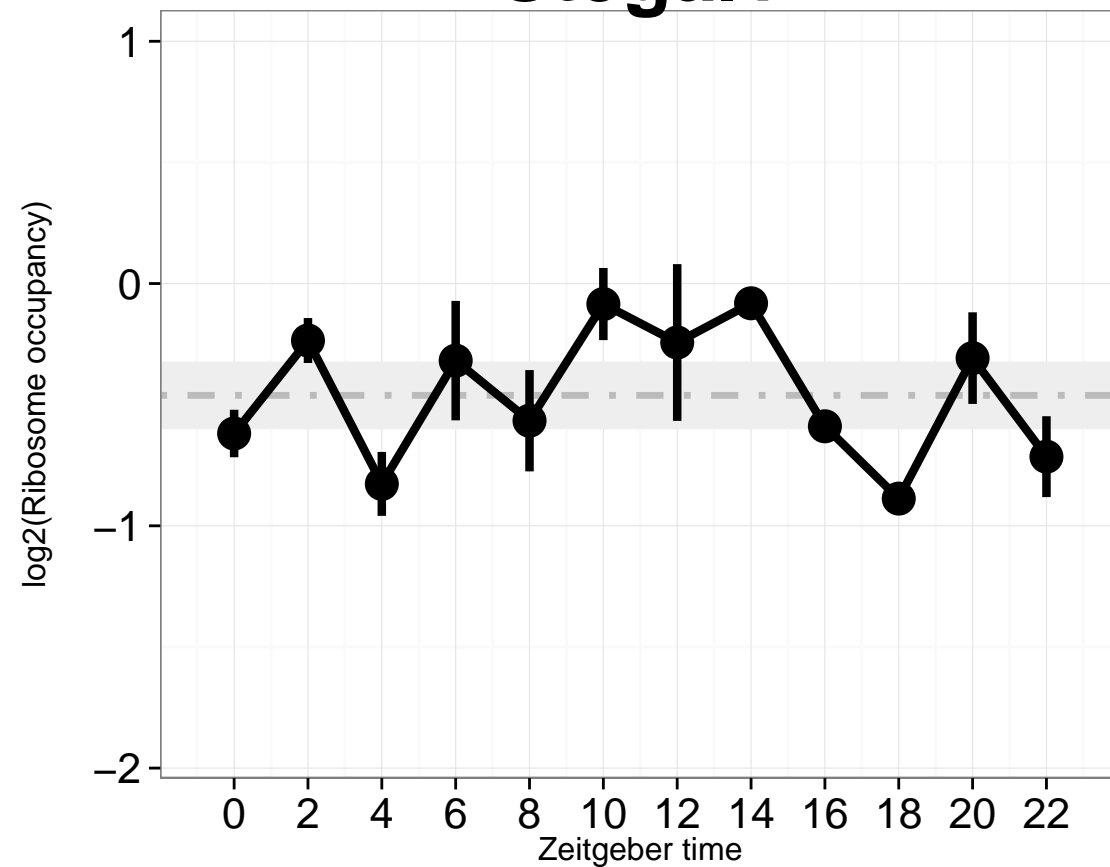

Supplement: Supplementary file 12669 [file 1]

## Xbp1

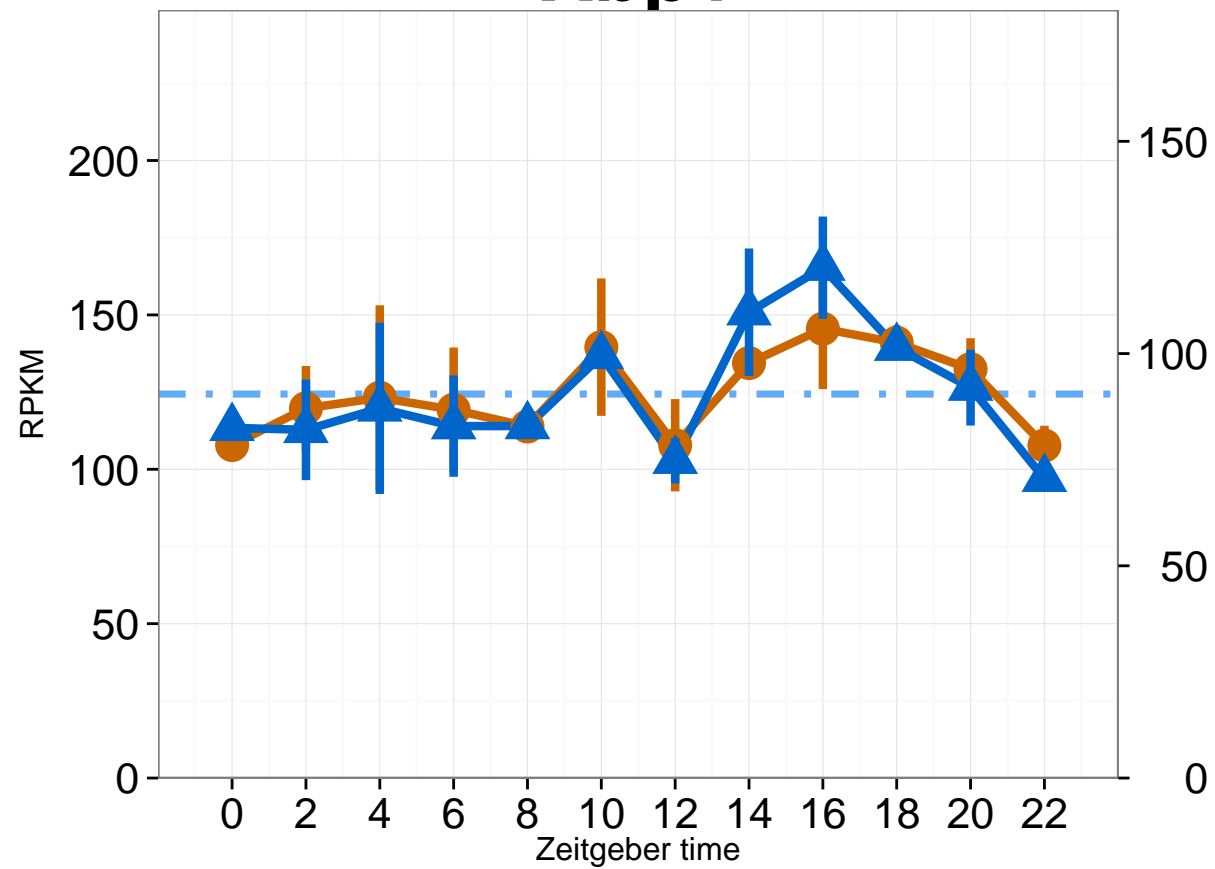

## Xbp1

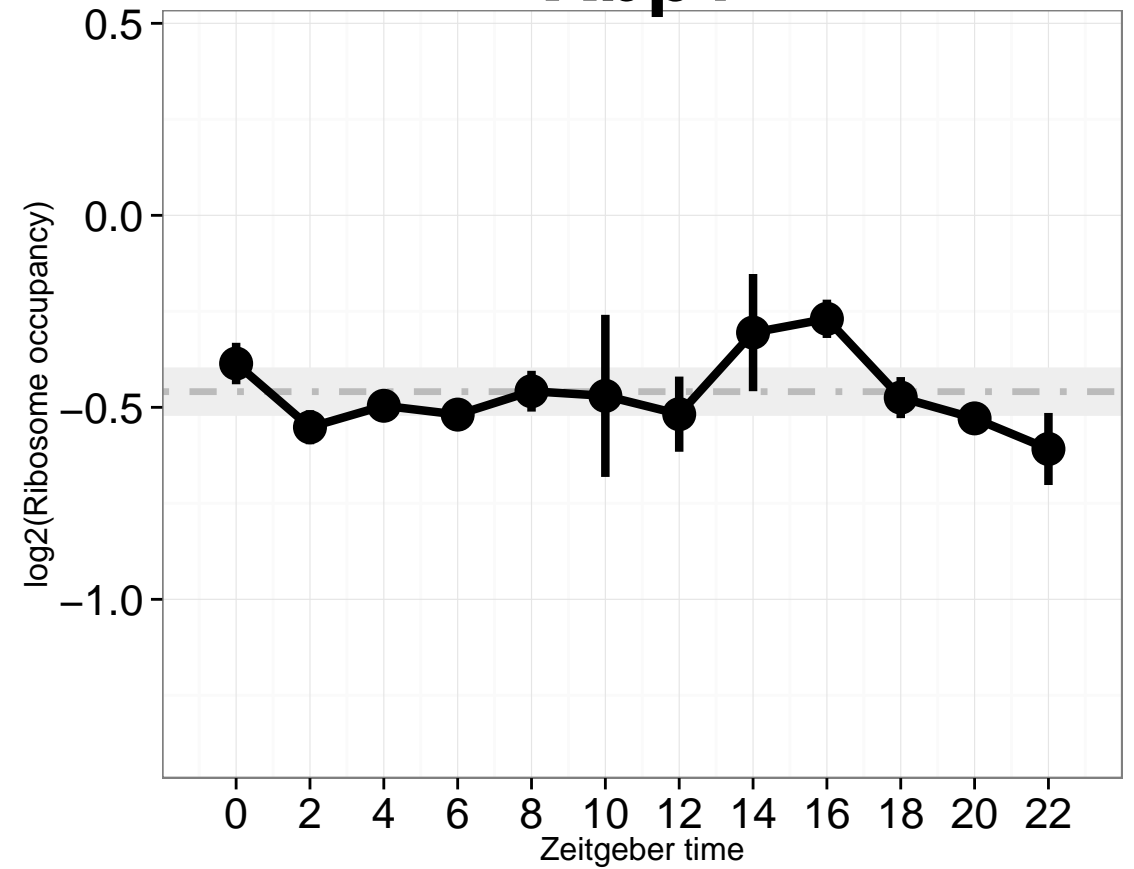

Supplement: Supplementary file 12670 [file 1]

## Impdh2

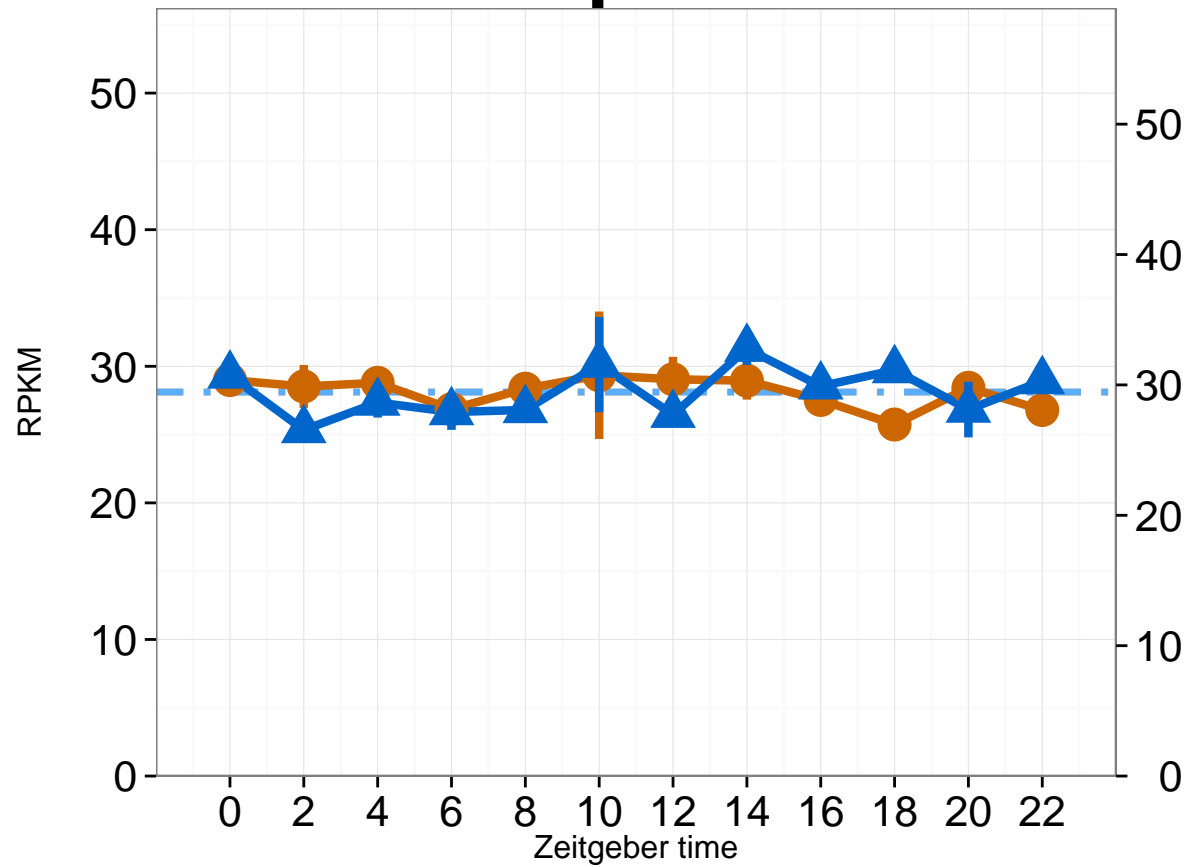

## Impdh2

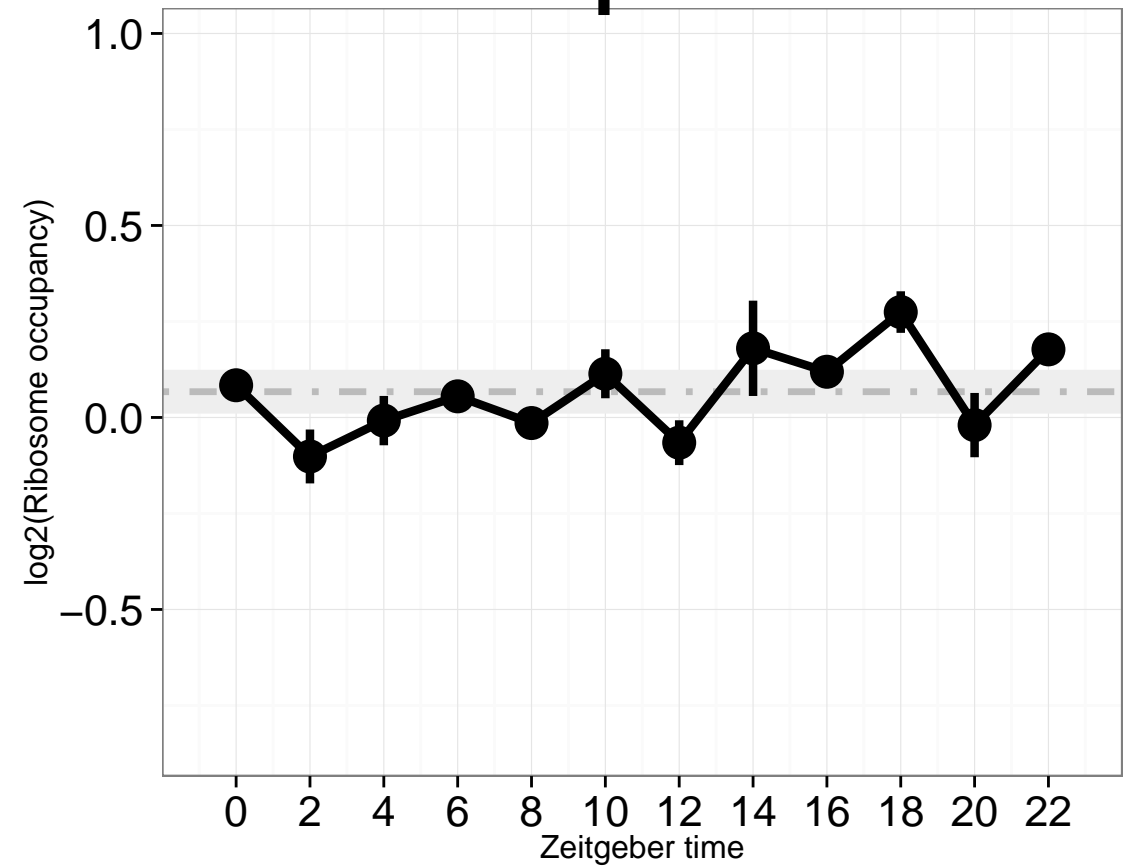

Supplement: Supplementary file 12671 [file 1]

## Mtg2

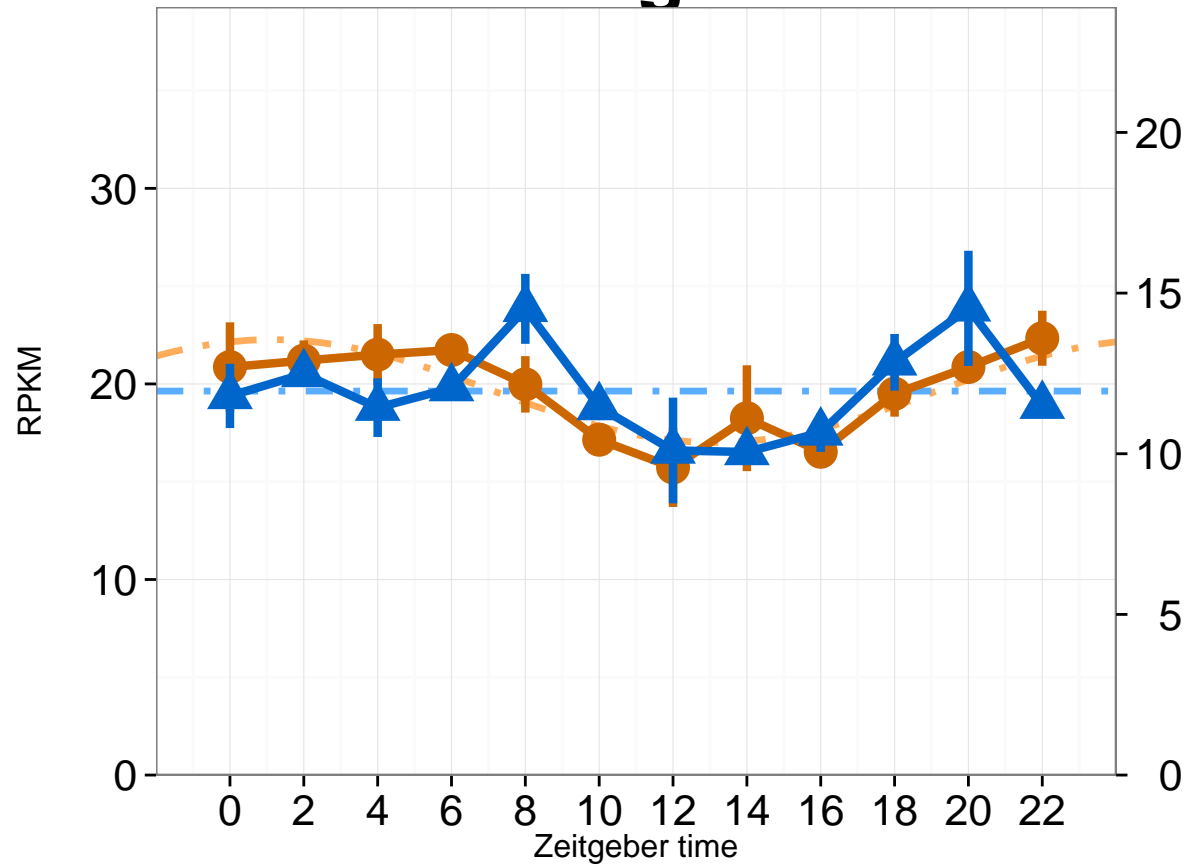

## Mtg2

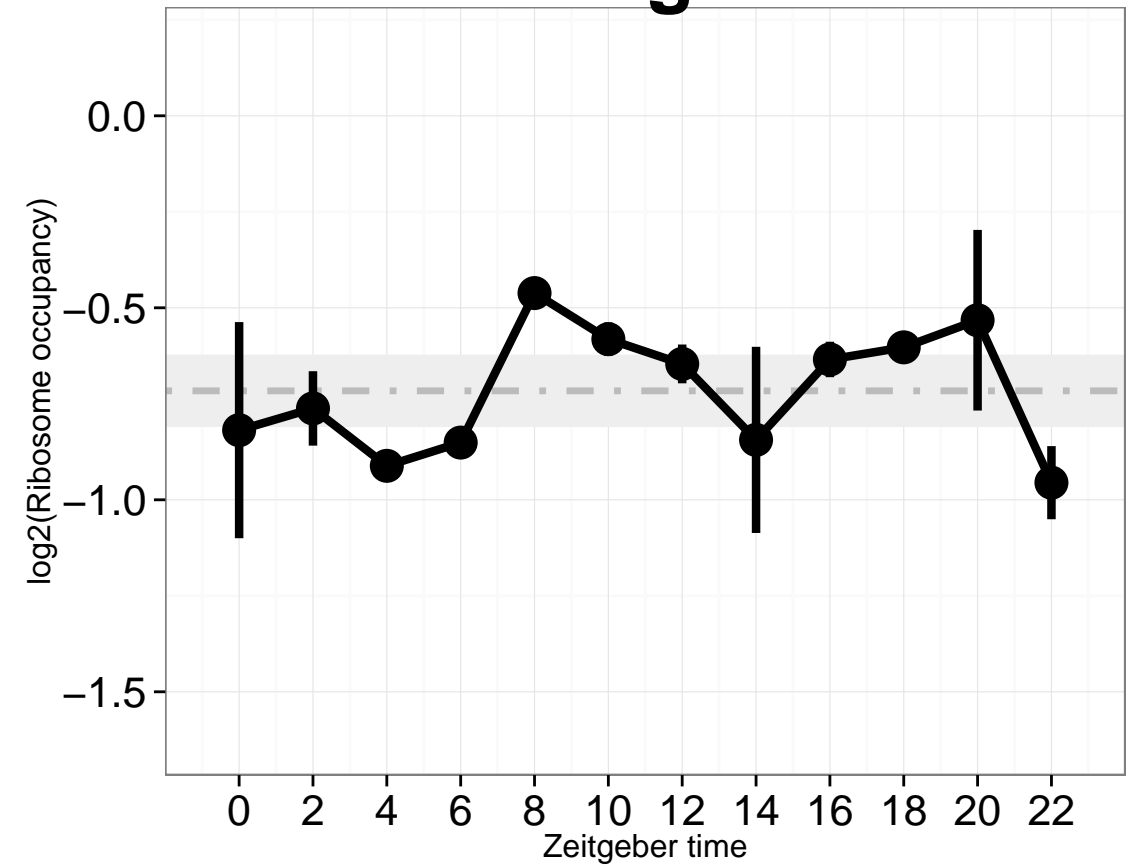

Supplement: Supplementary file 12672 [file 1]

## Arhgap33

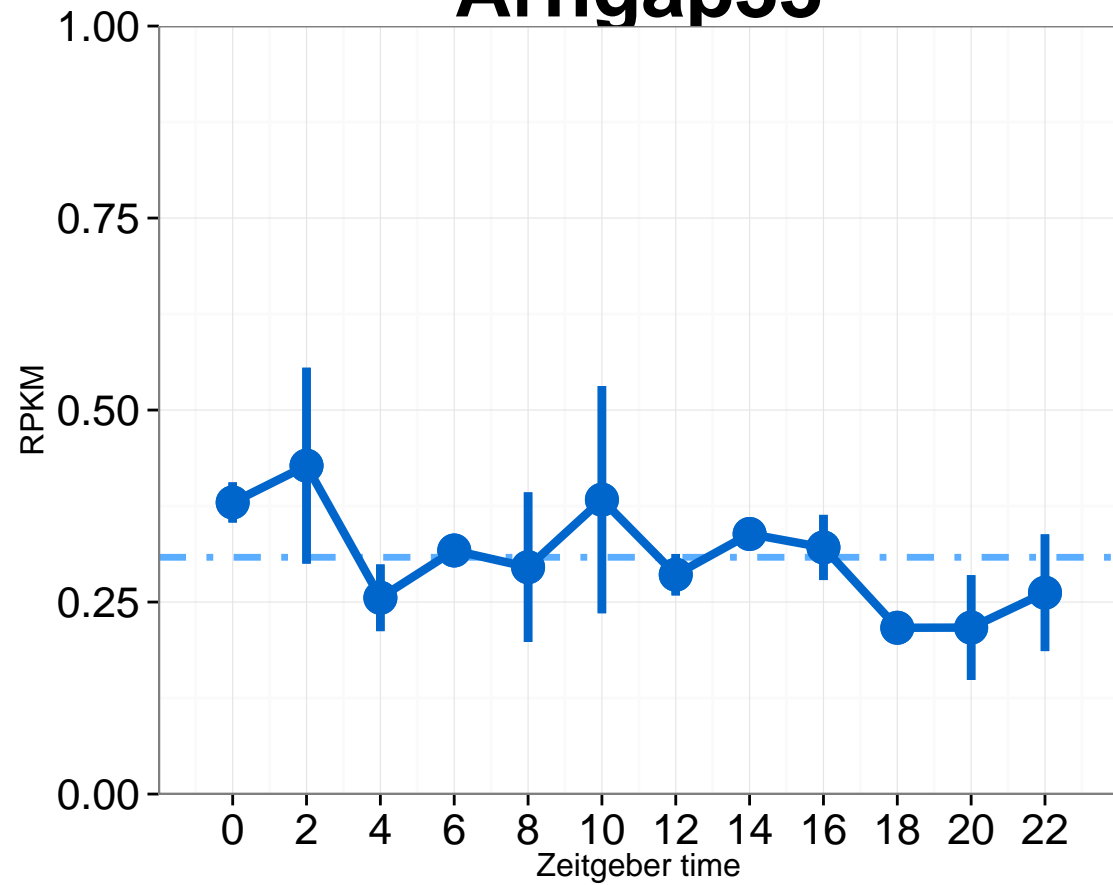

## Arhgap33 log2(Ribosome occupancy)

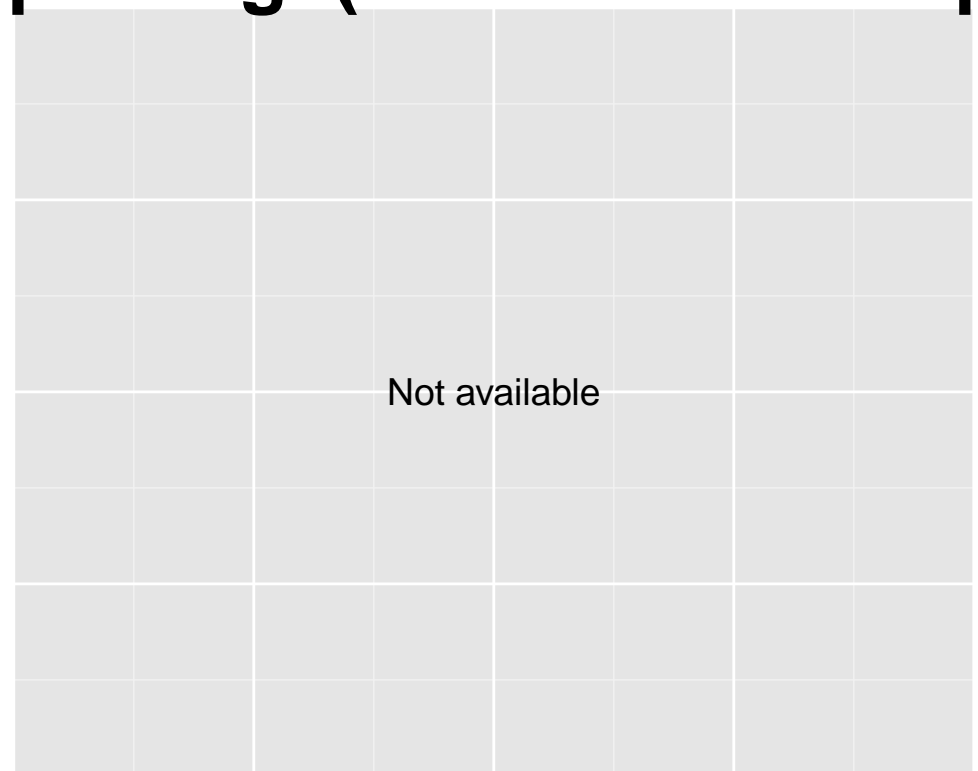

Supplement: Supplementary file 12673 [file 1]

## Zfp330

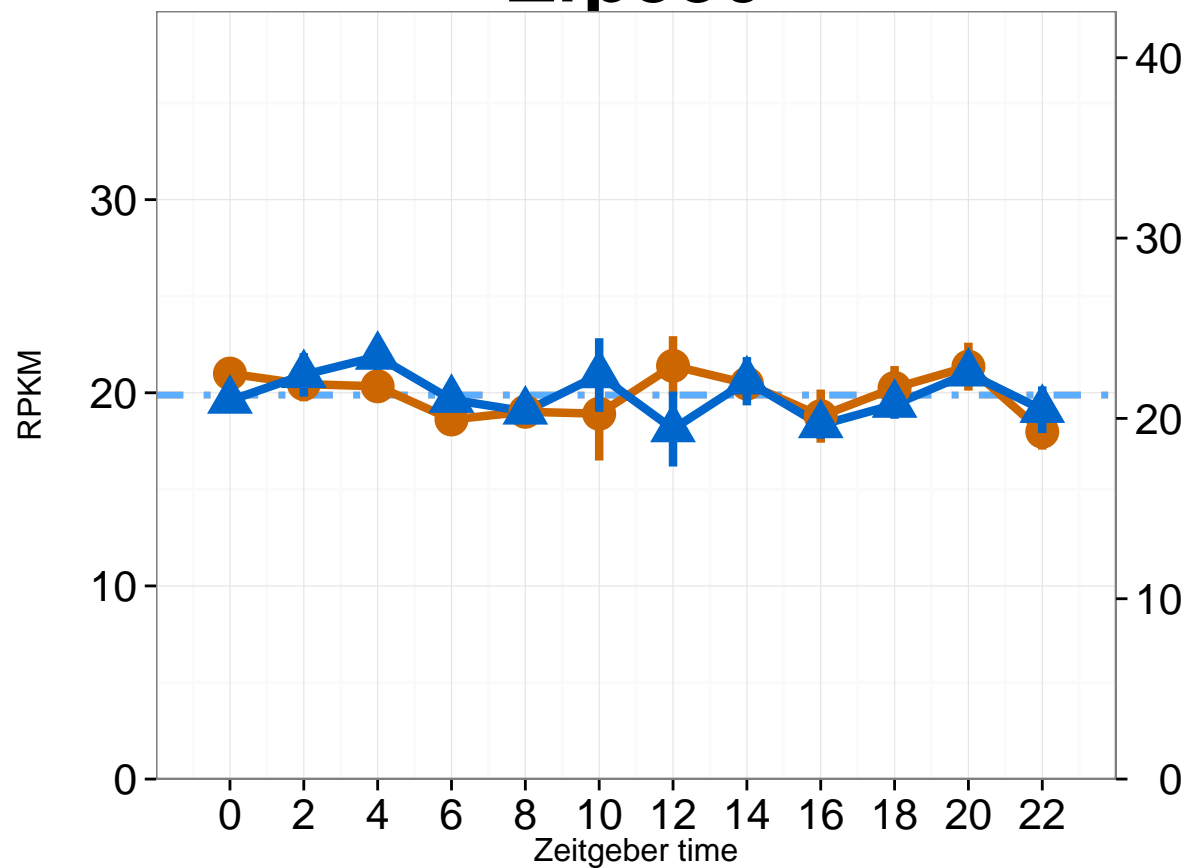

## Zfp330

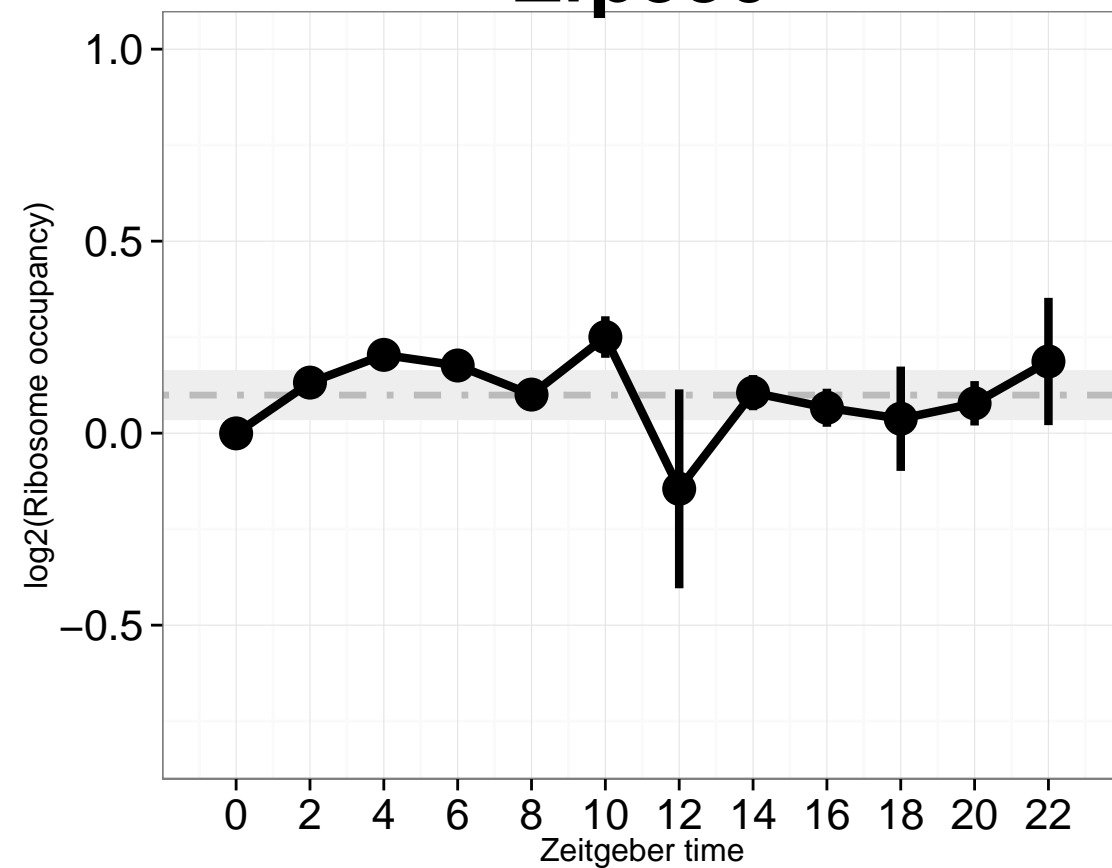

Supplement: Supplementary file 12674 [file 1]

## Kif15

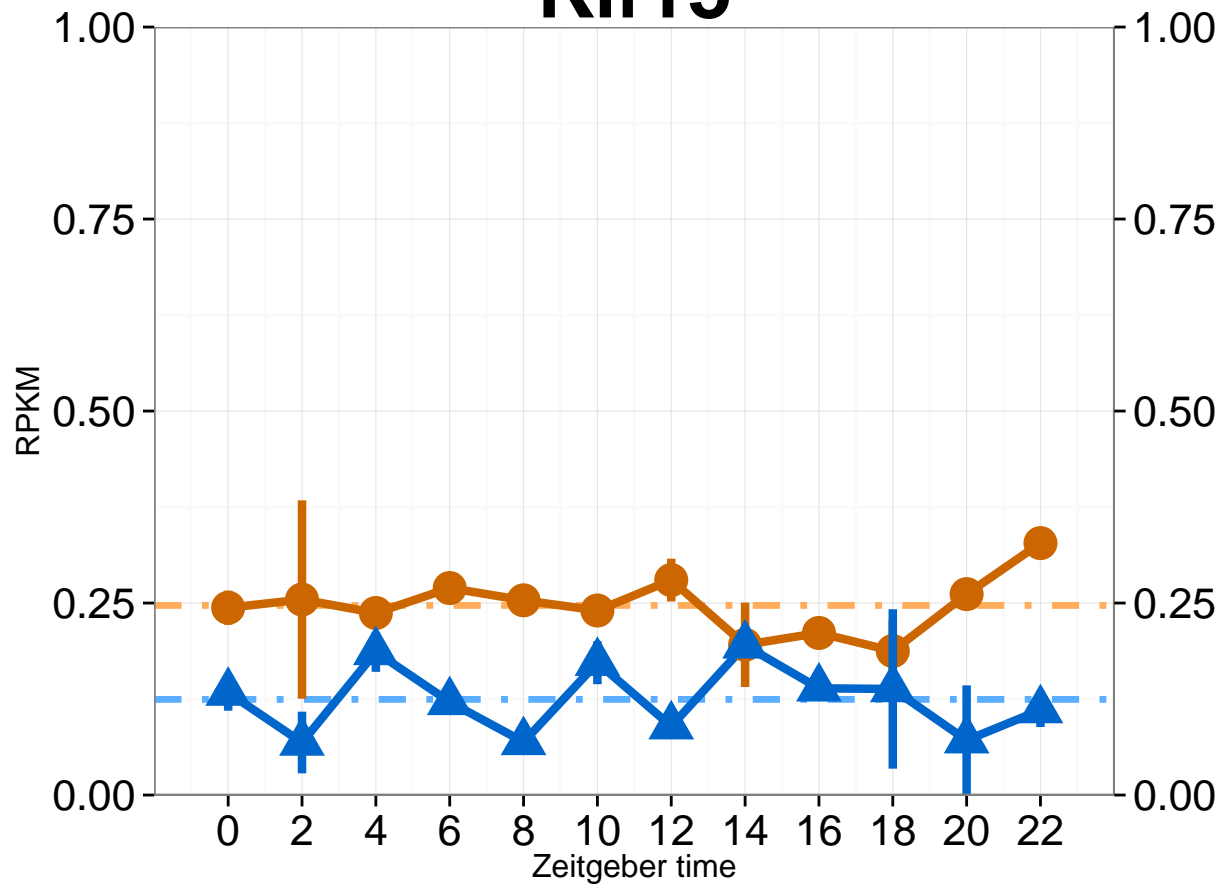

## Kif15

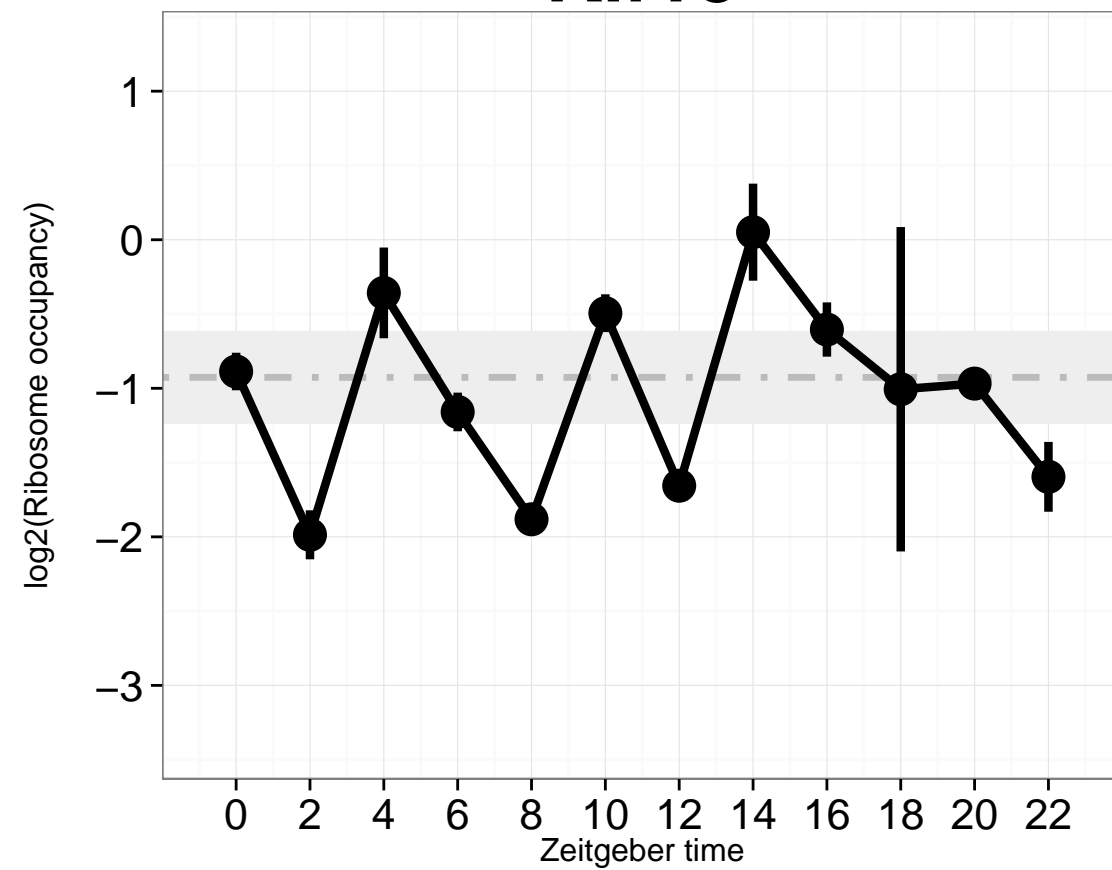

Supplement: Supplementary file 12675 [file 1]

**Tns4 TR**

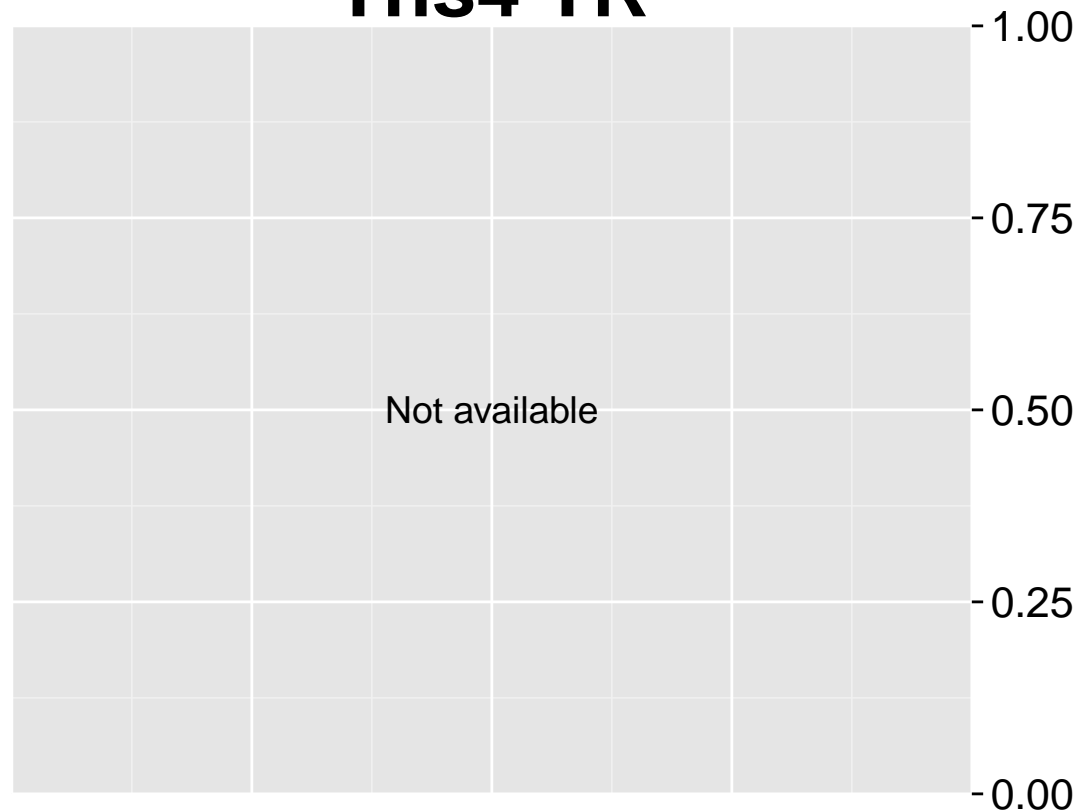

**Tns4 log2(Ribosome occupancy)**

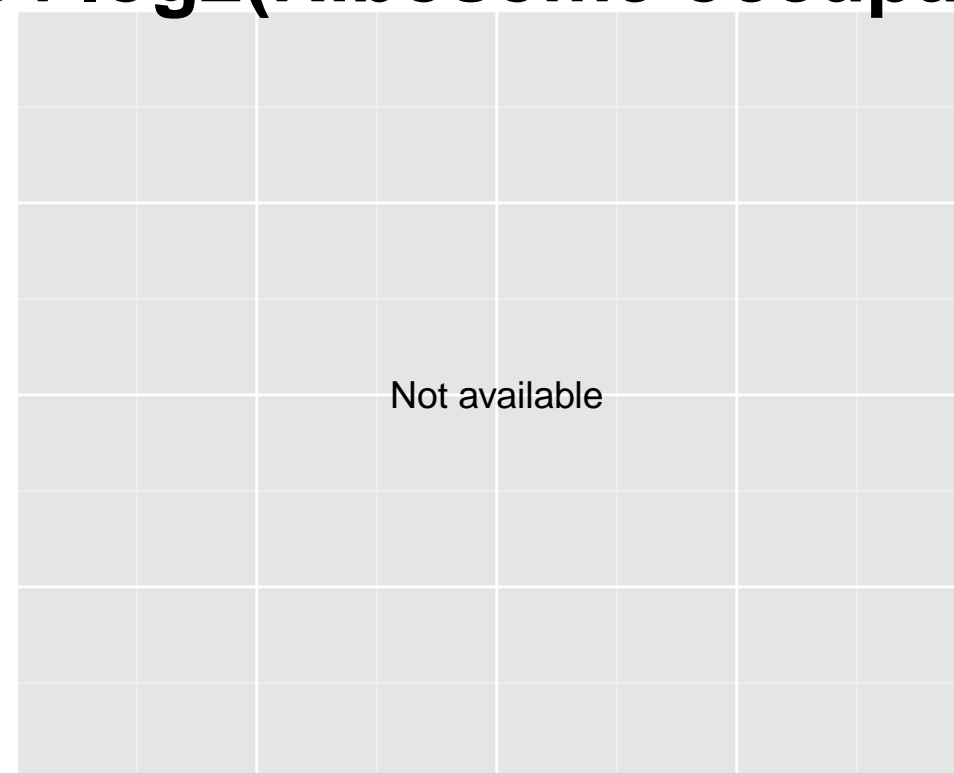

Supplement: Supplementary file 12676 [file 1]

## Nudcd1

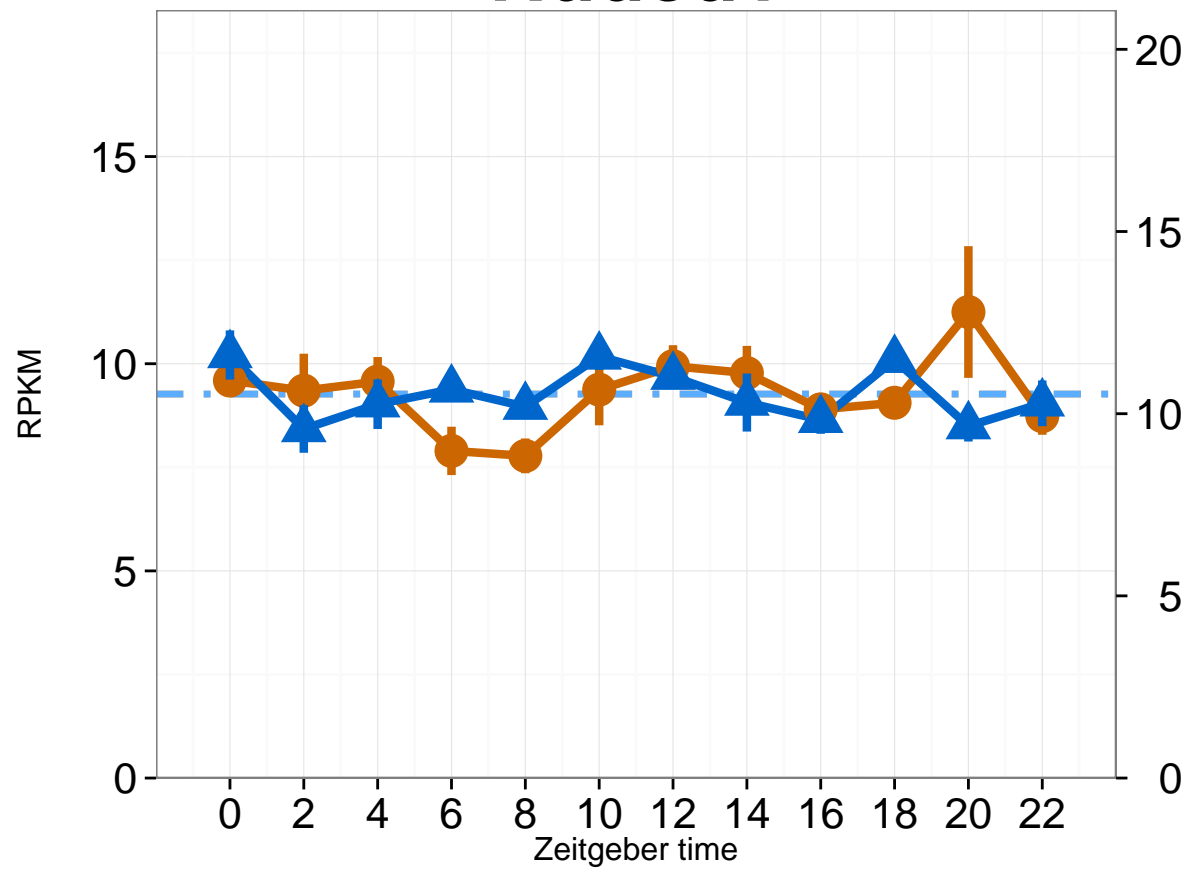

## Nudcd1

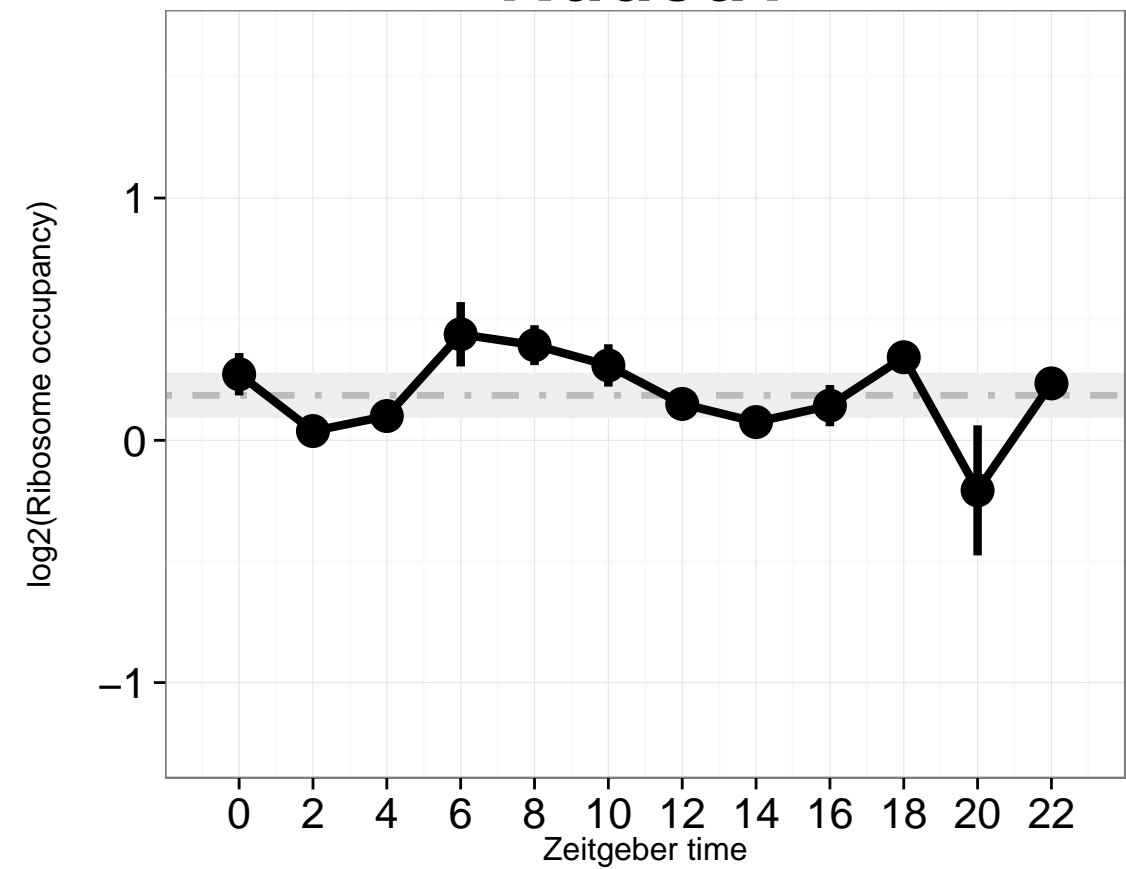

Supplement: Supplementary file 12677 [file 1]

# Mup3

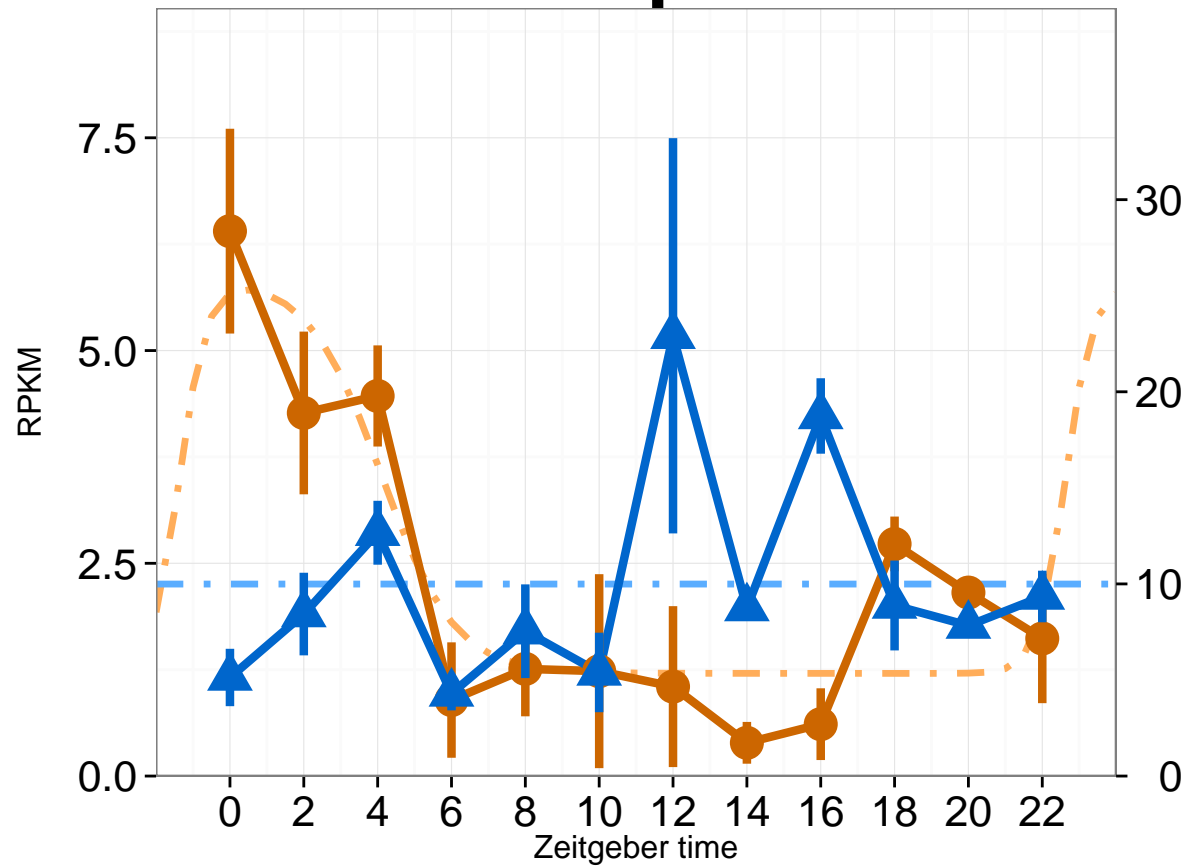

# Mup3

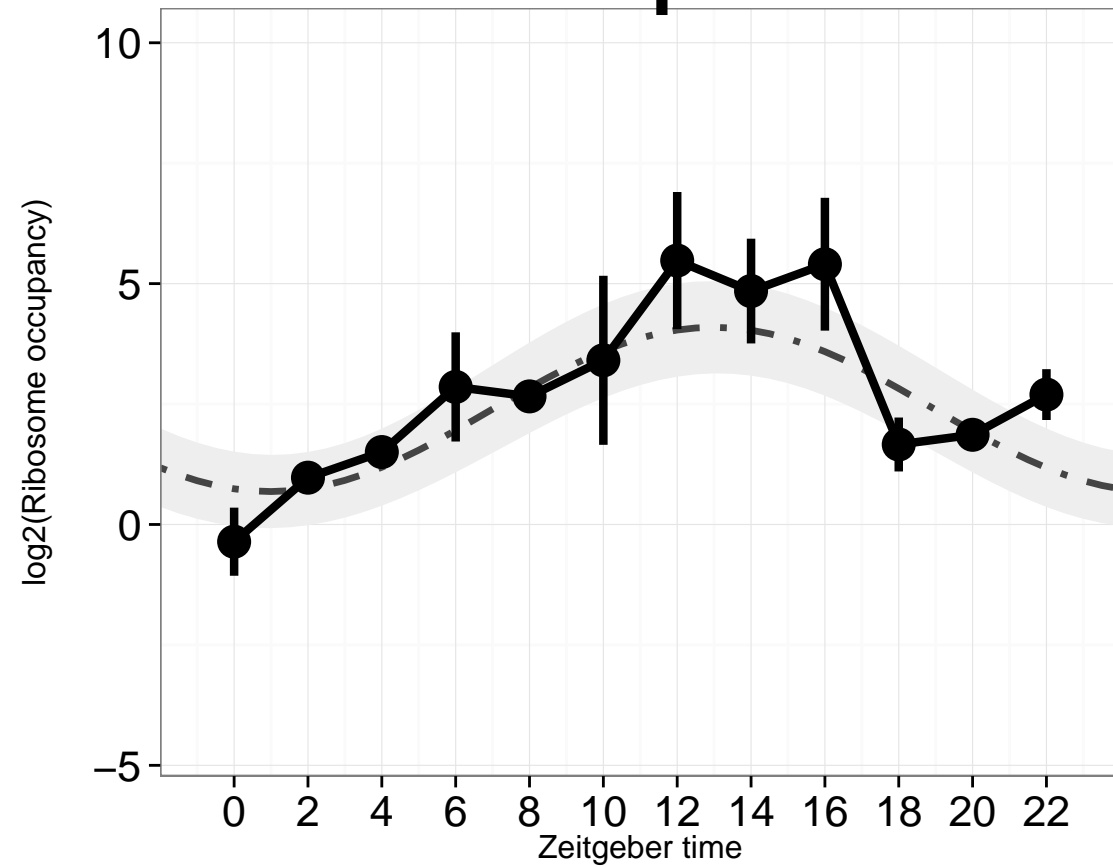

Supplement: Supplementary file 12678 [file 1]

# Taf9b

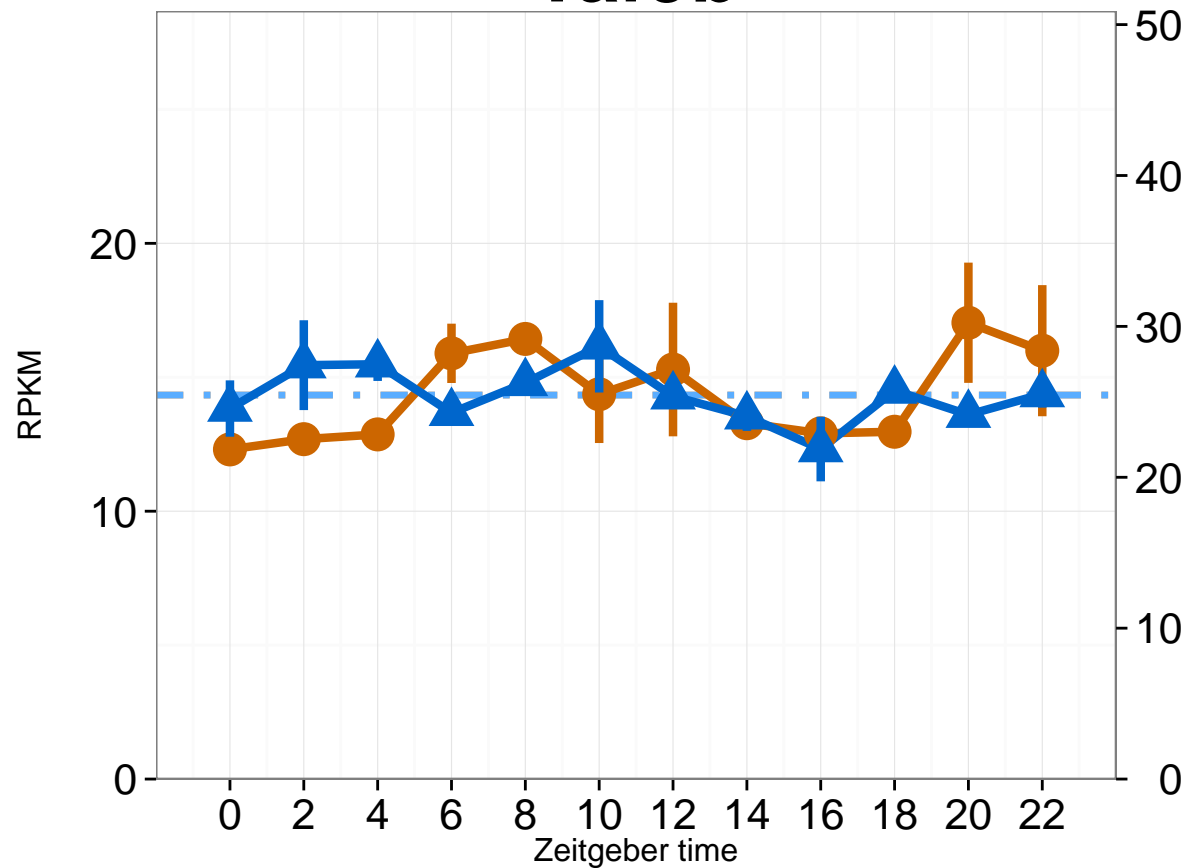

# Taf9b

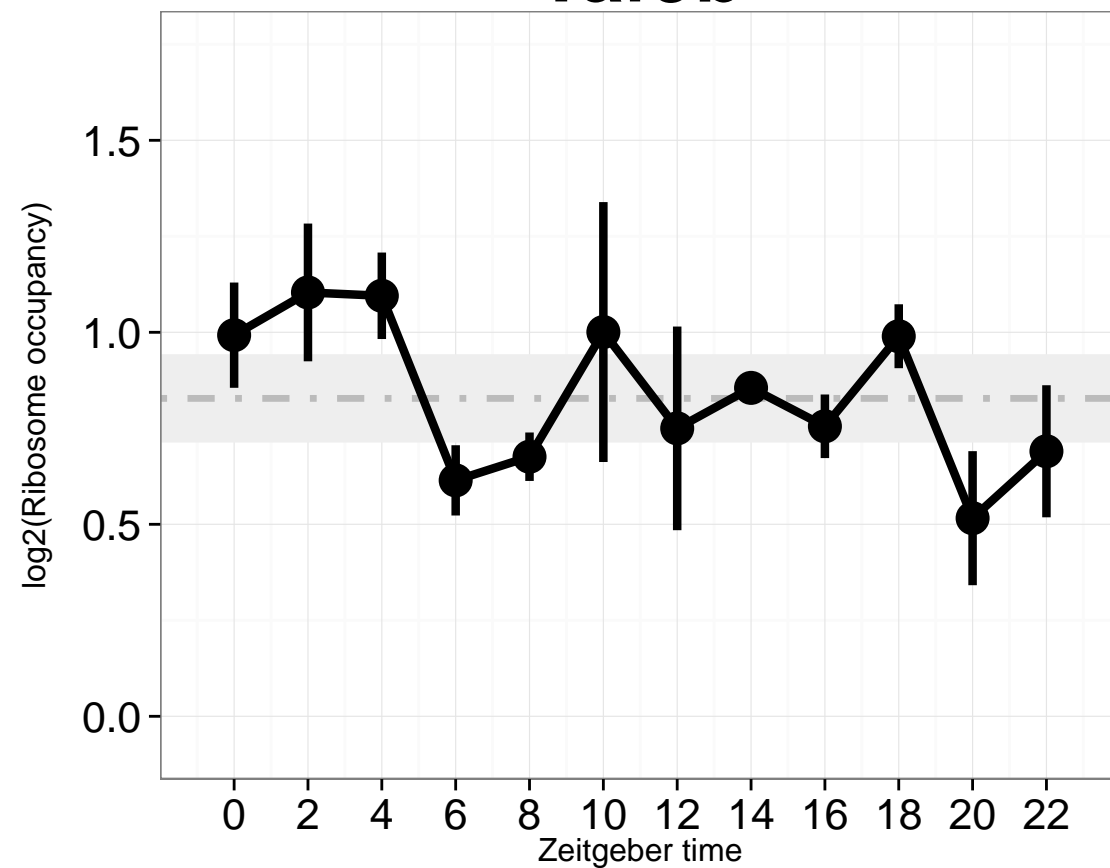

Supplement: Supplementary file 12679 [file 1]

## Slc5a11

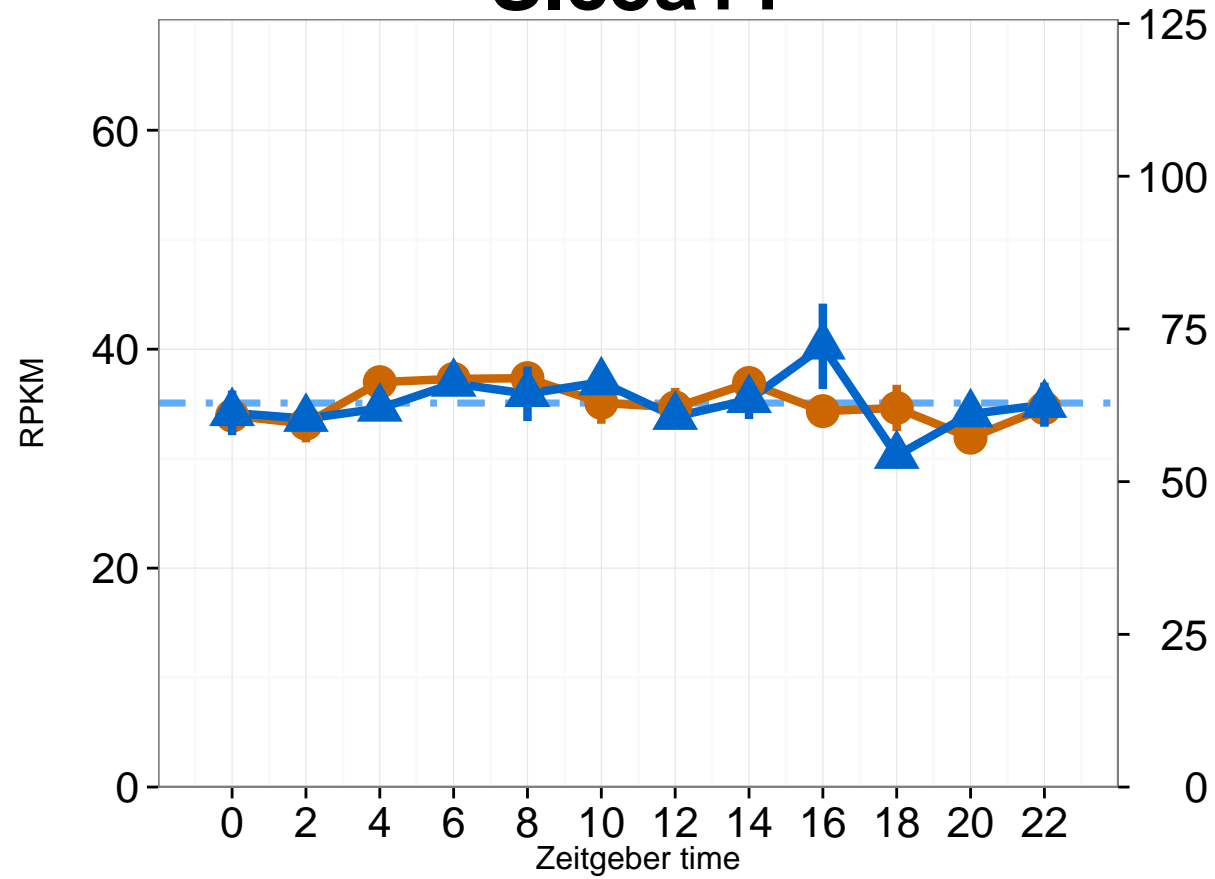

## Slc5a11

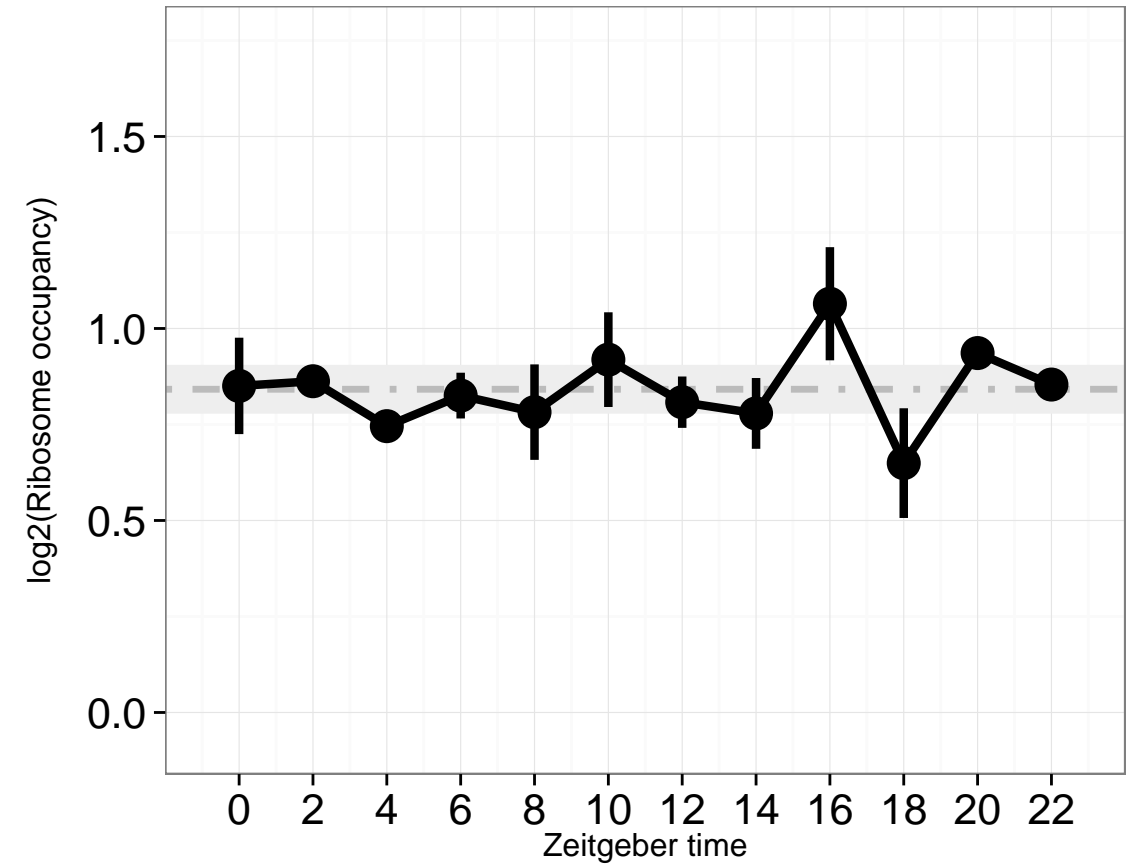

Supplement: Supplementary file 12680 [file 1]

# Nipsnap1

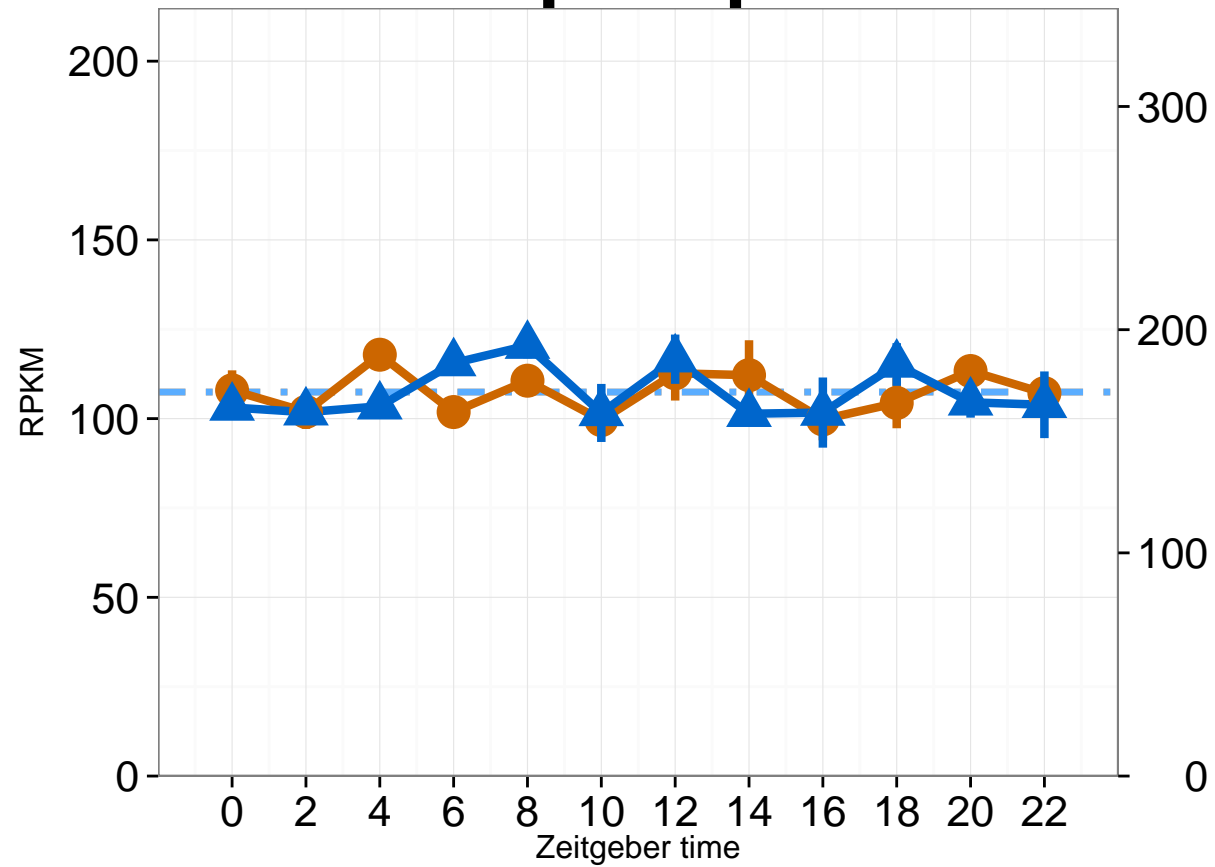

# Nipsnap1

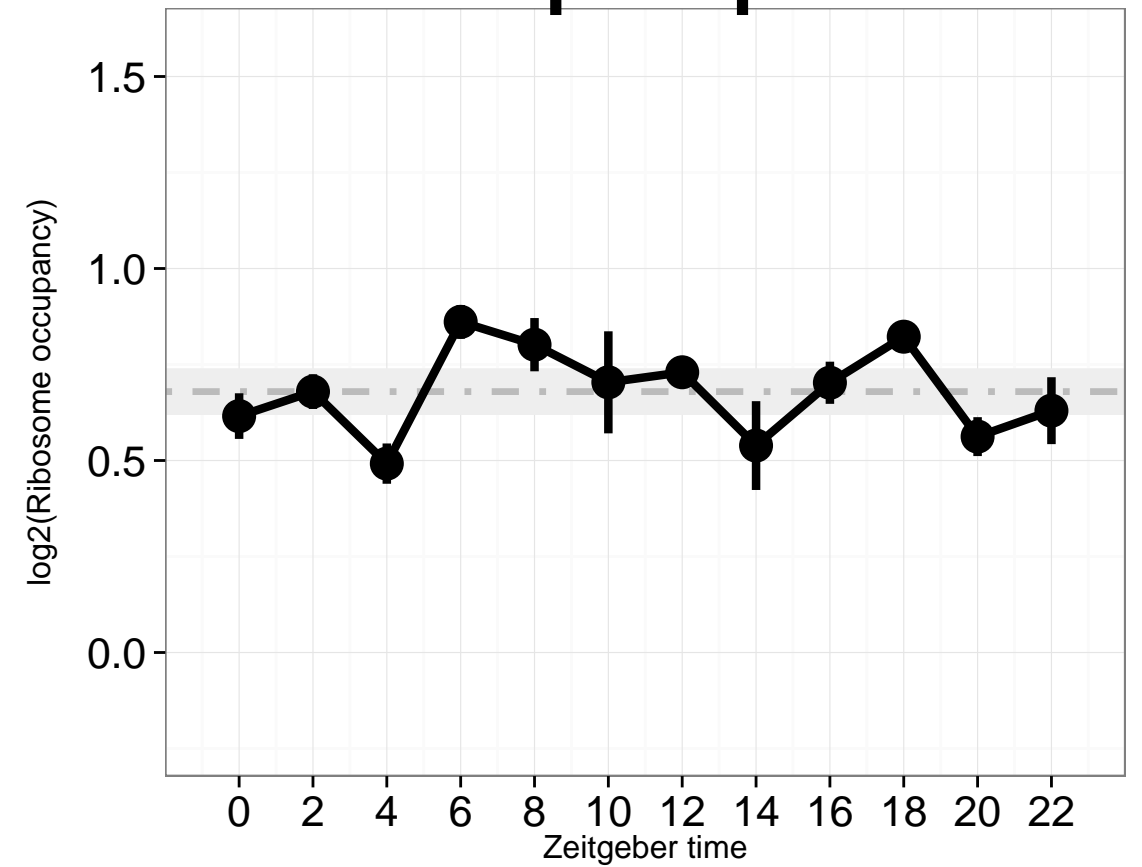

Supplement: Supplementary file 12681 [file 1]

## Uchl1

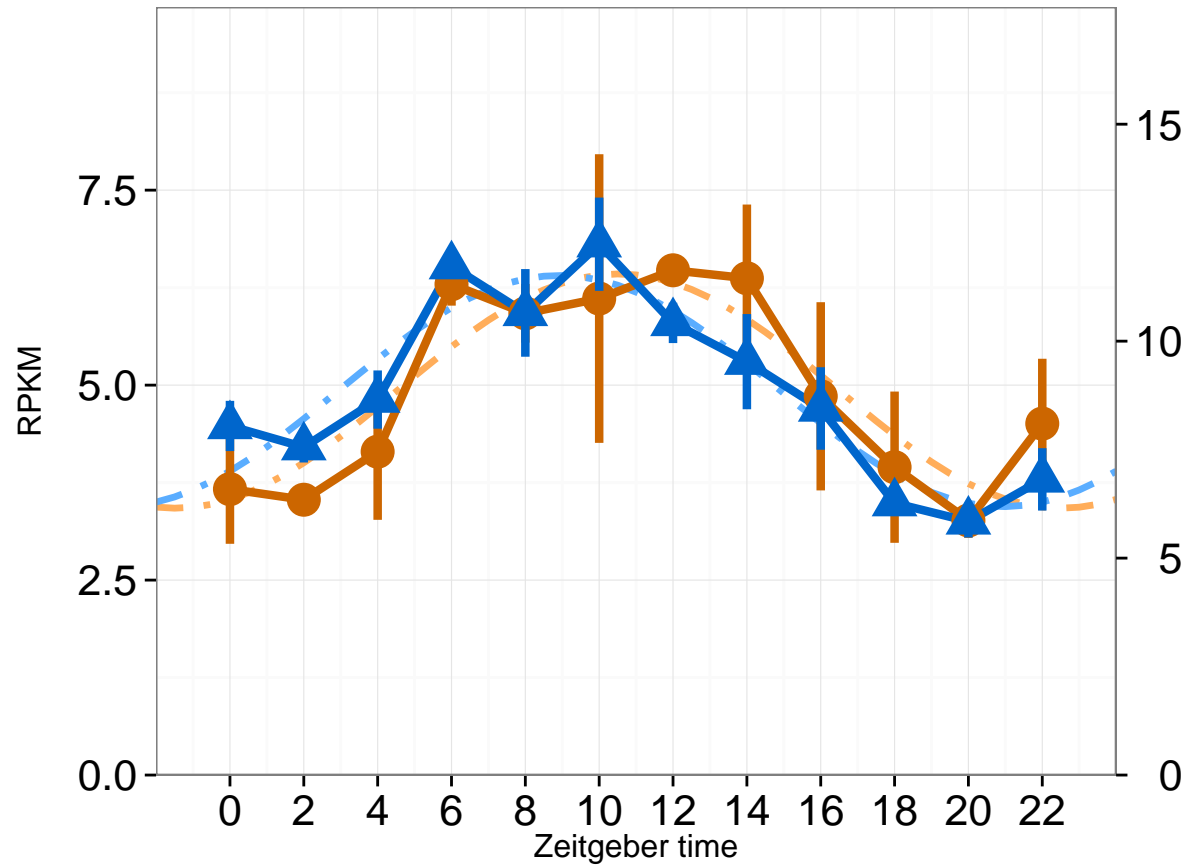

## Uchl1

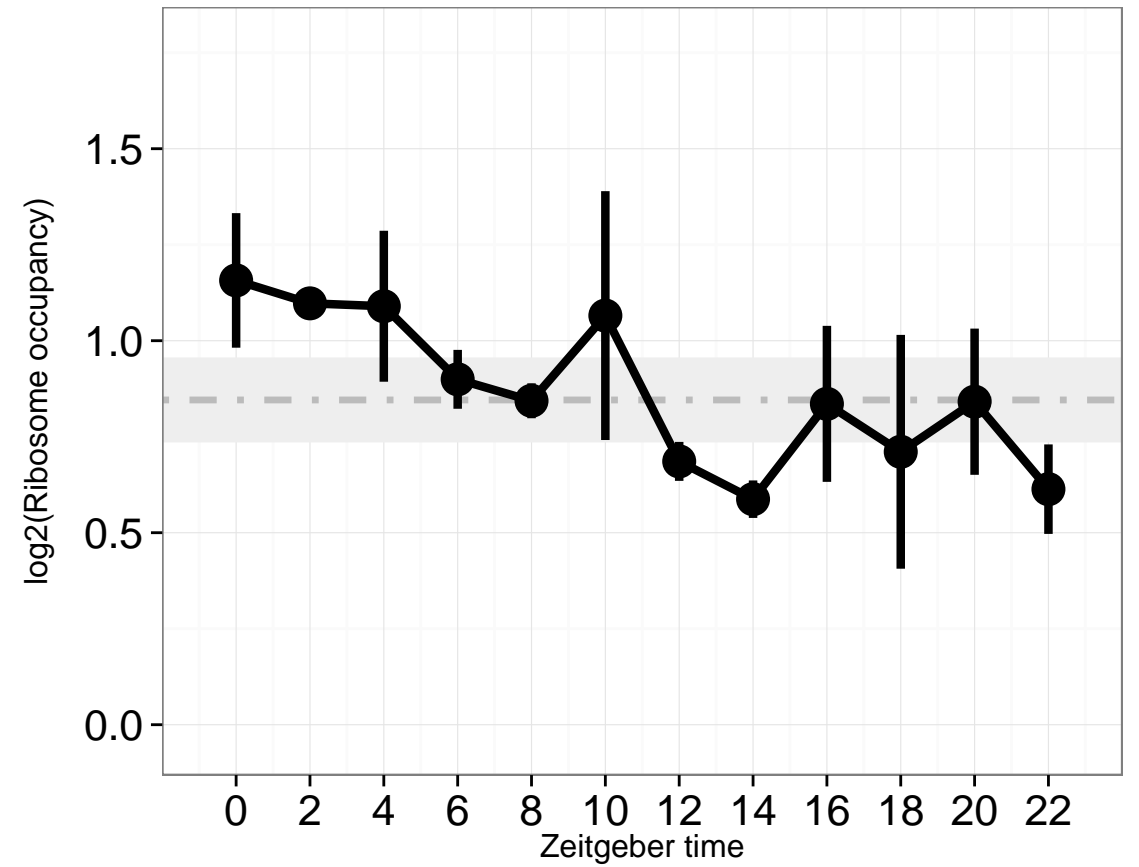

Supplement: Supplementary file 12682 [file 1]

## Kif23

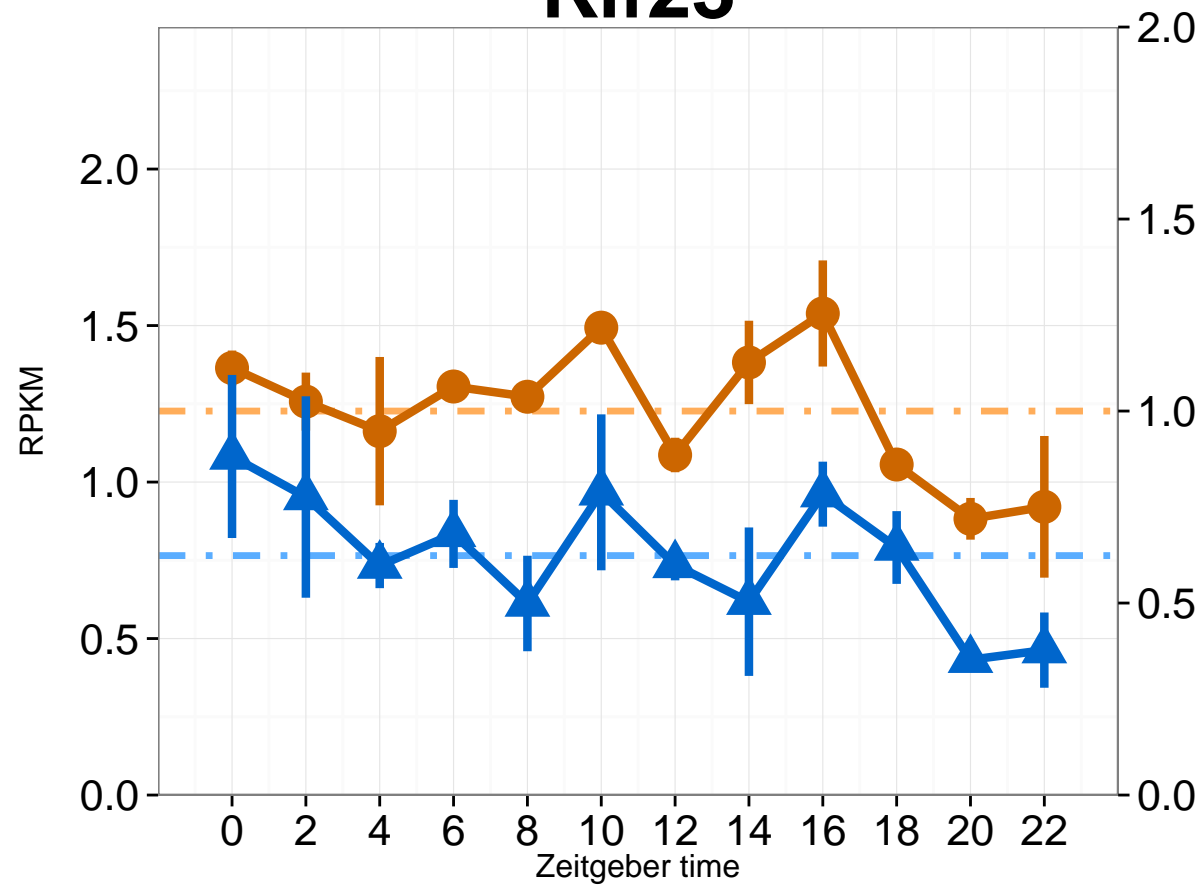

## Kif23

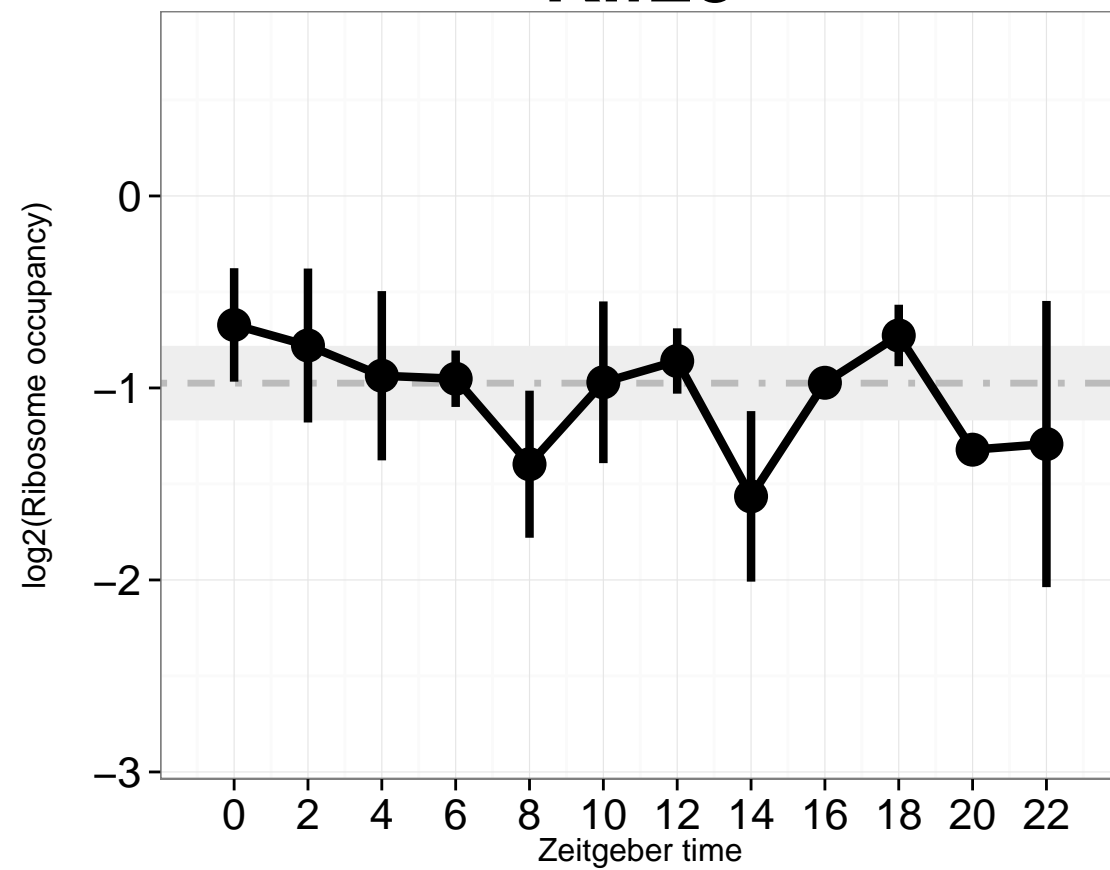

Supplement: Supplementary file 12683 [file 1]

## Cript

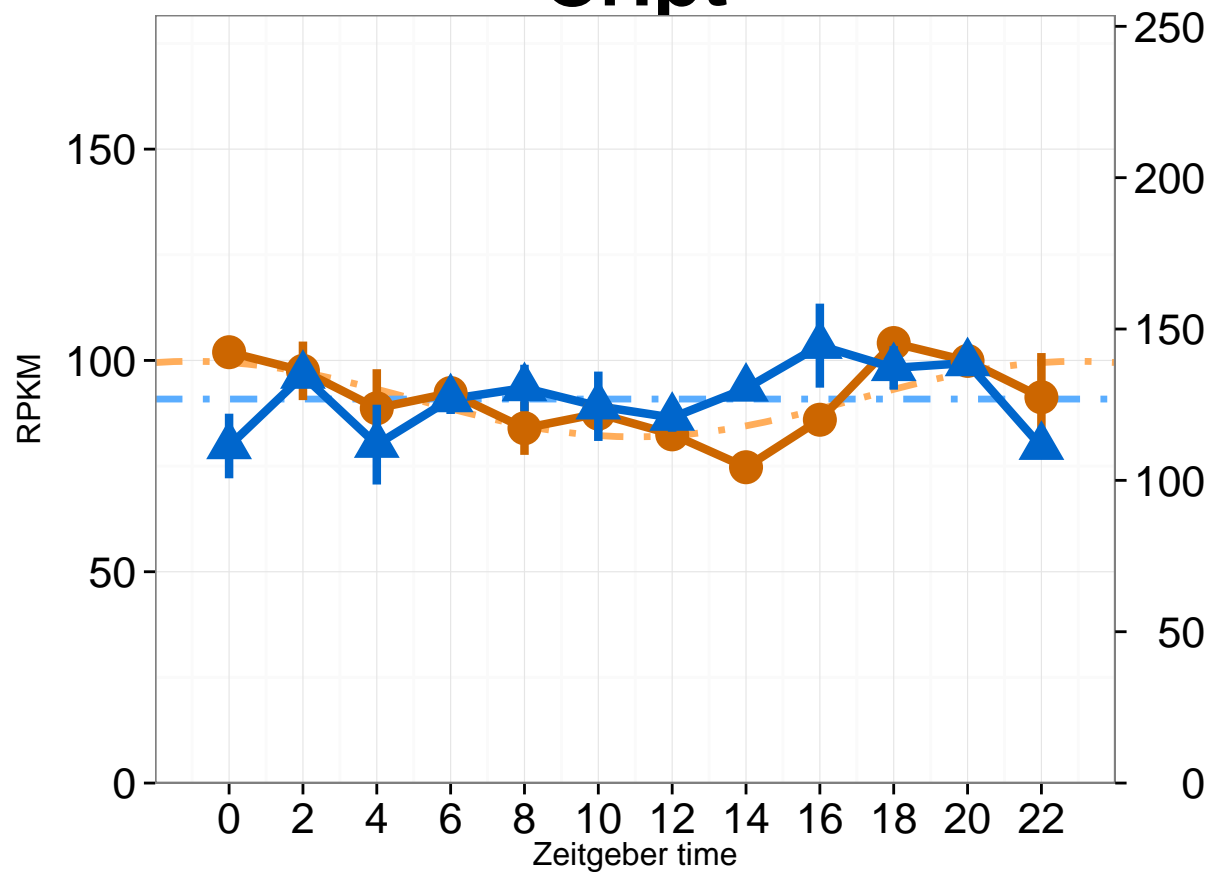

## Cript

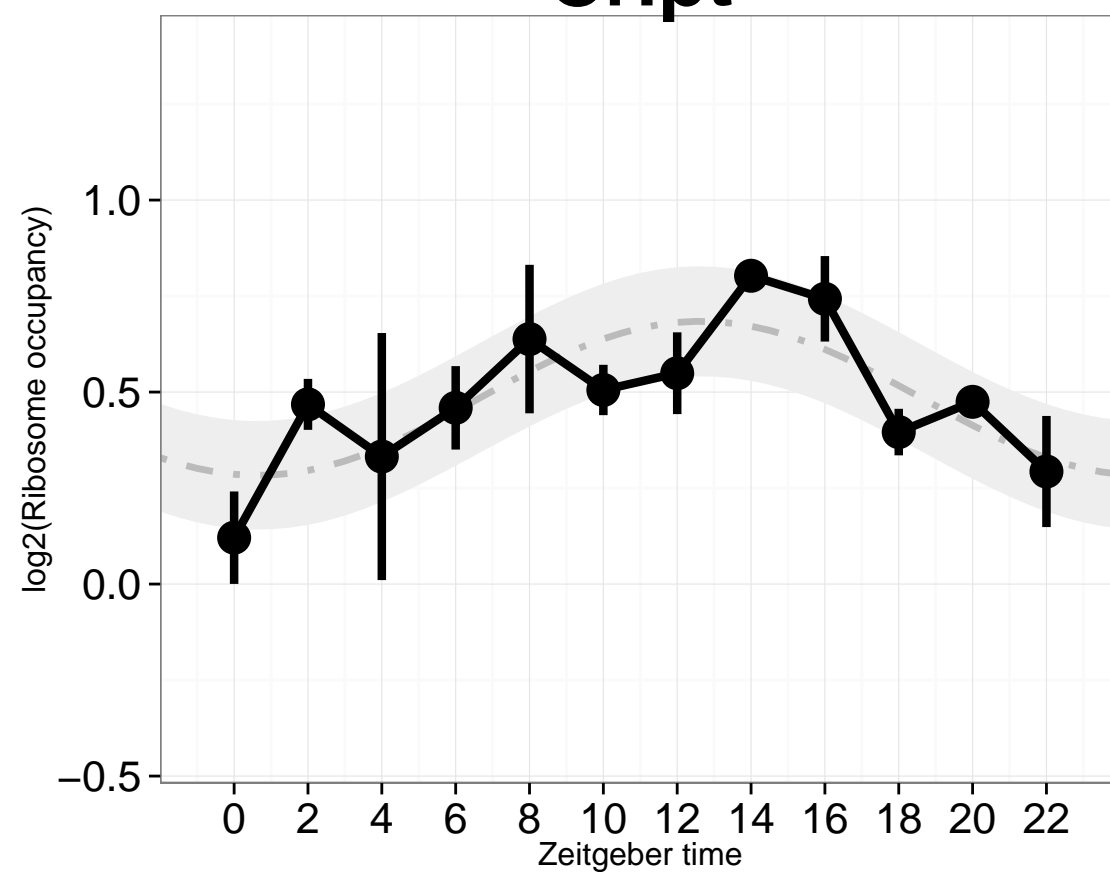

Supplement: Supplementary file 12684 [file 1]

# Micall2

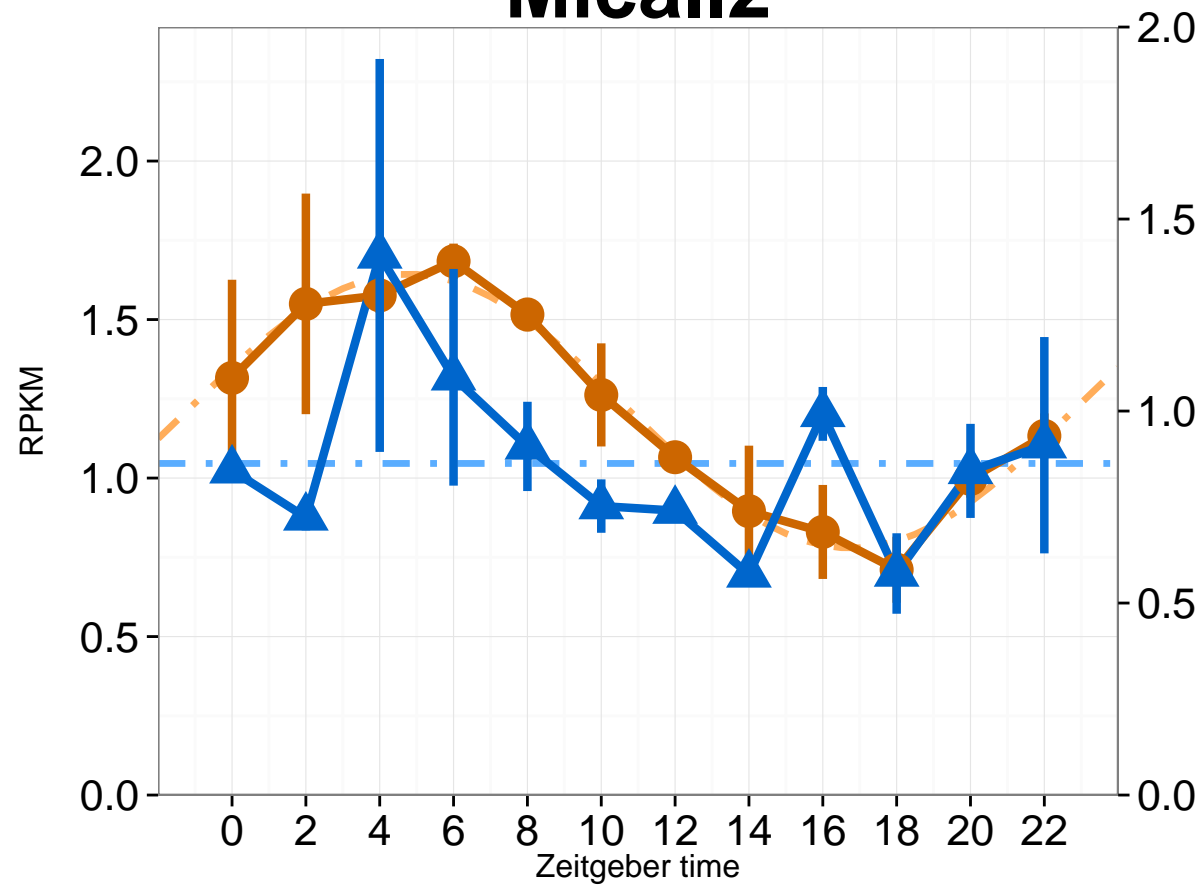

# Micall2

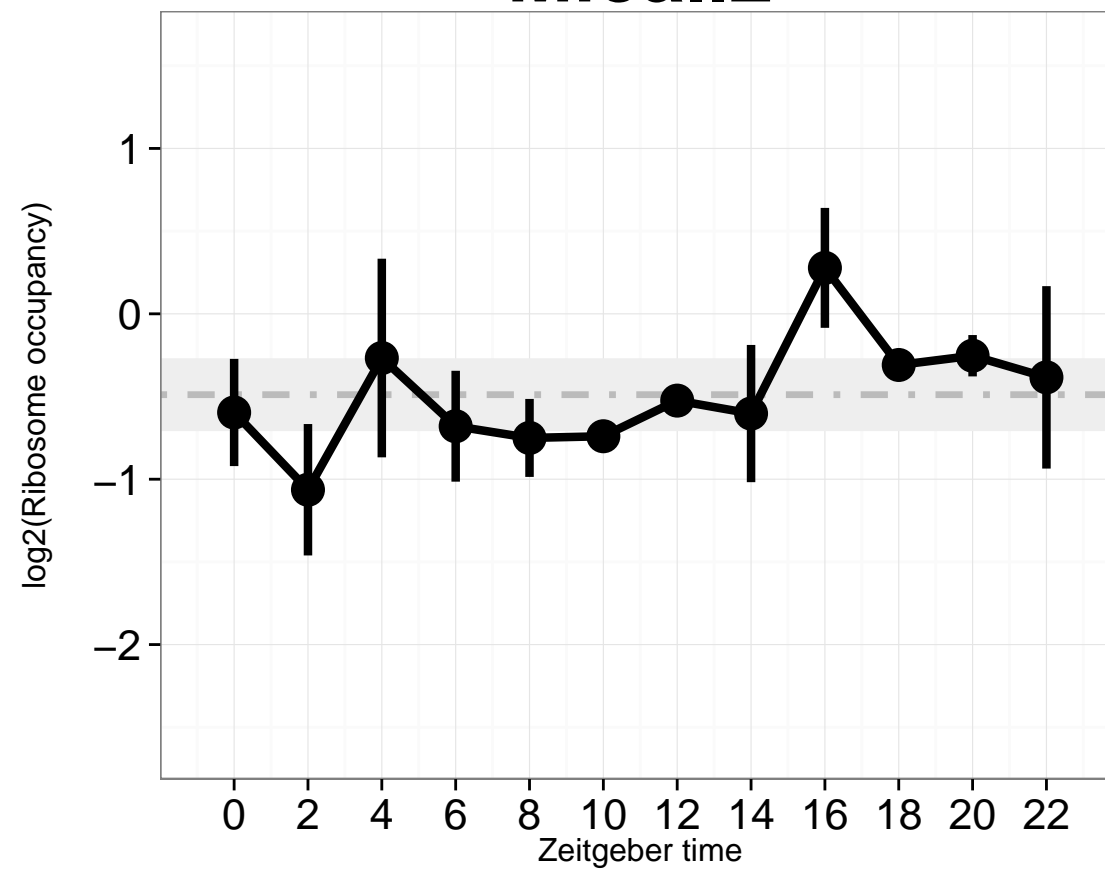

Supplement: Supplementary file 12685 [file 1]

# Ptpn18

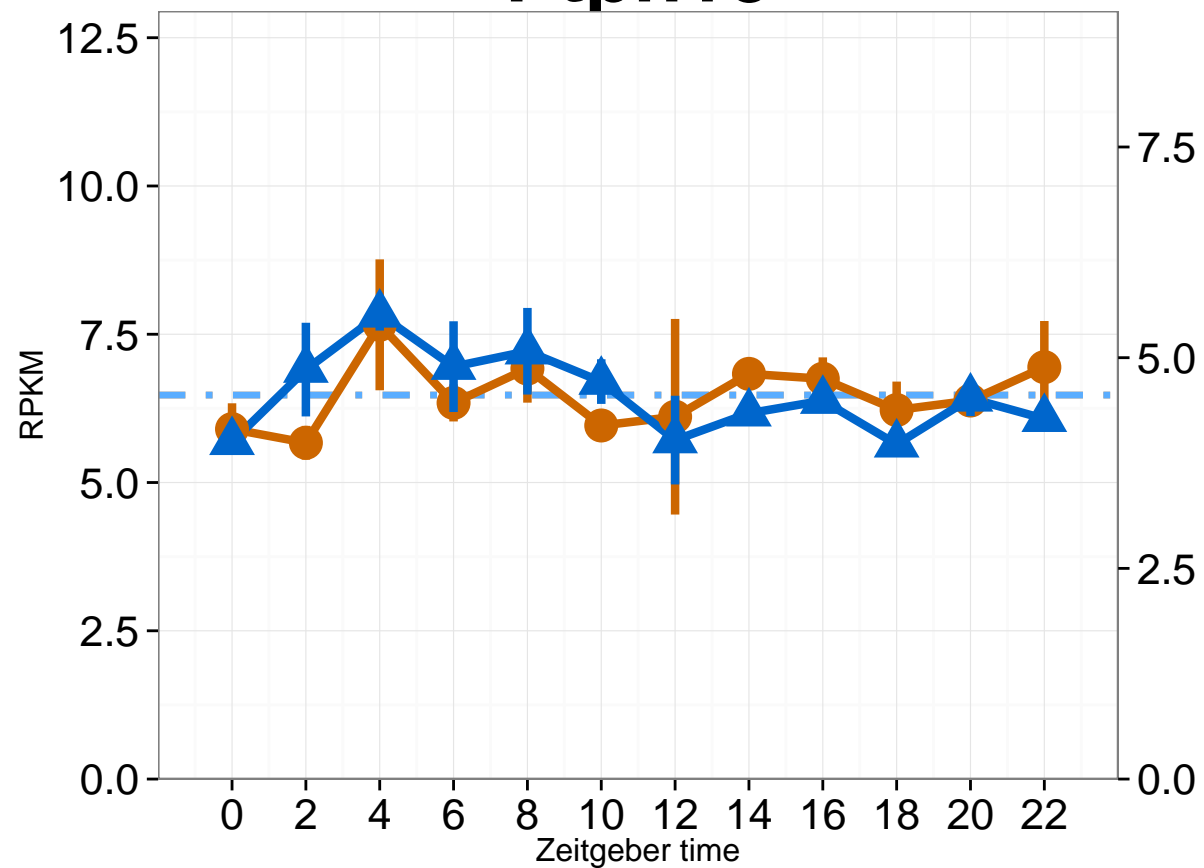

# Ptpn18

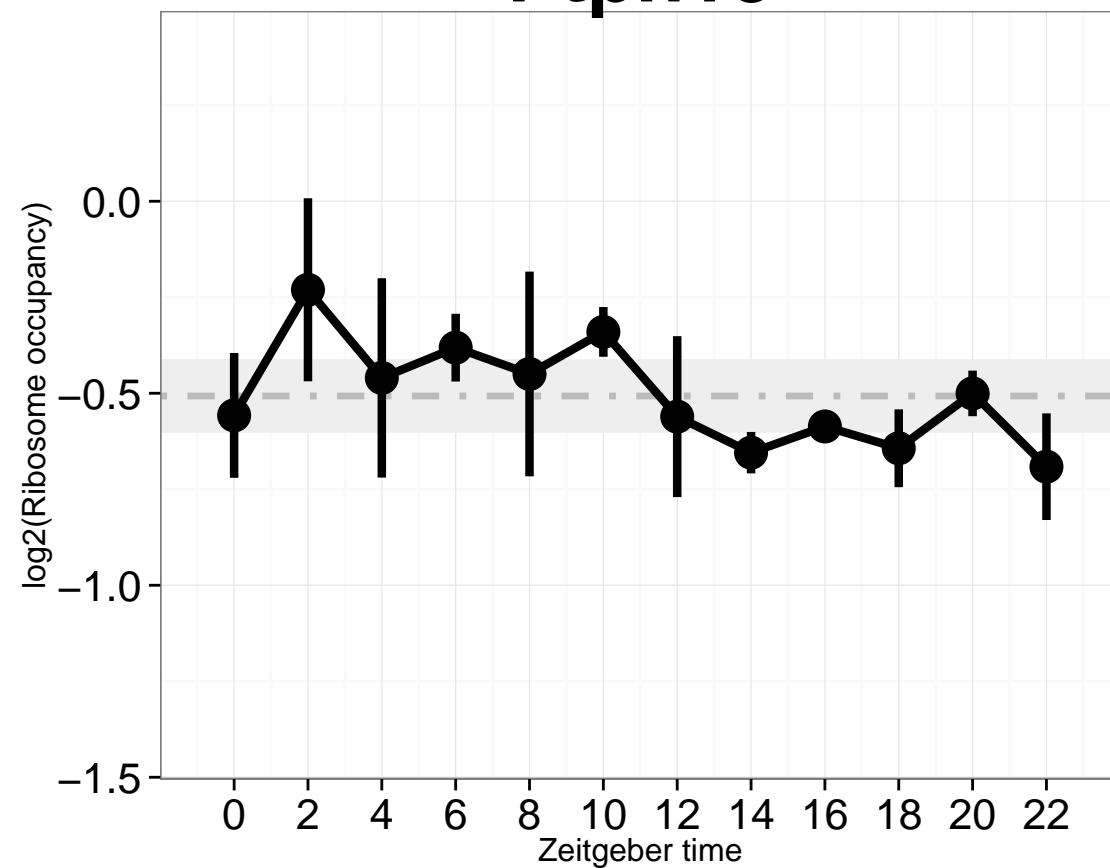

Supplement: Supplementary file 12686 [file 1]

## Bfsp1

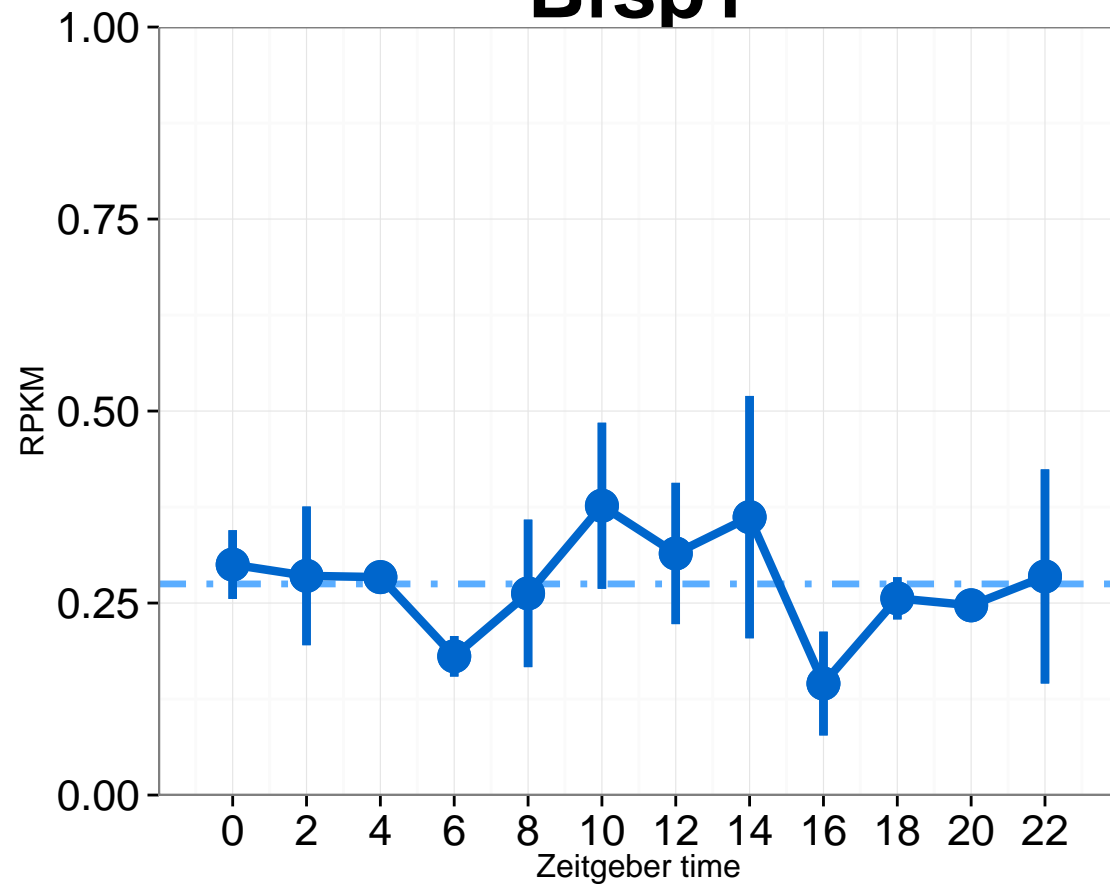

## Bfsp1 log2(Ribosome occupancy

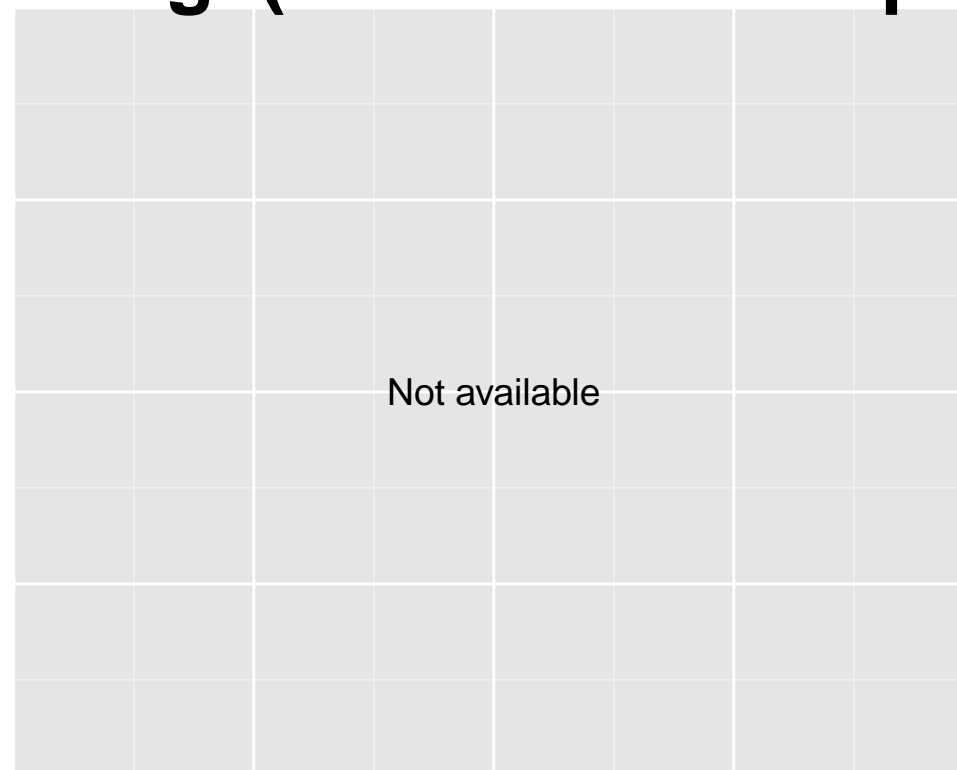

Supplement: Supplementary file 12687 [file 1]

# Map4k4

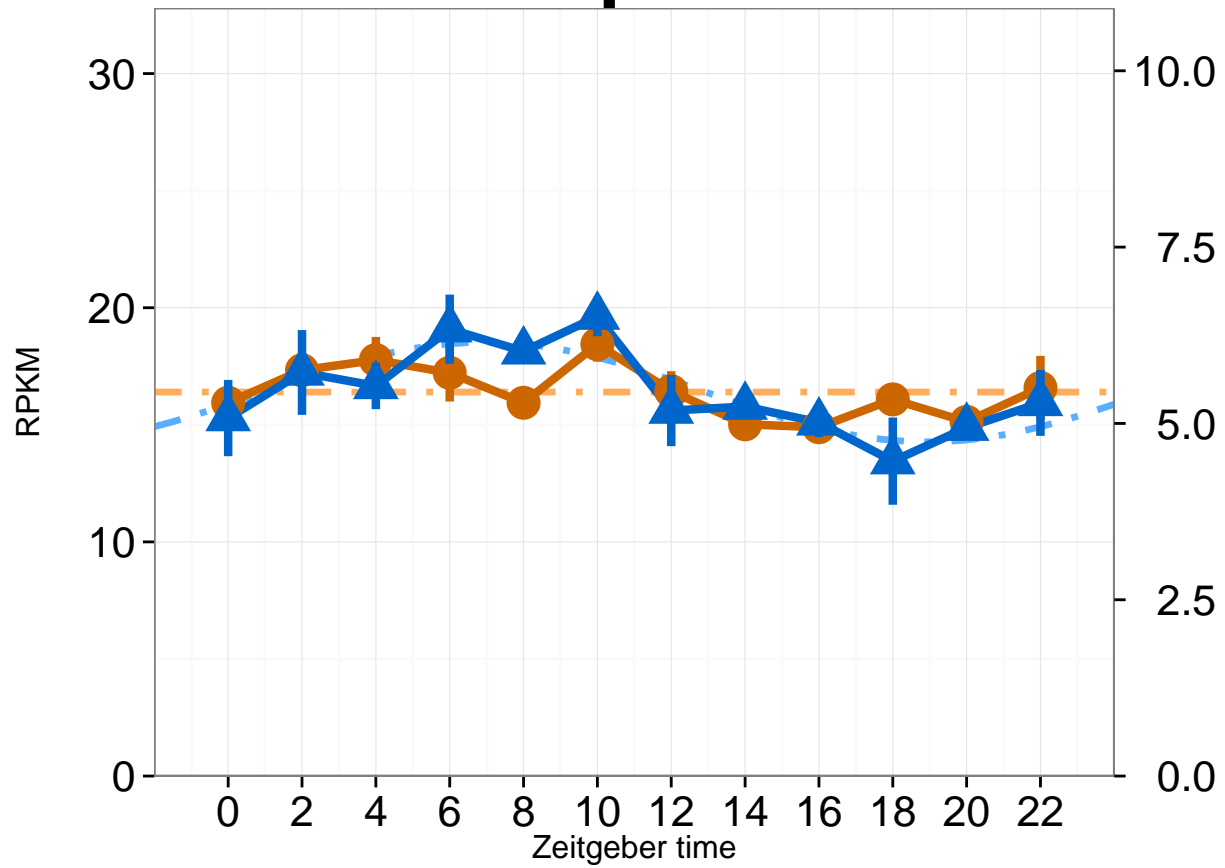

# Map4k4

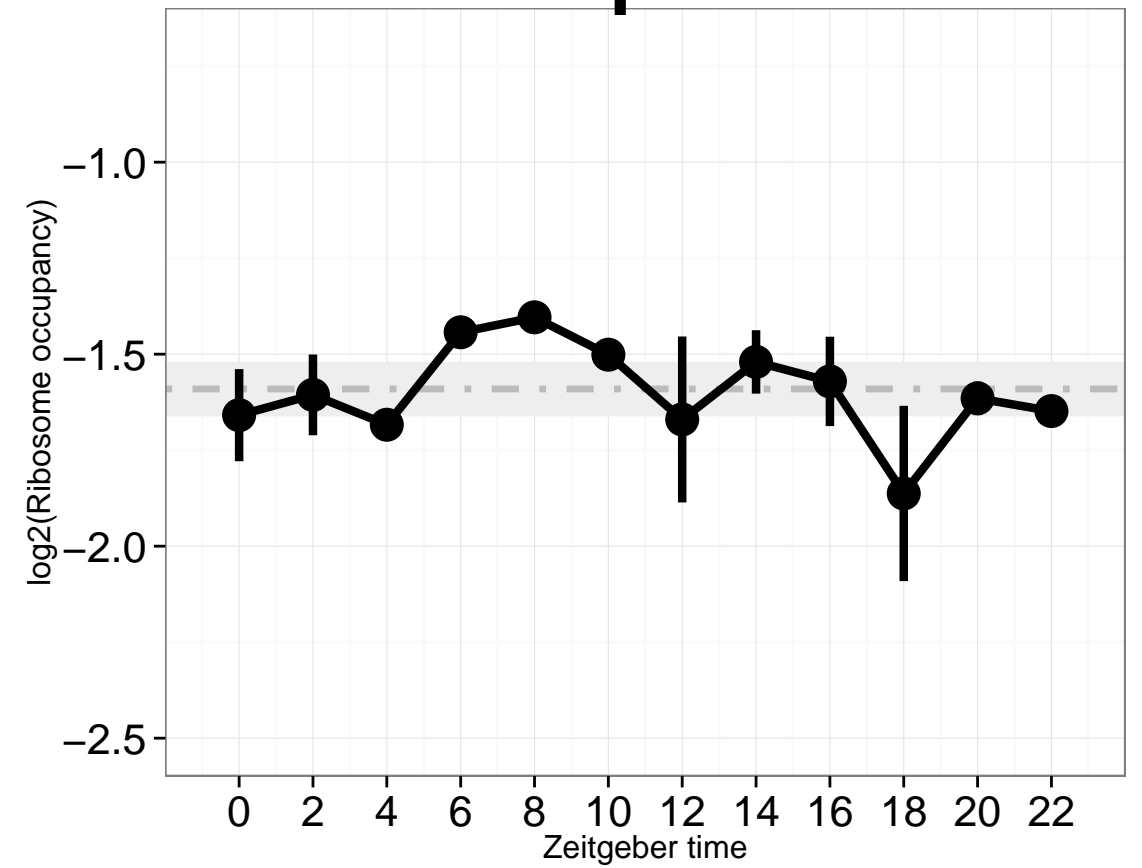

Supplement: Supplementary file 12688 [file 1]

# Il6ra

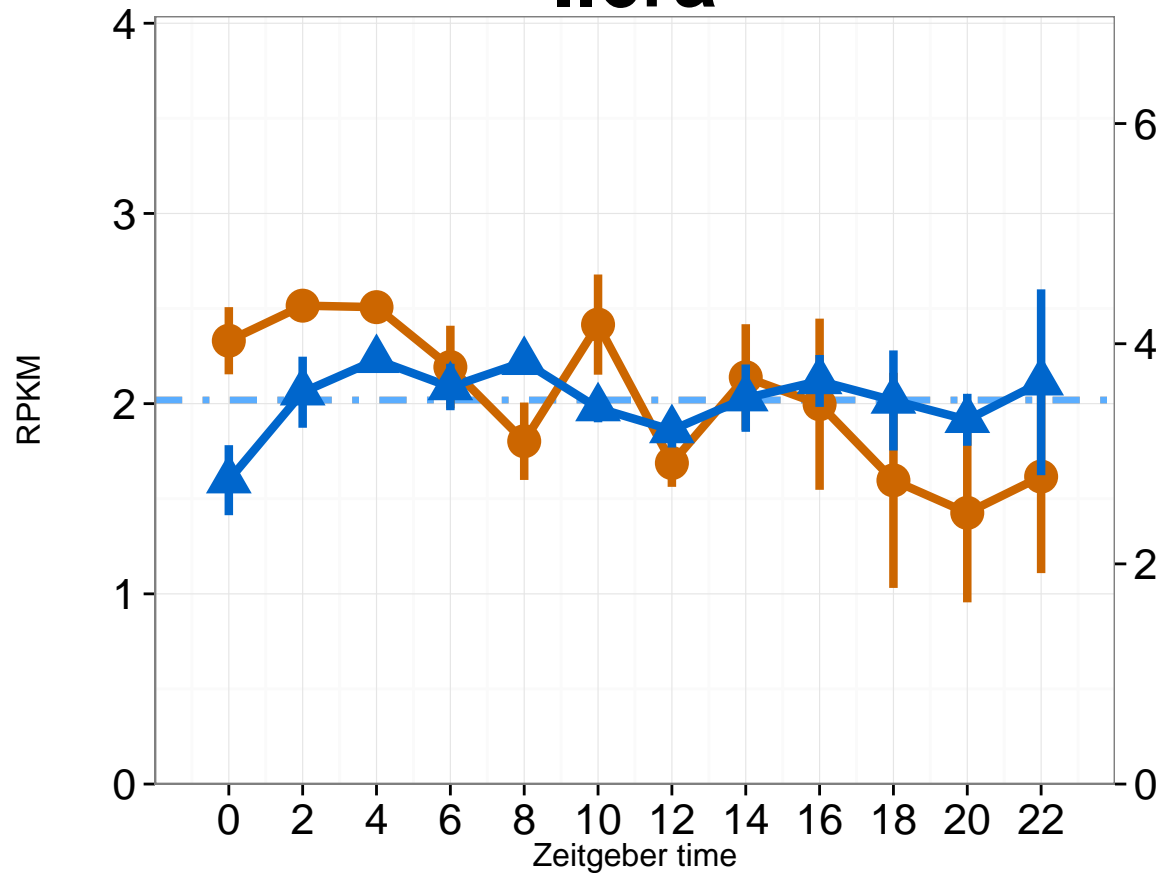

# Il6ra

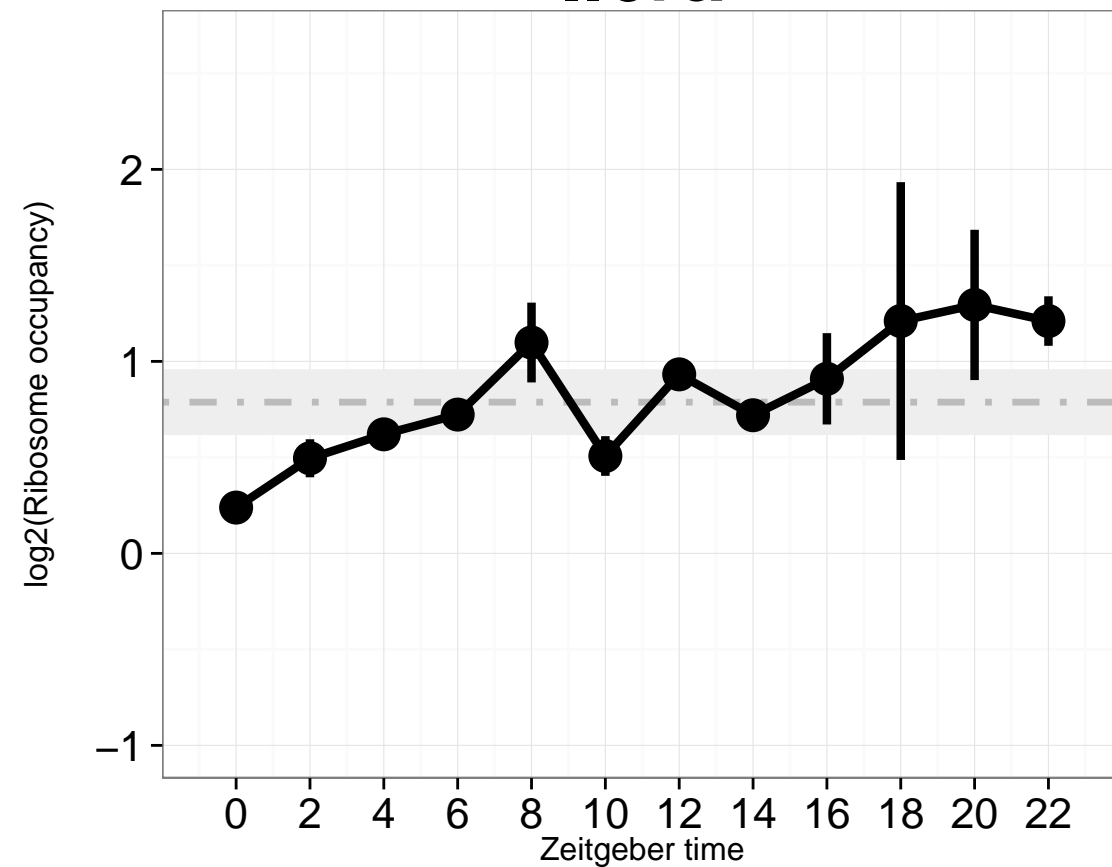

Supplement: Supplementary file 12689 [file 1]

# Rpl23a

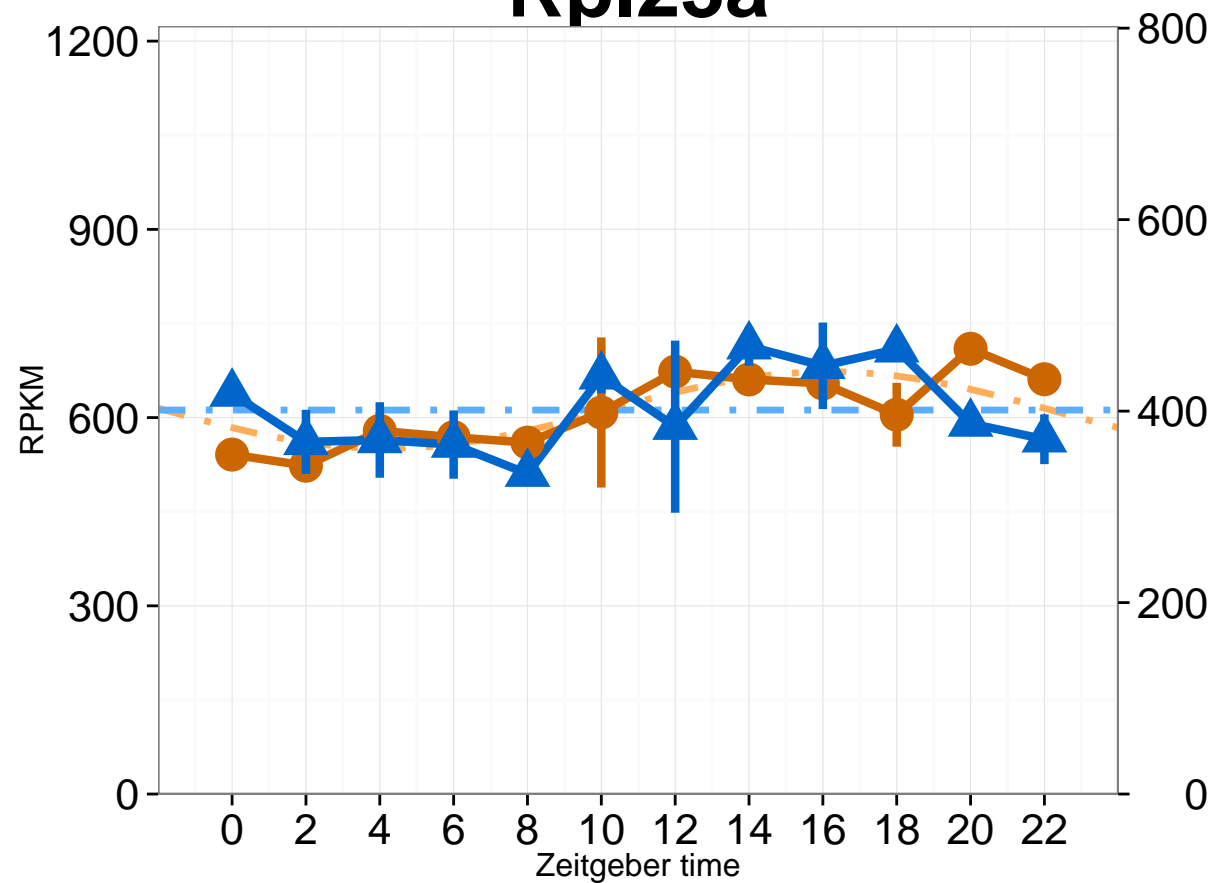

# Rpl23a

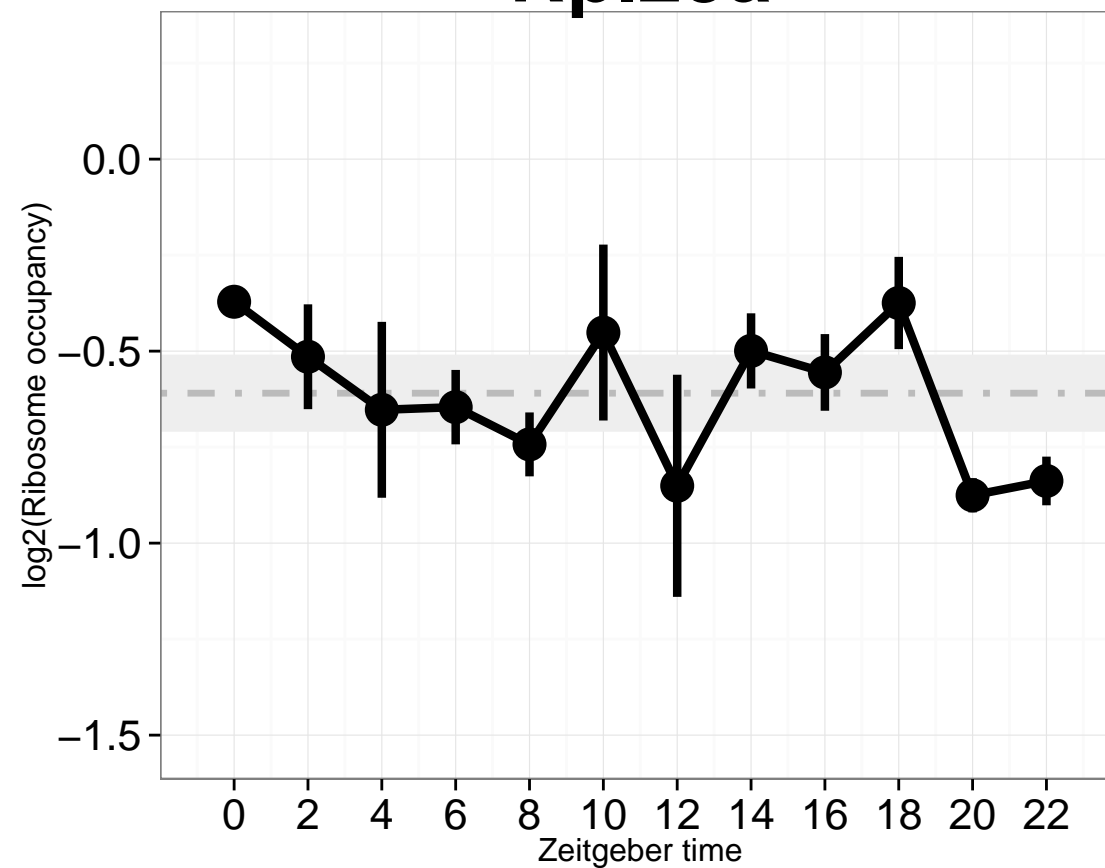

Supplement: Supplementary file 12690 [file 1]

## Hebp1

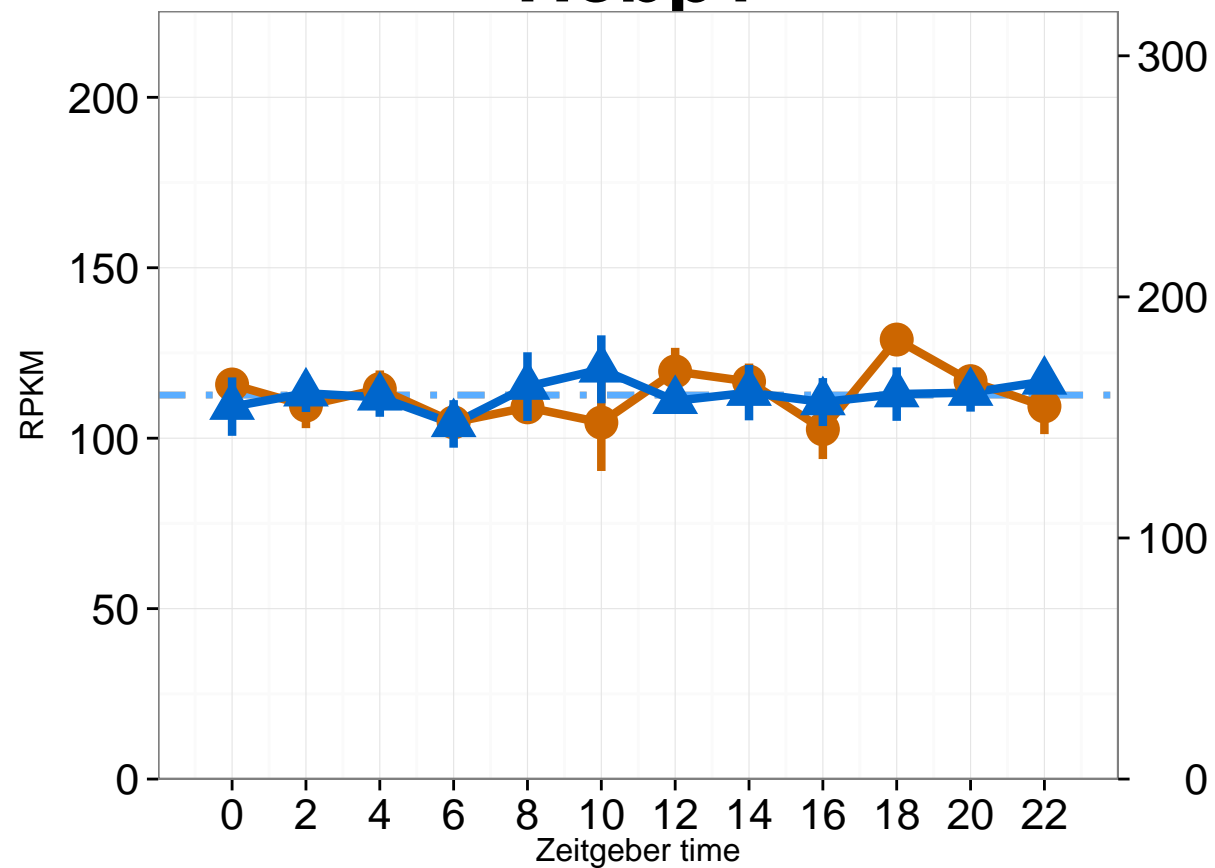

## Hebp1

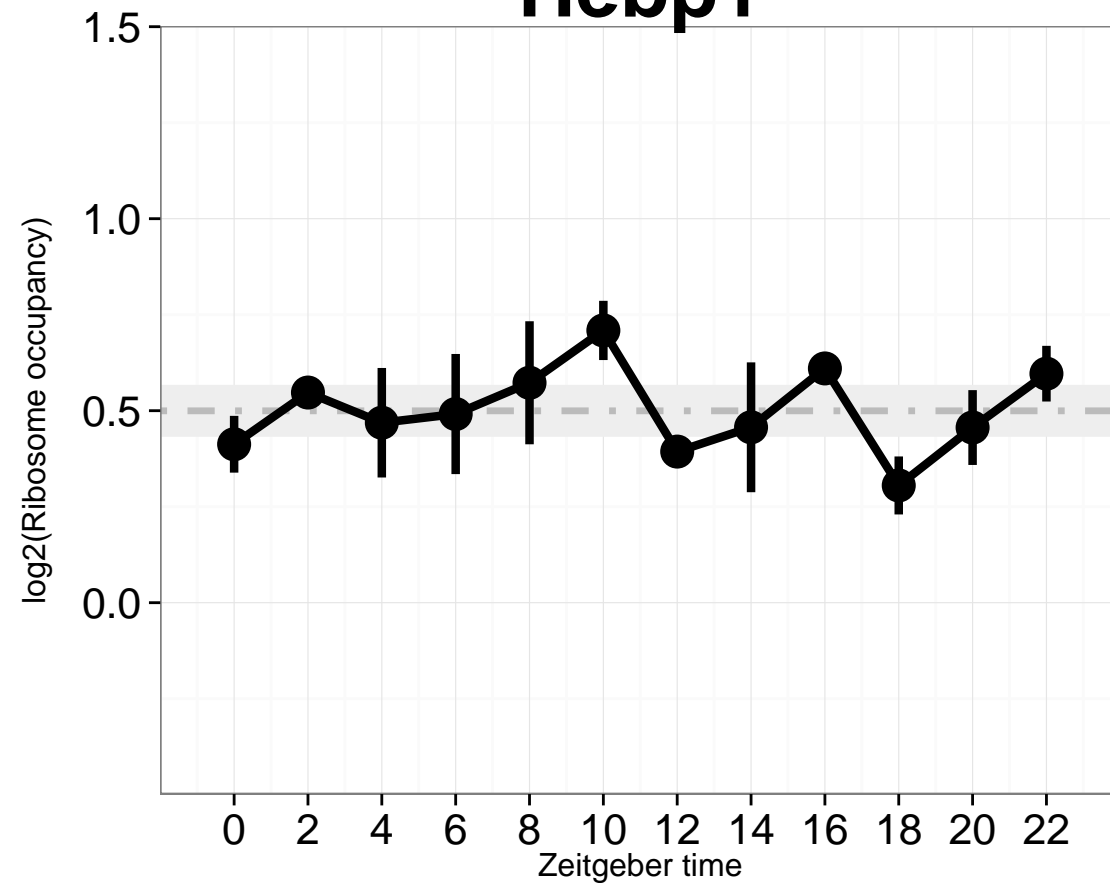

Supplement: Supplementary file 12691 [file 1]

## Ncaph

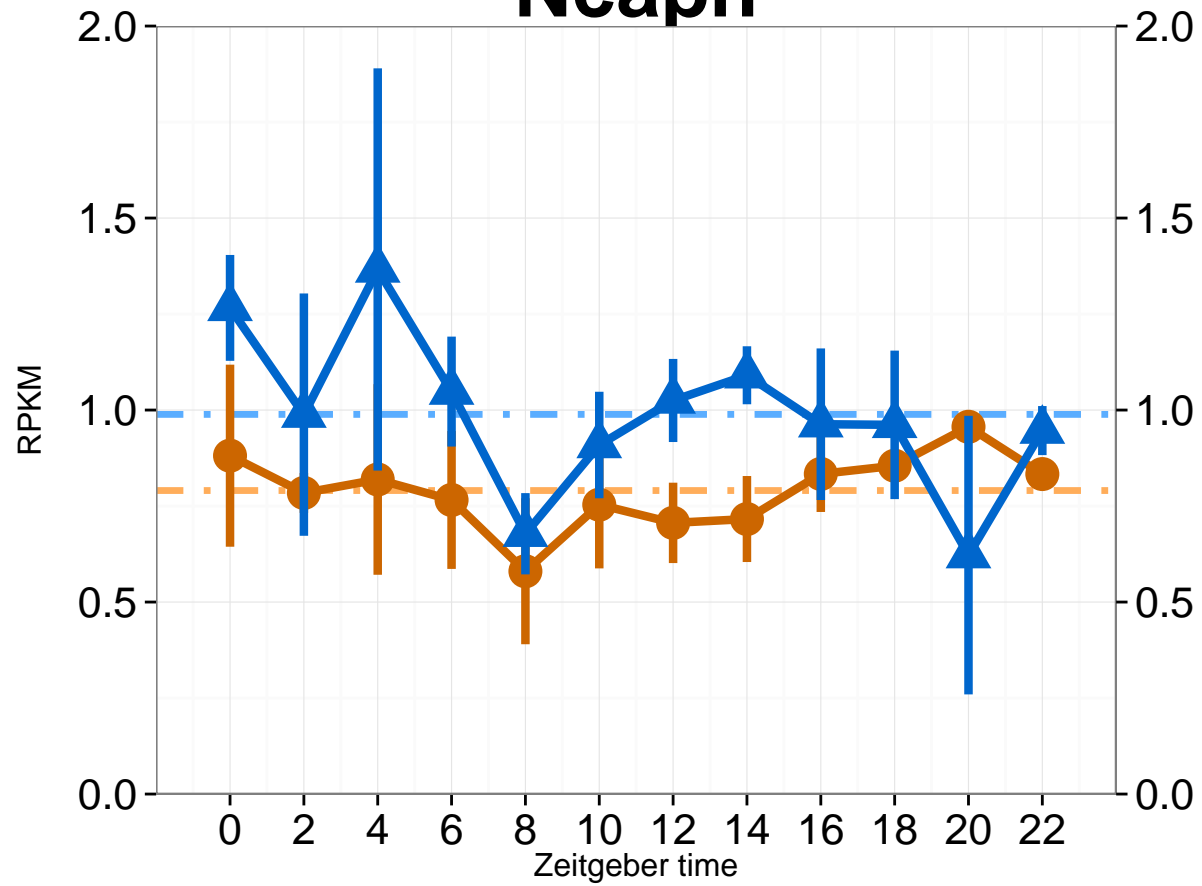

## Ncaph

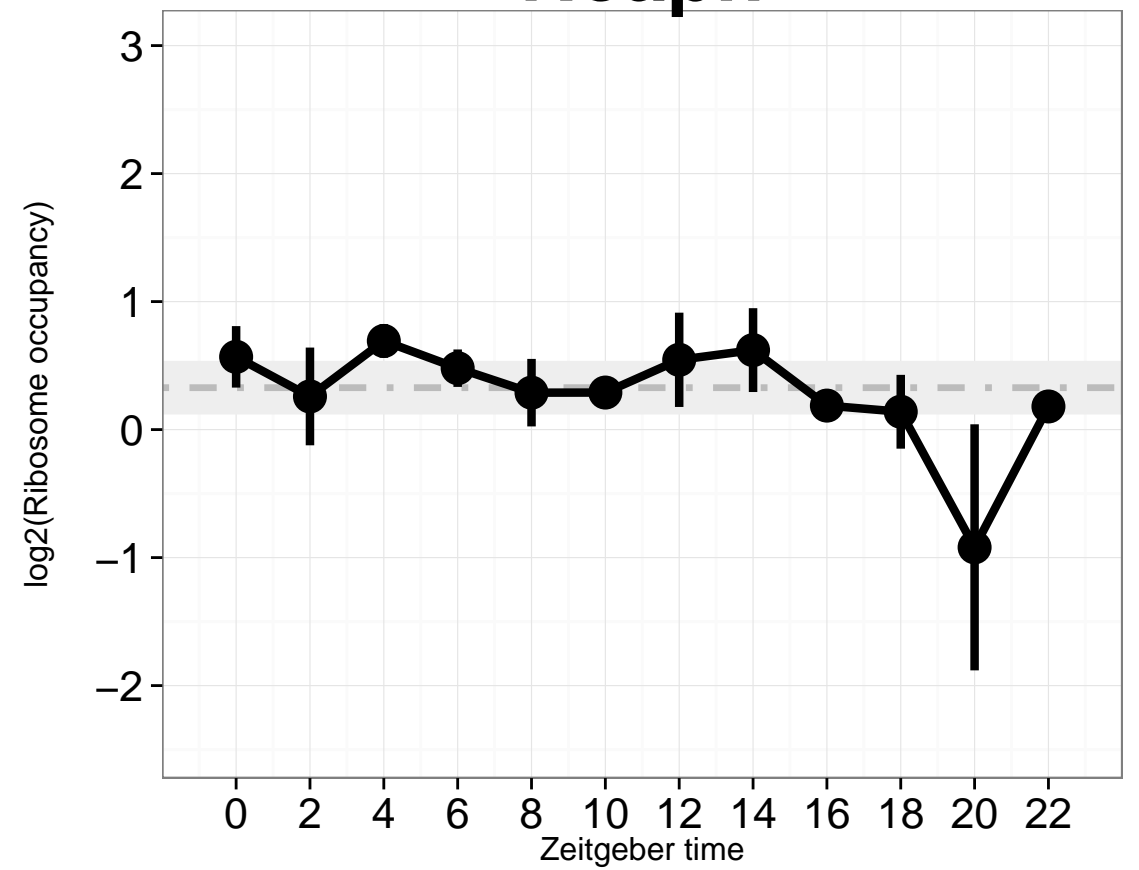

Supplement: Supplementary file 12692 [file 1]

## Cdca7

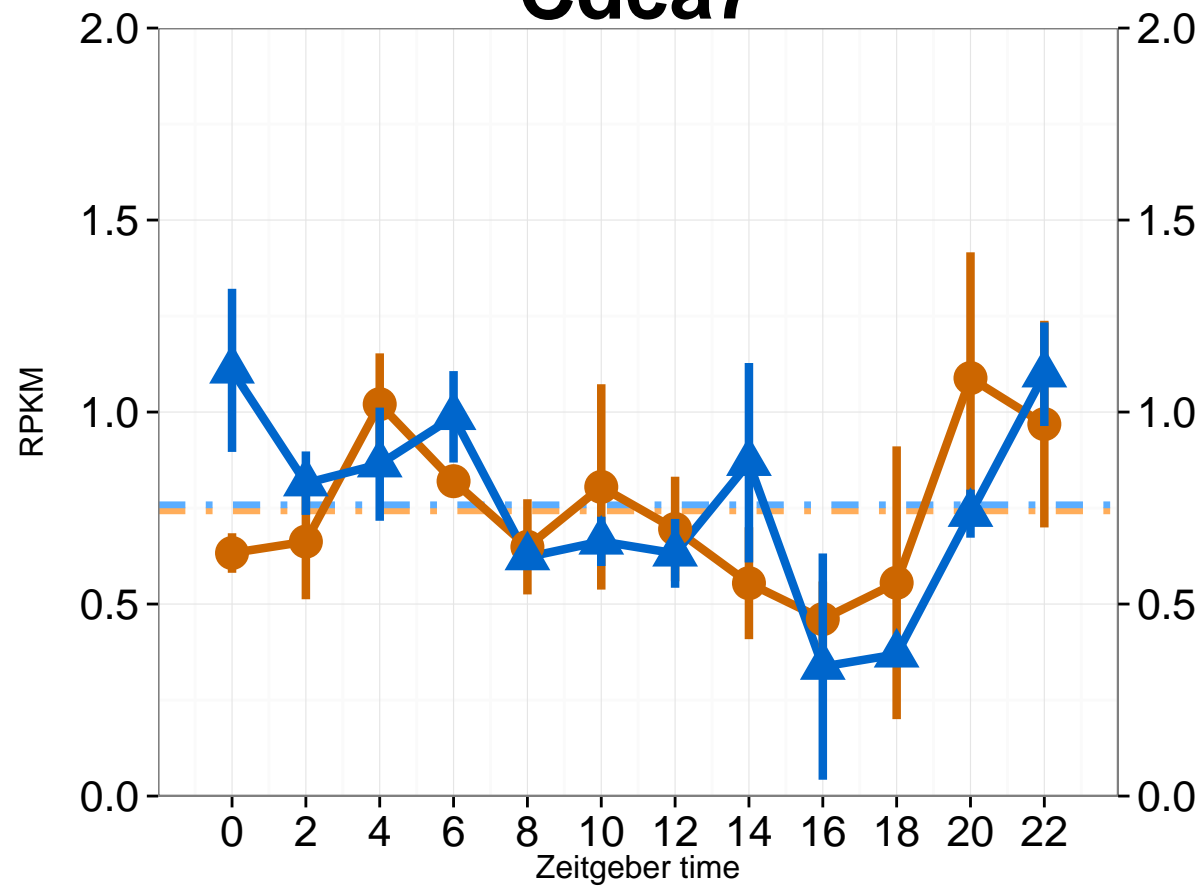

## Cdca7

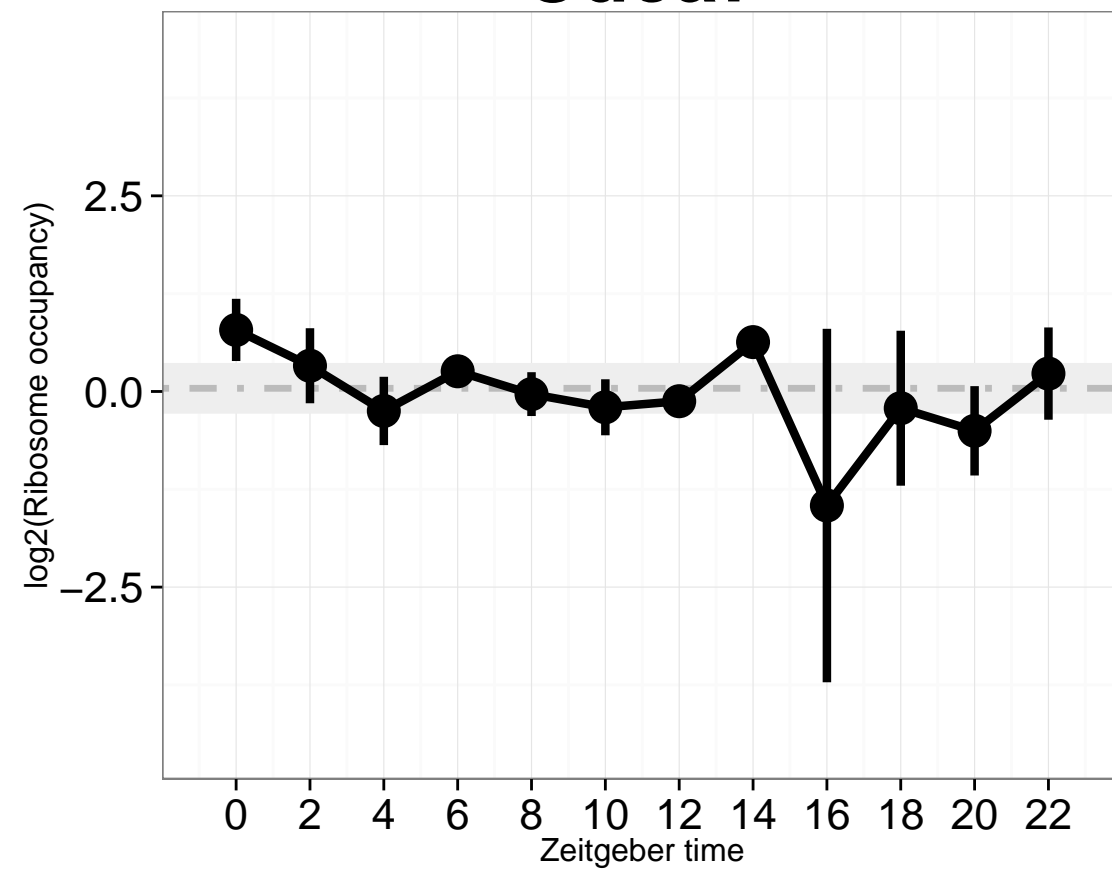

Supplement: Supplementary file 12693 [file 1]

# Camk2b

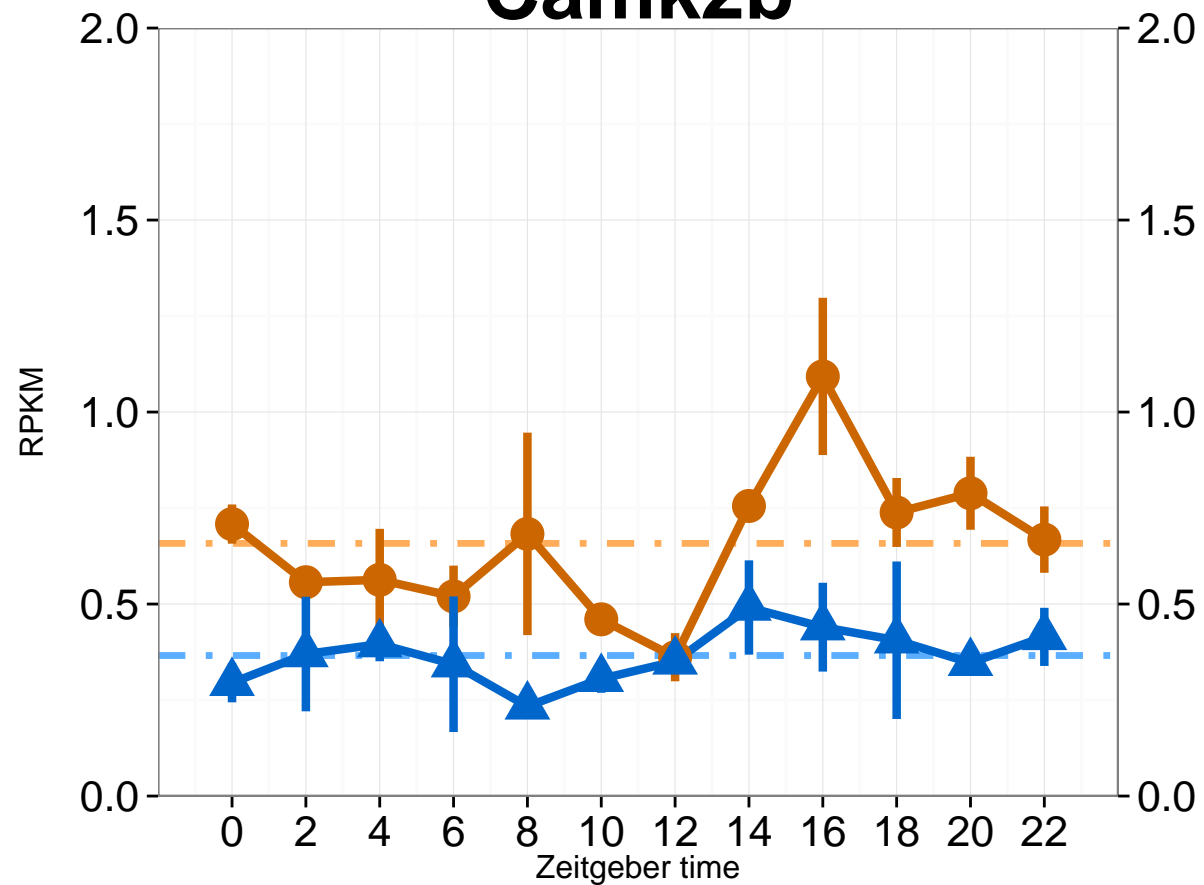

# Camk2b

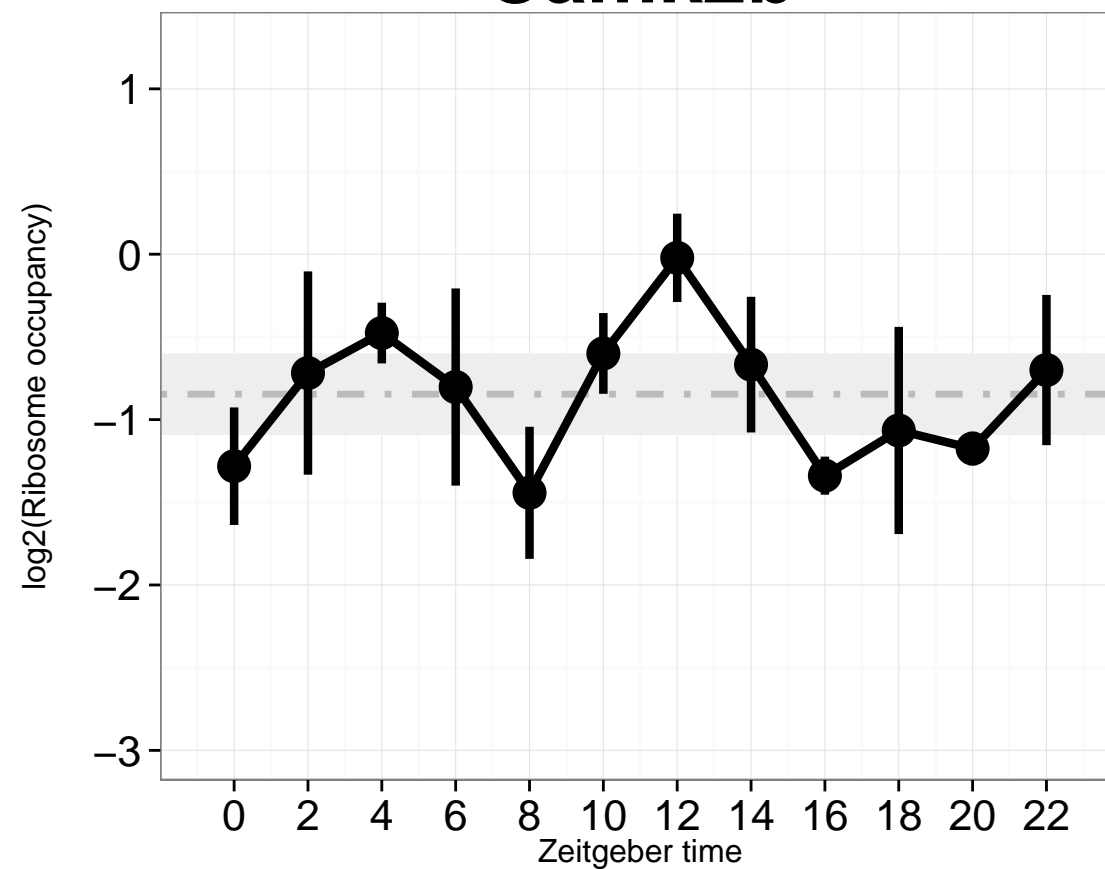

Supplement: Supplementary file 12694 [file 1]

# Fam214a

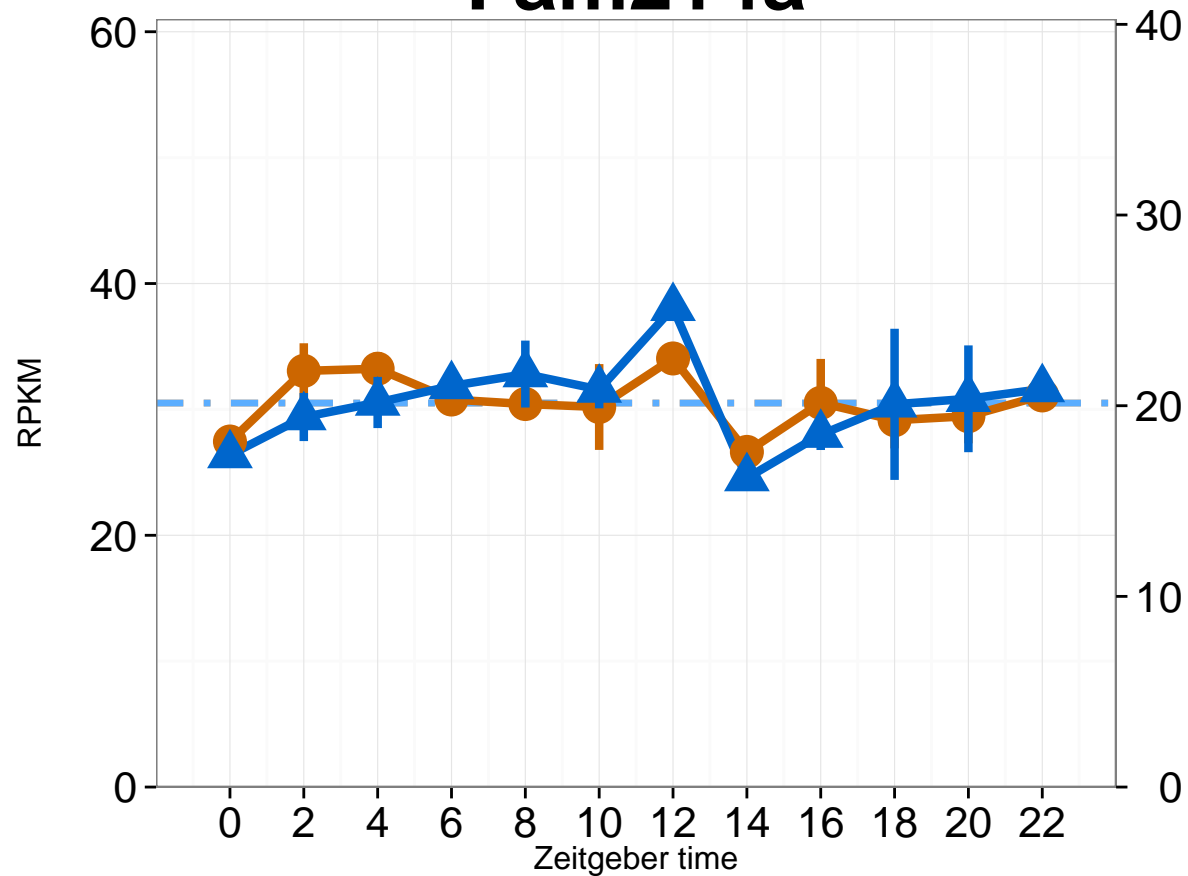

# Fam214a

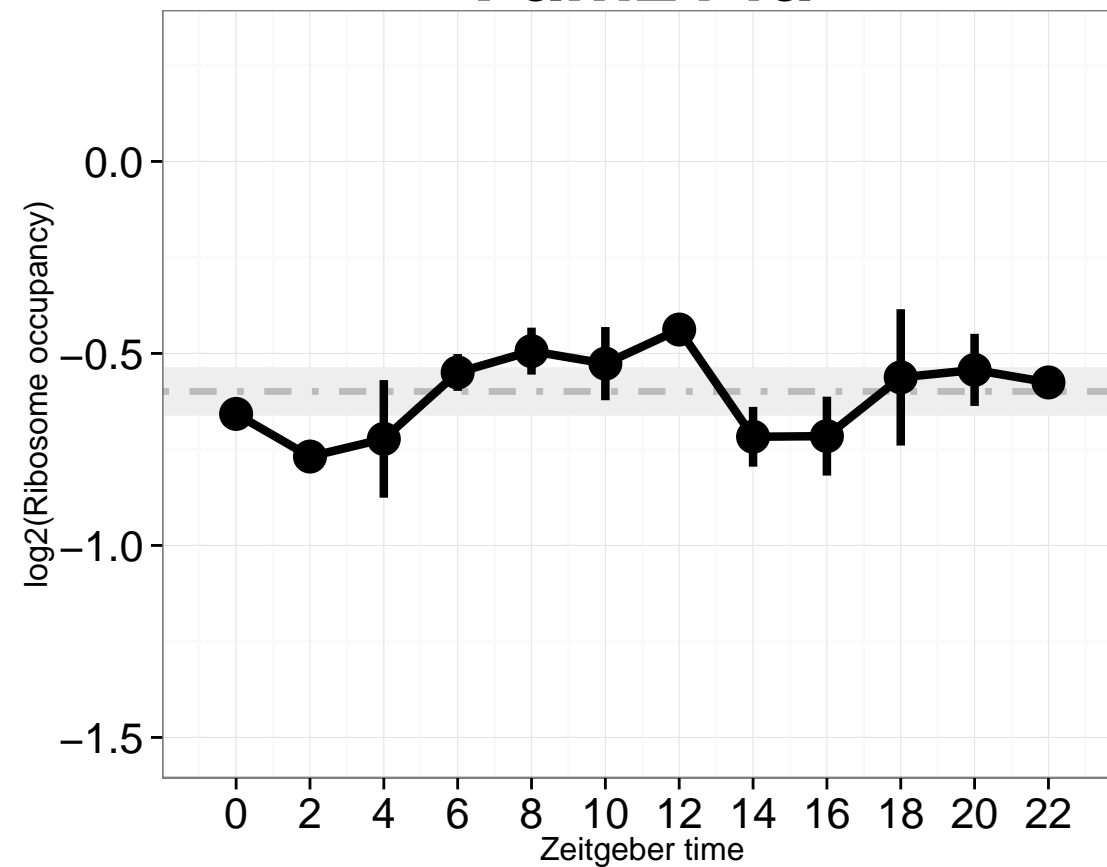

Supplement: Supplementary file 12695 [file 1]

# Abhd16a

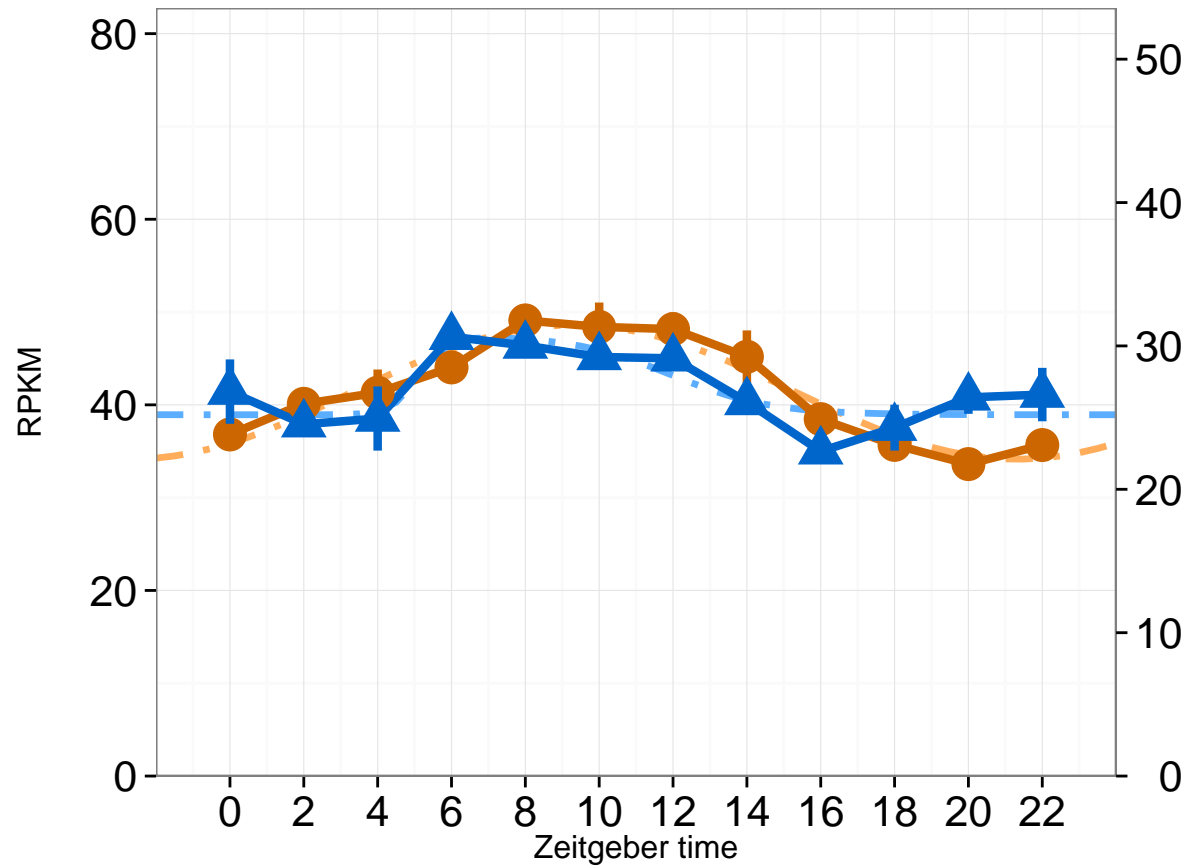

# Abhd16a

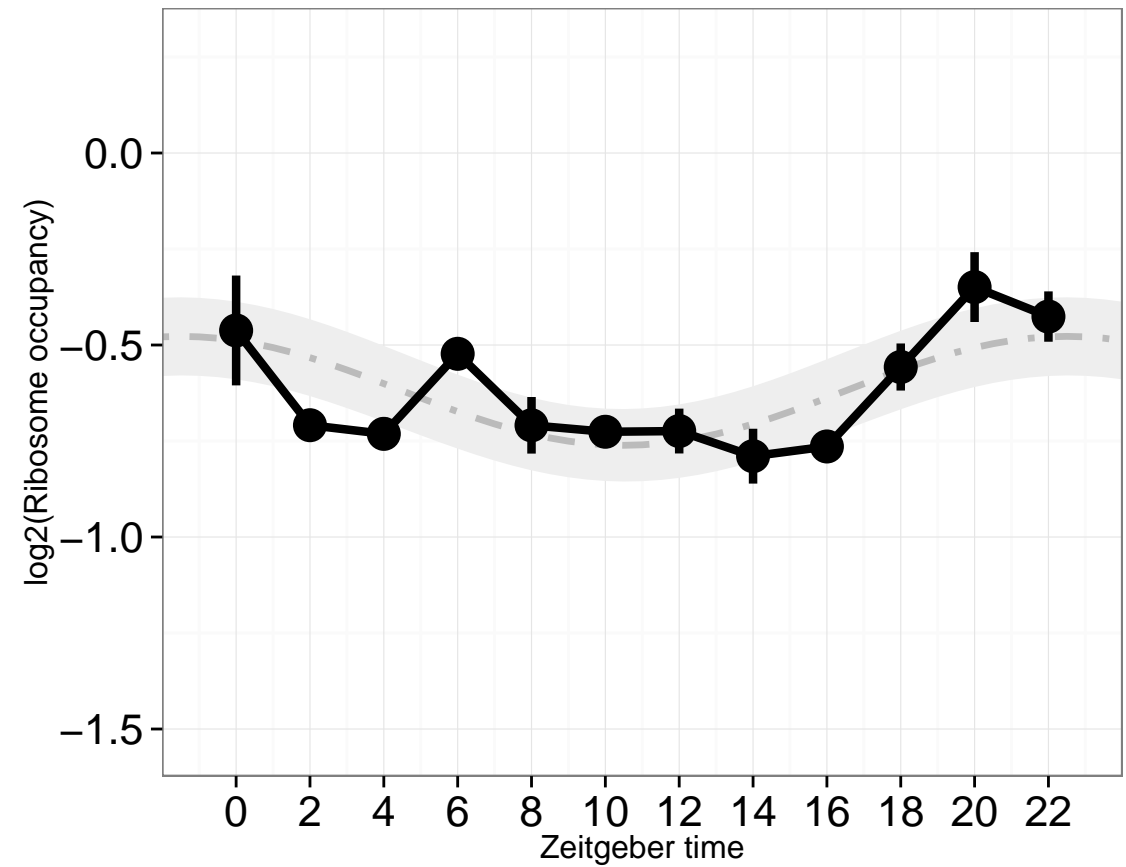

Supplement: Supplementary file 12696 [file 1]

# Slco2b1

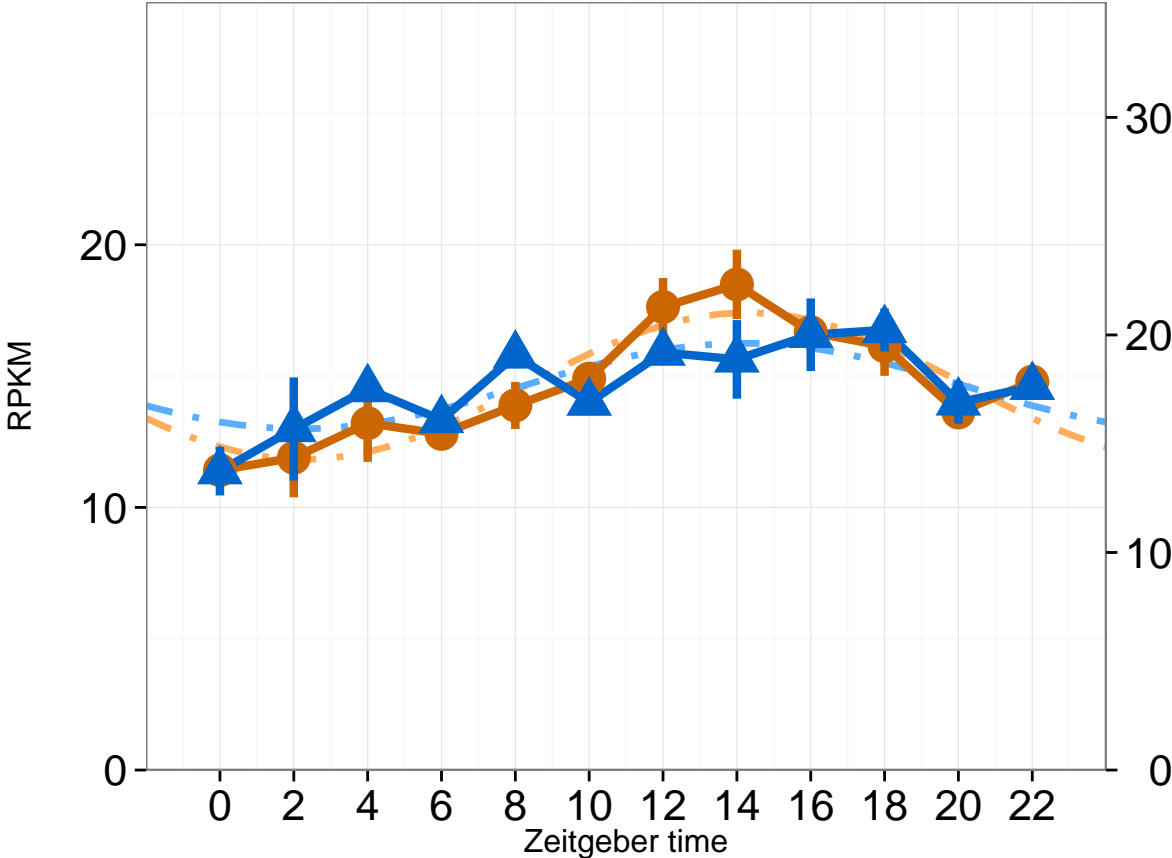

# Slco2b1

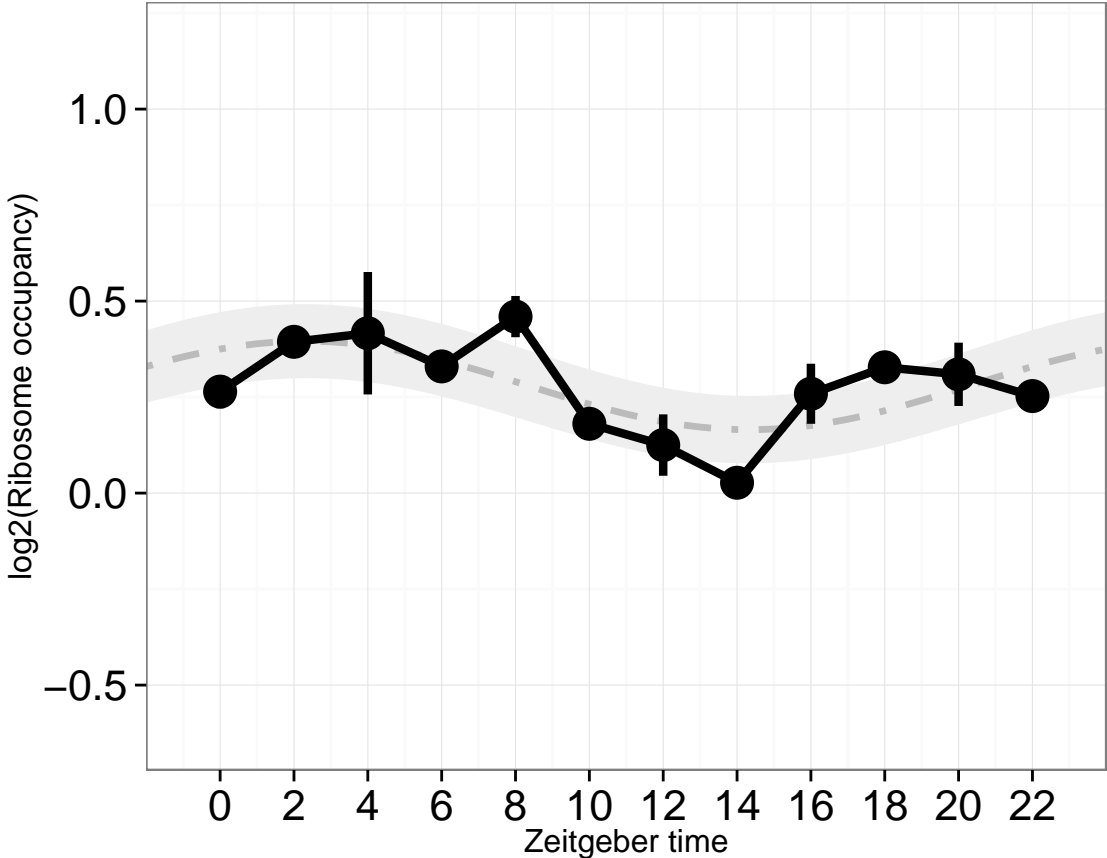

Supplement: Supplementary file 12697 [file 1]

## Fbxw9

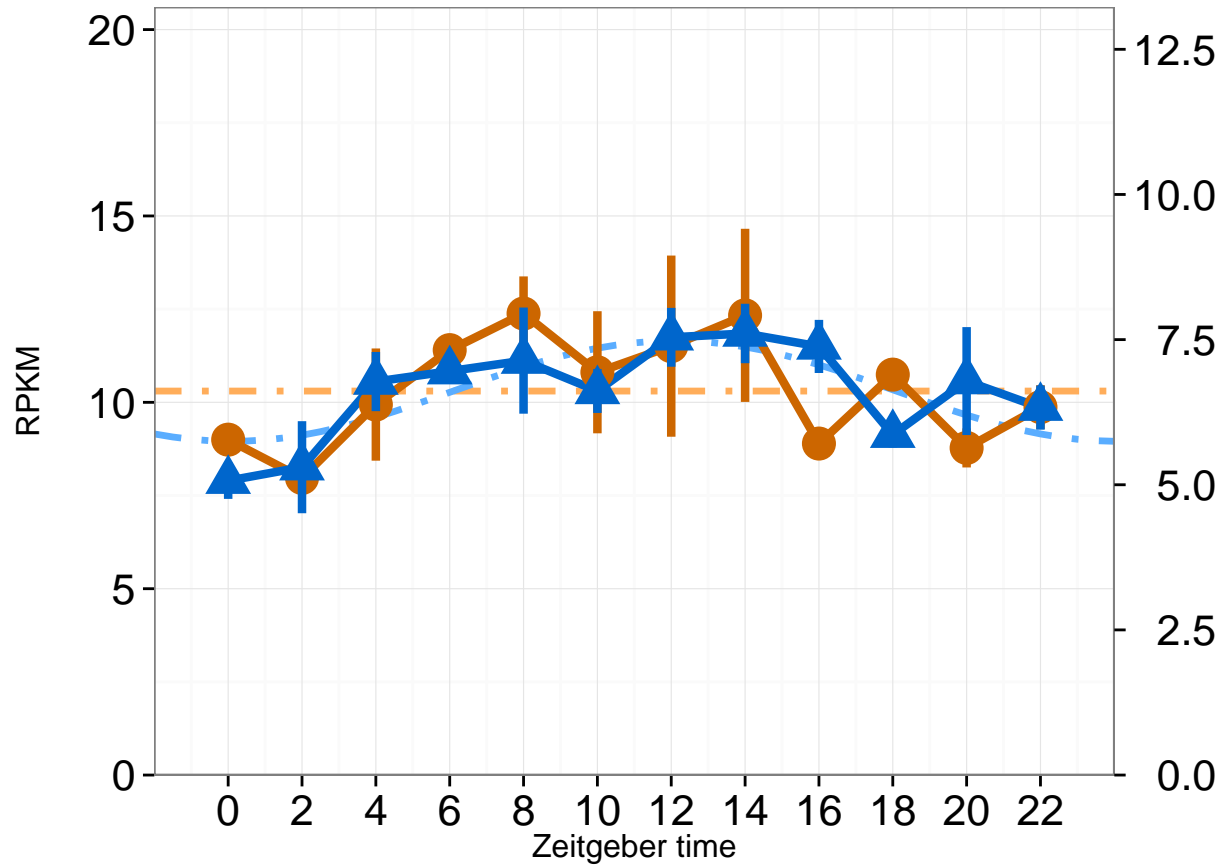

## Fbxw9

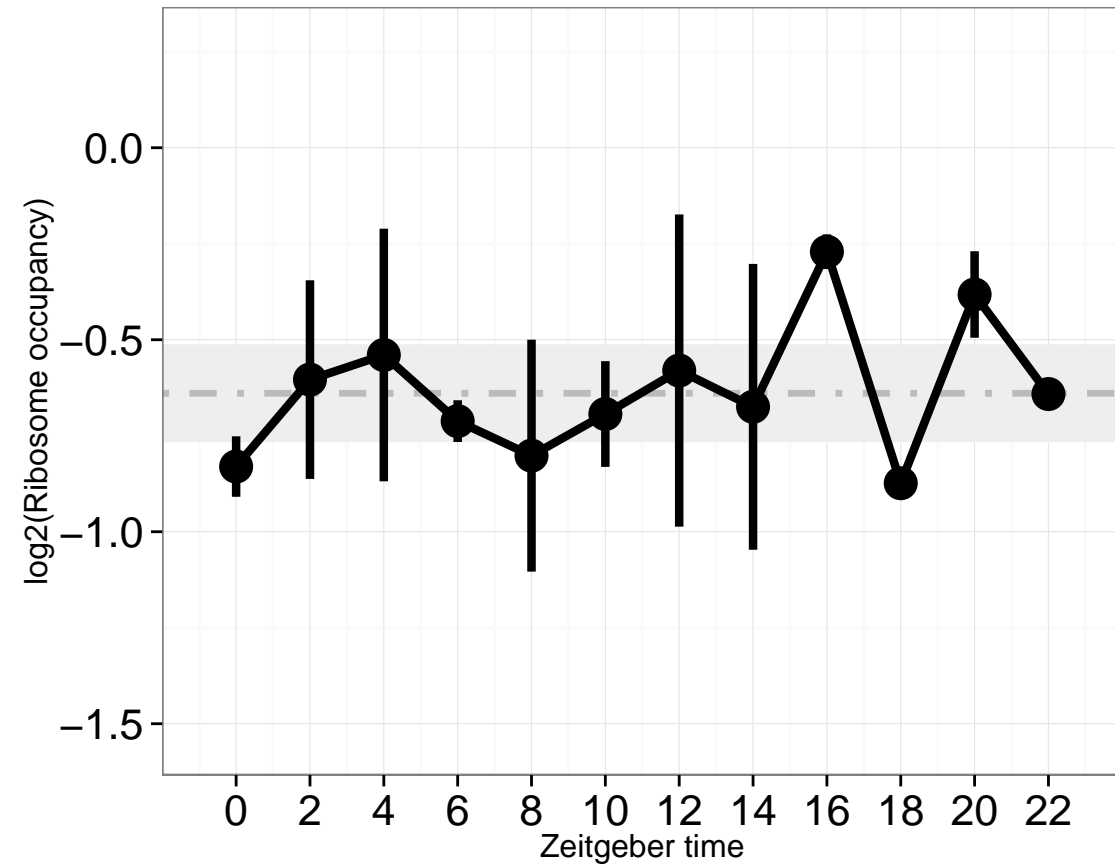

Supplement: Supplementary file 12698 [file 1]

# C1qtnf1

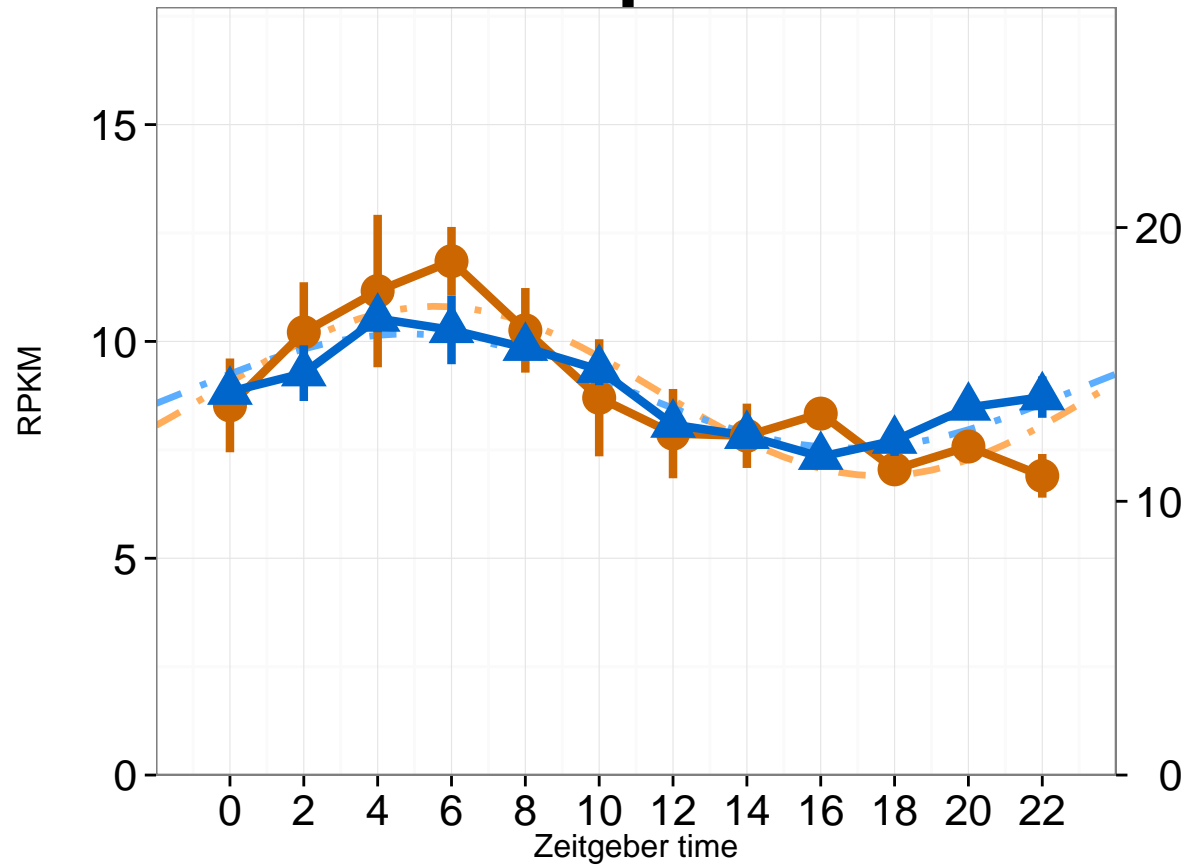

# C1qtnf1

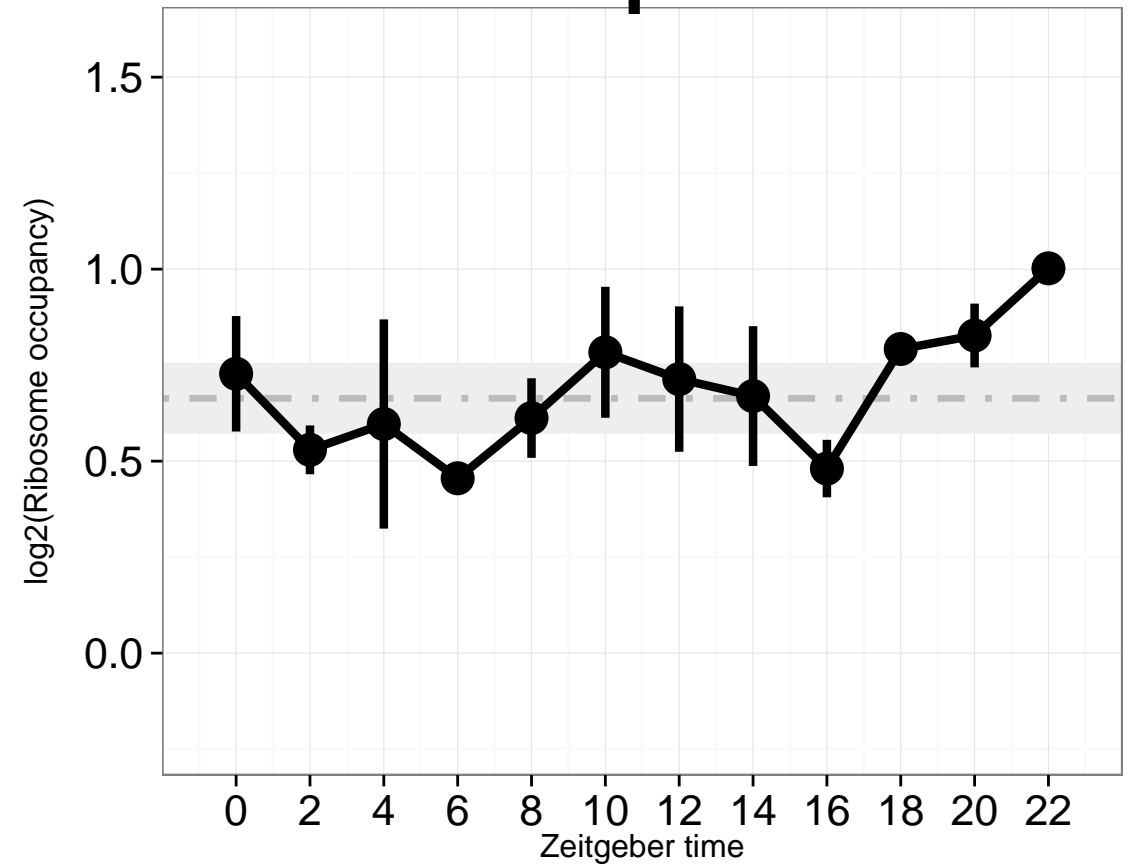

Supplement: Supplementary file 12699 [file 1]

## Rin1

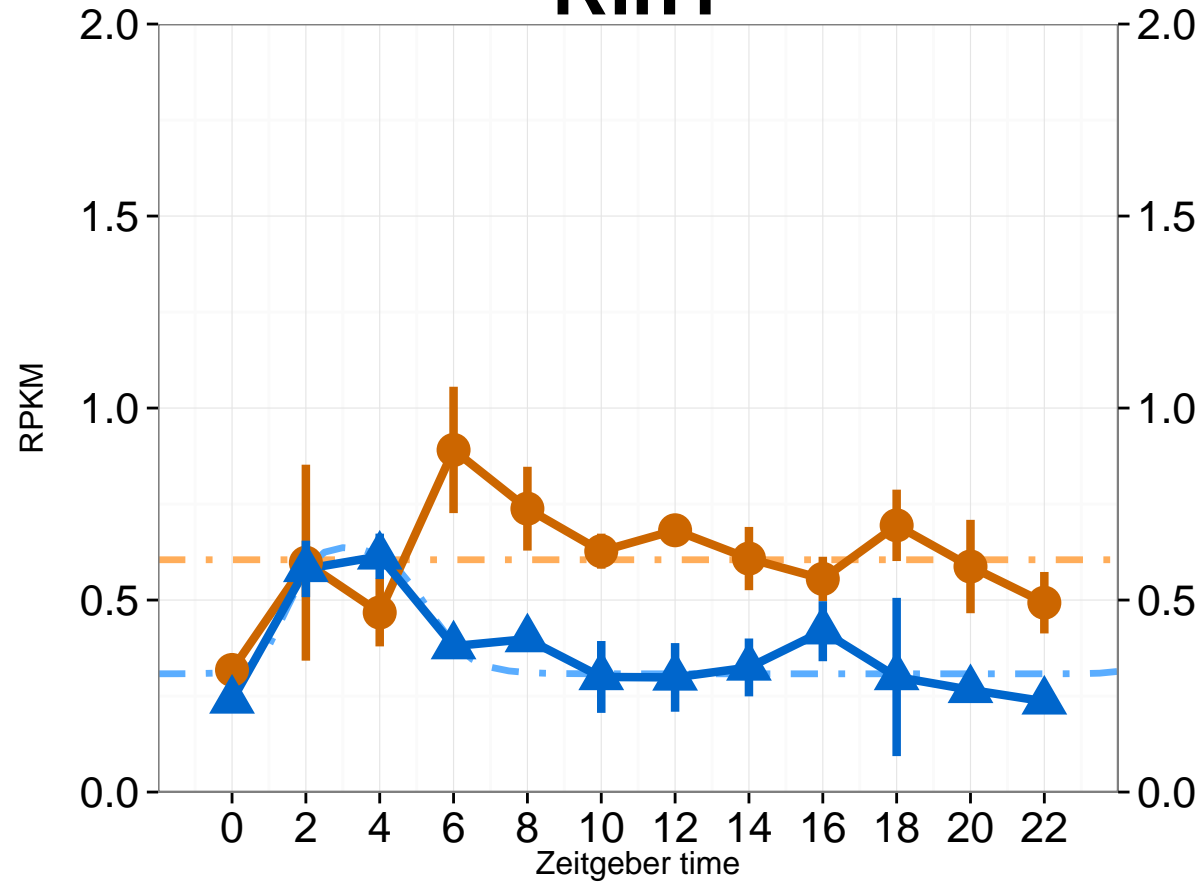

## Rin1

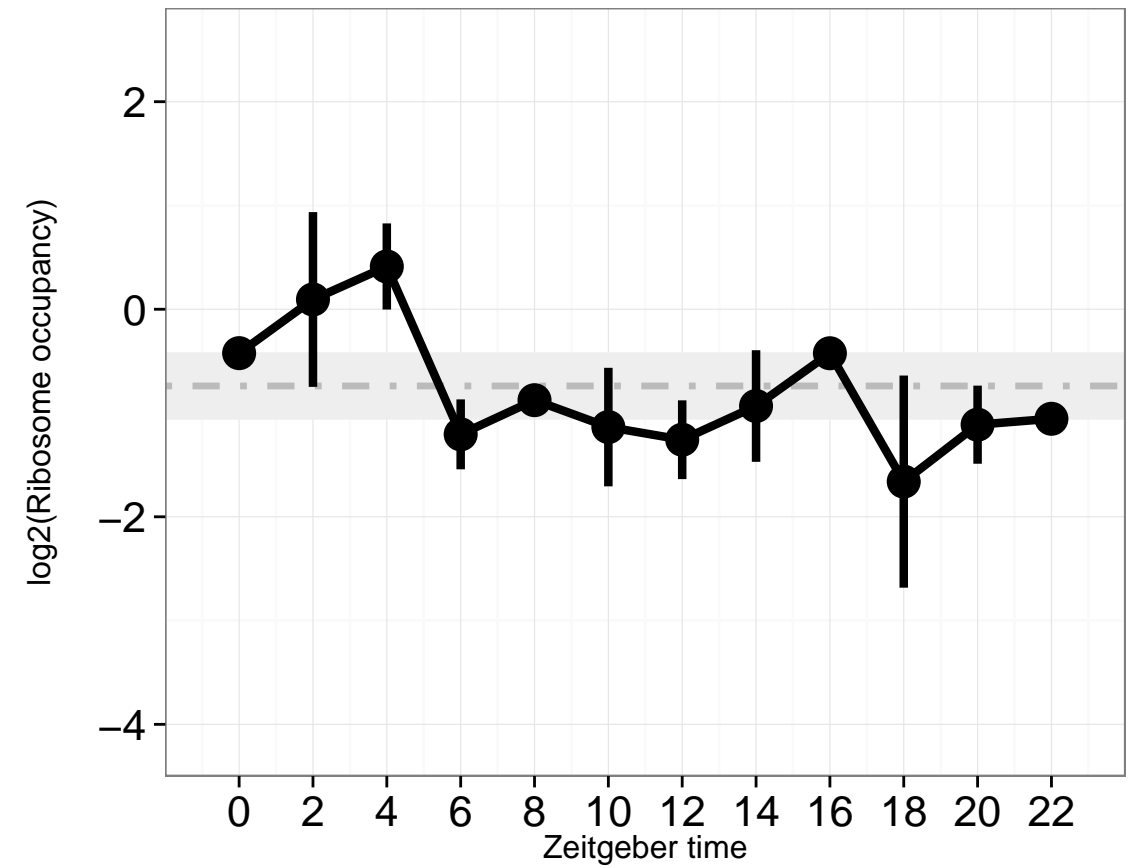

Supplement: Supplementary file 12700 [file 1]

# Zfp566

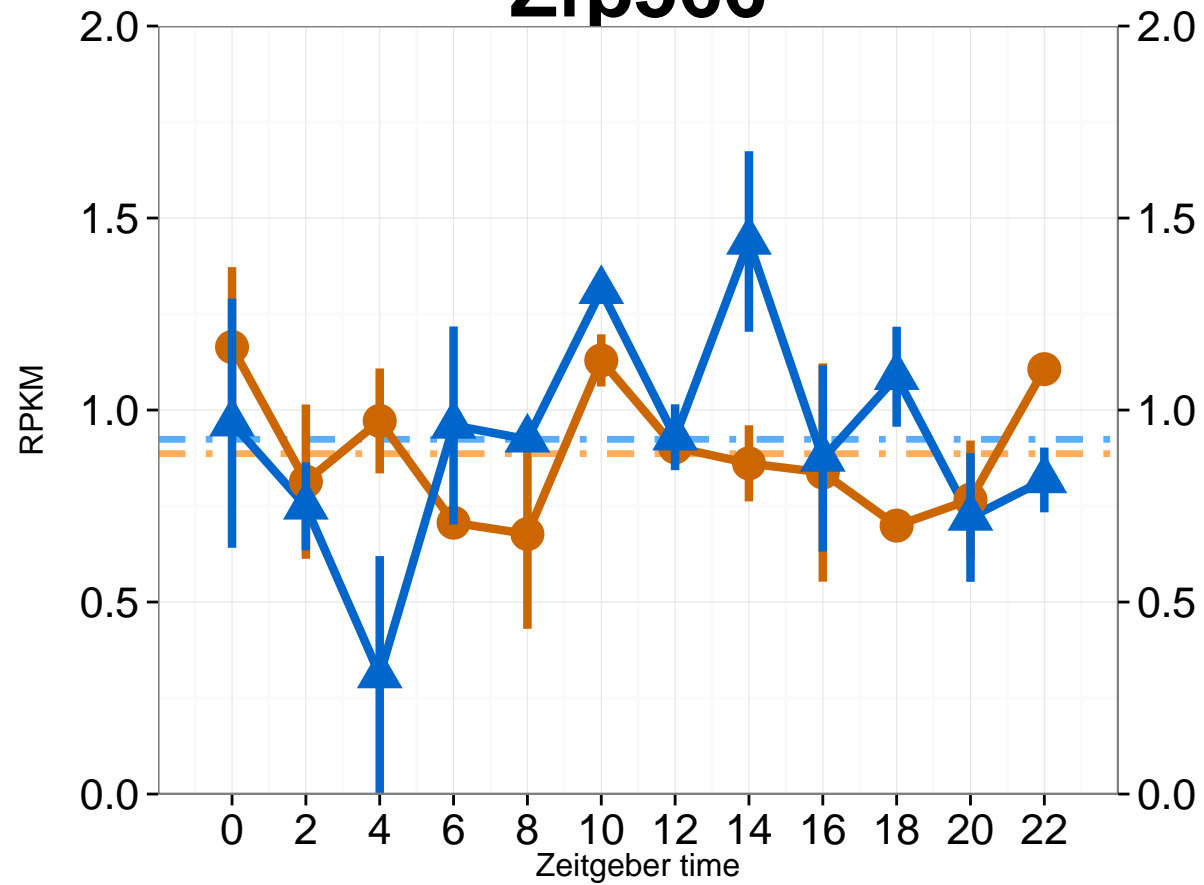

# Zfp566

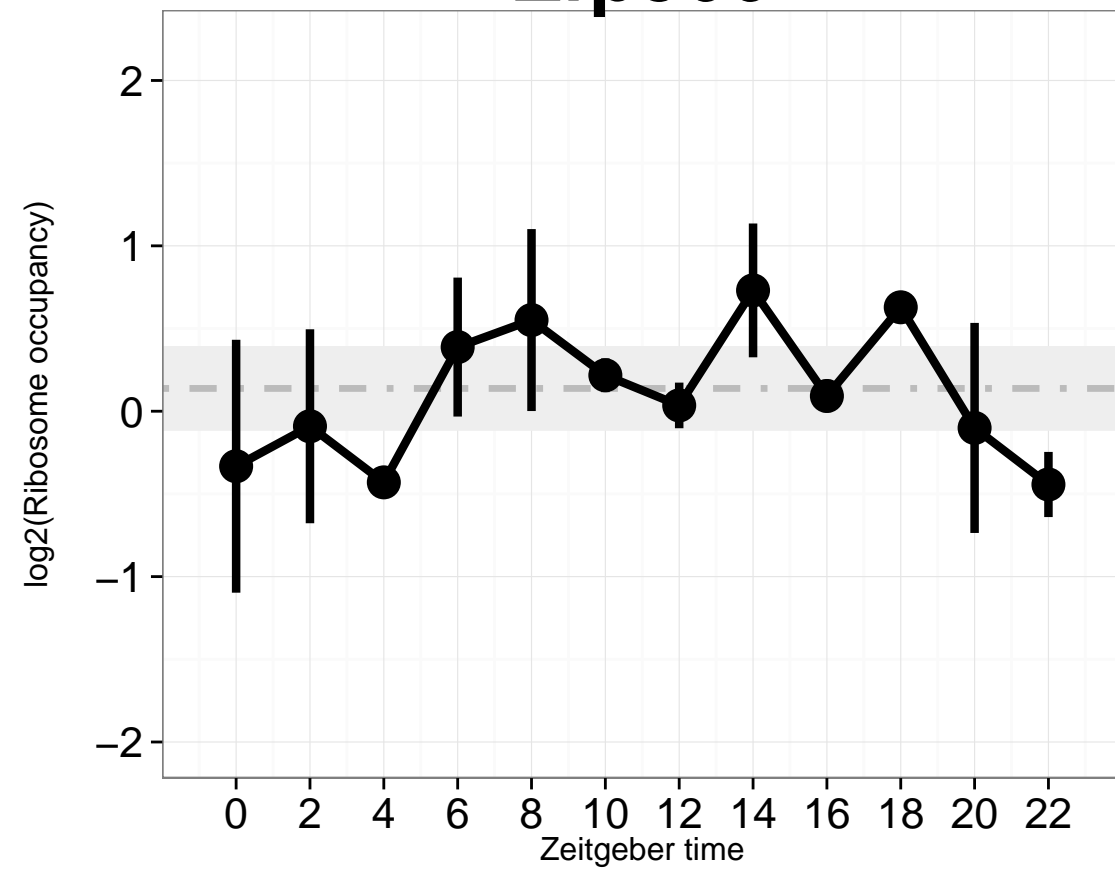

Supplement: Supplementary file 12701 [file 1]

# Sdcccag8

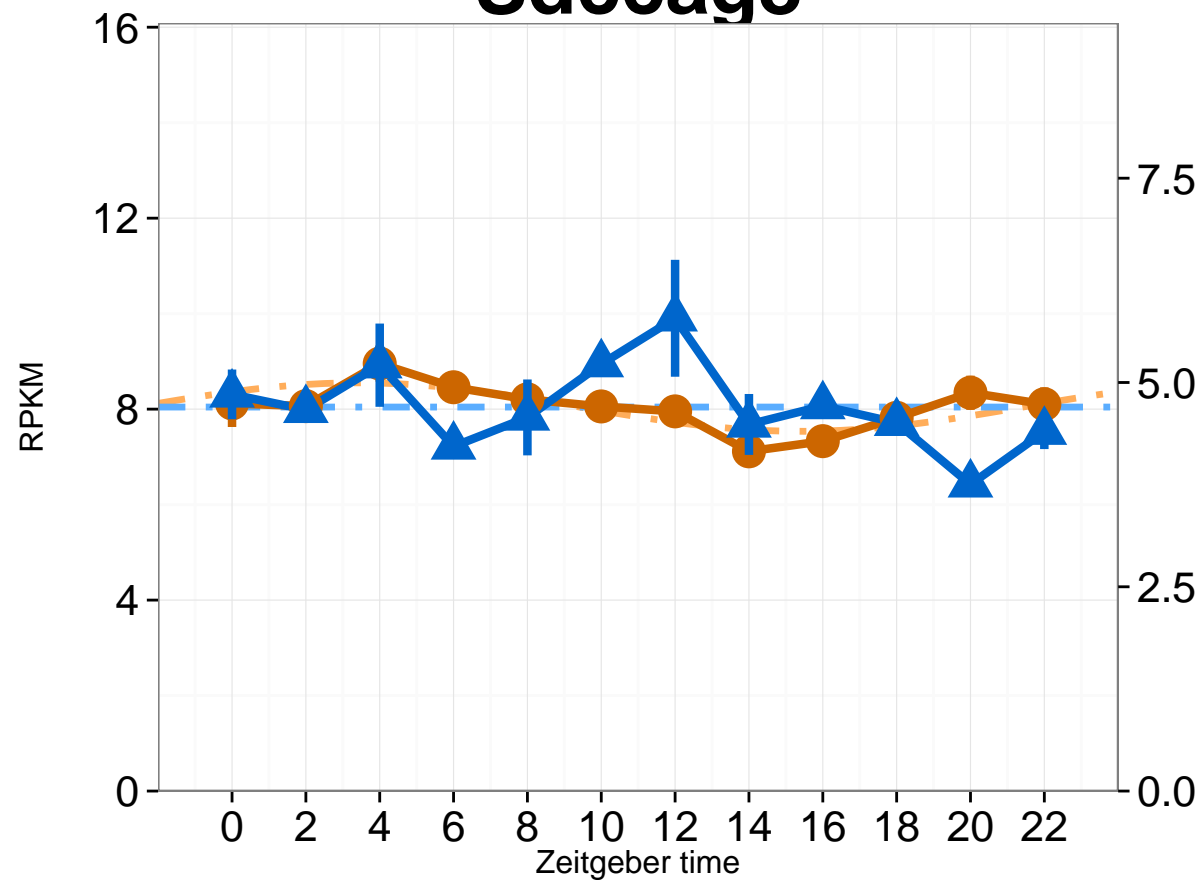

# Sdcccag8

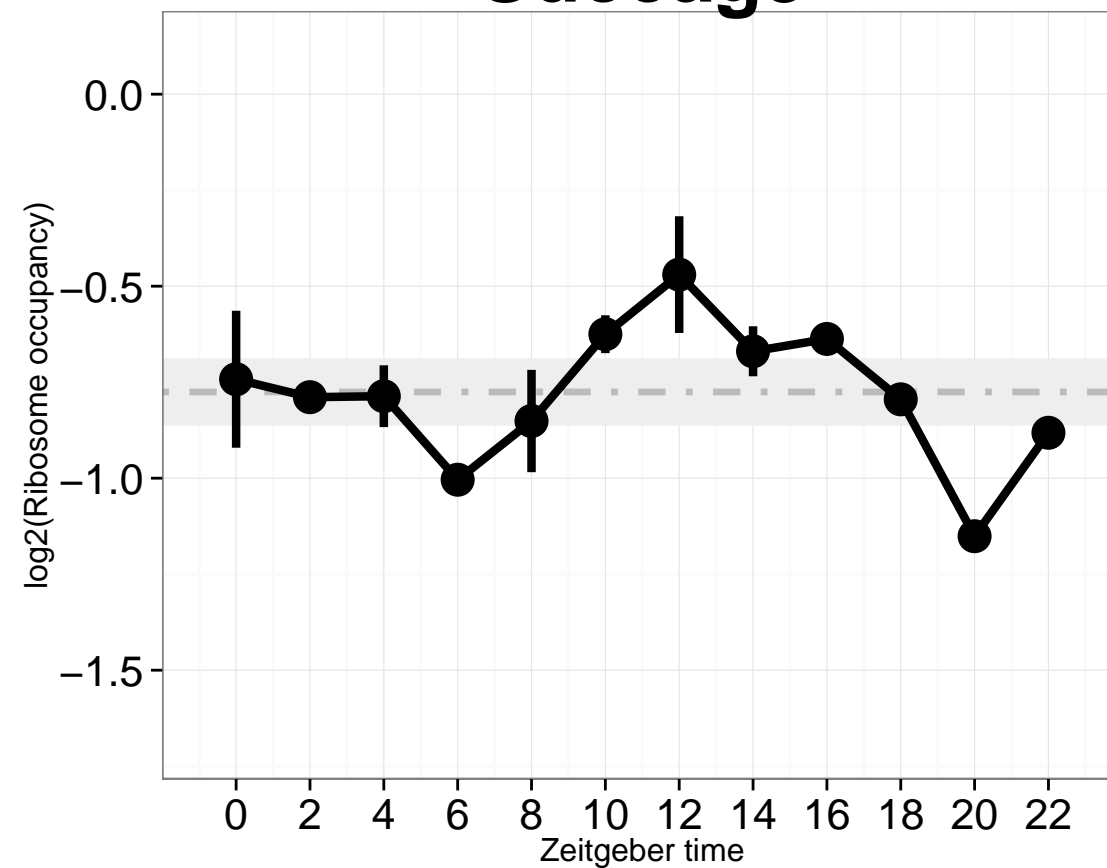

Supplement: Supplementary file 12702 [file 1]

# Dffa

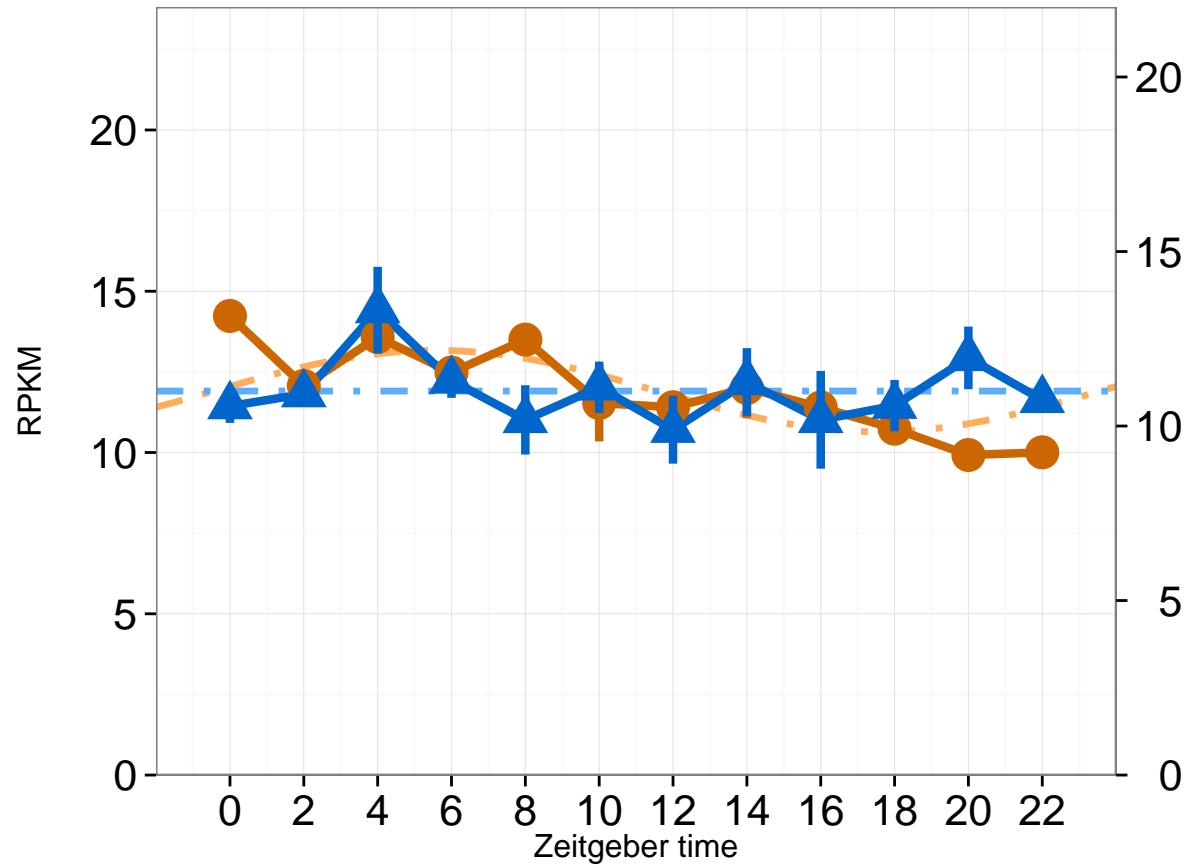

# Dffa

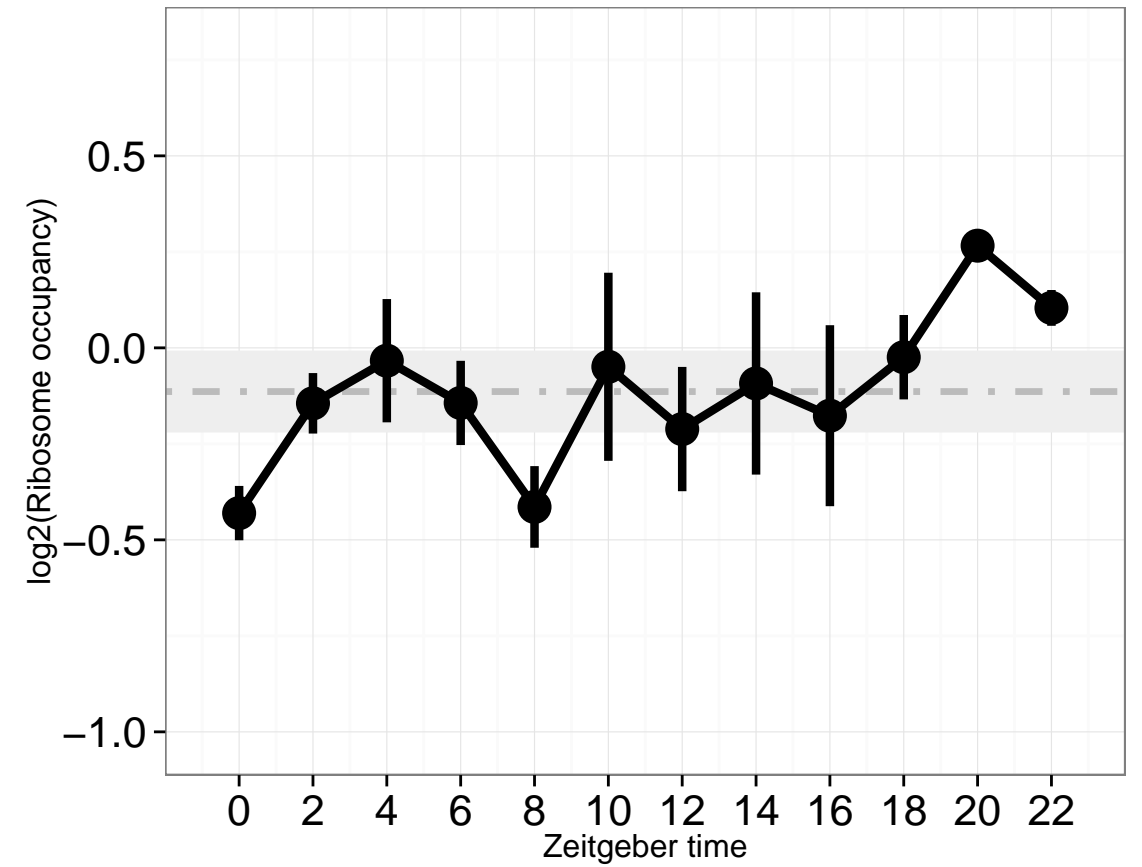

Supplement: Supplementary file 12703 [file 1]

## G3bp1

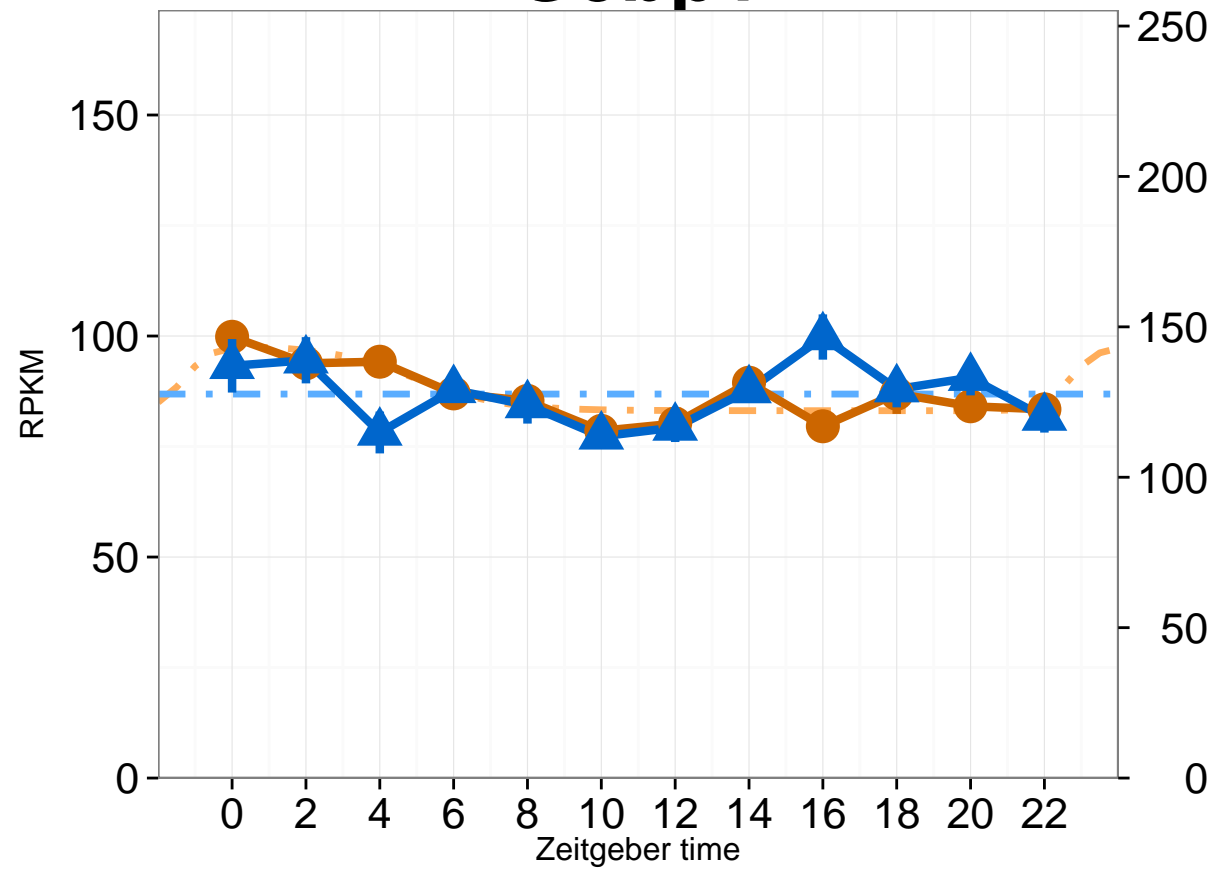

## G3bp1

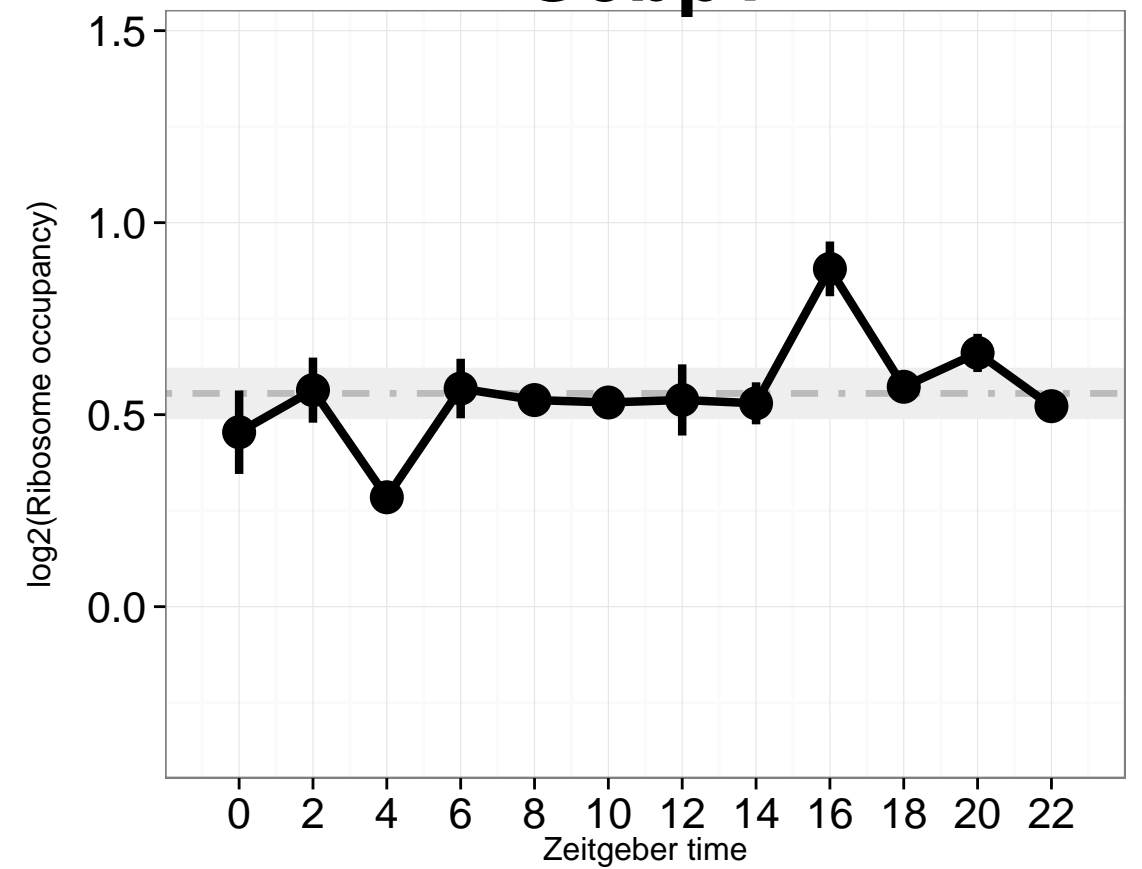

Supplement: Supplementary file 12704 [file 1]

## Dusp6

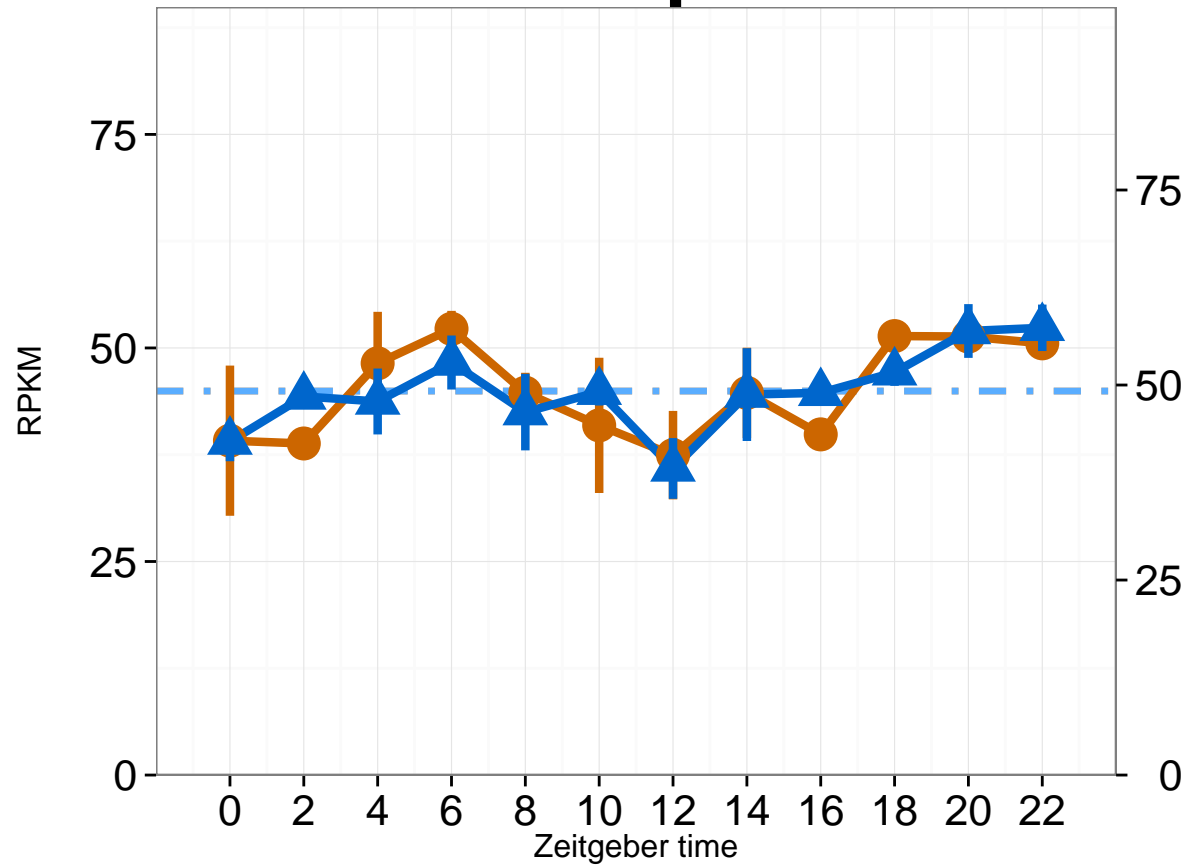

## Dusp6

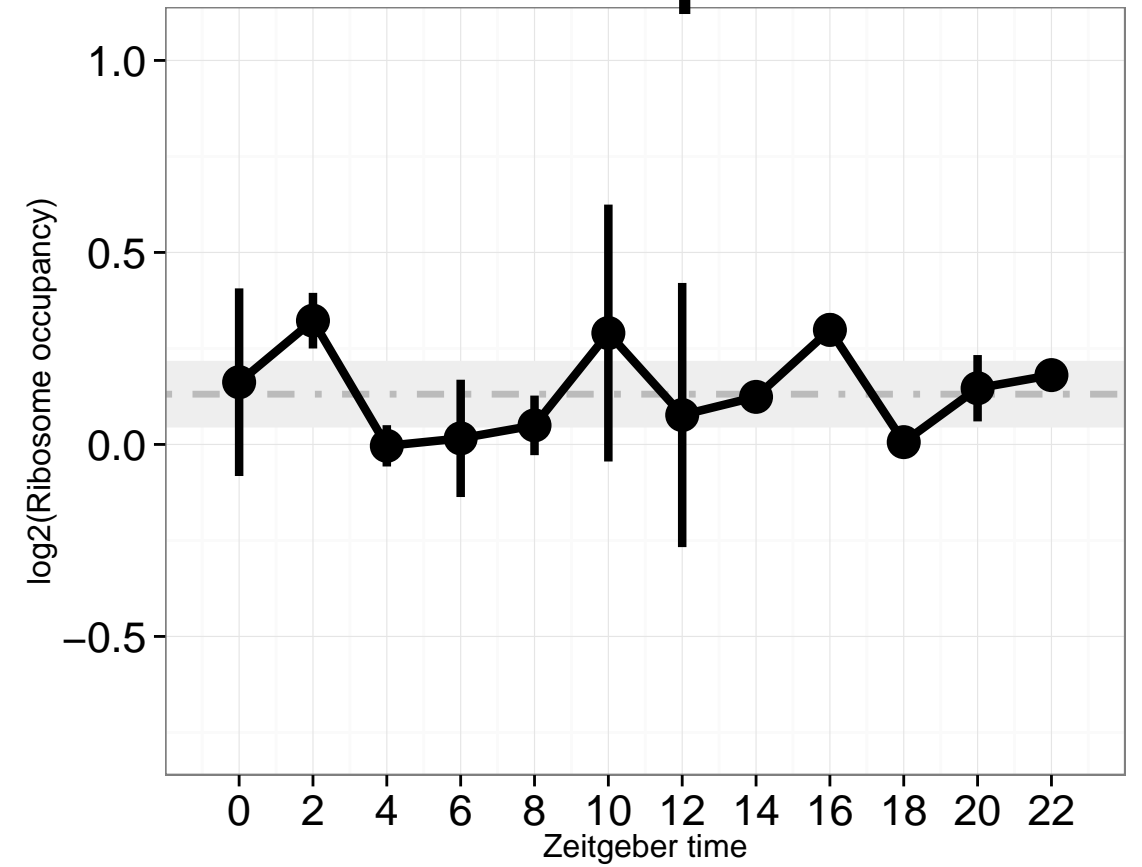

Supplement: Supplementary file 12705 [file 1]

## Usp32

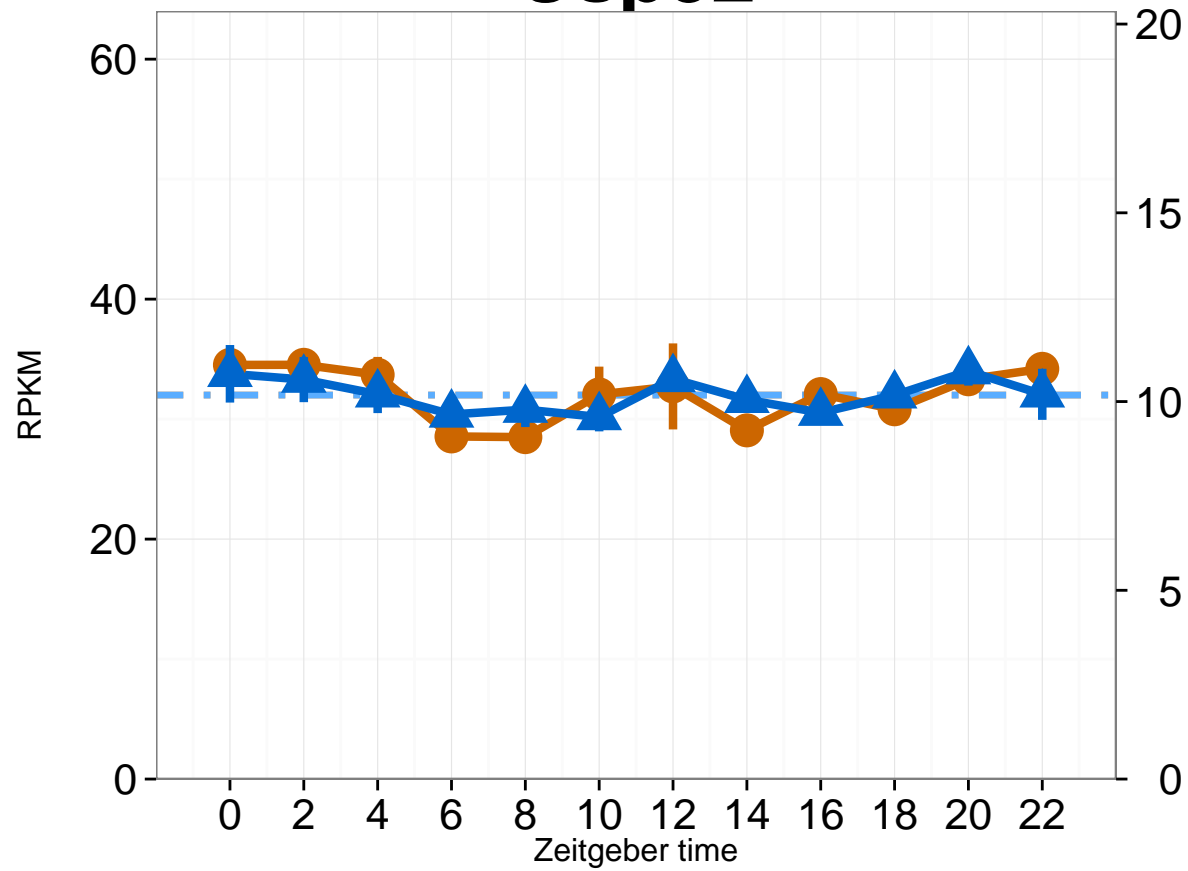

## Usp32

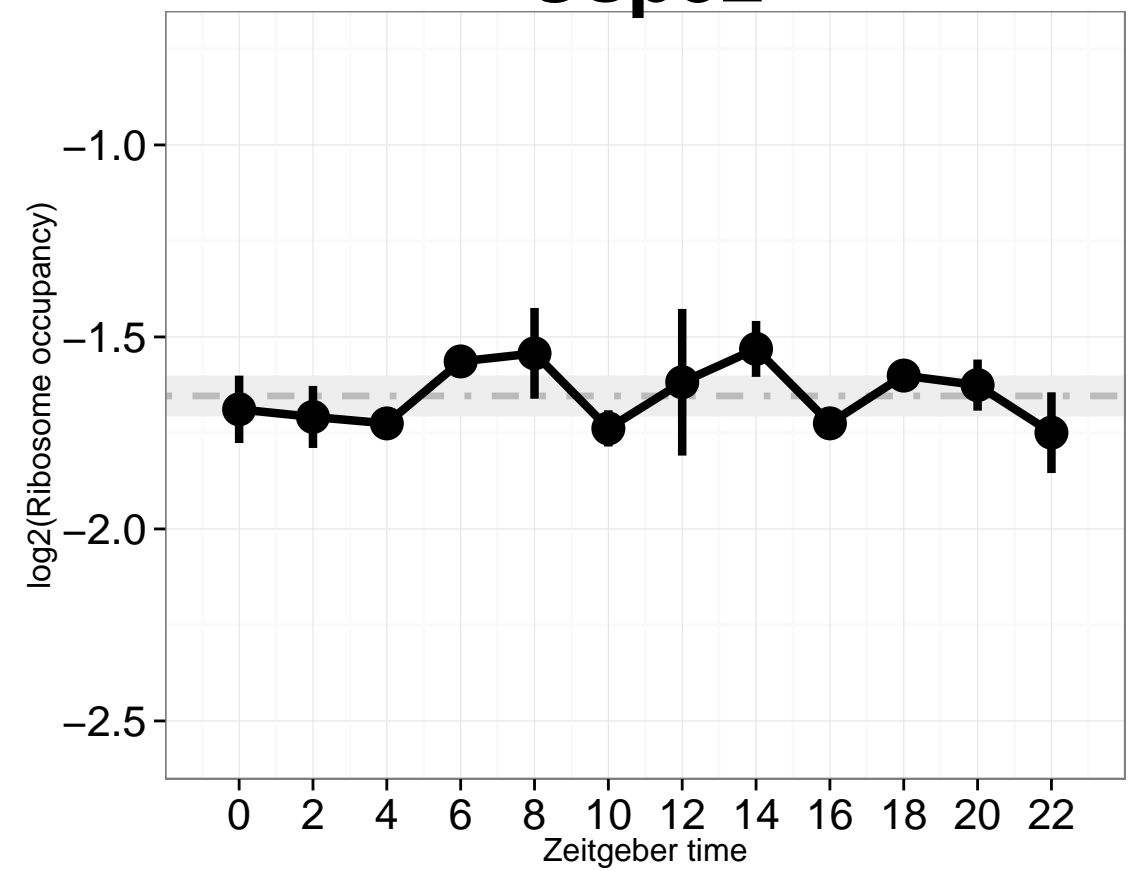

Supplement: Supplementary file 12706 [file 1]

## Irs3

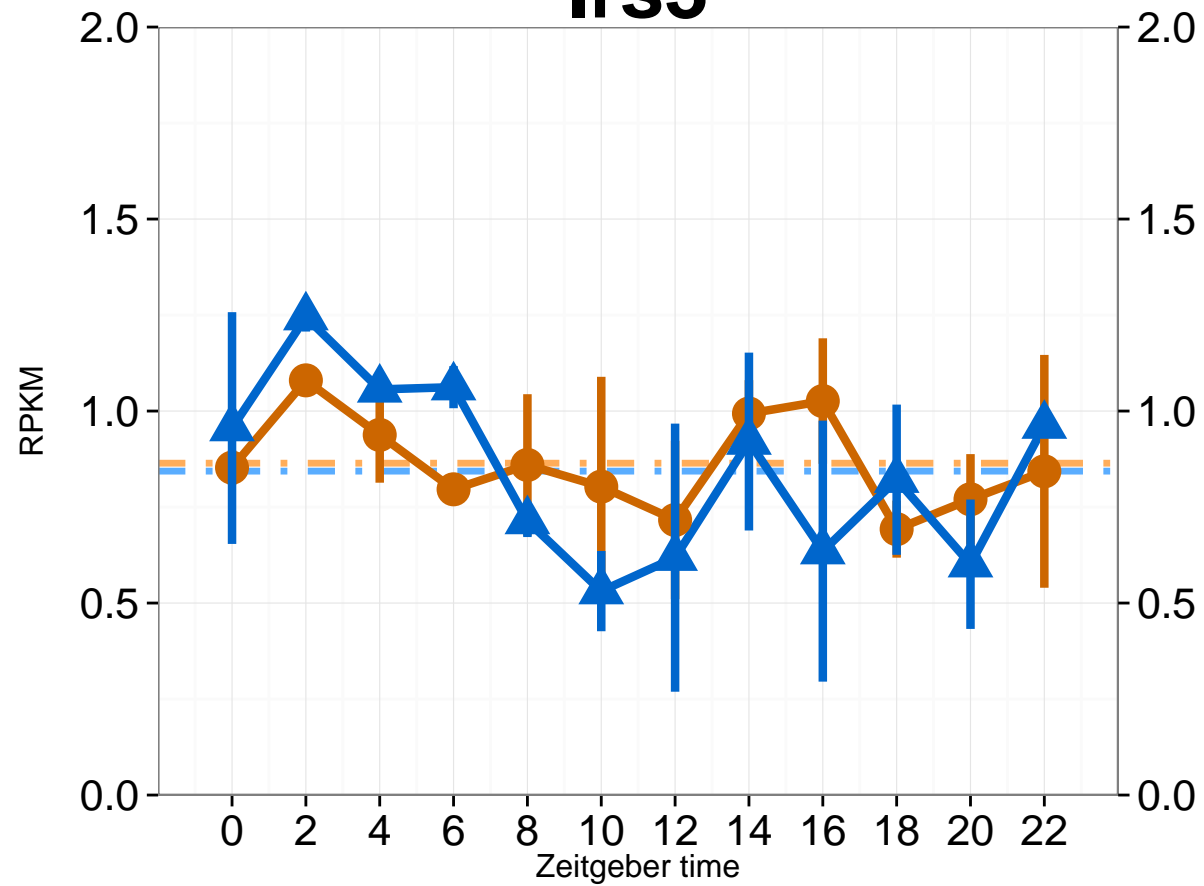

## Irs3

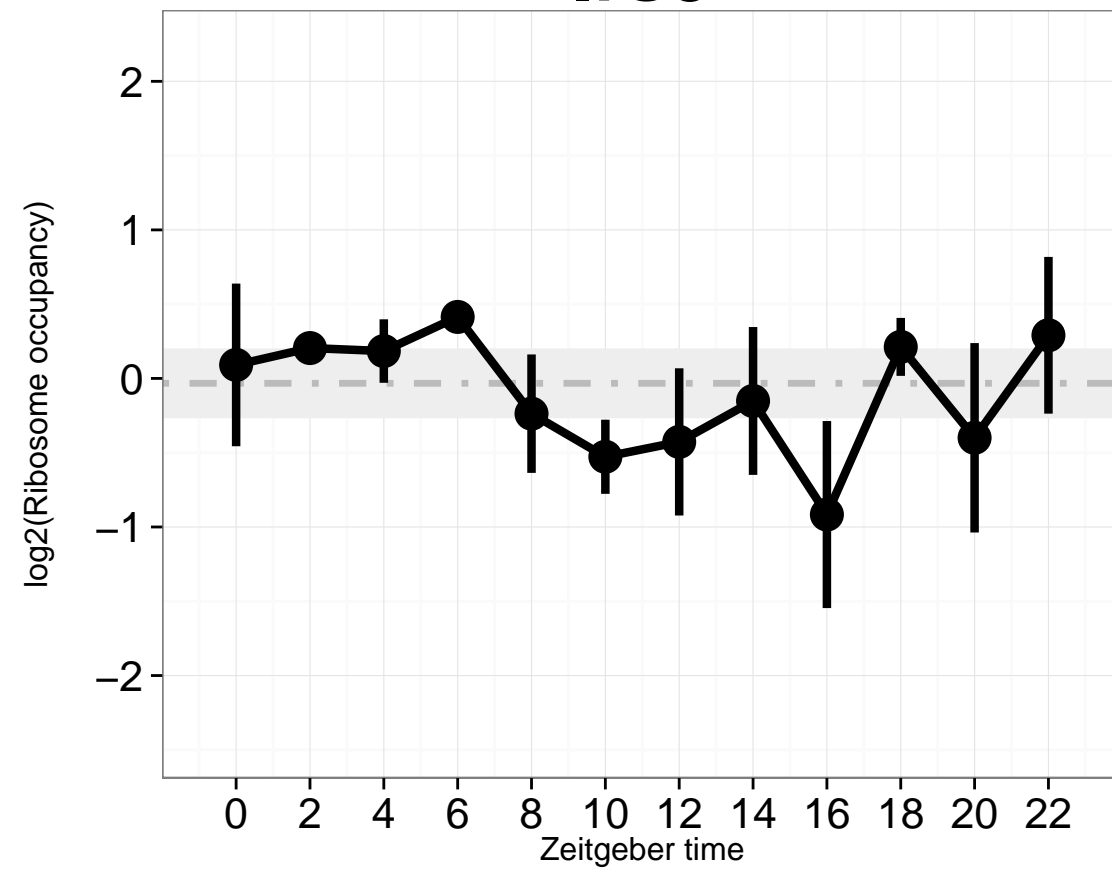

Supplement: Supplementary file 12707 [file 1]

# Zfp647

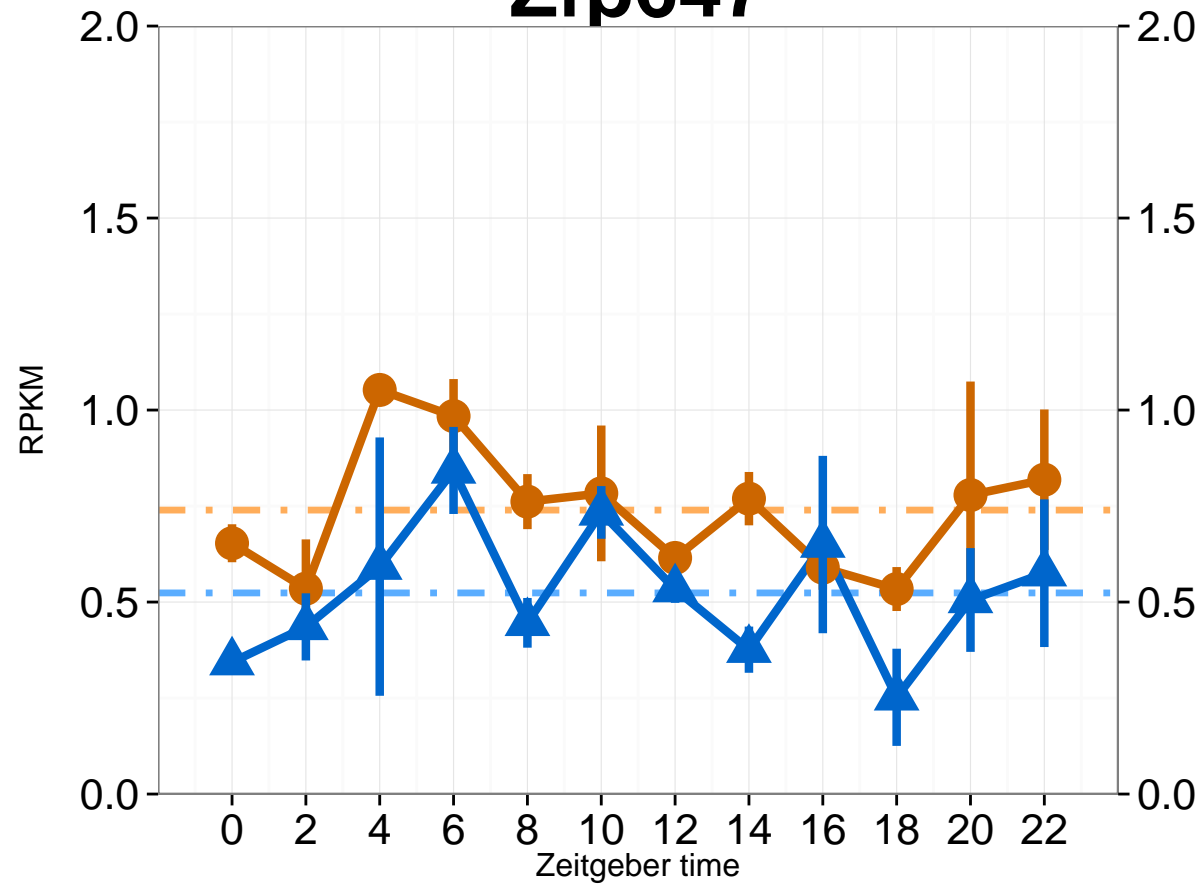

# Zfp647

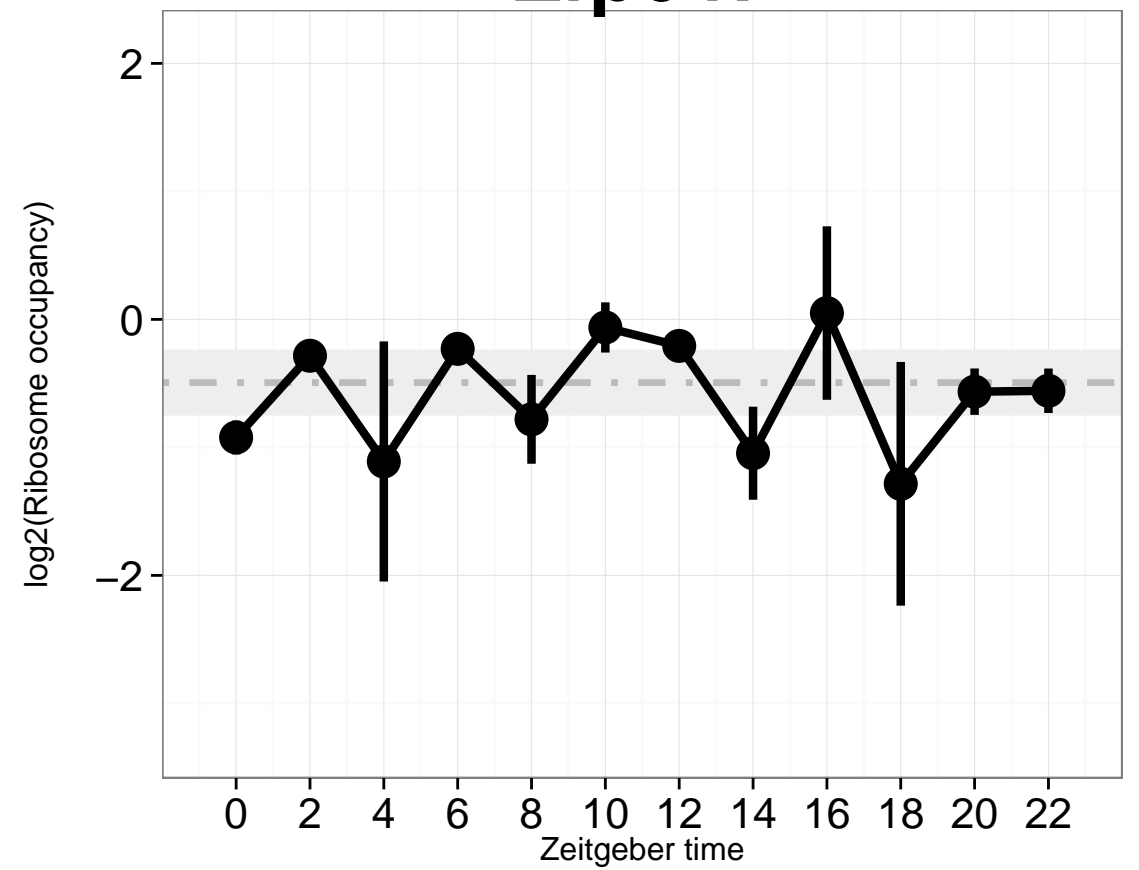

Supplement: Supplementary file 12708 [file 1]

# 4931414P19Rik

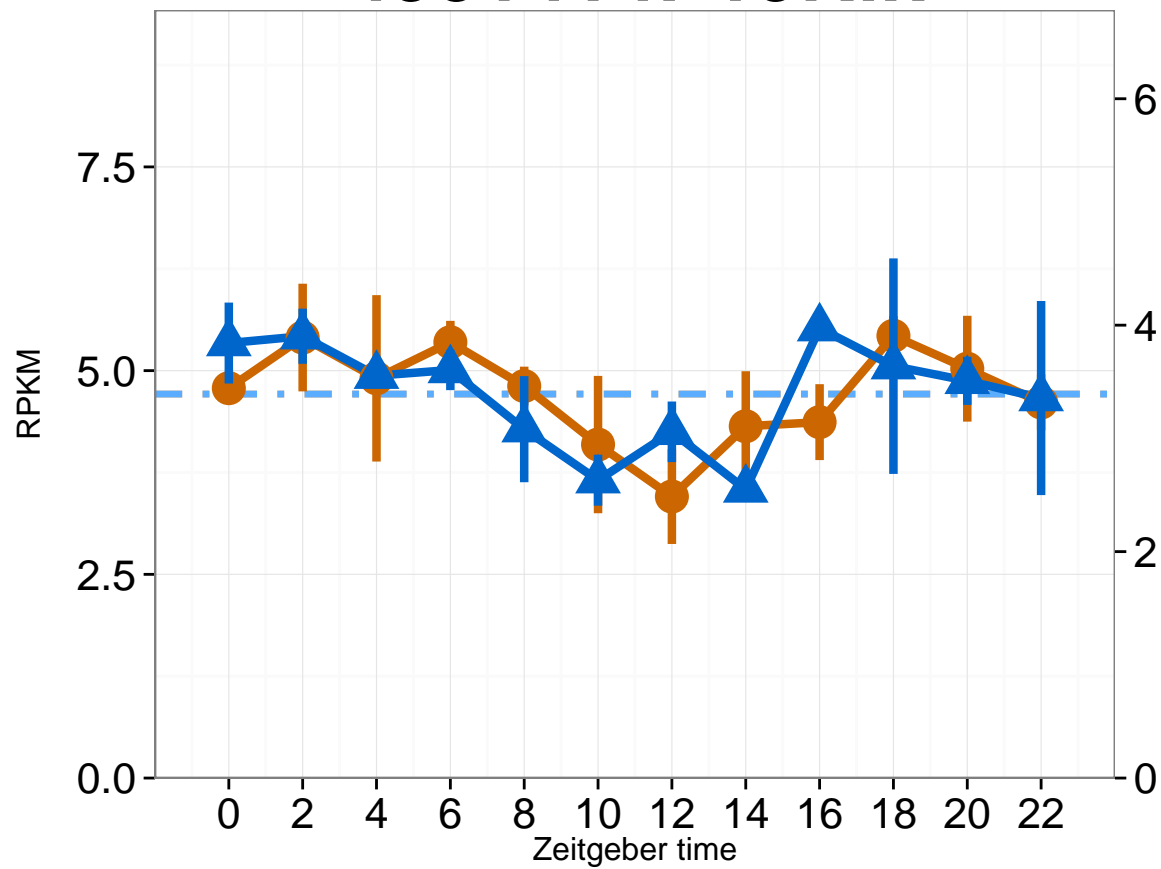

# 4931414P19Rik

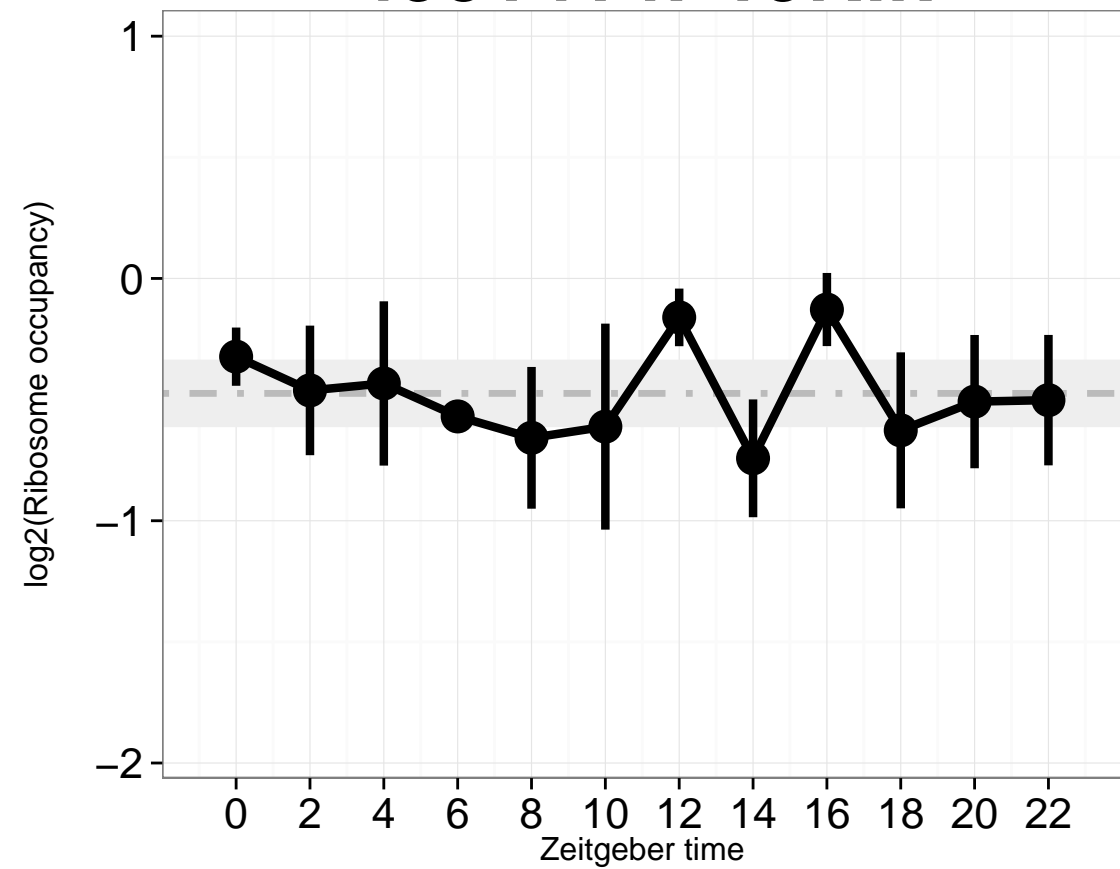

Supplement: Supplementary file 12709 [file 1]

# Krit1

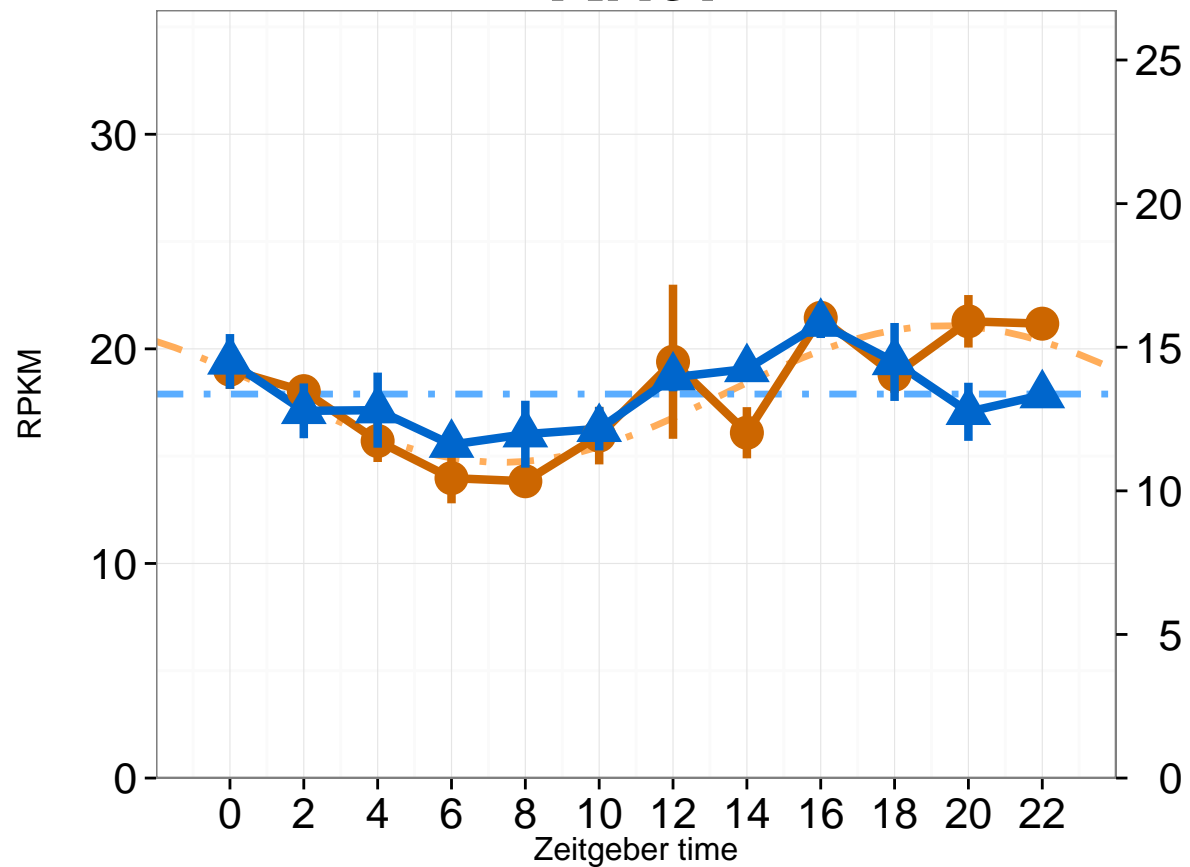

# Krit1

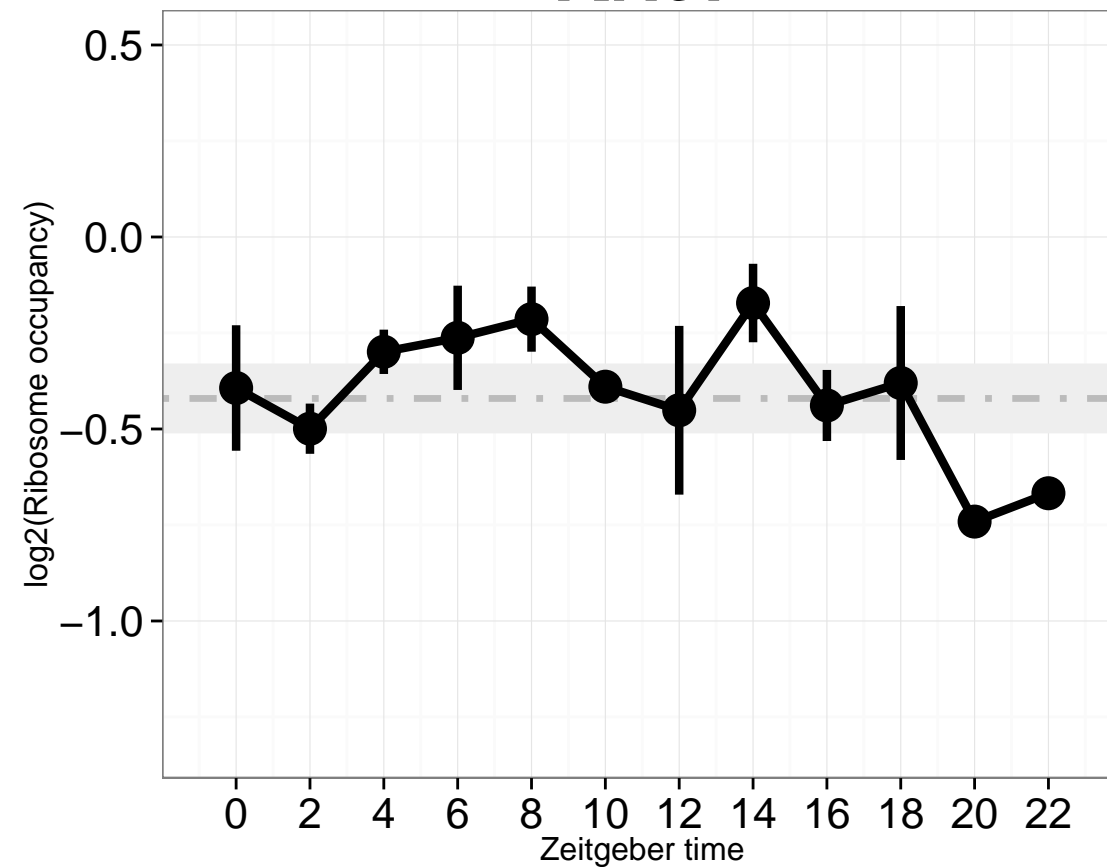

Supplement: Supplementary file 12710 [file 1]

## Brd3

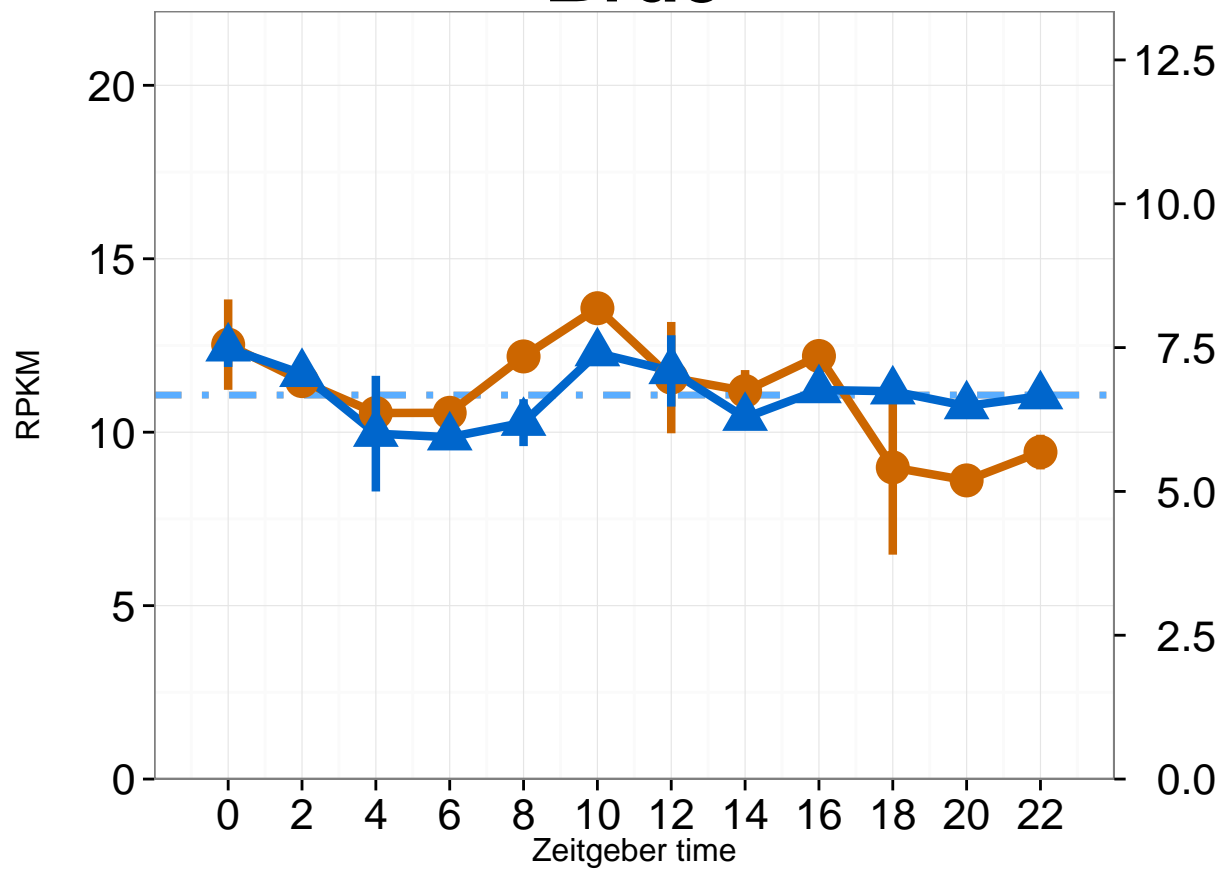

## Brd3

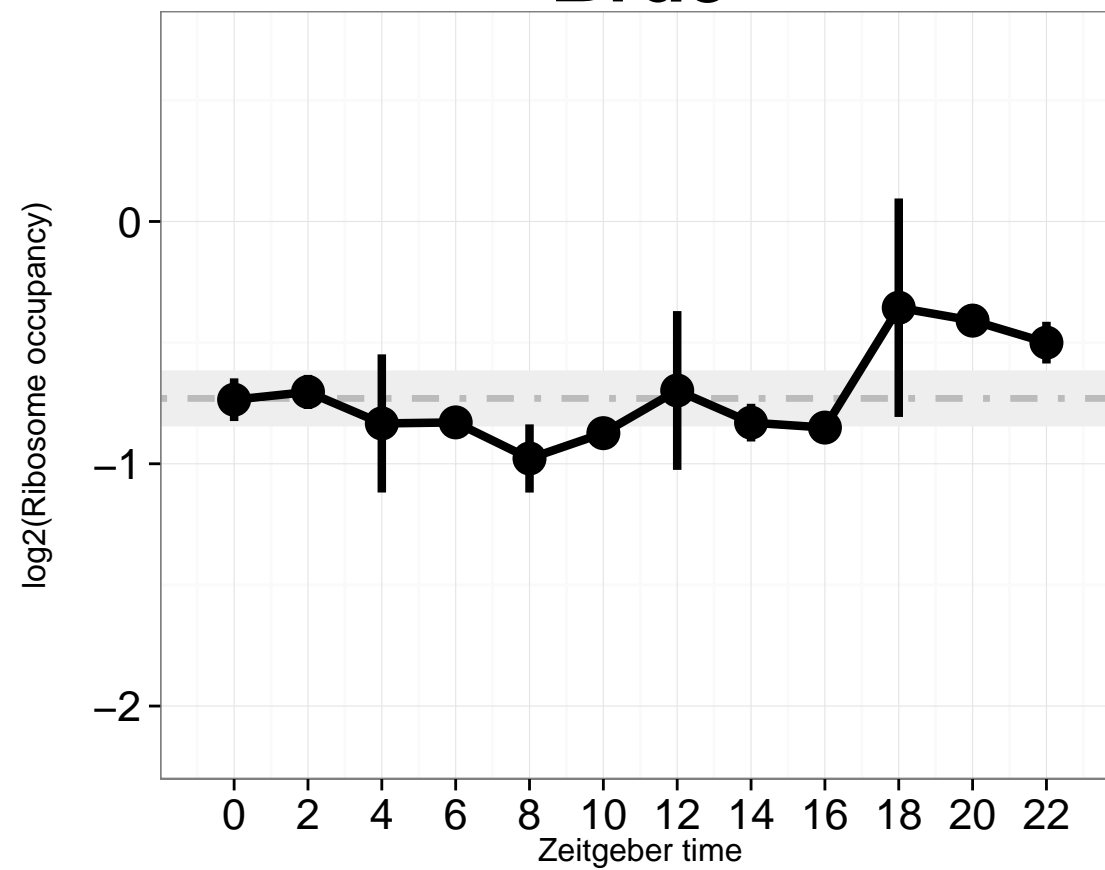

Supplement: Supplementary file 12711 [file 1]

## Traf2

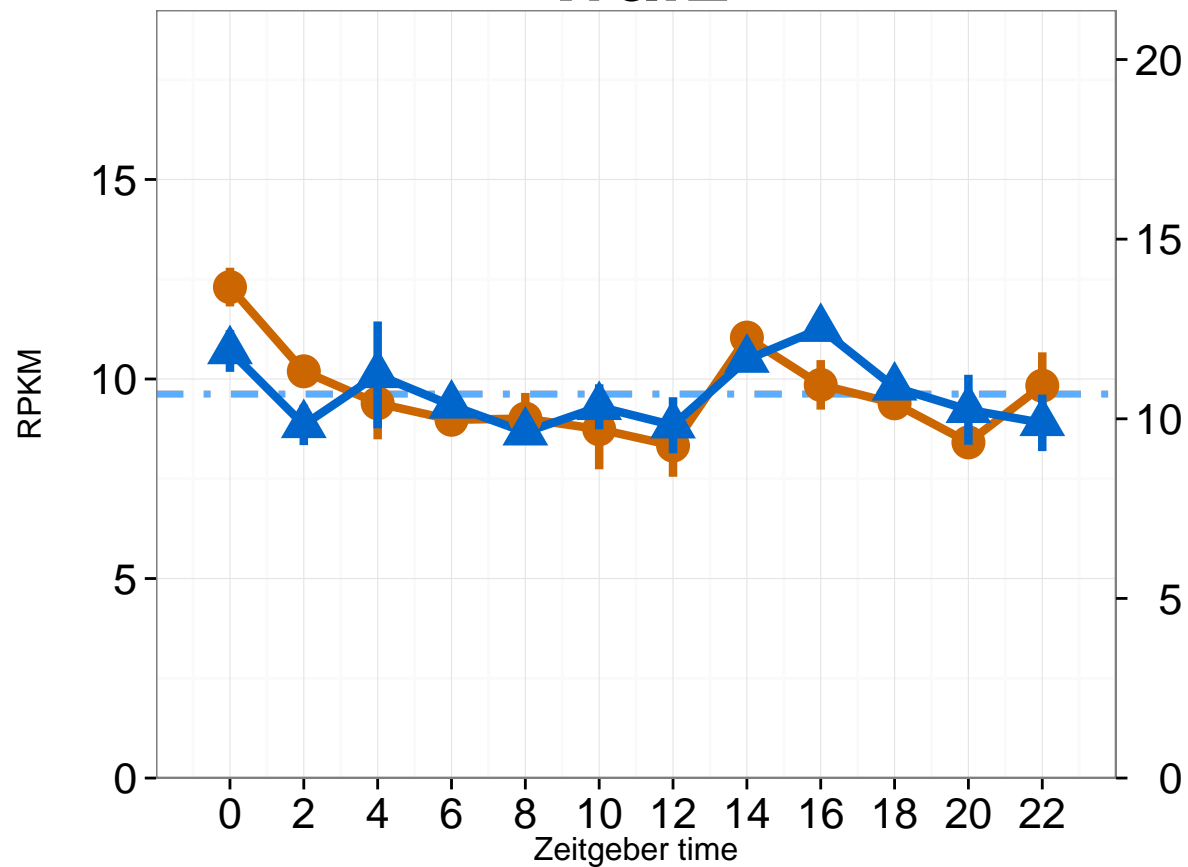

## Traf2

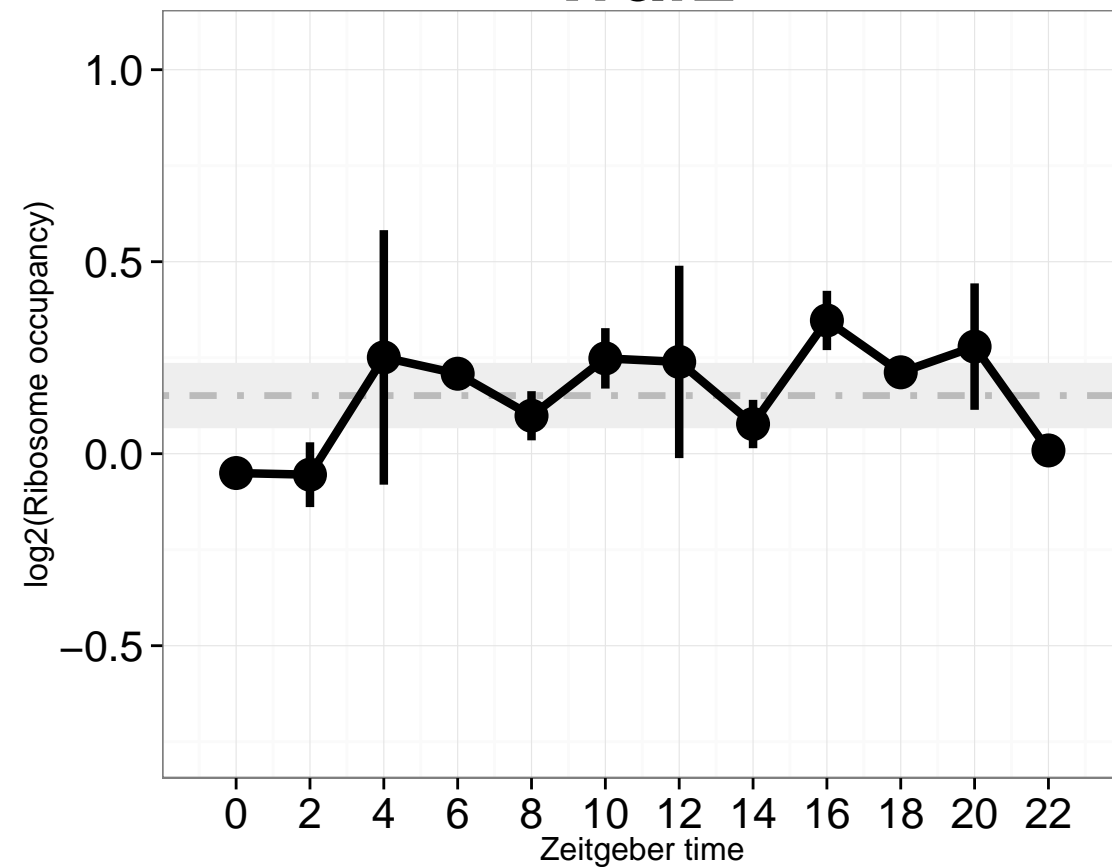

Supplement: Supplementary file 12712 [file 1]

# Zfp955a

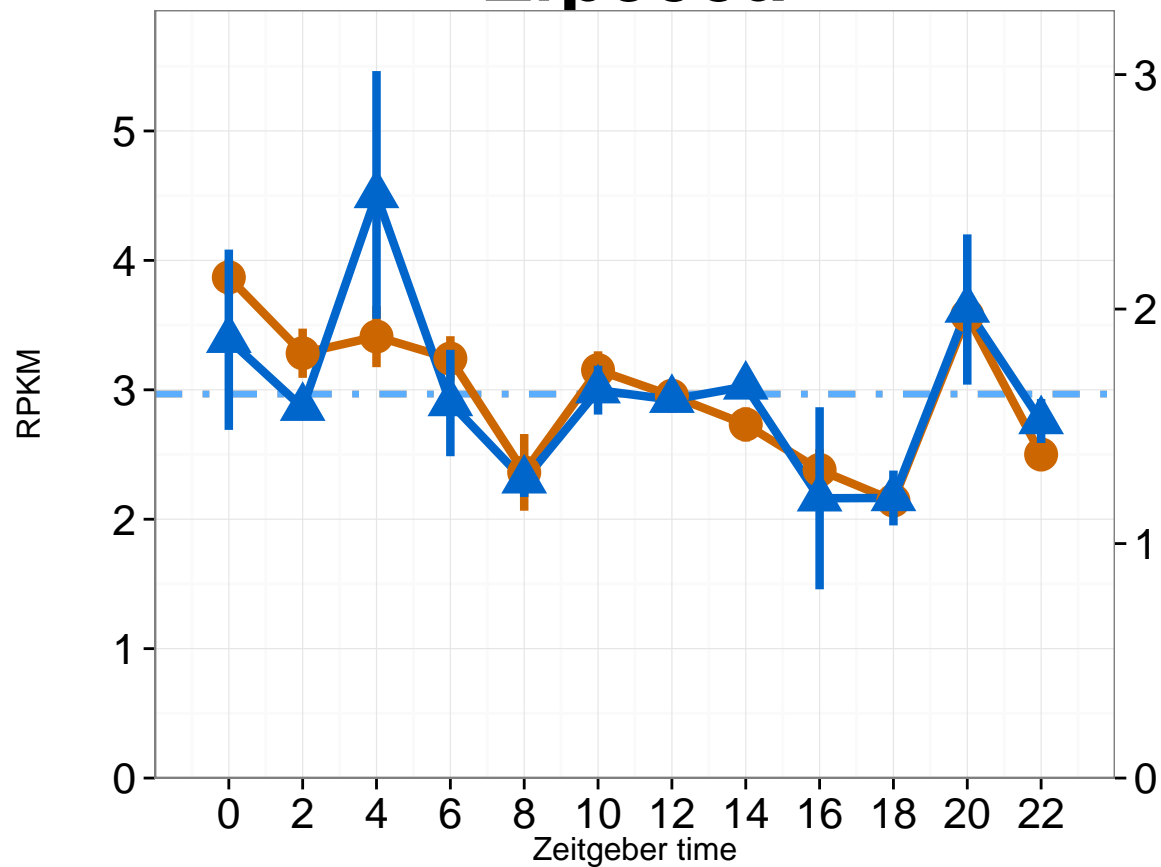

# Zfp955a

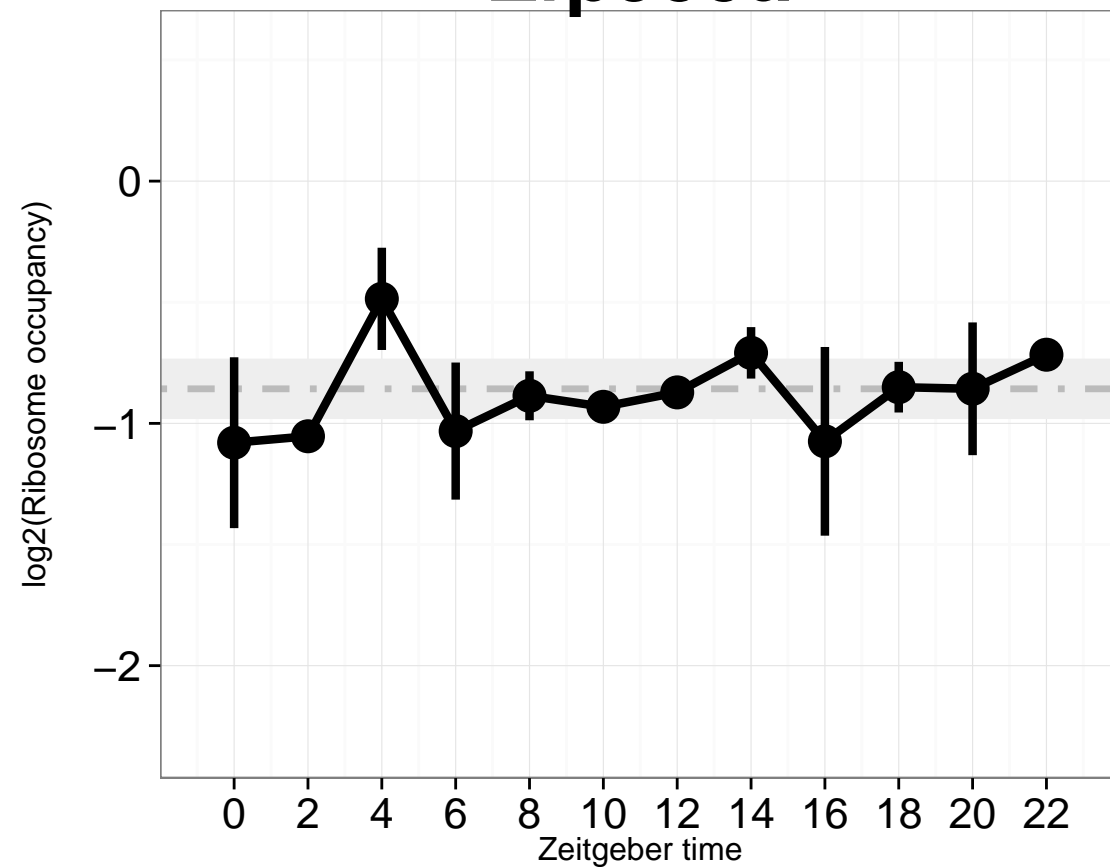

Supplement: Supplementary file 12713 [file 1]

## Rer1

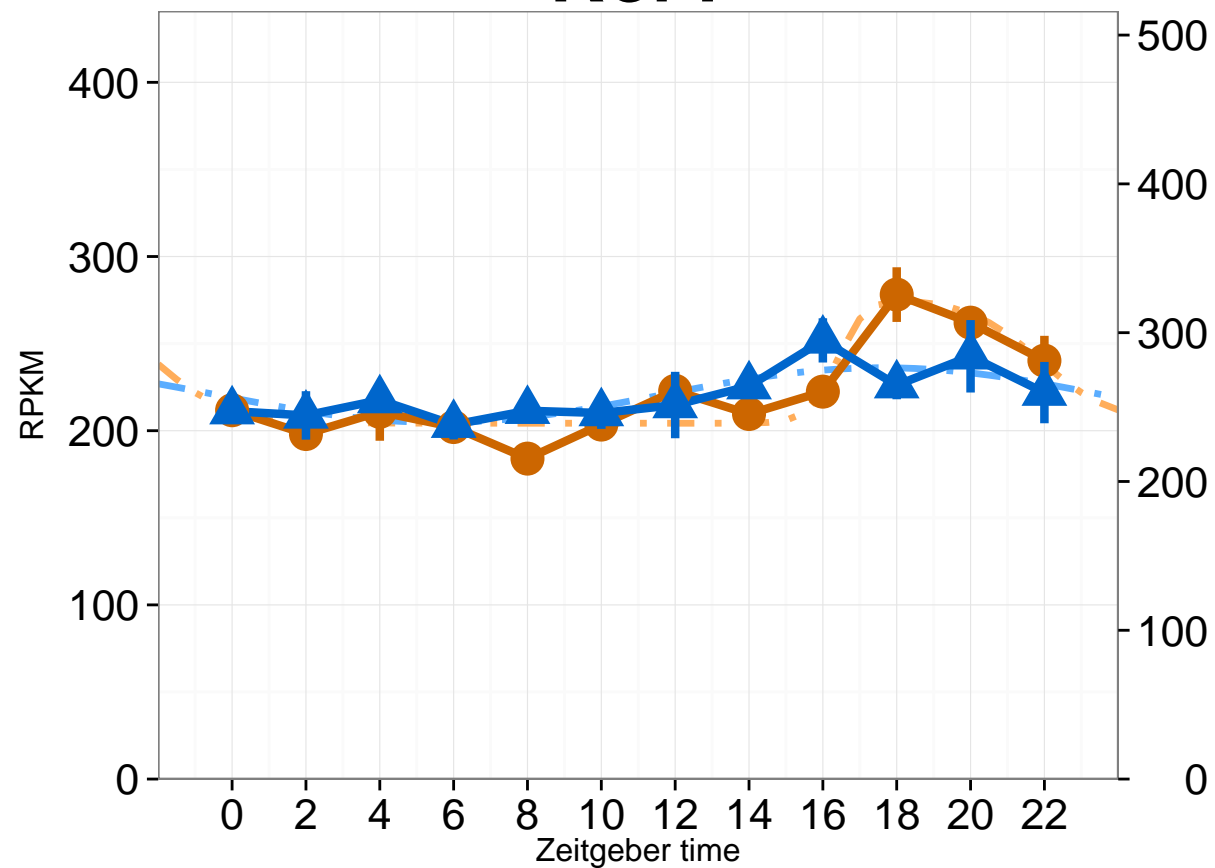

## Rer1

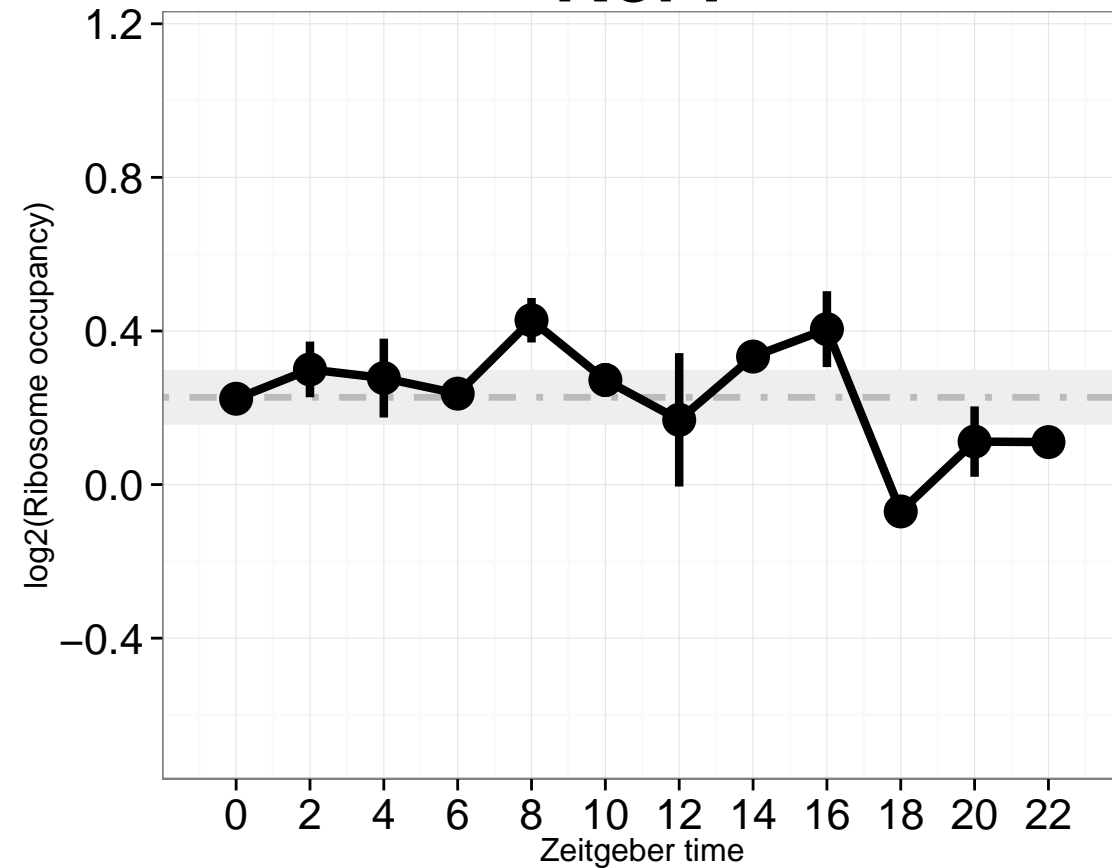

Supplement: Supplementary file 12714 [file 1]

## Ankrd27

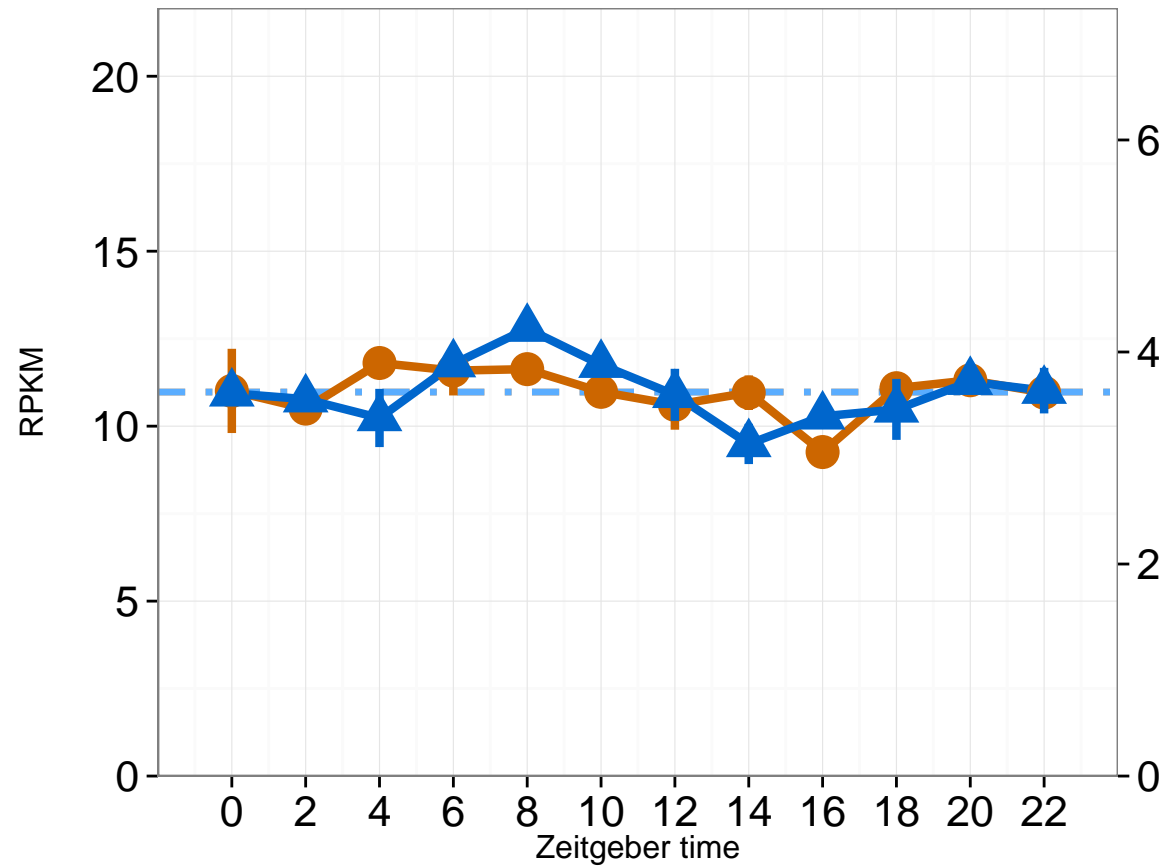

## Ankrd27

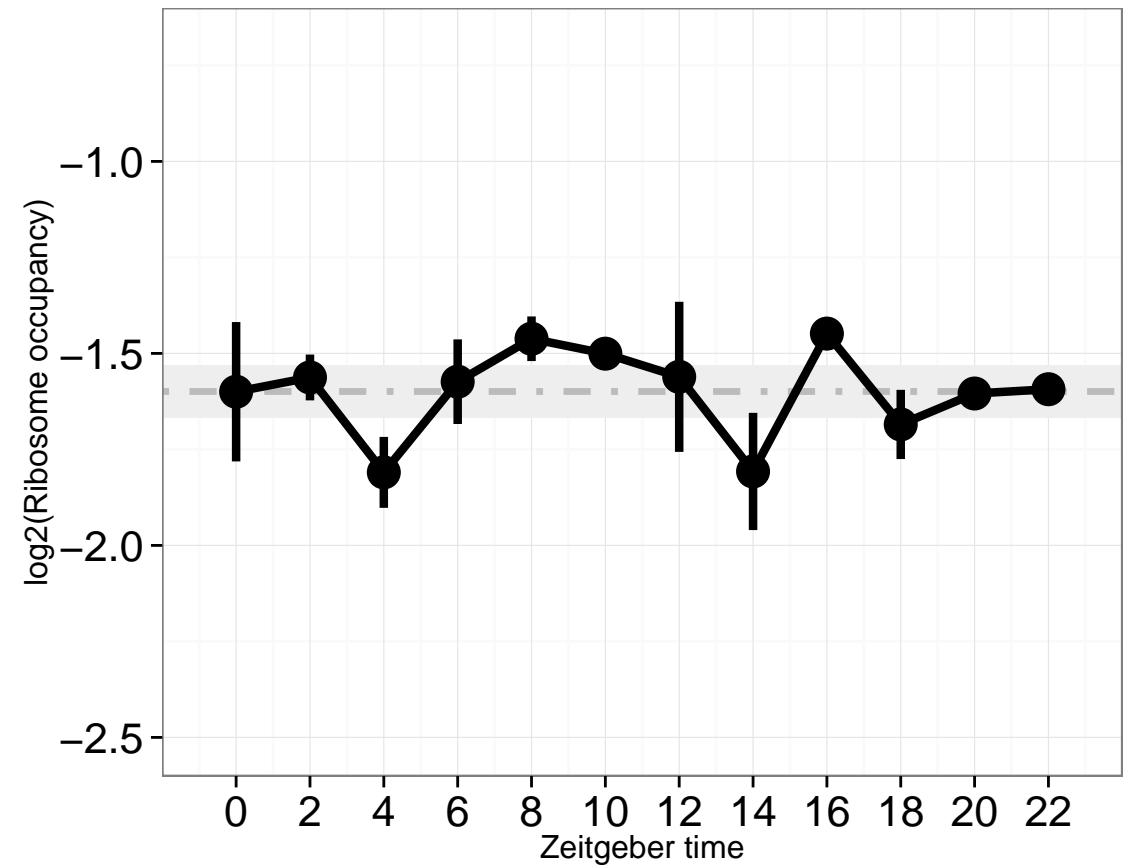

Supplement: Supplementary file 12715 [file 1]

# Zfp382

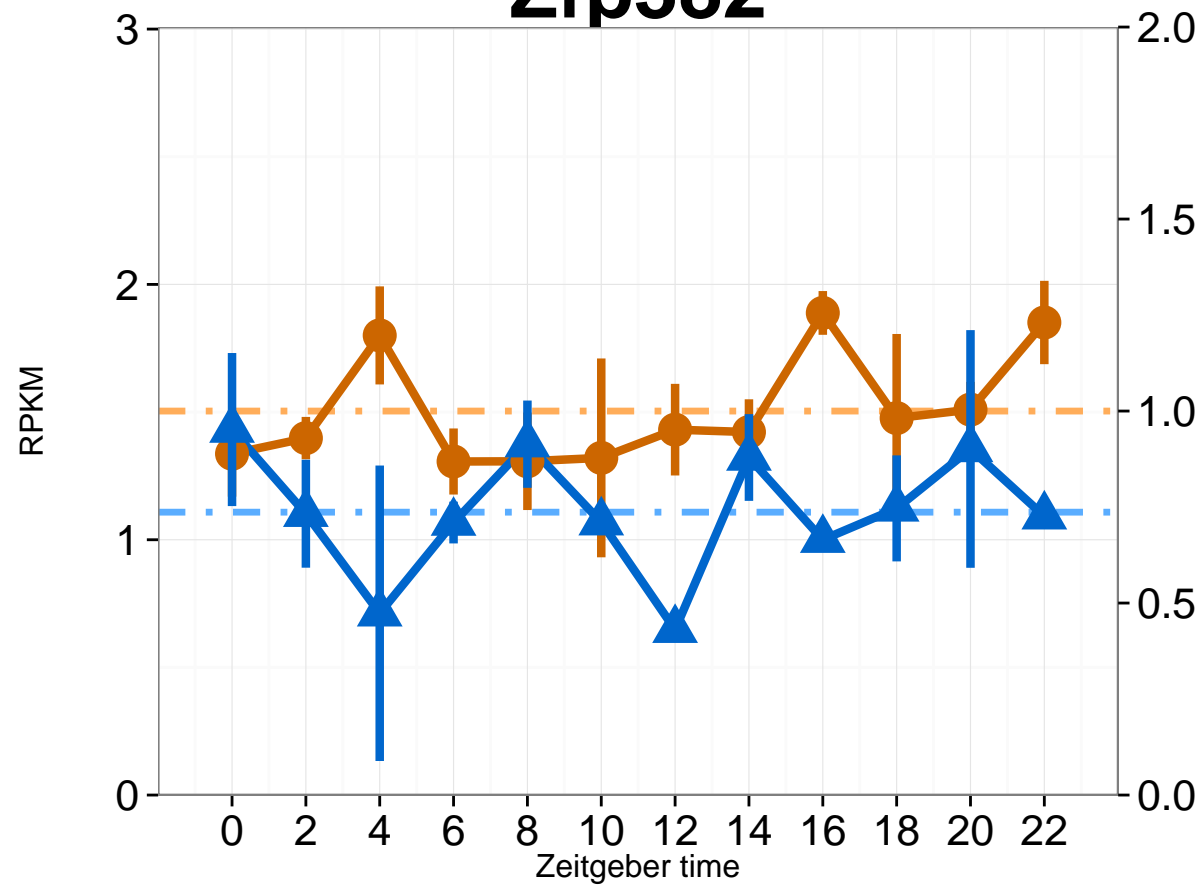

# Zfp382

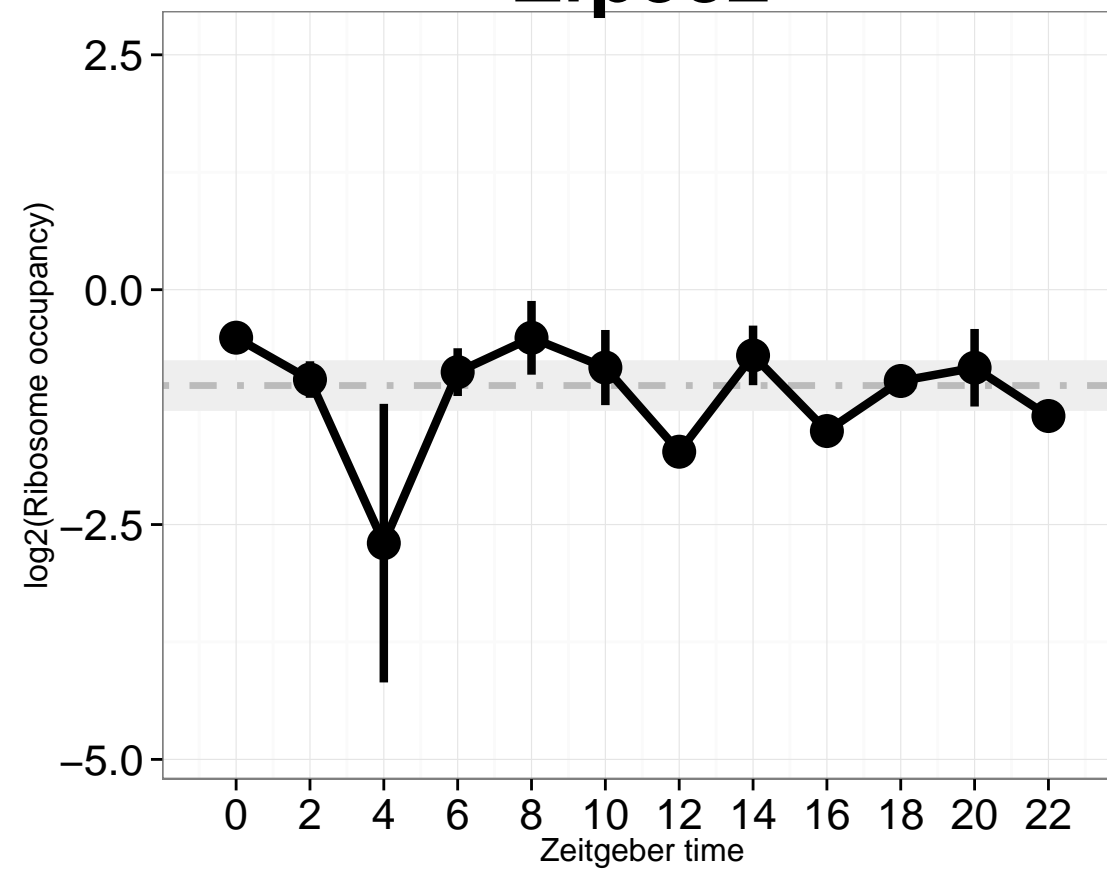

Supplement: Supplementary file 12716 [file 1]

## Ccdc65

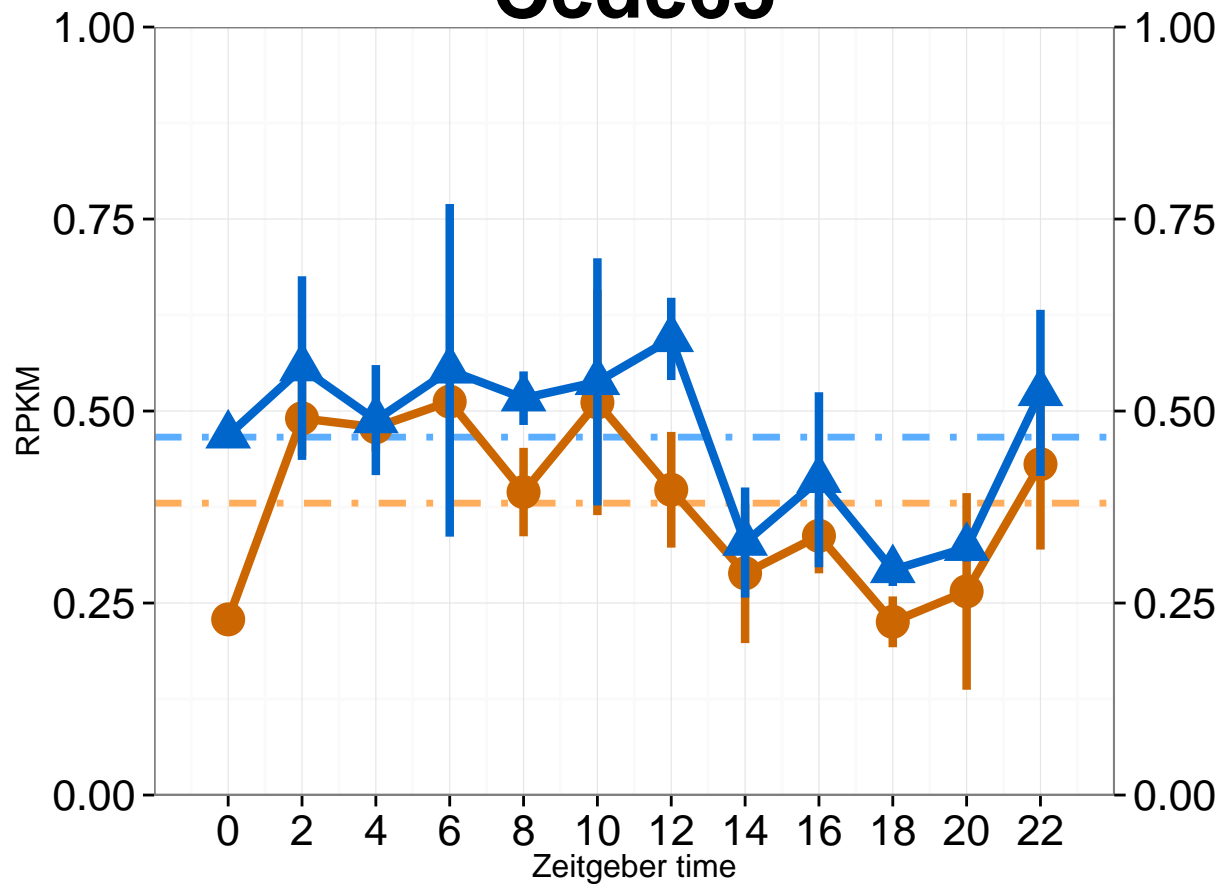

## Ccdc65

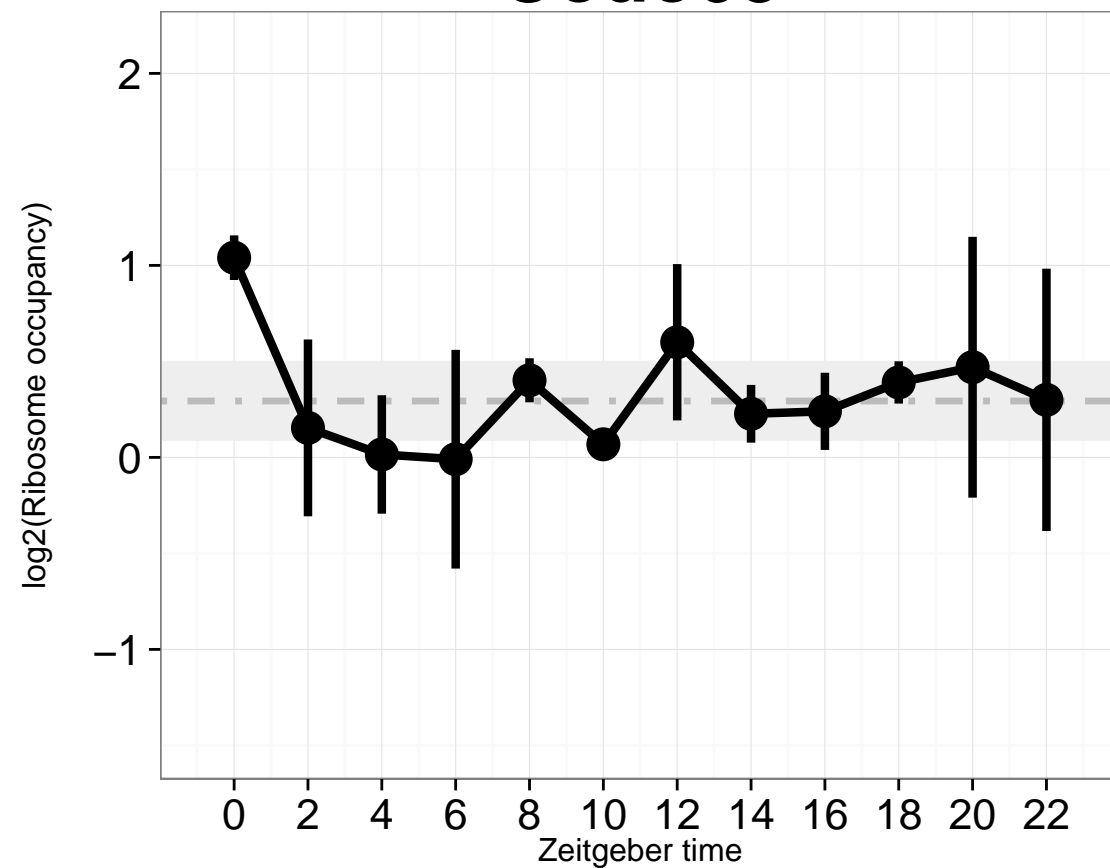

Supplement: Supplementary file 12717 [file 1]

# Ttc30b

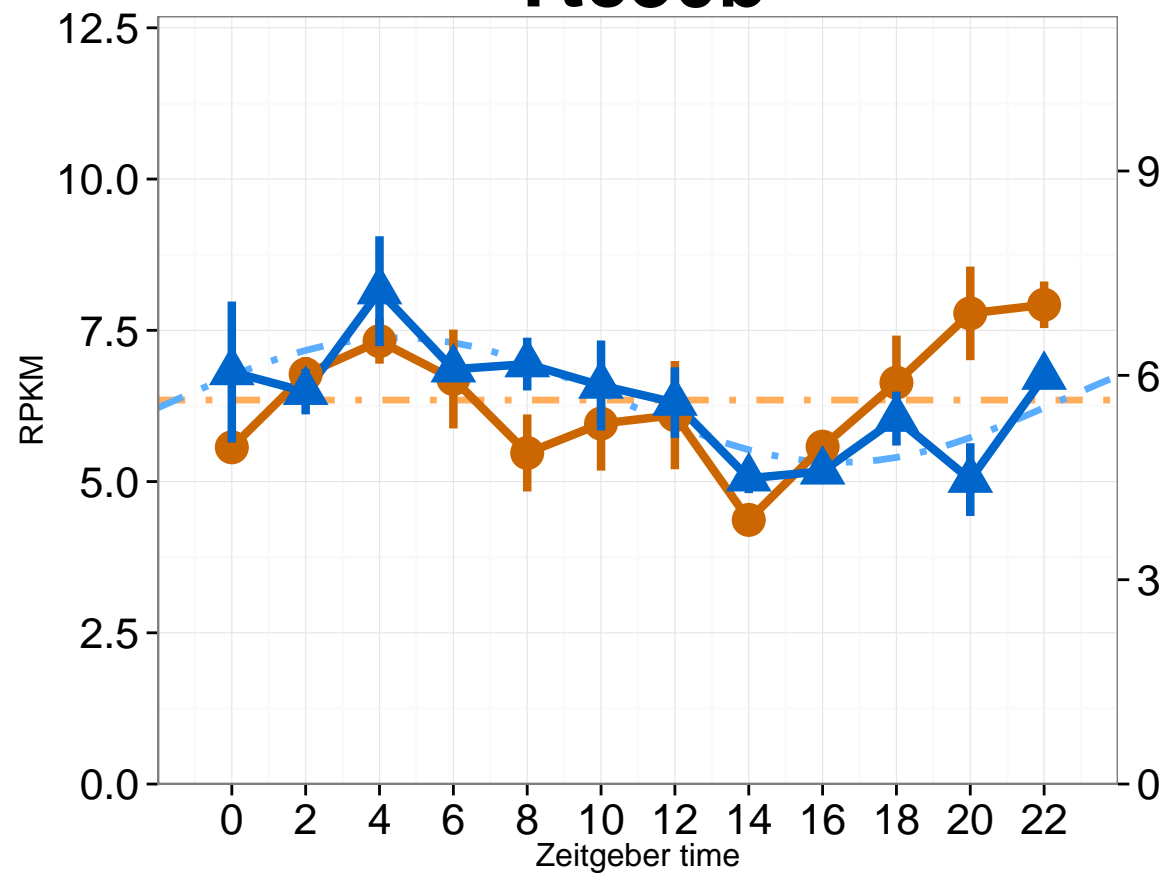

# Ttc30b

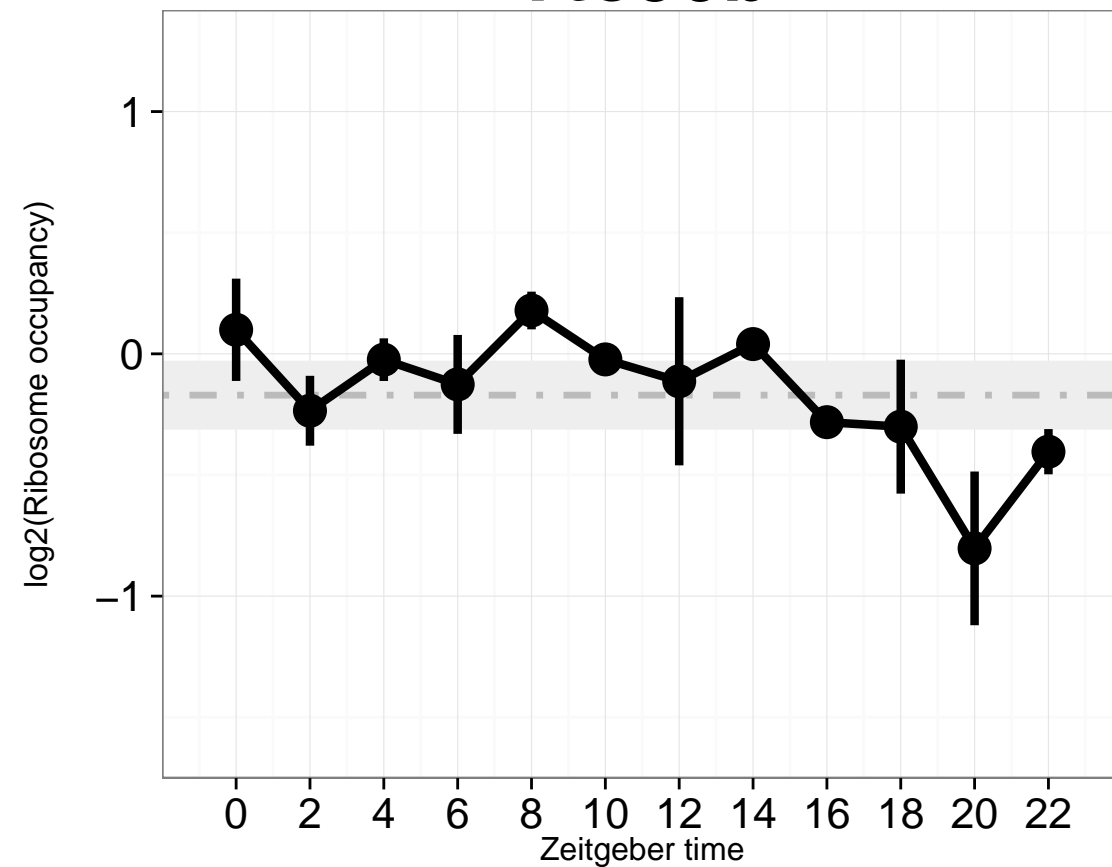

Supplement: Supplementary file 12718 [file 1]

# Acat2

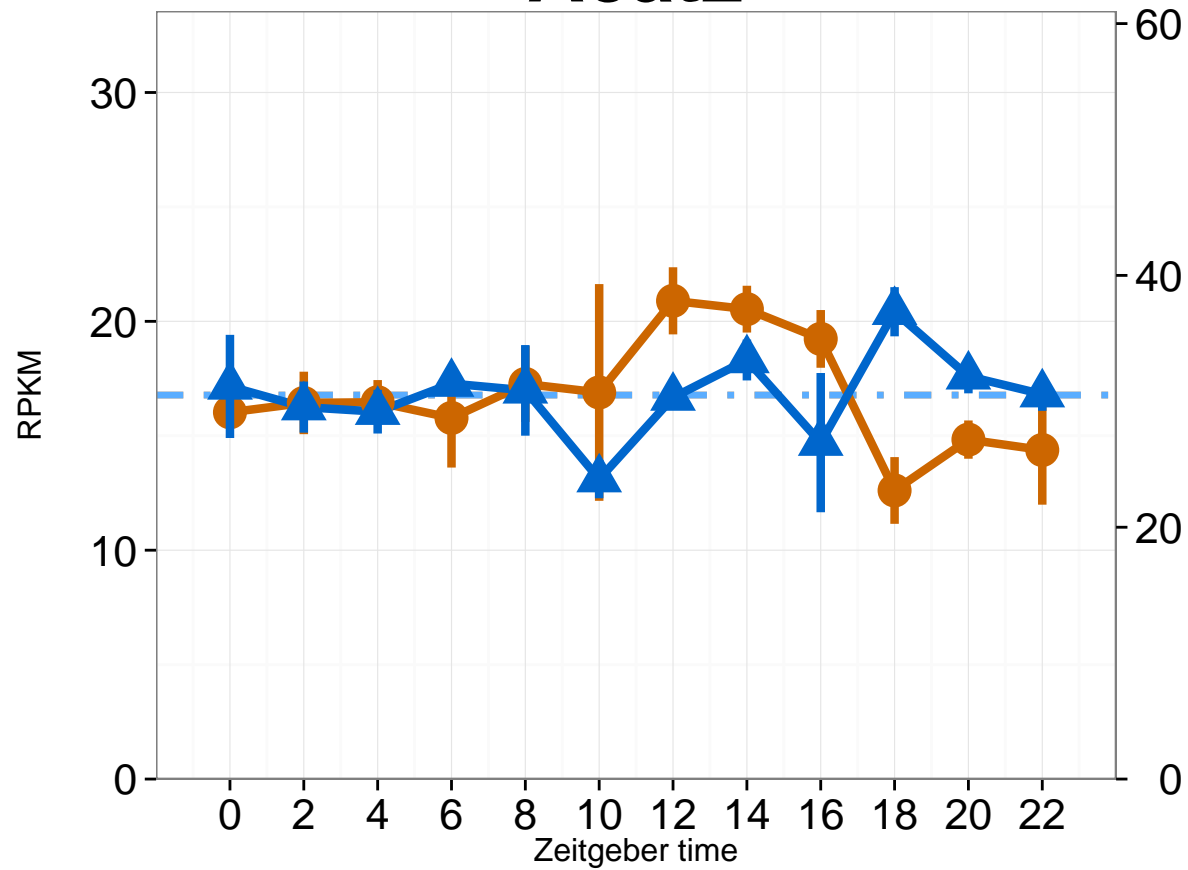

# Acat2

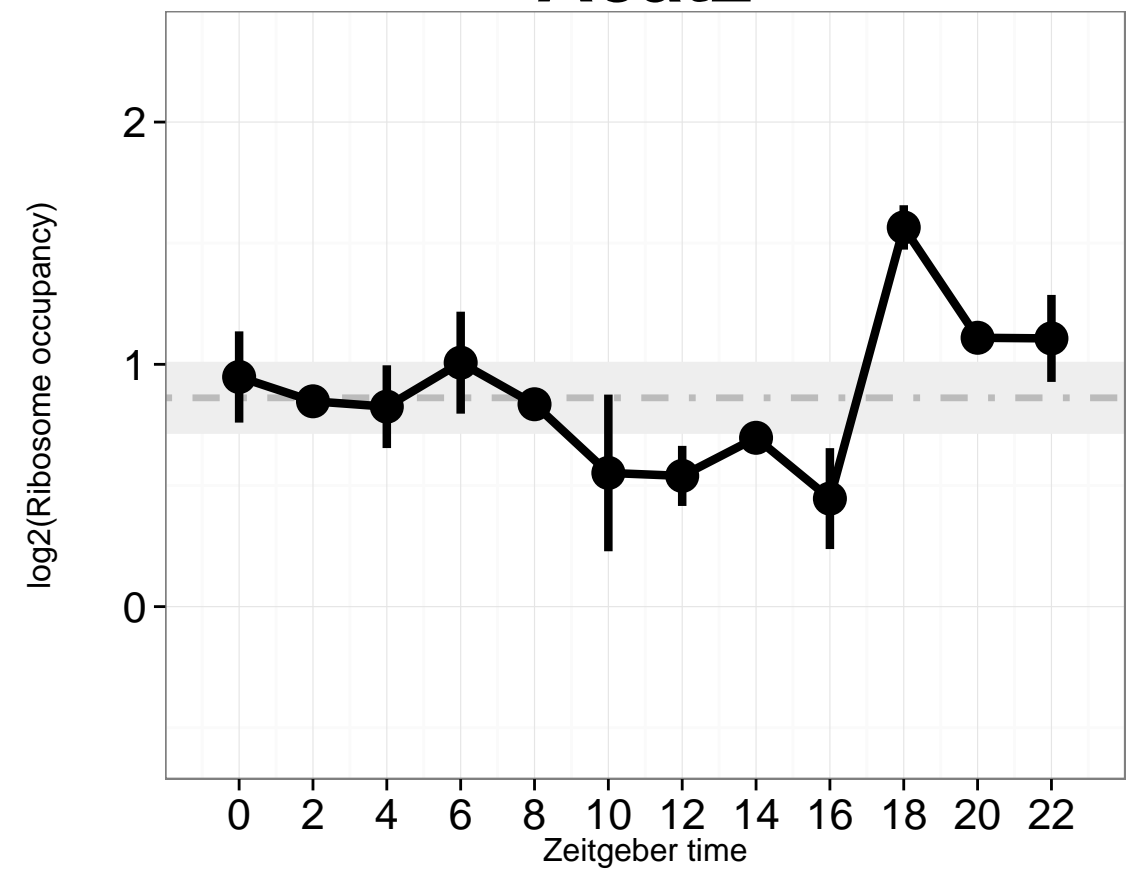

Supplement: Supplementary file 12719 [file 1]

## Ilf2

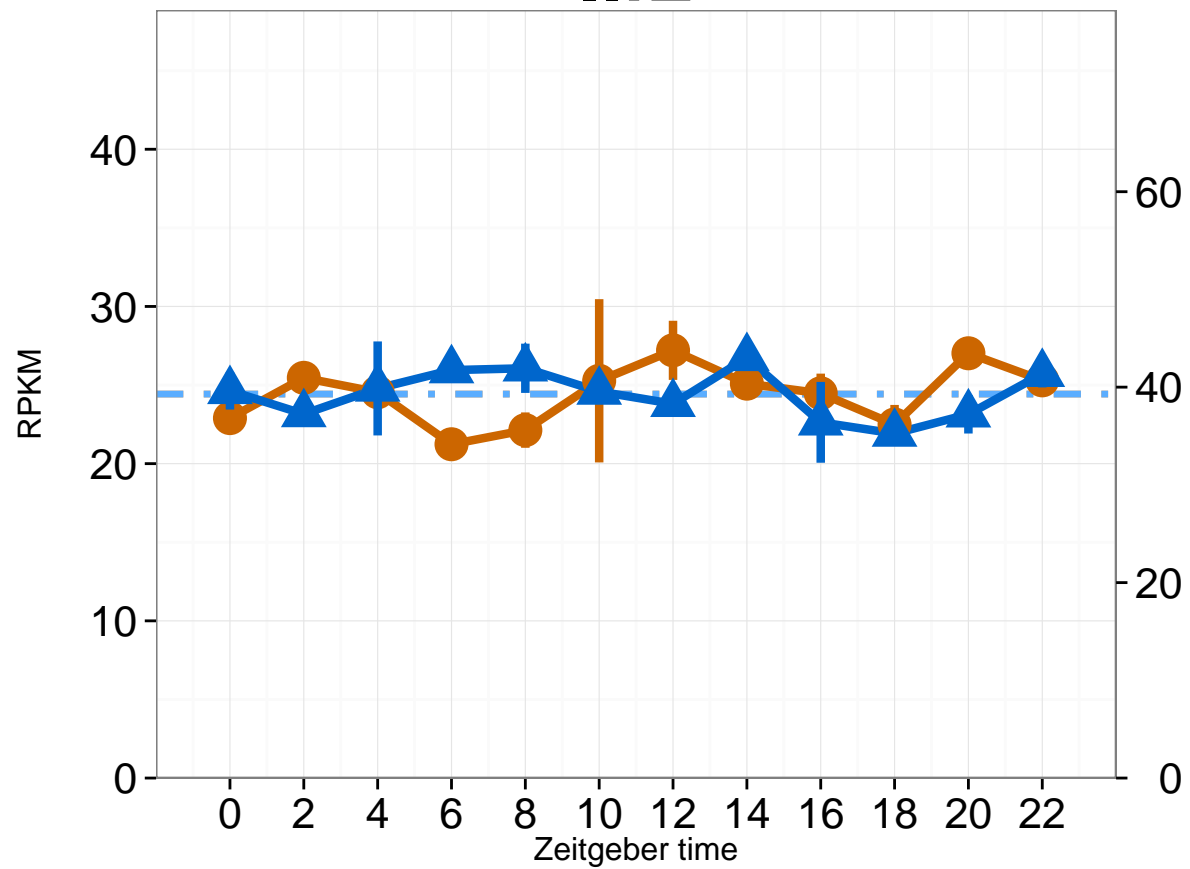

## Ilf2

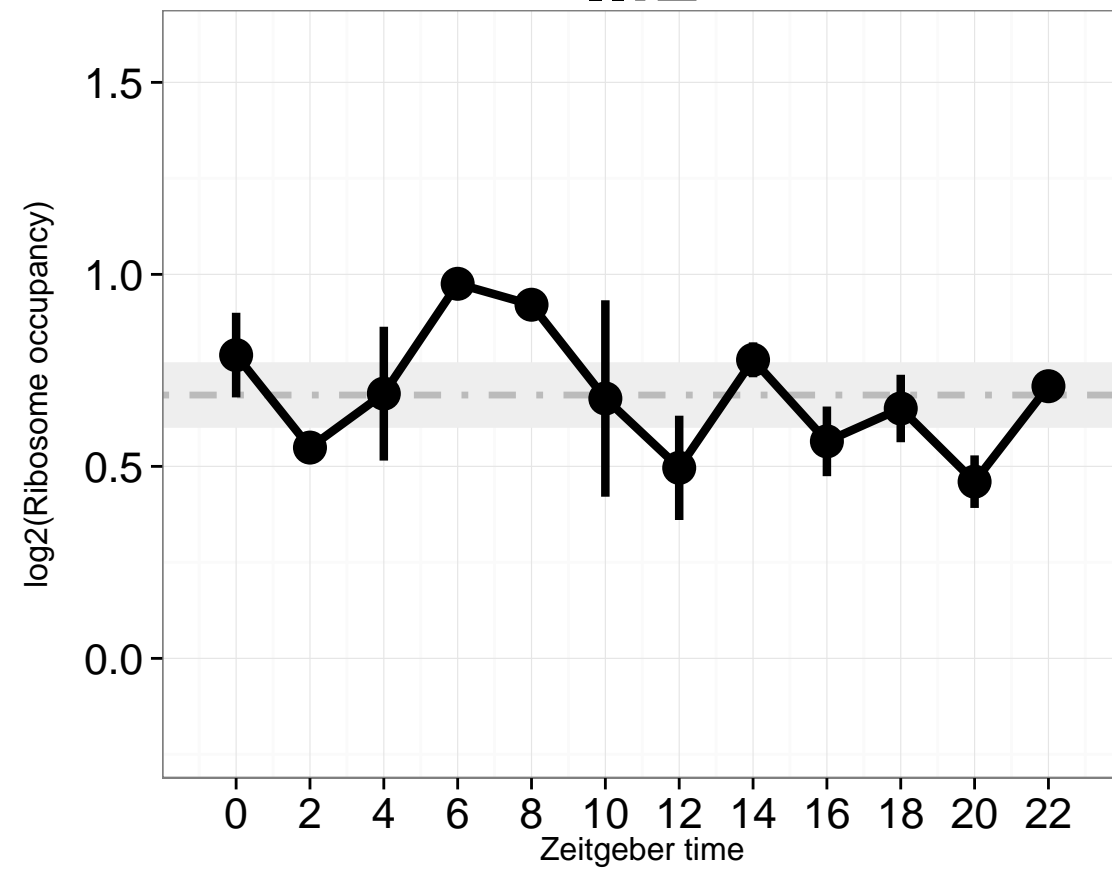

Supplement: Supplementary file 12720 [file 1]

# Ggct

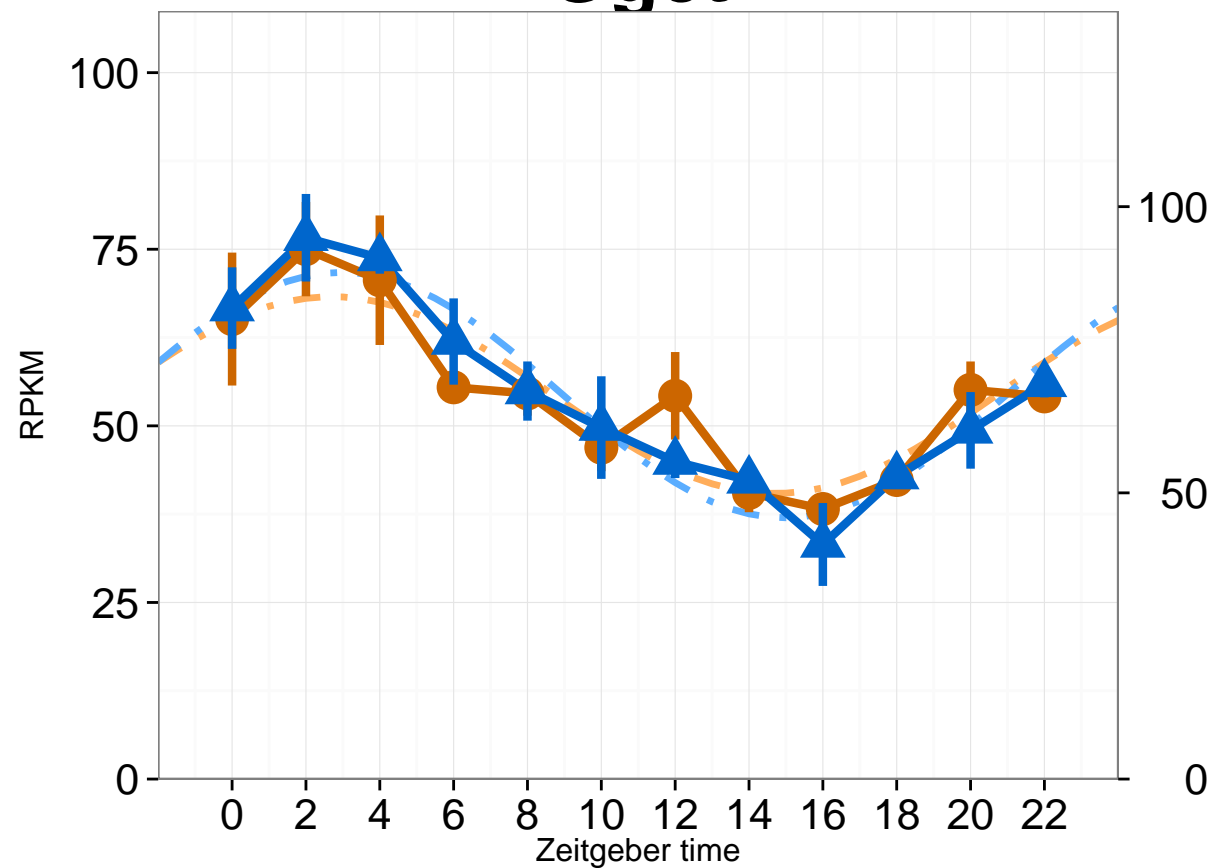

# Ggct

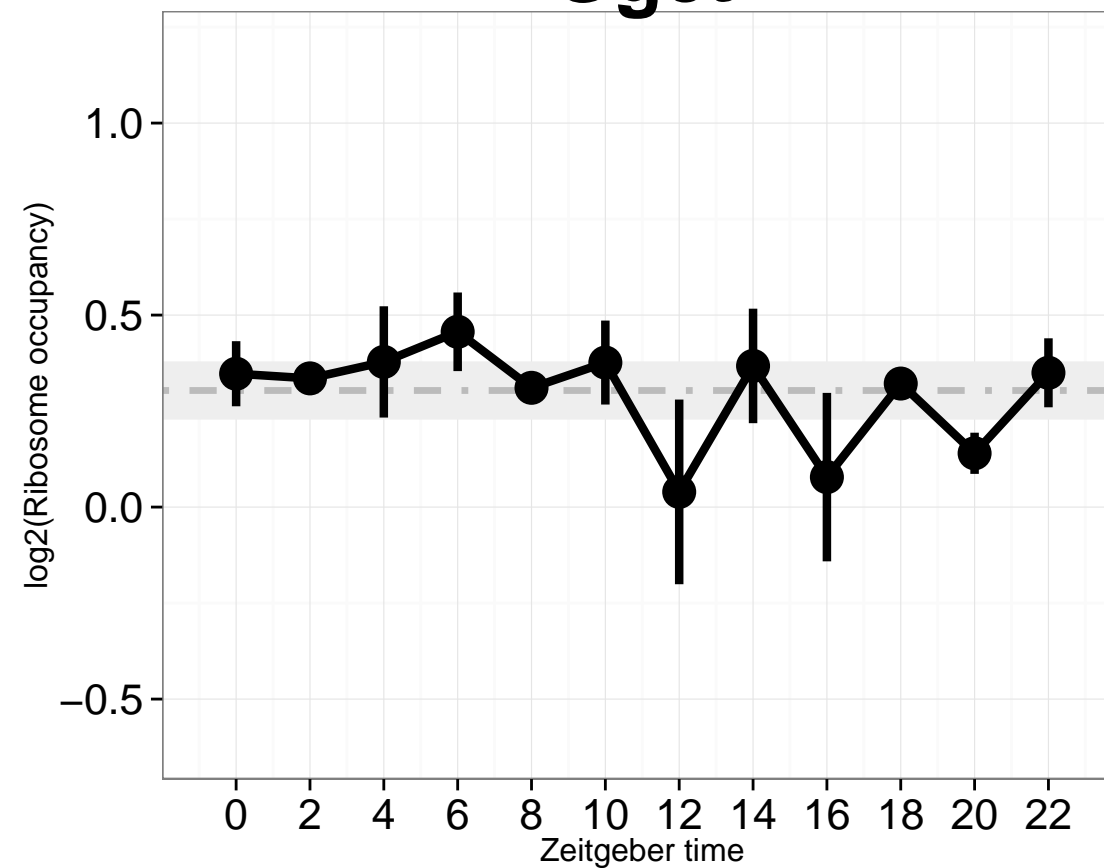

Supplement: Supplementary file 12721 [file 1]

# Cks1b

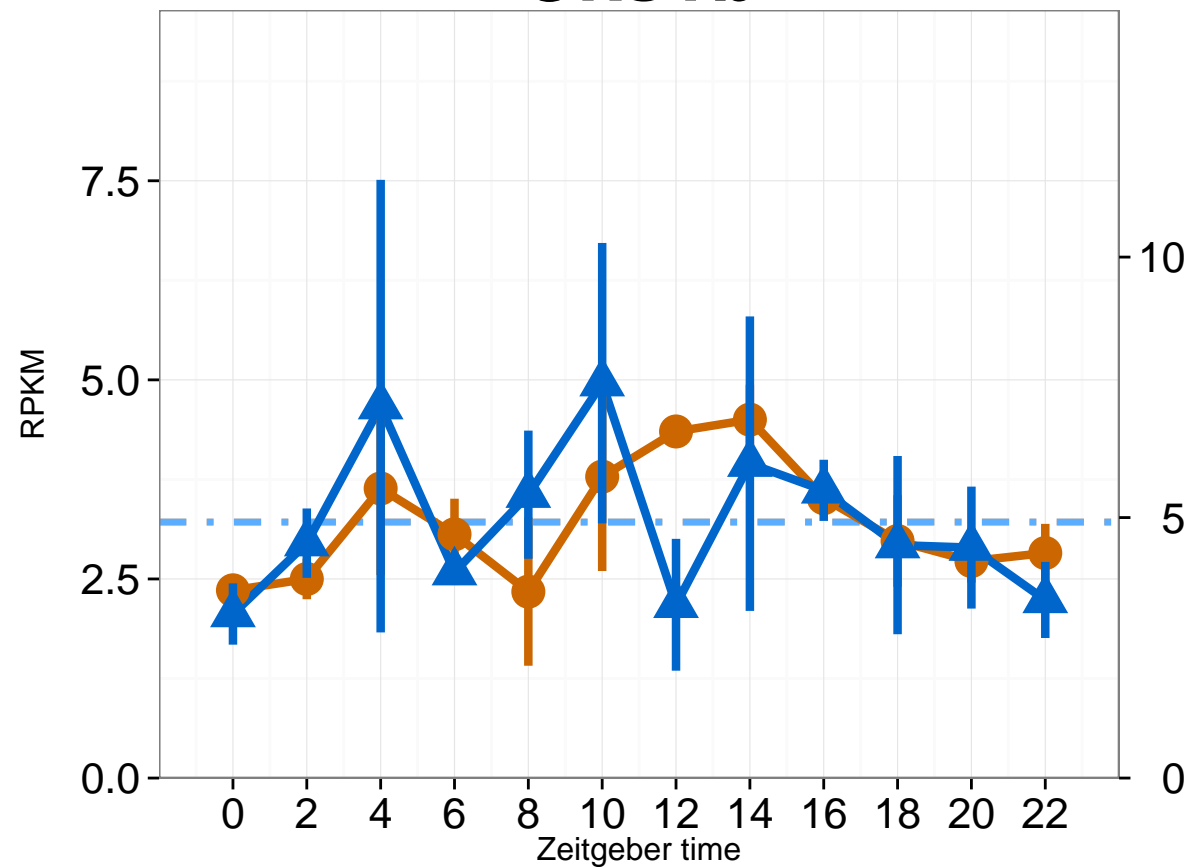

# Cks1b

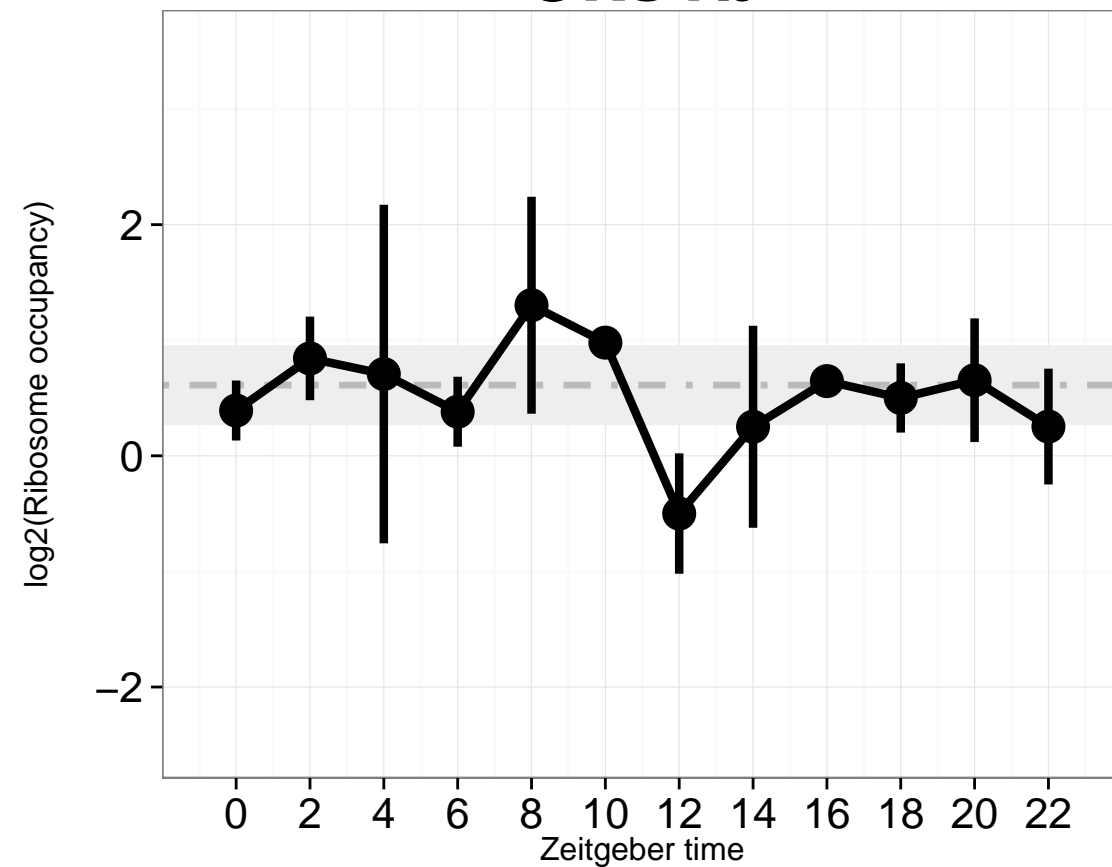

Supplement: Supplementary file 12722 [file 1]

# Hkdc1

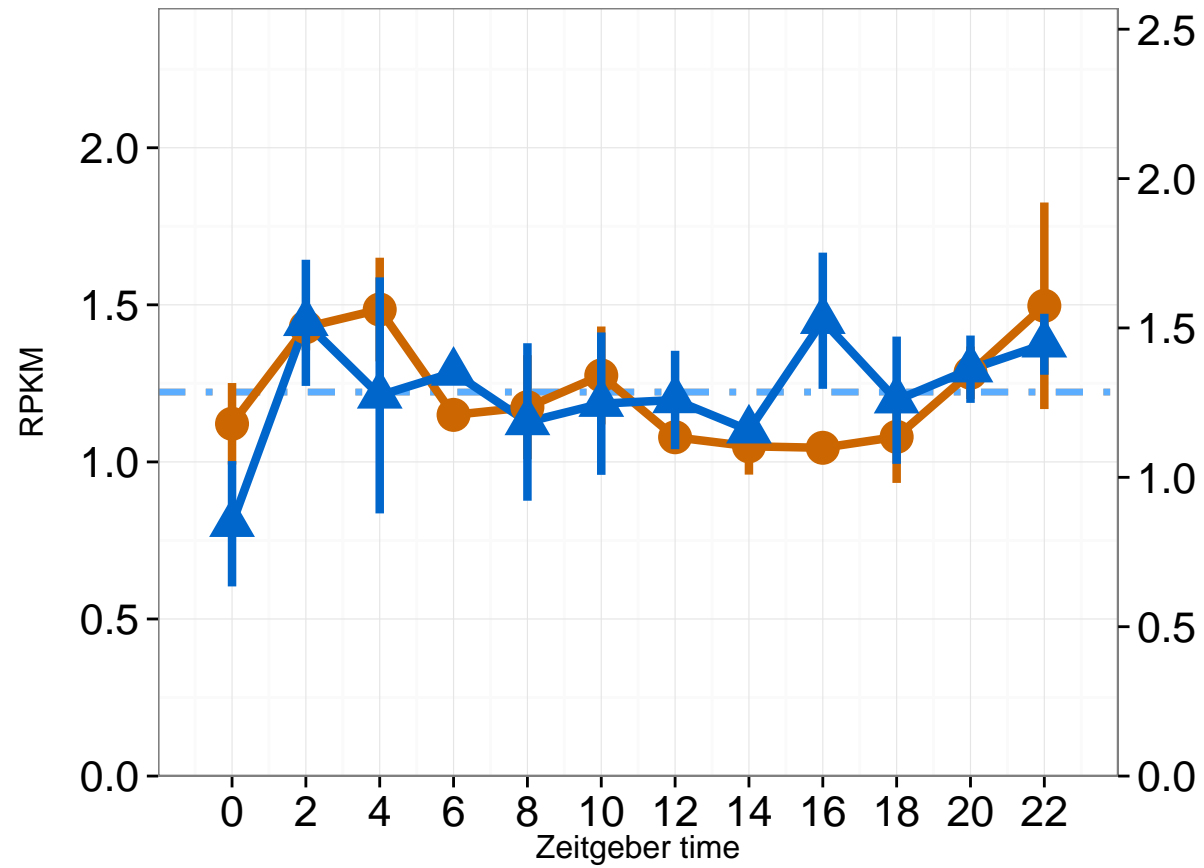

# Hkdc1

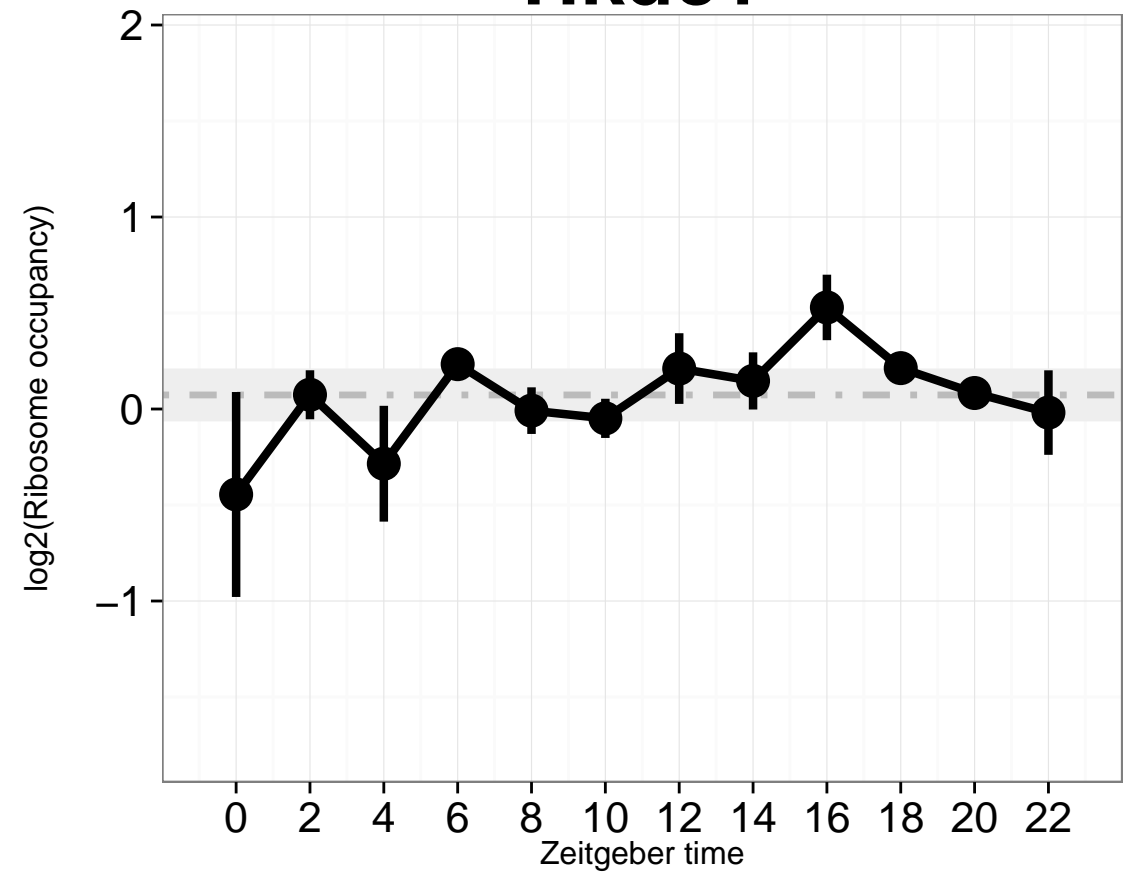

Supplement: Supplementary file 12723 [file 1]

## Agps

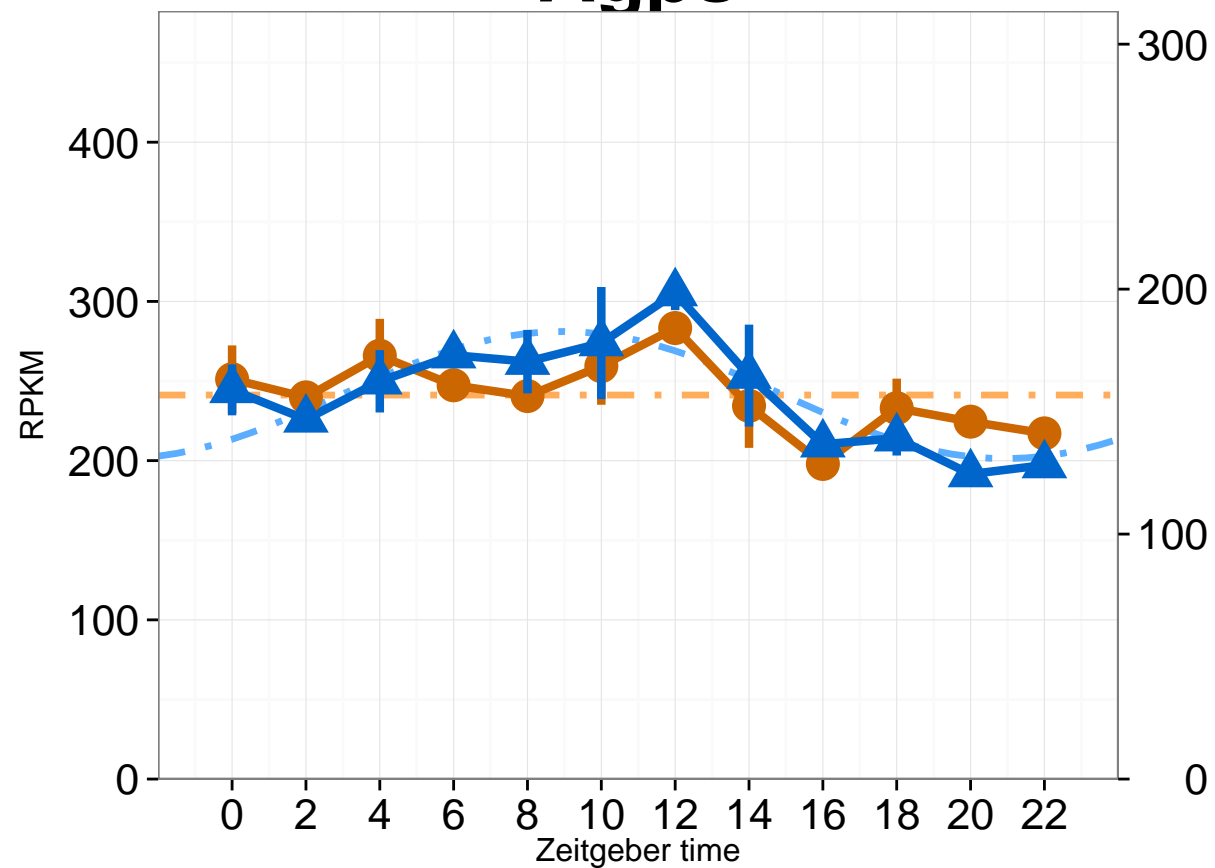

## Agps

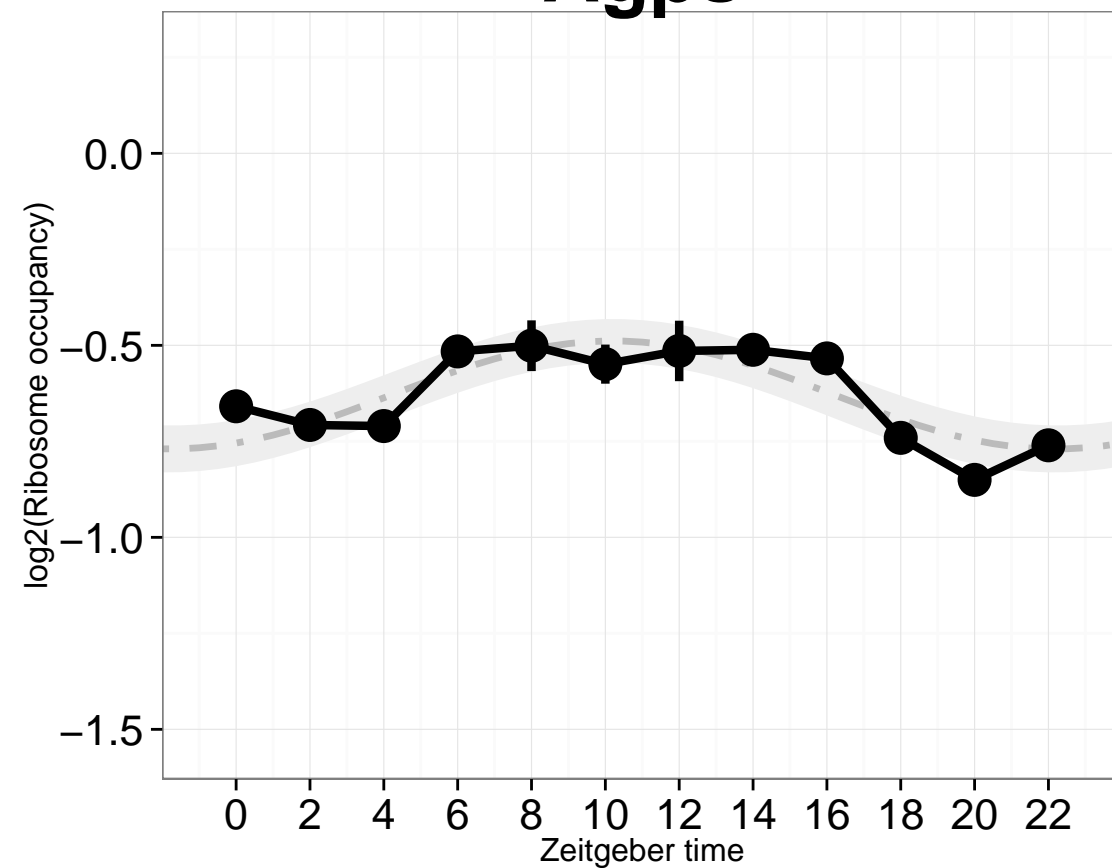

Supplement: Supplementary file 12724 [file 1]

## Nab1

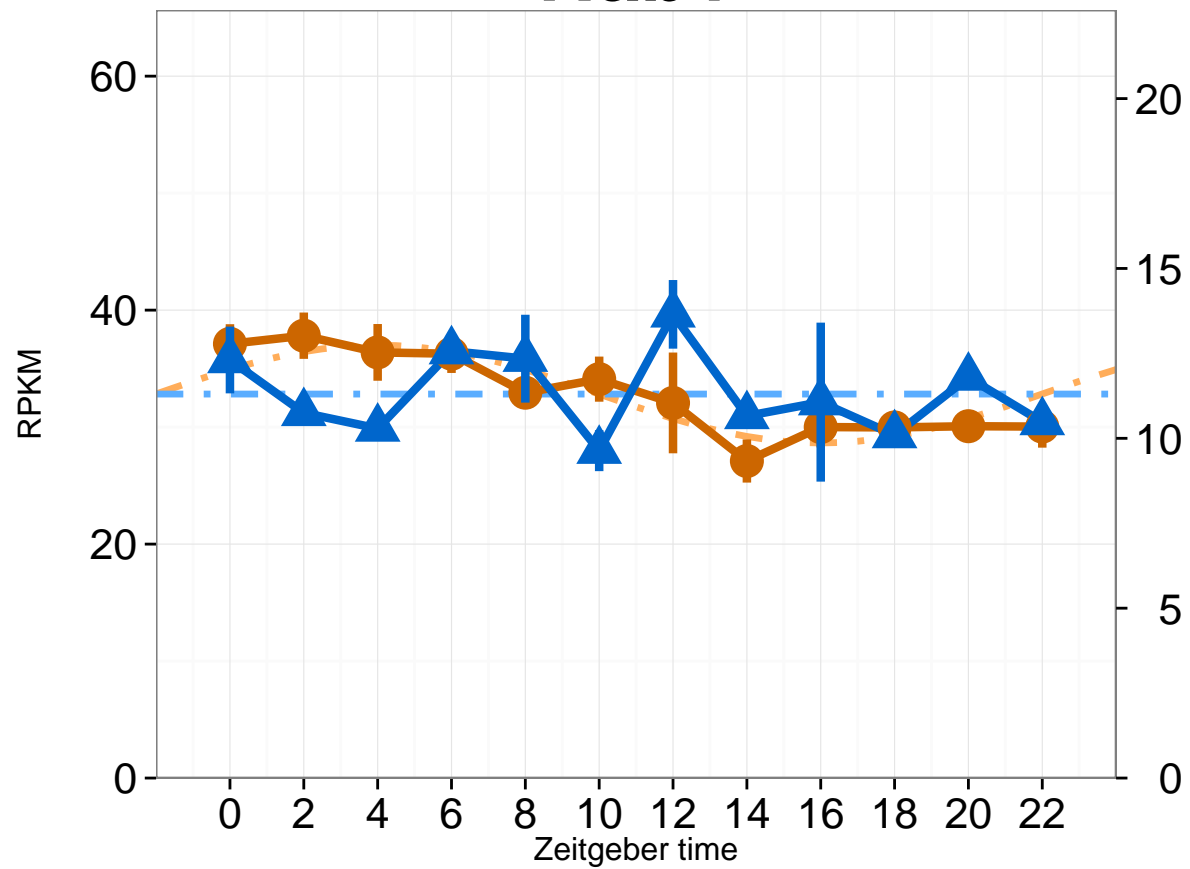

## Nab1

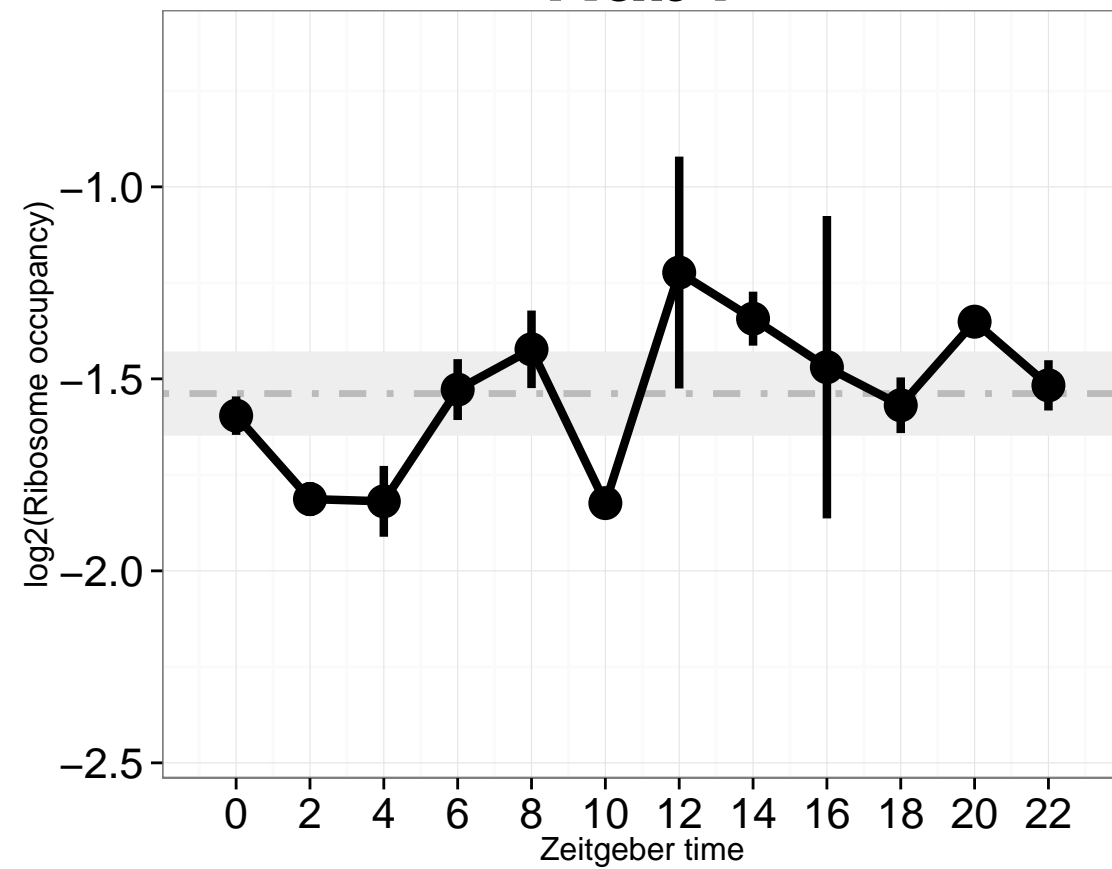

Supplement: Supplementary file 12725 [file 1]

# Sppl2b

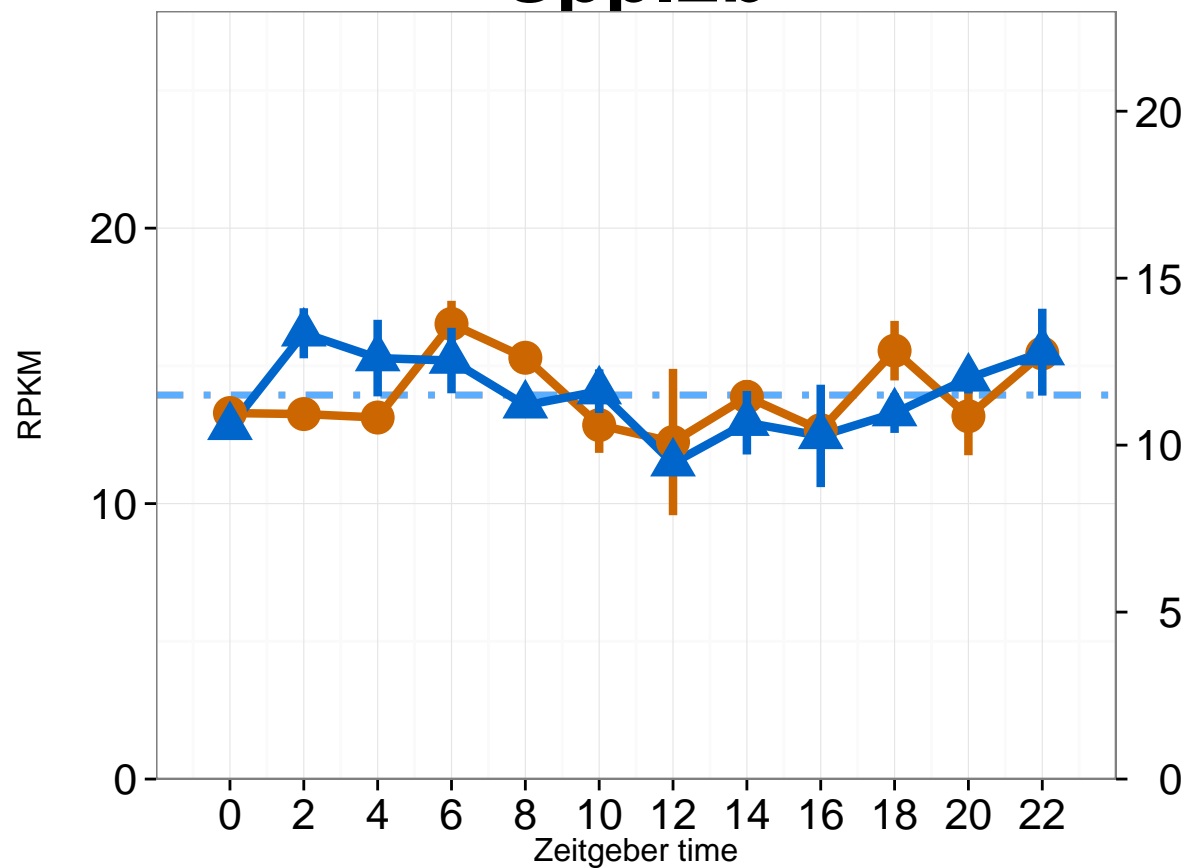

# Sppl2b

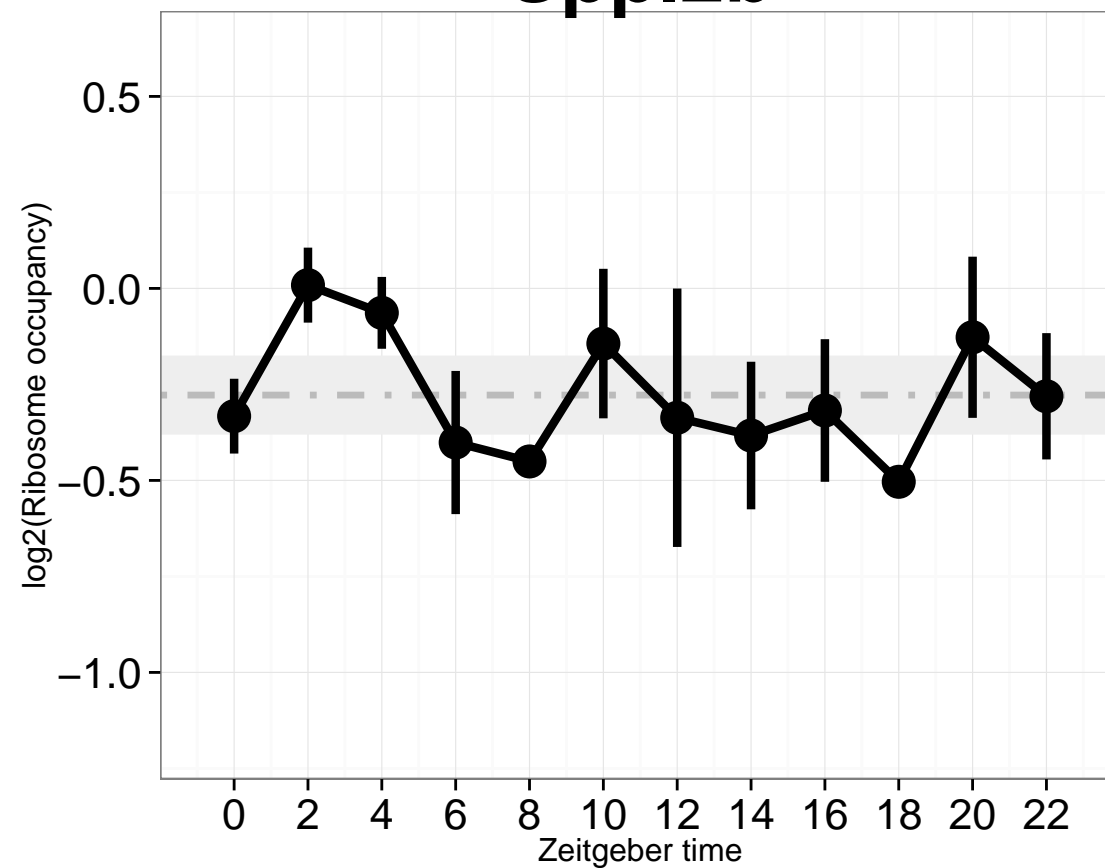

Supplement: Supplementary file 12726 [file 1]

## Gpbp1l1

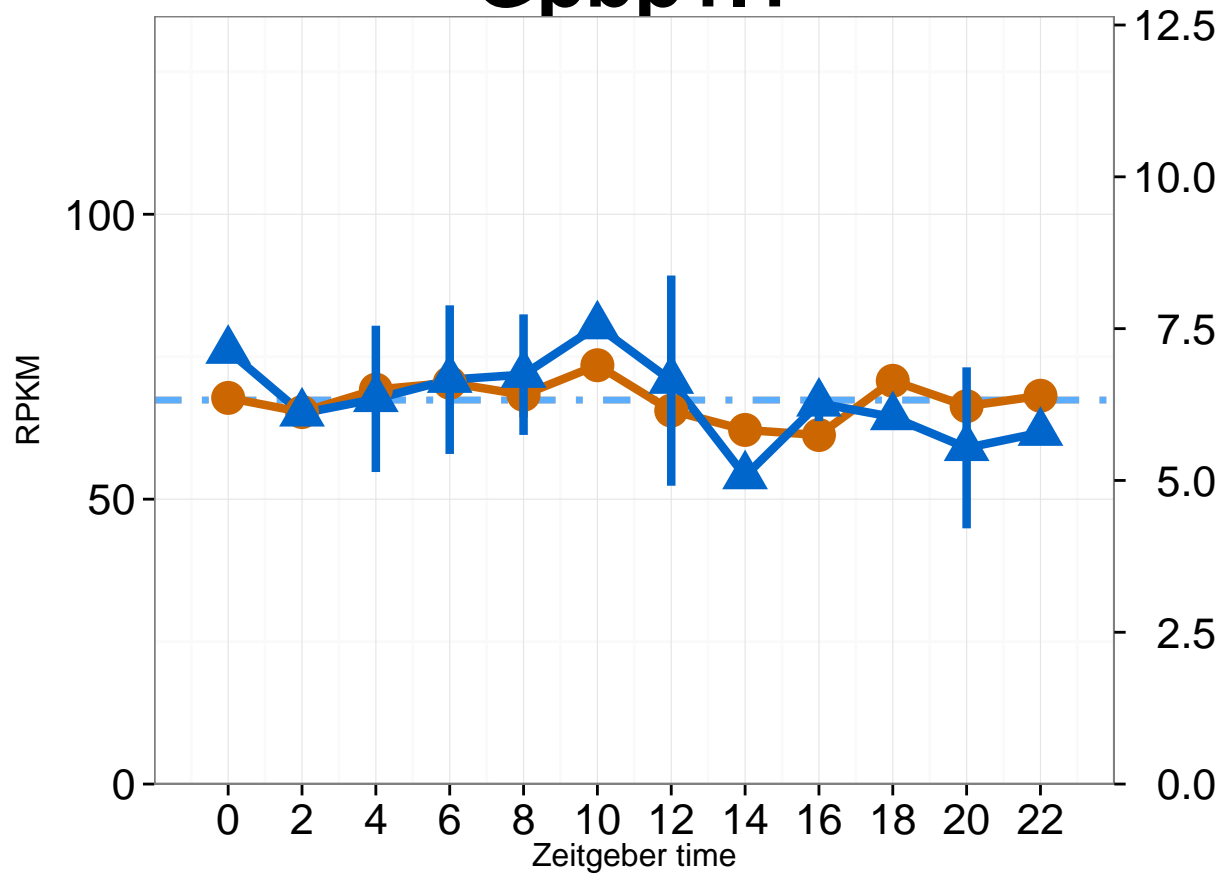

## Gpbp1l1

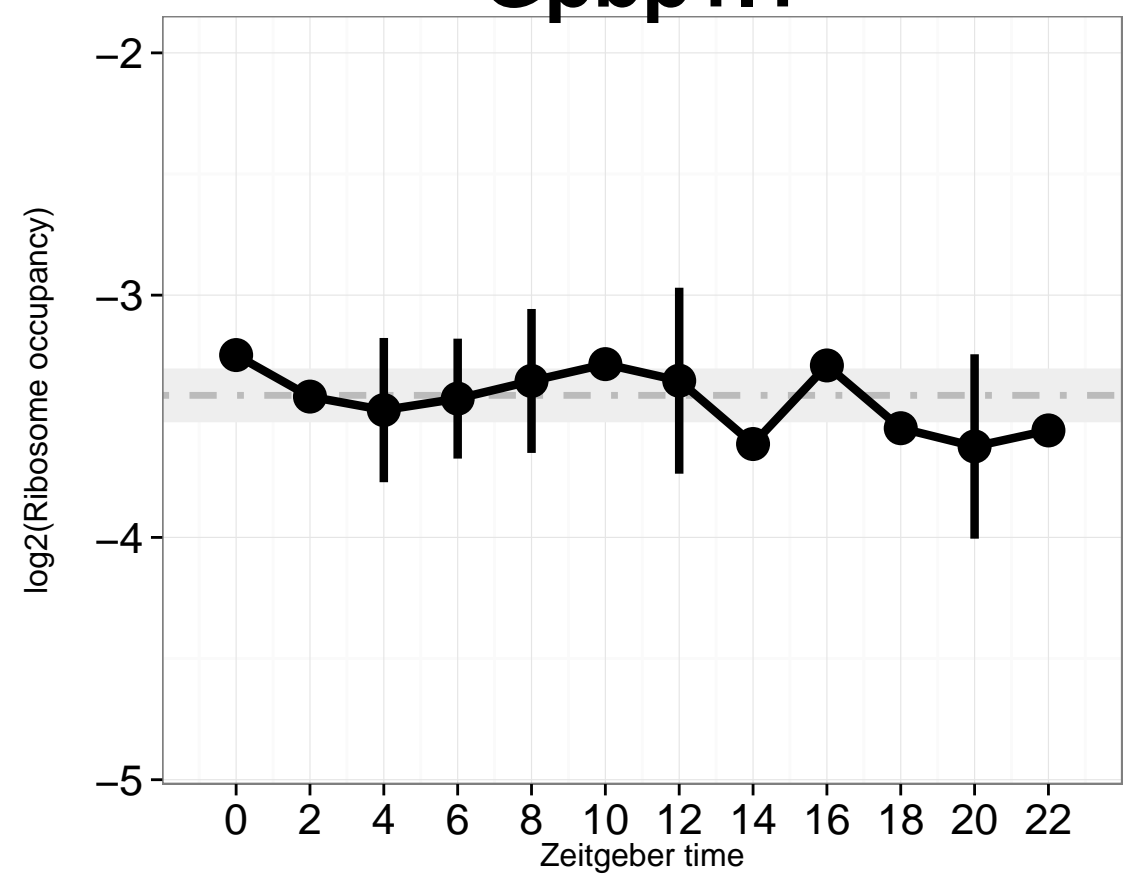

Supplement: Supplementary file 12727 [file 1]

# Fra10ac1

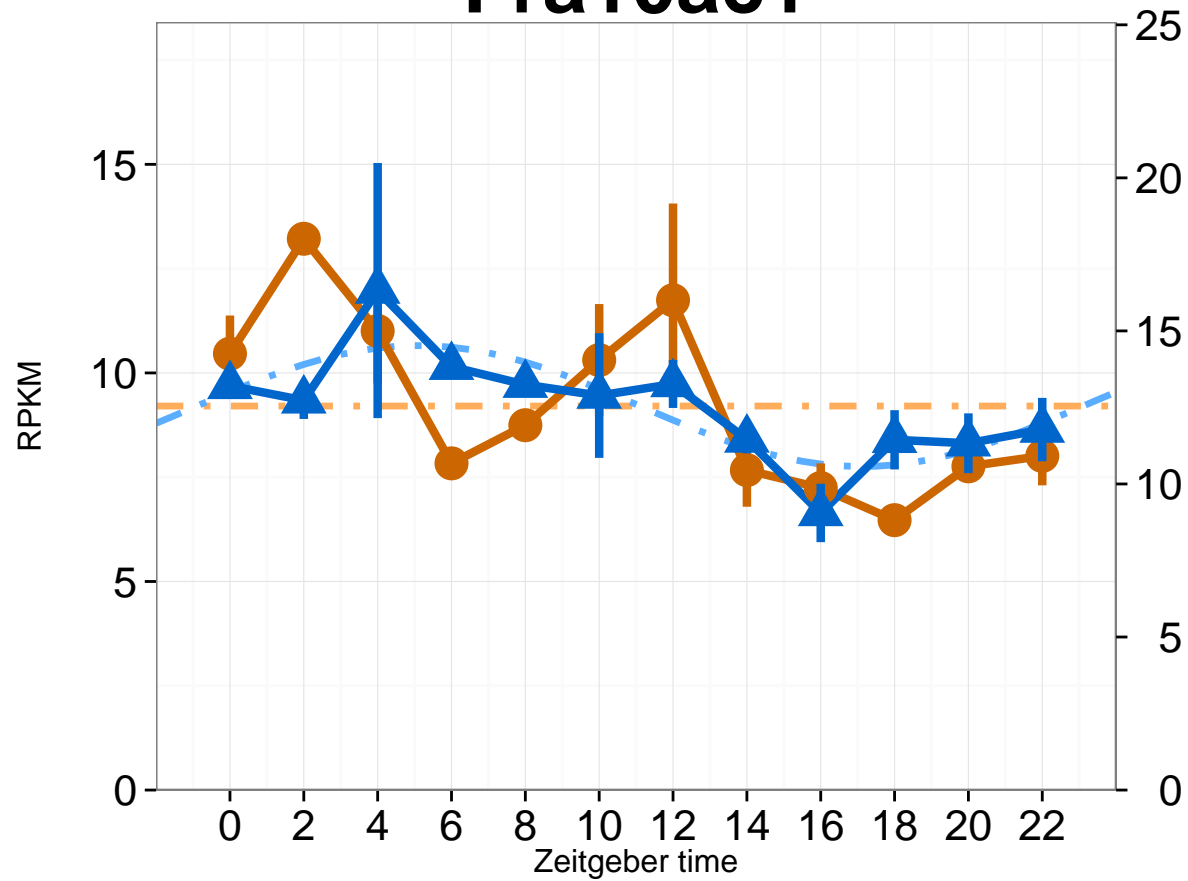

# Fra10ac1

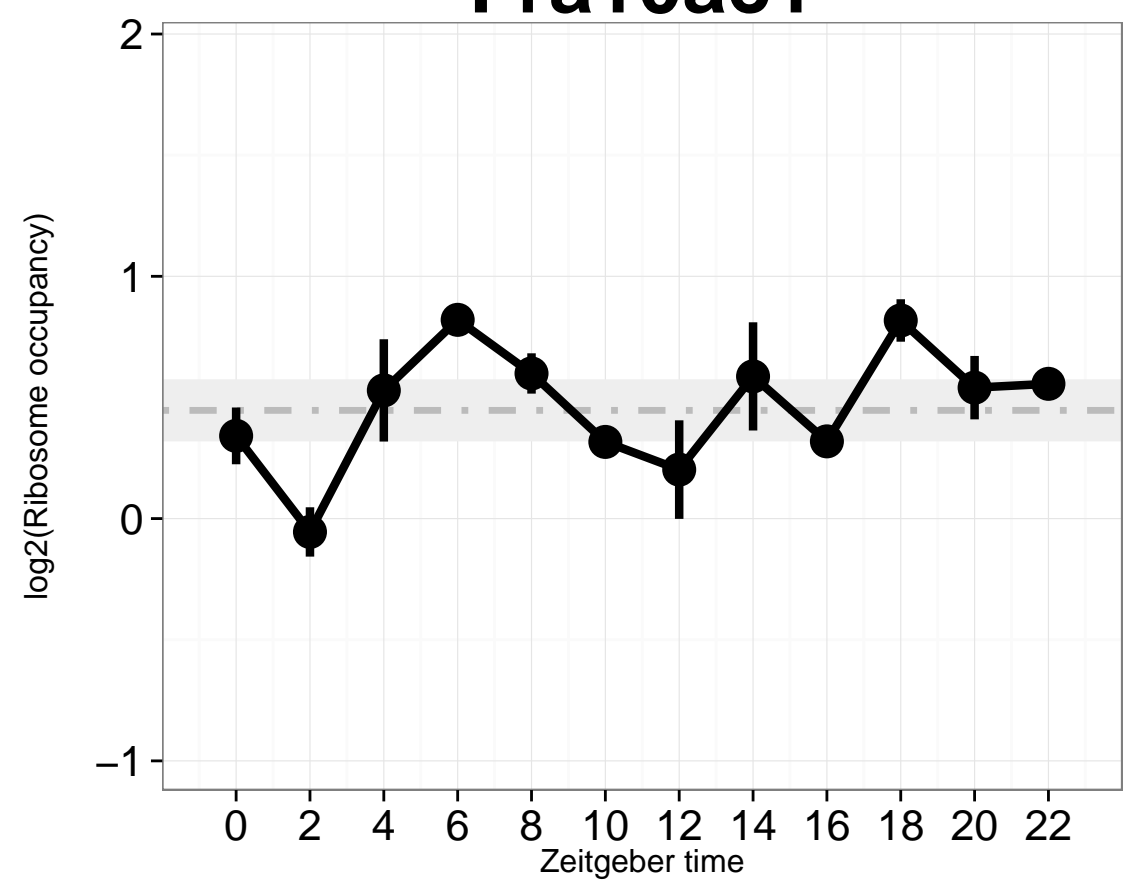

Supplement: Supplementary file 12728 [file 1]

# Yif1a

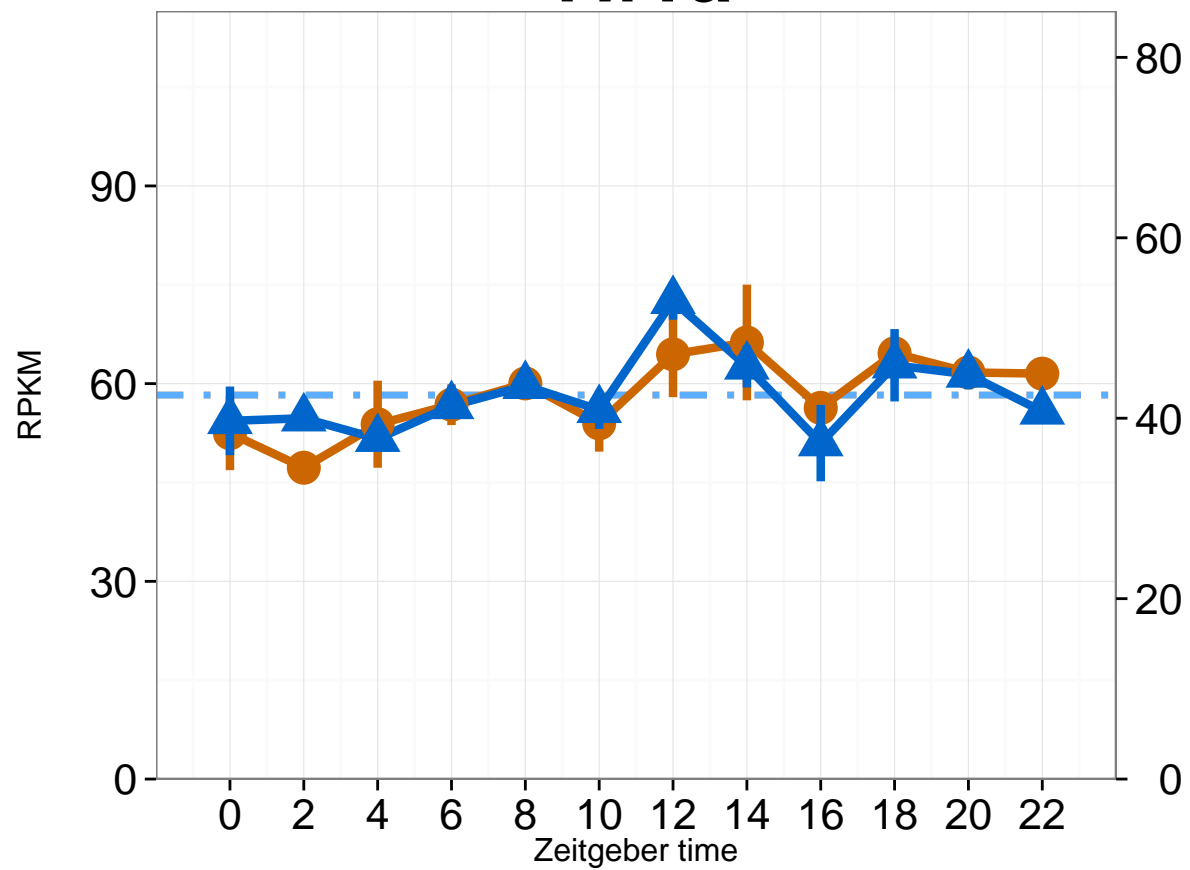

# Yif1a

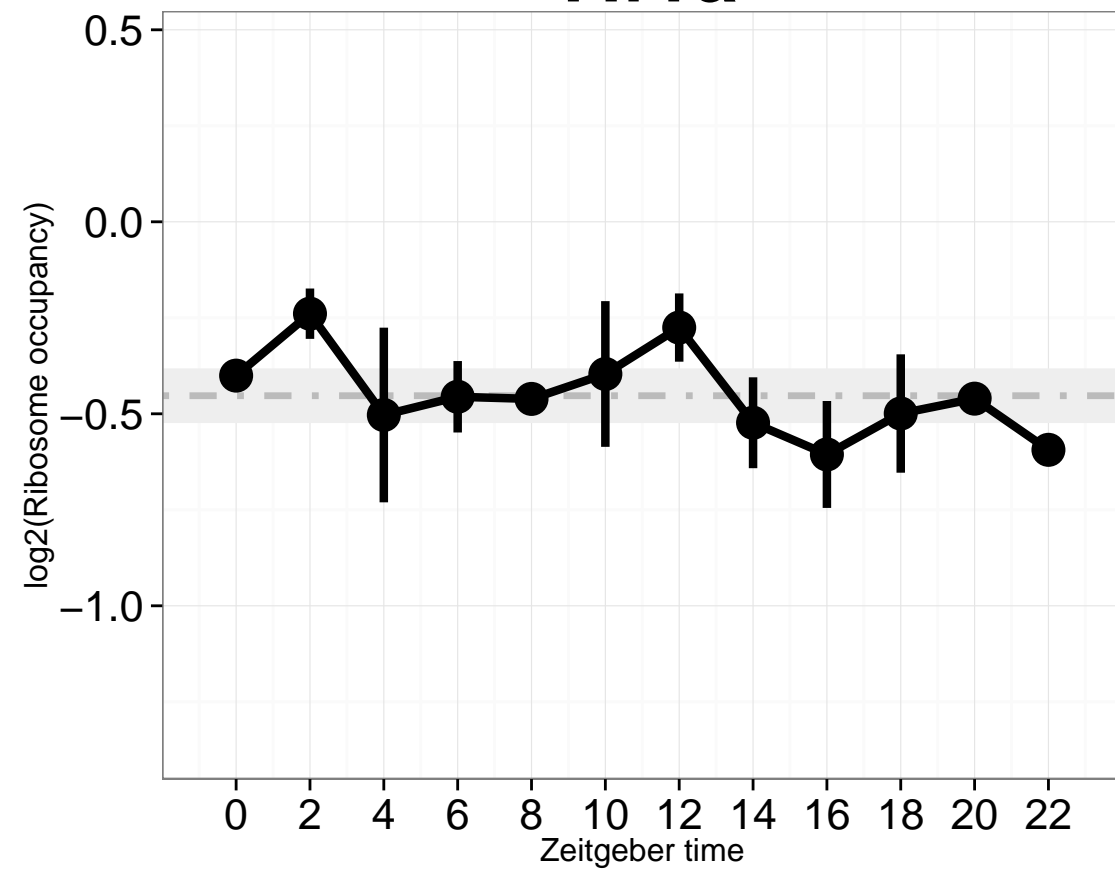

Supplement: Supplementary file 12729 [file 1]

## Clic5

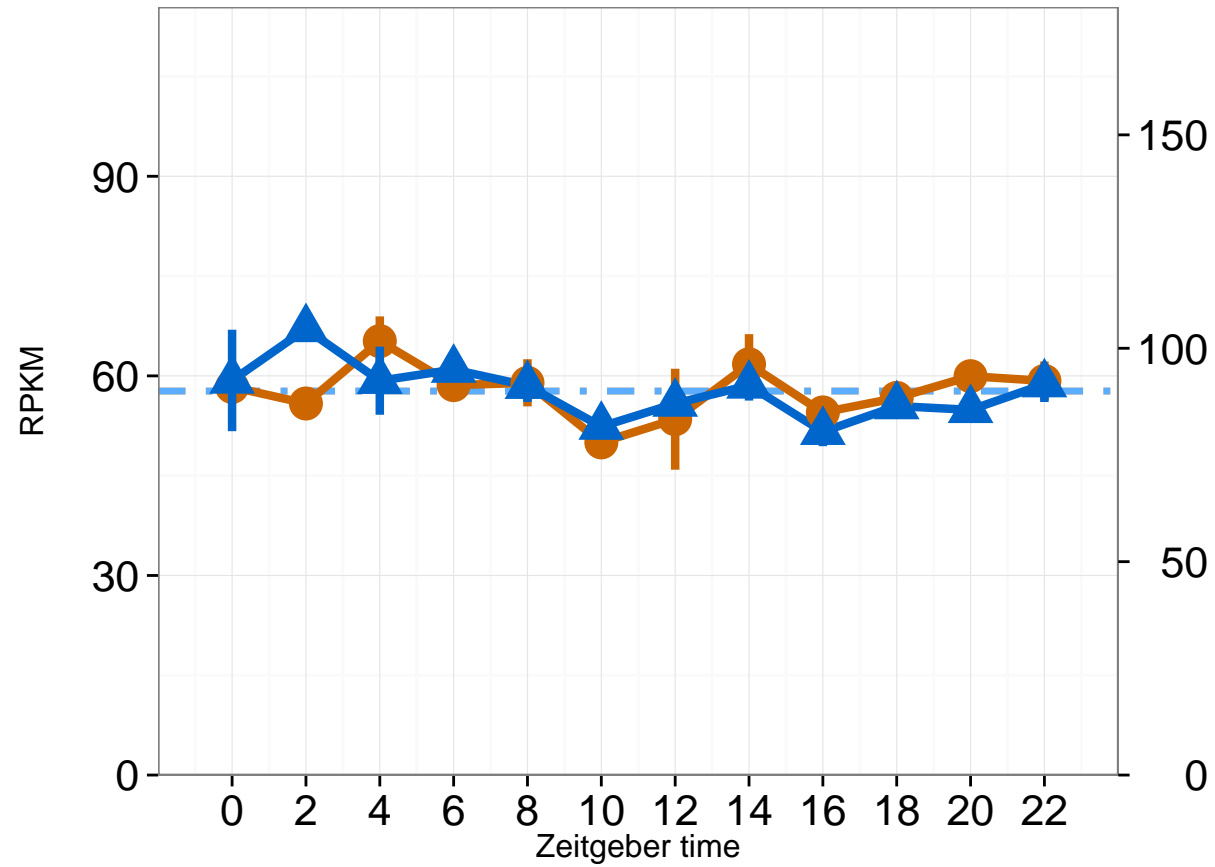

## Clic5

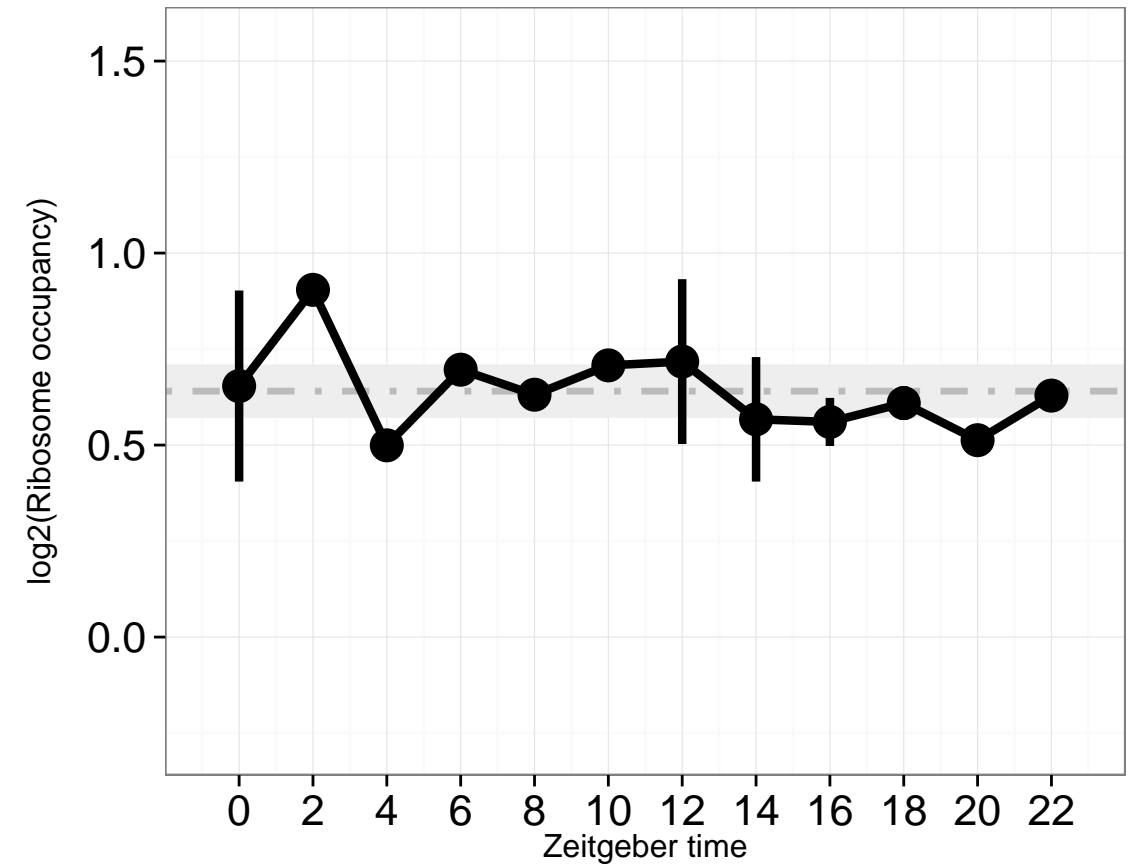

Supplement: Supplementary file 12730 [file 1]

# Slc30a4

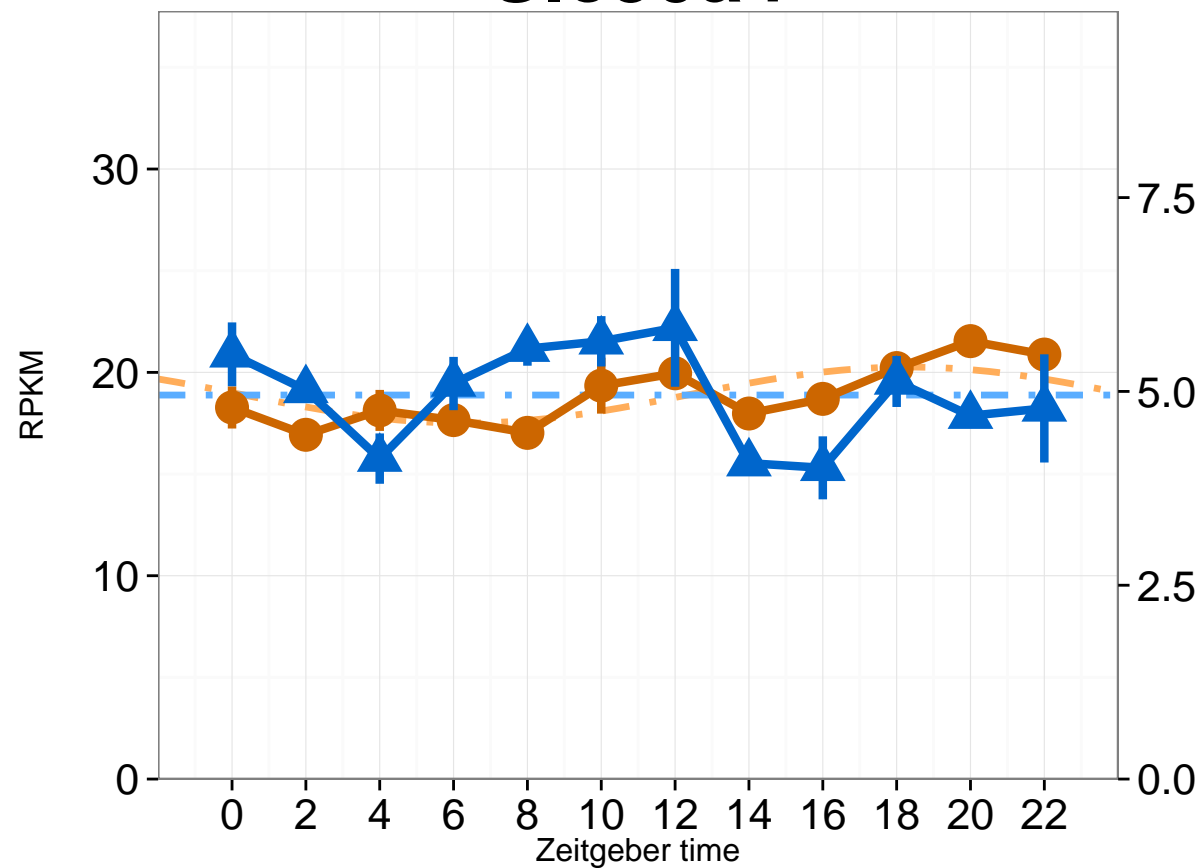

# Slc30a4

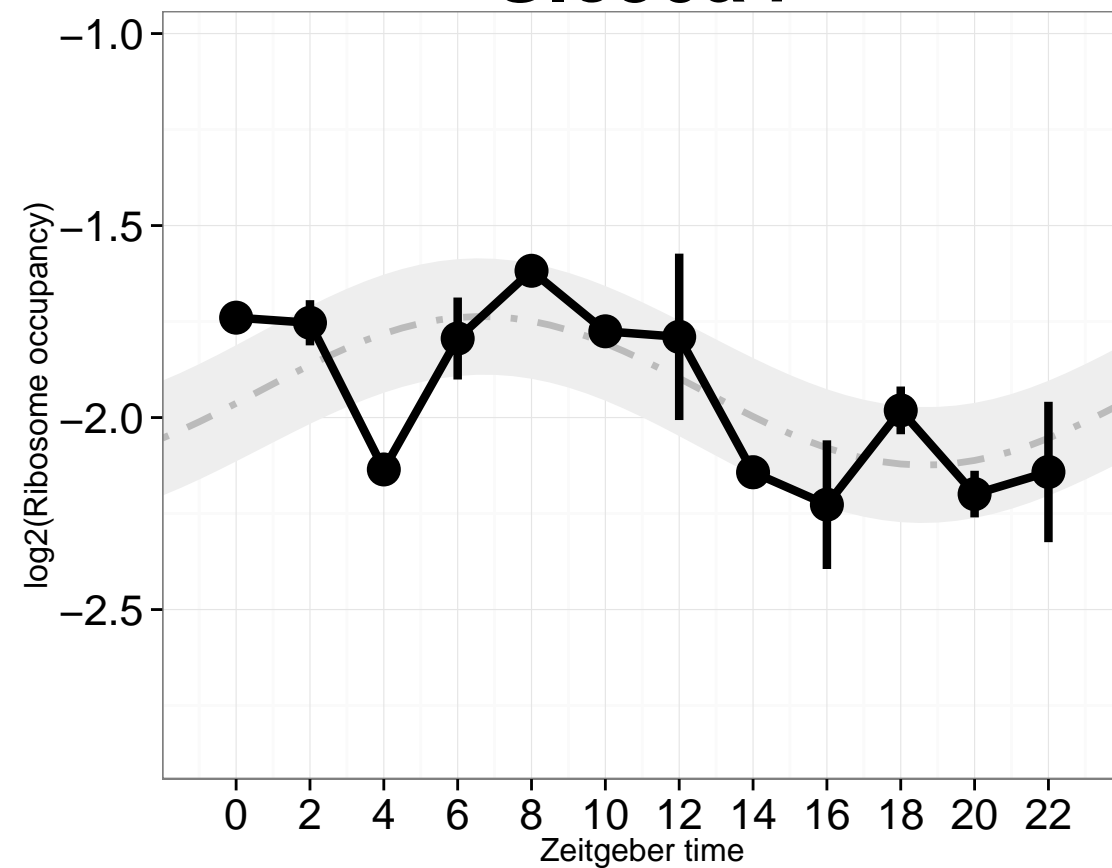

Supplement: Supplementary file 12731 [file 1]

## Npas2

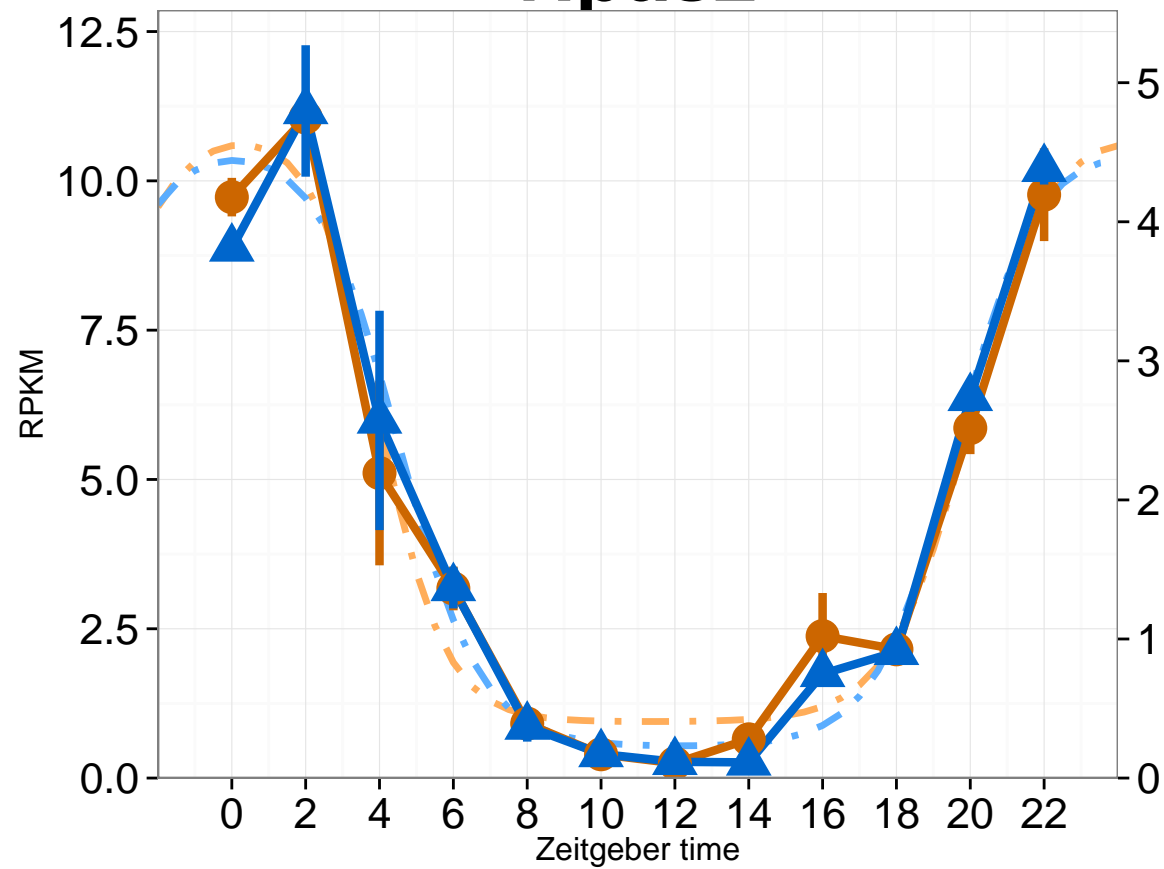

## Npas2

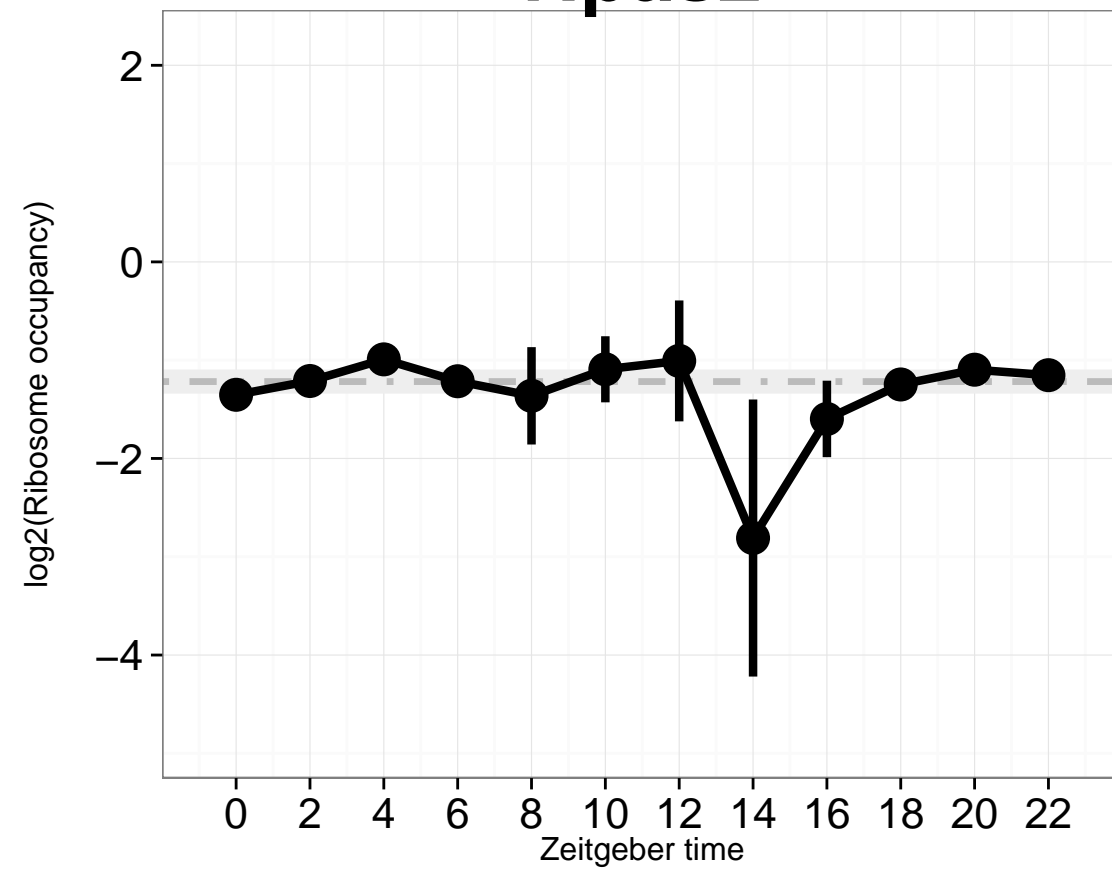

Supplement: Supplementary file 12732 [file 1]

# Procr

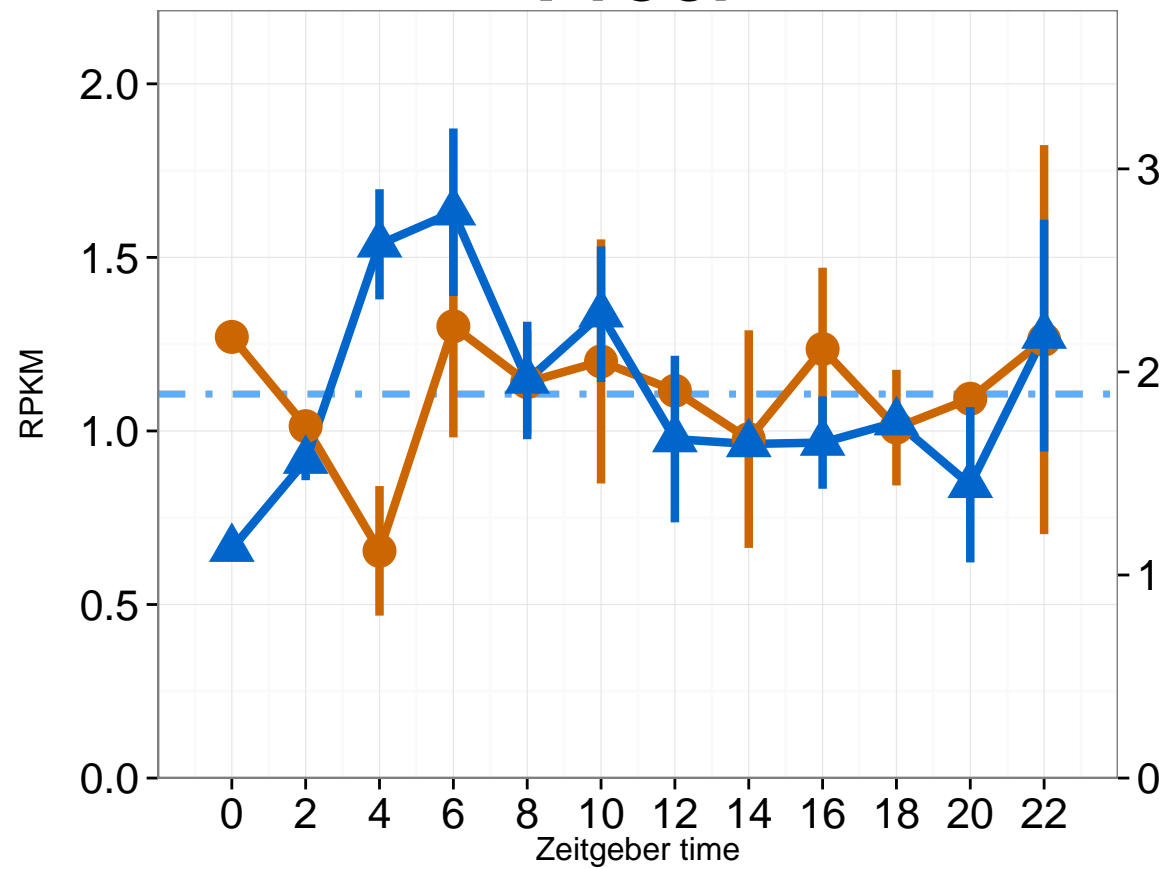

# Procr

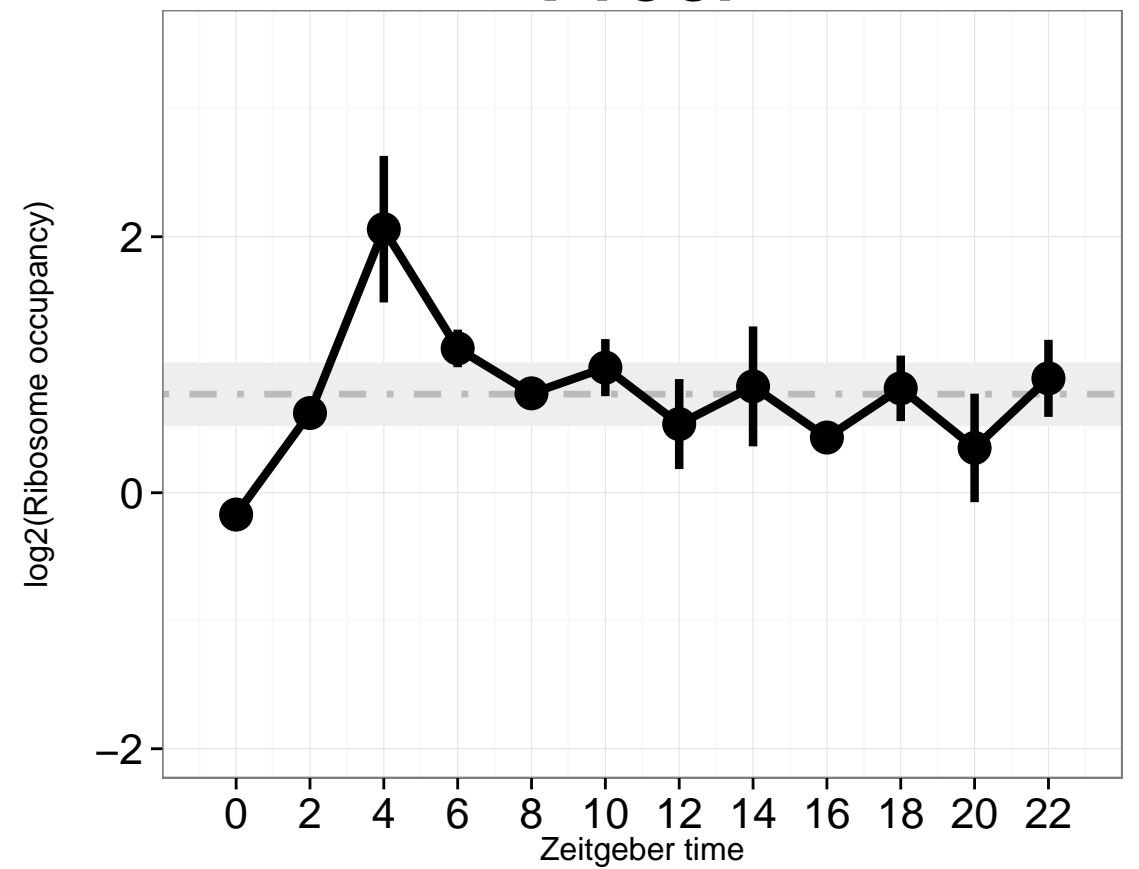

Supplement: Supplementary file 12733 [file 1]

# Ric8b

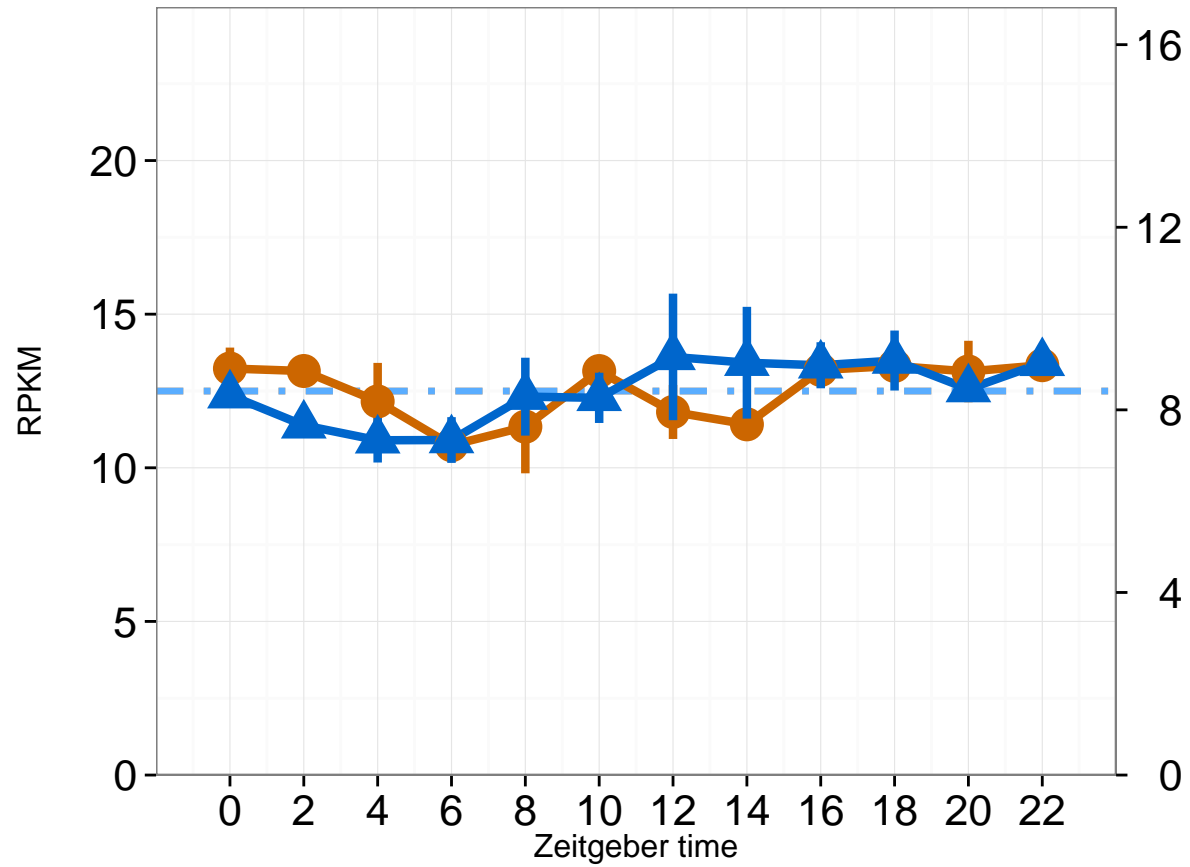

# Ric8b

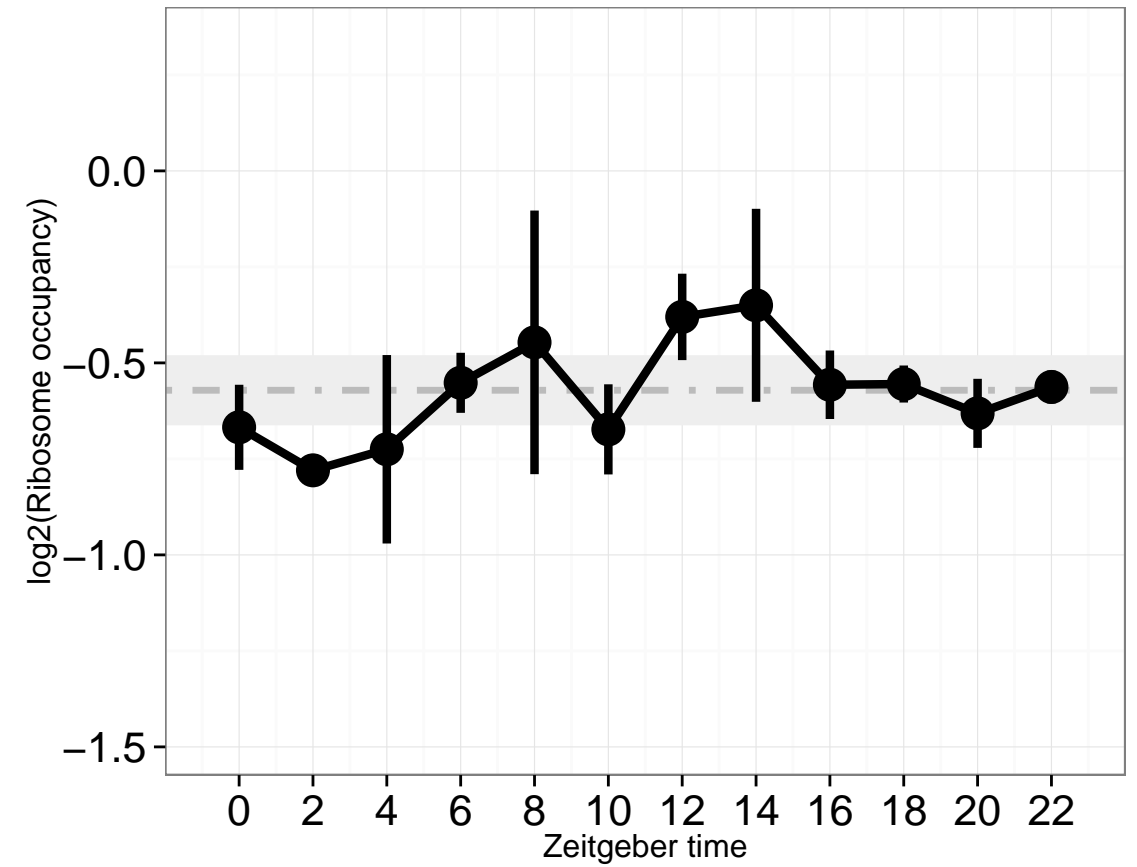

Supplement: Supplementary file 12734 [file 1]

## Enpp2

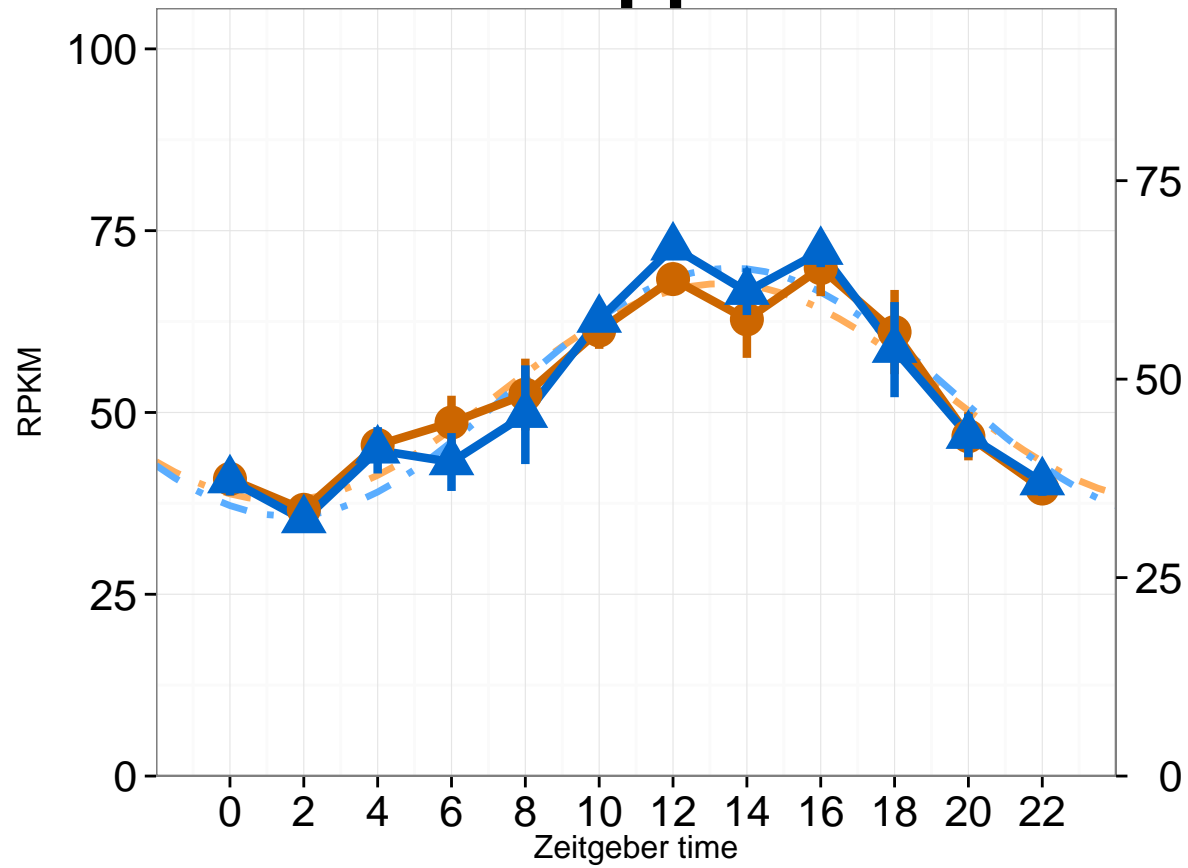

## Enpp2

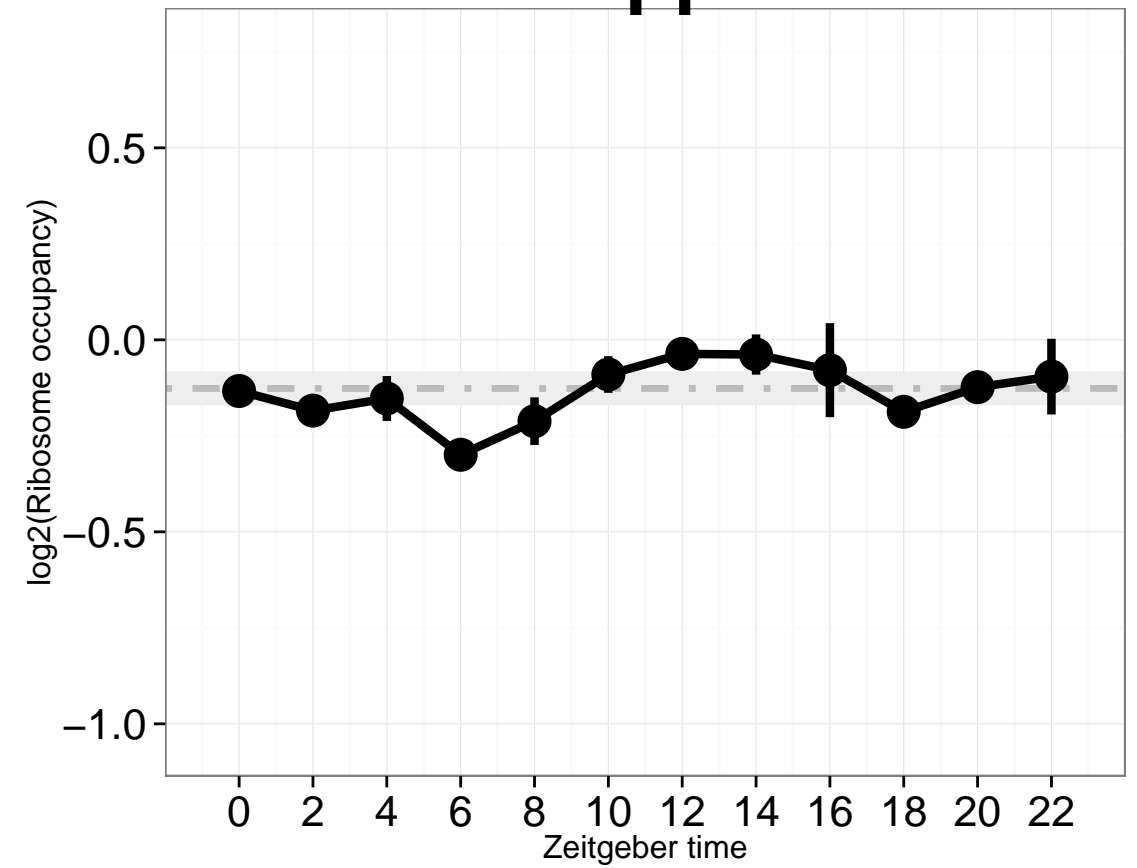

Supplement: Supplementary file 12735 [file 1]

## Sp5

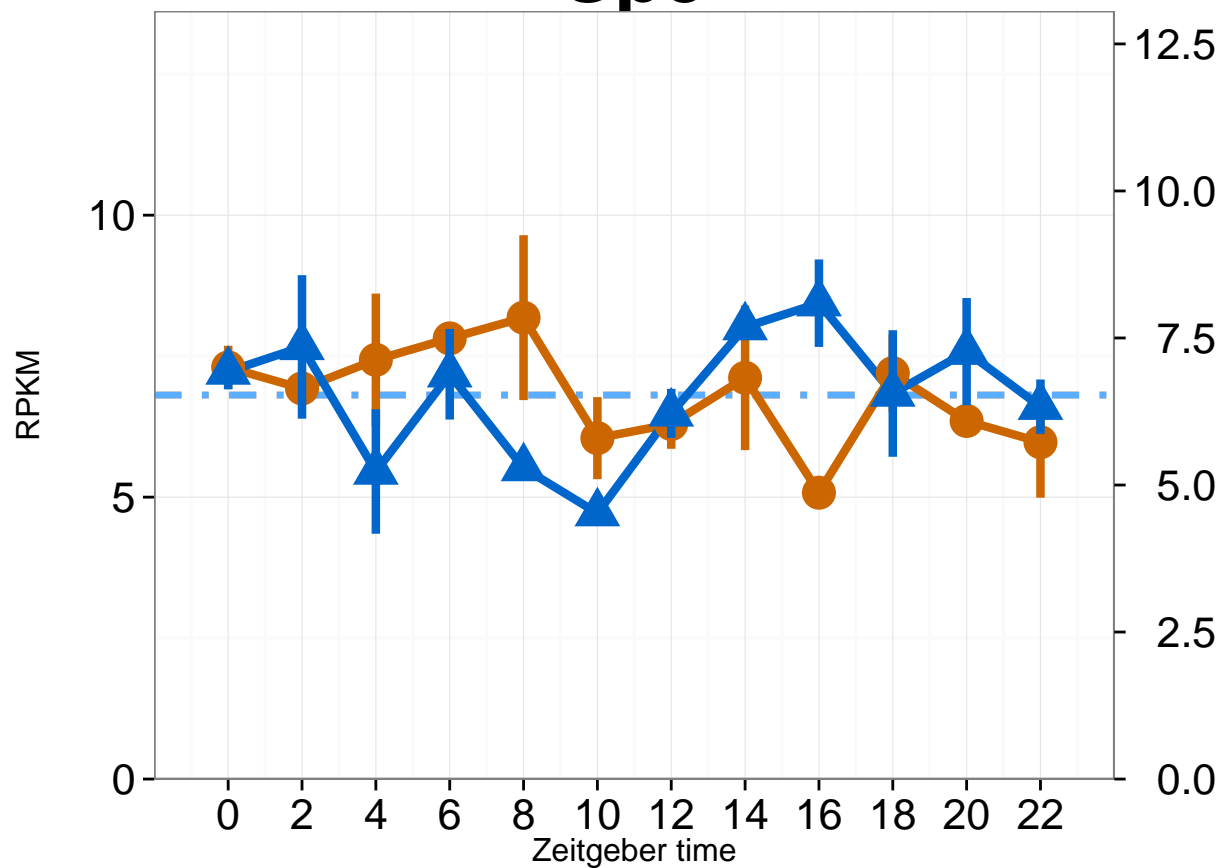

## Sp5

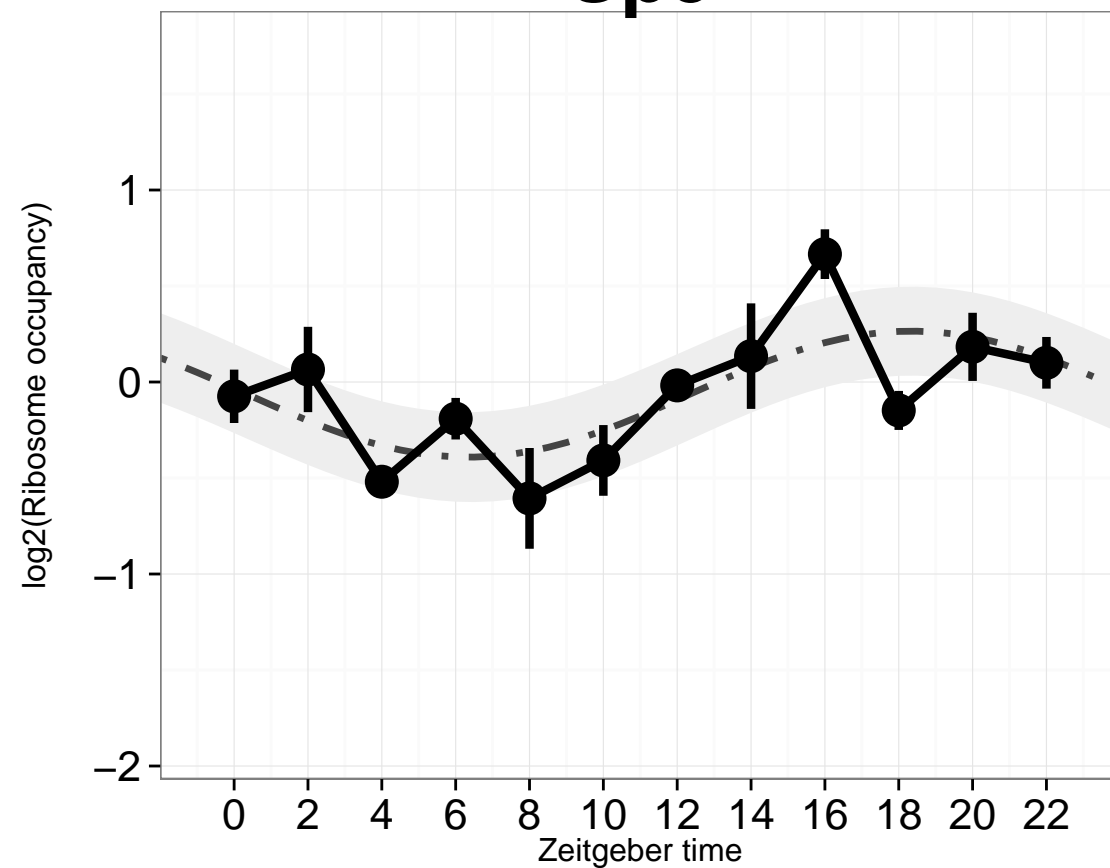

Supplement: Supplementary file 12736 [file 1]

# 2210018M11Rik

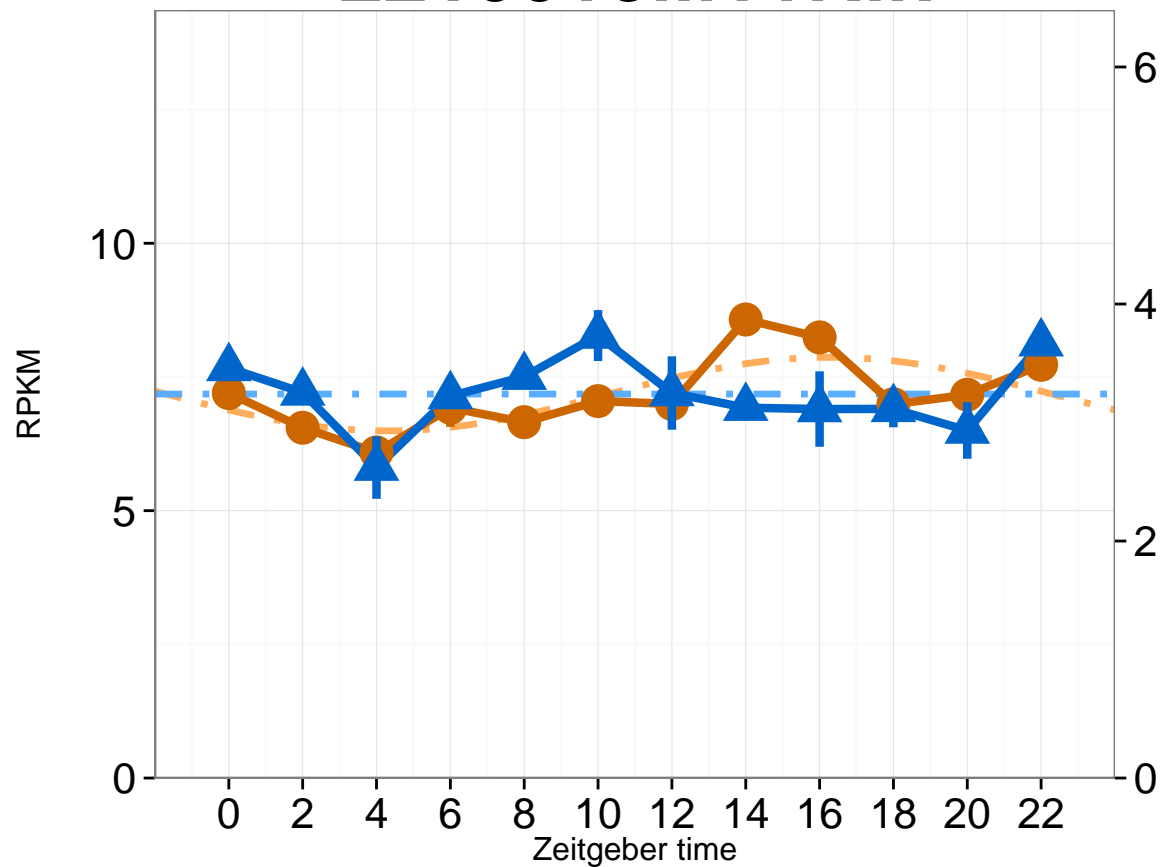

# 2210018M11Rik

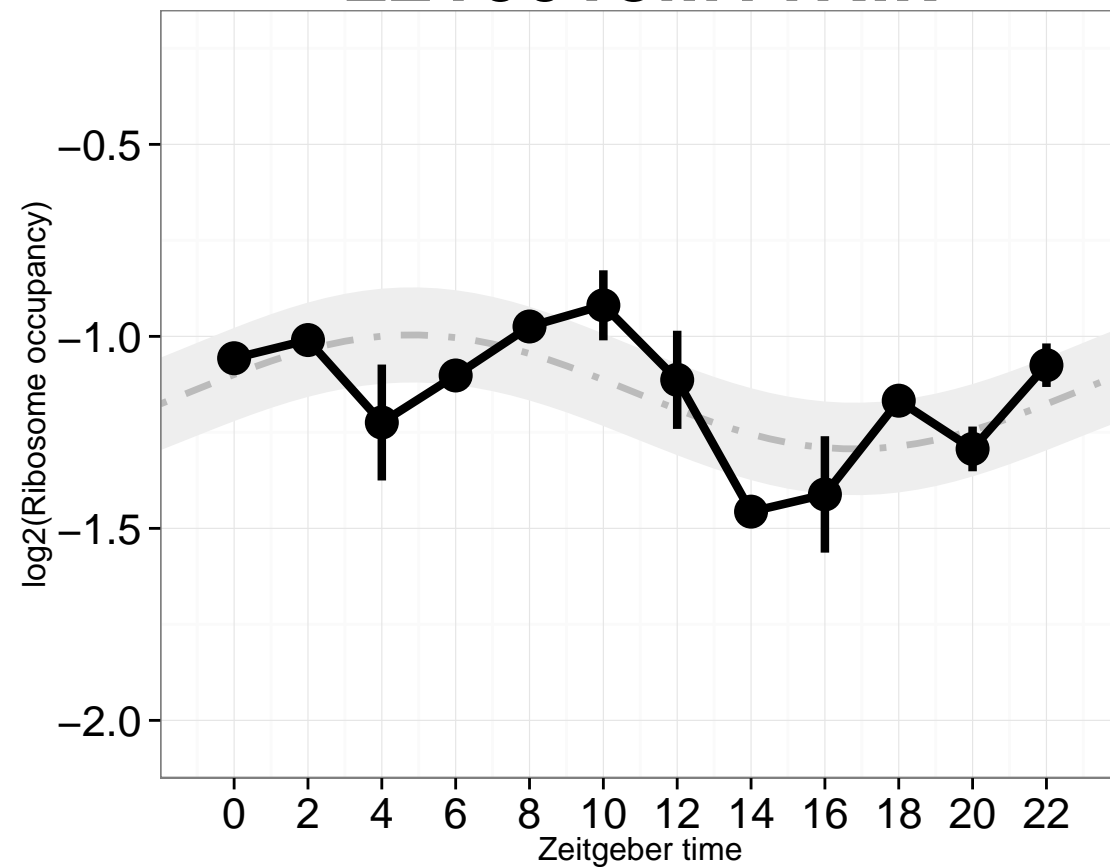

Supplement: Supplementary file 12737 [file 1]

# Atxn7

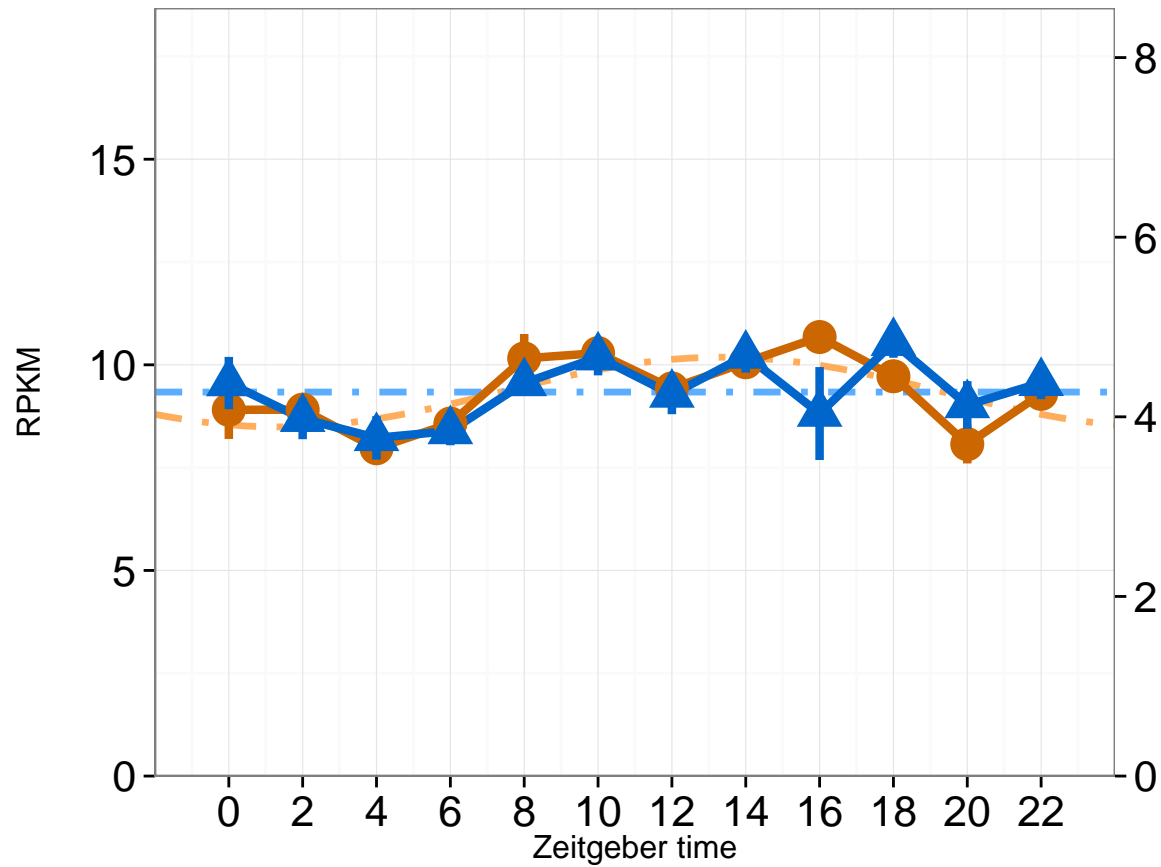

# Atxn7

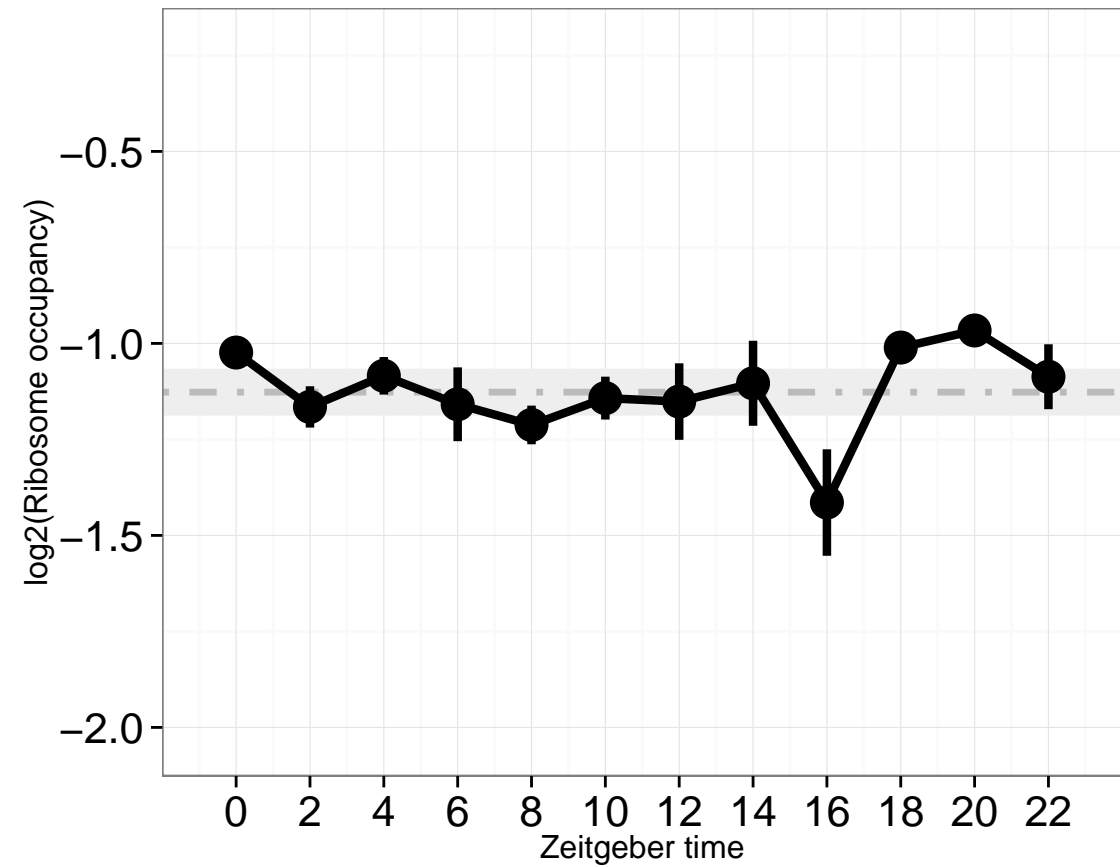

Supplement: Supplementary file 12738 [file 1]

## Plvap

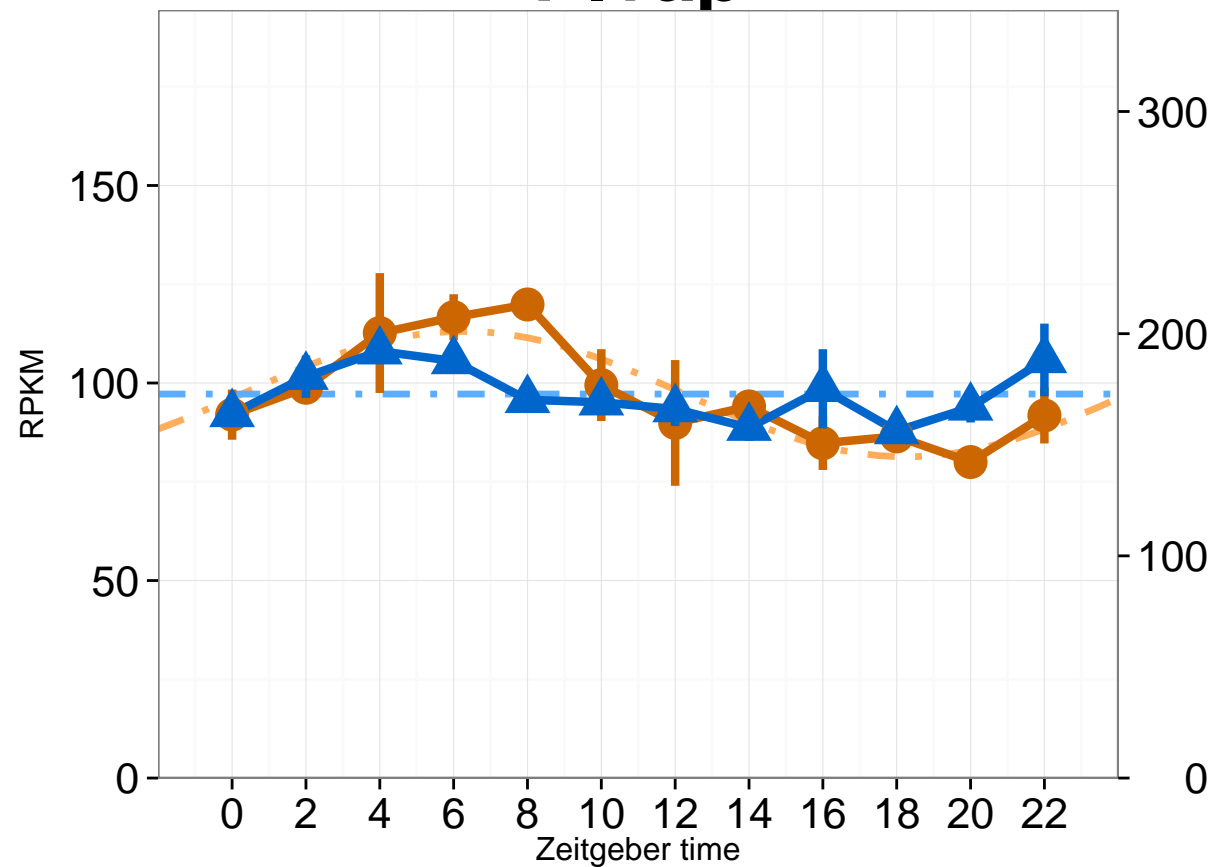

## Plvap

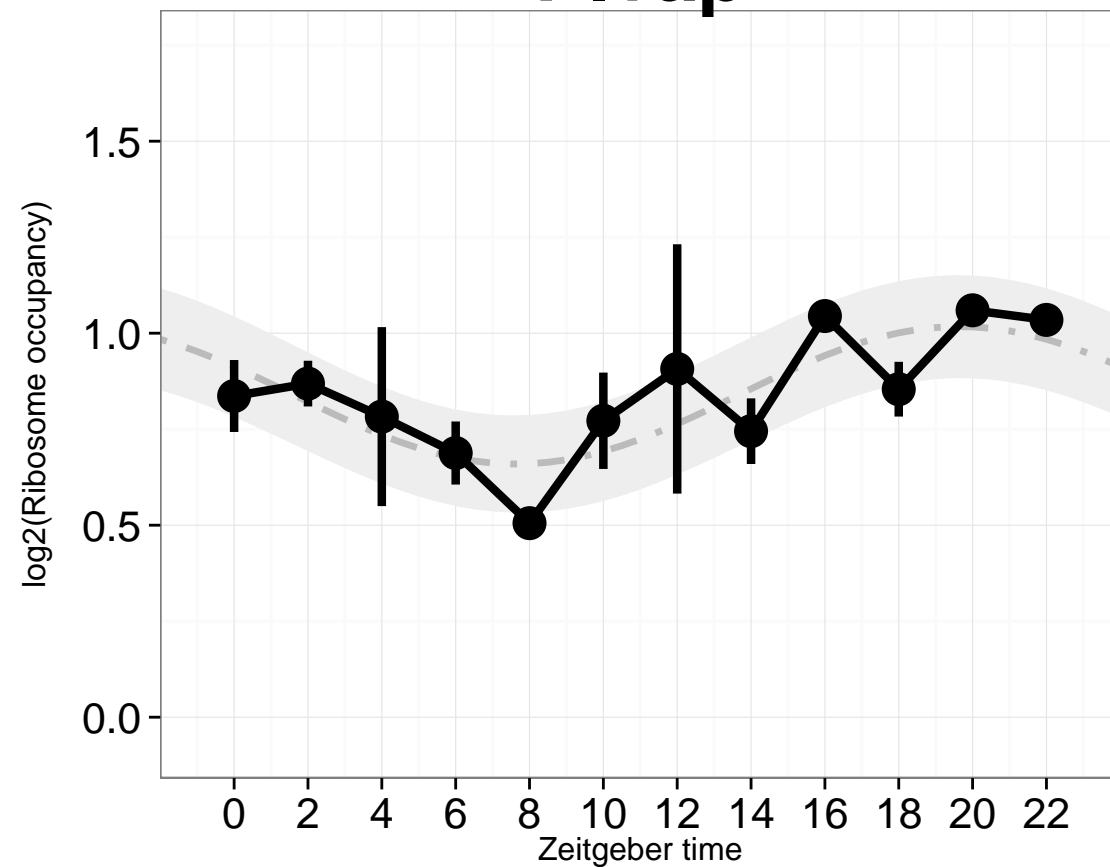

Supplement: Supplementary file 12739 [file 1]

## Fstl1

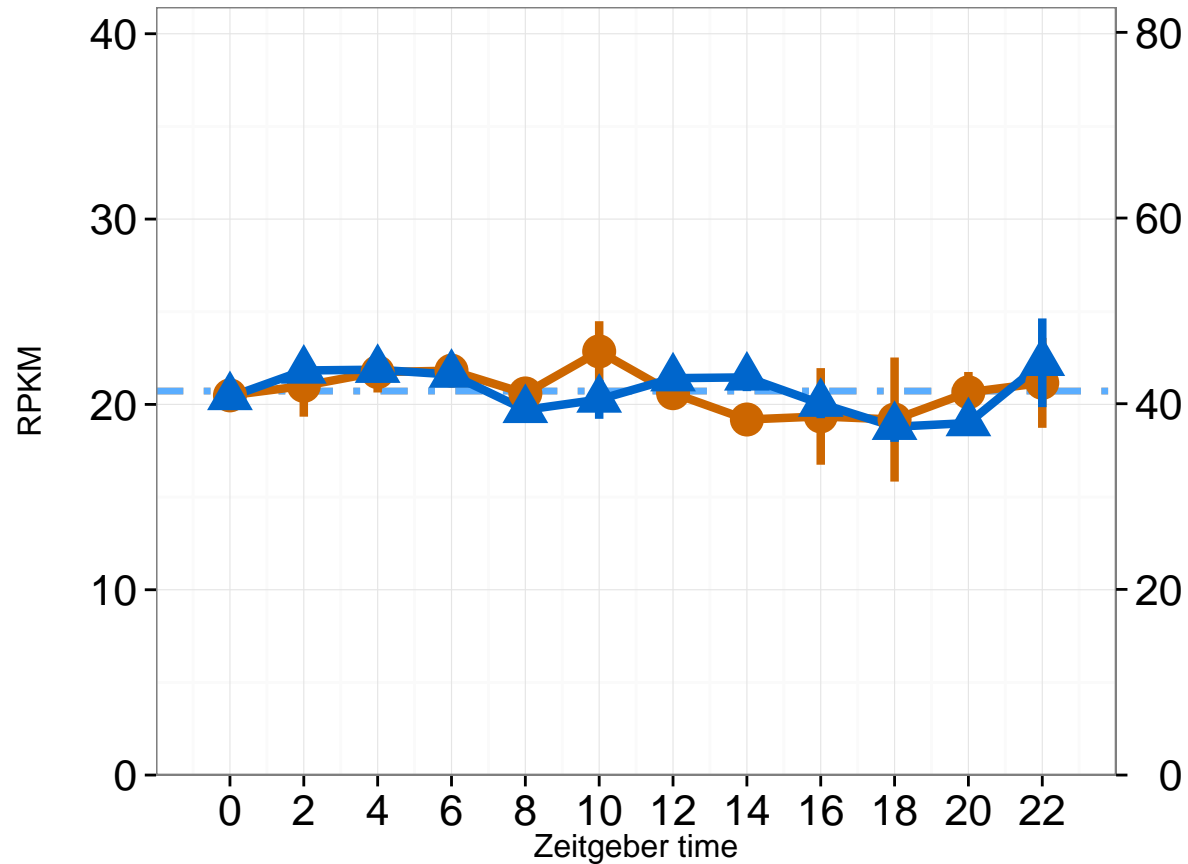

## Fstl1

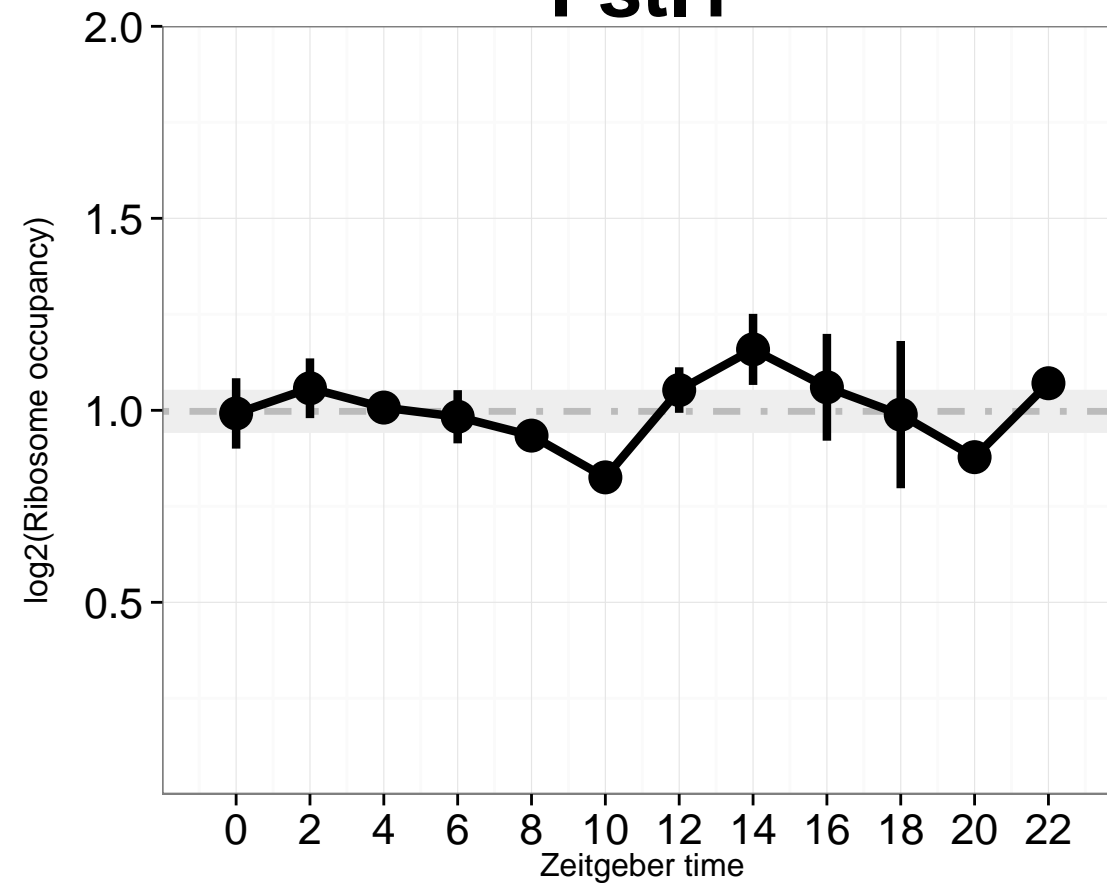

Supplement: Supplementary file 12740 [file 1]

# Elfn1

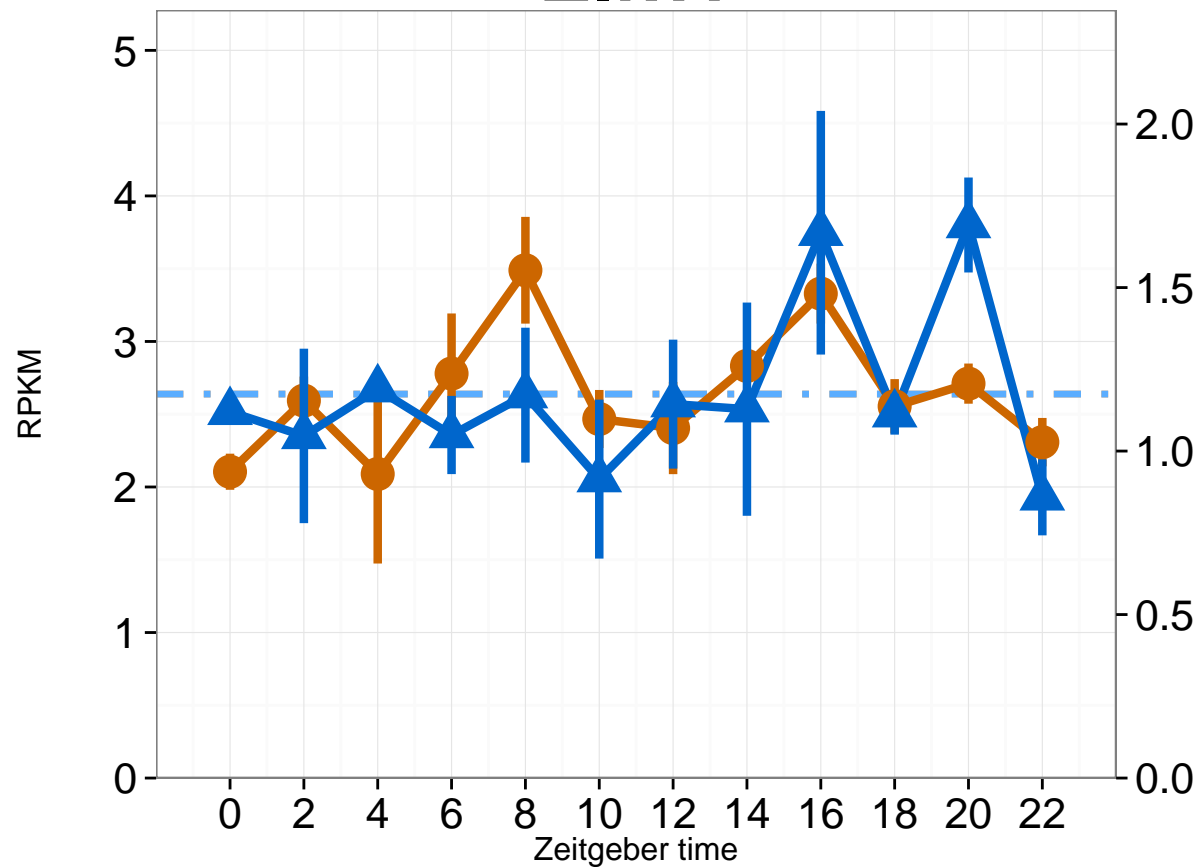

# Elfn1

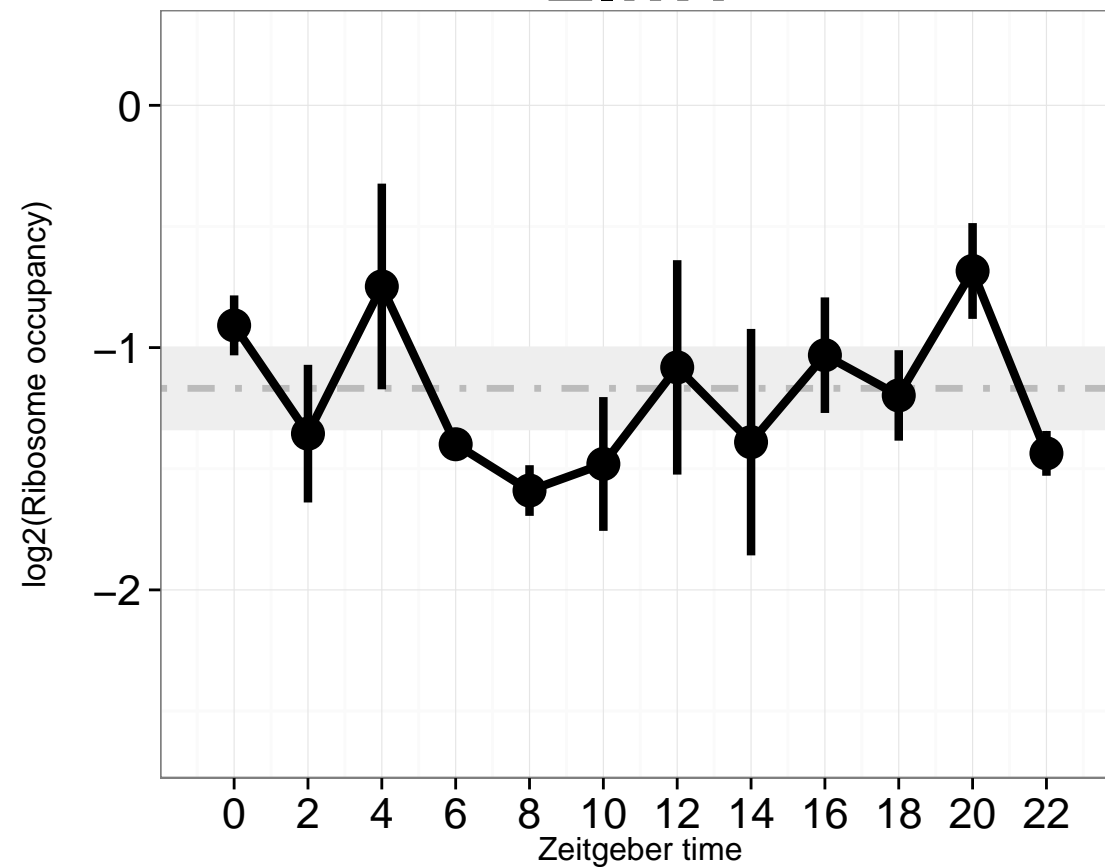

Supplement: Supplementary file 12741 [file 1]

# Gnl3

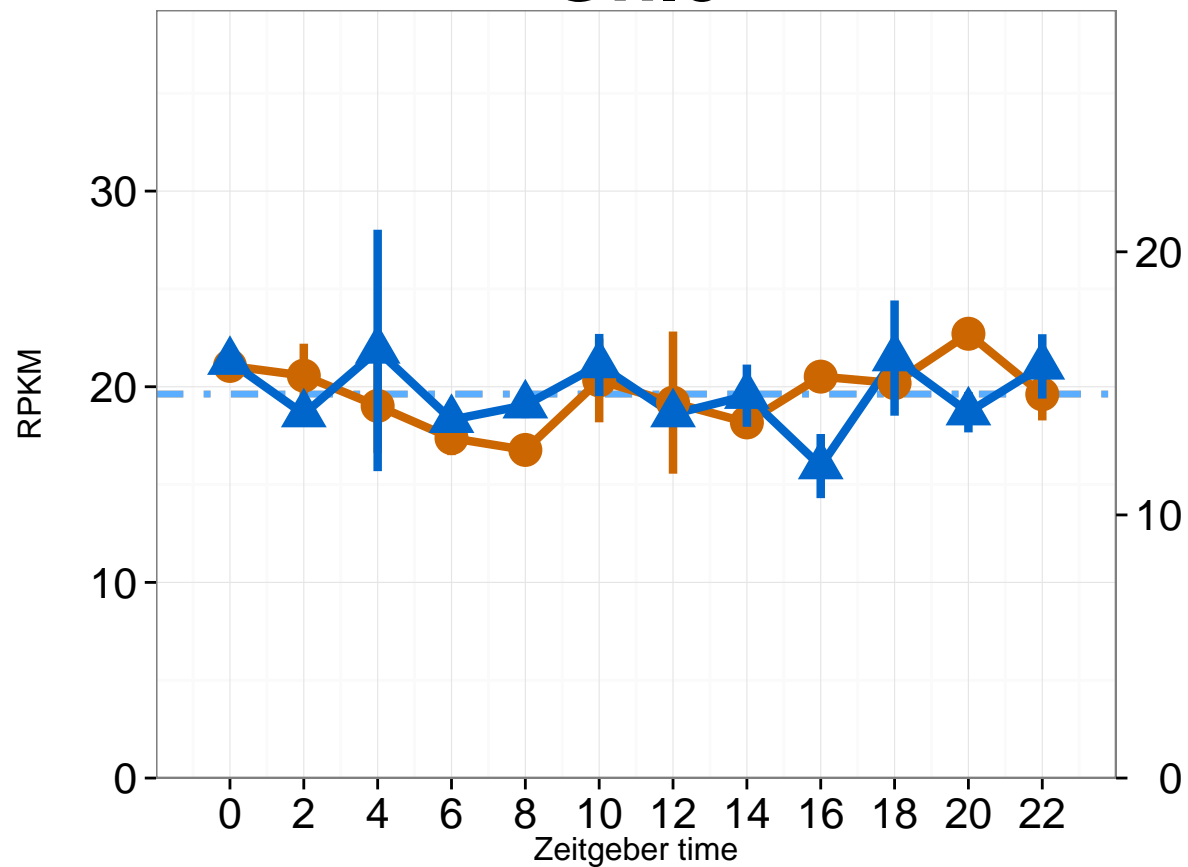

# Gnl3

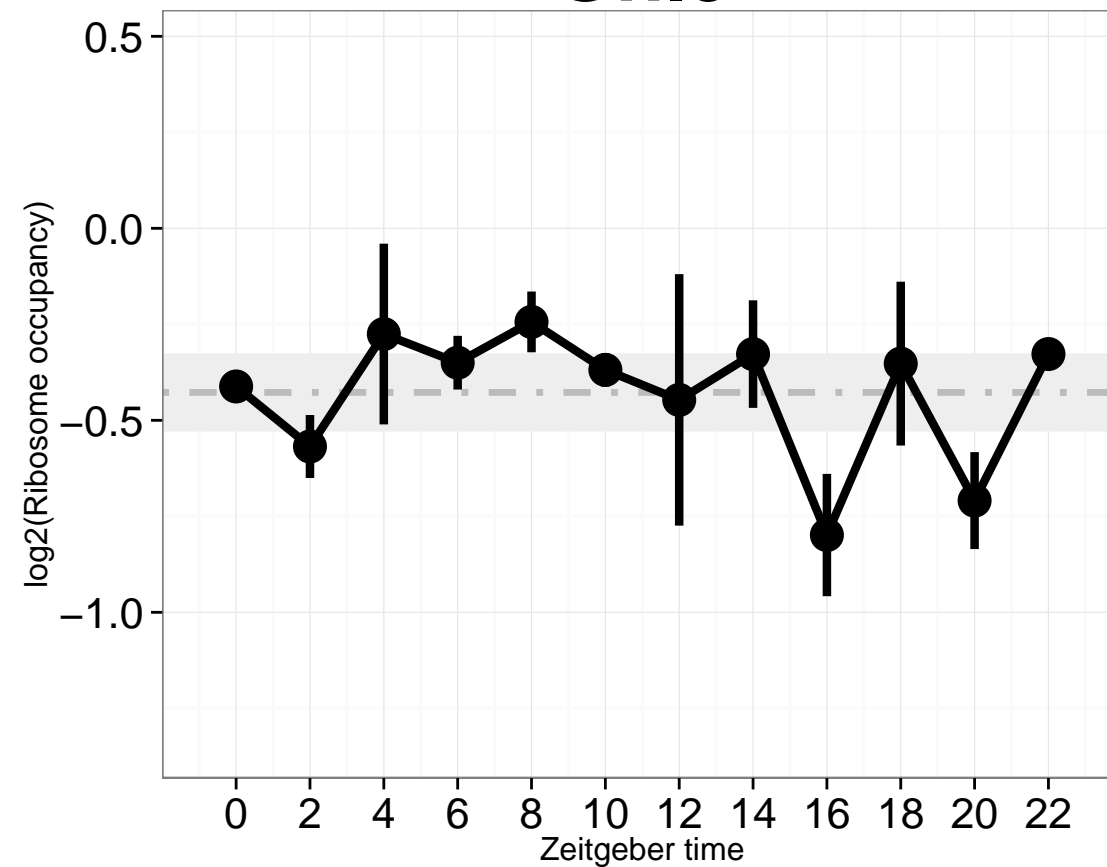

Supplement: Supplementary file 12742 [file 1]

## Enox2

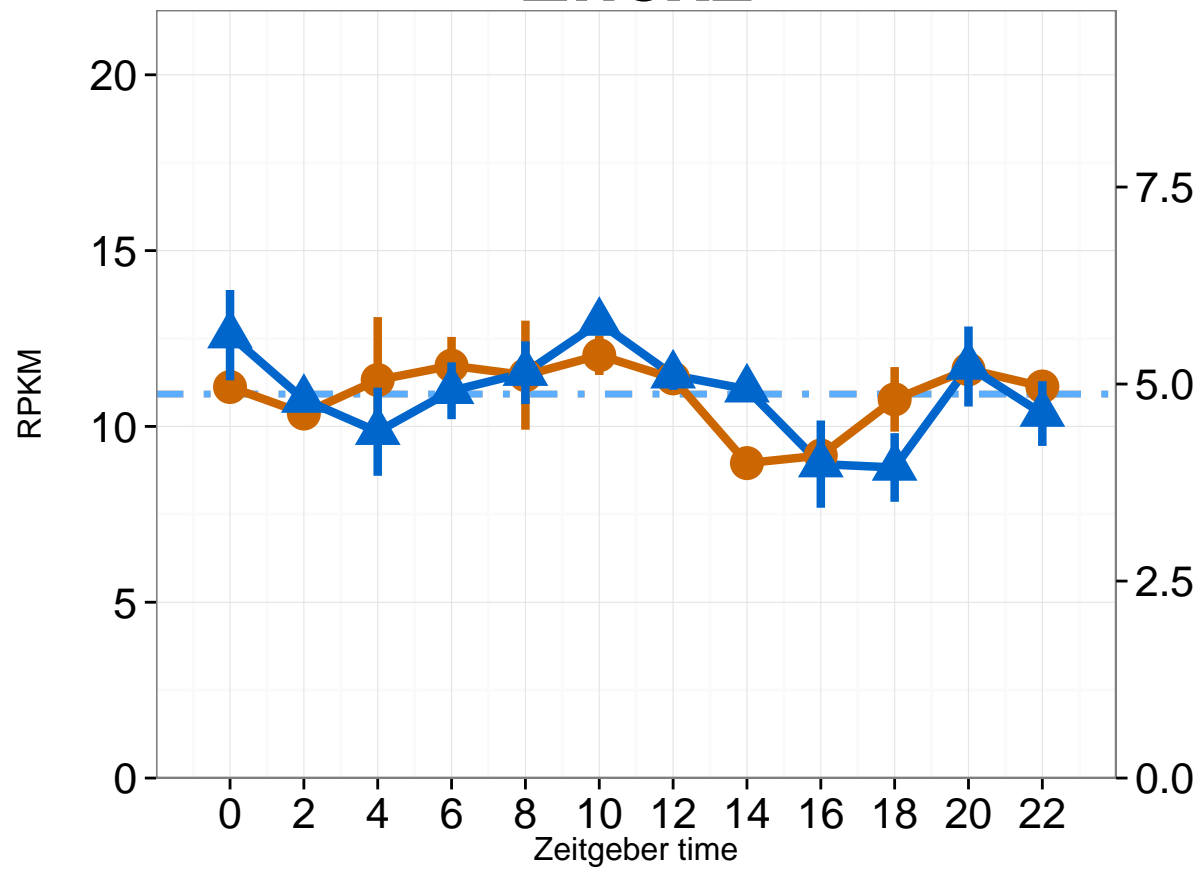

## Enox2

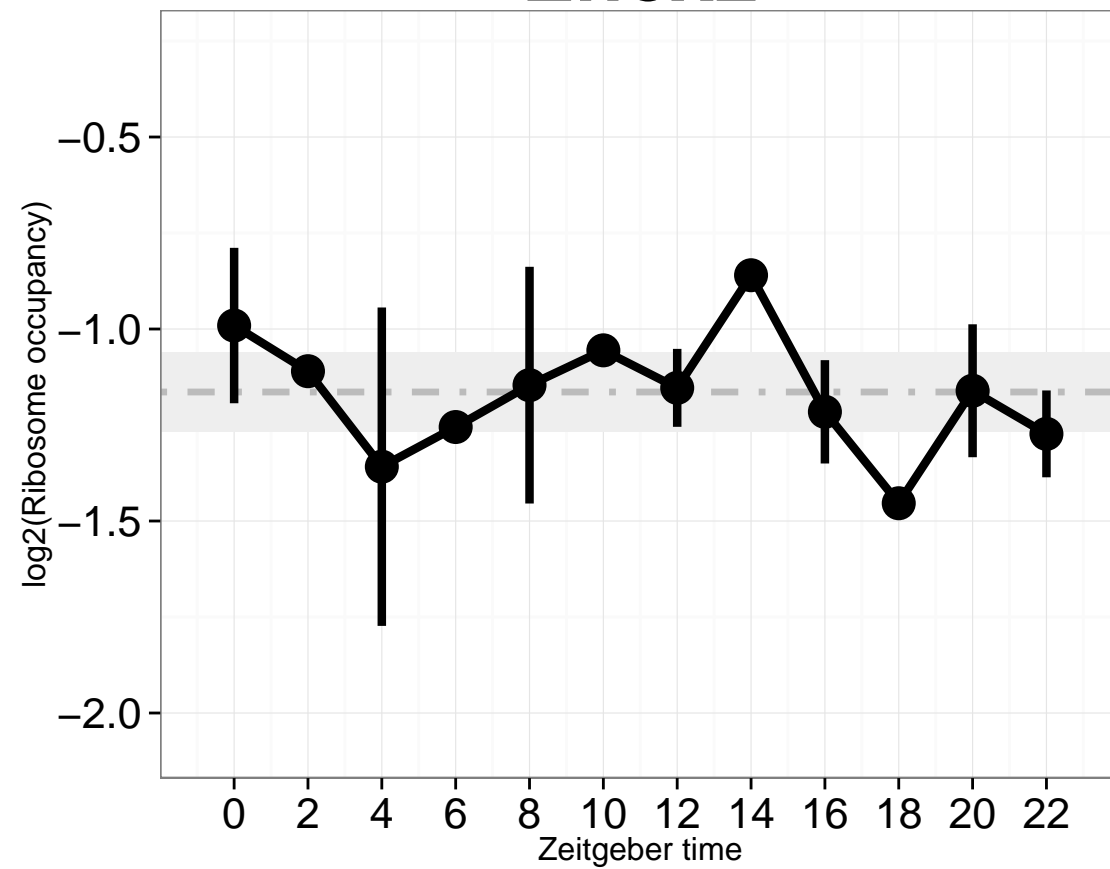

Supplement: Supplementary file 12743 [file 1]

## Add3

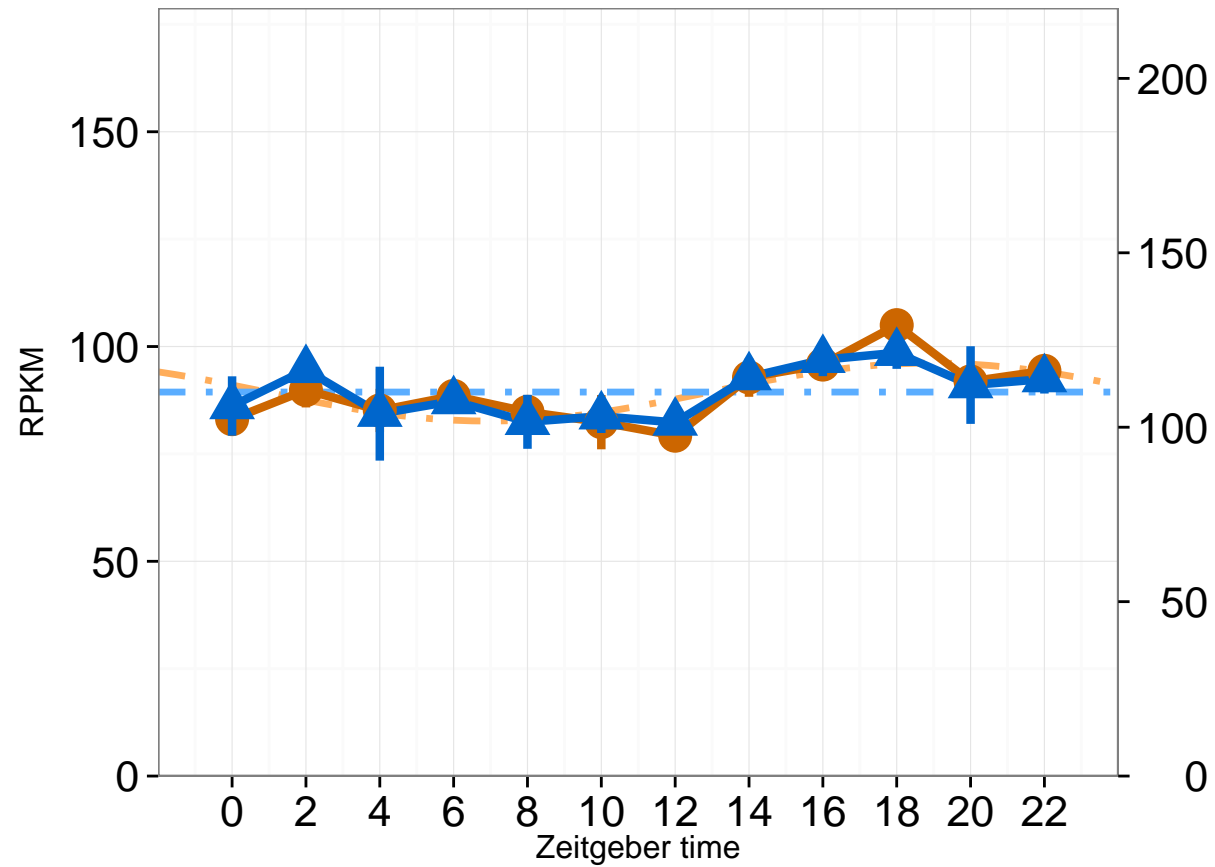

## Add3

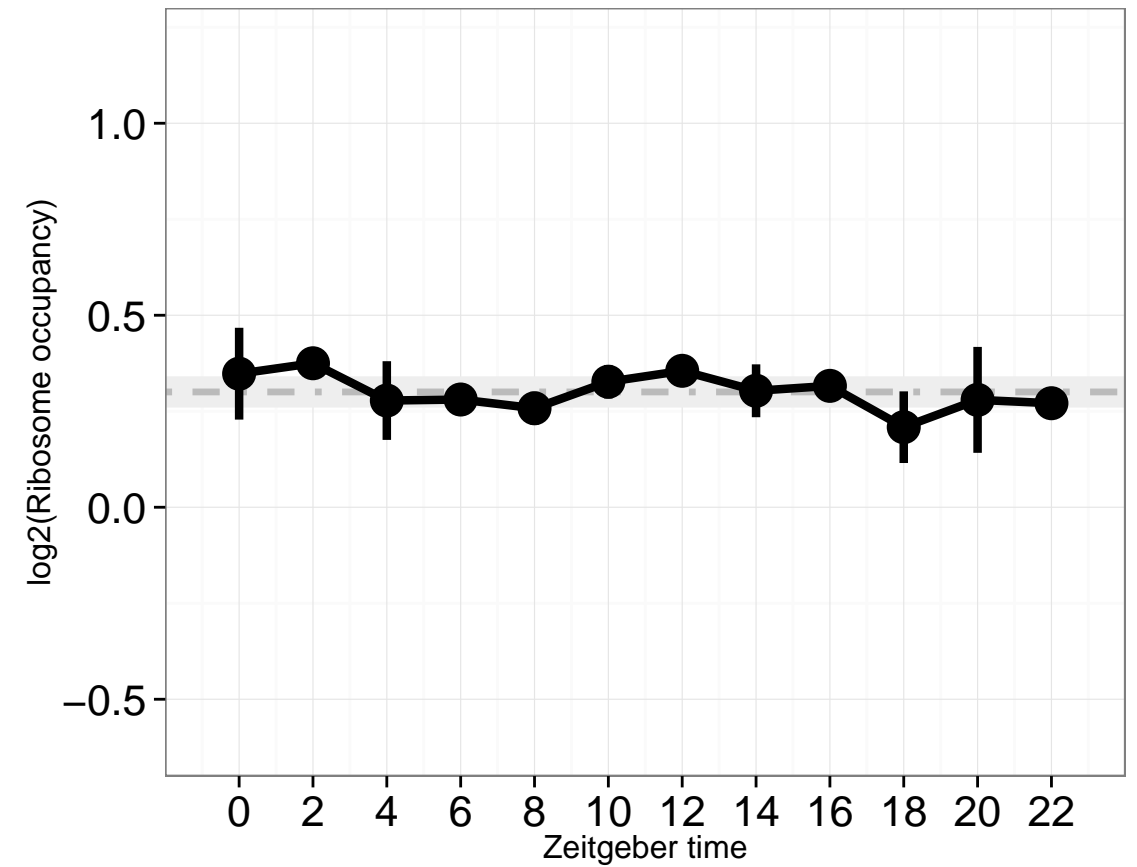

Supplement: Supplementary file 12744 [file 1]
