# Supplementary material (part 128 of 133)
Source: publisher figshare collection journal article supplement (https://springernature.figshare.com/articles/dataset/_/4903193)

## Copa

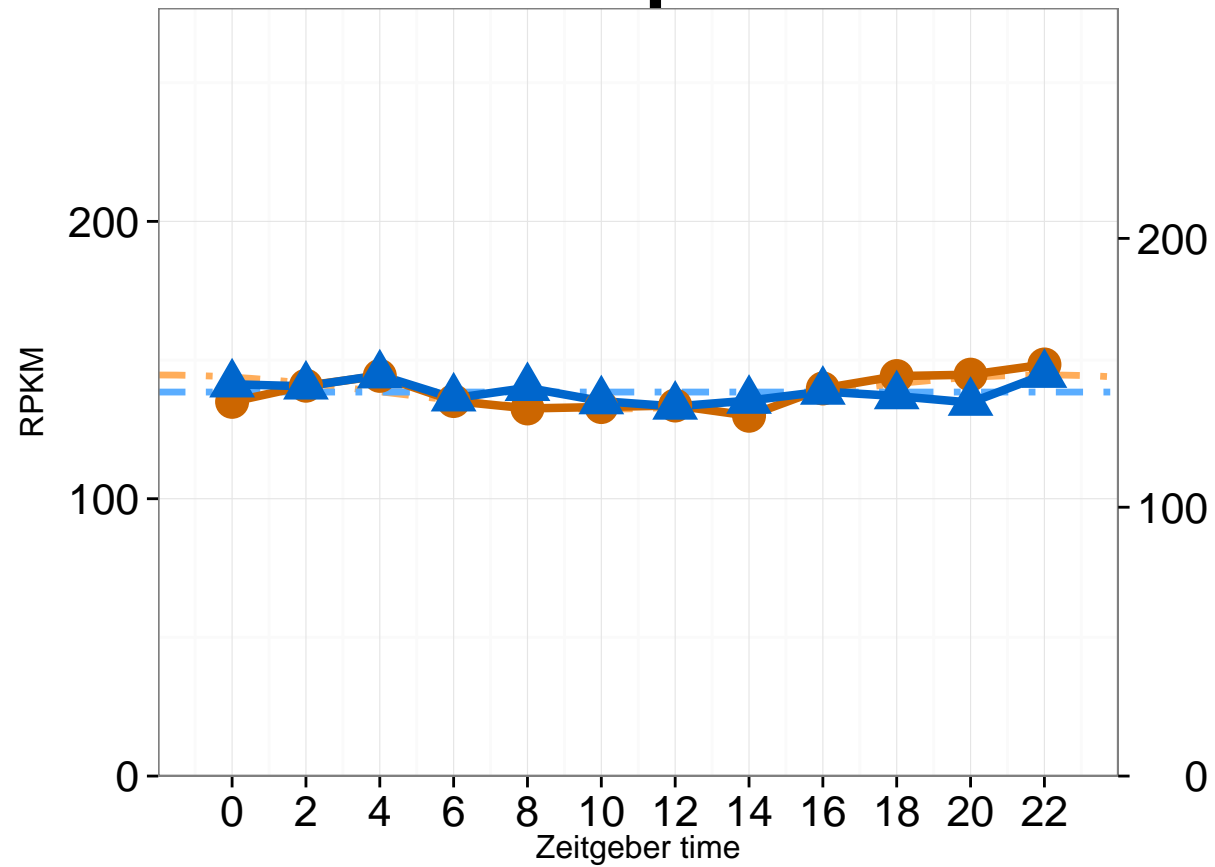

## Copa

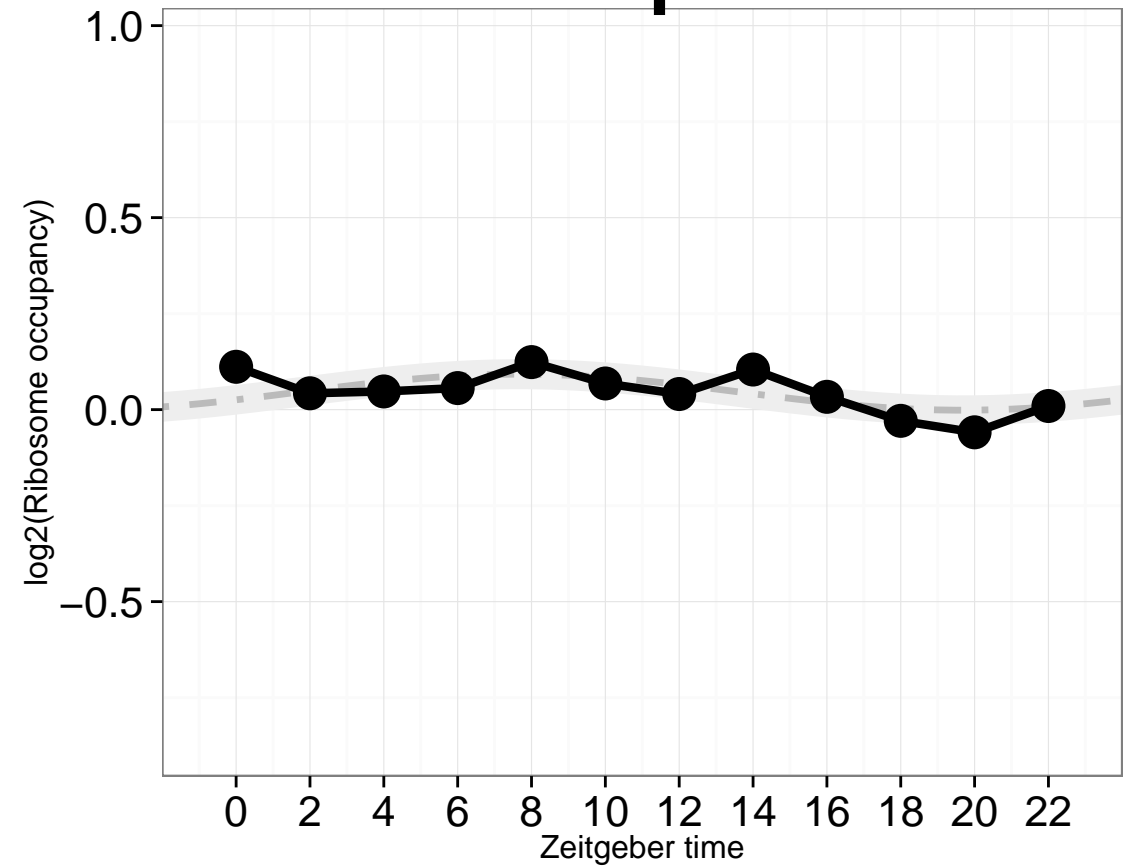

Supplement: Supplementary file 12745 [file 1]

# Slc25a14

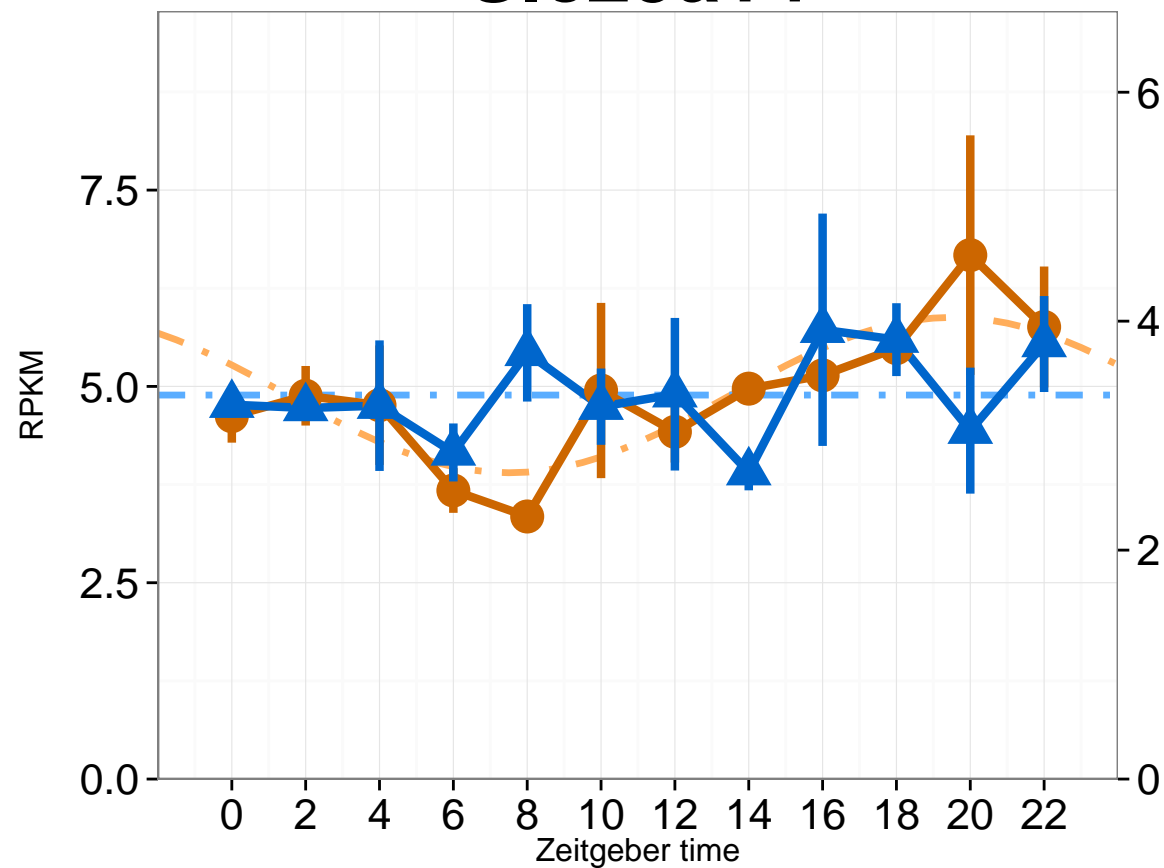

# Slc25a14

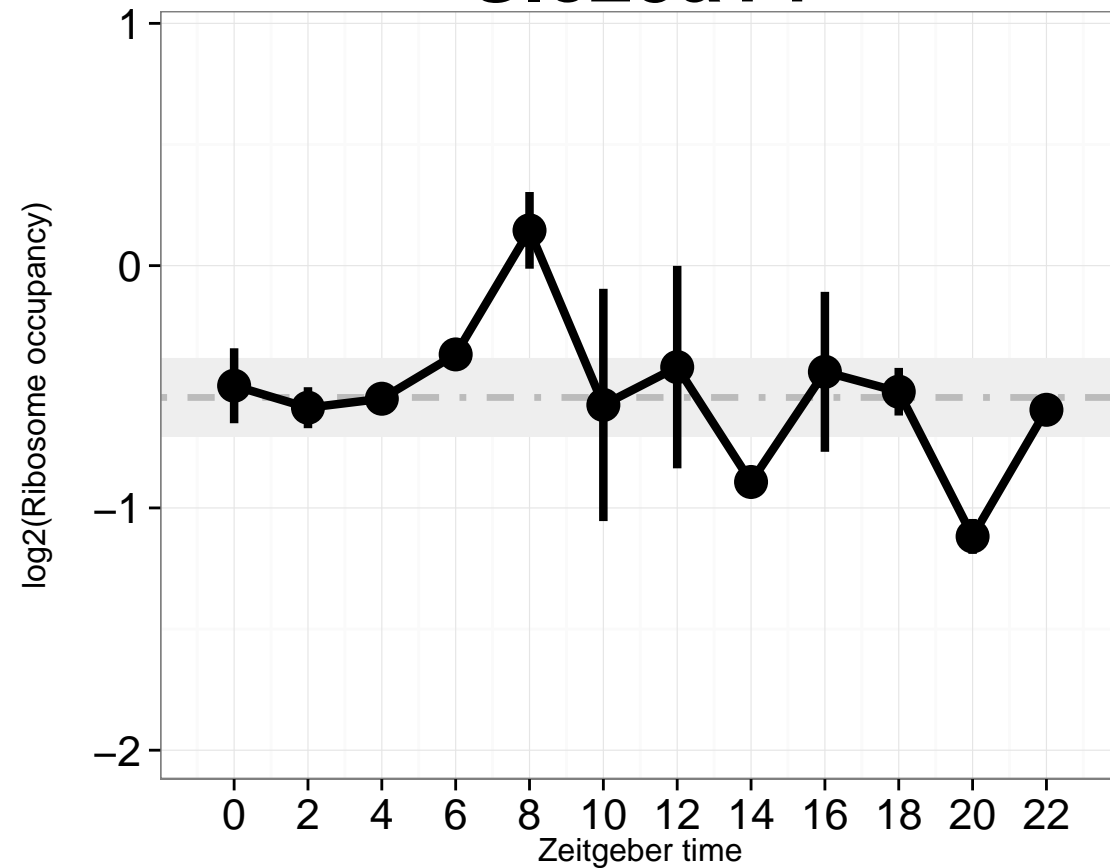

Supplement: Supplementary file 12746 [file 1]

# Acot1

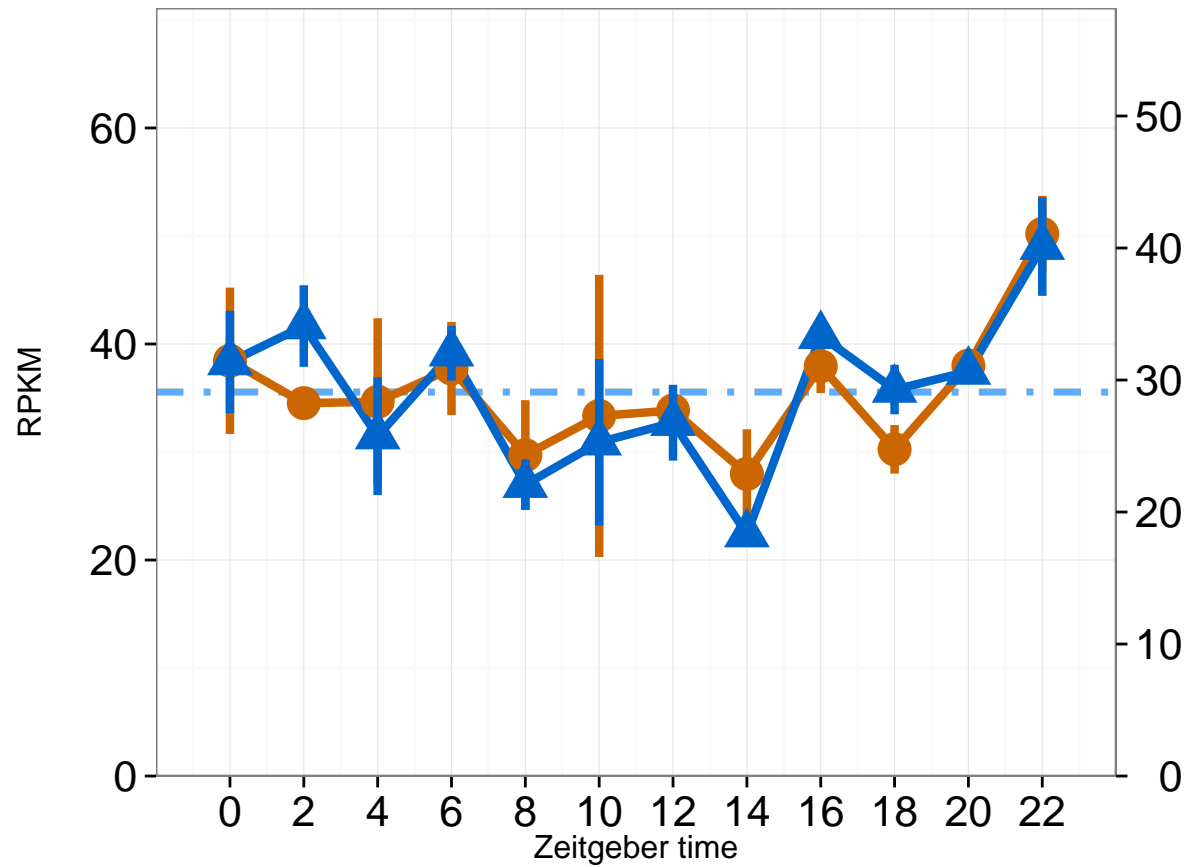

# Acot1

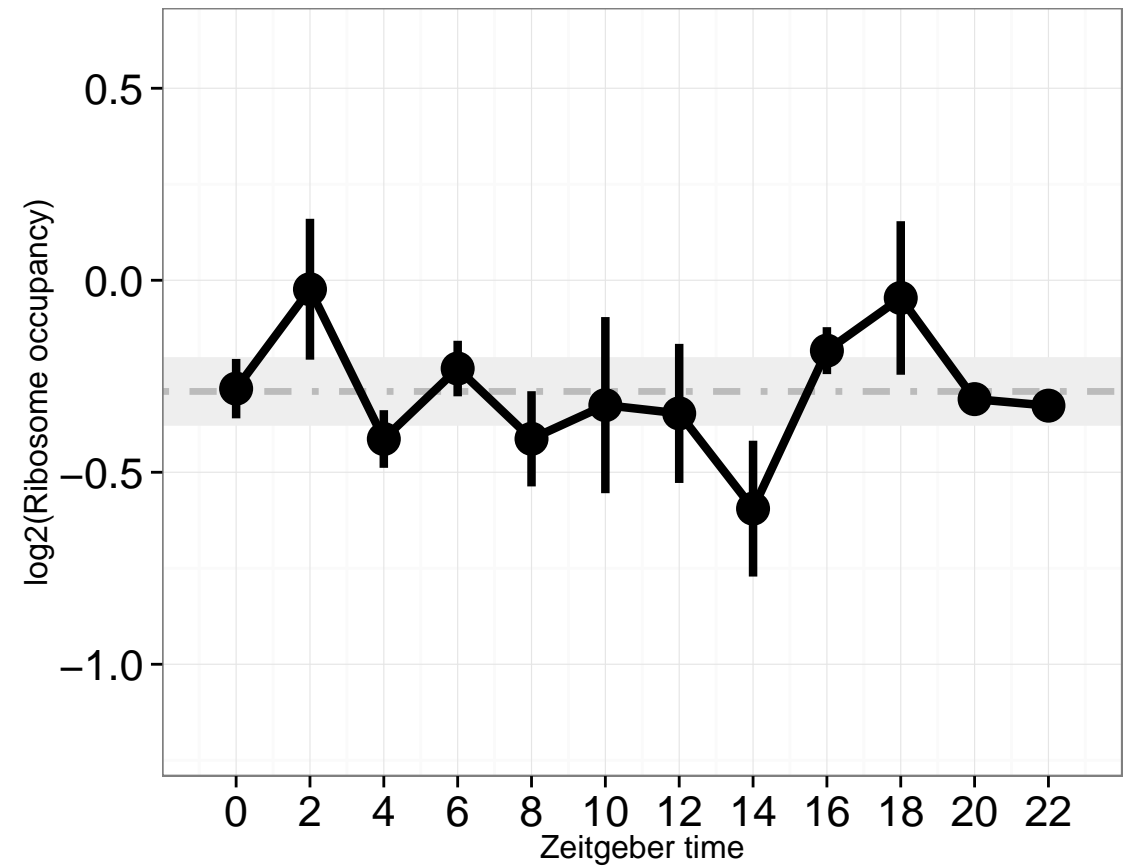

Supplement: Supplementary file 12747 [file 1]

## Nlrp3

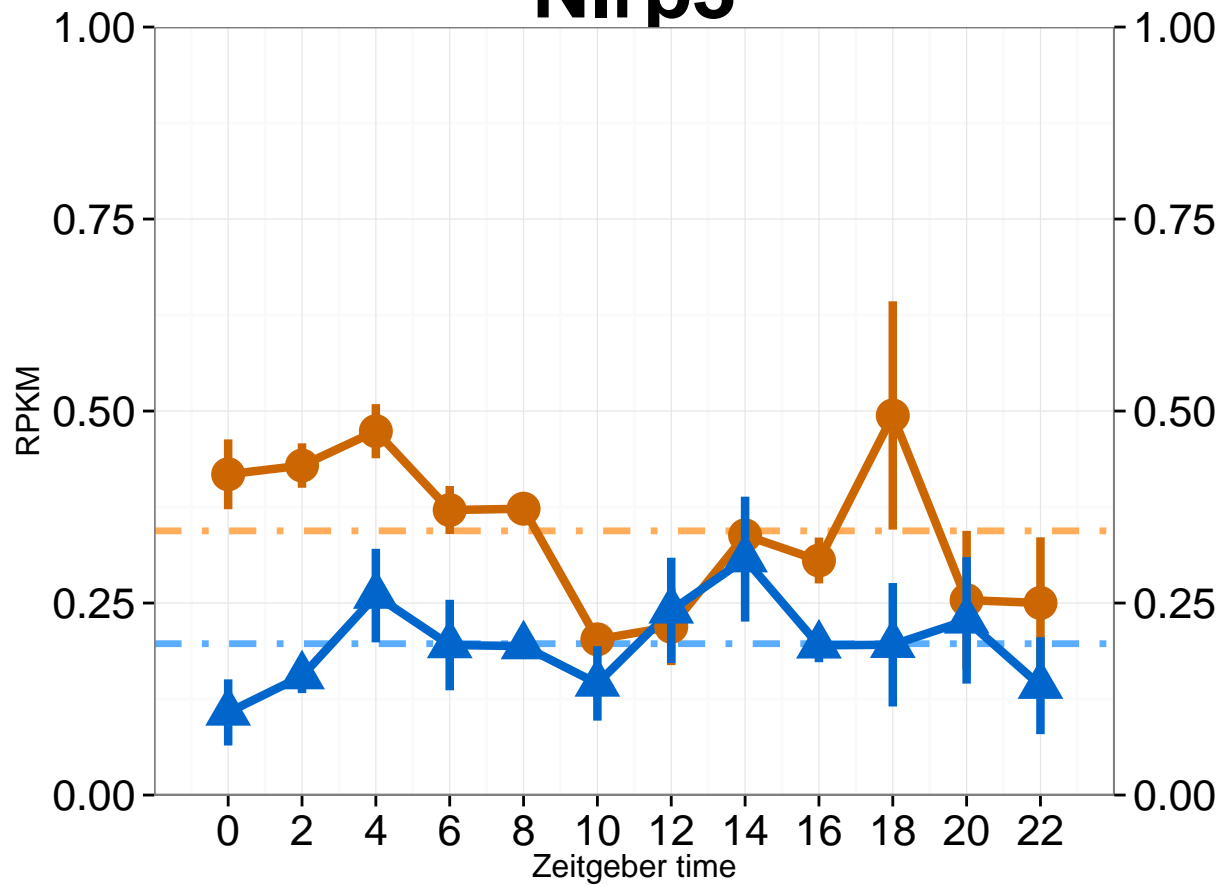

## Nlrp3

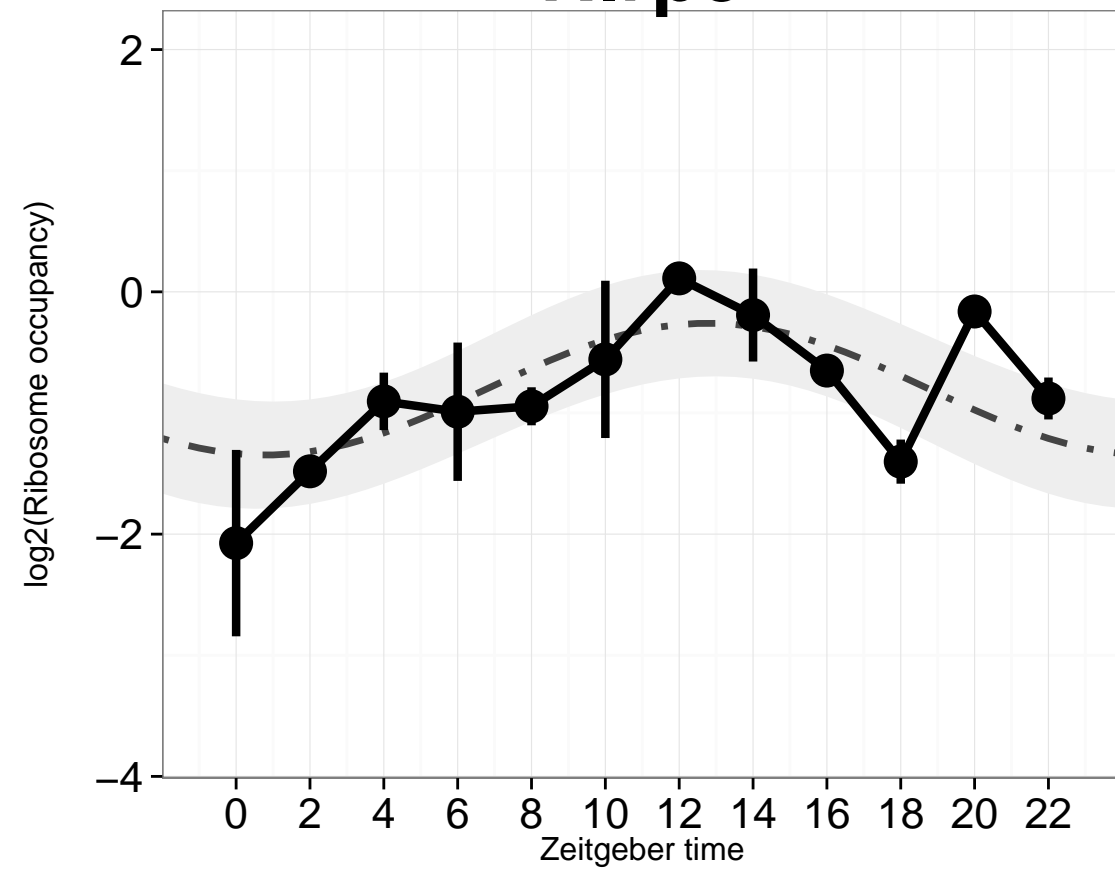

Supplement: Supplementary file 12748 [file 1]

## Gpc4

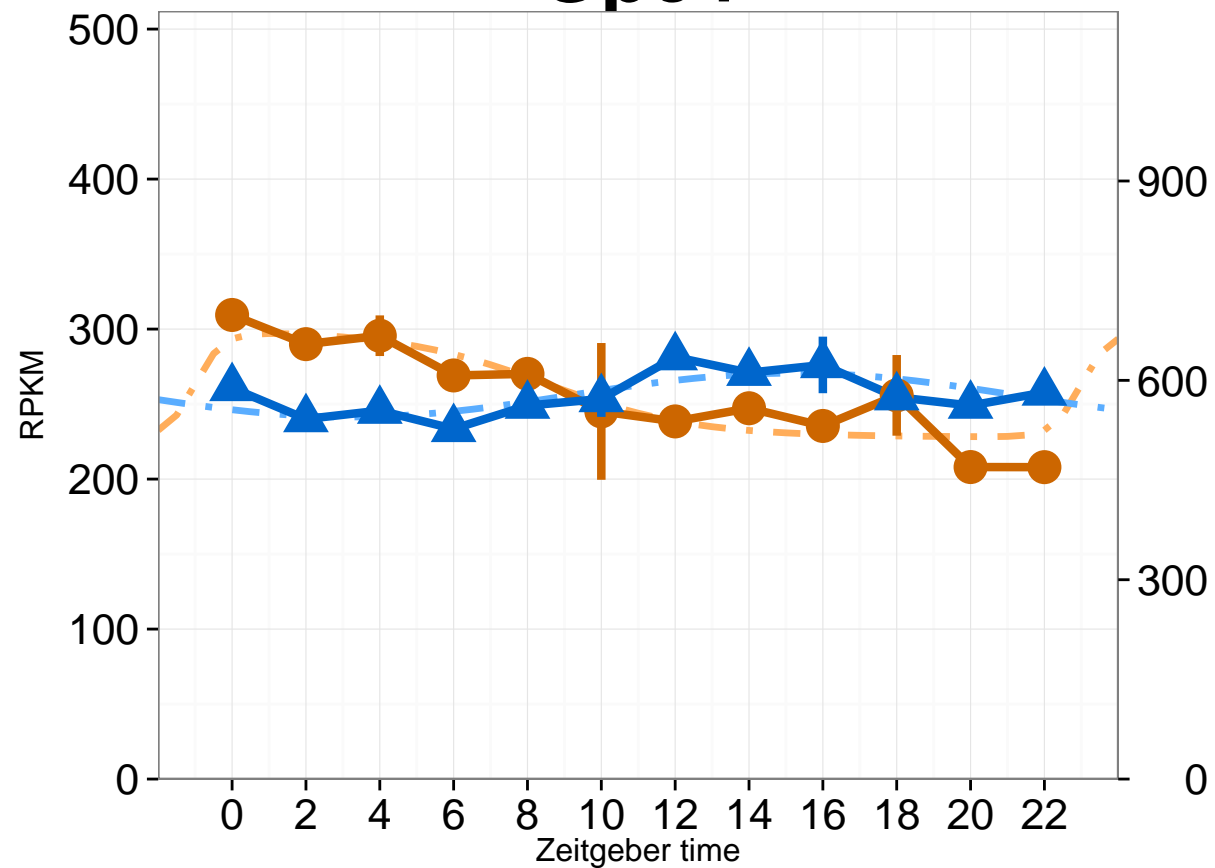

## Gpc4

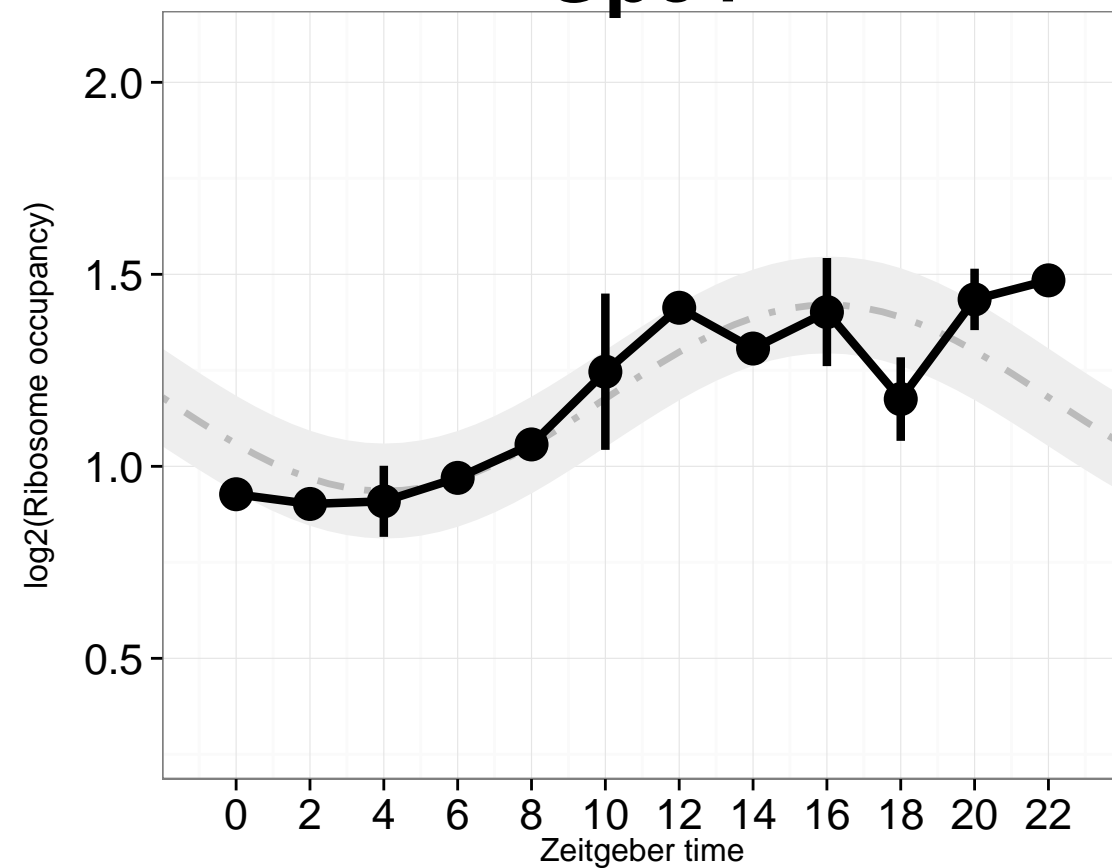

Supplement: Supplementary file 12749 [file 1]

## Lypla1

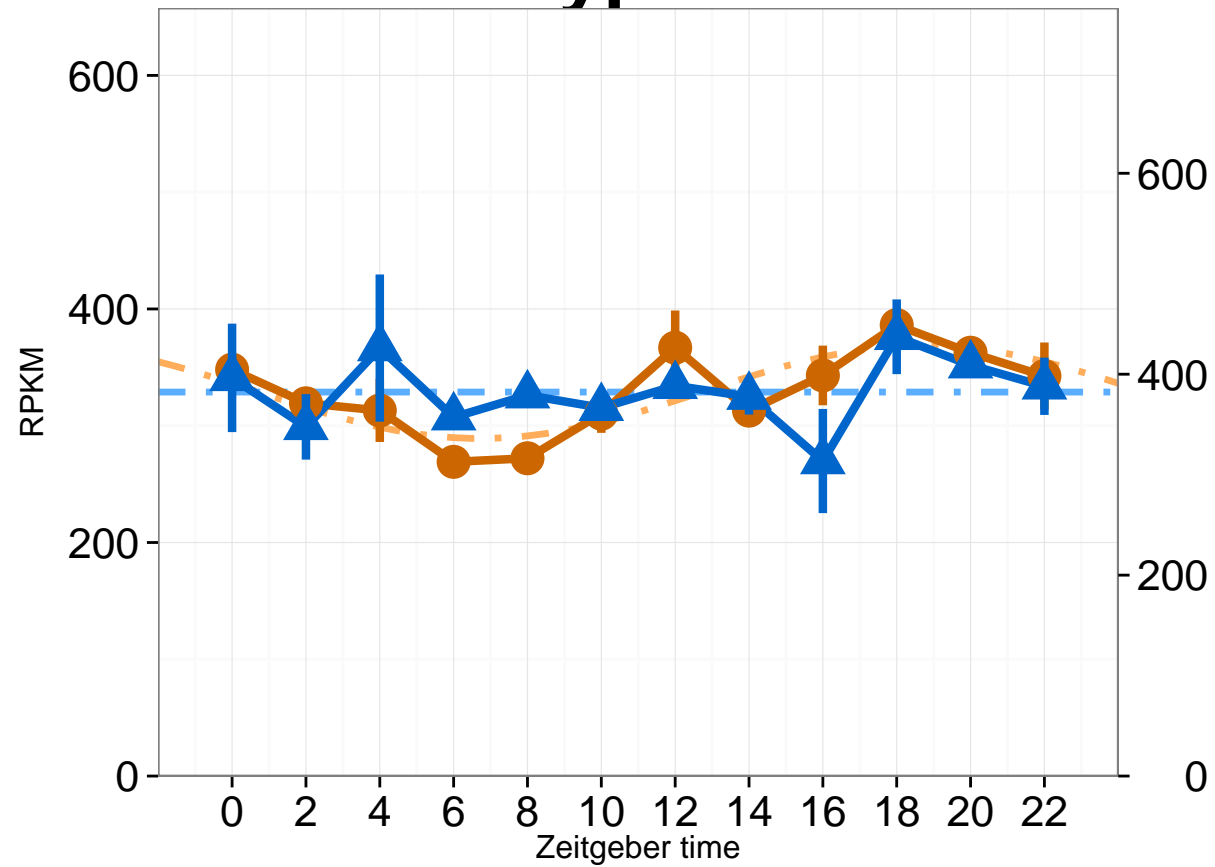

## Lypla1

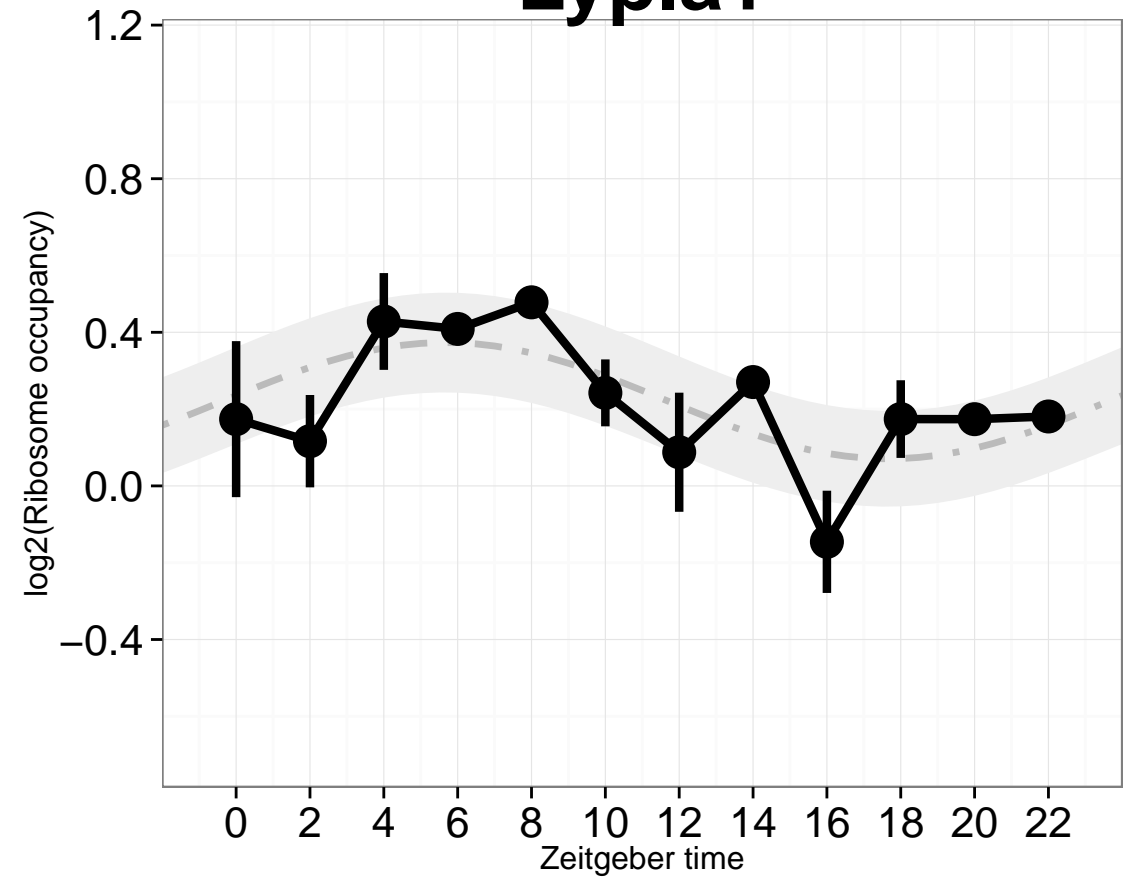

Supplement: Supplementary file 12750 [file 1]

# F2r11

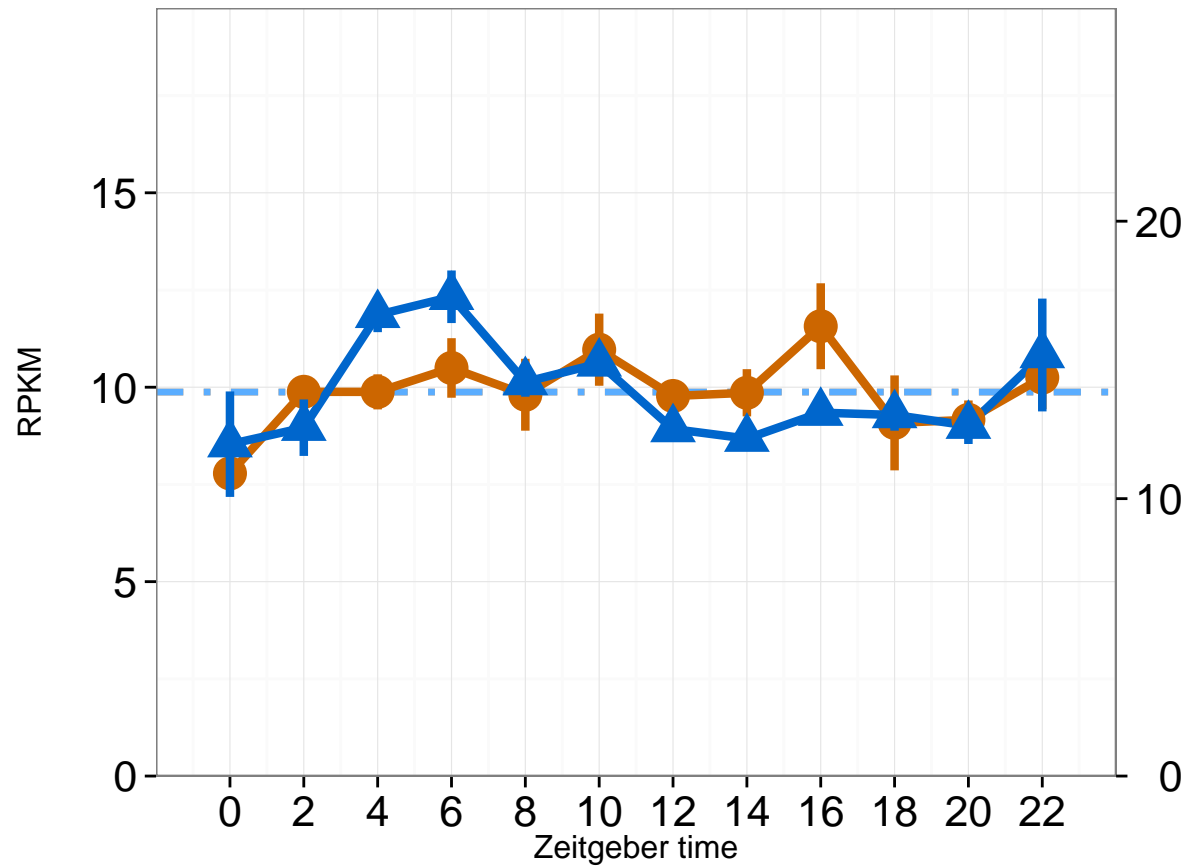

# F2r11

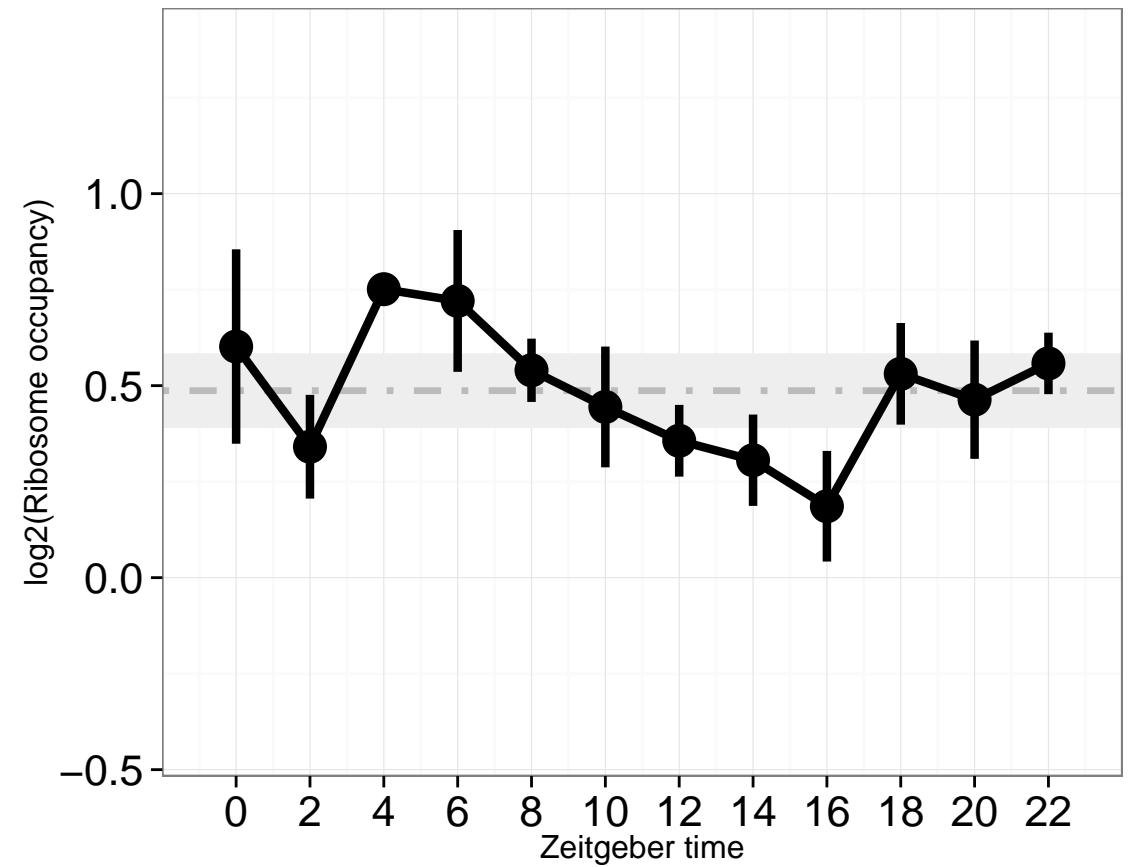

Supplement: Supplementary file 12751 [file 1]

## Nav1

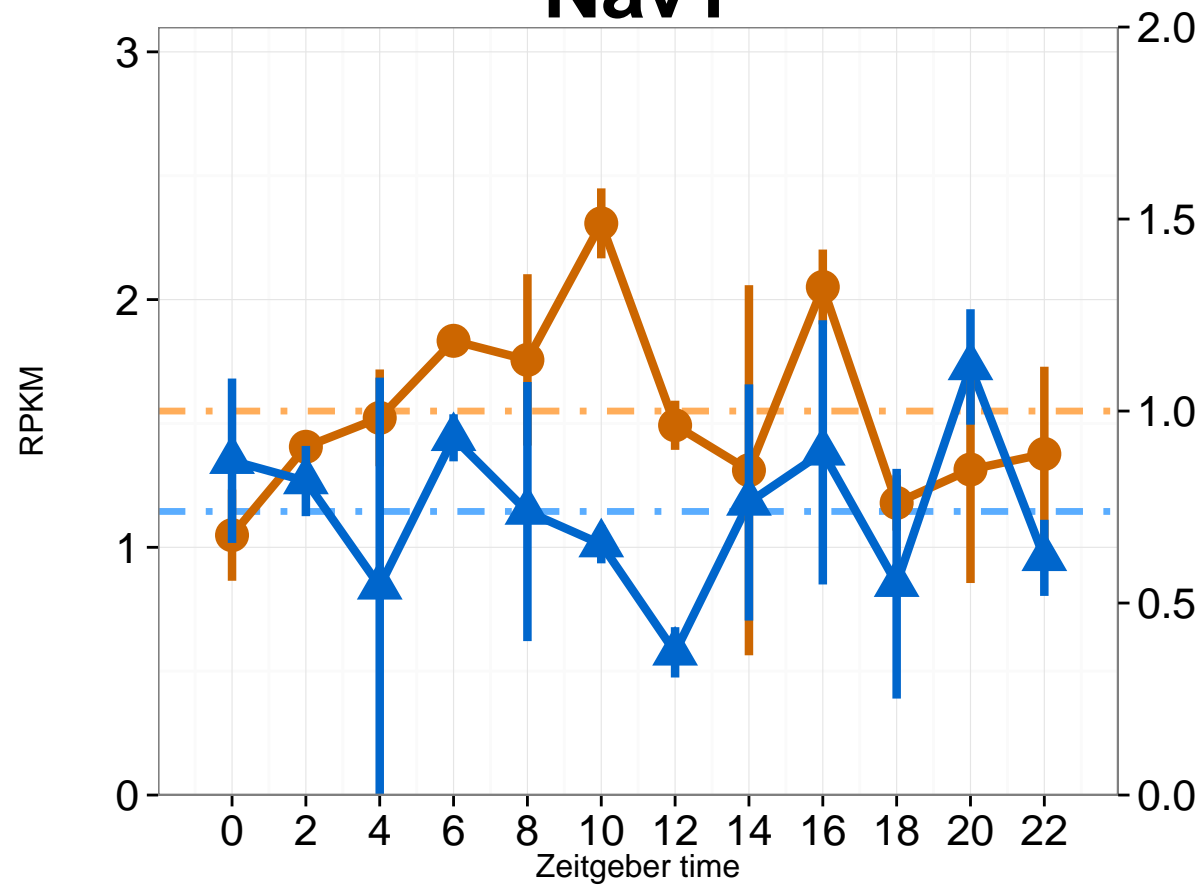

## Nav1

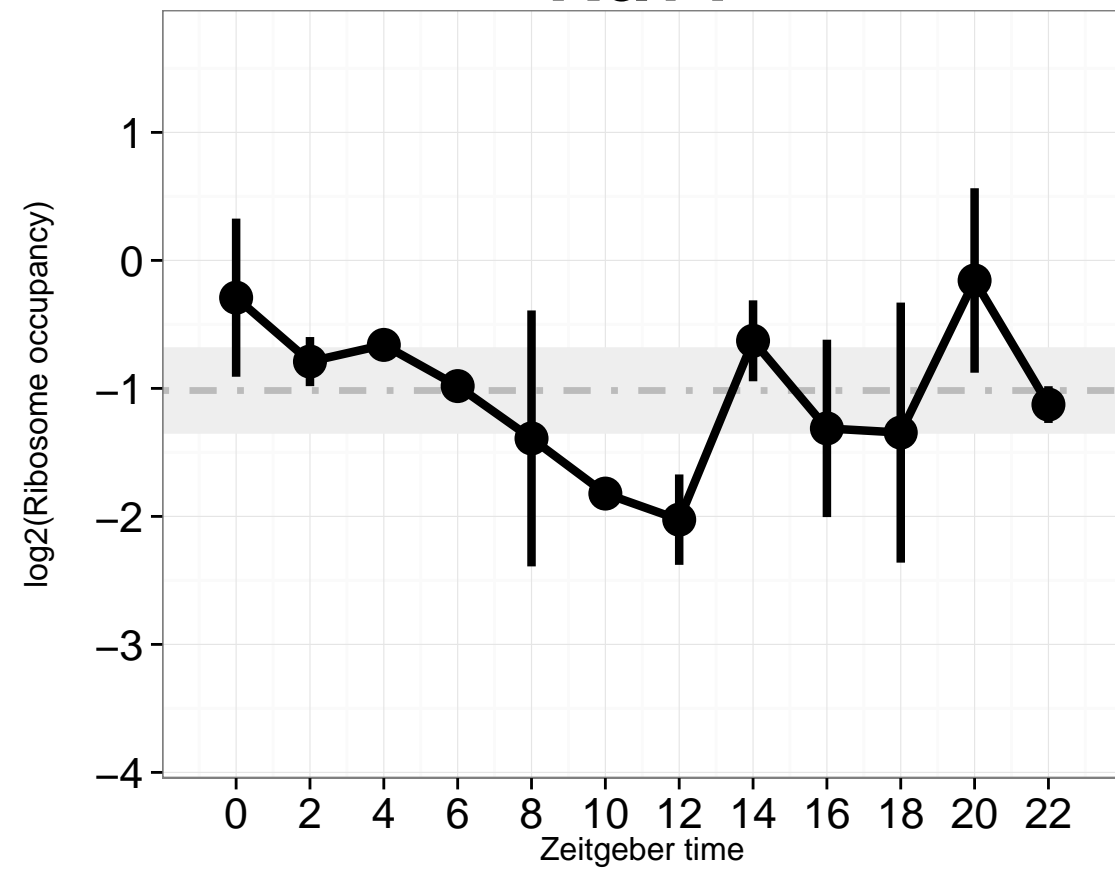

Supplement: Supplementary file 12752 [file 1]

# Bhlhb9

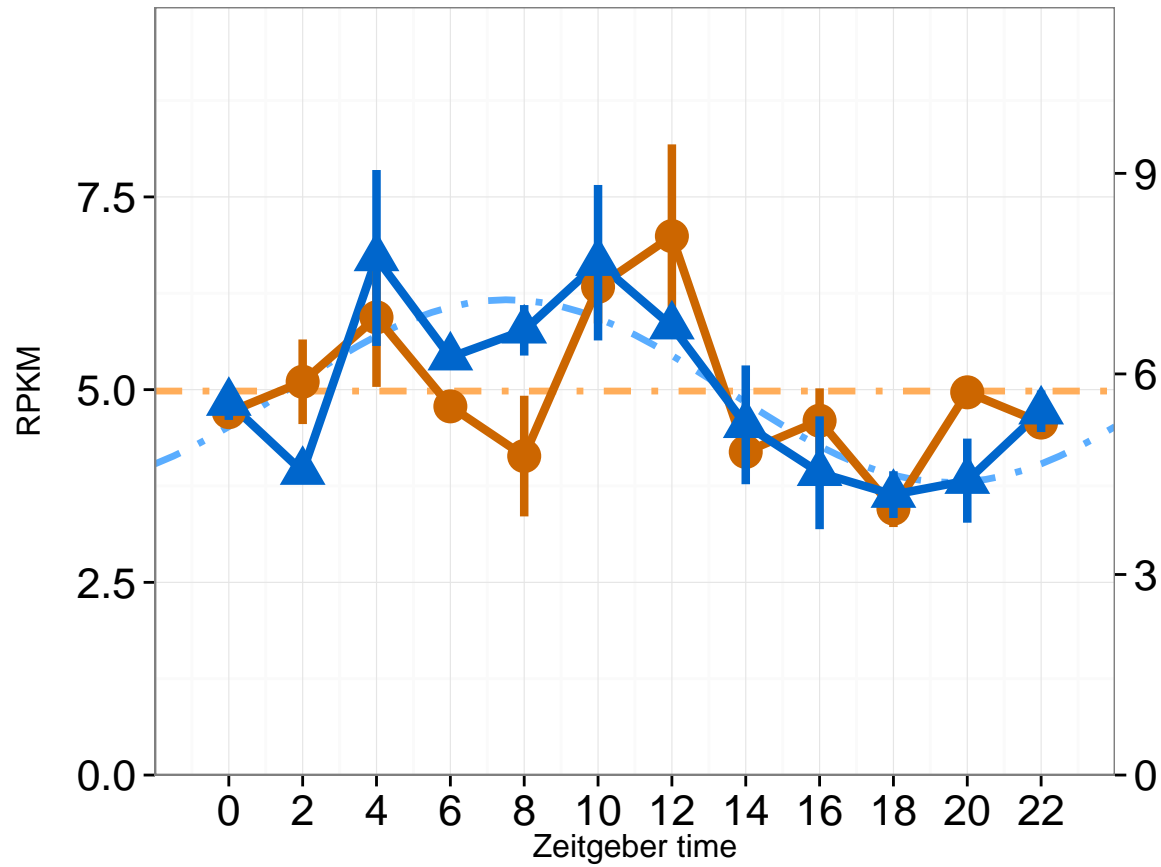

# Bhlhb9

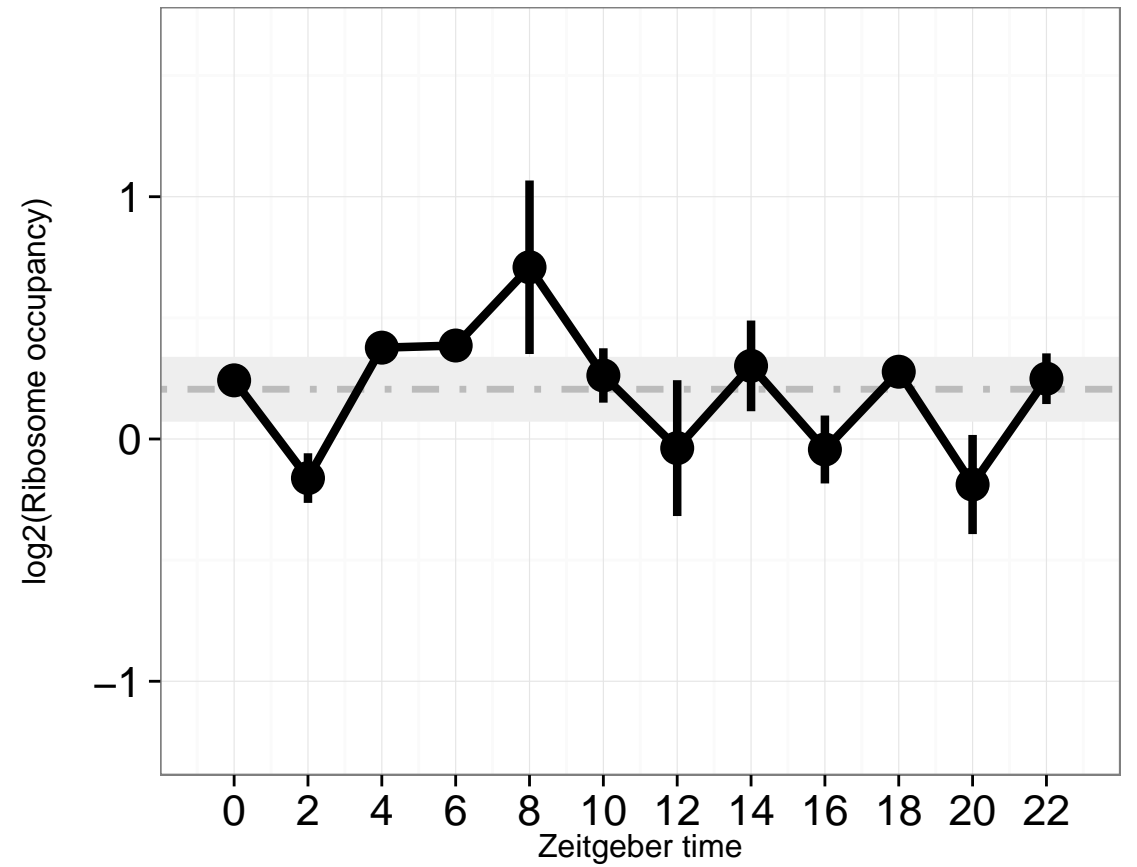

Supplement: Supplementary file 12753 [file 1]

# Spg21

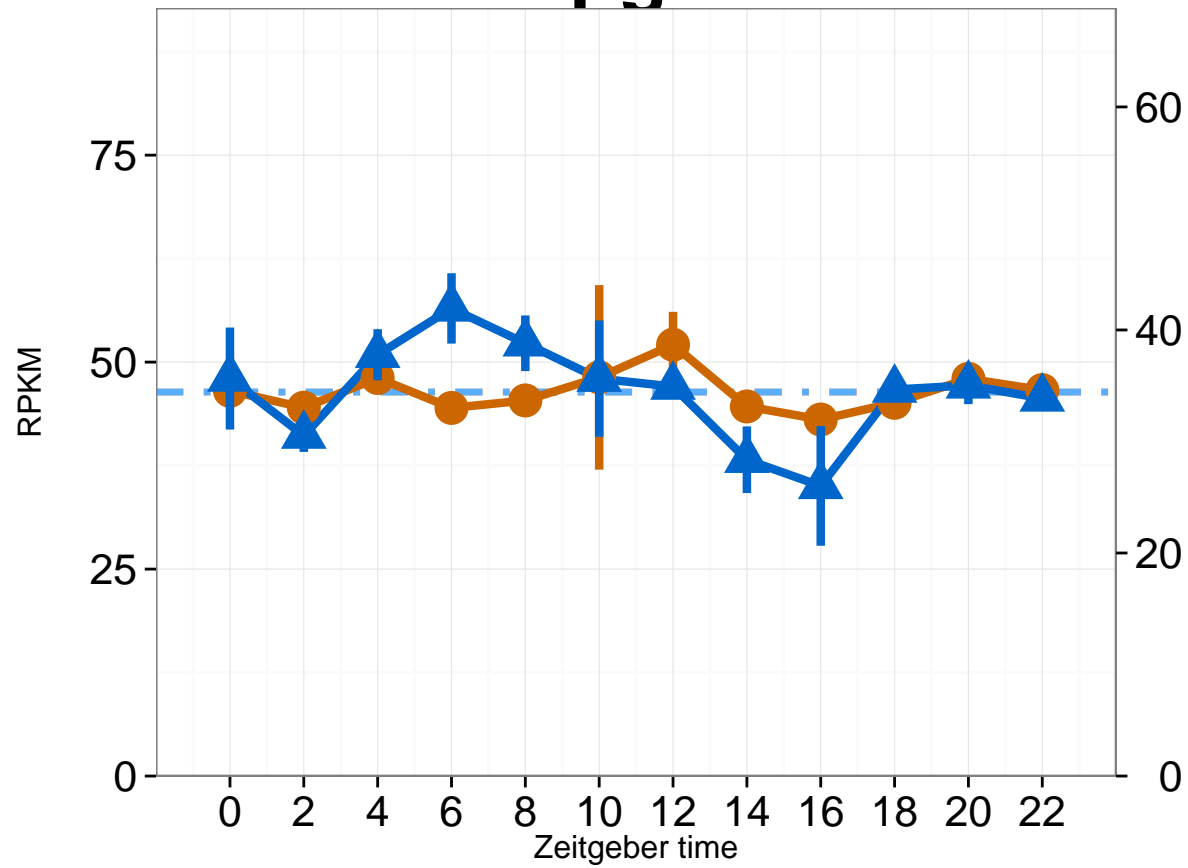

# Spg21

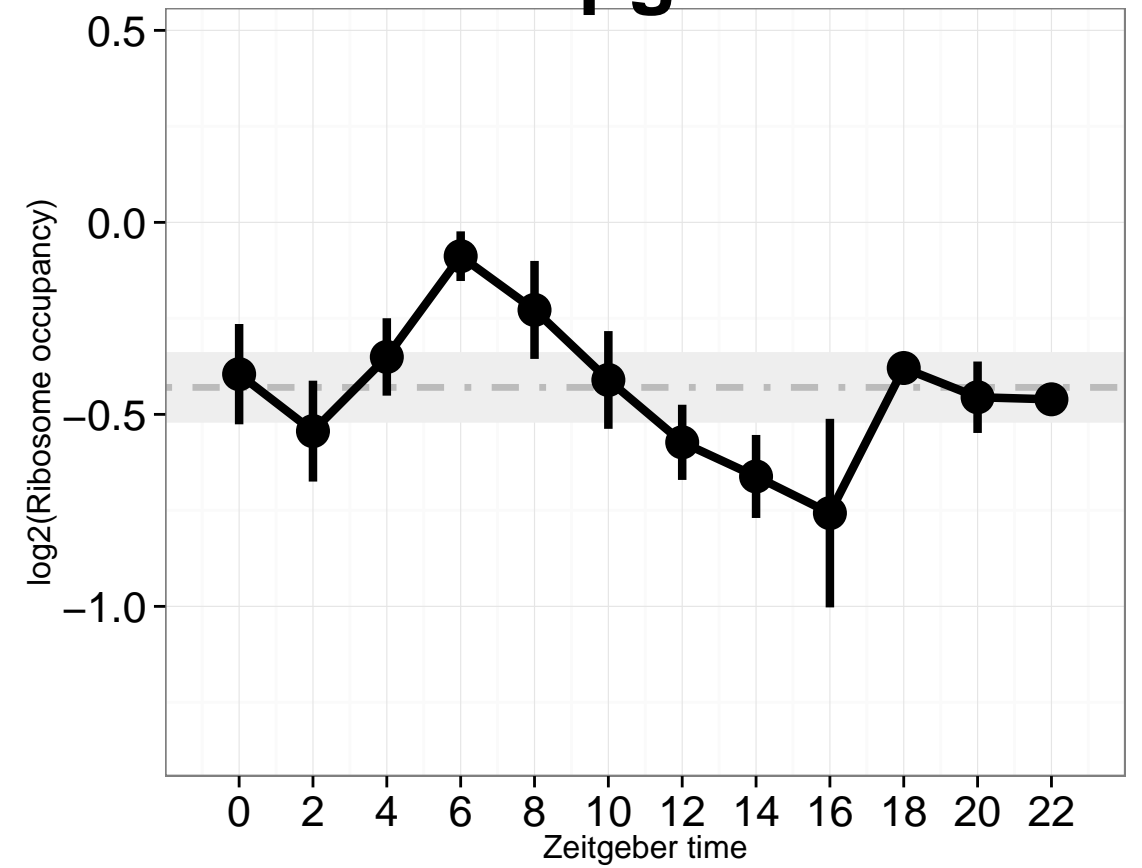

Supplement: Supplementary file 12754 [file 1]

# Gm6712

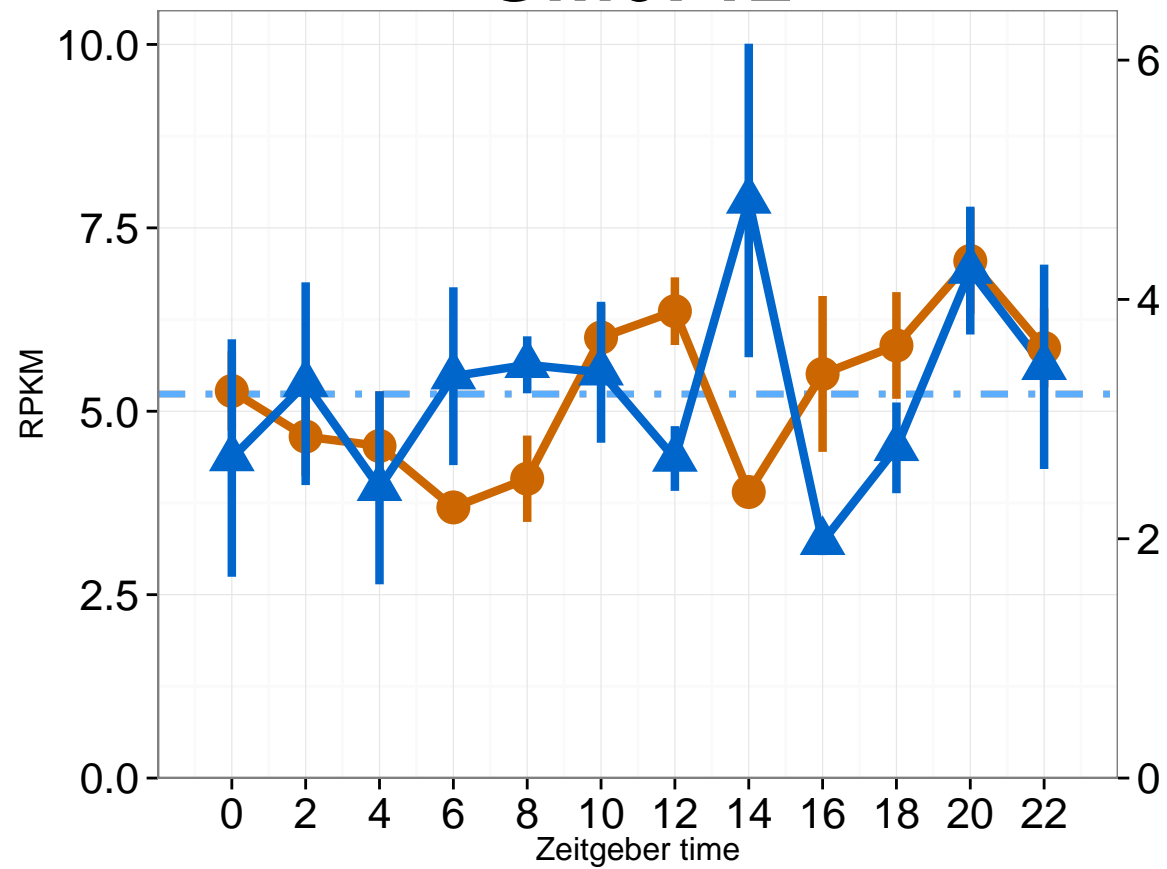

# Gm6712

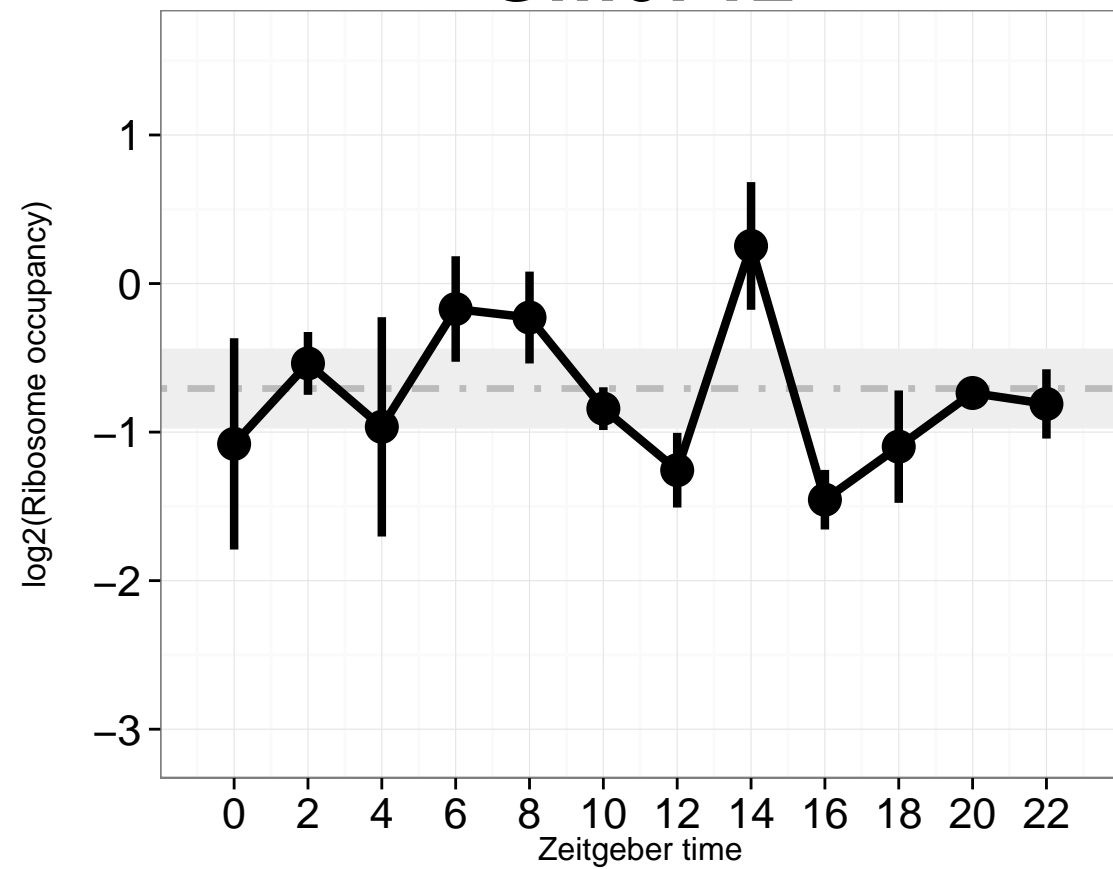

Supplement: Supplementary file 12755 [file 1]

# Tmigd1

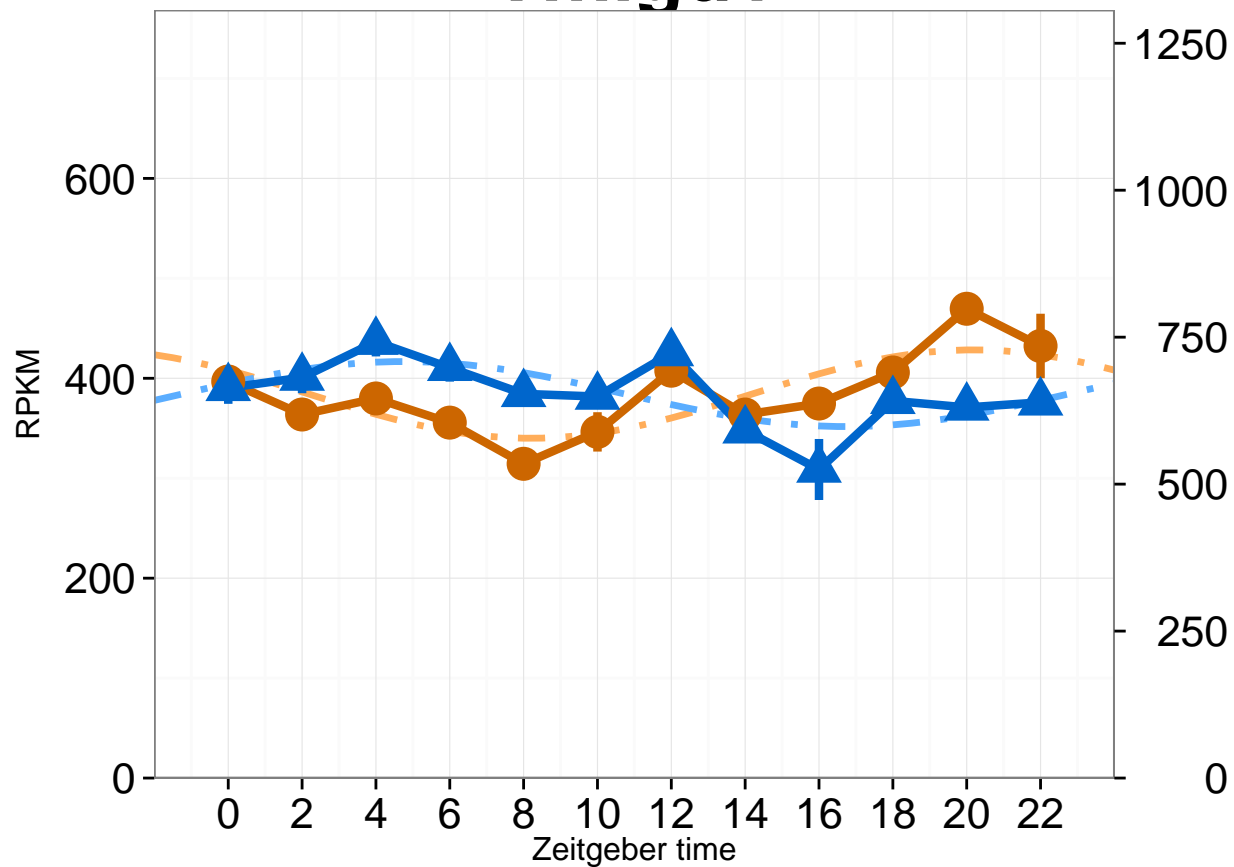

# Tmigd1

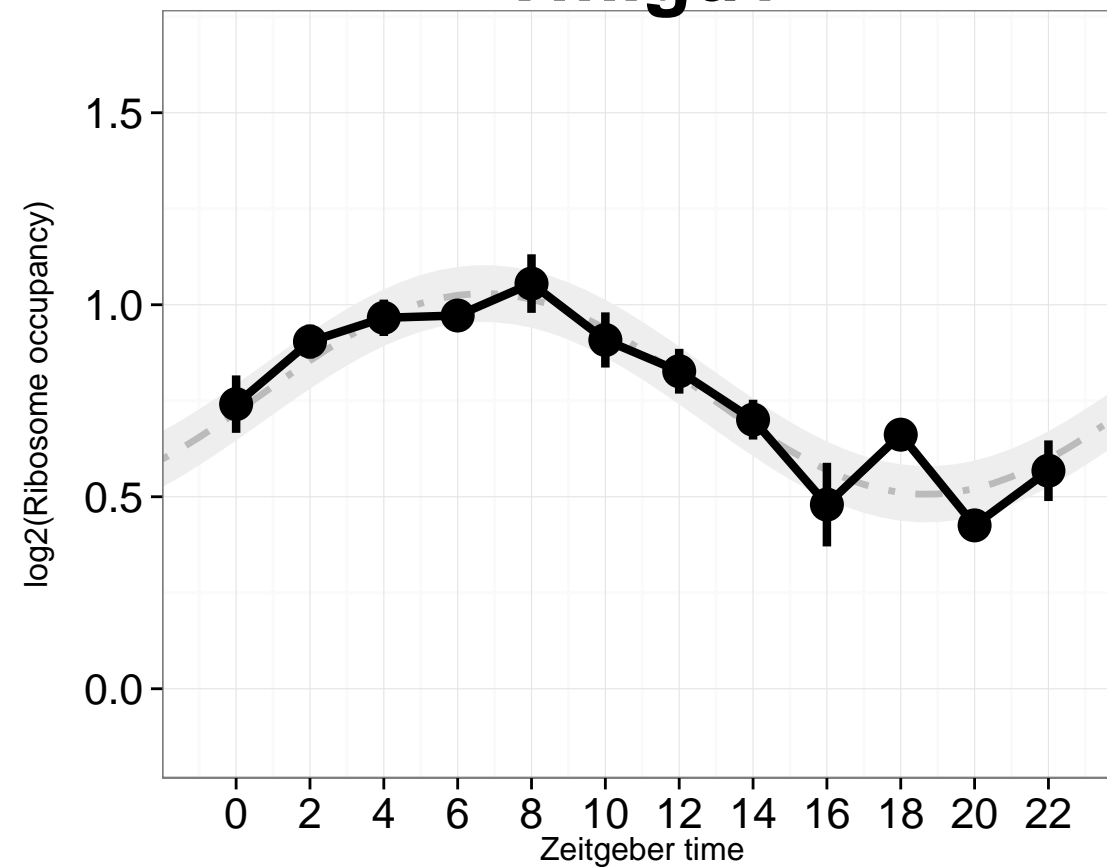

Supplement: Supplementary file 12756 [file 1]

## Krt5

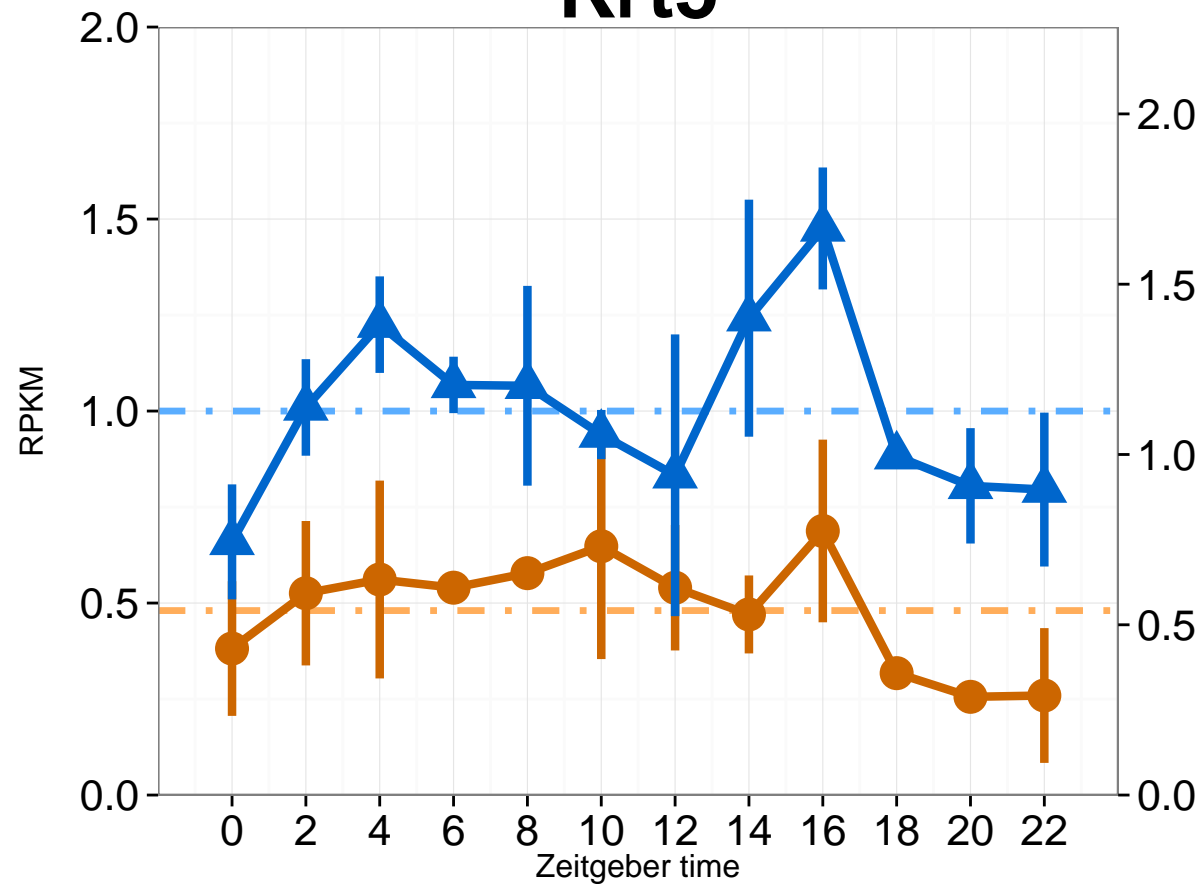

## Krt5

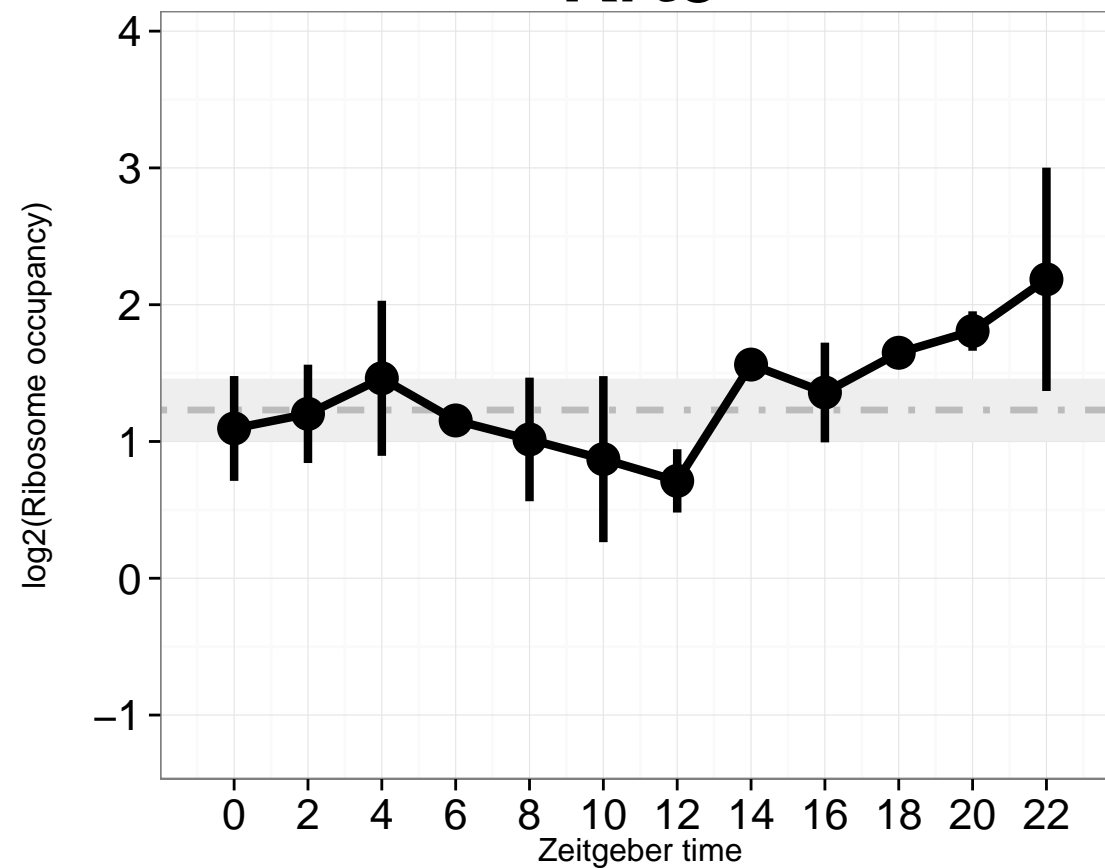

Supplement: Supplementary file 12757 [file 1]

Ccdc125

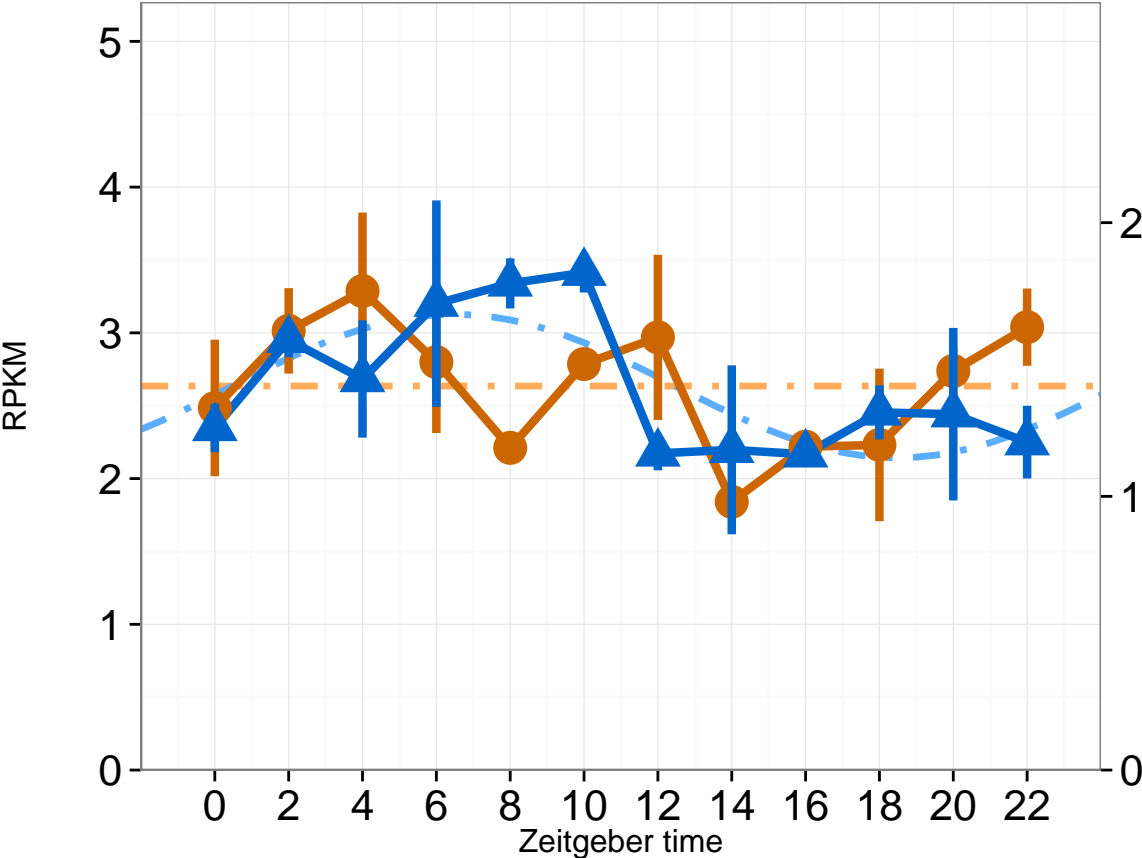

Ccdc125

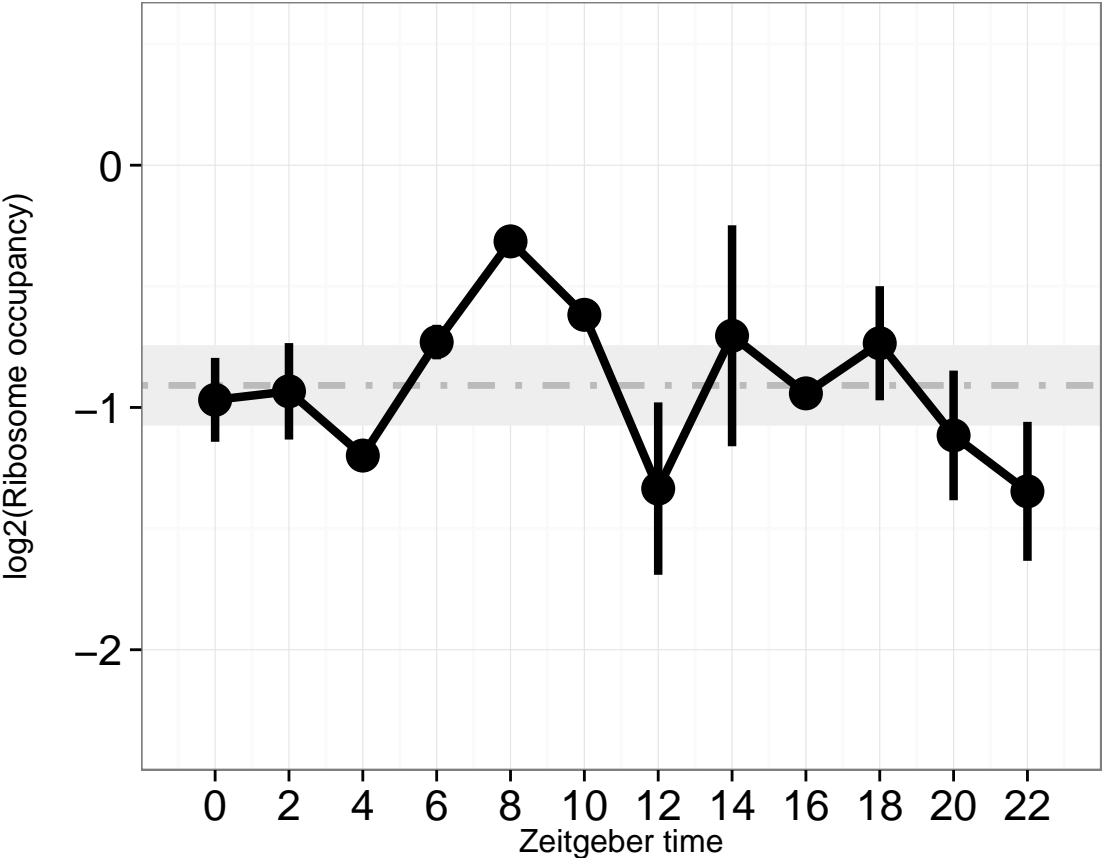

Supplement: Supplementary file 12758 [file 1]

## Aoc3

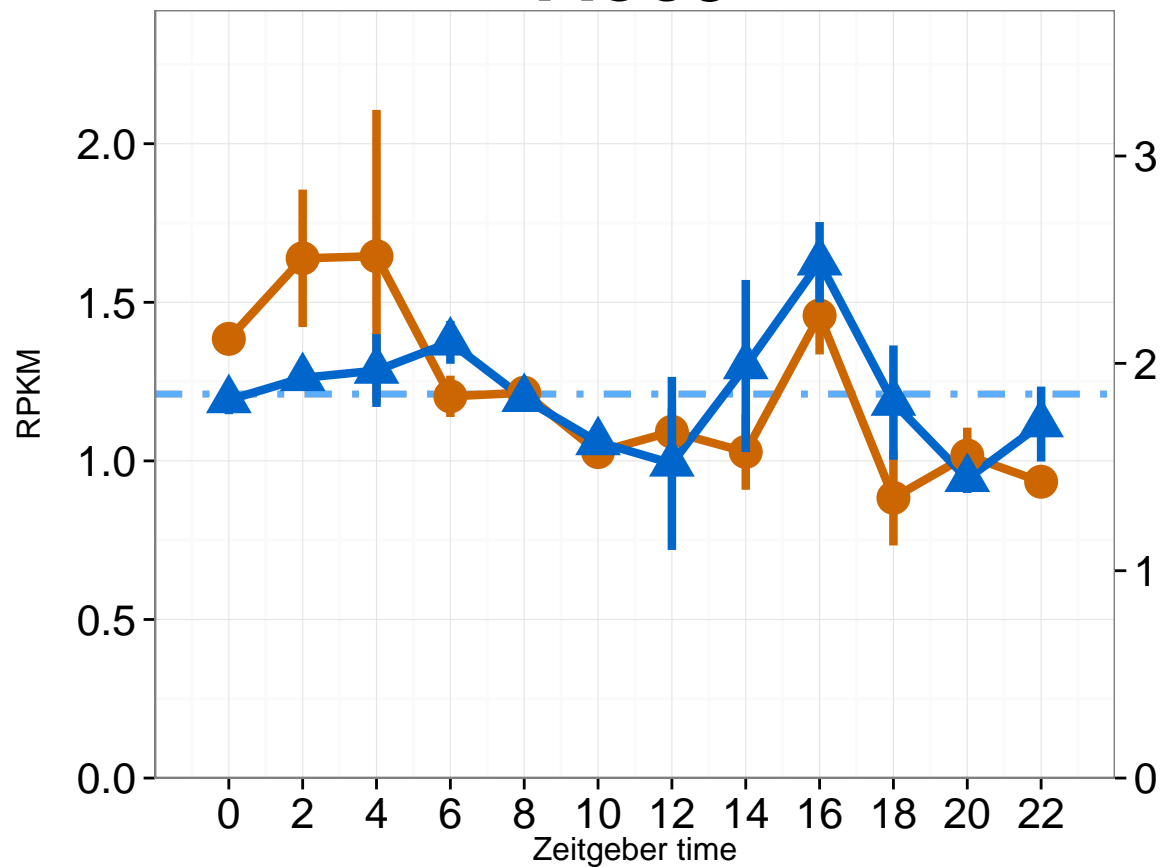

## Aoc3

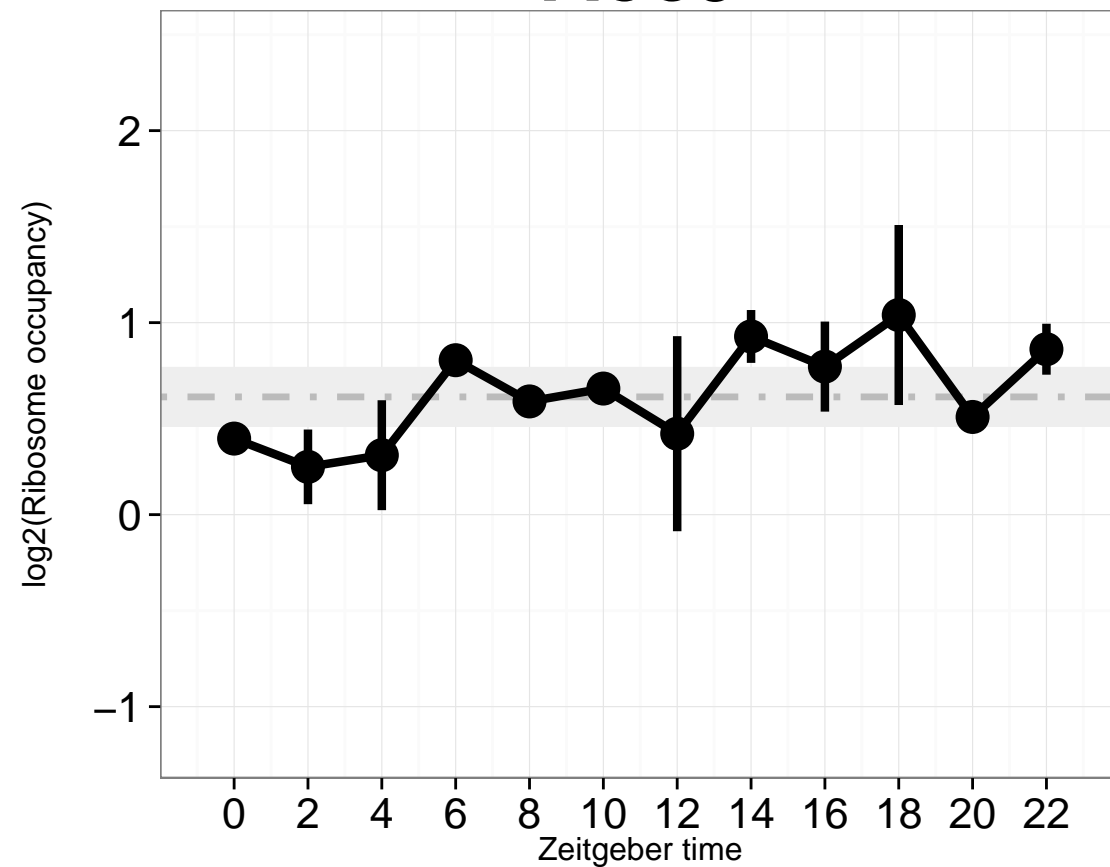

Supplement: Supplementary file 12759 [file 1]

# Ints9

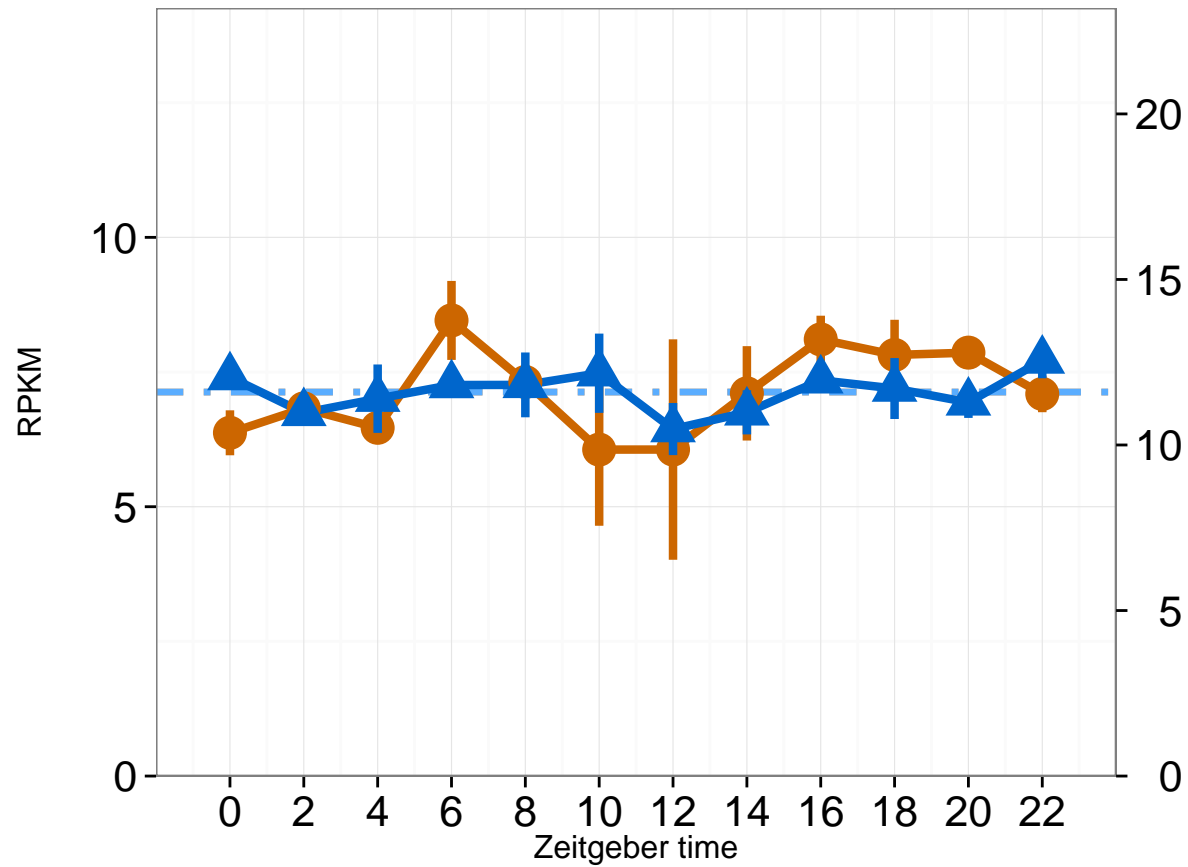

# Ints9

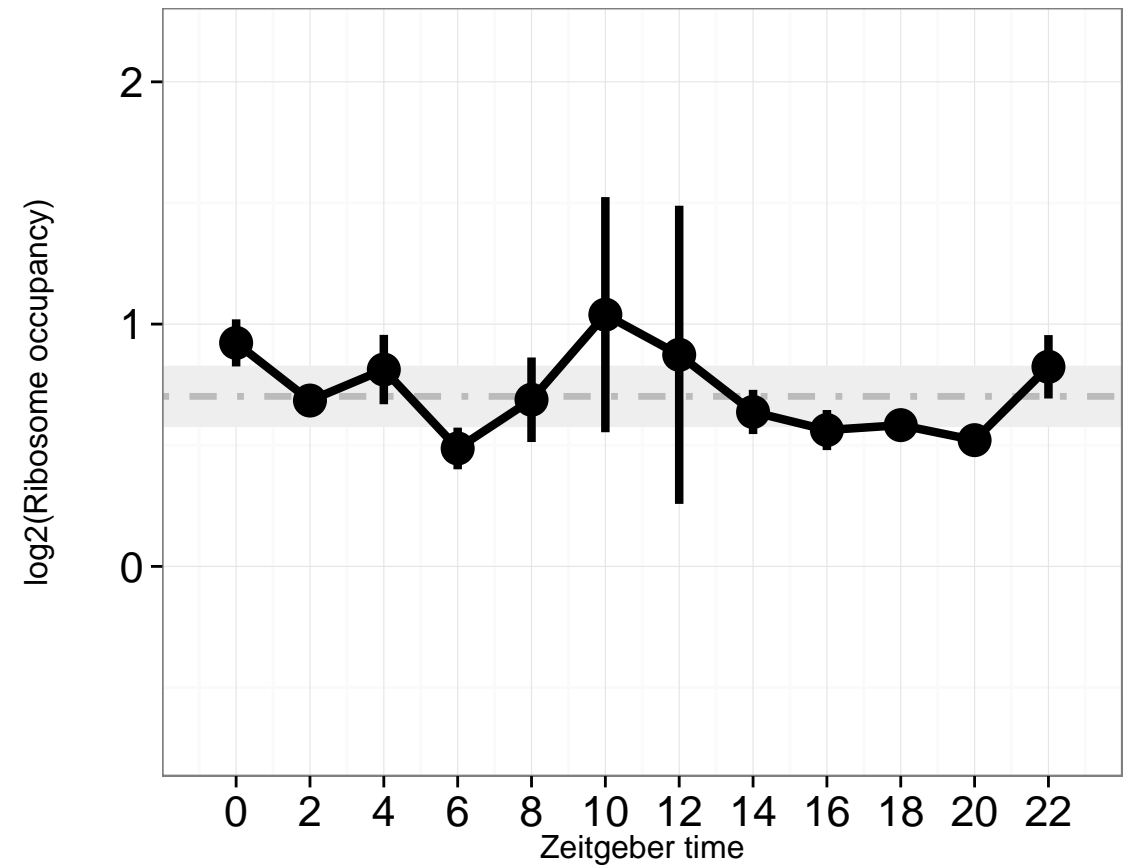

Supplement: Supplementary file 12760 [file 1]

## Csnk2a2

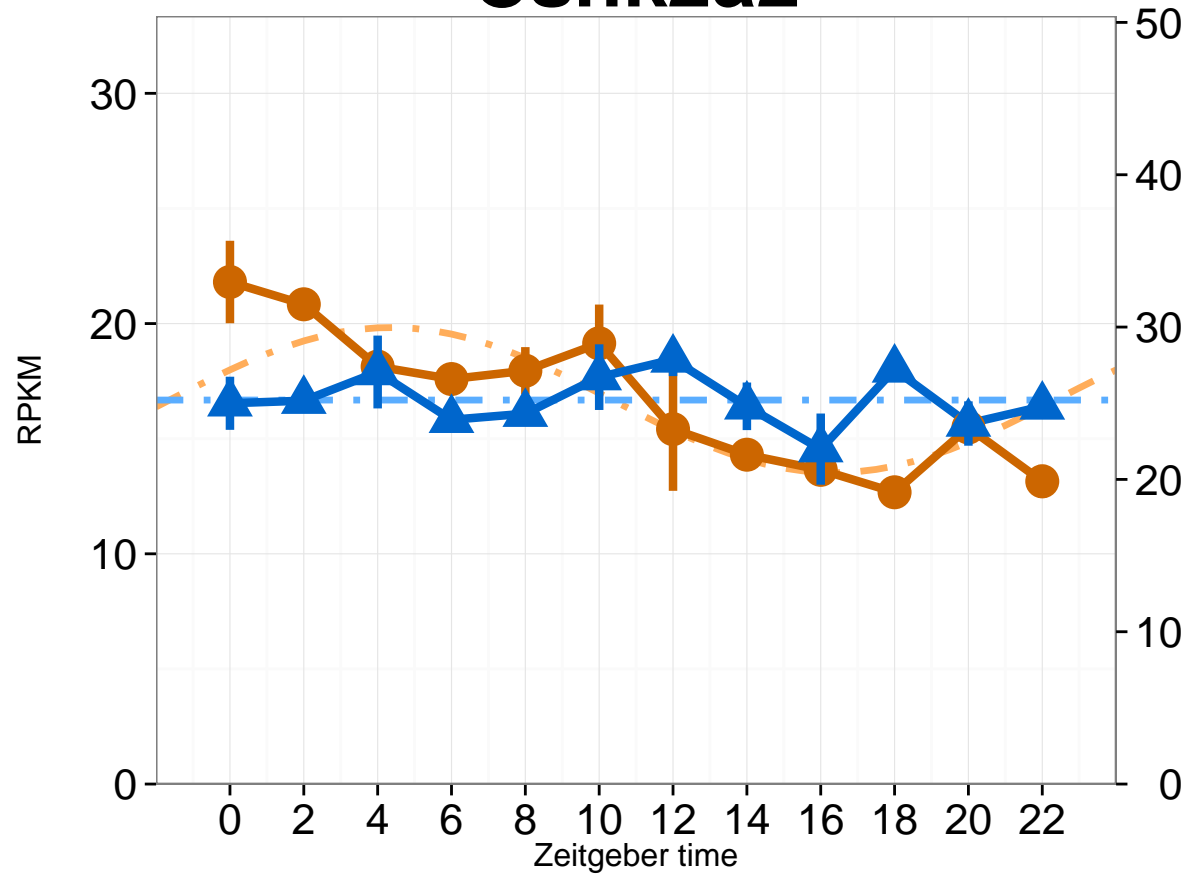

## Csnk2a2

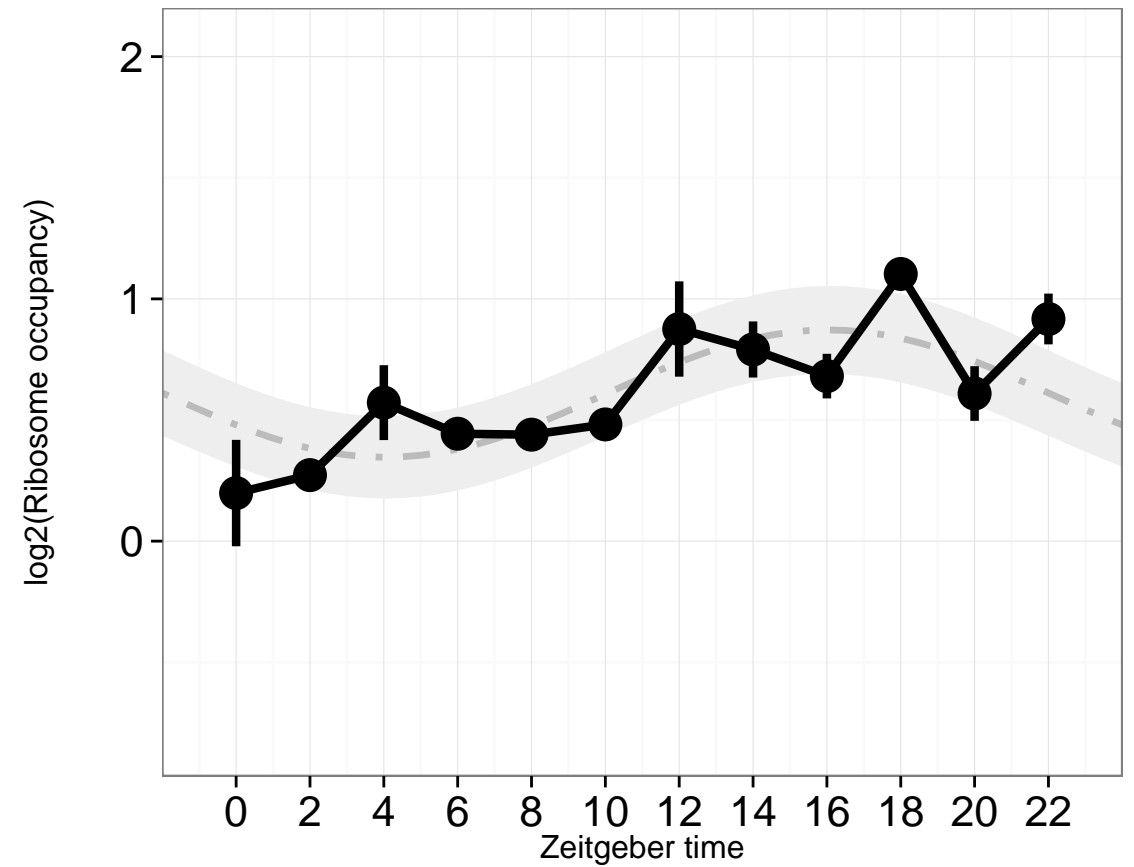

Supplement: Supplementary file 12761 [file 1]

# Rpl10a

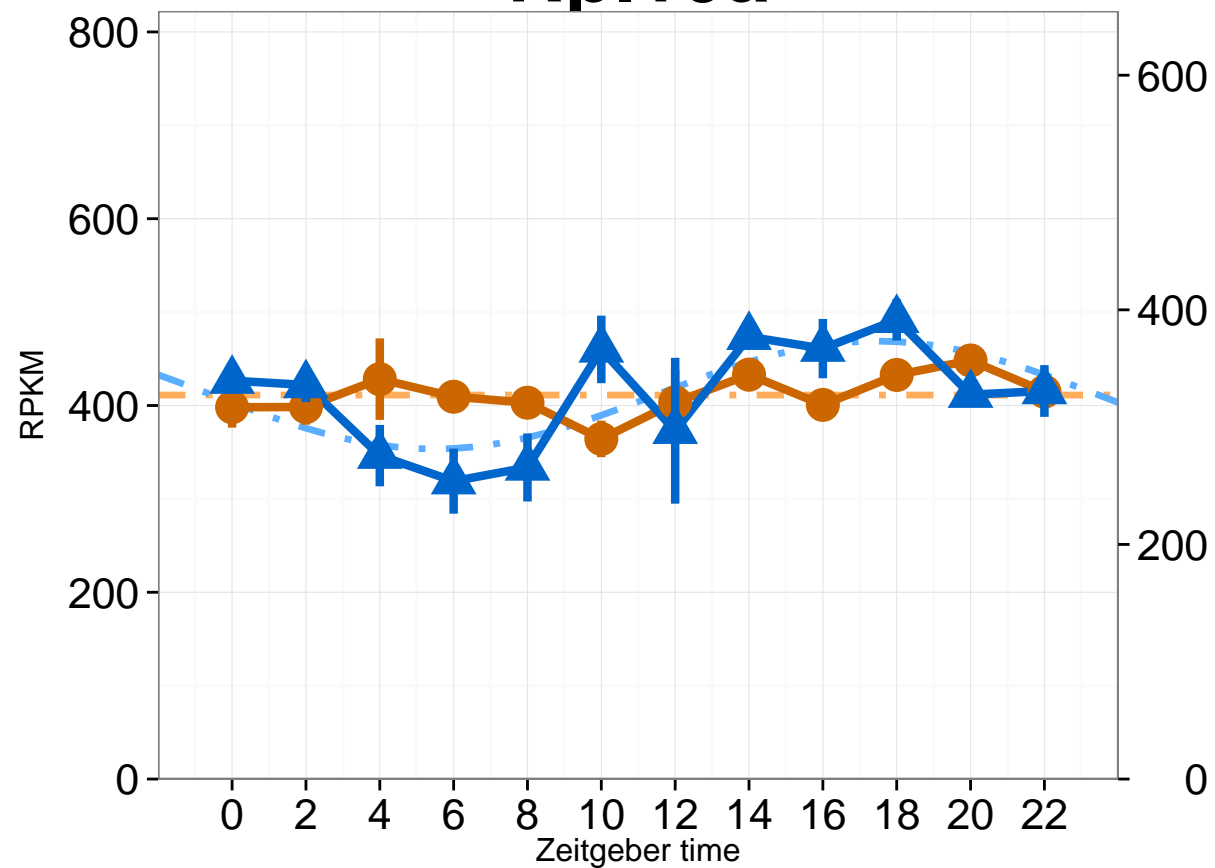

# Rpl10a

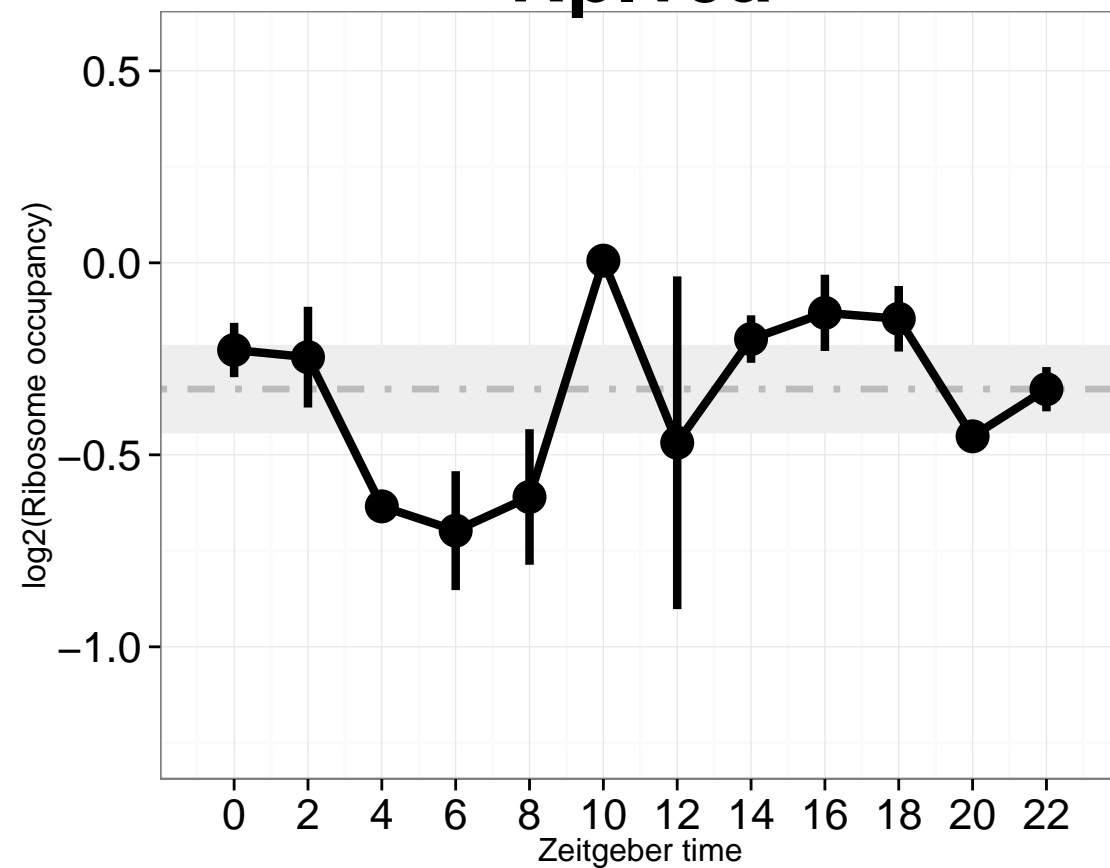

Supplement: Supplementary file 12762 [file 1]

## BC018507

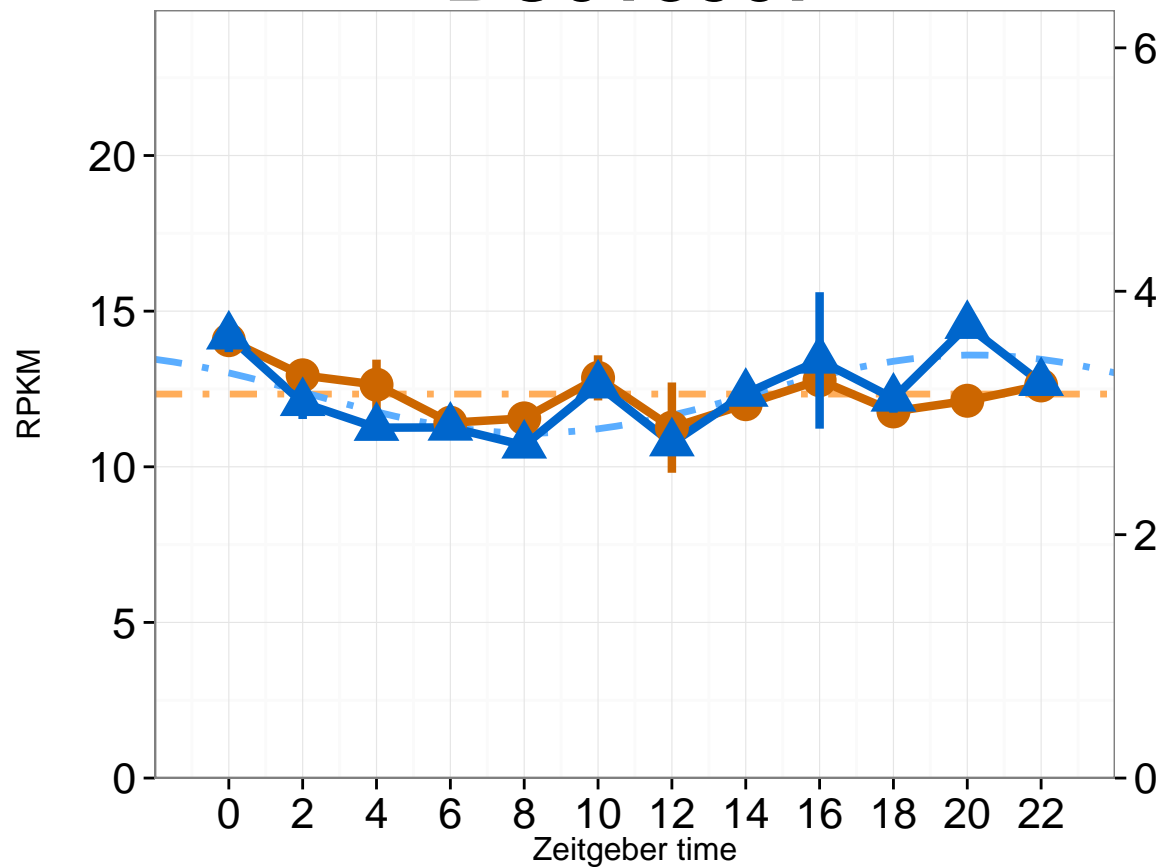

## BC018507

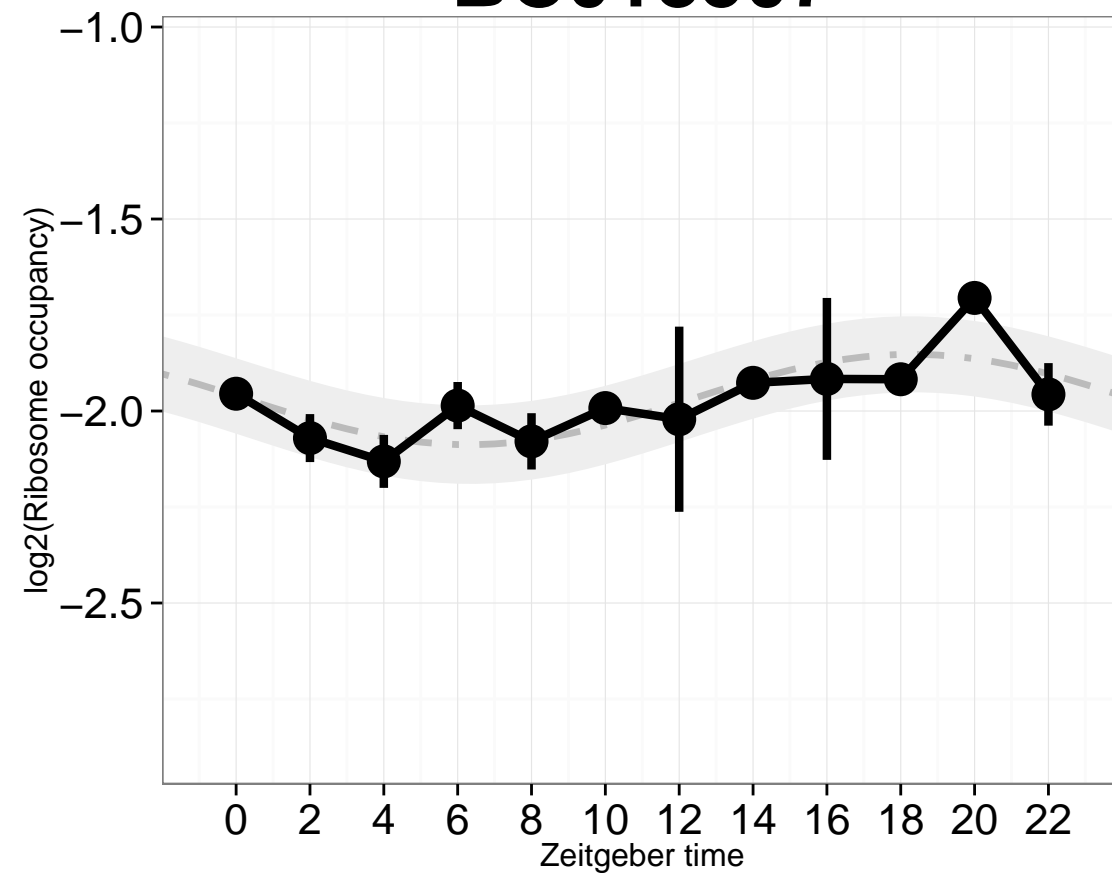

Supplement: Supplementary file 12763 [file 1]

## Akap13

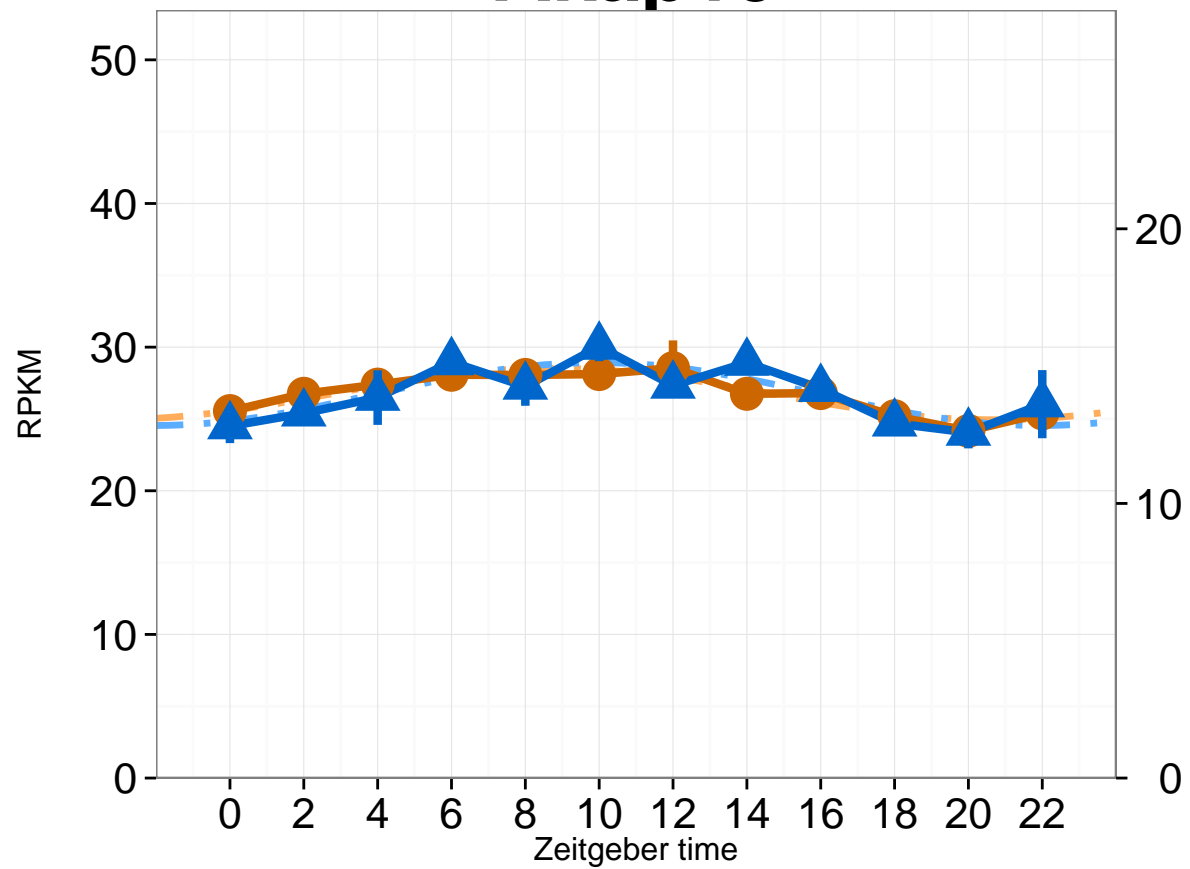

## Akap13

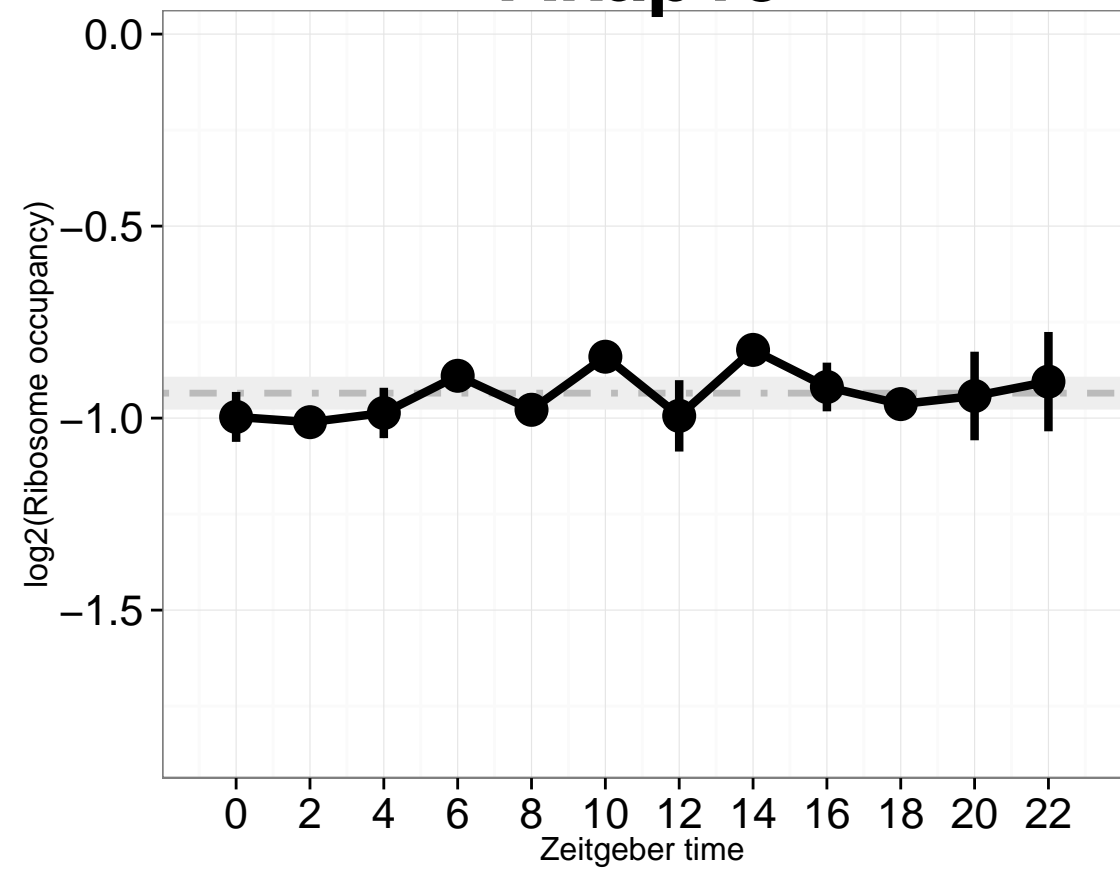

Supplement: Supplementary file 12764 [file 1]

## Ktn1

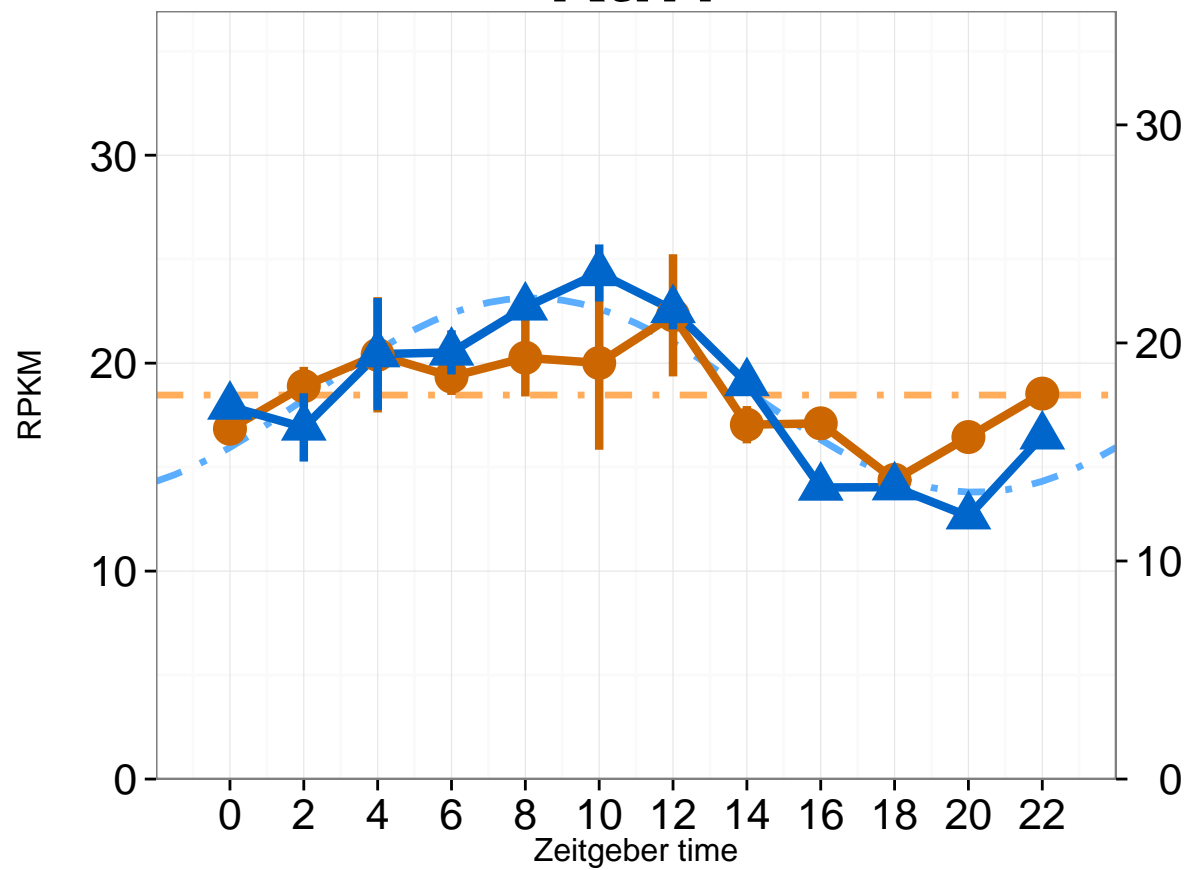

## Ktn1

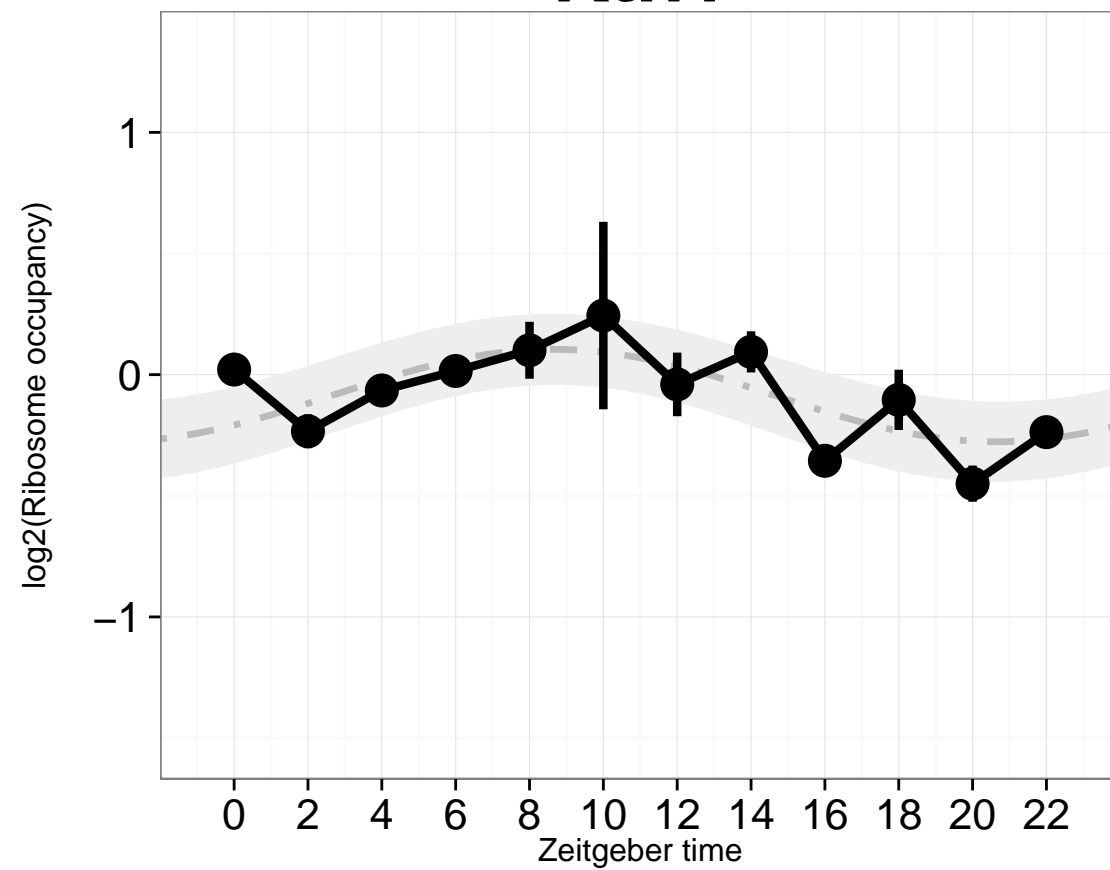

Supplement: Supplementary file 12765 [file 1]

## Nmd3

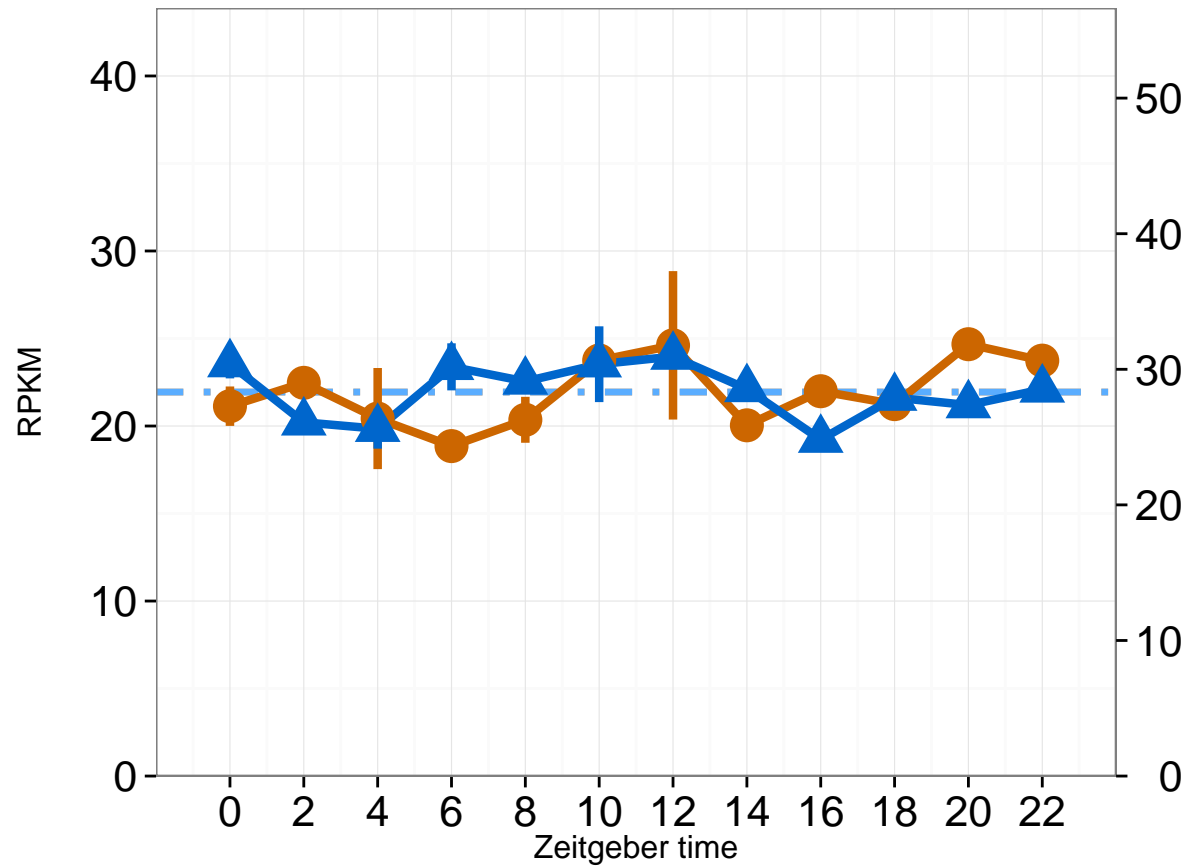

## Nmd3

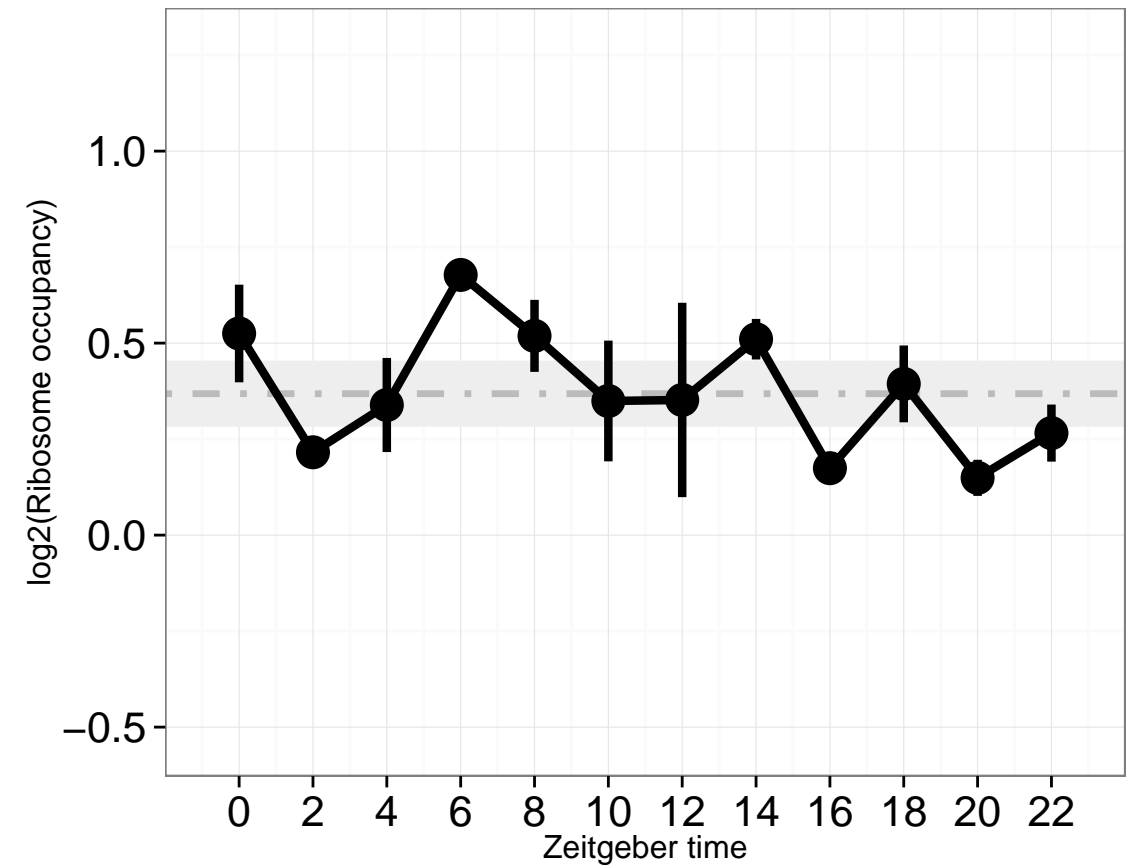

Supplement: Supplementary file 12766 [file 1]

## Mccc1

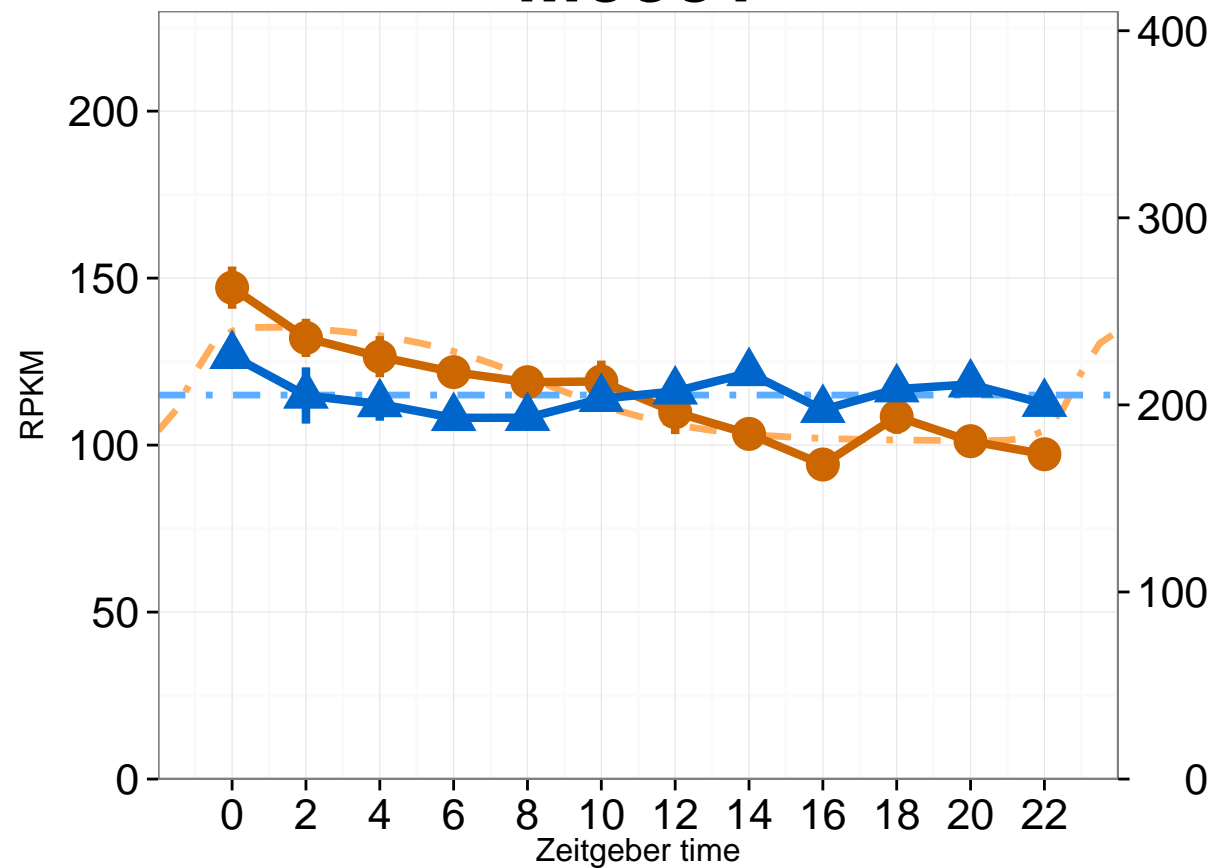

## Mccc1

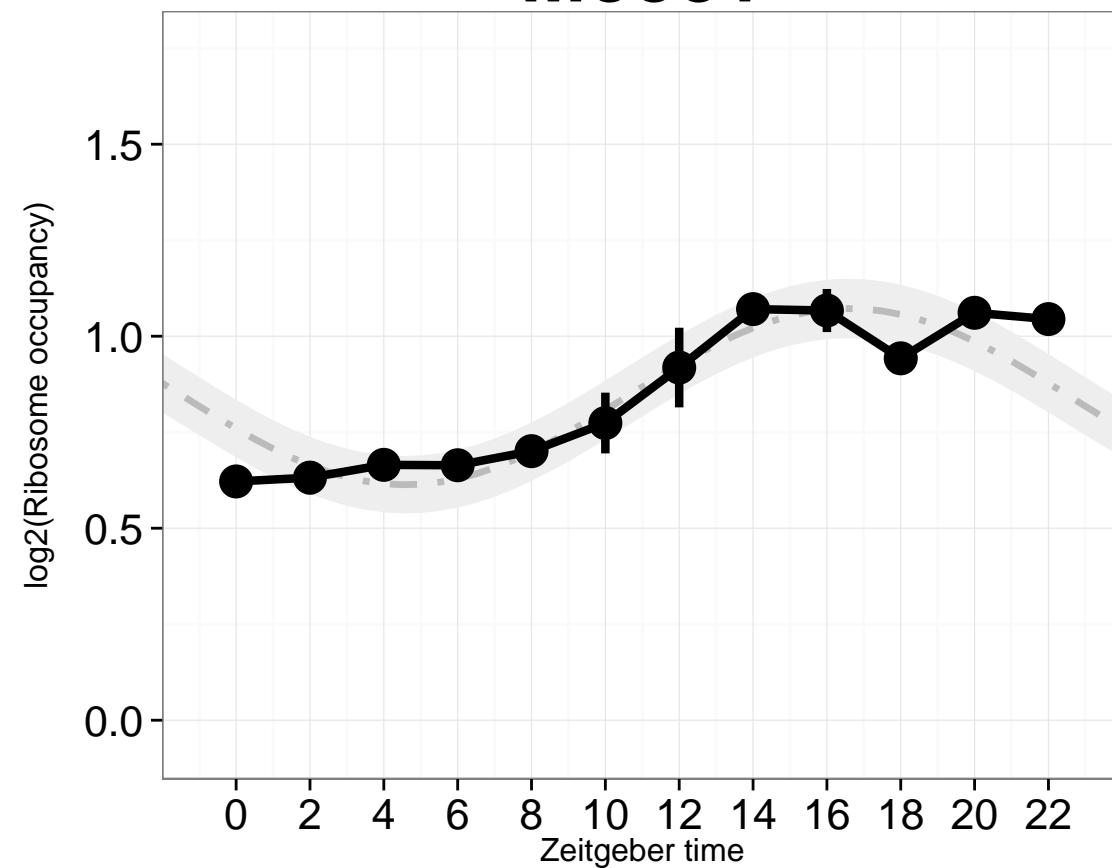

Supplement: Supplementary file 12767 [file 1]

## Usp30

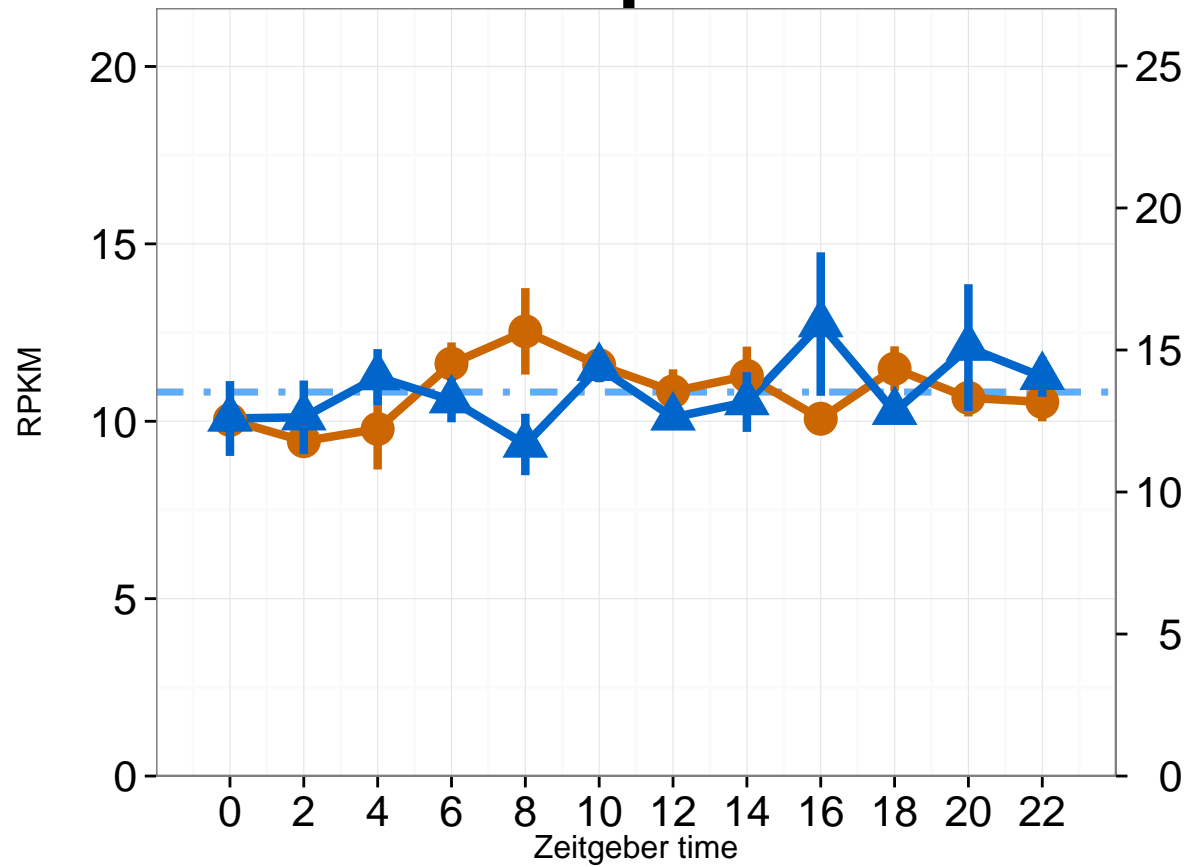

## Usp30

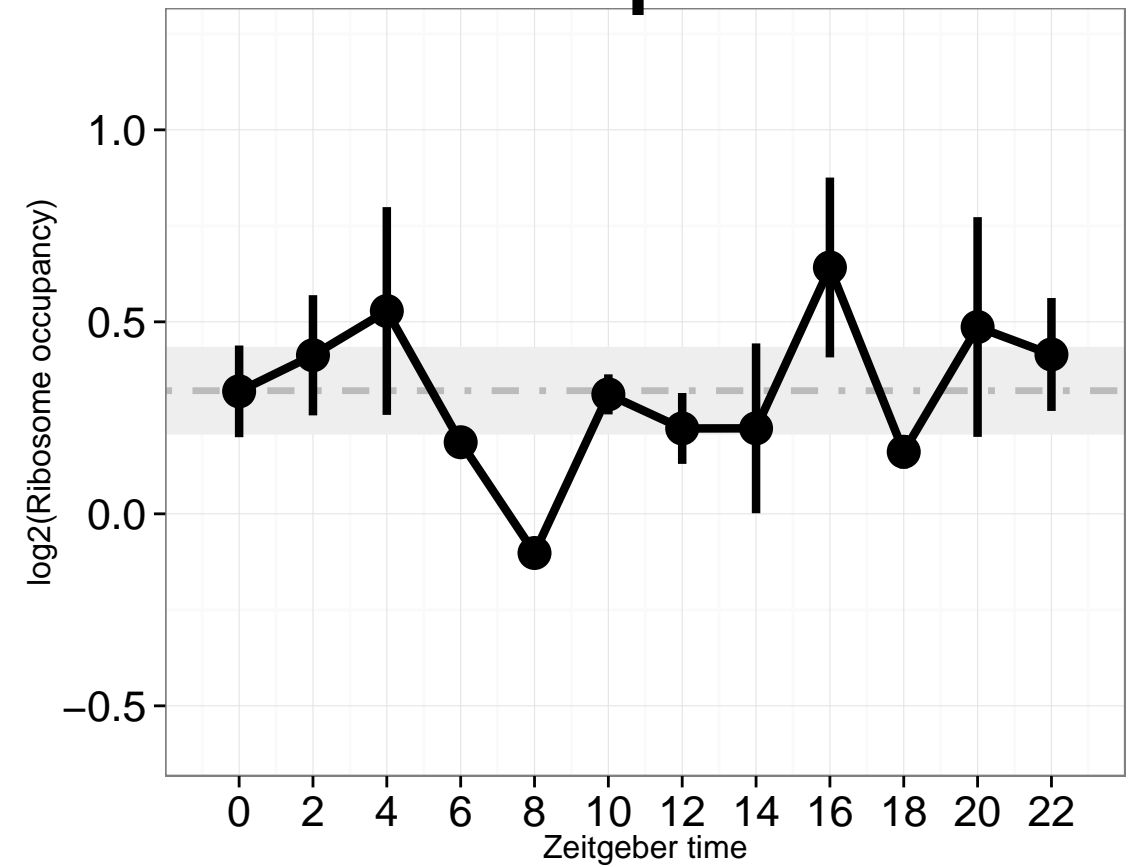

Supplement: Supplementary file 12768 [file 1]

## Mina

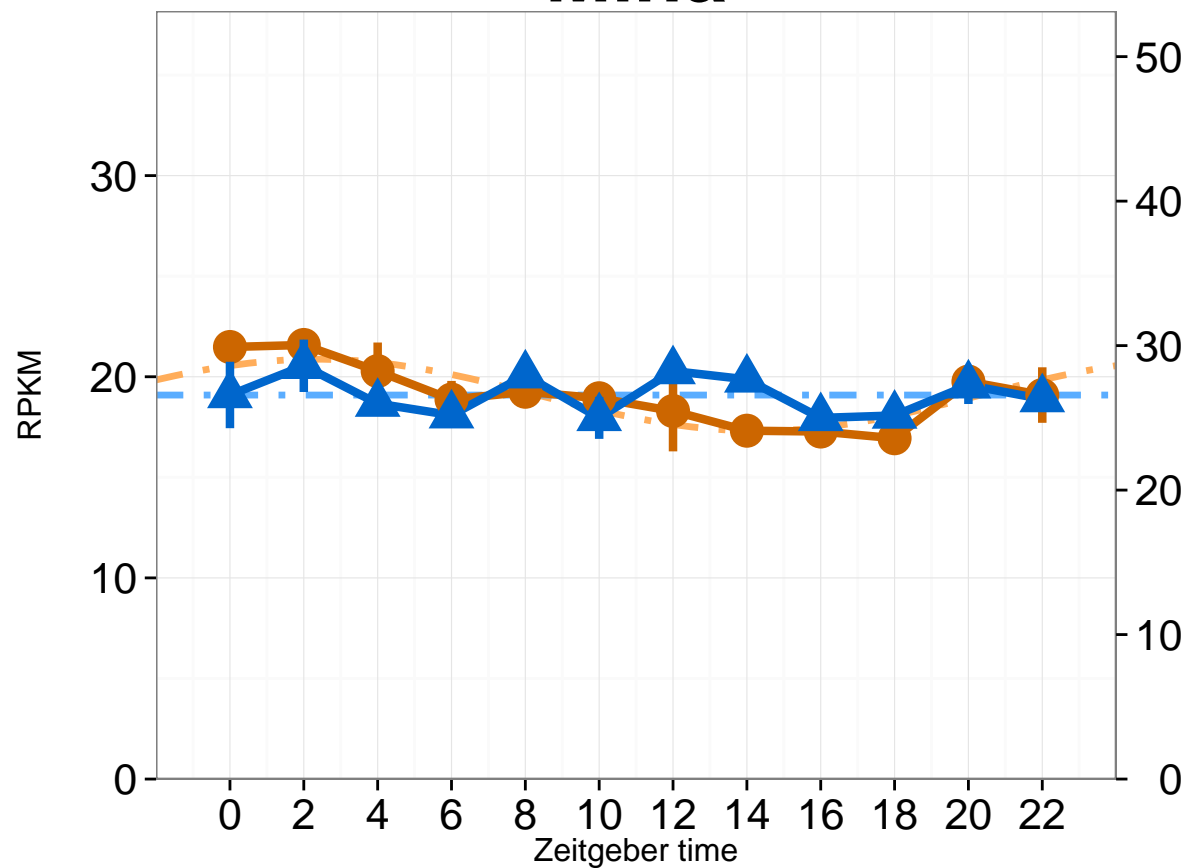

## Mina

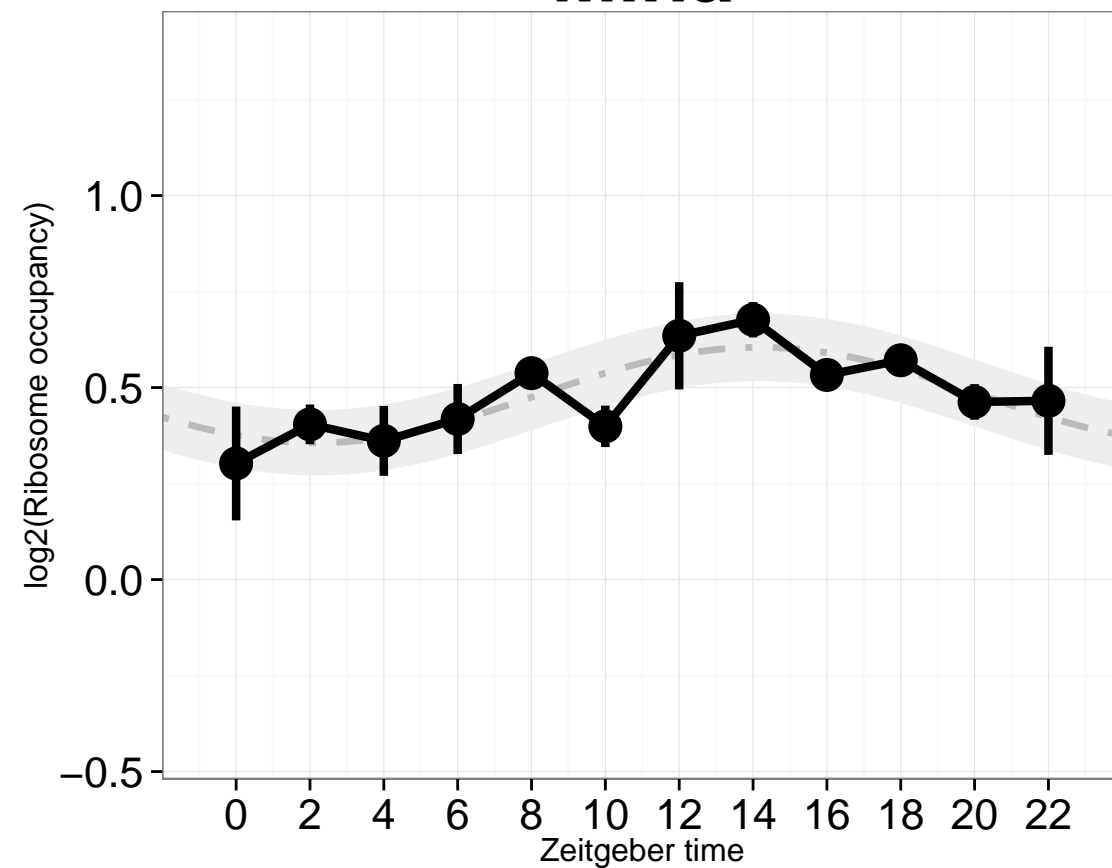

Supplement: Supplementary file 12769 [file 1]

# Rnf183

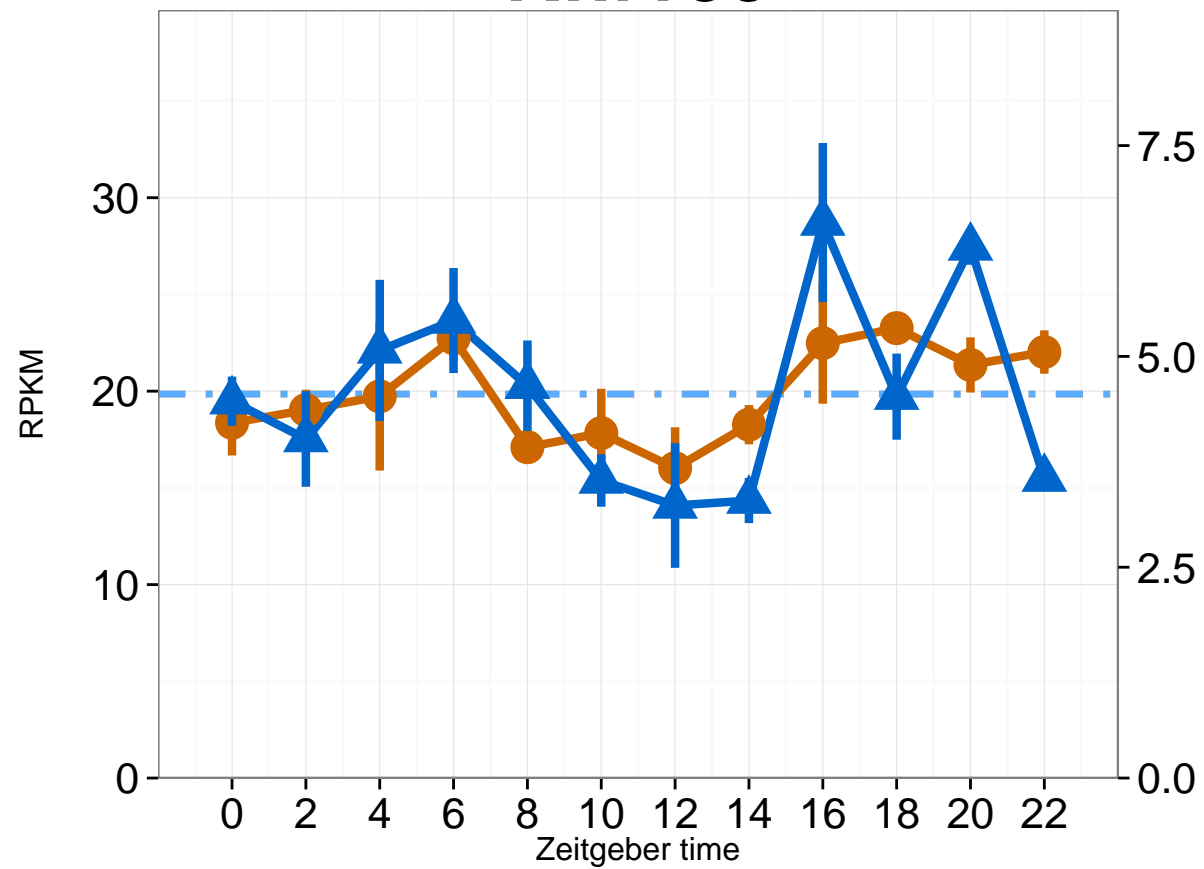

# Rnf183

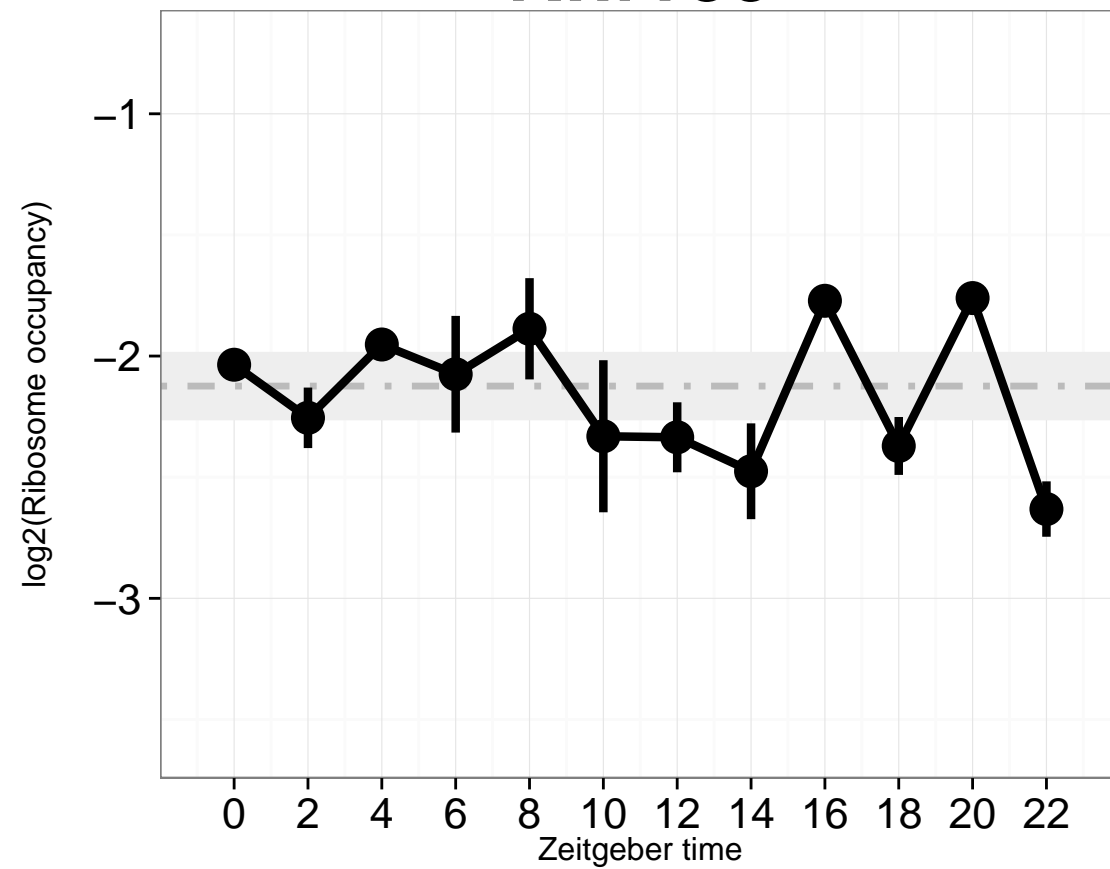

Supplement: Supplementary file 12770 [file 1]

## Ehhadh

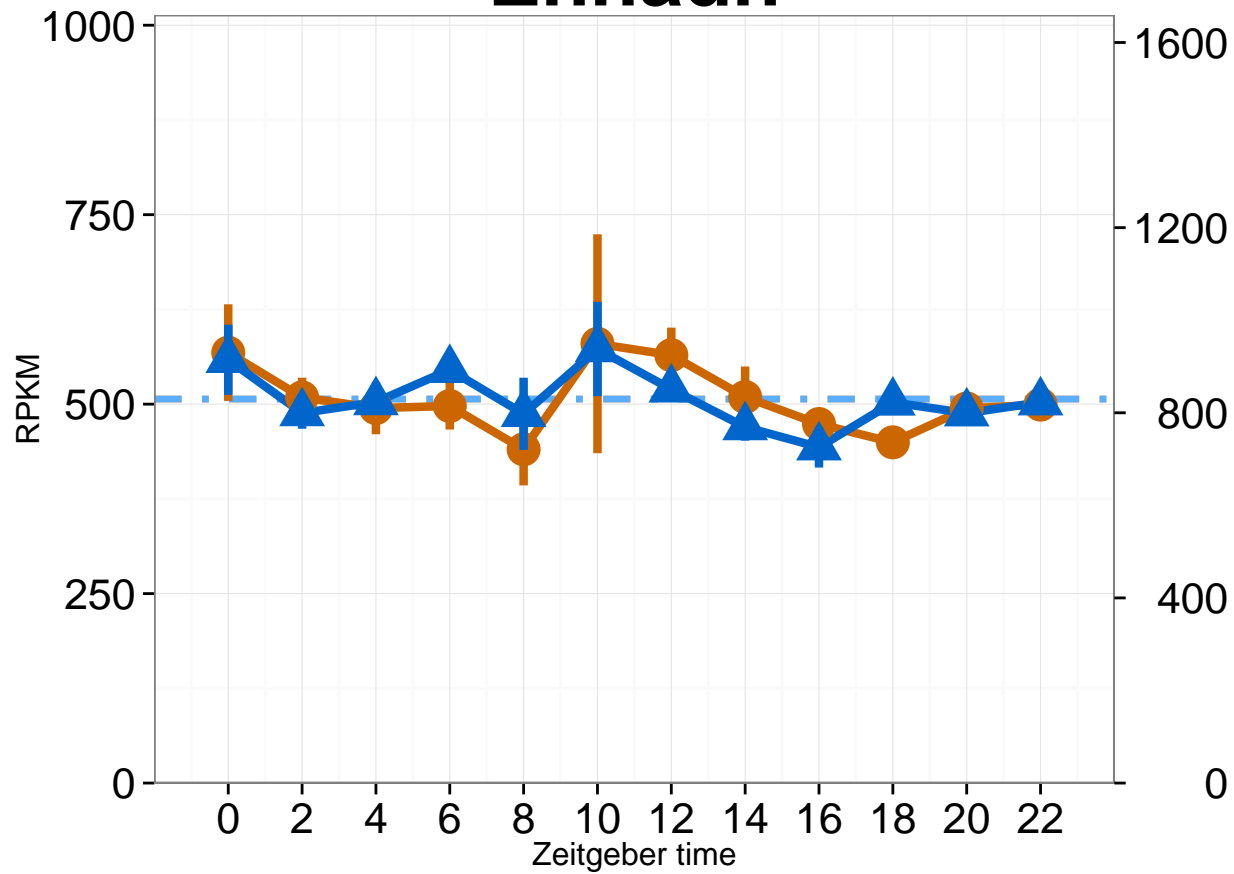

## Ehhadh

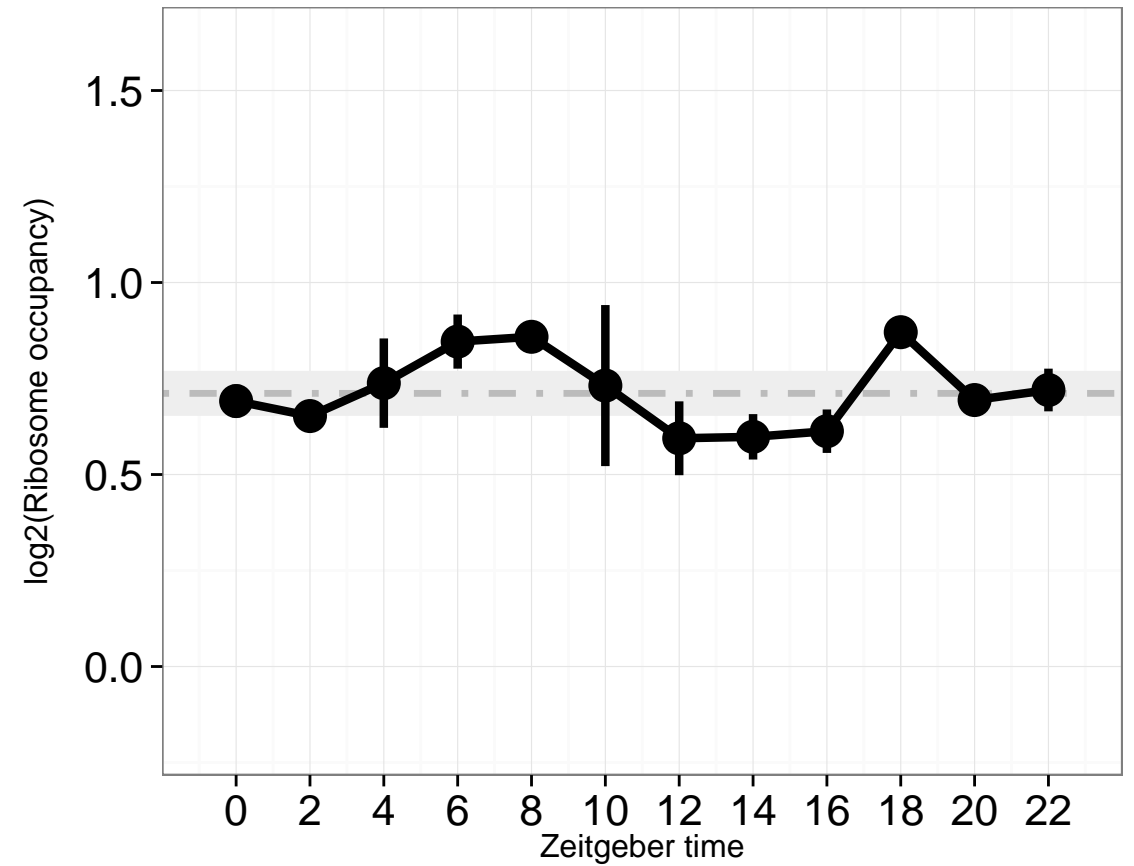

Supplement: Supplementary file 12771 [file 1]

## AcsI5

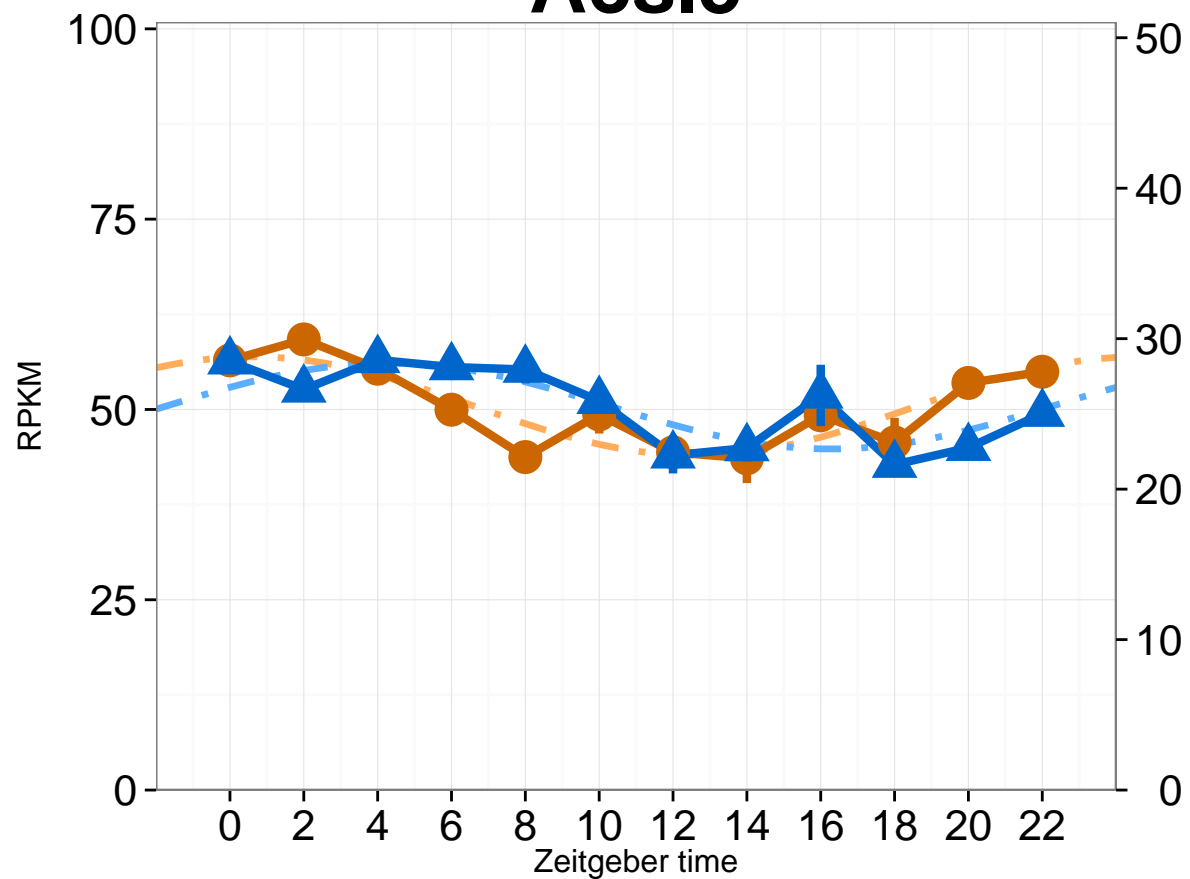

## AcsI5

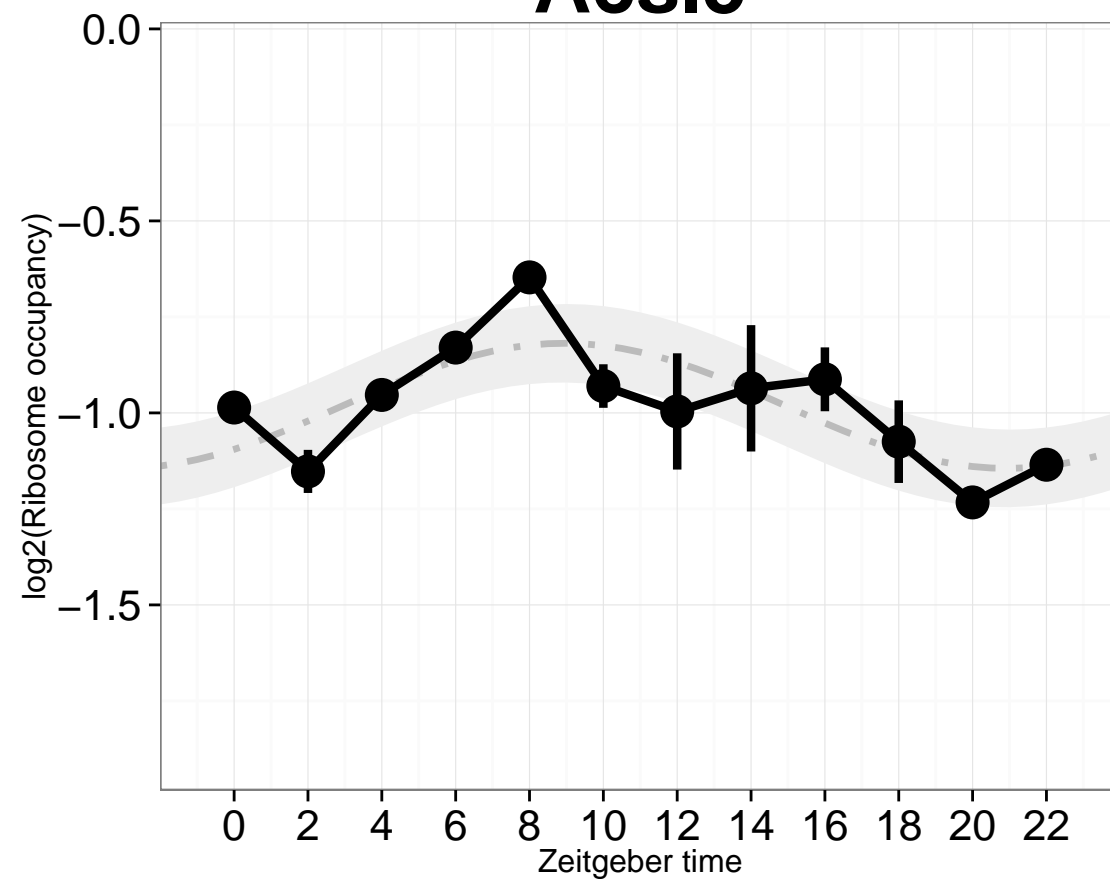

Supplement: Supplementary file 12772 [file 1]

## Coasy

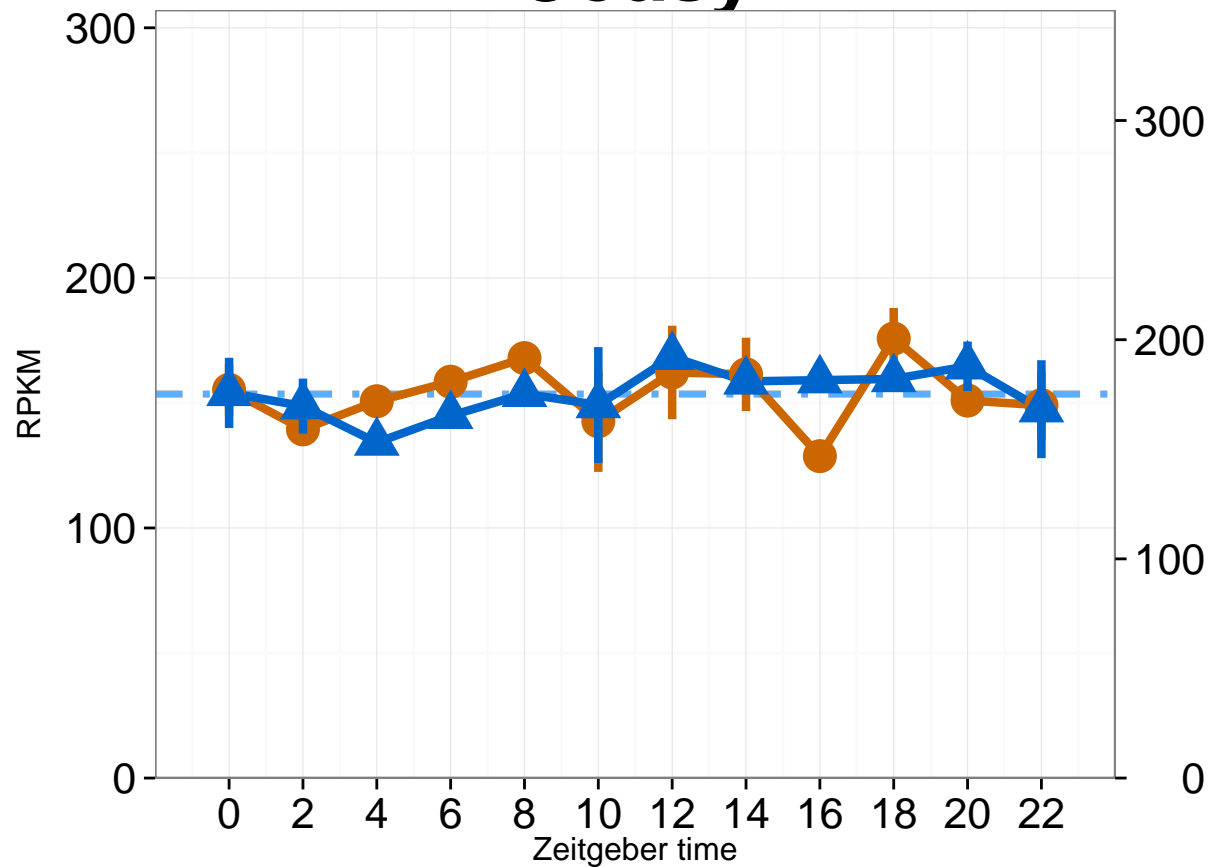

## Coasy

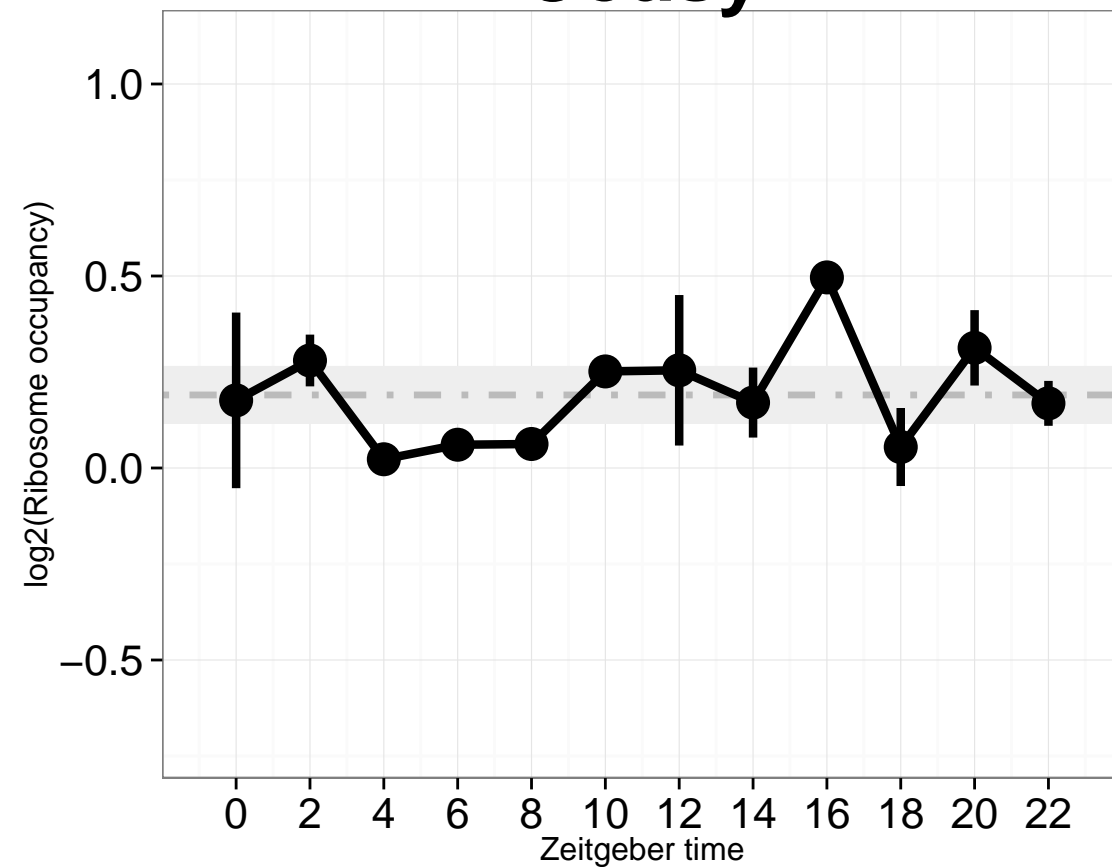

Supplement: Supplementary file 12773 [file 1]

# Itgb1

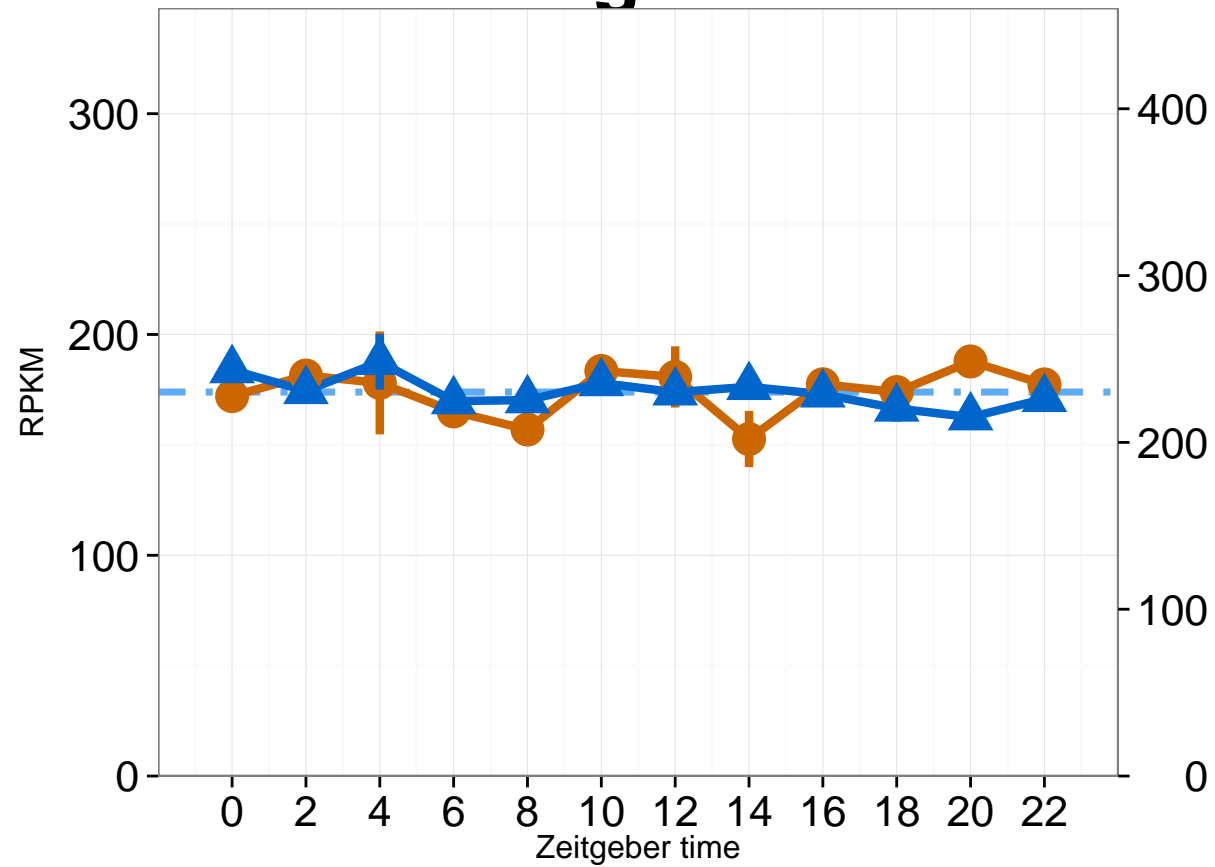

# Itgb1

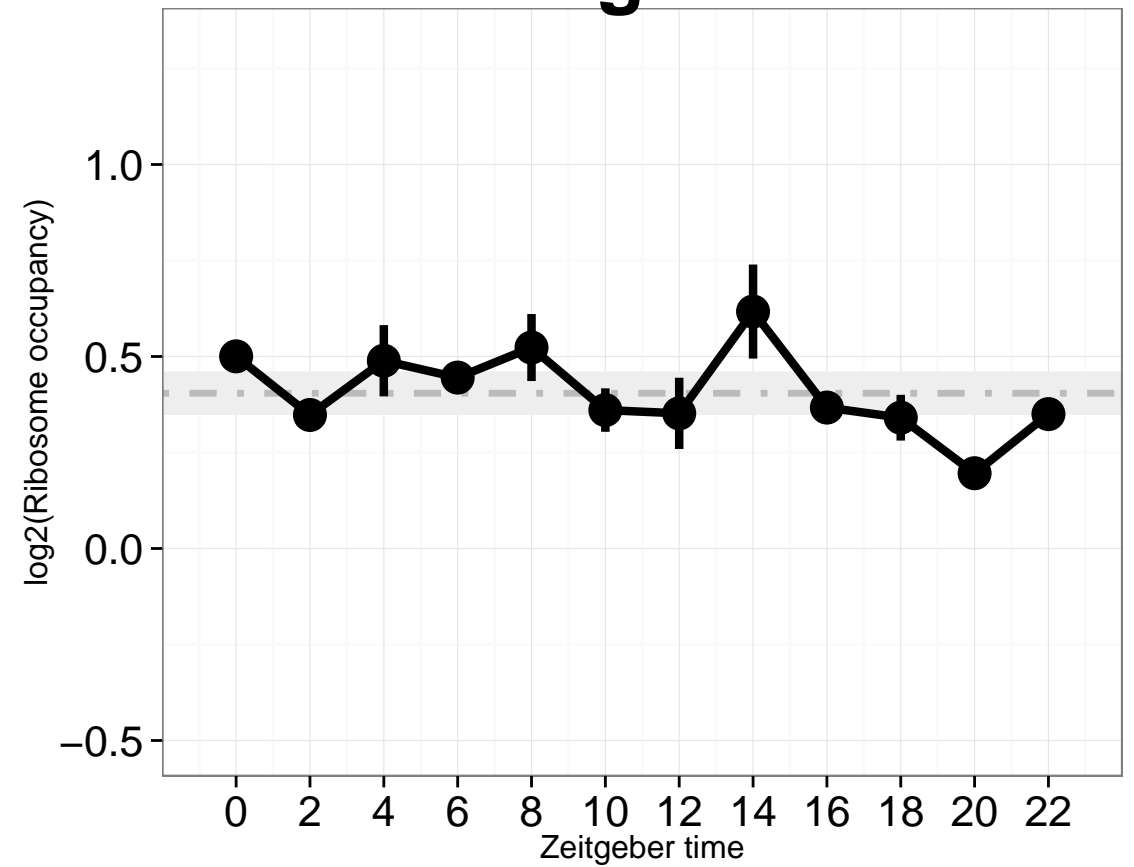

Supplement: Supplementary file 12774 [file 1]

## Hook3

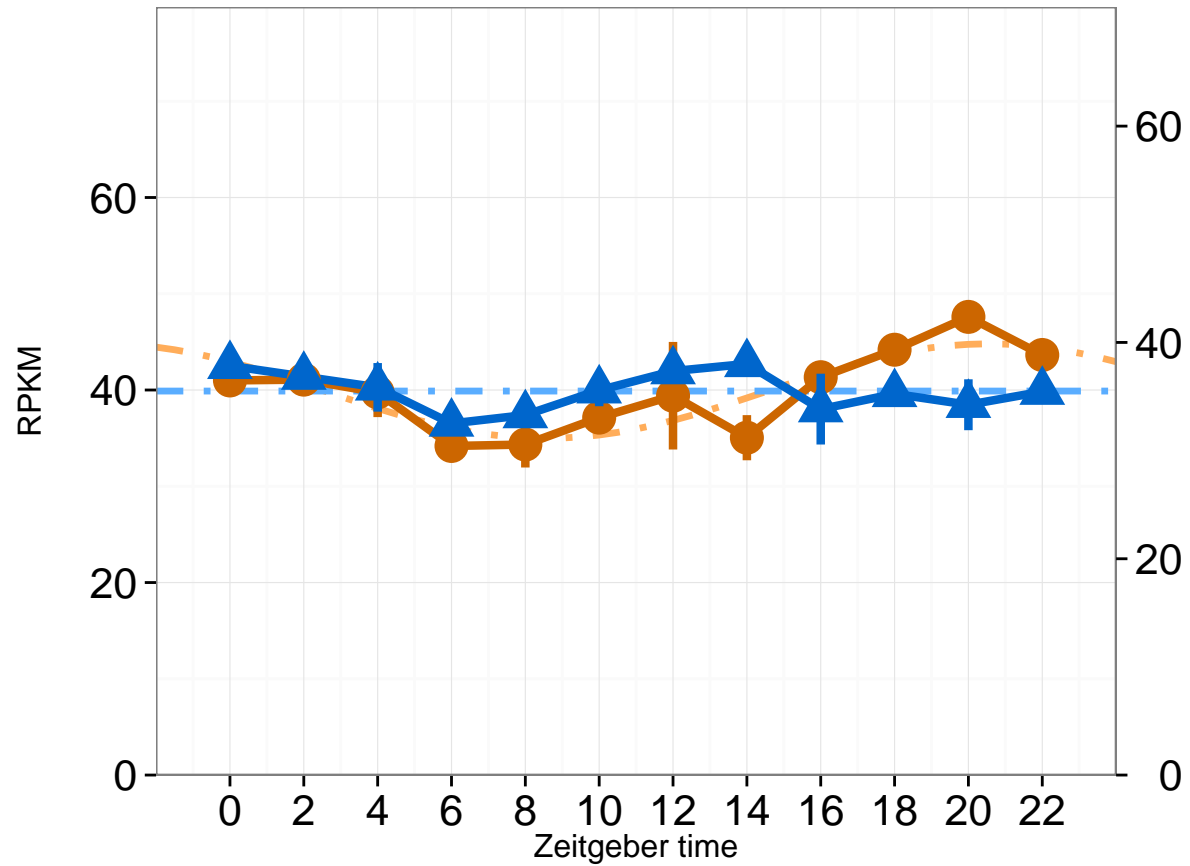

## Hook3

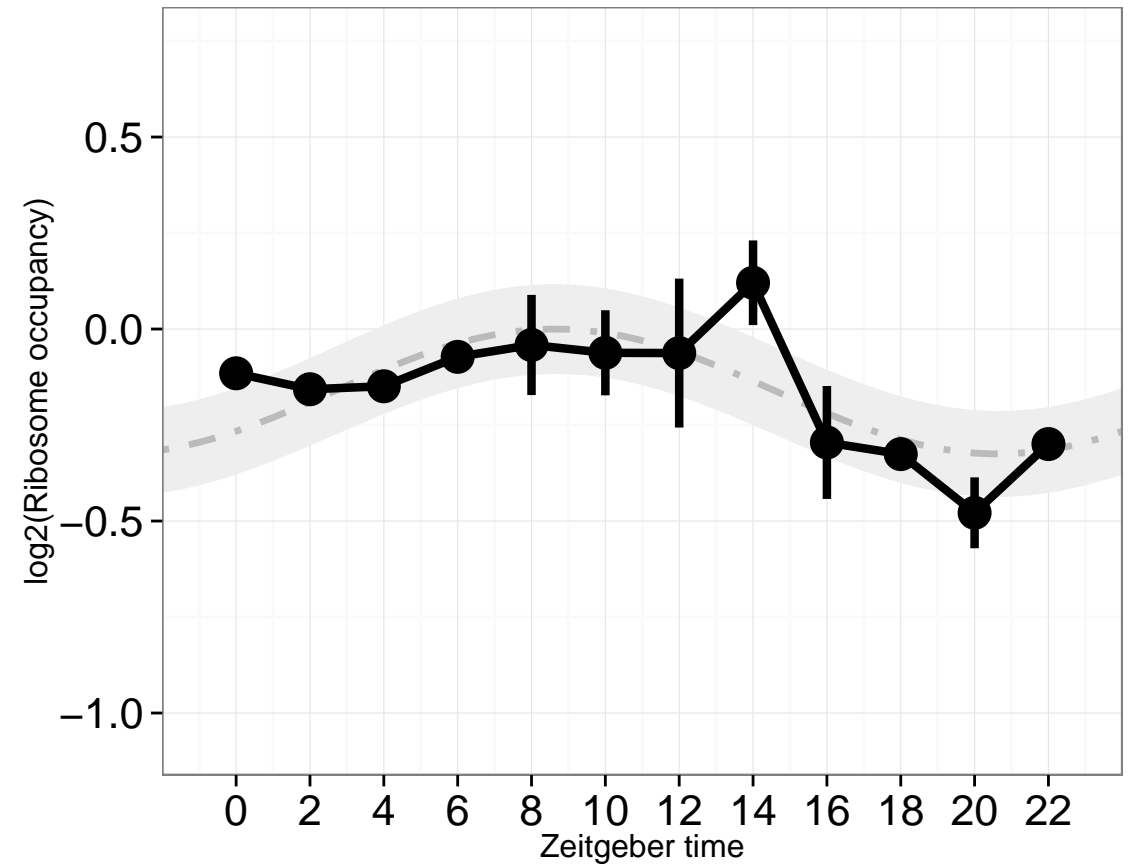

Supplement: Supplementary file 12775 [file 1]

## Skiv2l2

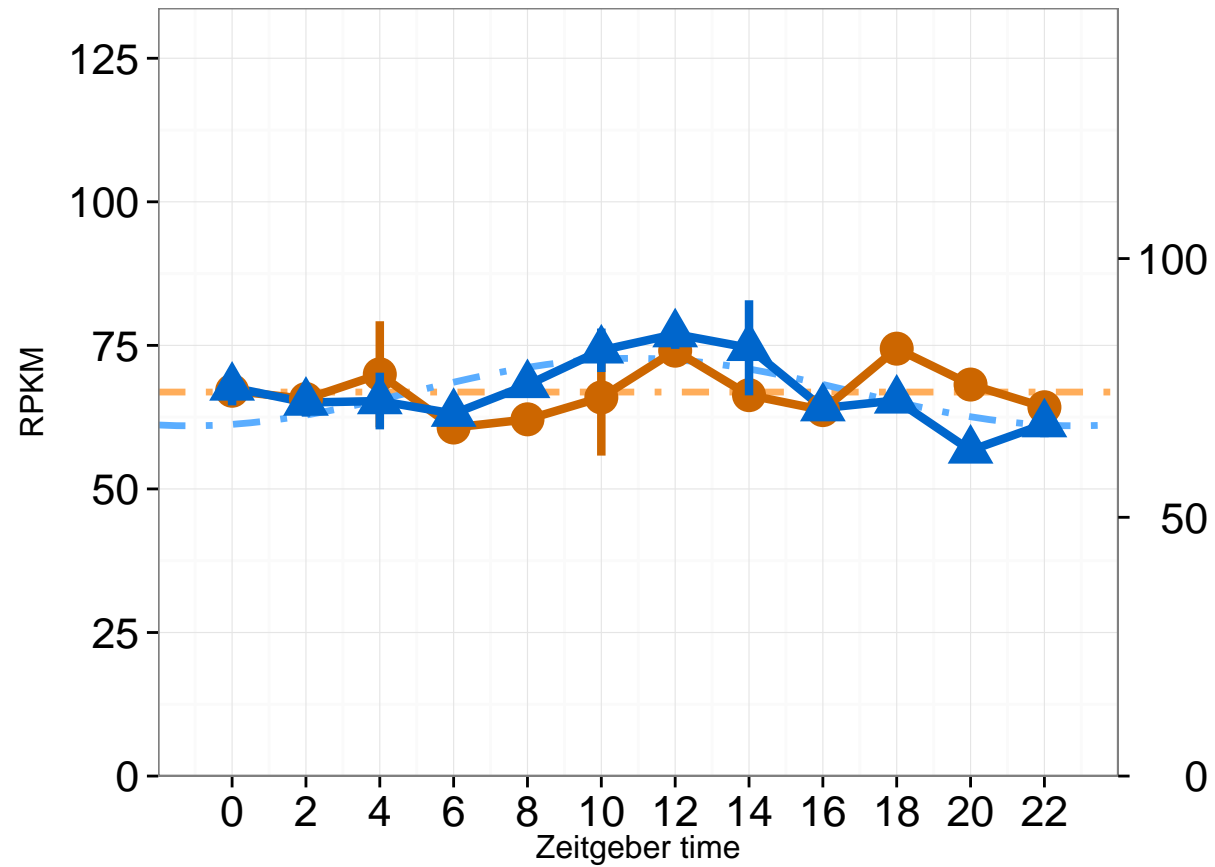

## Skiv2l2

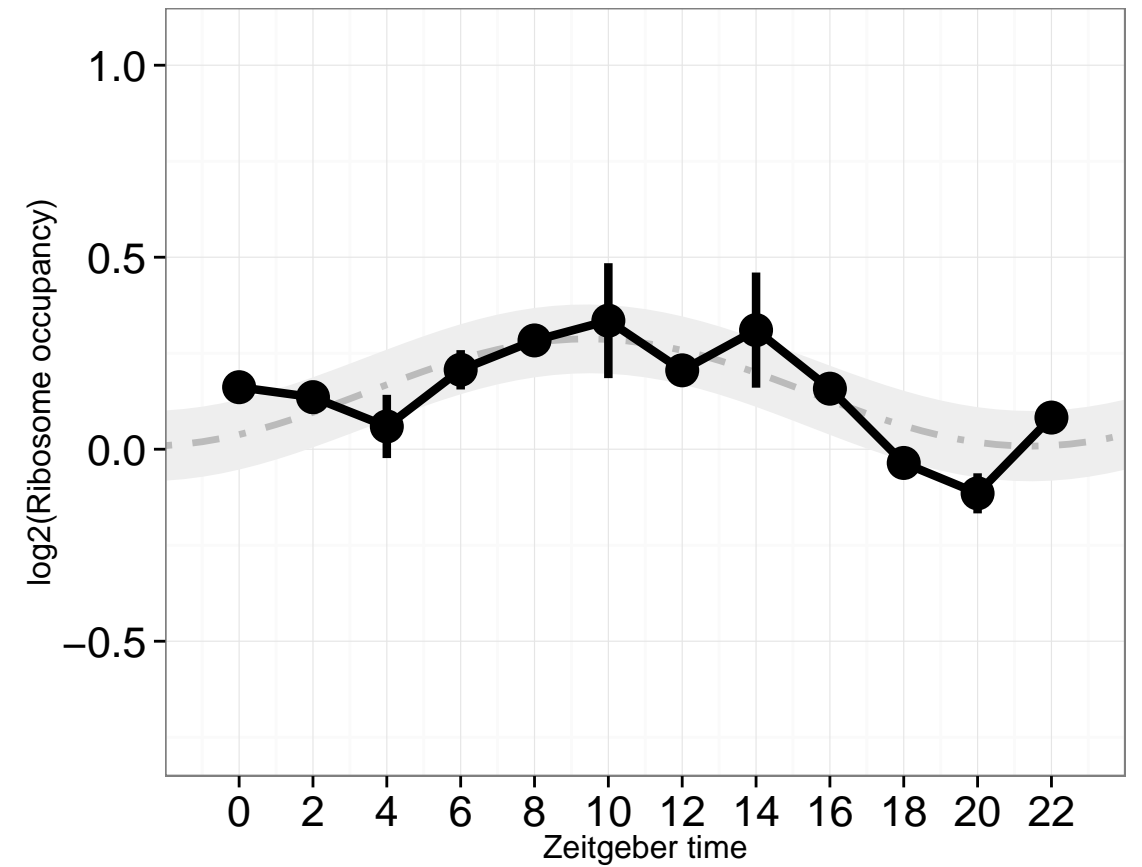

Supplement: Supplementary file 12776 [file 1]

## Pirb

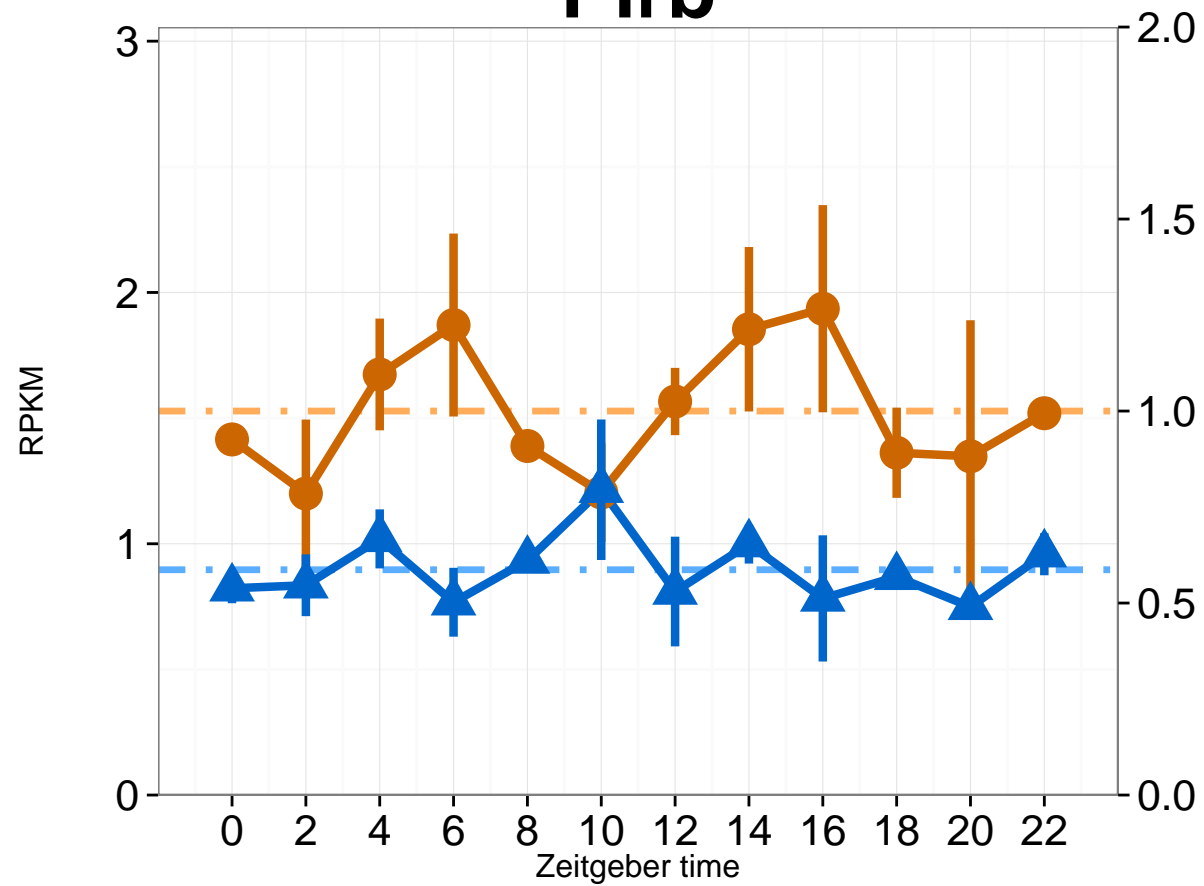

## Pirb

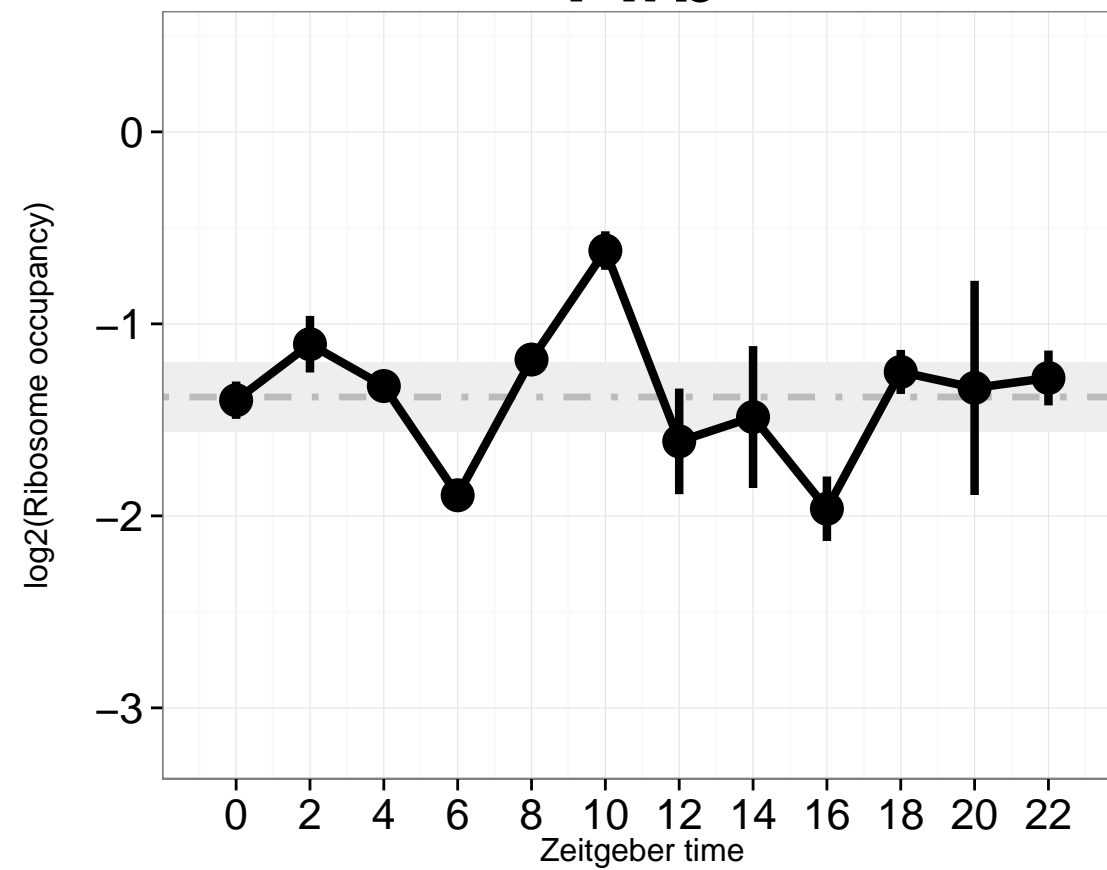

Supplement: Supplementary file 12777 [file 1]

# Acnat1

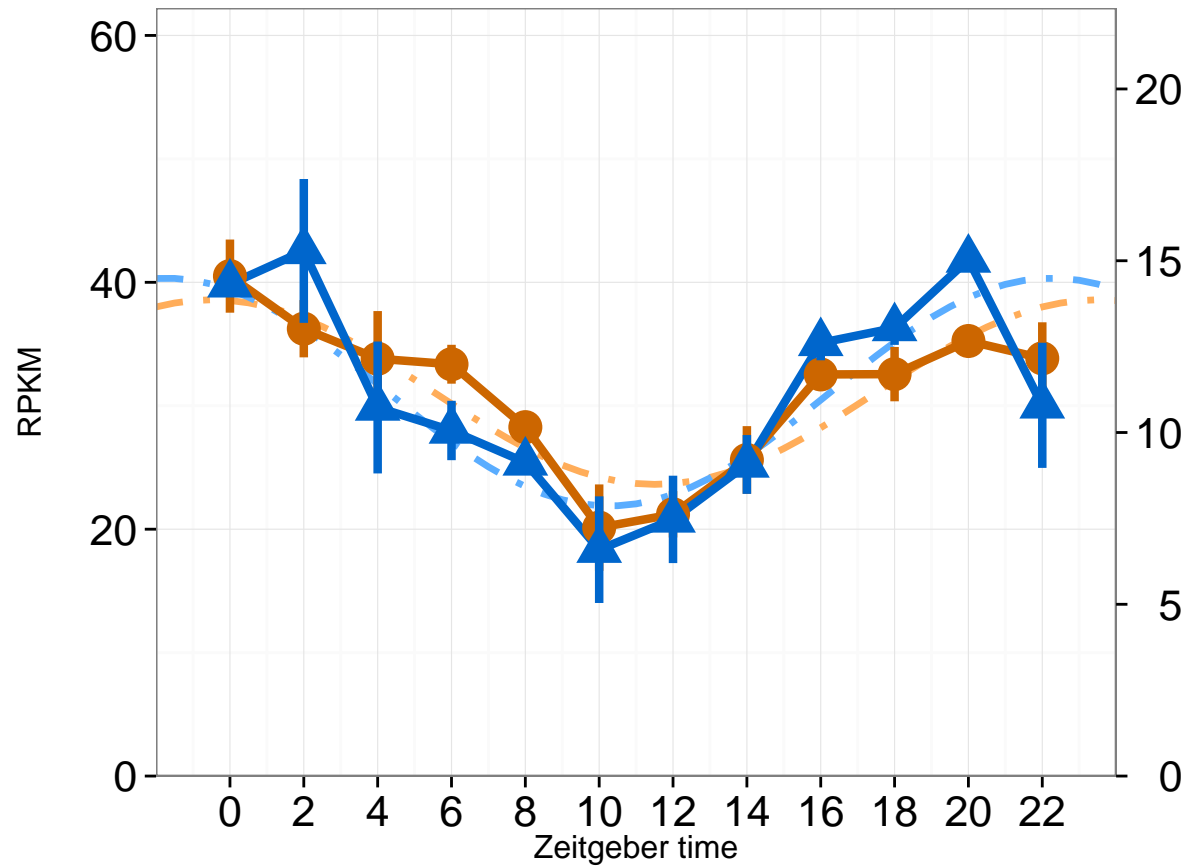

# Acnat1

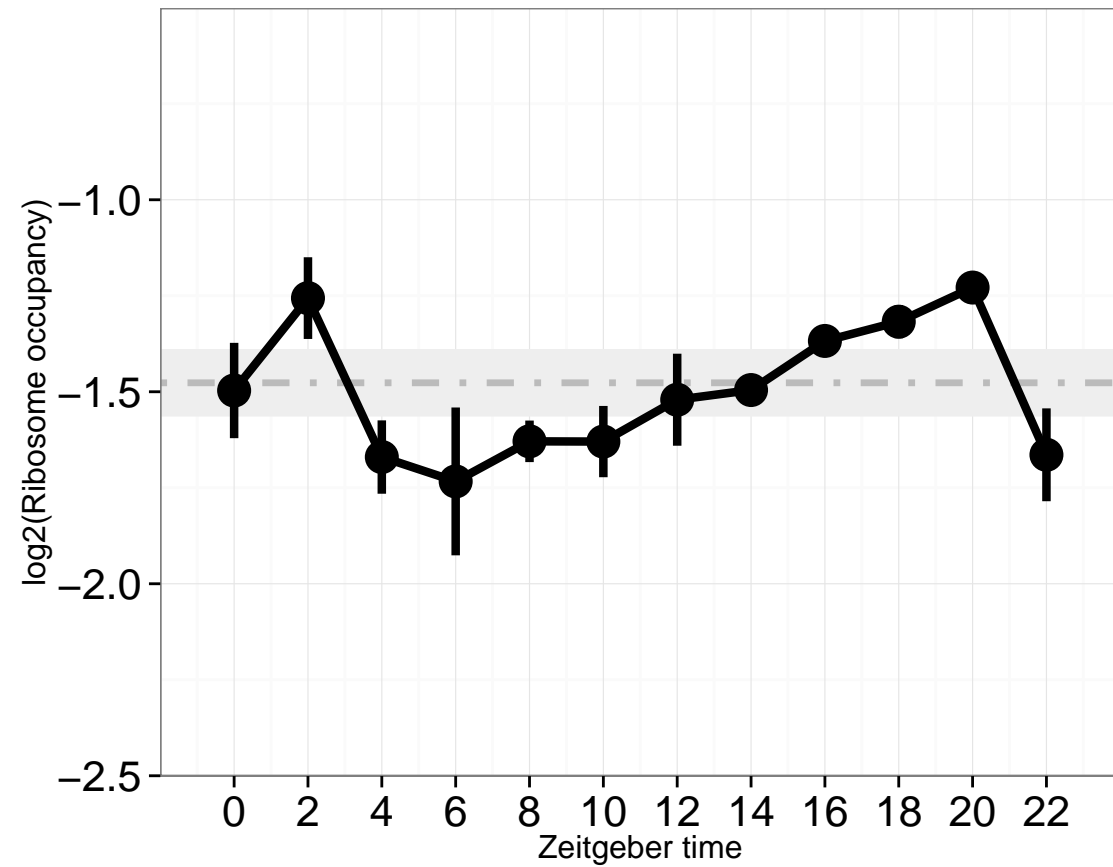

Supplement: Supplementary file 12778 [file 1]

# Slc26a10

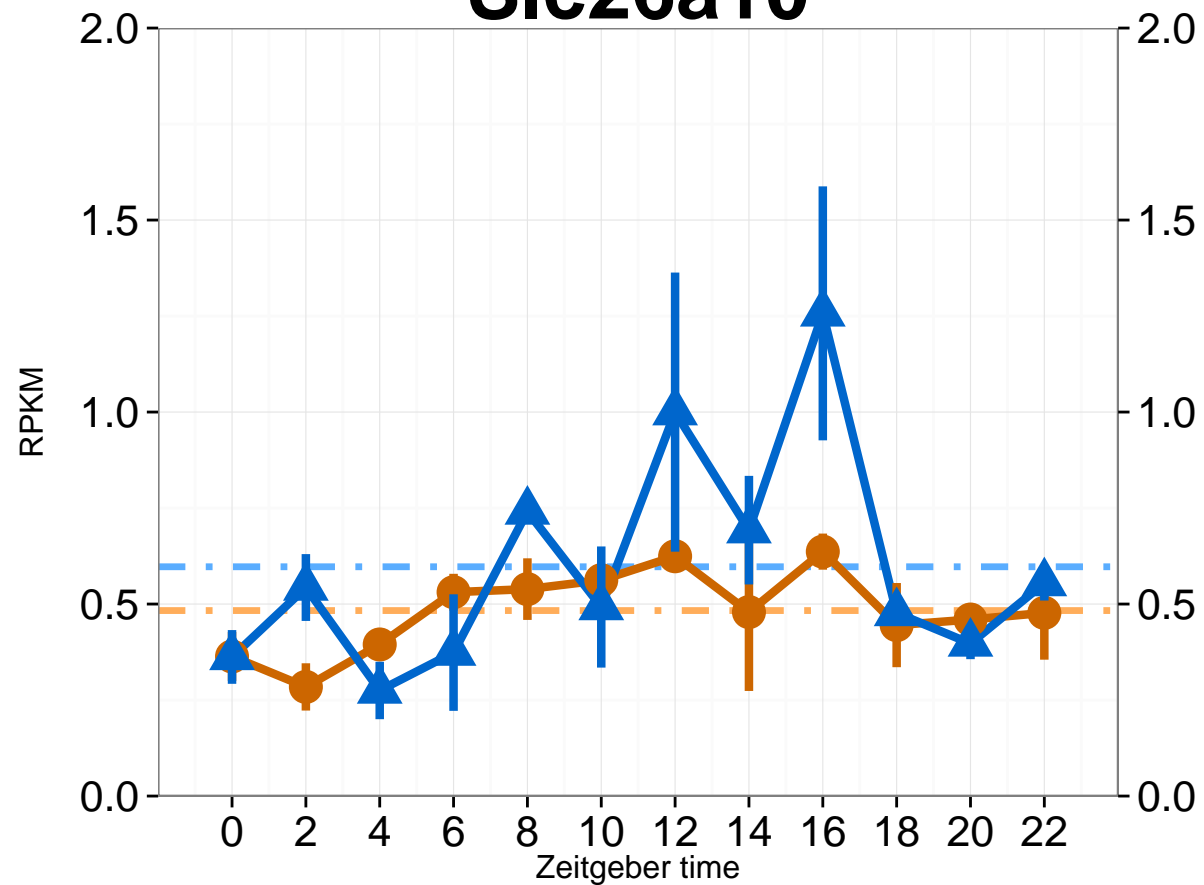

# Slc26a10

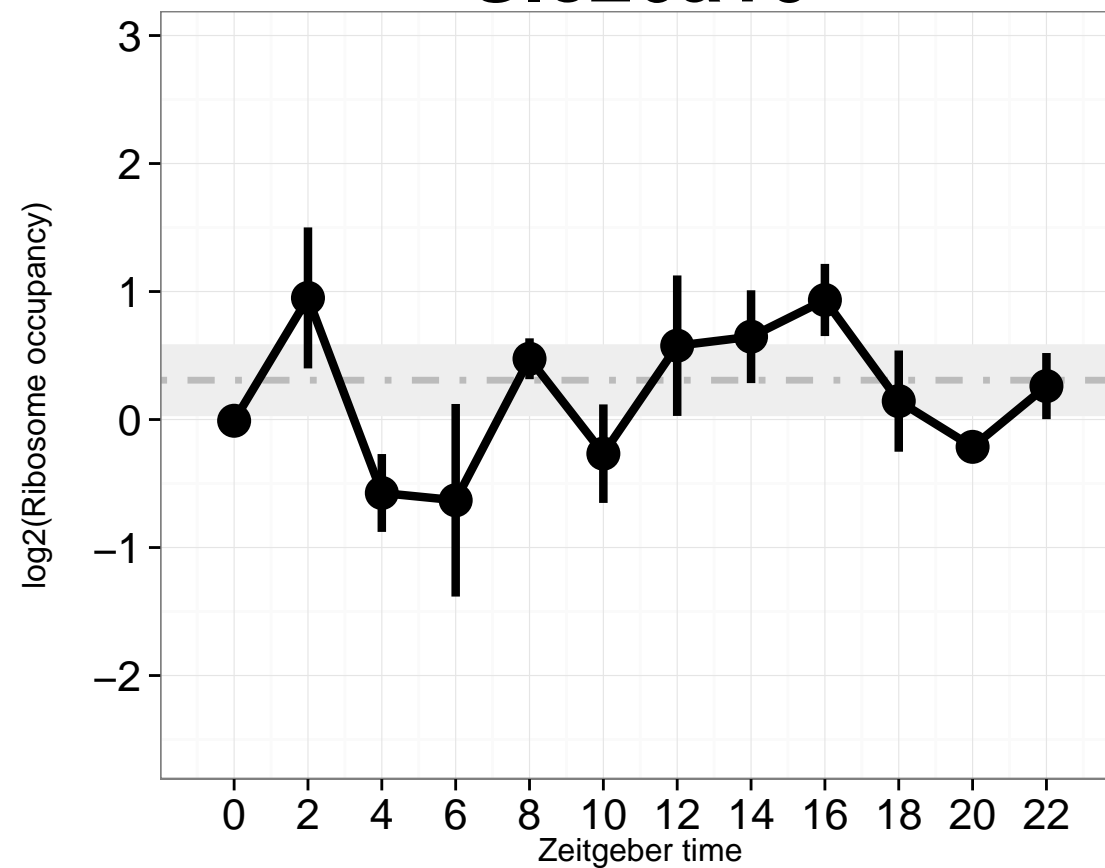

Supplement: Supplementary file 12779 [file 1]

# Serpina1b

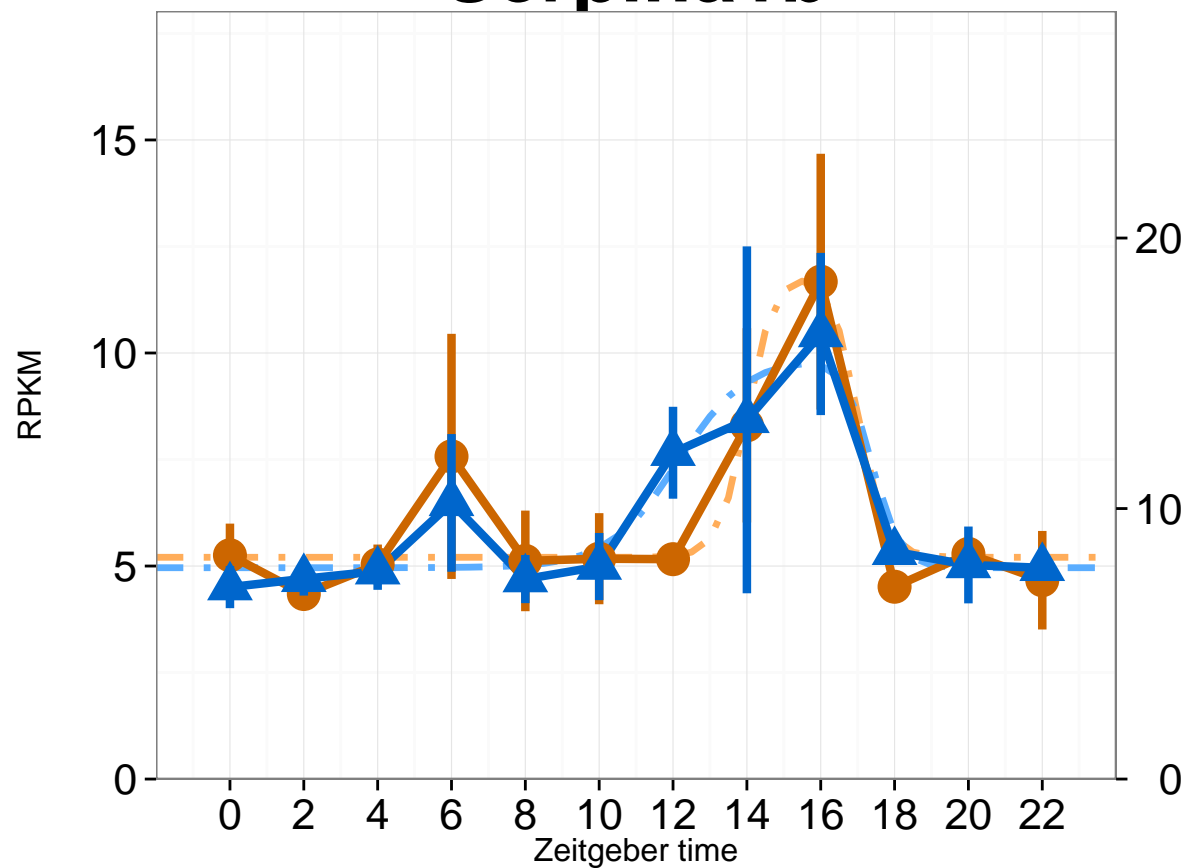

# Serpina1b

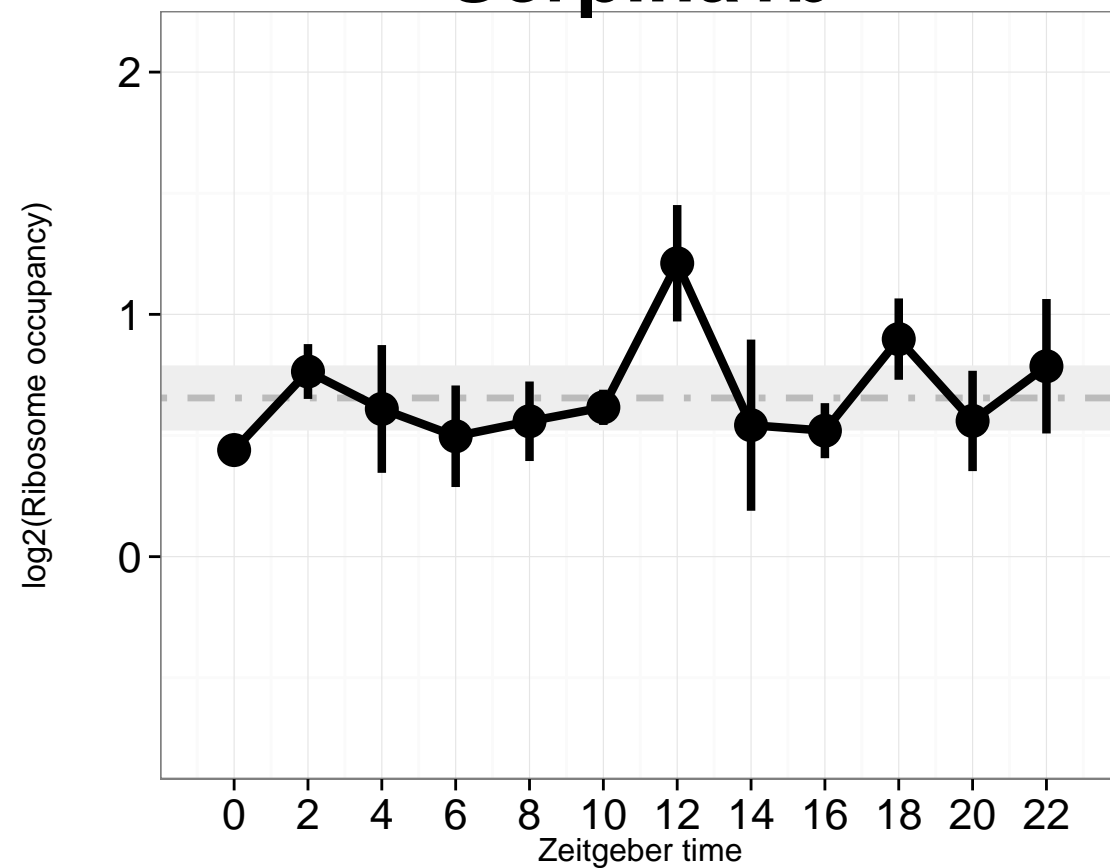

Supplement: Supplementary file 12780 [file 1]

## Clock

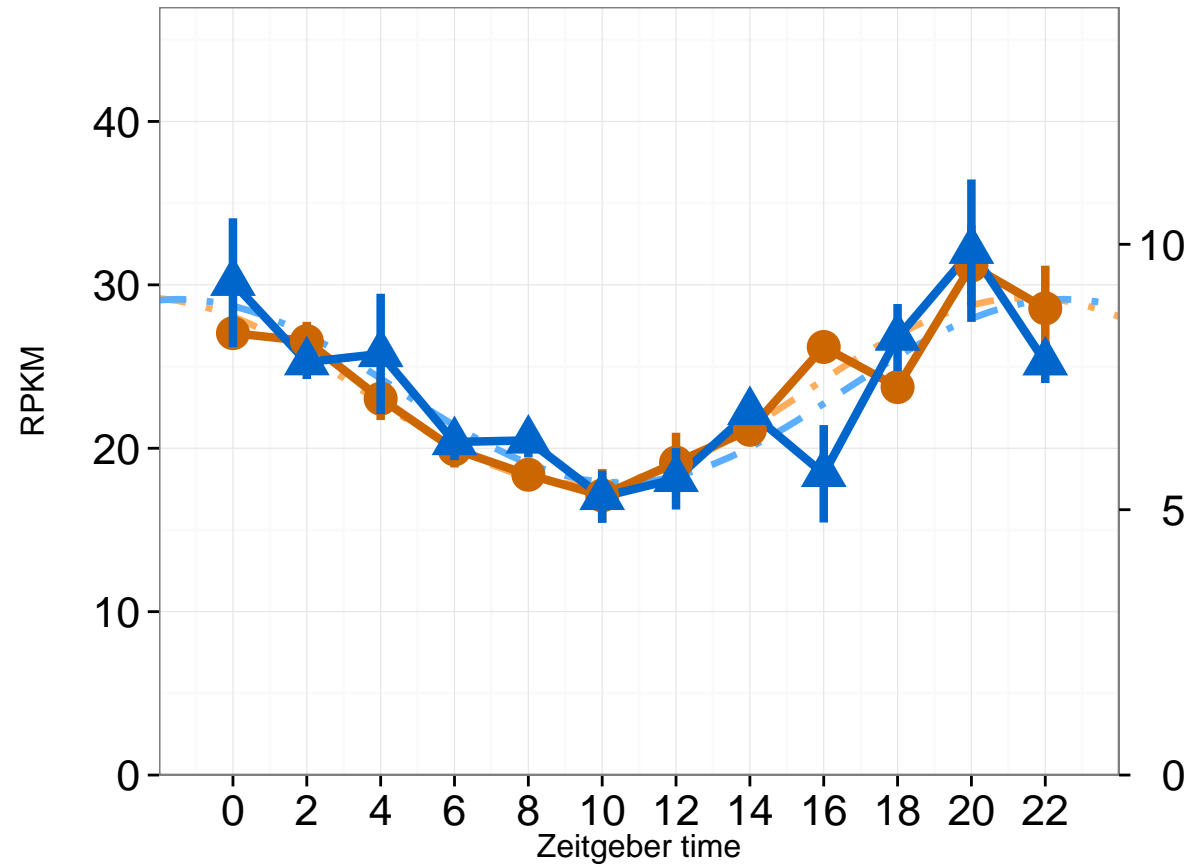

## Clock

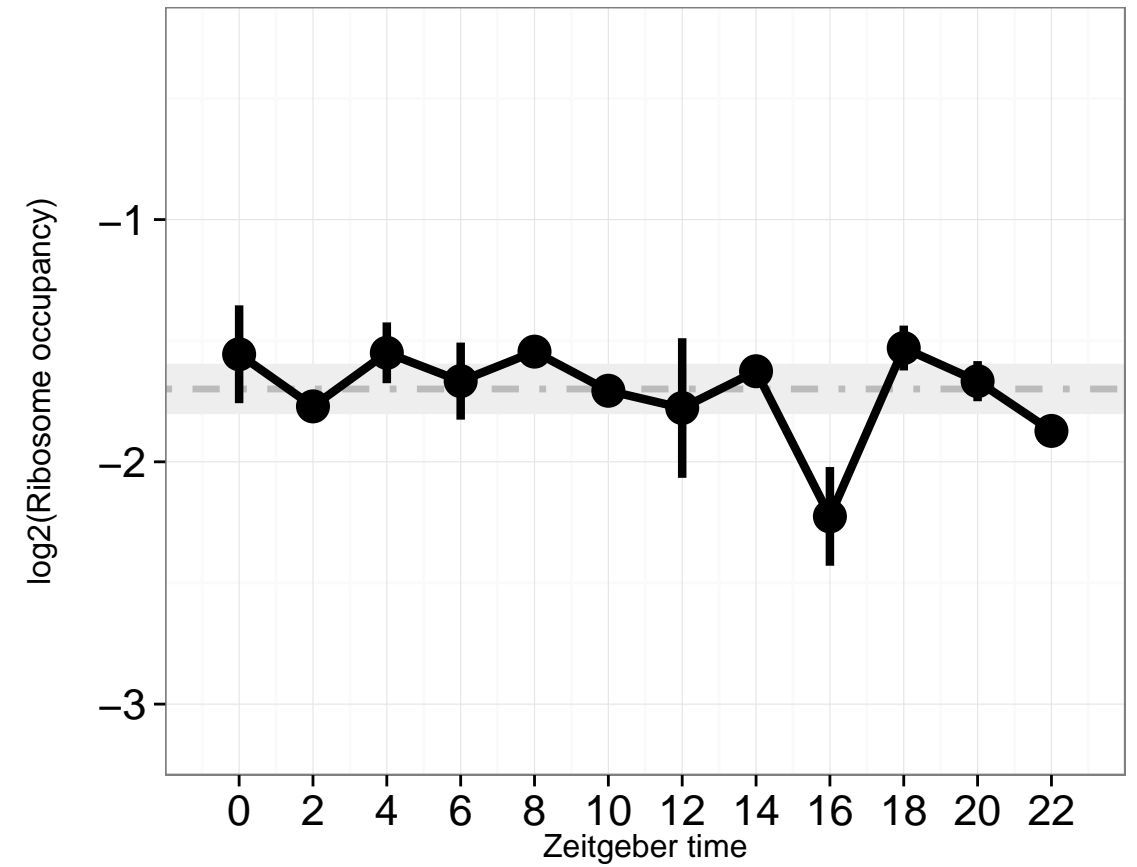

Supplement: Supplementary file 12781 [file 1]

## Tmtc4

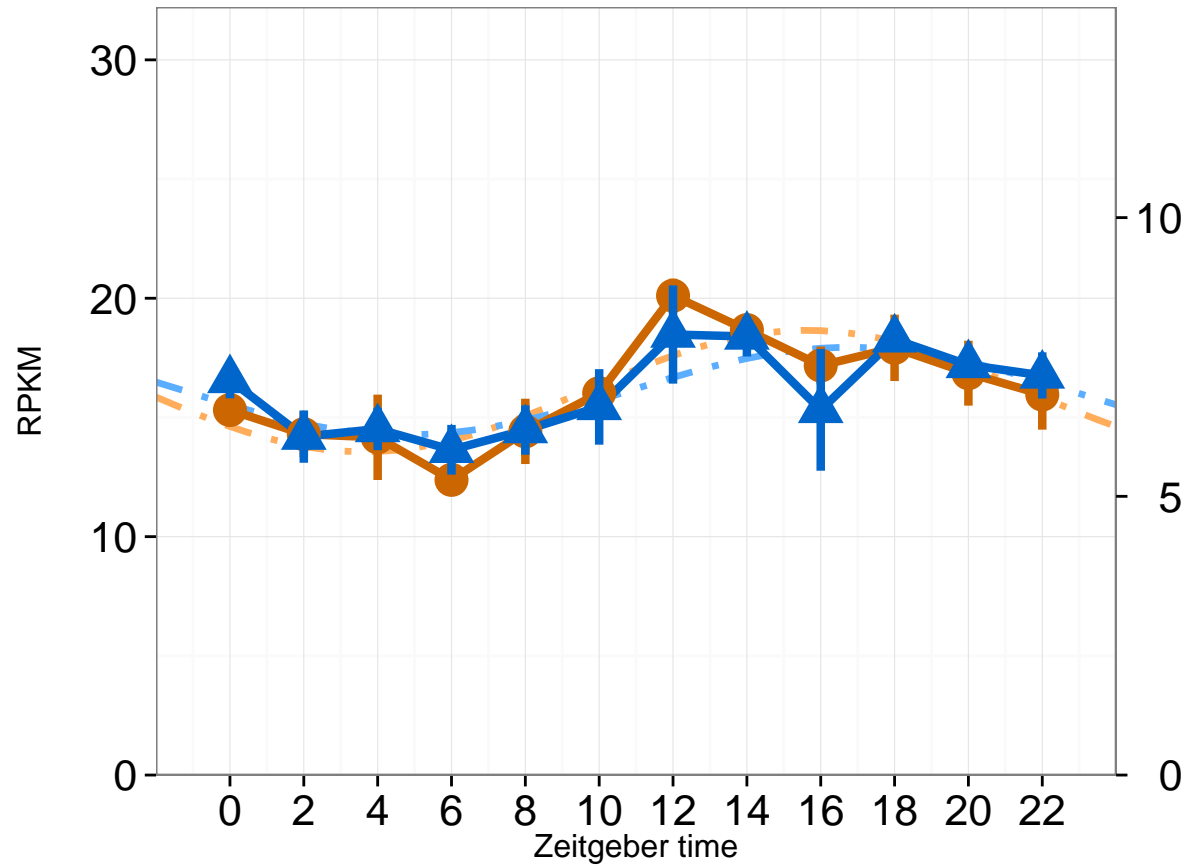

## Tmtc4

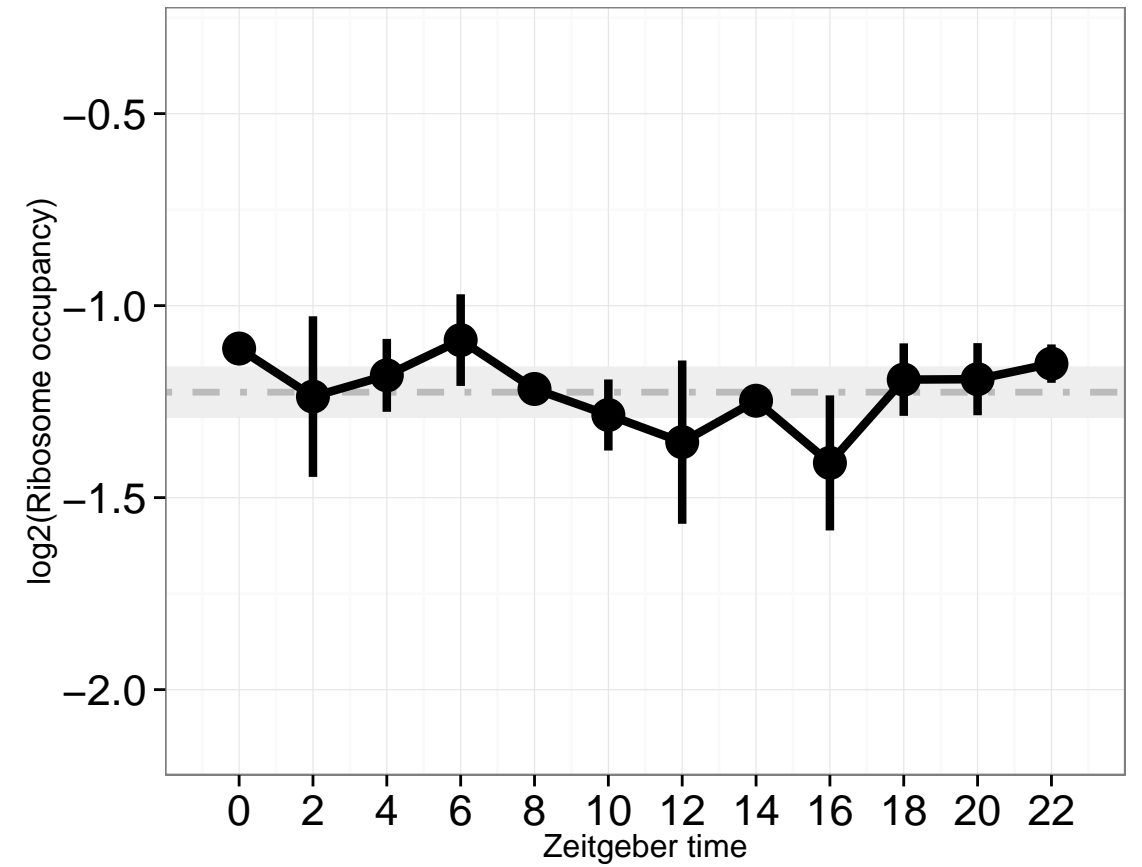

Supplement: Supplementary file 12782 [file 1]

# Slc22a1

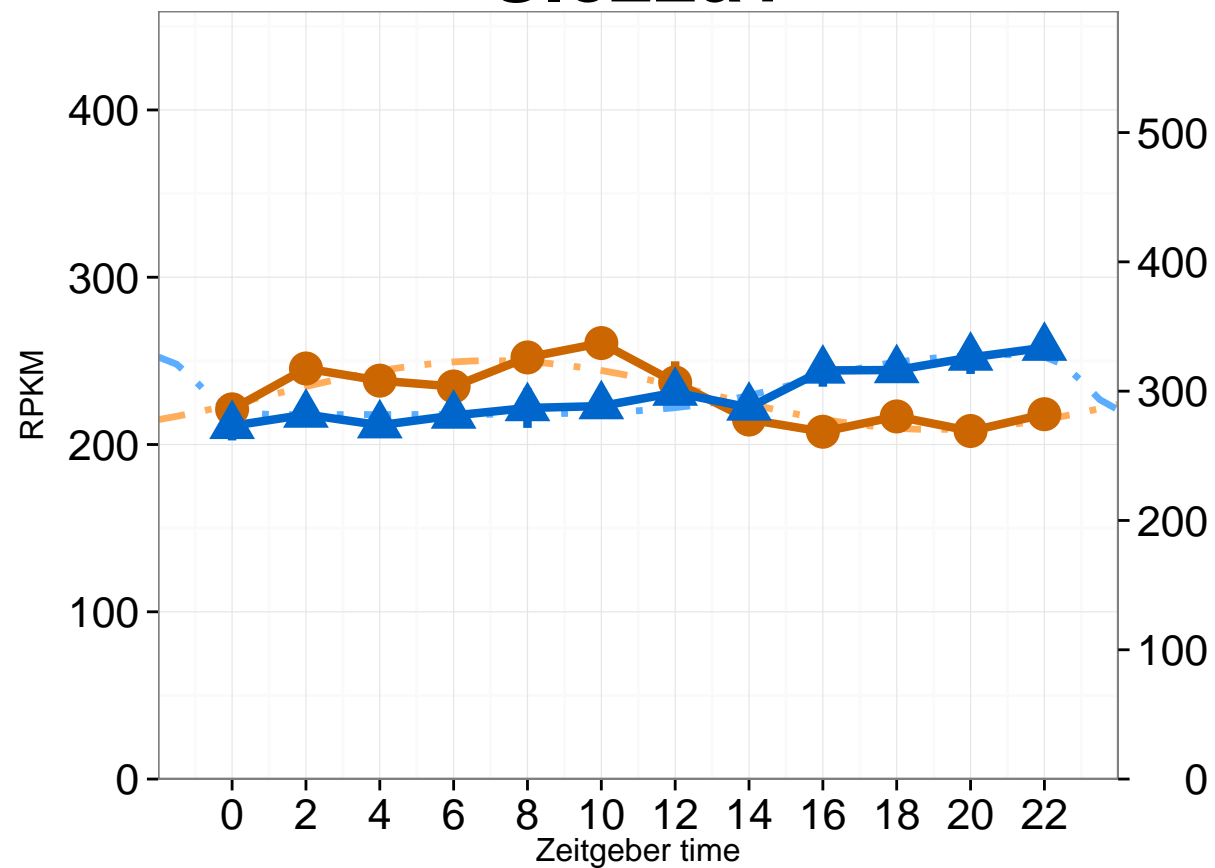

# Slc22a1

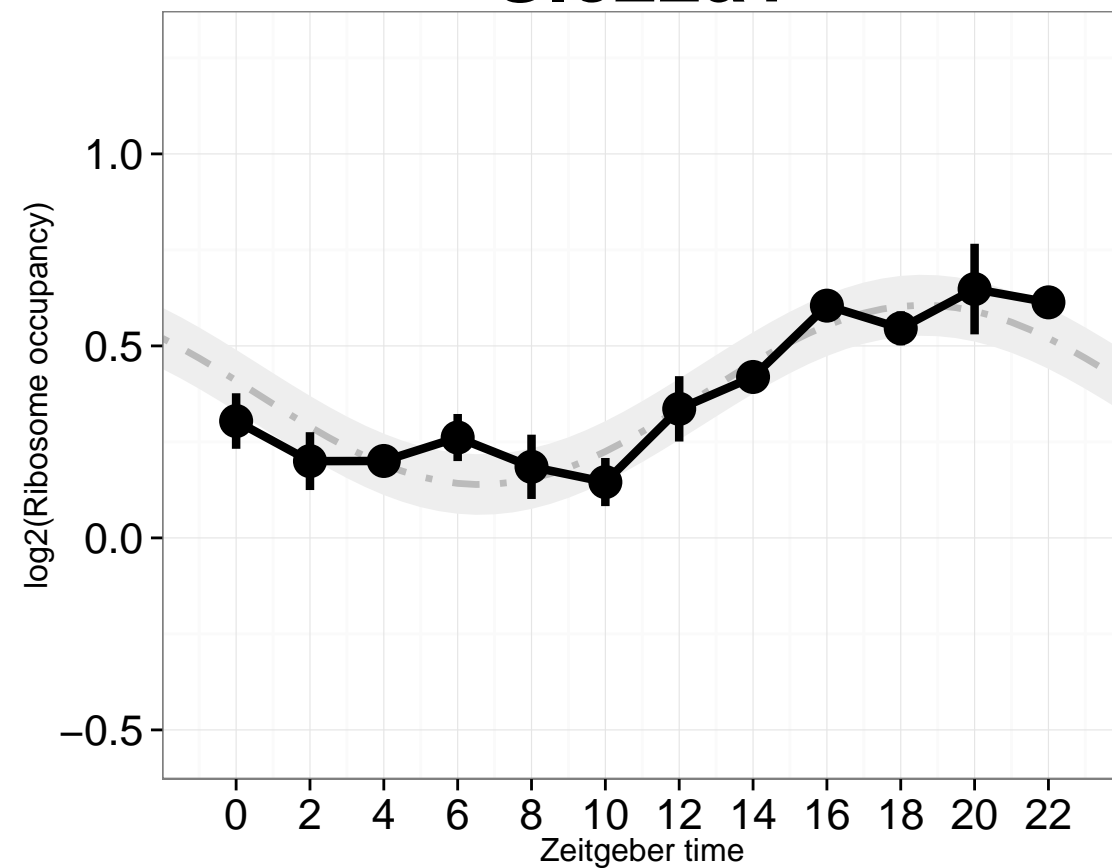

Supplement: Supplementary file 12783 [file 1]

## Amn

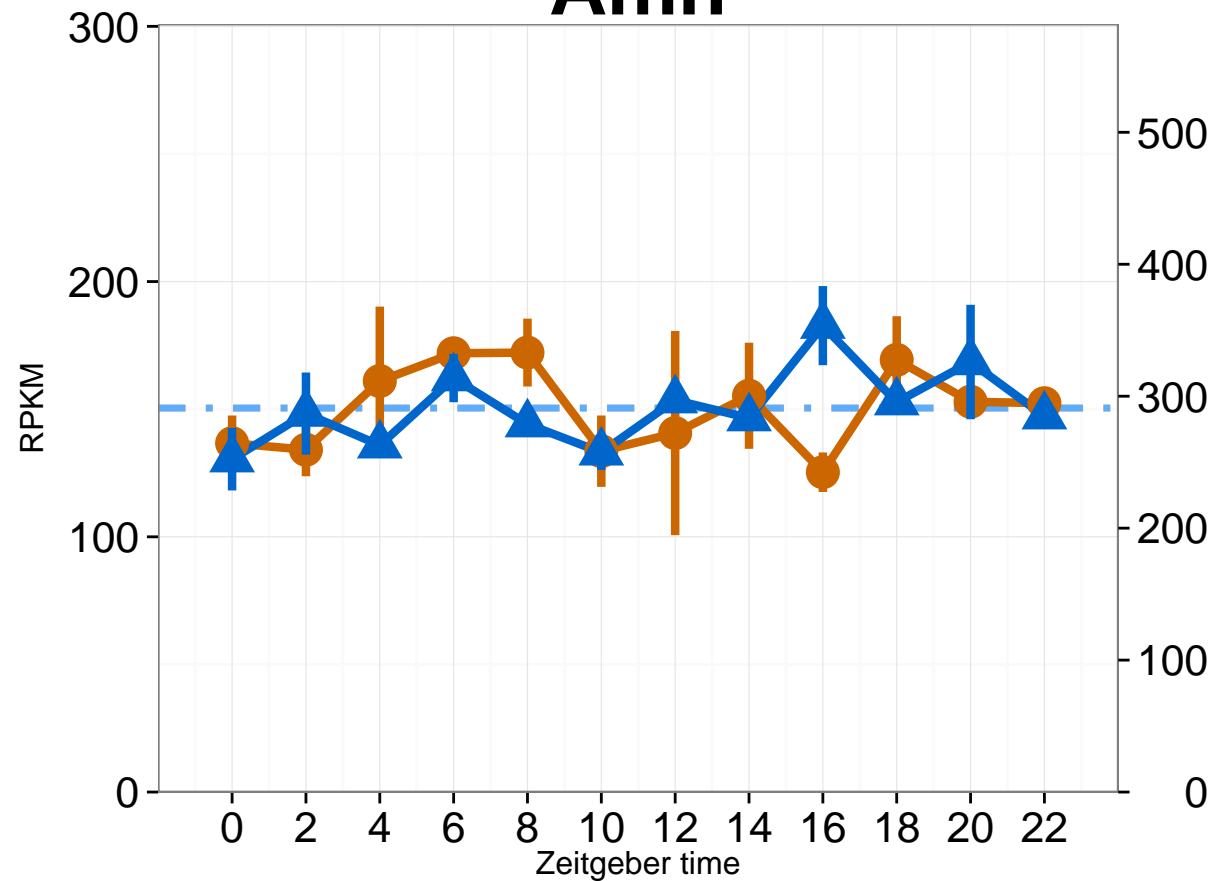

## Amn

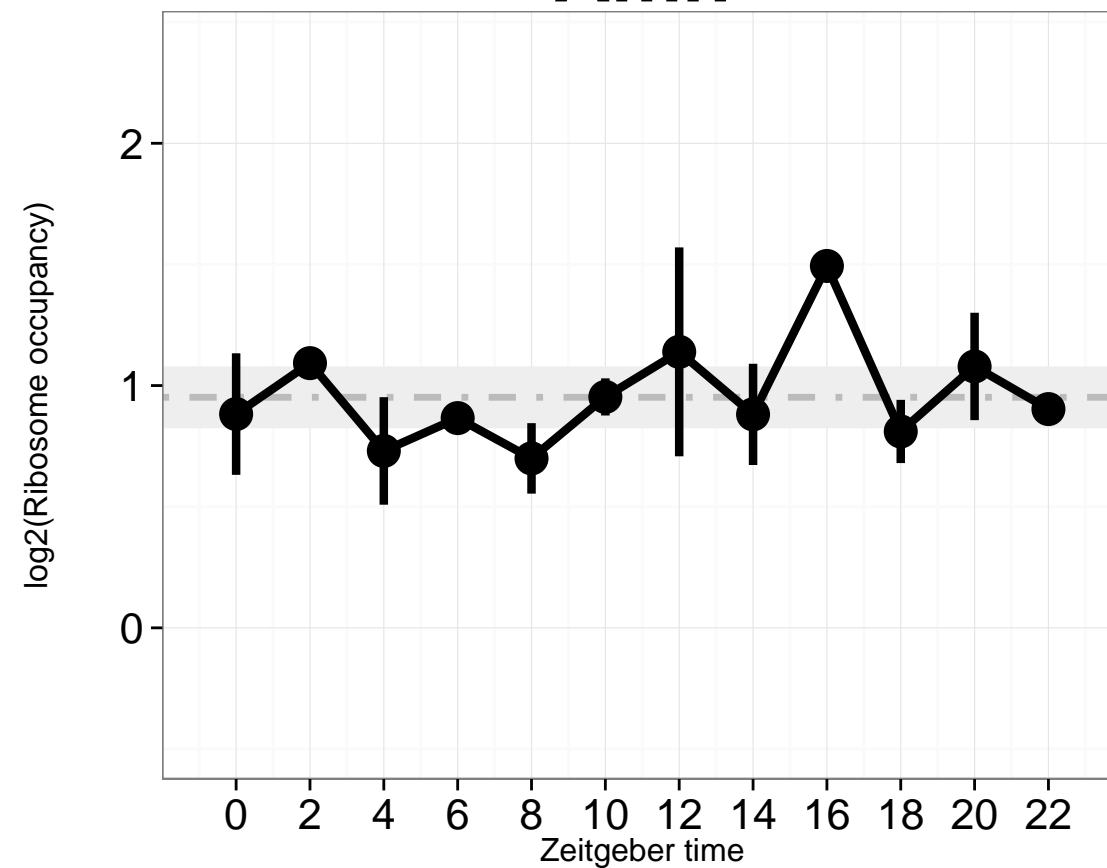

Supplement: Supplementary file 12784 [file 1]

# Tiam1

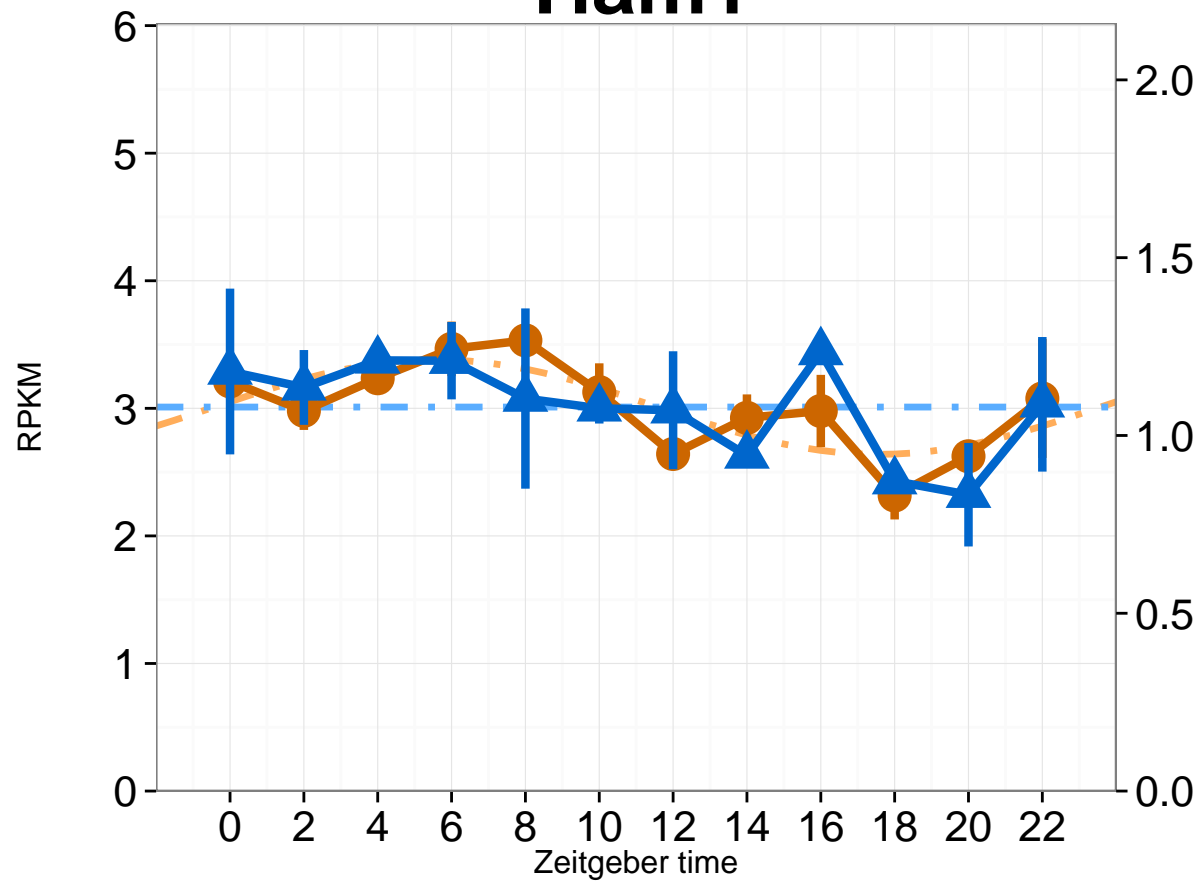

# Tiam1

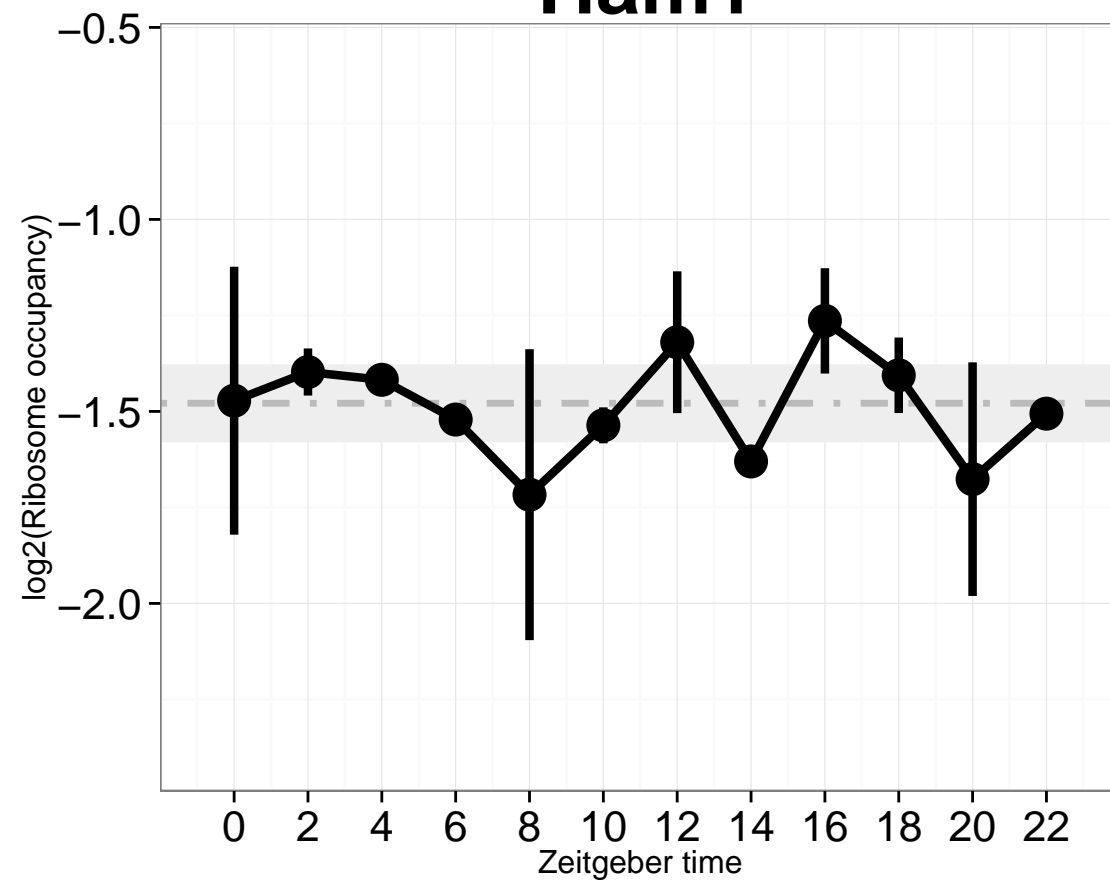

Supplement: Supplementary file 12785 [file 1]

## Nav3

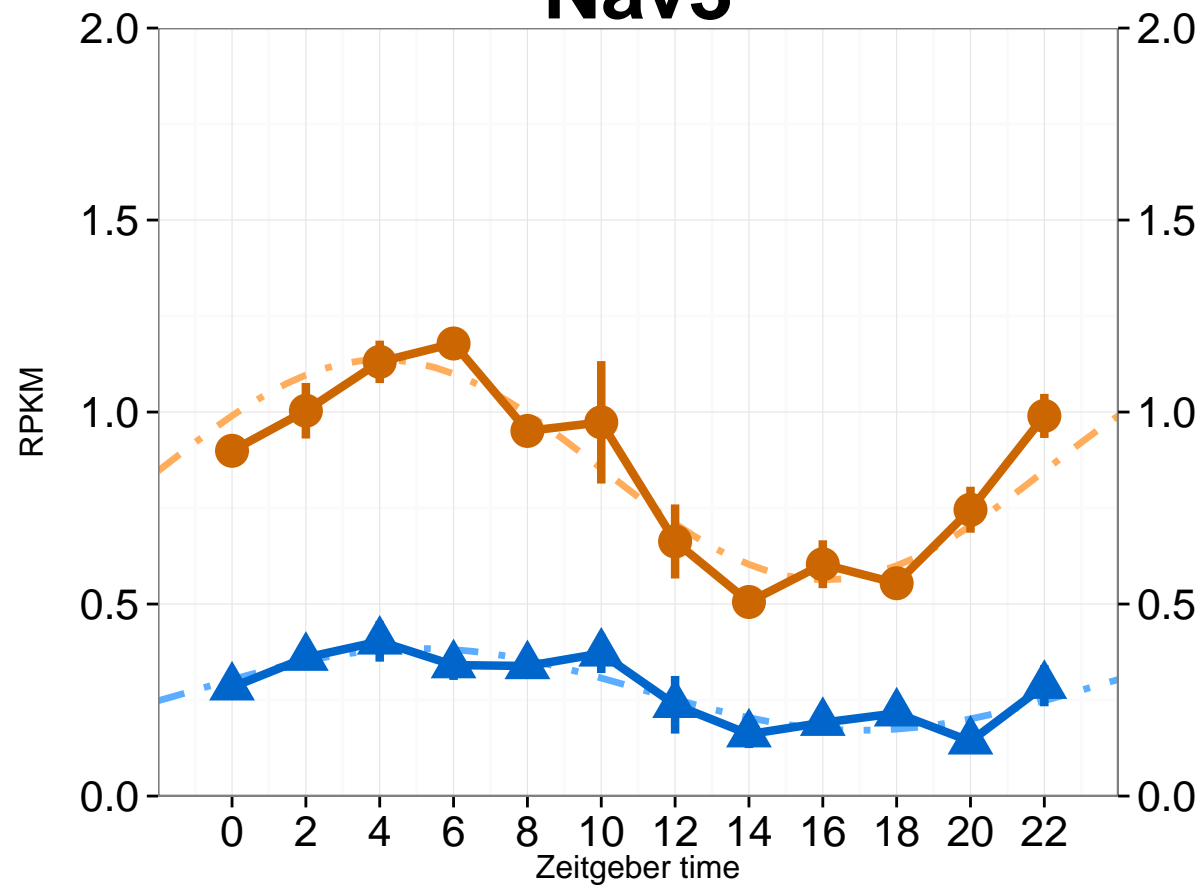

## Nav3

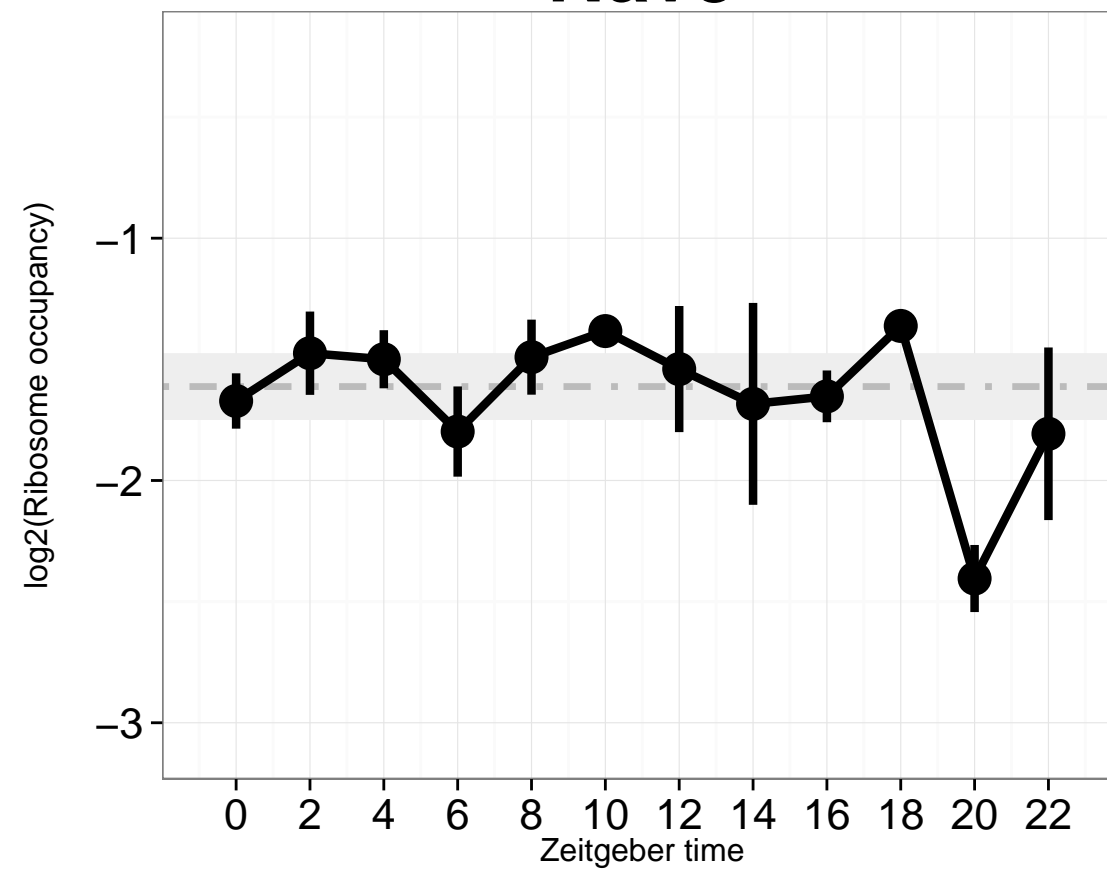

Supplement: Supplementary file 12786 [file 1]

## Ptprb

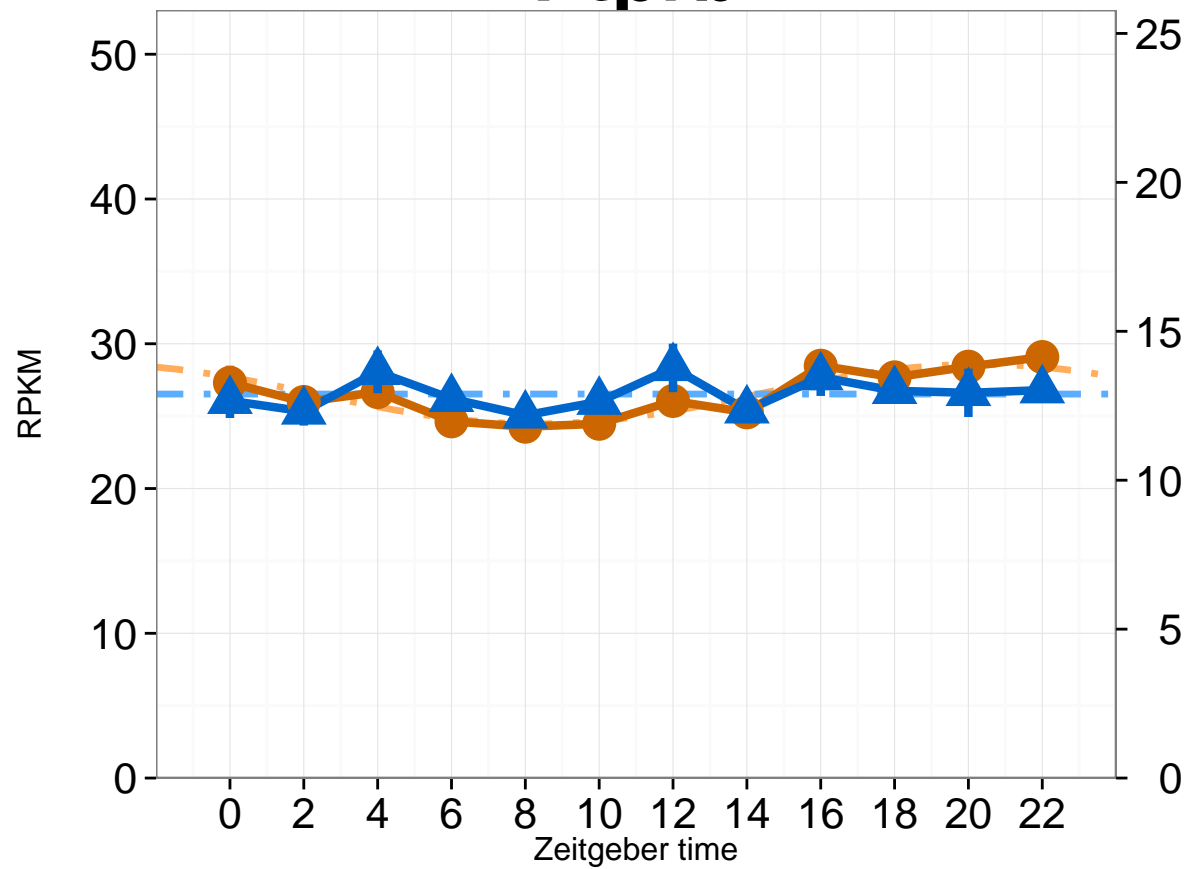

## Ptprb

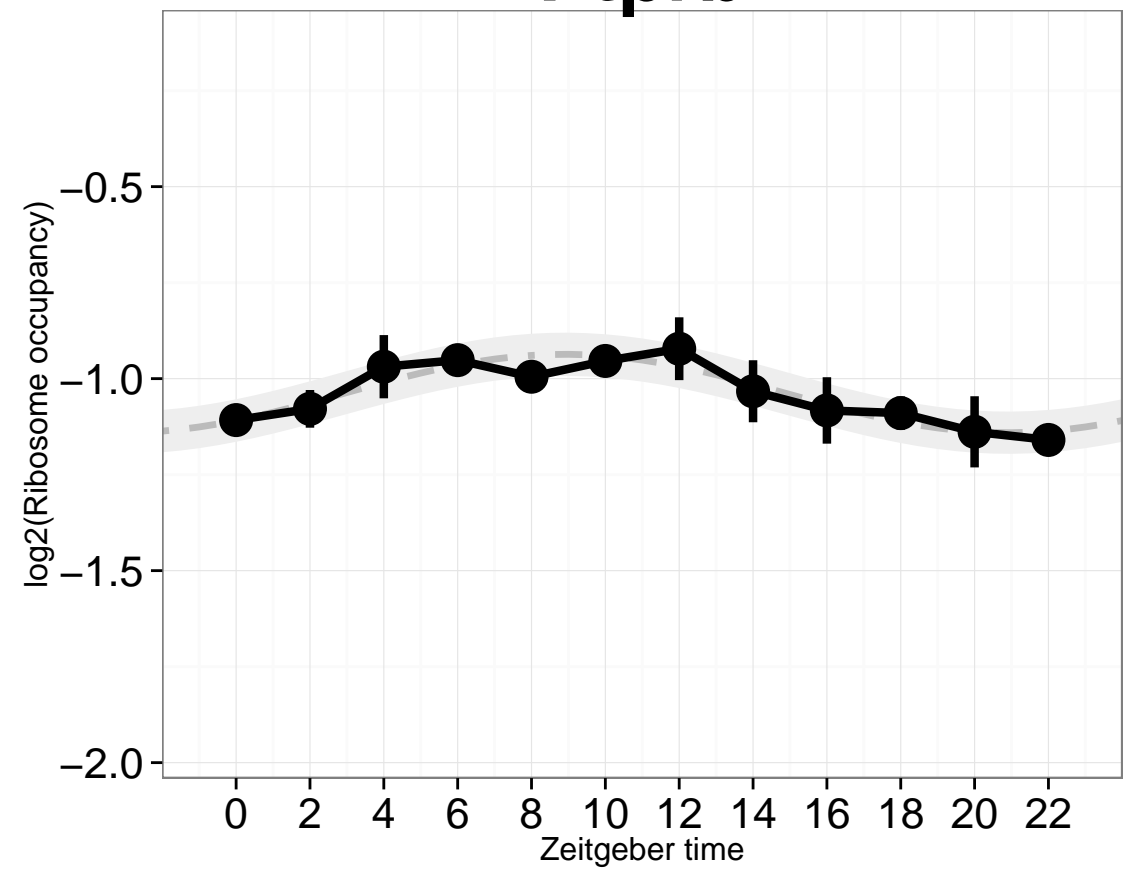

Supplement: Supplementary file 12787 [file 1]

# C2cd2

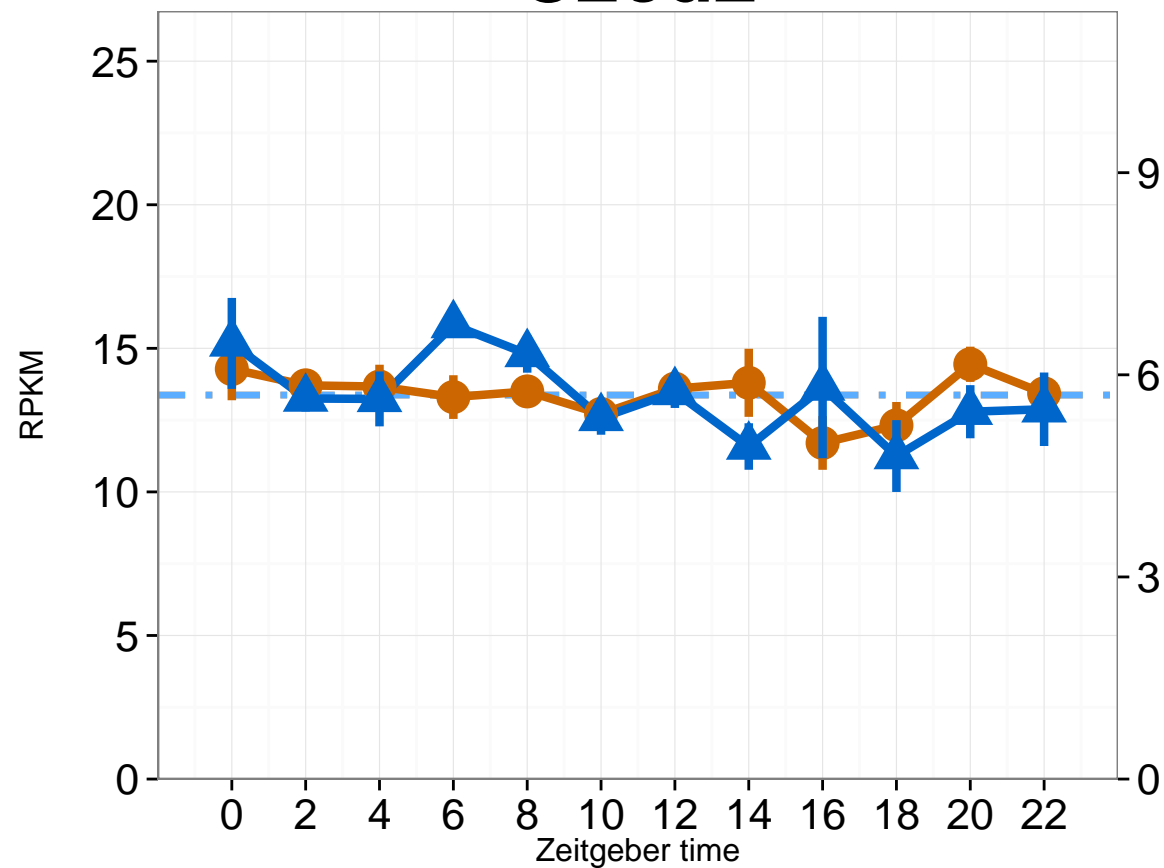

# C2cd2

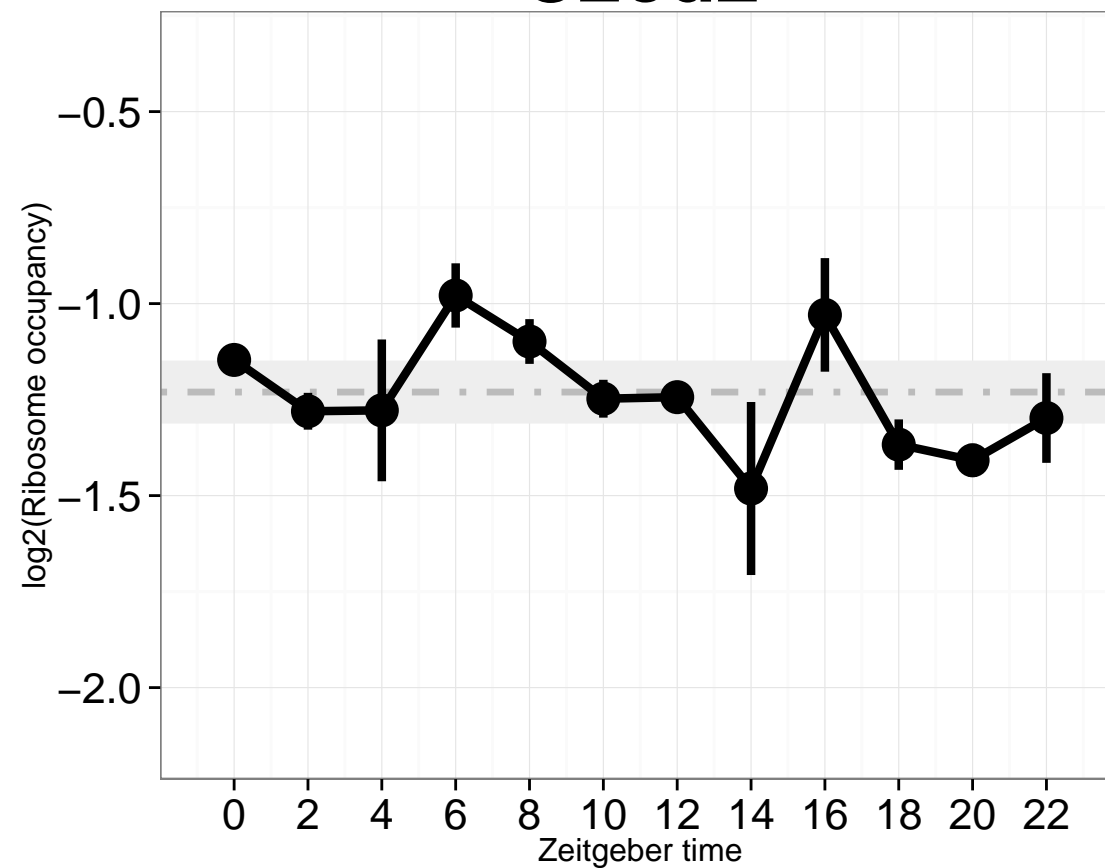

Supplement: Supplementary file 12788 [file 1]

## Rexo2

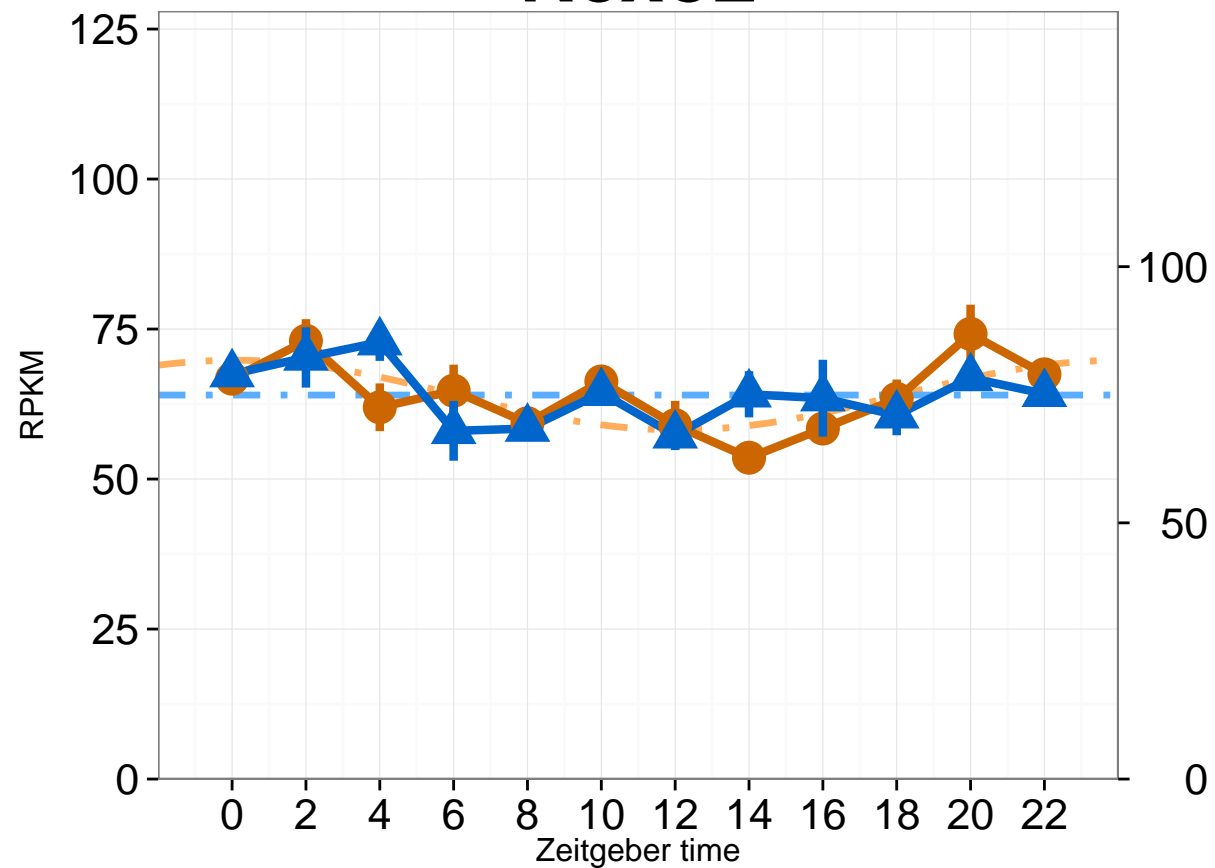

## Rexo2

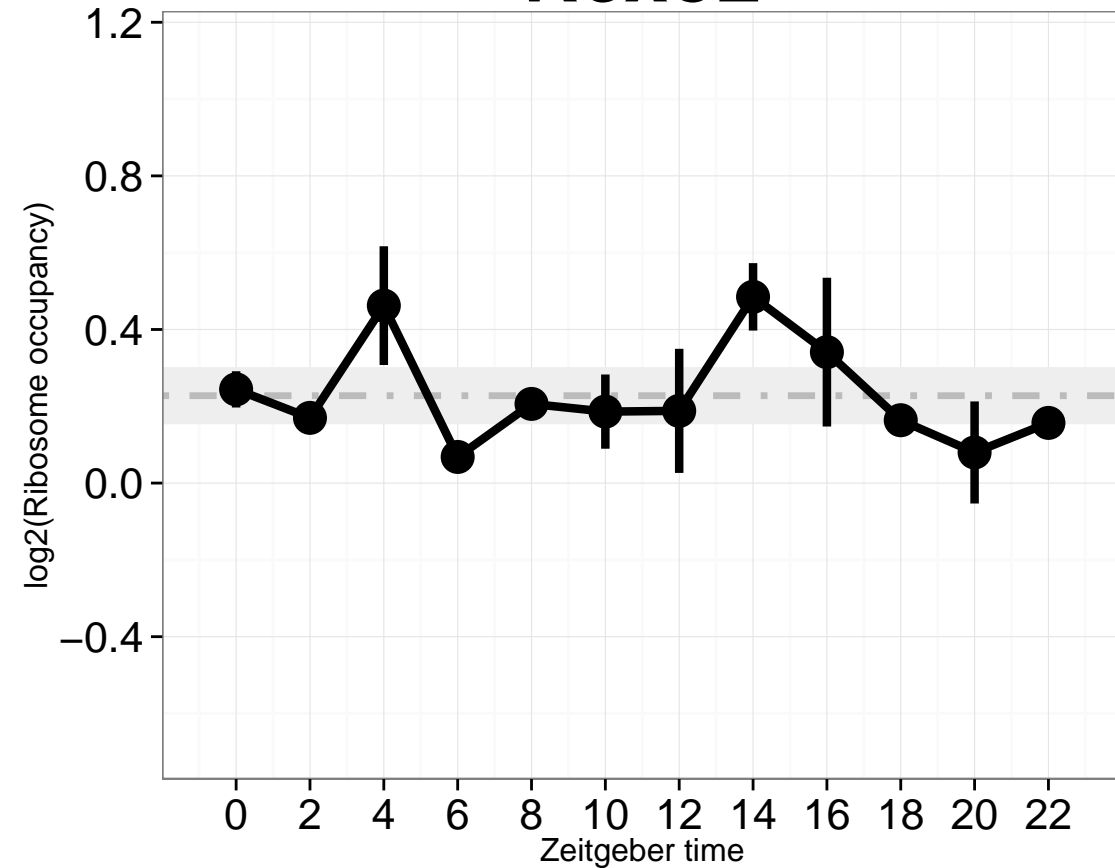

Supplement: Supplementary file 12789 [file 1]

## Capns1

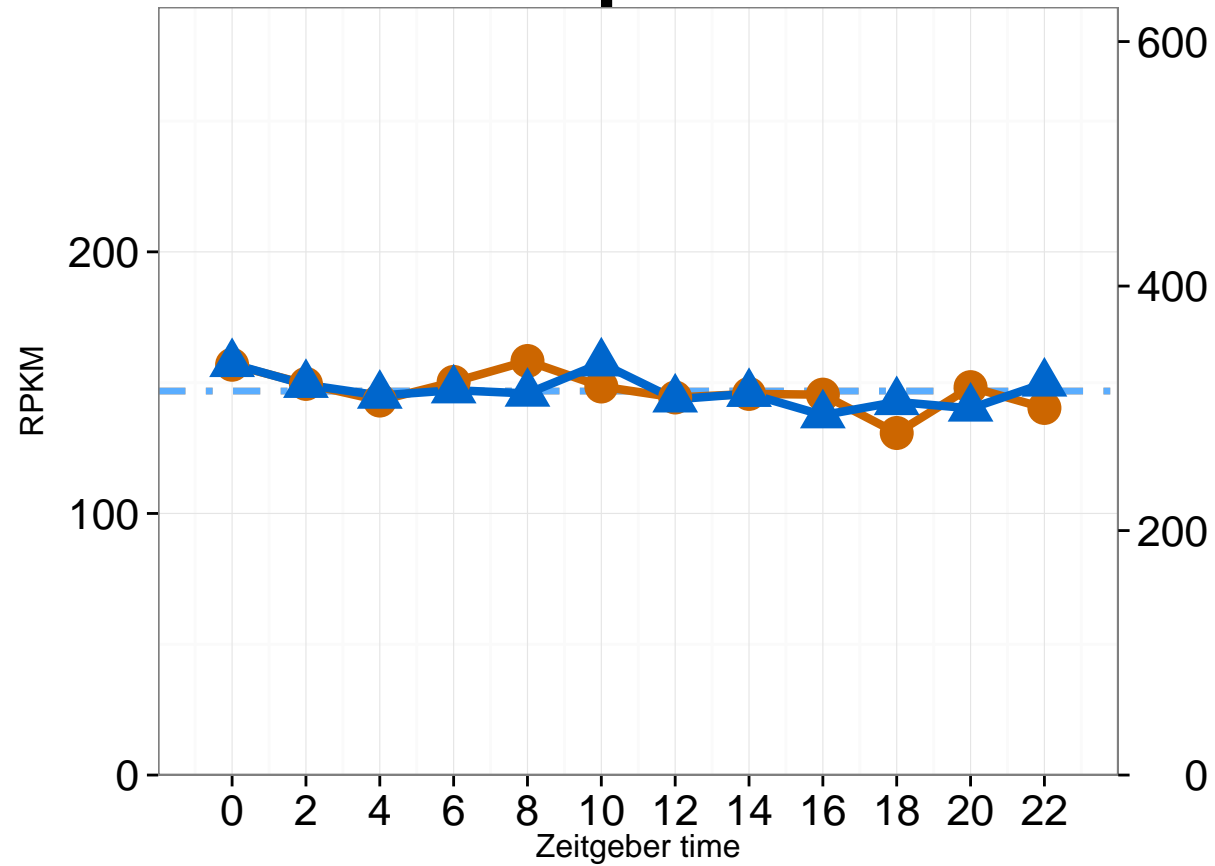

## Capns1

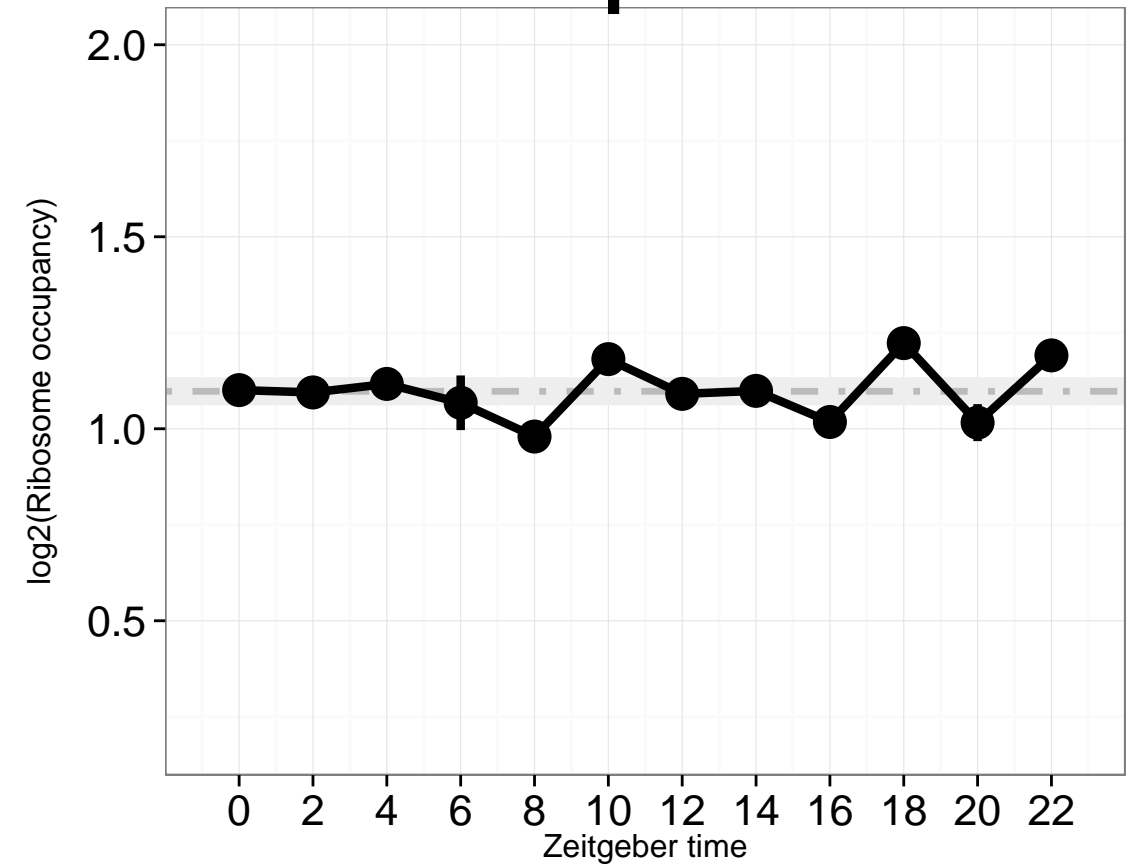

Supplement: Supplementary file 12790 [file 1]

# Lrrc61

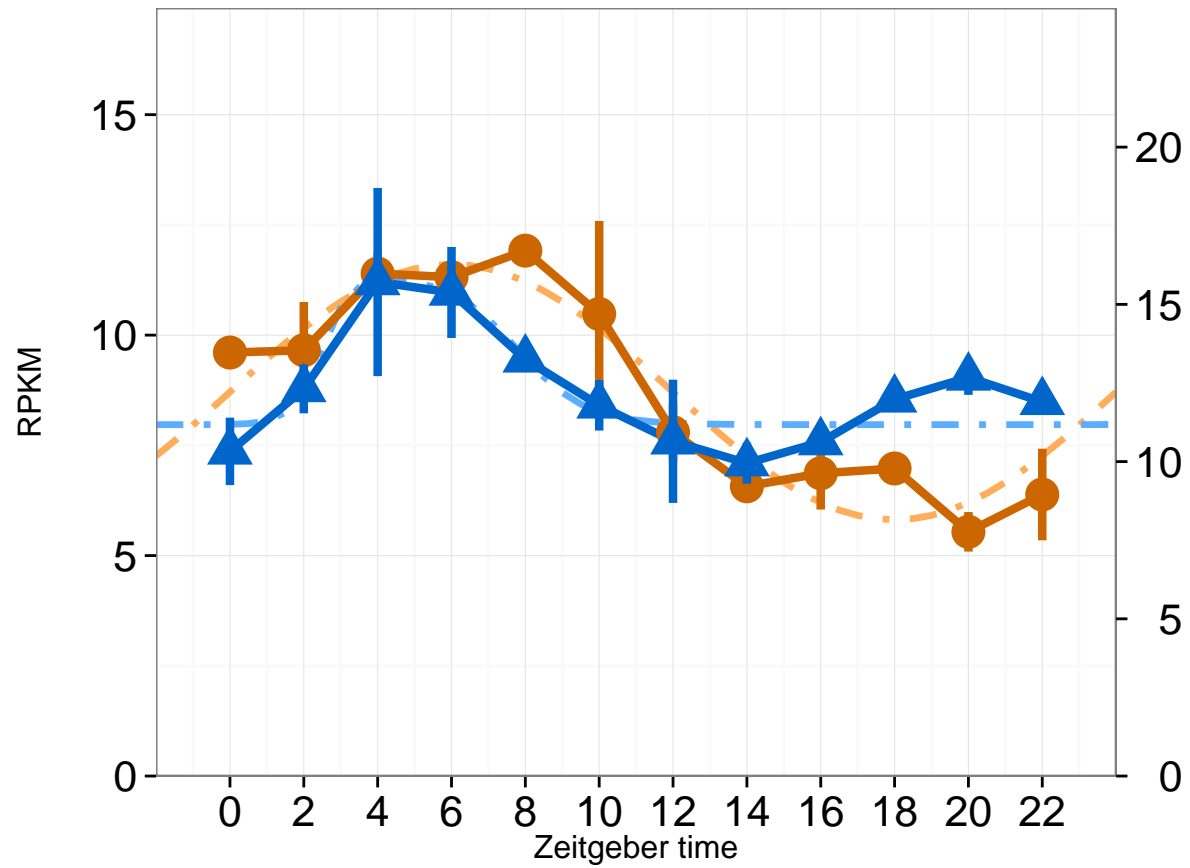

# Lrrc61

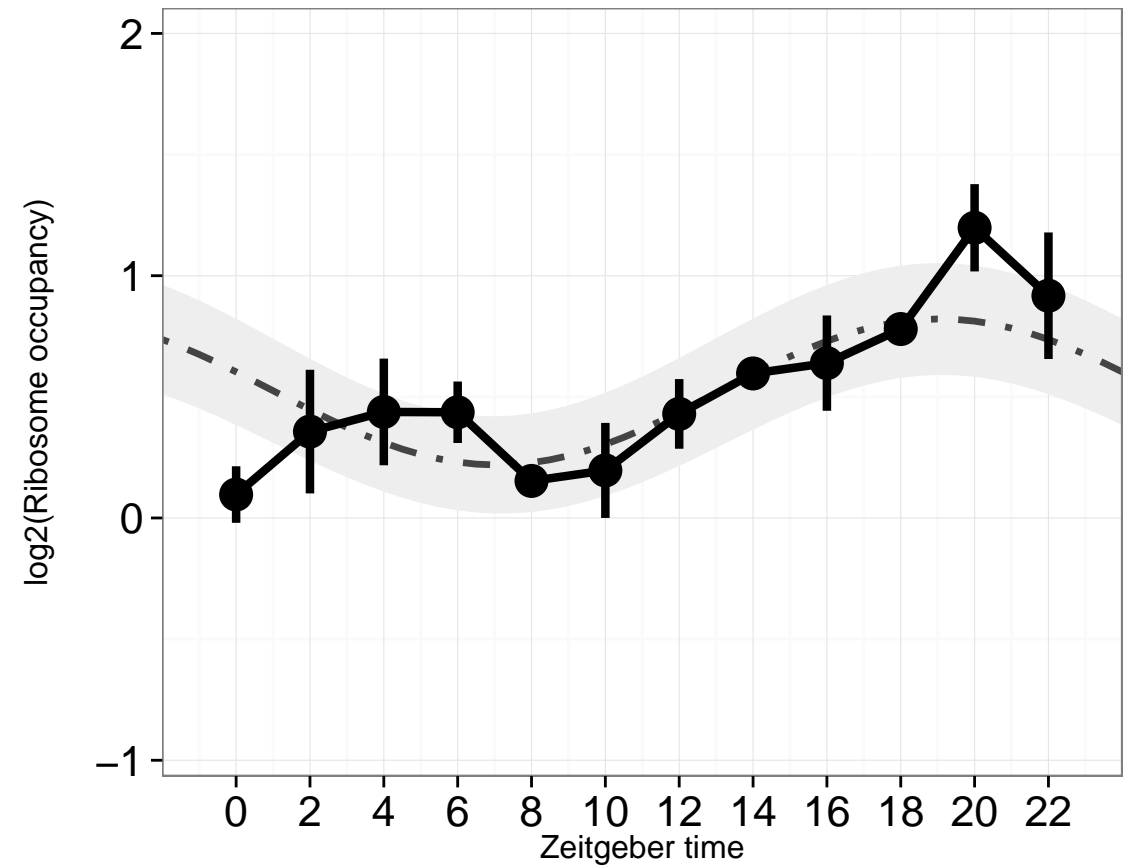

Supplement: Supplementary file 12791 [file 1]

## Asb13

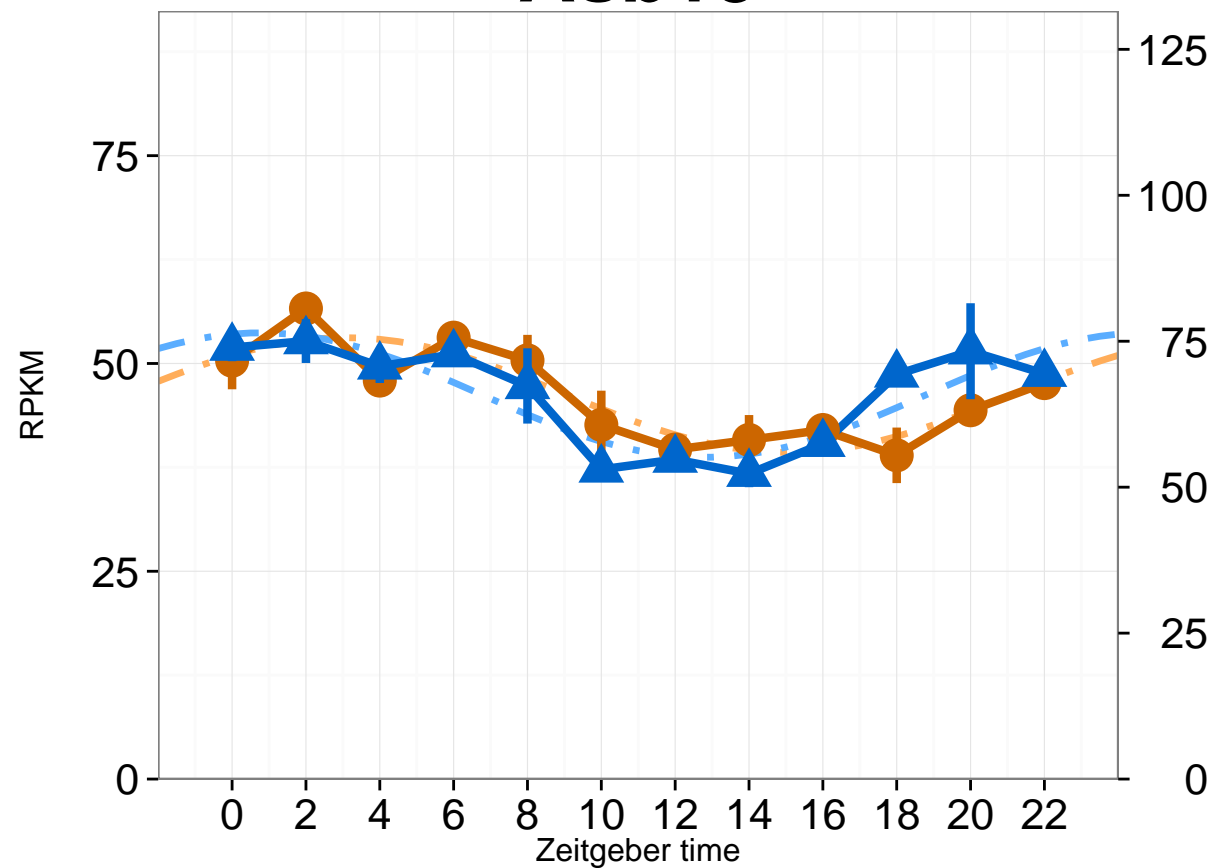

## Asb13

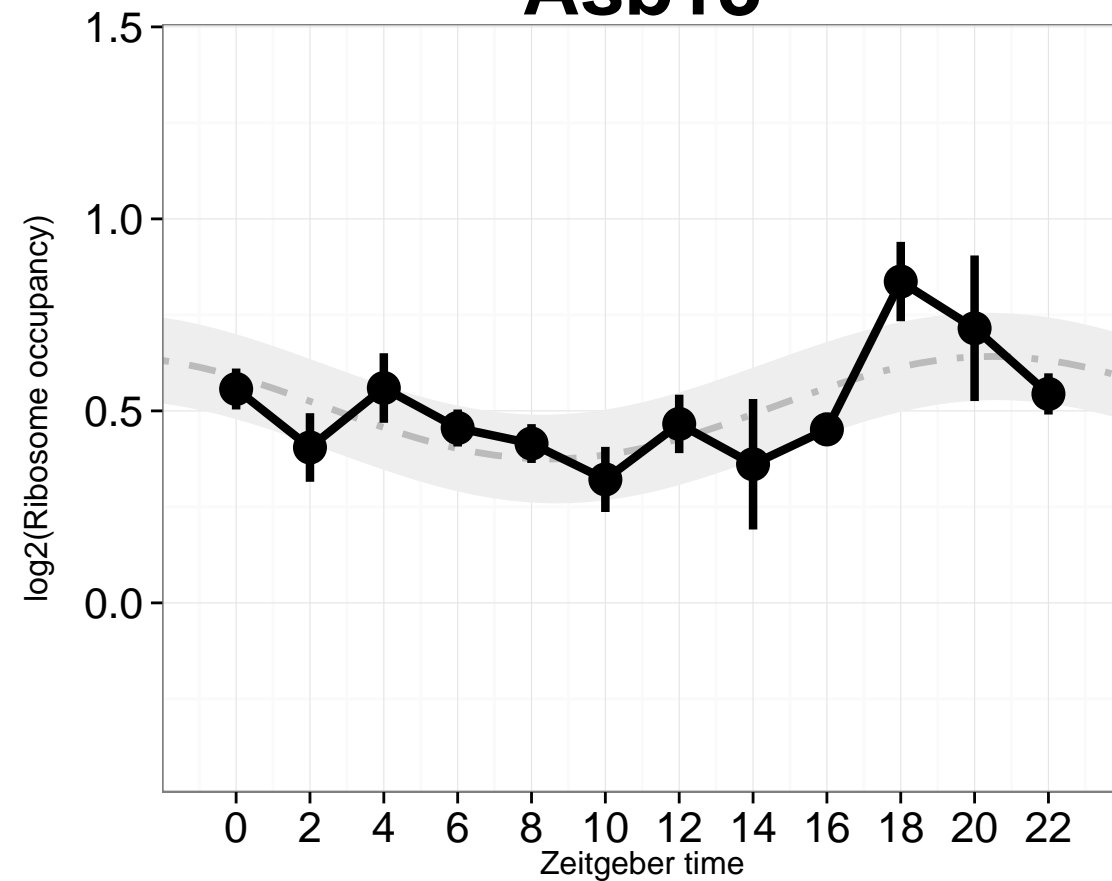

Supplement: Supplementary file 12792 [file 1]

## Cdk4

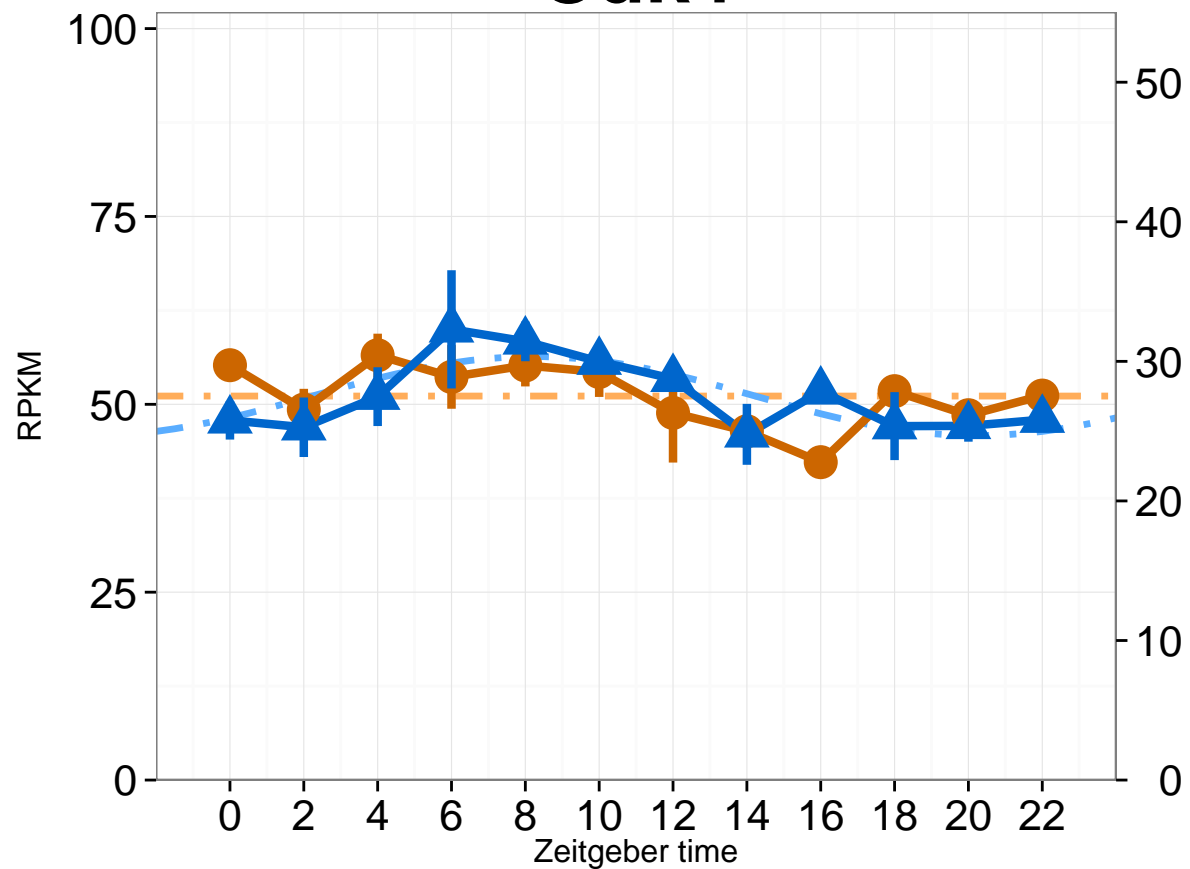

## Cdk4

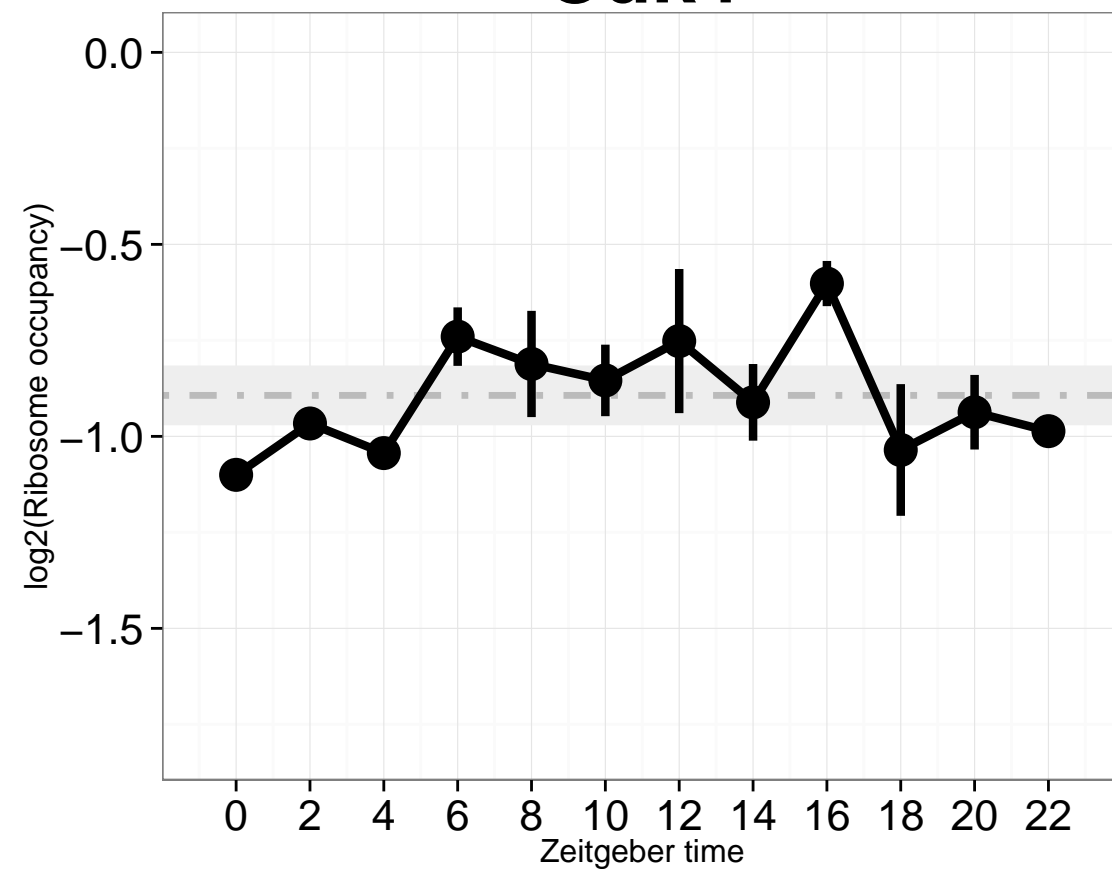

Supplement: Supplementary file 12793 [file 1]

# Grip1

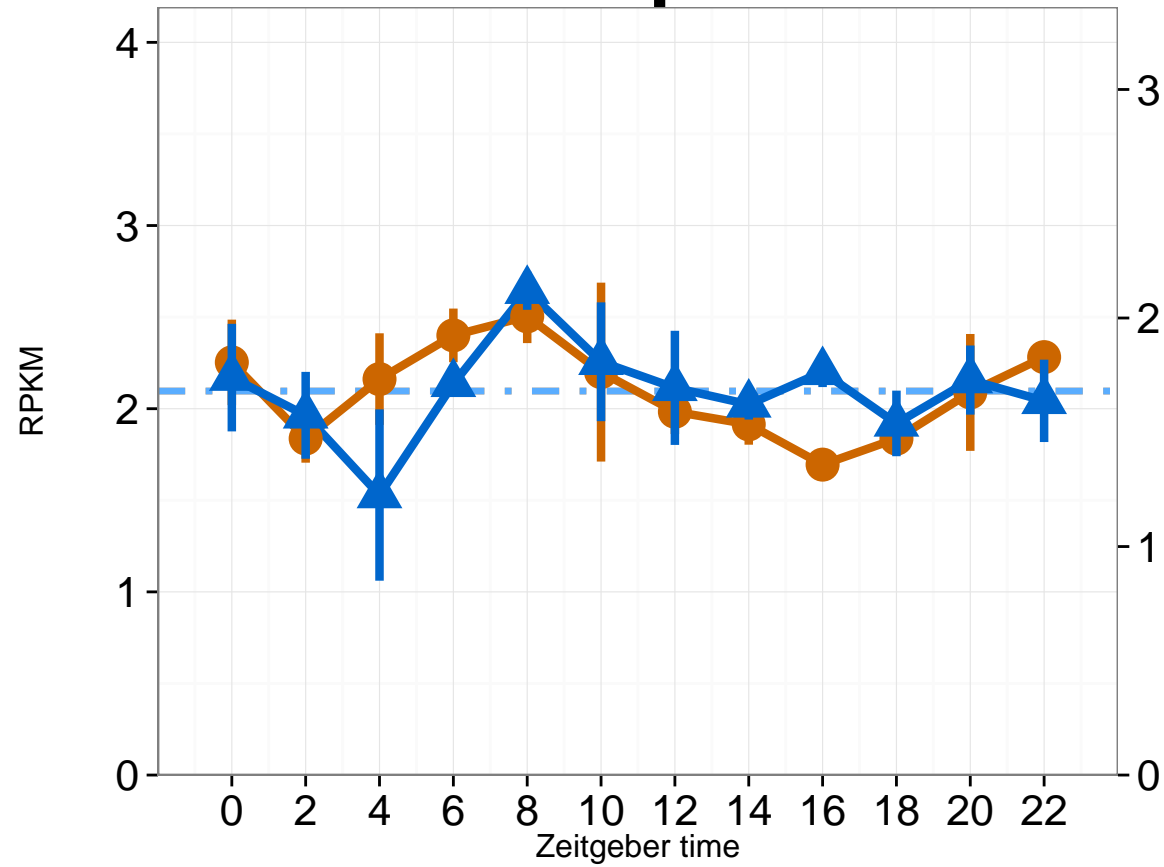

# Grip1

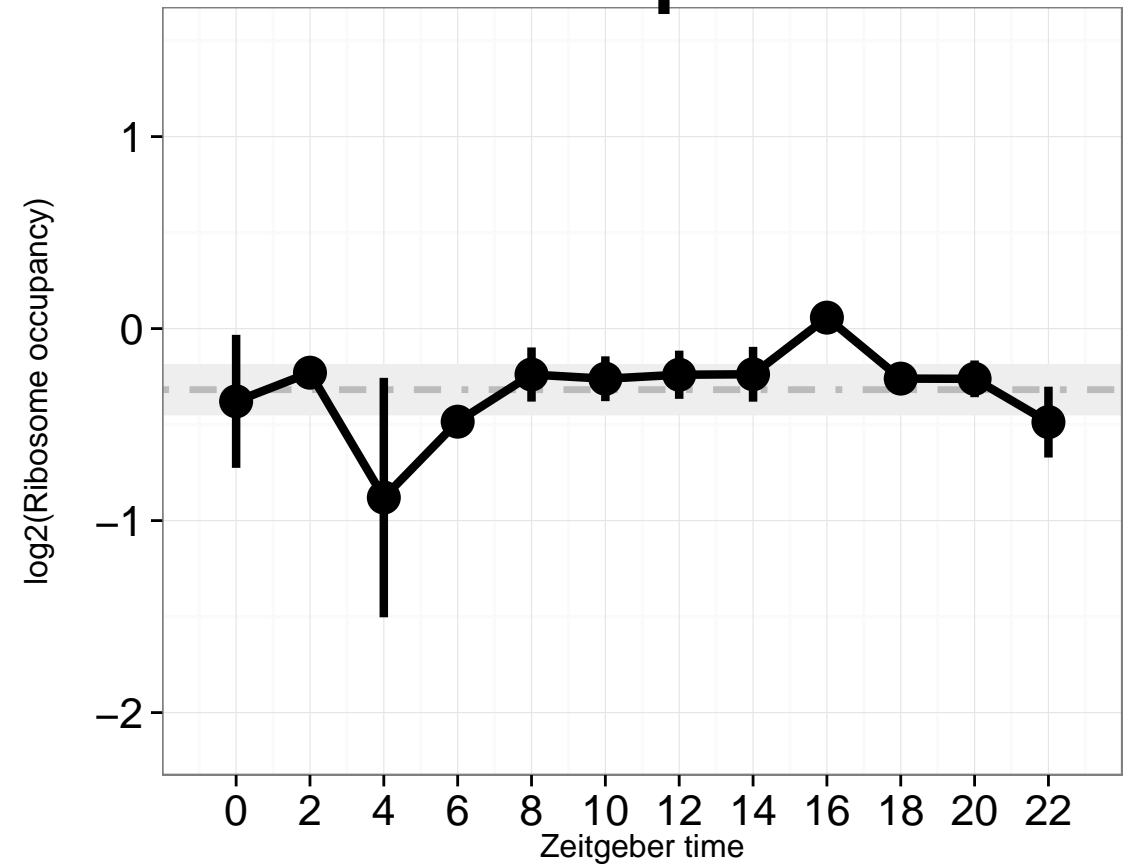

Supplement: Supplementary file 12794 [file 1]

# Rnf125

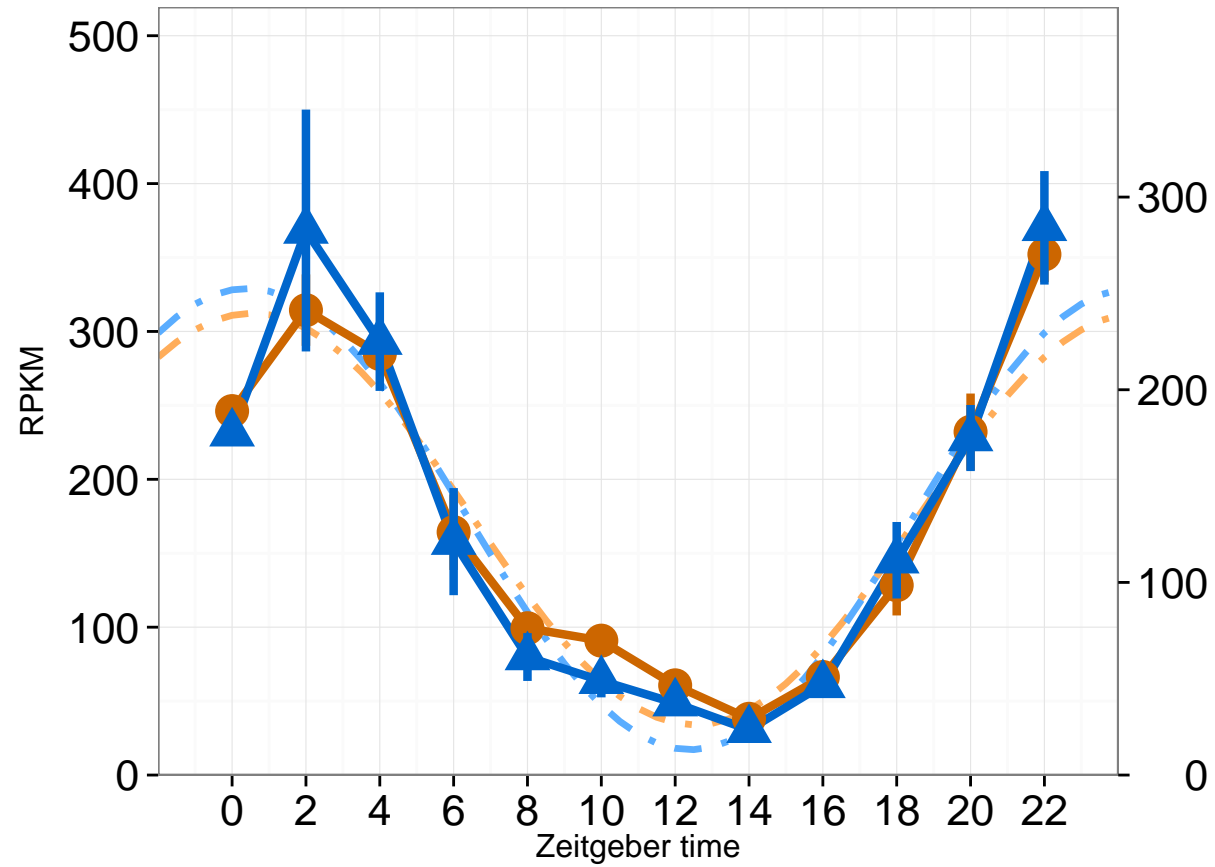

# Rnf125

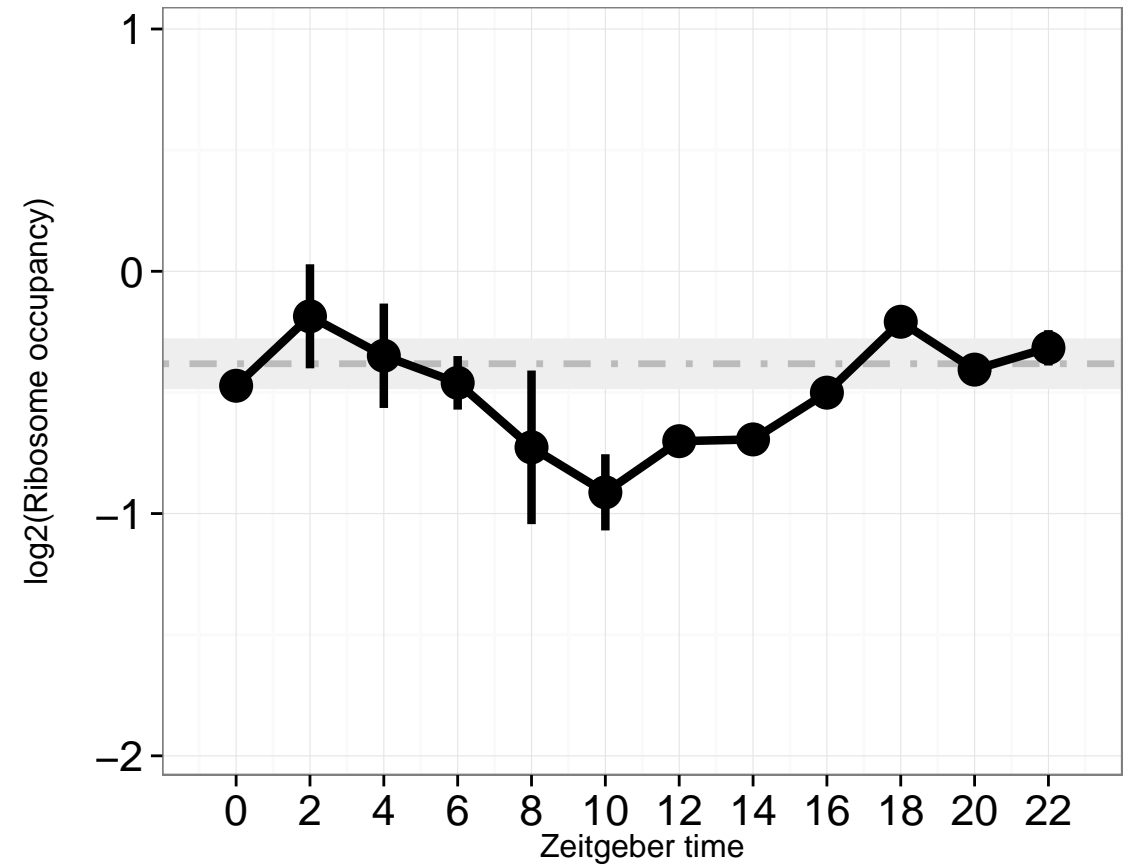

Supplement: Supplementary file 12795 [file 1]

# Rtfdc1

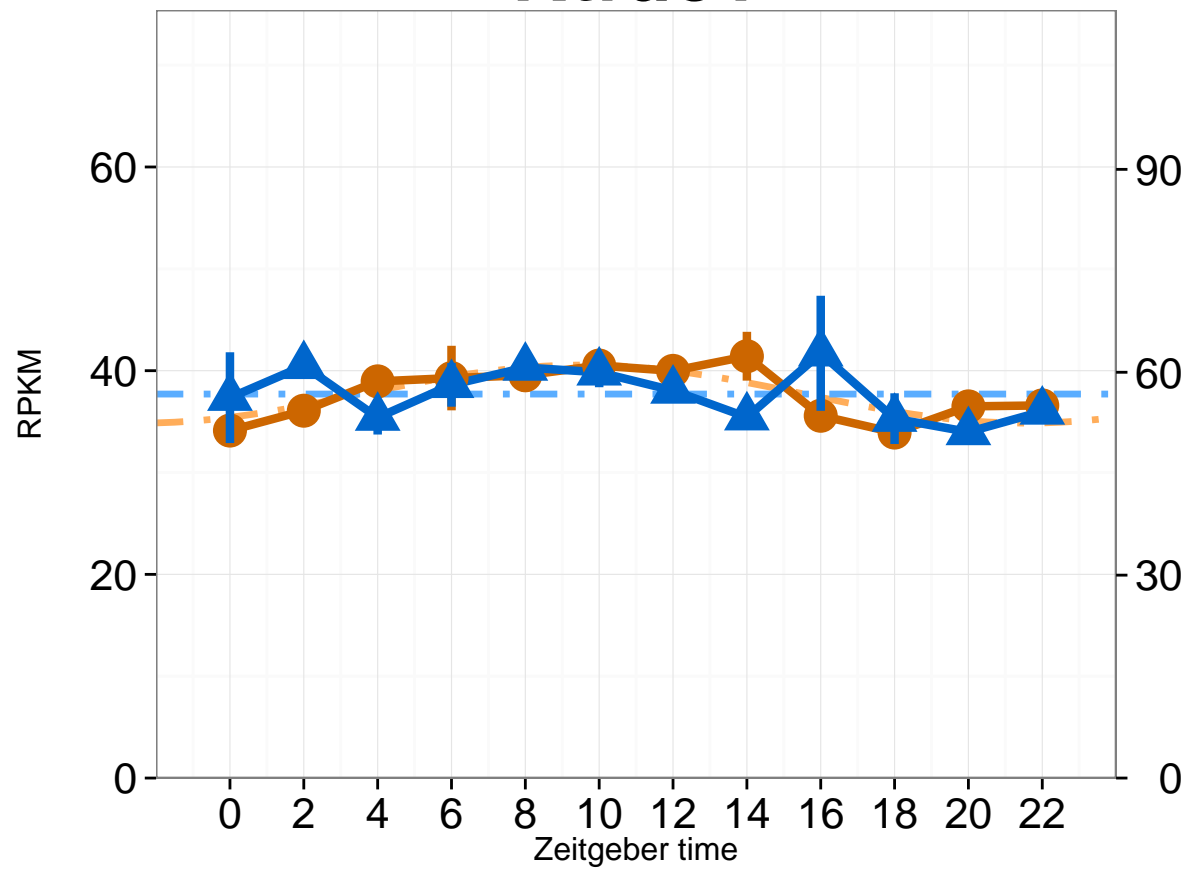

# Rtfdc1

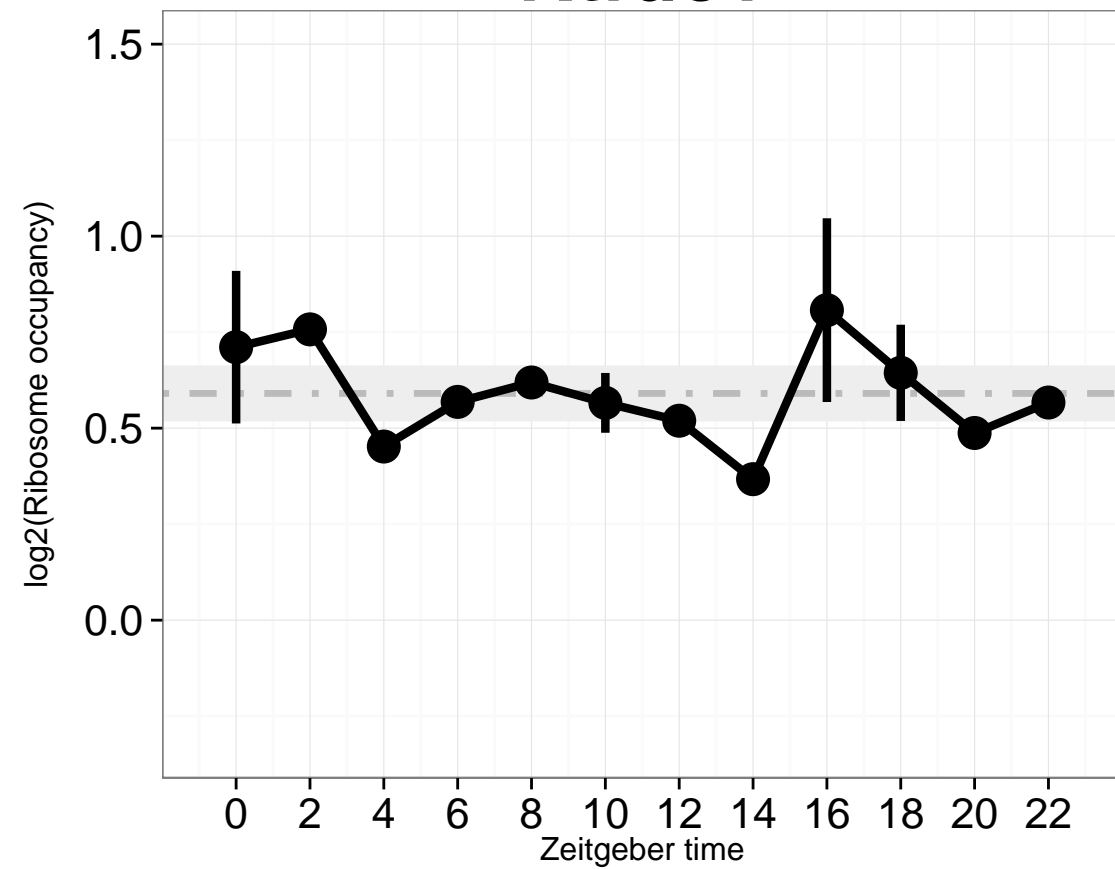

Supplement: Supplementary file 12796 [file 1]

## Rab34

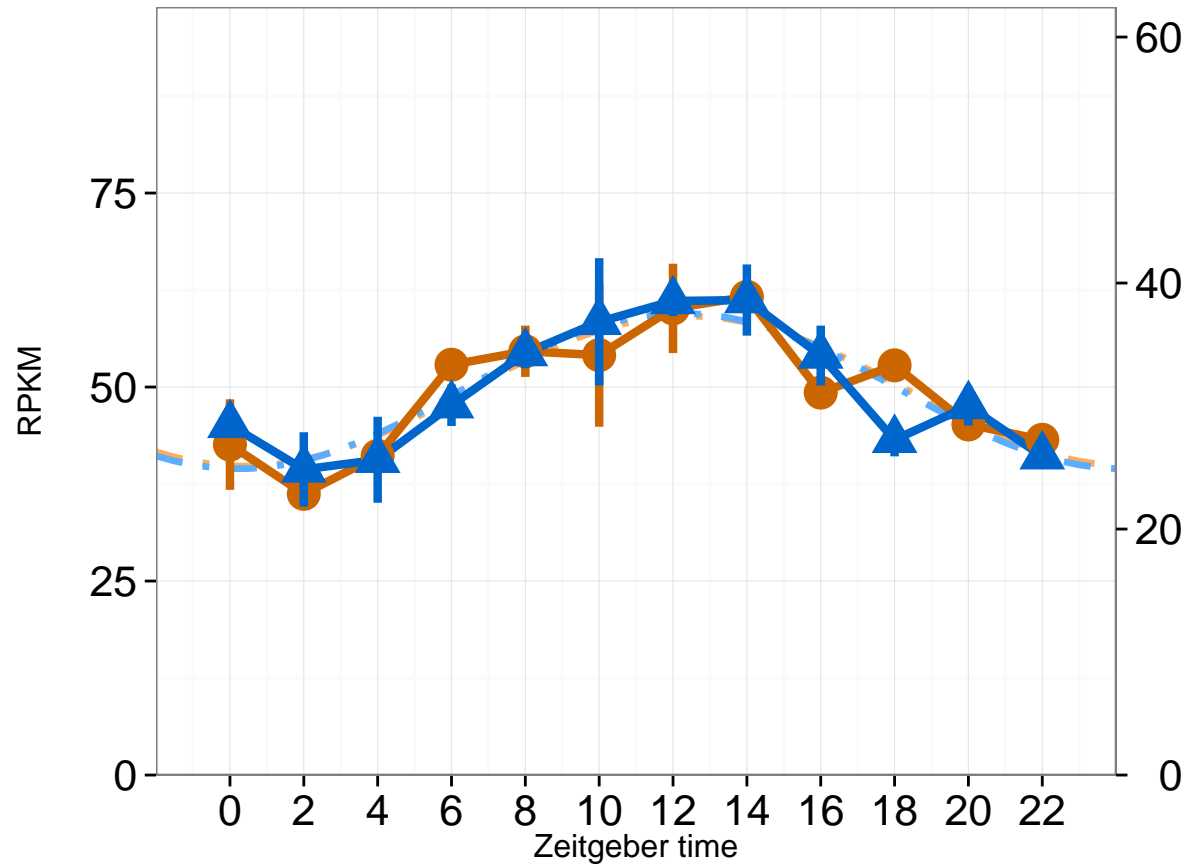

## Rab34

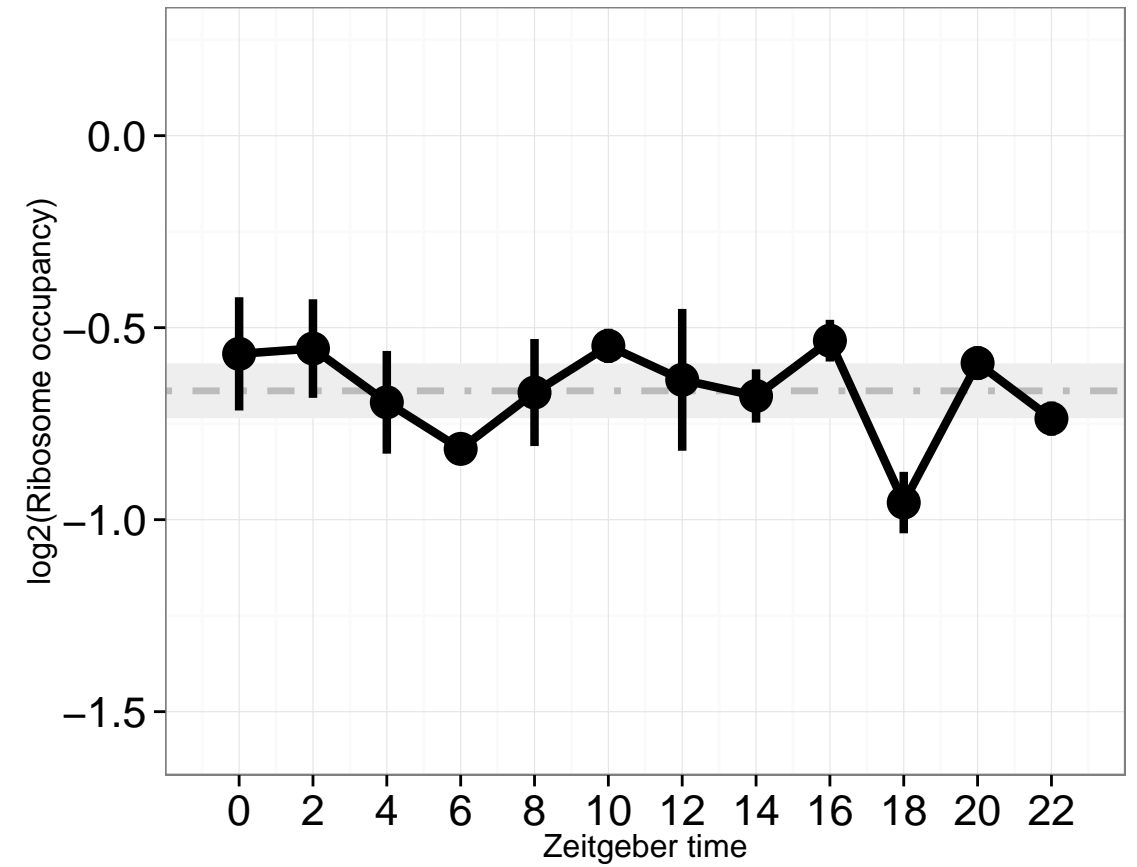

Supplement: Supplementary file 12797 [file 1]

# Hyls1

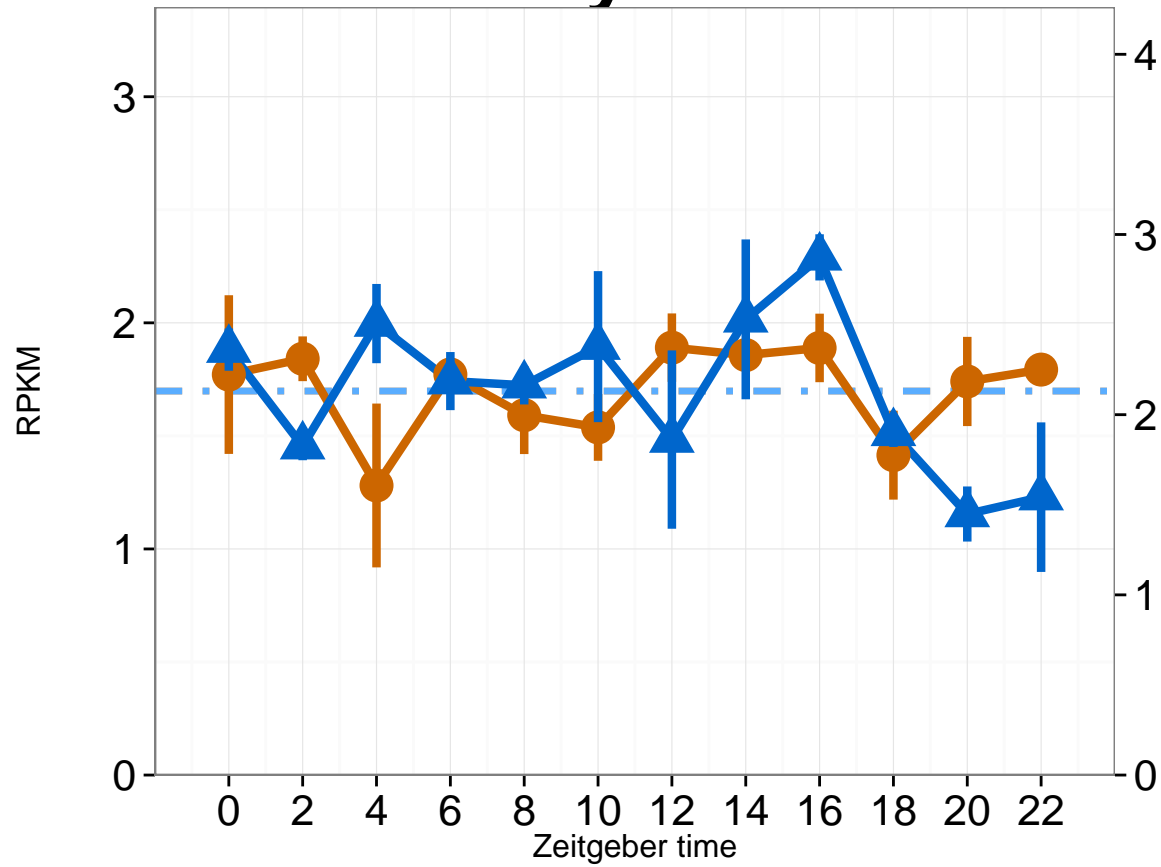

# Hyls1

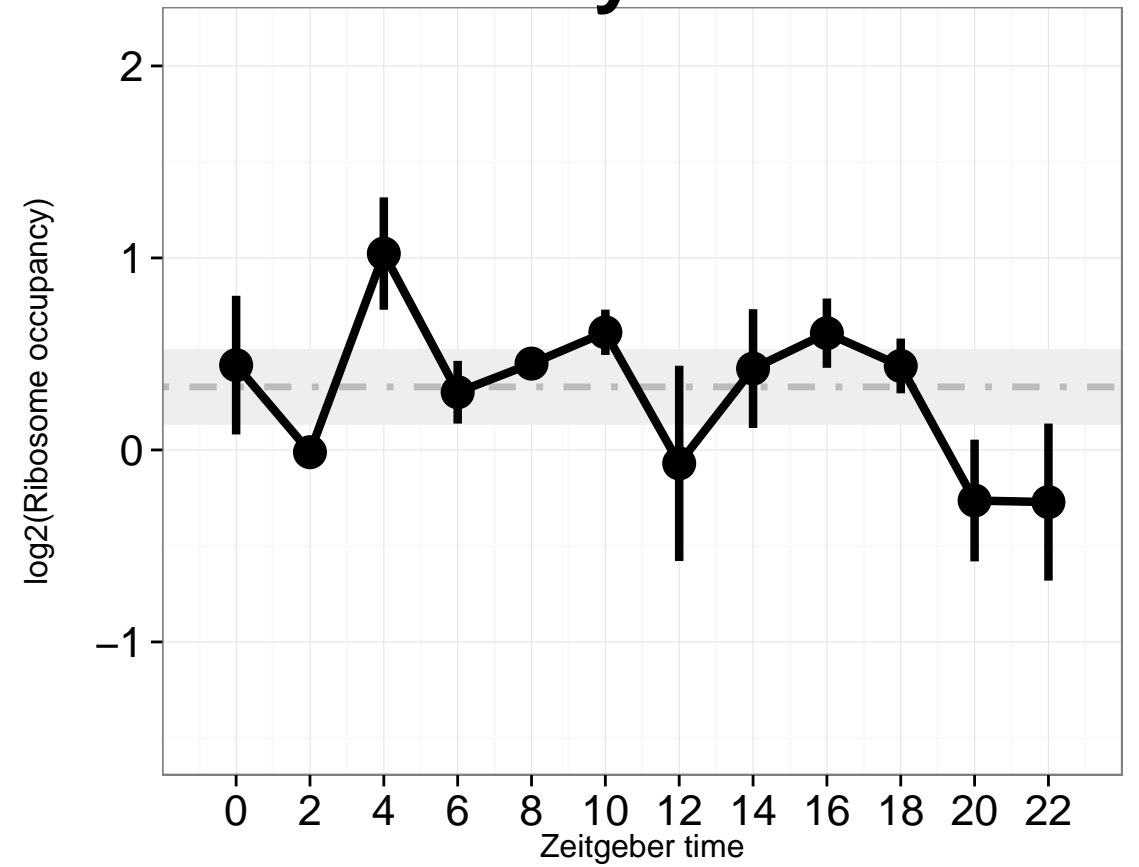

Supplement: Supplementary file 12798 [file 1]

## Pcdhga9

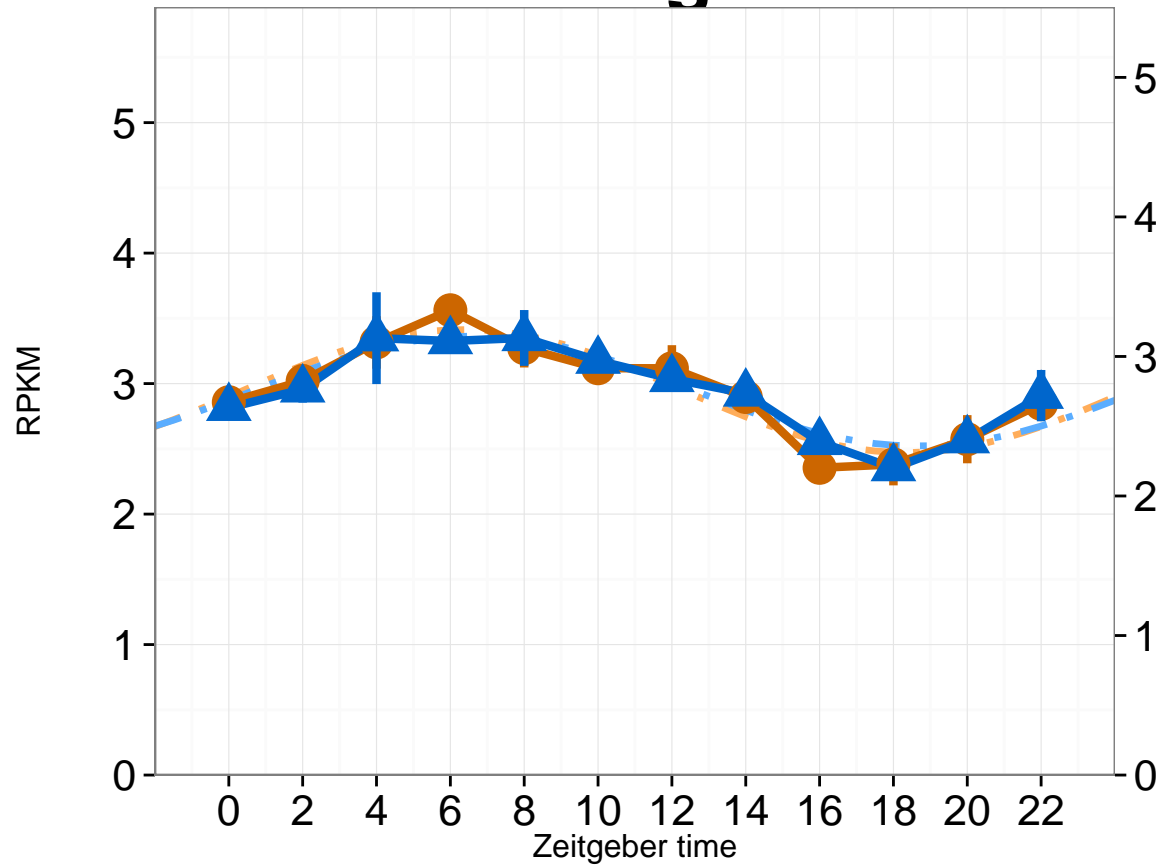

## Pcdhga9

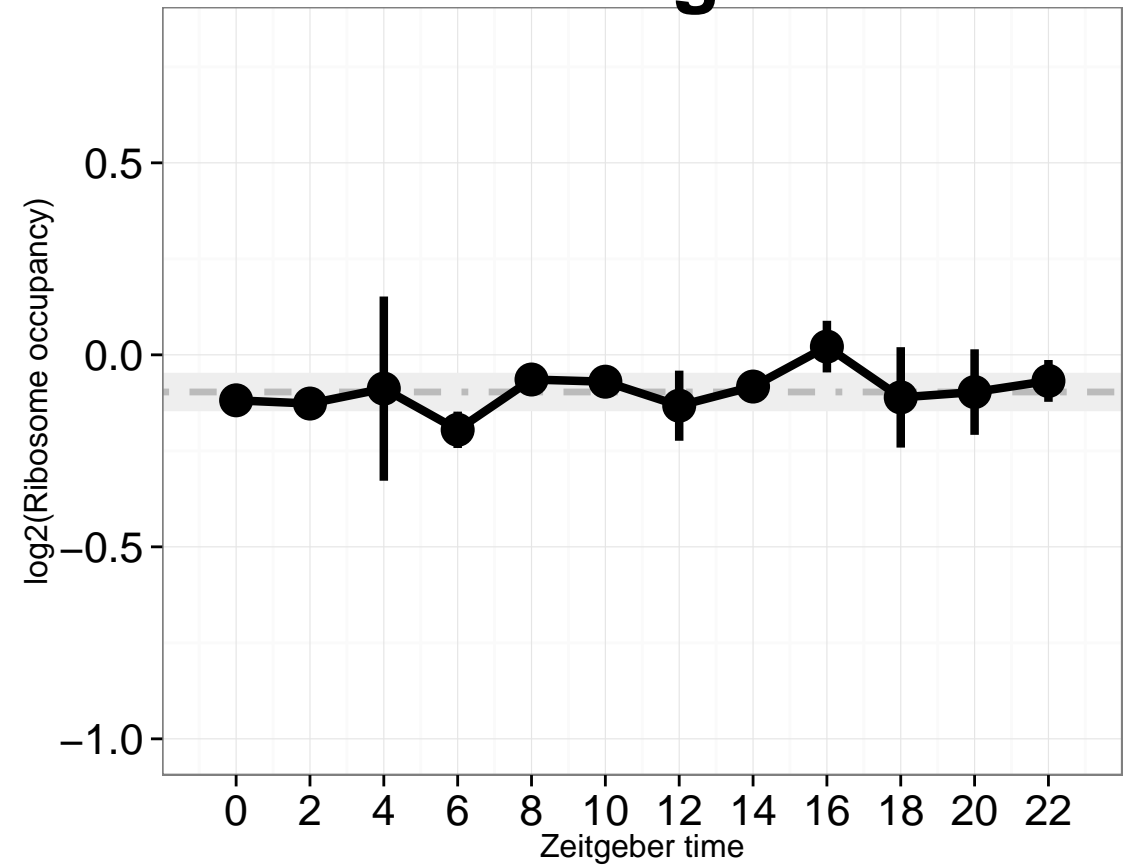

Supplement: Supplementary file 12799 [file 1]

**Ptprf**

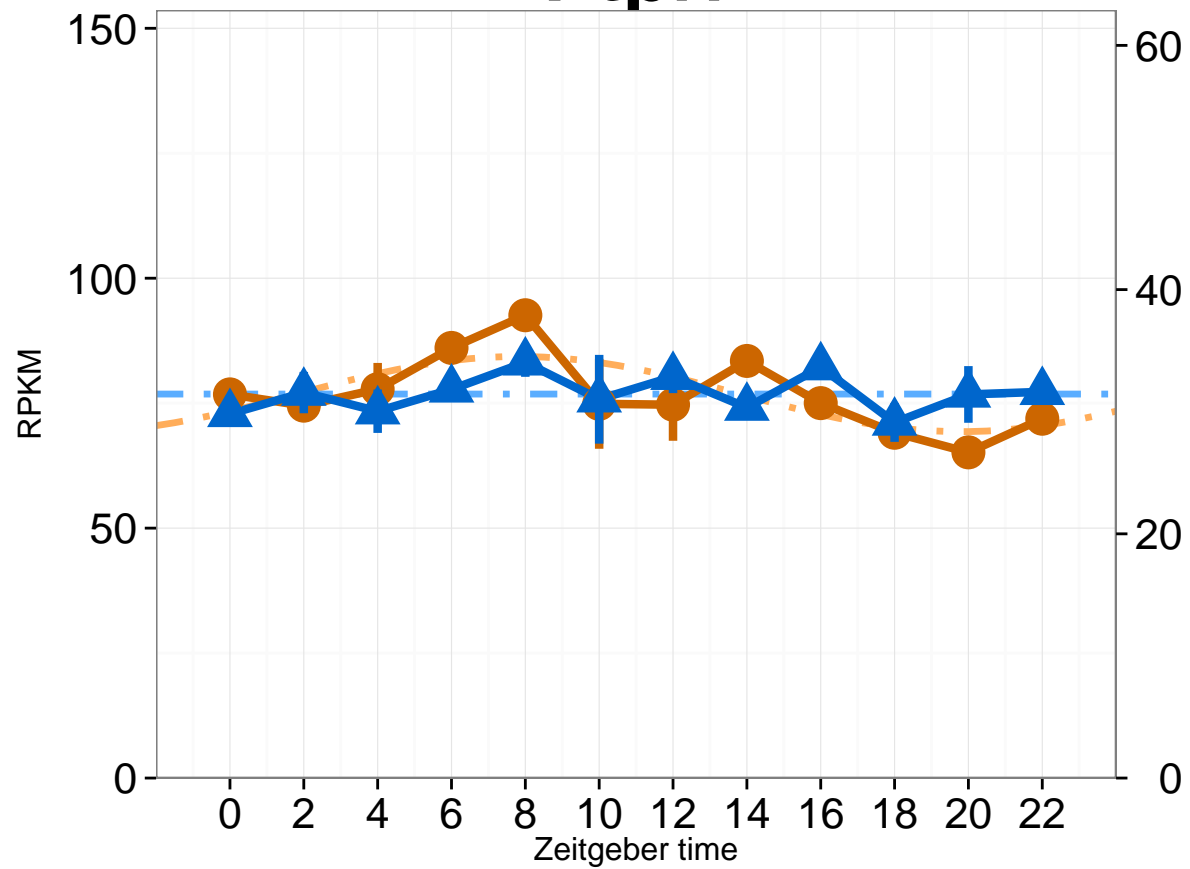

**Ptprf**

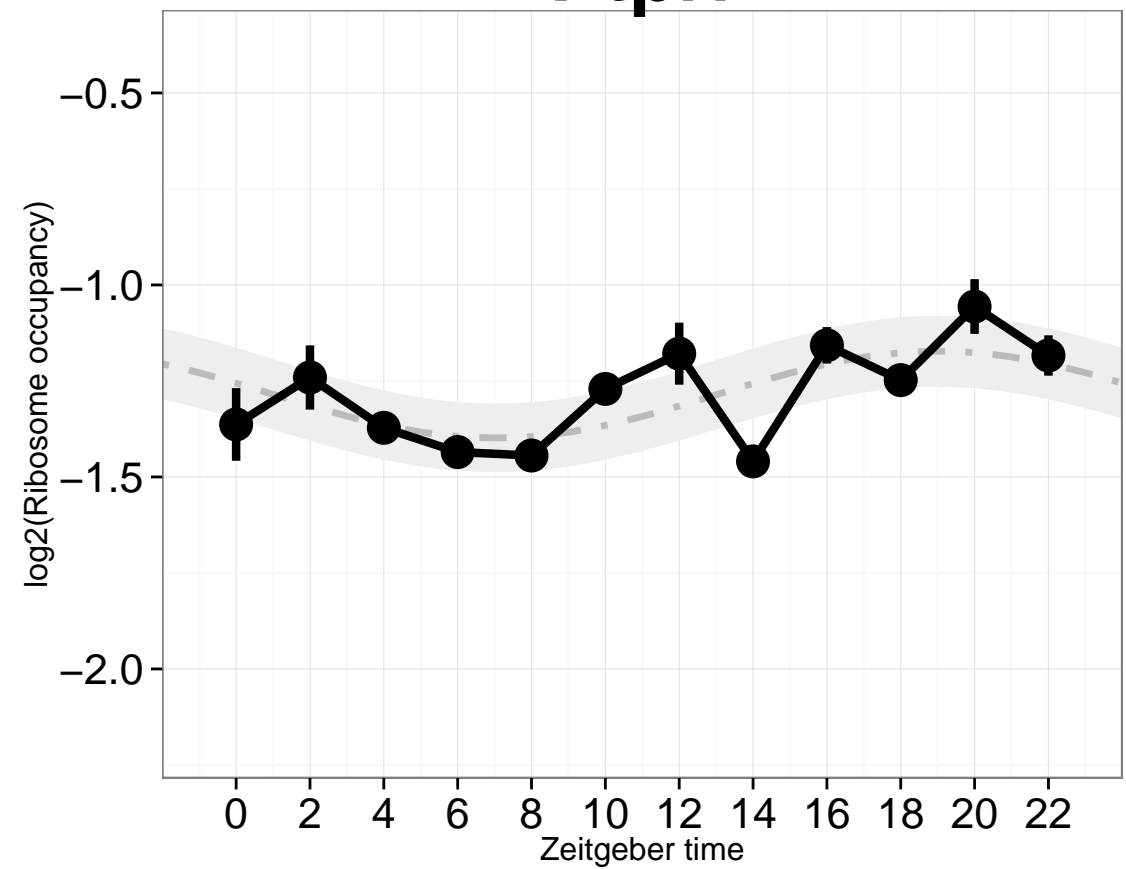

Supplement: Supplementary file 12800 [file 1]

# Ms4a6b

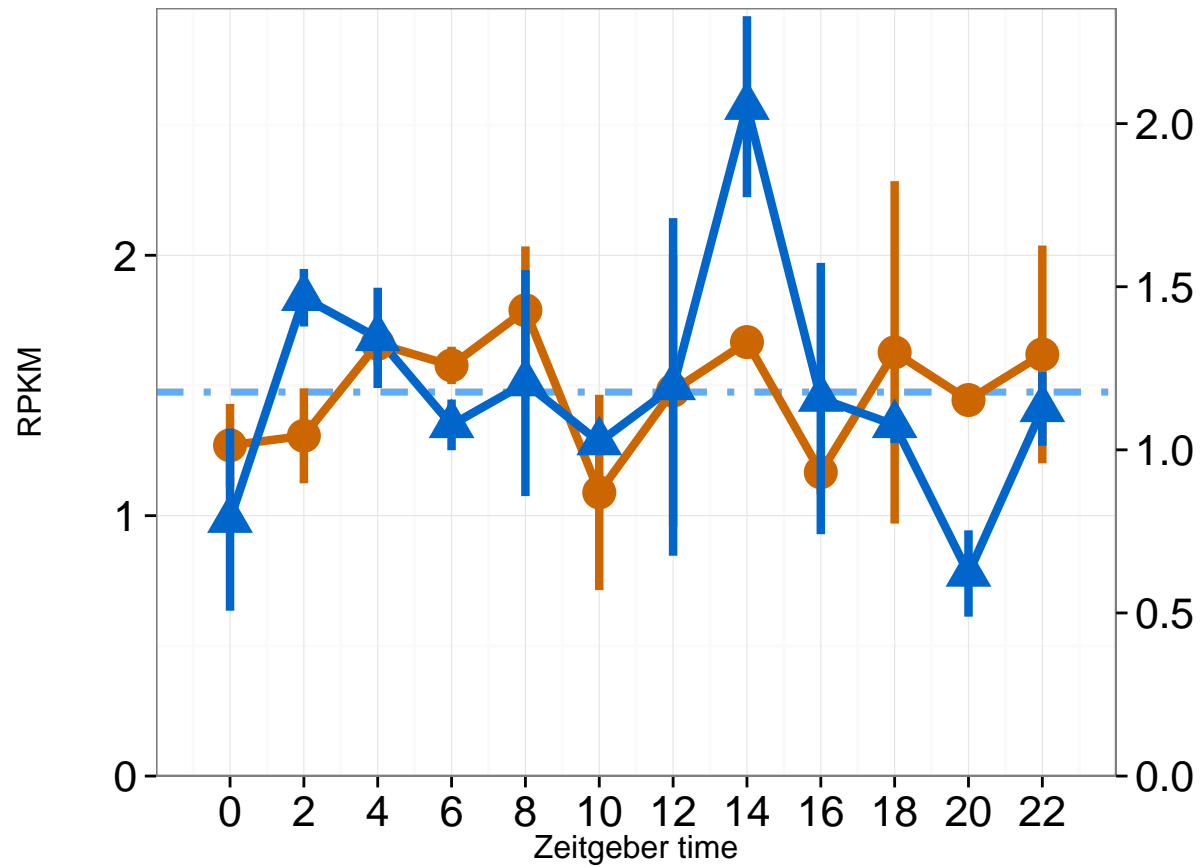

# Ms4a6b

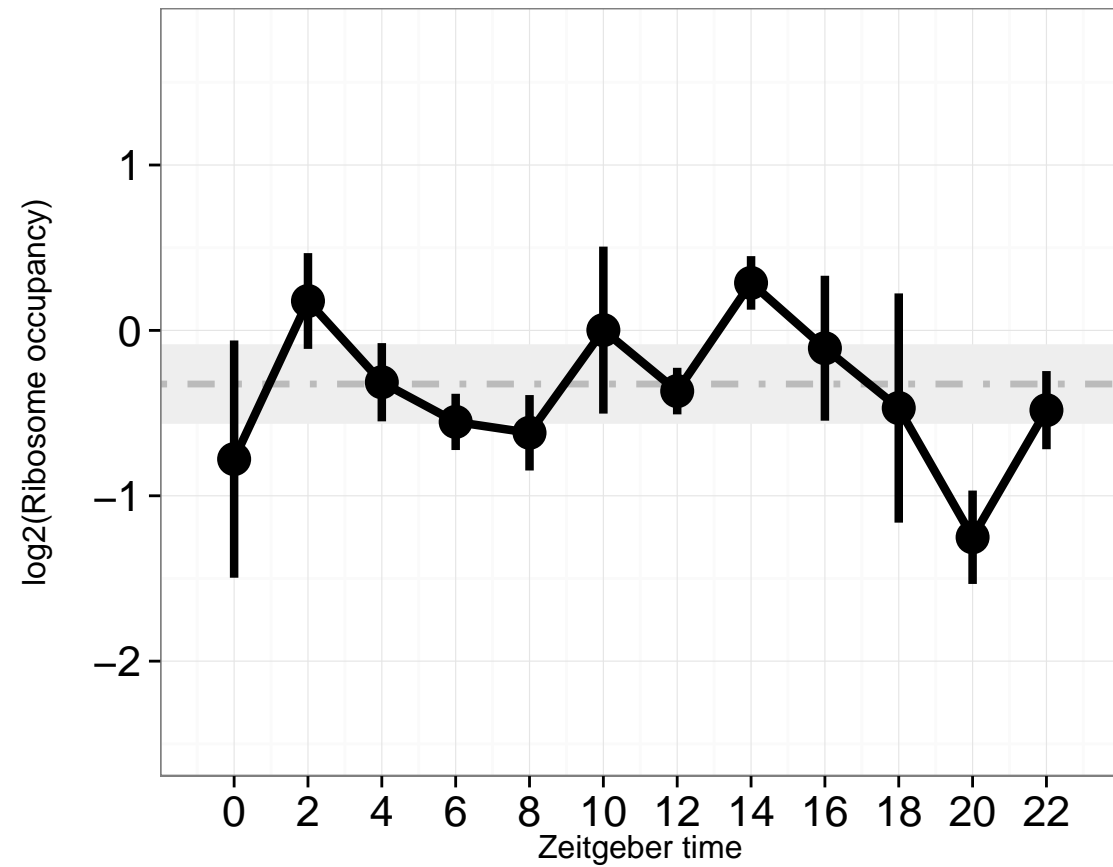

Supplement: Supplementary file 12801 [file 1]

# Tmem219

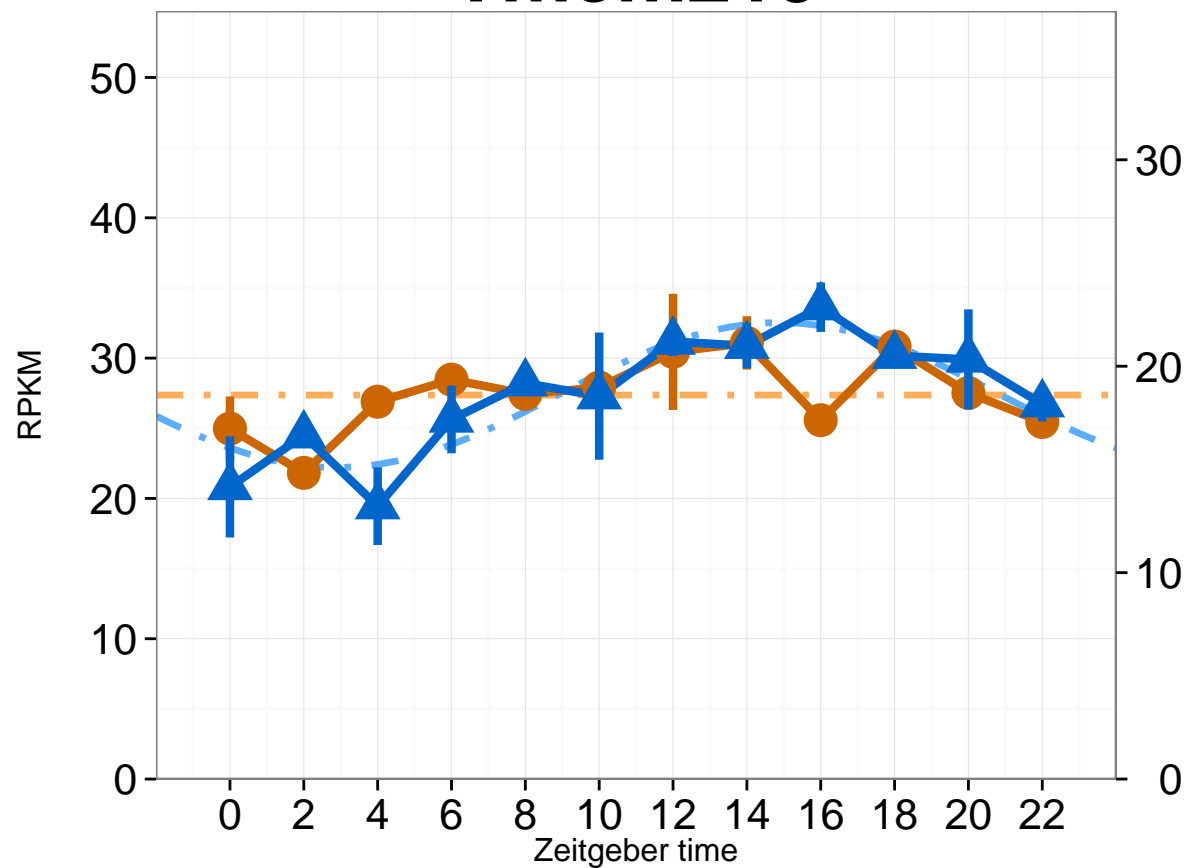

# Tmem219

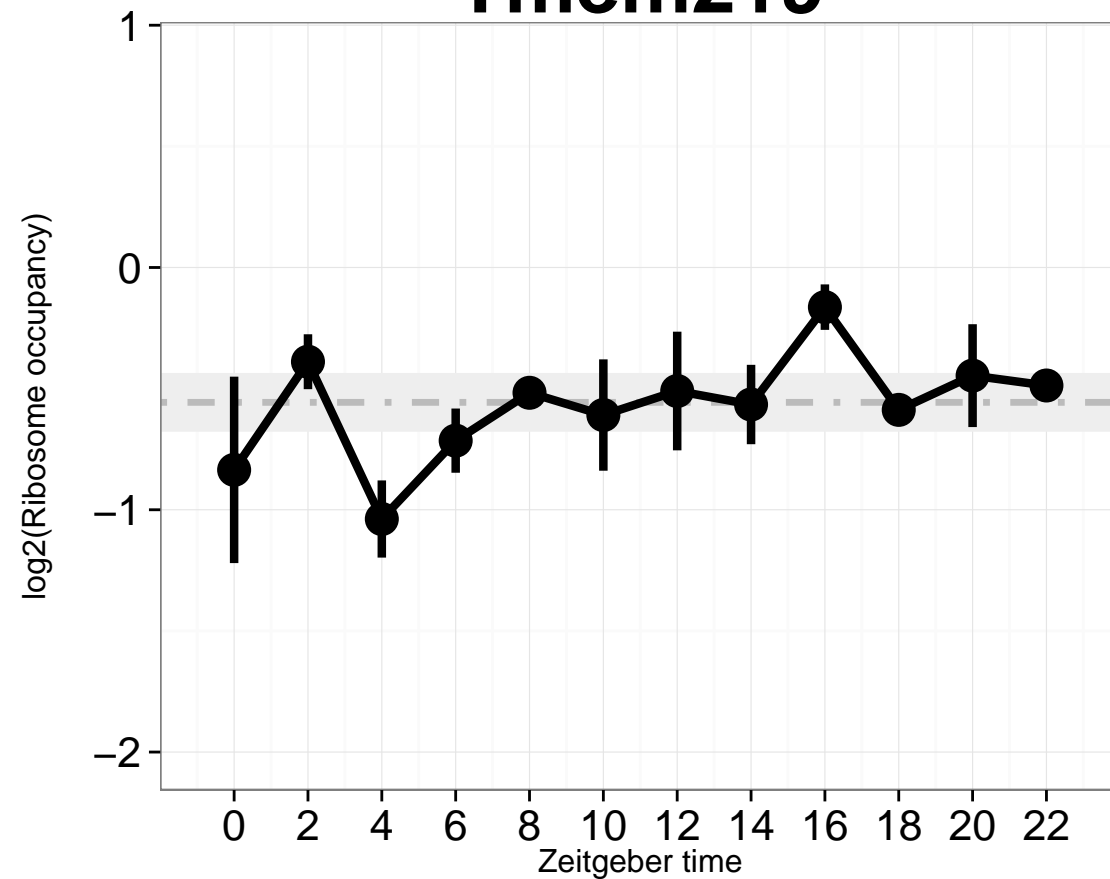

Supplement: Supplementary file 12802 [file 1]

## Urm1

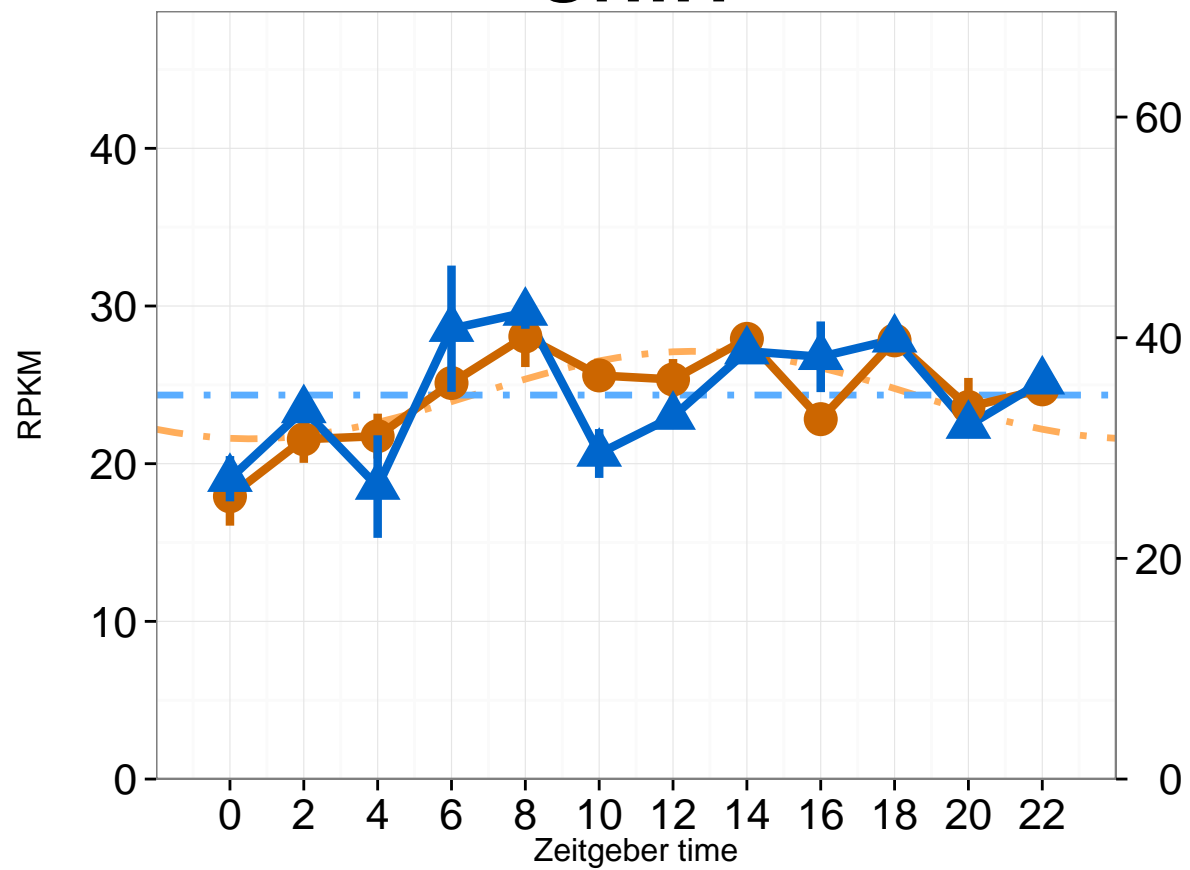

## Urm1

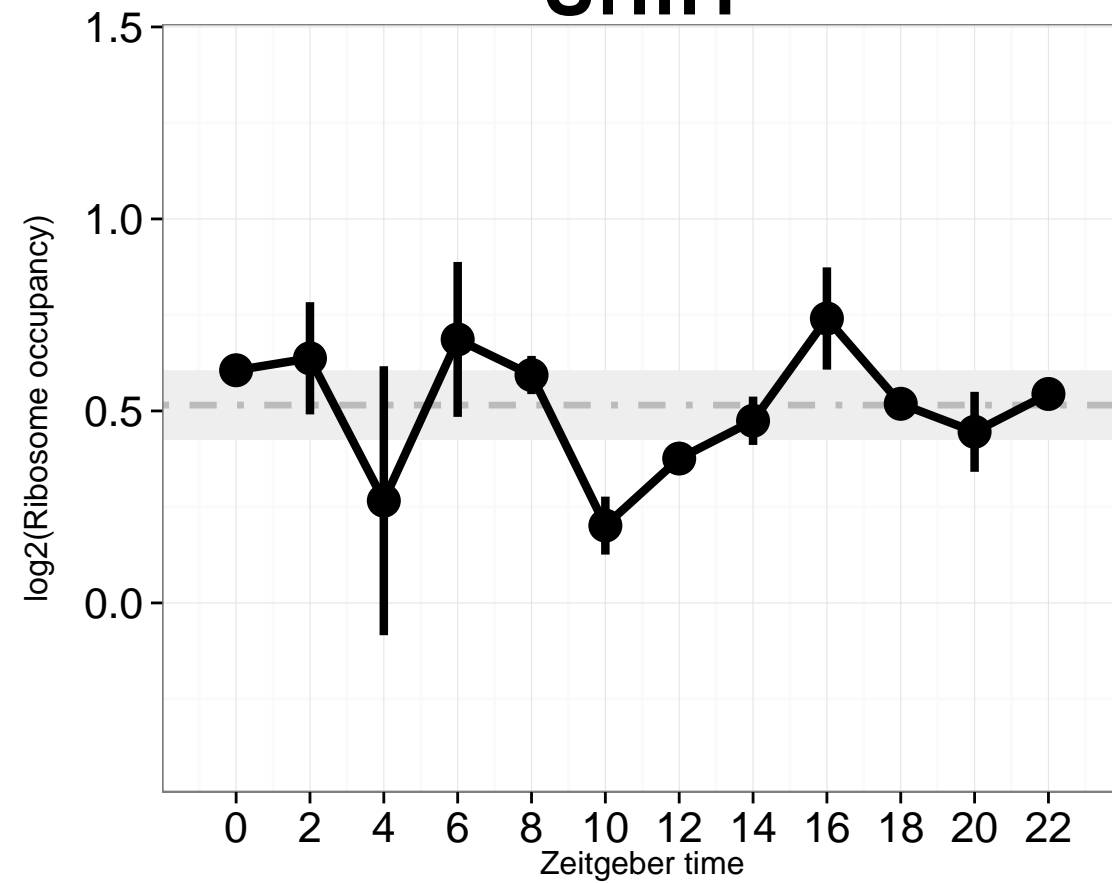

Supplement: Supplementary file 12803 [file 1]

## Pttg1

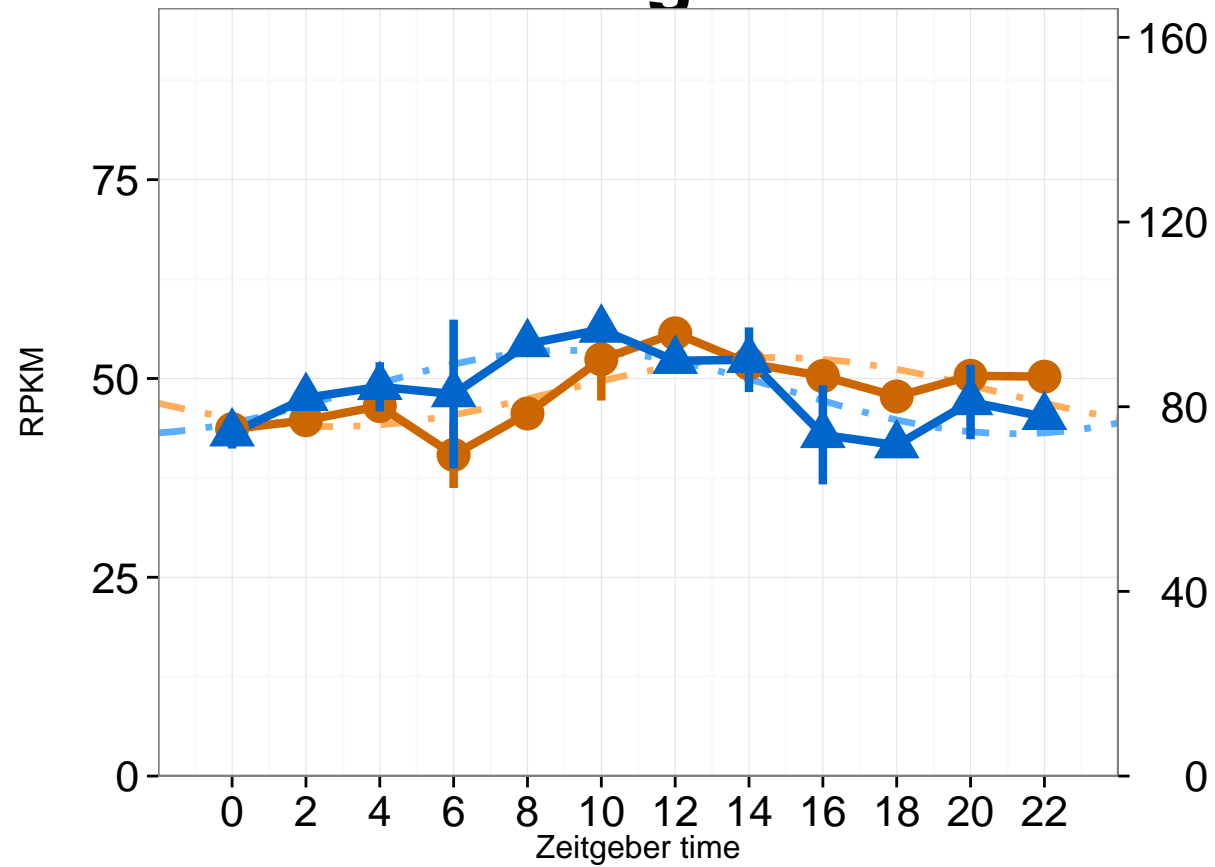

## Pttg1

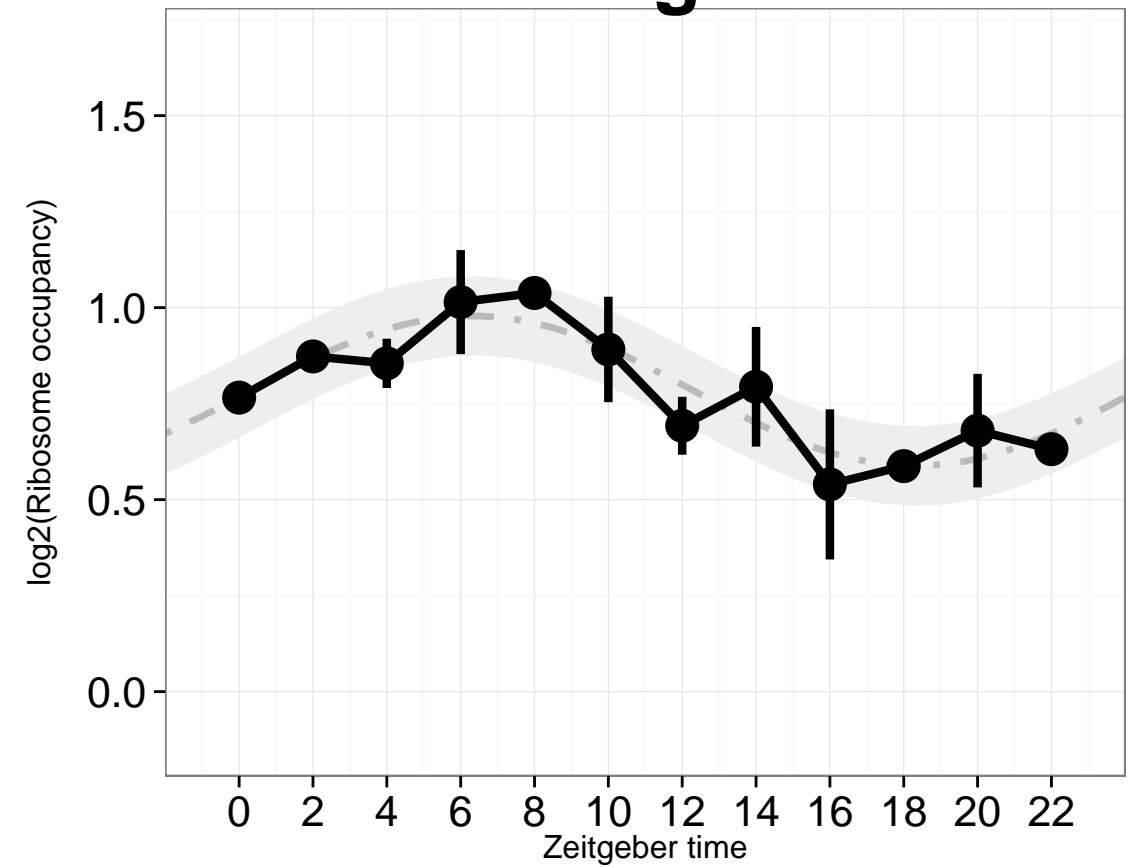

Supplement: Supplementary file 12804 [file 1]

## Osbp18

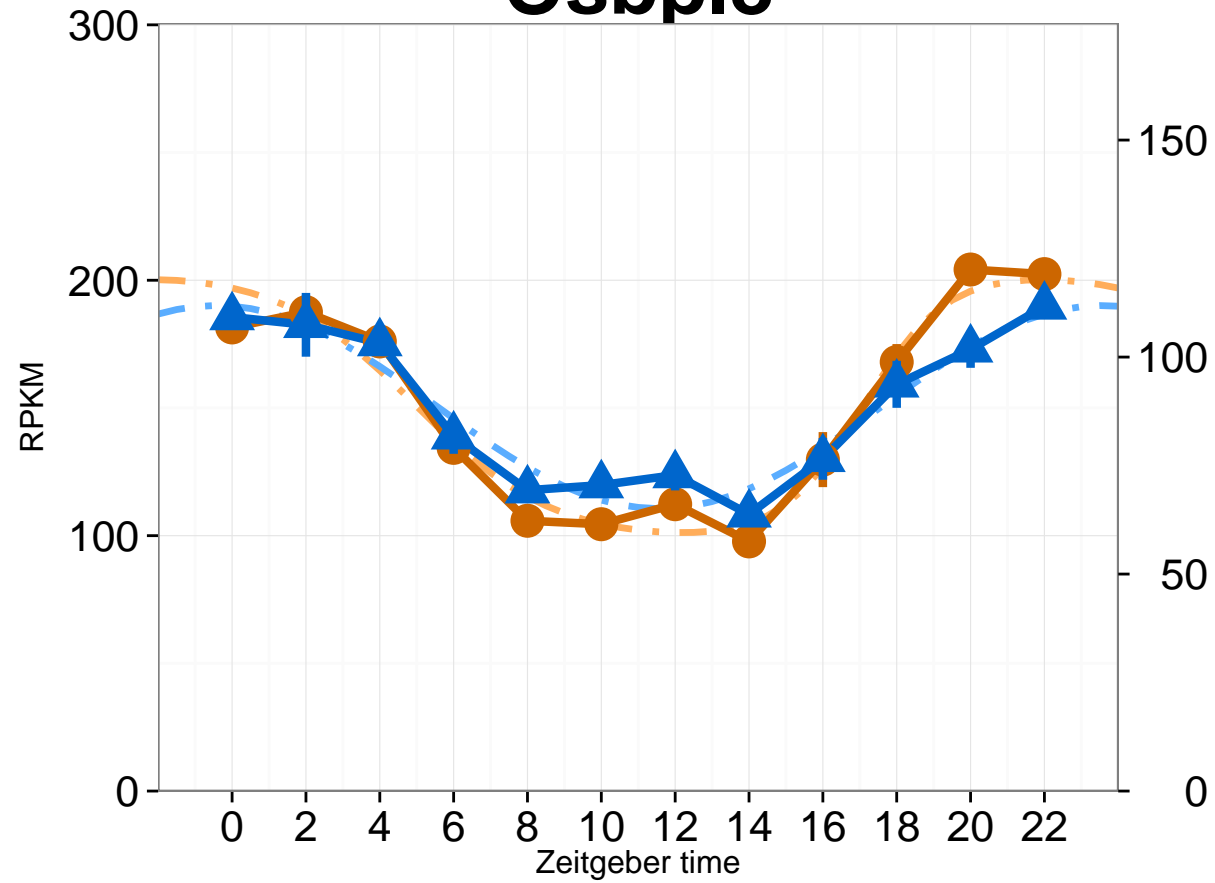

## Osbp18

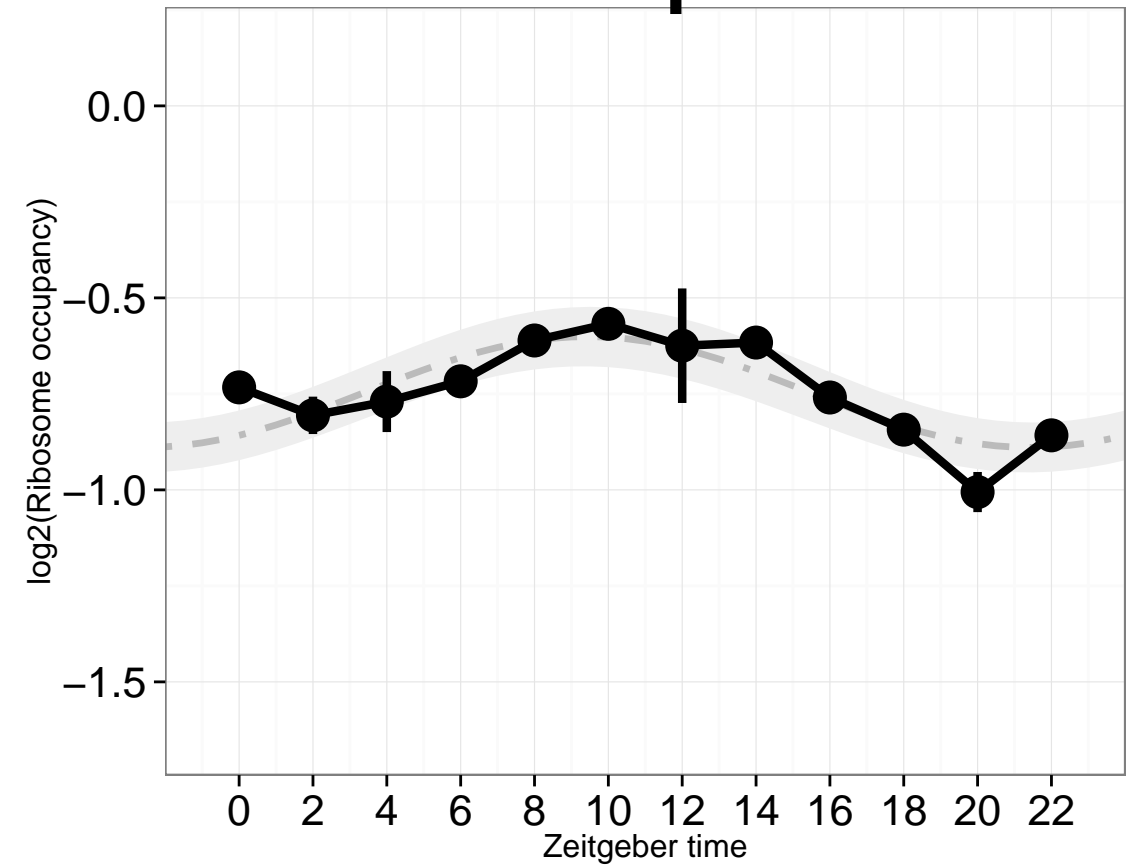

Supplement: Supplementary file 12805 [file 1]

# Utp14b

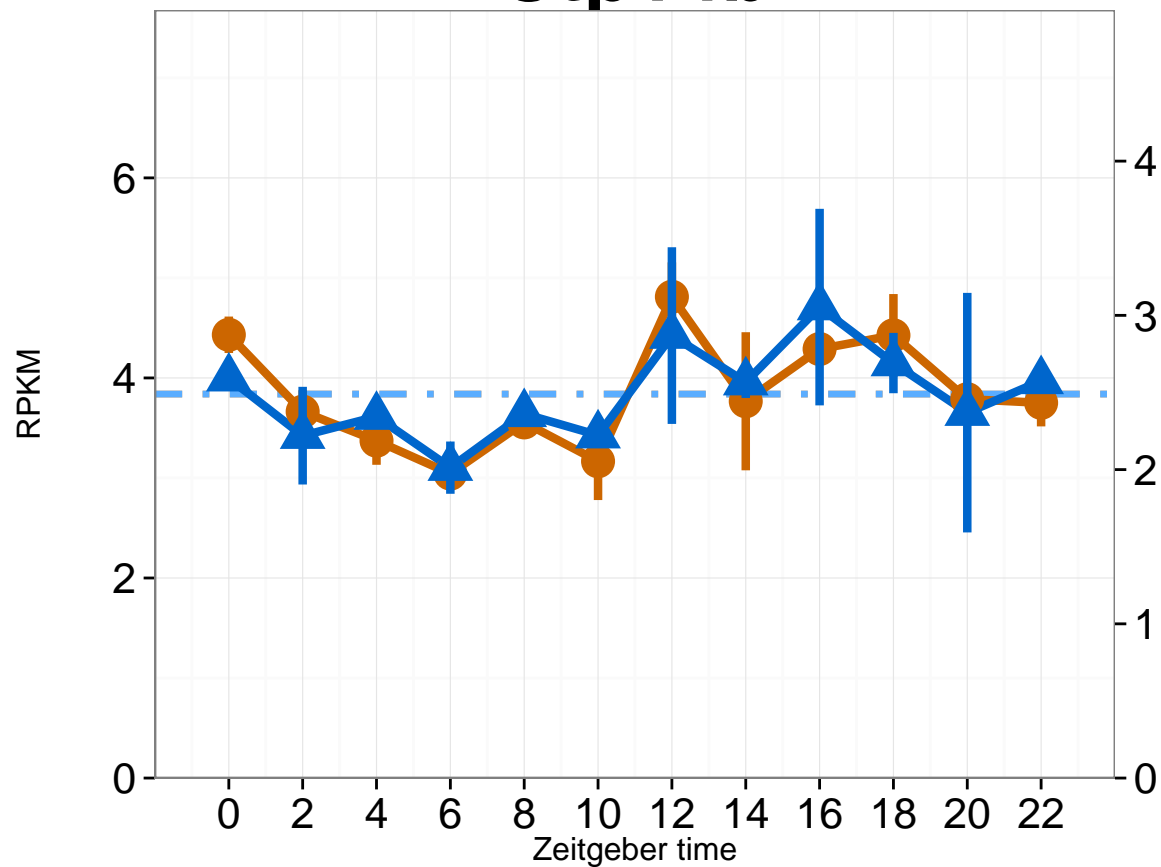

# Utp14b

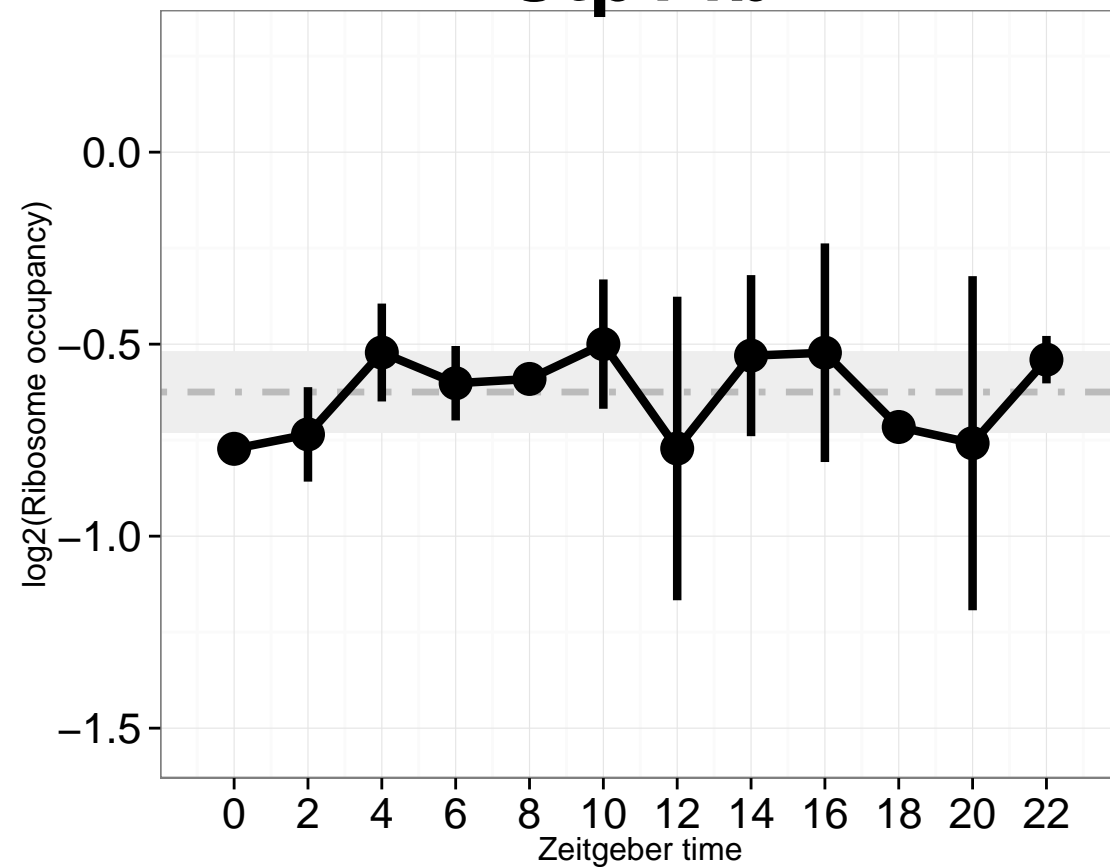

Supplement: Supplementary file 12806 [file 1]

## Pim3

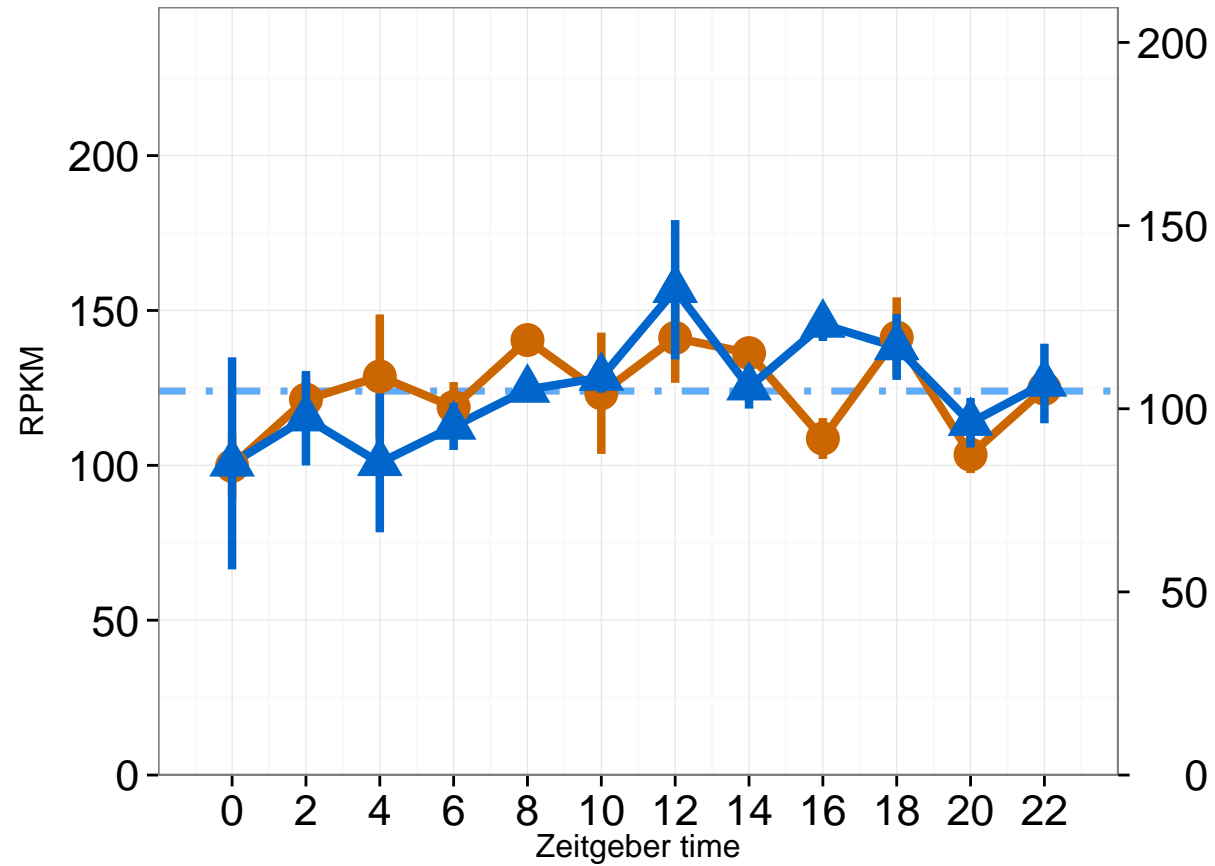

## Pim3

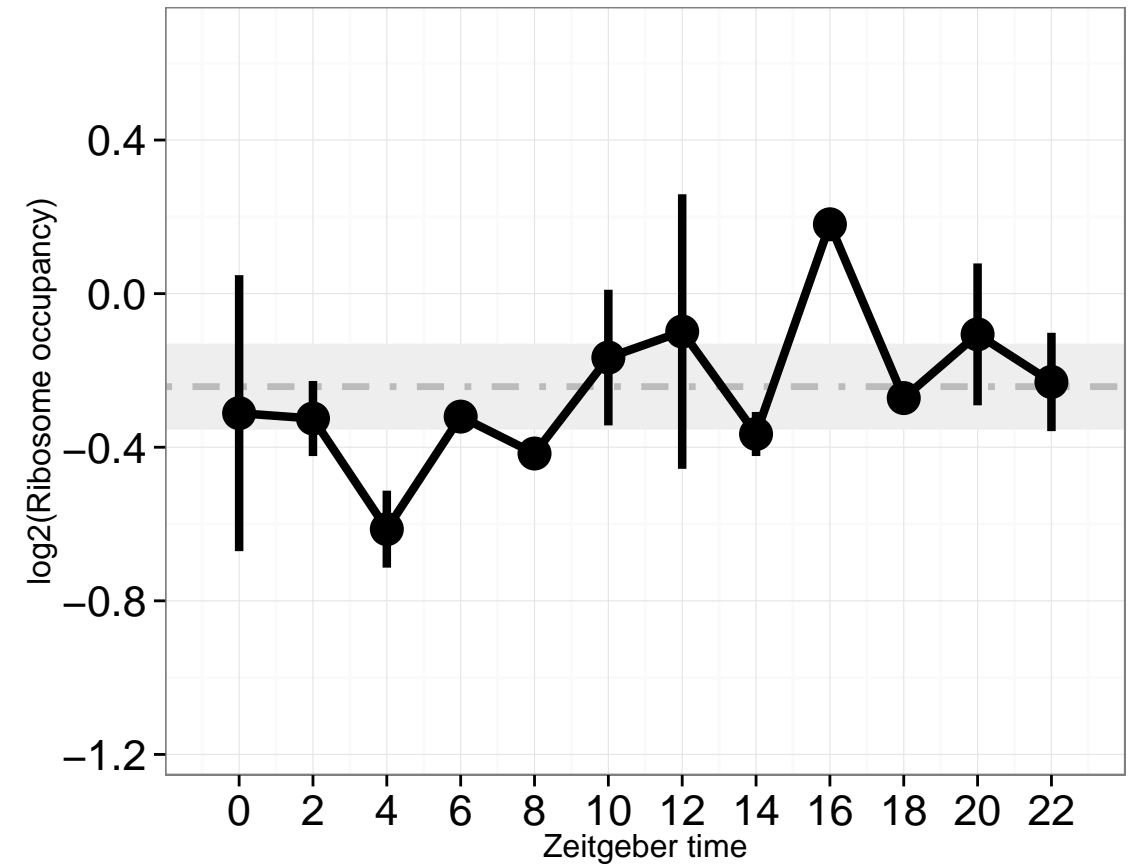

Supplement: Supplementary file 12807 [file 1]

# A430105I19Rik

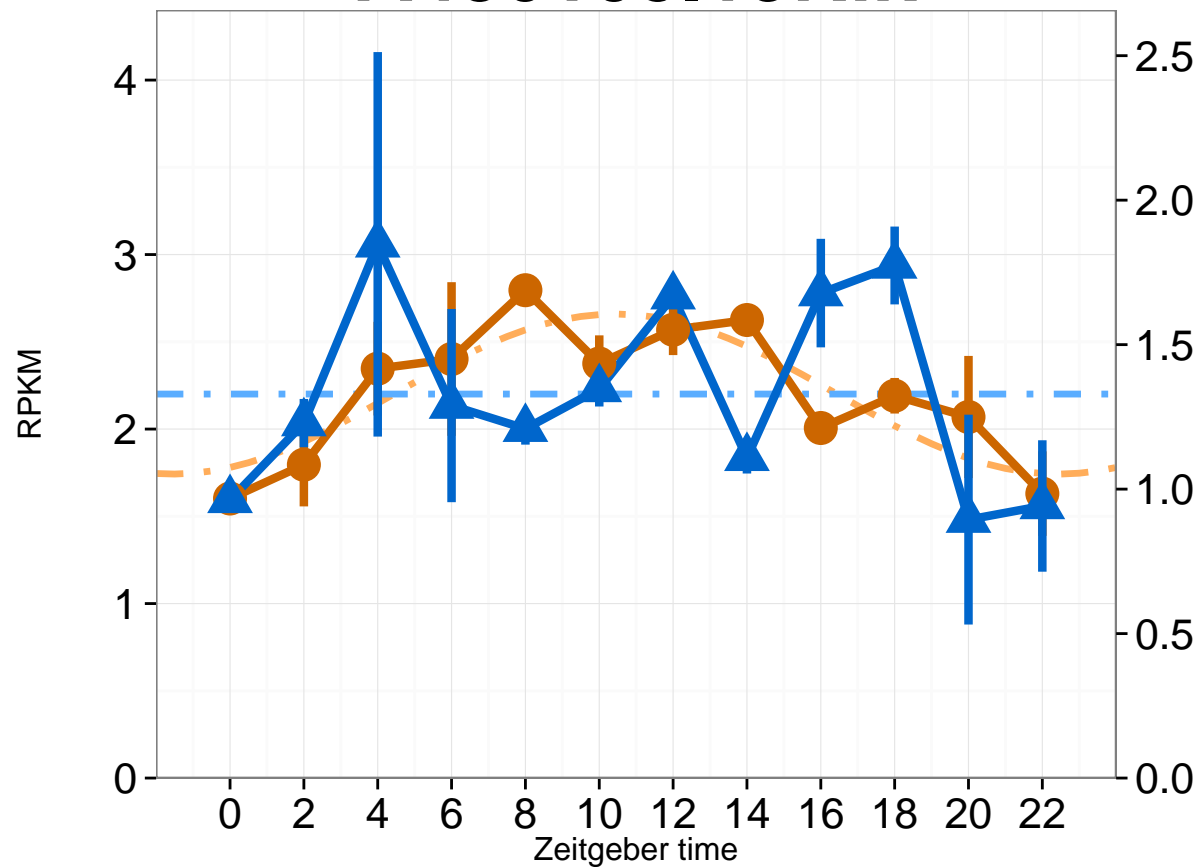

# A430105I19Rik

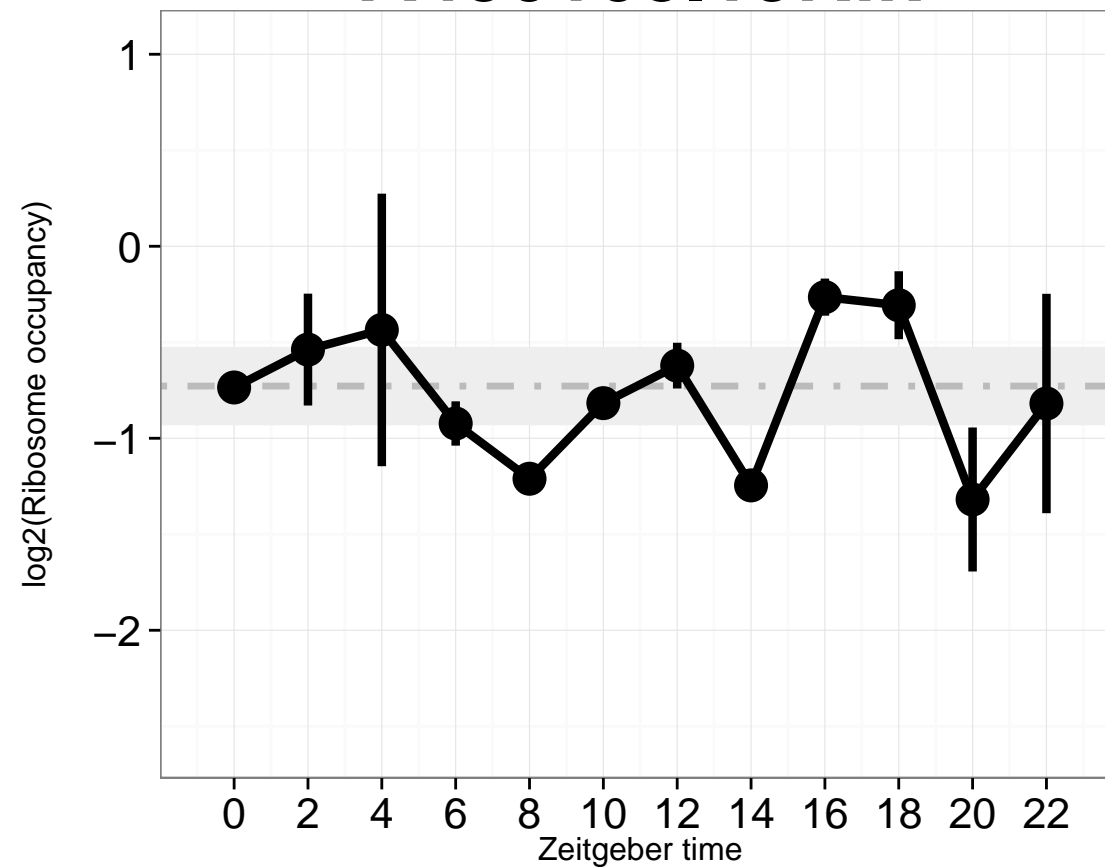

Supplement: Supplementary file 12808 [file 1]

## Ptrh2

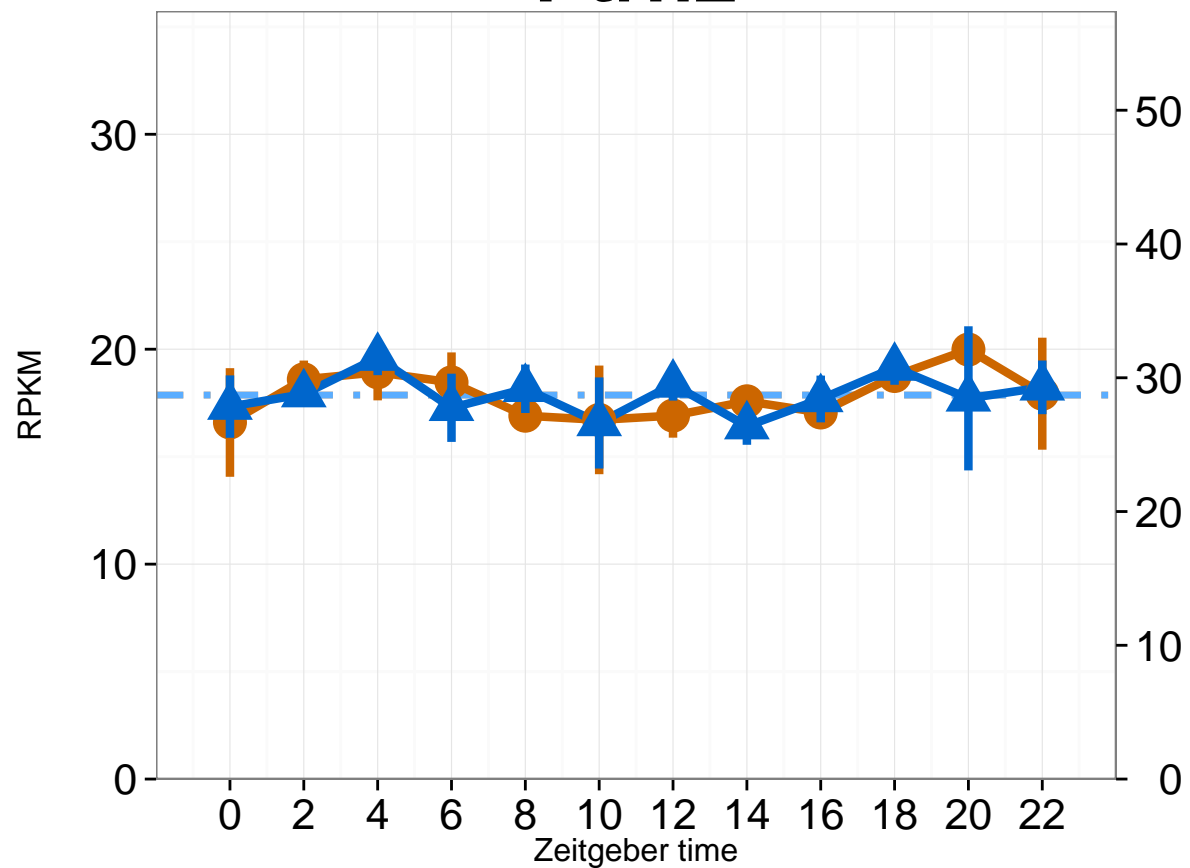

## Ptrh2

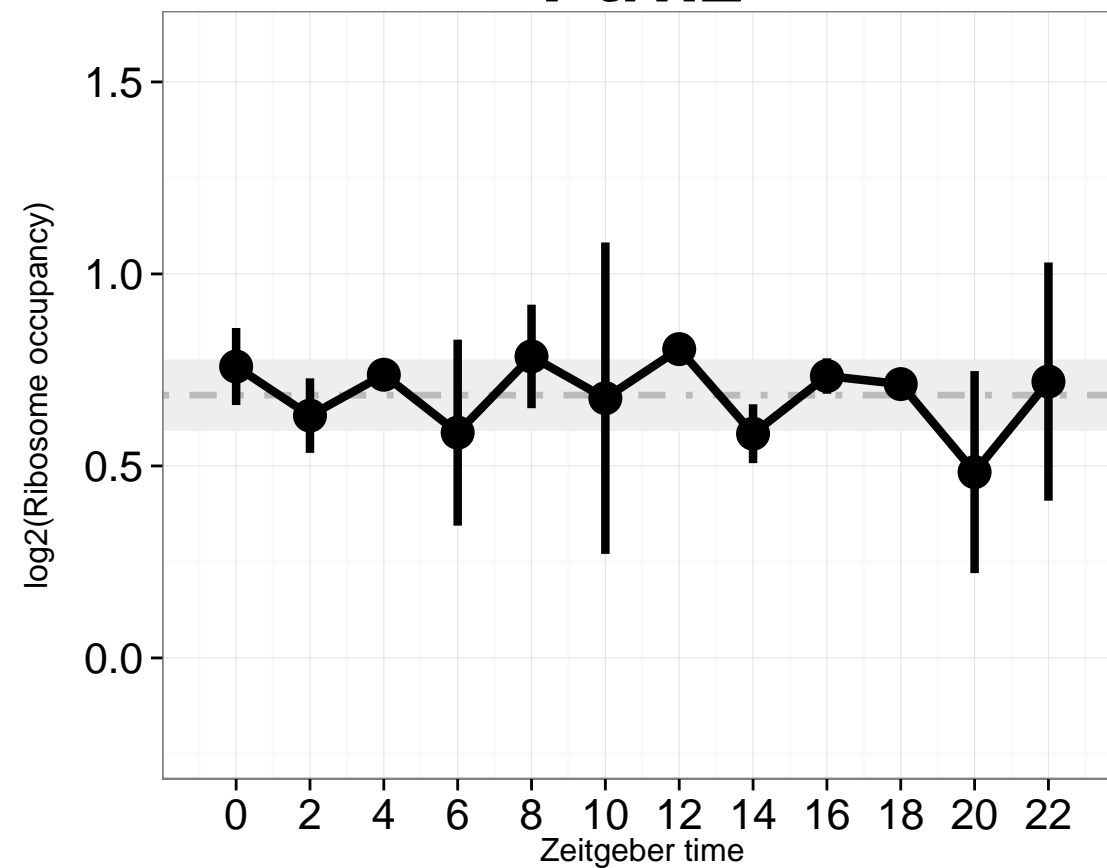

Supplement: Supplementary file 12809 [file 1]

# Ugt1a1

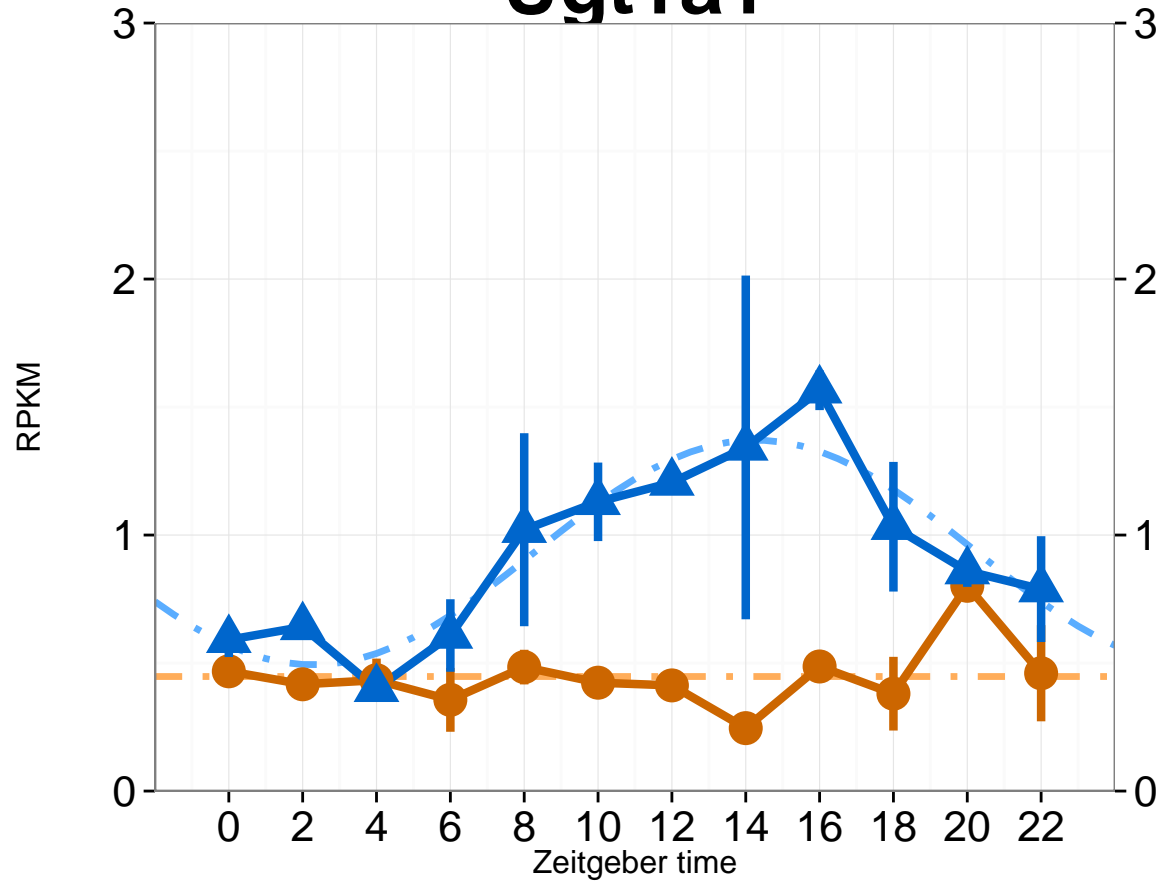

# Ugt1a1

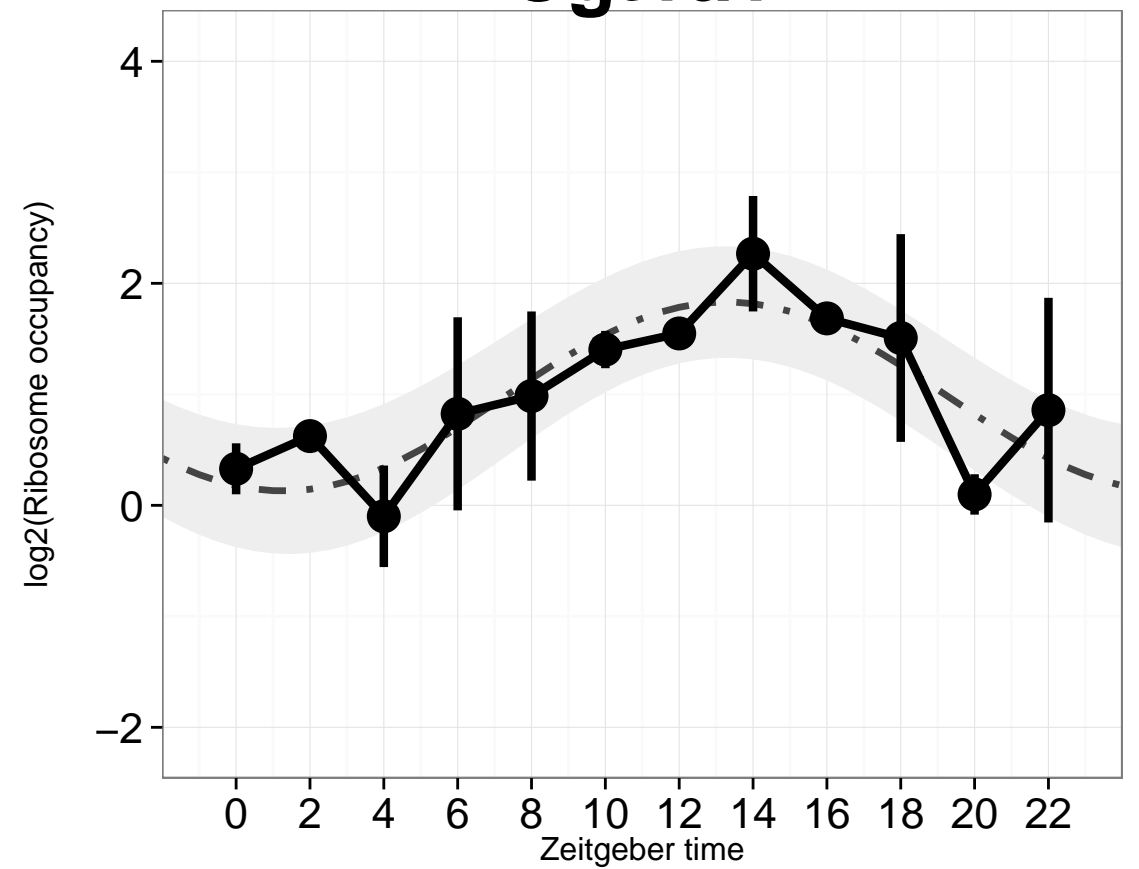

Supplement: Supplementary file 12810 [file 1]

## Lix1l

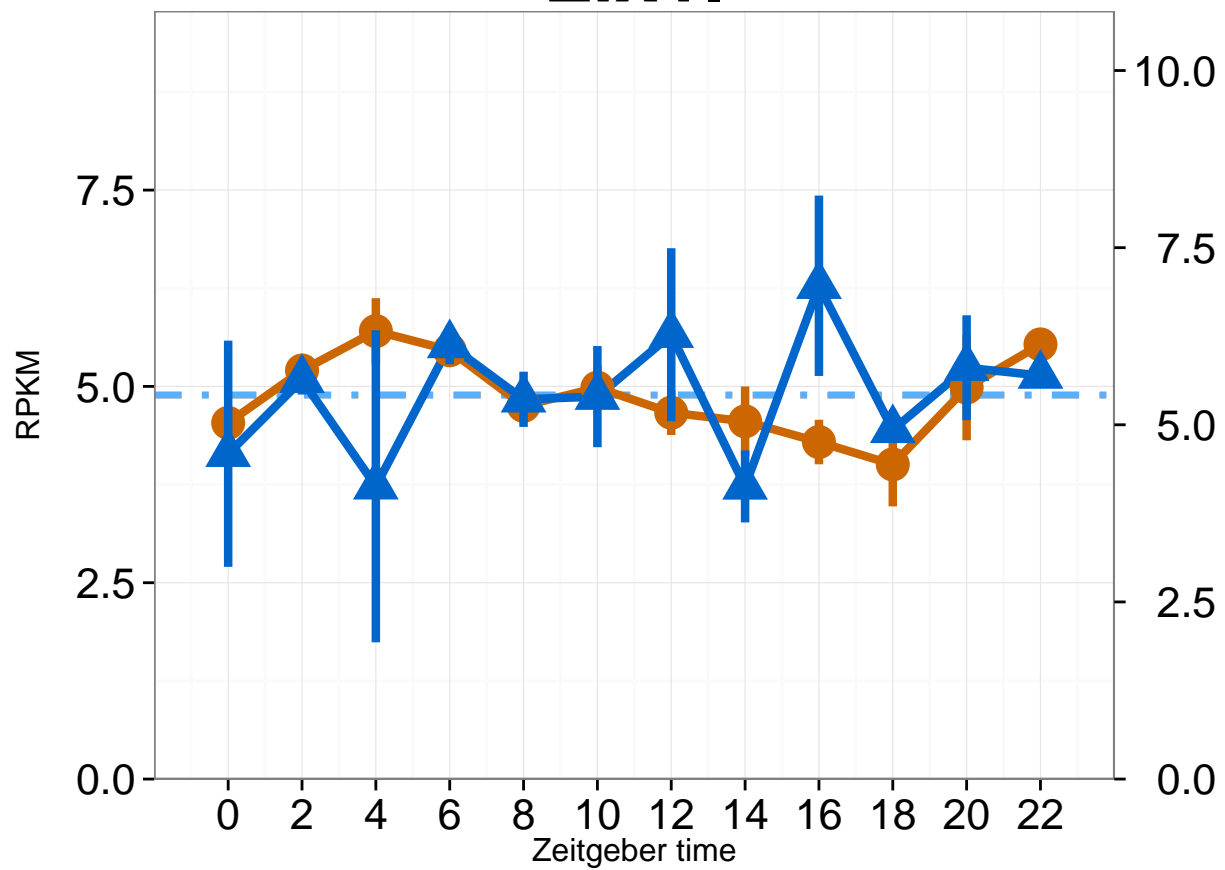

## Lix1l

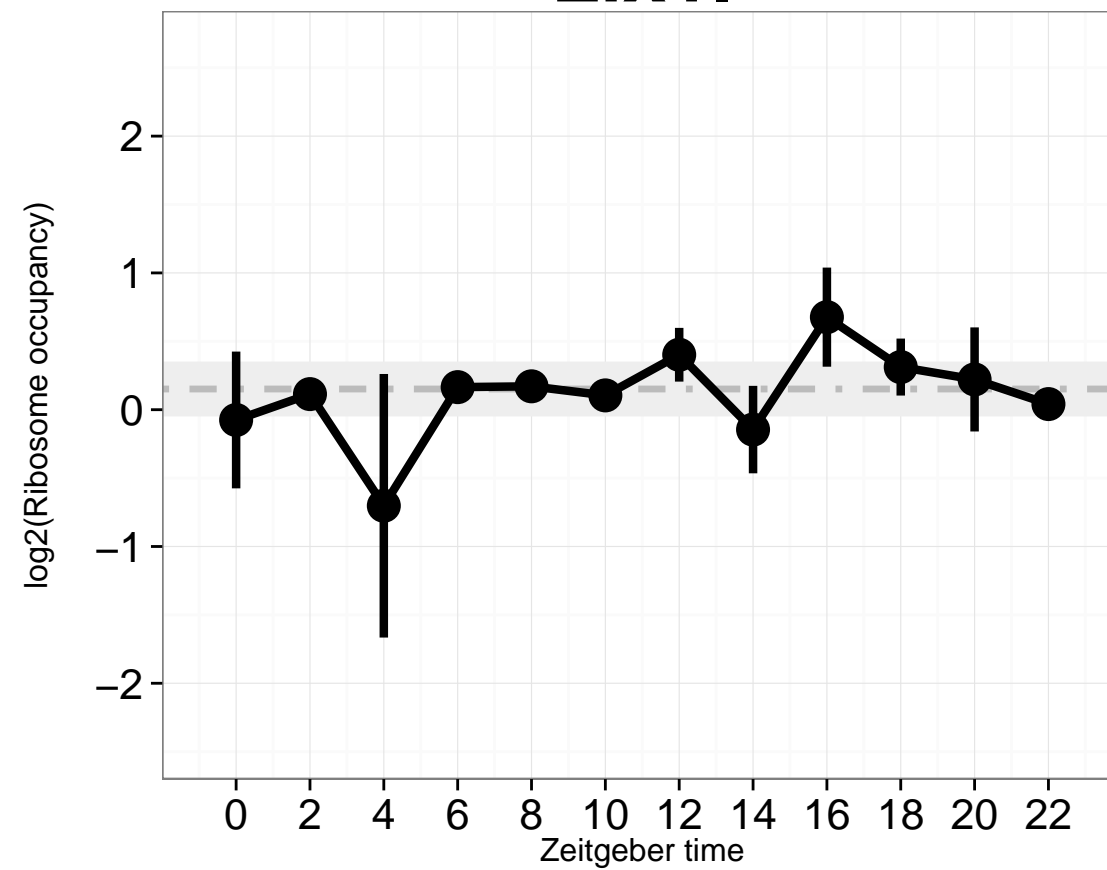

Supplement: Supplementary file 12811 [file 1]

## Dapk1

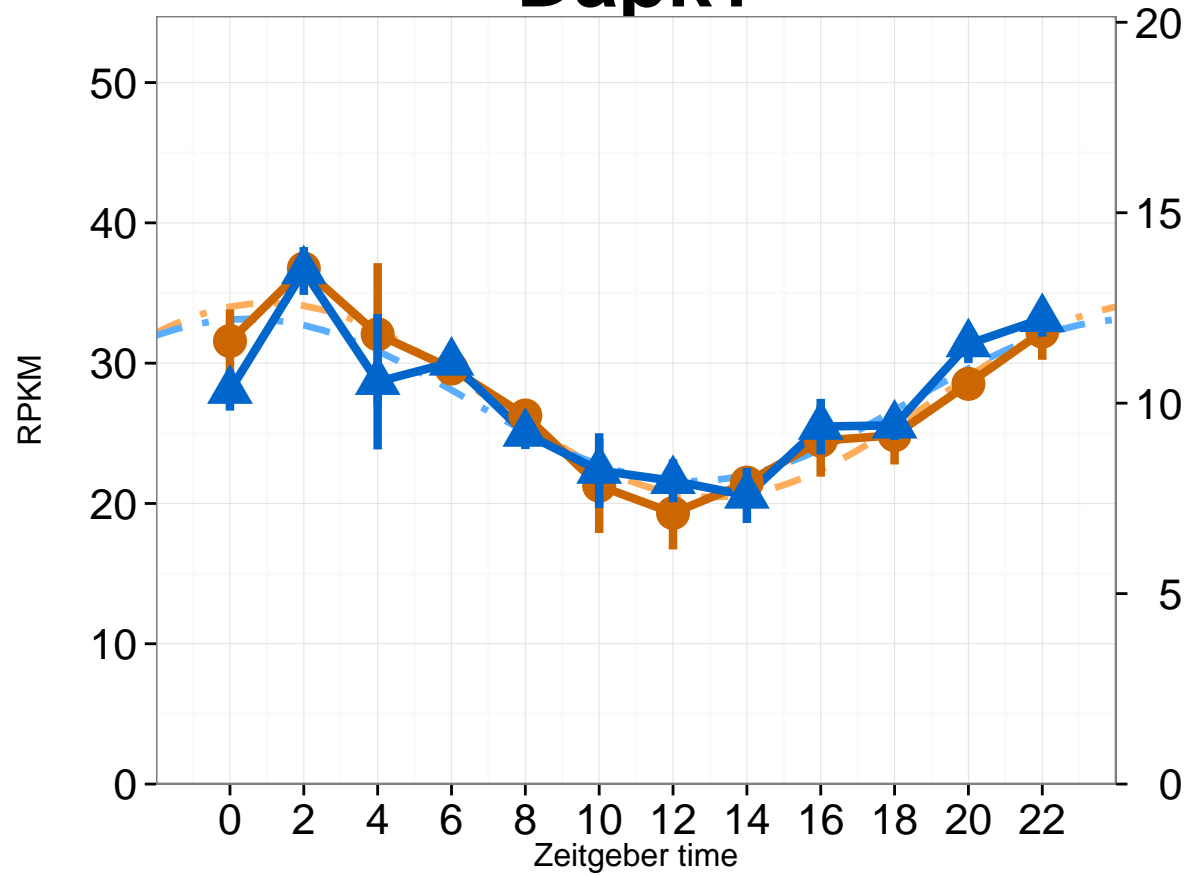

## Dapk1

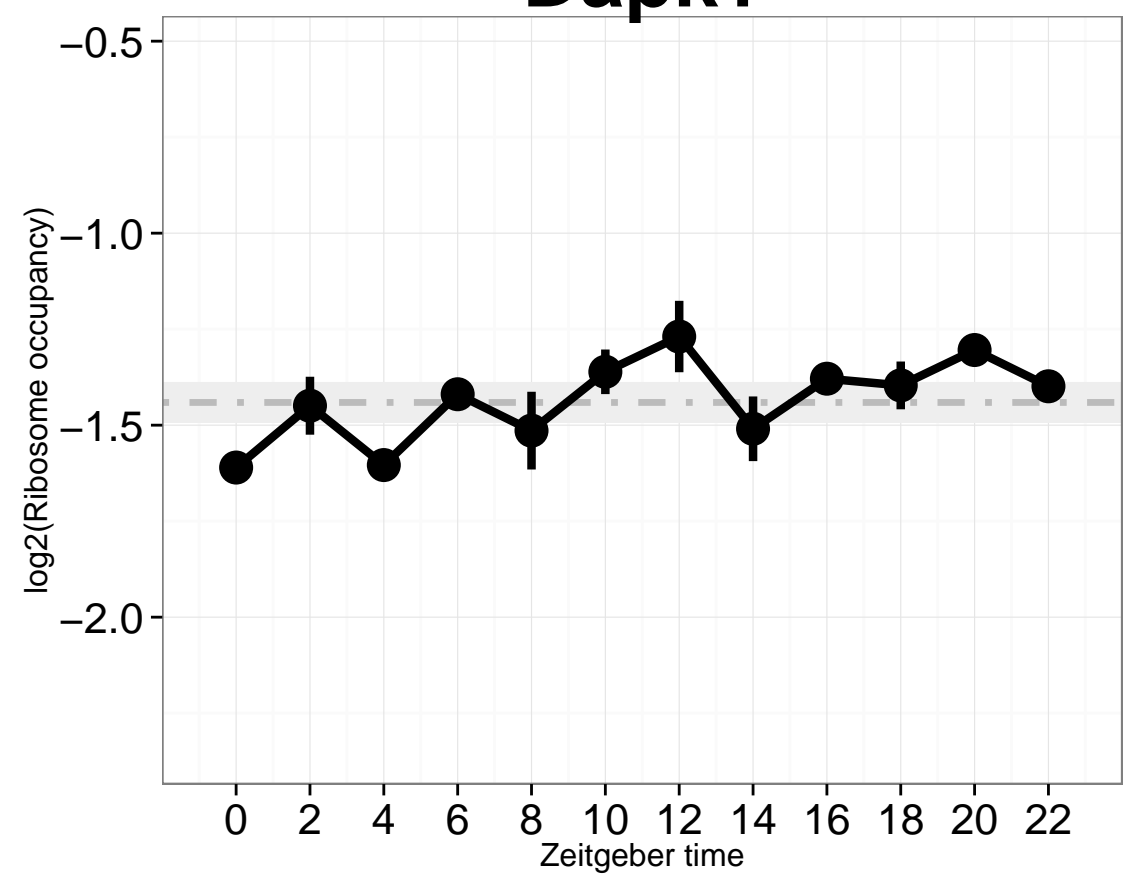

Supplement: Supplementary file 12812 [file 1]

# Fyn

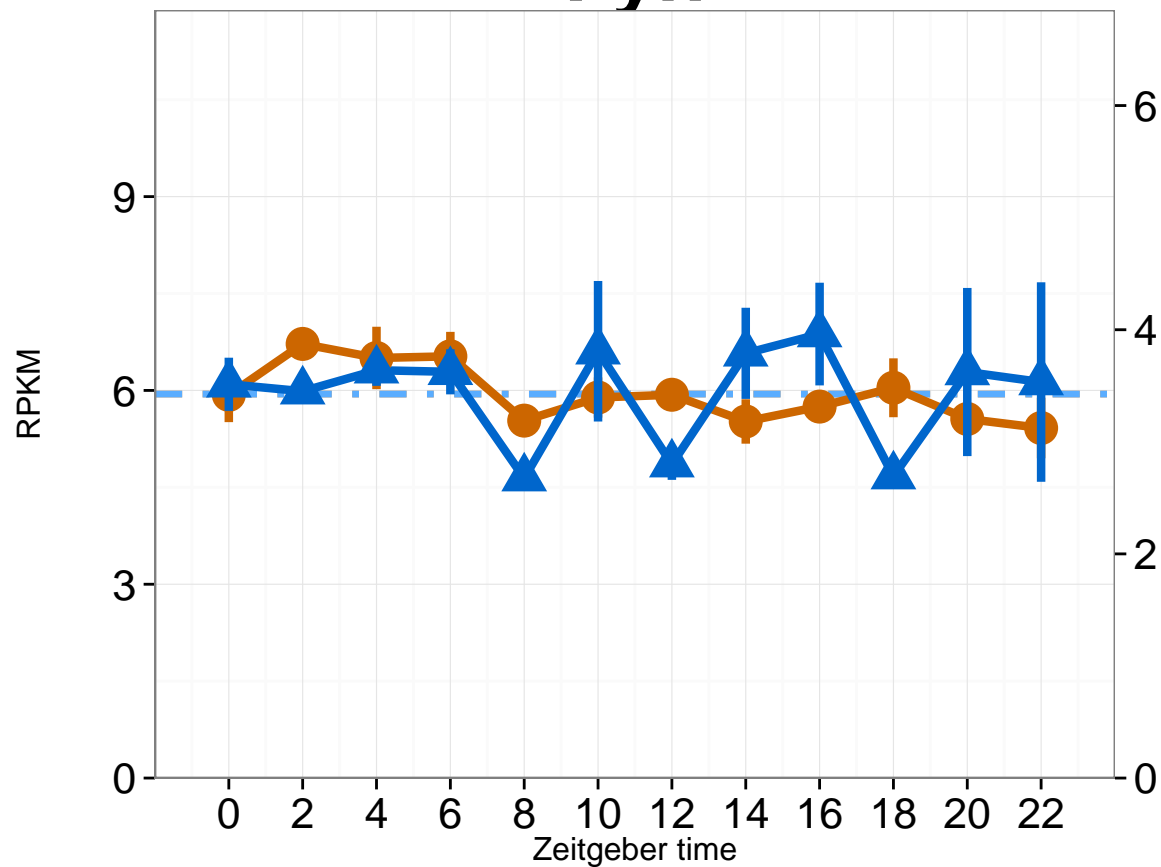

# Fyn

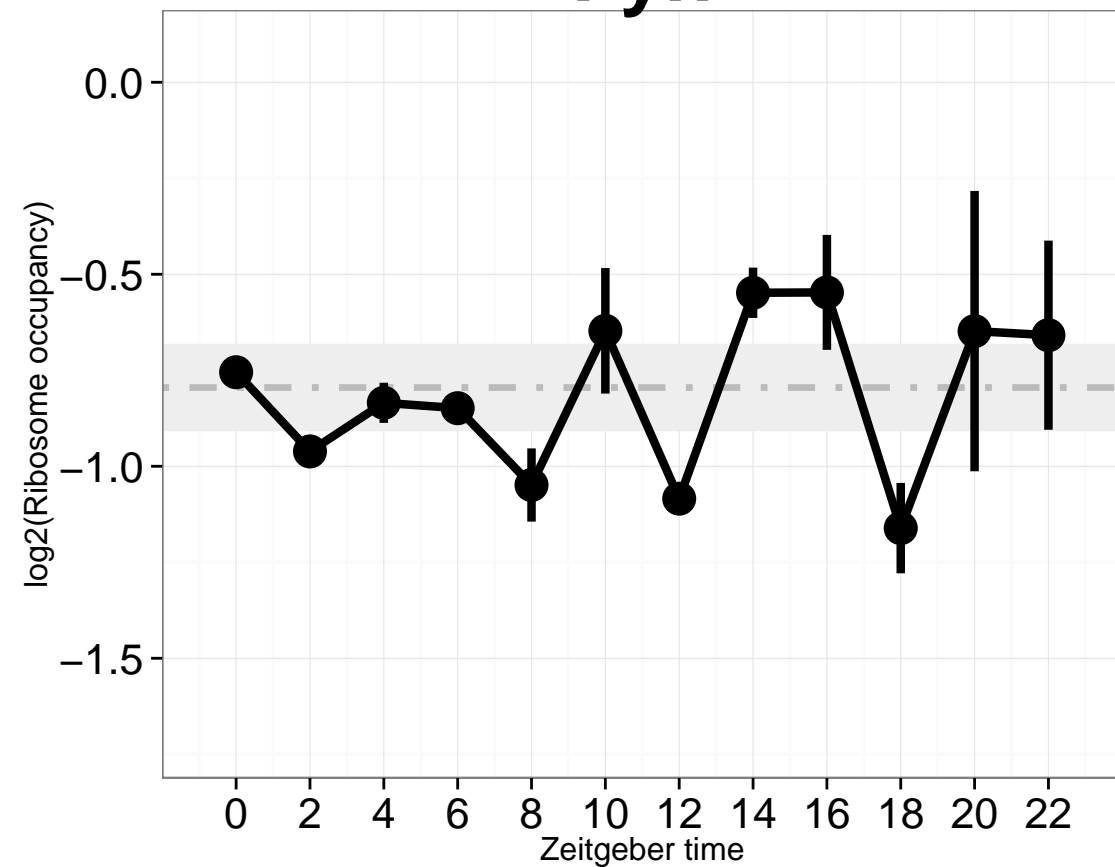

Supplement: Supplementary file 12813 [file 1]

## Fmo3

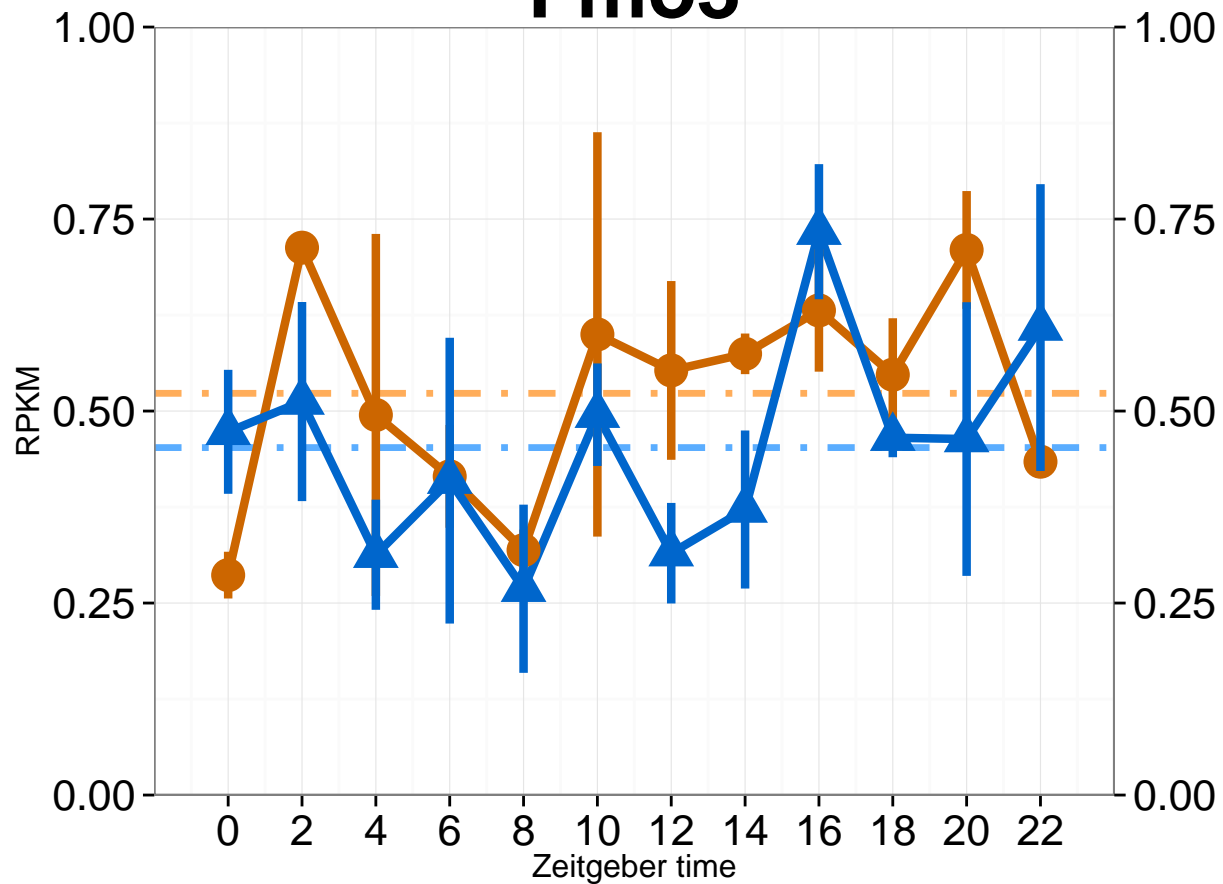

## Fmo3

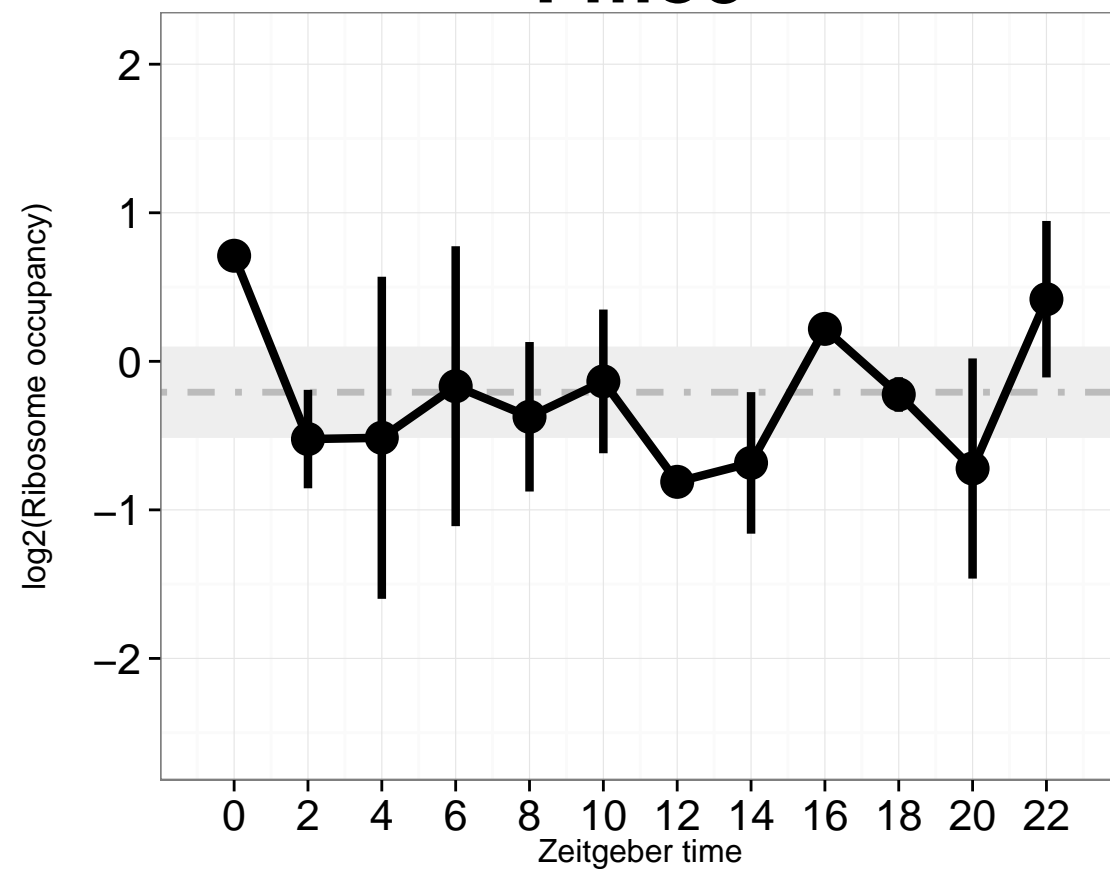

Supplement: Supplementary file 12814 [file 1]

## Klc2

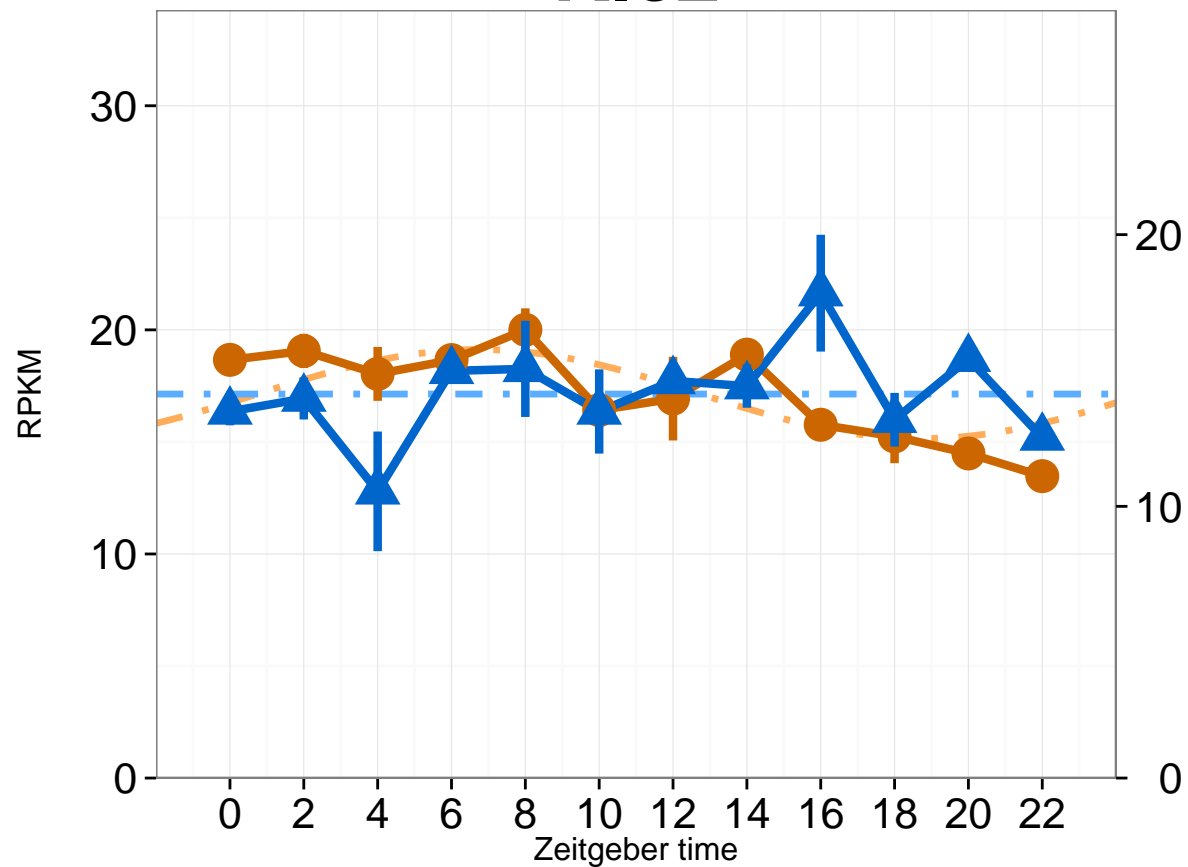

## Klc2

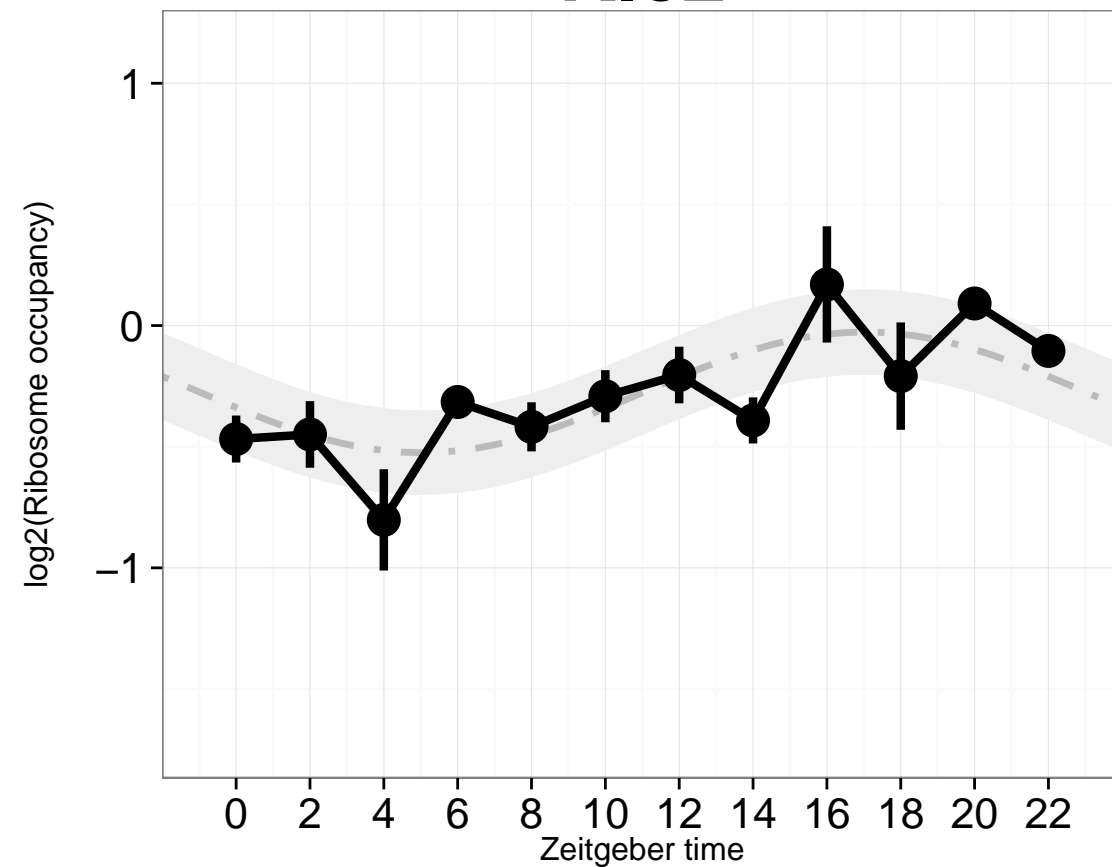

Supplement: Supplementary file 12815 [file 1]

## Dopey2

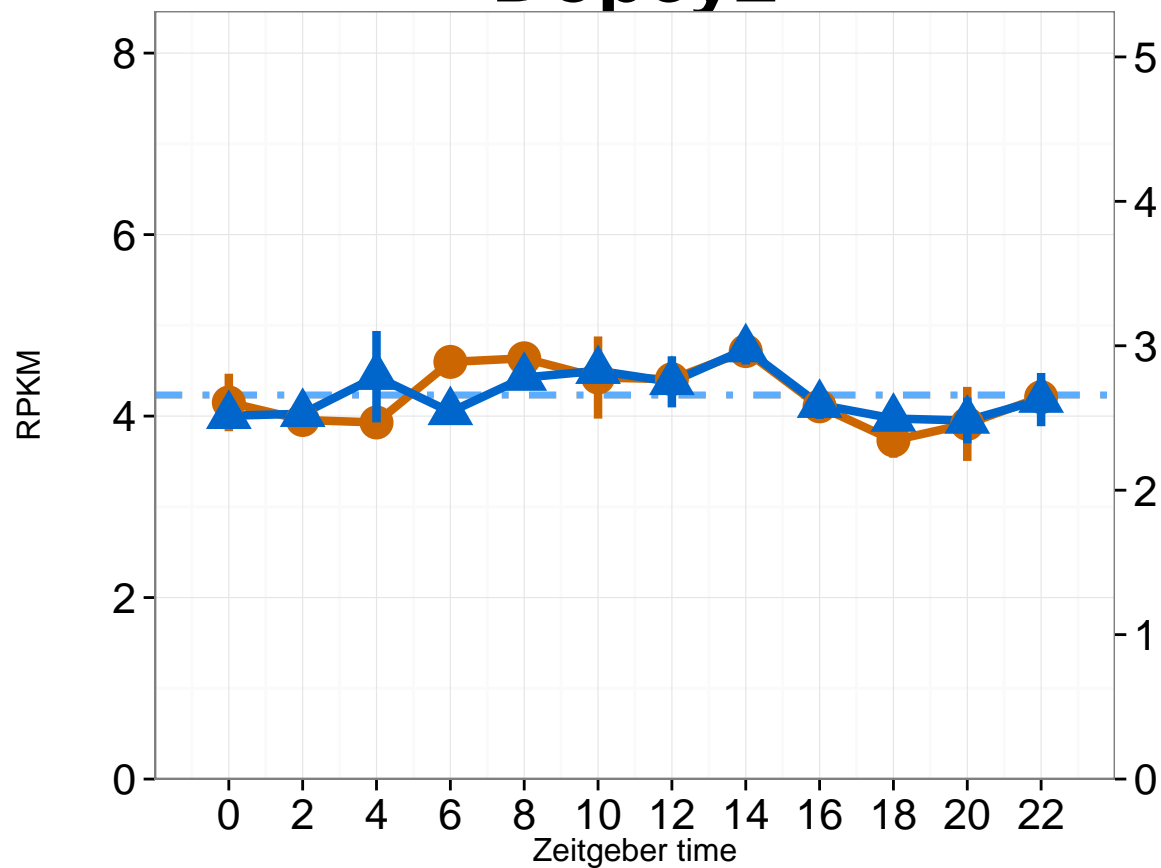

## Dopey2

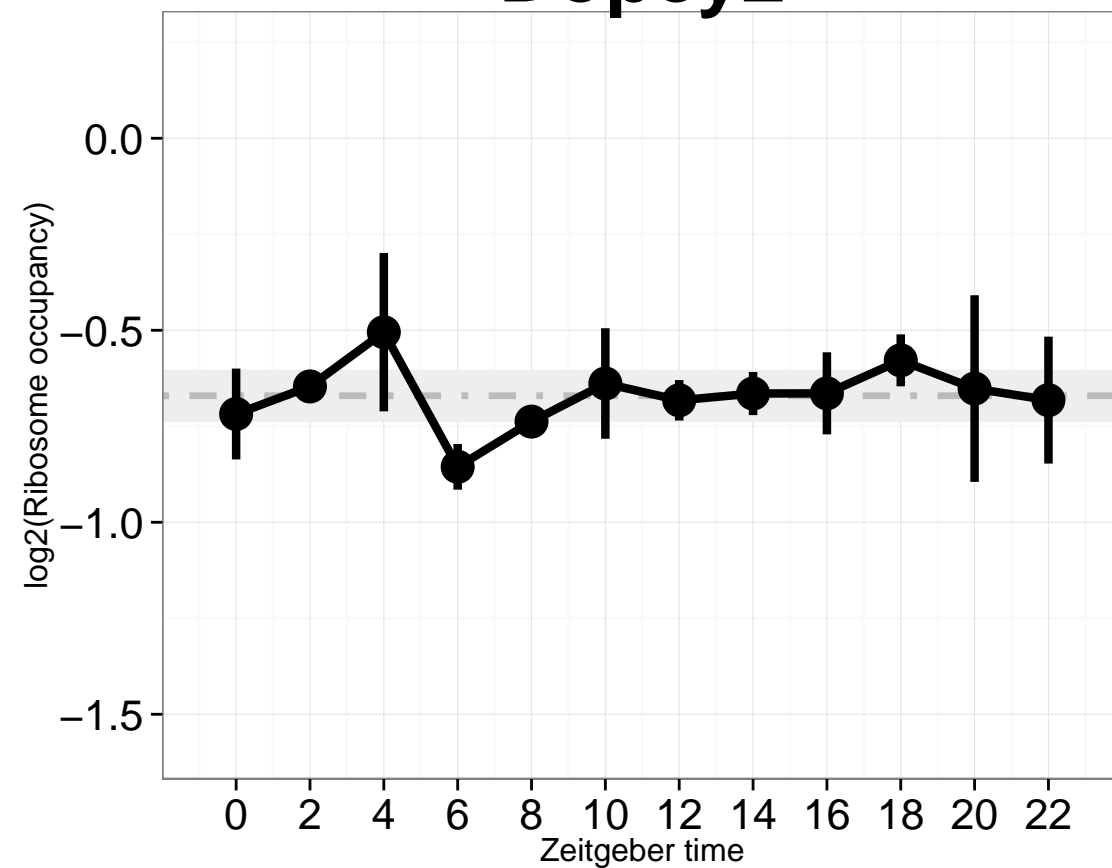

Supplement: Supplementary file 12816 [file 1]

## Tlr13

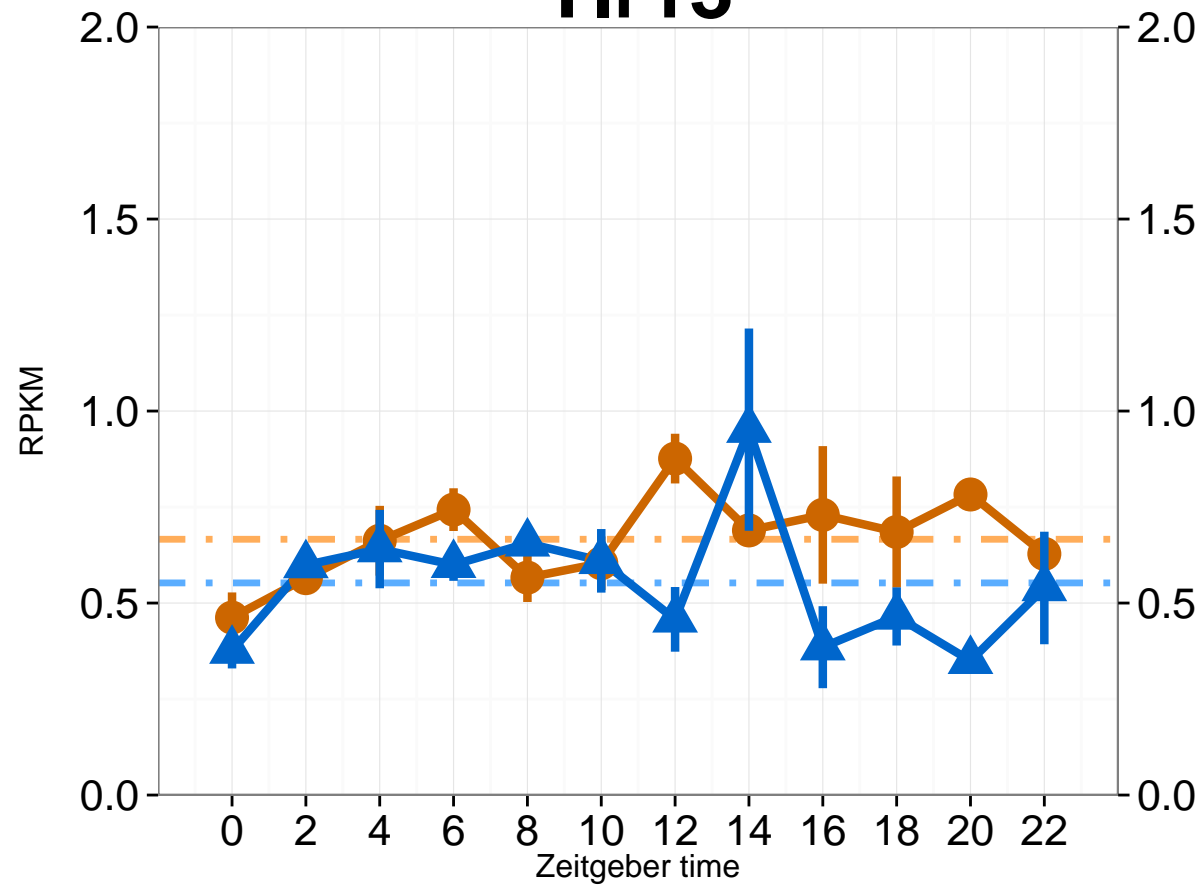

## Tlr13

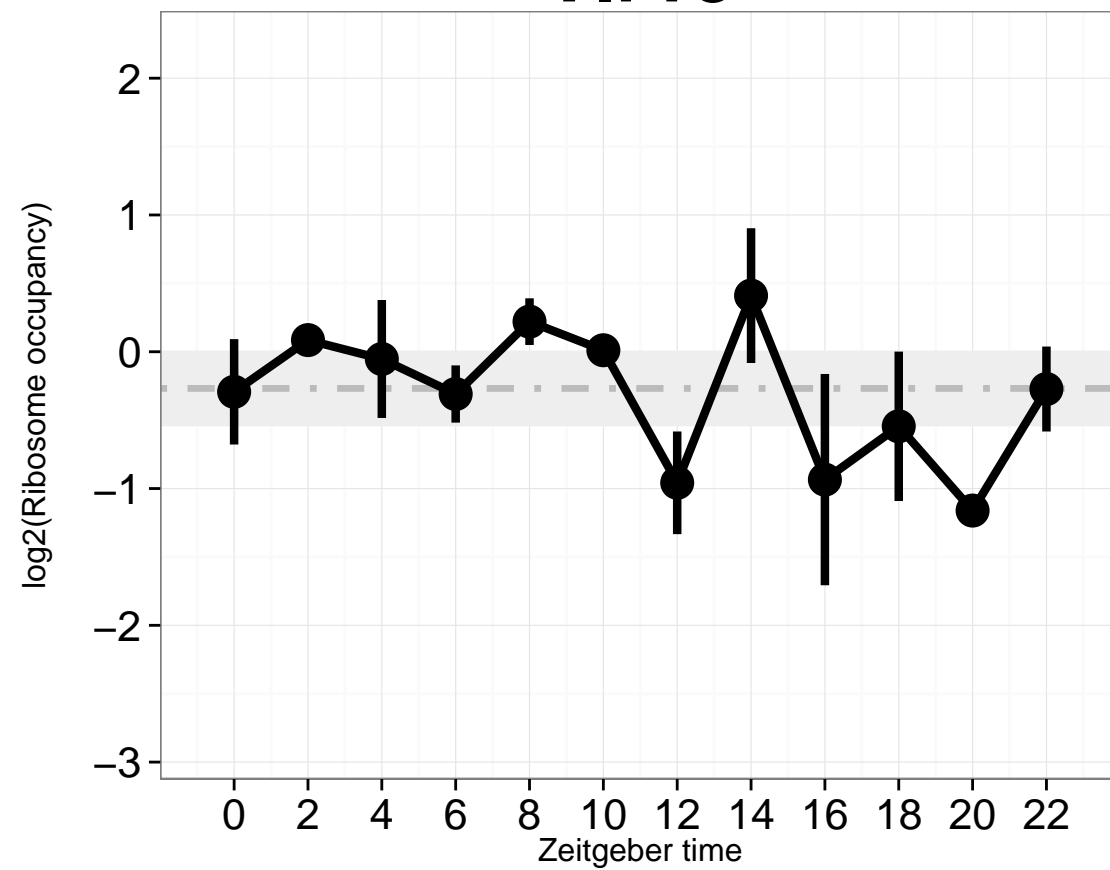

Supplement: Supplementary file 12817 [file 1]

## Tspan2

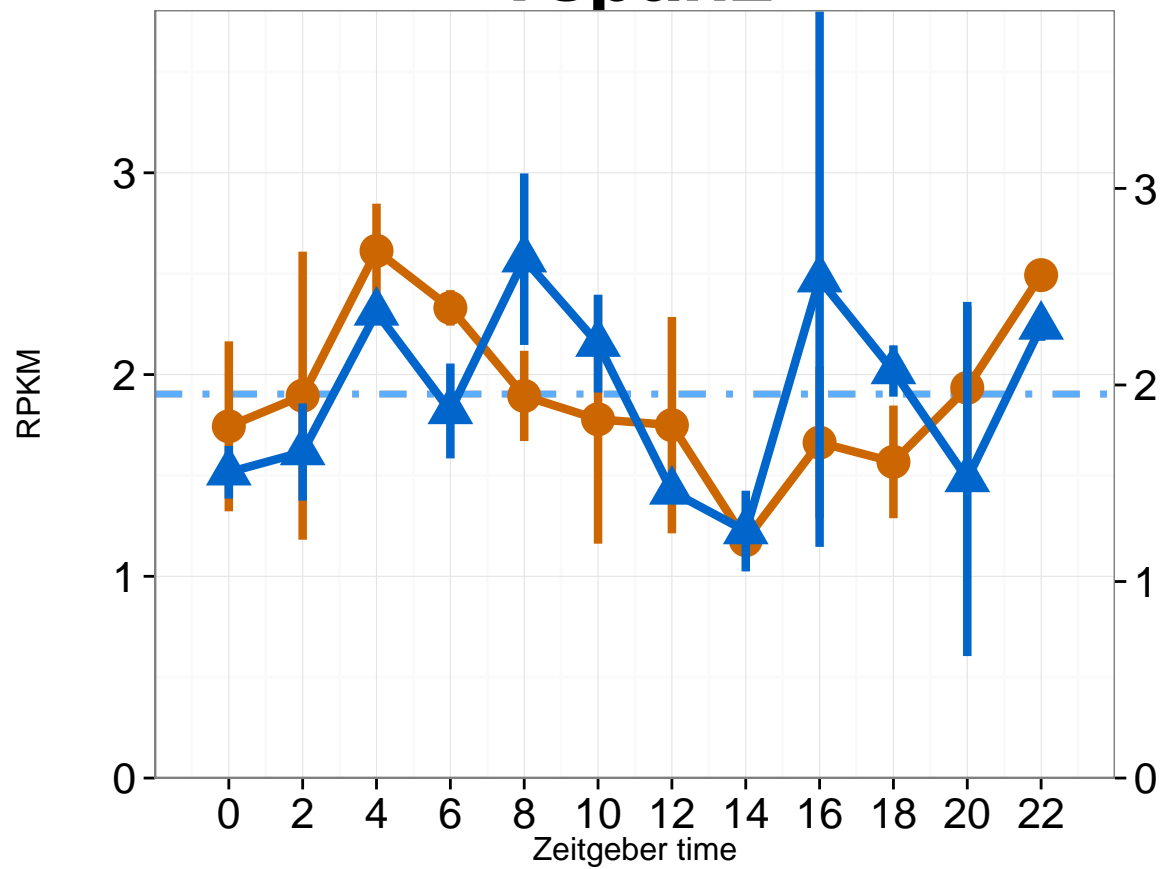

## Tspan2

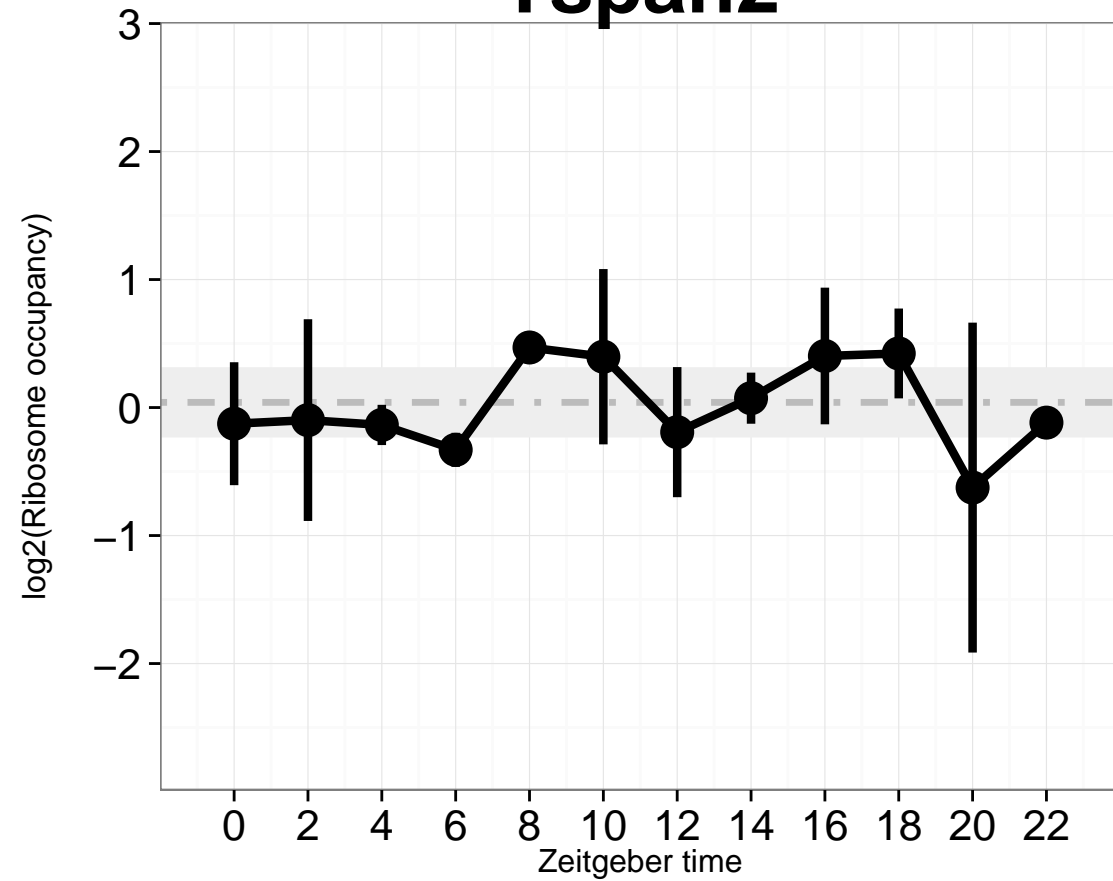

Supplement: Supplementary file 12818 [file 1]

## Mafk

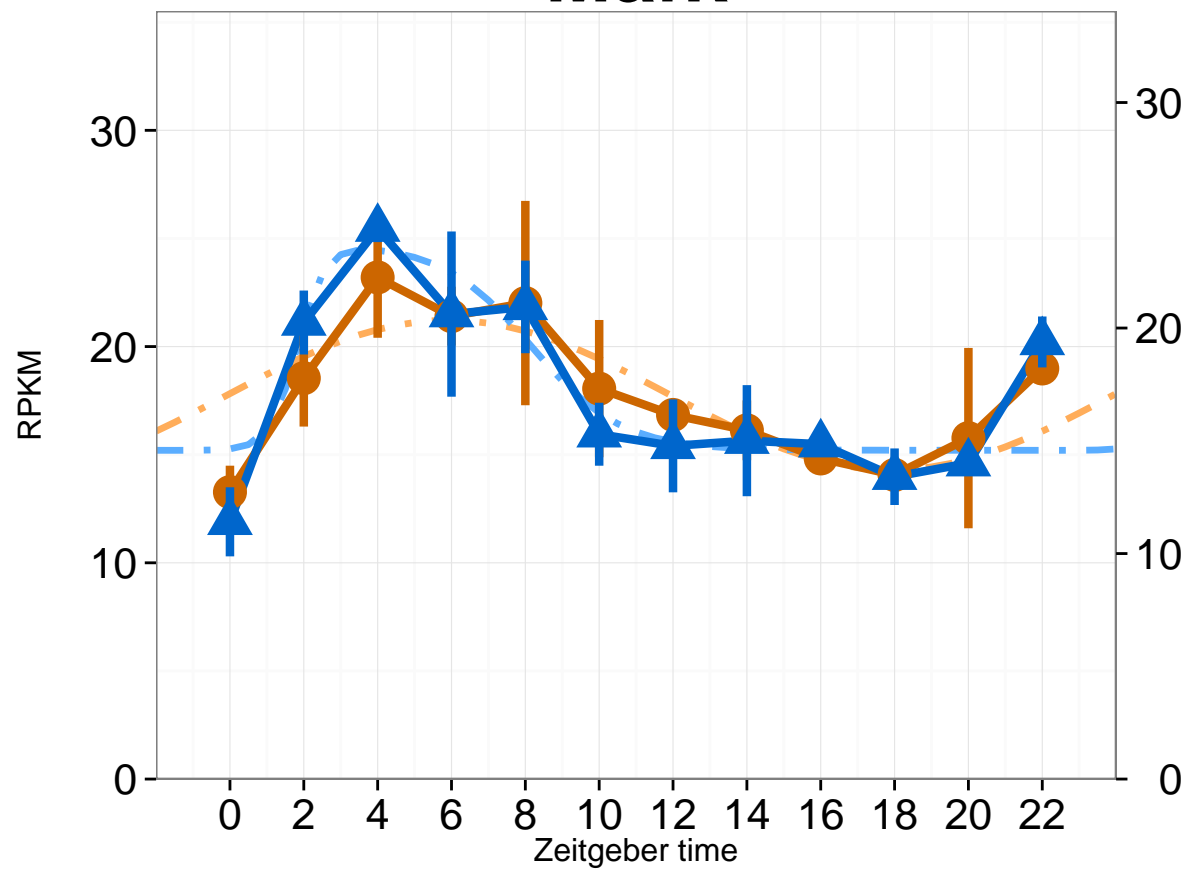

## Mafk

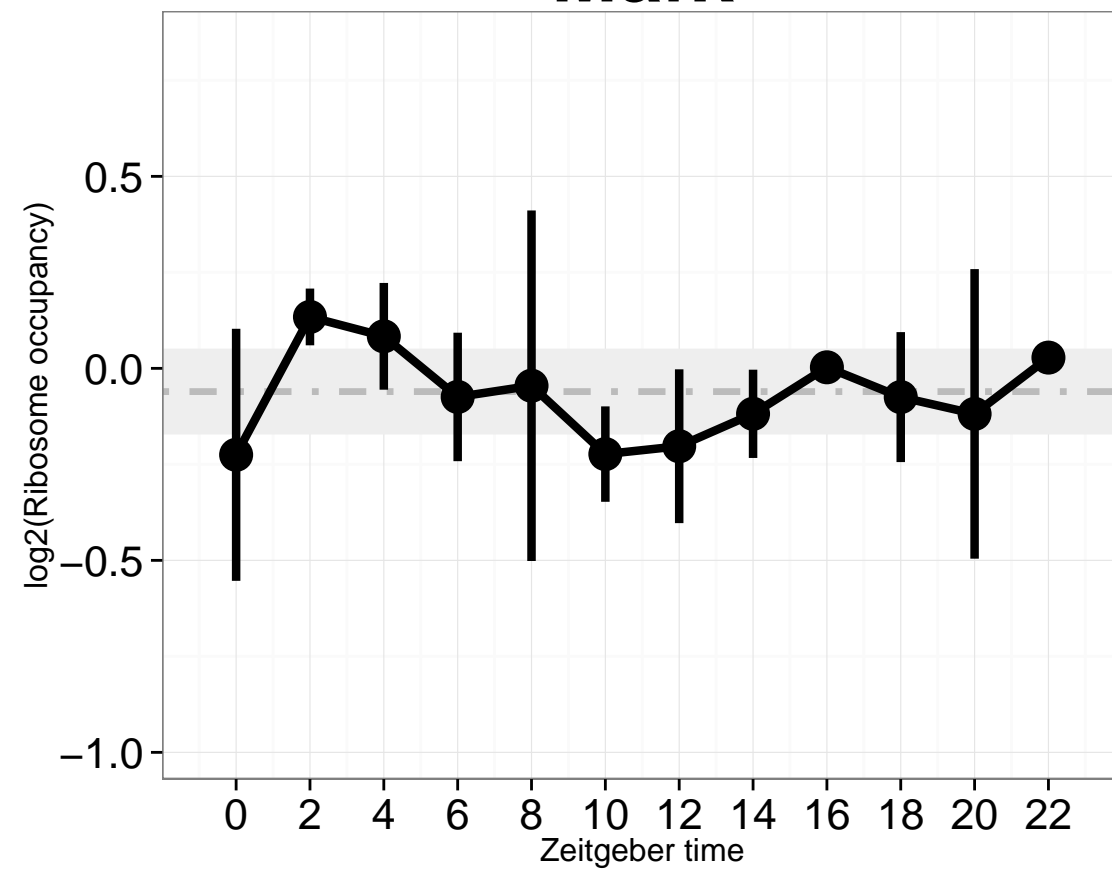

Supplement: Supplementary file 12819 [file 1]

## Hsph1

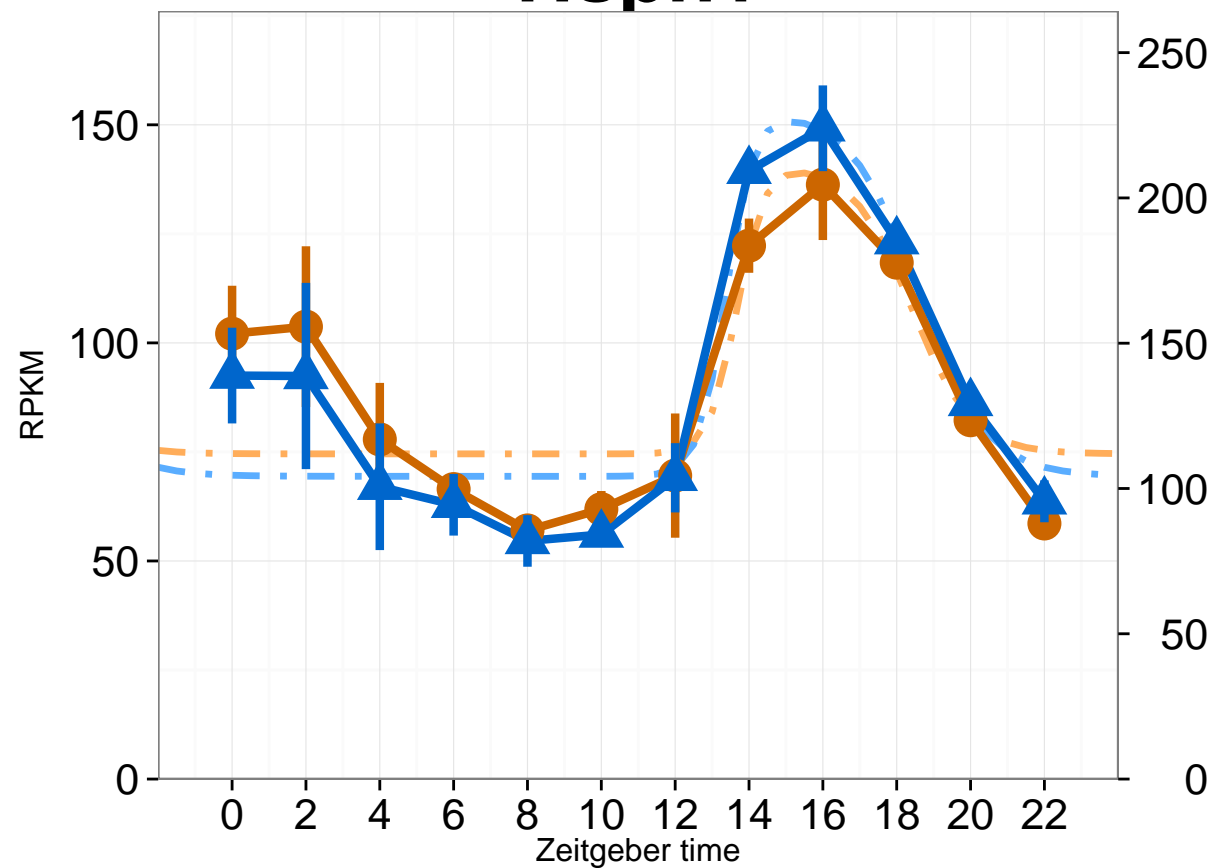

## Hsph1

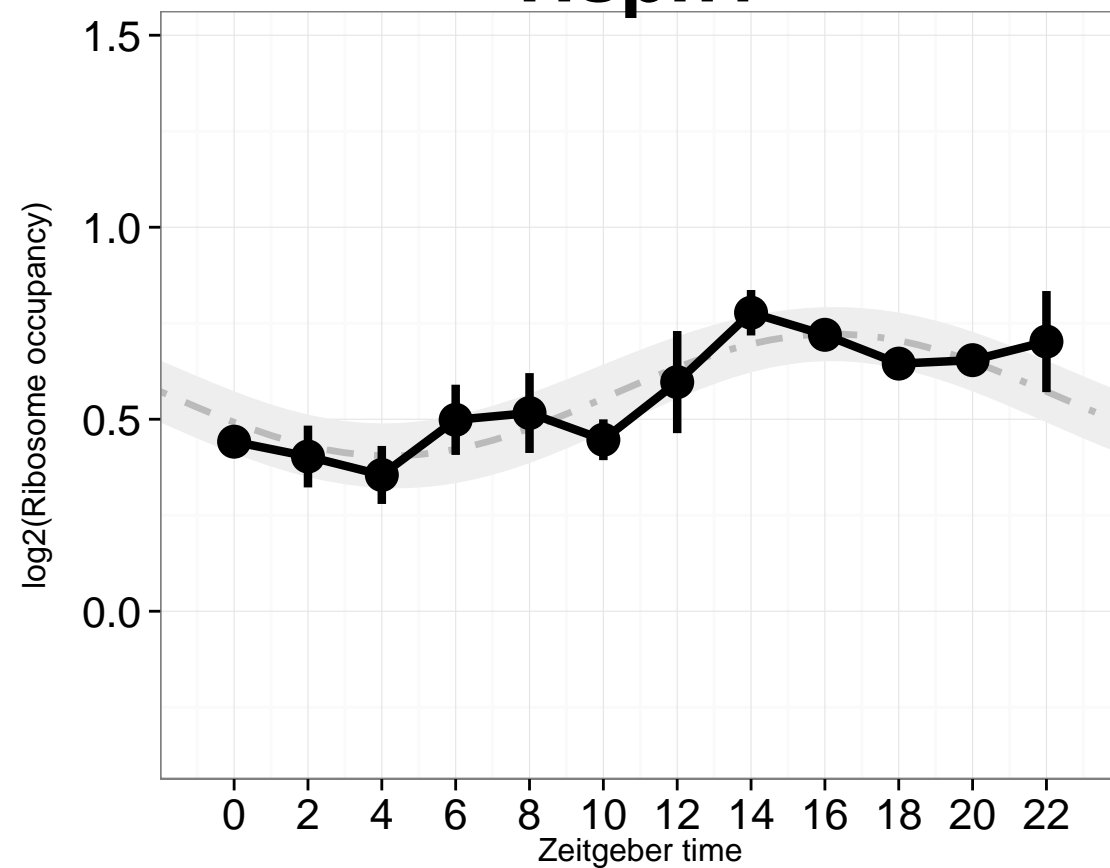

Supplement: Supplementary file 12820 [file 1]

## Txndc5

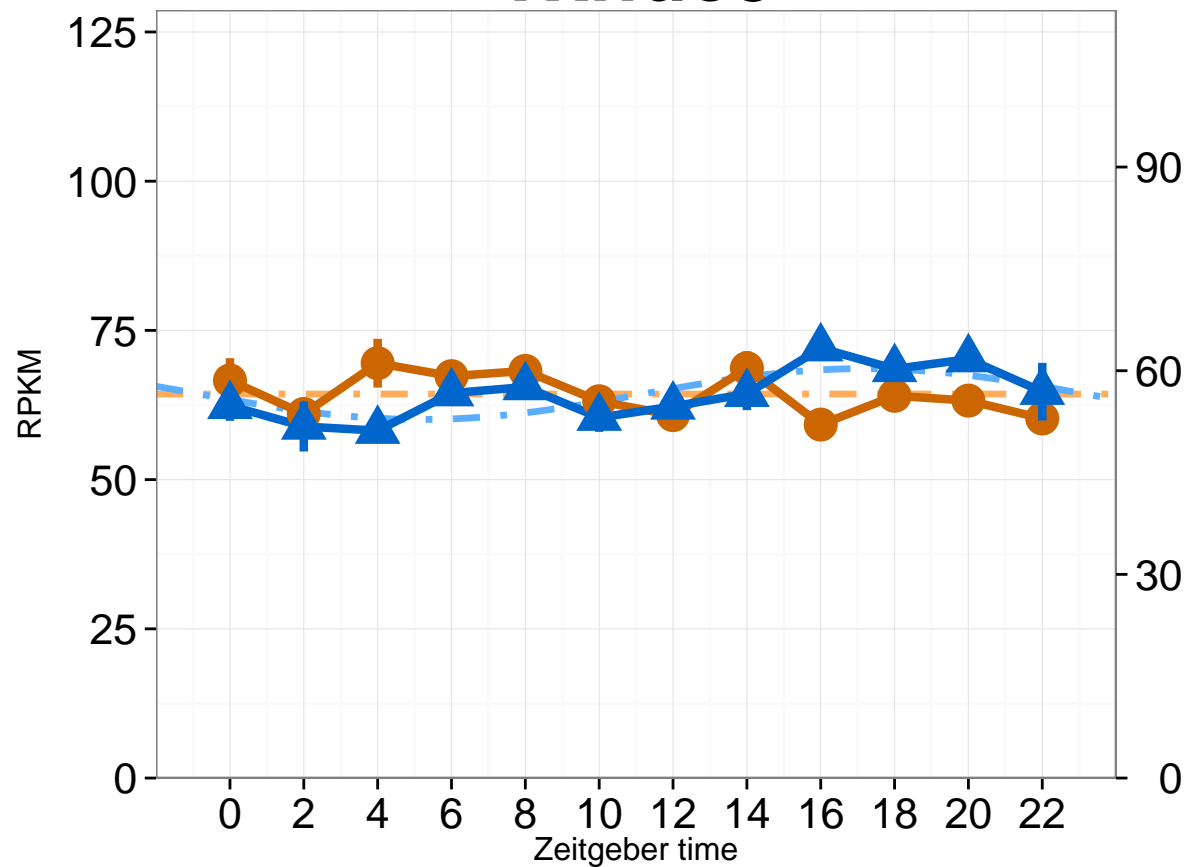

## Txndc5

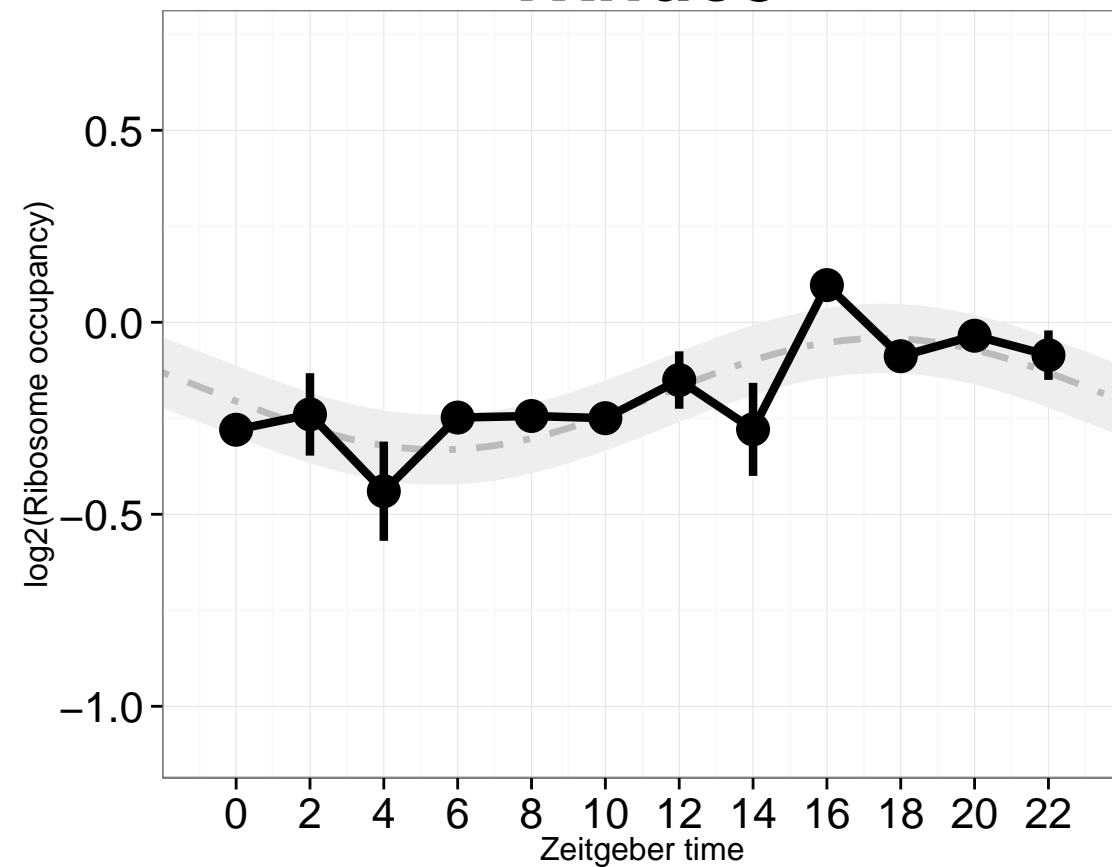

Supplement: Supplementary file 12821 [file 1]

## Phf201

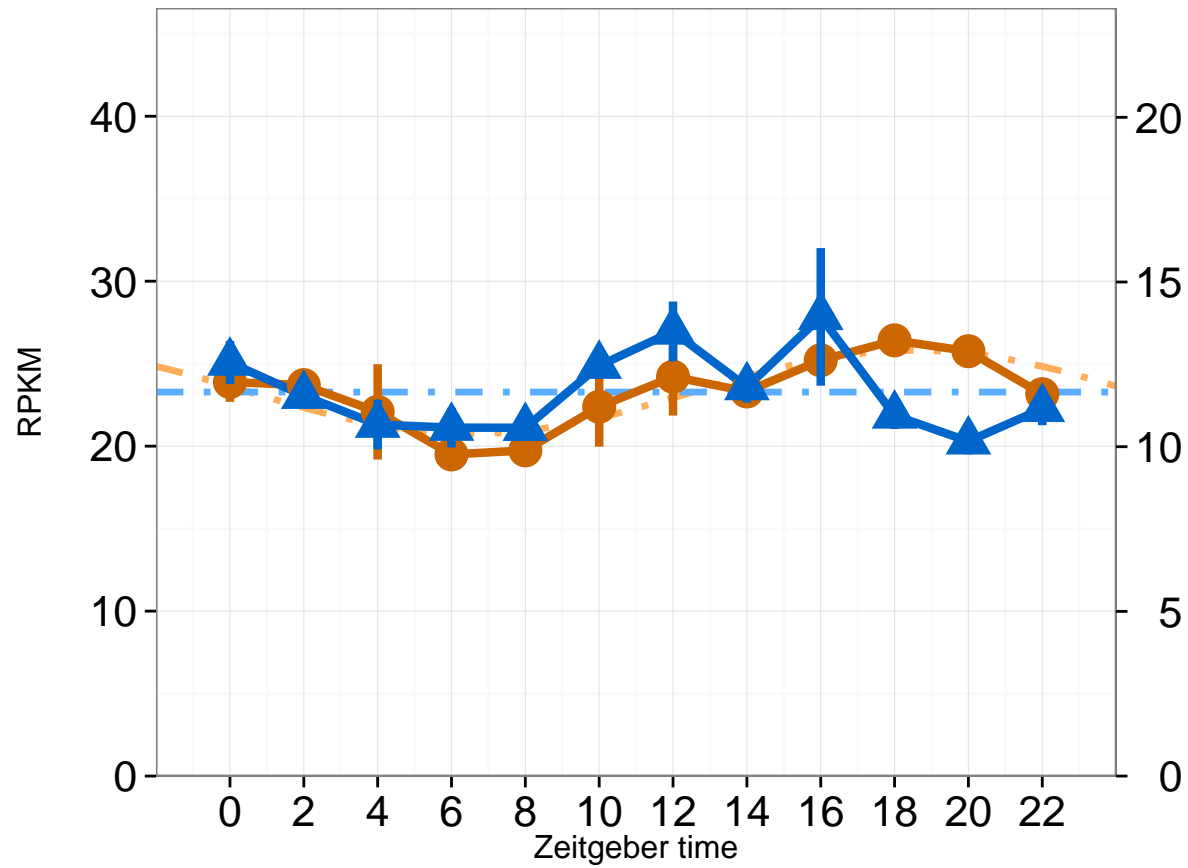

## Phf201

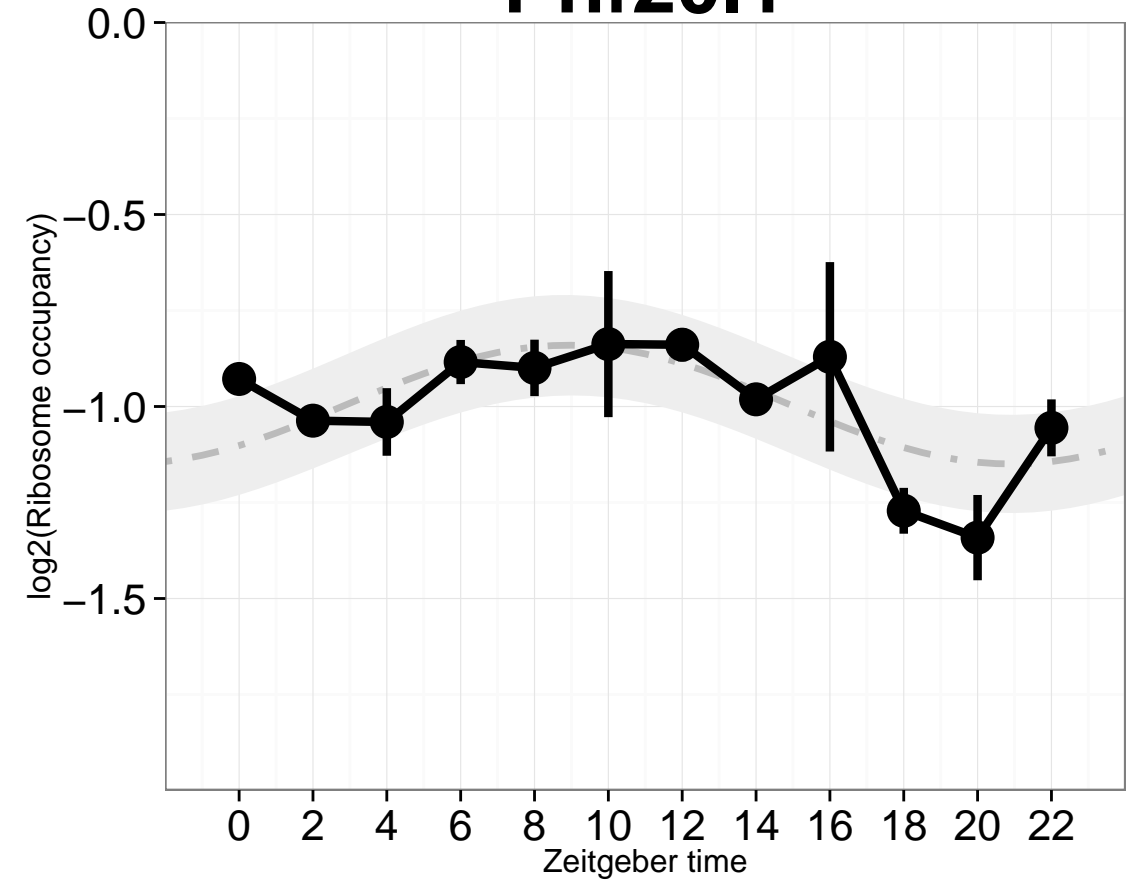

Supplement: Supplementary file 12822 [file 1]

**Cenph TR**

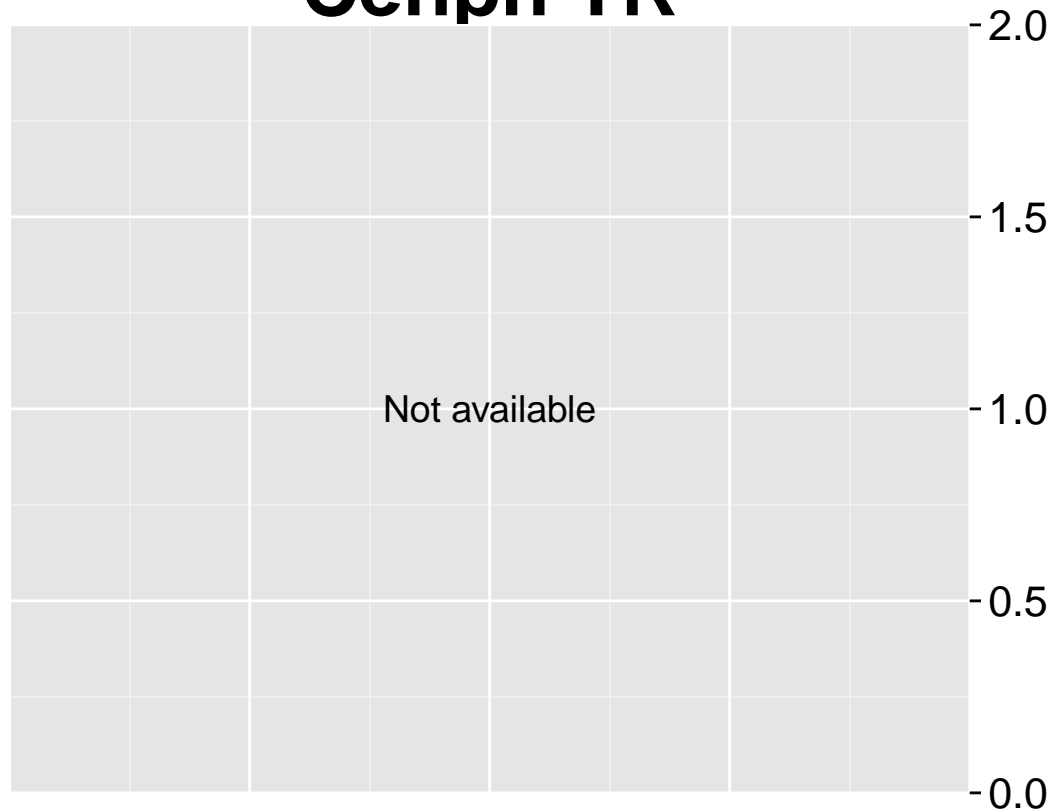

**Cenph log2(Ribosome occupancy**

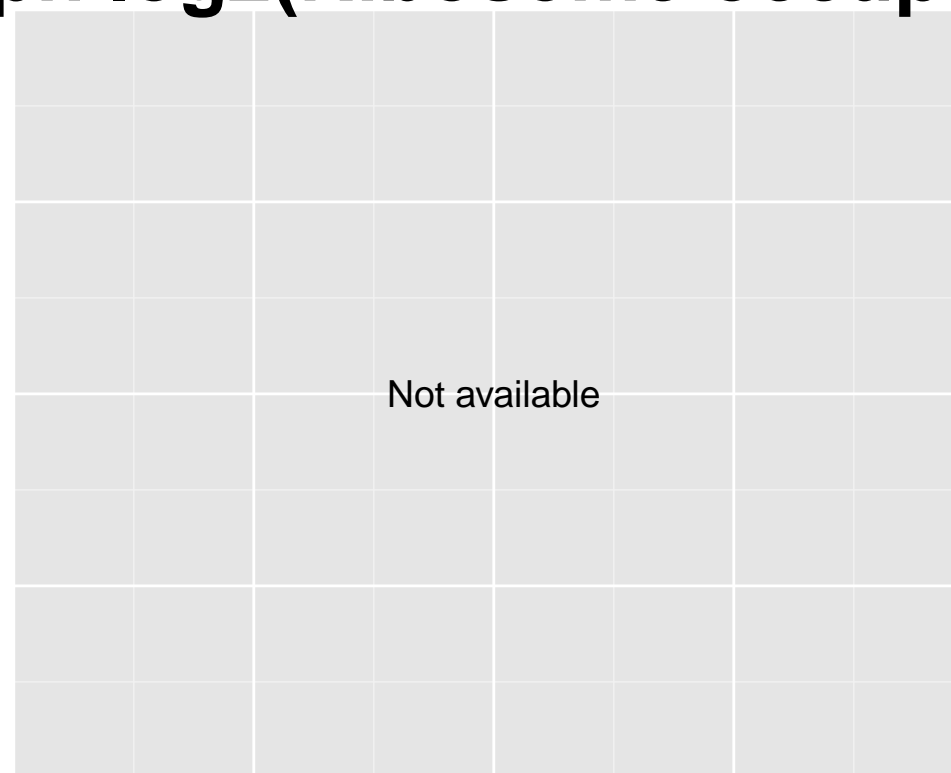

Supplement: Supplementary file 12823 [file 1]

## NoI12

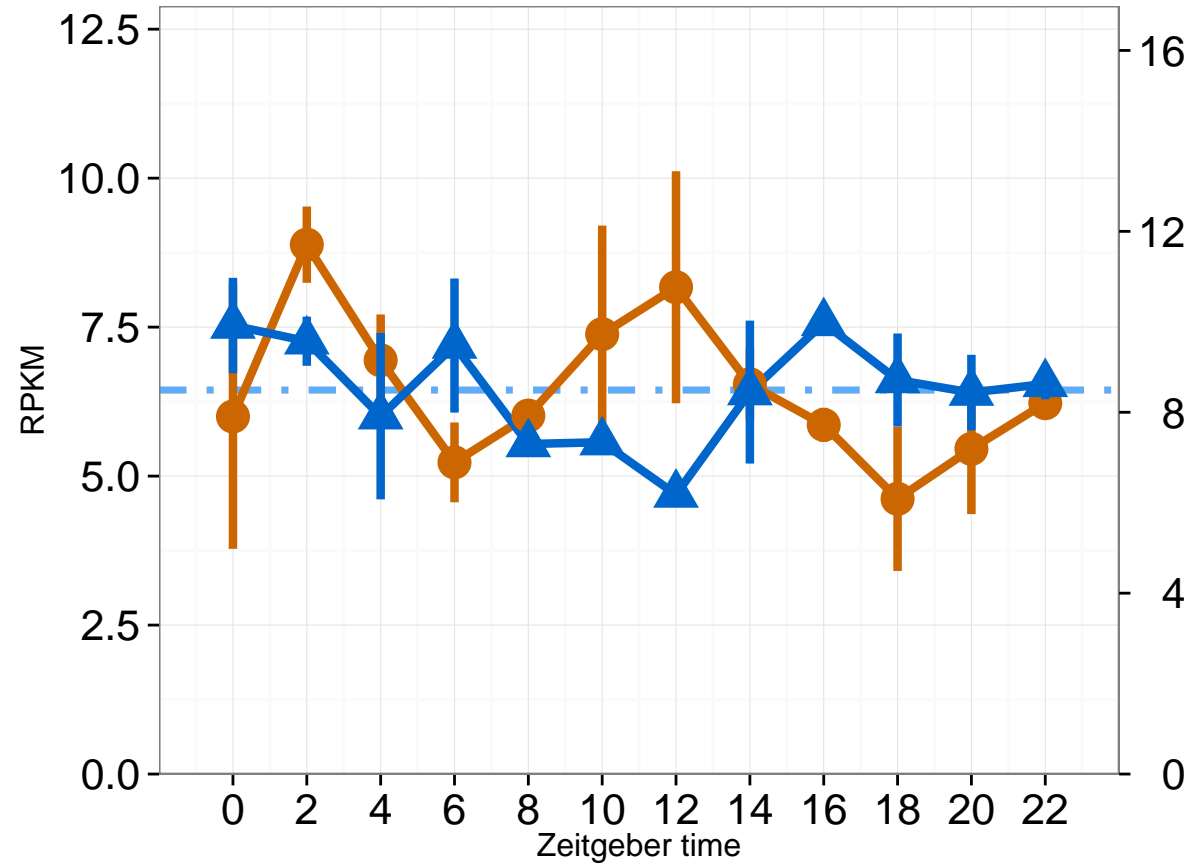

## NoI12

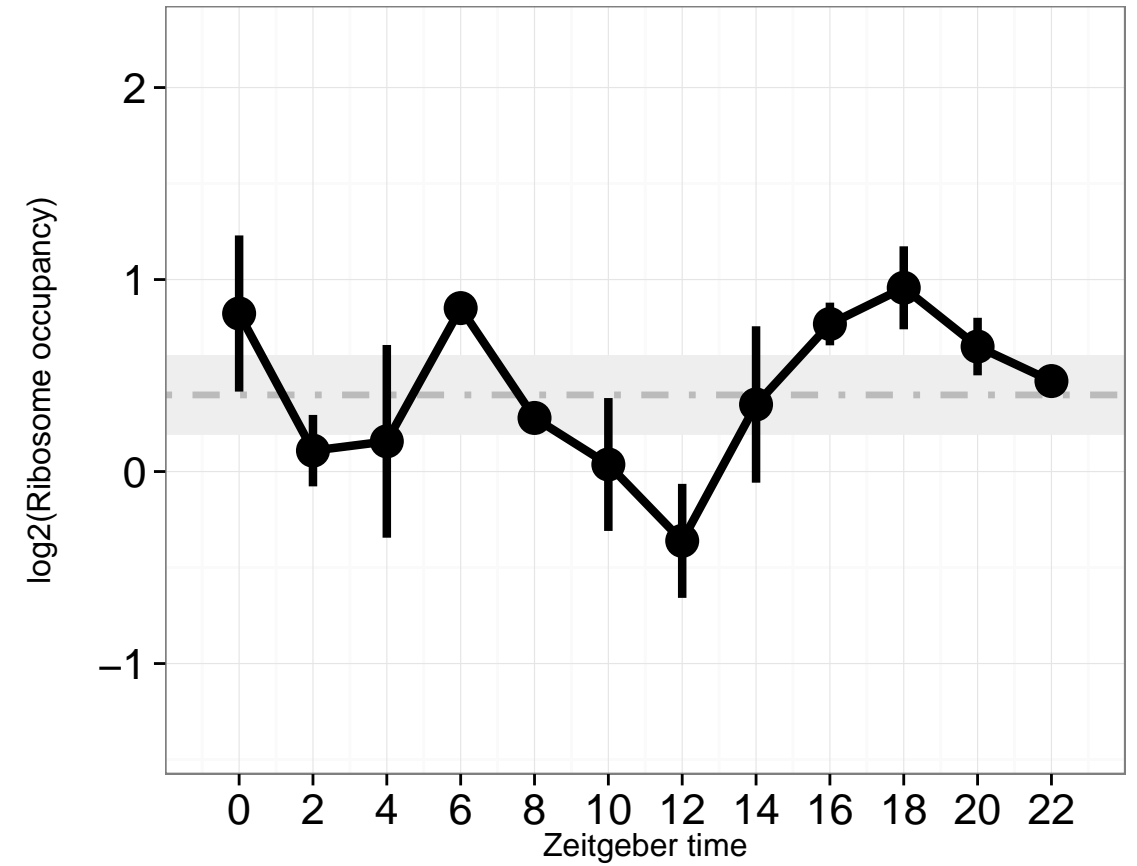

Supplement: Supplementary file 12824 [file 1]

## Brd4

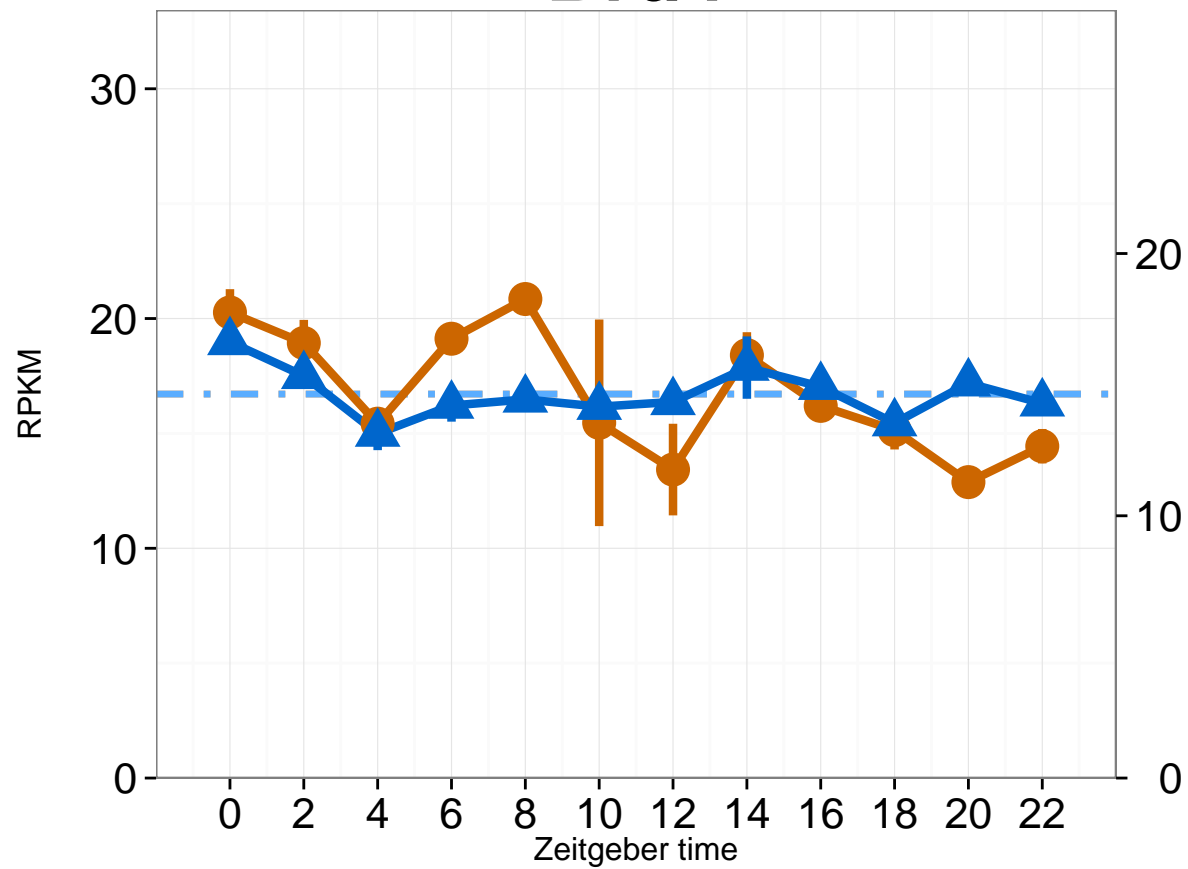

## Brd4

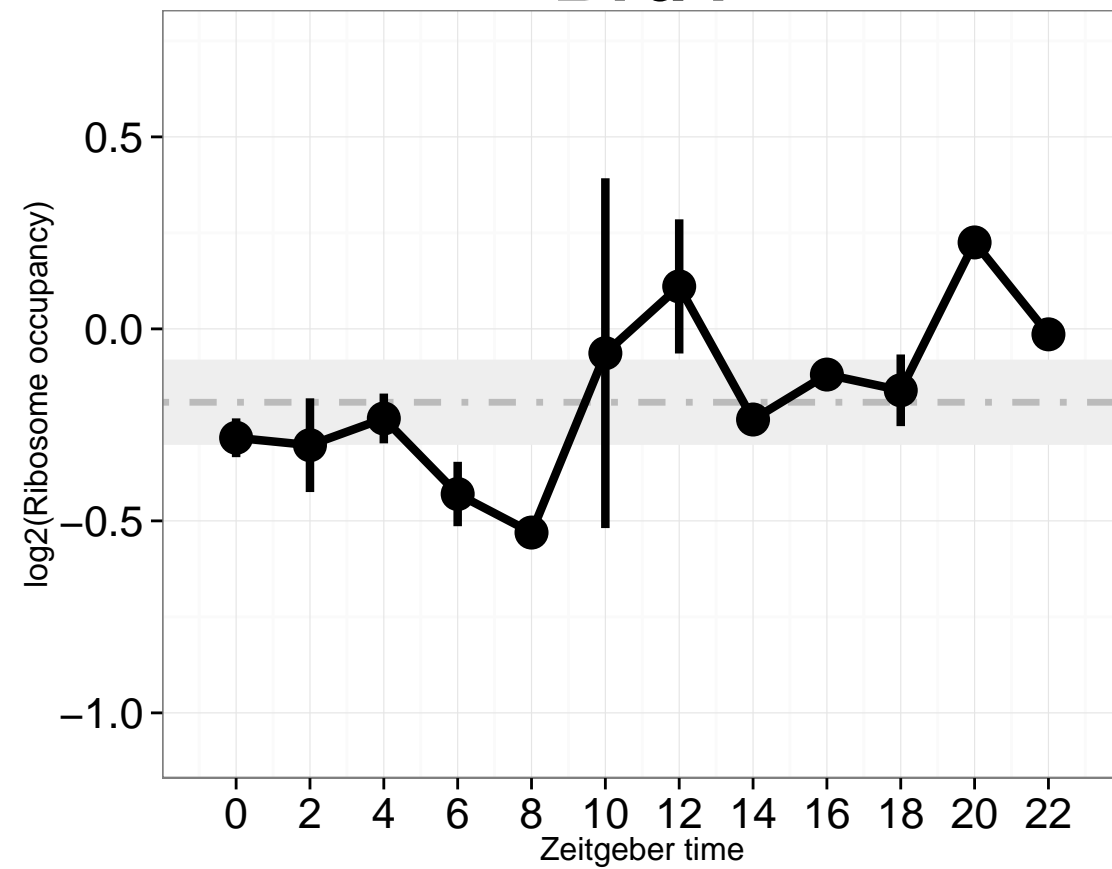

Supplement: Supplementary file 12825 [file 1]

# Snw1

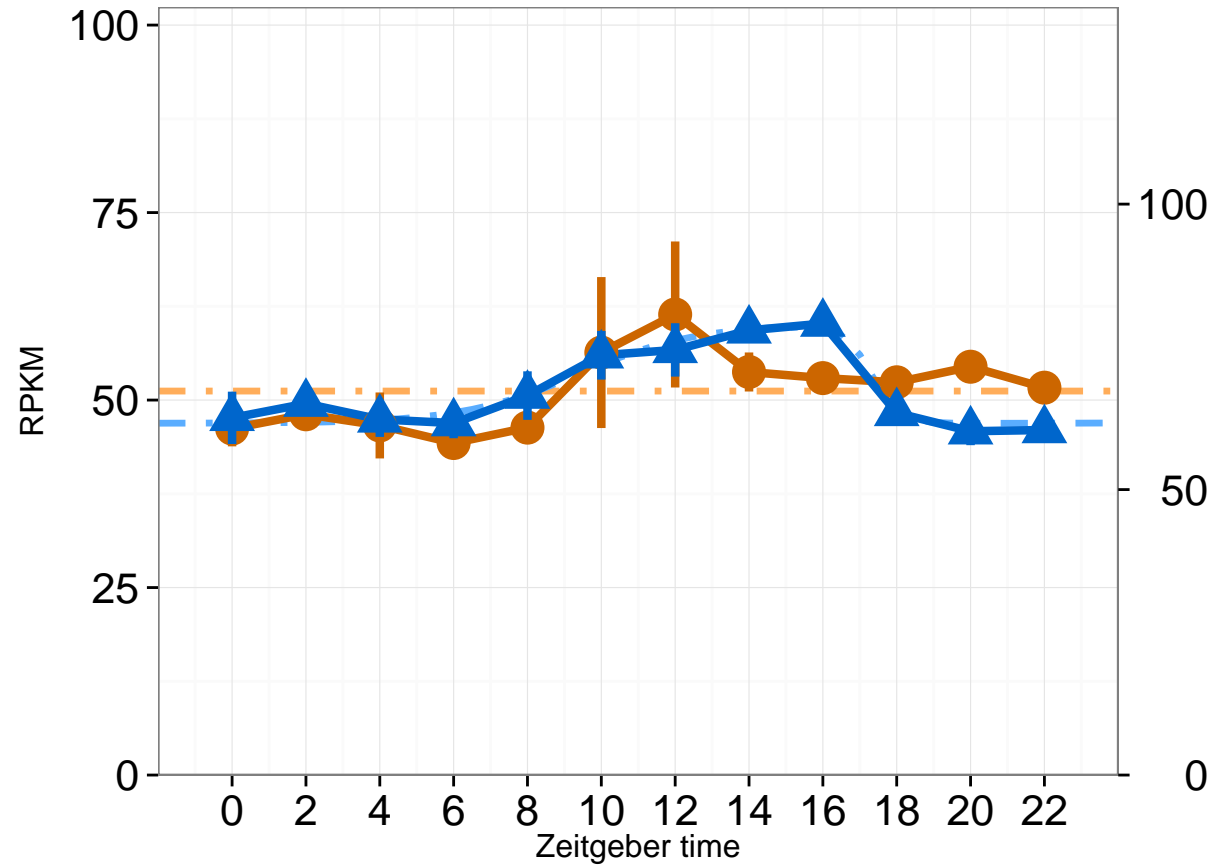

# Snw1

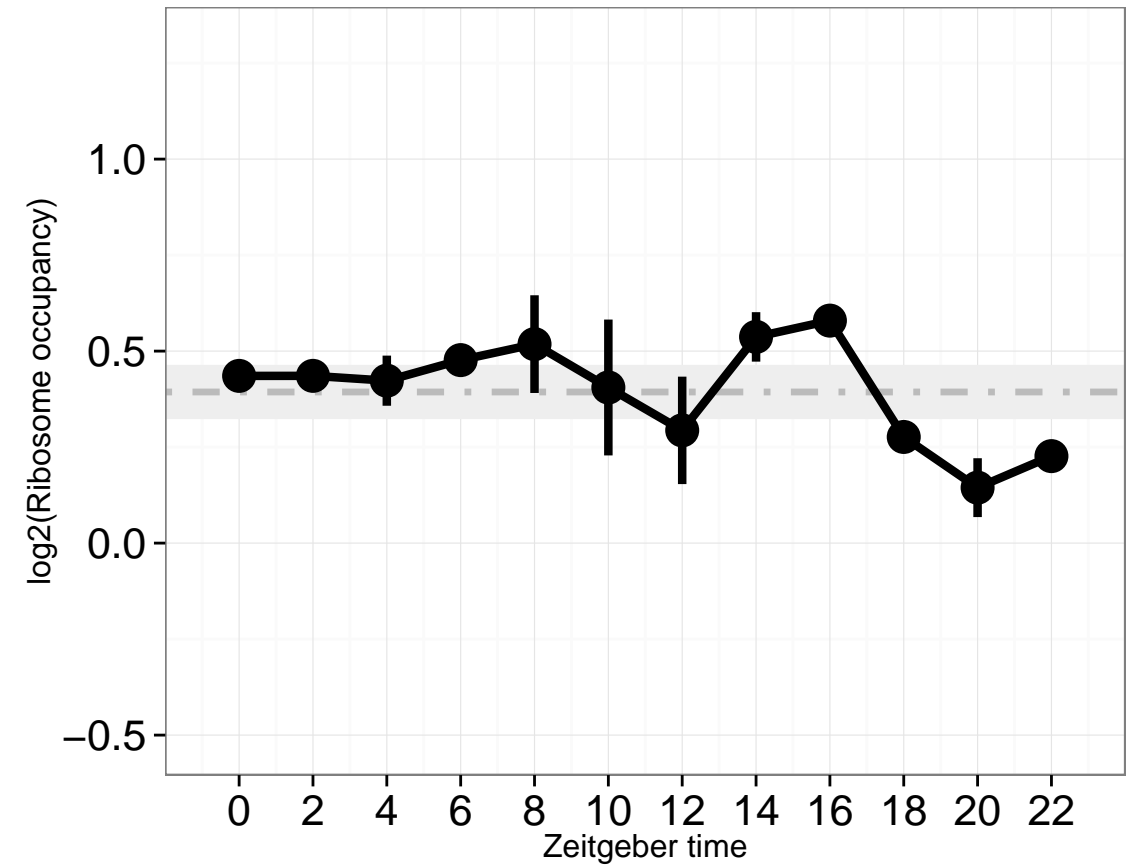

Supplement: Supplementary file 12826 [file 1]

## Hgfac

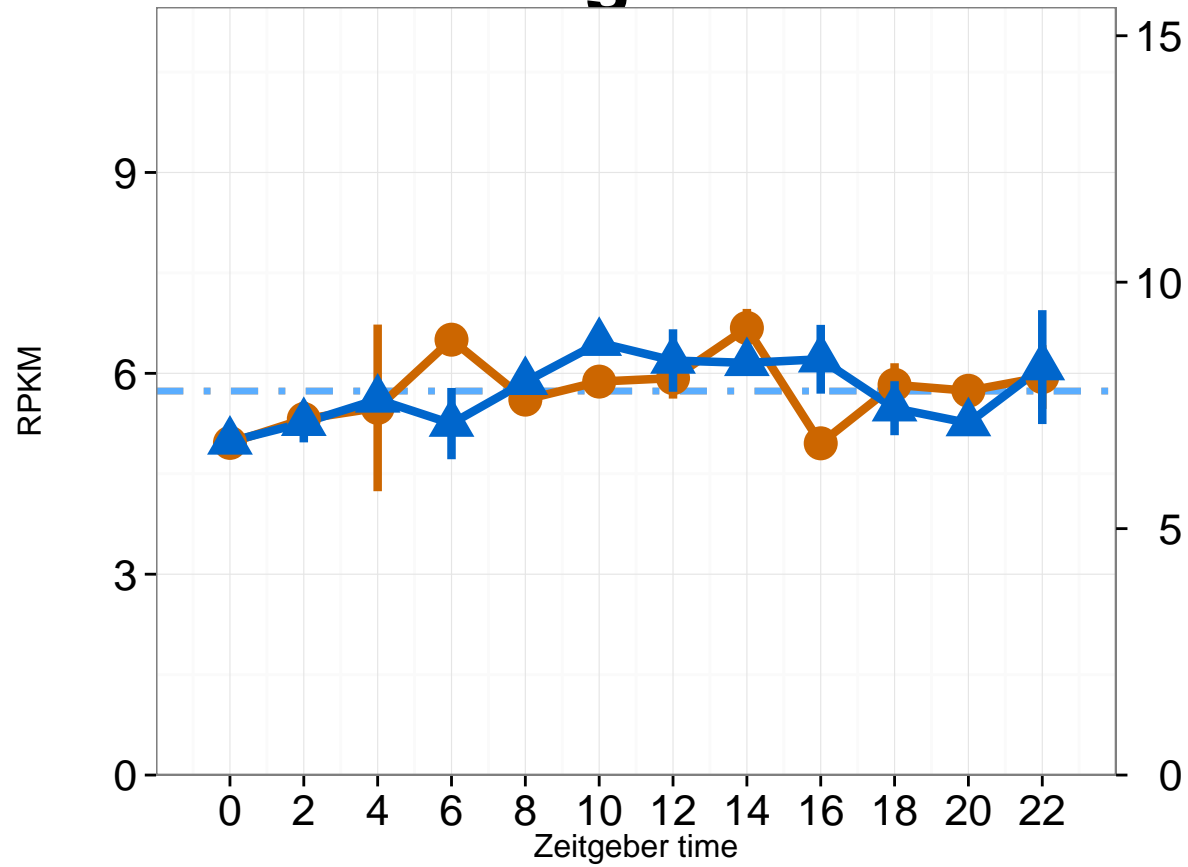

## Hgfac

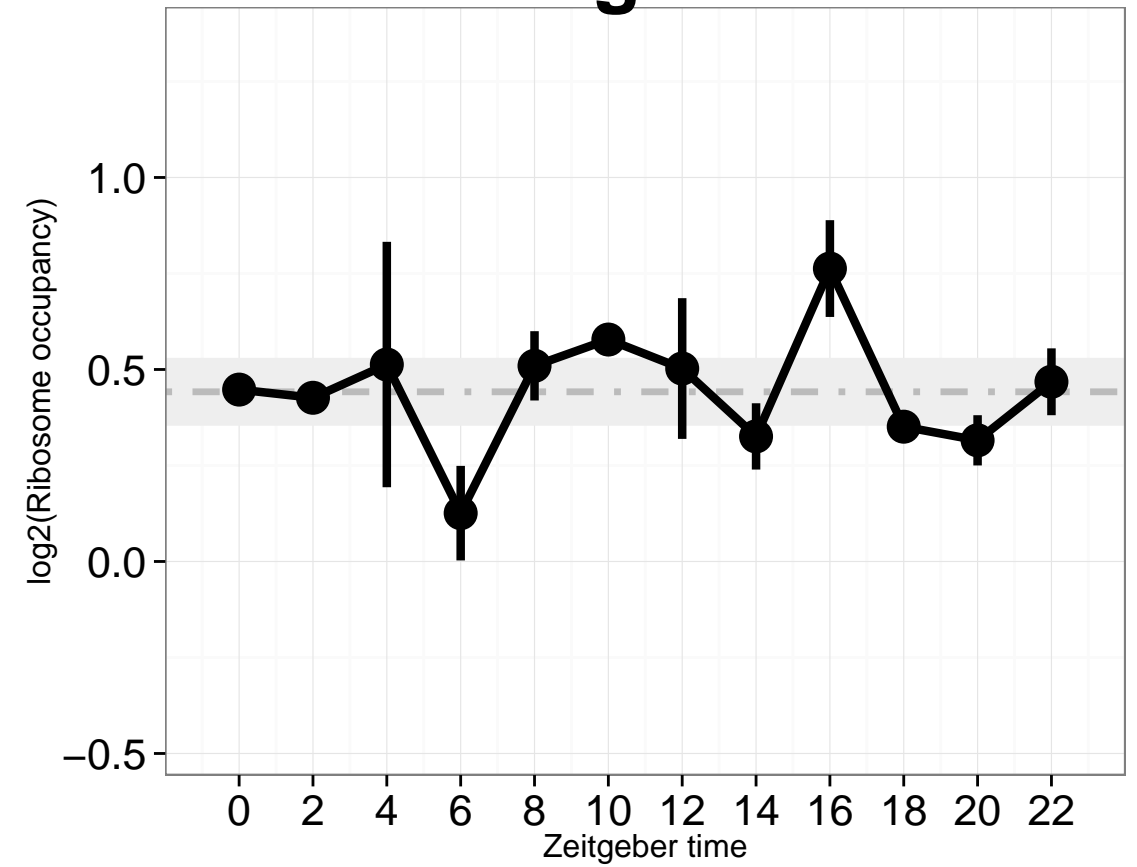

Supplement: Supplementary file 12827 [file 1]

## Rhod

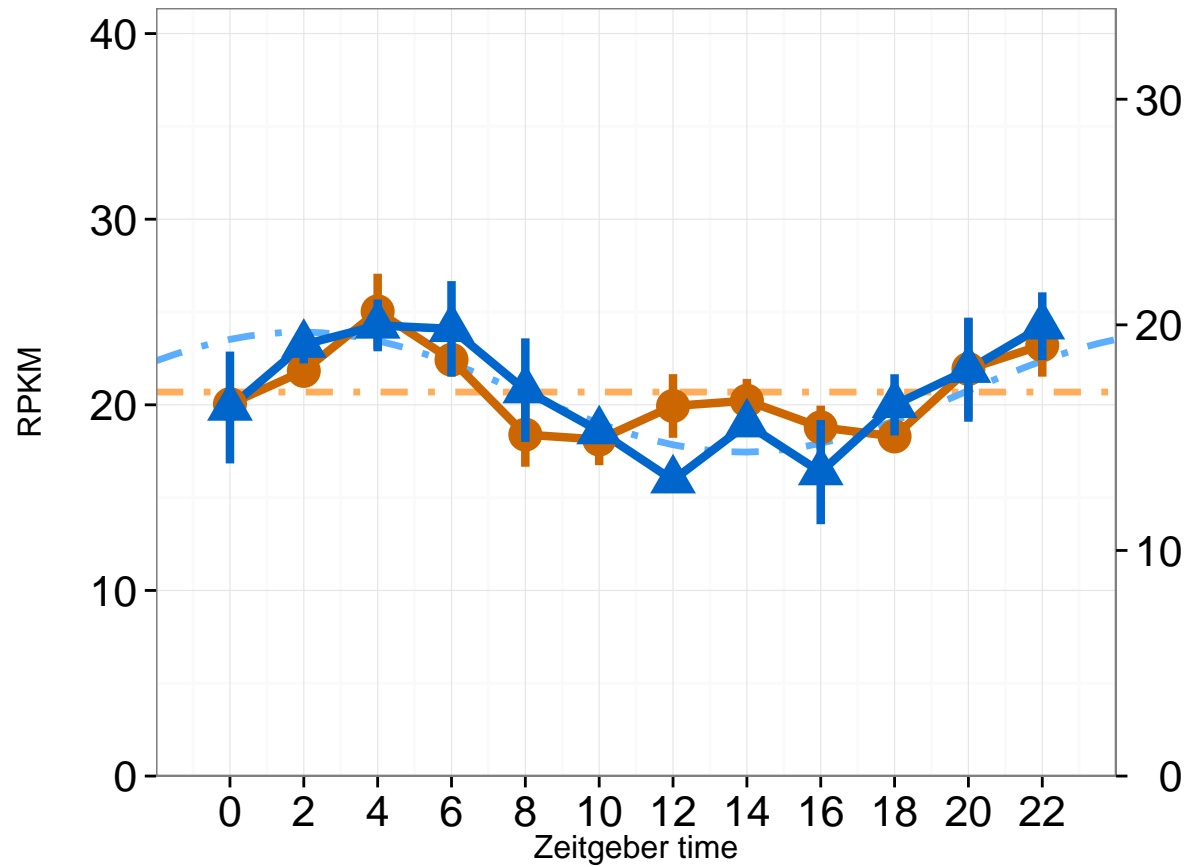

## Rhod

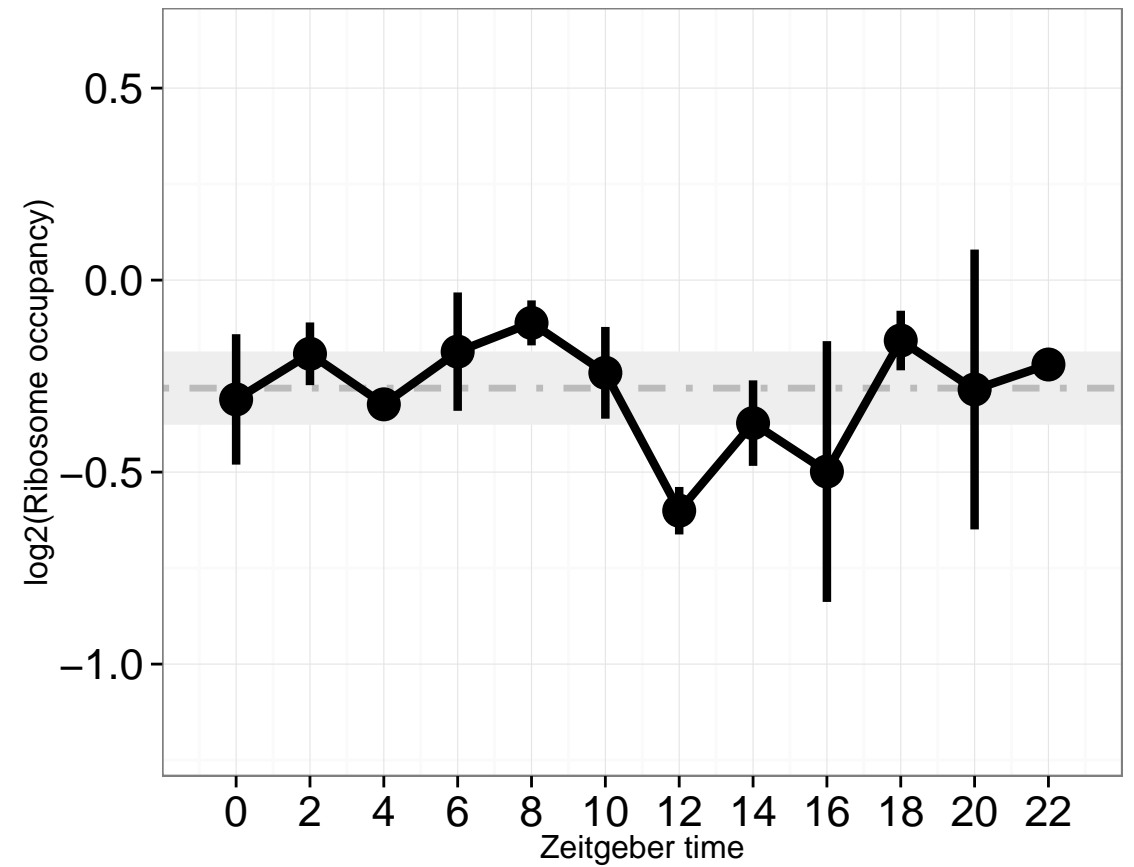

Supplement: Supplementary file 12828 [file 1]

# Slc25a37

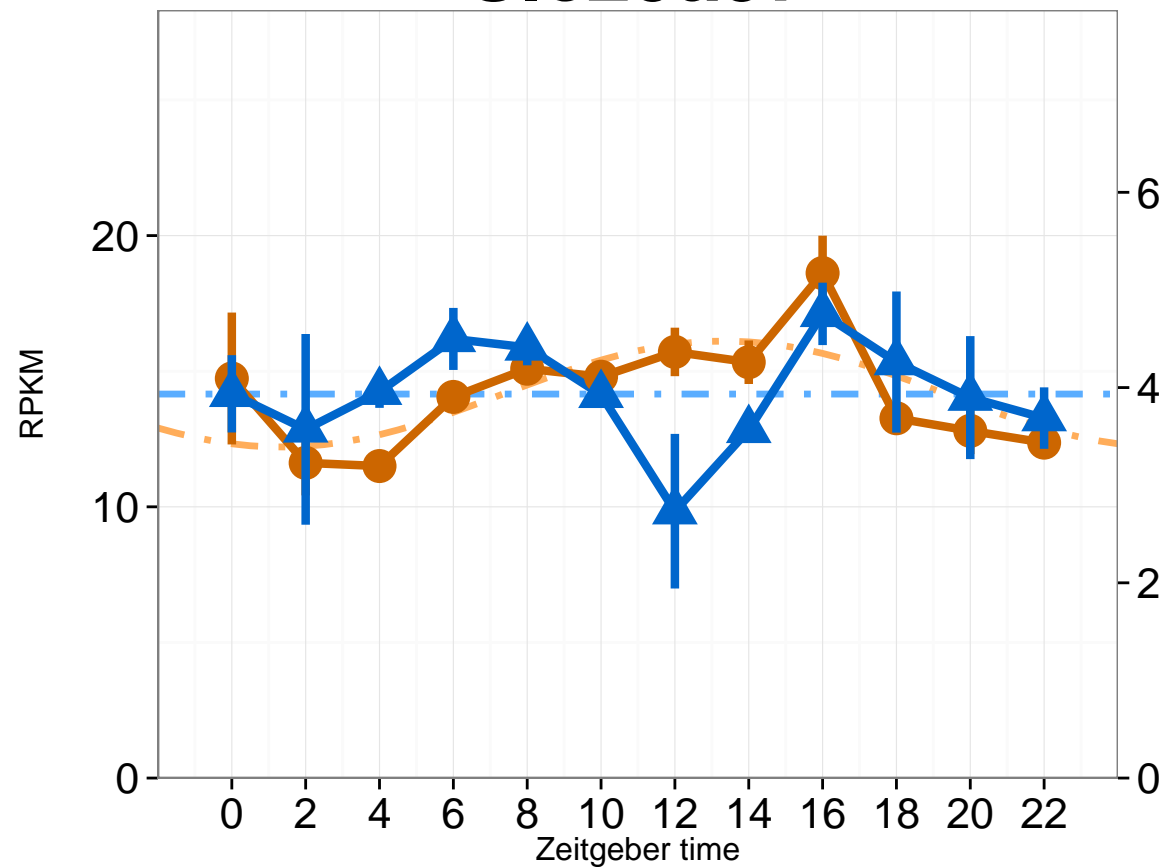

# Slc25a37

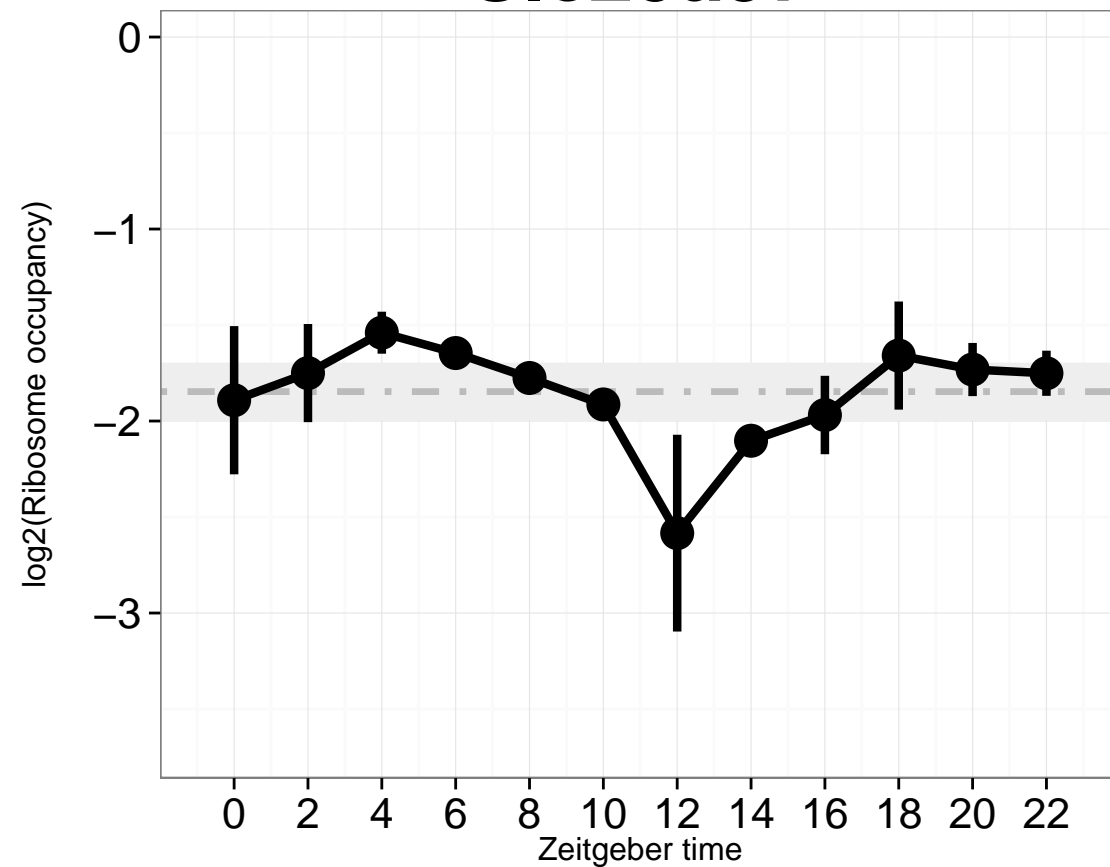

Supplement: Supplementary file 12829 [file 1]

## Tulp4

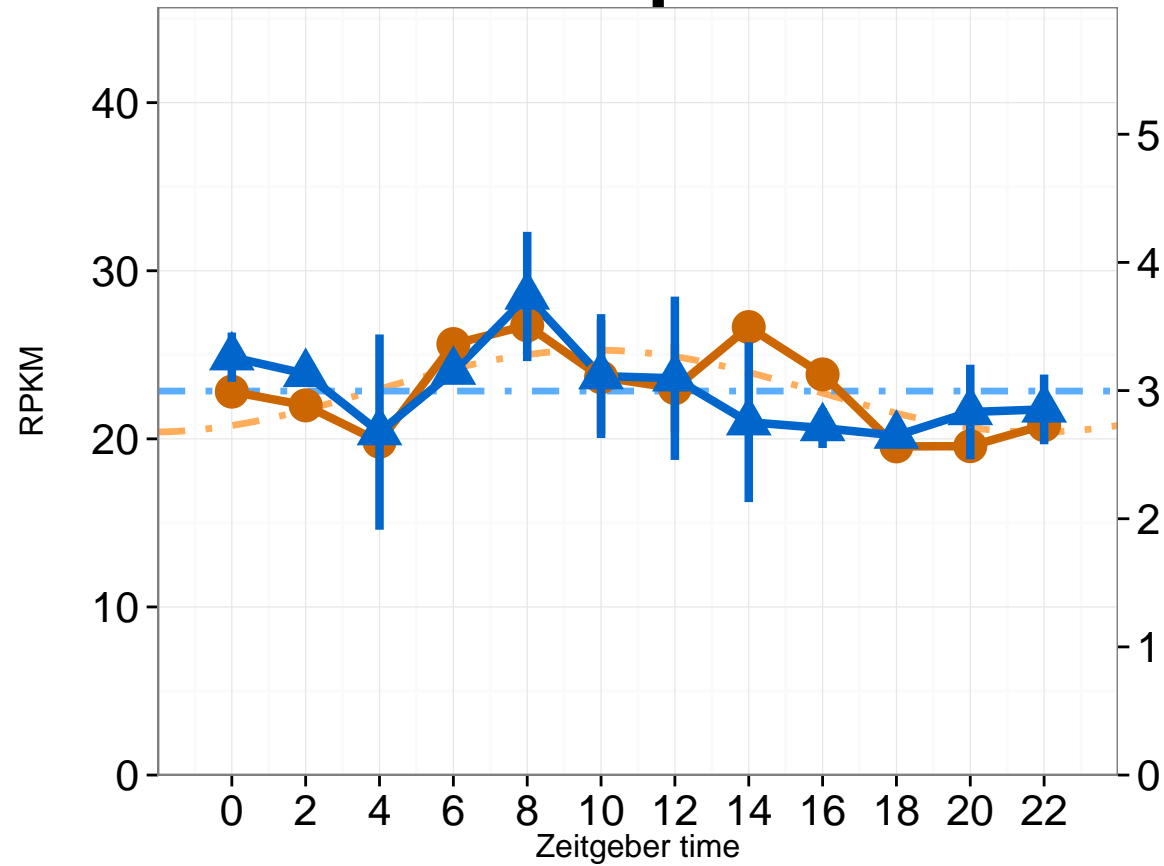

## Tulp4

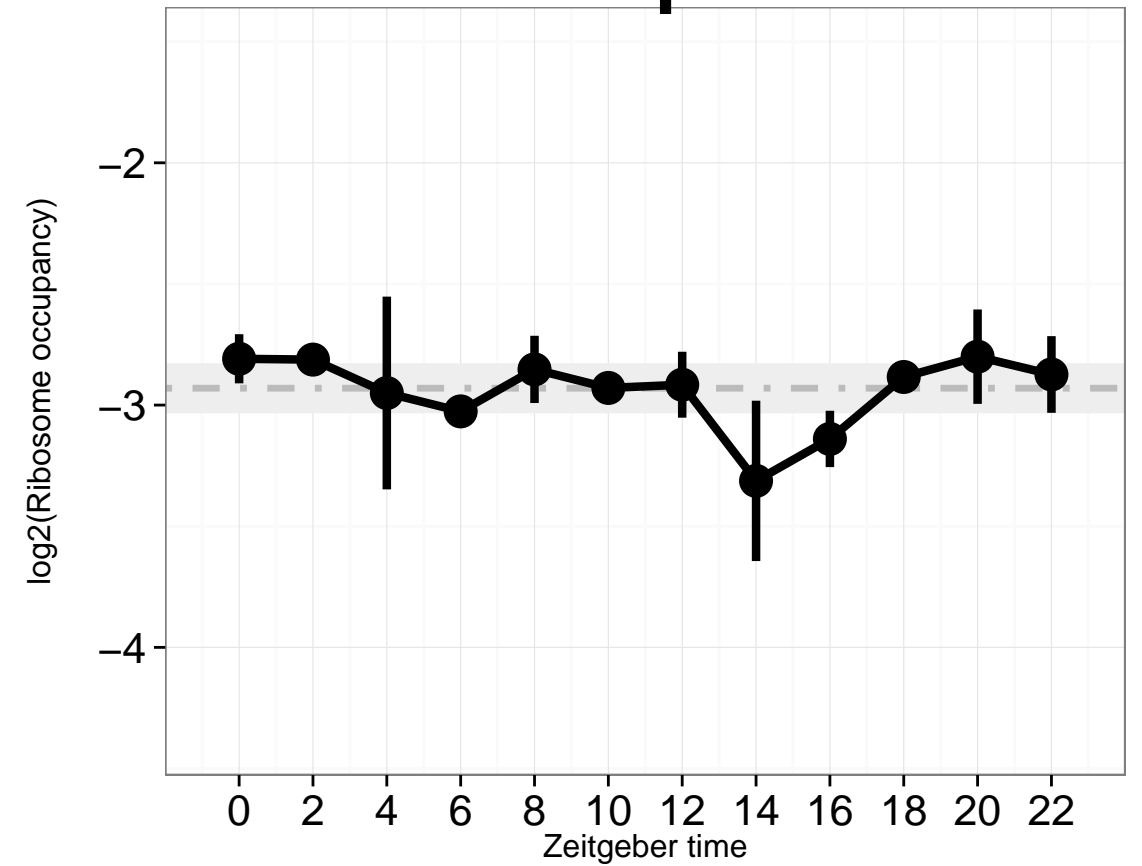

Supplement: Supplementary file 12831 [file 1]

## Rbms1

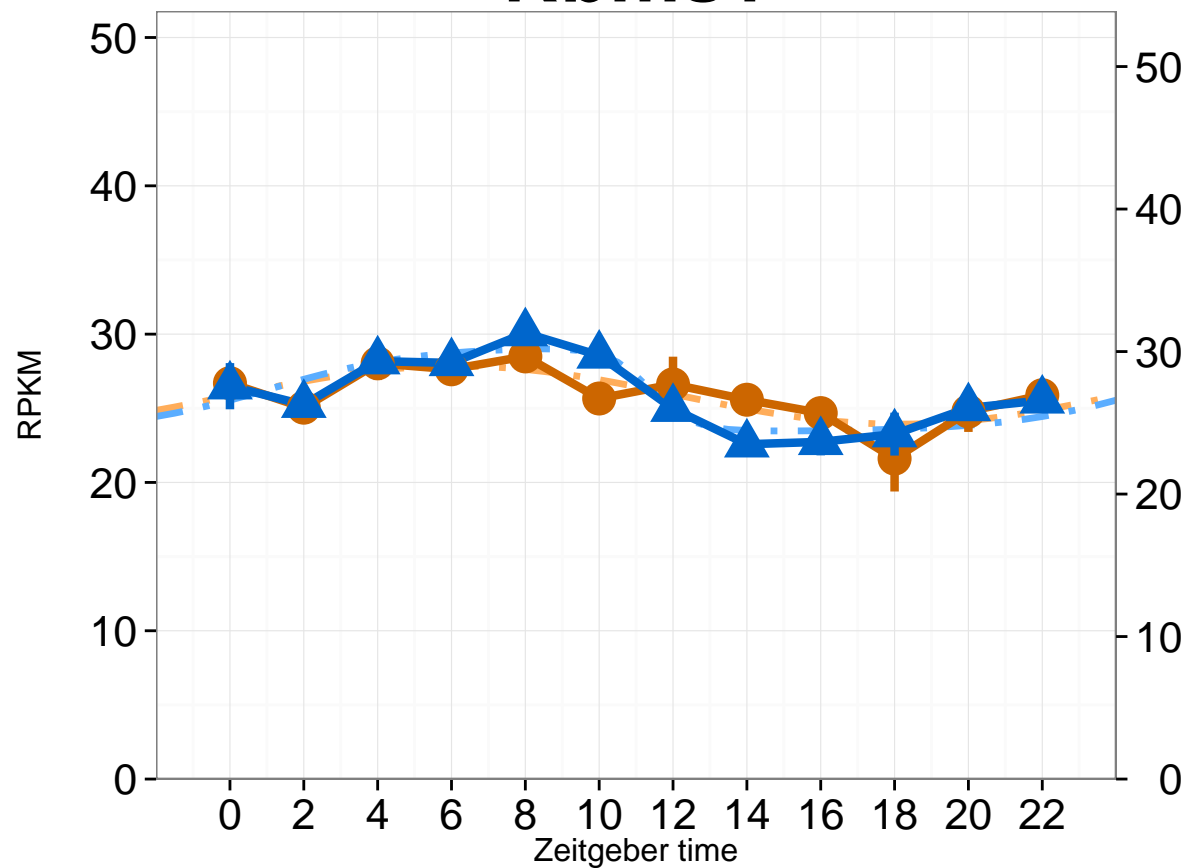

## Rbms1

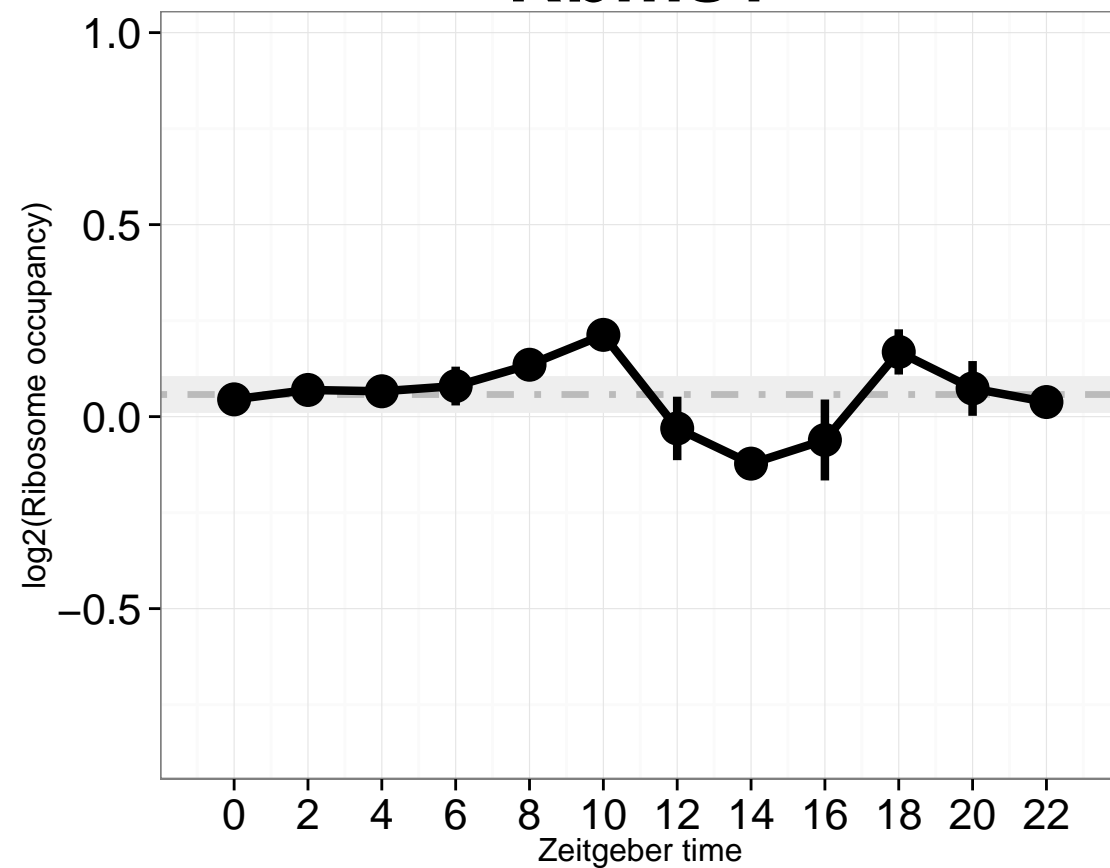

Supplement: Supplementary file 12832 [file 1]

## Notum

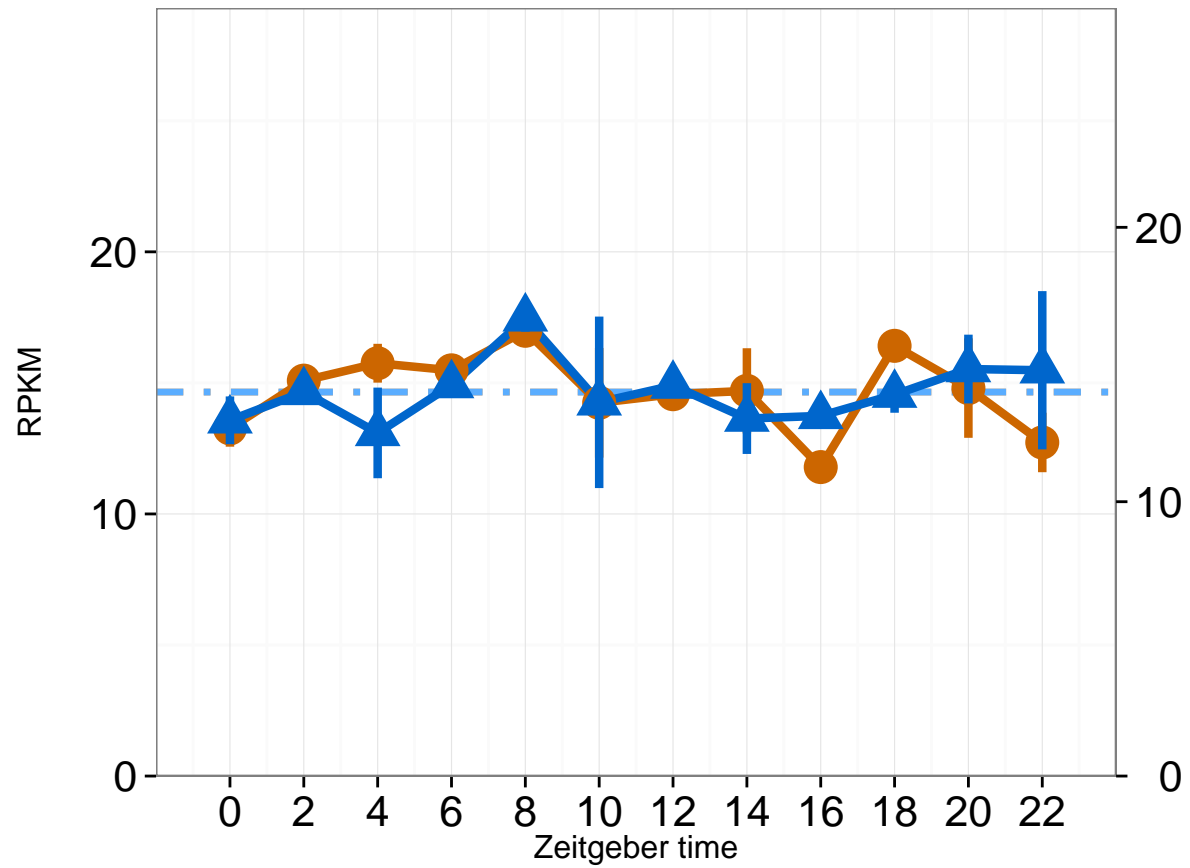

## Notum

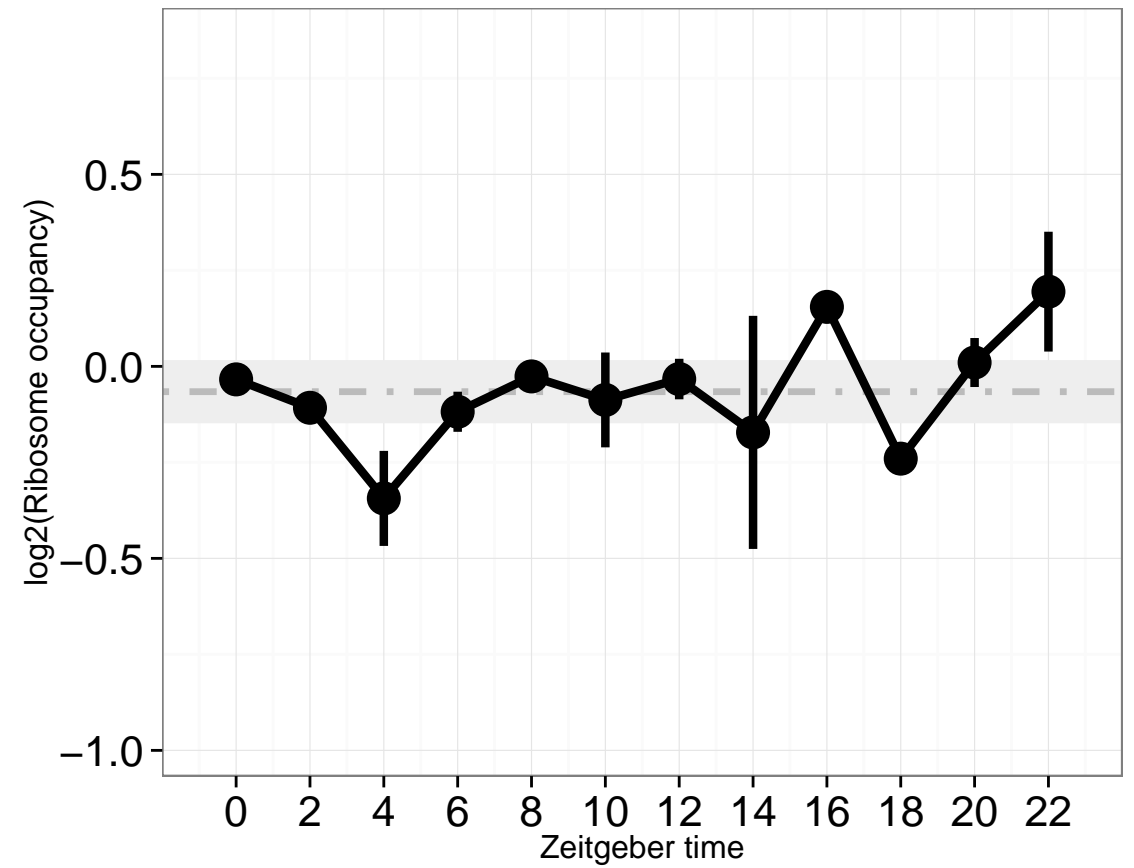

Supplement: Supplementary file 12833 [file 1]

# Btbd11

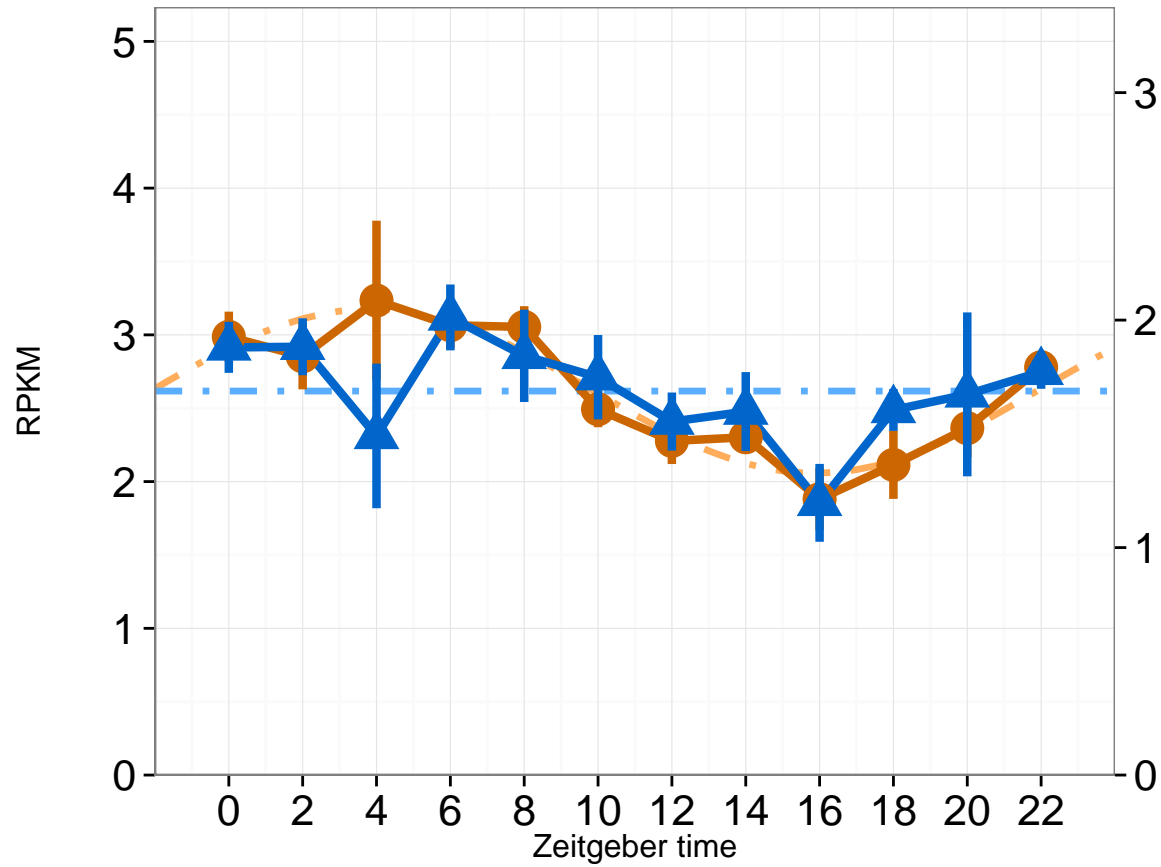

# Btbd11

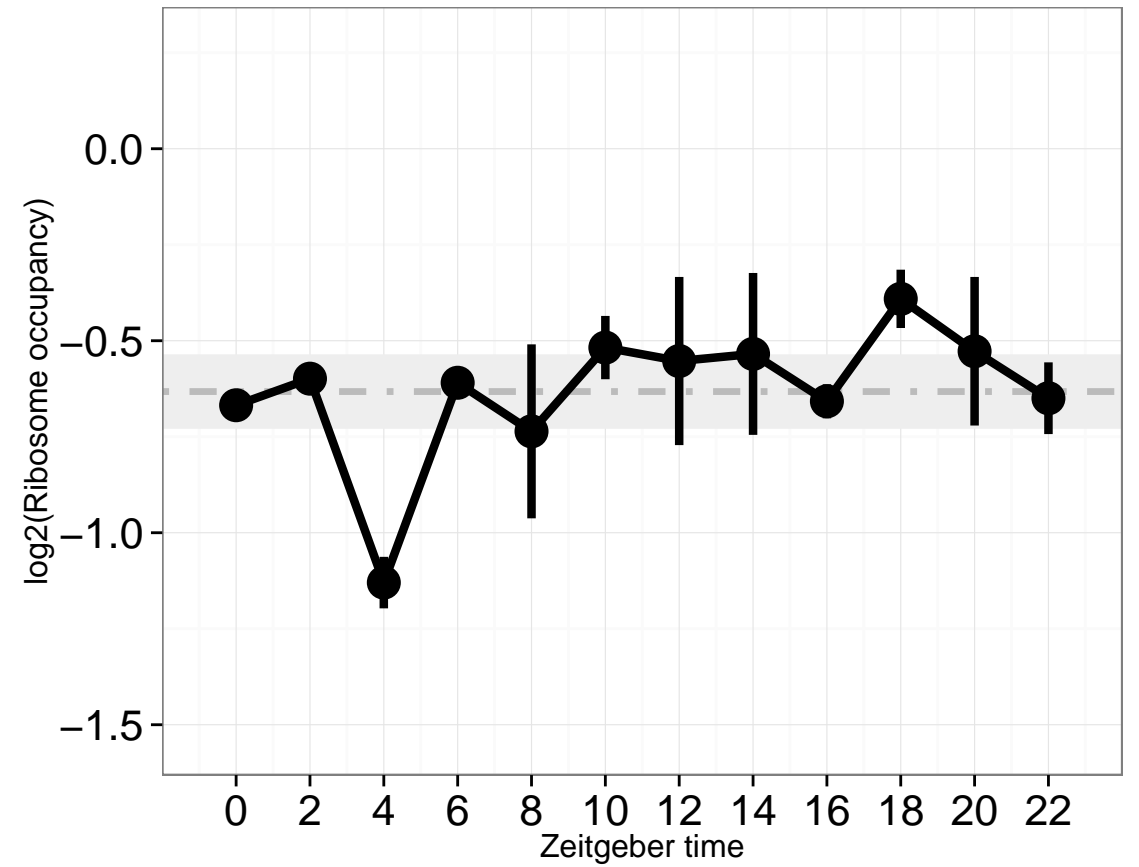

Supplement: Supplementary file 12834 [file 1]

# Fcgr2b

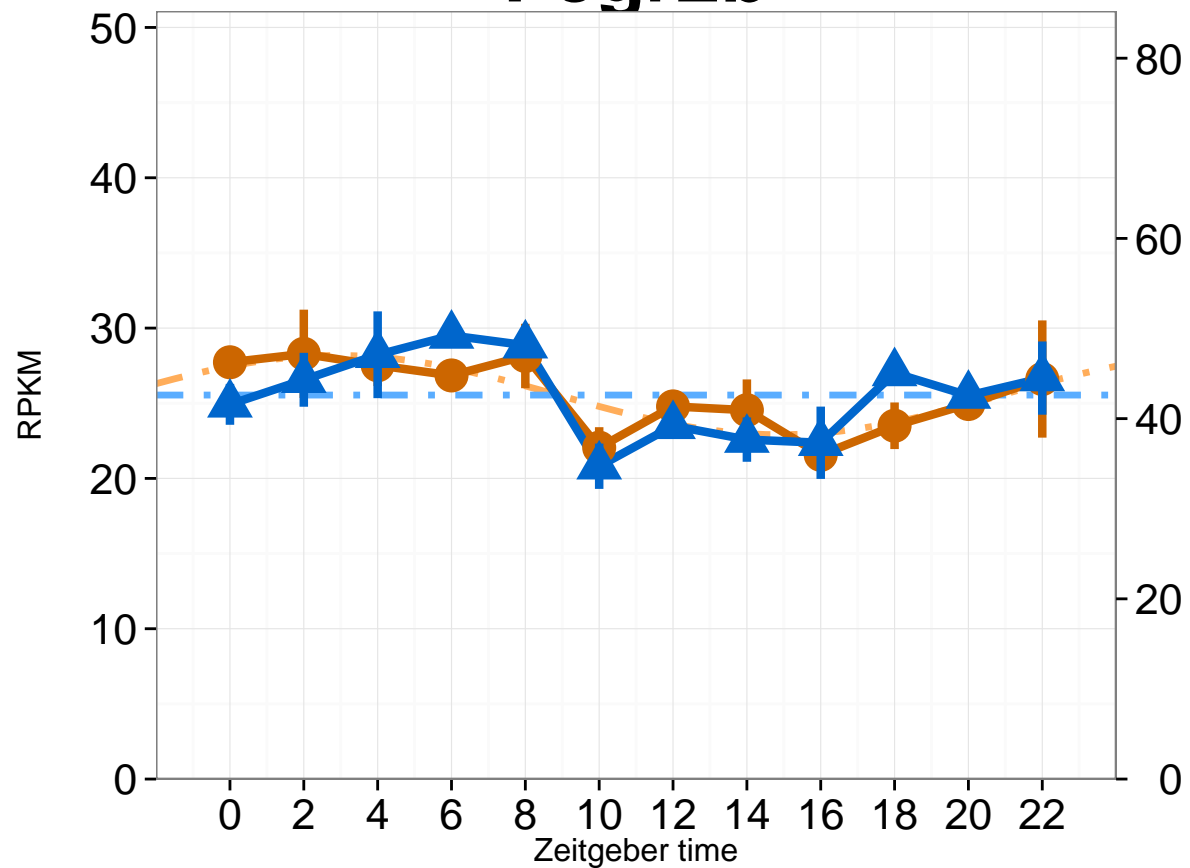

# Fcgr2b

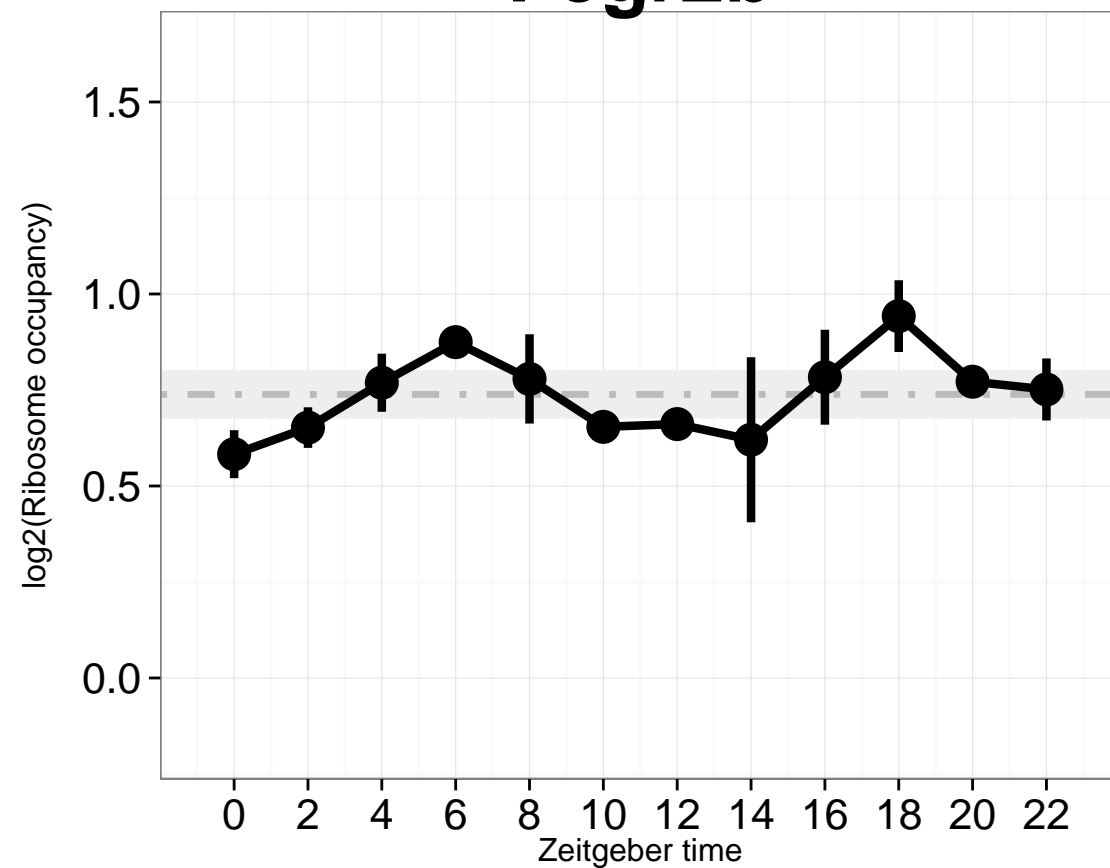

Supplement: Supplementary file 12835 [file 1]

## Emx2

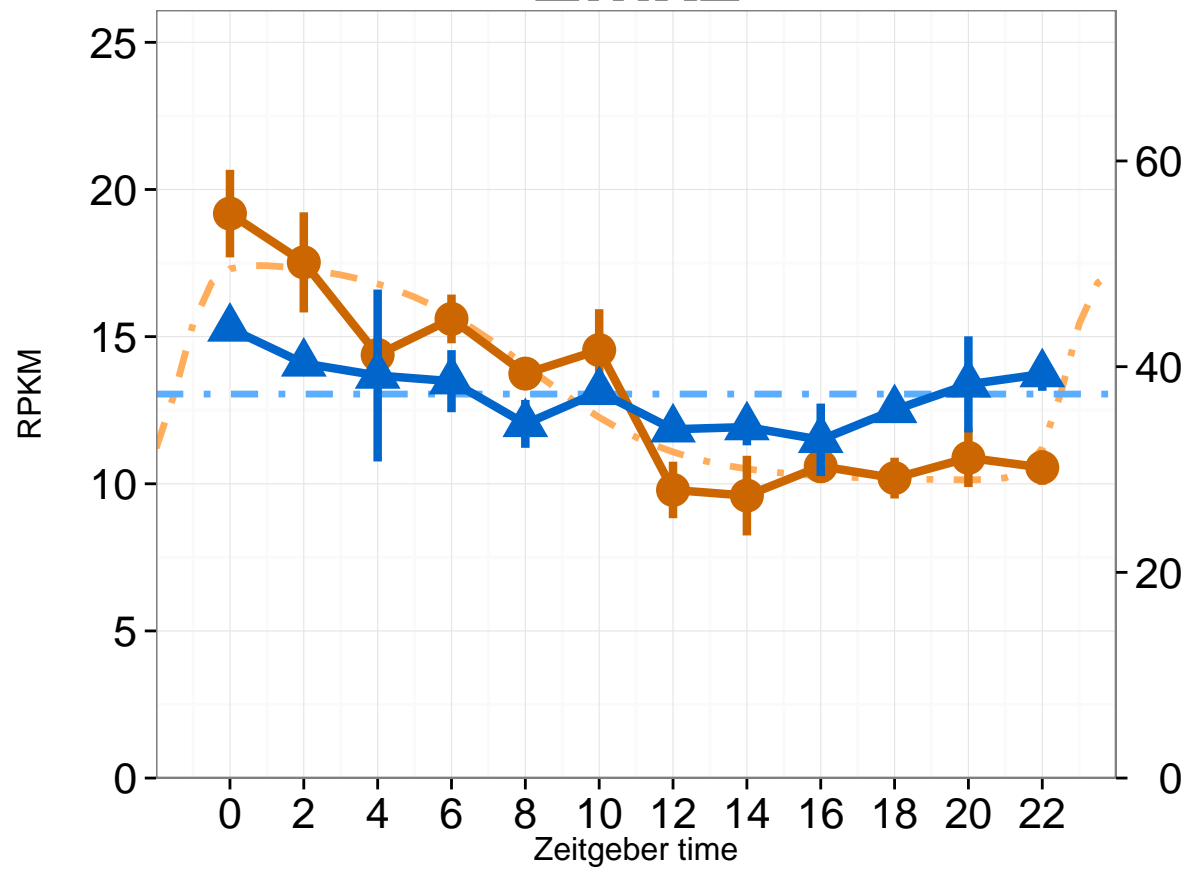

## Emx2

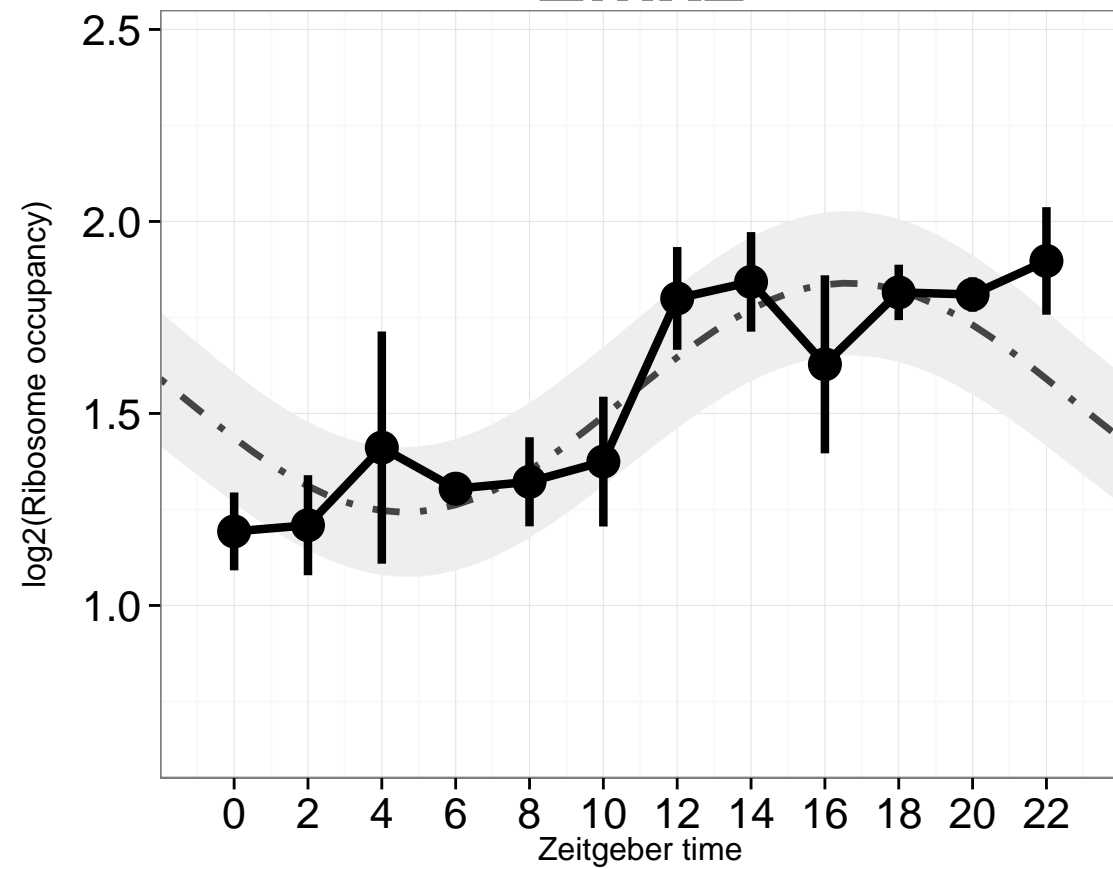

Supplement: Supplementary file 12836 [file 1]

## Nsun3

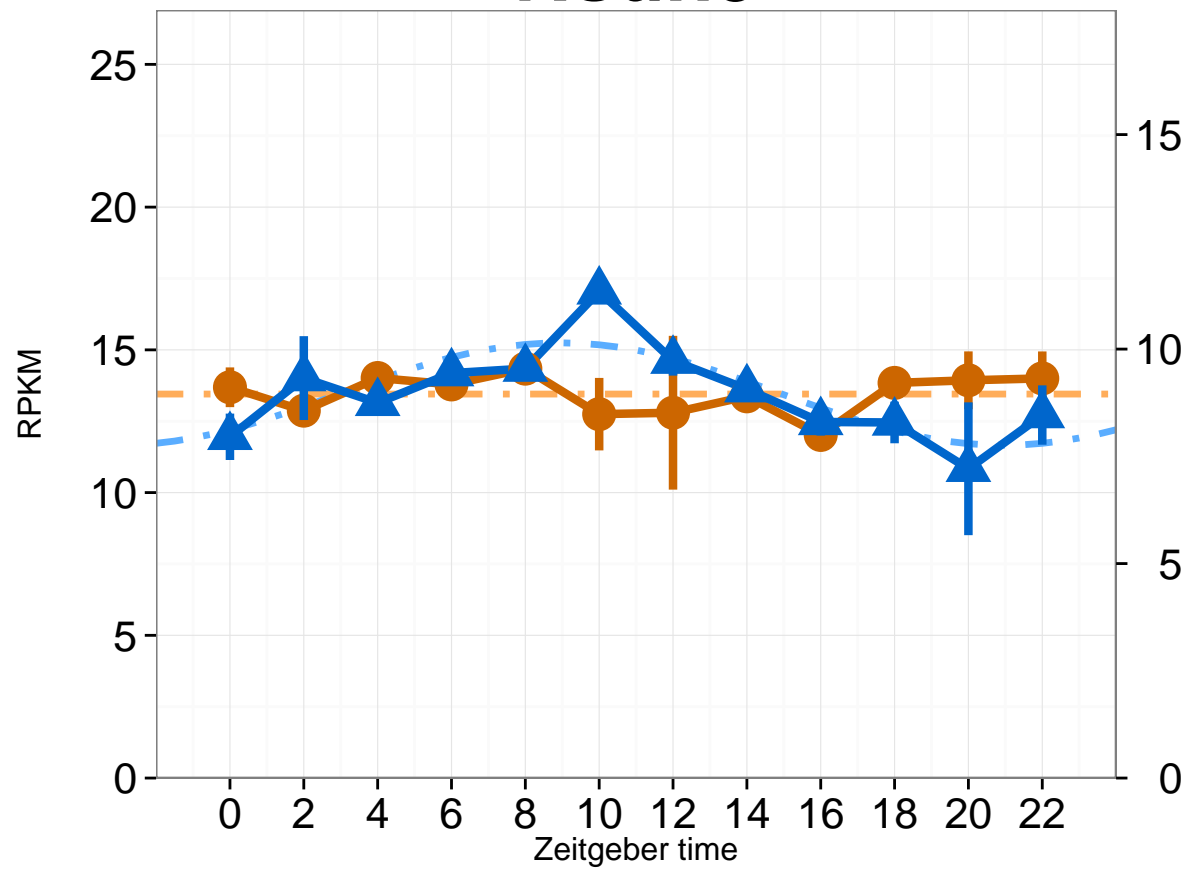

## Nsun3

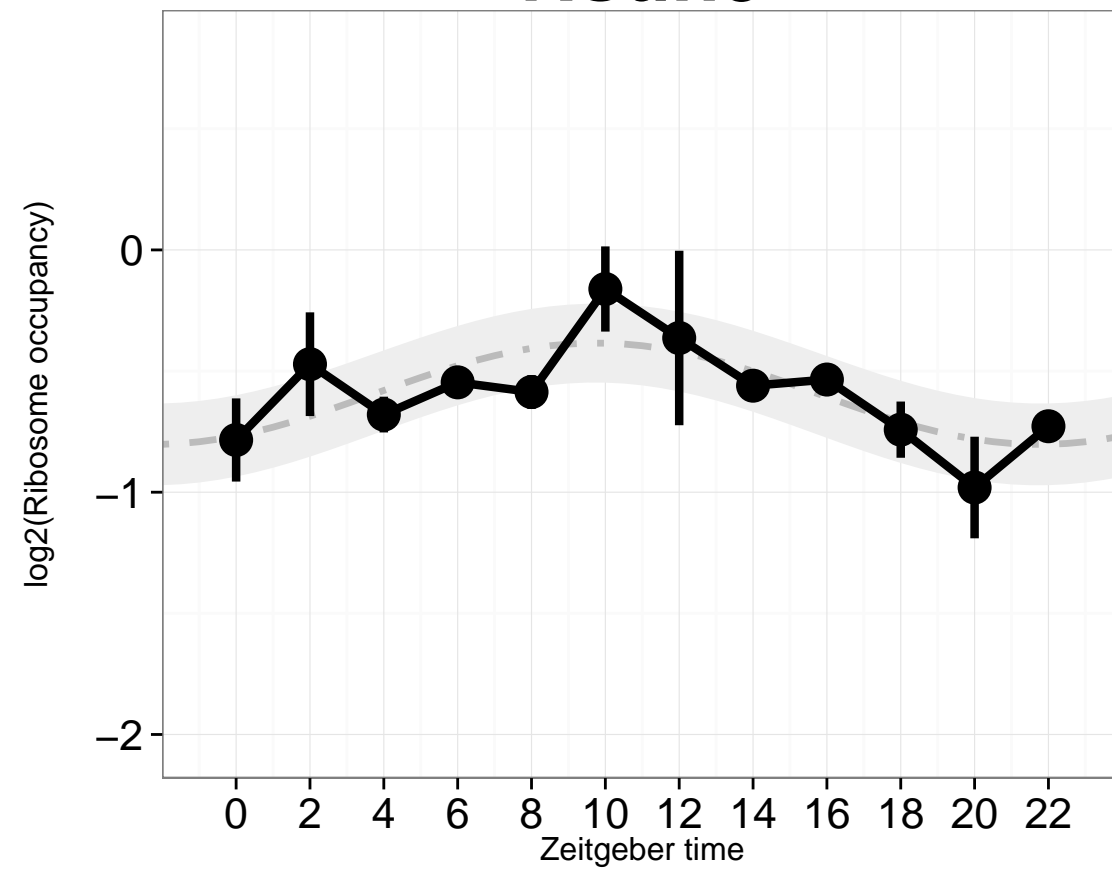

Supplement: Supplementary file 12837 [file 1]

## Rab6a

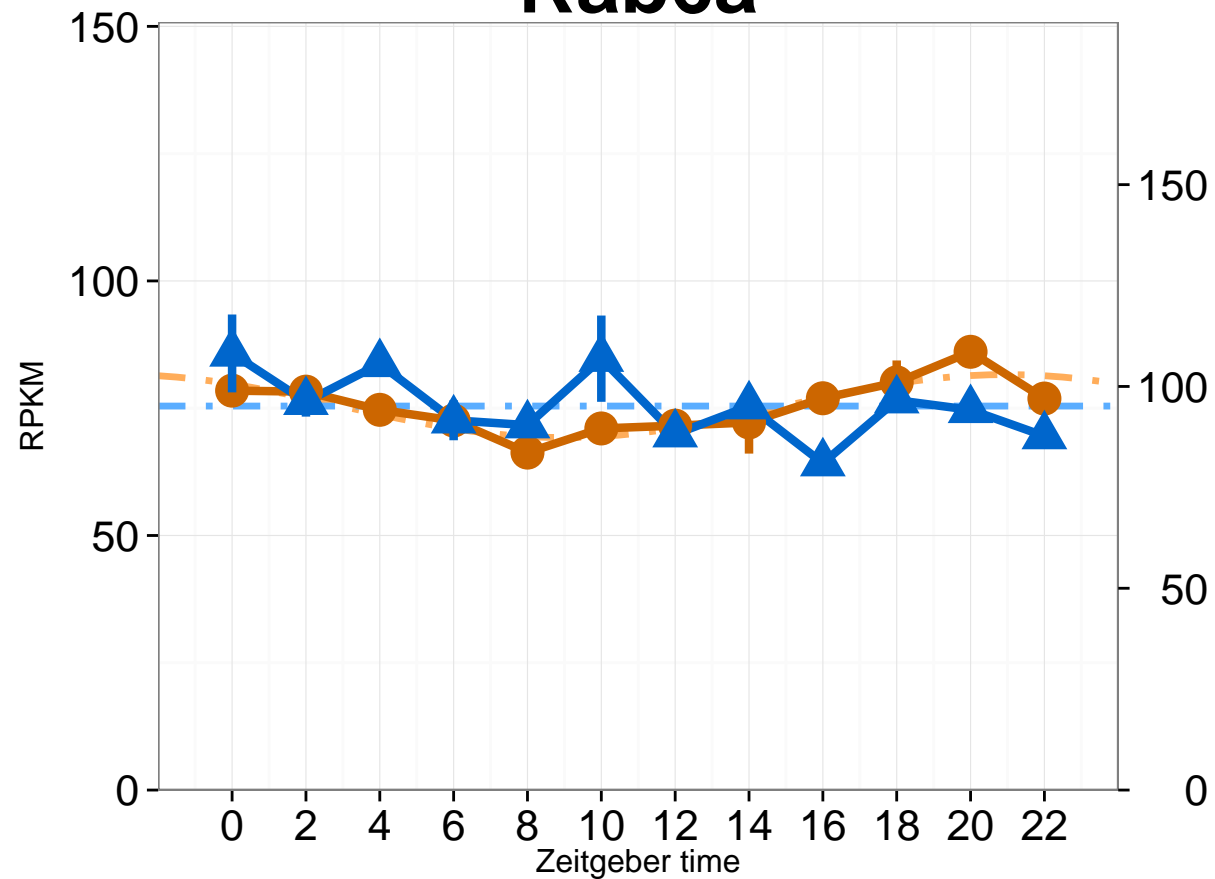

## Rab6a

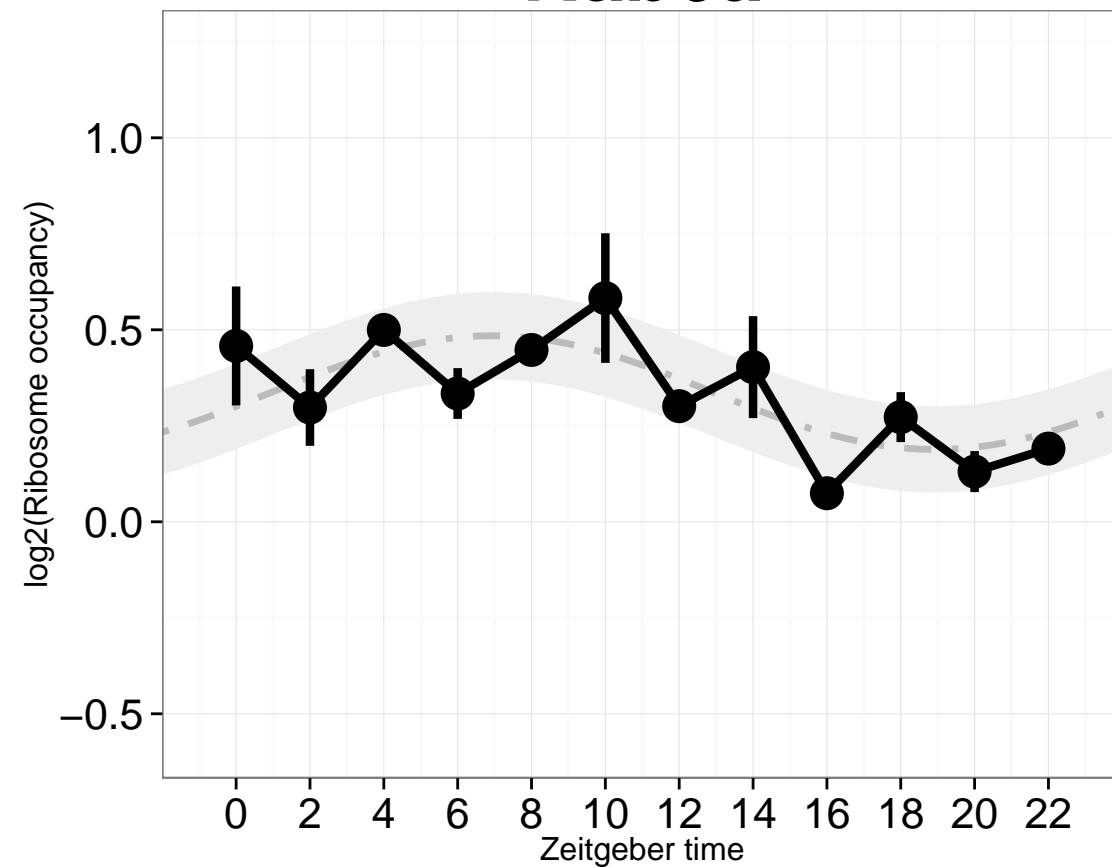

Supplement: Supplementary file 12838 [file 1]

# Lst1

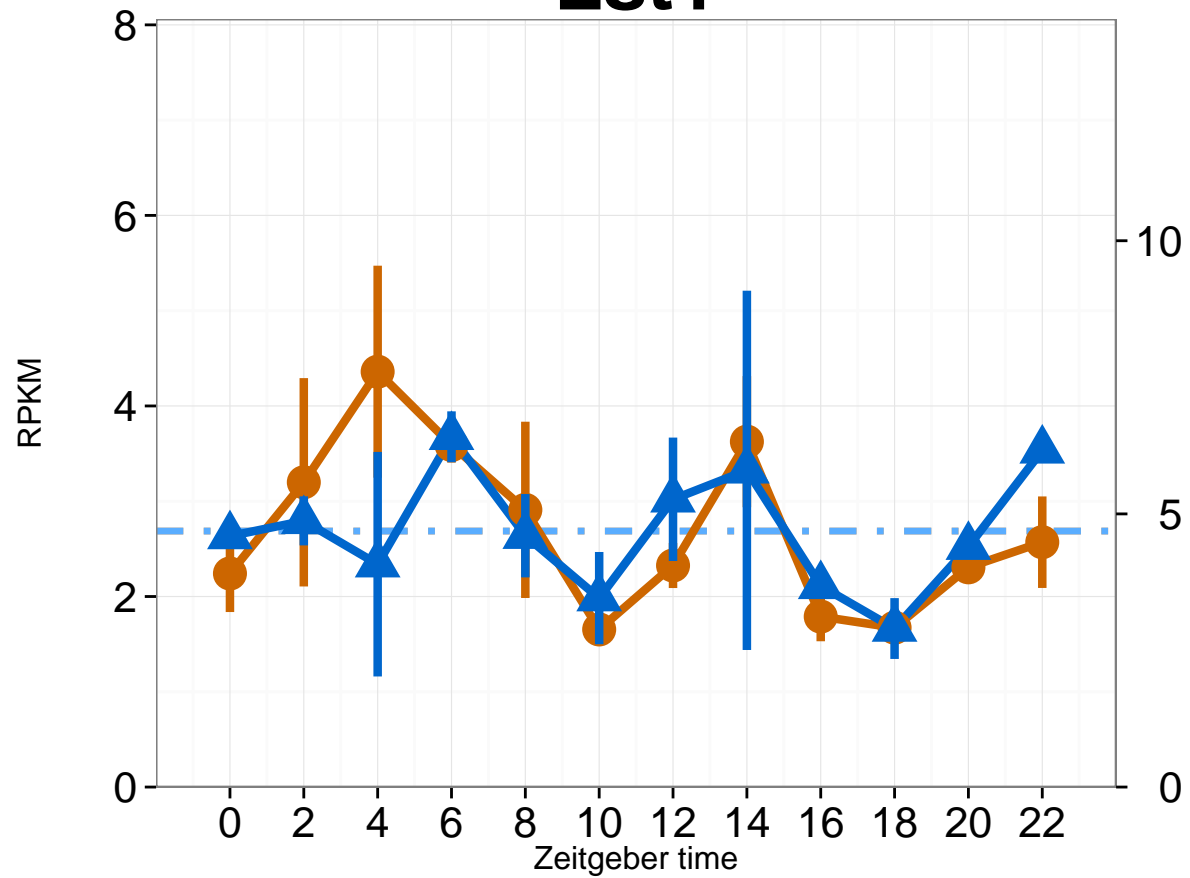

# Lst1

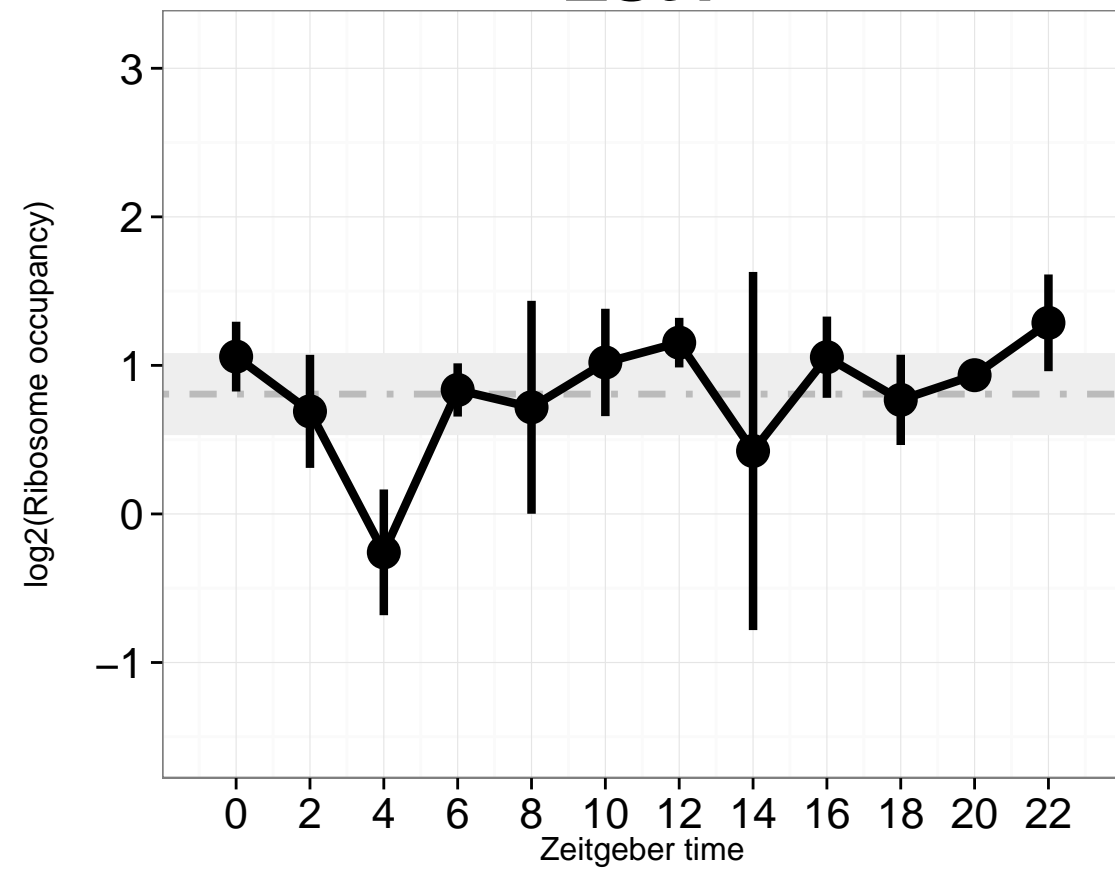

Supplement: Supplementary file 12839 [file 1]

# Fam98c

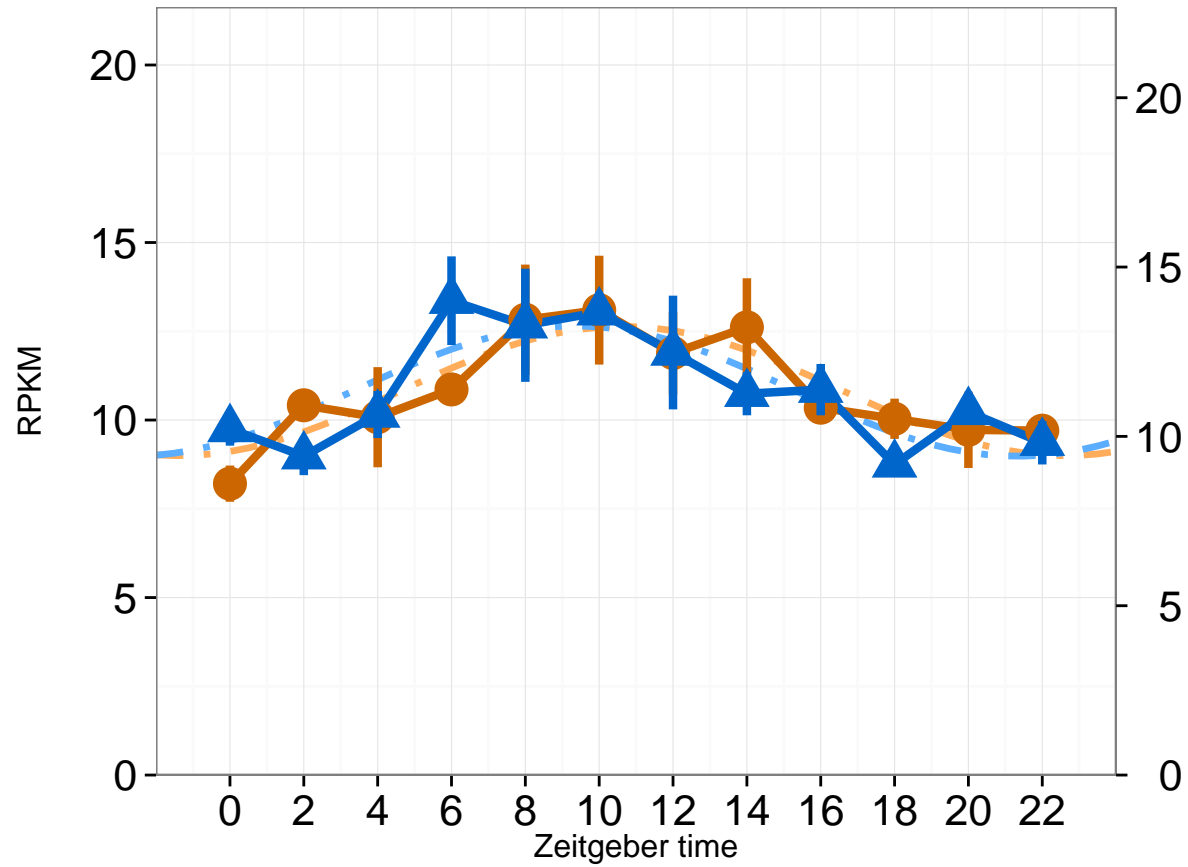

# Fam98c

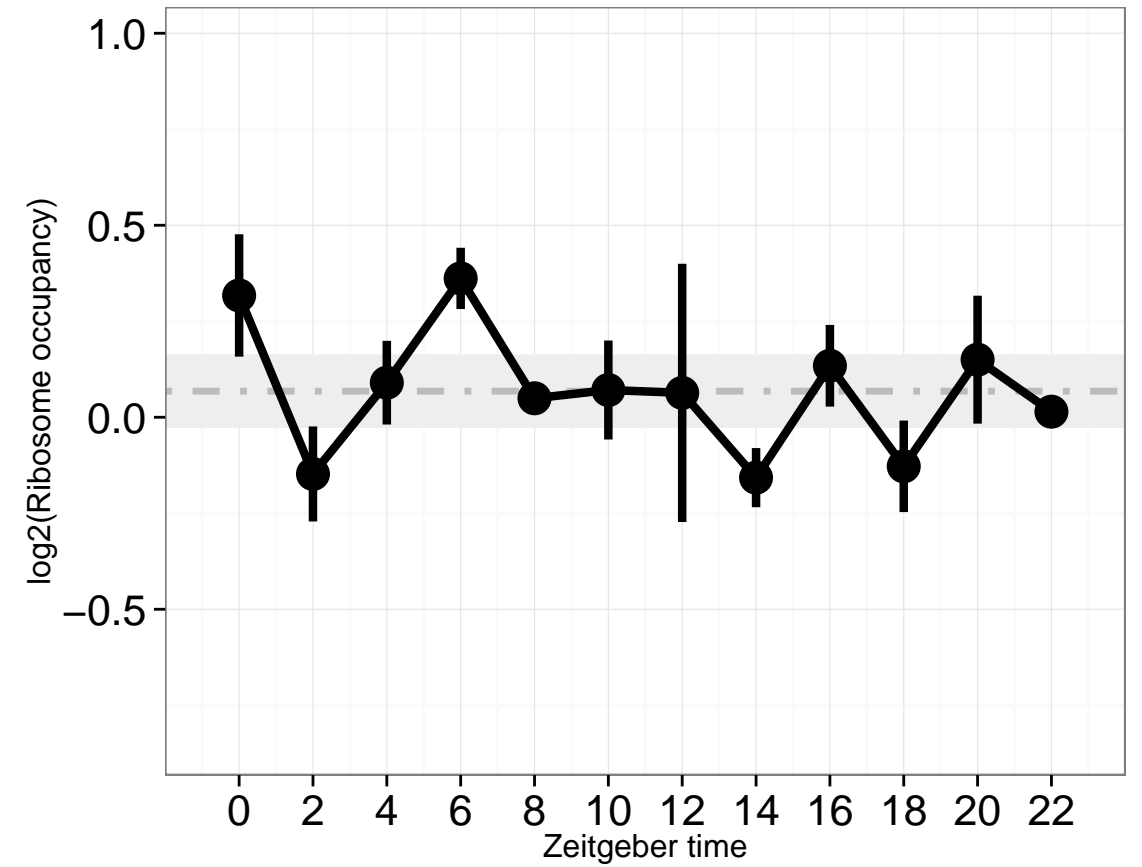

Supplement: Supplementary file 12840 [file 1]

# Gprasp2

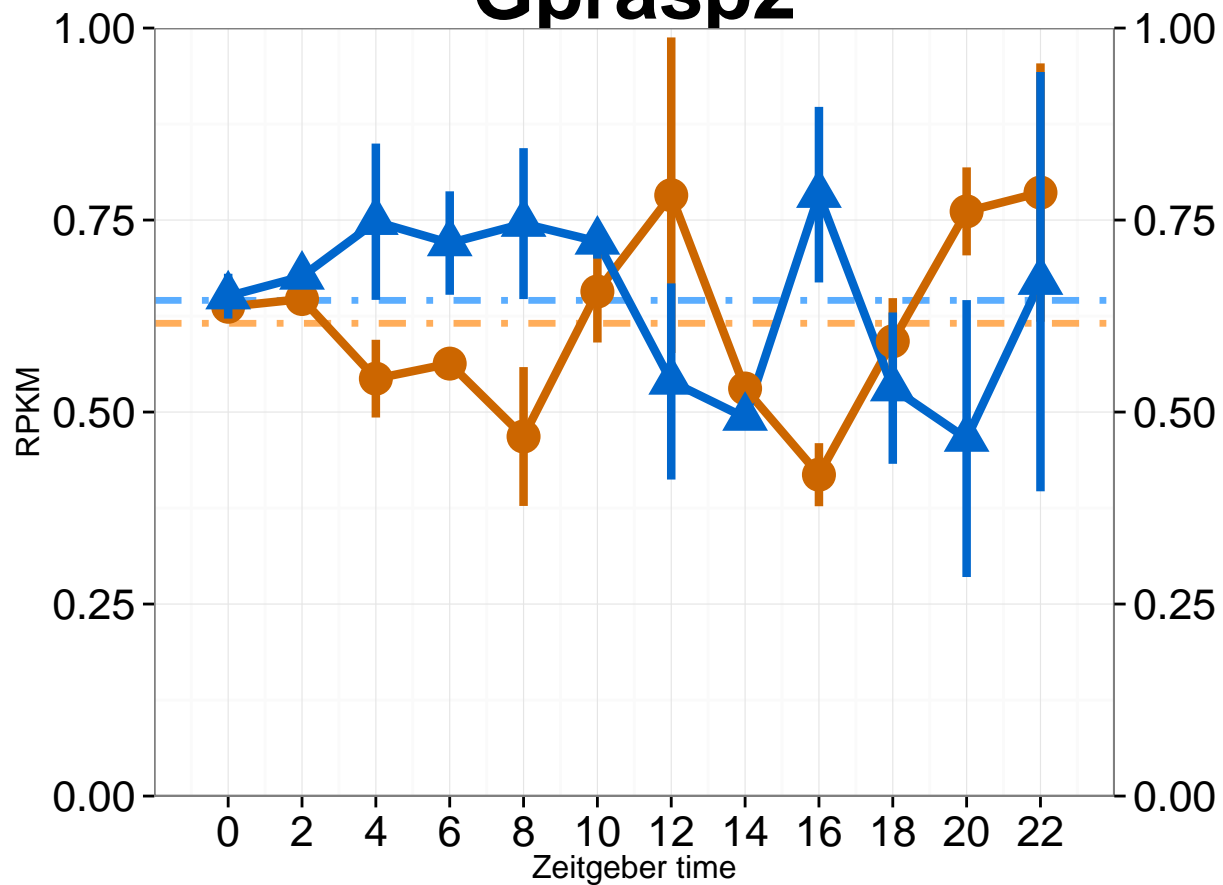

# Gprasp2

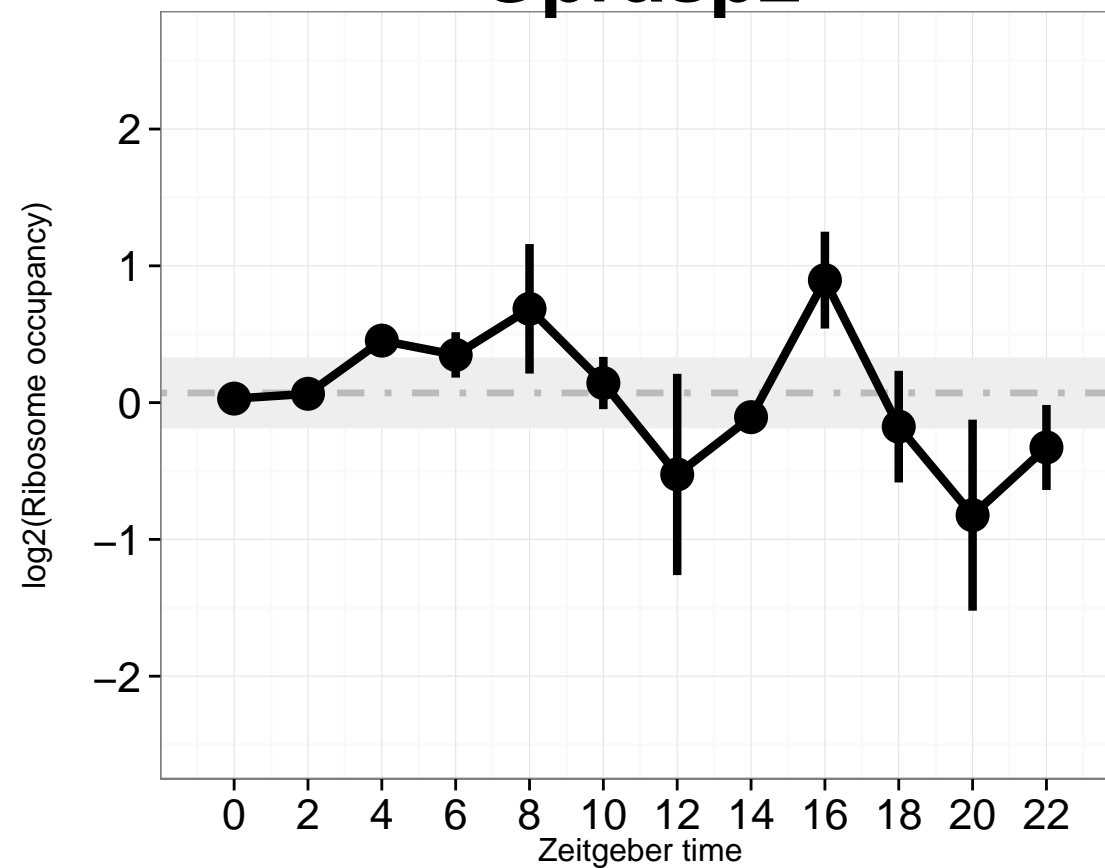

Supplement: Supplementary file 12841 [file 1]

# Phtf1

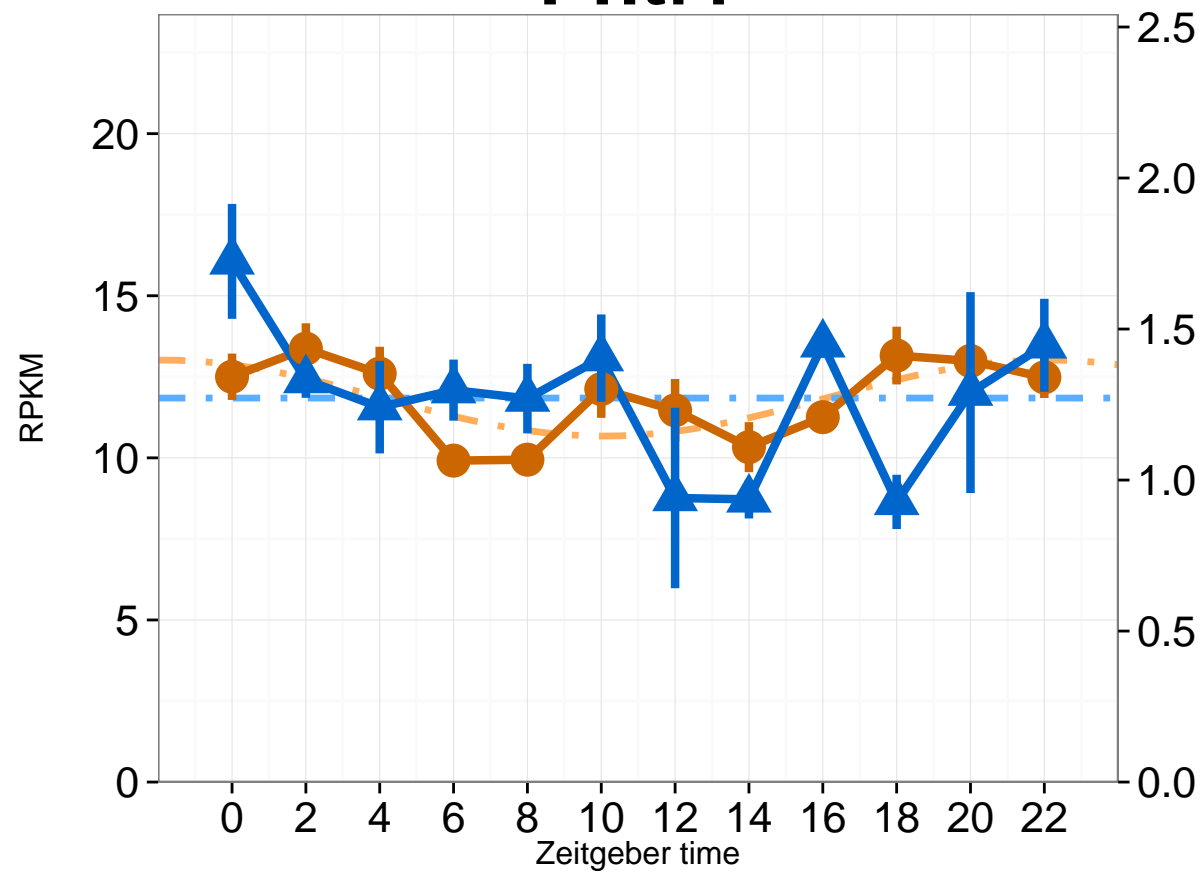

# Phtf1

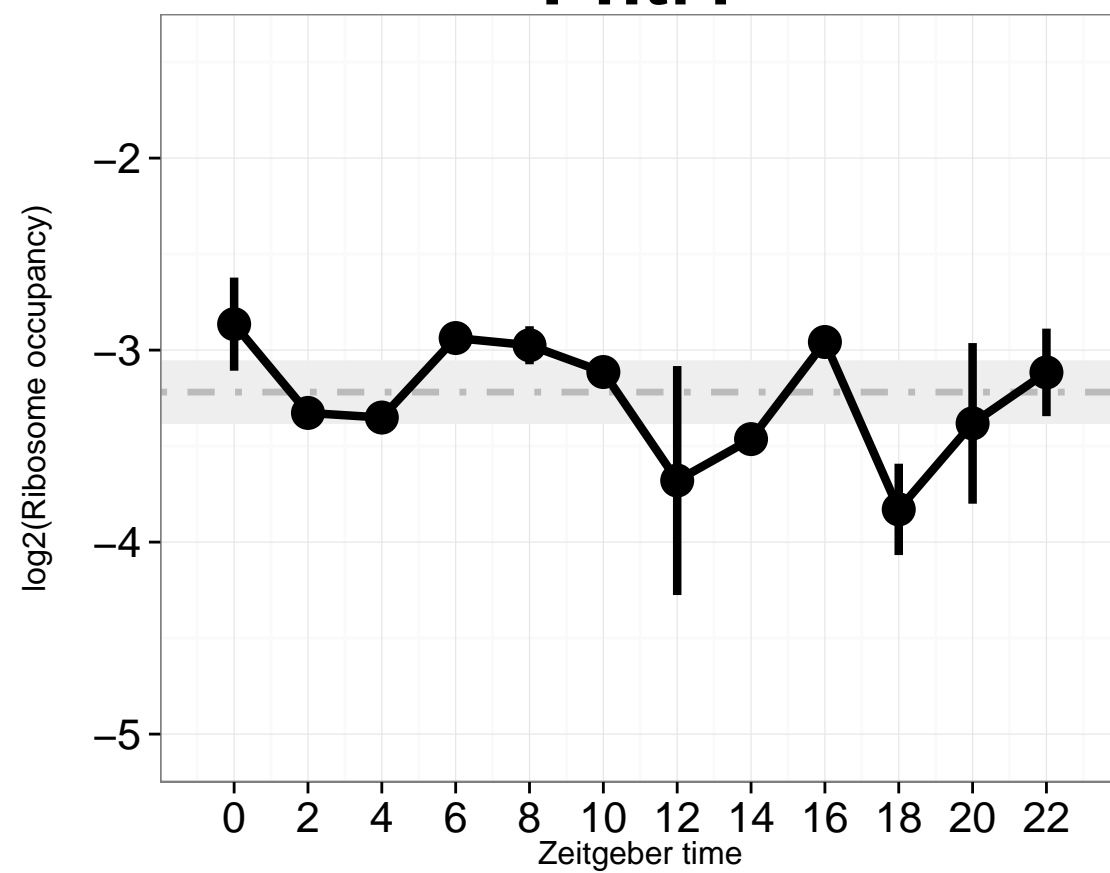

Supplement: Supplementary file 12842 [file 1]

# Lrrc66

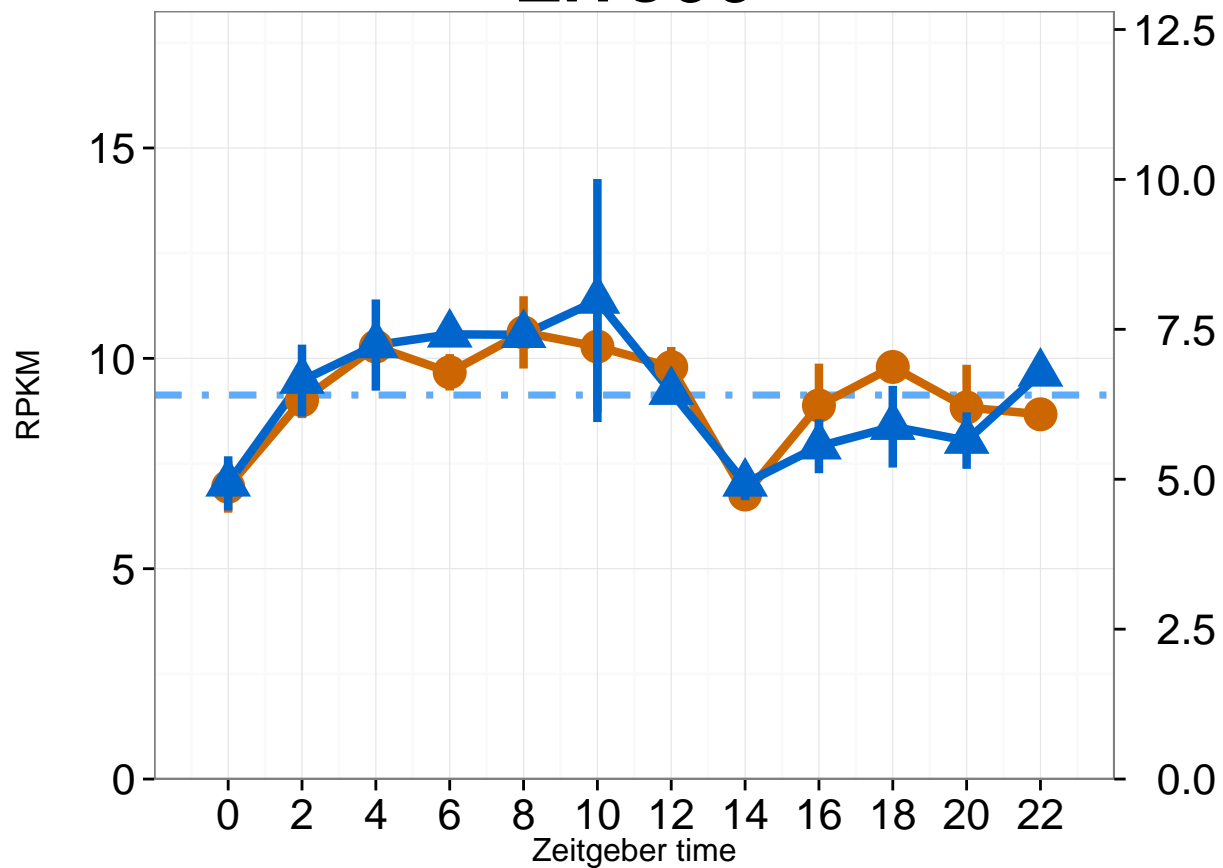

# Lrrc66

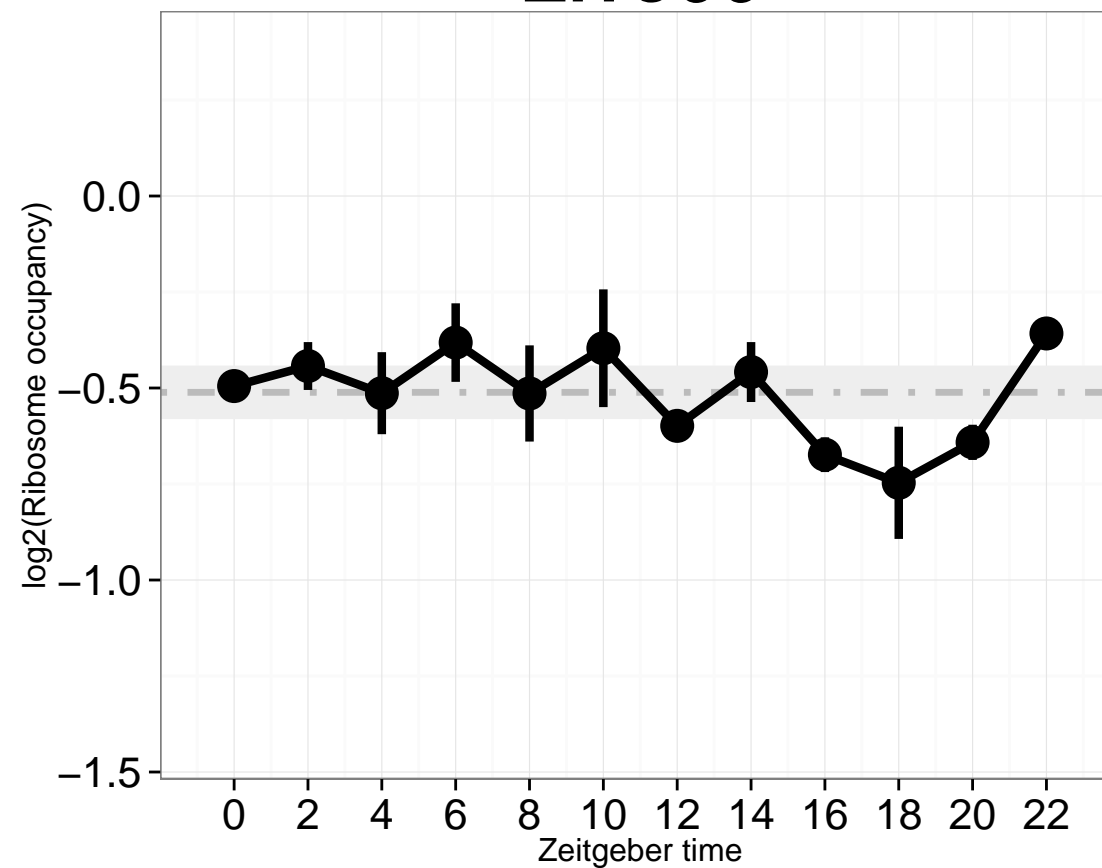

Supplement: Supplementary file 12843 [file 1]

## Ubn2

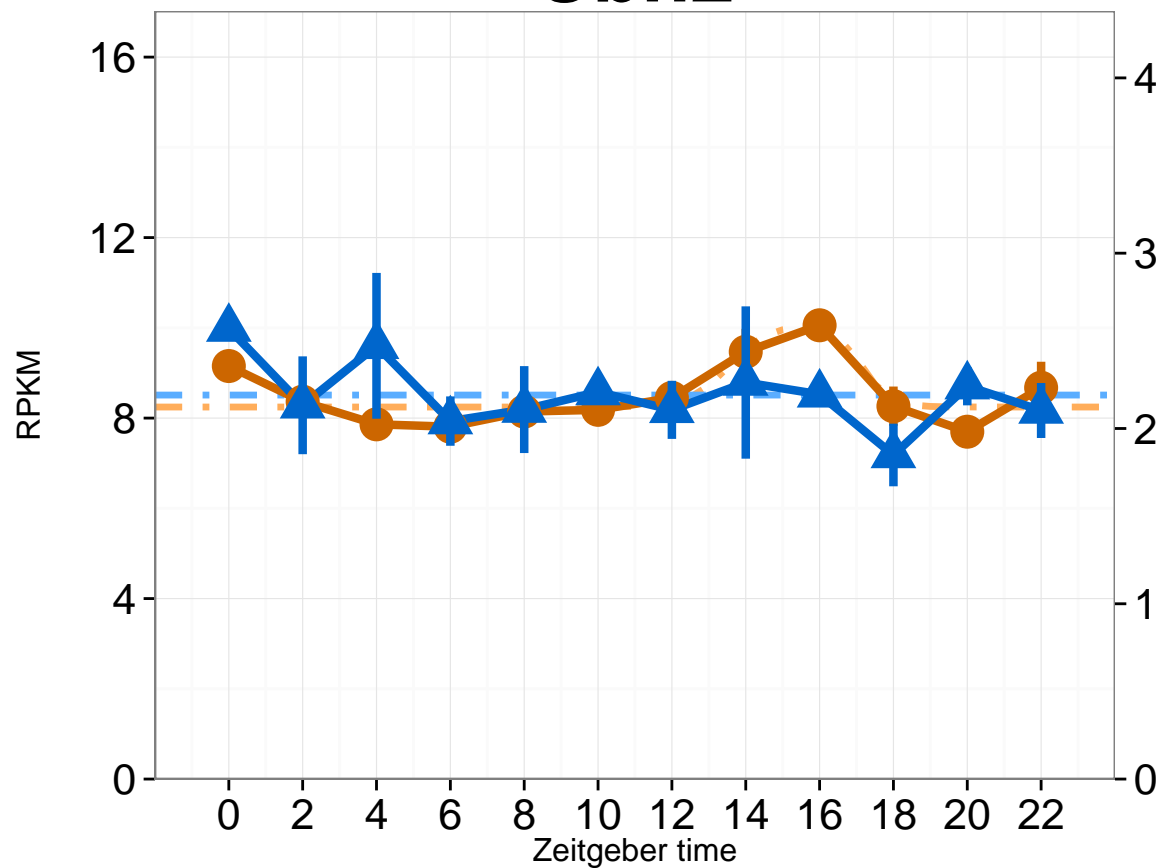

## Ubn2

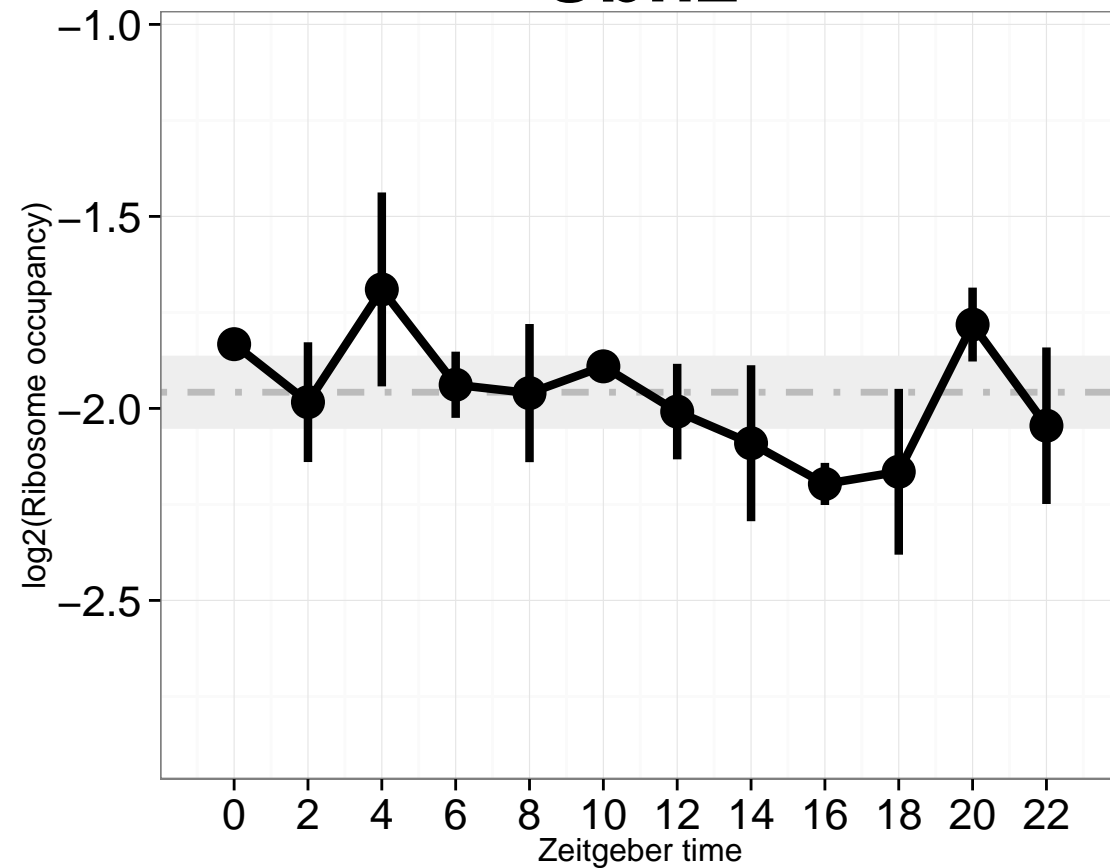

Supplement: Supplementary file 12844 [file 1]

## Phf14

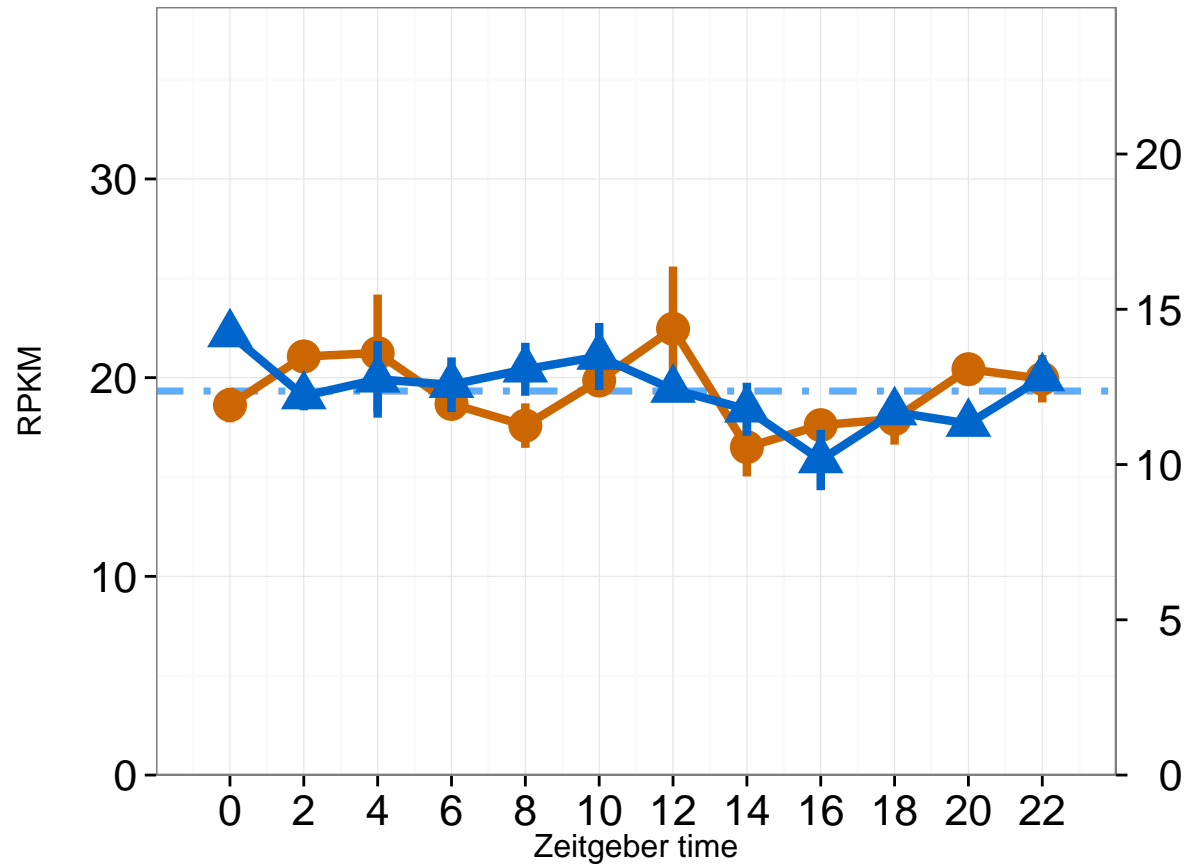

## Phf14

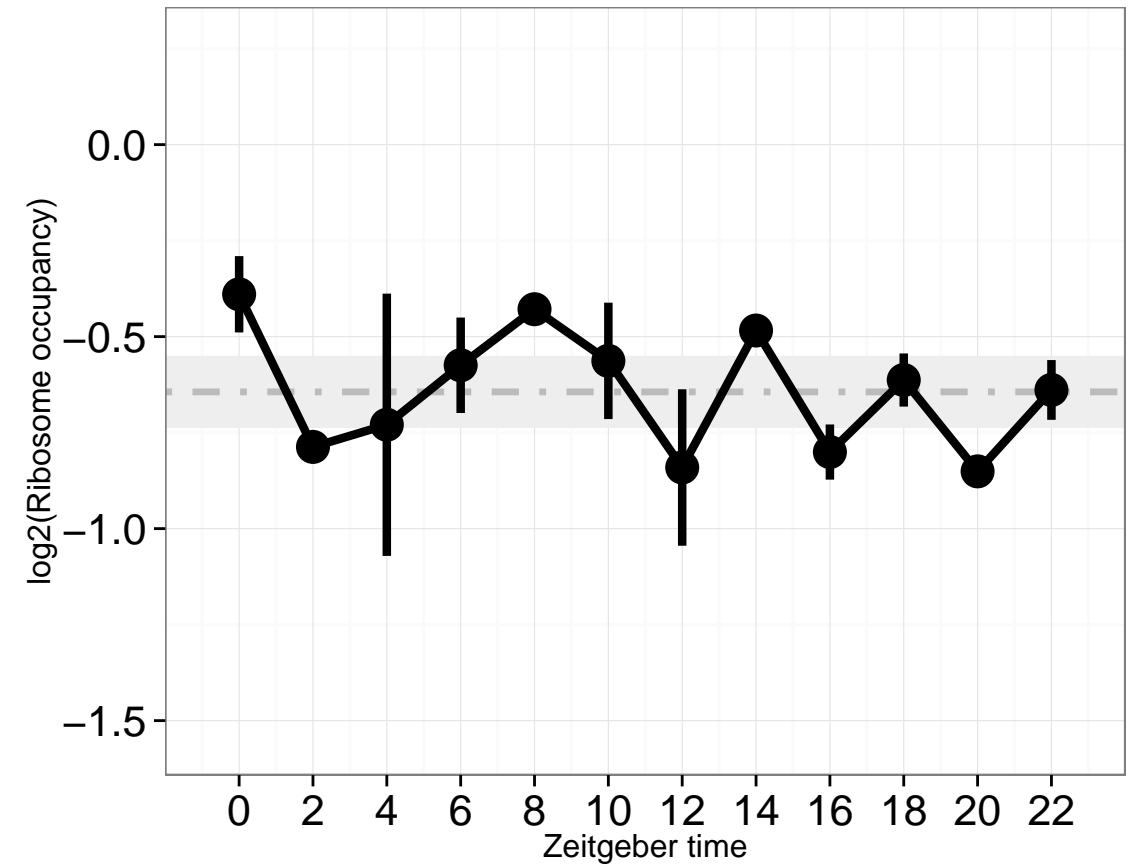

Supplement: Supplementary file 12845 [file 1]
