# Supplementary material (part 129 of 133)
Source: publisher figshare collection journal article supplement (https://springernature.figshare.com/articles/dataset/_/4903193)

## Adnp2

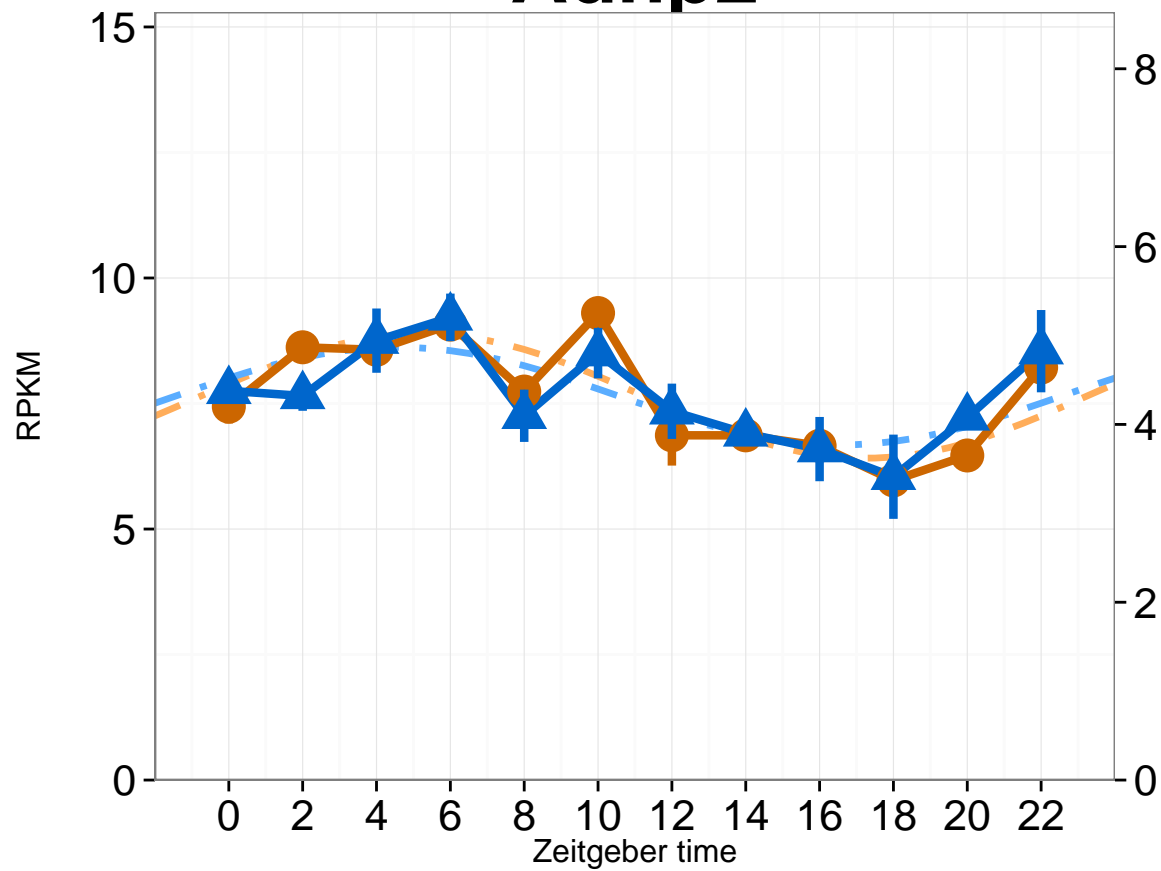

## Adnp2

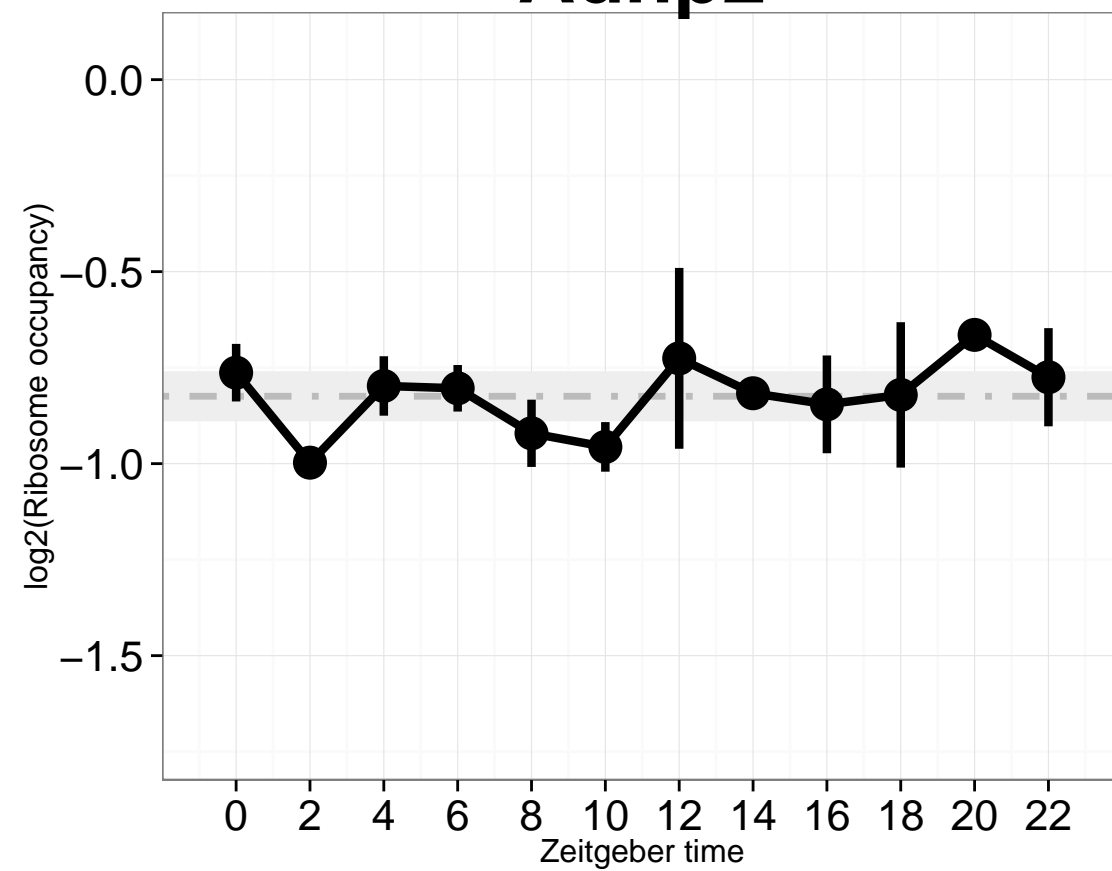

Supplement: Supplementary file 12846 [file 1]

## Slc27a2

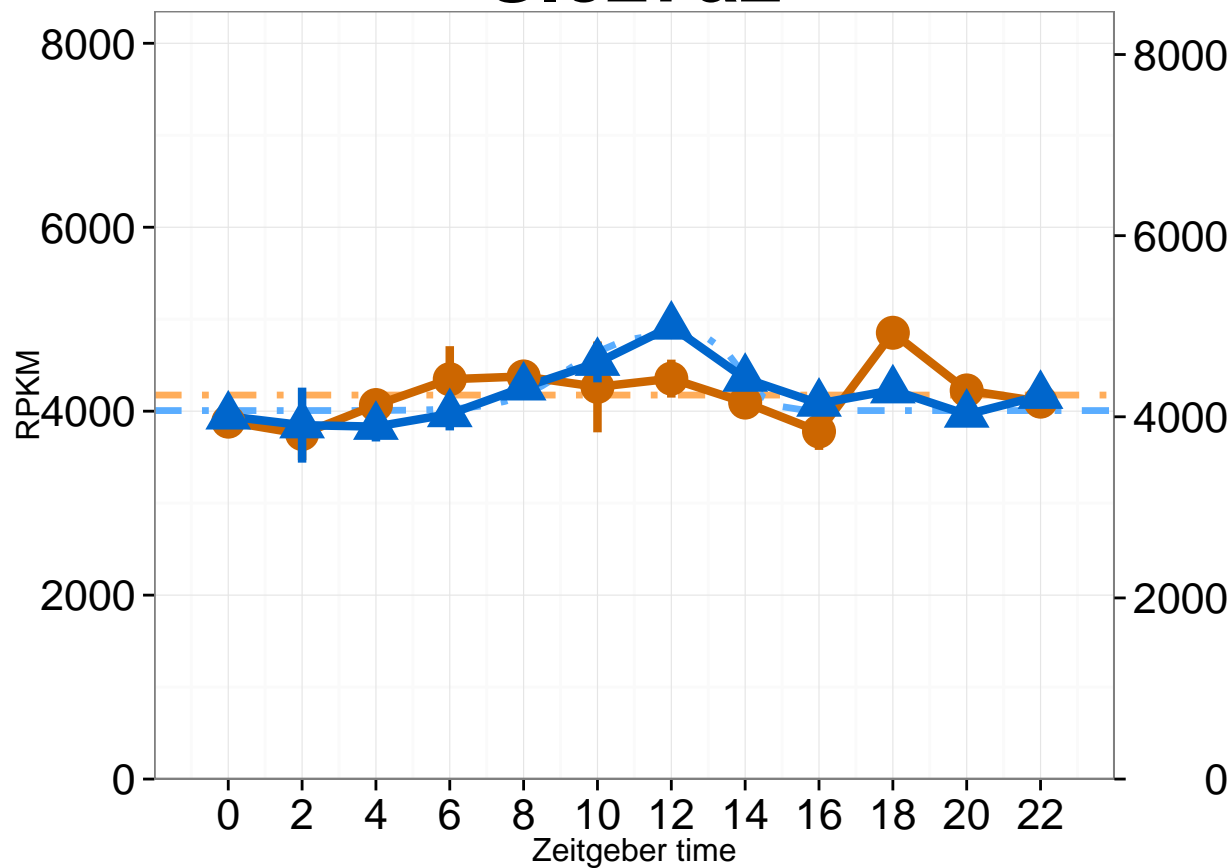

## Slc27a2

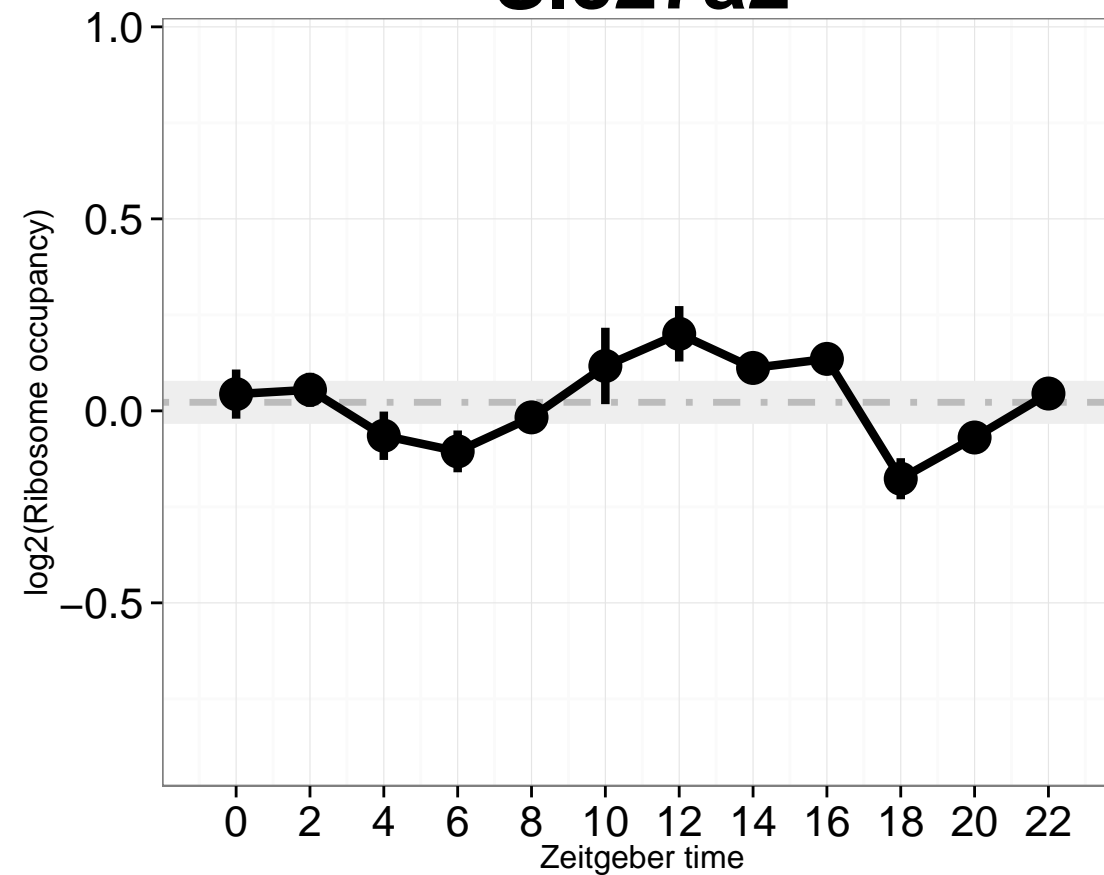

Supplement: Supplementary file 12847 [file 1]

## Rb1

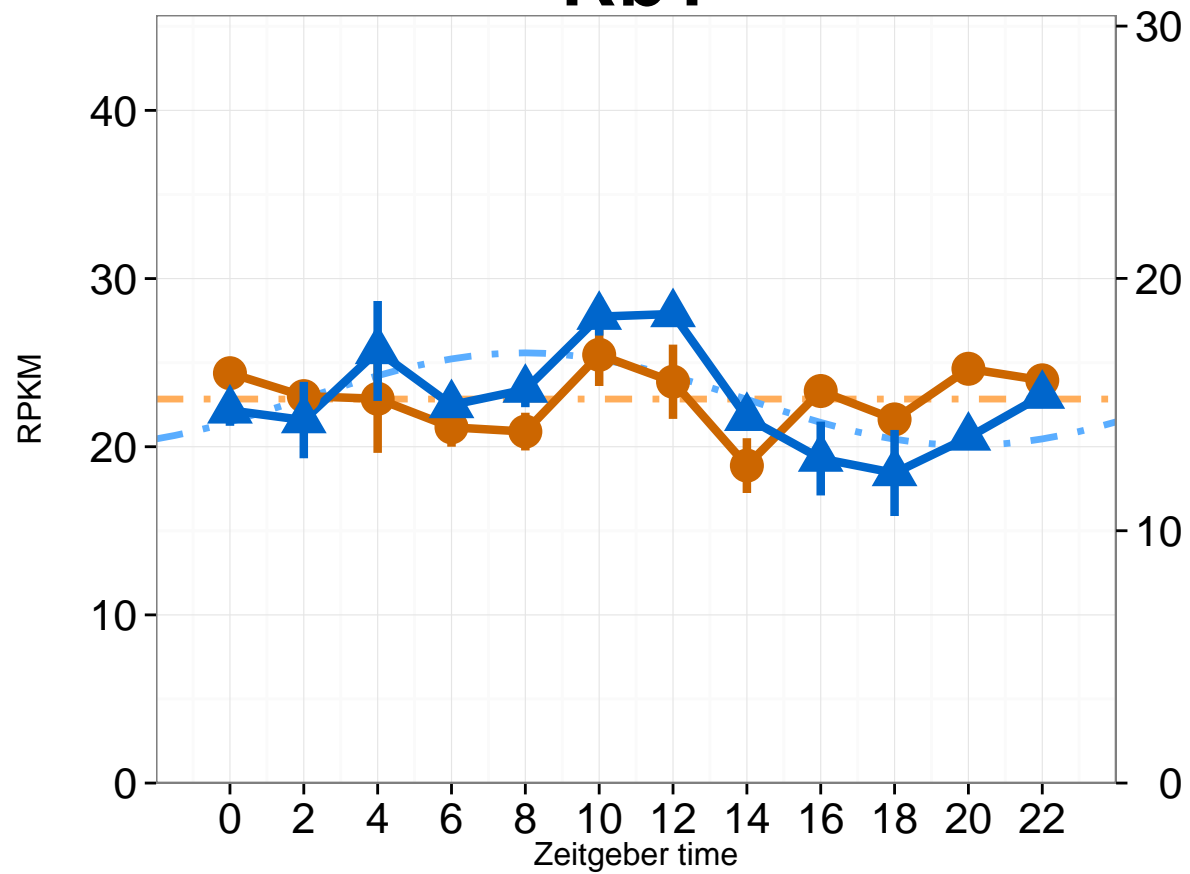

## Rb1

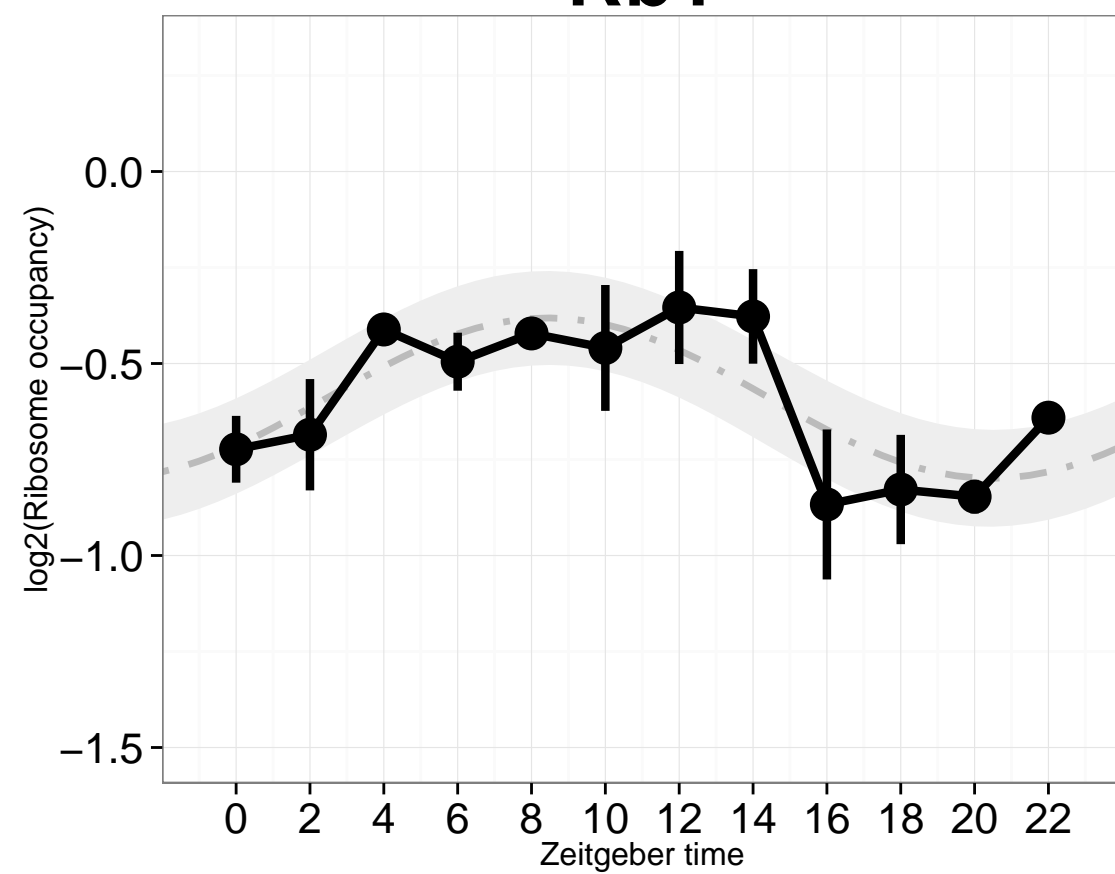

Supplement: Supplementary file 12848 [file 1]

## Slc4a2

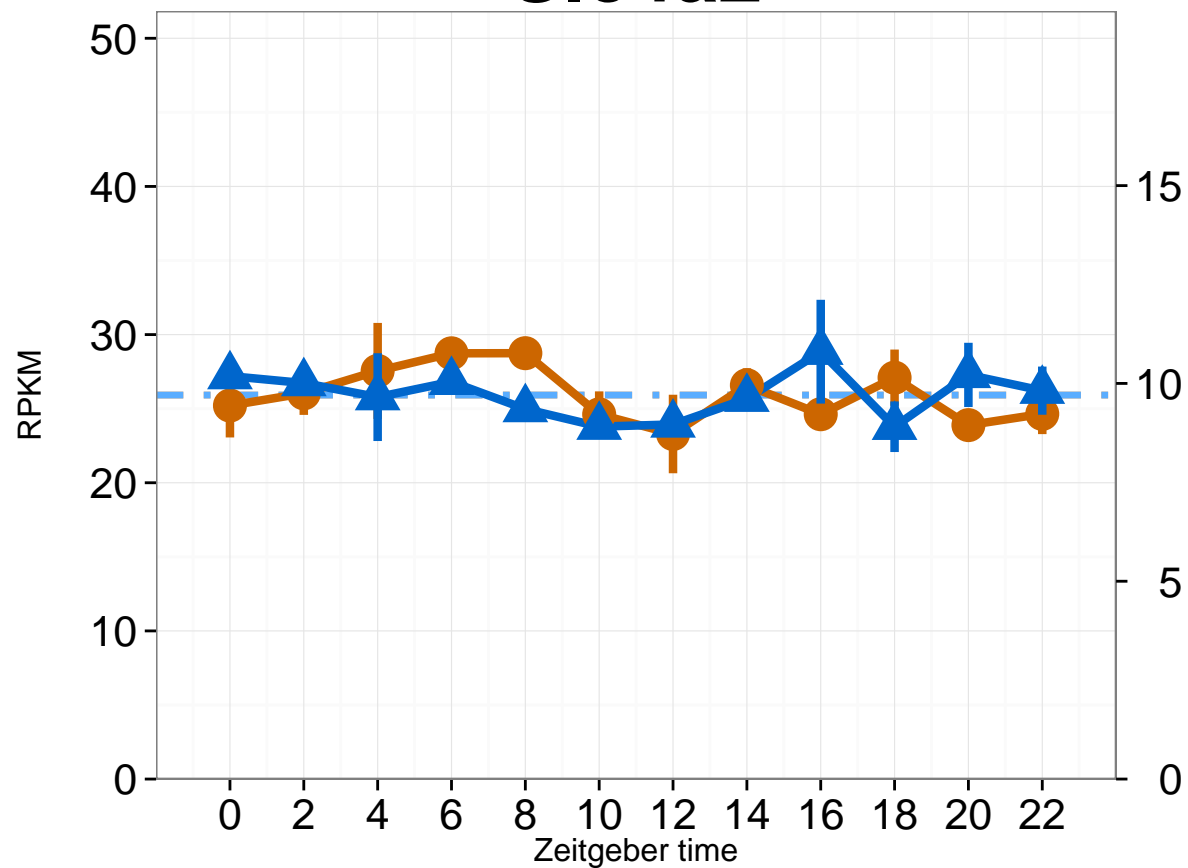

## Slc4a2

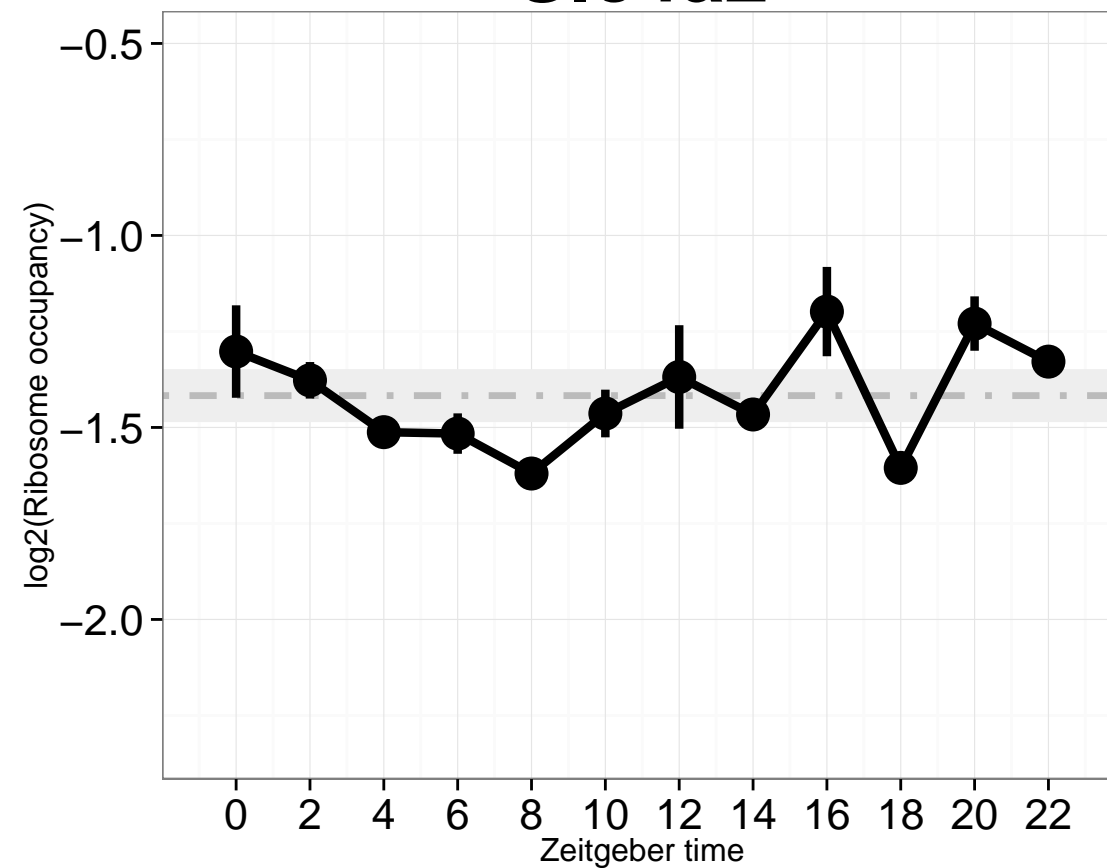

Supplement: Supplementary file 12849 [file 1]

# Slc2a5

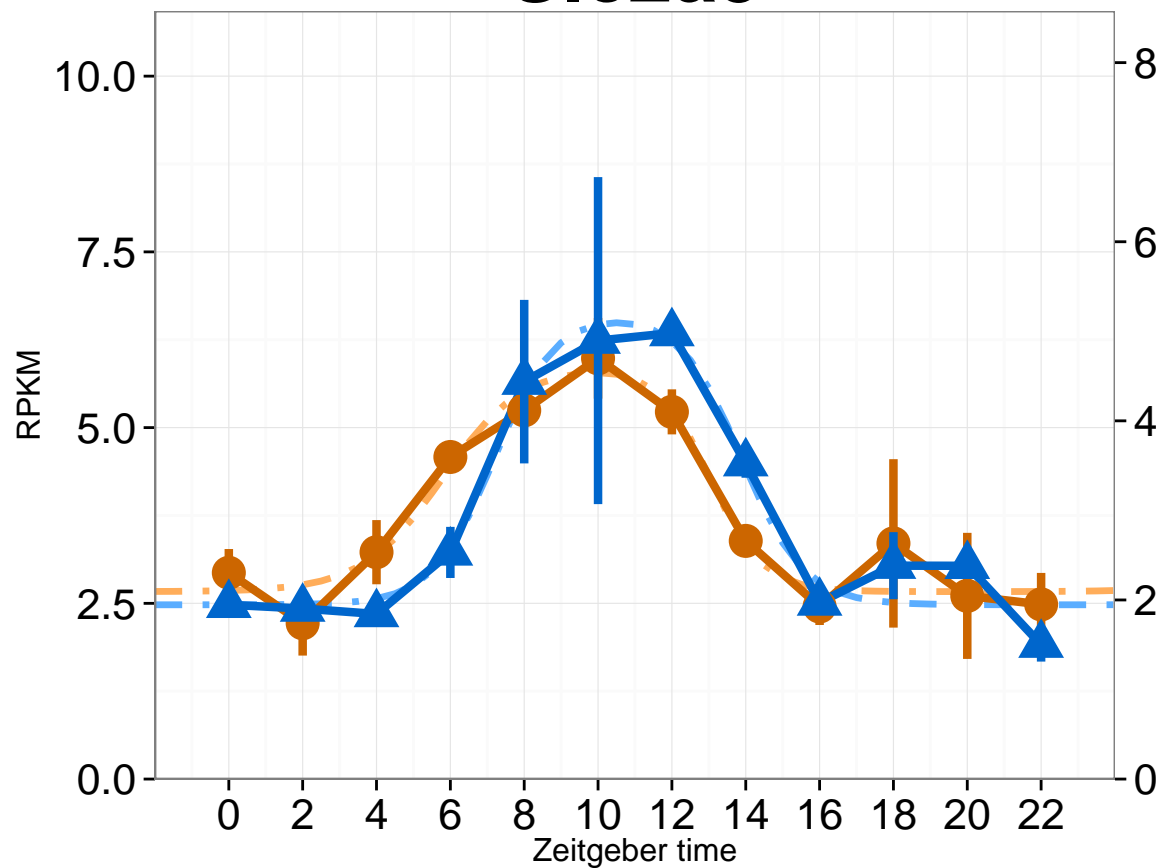

# Slc2a5

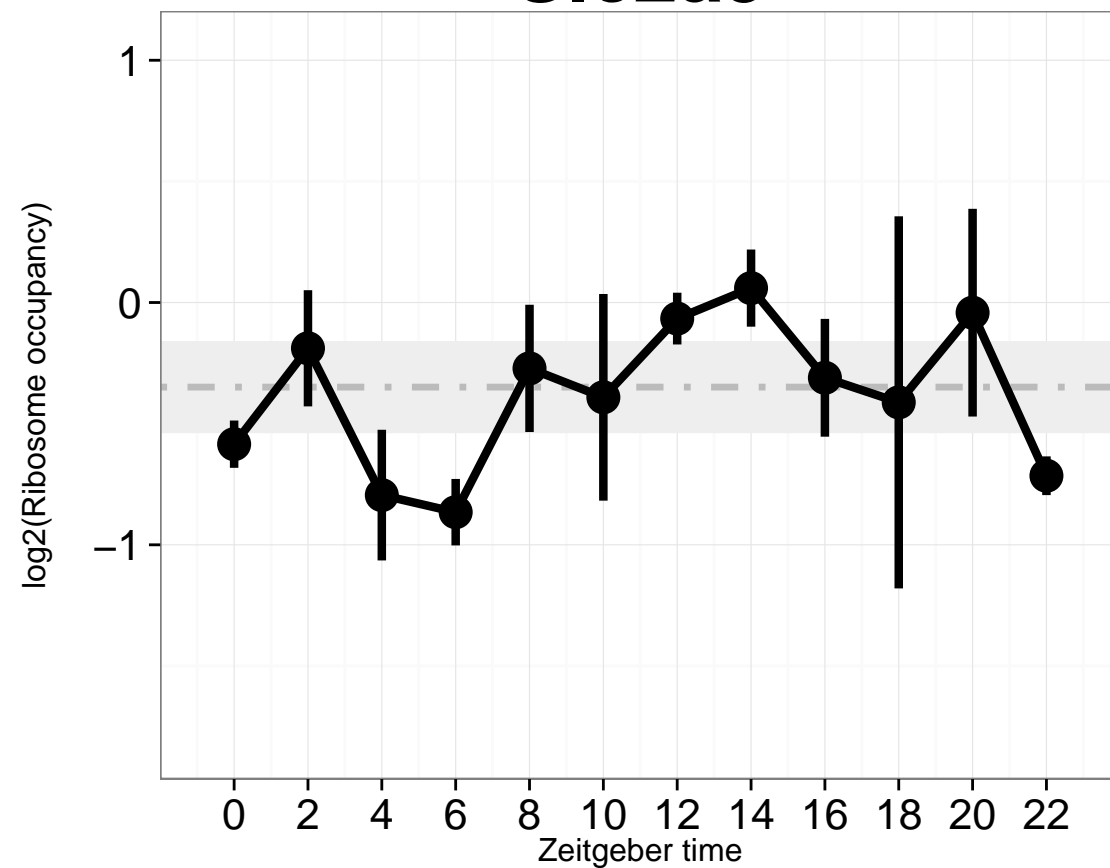

Supplement: Supplementary file 12850 [file 1]

## Uhmk1

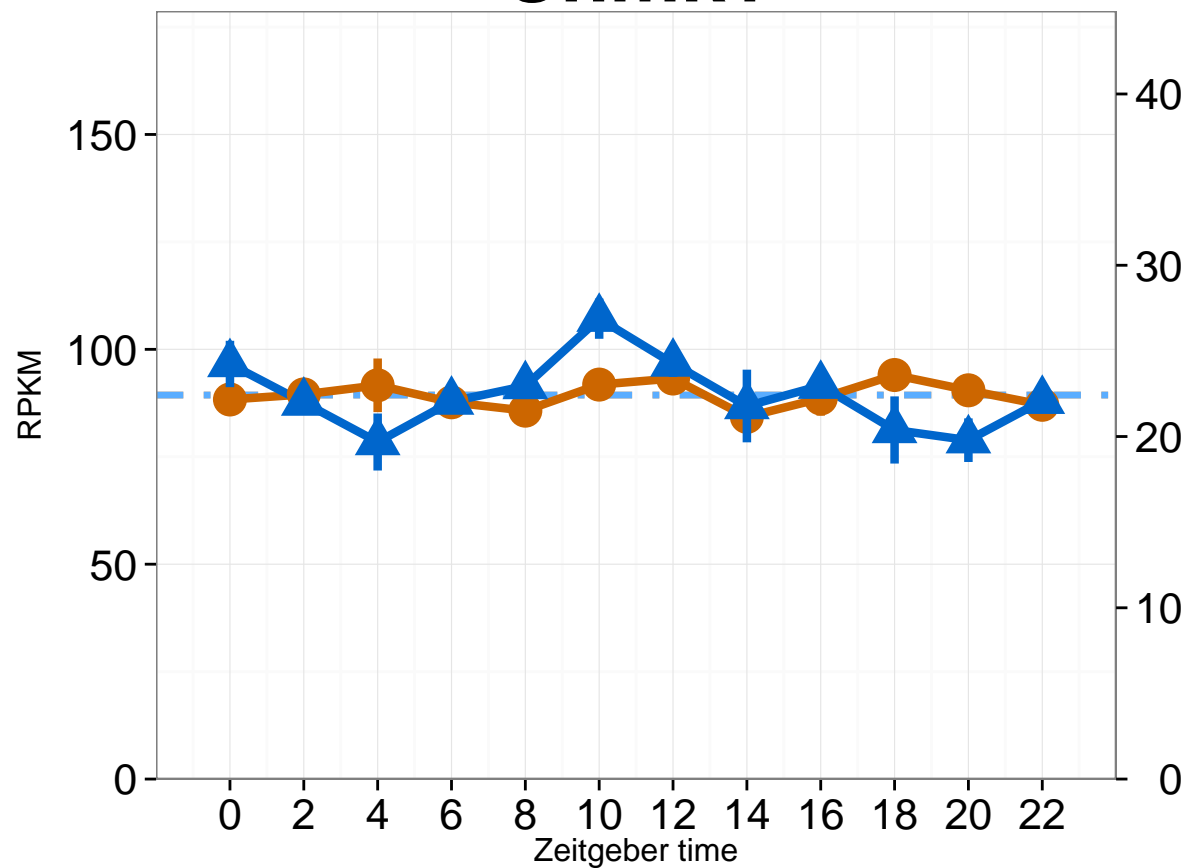

## Uhmk1

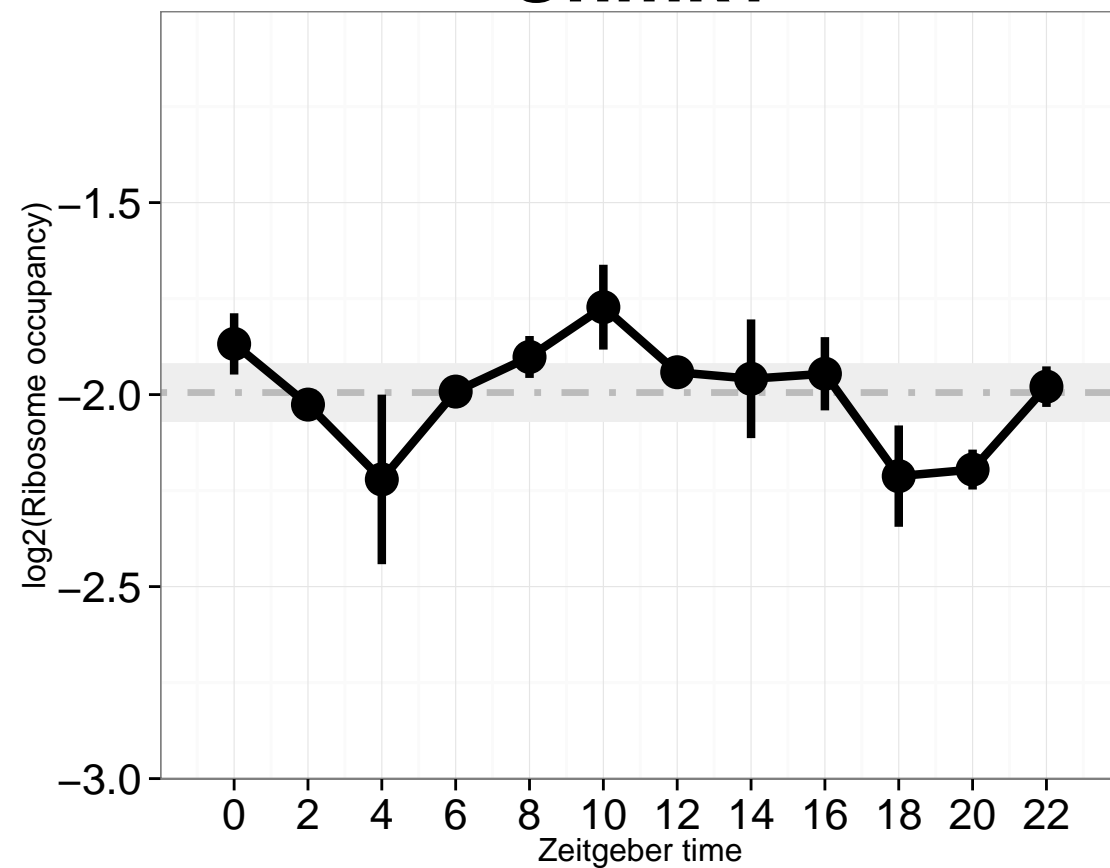

Supplement: Supplementary file 12851 [file 1]

# Tube1

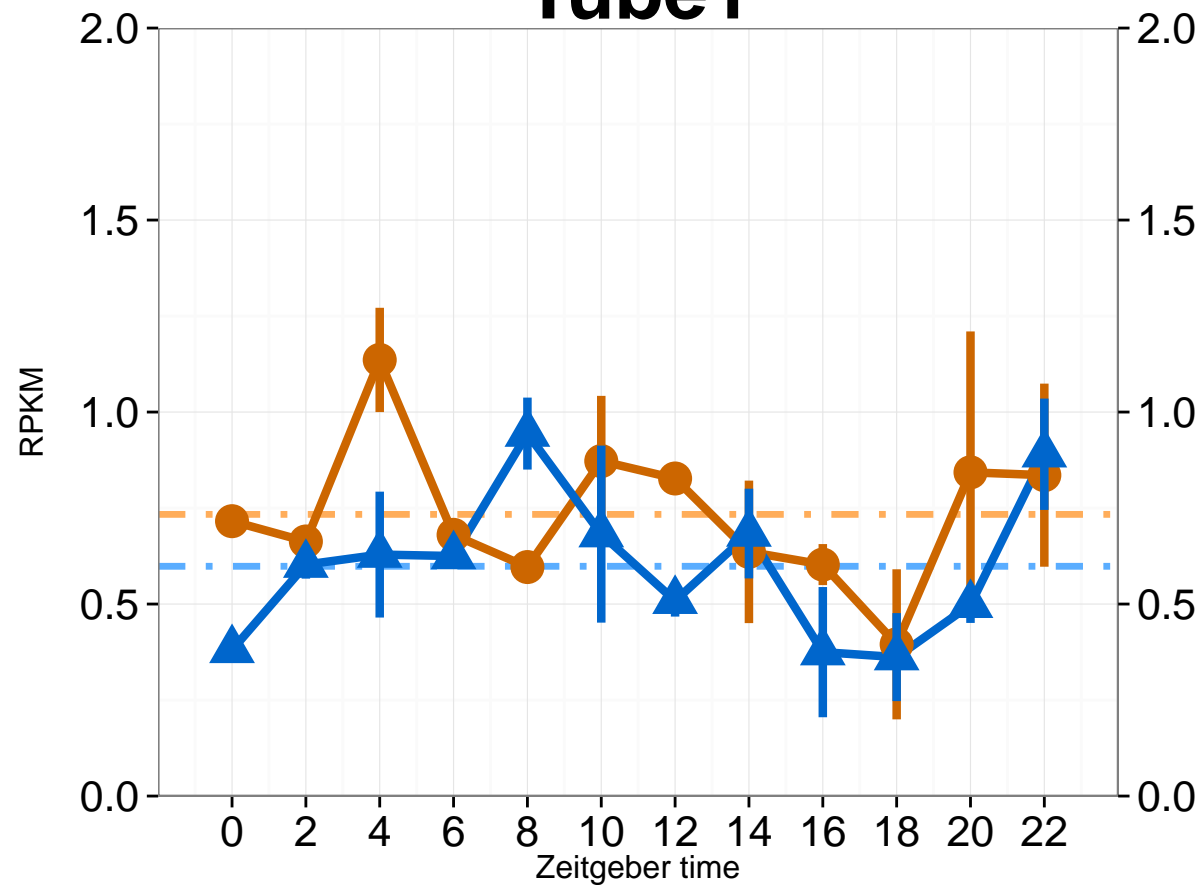

# Tube1

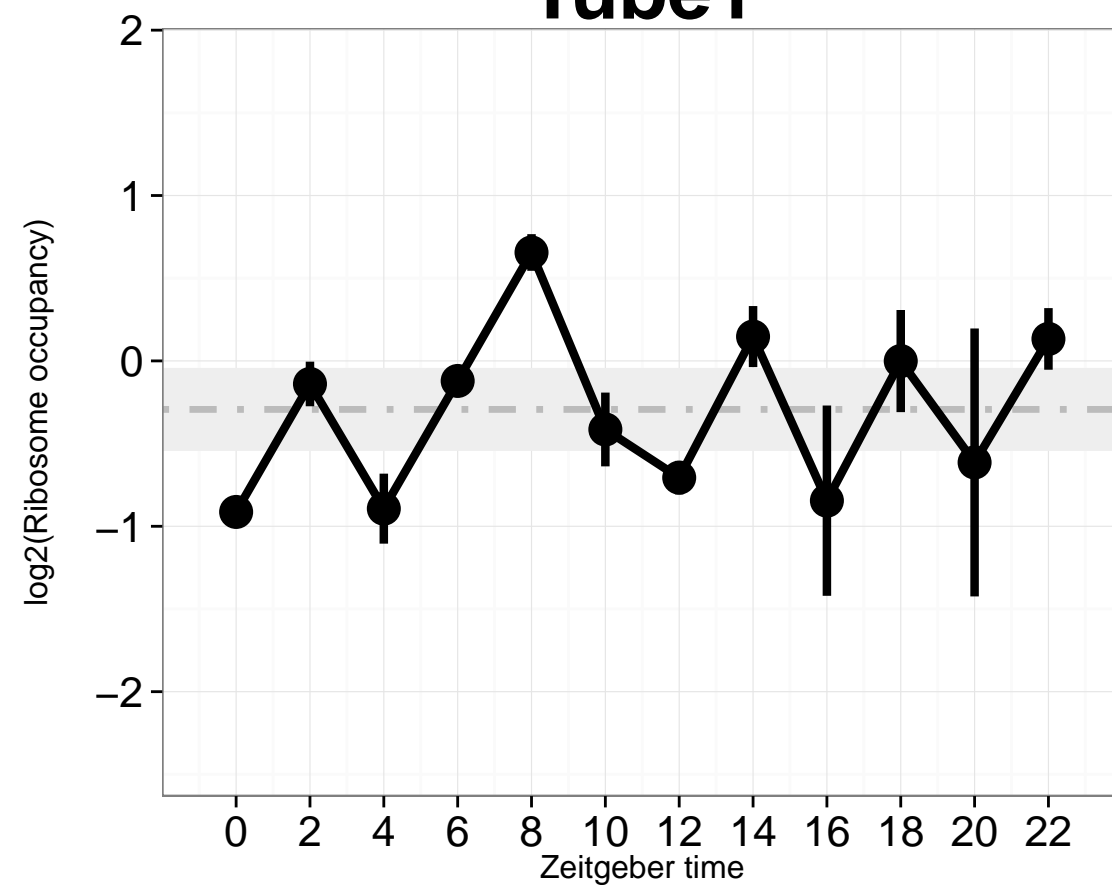

Supplement: Supplementary file 12852 [file 1]

## Sqle

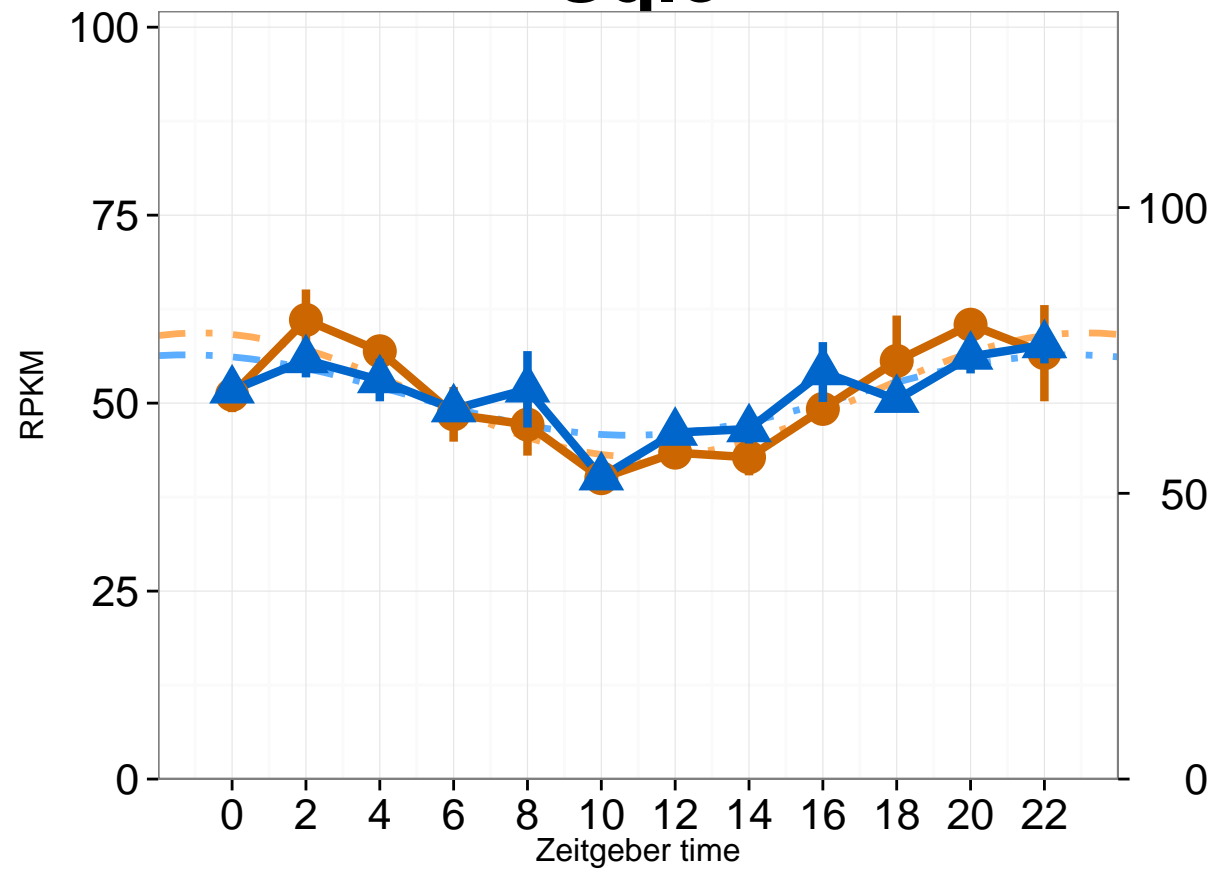

## Sqle

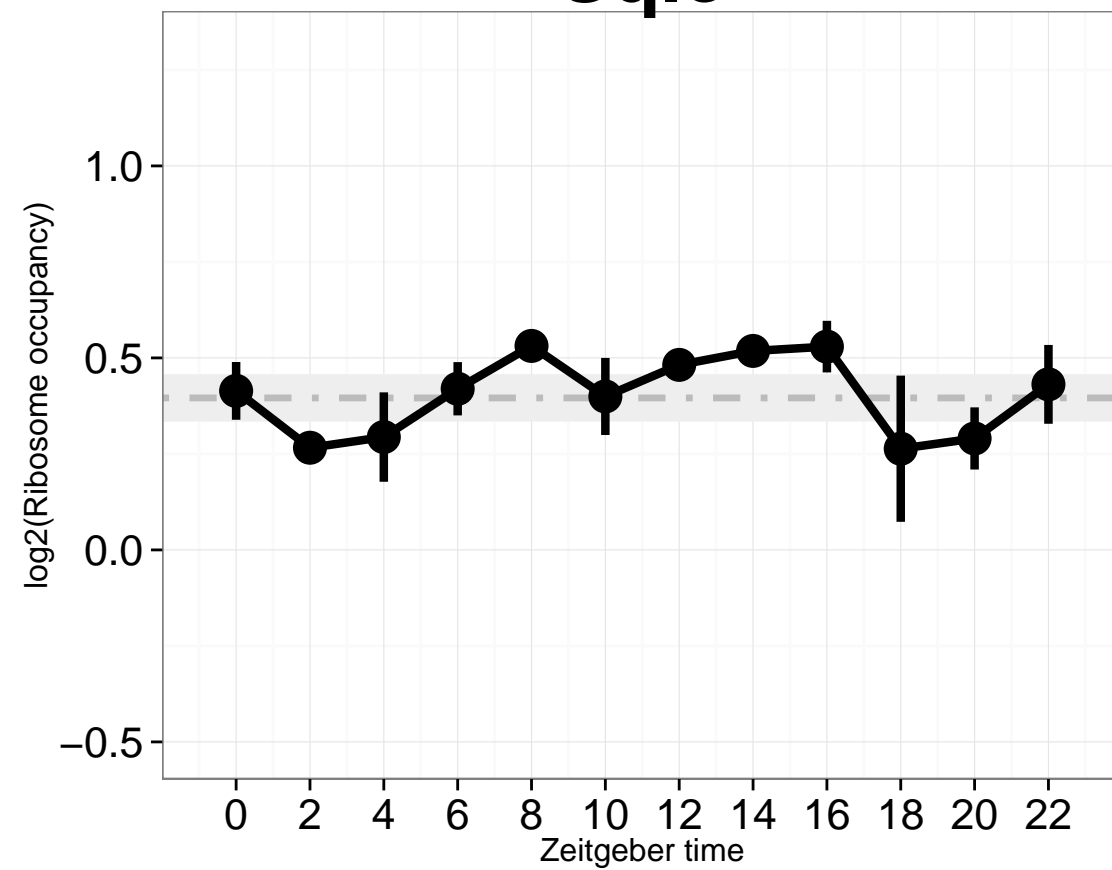

Supplement: Supplementary file 12853 [file 1]

## Zbtb14

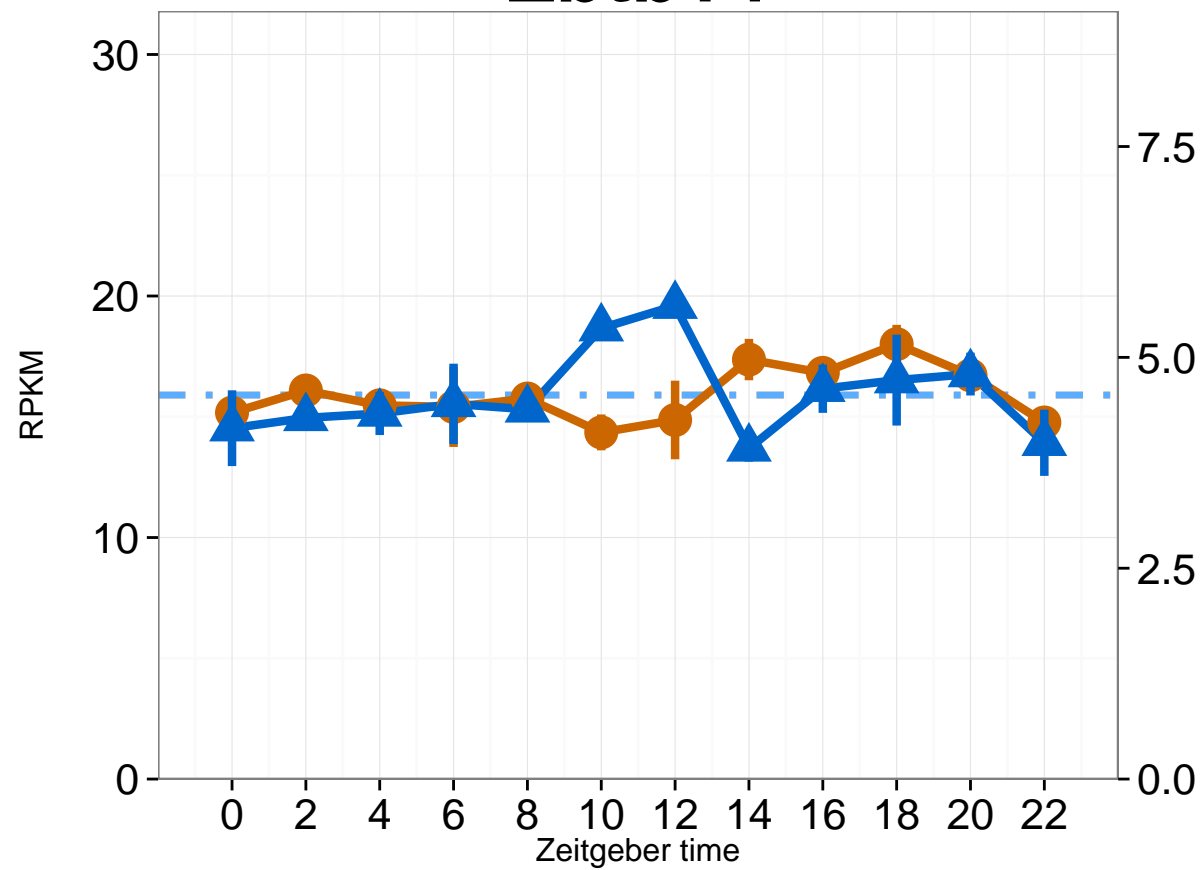

## Zbtb14

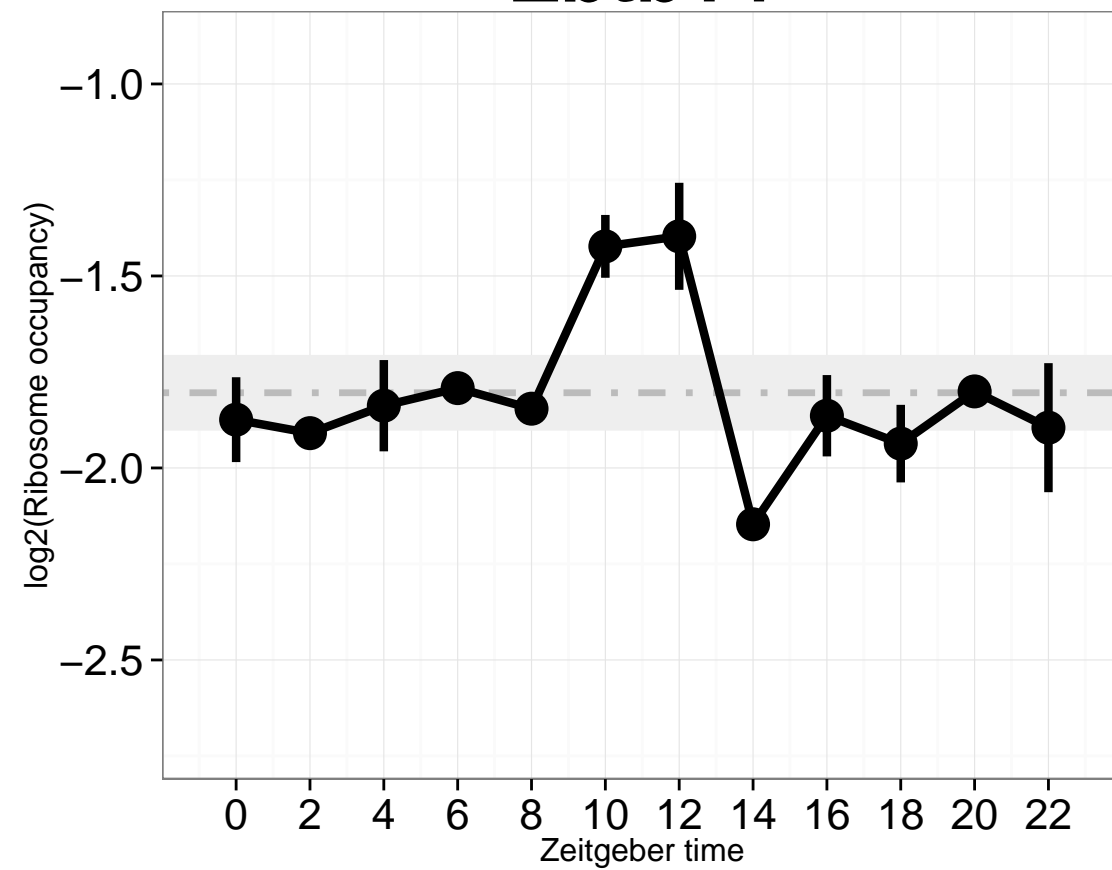

Supplement: Supplementary file 12854 [file 1]

# Fam160a1

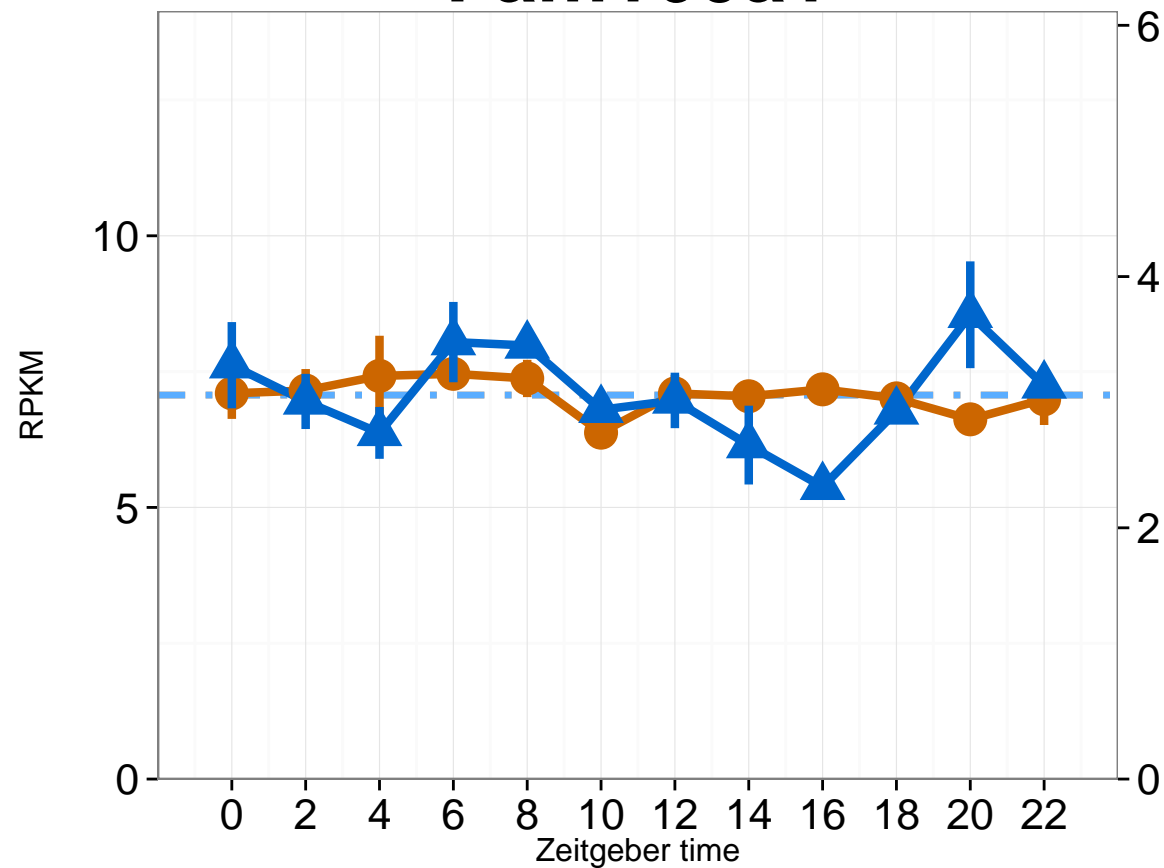

# Fam160a1

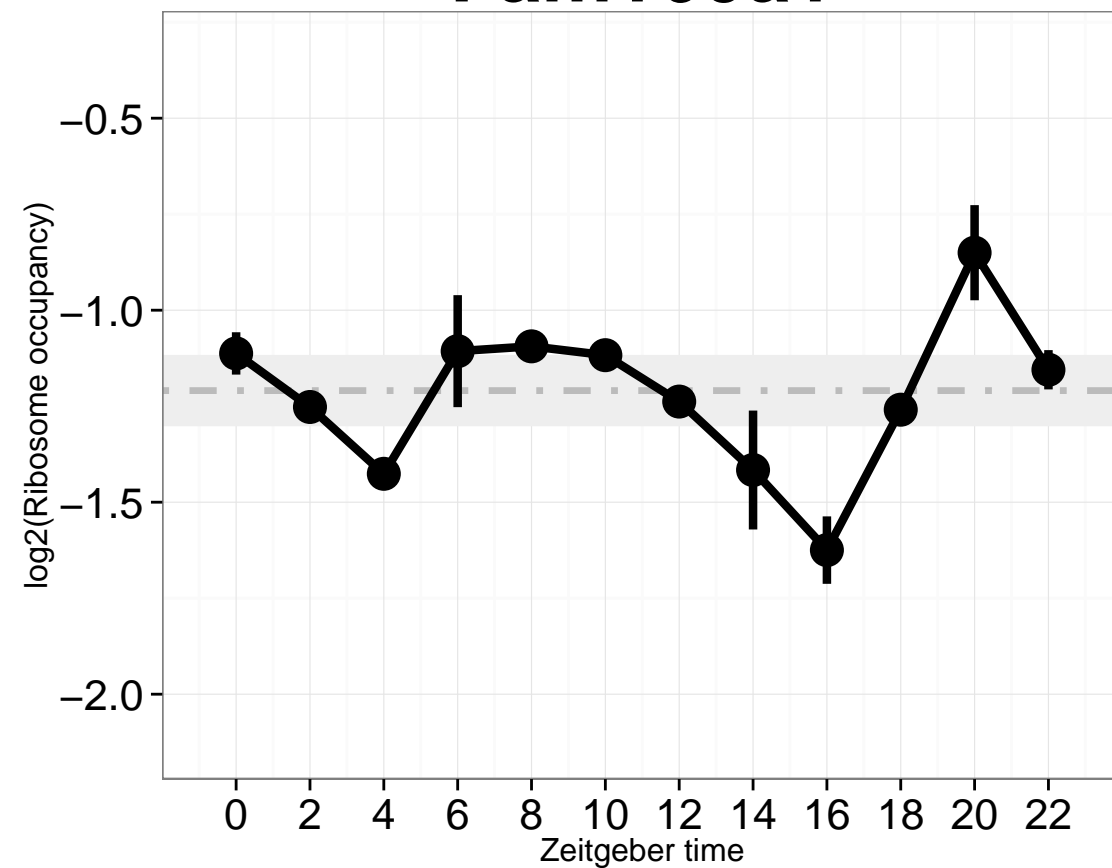

Supplement: Supplementary file 12855 [file 1]

## Msh2

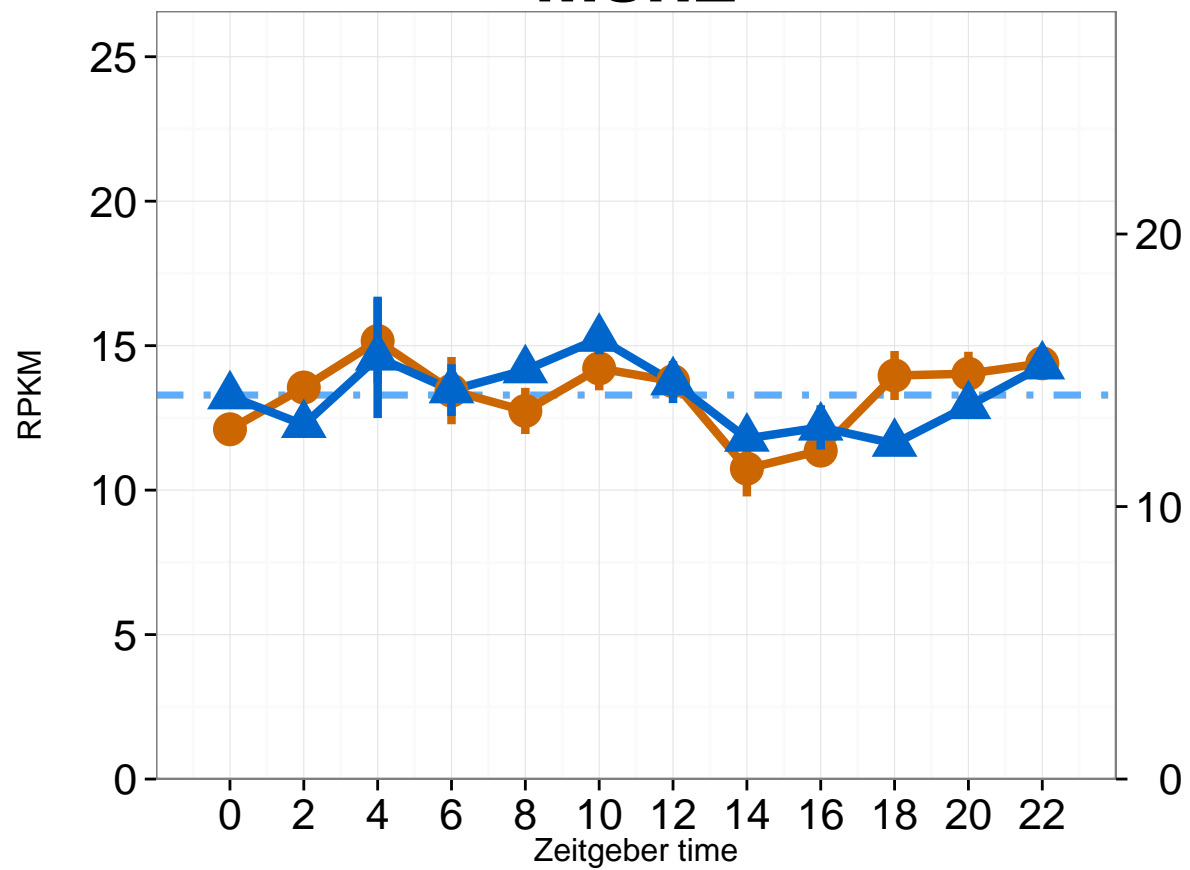

## Msh2

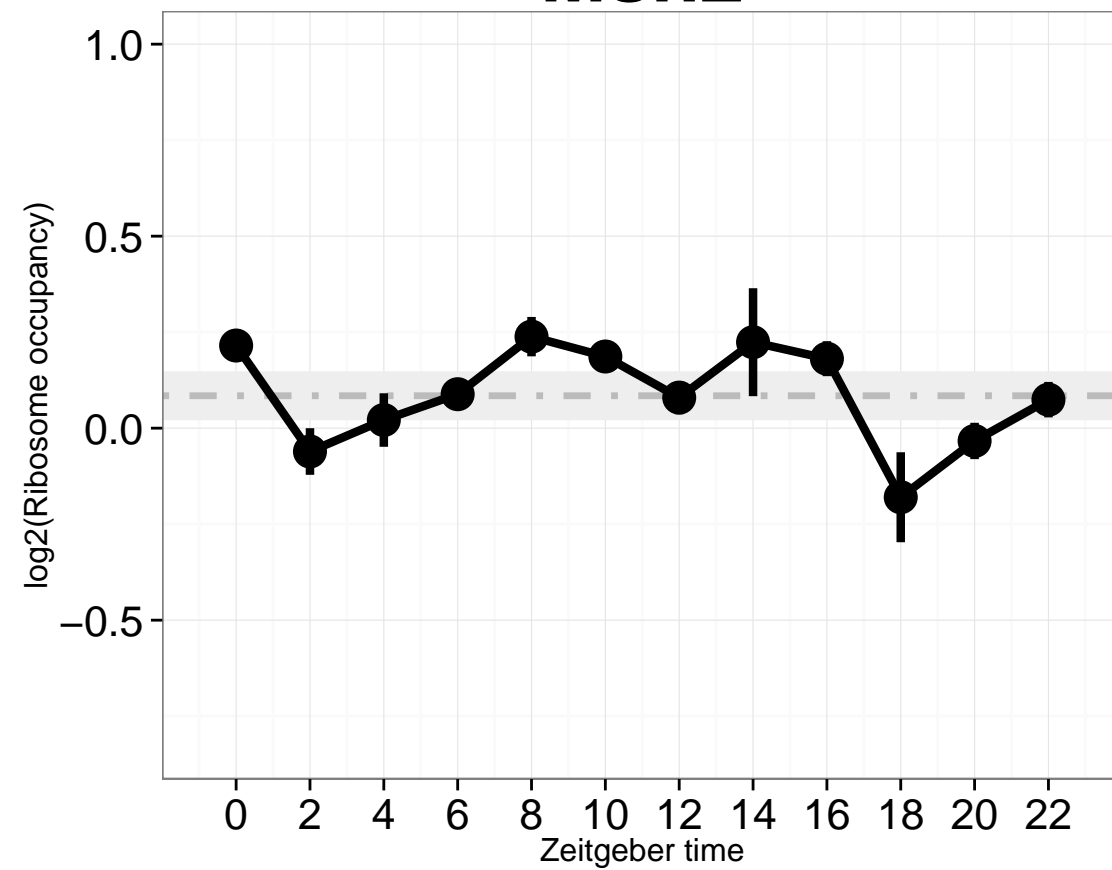

Supplement: Supplementary file 12856 [file 1]

## Prr5l

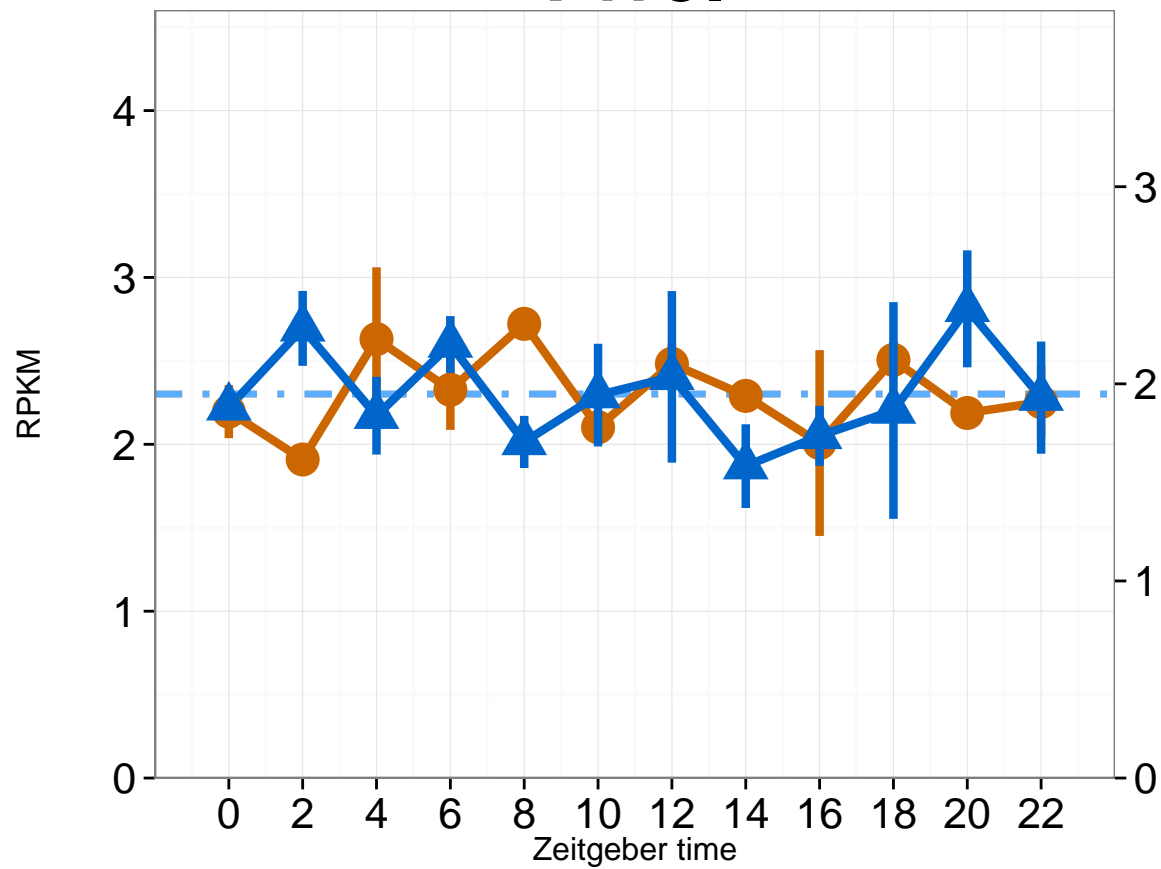

## Prr5l

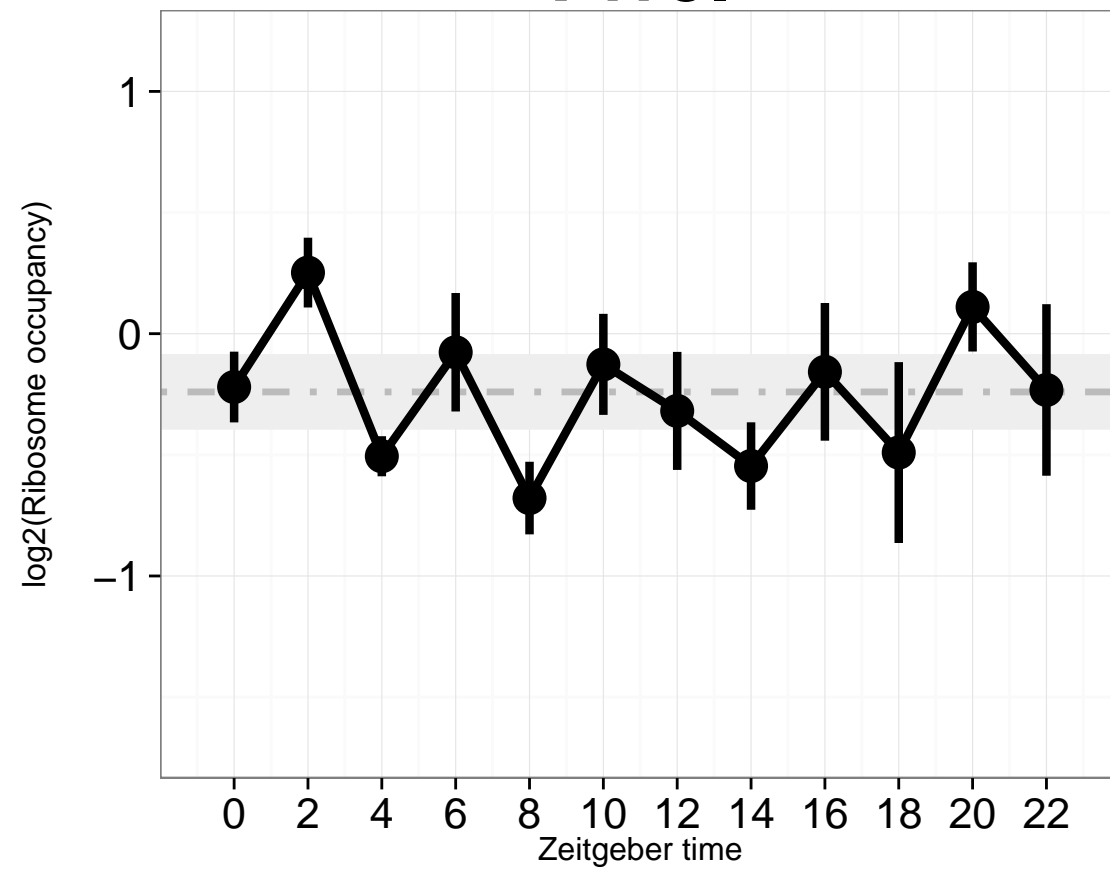

Supplement: Supplementary file 12857 [file 1]

# Csrnp3

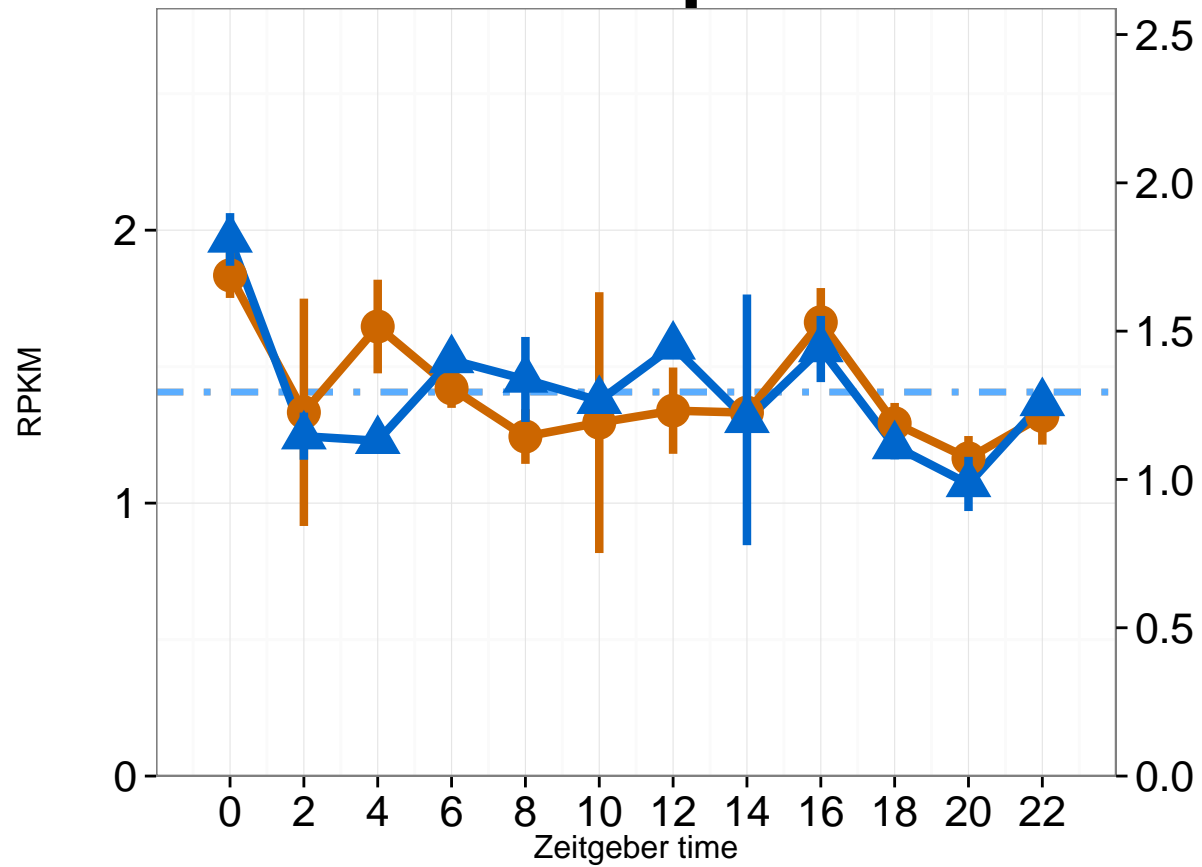

# Csrnp3

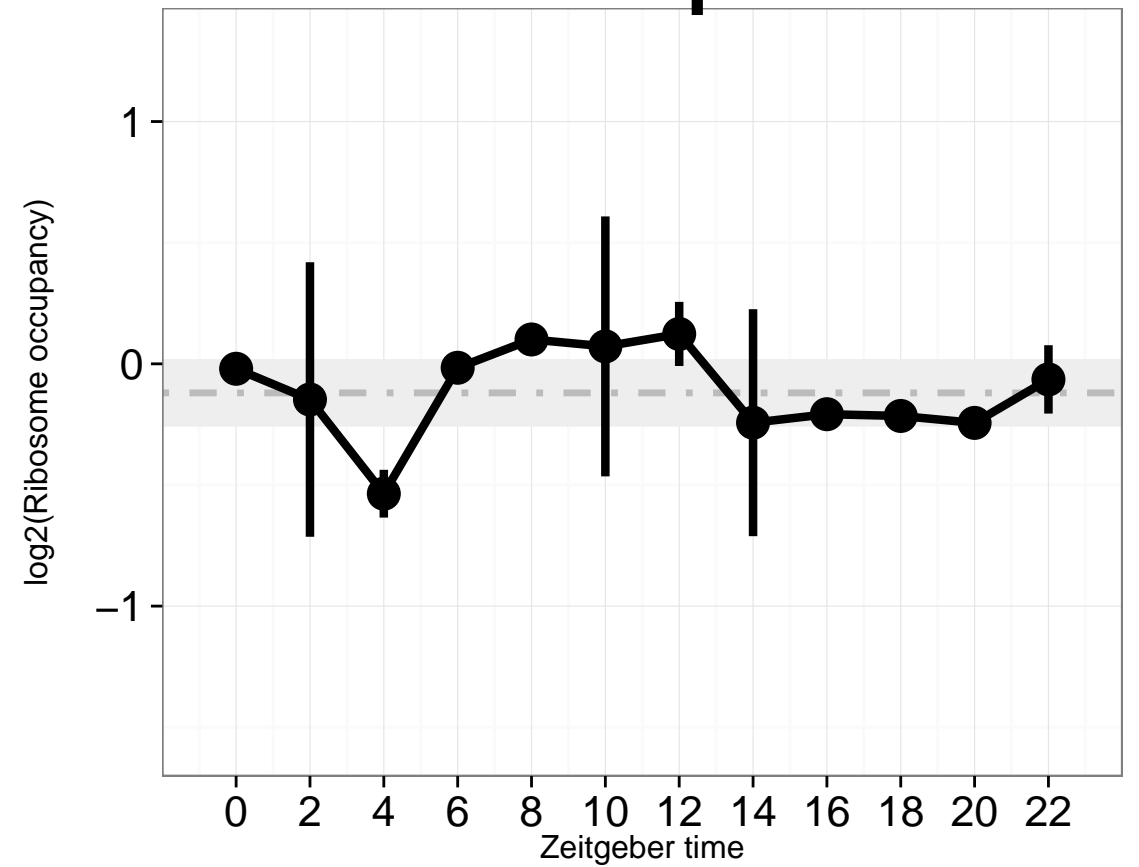

Supplement: Supplementary file 12858 [file 1]

## Kat5

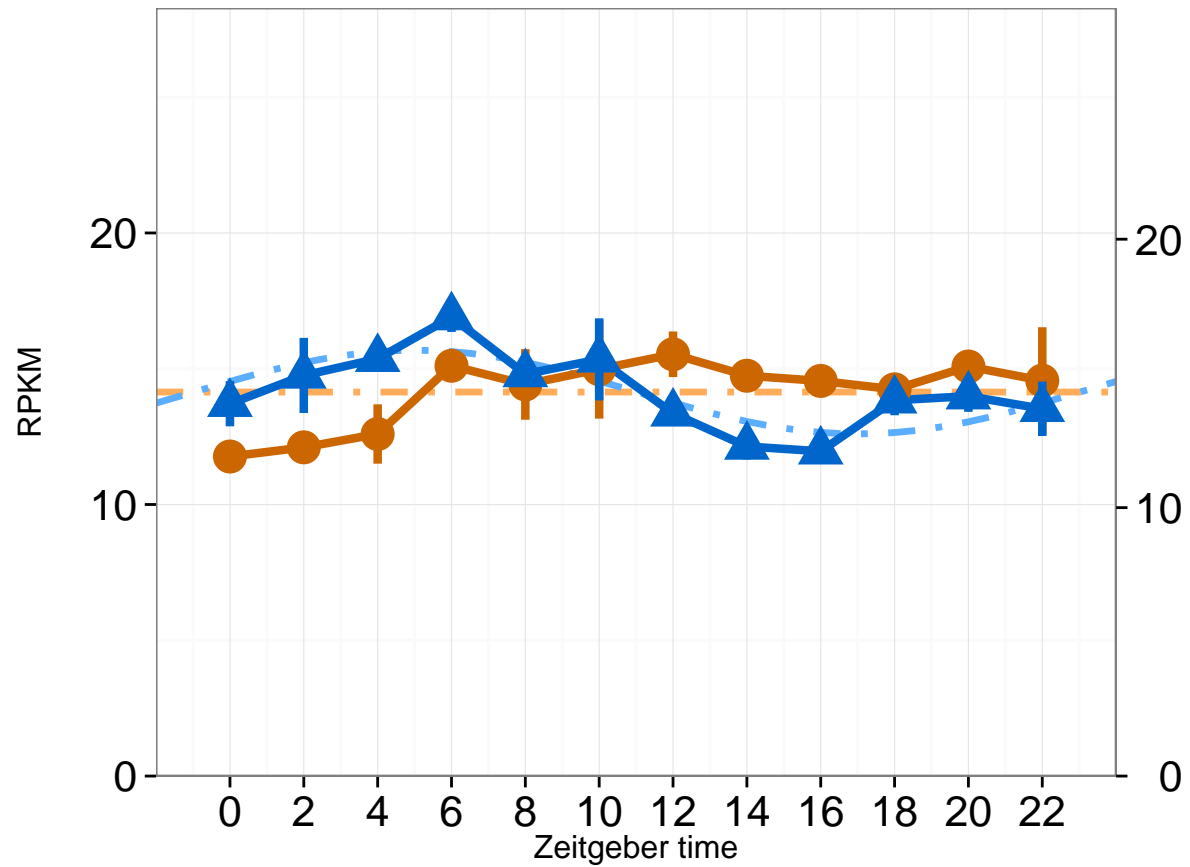

## Kat5

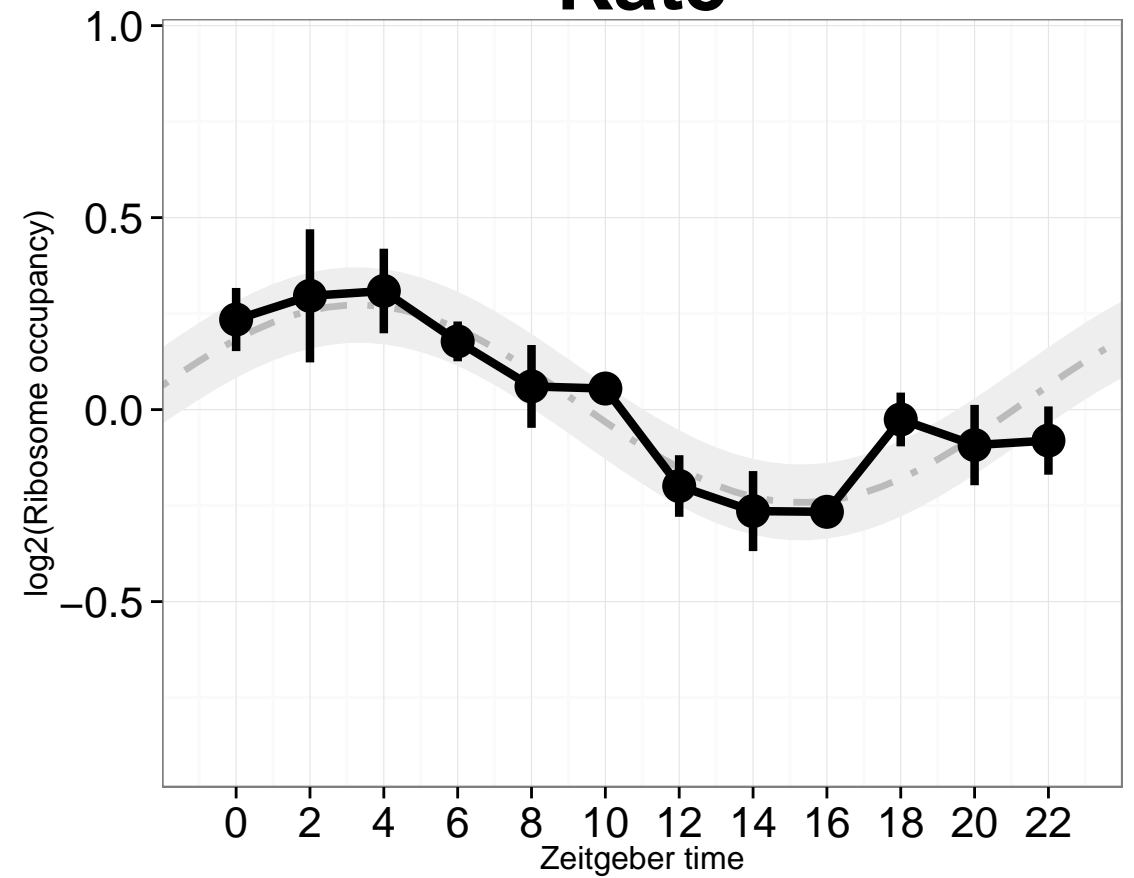

Supplement: Supplementary file 12859 [file 1]

# Reps2

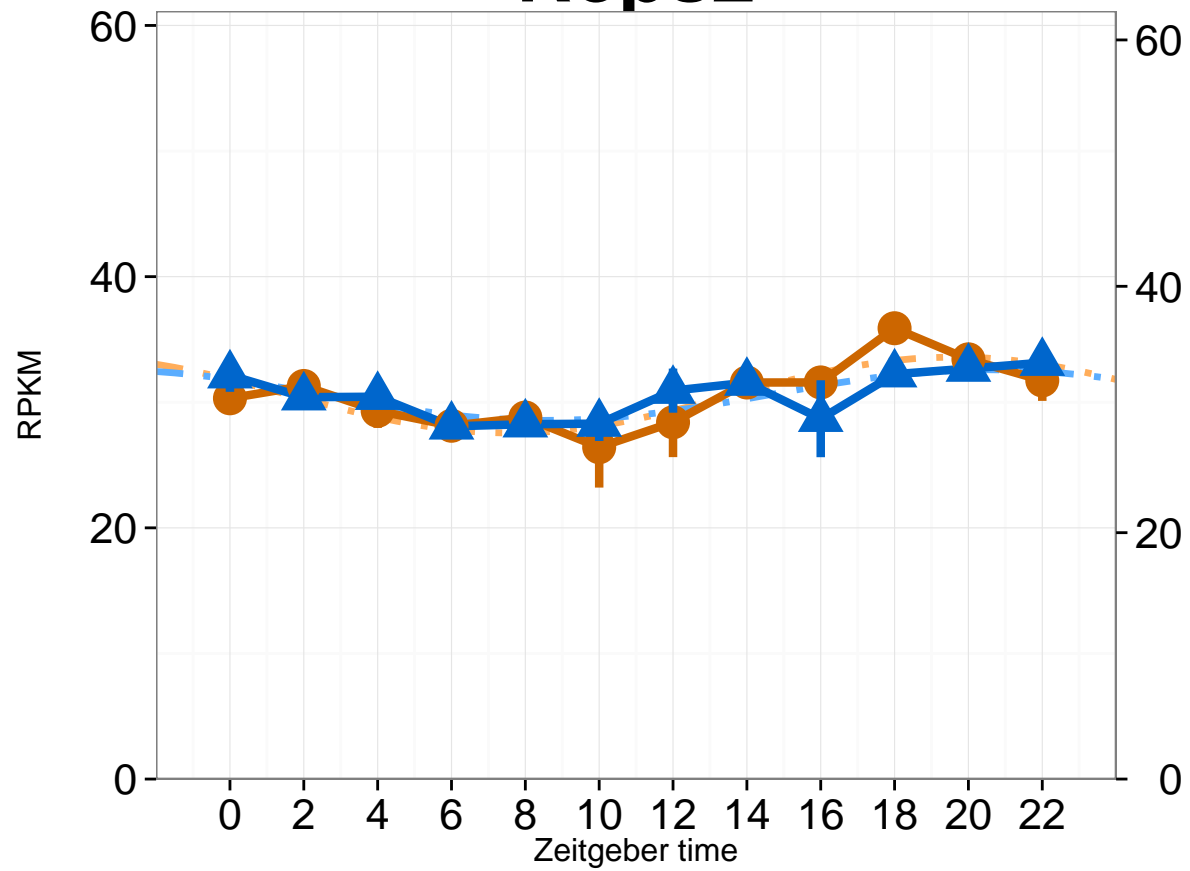

# Reps2

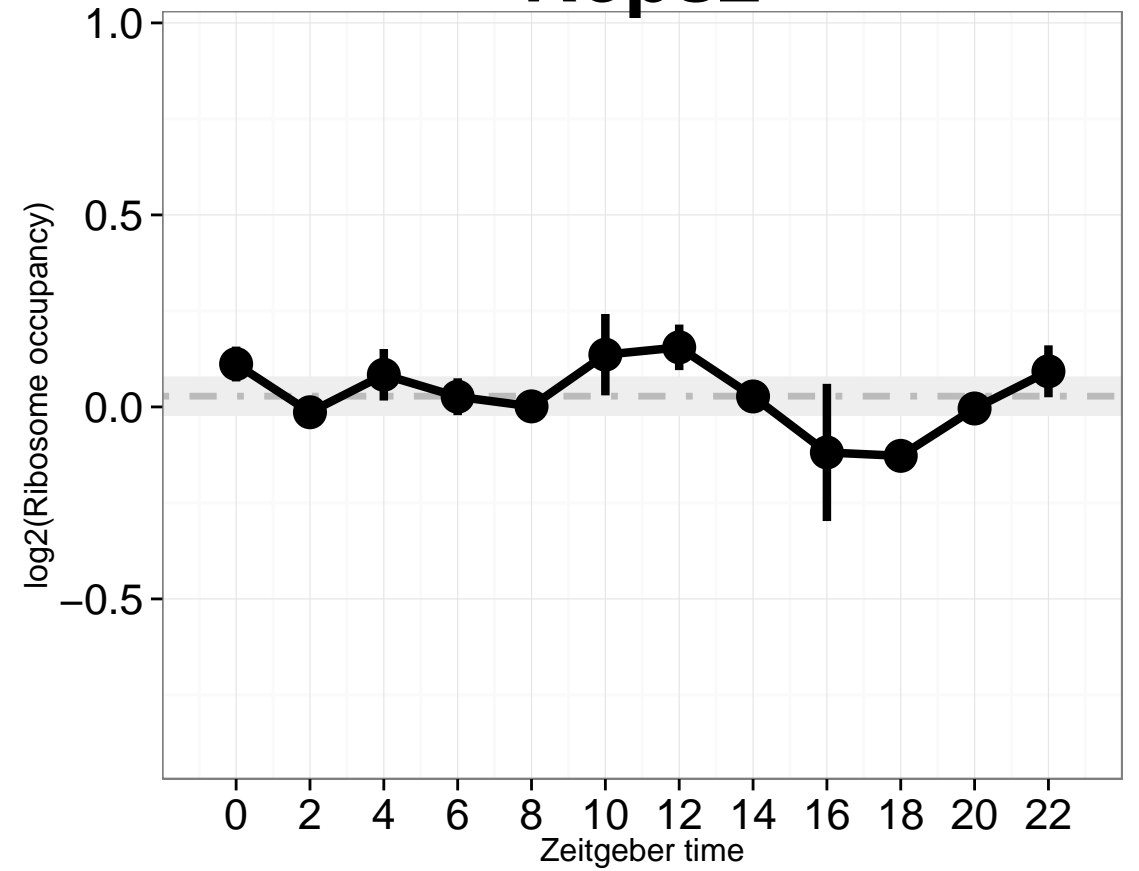

Supplement: Supplementary file 12860 [file 1]

# 3632451O06Rik

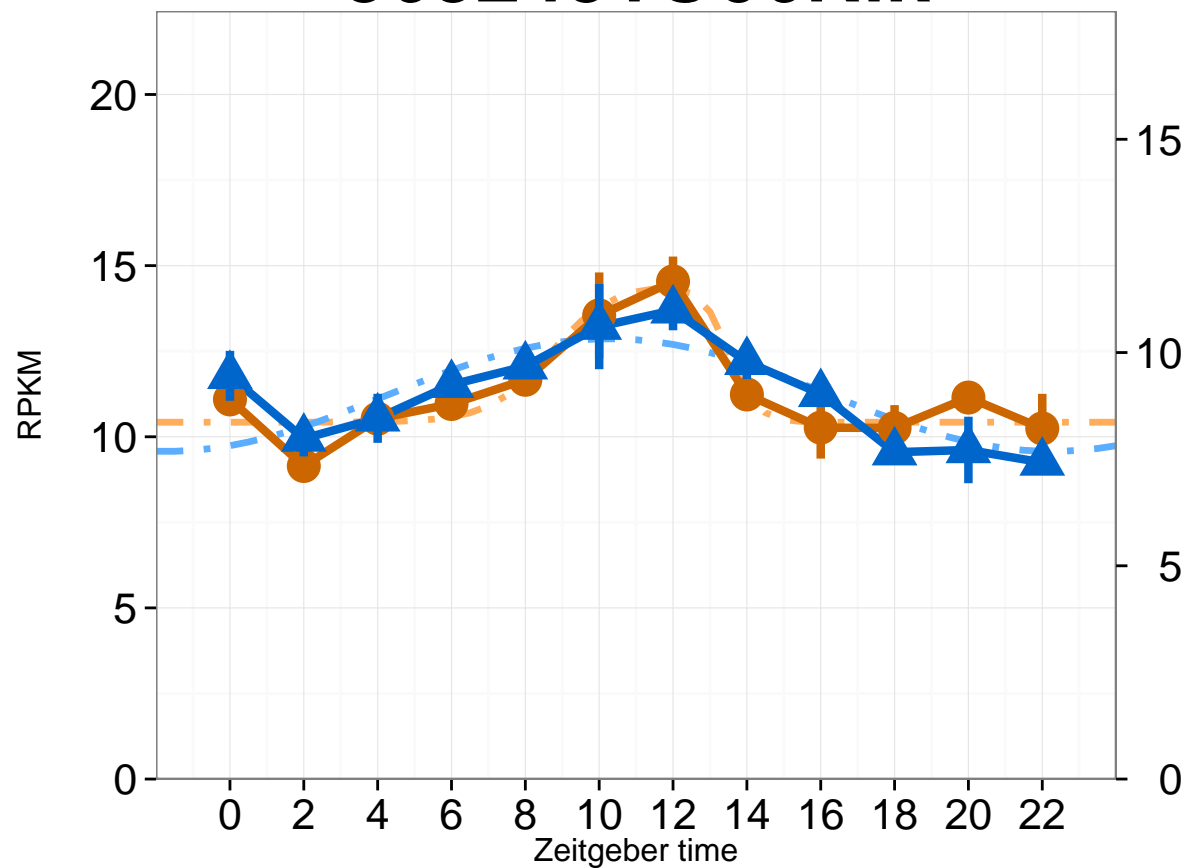

# 3632451O06Rik

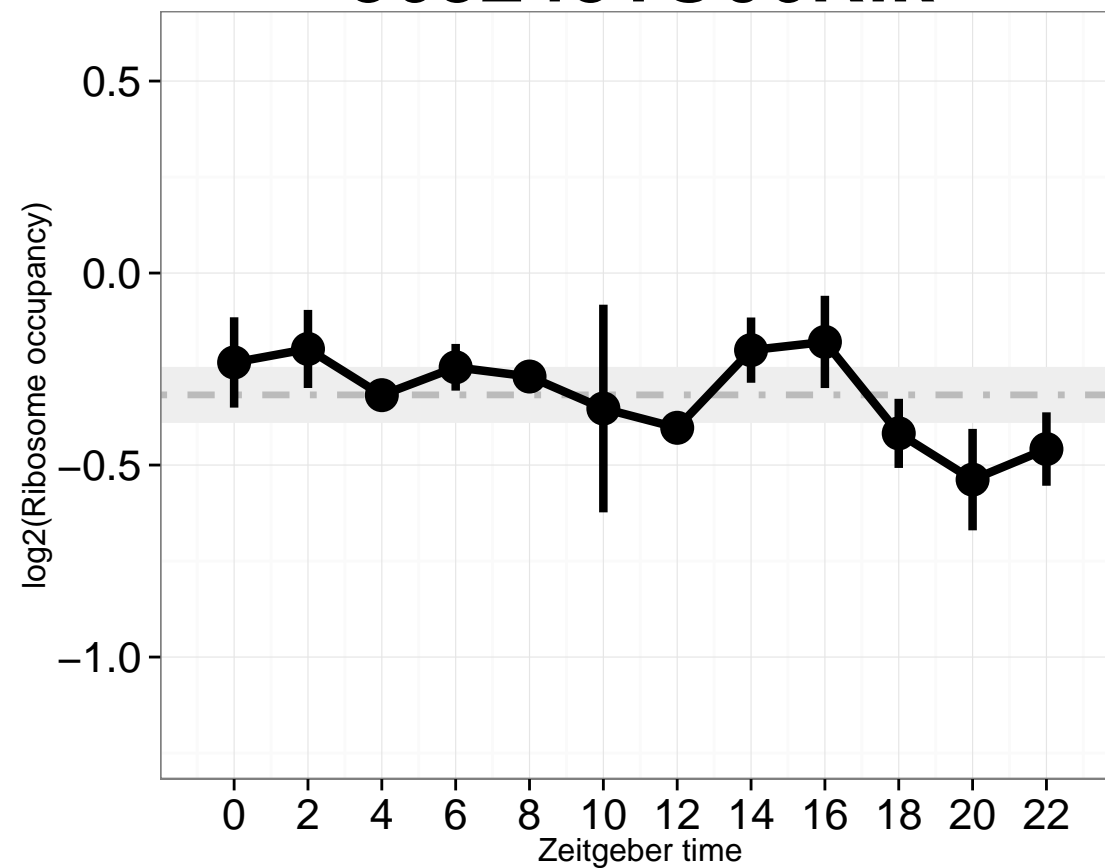

Supplement: Supplementary file 12861 [file 1]

## Hbp1

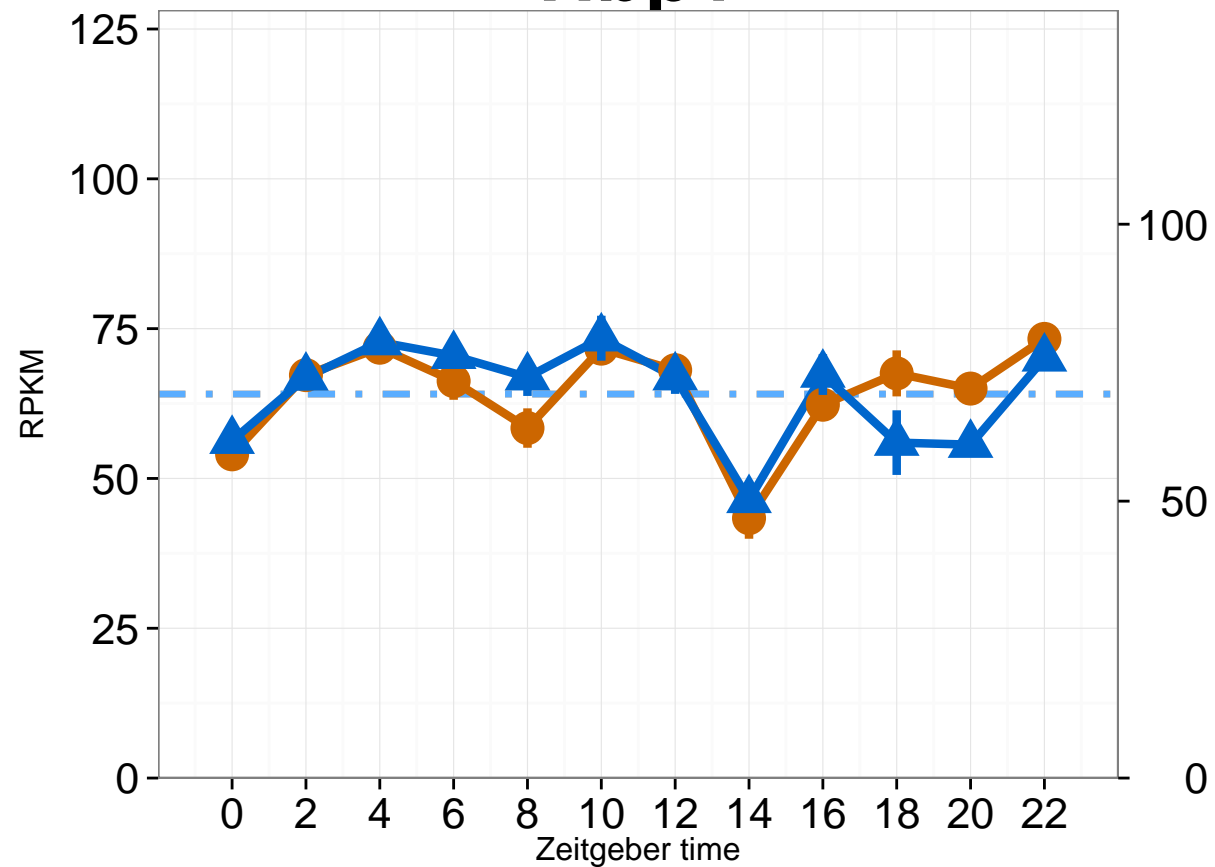

## Hbp1

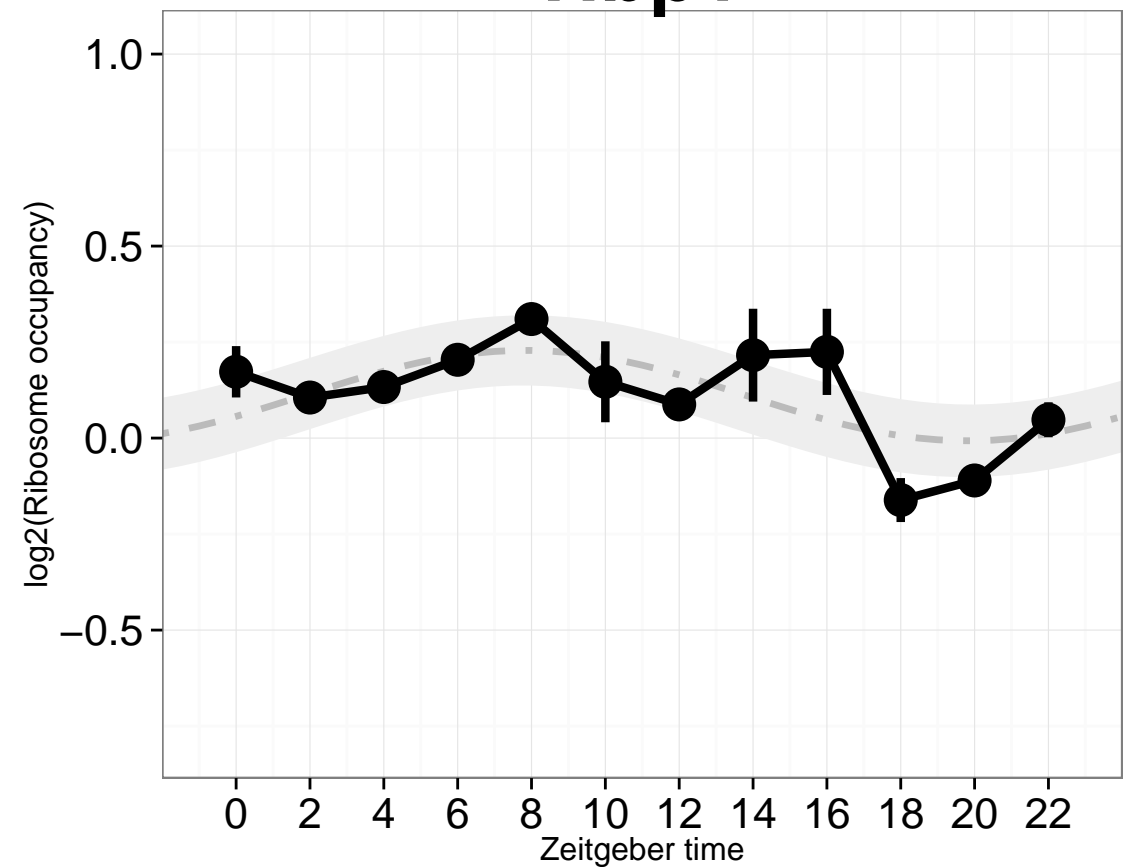

Supplement: Supplementary file 12862 [file 1]

## II15

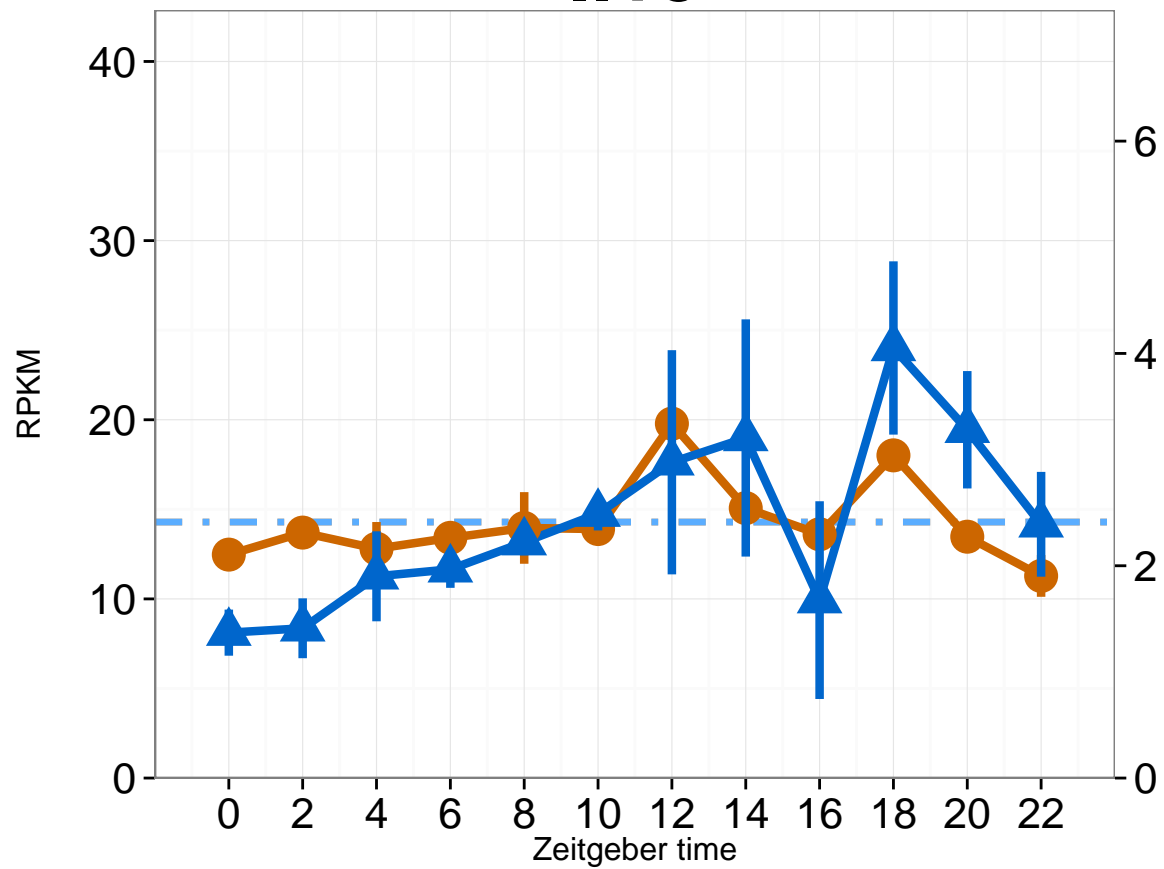

## II15

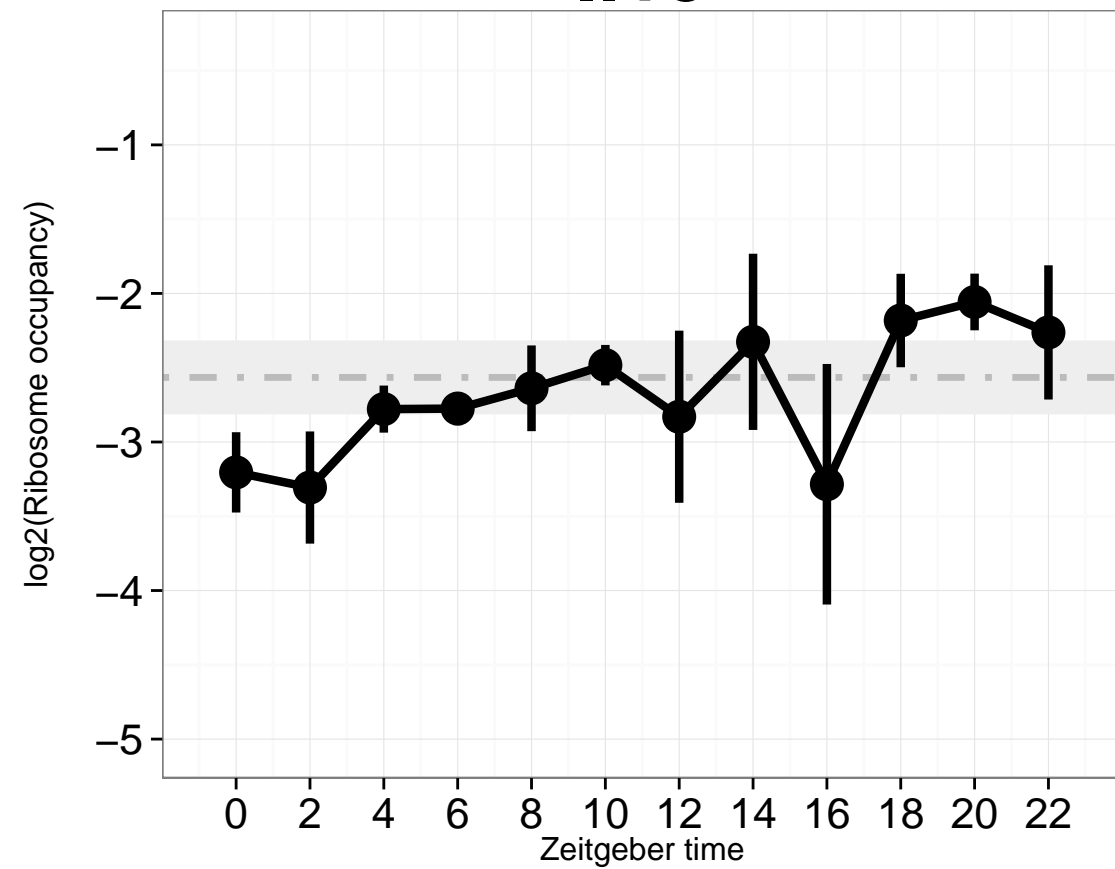

Supplement: Supplementary file 12863 [file 1]

## St7I

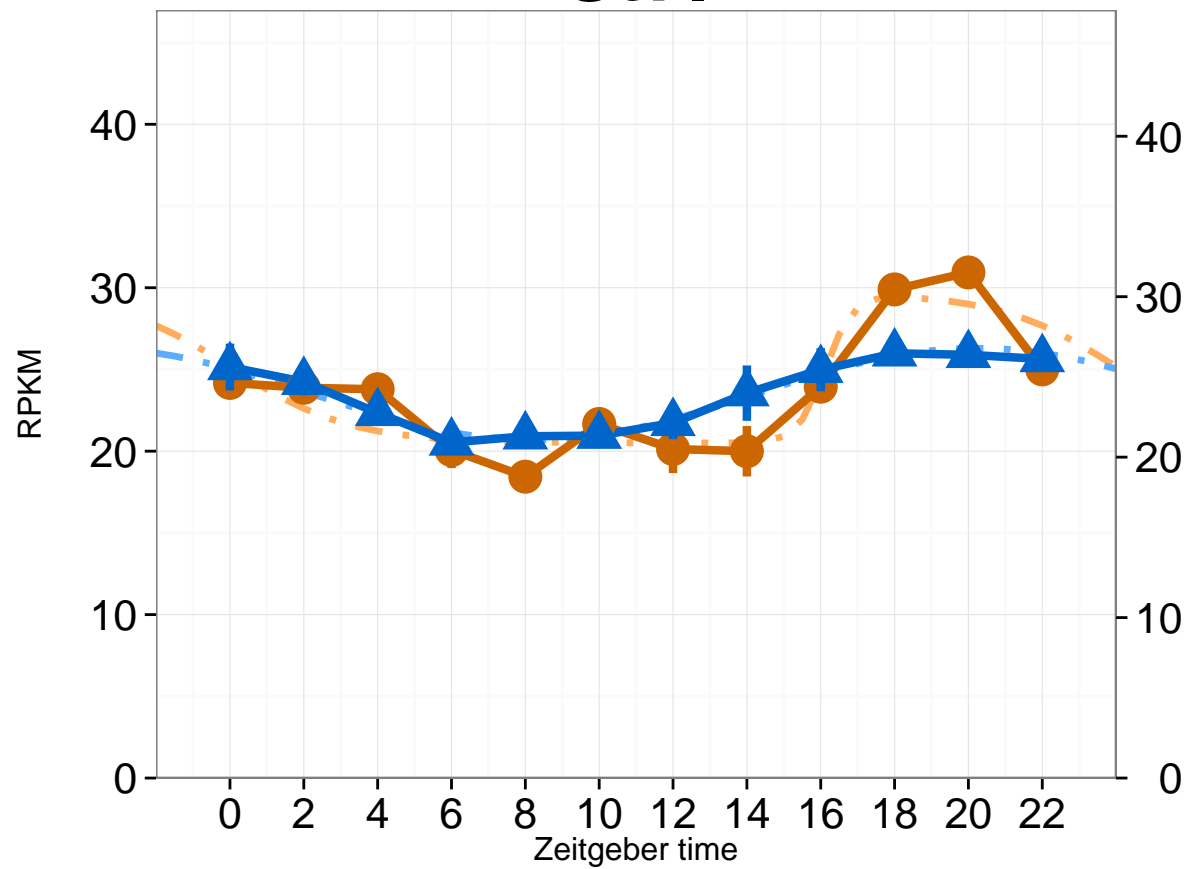

## St7I

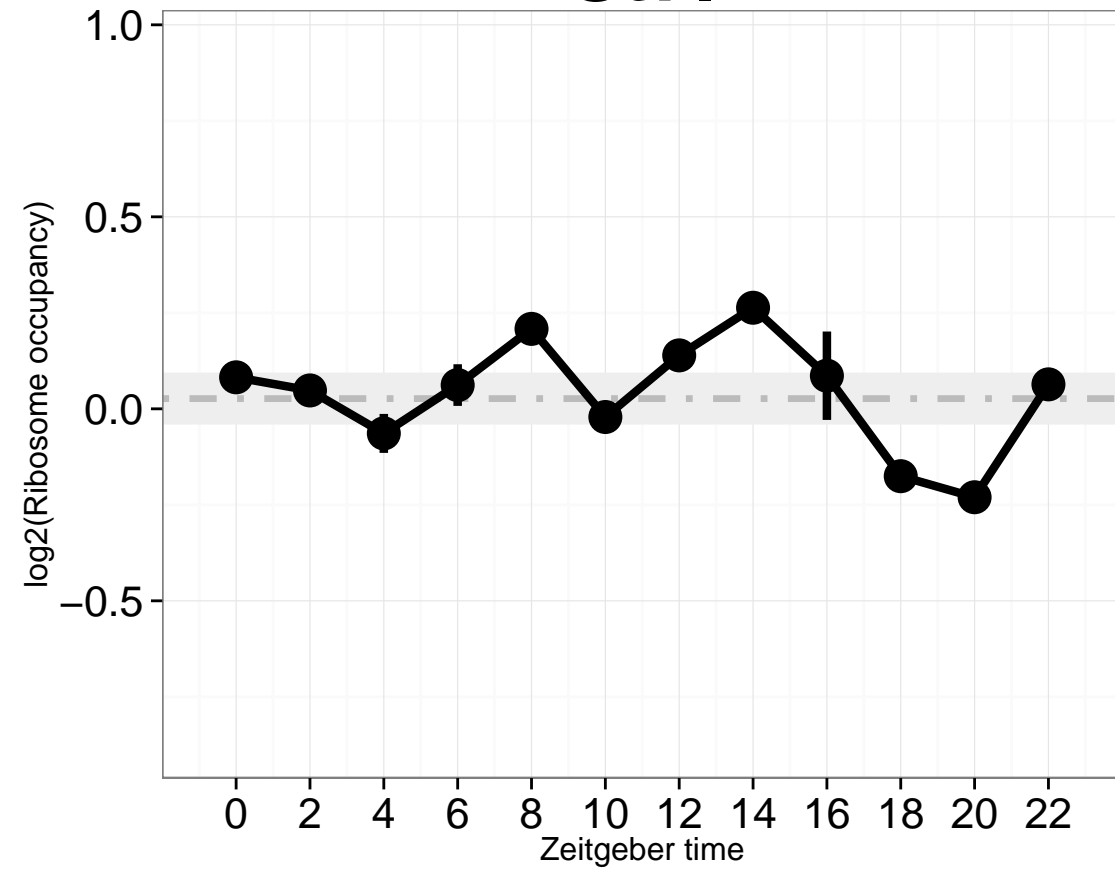

Supplement: Supplementary file 12864 [file 1]

## Eif2b5

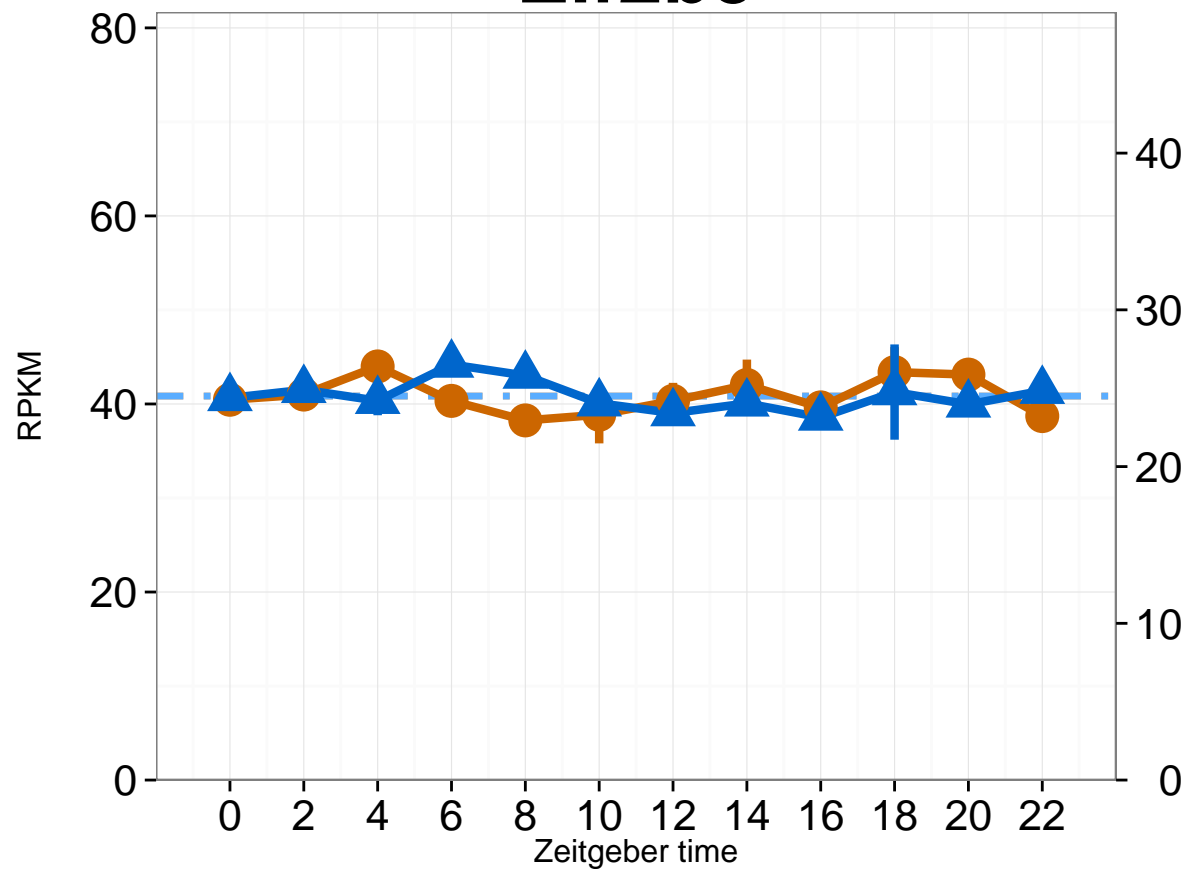

## Eif2b5

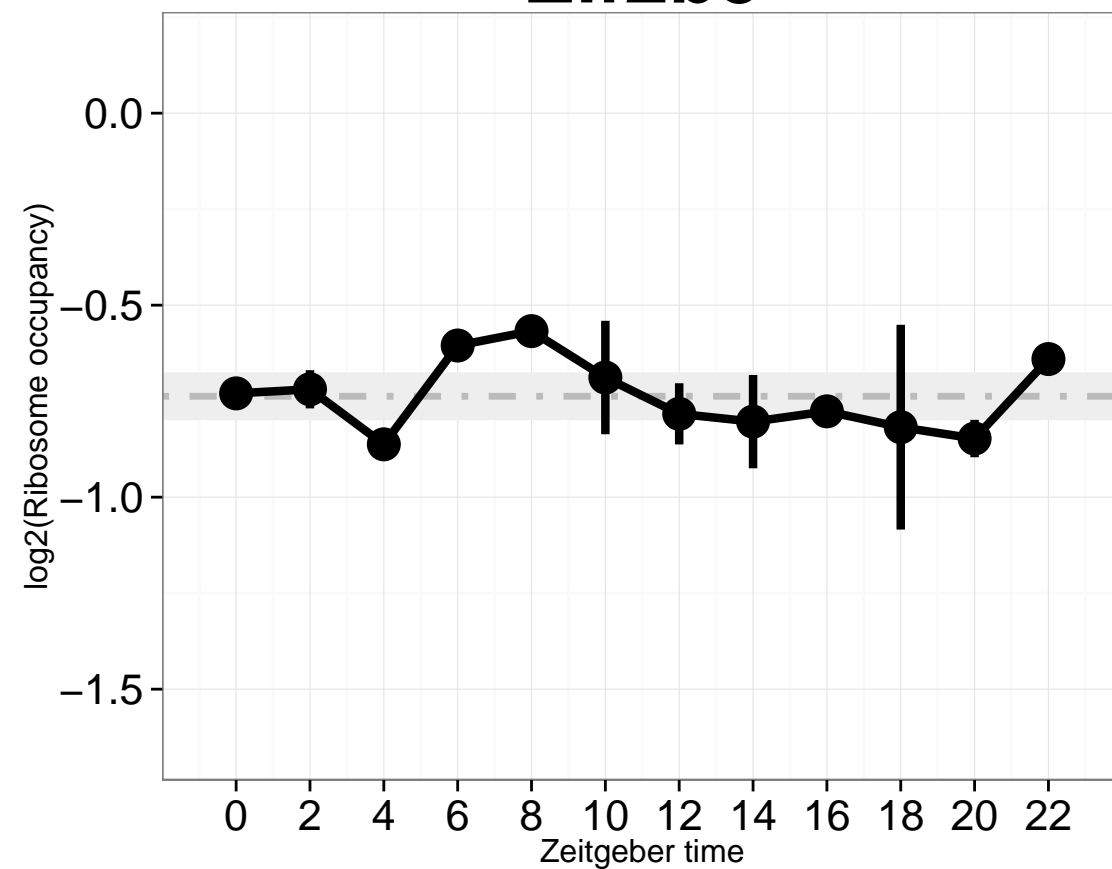

Supplement: Supplementary file 12865 [file 1]

# Rbm43

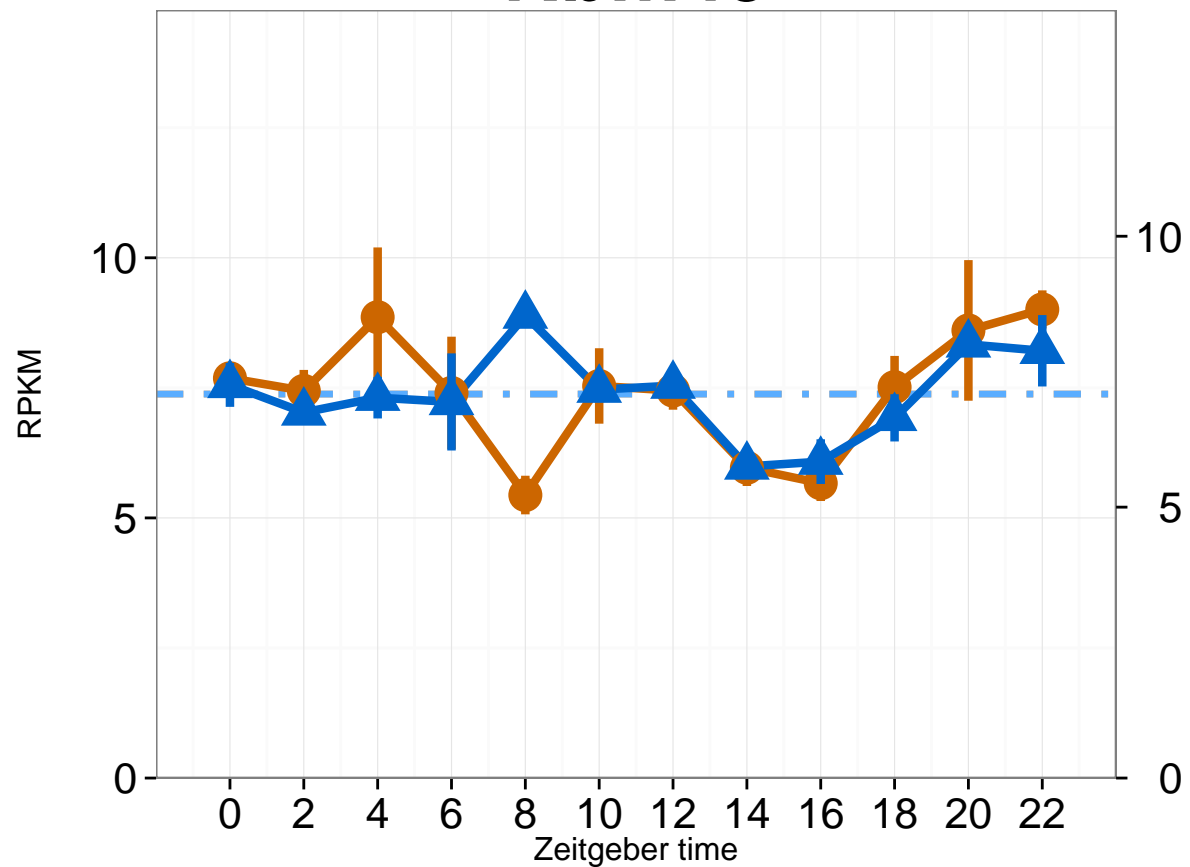

# Rbm43

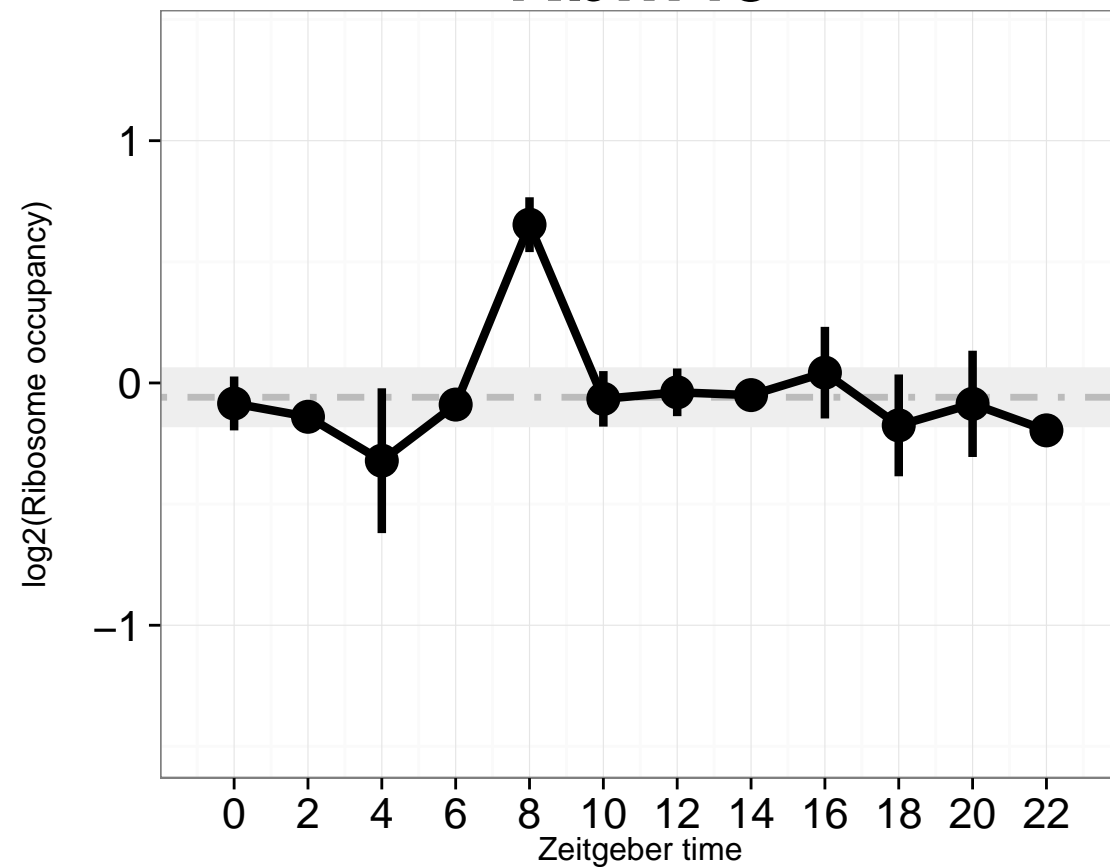

Supplement: Supplementary file 12866 [file 1]

## Nhs

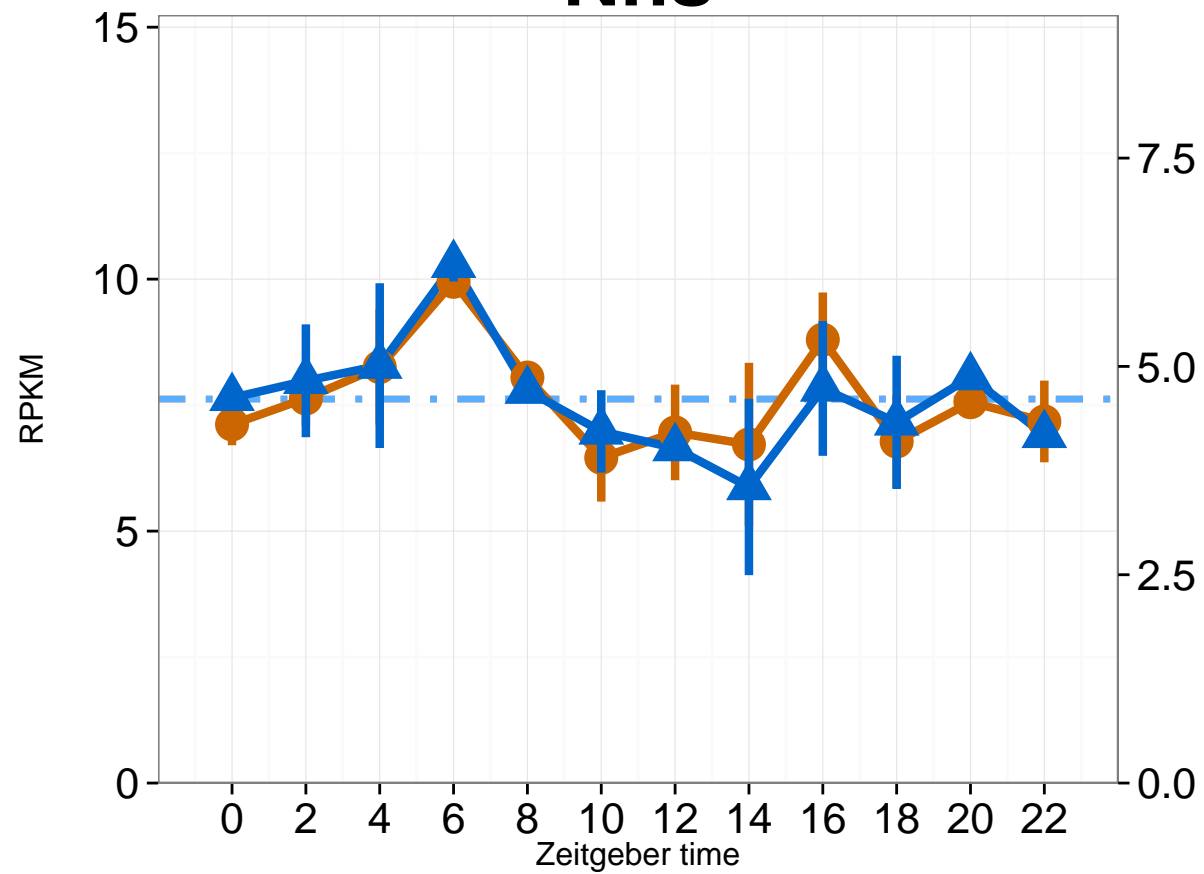

## Nhs

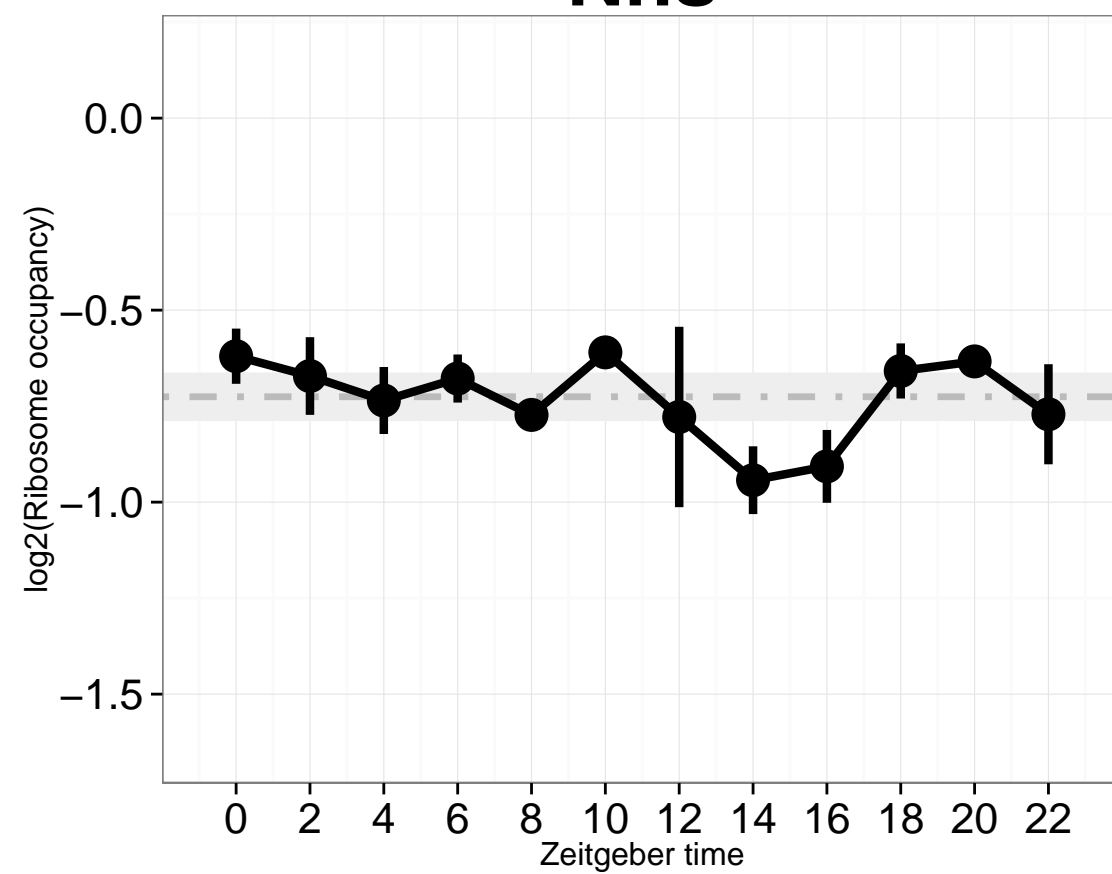

Supplement: Supplementary file 12867 [file 1]

## Snx3

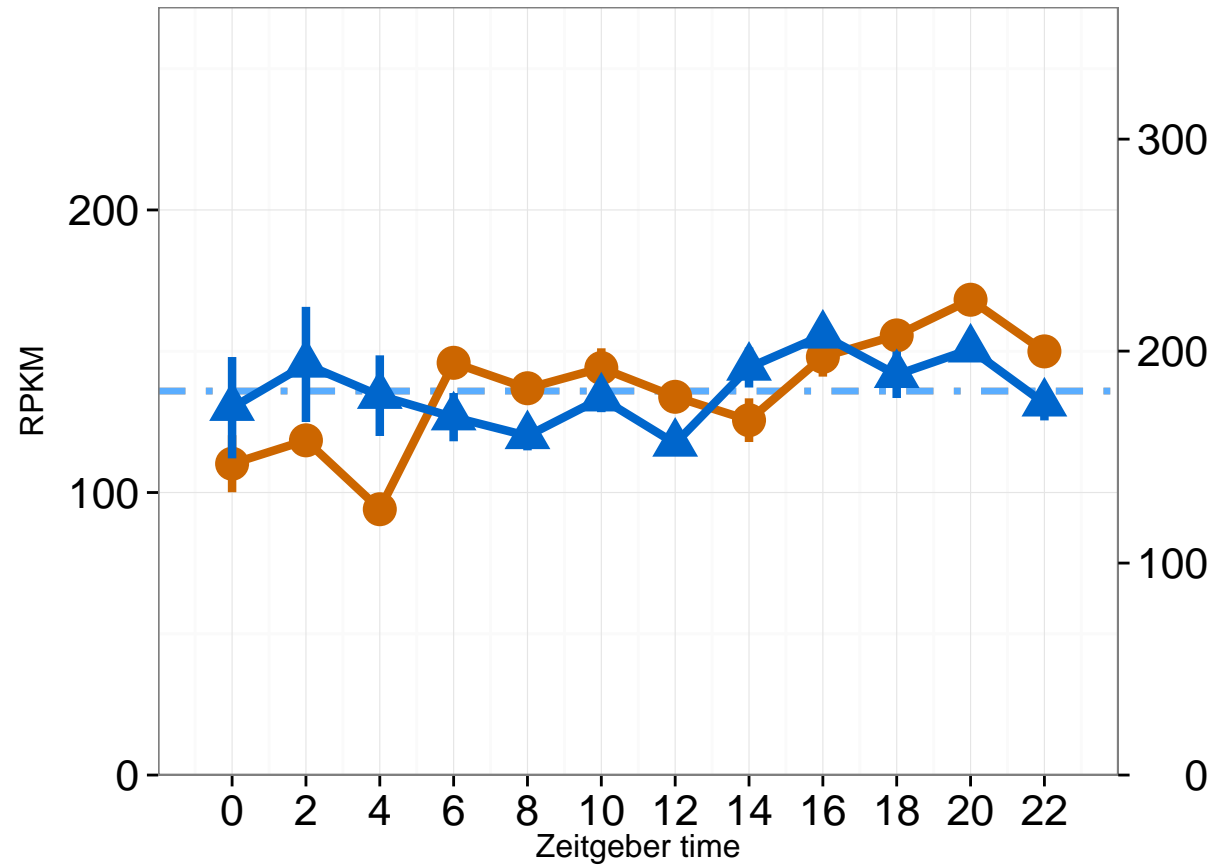

## Snx3

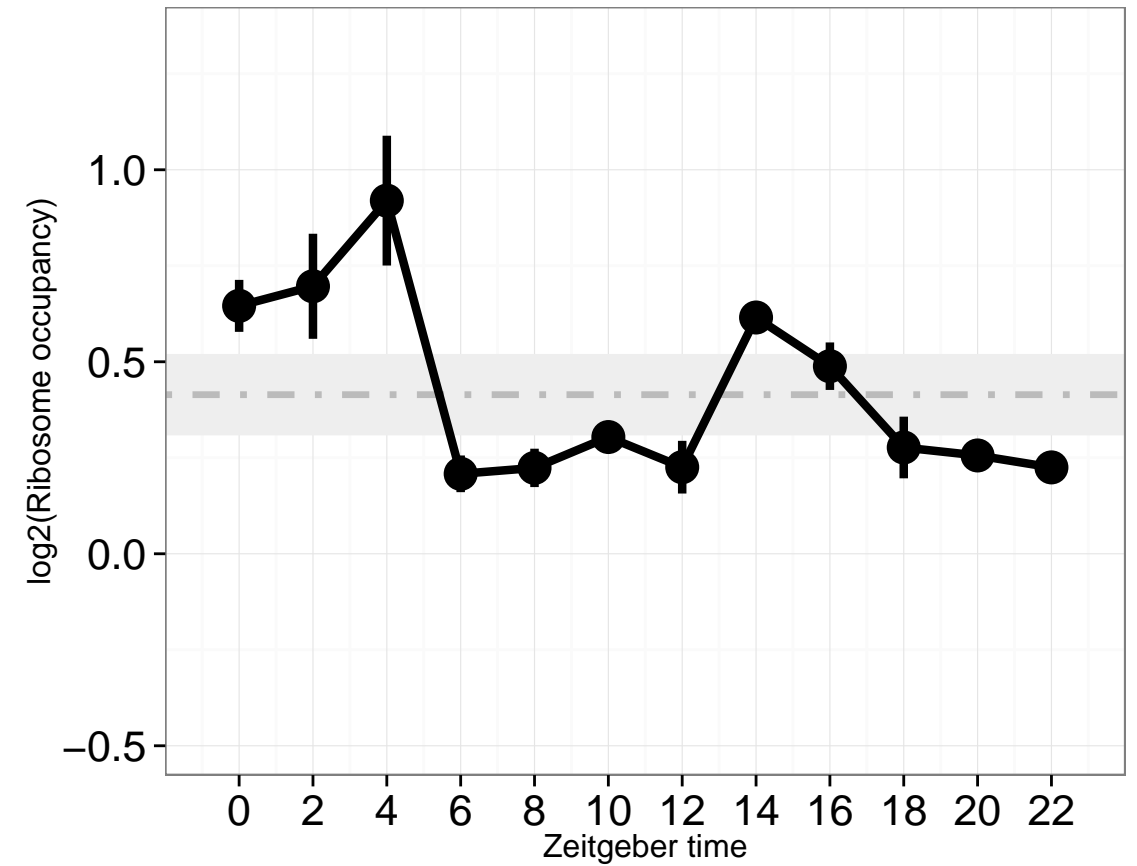

Supplement: Supplementary file 12868 [file 1]

# Map1b

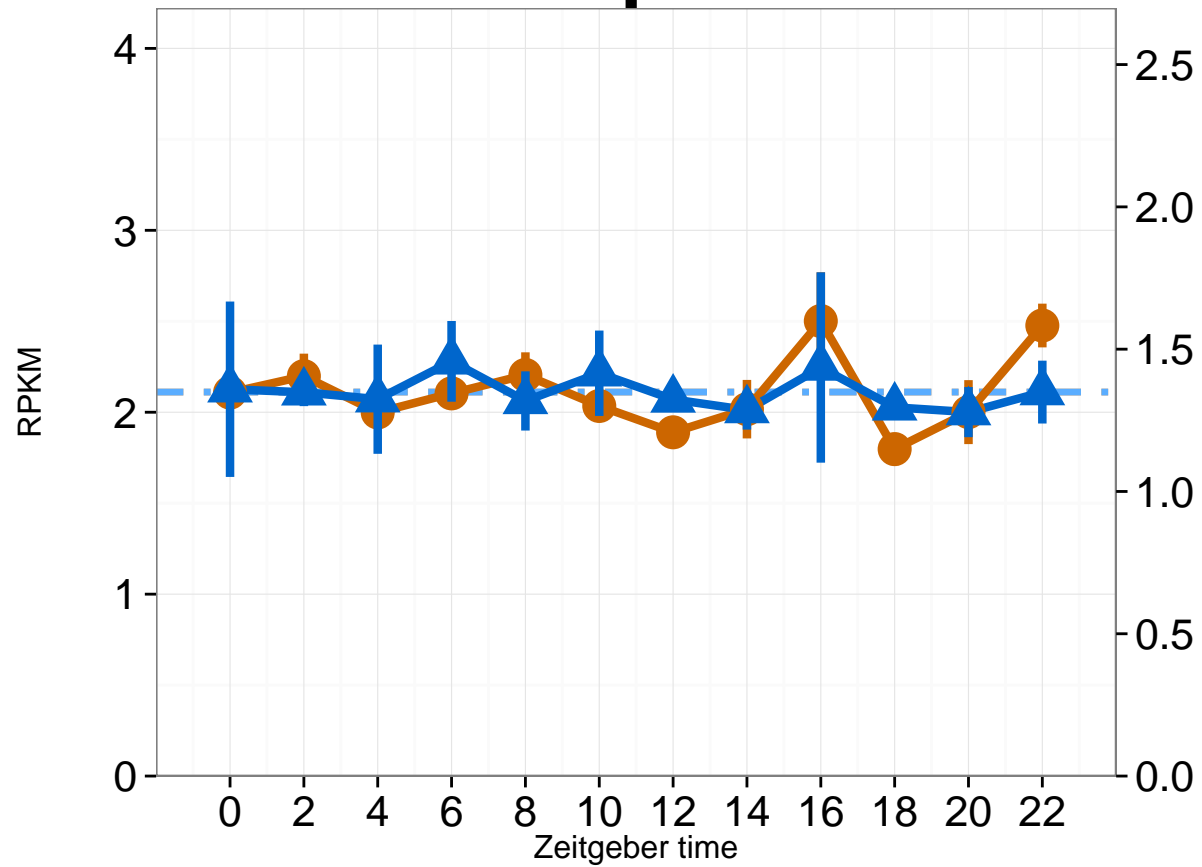

# Map1b

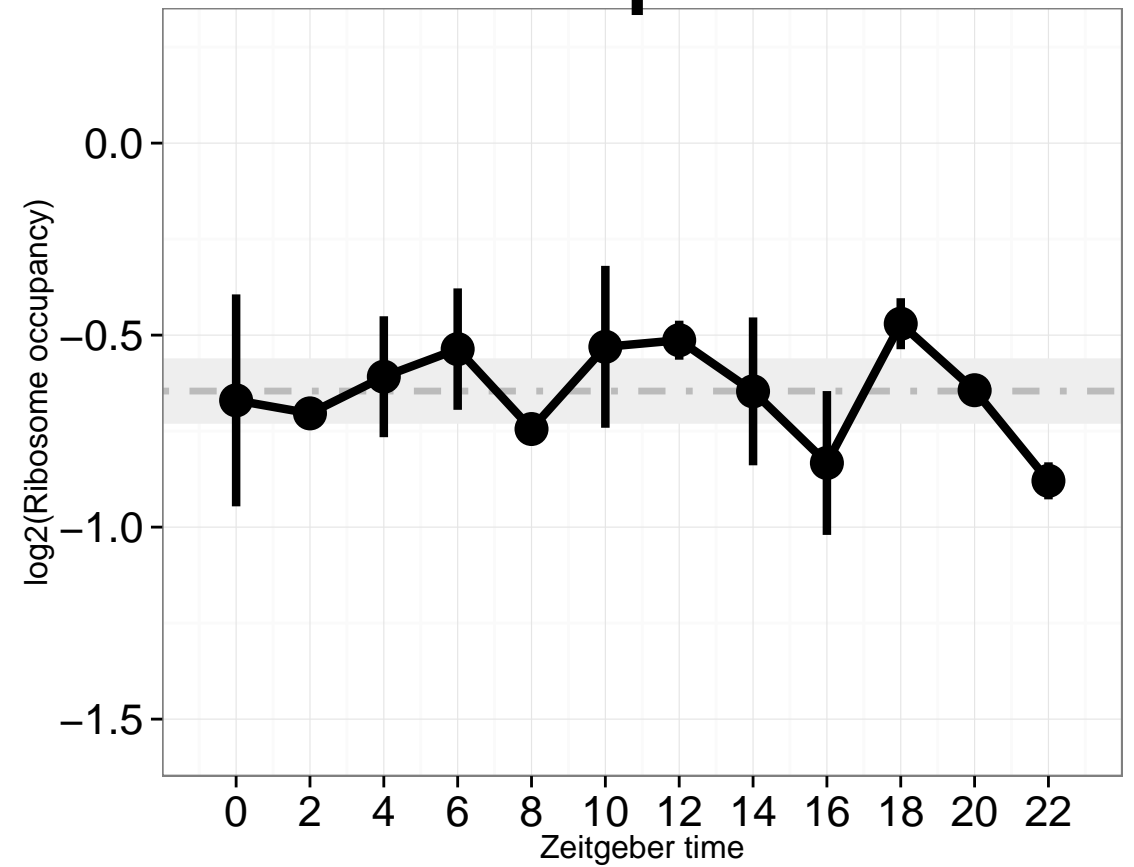

Supplement: Supplementary file 12869 [file 1]

## Slc5a8

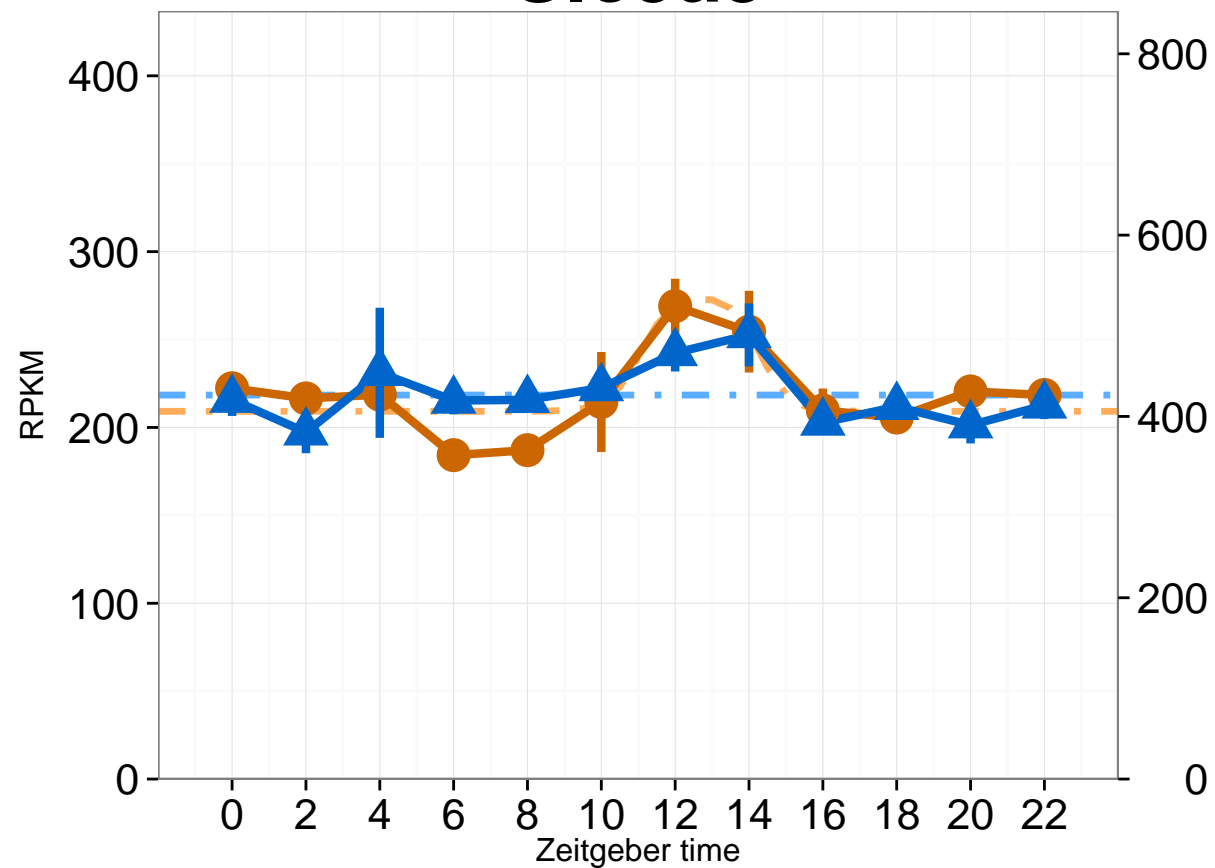

## Slc5a8

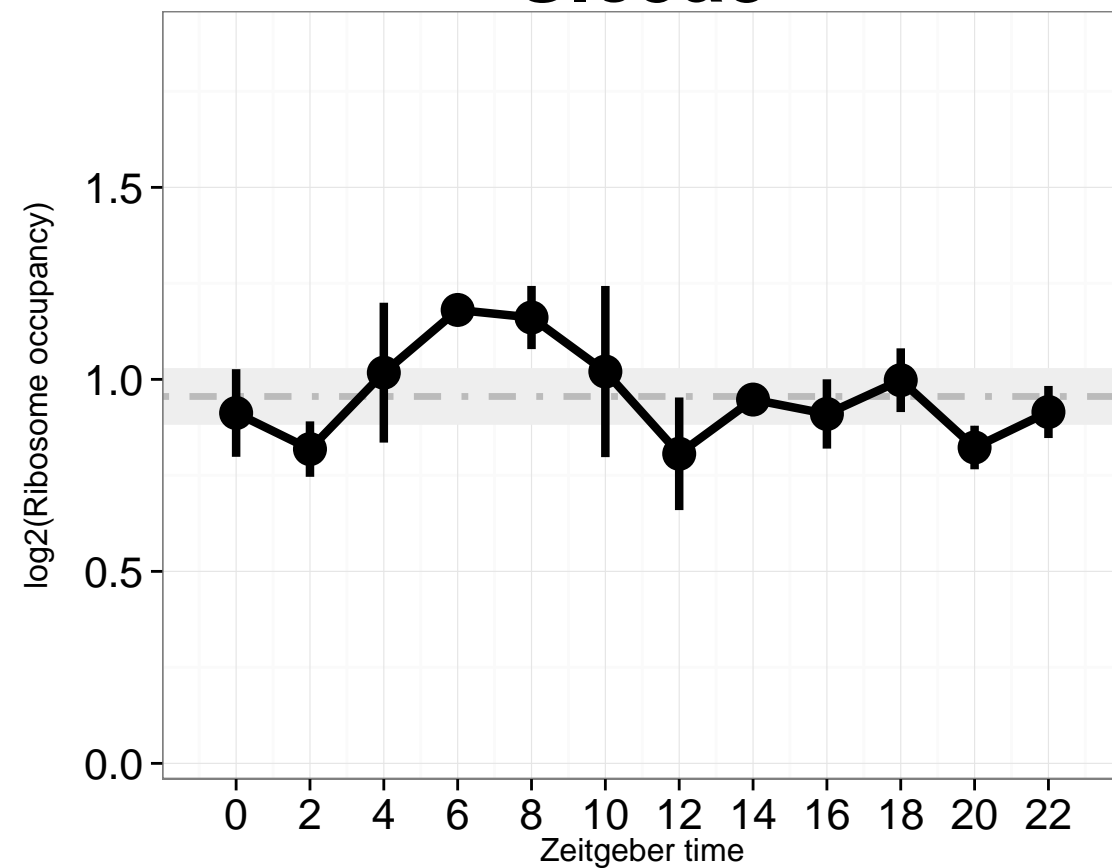

Supplement: Supplementary file 12870 [file 1]

# Trim39

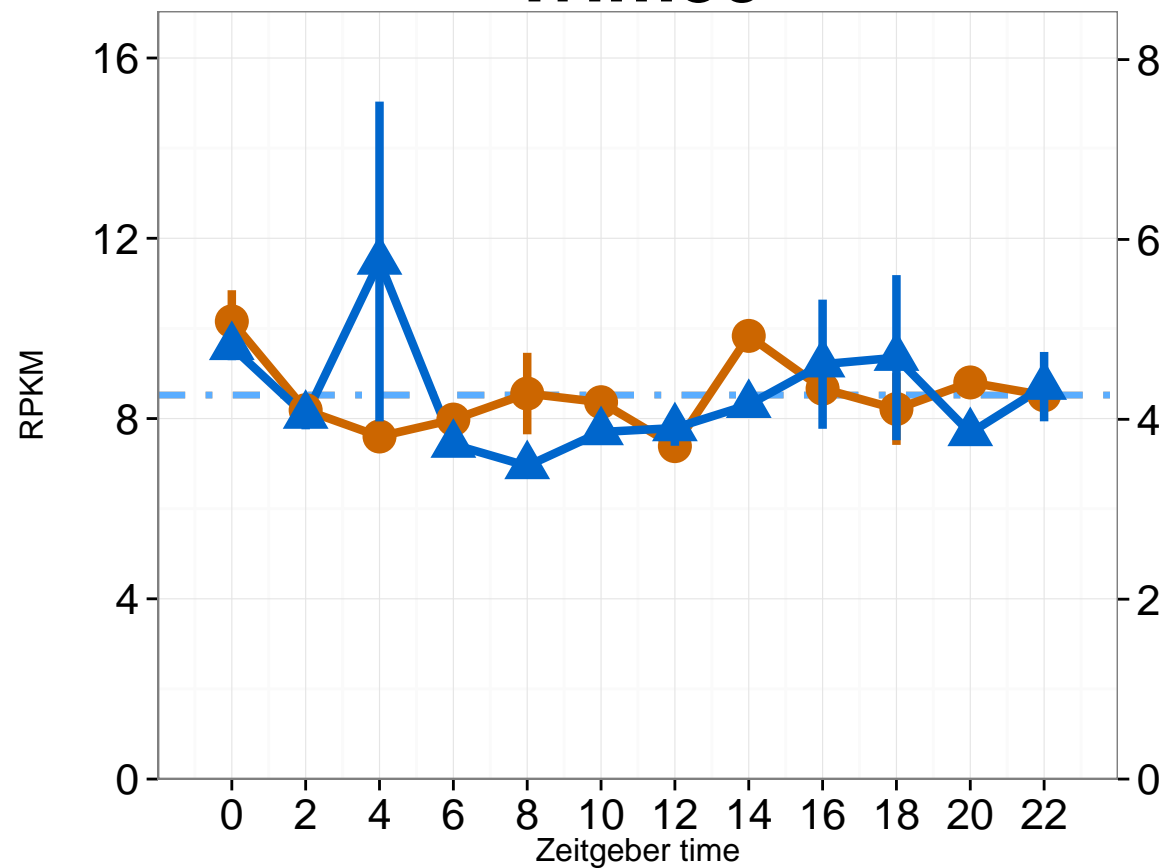

# Trim39

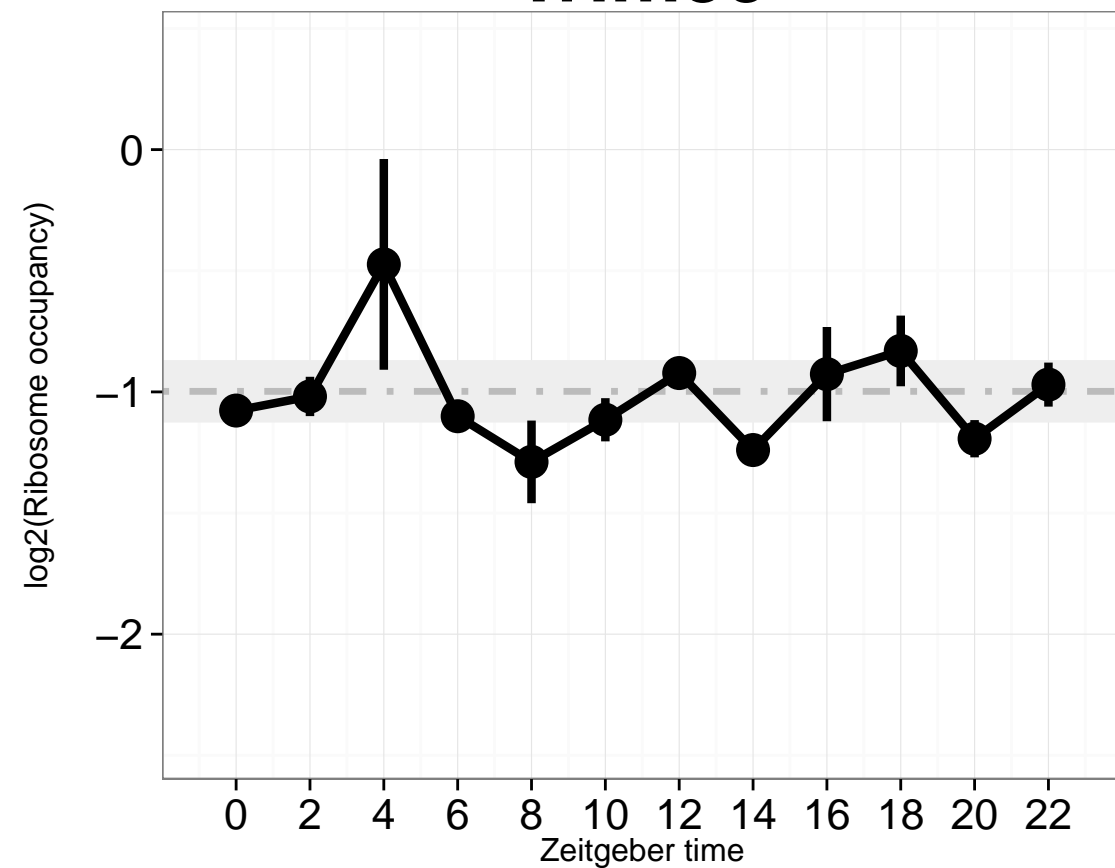

Supplement: Supplementary file 12871 [file 1]

## Atm

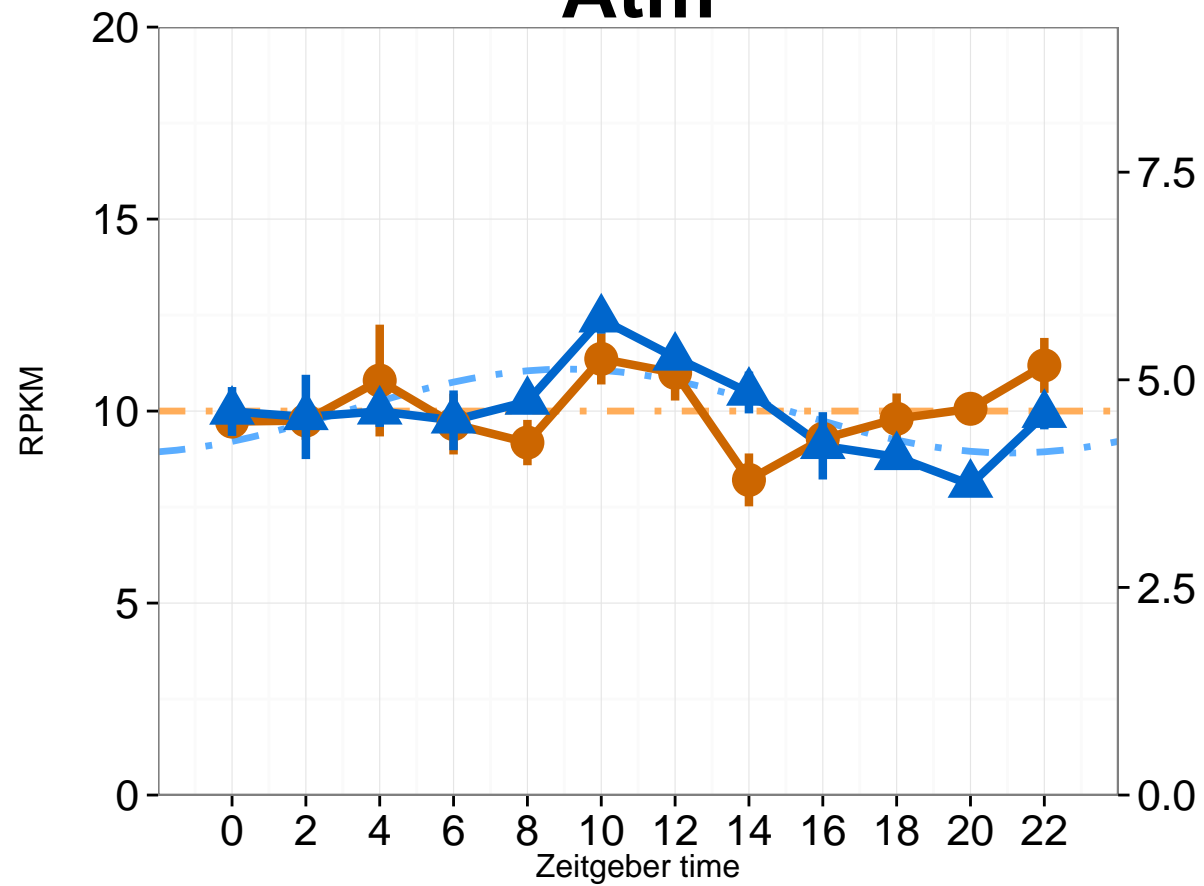

## Atm

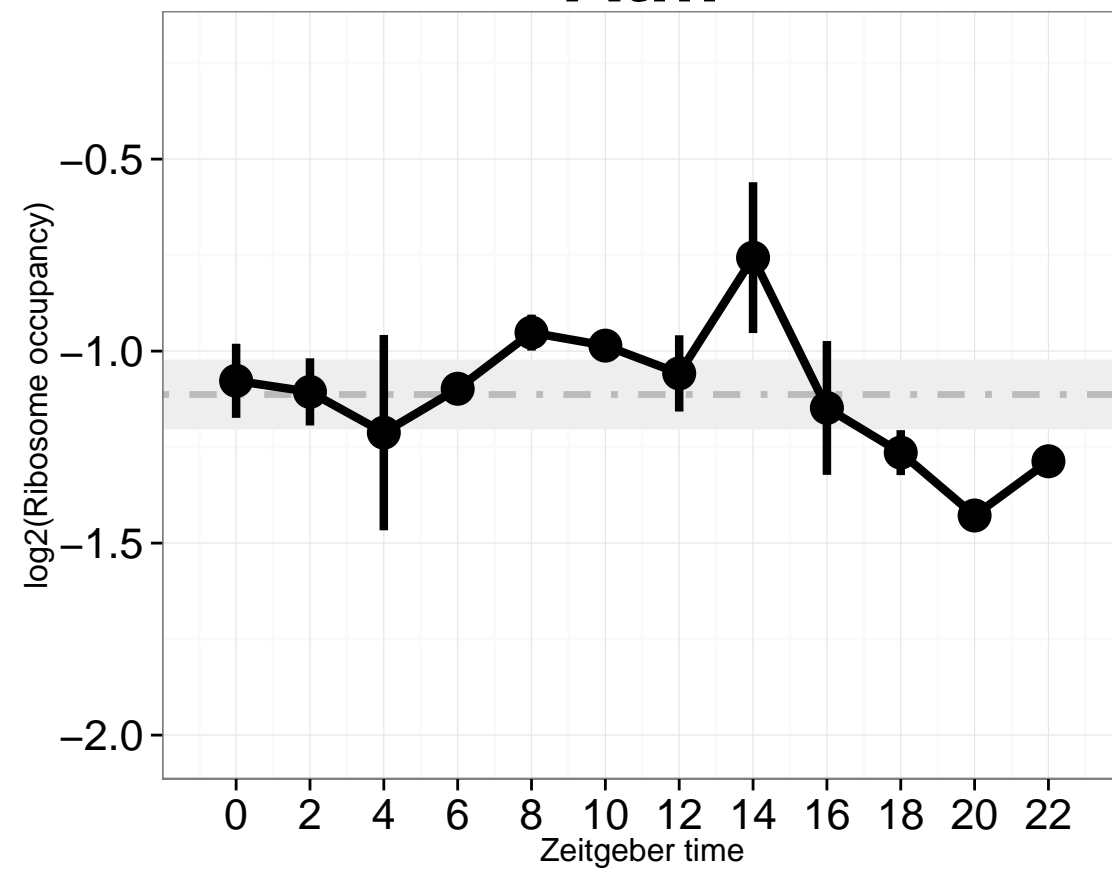

Supplement: Supplementary file 12872 [file 1]

# Efhc1

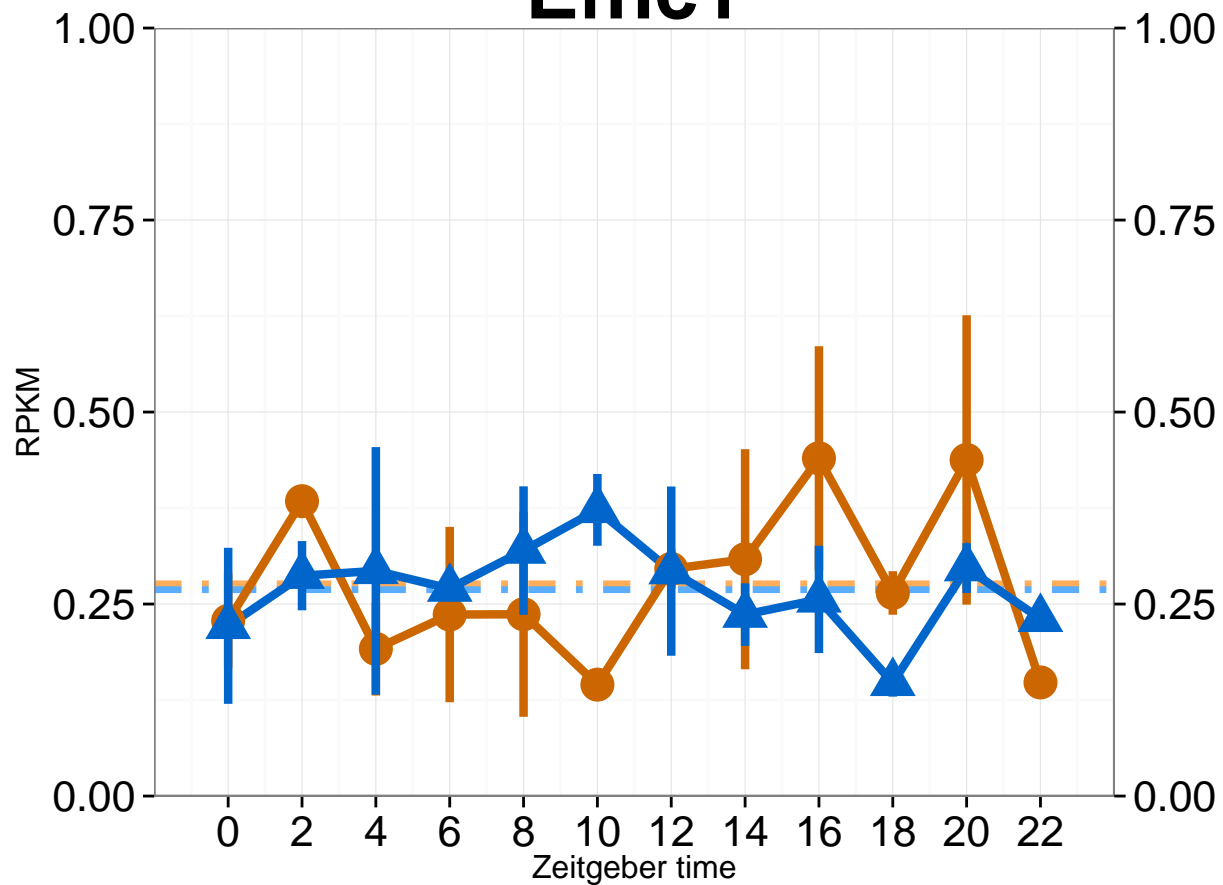

# Efhc1

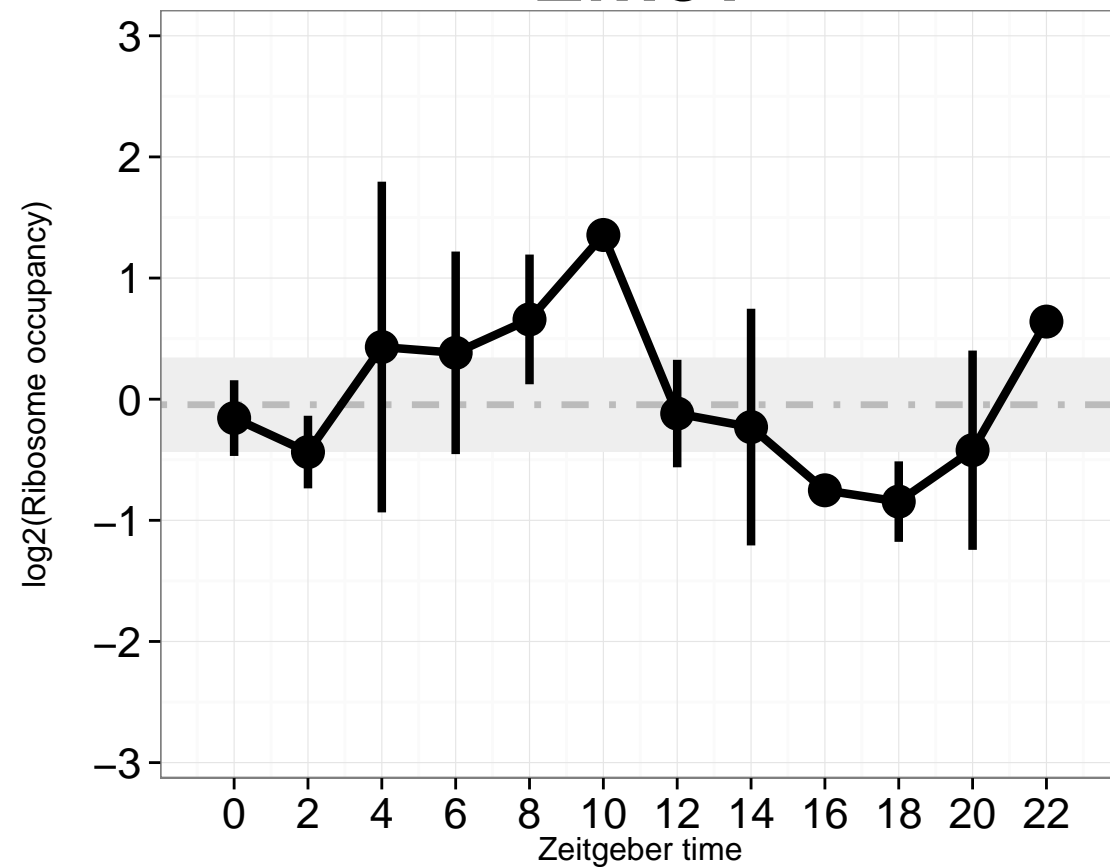

Supplement: Supplementary file 12873 [file 1]

## Pik3c2a

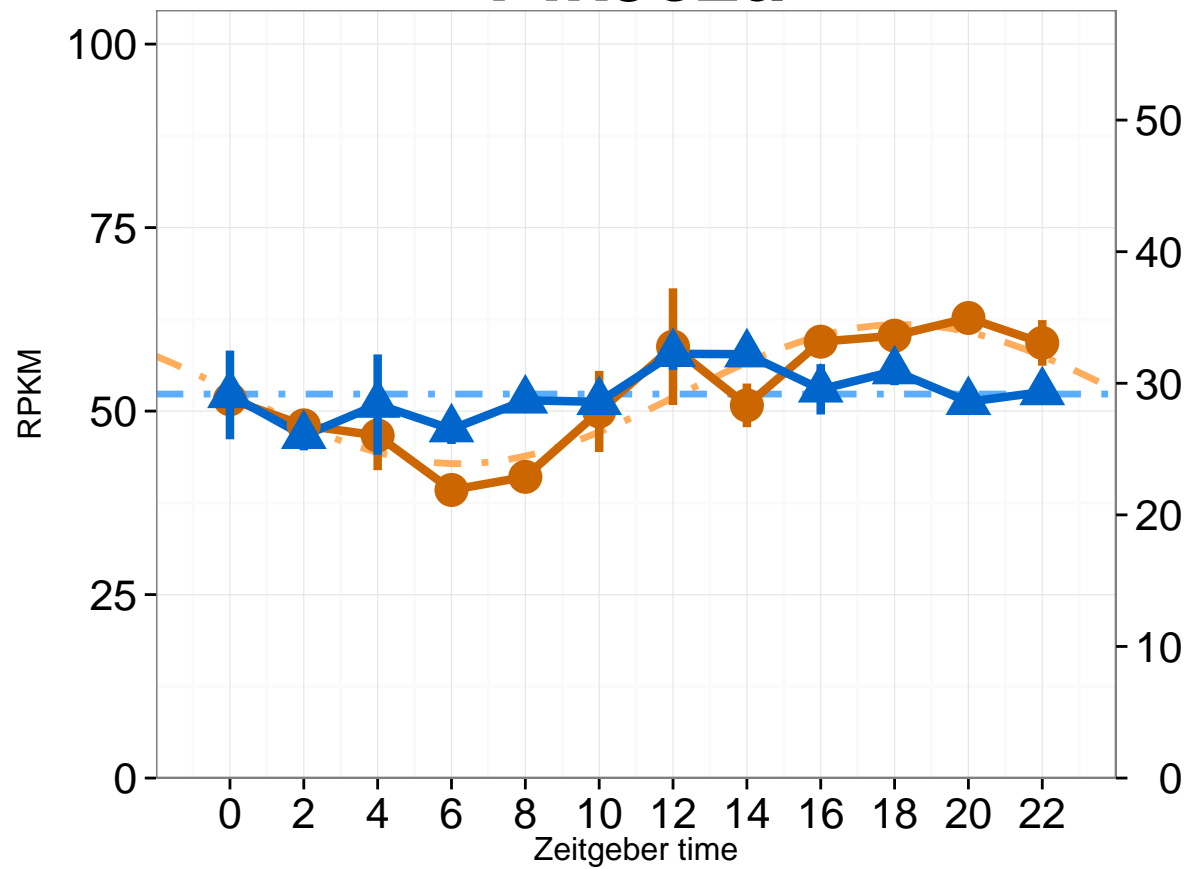

## Pik3c2a

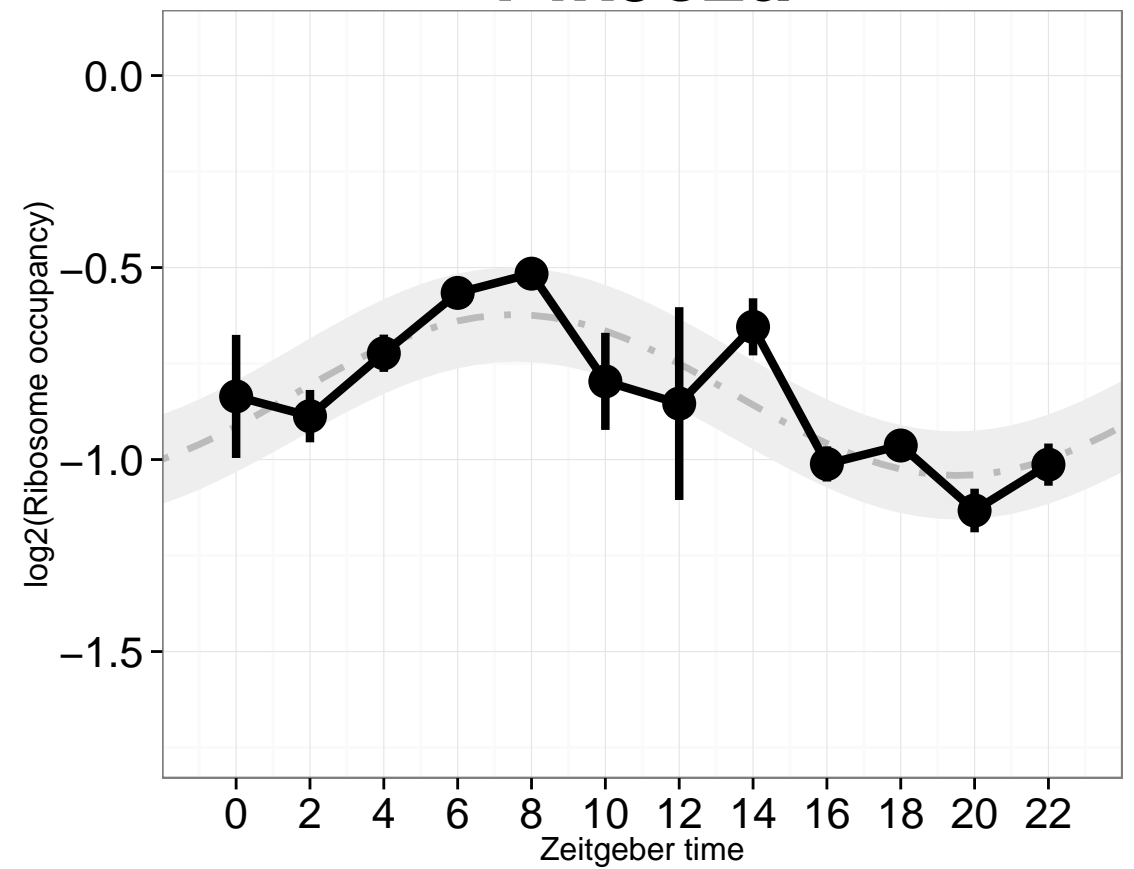

Supplement: Supplementary file 12874 [file 1]

# Pcyox1l

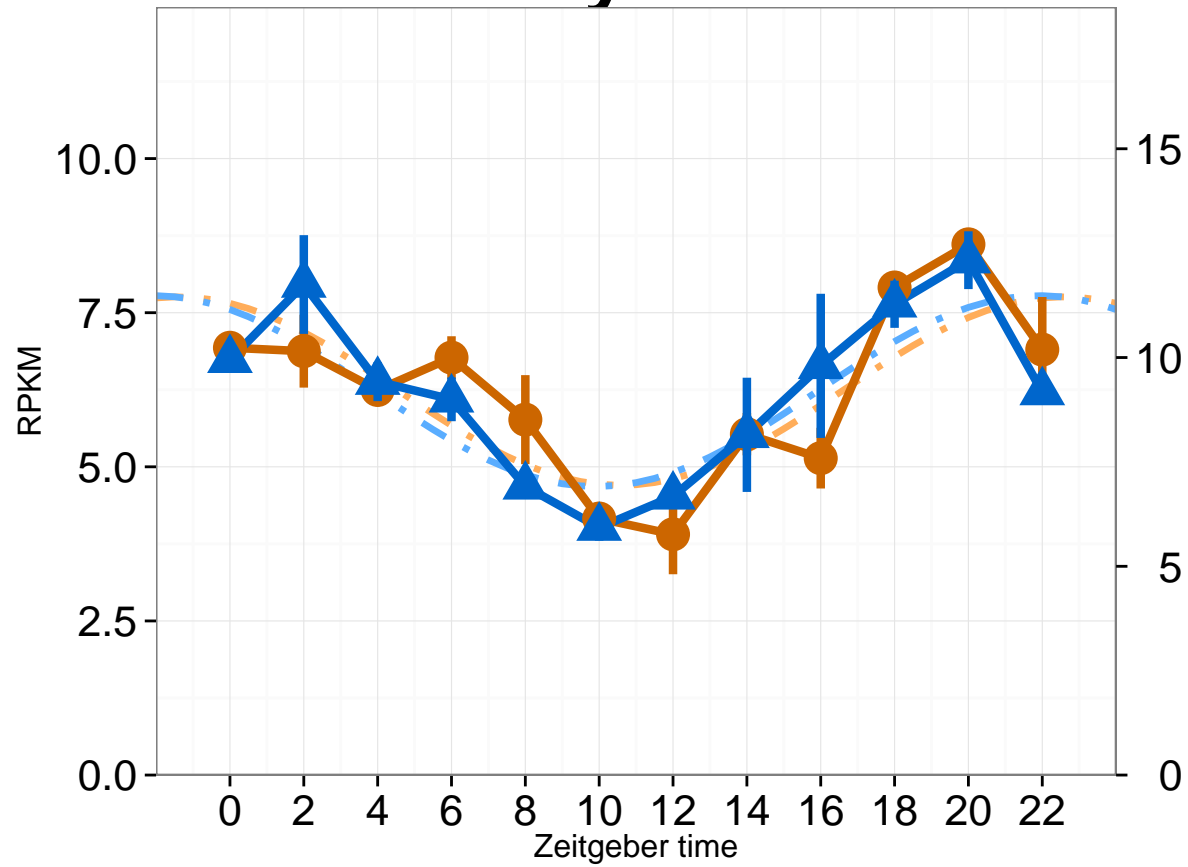

# Pcyox1l

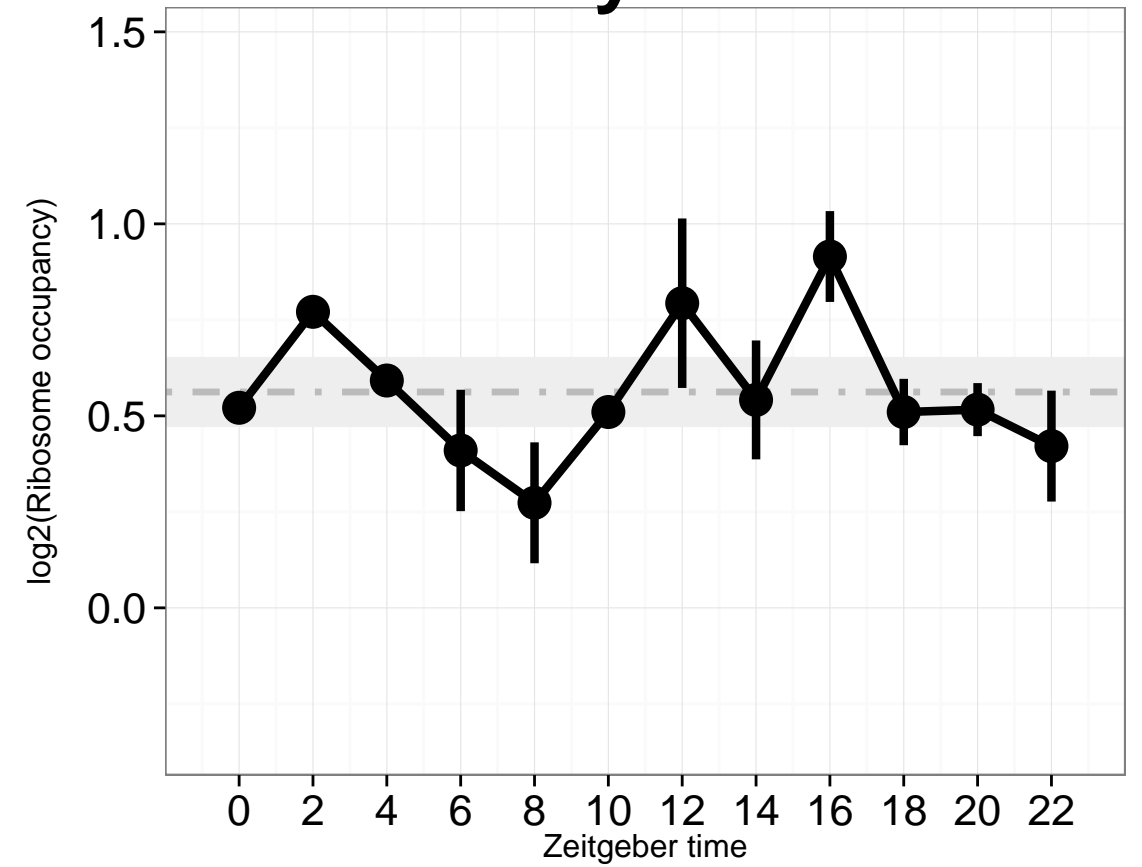

Supplement: Supplementary file 12875 [file 1]

## Shmt2

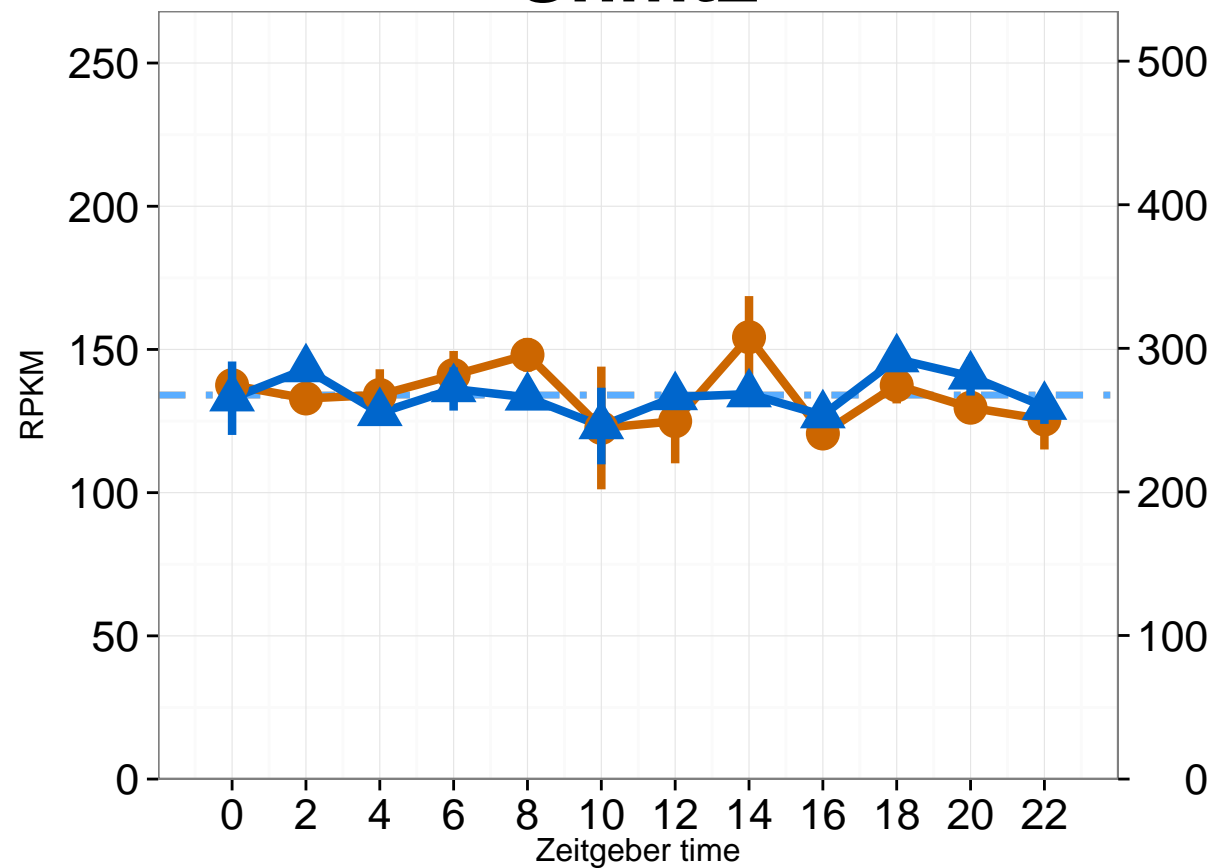

## Shmt2

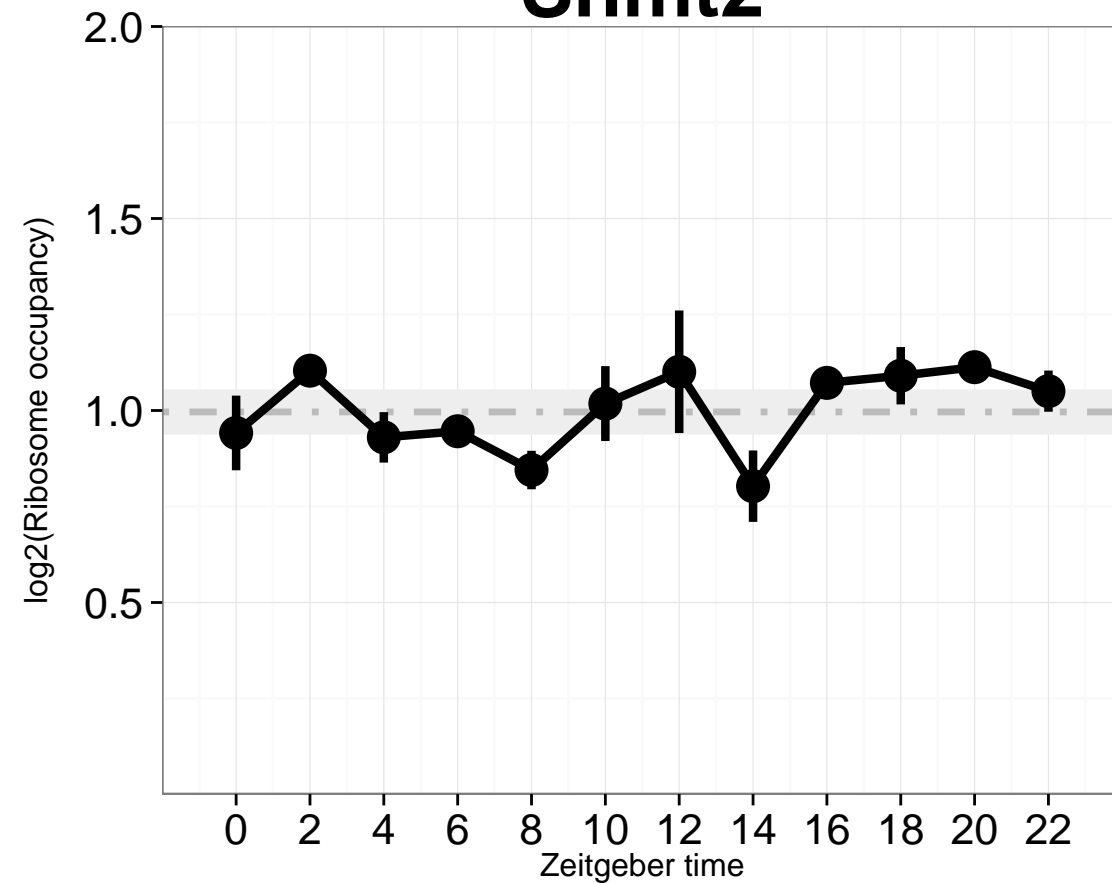

Supplement: Supplementary file 12876 [file 1]

## Zwilch

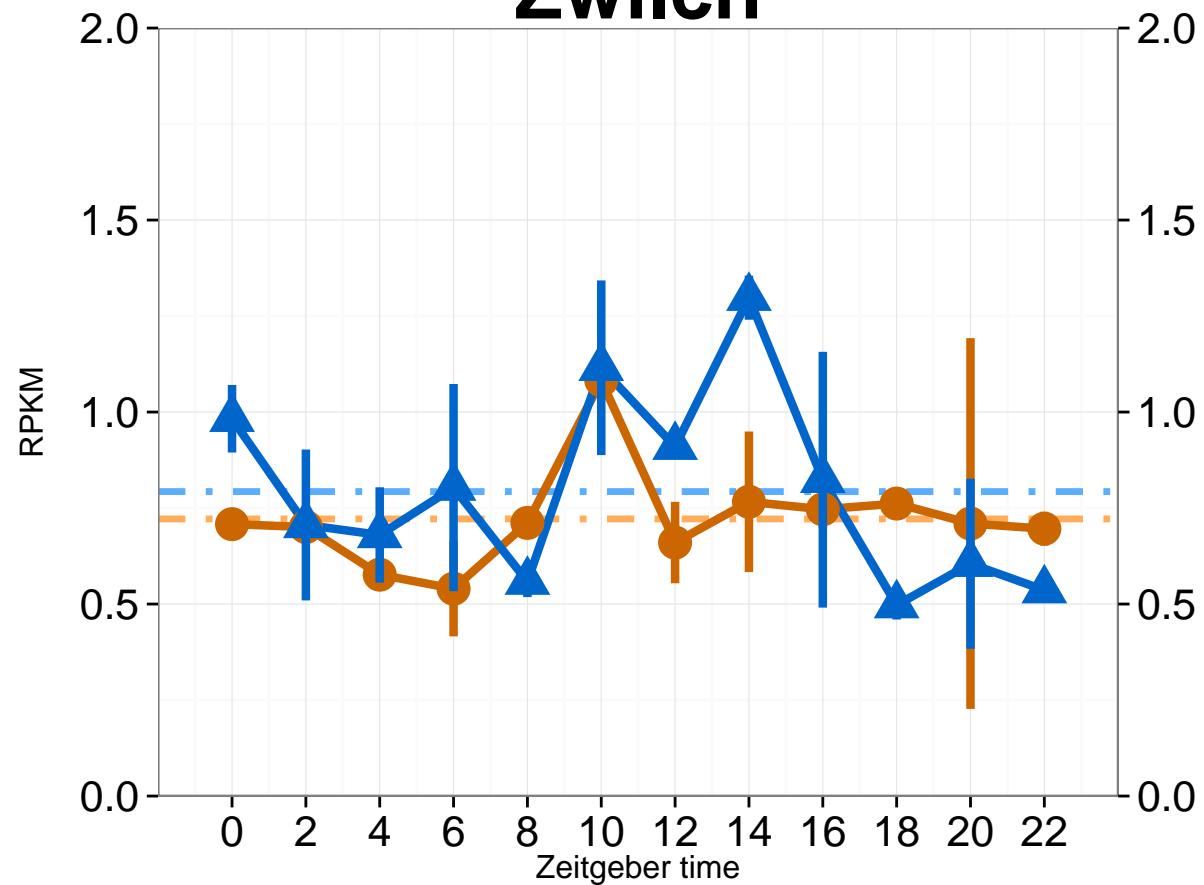

## Zwilch

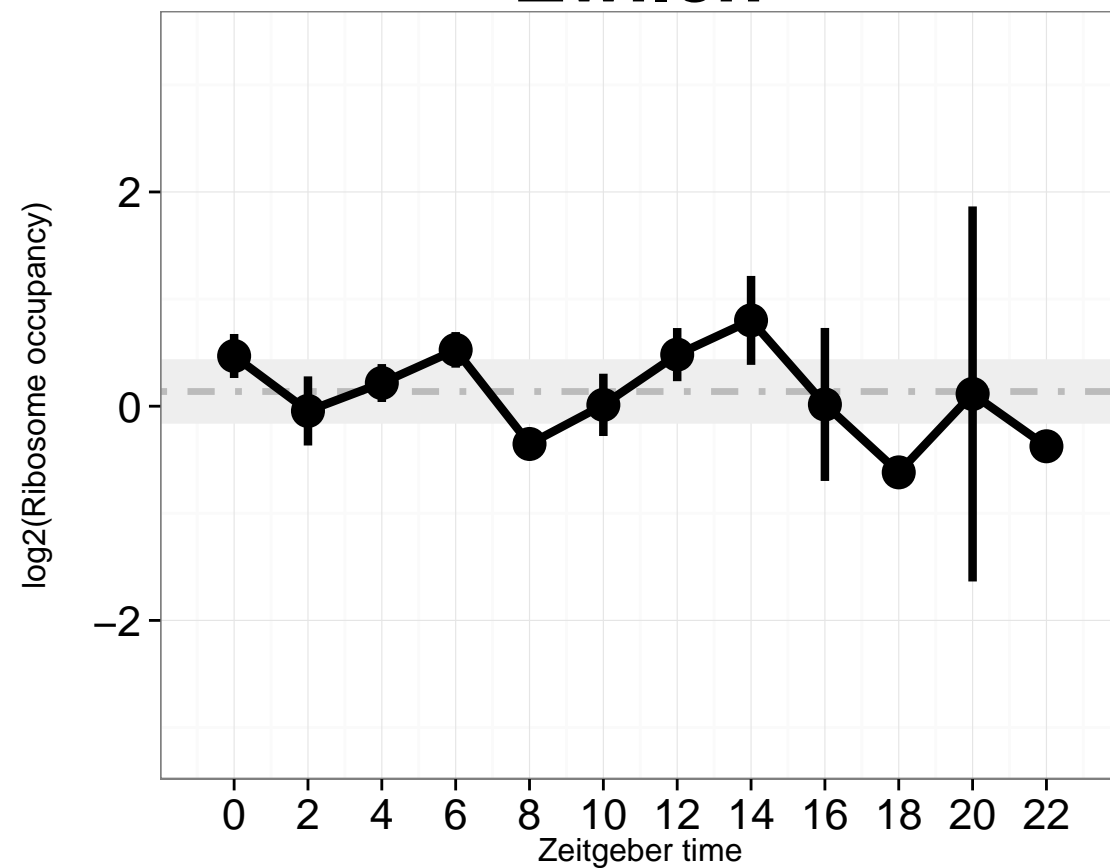

Supplement: Supplementary file 12877 [file 1]

## Kcnk2

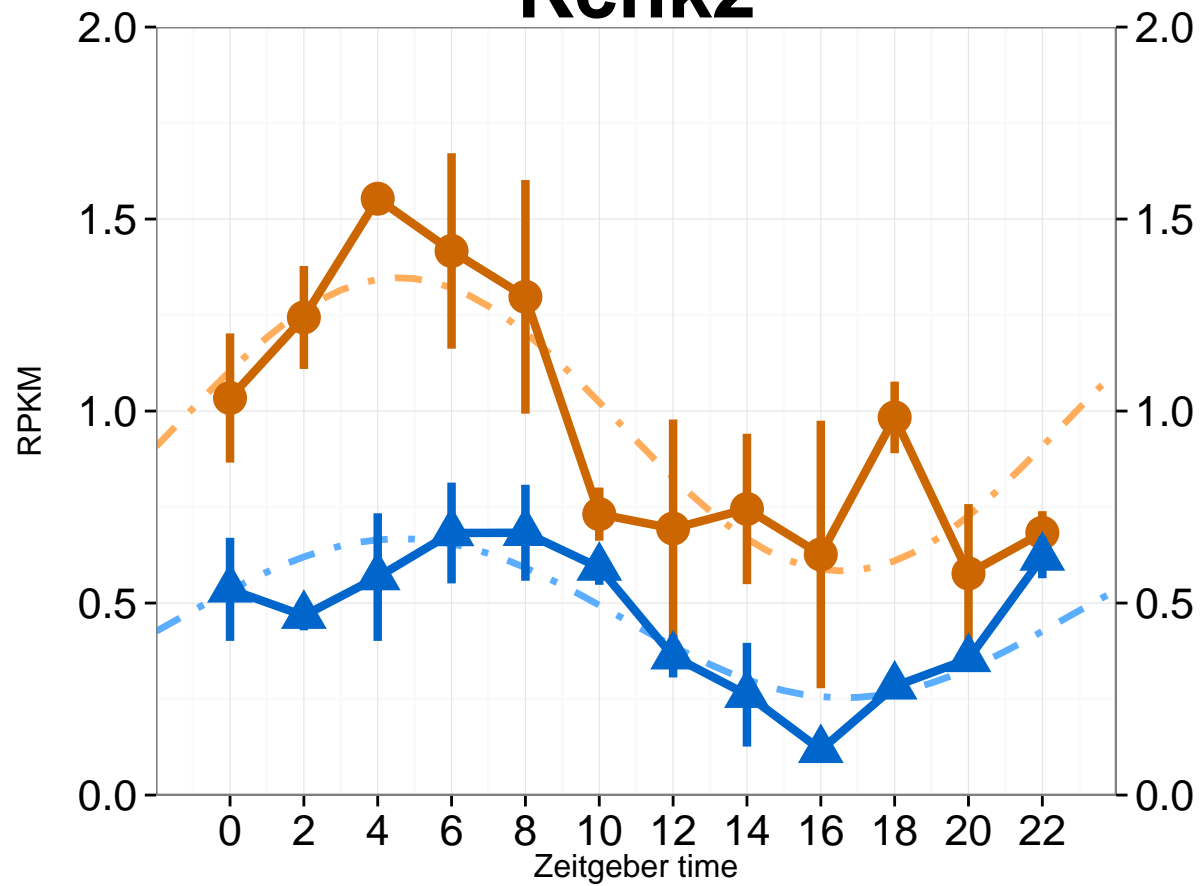

## Kcnk2

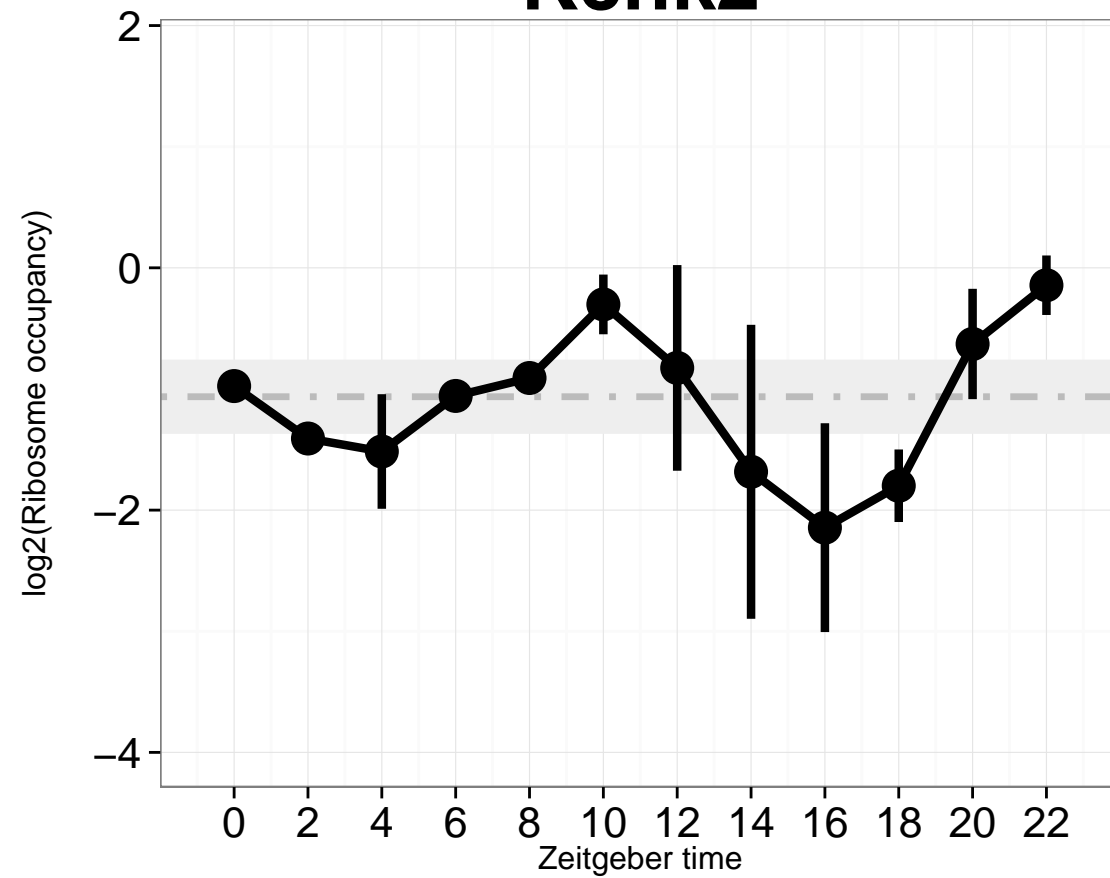

Supplement: Supplementary file 12878 [file 1]

# Sema5b

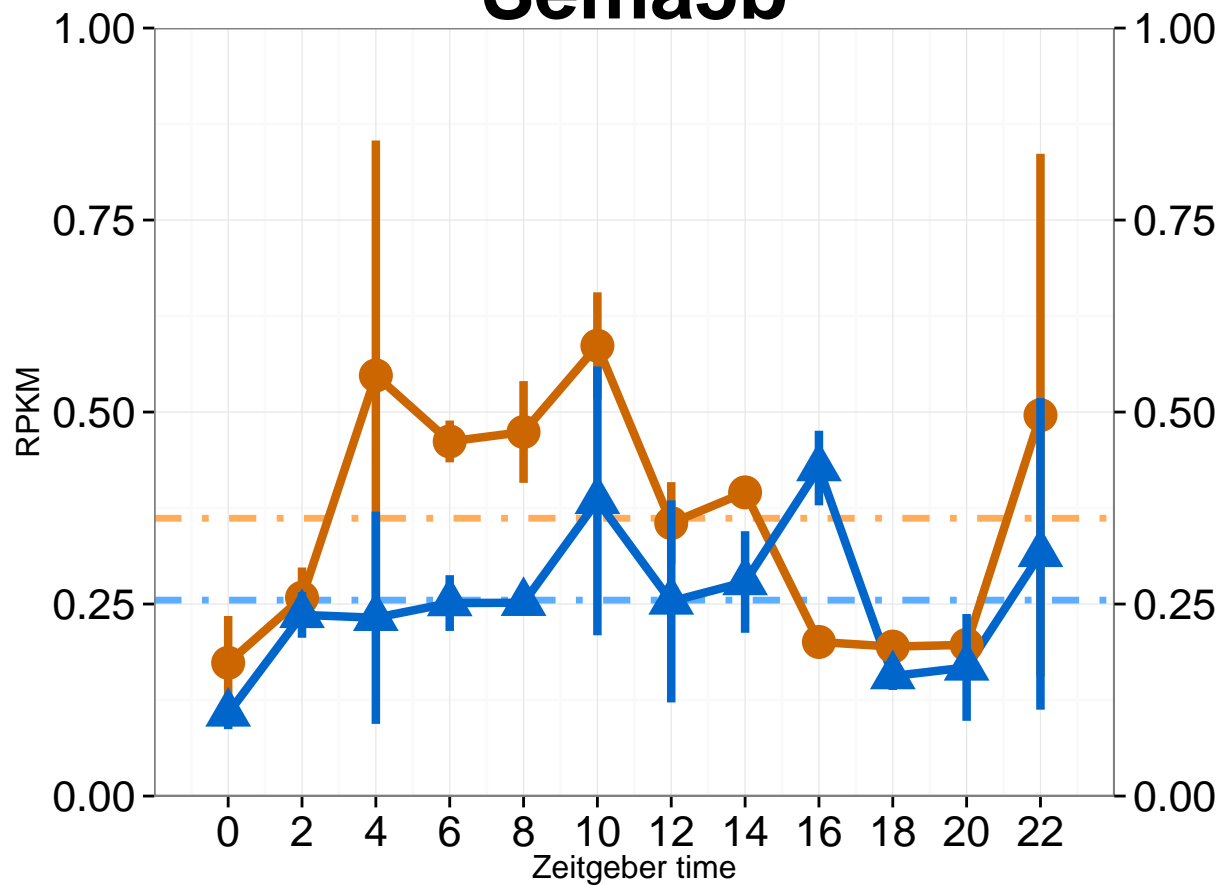

# Sema5b

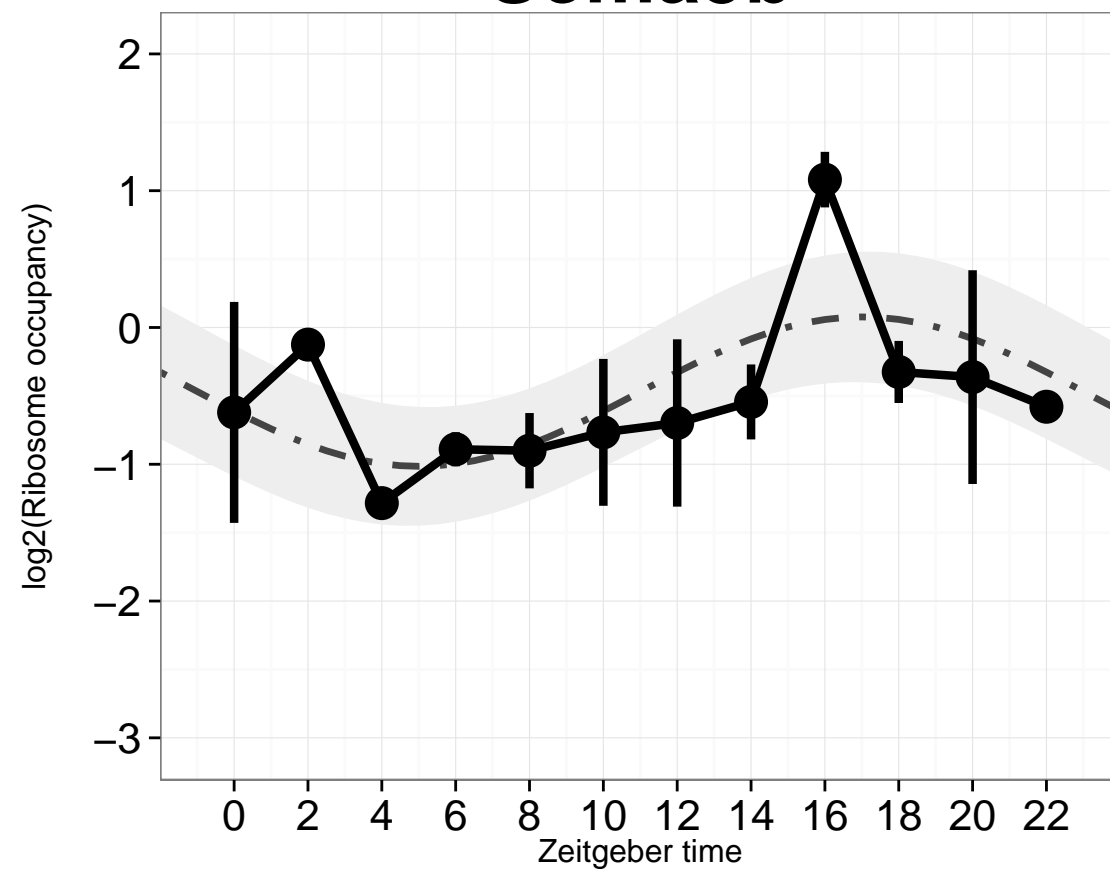

Supplement: Supplementary file 12879 [file 1]

## Rit1

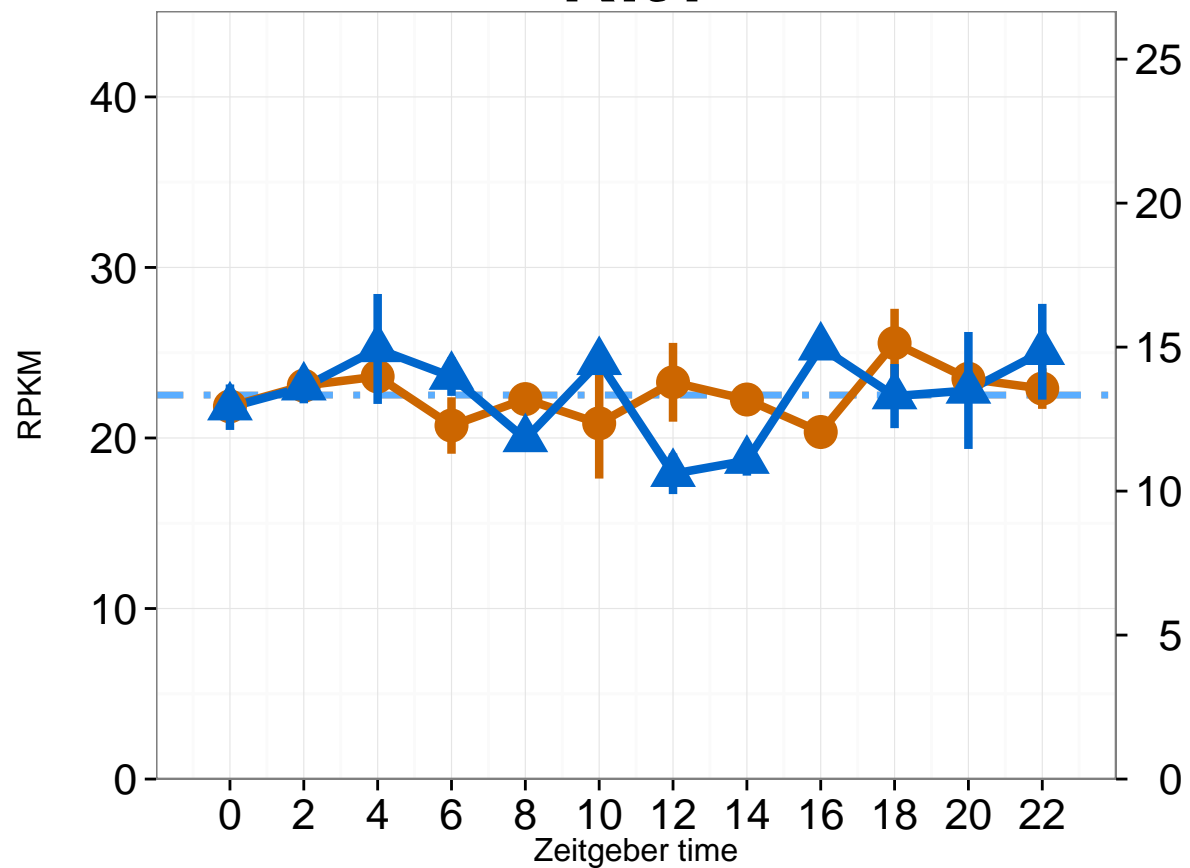

## Rit1

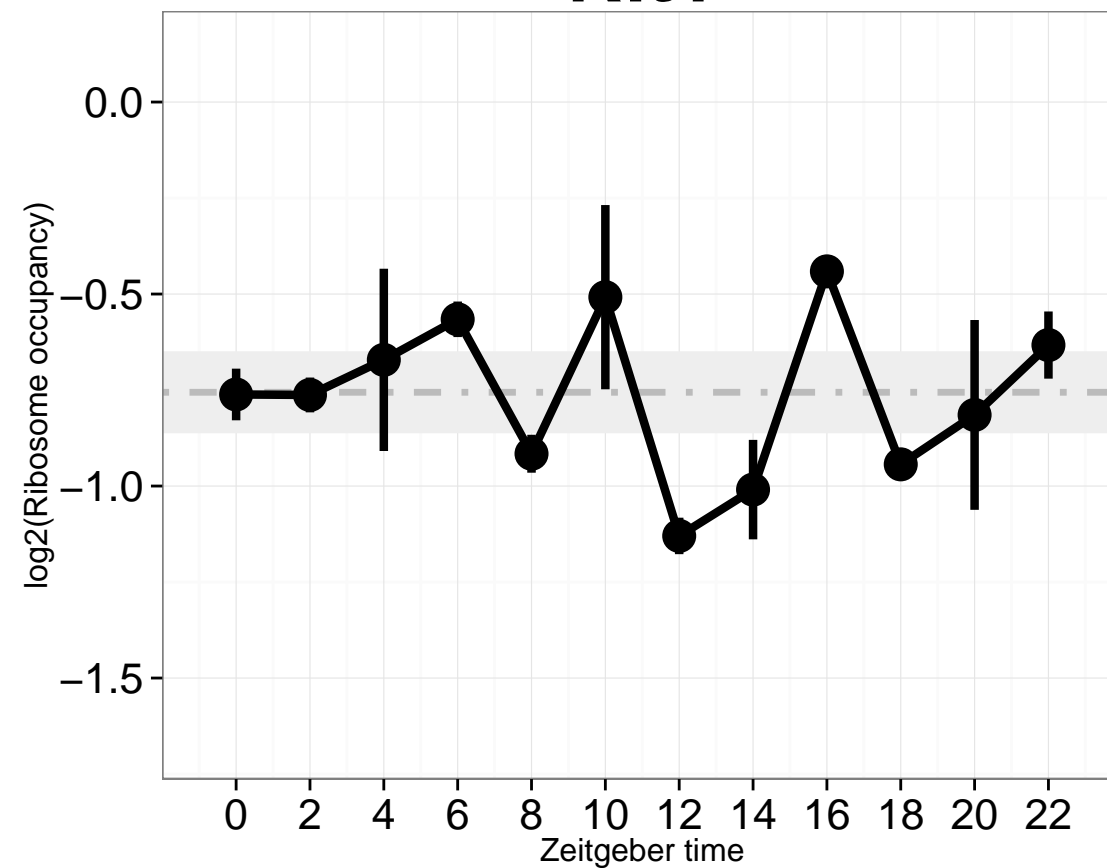

Supplement: Supplementary file 12880 [file 1]

## Exog

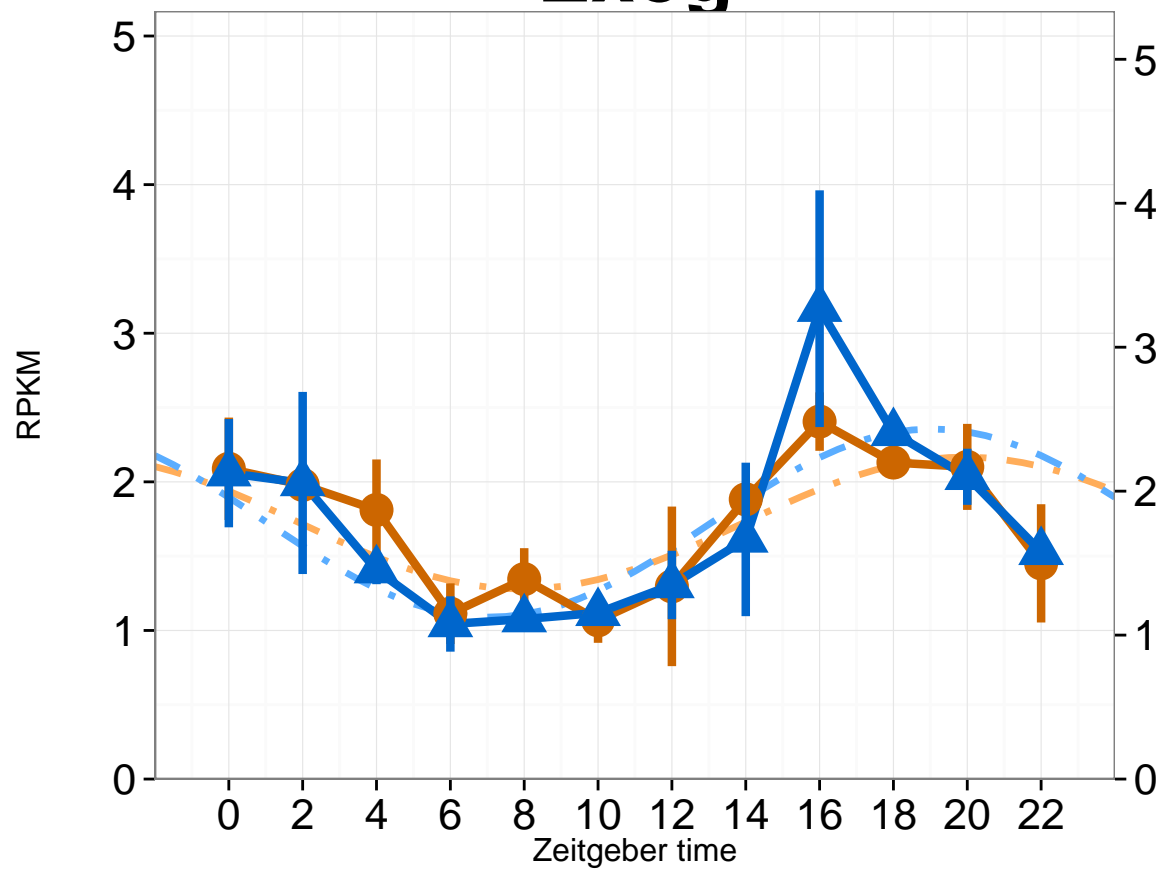

## Exog

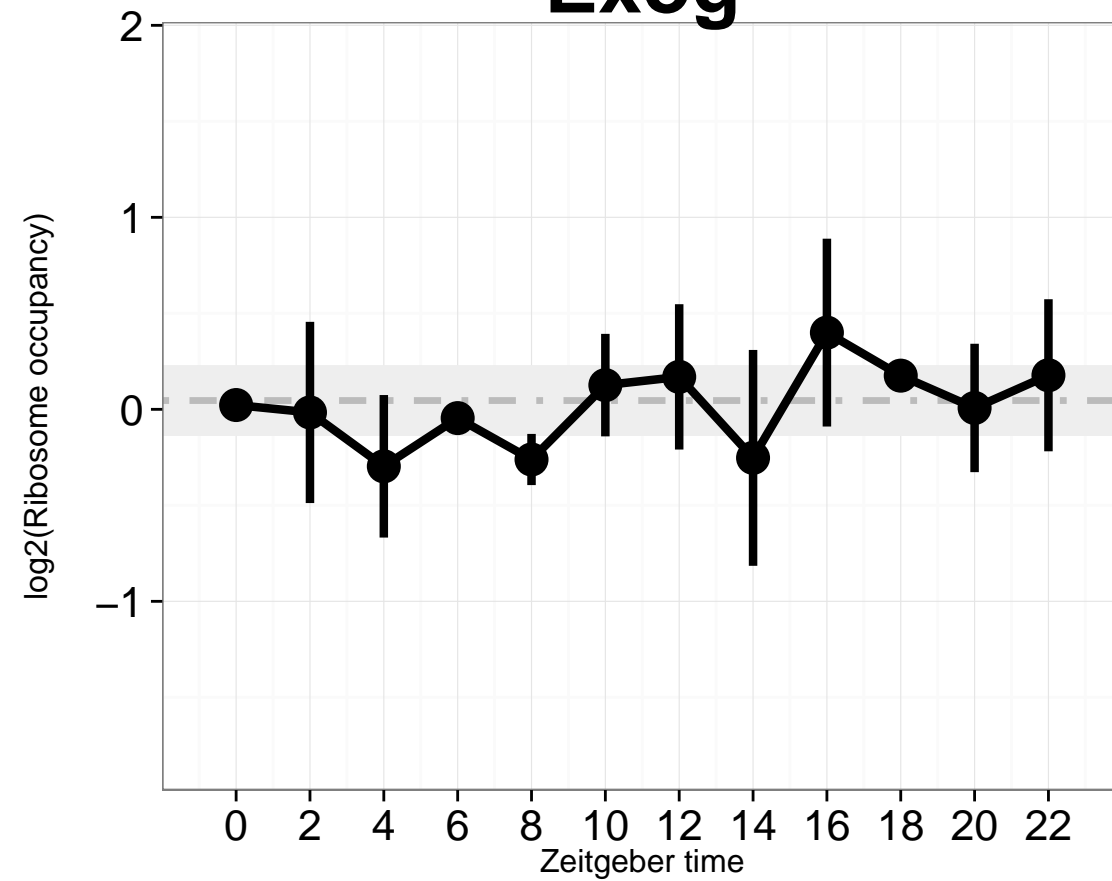

Supplement: Supplementary file 12881 [file 1]

# Sema3a

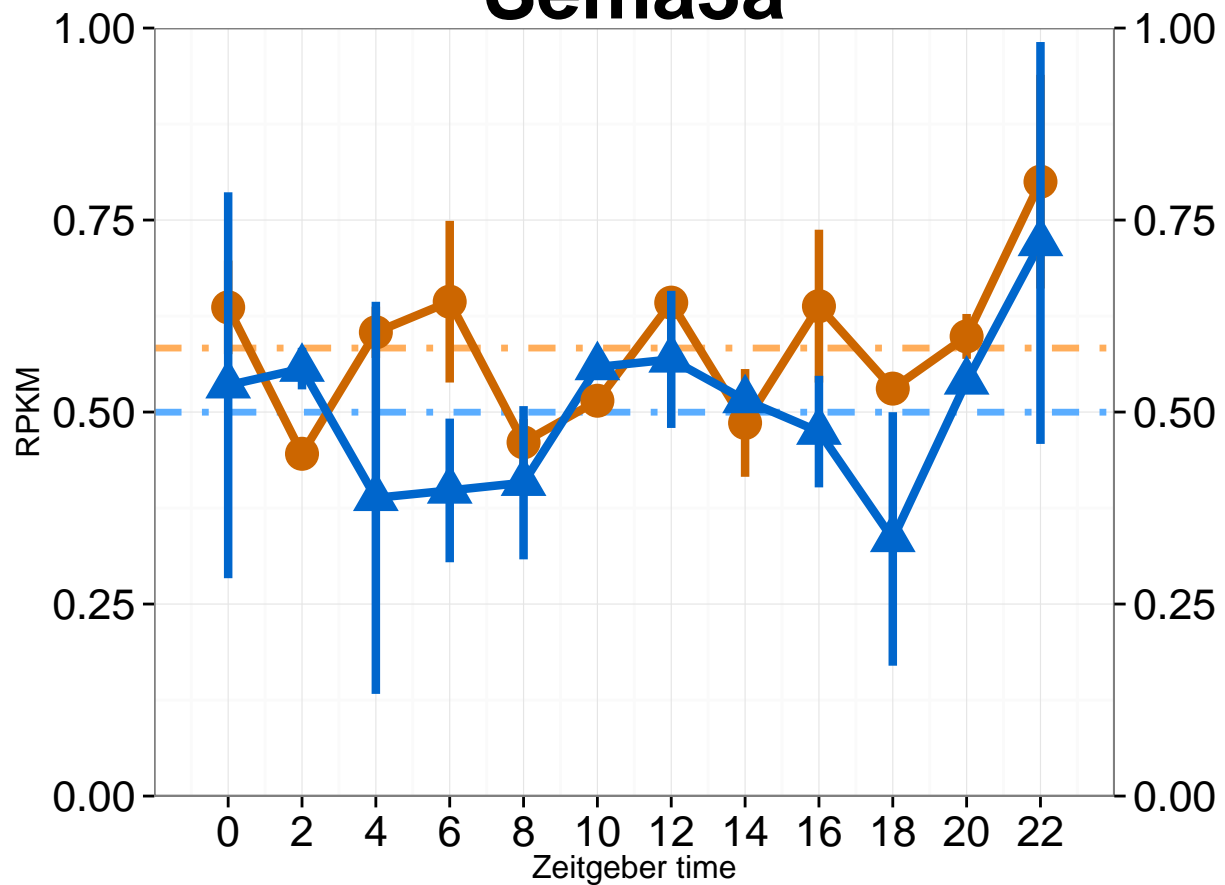

# Sema3a

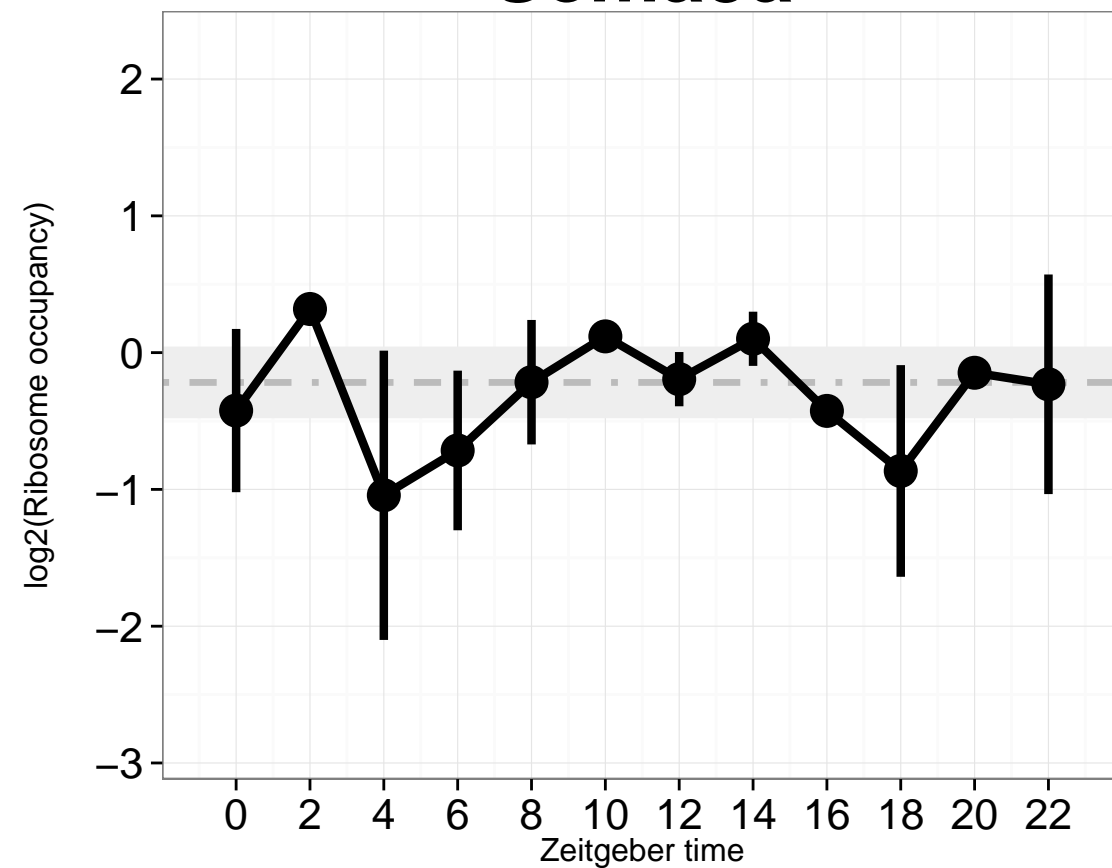

Supplement: Supplementary file 12882 [file 1]

# Mrps15

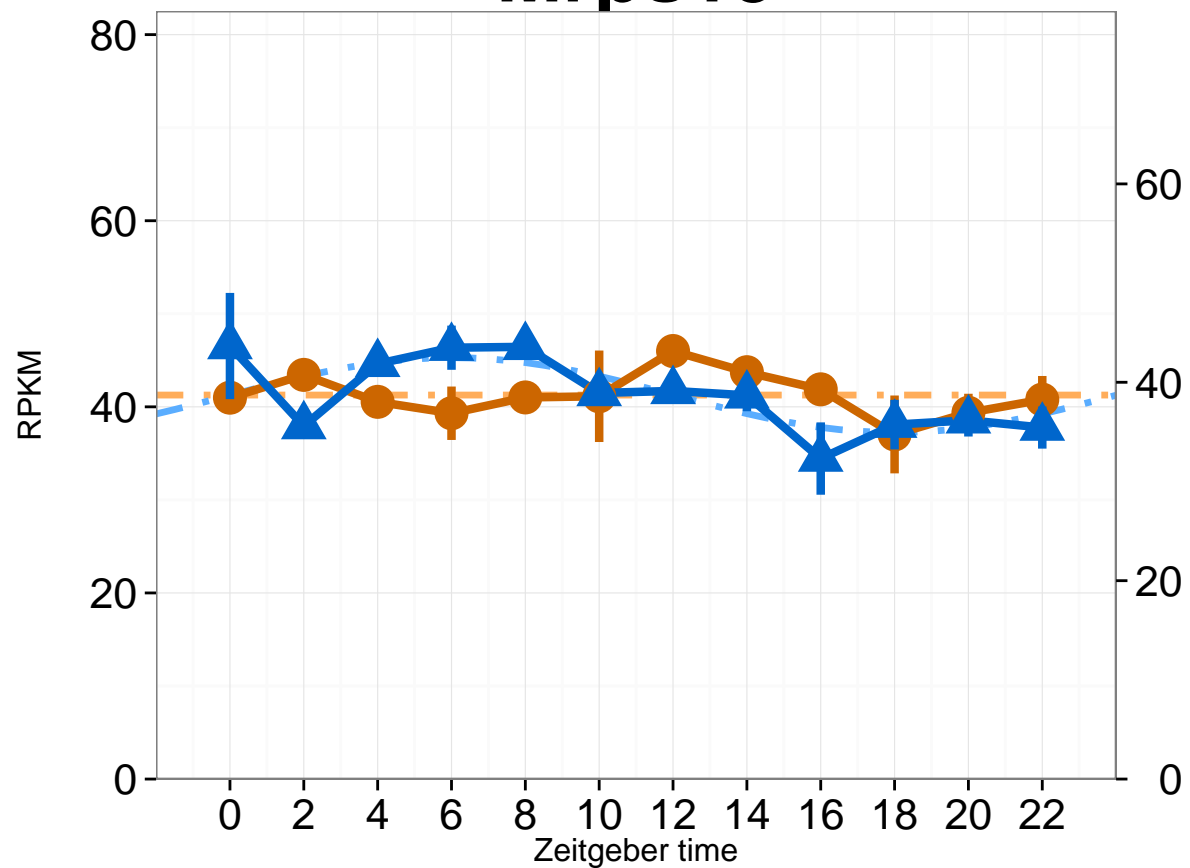

# Mrps15

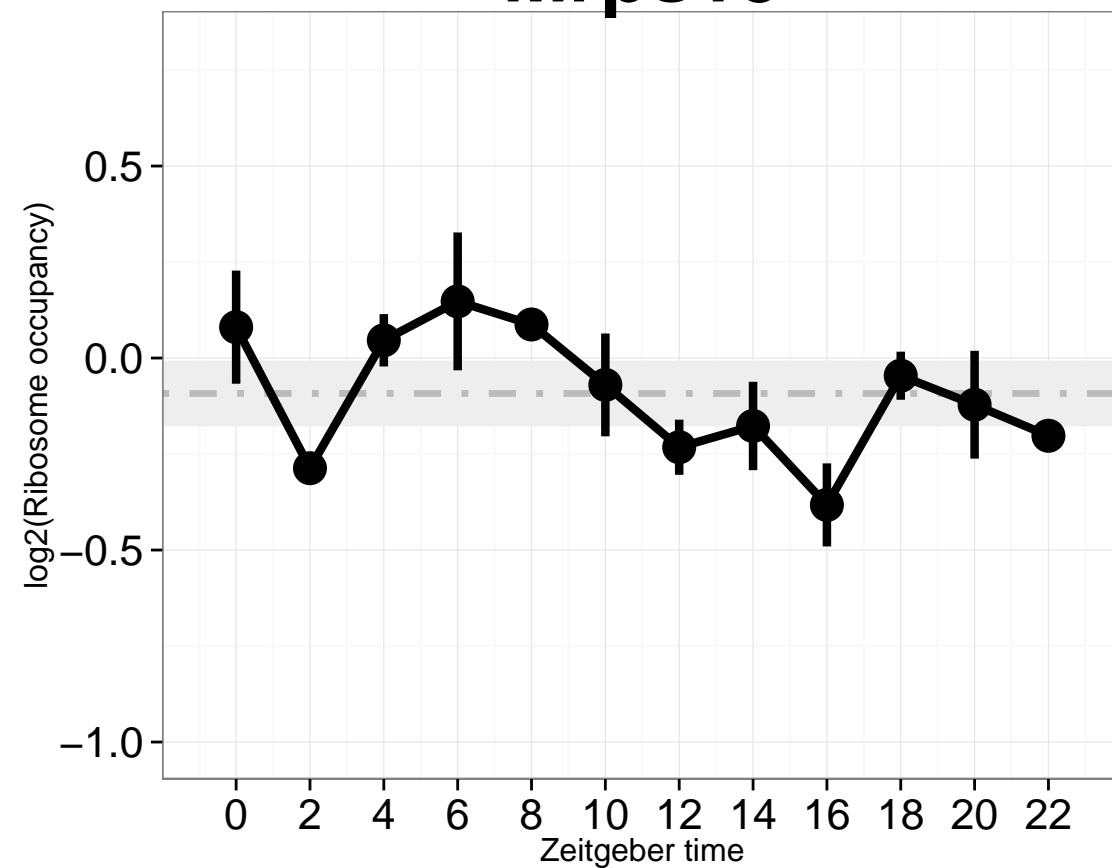

Supplement: Supplementary file 12883 [file 1]

# Hspe1

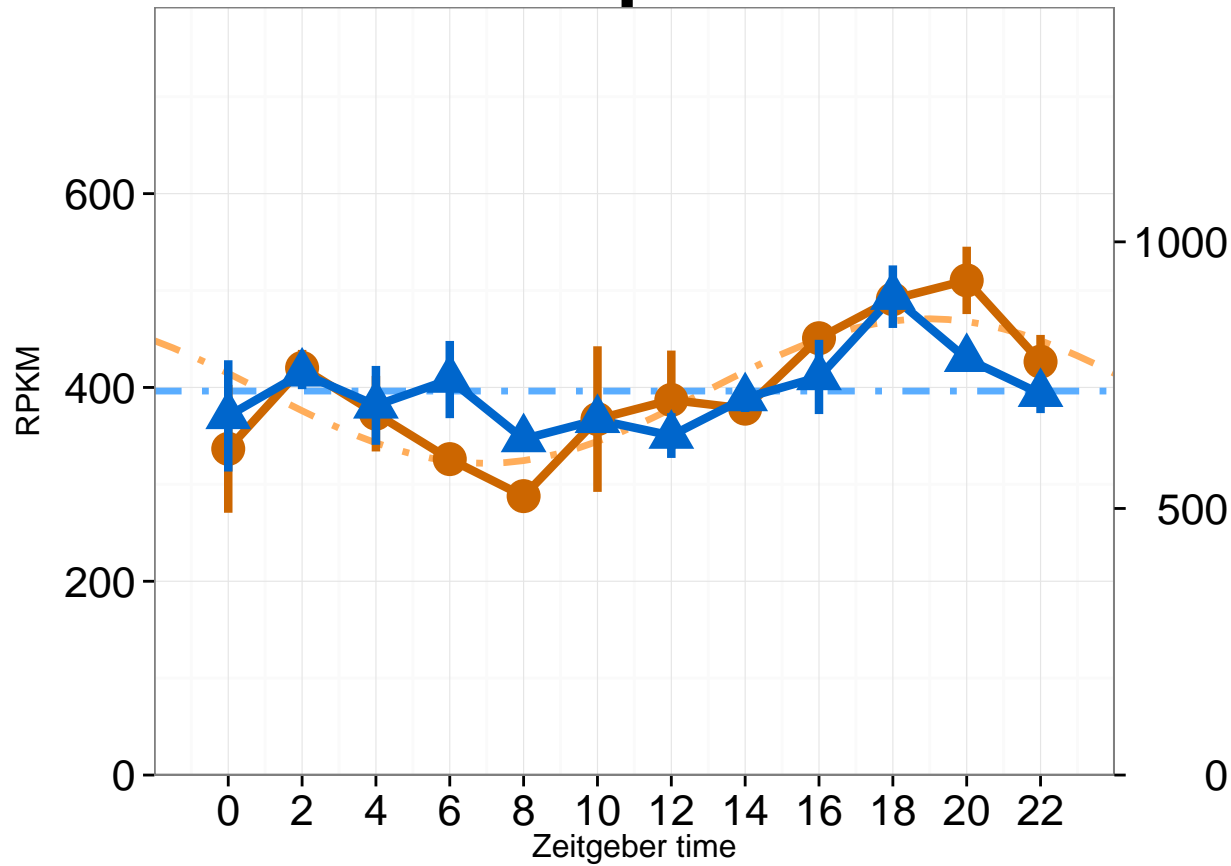

# Hspe1

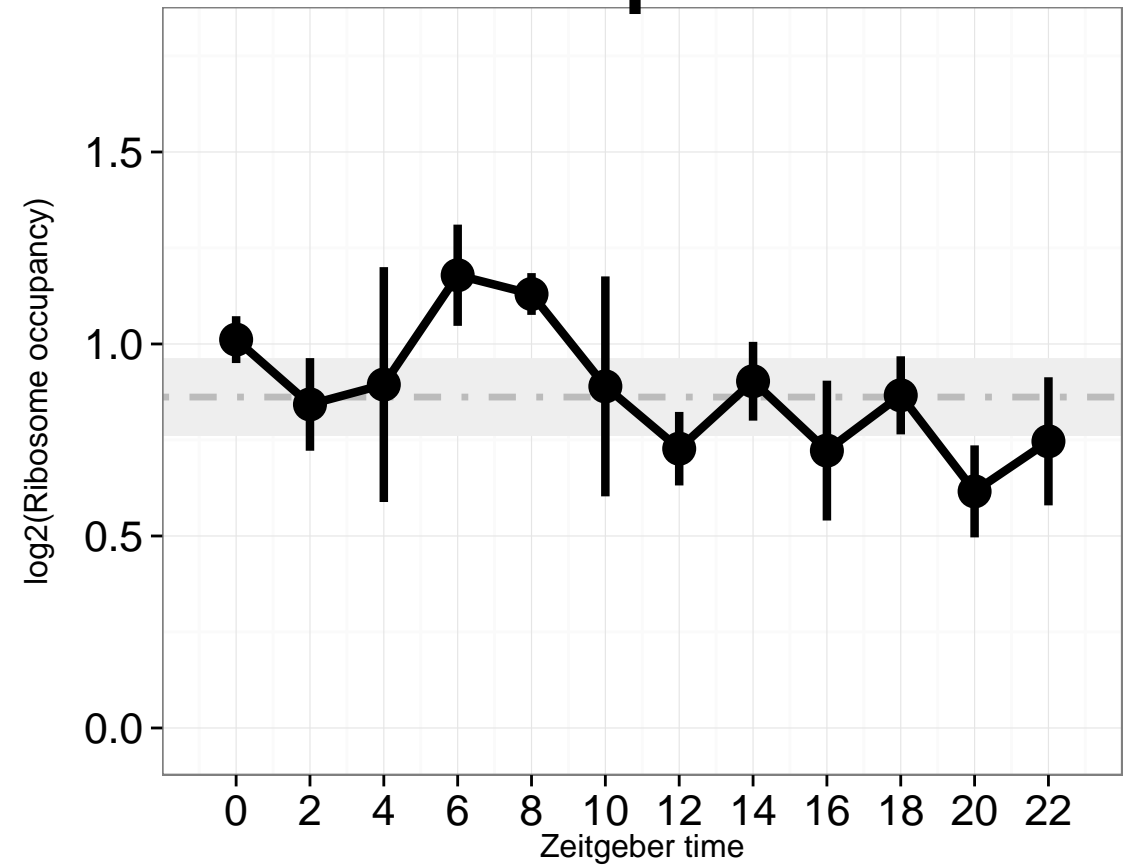

Supplement: Supplementary file 12884 [file 1]

# Tmem88

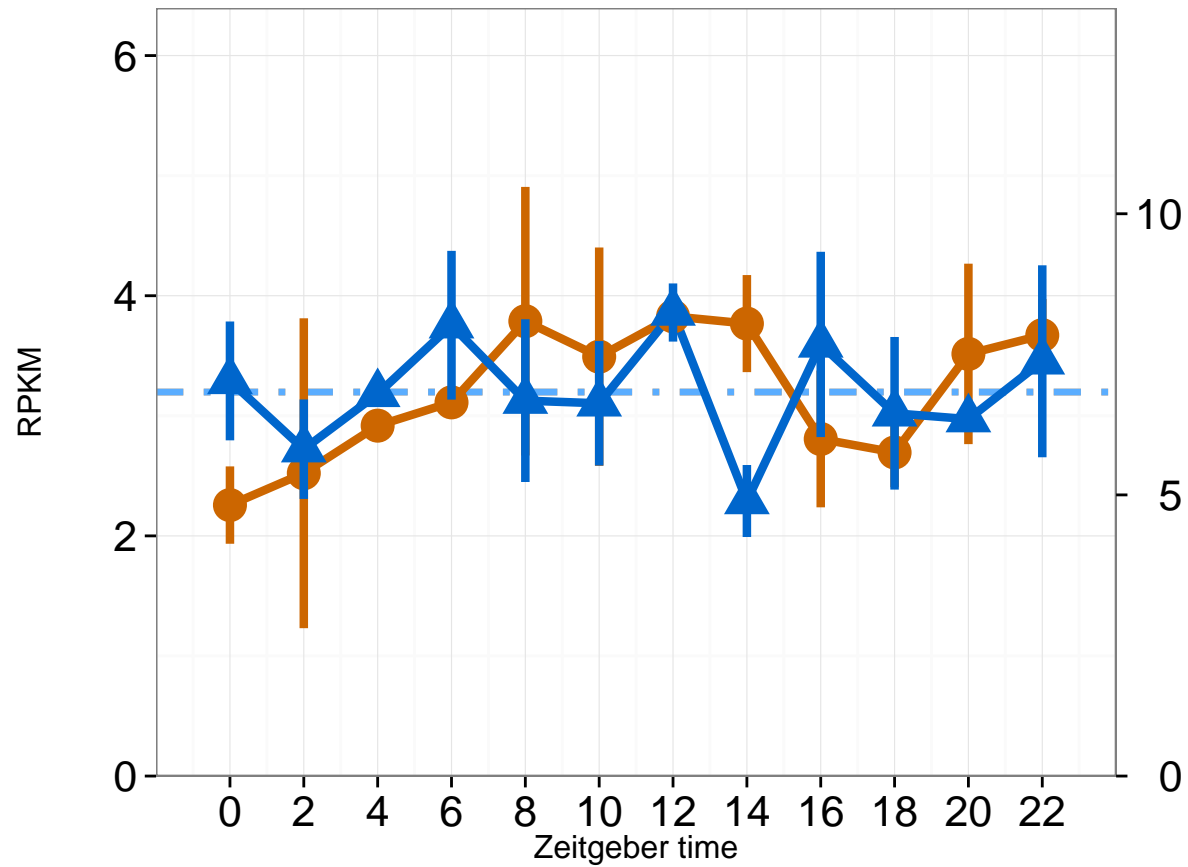

# Tmem88

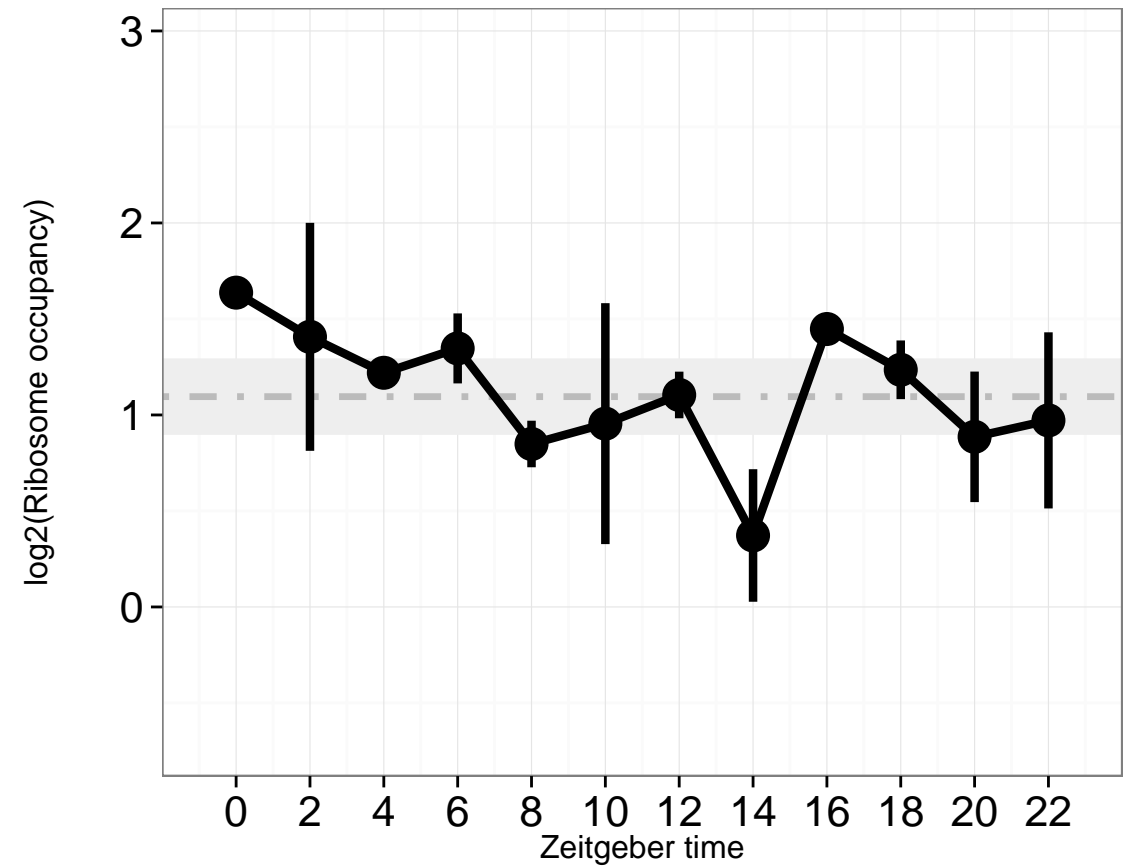

Supplement: Supplementary file 12885 [file 1]

# Zfp14

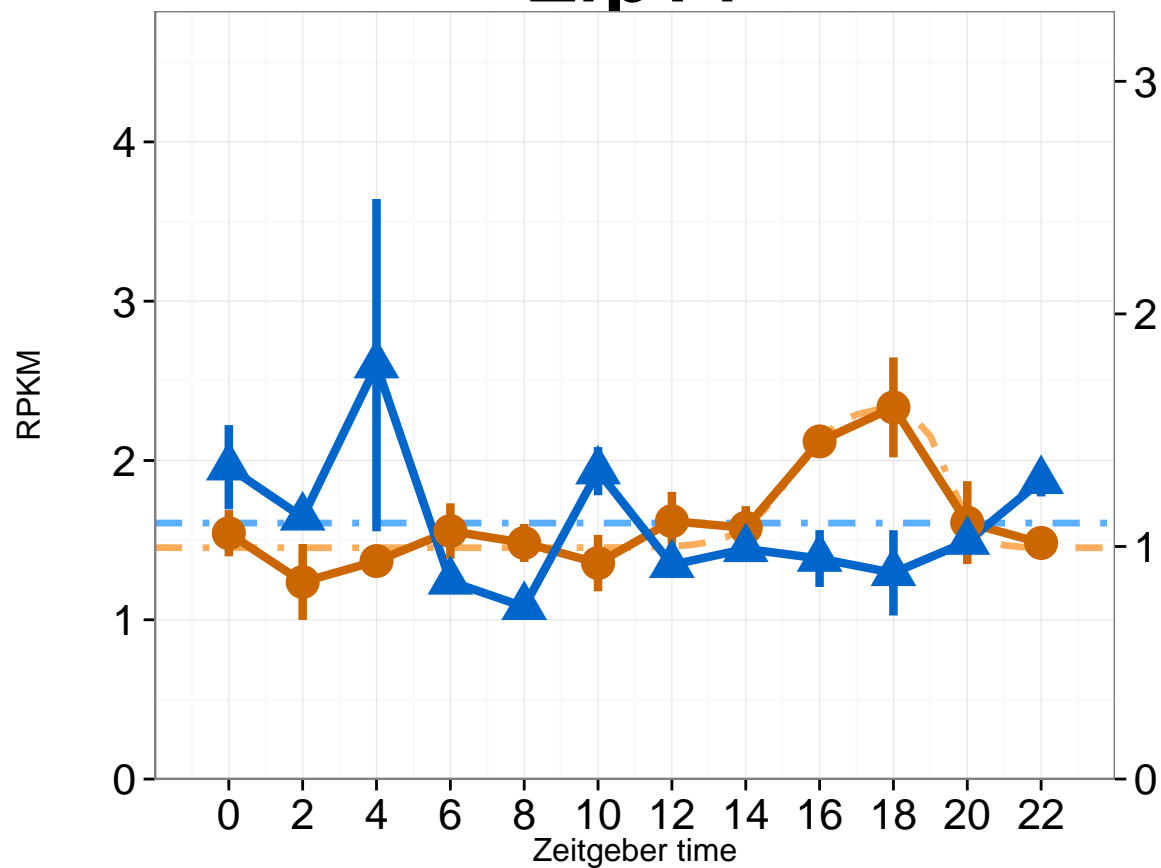

# Zfp14

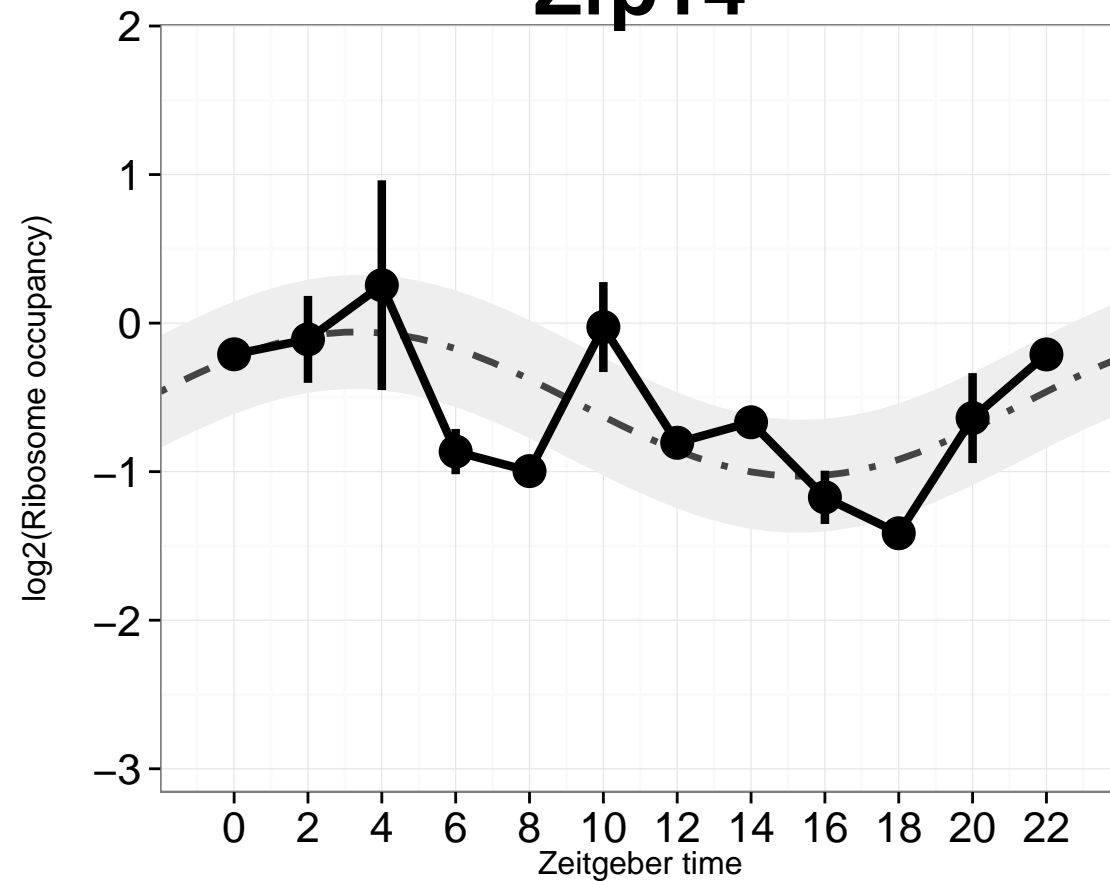

Supplement: Supplementary file 12886 [file 1]

# Hist1h1c

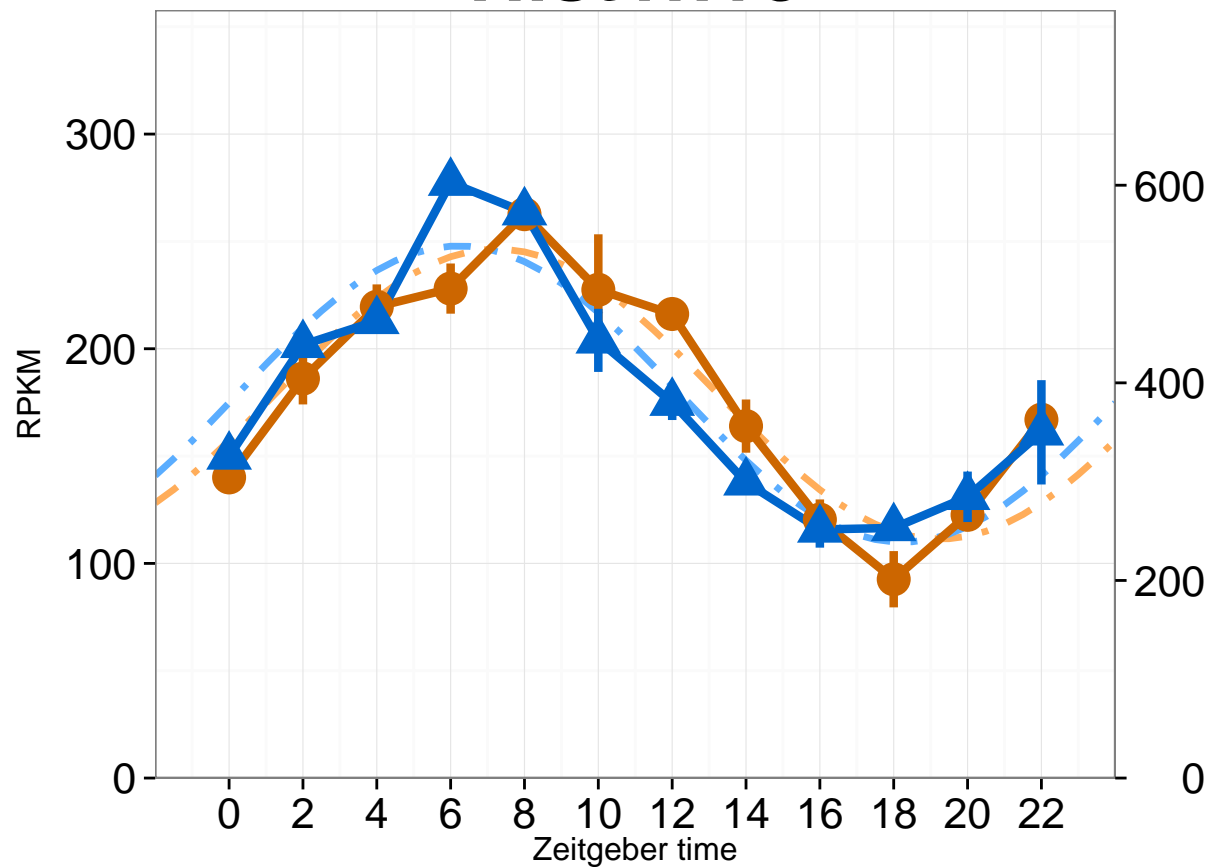

# Hist1h1c

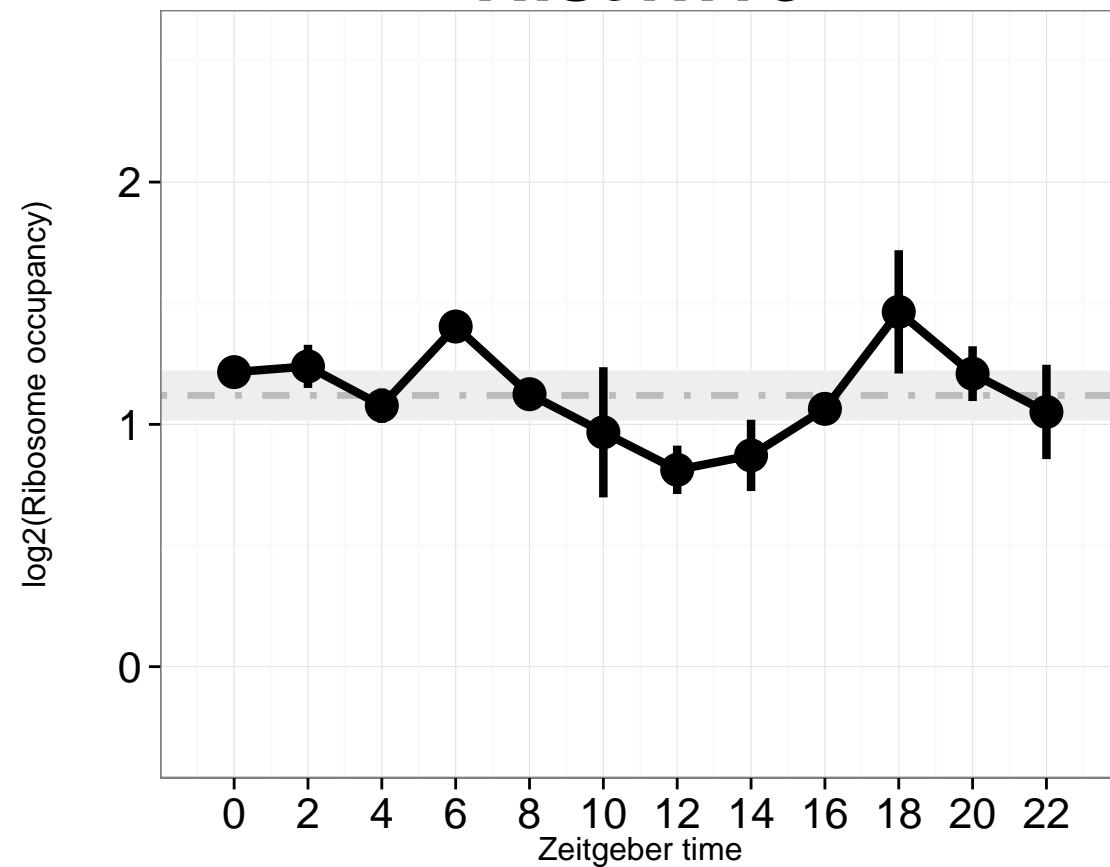

Supplement: Supplementary file 12887 [file 1]

## Akt2

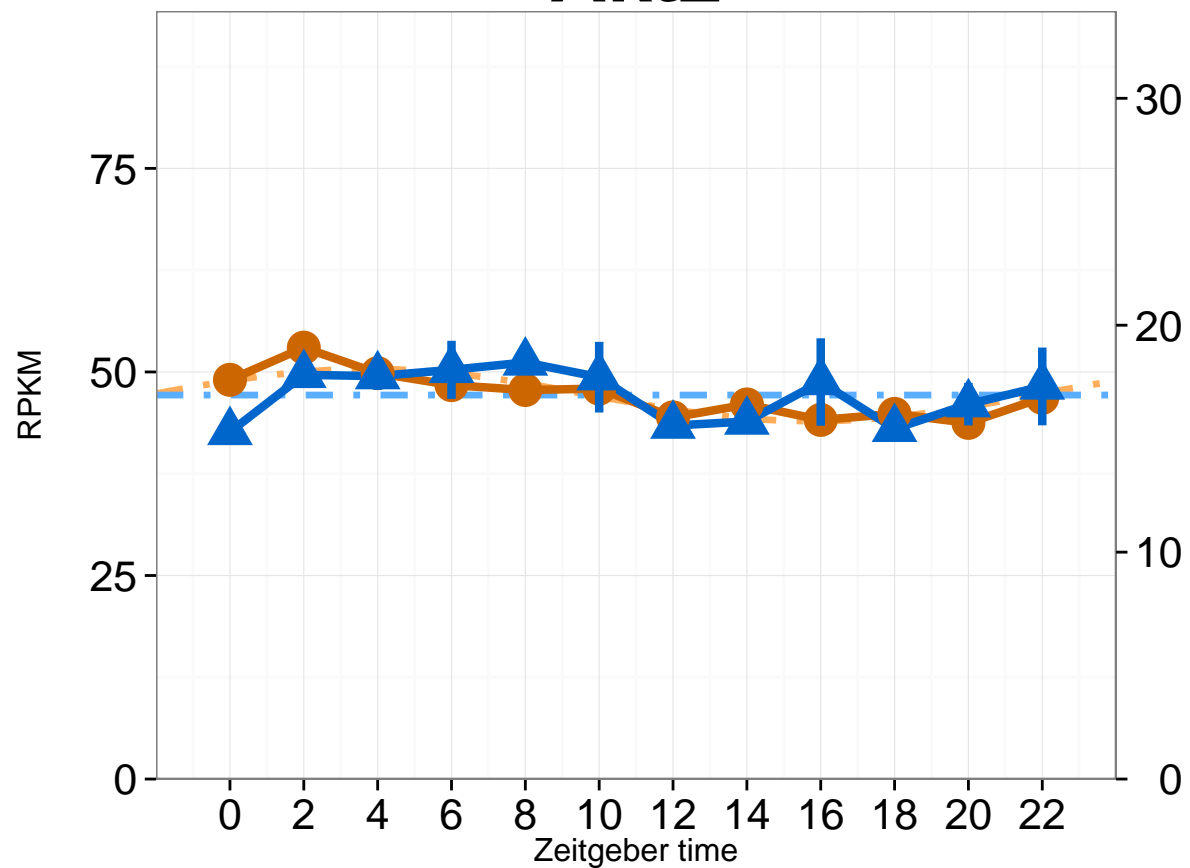

## Akt2

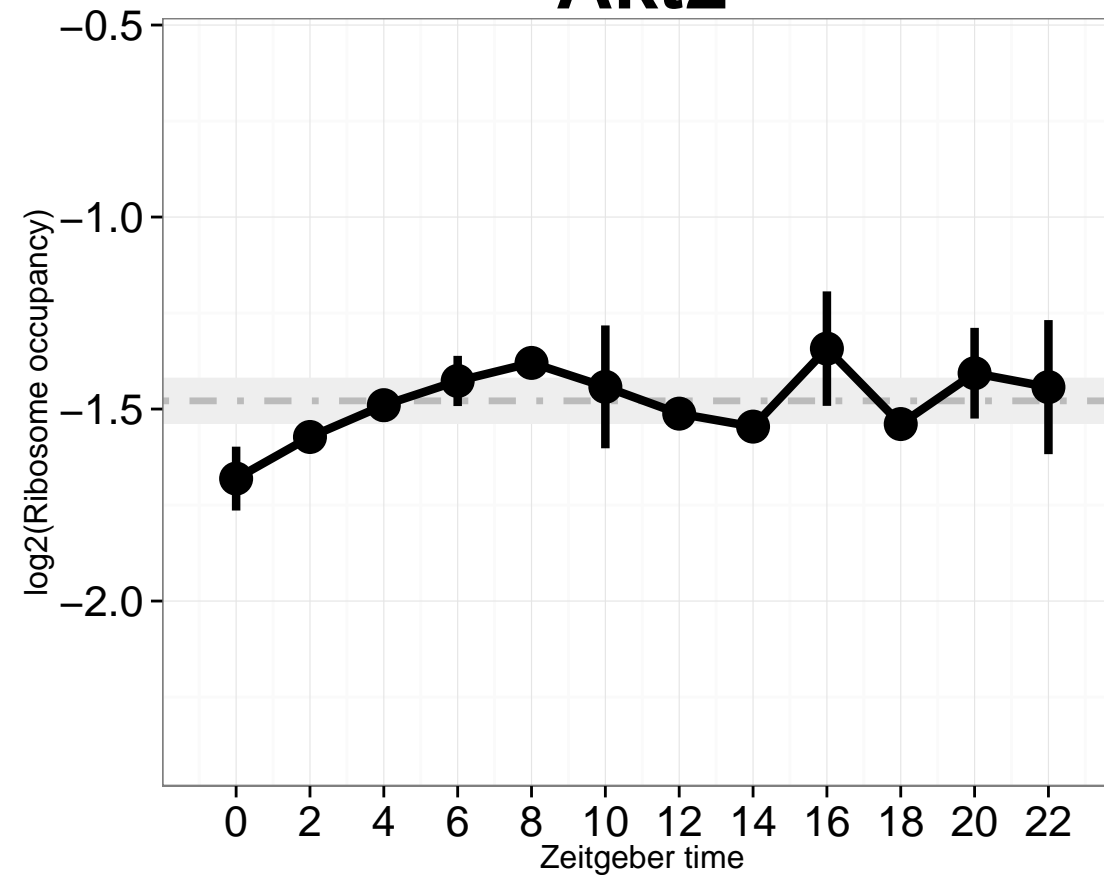

Supplement: Supplementary file 12888 [file 1]

# Dip2a

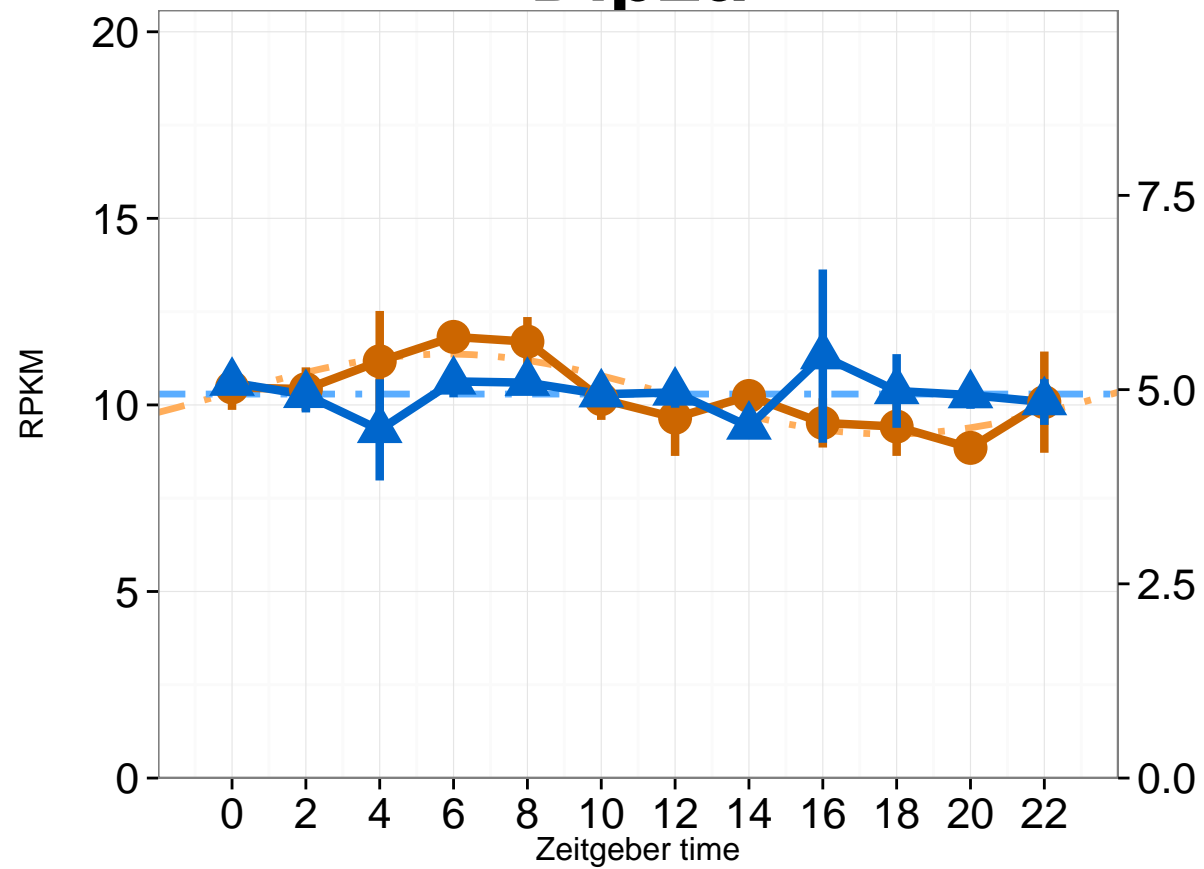

# Dip2a

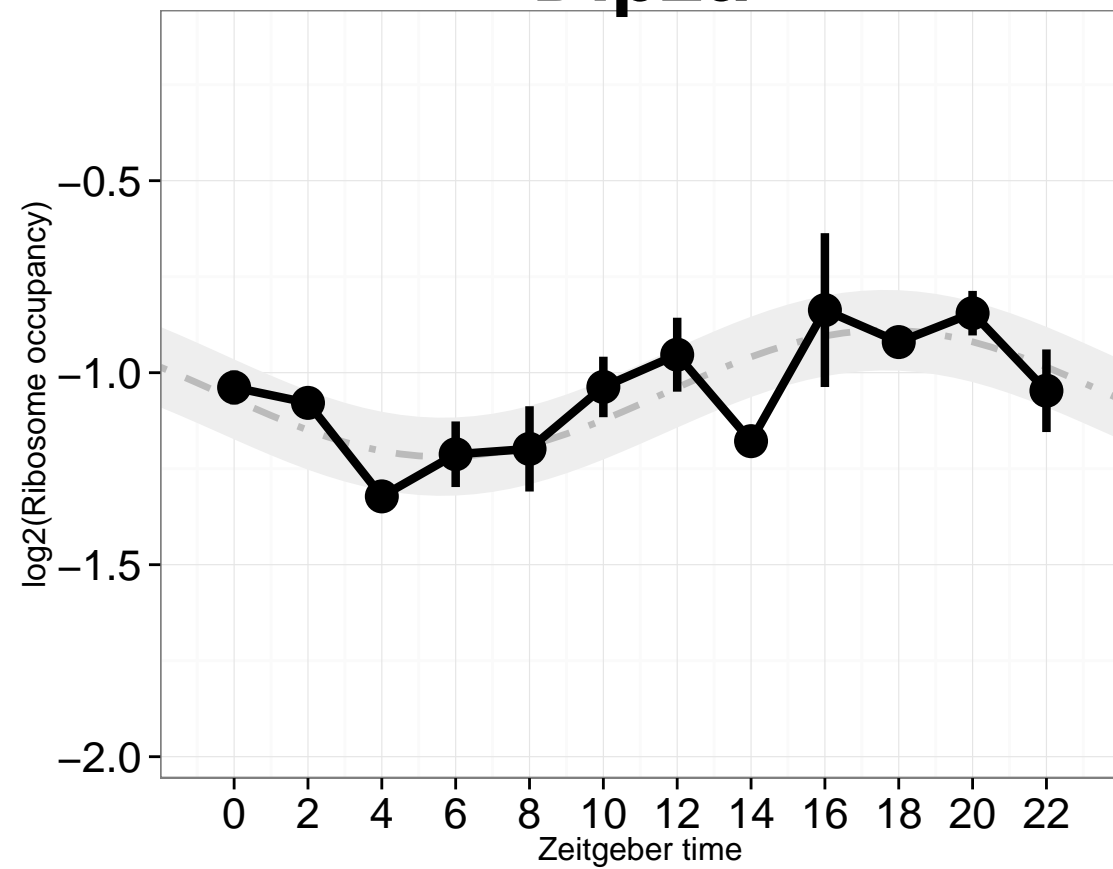

Supplement: Supplementary file 12889 [file 1]

## Klf6

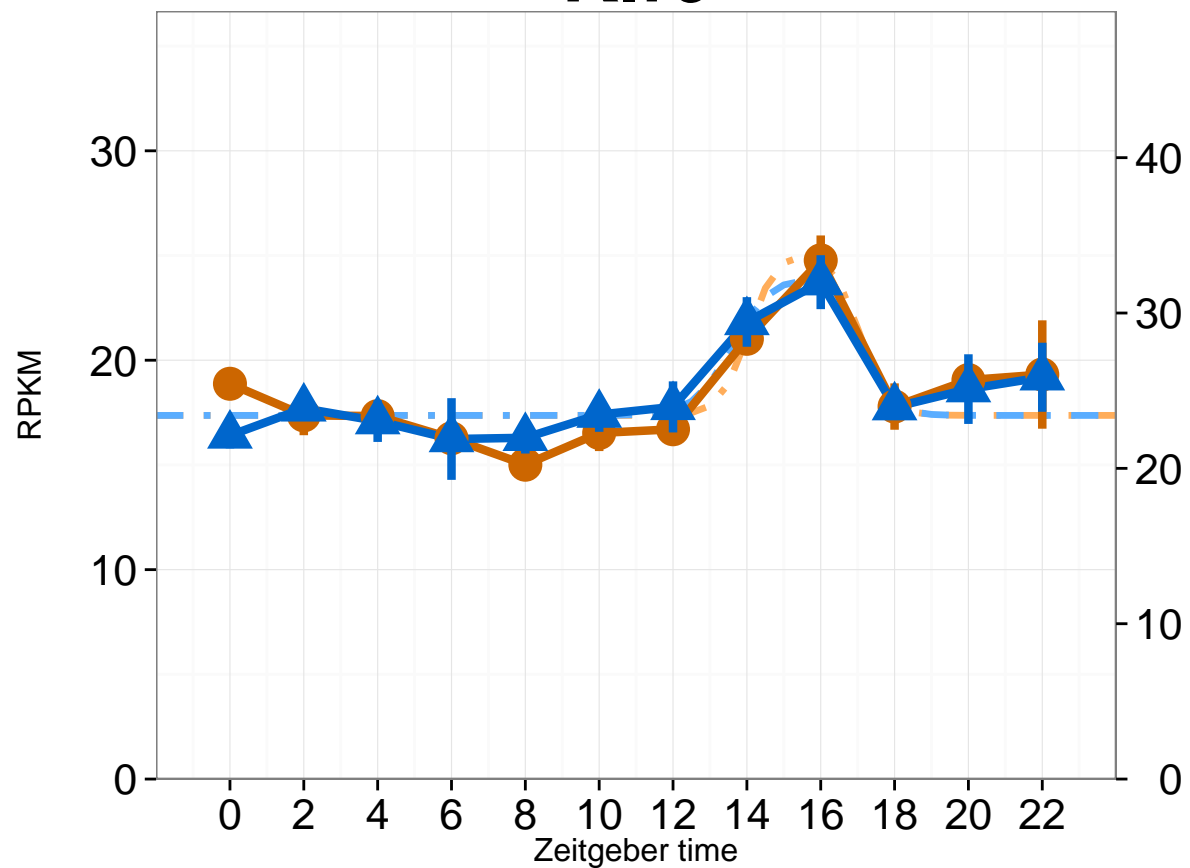

## Klf6

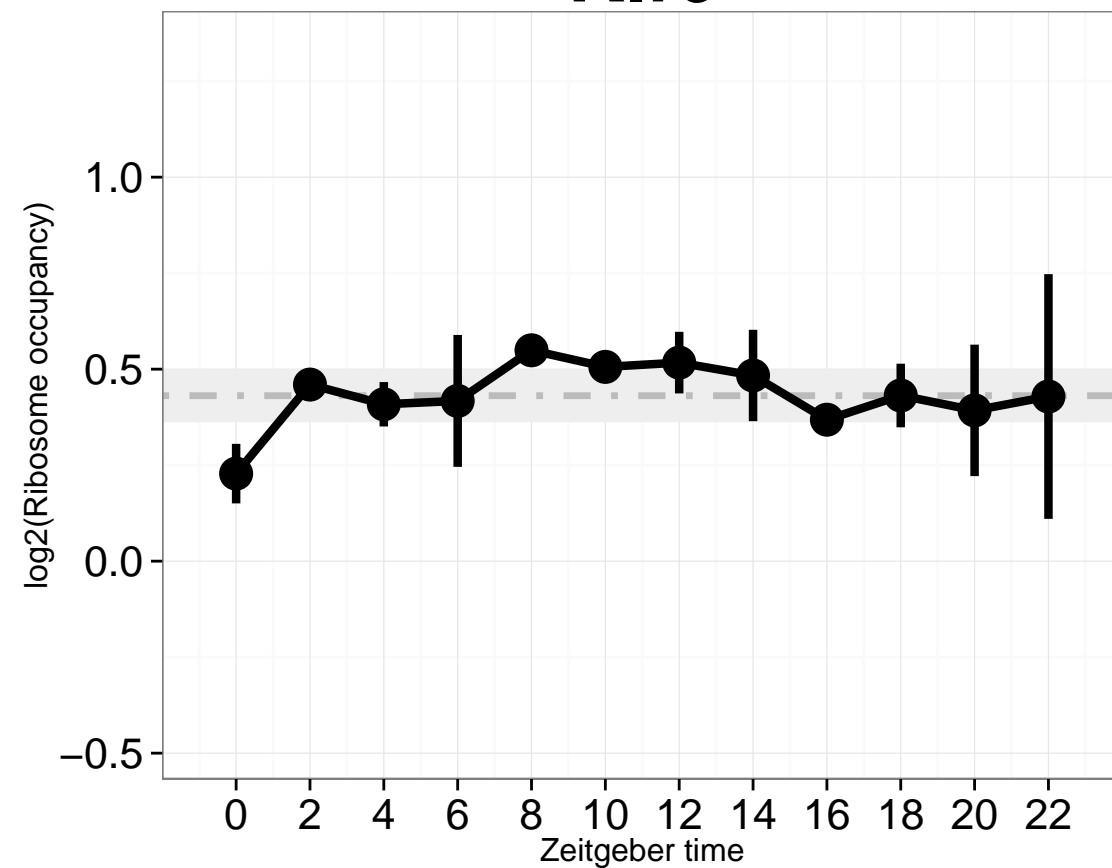

Supplement: Supplementary file 12890 [file 1]

## Lgals8

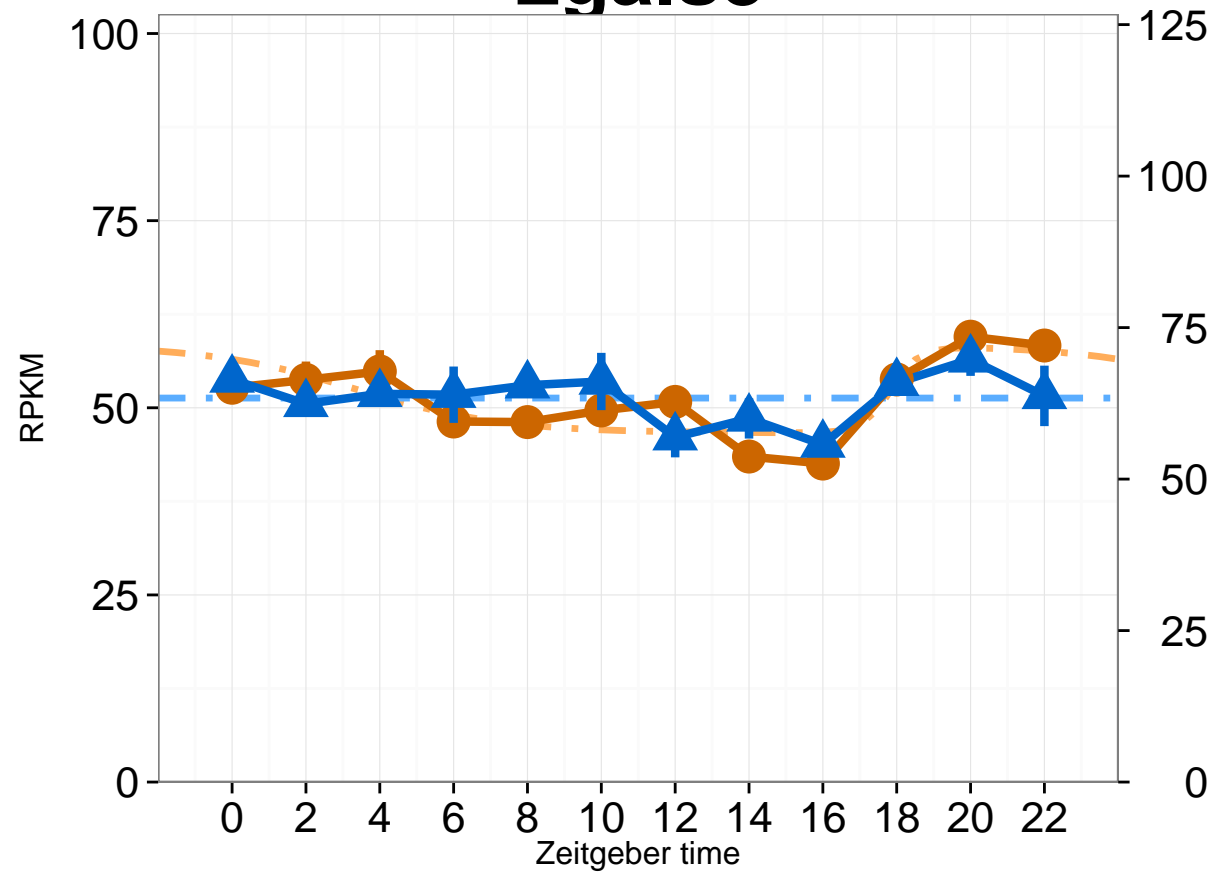

## Lgals8

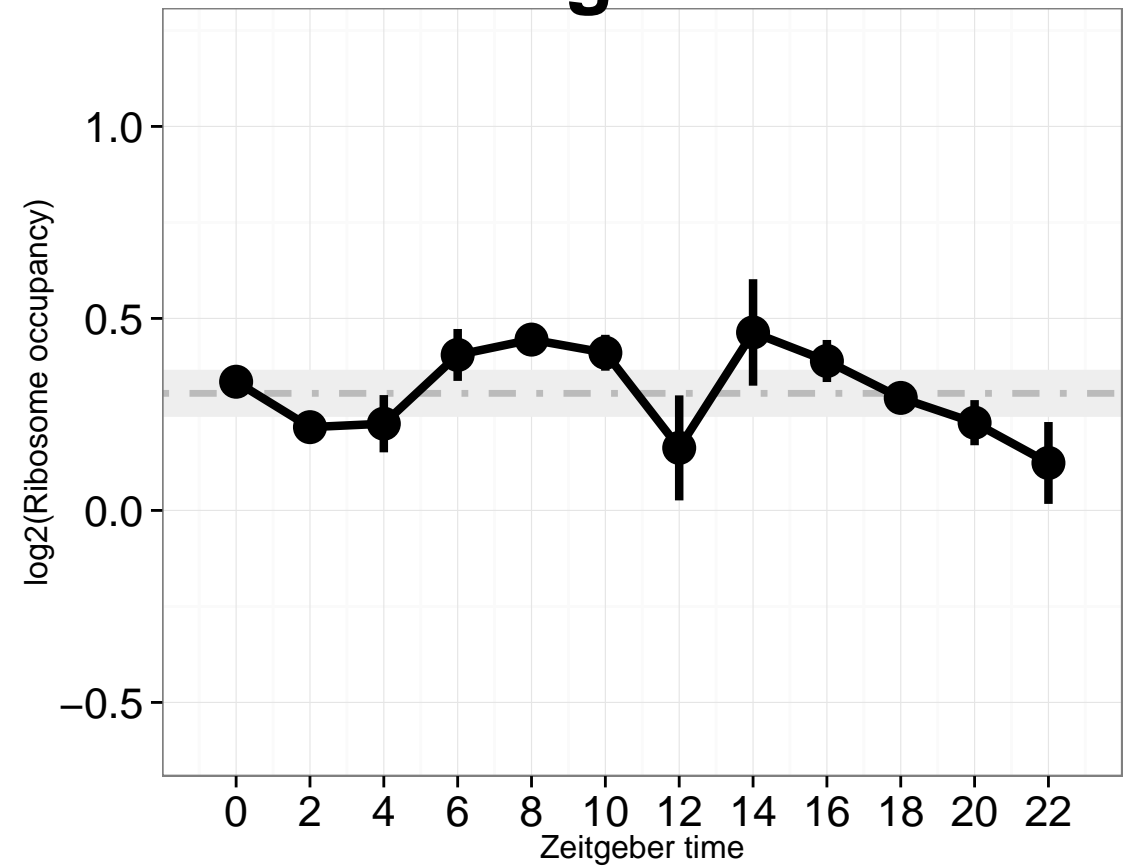

Supplement: Supplementary file 12891 [file 1]

## Ace2

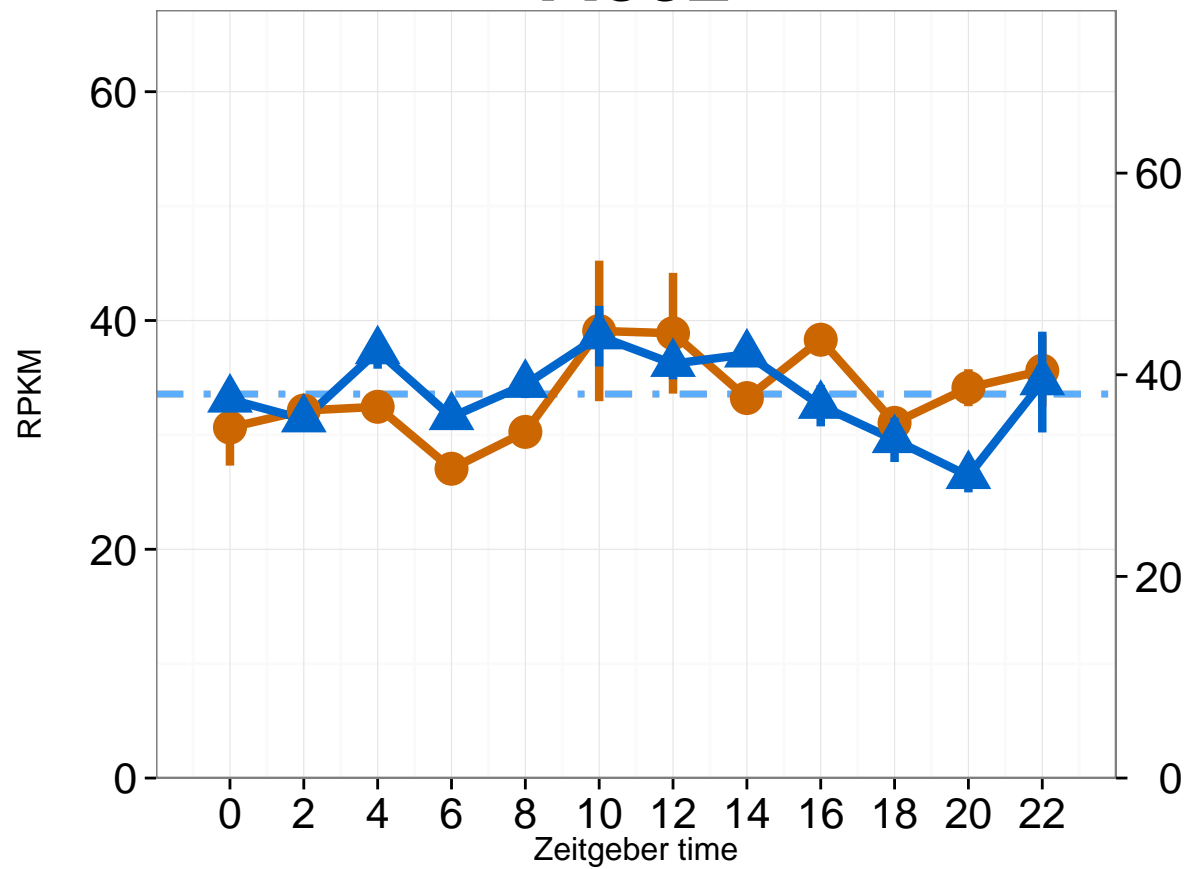

## Ace2

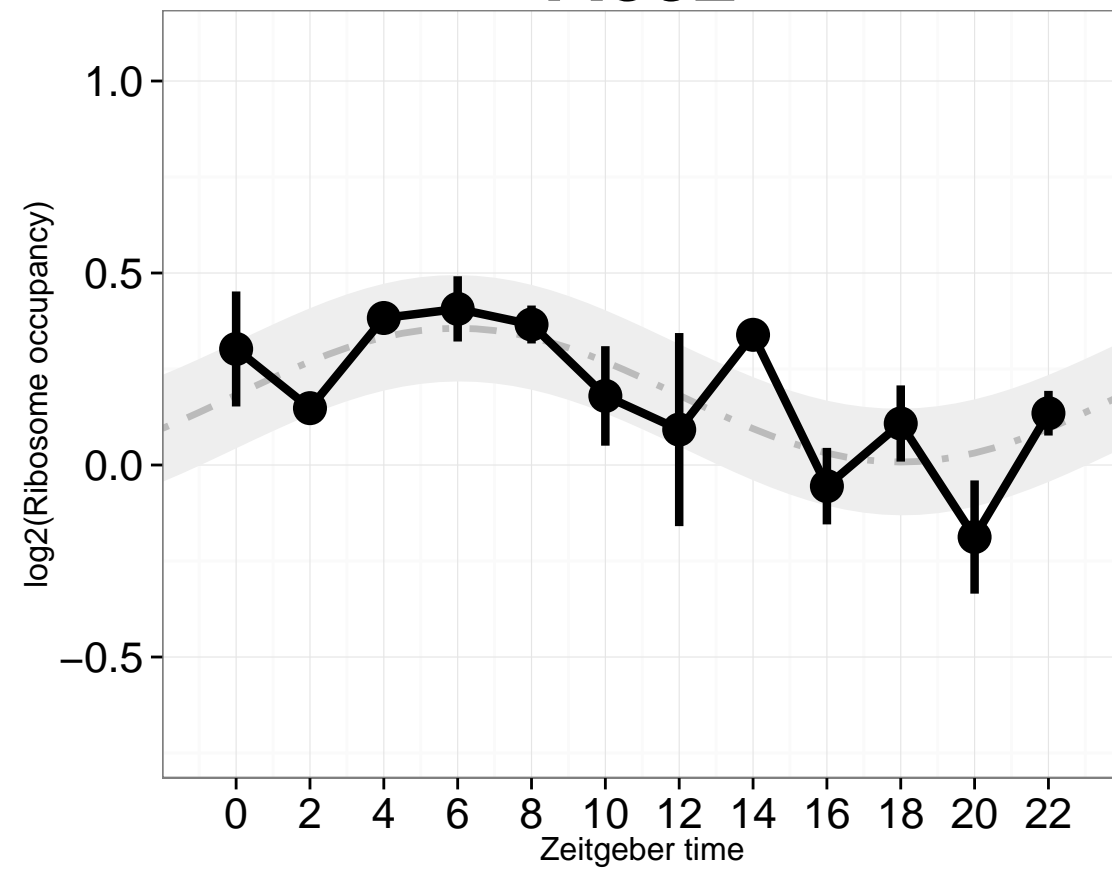

Supplement: Supplementary file 12892 [file 1]

# Best1

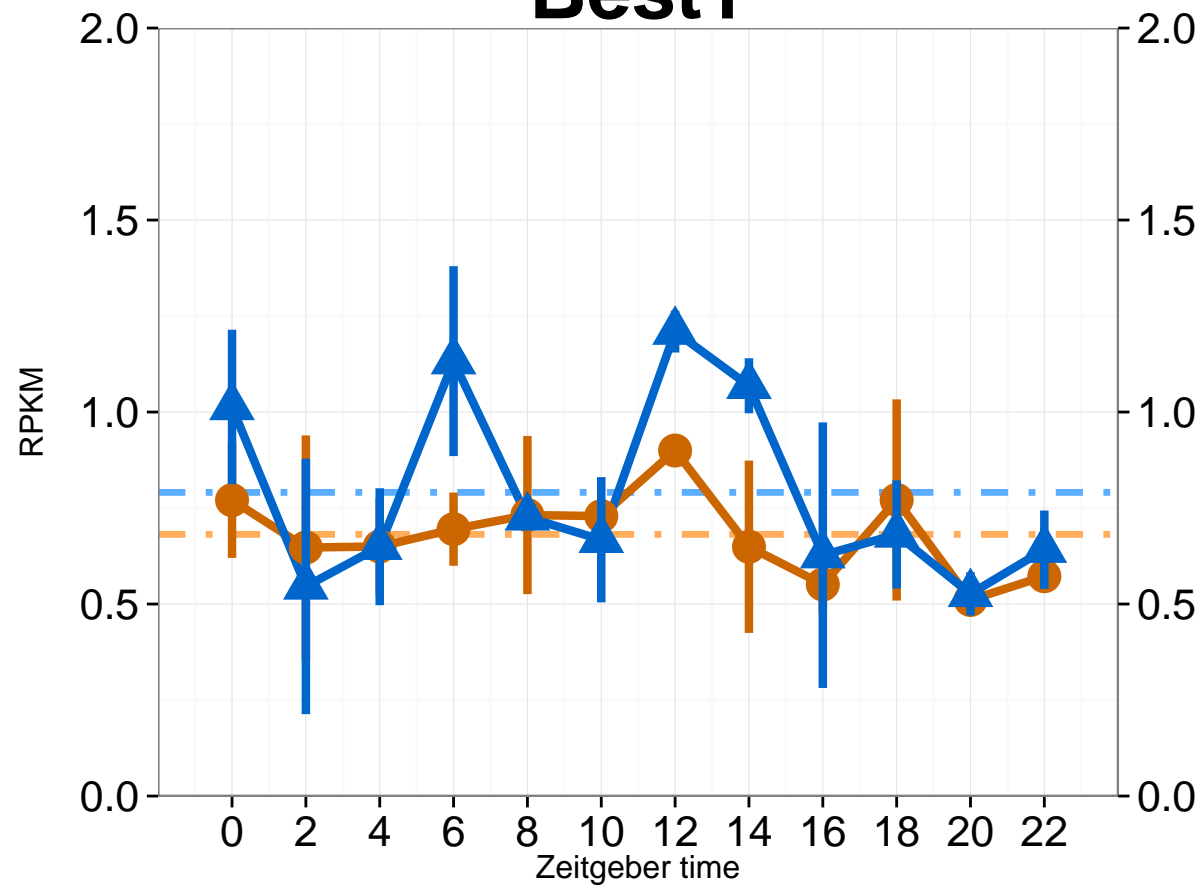

# Best1

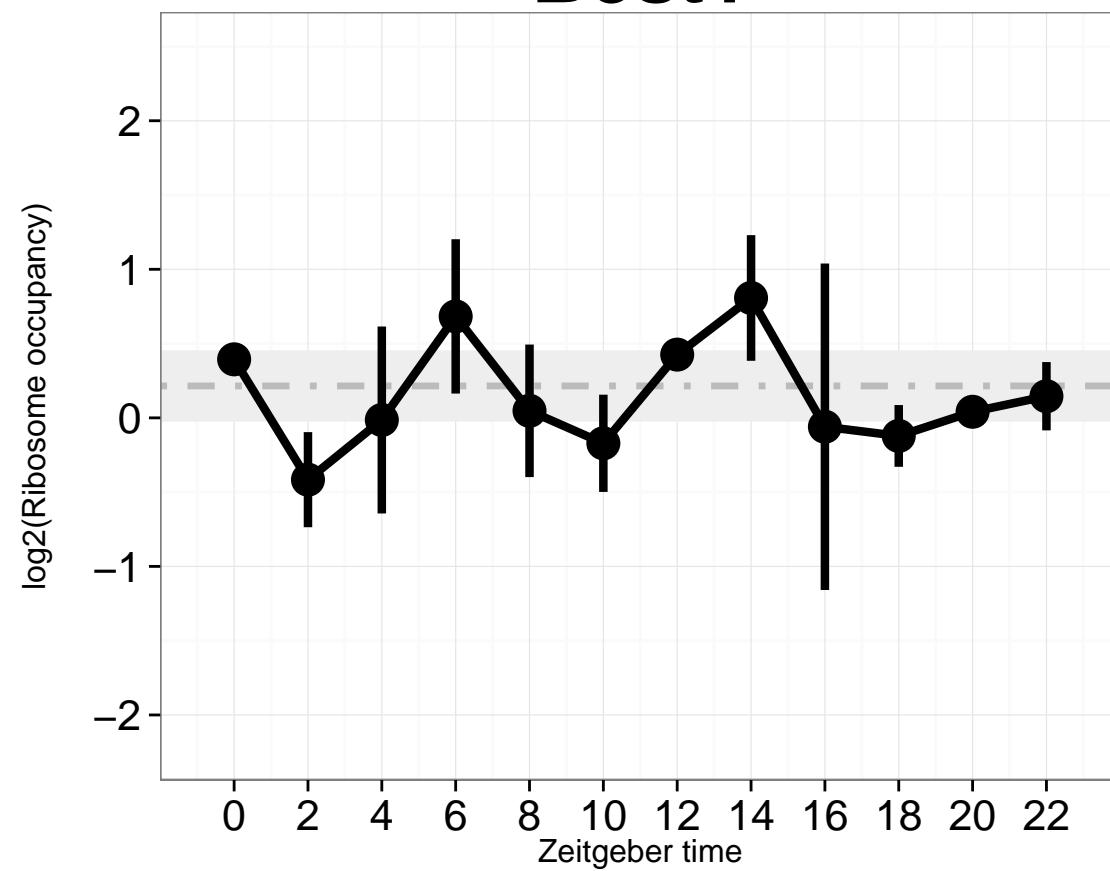

Supplement: Supplementary file 12893 [file 1]

# Pip4k2a

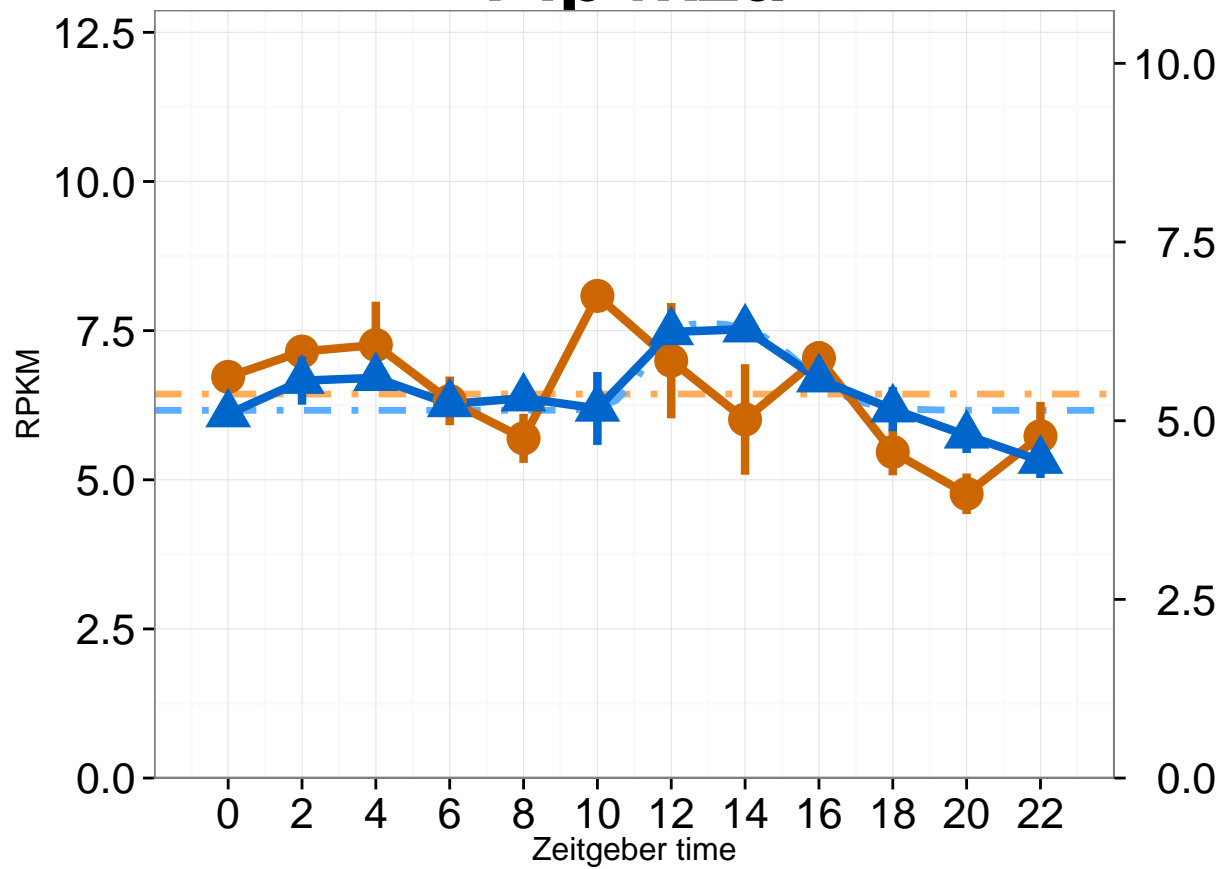

# Pip4k2a

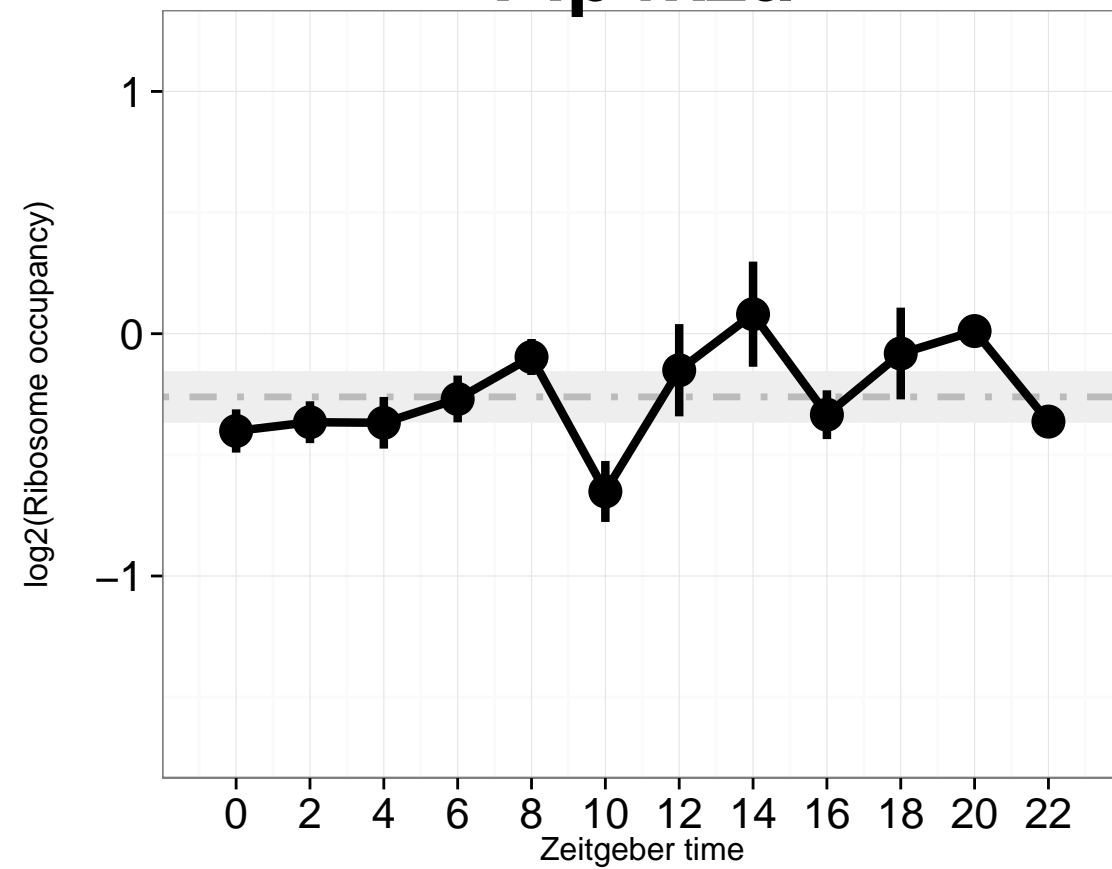

Supplement: Supplementary file 12894 [file 1]

# Cdan1

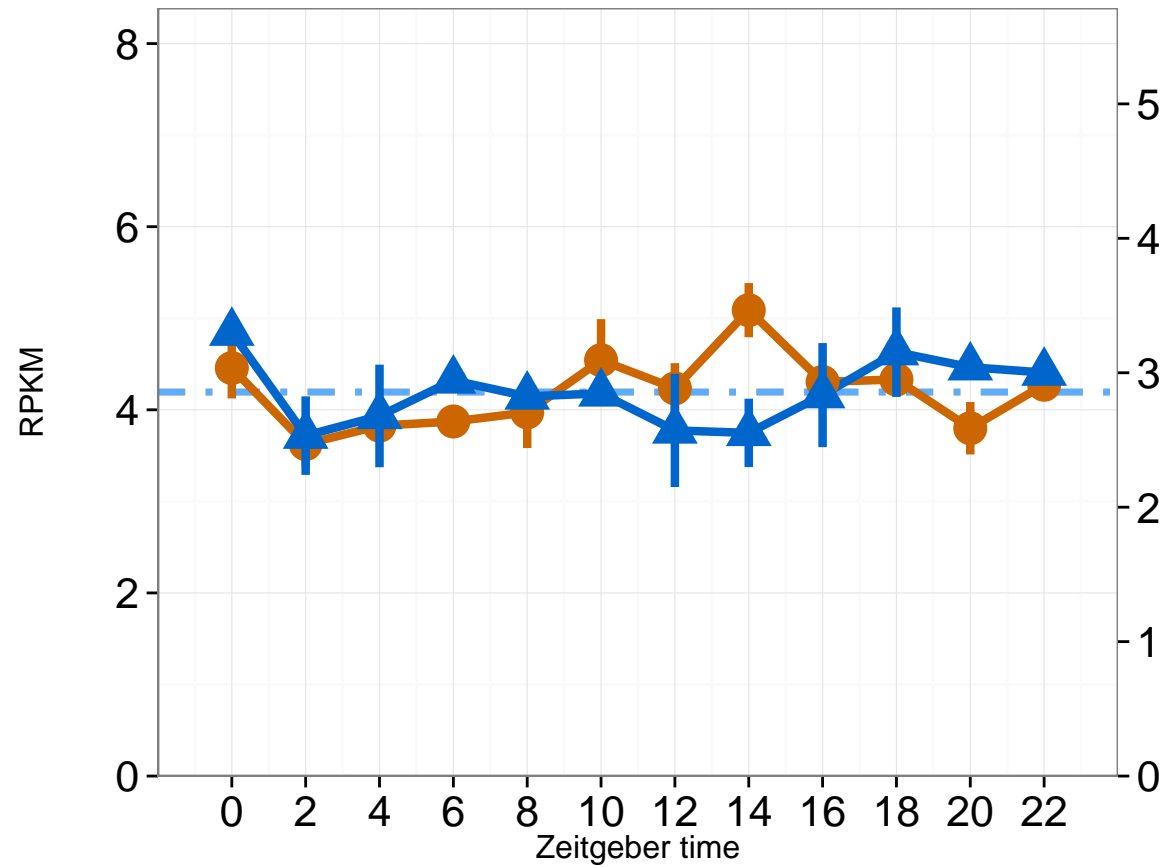

# Cdan1

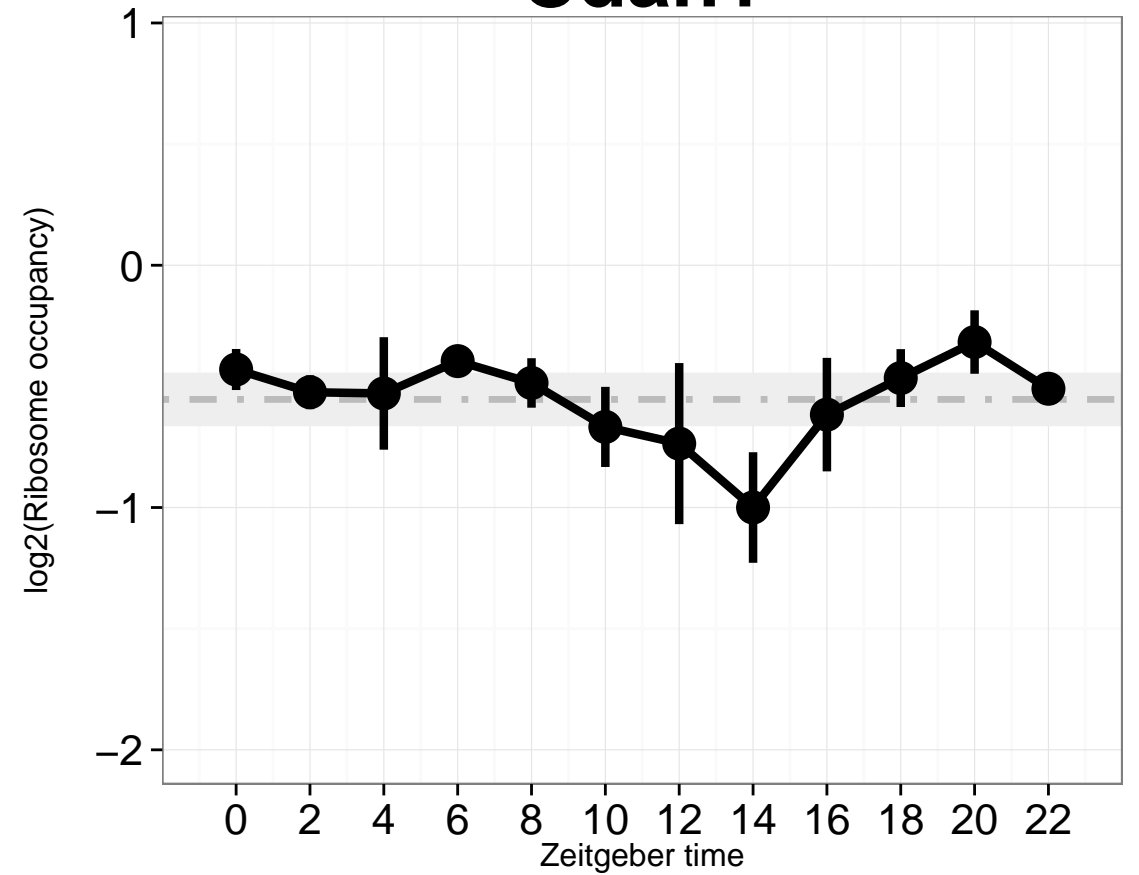

Supplement: Supplementary file 12895 [file 1]

## Npr3

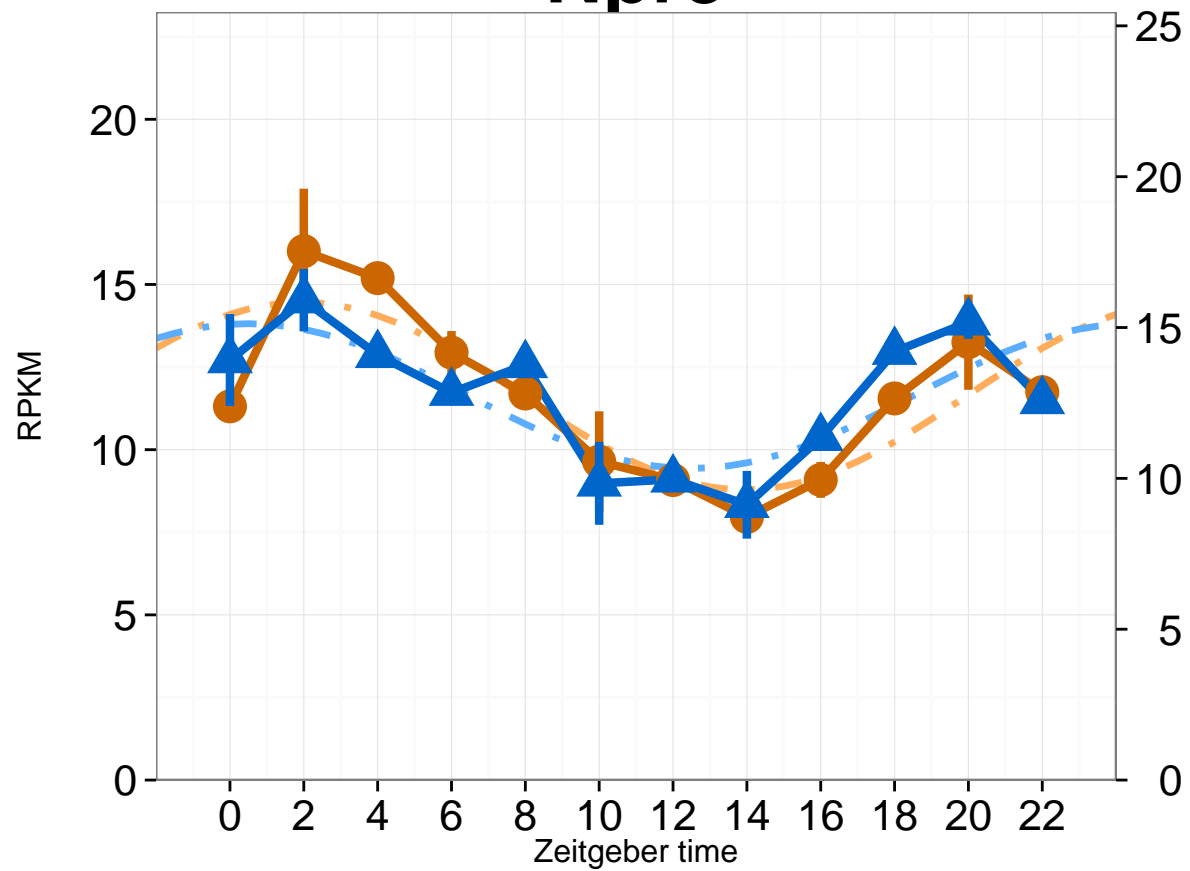

## Npr3

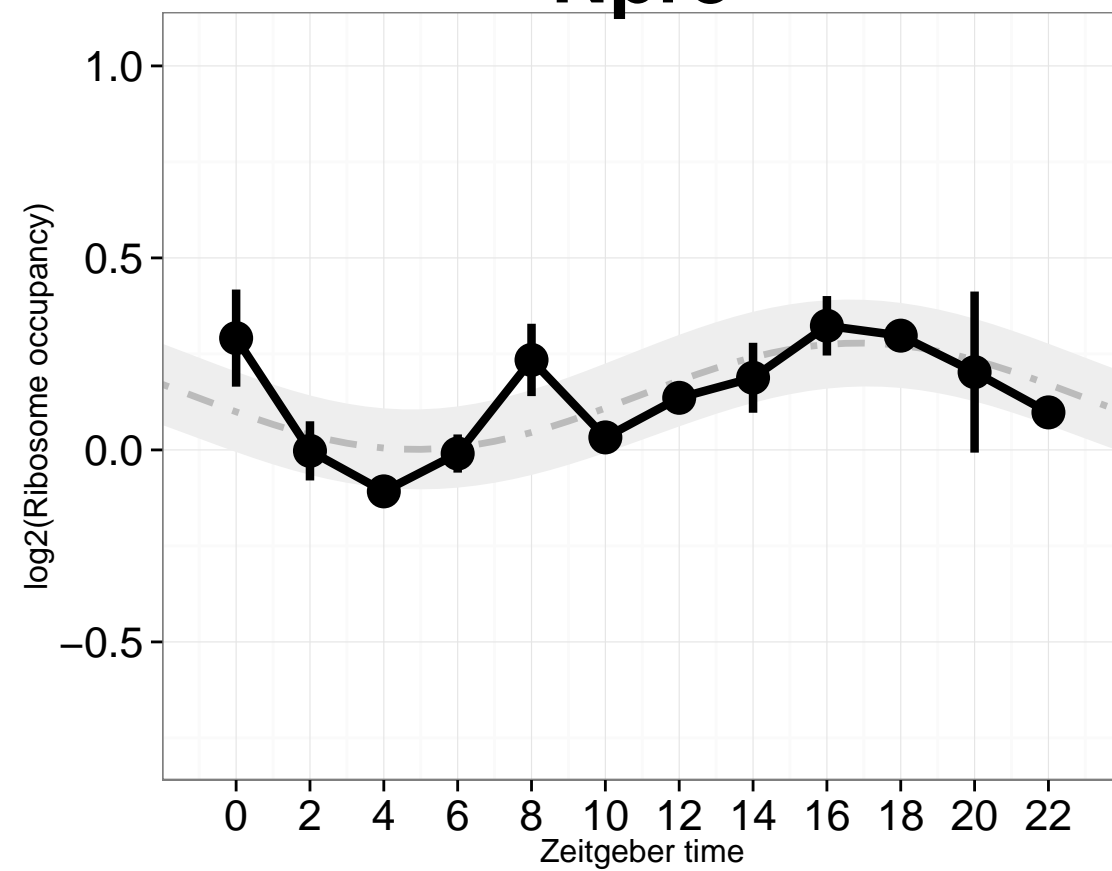

Supplement: Supplementary file 12896 [file 1]

## Bcr

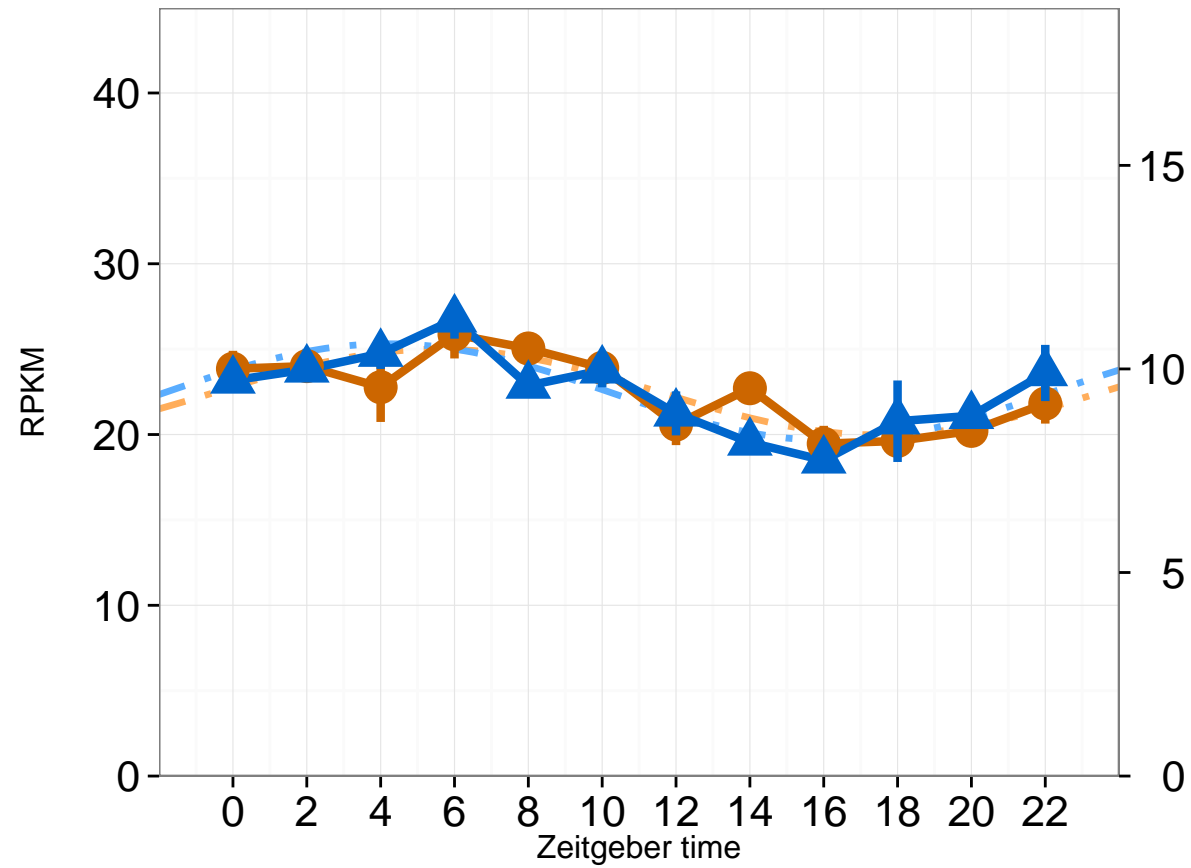

## Bcr

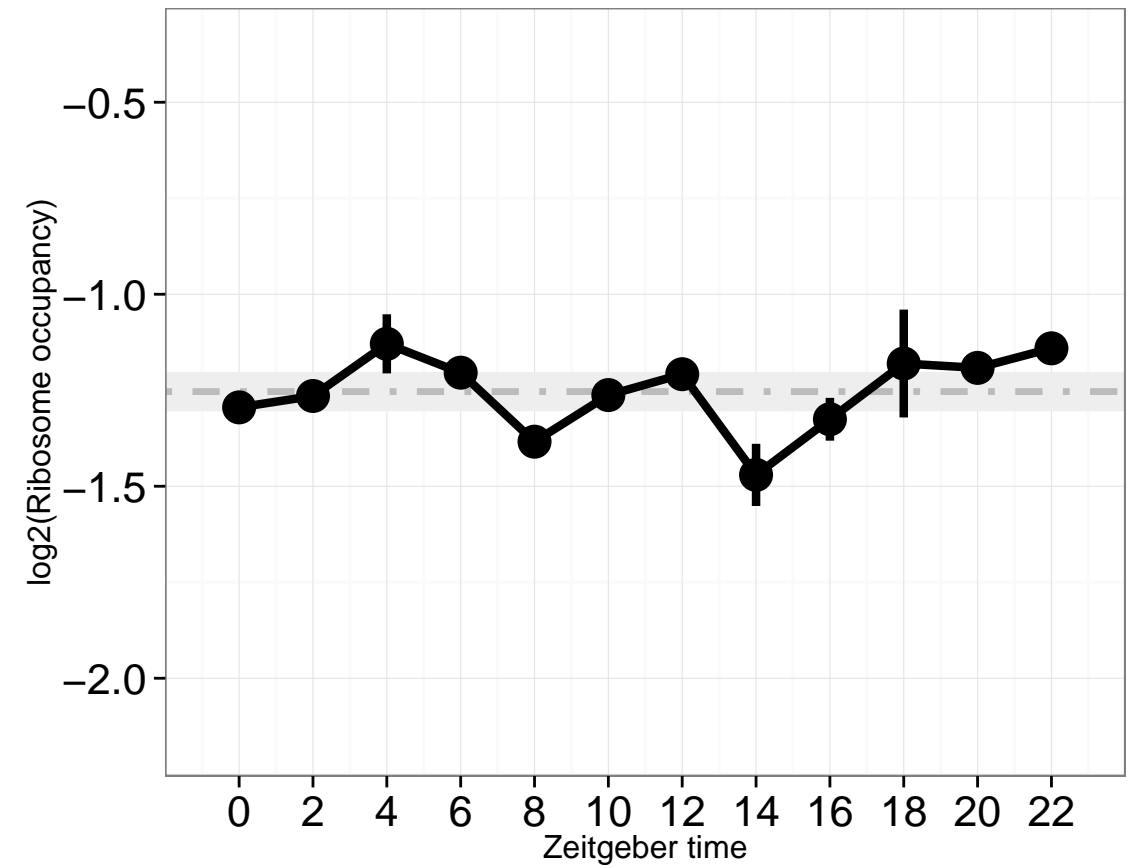

Supplement: Supplementary file 12897 [file 1]

## Fbp2

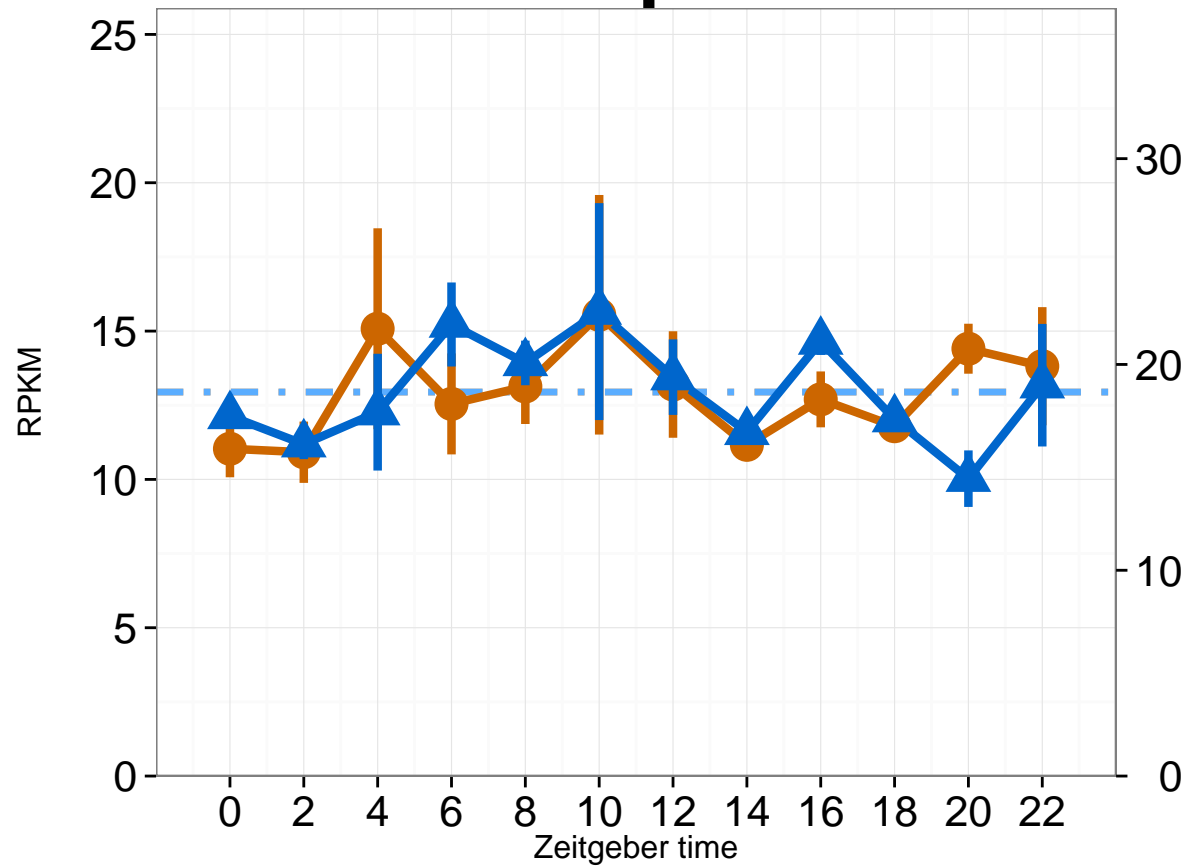

## Fbp2

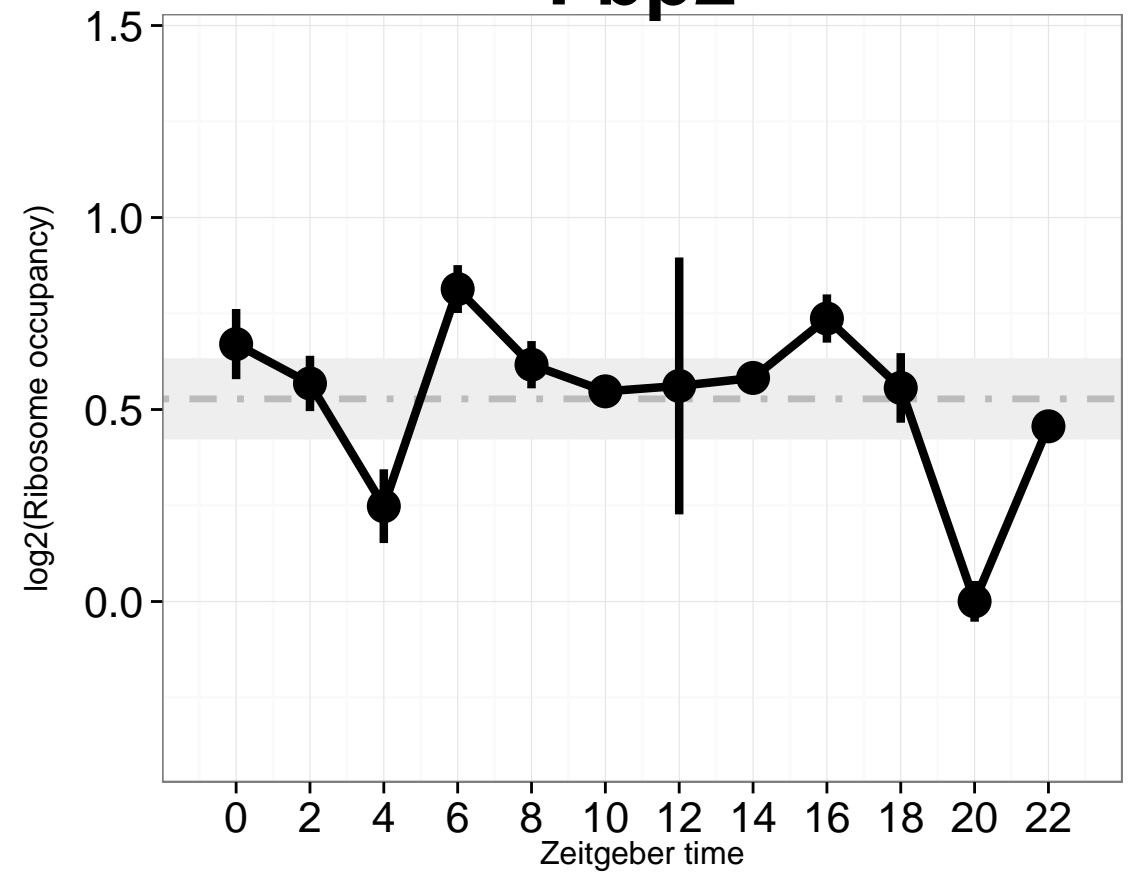

Supplement: Supplementary file 12898 [file 1]

# Gm12258

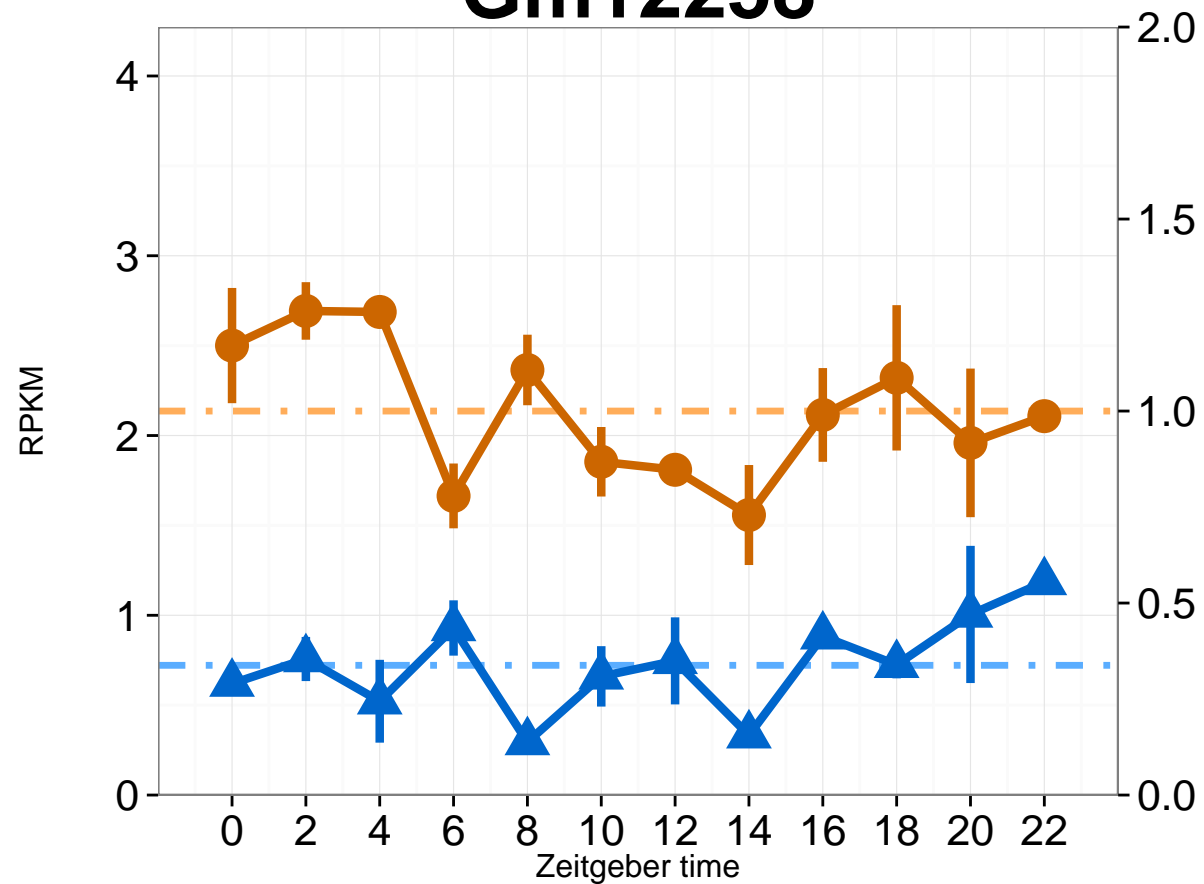

# Gm12258

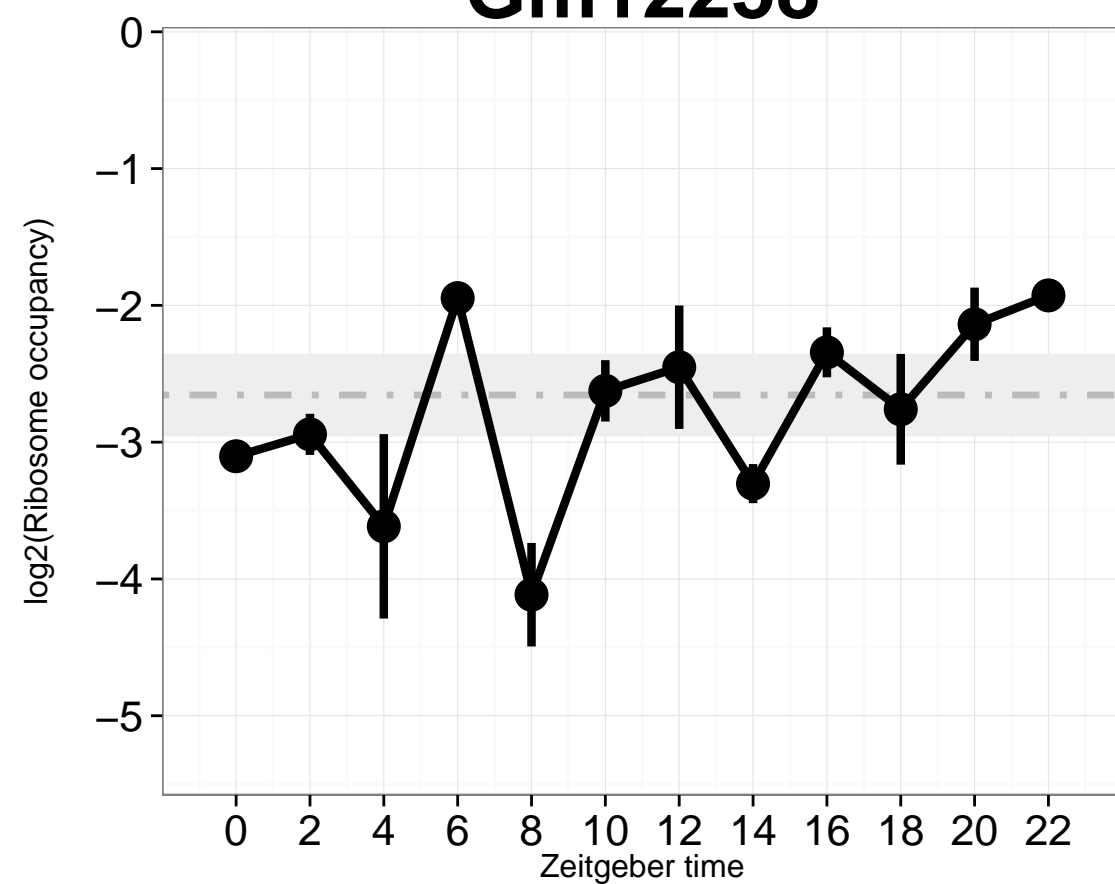

Supplement: Supplementary file 12899 [file 1]

## Dhrs3

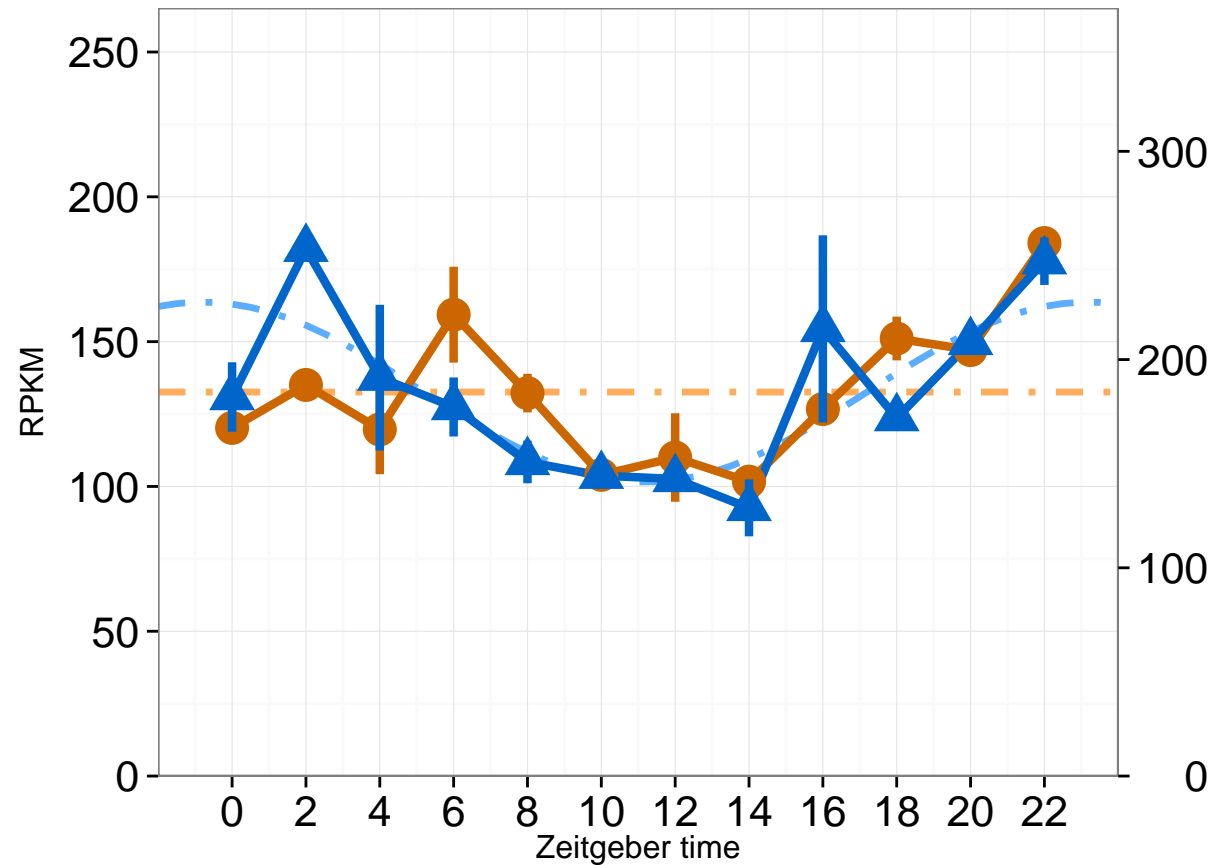

## Dhrs3

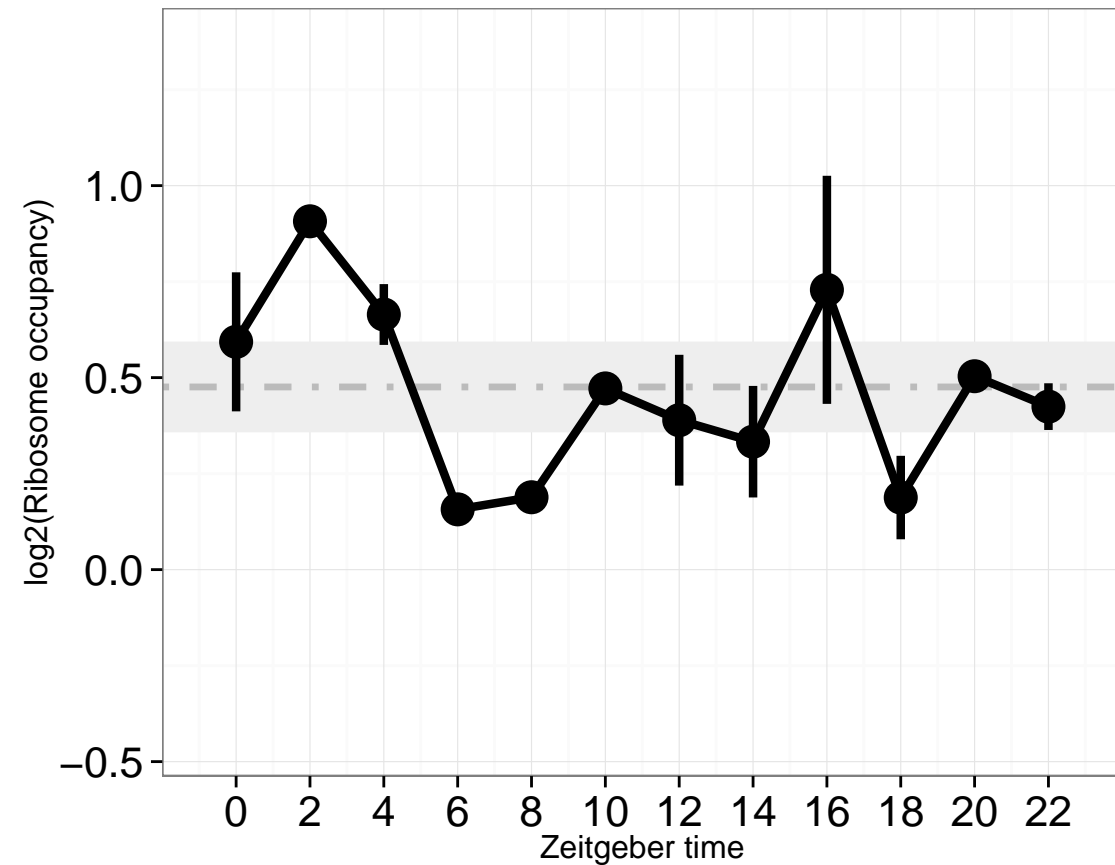

Supplement: Supplementary file 12900 [file 1]

# 9030025P20Rik

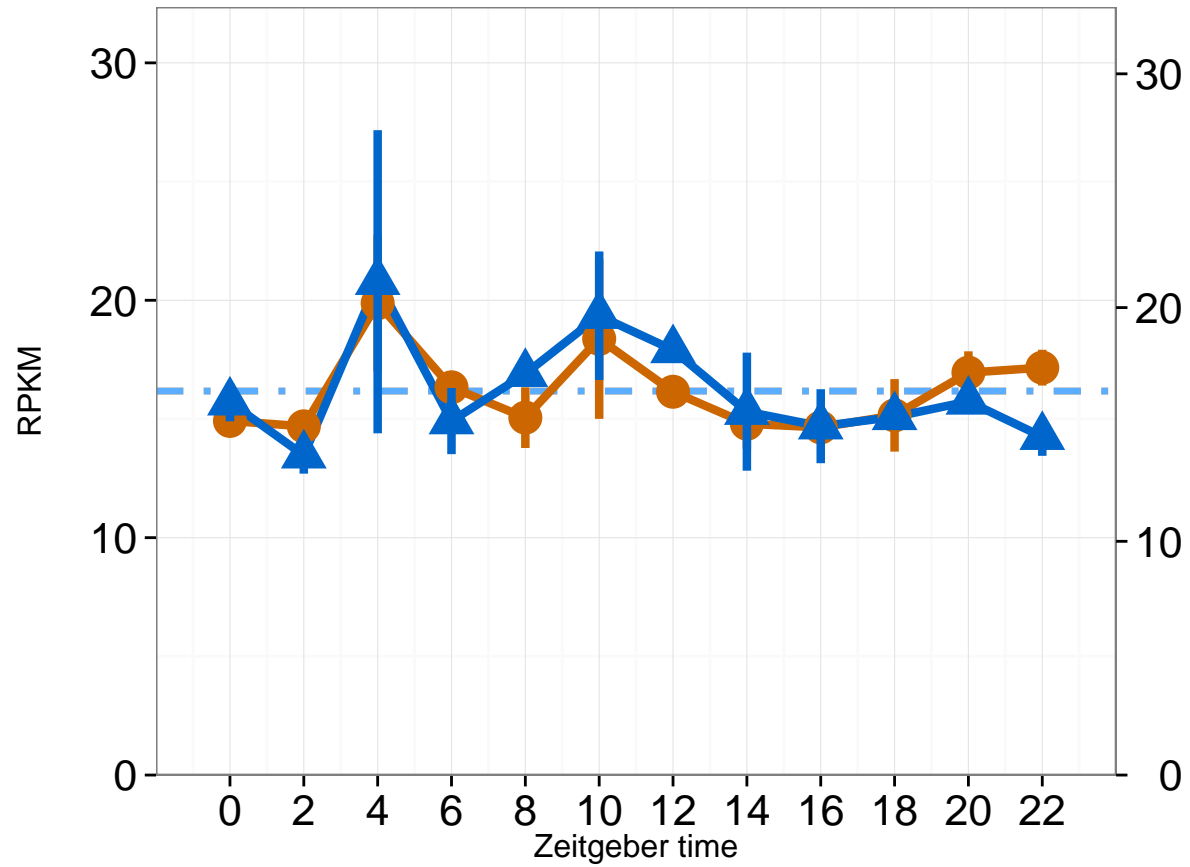

# 9030025P20Rik

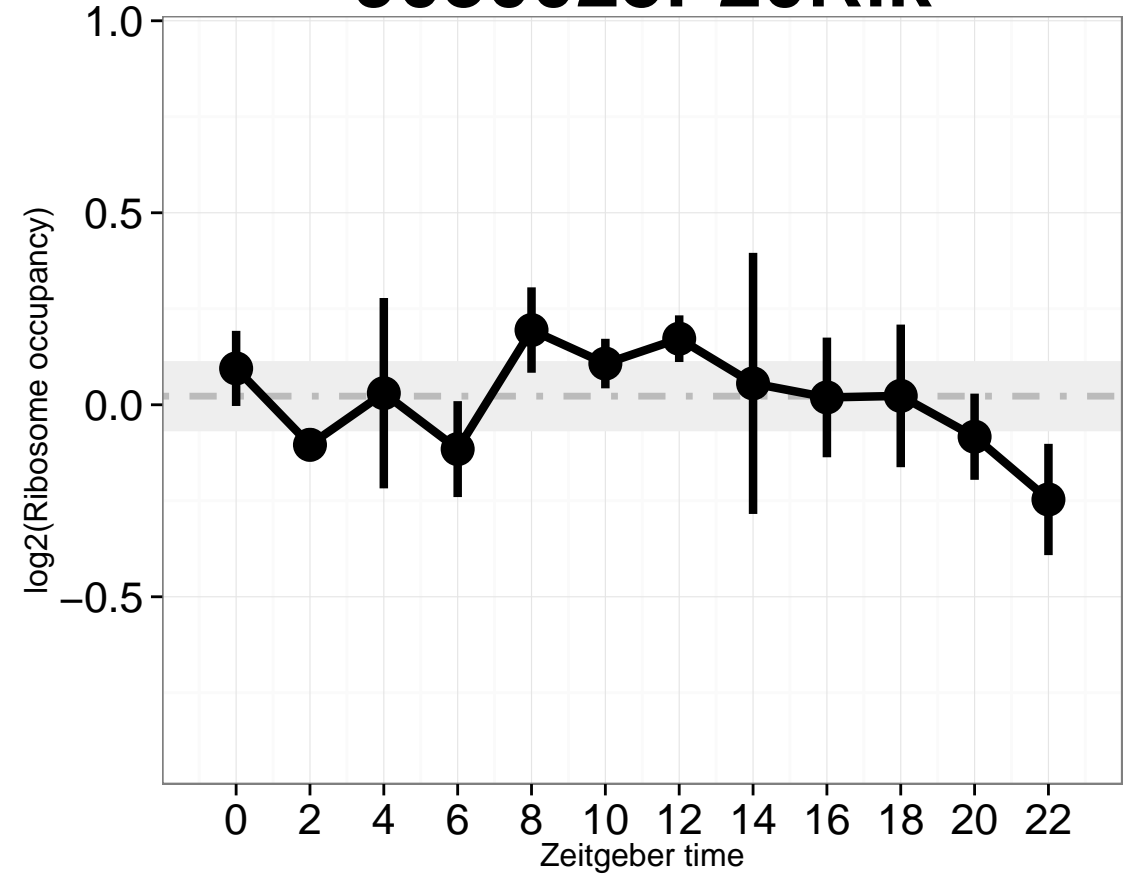

Supplement: Supplementary file 12901 [file 1]

## Ccdc86

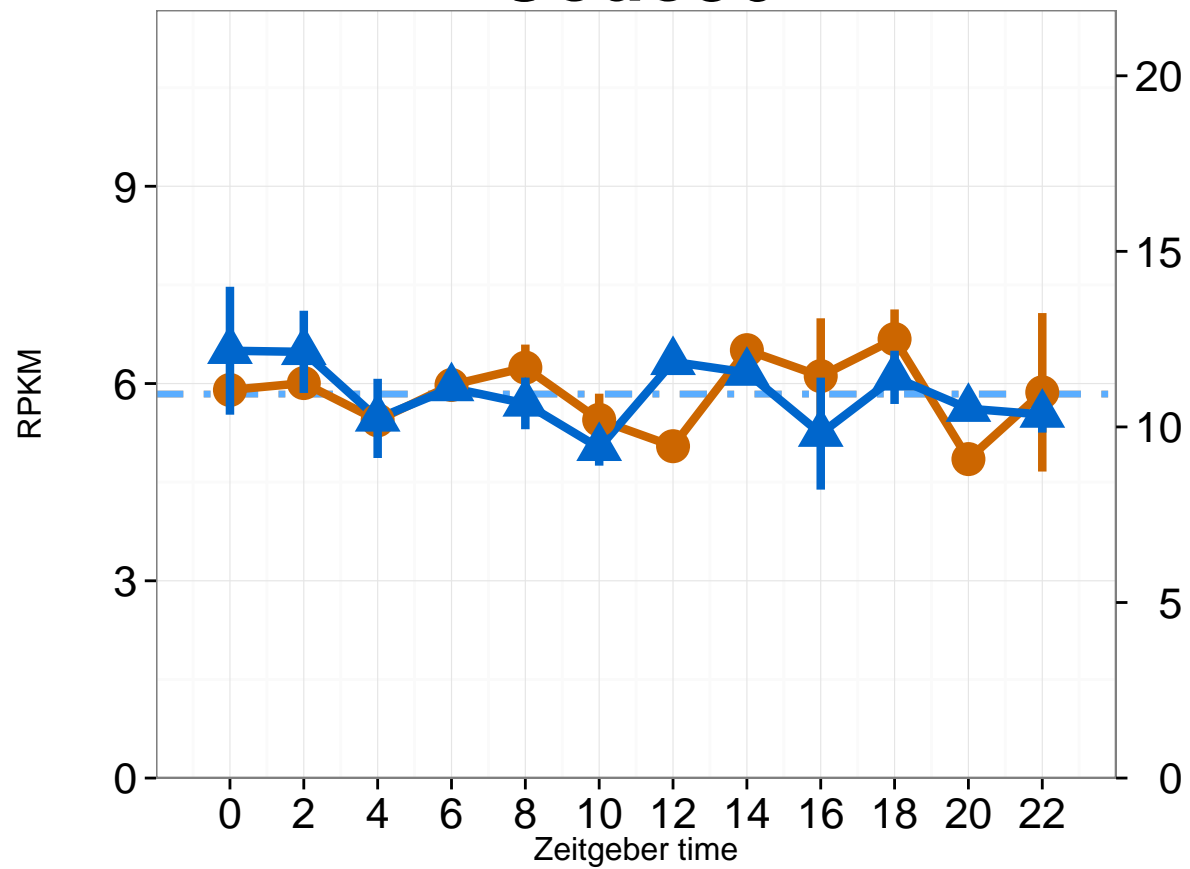

## Ccdc86

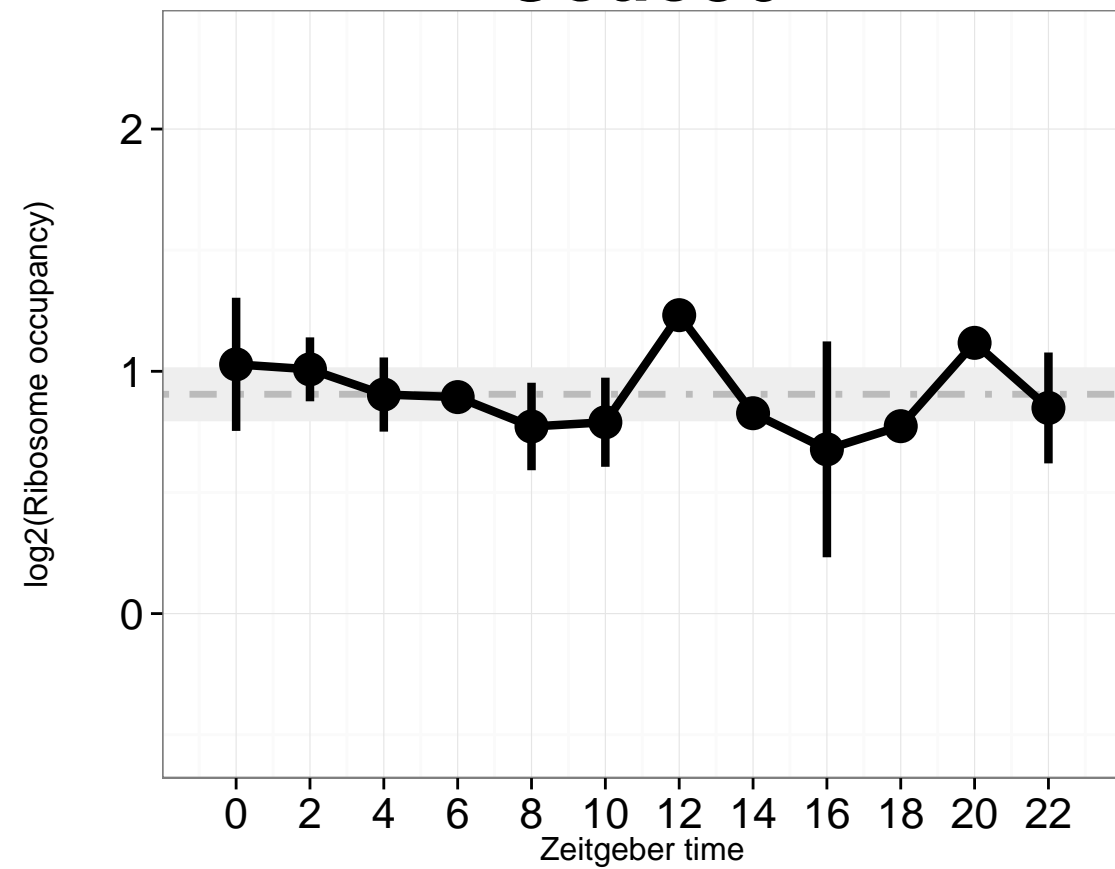

Supplement: Supplementary file 12902 [file 1]

## Gba

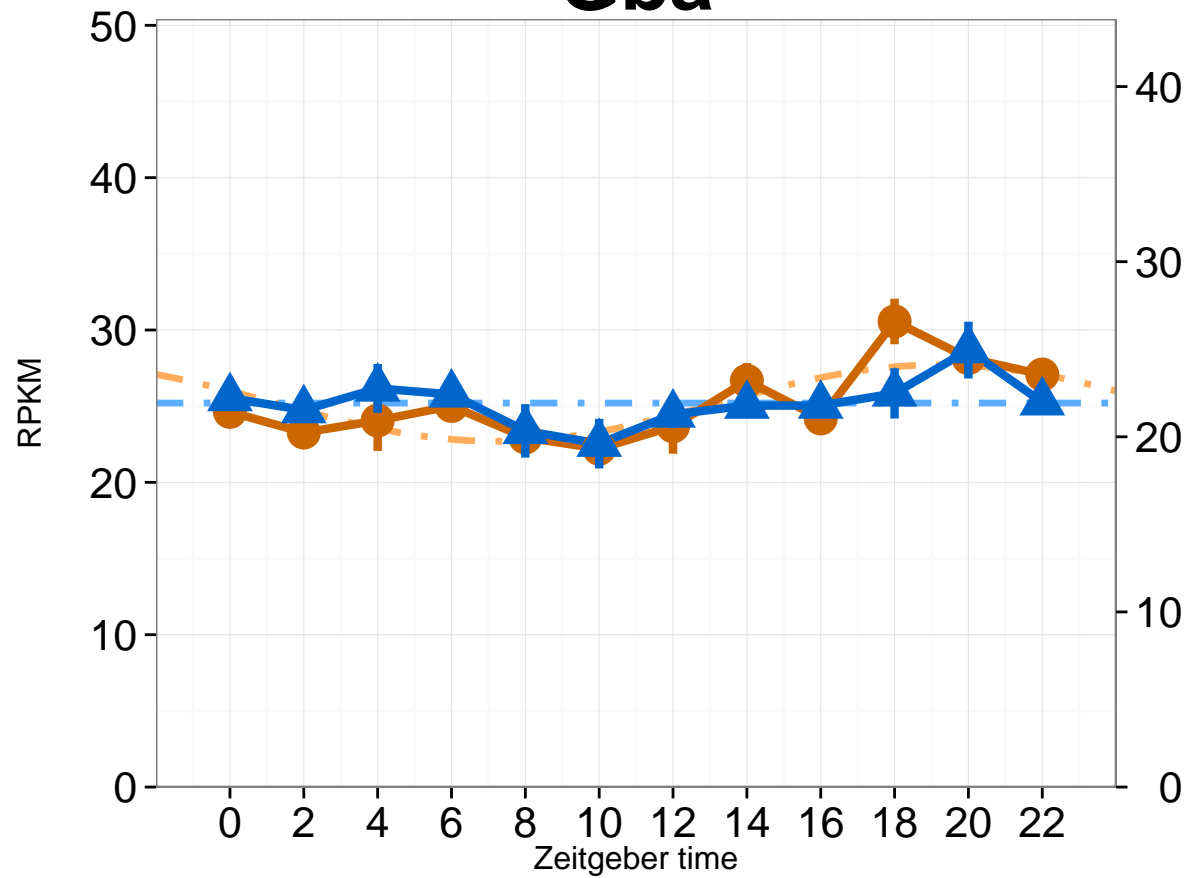

## Gba

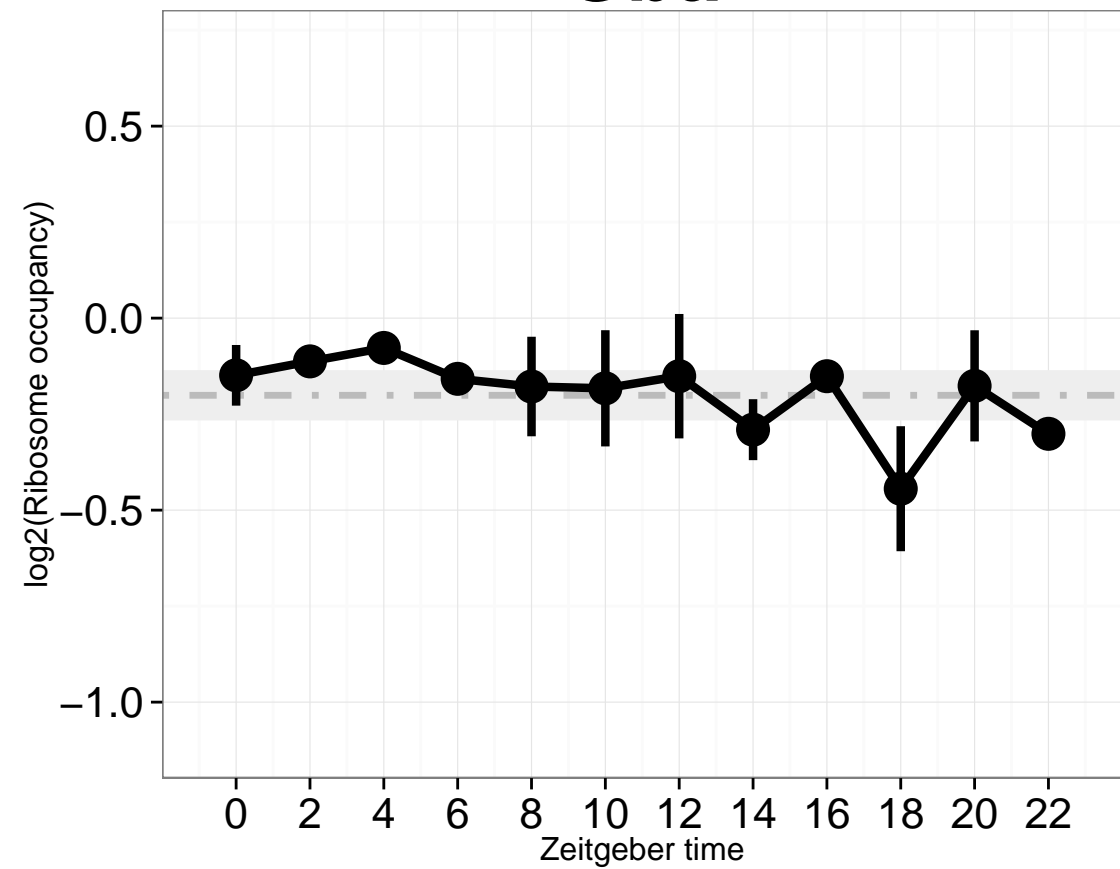

Supplement: Supplementary file 12903 [file 1]

## Ireb2

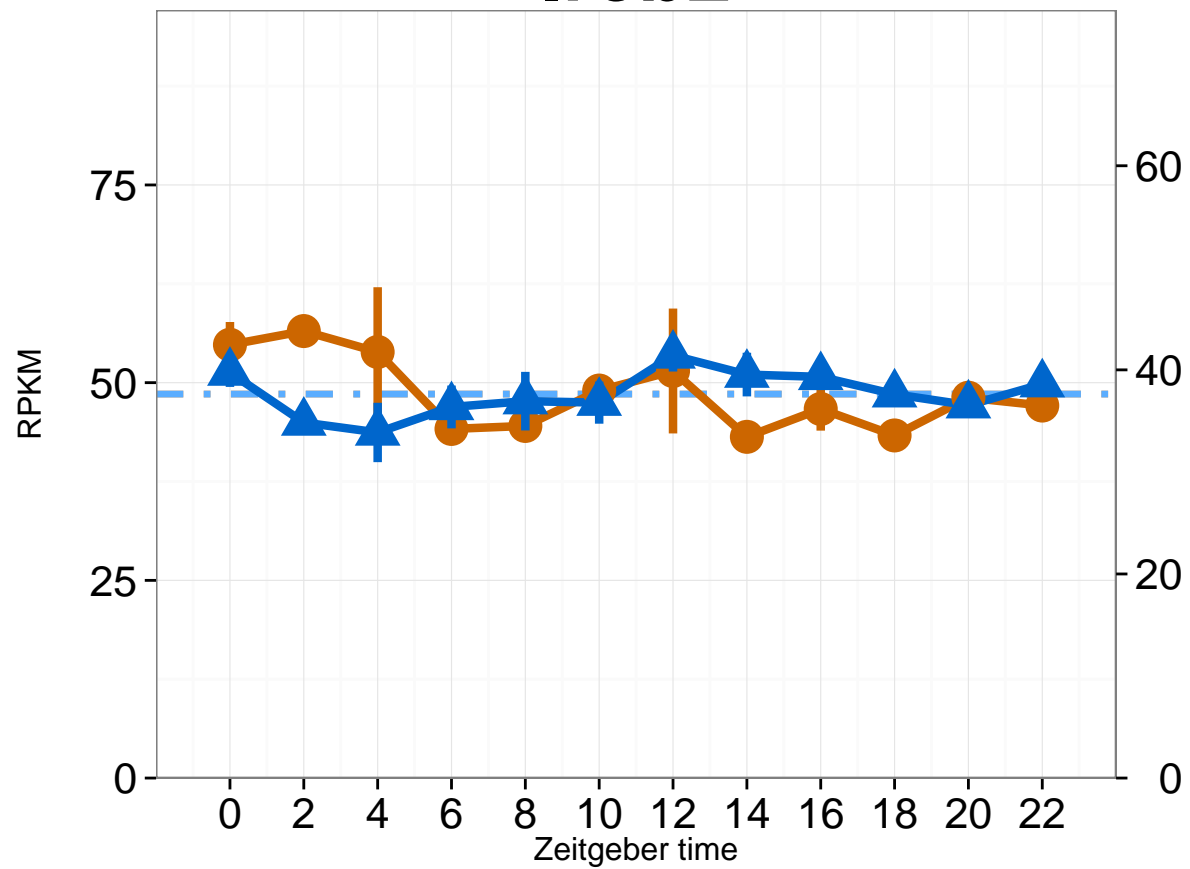

## Ireb2

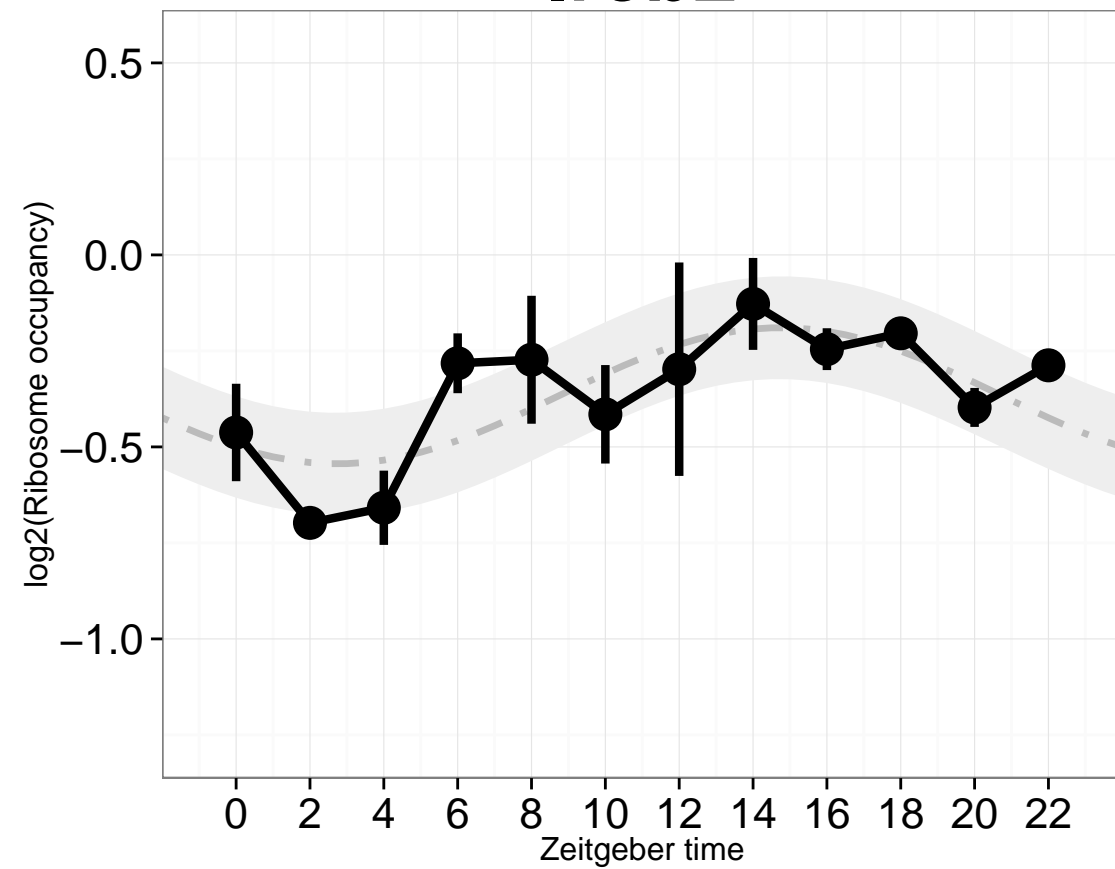

Supplement: Supplementary file 12904 [file 1]

## Fyco1

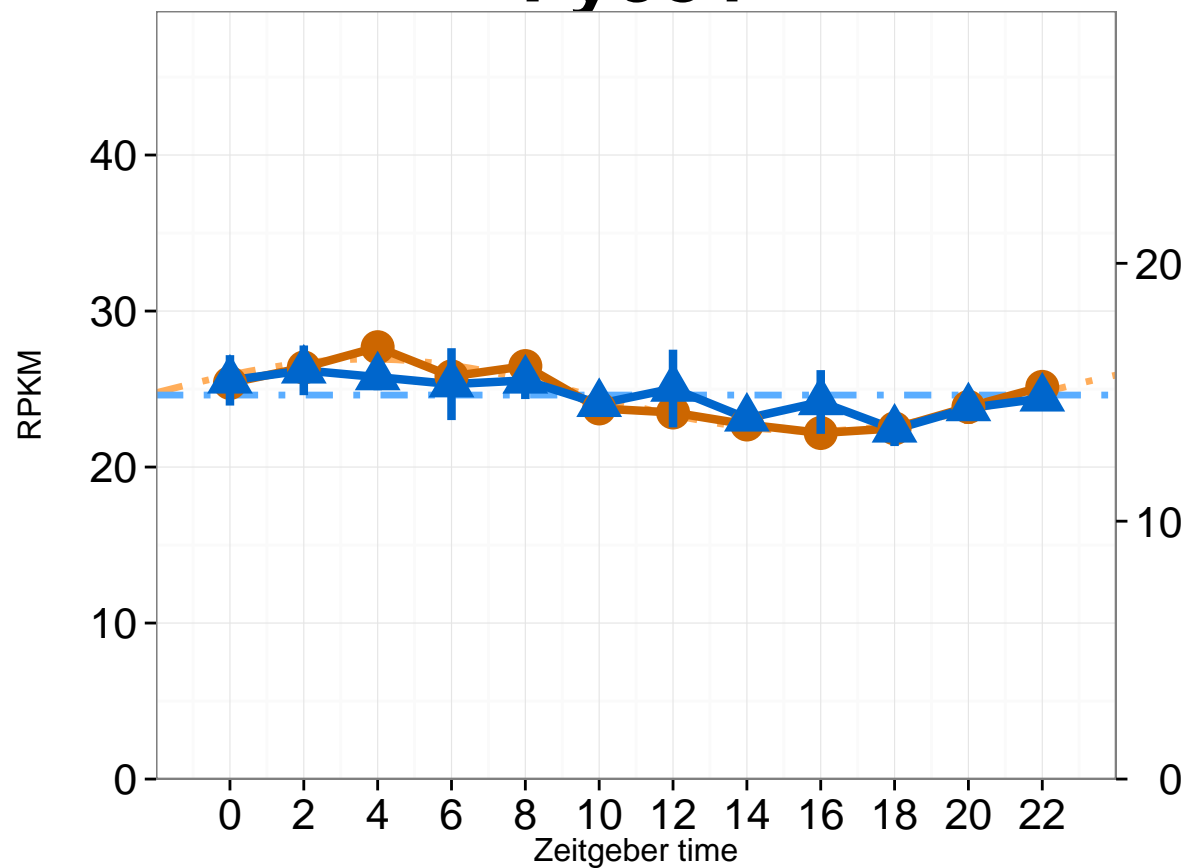

## Fyco1

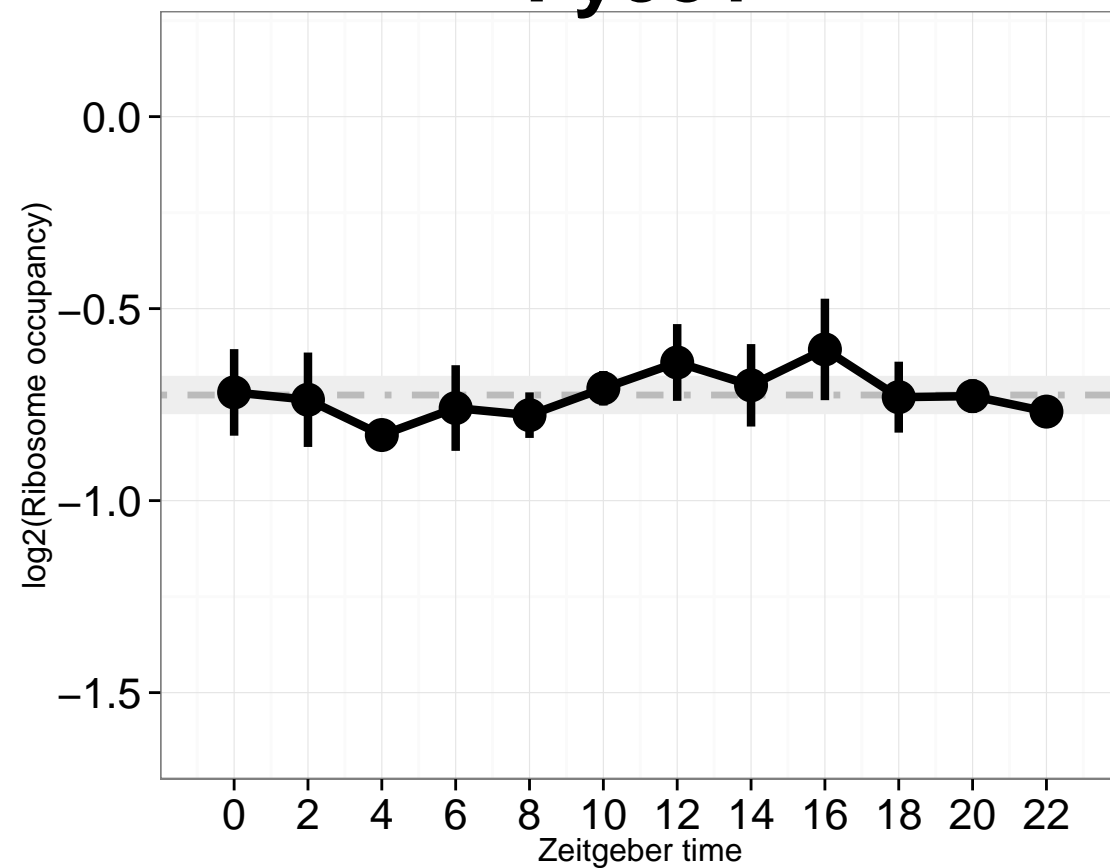

Supplement: Supplementary file 12905 [file 1]

## Ssr1

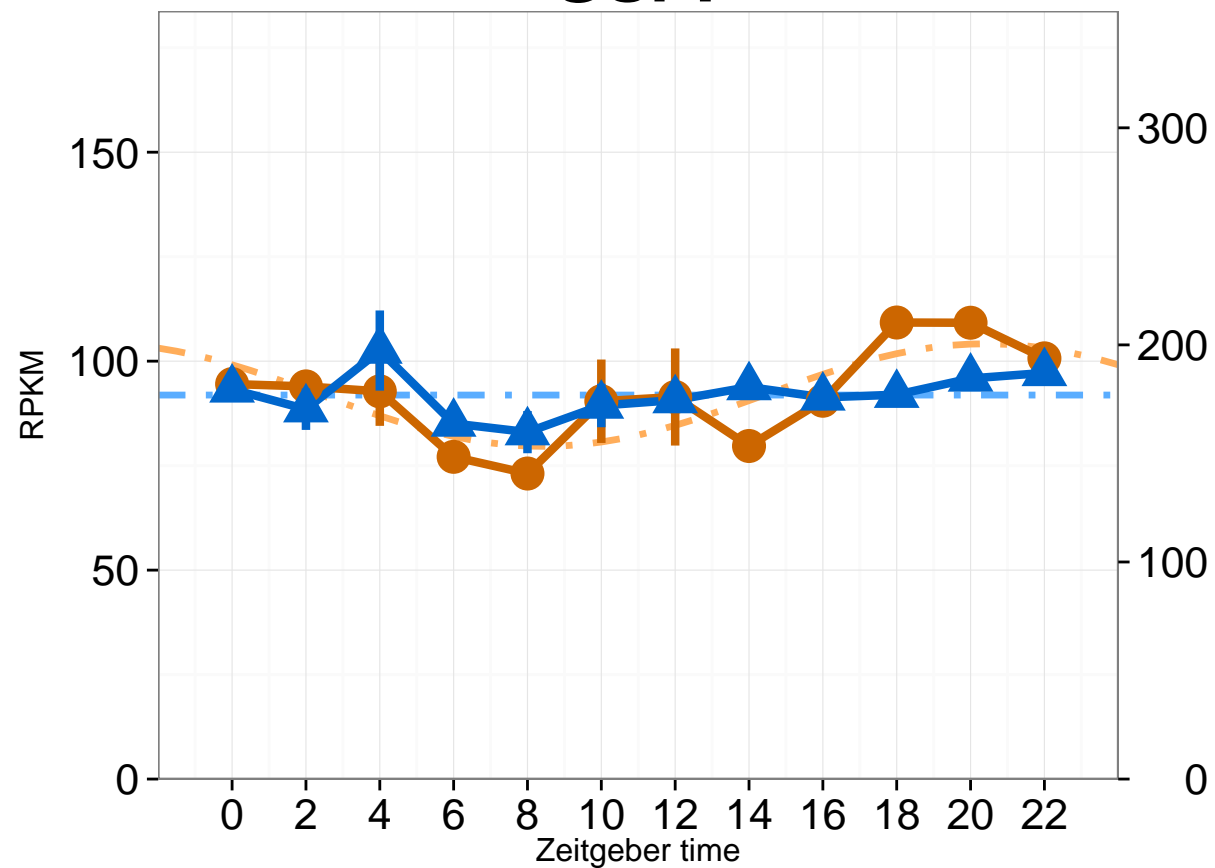

## Ssr1

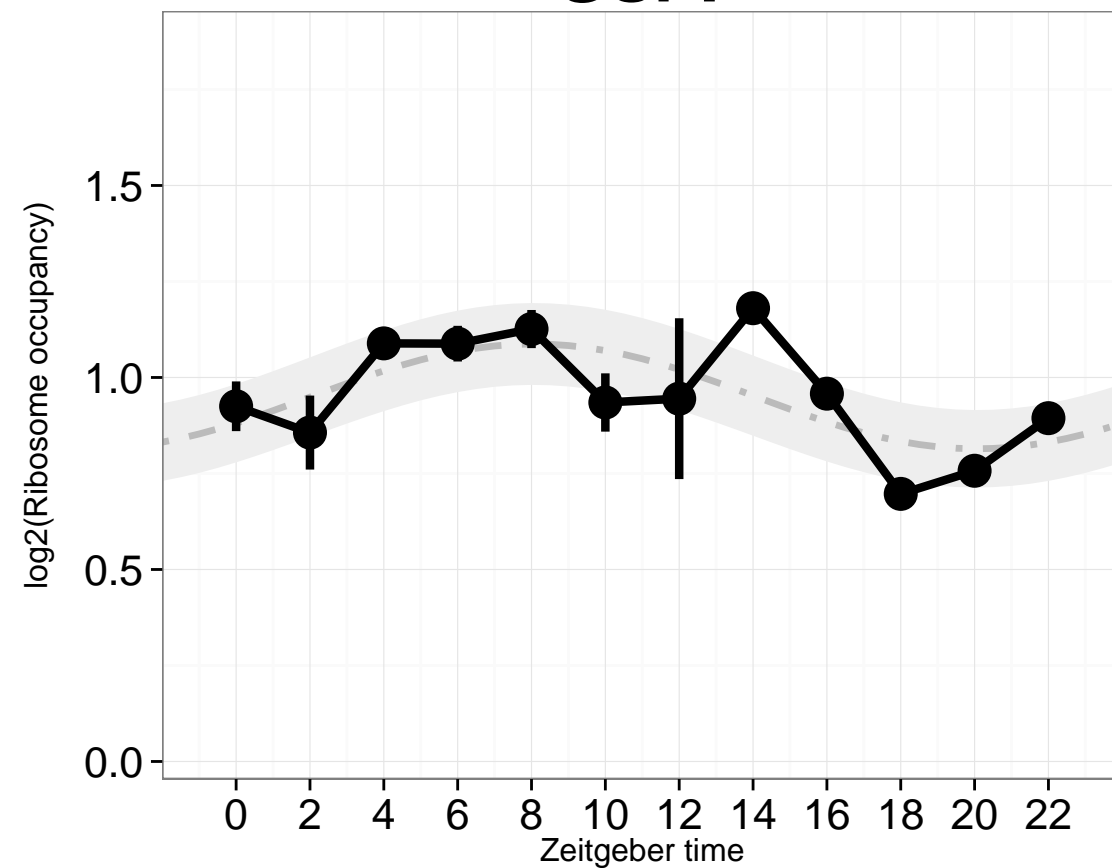

Supplement: Supplementary file 12906 [file 1]

# Psmc3ip

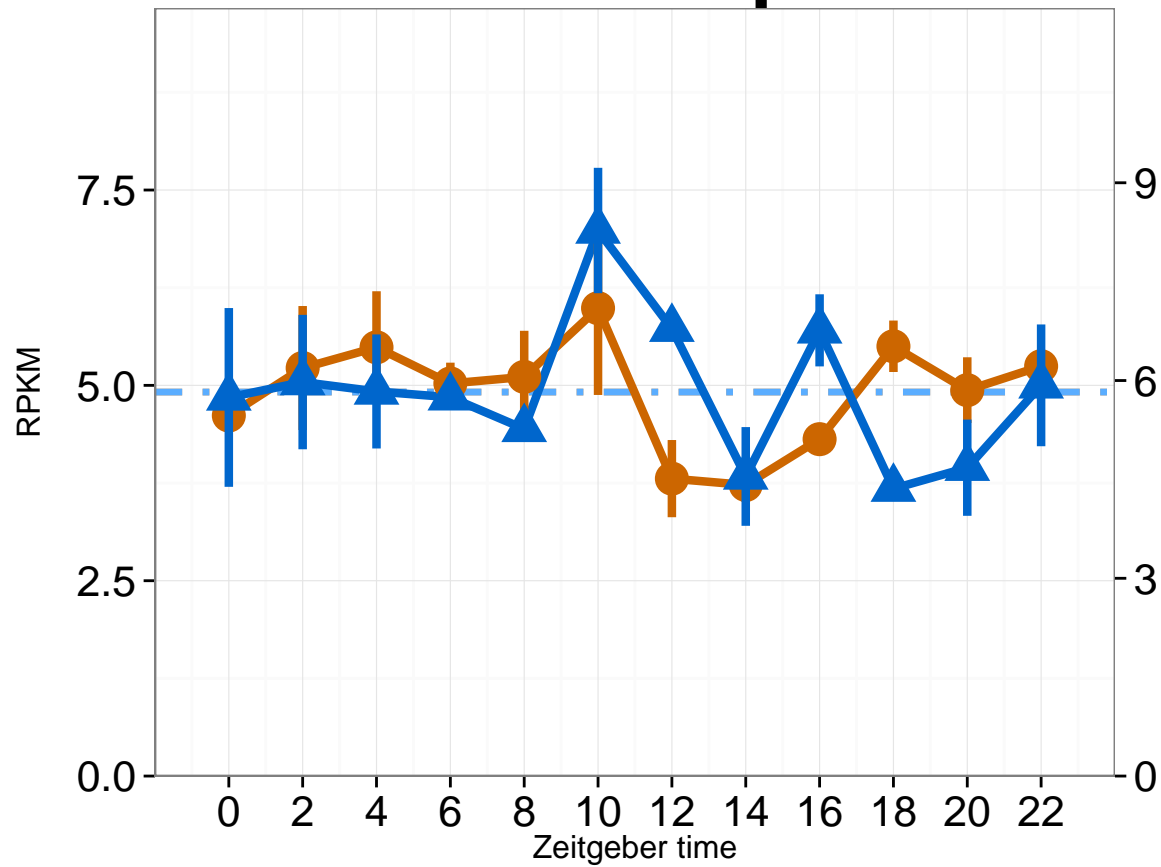

# Psmc3ip

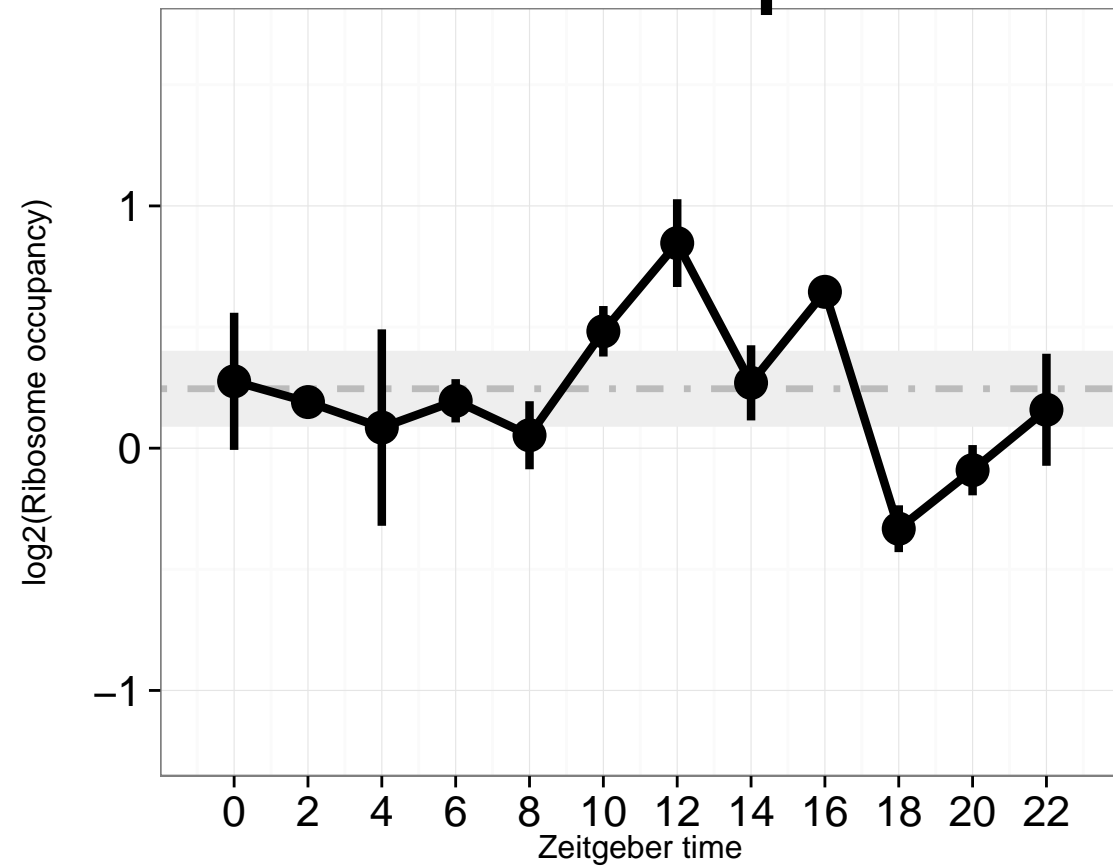

Supplement: Supplementary file 12907 [file 1]

# Foxred1

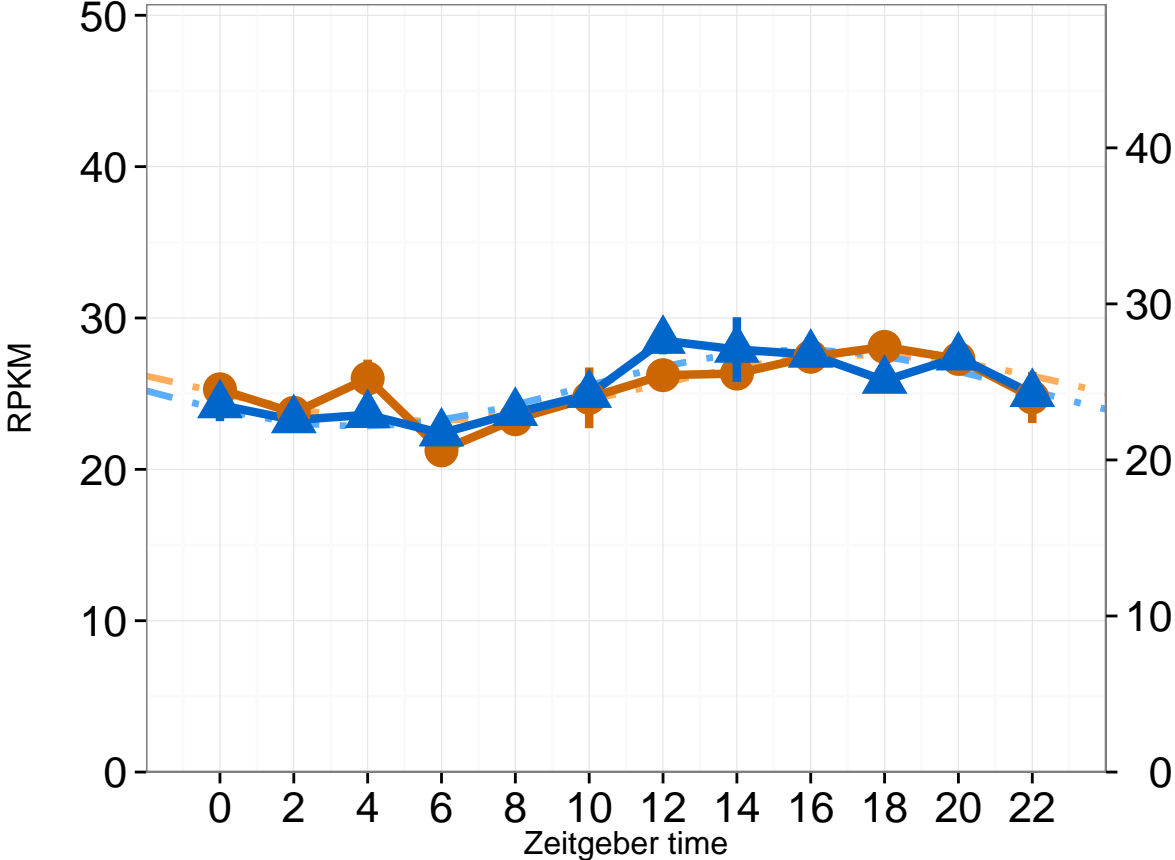

# Foxred1

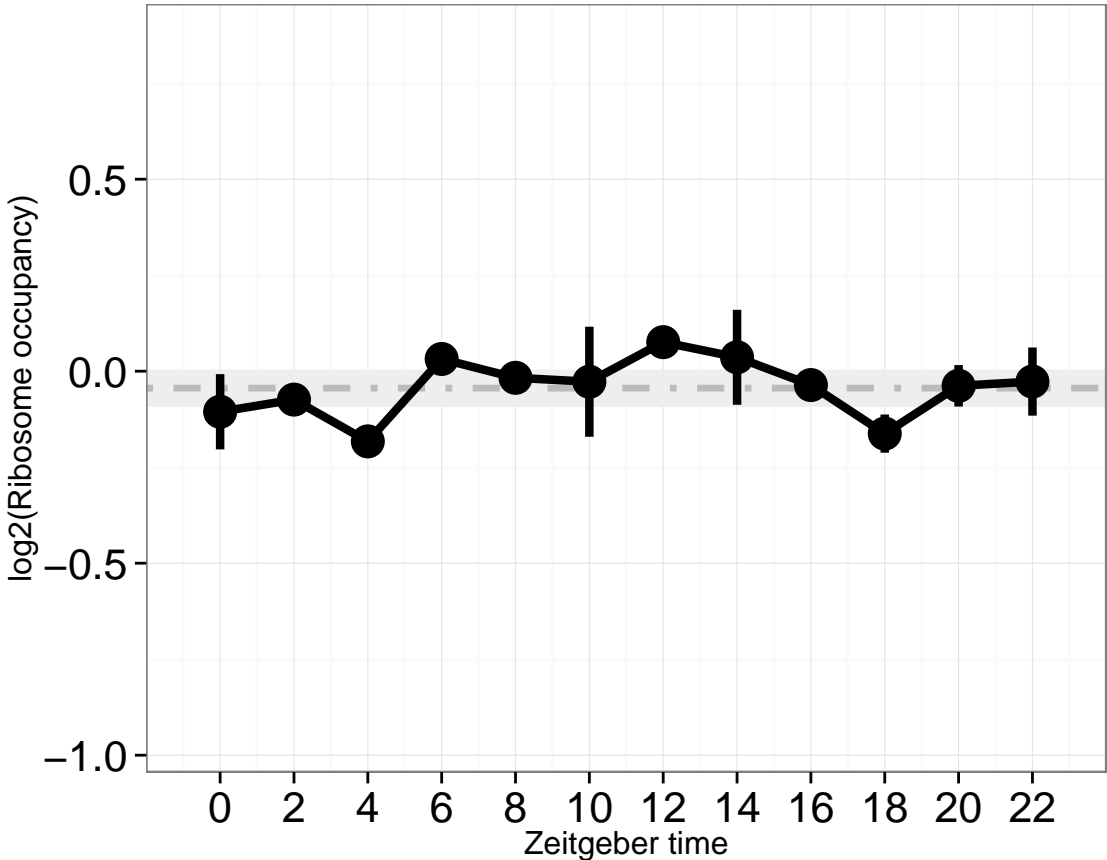

Supplement: Supplementary file 12908 [file 1]

## Rhbdl2

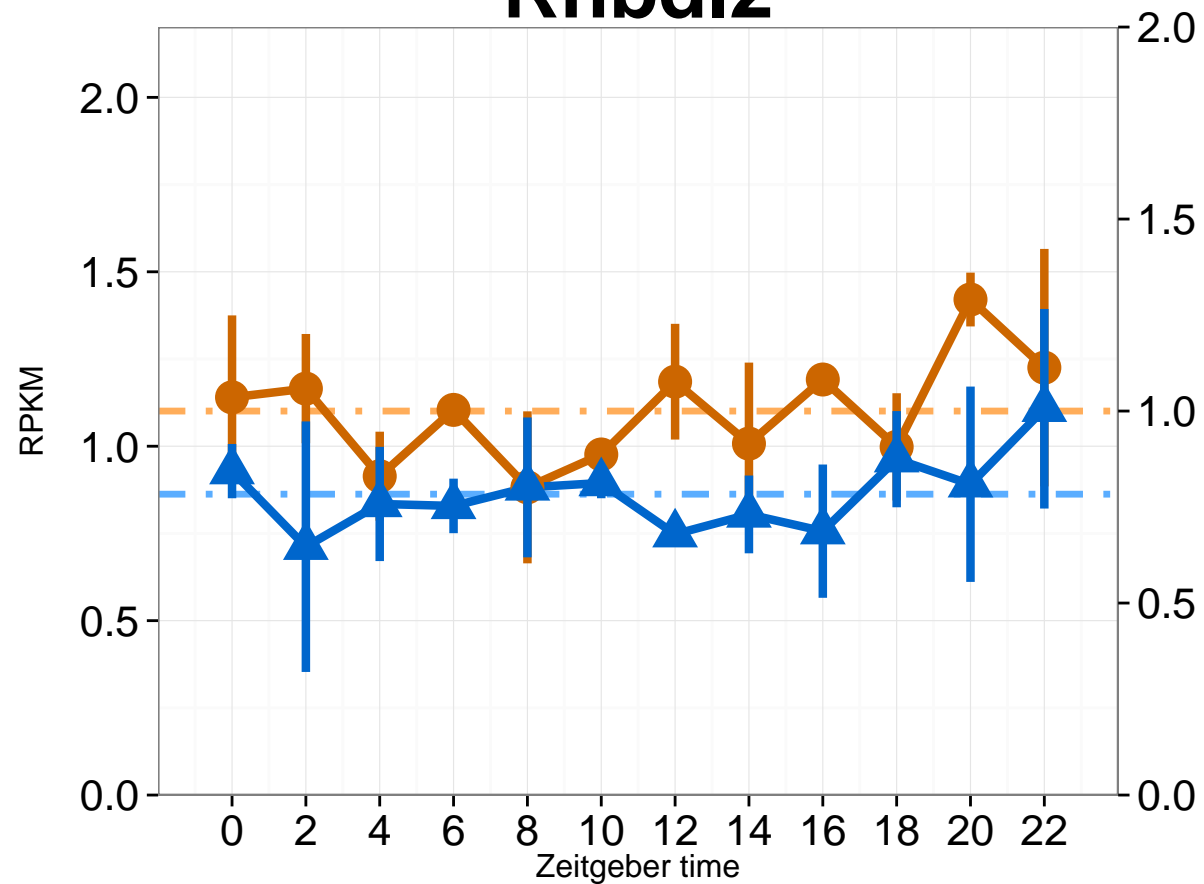

## Rhbdl2

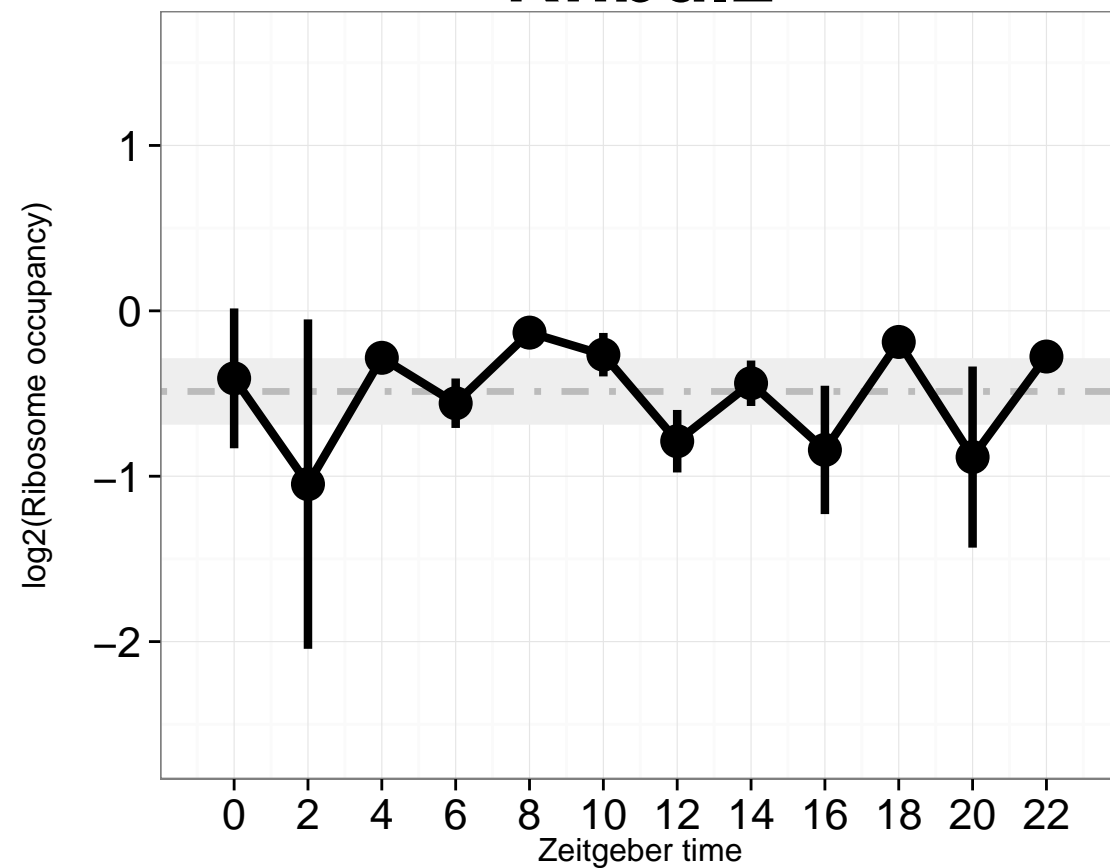

Supplement: Supplementary file 12909 [file 1]

## Rxra

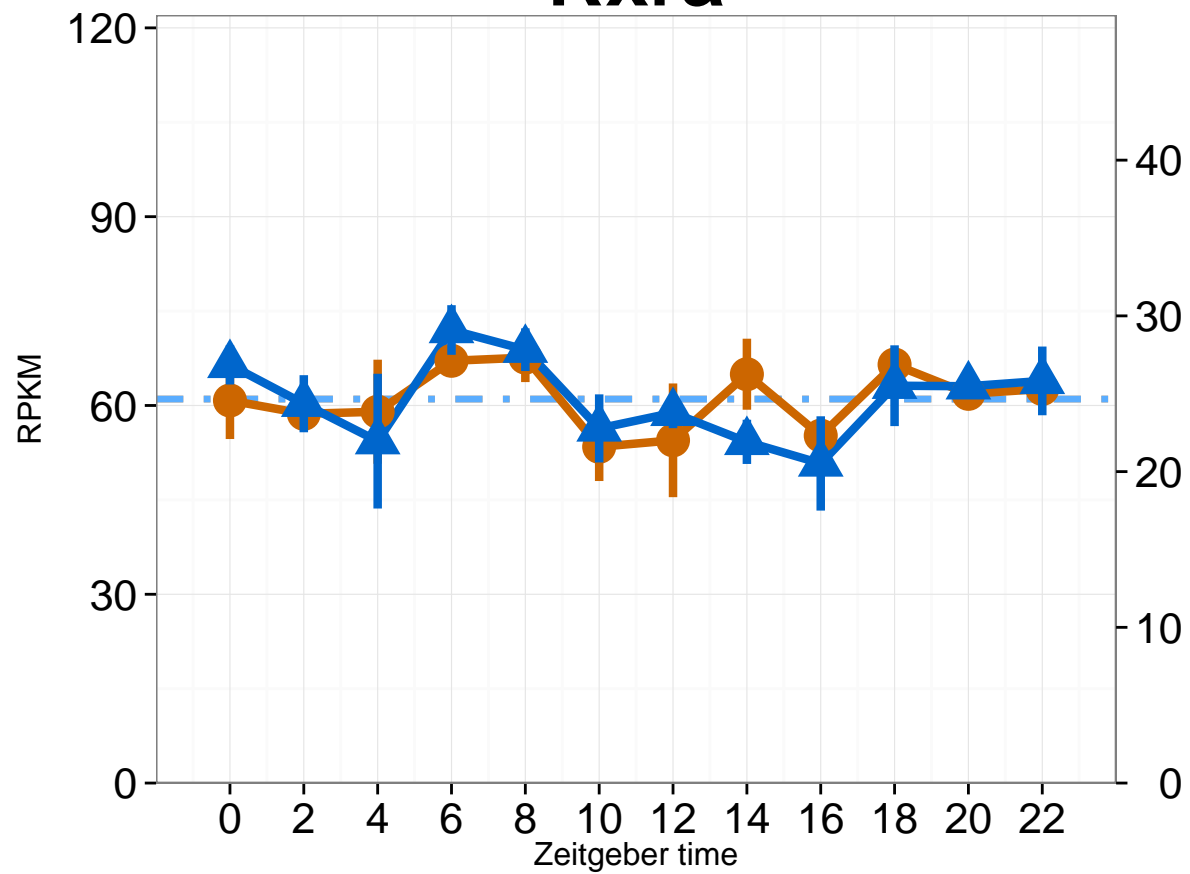

## Rxra

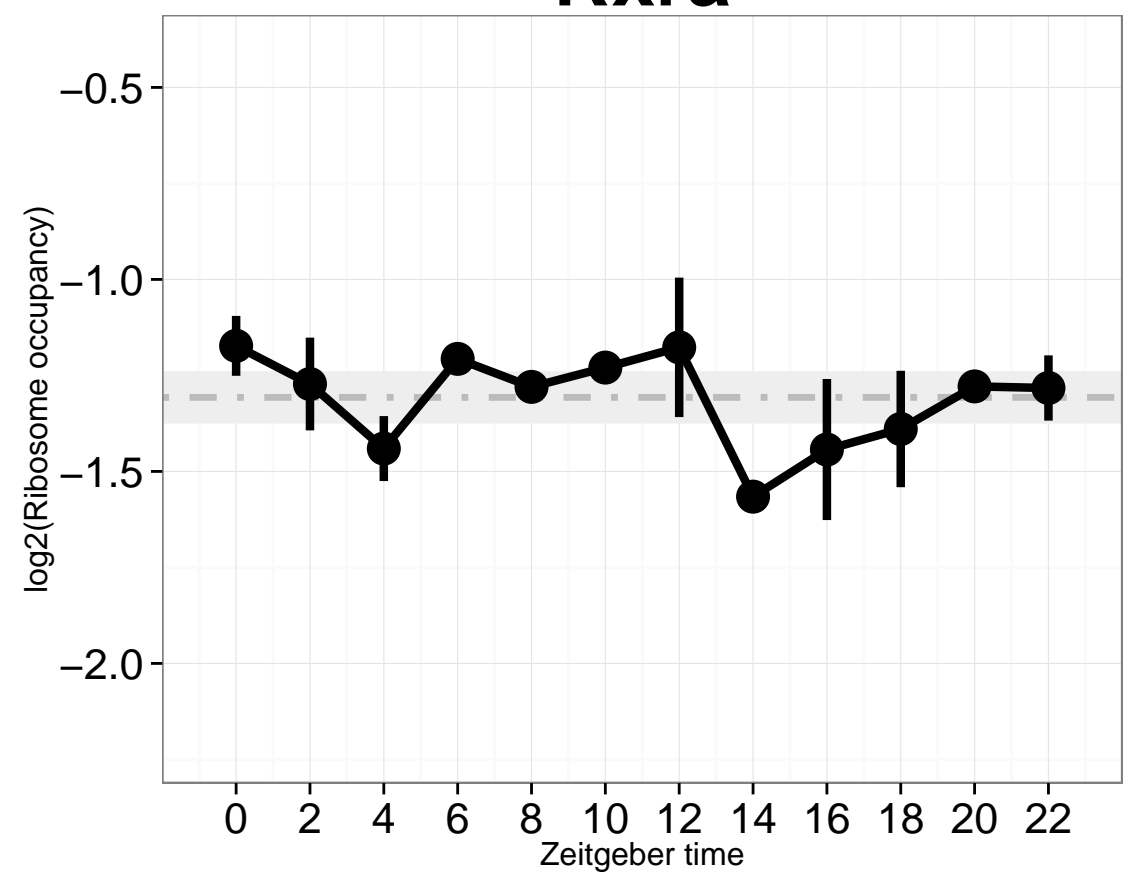

Supplement: Supplementary file 12910 [file 1]

# 1110059E24Rik

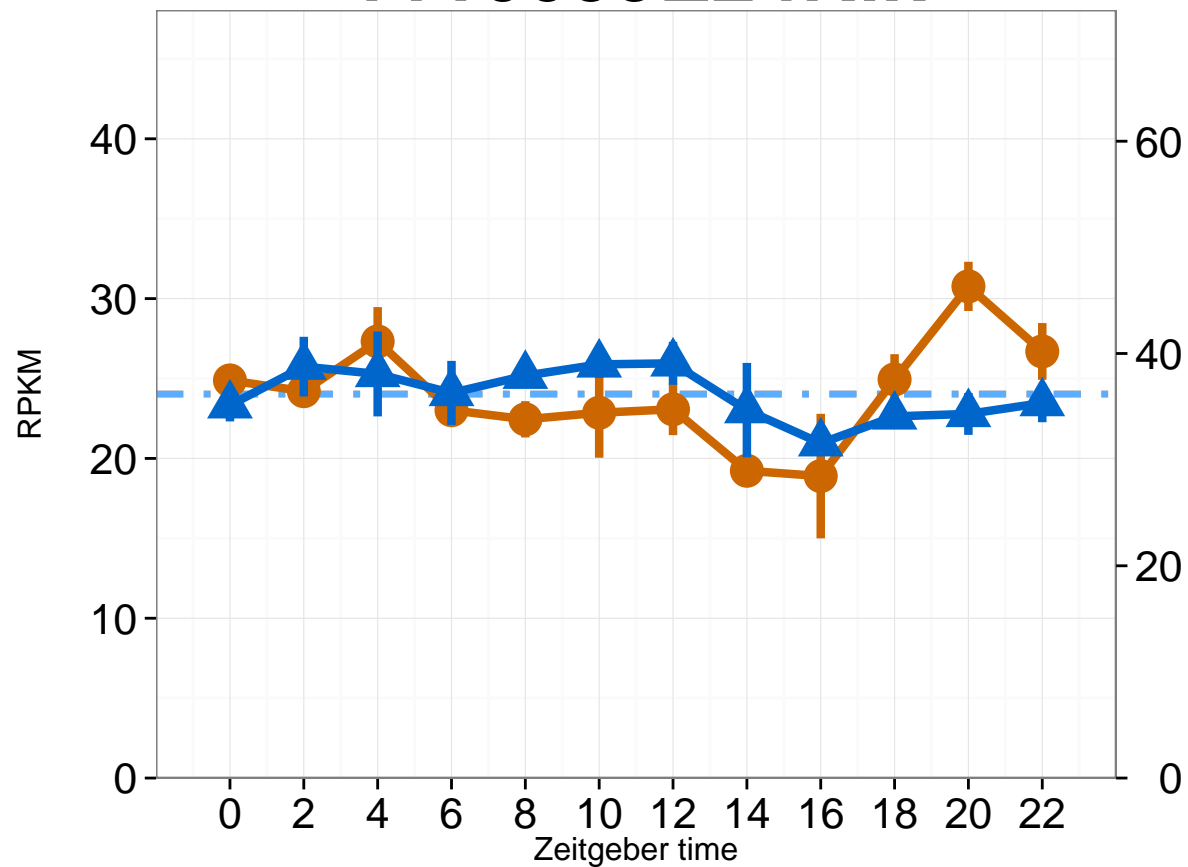

# 1110059E24Rik

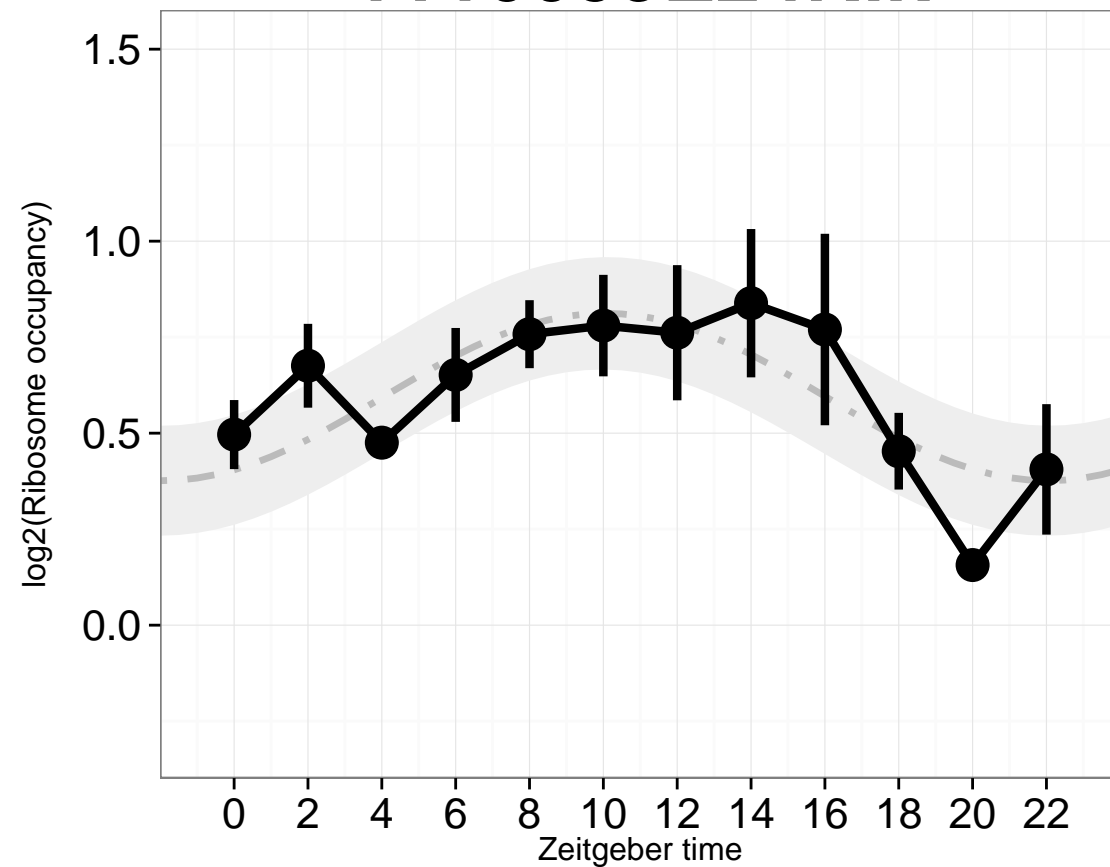

Supplement: Supplementary file 12911 [file 1]

## Polr2i

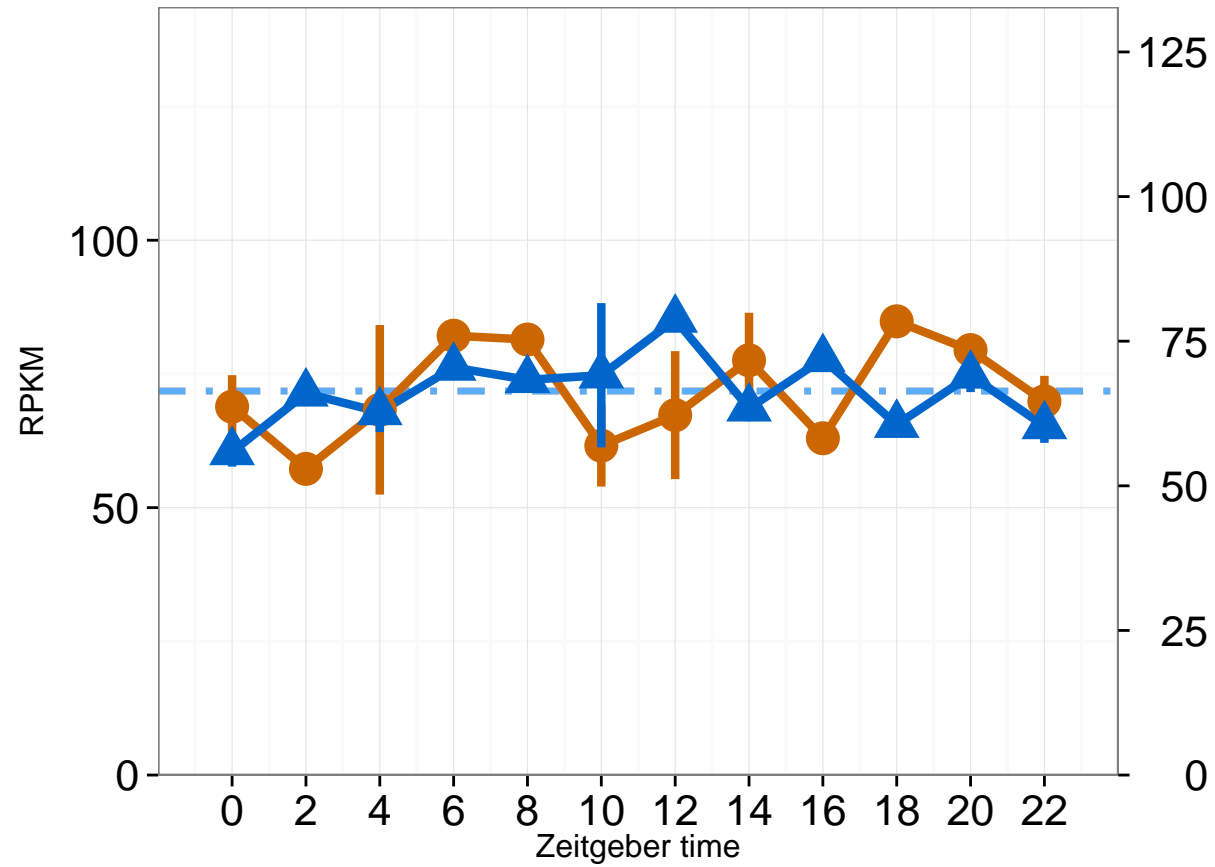

## Polr2i

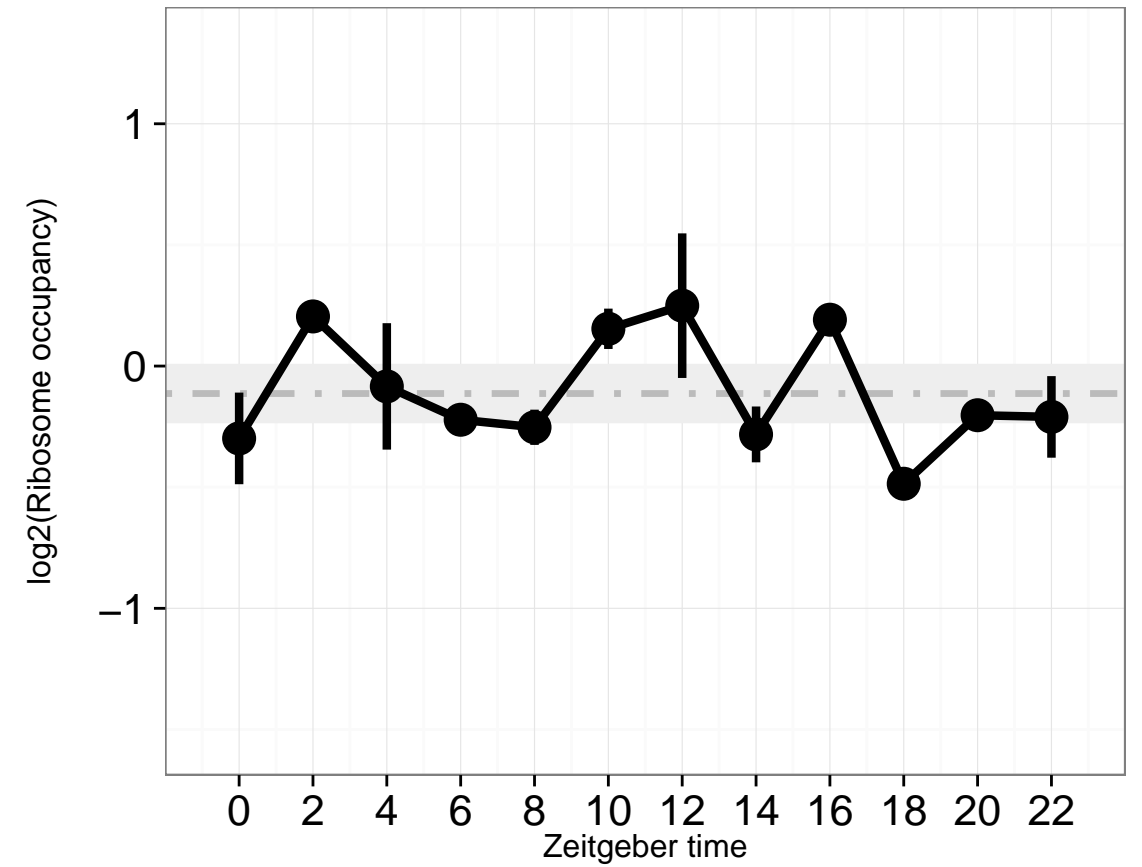

Supplement: Supplementary file 12912 [file 1]

# Gtf3c2

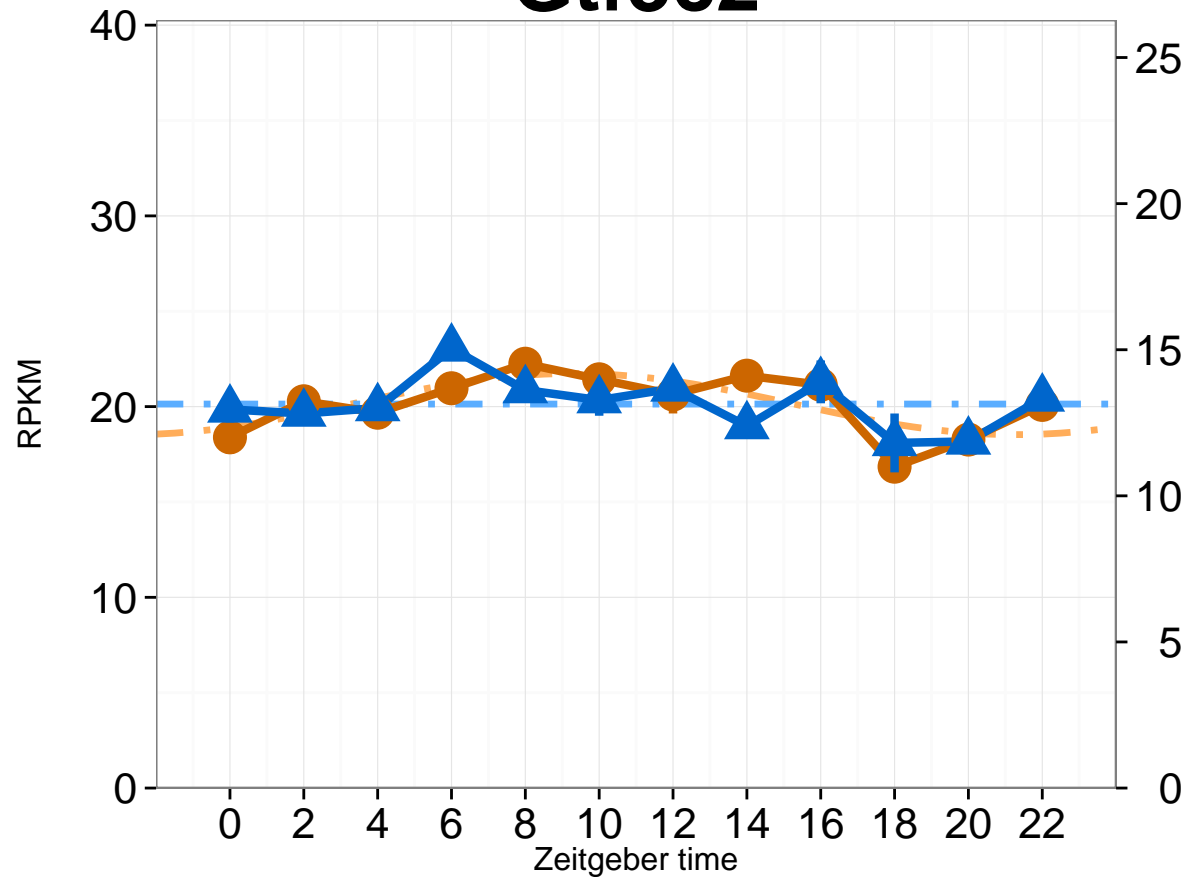

# Gtf3c2

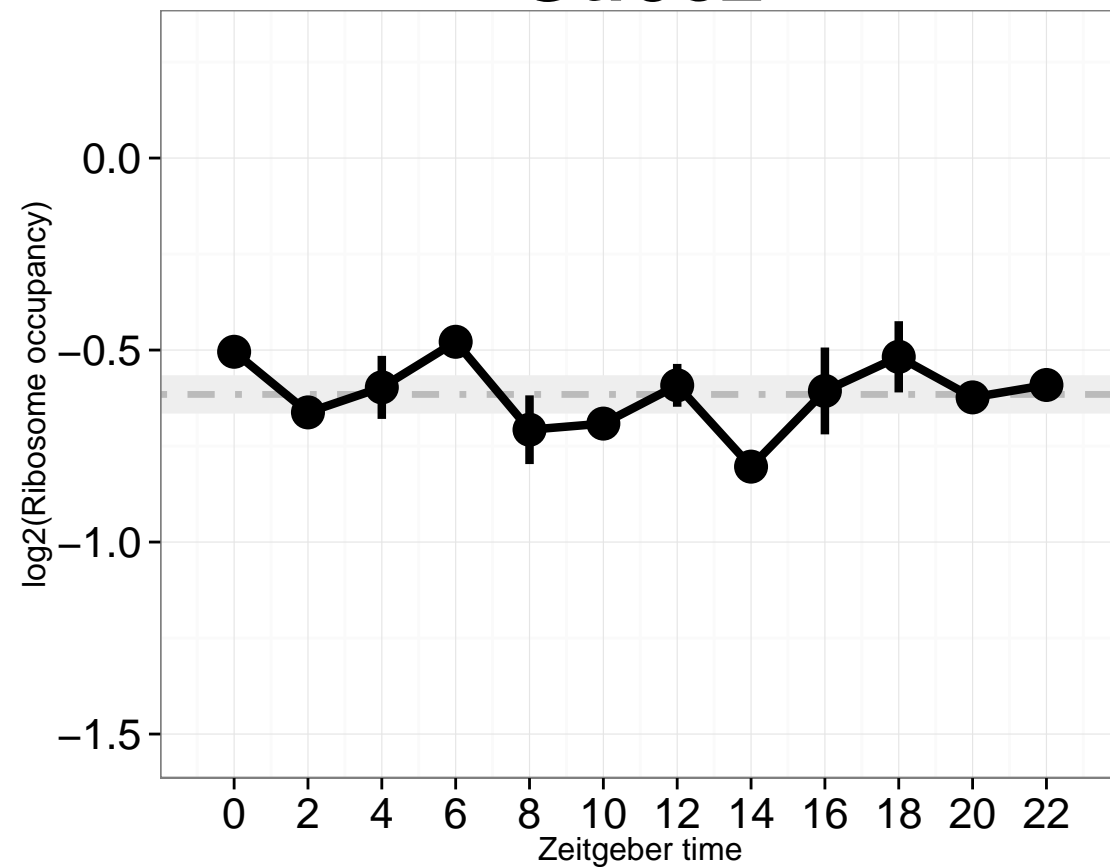

Supplement: Supplementary file 12913 [file 1]

## Ces2e

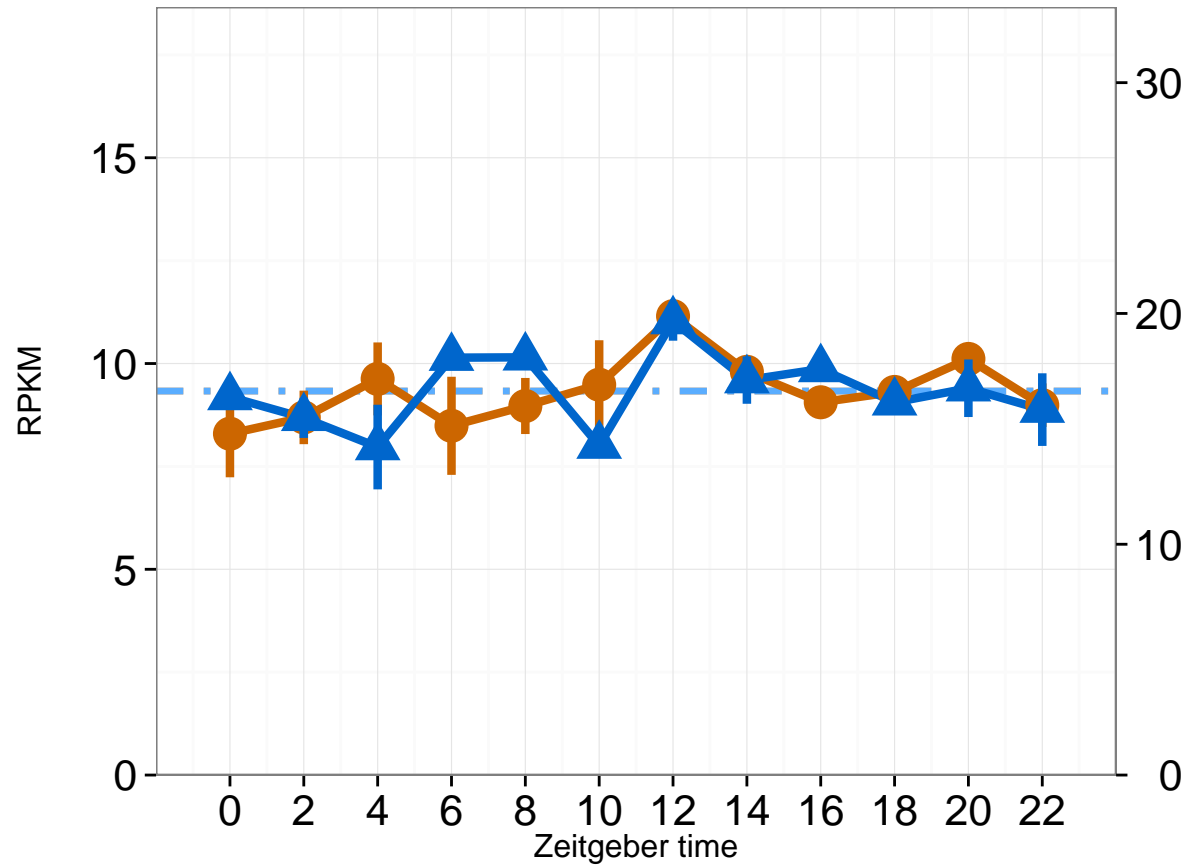

## Ces2e

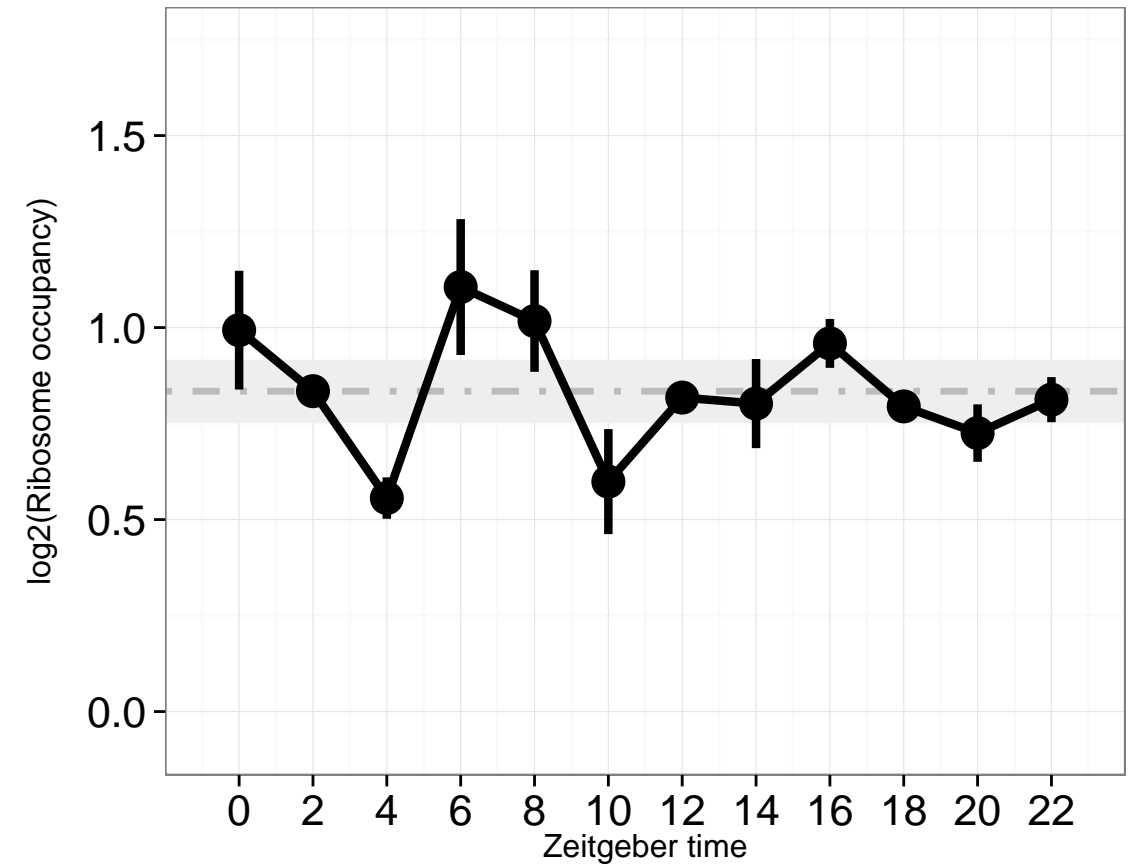

Supplement: Supplementary file 12914 [file 1]

# Atxn1l

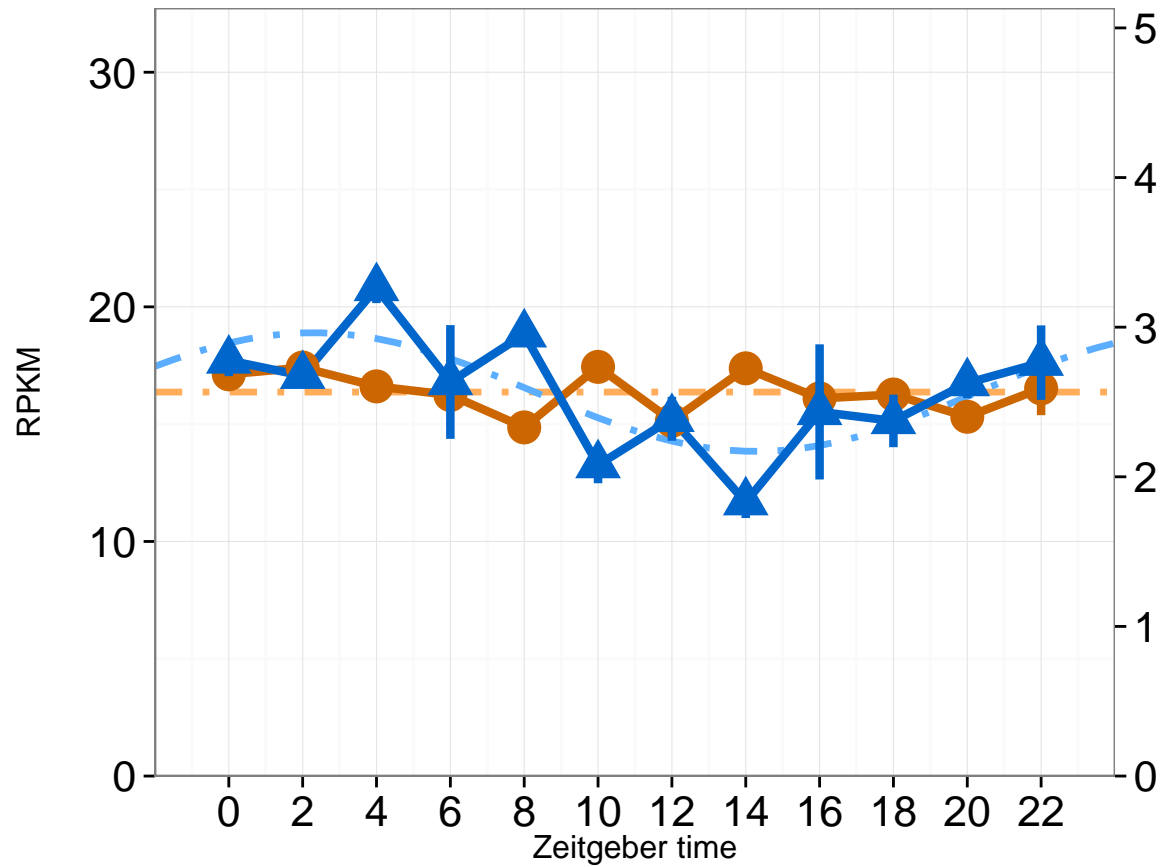

# Atxn1l

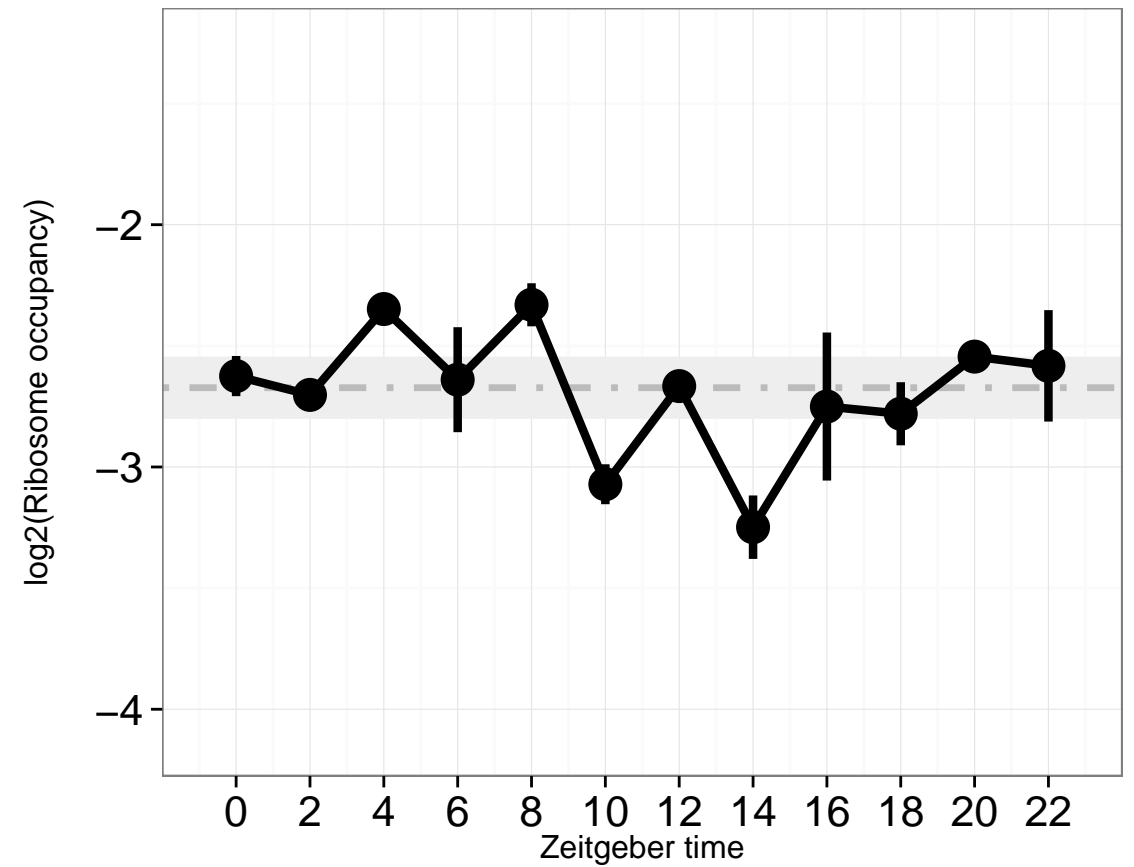

Supplement: Supplementary file 12915 [file 1]

# Atp4a

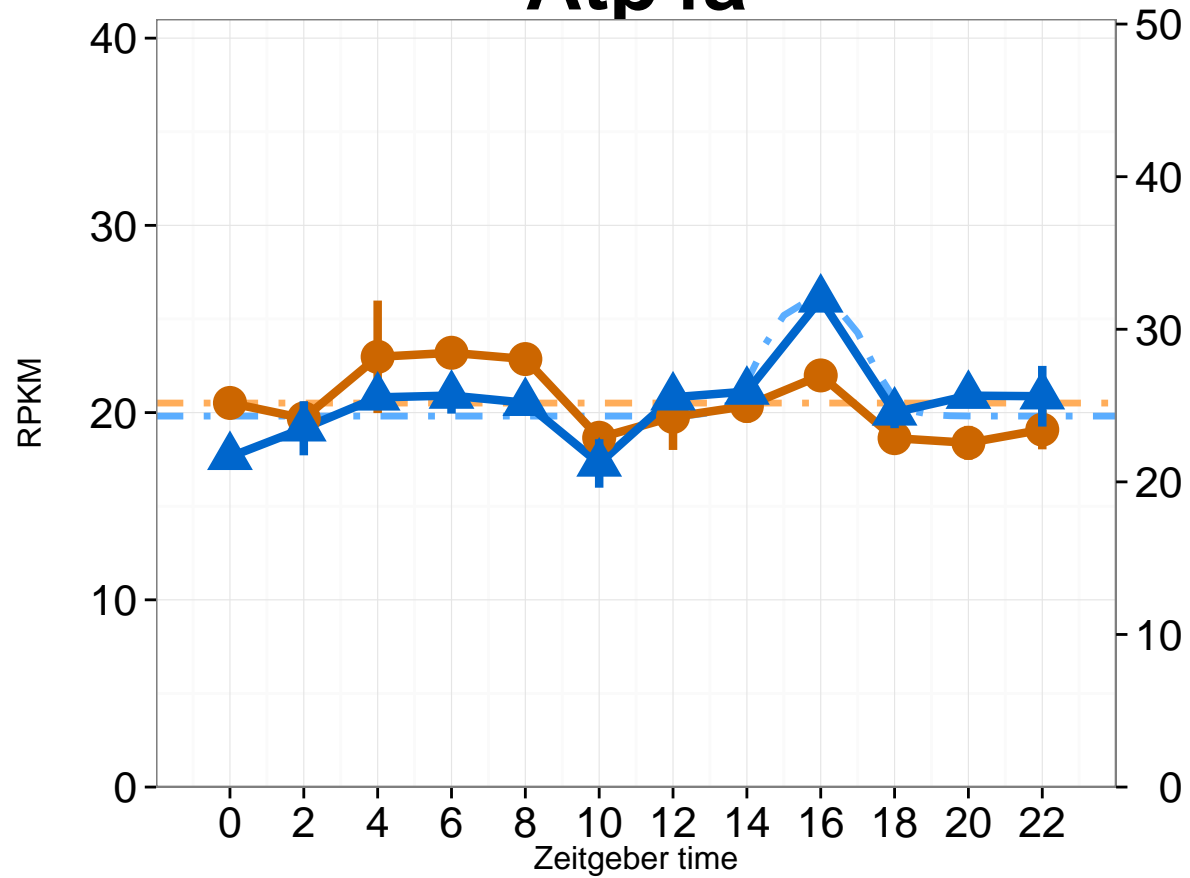

# Atp4a

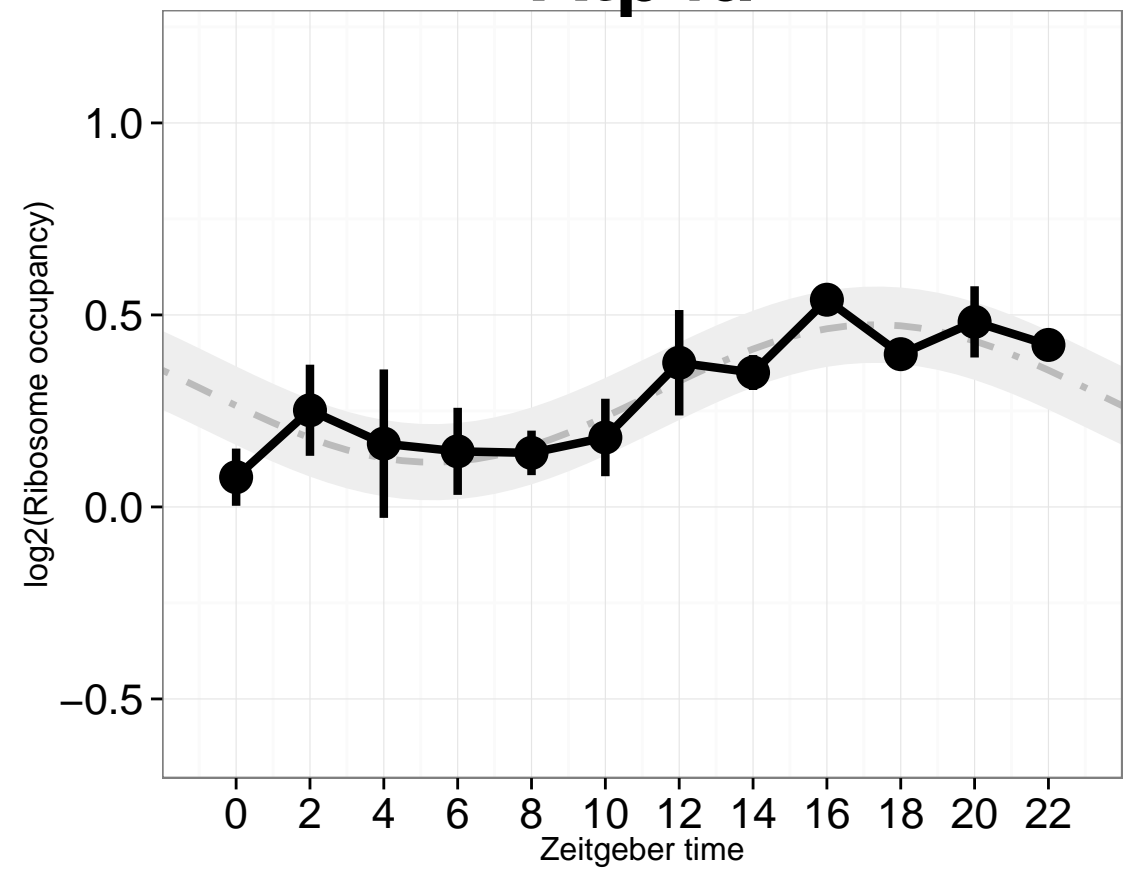

Supplement: Supplementary file 12916 [file 1]

## Glyat

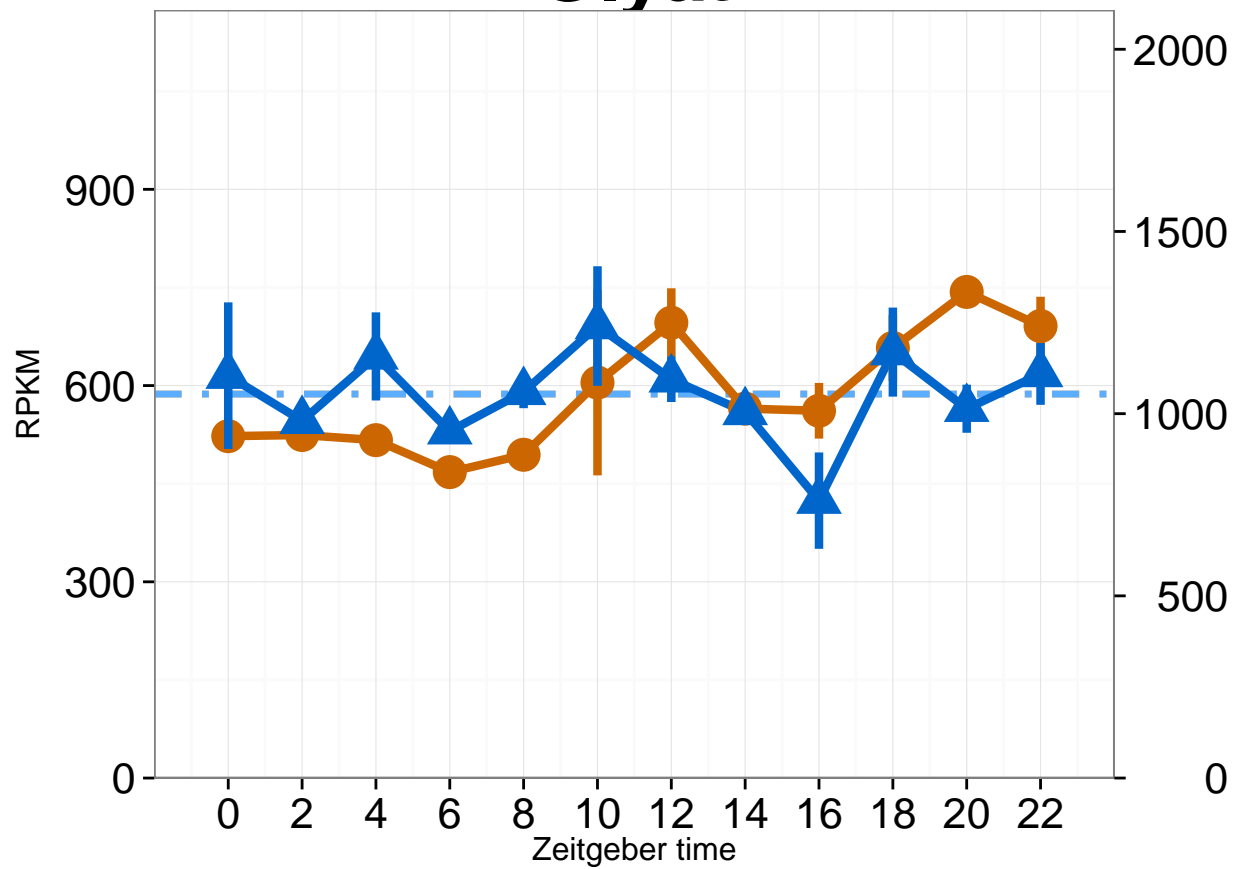

## Glyat

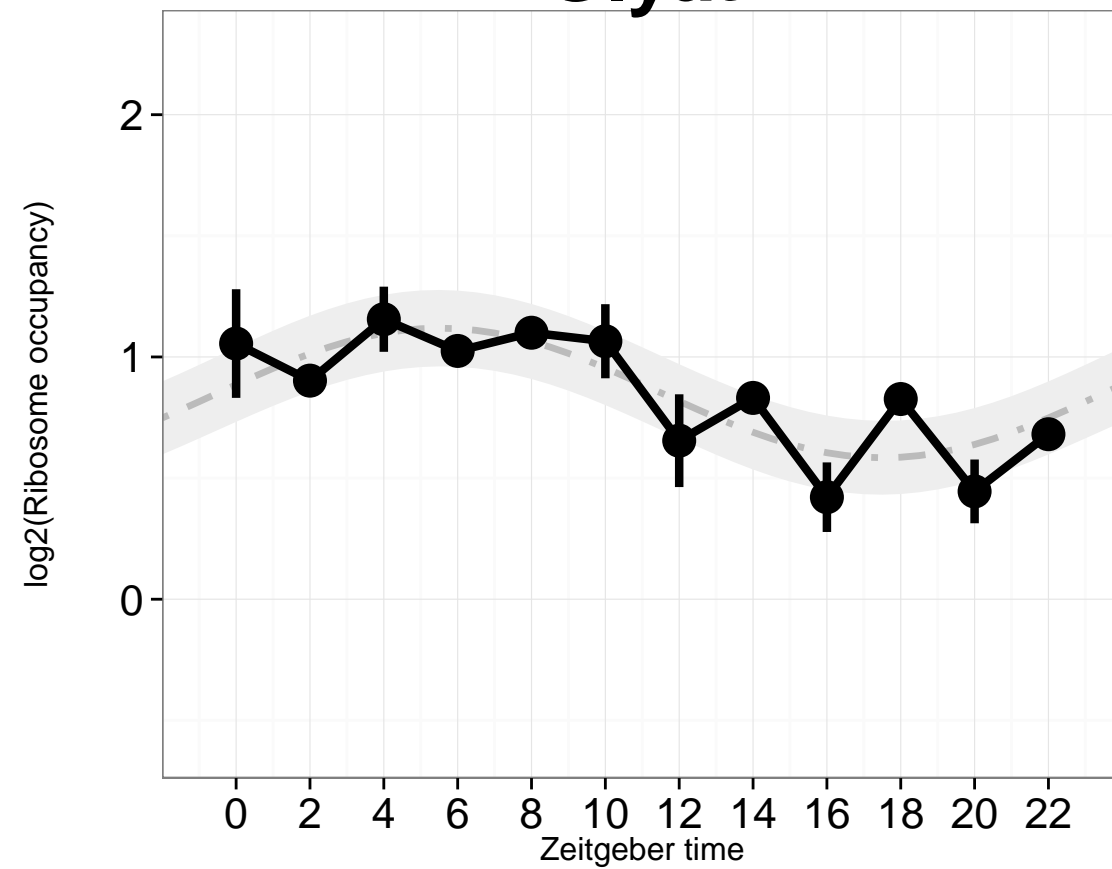

Supplement: Supplementary file 12917 [file 1]

# Actn1

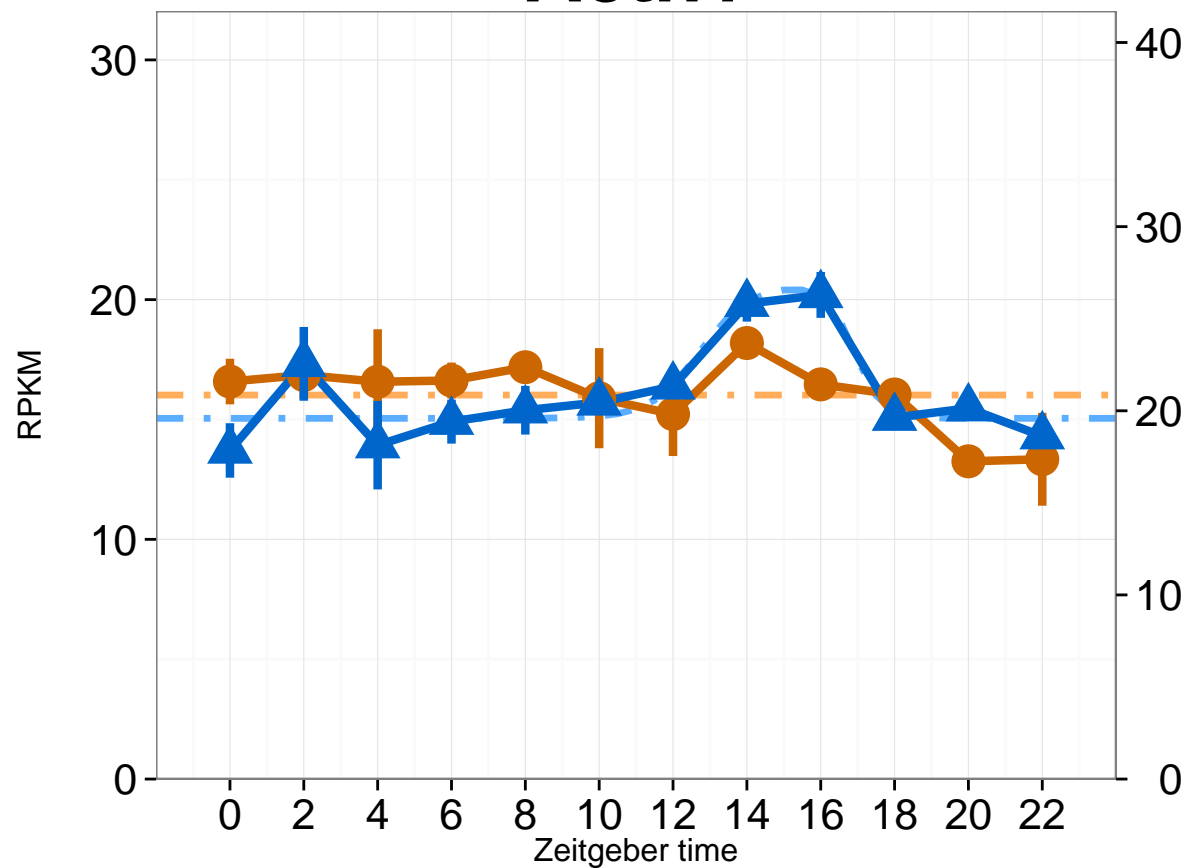

# Actn1

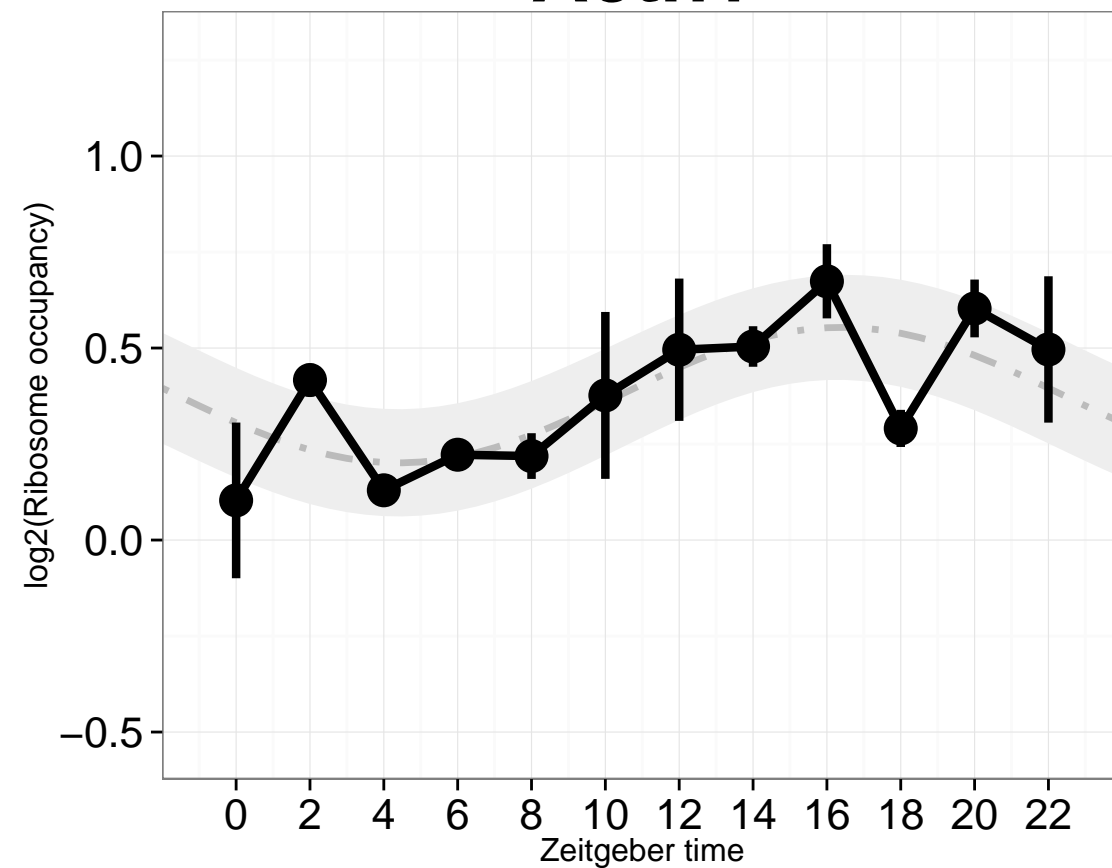

Supplement: Supplementary file 12918 [file 1]

# Fbxl3

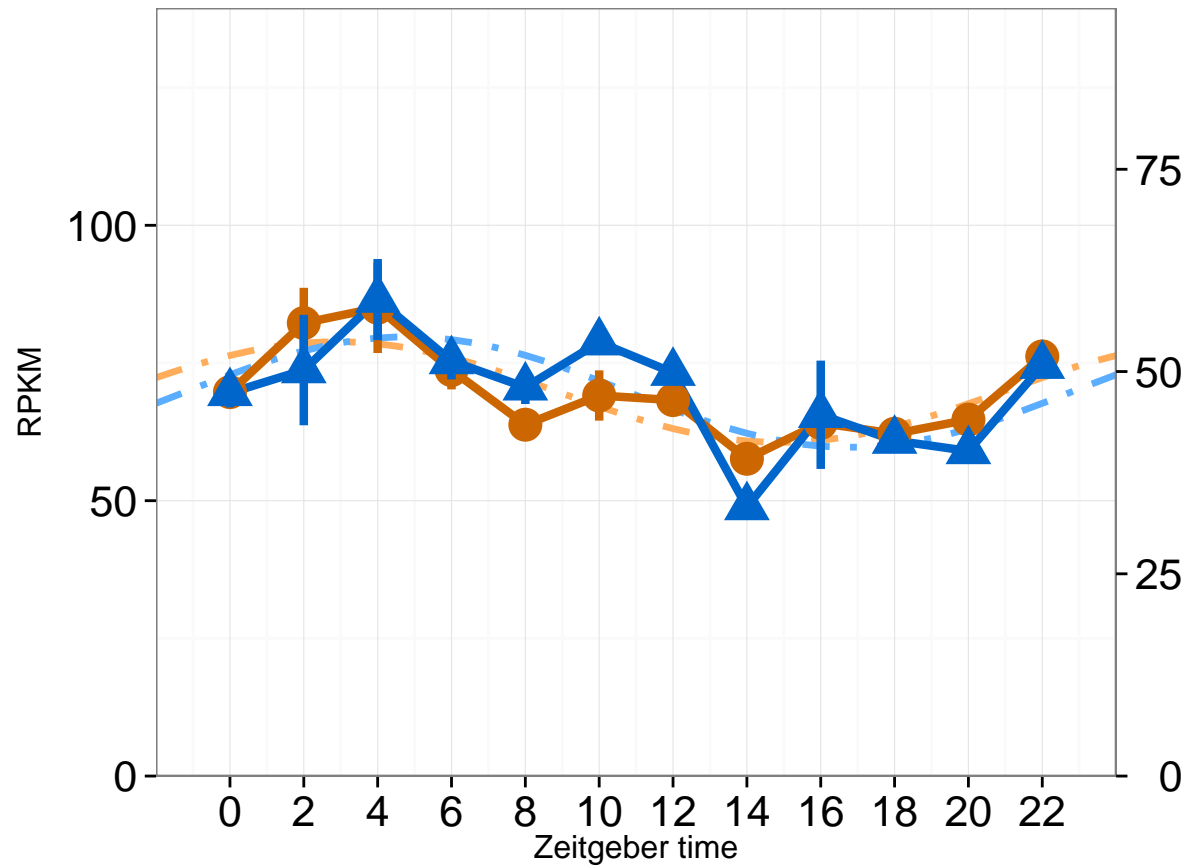

# Fbxl3

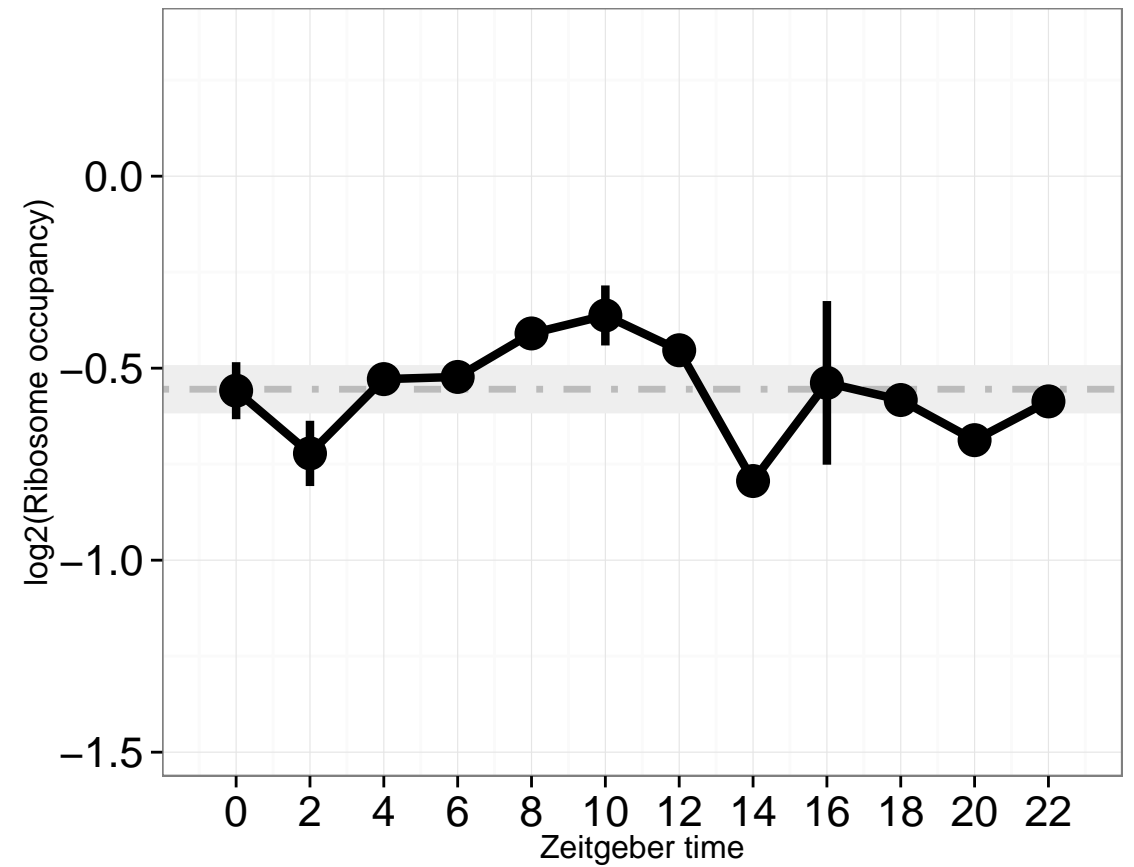

Supplement: Supplementary file 12919 [file 1]

## Lmo1

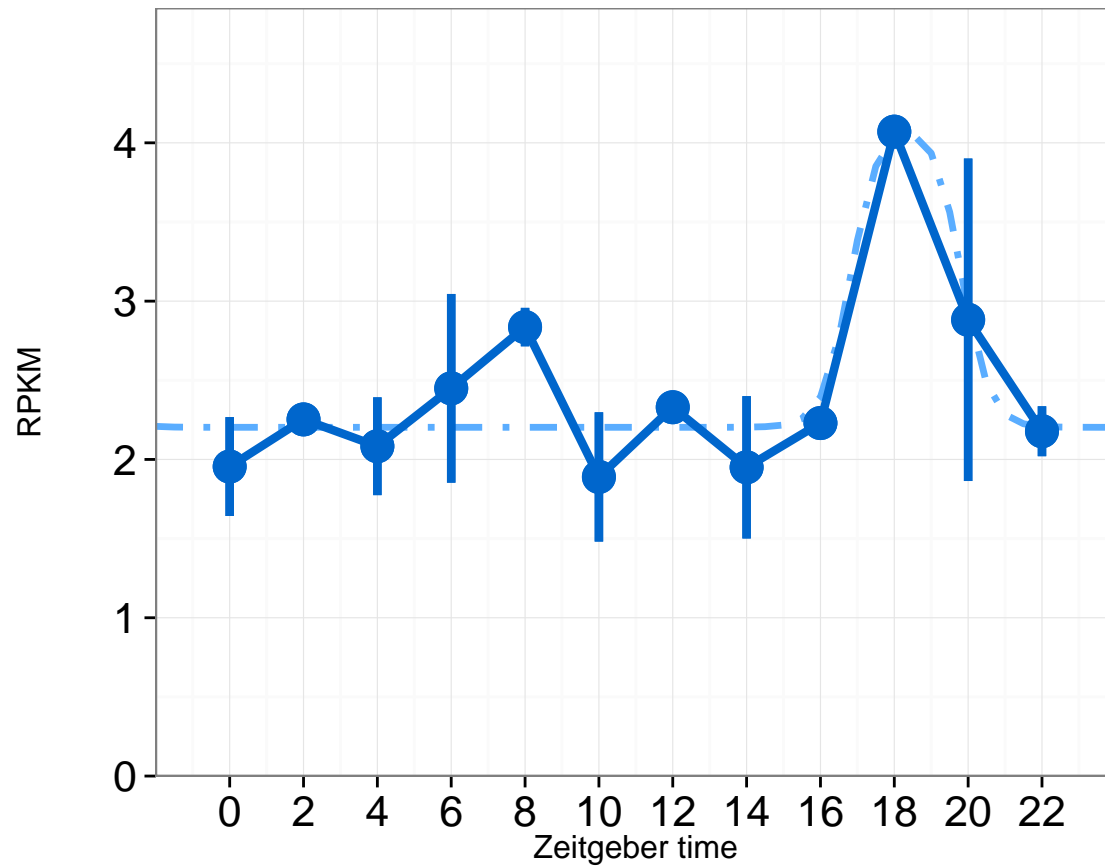

## Lmo1 log2(Ribosome occupancy)

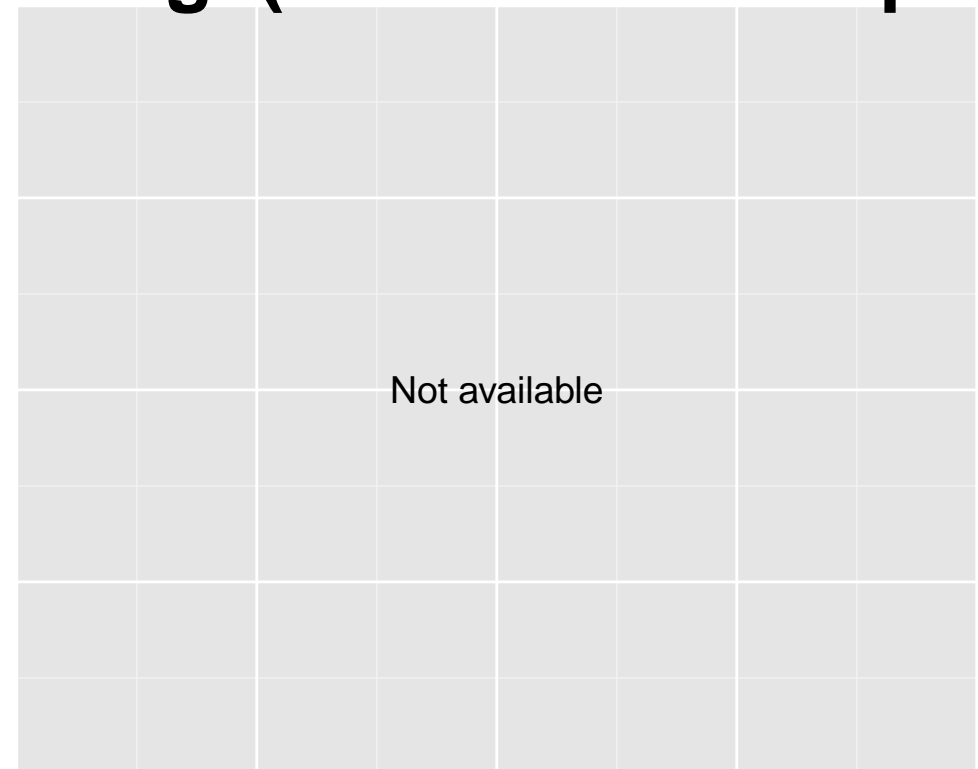

Supplement: Supplementary file 12920 [file 1]

**1700009P17Rik TR**

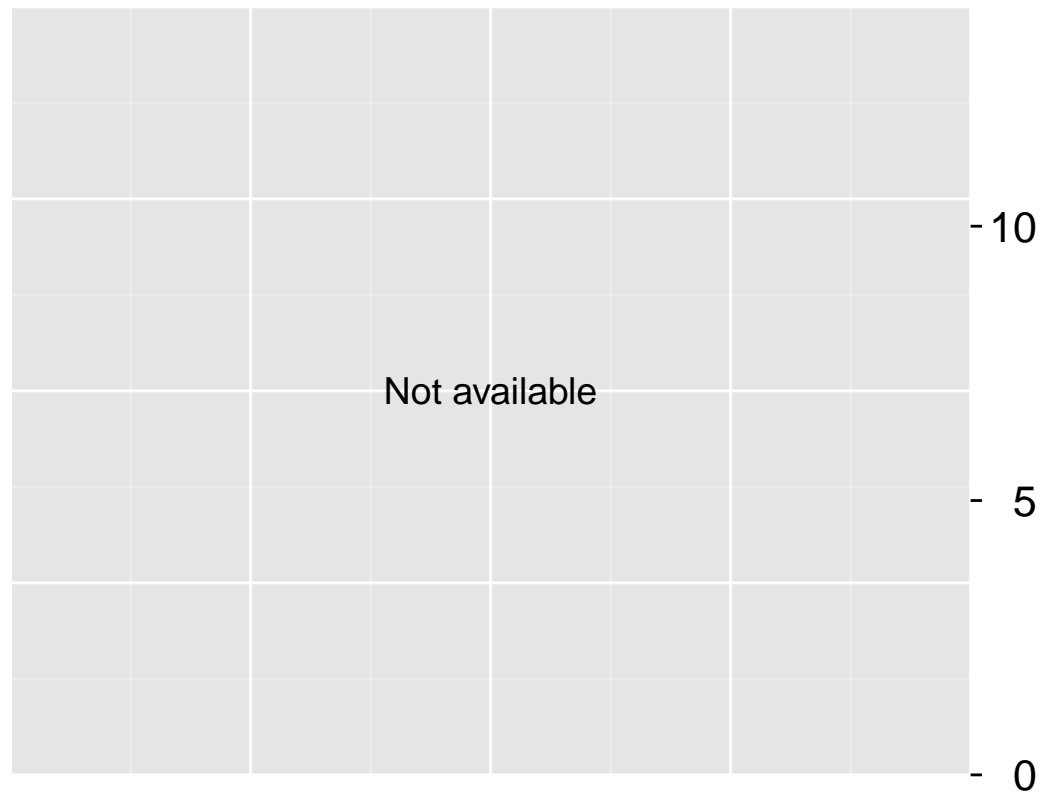

**1700009P17Rik log2(Ribosome occup**

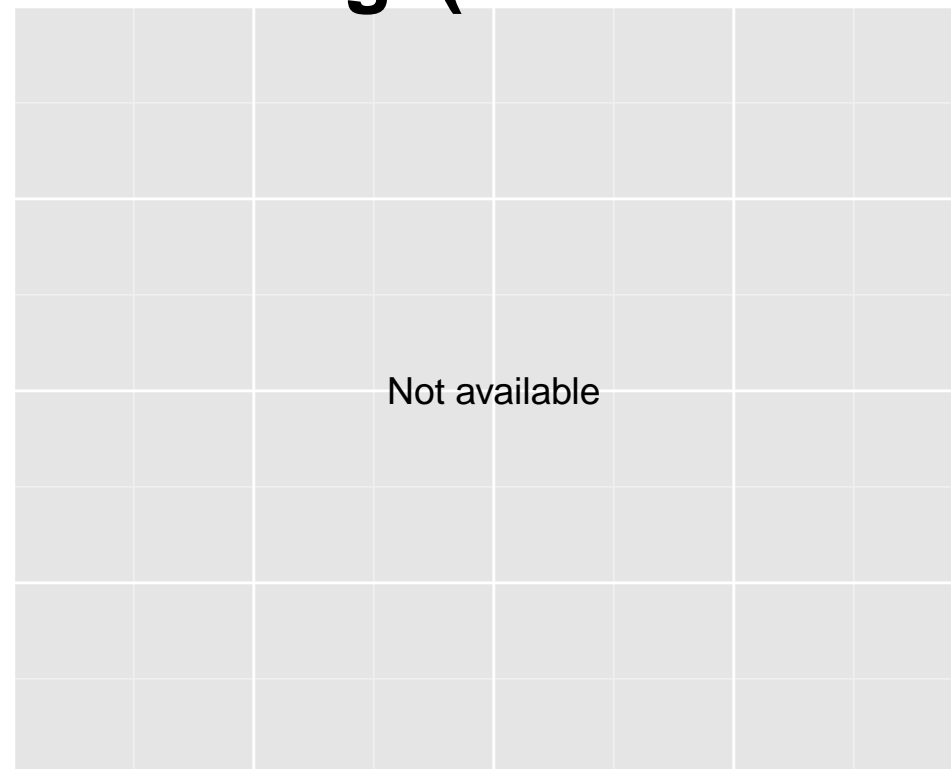

Supplement: Supplementary file 12921 [file 1]

# Rab40b

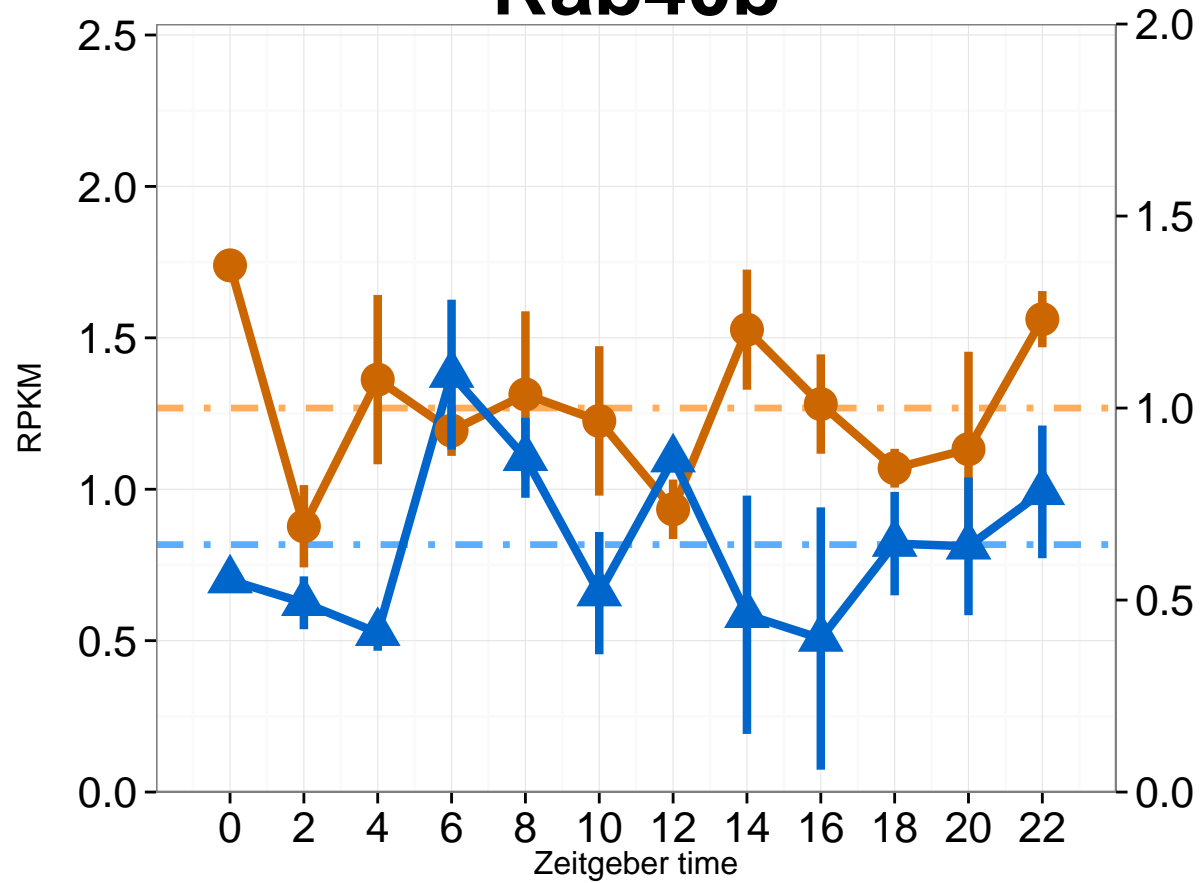

# Rab40b

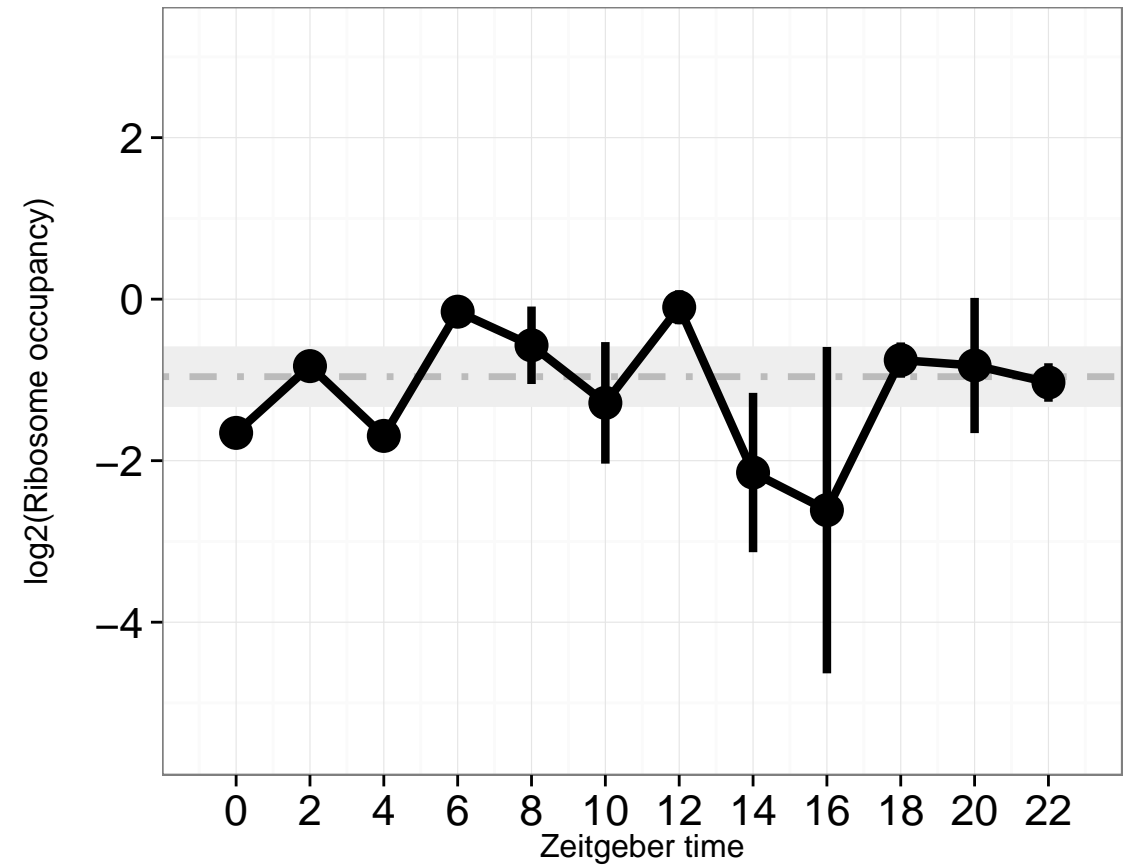

Supplement: Supplementary file 12922 [file 1]

## Ydjc

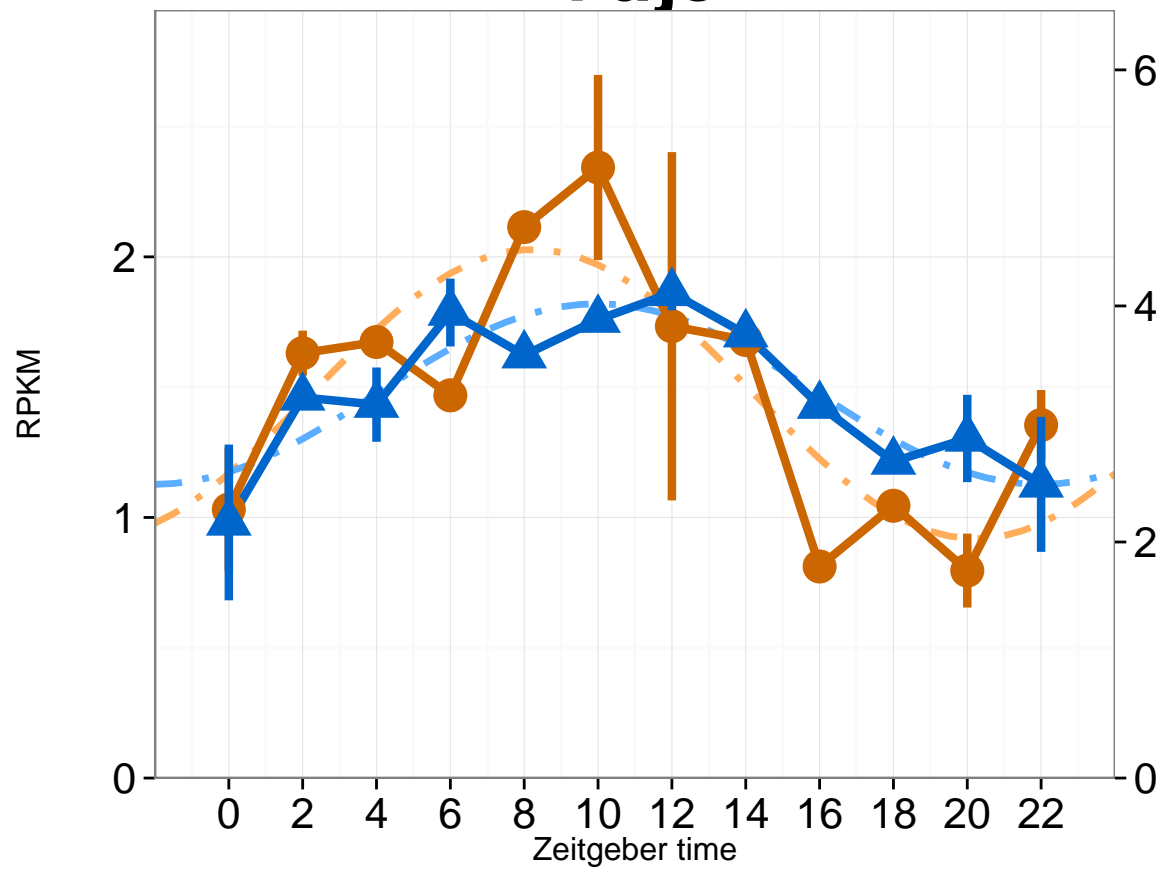

## Ydjc

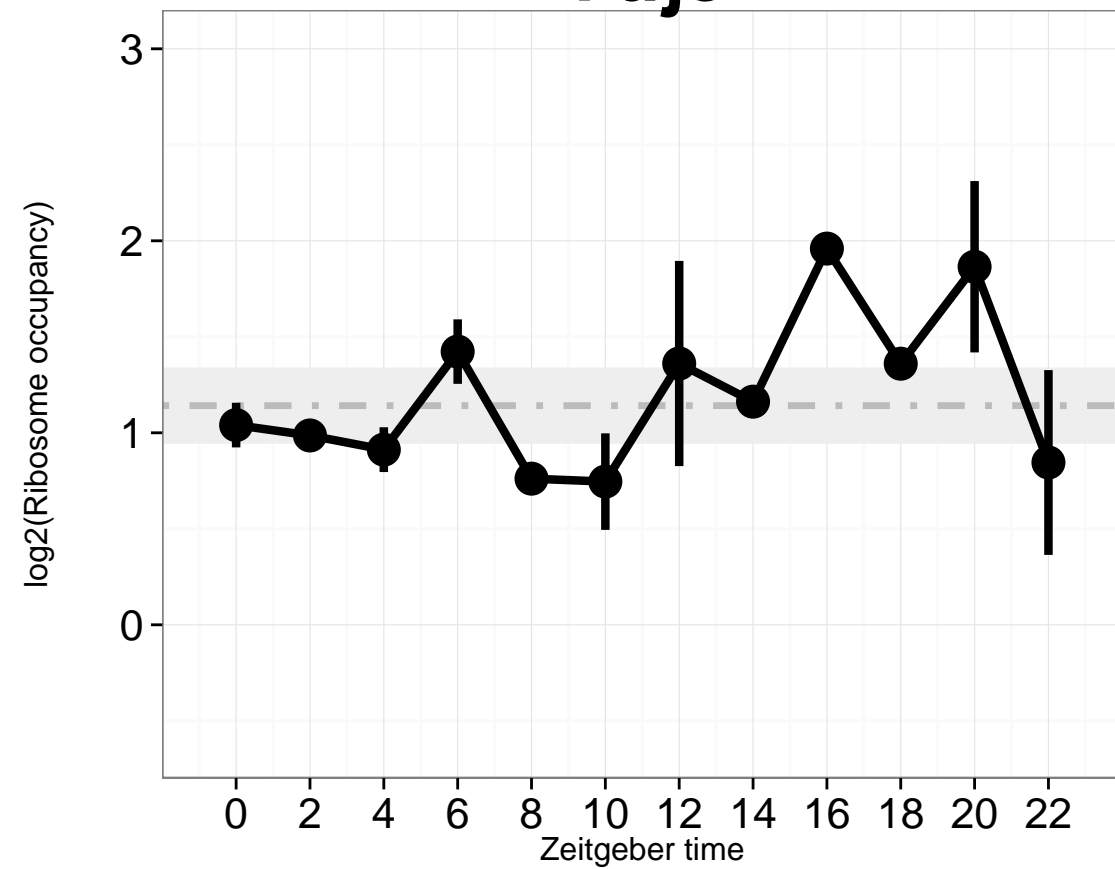

Supplement: Supplementary file 12923 [file 1]

## Sh2d3c

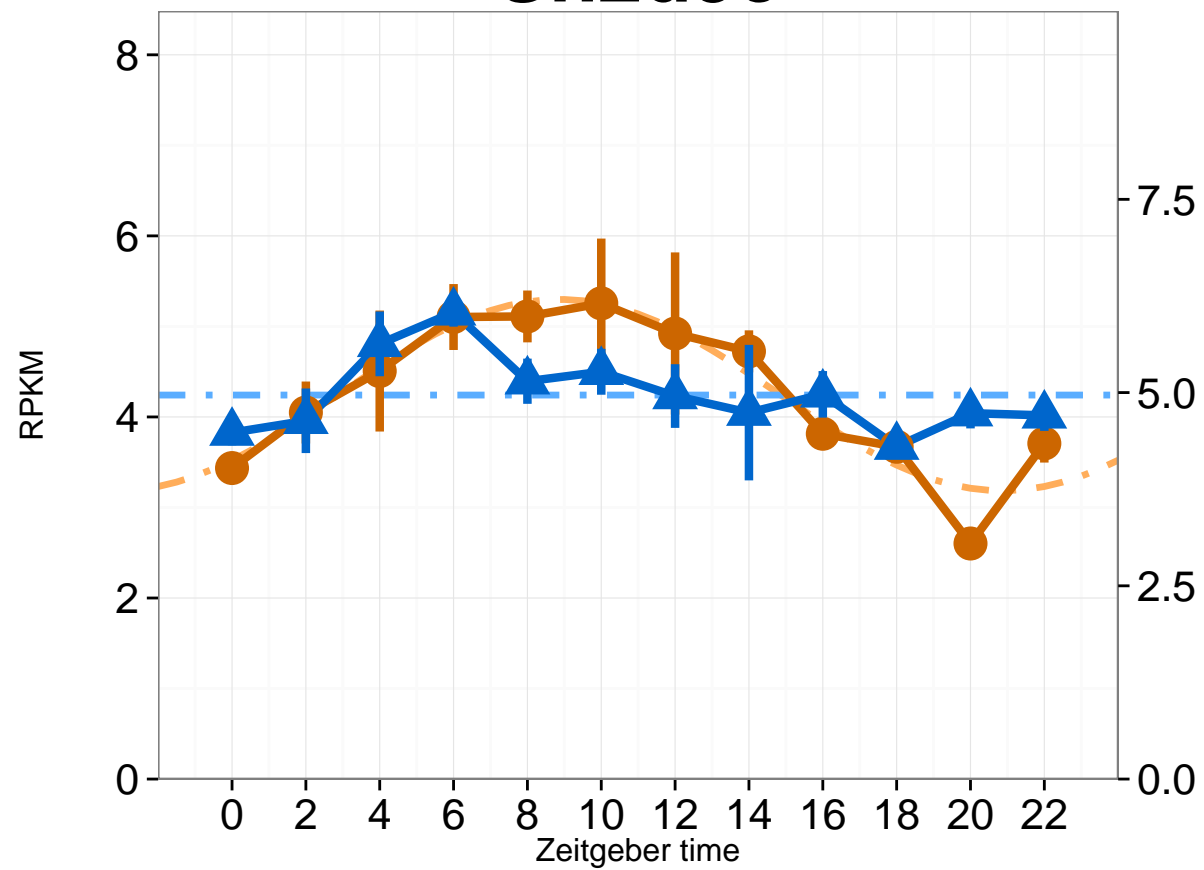

## Sh2d3c

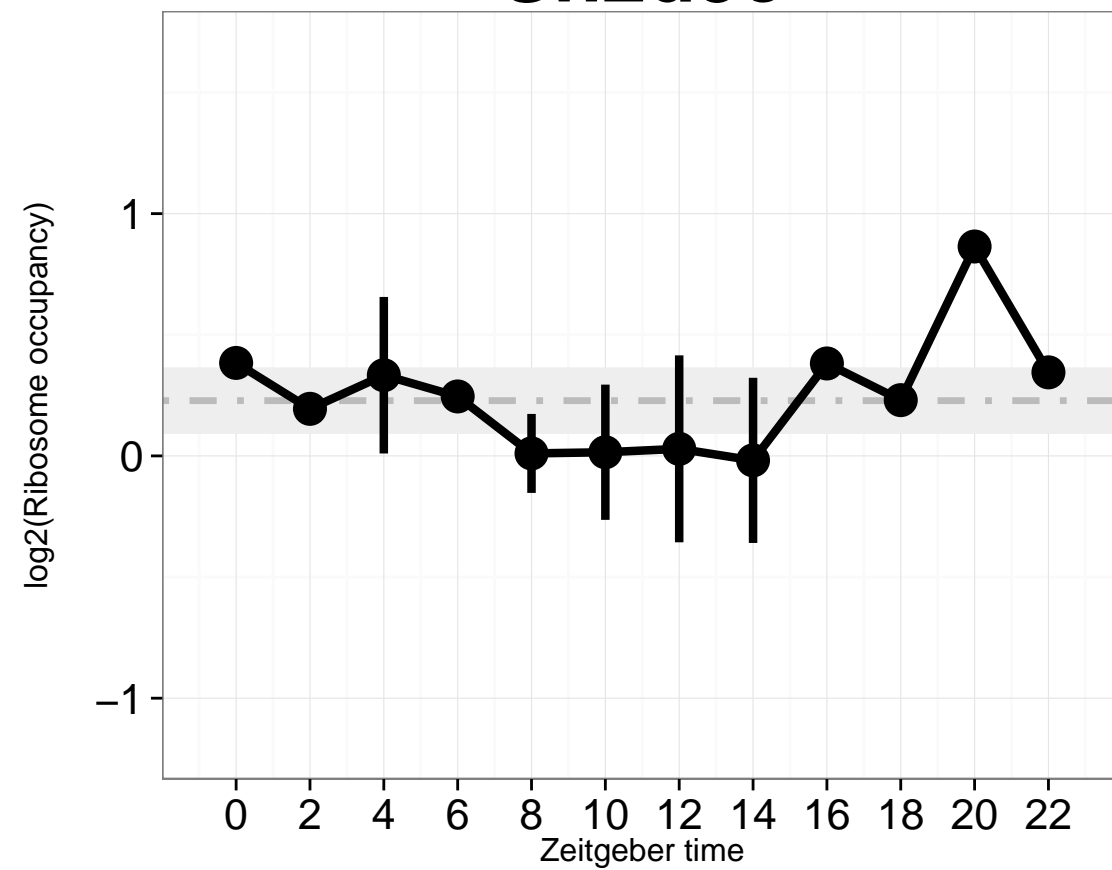

Supplement: Supplementary file 12924 [file 1]

# Actn3

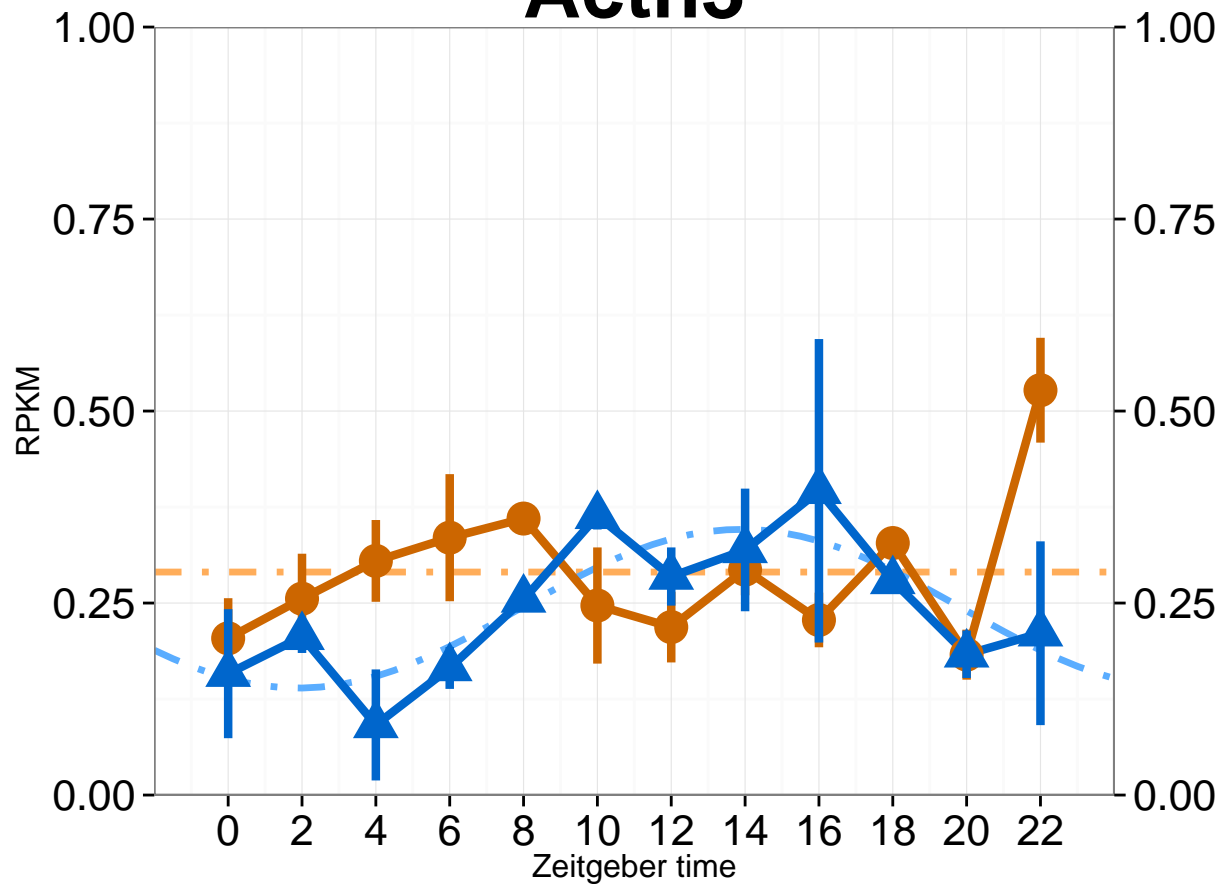

# Actn3

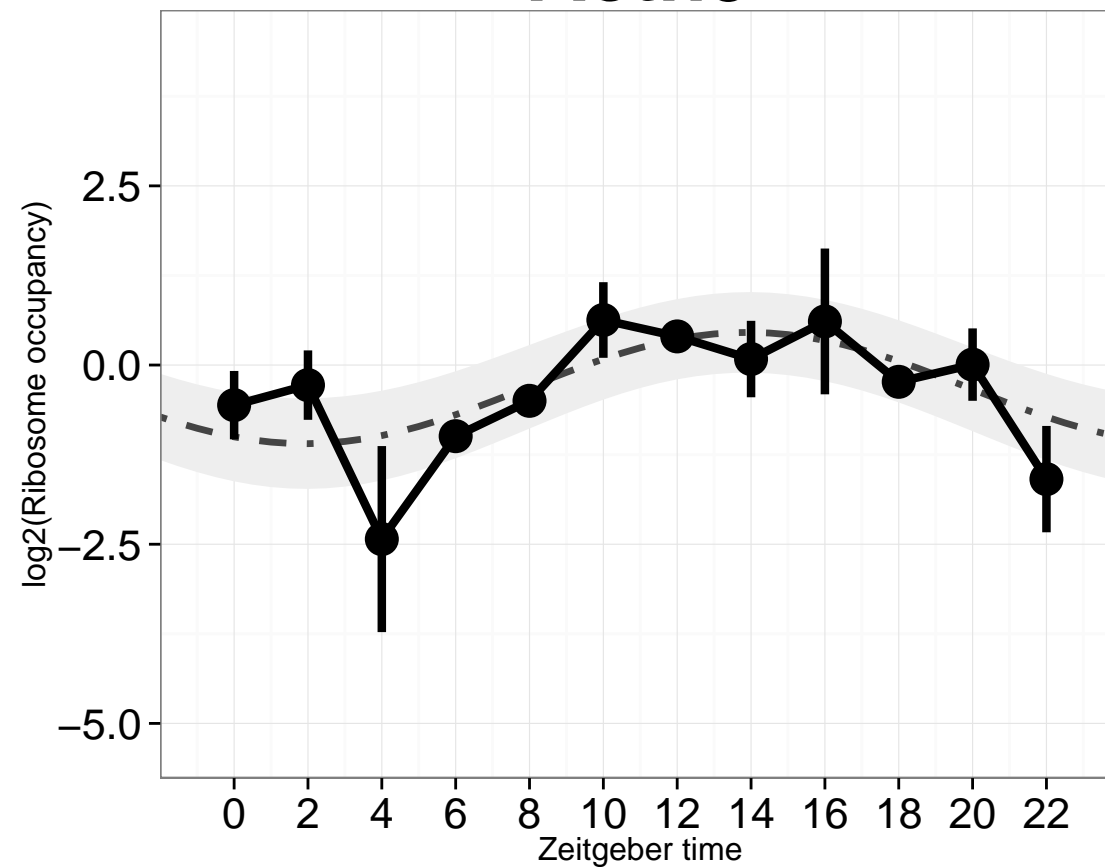

Supplement: Supplementary file 12925 [file 1]

# Ppp2r2d

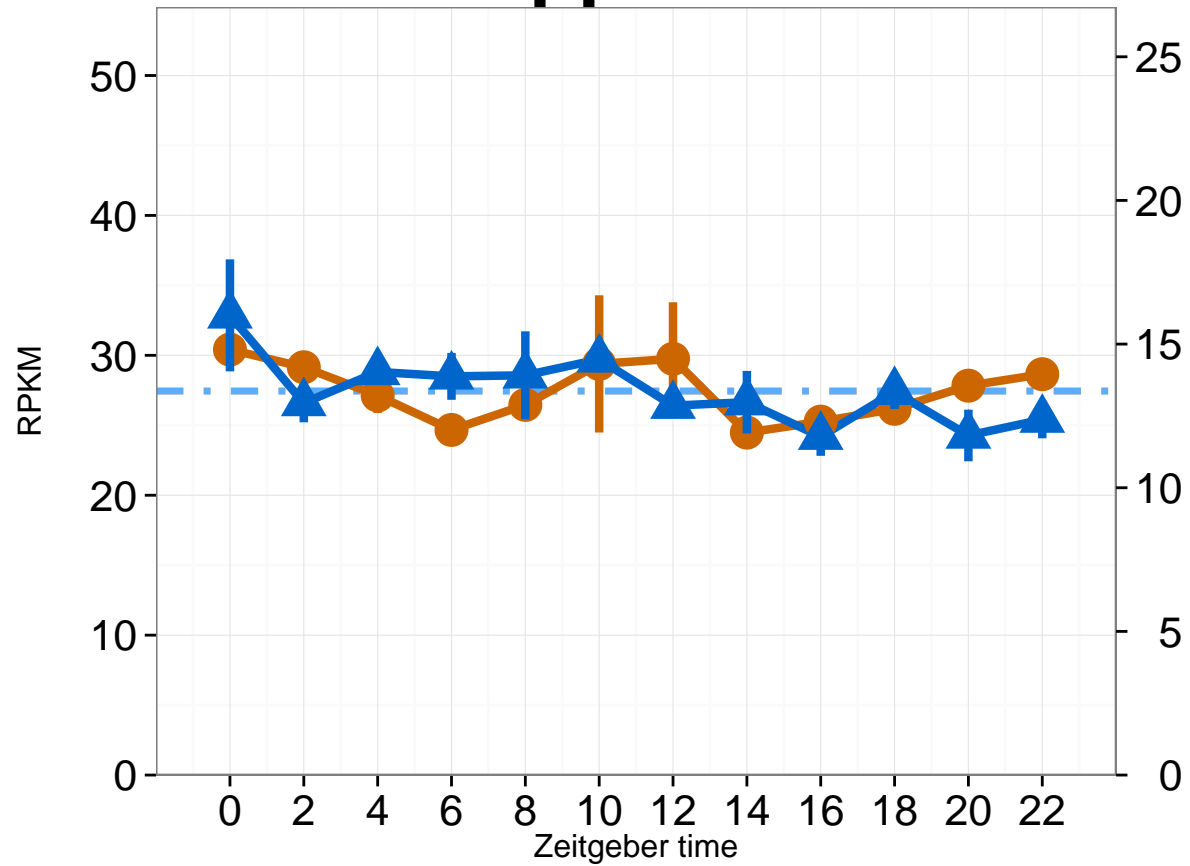

# Ppp2r2d

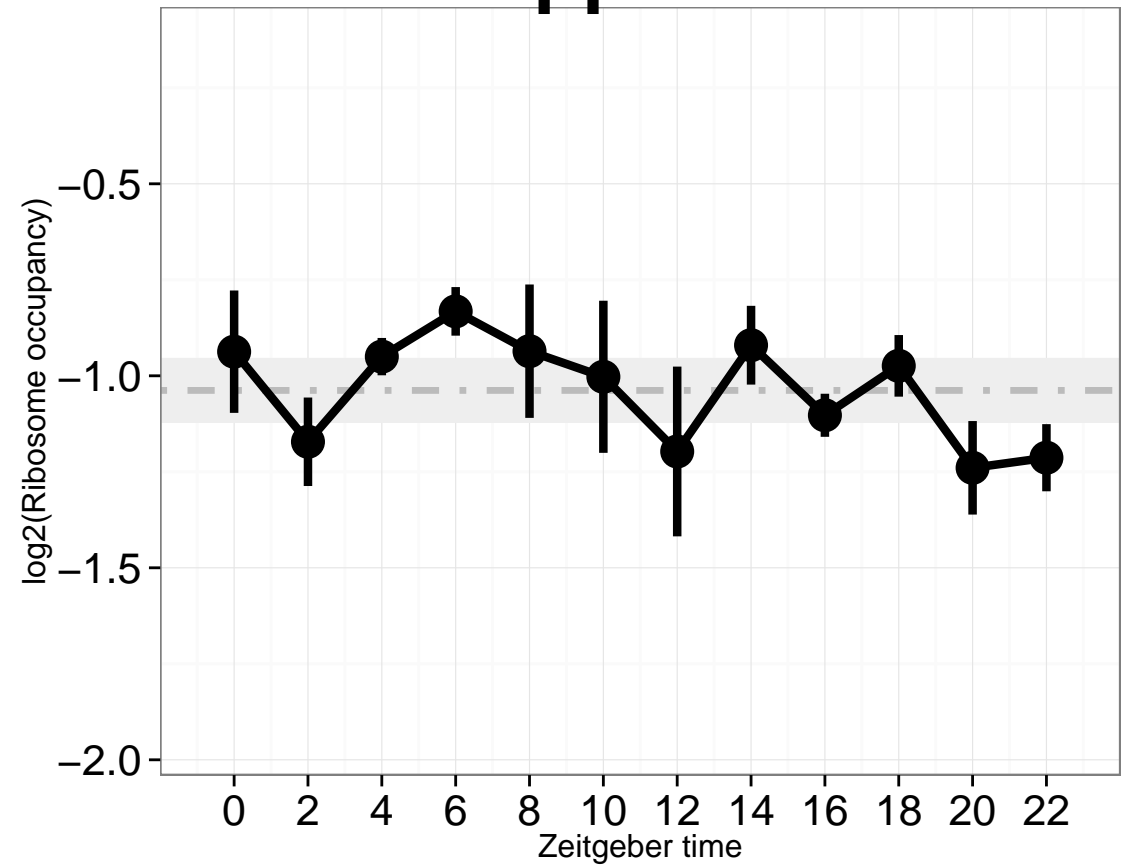

Supplement: Supplementary file 12926 [file 1]

# Cox5b

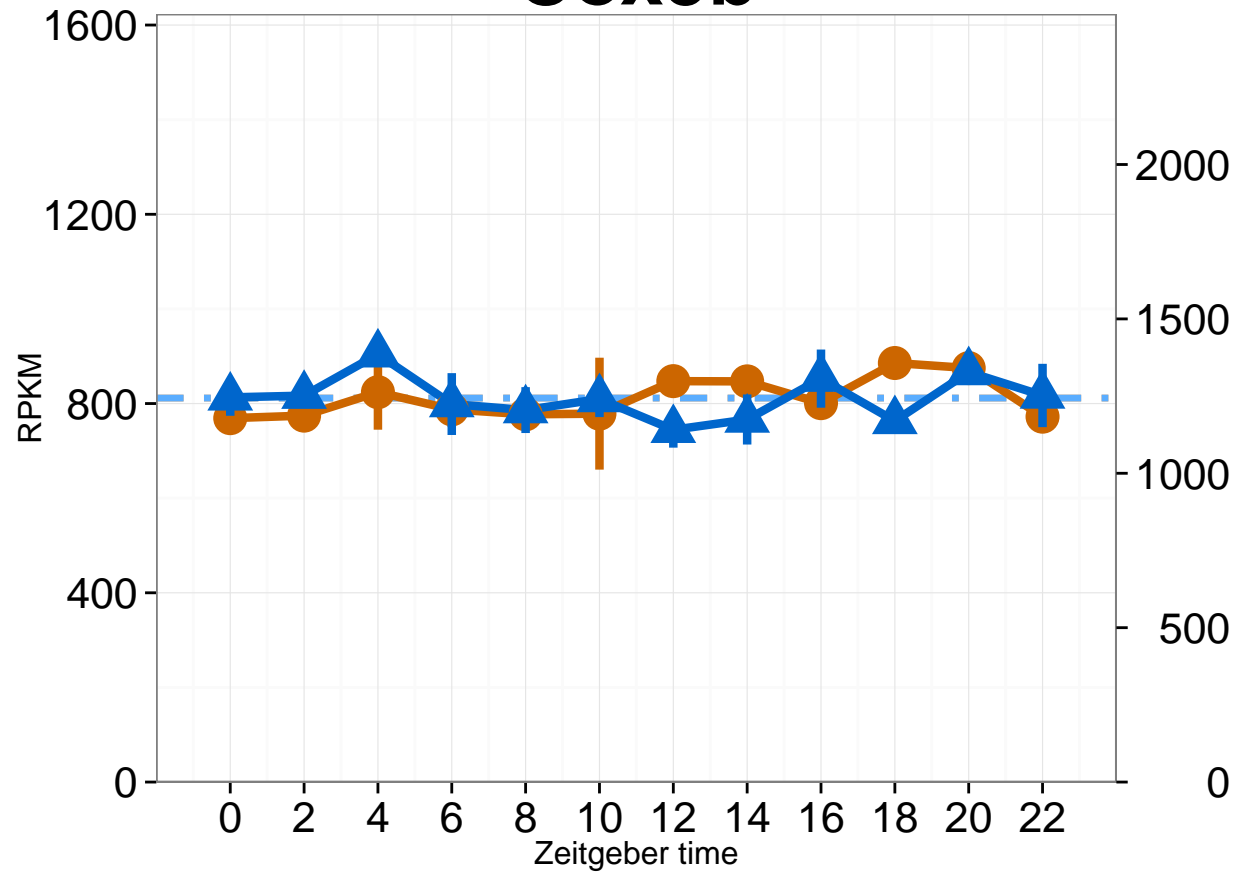

# Cox5b

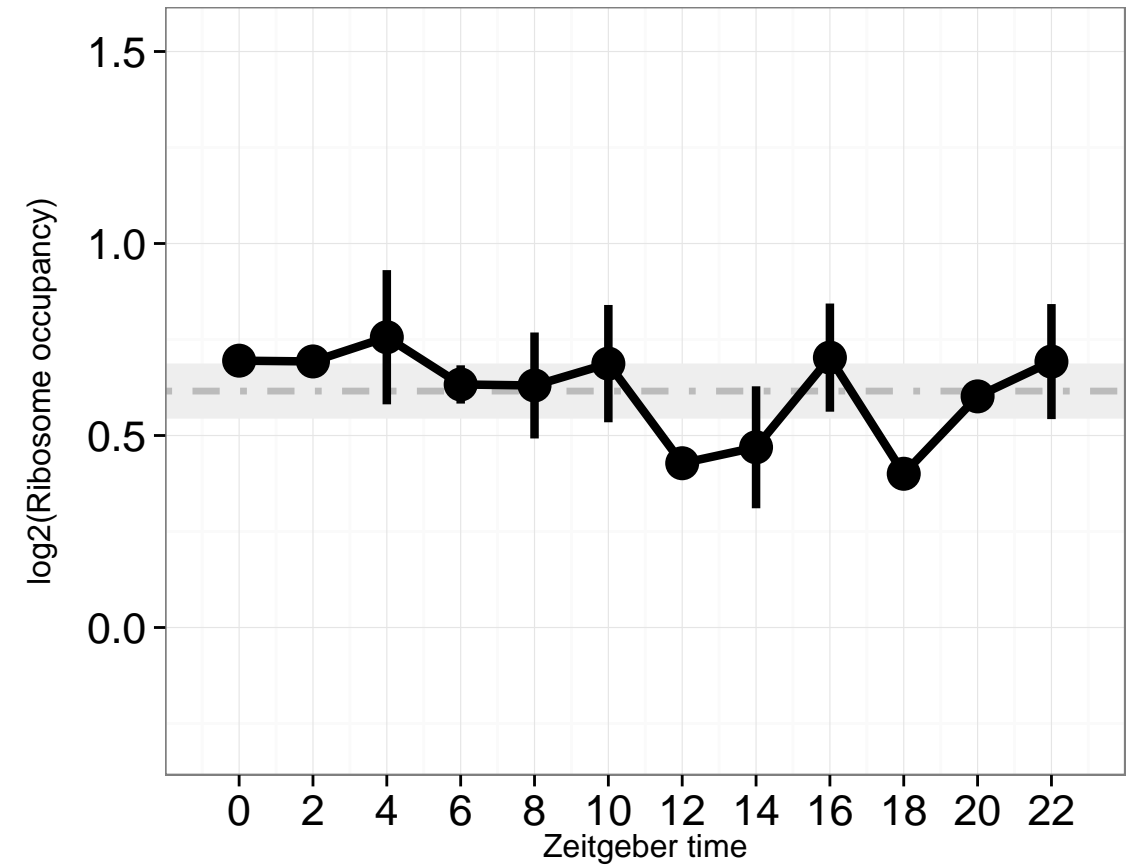

Supplement: Supplementary file 12927 [file 1]

# D1Ertd622e

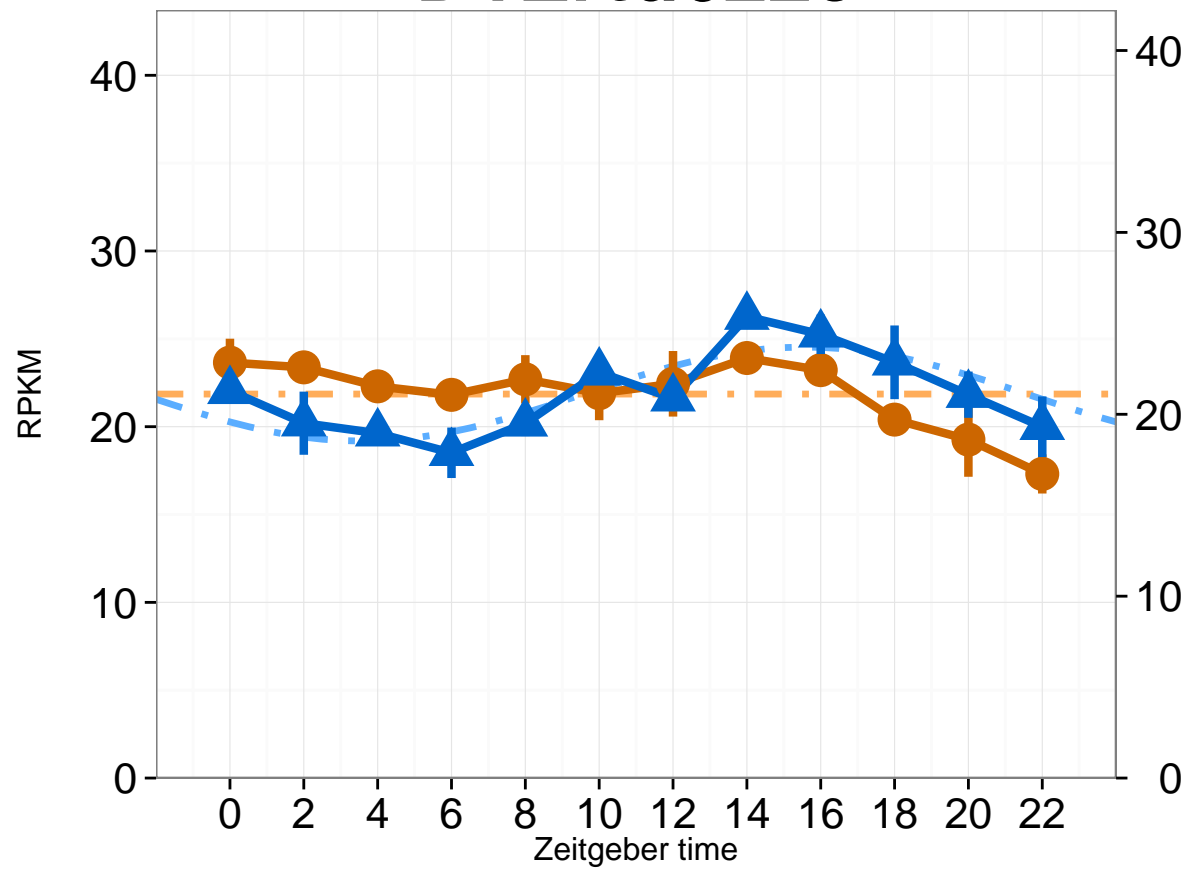

# D1Ertd622e

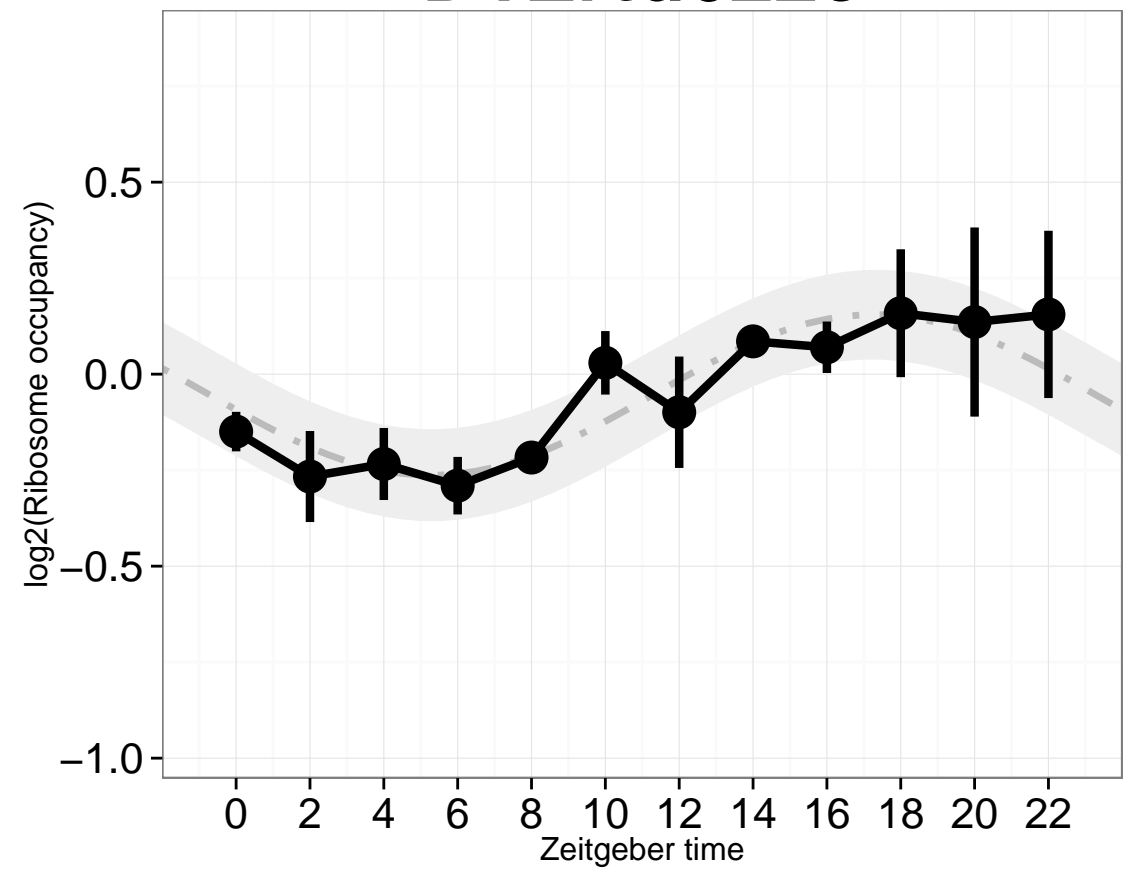

Supplement: Supplementary file 12928 [file 1]

## Slc41a1

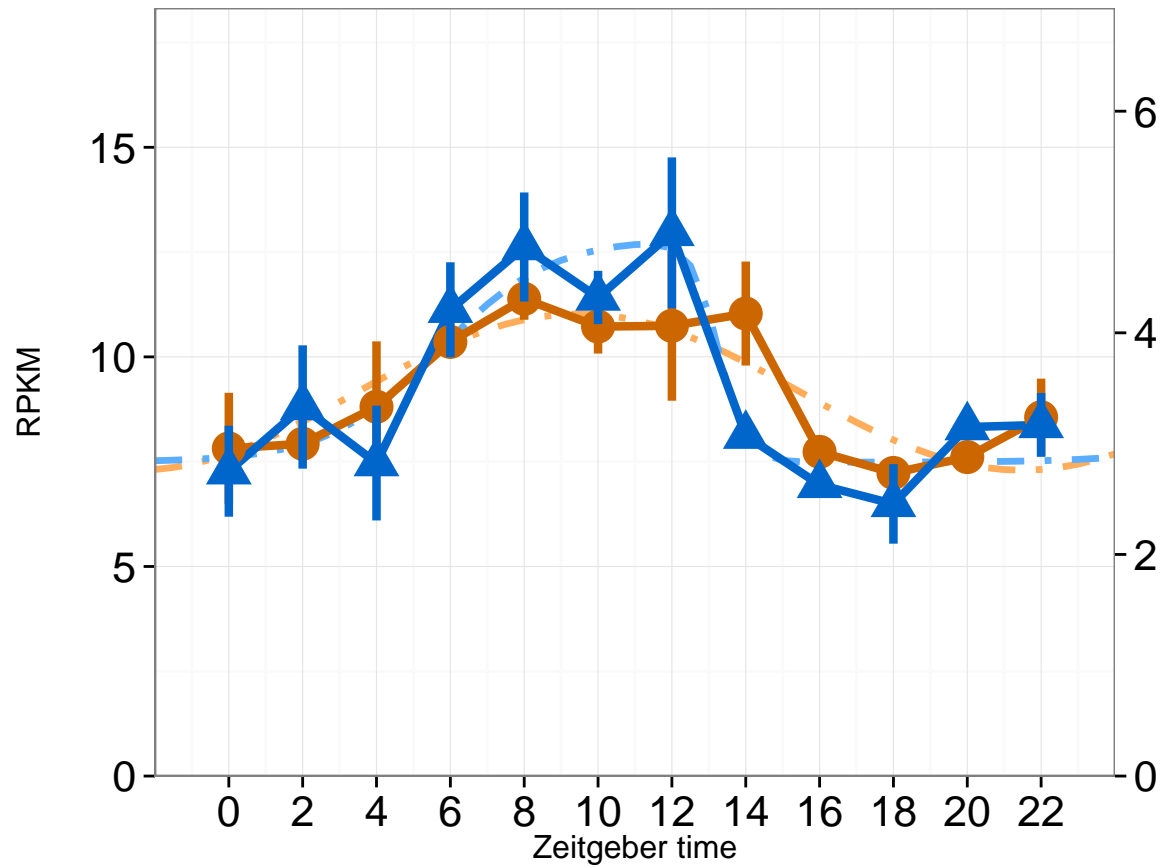

## Slc41a1

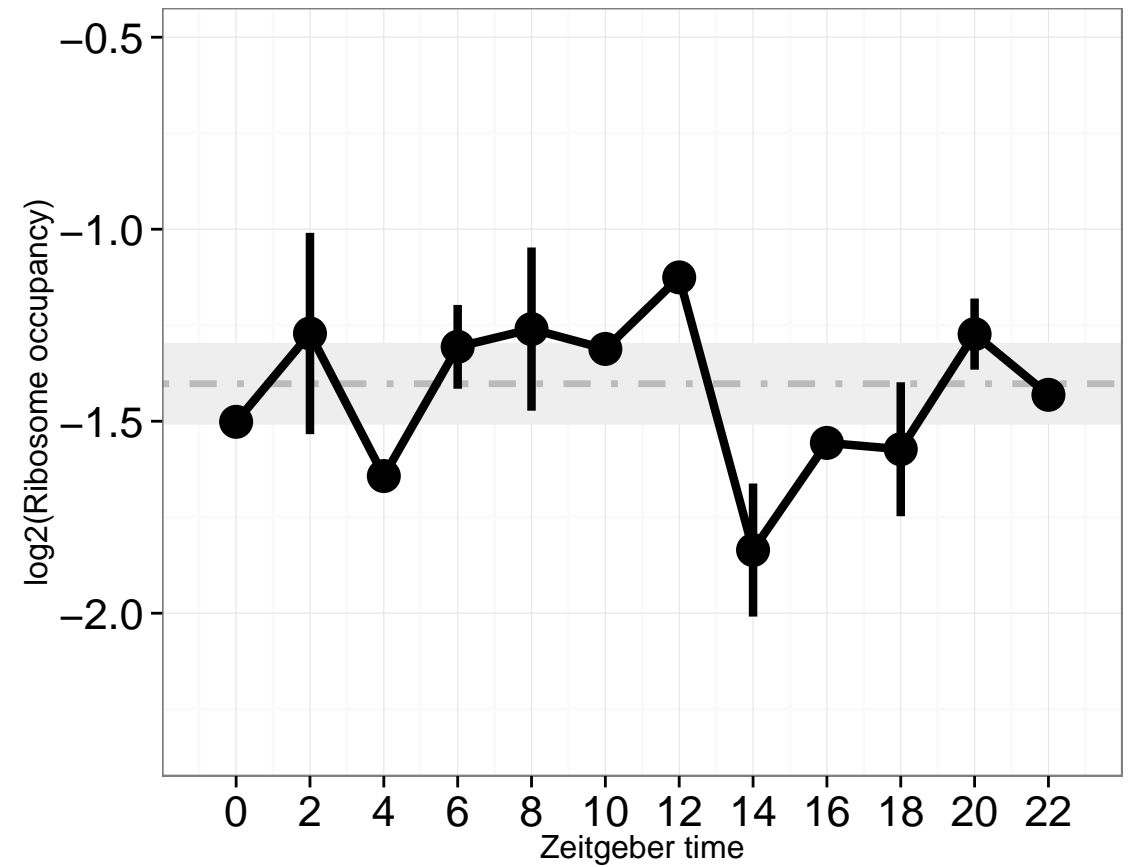

Supplement: Supplementary file 12929 [file 1]

# Nup62

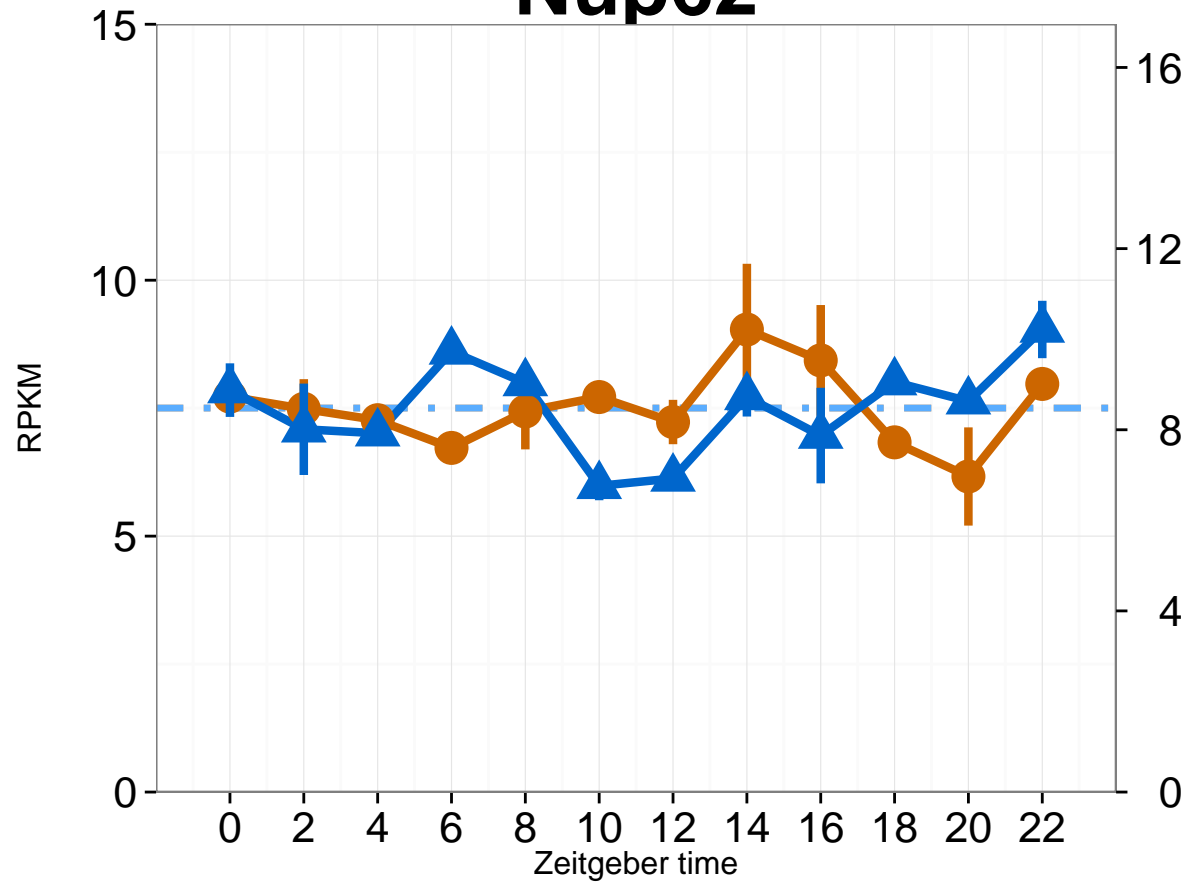

# Nup62

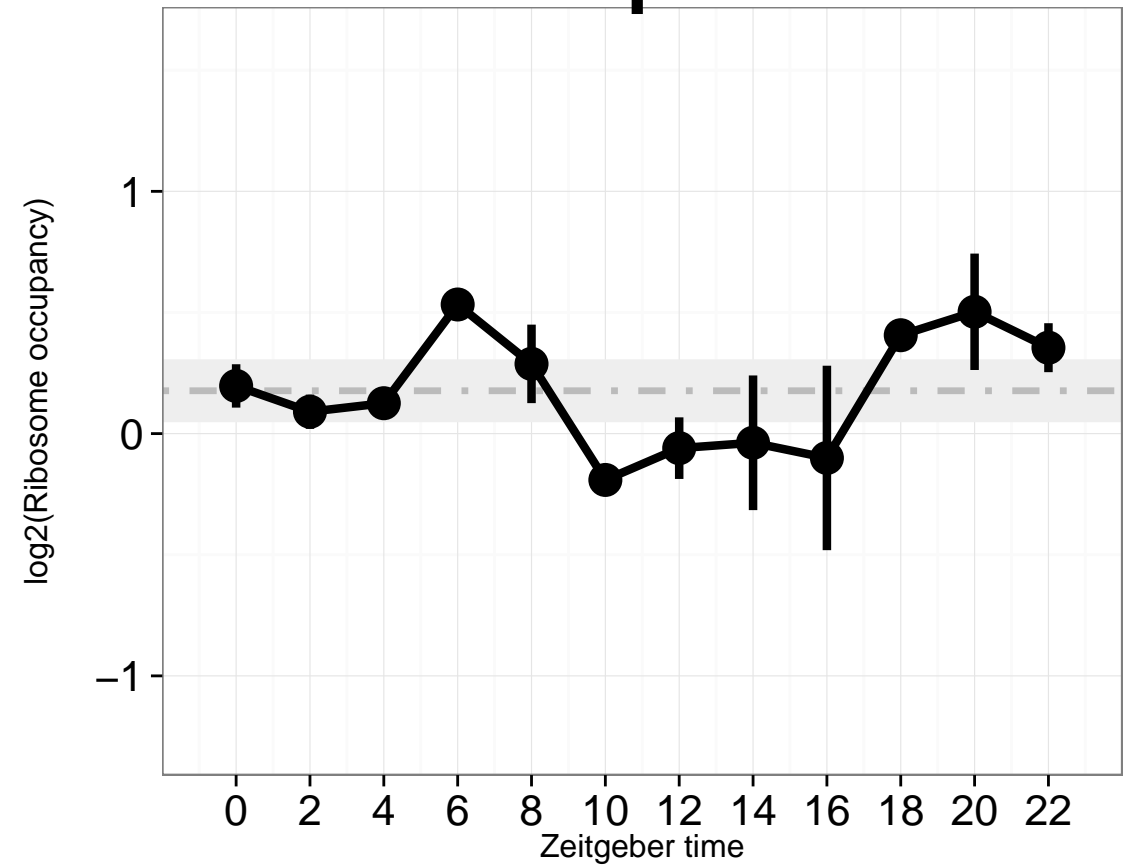

Supplement: Supplementary file 12930 [file 1]

## Lmf2

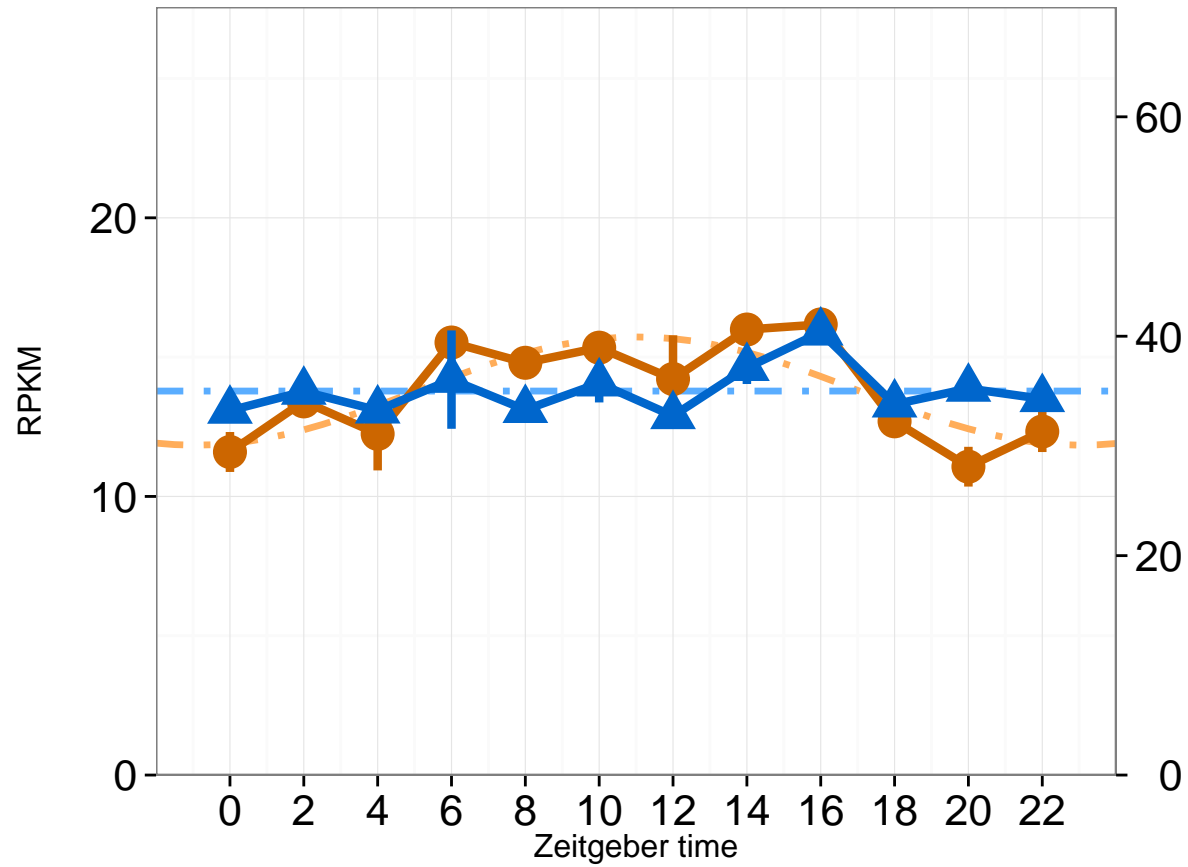

## Lmf2

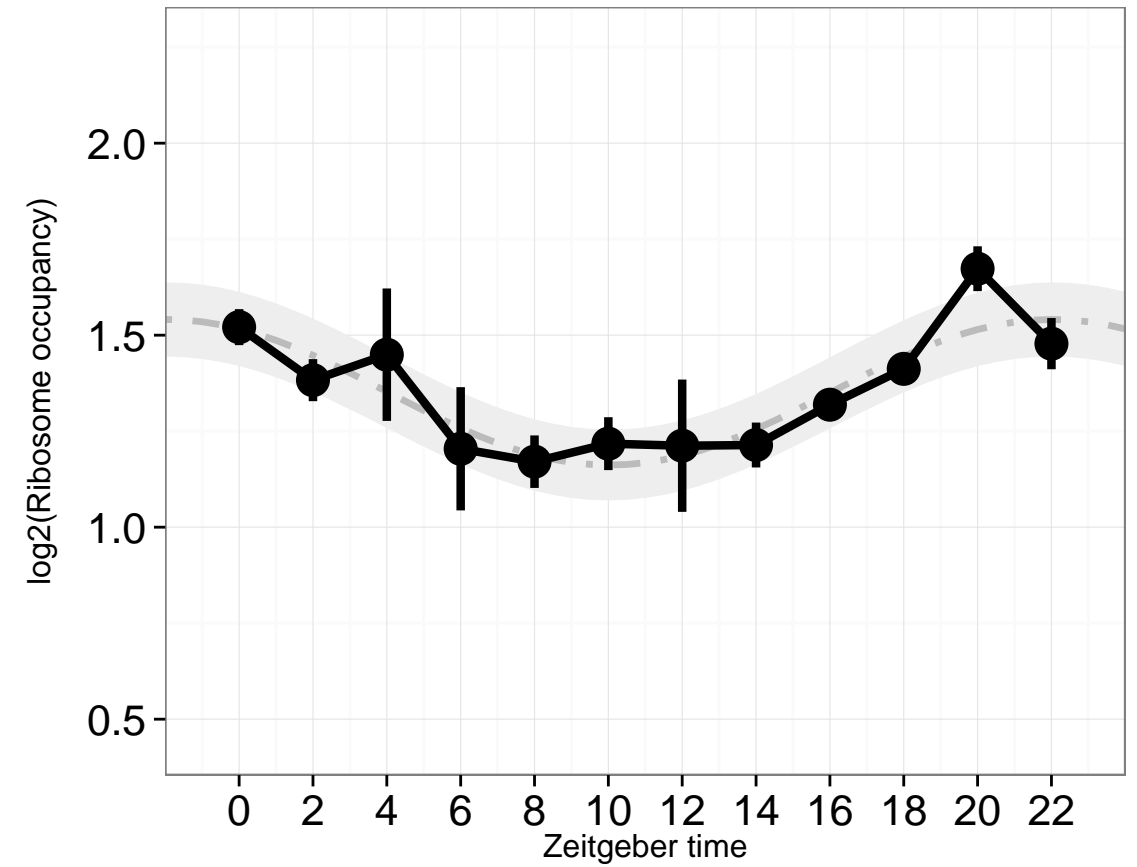

Supplement: Supplementary file 12931 [file 1]

## Slc16a10

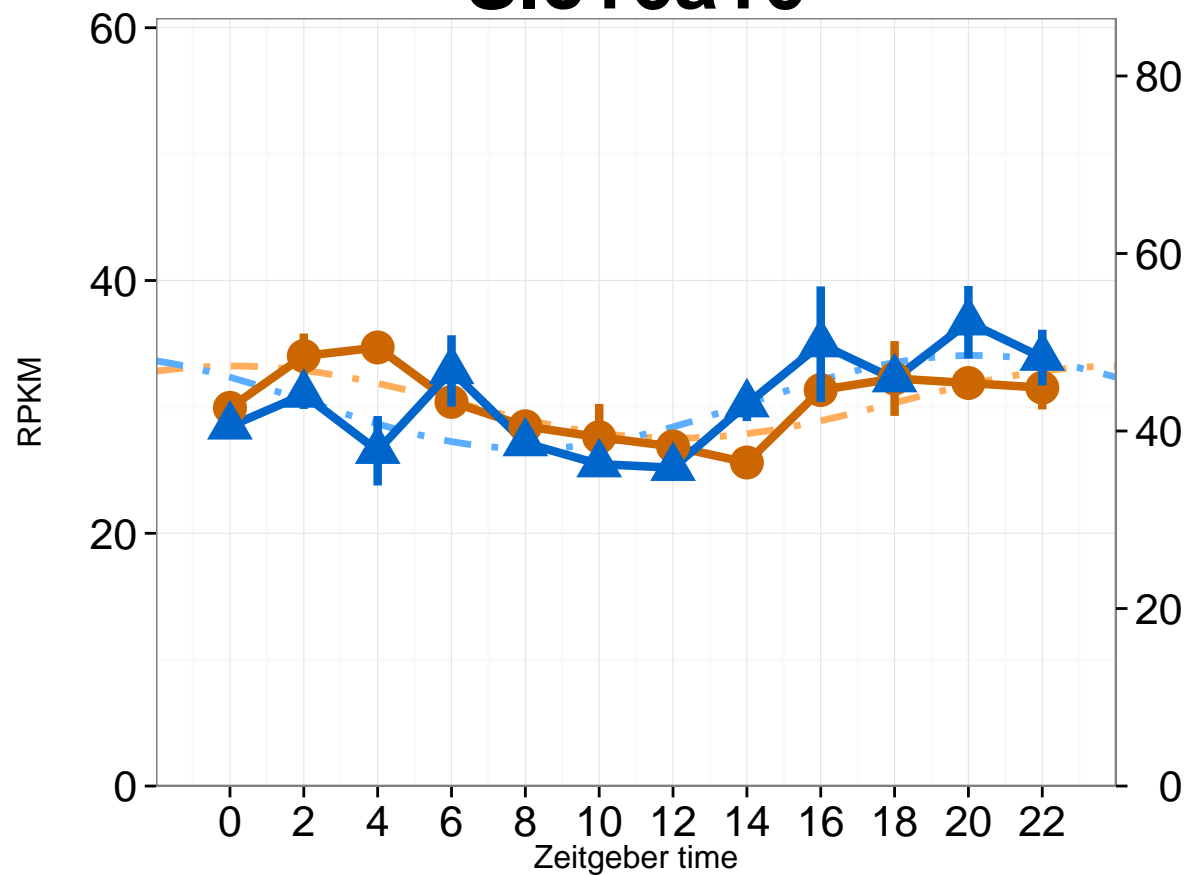

## Slc16a10

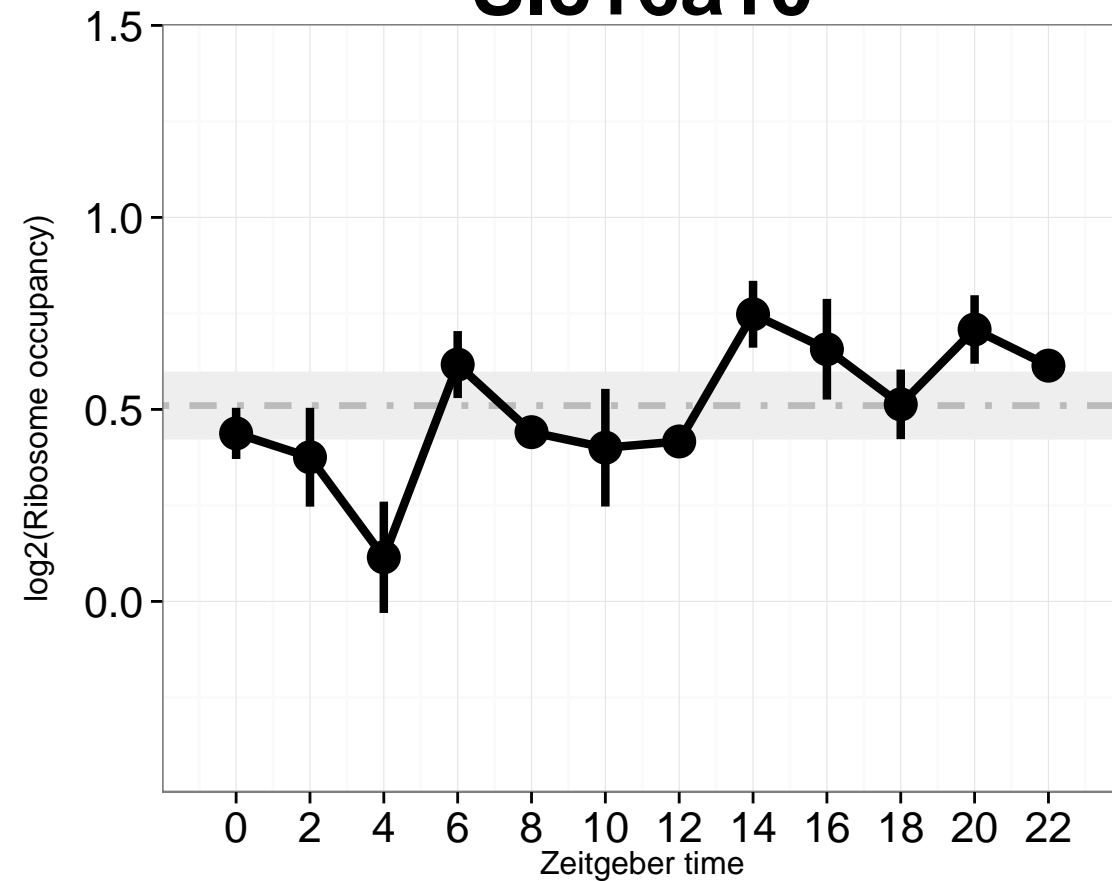

Supplement: Supplementary file 12932 [file 1]

## Rasl11b

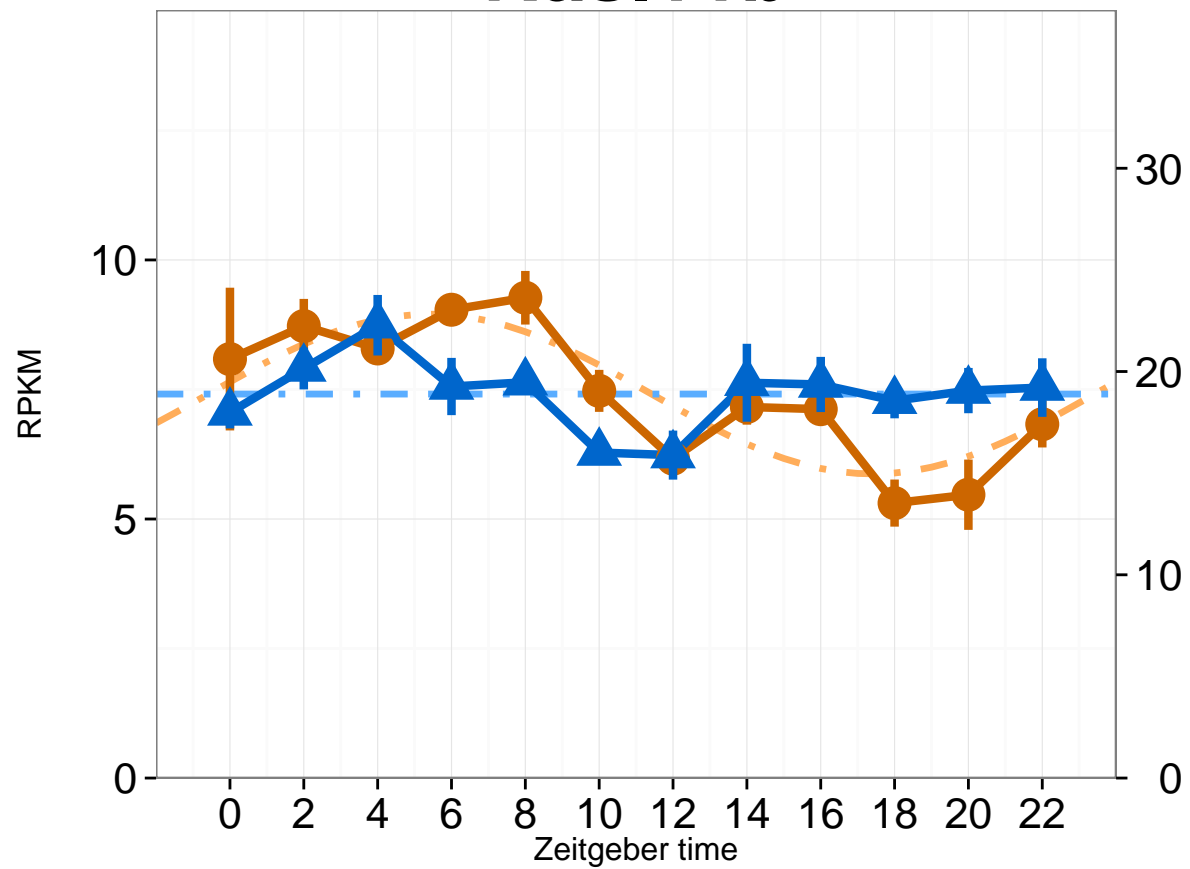

## Rasl11b

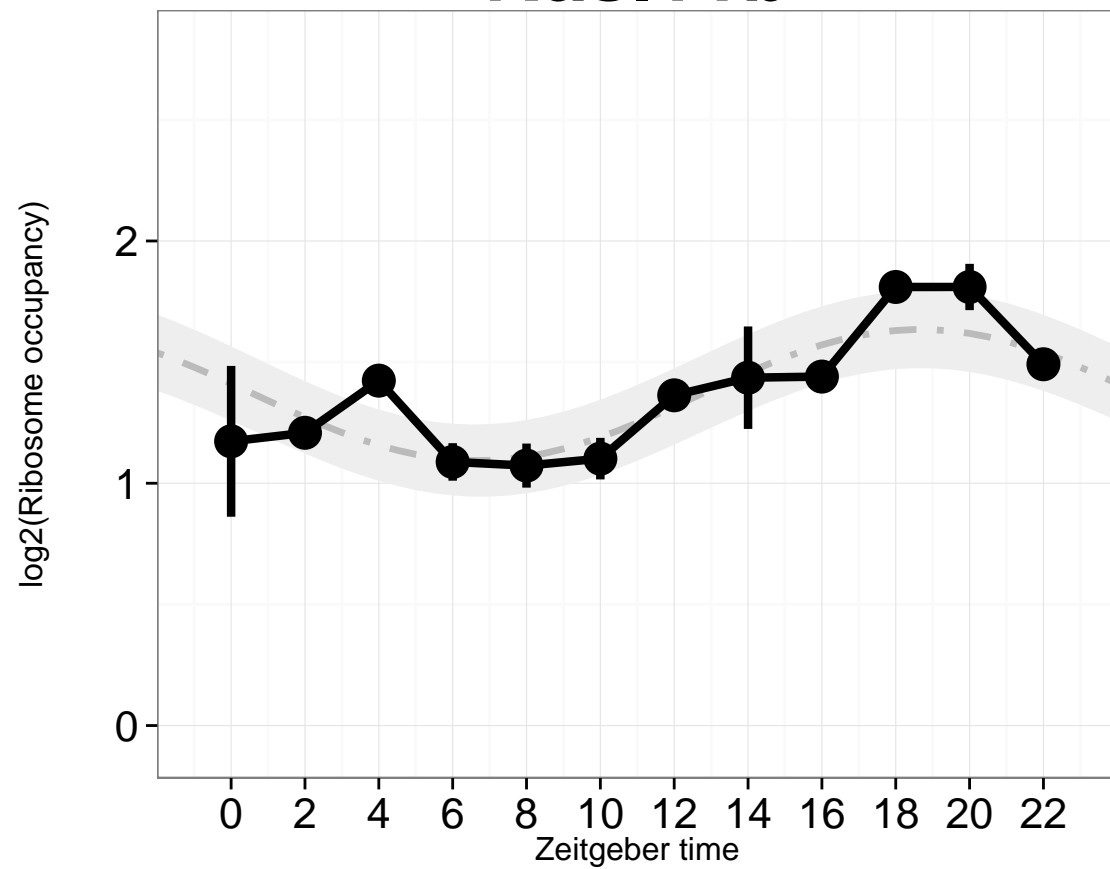

Supplement: Supplementary file 12933 [file 1]

## Ggct

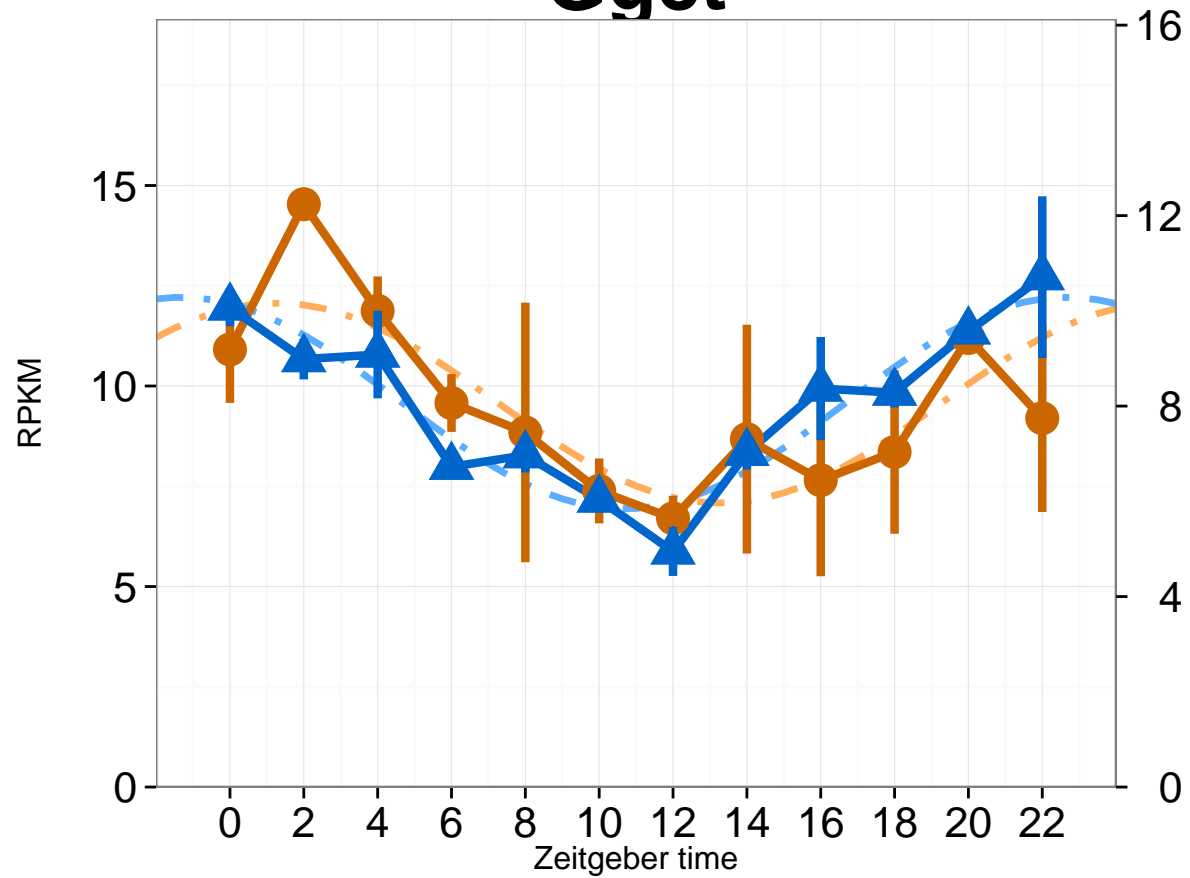

## Ggct

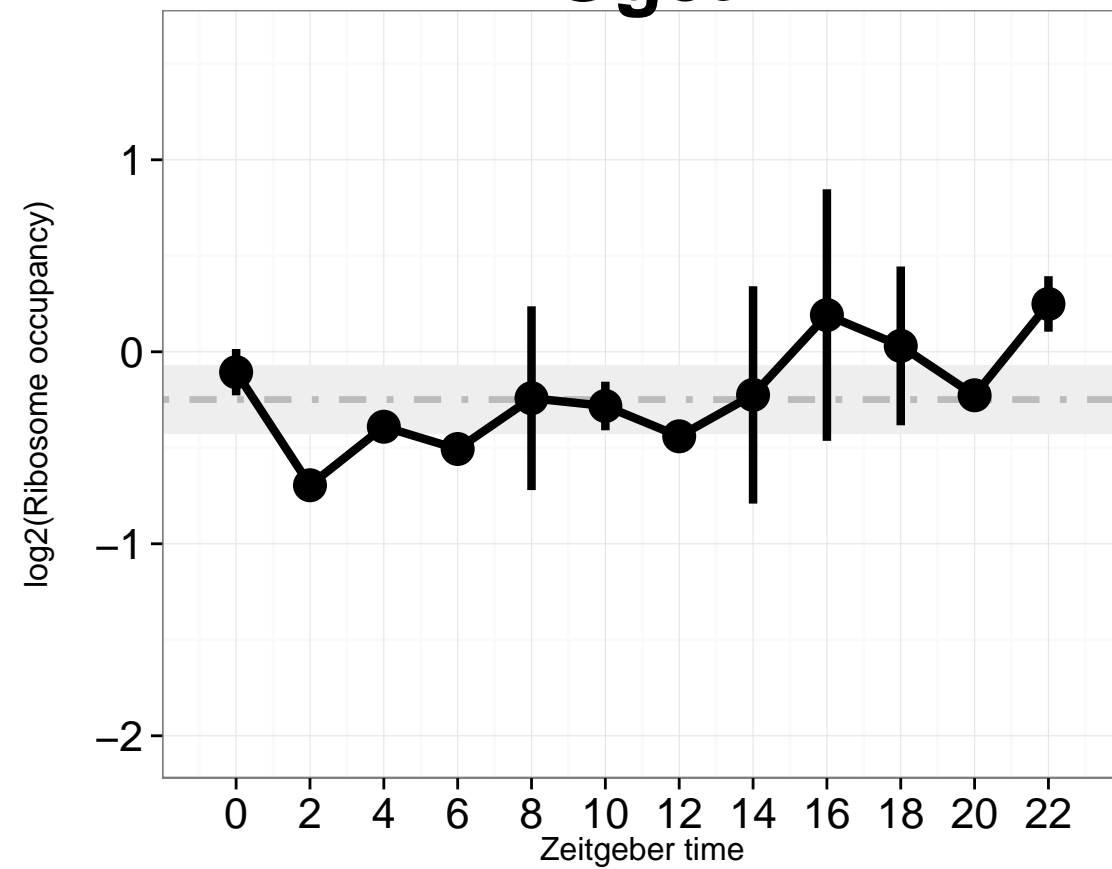

Supplement: Supplementary file 12934 [file 1]

# B3galt2

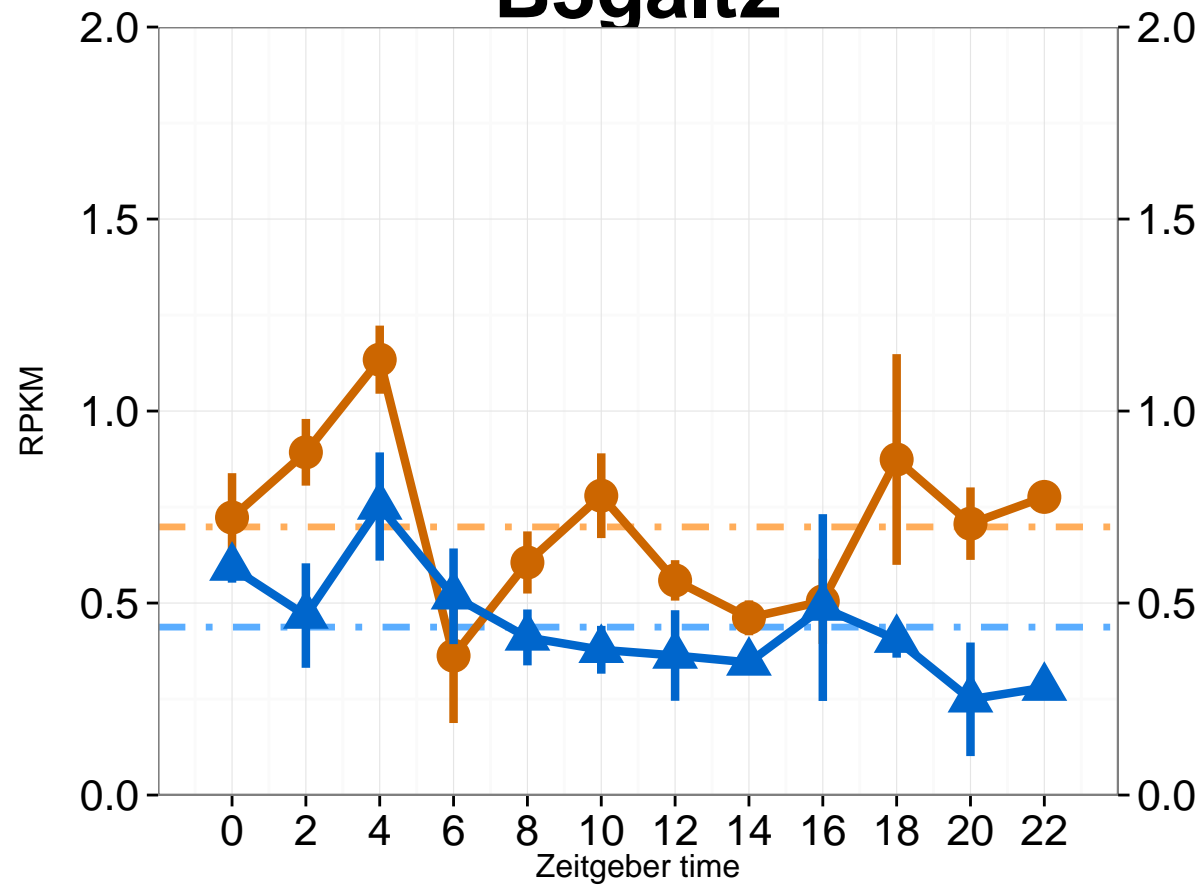

# B3galt2

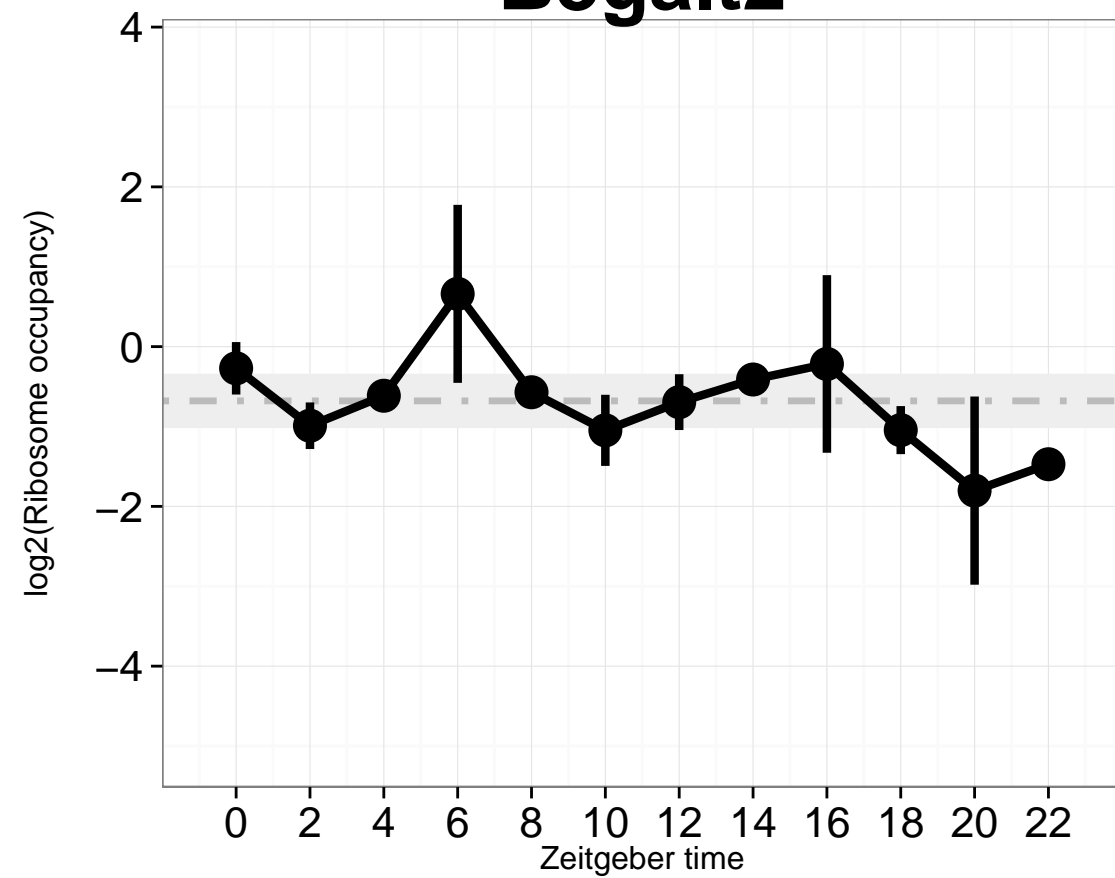

Supplement: Supplementary file 12935 [file 1]

## Sergef

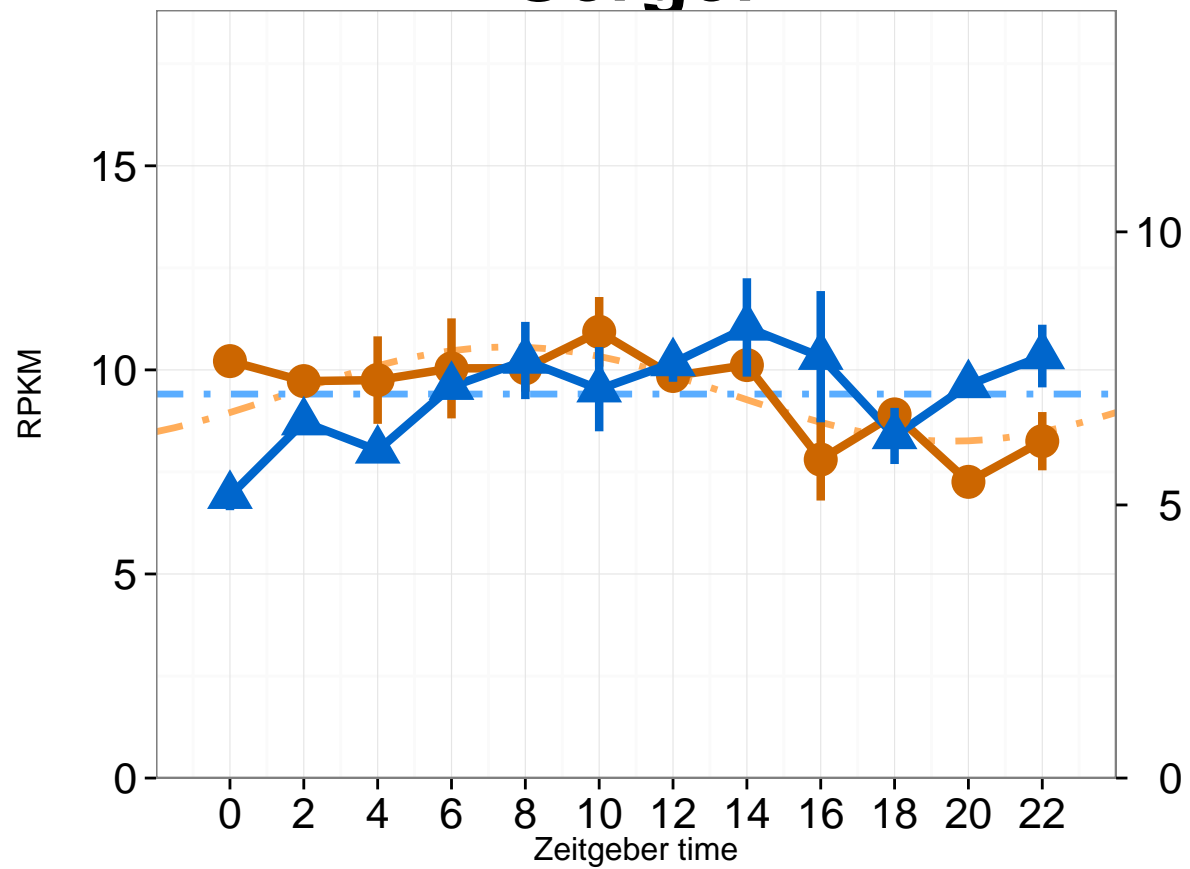

## Sergef

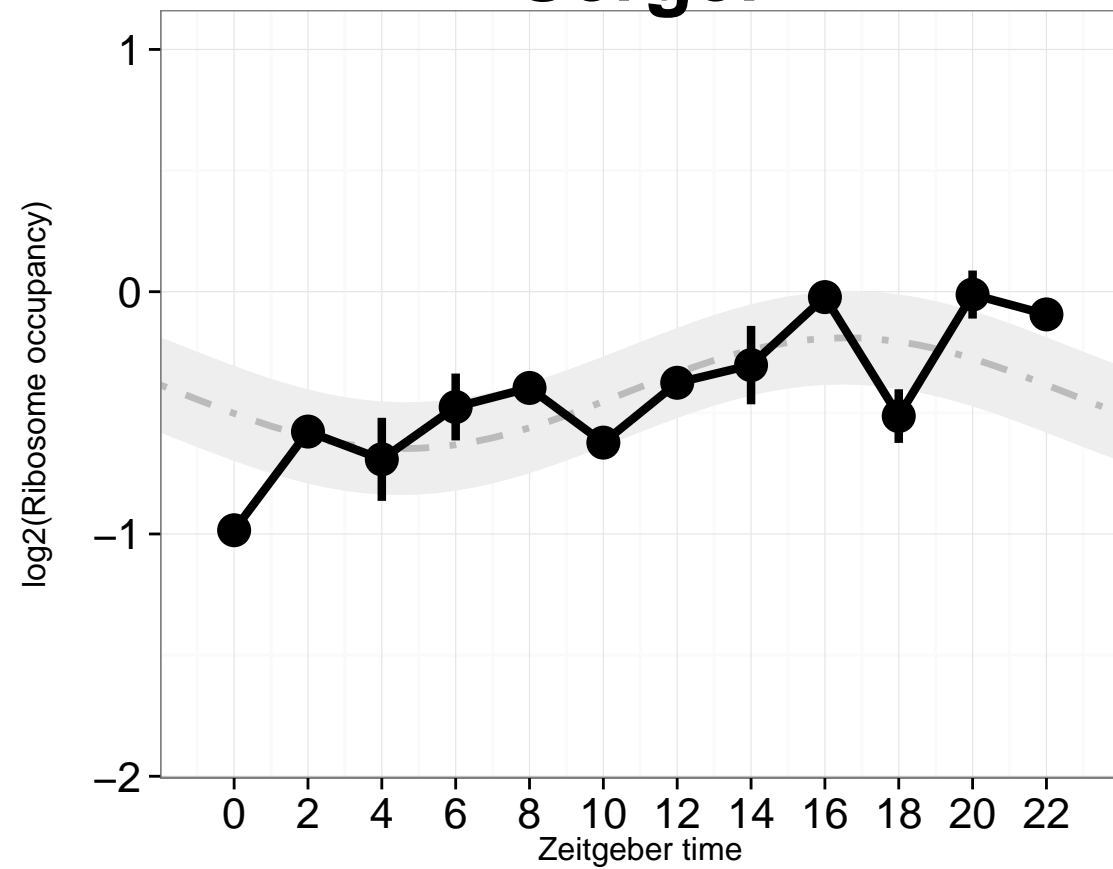

Supplement: Supplementary file 12936 [file 1]

## Nlgn2

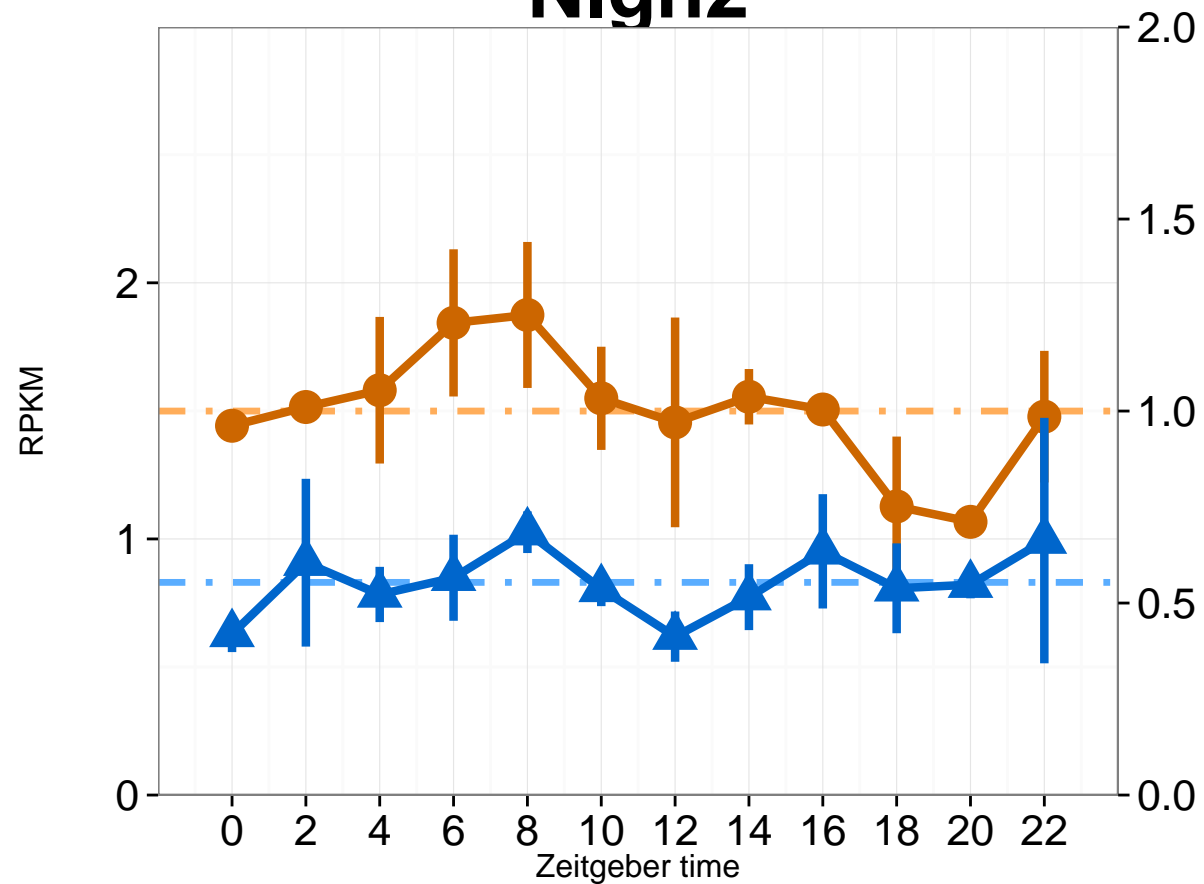

## Nlgn2

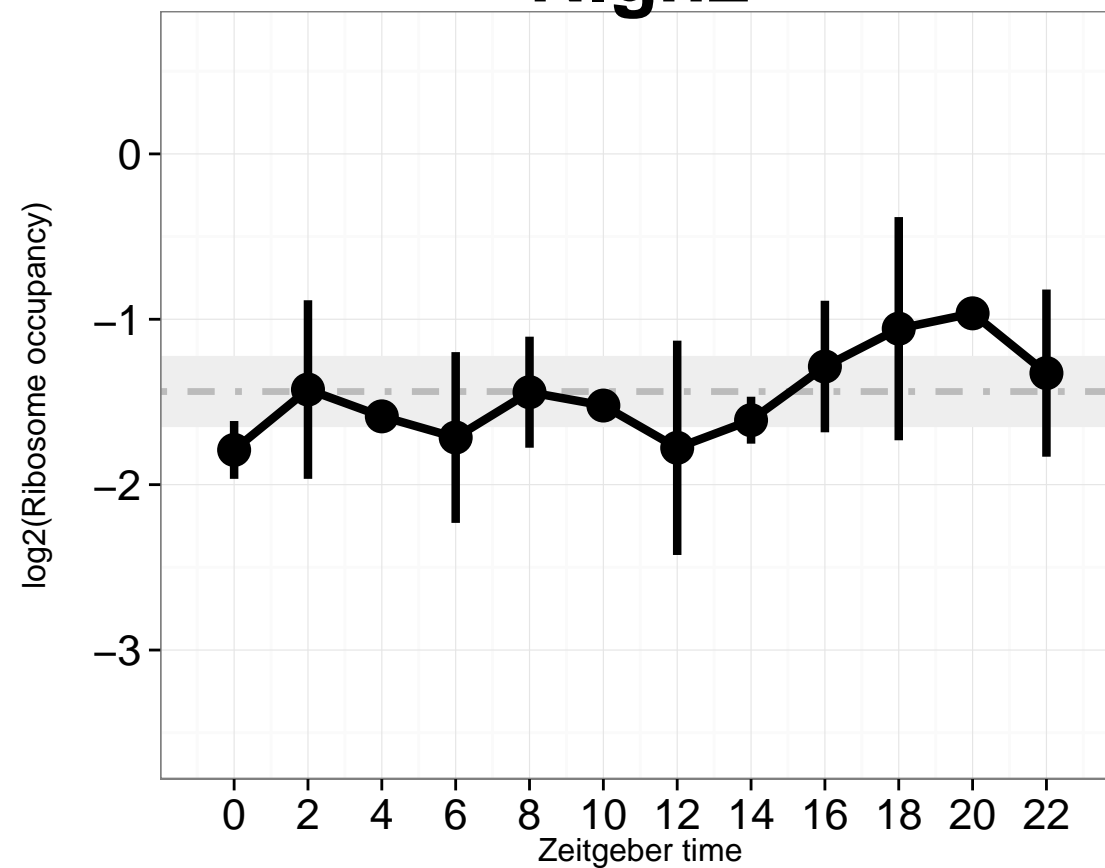

Supplement: Supplementary file 12937 [file 1]

## Slc25a48

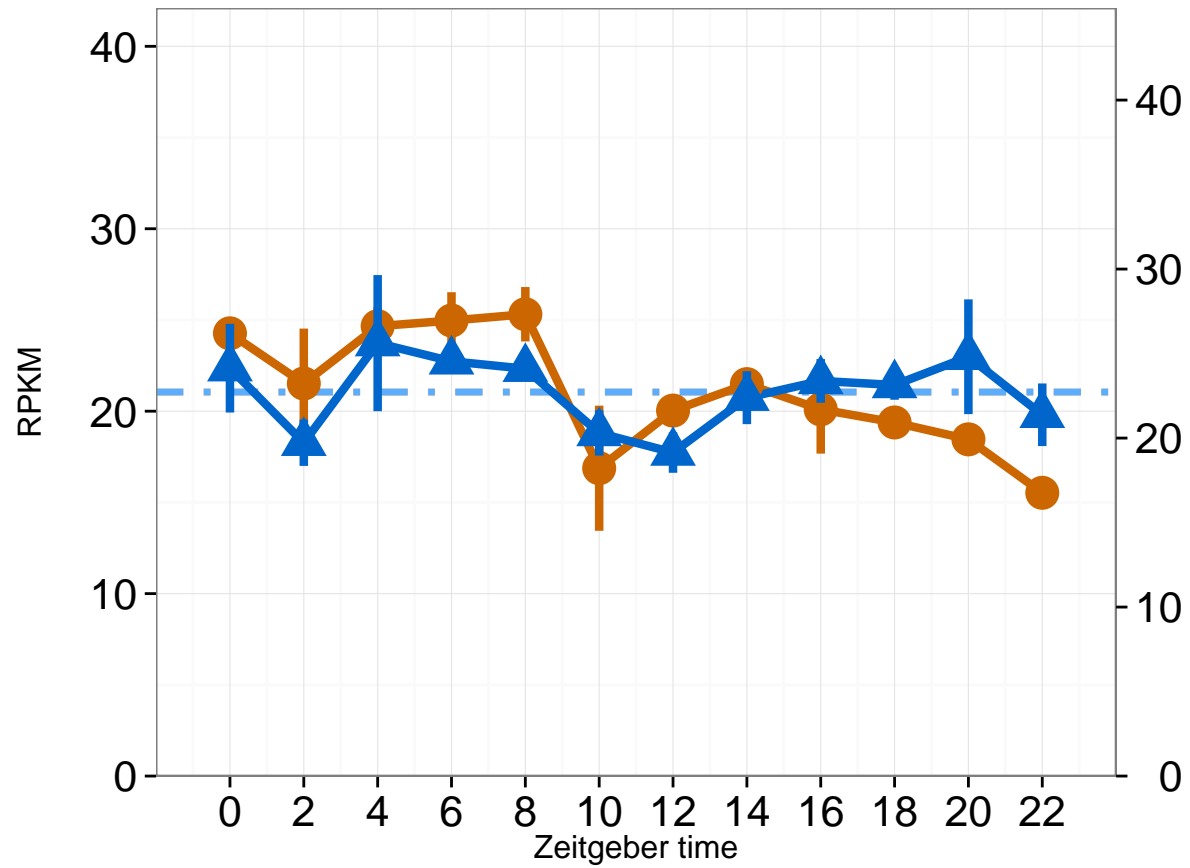

## Slc25a48

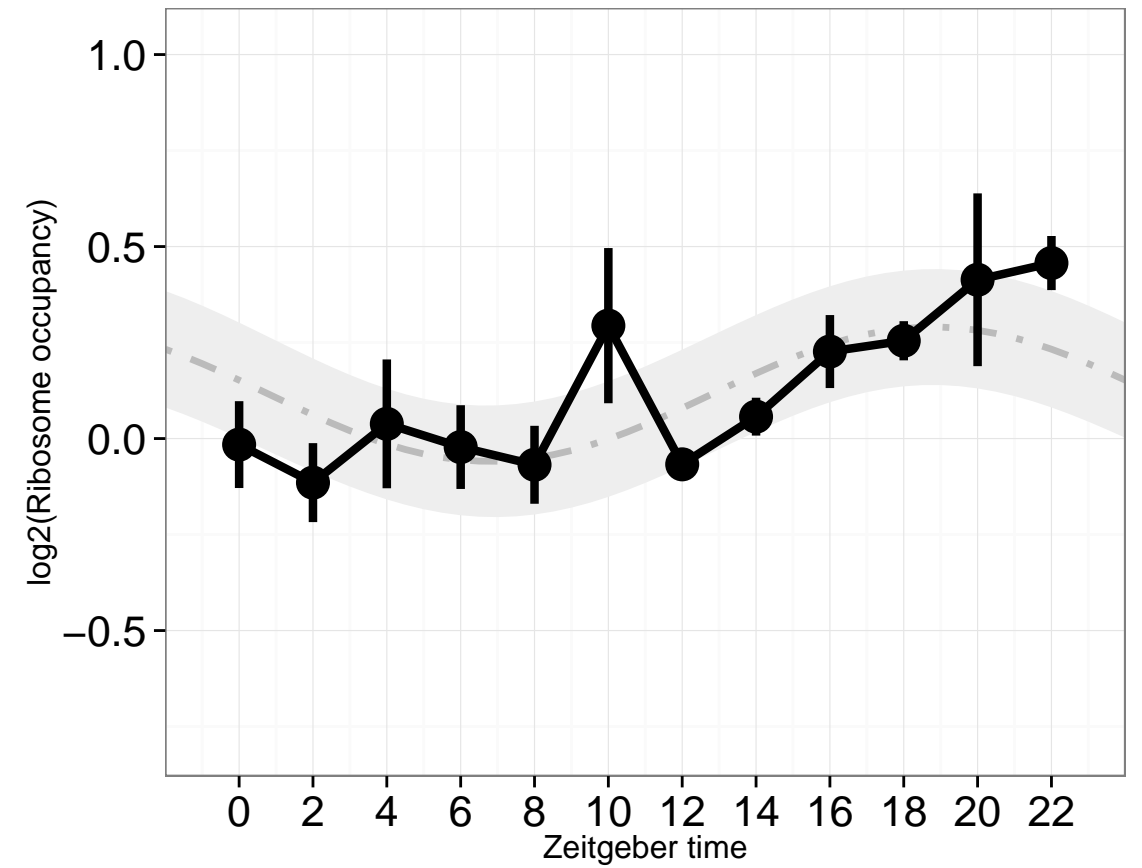

Supplement: Supplementary file 12938 [file 1]

## Prkdc

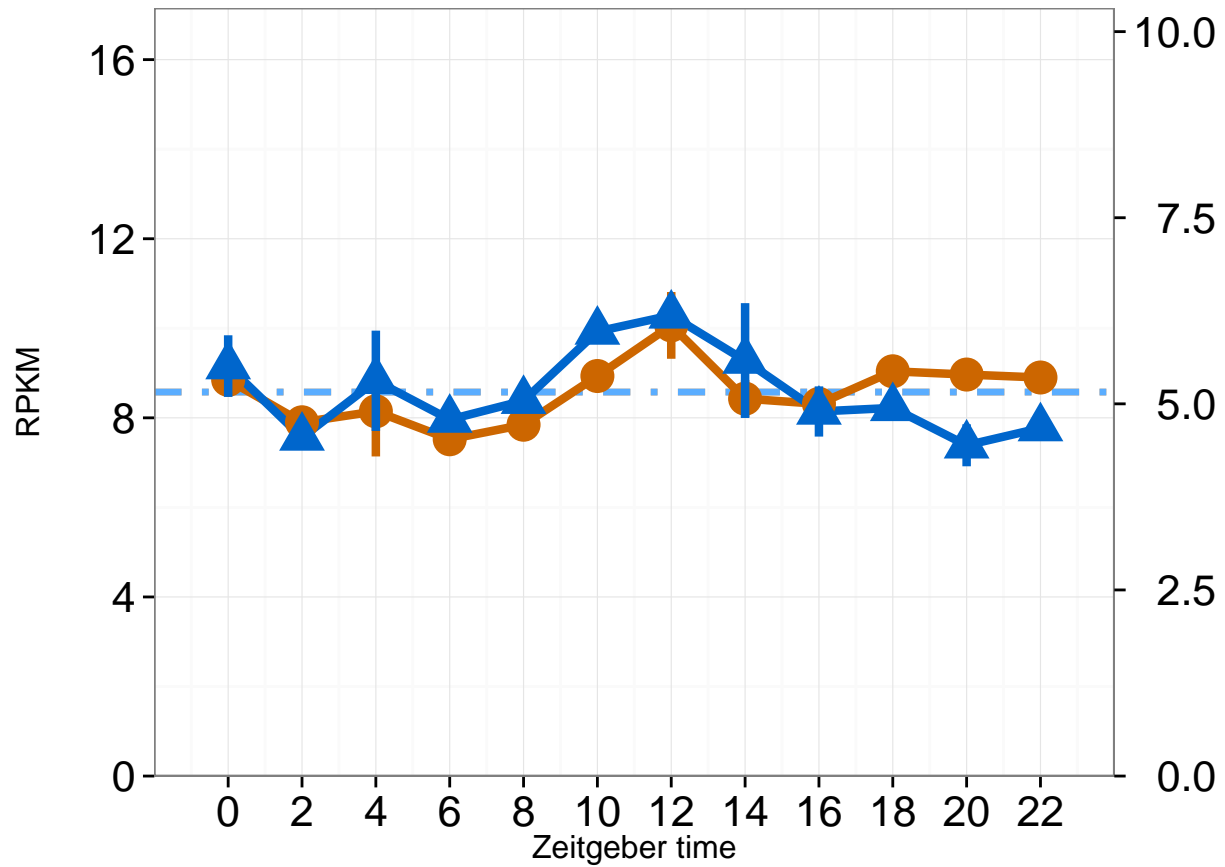

## Prkdc

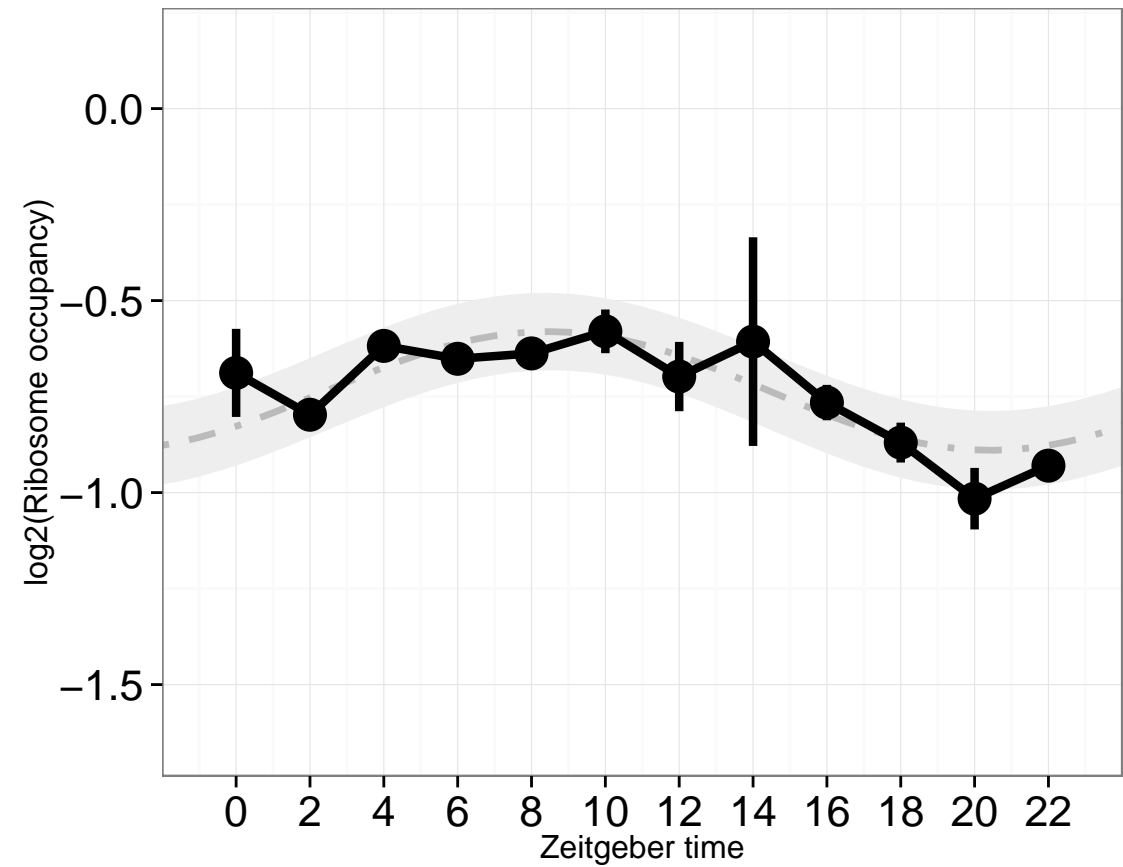

Supplement: Supplementary file 12939 [file 1]

# Psmb8

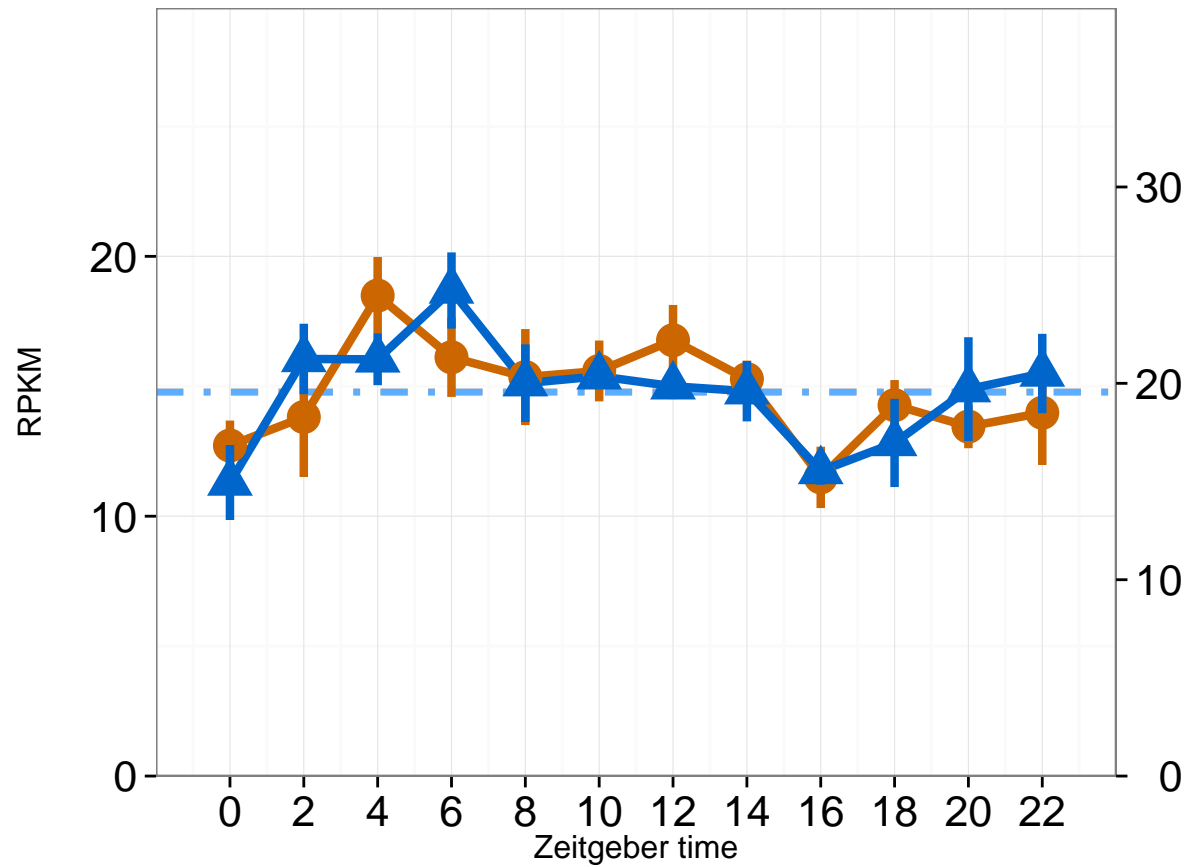

# Psmb8

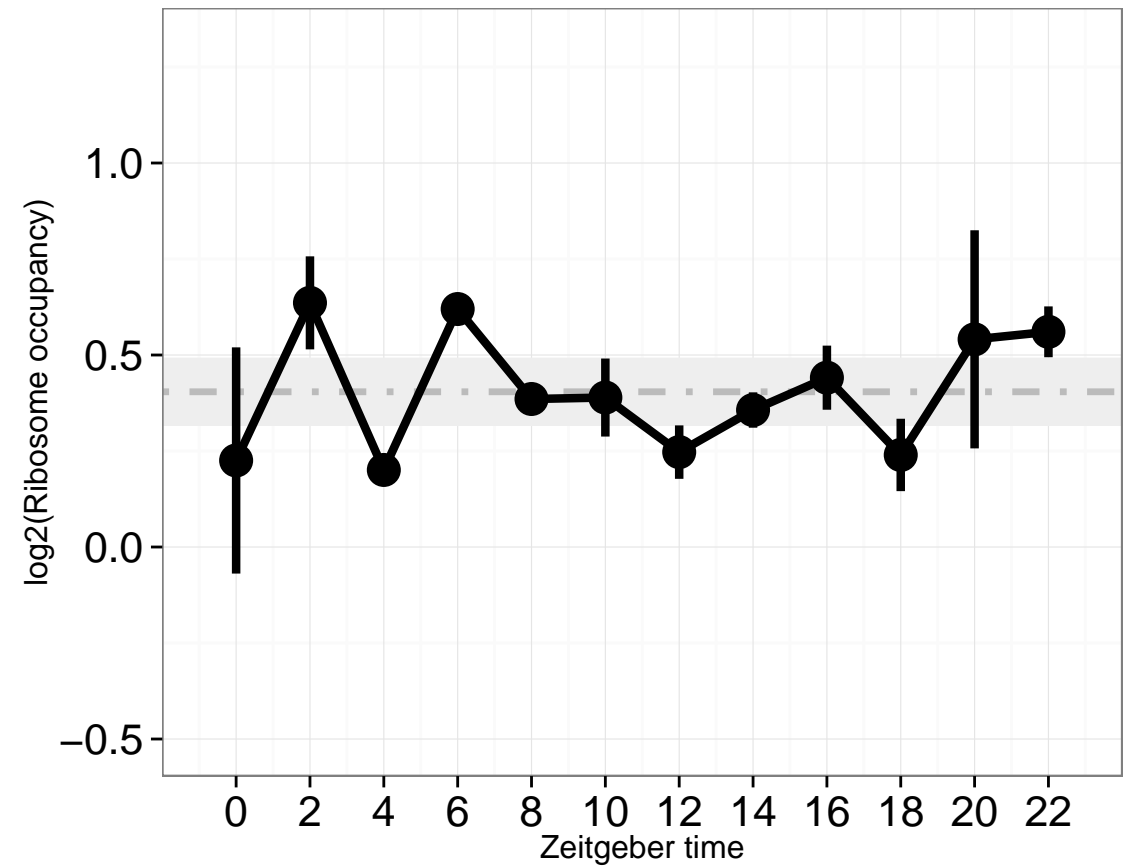

Supplement: Supplementary file 12940 [file 1]

## Rnf216

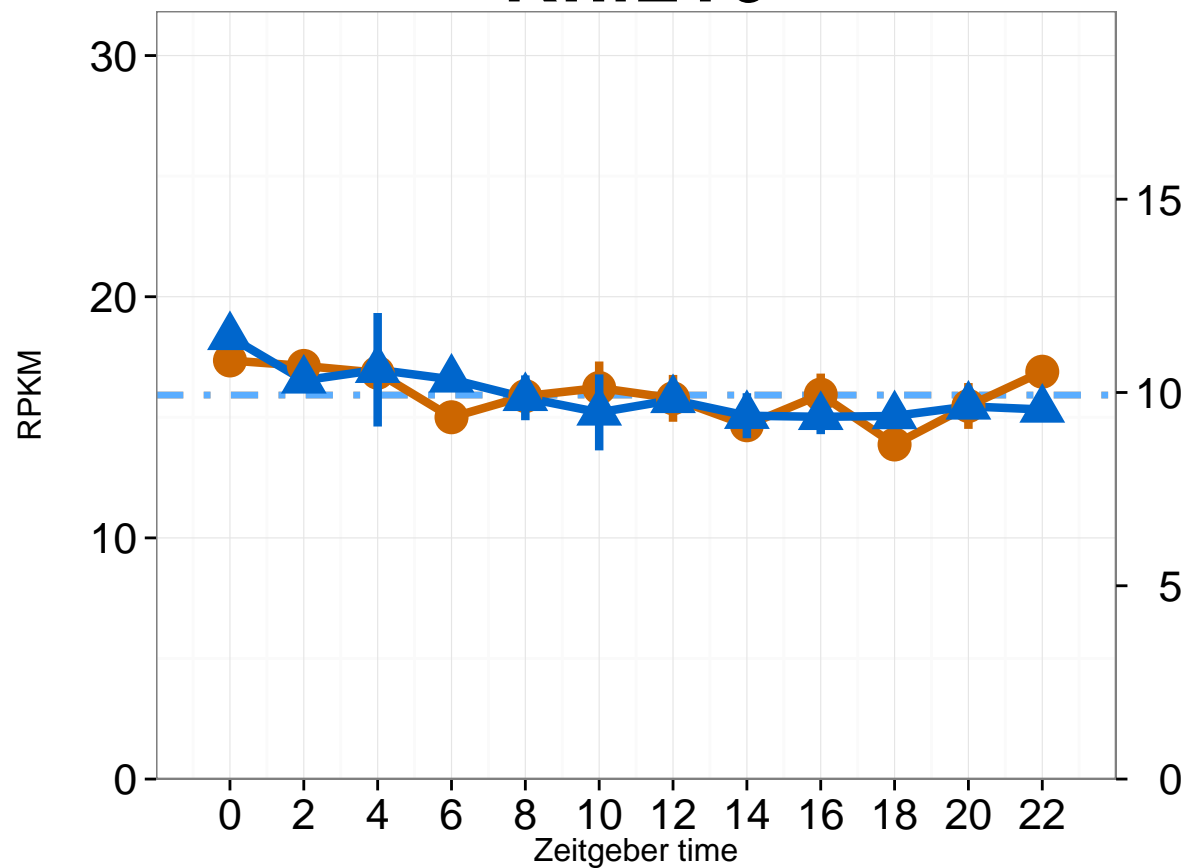

## Rnf216

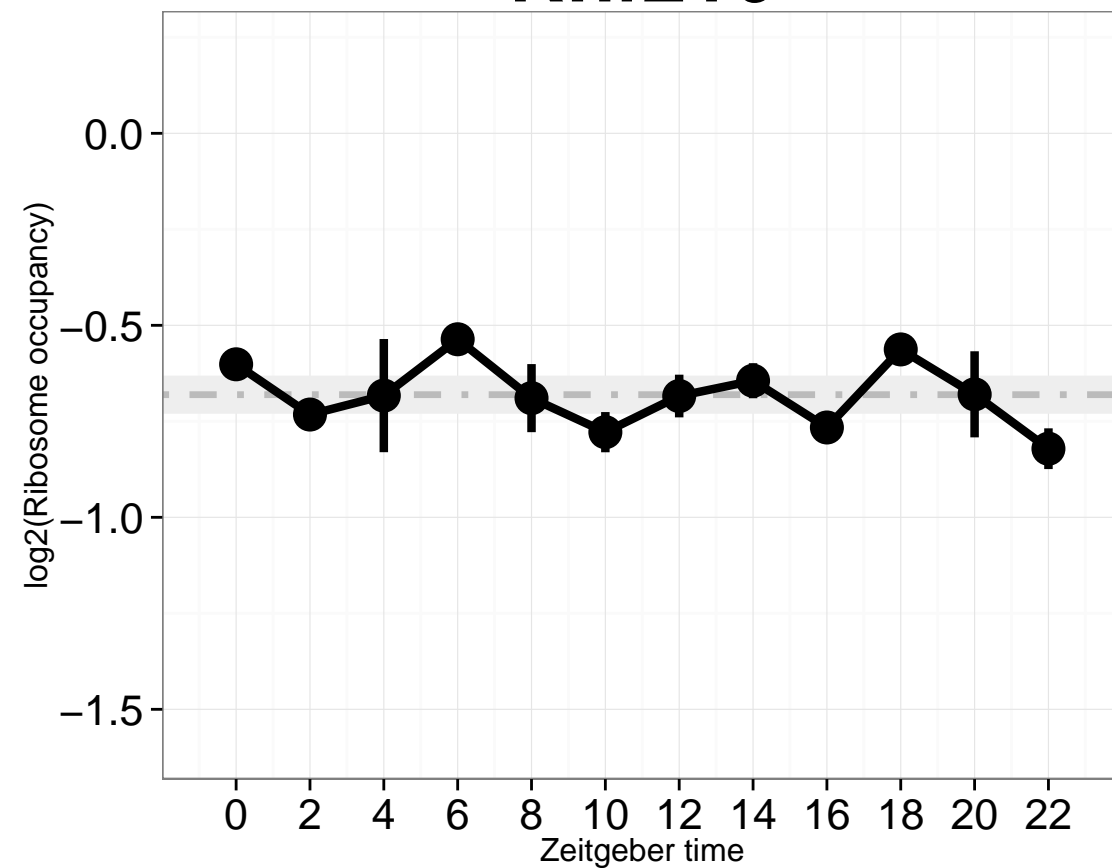

Supplement: Supplementary file 12941 [file 1]

## Gm12942

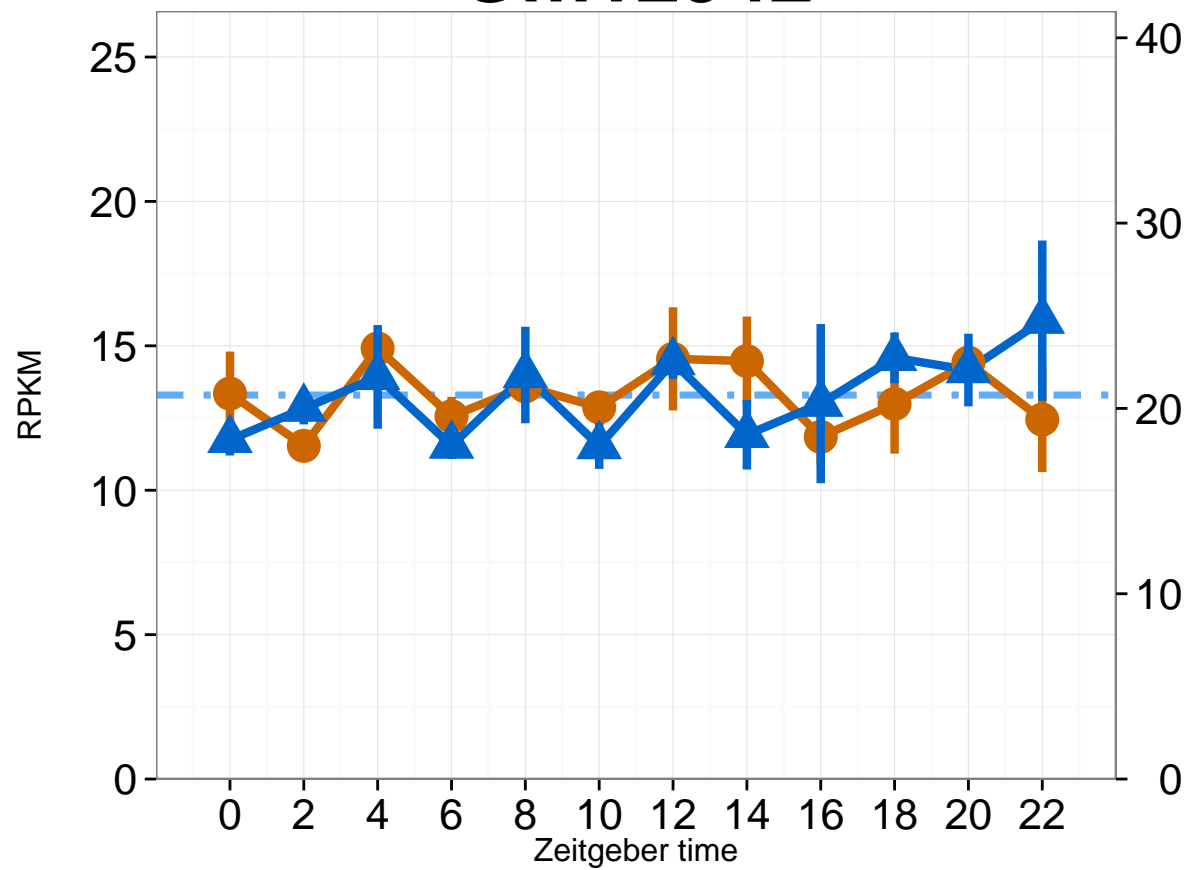

## Gm12942

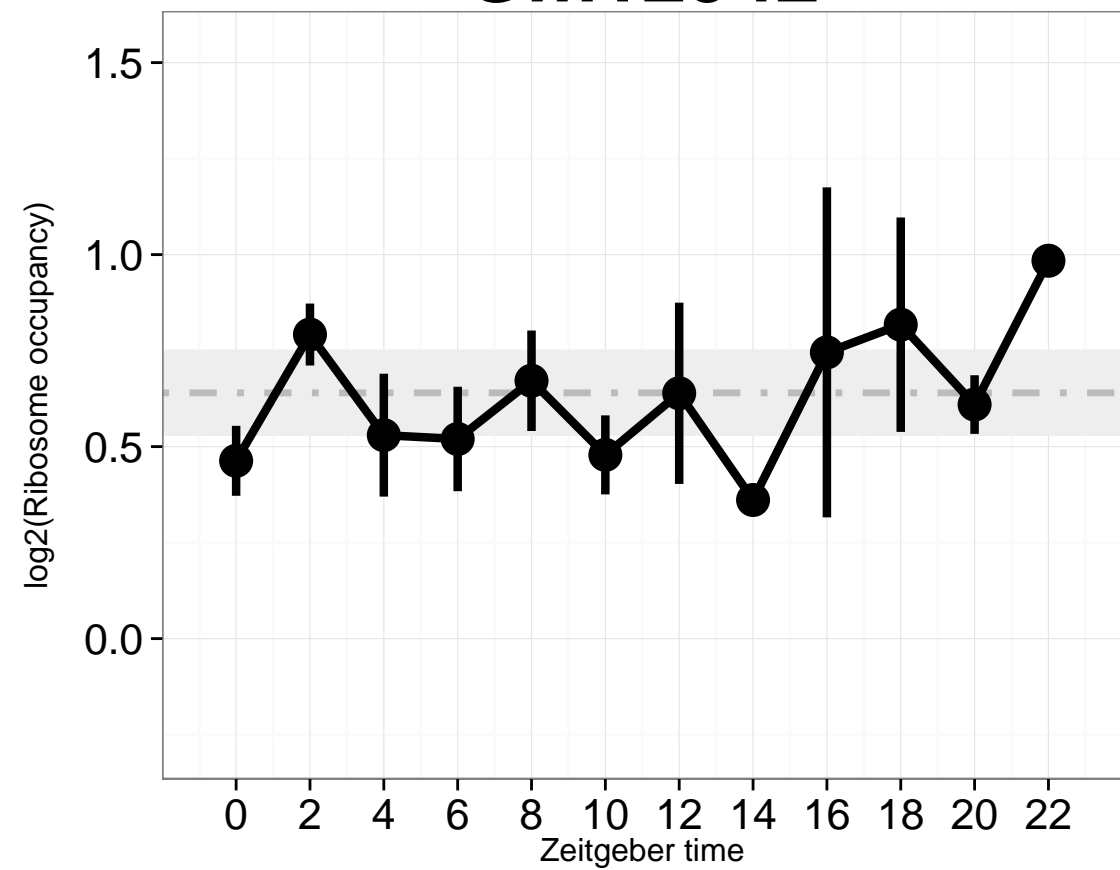

Supplement: Supplementary file 12942 [file 1]

## Acad9

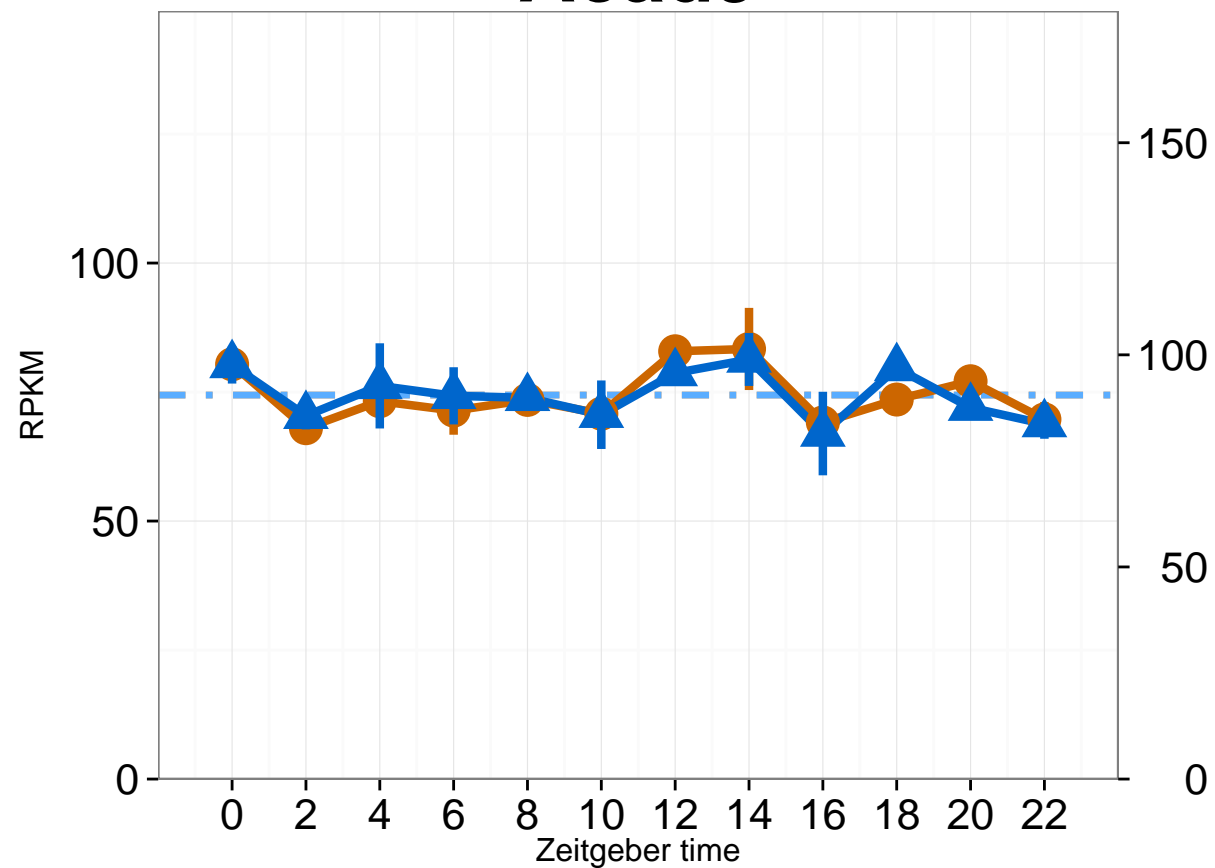

## Acad9

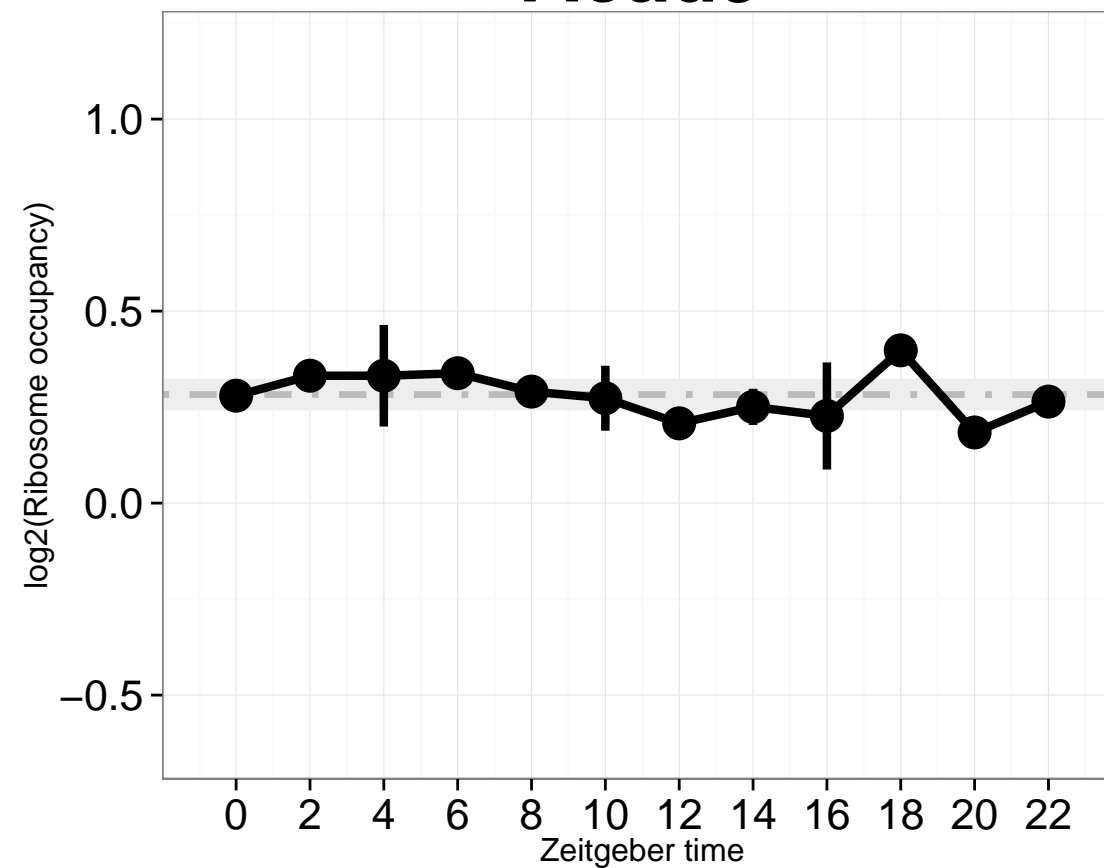

Supplement: Supplementary file 12943 [file 1]

# User1

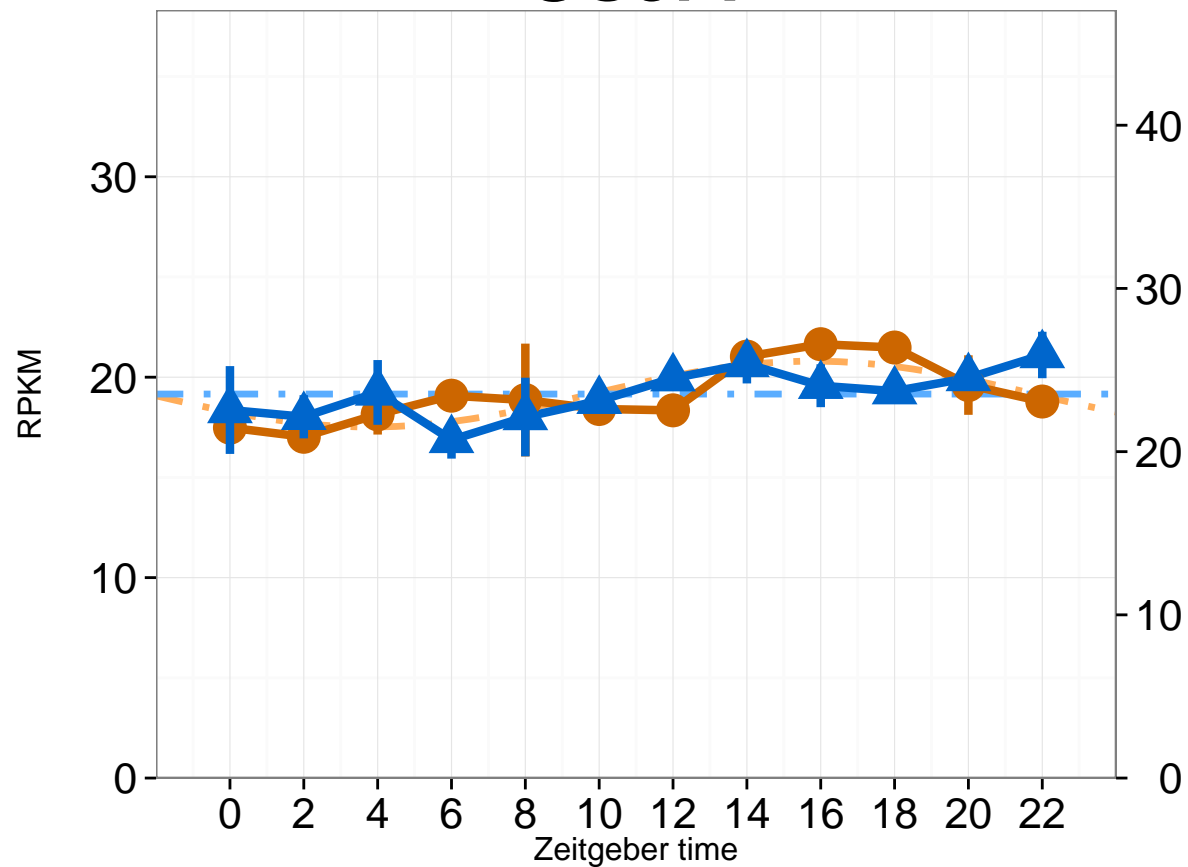

# User1

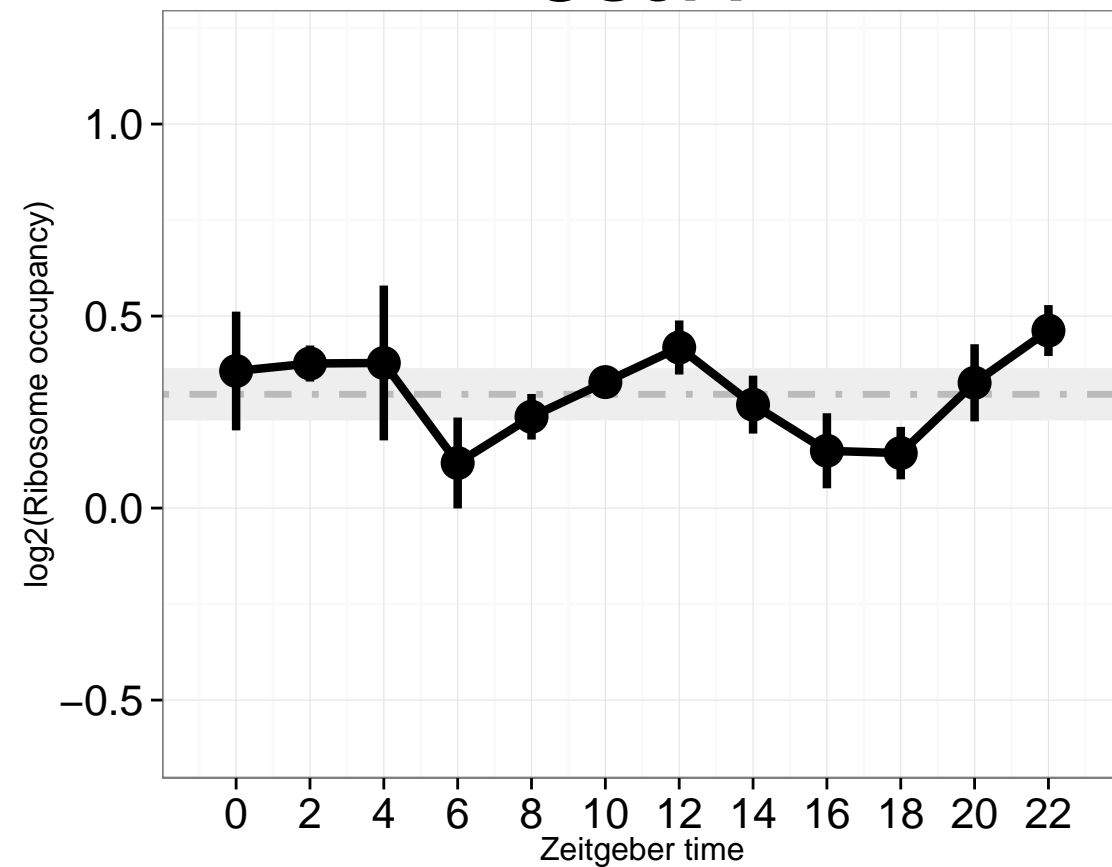

Supplement: Supplementary file 12944 [file 1]

## Flrt1

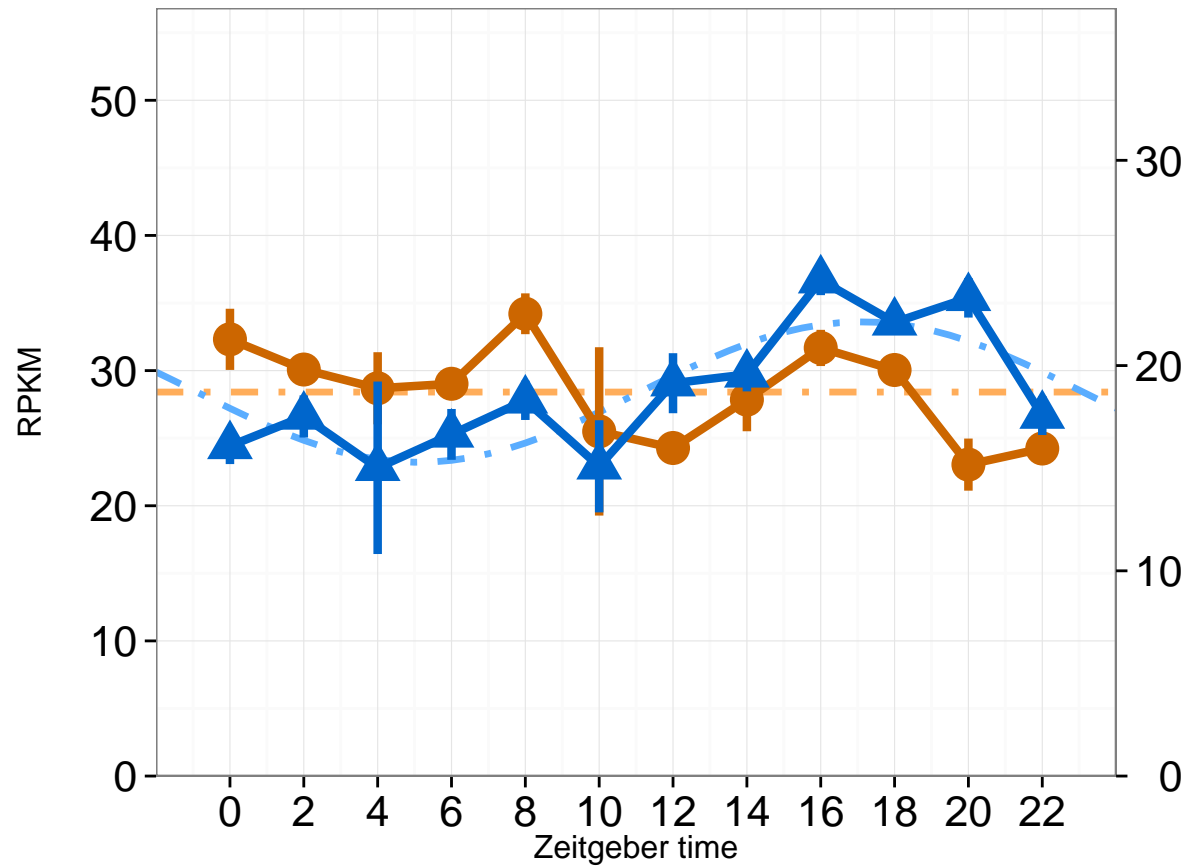

## Flrt1

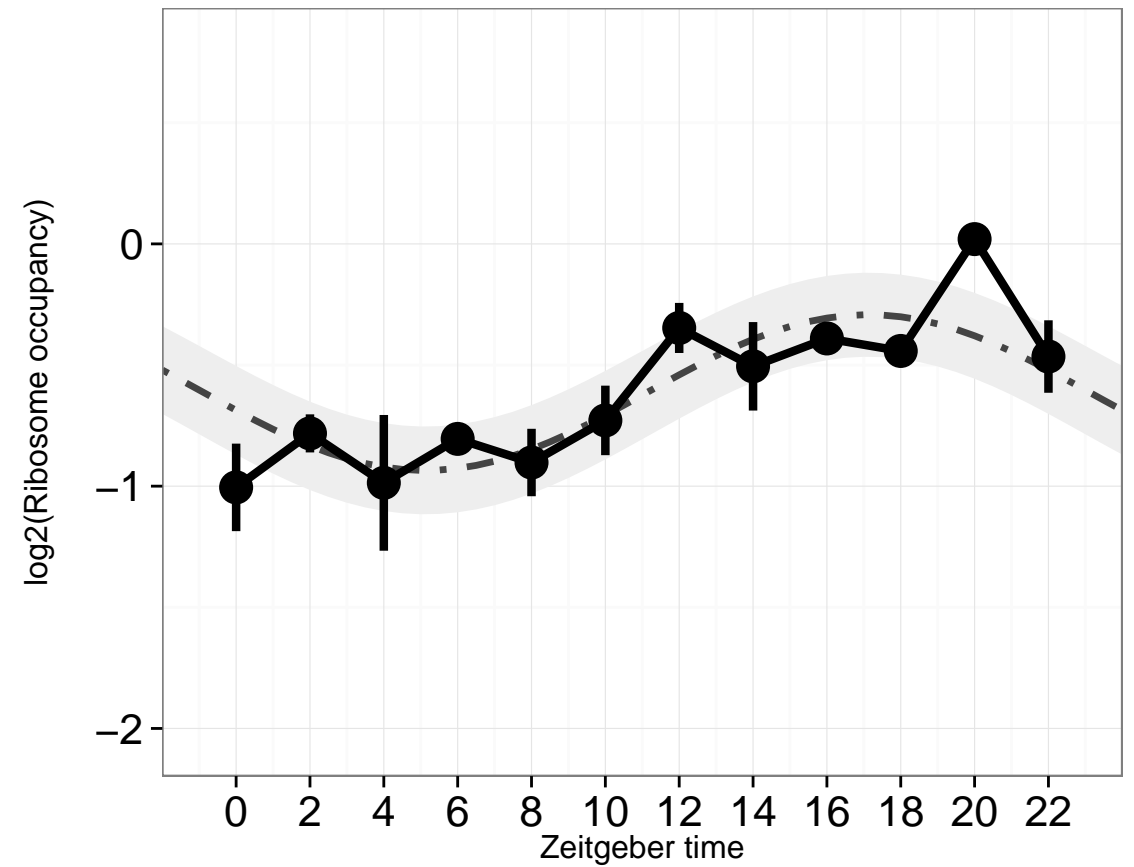

Supplement: Supplementary file 12945 [file 1]
