# Supplementary material (part 130 of 133)
Source: publisher figshare collection journal article supplement (https://springernature.figshare.com/articles/dataset/_/4903193)

## Pard6b

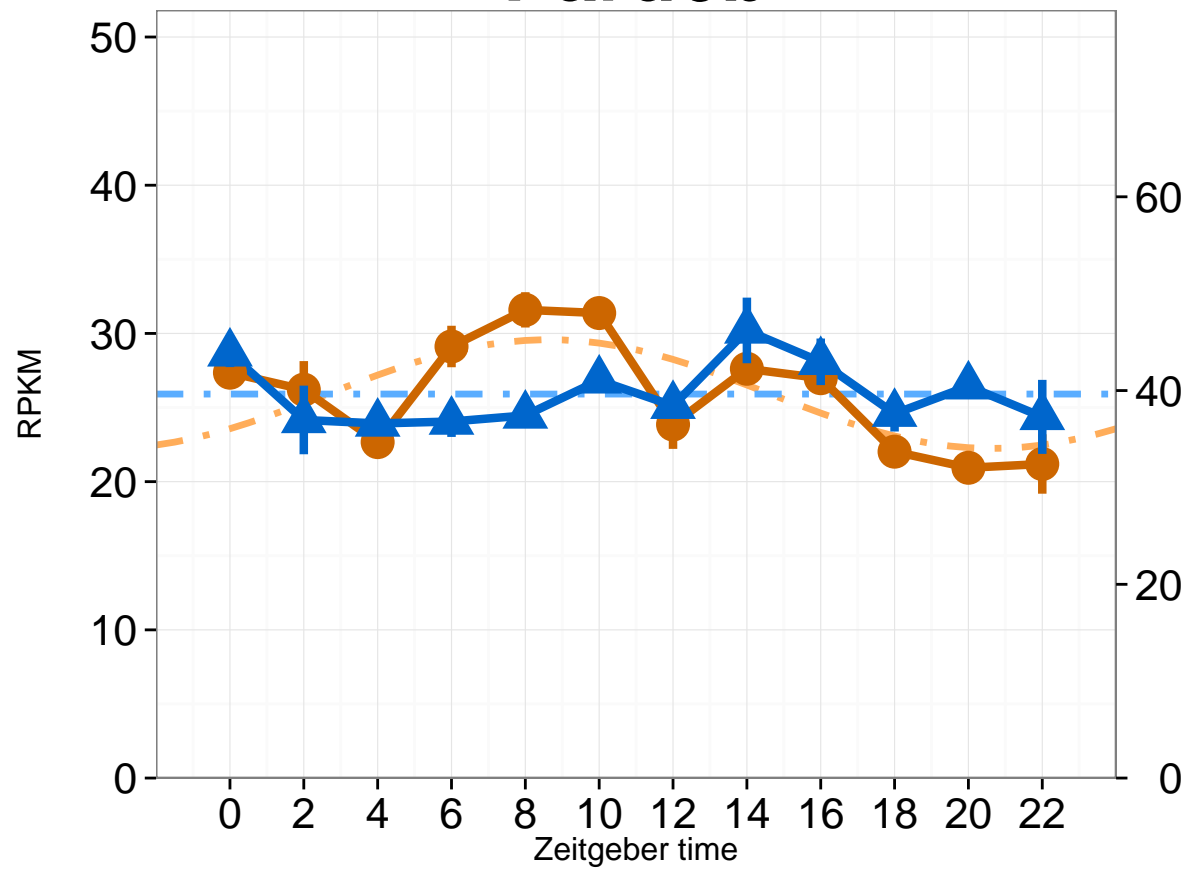

## Pard6b

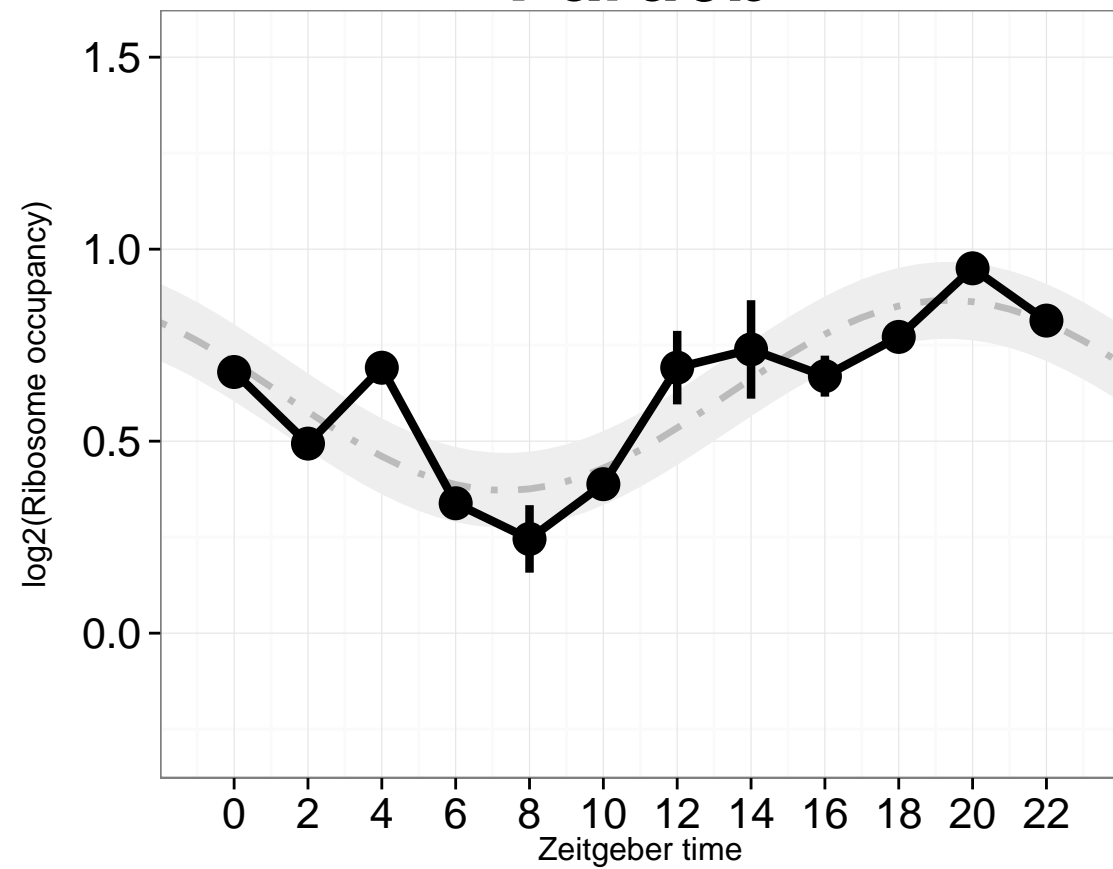

Supplement: Supplementary file 12946 [file 1]

# Rpl21

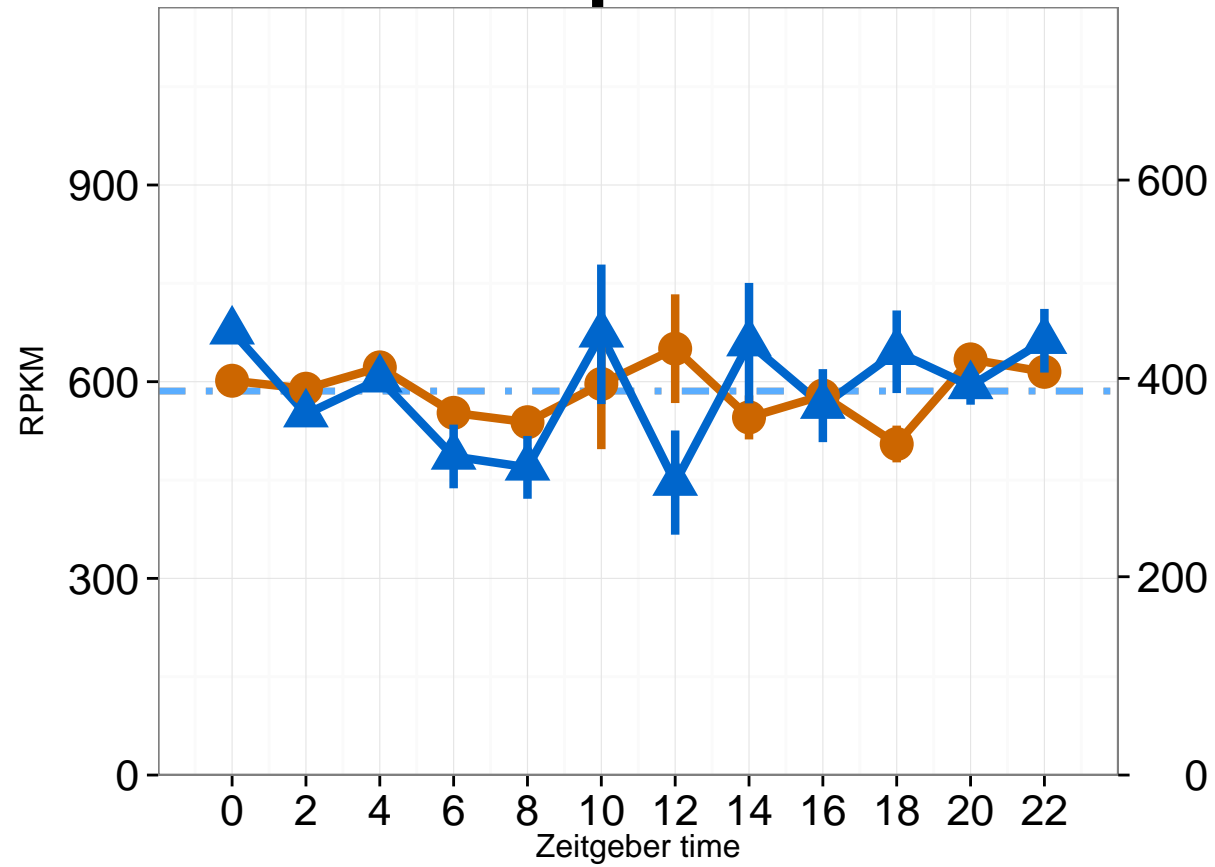

# Rpl21

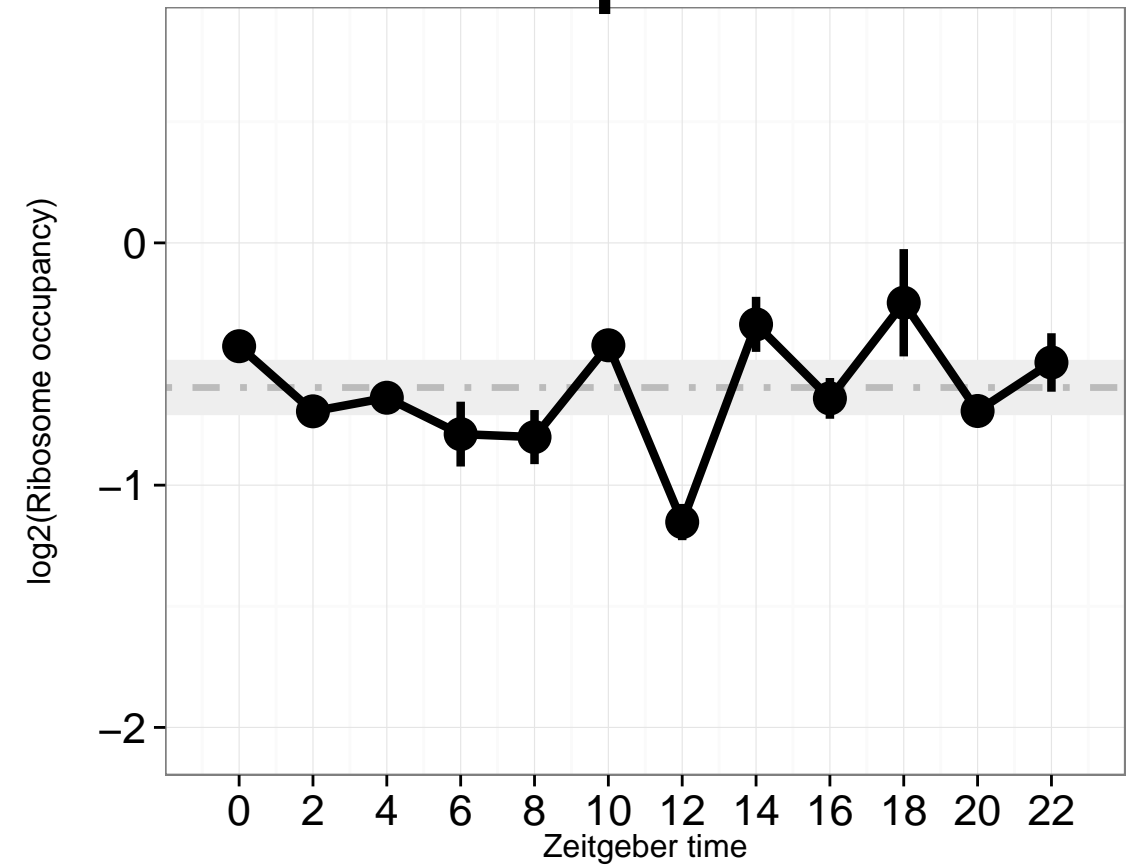

Supplement: Supplementary file 12947 [file 1]

# Mrps7

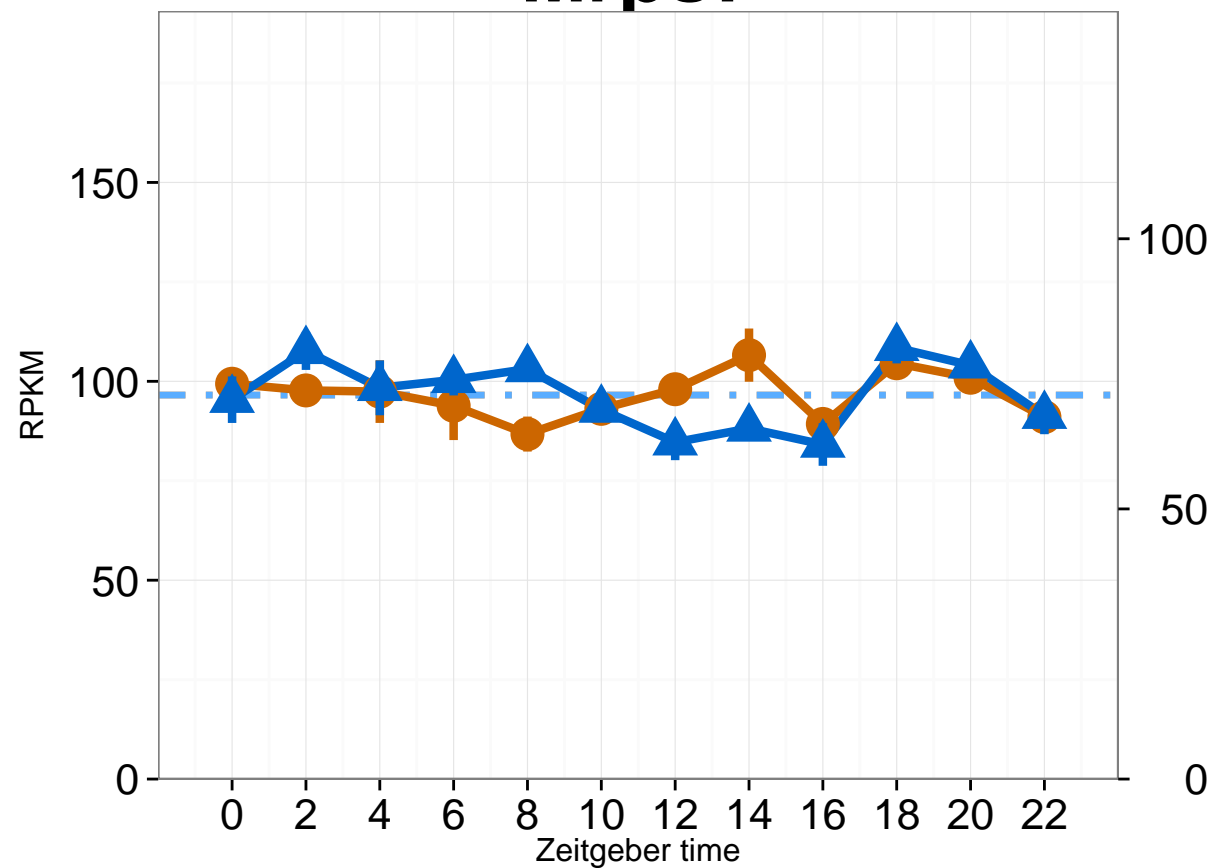

# Mrps7

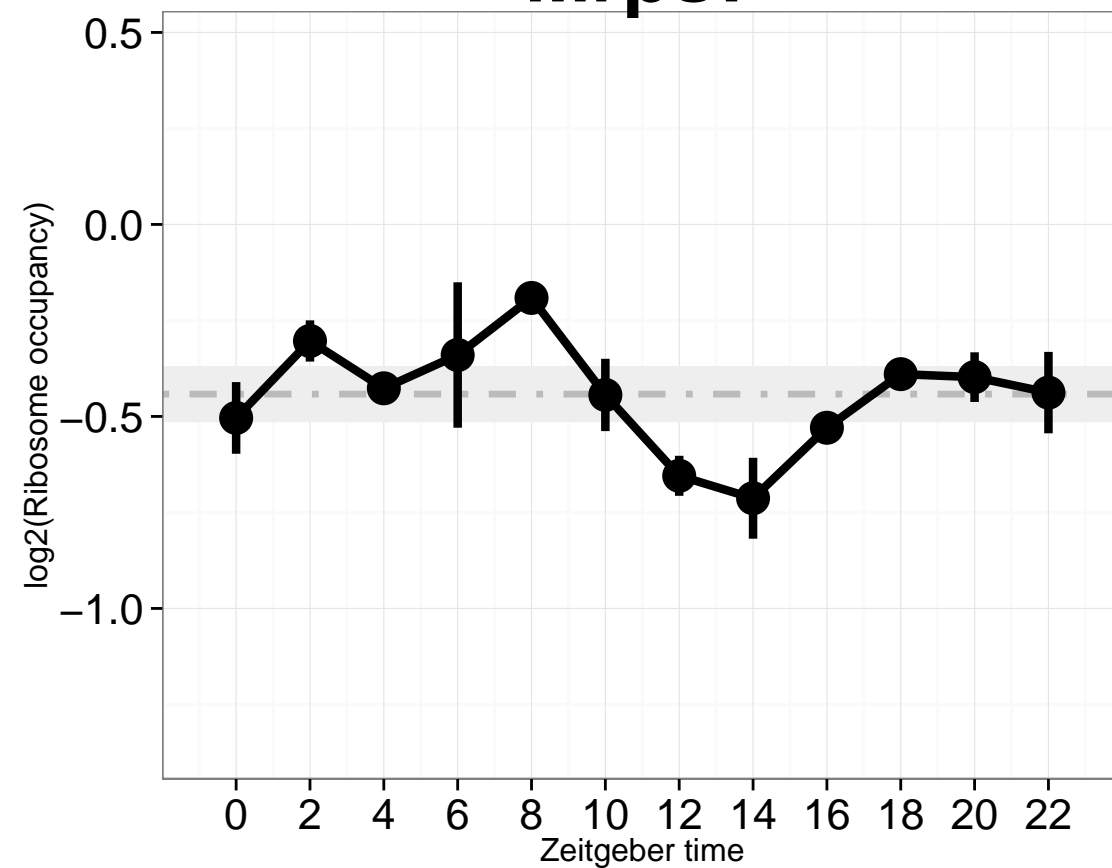

Supplement: Supplementary file 12948 [file 1]

# Pcdhb18

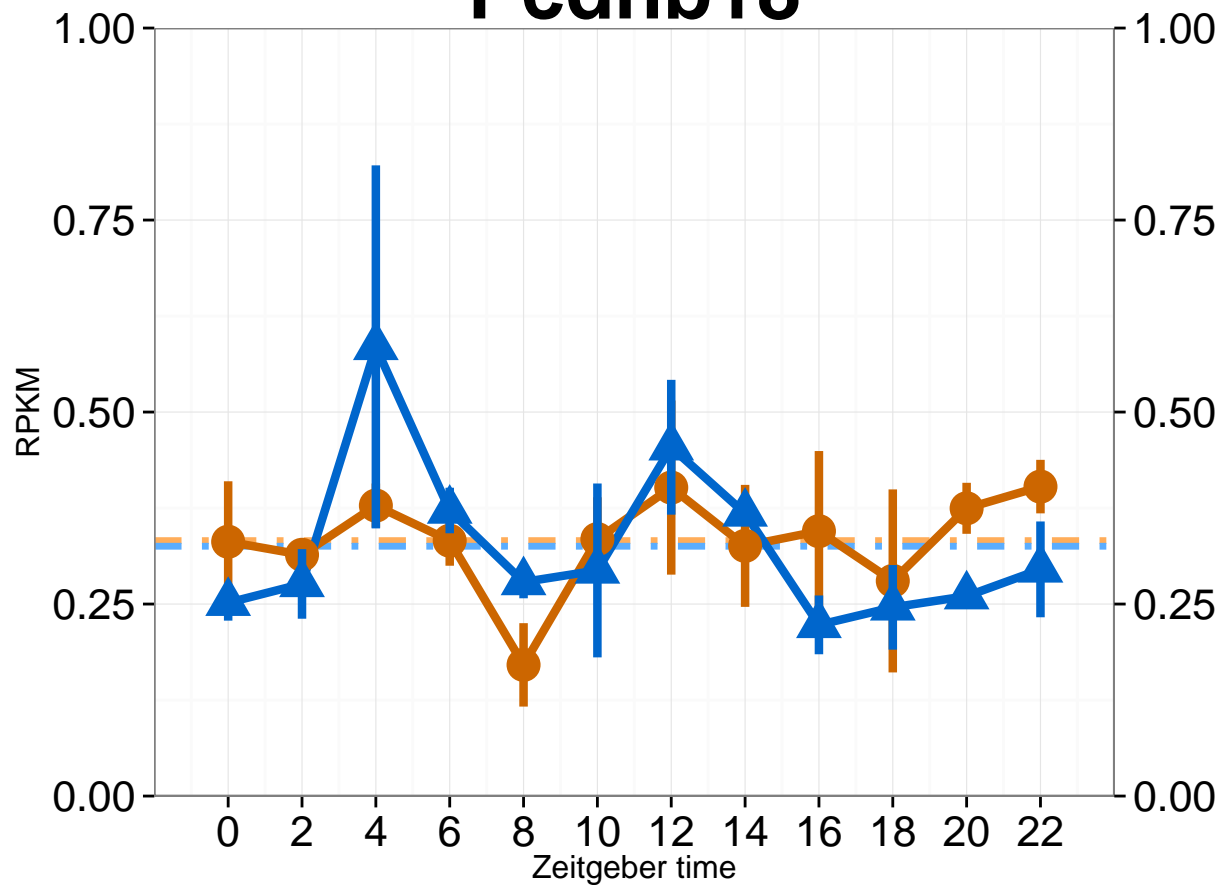

# Pcdhb18

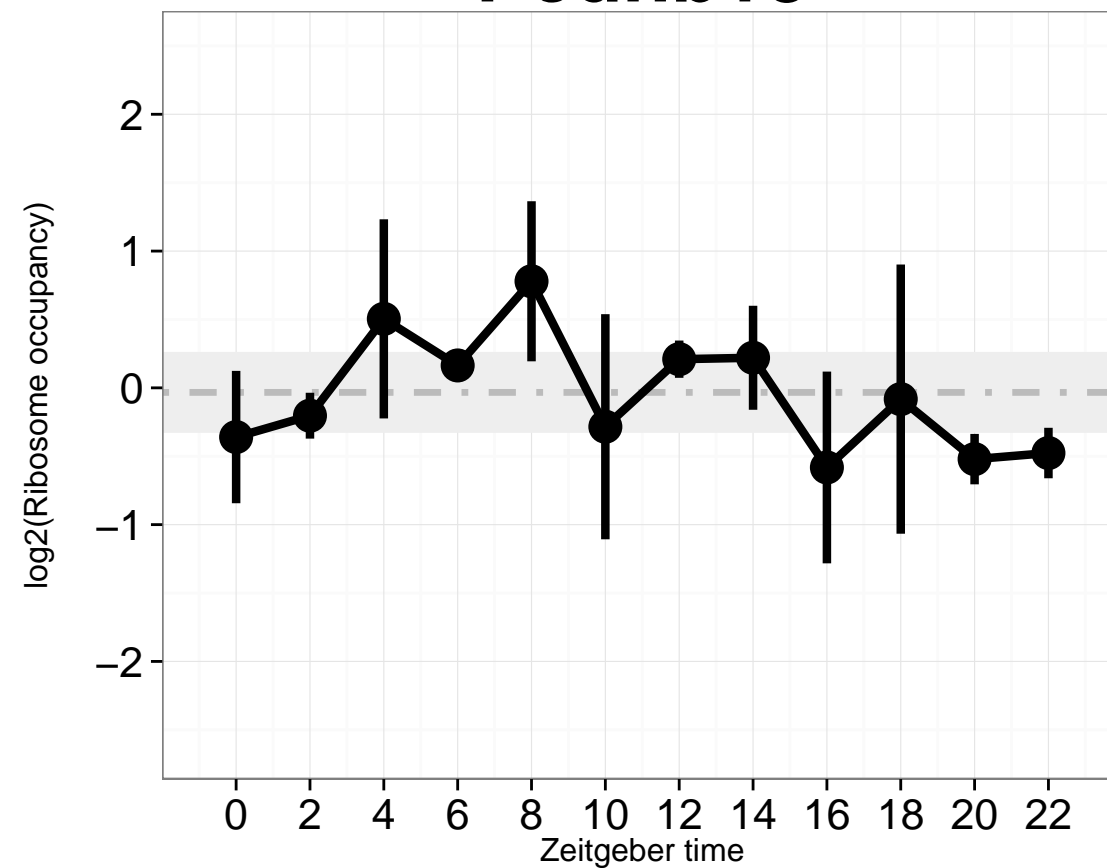

Supplement: Supplementary file 12949 [file 1]

## Bnip2

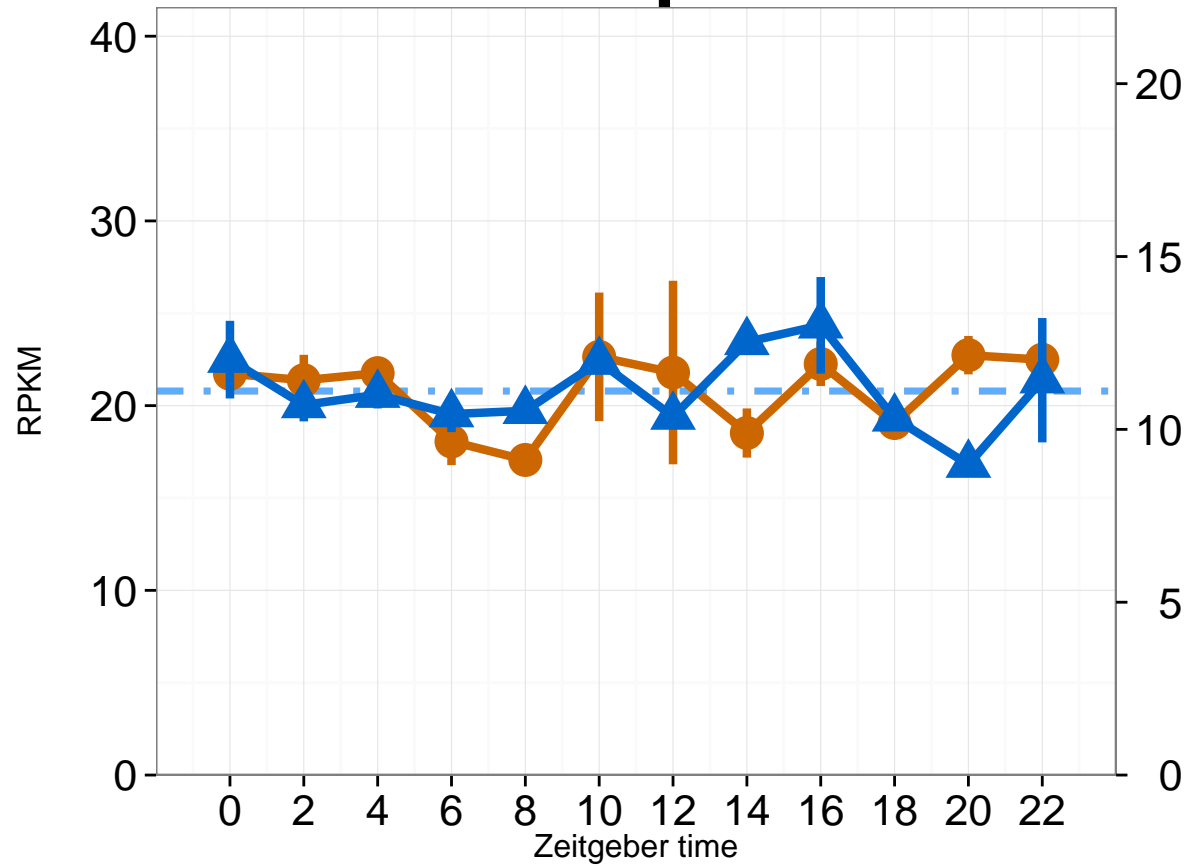

## Bnip2

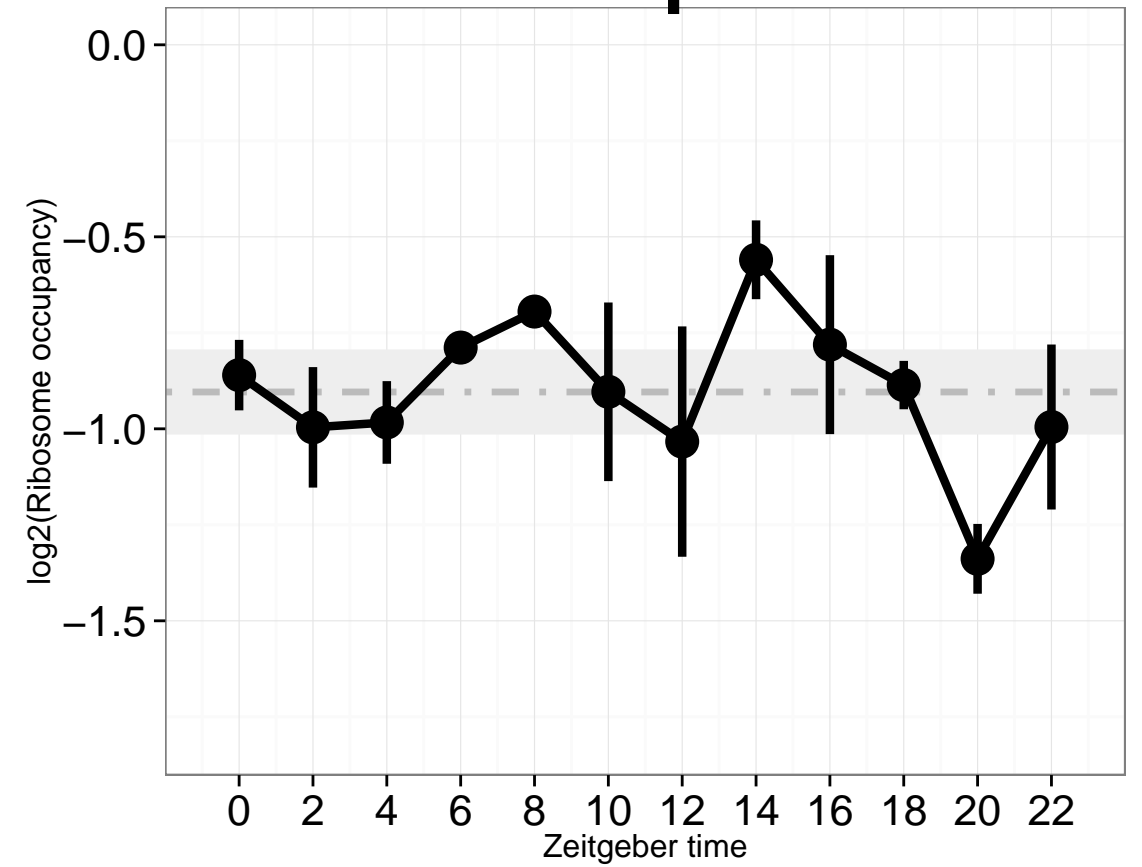

Supplement: Supplementary file 12950 [file 1]

## Naa60

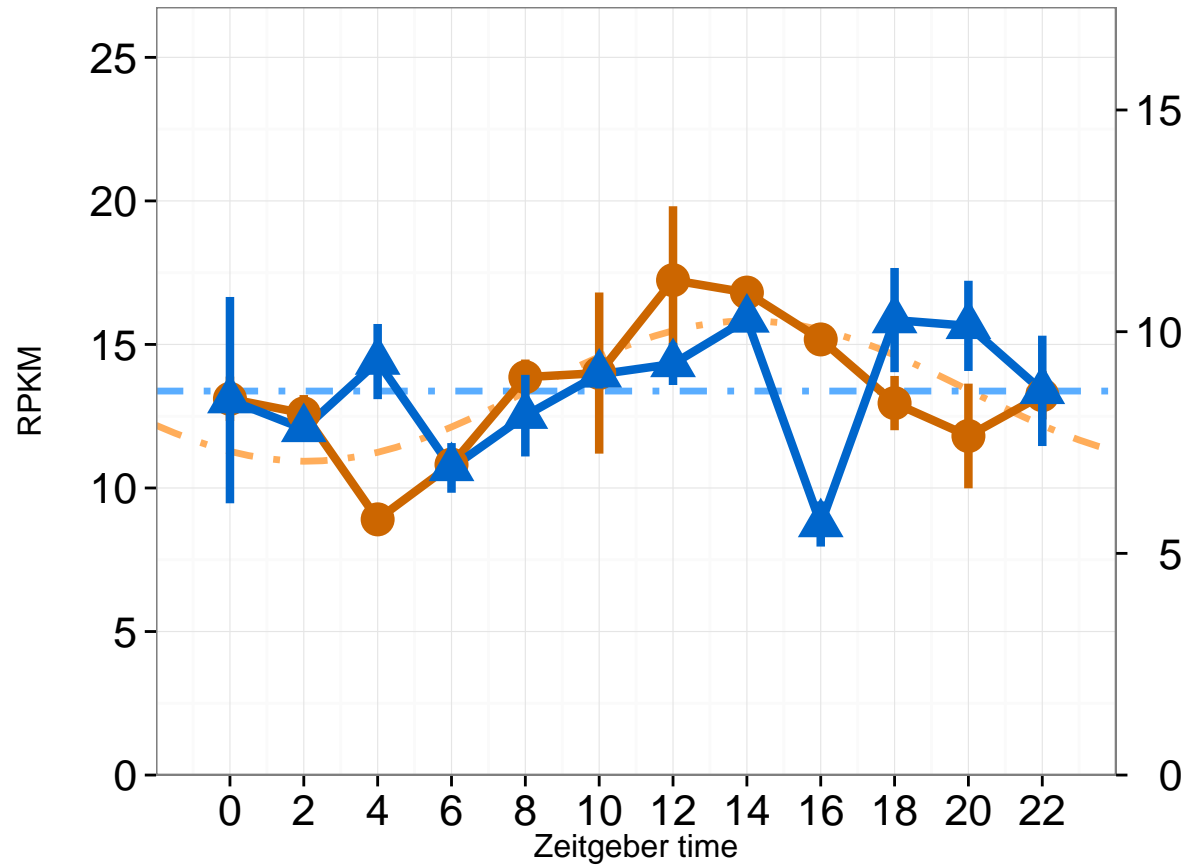

## Naa60

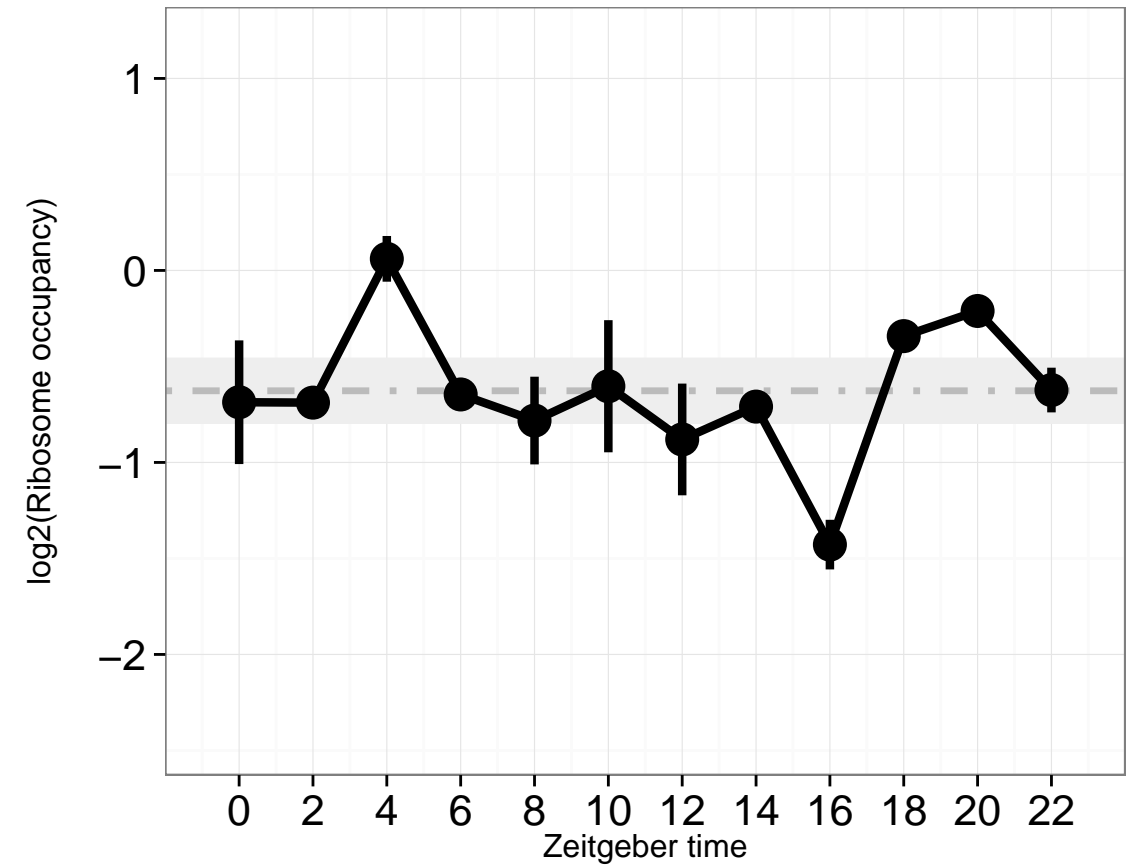

Supplement: Supplementary file 12951 [file 1]

# Slc4a5

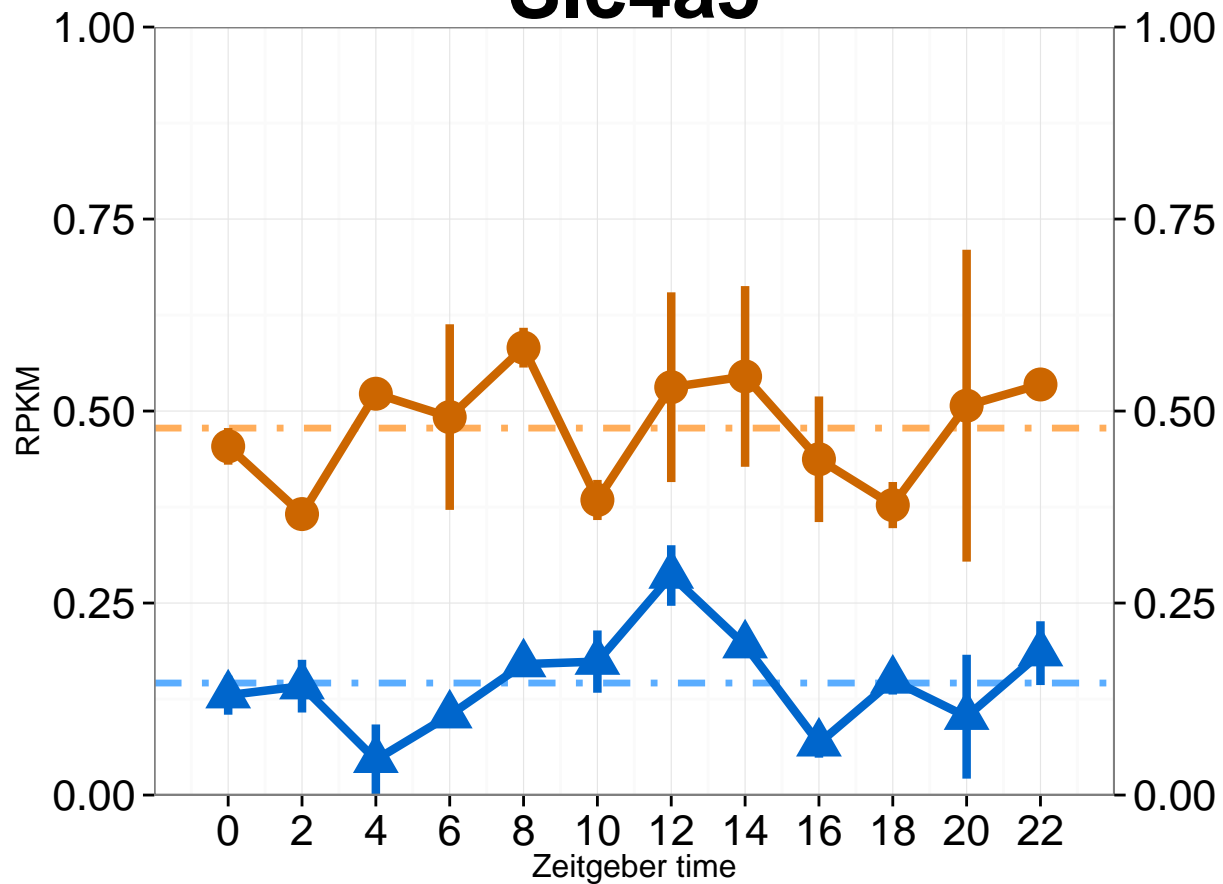

# Slc4a5

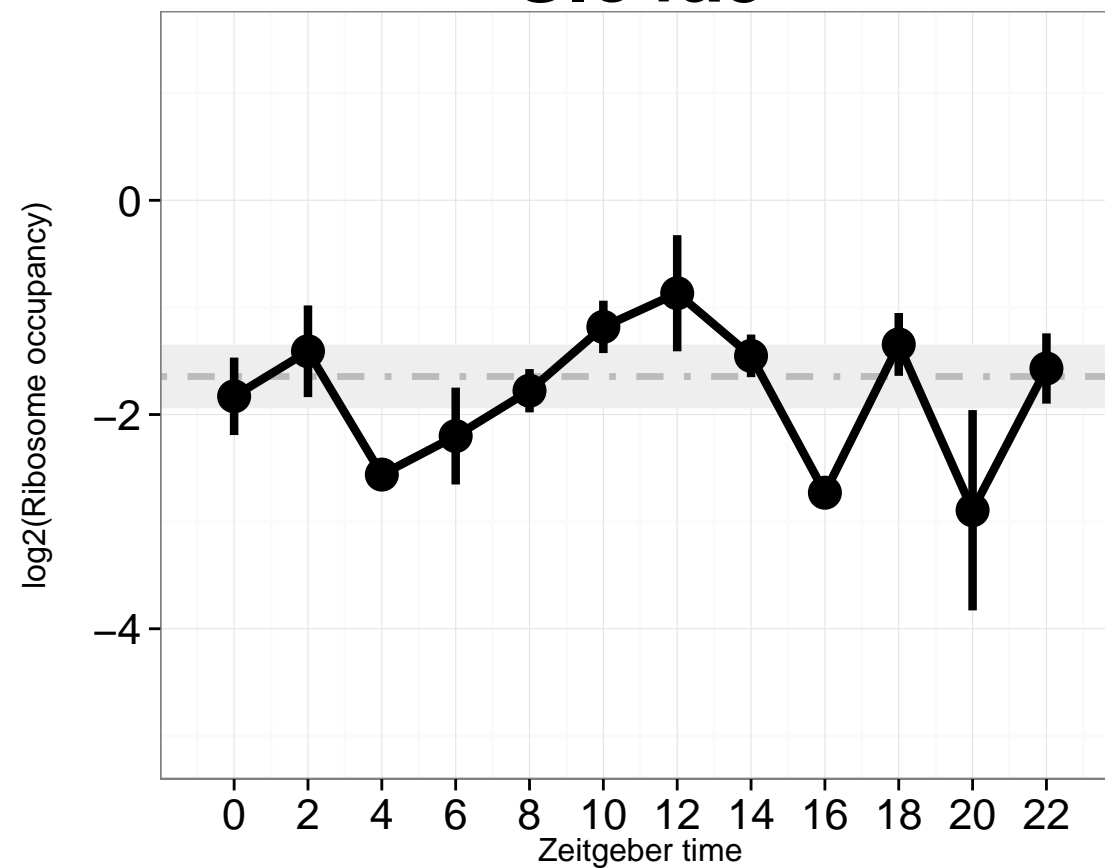

Supplement: Supplementary file 12952 [file 1]

## Nlrc3

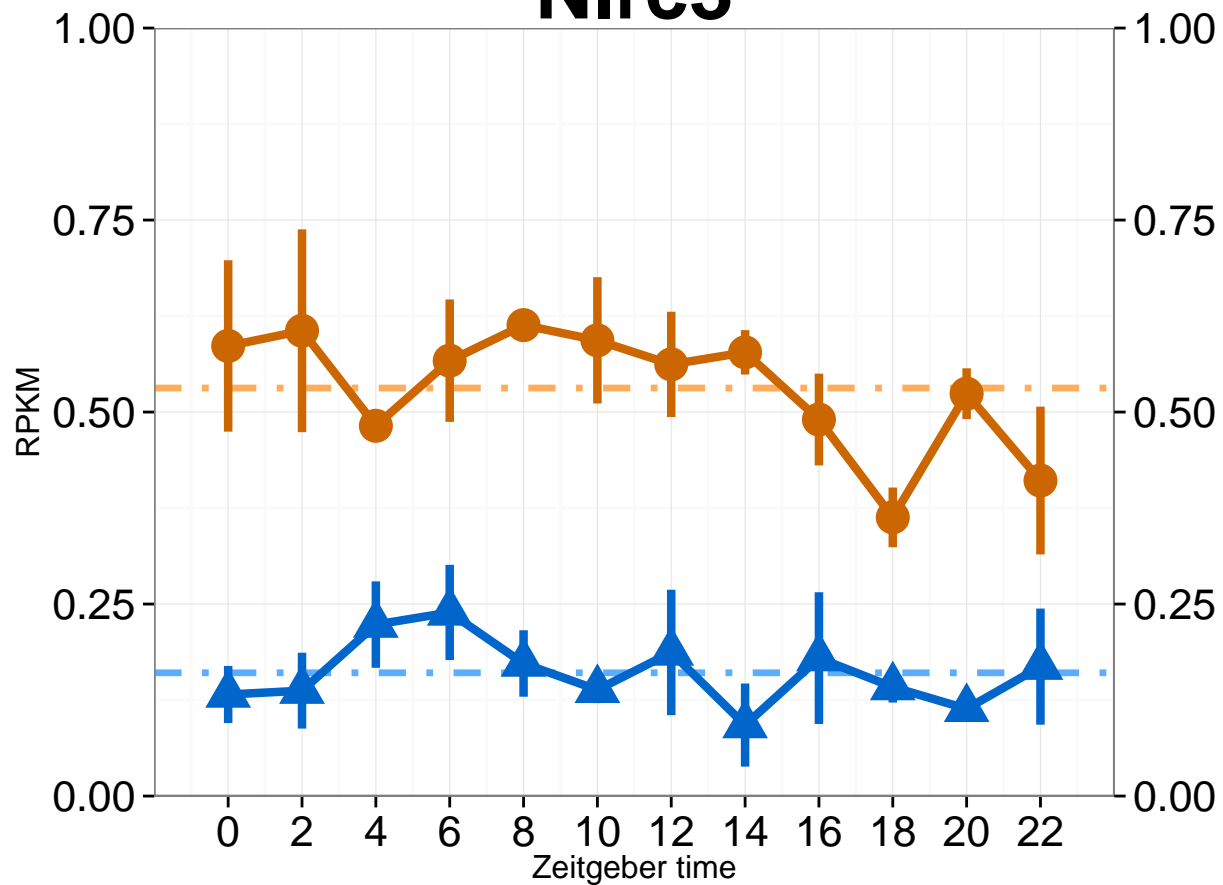

## Nlrc3

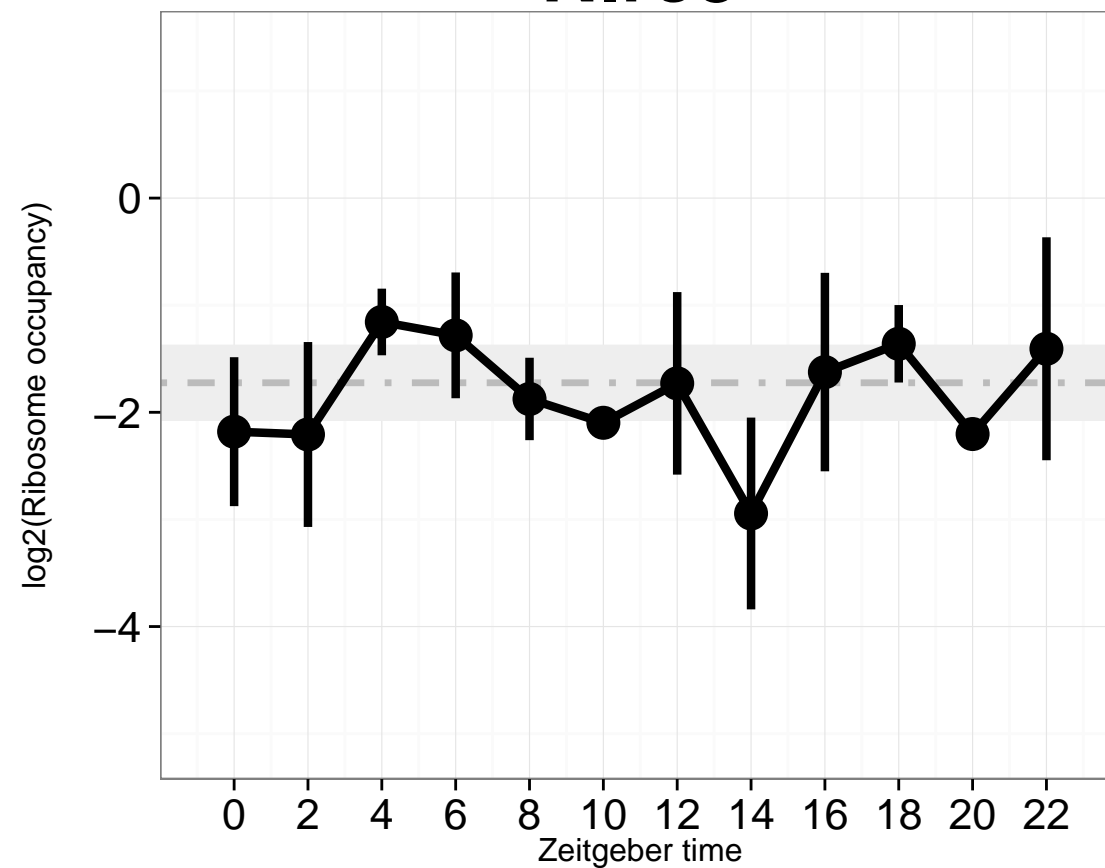

Supplement: Supplementary file 12953 [file 1]

## Cops6

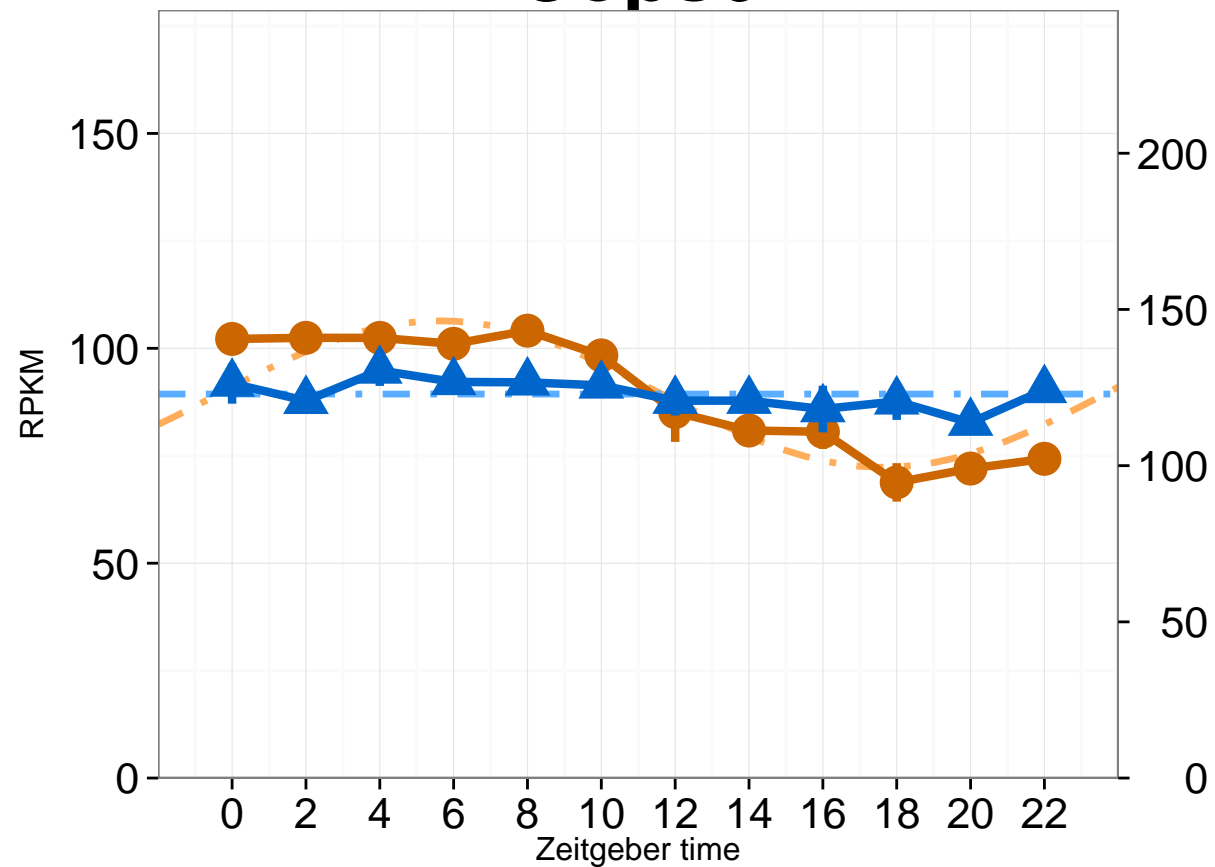

## Cops6

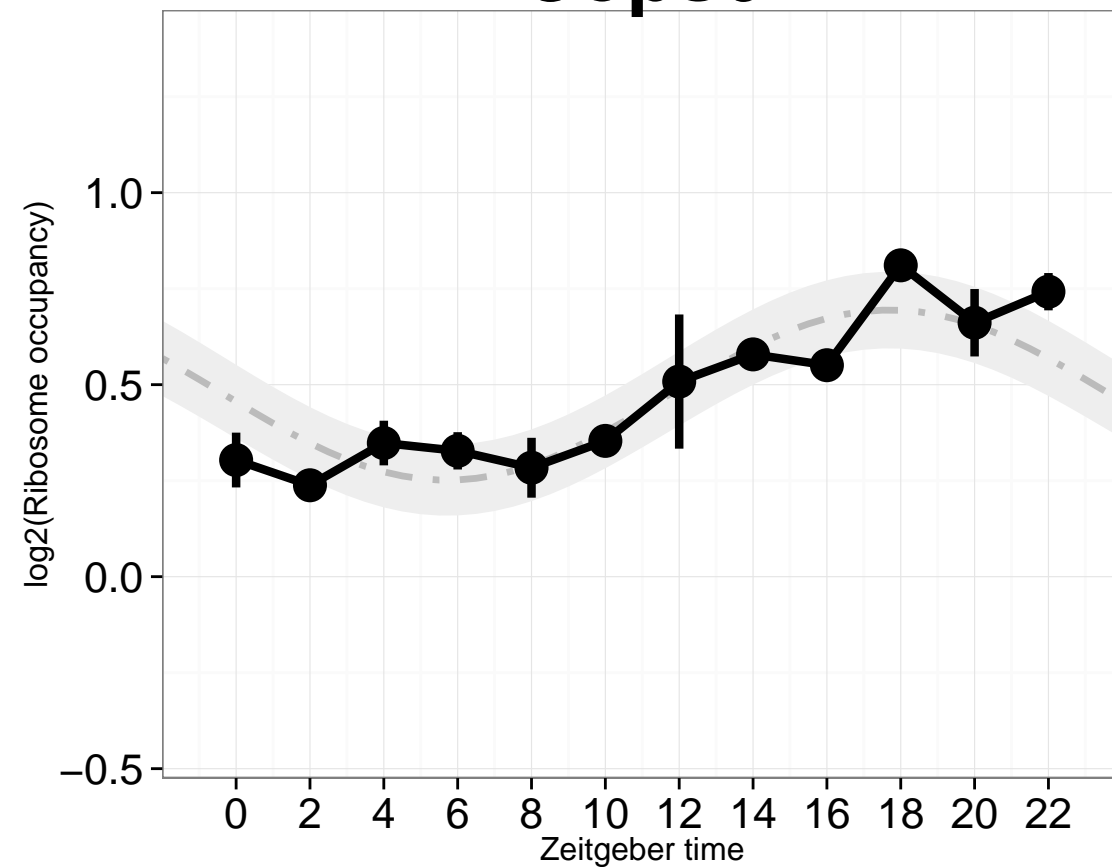

Supplement: Supplementary file 12954 [file 1]

## Pacsin2

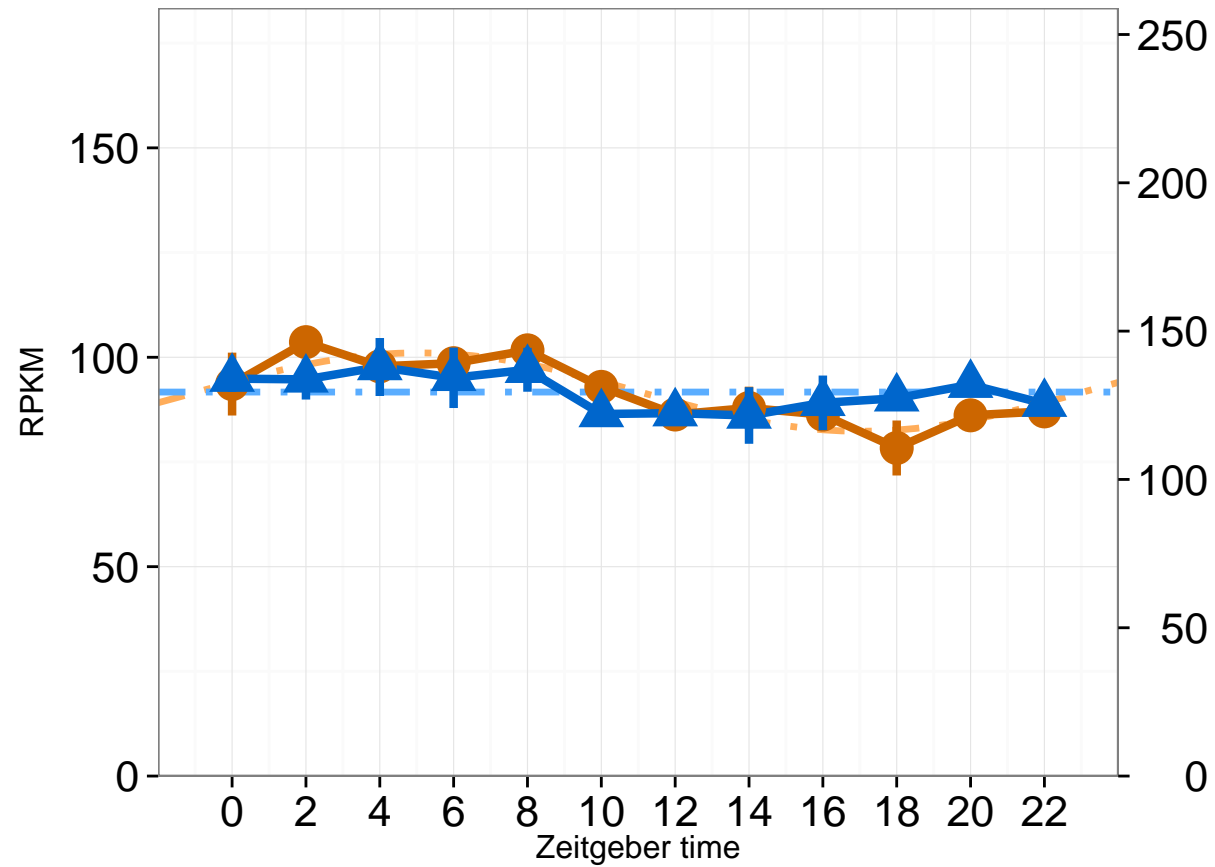

## Pacsin2

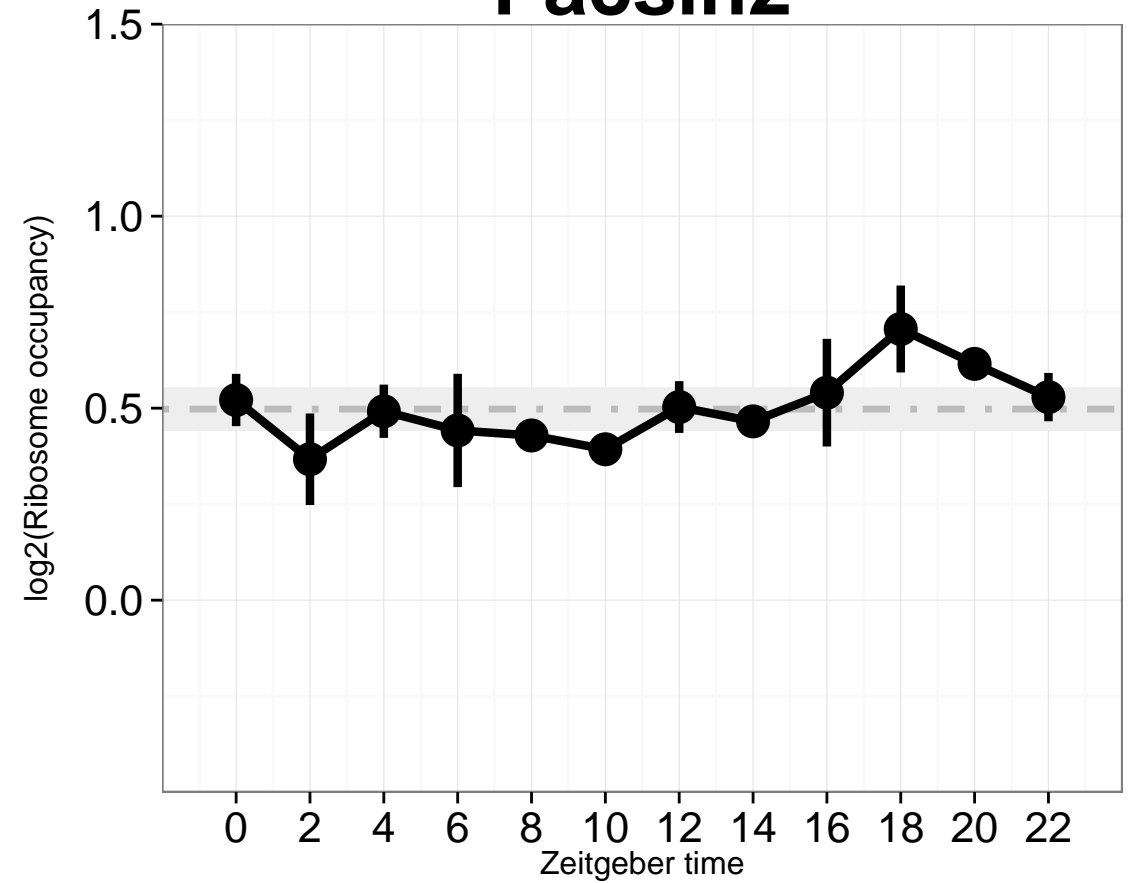

Supplement: Supplementary file 12955 [file 1]

## Abcd1

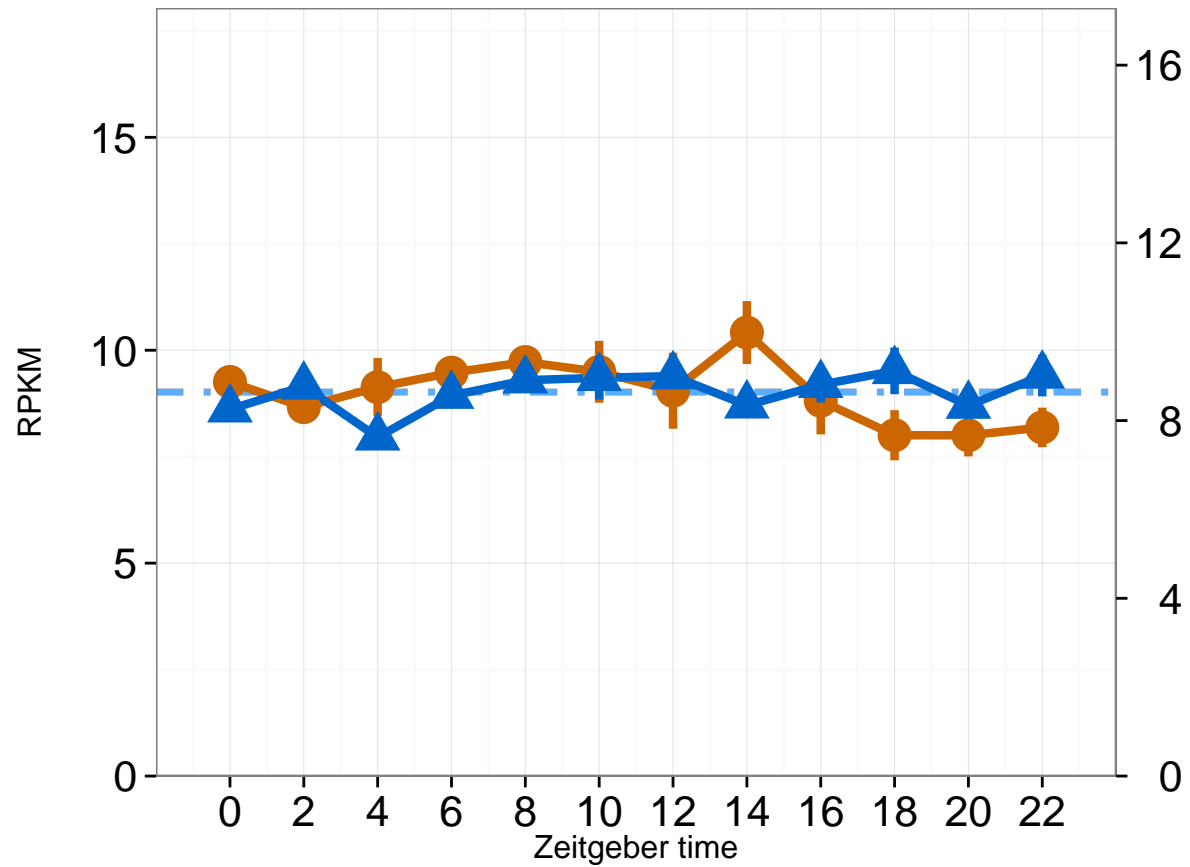

## Abcd1

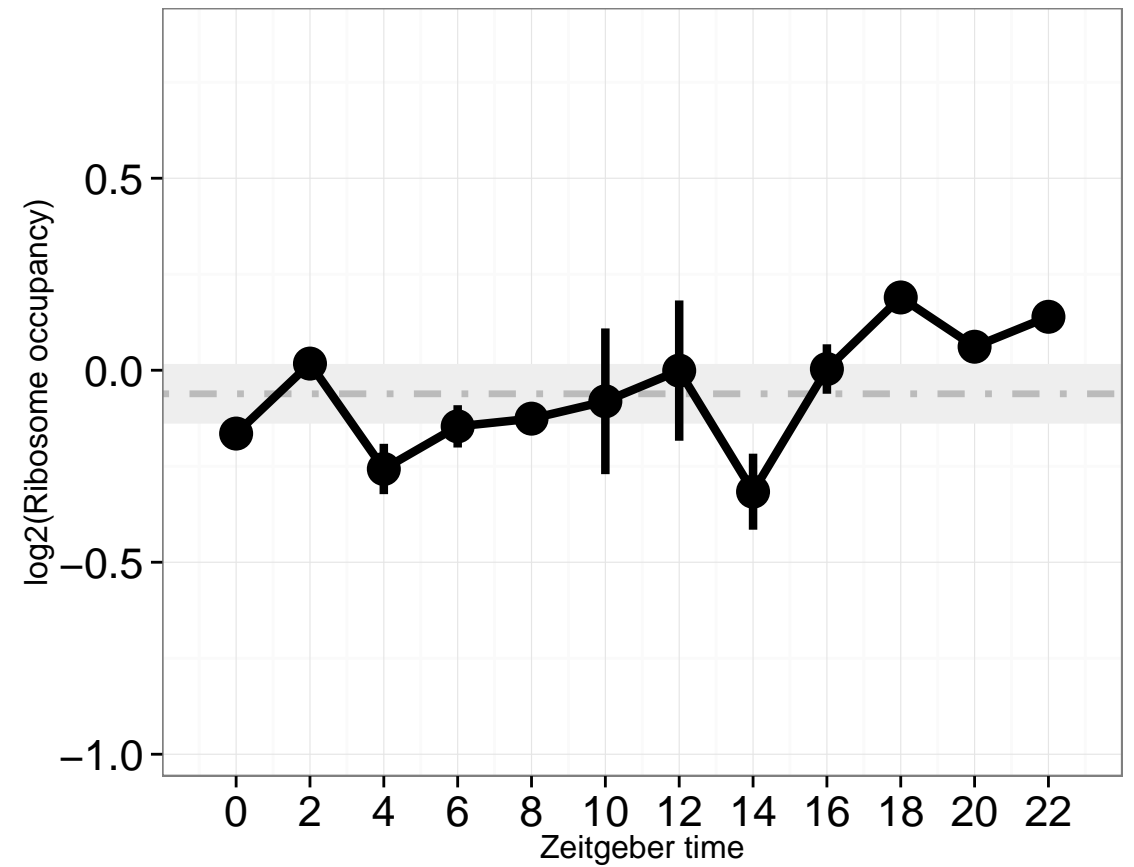

Supplement: Supplementary file 12956 [file 1]

## Znrd1

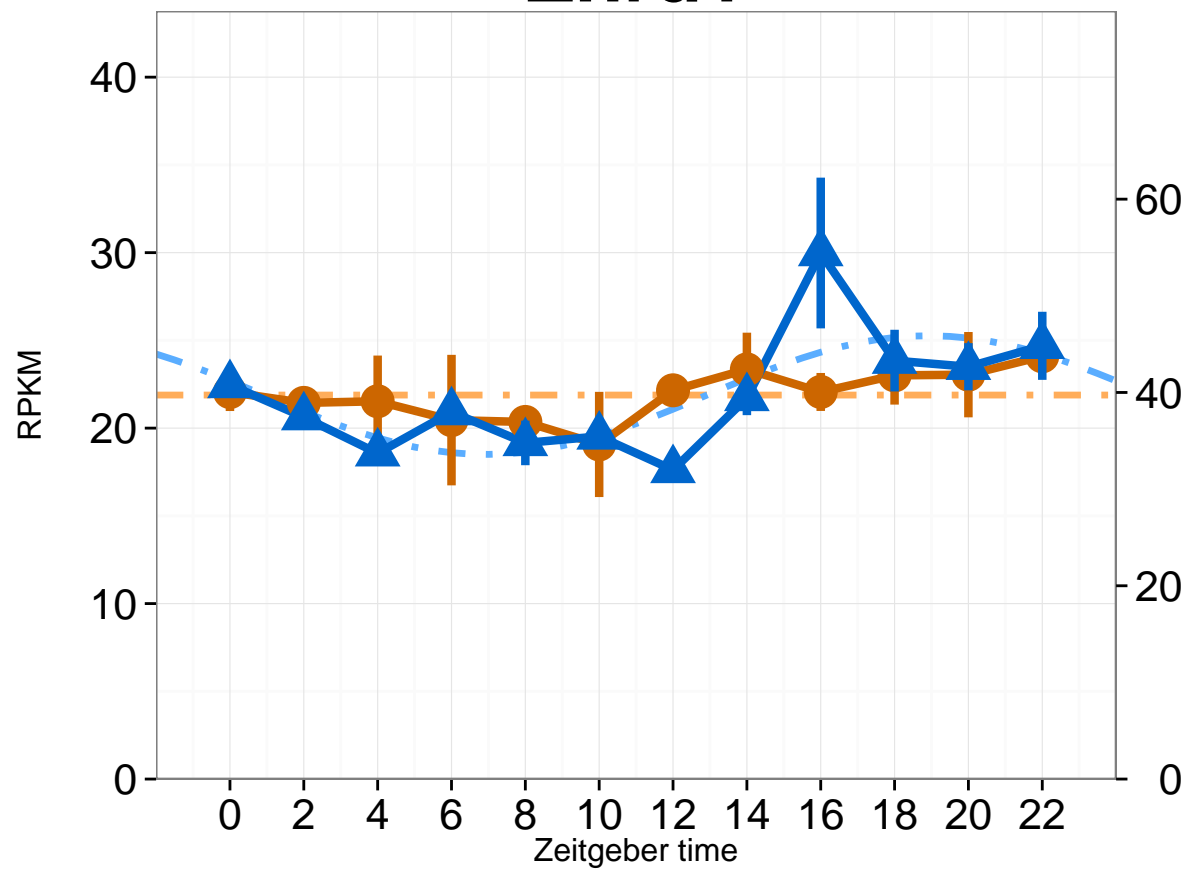

## Znrd1

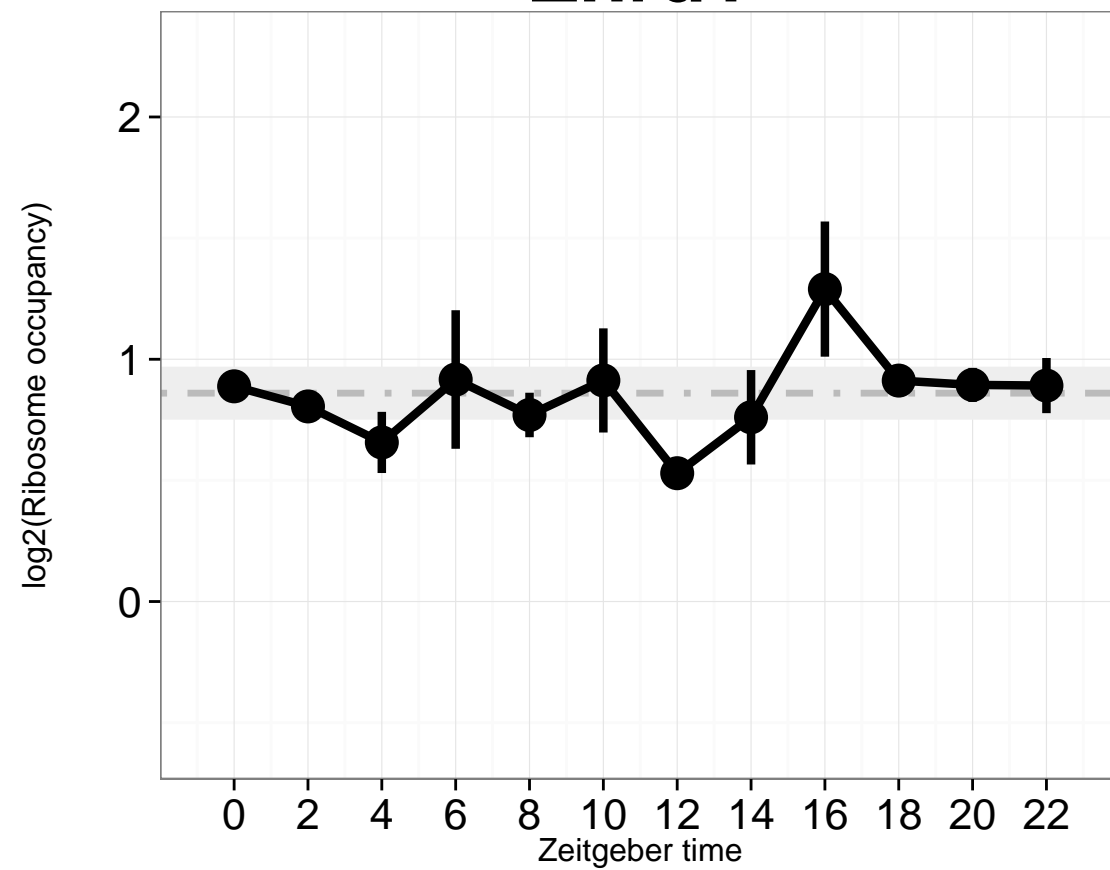

Supplement: Supplementary file 12957 [file 1]

## Sec62

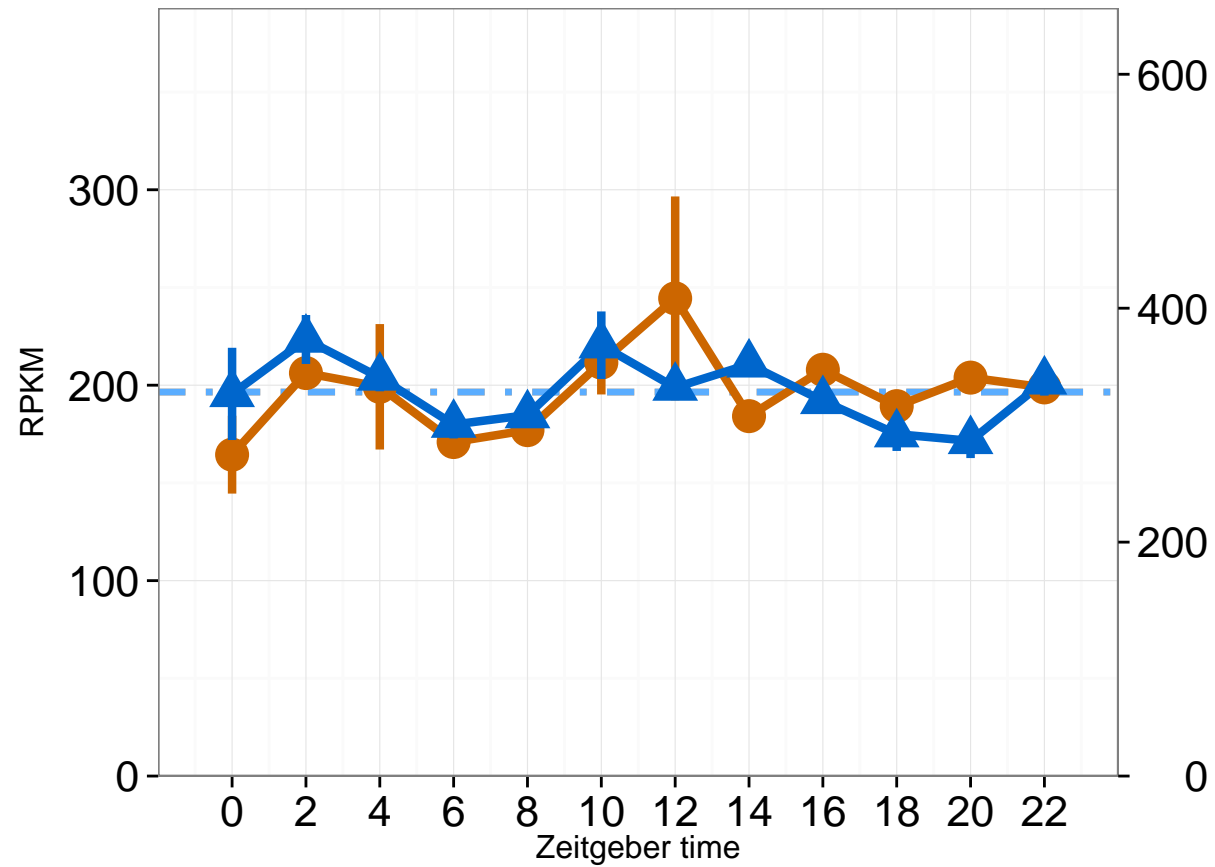

## Sec62

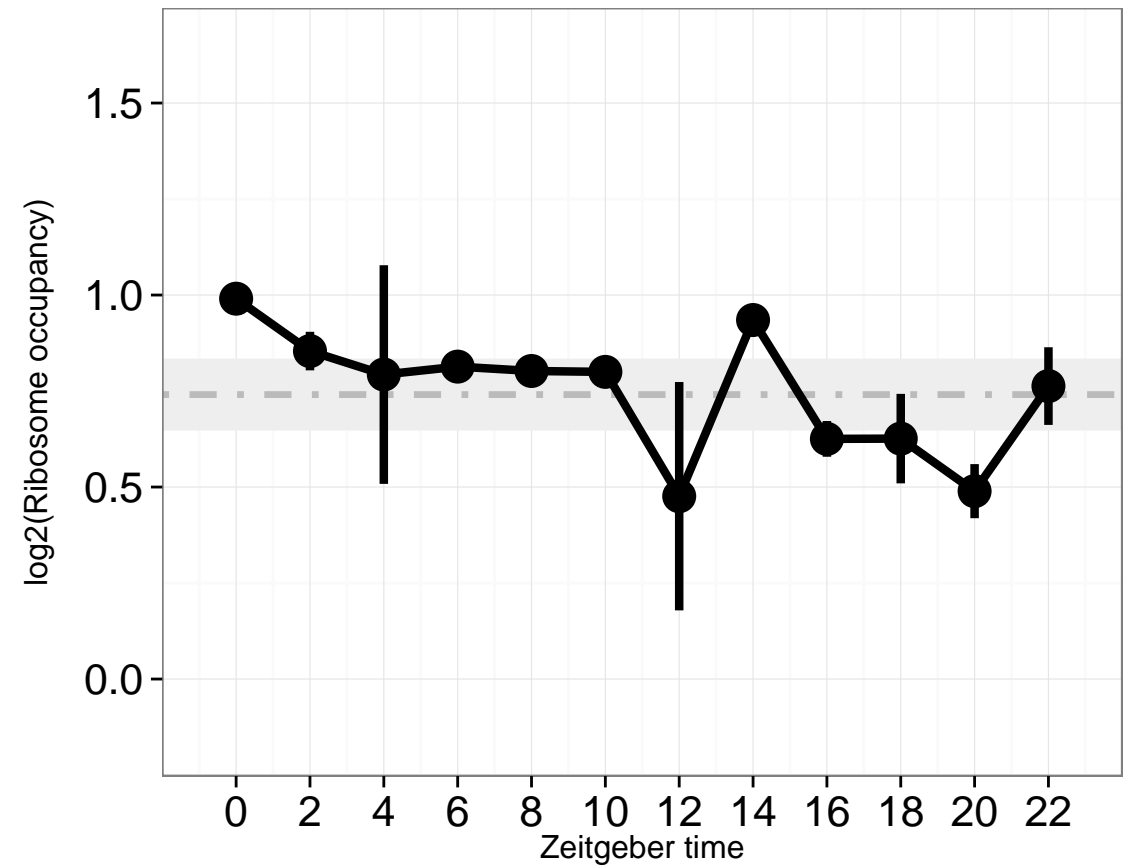

Supplement: Supplementary file 12958 [file 1]

# Prune2

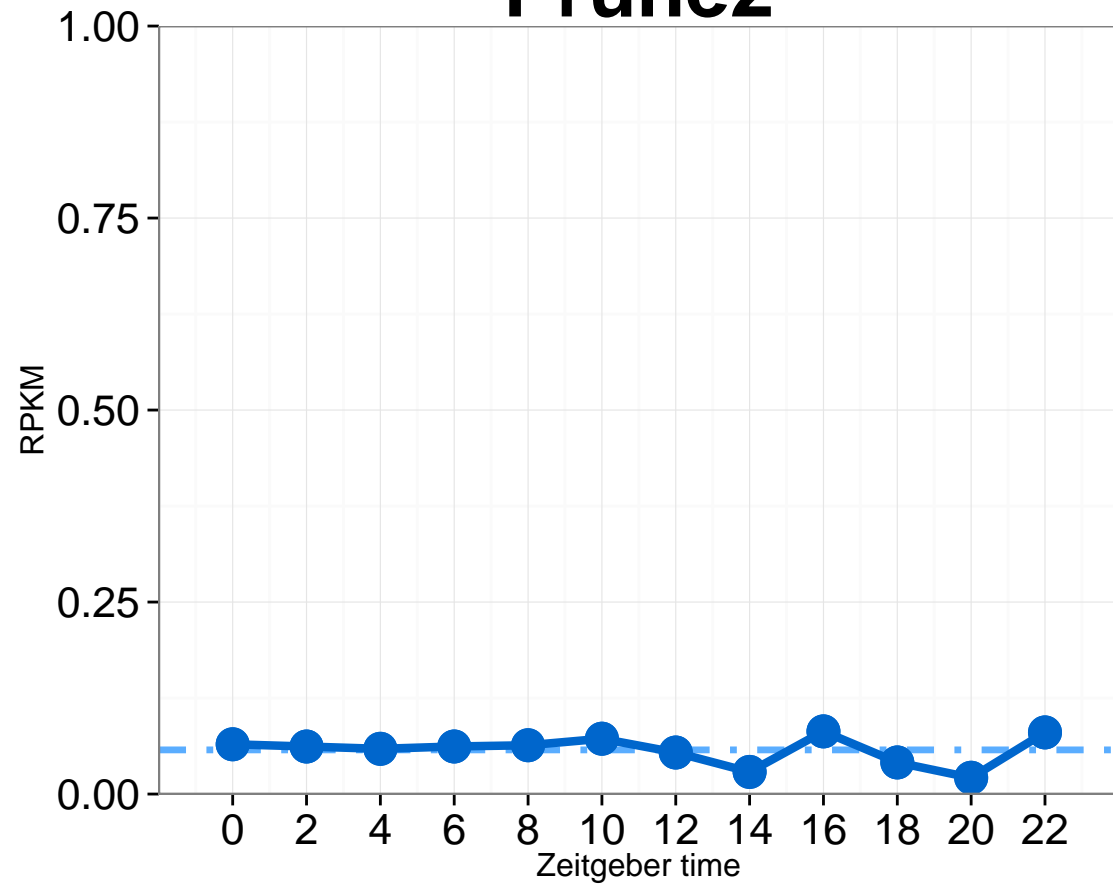

# Prune2 log2(Ribosome occupancy

Supplement: Supplementary file 12959 [file 1]

## Emc1

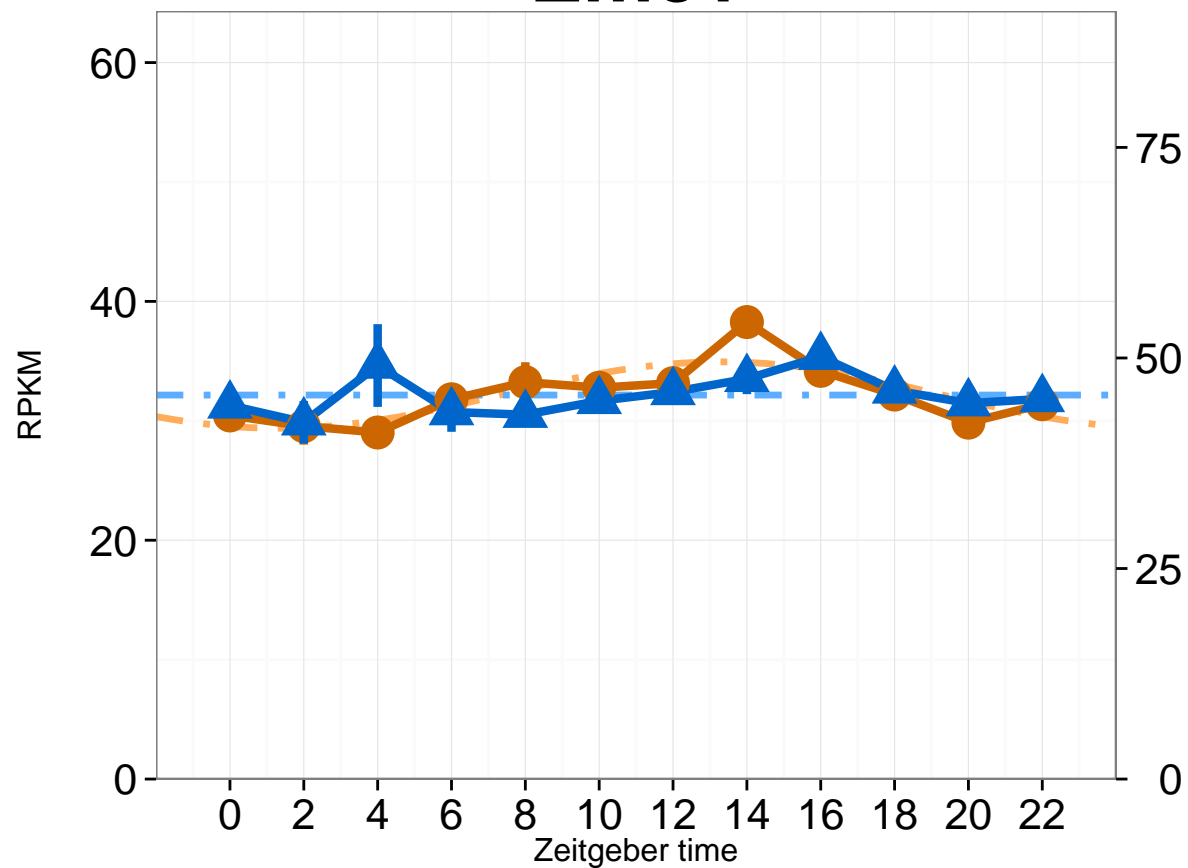

## Emc1

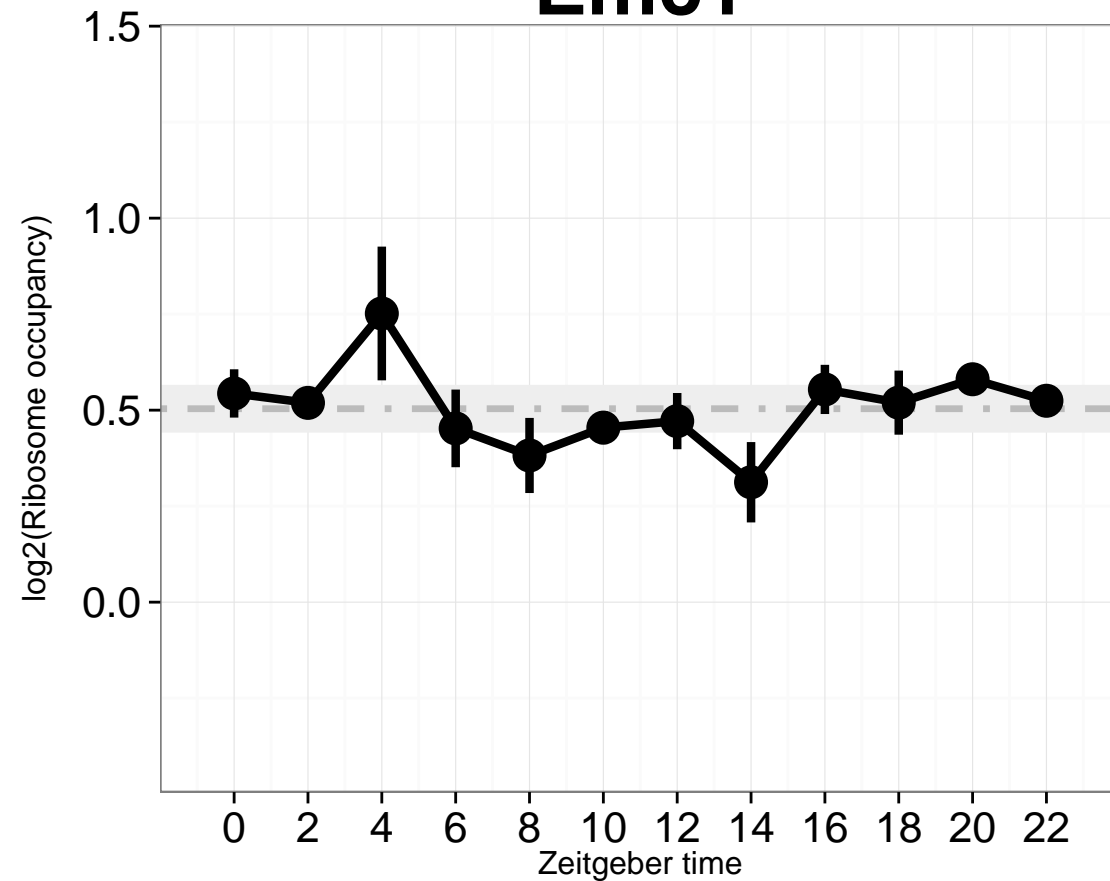

Supplement: Supplementary file 12960 [file 1]

# Pydc3

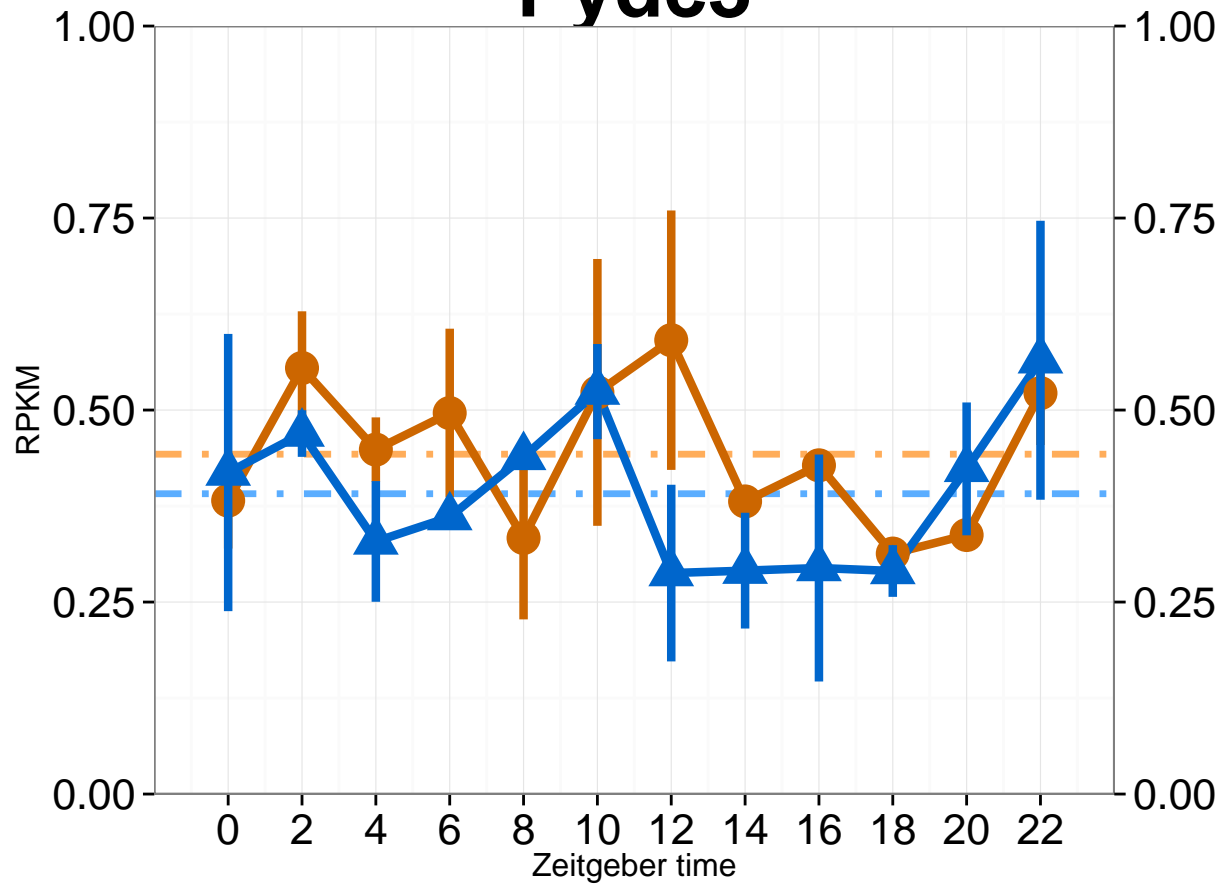

# Pydc3

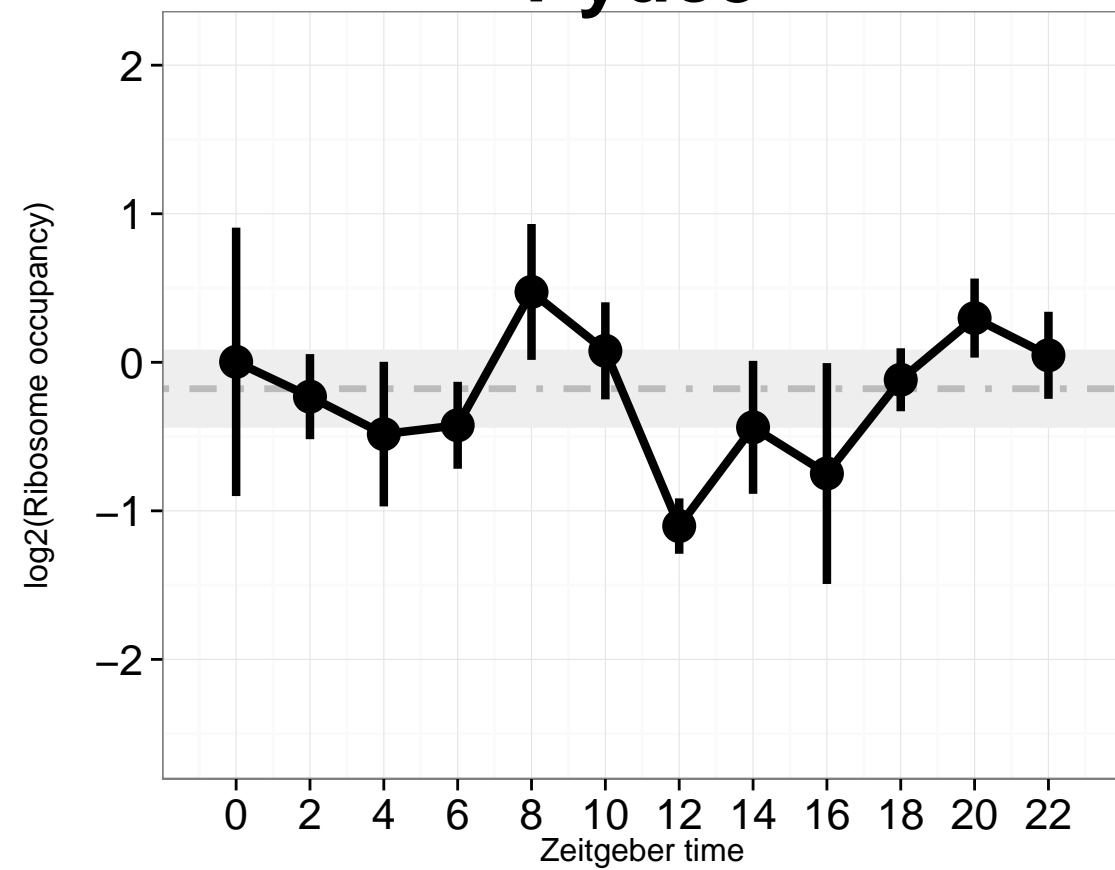

Supplement: Supplementary file 12961 [file 1]

## Eif2b1

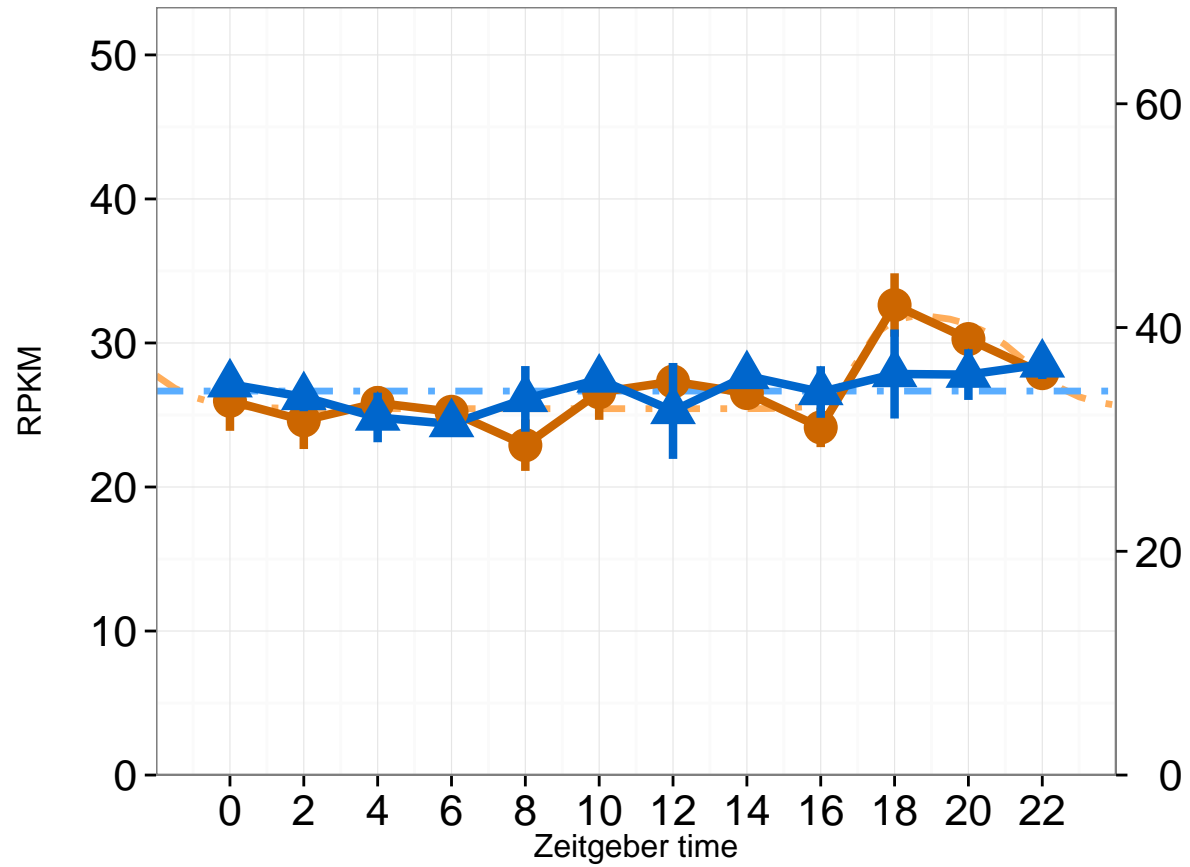

## Eif2b1

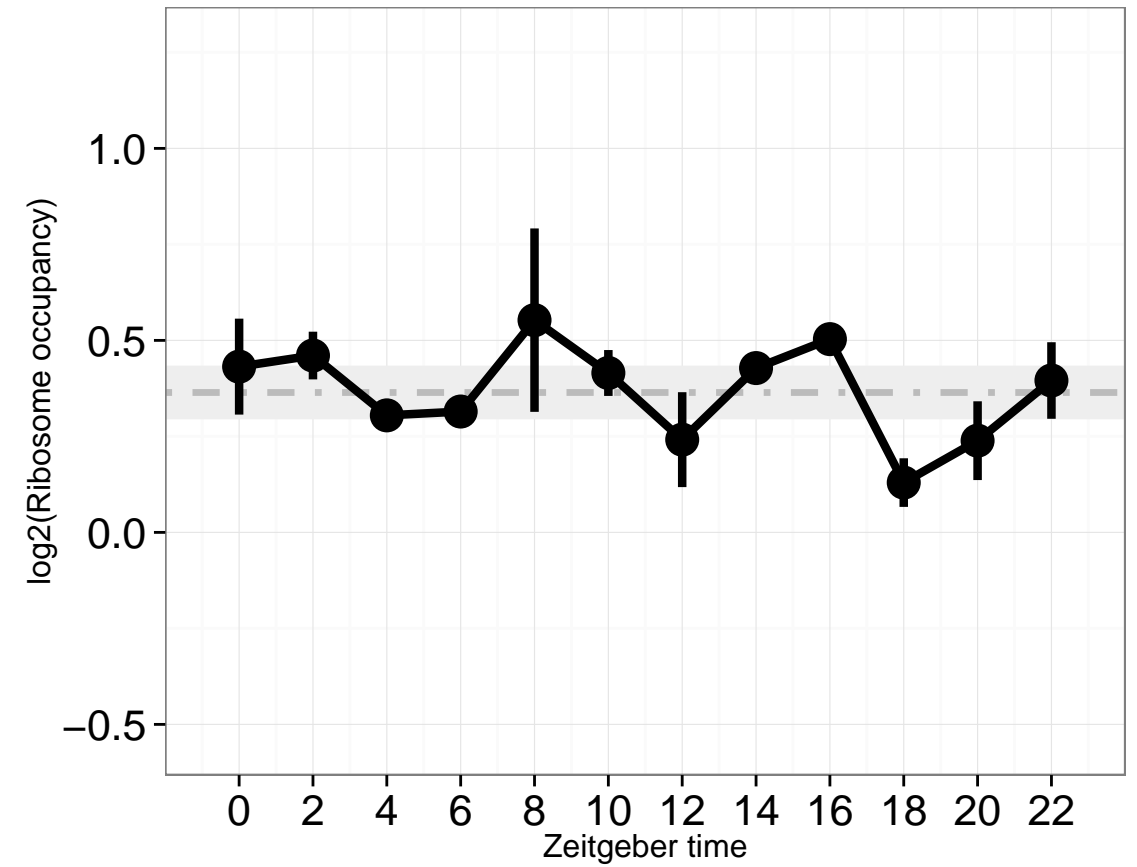

Supplement: Supplementary file 12962 [file 1]

# Arhgef10l

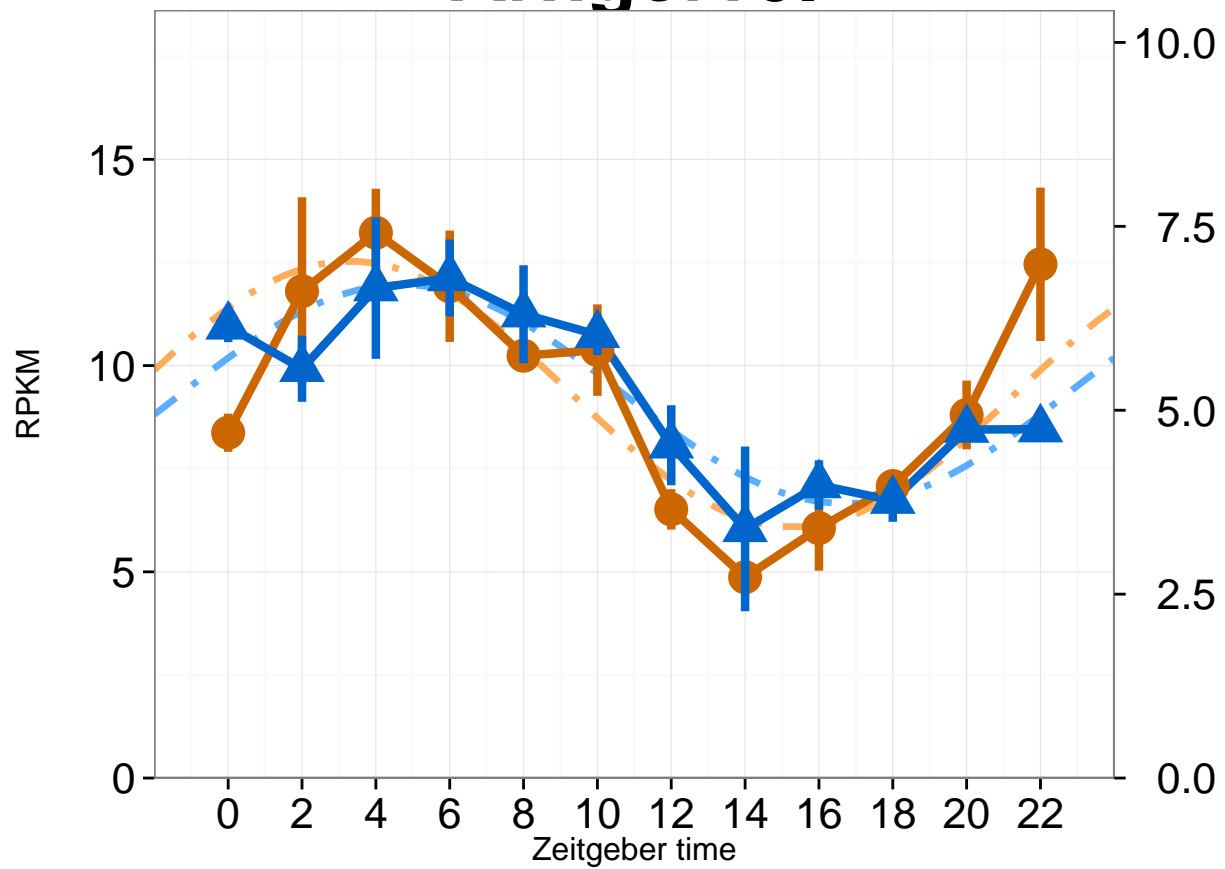

# Arhgef10l

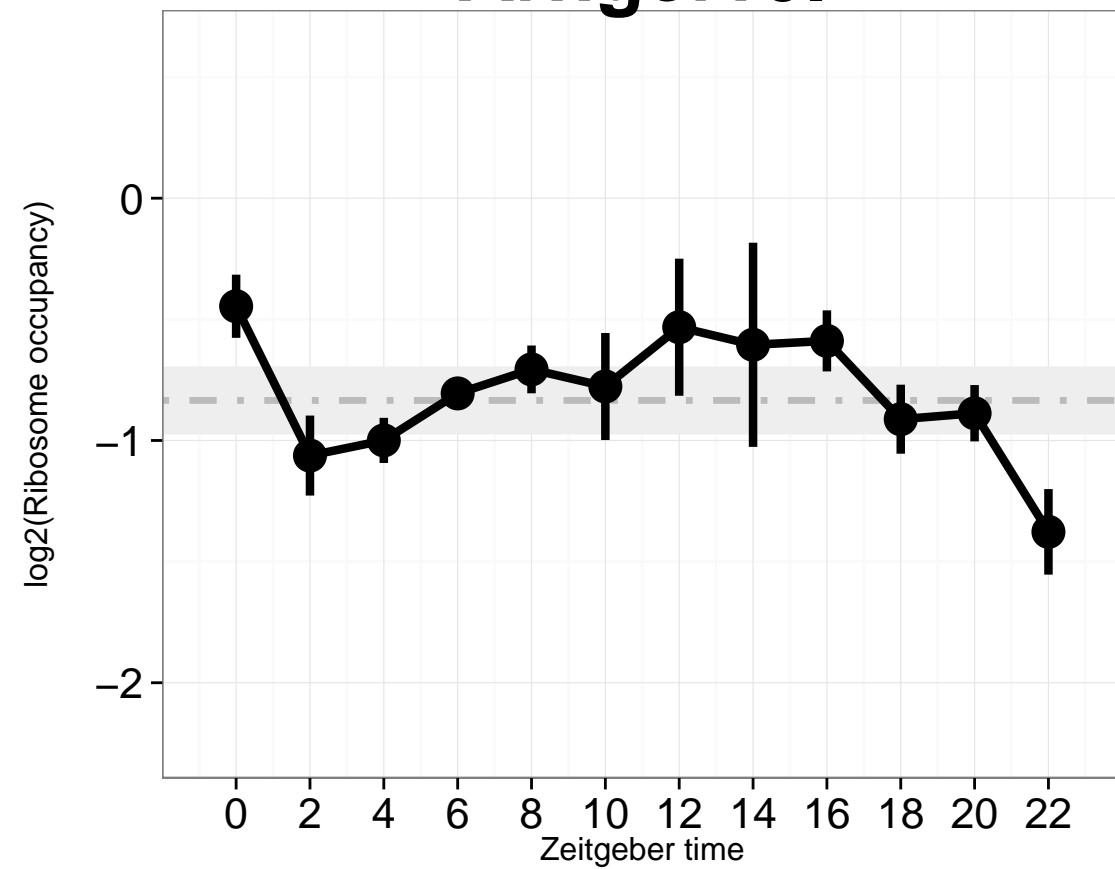

Supplement: Supplementary file 12963 [file 1]

# Nr1d1

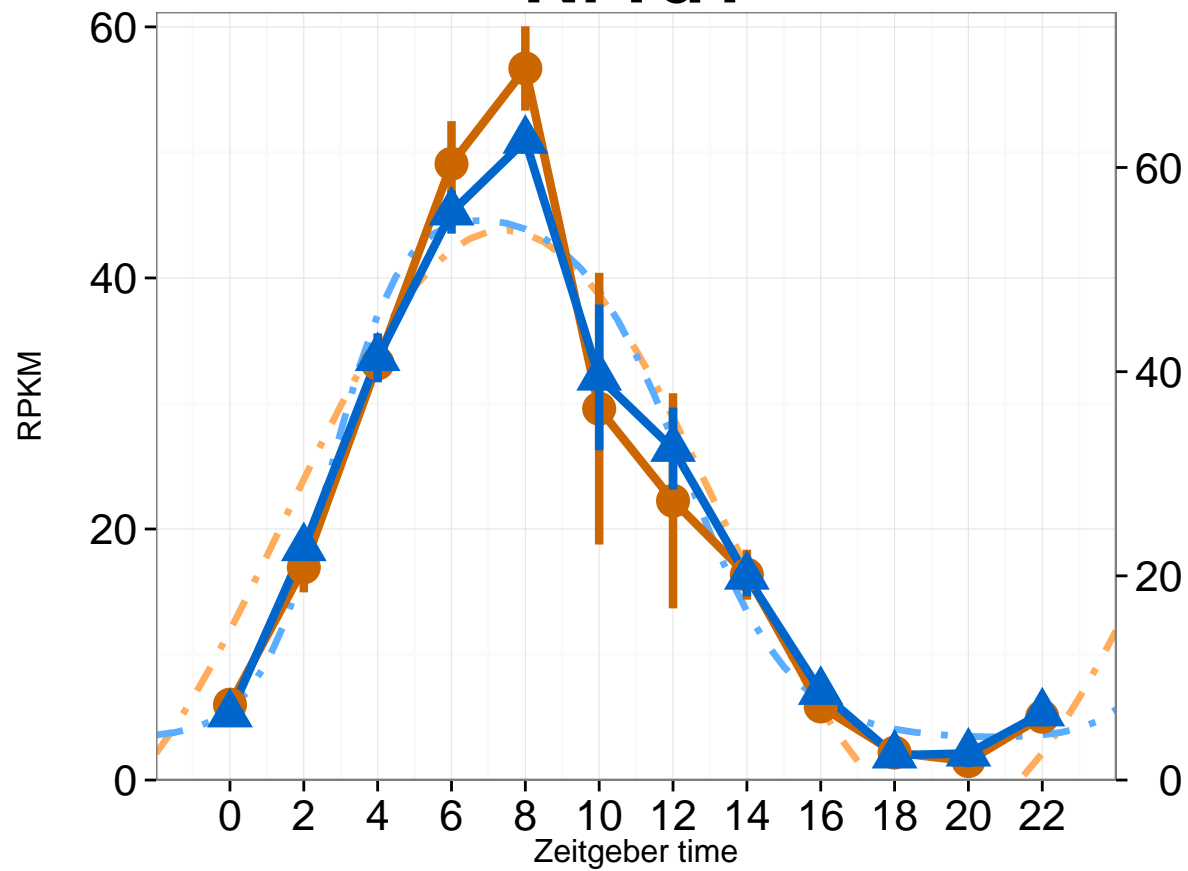

# Nr1d1

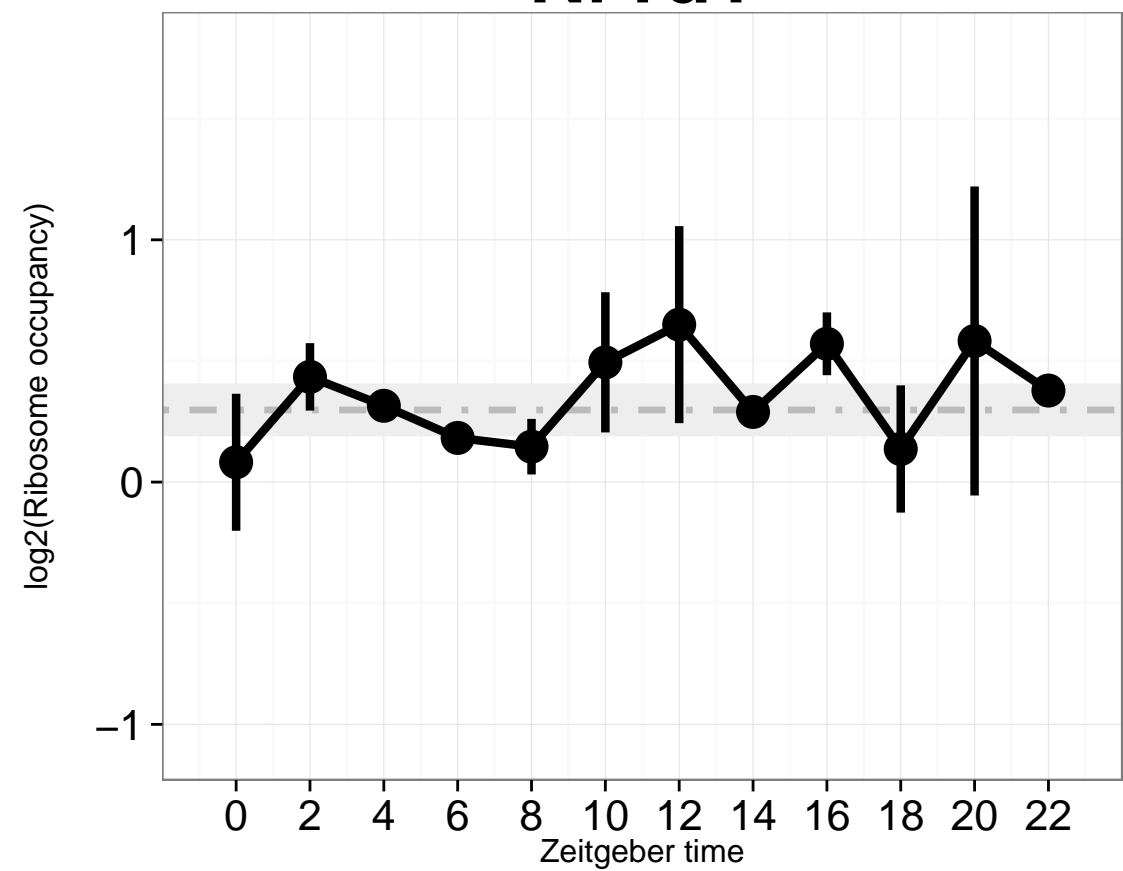

Supplement: Supplementary file 12964 [file 1]

## Thap2

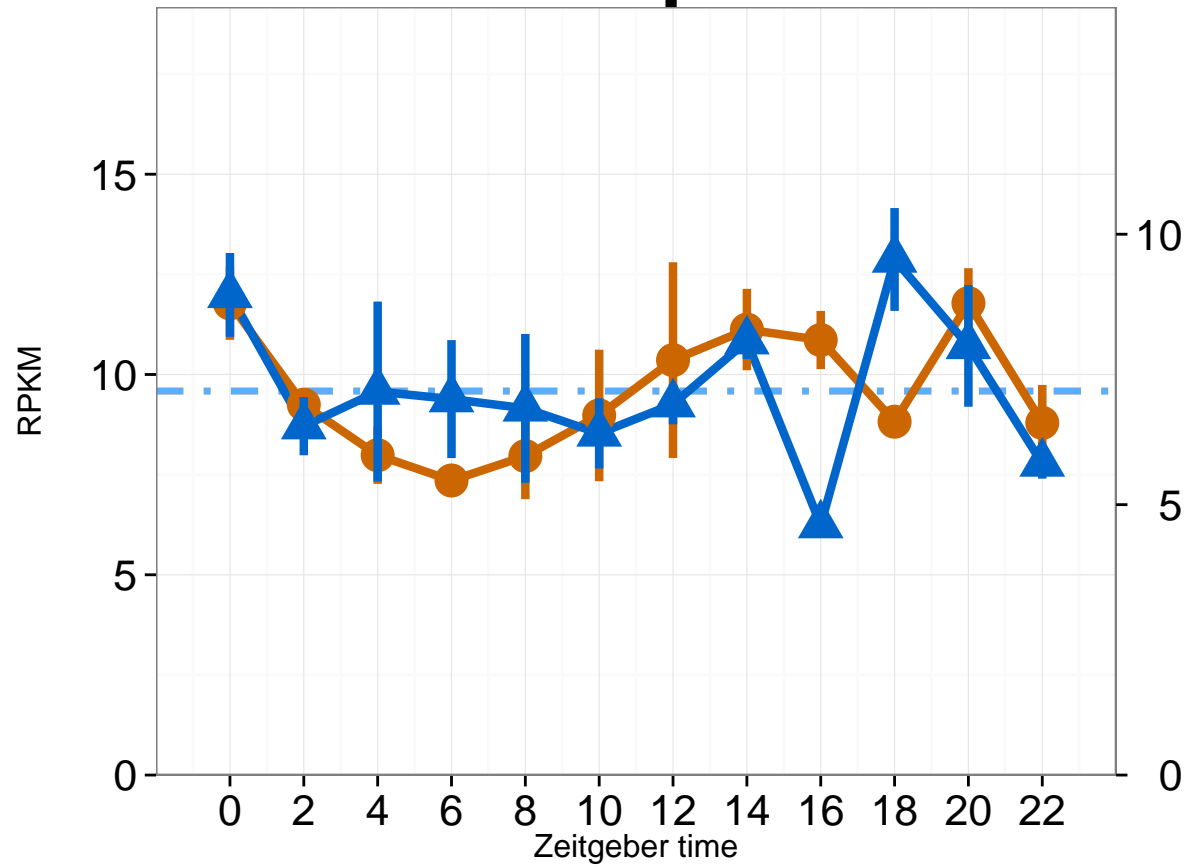

## Thap2

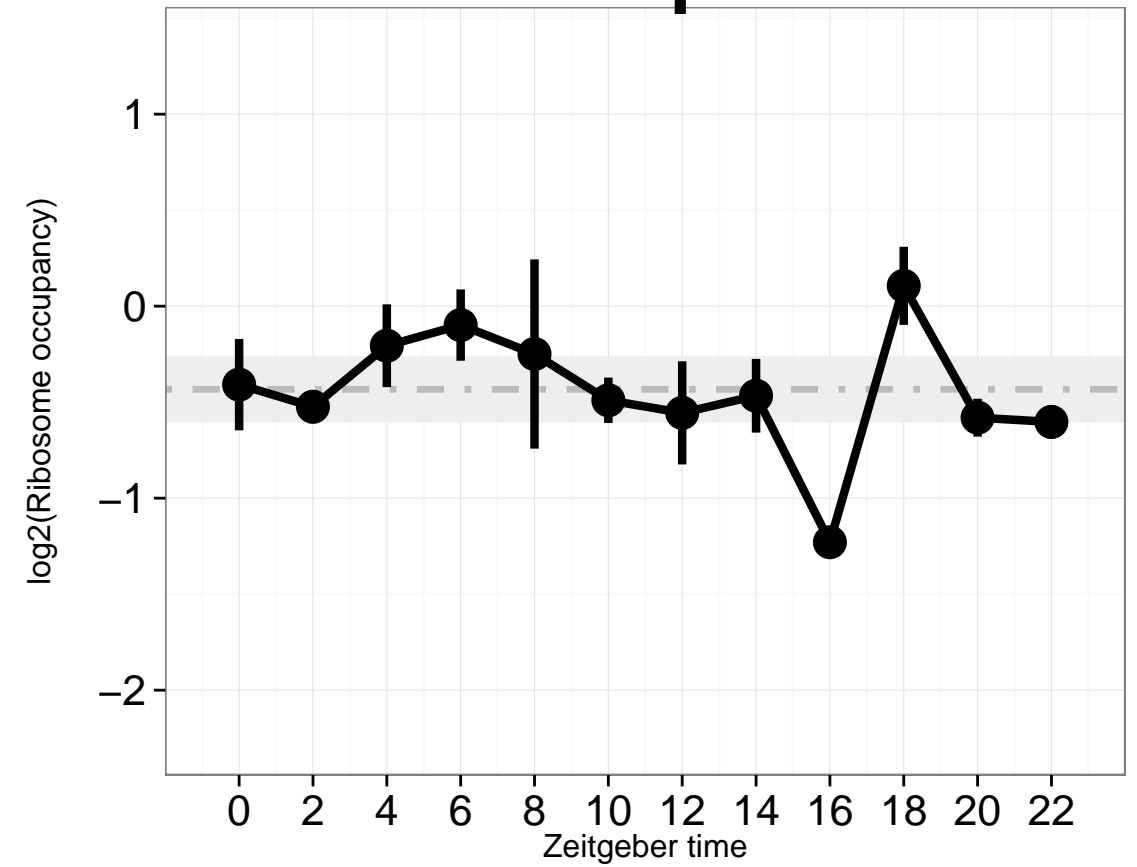

Supplement: Supplementary file 12965 [file 1]

# 1600002H07Rik

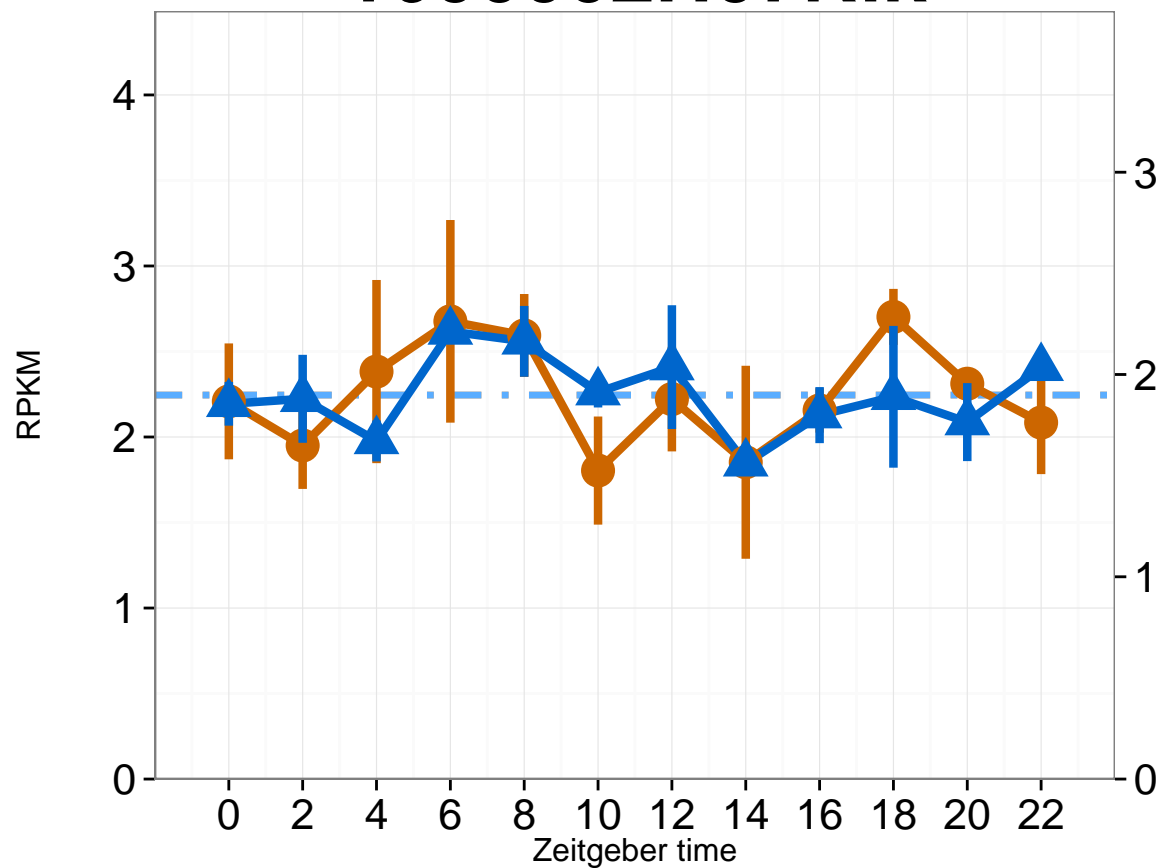

# 1600002H07Rik

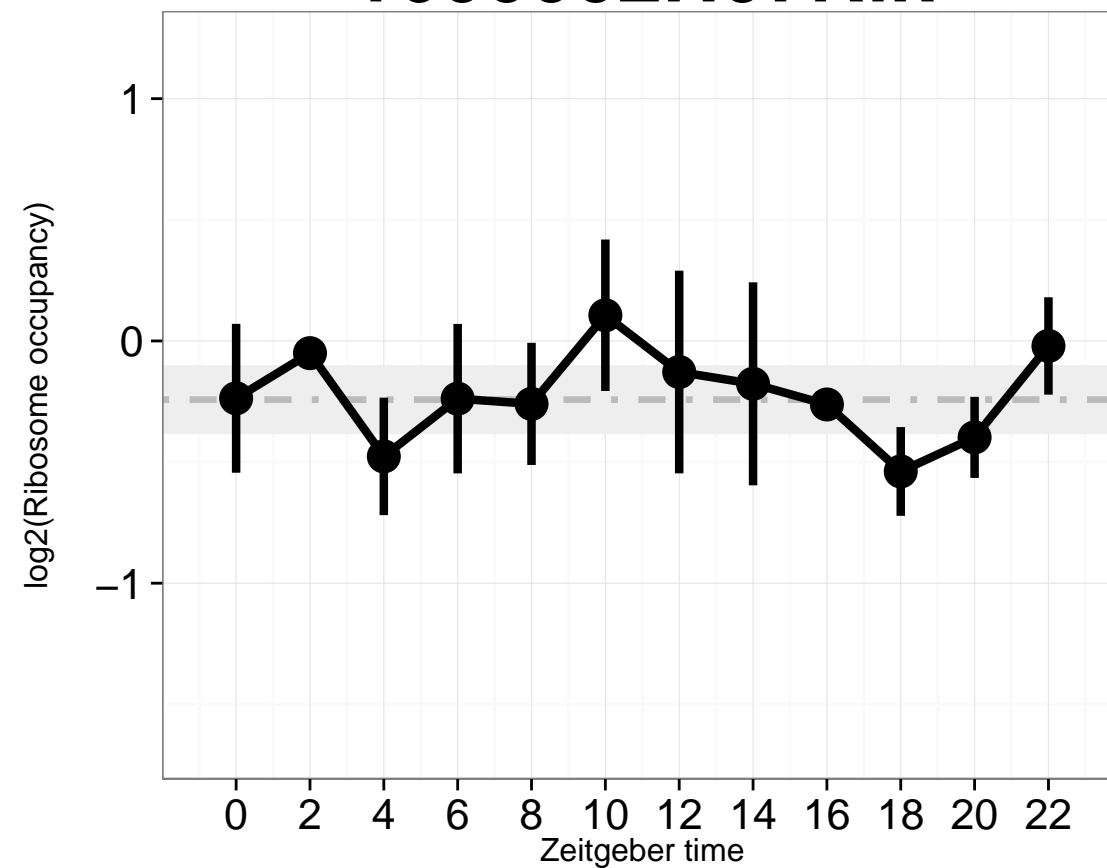

Supplement: Supplementary file 12966 [file 1]

# Adamts7

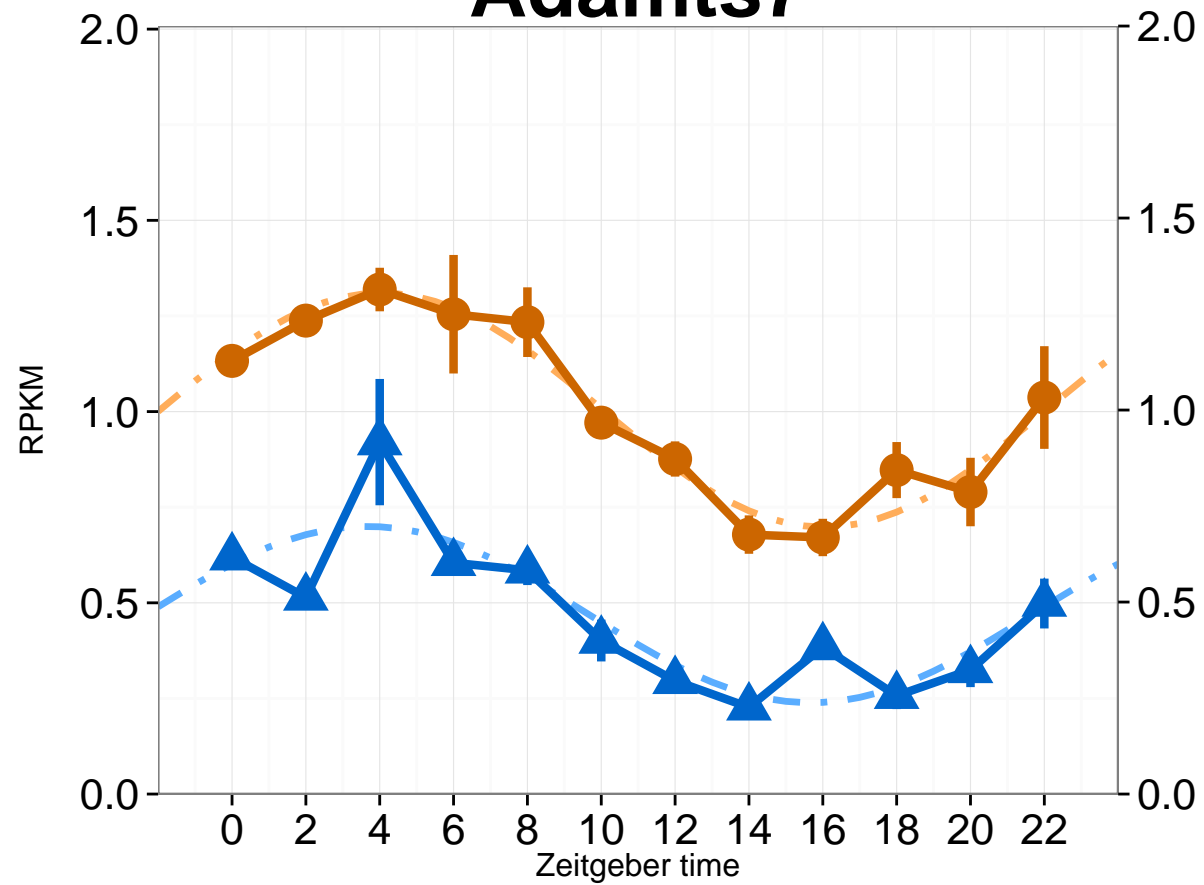

# Adamts7

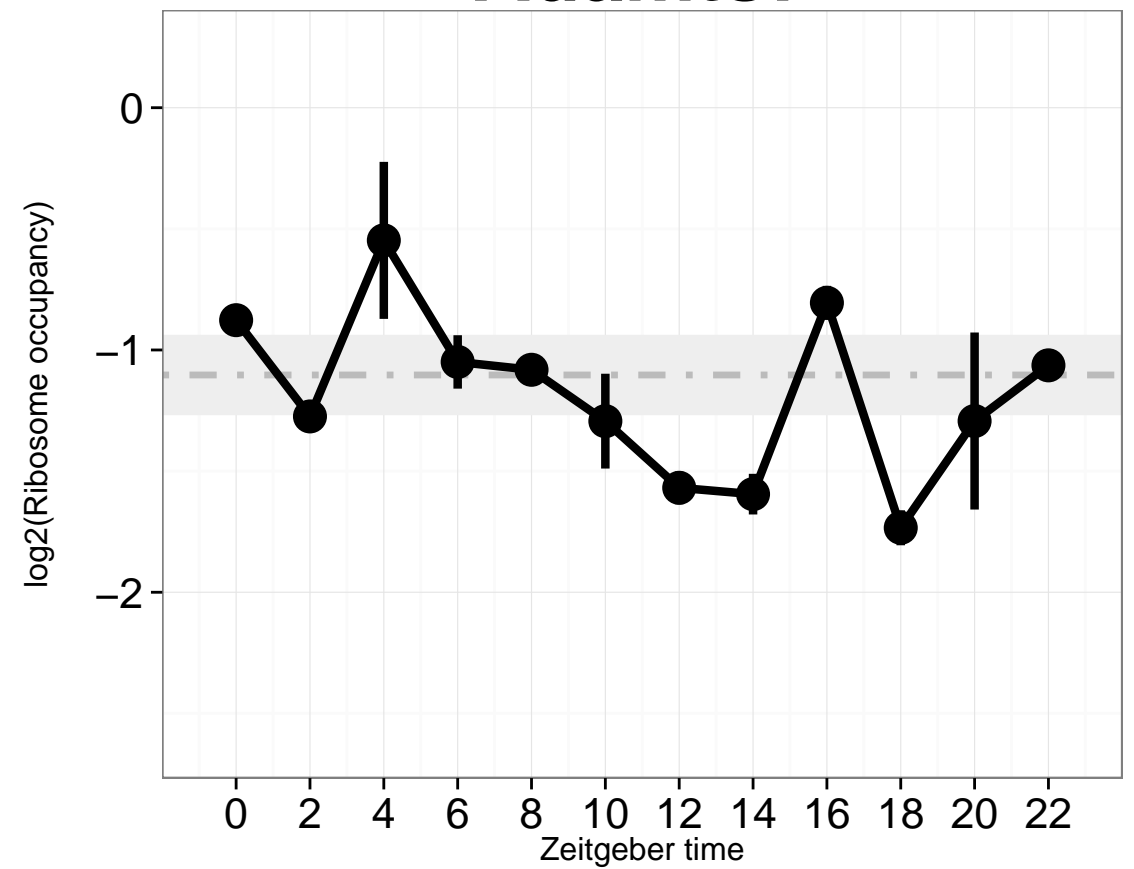

Supplement: Supplementary file 12967 [file 1]

# Pcdhb17

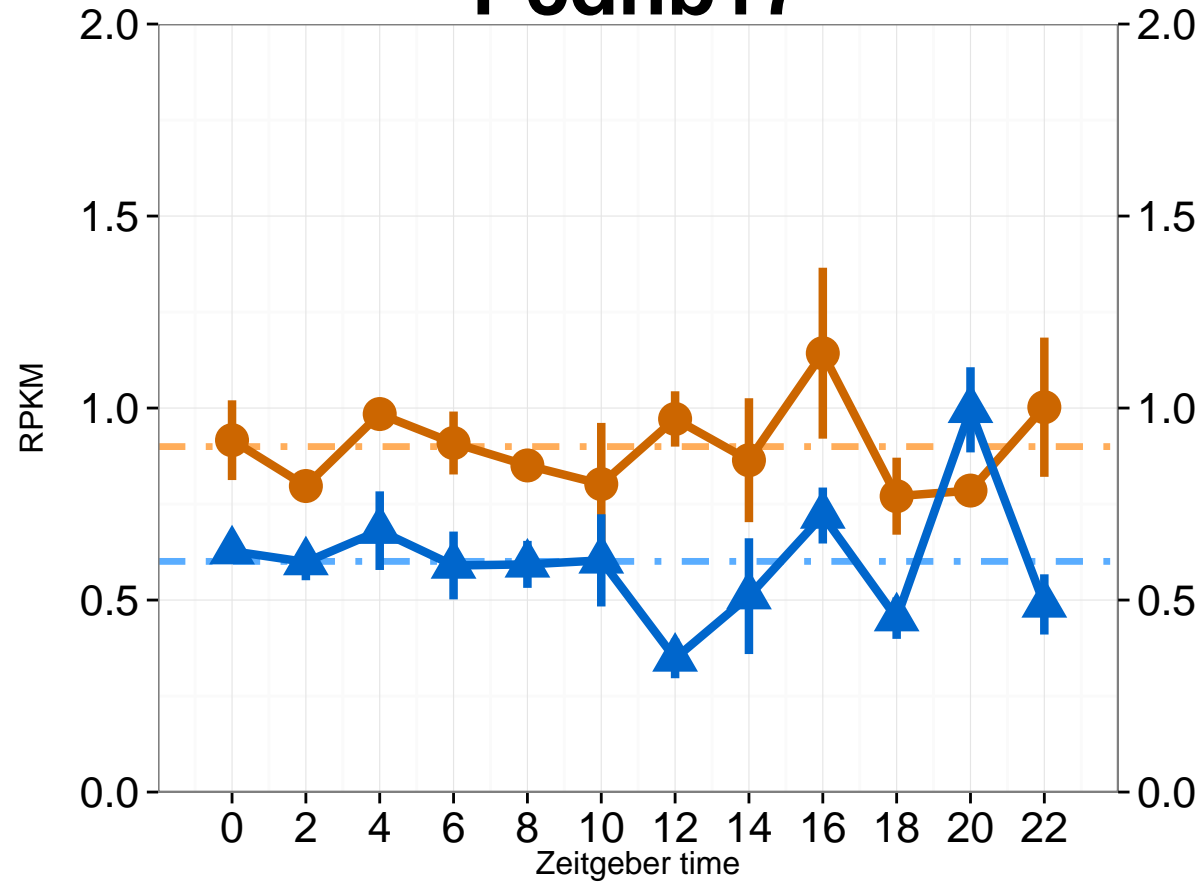

# Pcdhb17

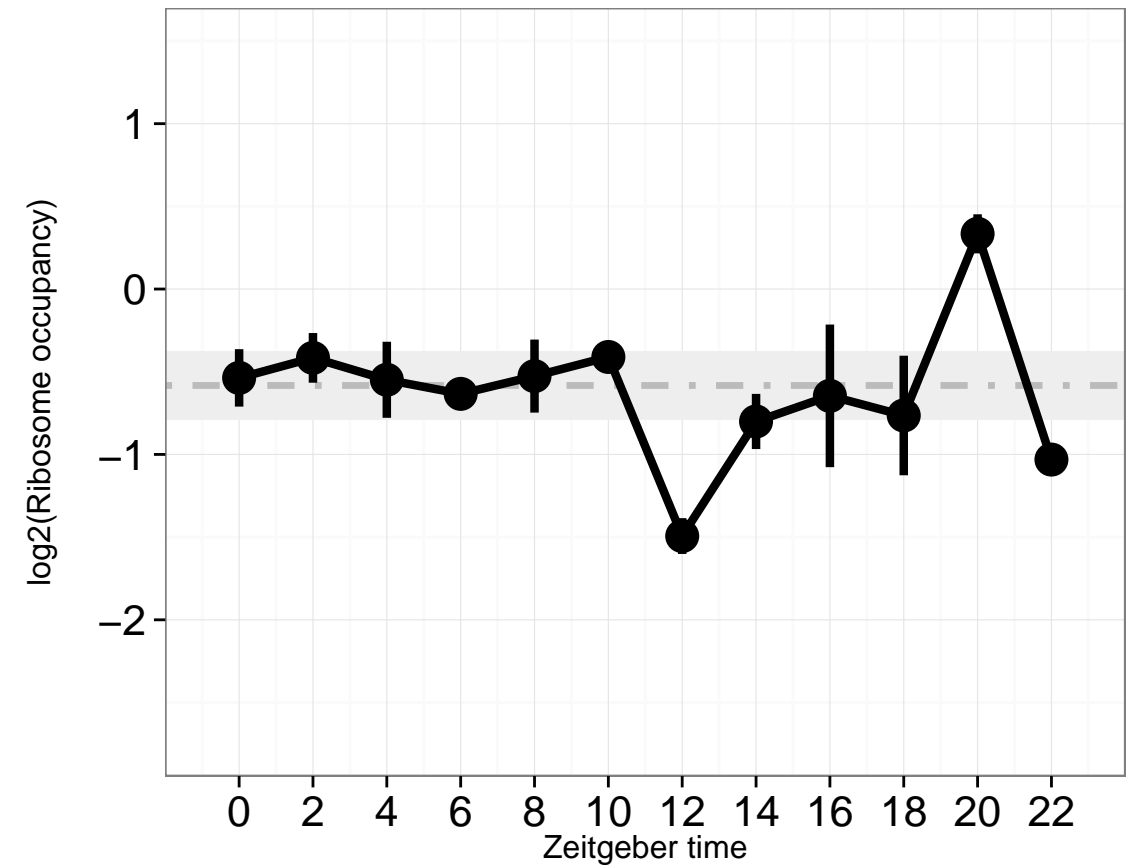

Supplement: Supplementary file 12968 [file 1]

## Rnase6

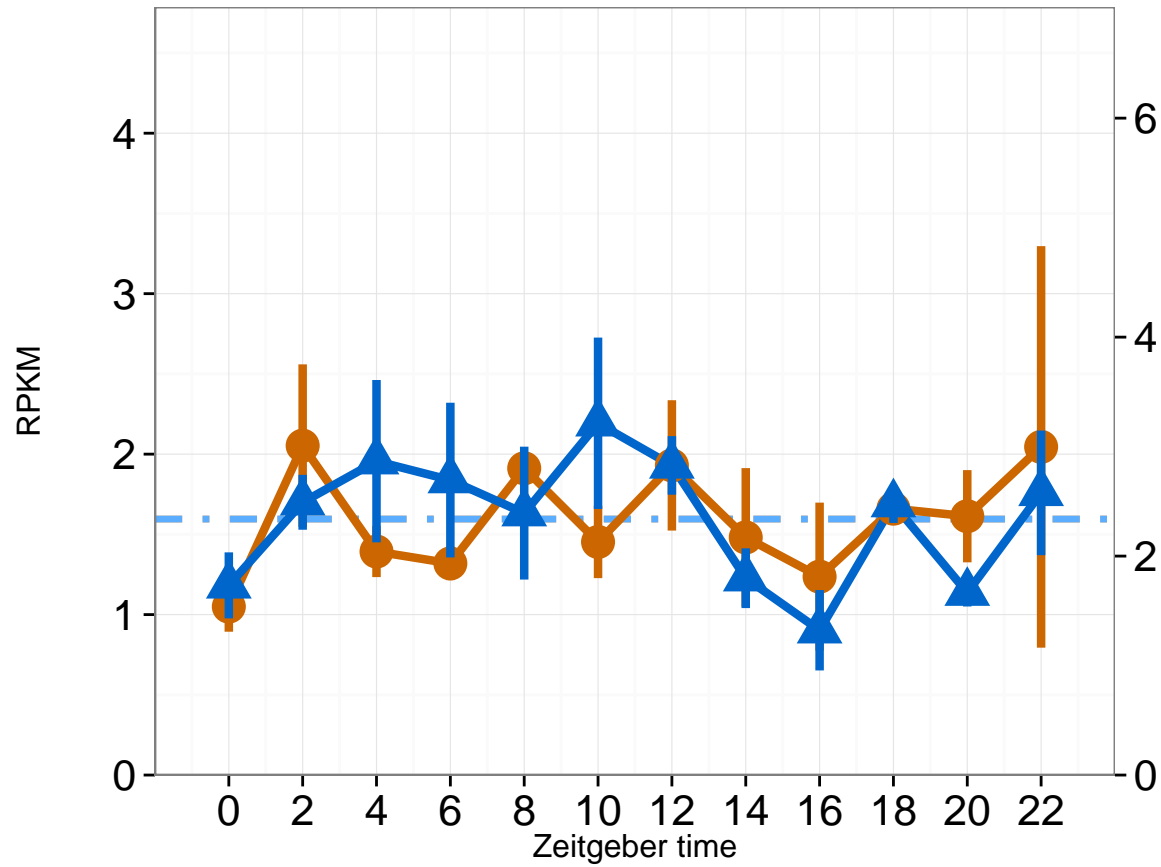

## Rnase6

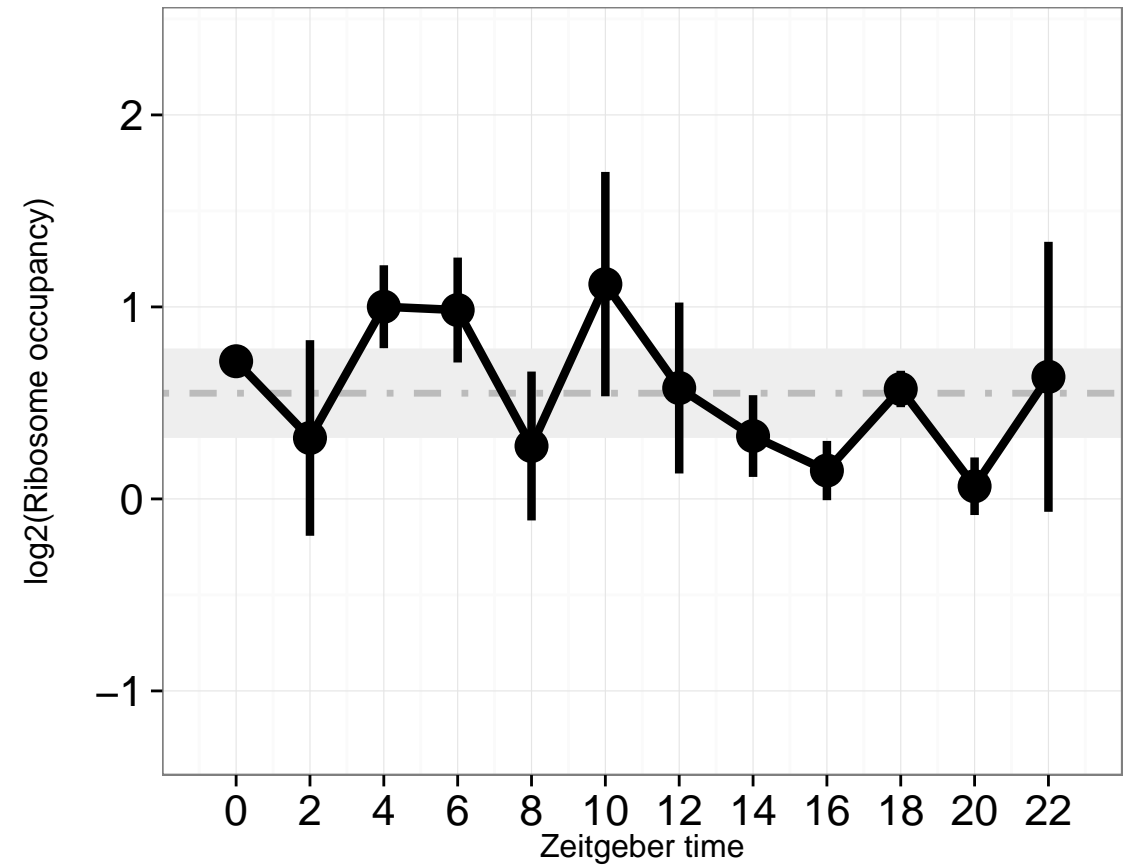

Supplement: Supplementary file 12969 [file 1]

Klk1b24

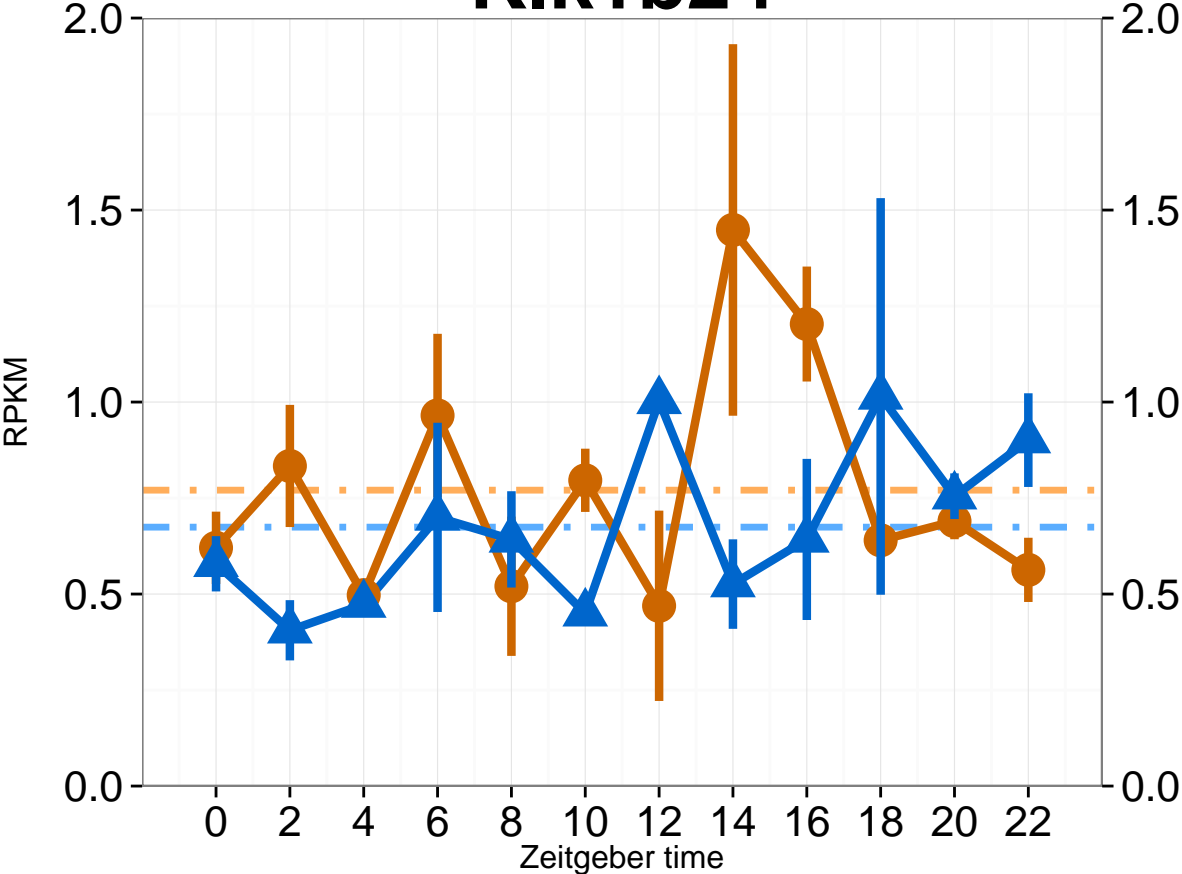

Klk1b24

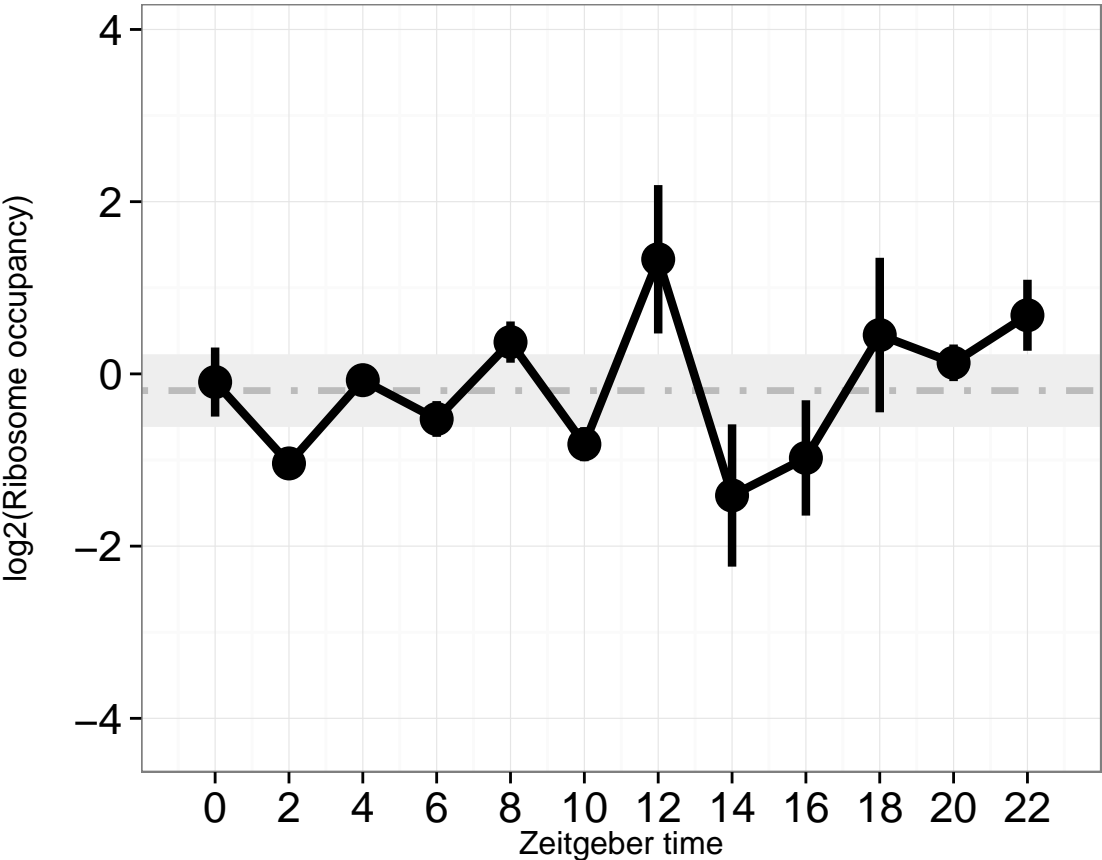

Supplement: Supplementary file 12970 [file 1]

# Tmem138

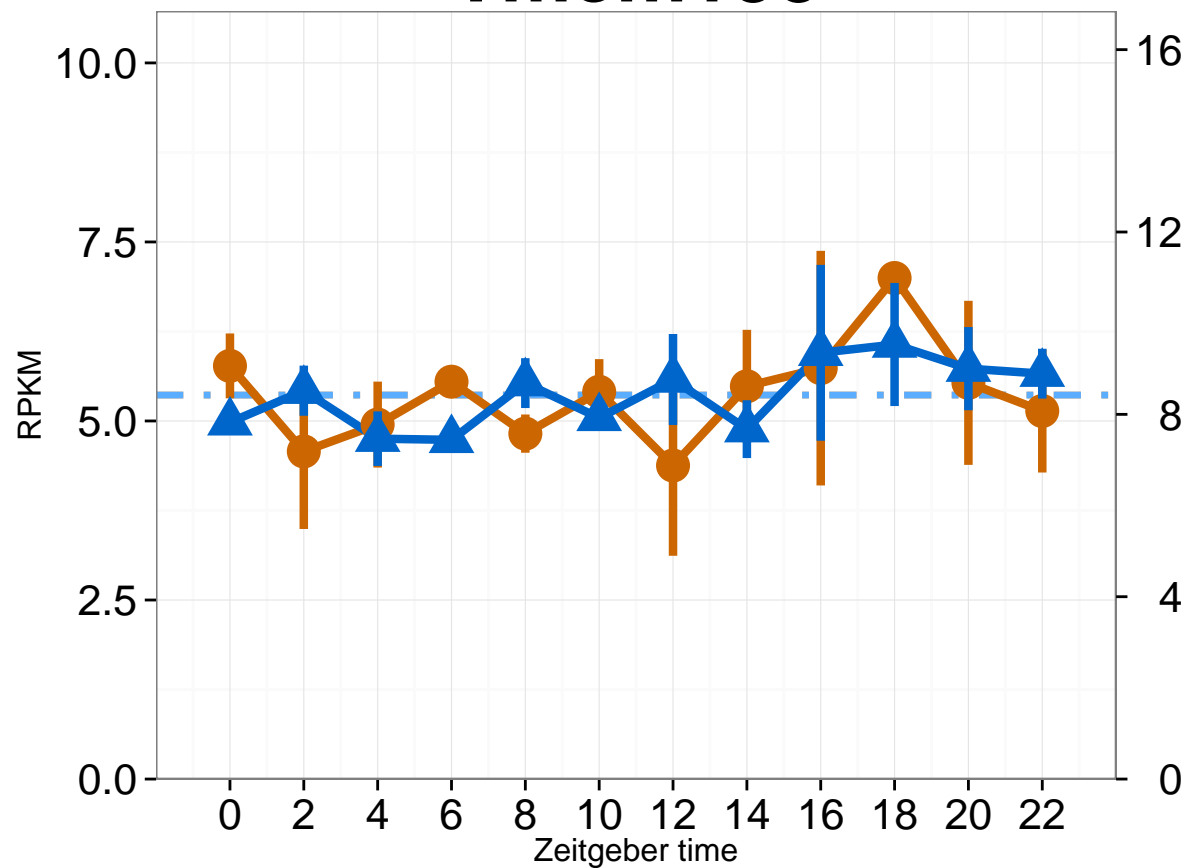

# Tmem138

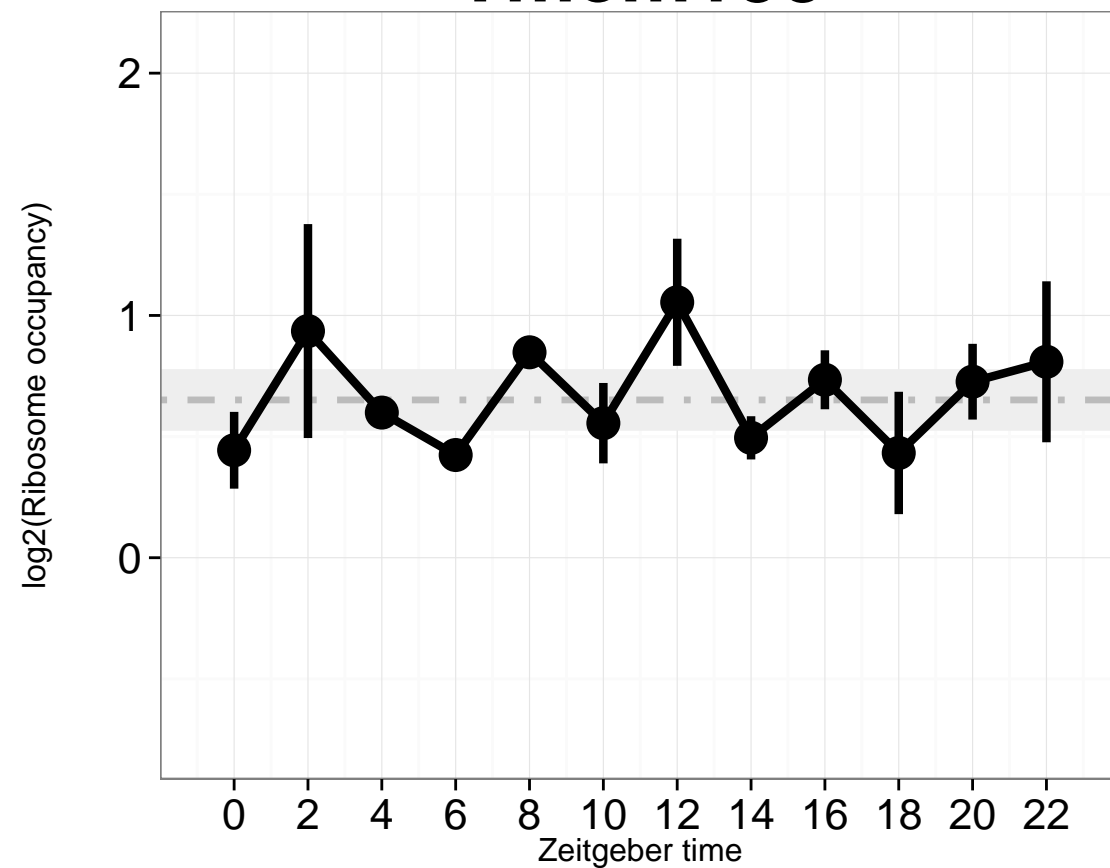

Supplement: Supplementary file 12971 [file 1]

# Slc30a5

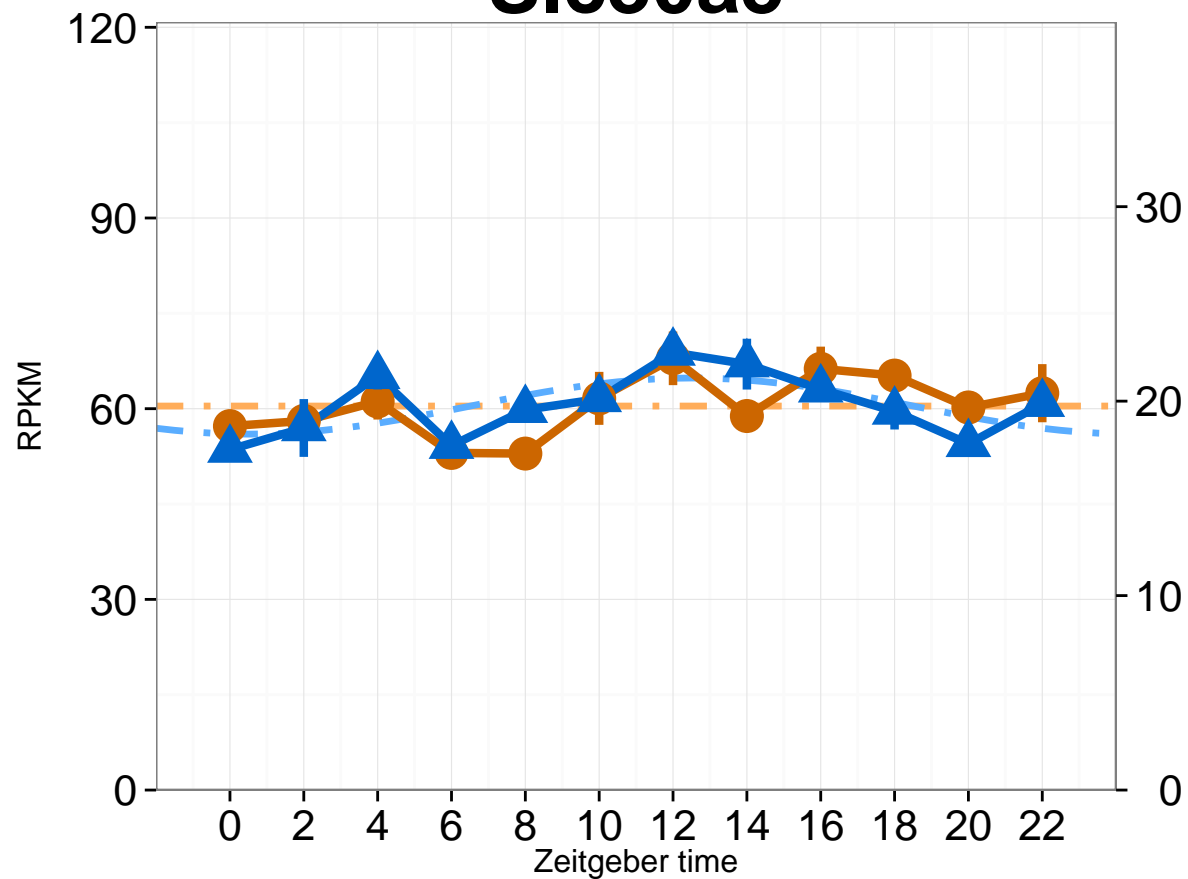

# Slc30a5

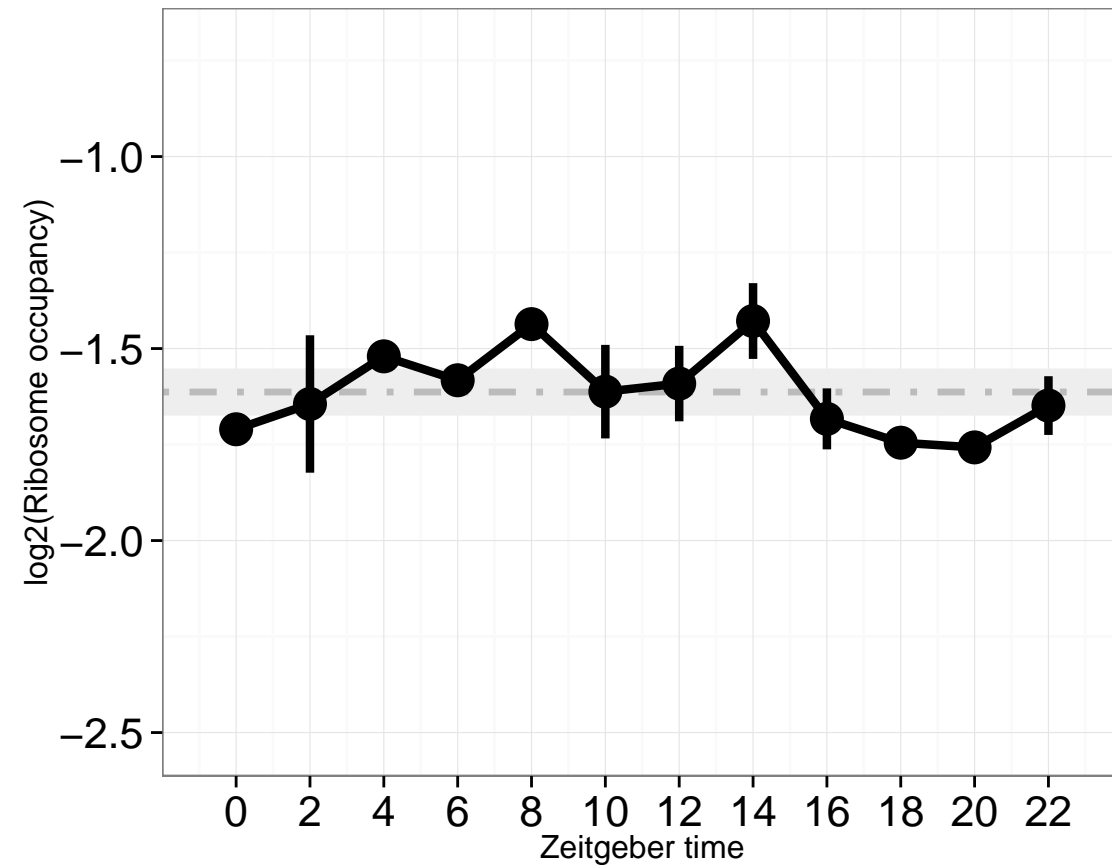

Supplement: Supplementary file 12972 [file 1]

# Asb1

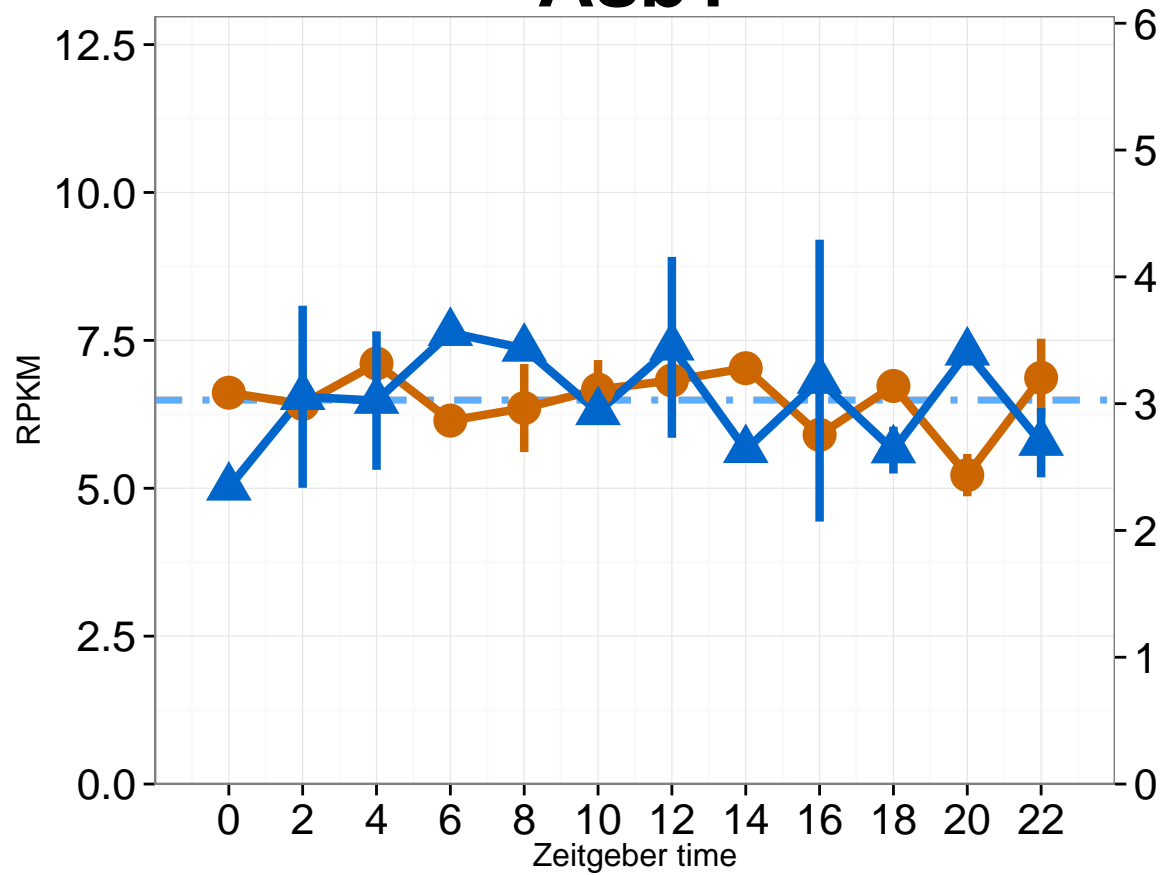

# Asb1

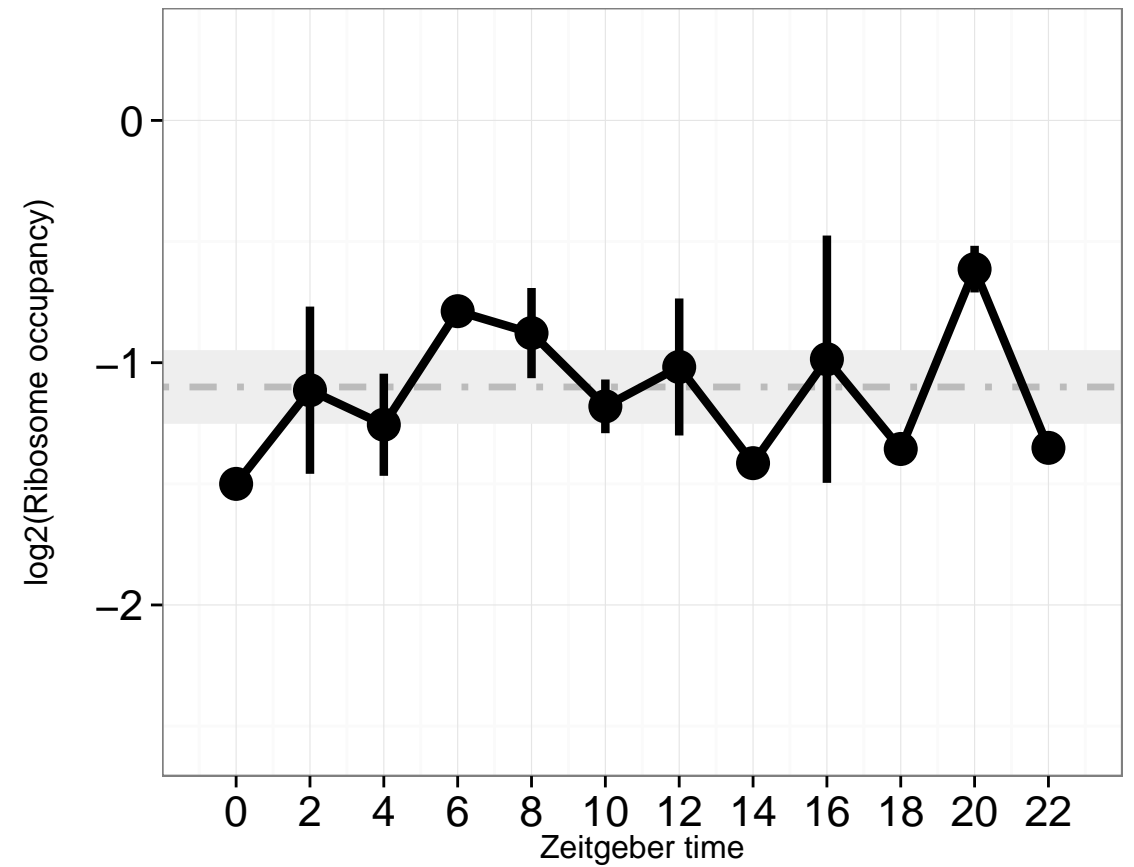

Supplement: Supplementary file 12973 [file 1]

## Creb3l1

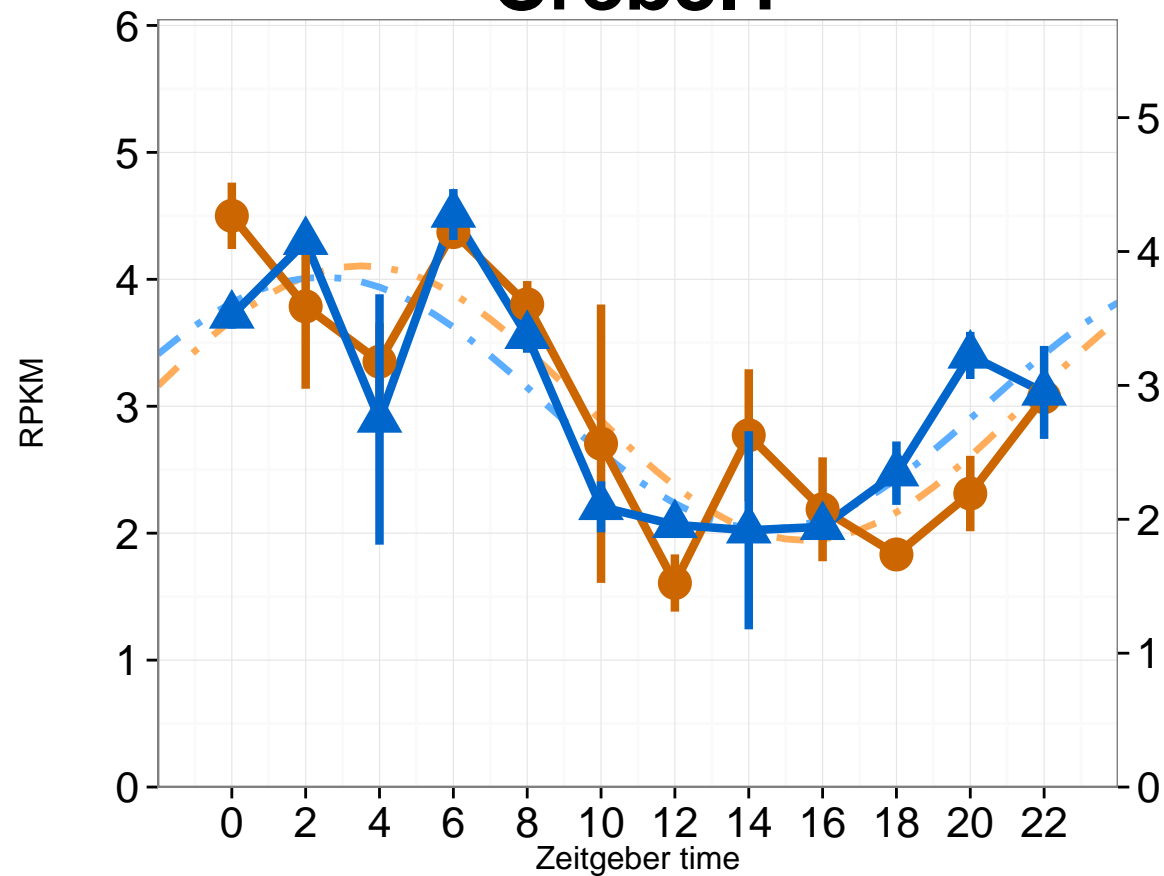

## Creb3l1

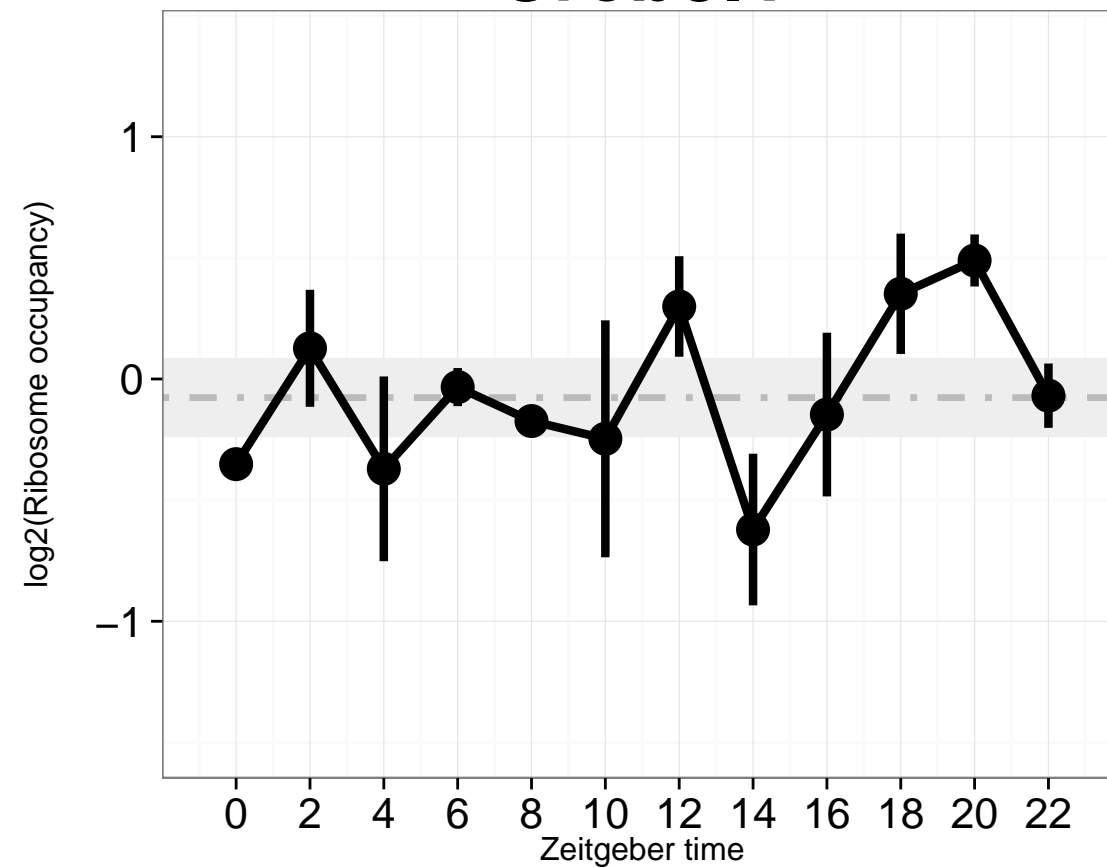

Supplement: Supplementary file 12974 [file 1]

## Ankrd49

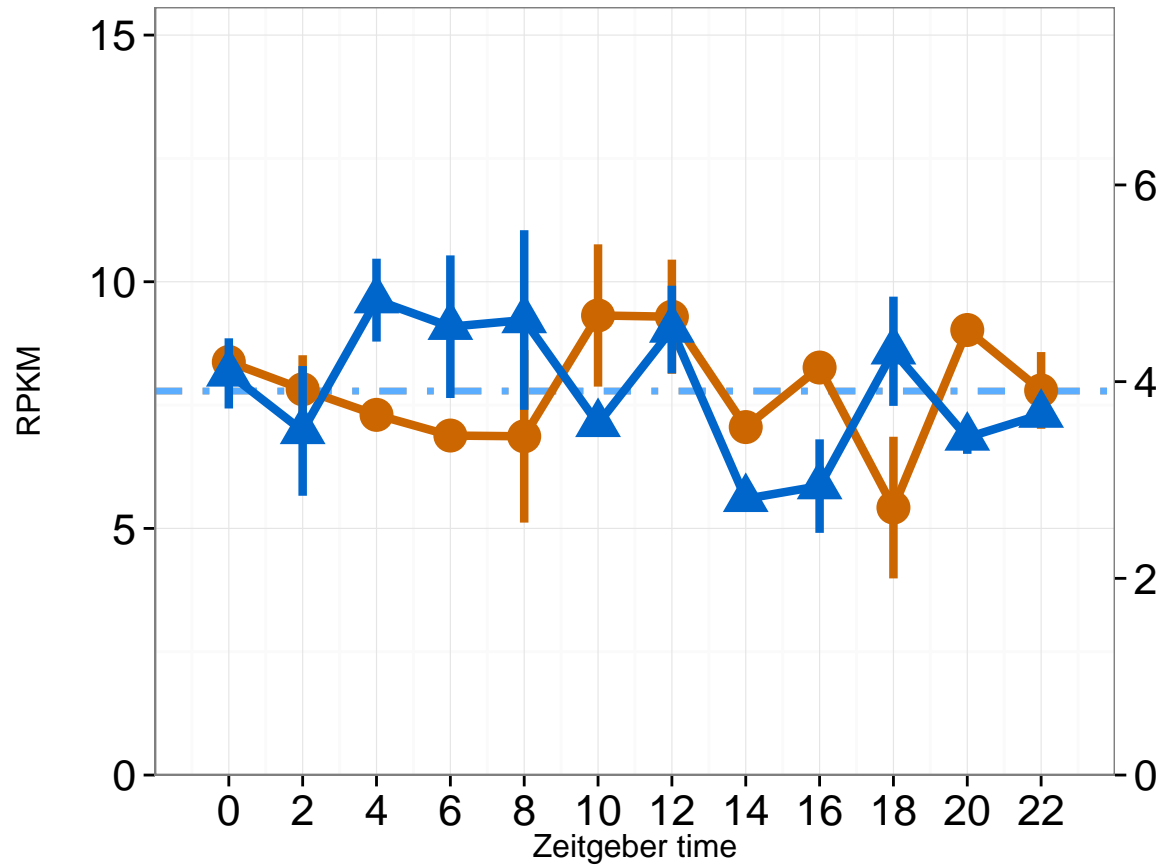

## Ankrd49

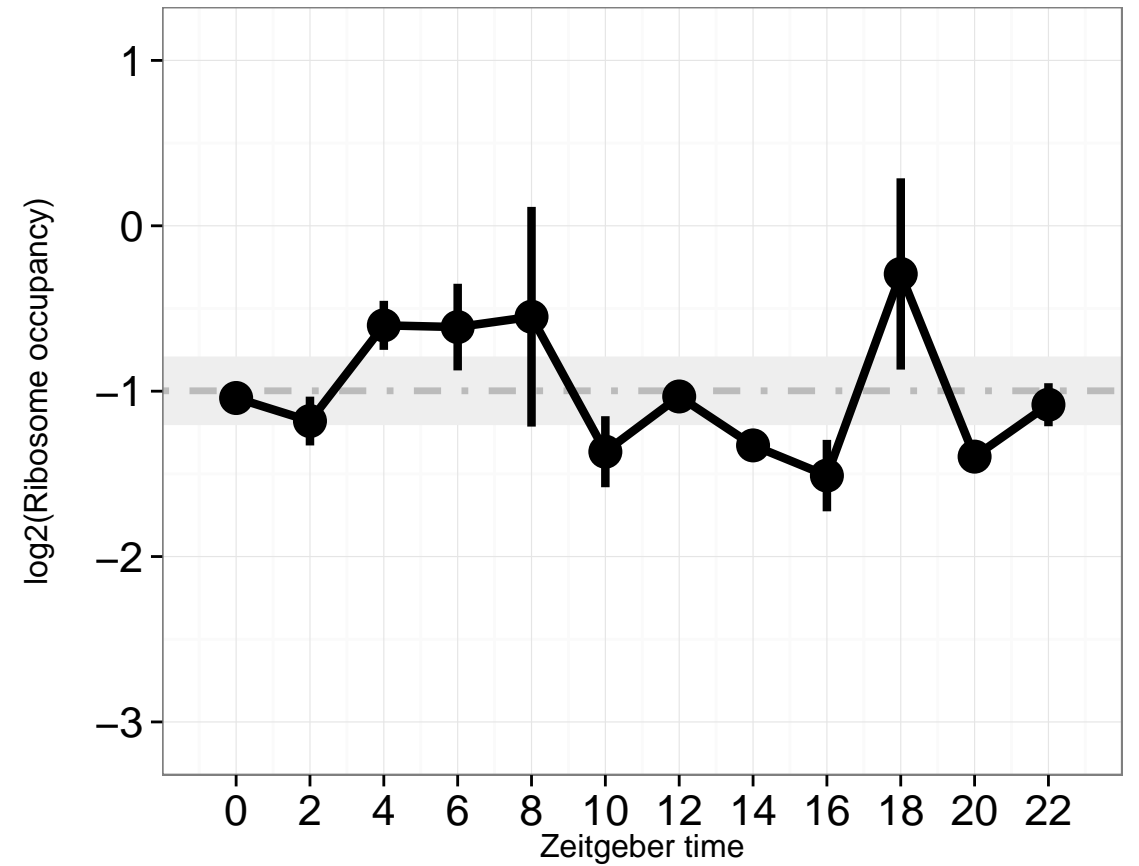

Supplement: Supplementary file 12975 [file 1]

## Cdc45

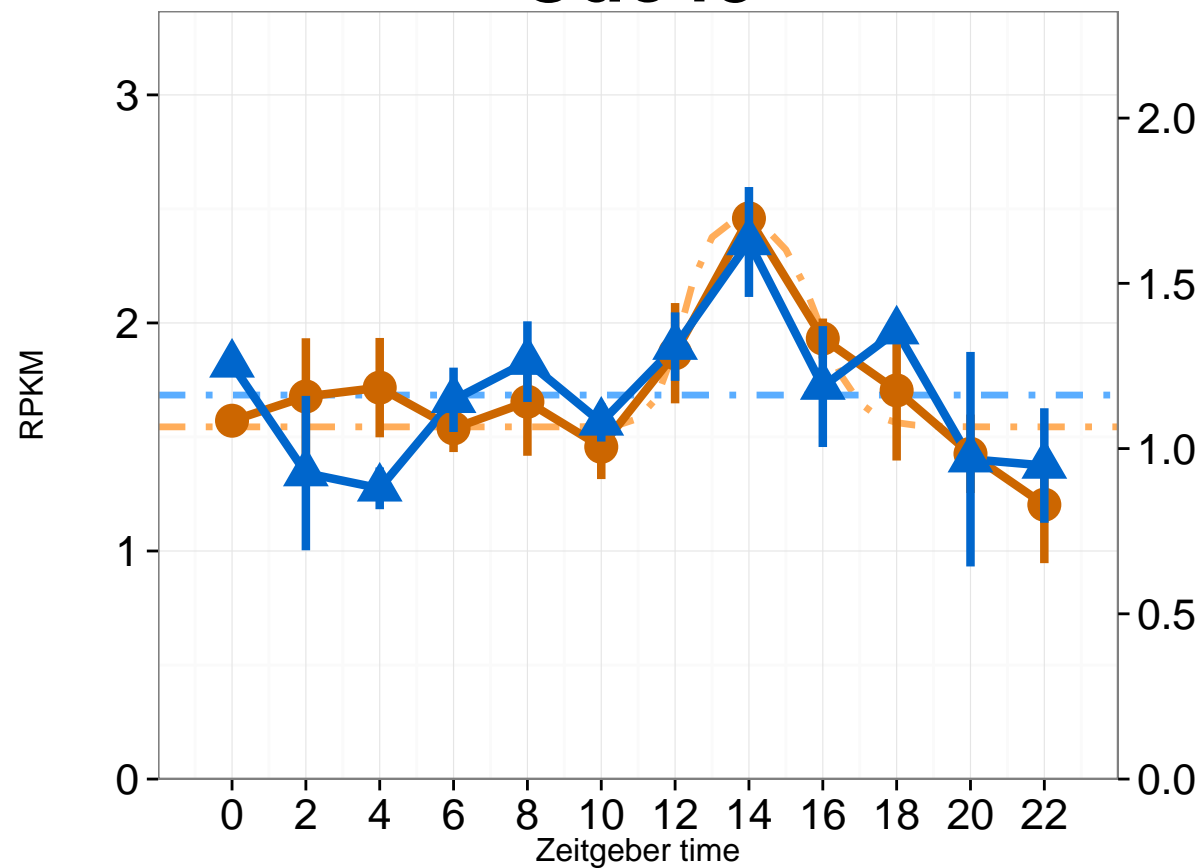

## Cdc45

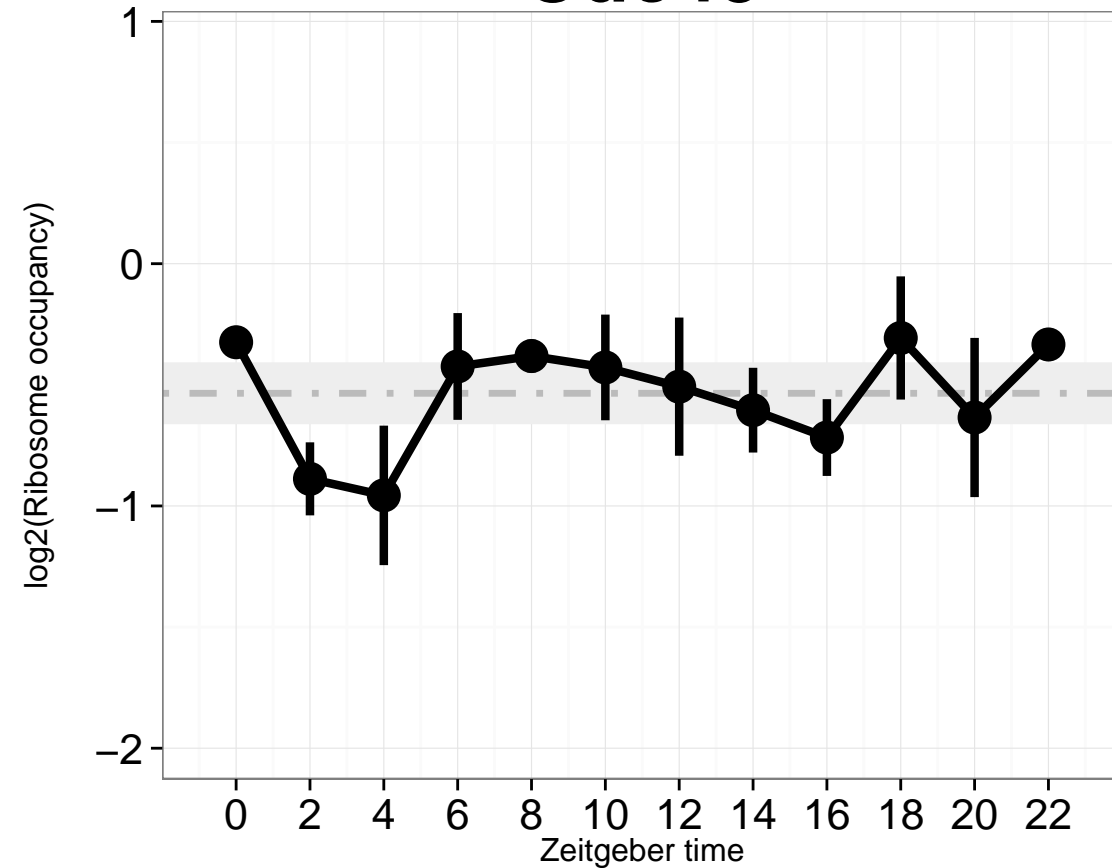

Supplement: Supplementary file 12976 [file 1]

# Wfdc1

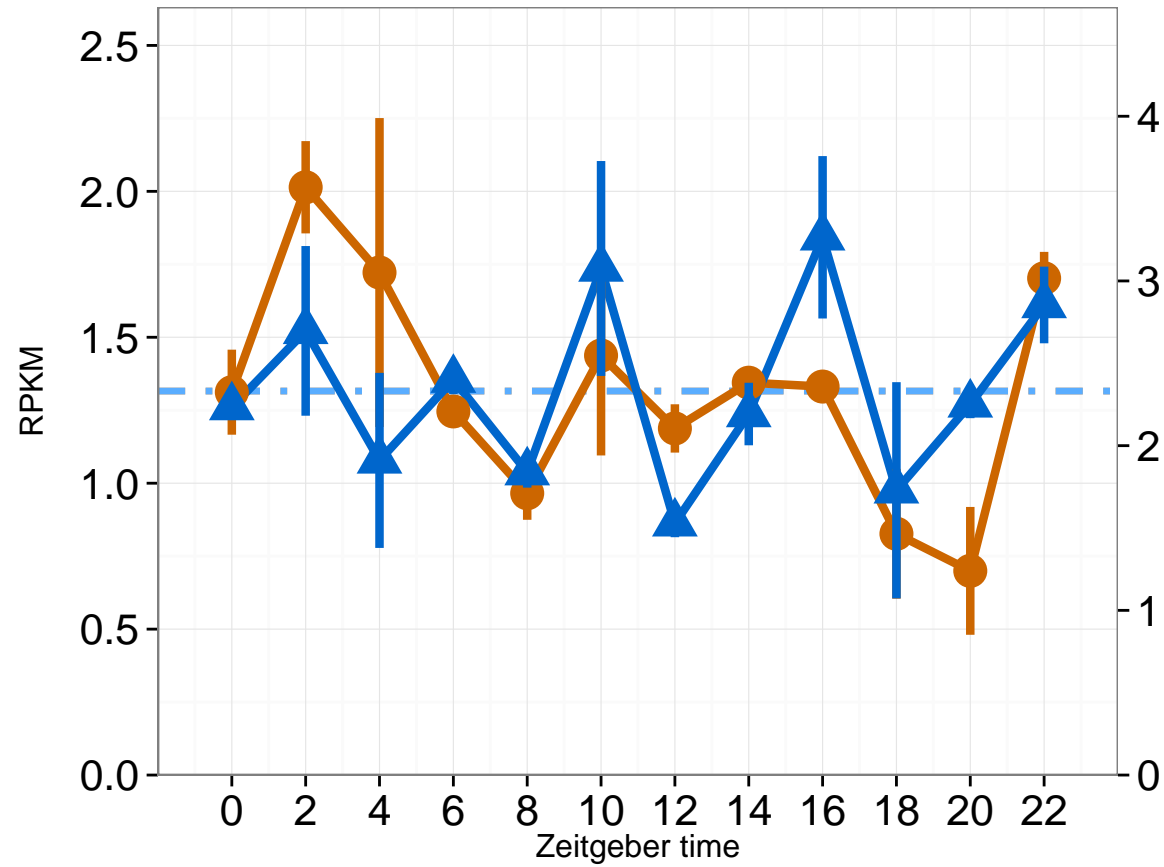

# Wfdc1

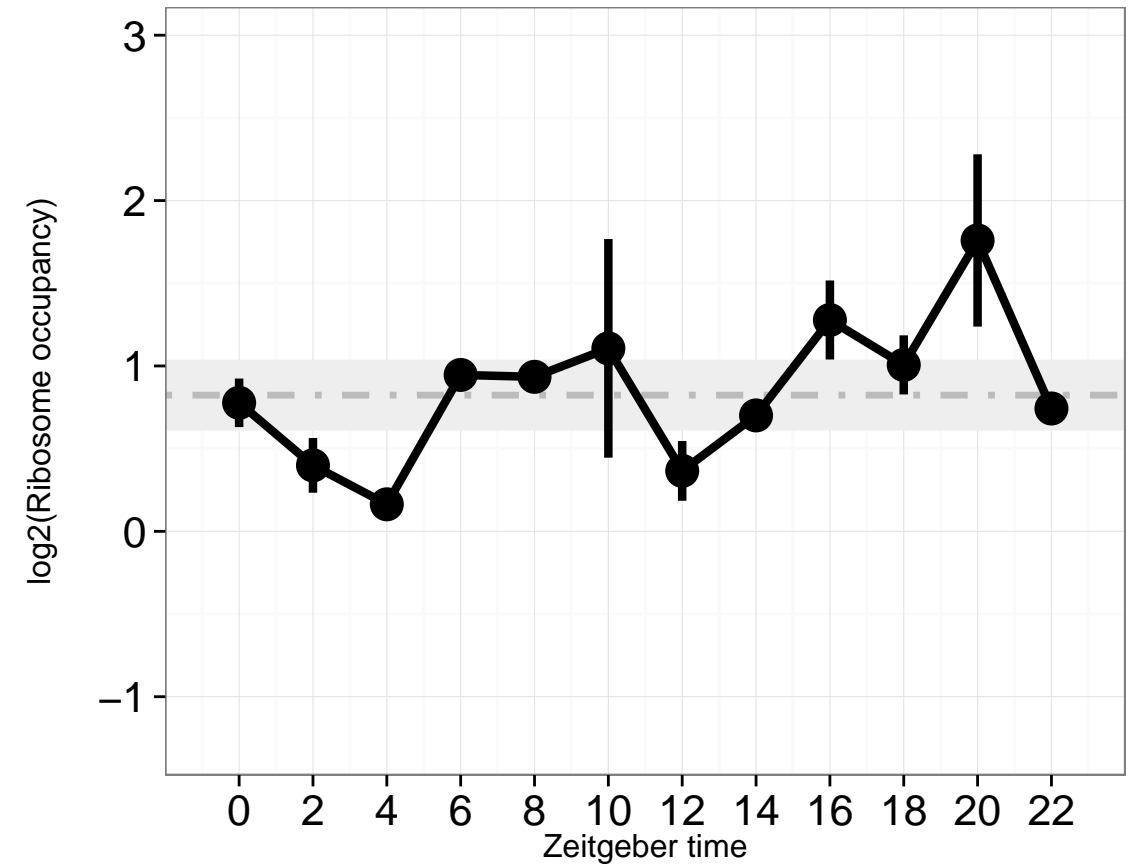

Supplement: Supplementary file 12977 [file 1]

# Cnep1r1

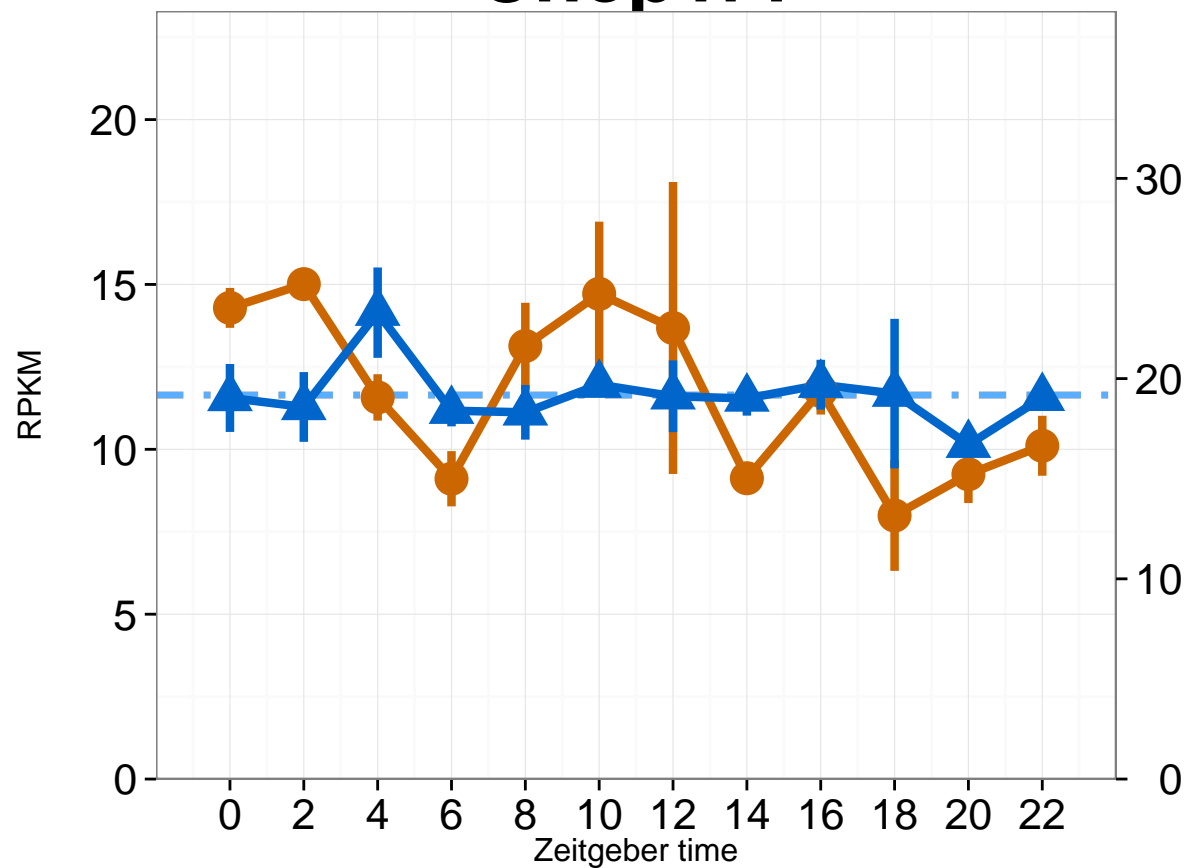

# Cnep1r1

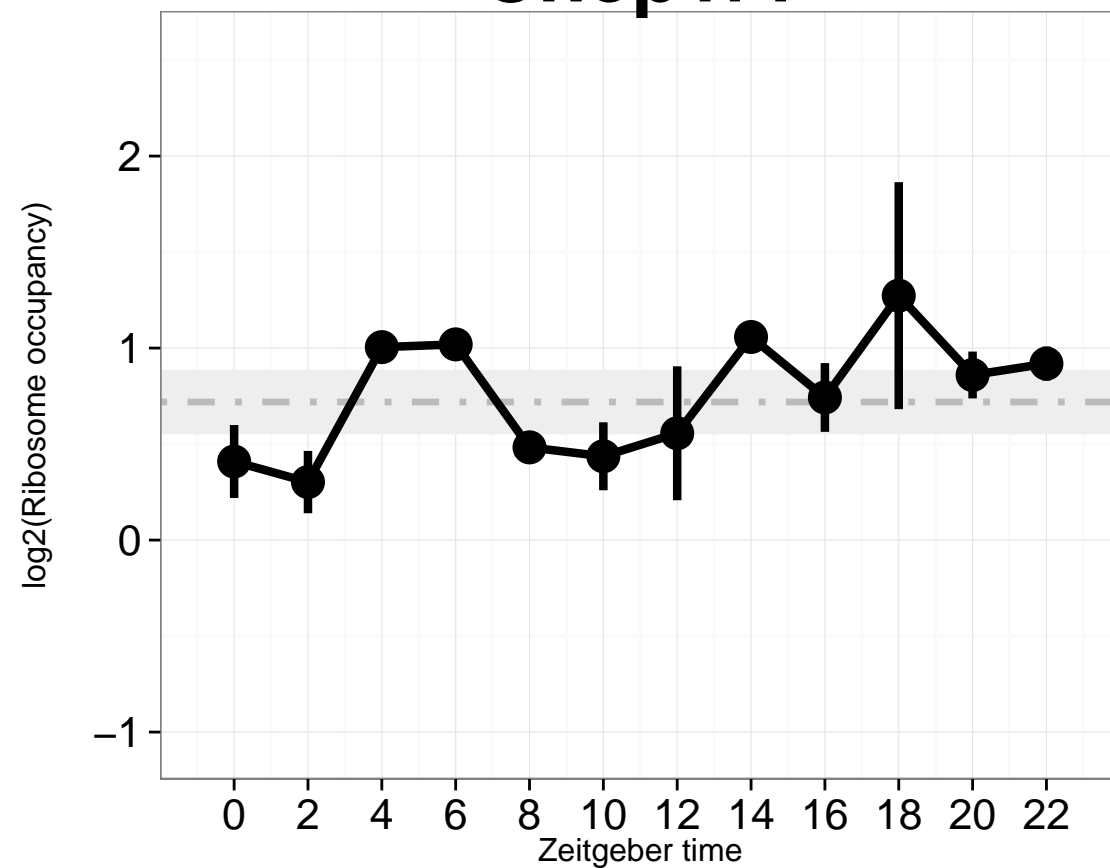

Supplement: Supplementary file 12978 [file 1]

# Hspa8

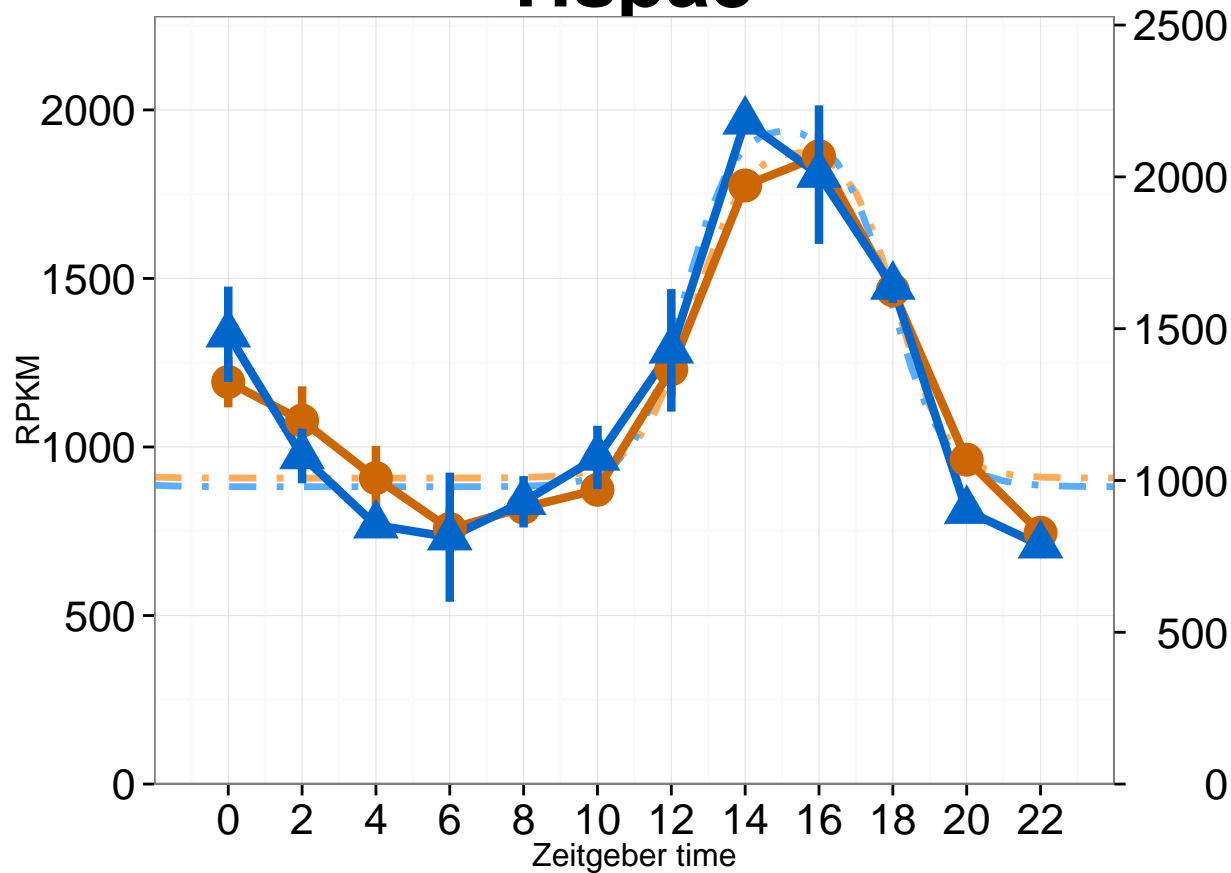

# Hspa8

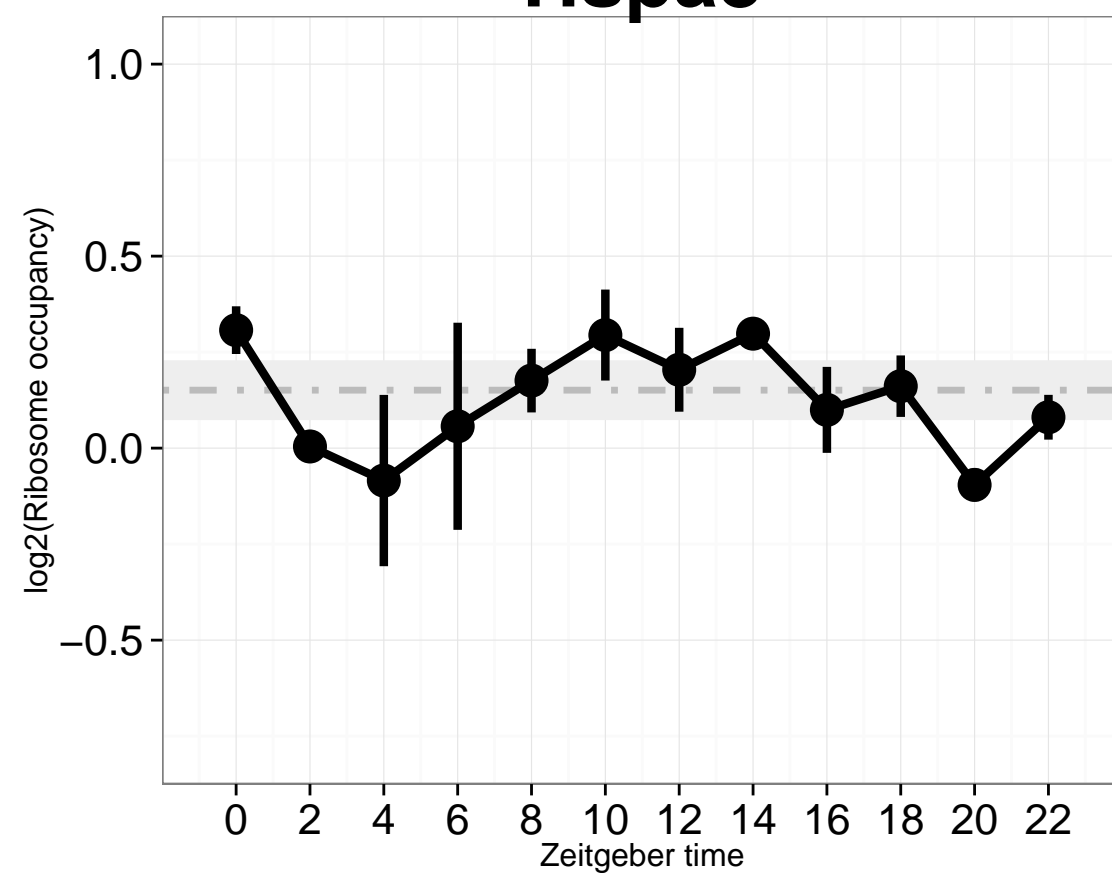

Supplement: Supplementary file 12979 [file 1]

# Aldh3a1

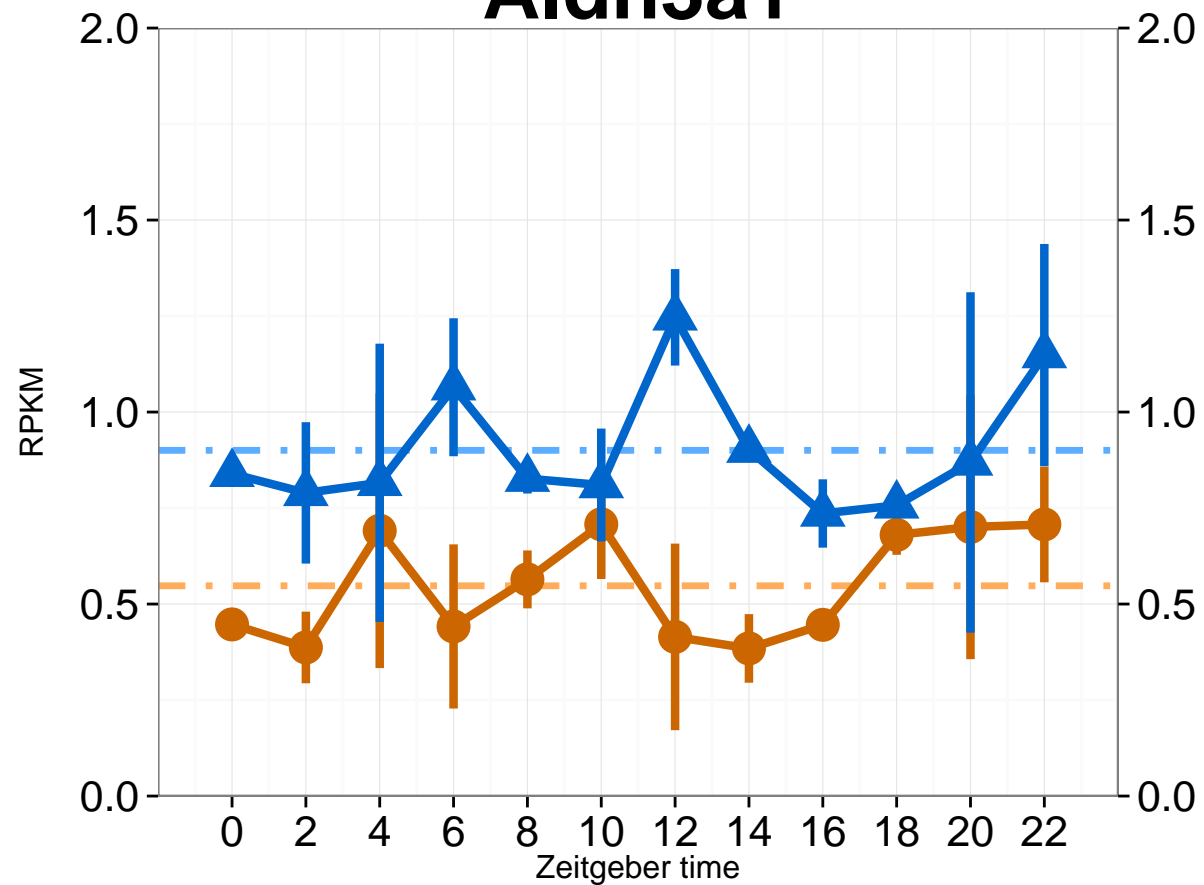

# Aldh3a1

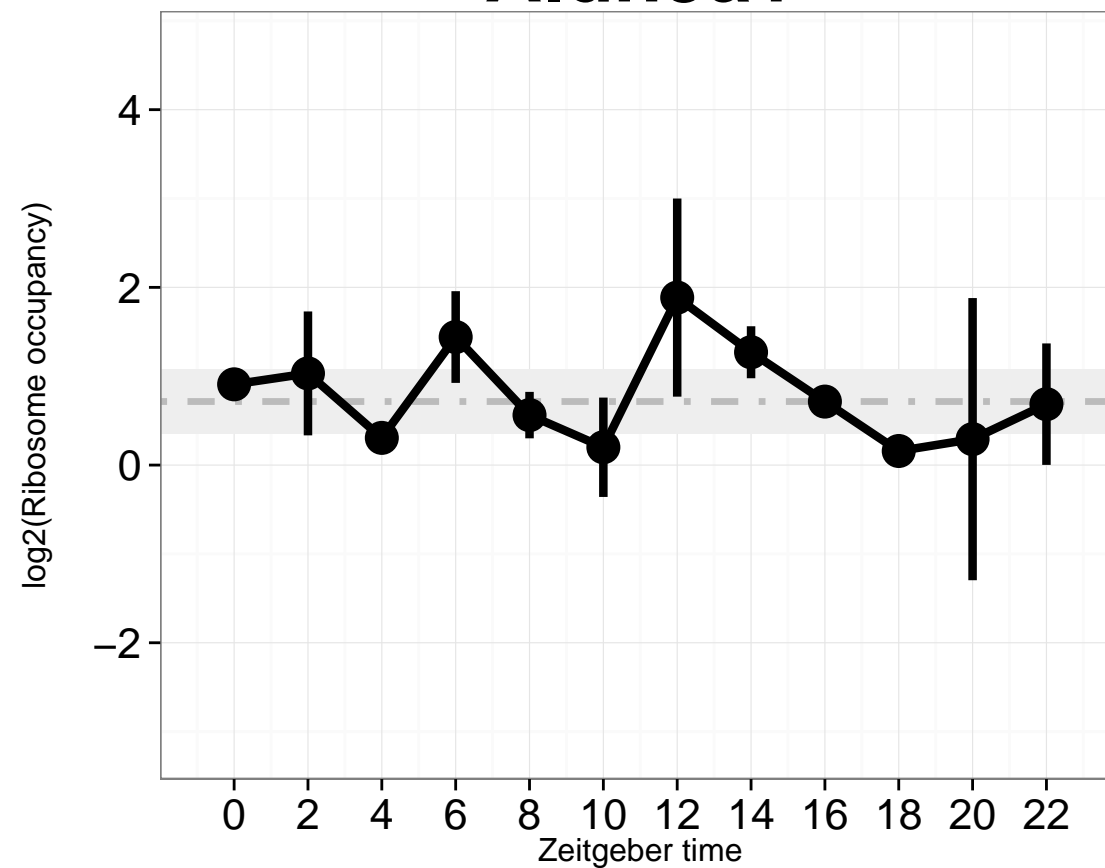

Supplement: Supplementary file 12980 [file 1]

# Rsrc1

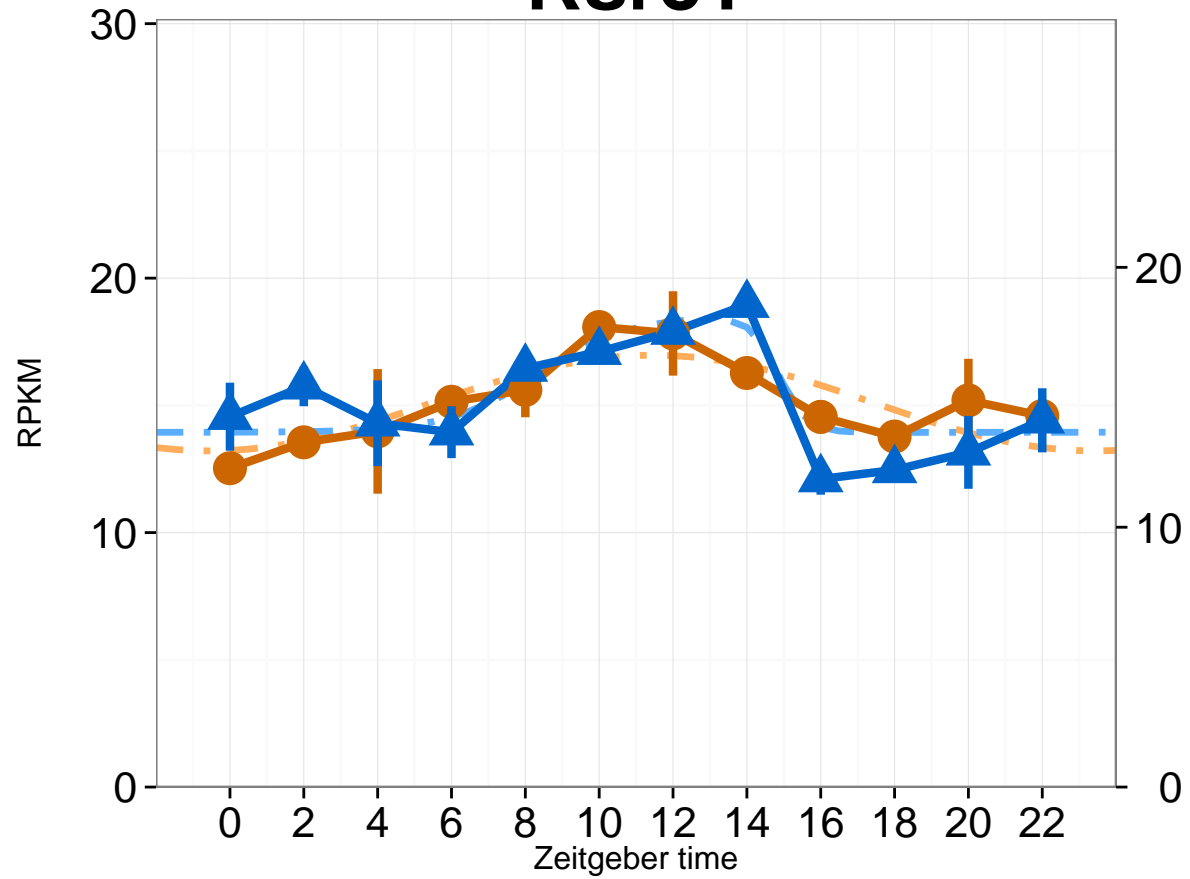

# Rsrc1

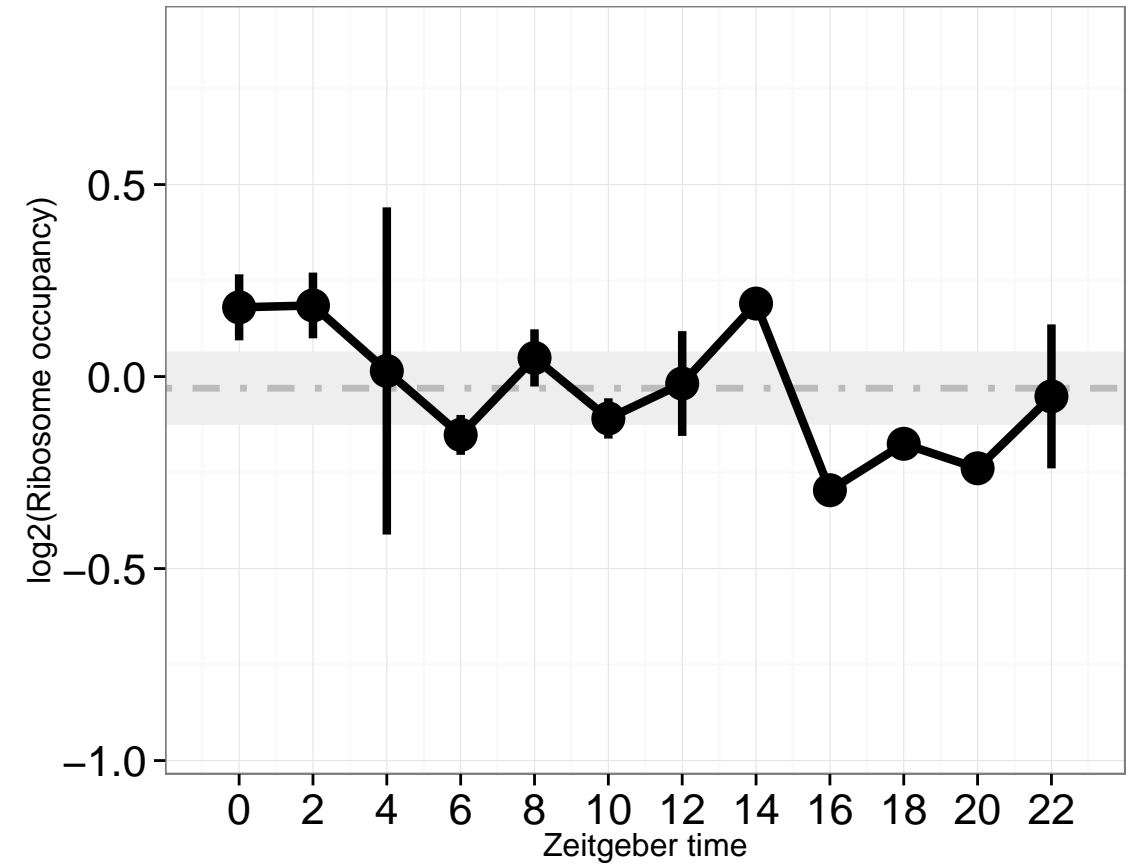

Supplement: Supplementary file 12981 [file 1]

# Epb4.2

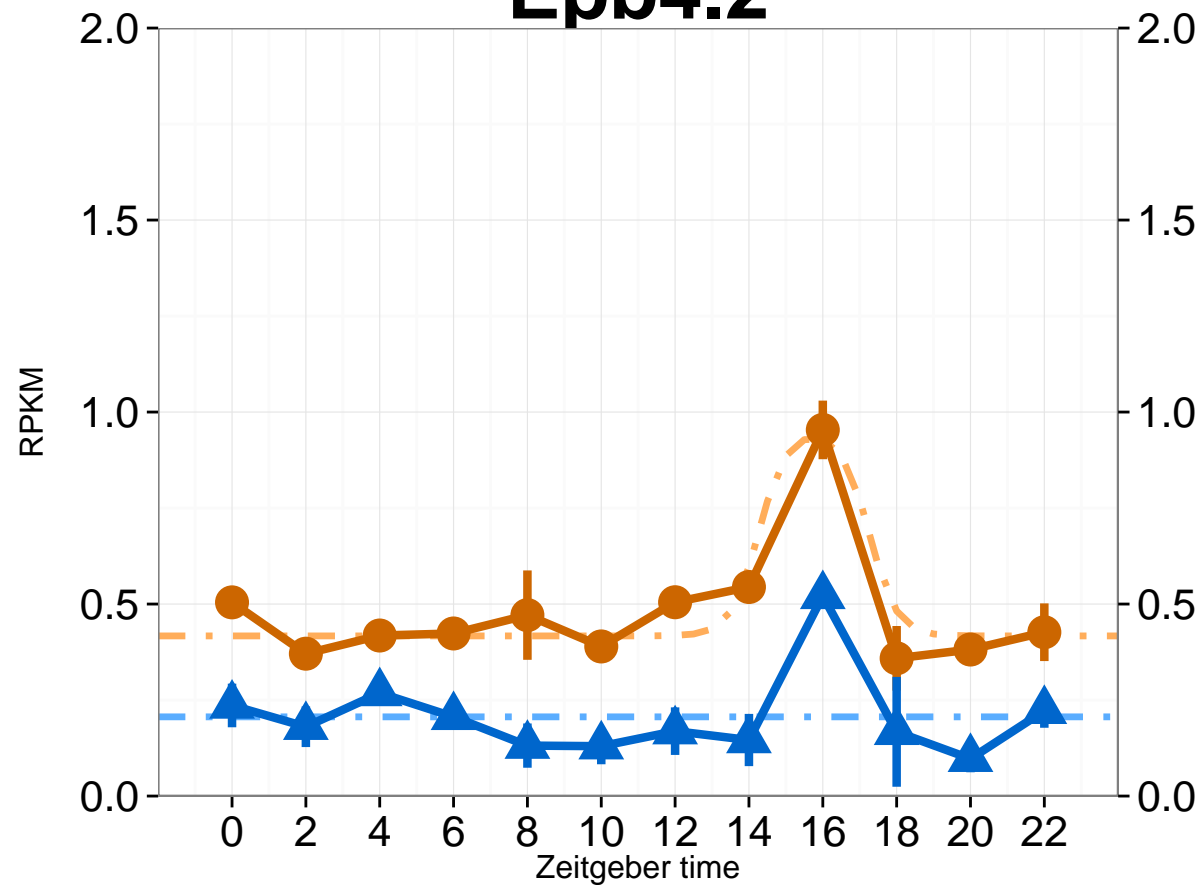

# Epb4.2

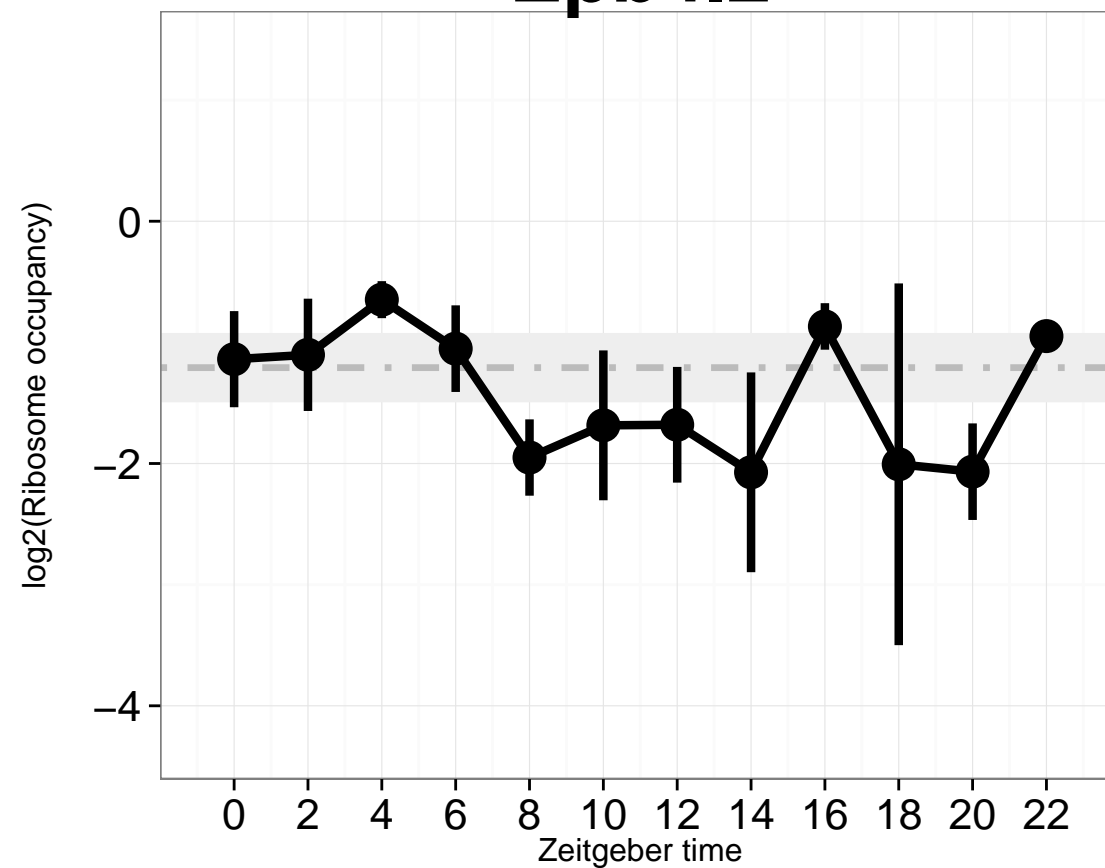

Supplement: Supplementary file 12982 [file 1]

## Ssbp2

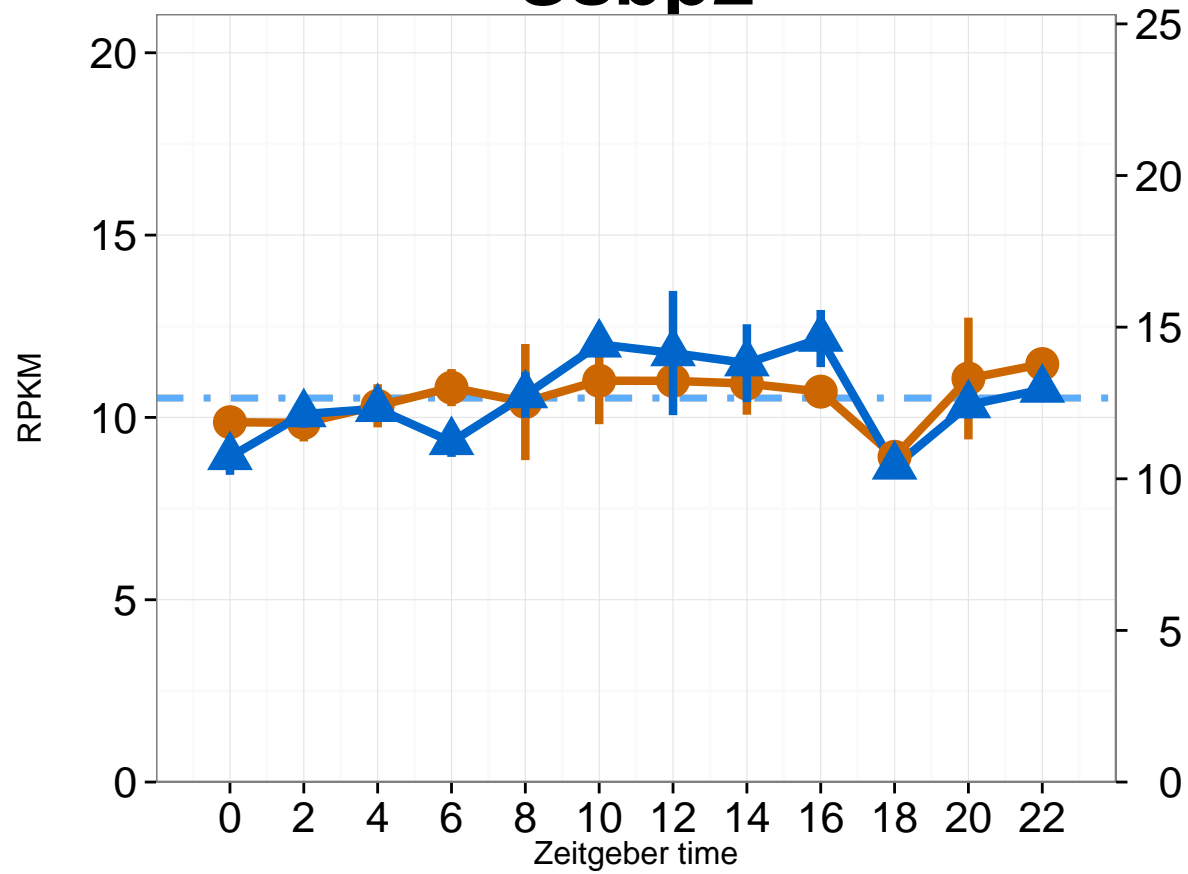

## Ssbp2

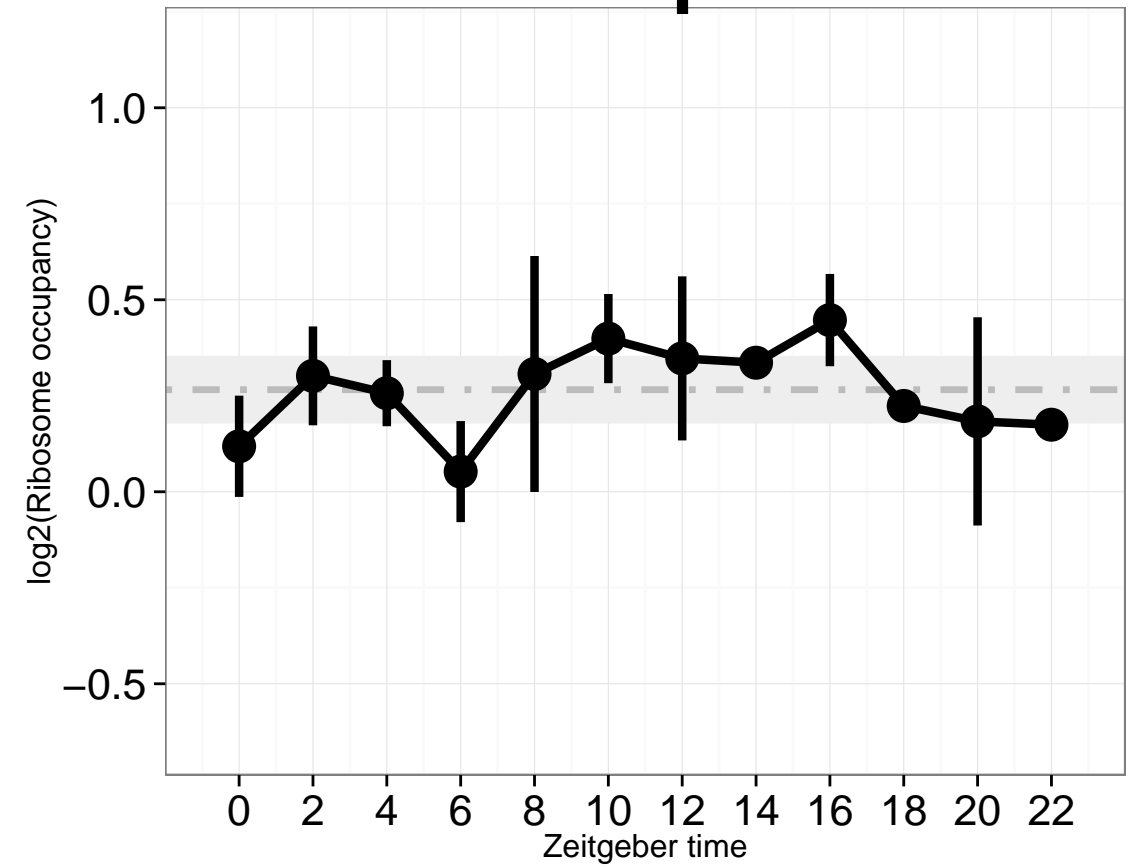

Supplement: Supplementary file 12983 [file 1]

## Rala

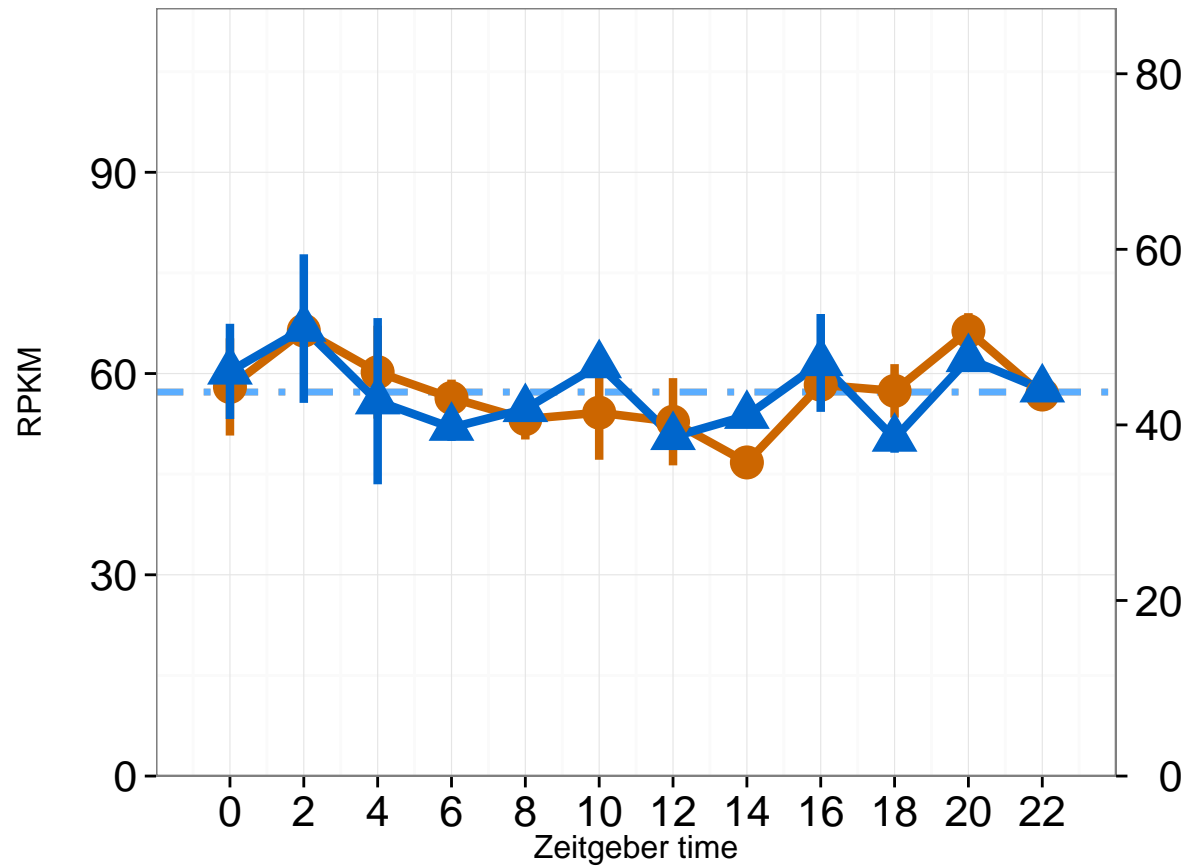

## Rala

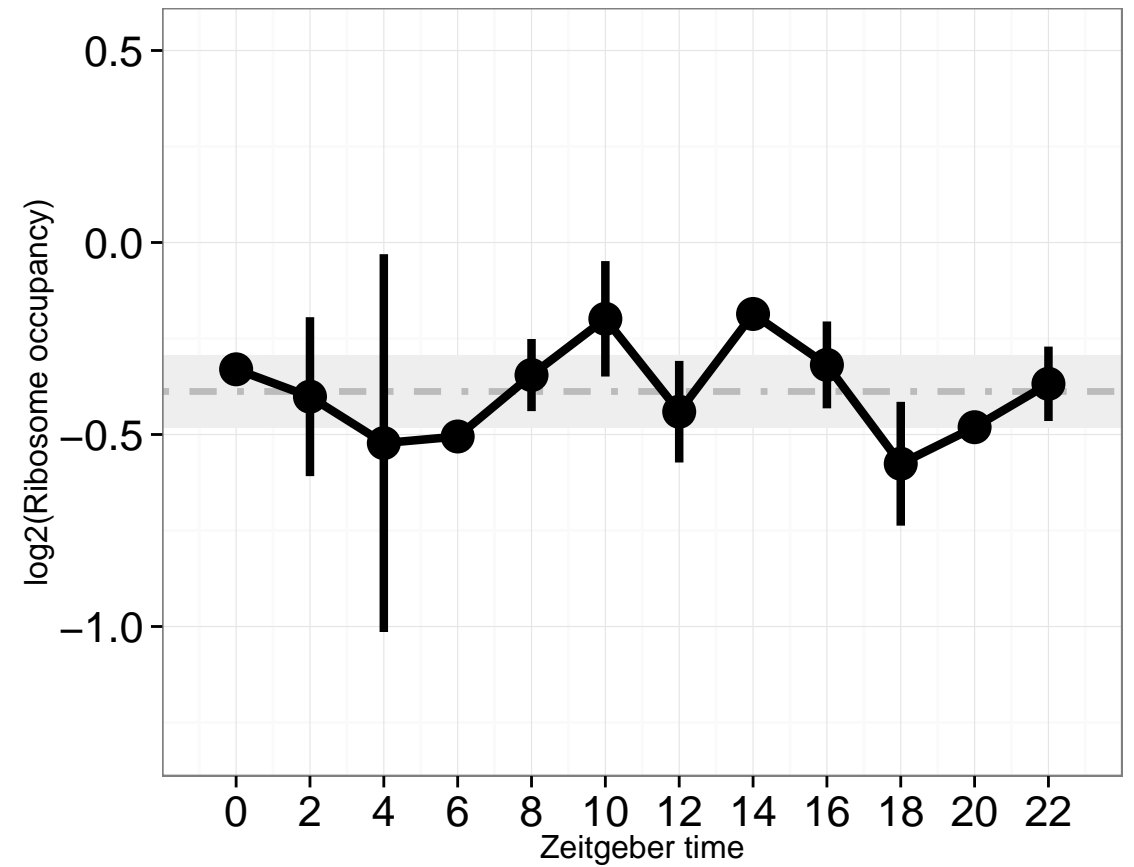

Supplement: Supplementary file 12984 [file 1]

## Tmem178

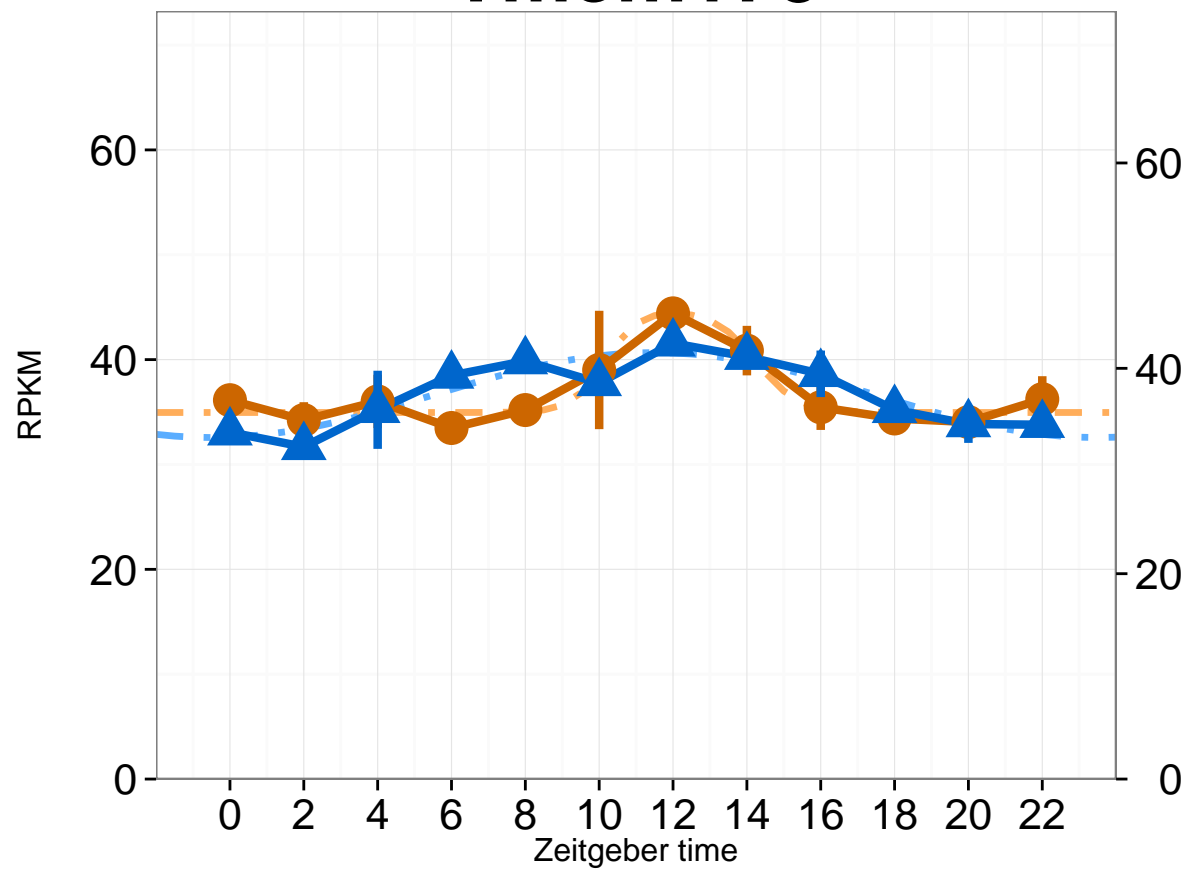

## Tmem178

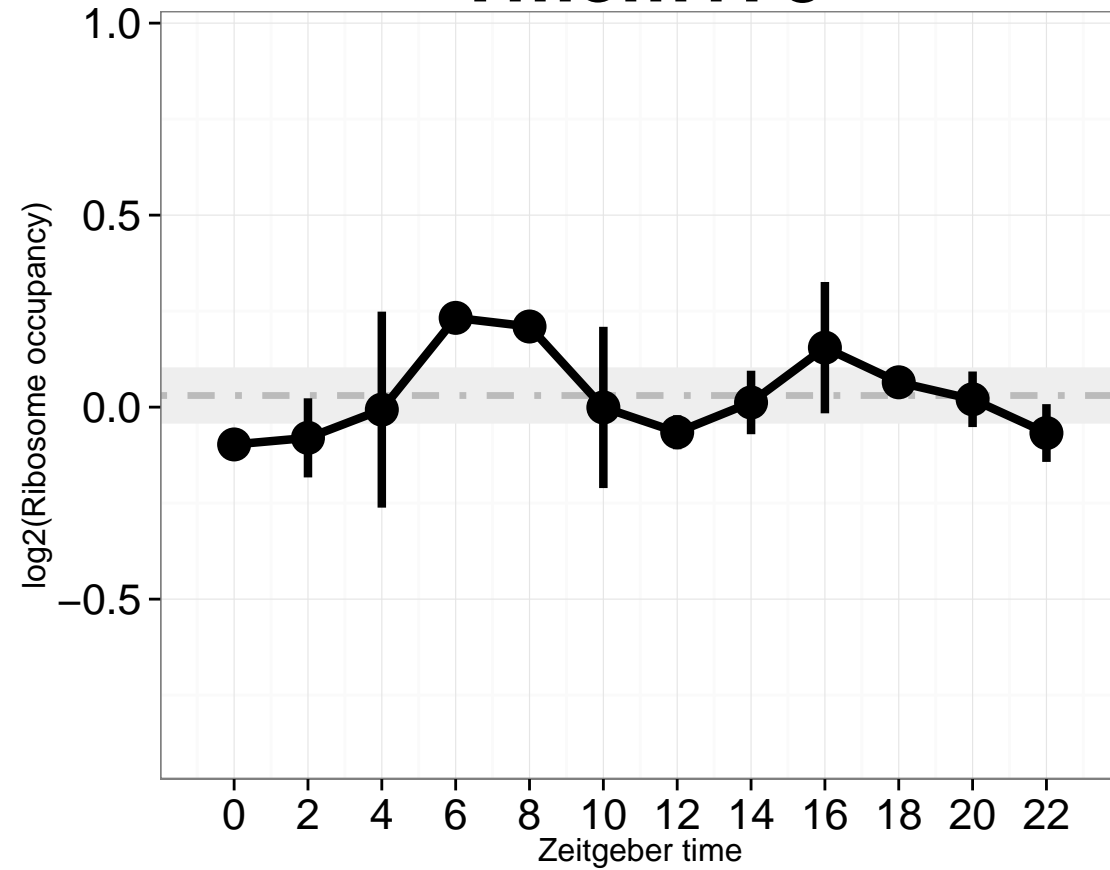

Supplement: Supplementary file 12985 [file 1]

# Klhdc8a

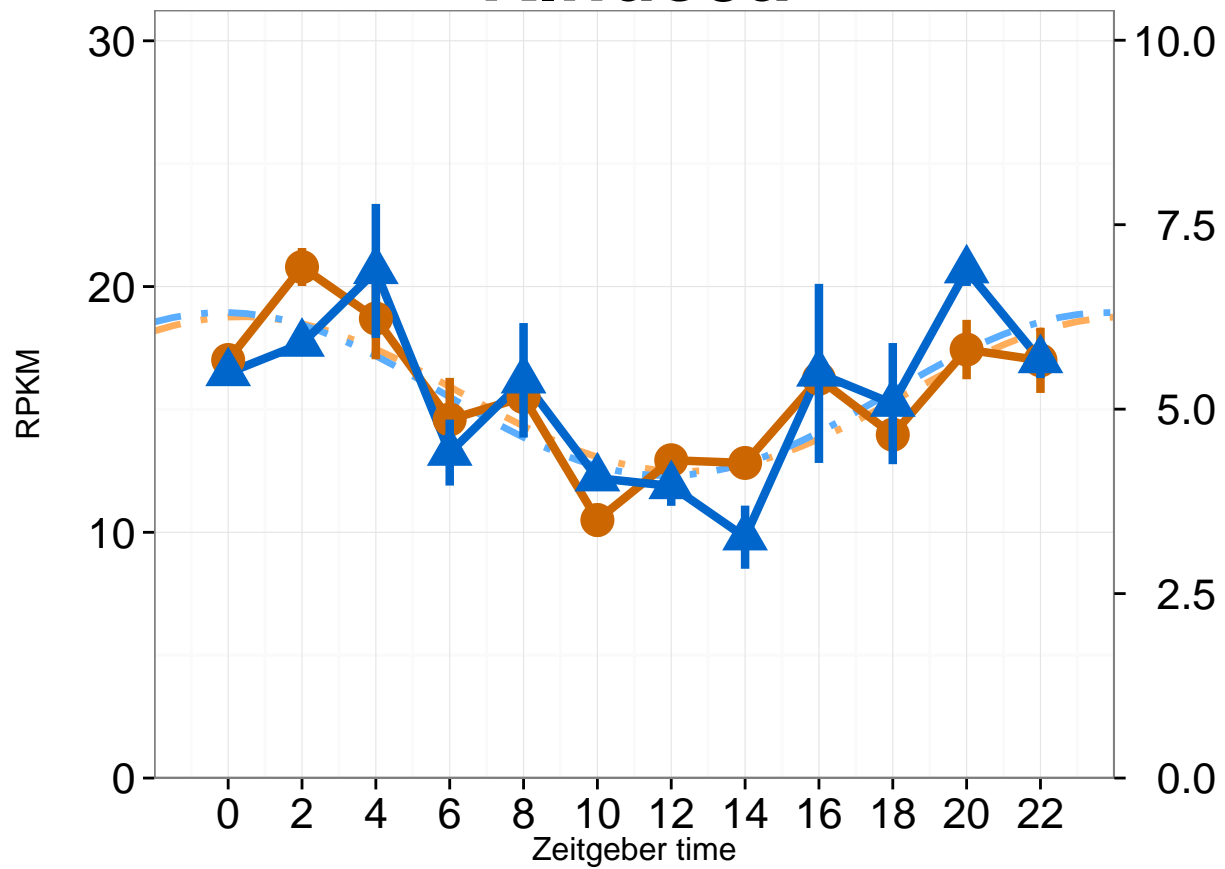

# Klhdc8a

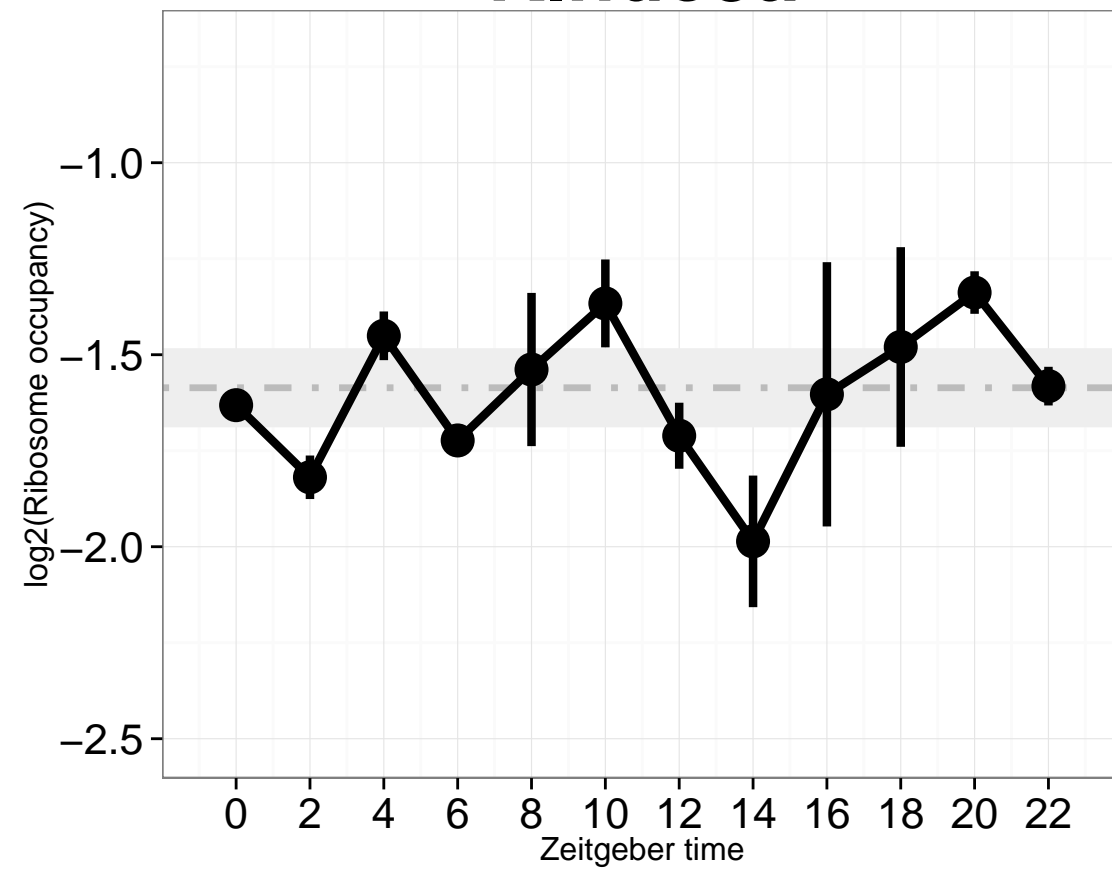

Supplement: Supplementary file 12986 [file 1]

## Grk4

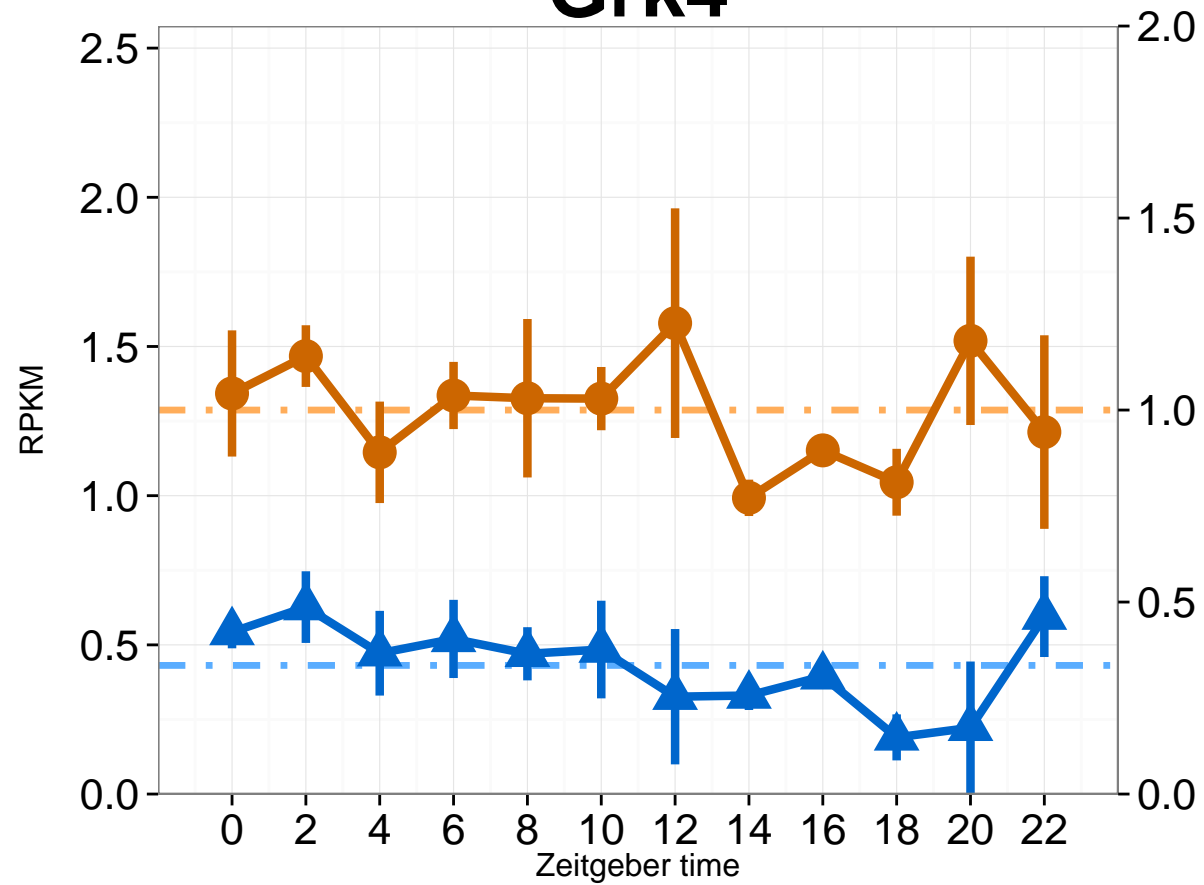

## Grk4

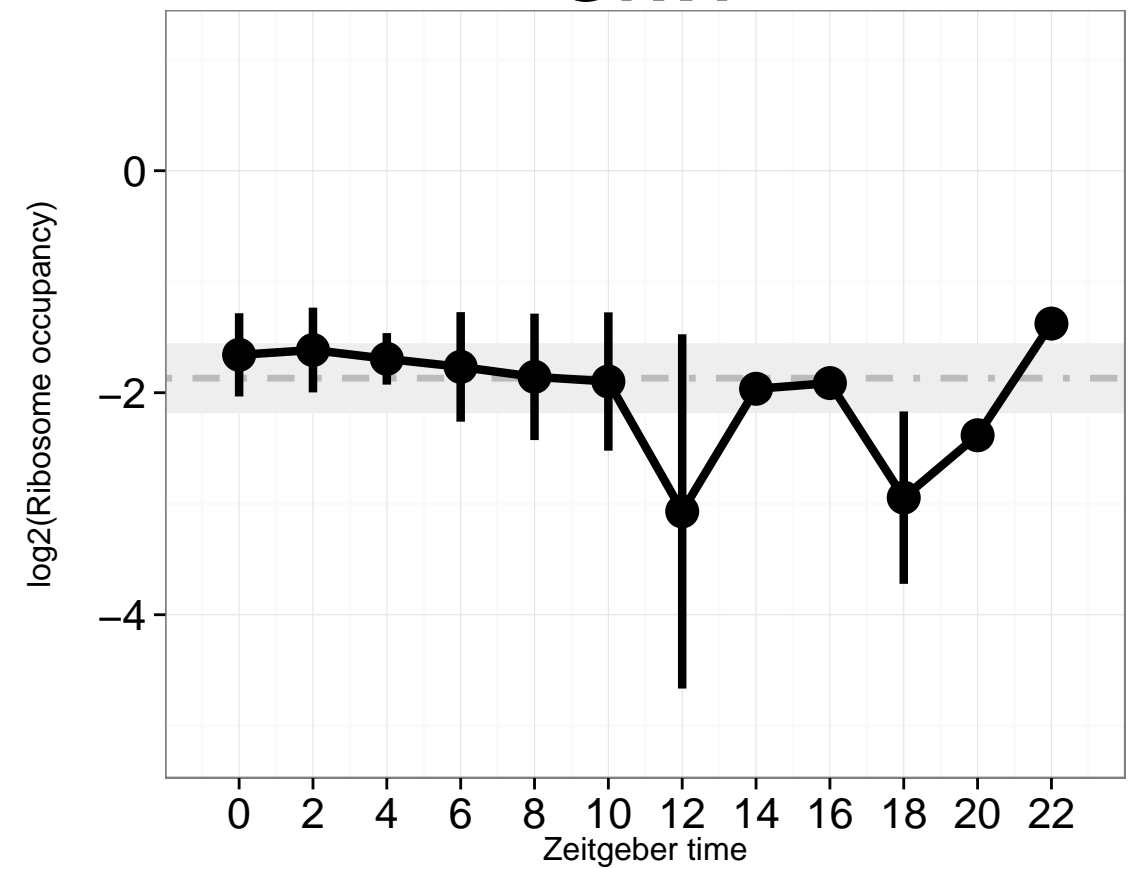

Supplement: Supplementary file 12987 [file 1]

## Ar15

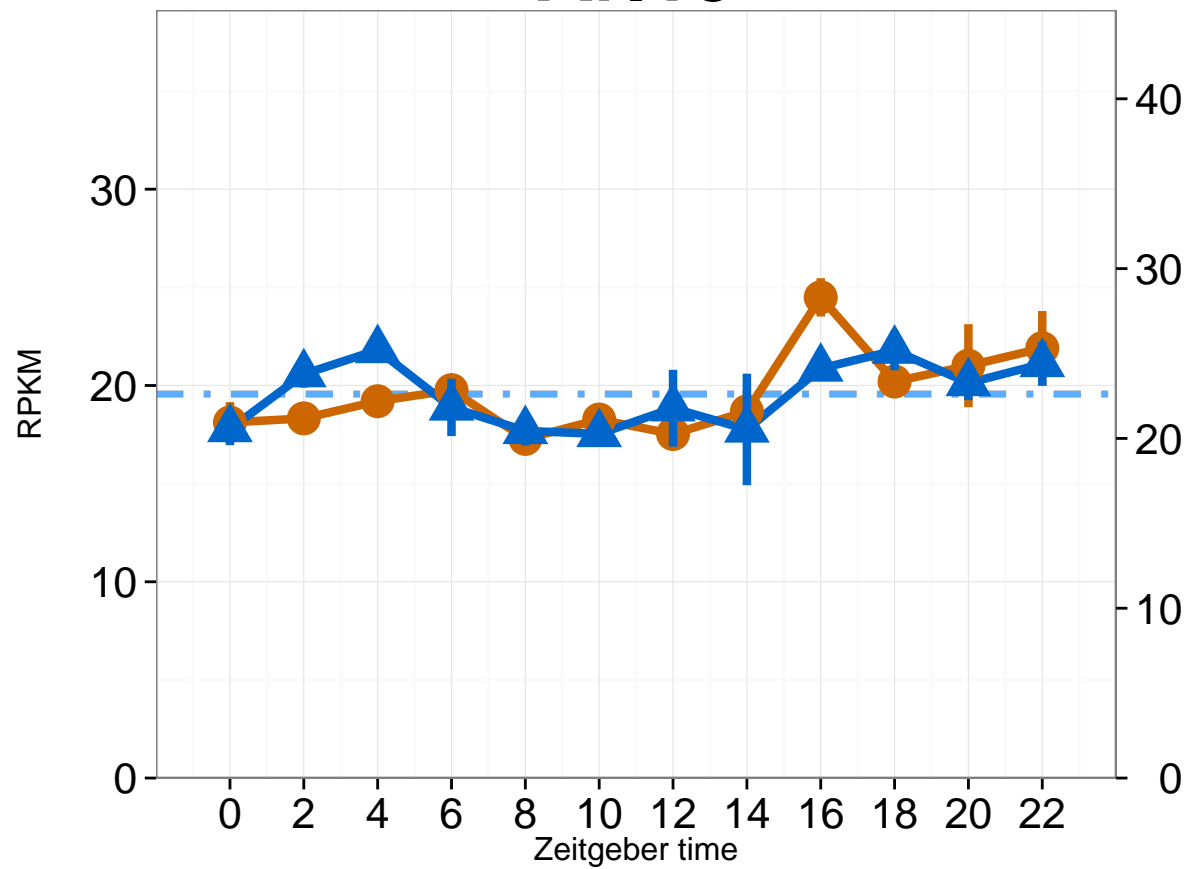

## Ar15

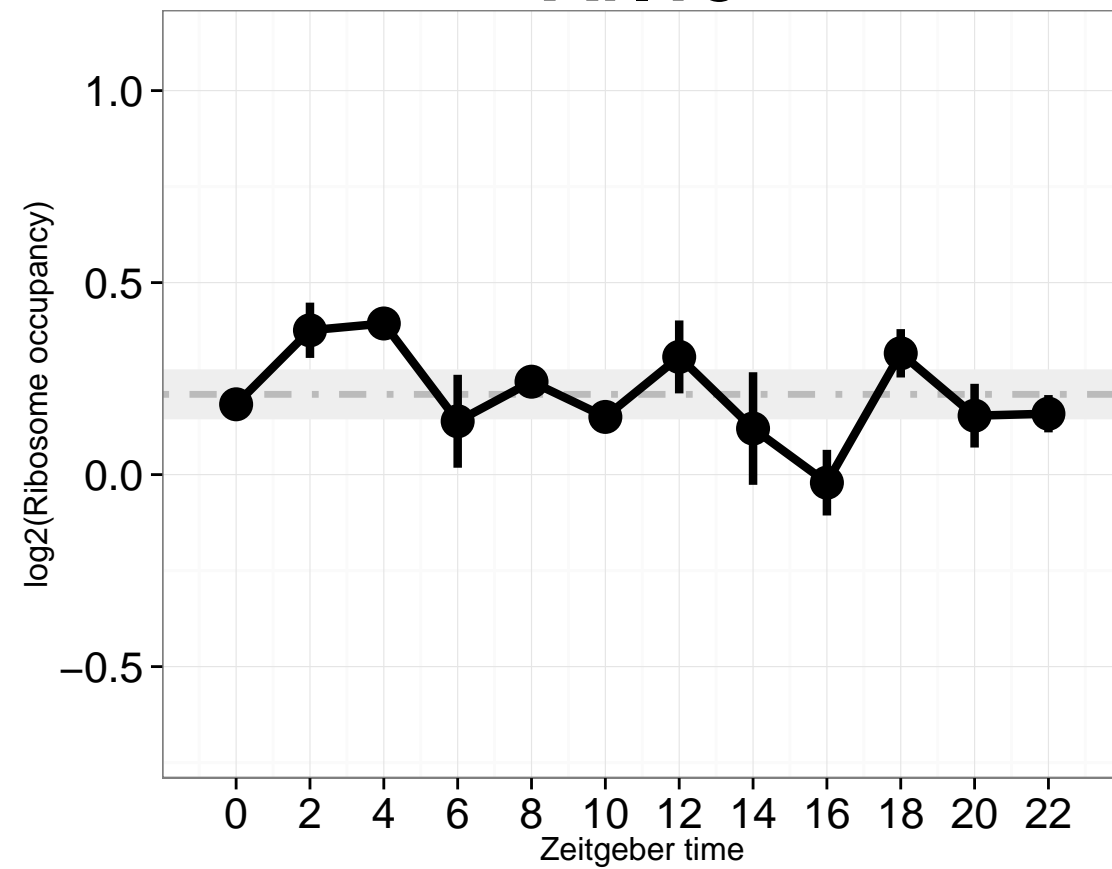

Supplement: Supplementary file 12988 [file 1]

## Gabarap

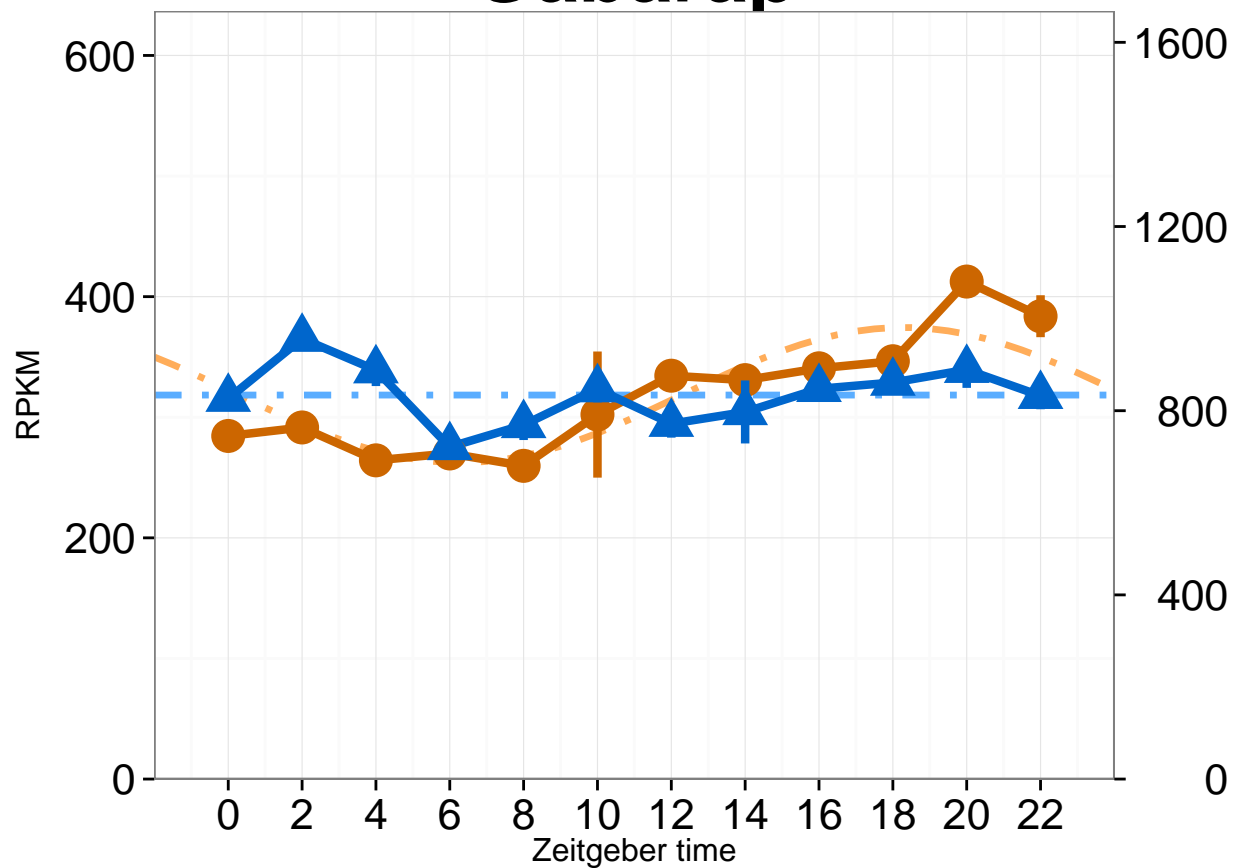

## Gabarap

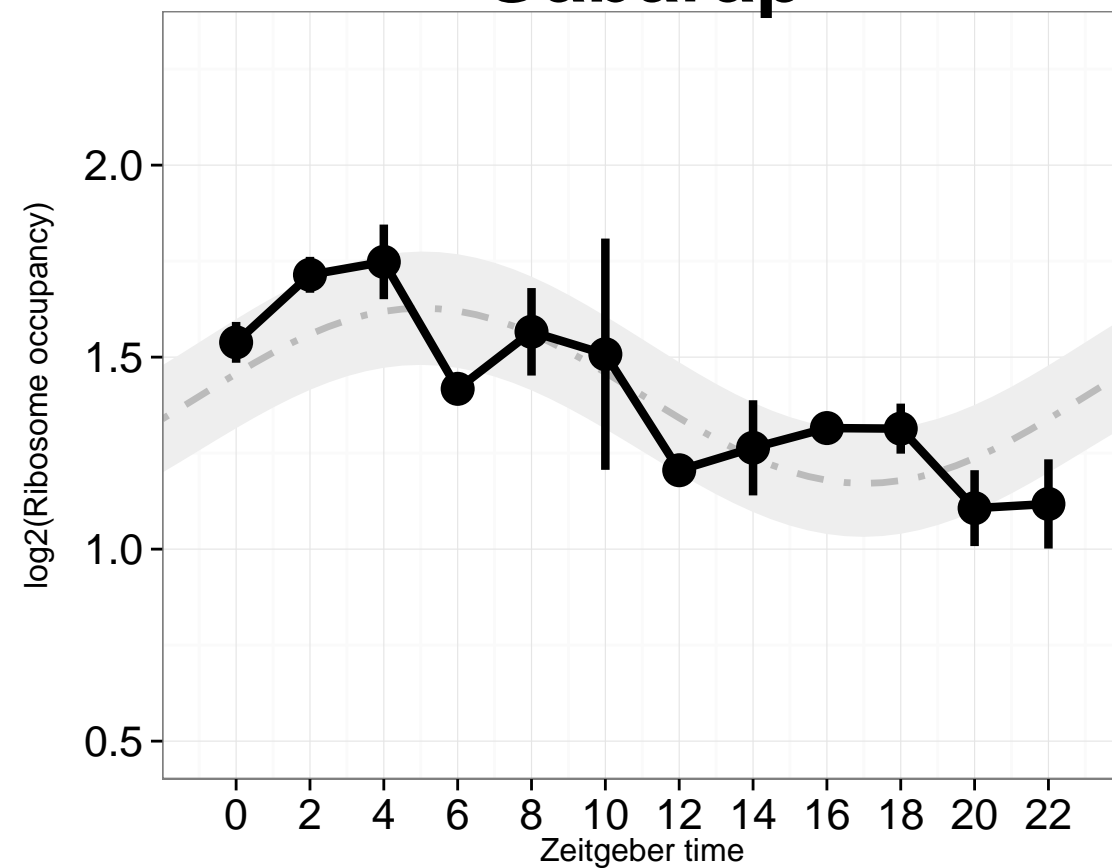

Supplement: Supplementary file 12989 [file 1]

## Kdsr

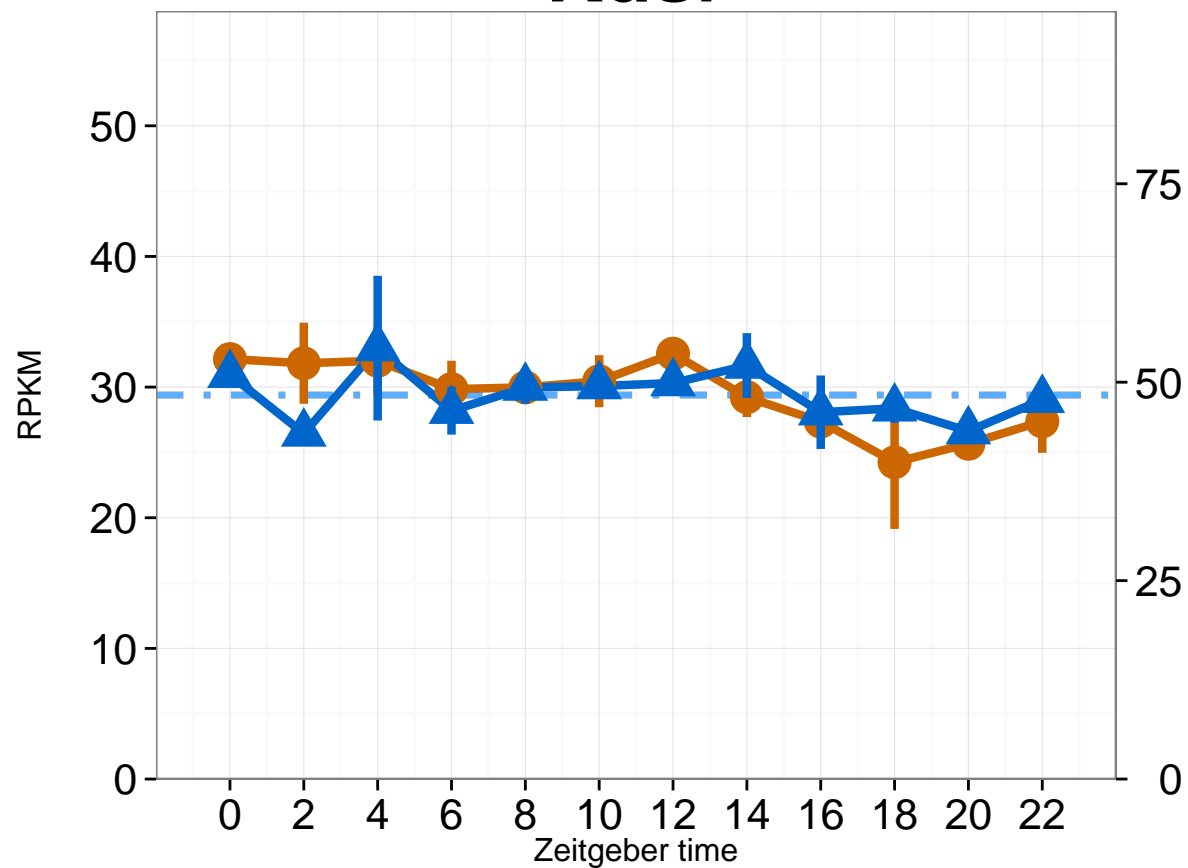

## Kdsr

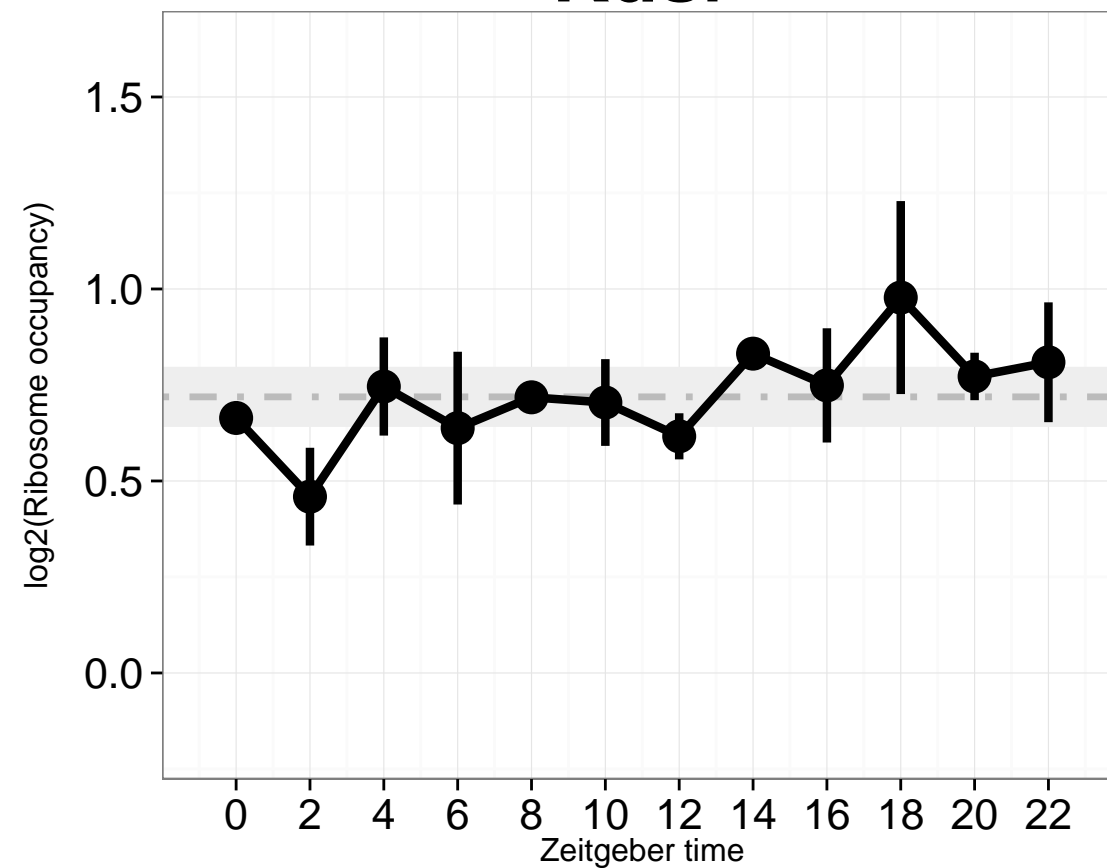

Supplement: Supplementary file 12990 [file 1]

## Wdr45b

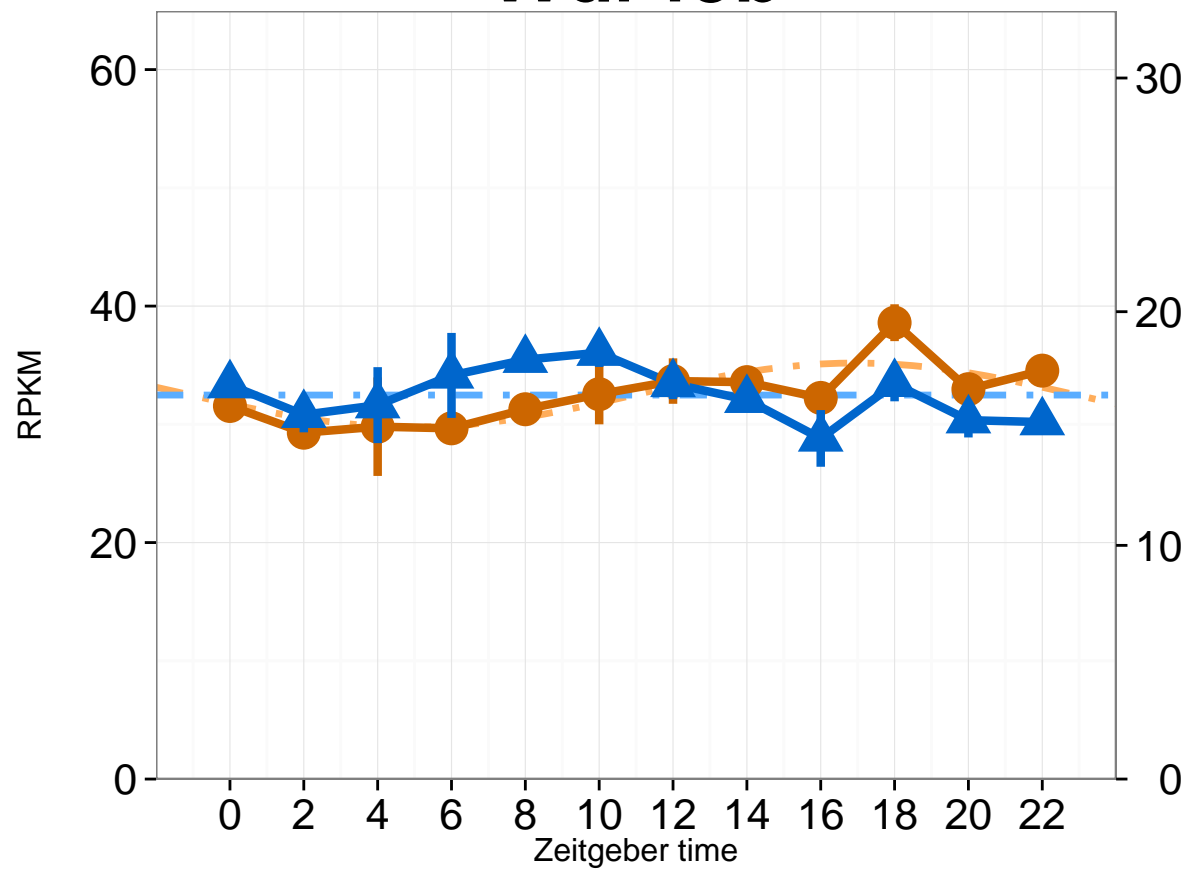

## Wdr45b

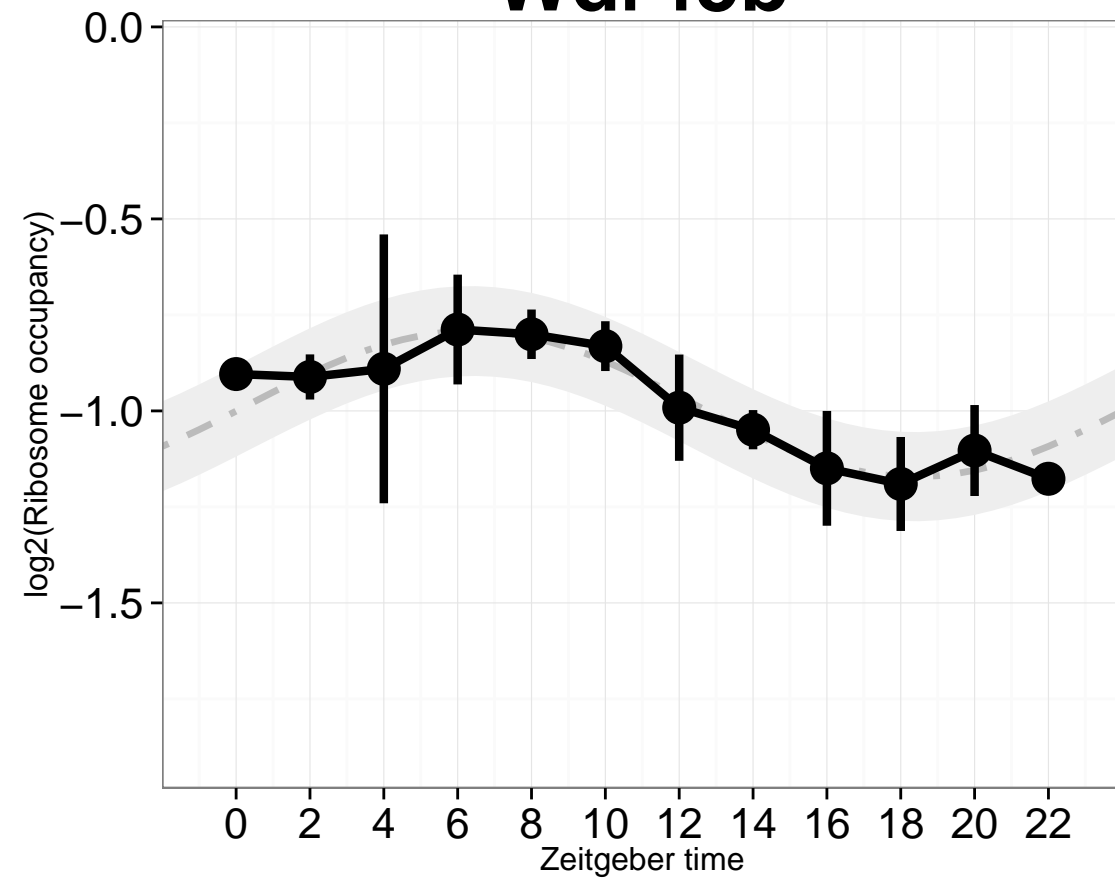

Supplement: Supplementary file 12991 [file 1]

## Xiap

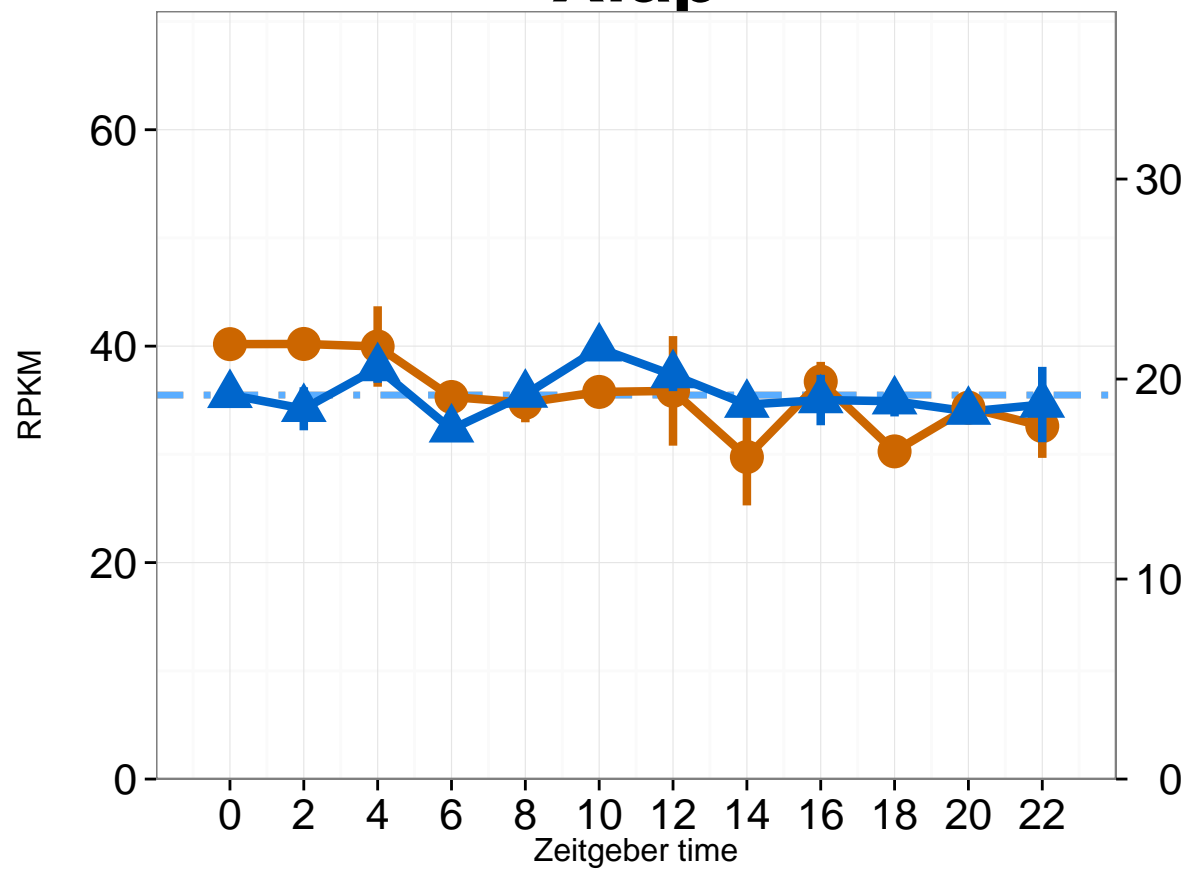

## Xiap

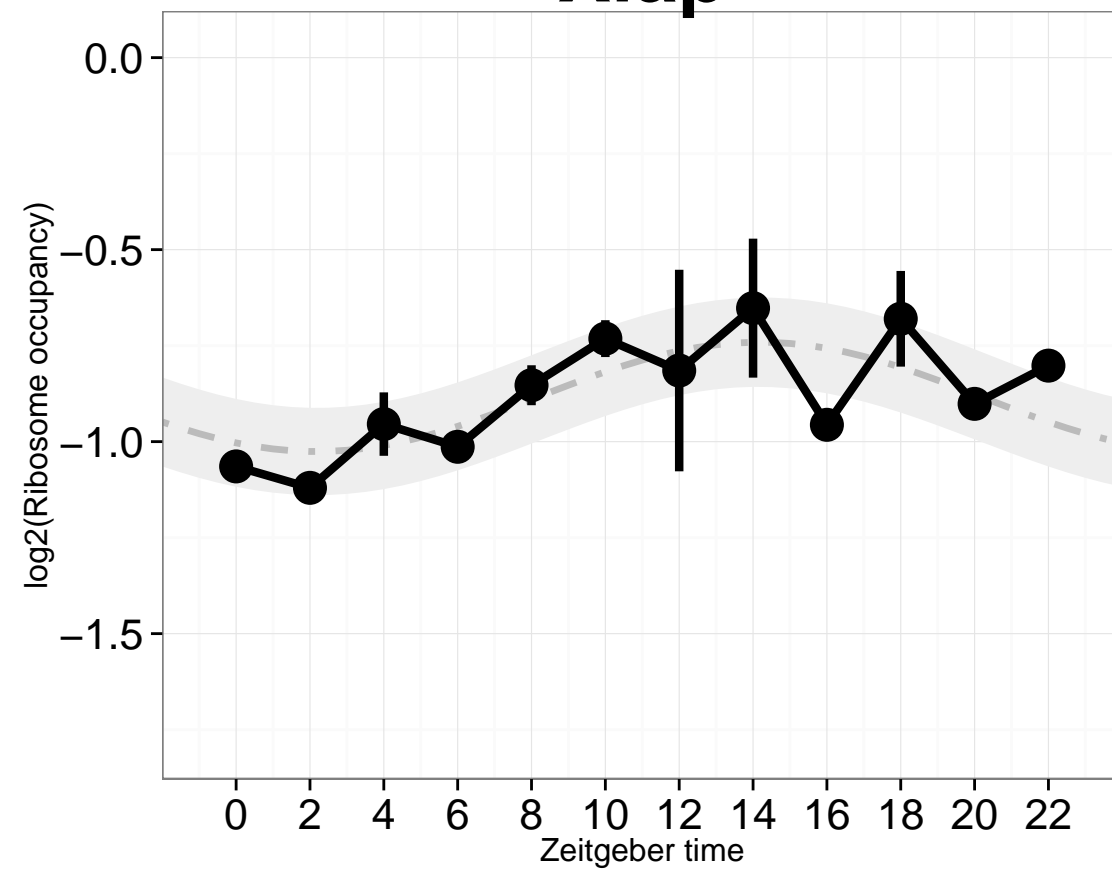

Supplement: Supplementary file 12992 [file 1]

## MiIt1

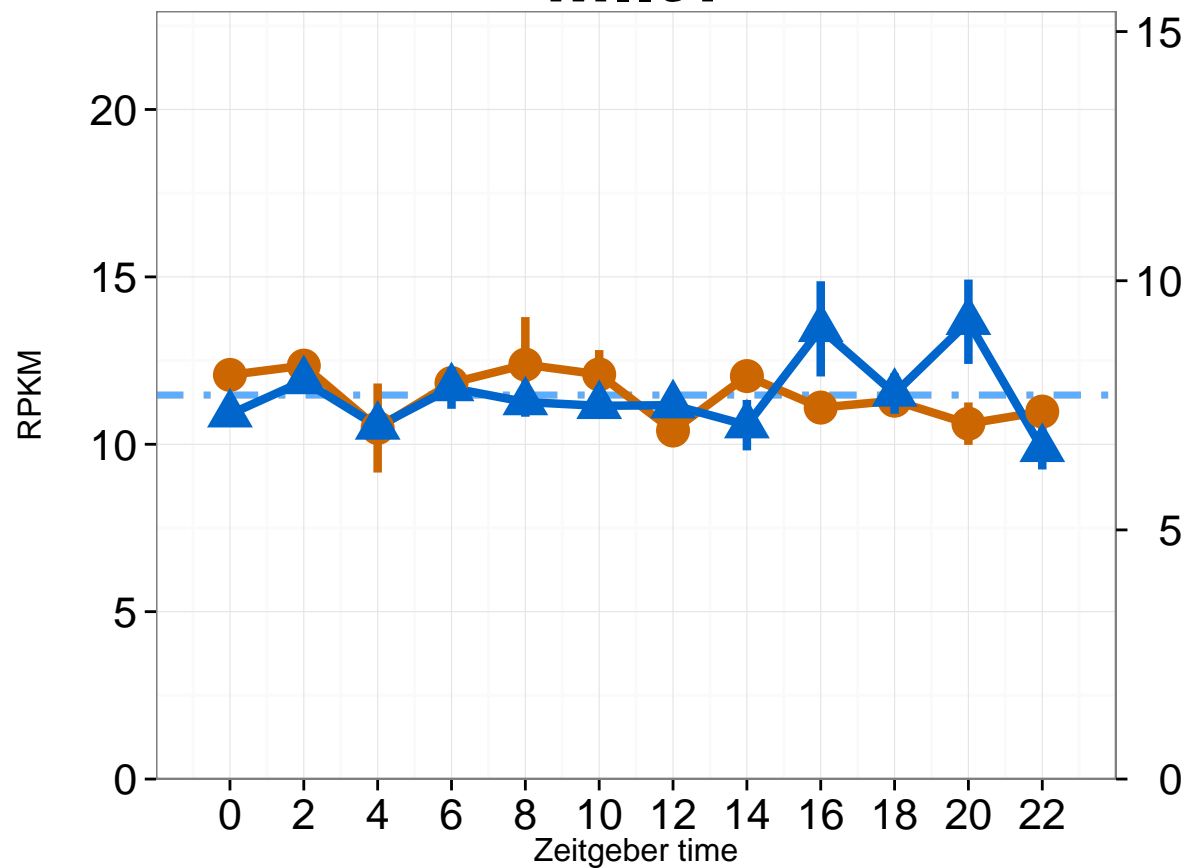

## MiIt1

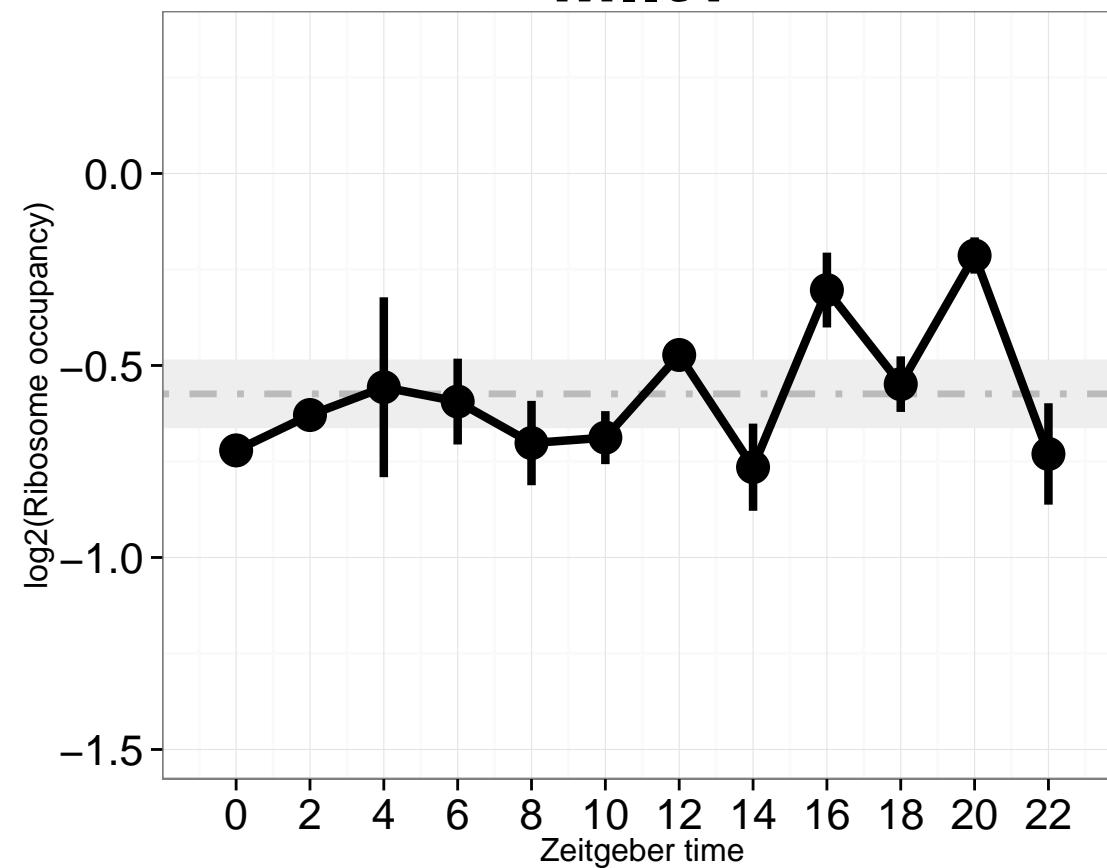

Supplement: Supplementary file 12993 [file 1]

## Wdr70

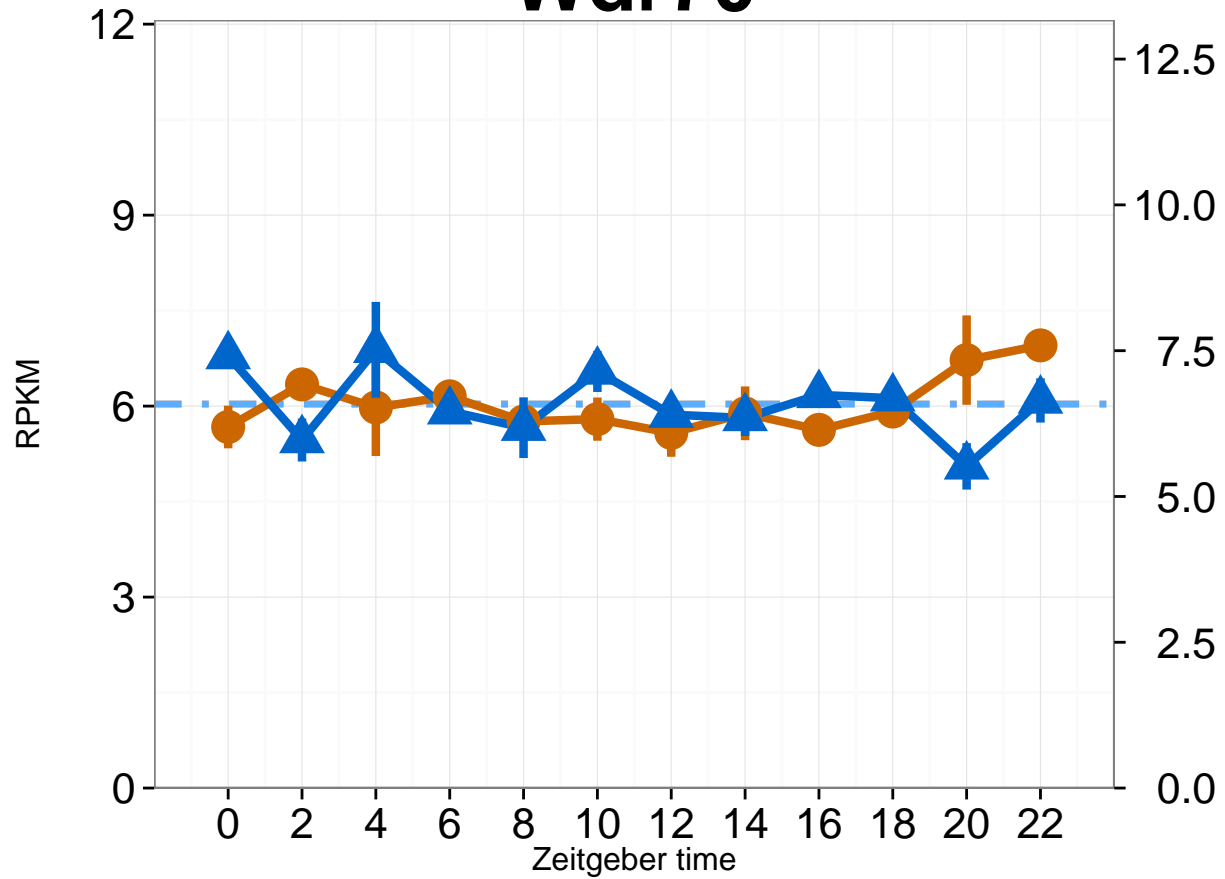

## Wdr70

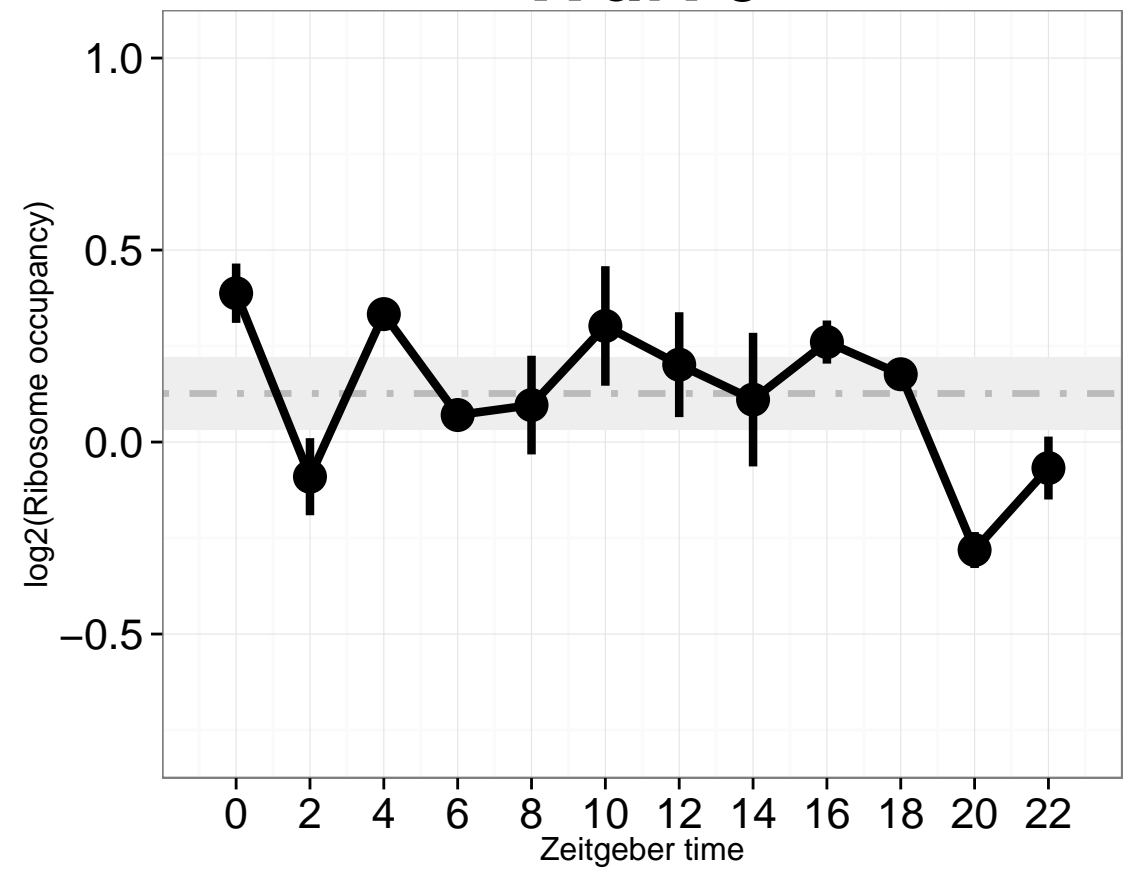

Supplement: Supplementary file 12994 [file 1]

## Adamtsl3

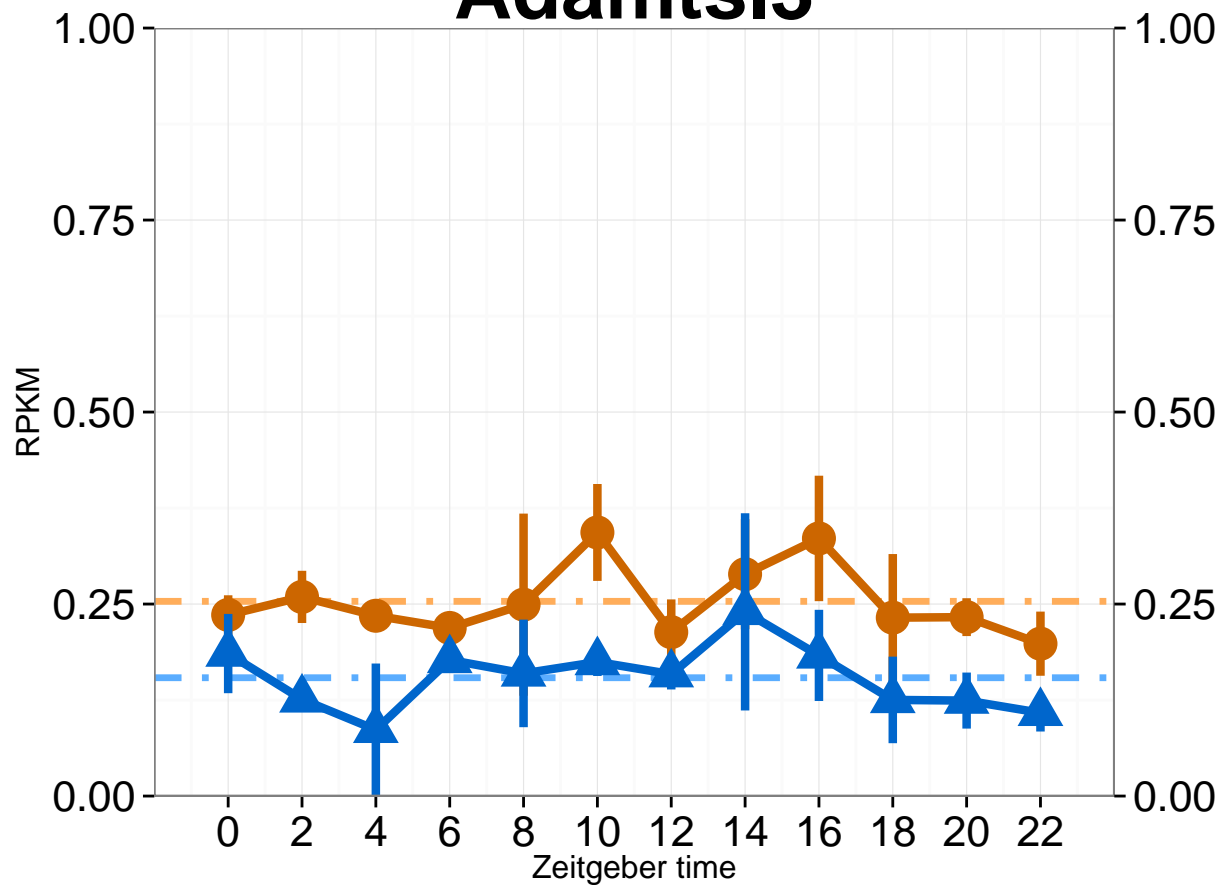

## Adamtsl3

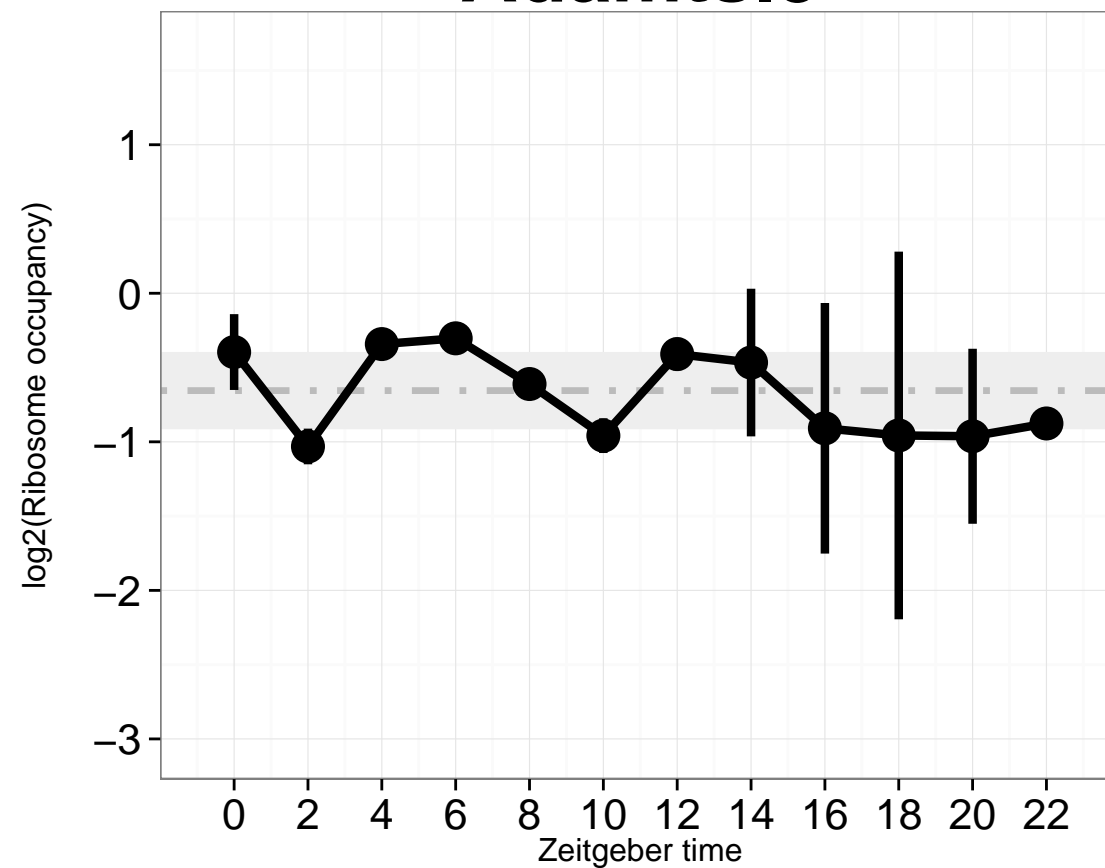

Supplement: Supplementary file 12995 [file 1]

## Yap1

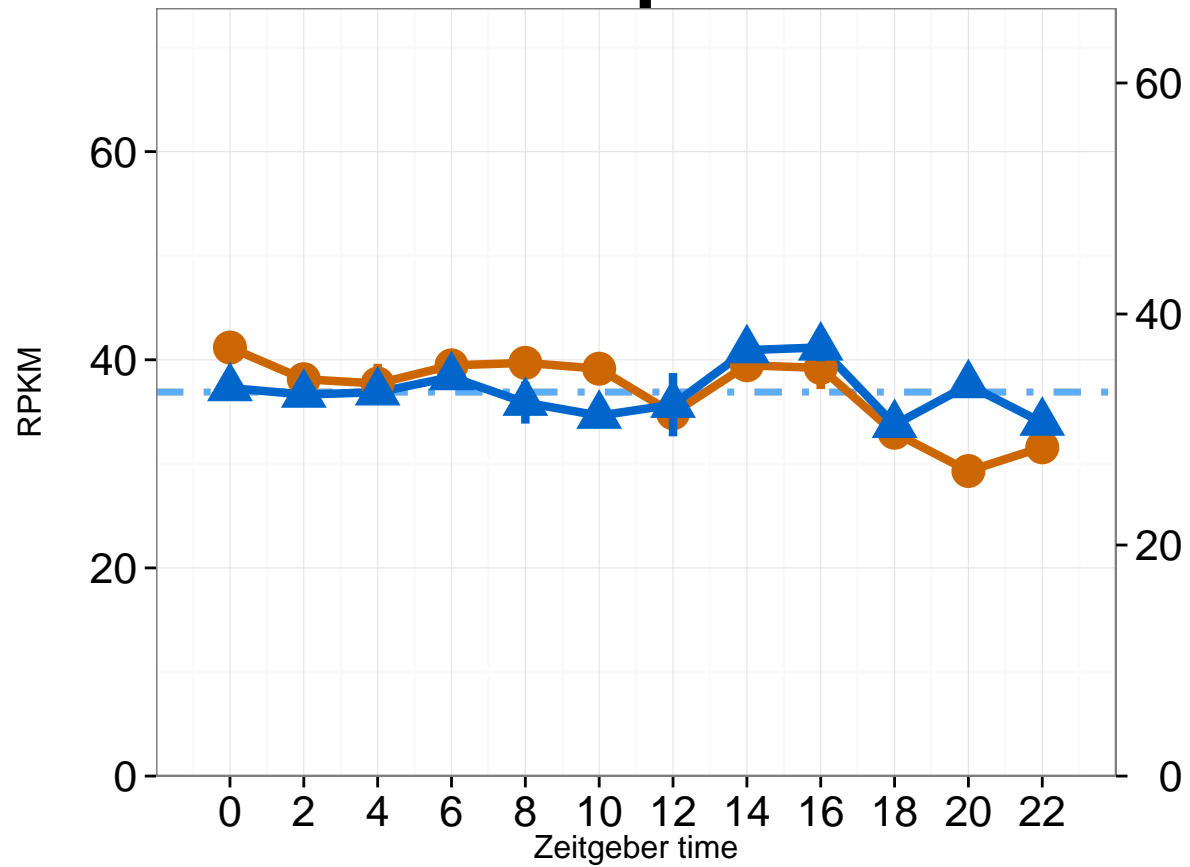

## Yap1

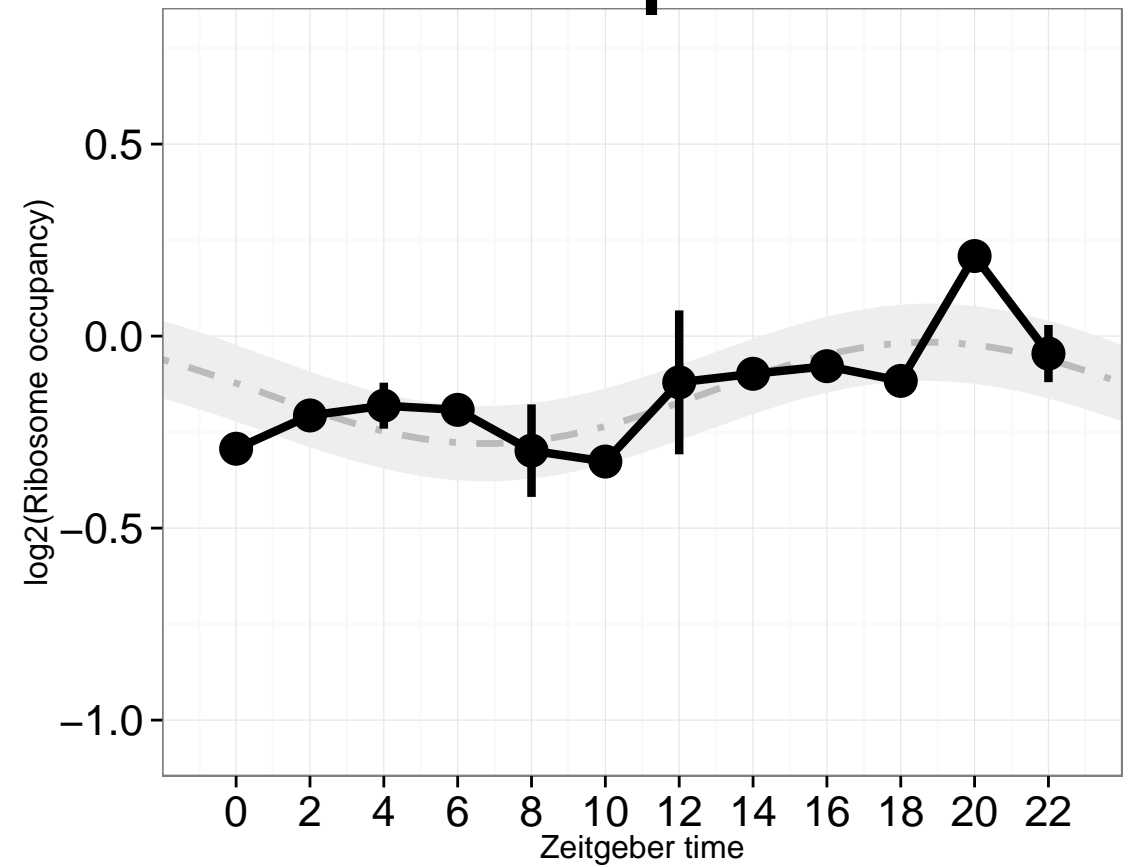

Supplement: Supplementary file 12996 [file 1]

## Olfml1

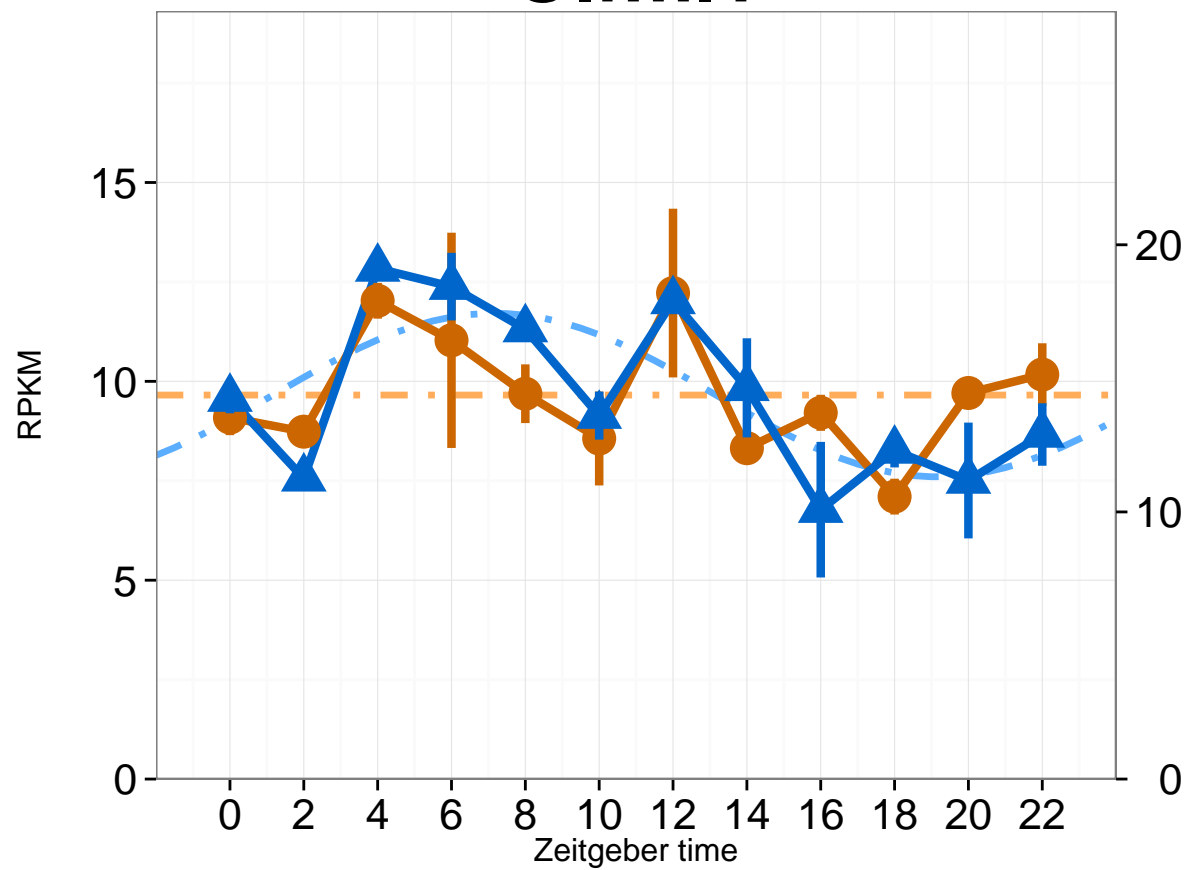

## Olfml1

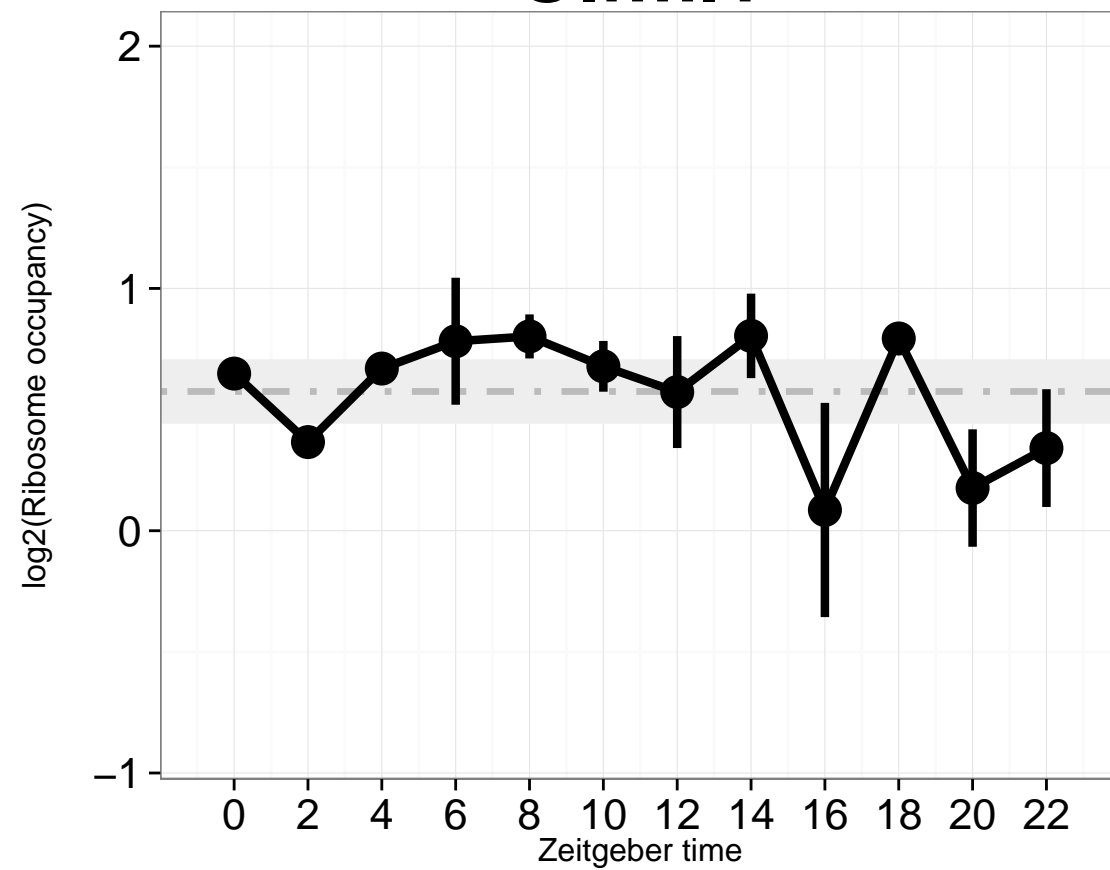

Supplement: Supplementary file 12997 [file 1]

# Hspa2

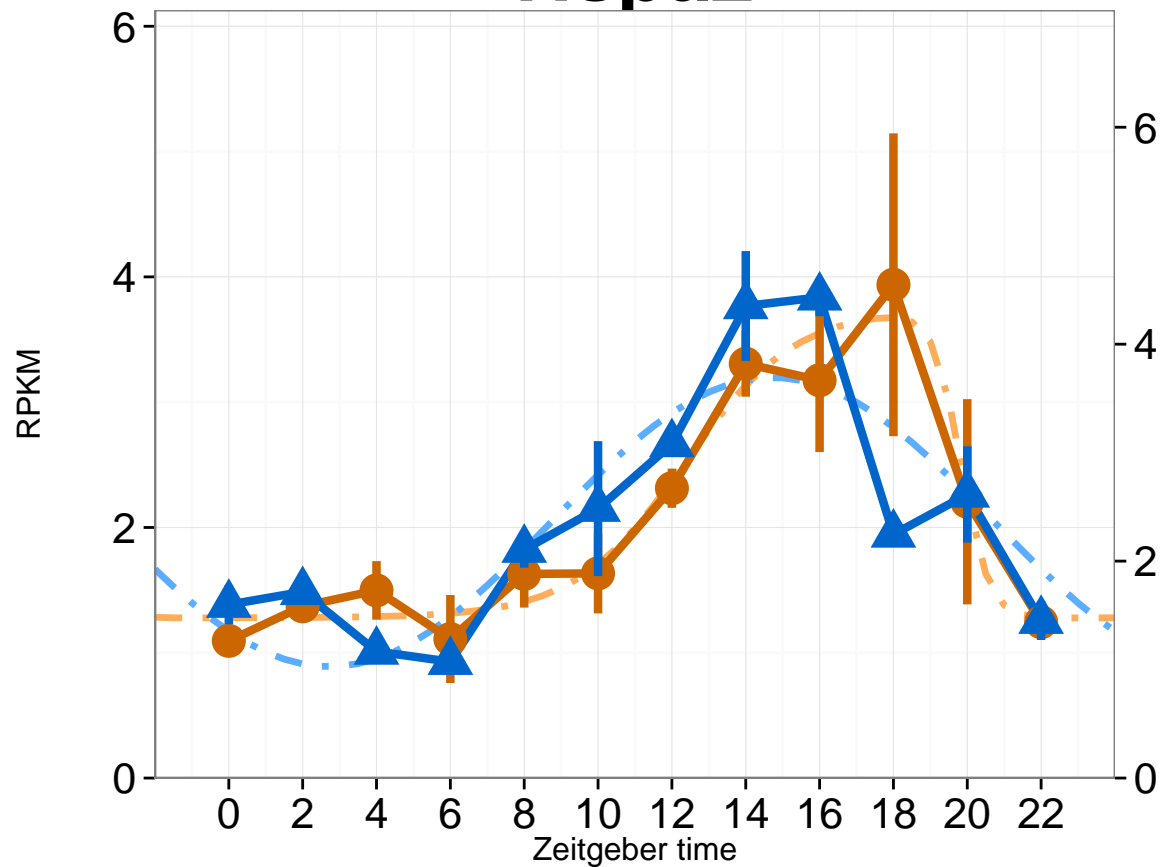

# Hspa2

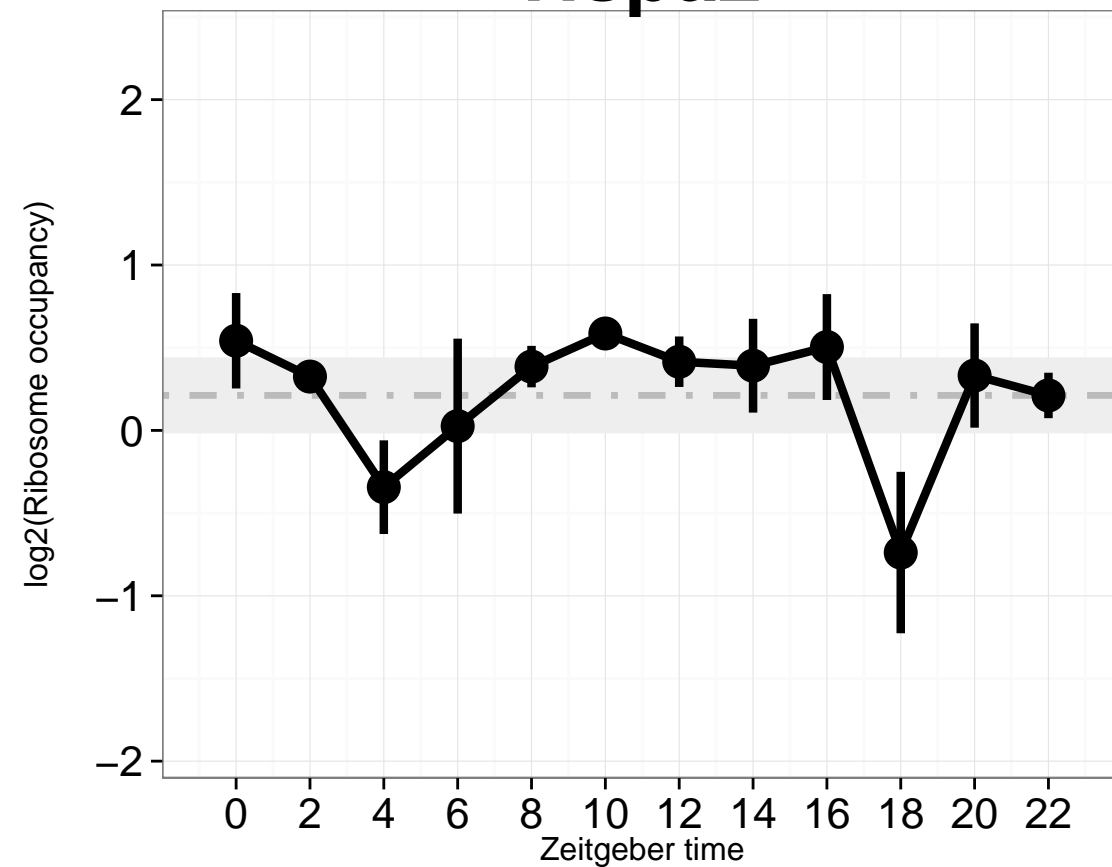

Supplement: Supplementary file 12998 [file 1]

# Tbc1d17

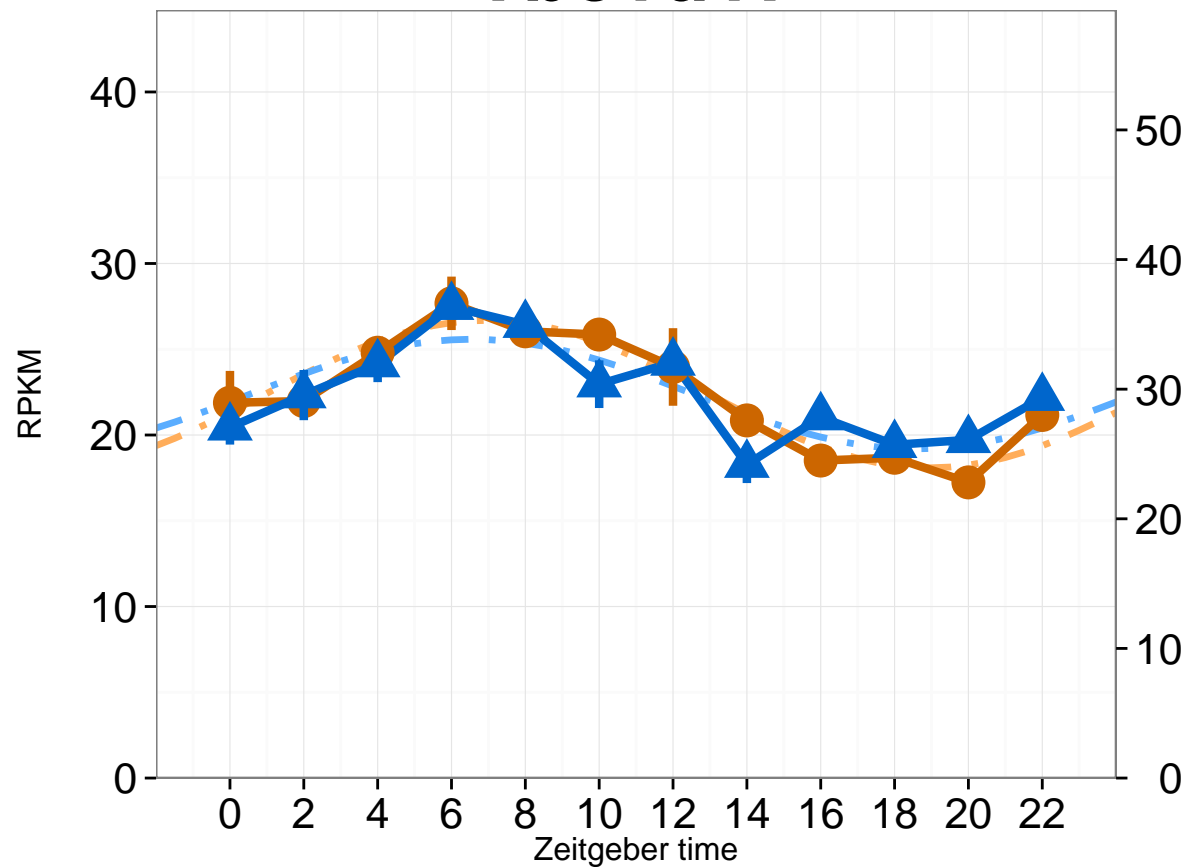

# Tbc1d17

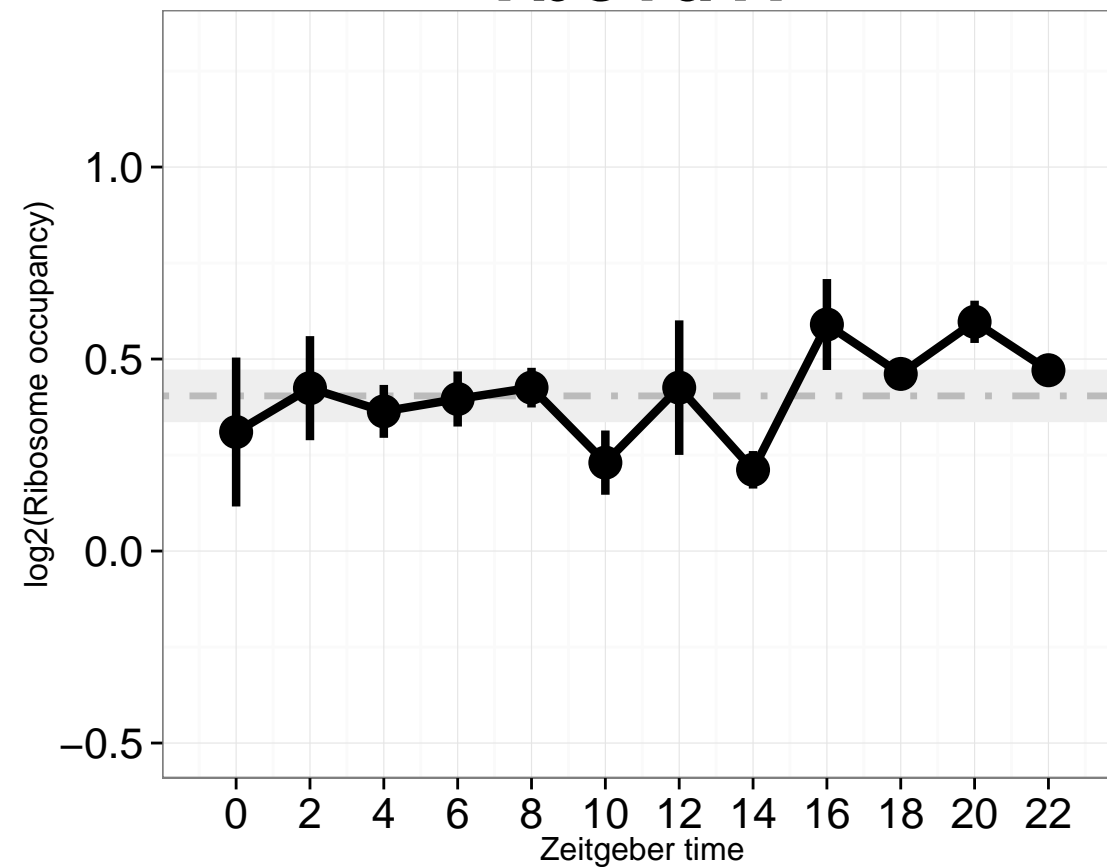

Supplement: Supplementary file 12999 [file 1]

# P2rx5

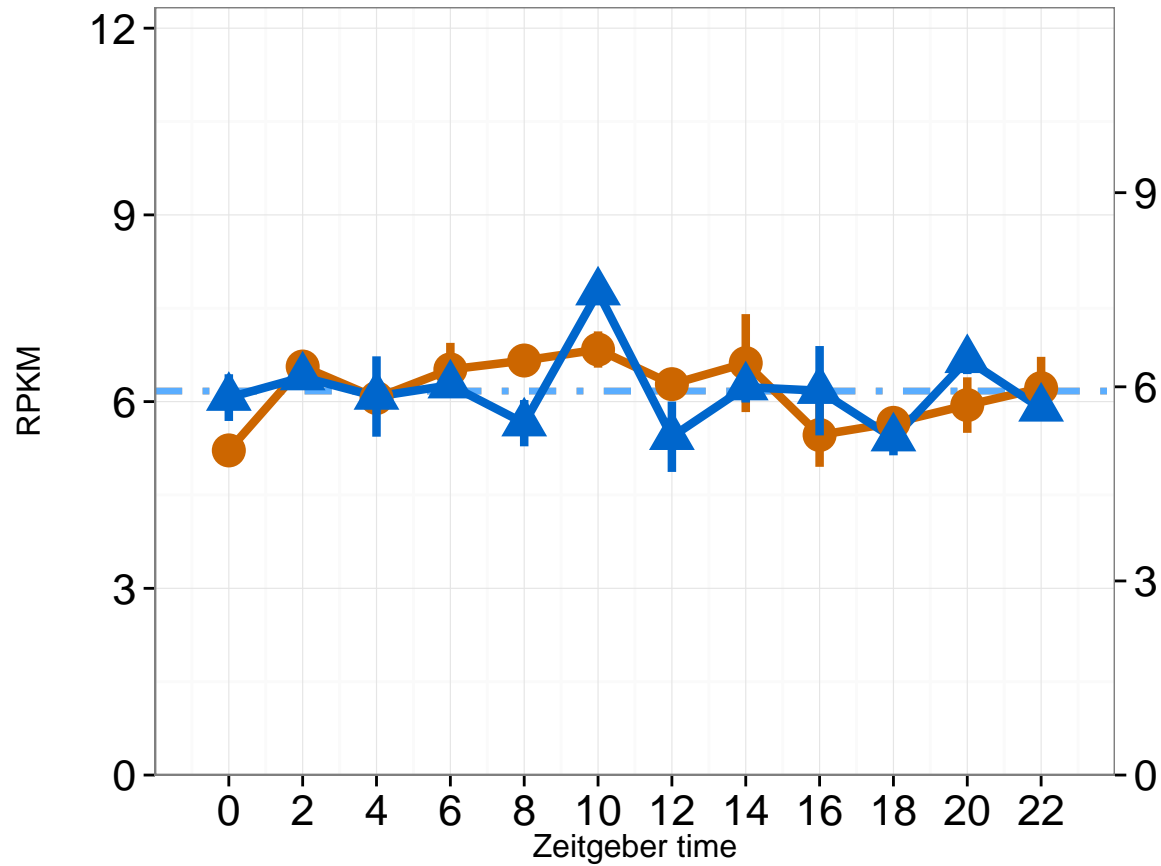

# P2rx5

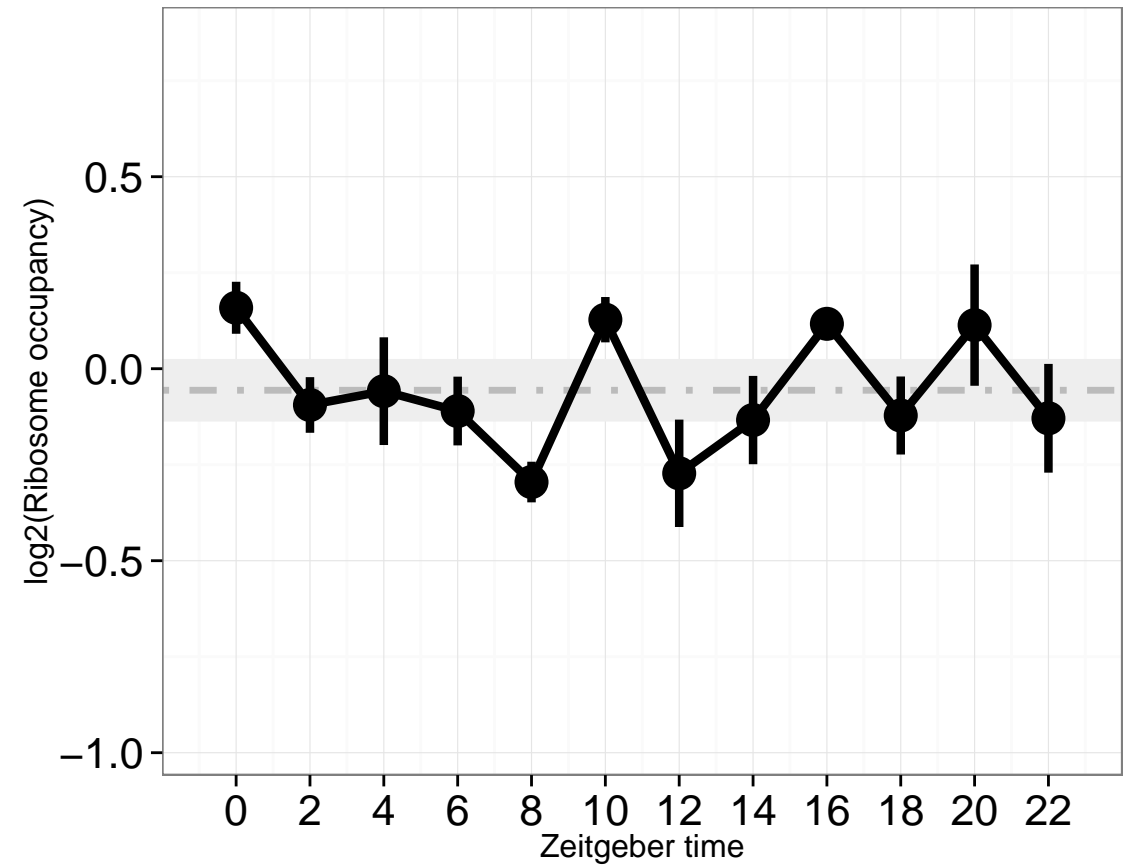

Supplement: Supplementary file 13000 [file 1]

## Slc22a26

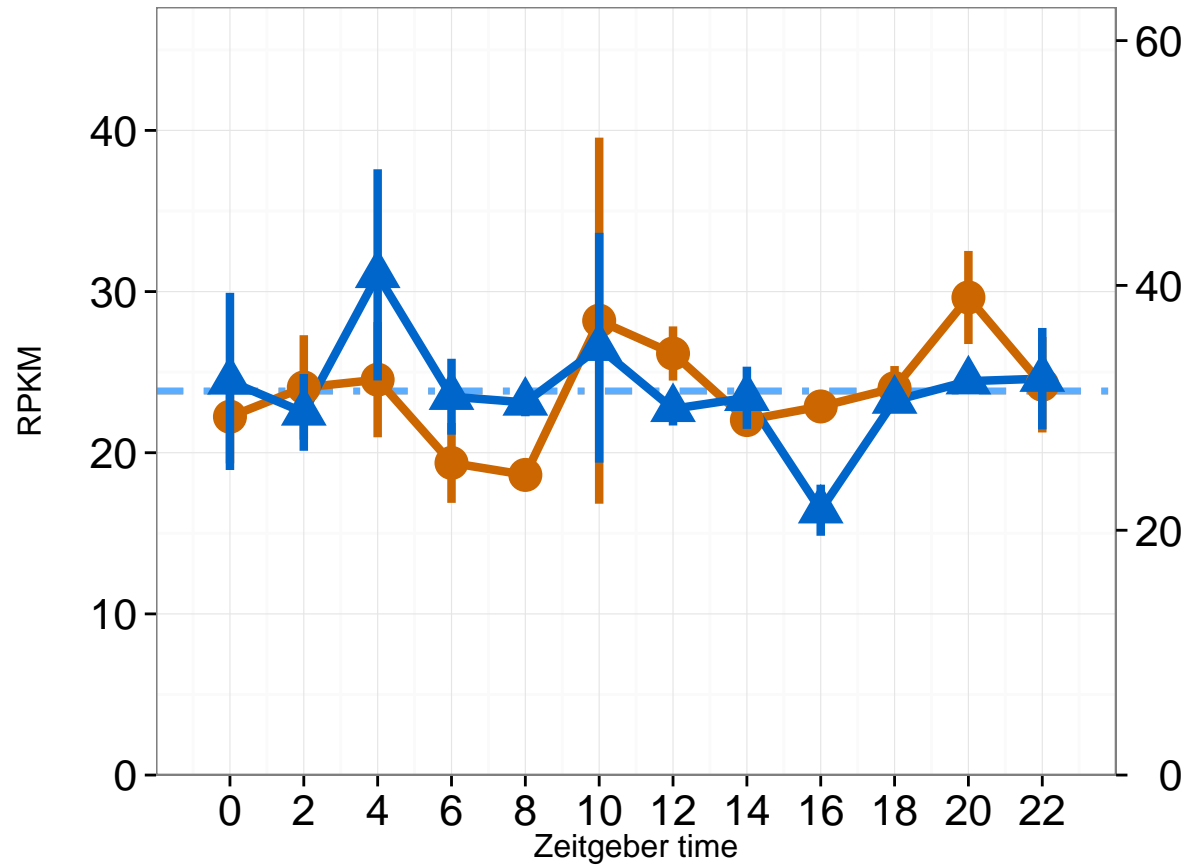

## Slc22a26

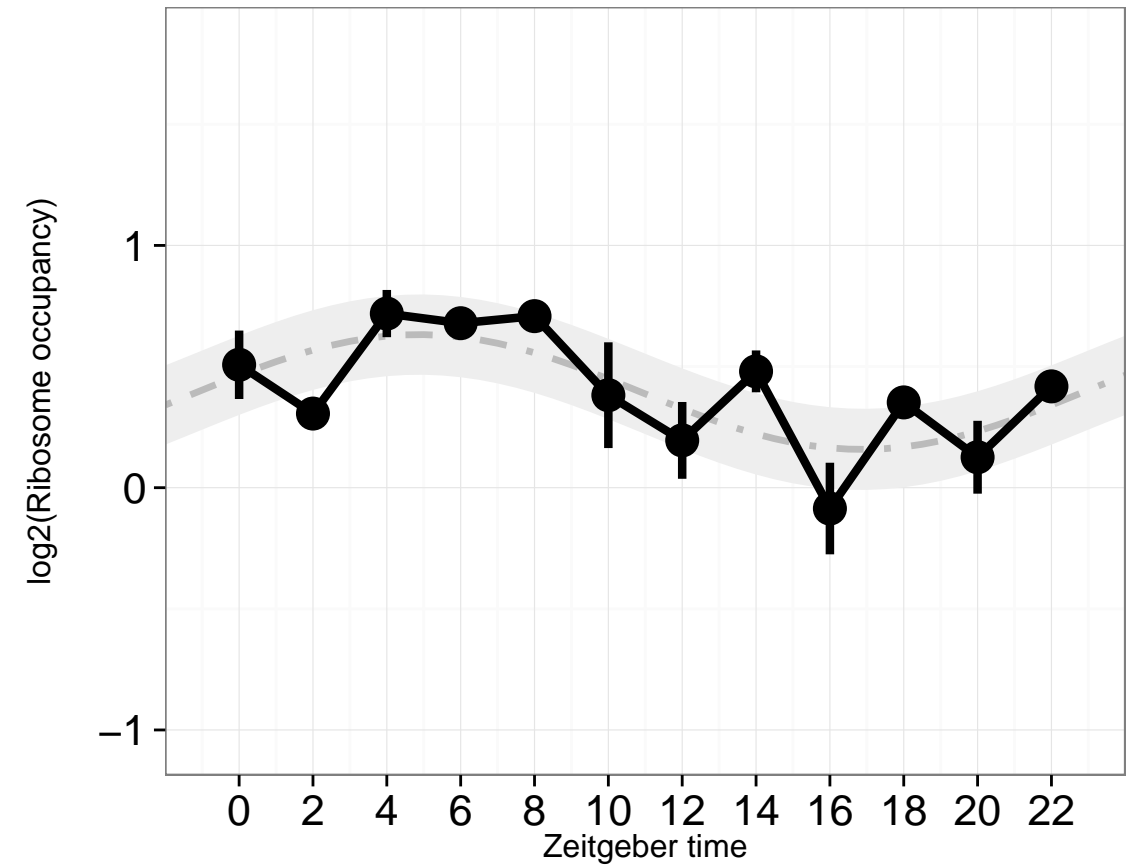

Supplement: Supplementary file 13001 [file 1]

# Cdca8

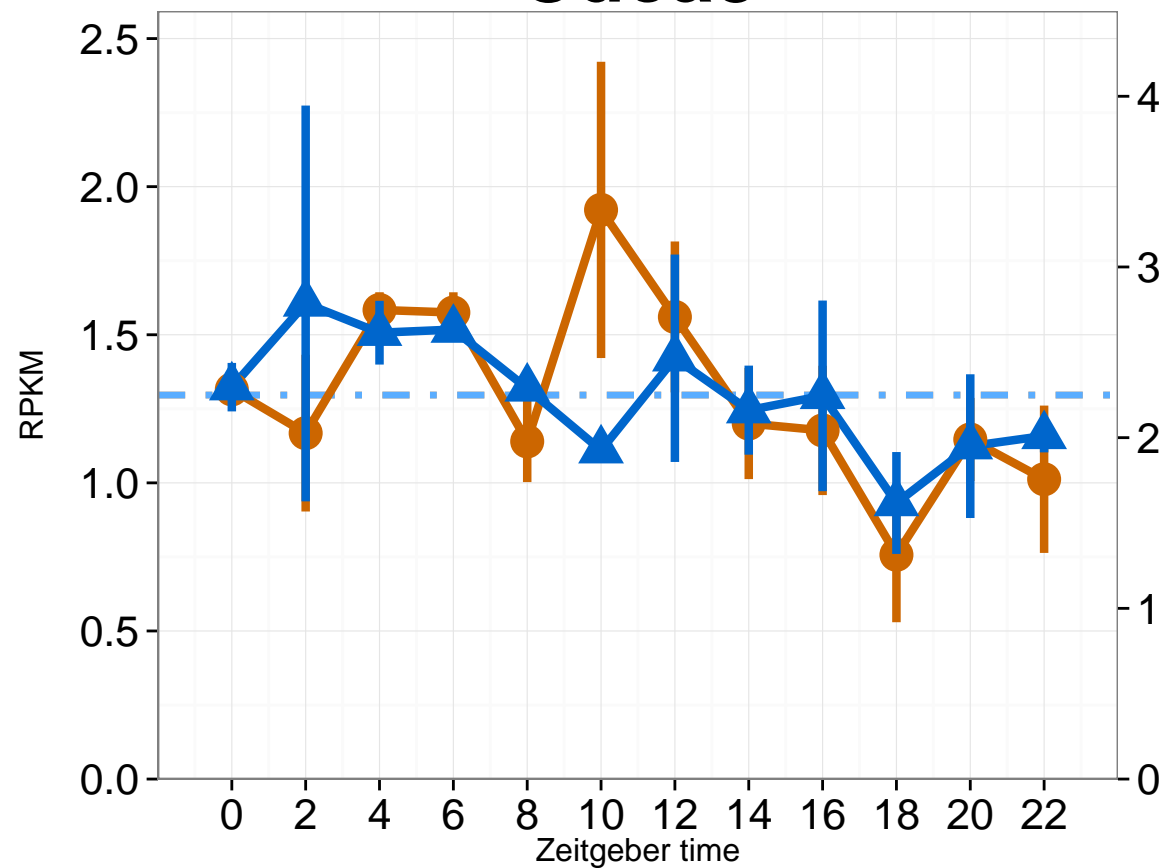

# Cdca8

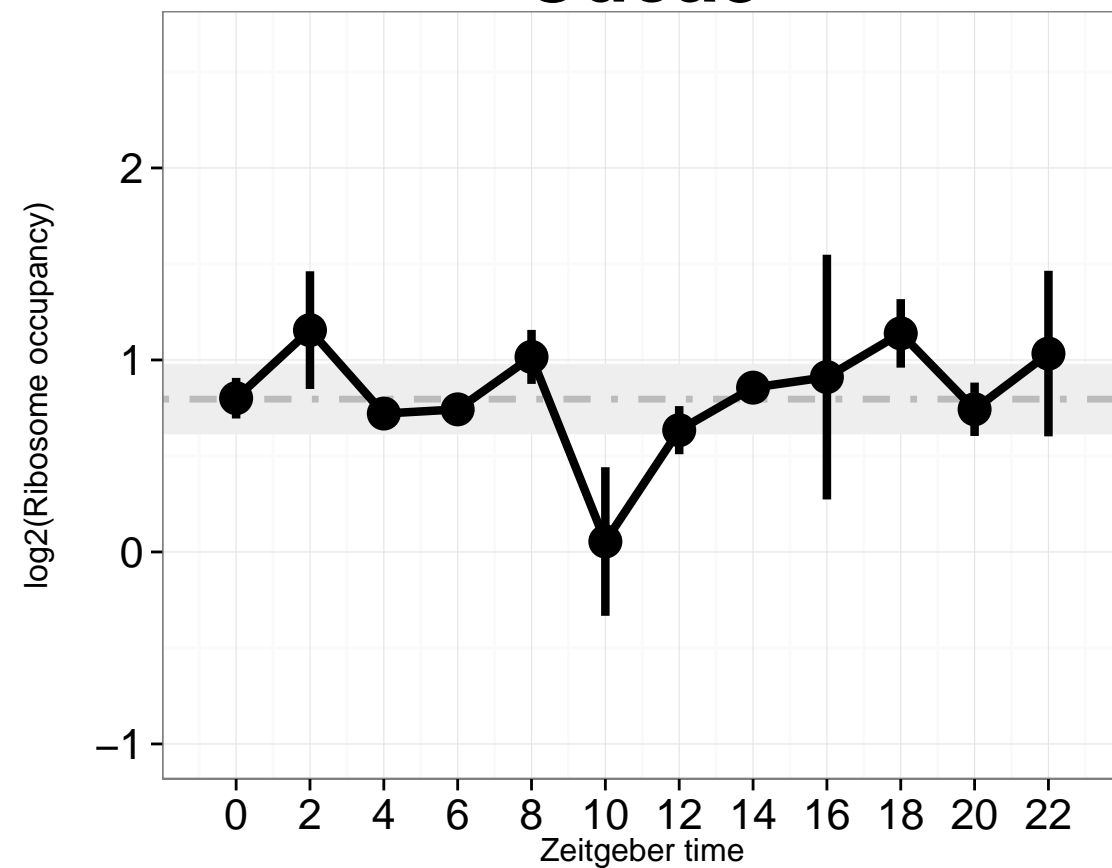

Supplement: Supplementary file 13002 [file 1]

# D10Wsu102e

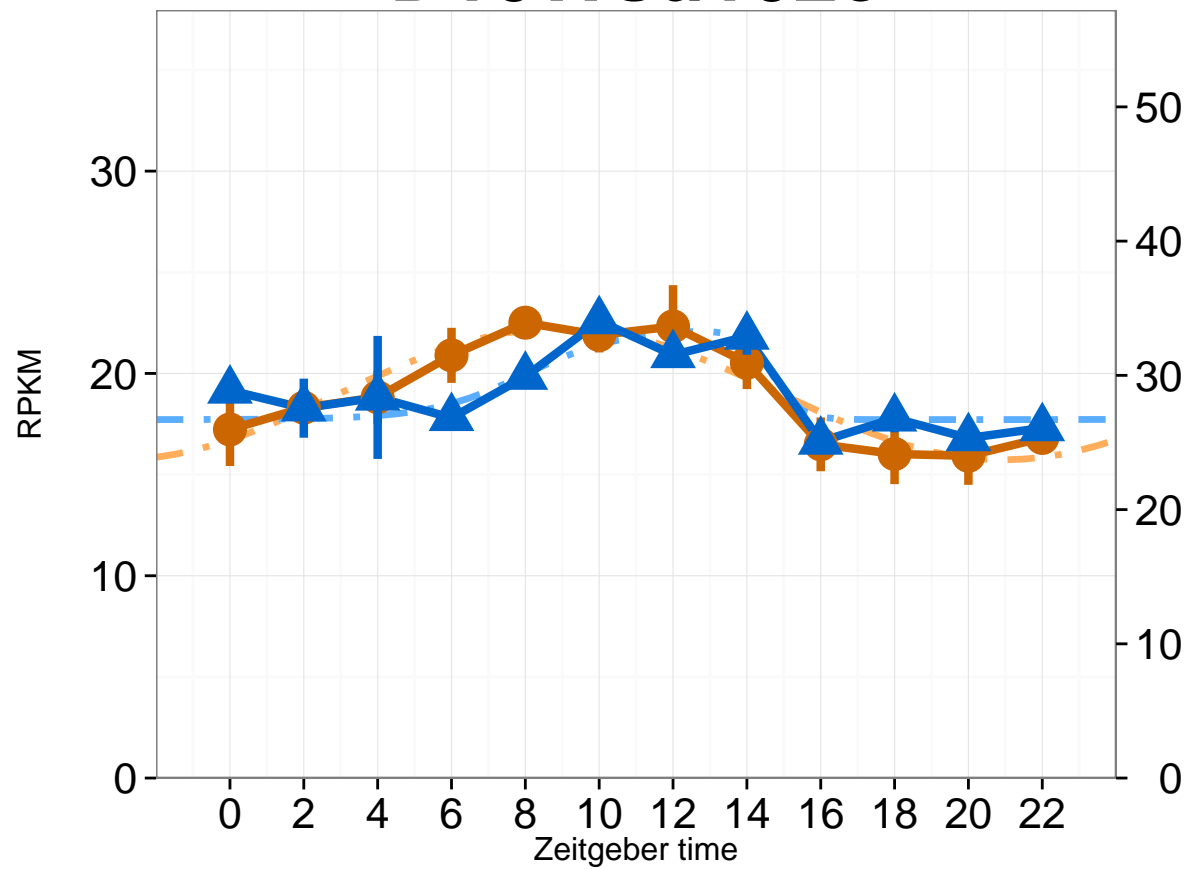

# D10Wsu102e

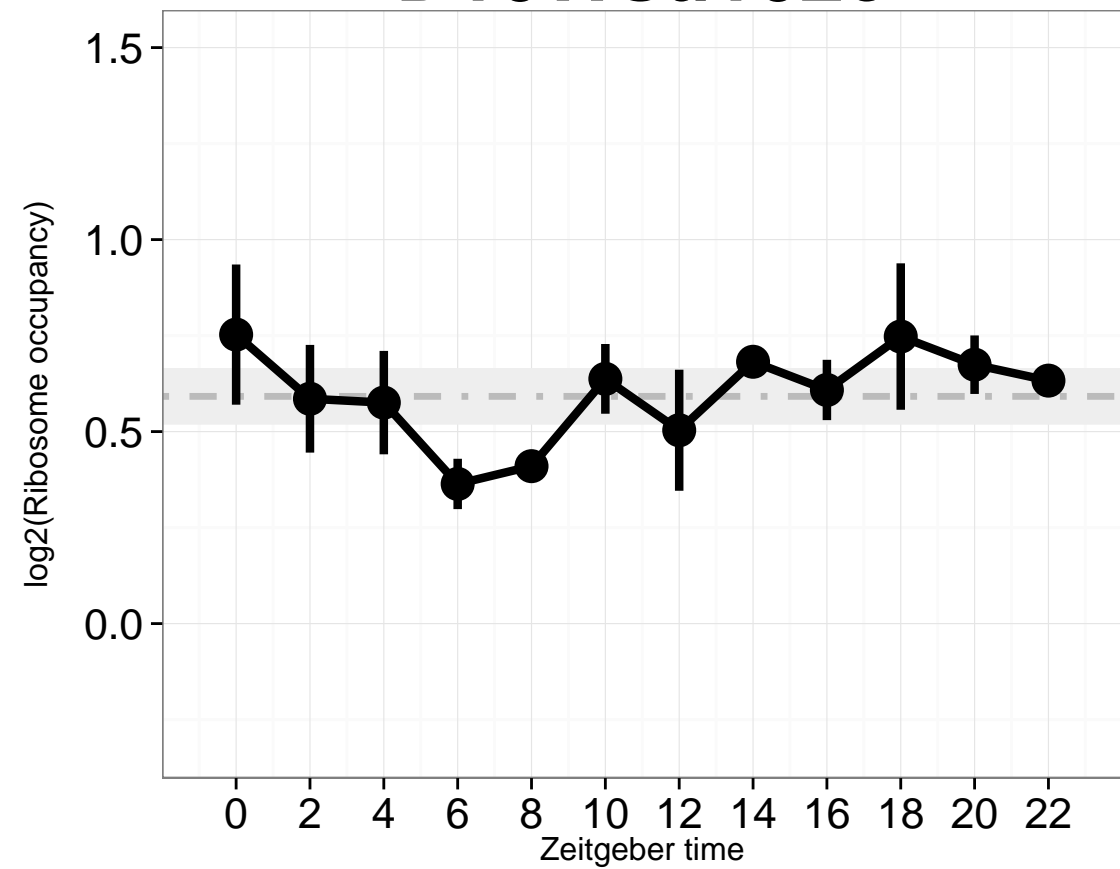

Supplement: Supplementary file 13003 [file 1]

## Fbxl8

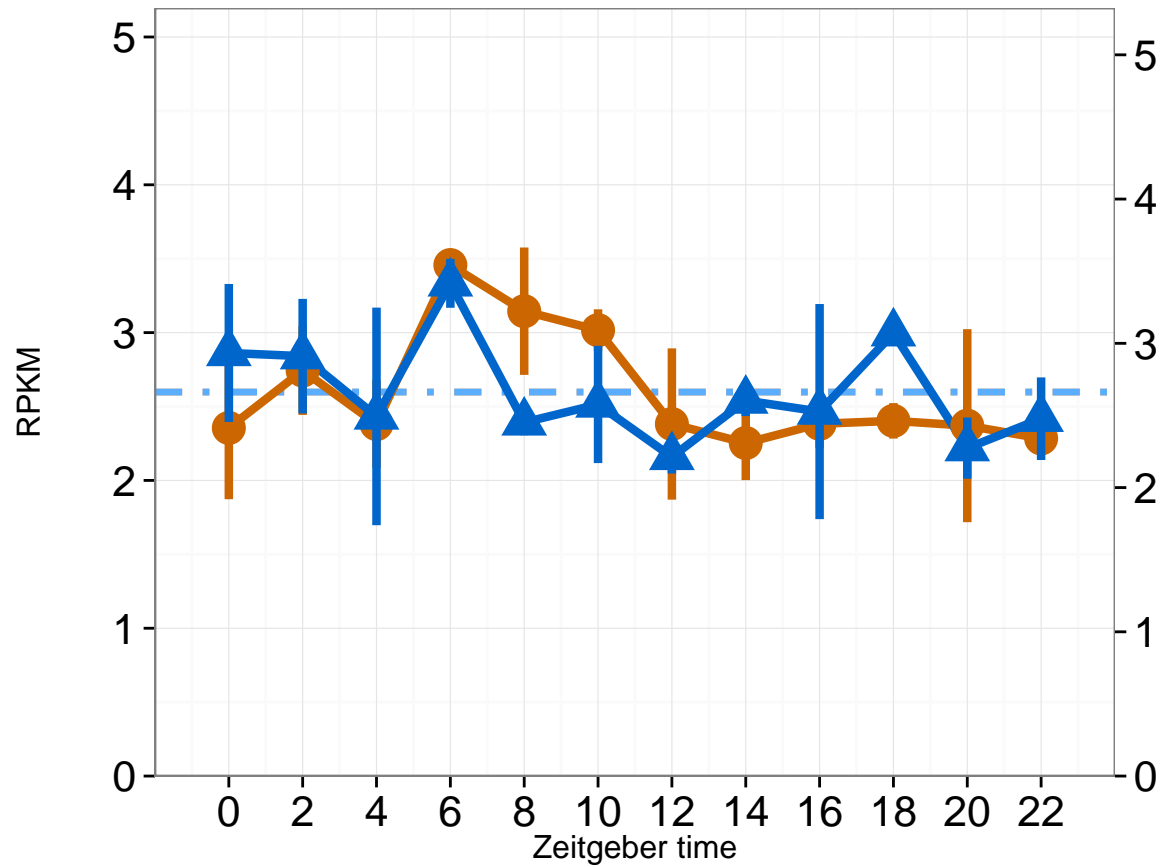

## Fbxl8

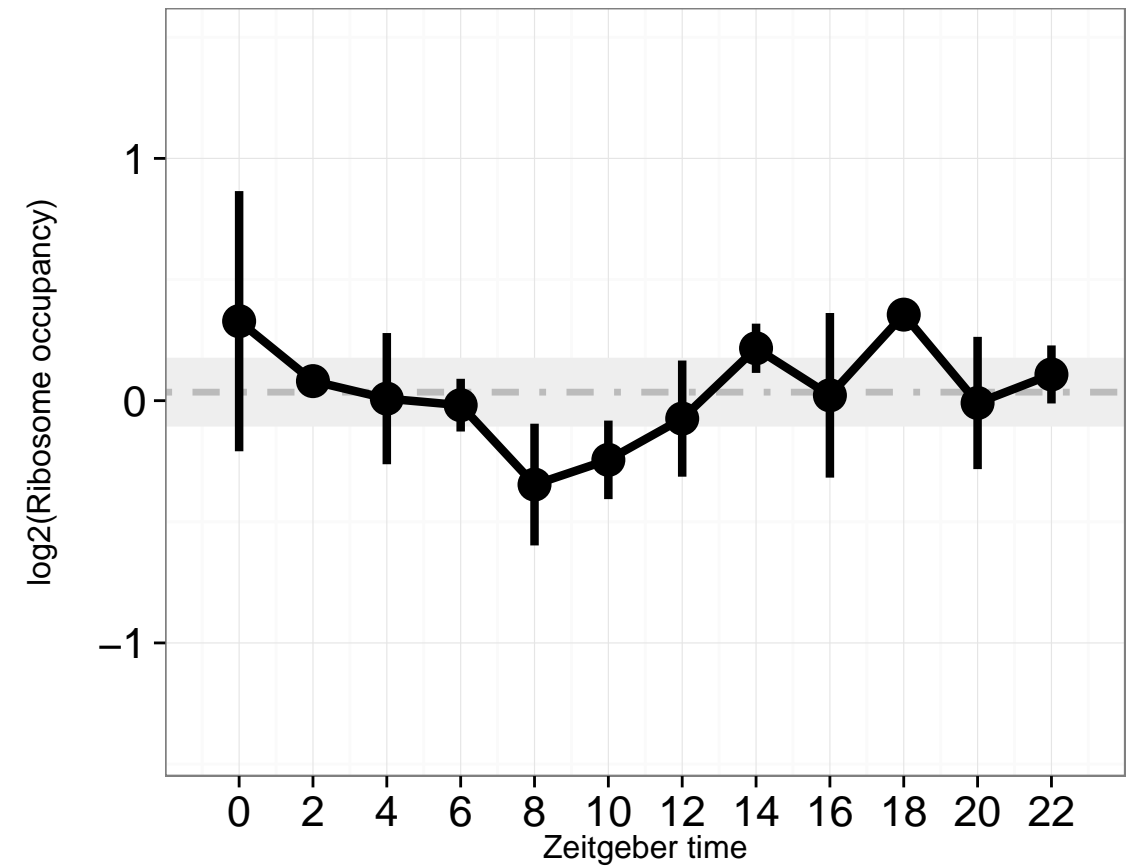

Supplement: Supplementary file 13004 [file 1]

## Atox1

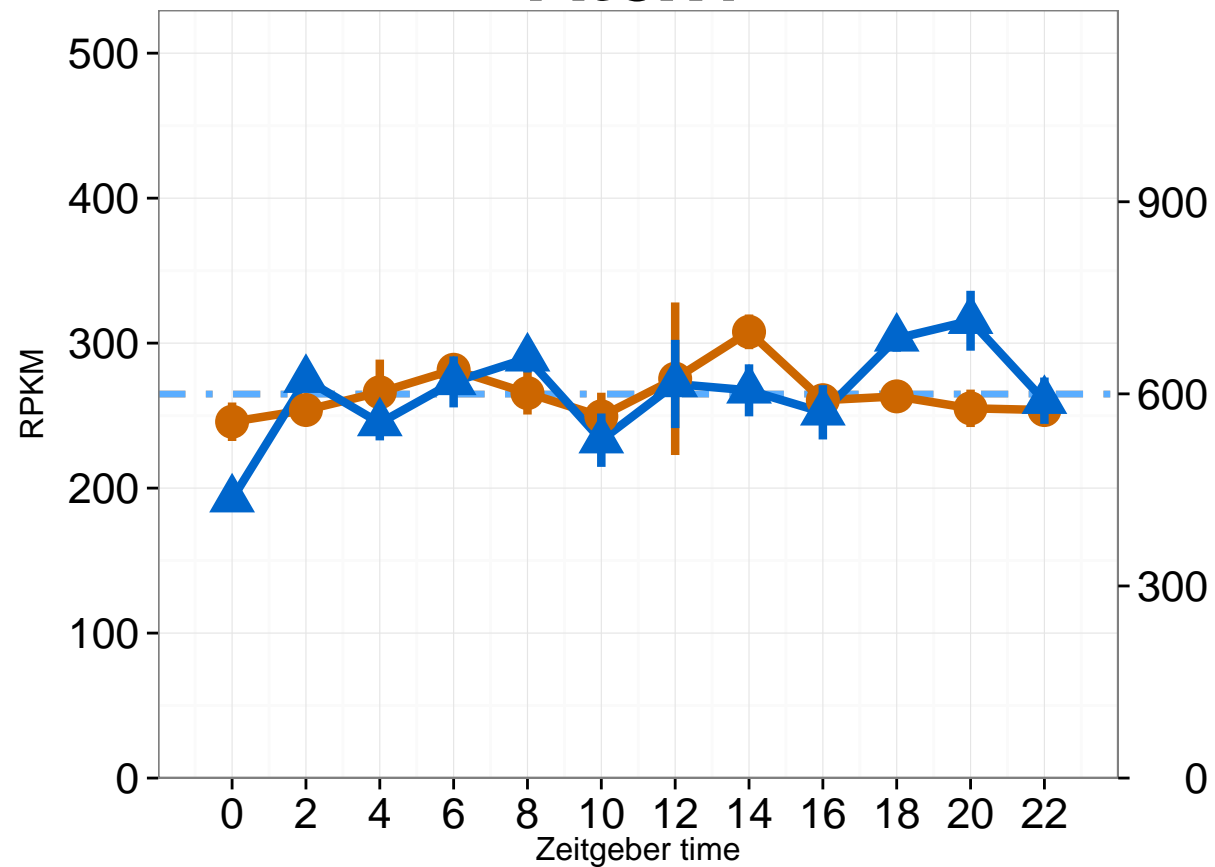

## Atox1

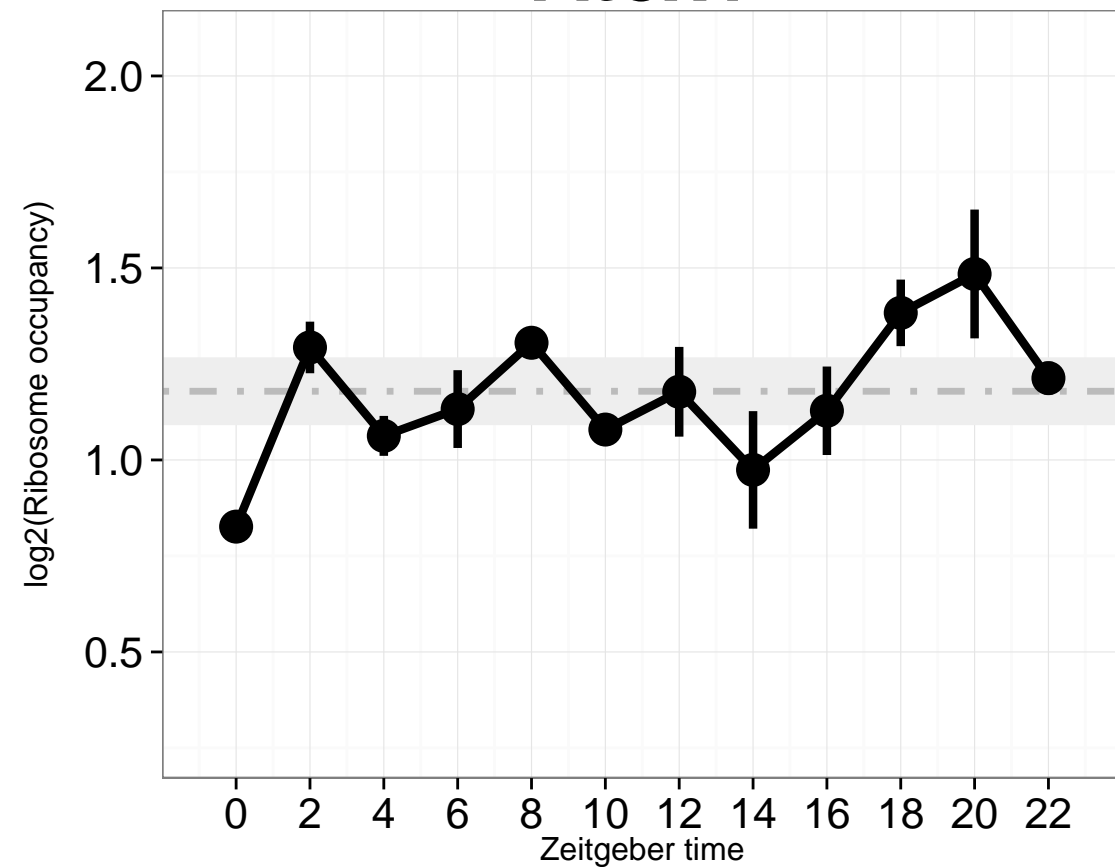

Supplement: Supplementary file 13005 [file 1]

## Nek8

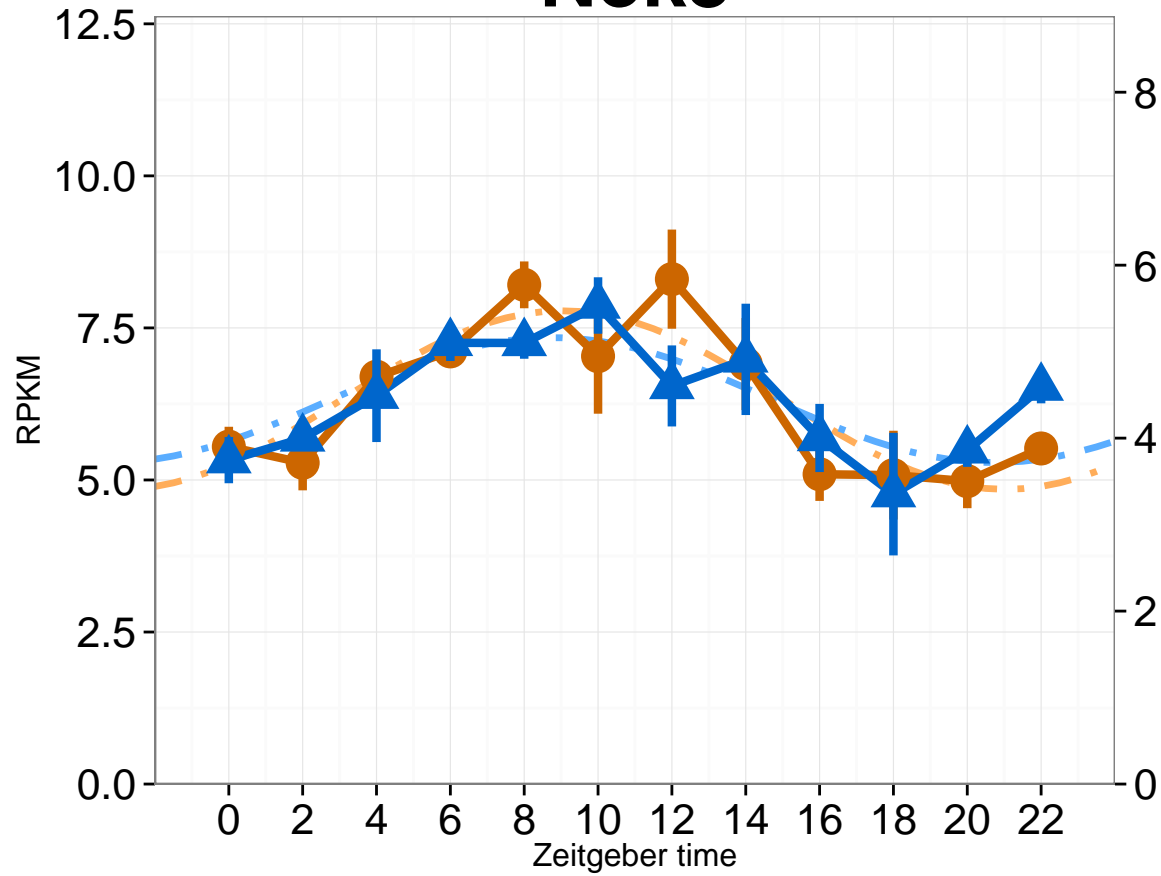

## Nek8

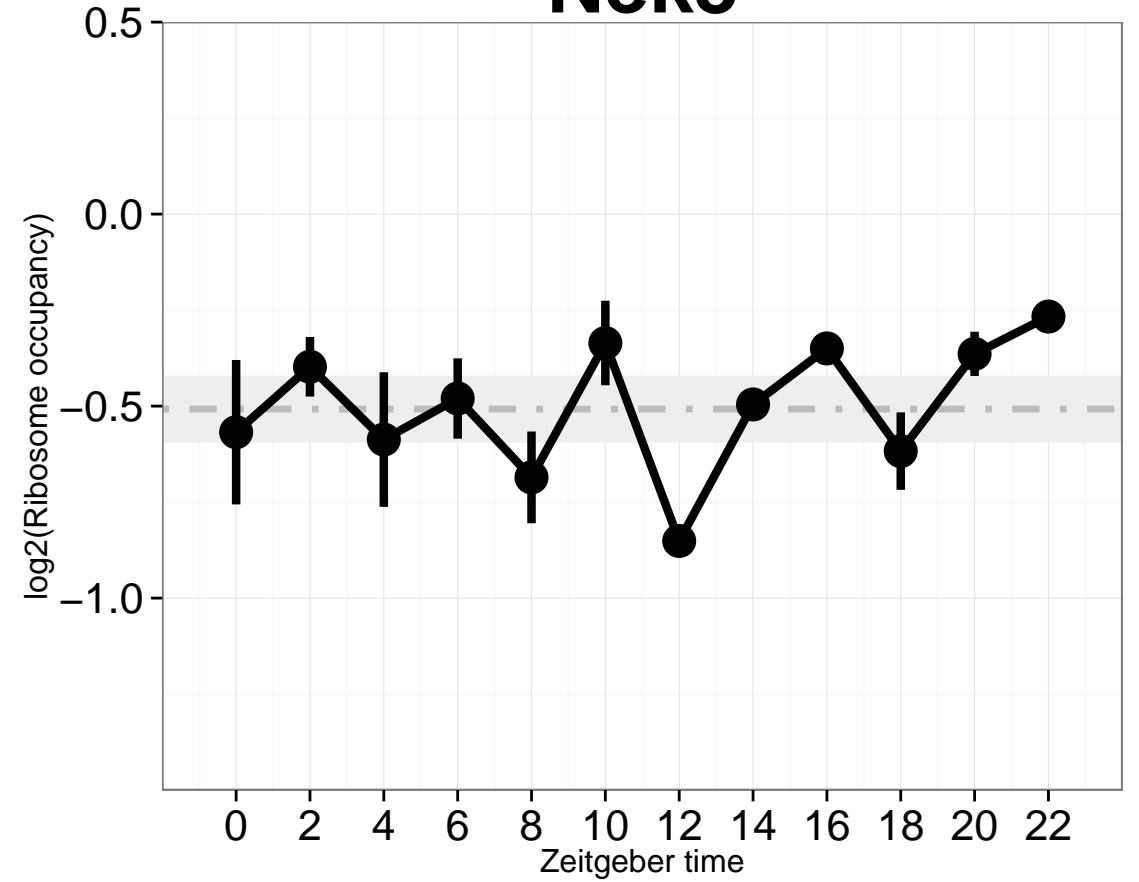

Supplement: Supplementary file 13006 [file 1]

# Fam69a

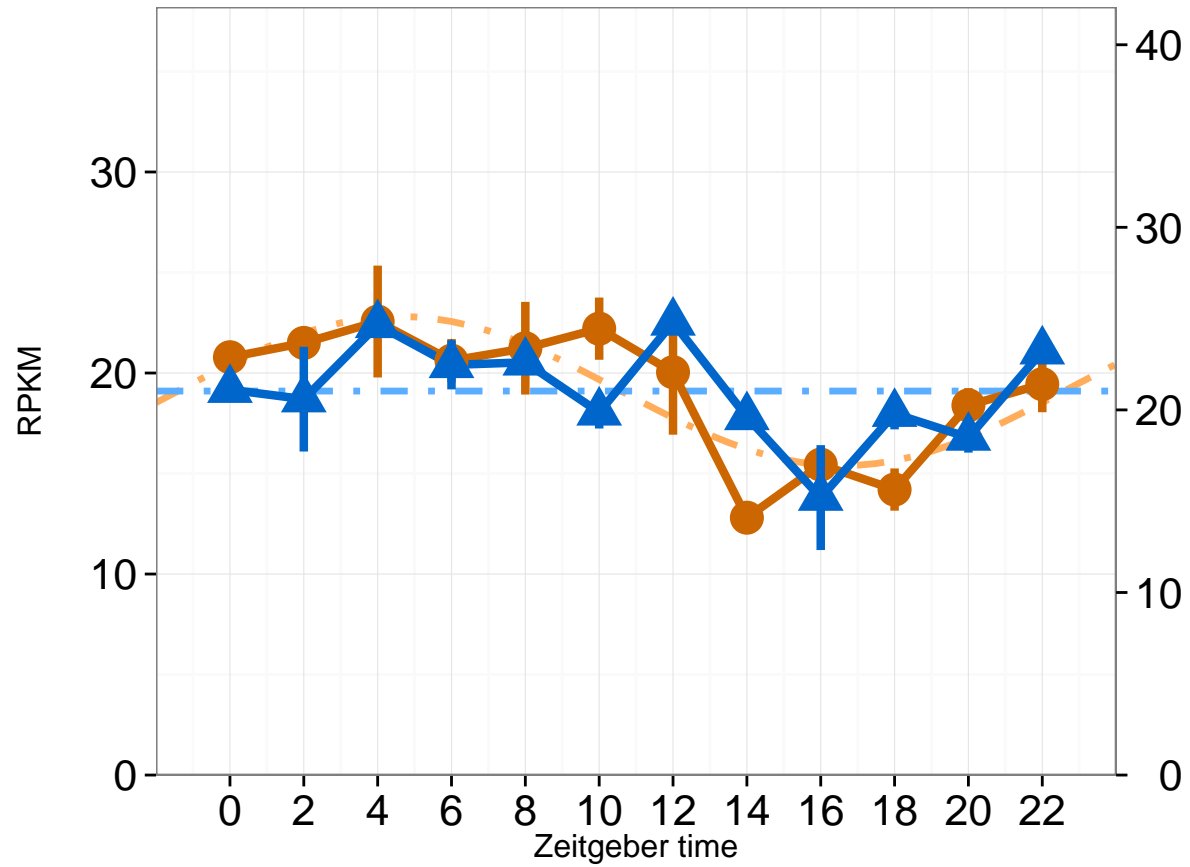

# Fam69a

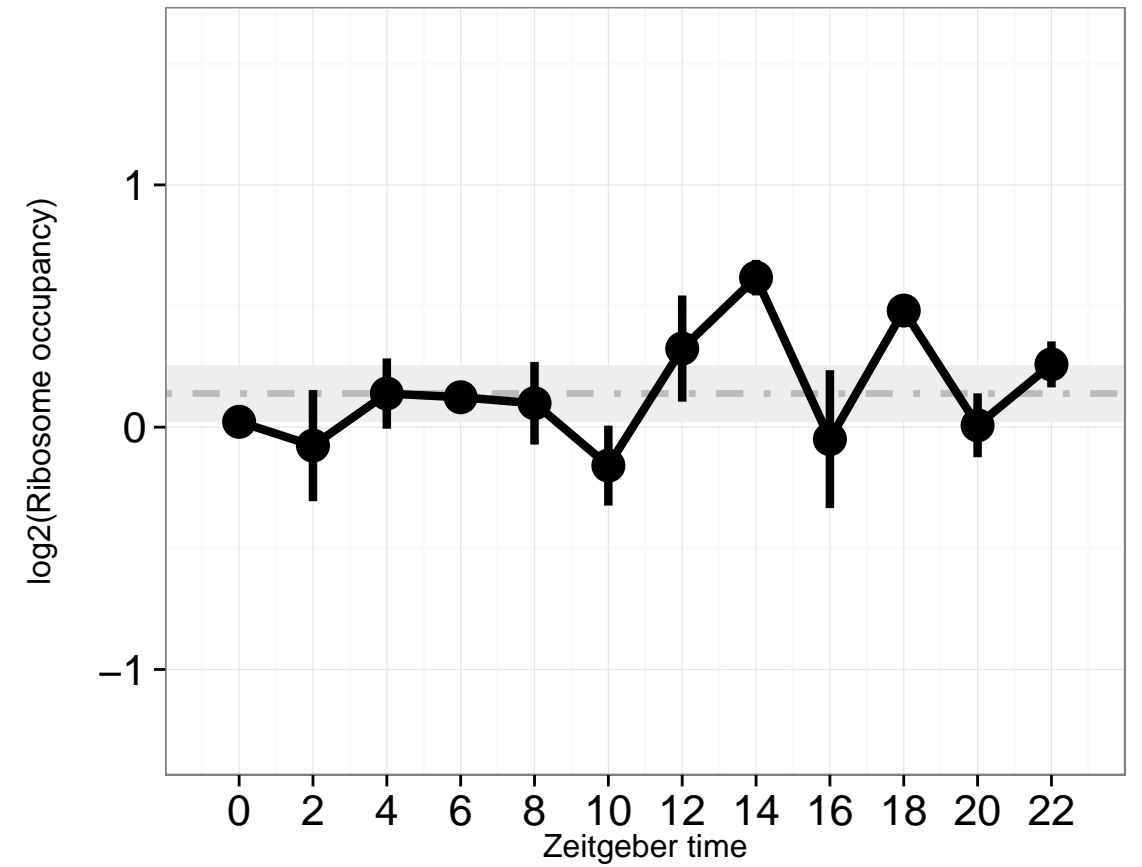

Supplement: Supplementary file 13007 [file 1]

# Pja1

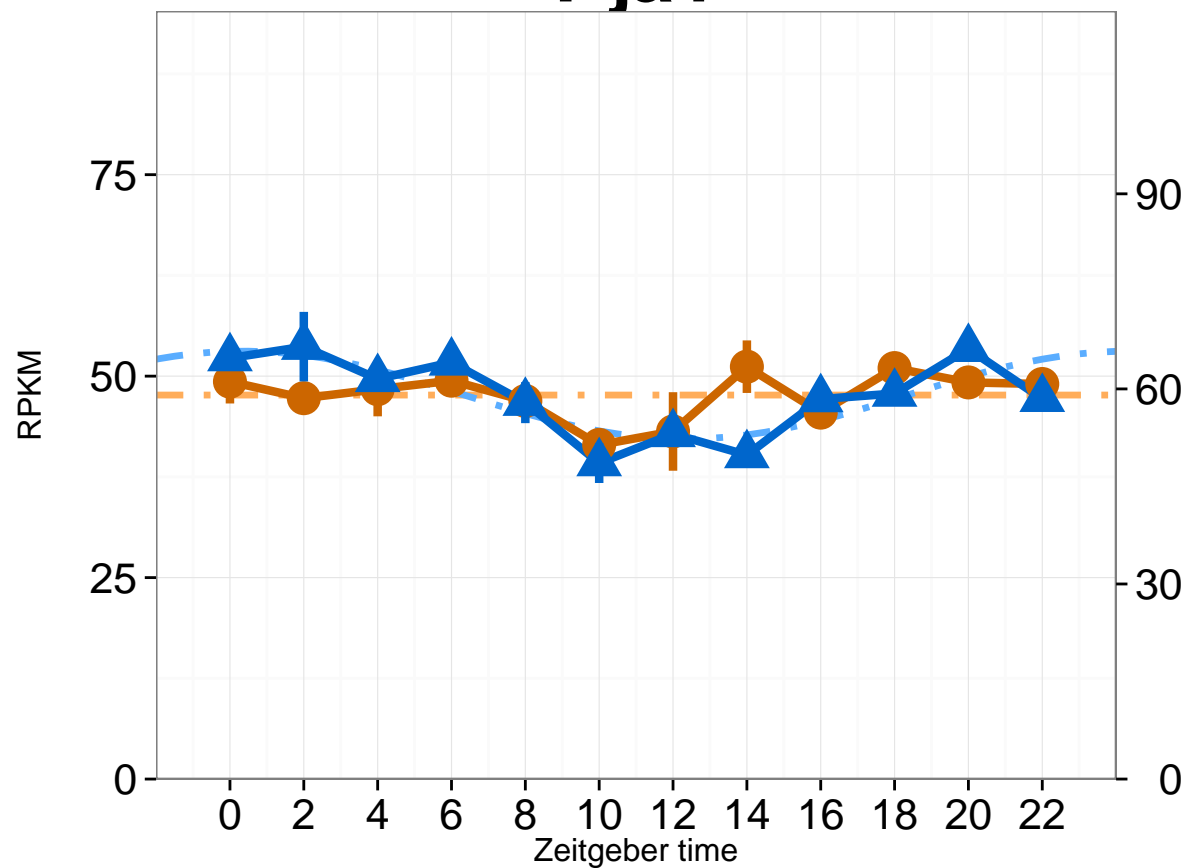

# Pja1

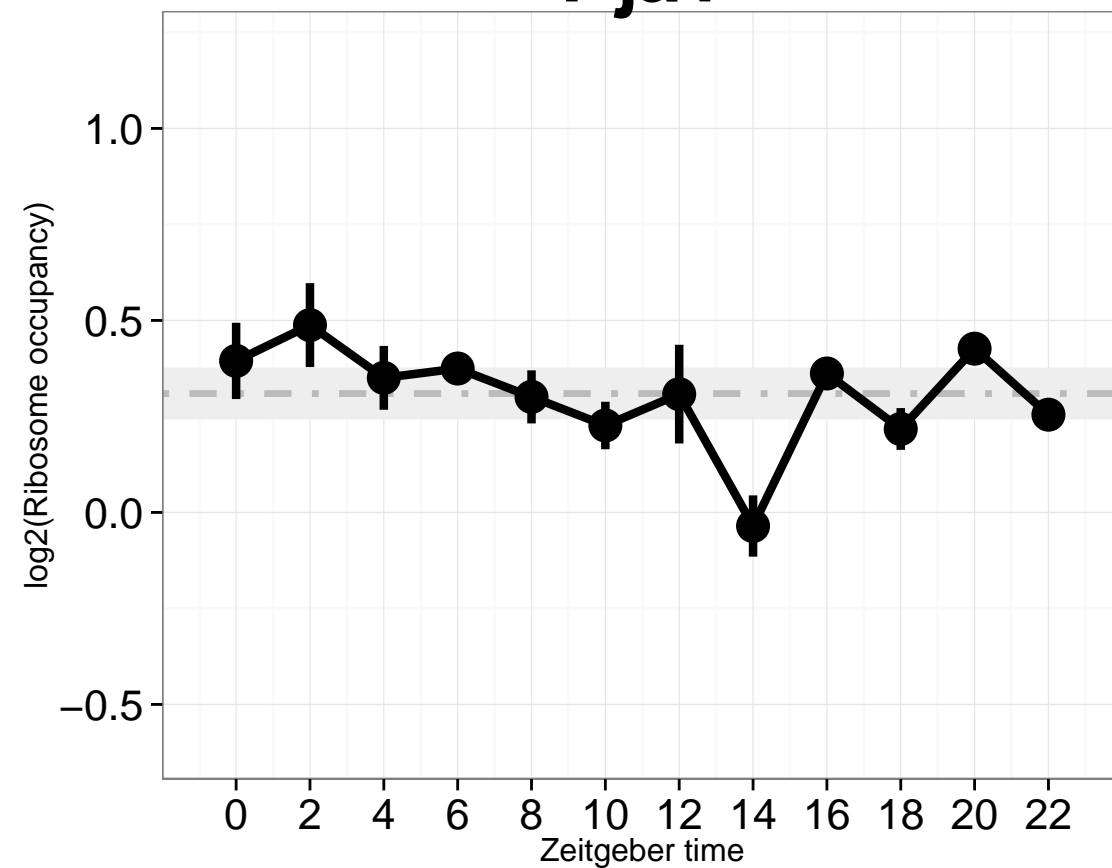

Supplement: Supplementary file 13009 [file 1]

# Zfp709

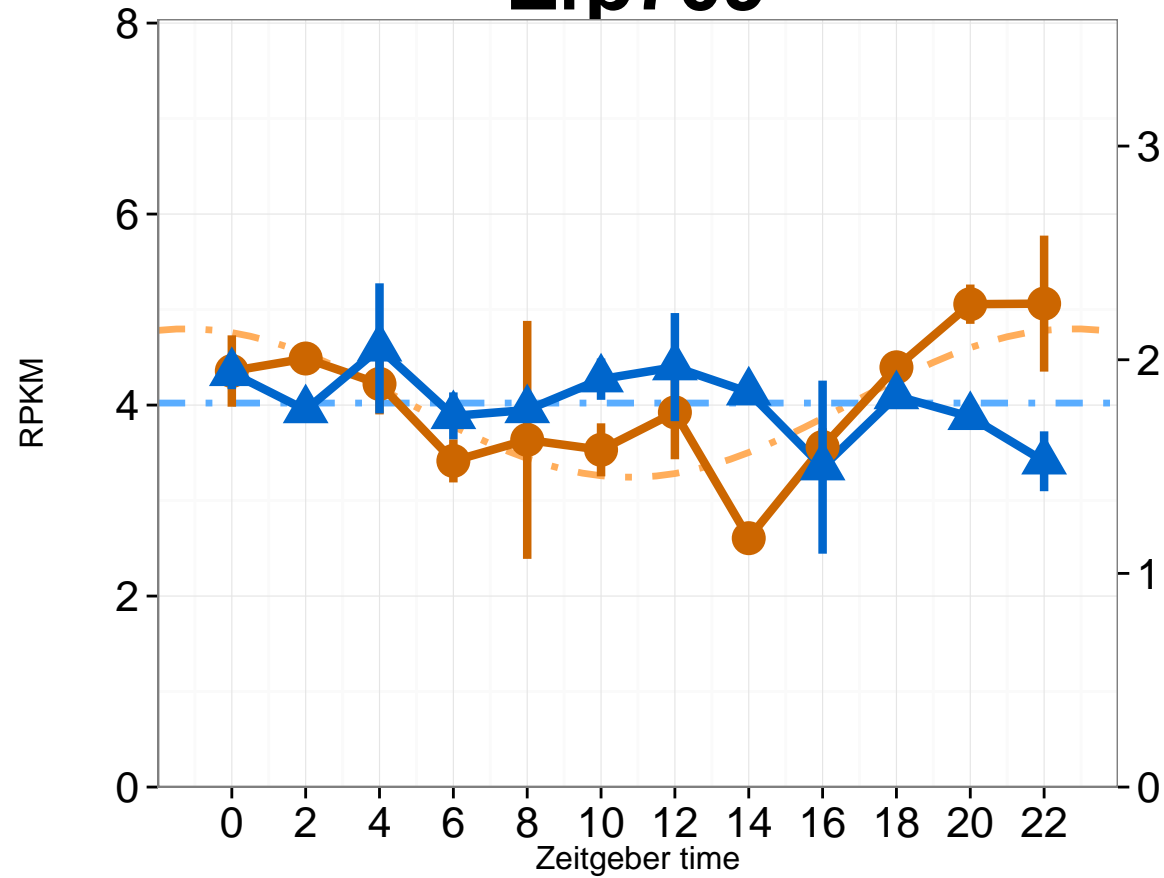

# Zfp709

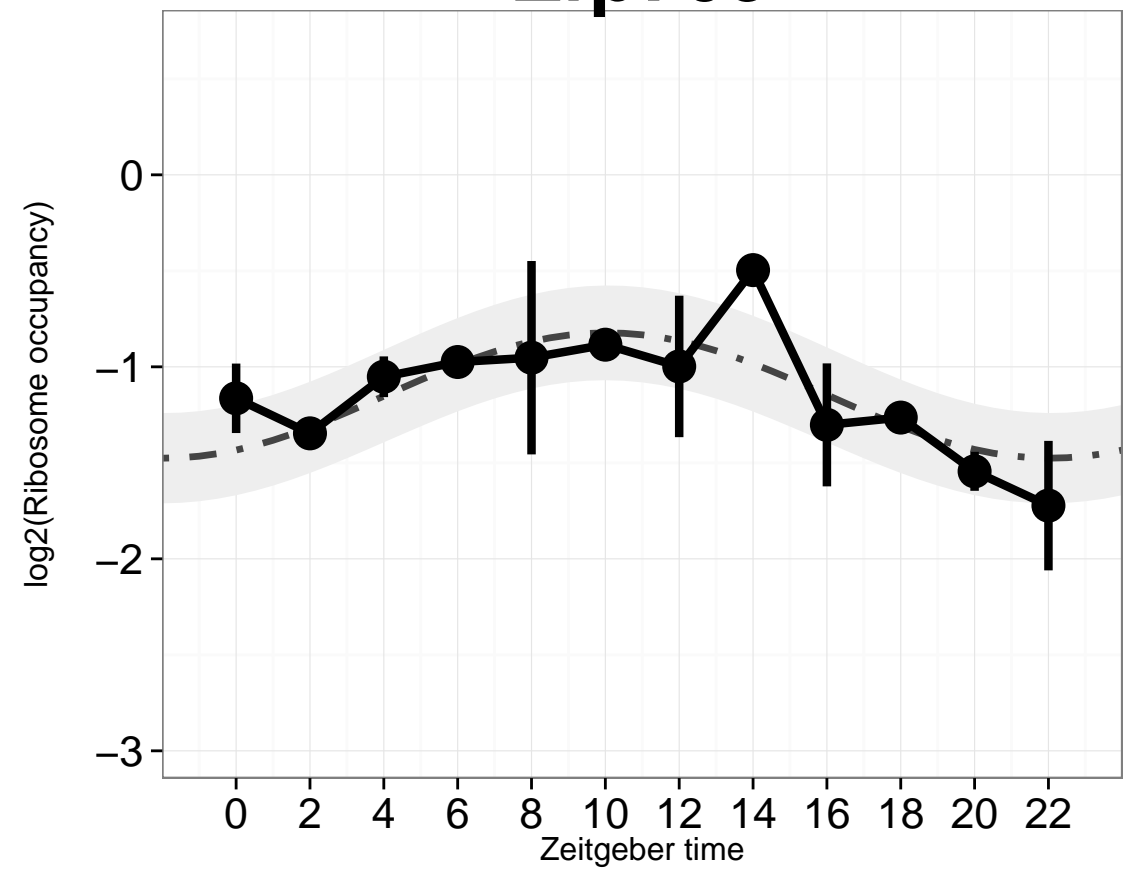

Supplement: Supplementary file 13010 [file 1]

# Col1a2

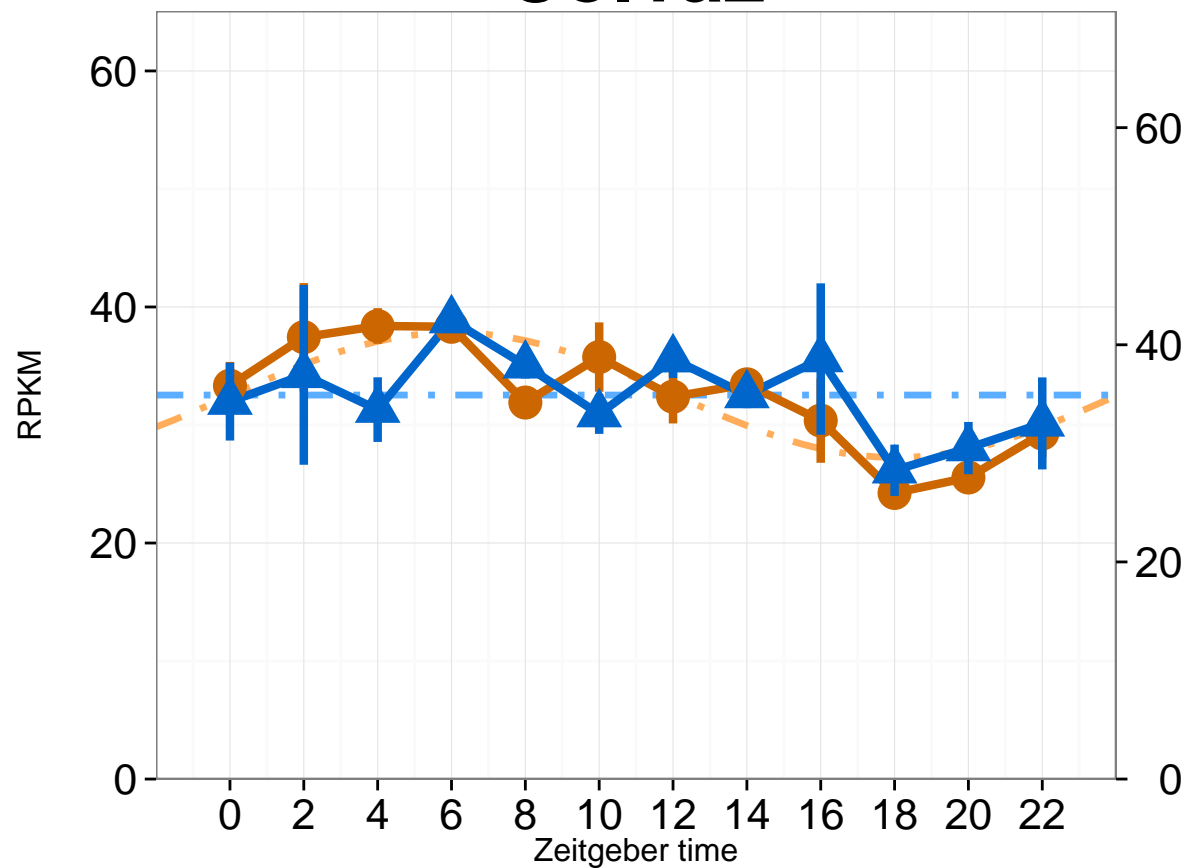

# Col1a2

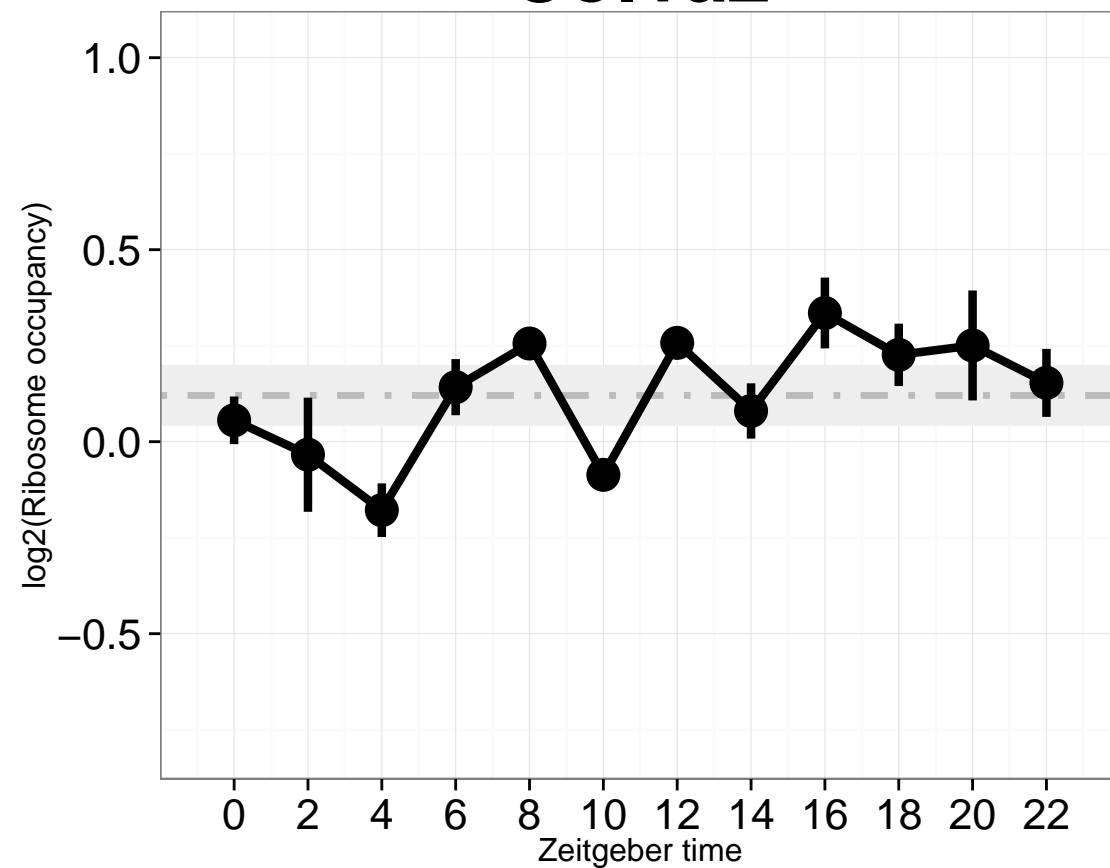

Supplement: Supplementary file 13011 [file 1]

## Nktr

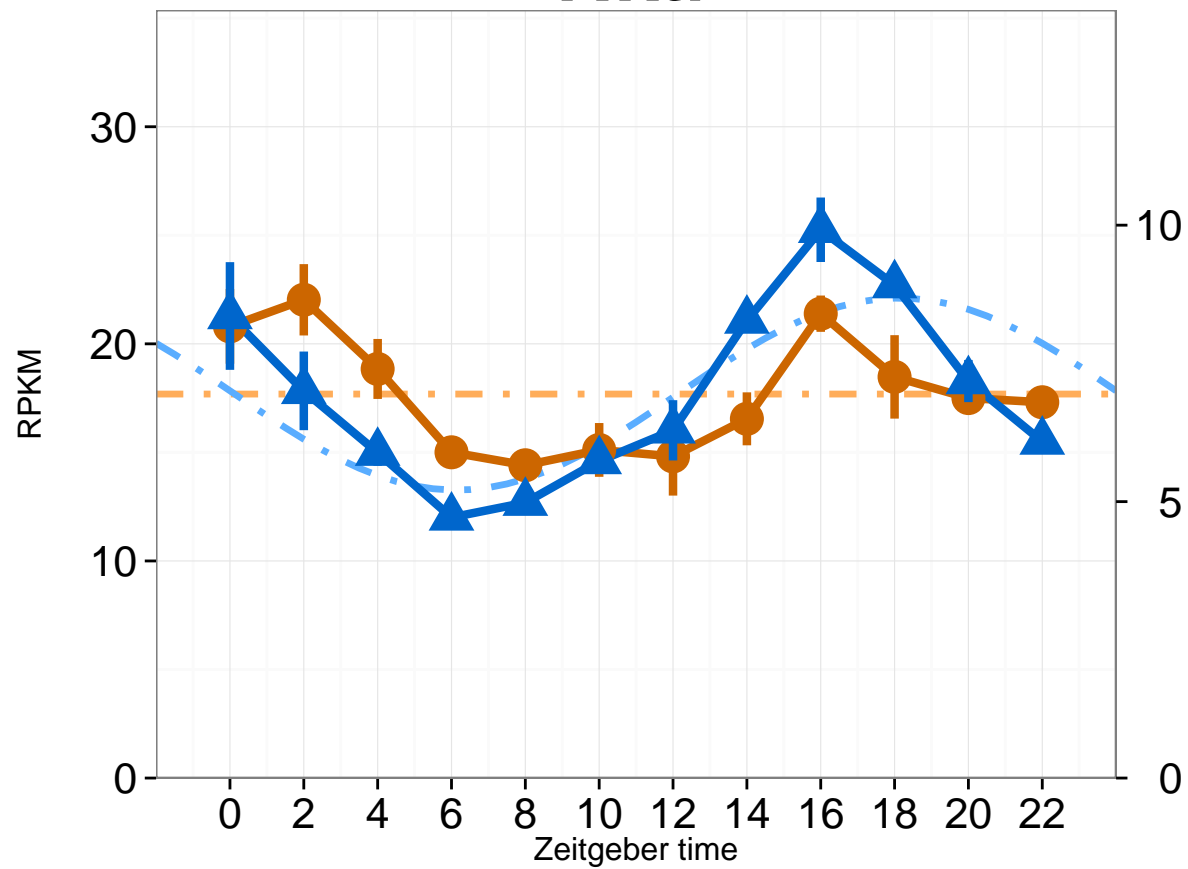

## Nktr

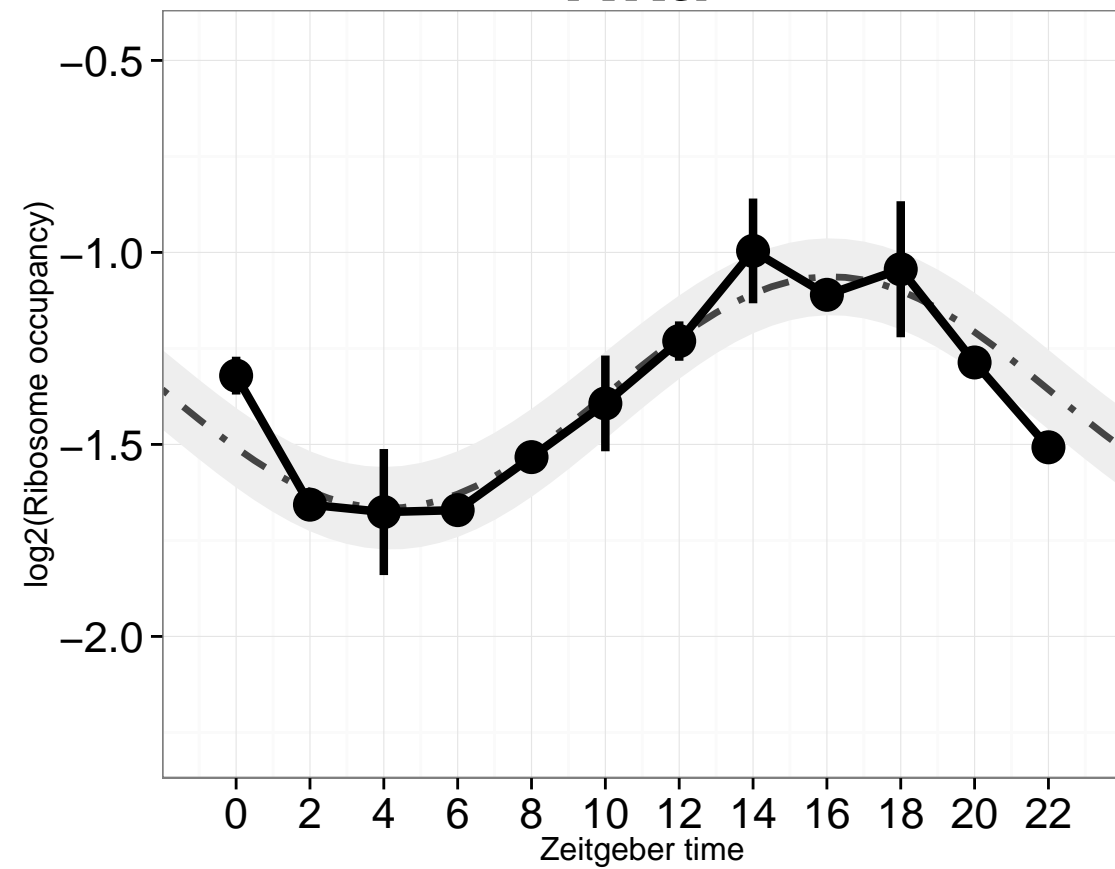

Supplement: Supplementary file 13012 [file 1]

## Pex7

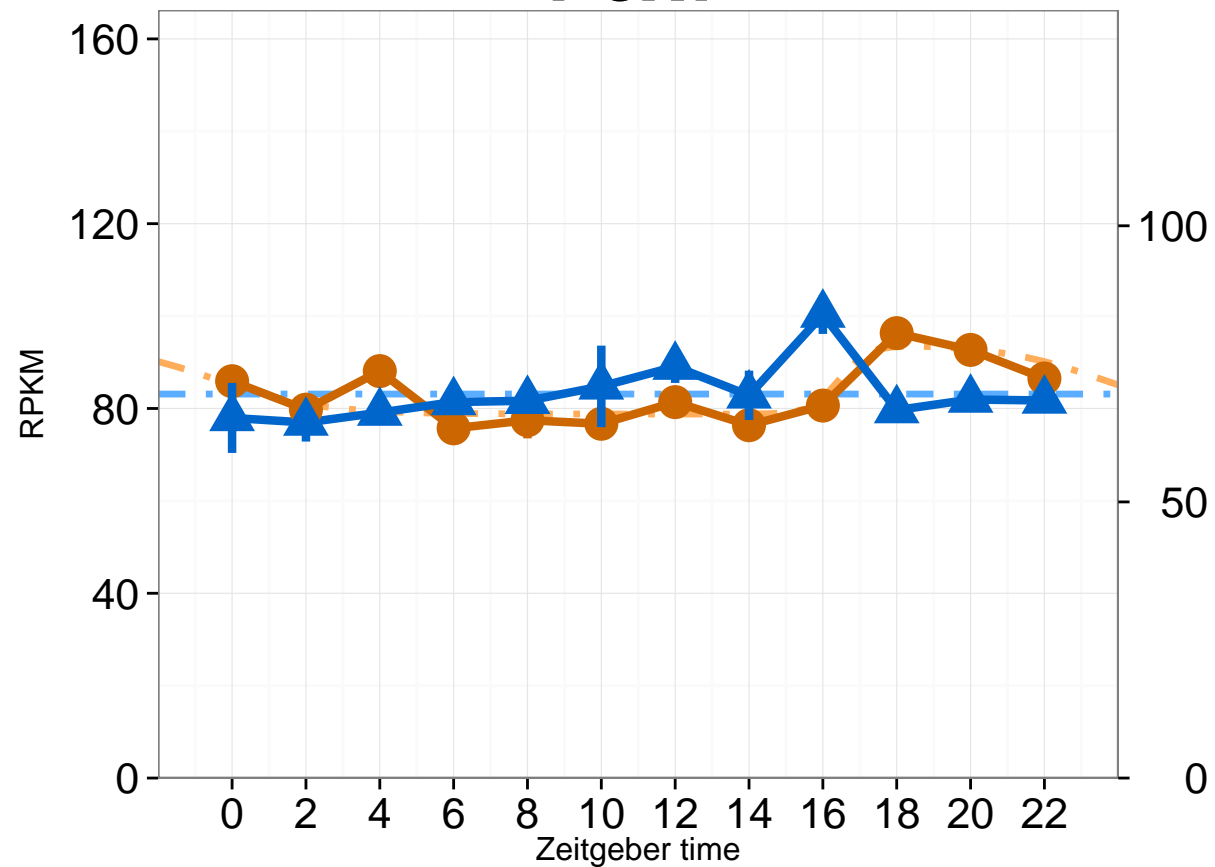

## Pex7

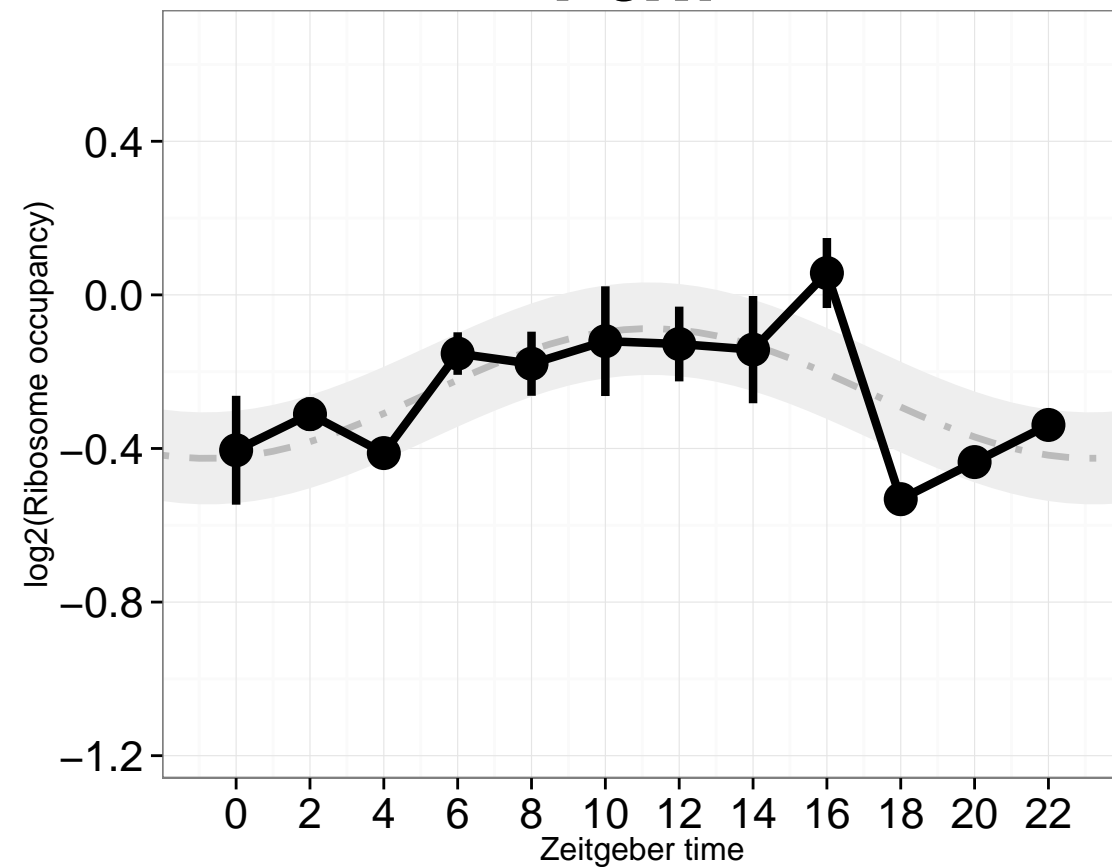

Supplement: Supplementary file 13013 [file 1]

# Myo5c

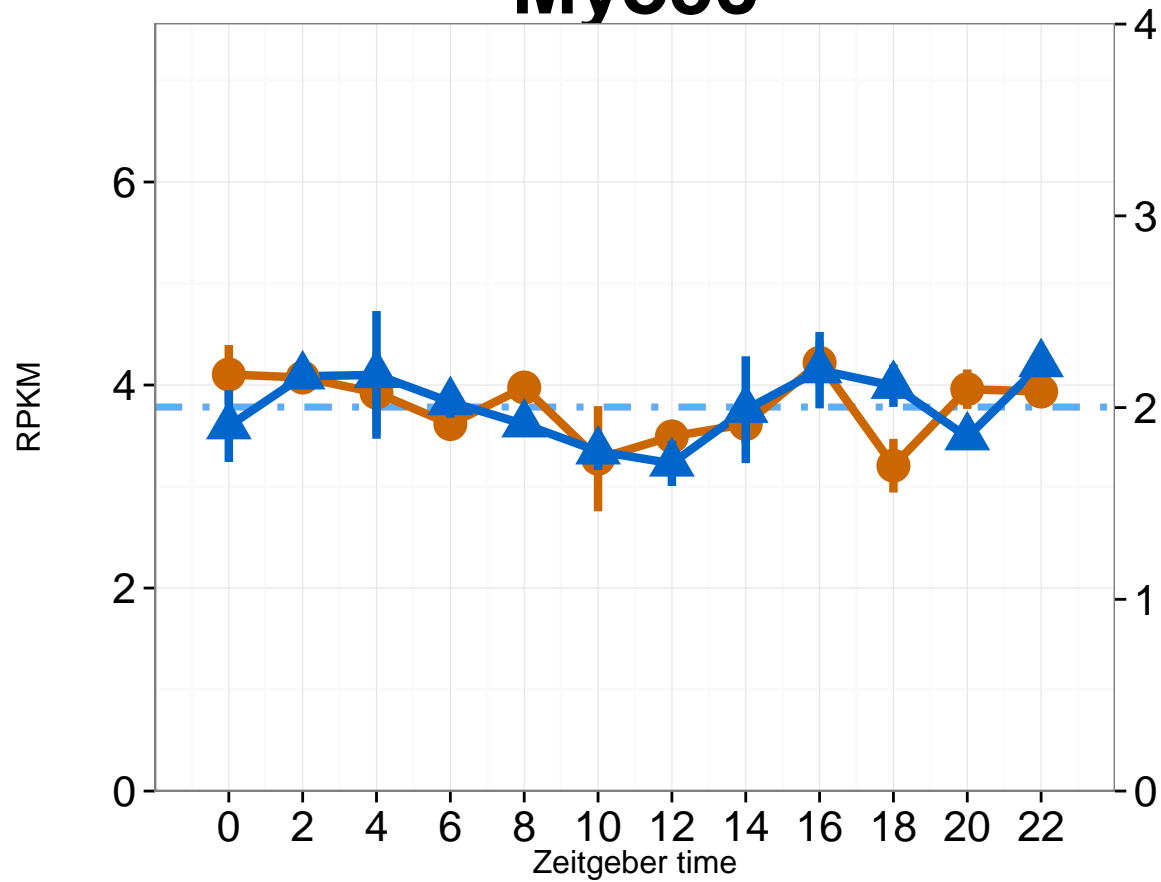

# Myo5c

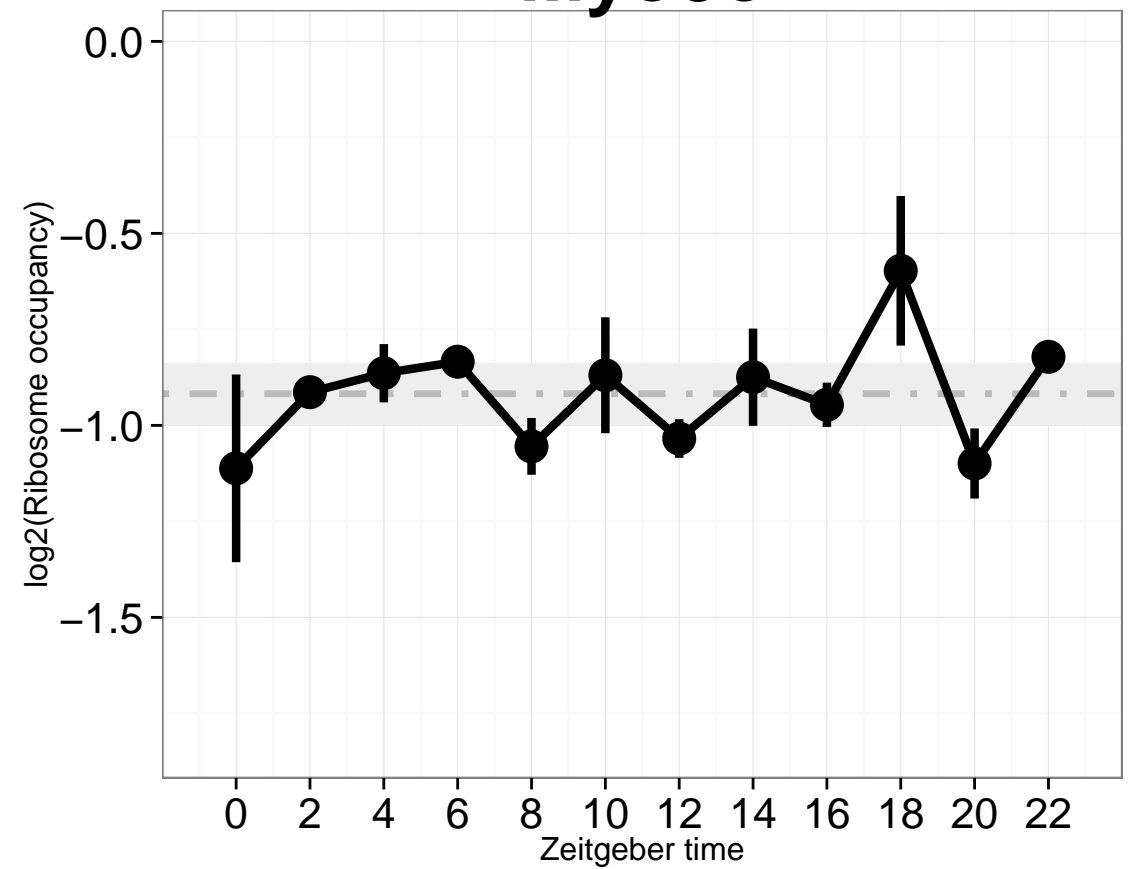

Supplement: Supplementary file 13014 [file 1]

# Armc6

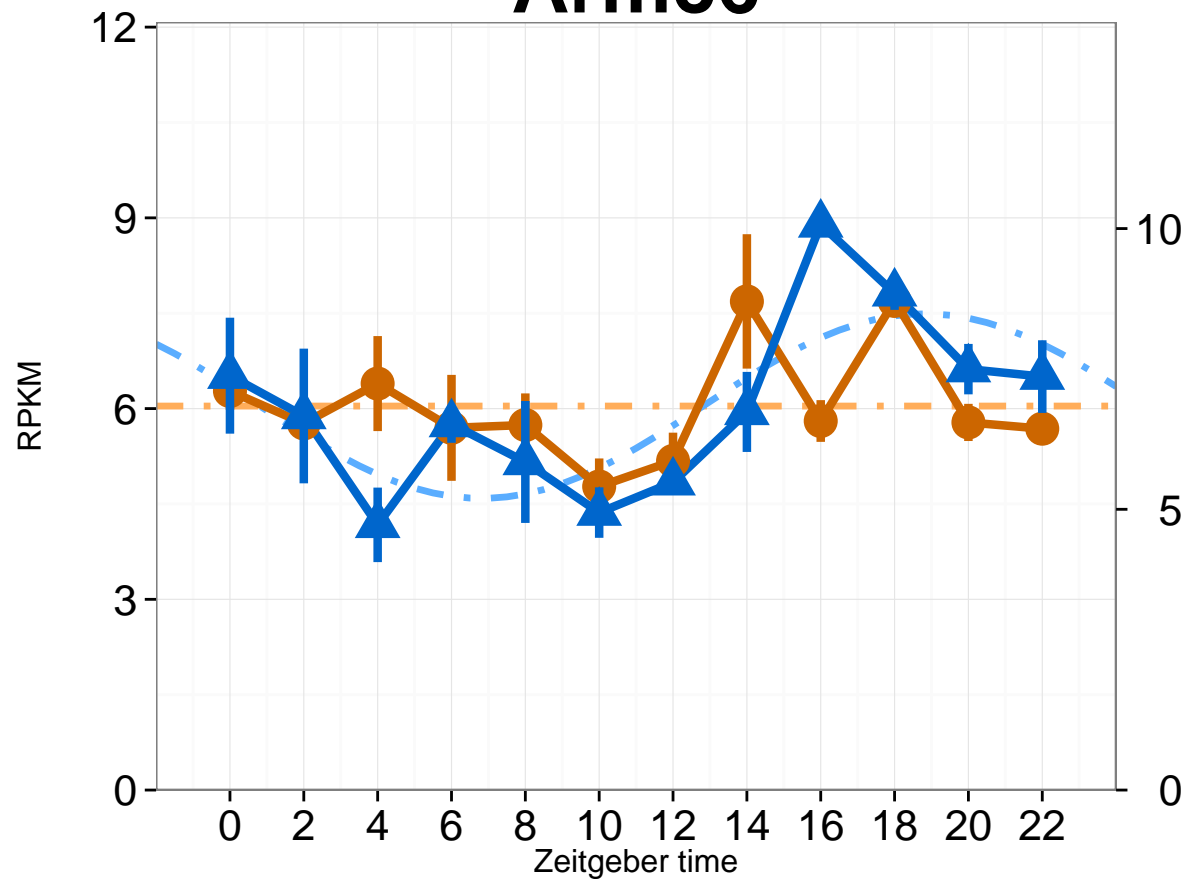

# Armc6

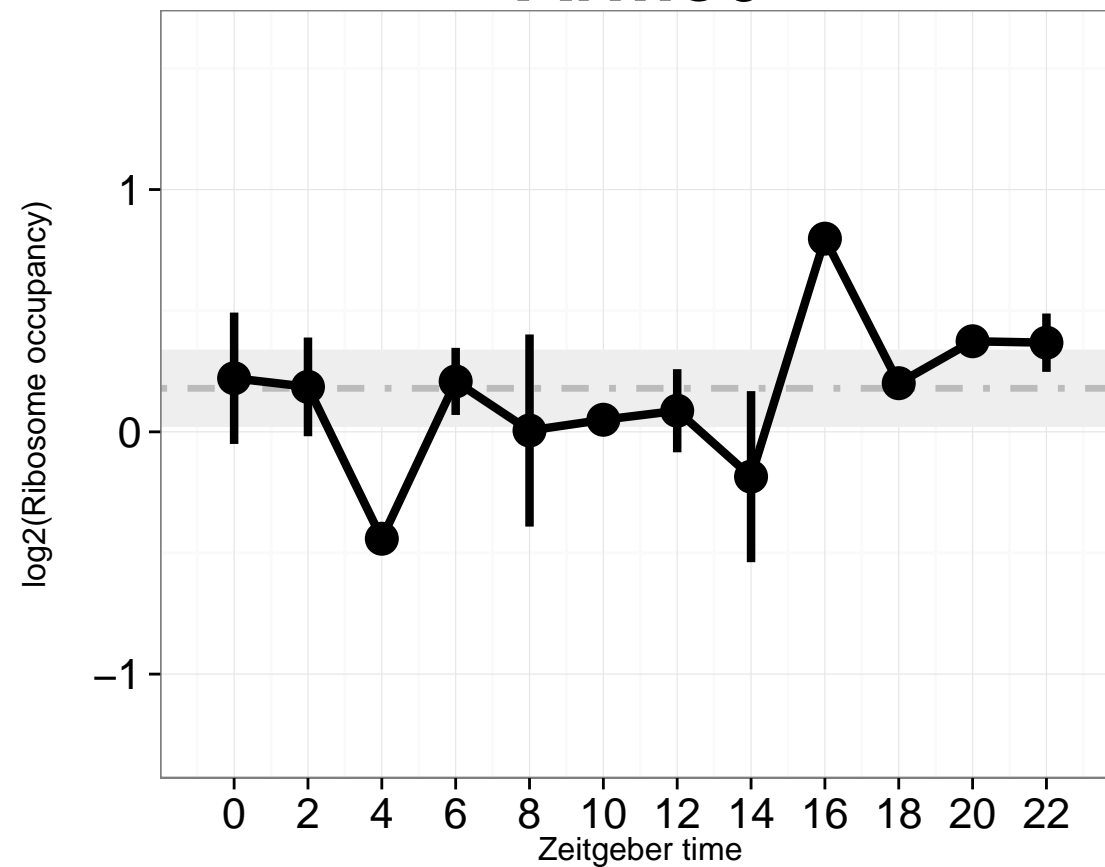

Supplement: Supplementary file 13015 [file 1]

# Zfp773

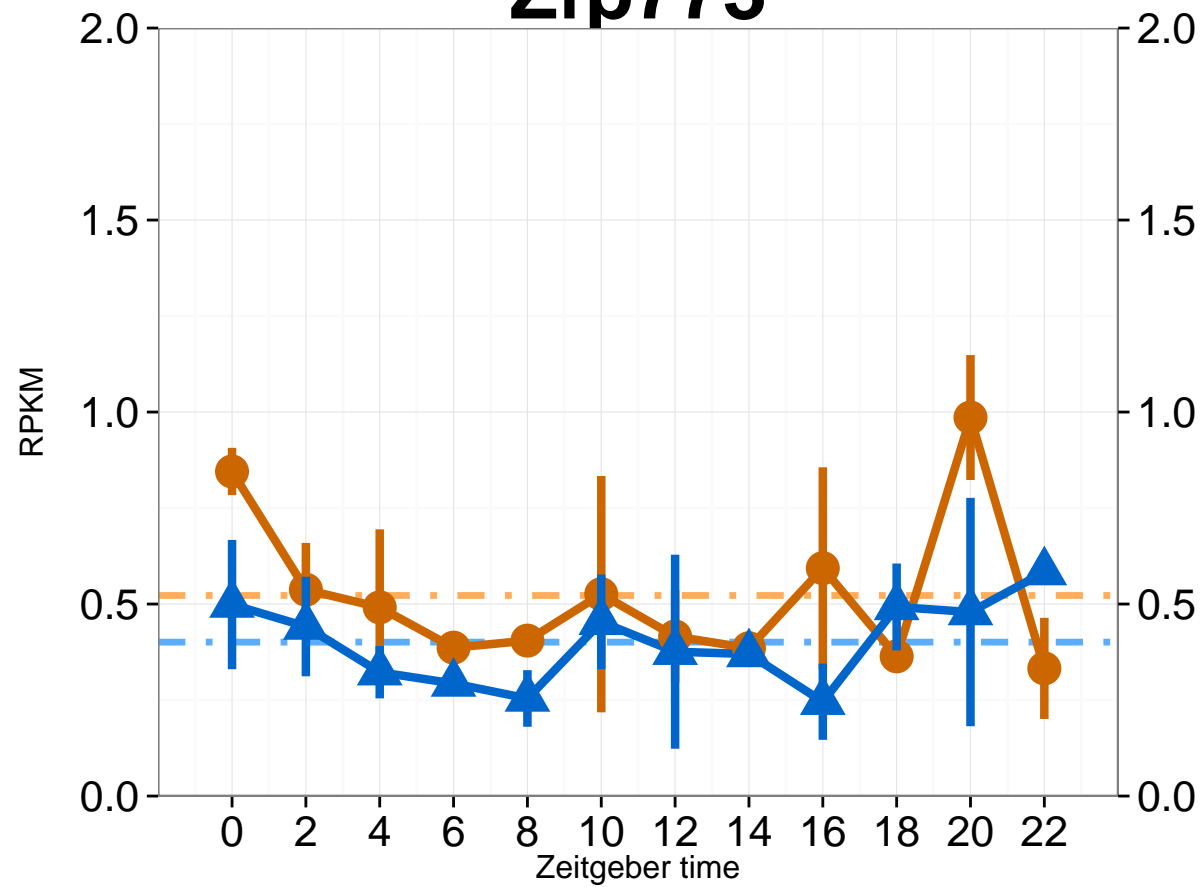

# Zfp773

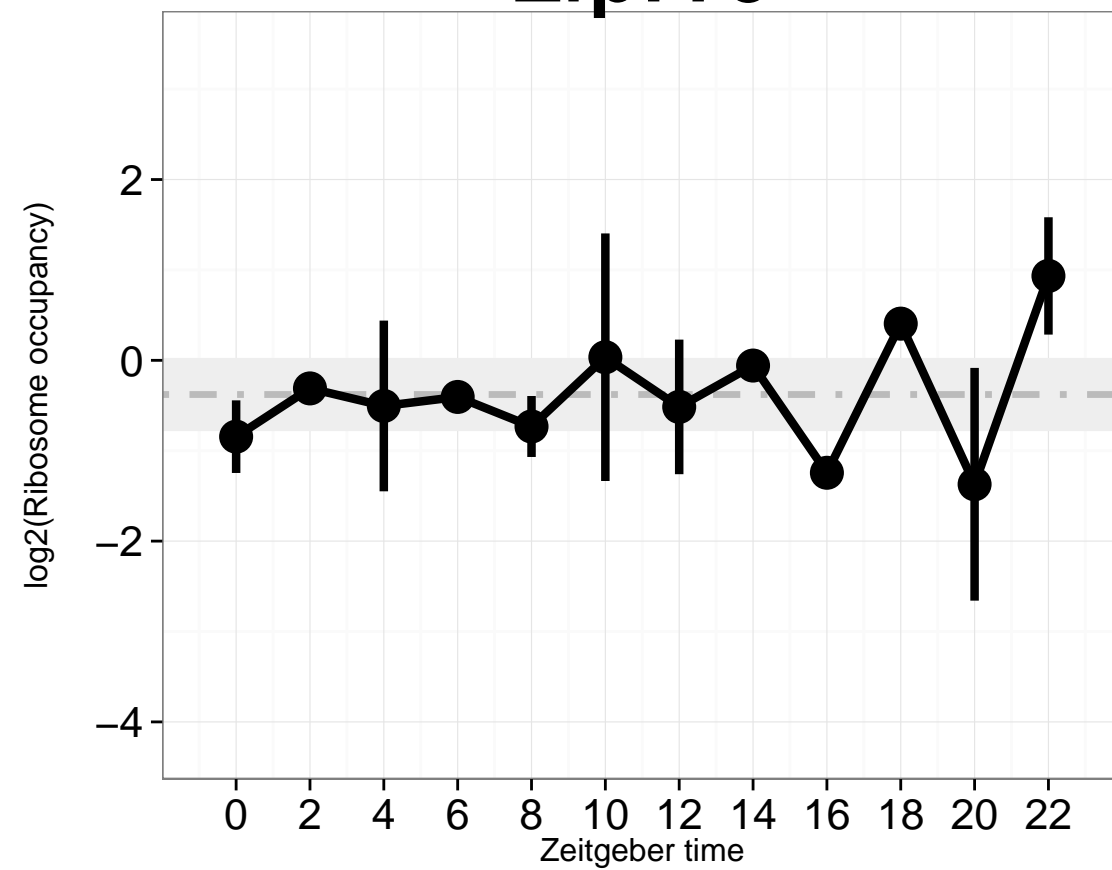

Supplement: Supplementary file 13016 [file 1]

## Mto1

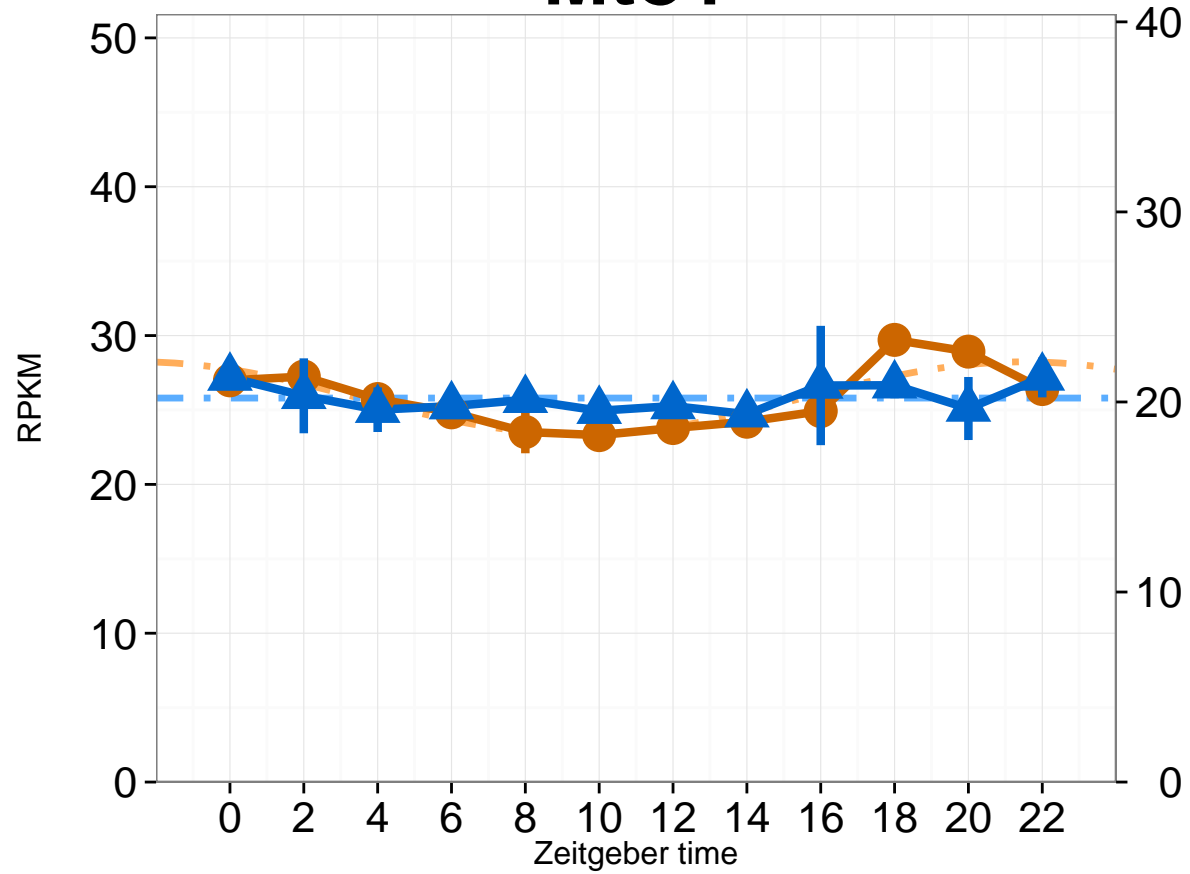

## Mto1

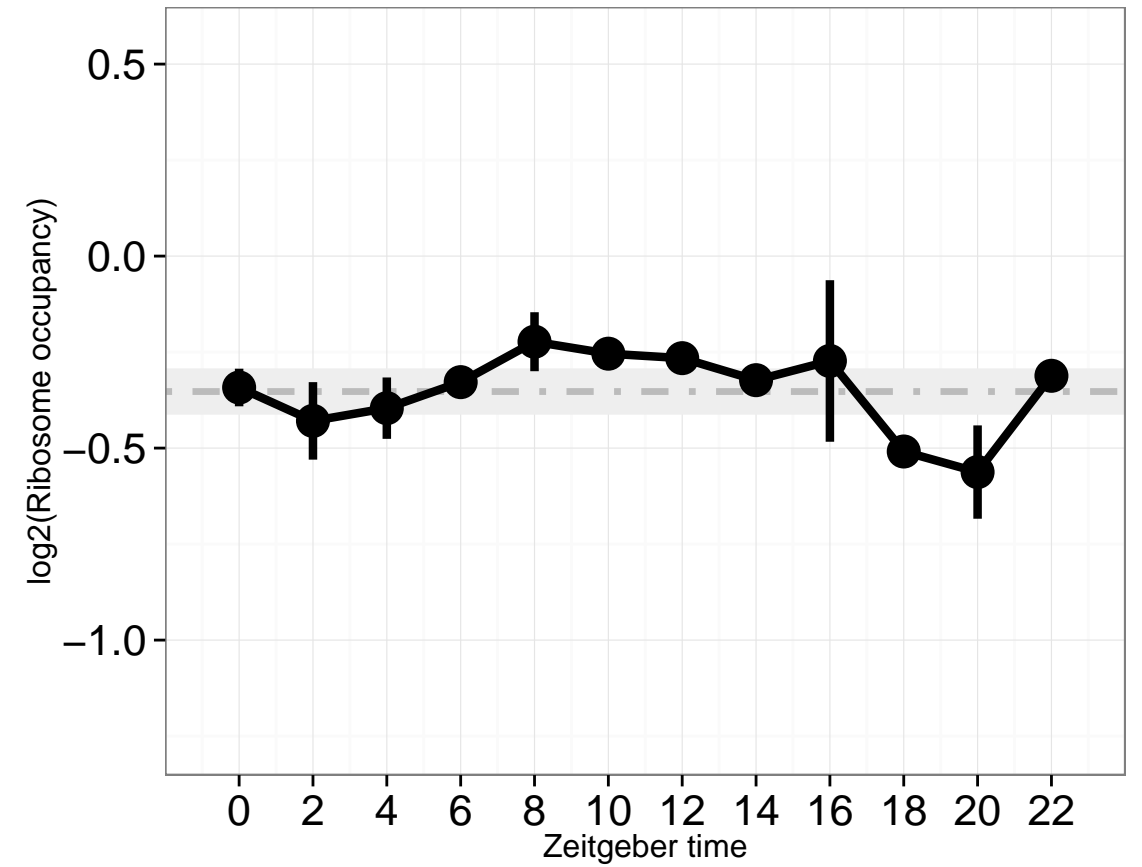

Supplement: Supplementary file 13017 [file 1]

# Alg8

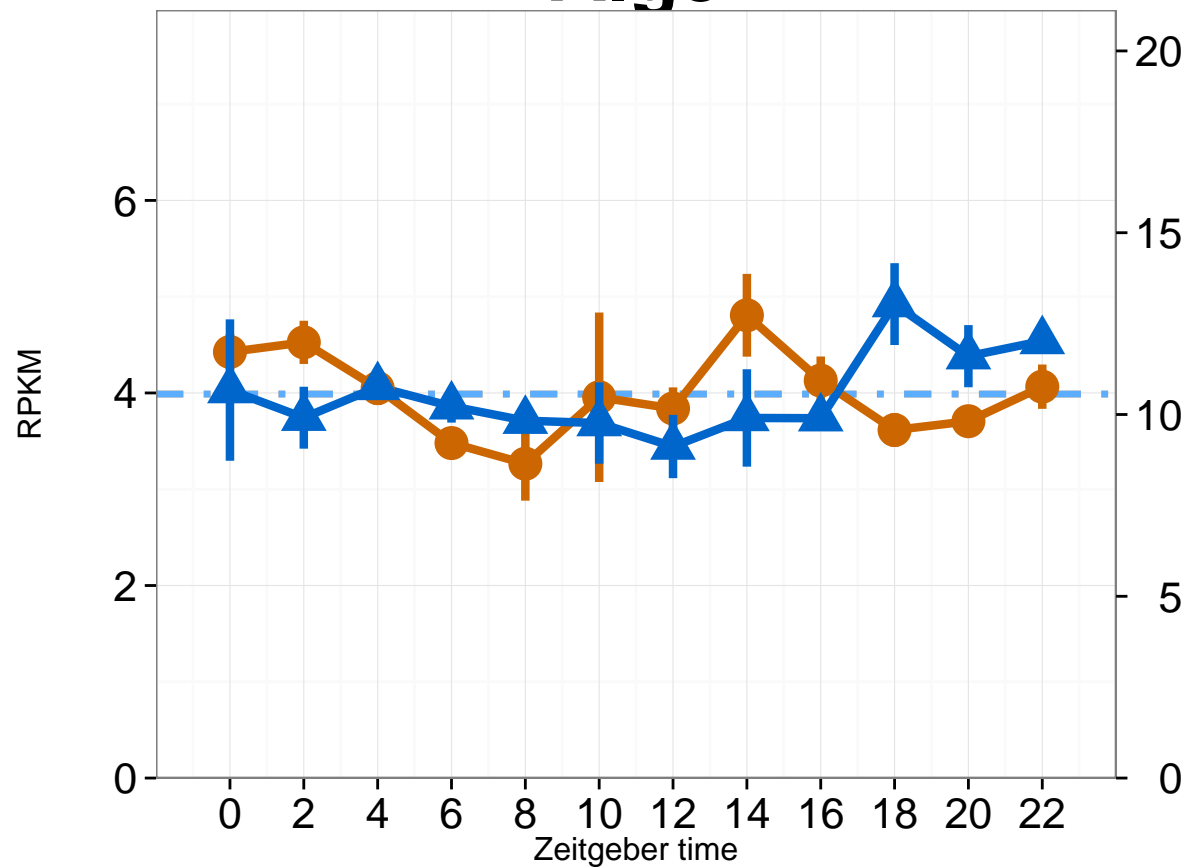

# Alg8

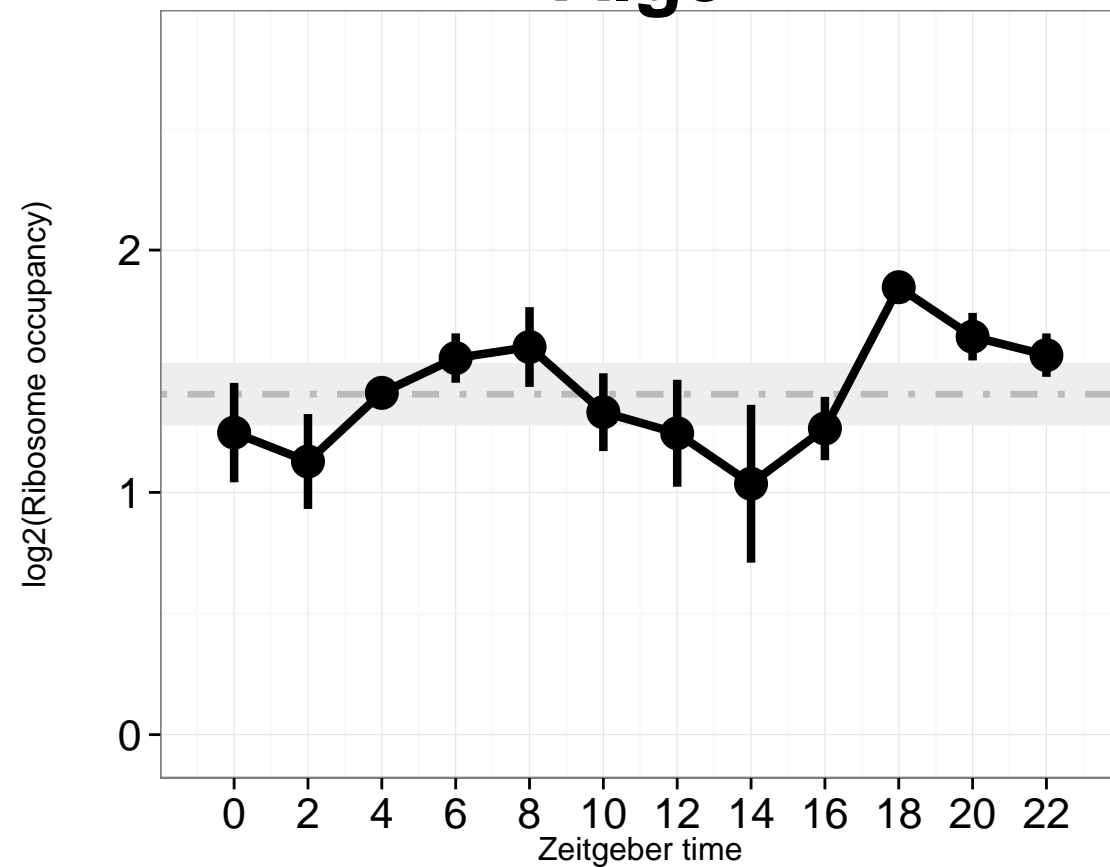

Supplement: Supplementary file 13018 [file 1]

## Ackr3

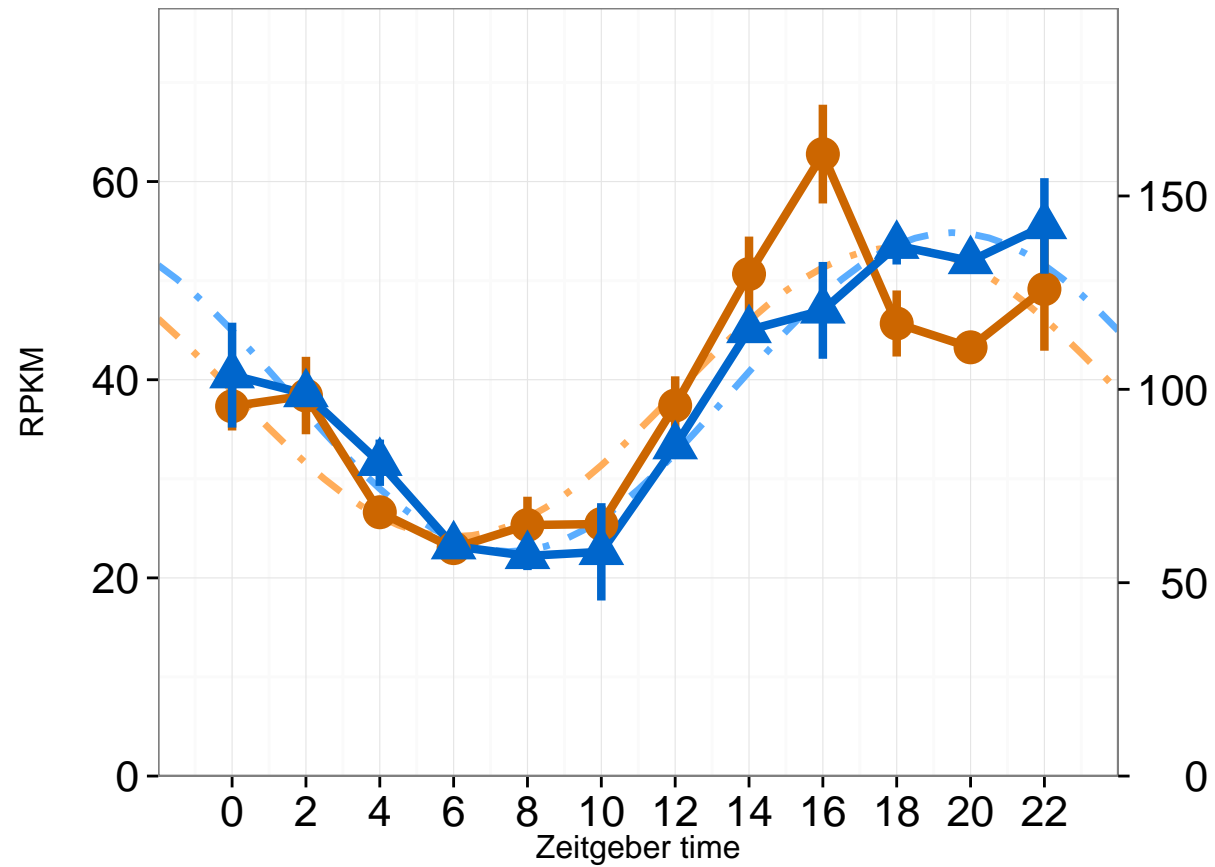

## Ackr3

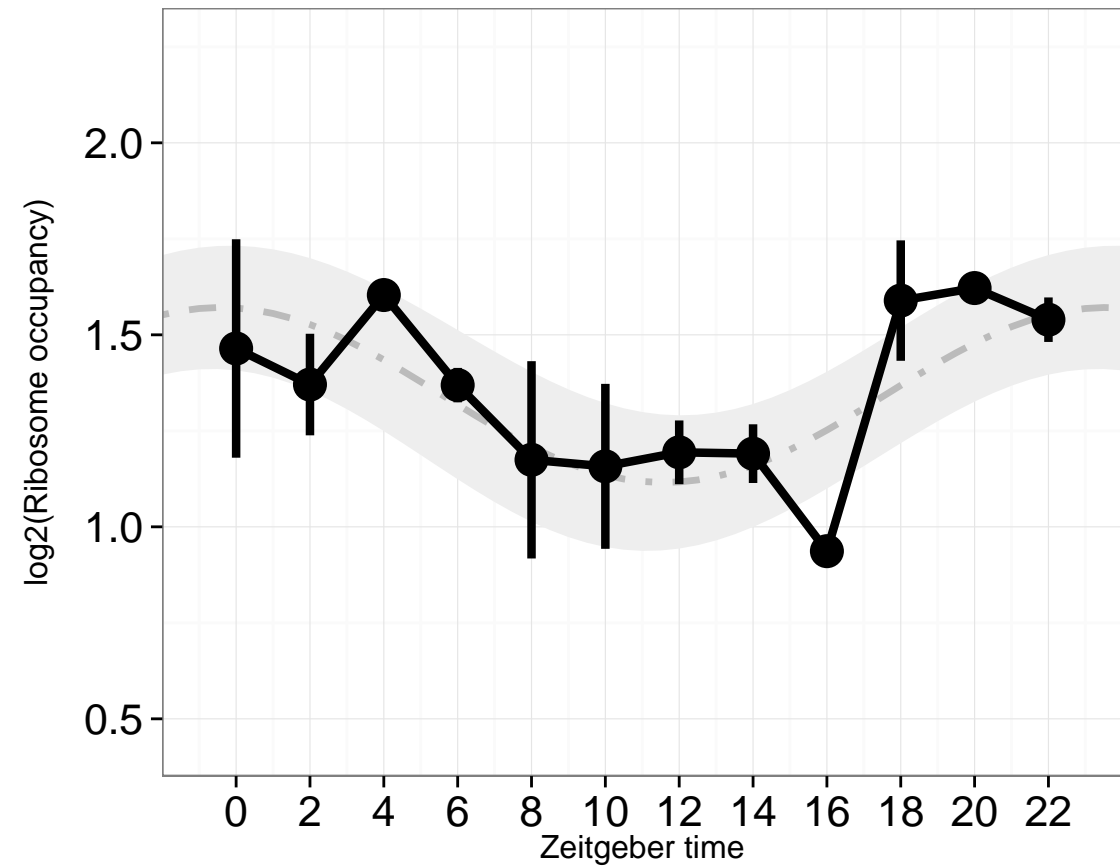

Supplement: Supplementary file 13019 [file 1]

## Nhlrc2

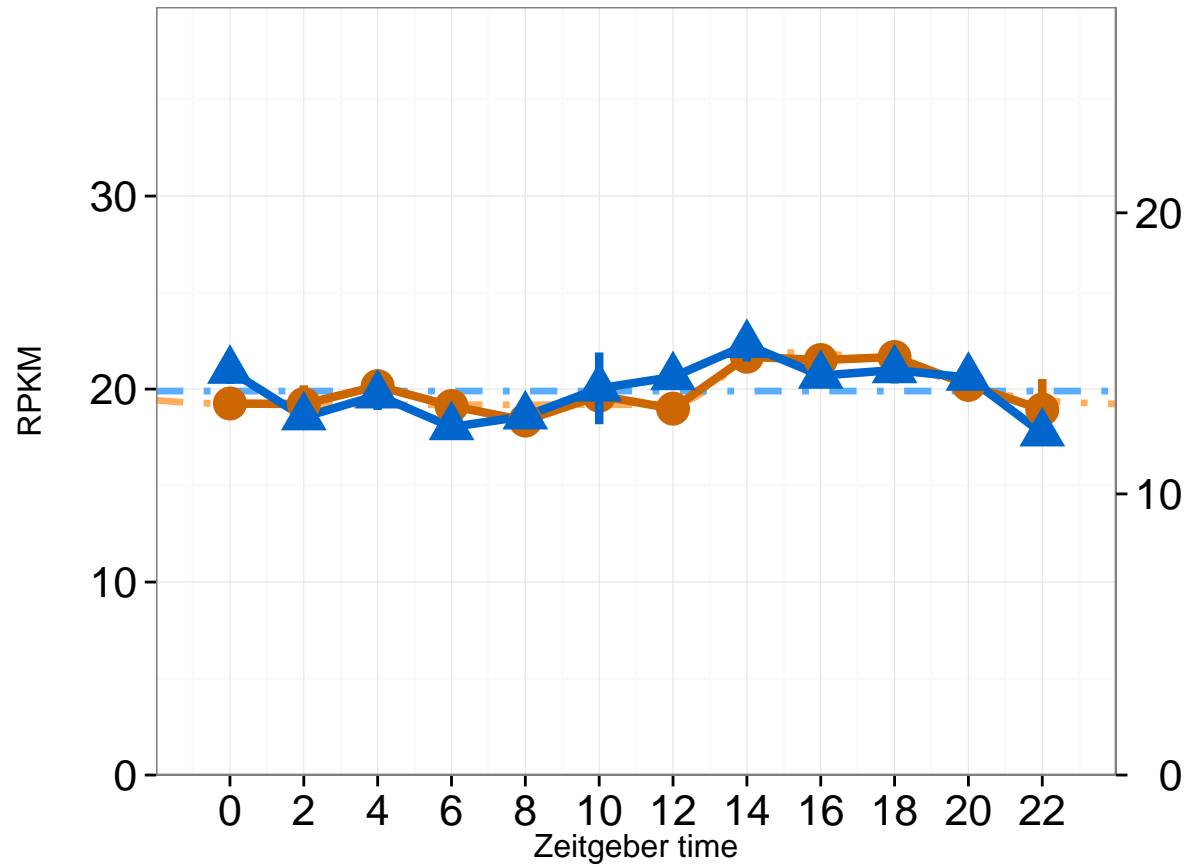

## Nhlrc2

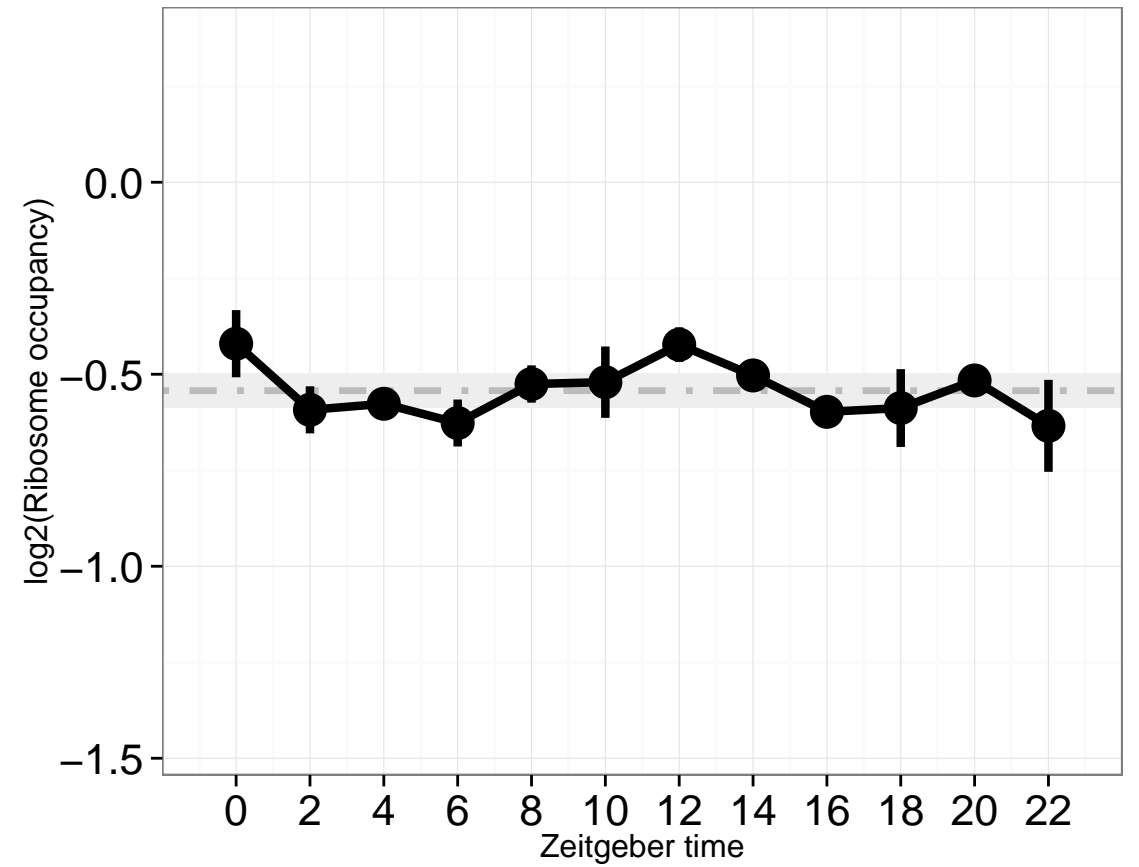

Supplement: Supplementary file 13020 [file 1]

## Ash2l

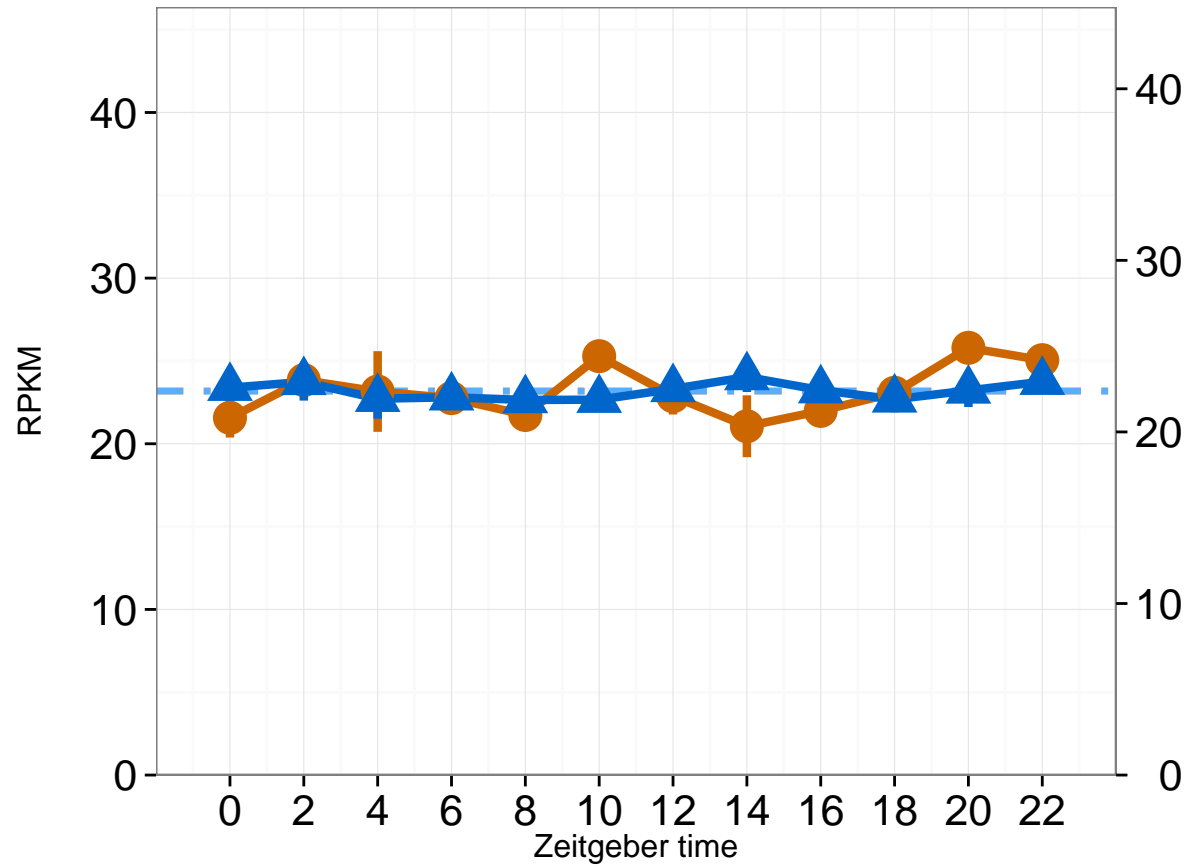

## Ash2l

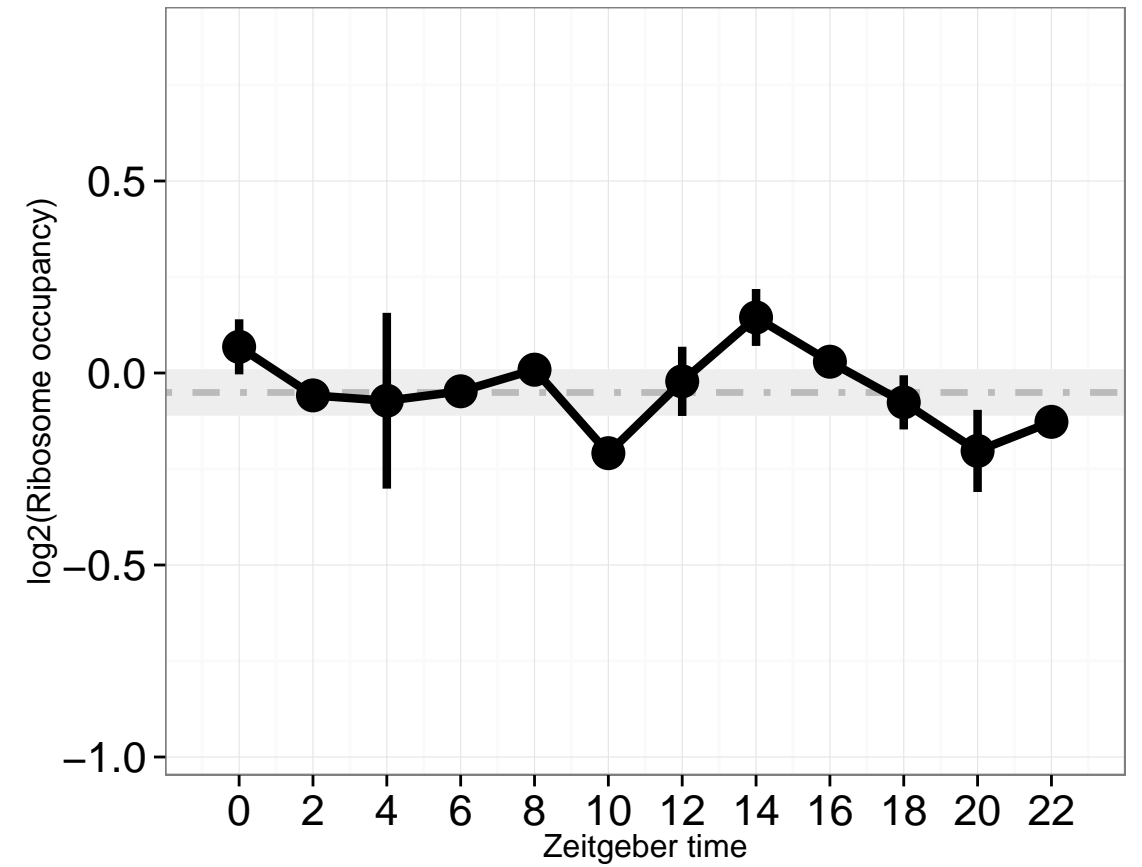

Supplement: Supplementary file 13021 [file 1]

# Pik3ap1

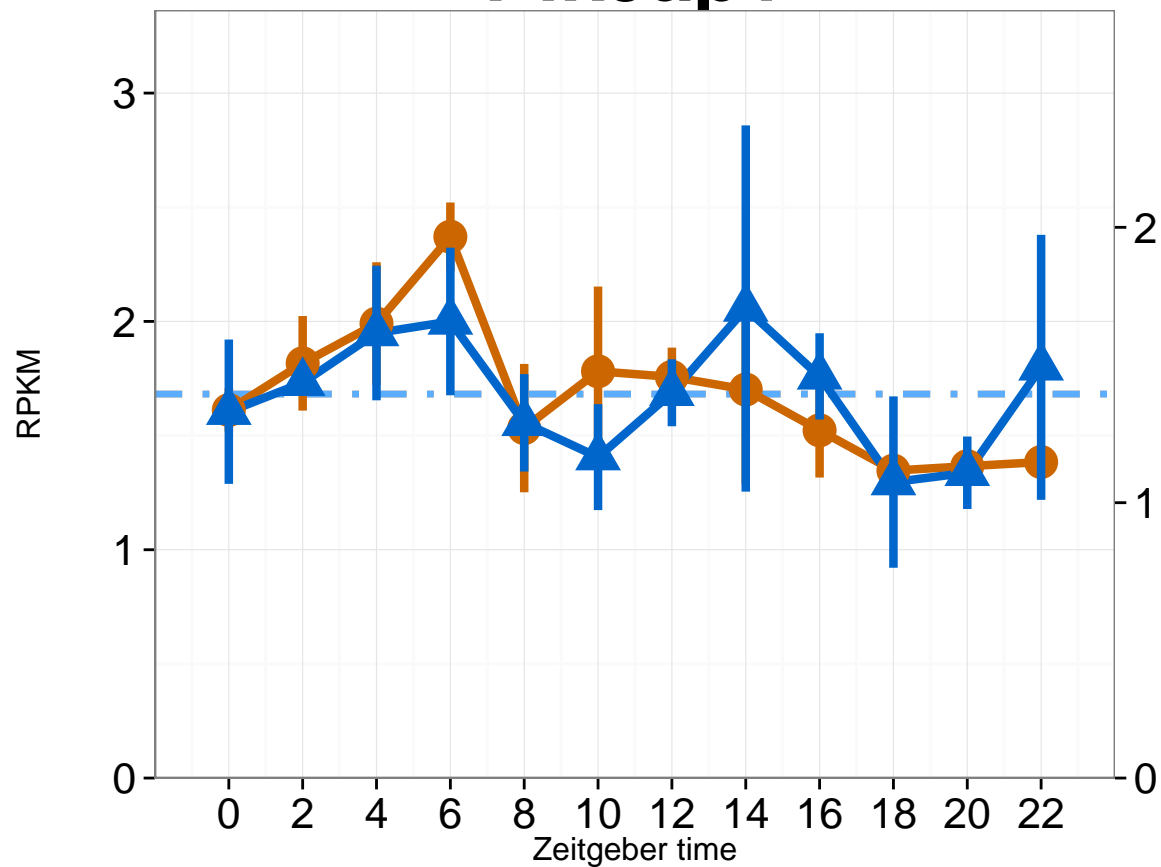

# Pik3ap1

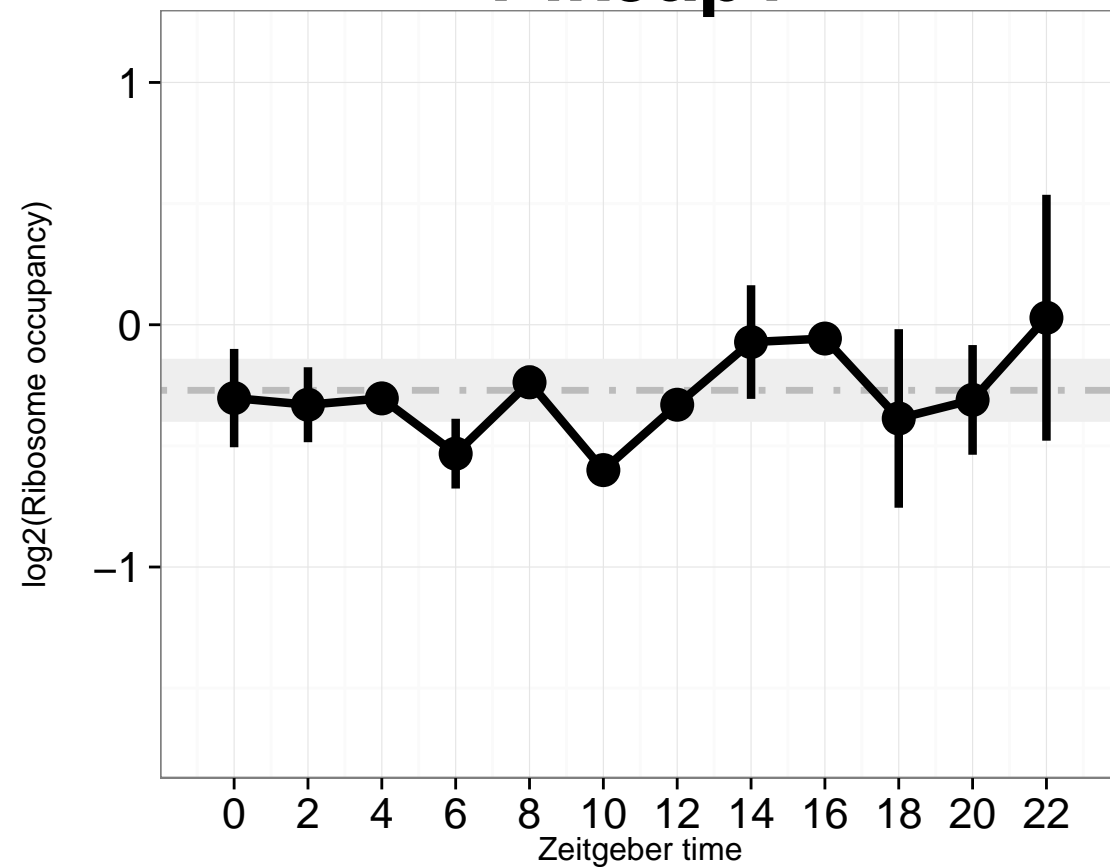

Supplement: Supplementary file 13022 [file 1]

## Secisbp2l

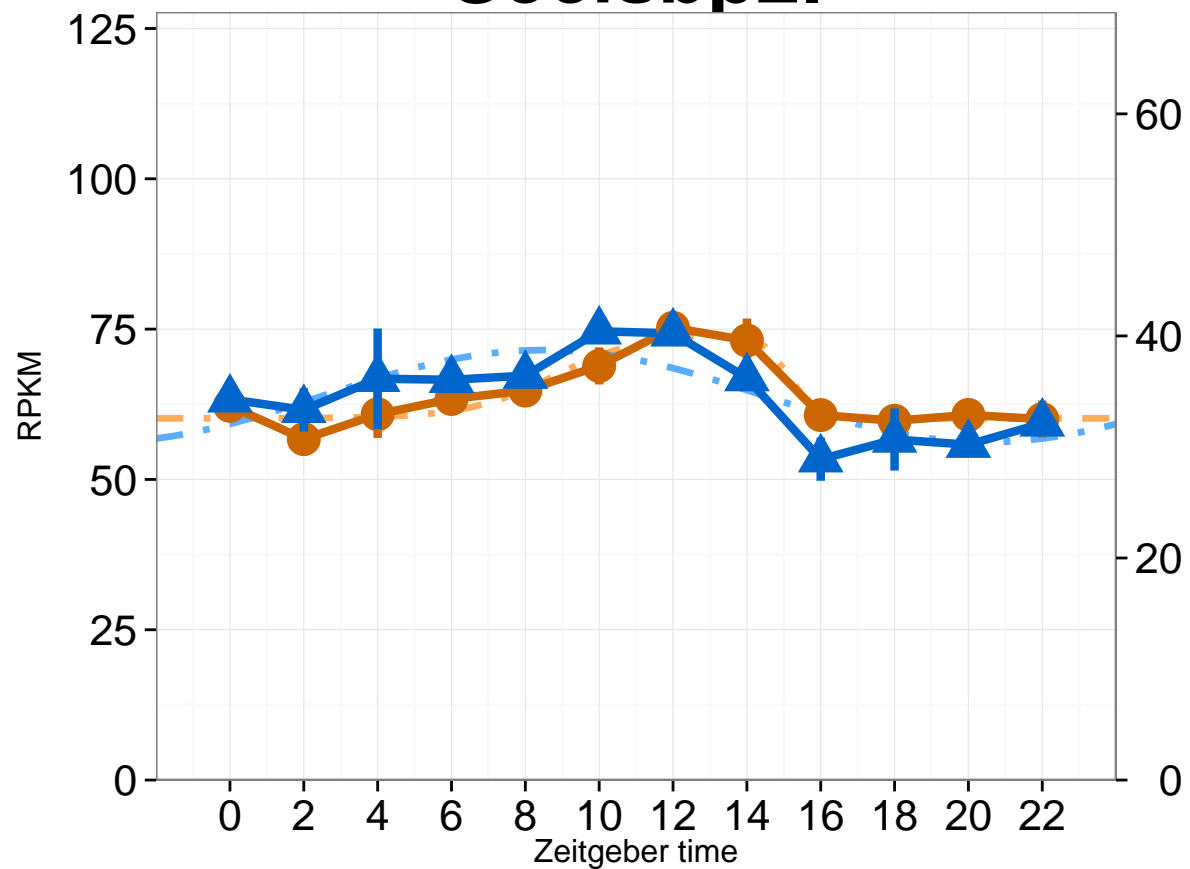

## Secisbp2l

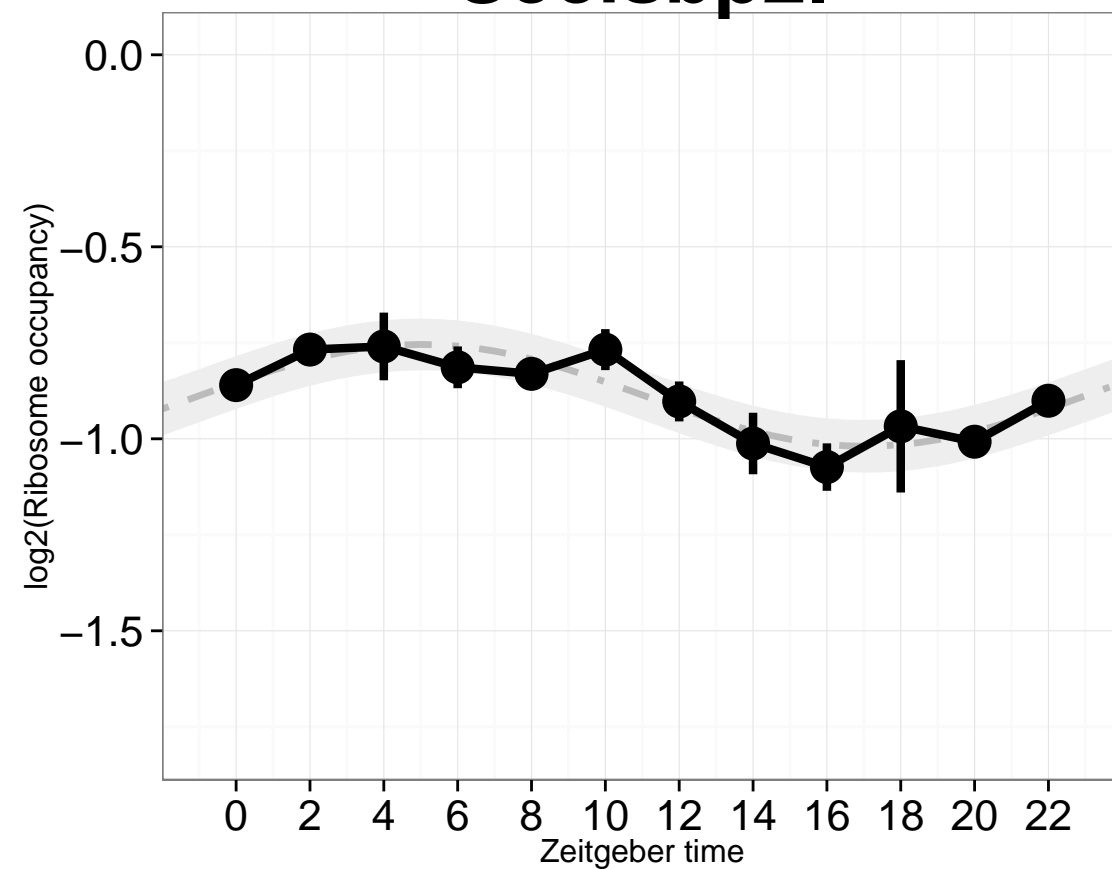

Supplement: Supplementary file 13023 [file 1]

## Sntb1

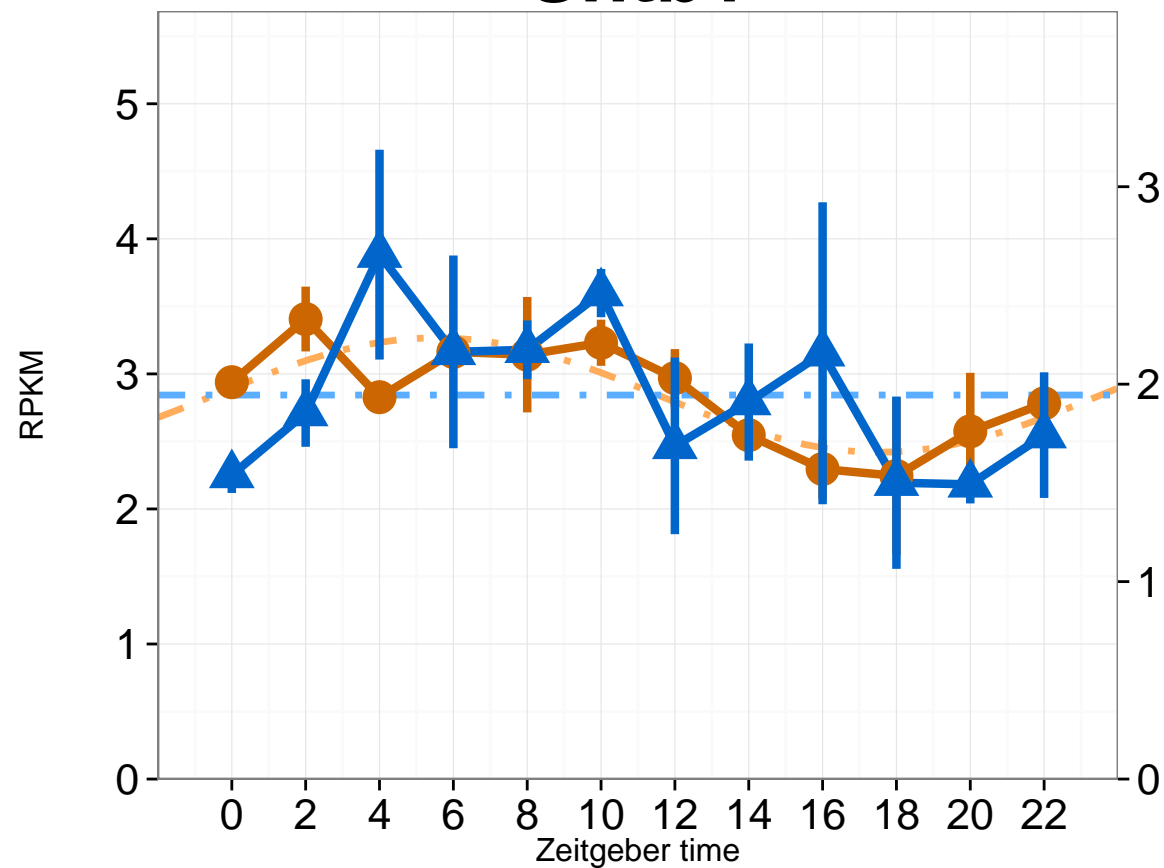

## Sntb1

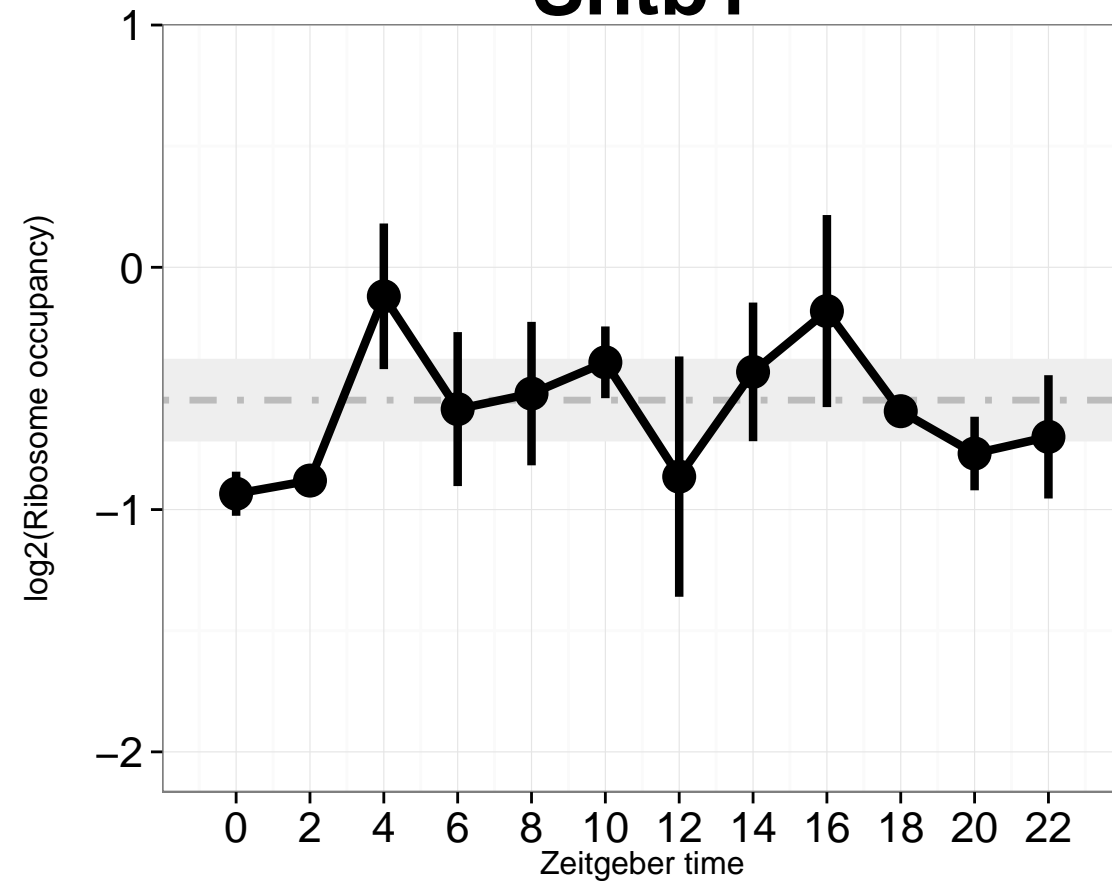

Supplement: Supplementary file 13024 [file 1]

## Eif6

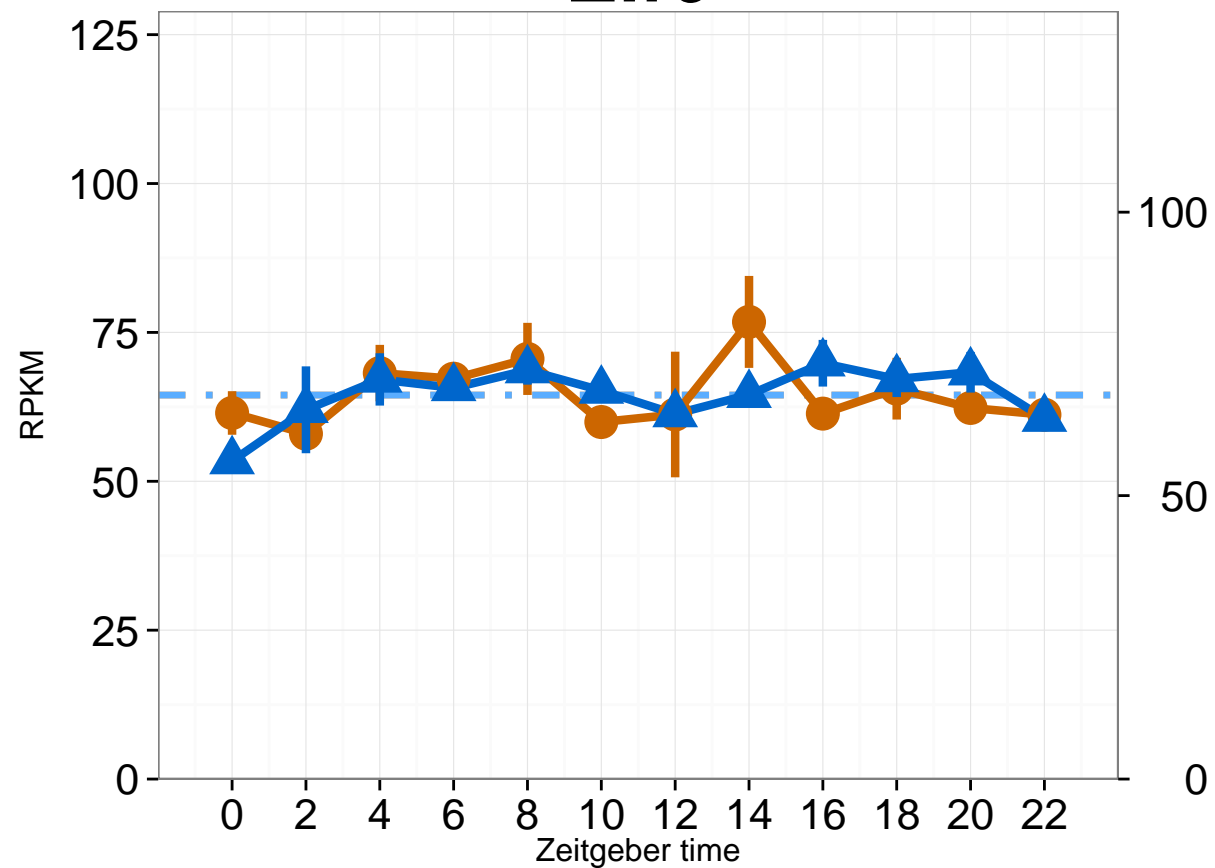

## Eif6

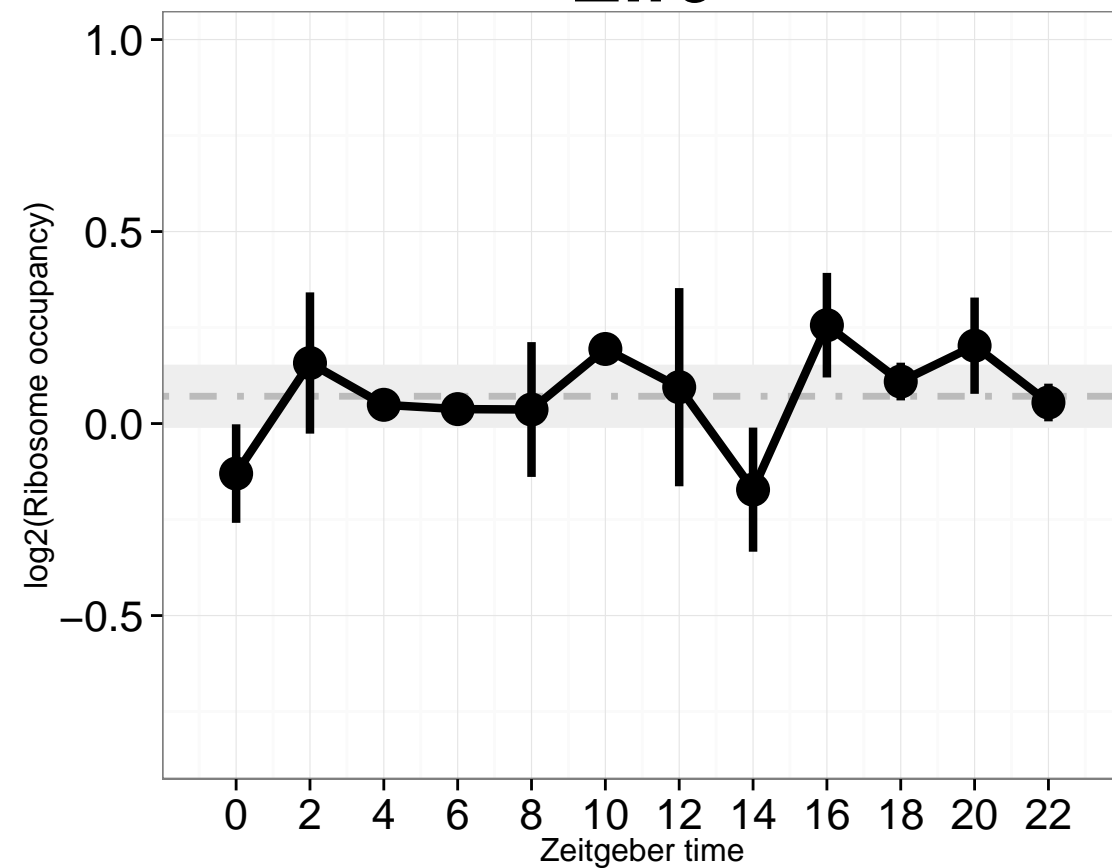

Supplement: Supplementary file 13025 [file 1]

## Derl2

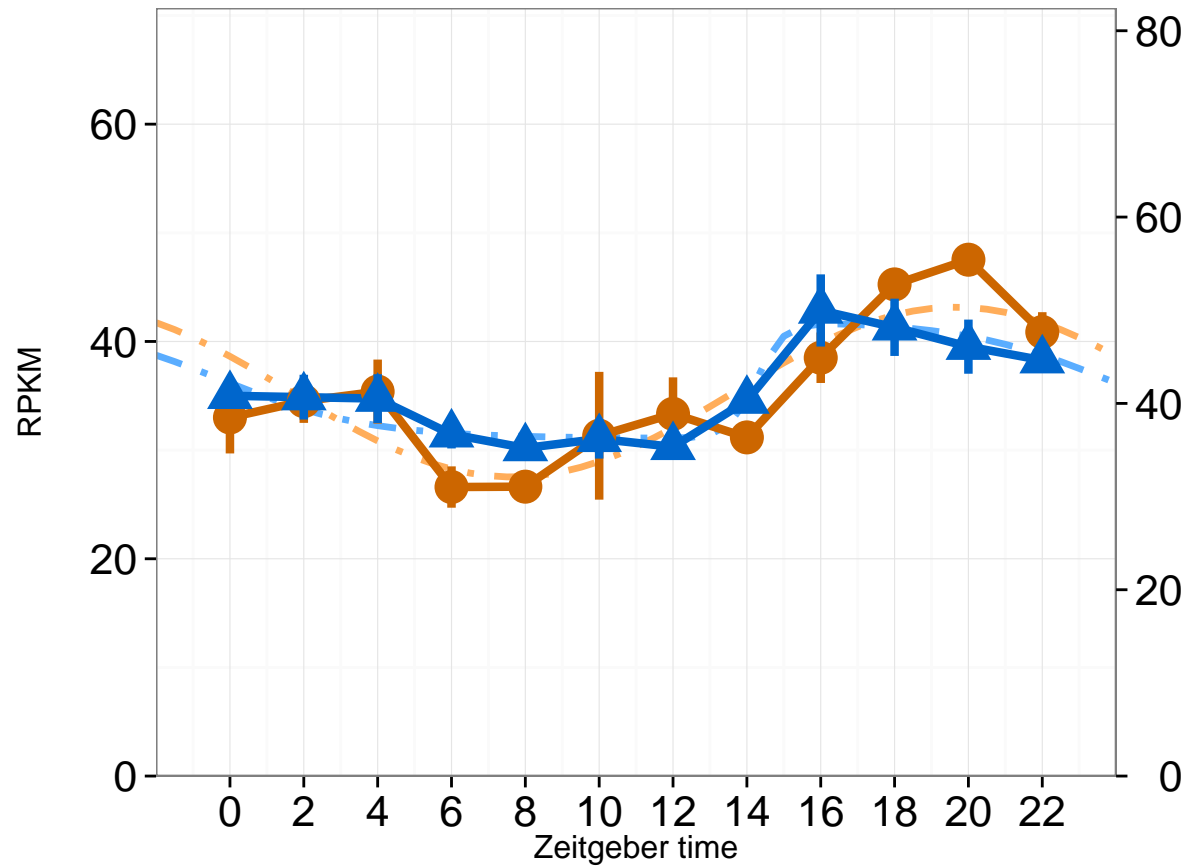

## Derl2

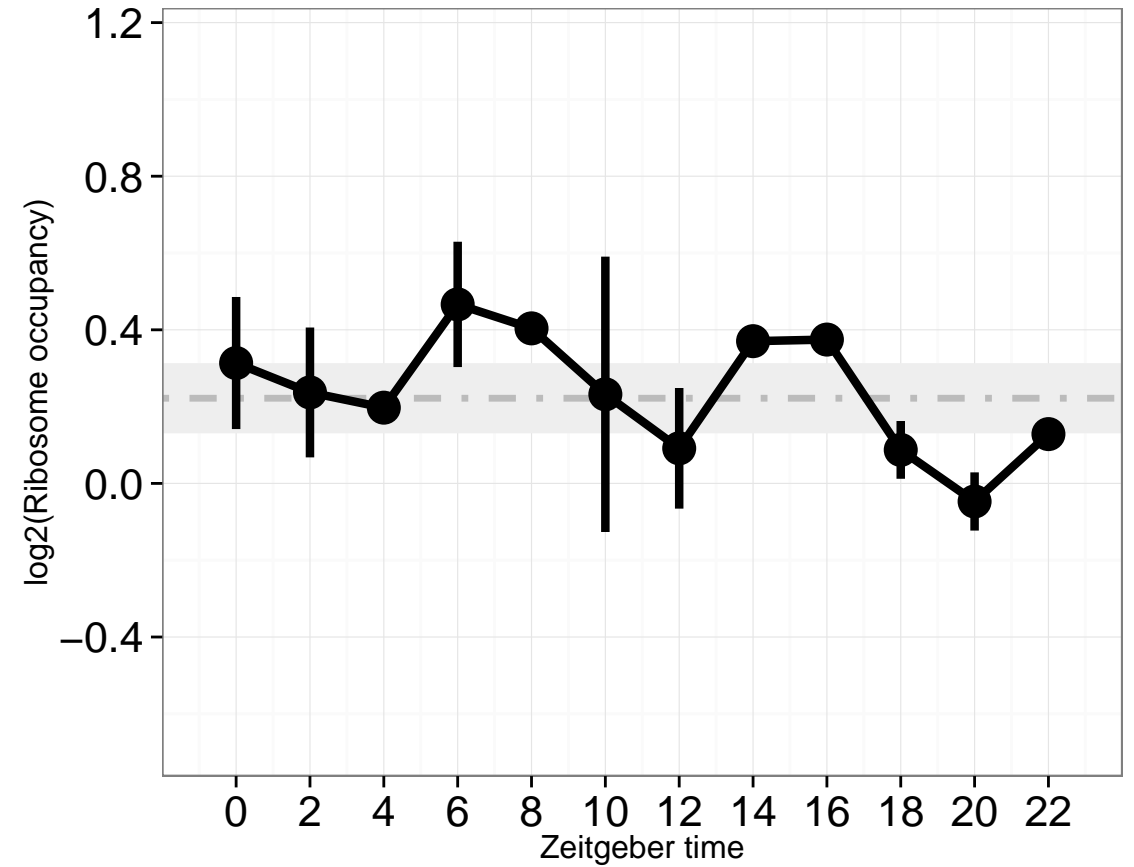

Supplement: Supplementary file 13026 [file 1]

# Lactb2

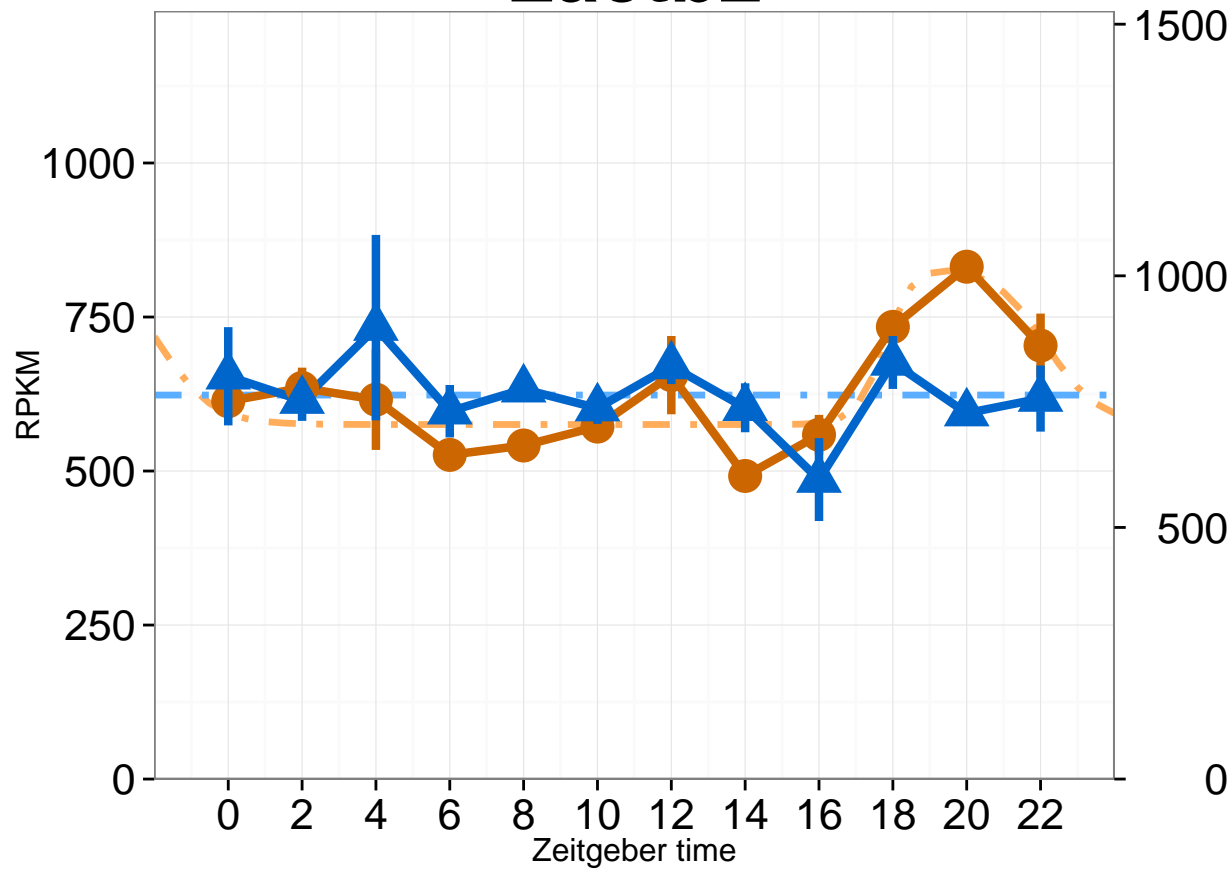

# Lactb2

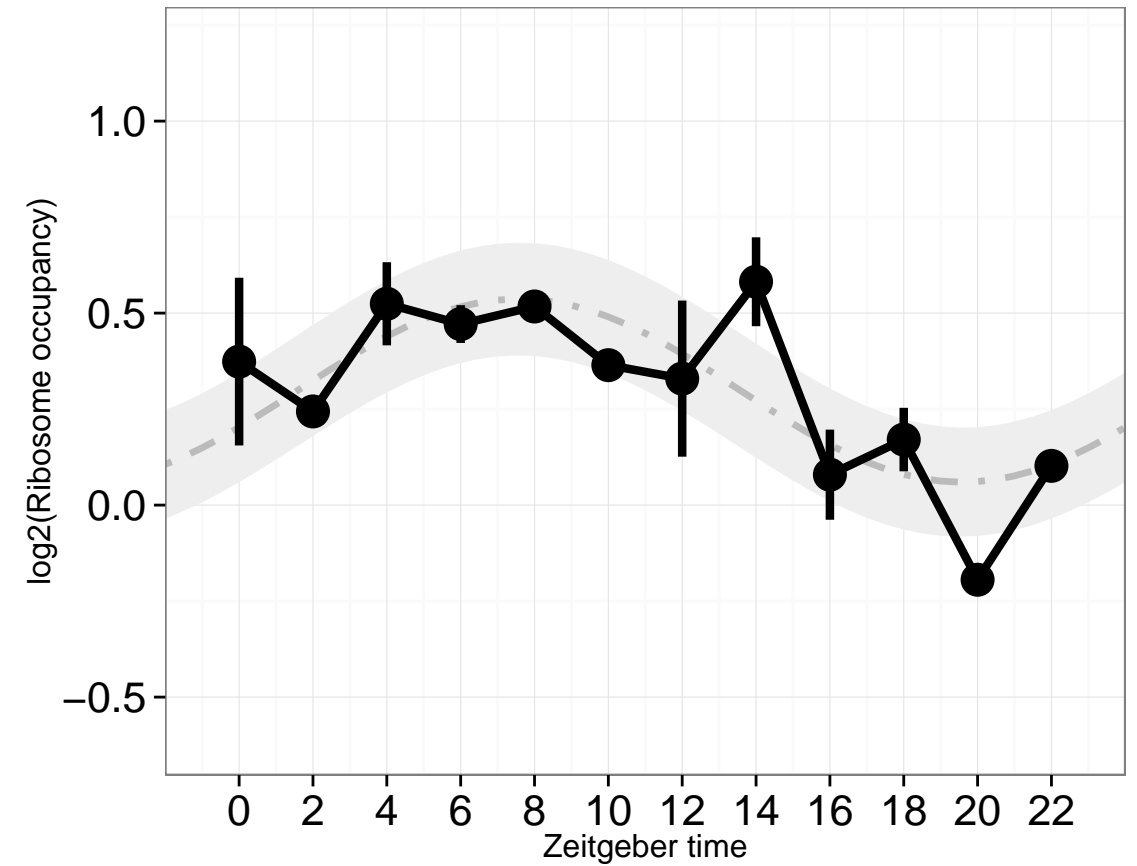

Supplement: Supplementary file 13027 [file 1]

## Acnat2

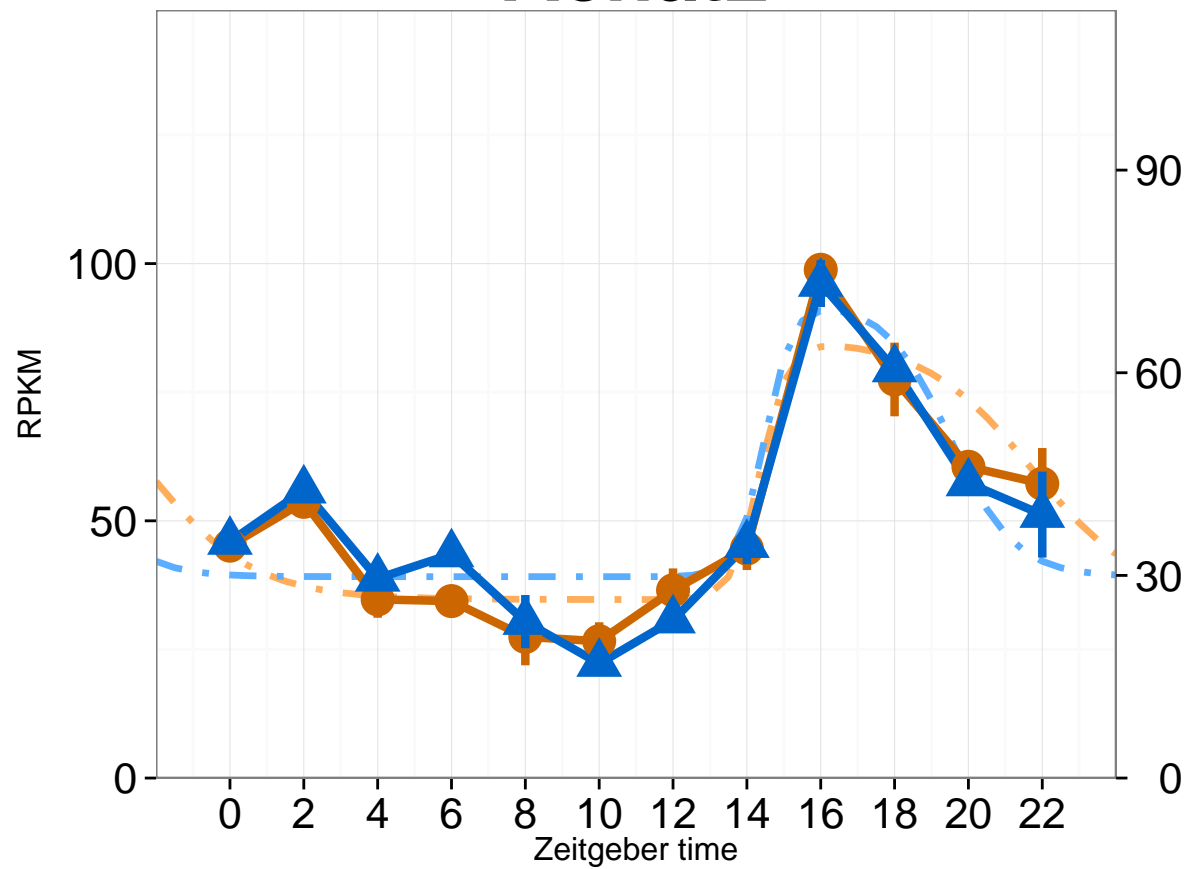

## Acnat2

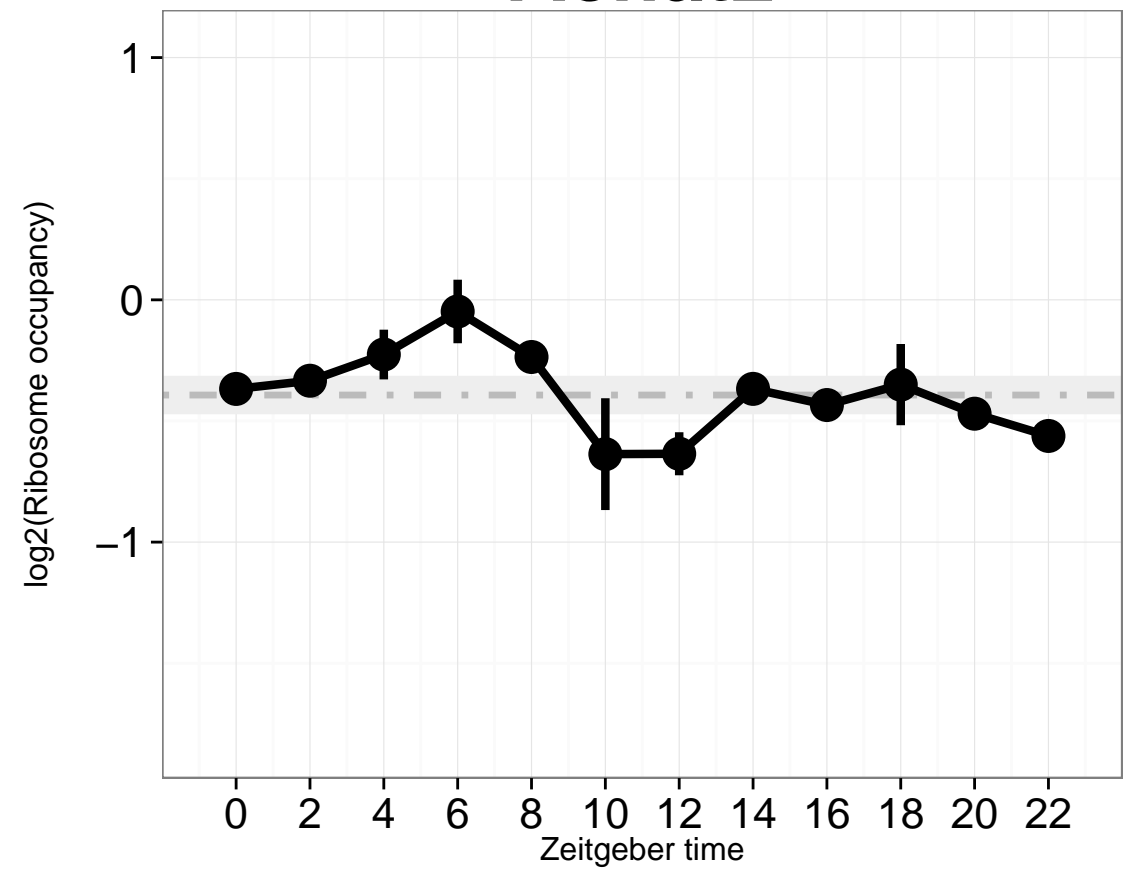

Supplement: Supplementary file 13028 [file 1]

# Psma6

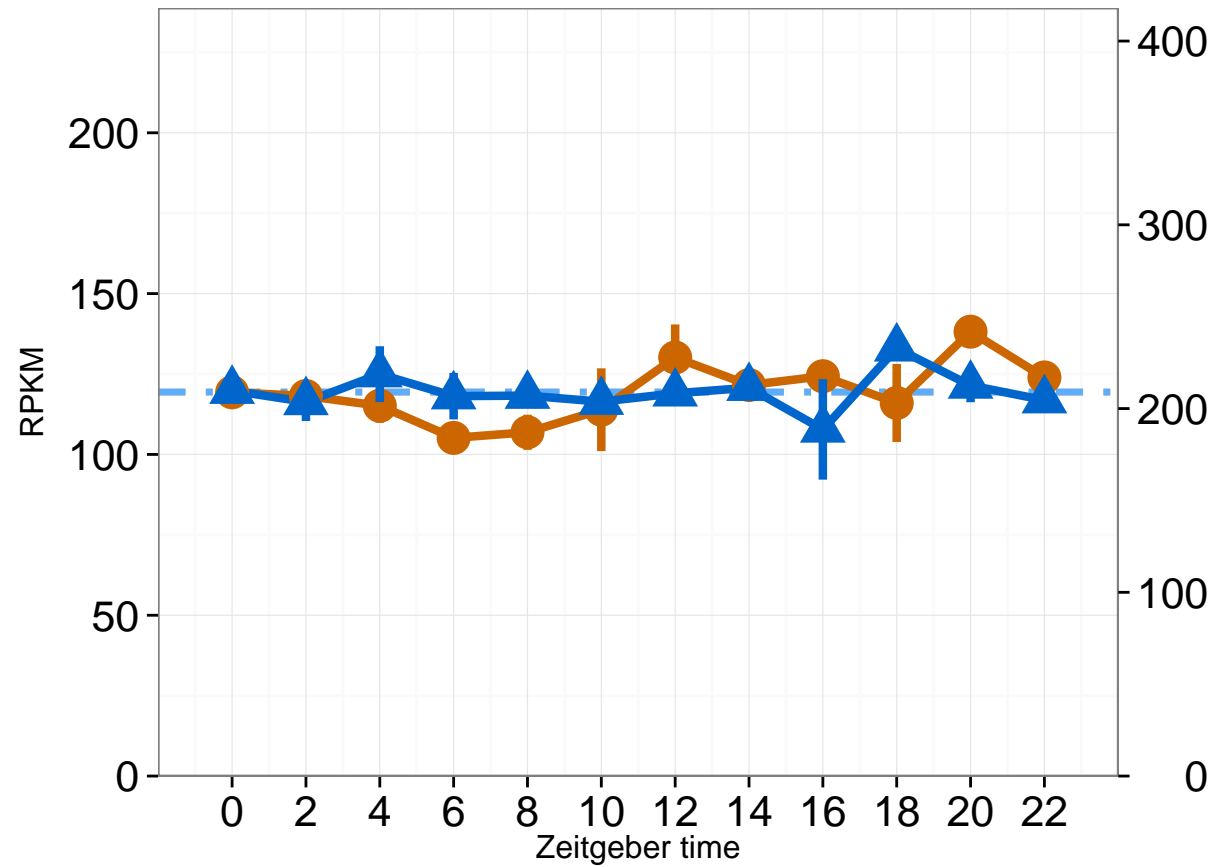

# Psma6

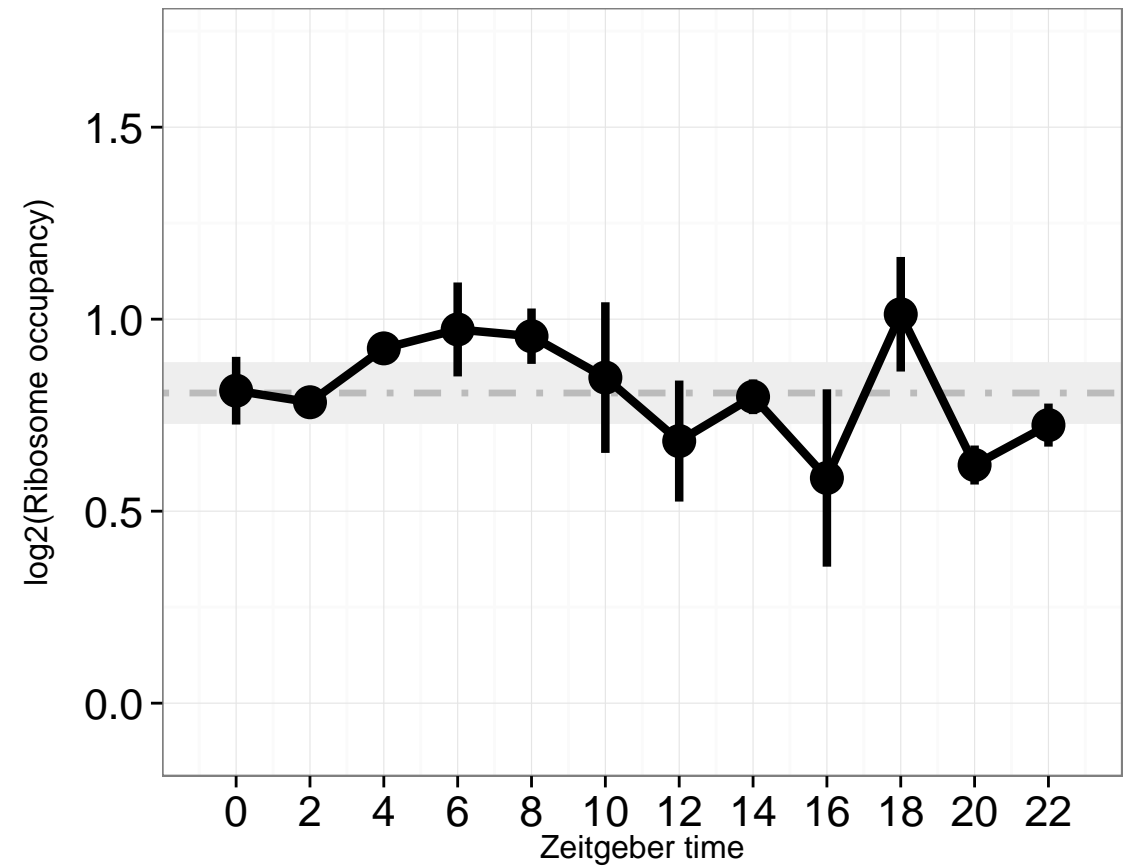

Supplement: Supplementary file 13029 [file 1]

## Ercc2

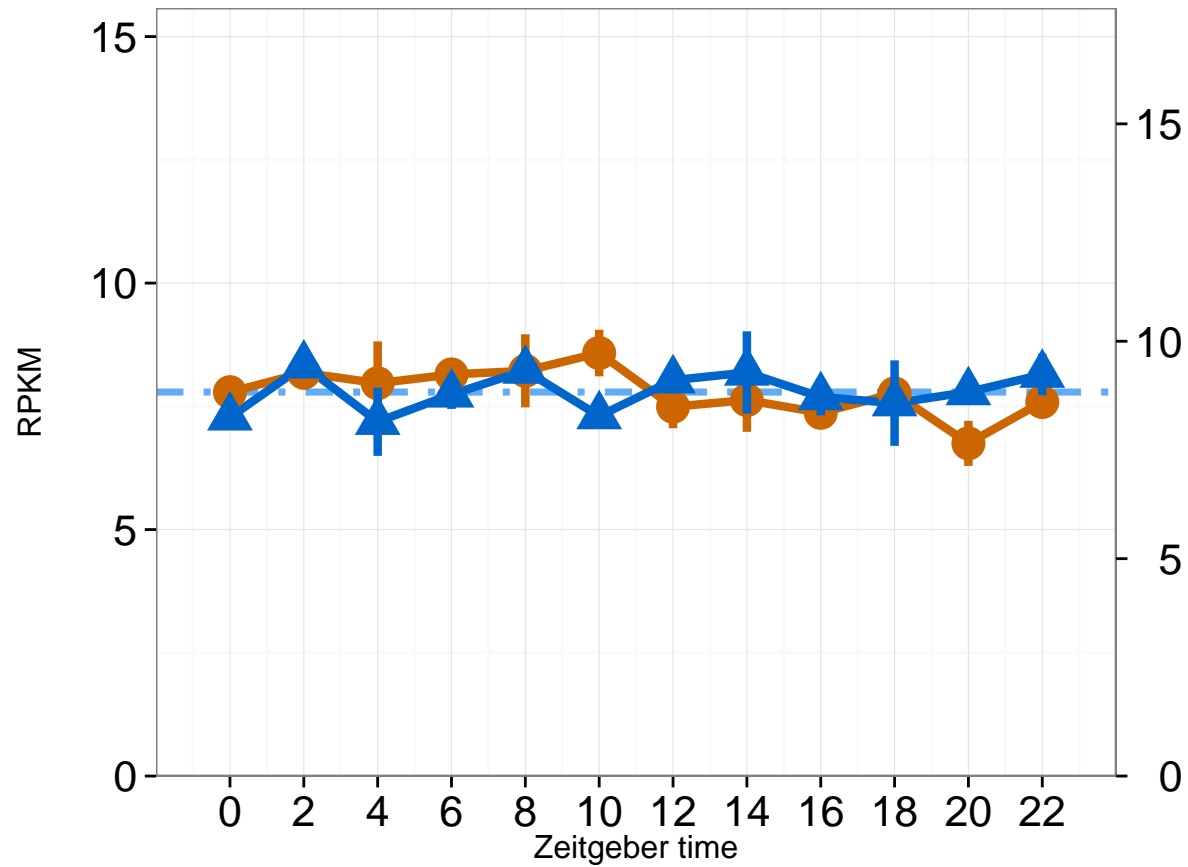

## Ercc2

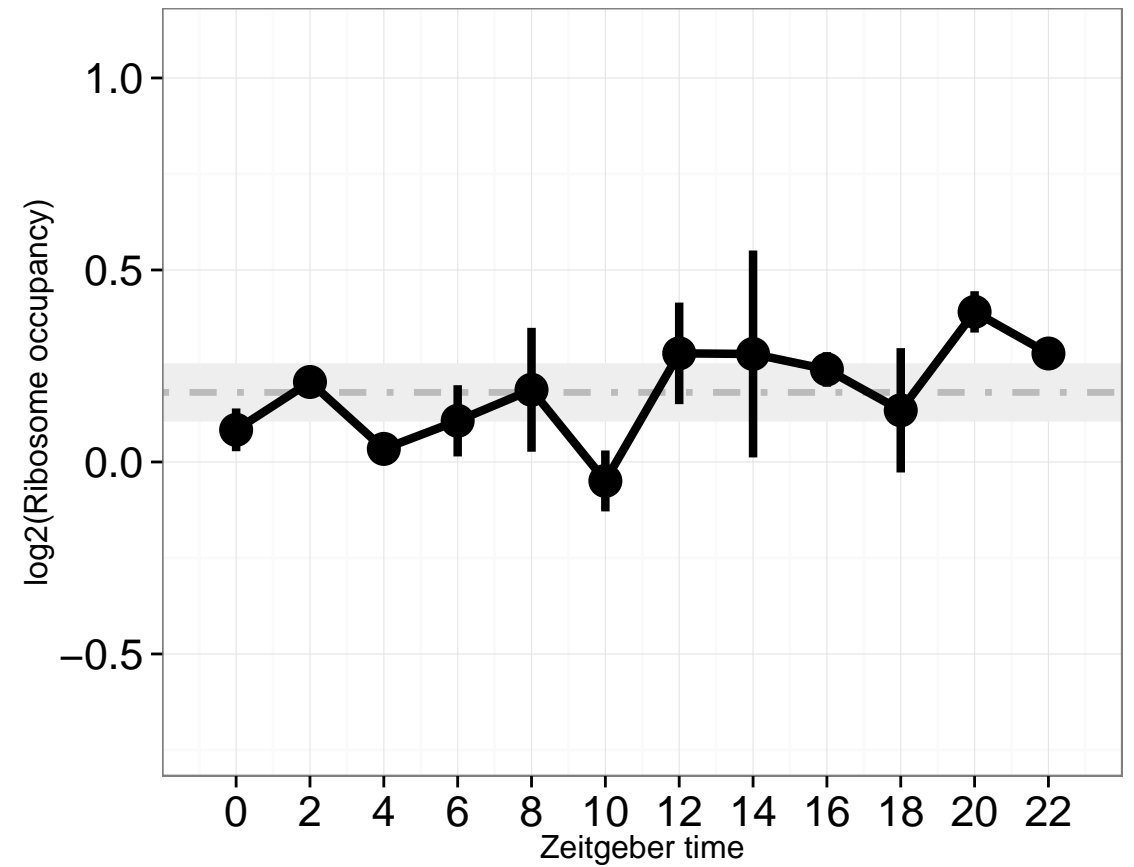

Supplement: Supplementary file 13030 [file 1]

## Ap2b1

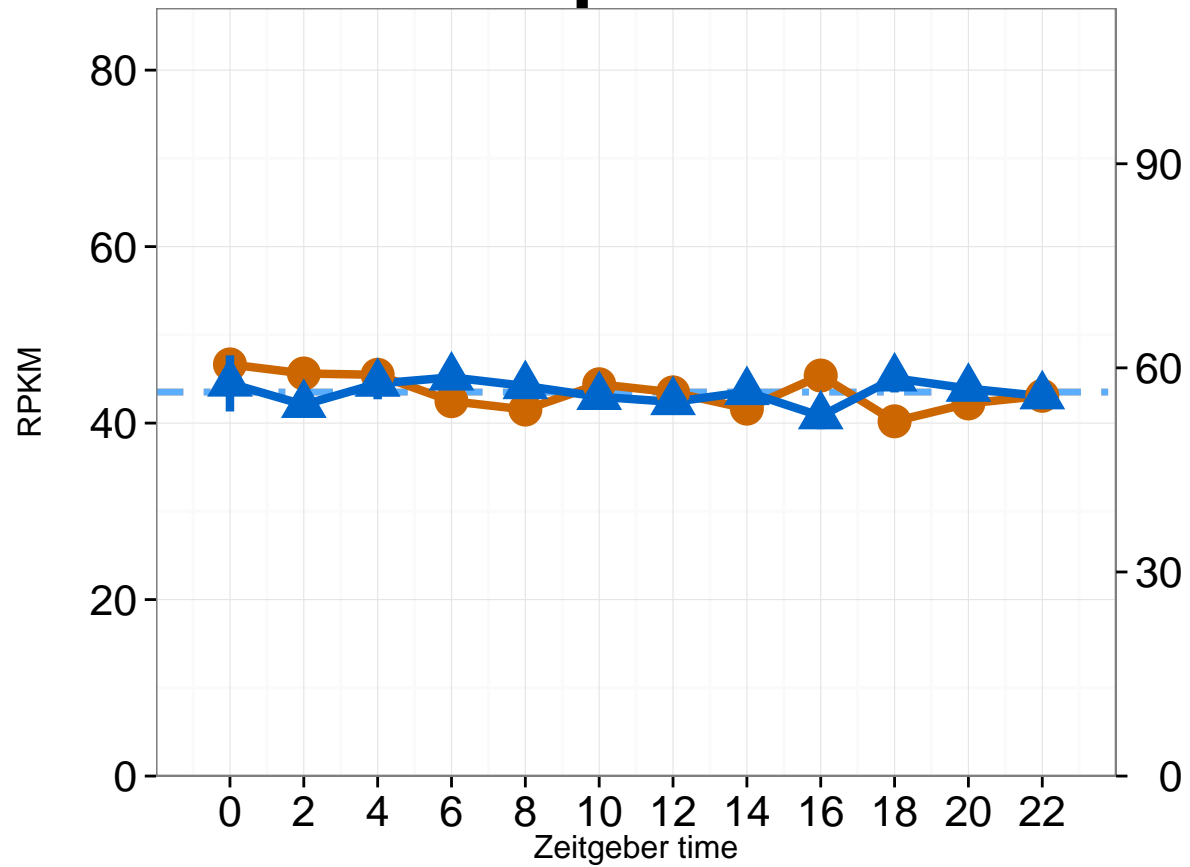

## Ap2b1

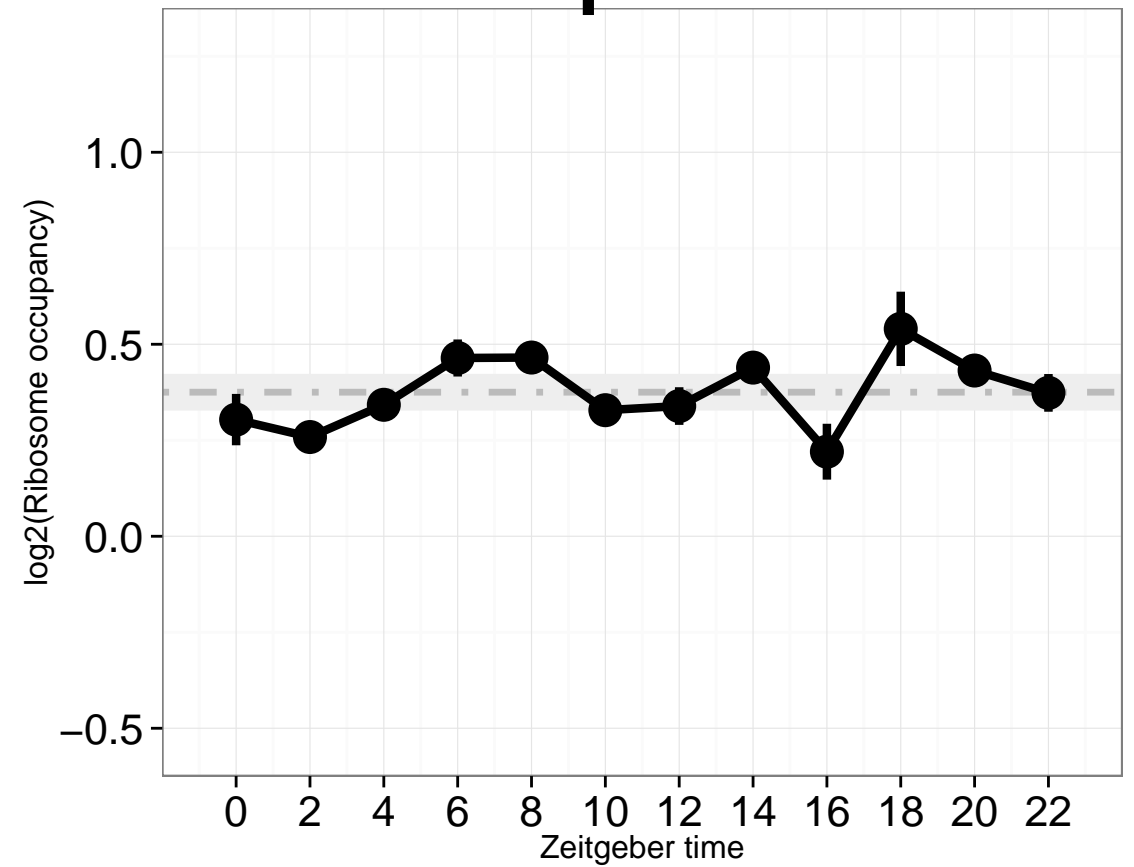

Supplement: Supplementary file 13031 [file 1]

# Ptprd

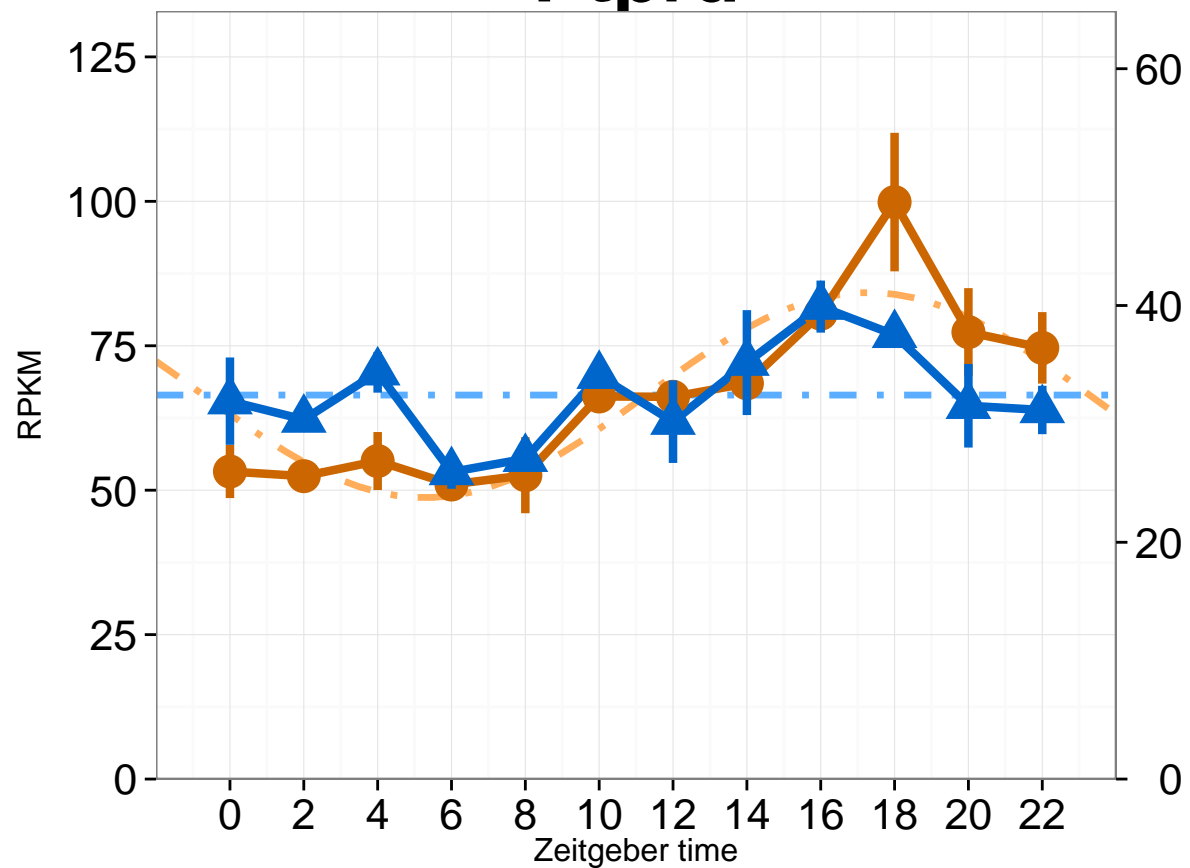

# Ptprd

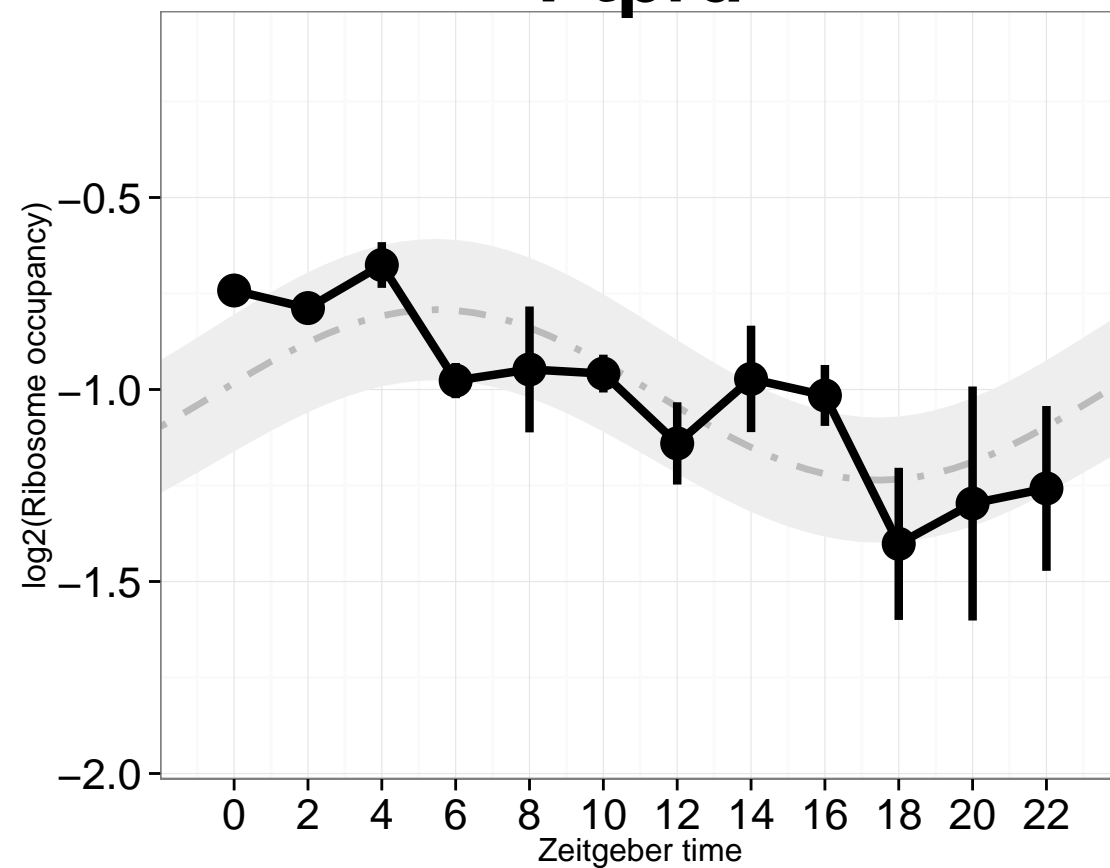

Supplement: Supplementary file 13032 [file 1]

## Sema5a

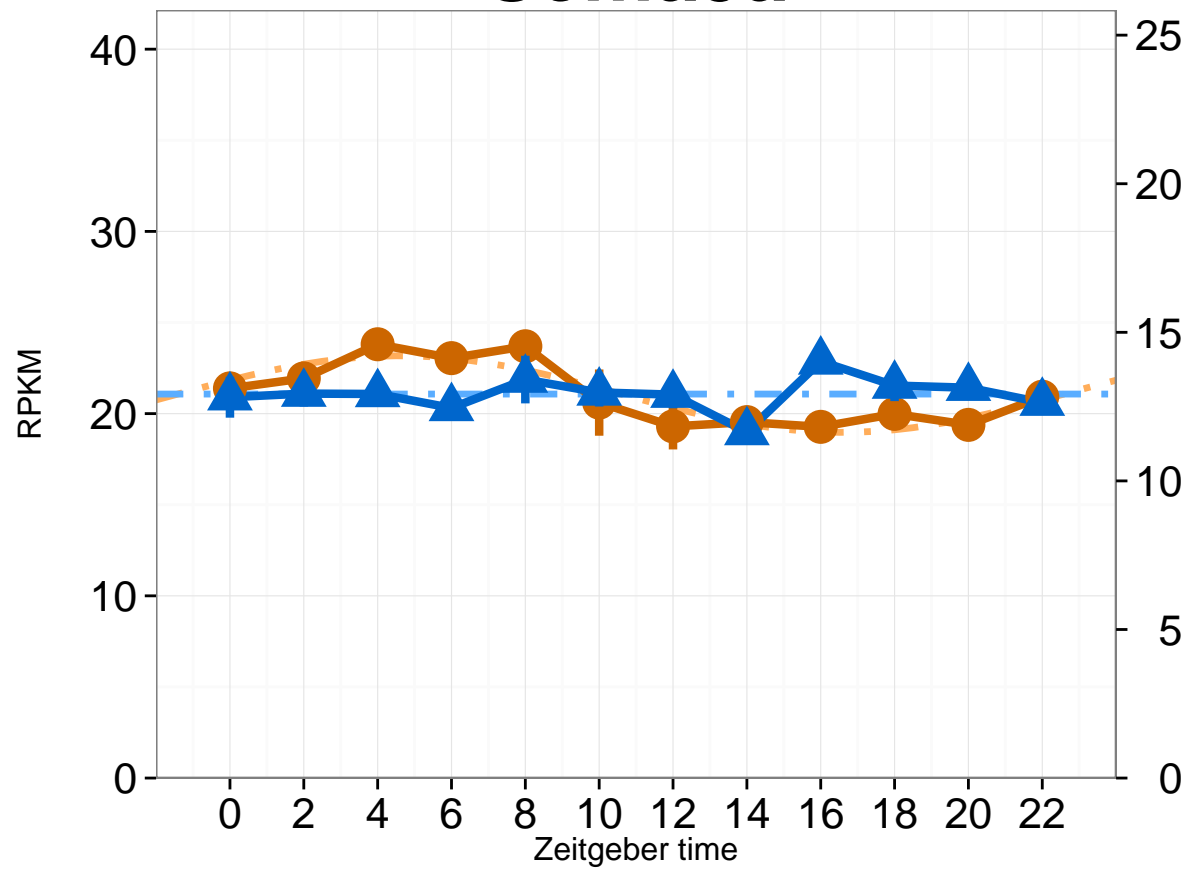

## Sema5a

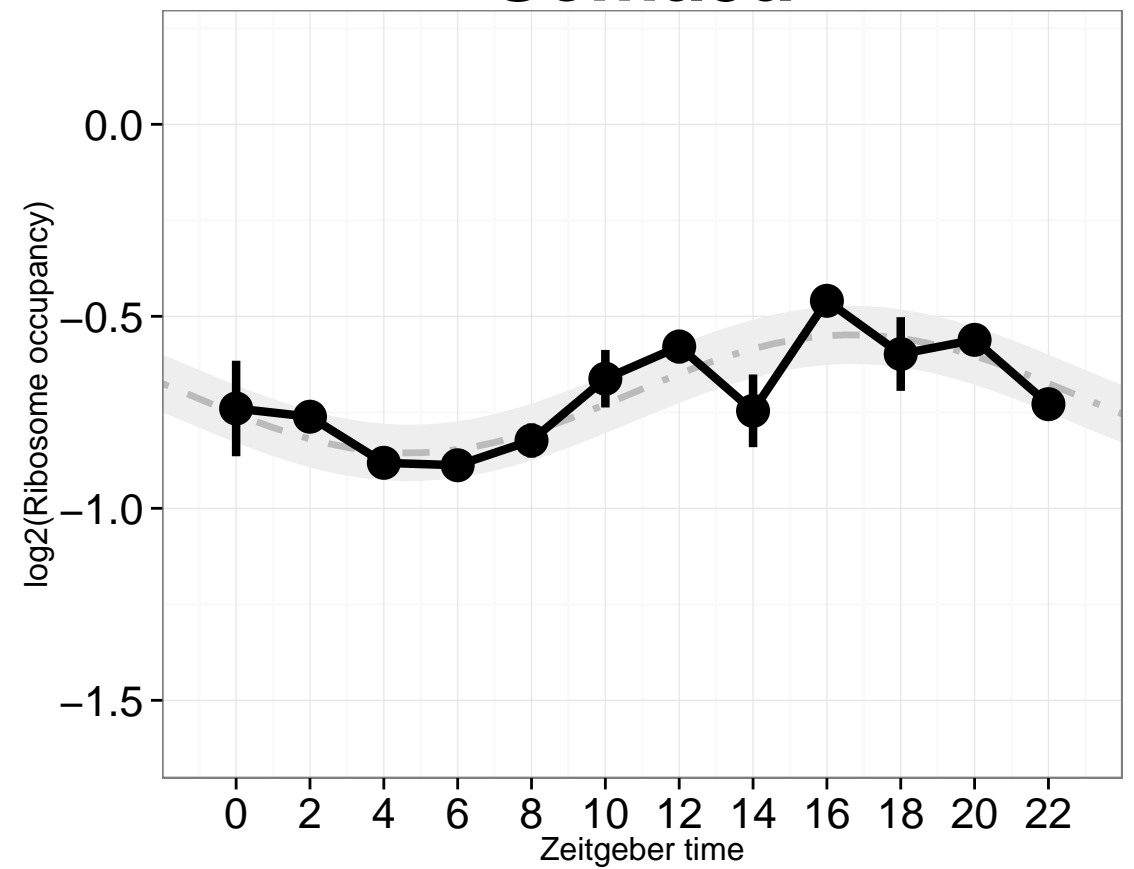

Supplement: Supplementary file 13033 [file 1]

# Fetub

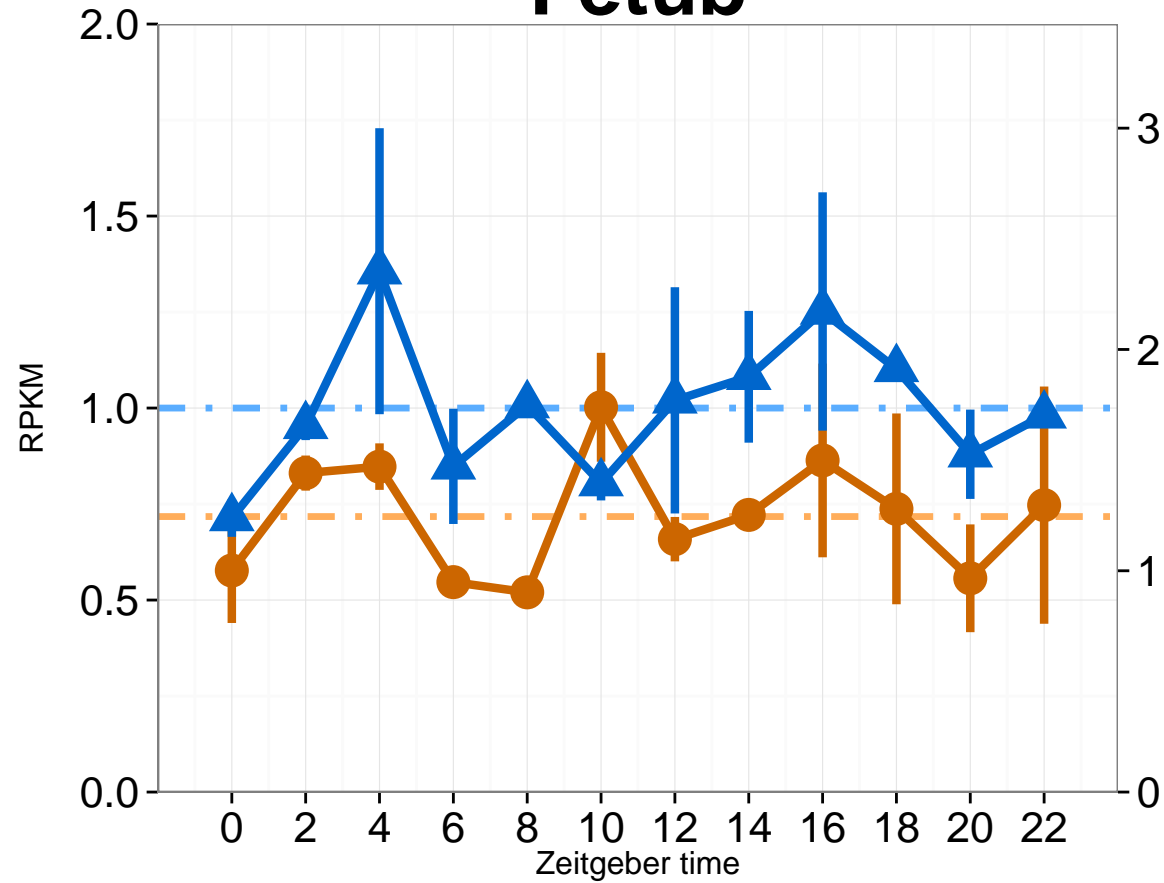

# Fetub

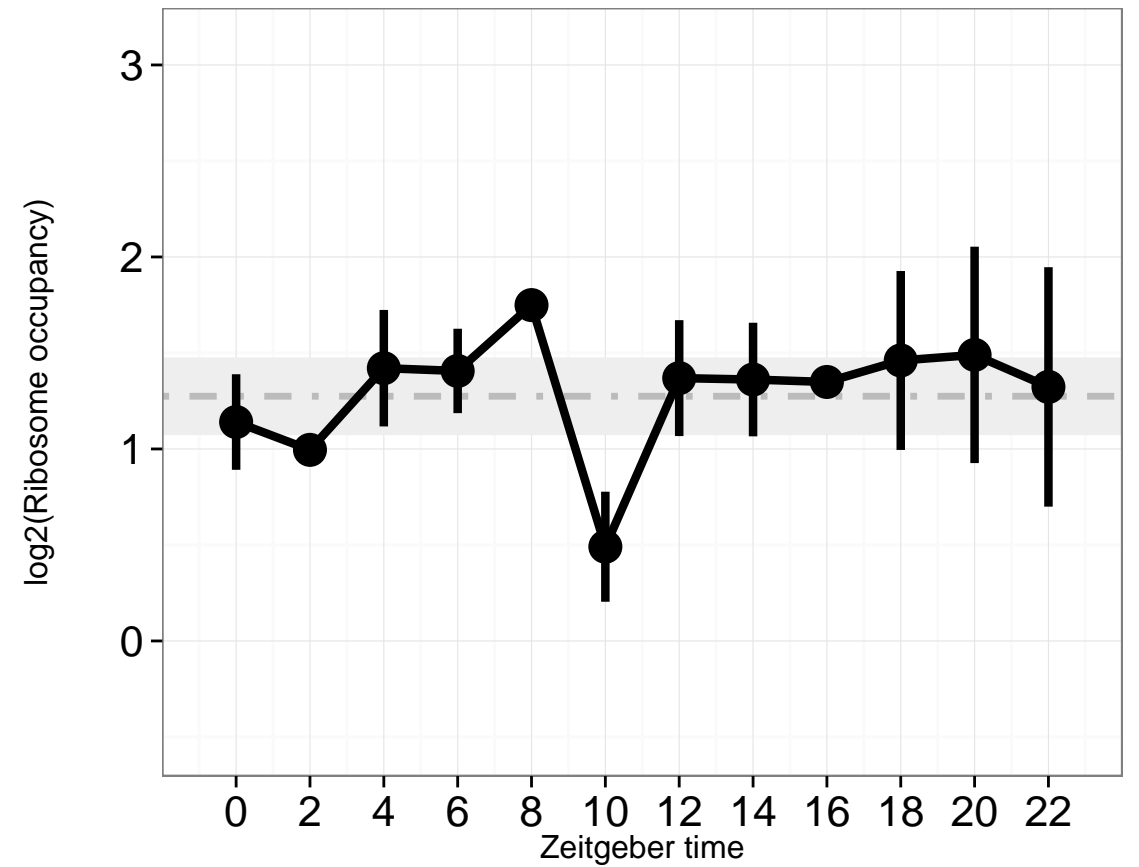

Supplement: Supplementary file 13034 [file 1]

## Golga2

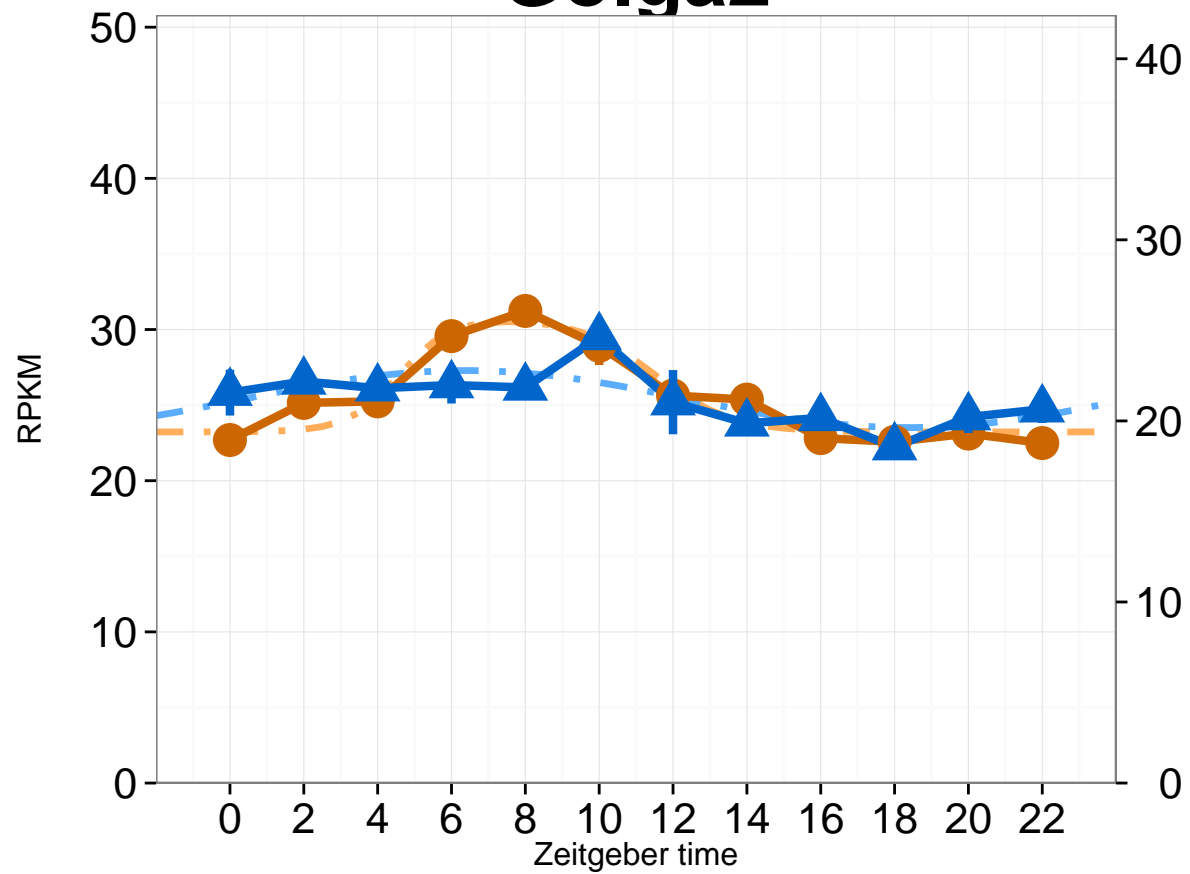

## Golga2

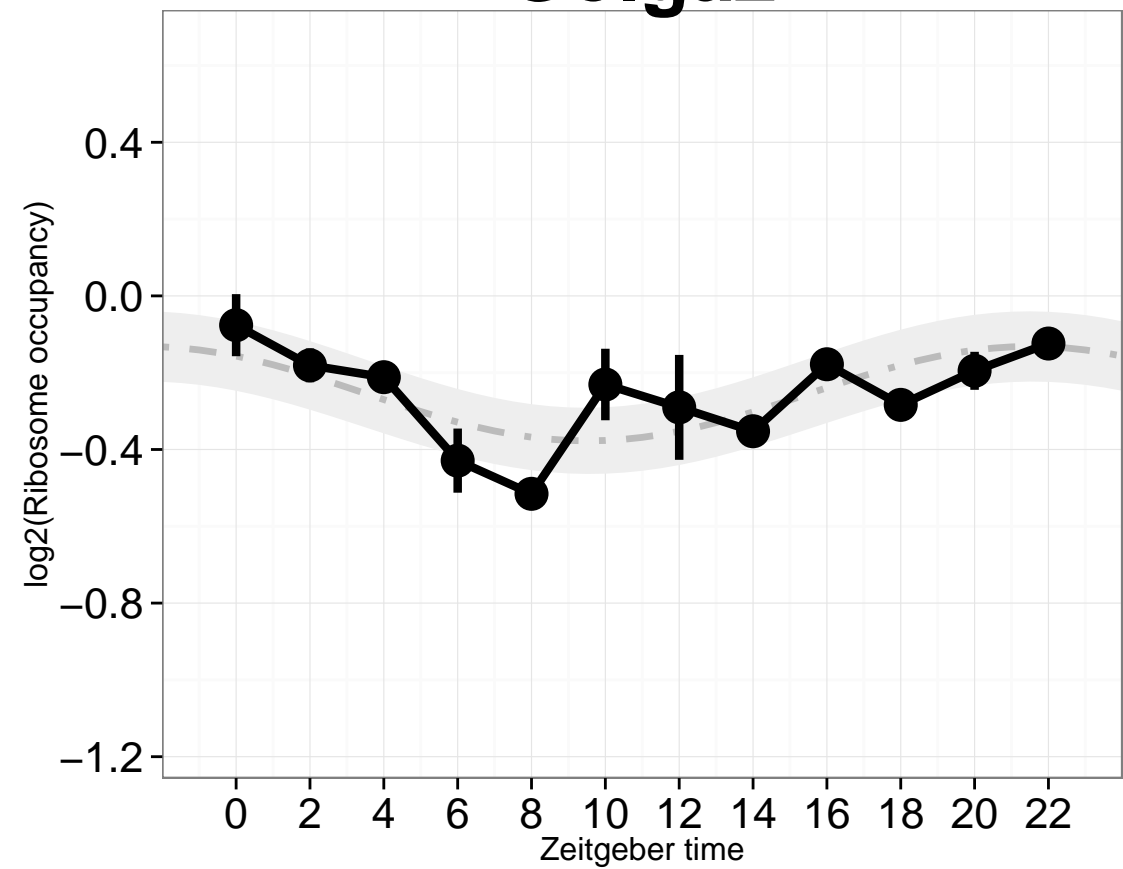

Supplement: Supplementary file 13035 [file 1]

## Haus4

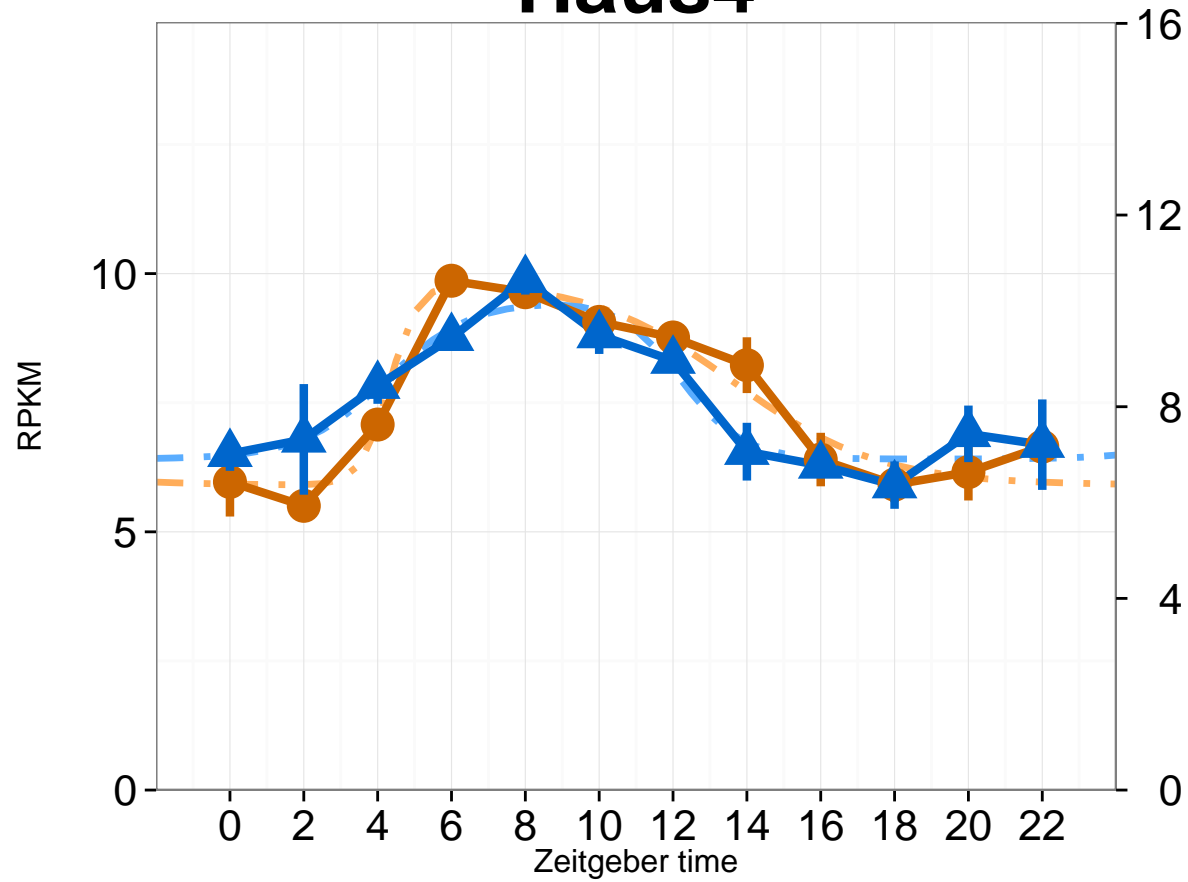

## Haus4

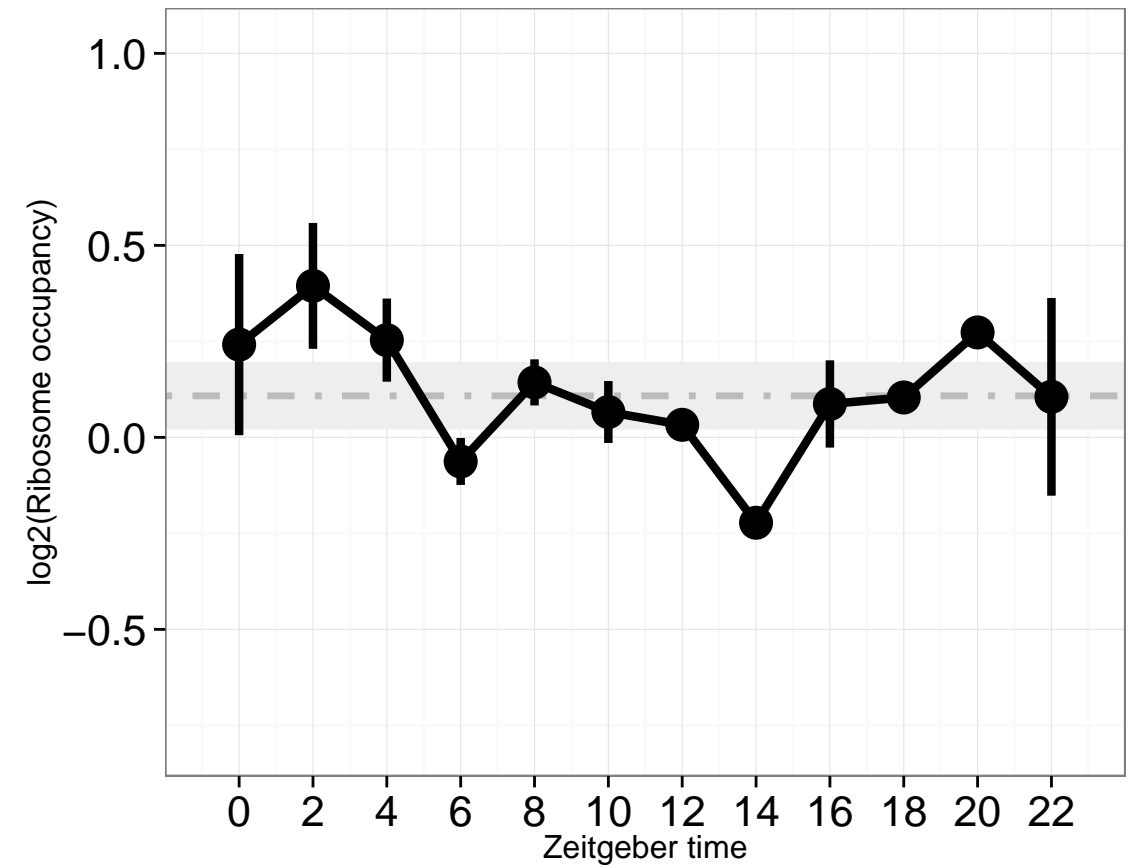

Supplement: Supplementary file 13036 [file 1]

# Tmem132a

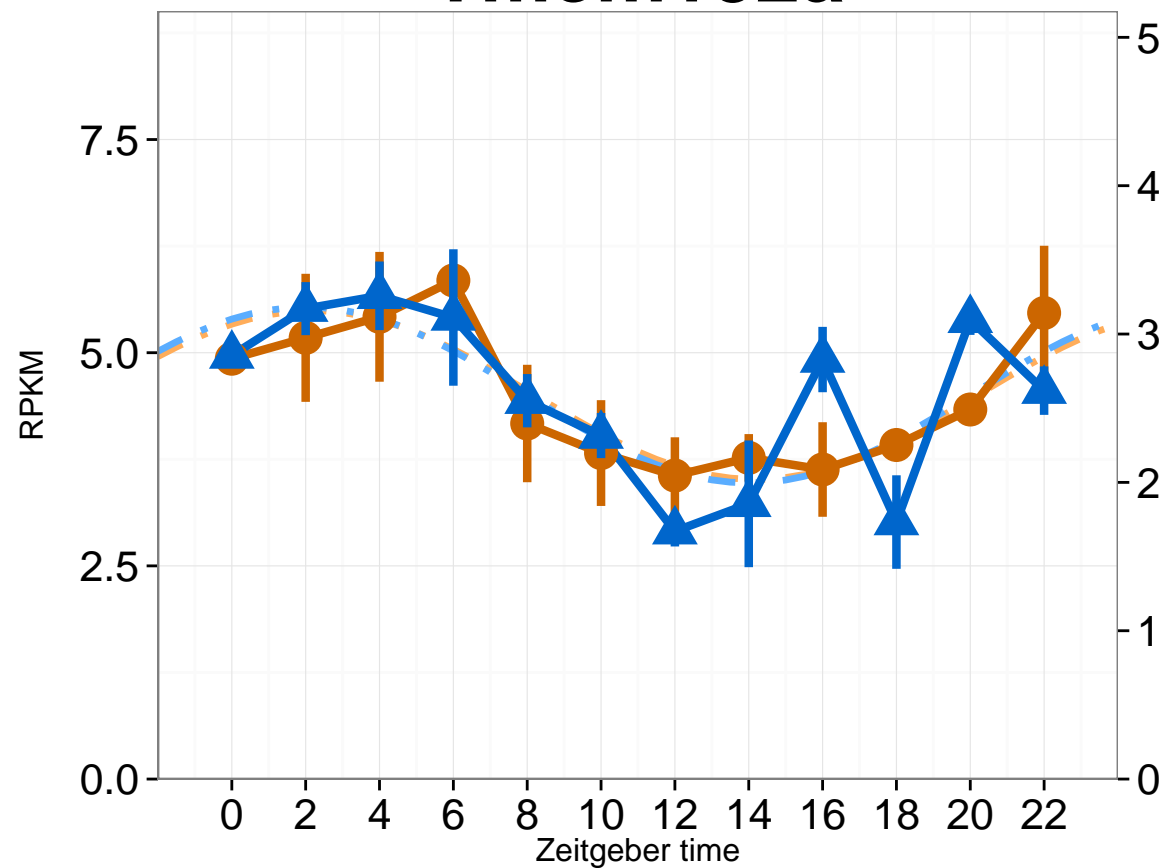

# Tmem132a

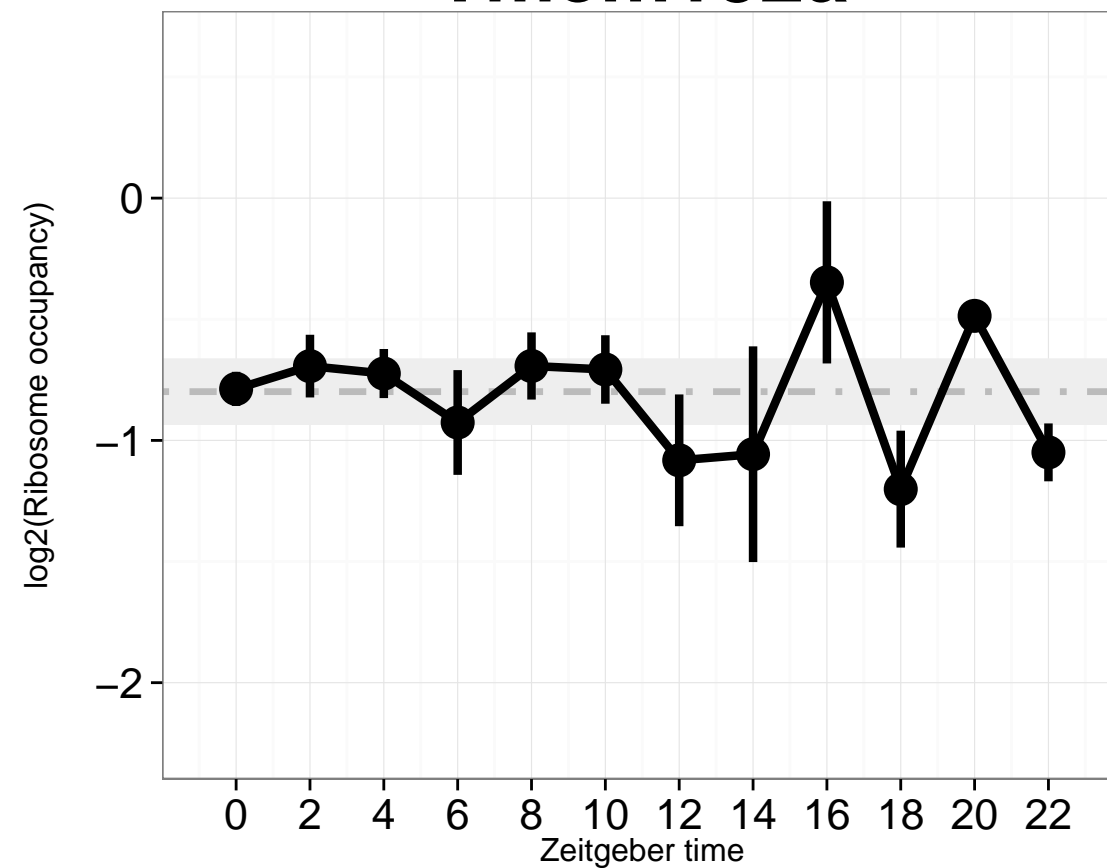

Supplement: Supplementary file 13037 [file 1]

# Psm�4

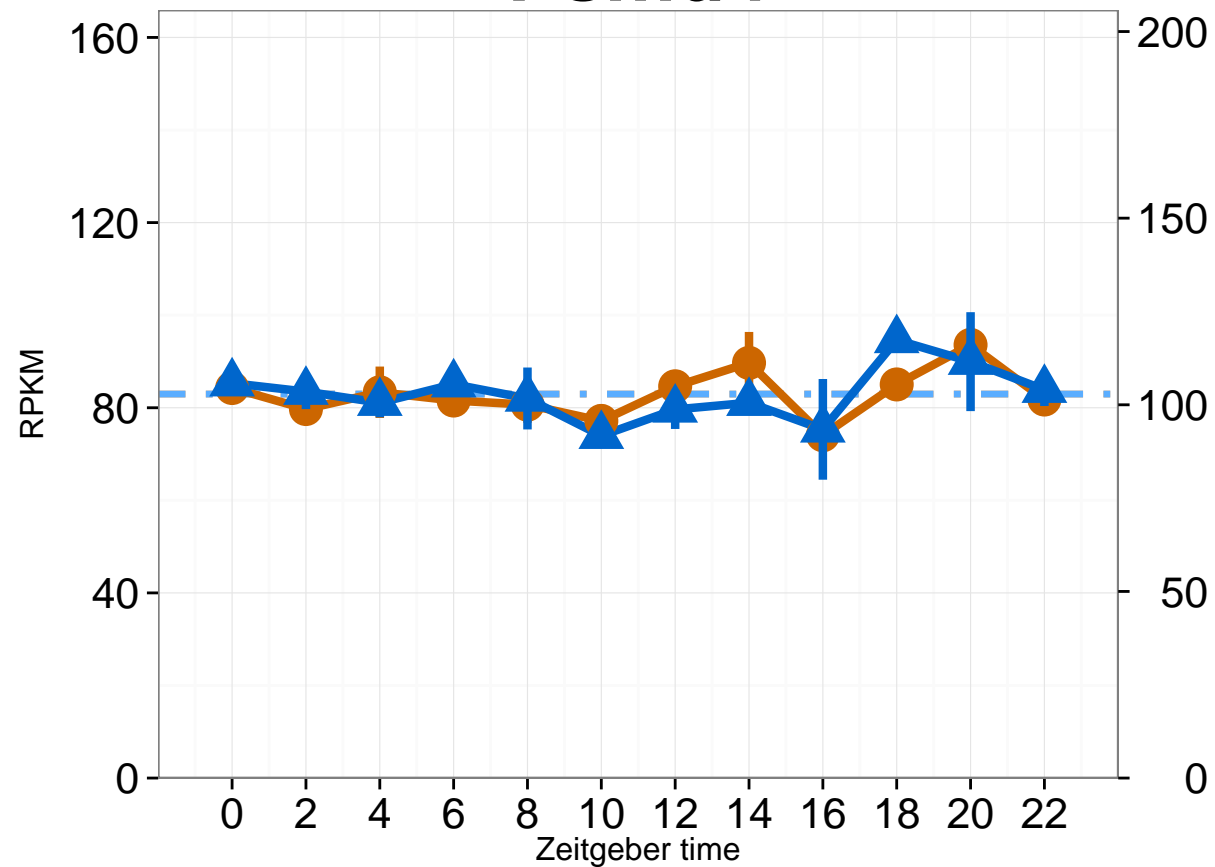

# Psm�4

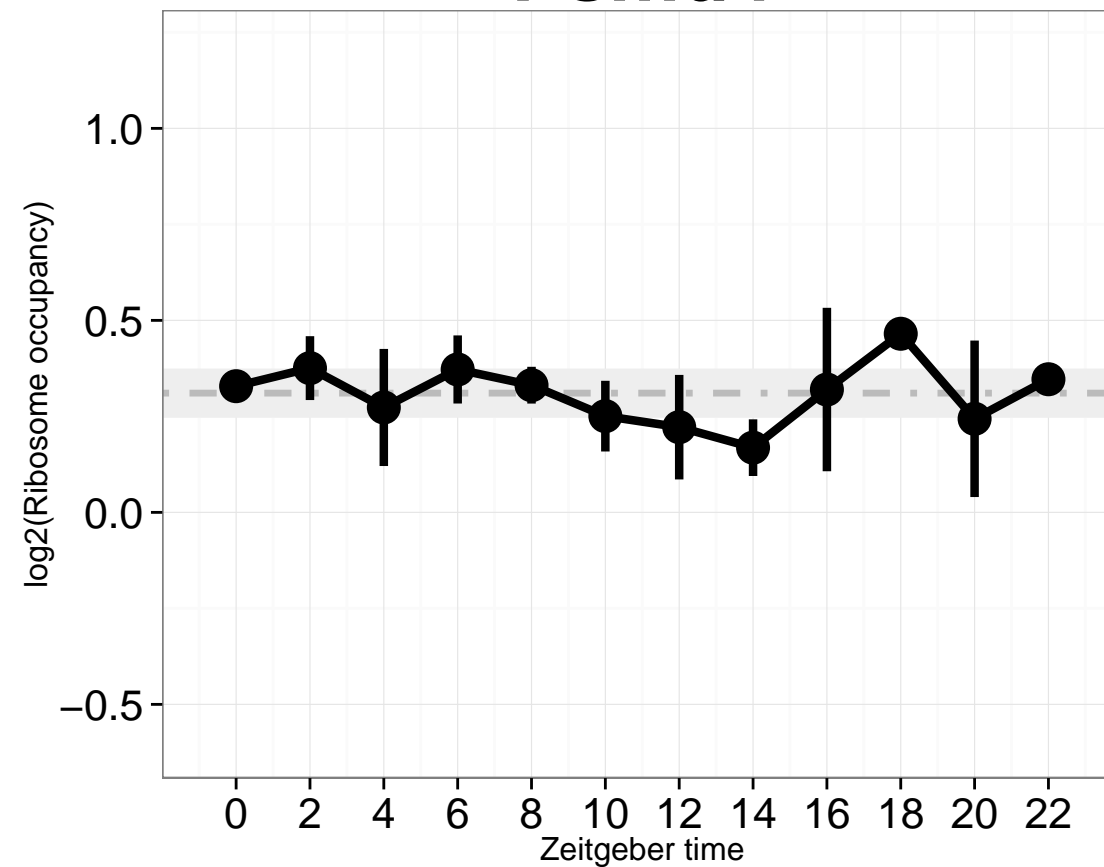

Supplement: Supplementary file 13038 [file 1]

## Fzr1

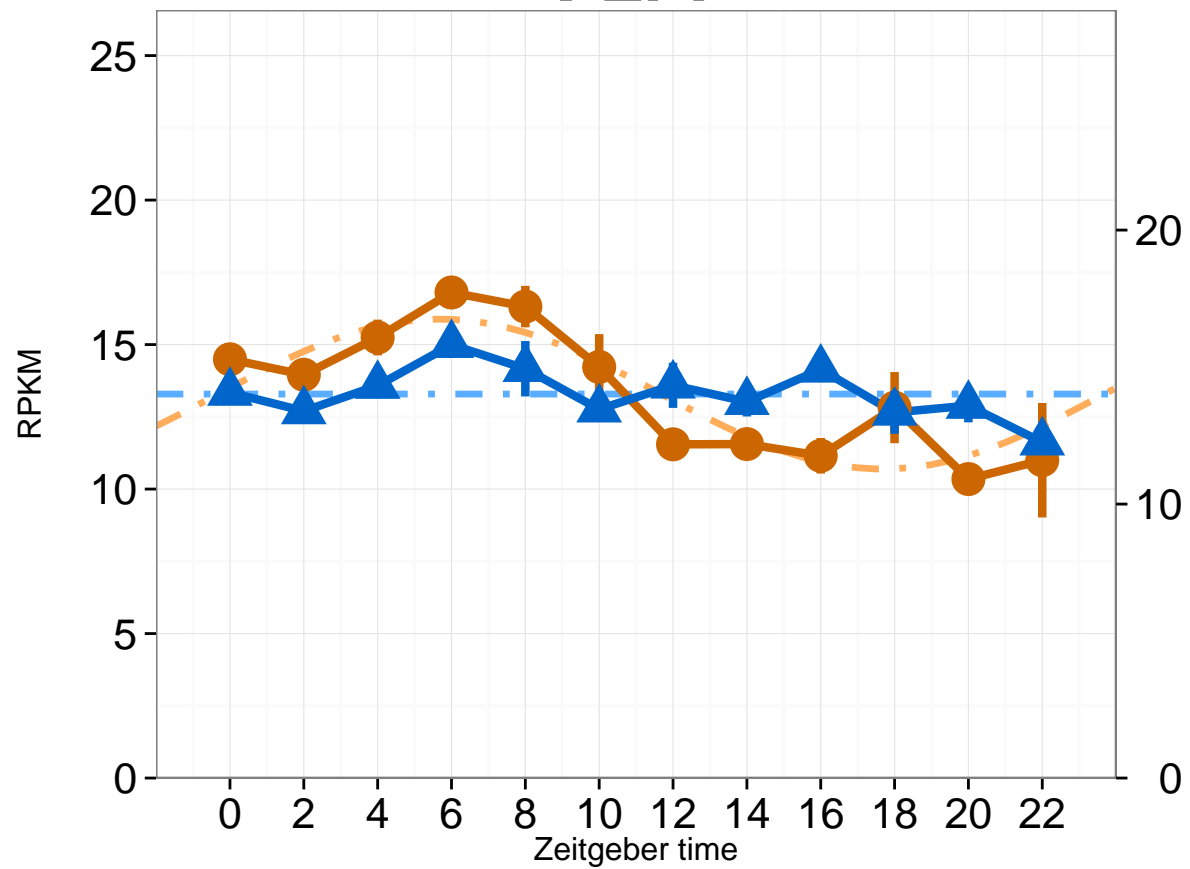

## Fzr1

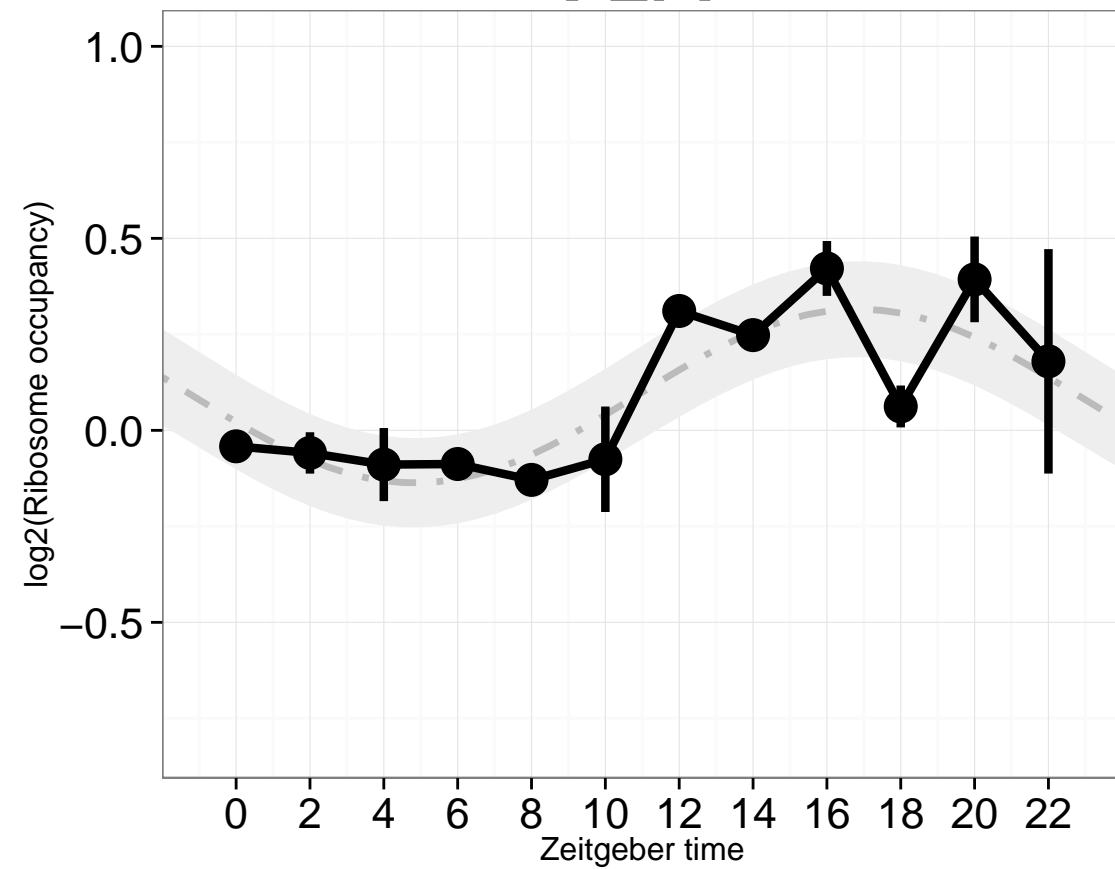

Supplement: Supplementary file 13039 [file 1]

# Psme1

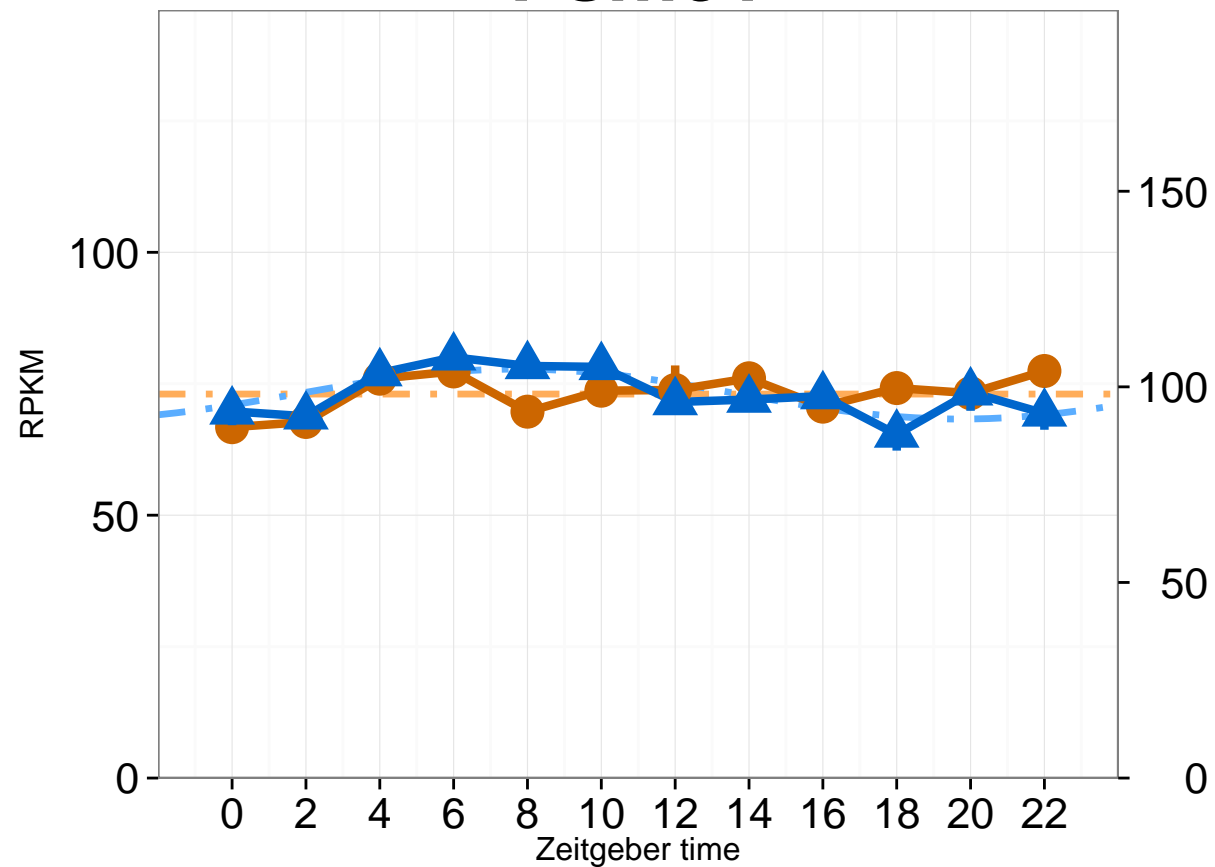

# Psme1

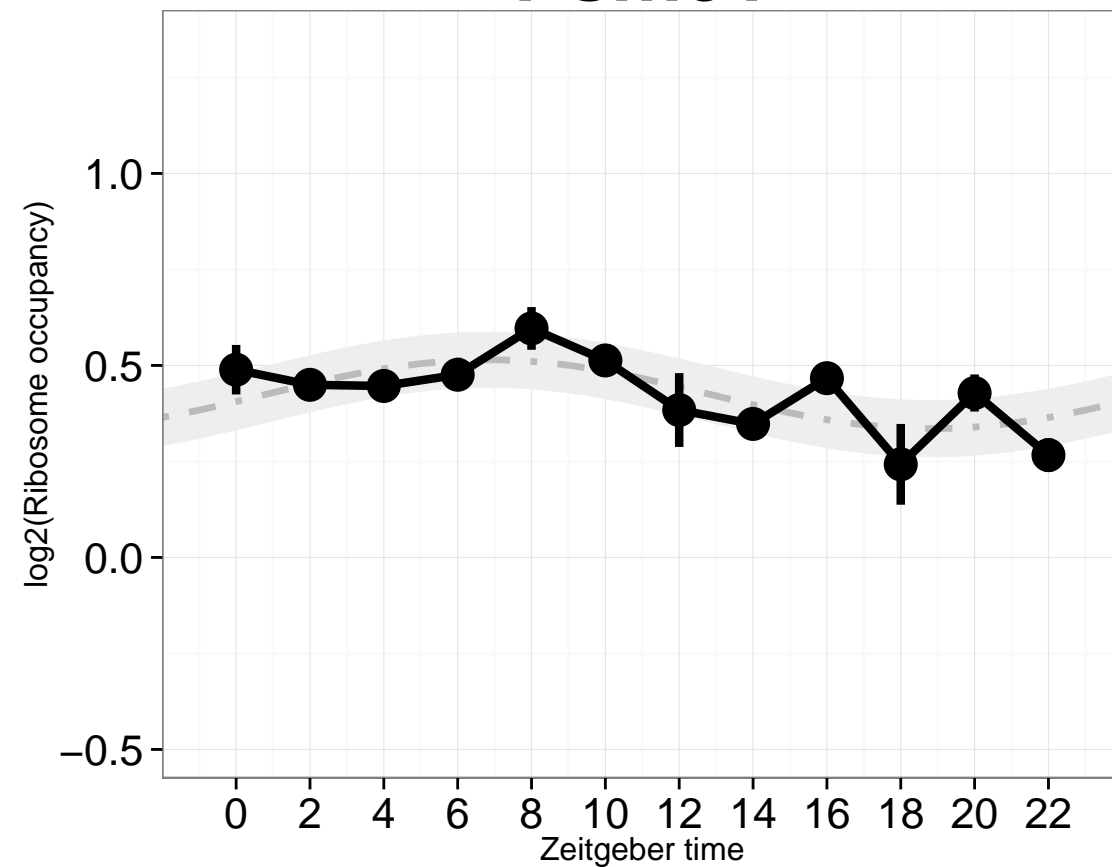

Supplement: Supplementary file 13040 [file 1]

# Ints4

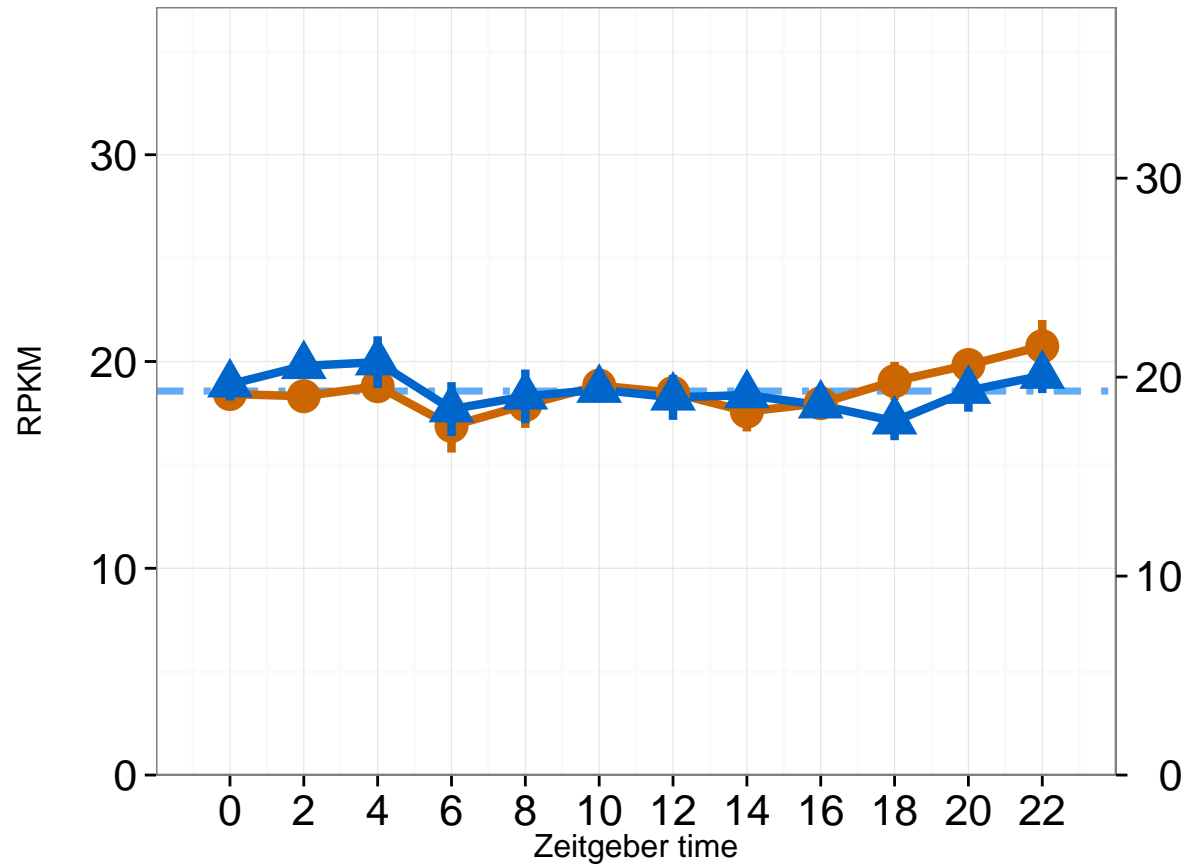

# Ints4

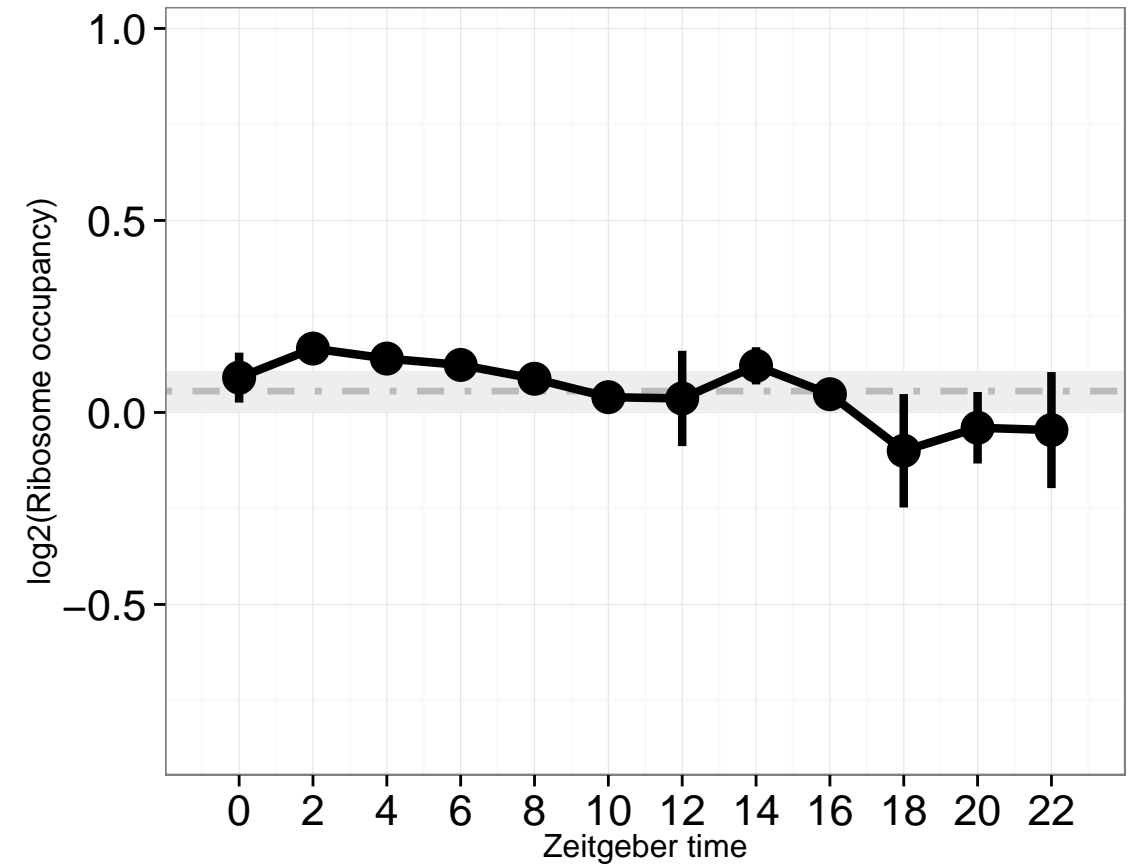

Supplement: Supplementary file 13041 [file 1]

# BC030336

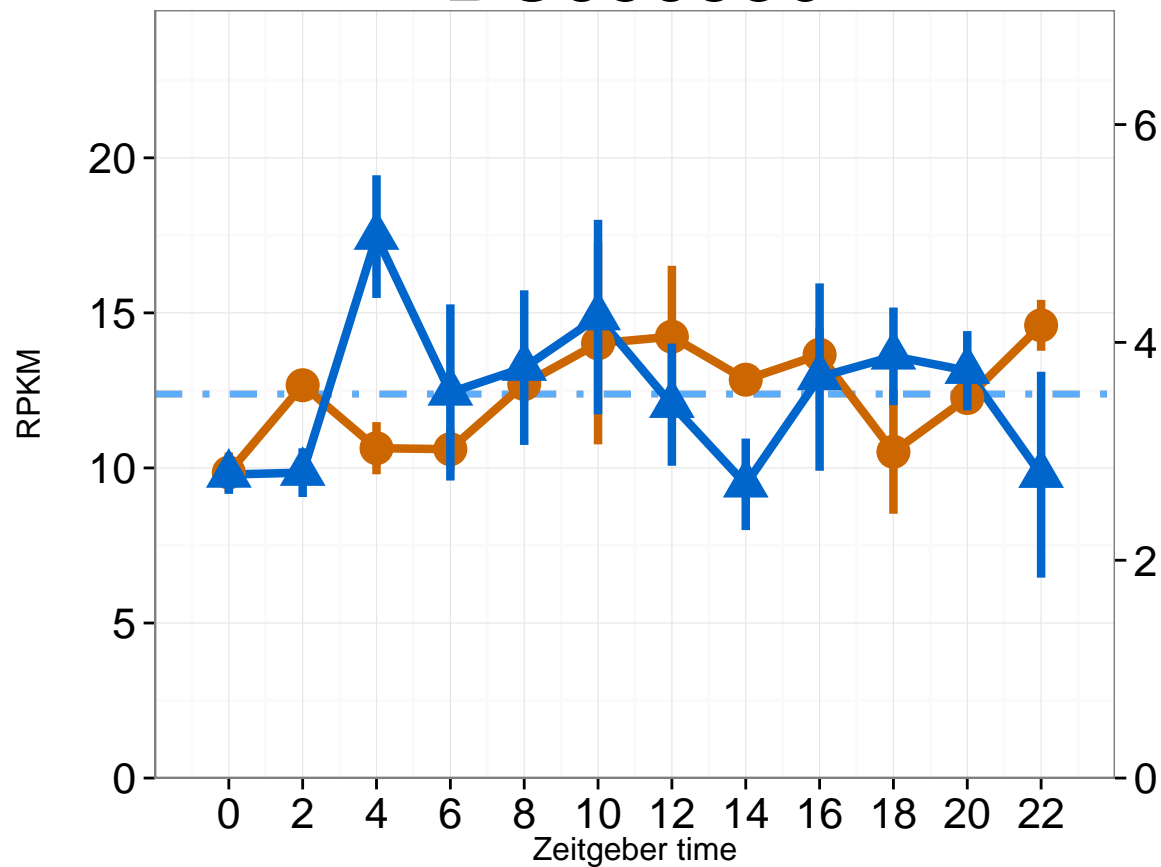

# BC030336

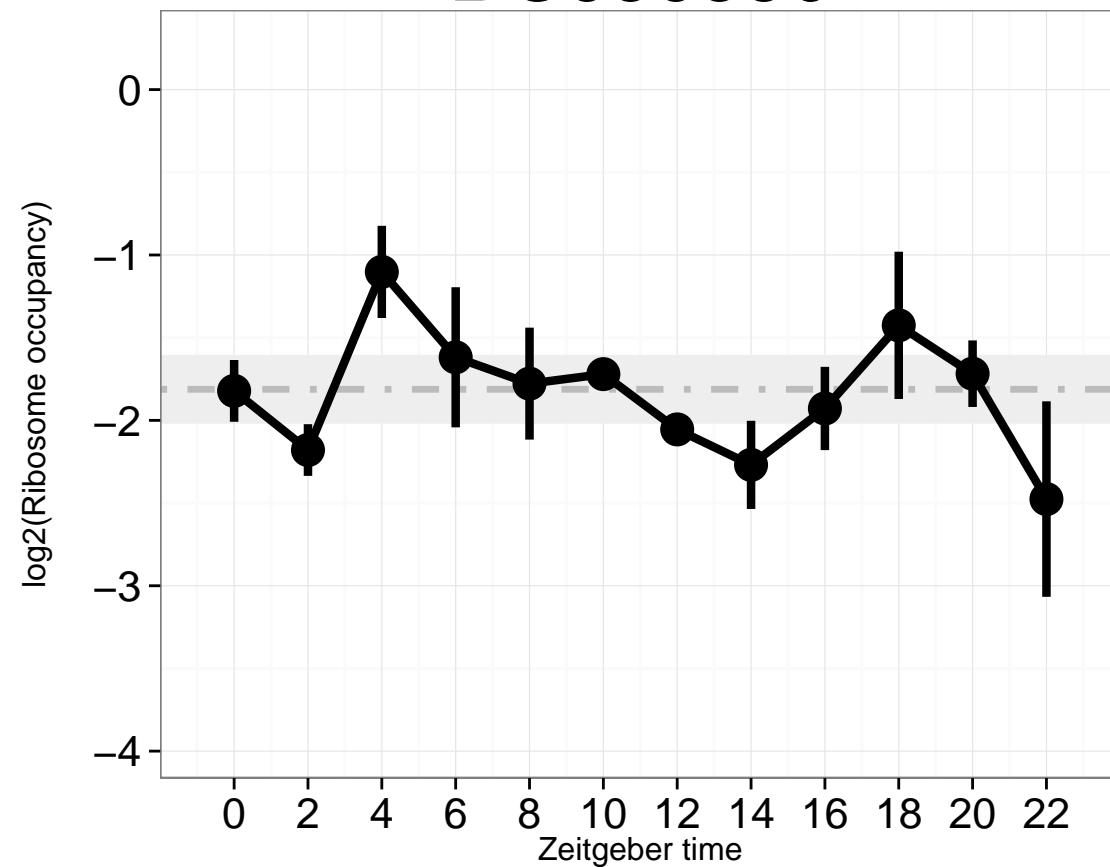

Supplement: Supplementary file 13042 [file 1]

## Hccs

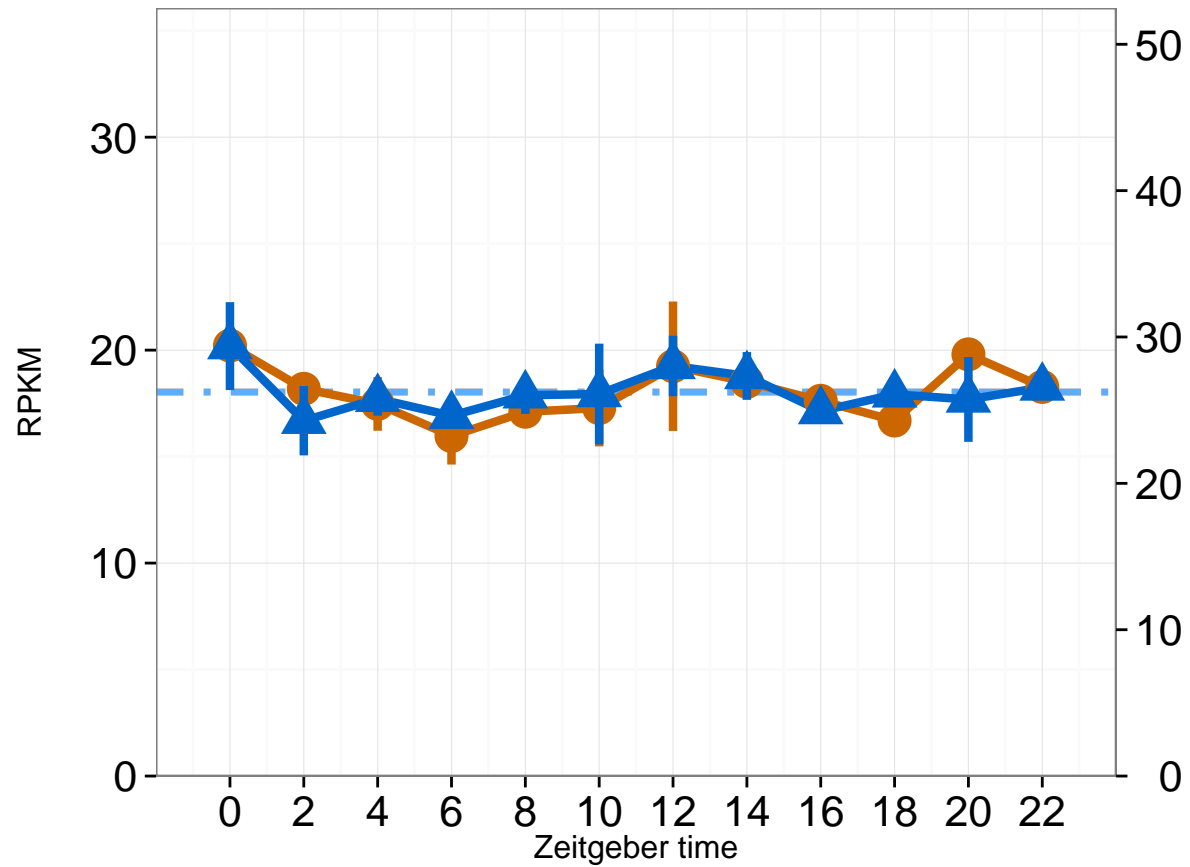

## Hccs

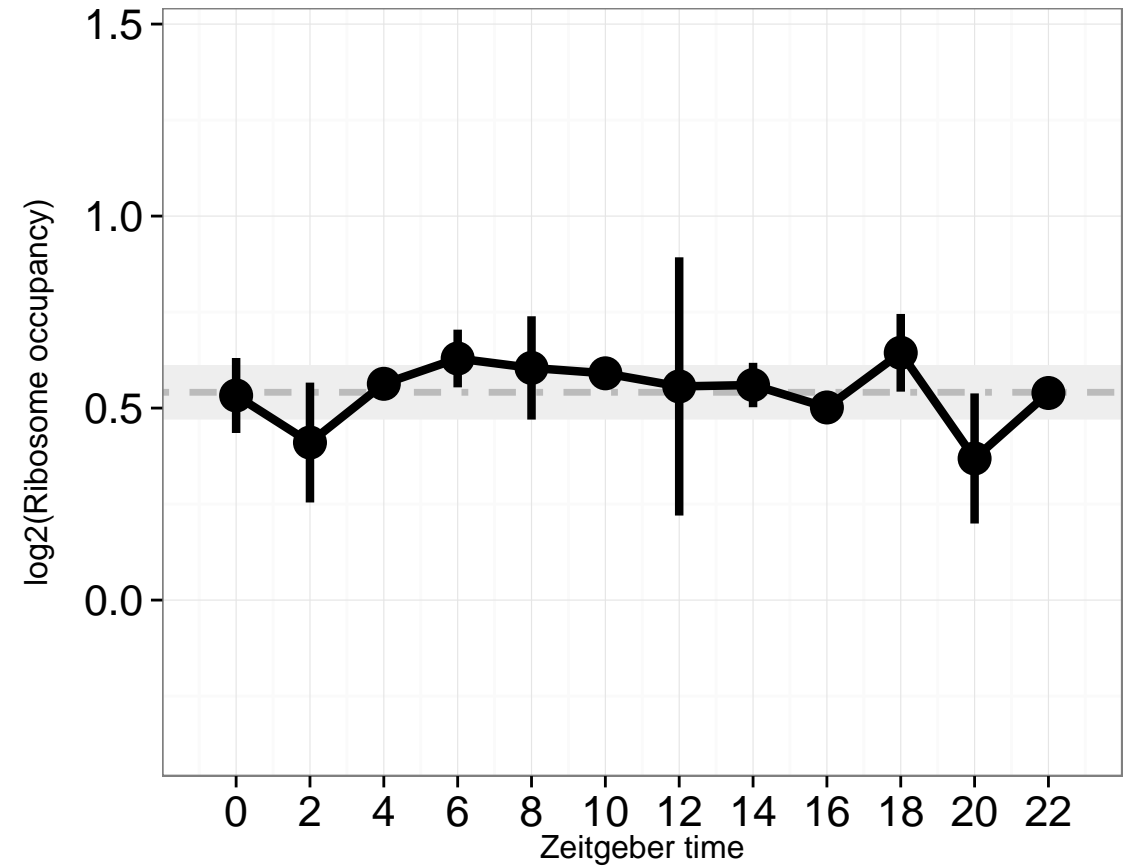

Supplement: Supplementary file 13043 [file 1]

# Pde3a

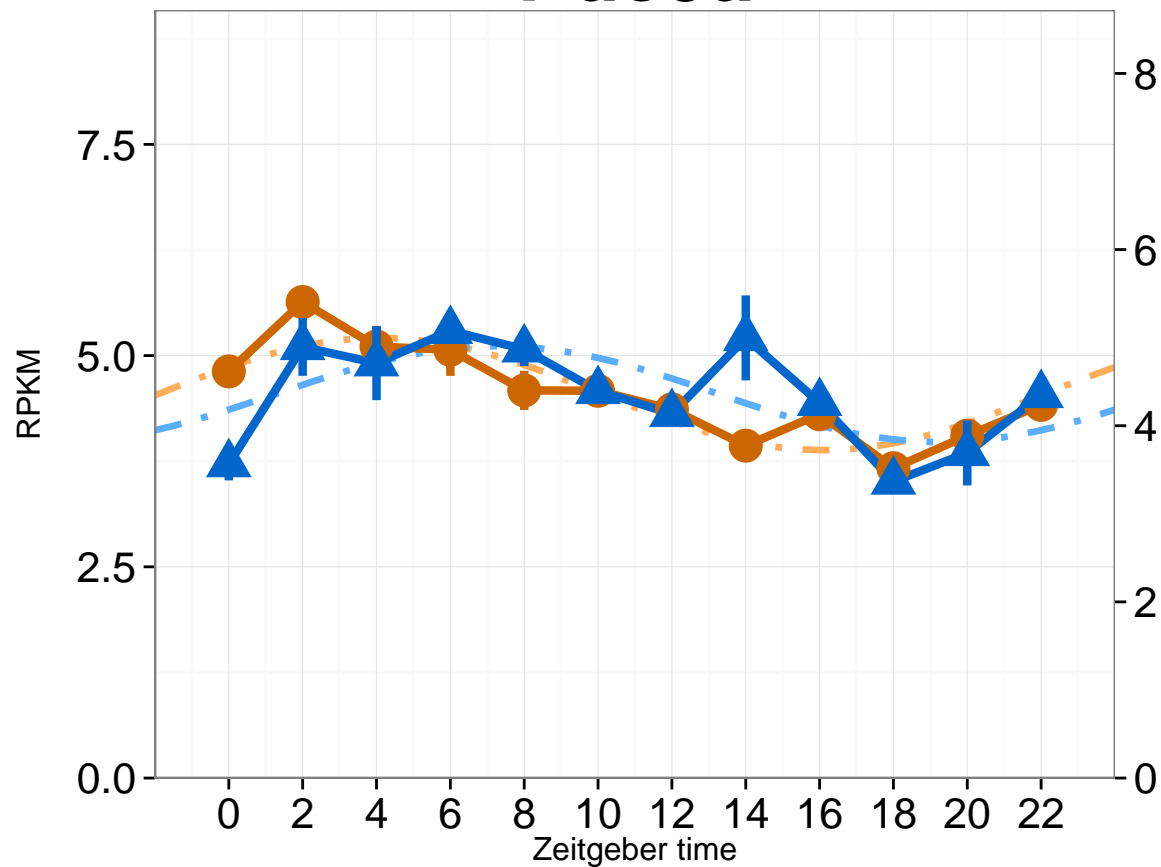

# Pde3a

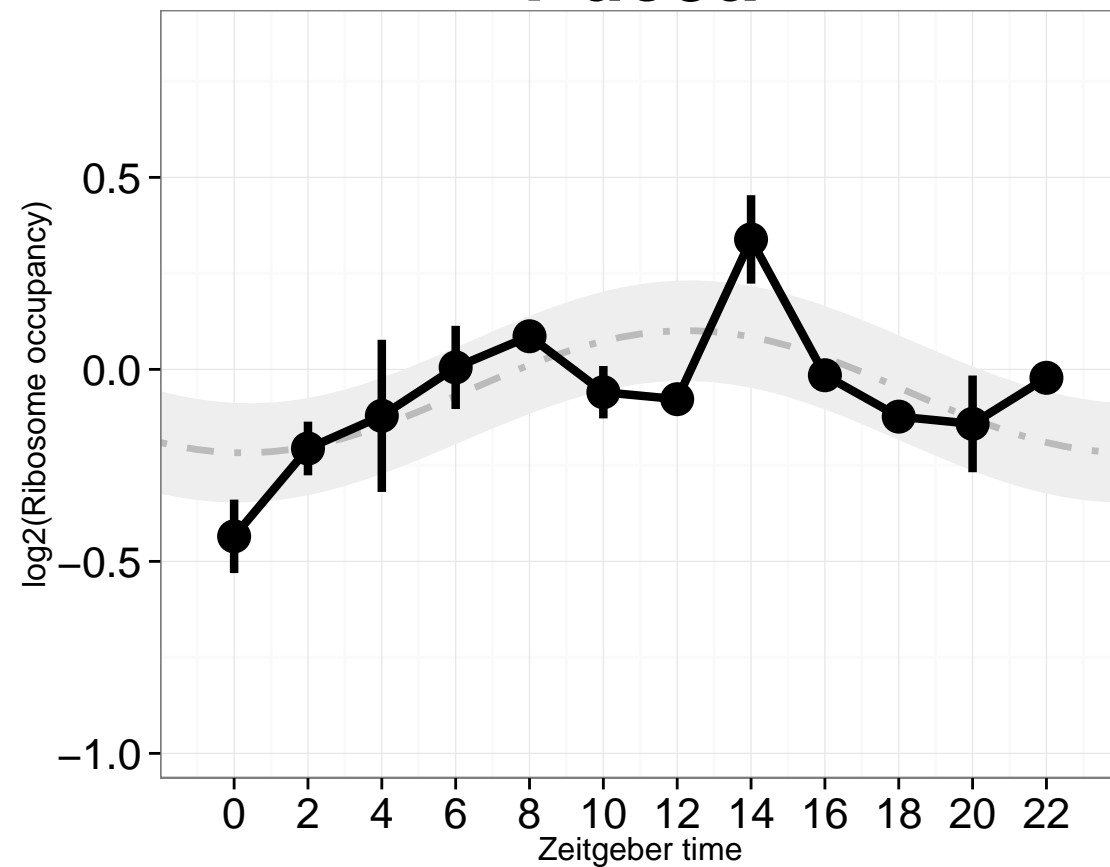

Supplement: Supplementary file 13044 [file 1]

# Zfand2a

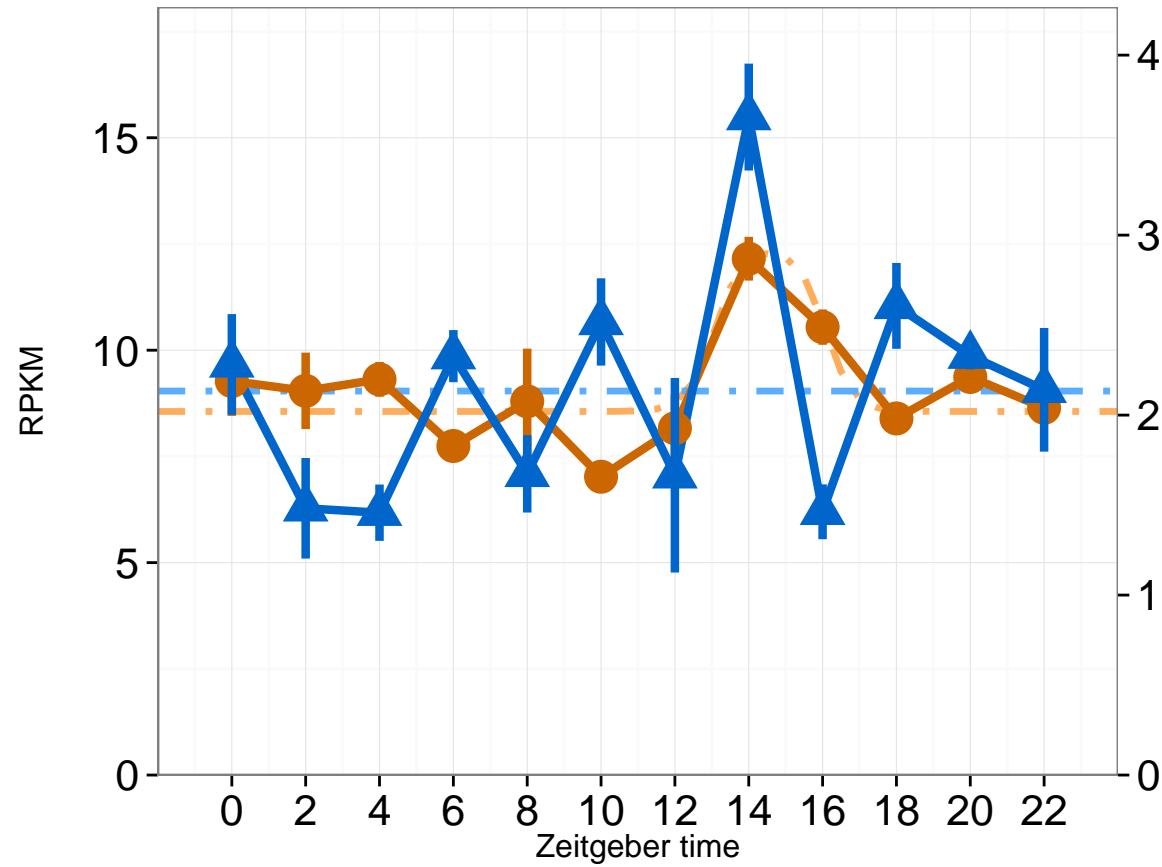

# Zfand2a

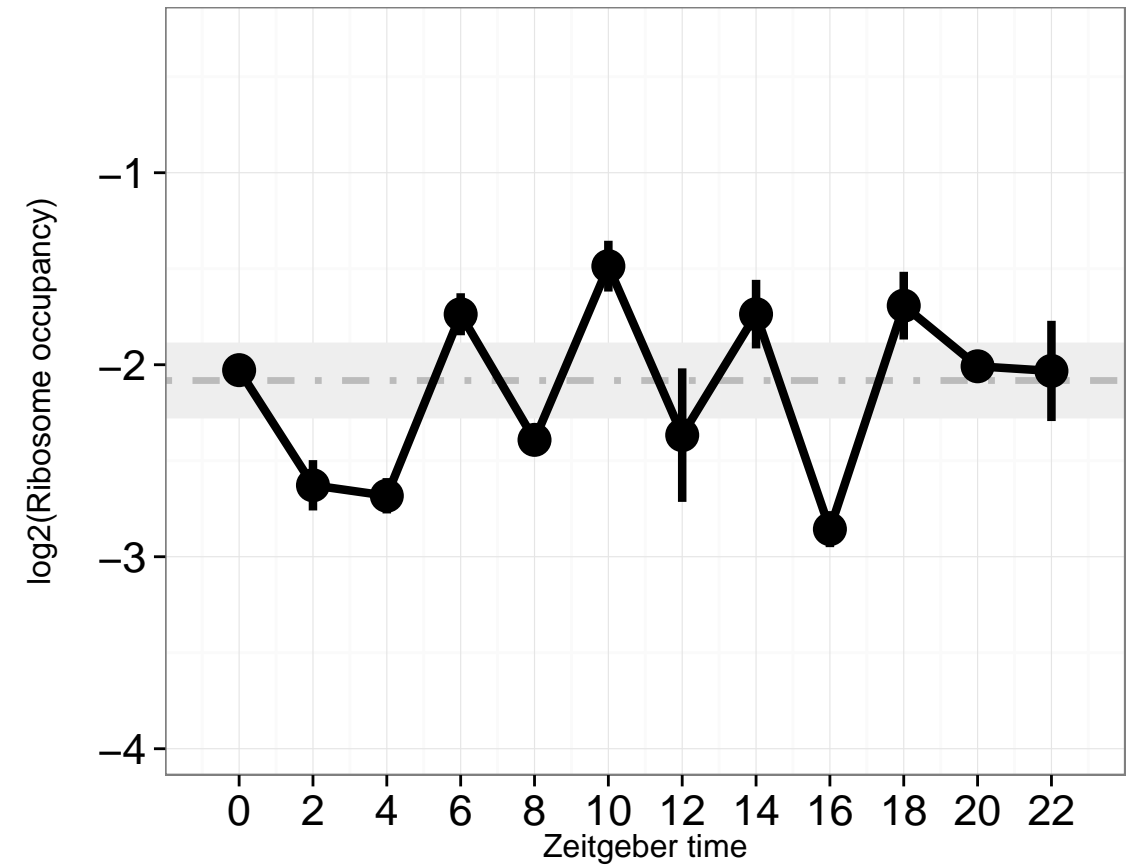

Supplement: Supplementary file 13045 [file 1]

# Ccdc162

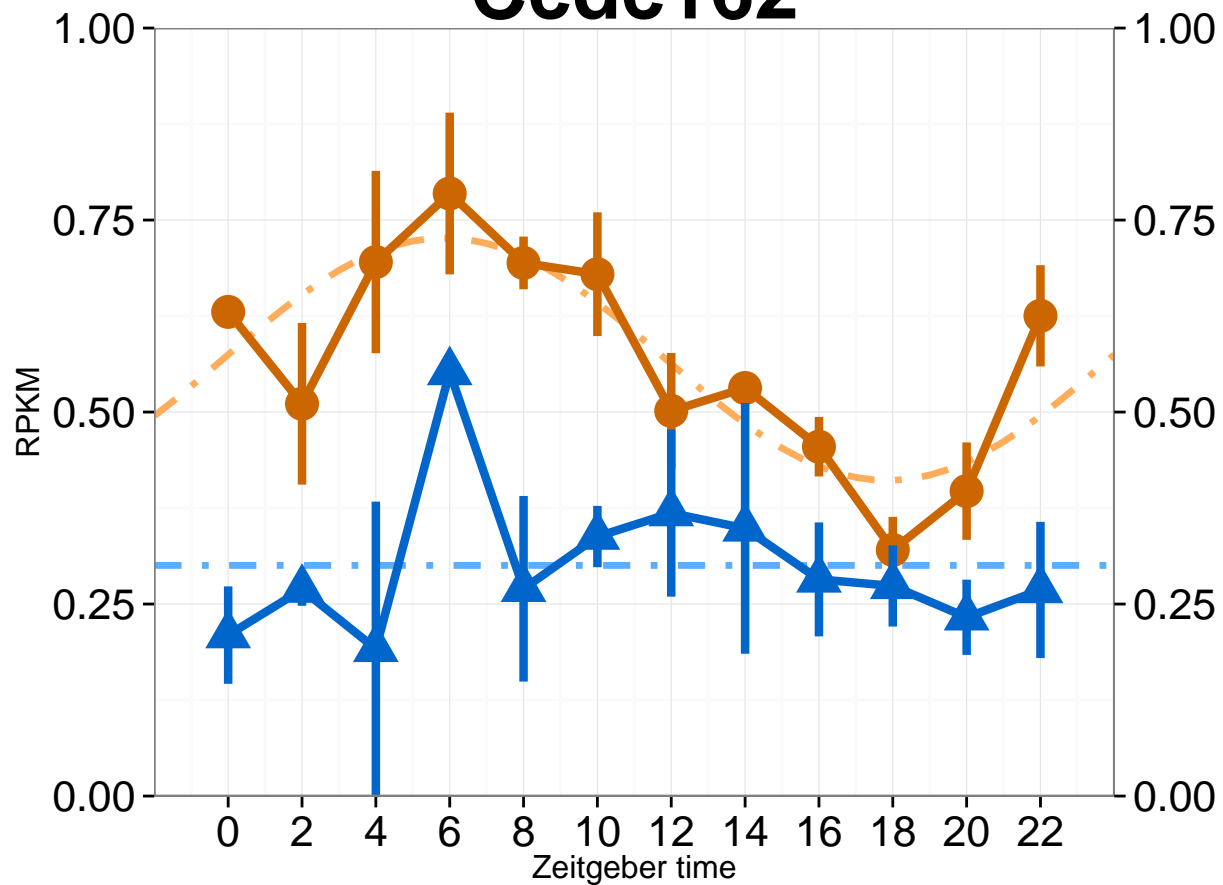

# Ccdc162

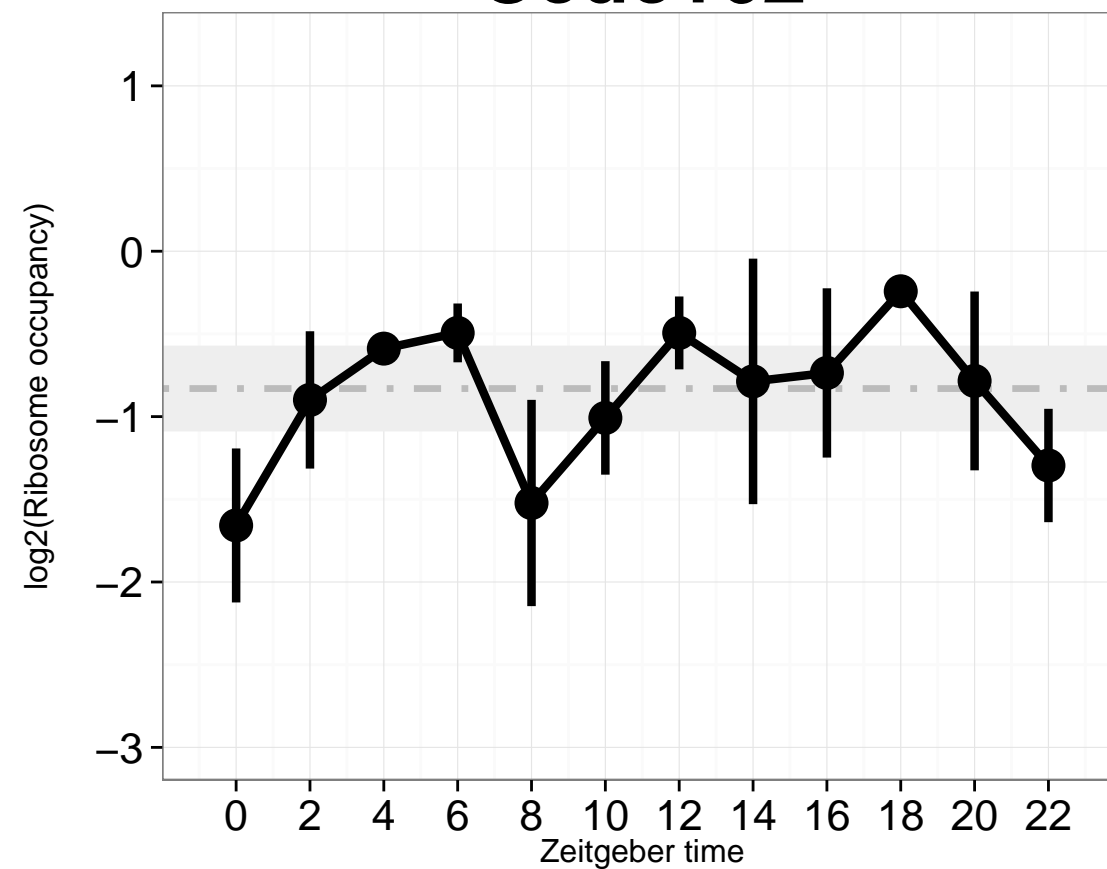

Supplement: Supplementary file 13046 [file 1]
