# Supplementary material (part 131 of 133)
Source: publisher figshare collection journal article supplement (https://springernature.figshare.com/articles/dataset/_/4903193)

# Tmem199

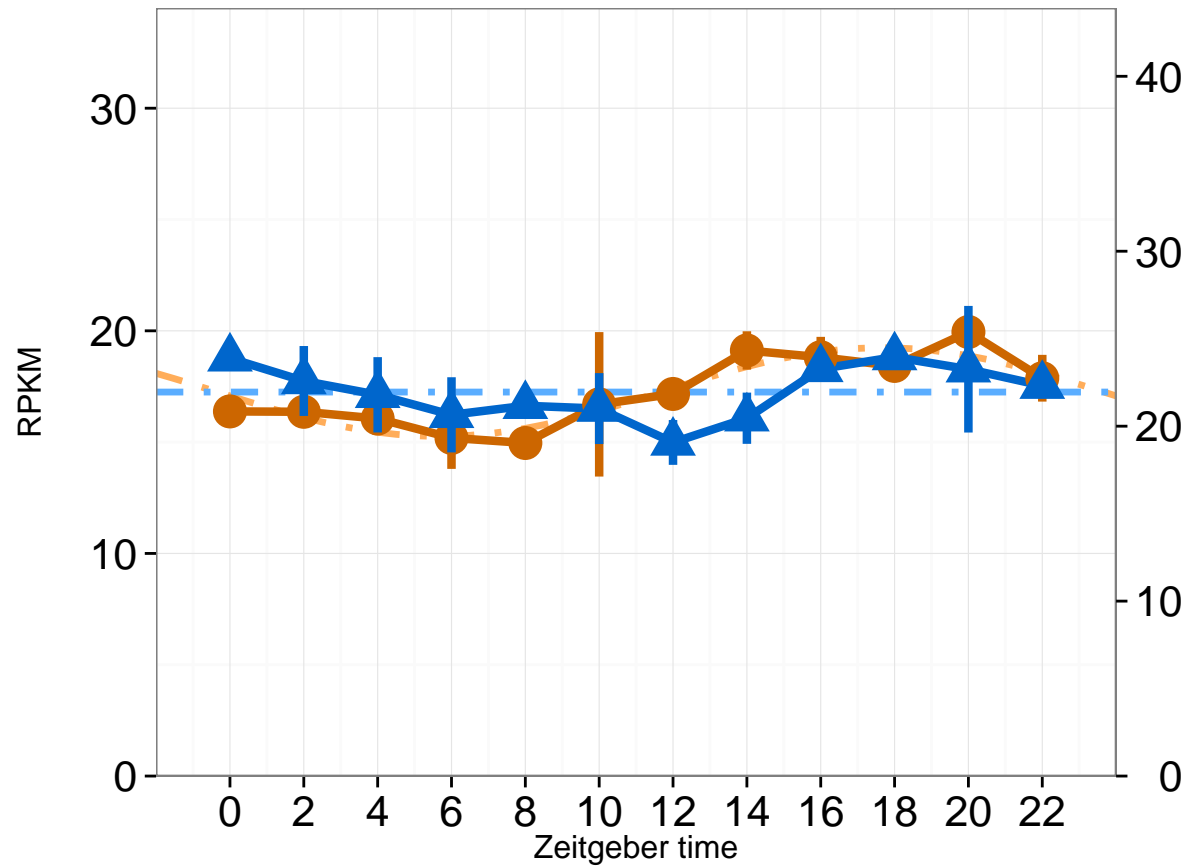

# Tmem199

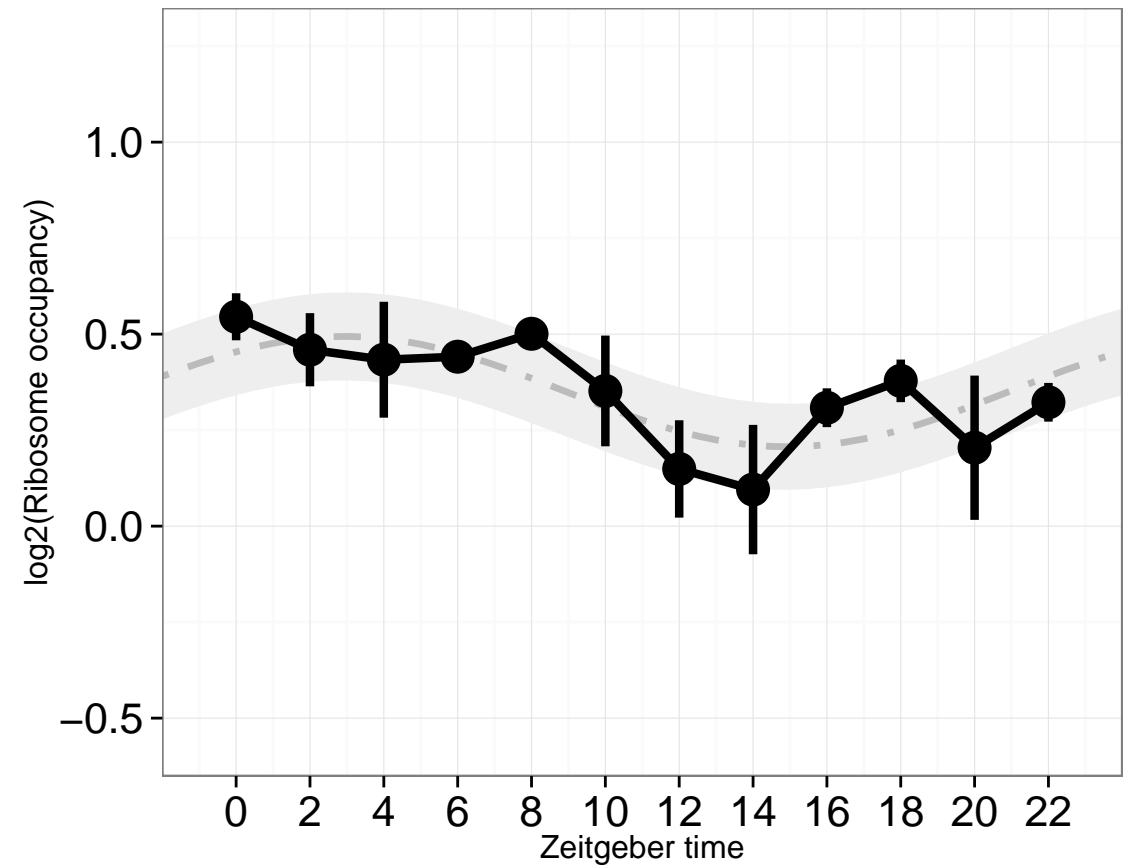

Supplement: Supplementary file 13047 [file 1]

## Entpd8

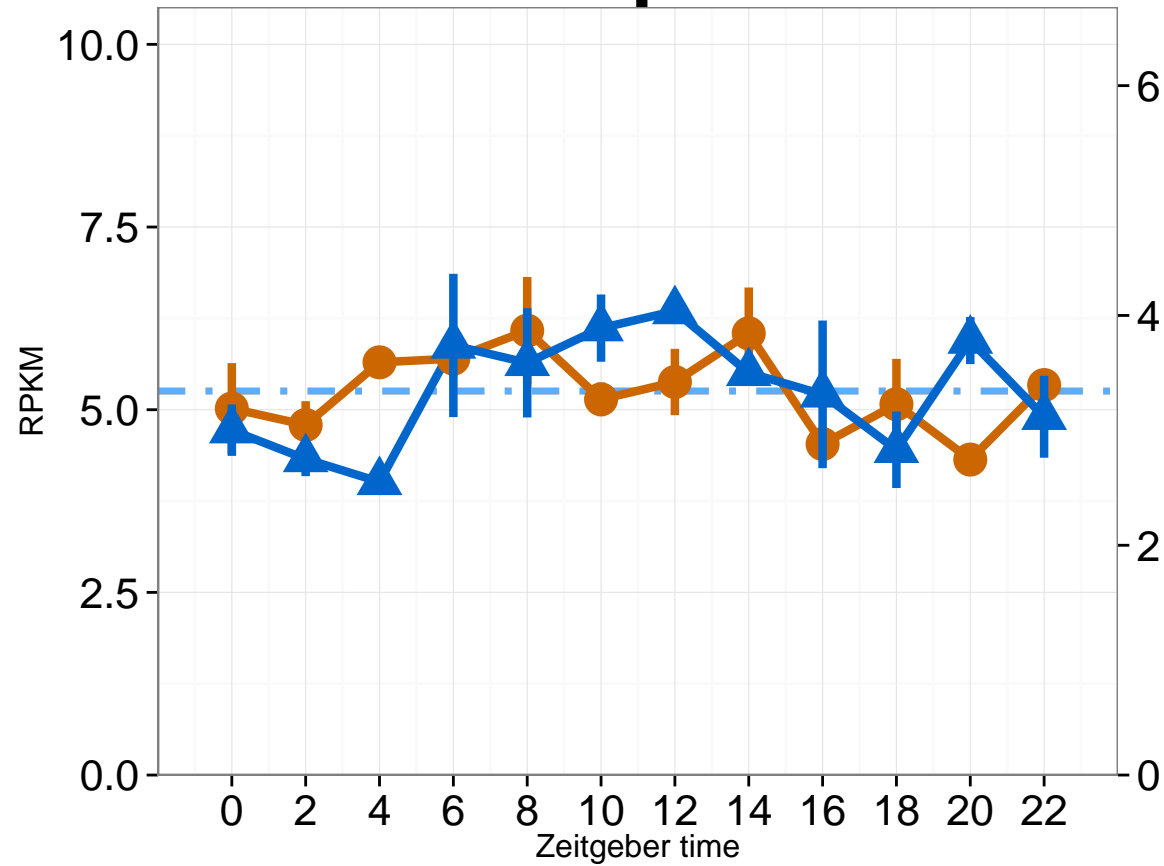

## Entpd8

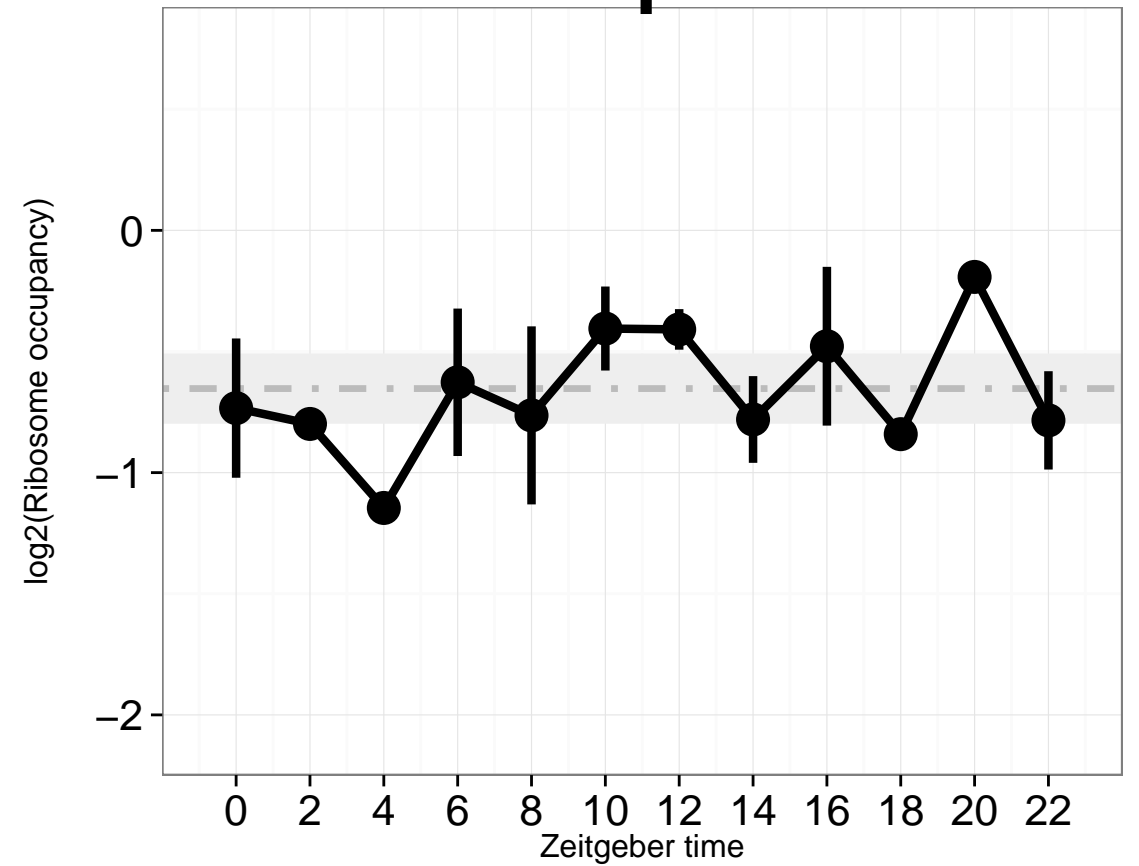

Supplement: Supplementary file 13048 [file 1]

## Foxc1

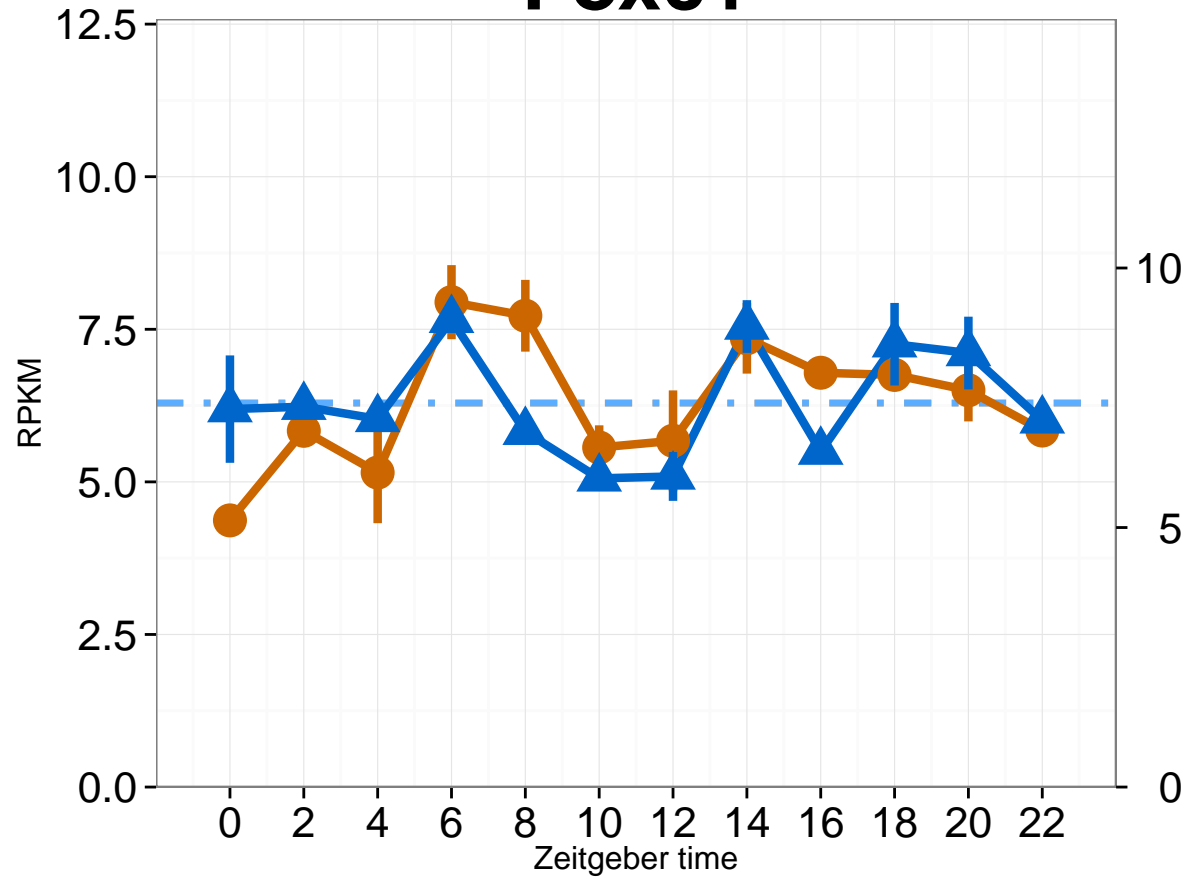

## Foxc1

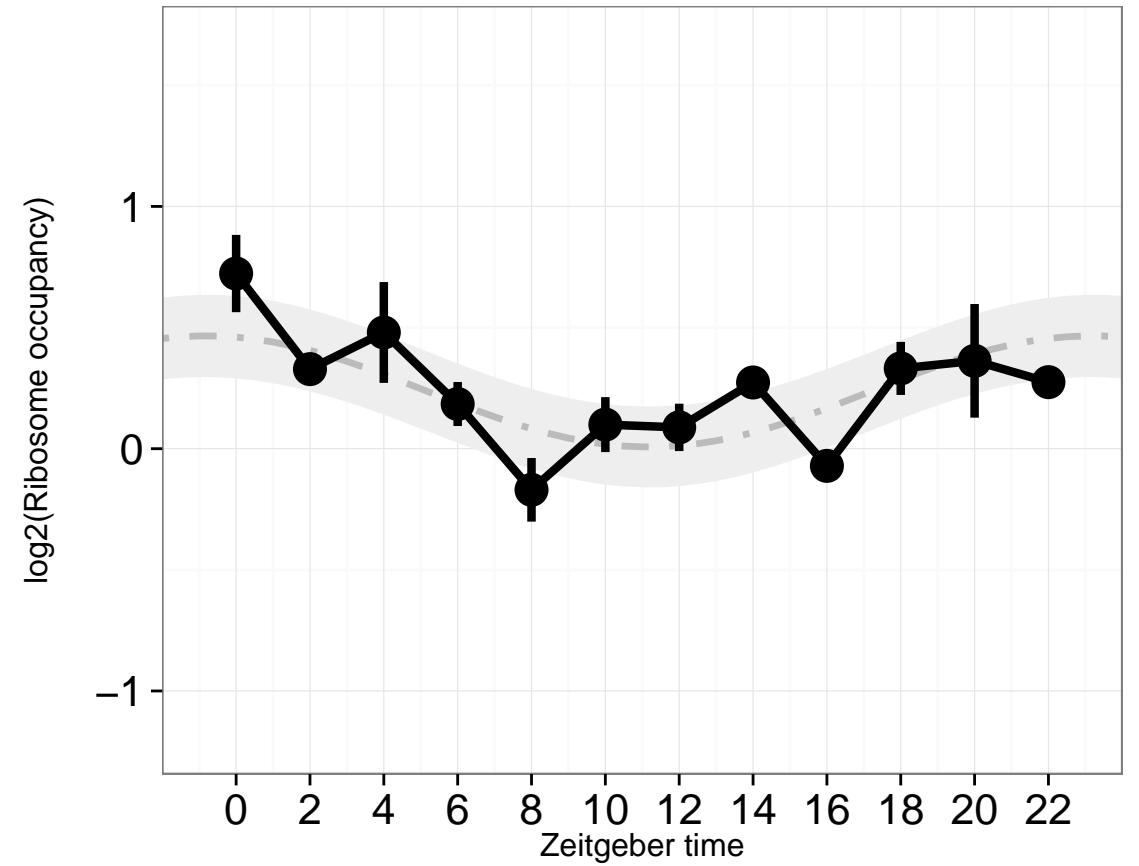

Supplement: Supplementary file 13049 [file 1]

# Cenpl

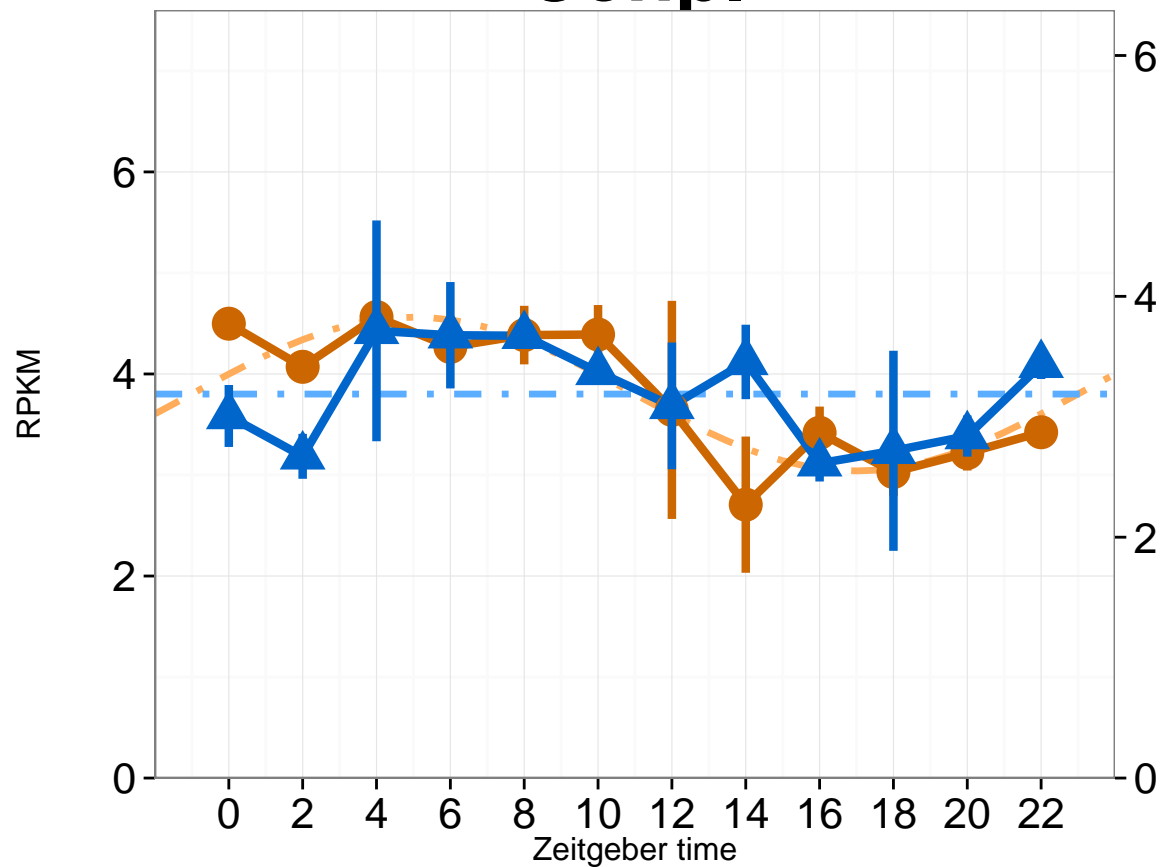

# Cenpl

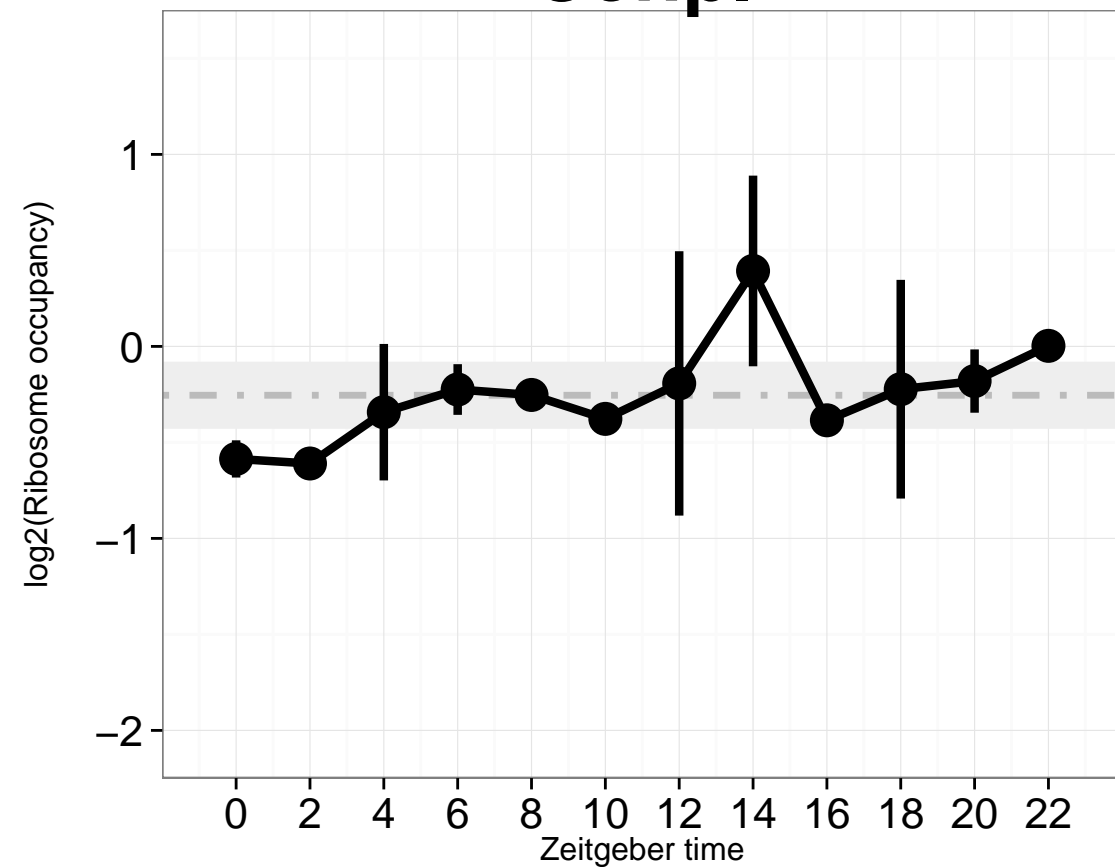

Supplement: Supplementary file 13050 [file 1]

## Sox6

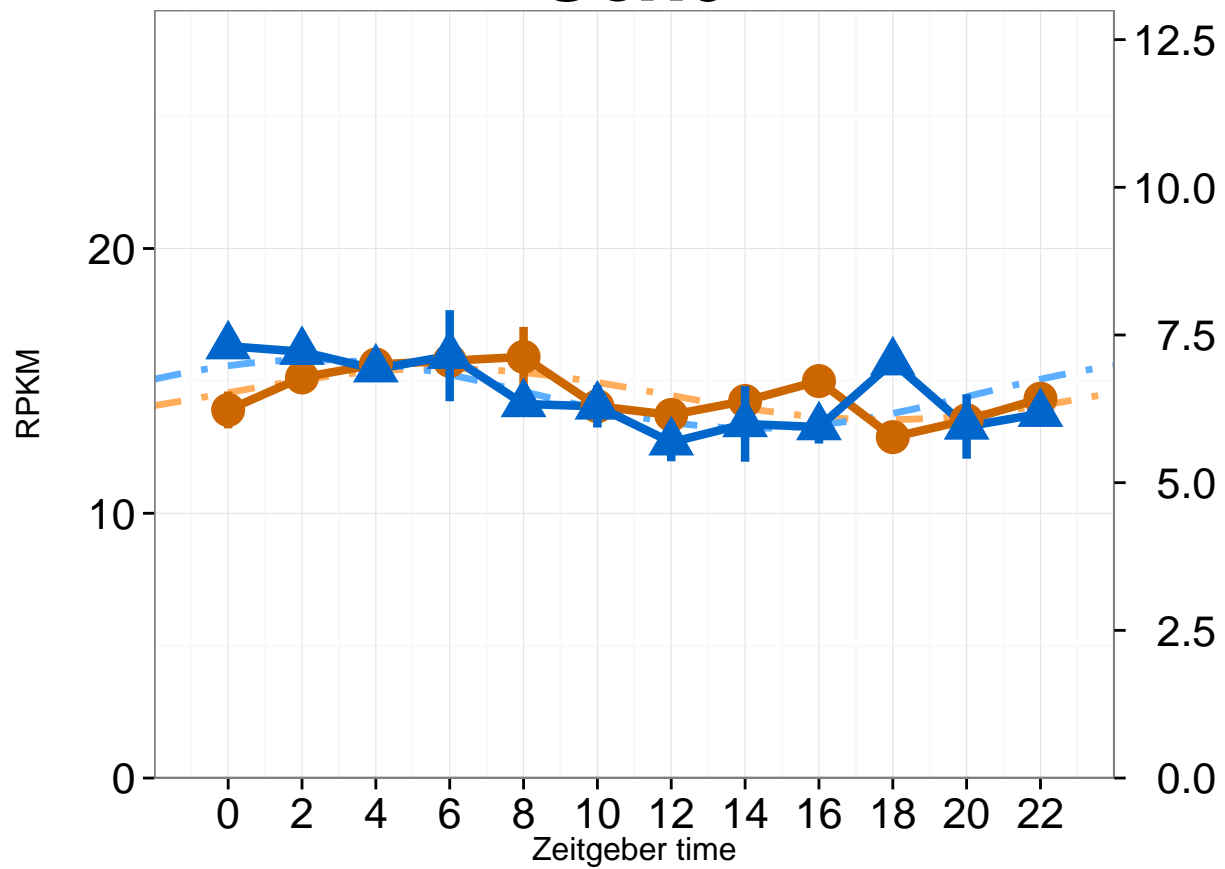

## Sox6

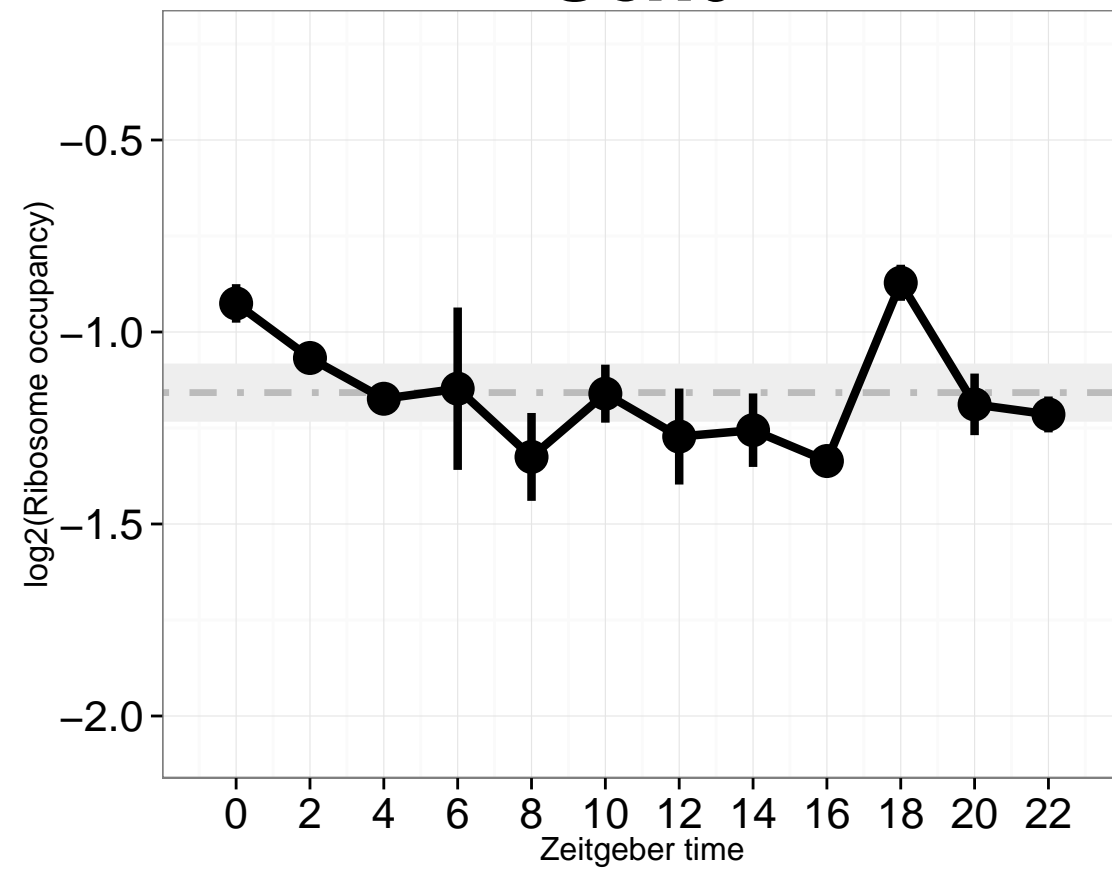

Supplement: Supplementary file 13051 [file 1]

## Pik3cb

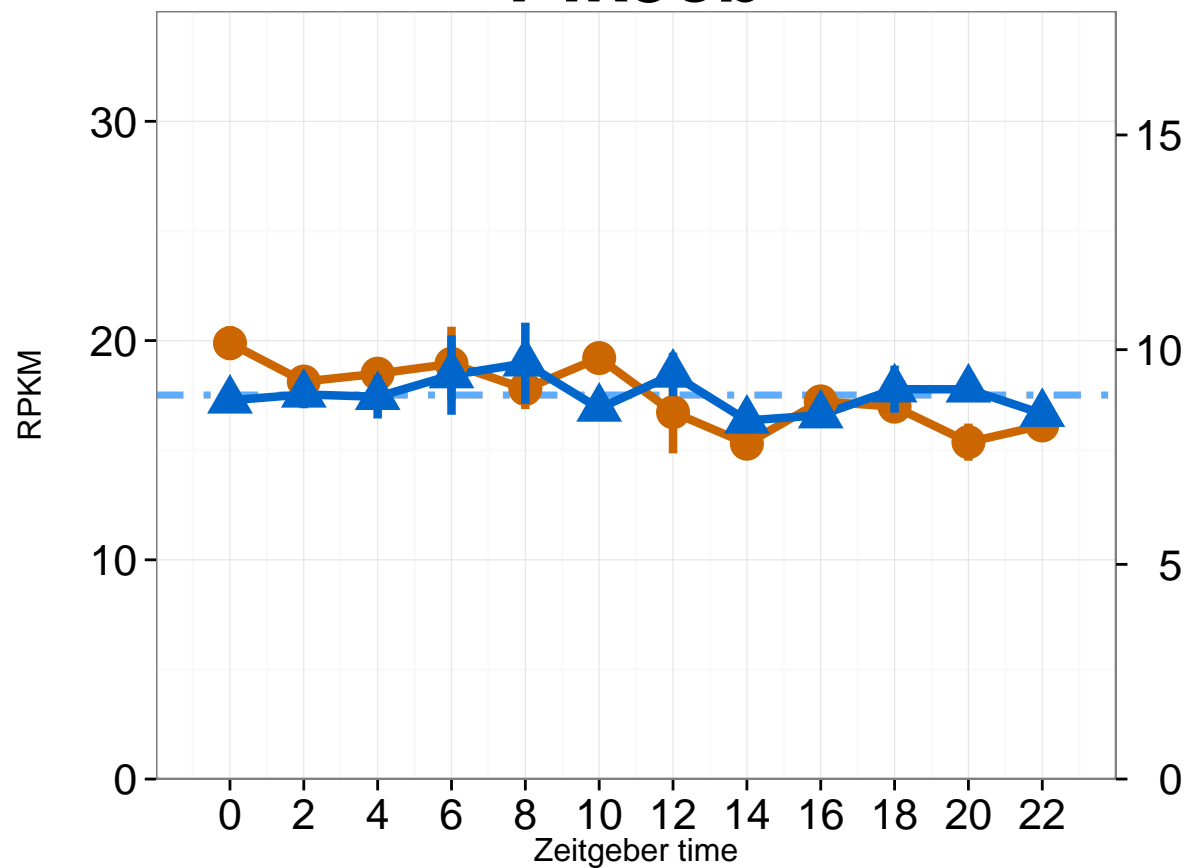

## Pik3cb

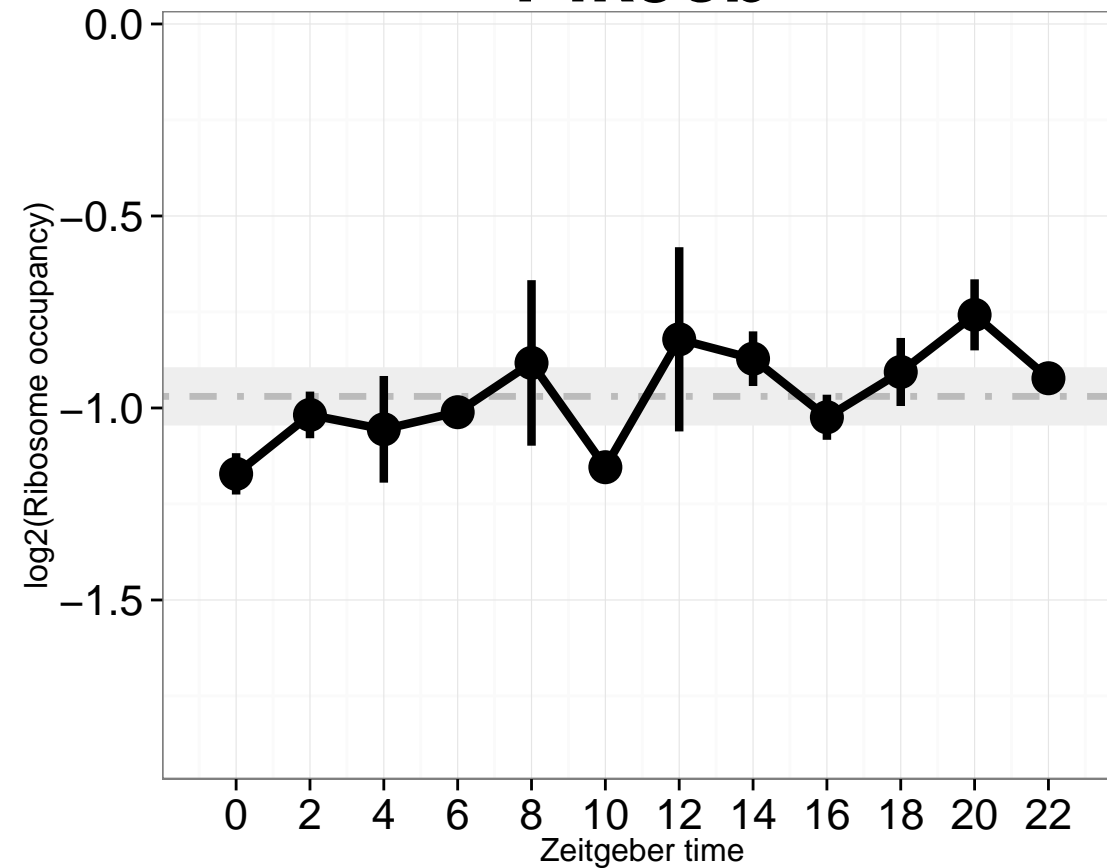

Supplement: Supplementary file 13052 [file 1]

## Gatc

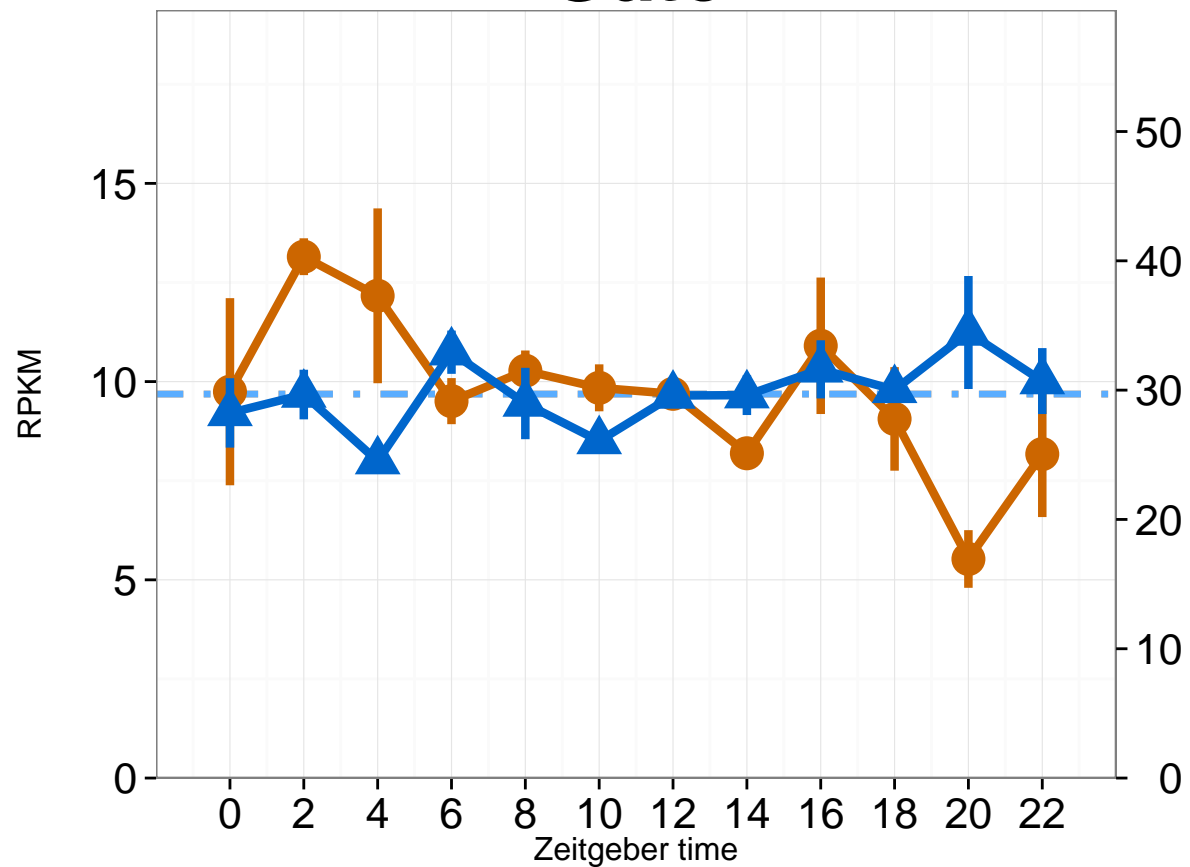

## Gatc

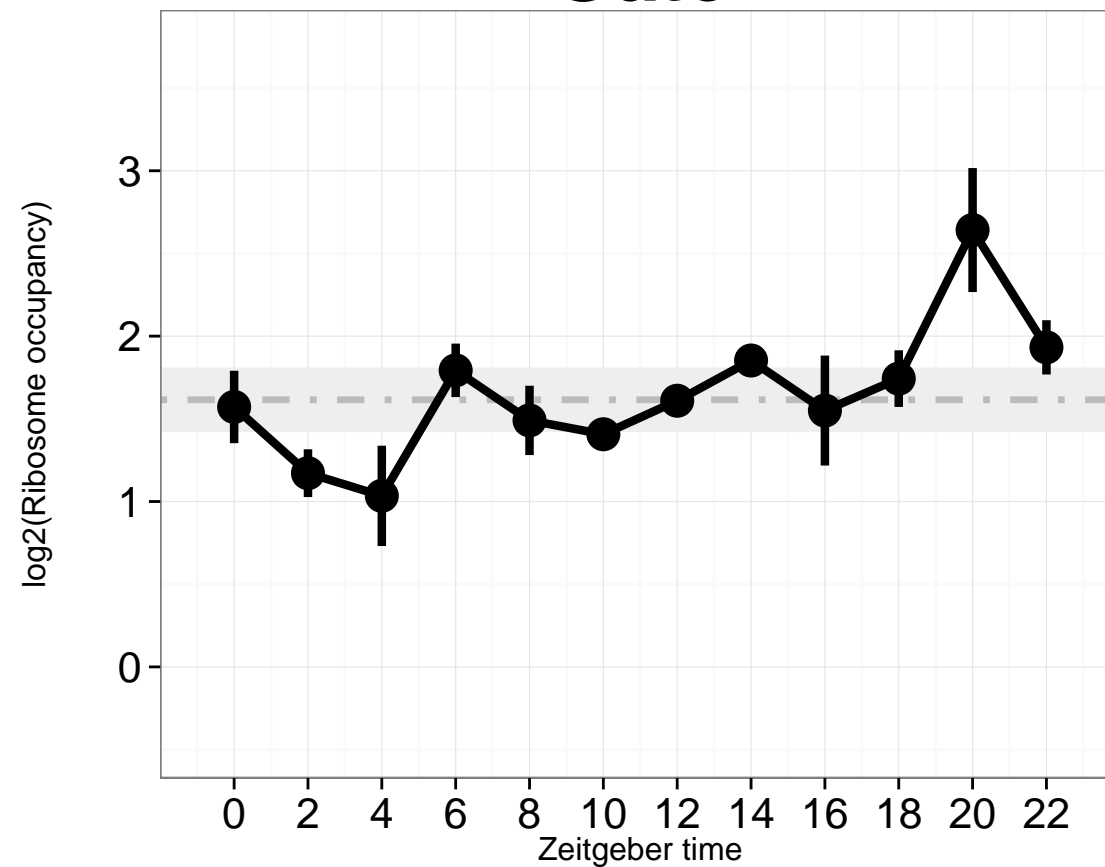

Supplement: Supplementary file 13053 [file 1]

# Mtx1

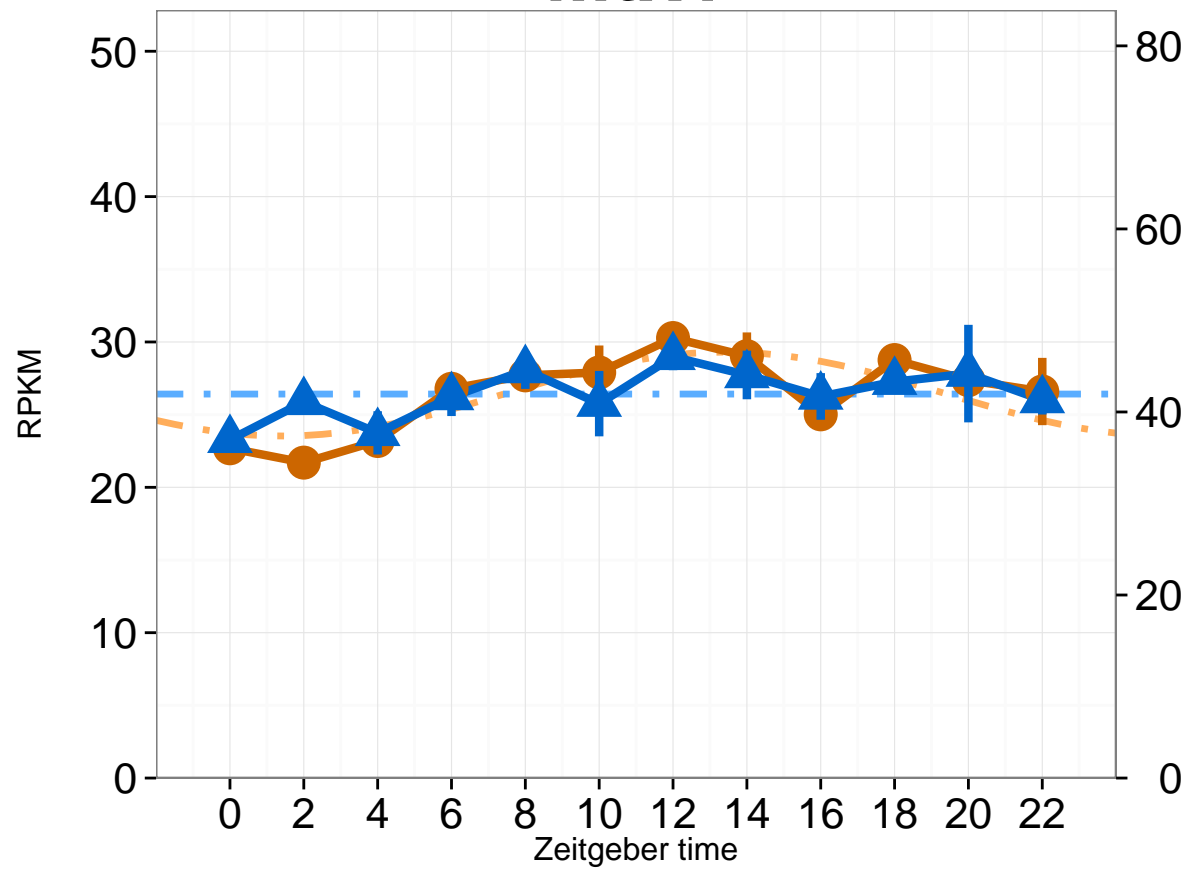

# Mtx1

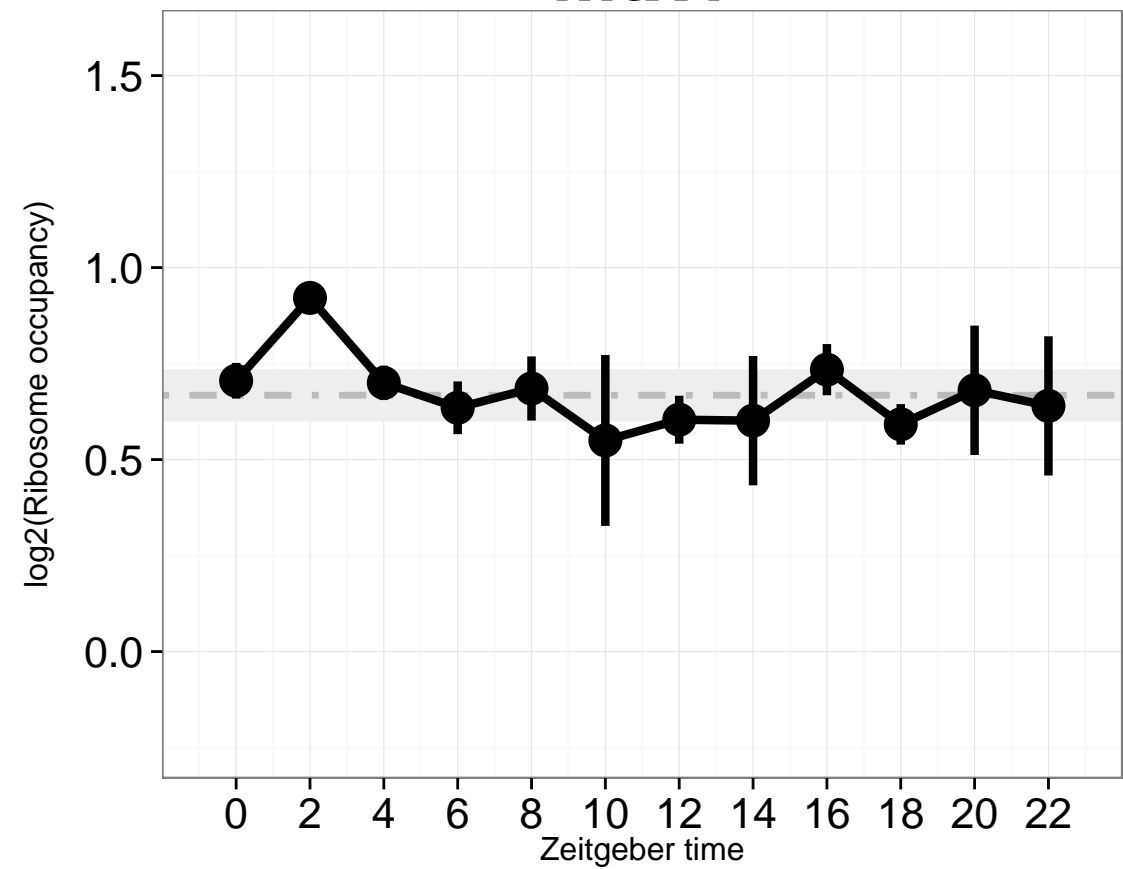

Supplement: Supplementary file 13054 [file 1]

# Chst3

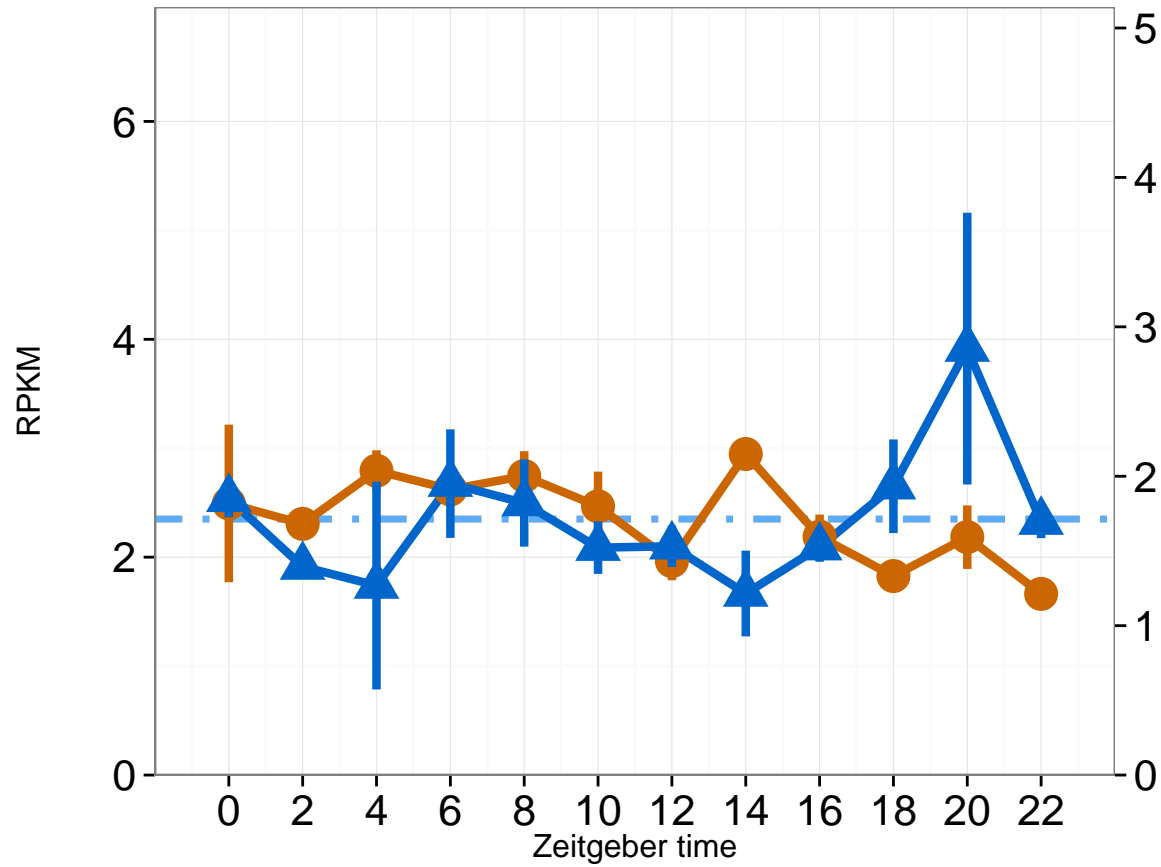

# Chst3

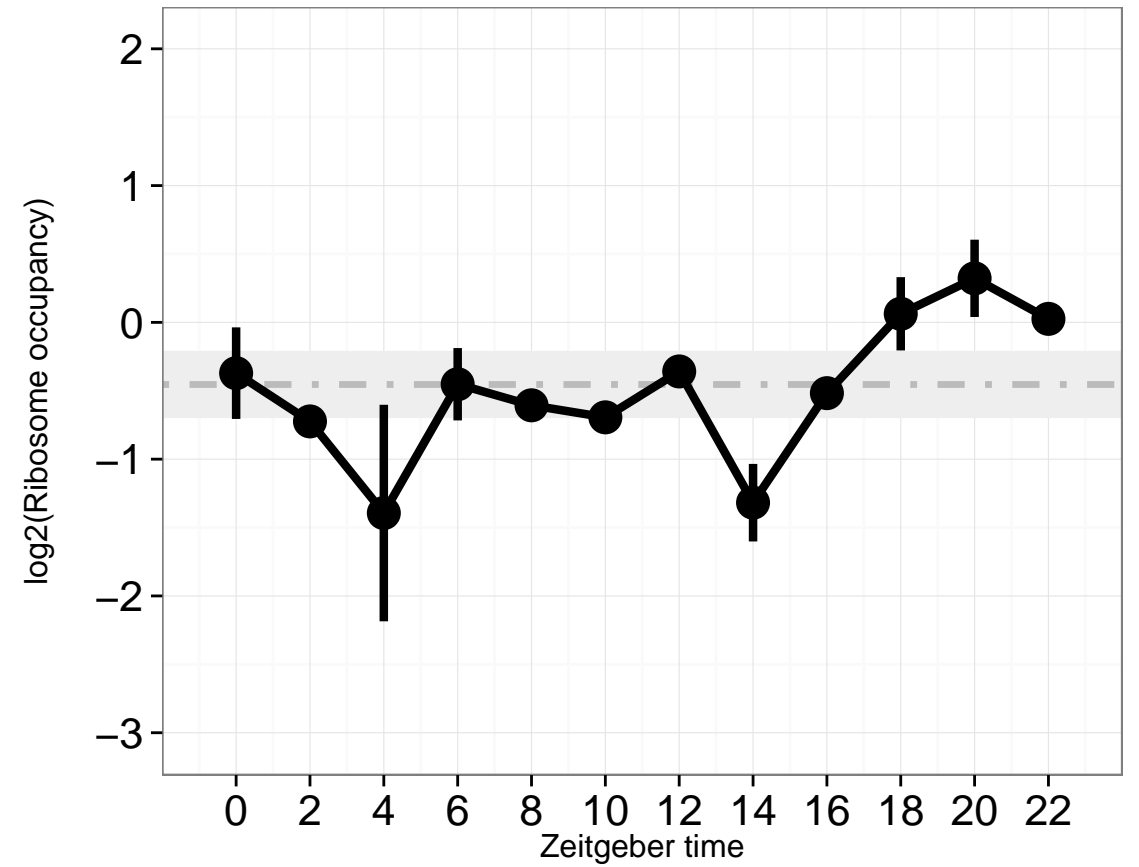

Supplement: Supplementary file 13055 [file 1]

## Fsbp

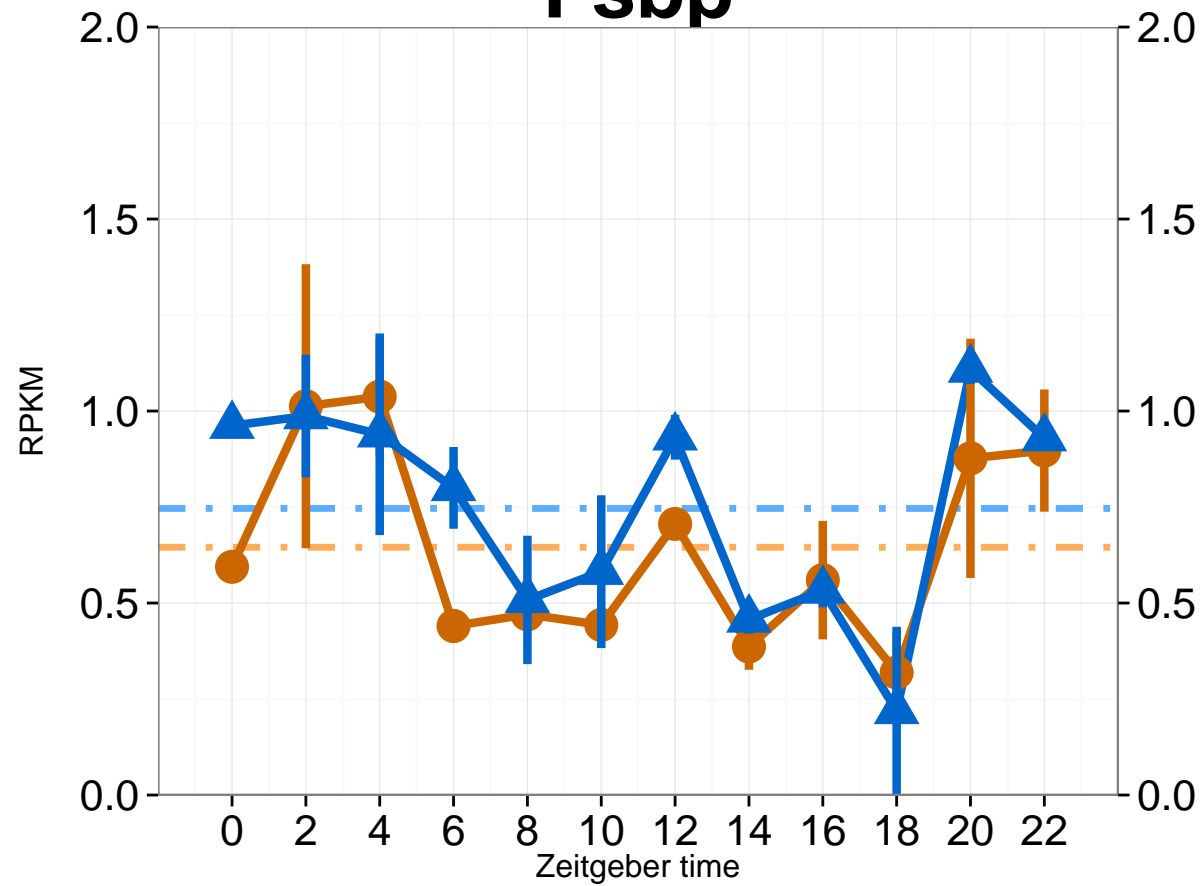

## Fsbp

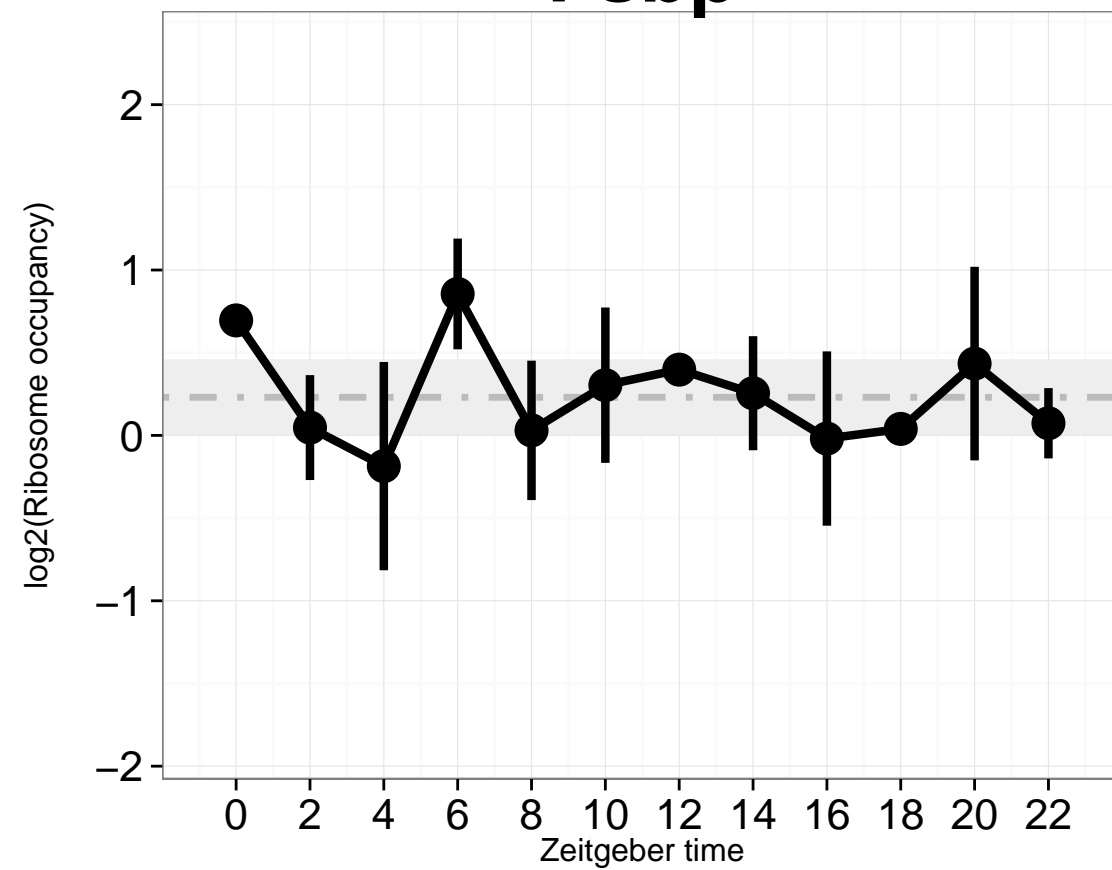

Supplement: Supplementary file 13056 [file 1]

# Acsm2

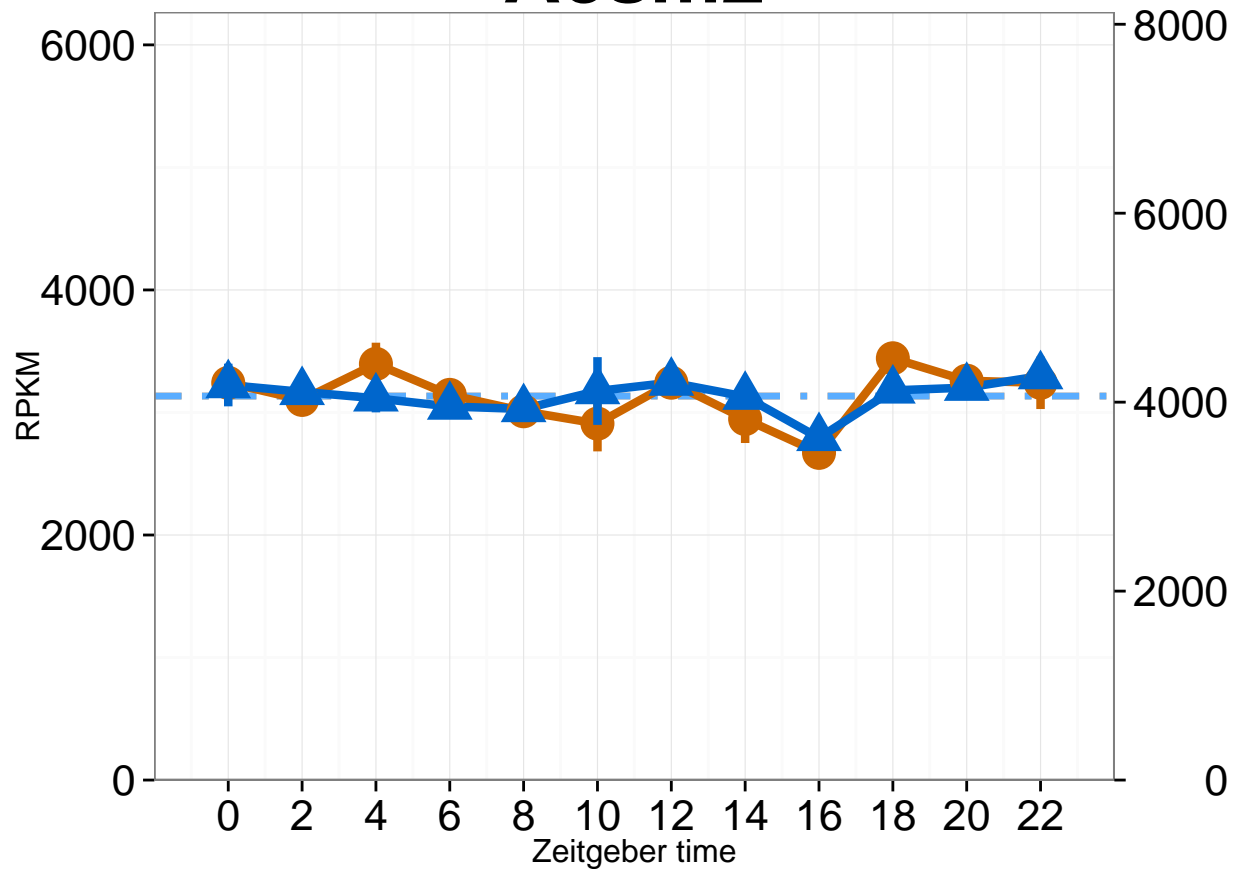

# Acsm2

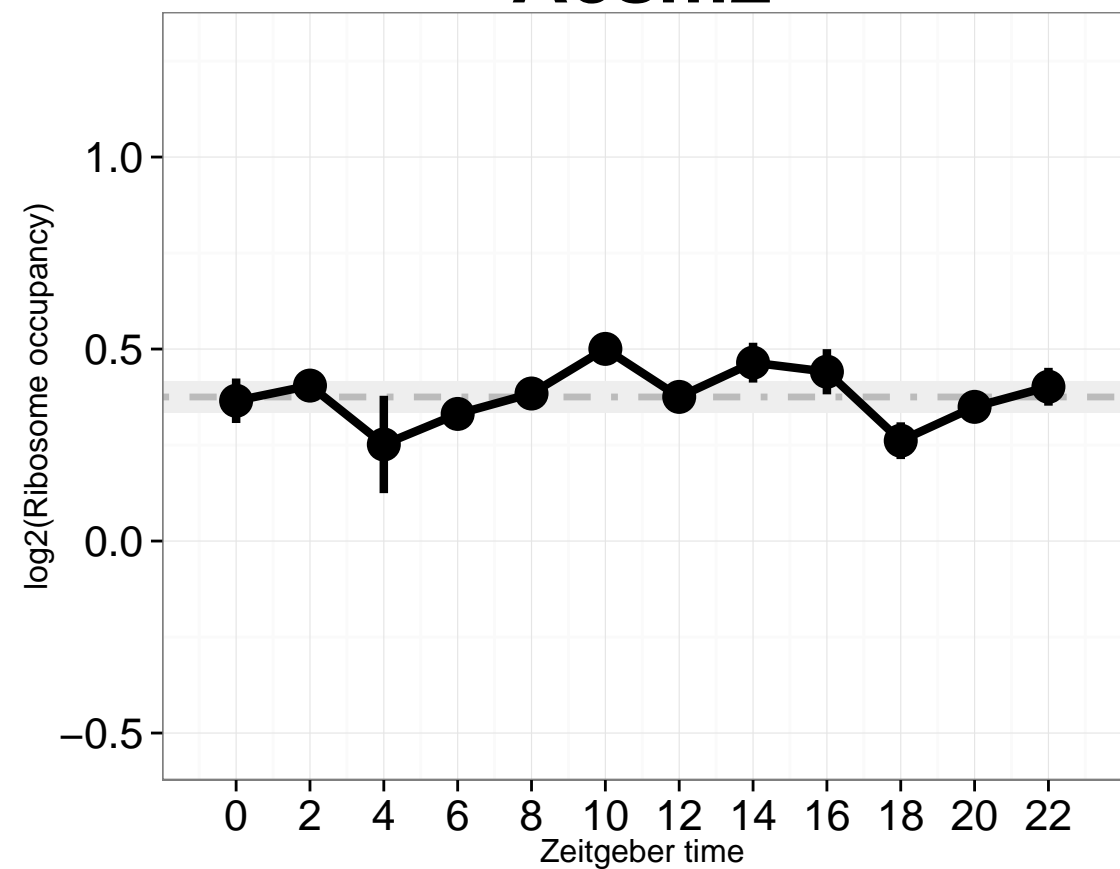

Supplement: Supplementary file 13057 [file 1]

## Cntrob

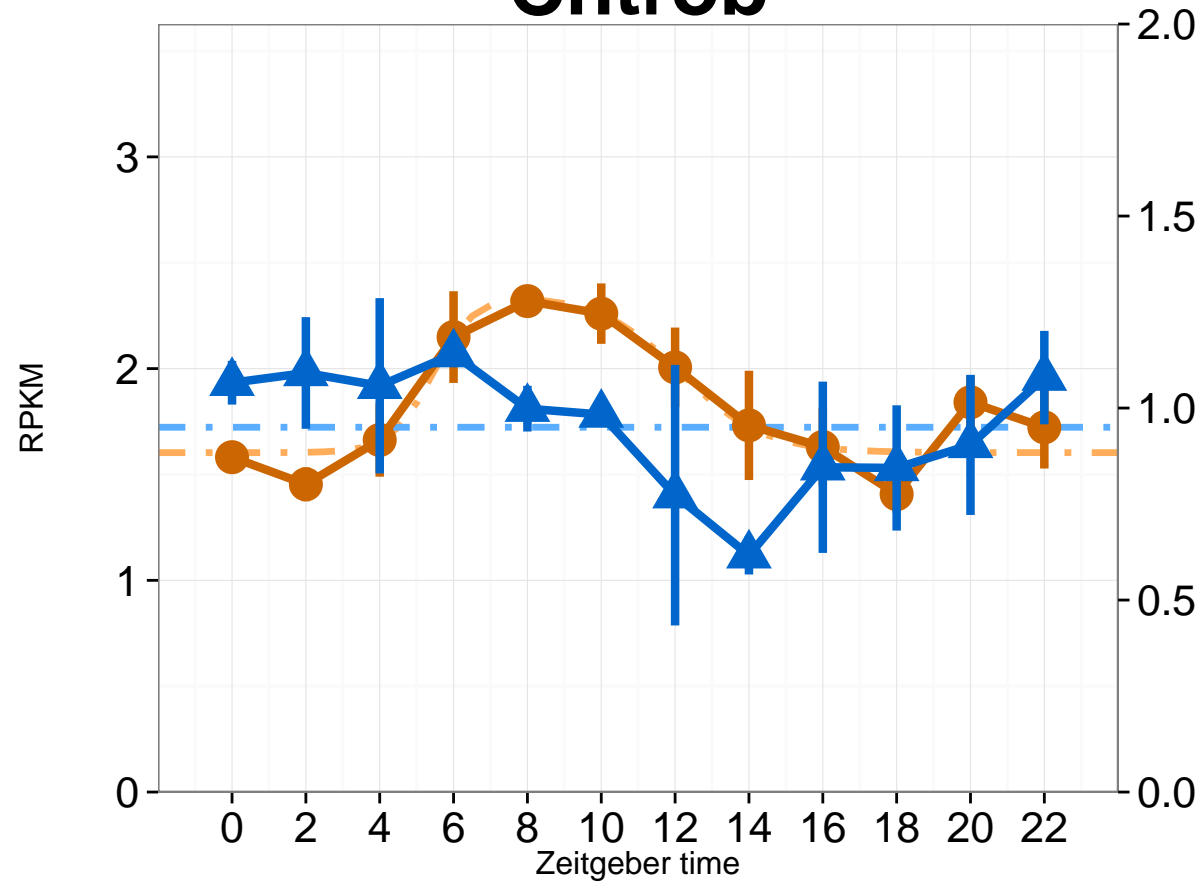

## Cntrob

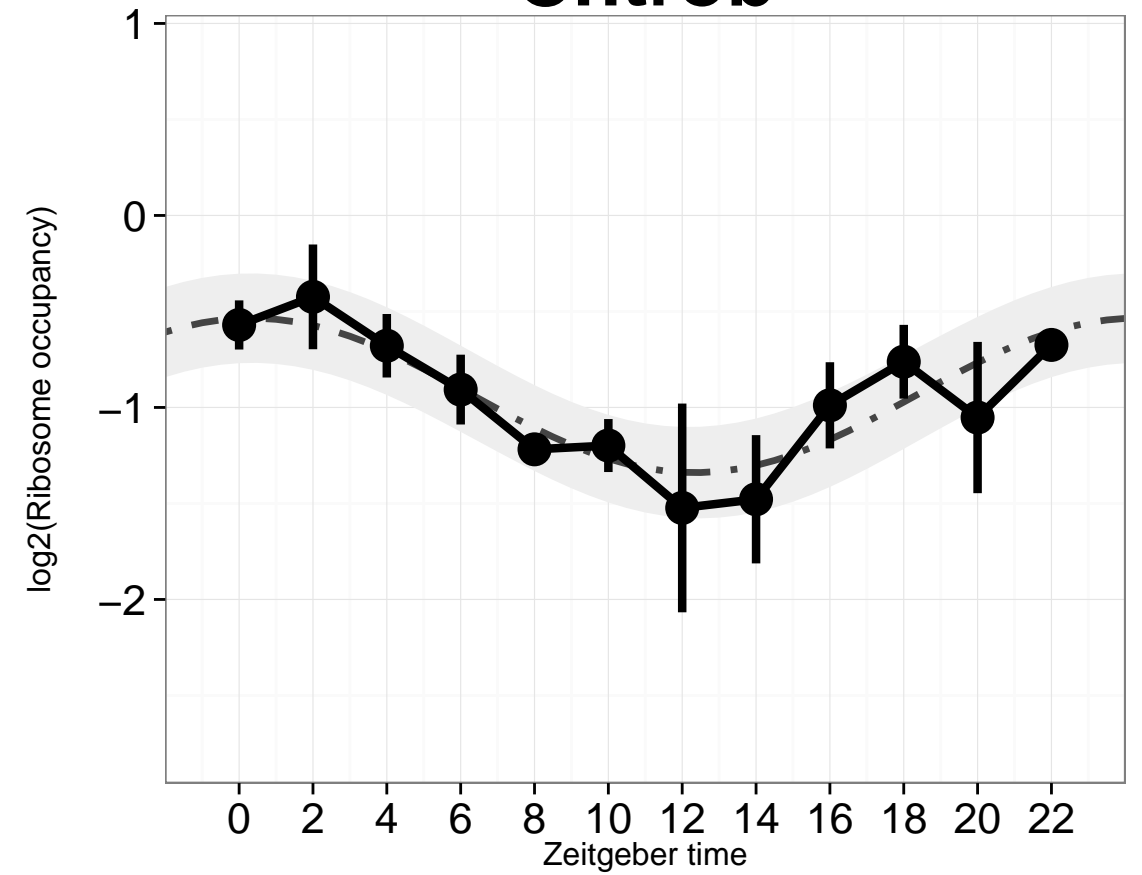

Supplement: Supplementary file 13058 [file 1]

# Slc16a11

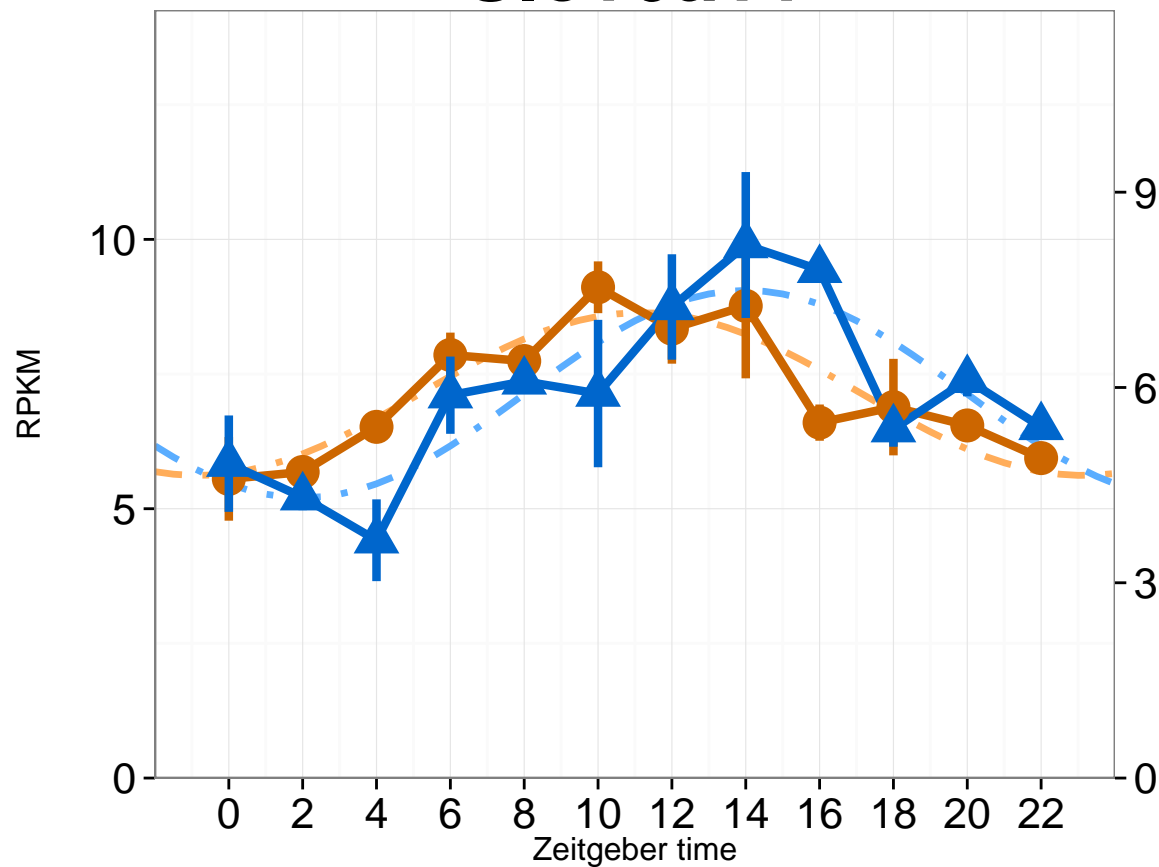

# Slc16a11

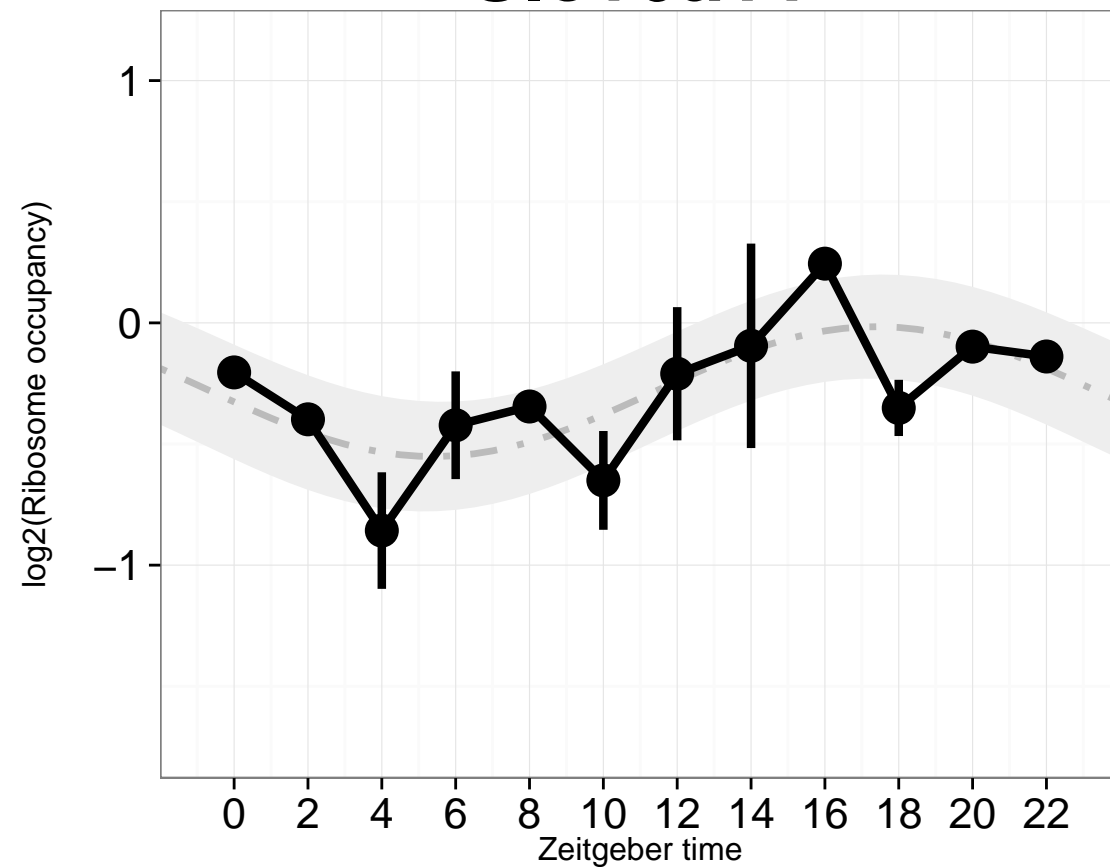

Supplement: Supplementary file 13059 [file 1]

# Dhtkd1

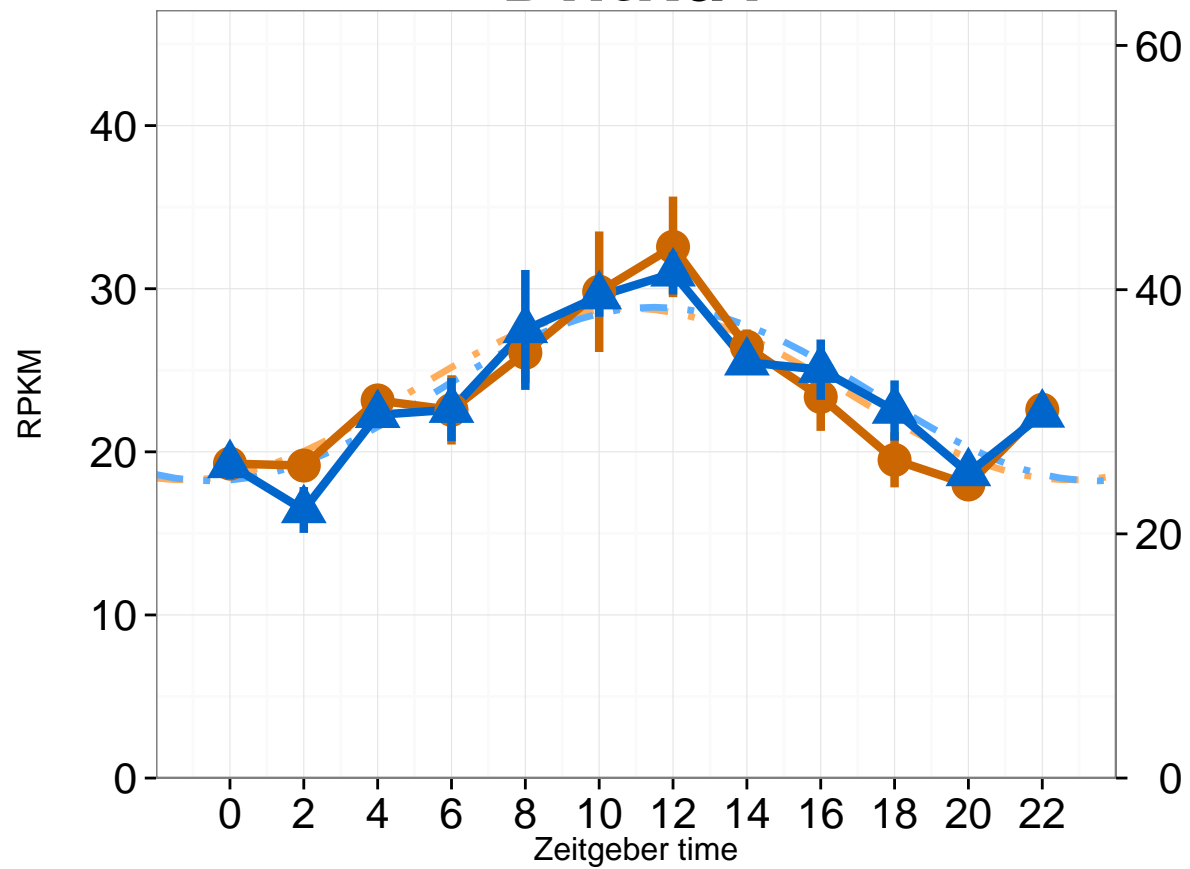

# Dhtkd1

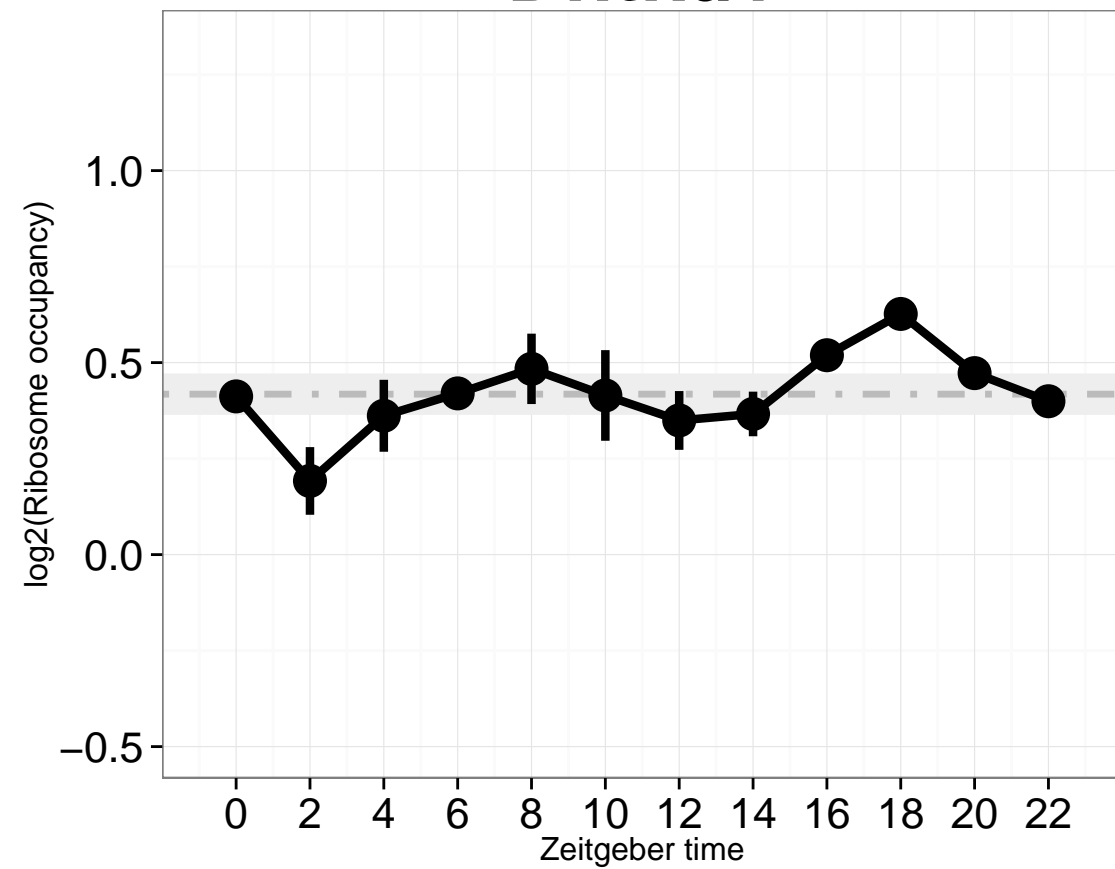

Supplement: Supplementary file 13060 [file 1]

# Srp54c

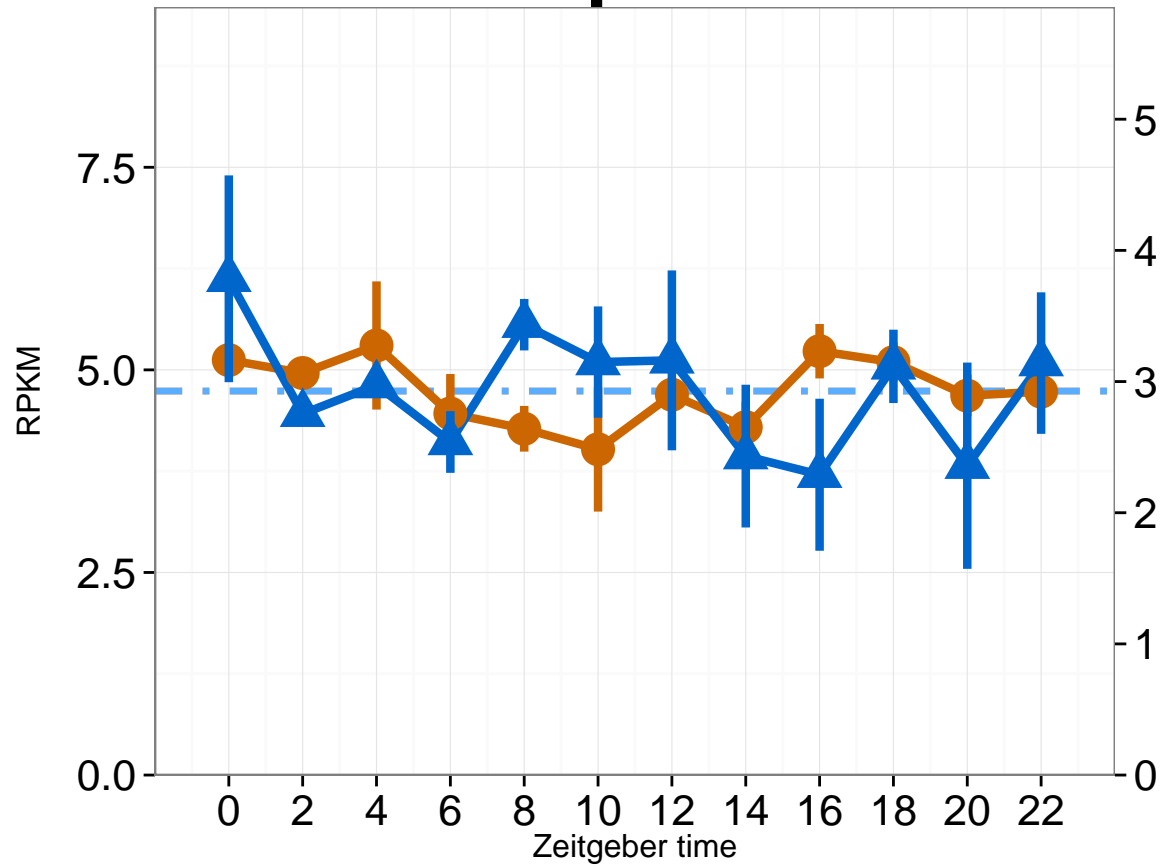

# Srp54c

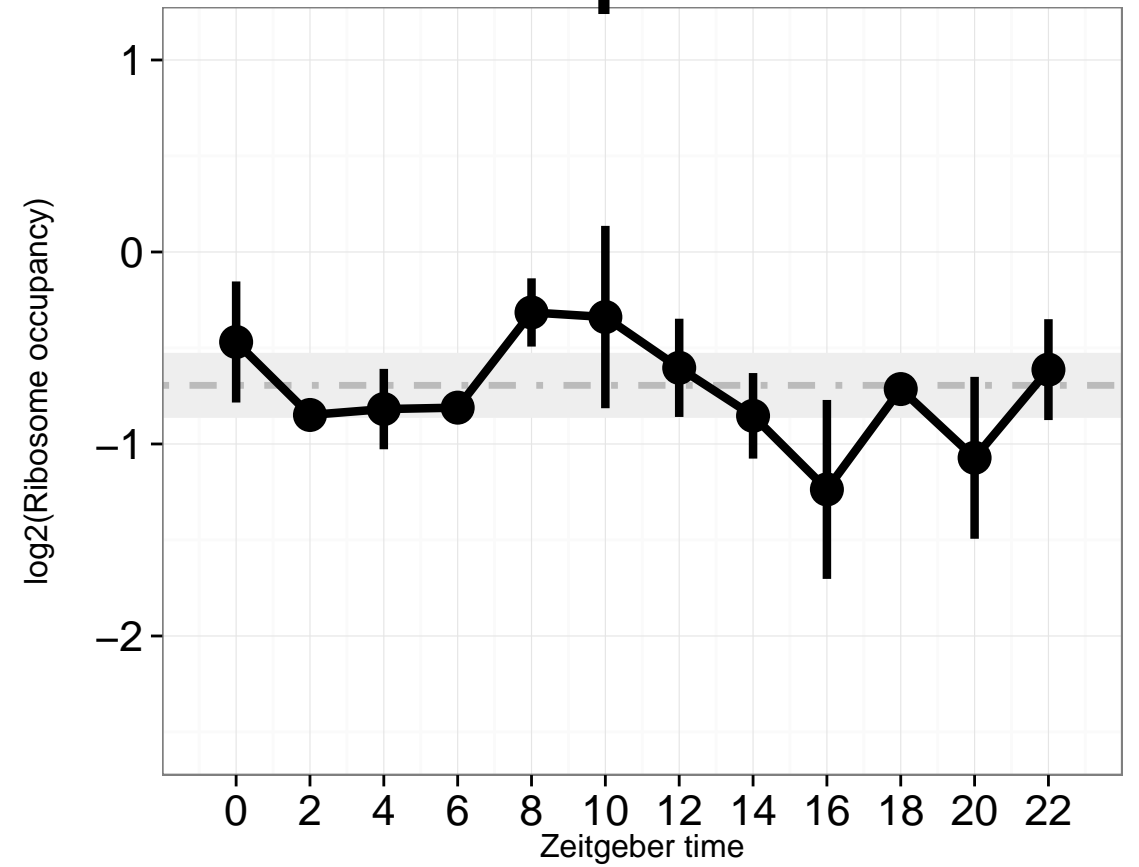

Supplement: Supplementary file 13061 [file 1]

# Lyrm2

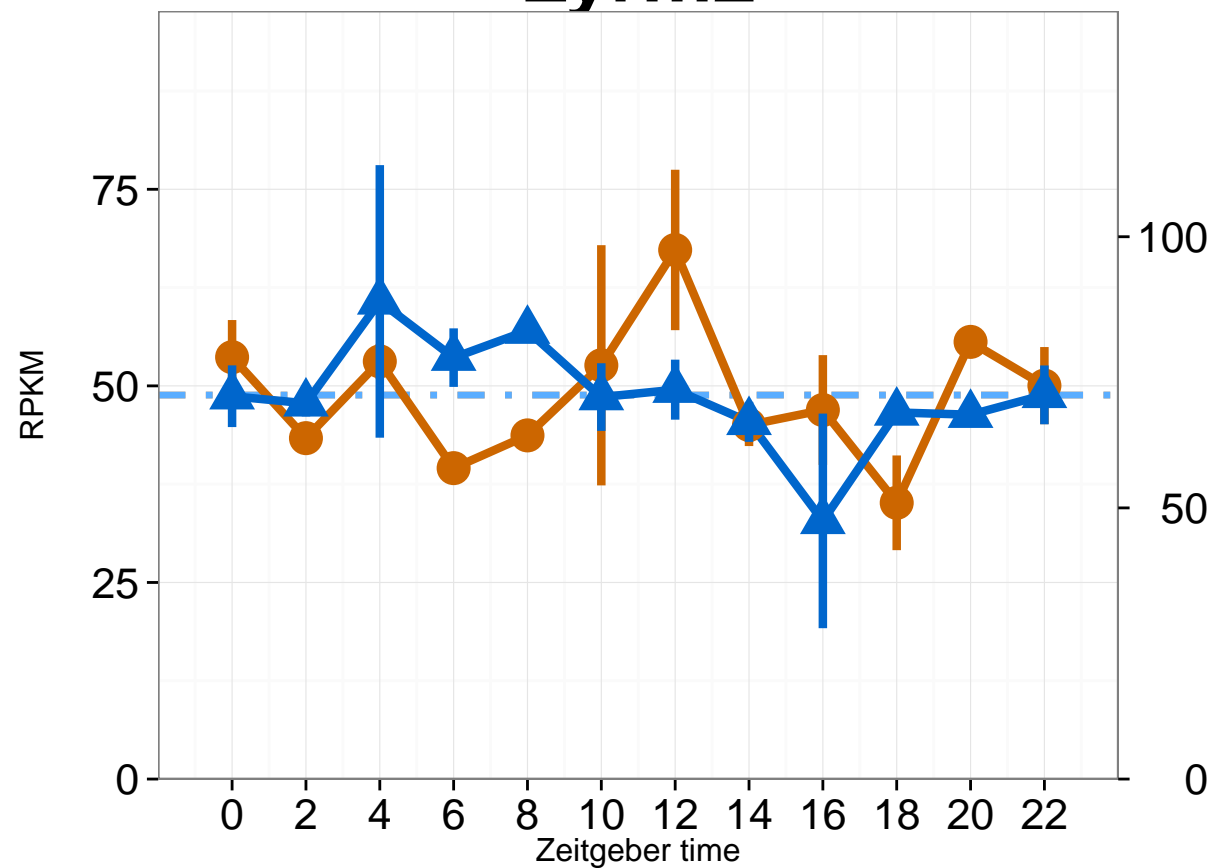

# Lyrm2

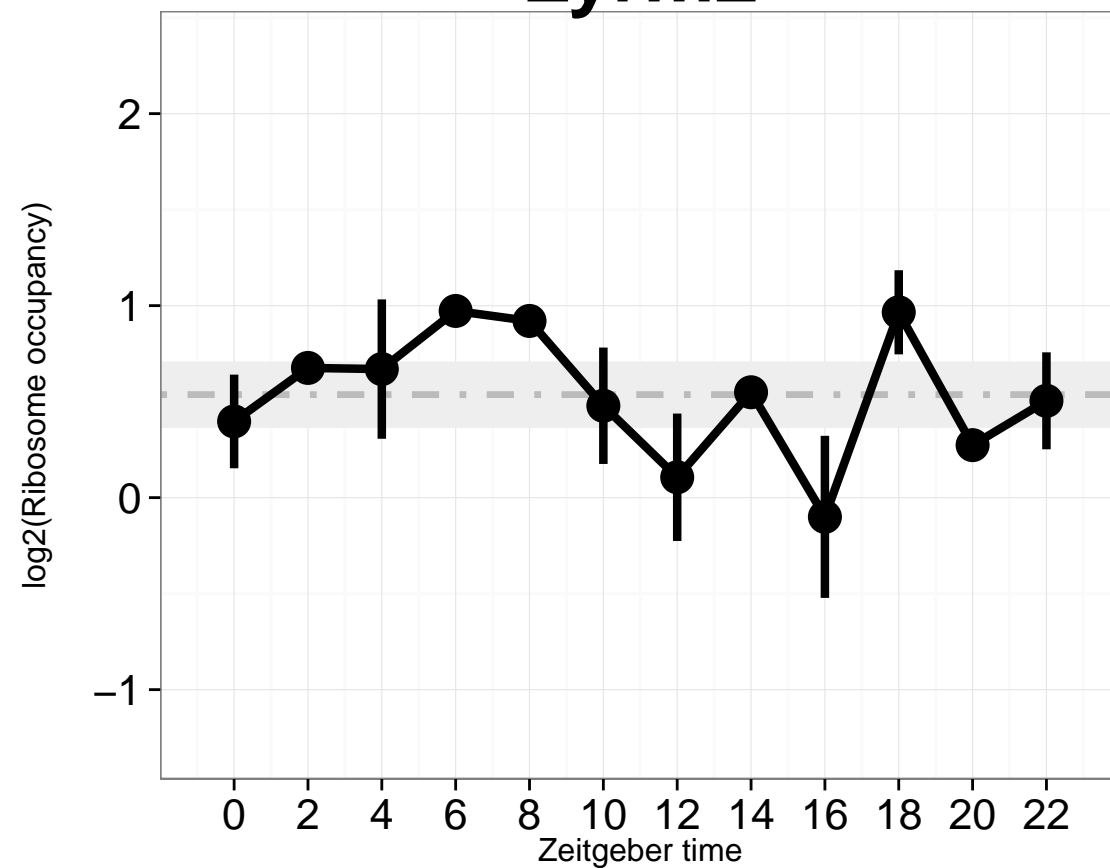

Supplement: Supplementary file 13062 [file 1]

## Dip2b

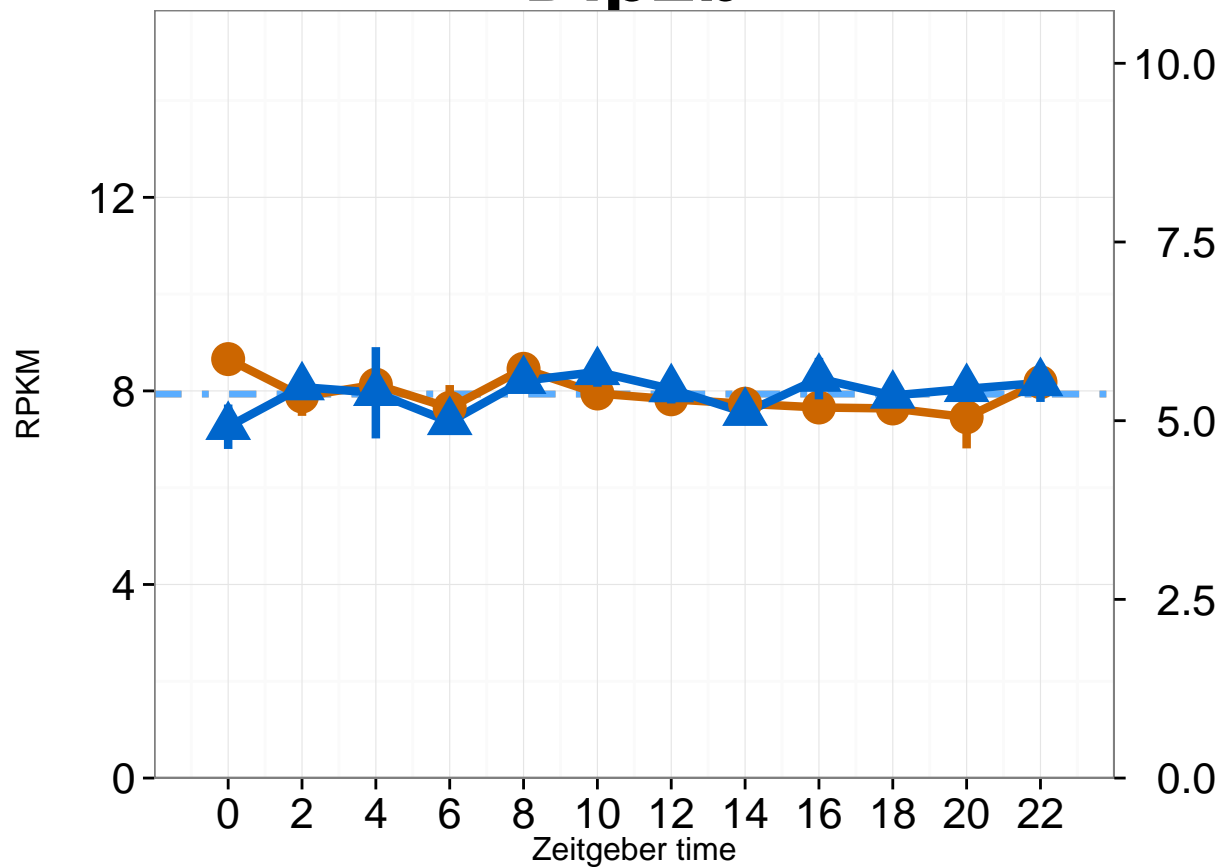

## Dip2b

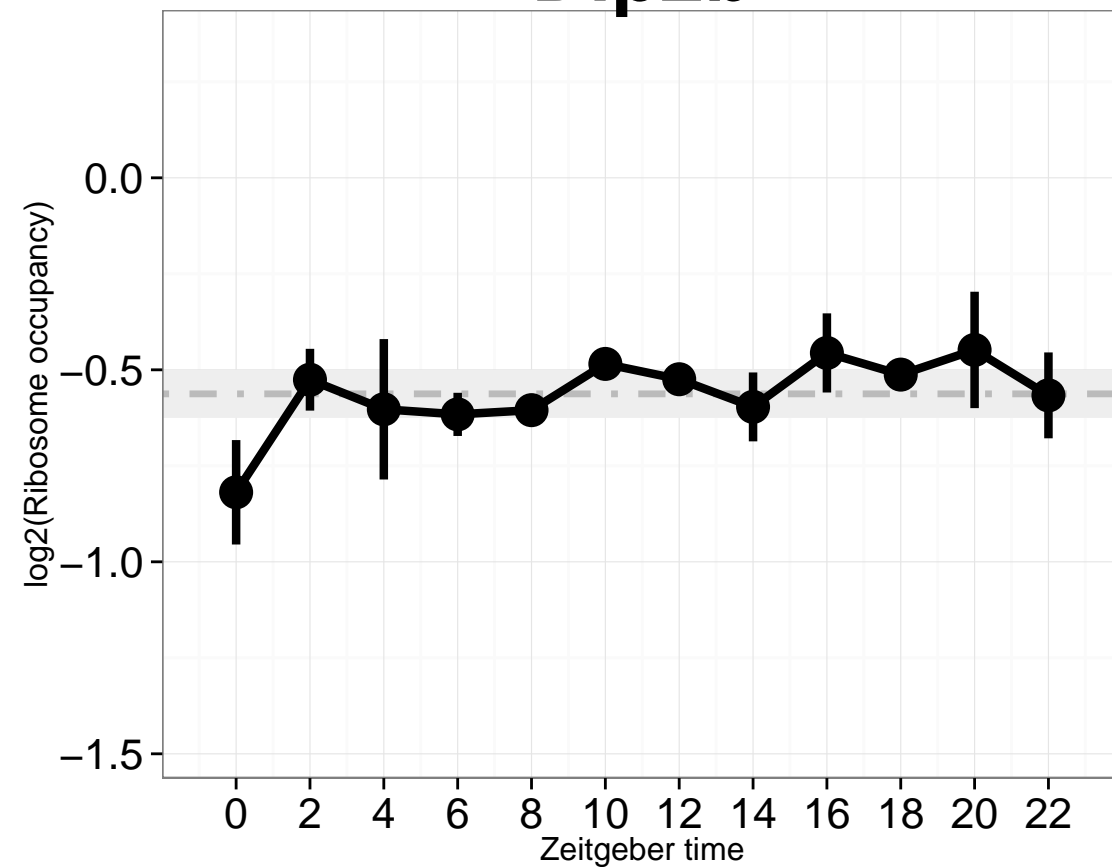

Supplement: Supplementary file 13063 [file 1]

## Plekhg5

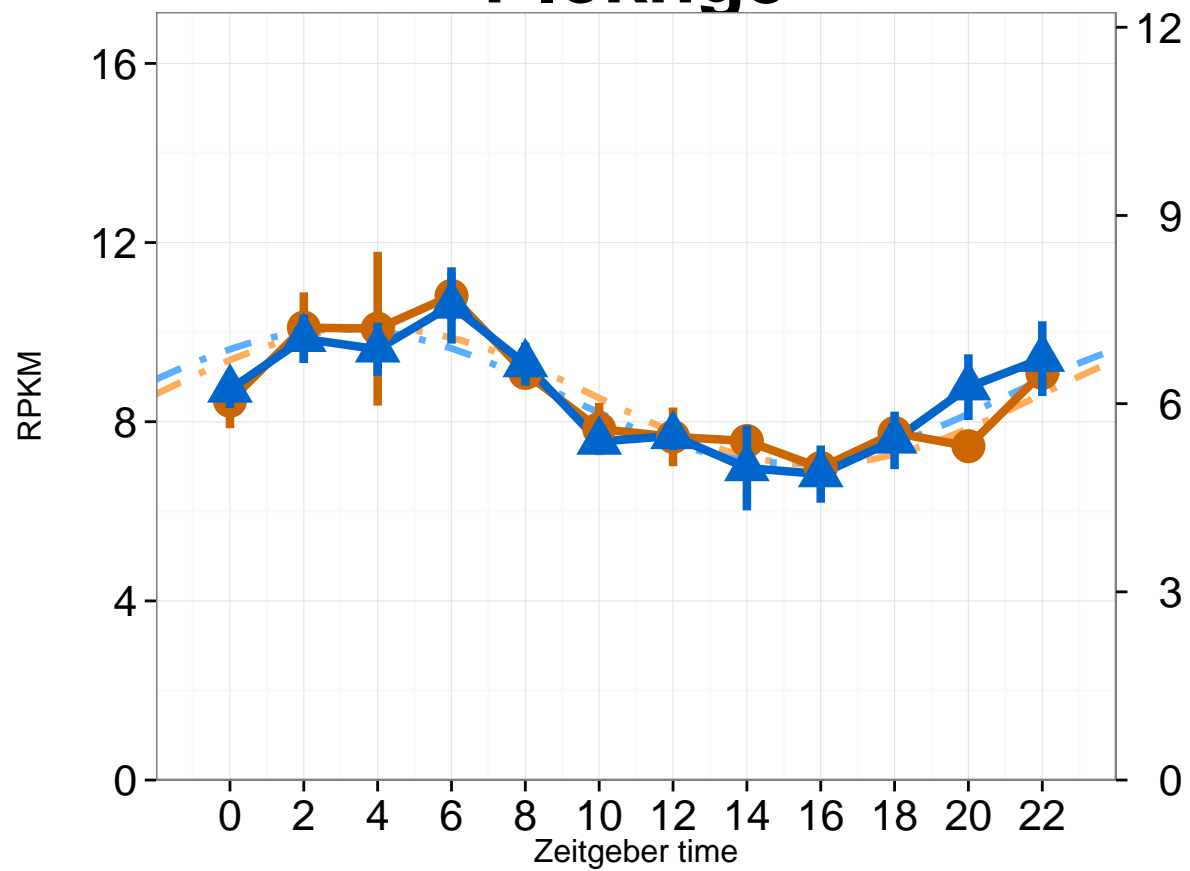

## Plekhg5

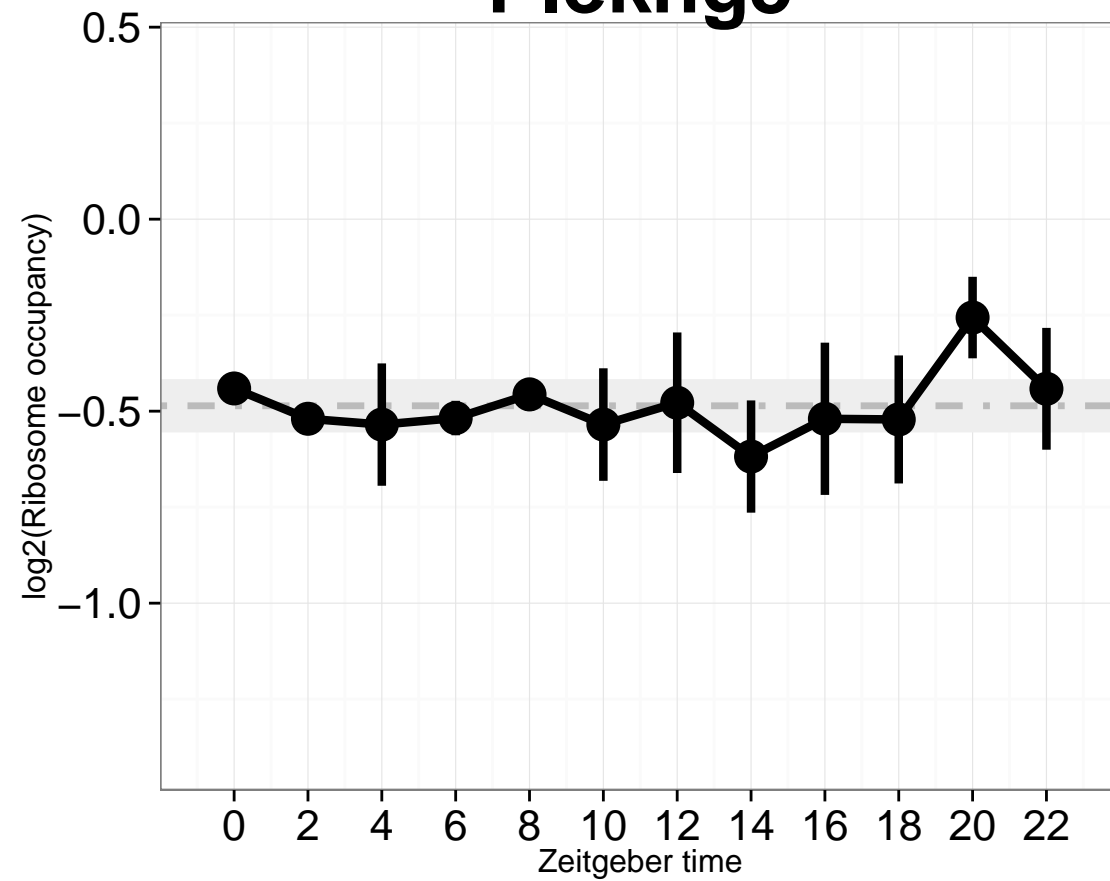

Supplement: Supplementary file 13064 [file 1]

# Sys1

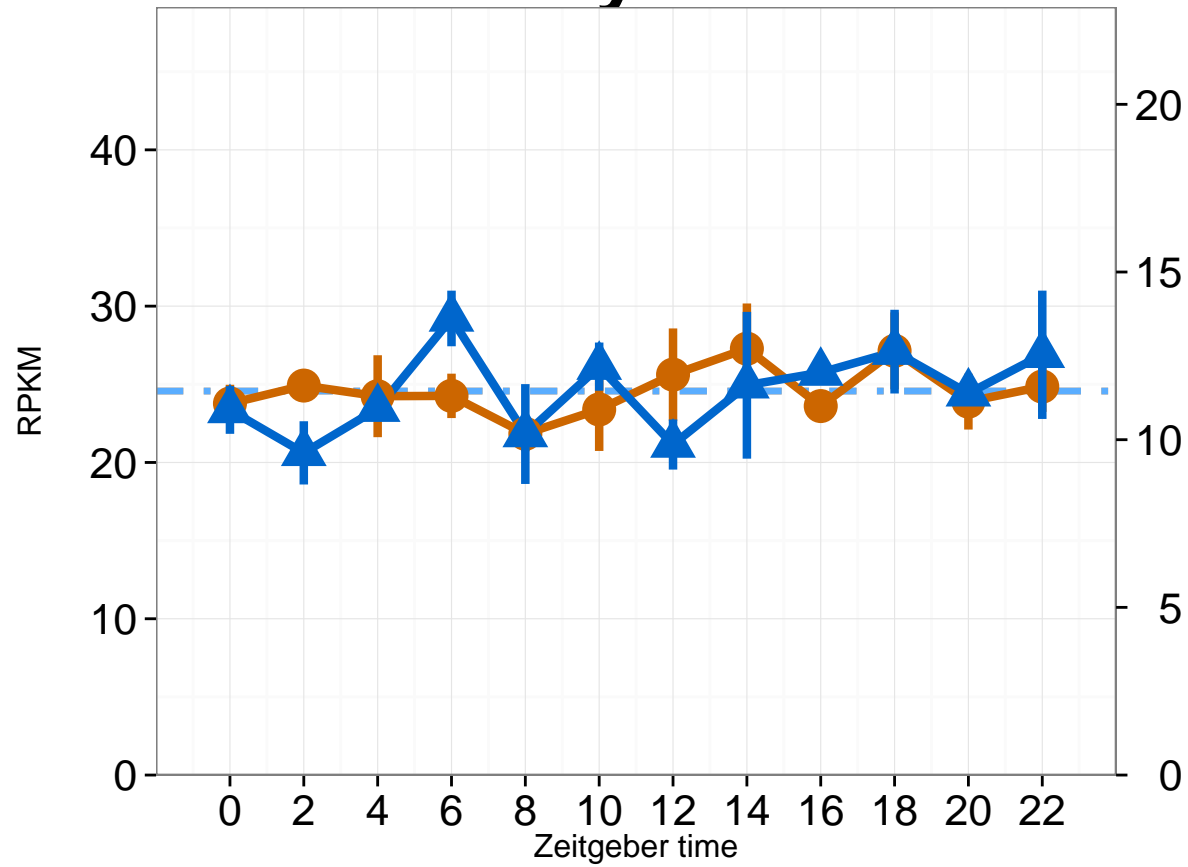

# Sys1

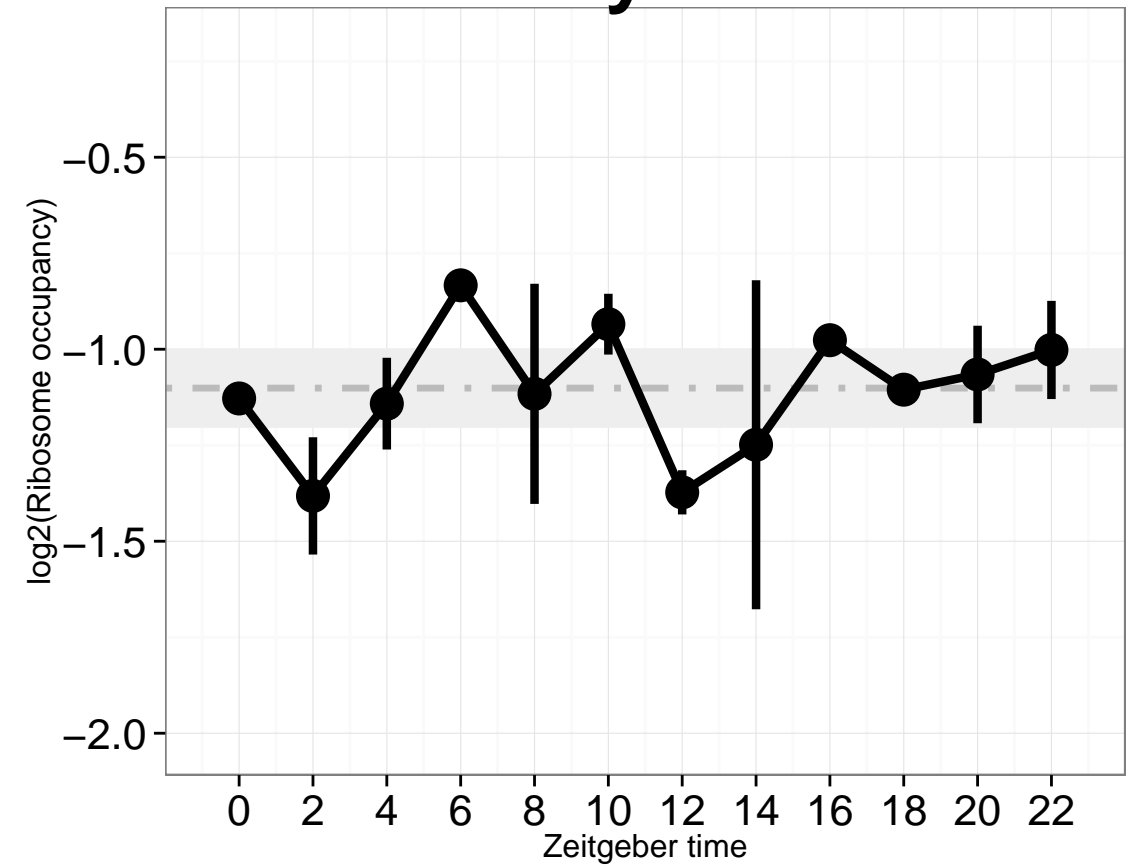

Supplement: Supplementary file 13065 [file 1]

# Trmt44

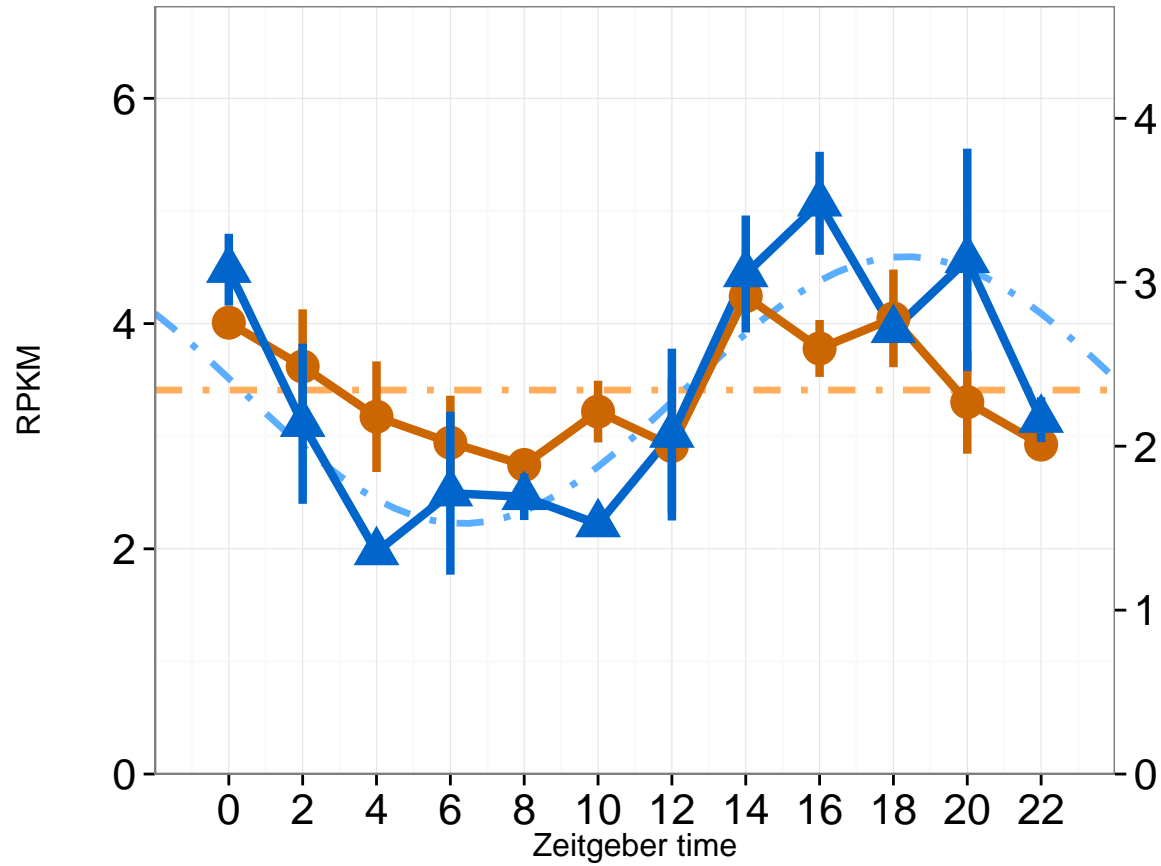

# Trmt44

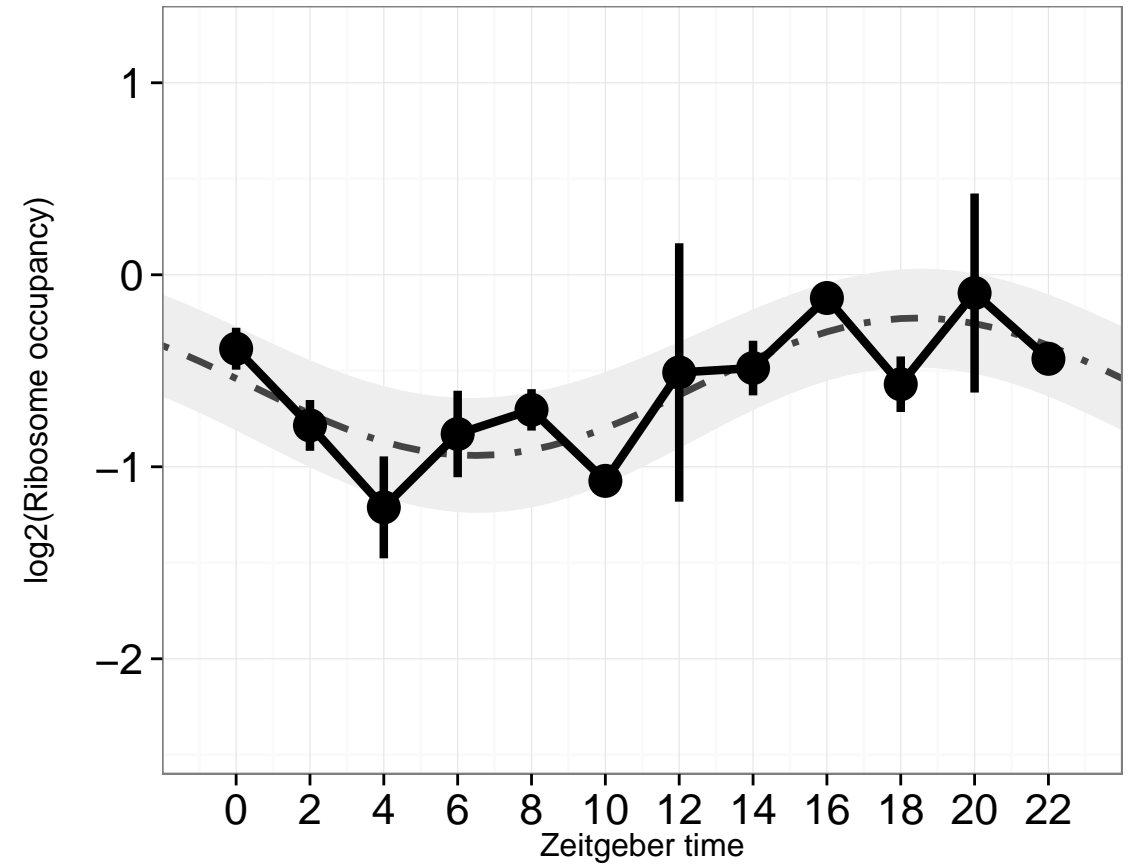

Supplement: Supplementary file 13066 [file 1]

# Krtcap3

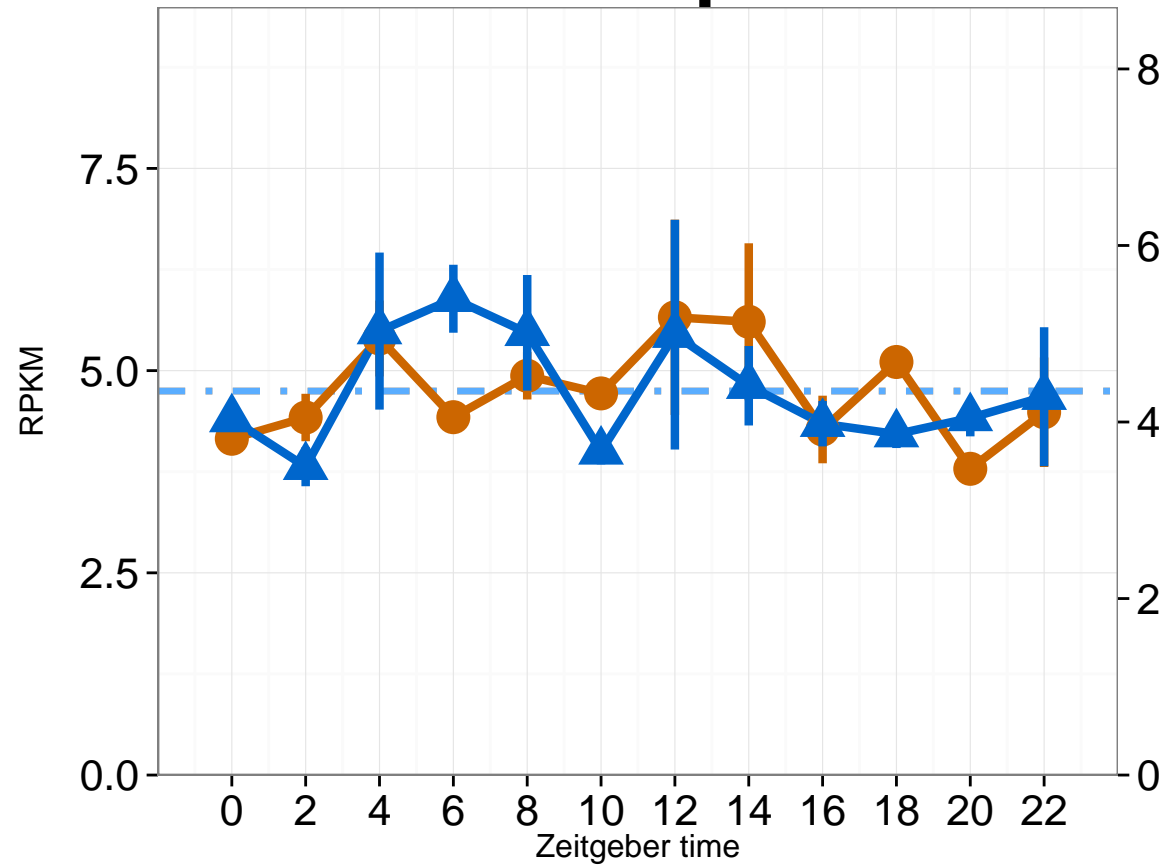

# Krtcap3

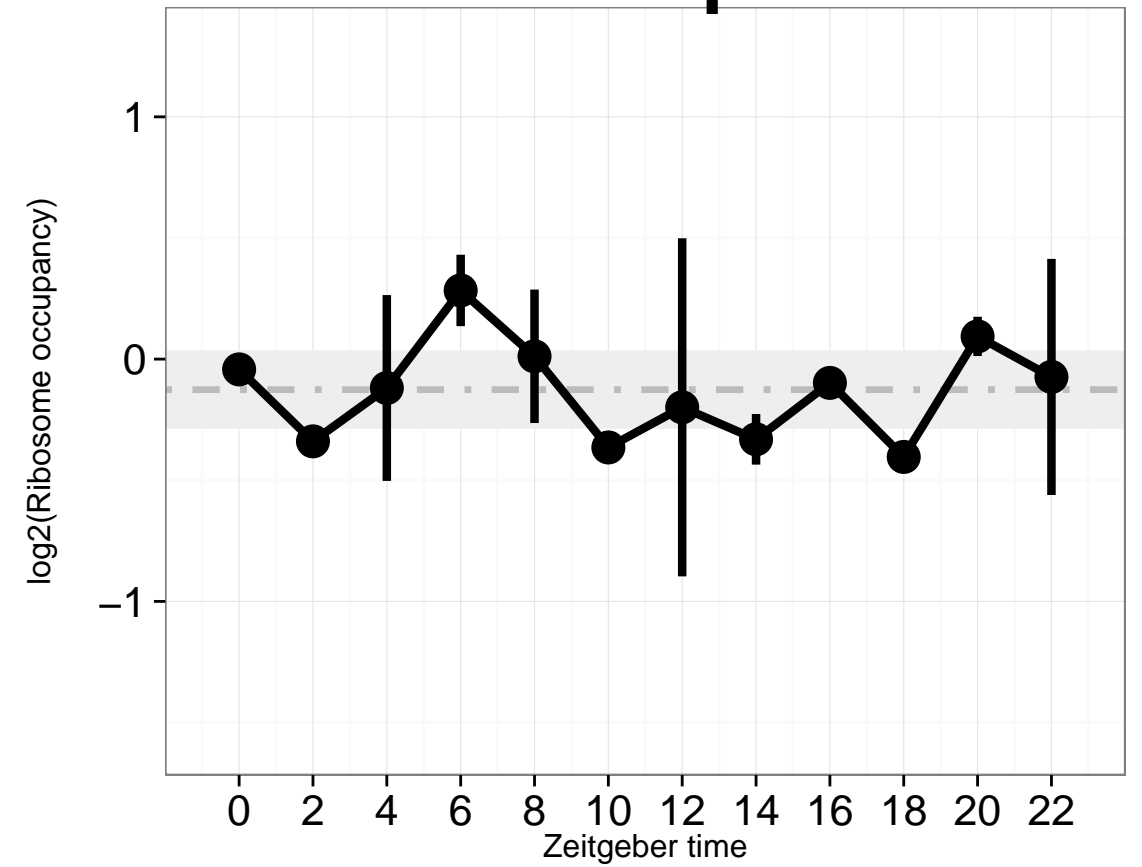

Supplement: Supplementary file 13067 [file 1]

# Abcb6

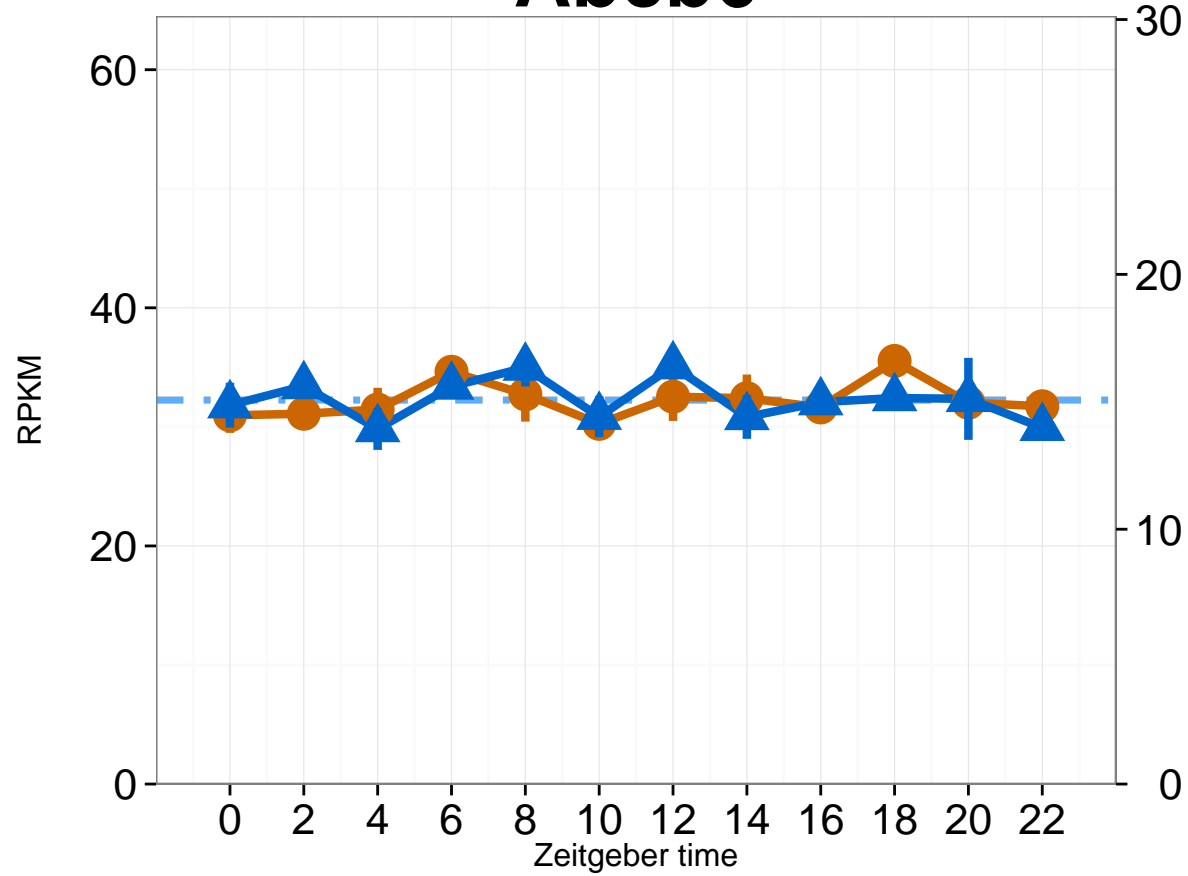

# Abcb6

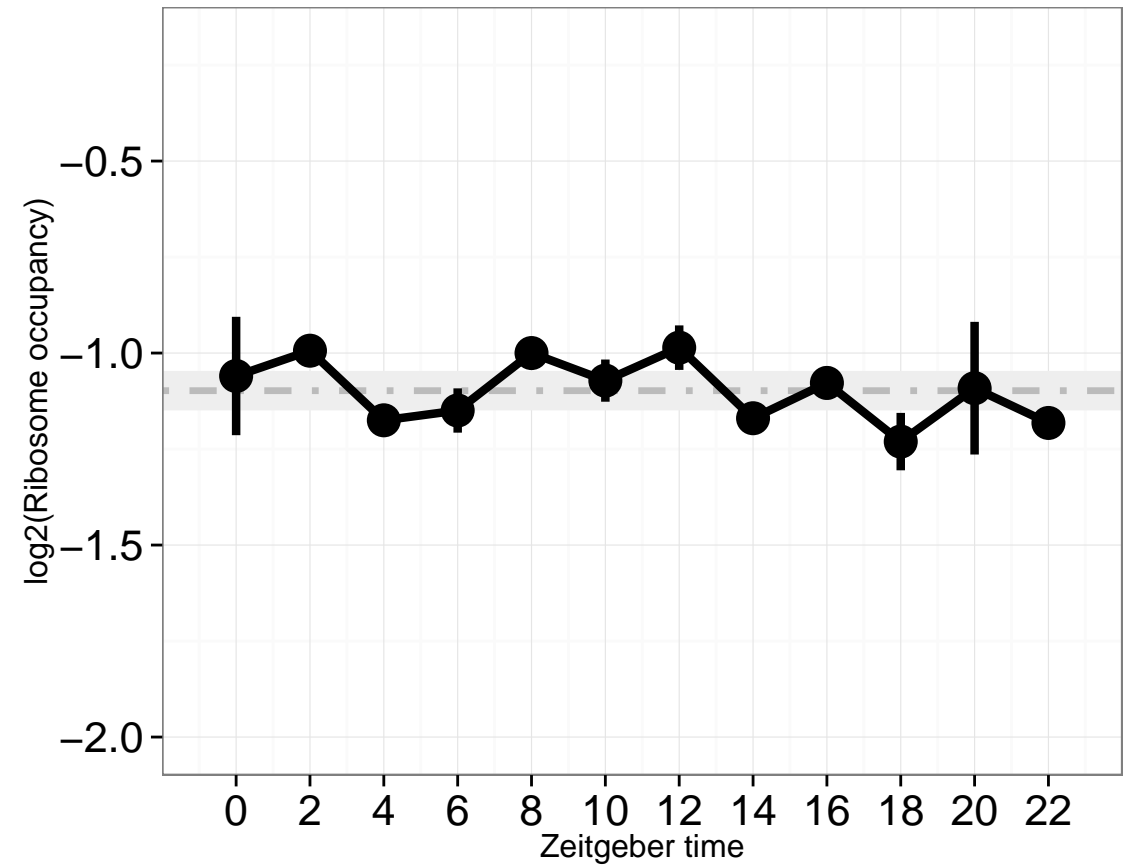

Supplement: Supplementary file 13068 [file 1]

## Slc9a4

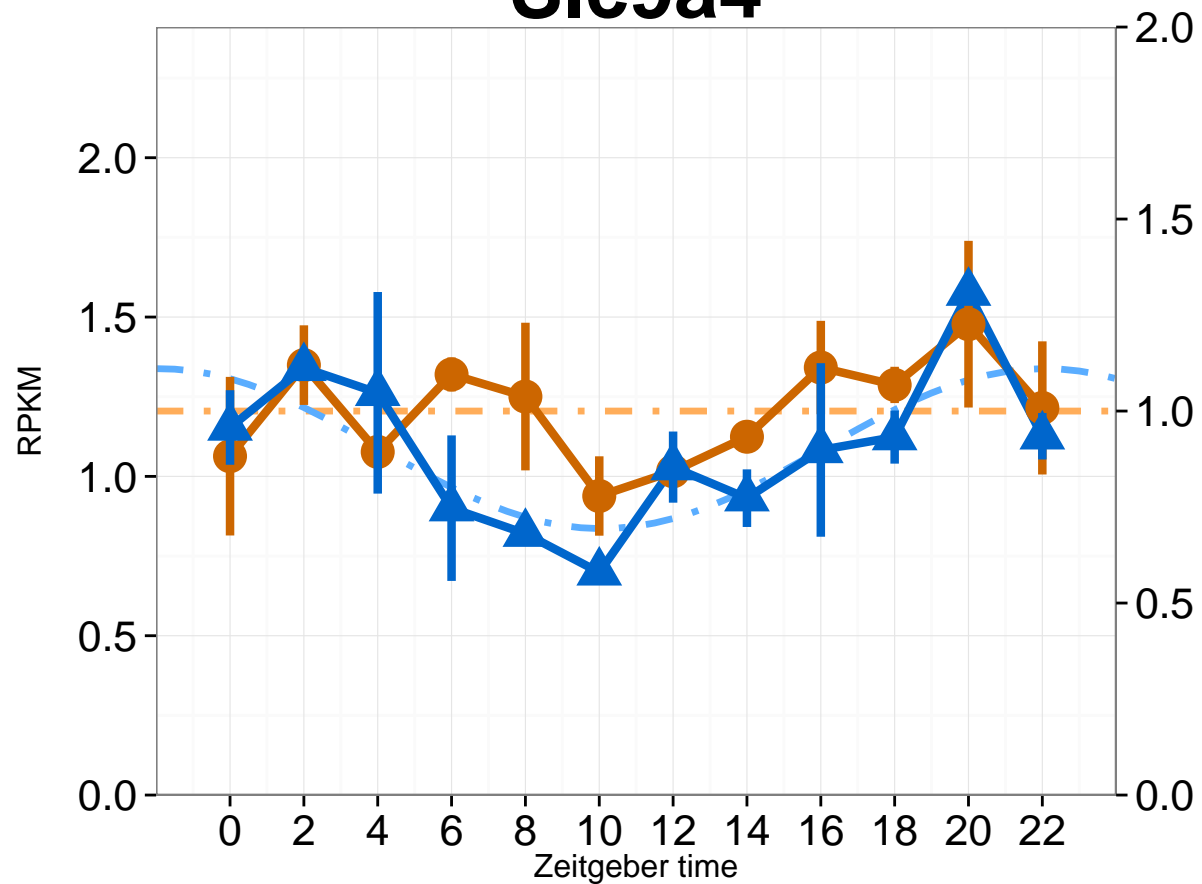

## Slc9a4

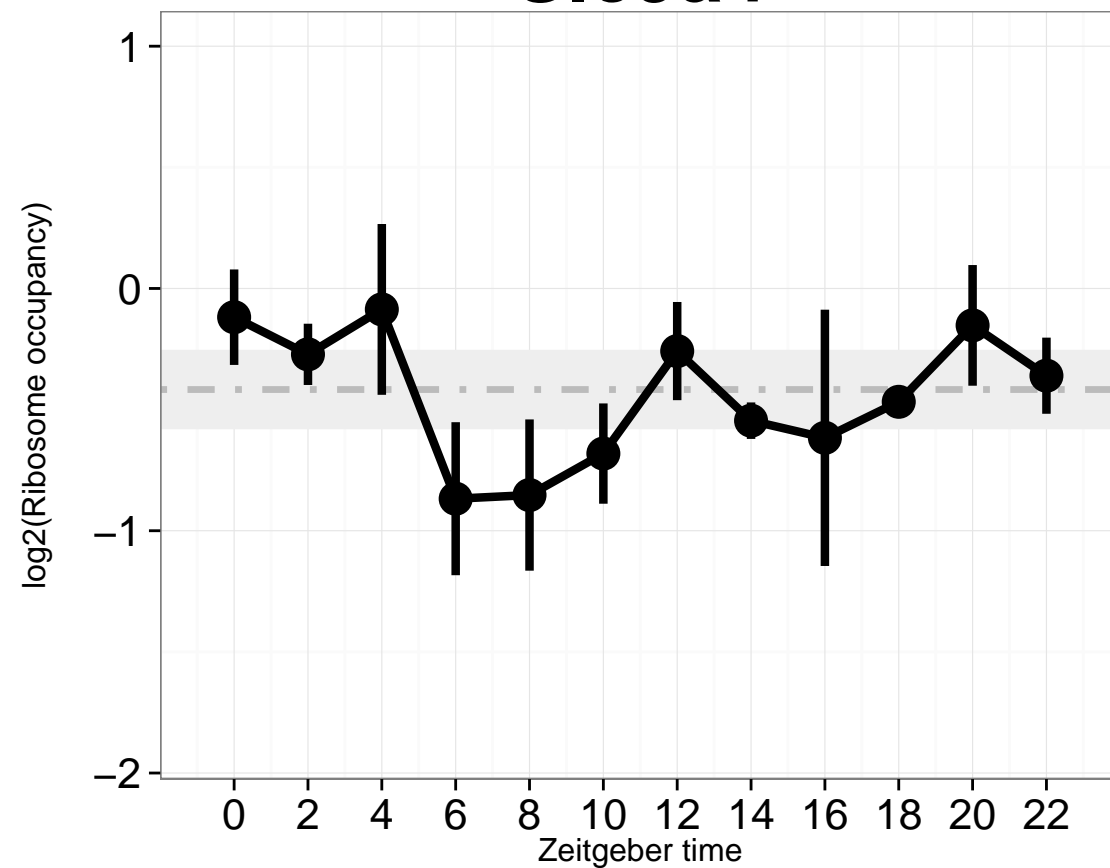

Supplement: Supplementary file 13069 [file 1]

## Nfatc3

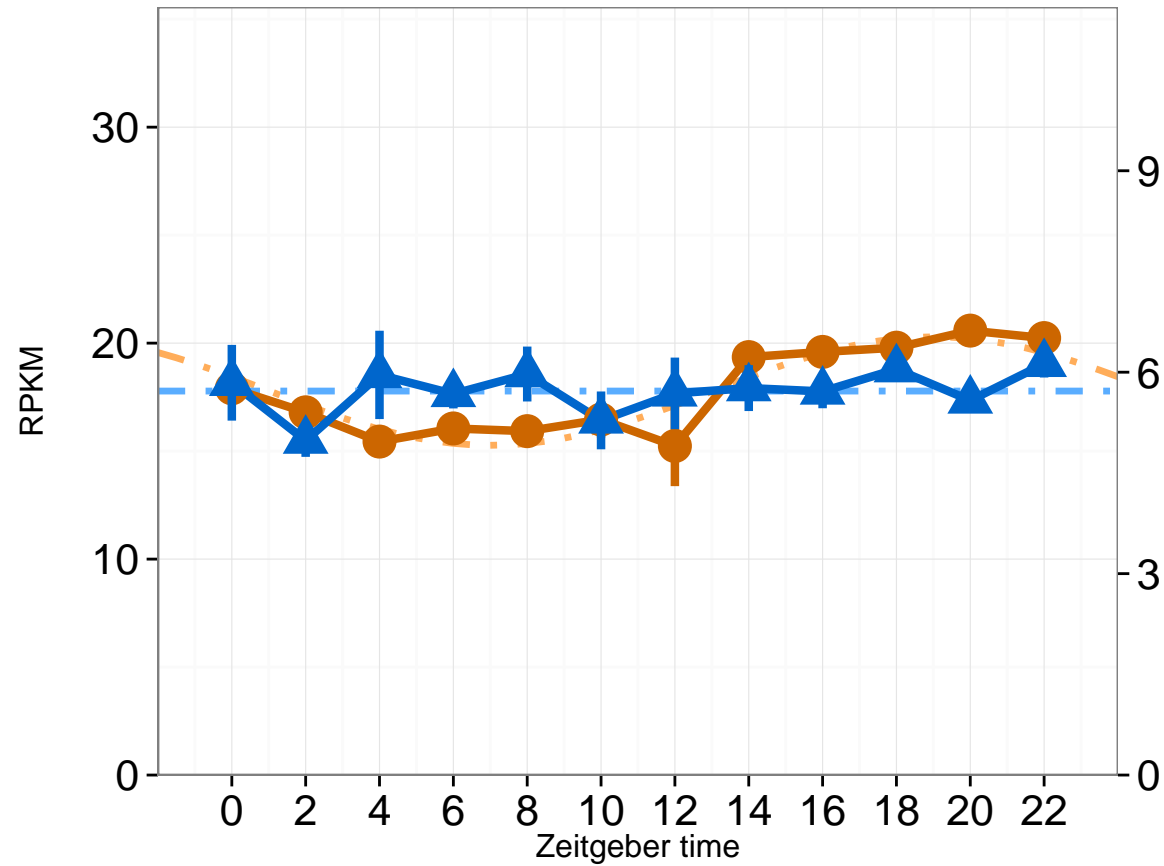

## Nfatc3

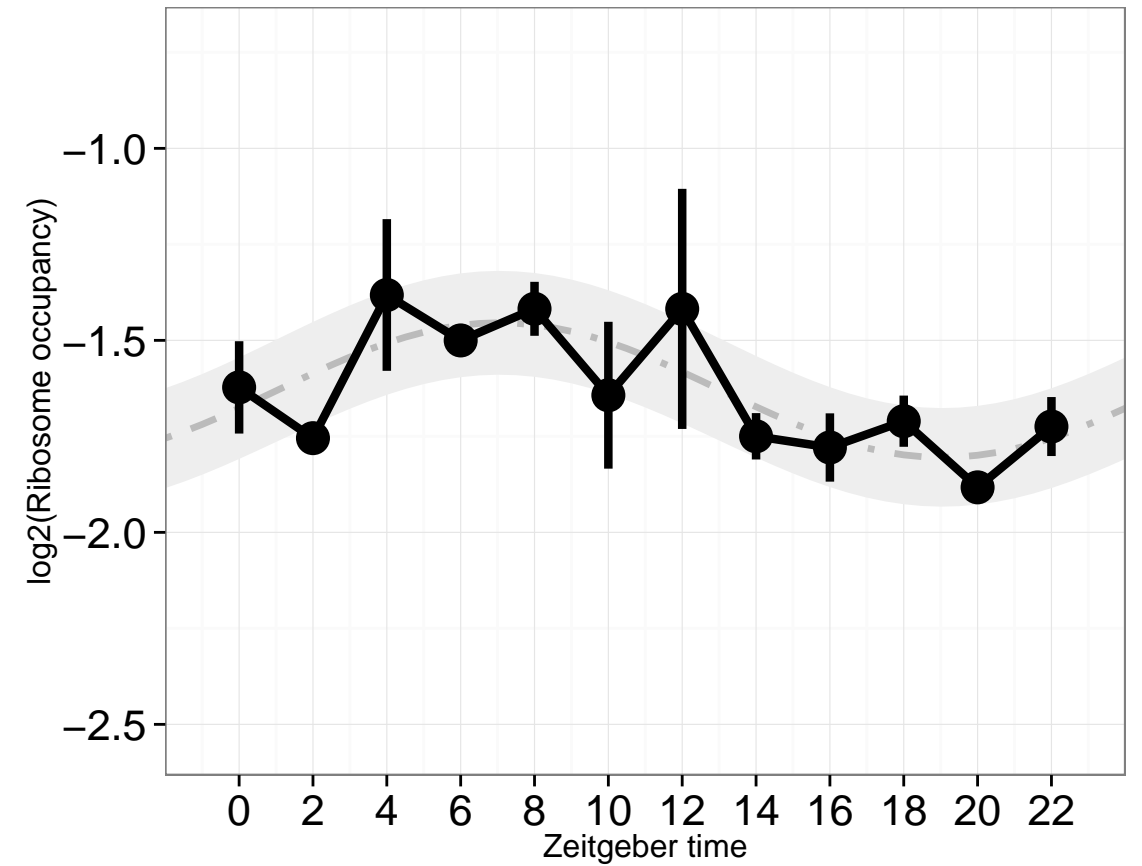

Supplement: Supplementary file 13070 [file 1]

# Mt1

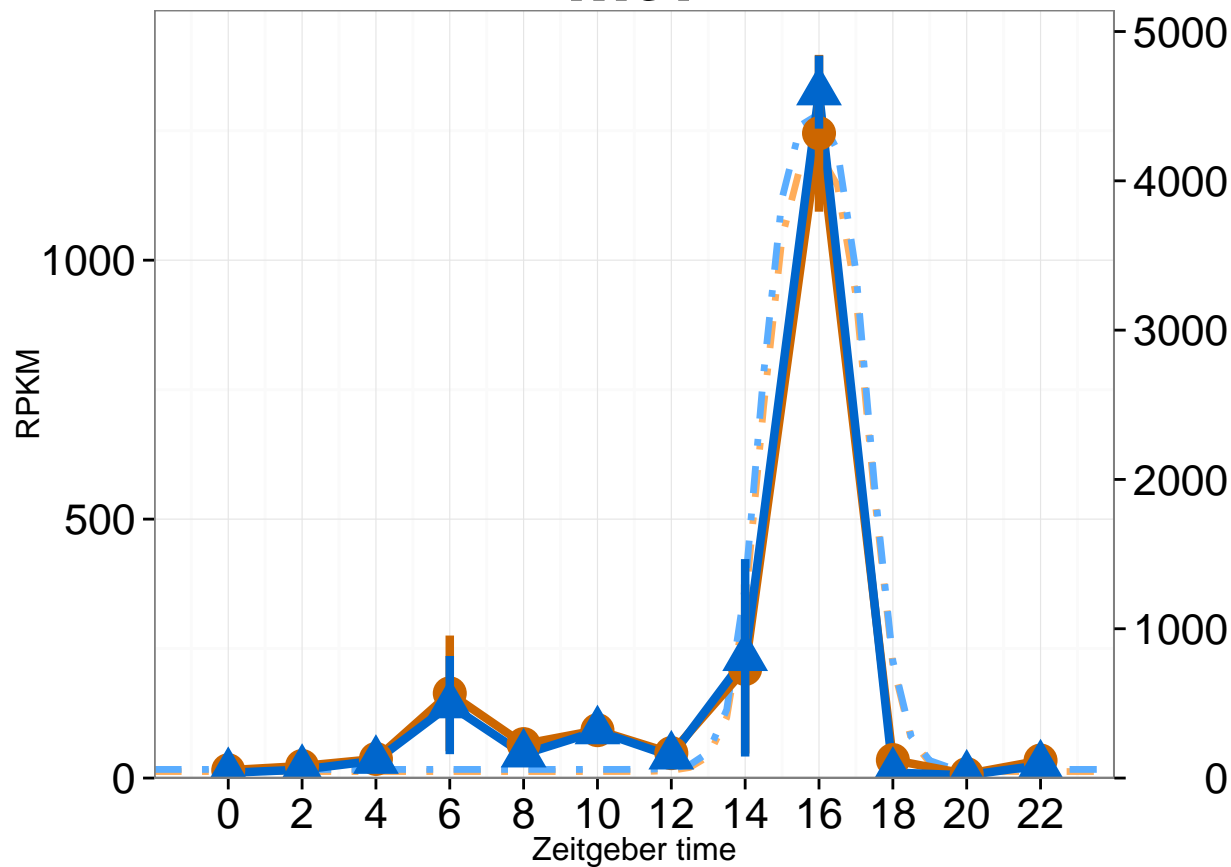

# Mt1

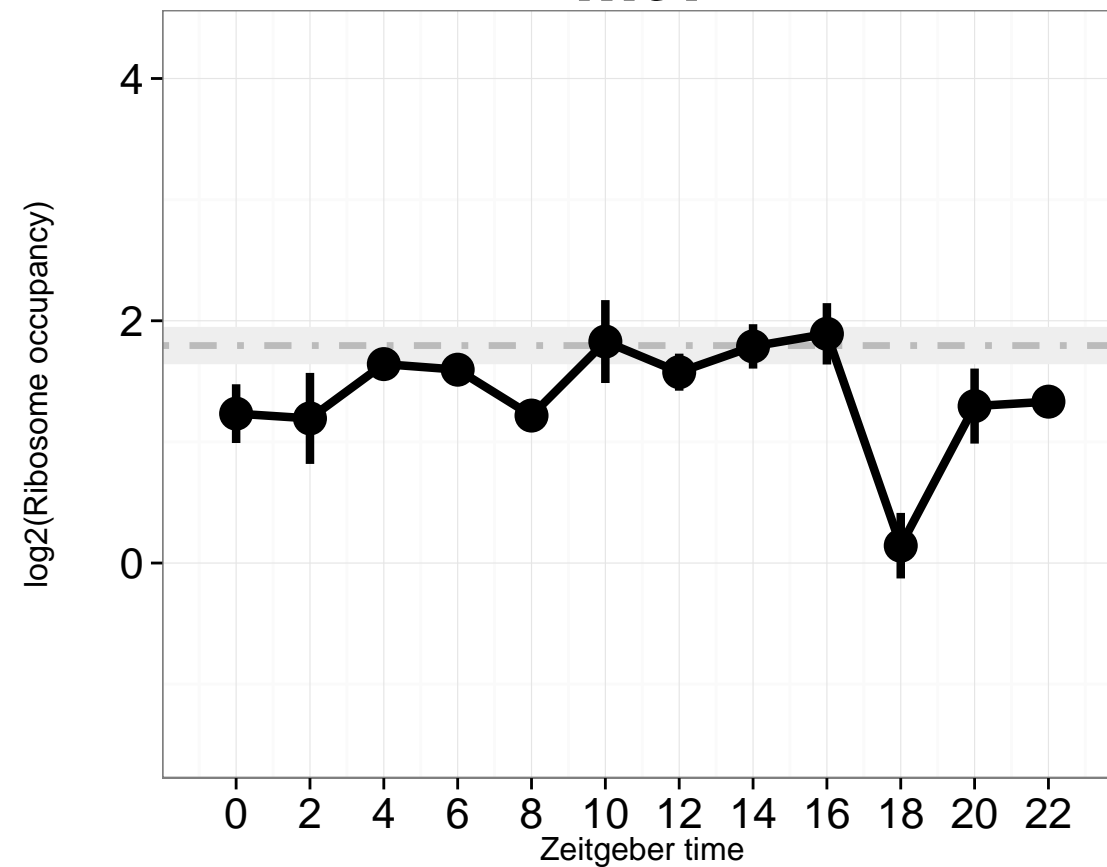

Supplement: Supplementary file 13071 [file 1]

# Acnat1

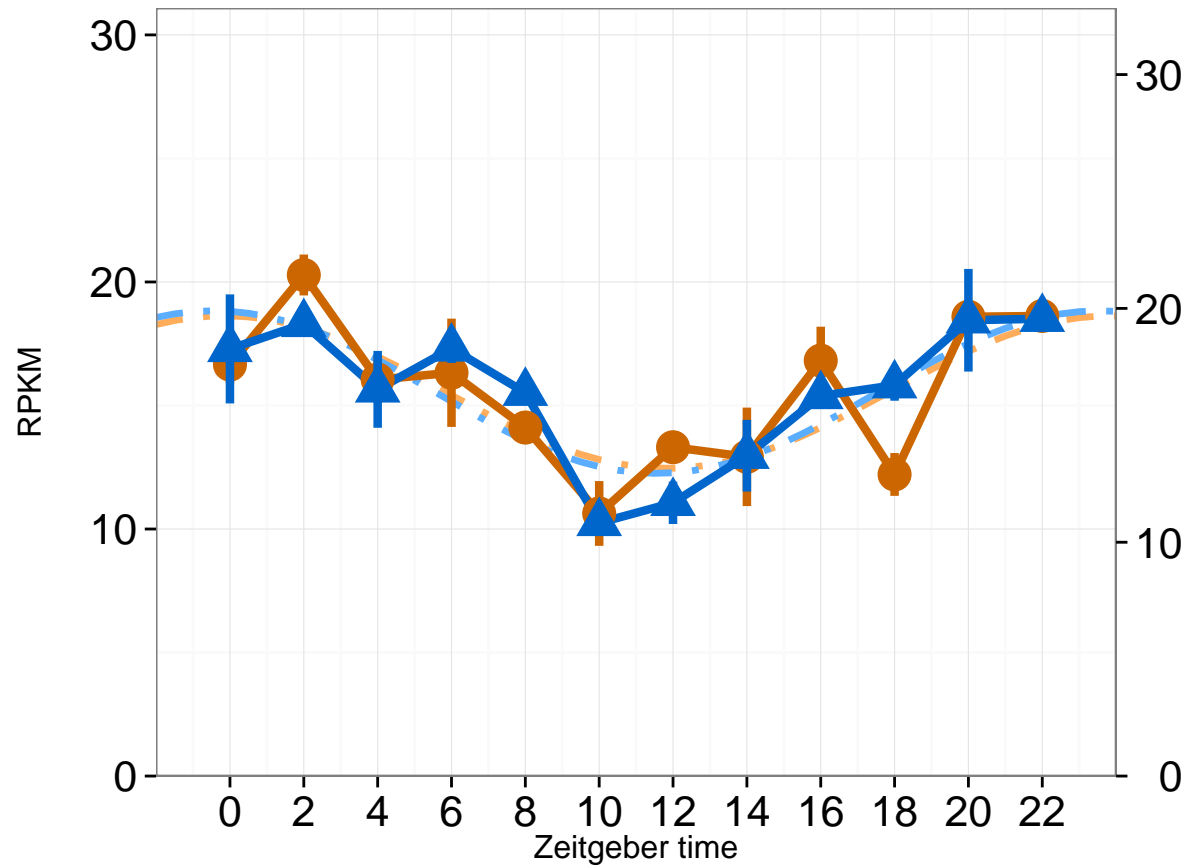

# Acnat1

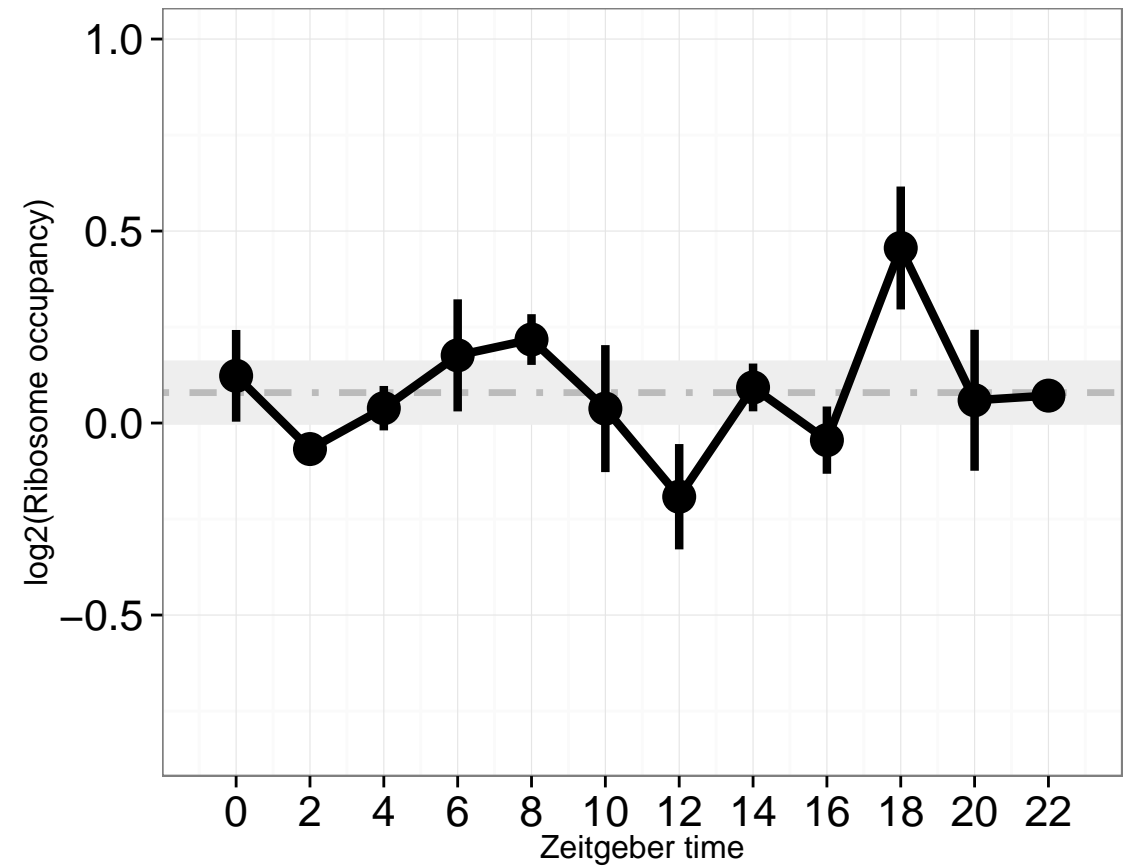

Supplement: Supplementary file 13072 [file 1]

## Sfxn2

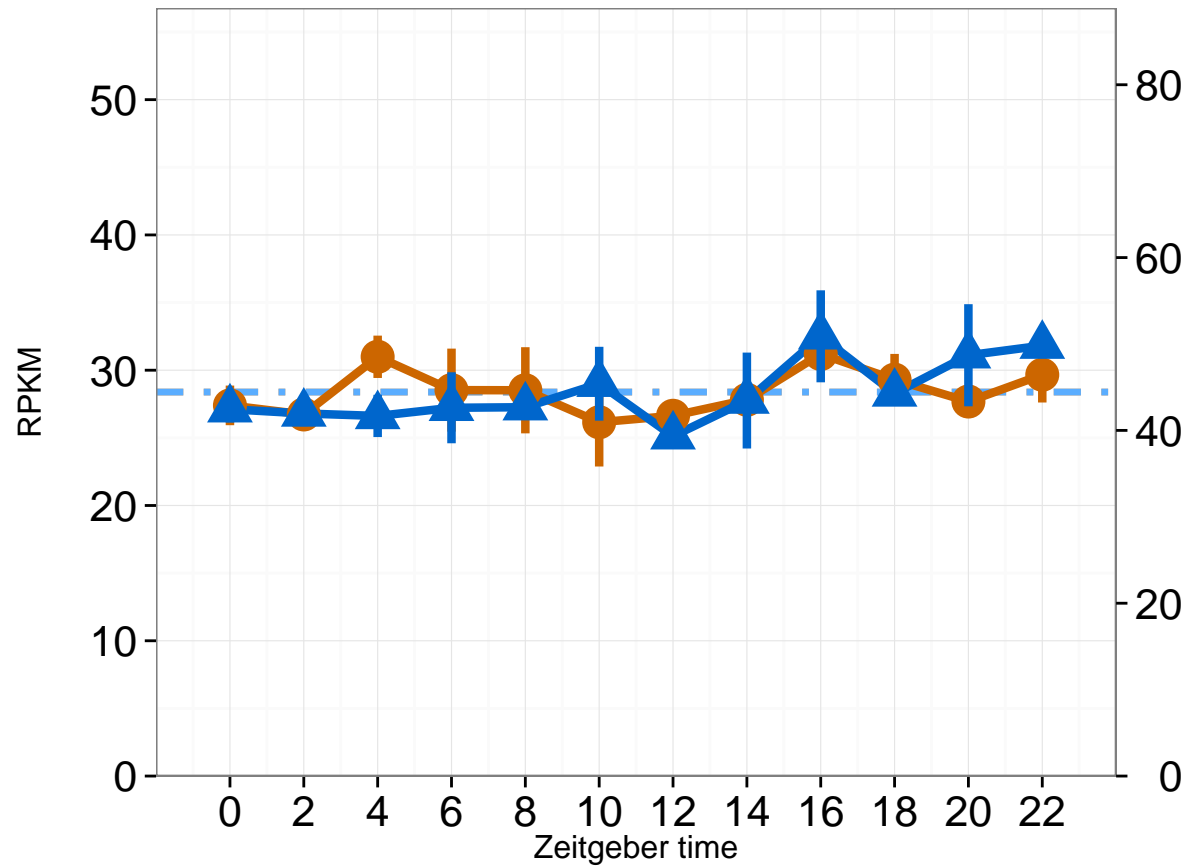

## Sfxn2

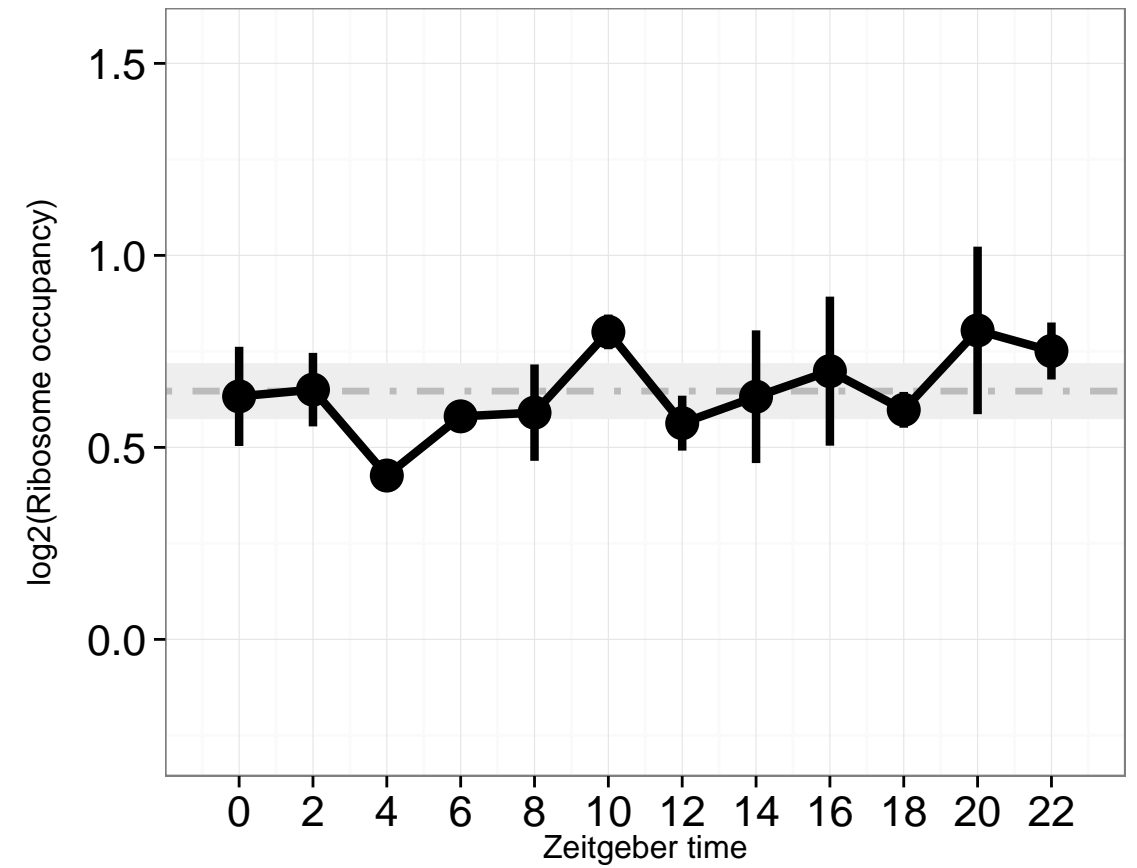

Supplement: Supplementary file 13073 [file 1]

# Atp5j

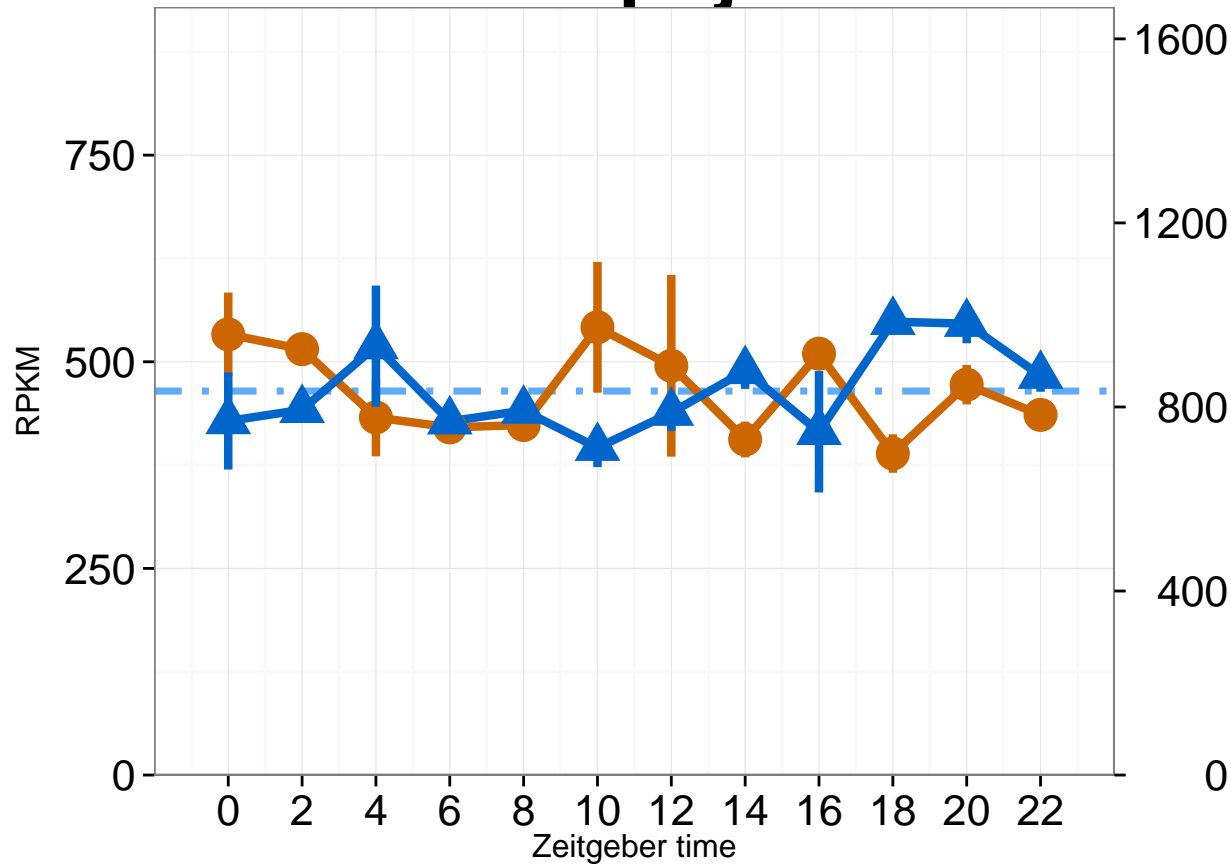

# Atp5j

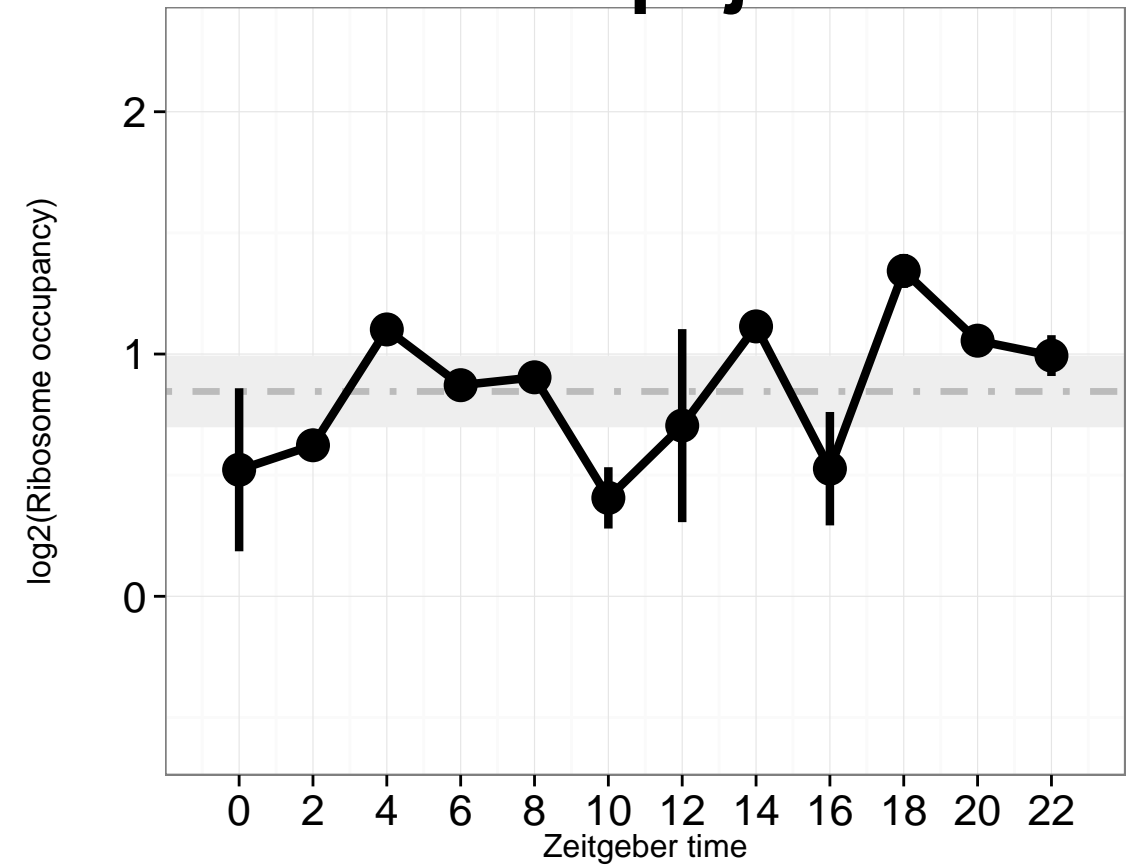

Supplement: Supplementary file 13074 [file 1]

# Fam129b

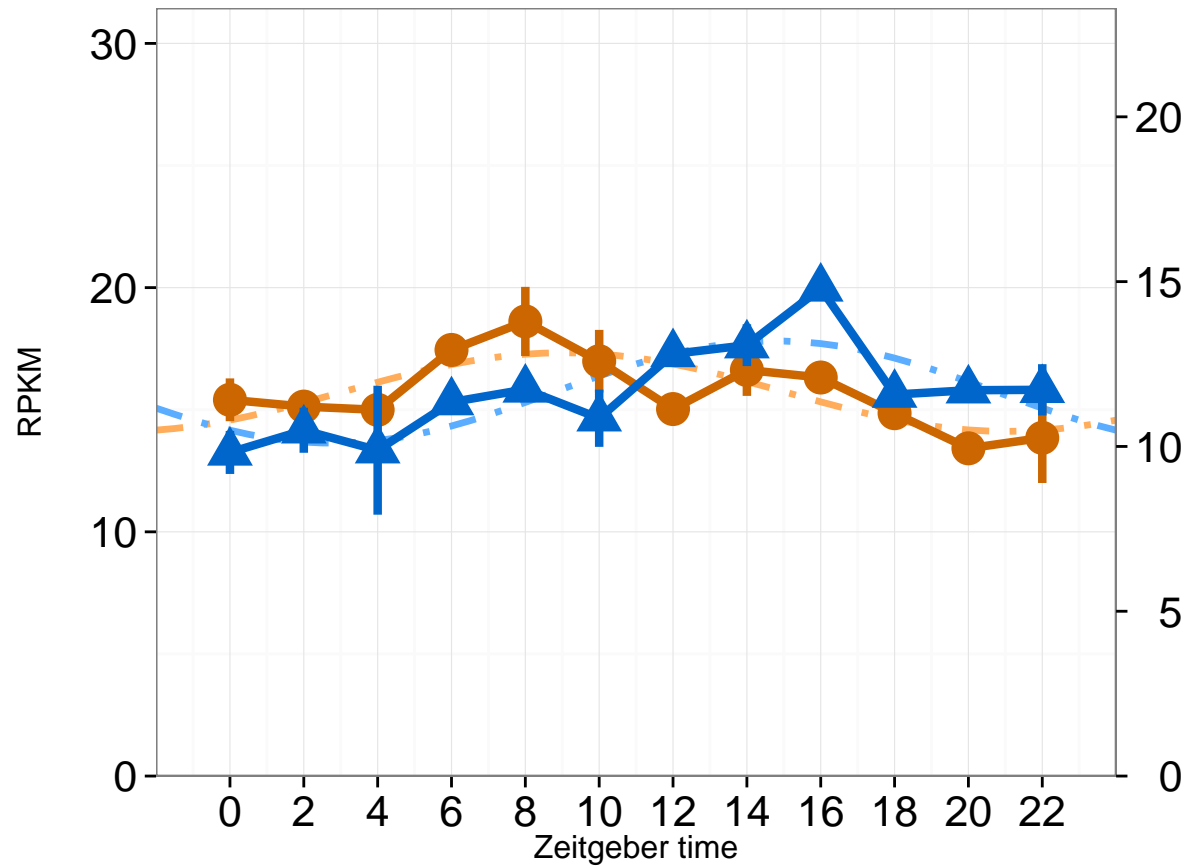

# Fam129b

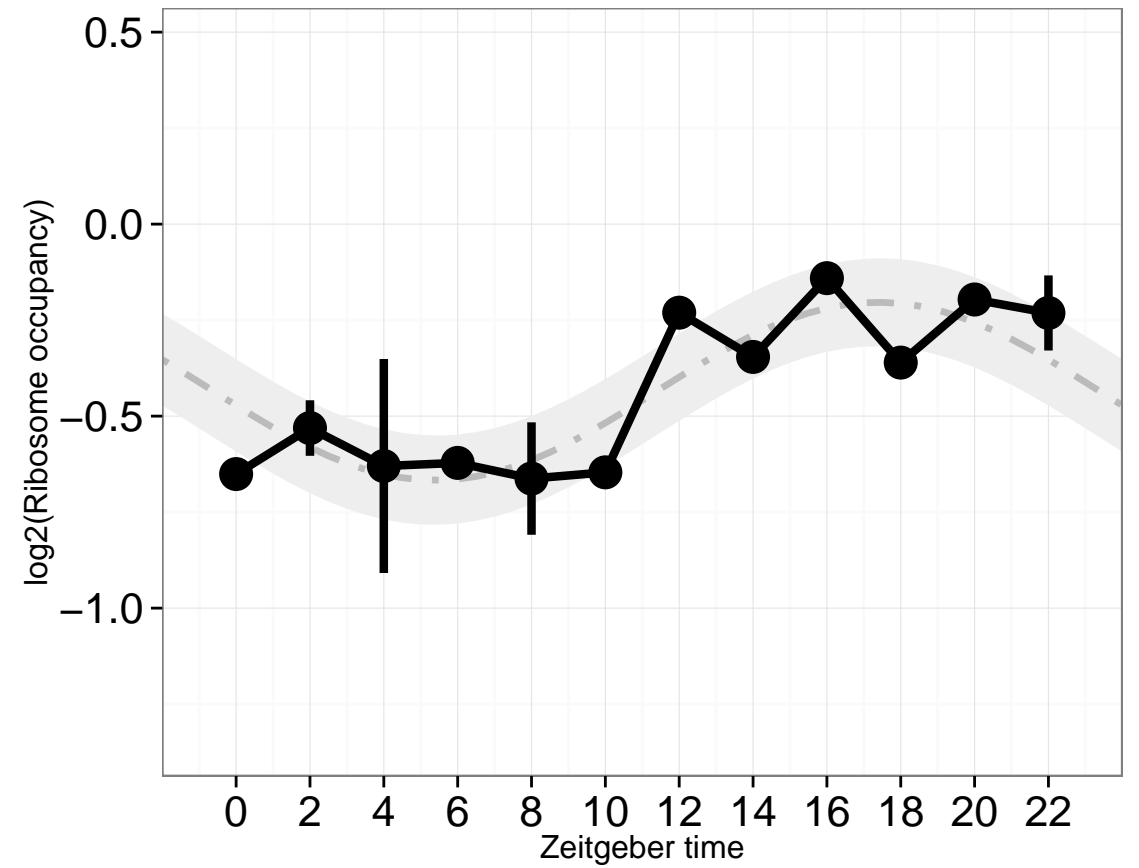

Supplement: Supplementary file 13075 [file 1]

## Itgae

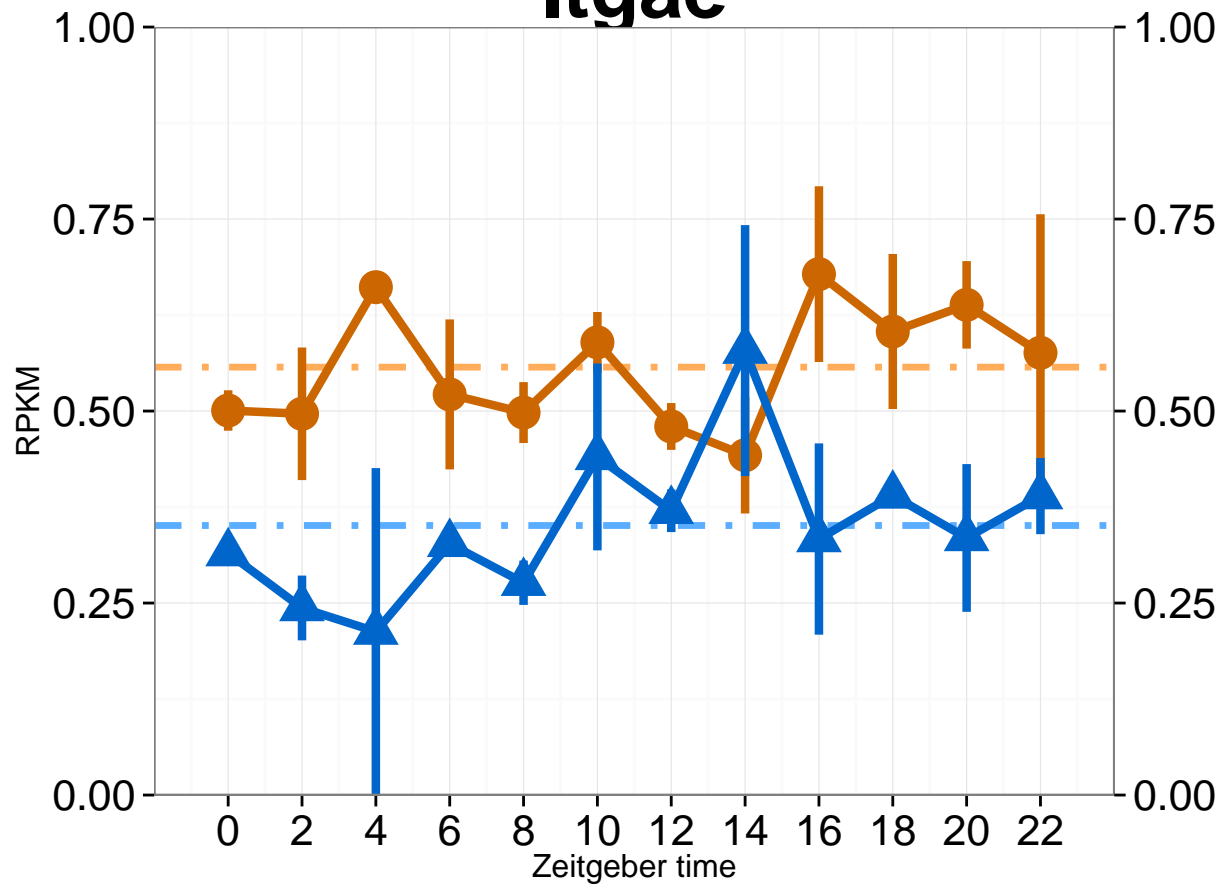

## Itgae

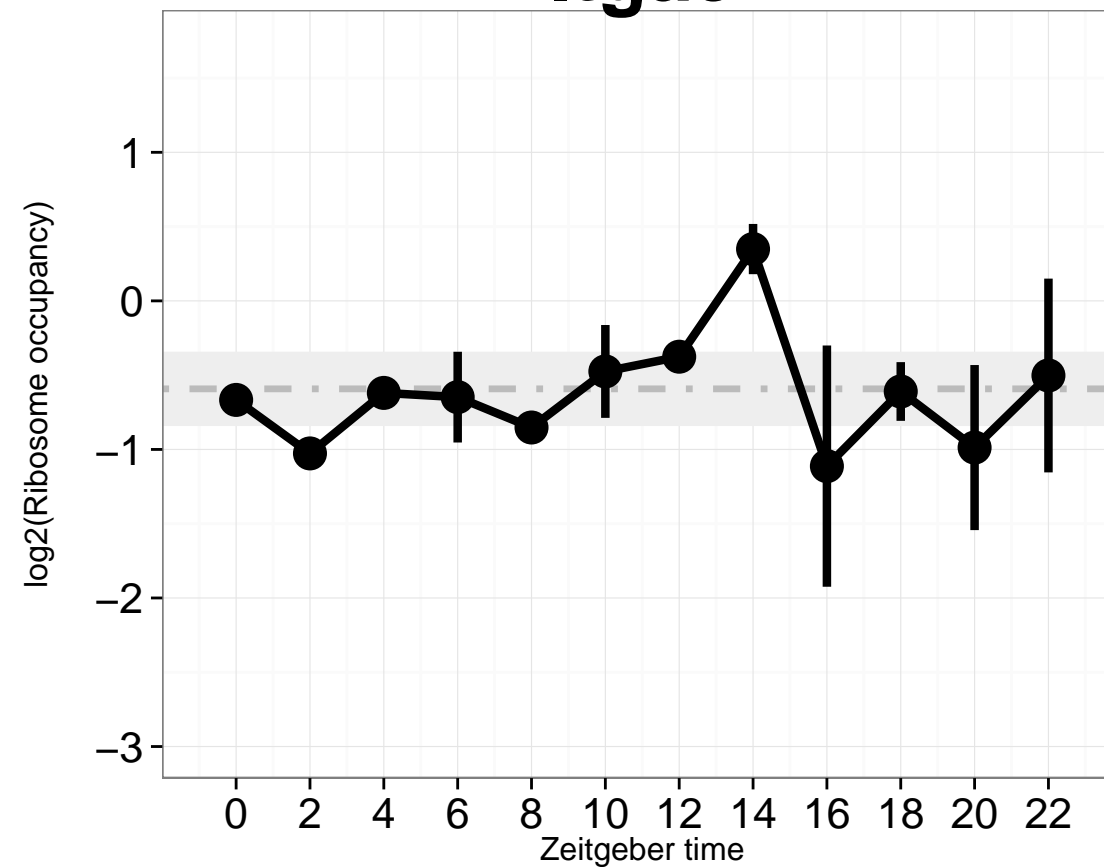

Supplement: Supplementary file 13076 [file 1]

## Ube2e2

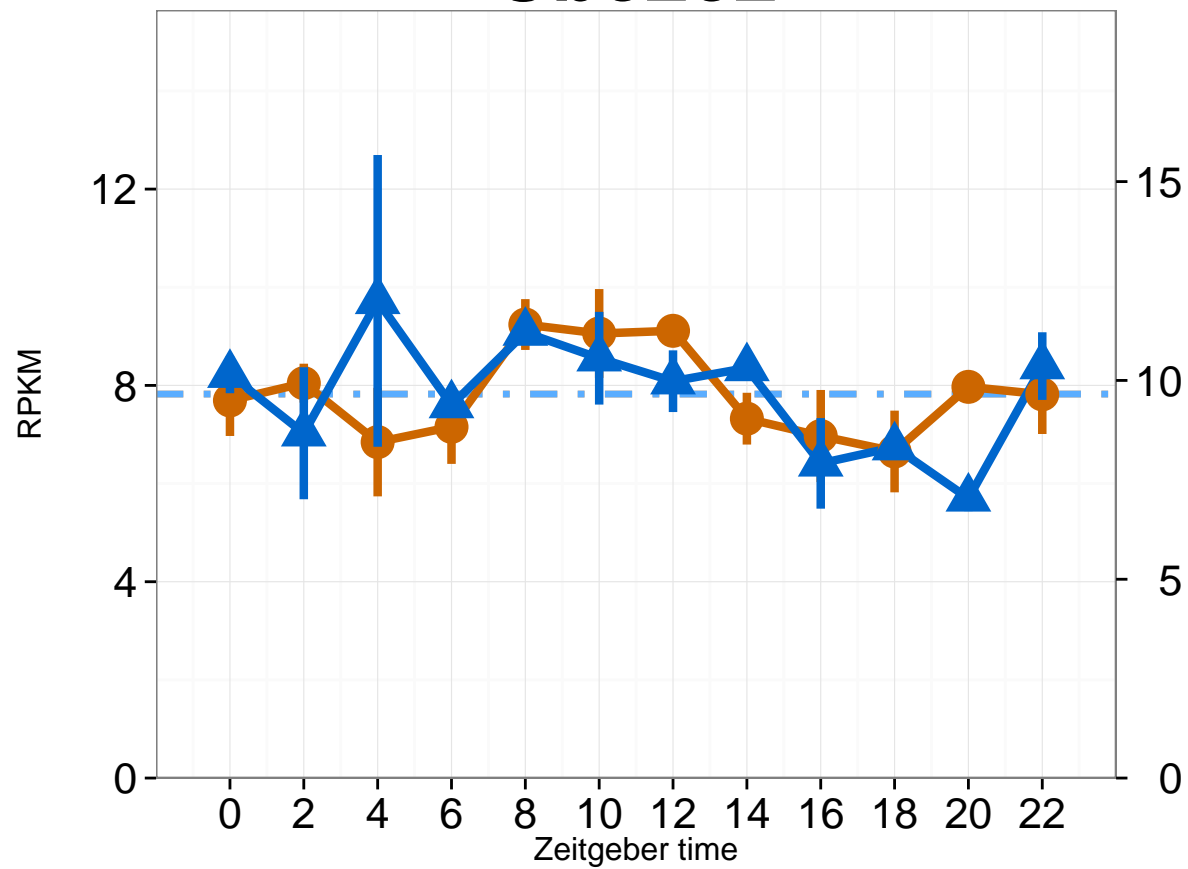

## Ube2e2

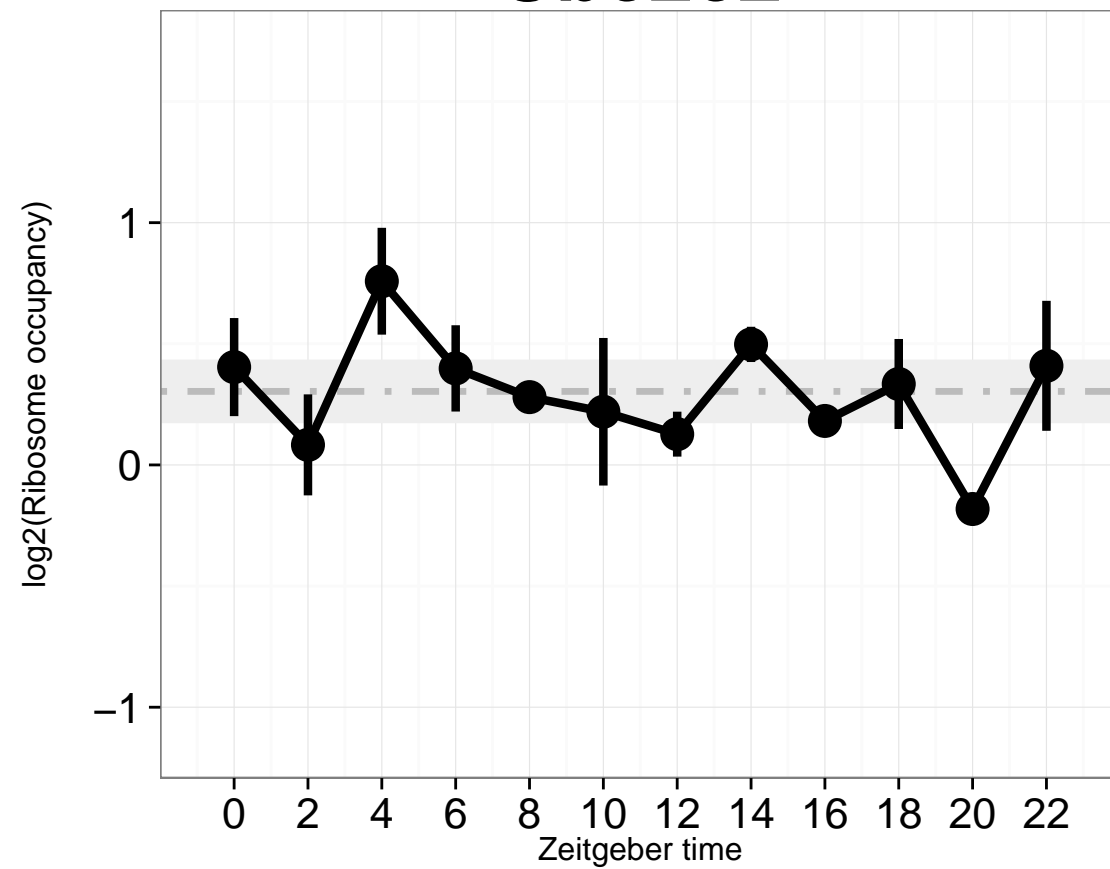

Supplement: Supplementary file 13077 [file 1]

**Rdh7 TR**

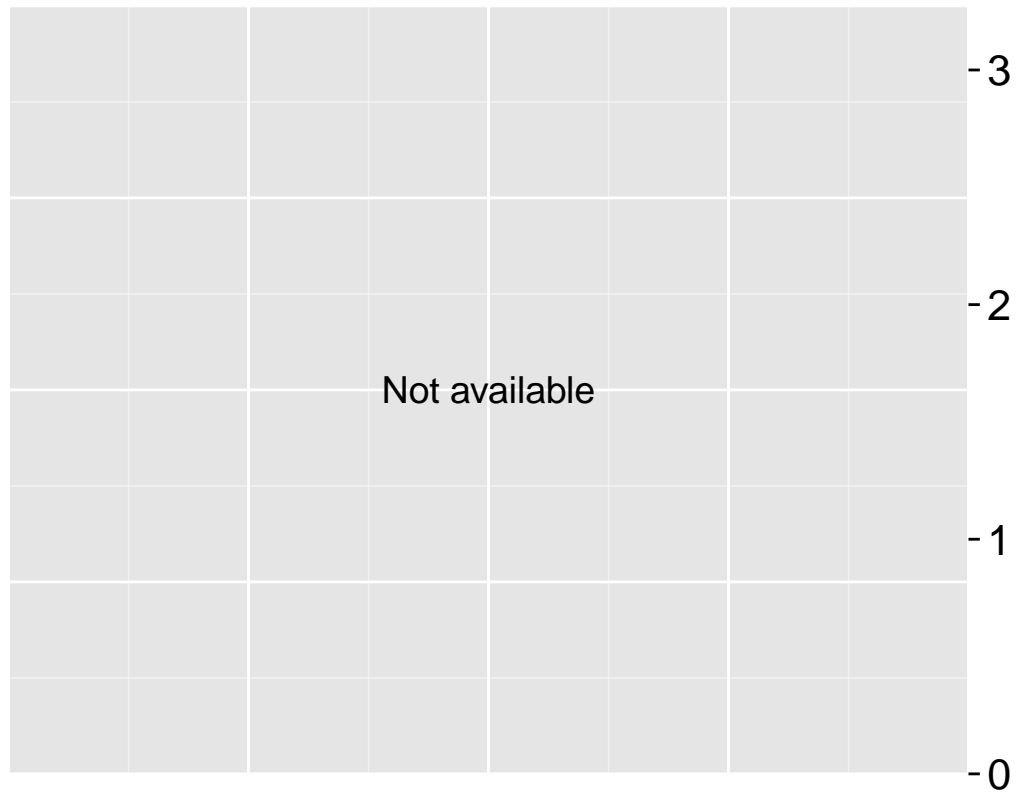

**Rdh7 log2(Ribosome occupancy)**

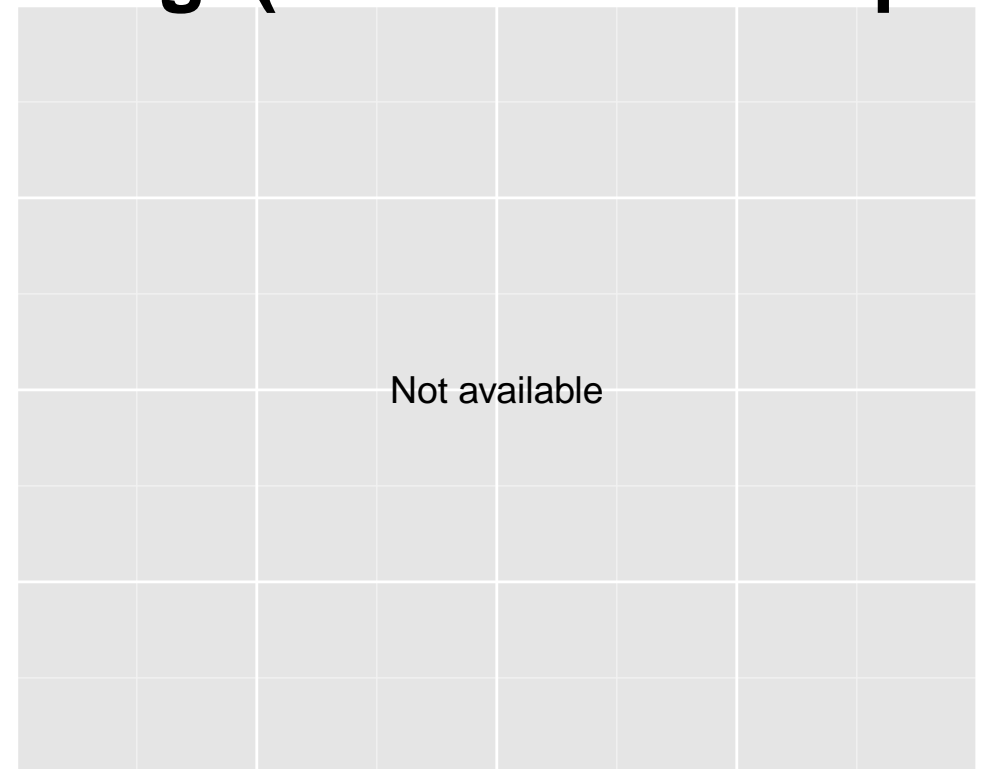

Supplement: Supplementary file 13078 [file 1]

# Rtp4

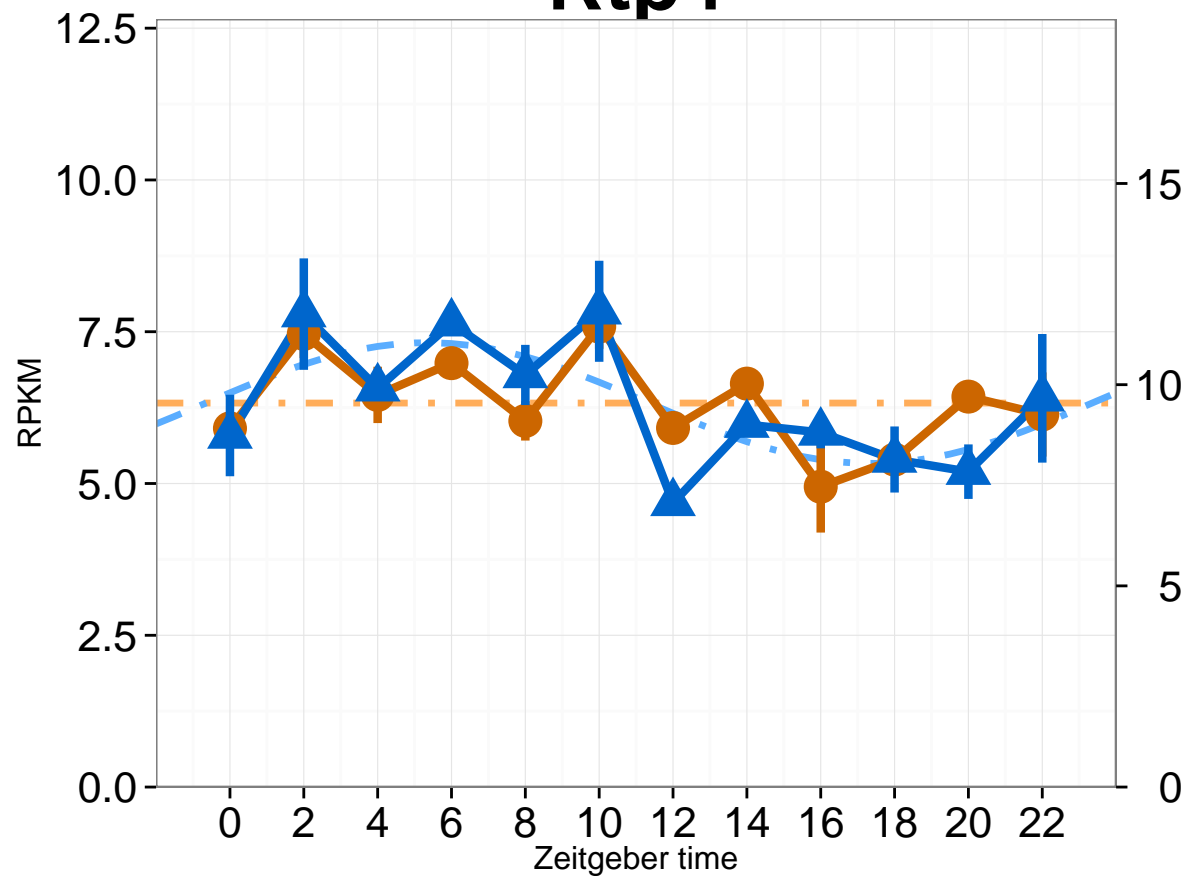

# Rtp4

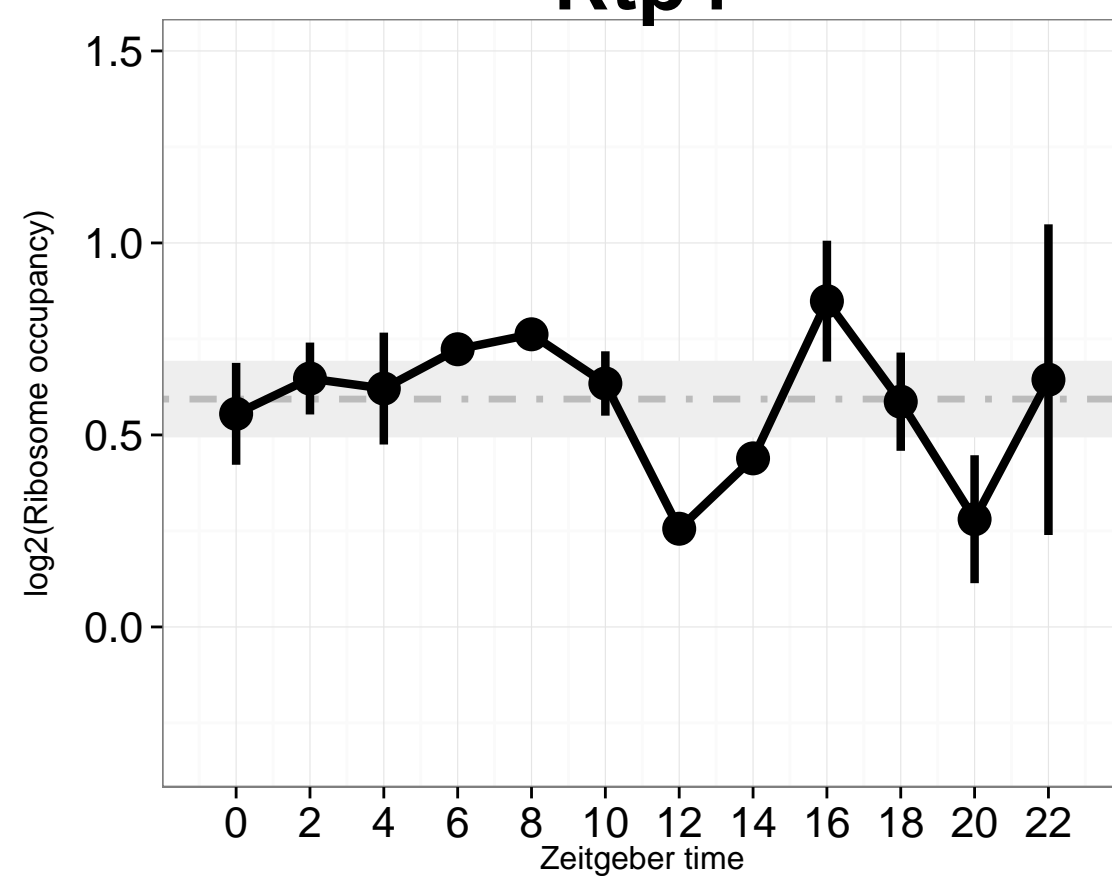

Supplement: Supplementary file 13079 [file 1]

## Hspg2

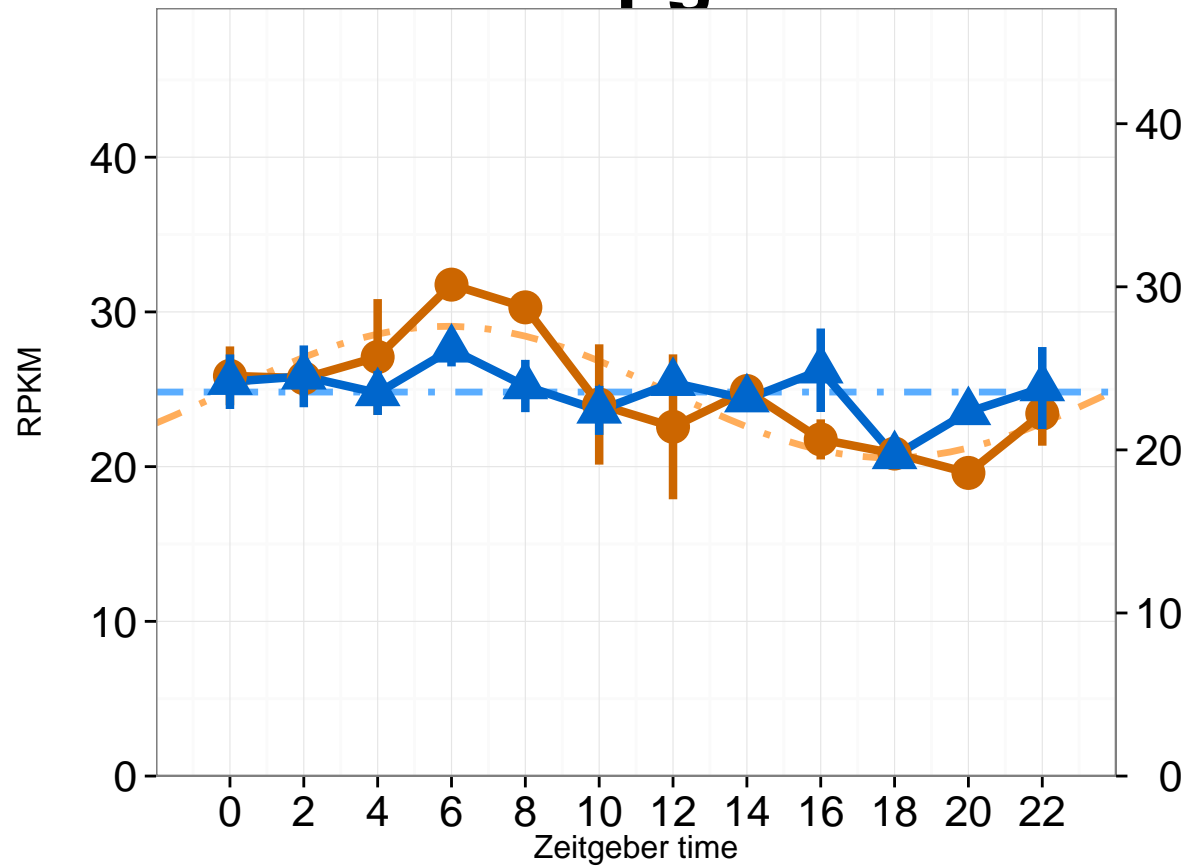

## Hspg2

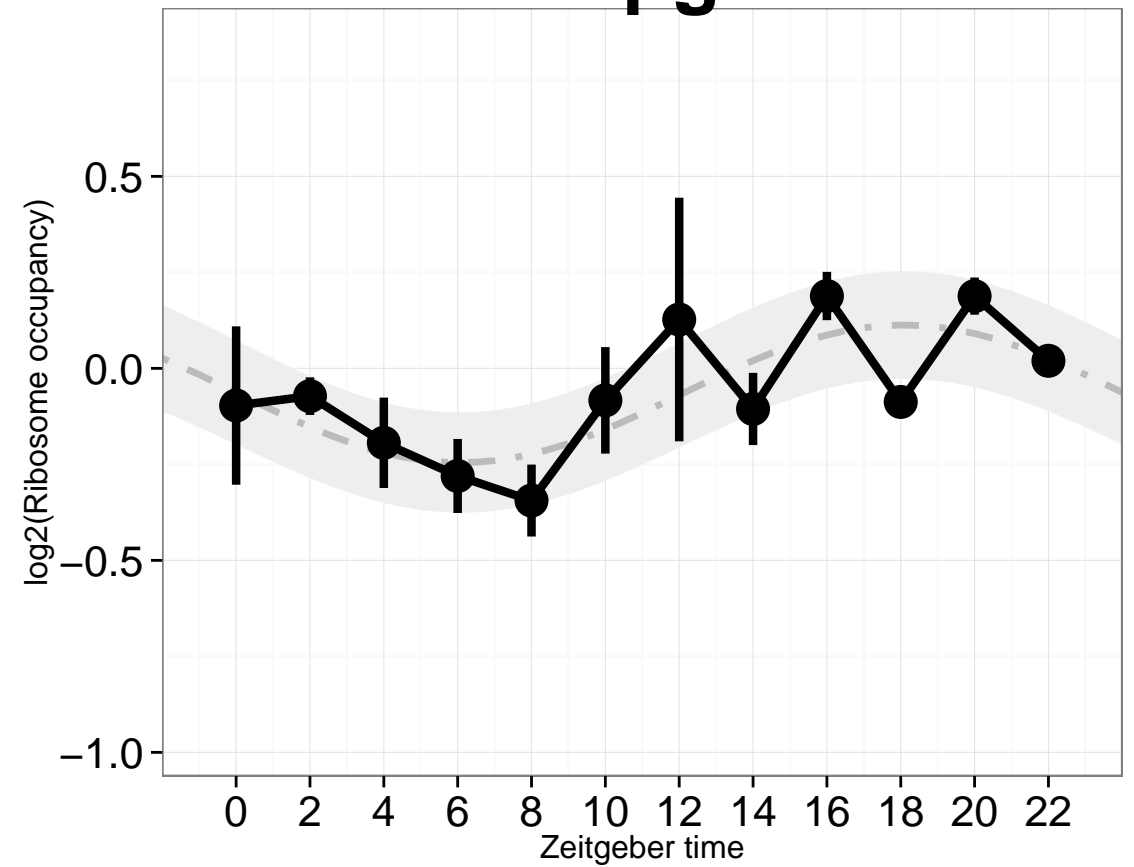

Supplement: Supplementary file 13080 [file 1]

## Car14

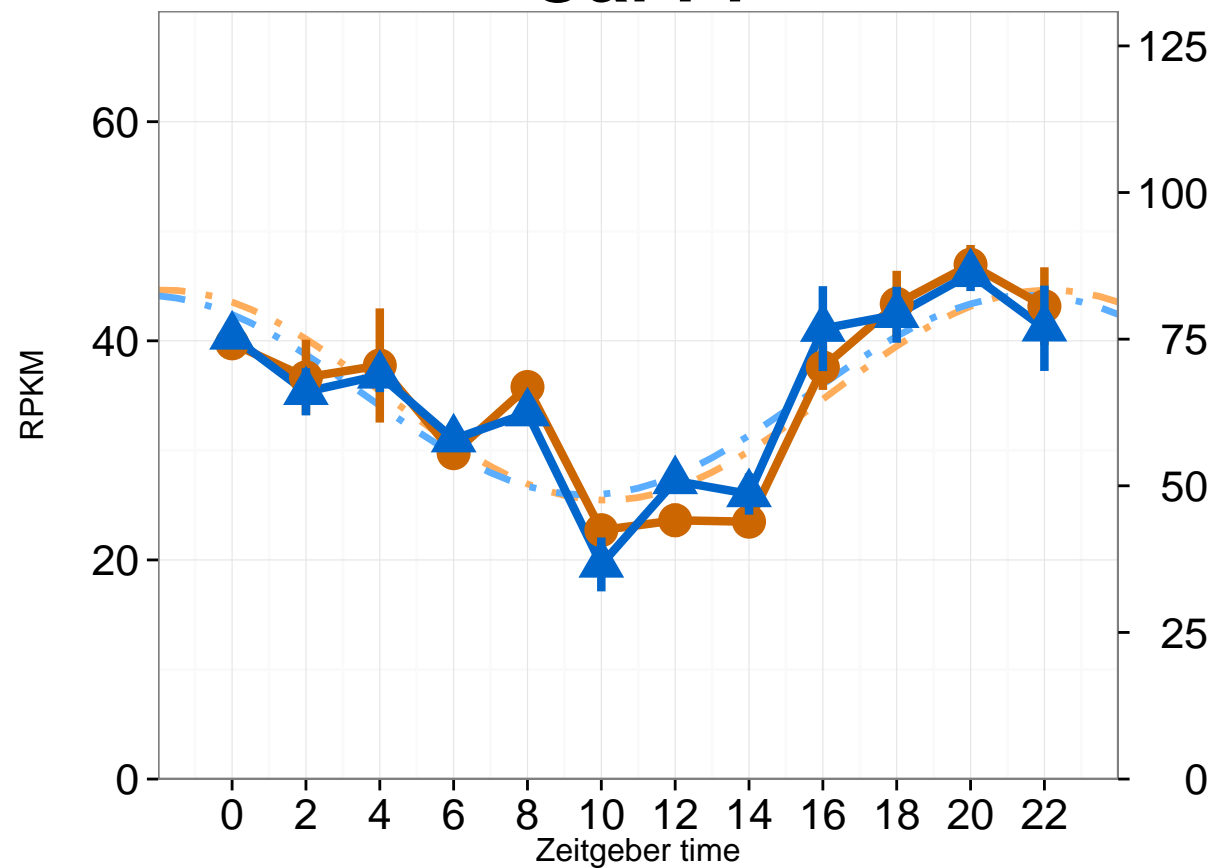

## Car14

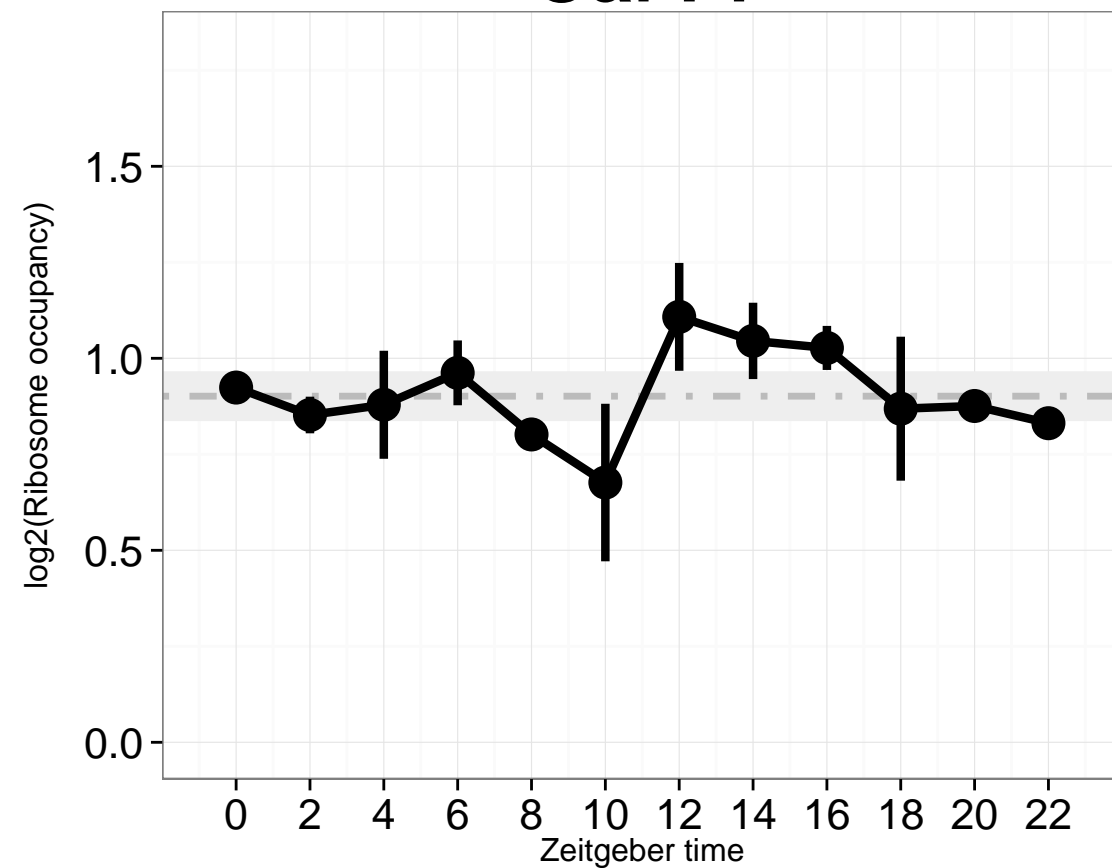

Supplement: Supplementary file 13081 [file 1]

## Umps

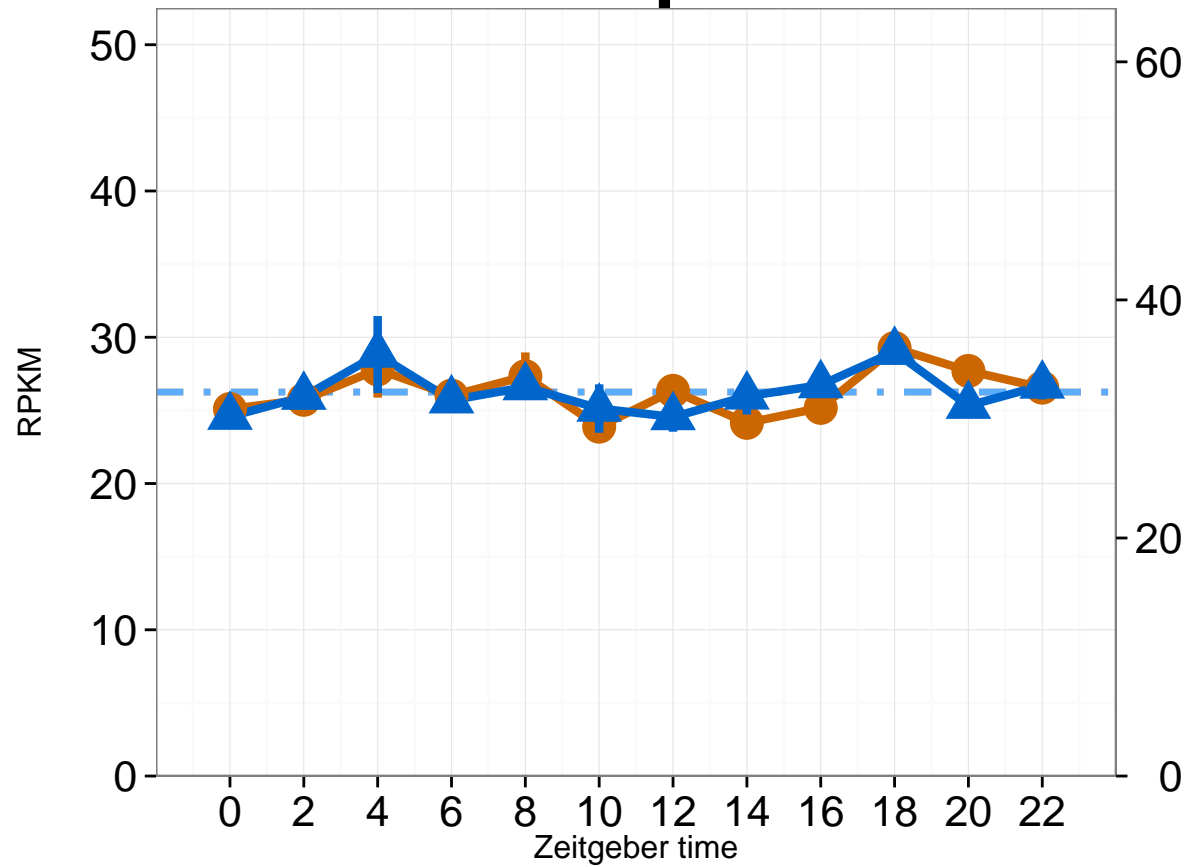

## Umps

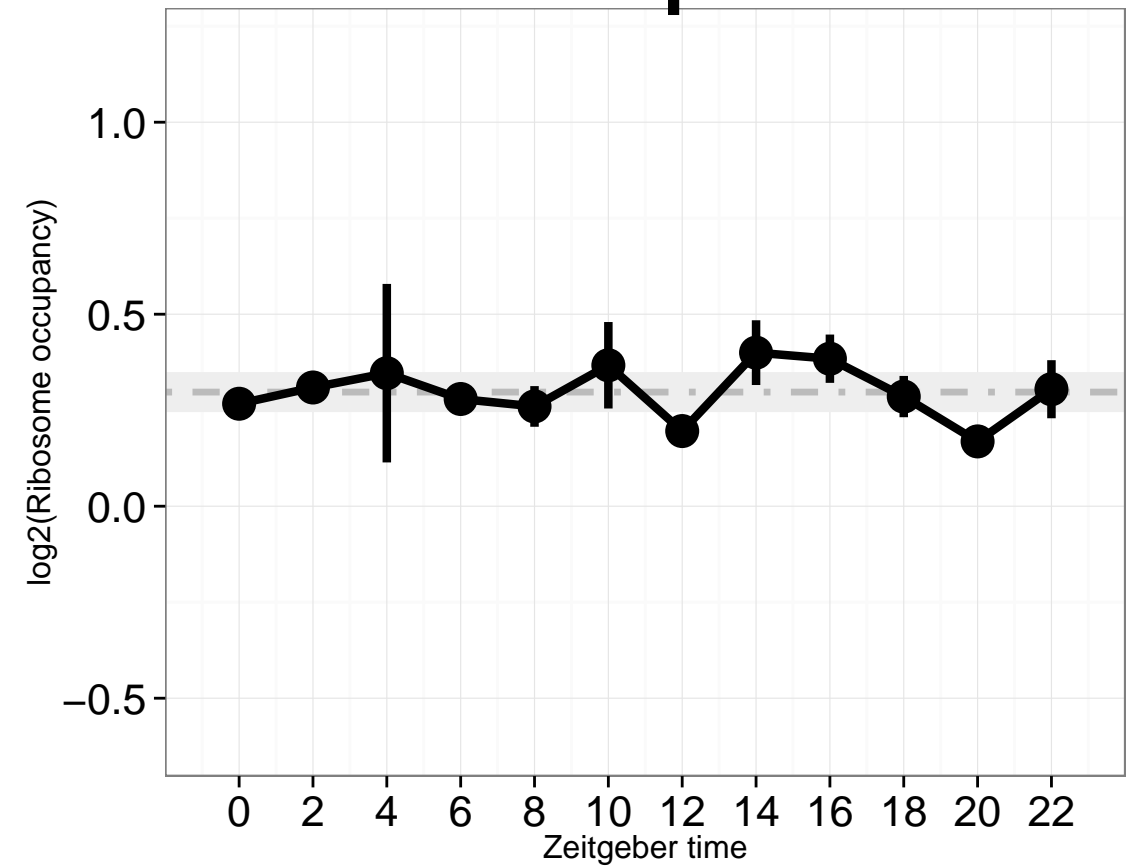

Supplement: Supplementary file 13082 [file 1]

## Rab1b

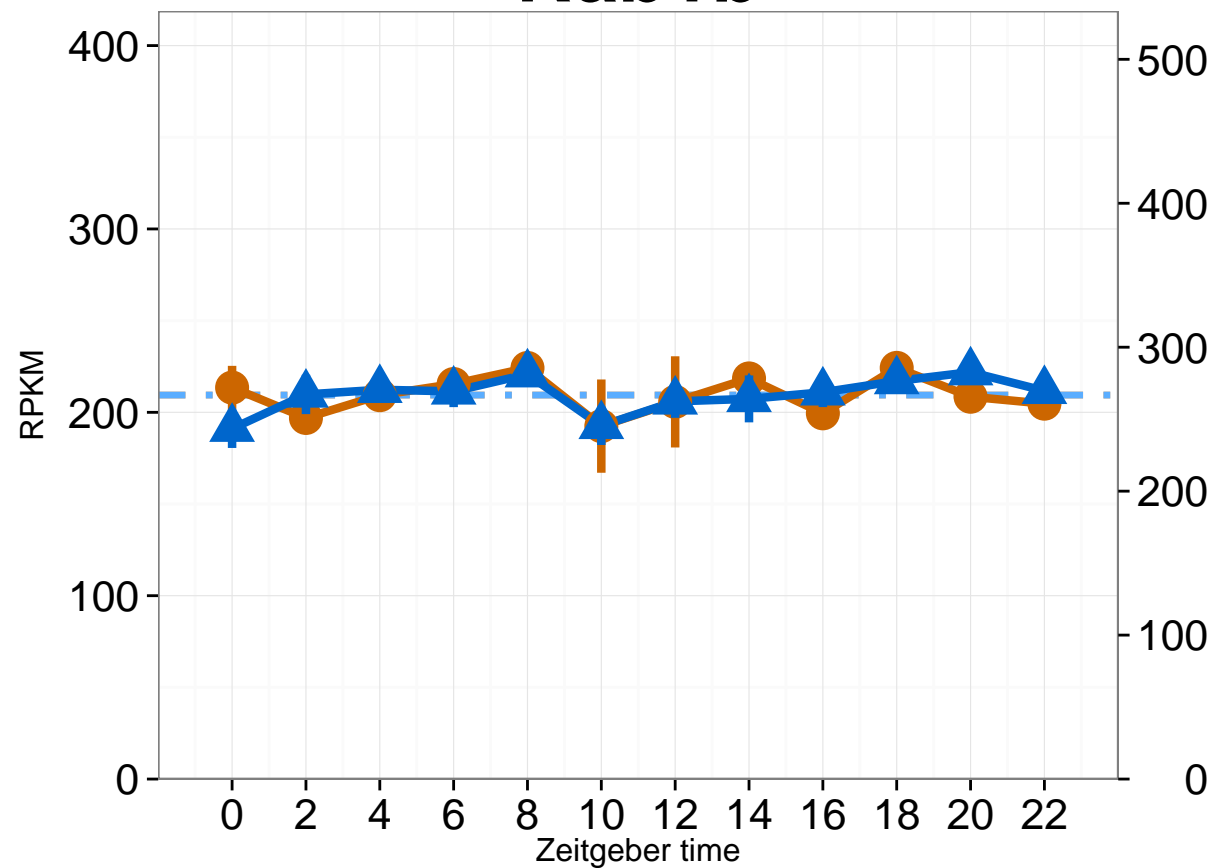

## Rab1b

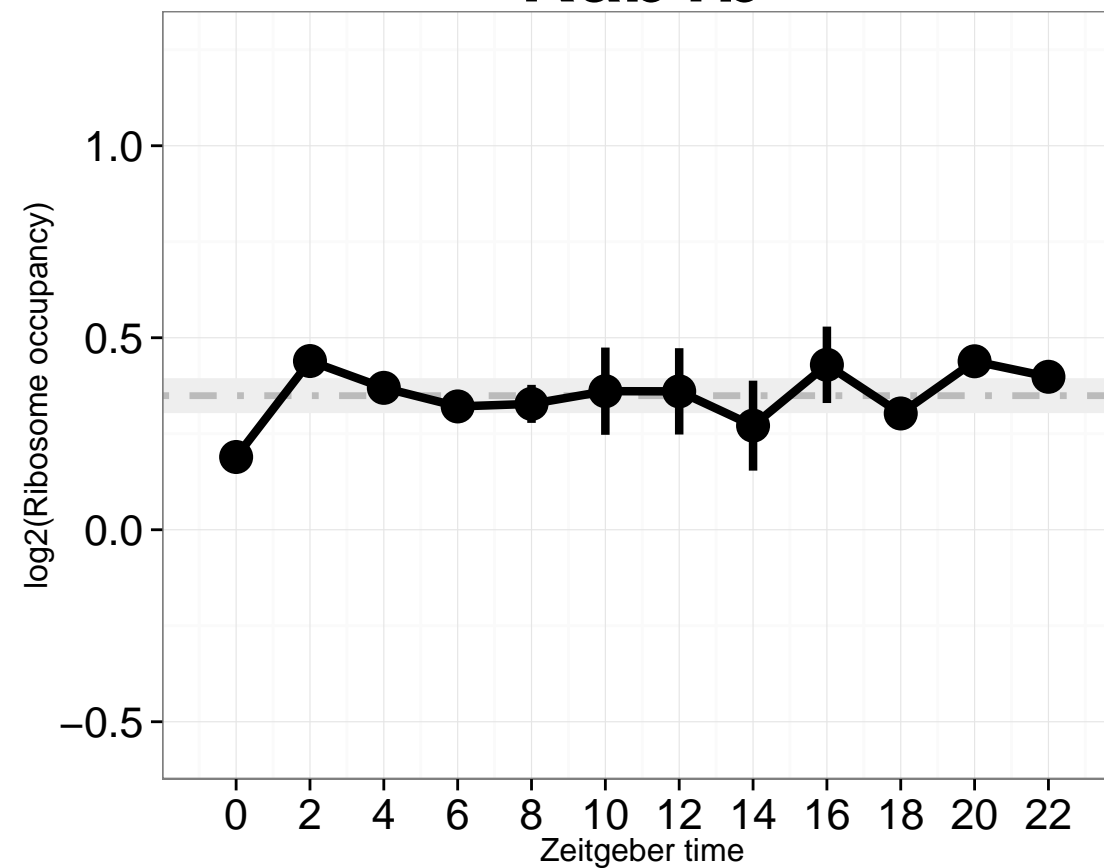

Supplement: Supplementary file 13083 [file 1]

## Glis3

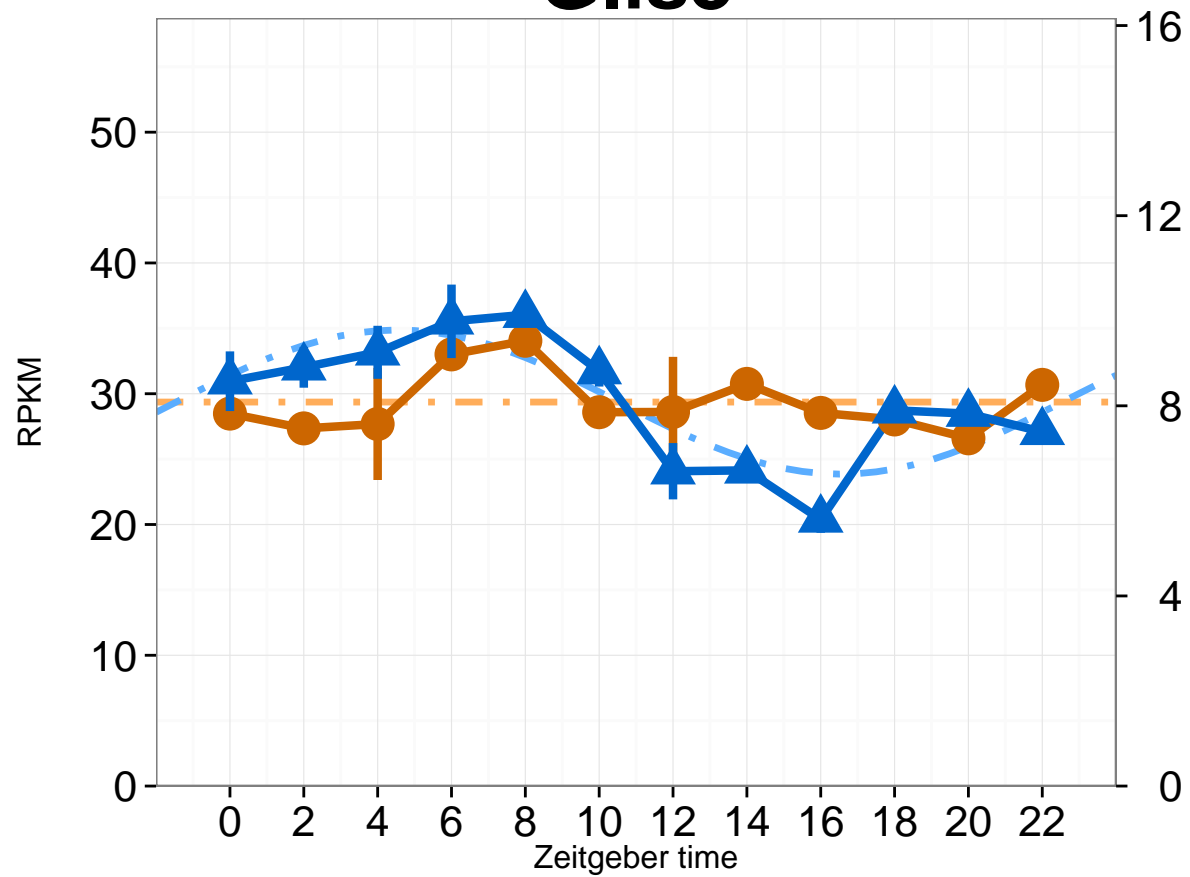

## Glis3

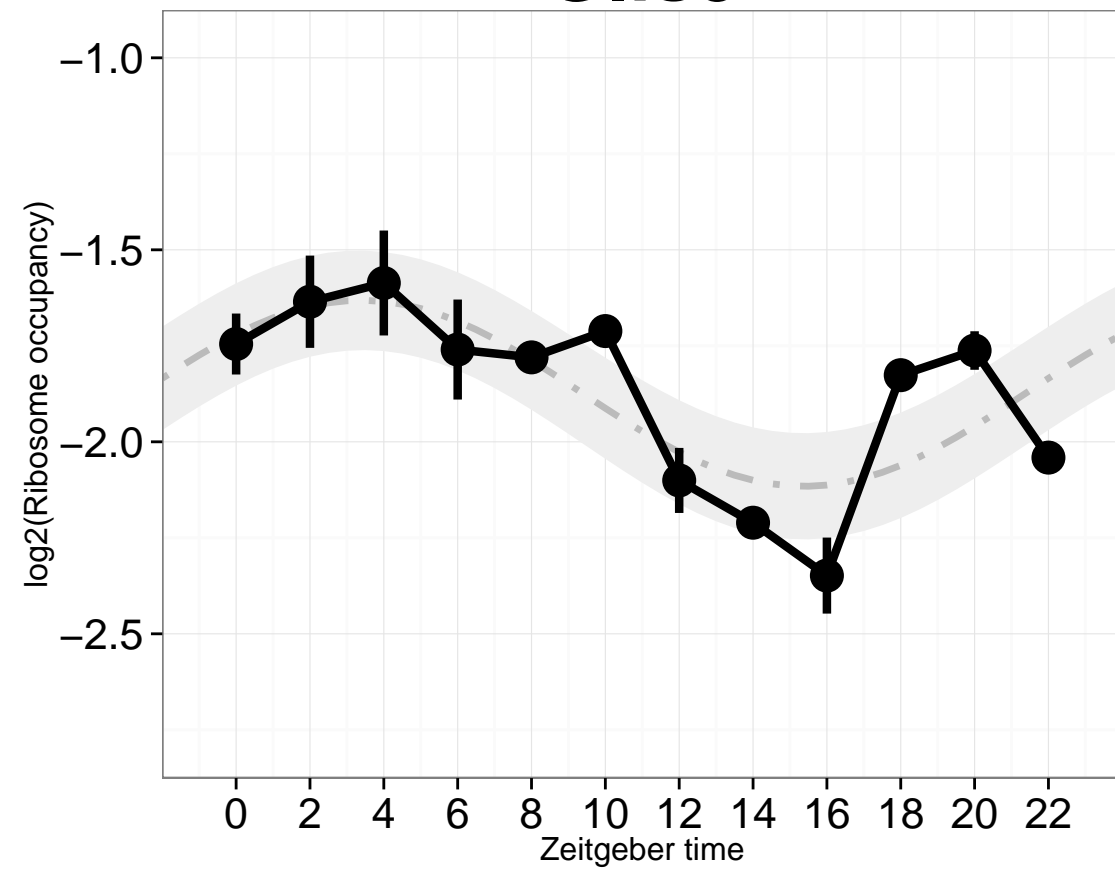

Supplement: Supplementary file 13084 [file 1]

## 2210016F16Rik

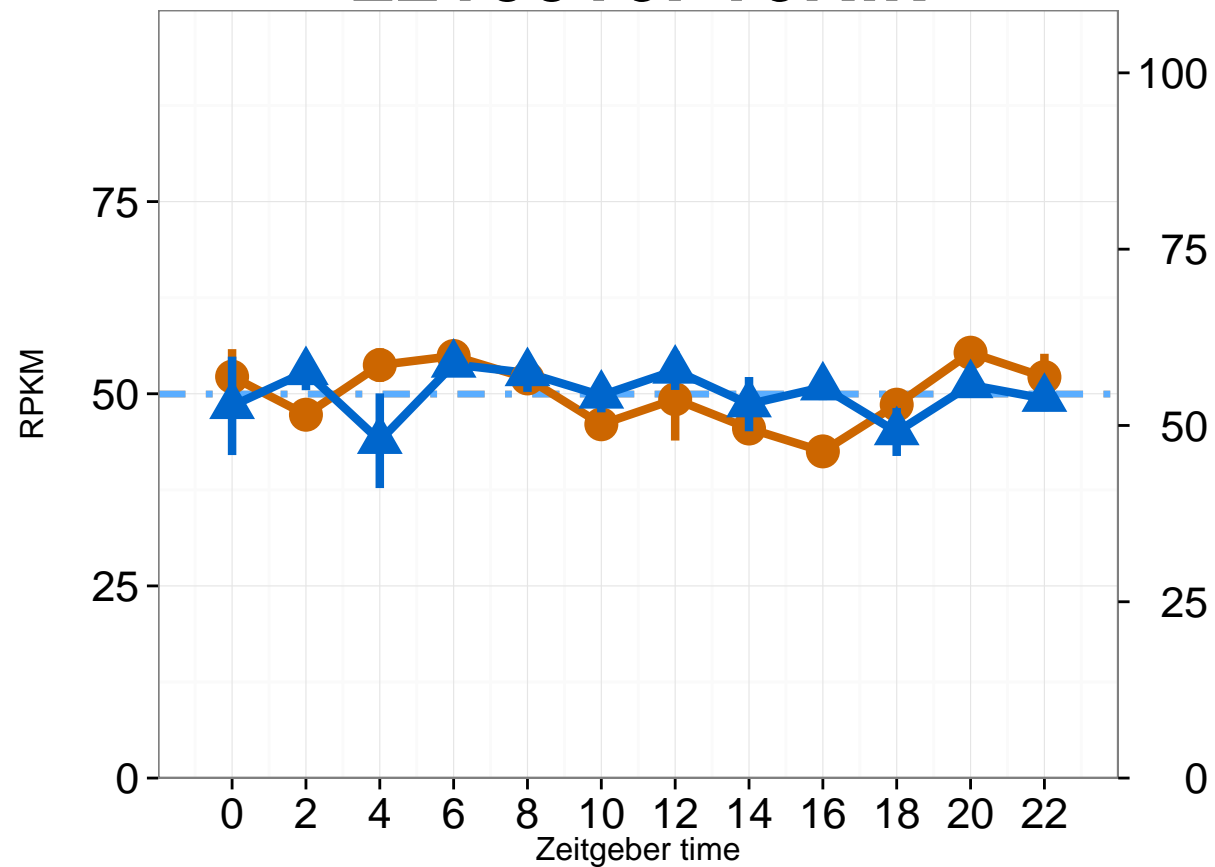

## 2210016F16Rik

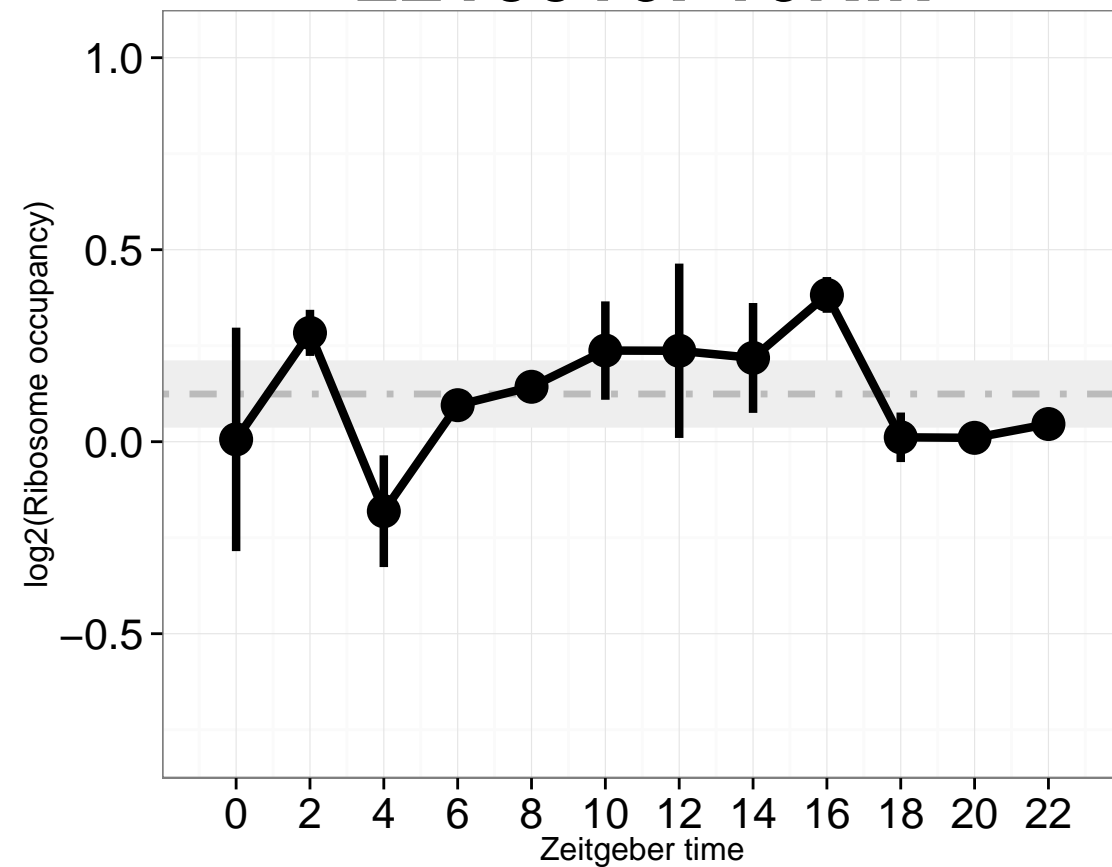

Supplement: Supplementary file 13085 [file 1]

# Zfp609

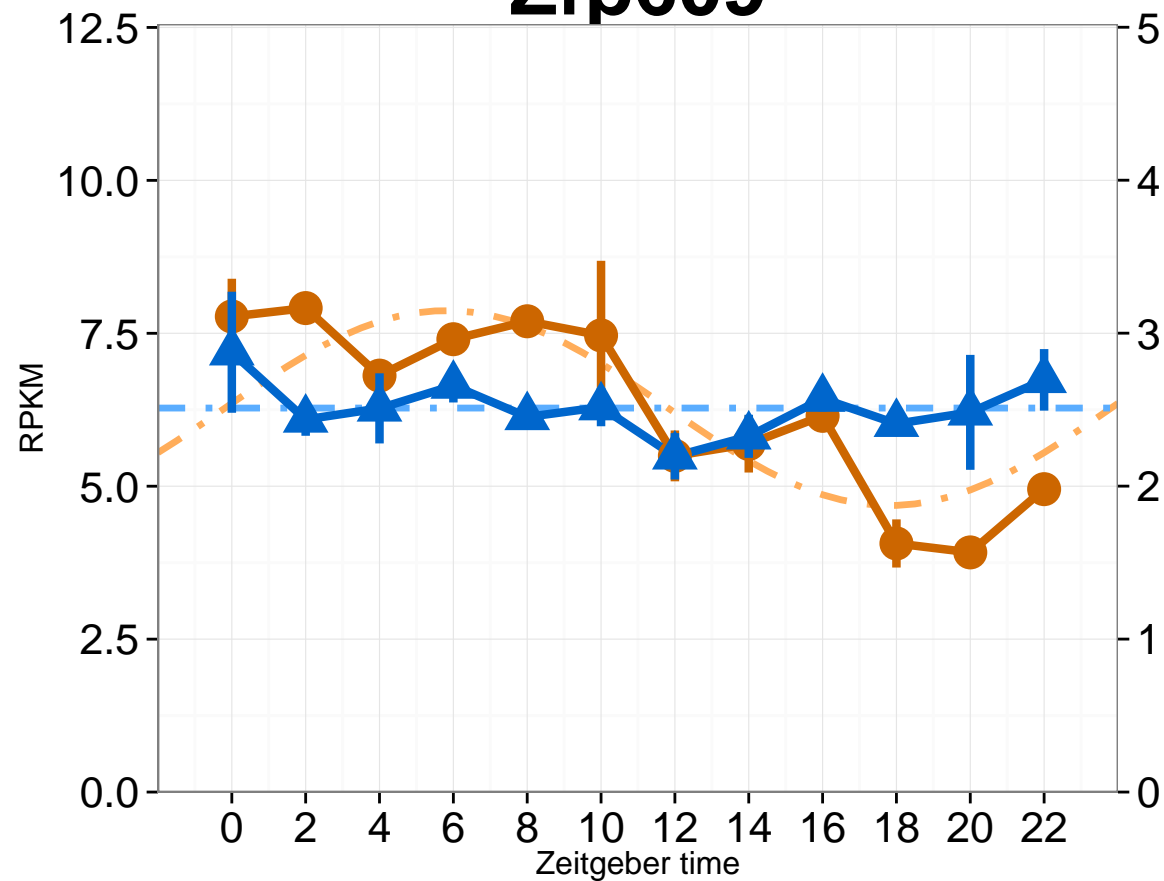

# Zfp609

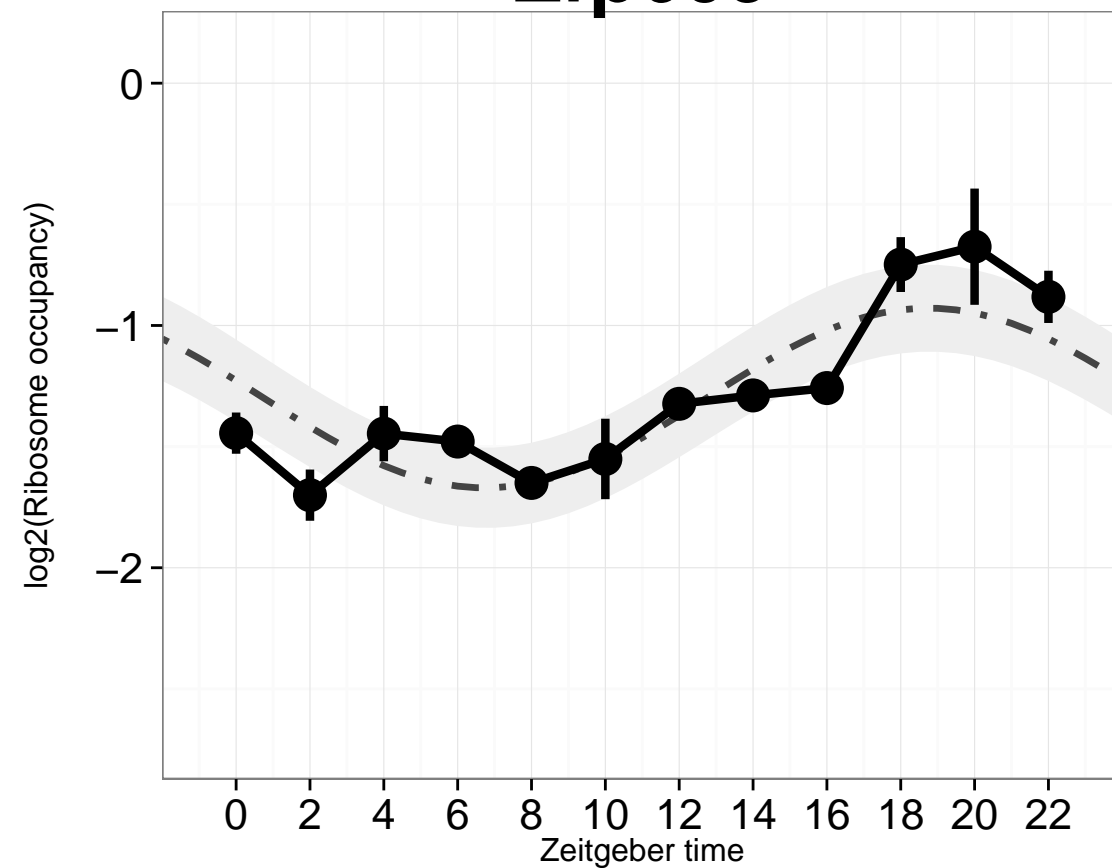

Supplement: Supplementary file 13086 [file 1]

# Tmem82

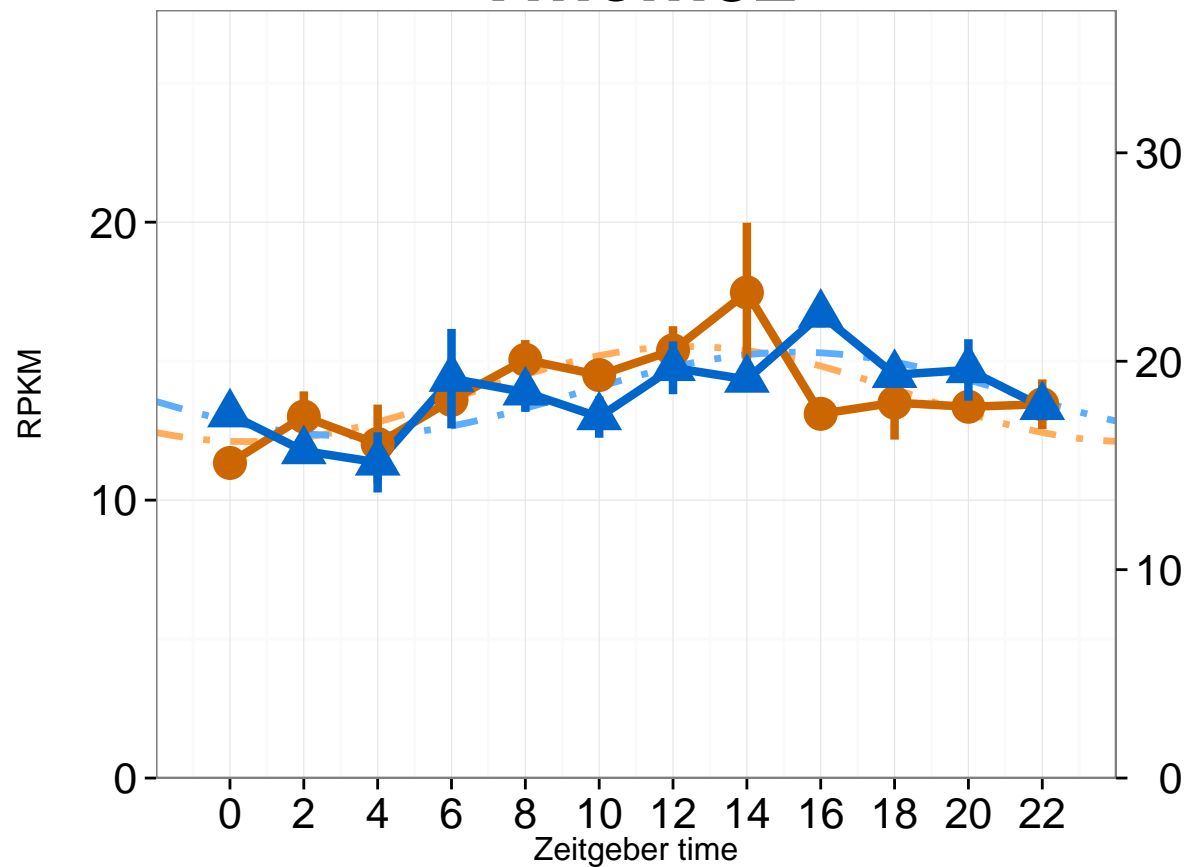

# Tmem82

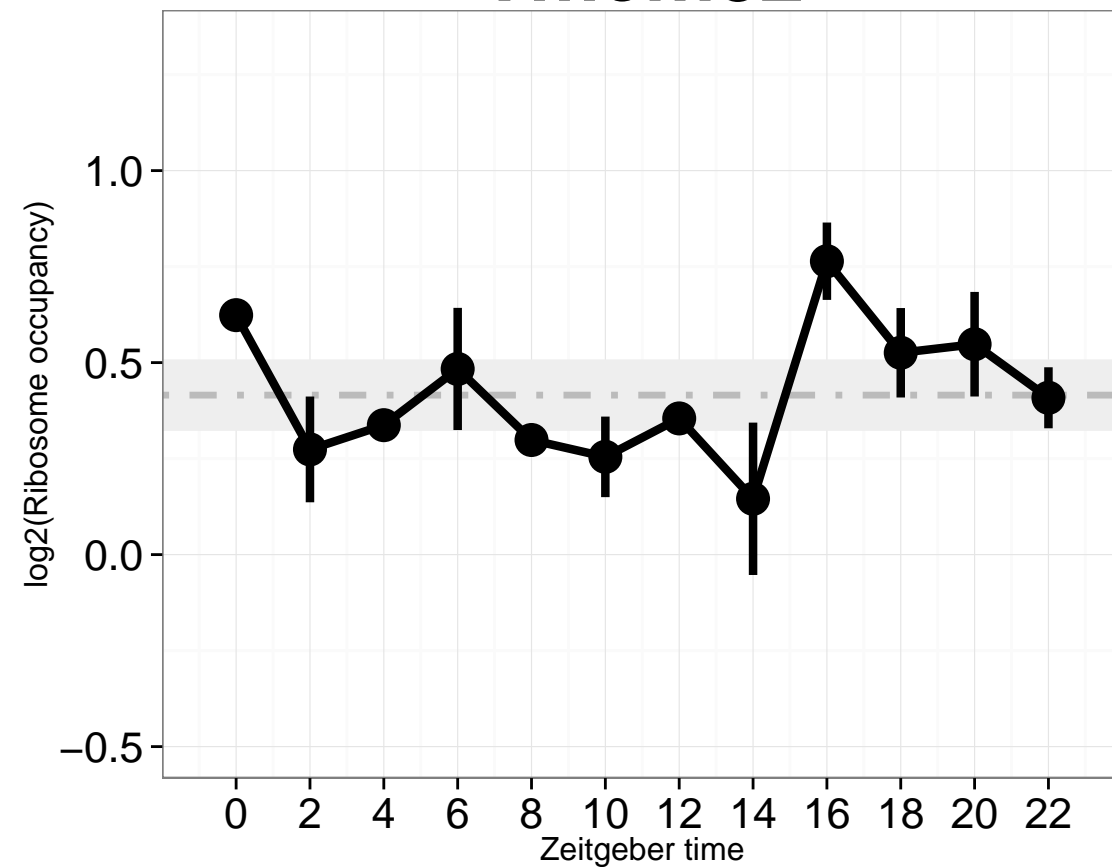

Supplement: Supplementary file 13087 [file 1]

## Rnf121

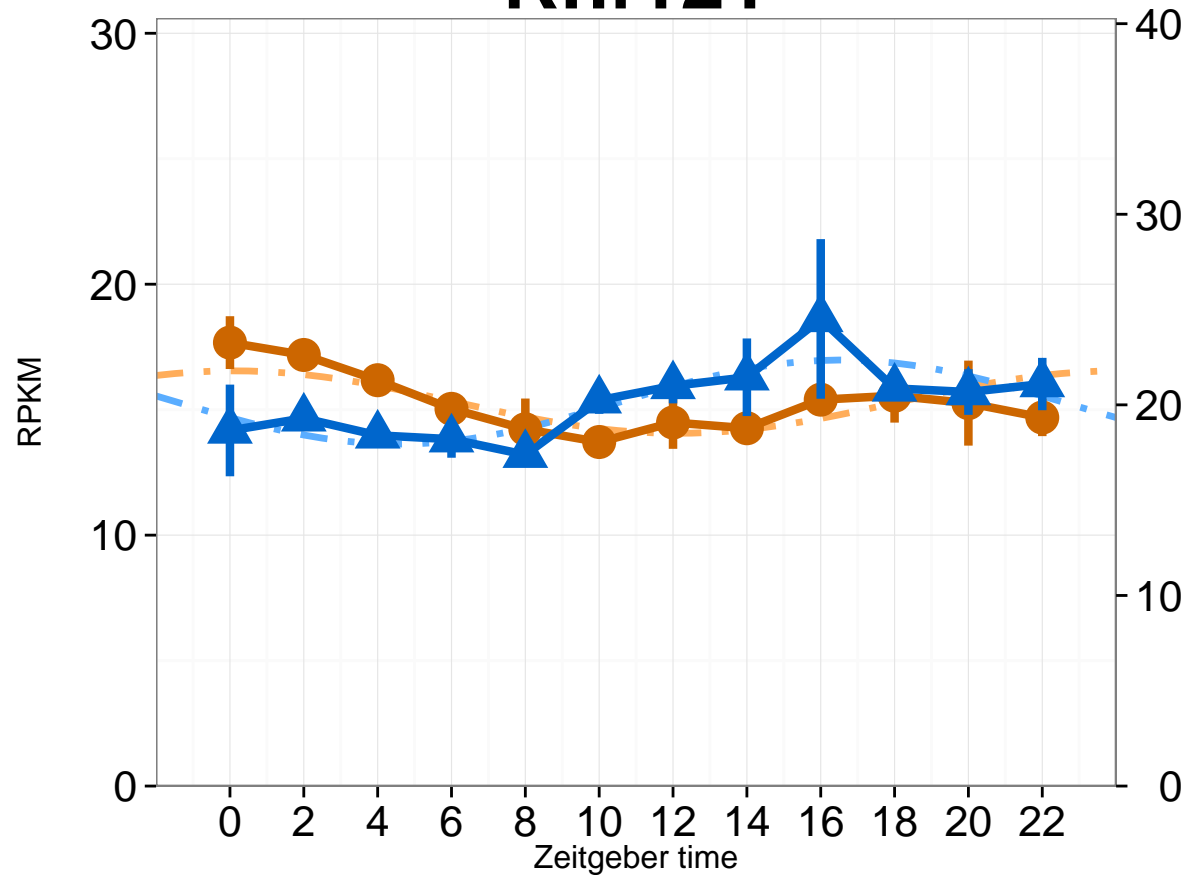

## Rnf121

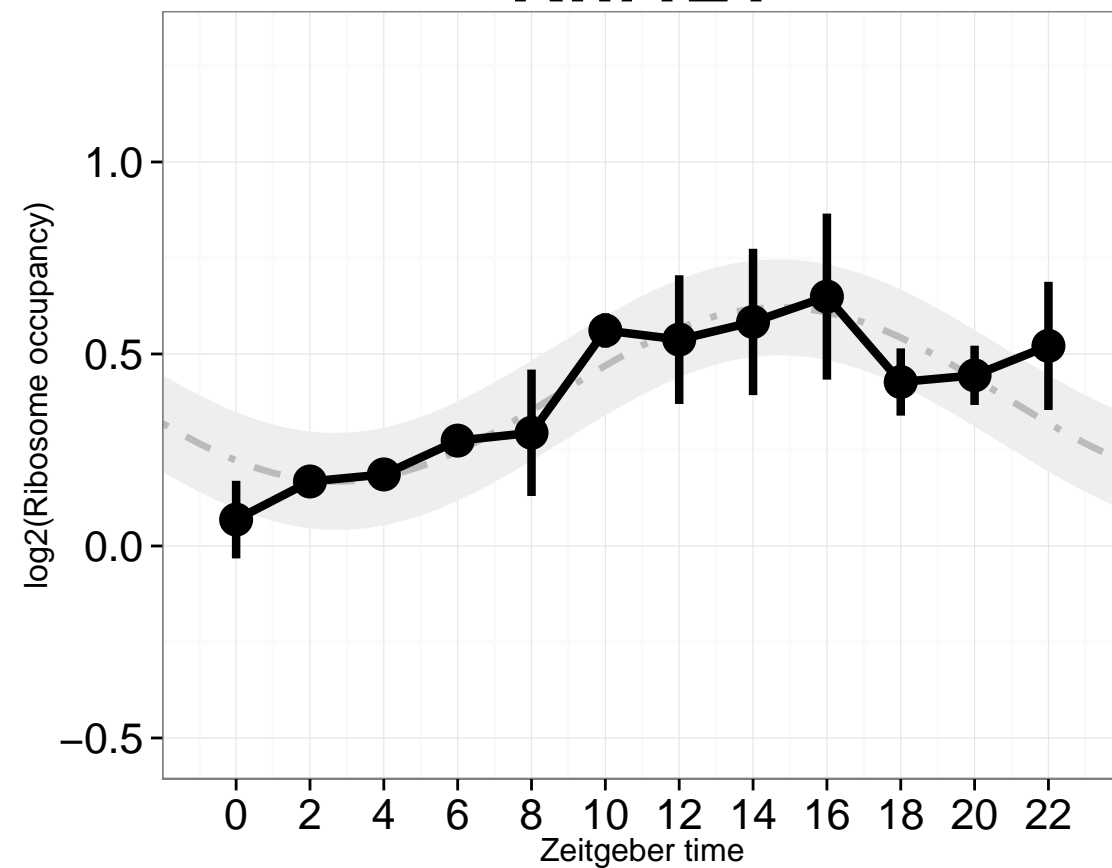

Supplement: Supplementary file 13088 [file 1]

# Haghl

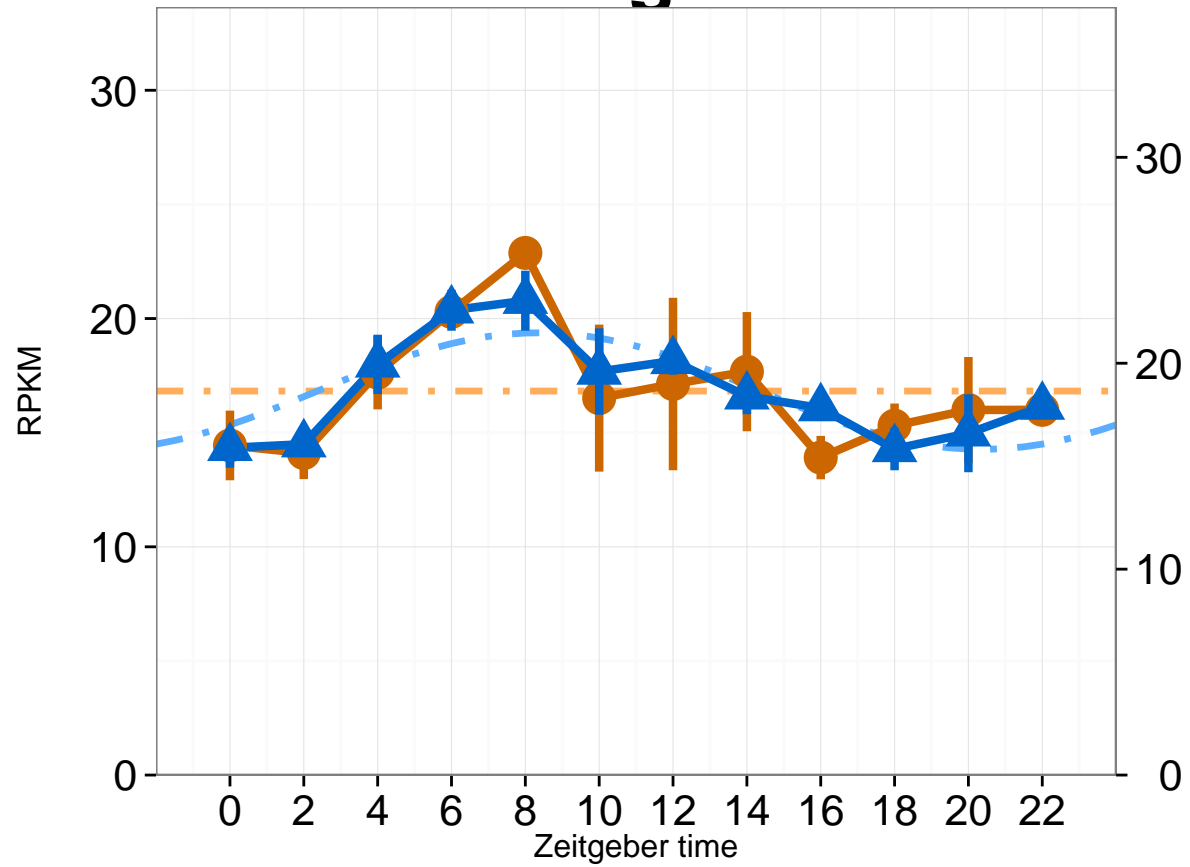

# Haghl

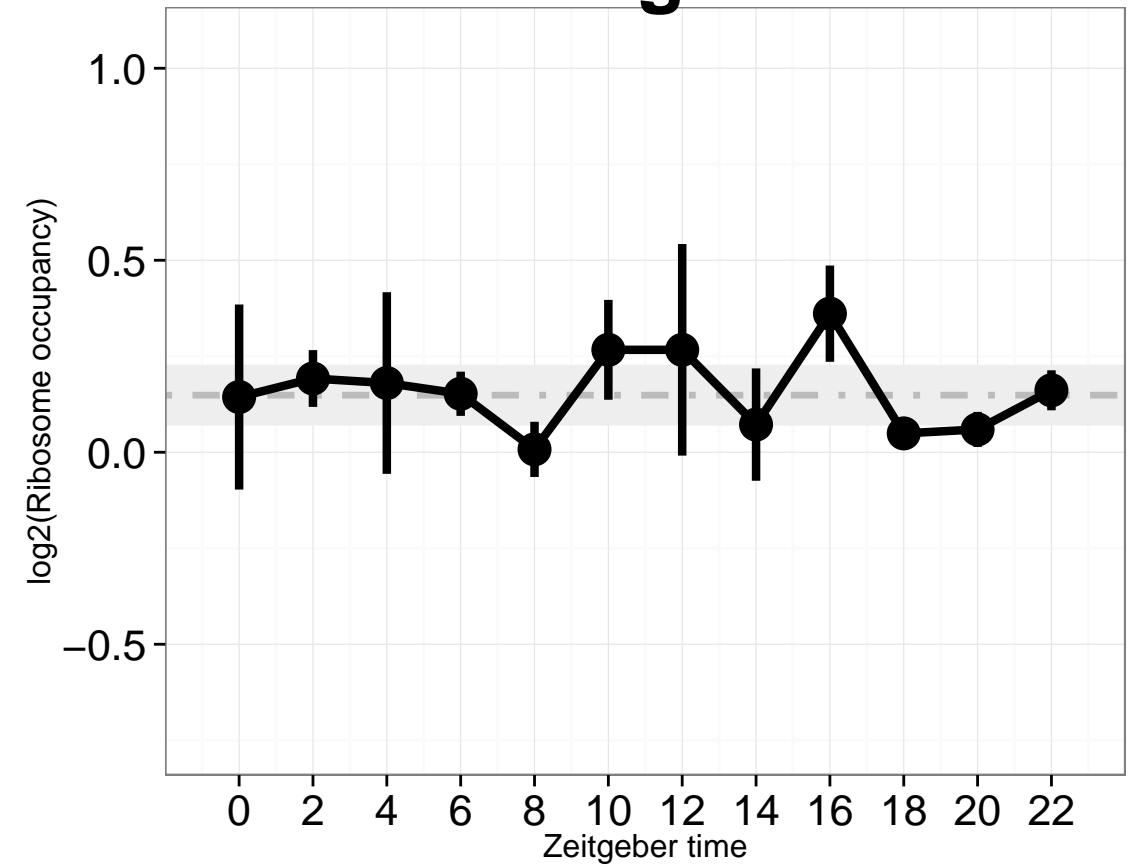

Supplement: Supplementary file 13089 [file 1]

# Uprt

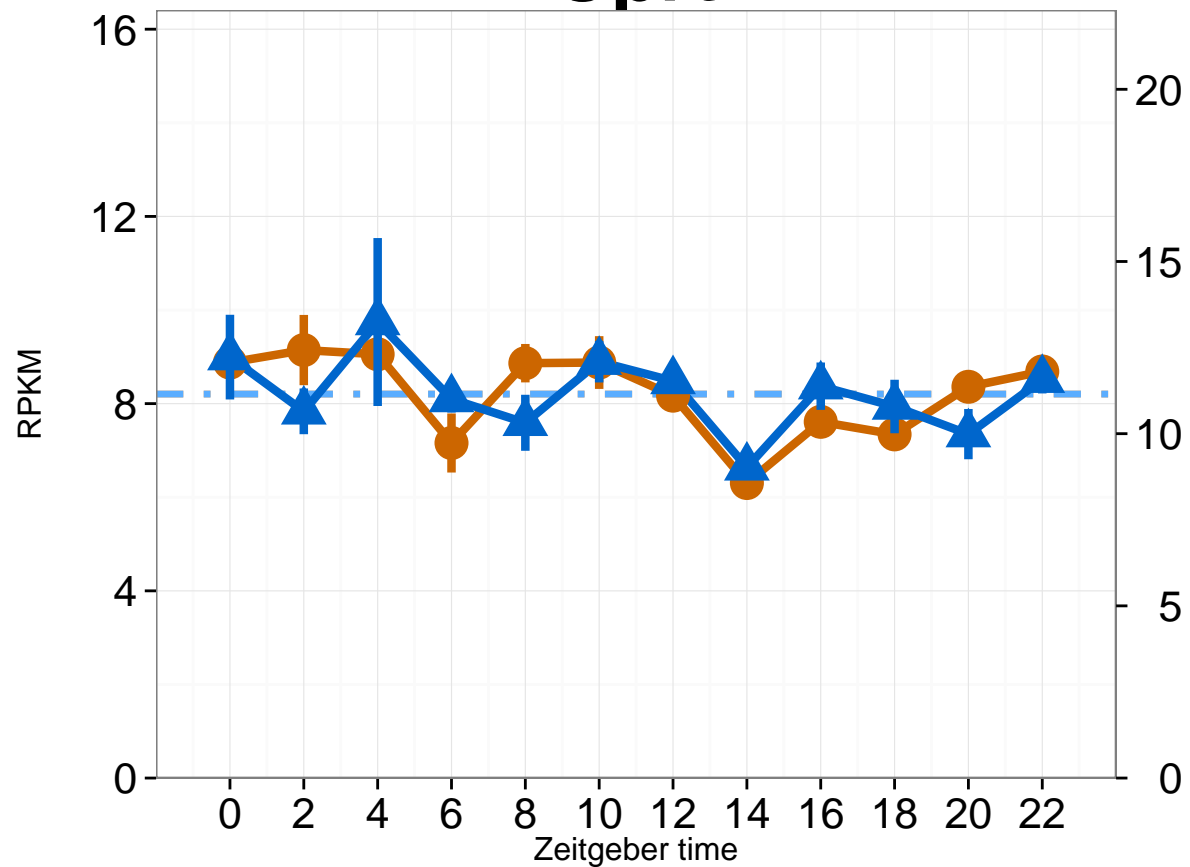

# Uprt

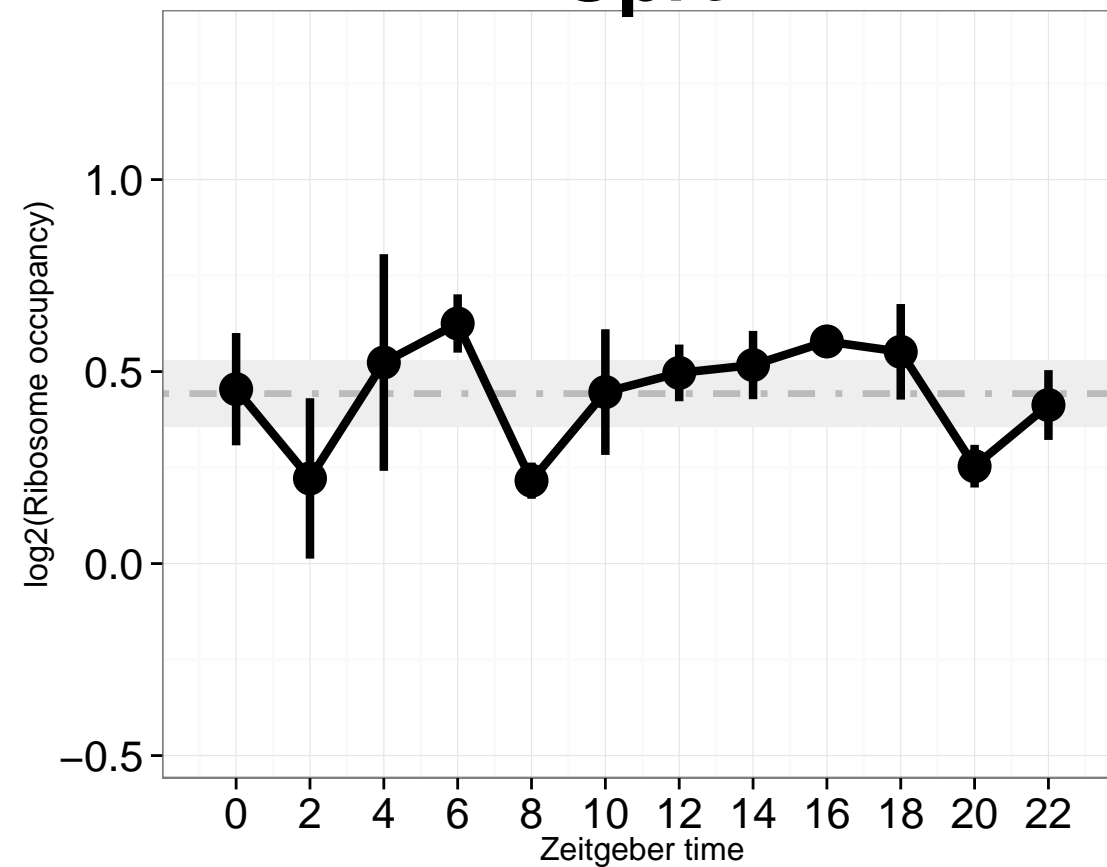

Supplement: Supplementary file 13090 [file 1]

# Cyb5d2

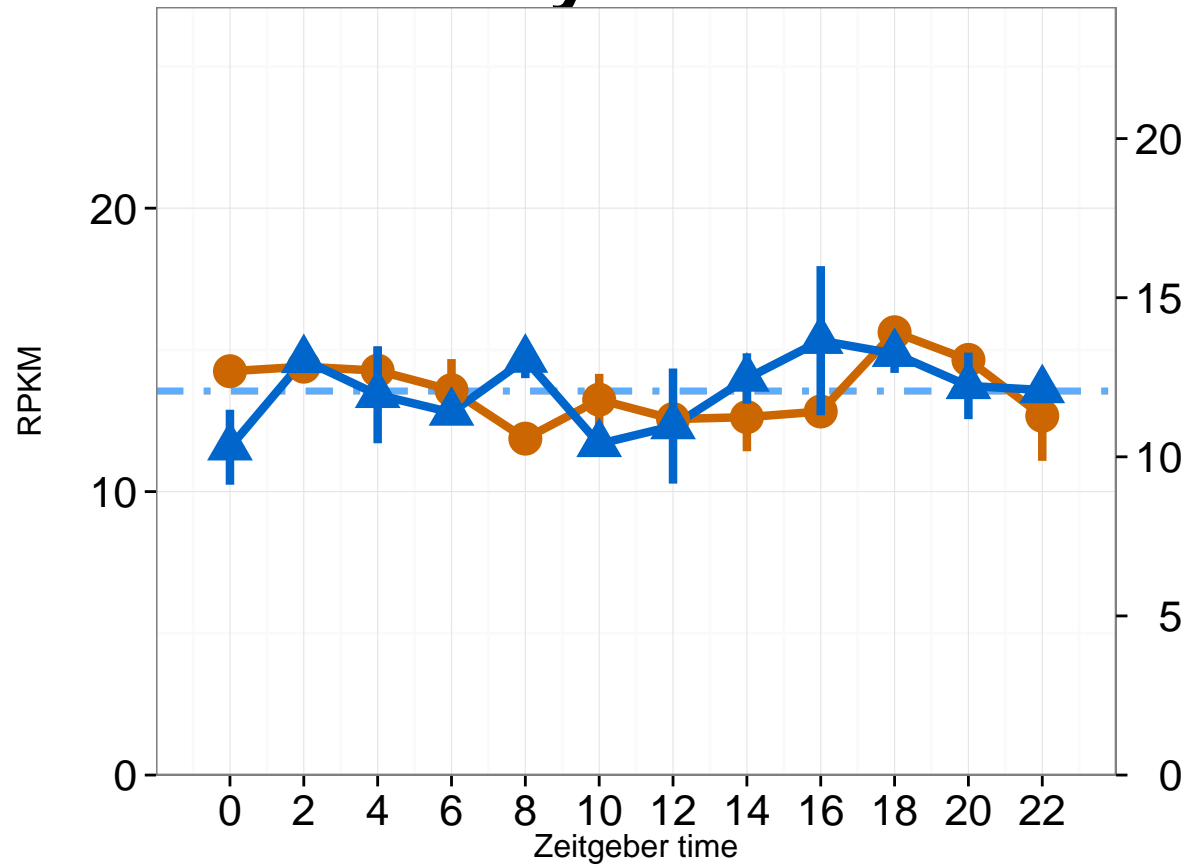

# Cyb5d2

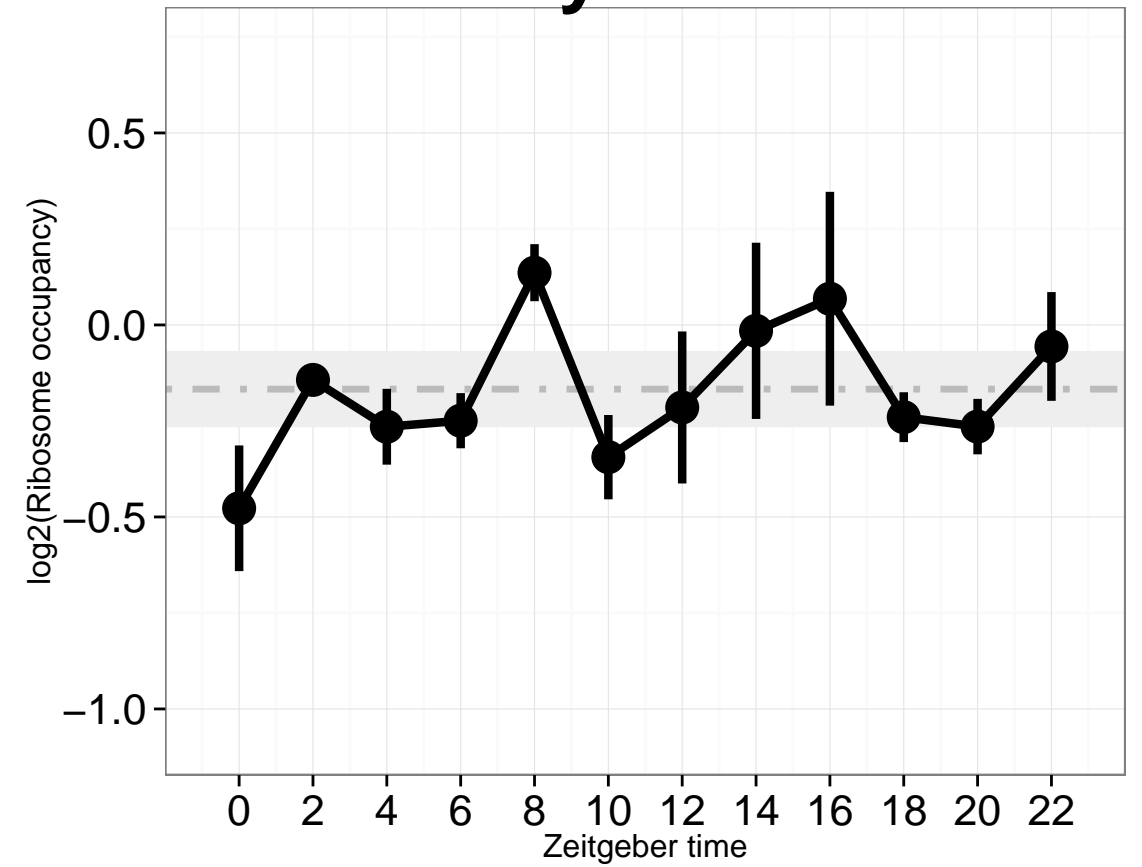

Supplement: Supplementary file 13091 [file 1]

## Tlcd2

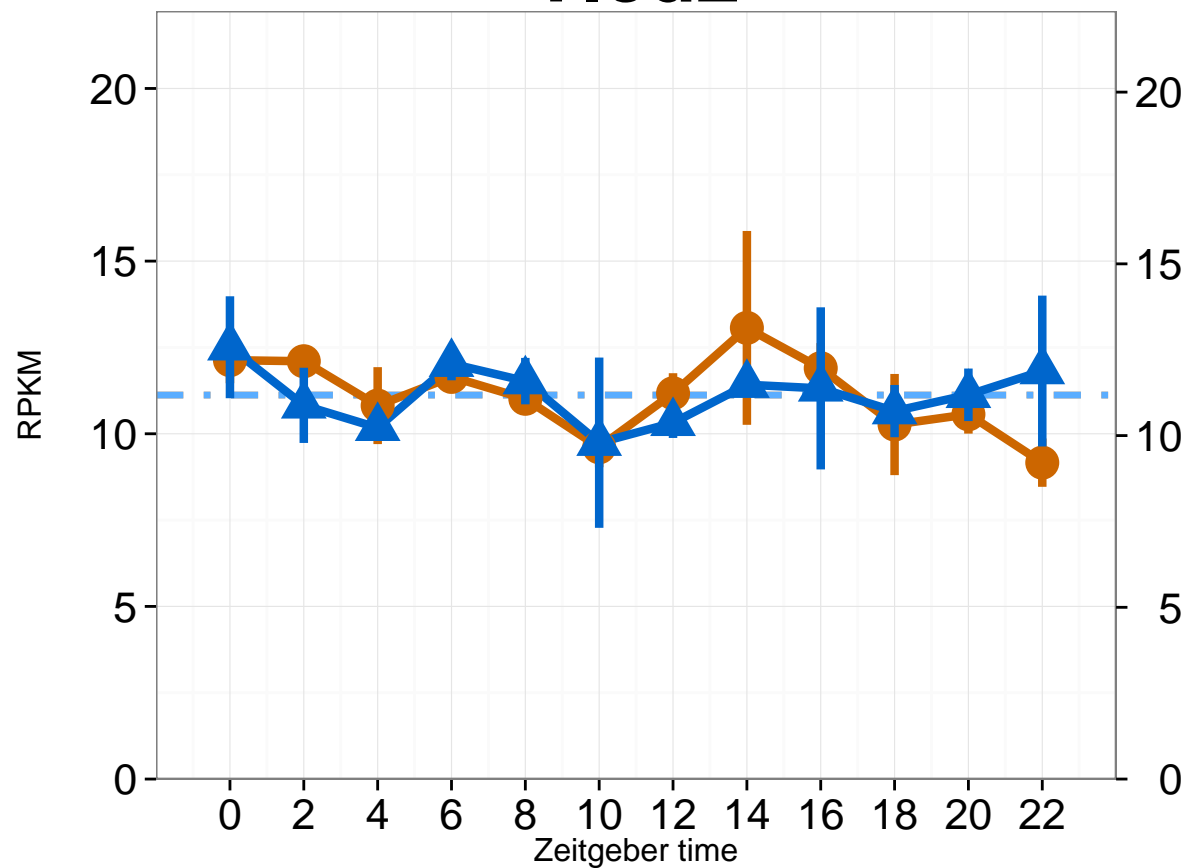

## Tlcd2

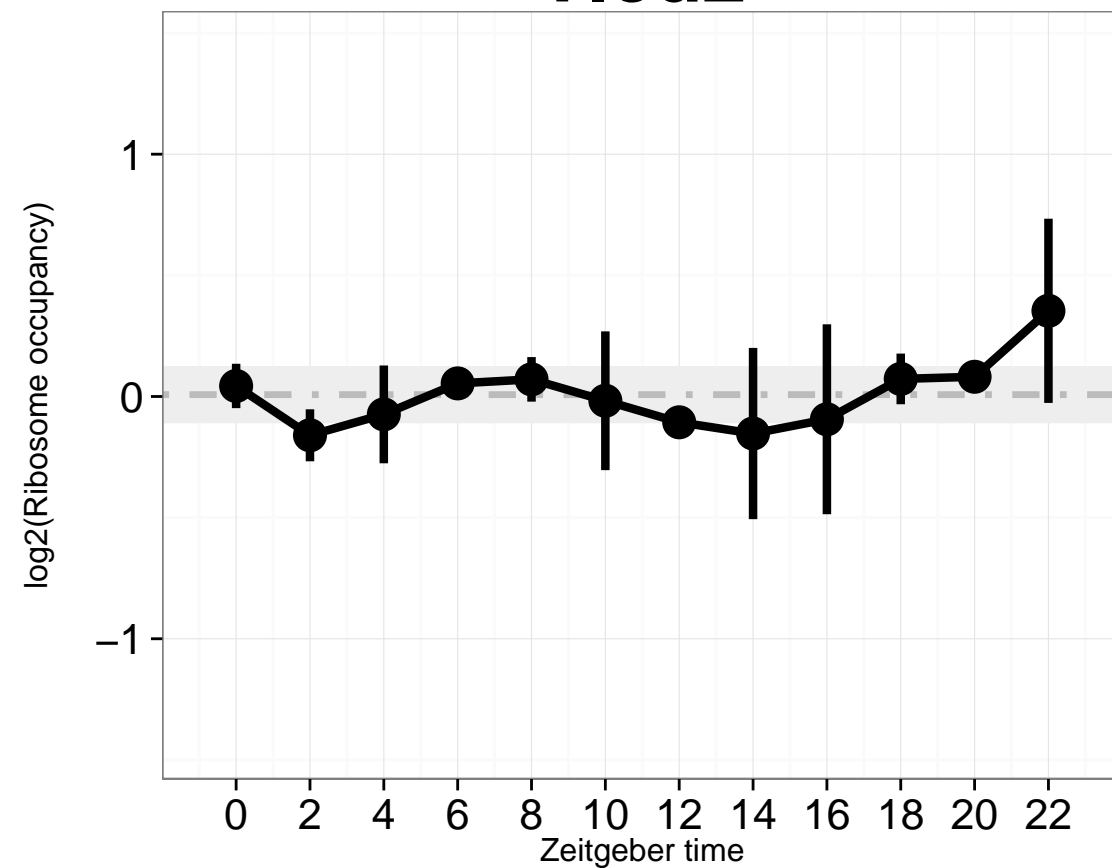

Supplement: Supplementary file 13092 [file 1]

# B4galt6

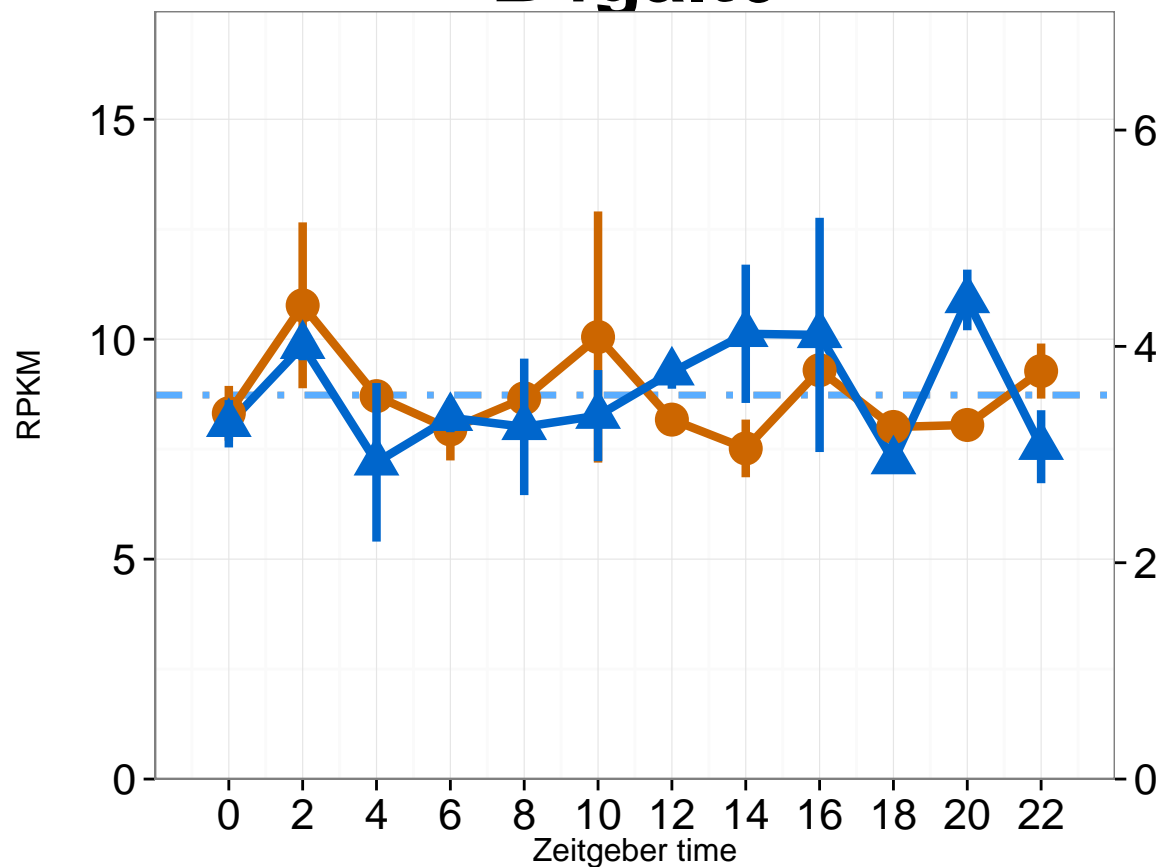

# B4galt6

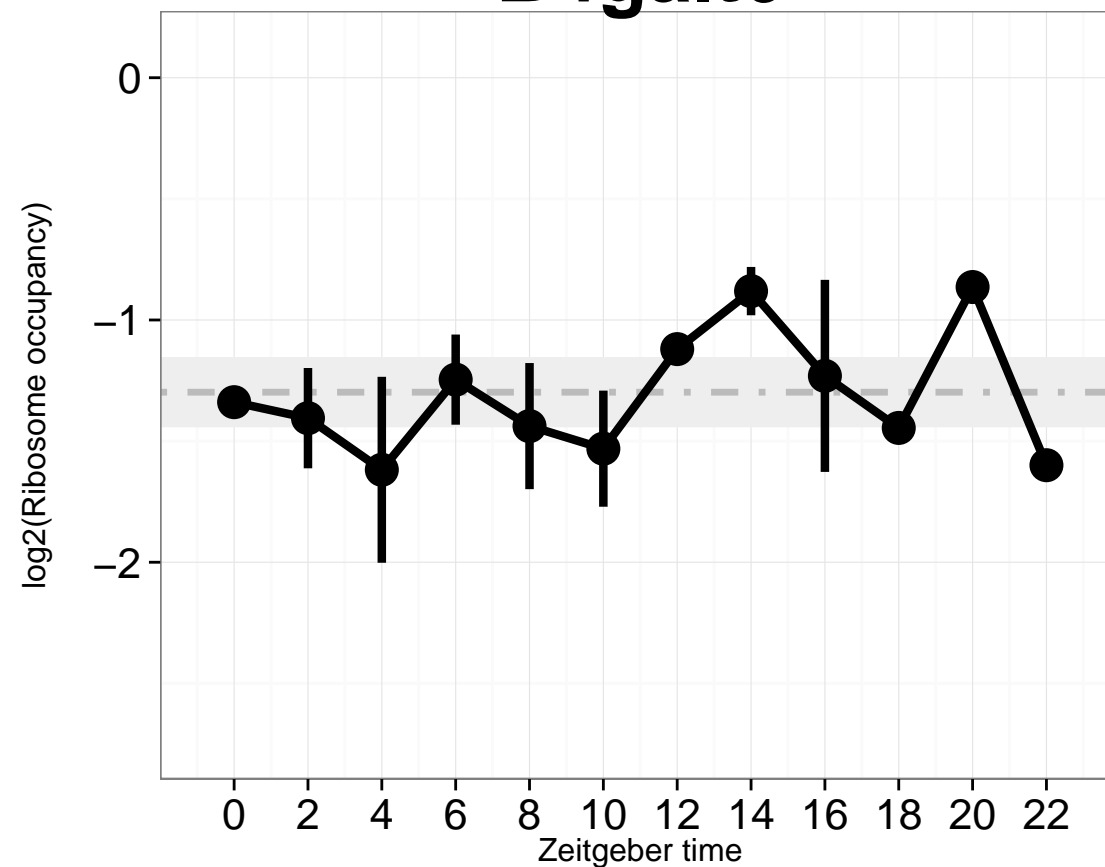

Supplement: Supplementary file 13093 [file 1]

## Snrpd3

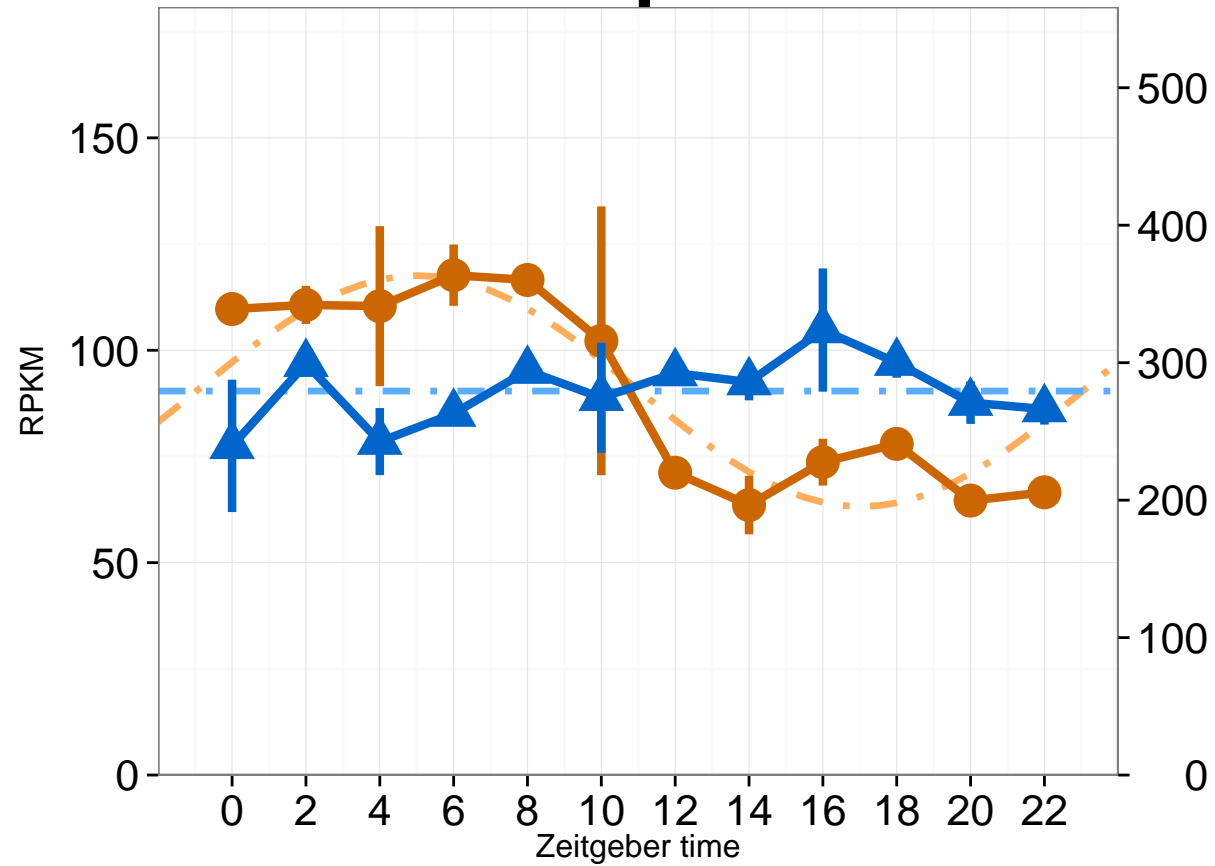

## Snrpd3

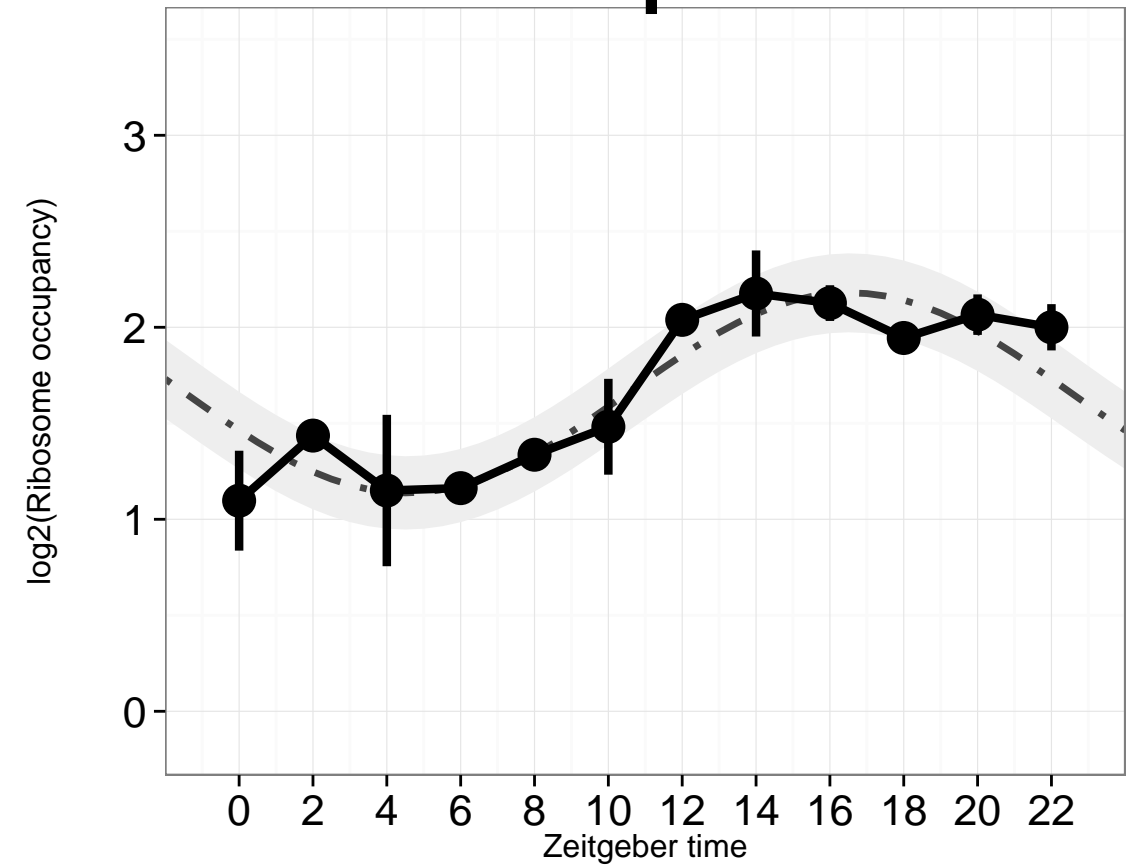

Supplement: Supplementary file 13094 [file 1]

# Itgb4

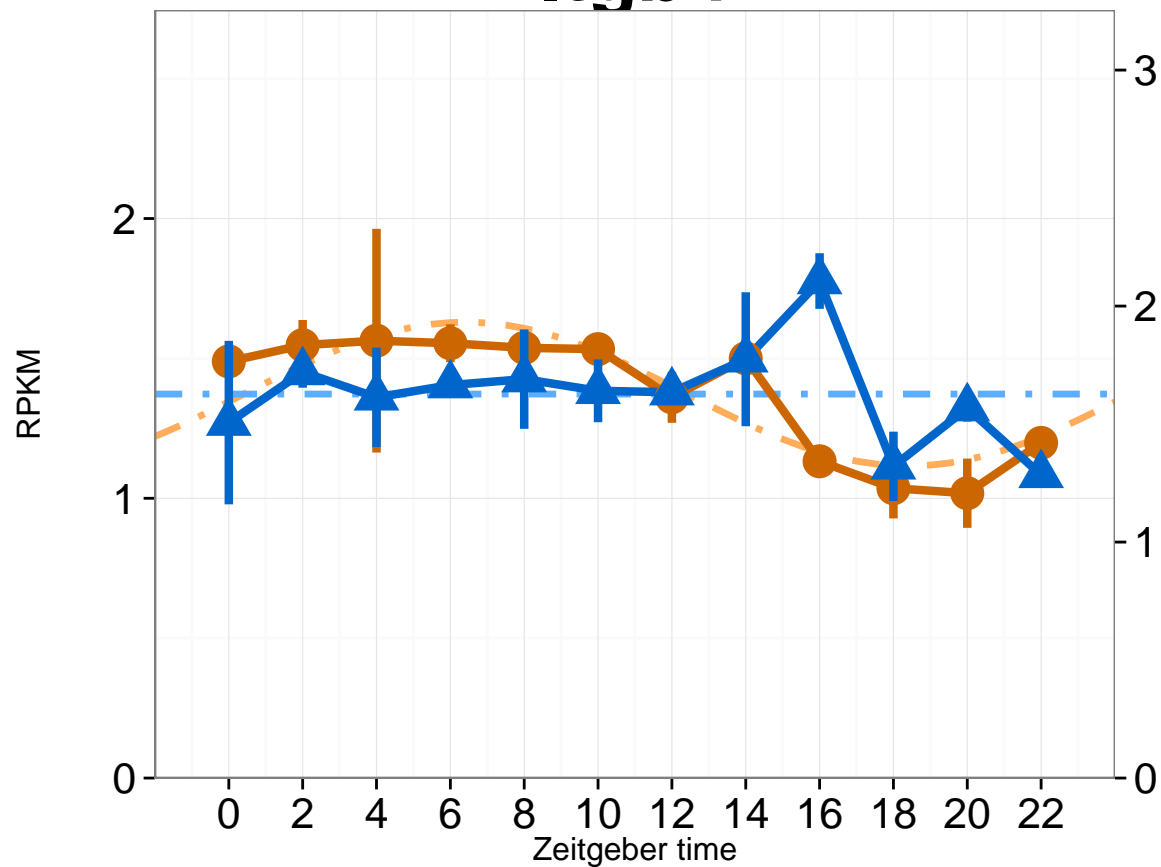

# Itgb4

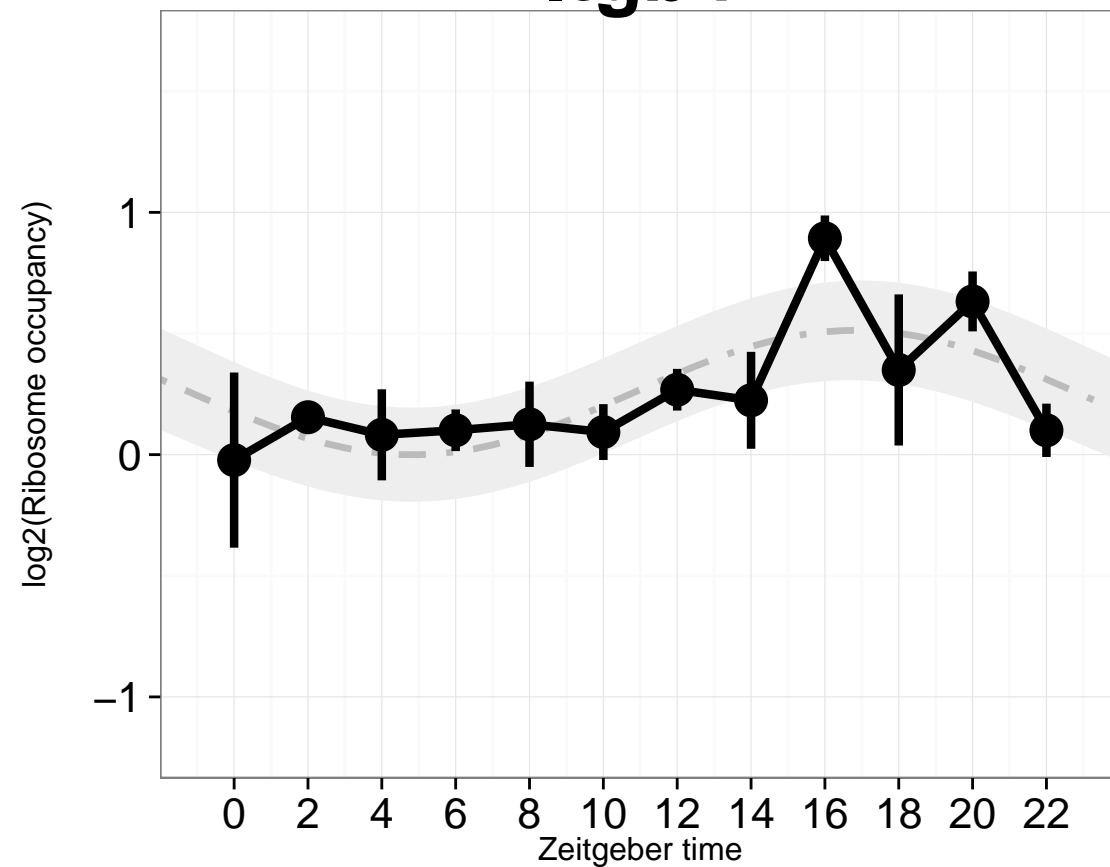

Supplement: Supplementary file 13095 [file 1]

## Zfp551

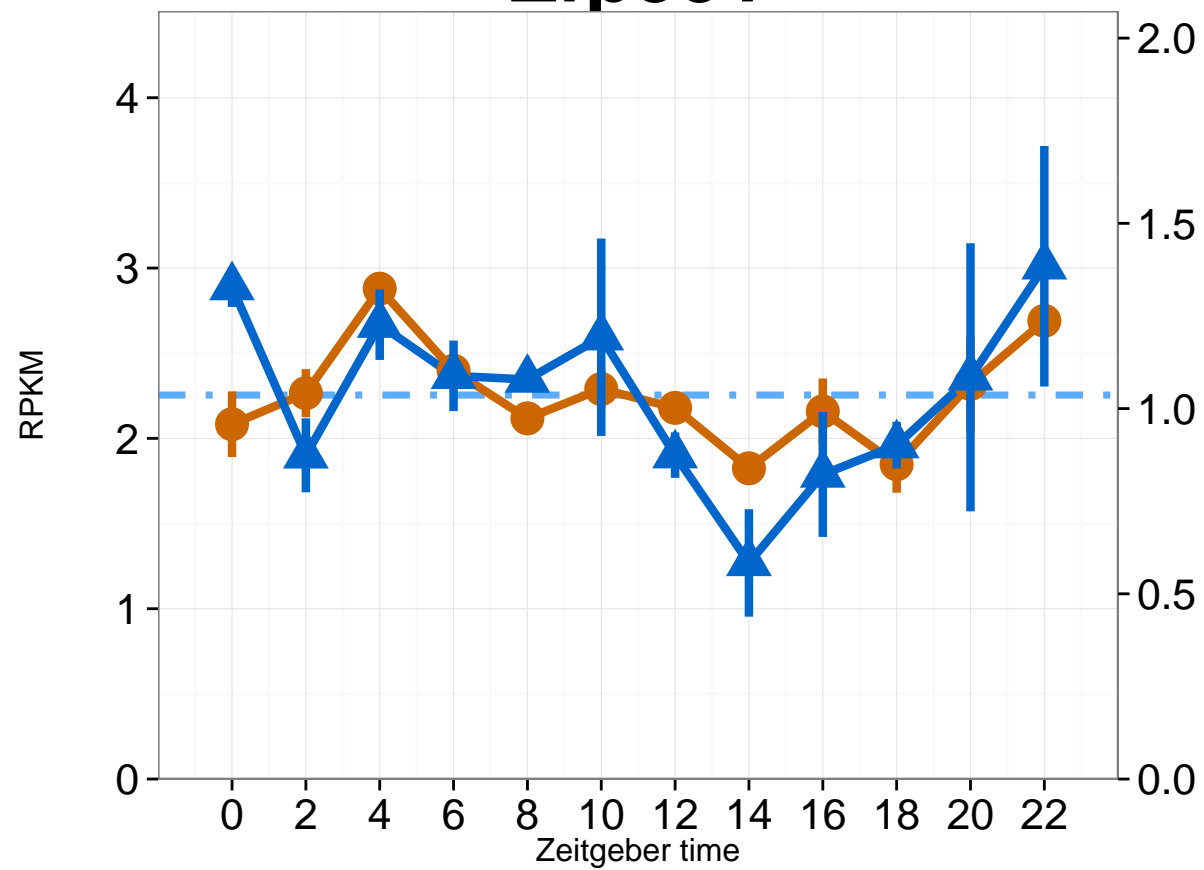

## Zfp551

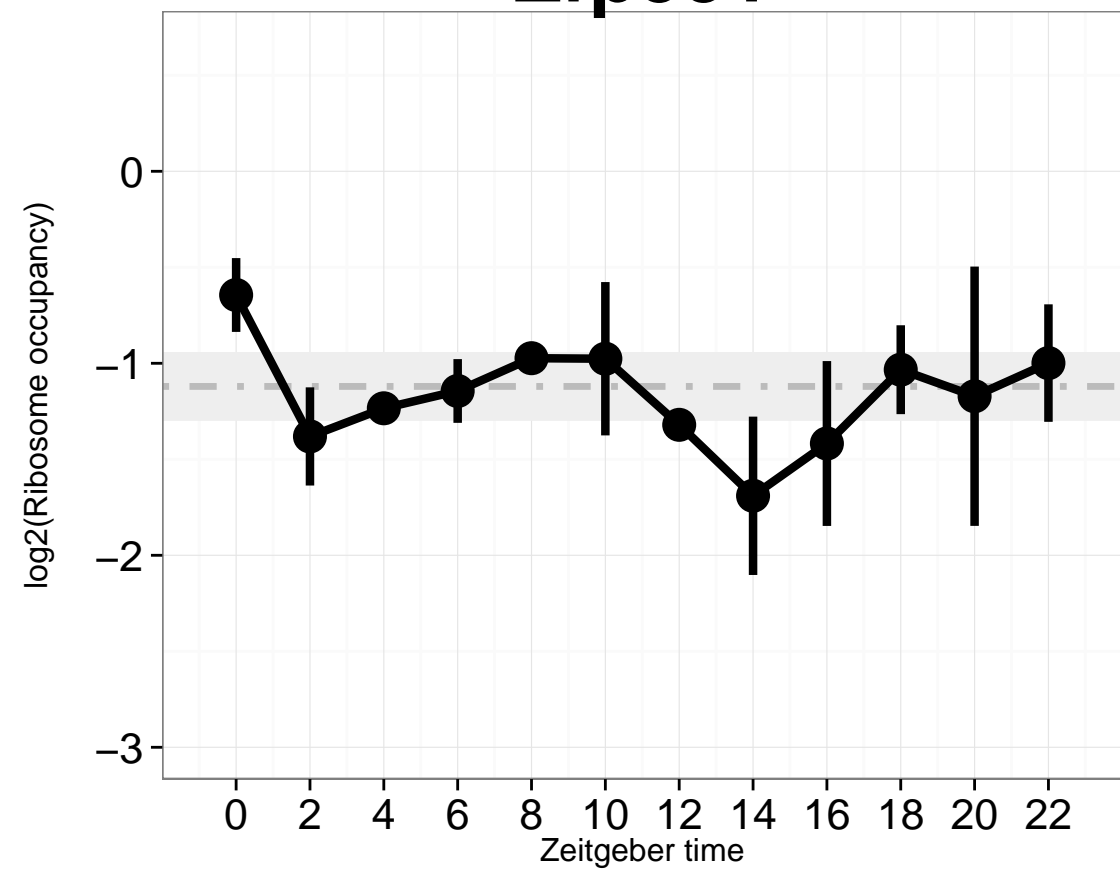

Supplement: Supplementary file 13096 [file 1]

# Taf1d

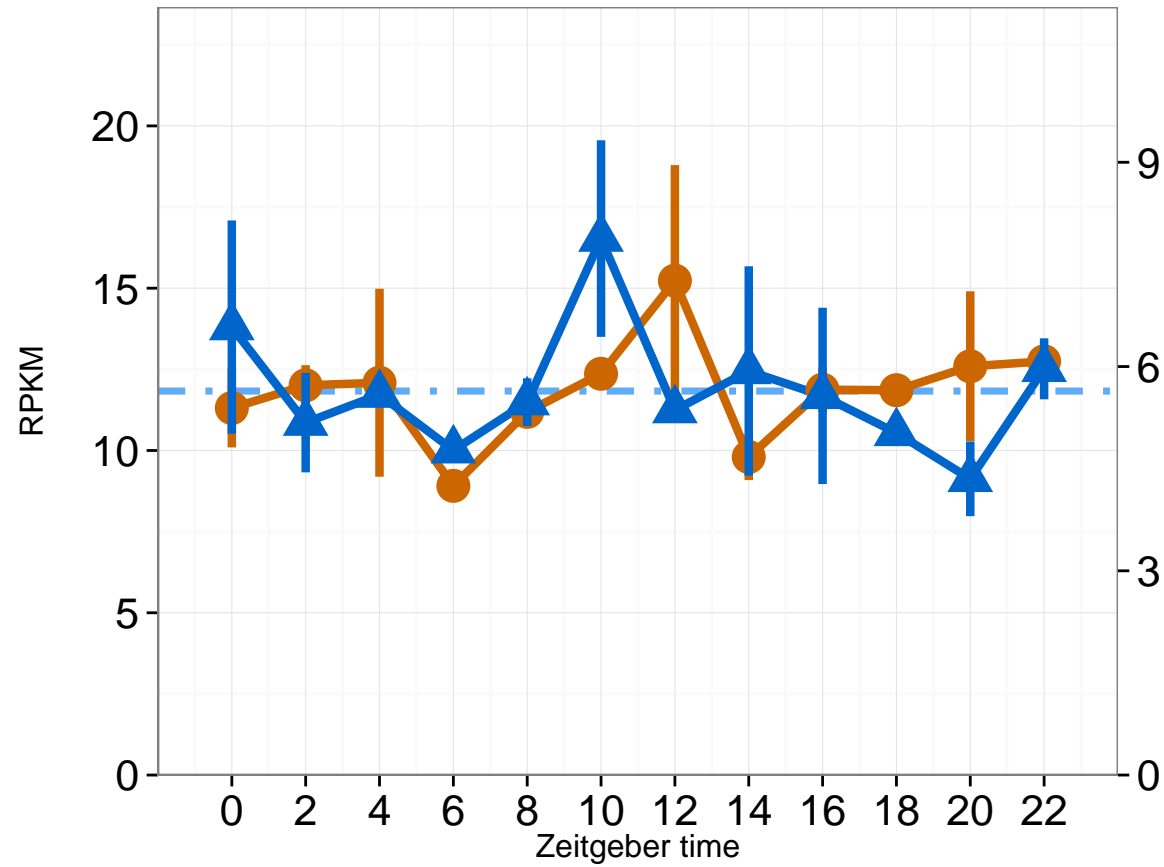

# Taf1d

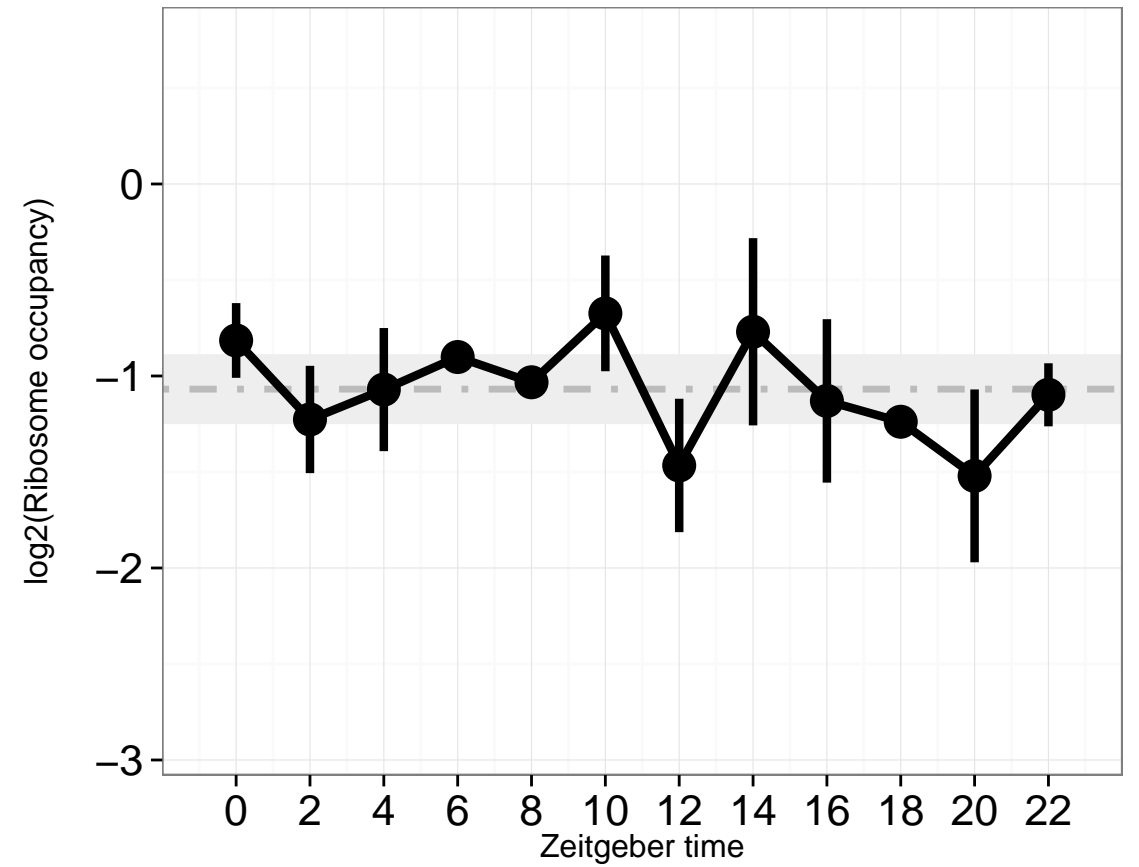

Supplement: Supplementary file 13097 [file 1]

## Acpl2

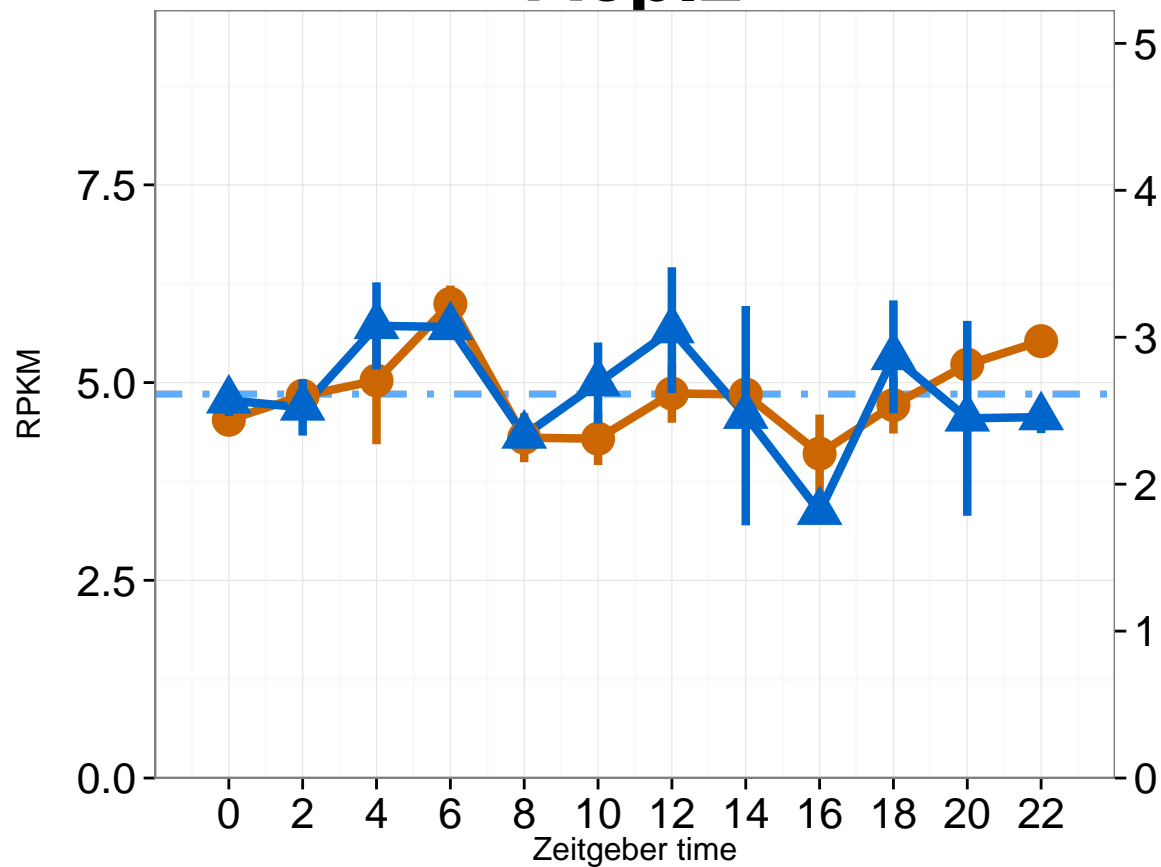

## Acpl2

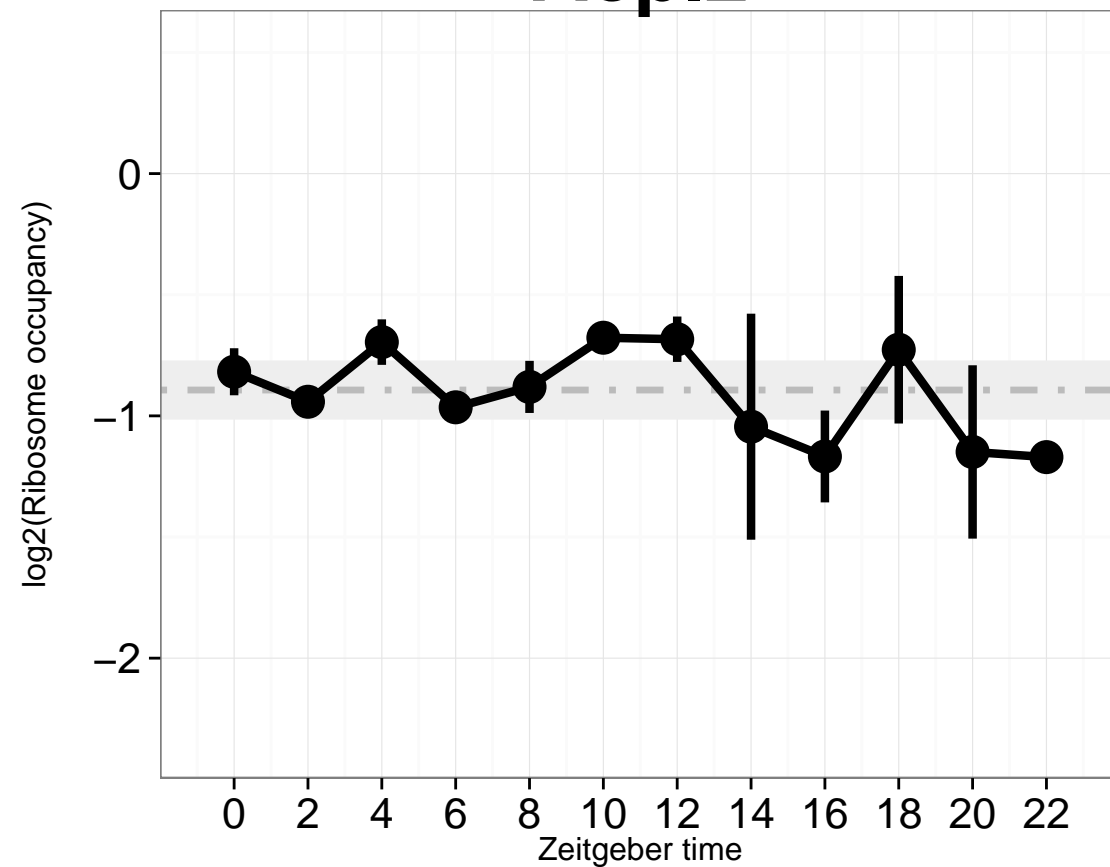

Supplement: Supplementary file 13098 [file 1]

## Katnb1

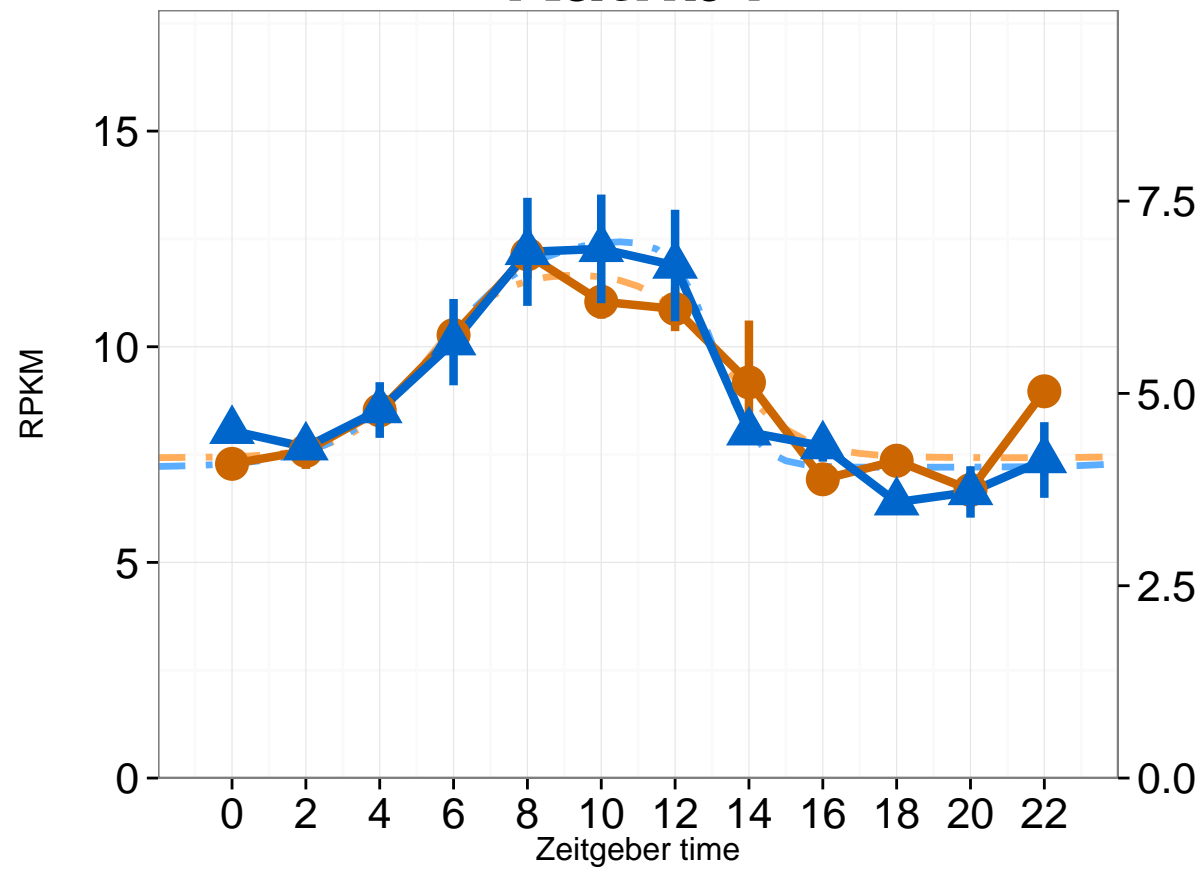

## Katnb1

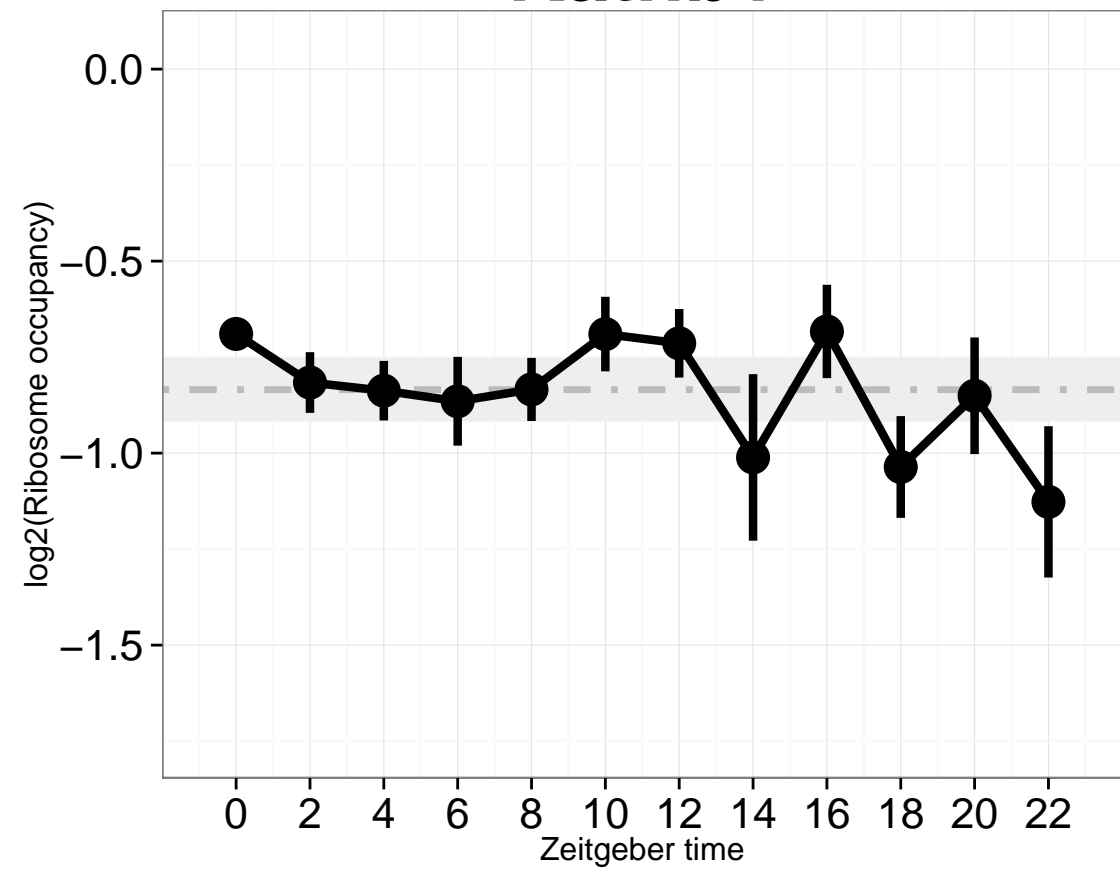

Supplement: Supplementary file 13099 [file 1]

# Rpl31

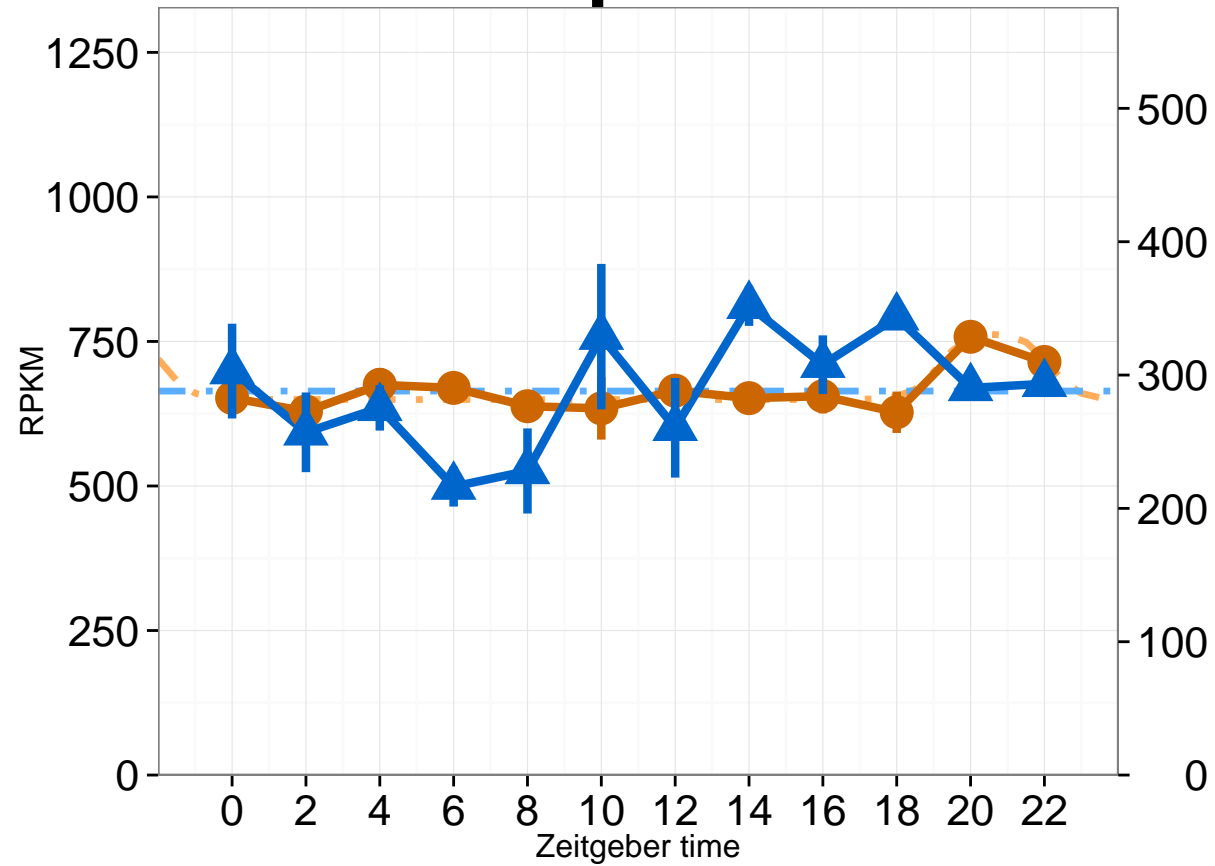

# Rpl31

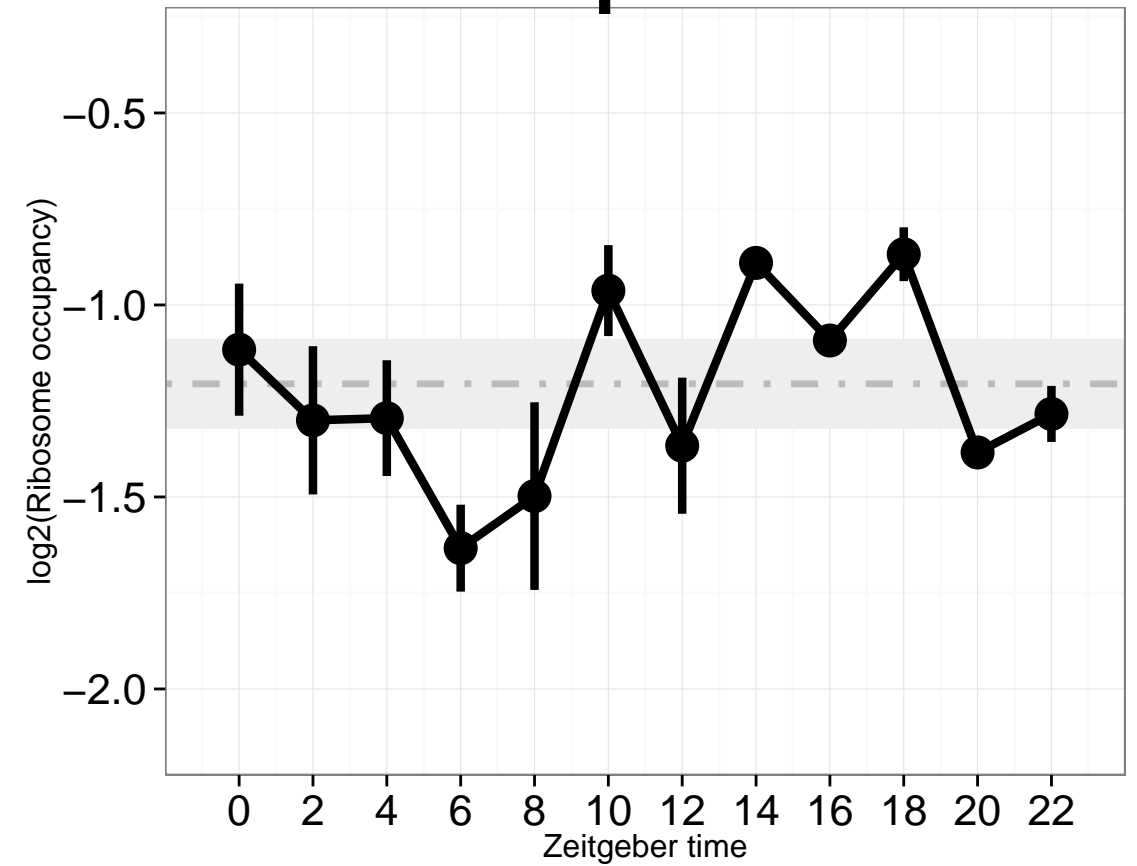

Supplement: Supplementary file 13100 [file 1]

## Smad4

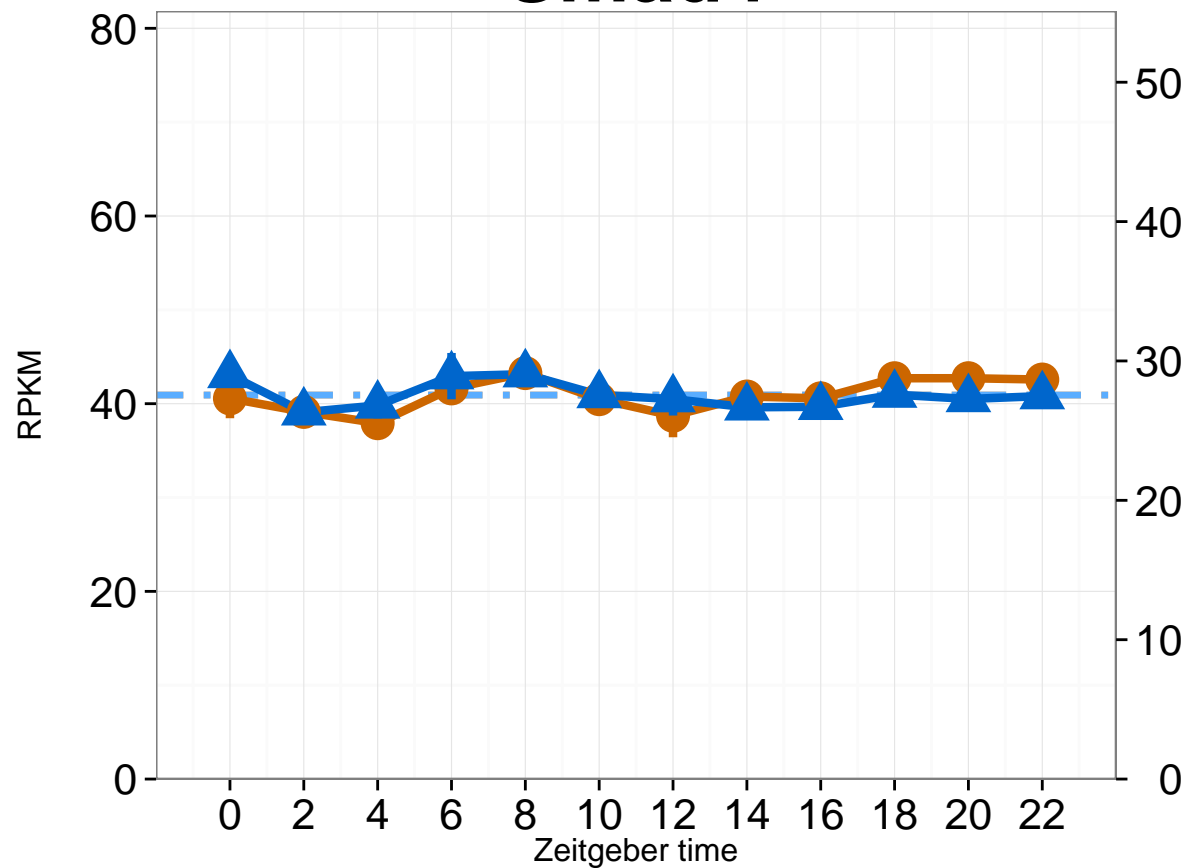

## Smad4

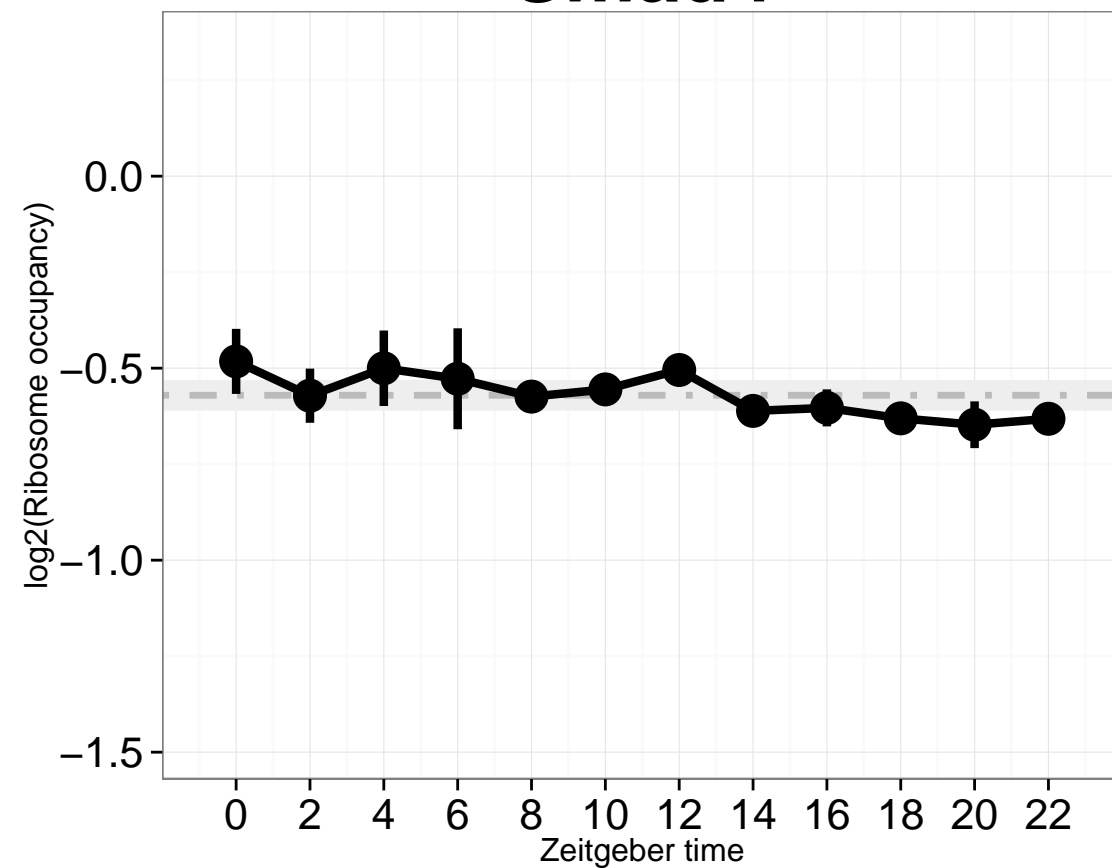

Supplement: Supplementary file 13101 [file 1]

# Alg12

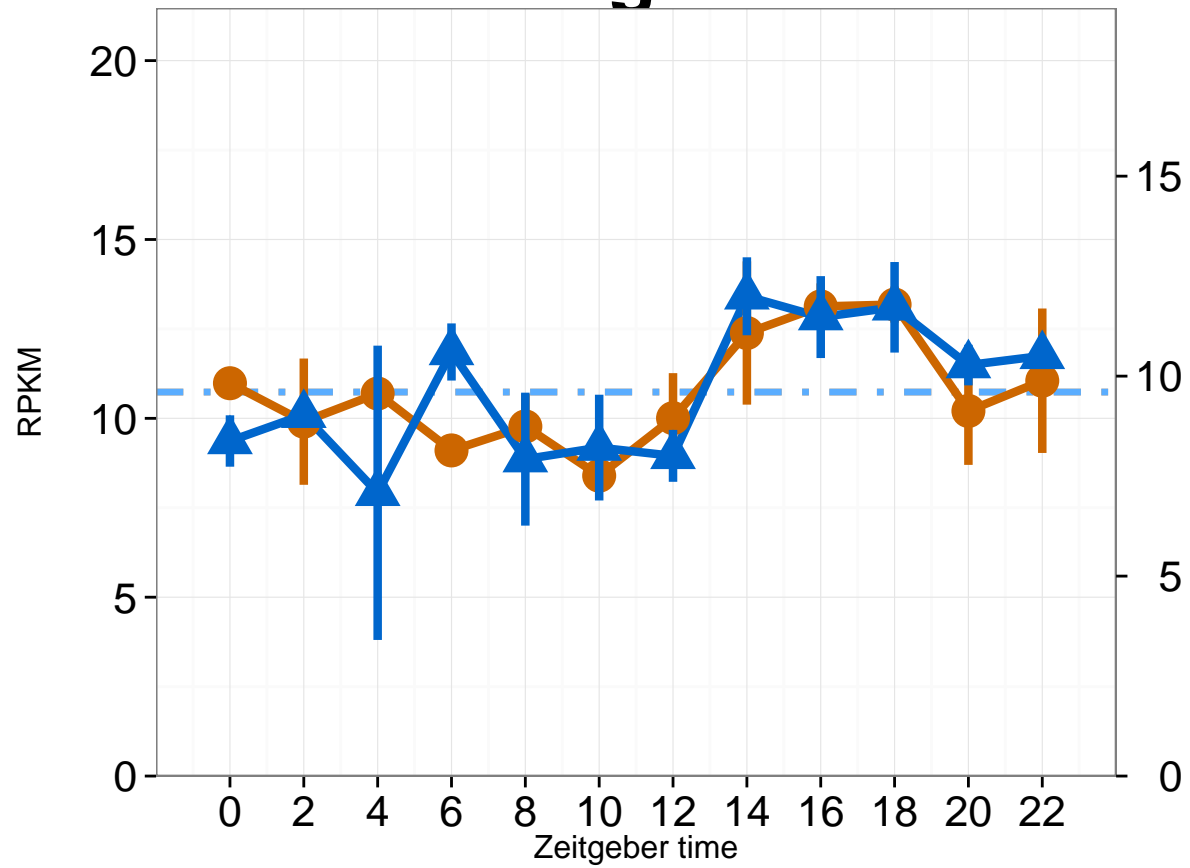

# Alg12

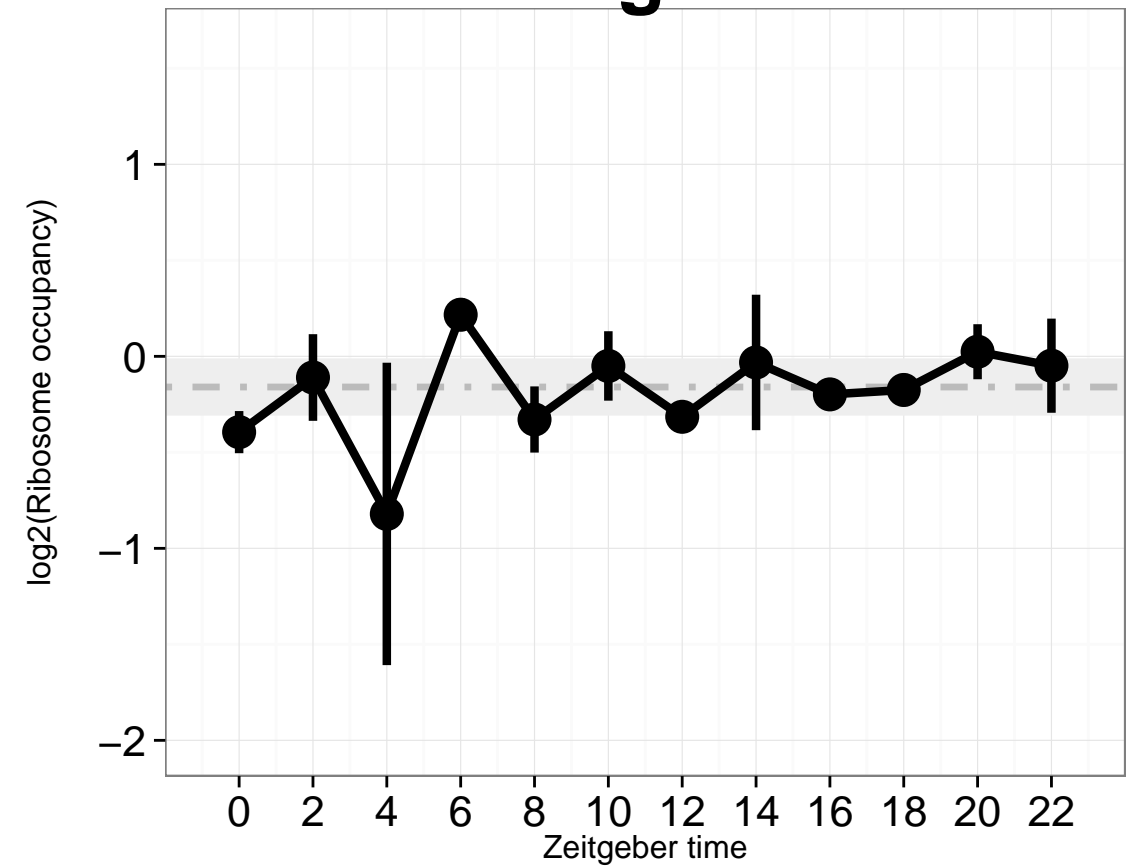

Supplement: Supplementary file 13102 [file 1]

# Mt2

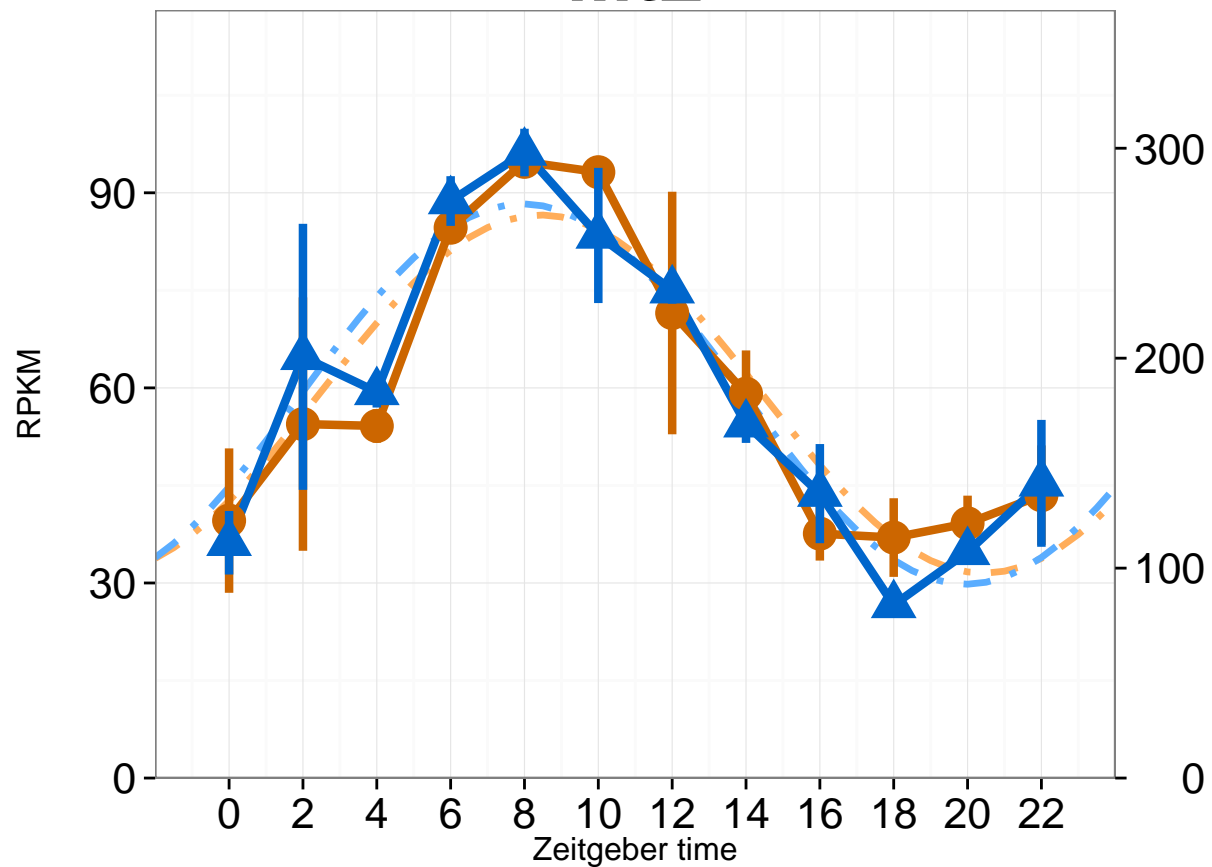

# Mt2

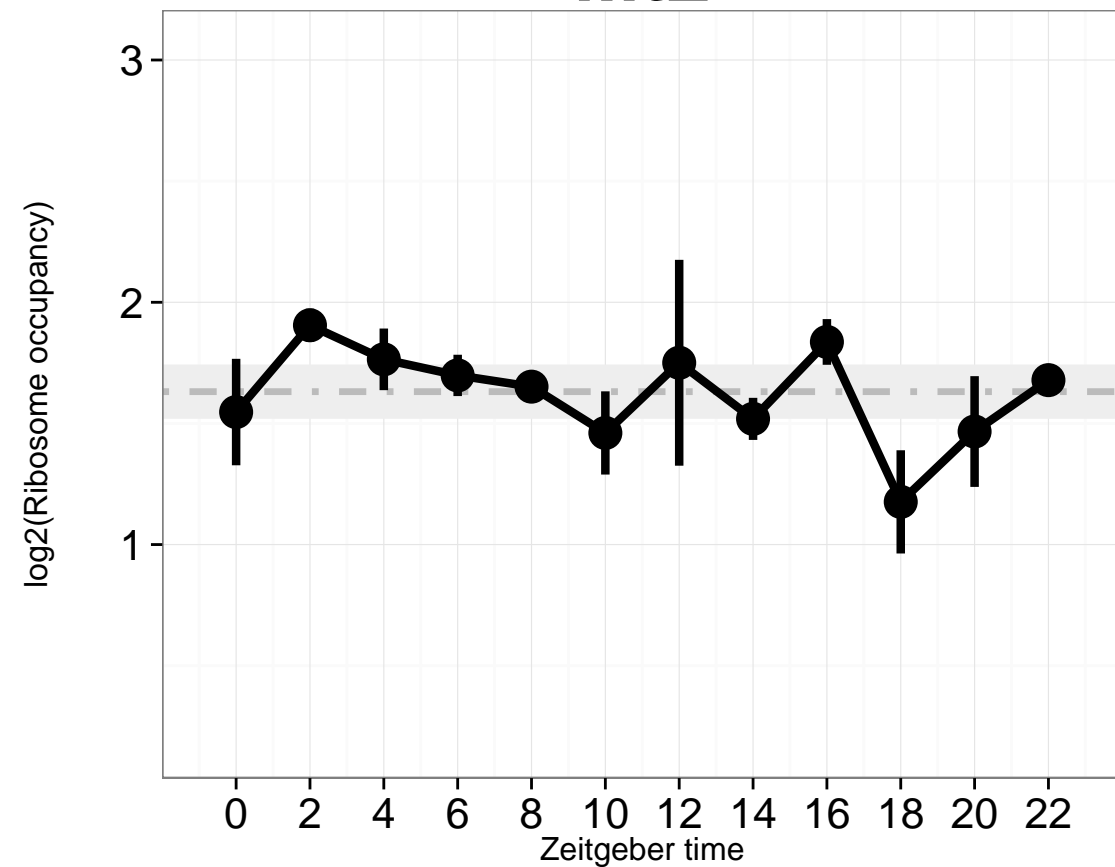

Supplement: Supplementary file 13103 [file 1]

## Mapk3

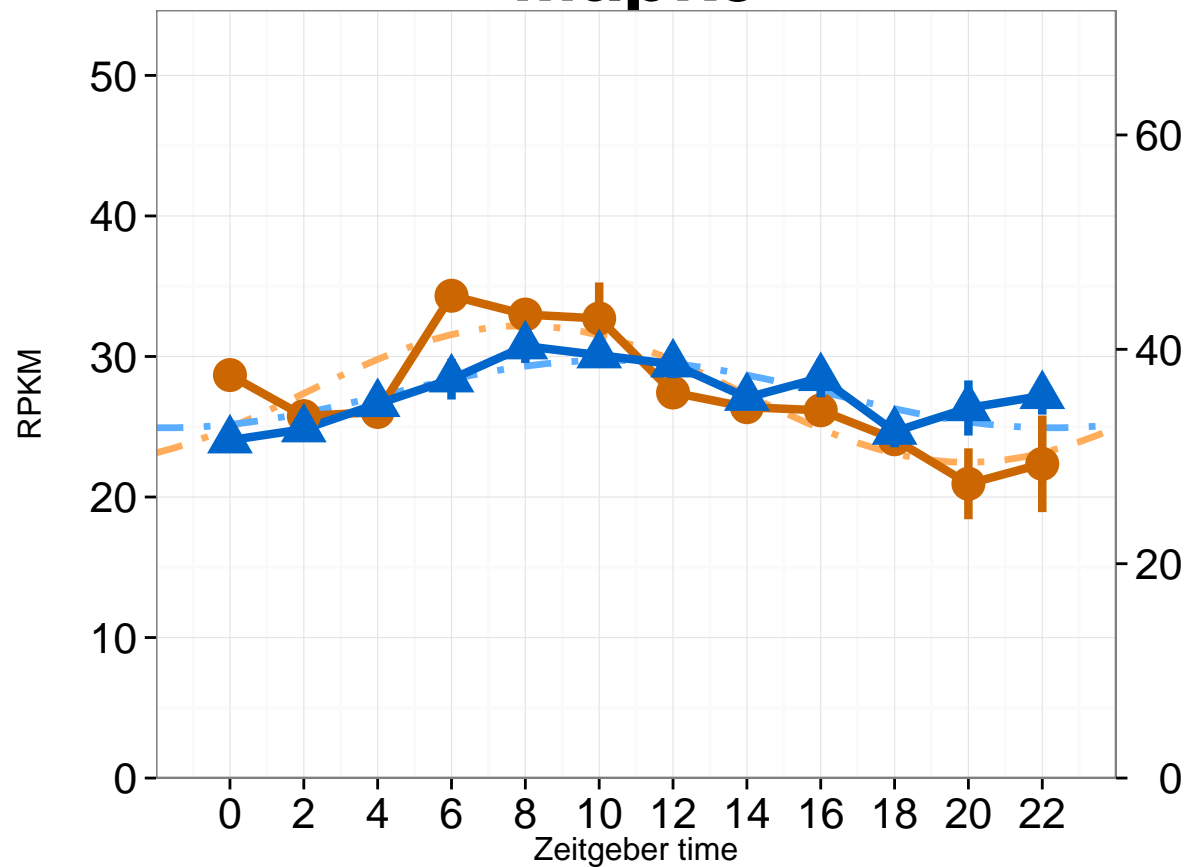

## Mapk3

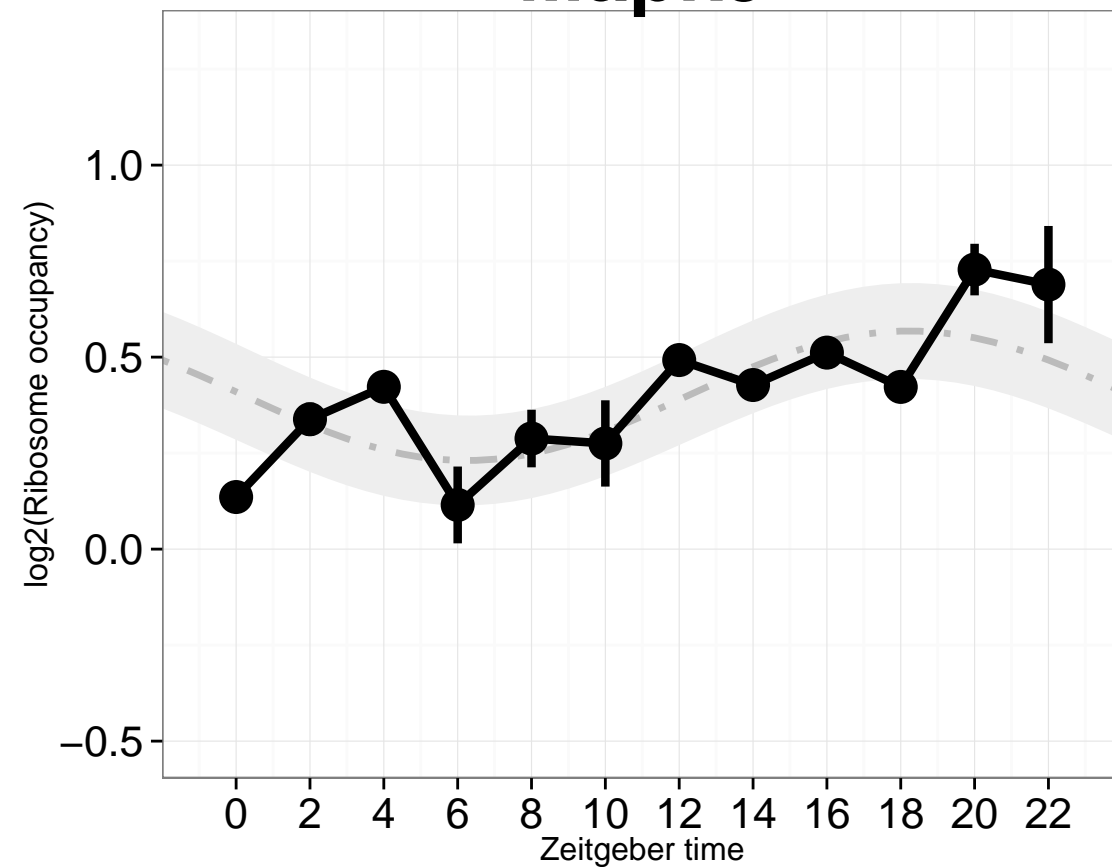

Supplement: Supplementary file 13104 [file 1]

## Plec

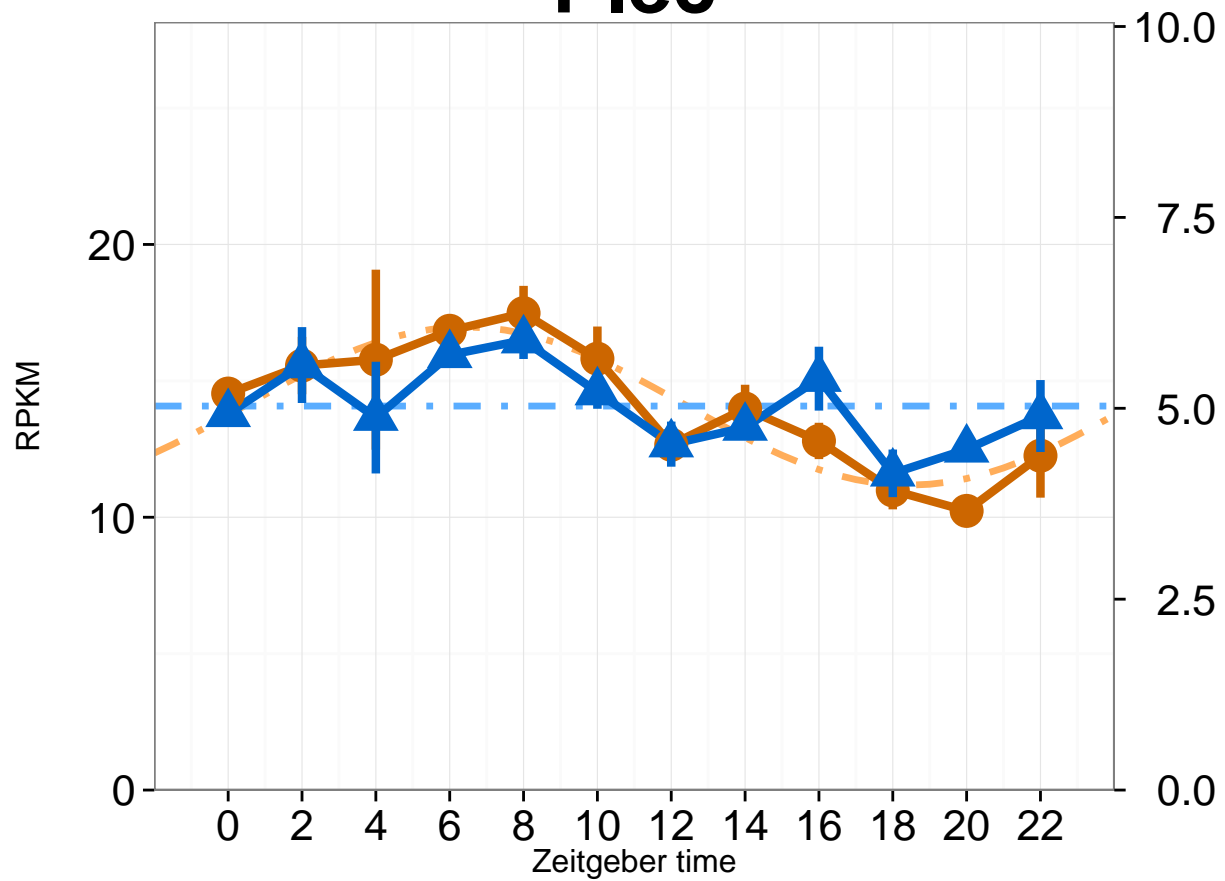

## Plec

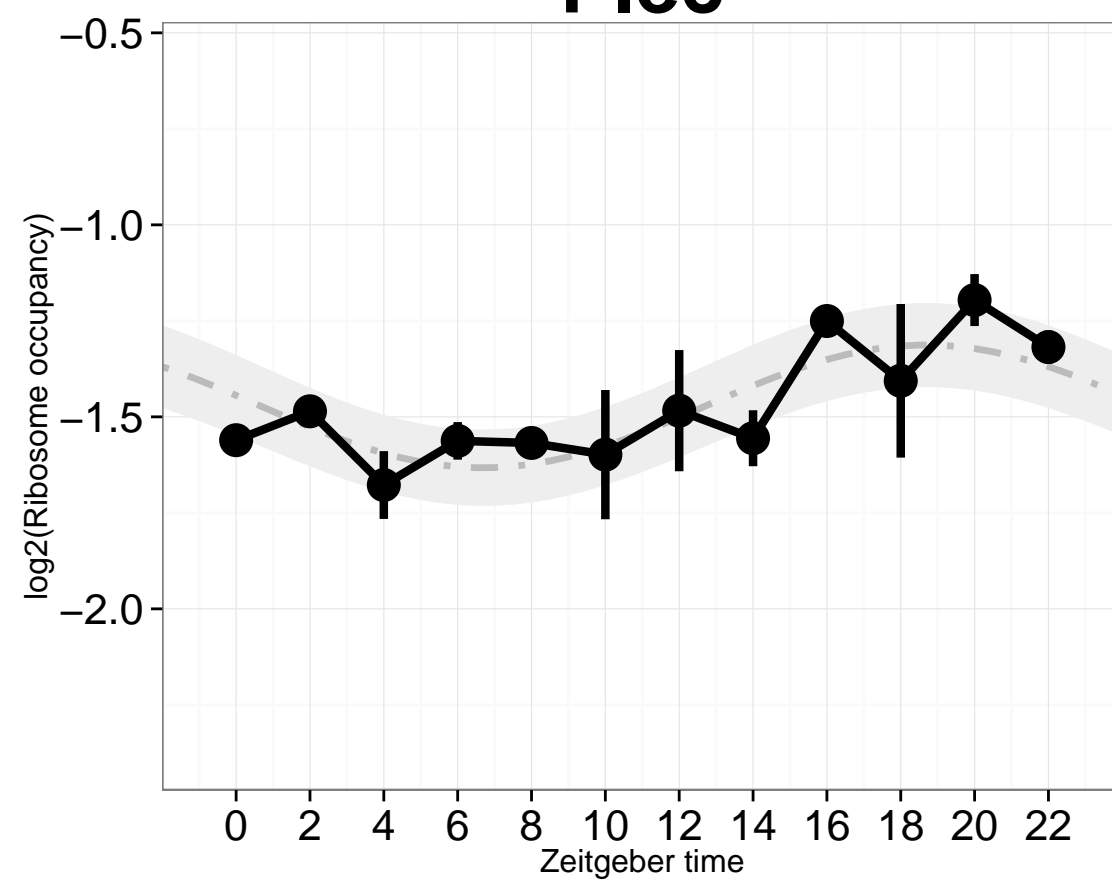

Supplement: Supplementary file 13105 [file 1]

# Atp6v0e

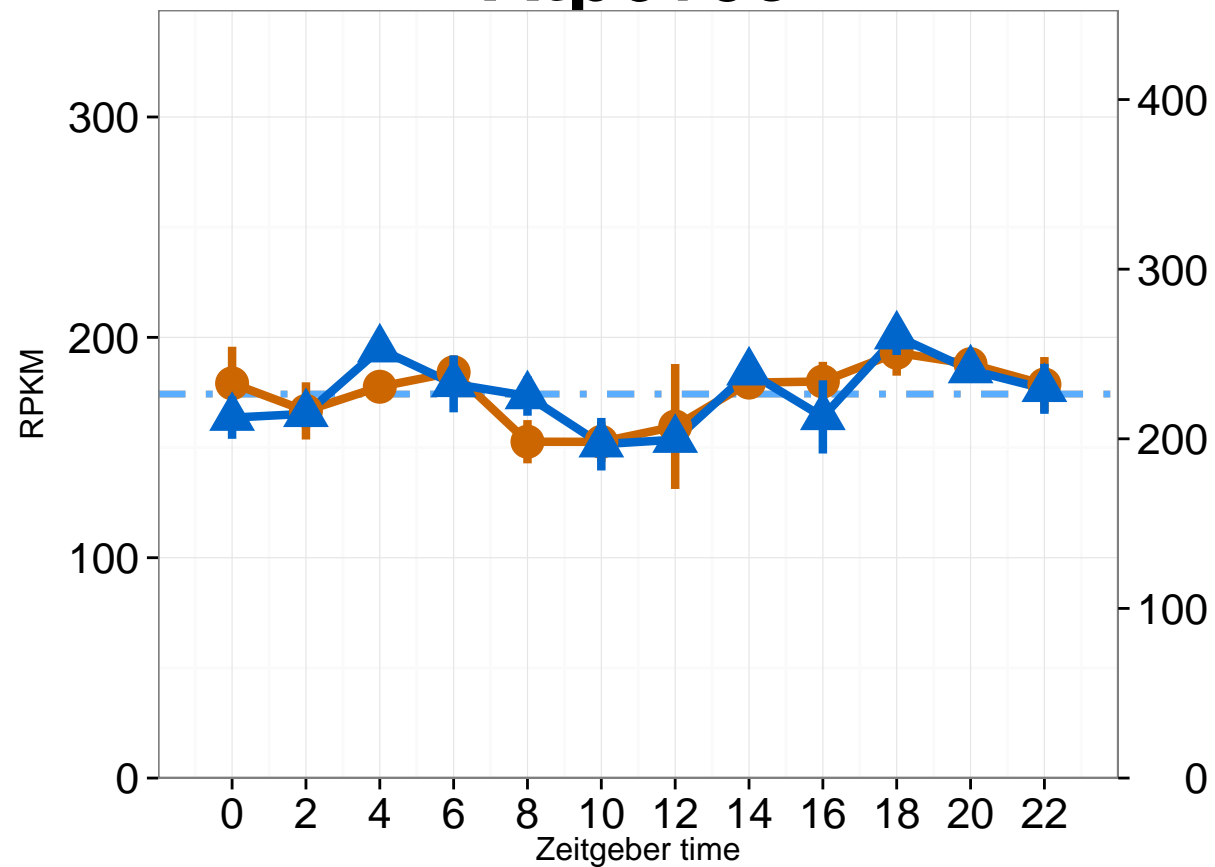

# Atp6v0e

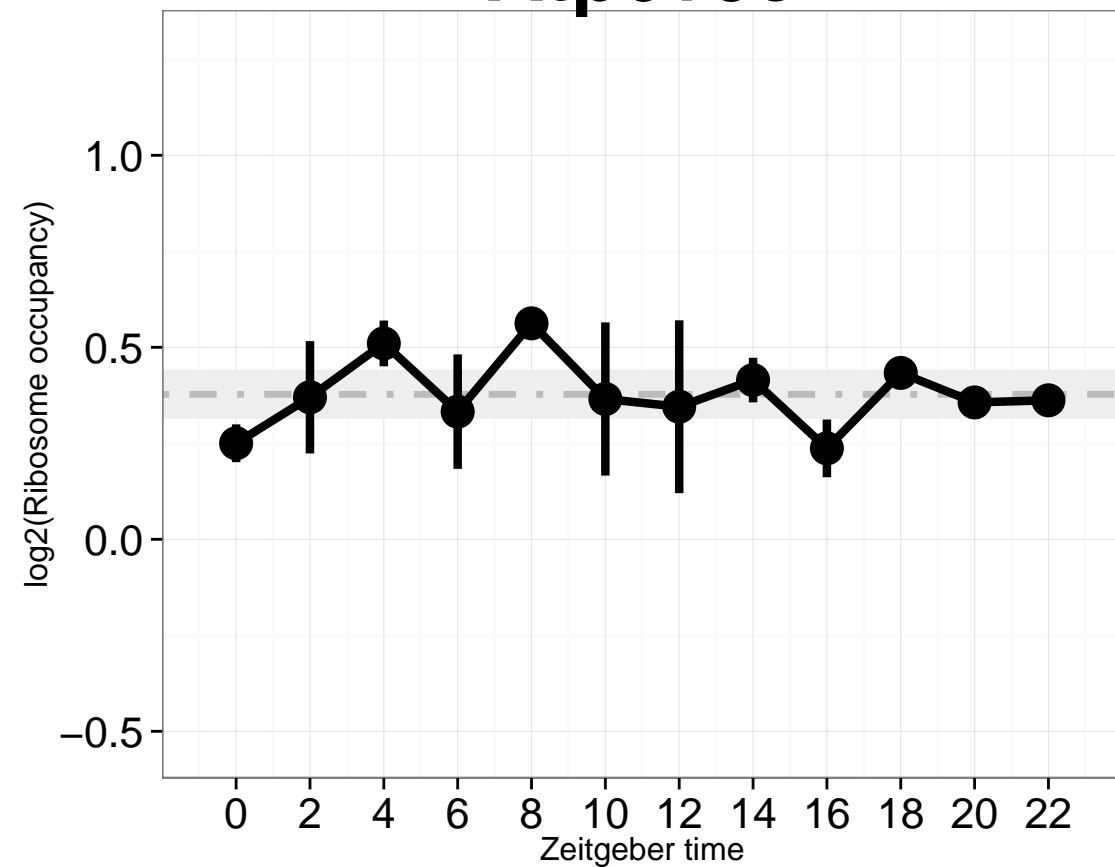

Supplement: Supplementary file 13106 [file 1]

## Ctla2a

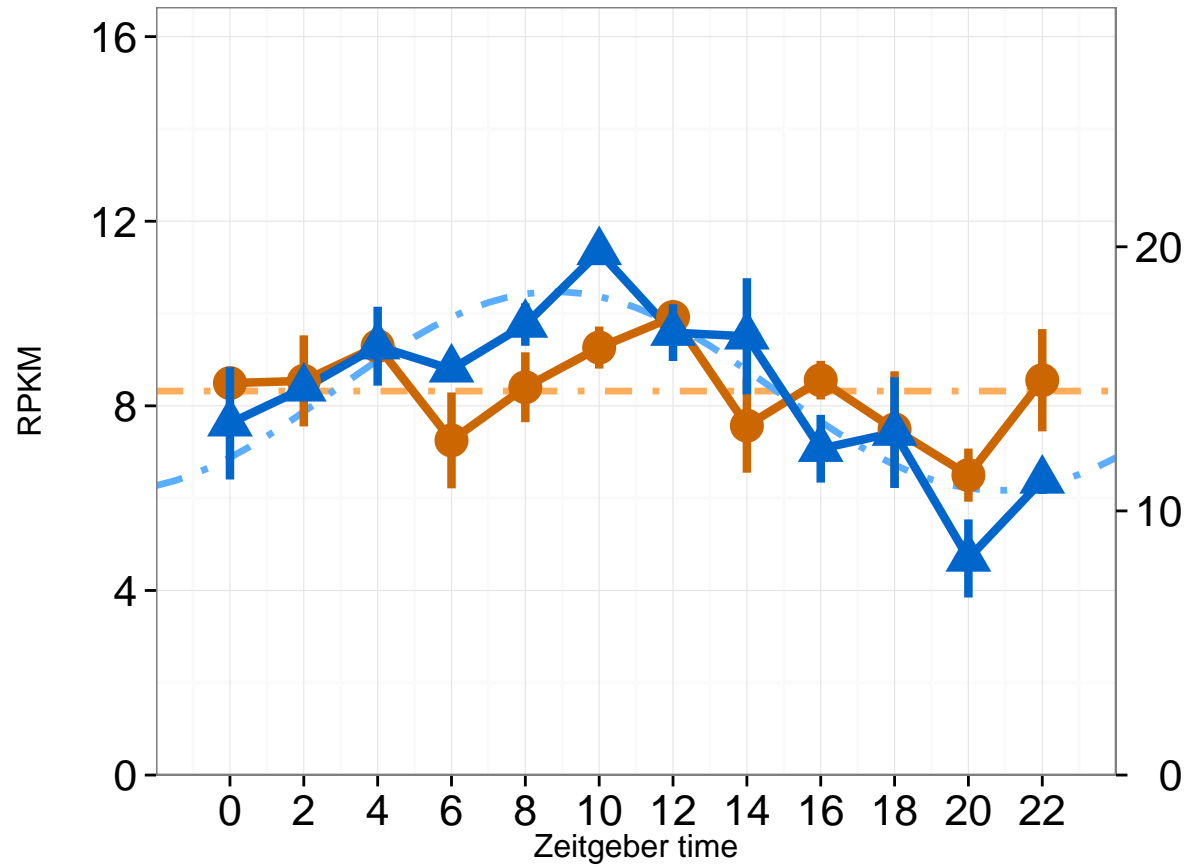

## Ctla2a

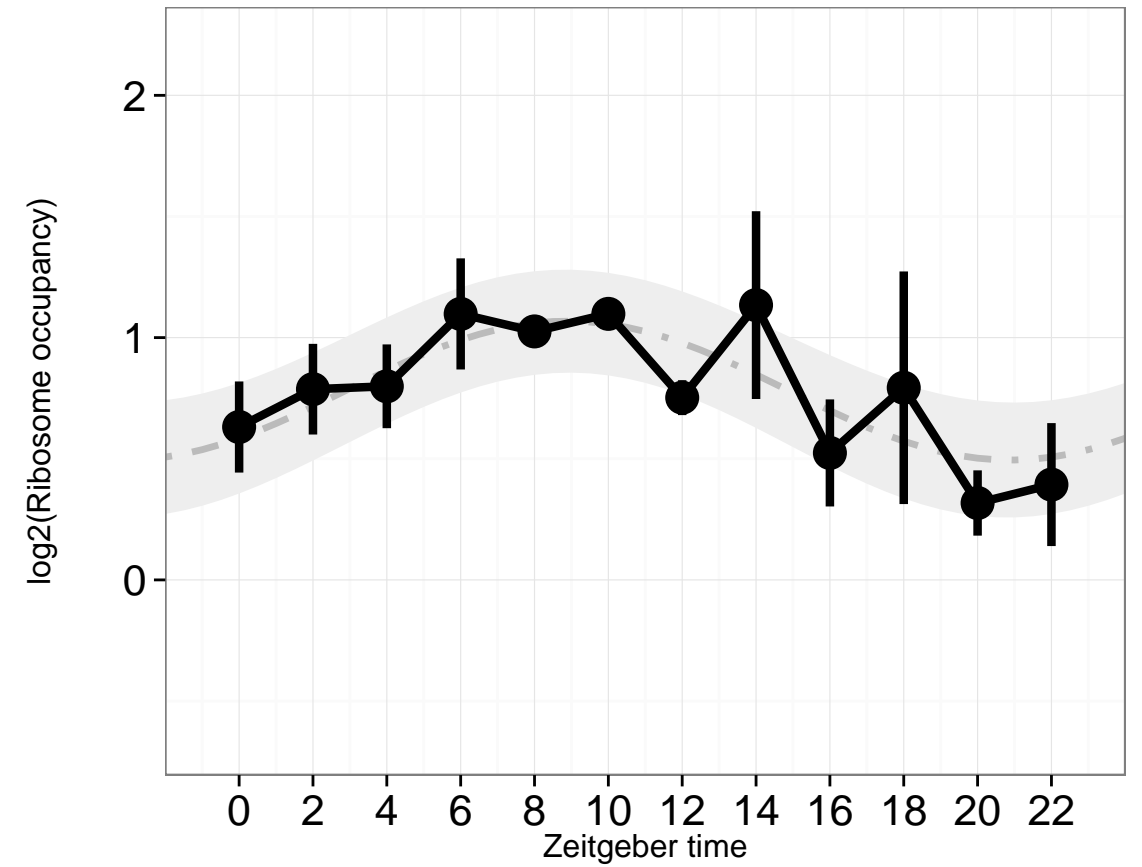

Supplement: Supplementary file 13107 [file 1]

## Epc1

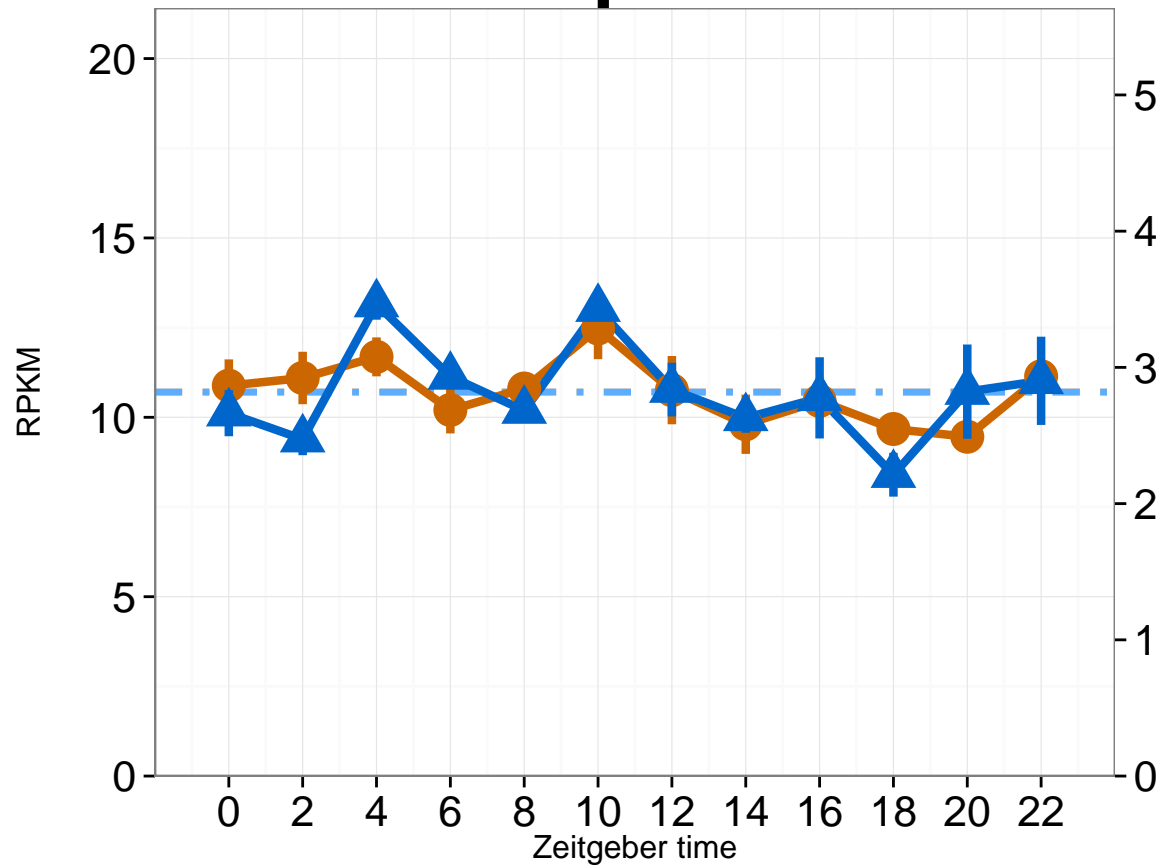

## Epc1

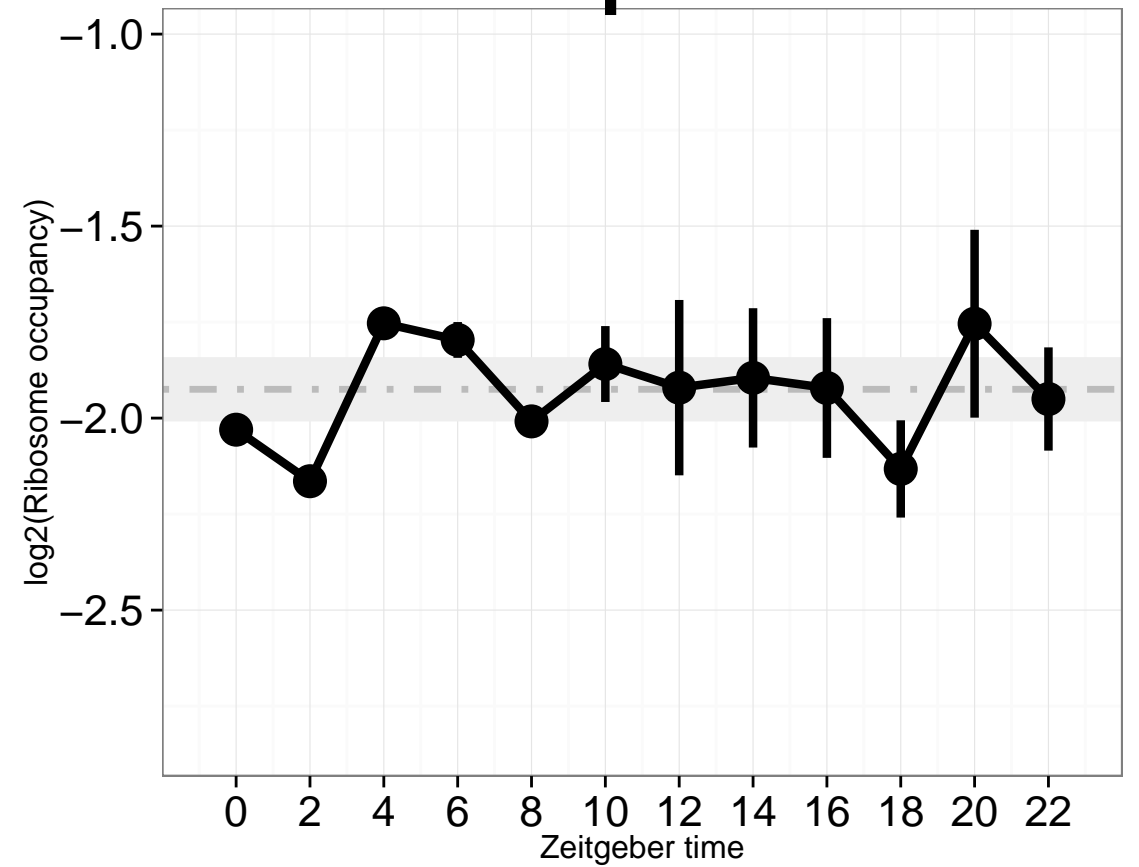

Supplement: Supplementary file 13108 [file 1]

## Gas2l3

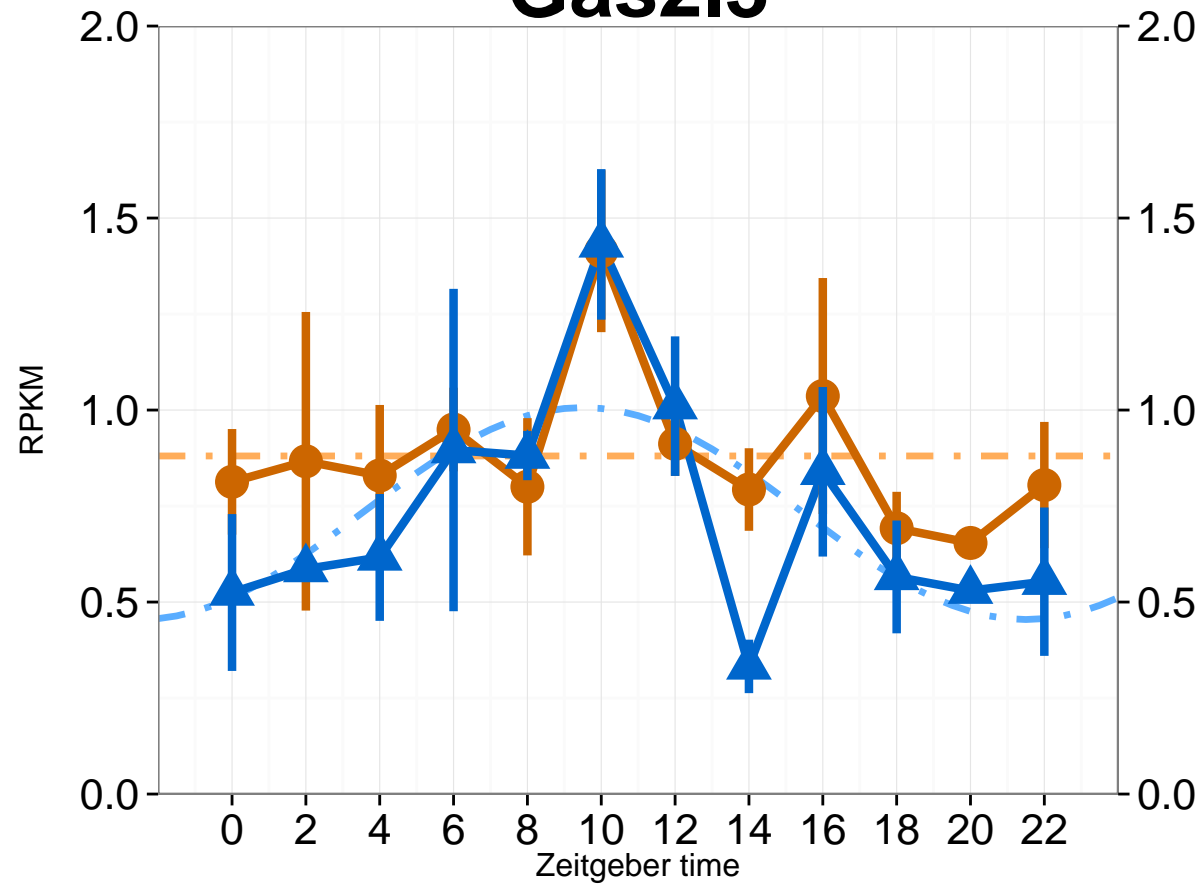

## Gas2l3

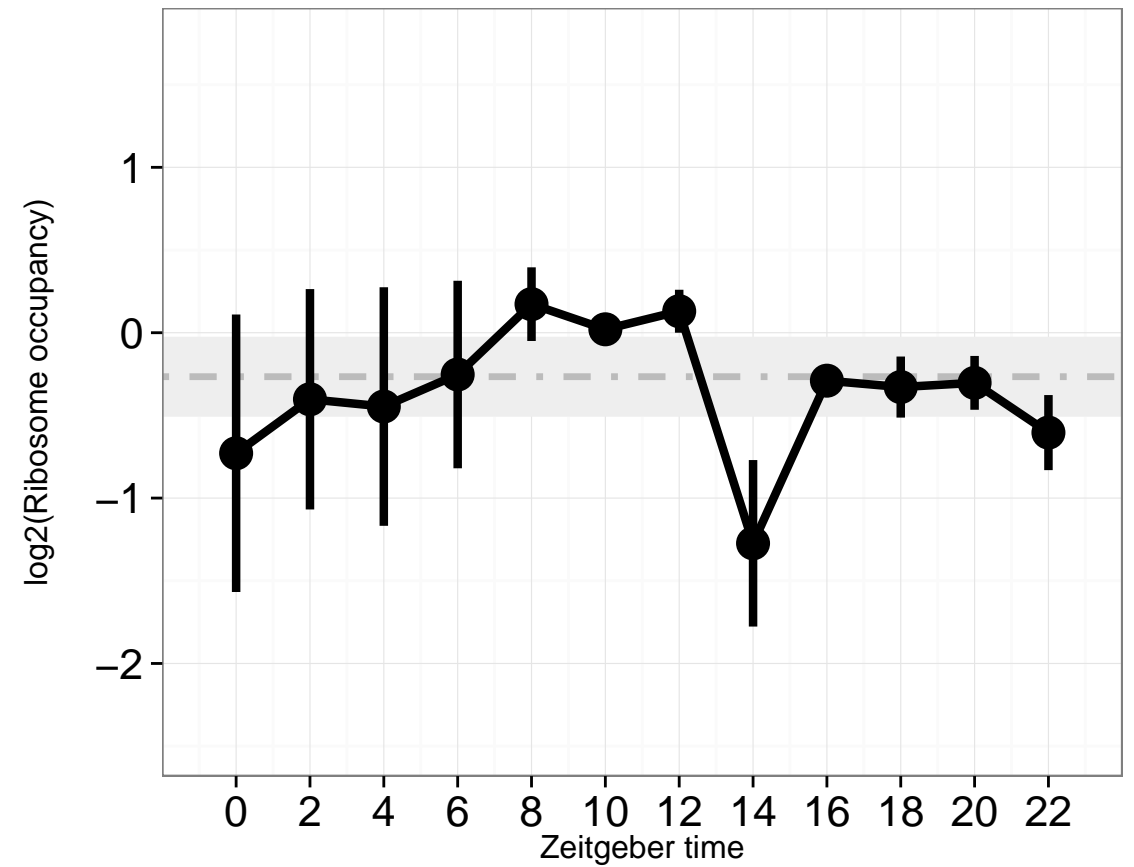

Supplement: Supplementary file 13109 [file 1]

## Agmo

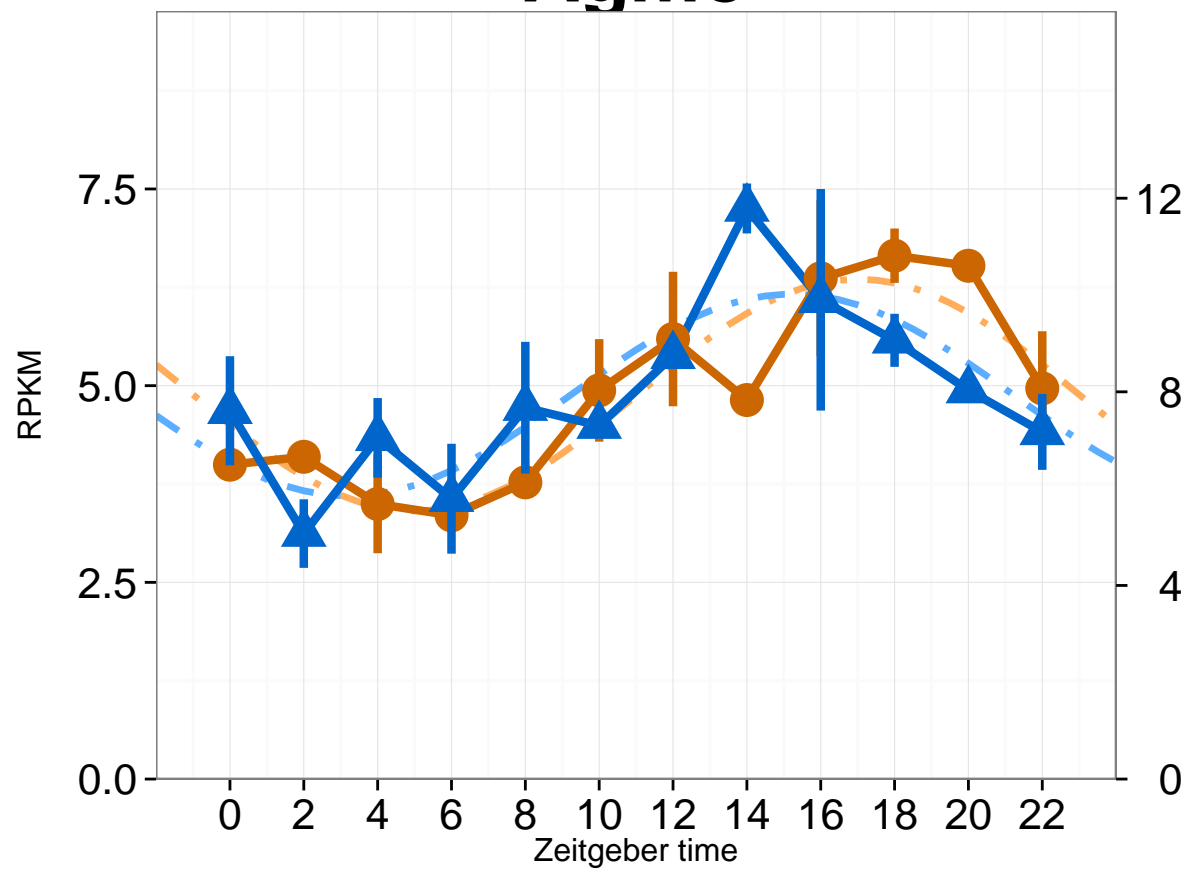

## Agmo

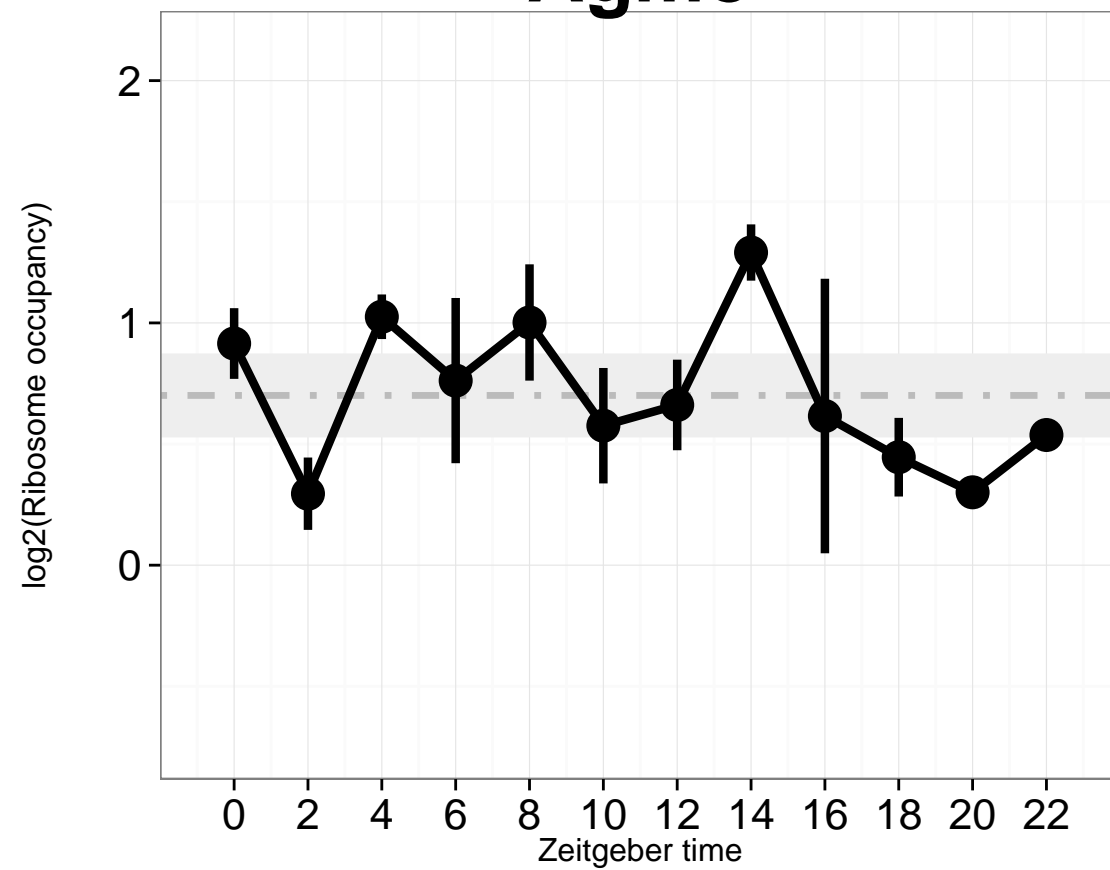

Supplement: Supplementary file 13110 [file 1]

# H2-Ke6

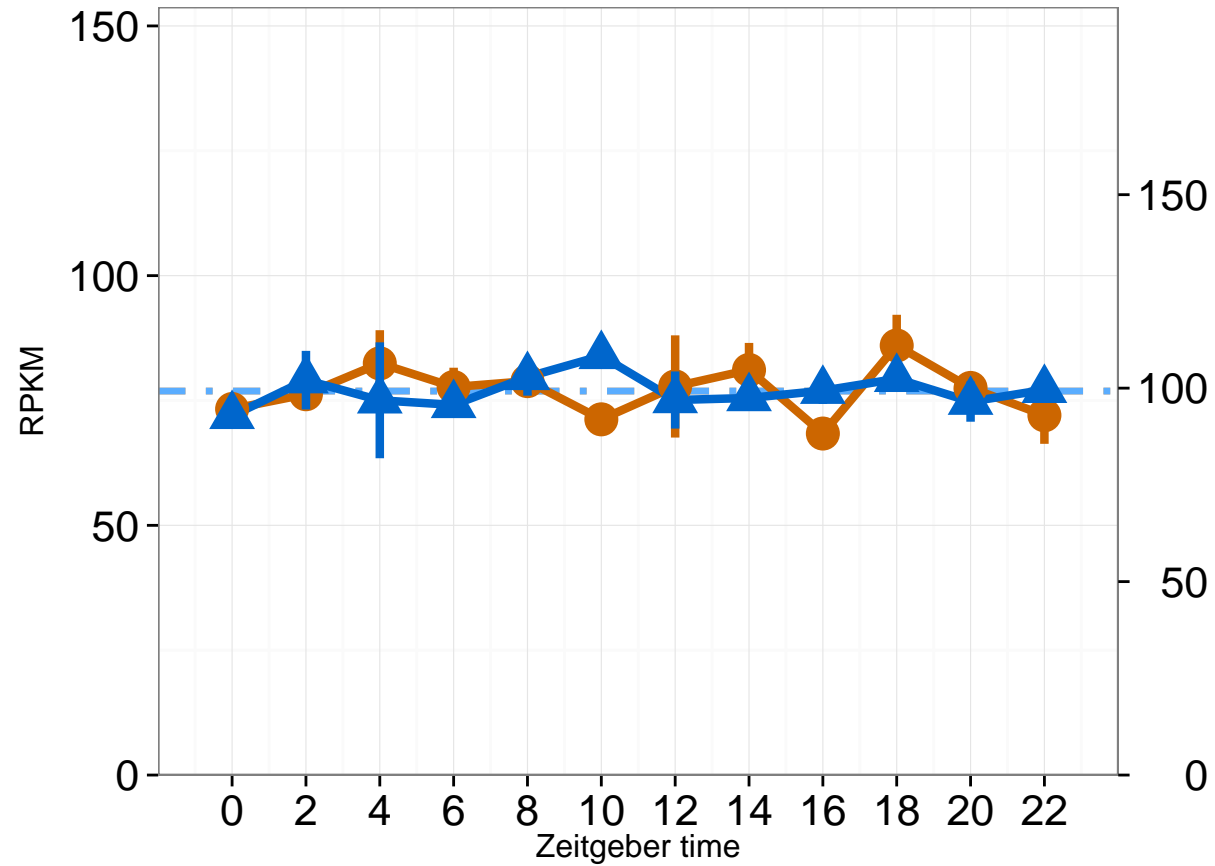

# H2-Ke6

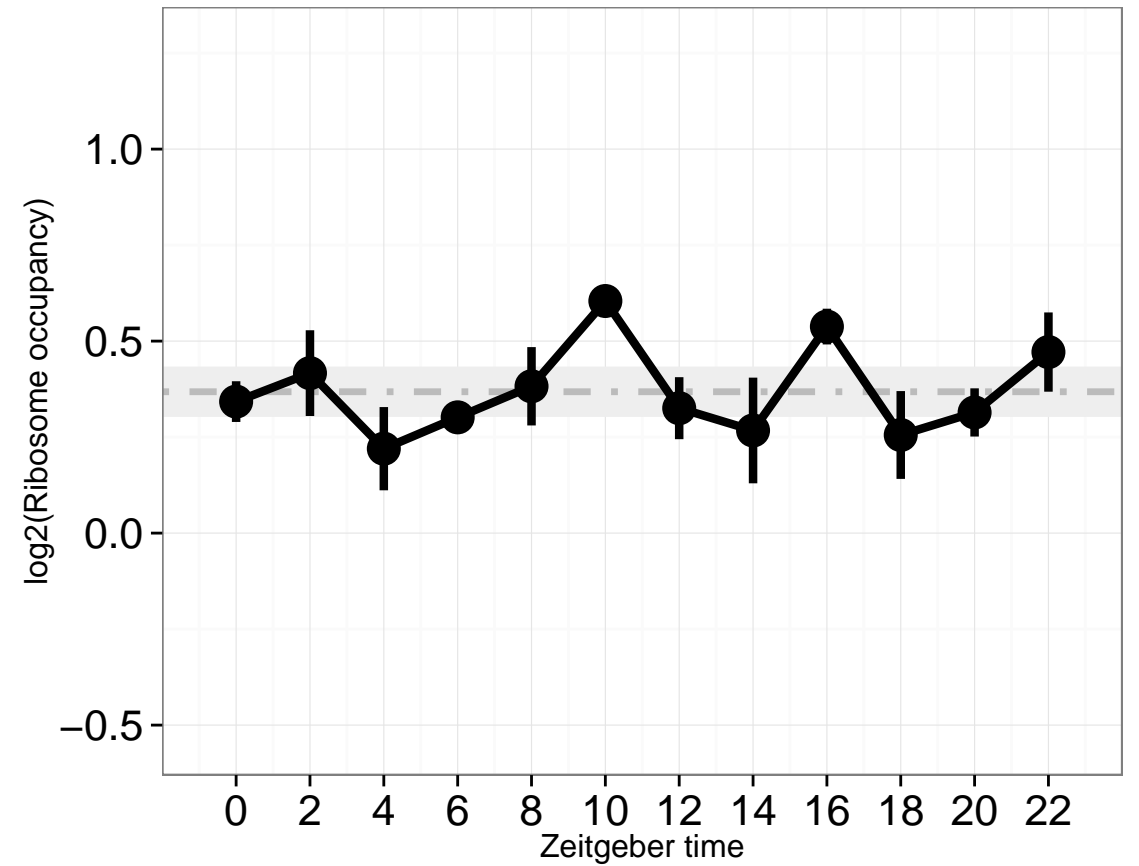

Supplement: Supplementary file 13111 [file 1]

# Slc37a1

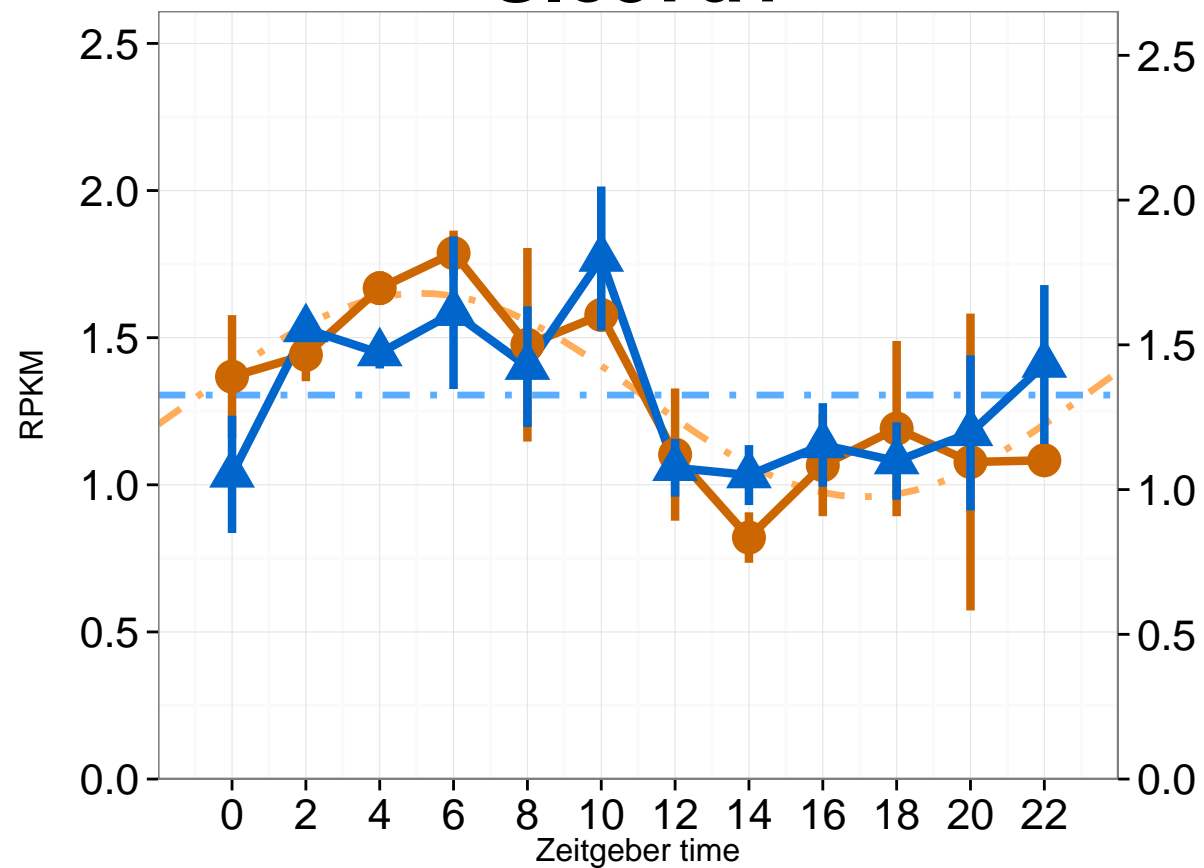

# Slc37a1

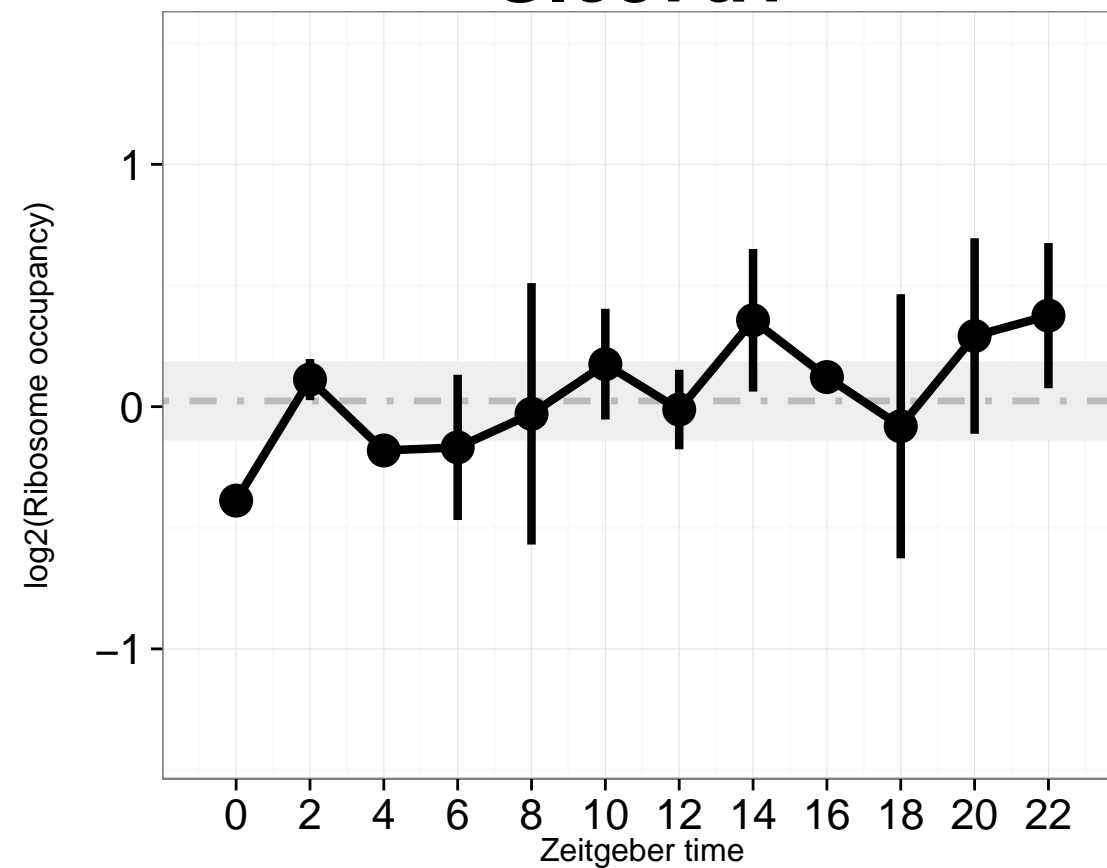

Supplement: Supplementary file 13112 [file 1]

# Atg2a

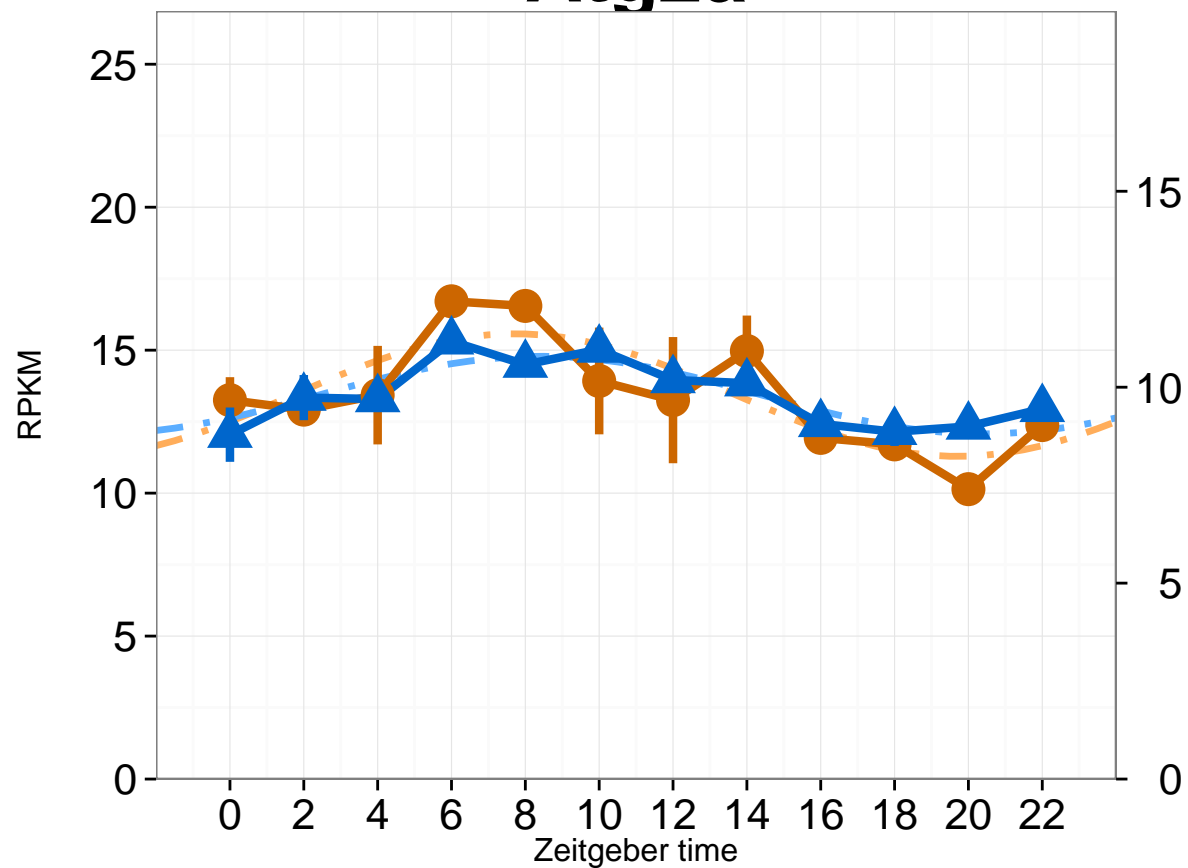

# Atg2a

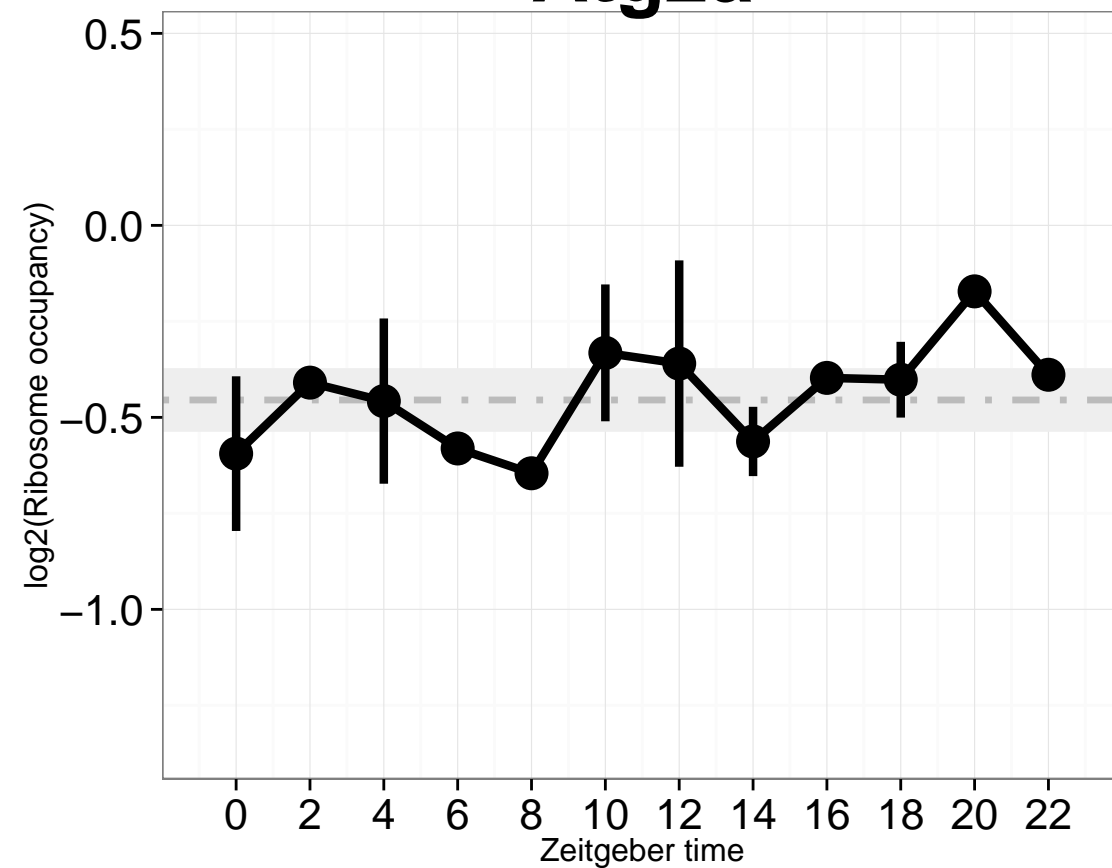

Supplement: Supplementary file 13113 [file 1]

## Csrnp2

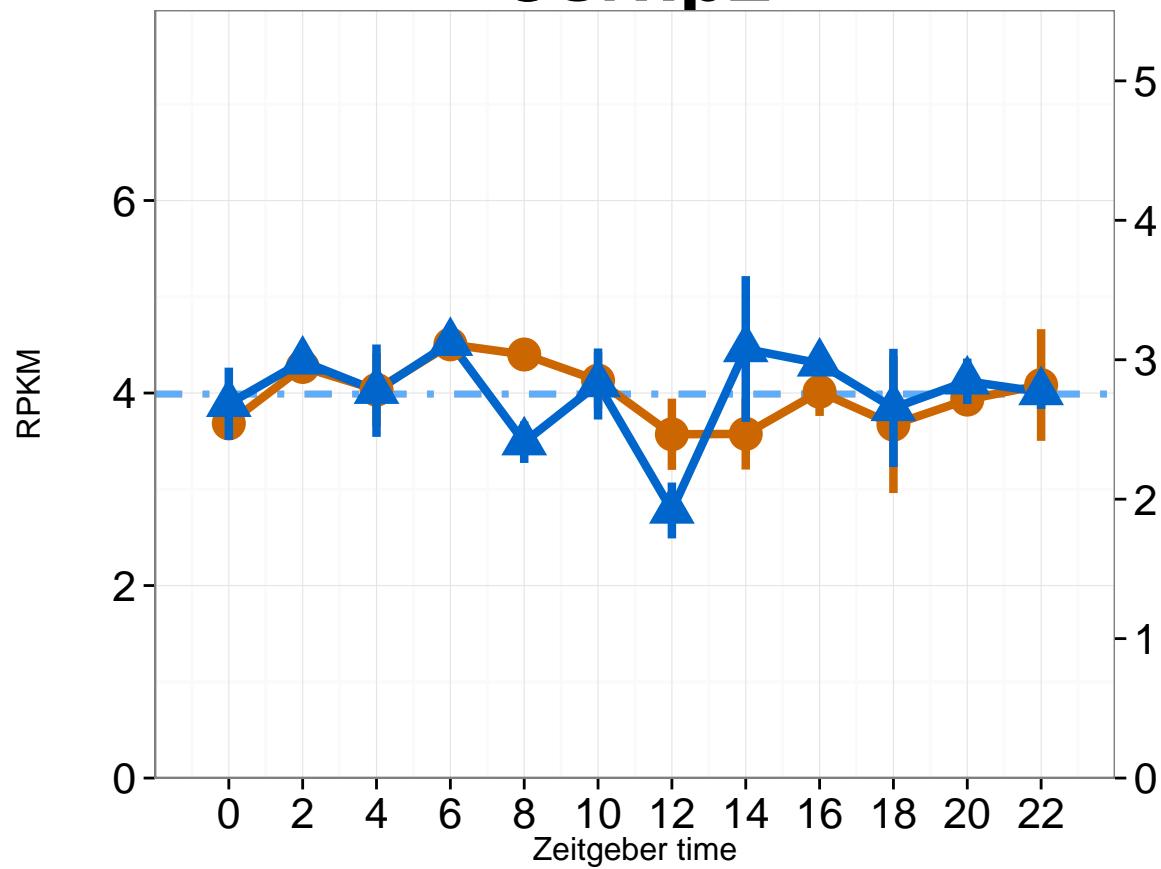

## Csrnp2

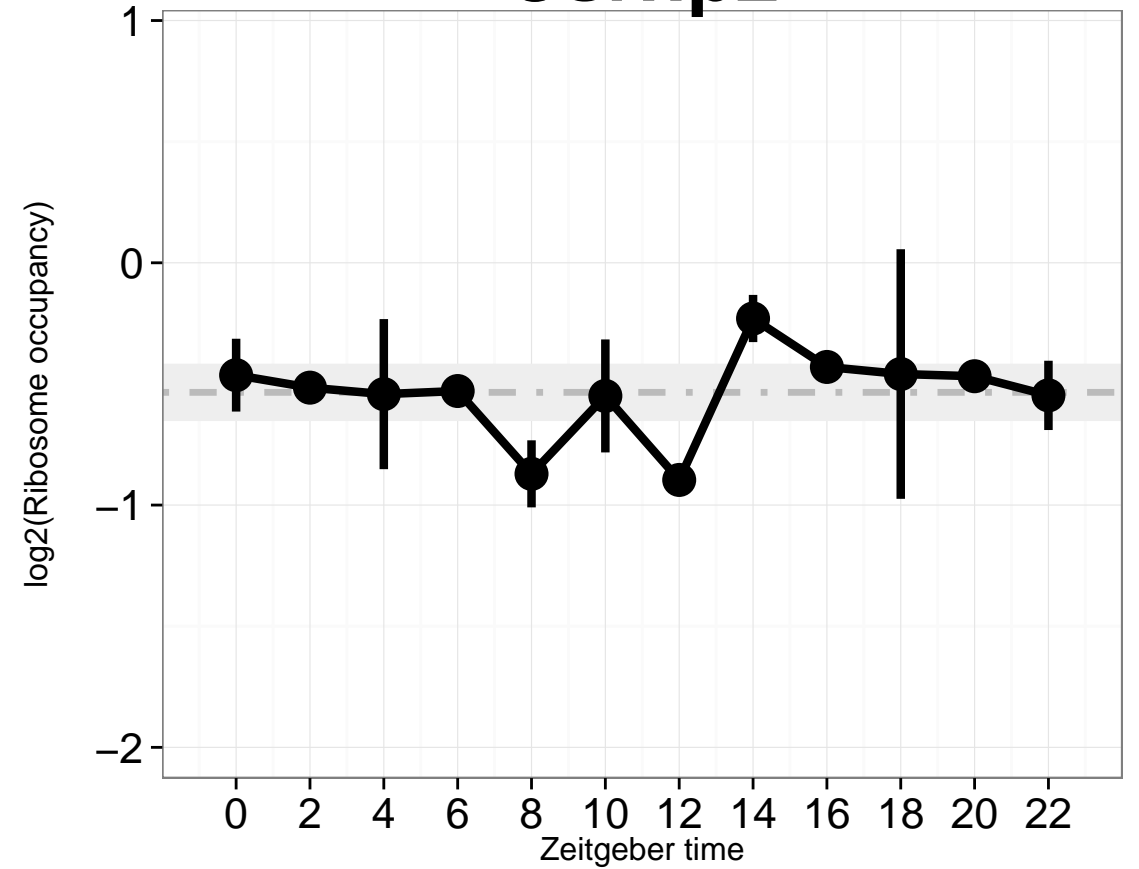

Supplement: Supplementary file 13114 [file 1]

## Sf1

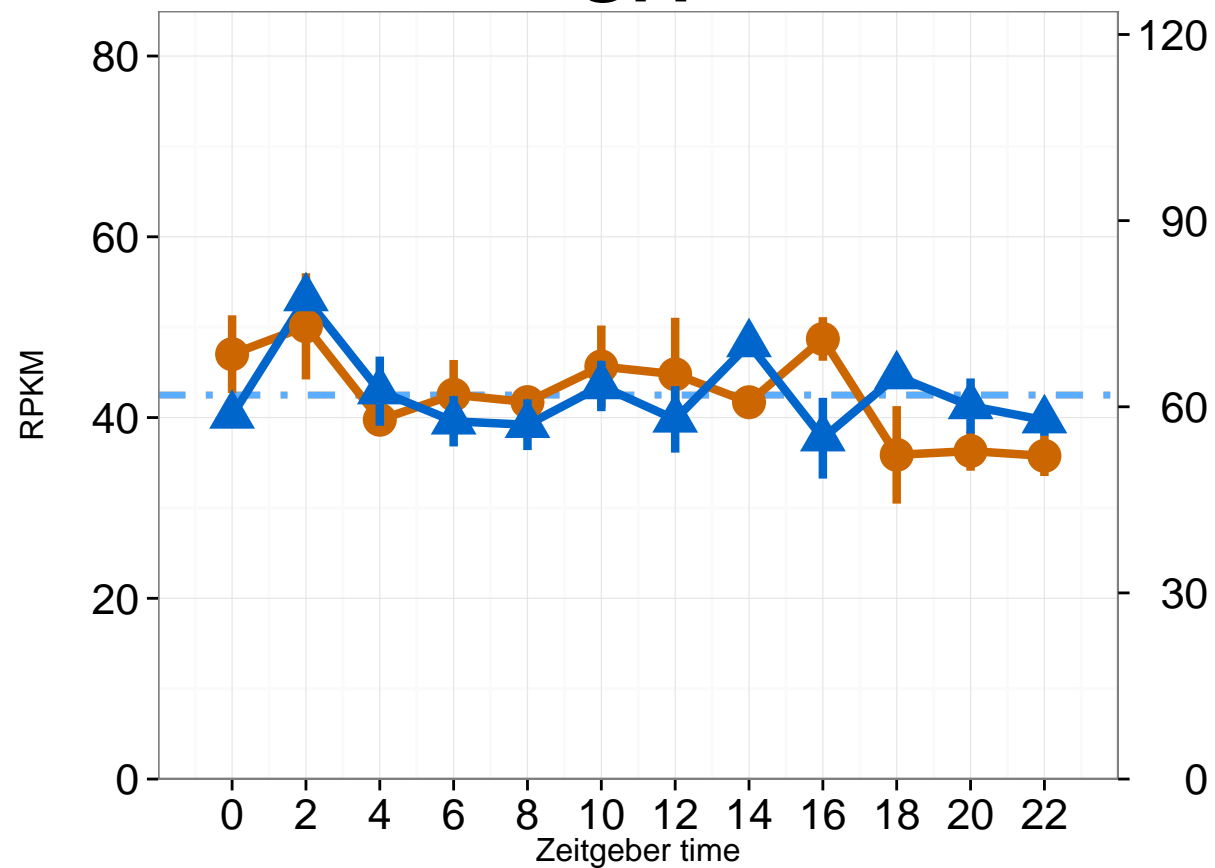

## Sf1

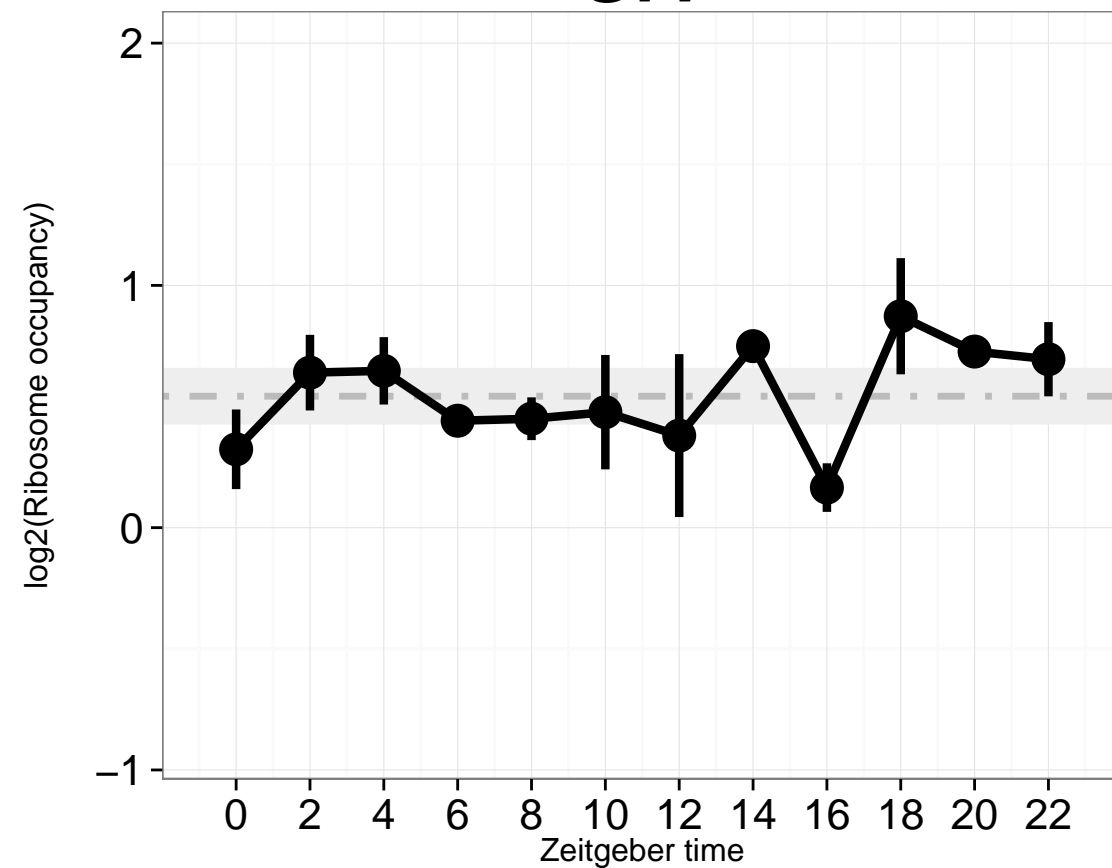

Supplement: Supplementary file 13115 [file 1]

## Dis3l2

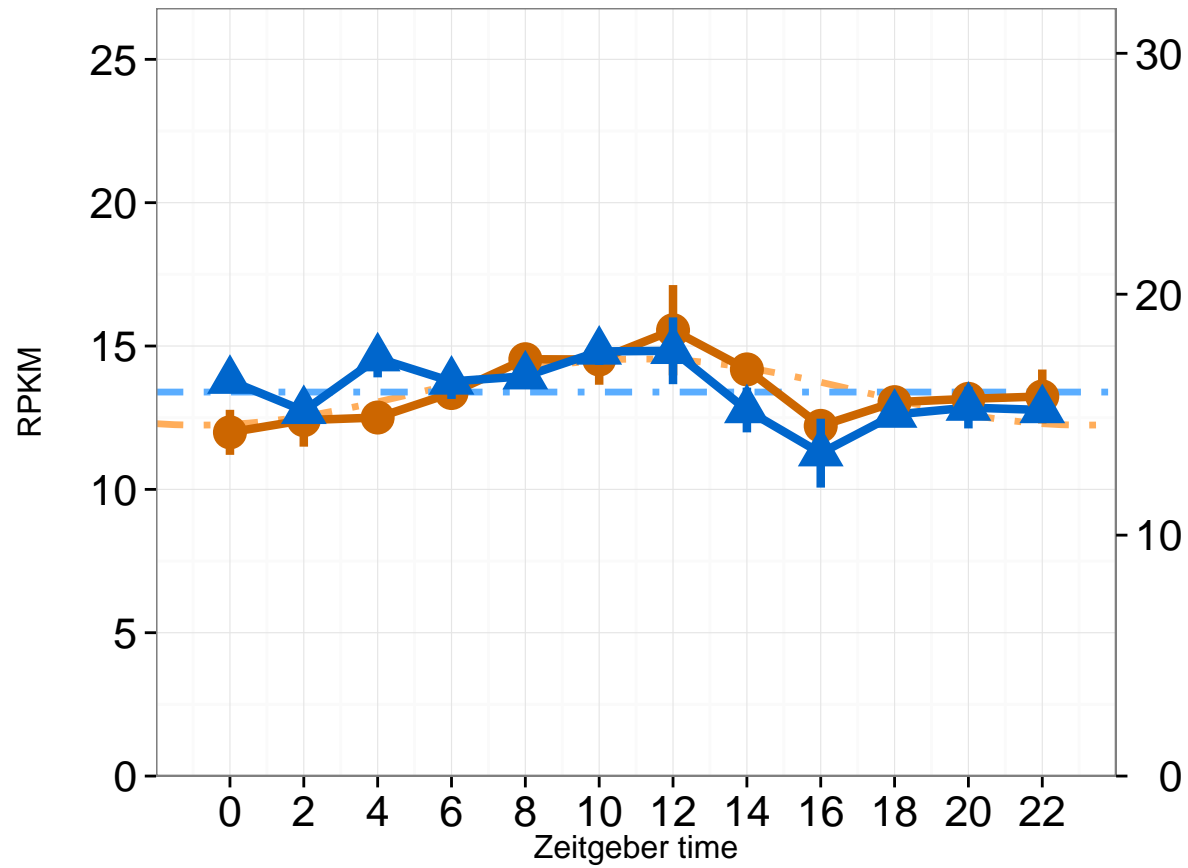

## Dis3l2

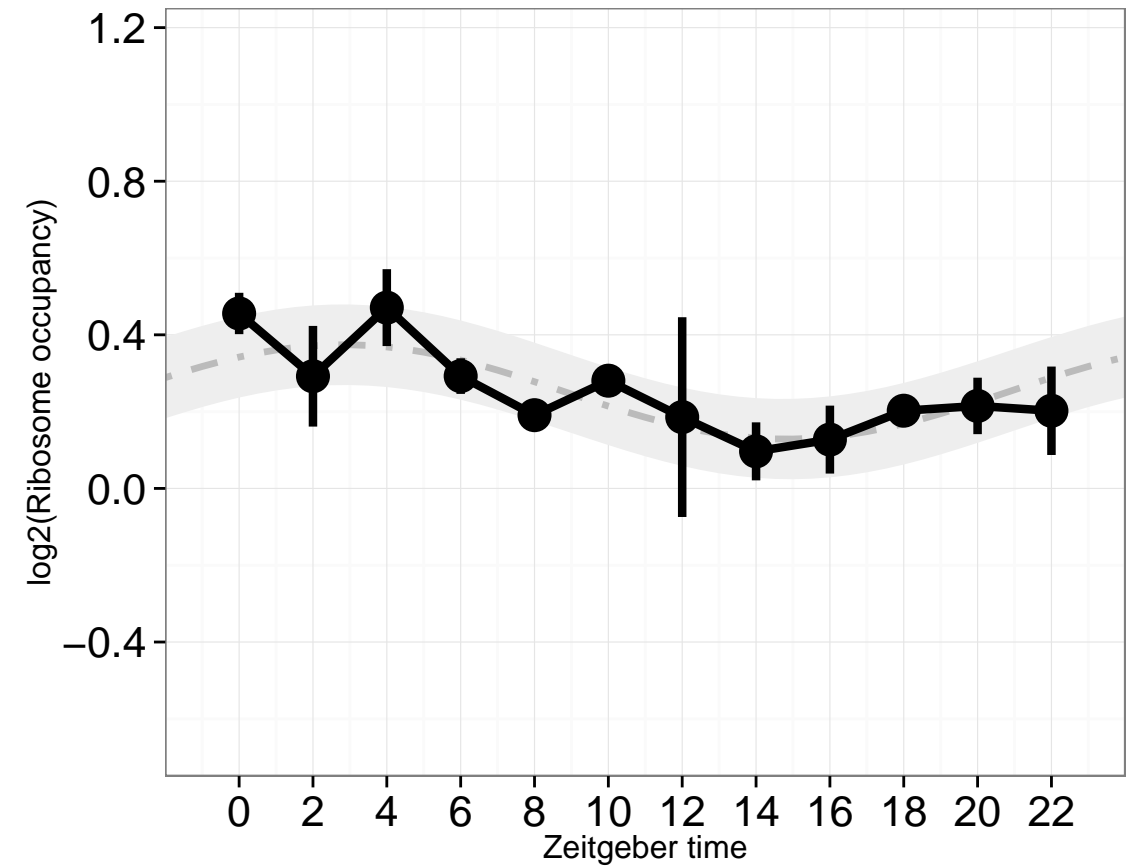

Supplement: Supplementary file 13116 [file 1]

# Dnajb4

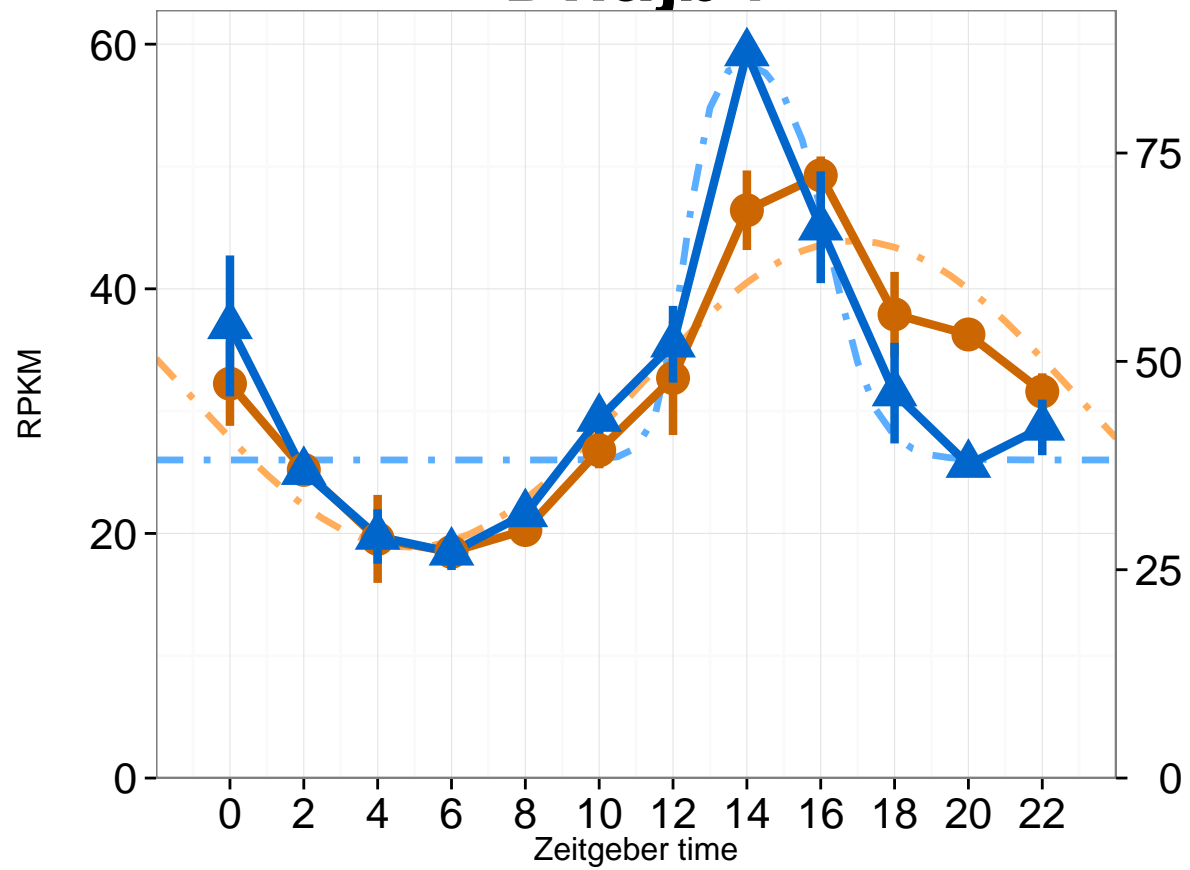

# Dnajb4

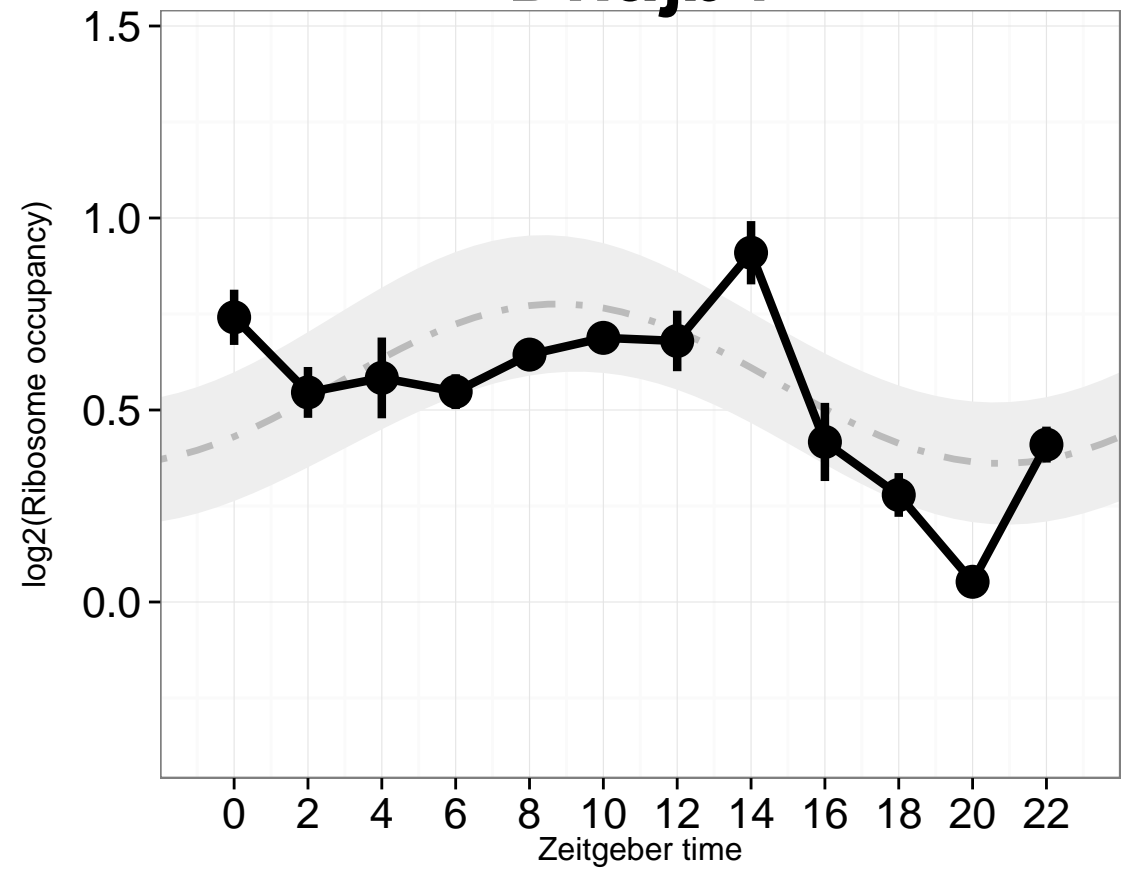

Supplement: Supplementary file 13117 [file 1]

# Slc26a11

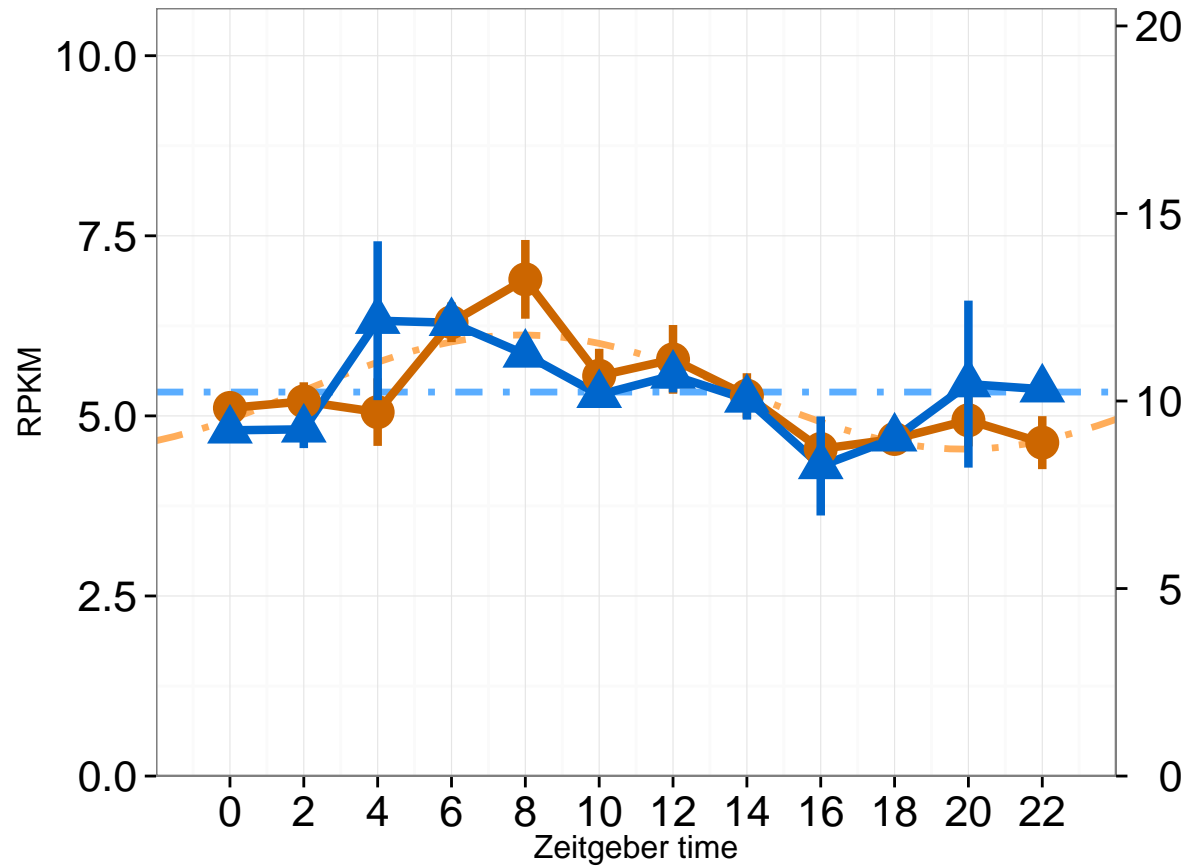

# Slc26a11

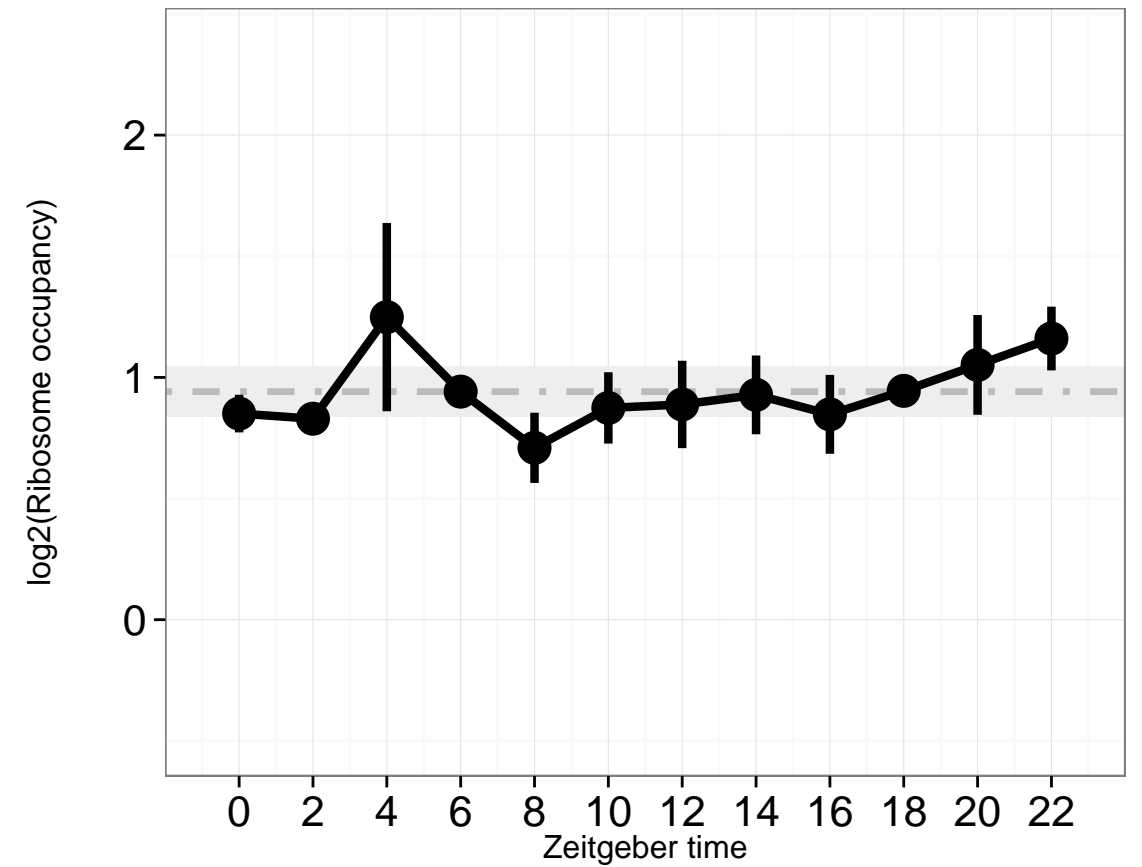

Supplement: Supplementary file 13118 [file 1]

## Ece1

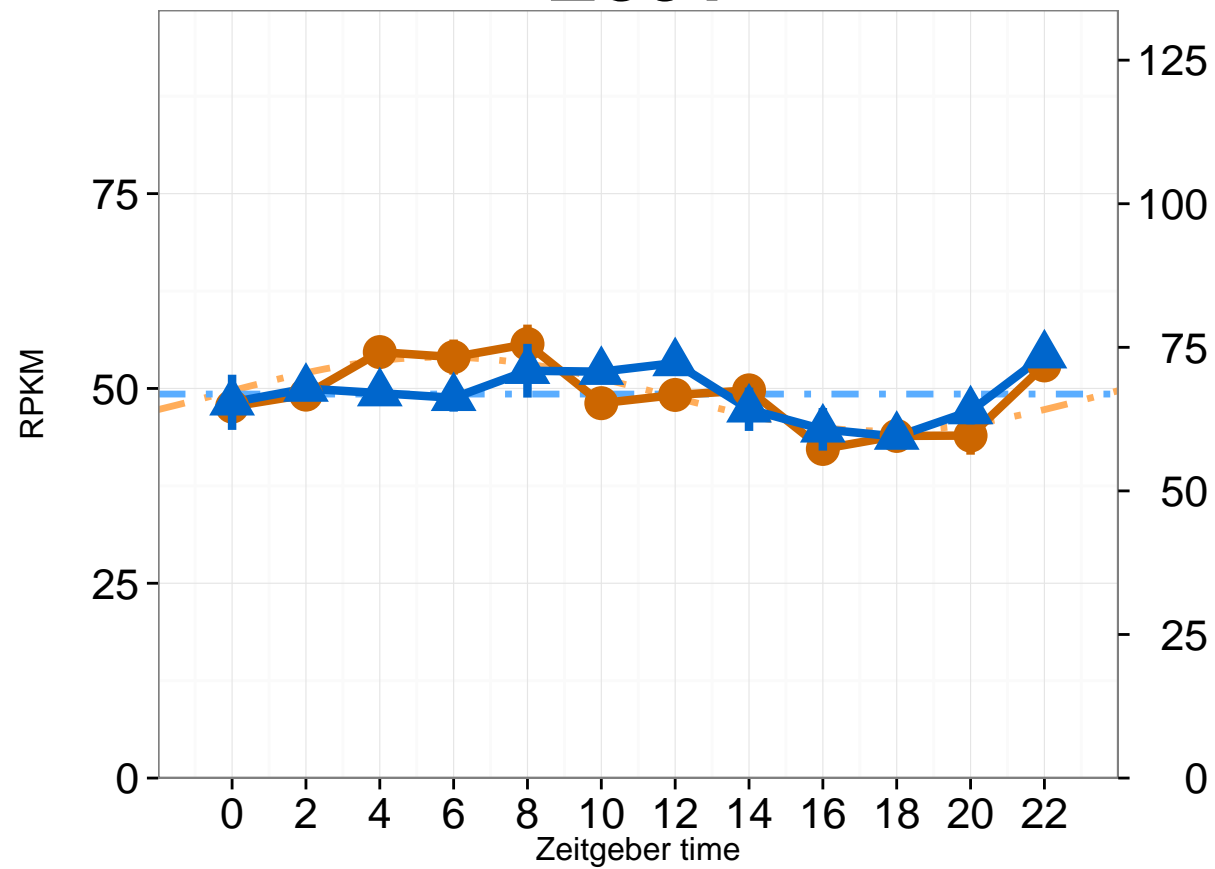

## Ece1

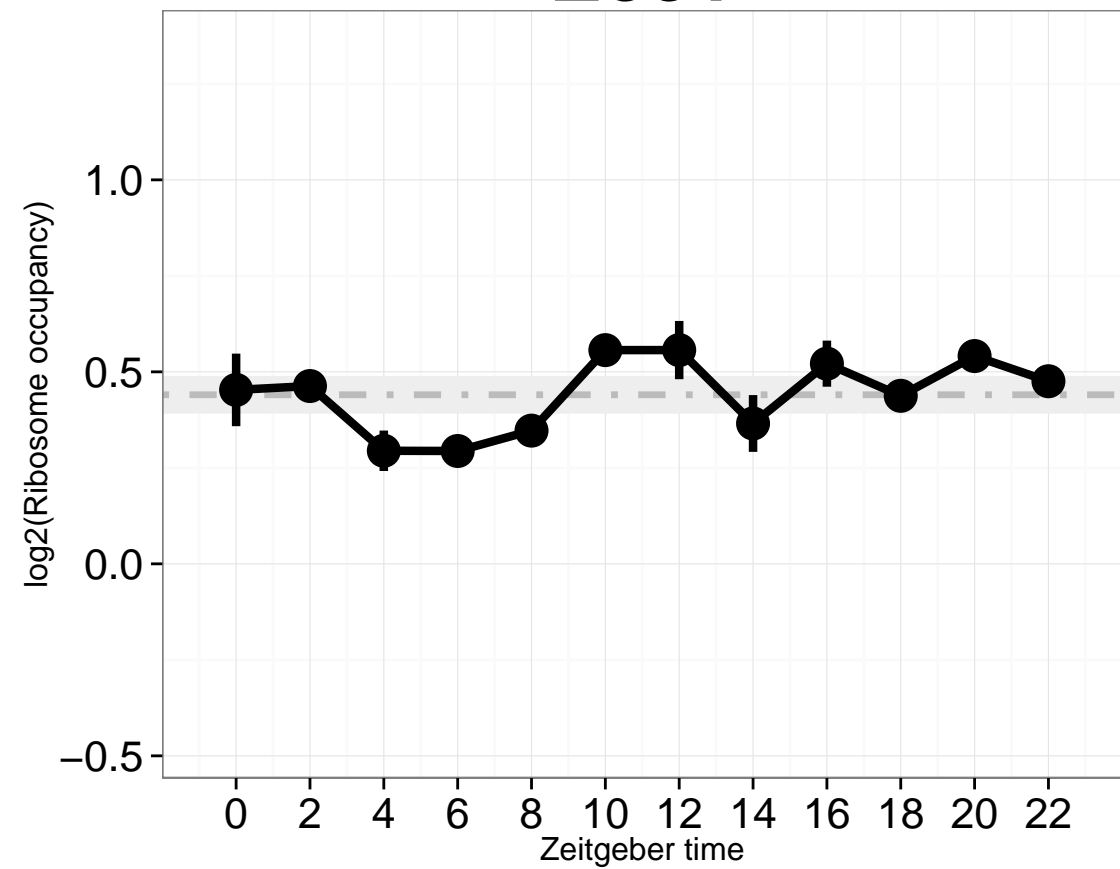

Supplement: Supplementary file 13119 [file 1]

## Arl8b

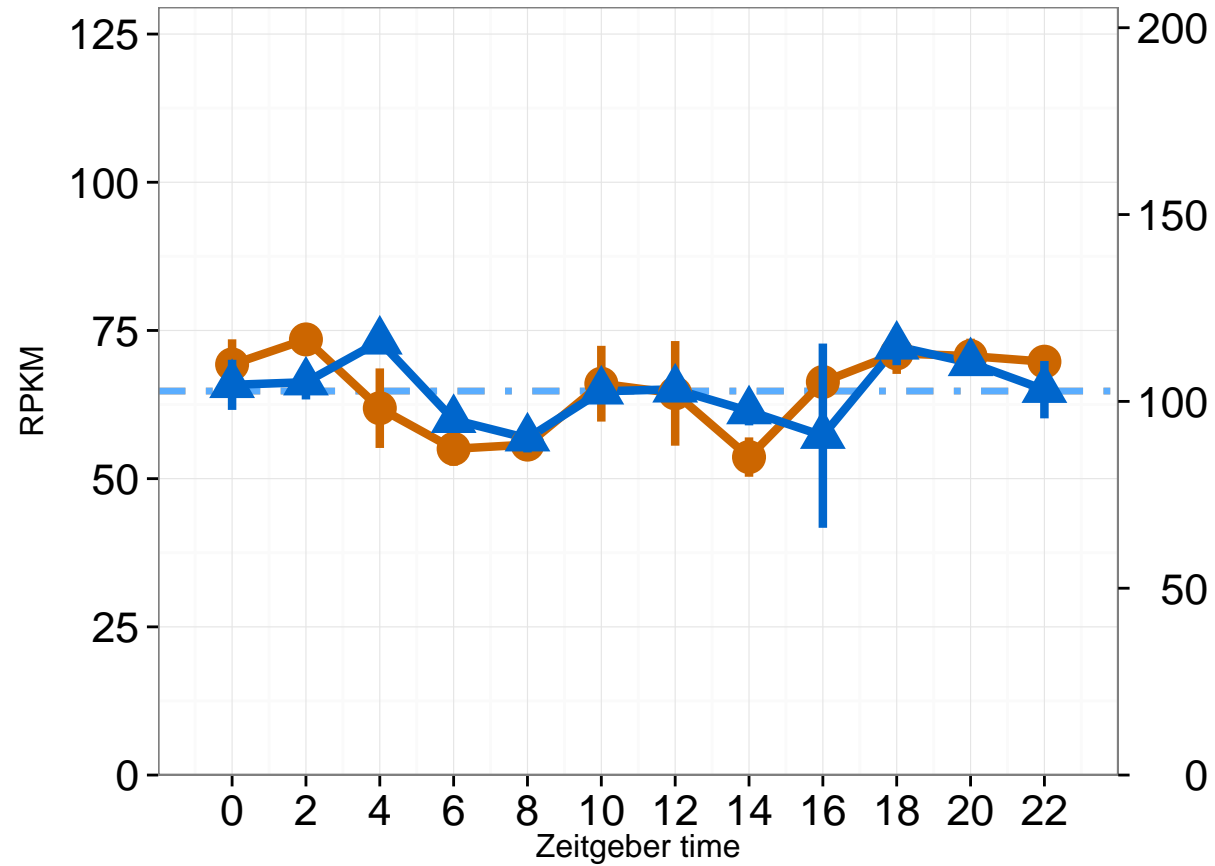

## Arl8b

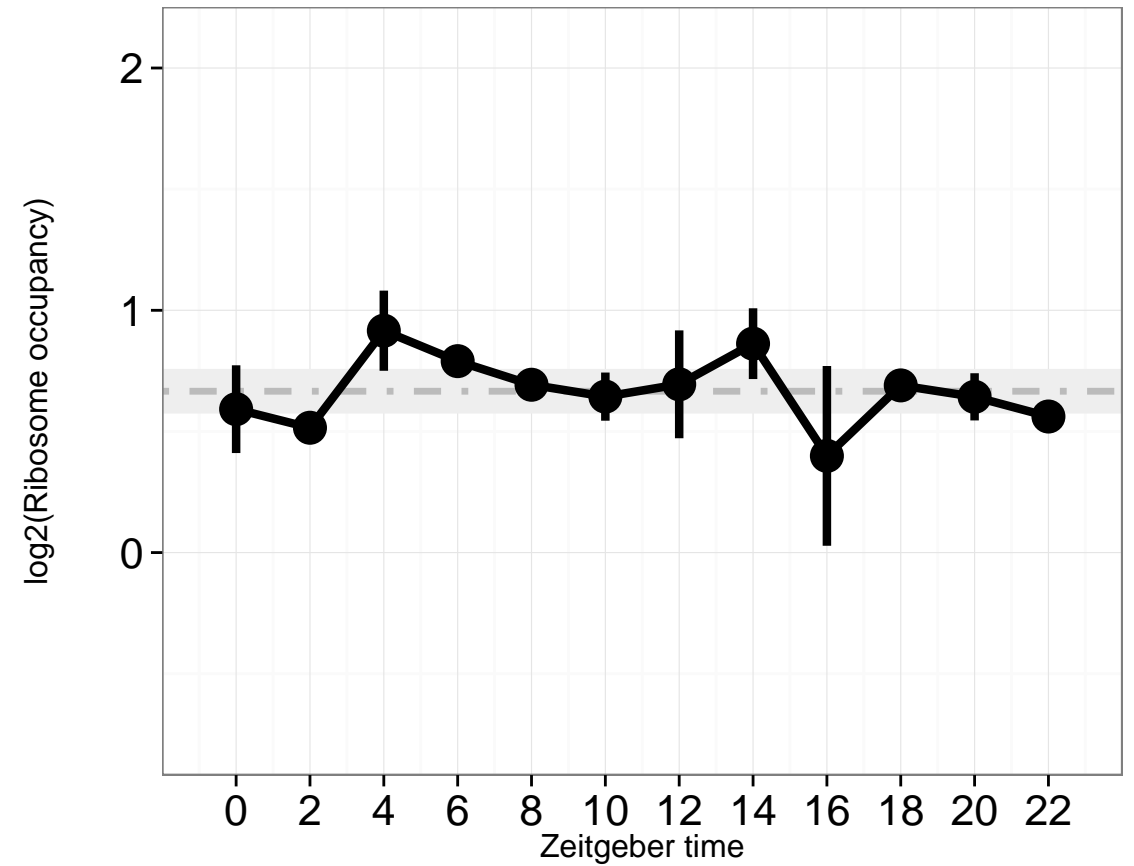

Supplement: Supplementary file 13120 [file 1]

## Dok4

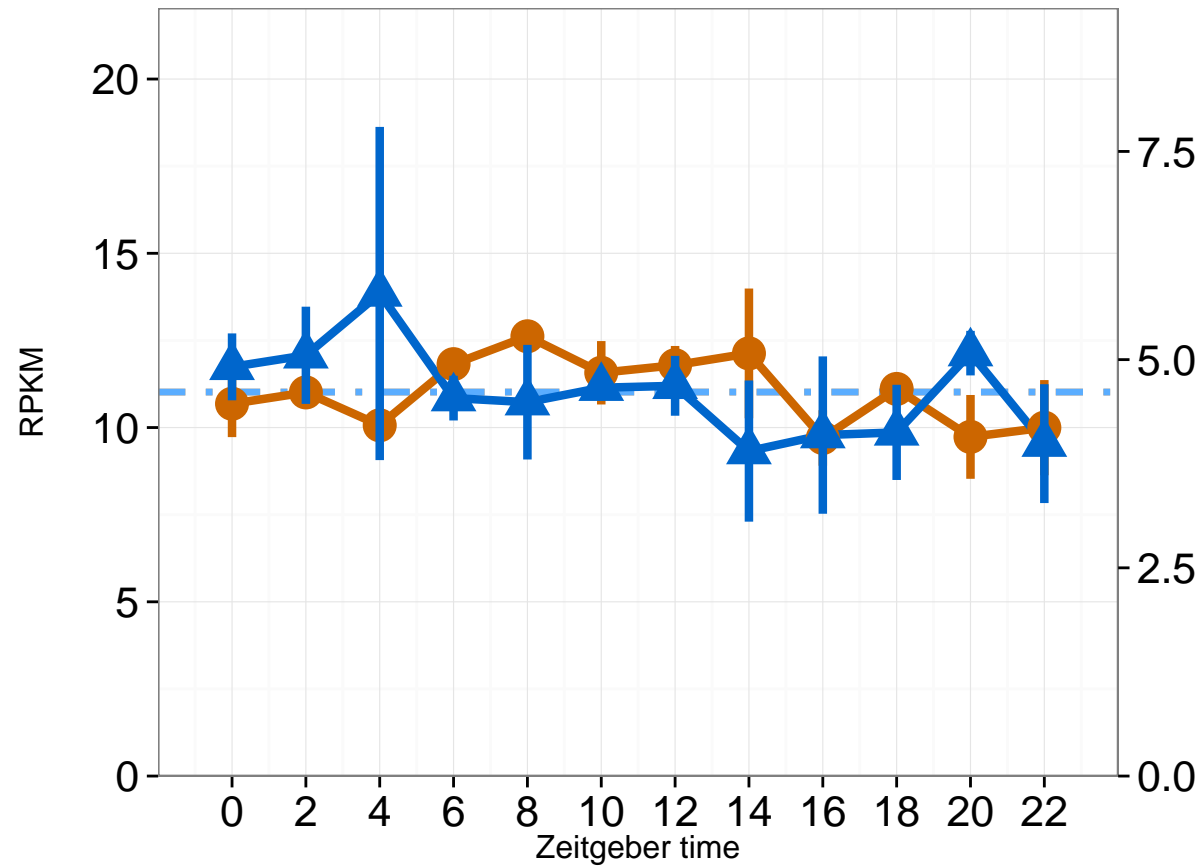

## Dok4

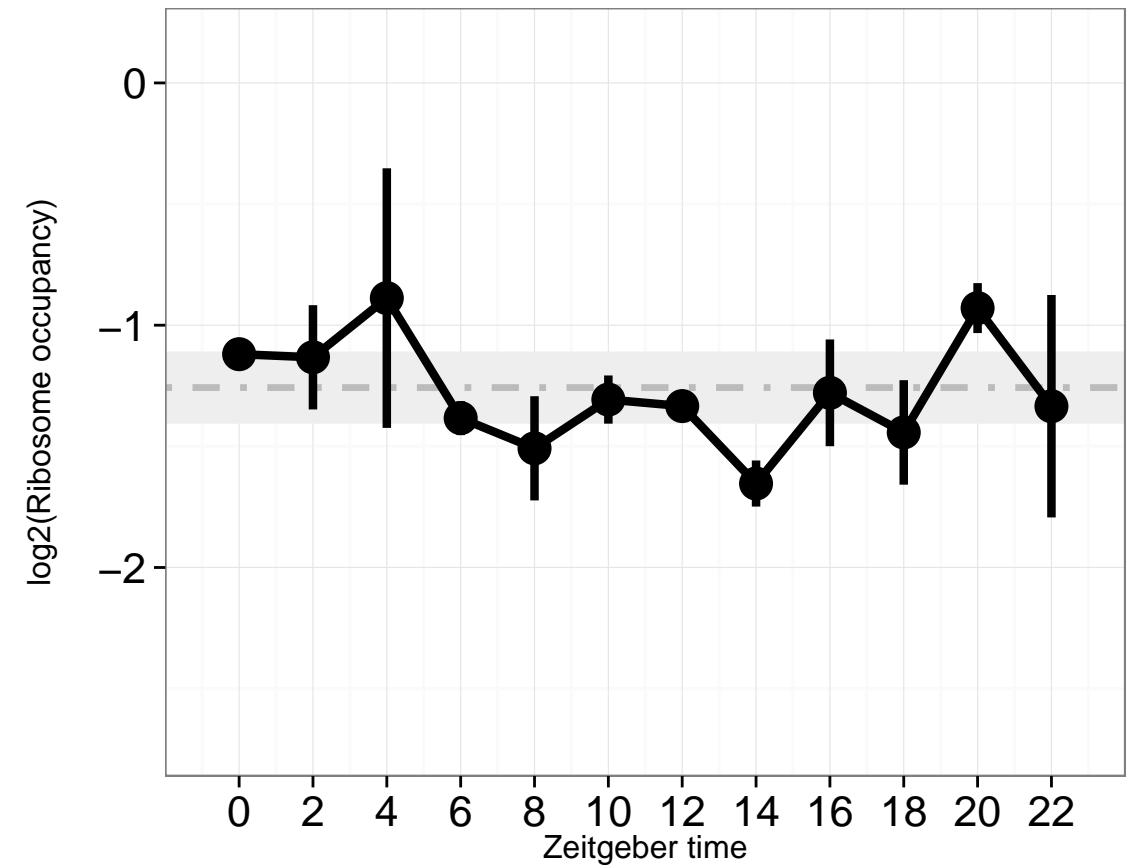

Supplement: Supplementary file 13121 [file 1]

## Magix

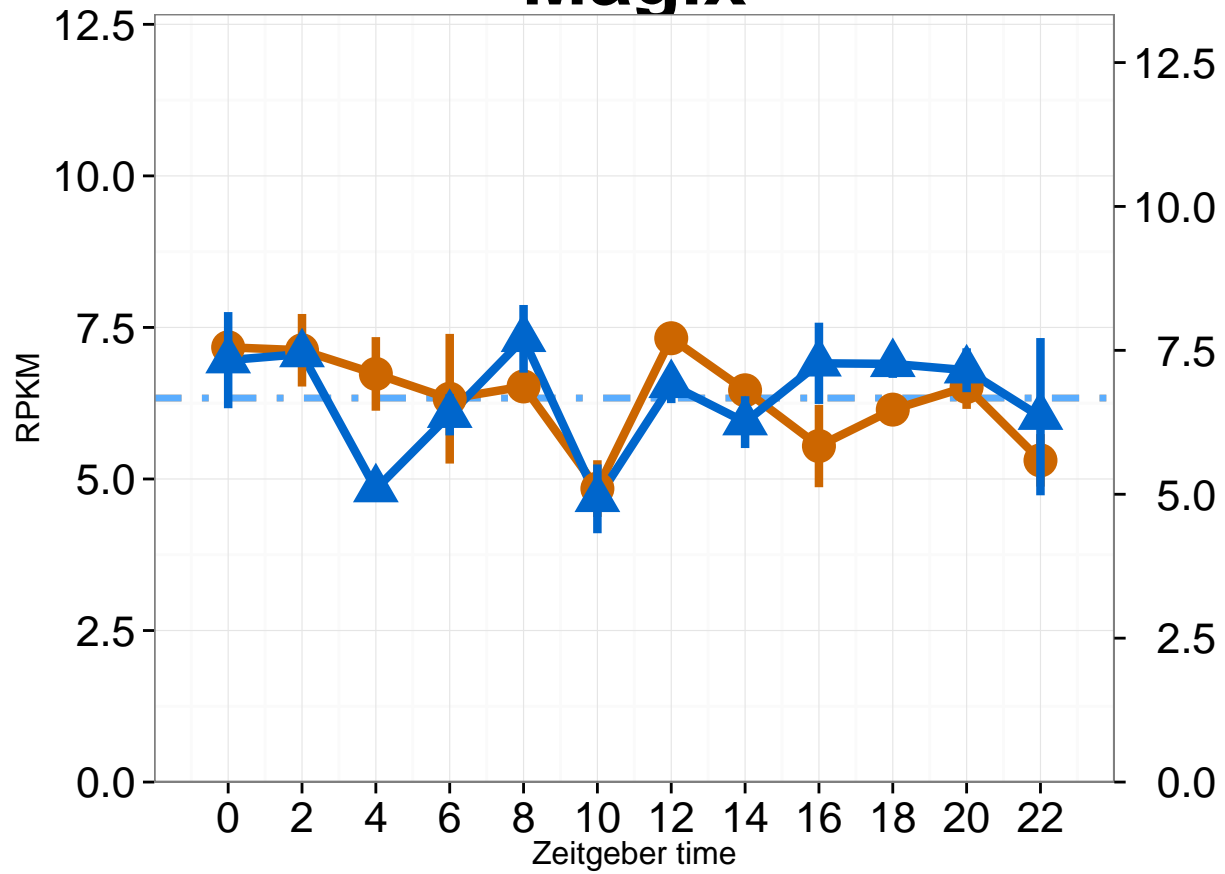

## Magix

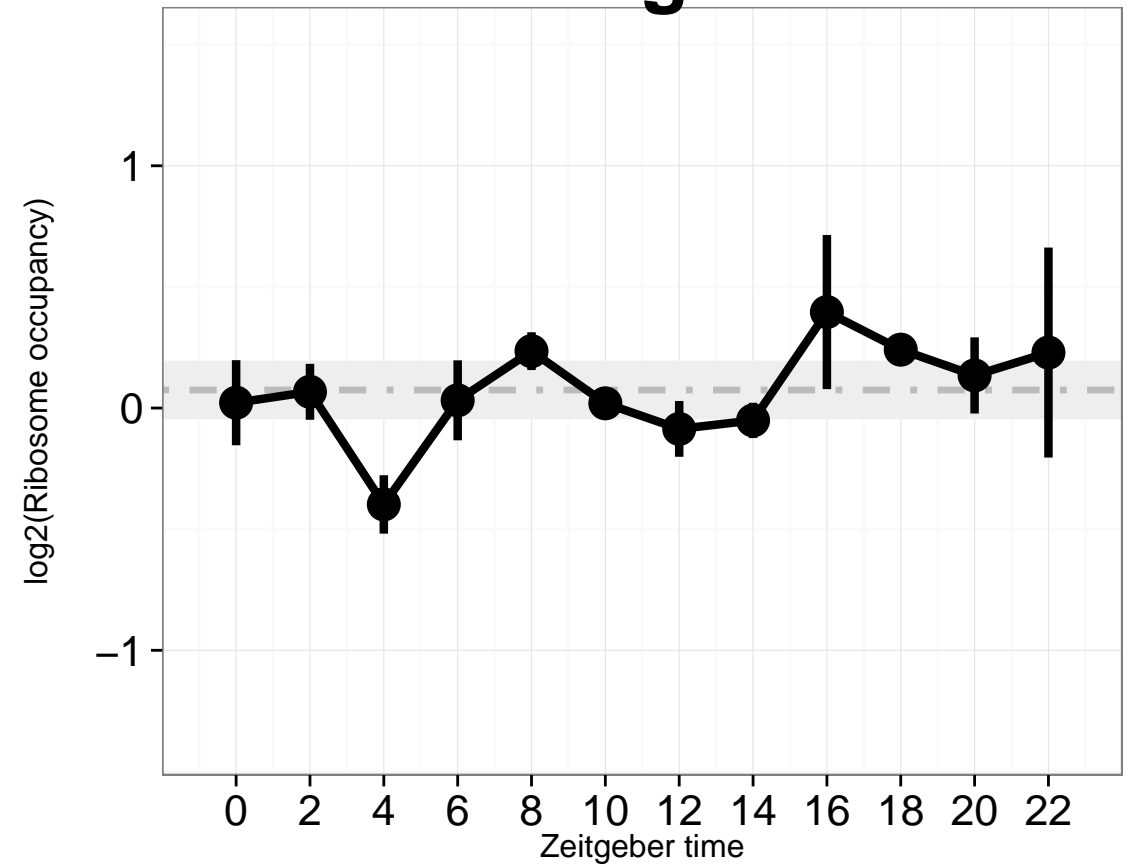

Supplement: Supplementary file 13122 [file 1]

# Slc2a13

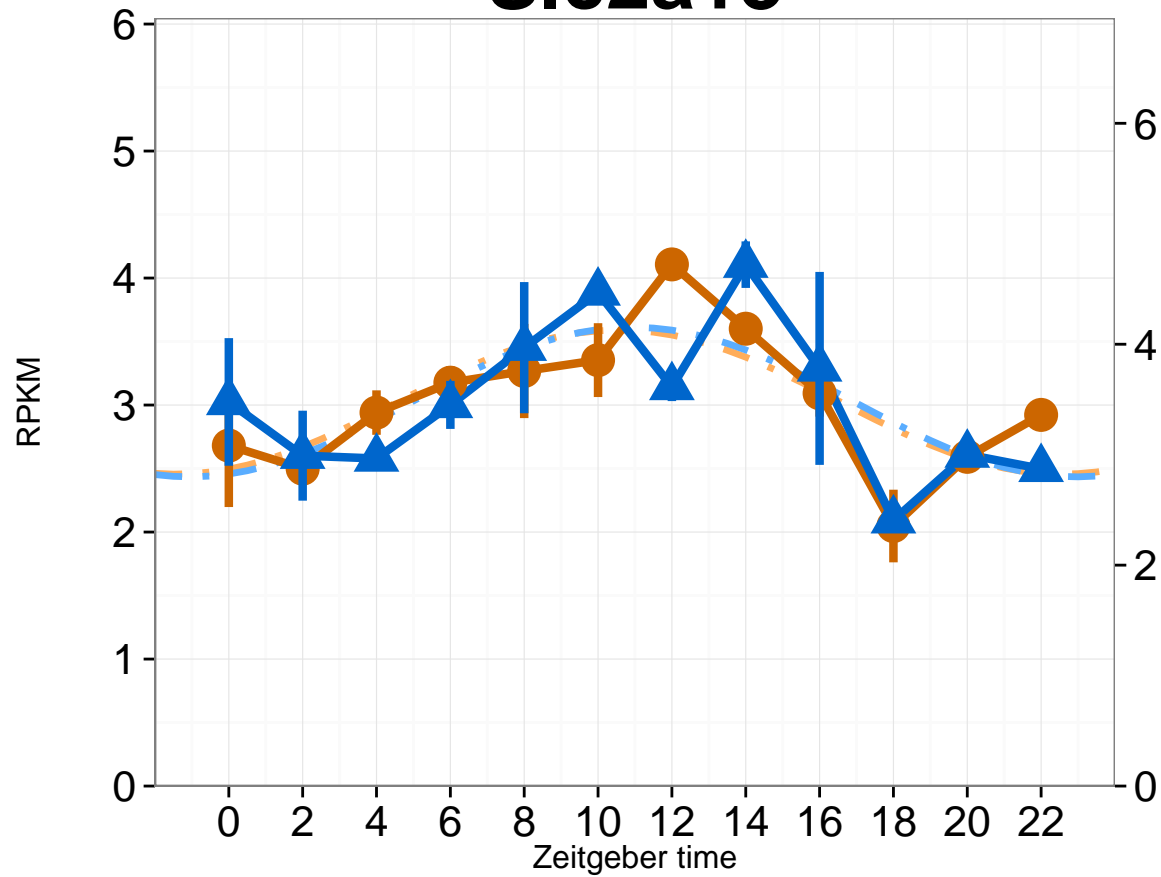

# Slc2a13

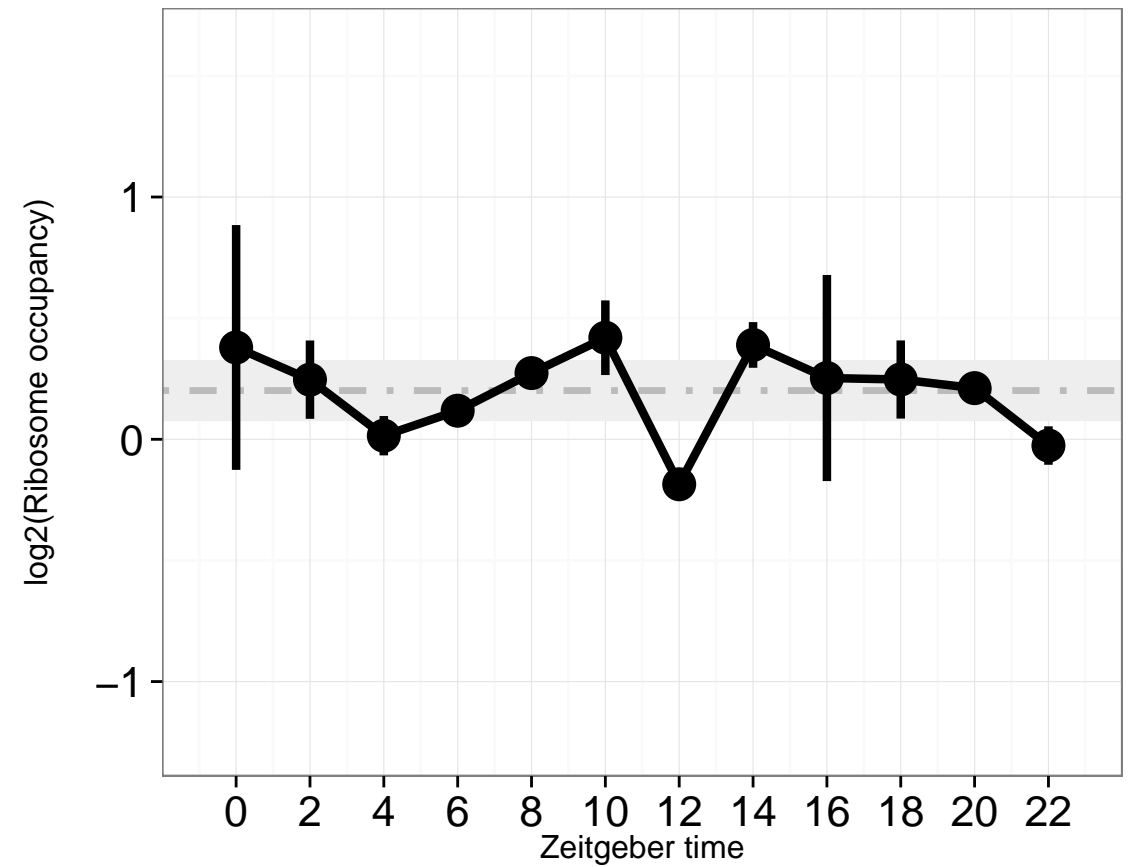

Supplement: Supplementary file 13123 [file 1]

## Zscan12

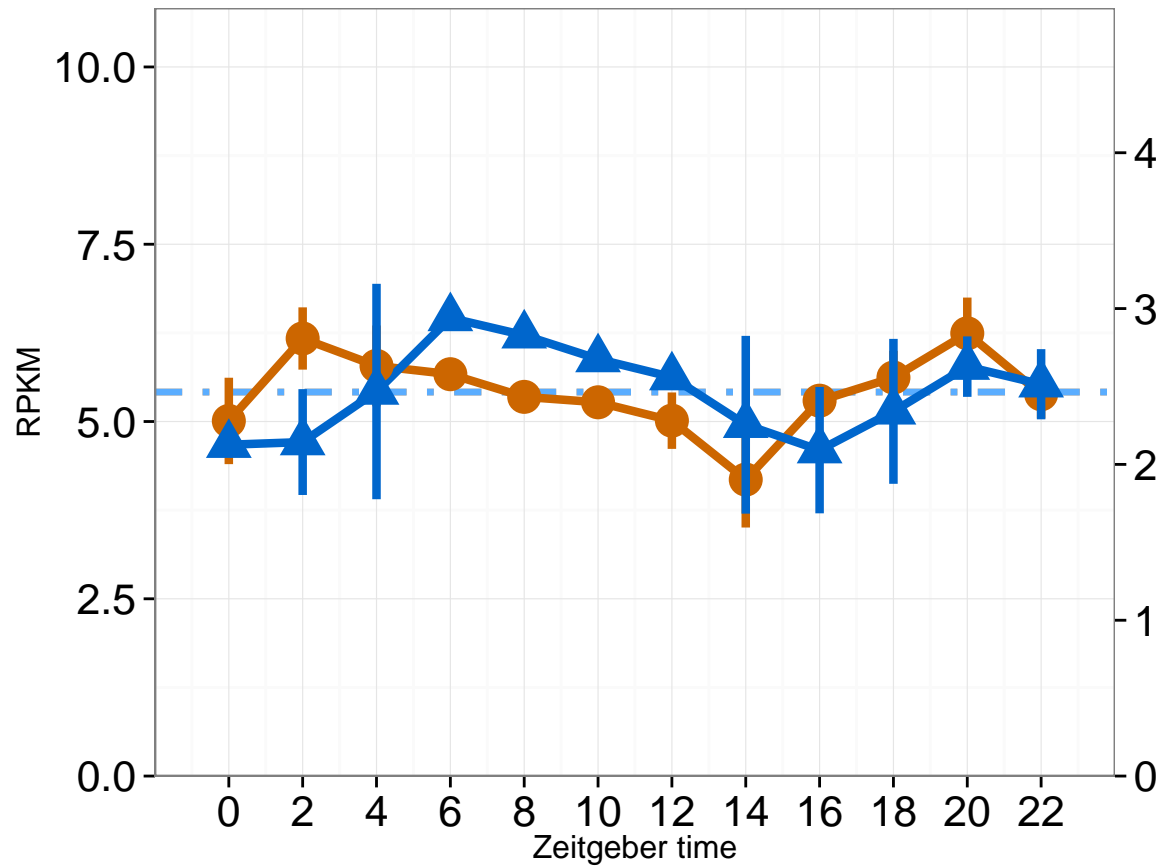

## Zscan12

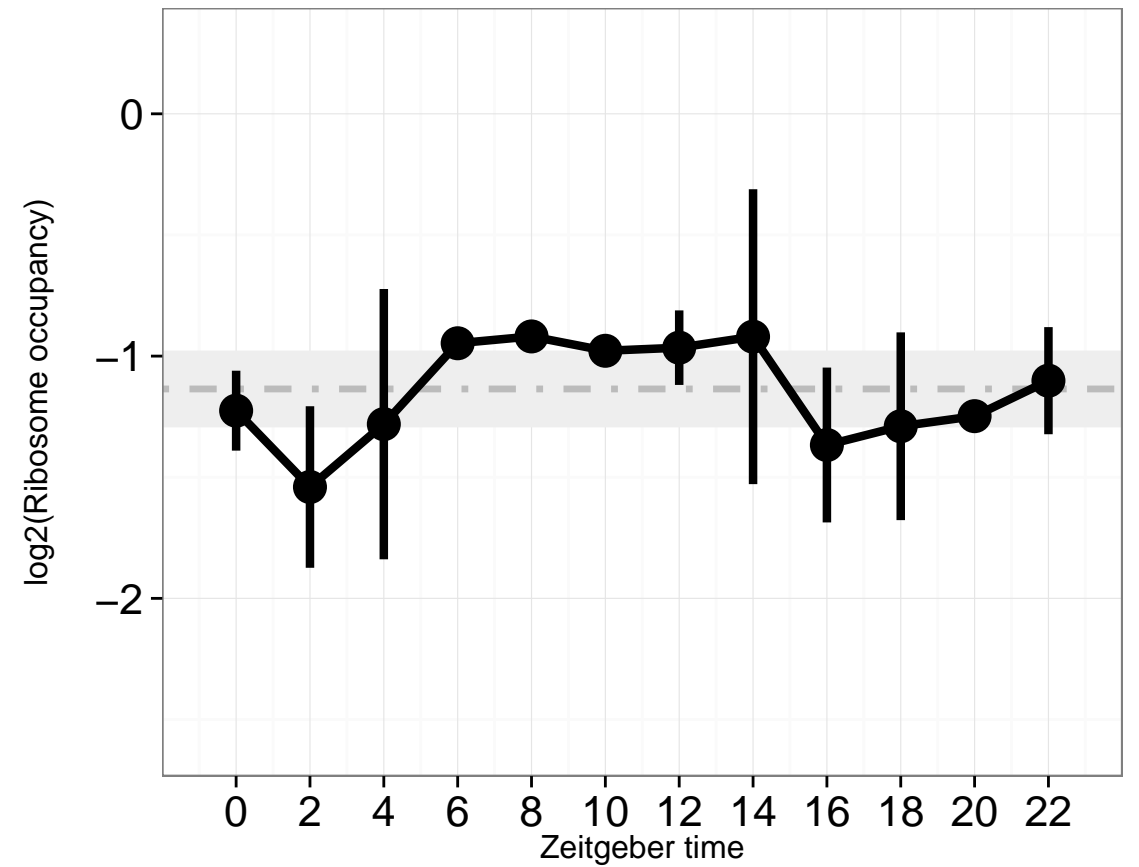

Supplement: Supplementary file 13124 [file 1]

## Dmgdh

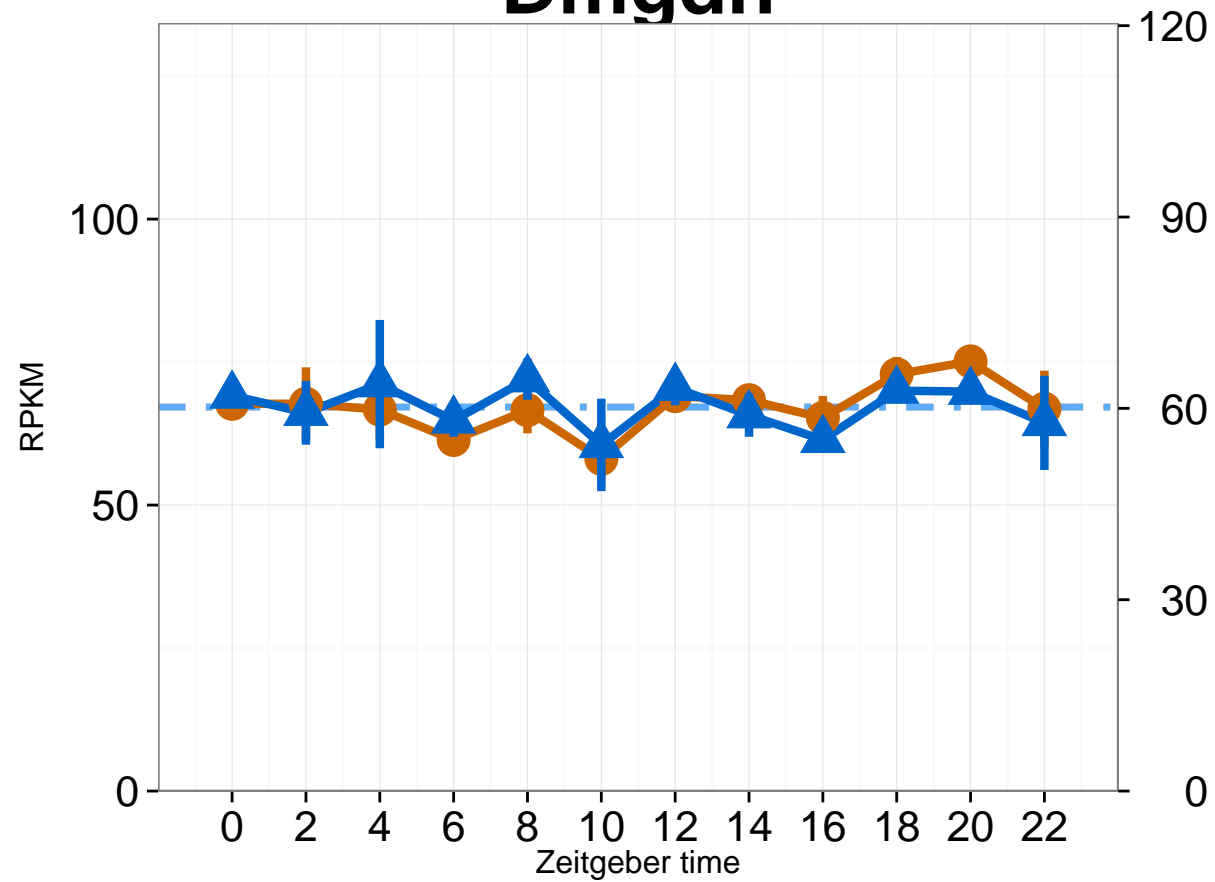

## Dmgdh

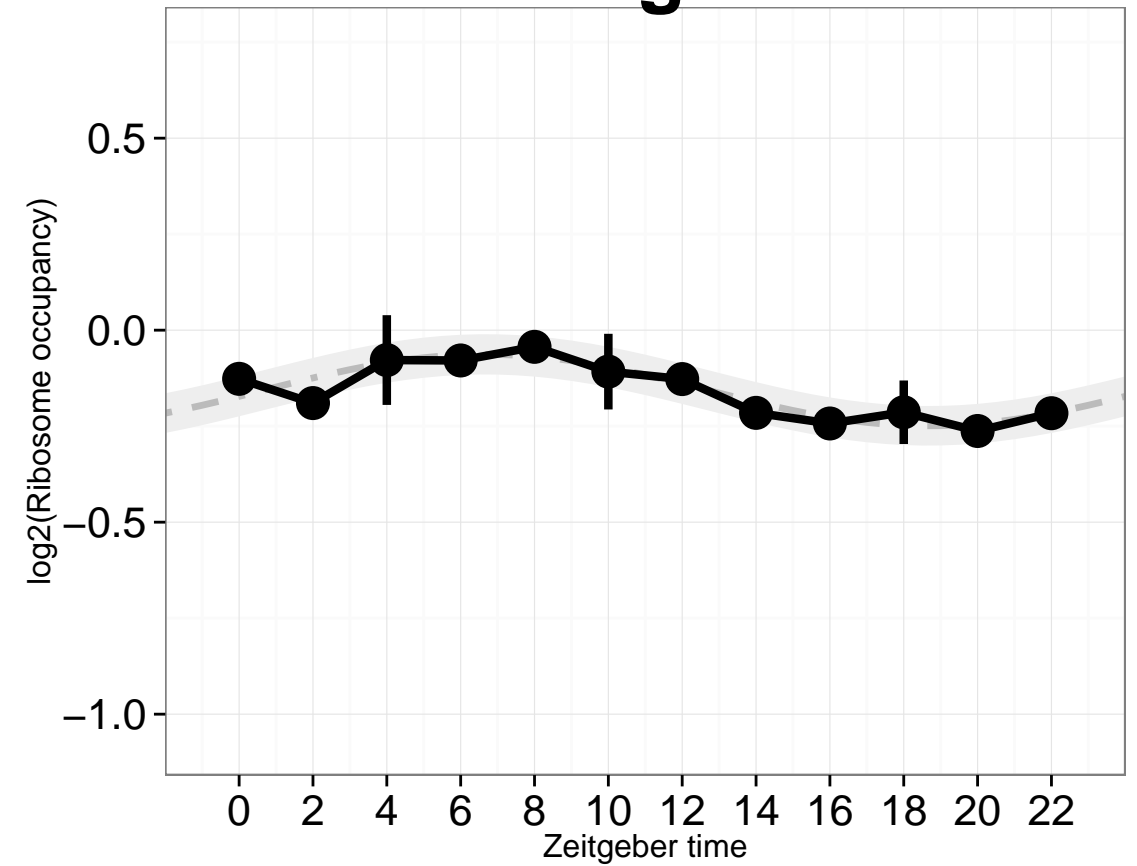

Supplement: Supplementary file 13125 [file 1]

# Ankrd12

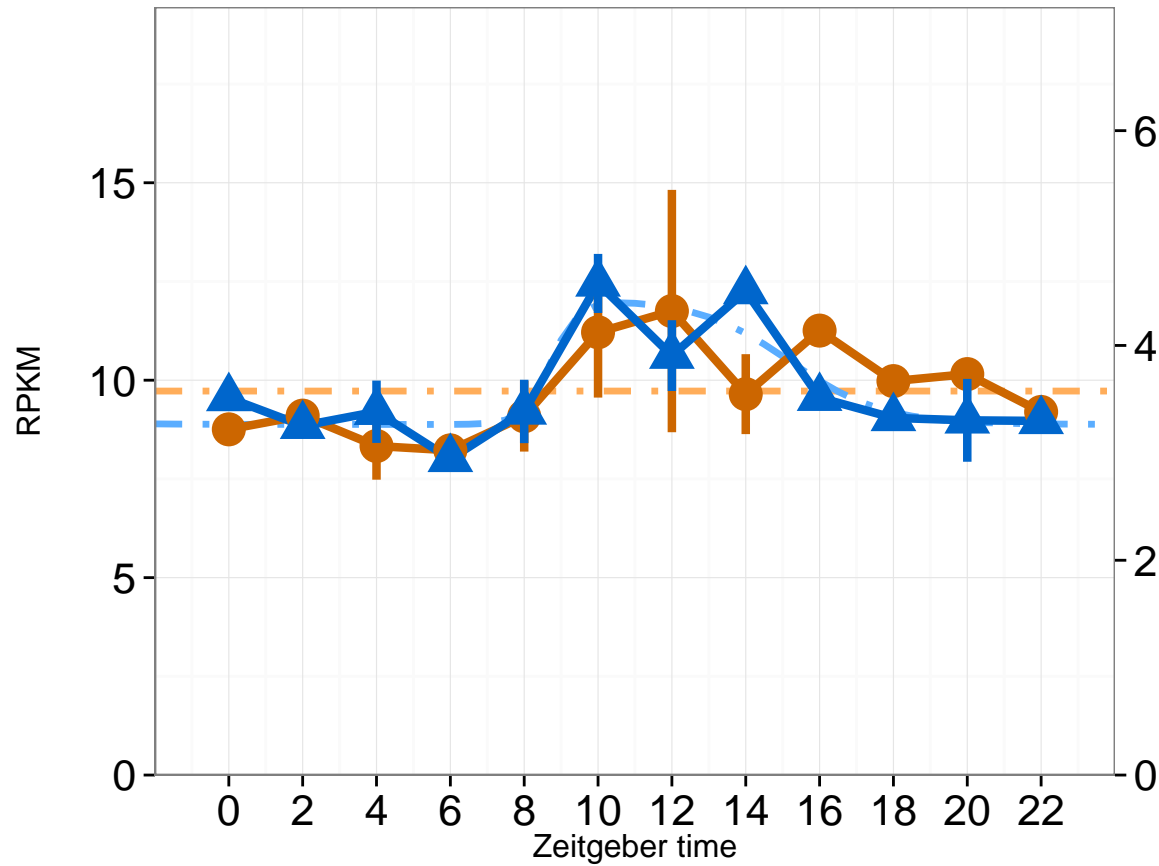

# Ankrd12

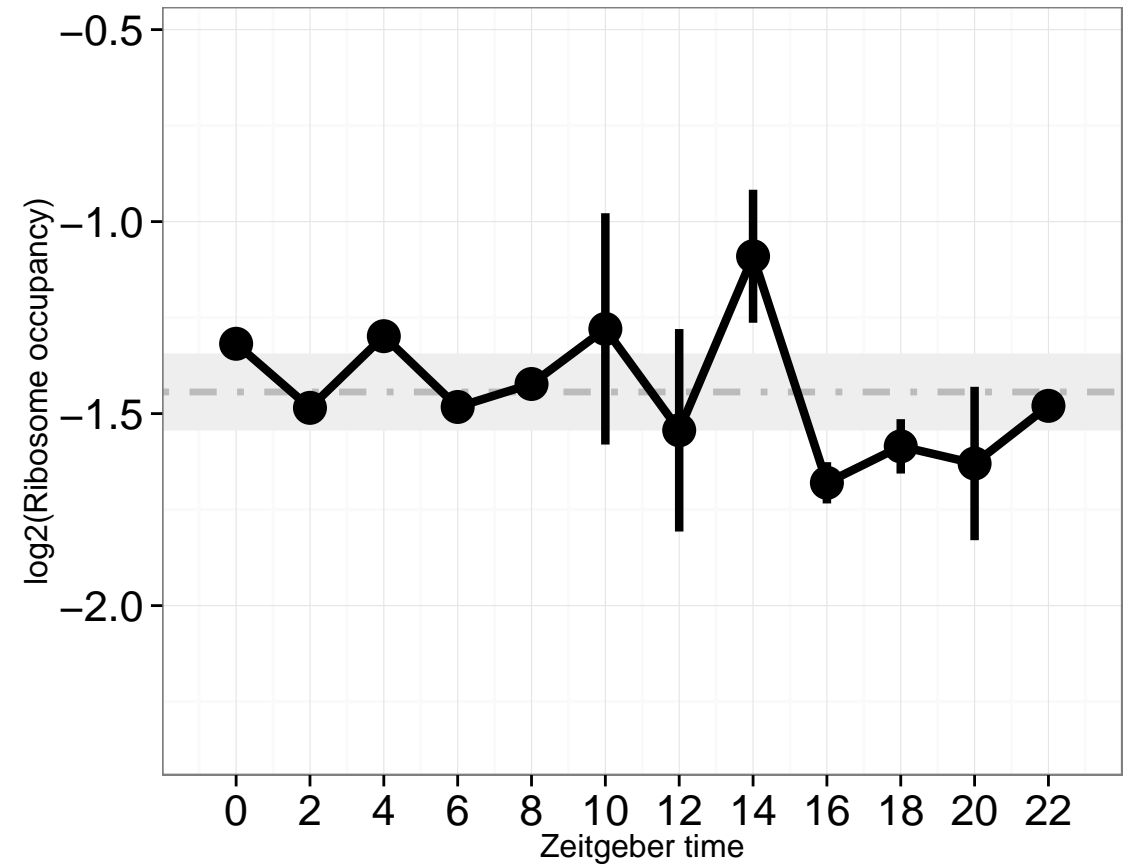

Supplement: Supplementary file 13126 [file 1]

## Trim28

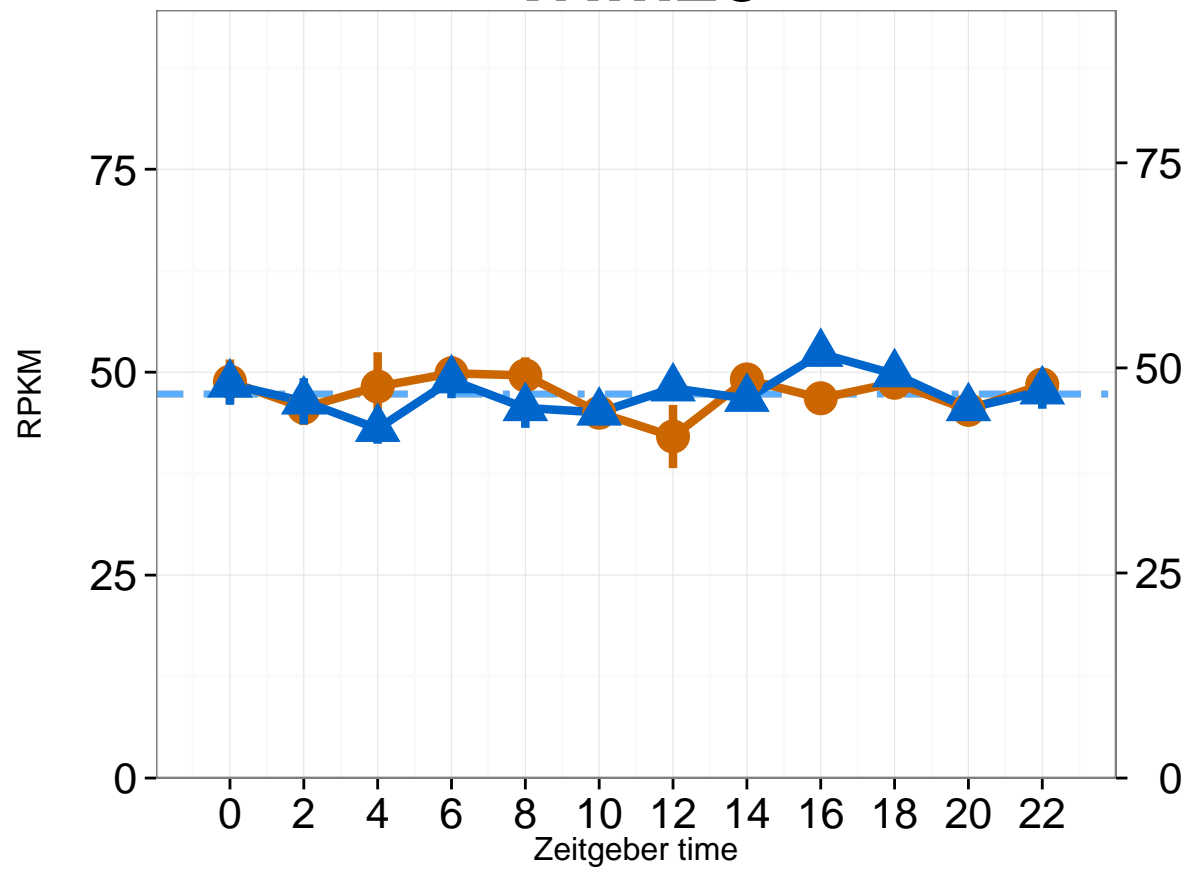

## Trim28

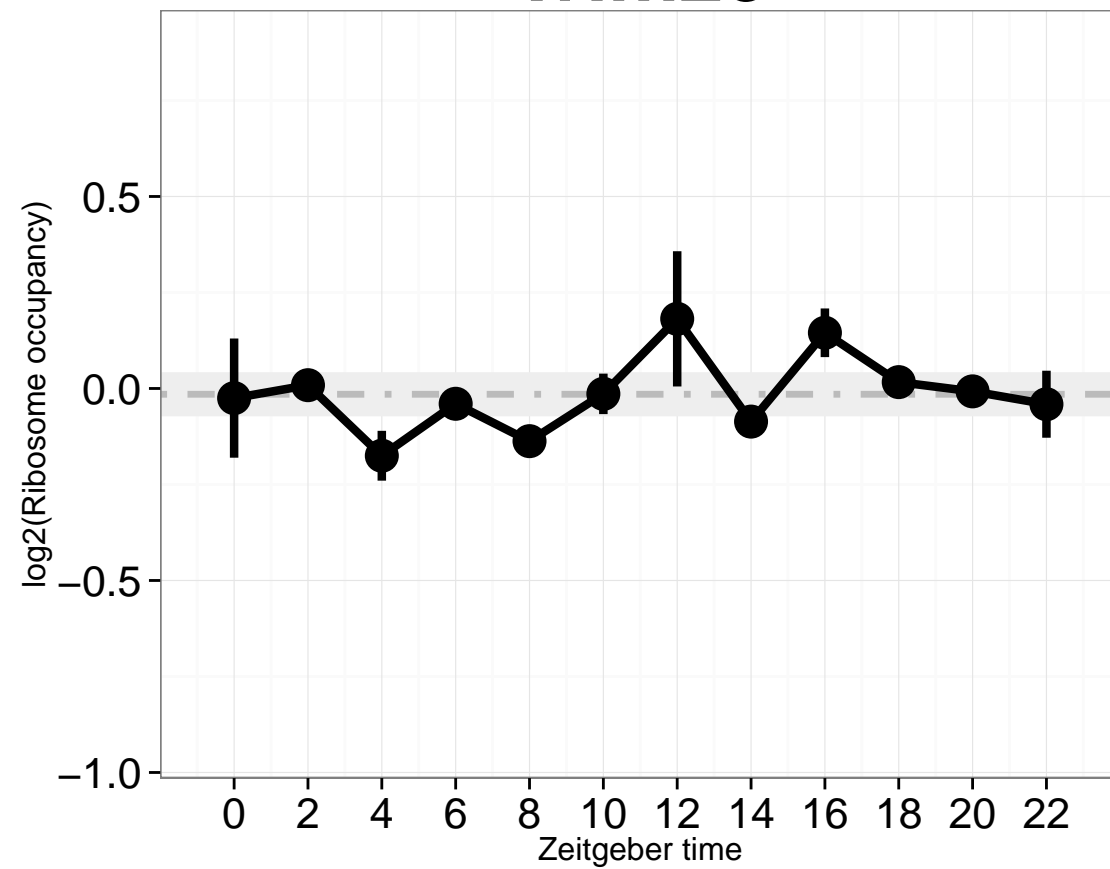

Supplement: Supplementary file 13127 [file 1]

## Adcy6

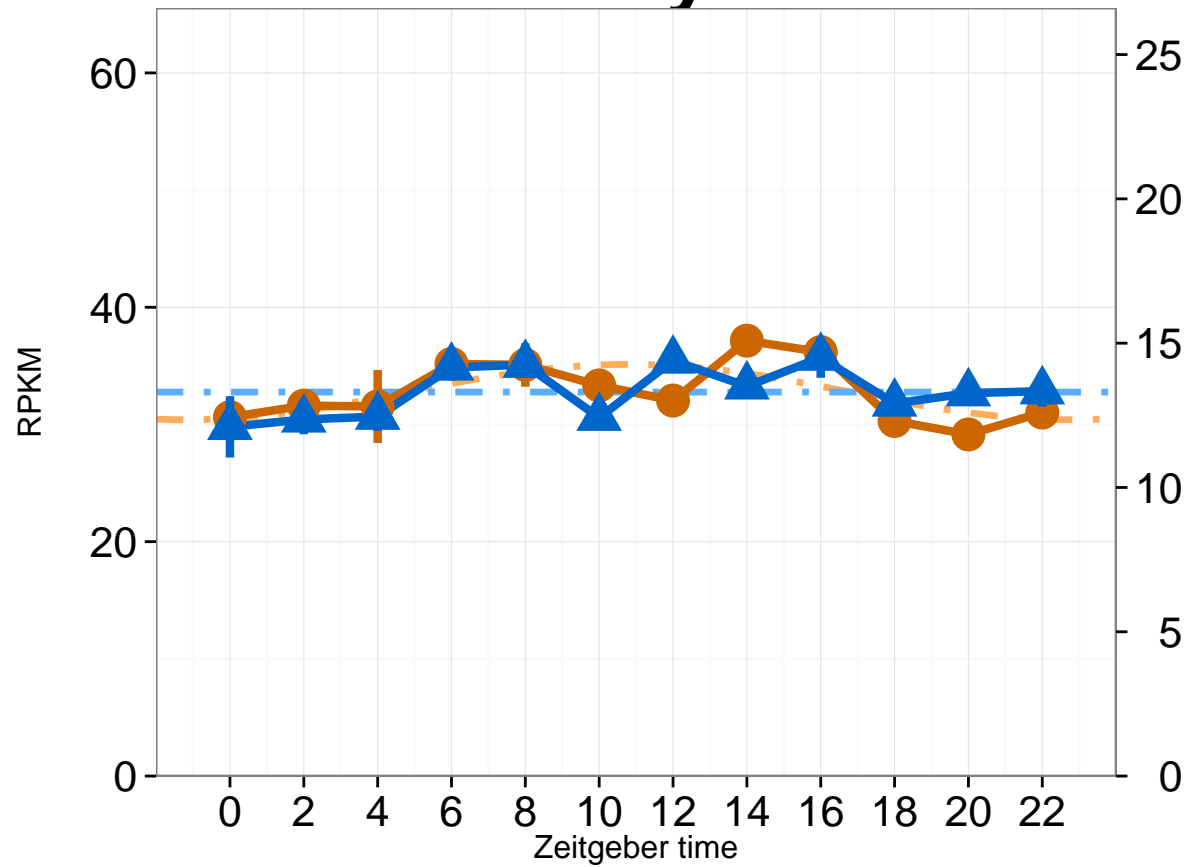

## Adcy6

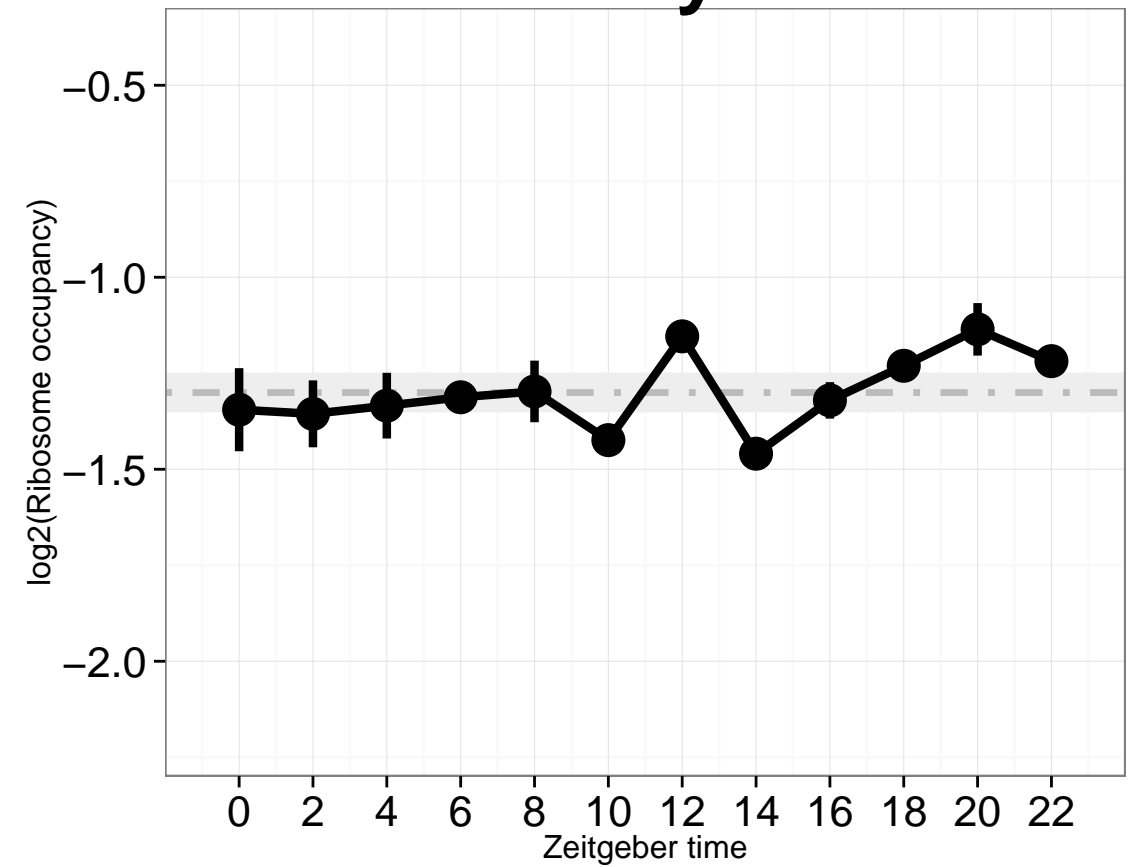

Supplement: Supplementary file 13128 [file 1]

# Zfp641

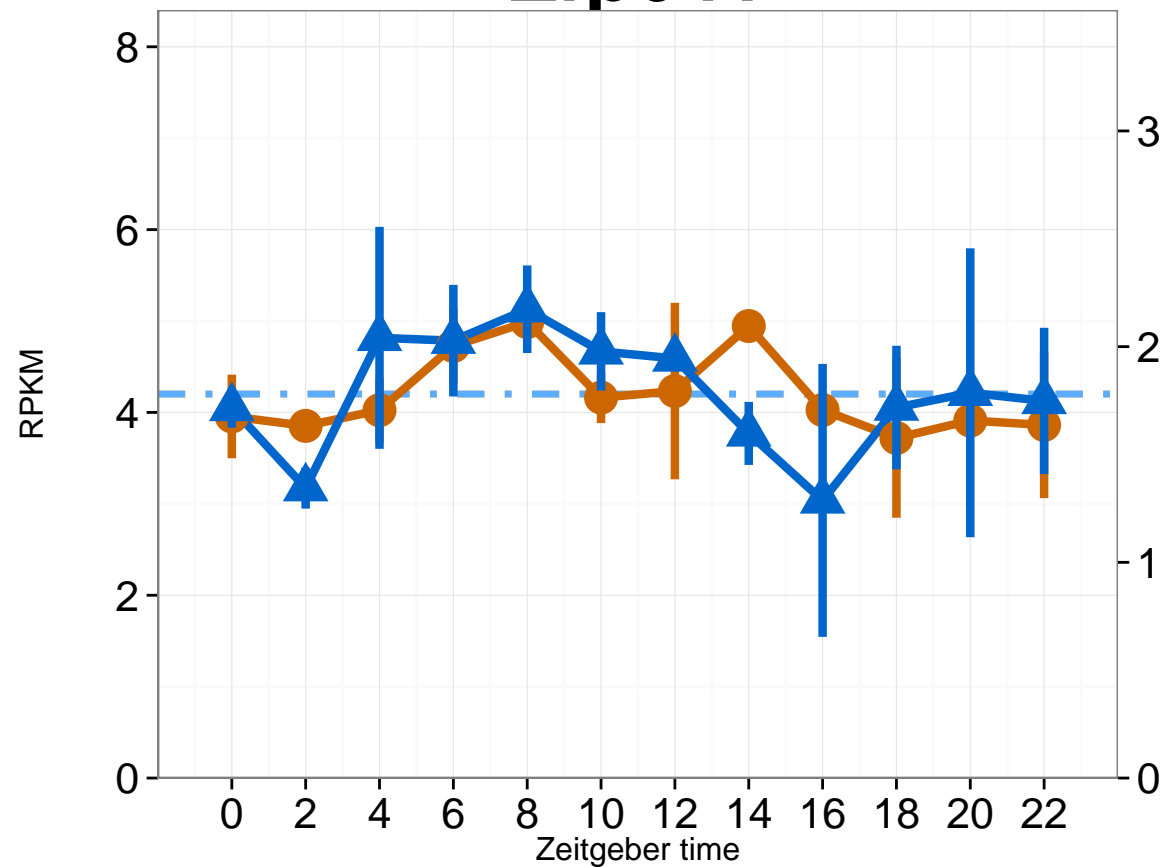

# Zfp641

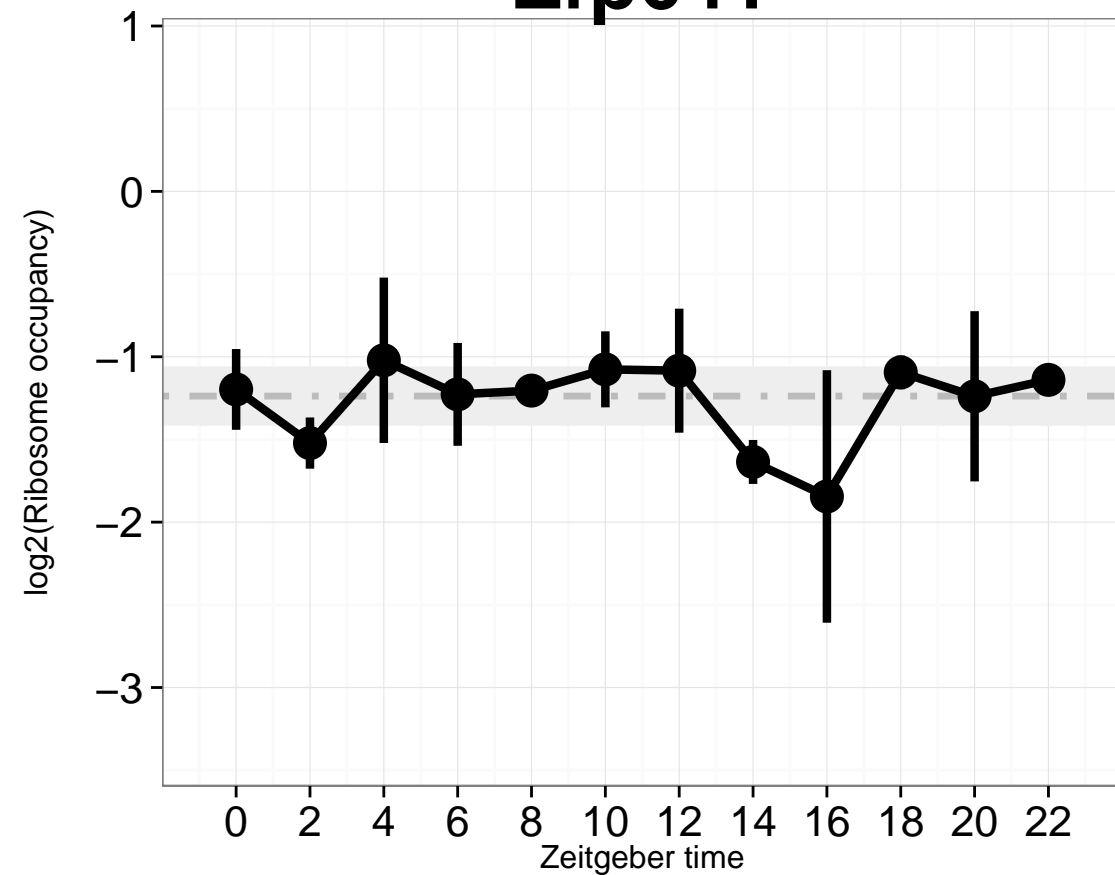

Supplement: Supplementary file 13129 [file 1]

## Rhog

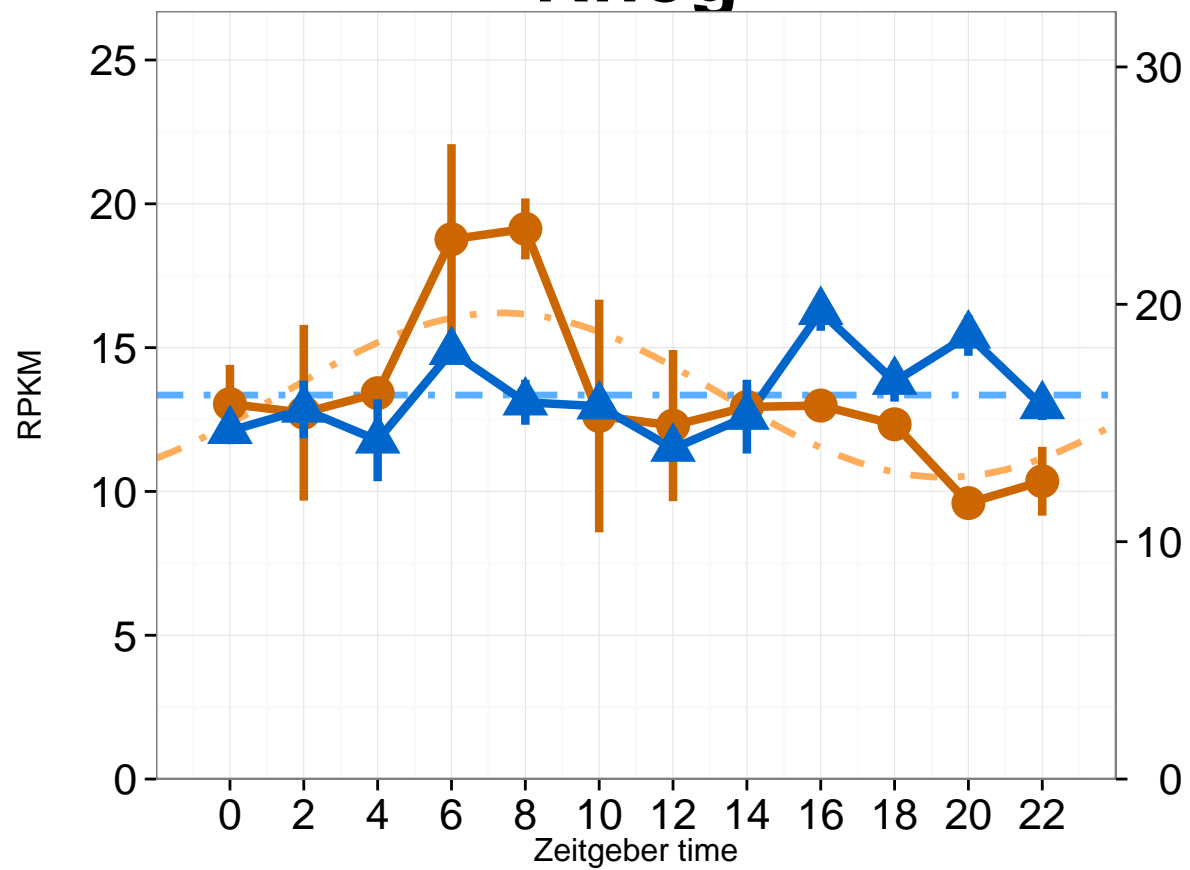

## Rhog

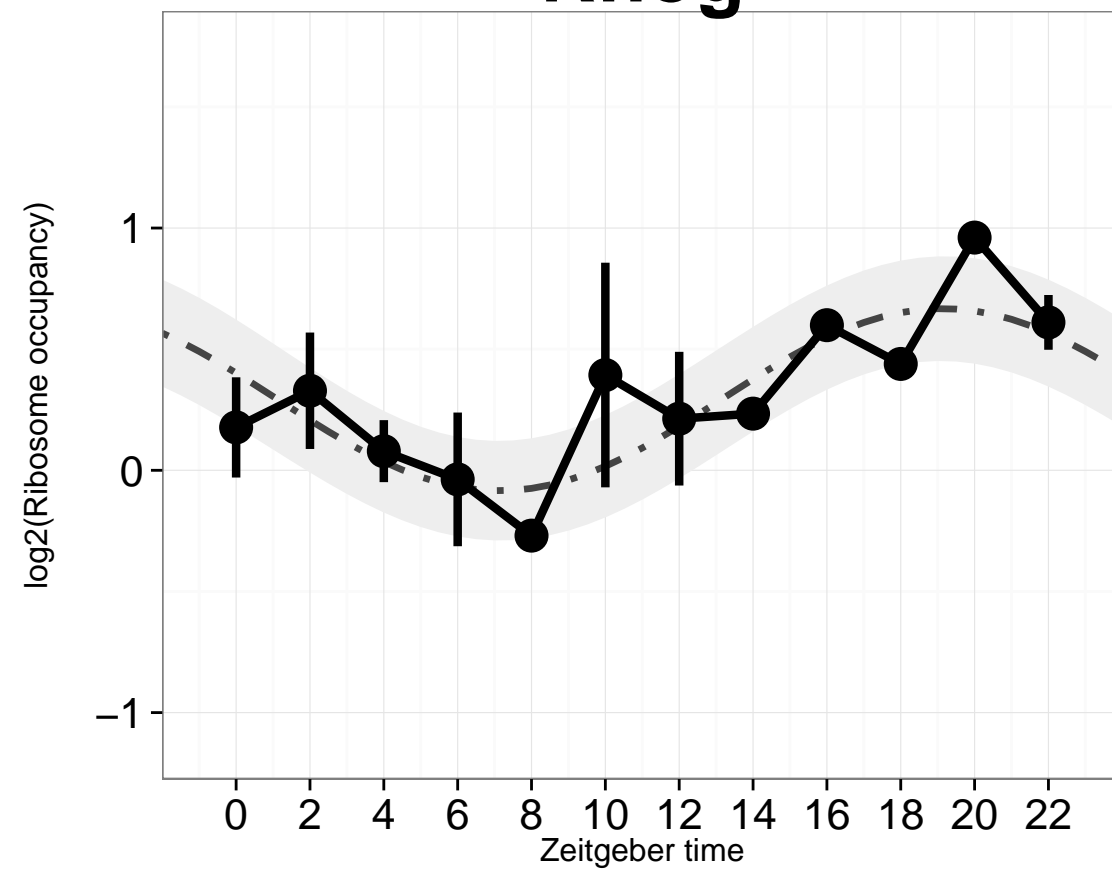

Supplement: Supplementary file 13130 [file 1]

## Wsb1

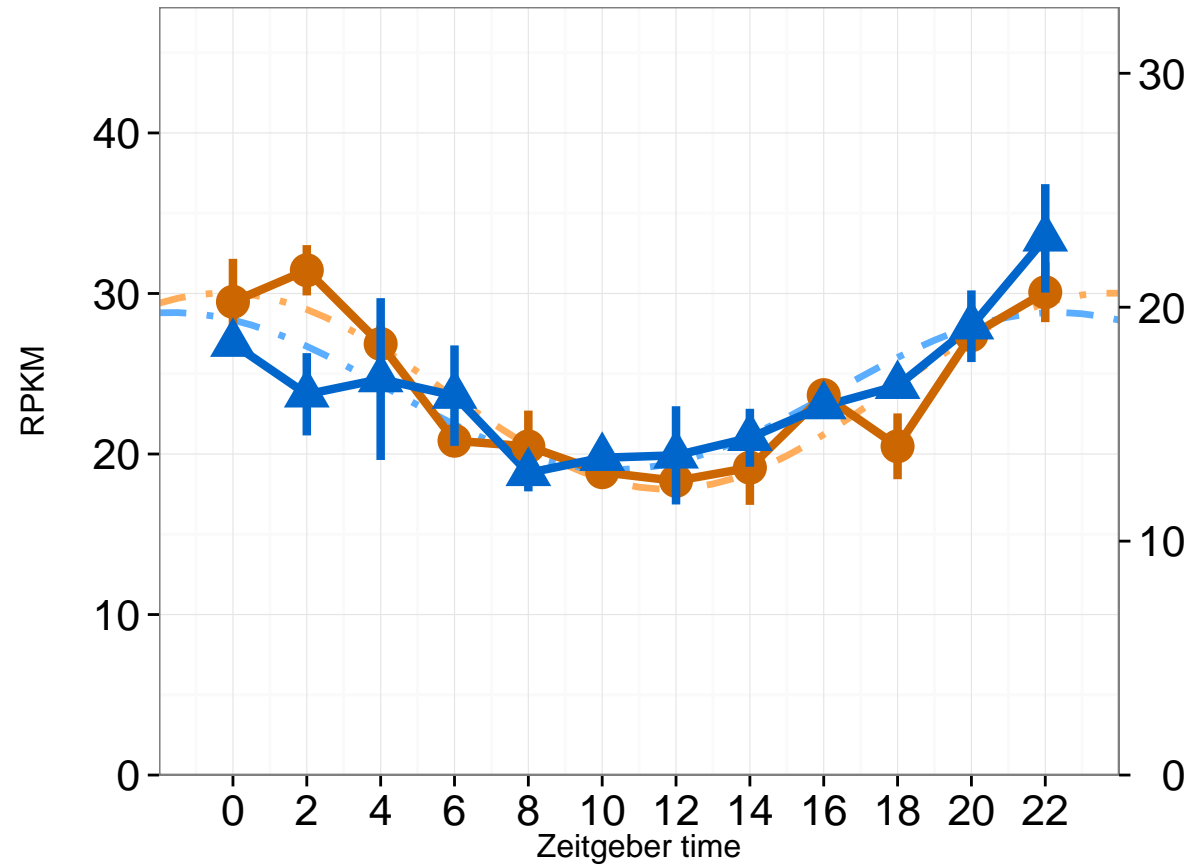

## Wsb1

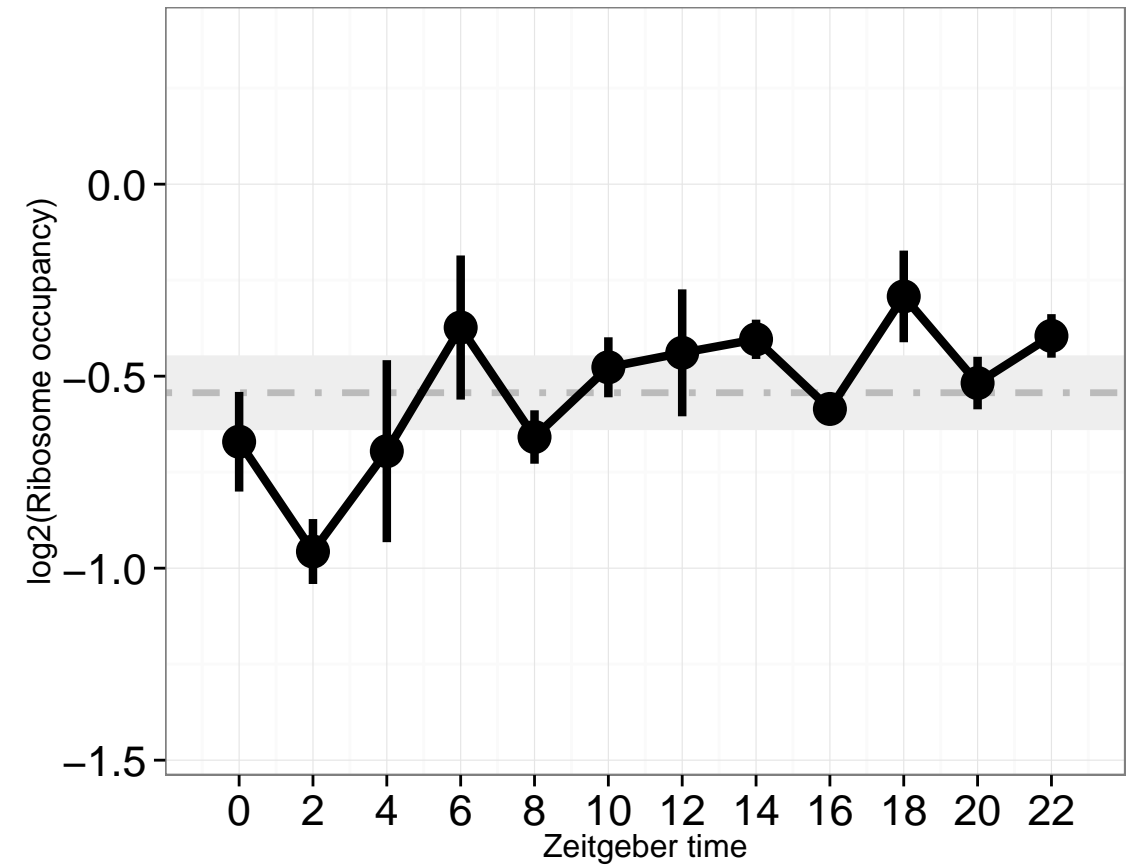

Supplement: Supplementary file 13131 [file 1]

## Pipox

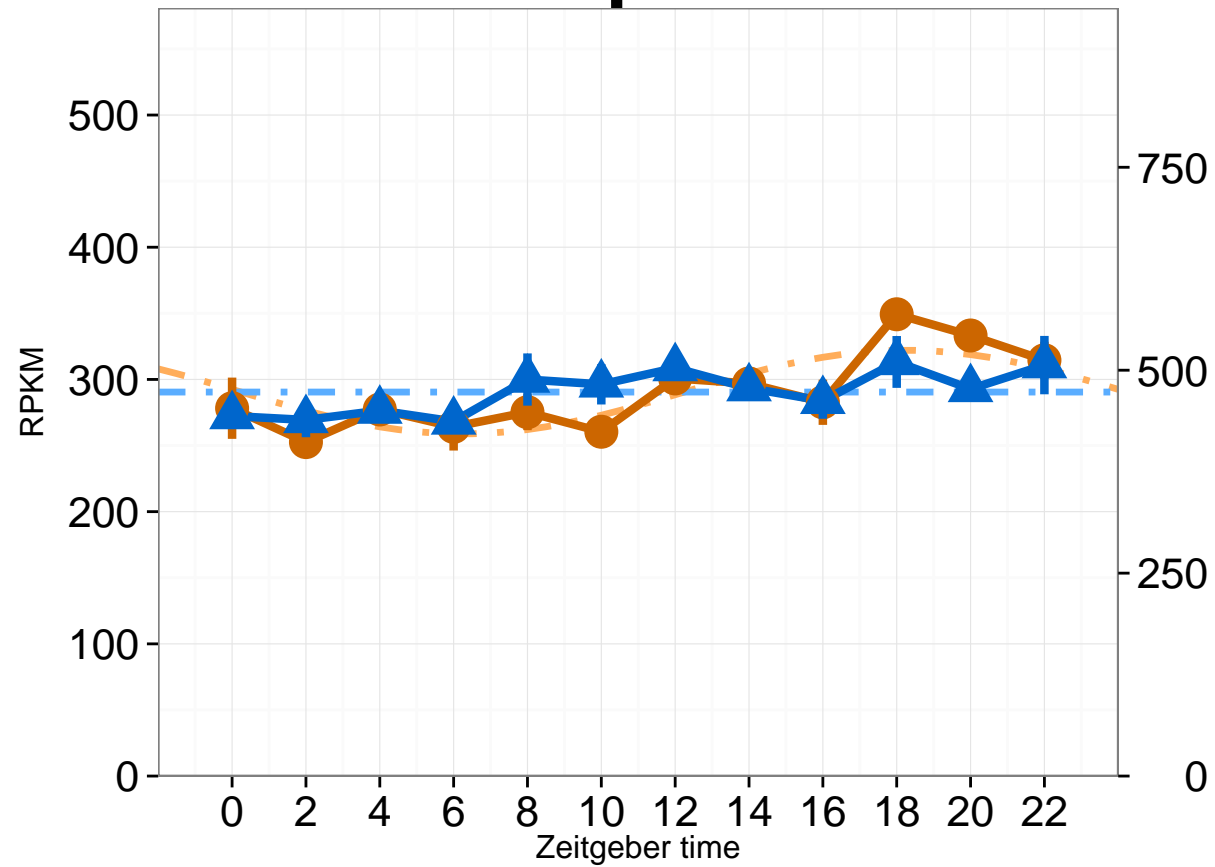

## Pipox

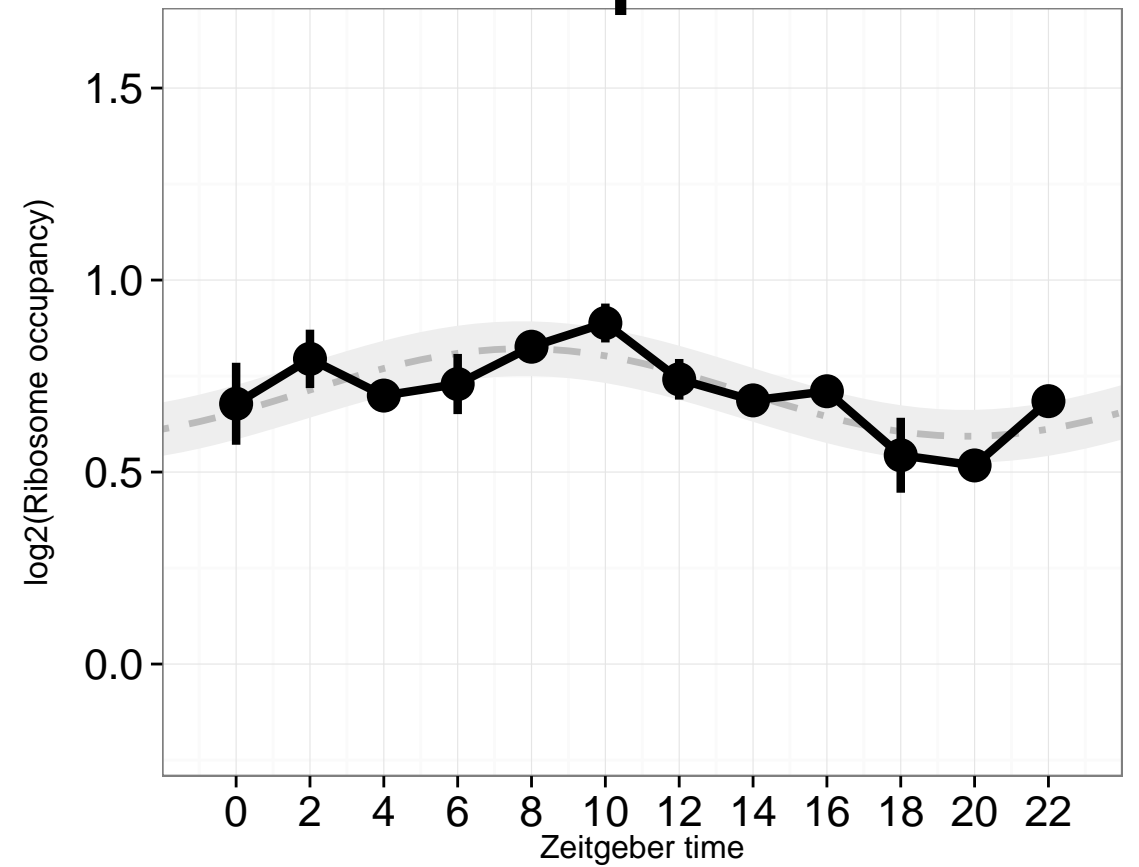

Supplement: Supplementary file 13132 [file 1]

# Cpt1b

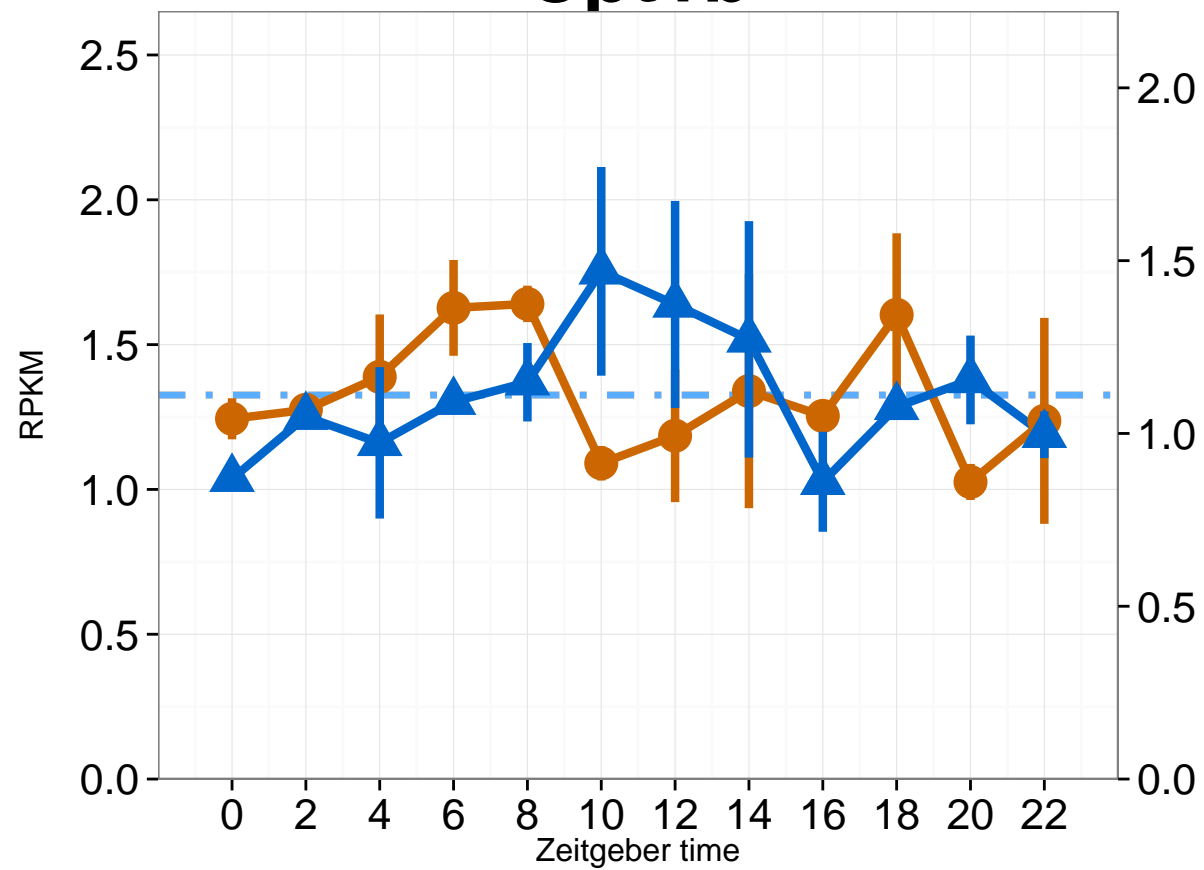

# Cpt1b

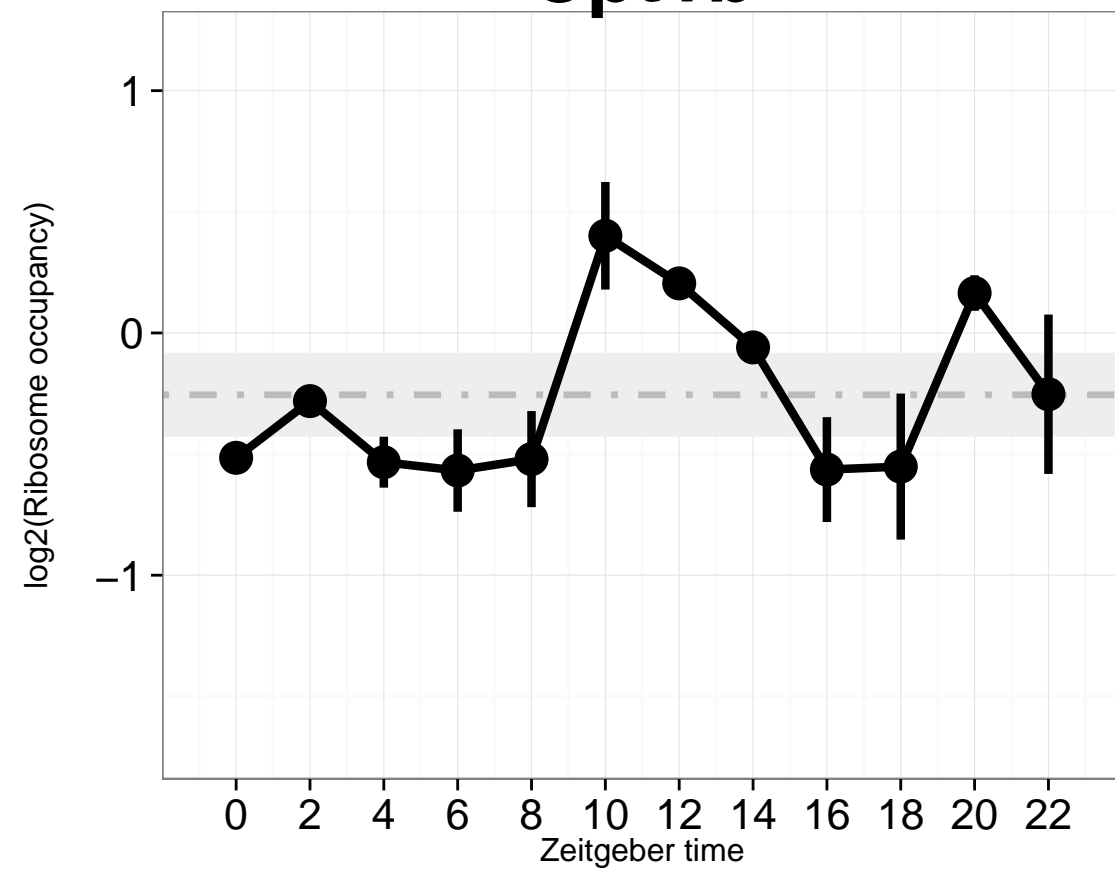

Supplement: Supplementary file 13133 [file 1]

# Col5a3

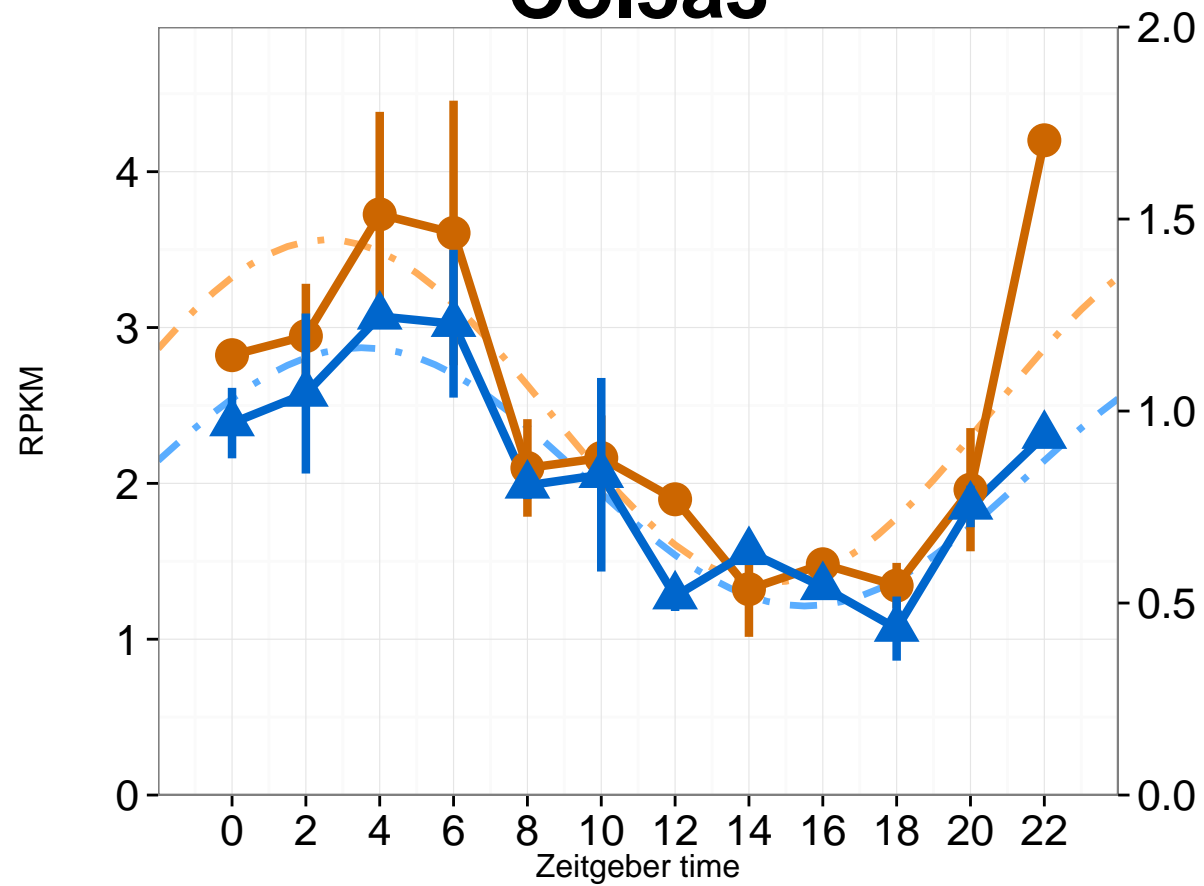

# Col5a3

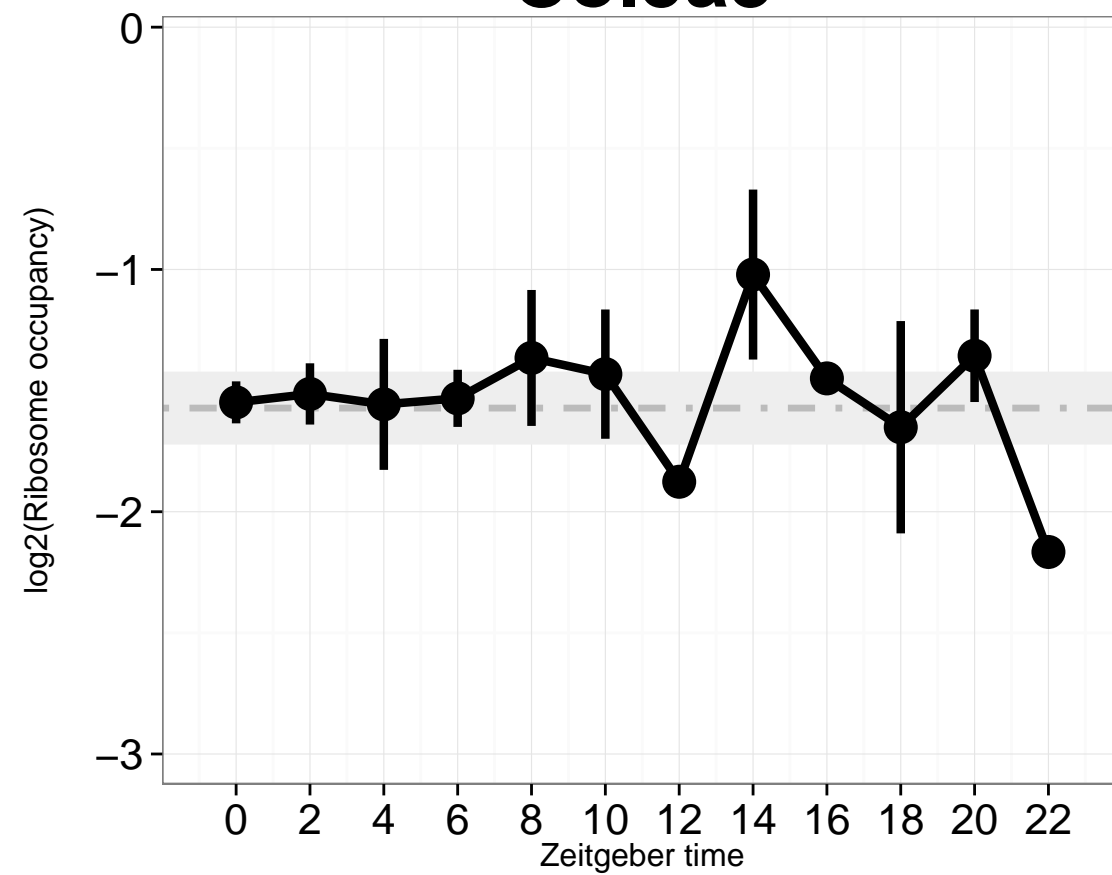

Supplement: Supplementary file 13134 [file 1]

# Gylt1b

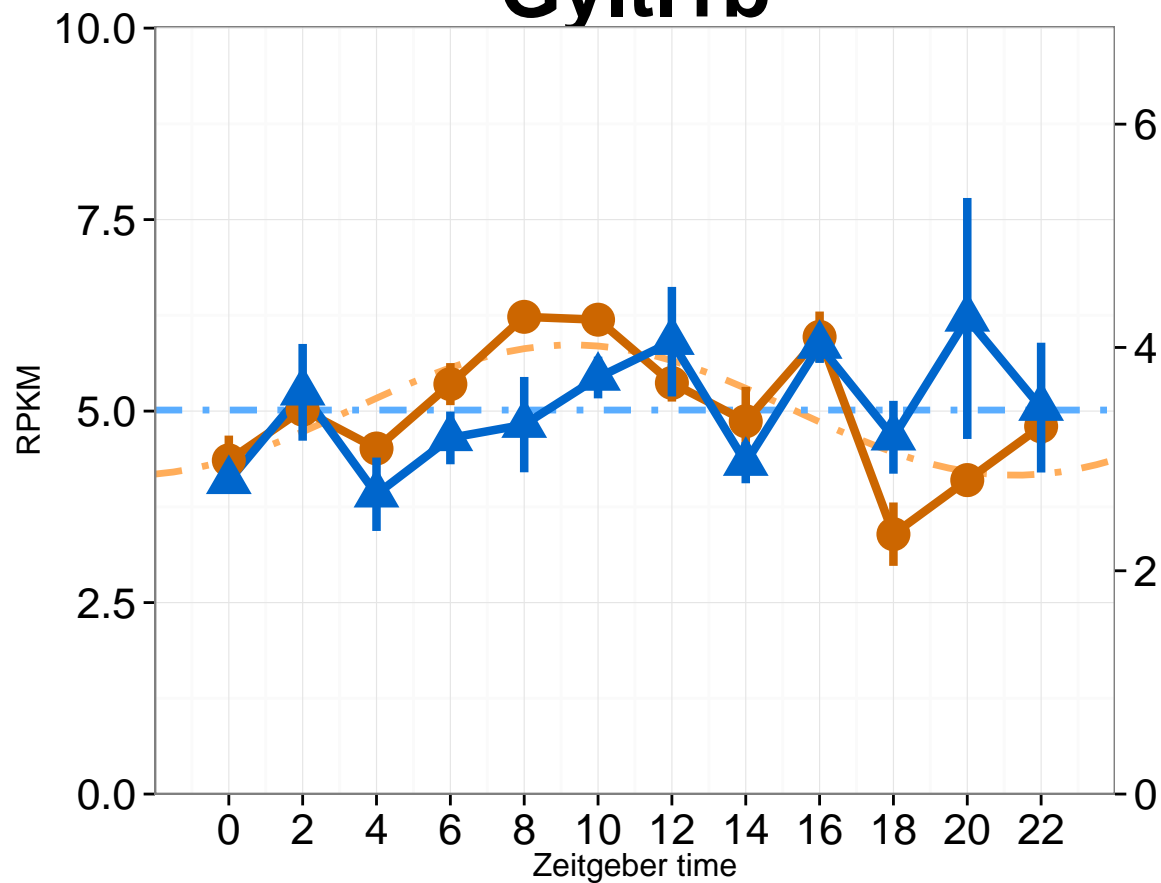

# Gylt1b

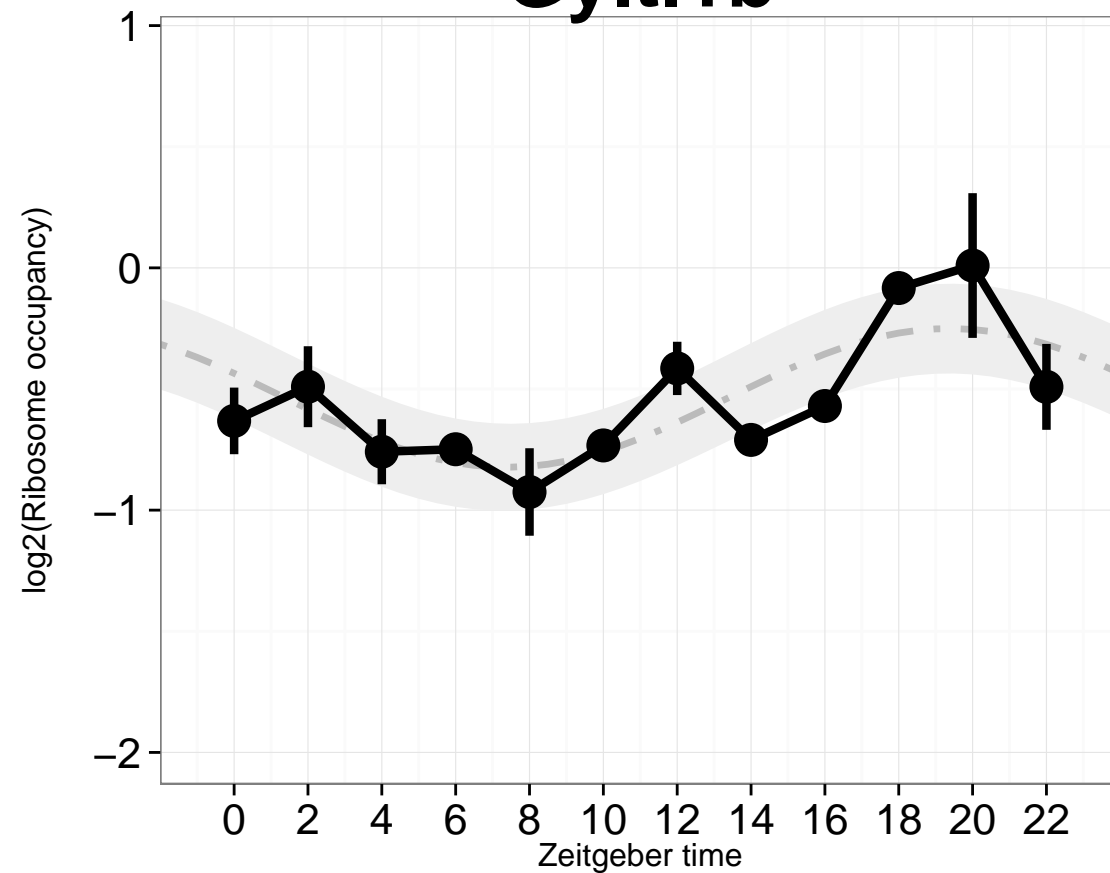

Supplement: Supplementary file 13135 [file 1]

# Taf4a

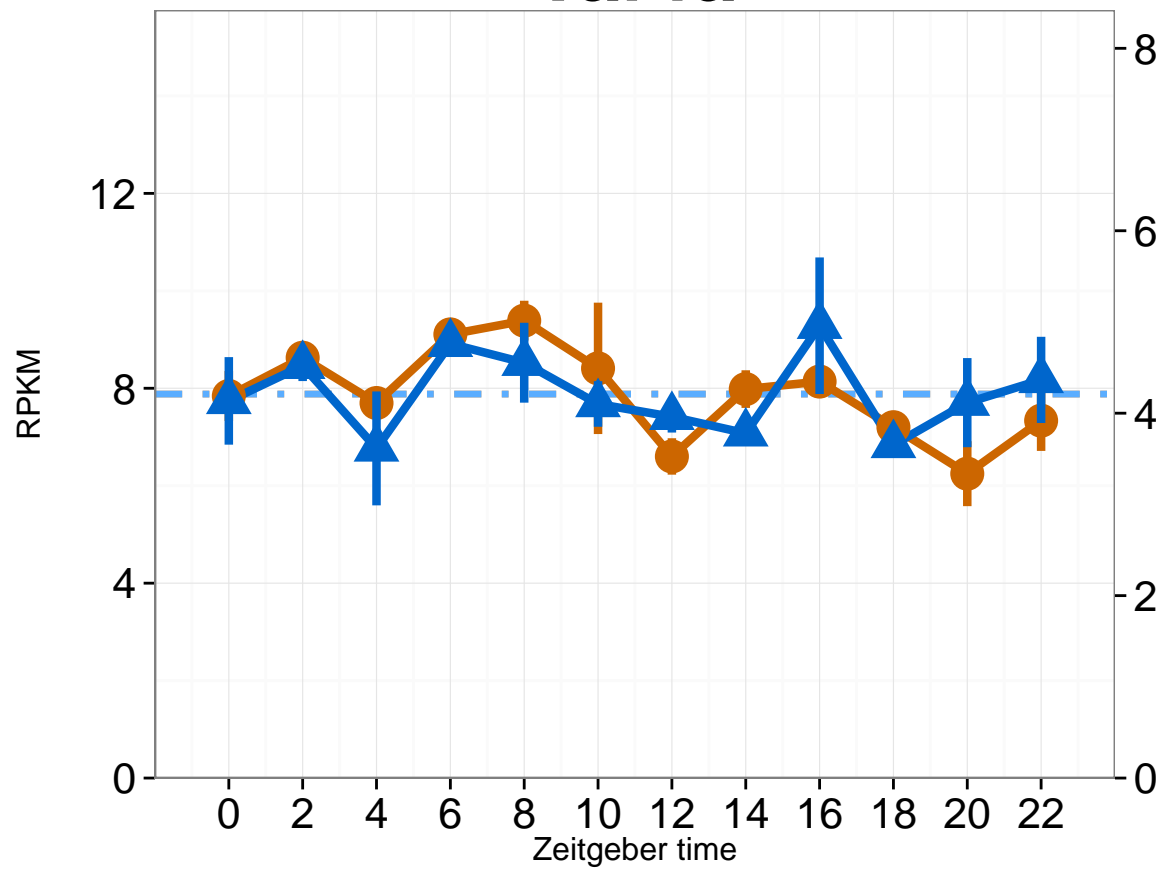

# Taf4a

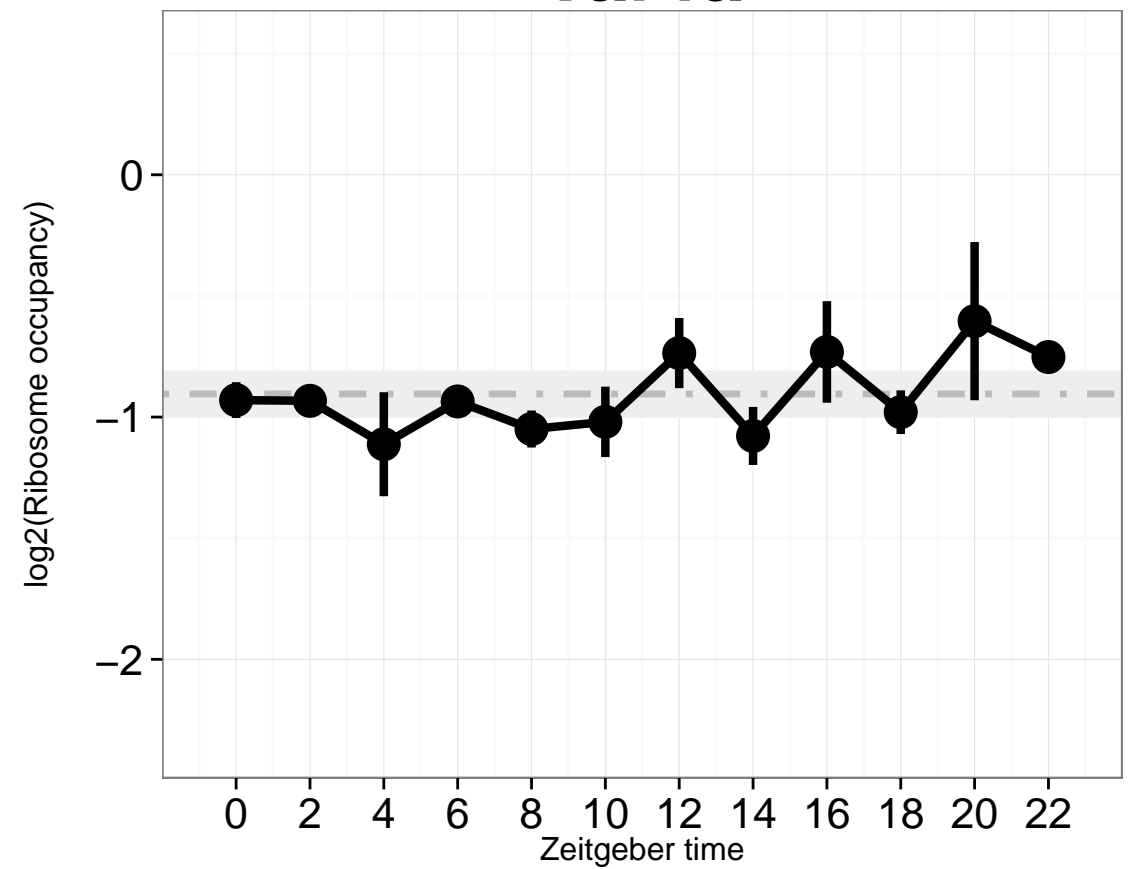

Supplement: Supplementary file 13136 [file 1]

# Tubd1

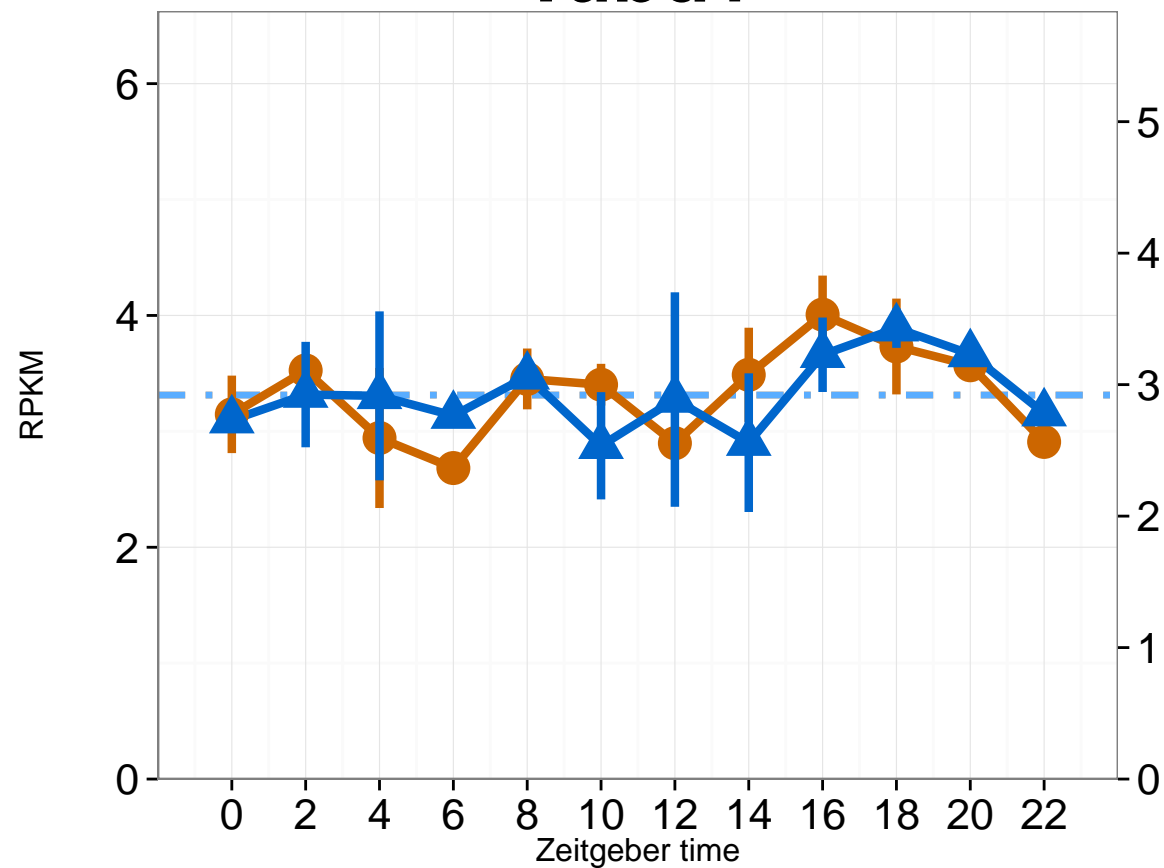

# Tubd1

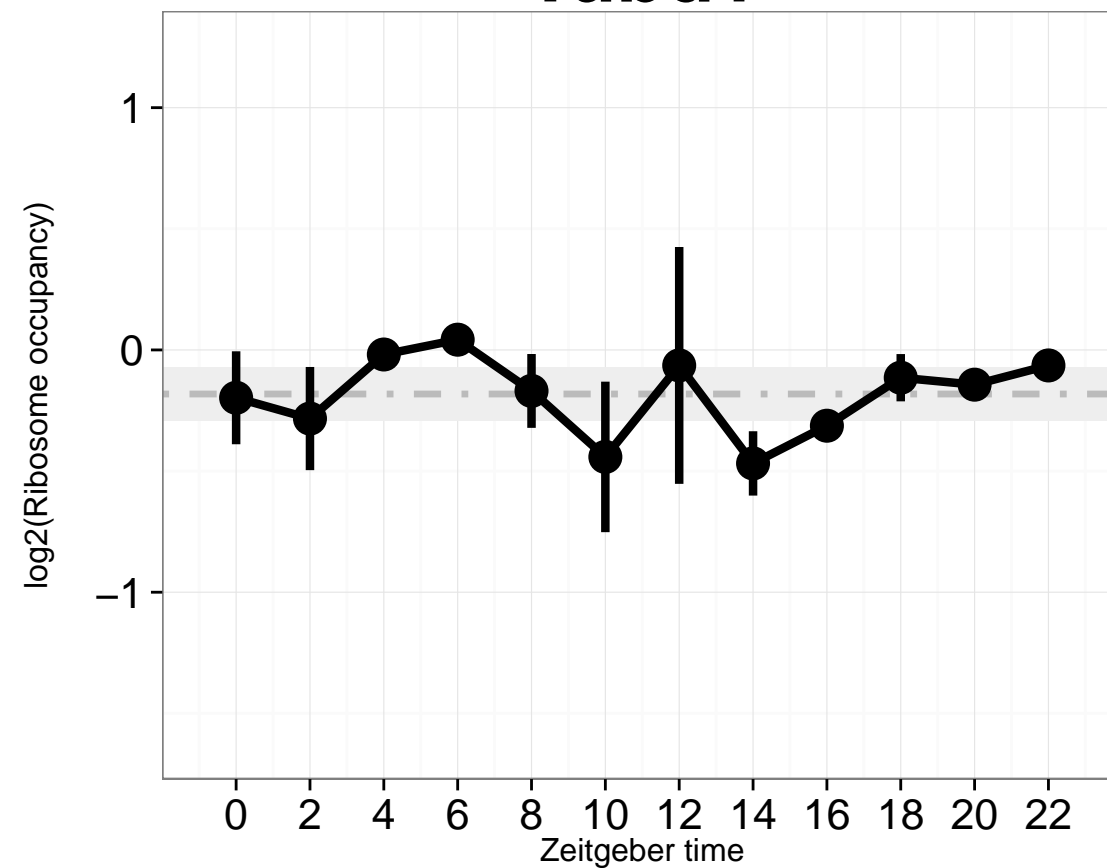

Supplement: Supplementary file 13137 [file 1]

## Thra

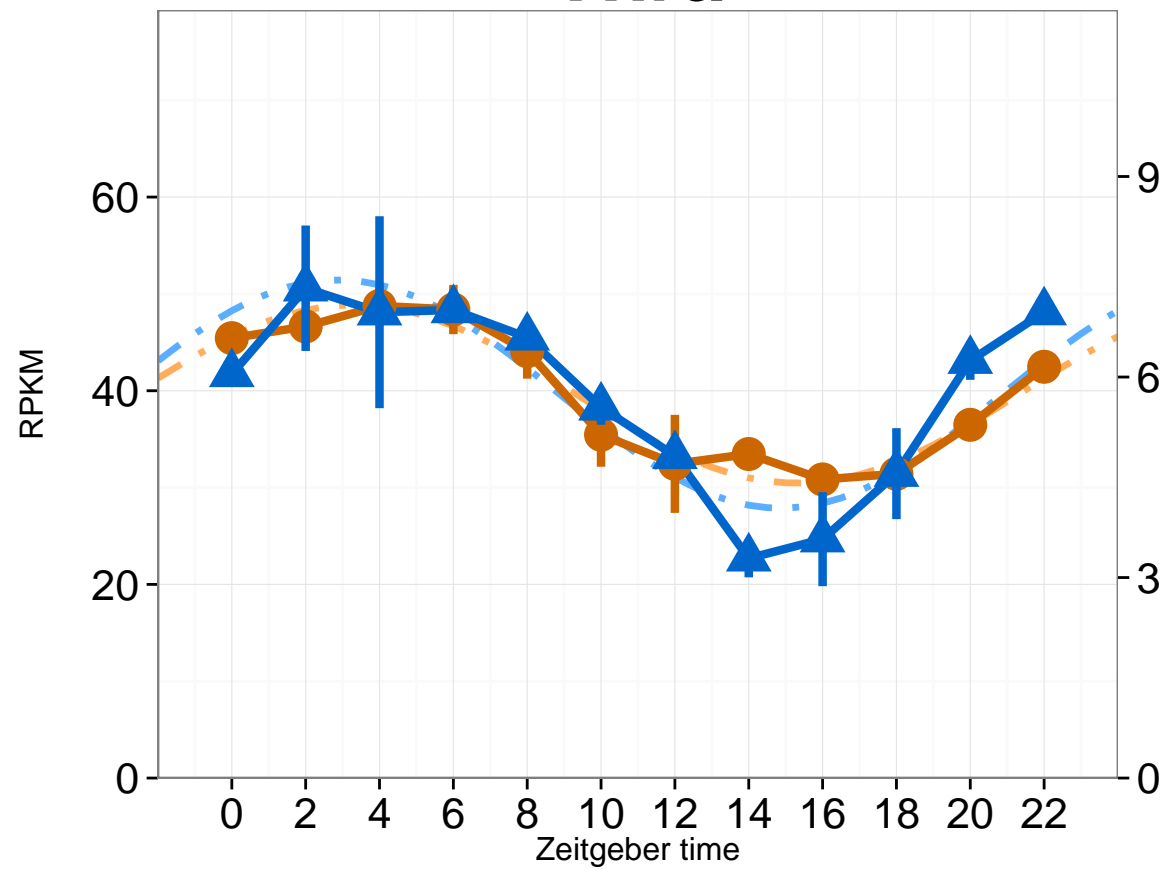

## Thra

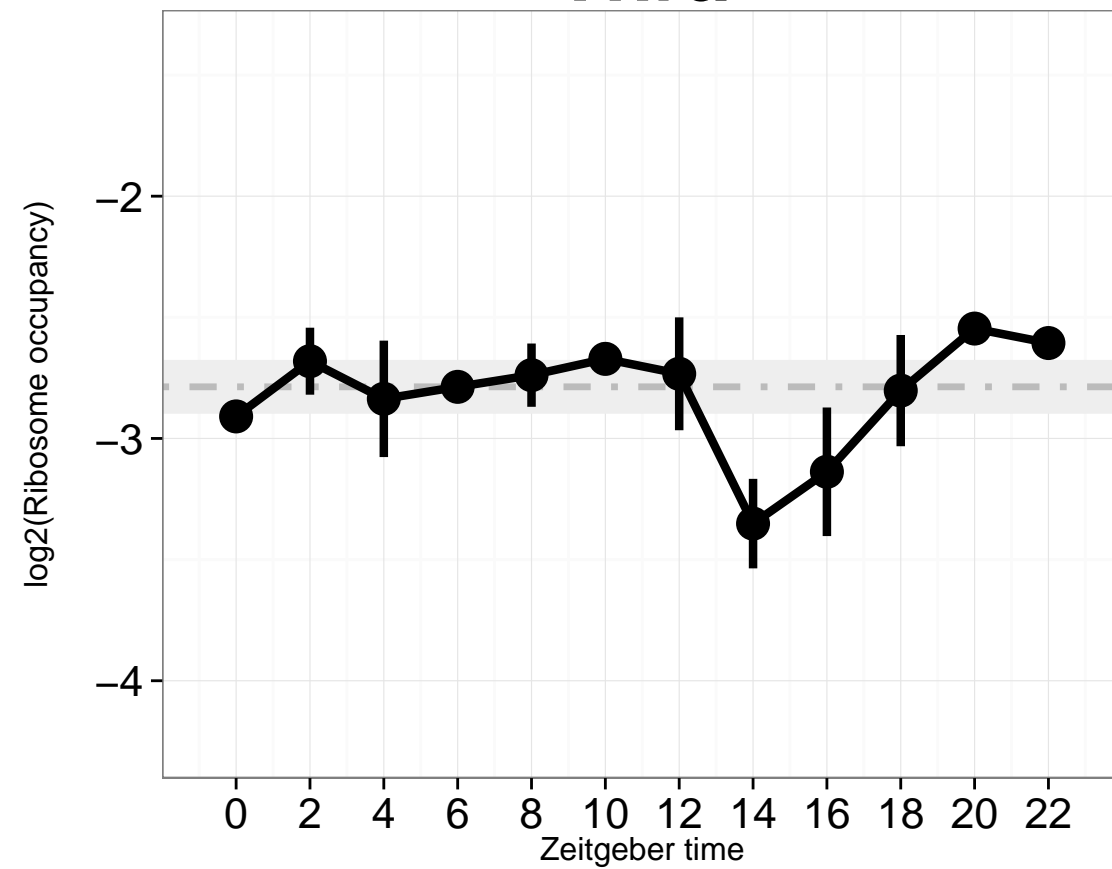

Supplement: Supplementary file 13138 [file 1]

## Srebf1

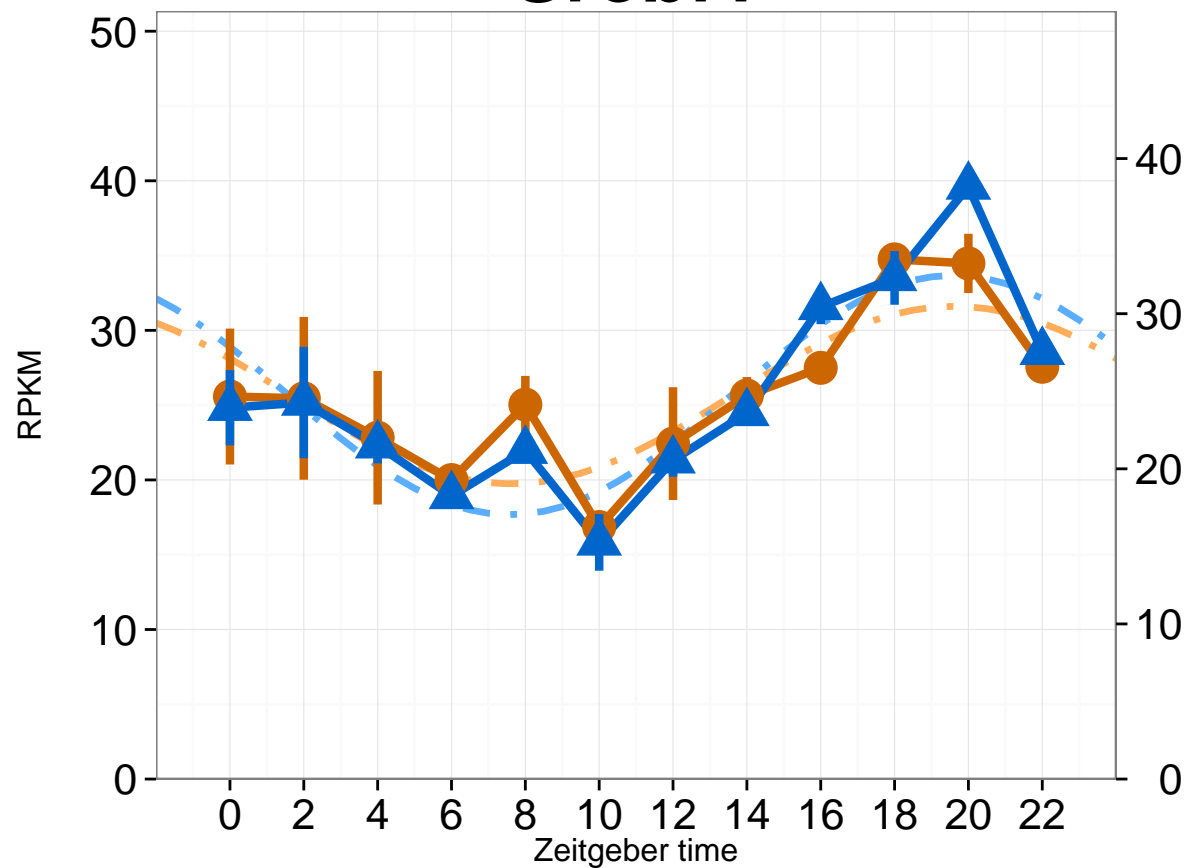

## Srebf1

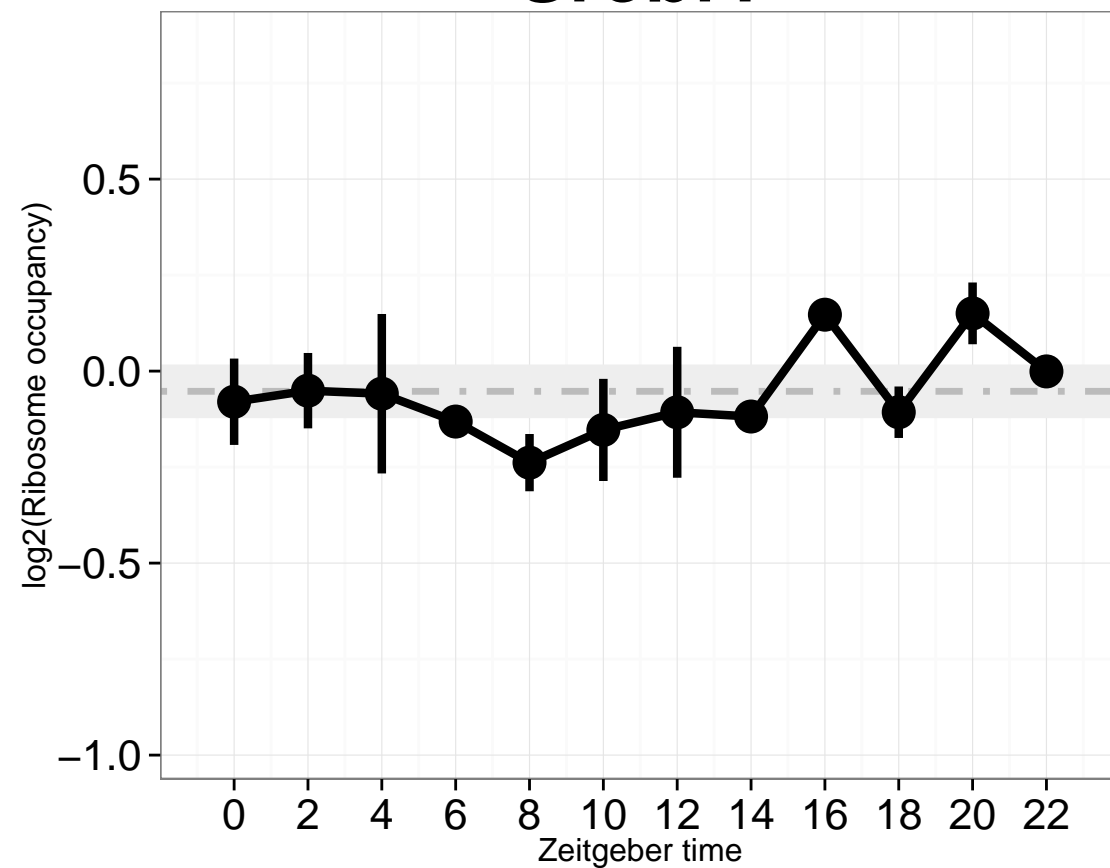

Supplement: Supplementary file 13139 [file 1]

## Grb7

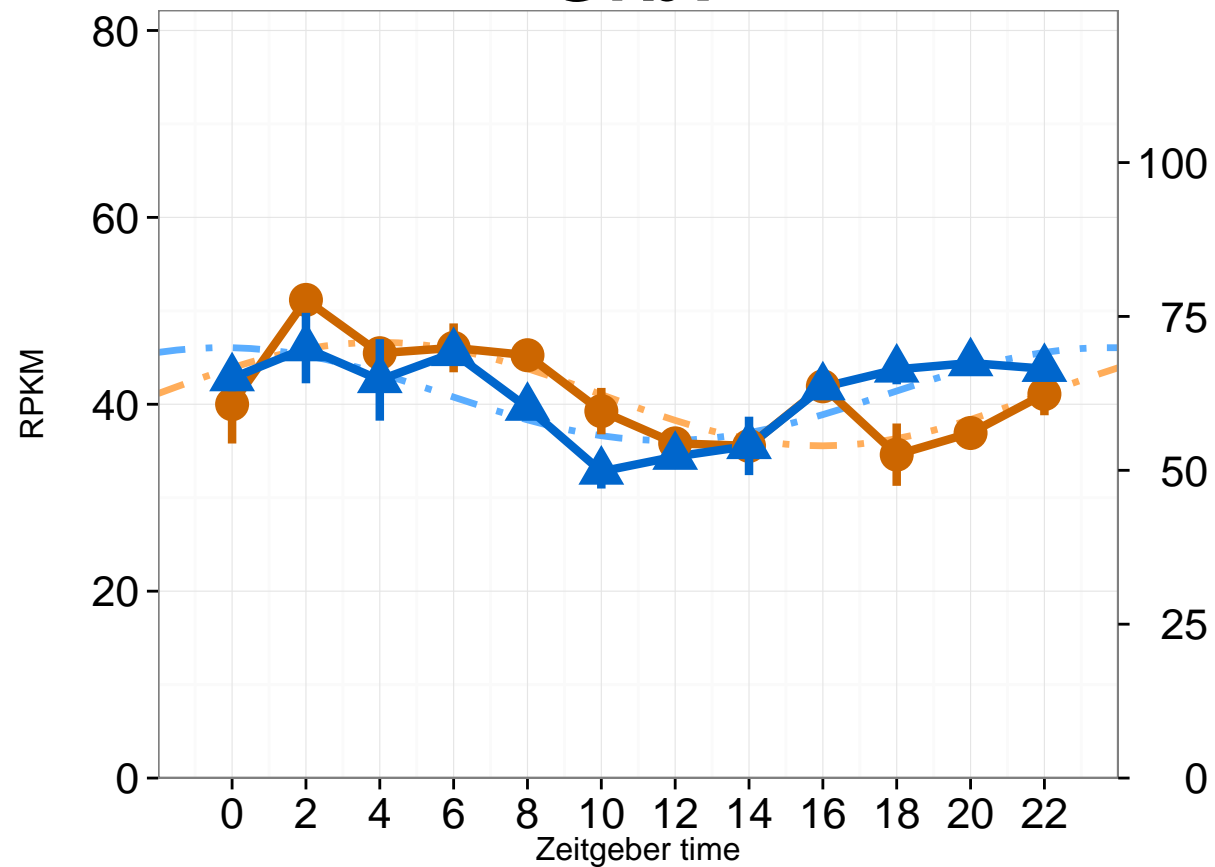

## Grb7

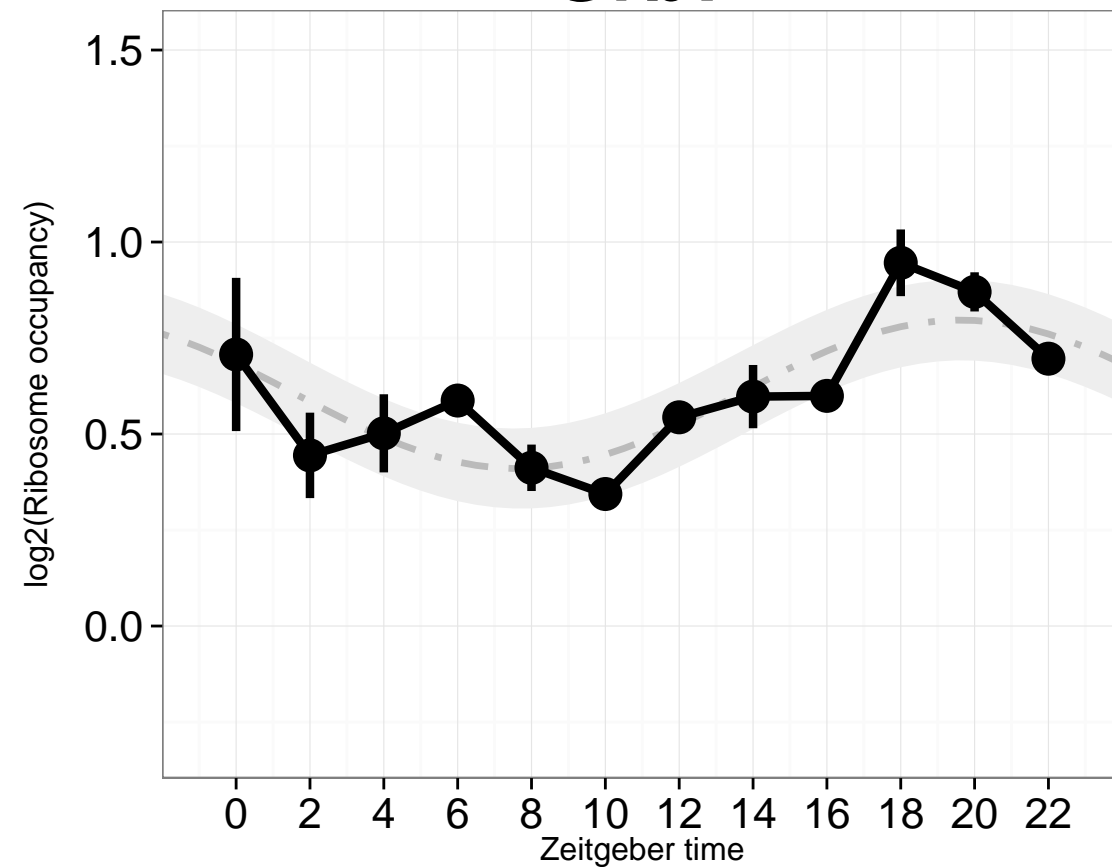

Supplement: Supplementary file 13140 [file 1]

# Rbm12

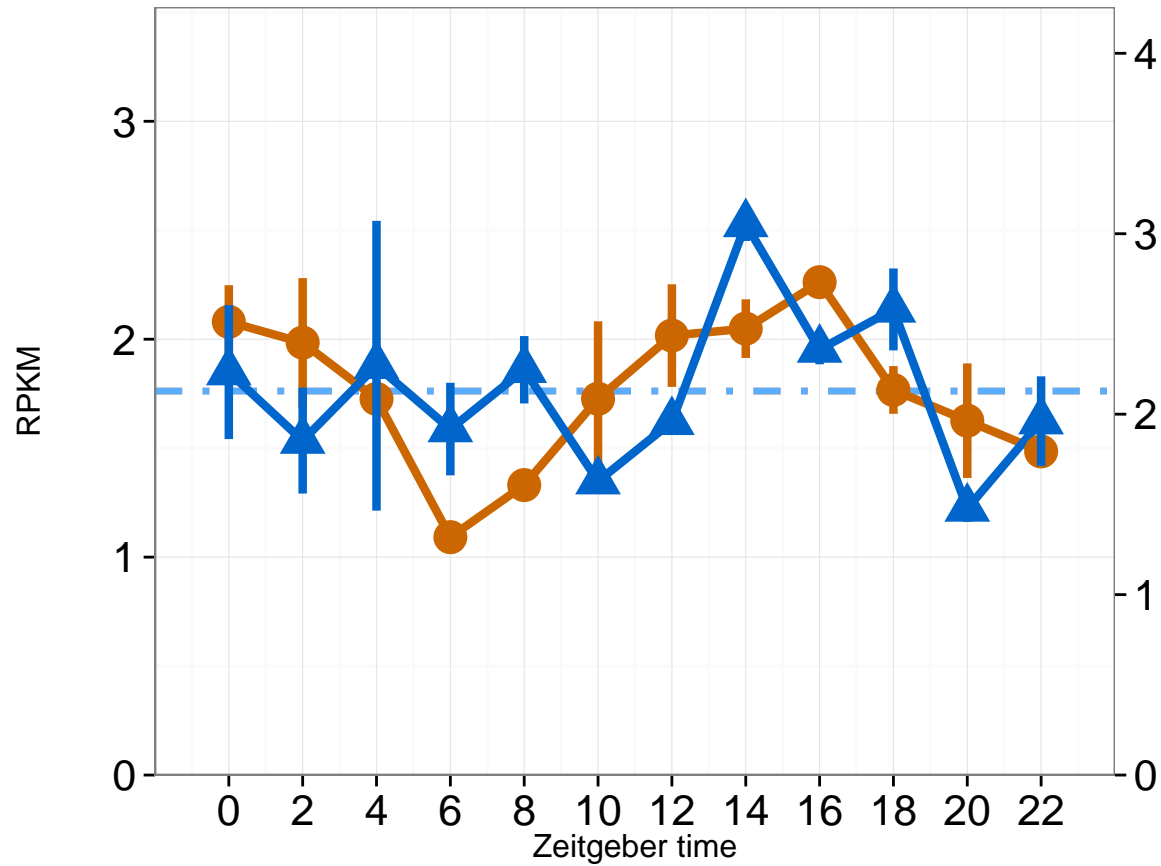

# Rbm12

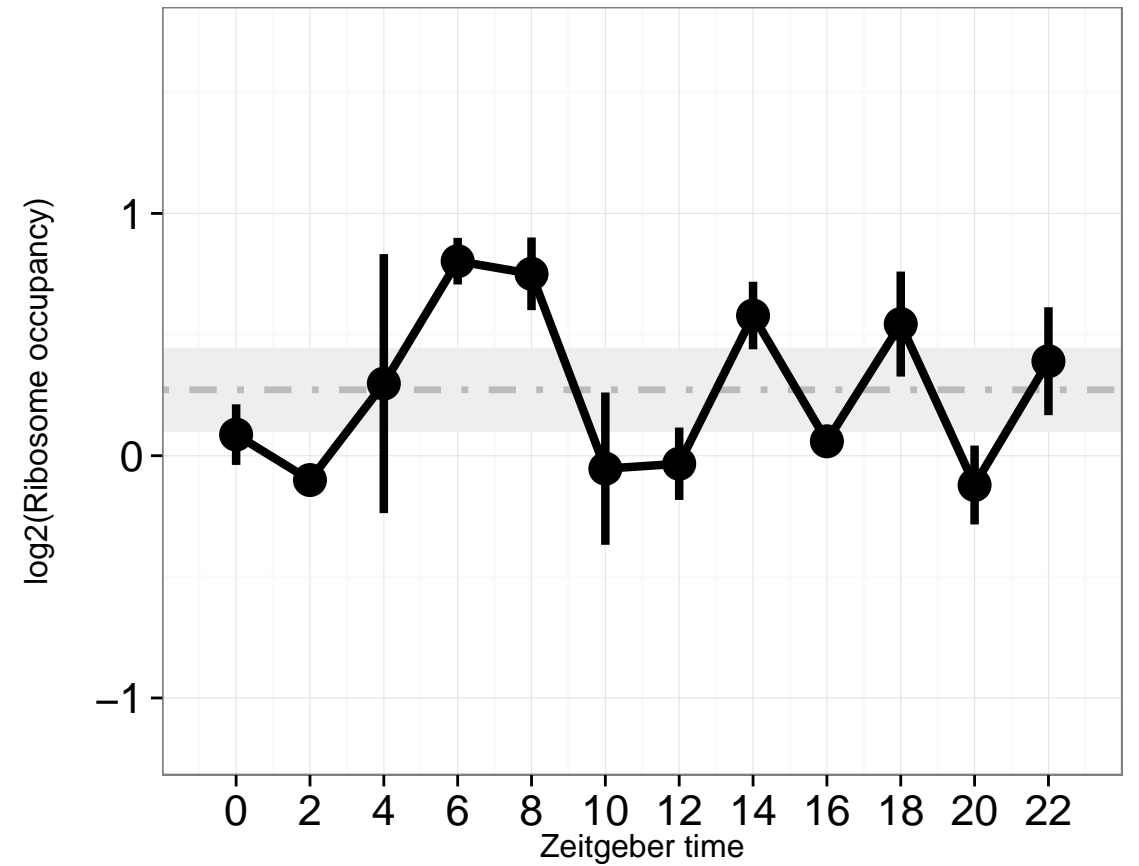

Supplement: Supplementary file 13141 [file 1]

## Blvra

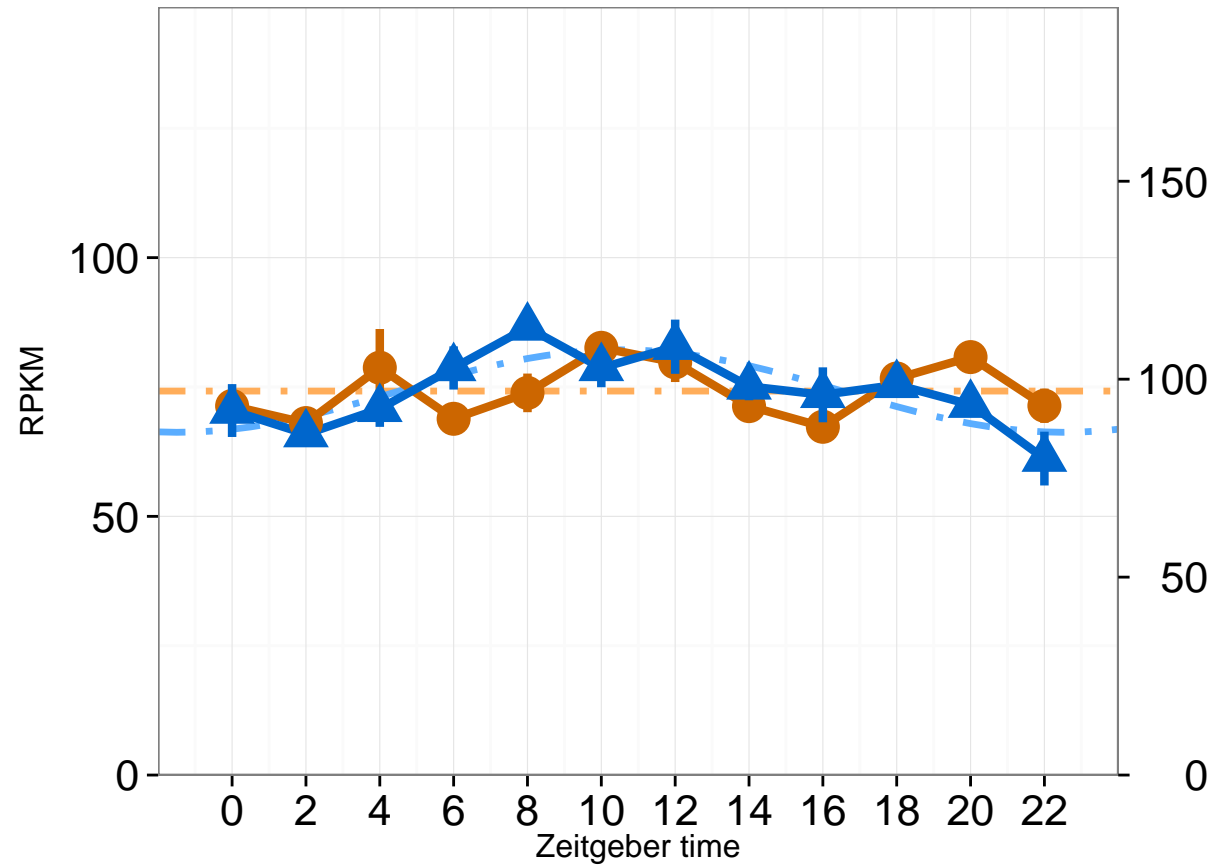

## Blvra

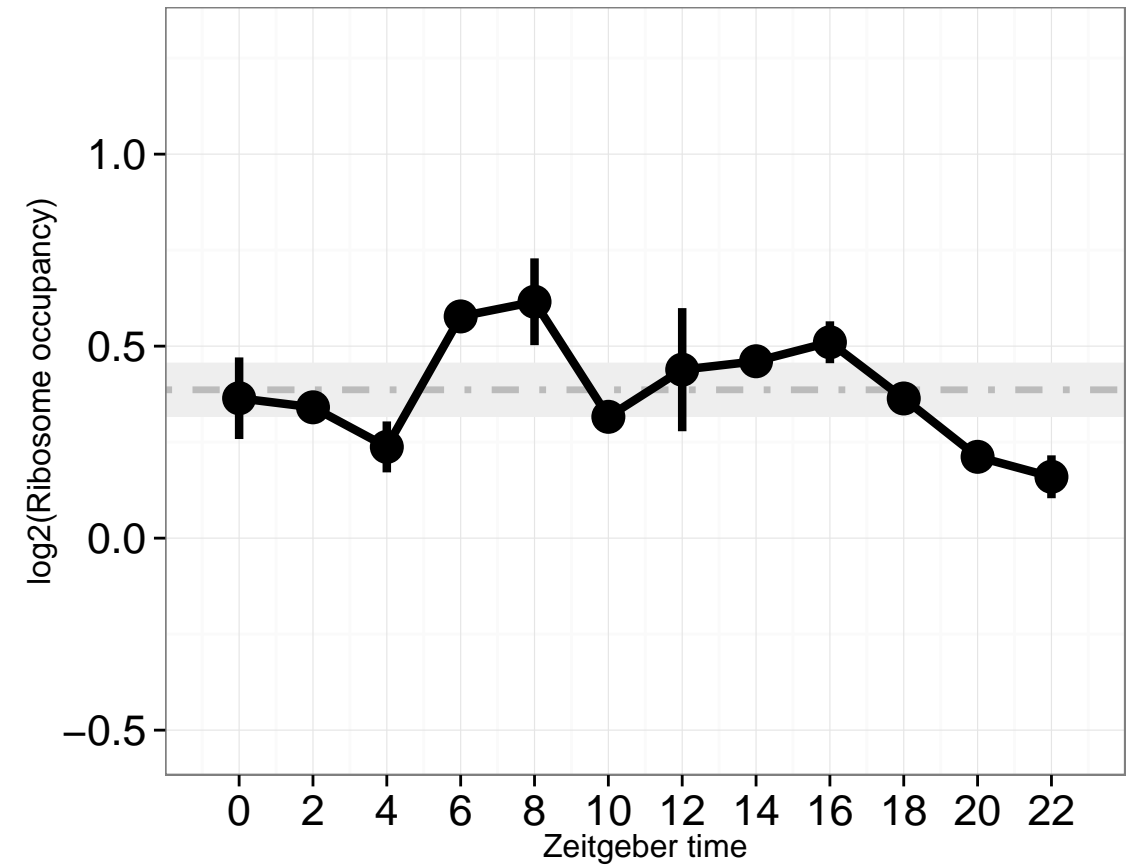

Supplement: Supplementary file 13142 [file 1]

# Pum1

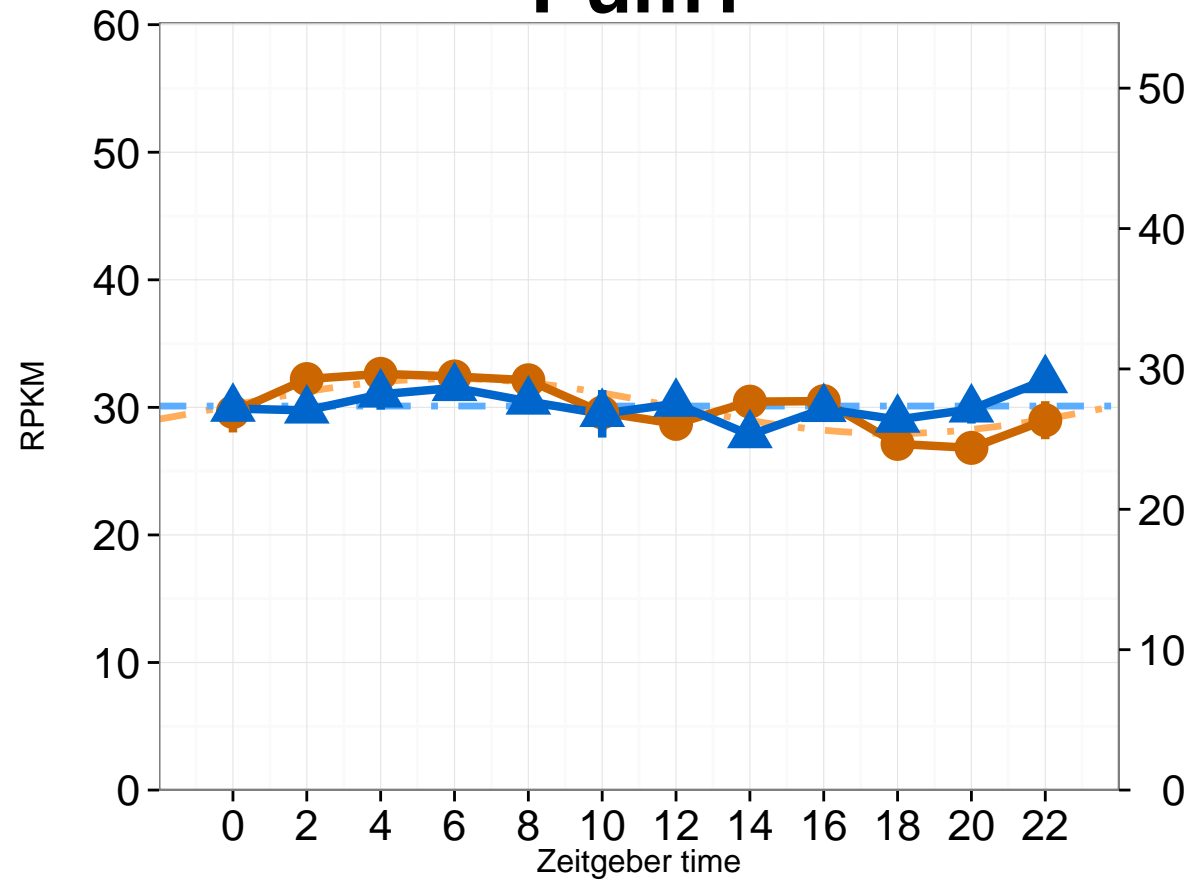

# Pum1

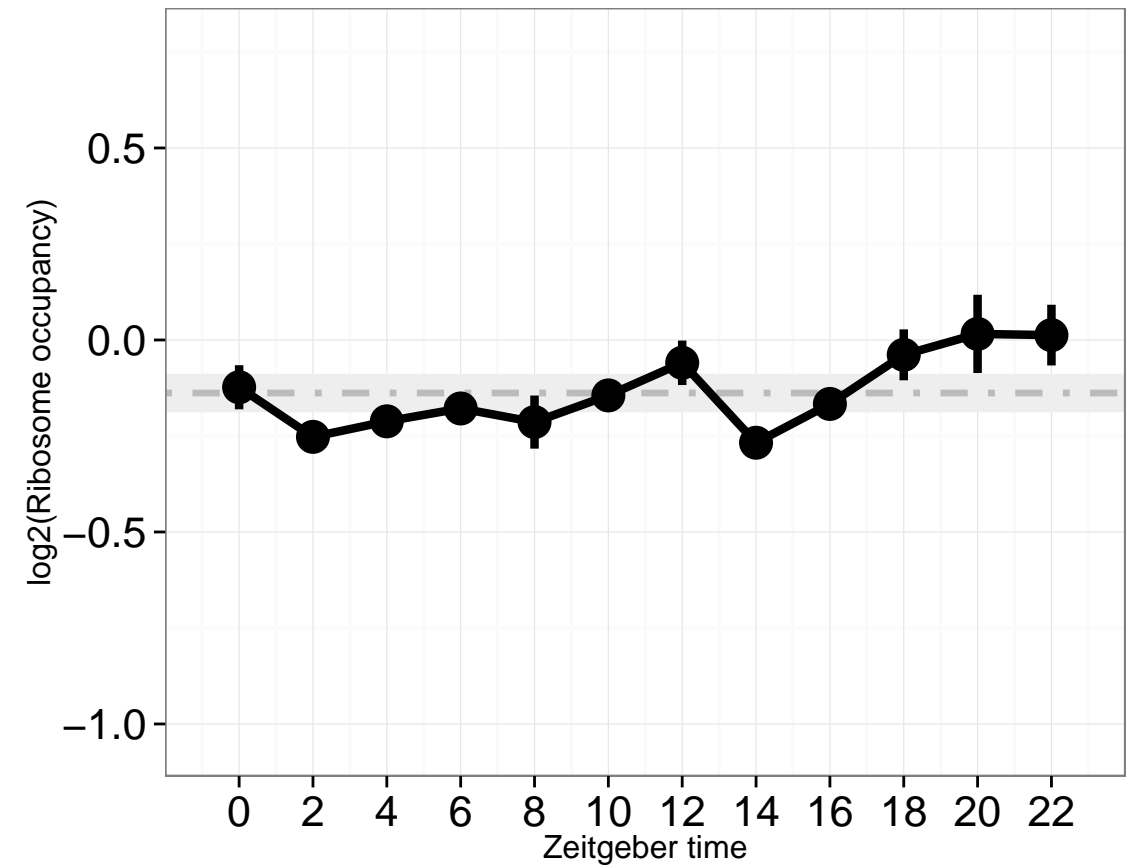

Supplement: Supplementary file 13143 [file 1]

## Ccbl2

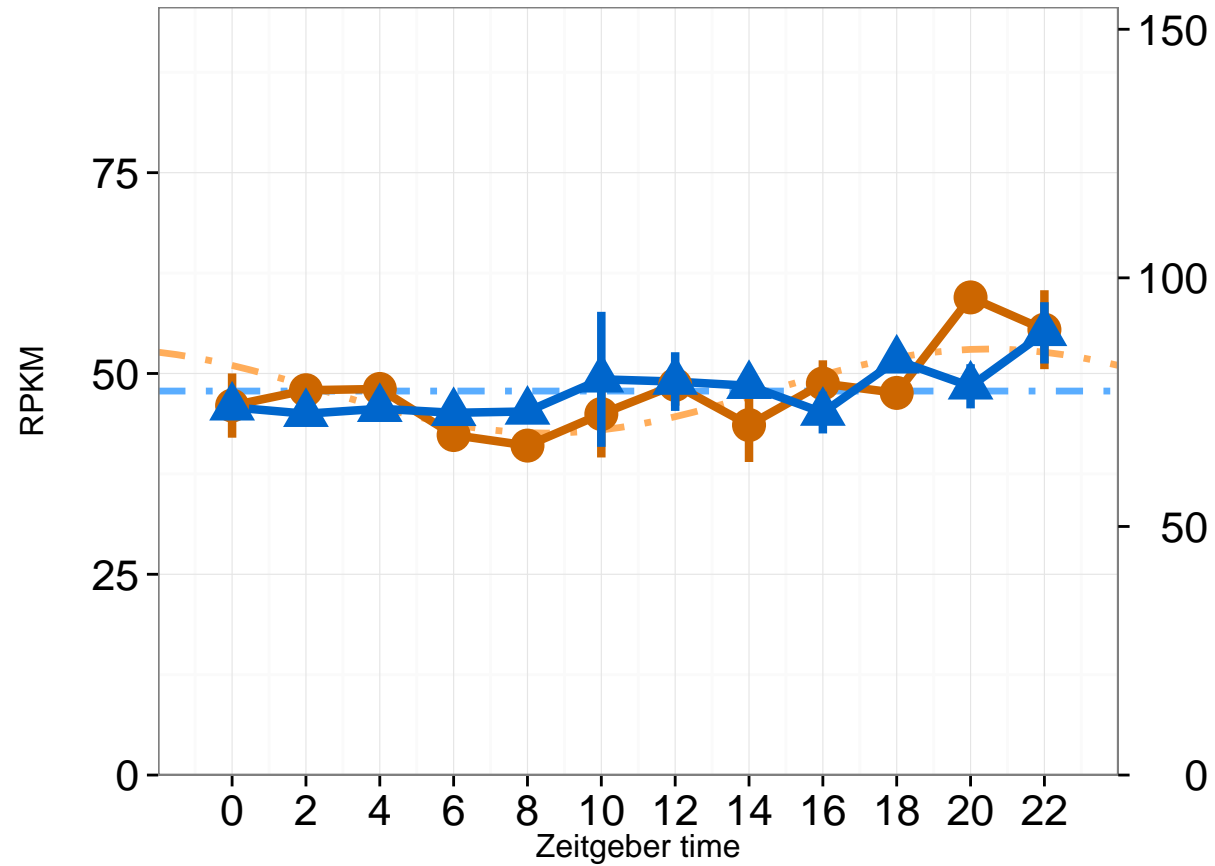

## Ccbl2

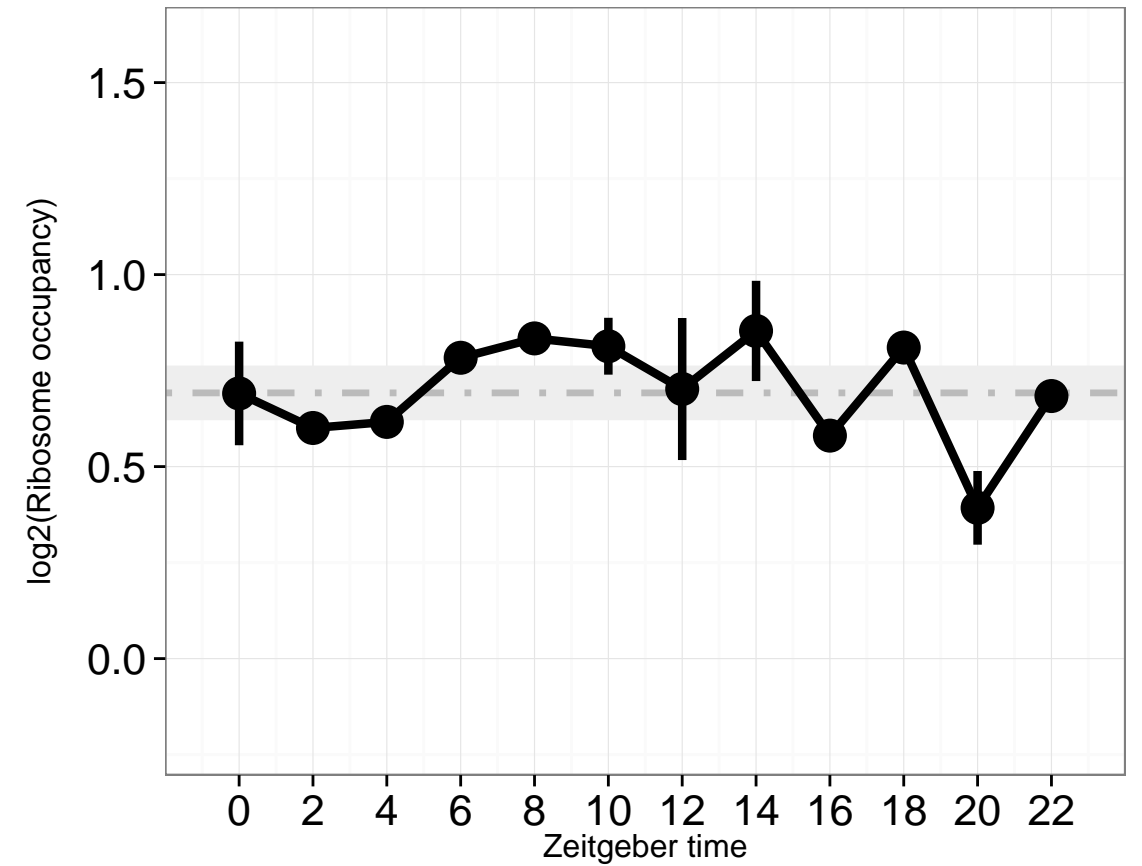

Supplement: Supplementary file 13144 [file 1]

## Slc2a12

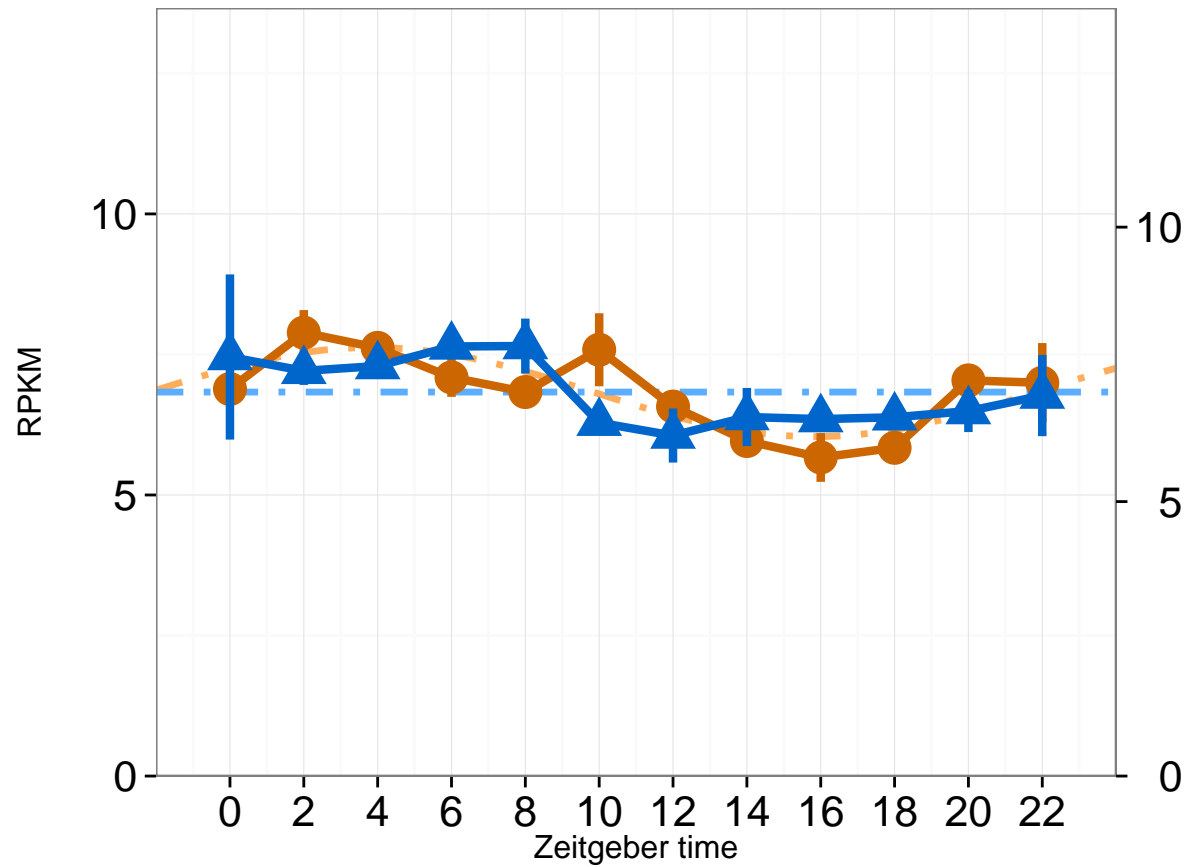

## Slc2a12

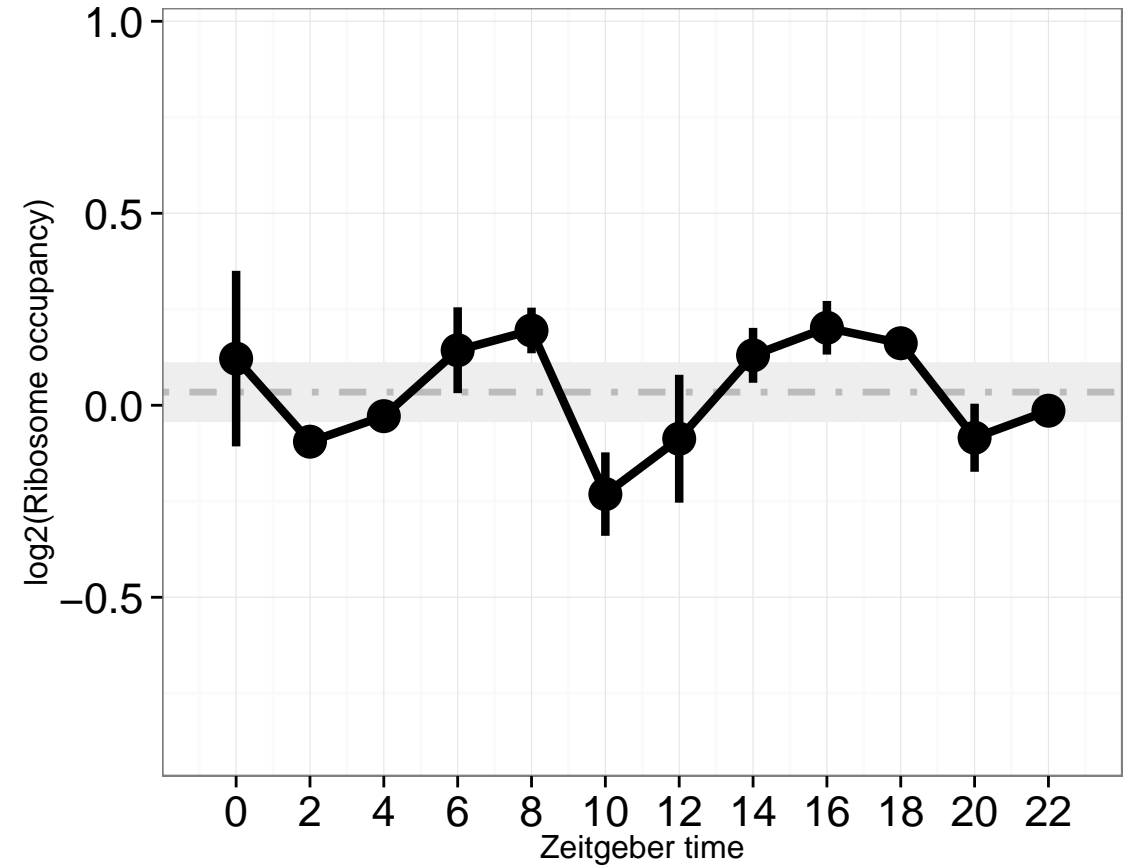

Supplement: Supplementary file 13145 [file 1]

# Spcs1

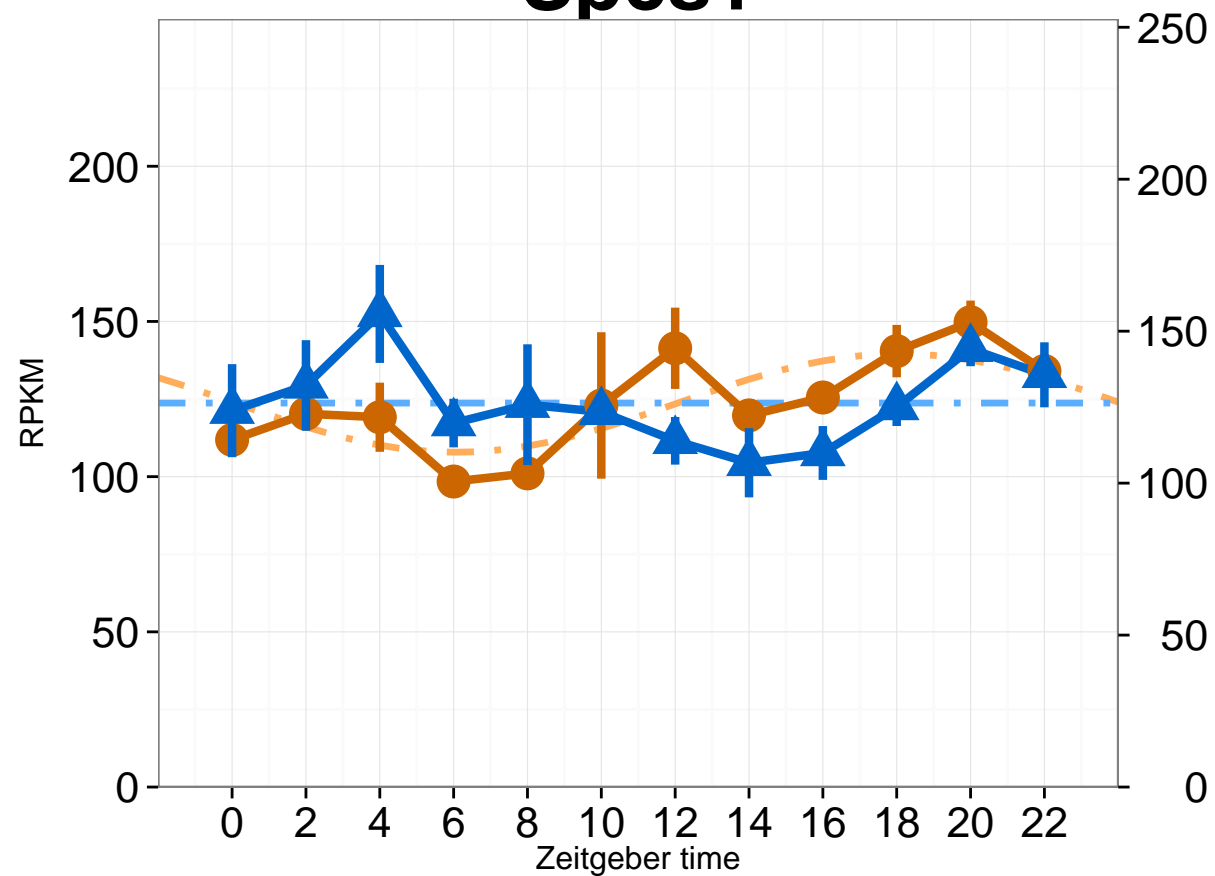

# Spcs1

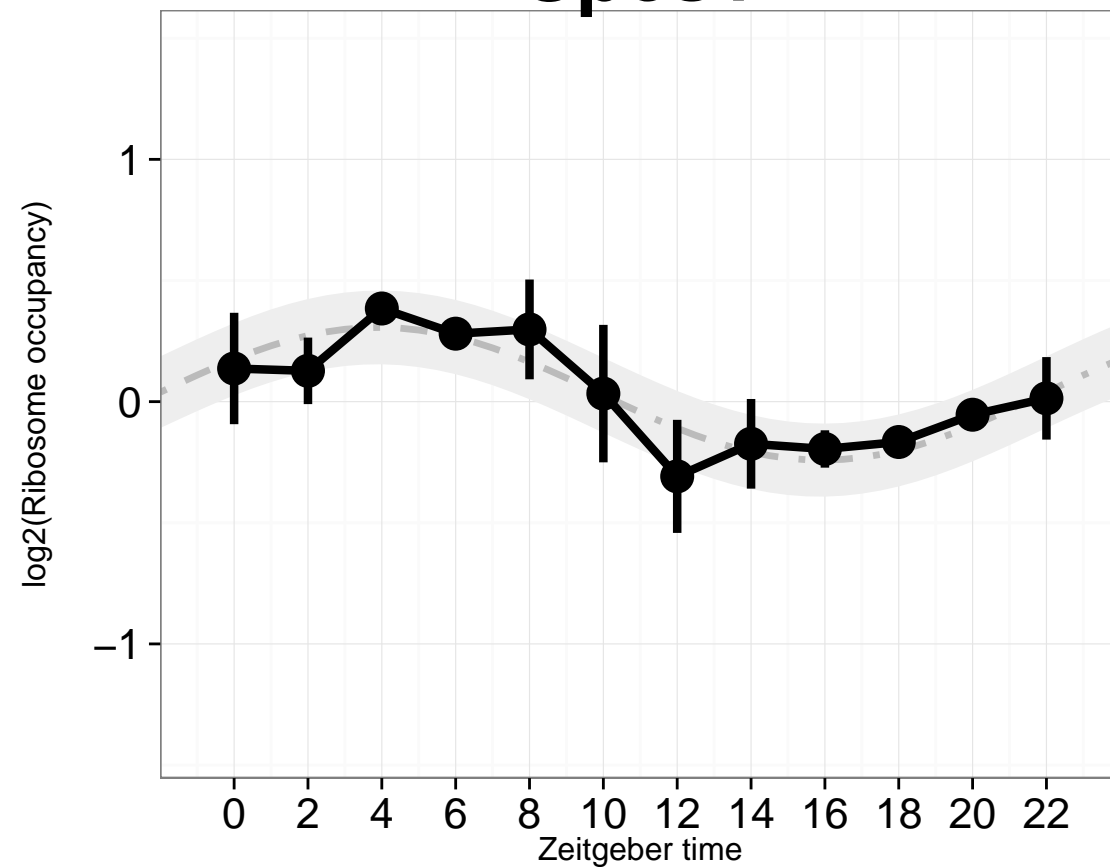

Supplement: Supplementary file 13146 [file 1]
