# Supplementary material (part 132 of 133)
Source: publisher figshare collection journal article supplement (https://springernature.figshare.com/articles/dataset/_/4903193)

# Satb1

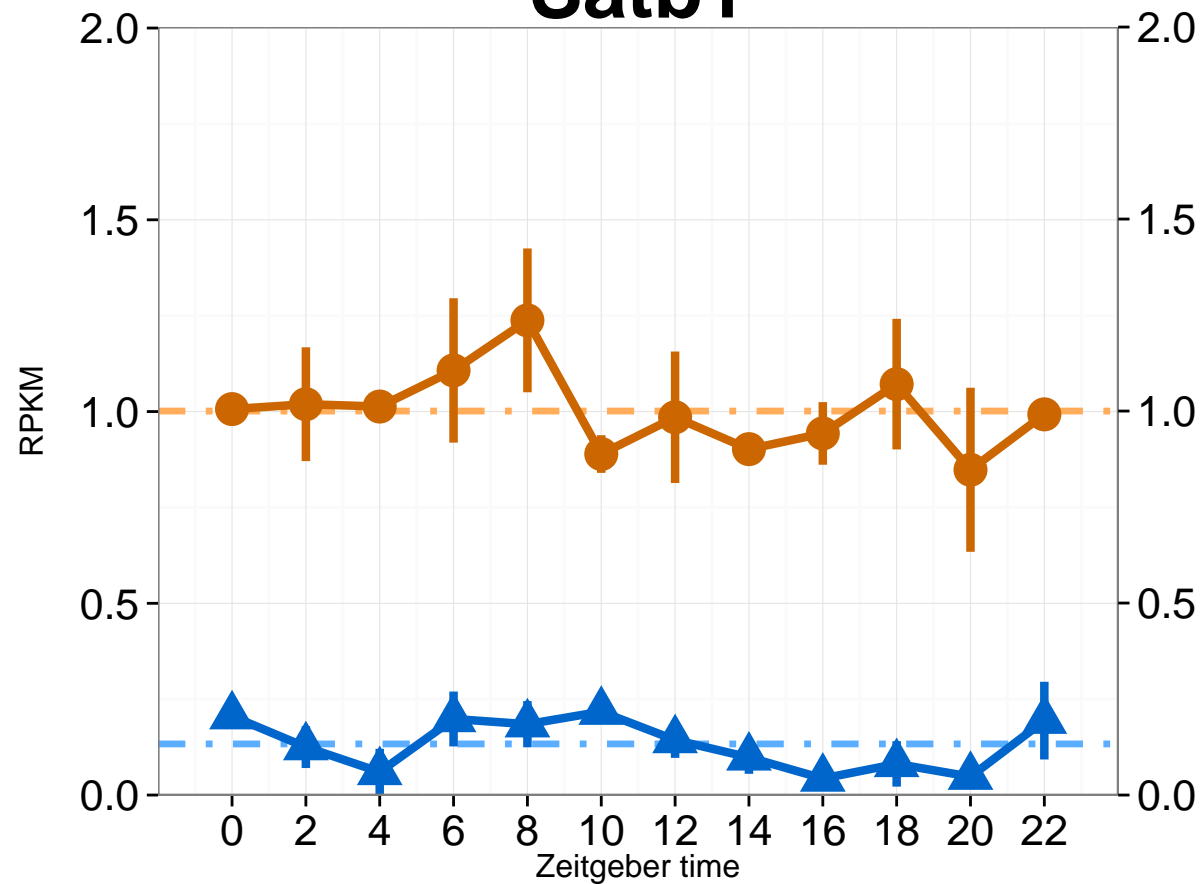

# Satb1

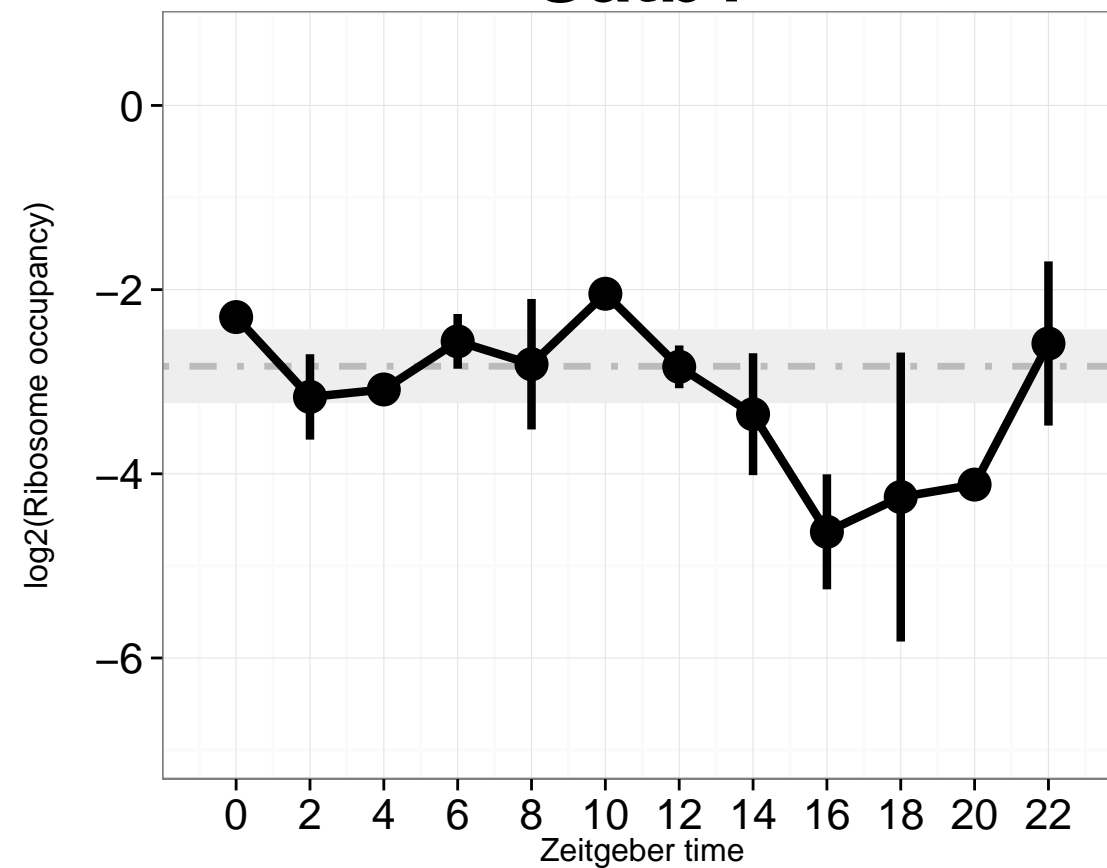

Supplement: Supplementary file 13147 [file 1]

# Trim65

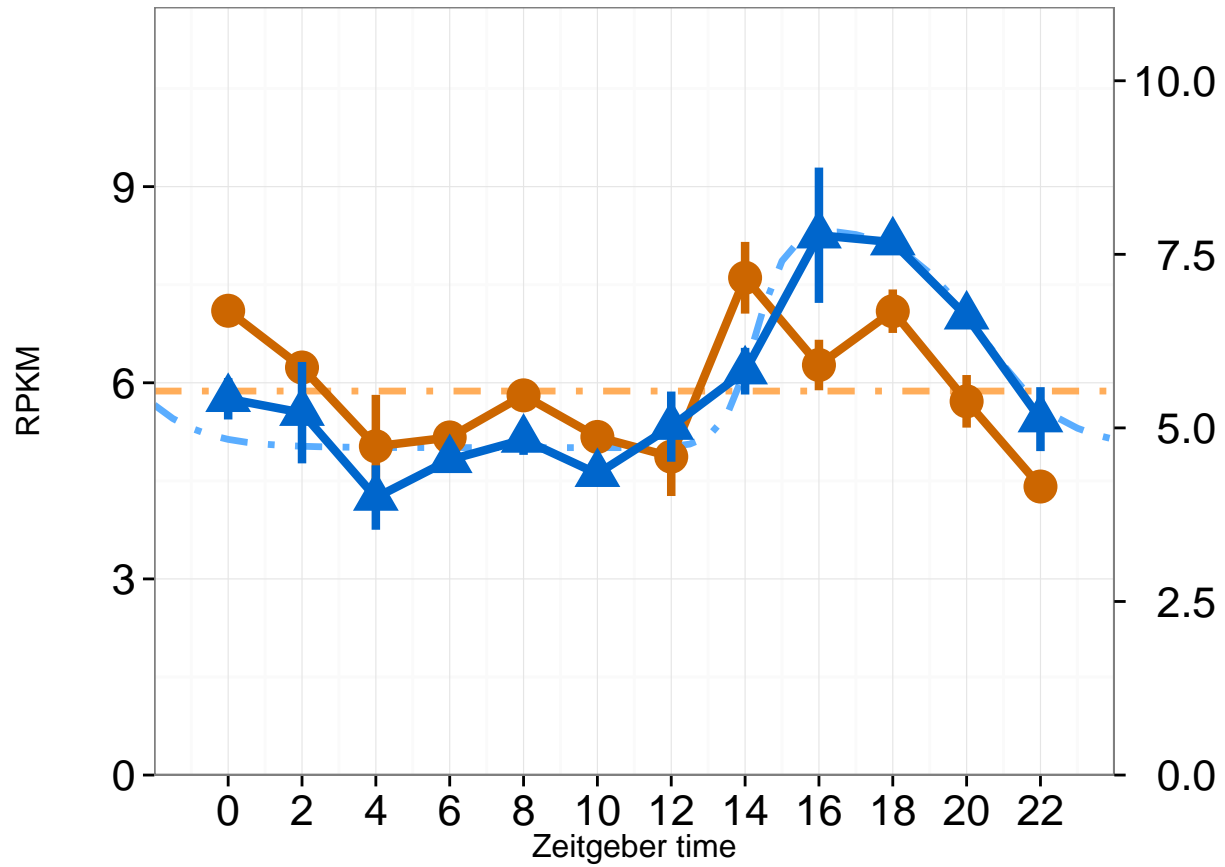

# Trim65

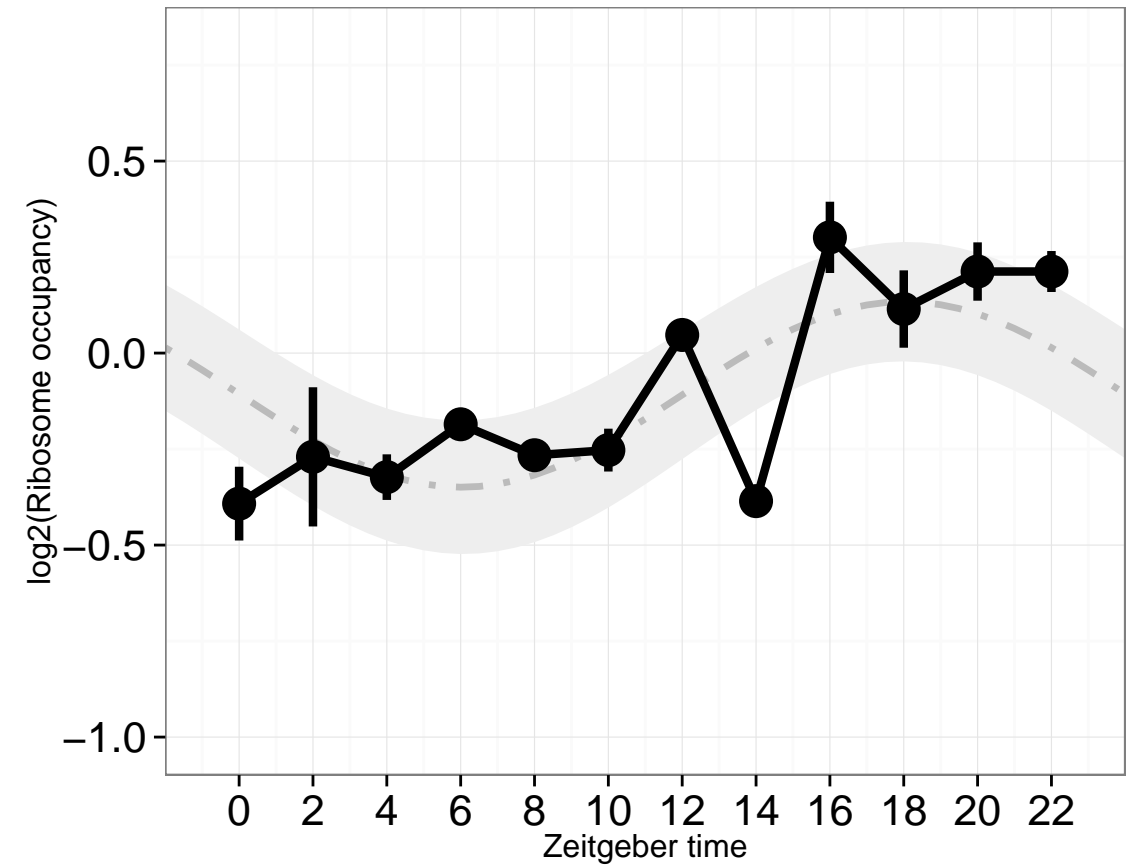

Supplement: Supplementary file 13148 [file 1]

**Serpind1 TR**

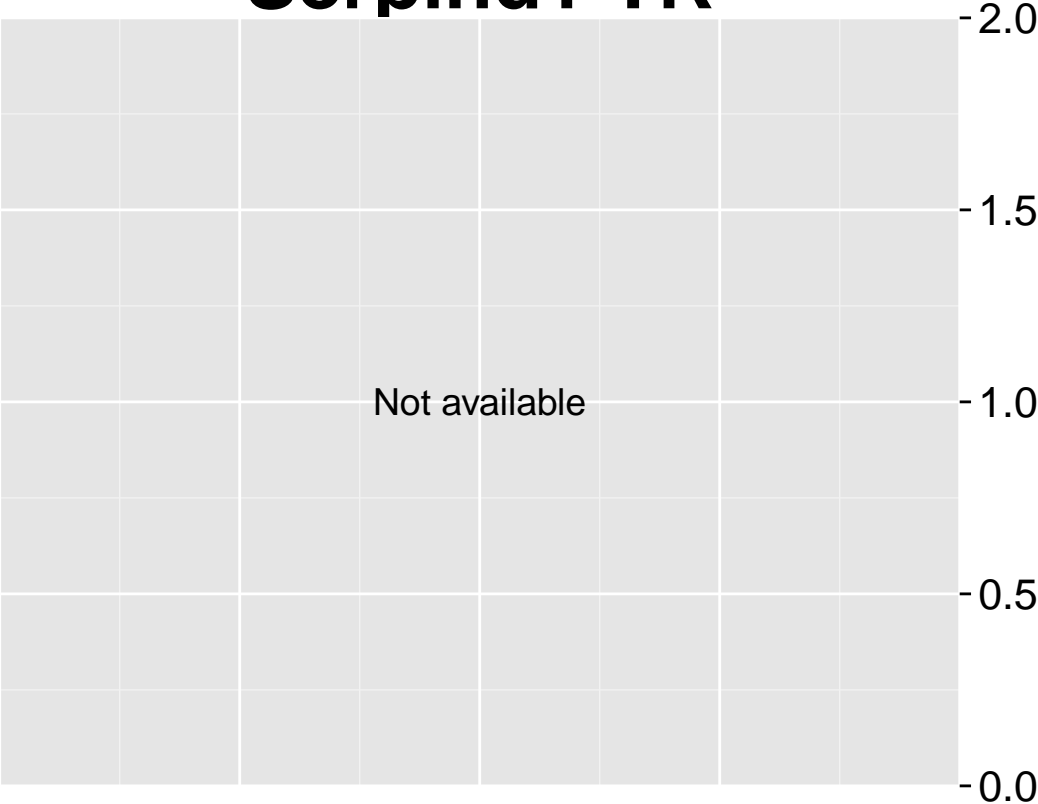

**Serpind1 log2(Ribosome occupanc**

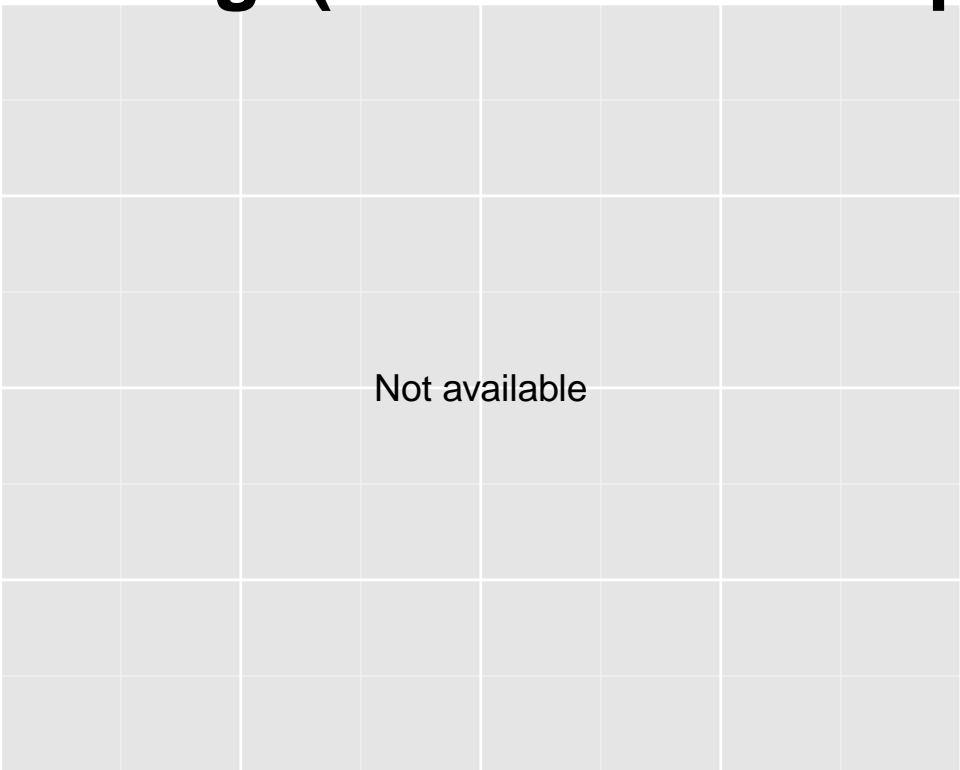

Supplement: Supplementary file 13149 [file 1]

## Drosha

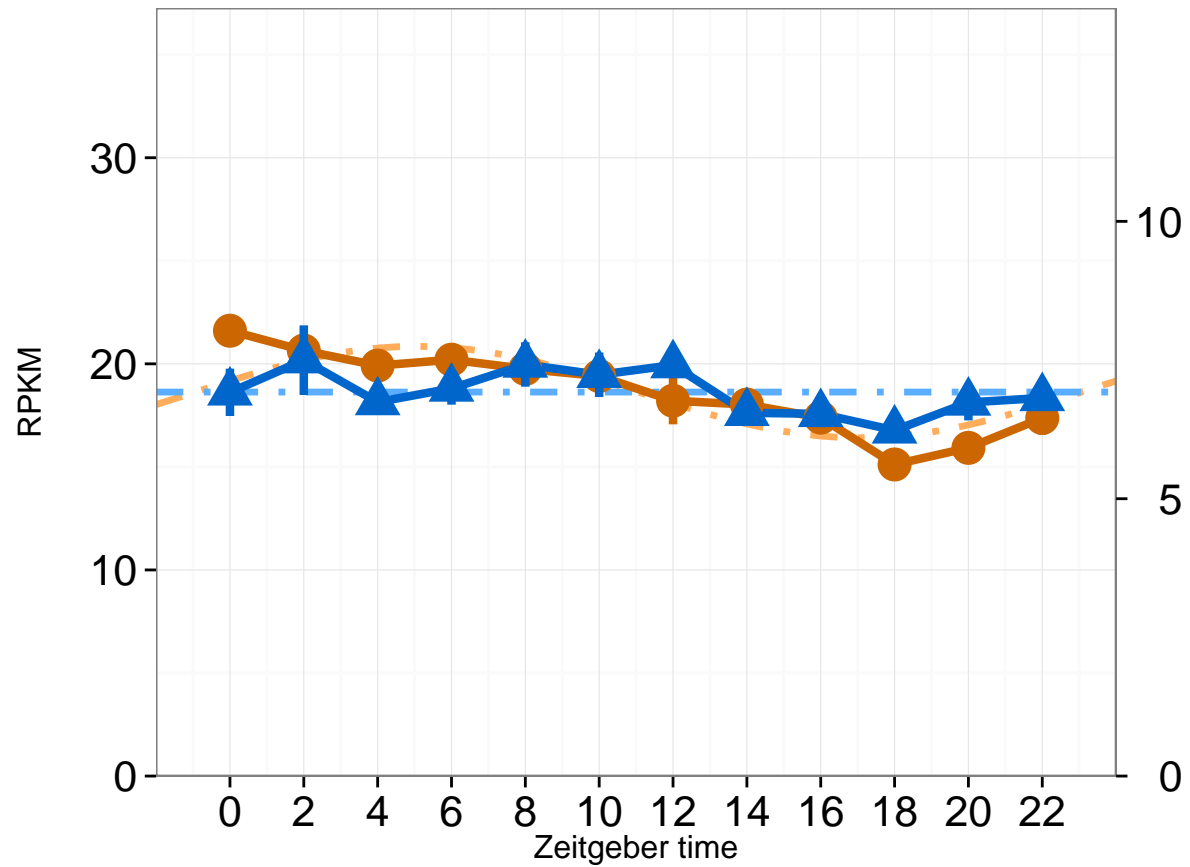

## Drosha

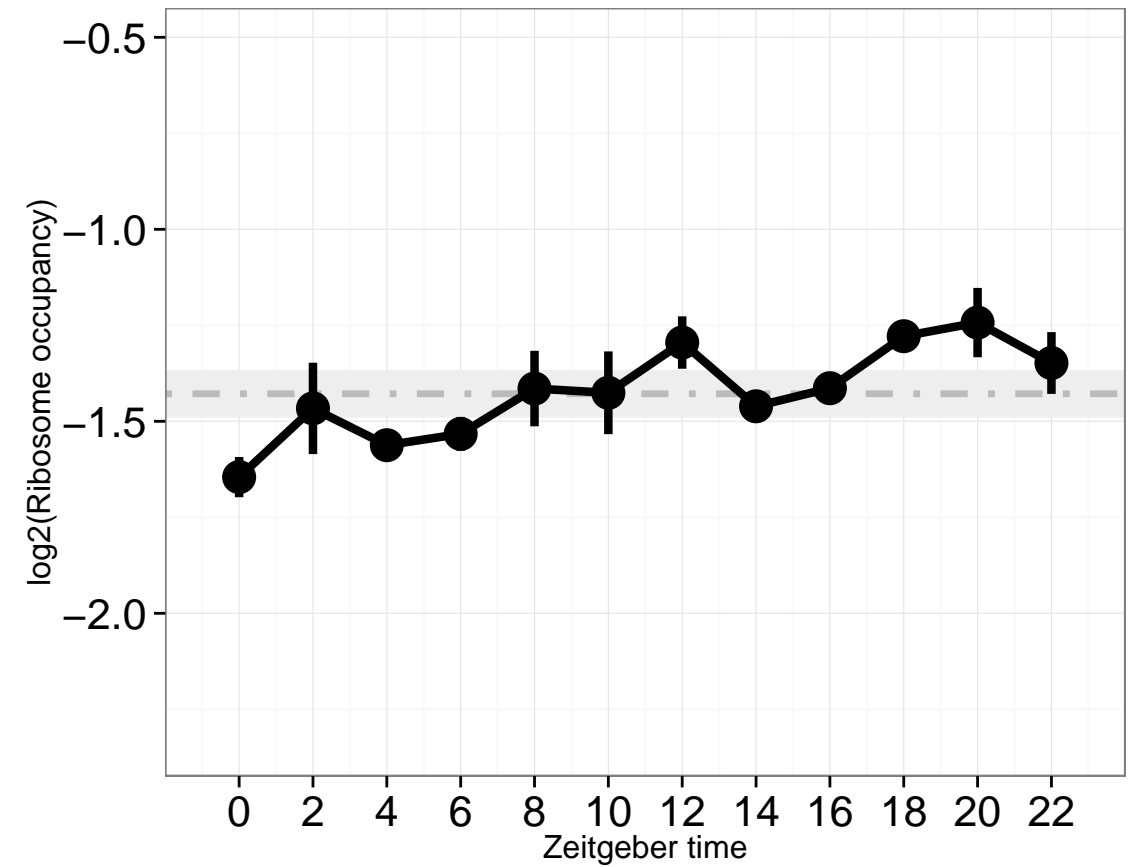

Supplement: Supplementary file 13150 [file 1]

## Cdkl3

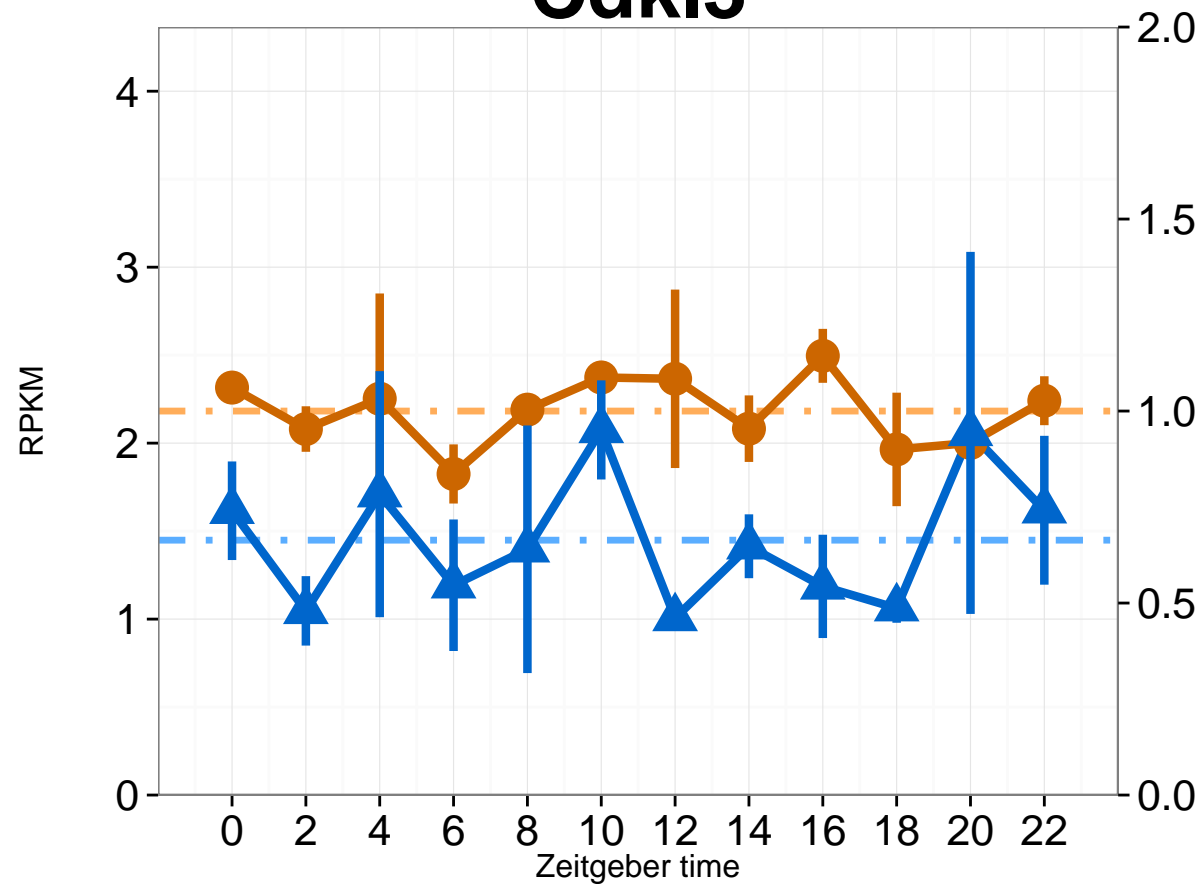

## Cdkl3

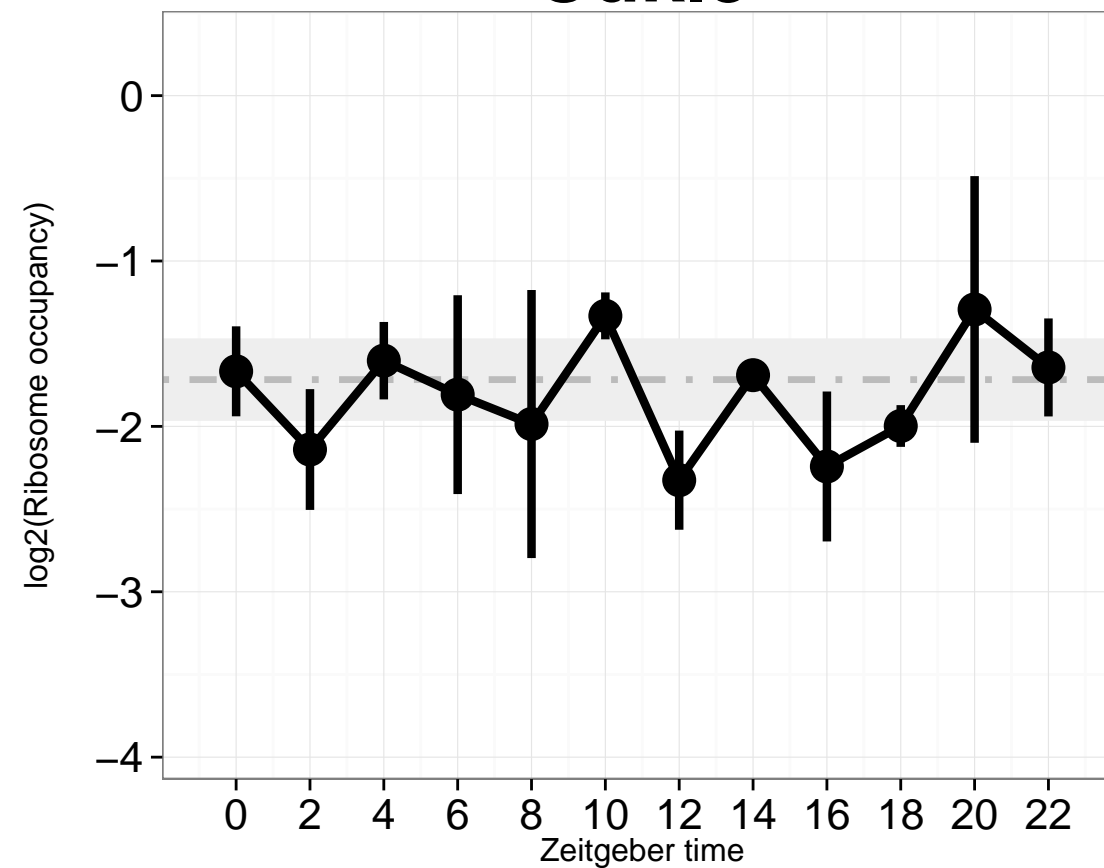

Supplement: Supplementary file 13151 [file 1]

## Npy

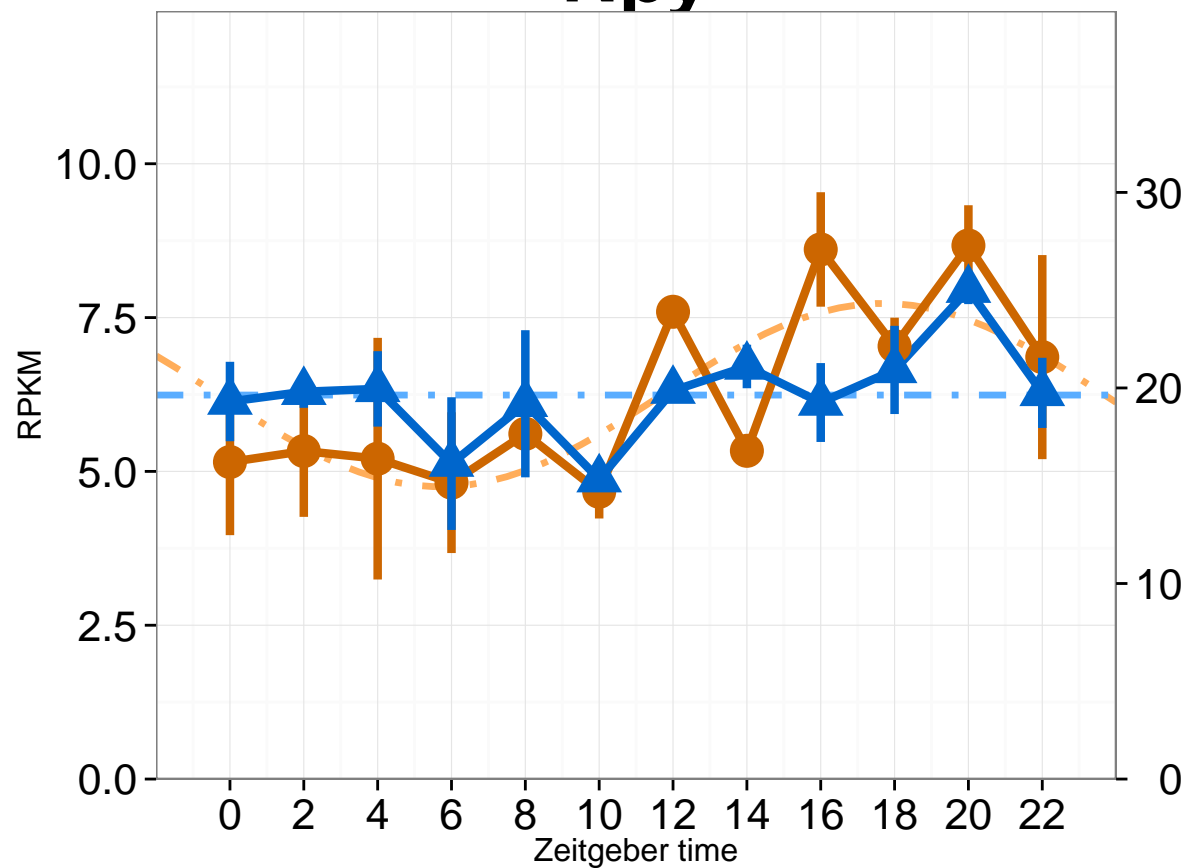

## Npy

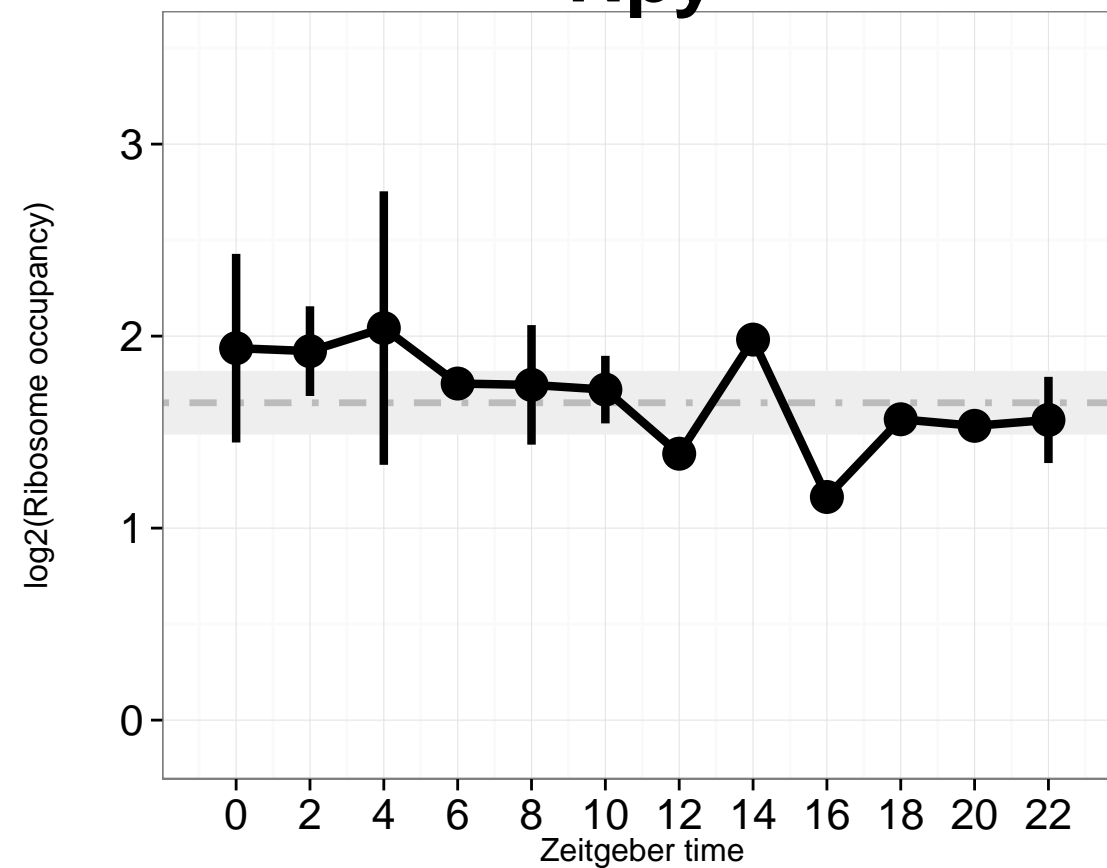

Supplement: Supplementary file 13152 [file 1]

## Kcnk3

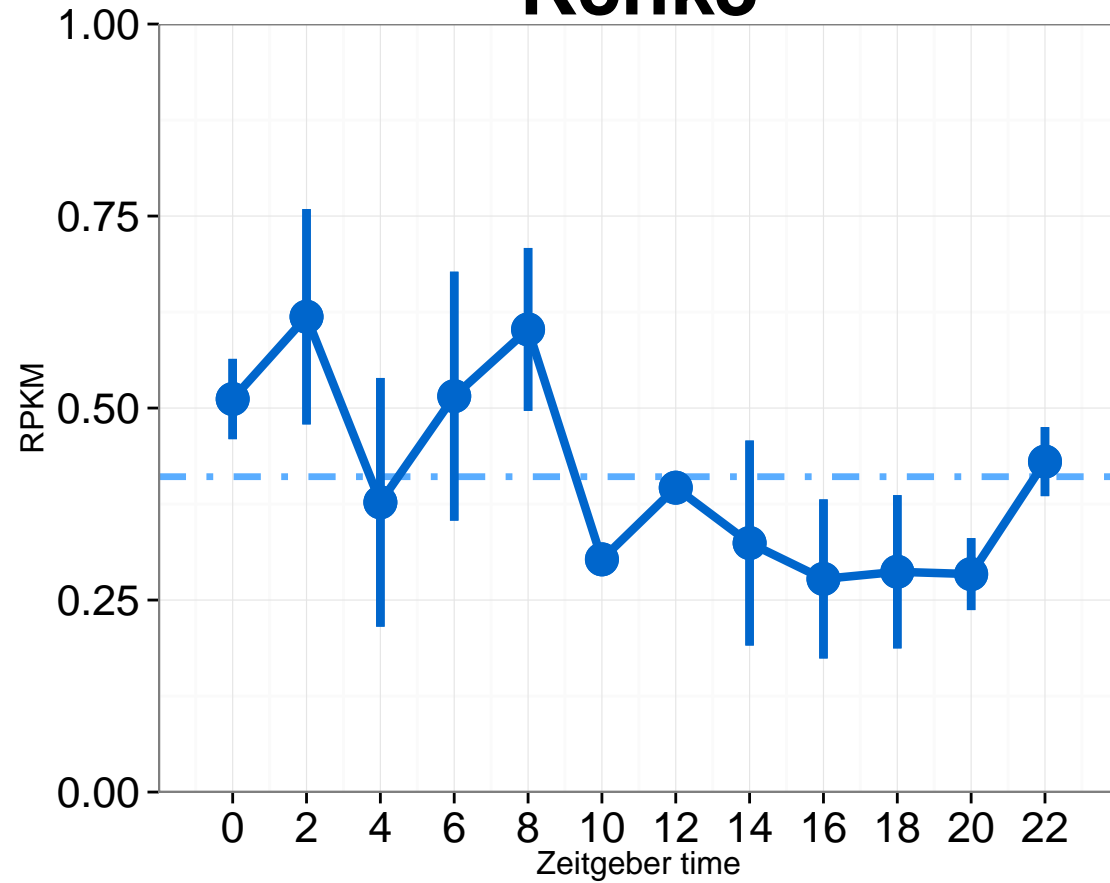

## Kcnk3 log2(Ribosome occupancy

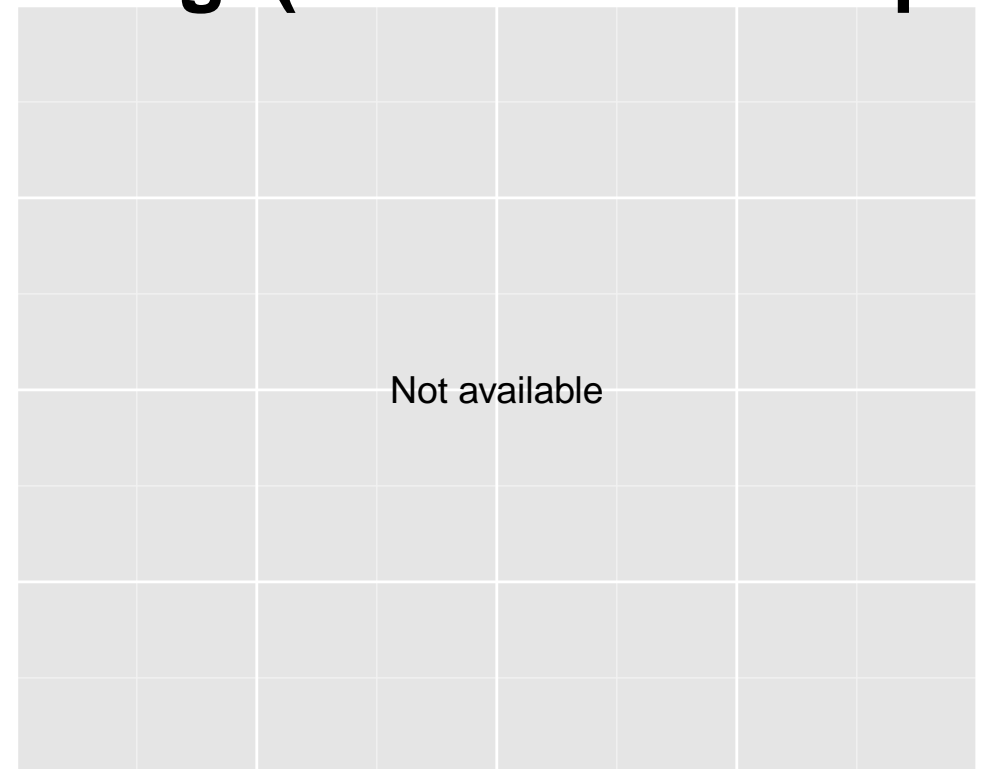

Supplement: Supplementary file 13153 [file 1]

## Arsk

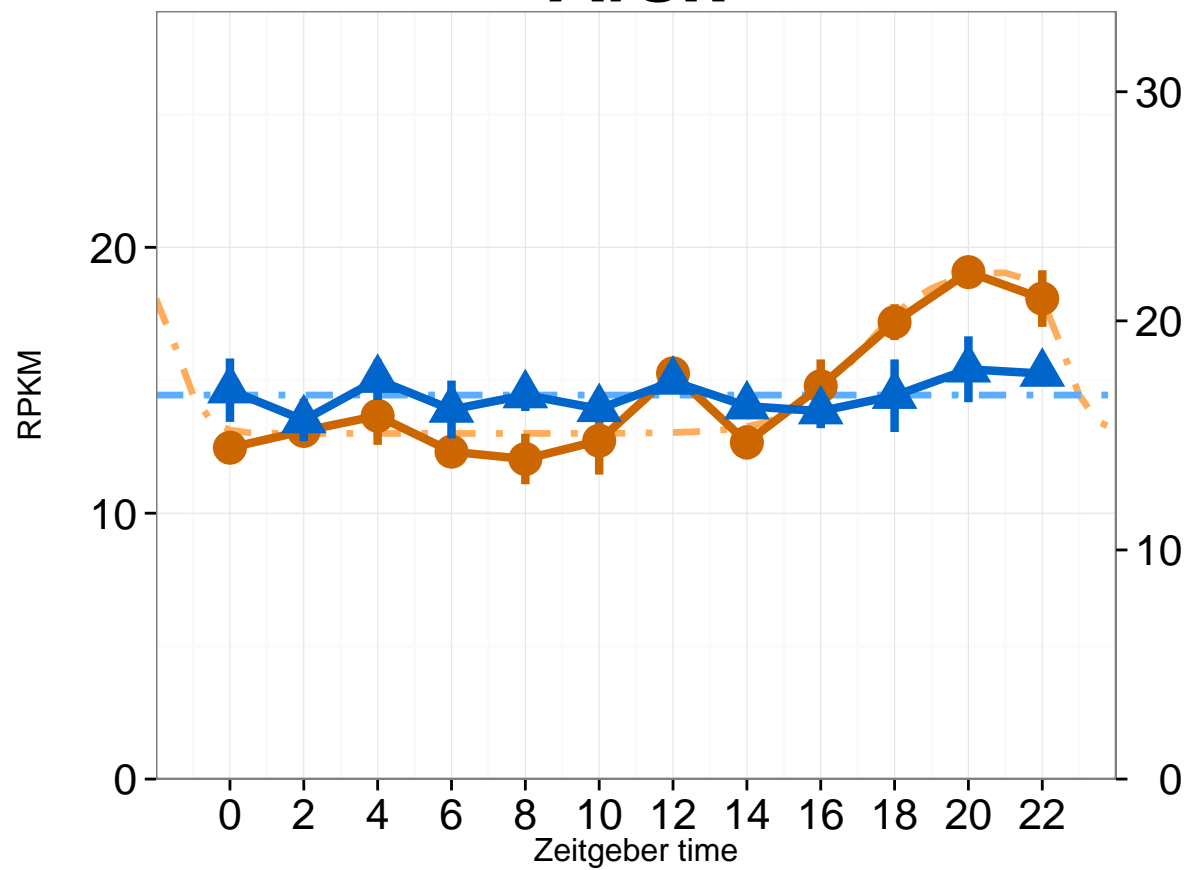

## Arsk

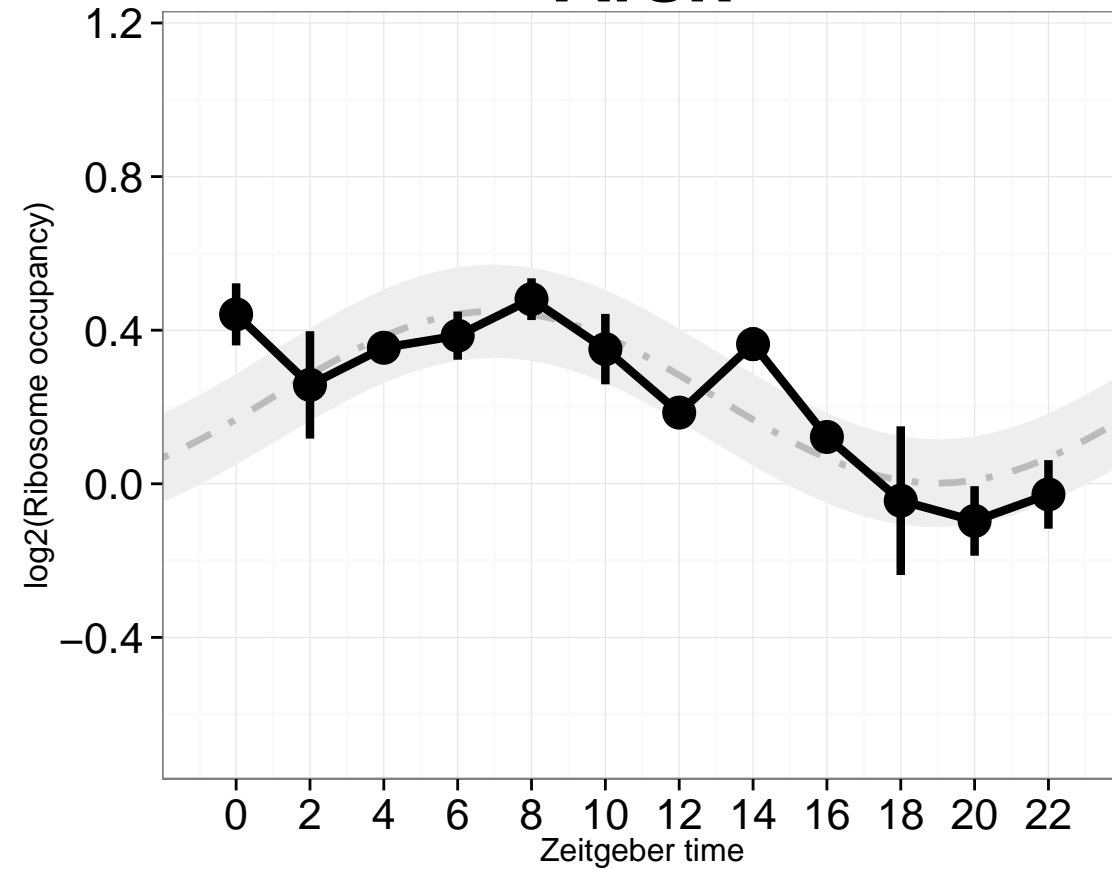

Supplement: Supplementary file 13154 [file 1]

**Ptprj**

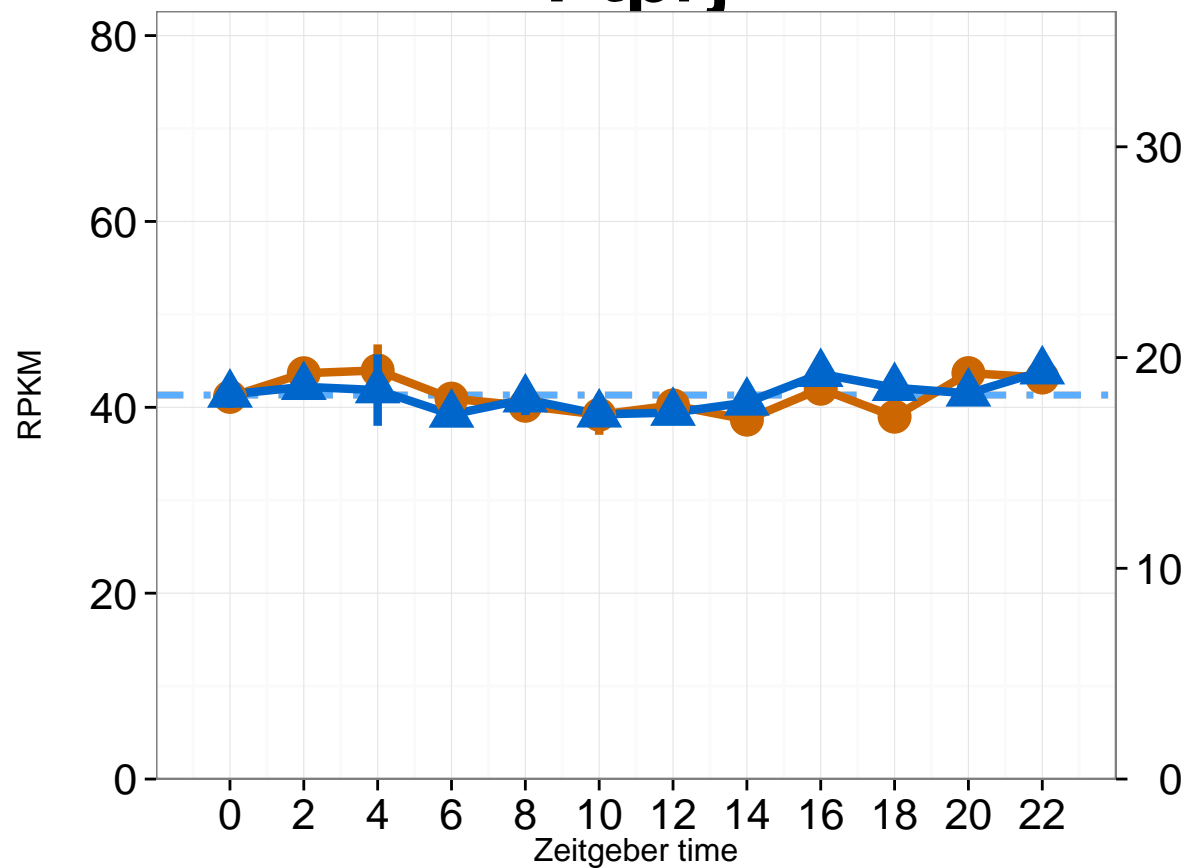

**Ptprj**

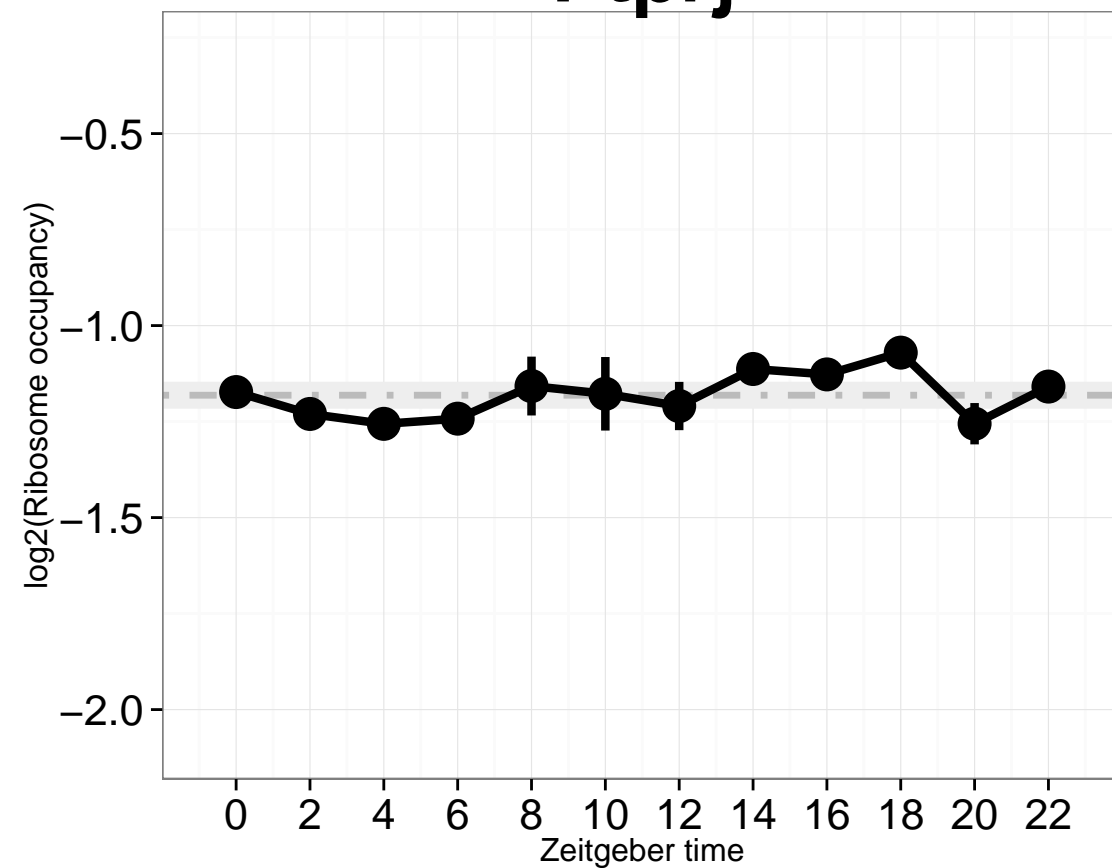

Supplement: Supplementary file 13155 [file 1]

# Gtf2b

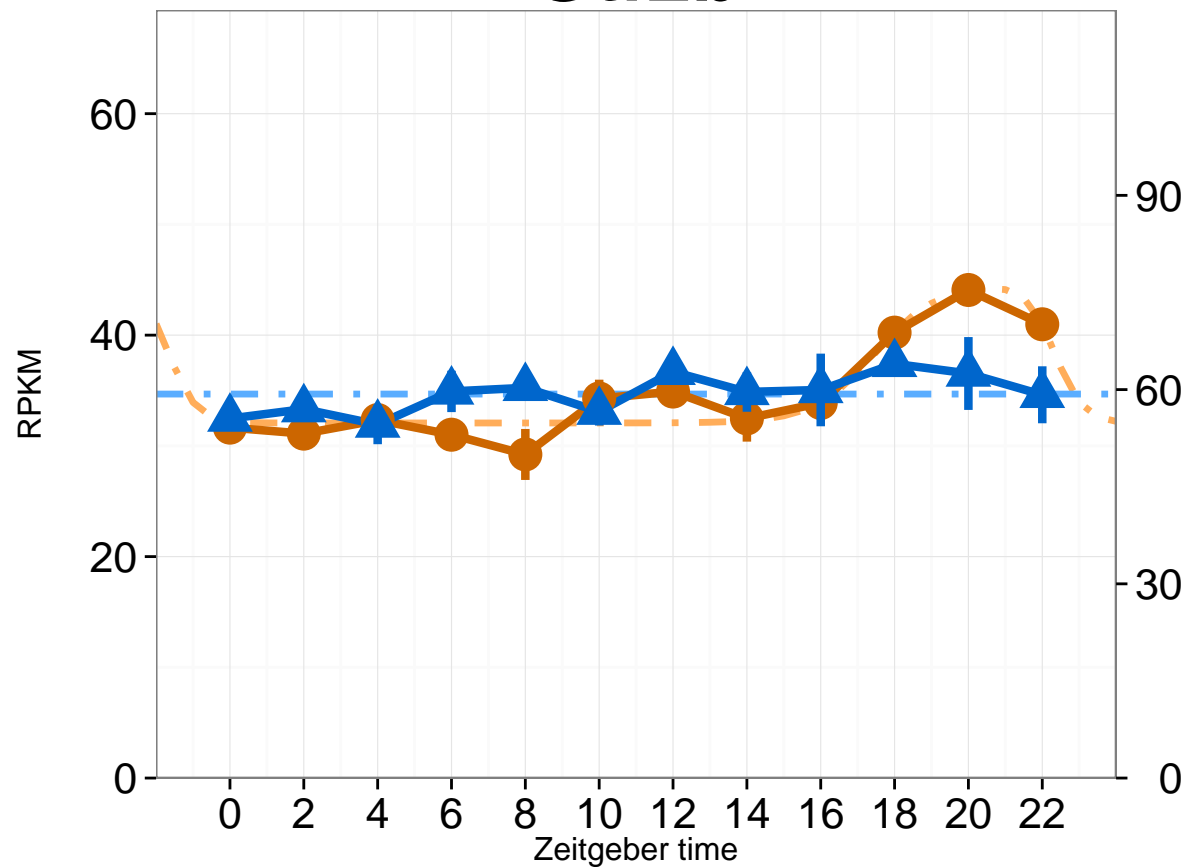

# Gtf2b

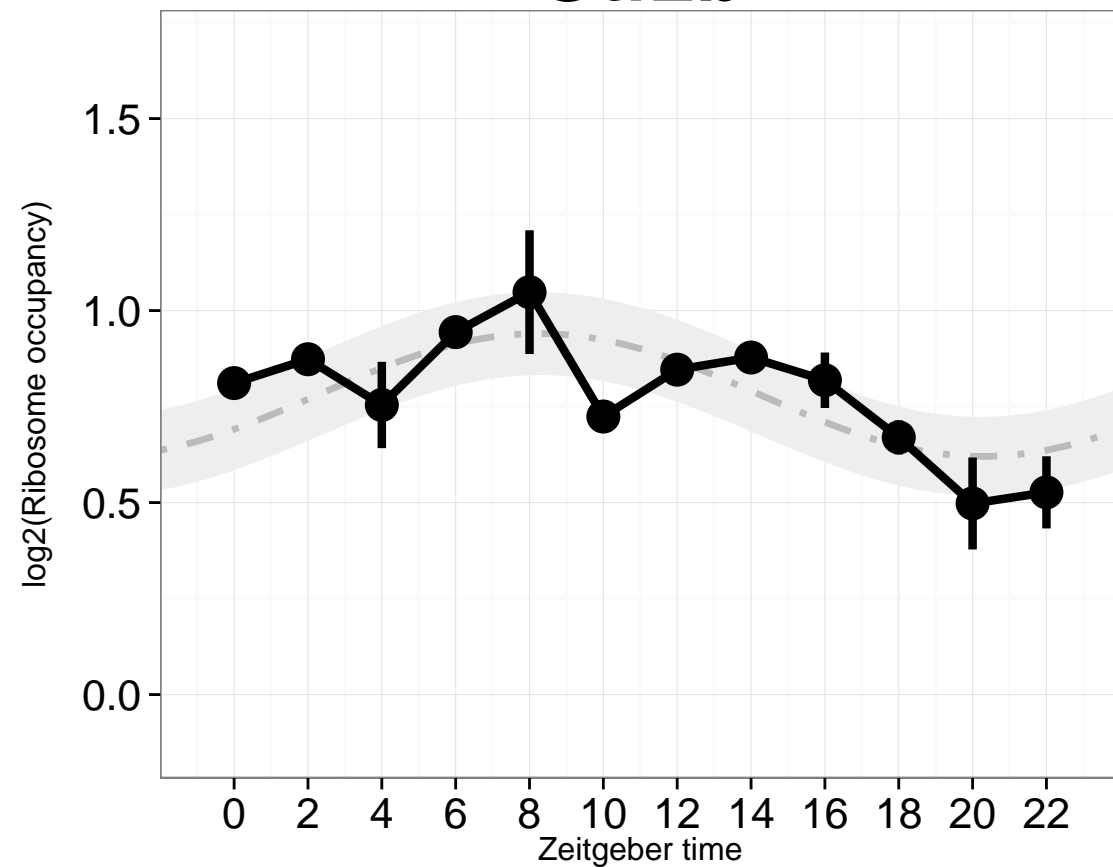

Supplement: Supplementary file 13156 [file 1]

## Akap1

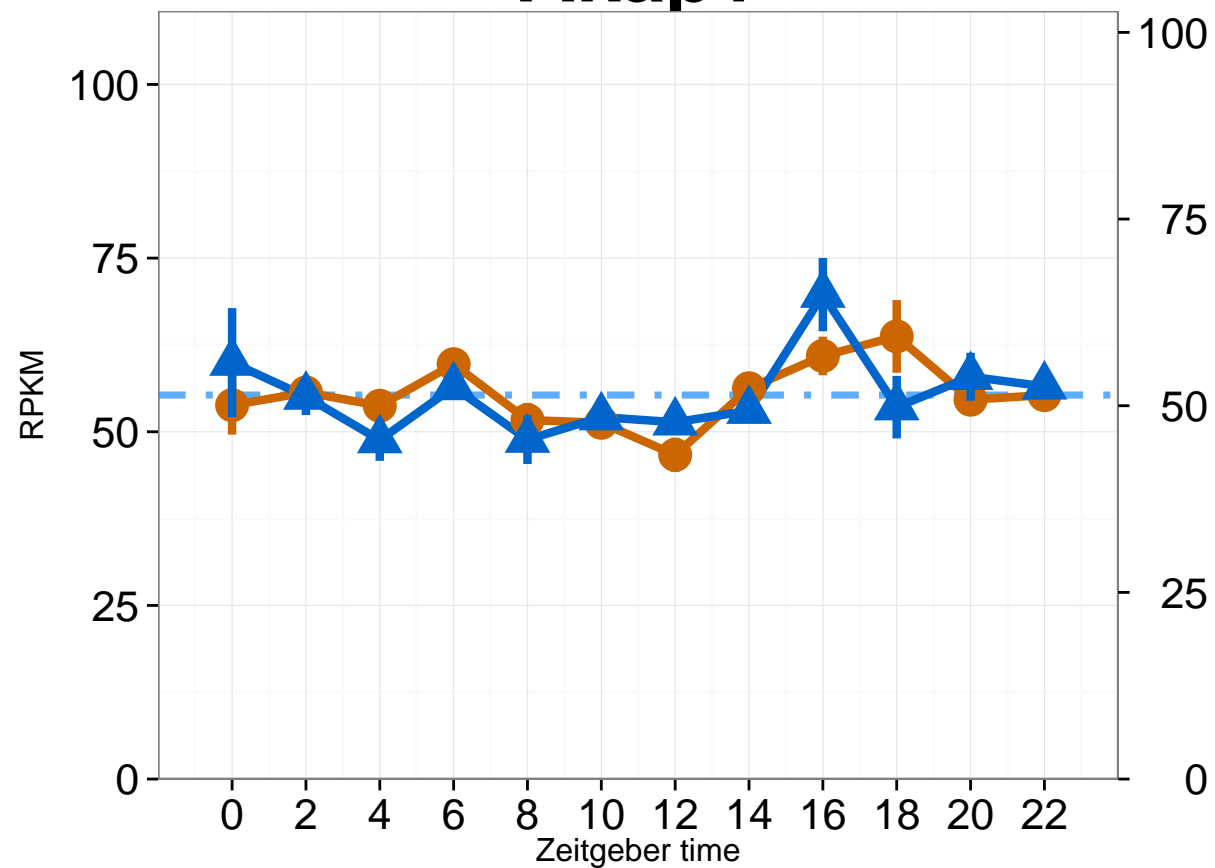

## Akap1

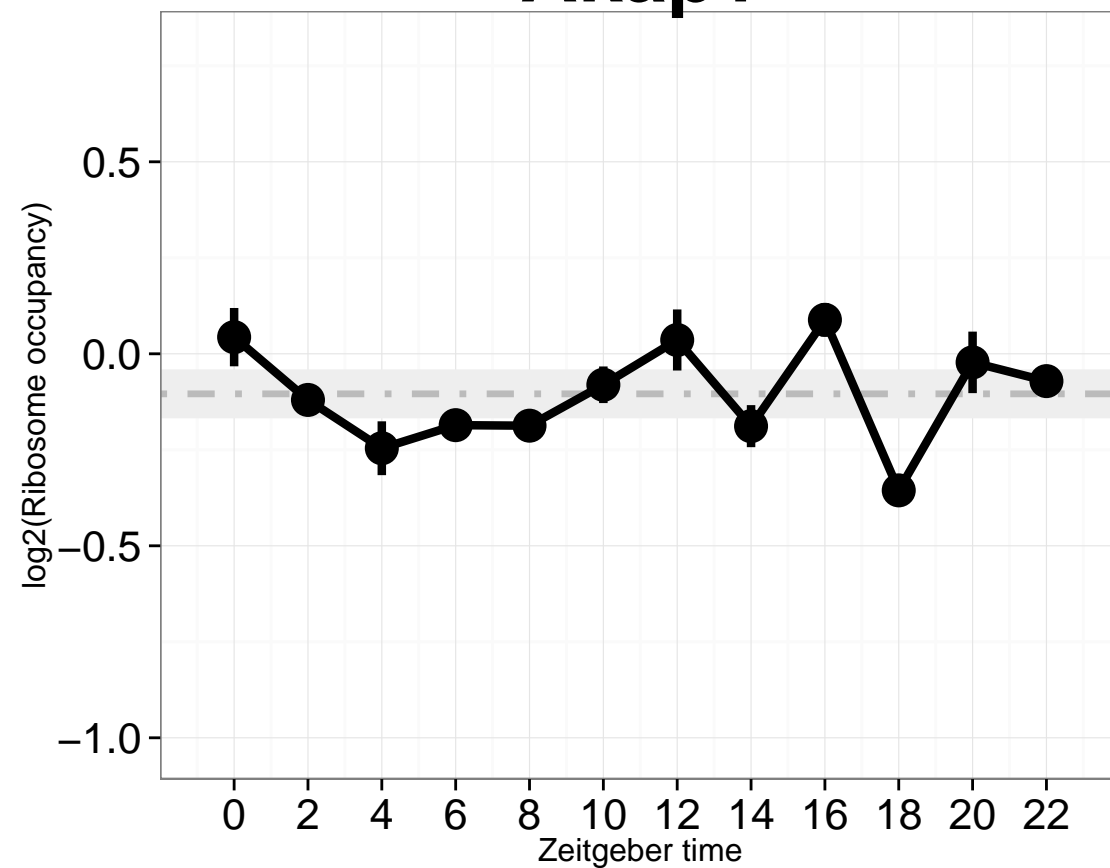

Supplement: Supplementary file 13157 [file 1]

## Atf3

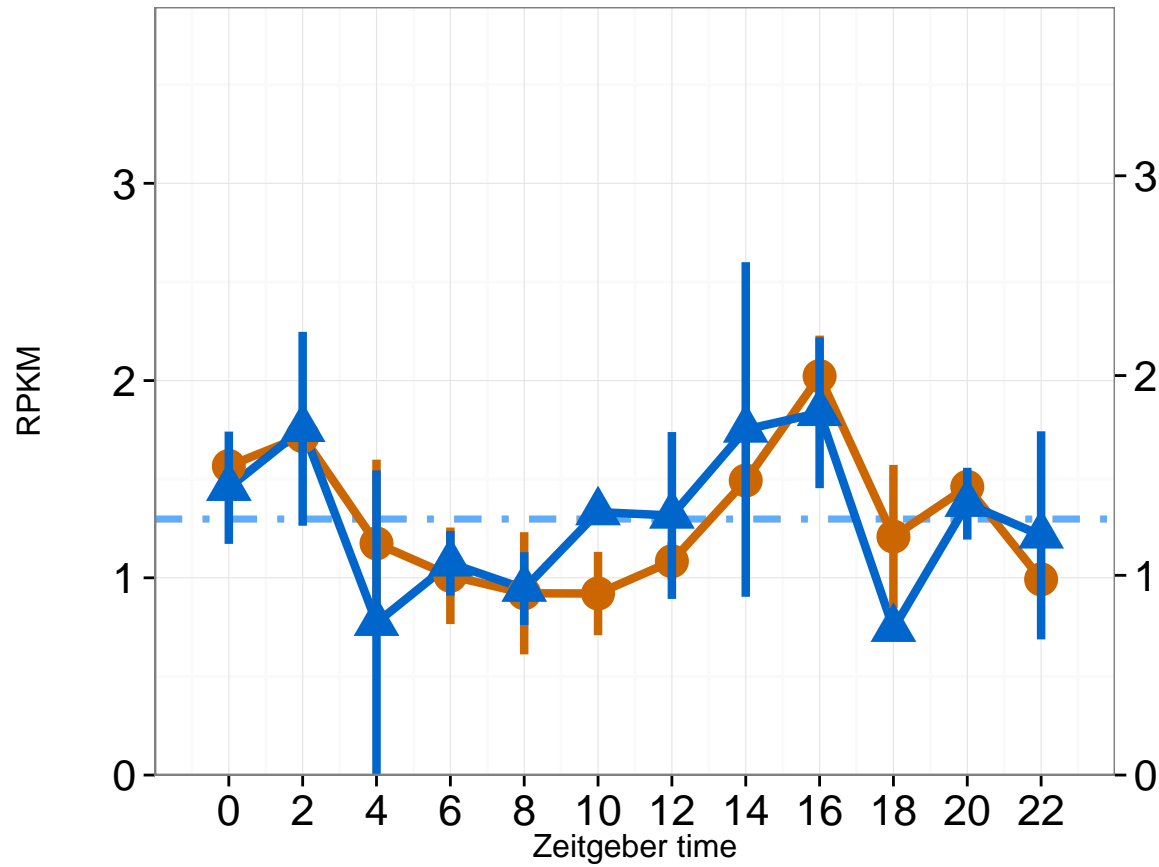

## Atf3

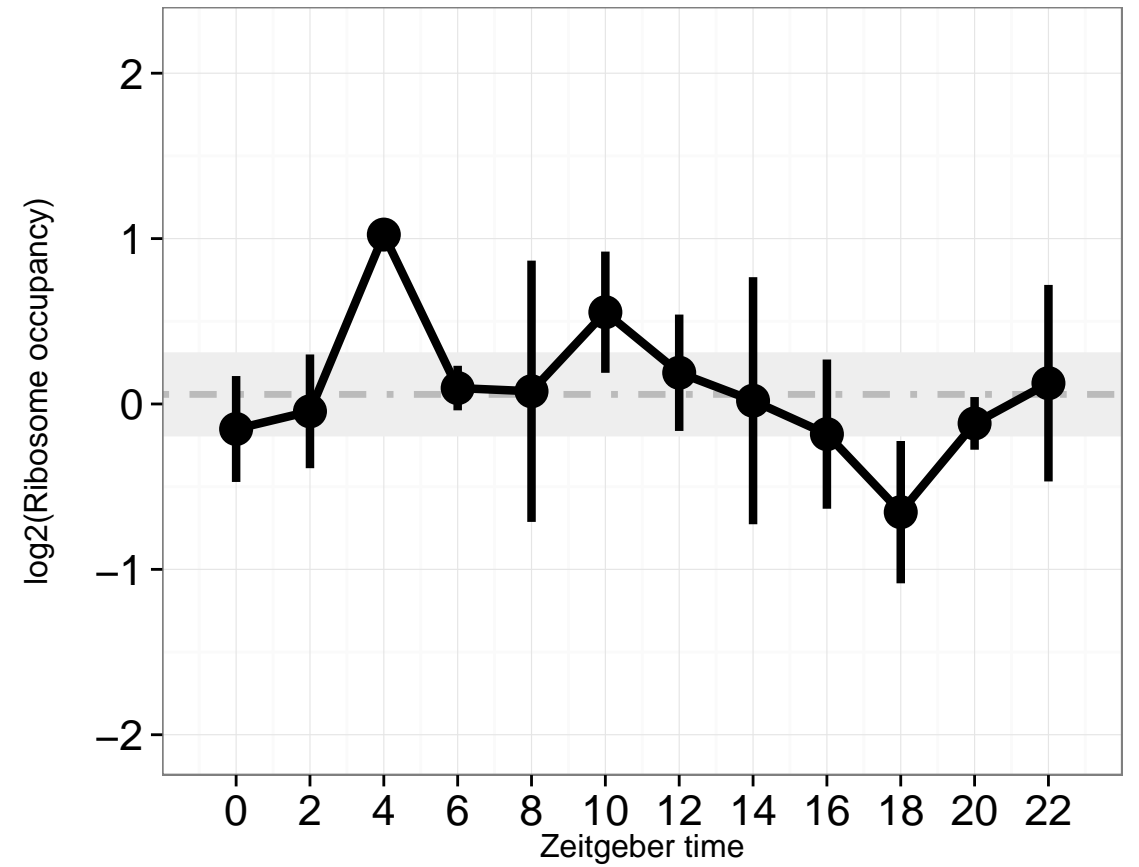

Supplement: Supplementary file 13158 [file 1]

# Tgoln1

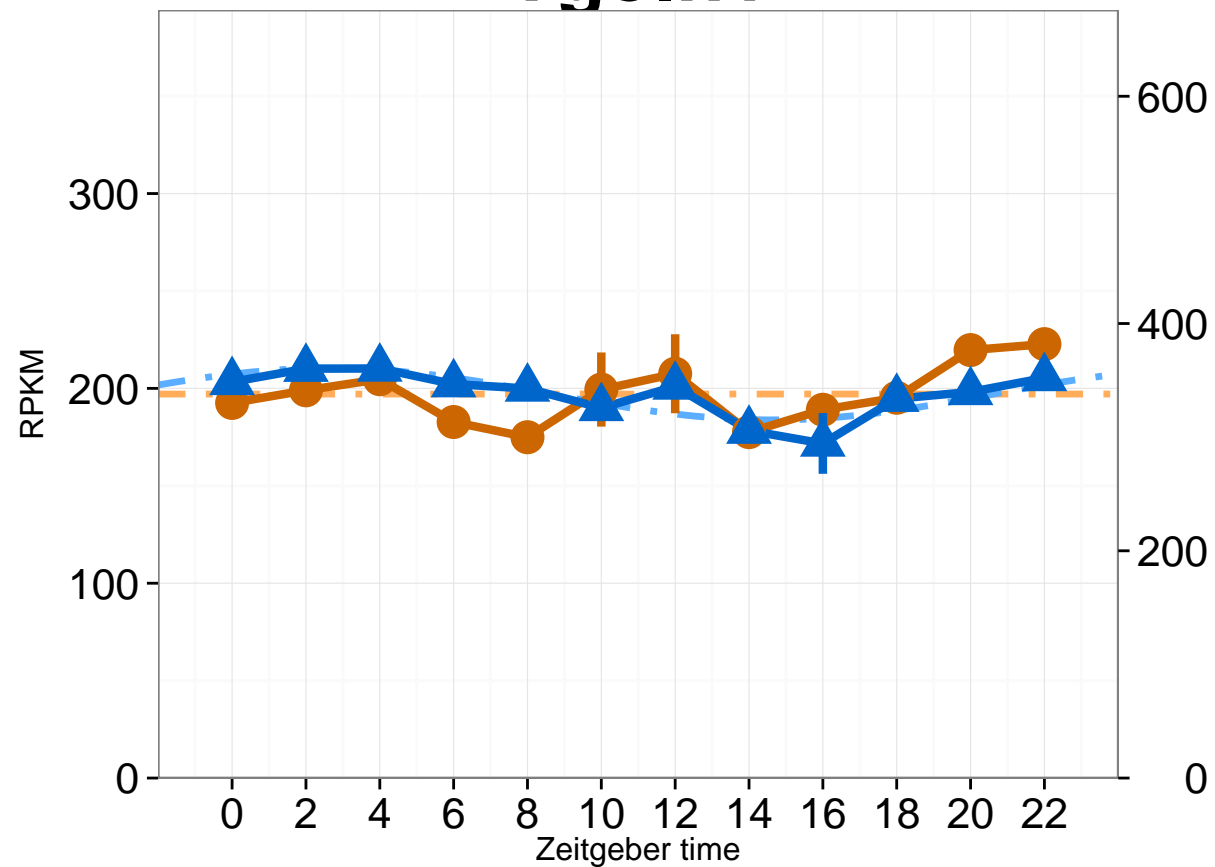

# Tgoln1

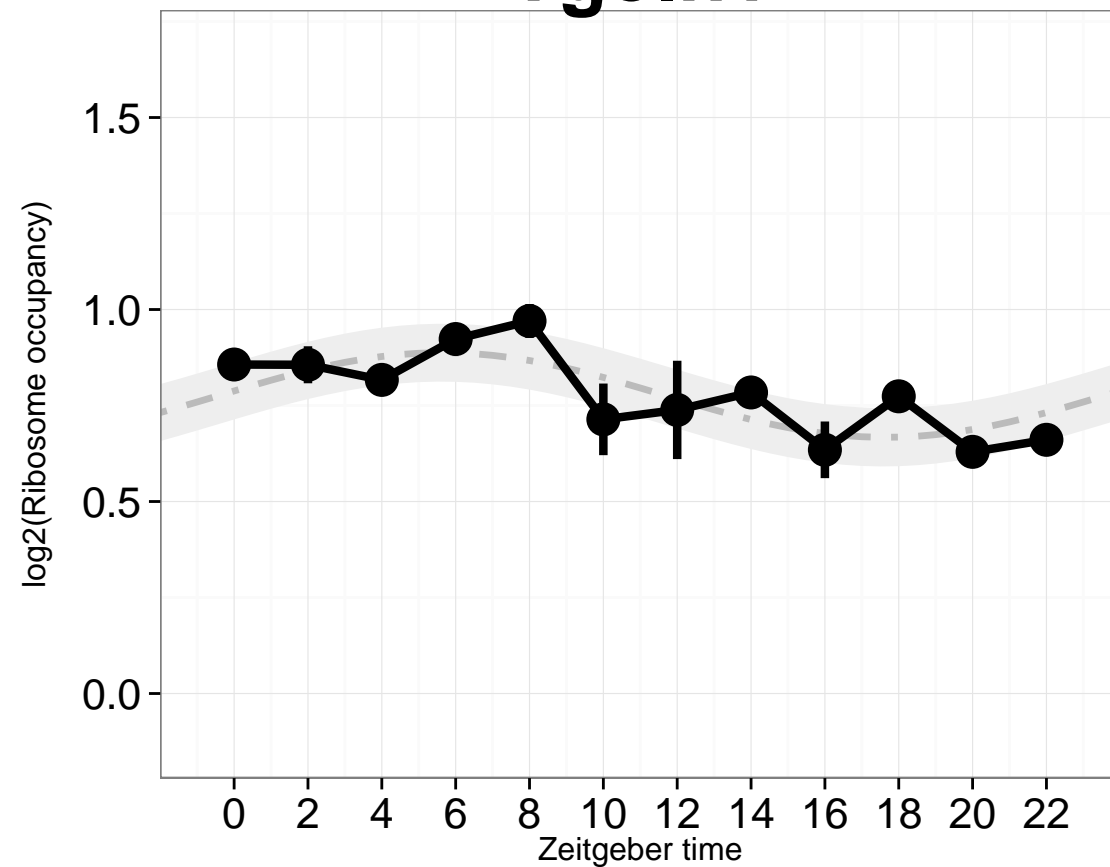

Supplement: Supplementary file 13159 [file 1]

## BC003965

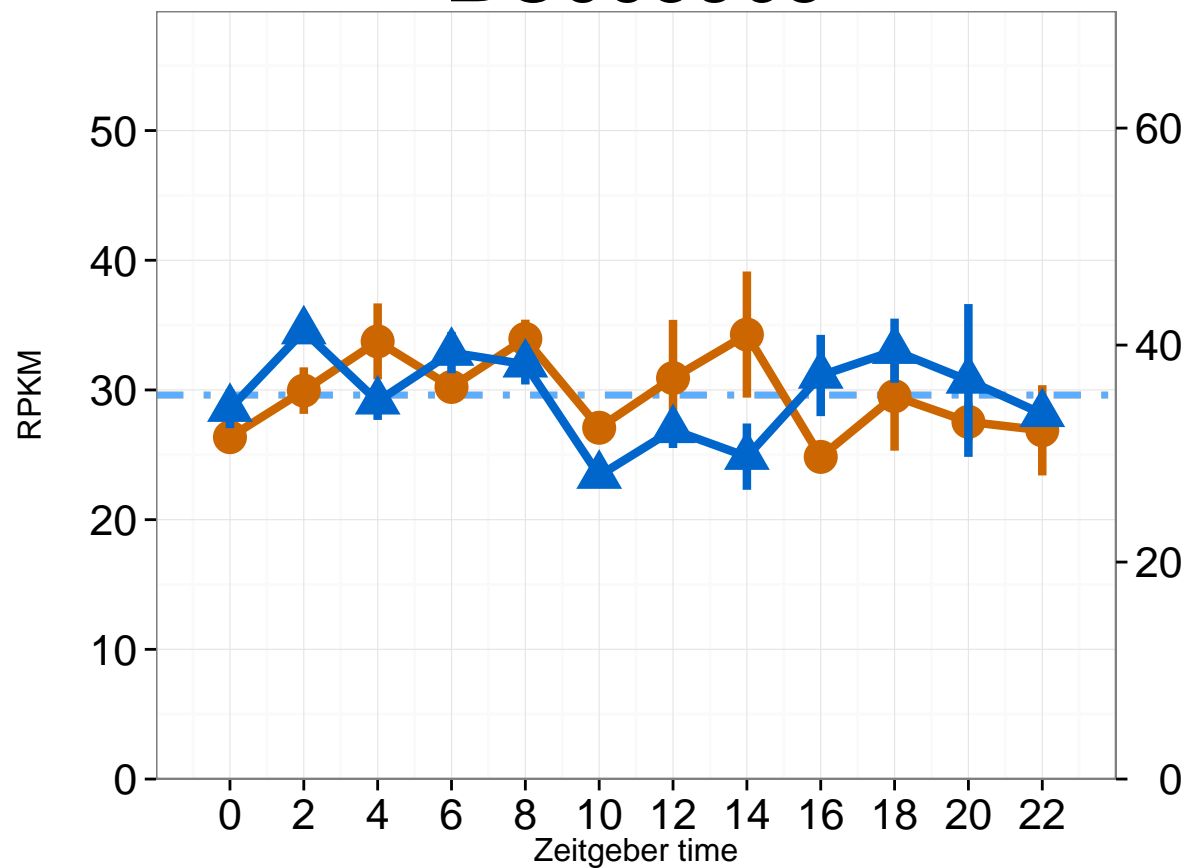

## BC003965

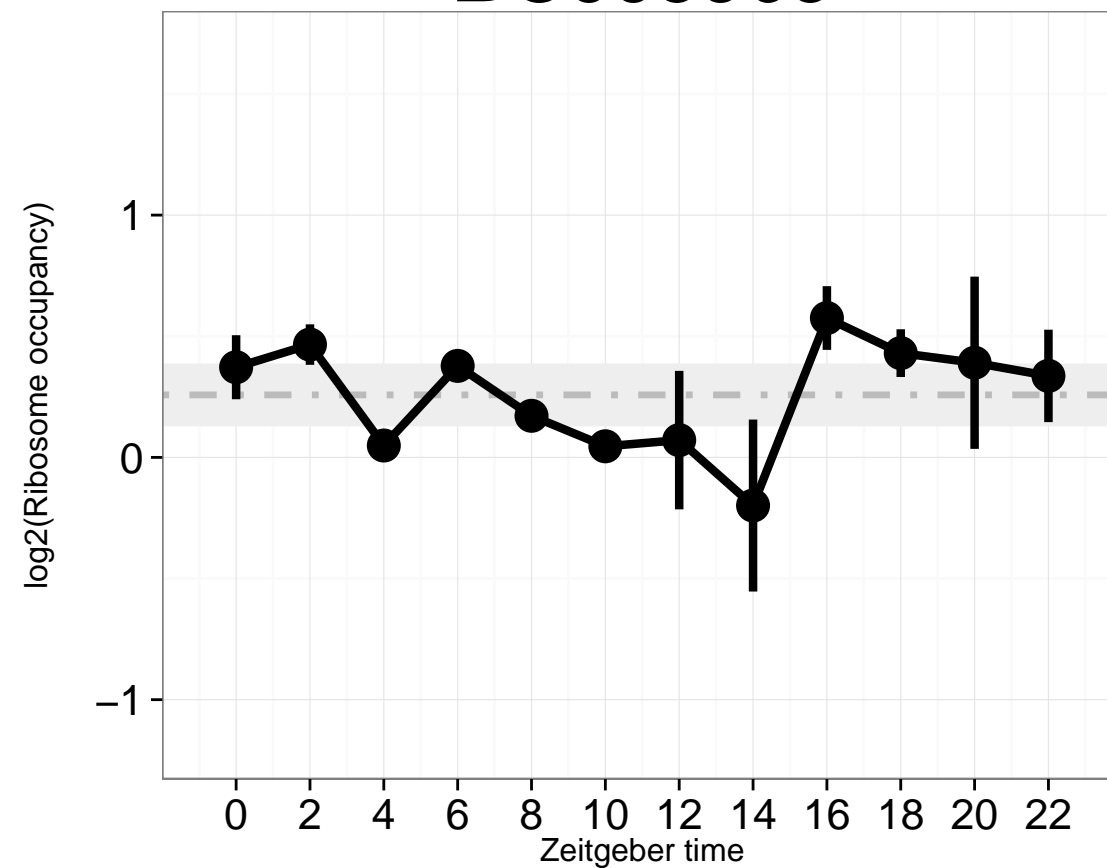

Supplement: Supplementary file 13160 [file 1]

## Pdzd11

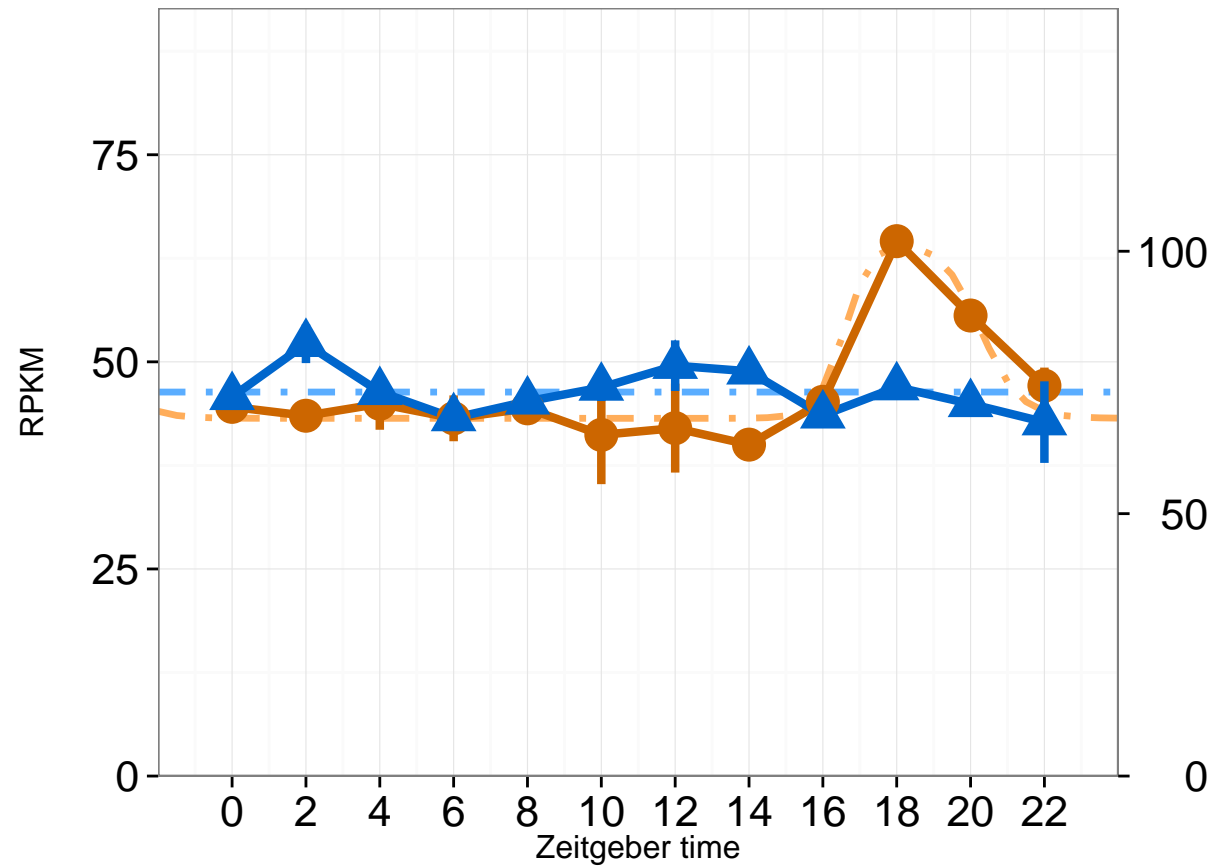

## Pdzd11

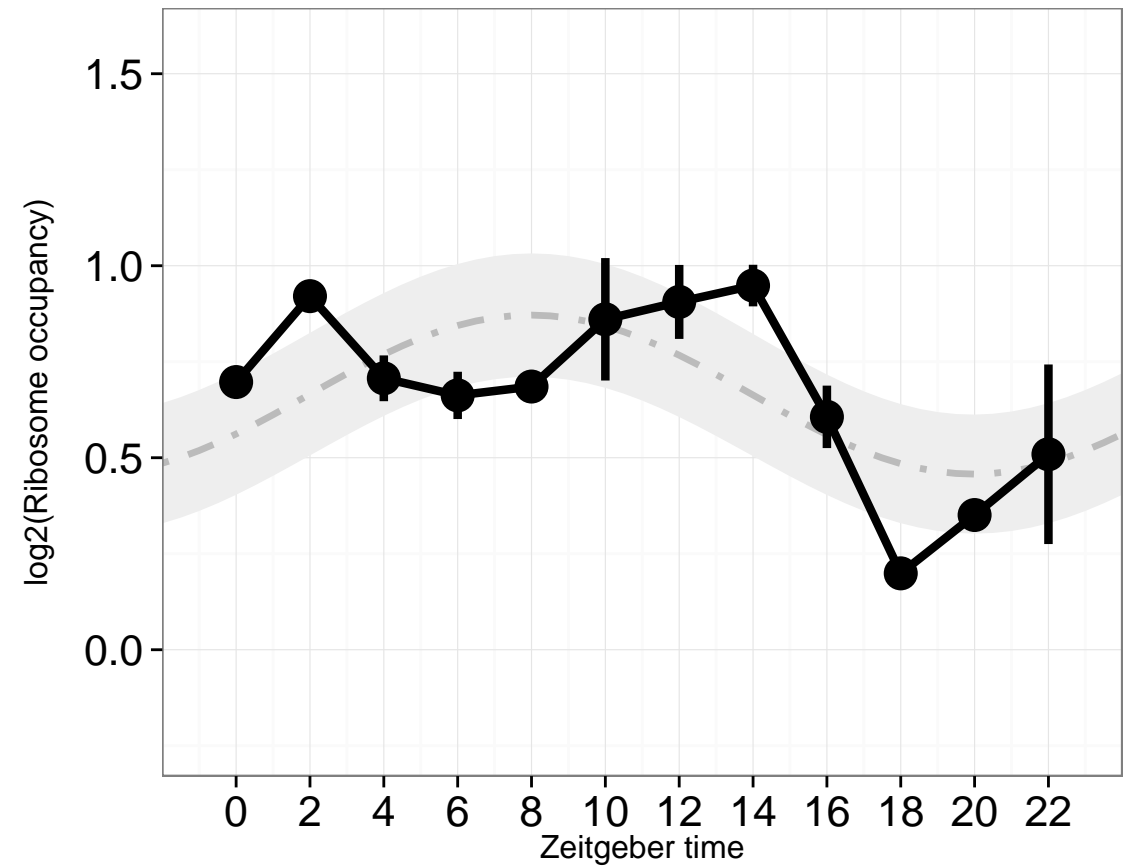

Supplement: Supplementary file 13161 [file 1]

# Zfp30

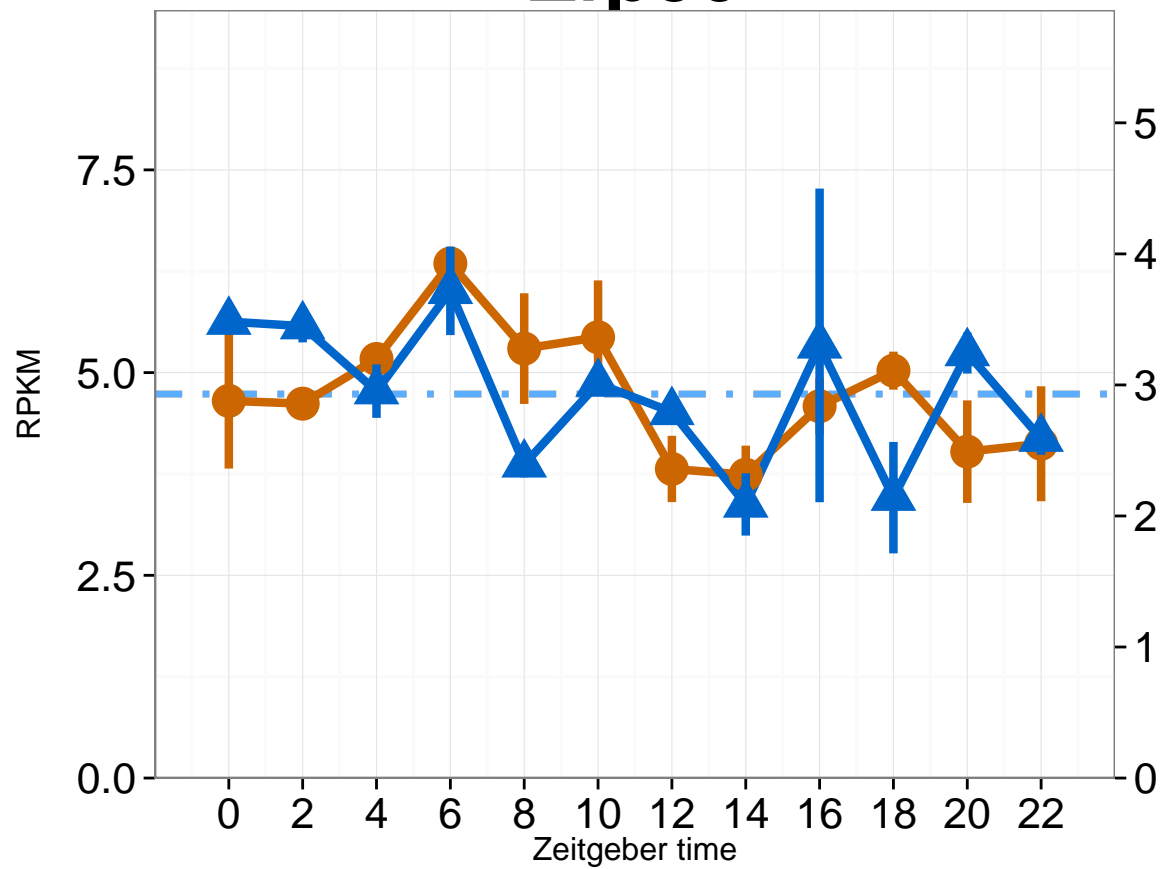

# Zfp30

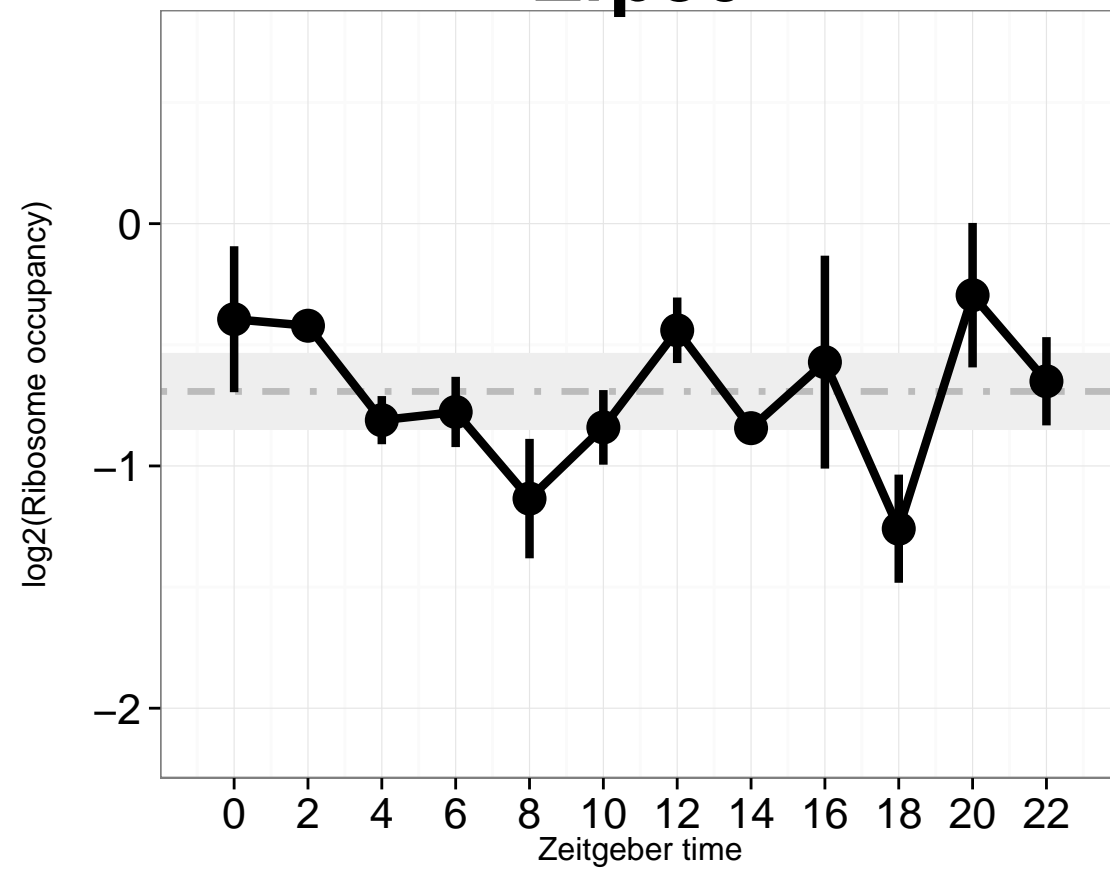

Supplement: Supplementary file 13162 [file 1]

## Mum1

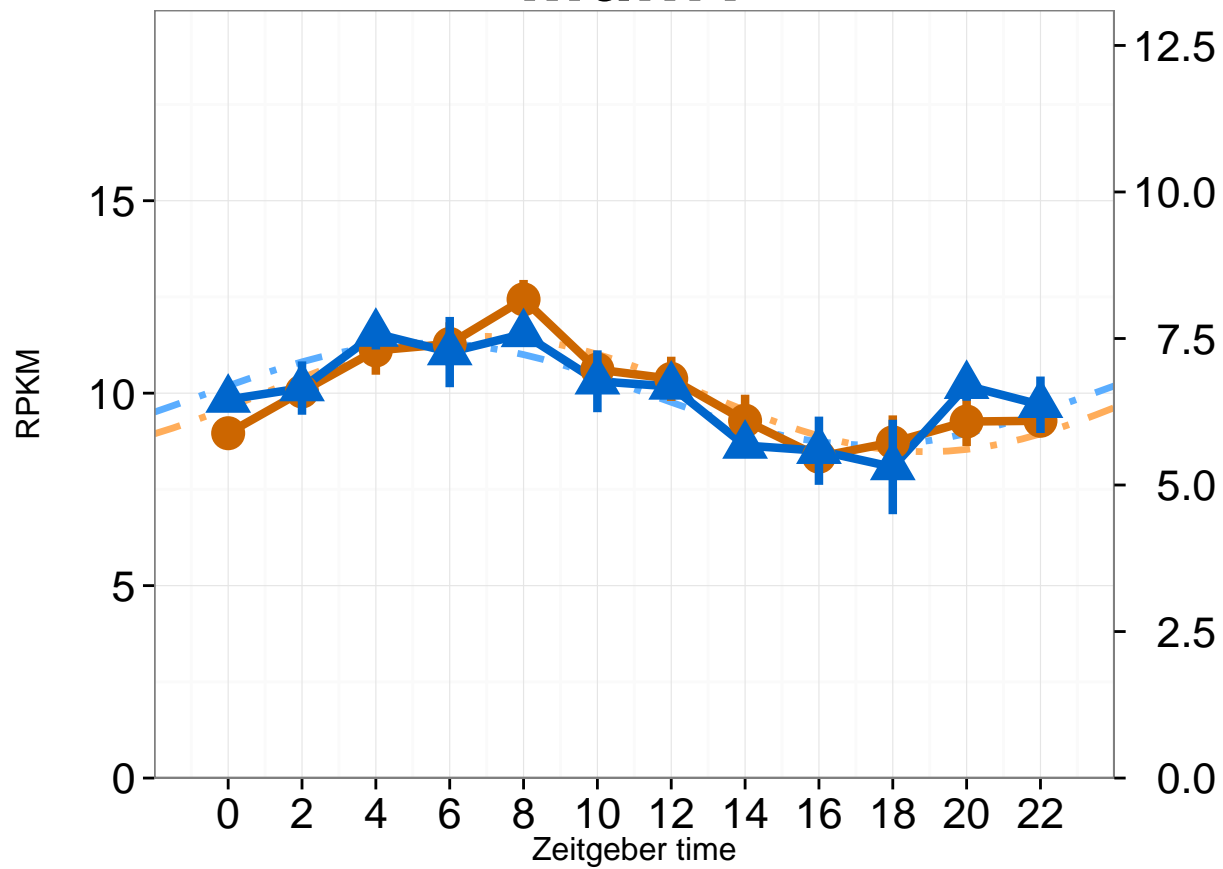

## Mum1

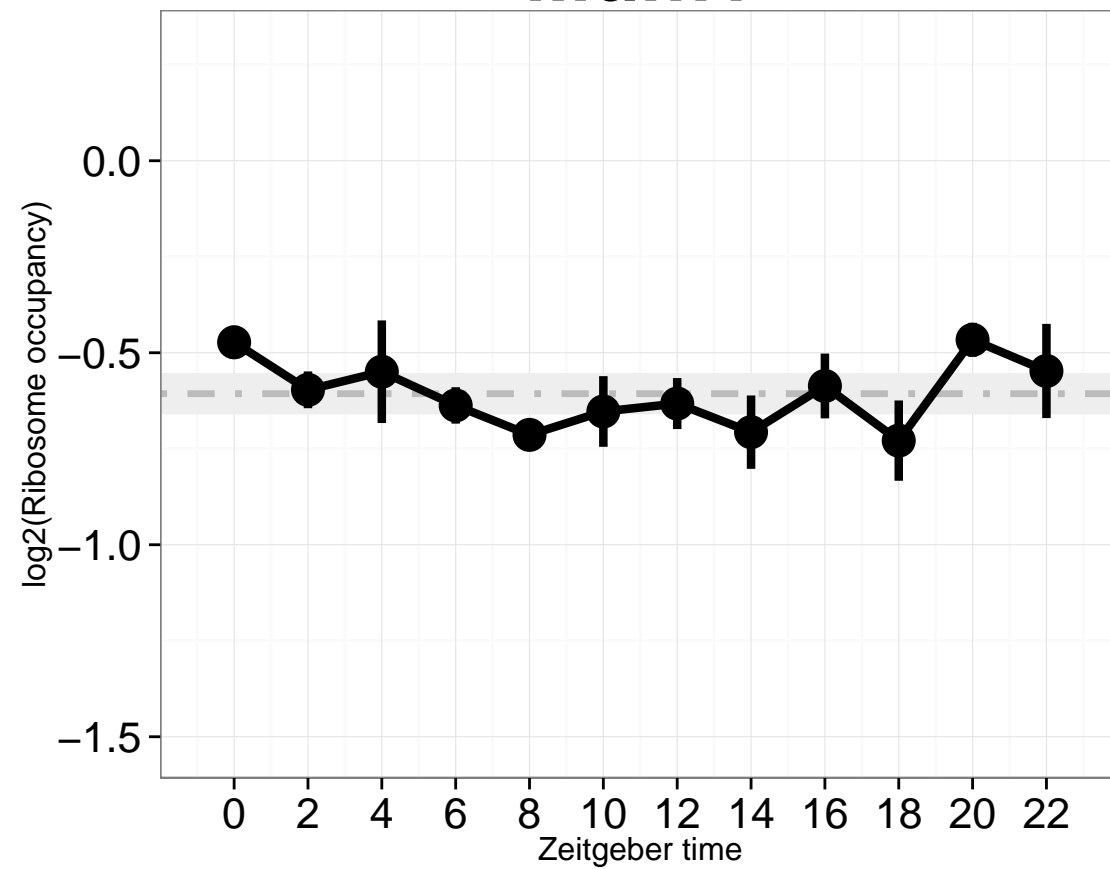

Supplement: Supplementary file 13163 [file 1]

## BphI

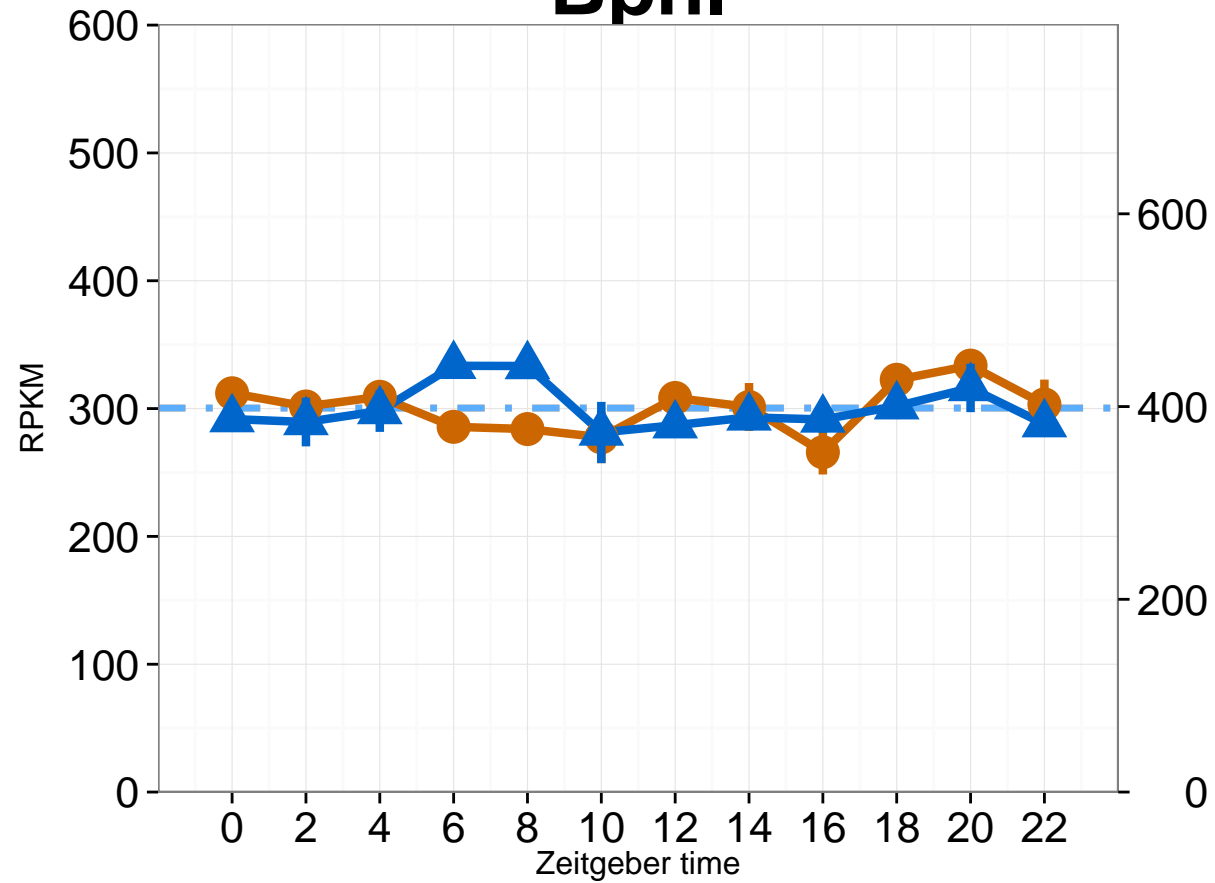

## BphI

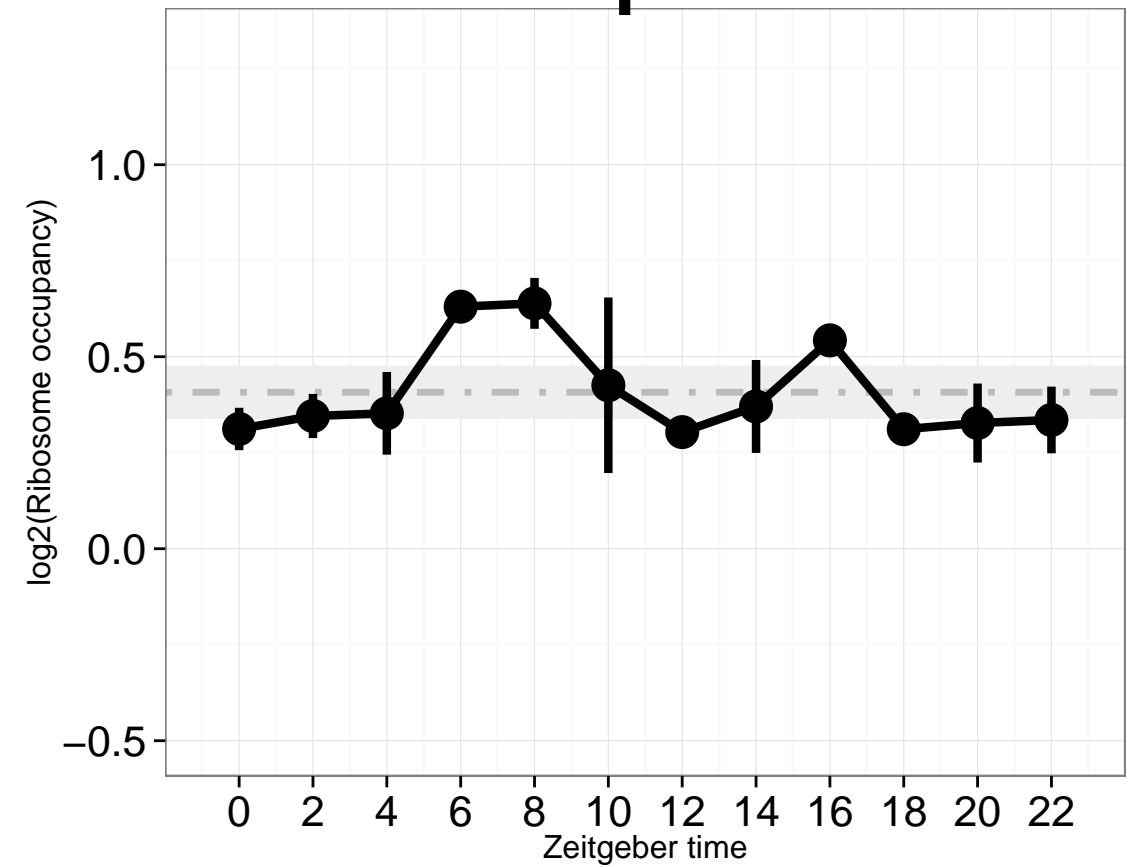

Supplement: Supplementary file 13164 [file 1]

# Zfp213

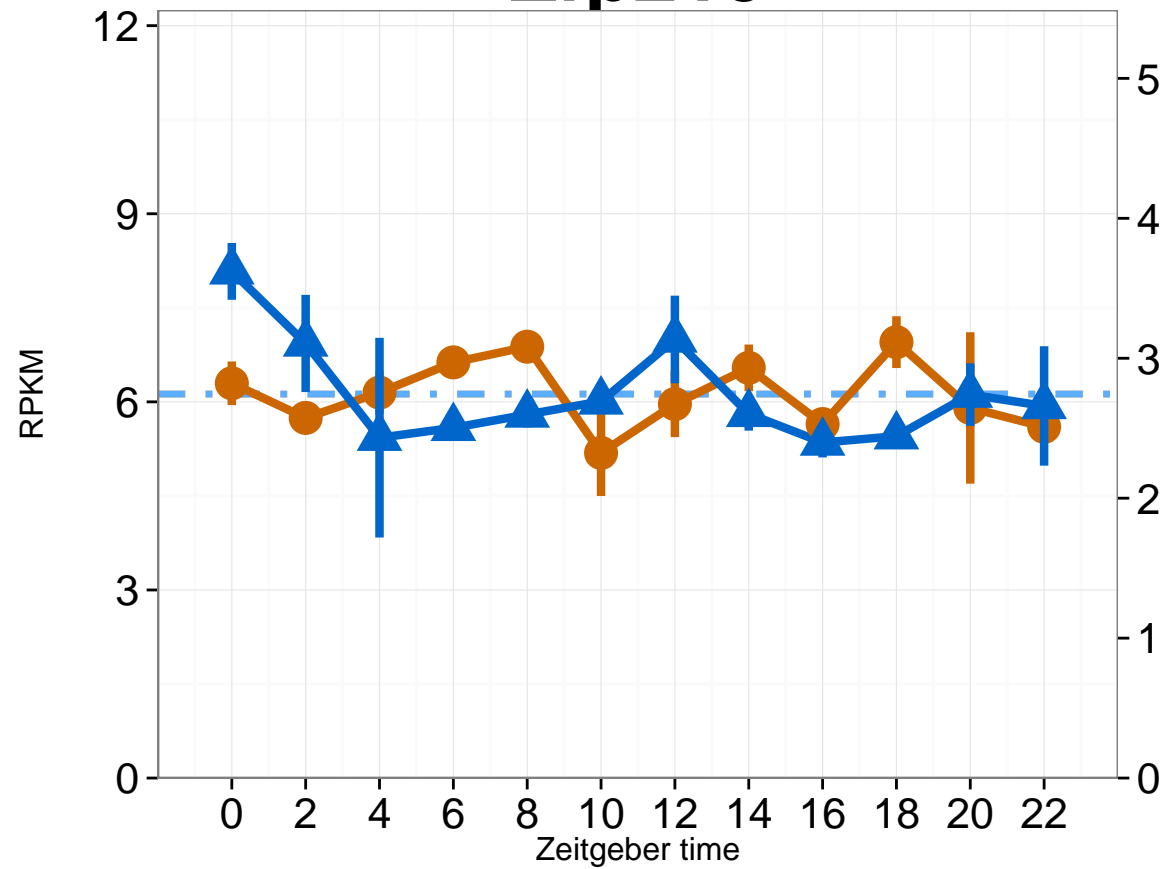

# Zfp213

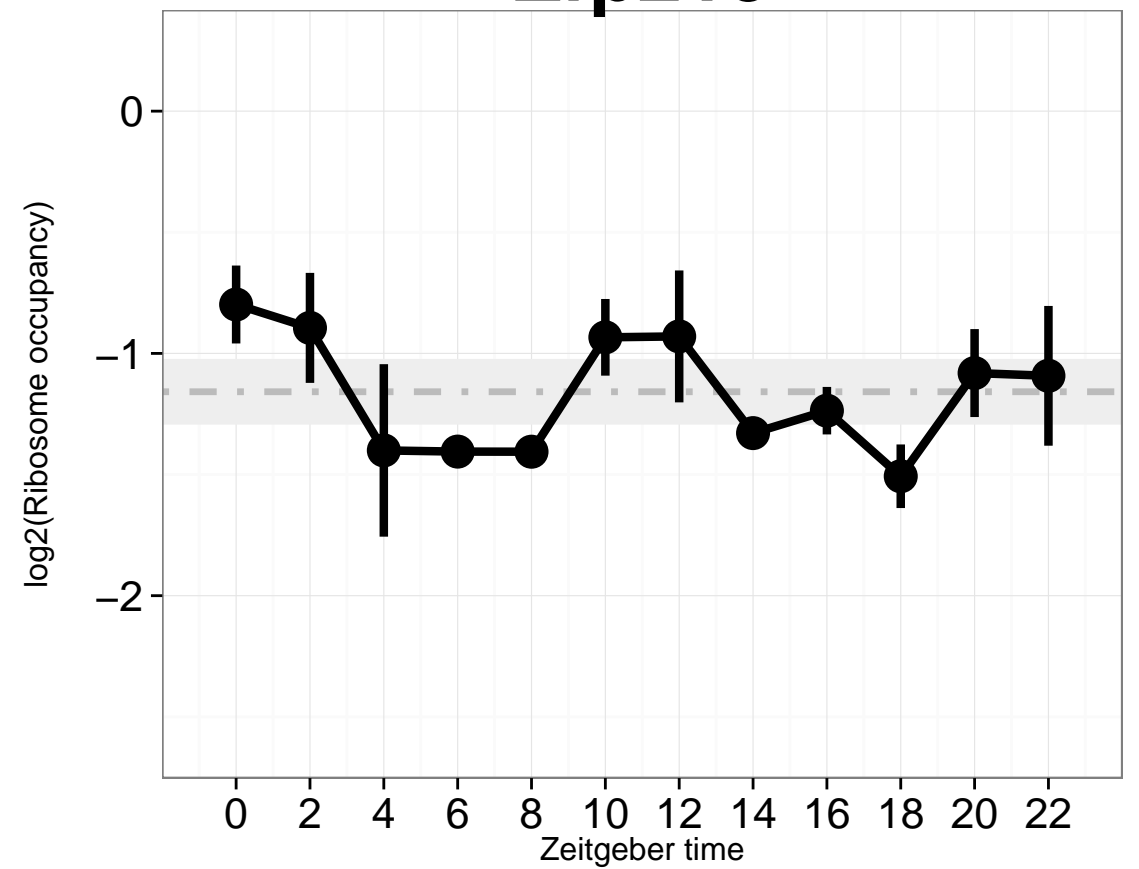

Supplement: Supplementary file 13165 [file 1]

## Samd4

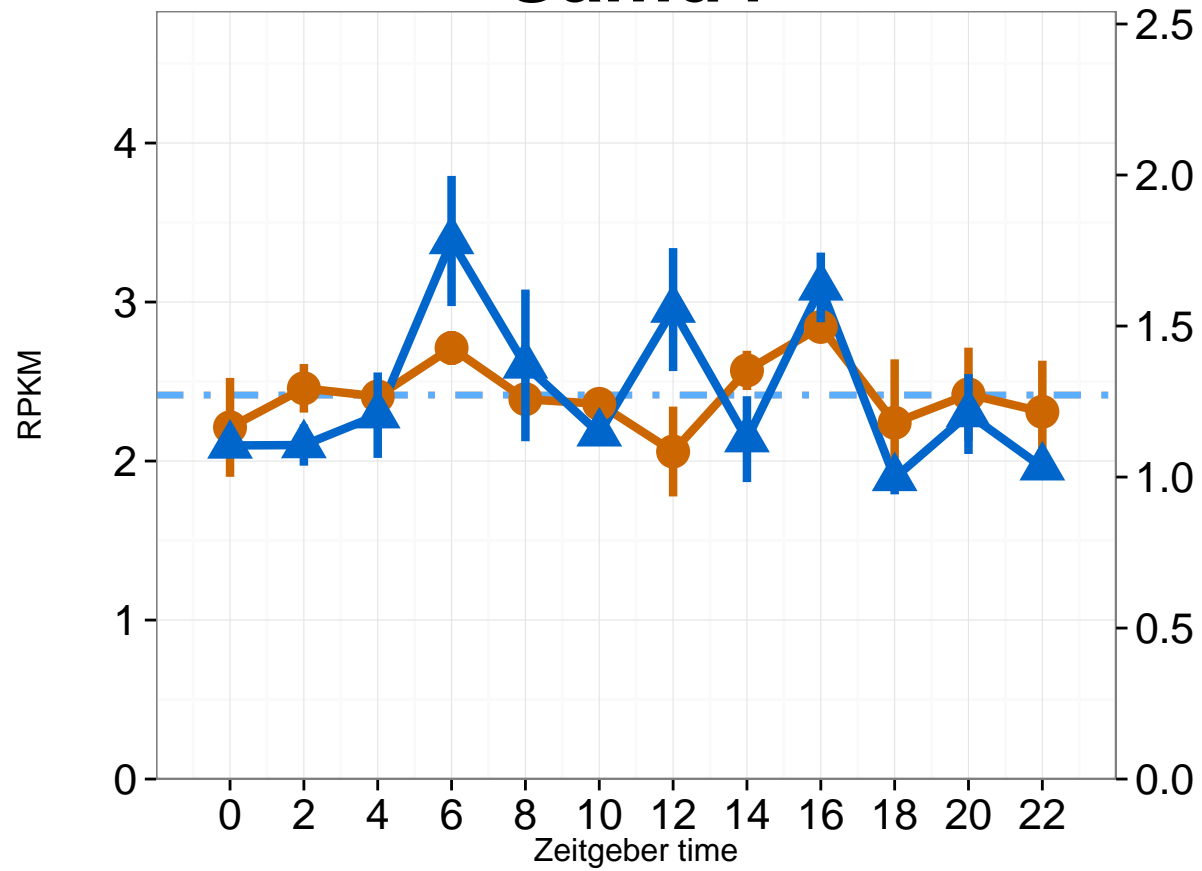

## Samd4

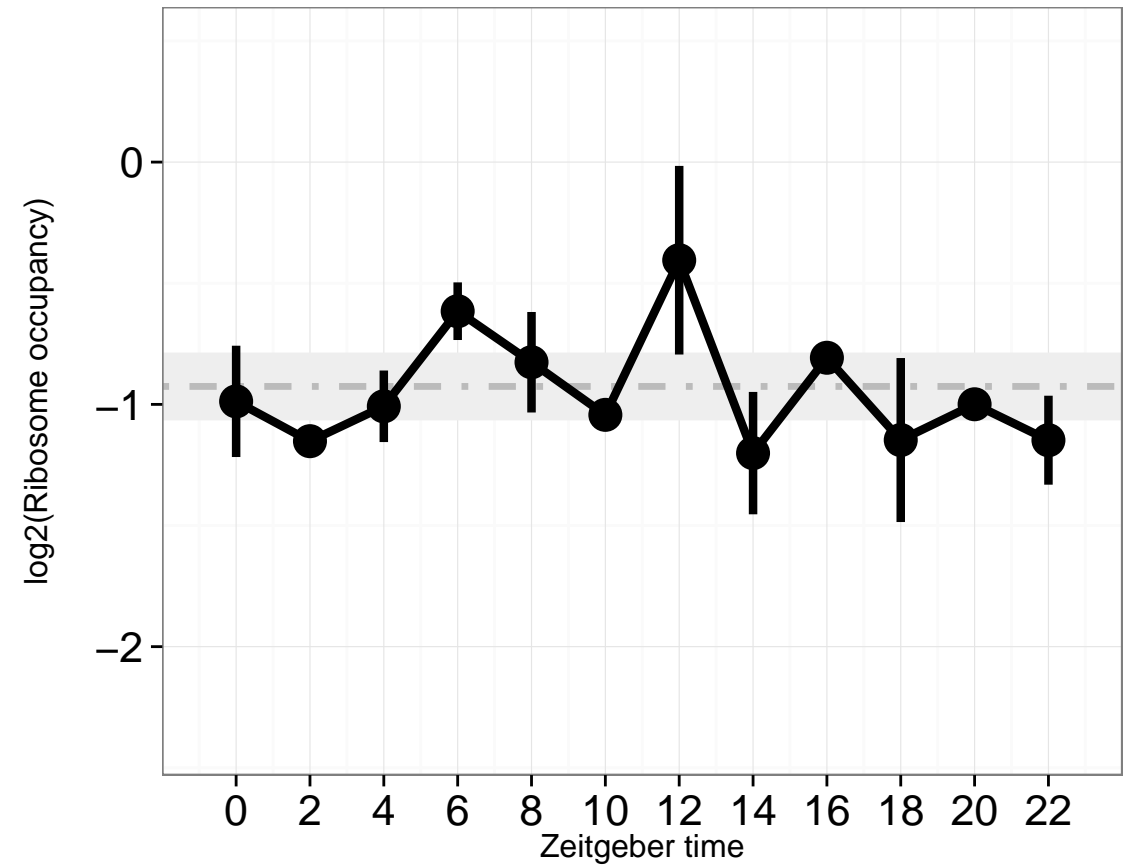

Supplement: Supplementary file 13166 [file 1]

# Rps6ka6

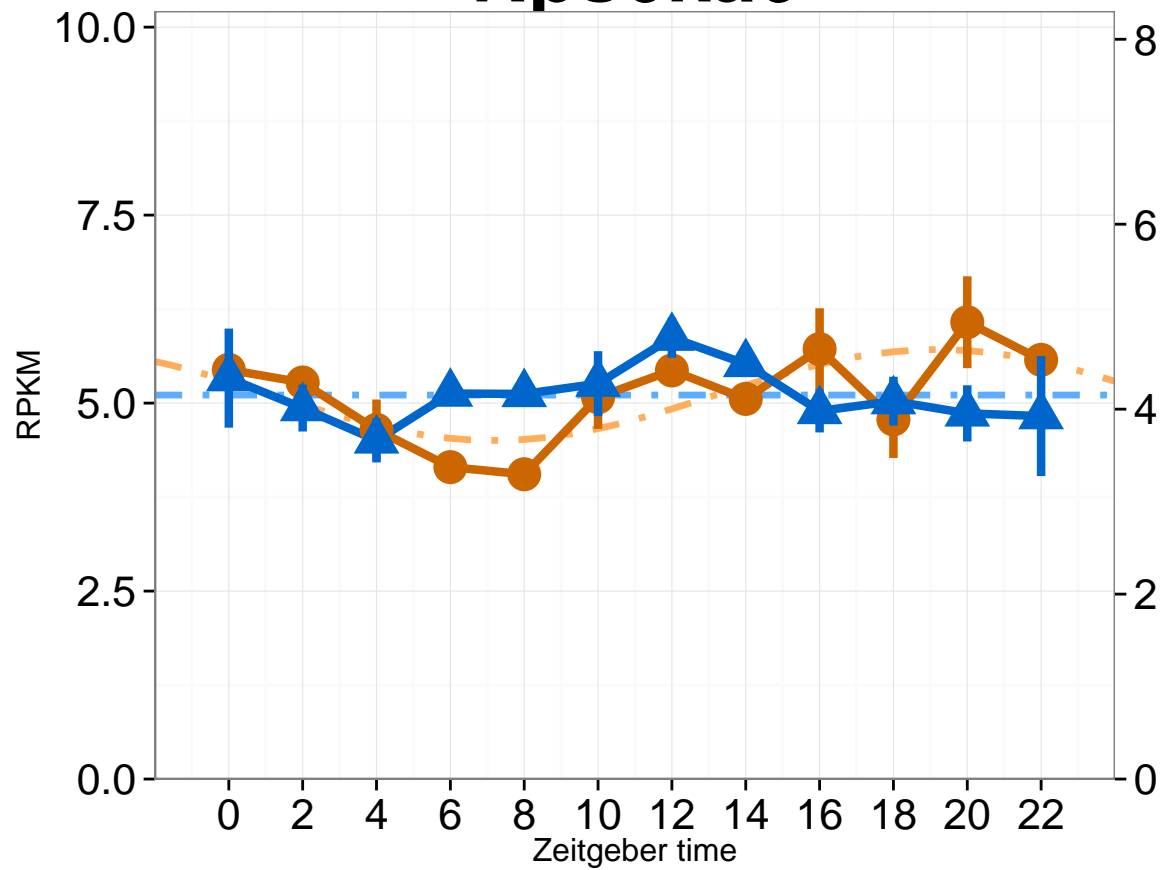

# Rps6ka6

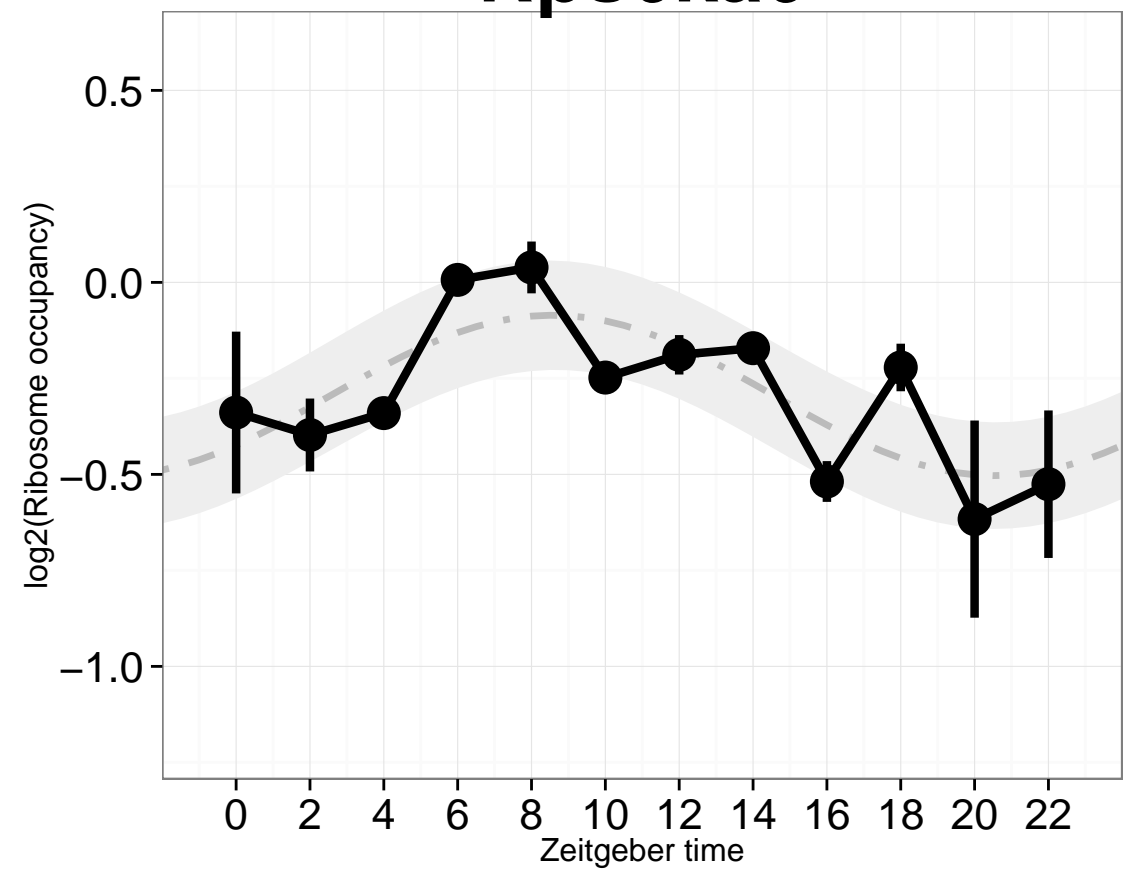

Supplement: Supplementary file 13167 [file 1]

# Homer2

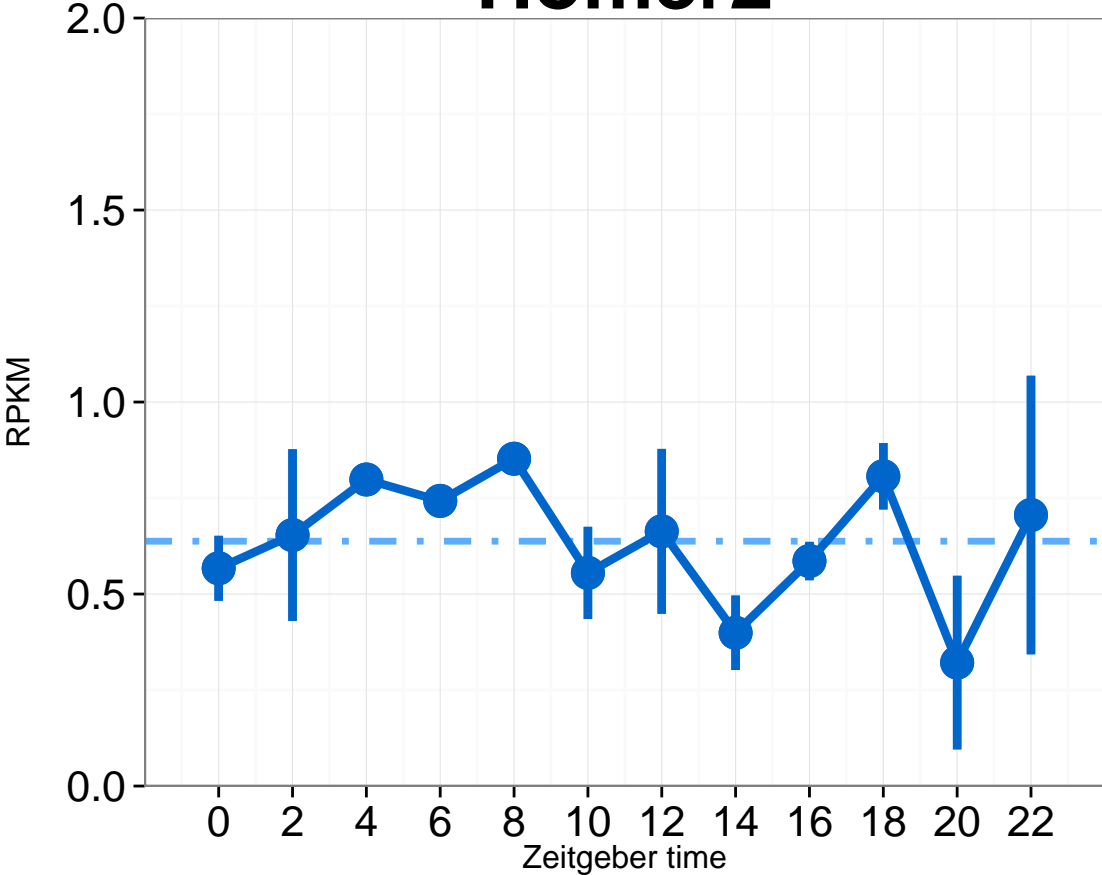

# Homer2 log2(Ribosome occupancy

Supplement: Supplementary file 13168 [file 1]

# Rps6

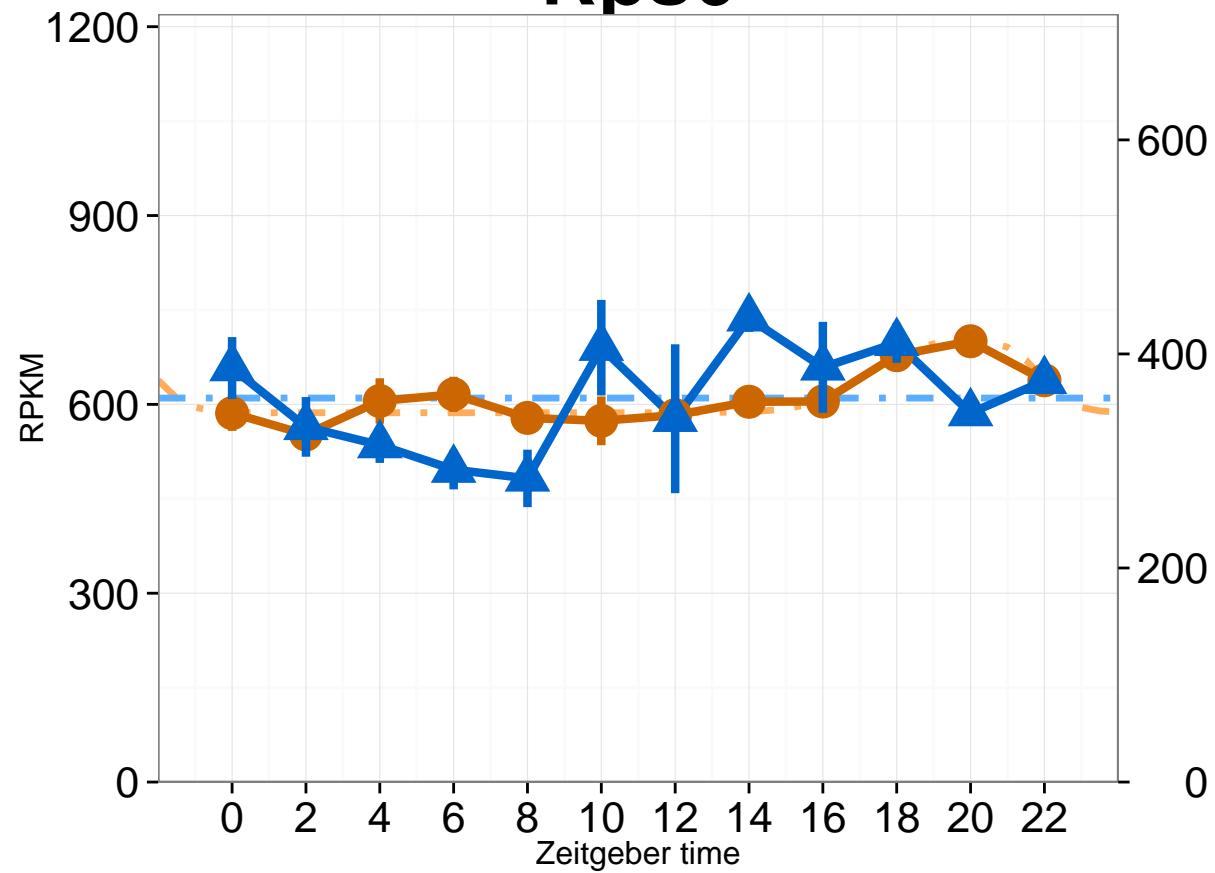

# Rps6

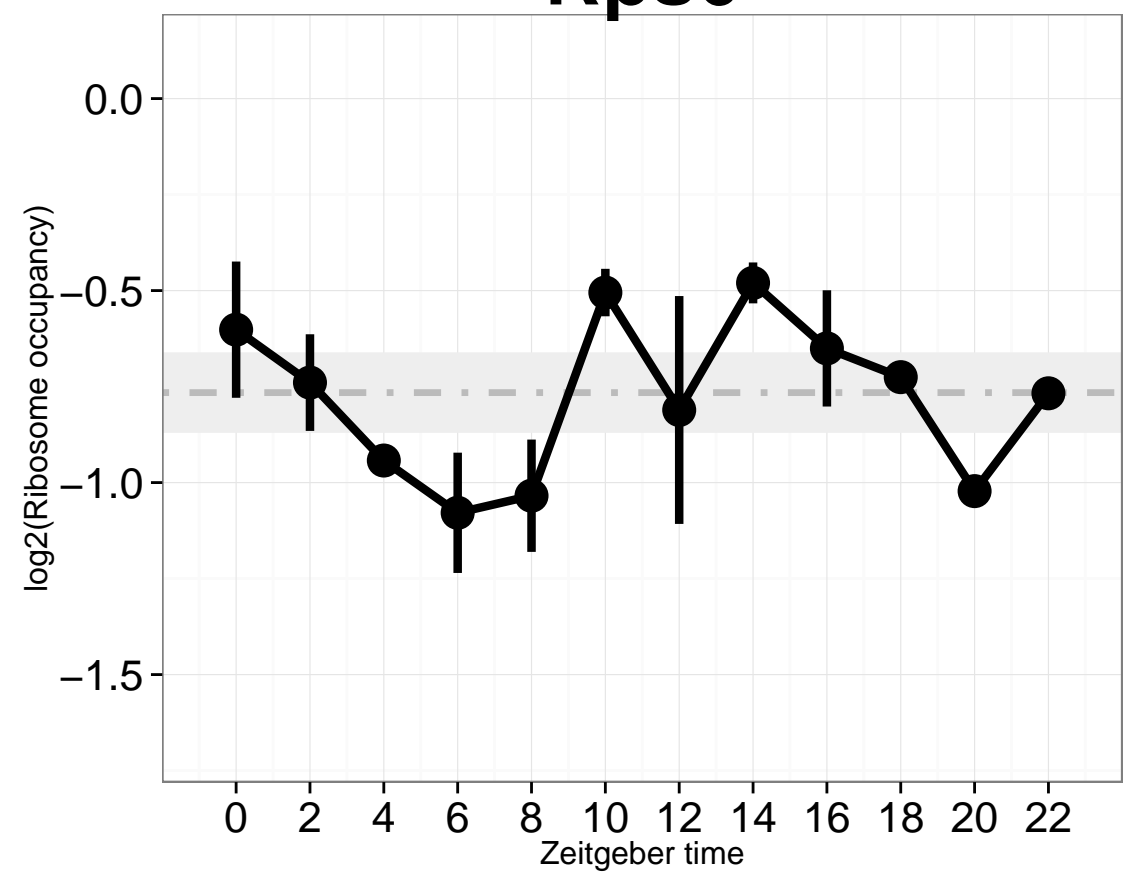

Supplement: Supplementary file 13169 [file 1]

# Map4k1

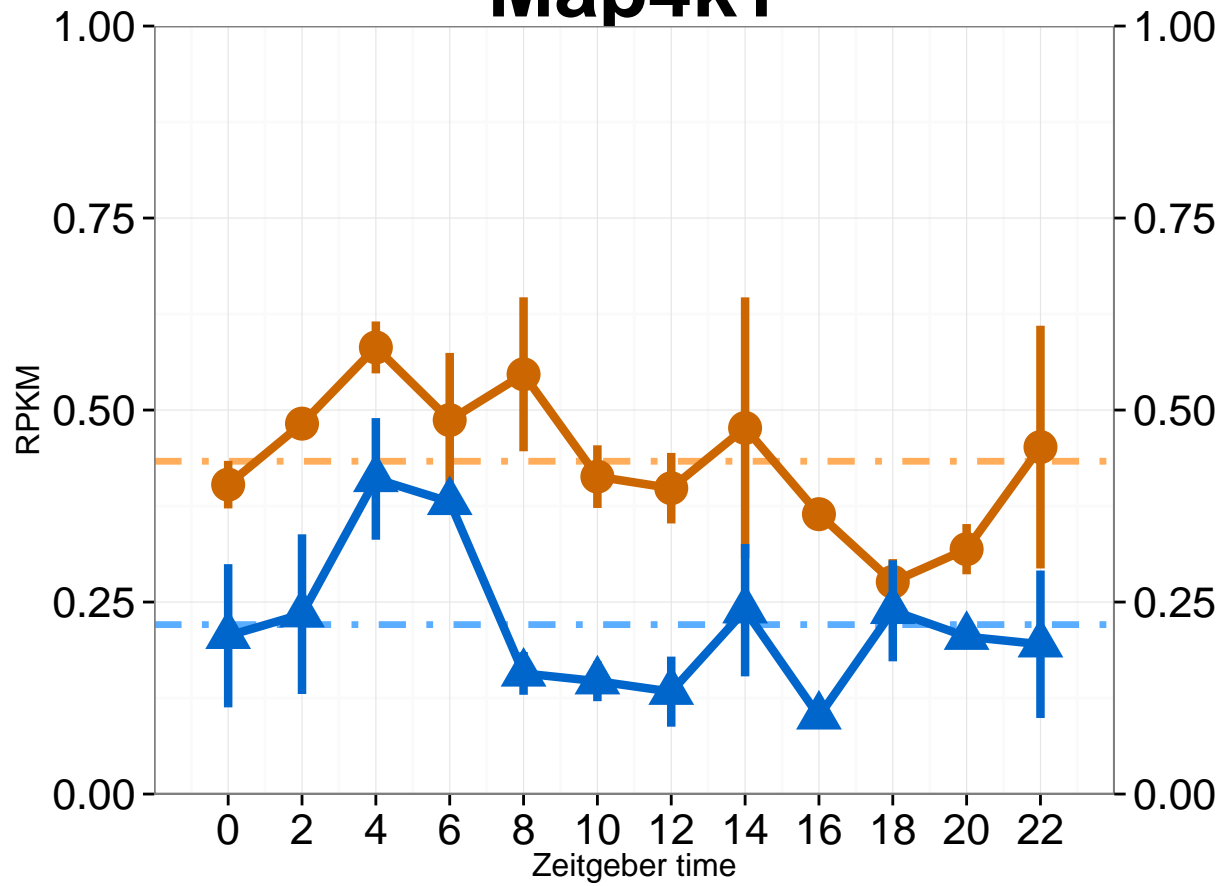

# Map4k1

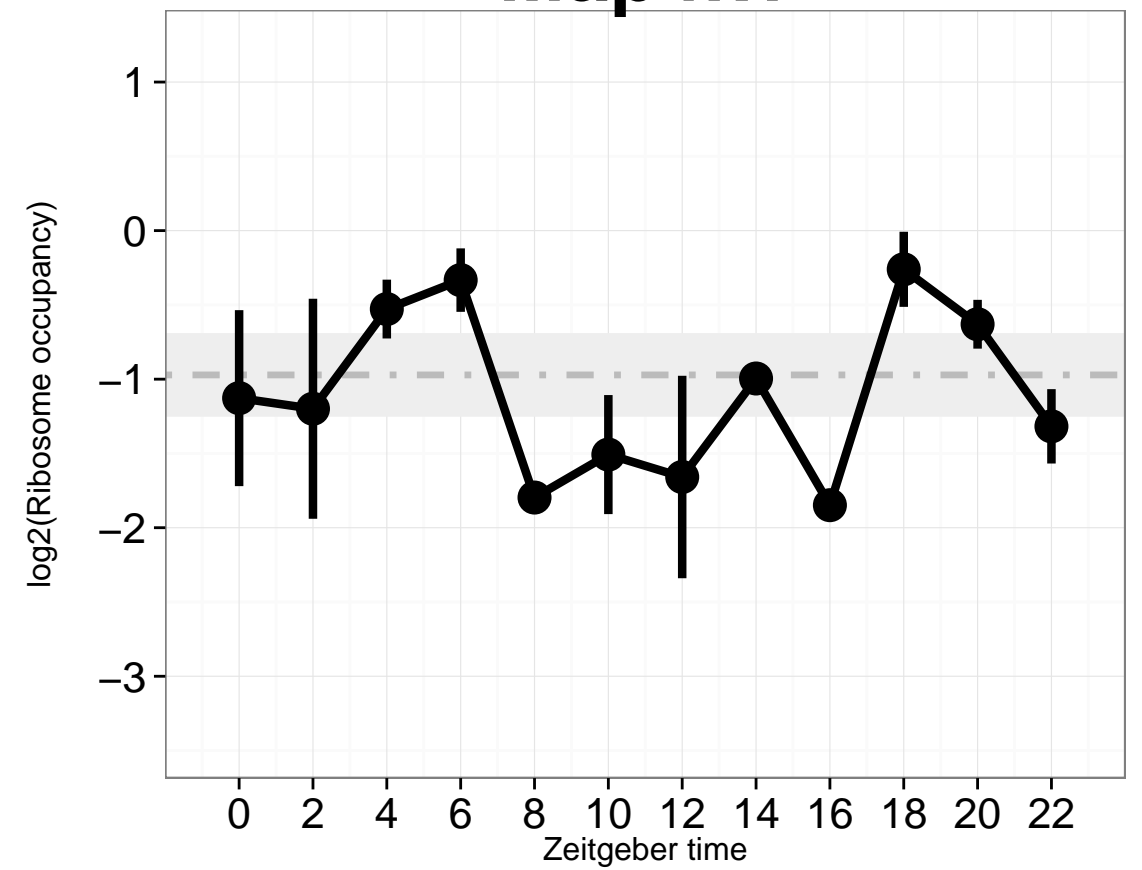

Supplement: Supplementary file 13170 [file 1]

# Isy1

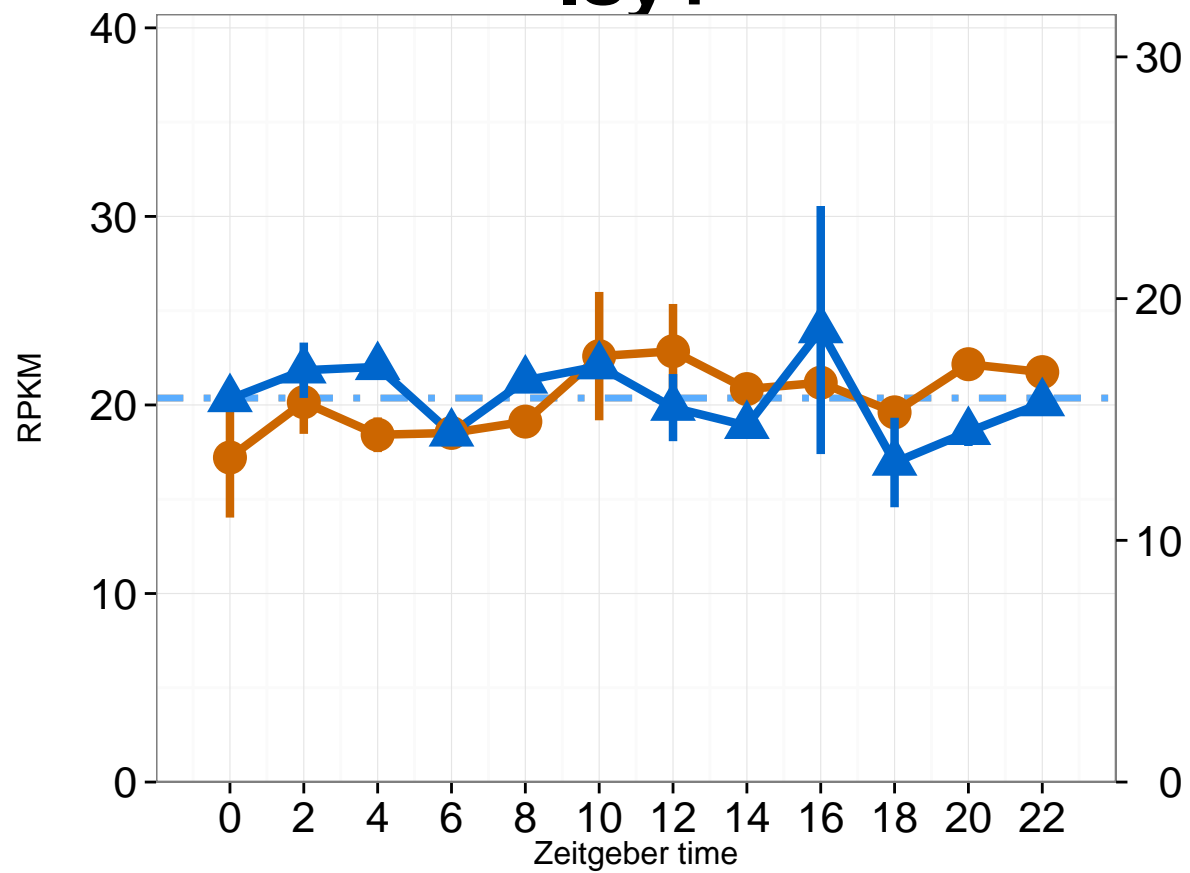

# Isy1

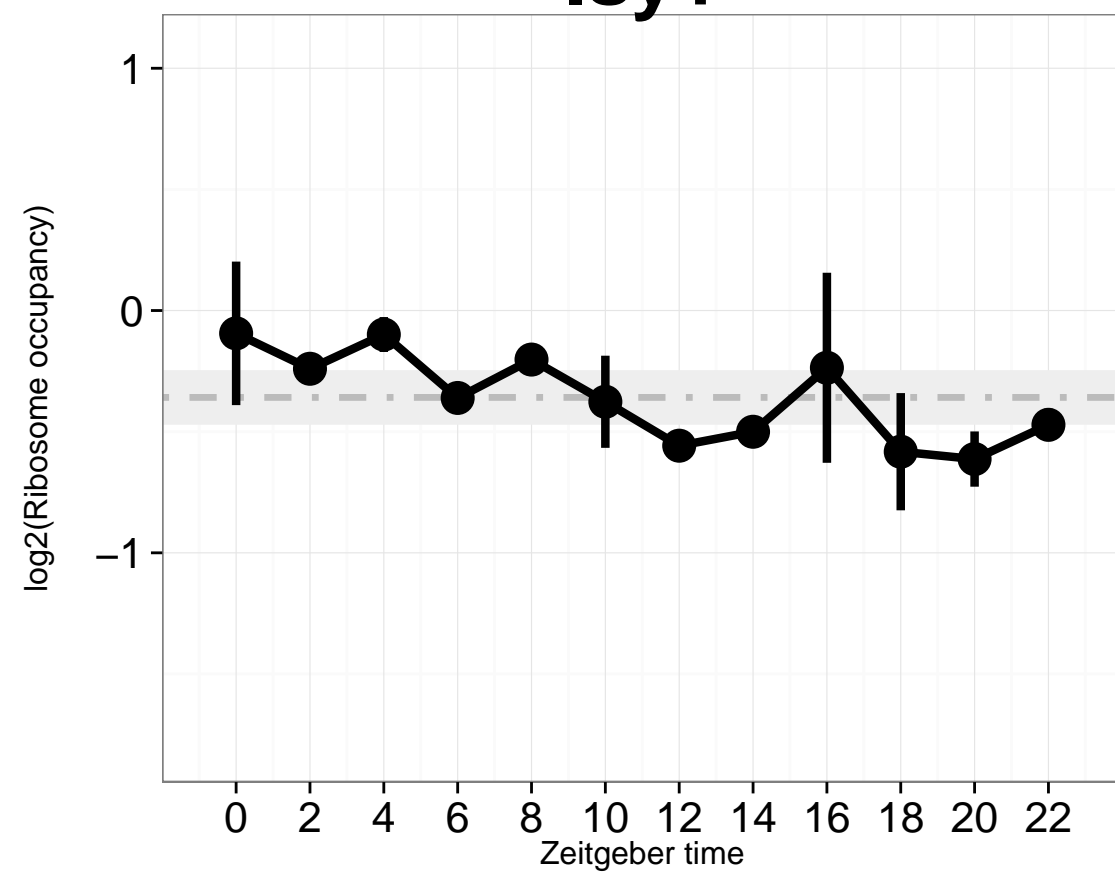

Supplement: Supplementary file 13171 [file 1]

# Slc38a1

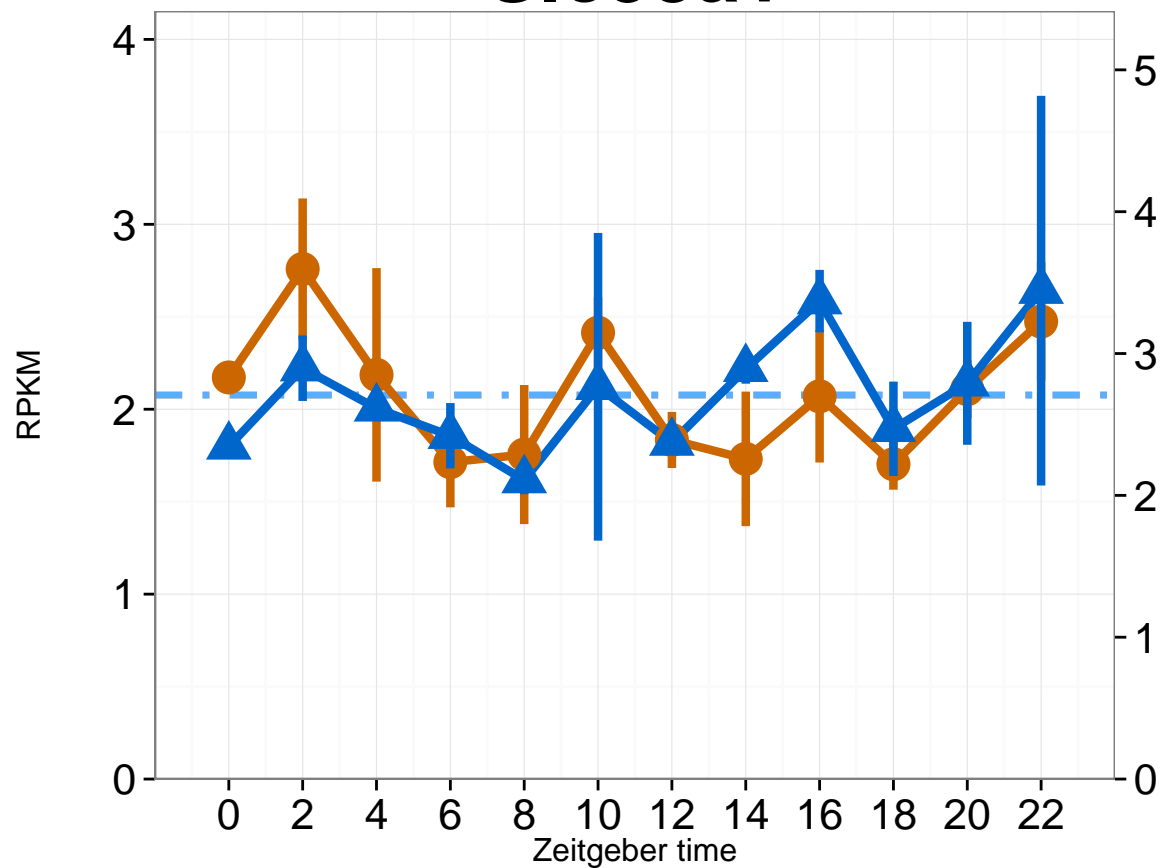

# Slc38a1

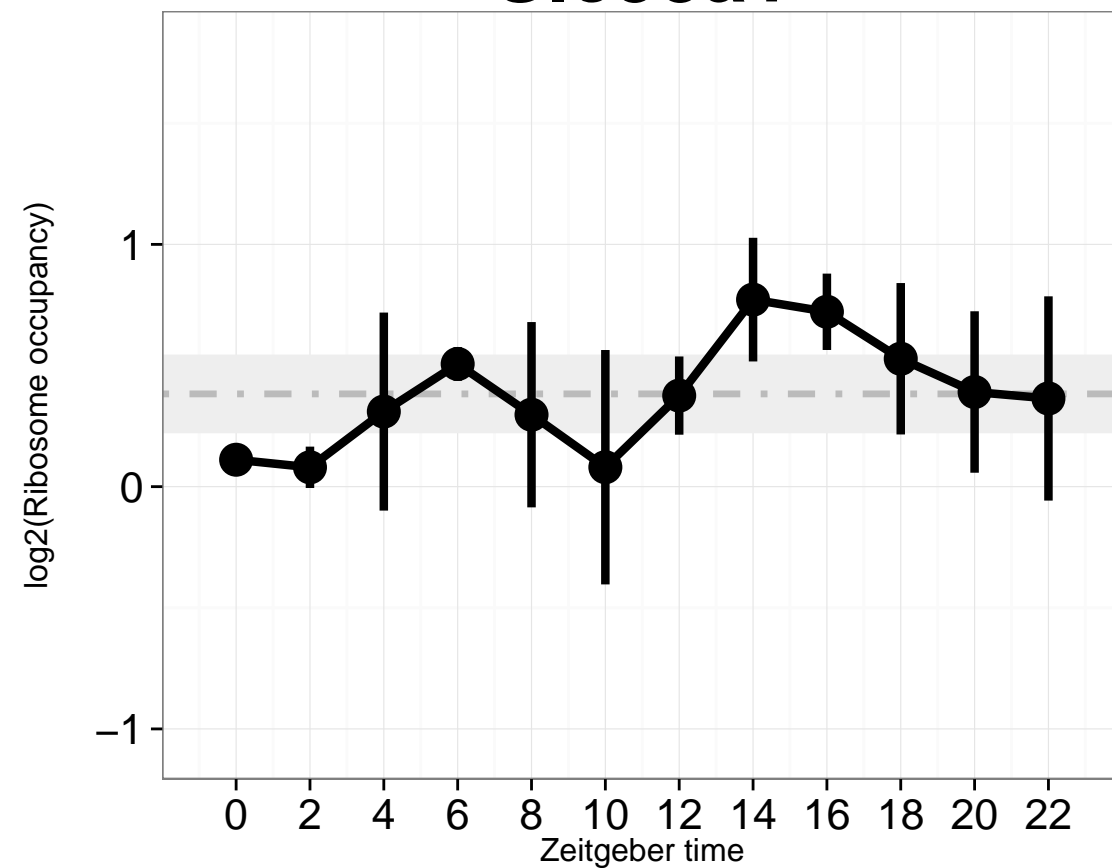

Supplement: Supplementary file 13172 [file 1]

## Mpp1

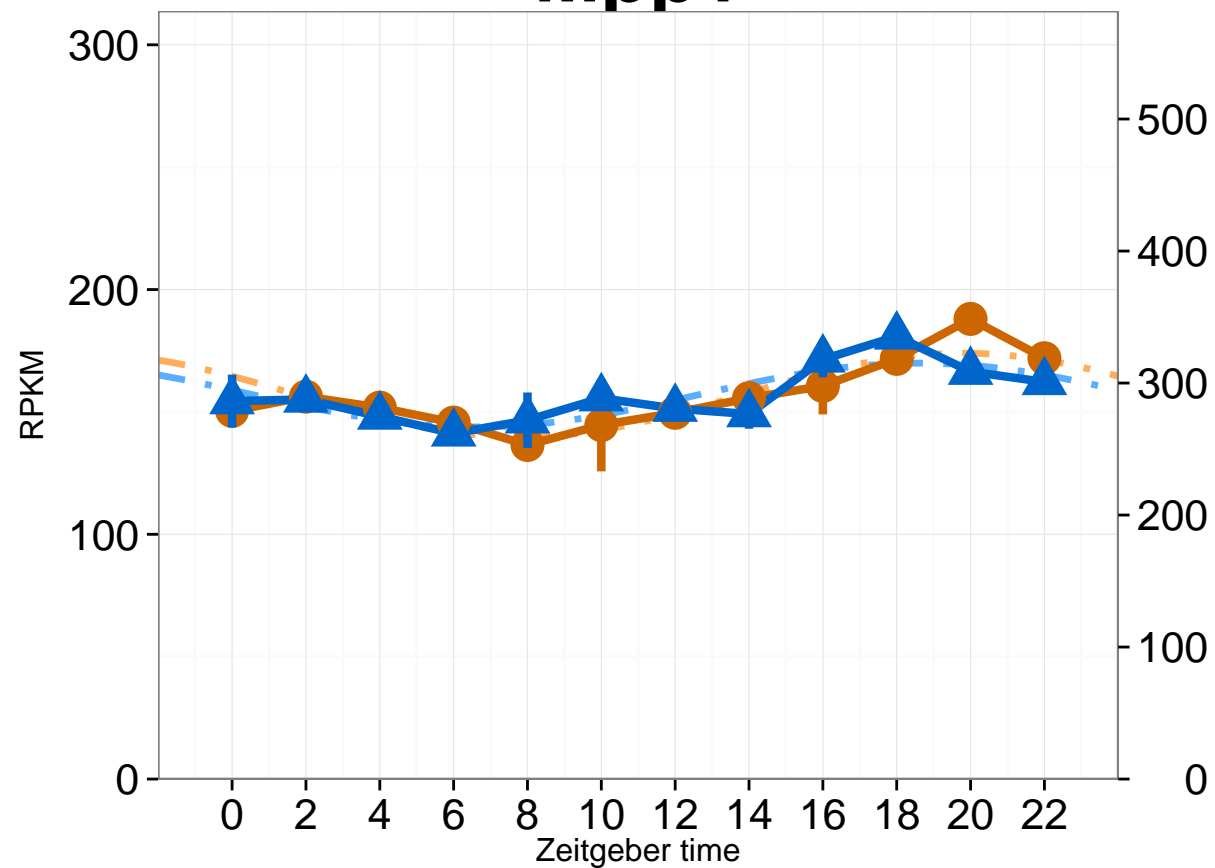

## Mpp1

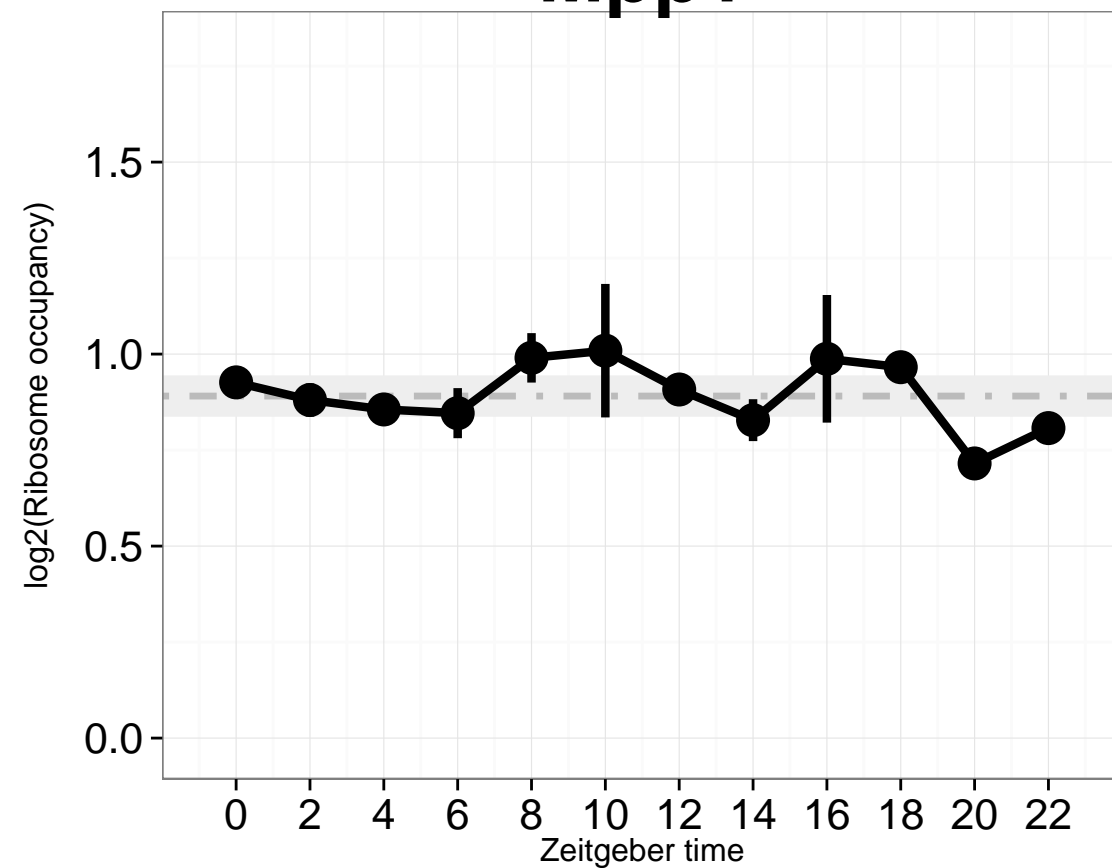

Supplement: Supplementary file 13173 [file 1]

# Ppp6r1

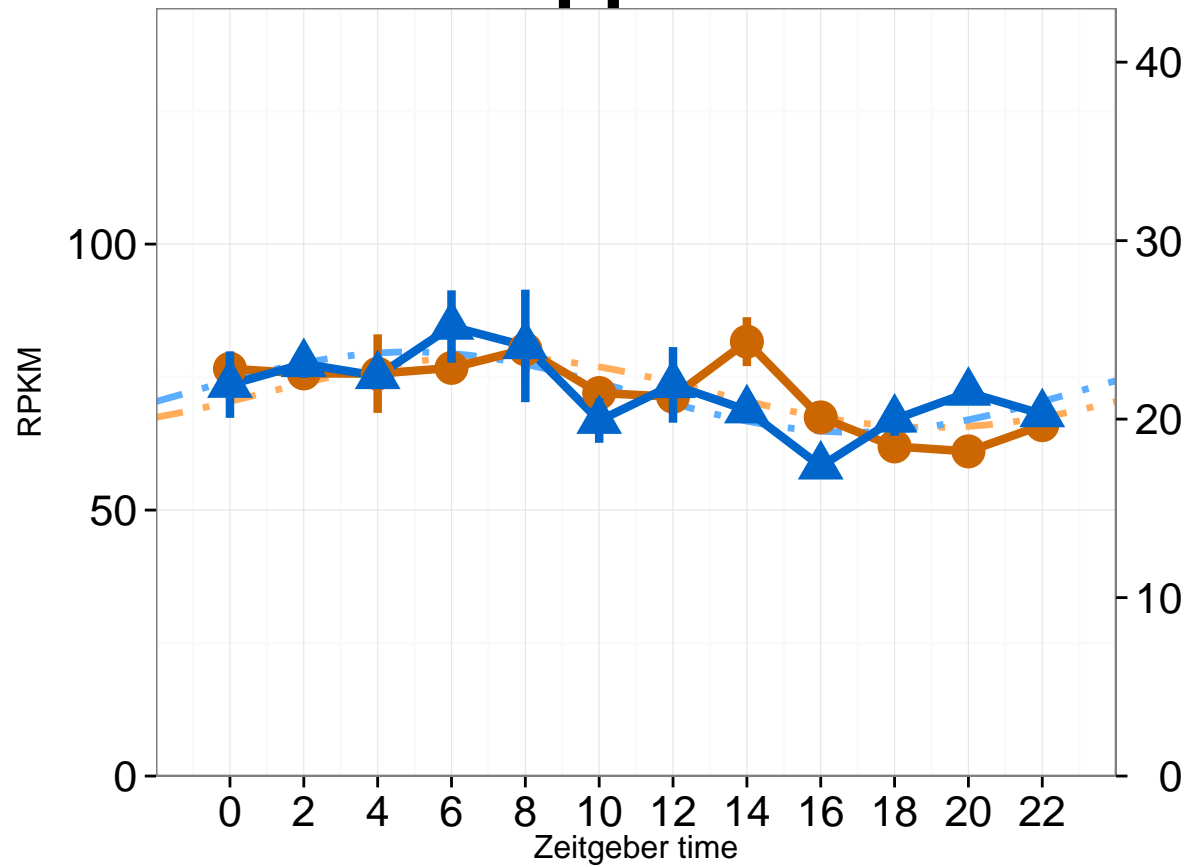

# Ppp6r1

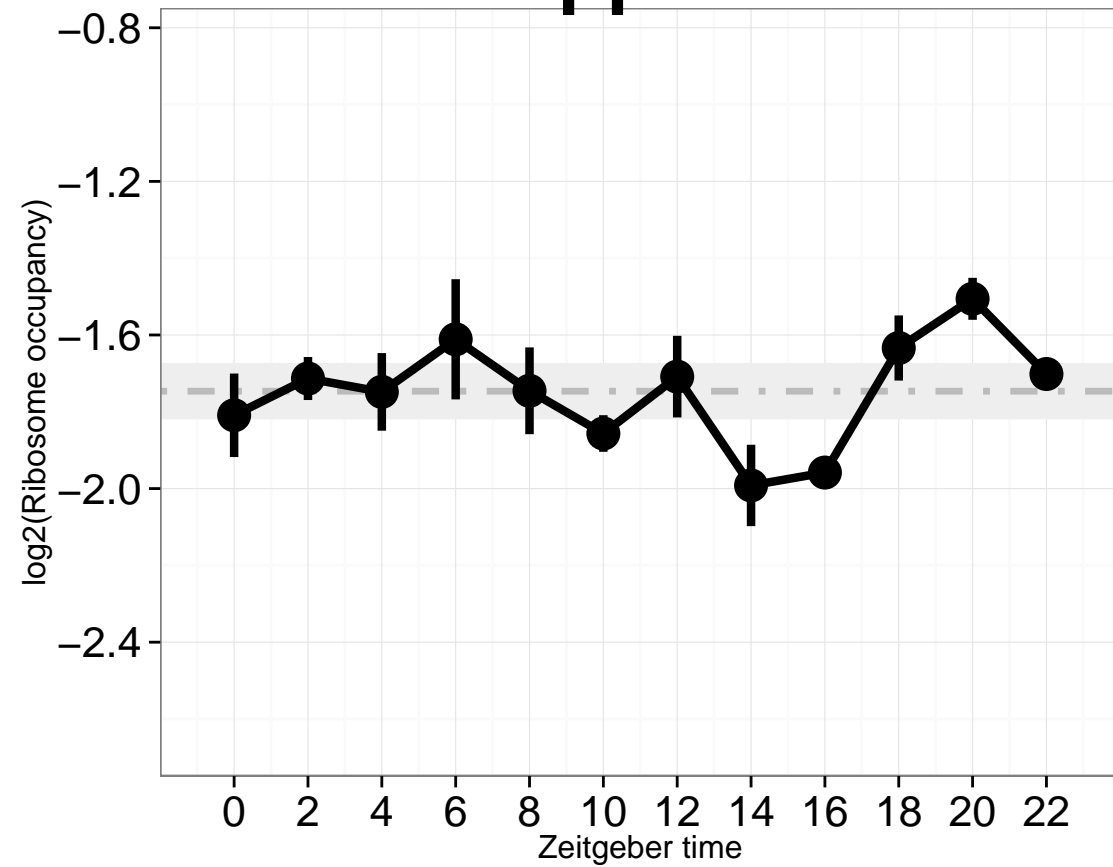

Supplement: Supplementary file 13174 [file 1]

## Fbxl20

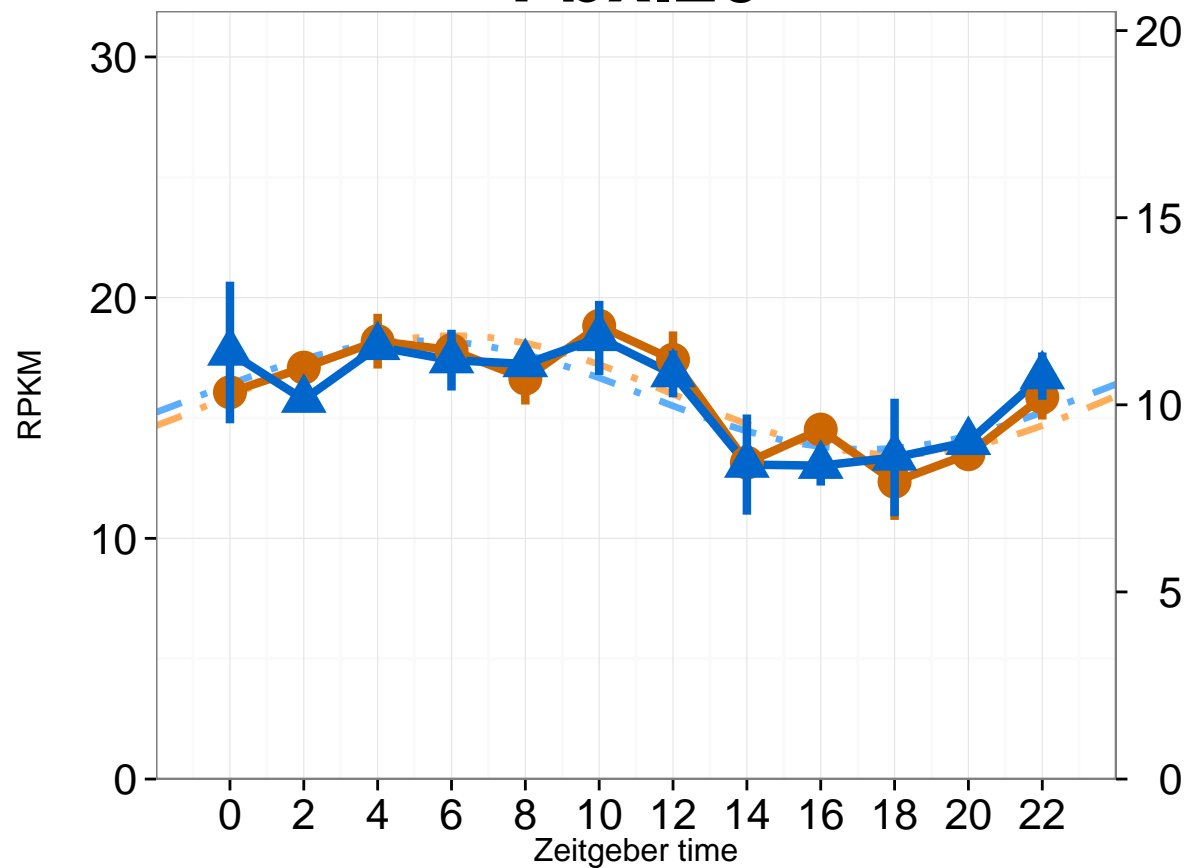

## Fbxl20

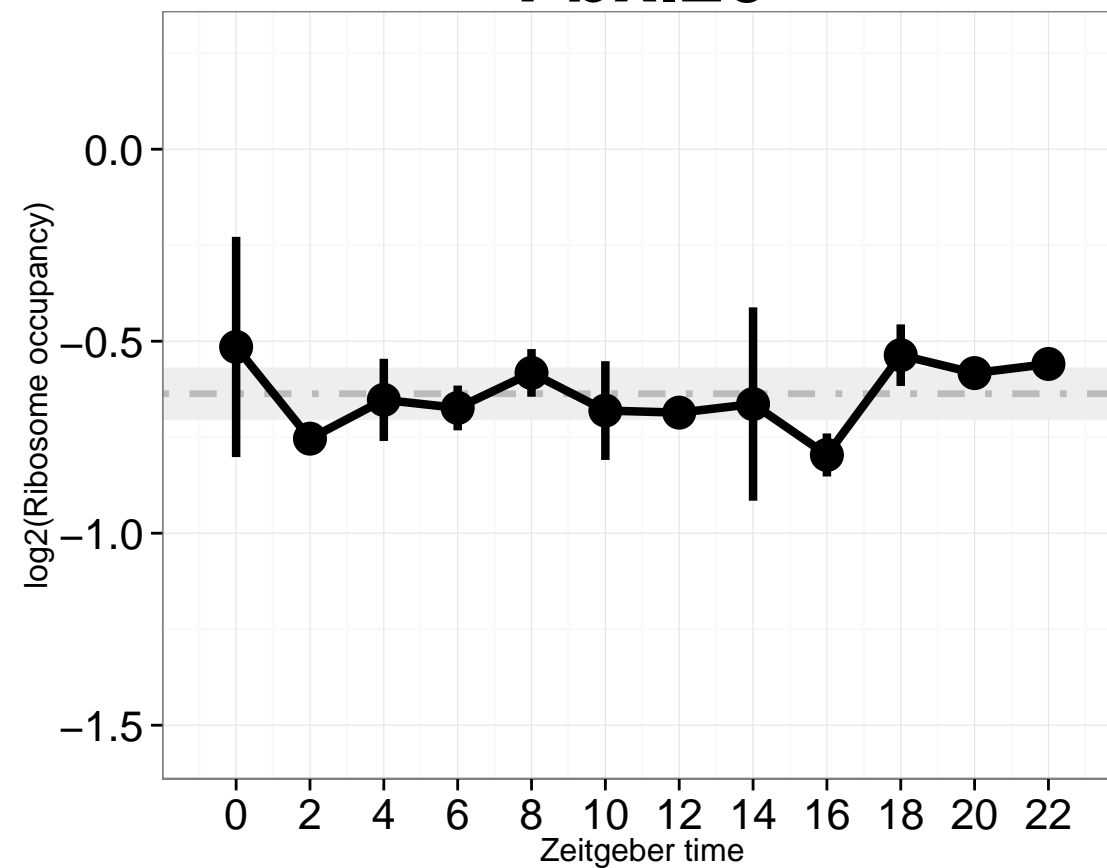

Supplement: Supplementary file 13175 [file 1]

# Sft2d1

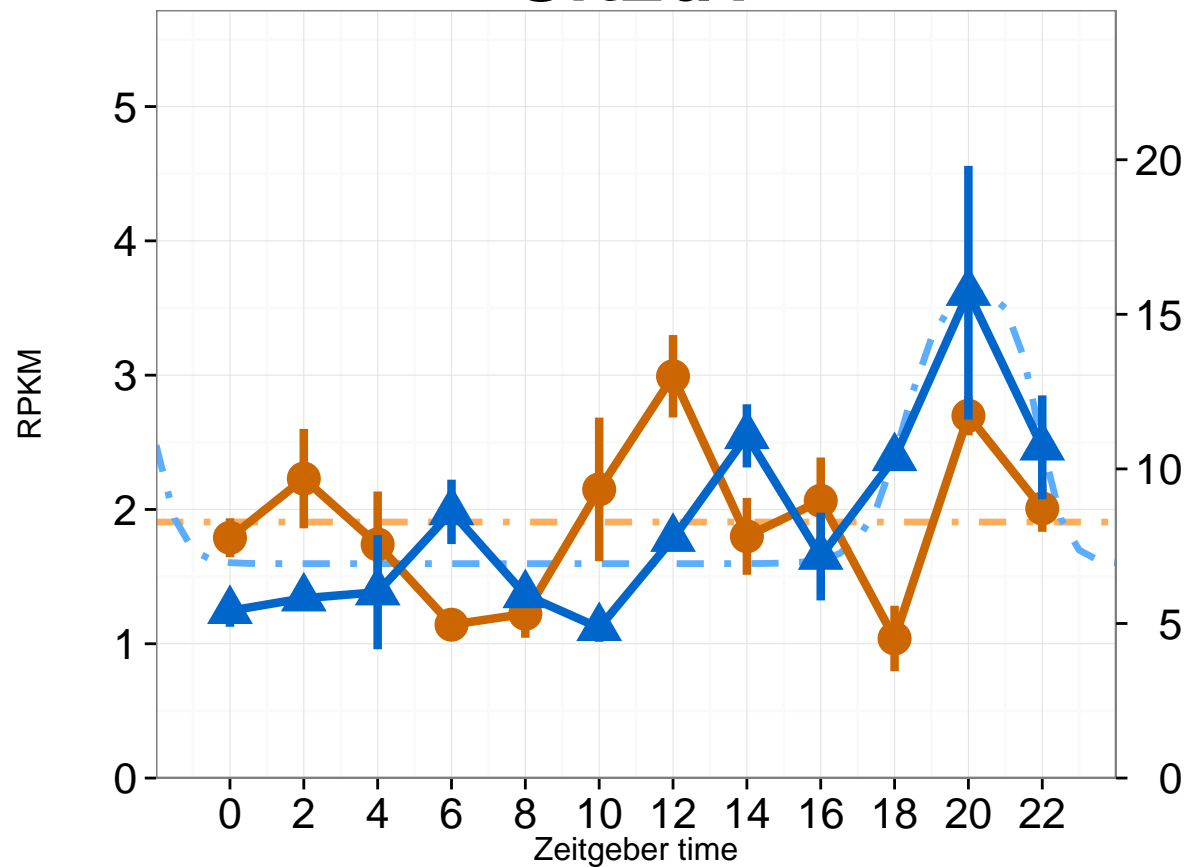

# Sft2d1

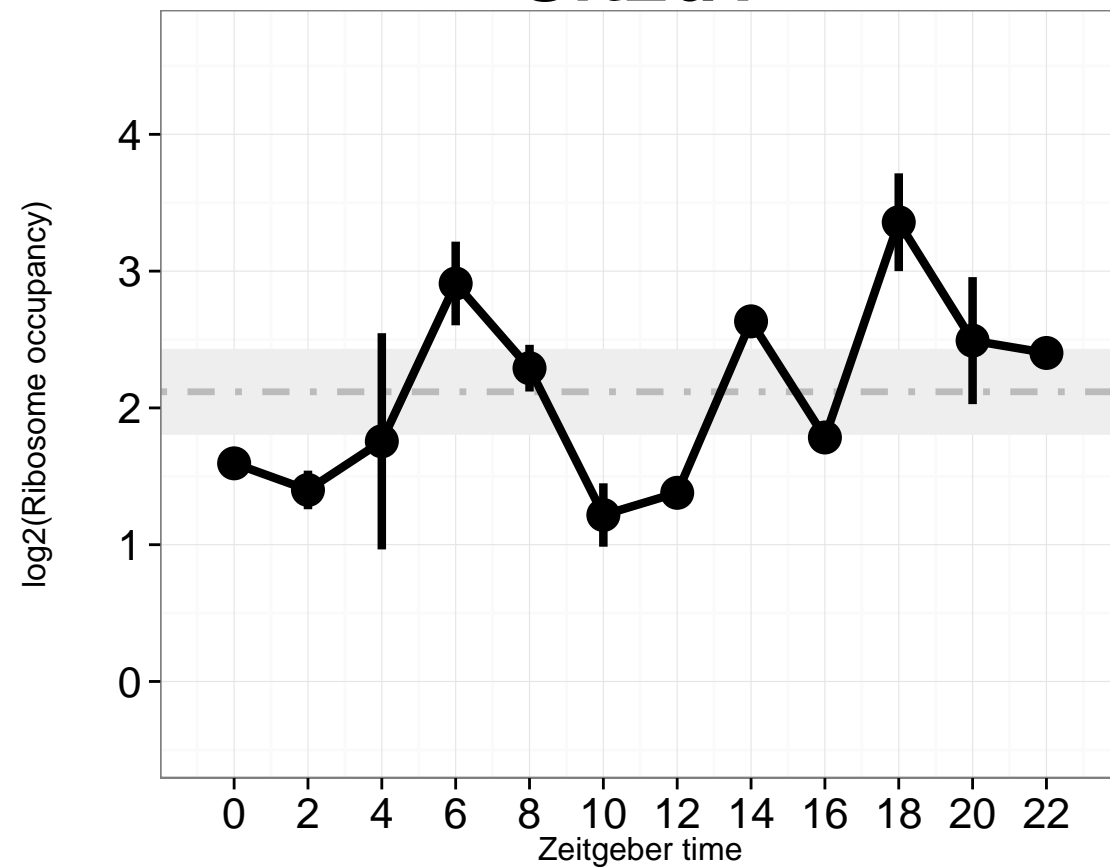

Supplement: Supplementary file 13176 [file 1]

# Fdft1

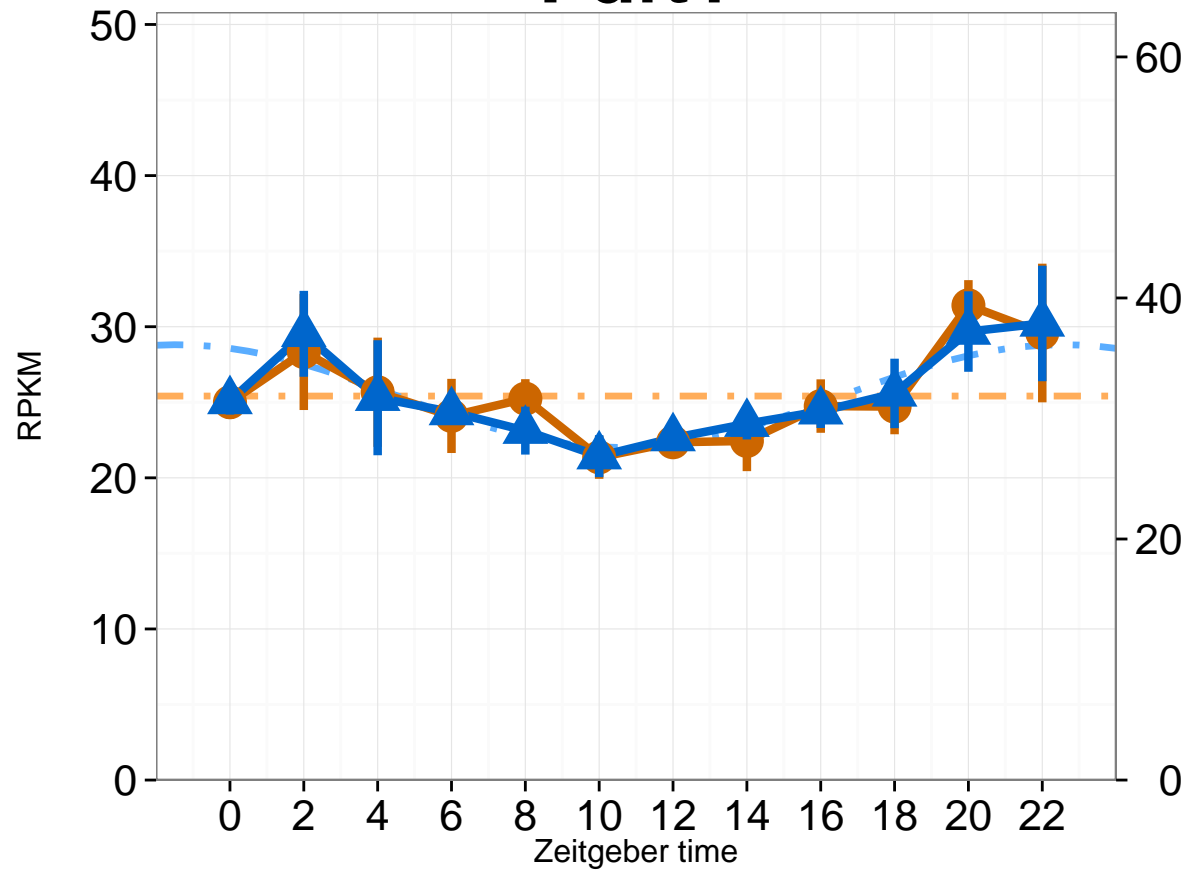

# Fdft1

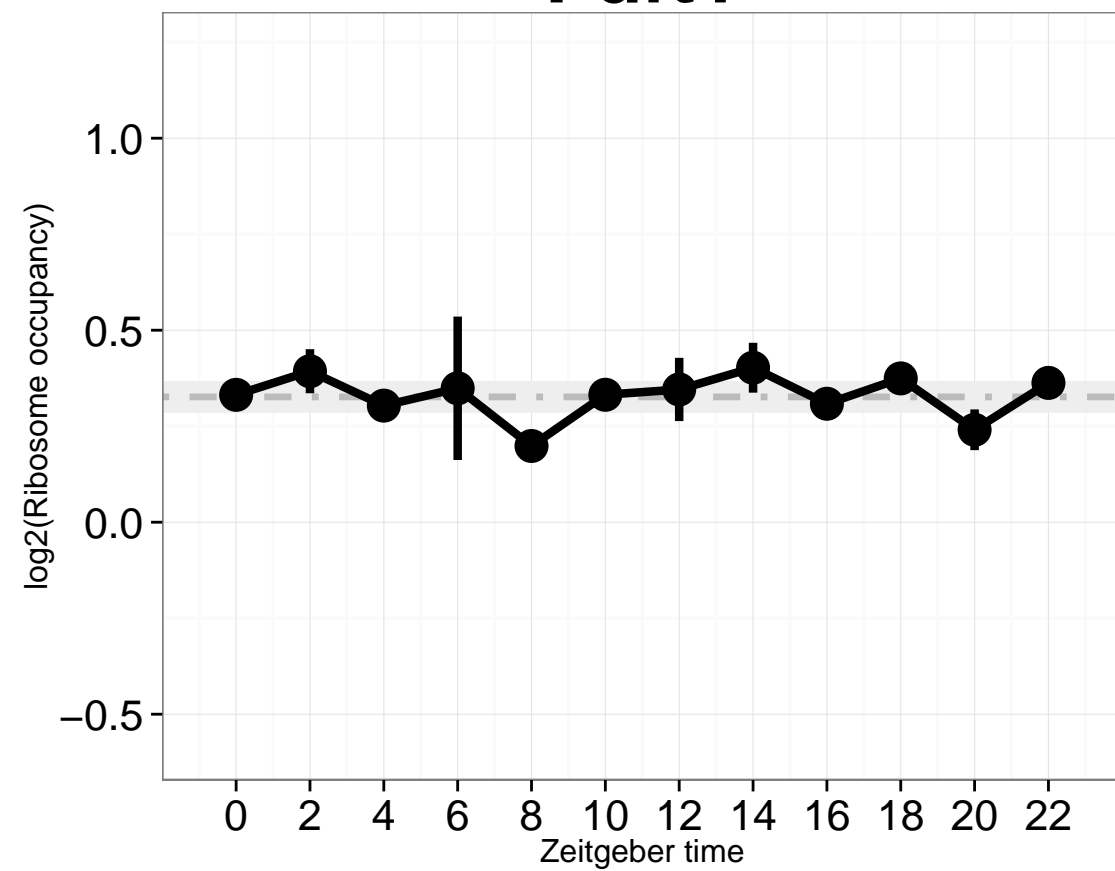

Supplement: Supplementary file 13177 [file 1]

# Laptm4a

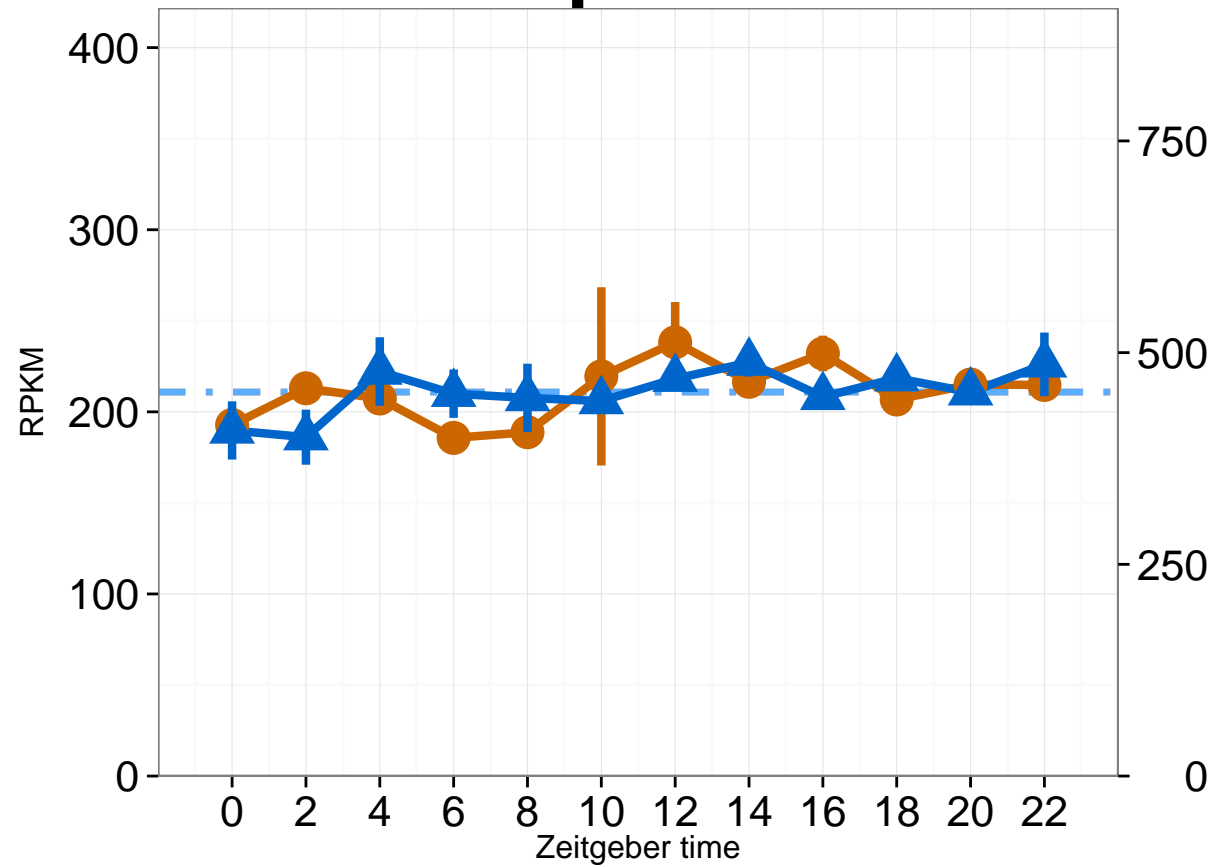

# Laptm4a

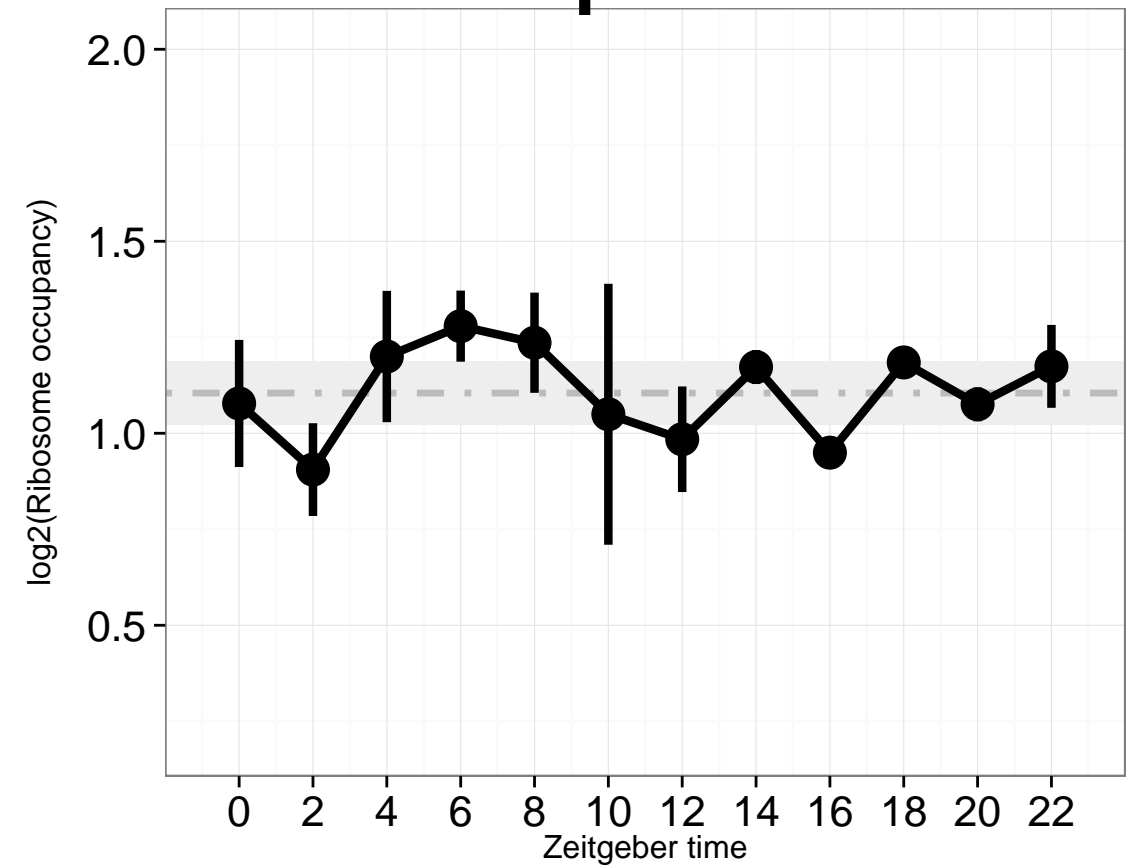

Supplement: Supplementary file 13178 [file 1]

## Capg

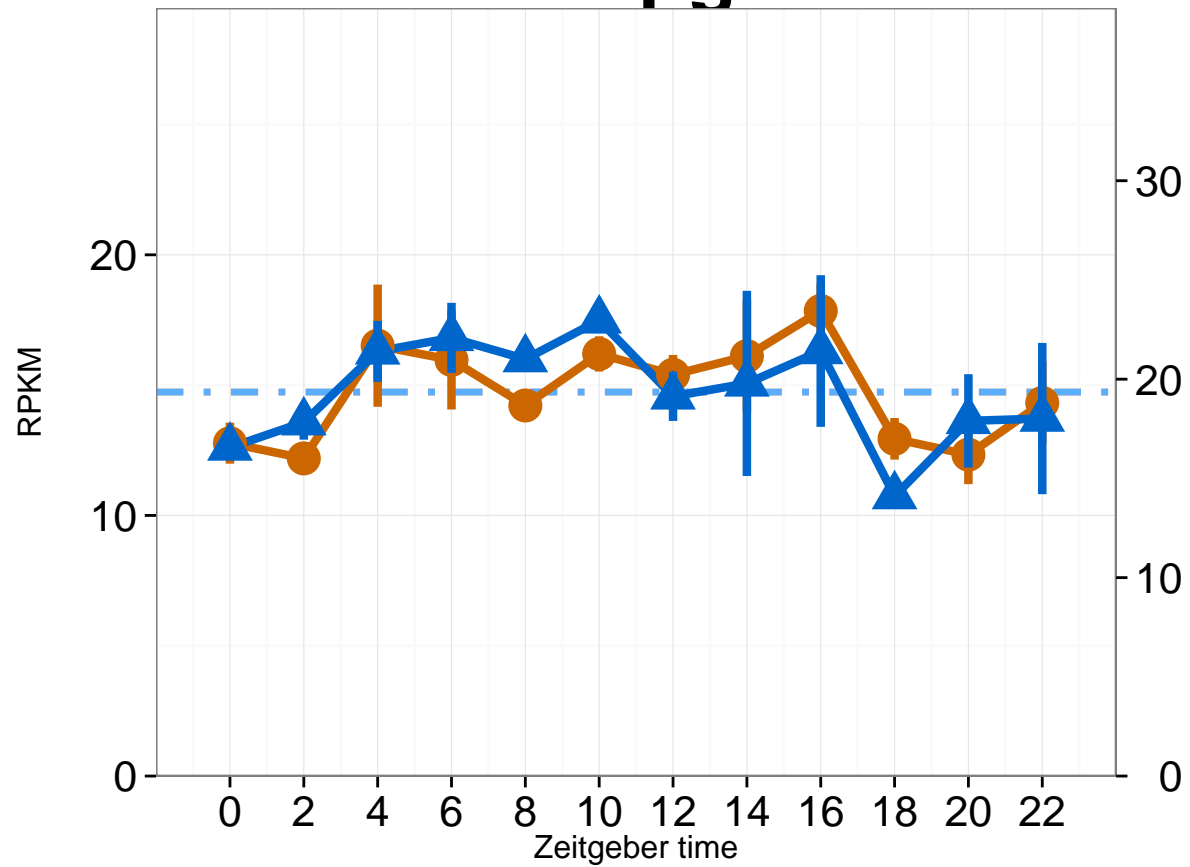

## Capg

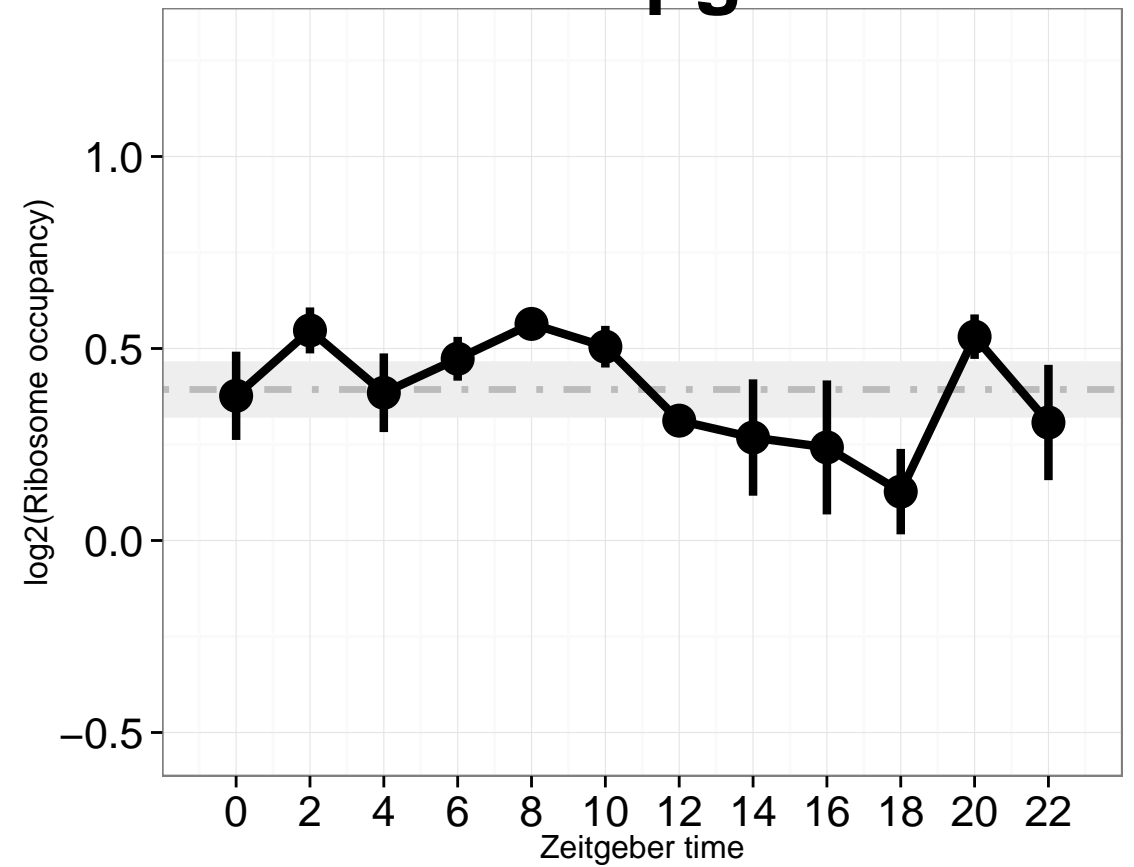

Supplement: Supplementary file 13179 [file 1]

## Rgag4

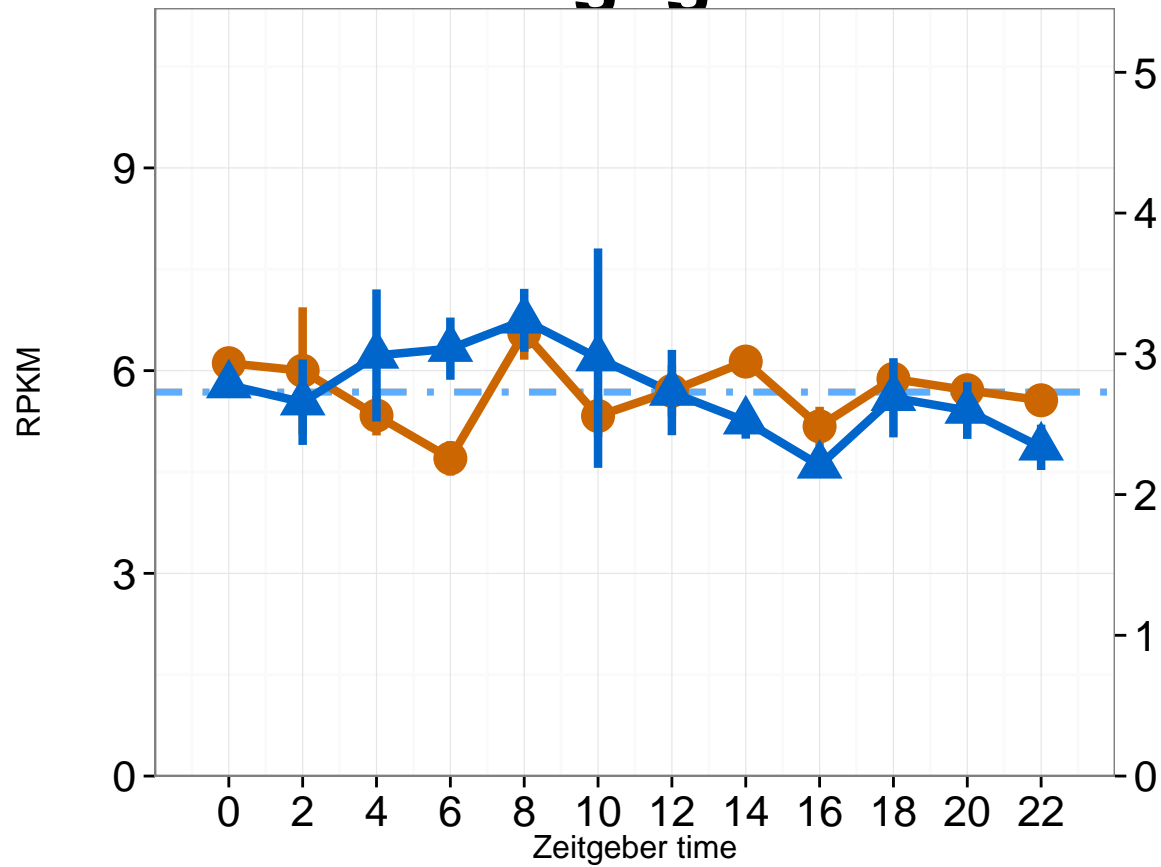

## Rgag4

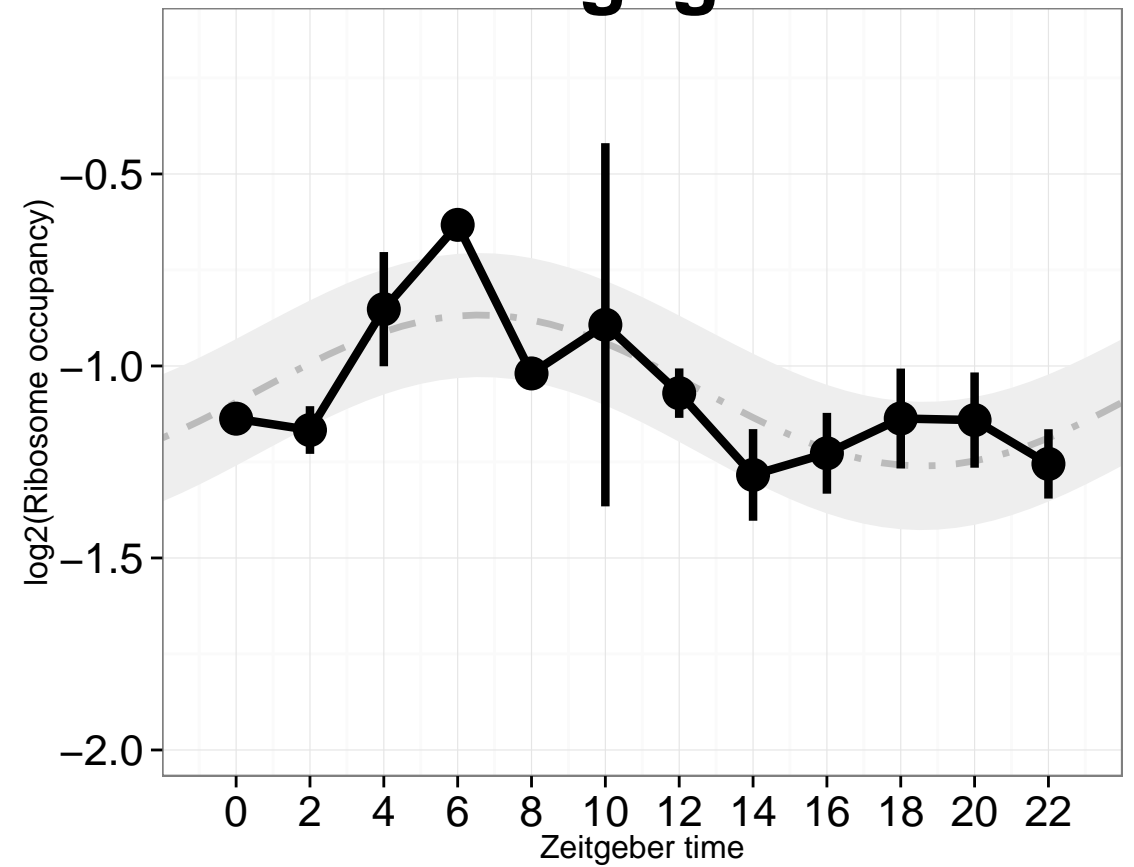

Supplement: Supplementary file 13180 [file 1]

# Atp8a1

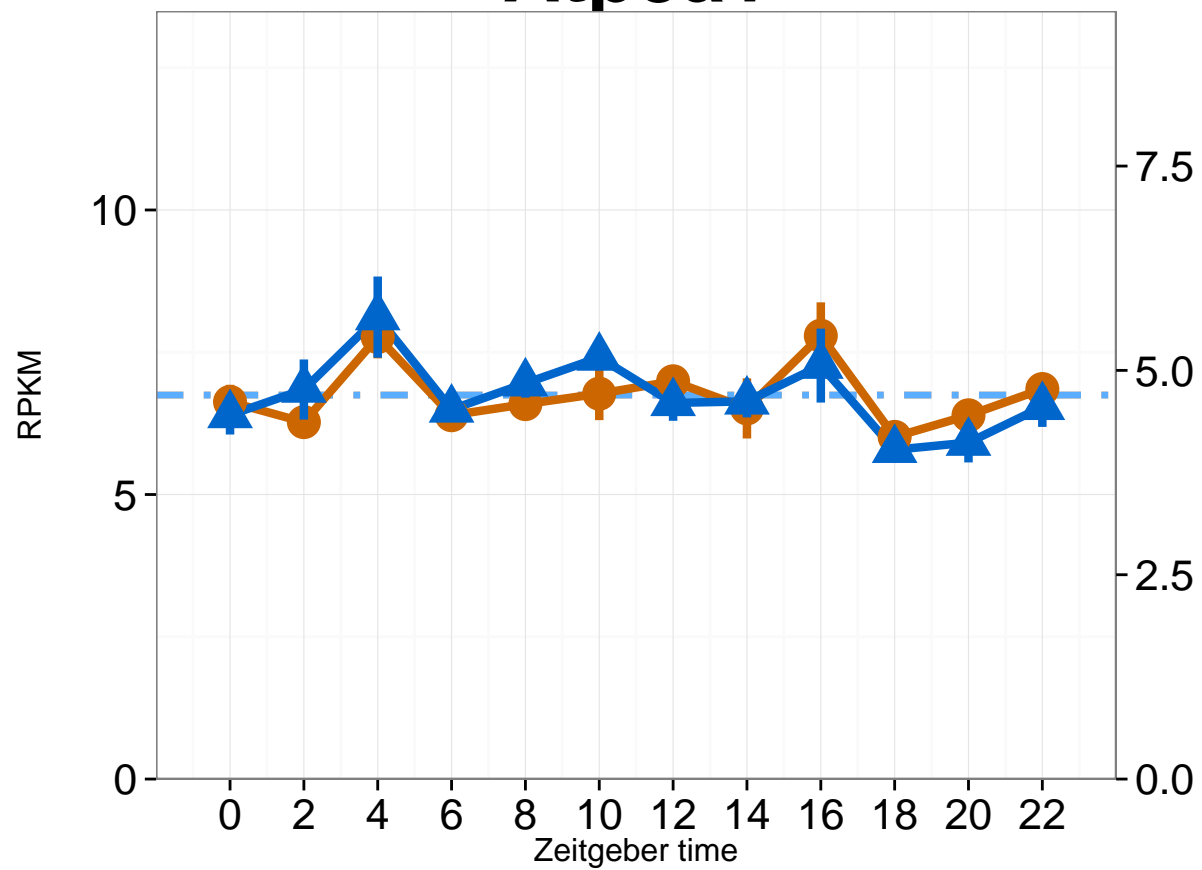

# Atp8a1

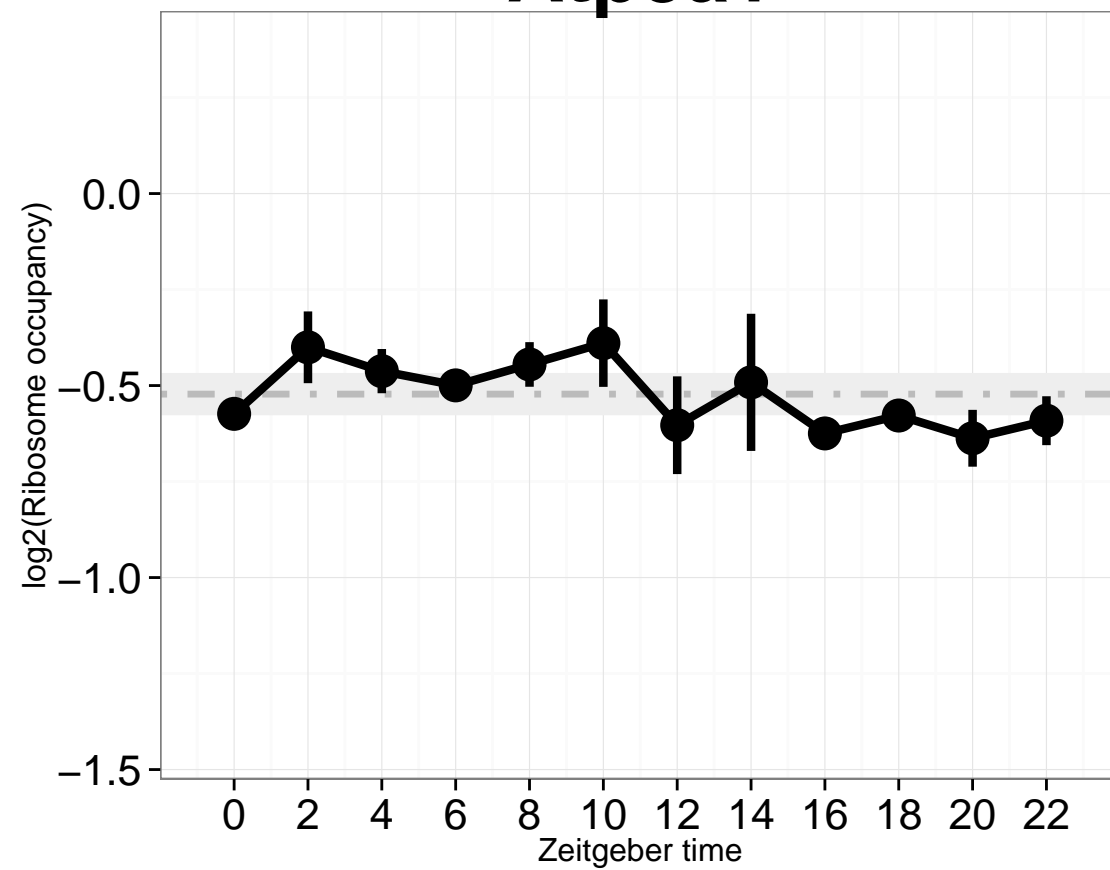

Supplement: Supplementary file 13181 [file 1]

## Pkdcc

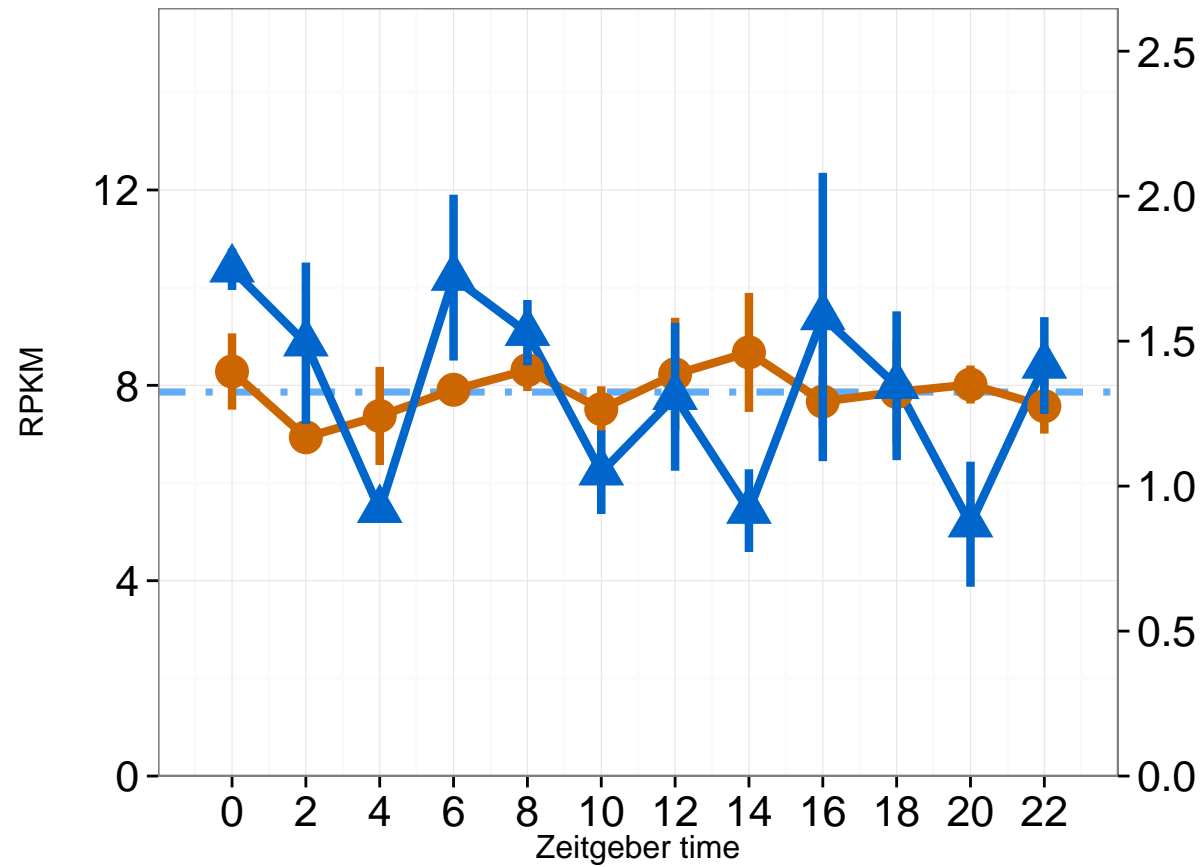

## Pkdcc

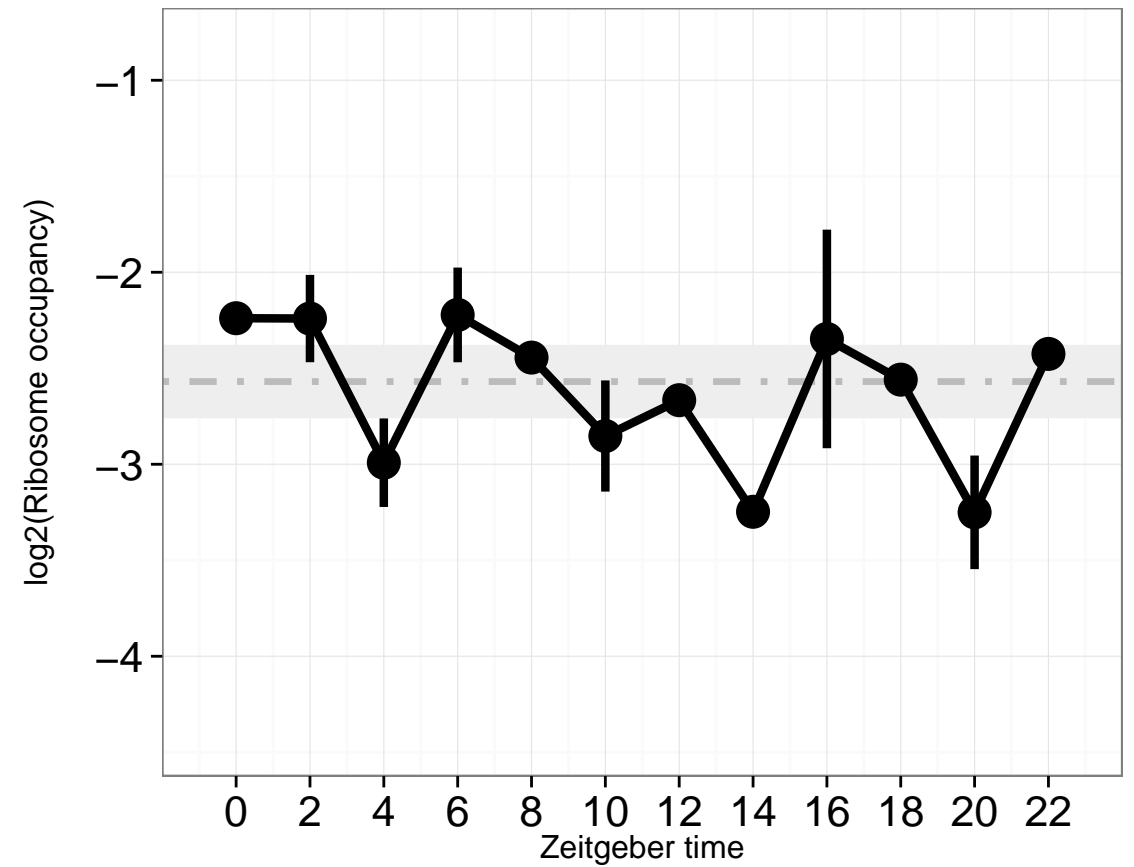

Supplement: Supplementary file 13182 [file 1]

## Krr1

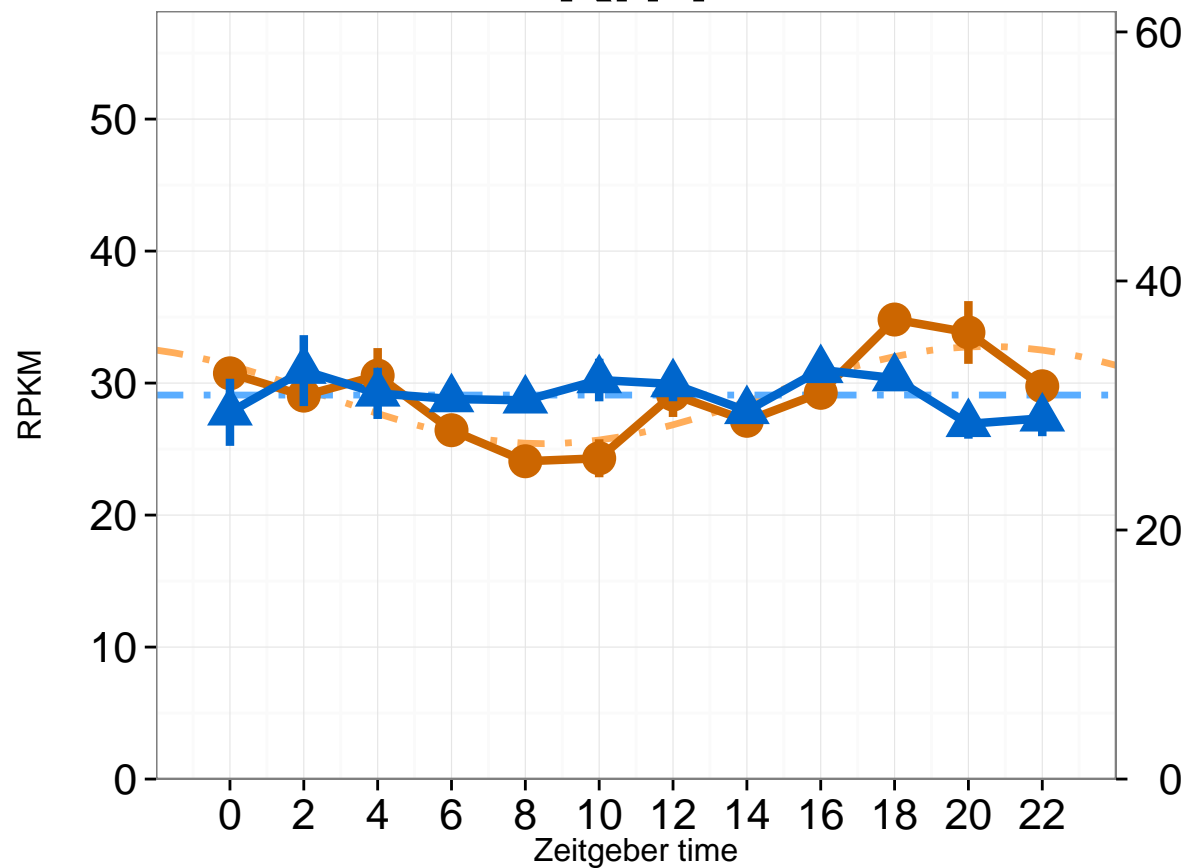

## Krr1

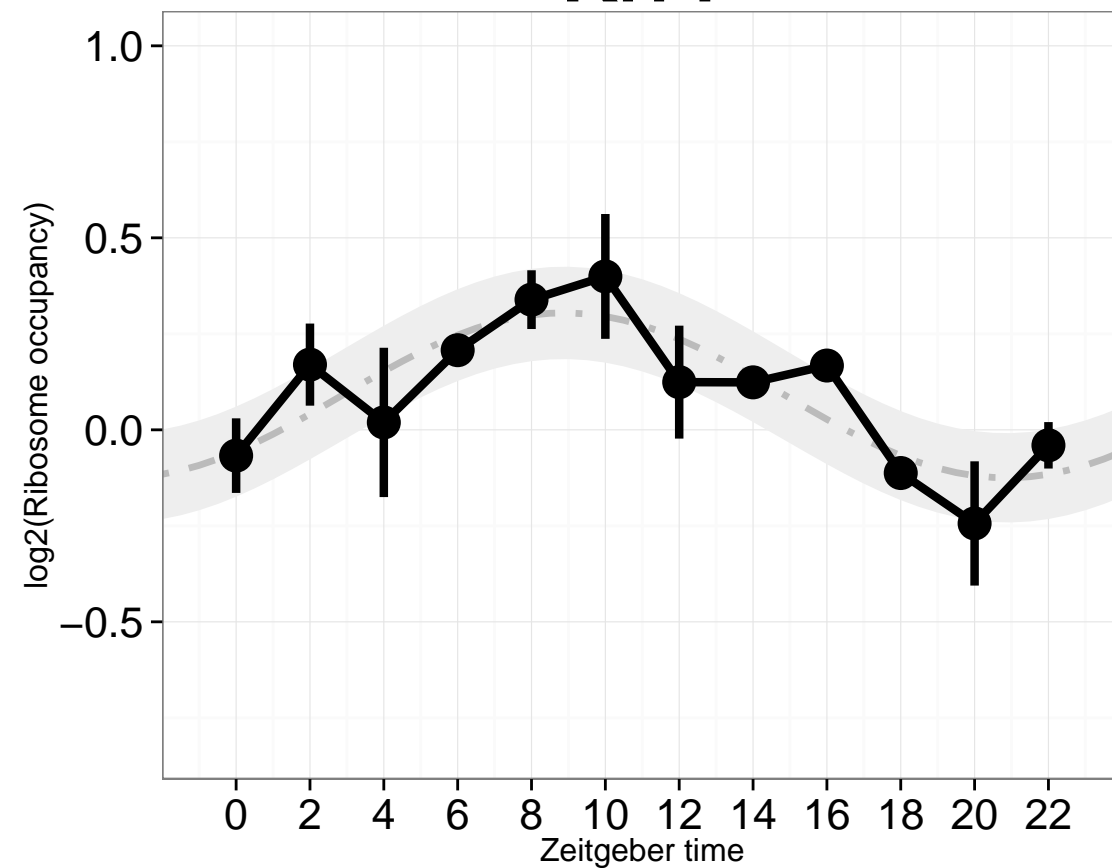

Supplement: Supplementary file 13183 [file 1]

## Cpox

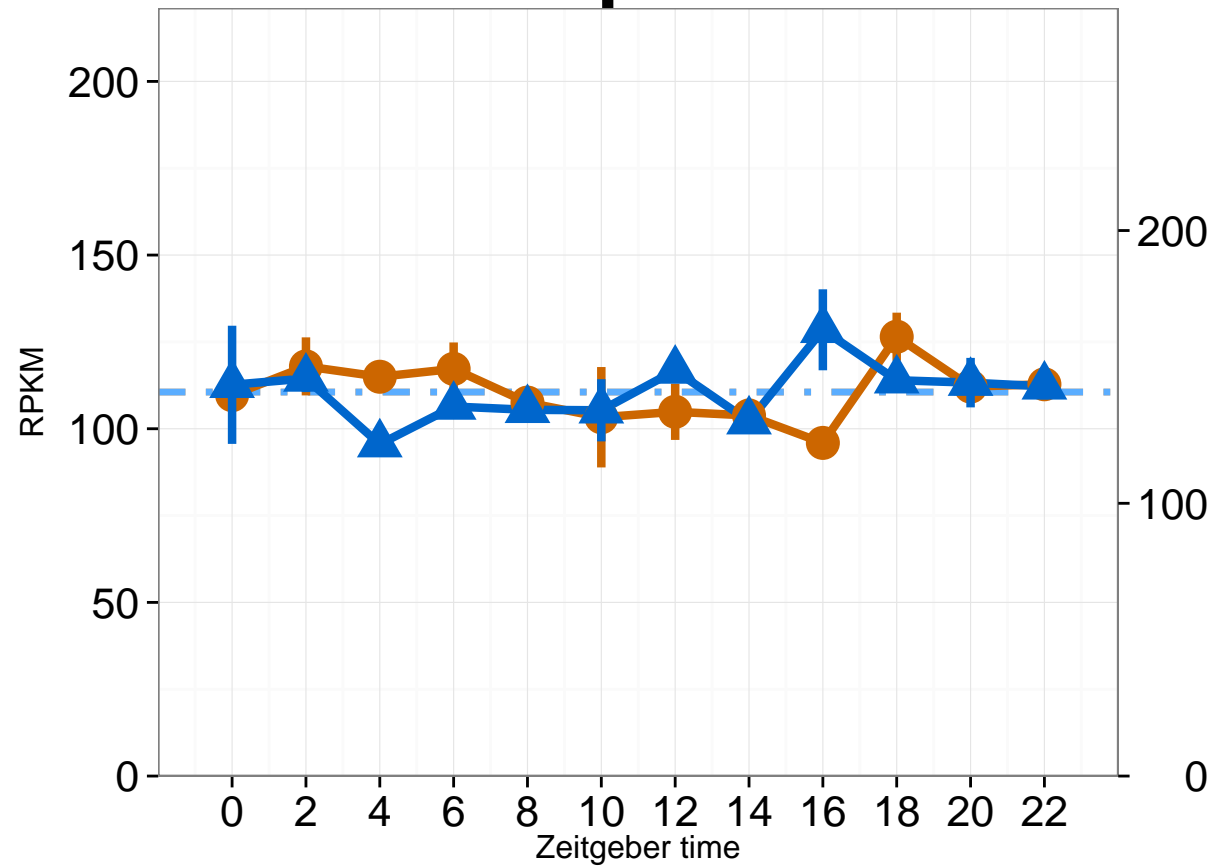

## Cpox

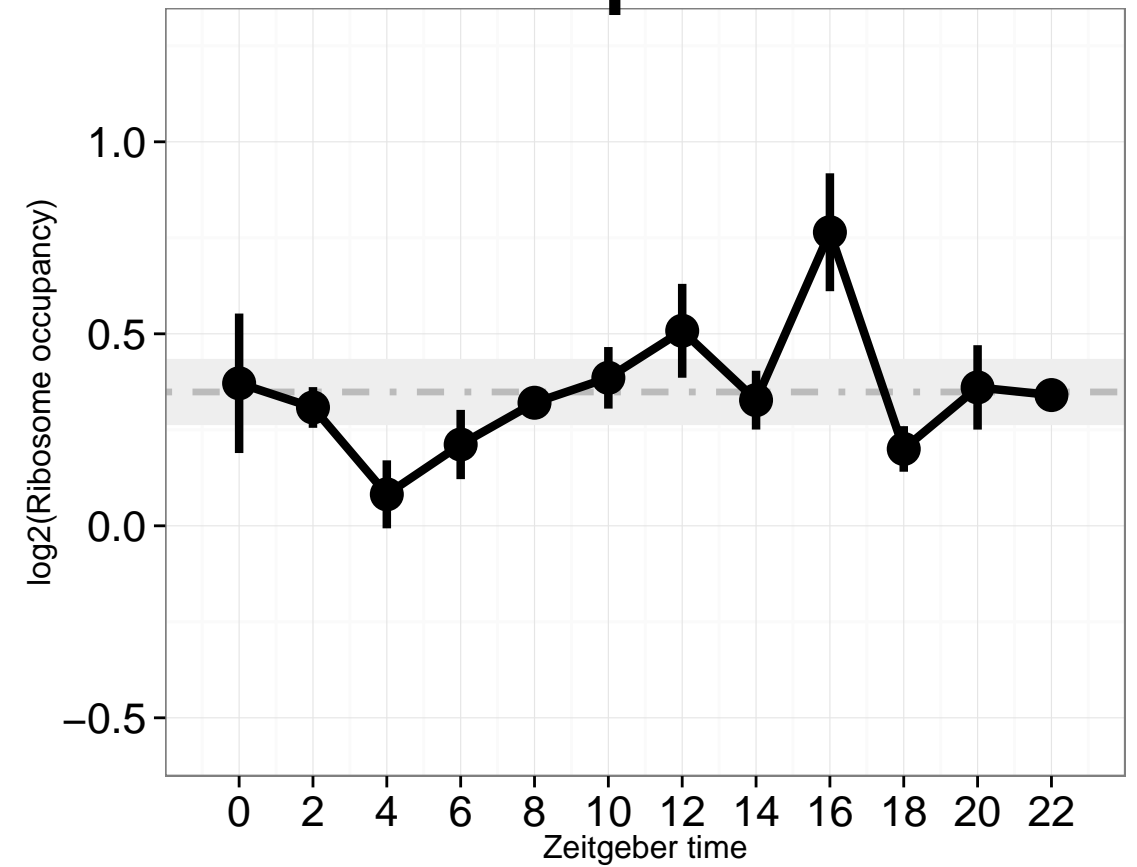

Supplement: Supplementary file 13184 [file 1]

## Eif1

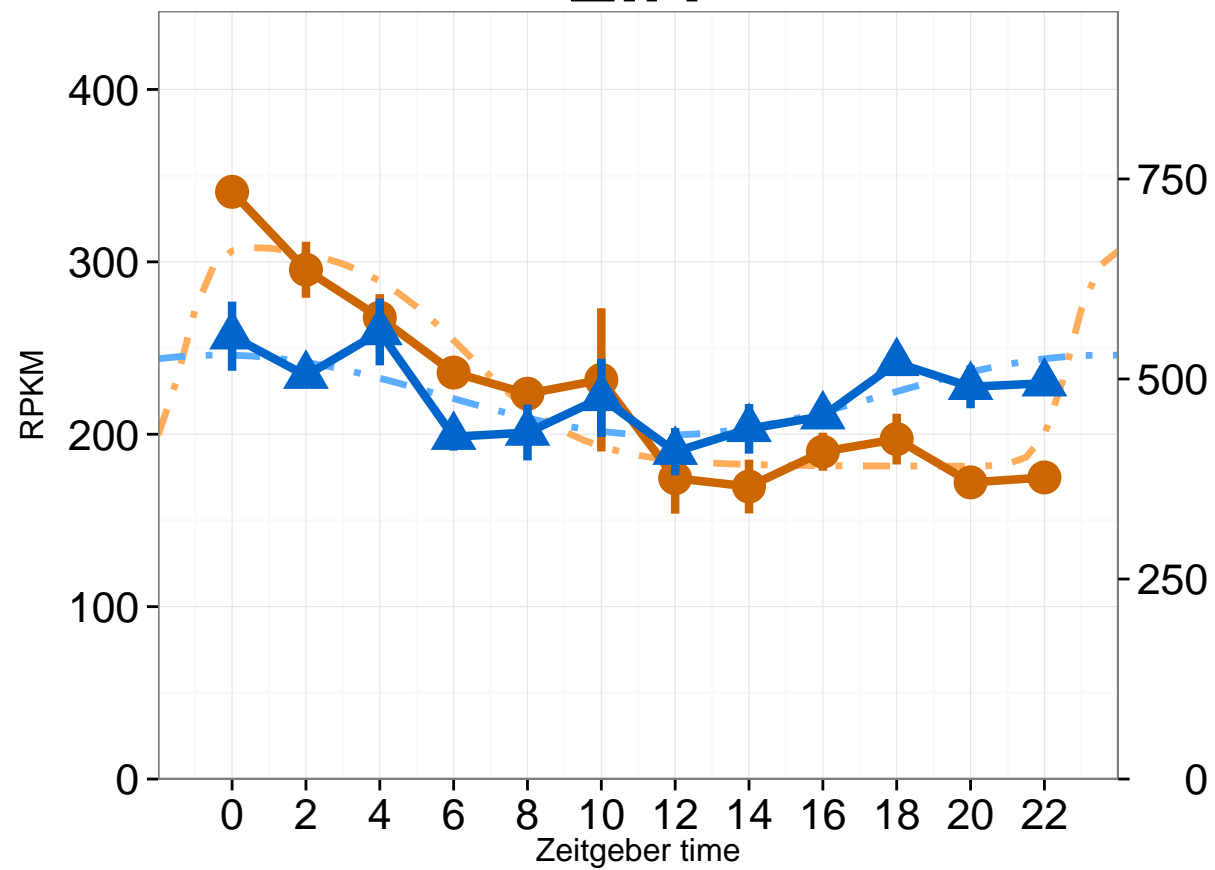

## Eif1

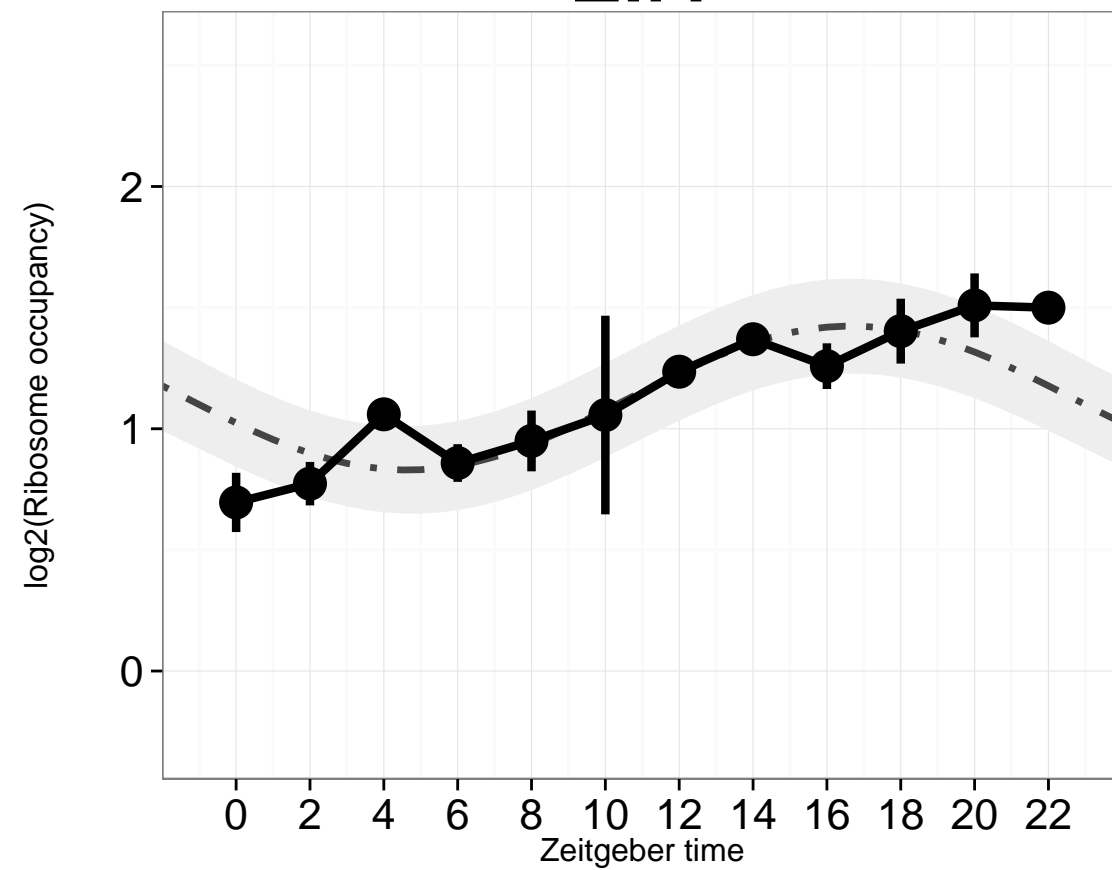

Supplement: Supplementary file 13185 [file 1]

# Cspg5

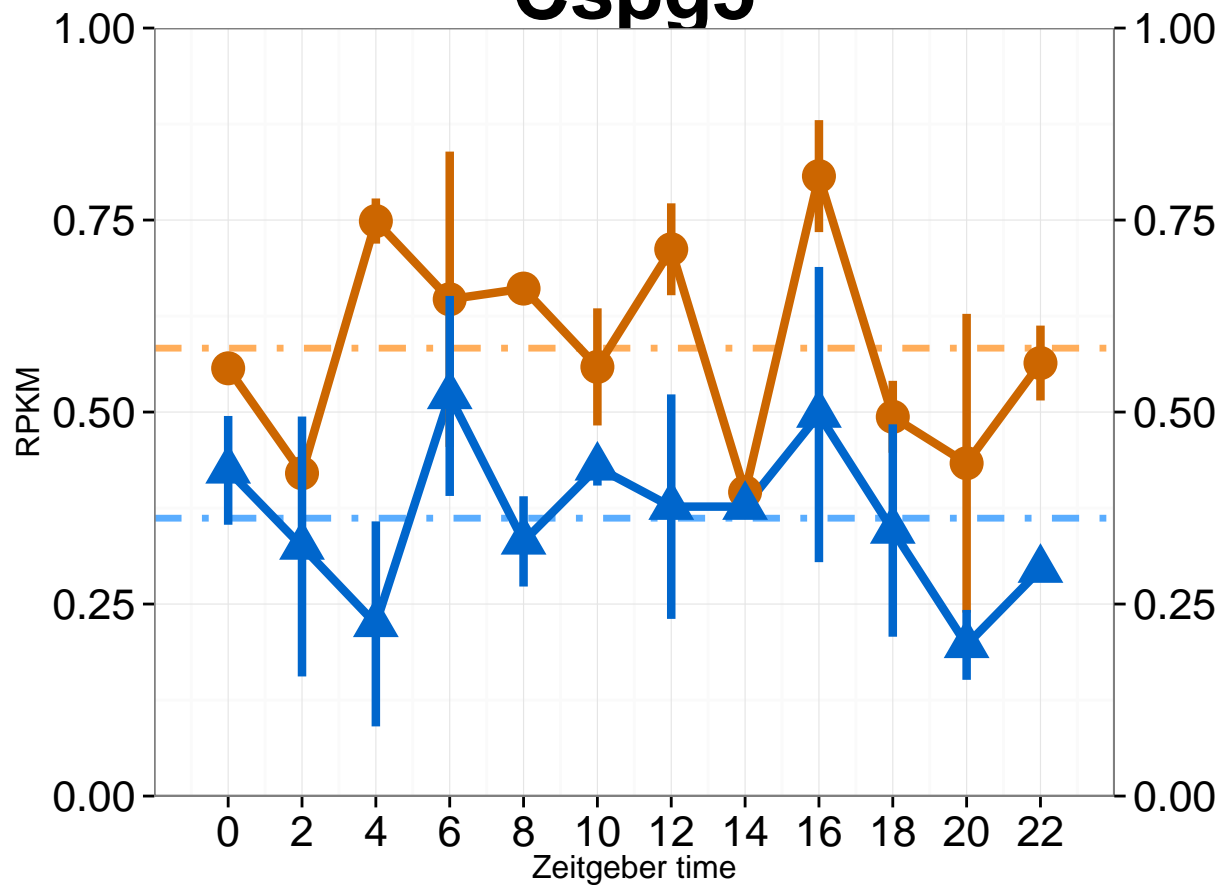

# Cspg5

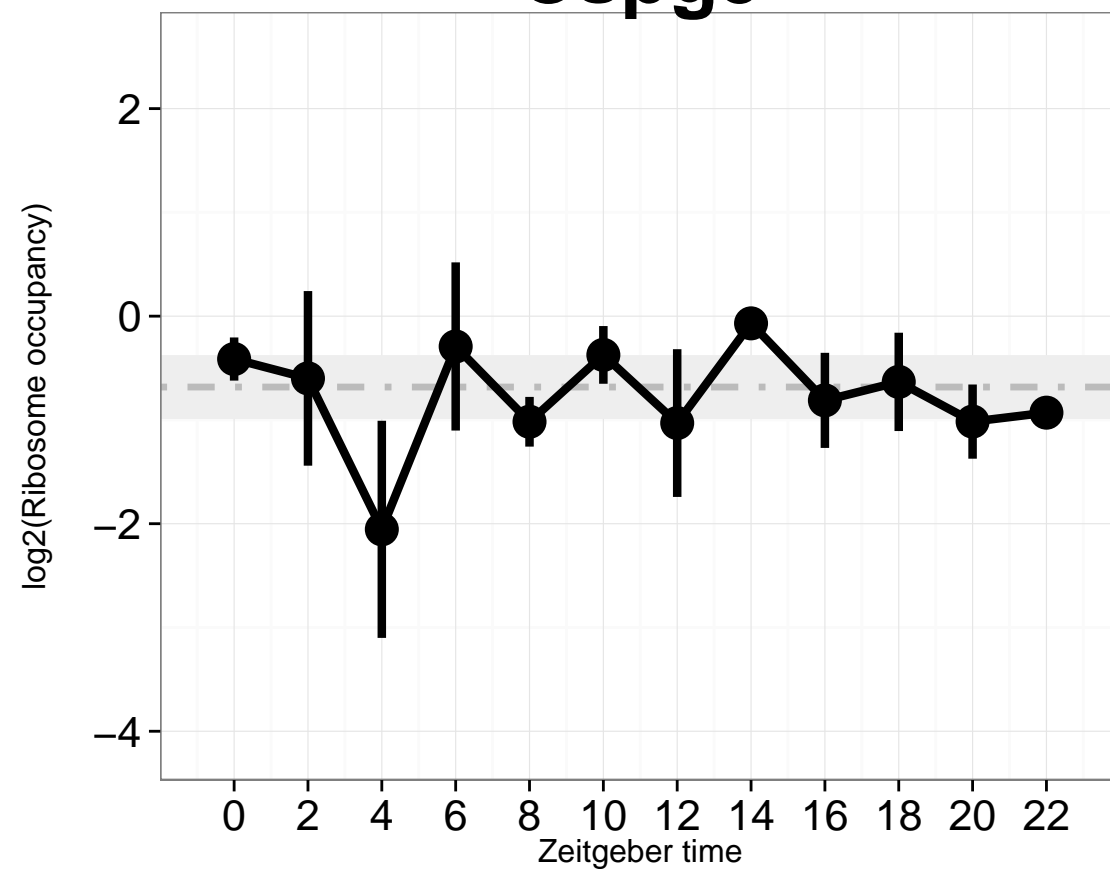

Supplement: Supplementary file 13186 [file 1]

**Ptx3 TR**

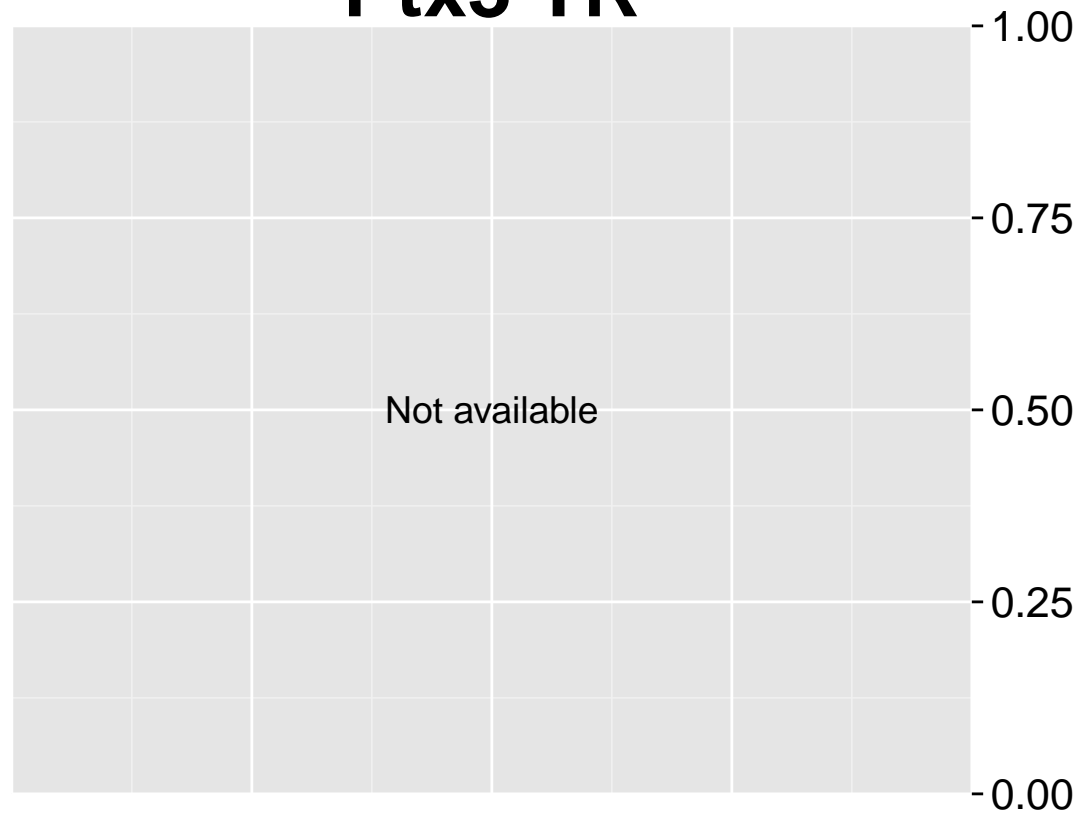

**Ptx3 log2(Ribosome occupancy)**

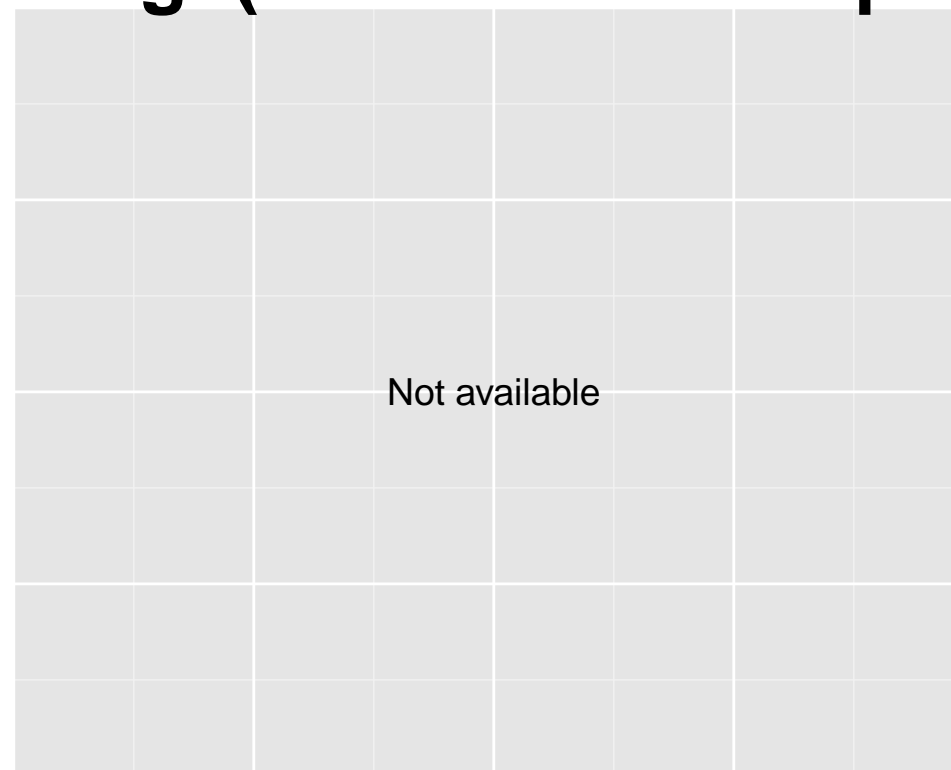

Supplement: Supplementary file 13187 [file 1]

# Phtf2

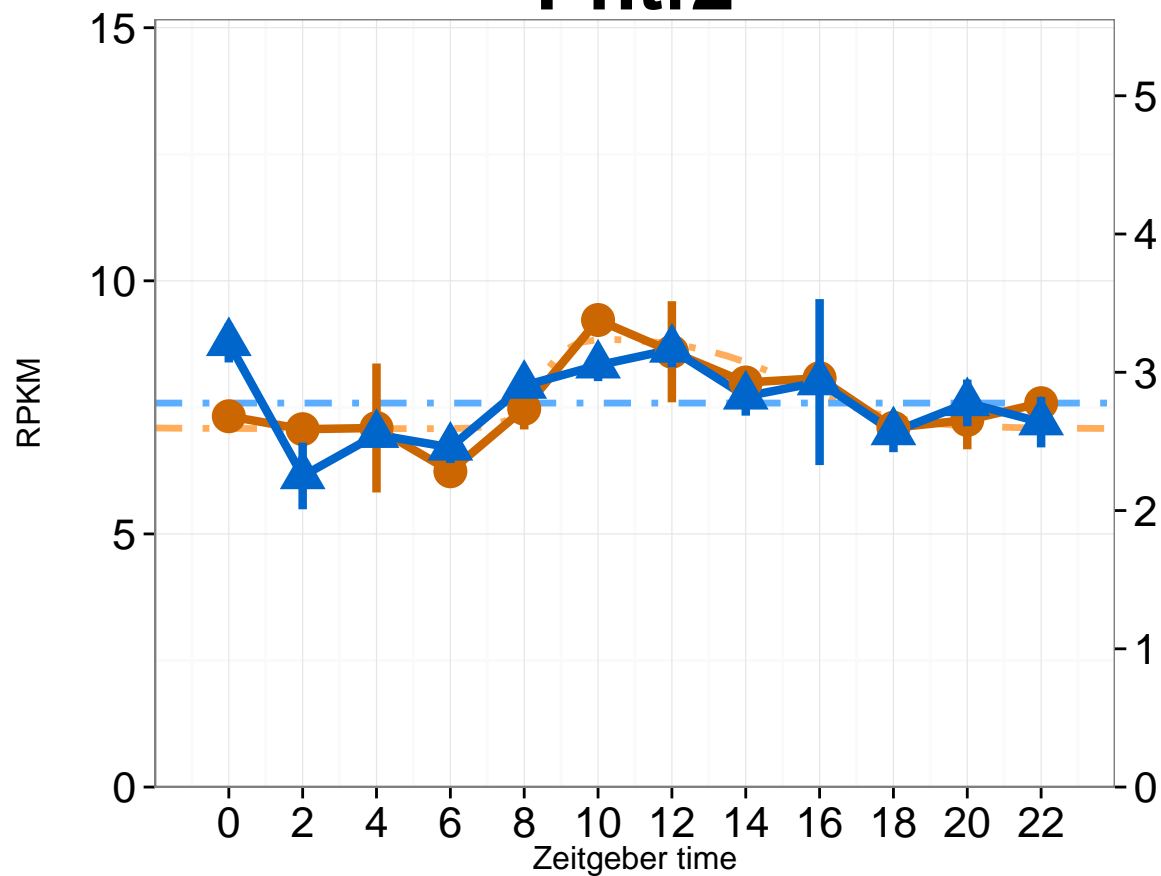

# Phtf2

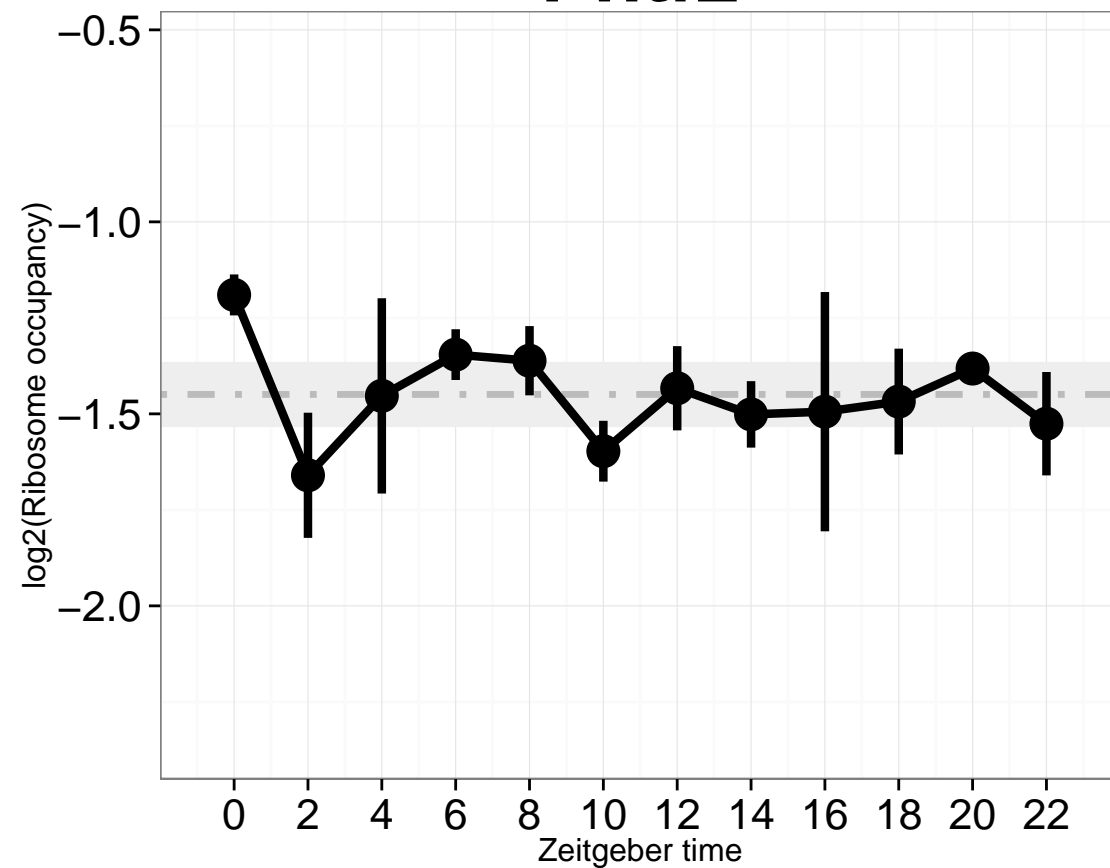

Supplement: Supplementary file 13188 [file 1]

# Sestd1

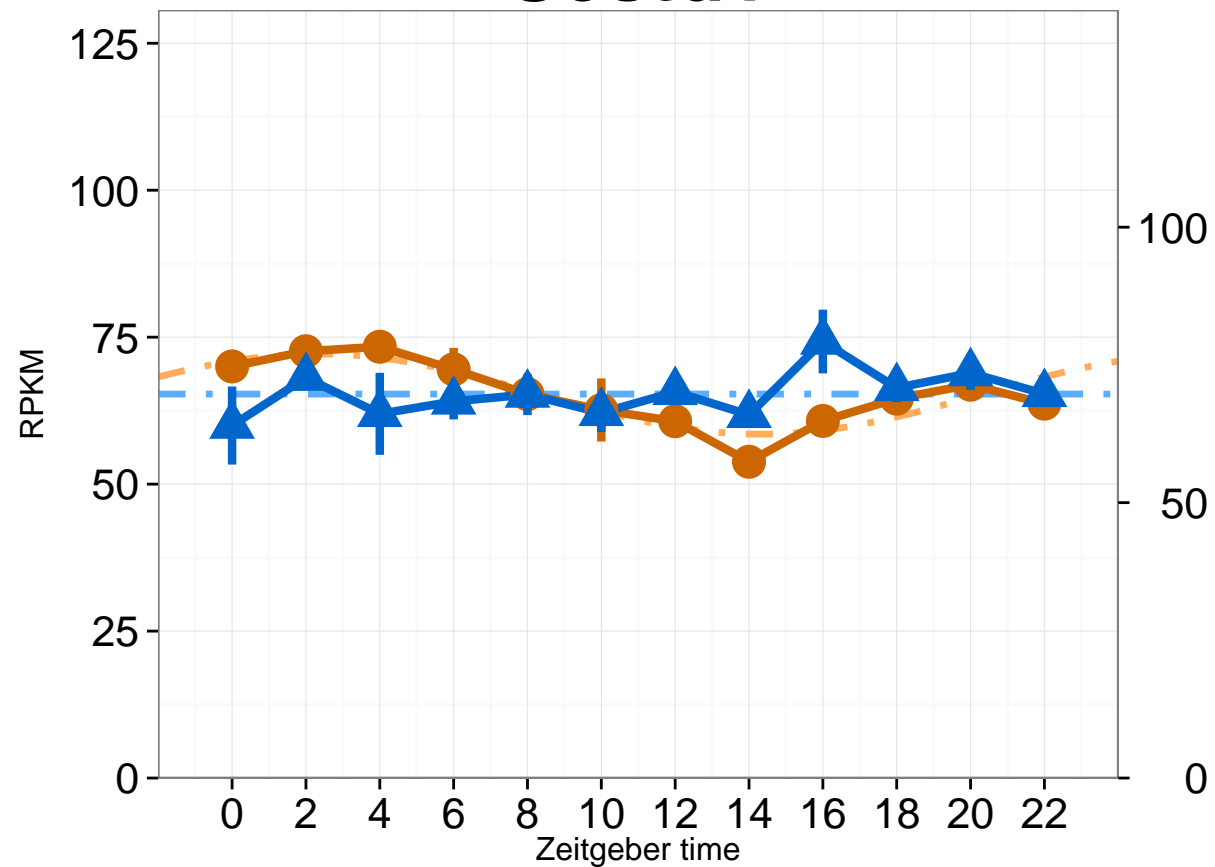

# Sestd1

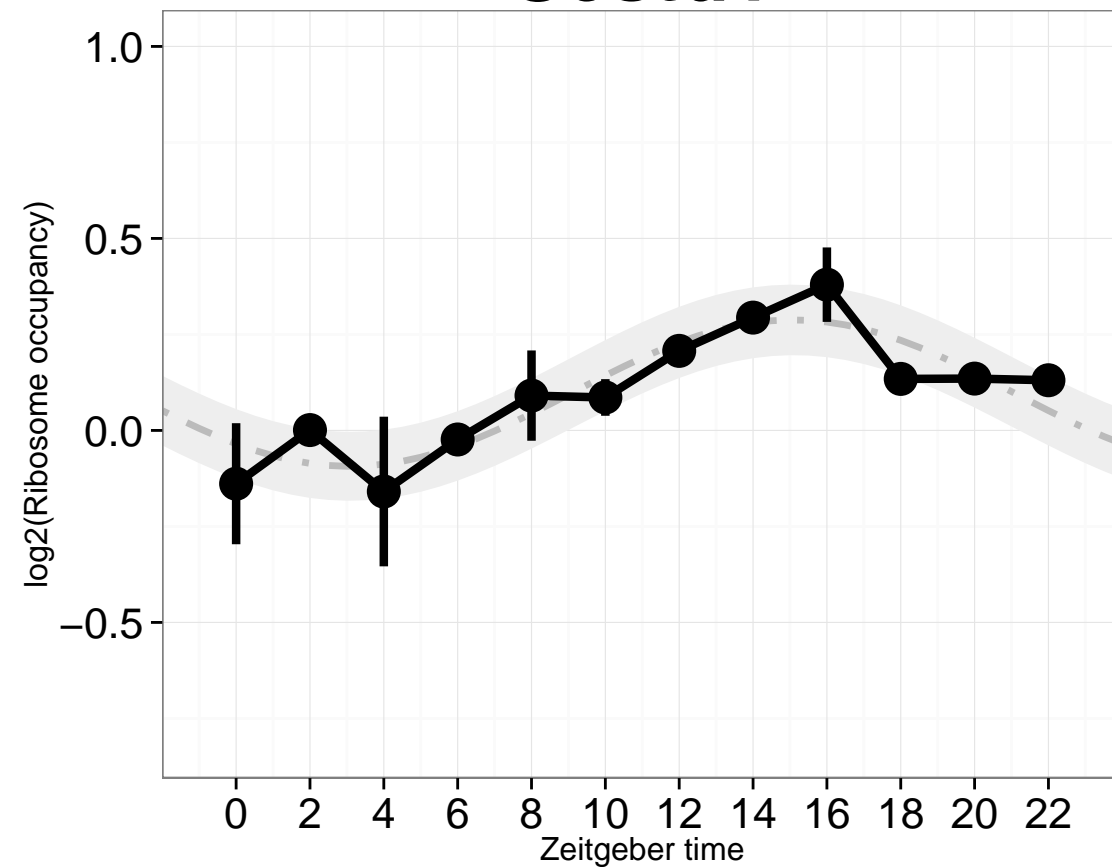

Supplement: Supplementary file 13189 [file 1]

## Sptssb

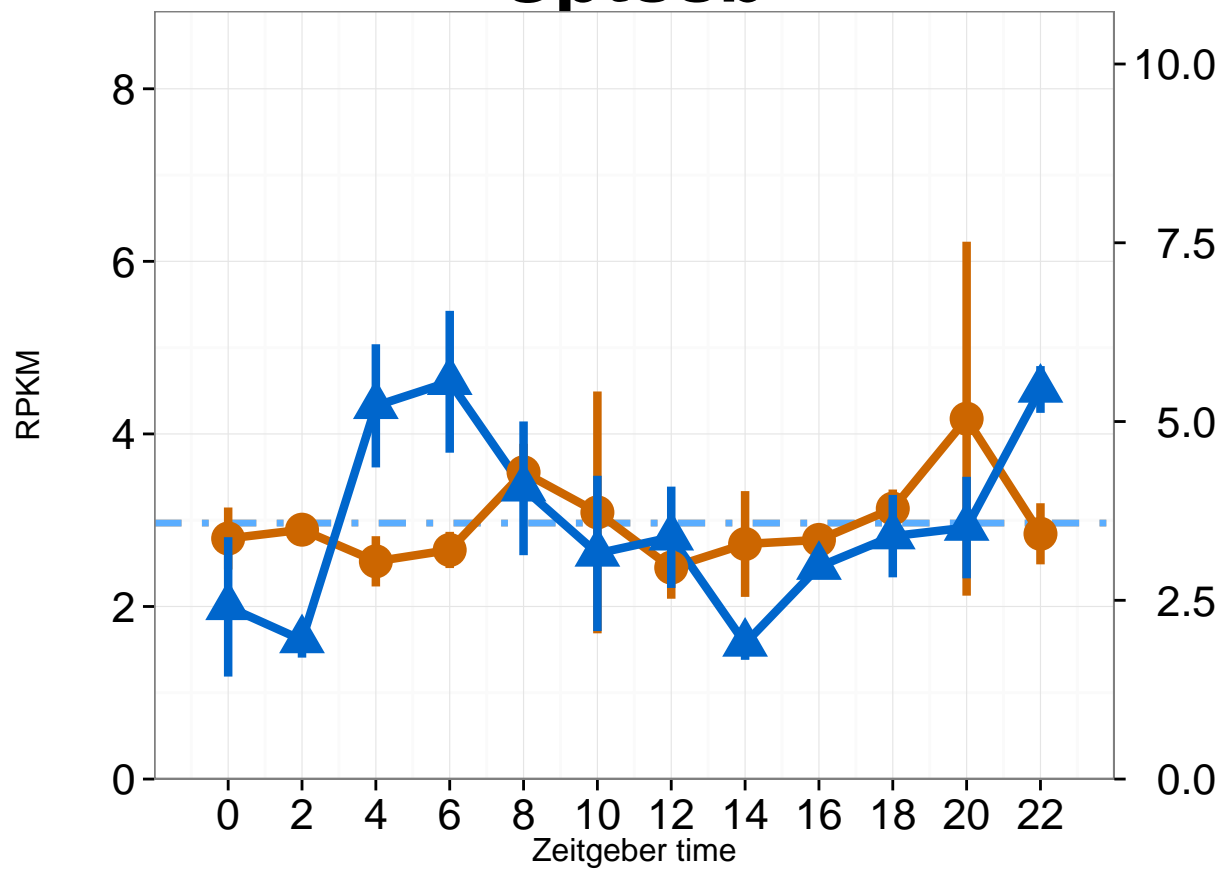

## Sptssb

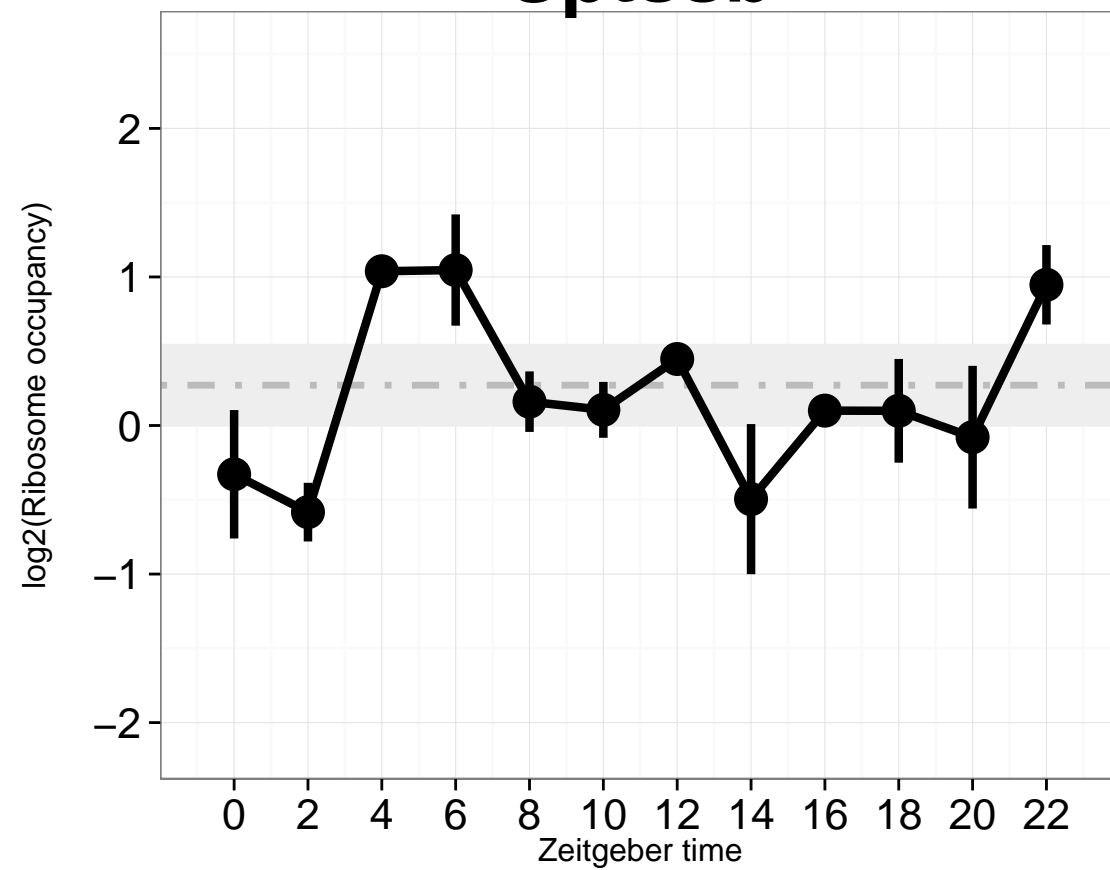

Supplement: Supplementary file 13190 [file 1]

# Hmgcs1

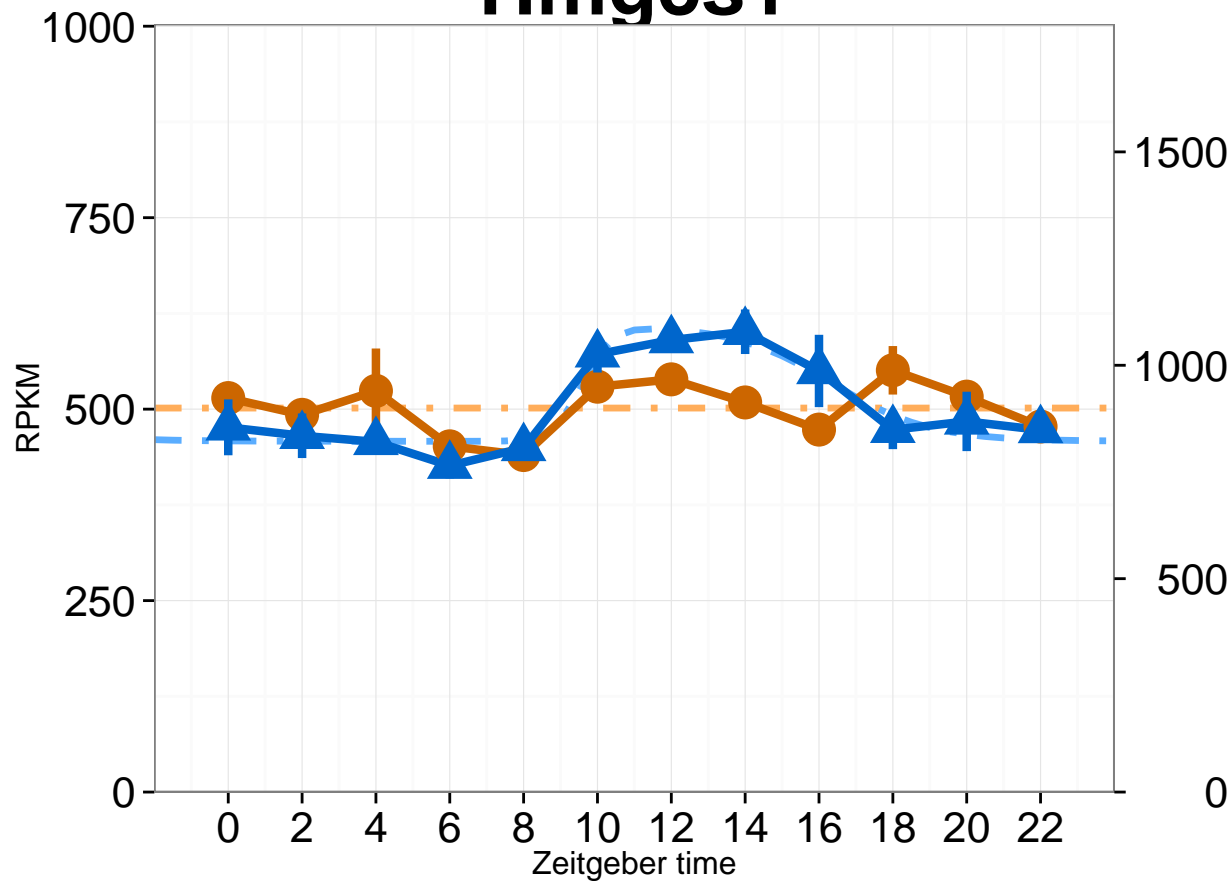

# Hmgcs1

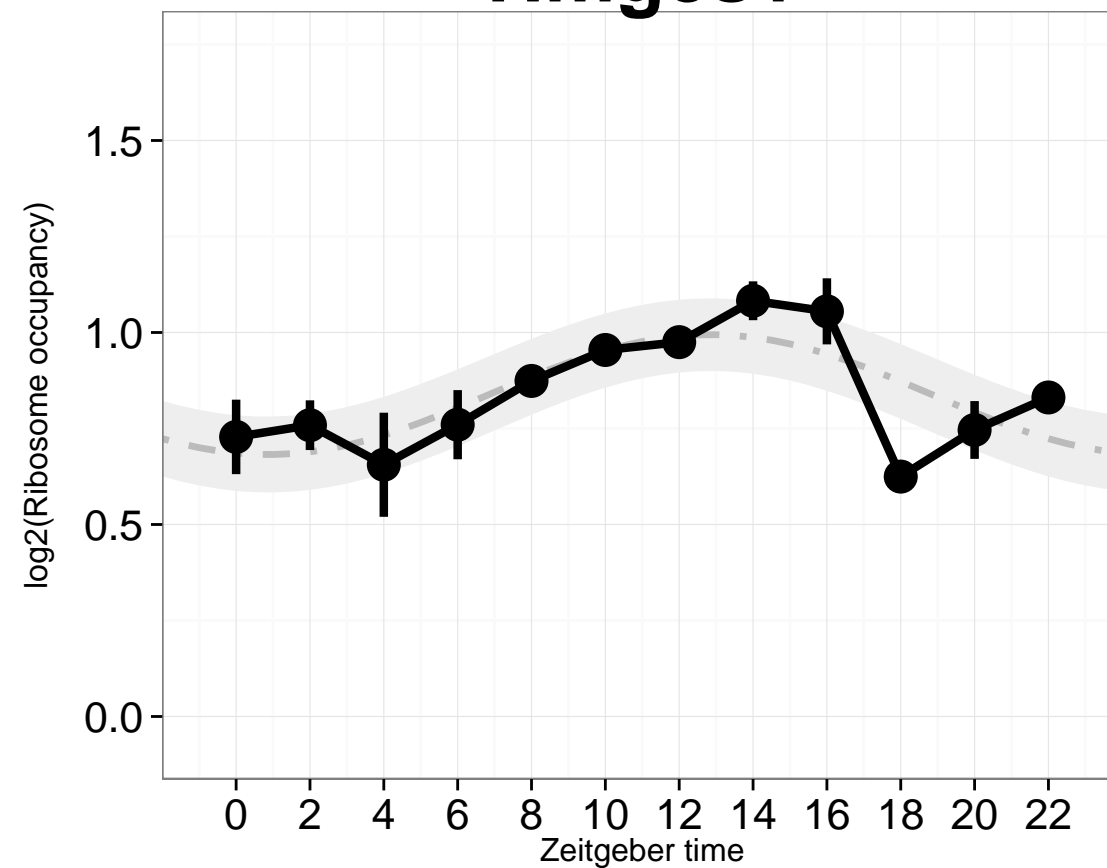

Supplement: Supplementary file 13191 [file 1]

# Xylt2

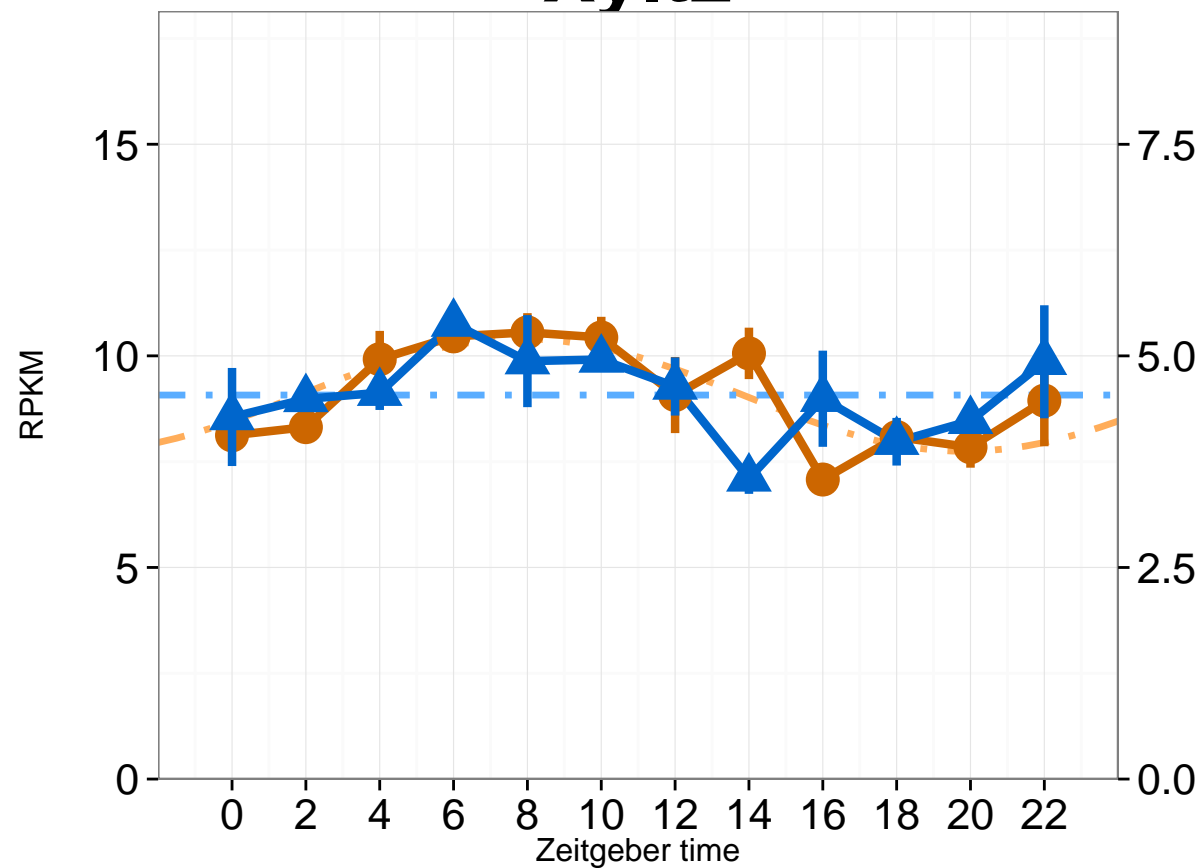

# Xylt2

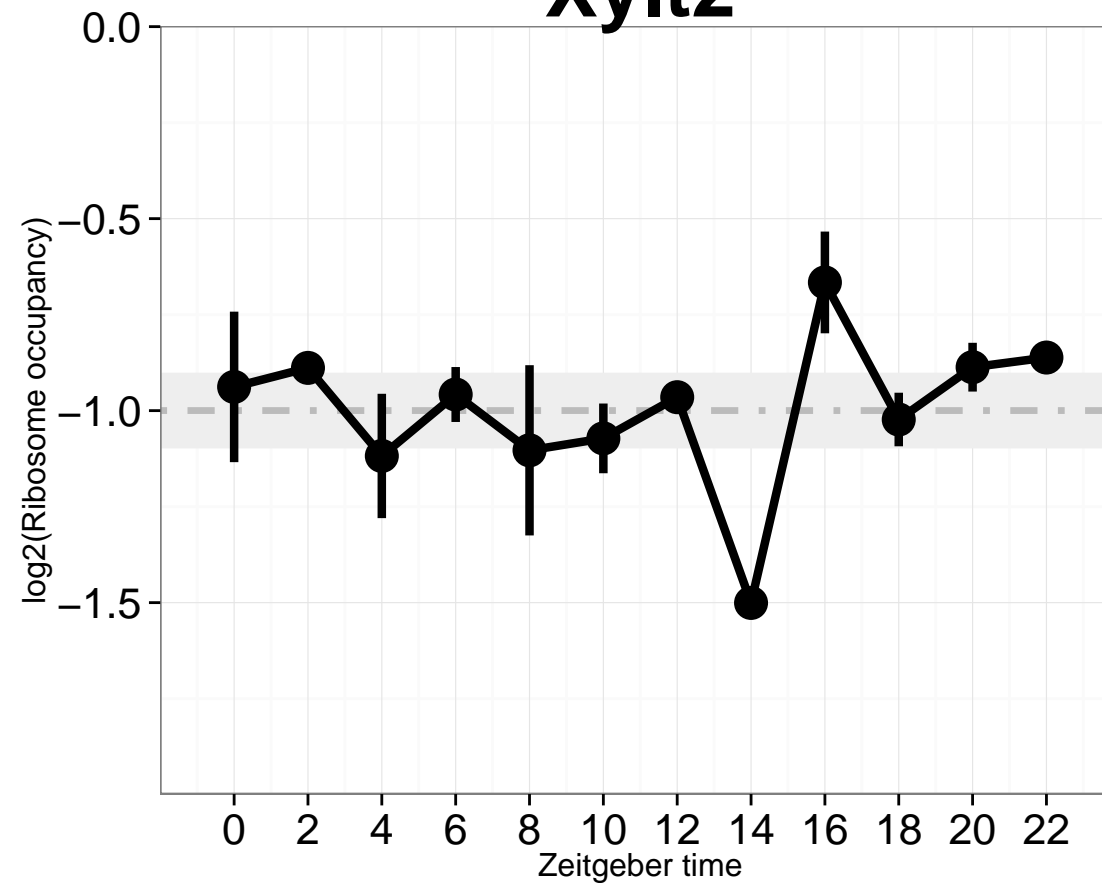

Supplement: Supplementary file 13192 [file 1]

## Nudt16l1

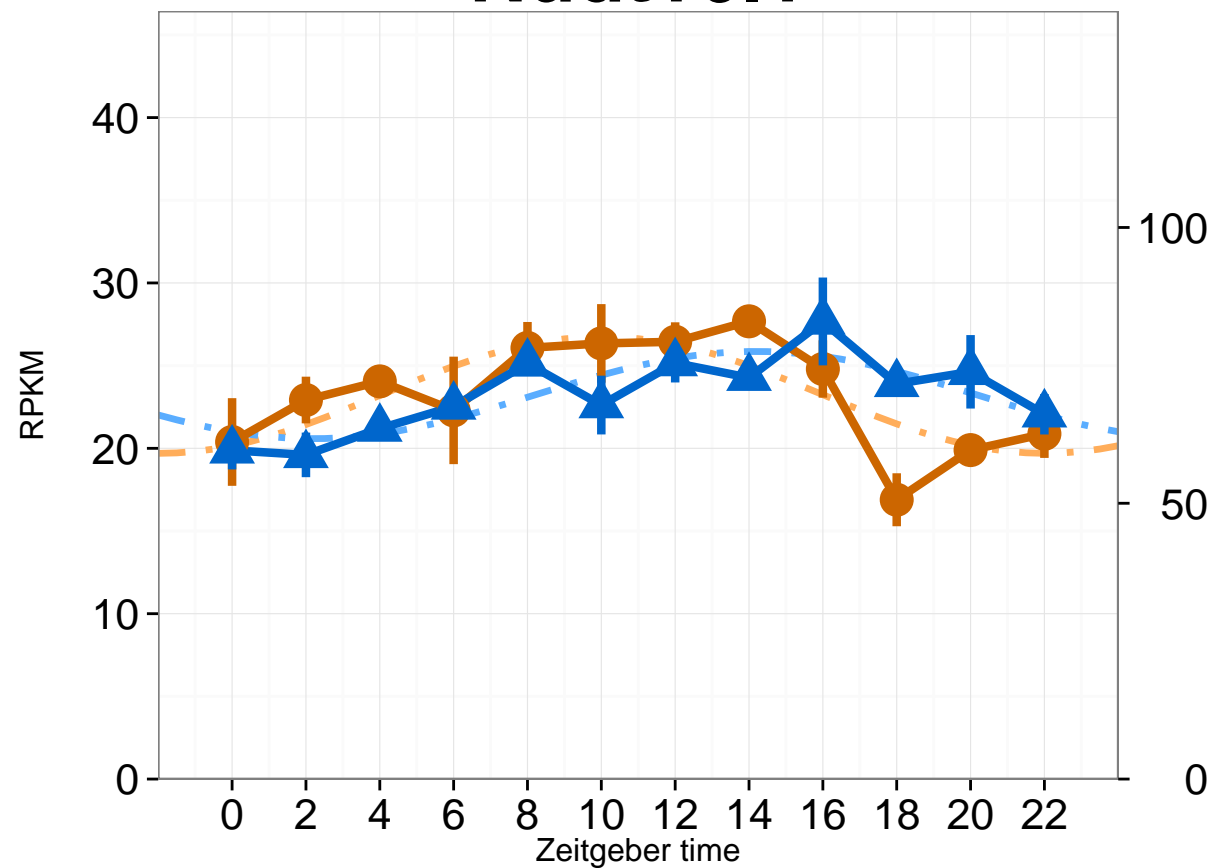

## Nudt16l1

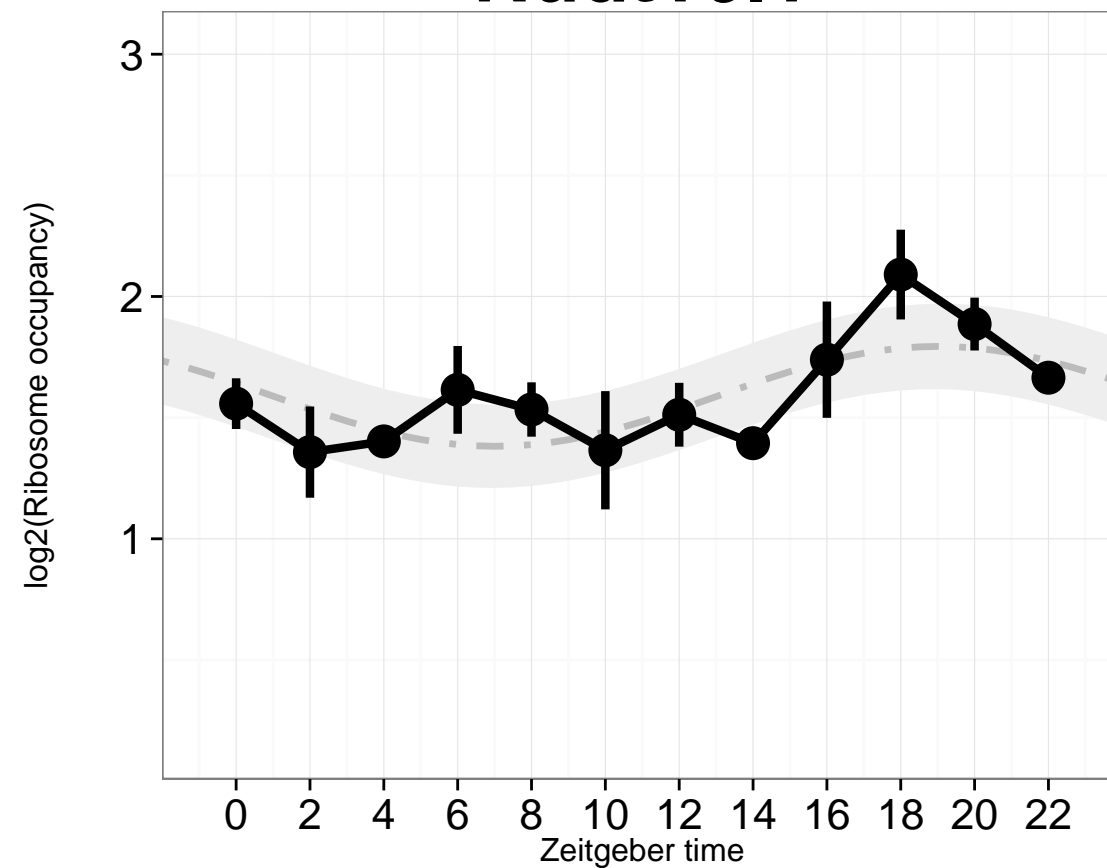

Supplement: Supplementary file 13193 [file 1]

# Gfpt2

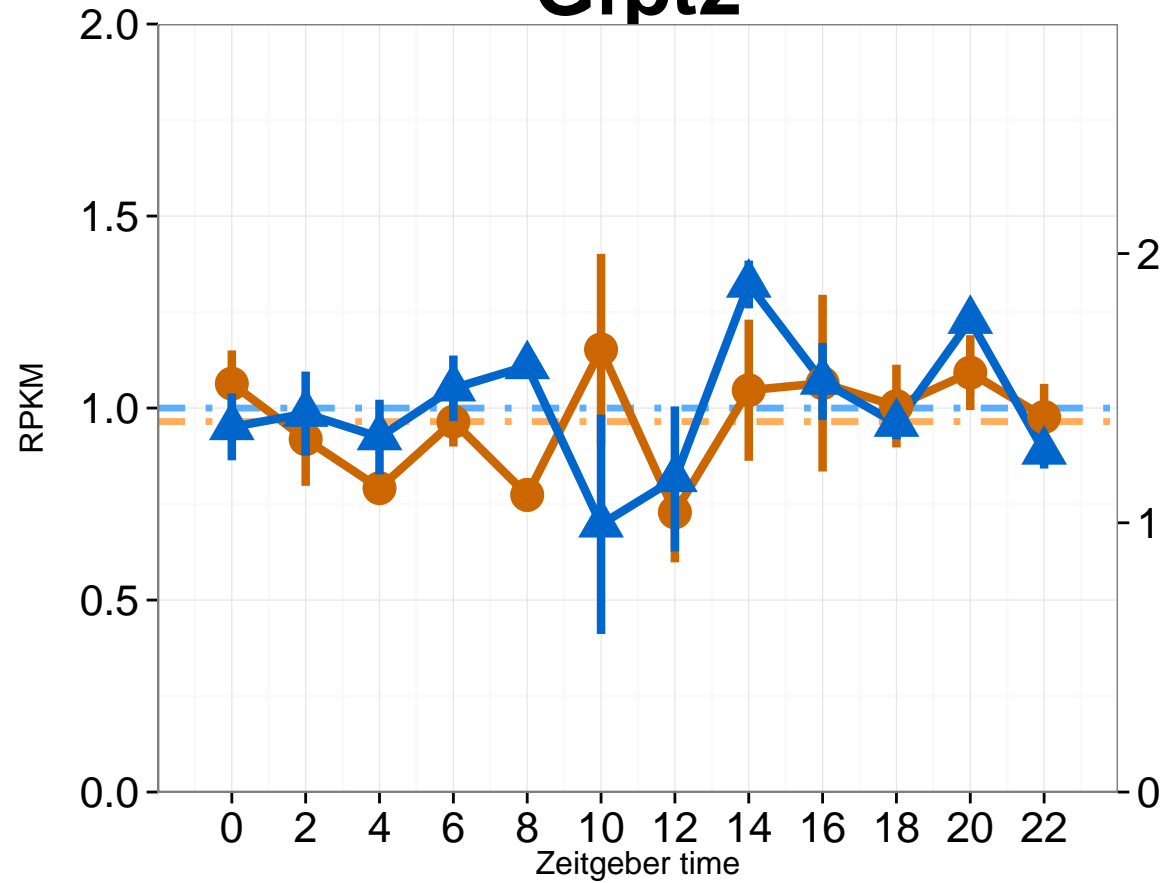

# Gfpt2

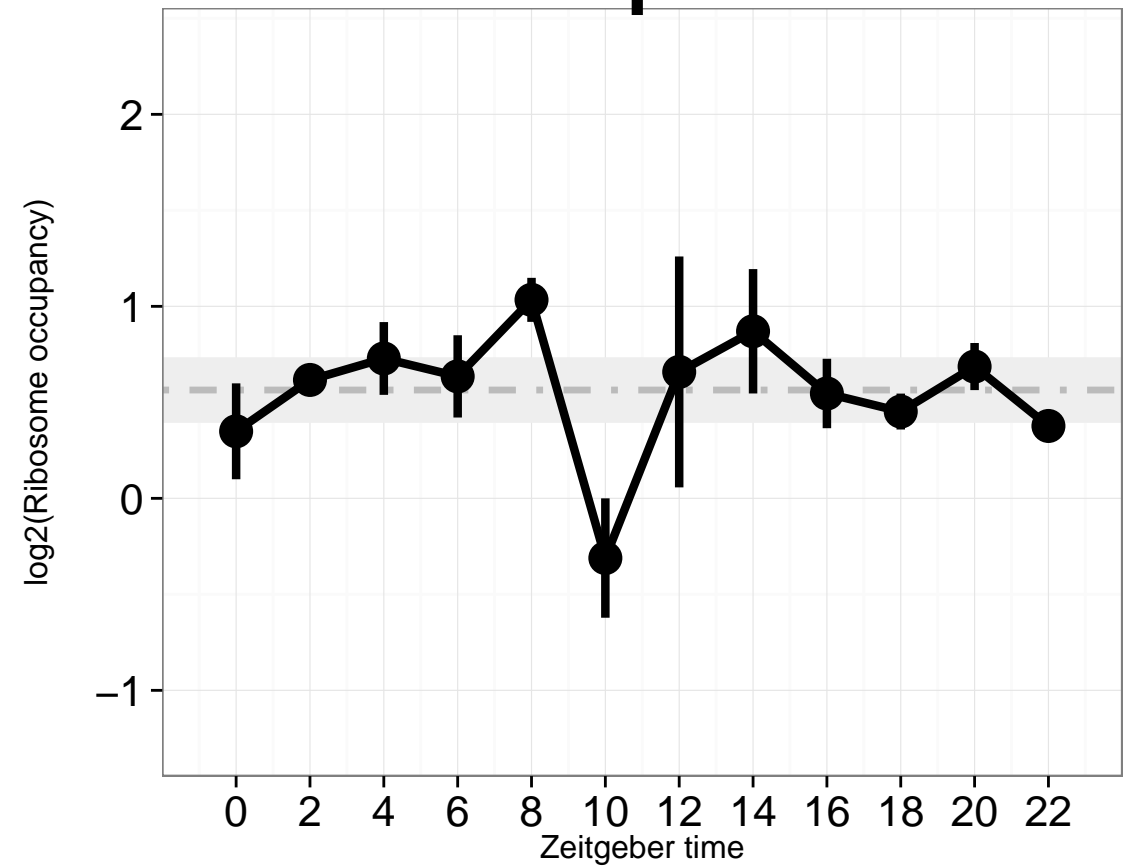

Supplement: Supplementary file 13194 [file 1]

# Zfp652

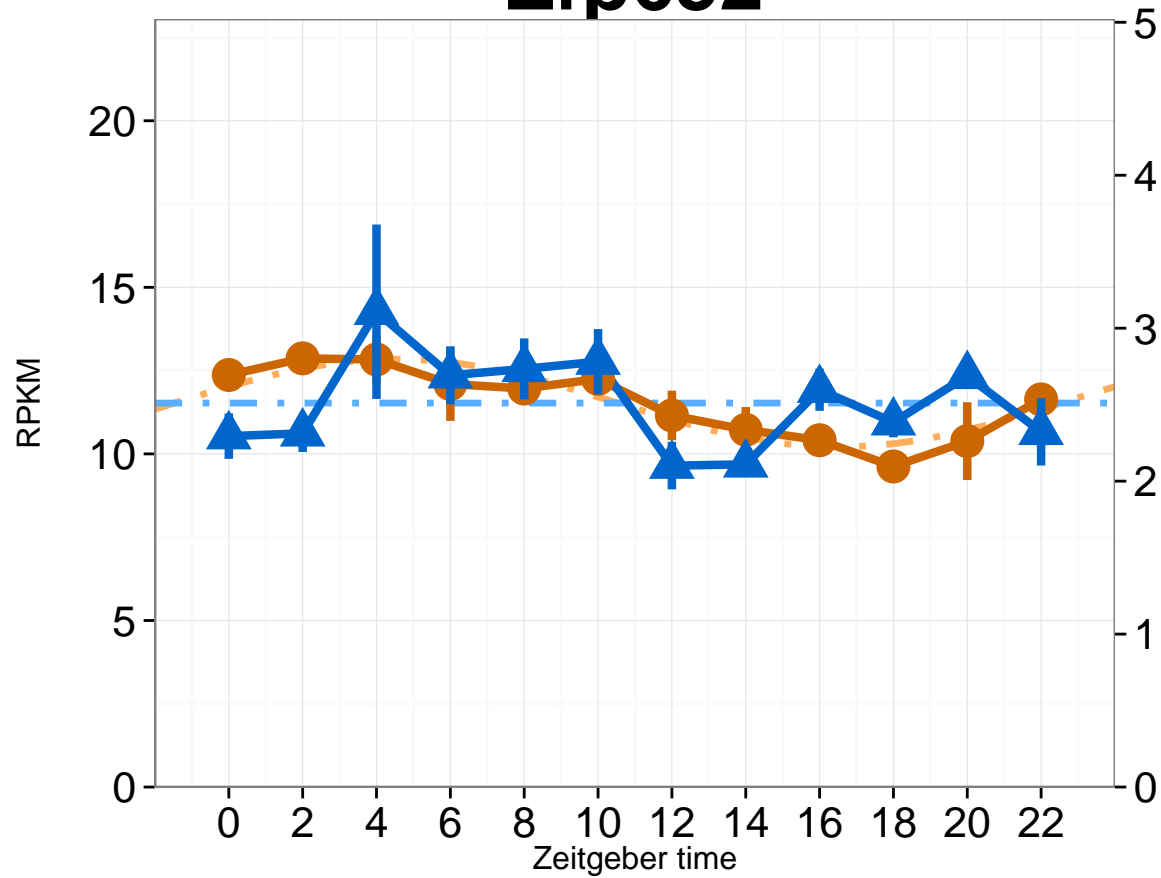

# Zfp652

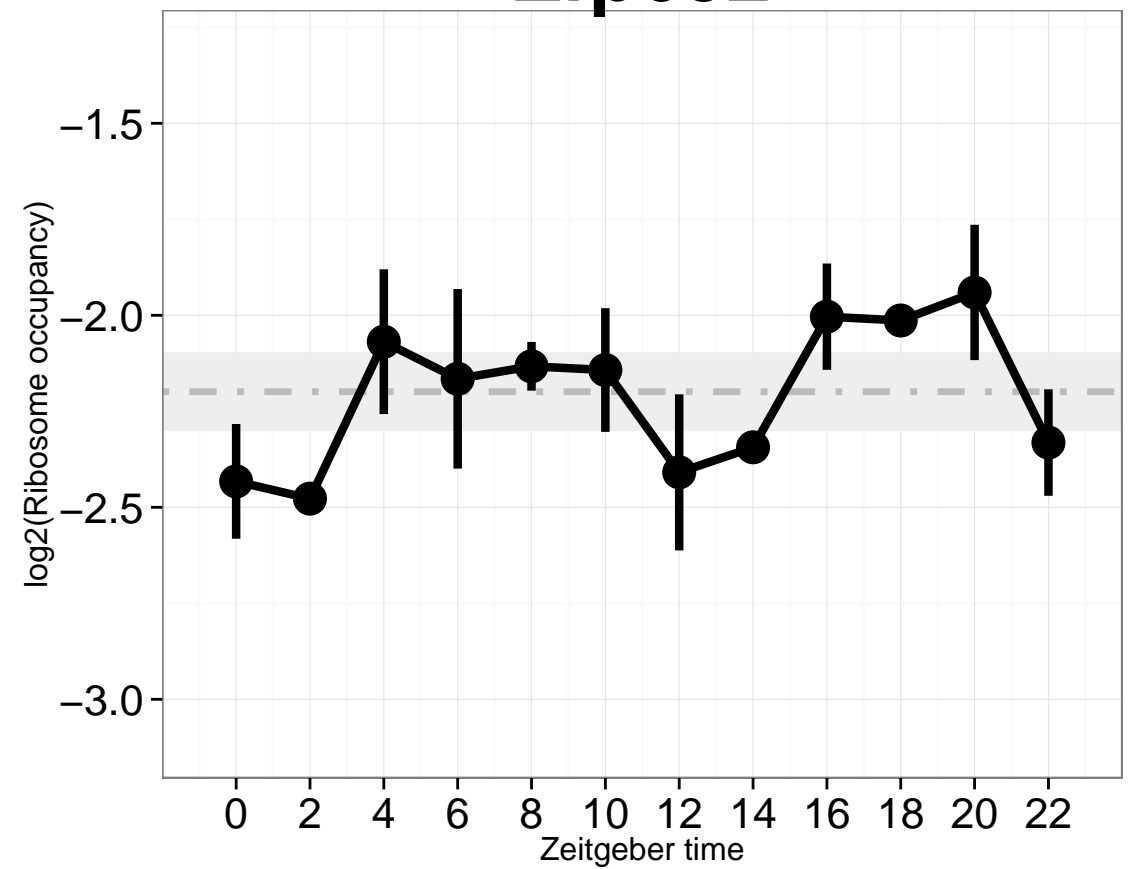

Supplement: Supplementary file 13195 [file 1]

## Sptb

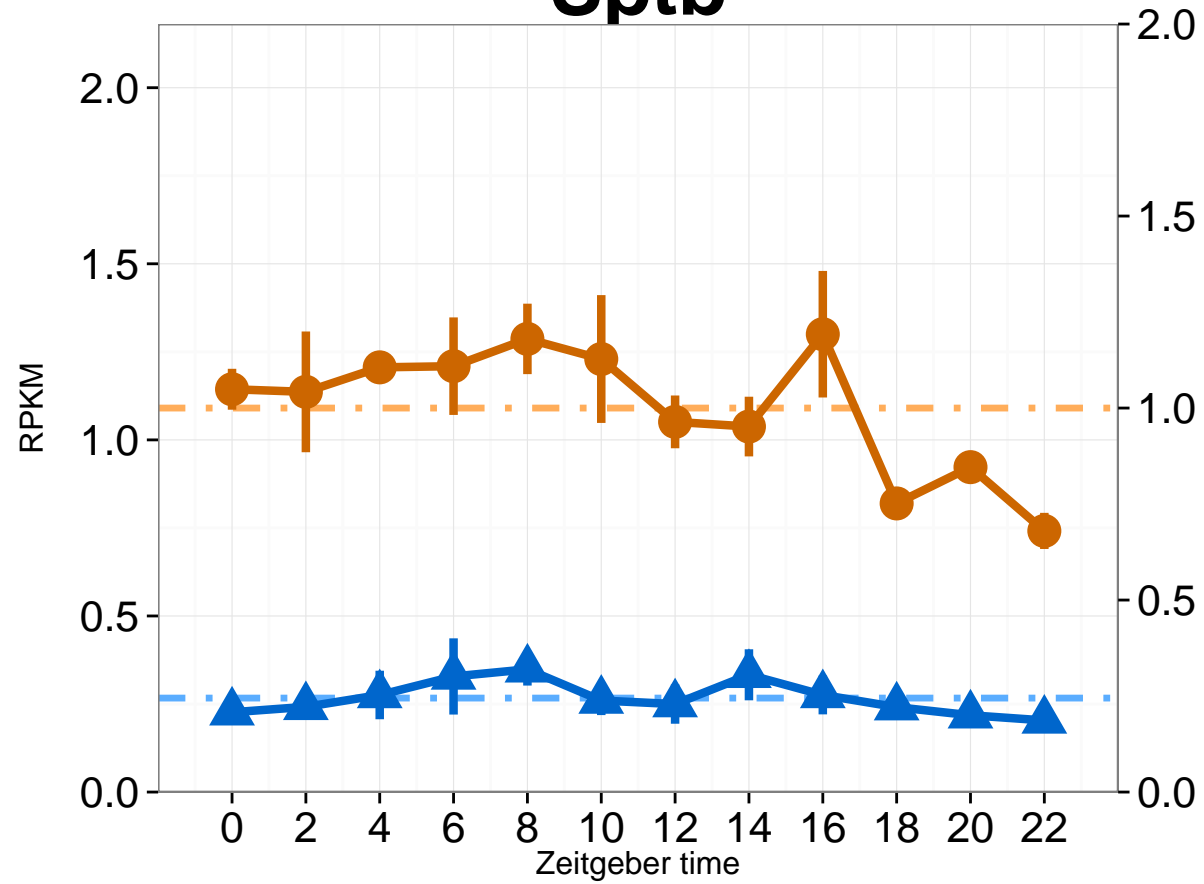

## Sptb

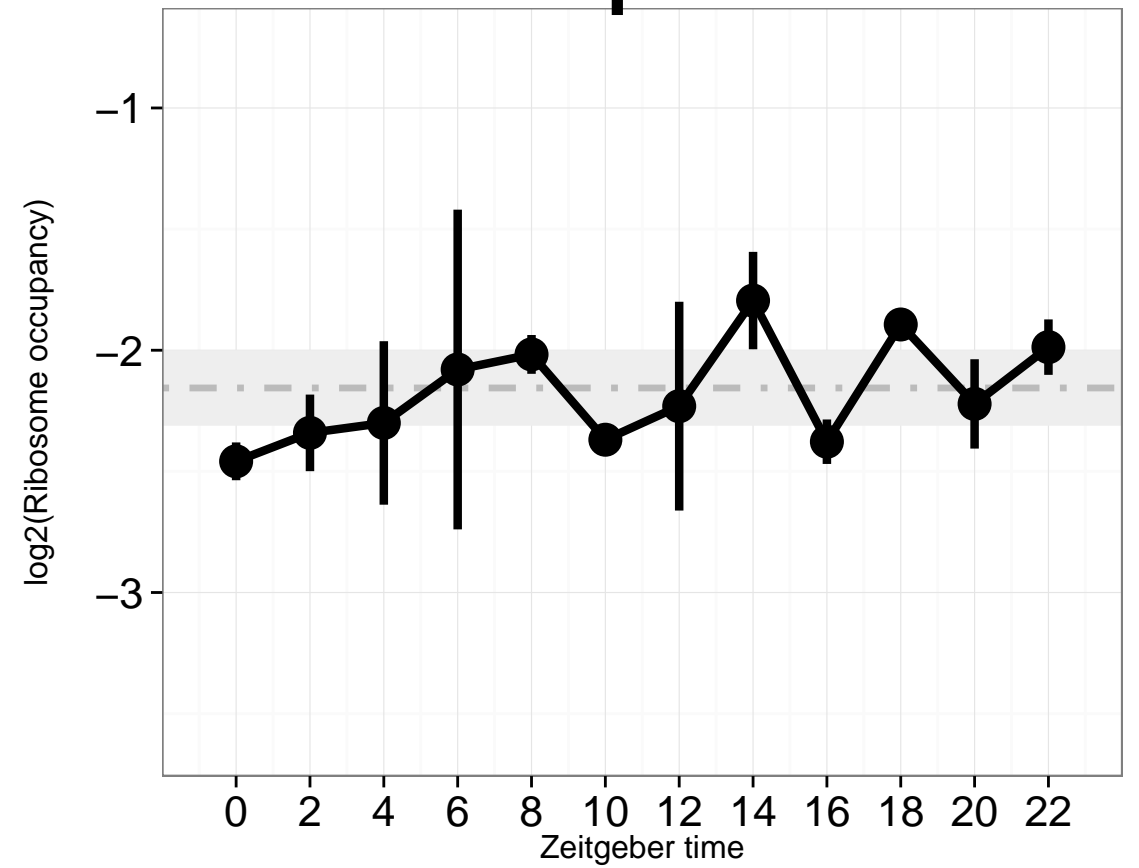

Supplement: Supplementary file 13196 [file 1]

## Fga

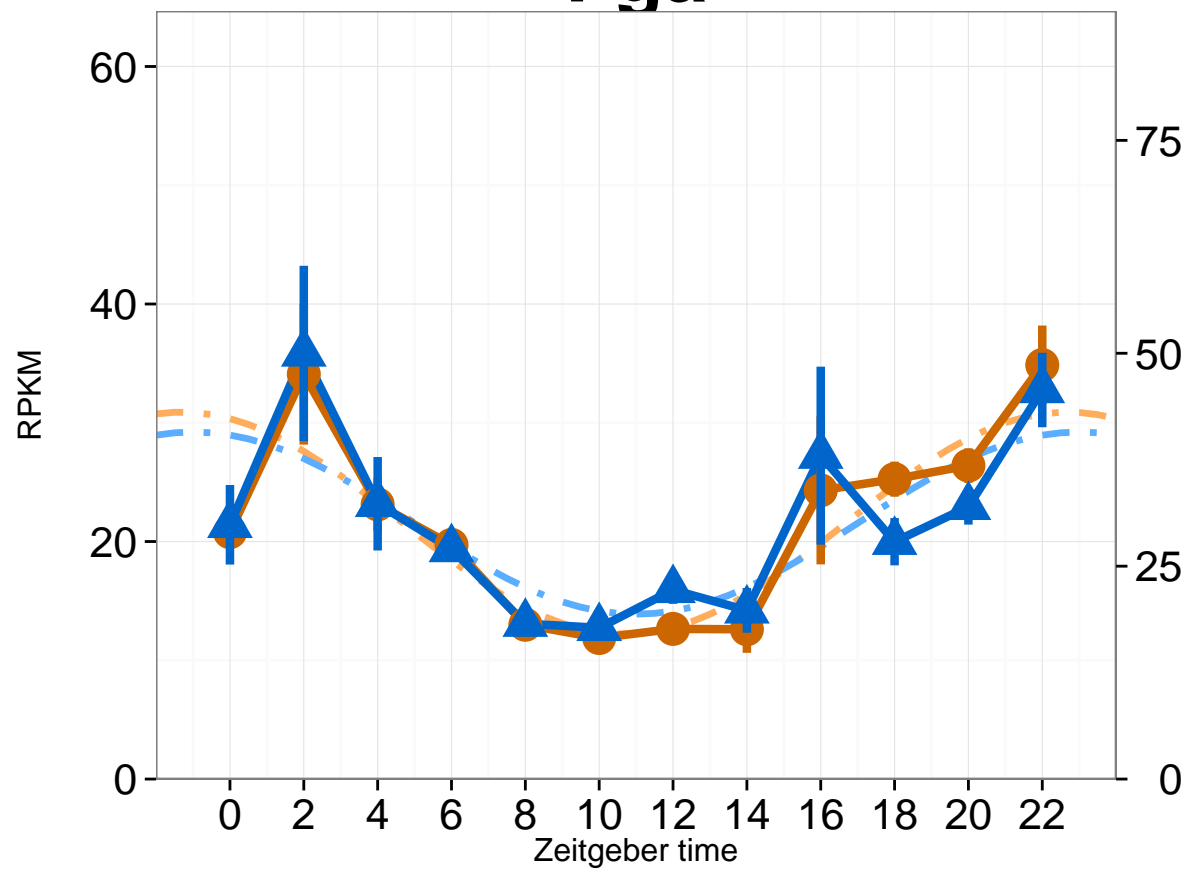

## Fga

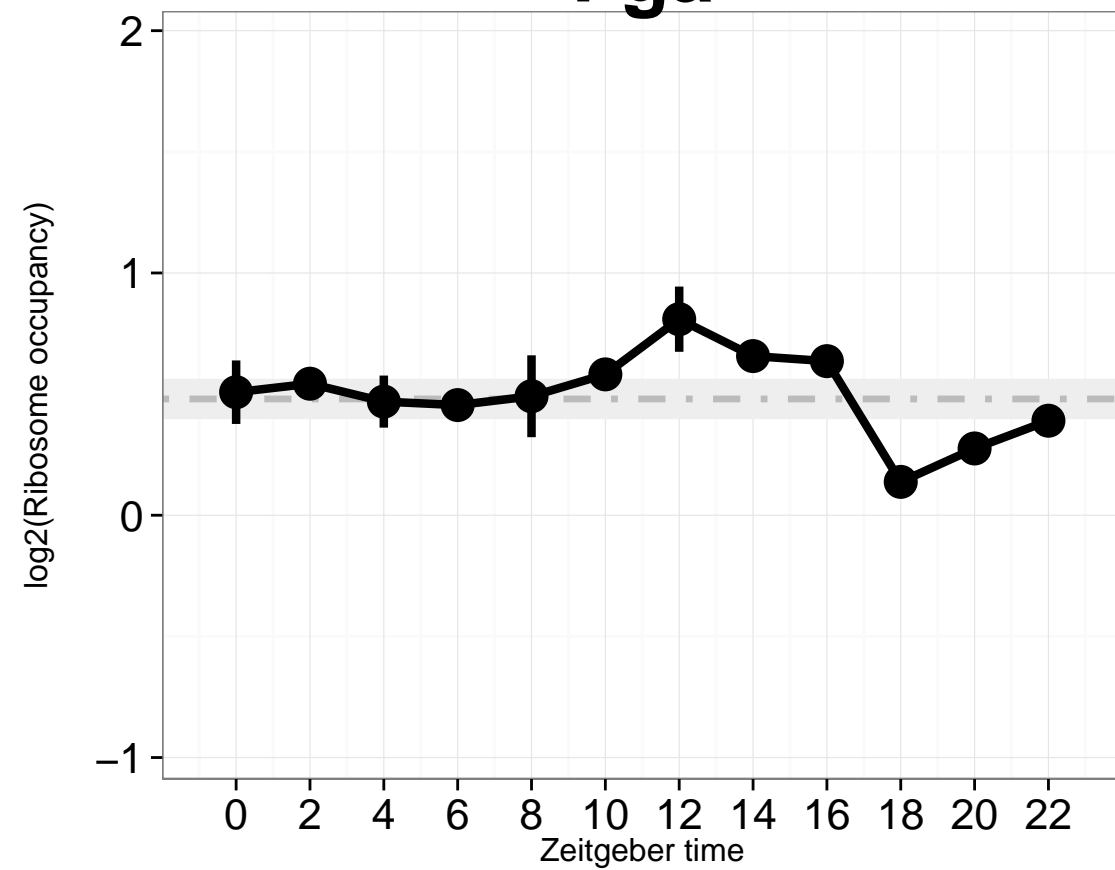

Supplement: Supplementary file 13197 [file 1]

# Psd4

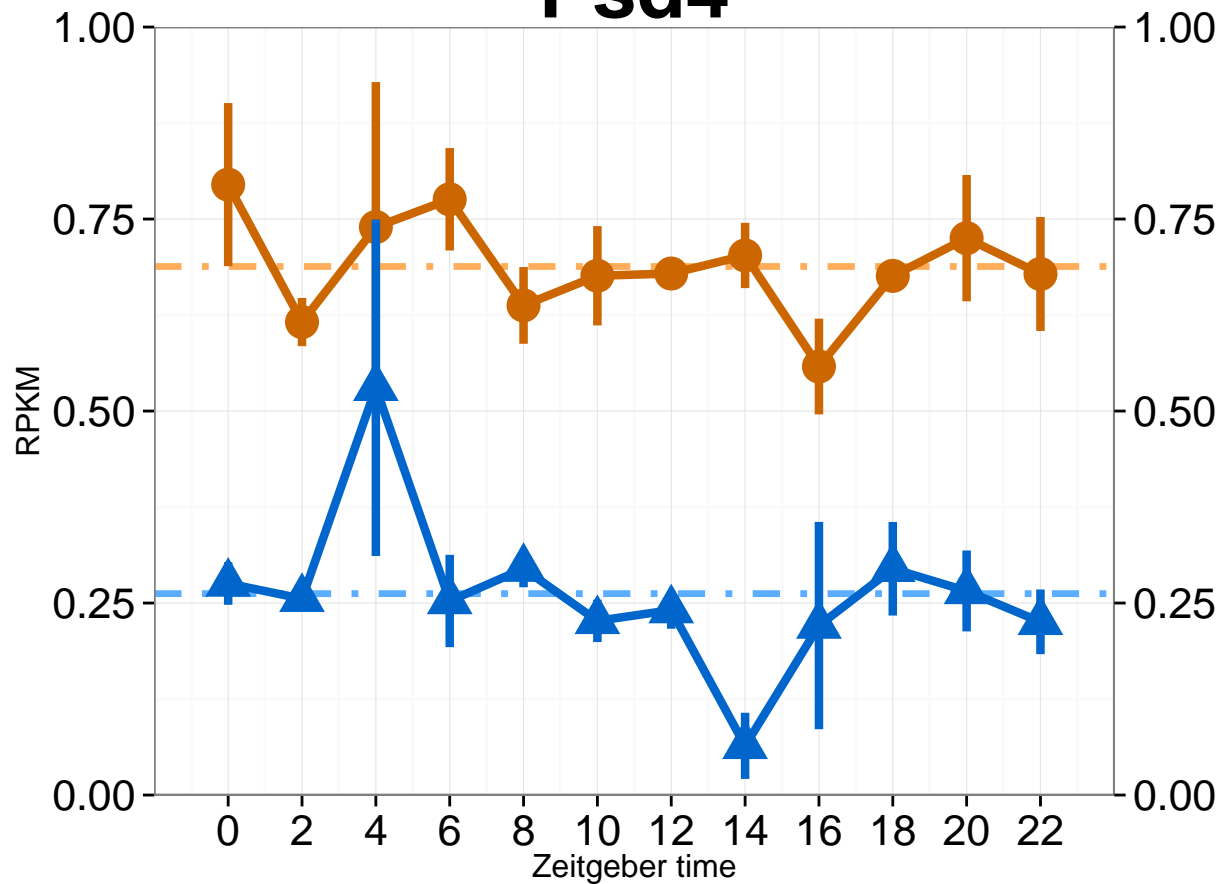

# Psd4

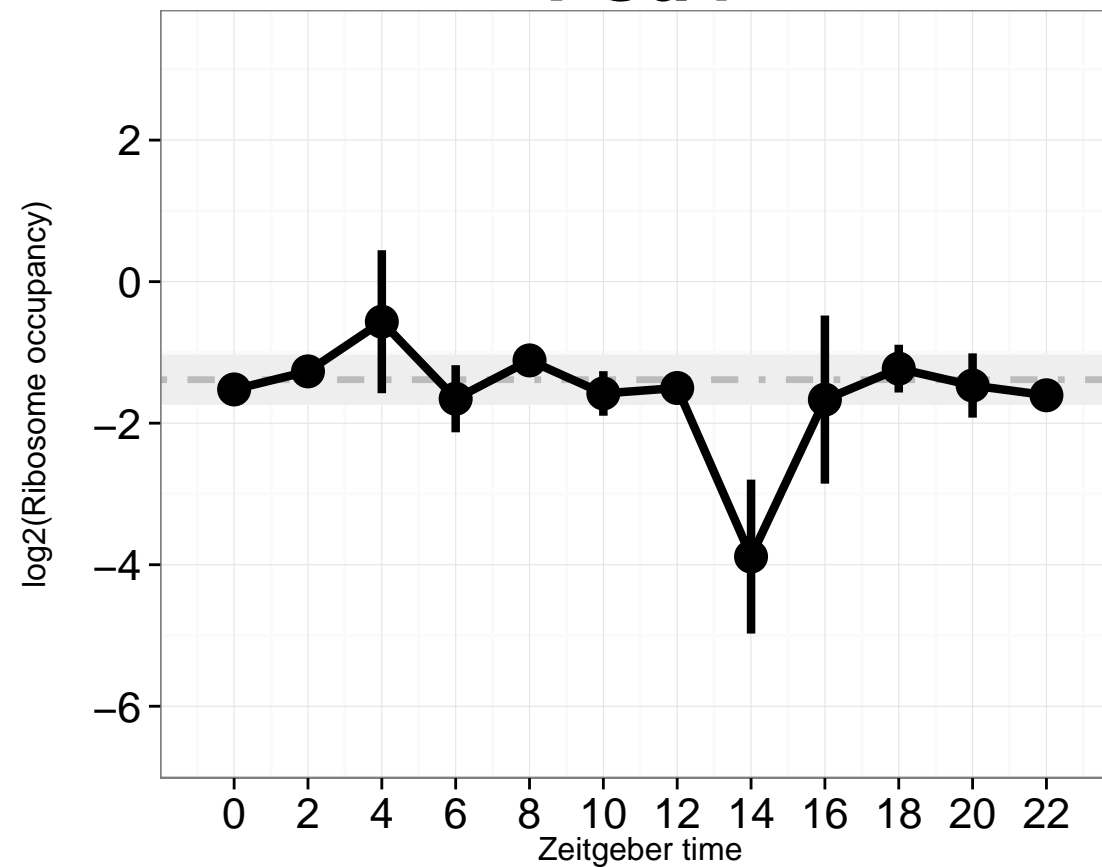

Supplement: Supplementary file 13198 [file 1]

# Lrrc41

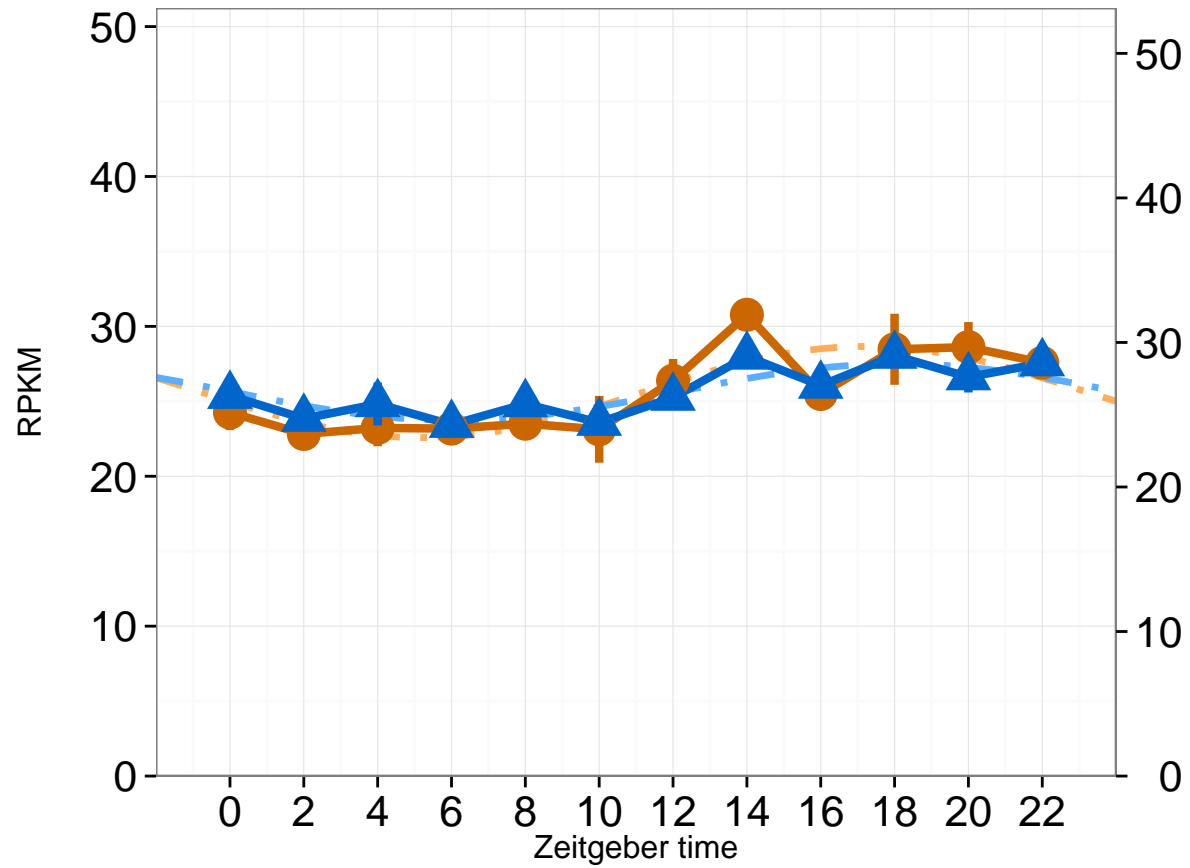

# Lrrc41

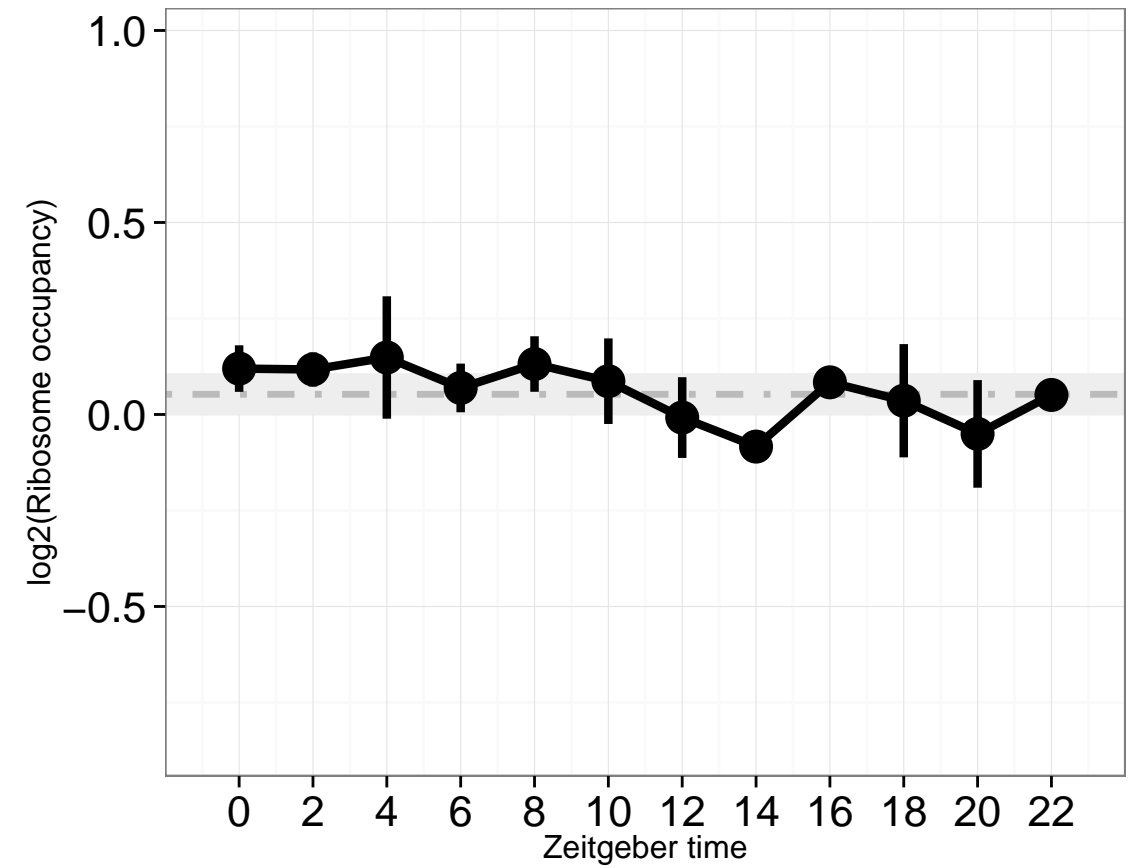

Supplement: Supplementary file 13199 [file 1]

## Aoah

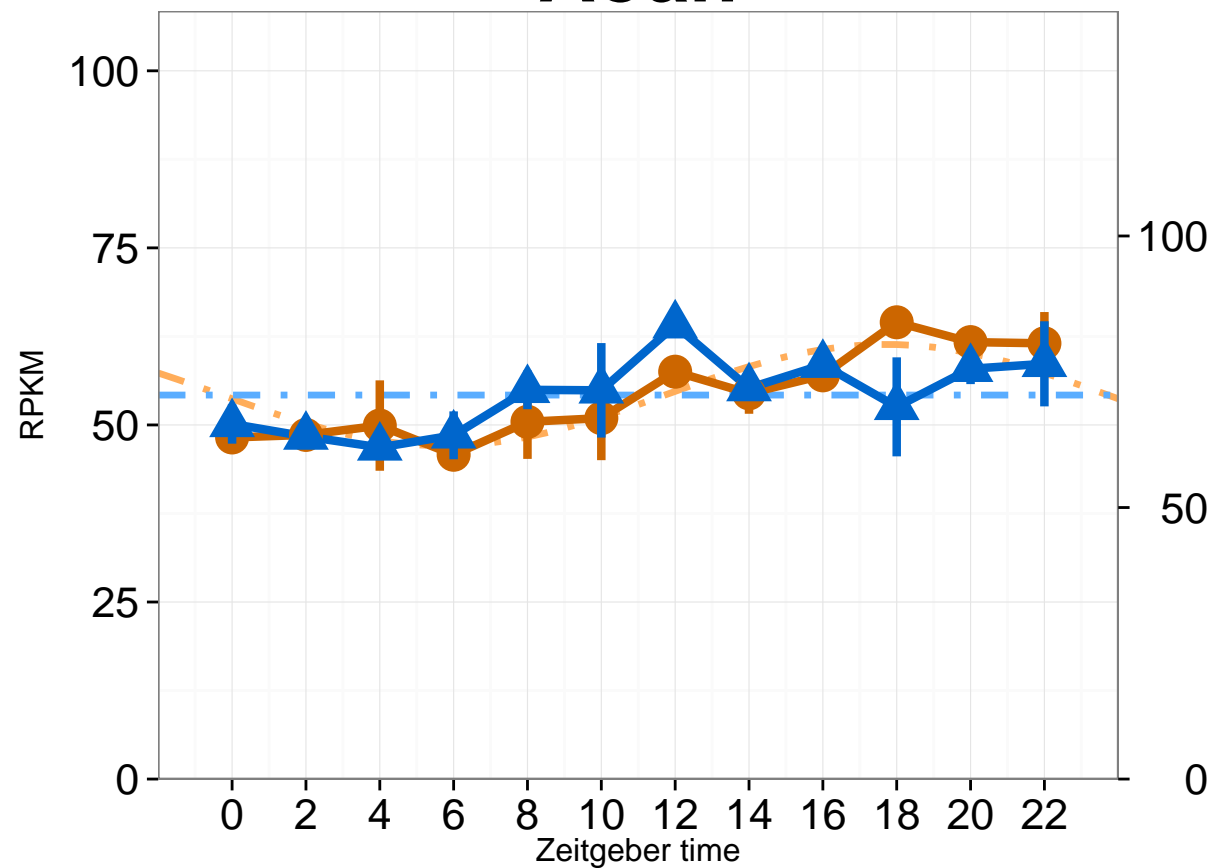

## Aoah

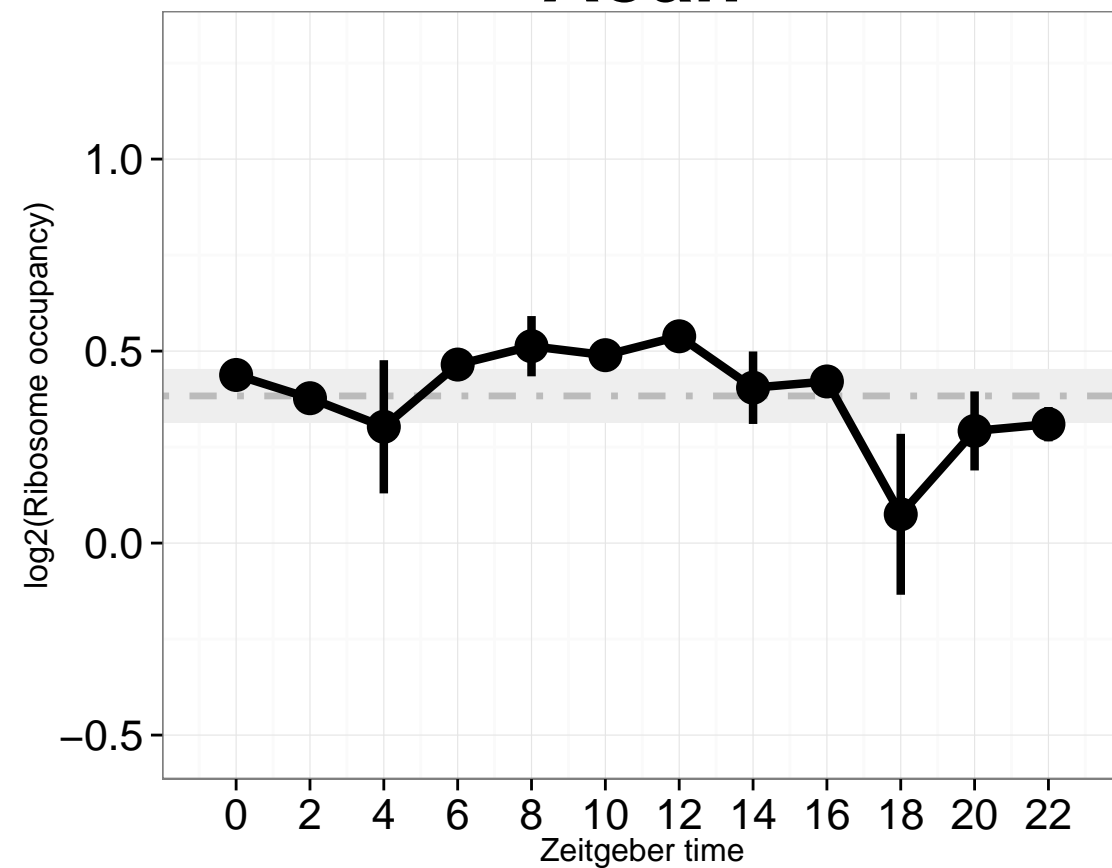

Supplement: Supplementary file 13200 [file 1]

# Tgfb1

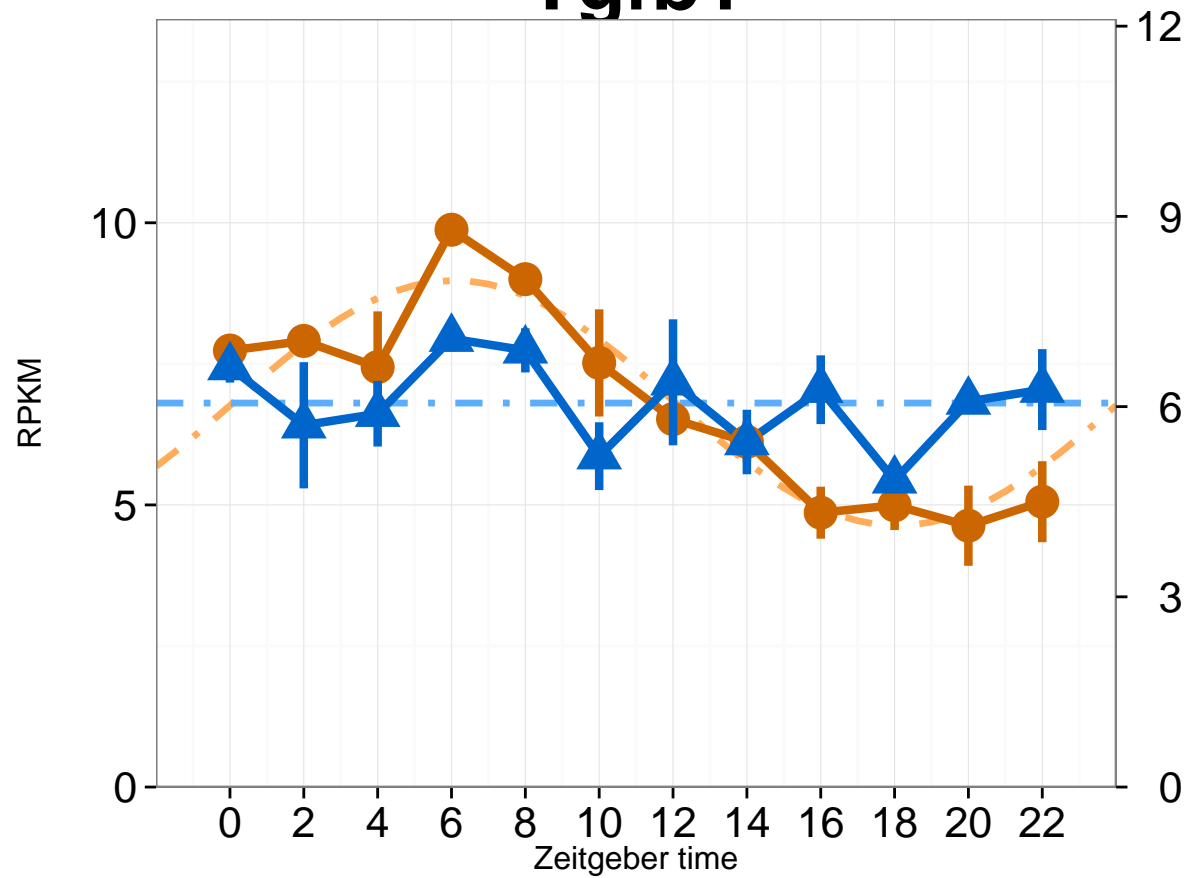

# Tgfb1

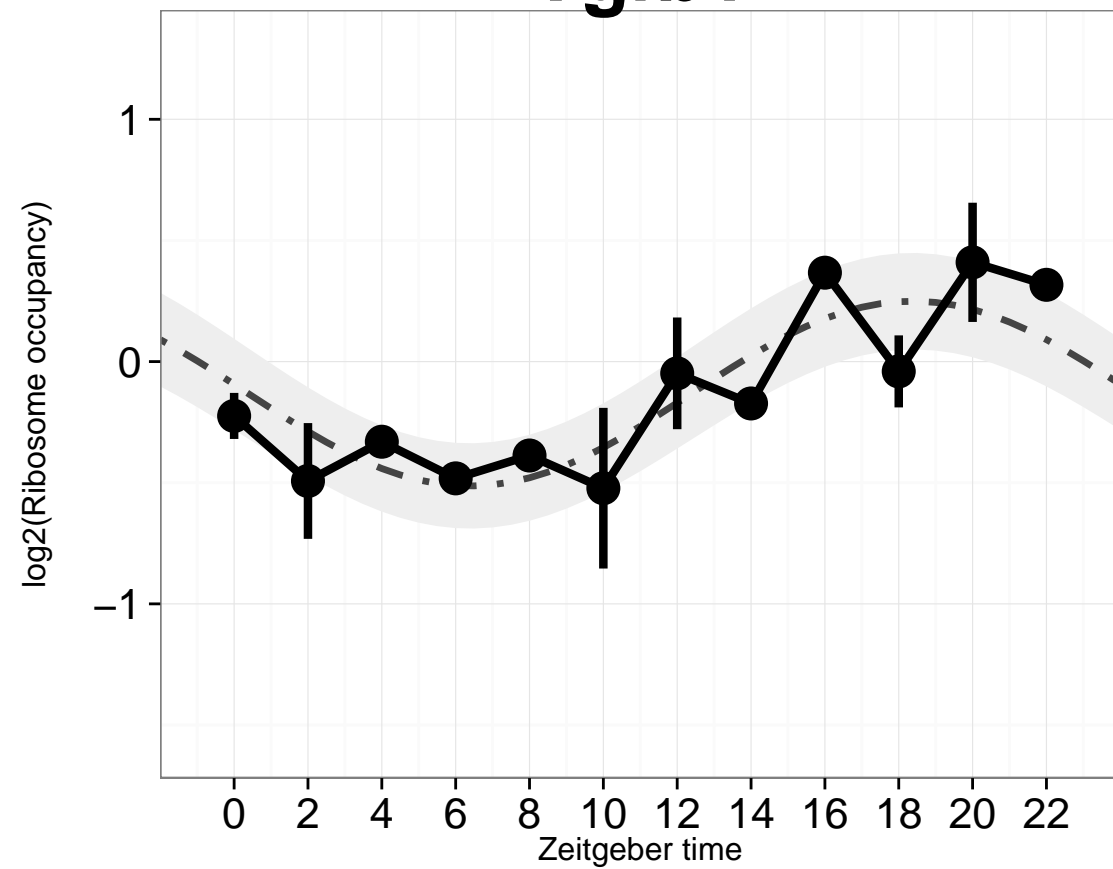

Supplement: Supplementary file 13201 [file 1]

## Elp3

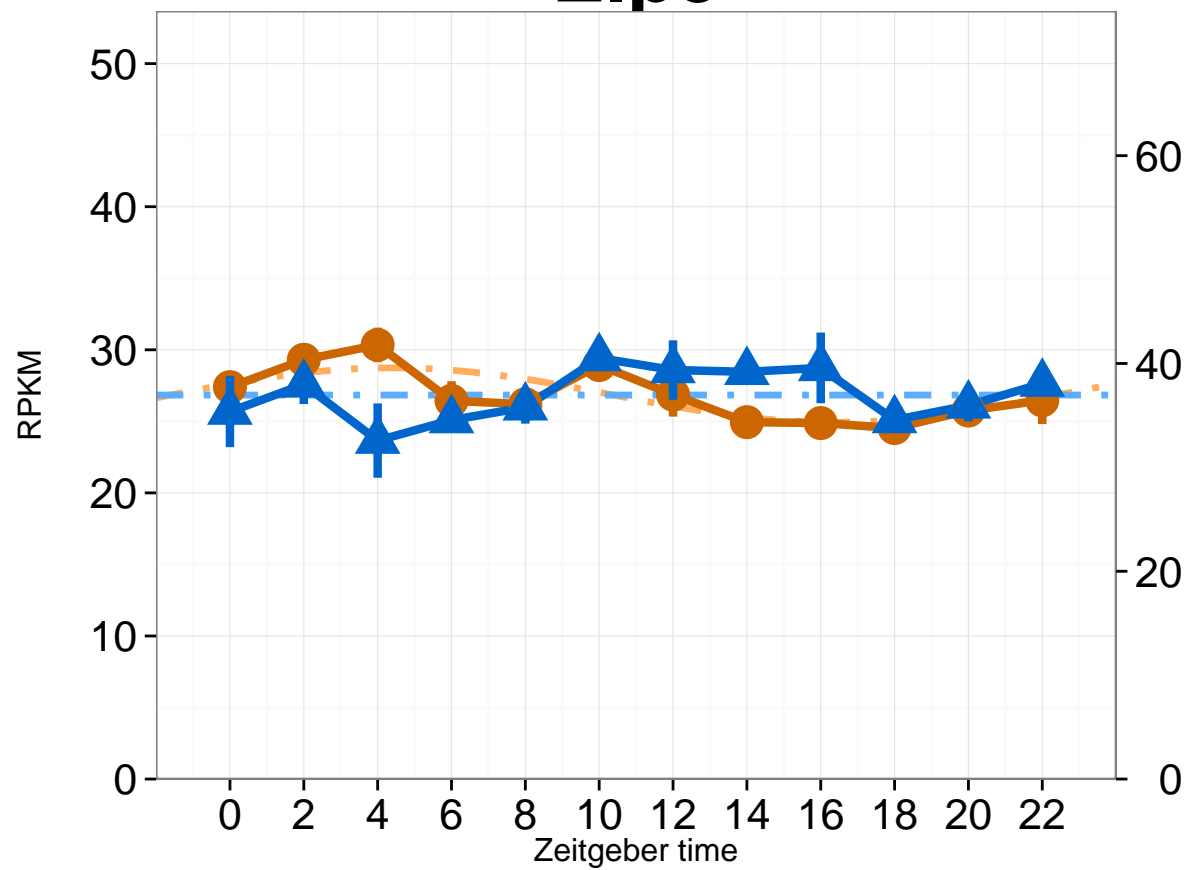

## Elp3

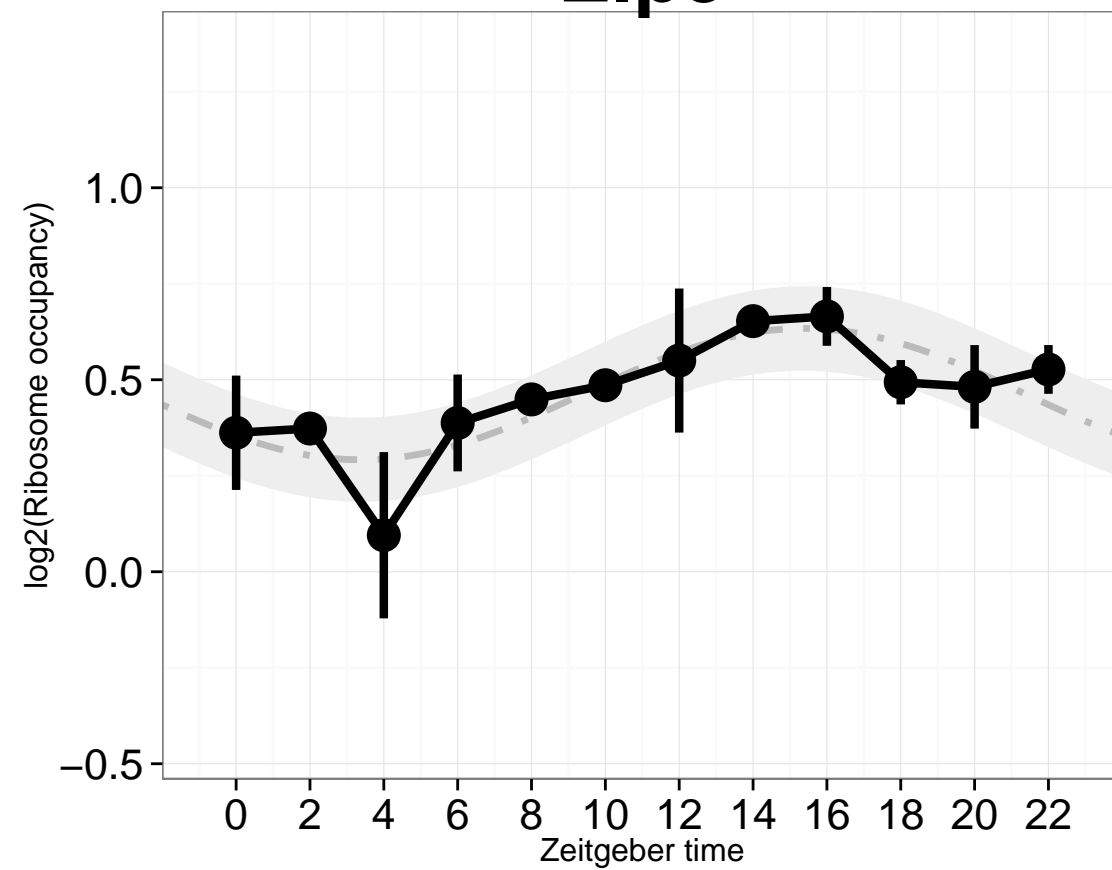

Supplement: Supplementary file 13202 [file 1]

# Sacm1l

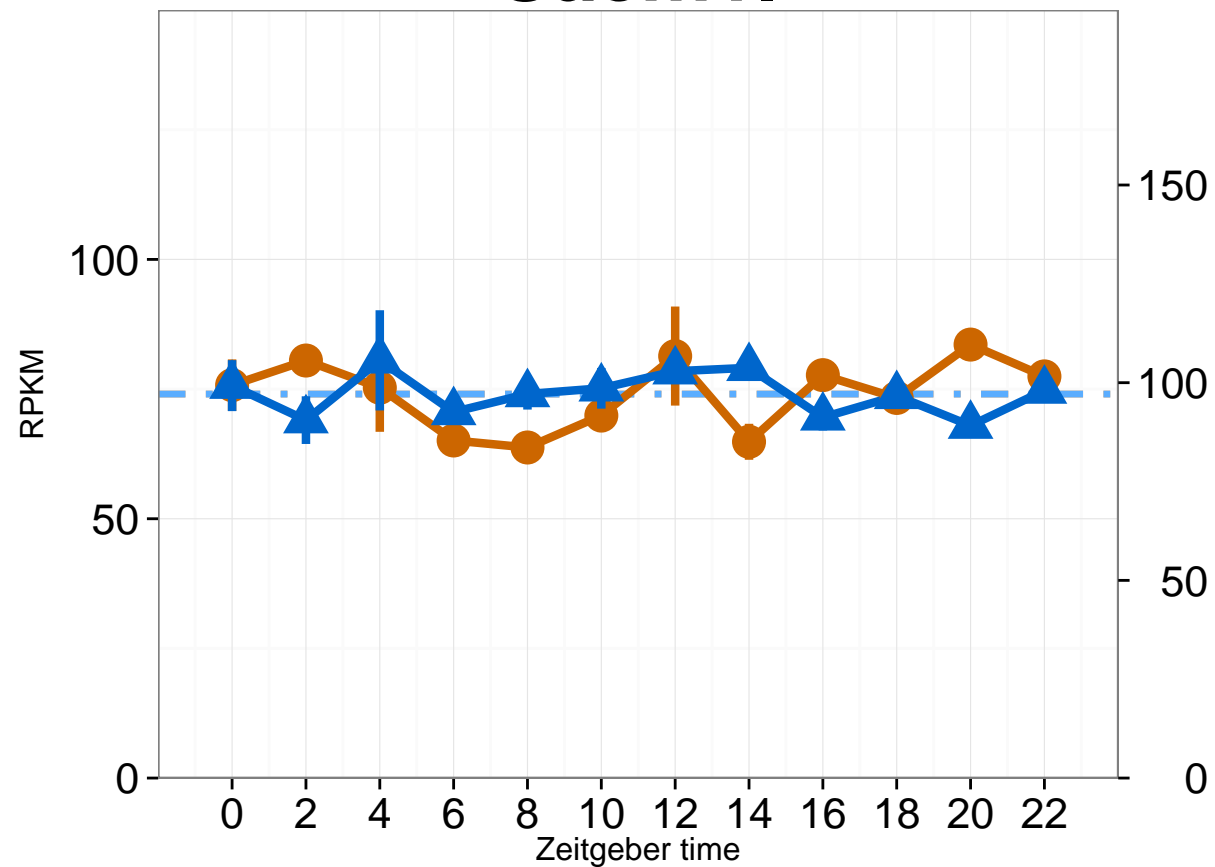

# Sacm1l

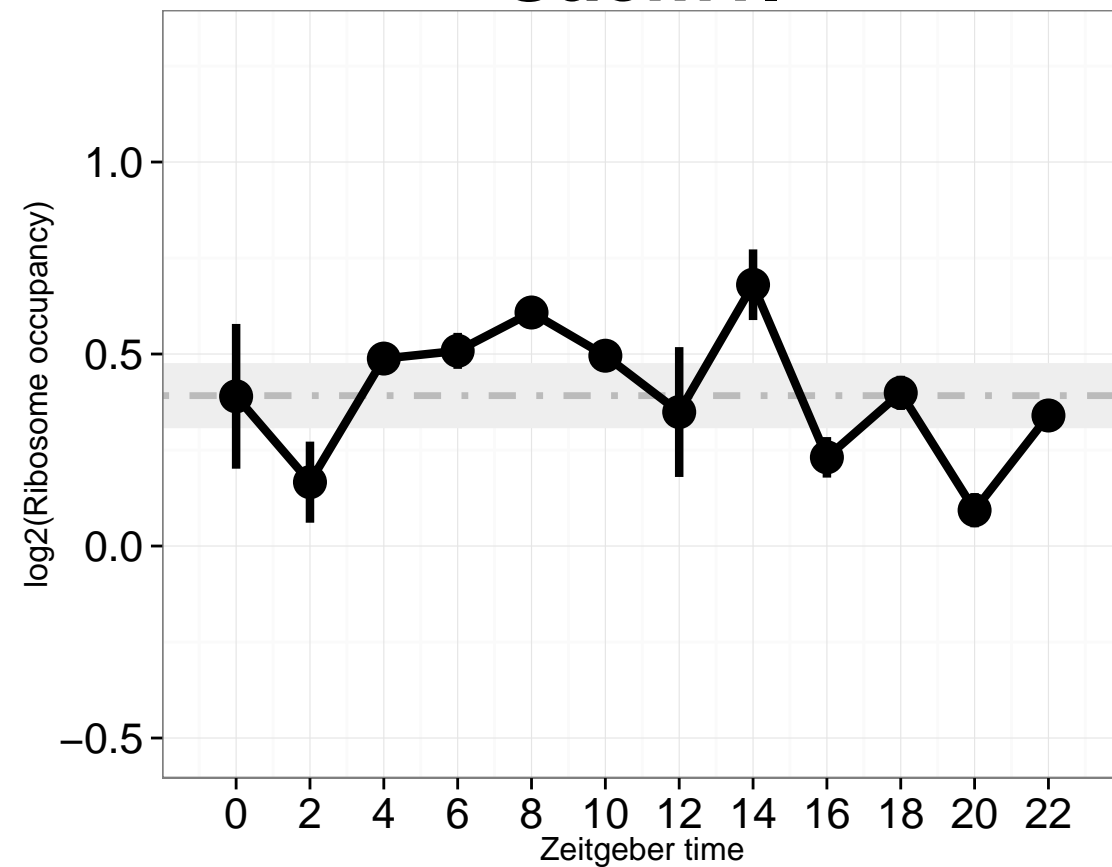

Supplement: Supplementary file 13203 [file 1]

## Chml

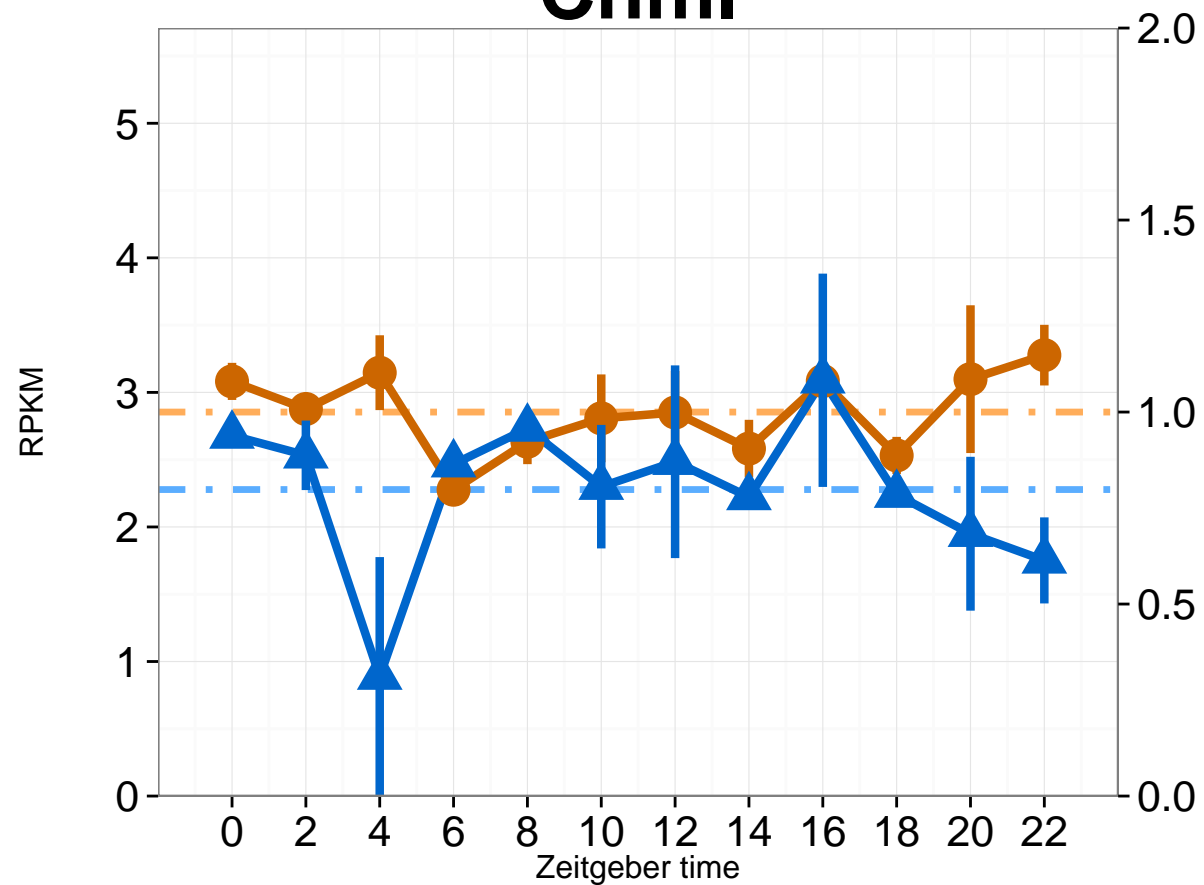

## Chml

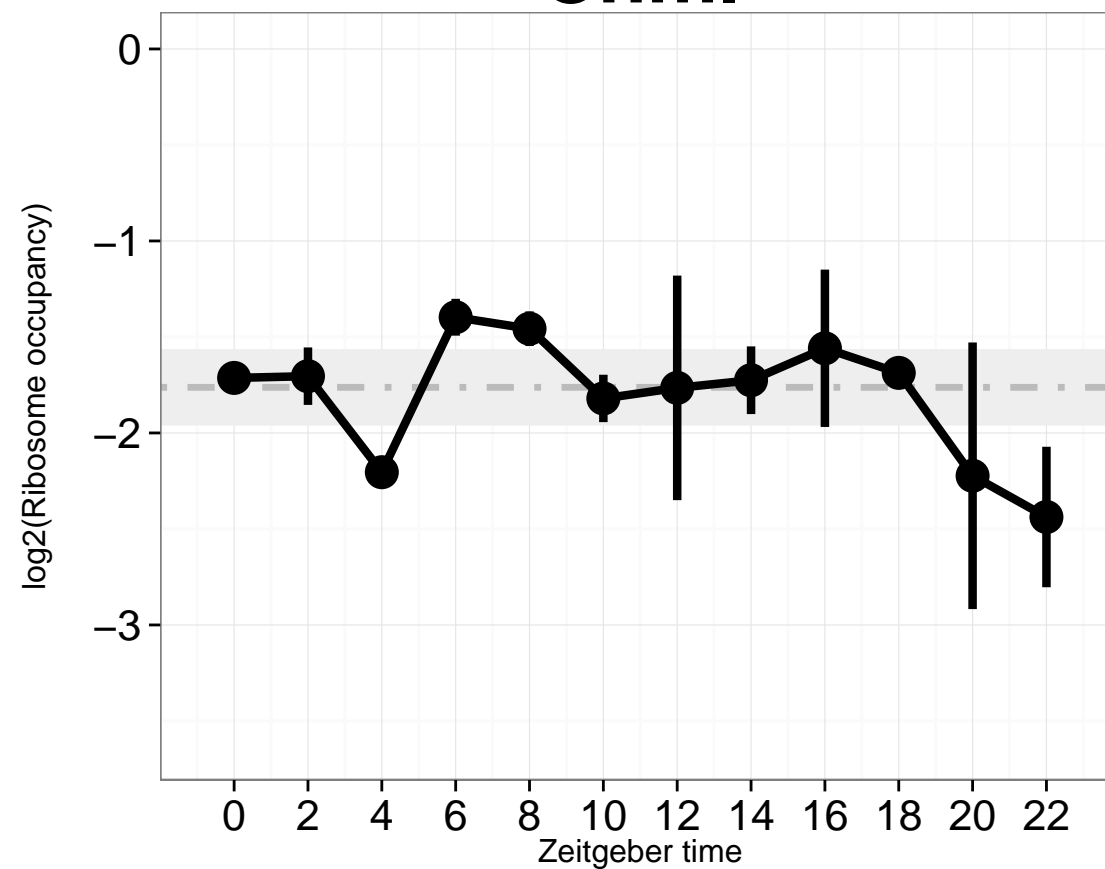

Supplement: Supplementary file 13204 [file 1]

## Exosc1

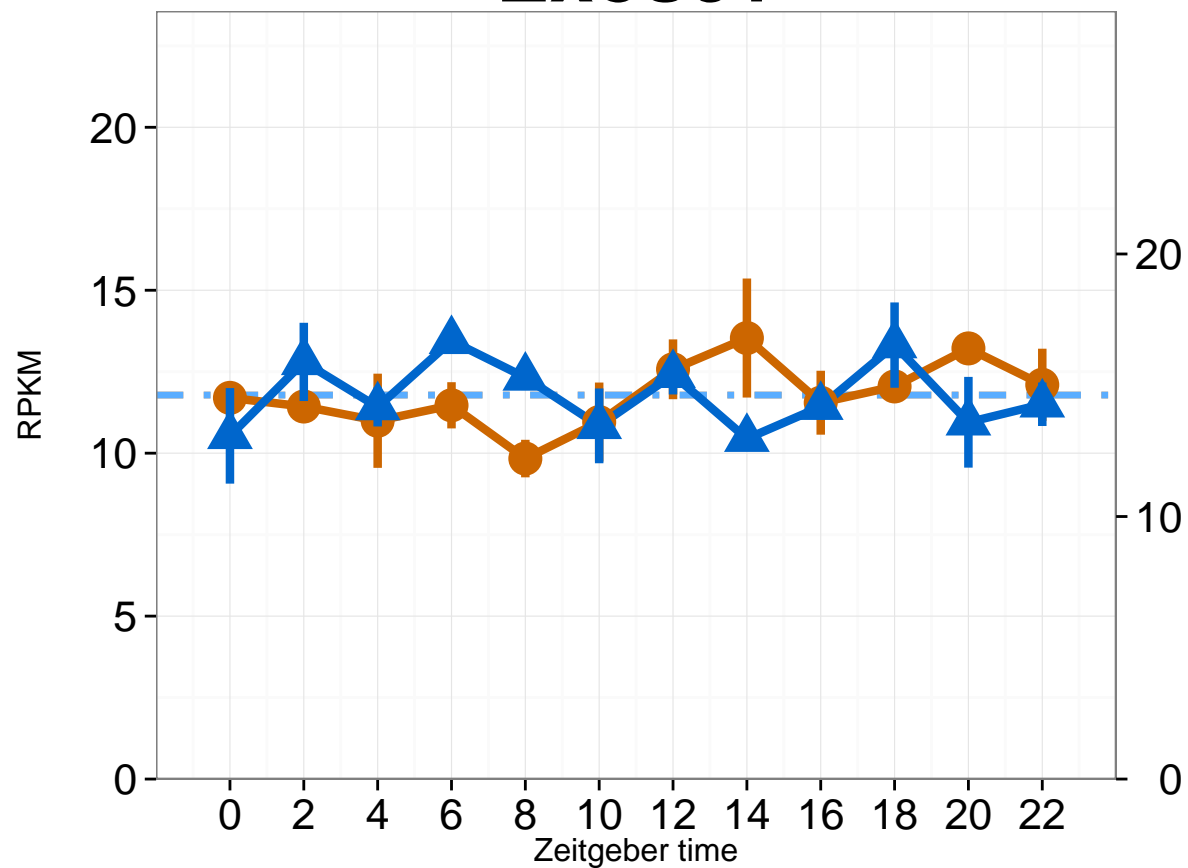

## Exosc1

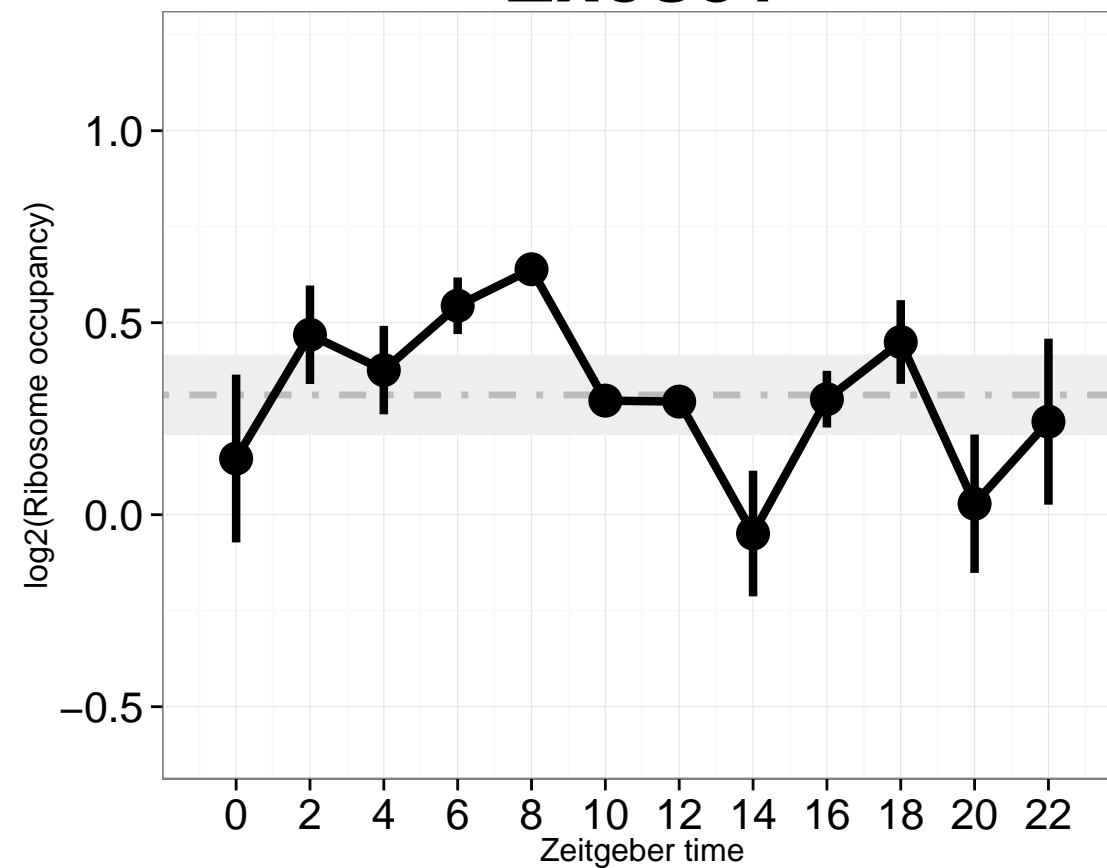

Supplement: Supplementary file 13205 [file 1]

## Osgin2

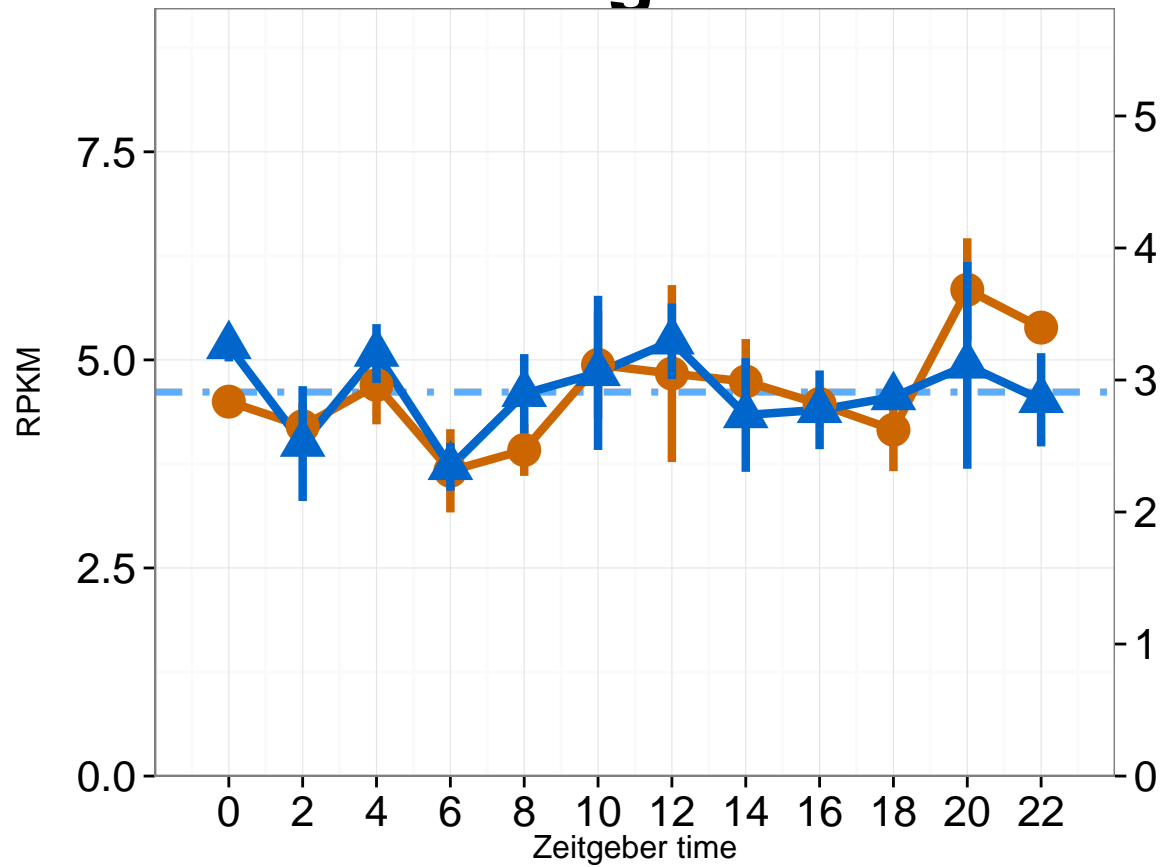

## Osgin2

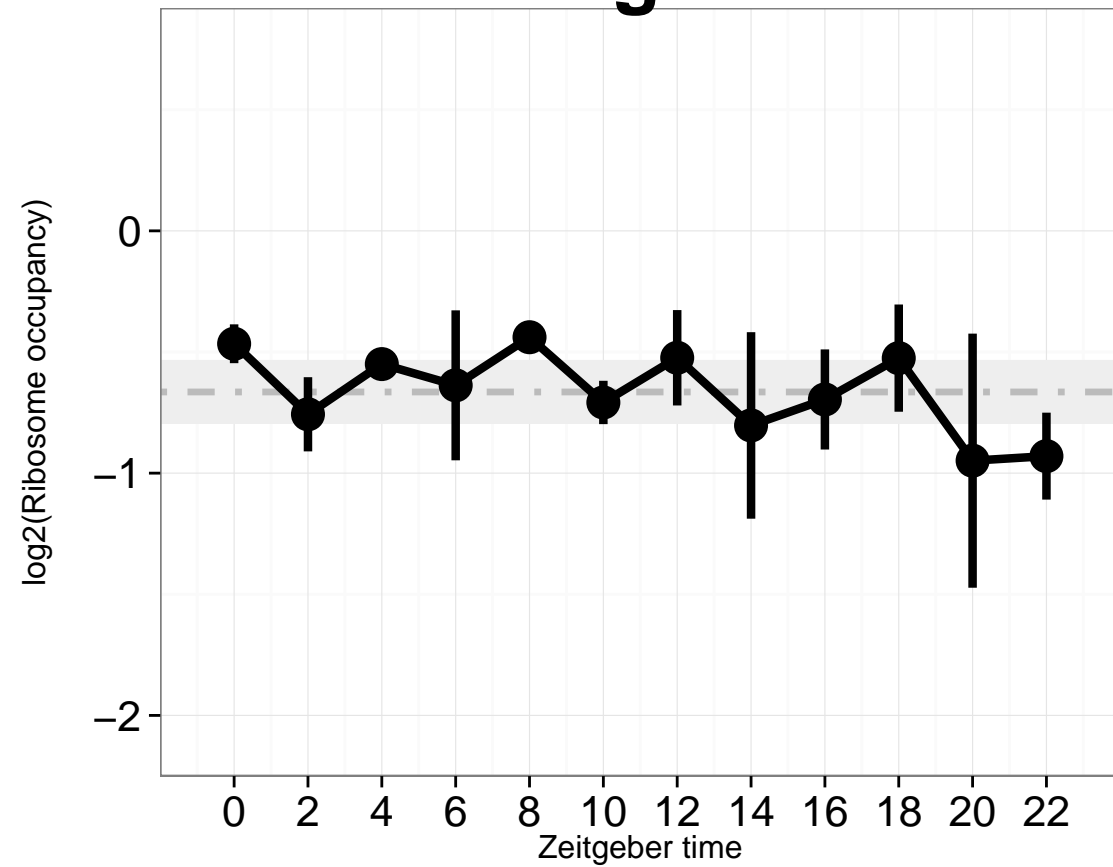

Supplement: Supplementary file 13206 [file 1]

## Gsto1

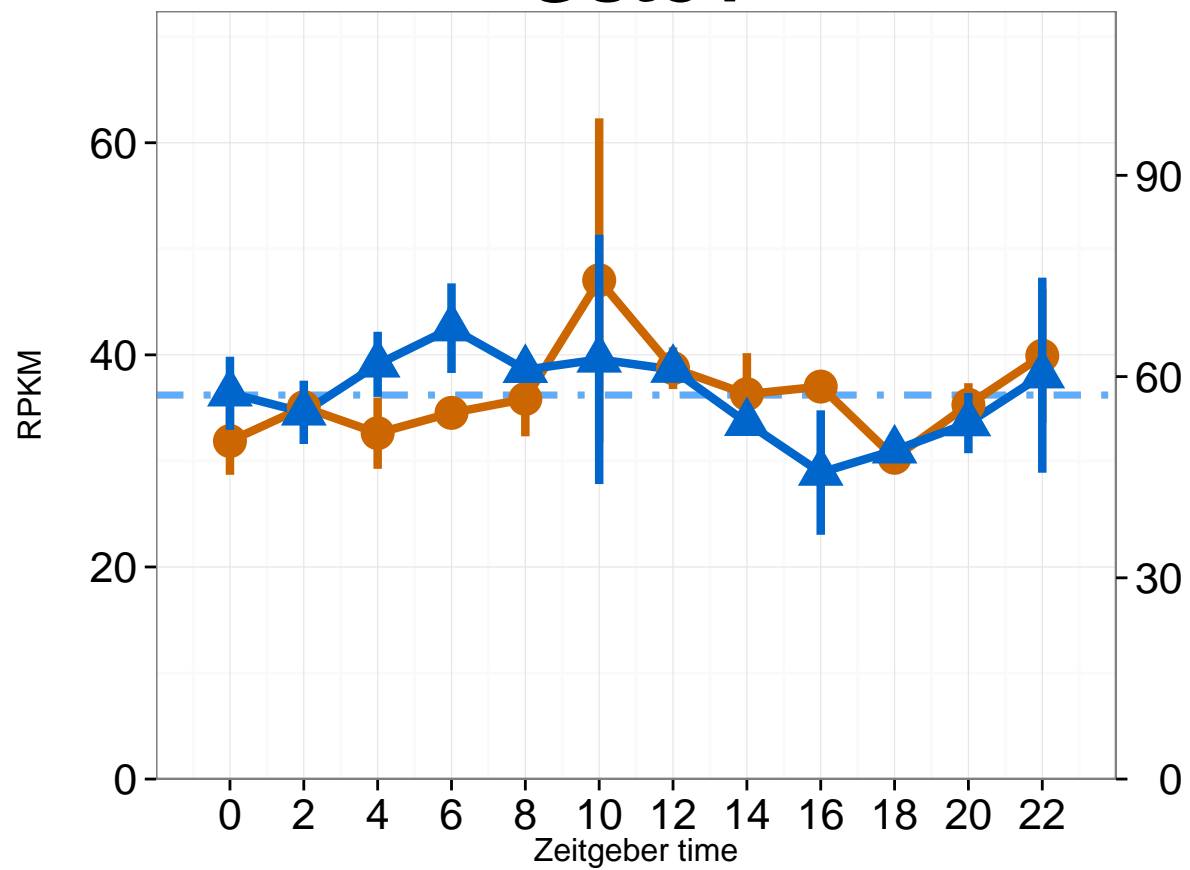

## Gsto1

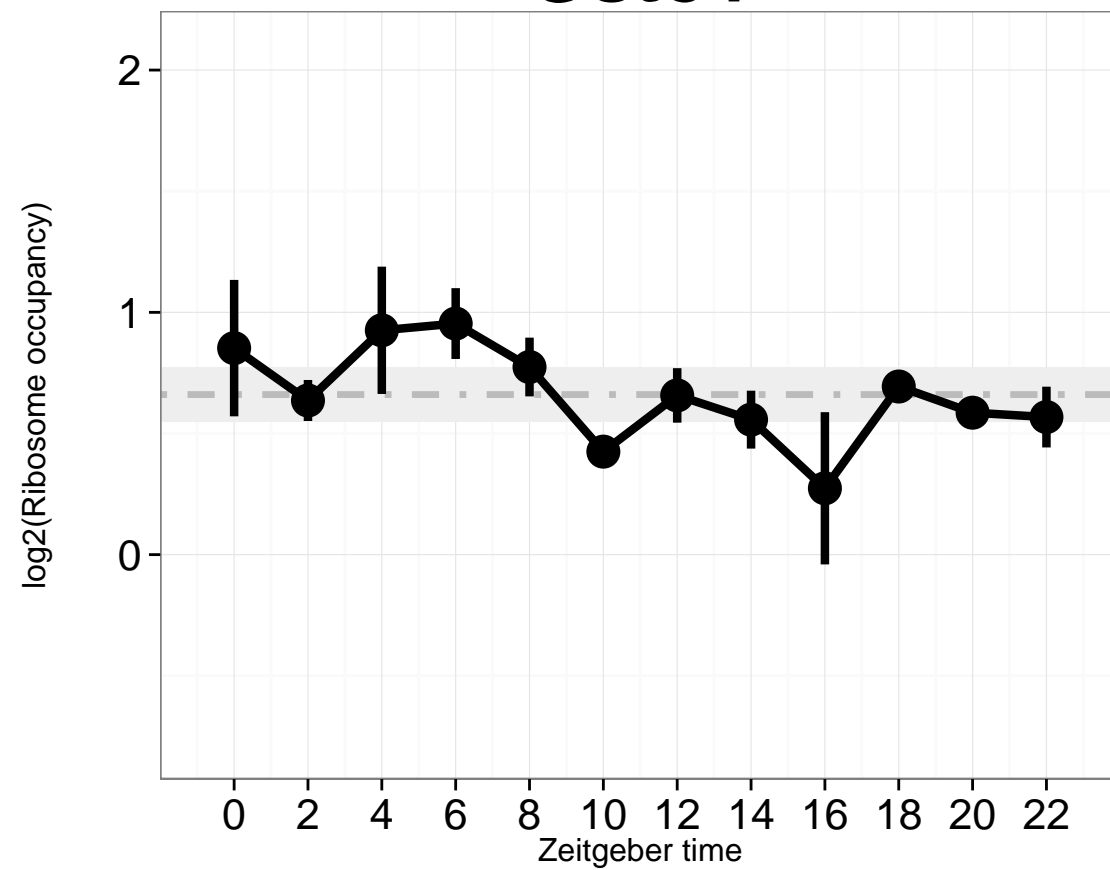

Supplement: Supplementary file 13207 [file 1]

## Slc38a2

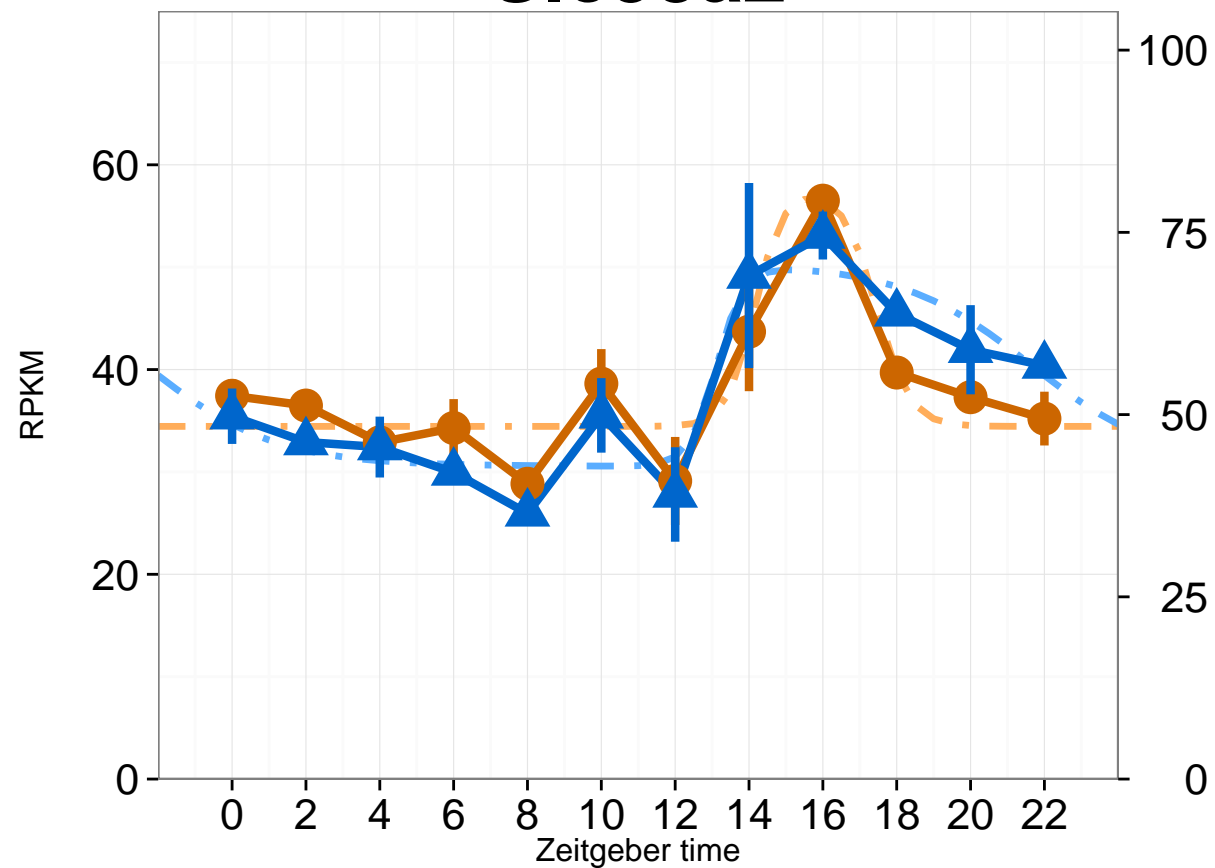

## Slc38a2

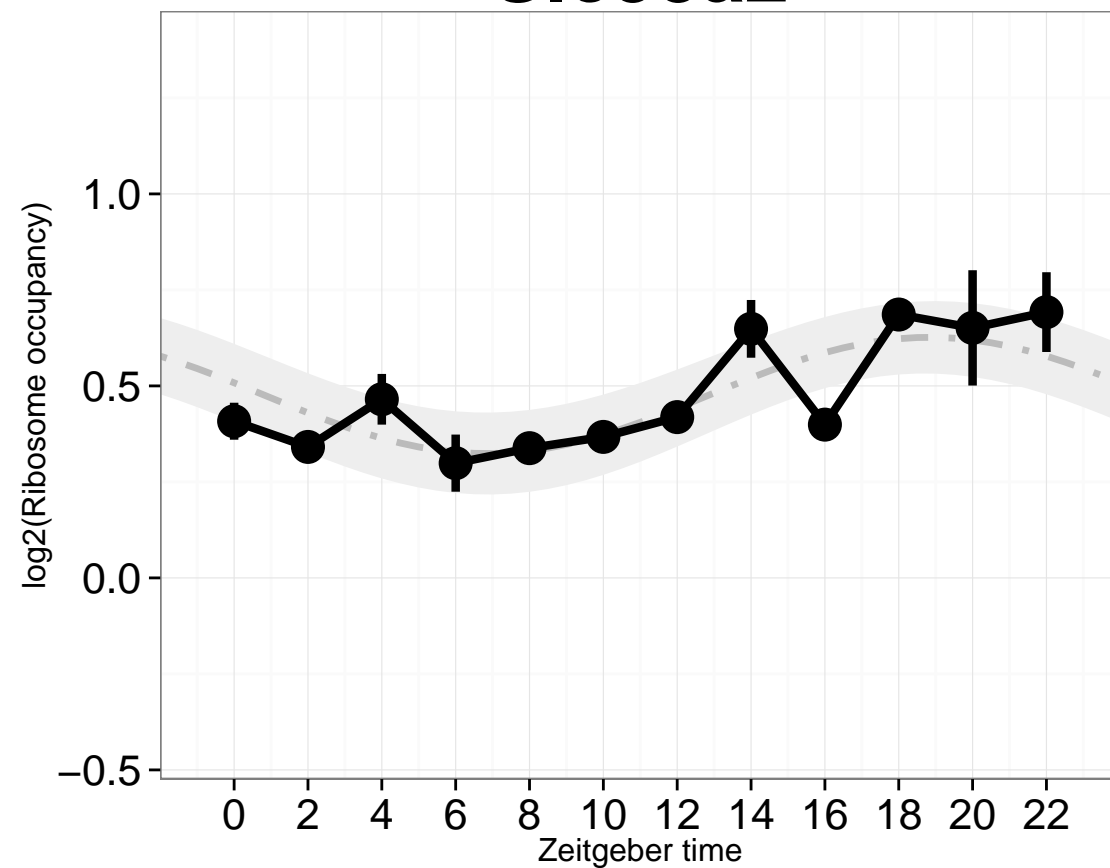

Supplement: Supplementary file 13208 [file 1]

# Smim4

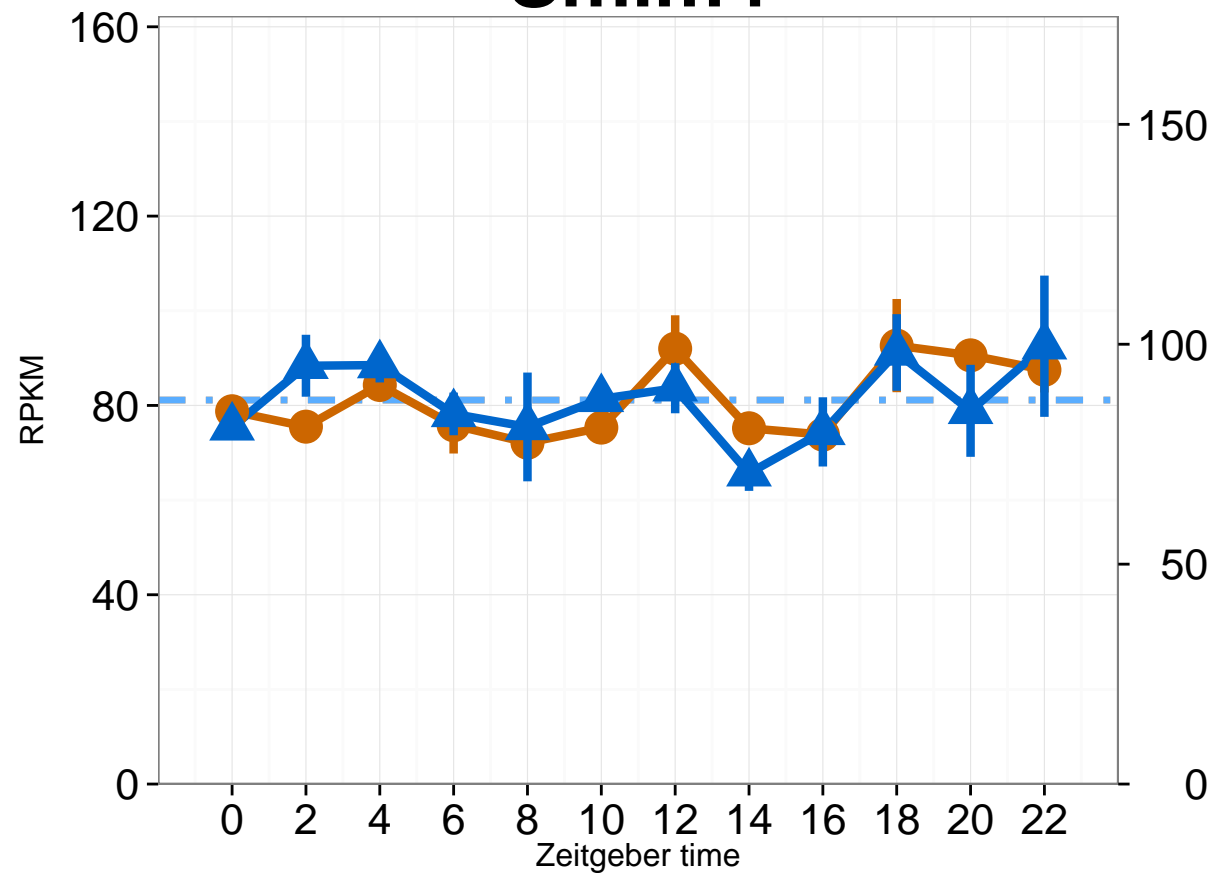

# Smim4

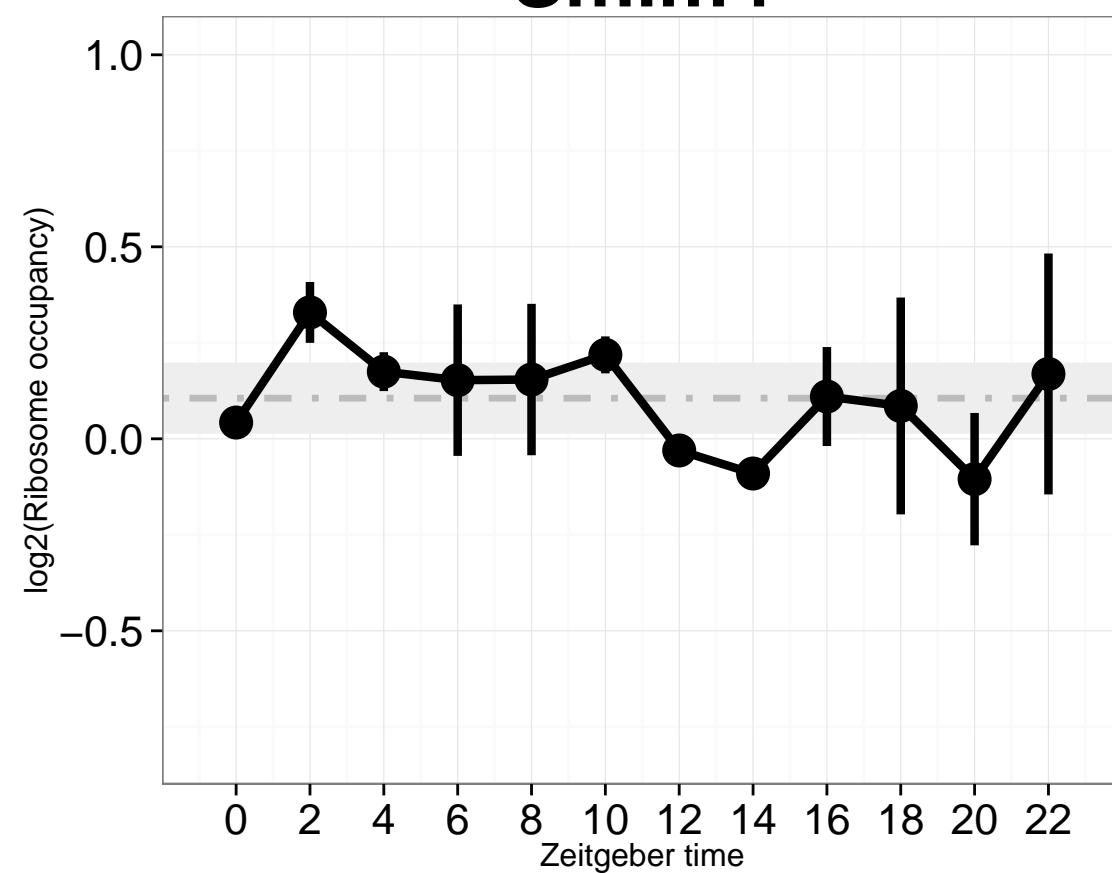

Supplement: Supplementary file 13209 [file 1]

## Polr3k

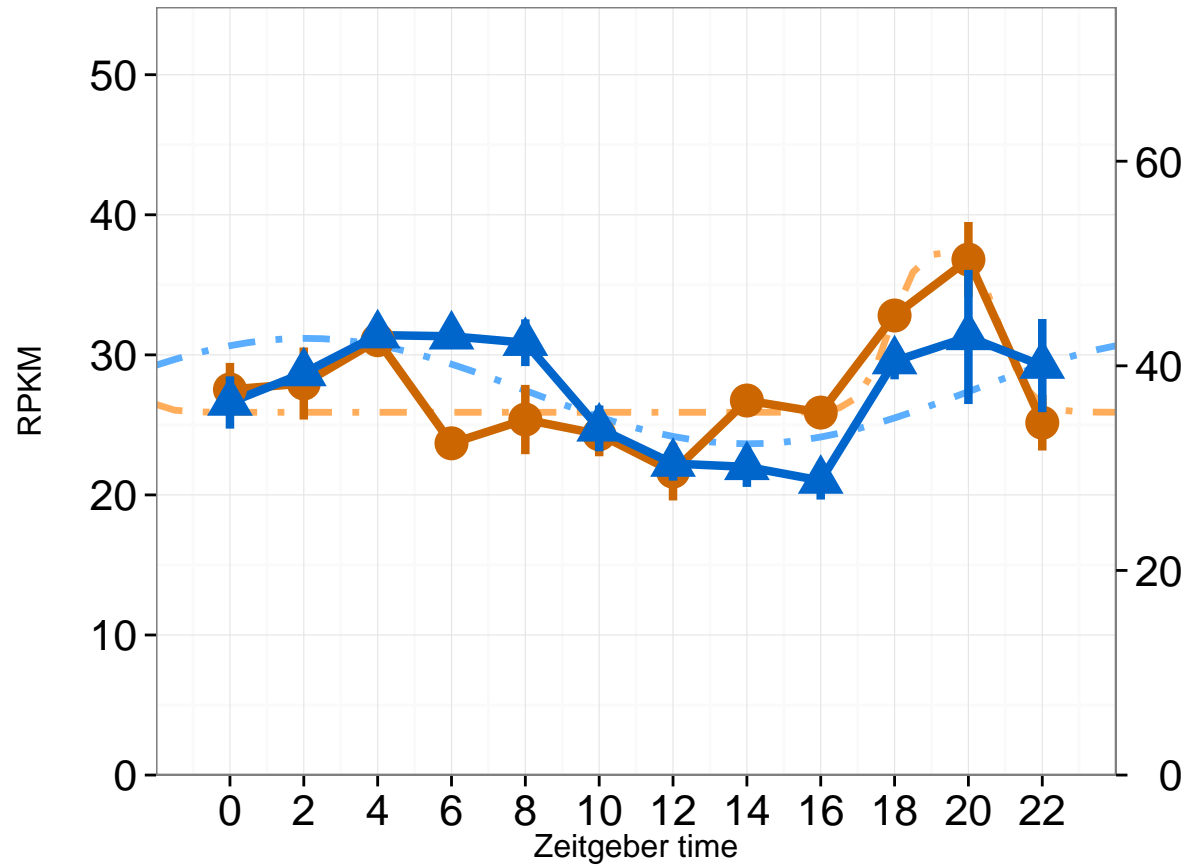

## Polr3k

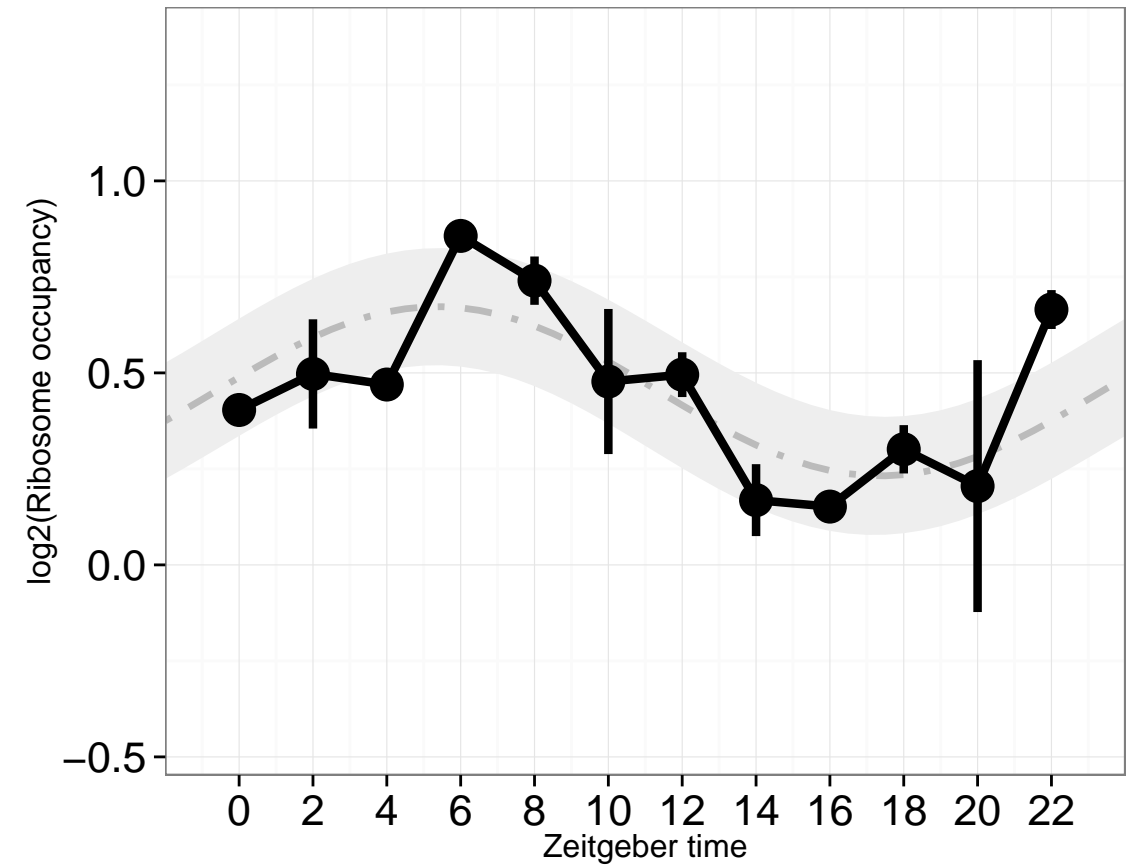

Supplement: Supplementary file 13210 [file 1]

## Il1r1

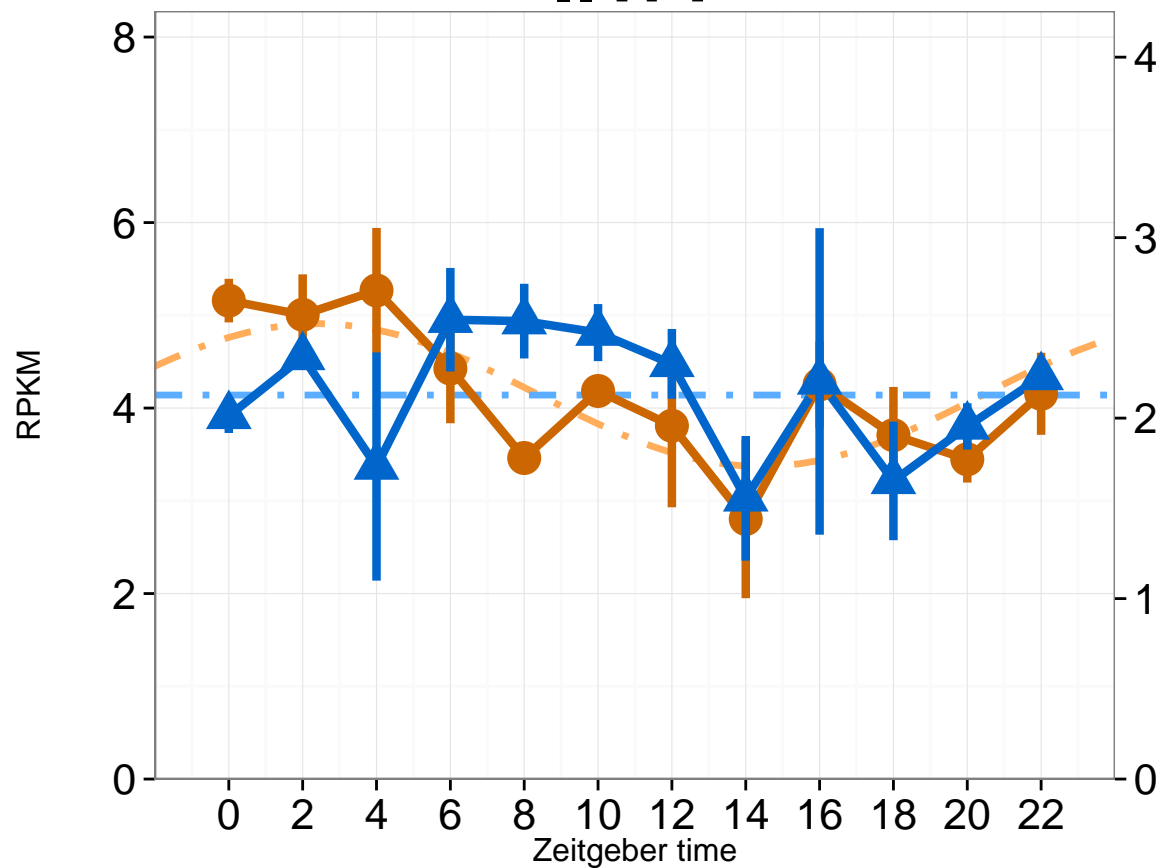

## Il1r1

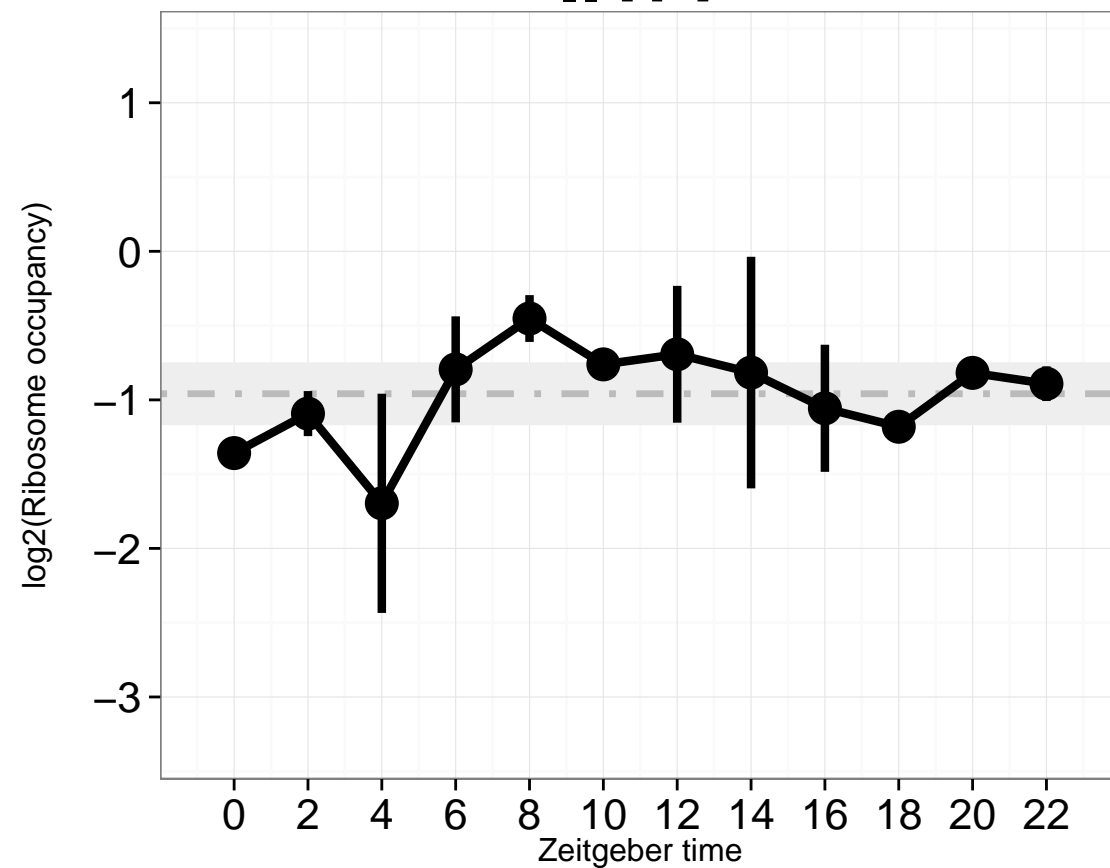

Supplement: Supplementary file 13211 [file 1]

## Sufu

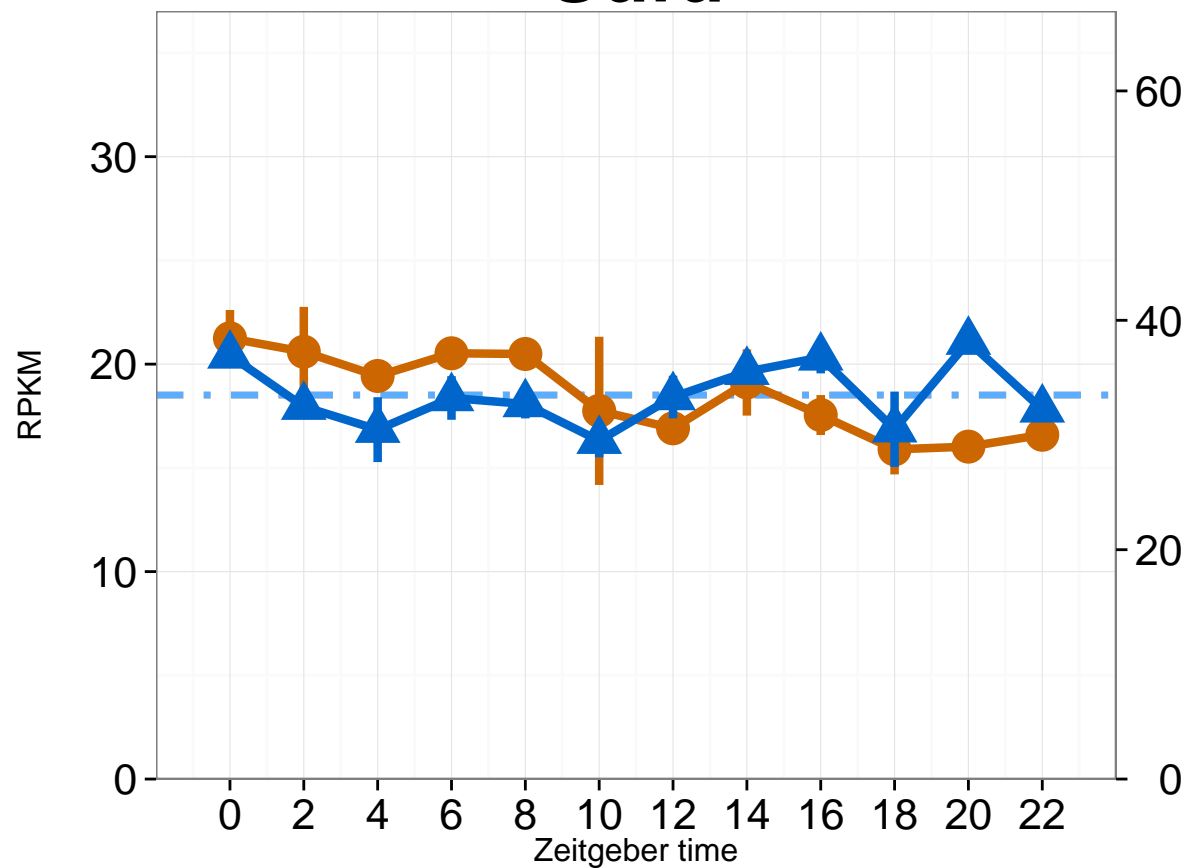

## Sufu

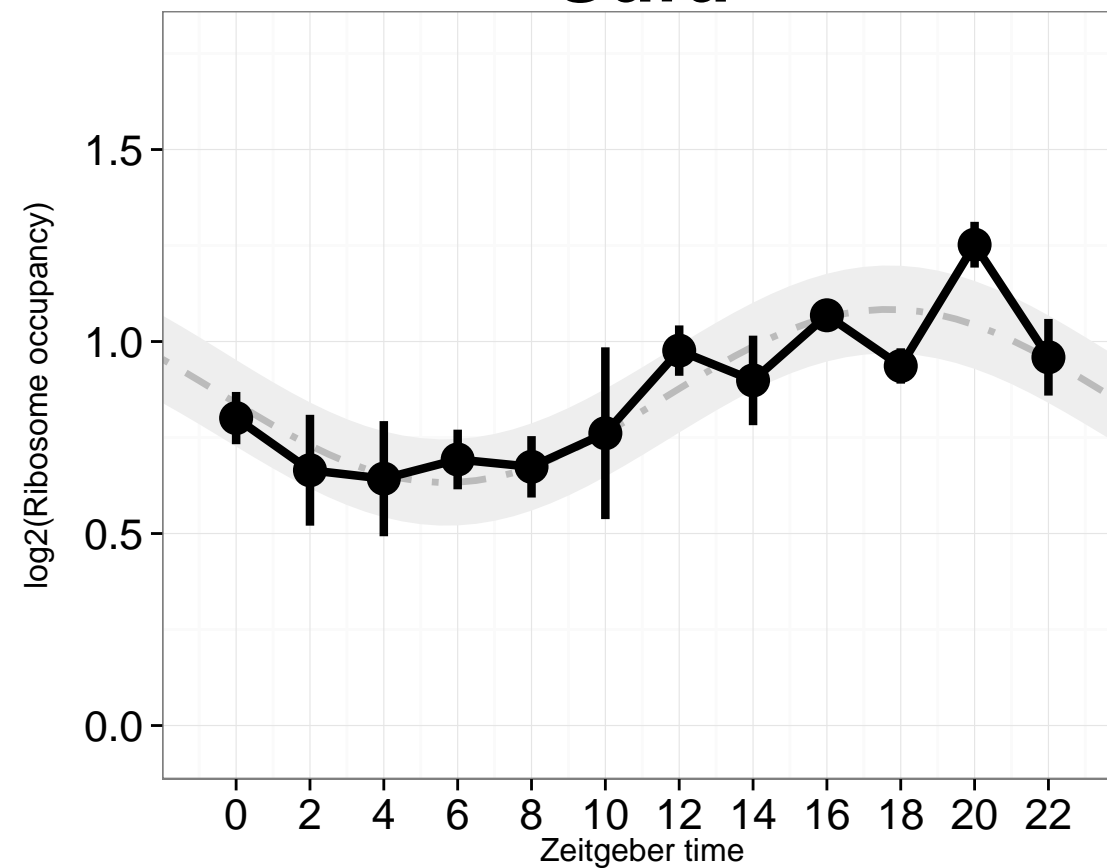

Supplement: Supplementary file 13212 [file 1]

## Wars

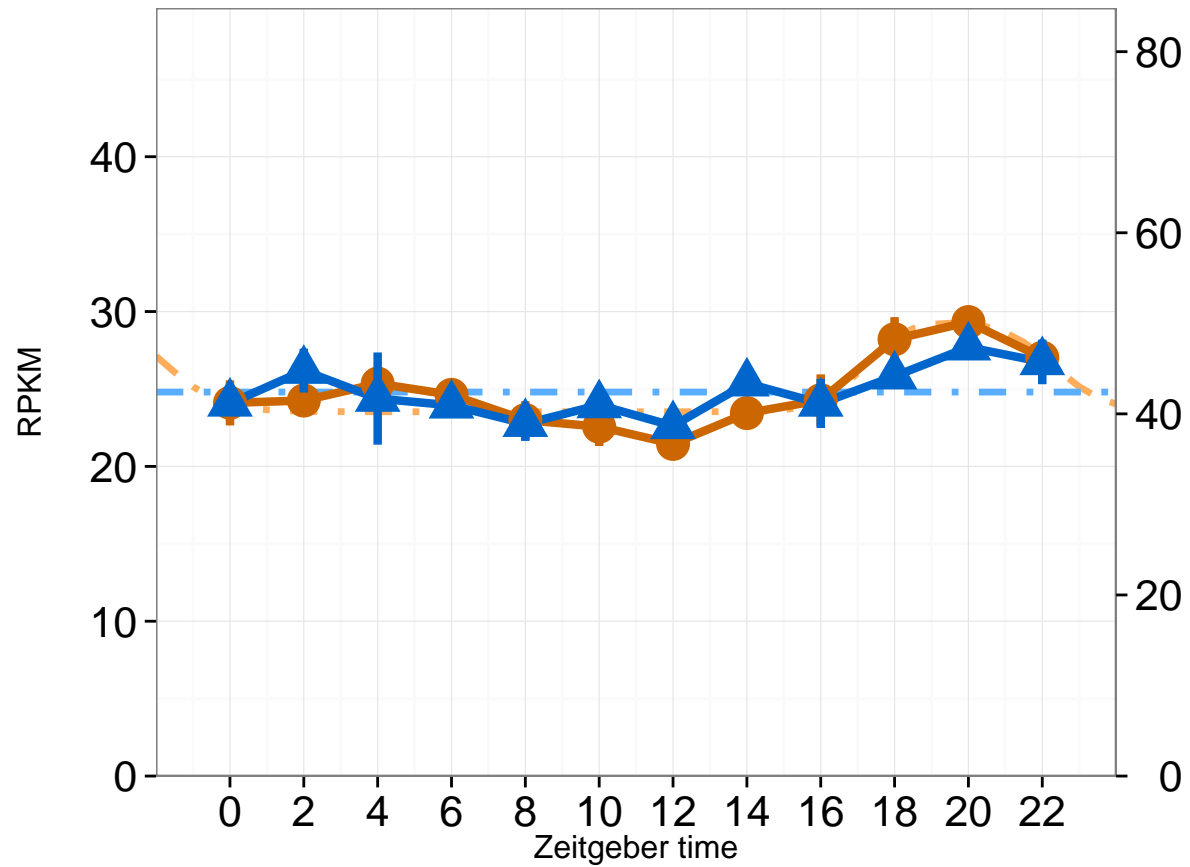

## Wars

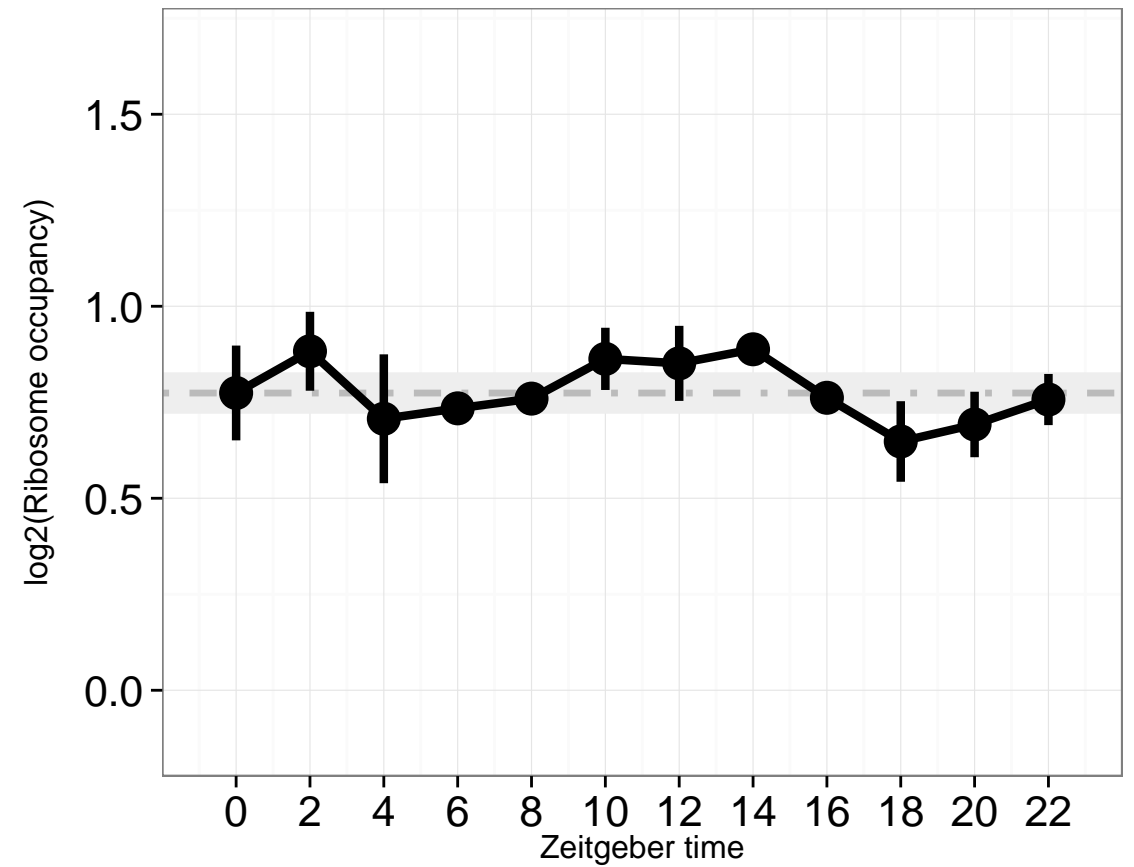

Supplement: Supplementary file 13213 [file 1]

## Pq1c3

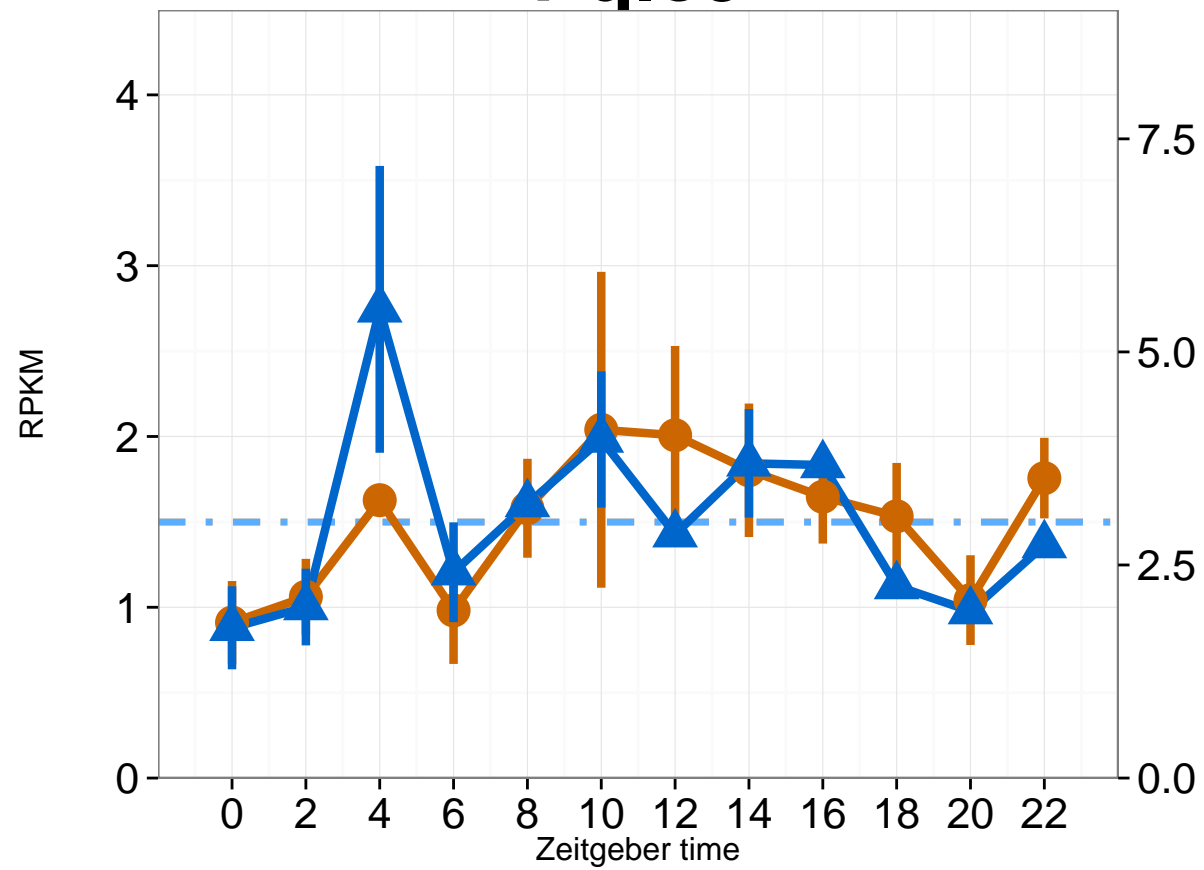

## Pq1c3

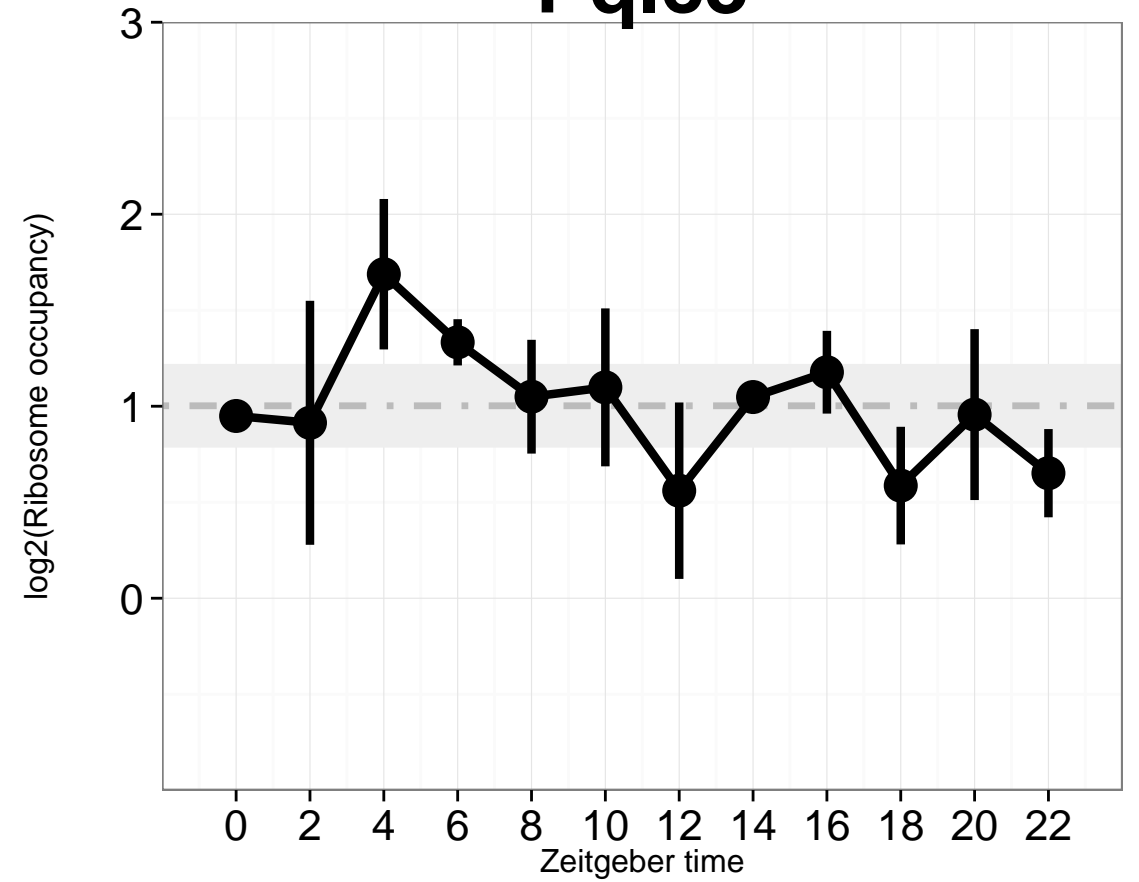

Supplement: Supplementary file 13214 [file 1]

## Lman2

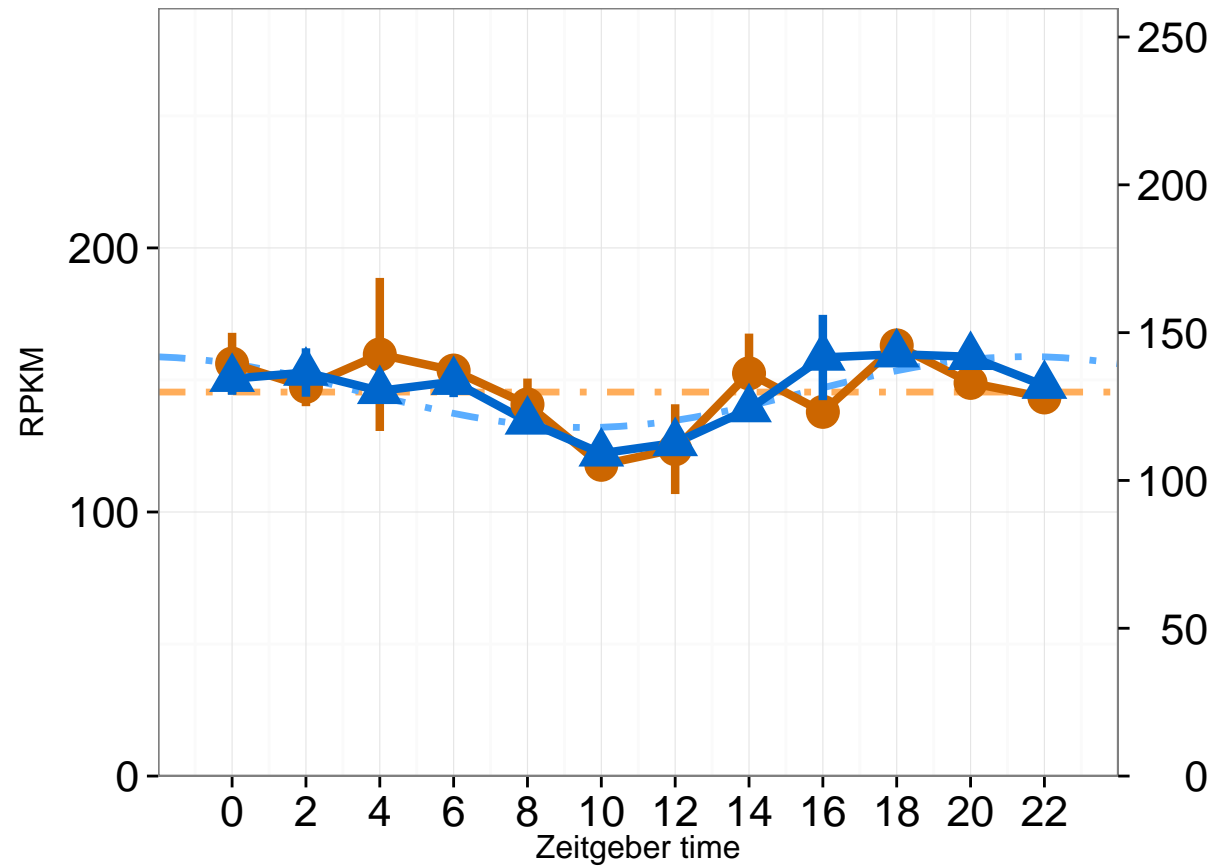

## Lman2

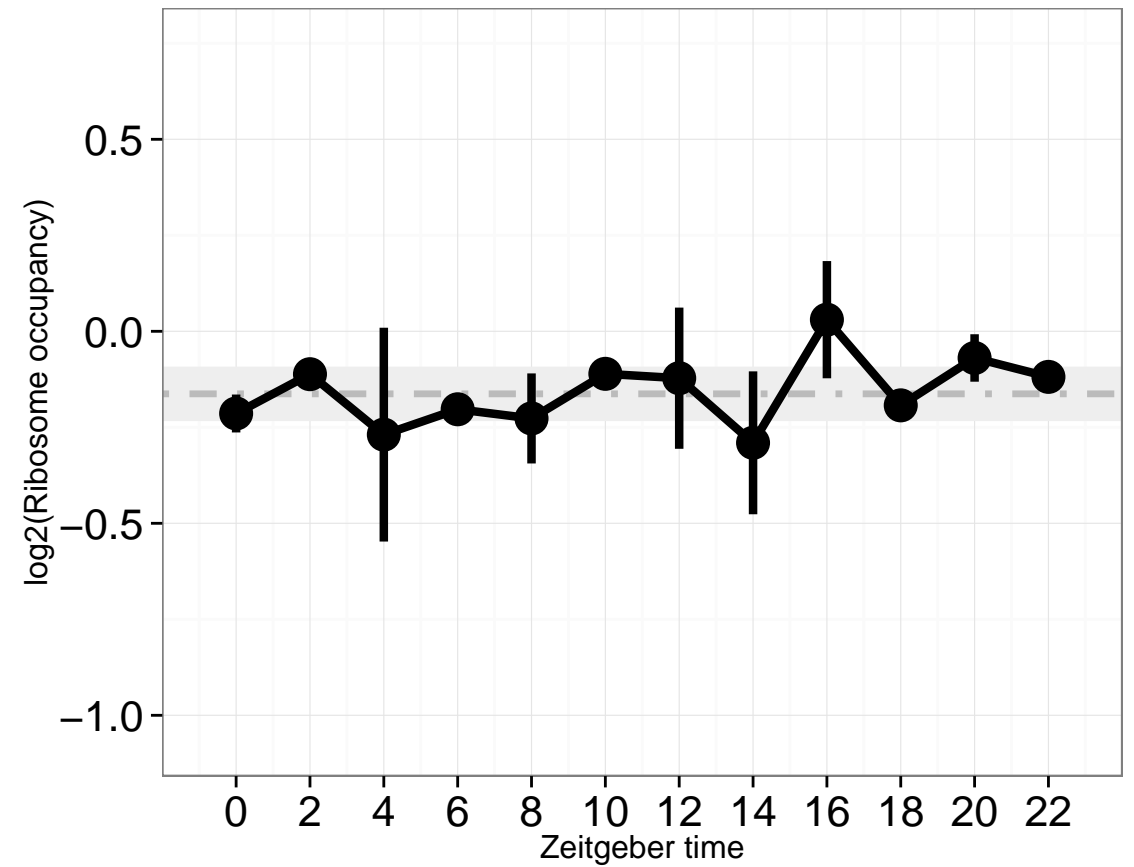

Supplement: Supplementary file 13215 [file 1]

# Gprc5a

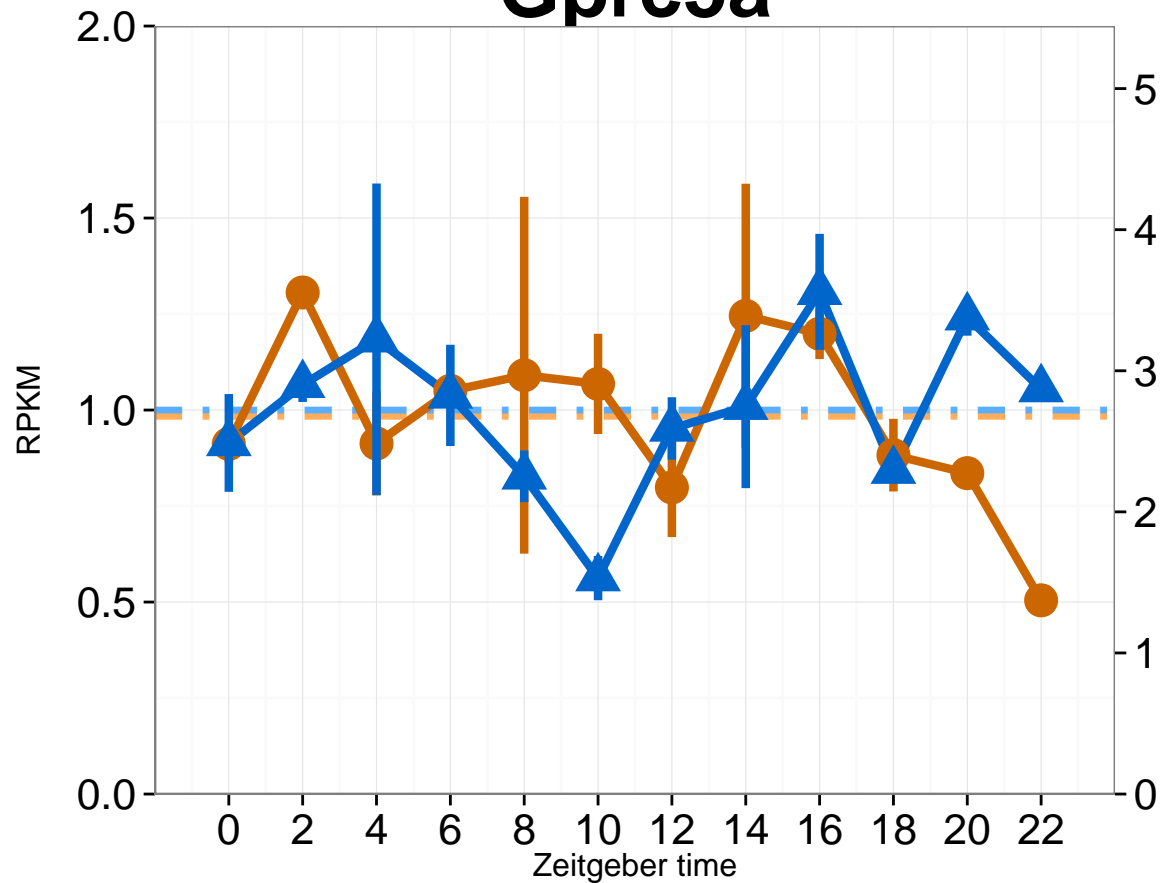

# Gprc5a

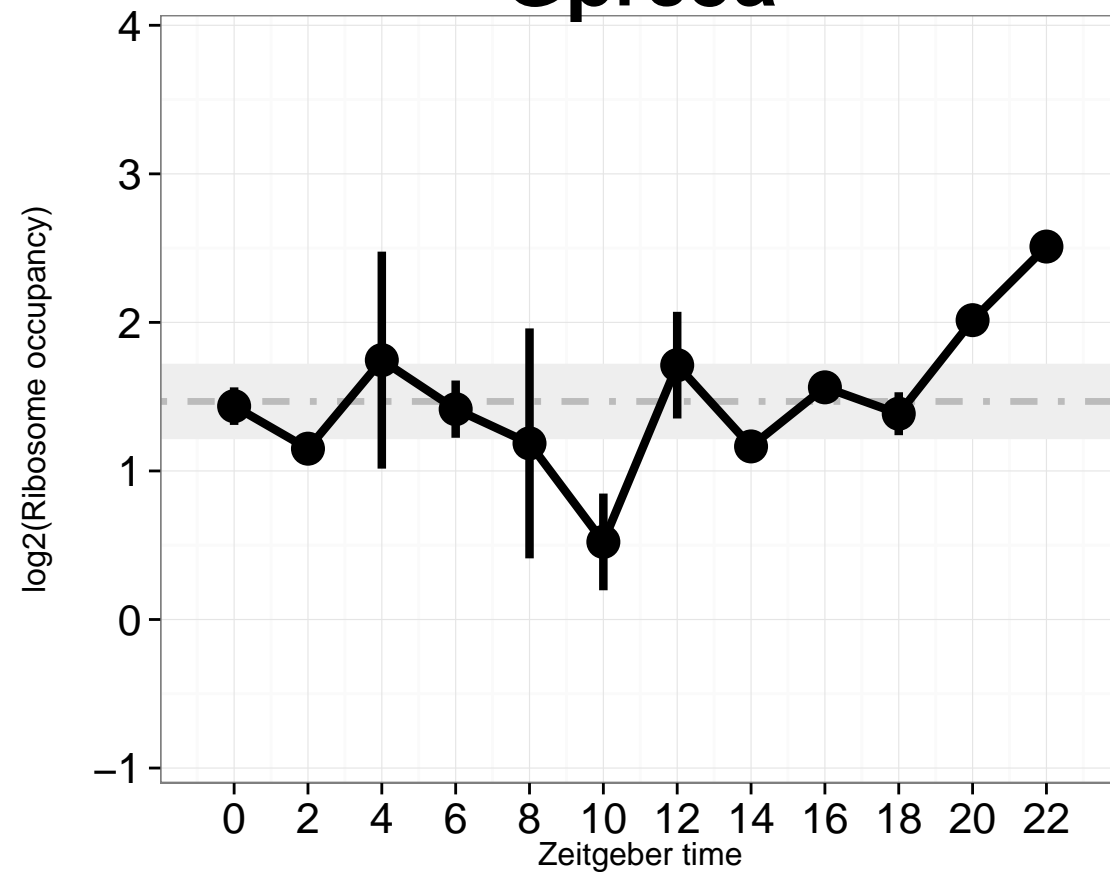

Supplement: Supplementary file 13216 [file 1]

## Ccdc91

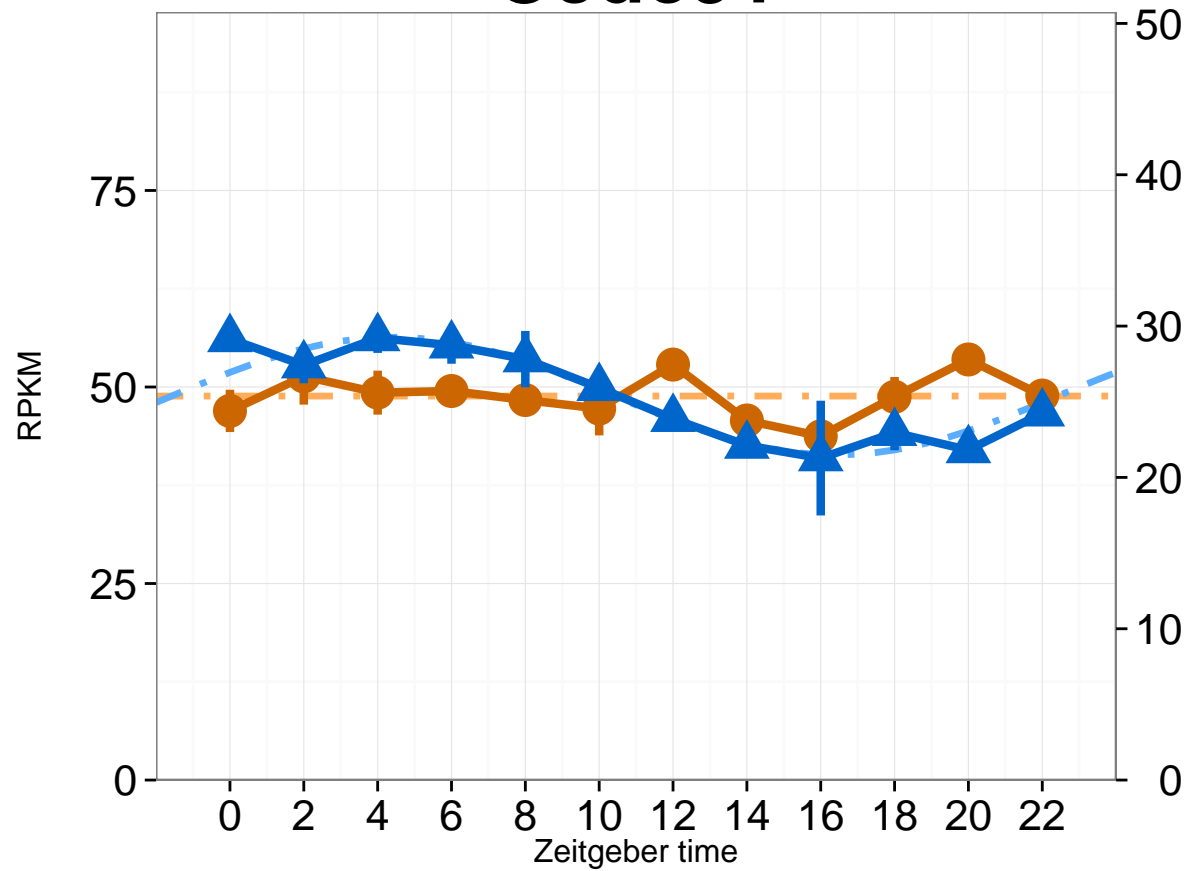

## Ccdc91

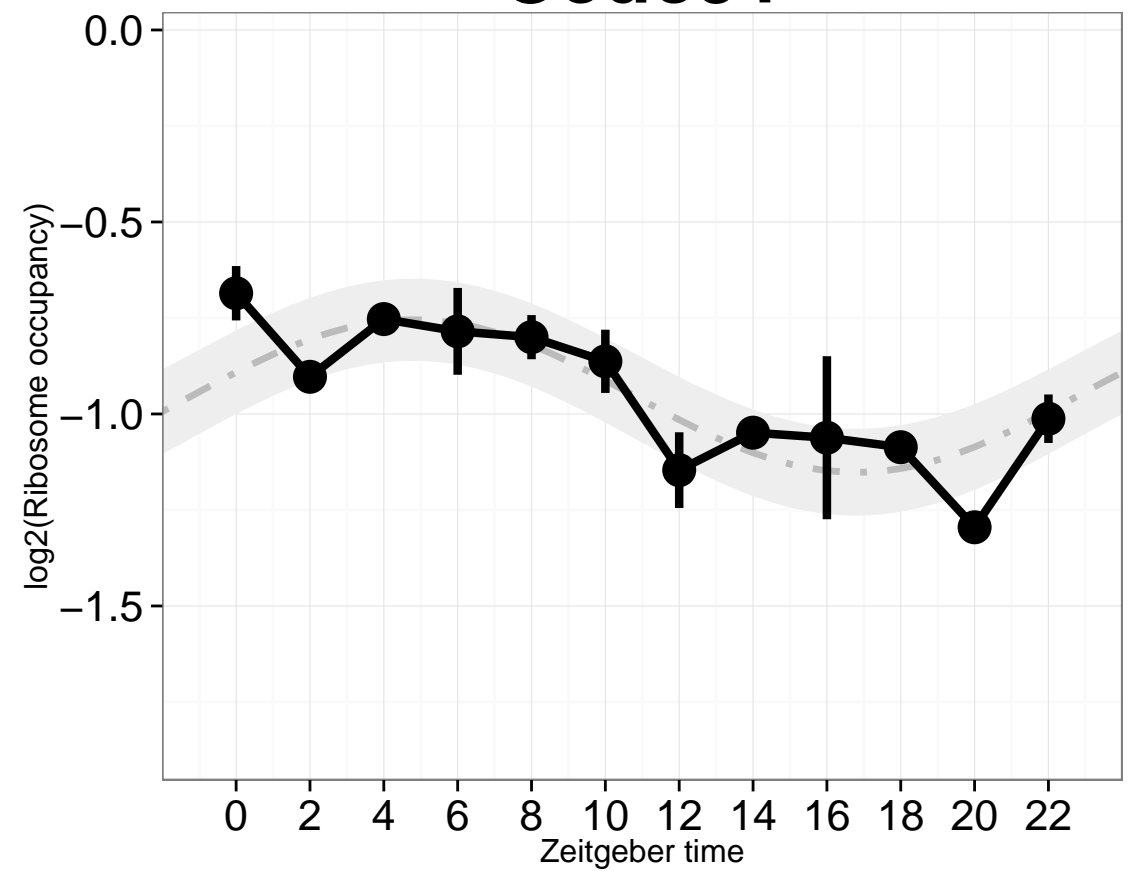

Supplement: Supplementary file 13217 [file 1]

## Ddc

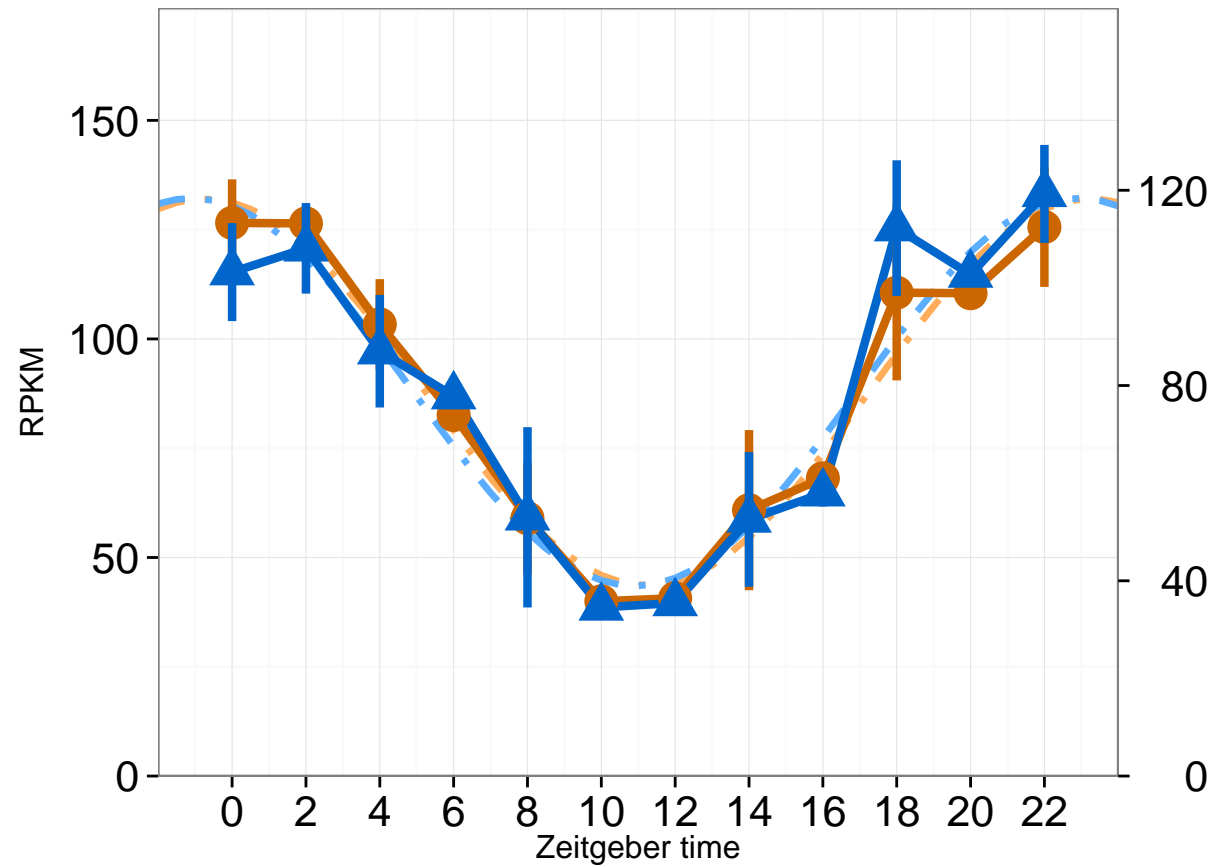

## Ddc

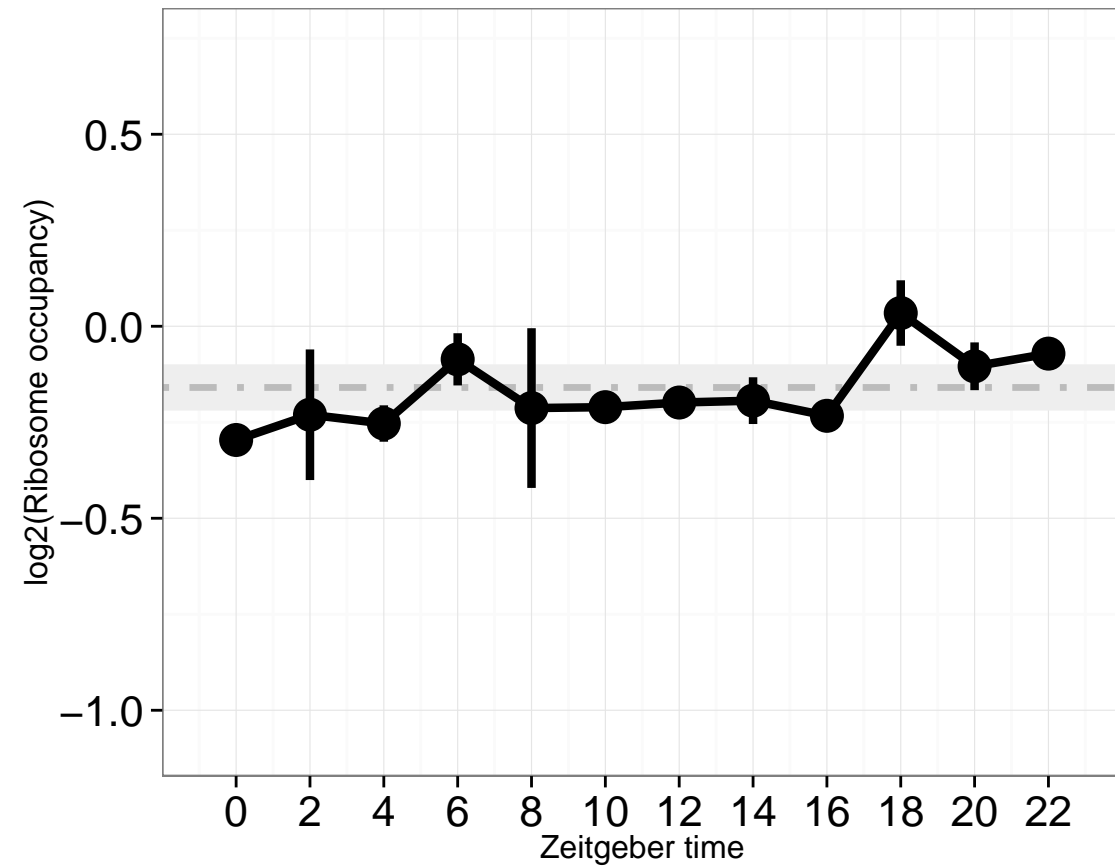

Supplement: Supplementary file 13218 [file 1]

# Cetn4

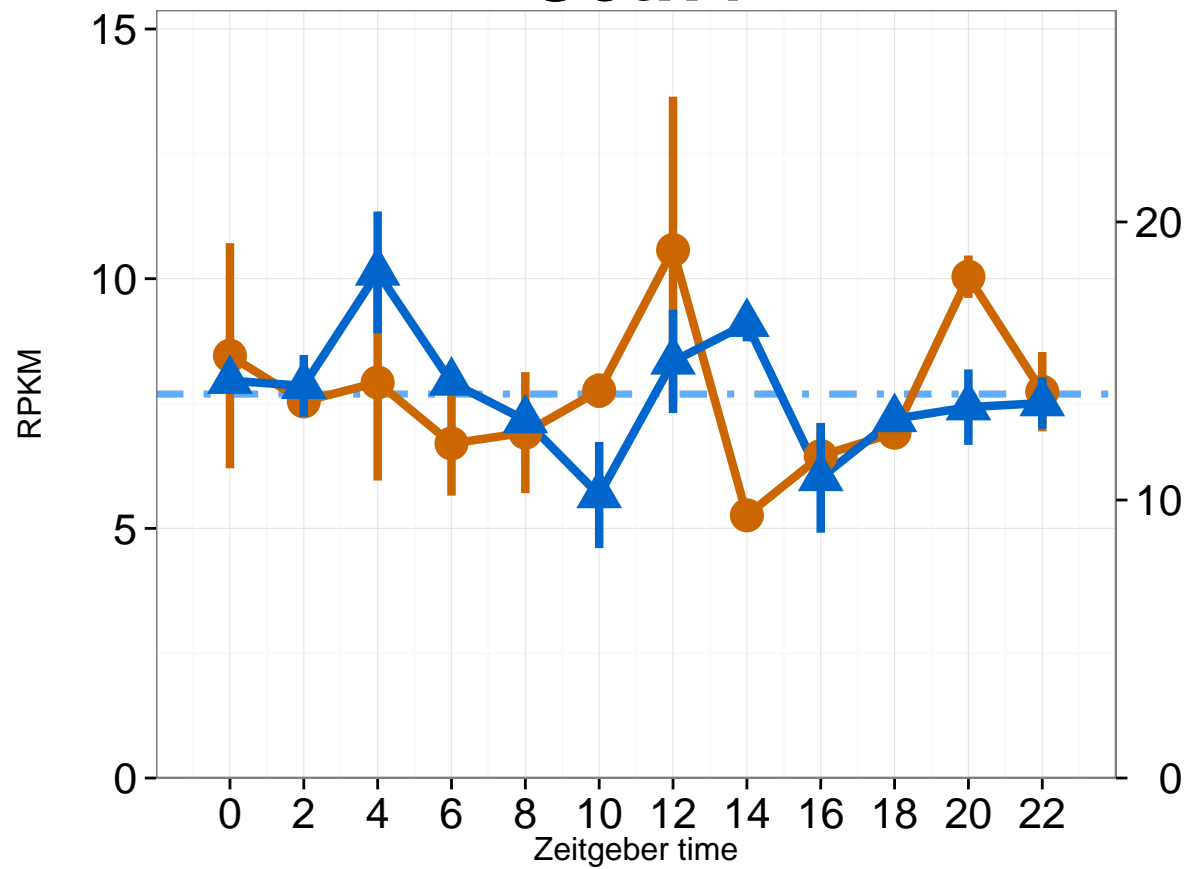

# Cetn4

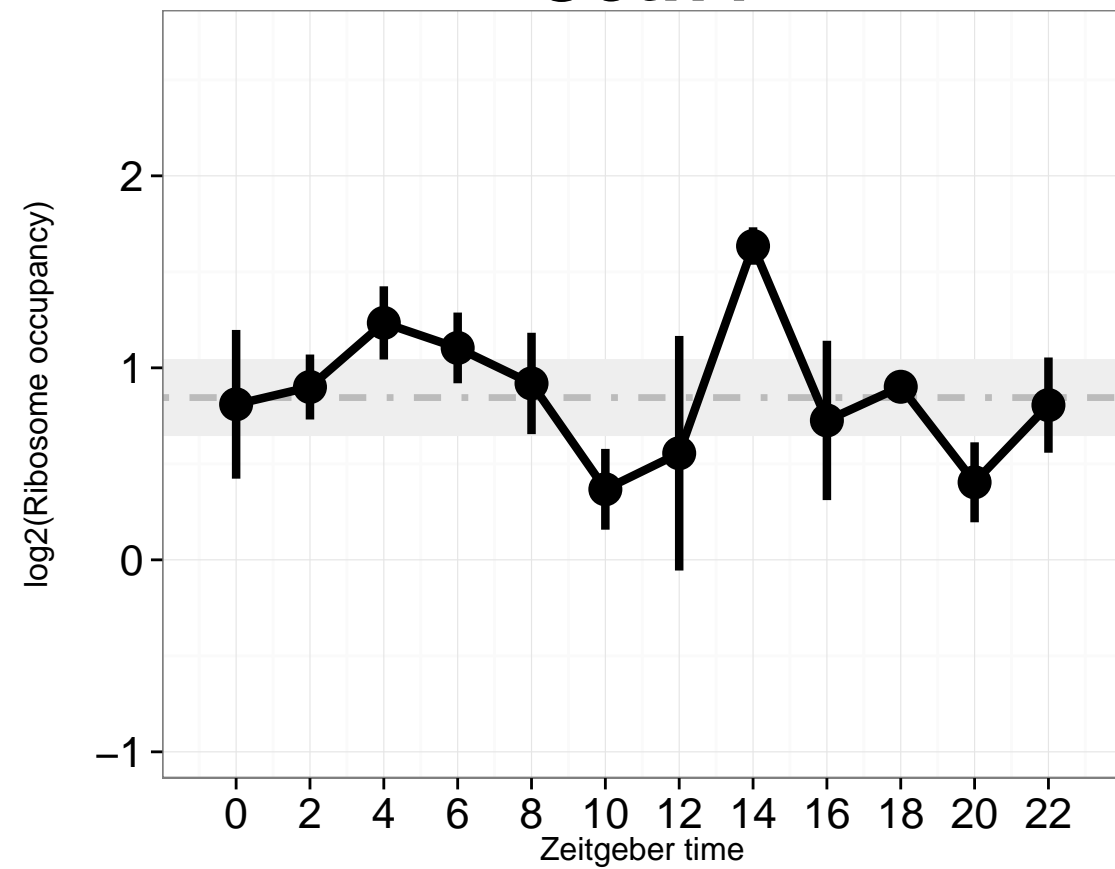

Supplement: Supplementary file 13219 [file 1]

# Ddx60

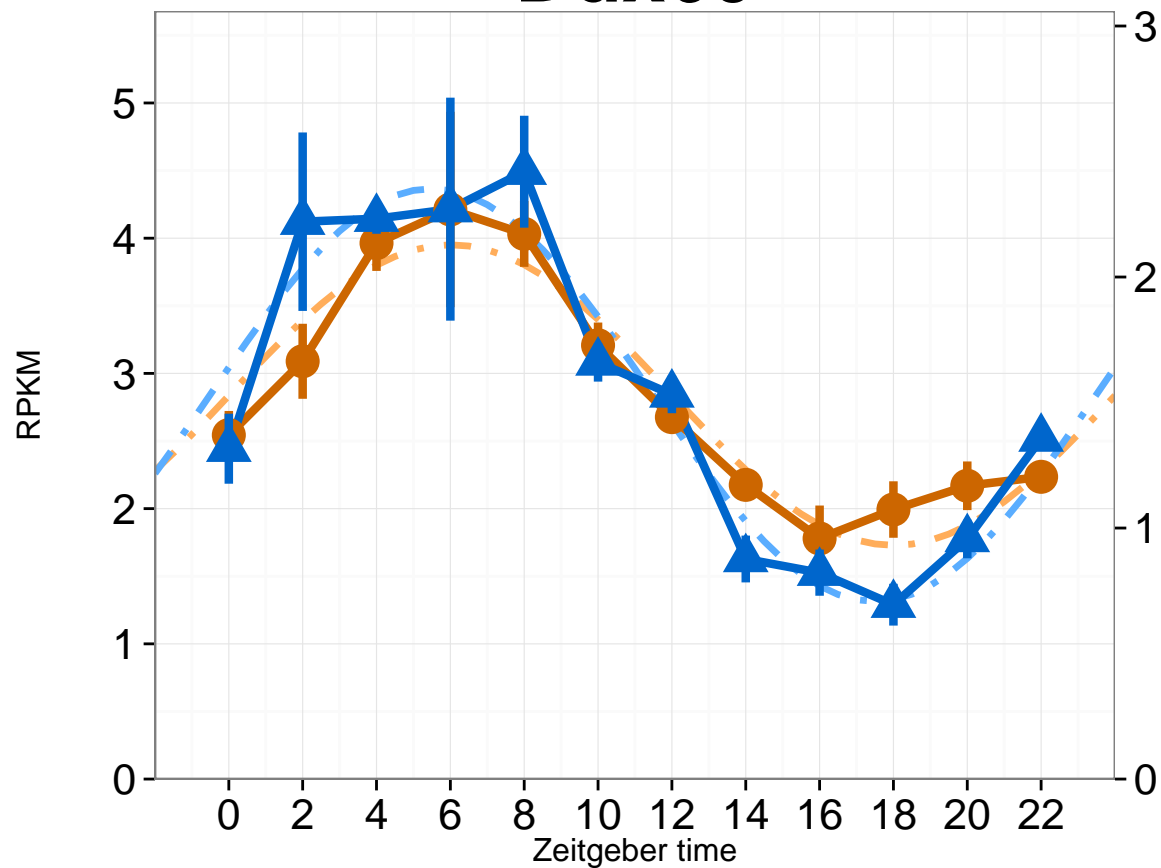

# Ddx60

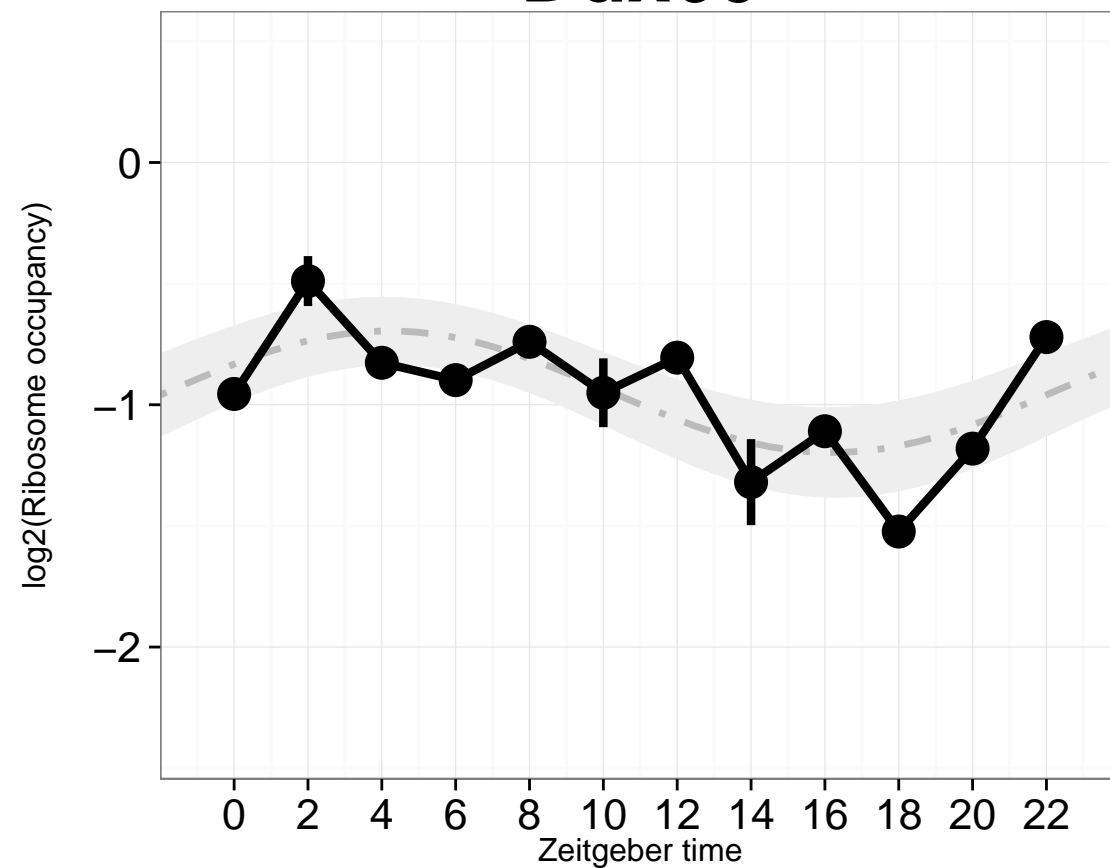

Supplement: Supplementary file 13220 [file 1]

## Thsd4

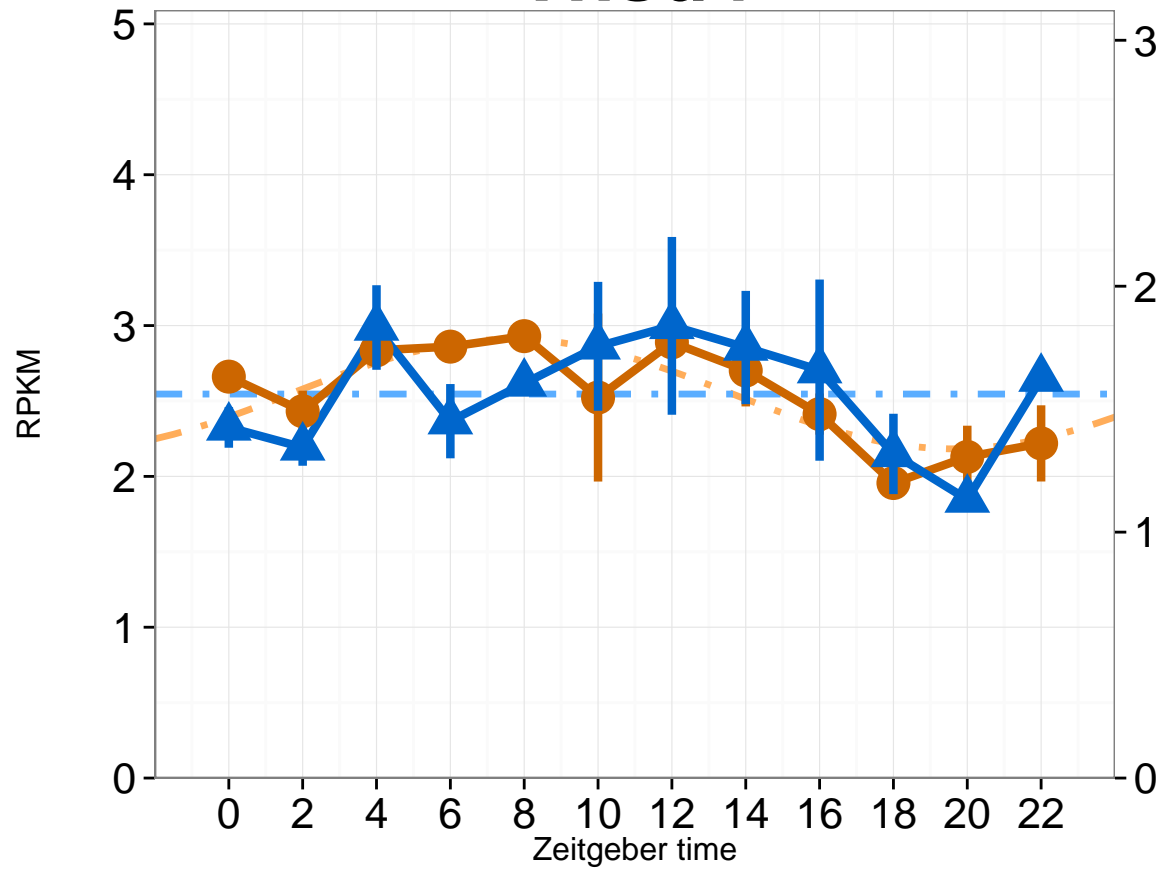

## Thsd4

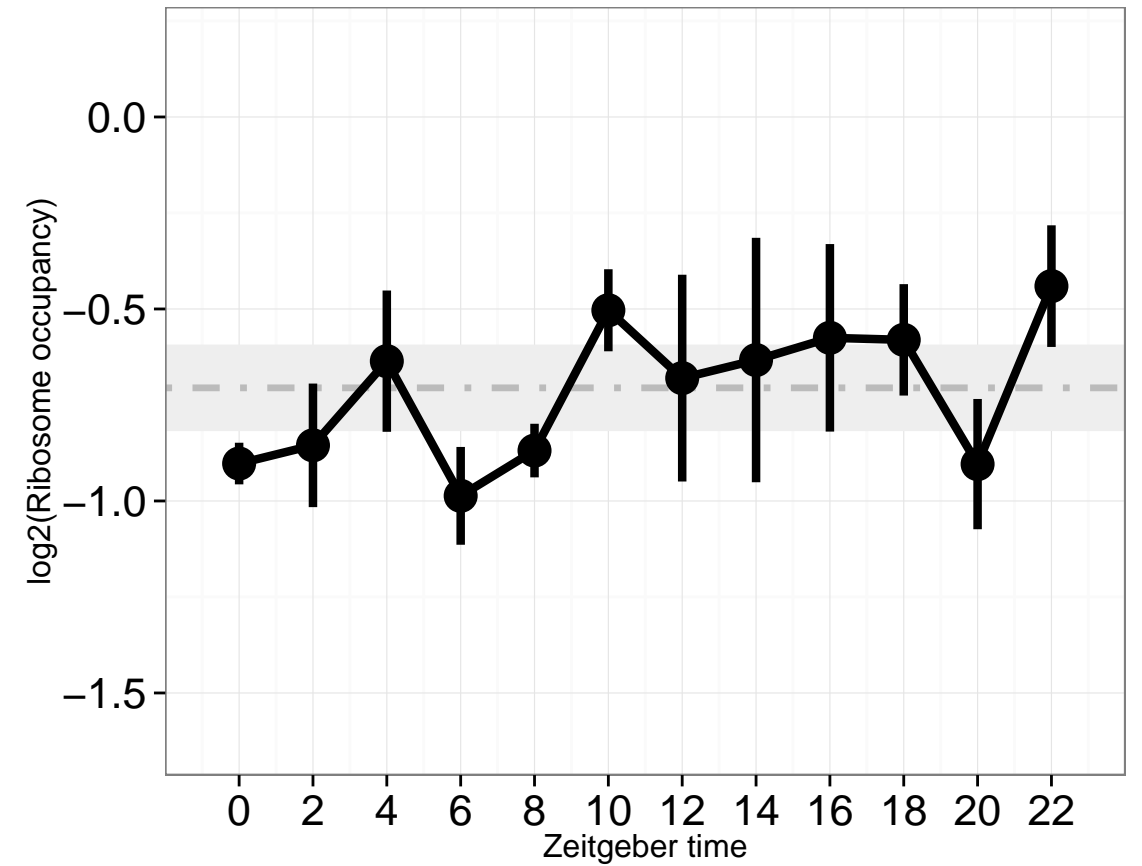

Supplement: Supplementary file 13221 [file 1]

## Dennd3

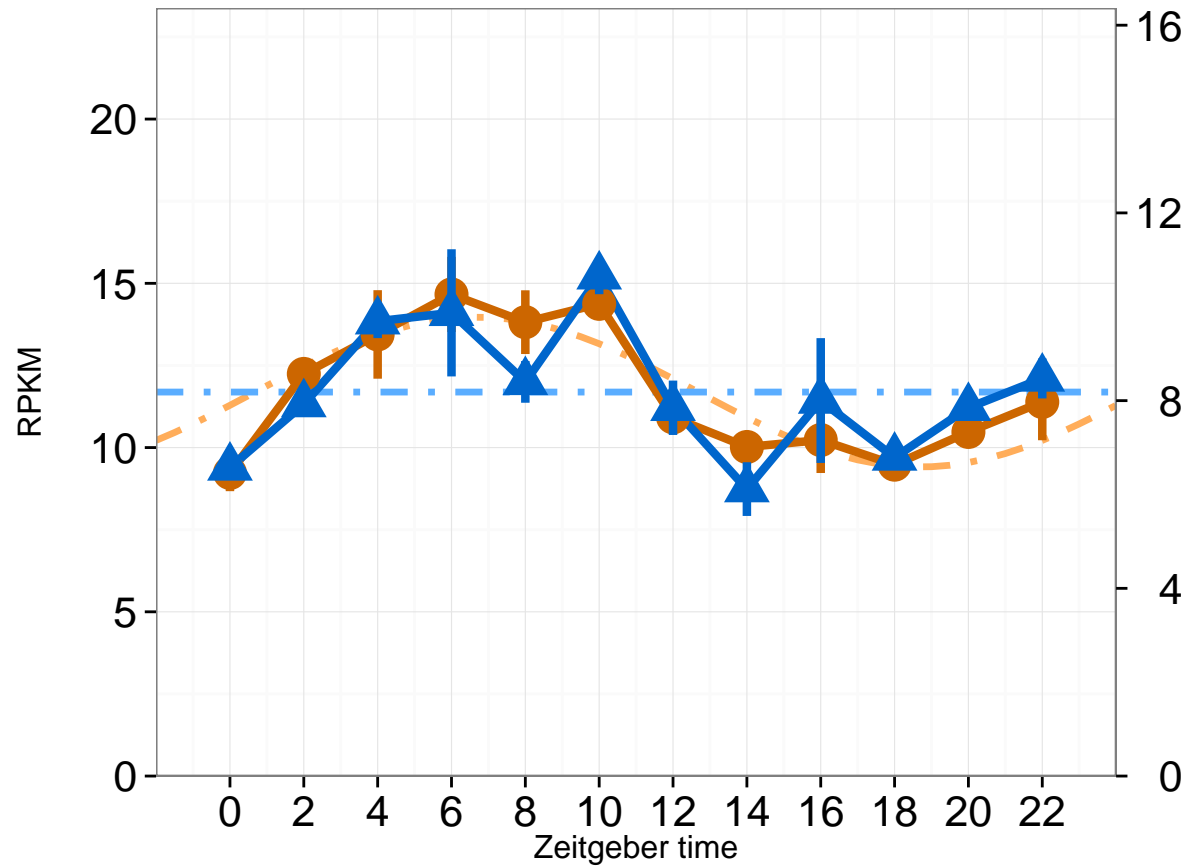

## Dennd3

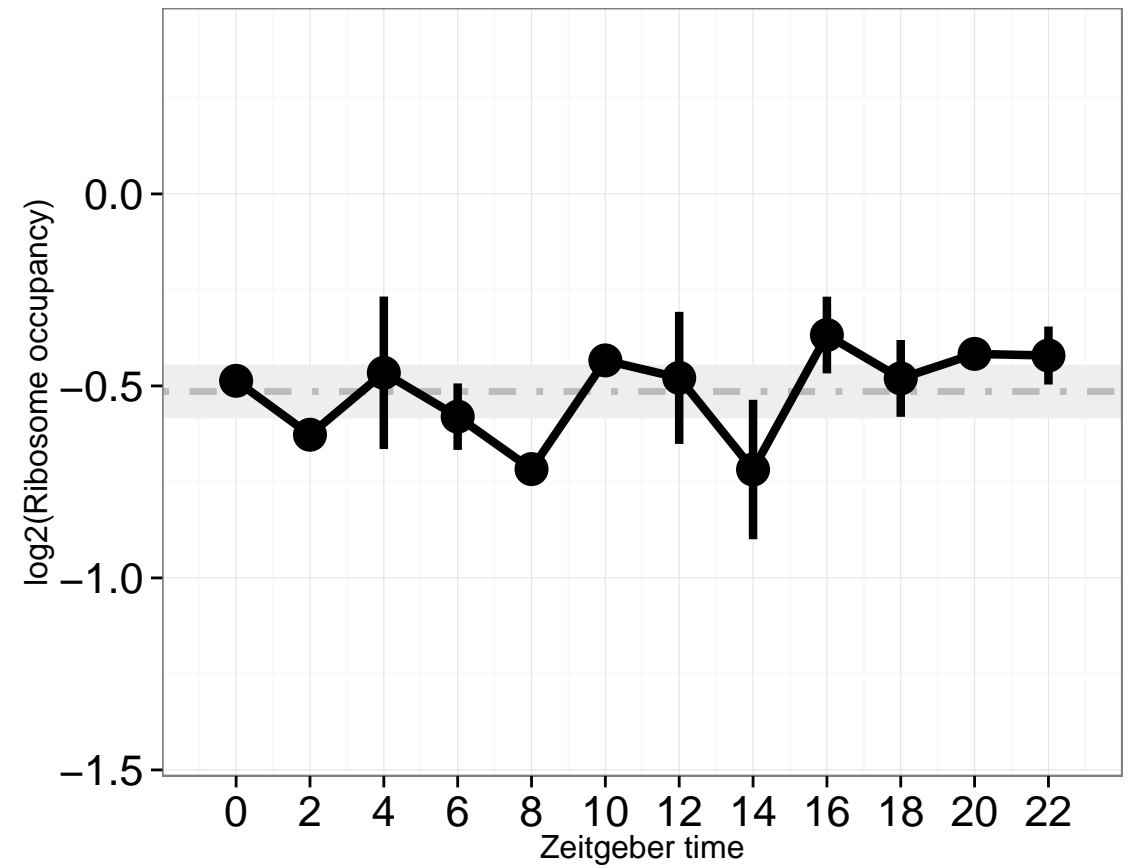

Supplement: Supplementary file 13222 [file 1]

## Ddo

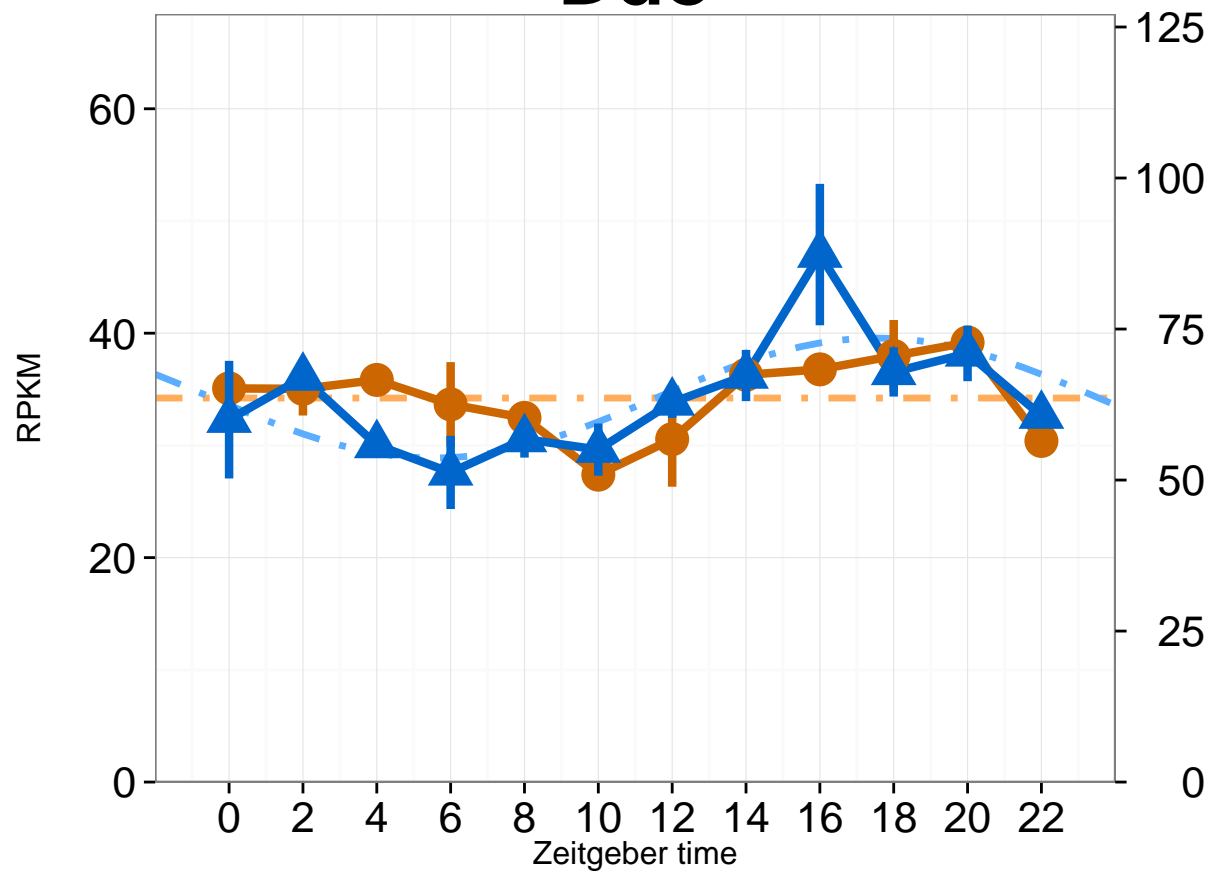

## Ddo

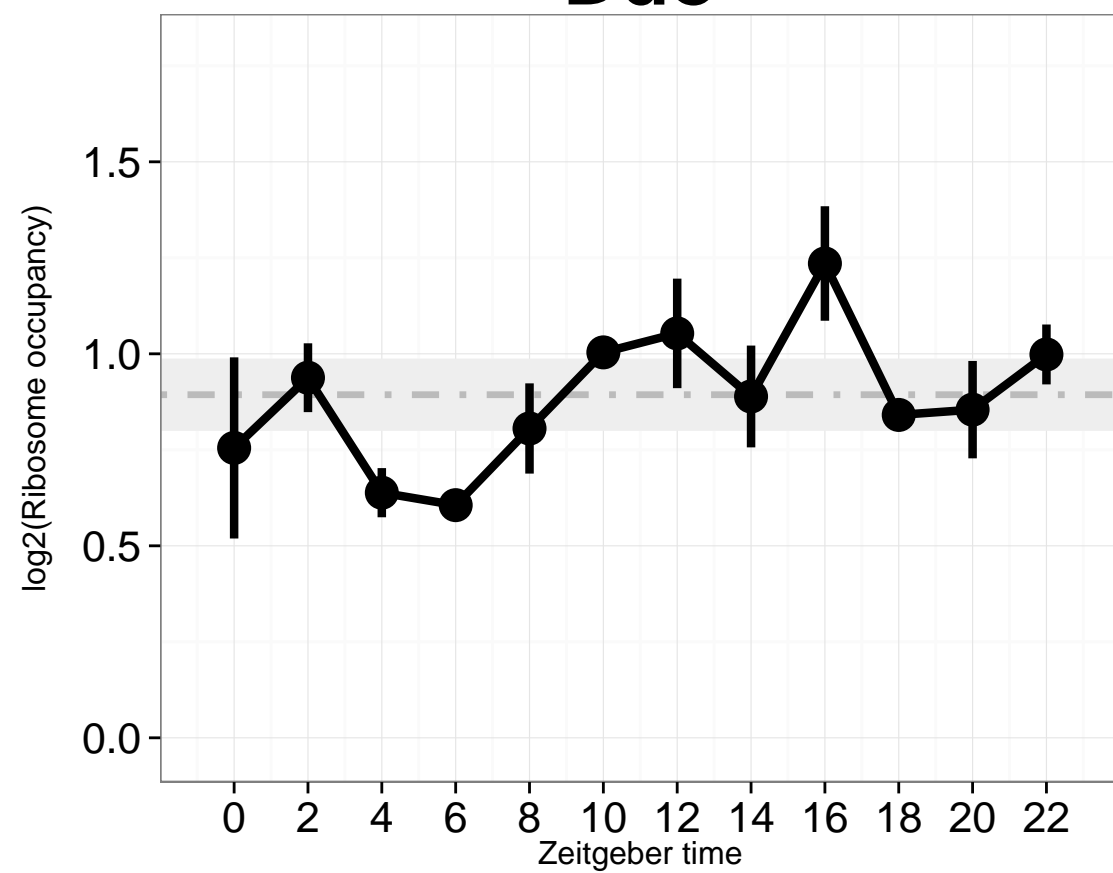

Supplement: Supplementary file 13223 [file 1]

## Dtd2

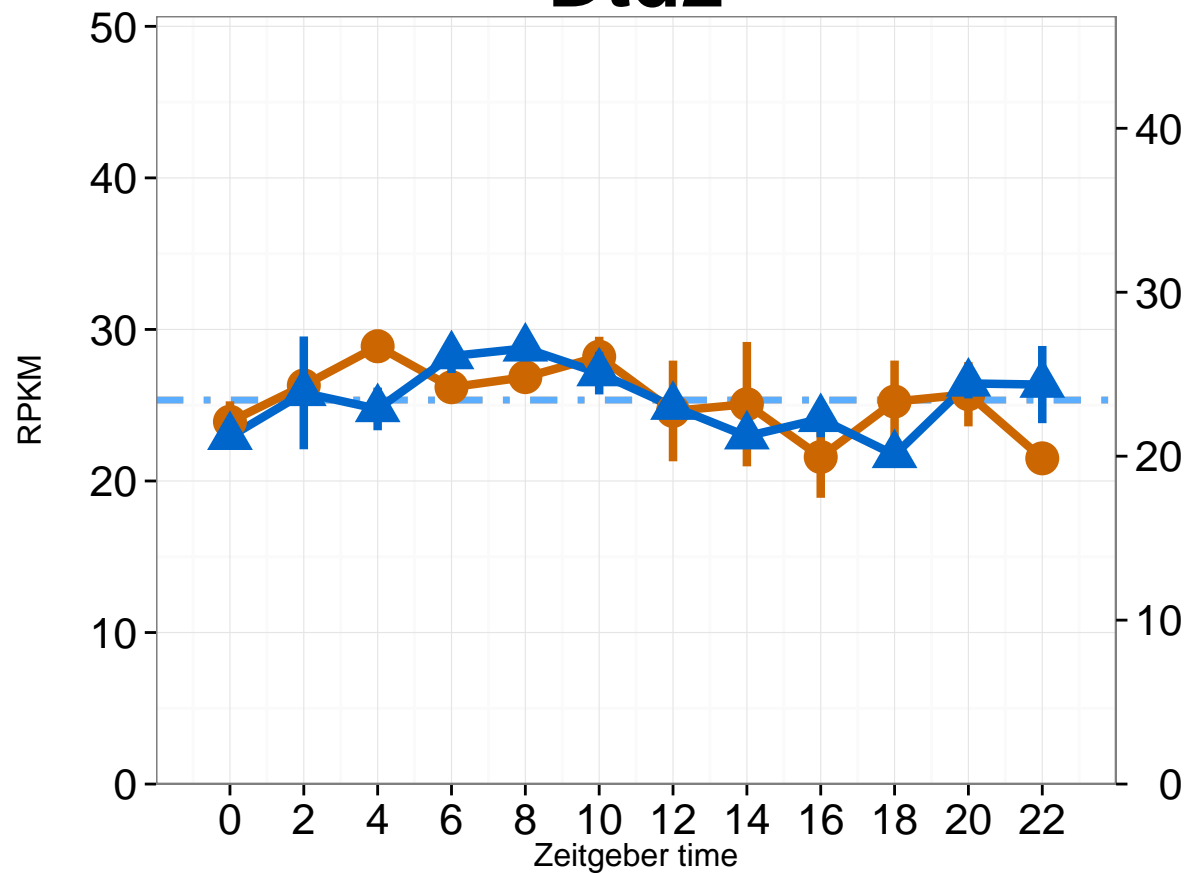

## Dtd2

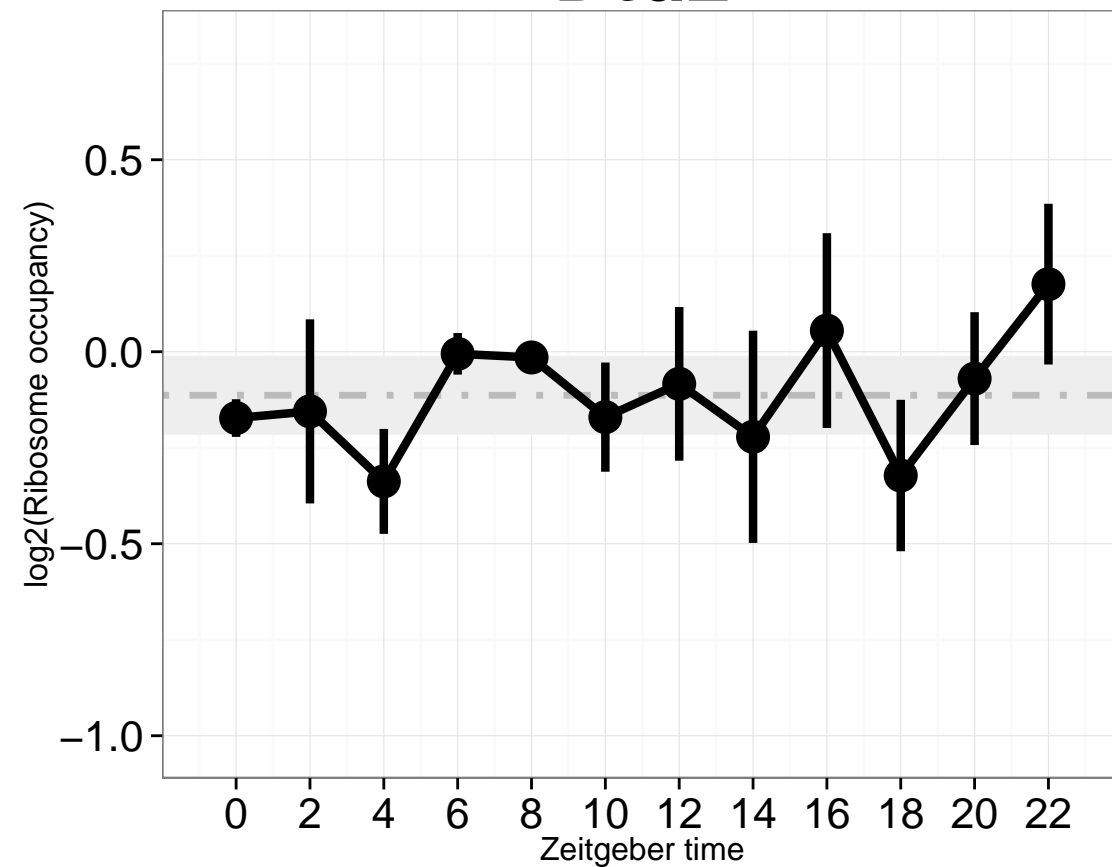

Supplement: Supplementary file 13224 [file 1]

## Sec14l2

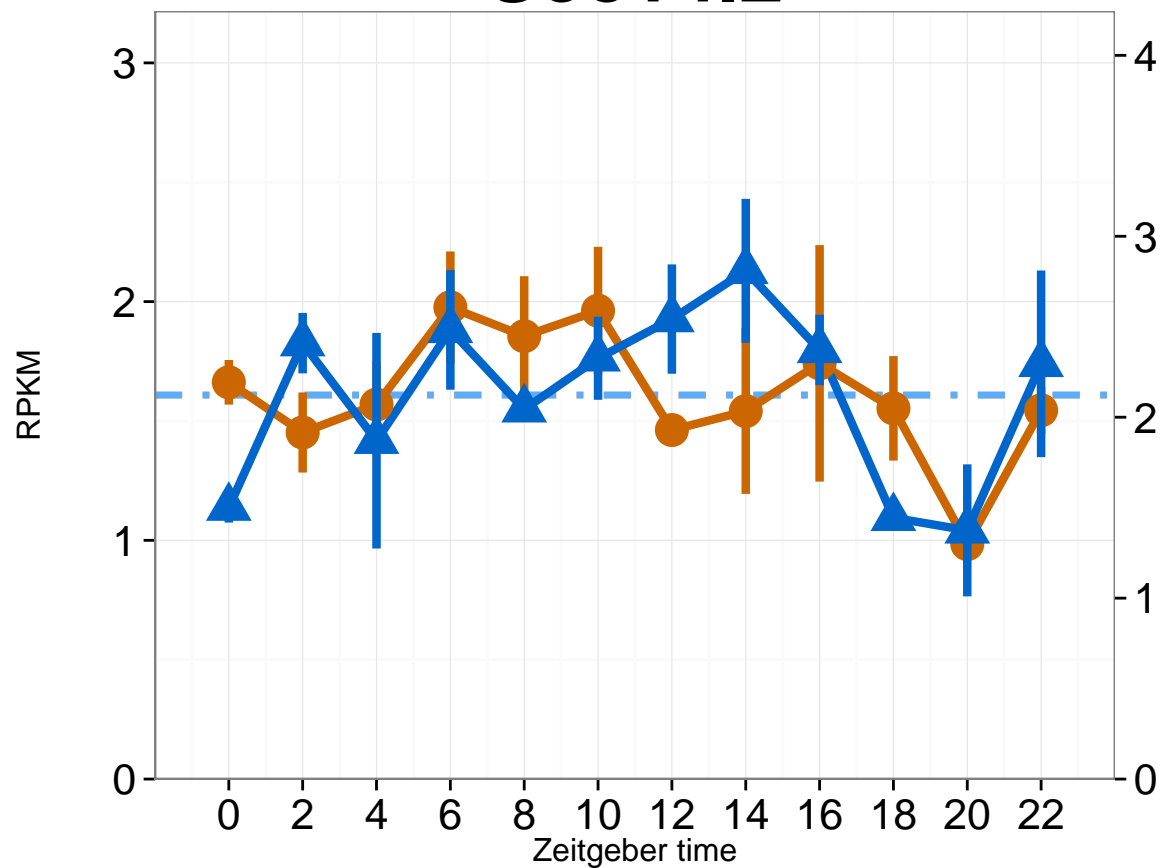

## Sec14l2

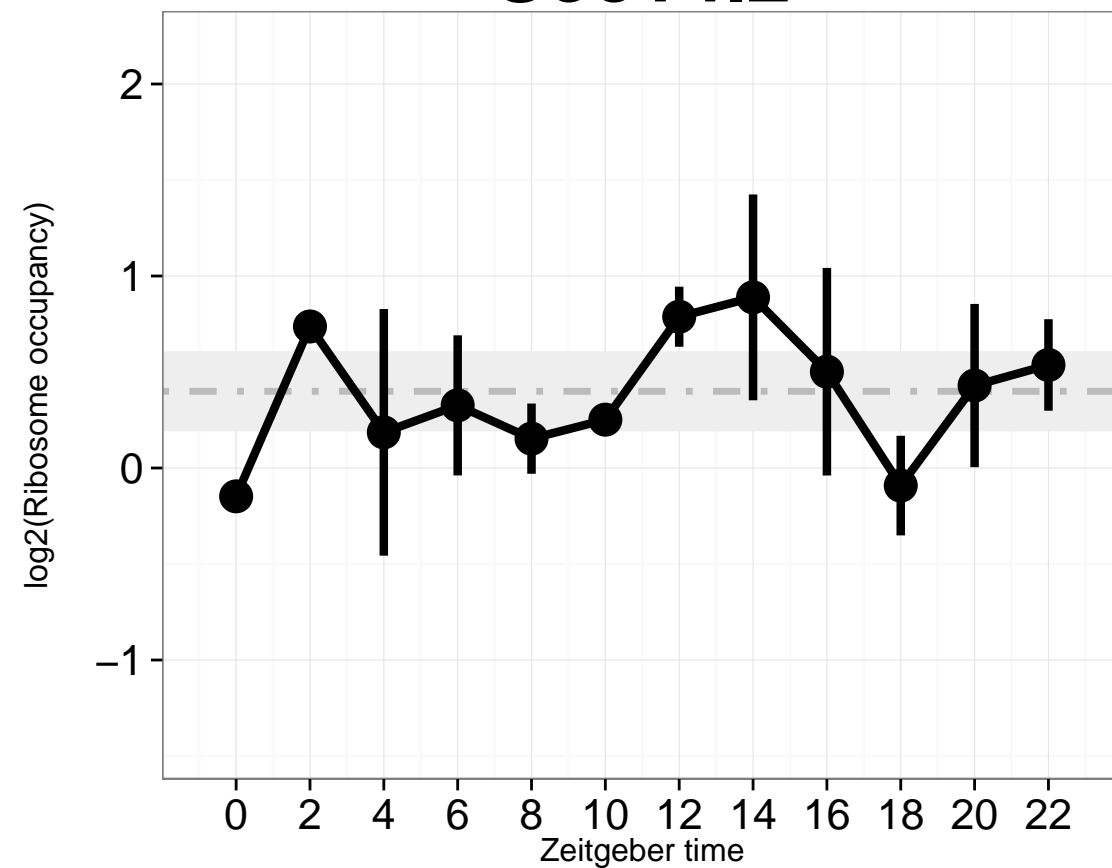

Supplement: Supplementary file 13225 [file 1]

## Podn

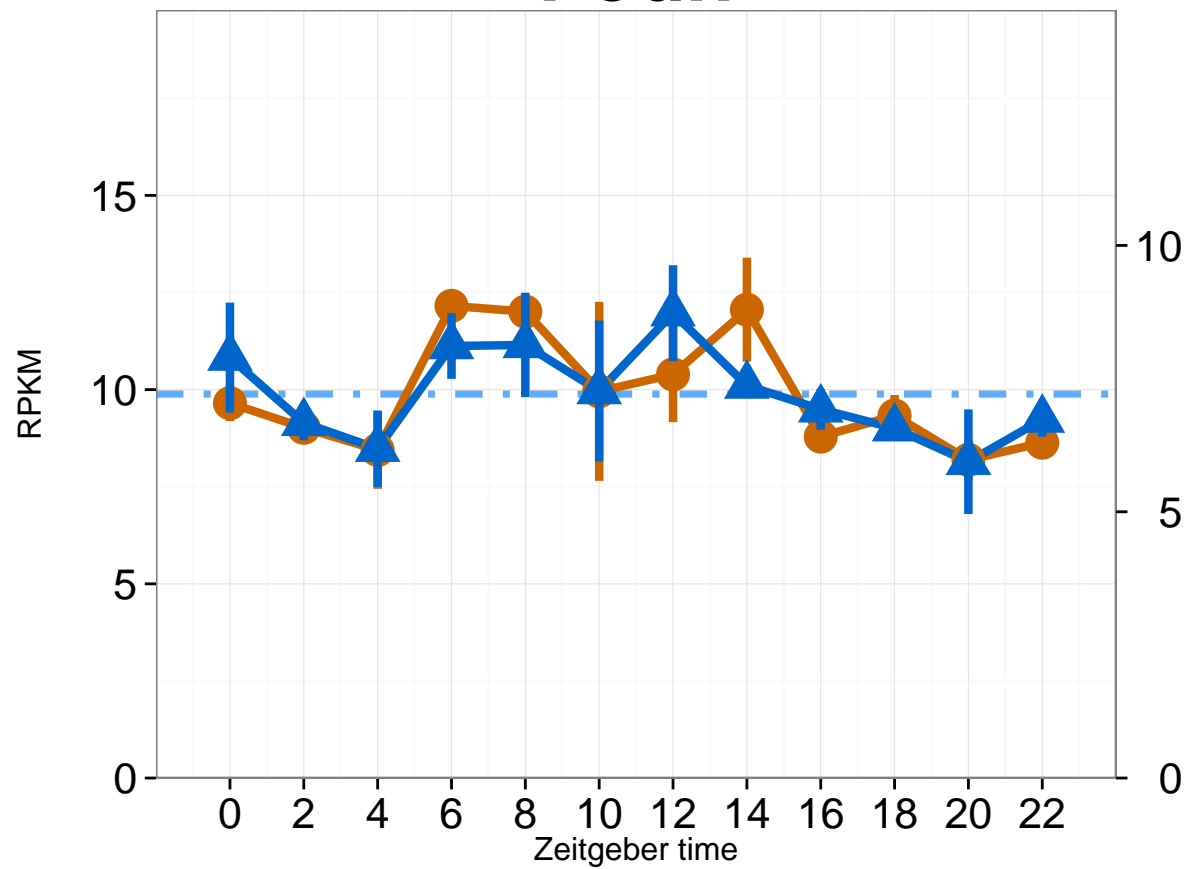

## Podn

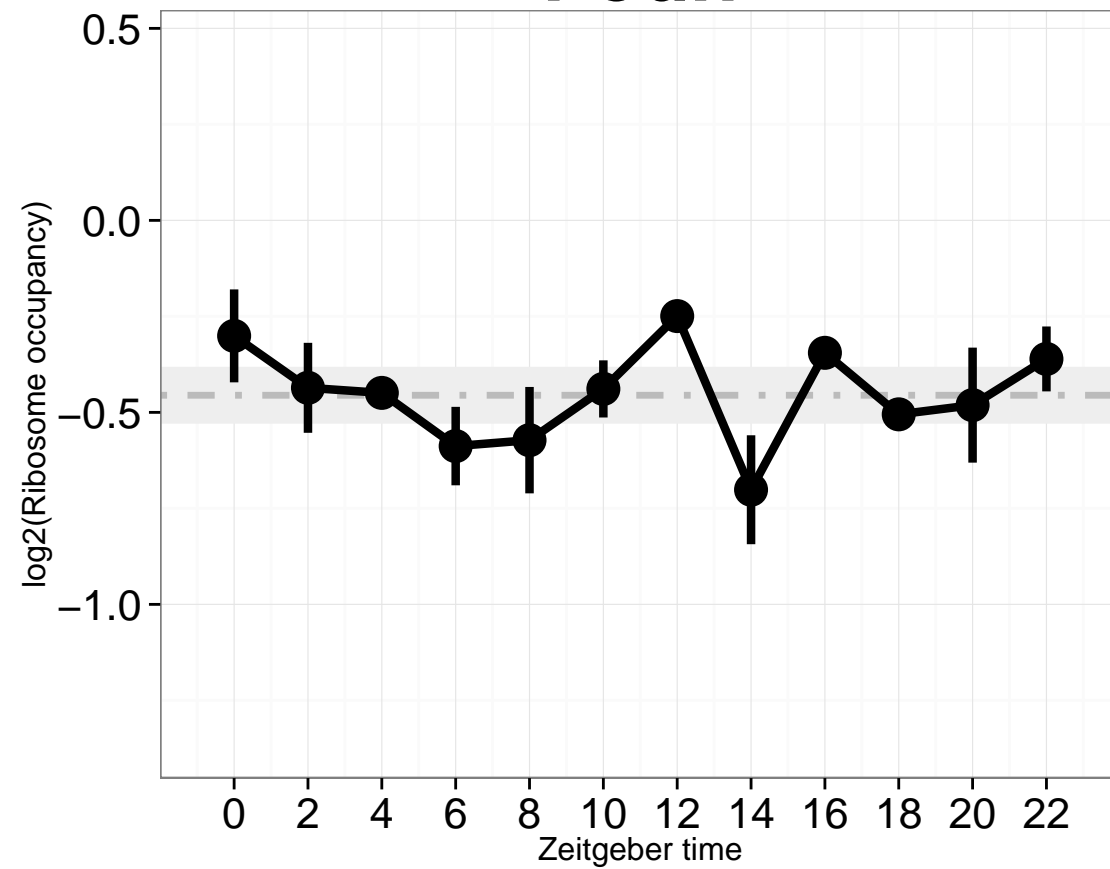

Supplement: Supplementary file 13226 [file 1]

## Dpys

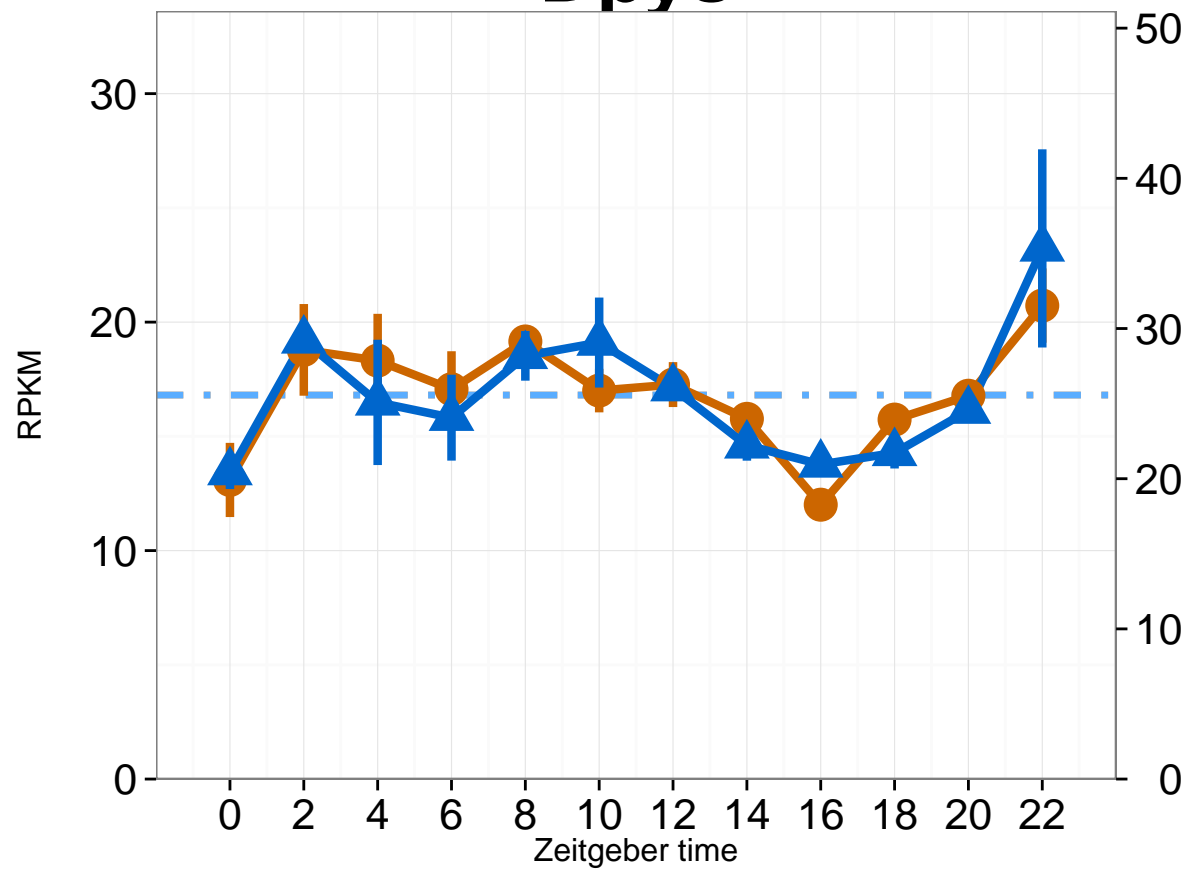

## Dpys

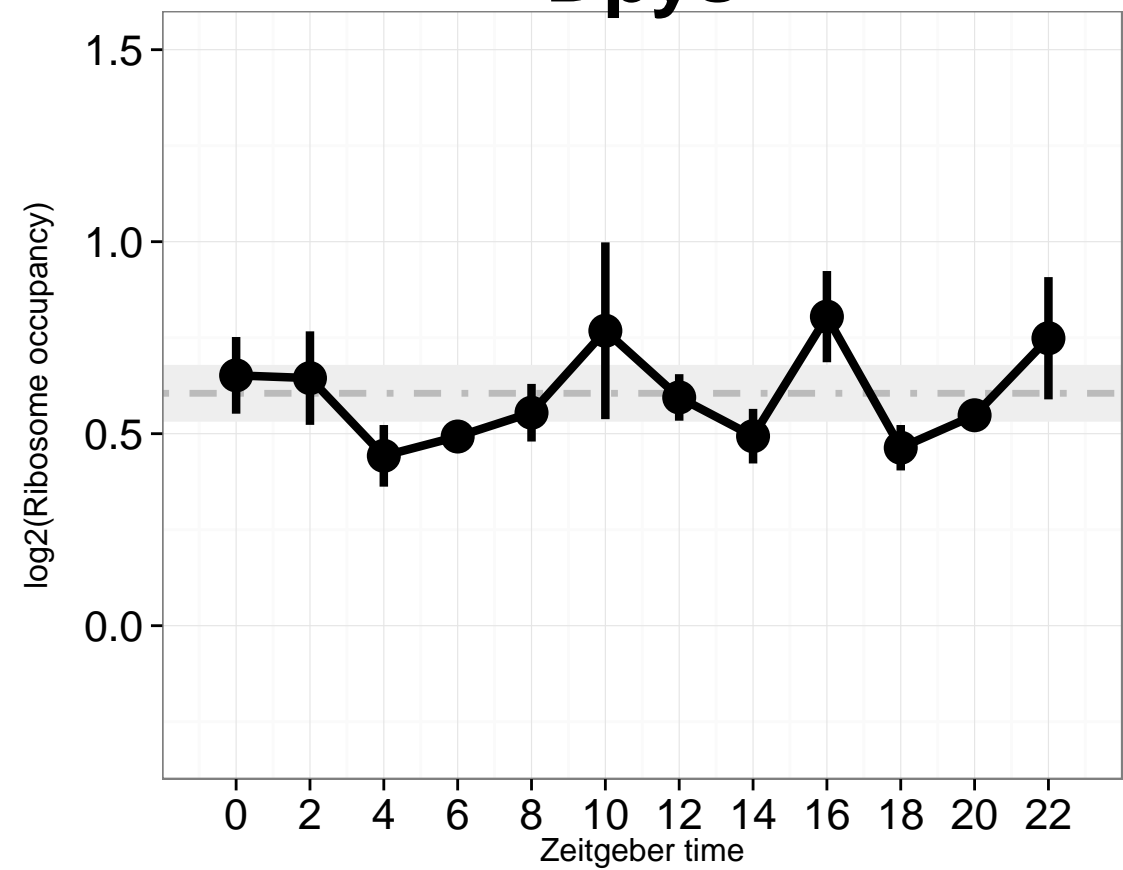

Supplement: Supplementary file 13227 [file 1]

## Cysltr2

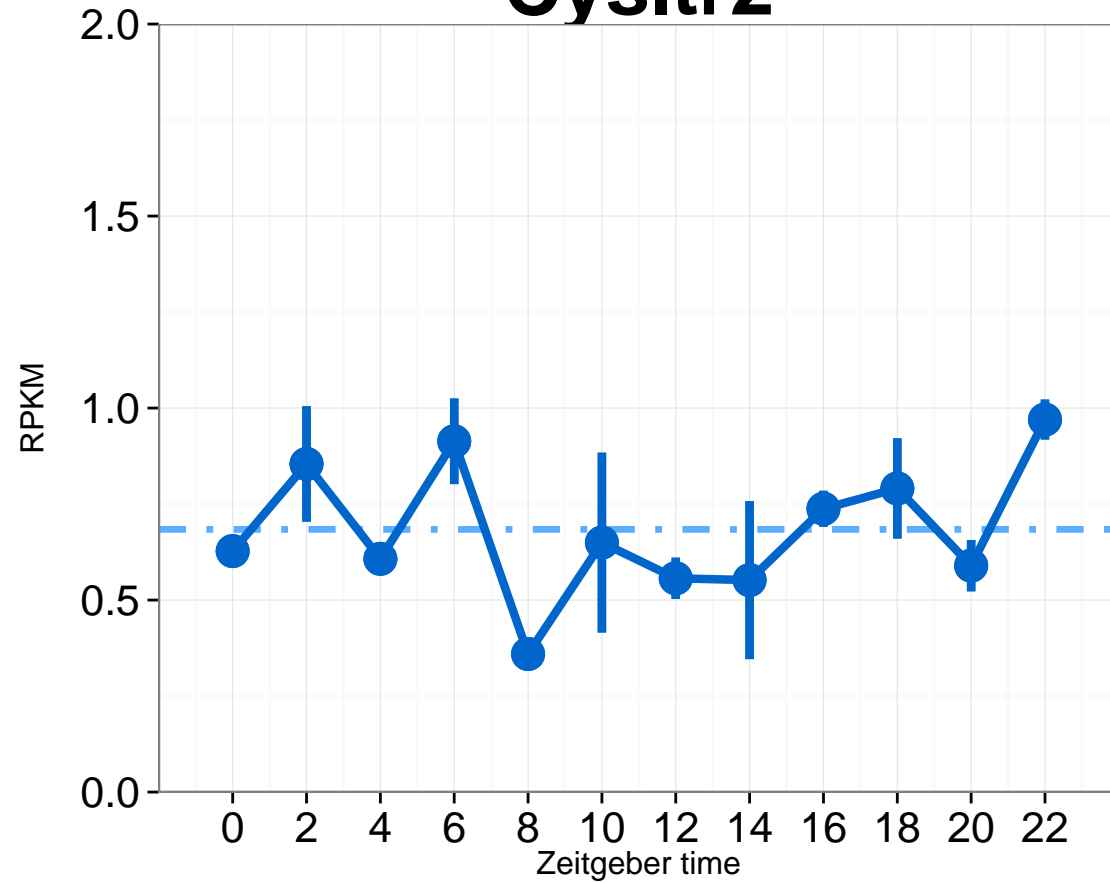

## Cysltr2 log2(Ribosome occupancy

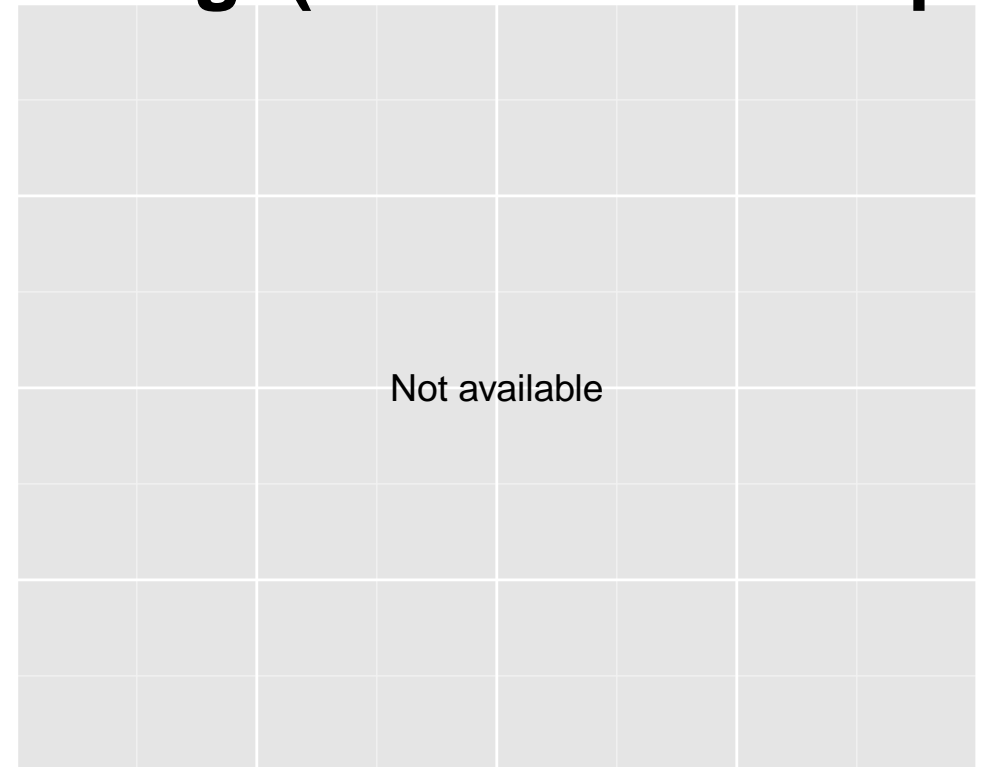

Supplement: Supplementary file 13228 [file 1]

## Cldn5

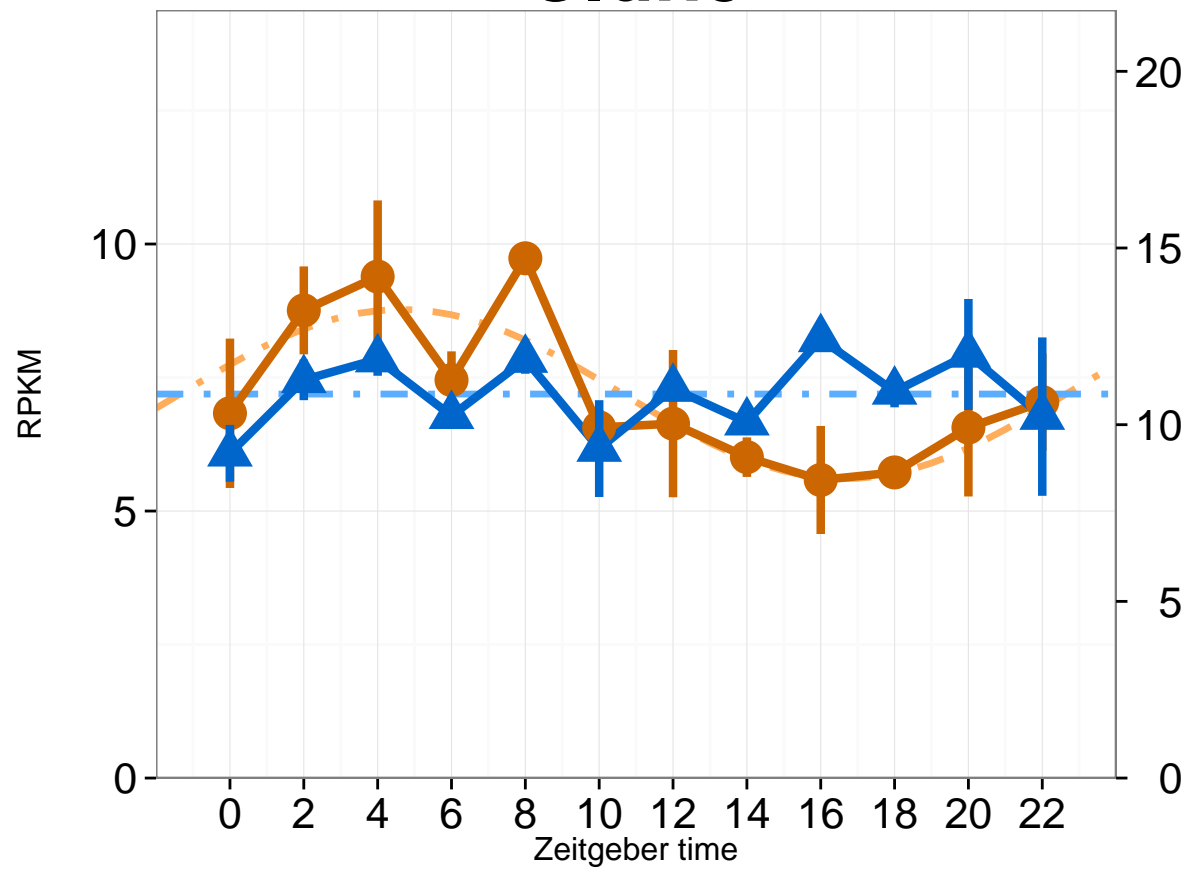

## Cldn5

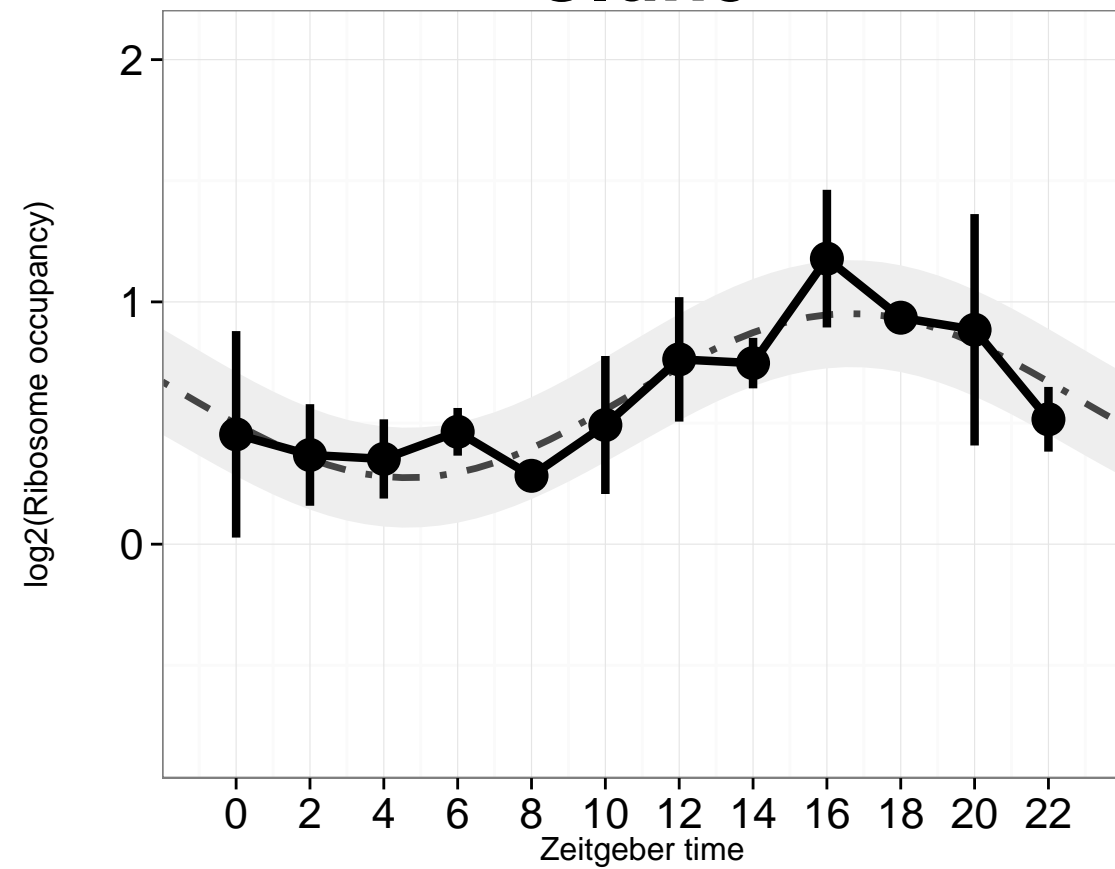

Supplement: Supplementary file 13229 [file 1]

## Pex2

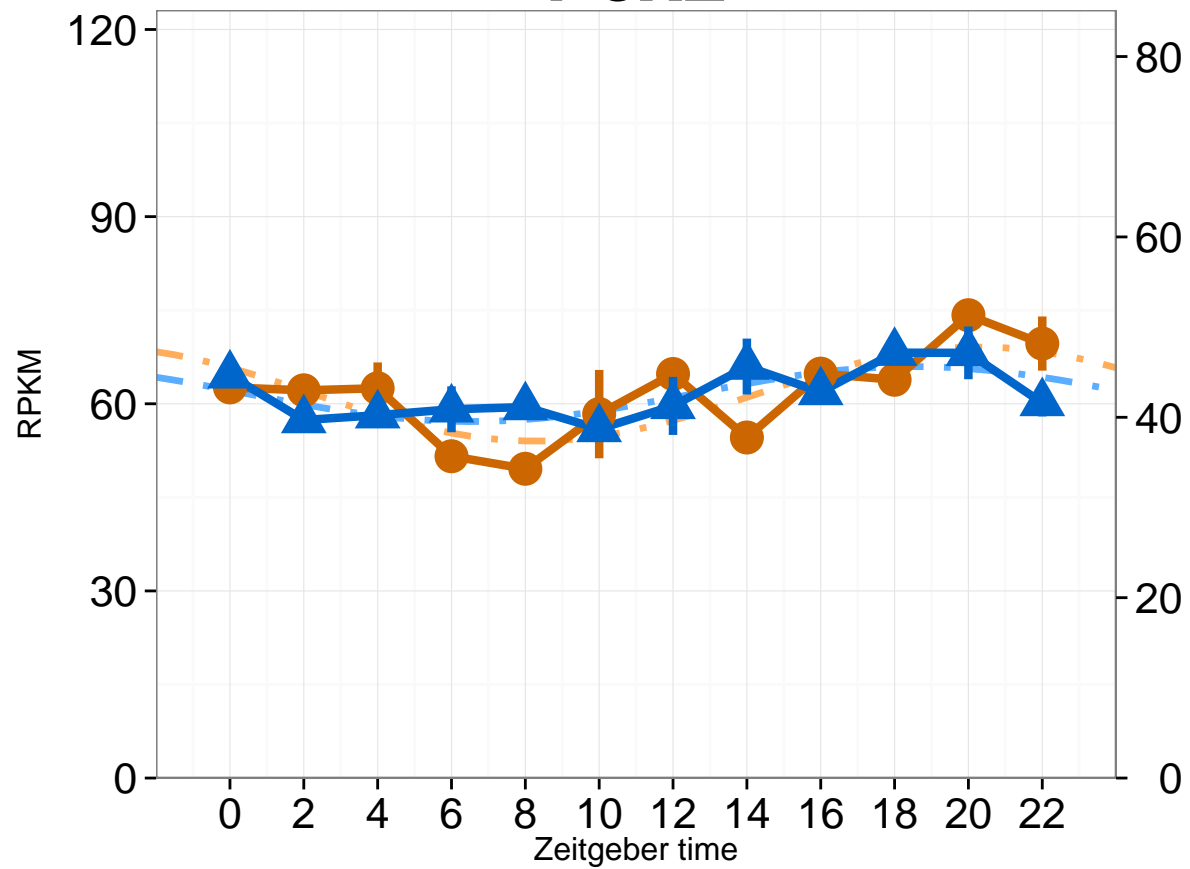

## Pex2

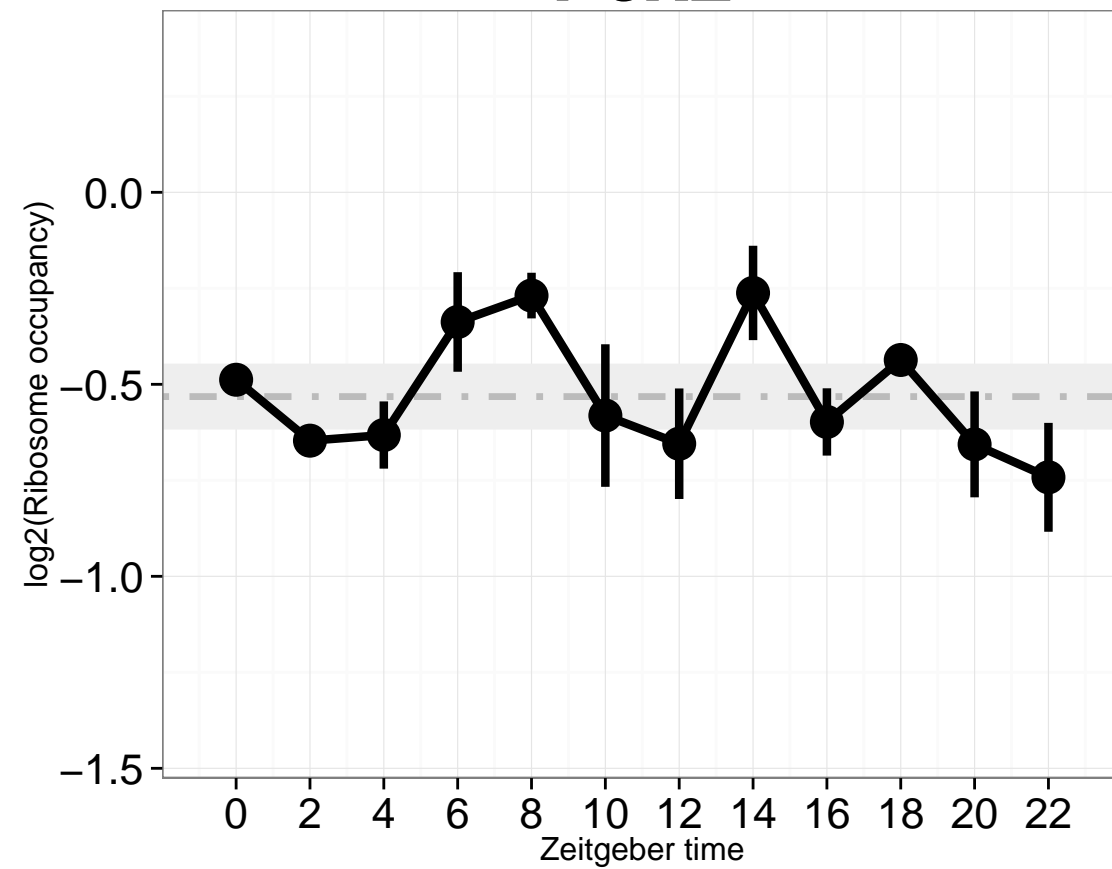

Supplement: Supplementary file 13230 [file 1]

## Mbl1

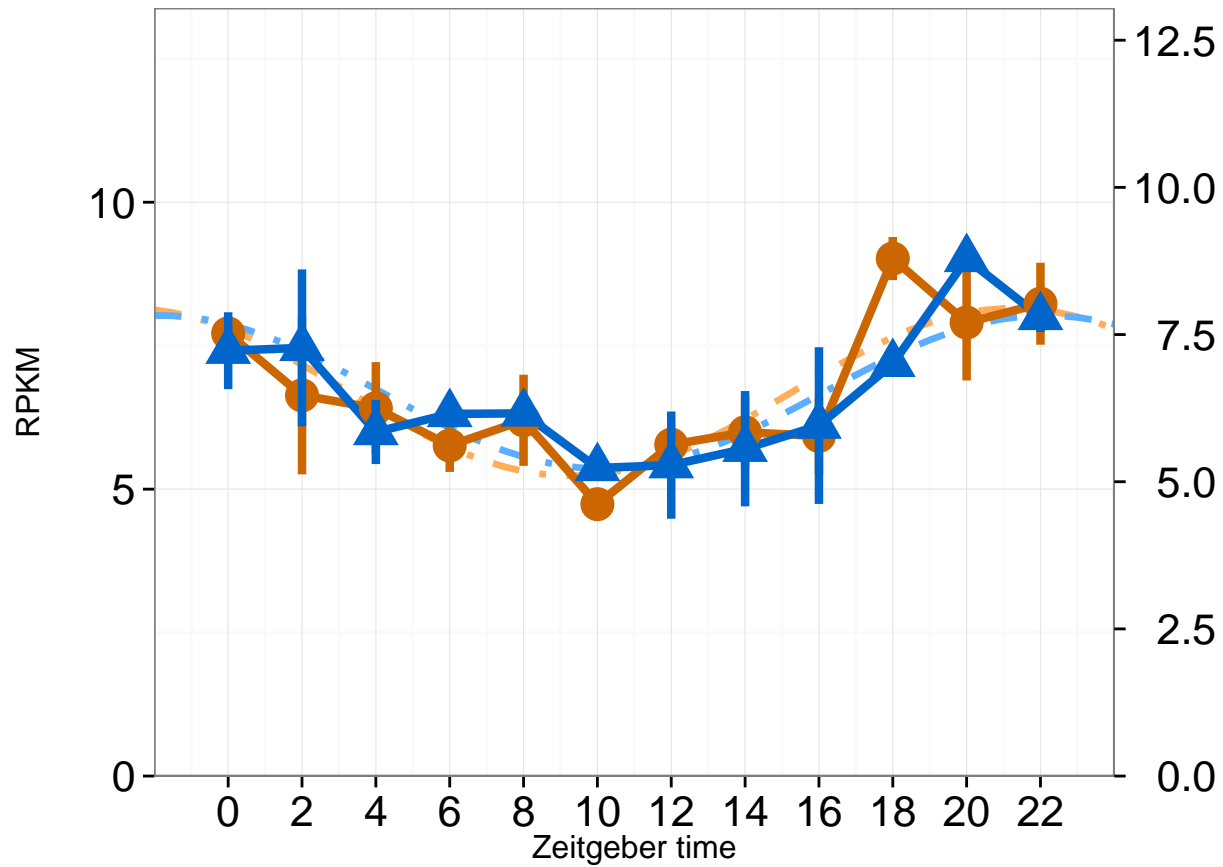

## Mbl1

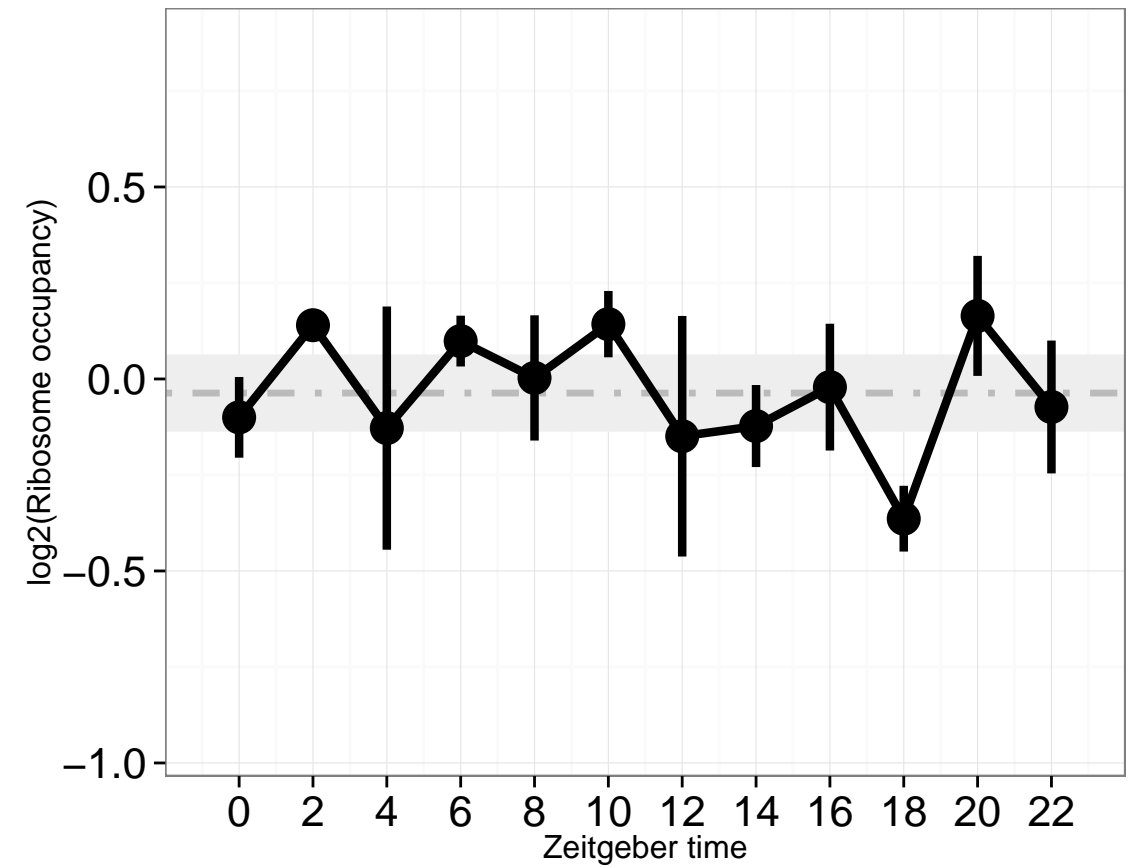

Supplement: Supplementary file 13231 [file 1]

# BC028528

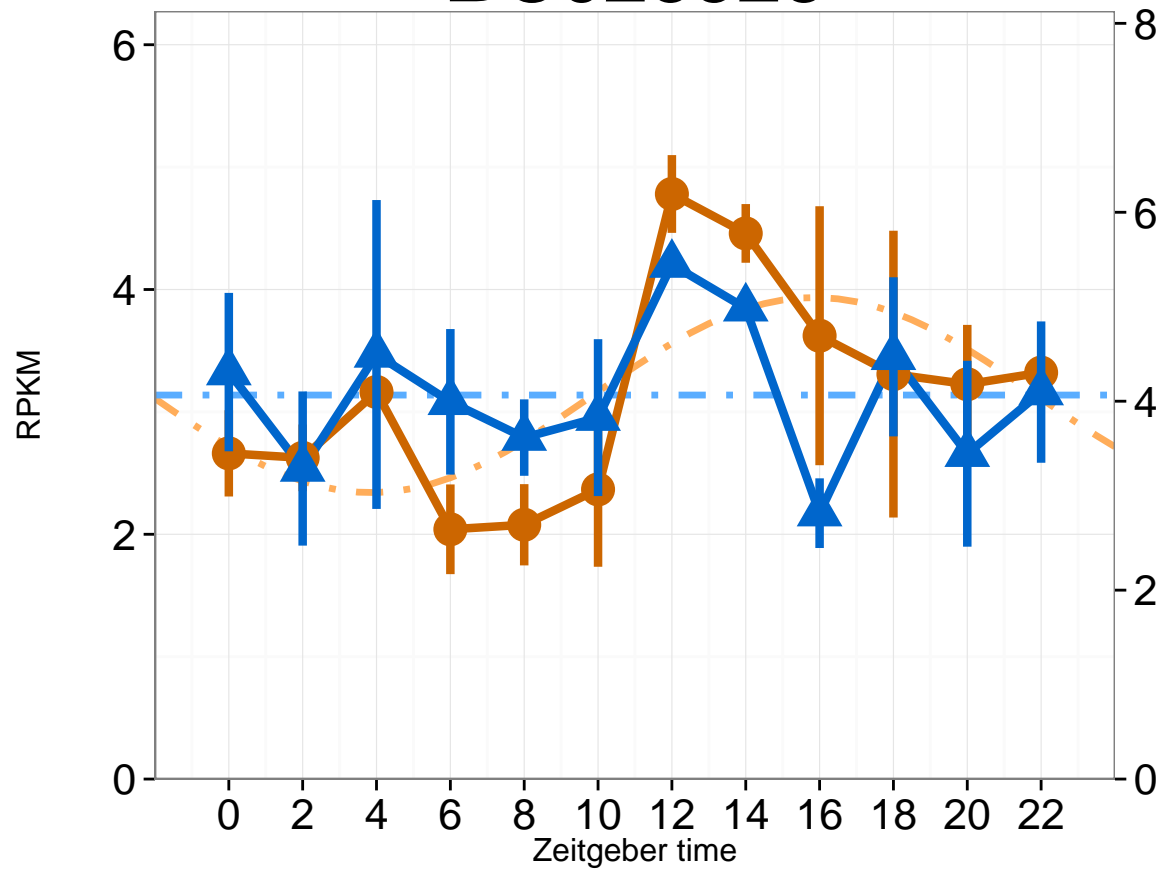

# BC028528

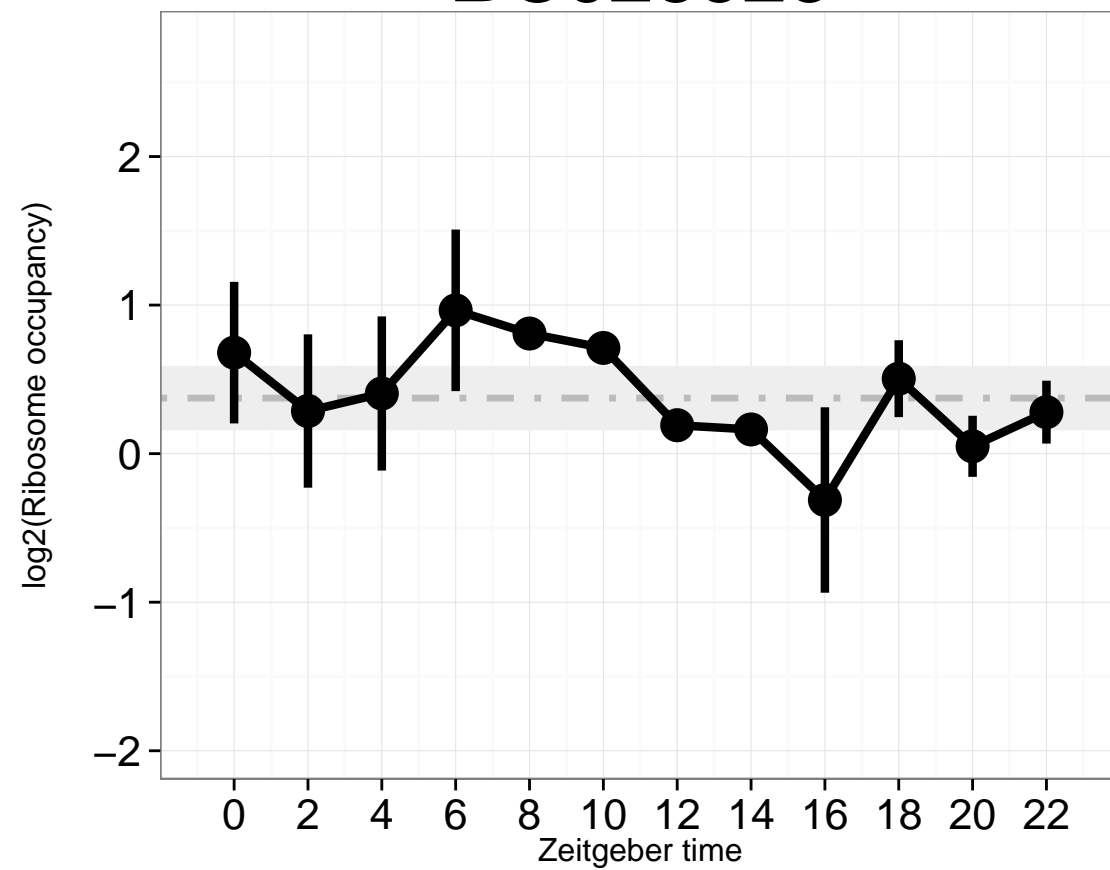

Supplement: Supplementary file 13232 [file 1]

## Nucks1

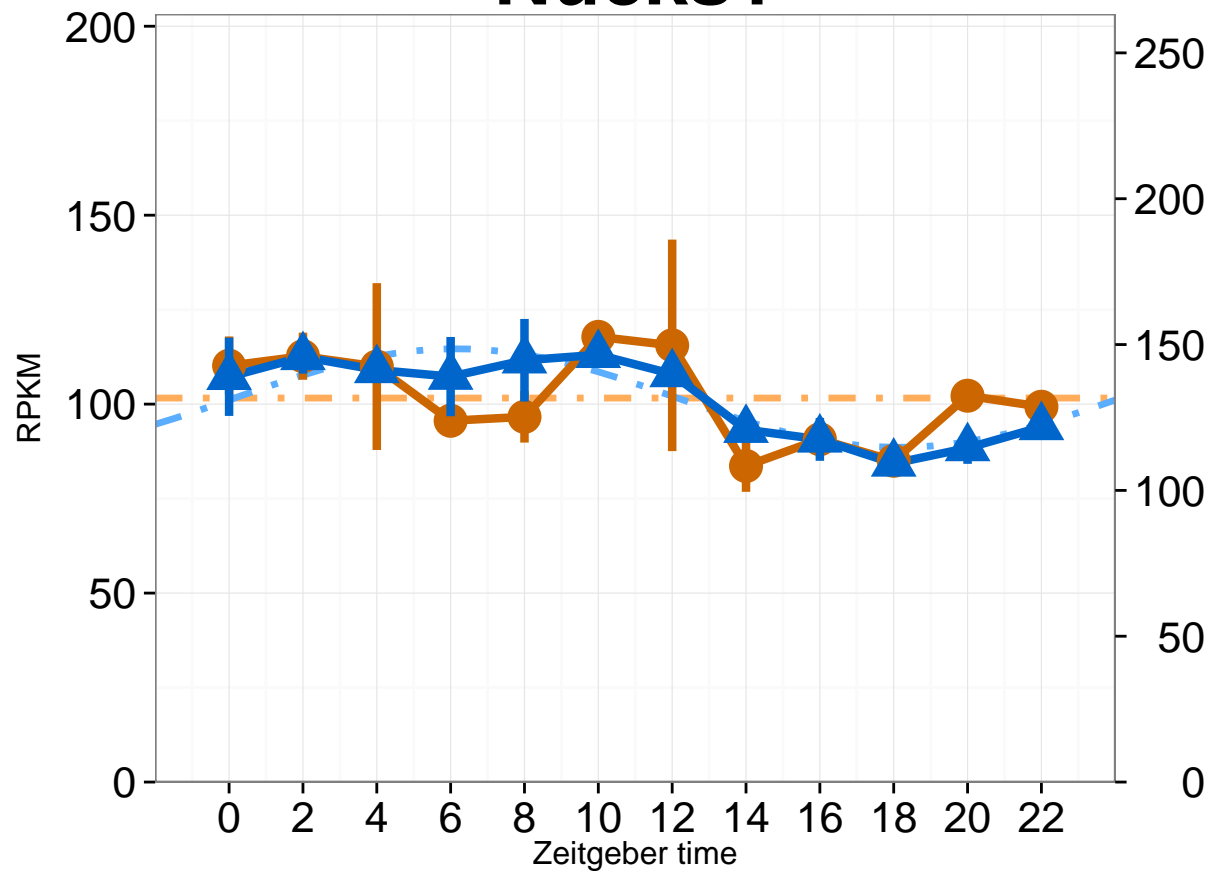

## Nucks1

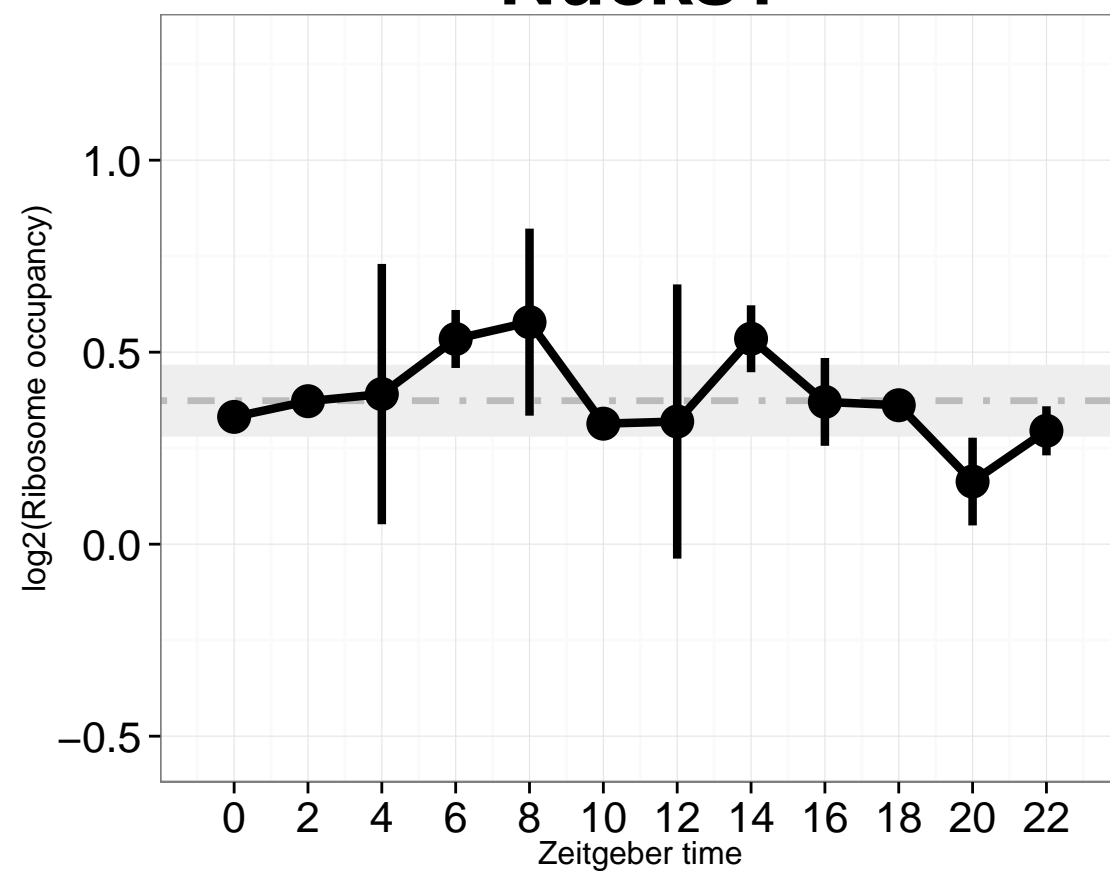

Supplement: Supplementary file 13233 [file 1]

## Rnf152

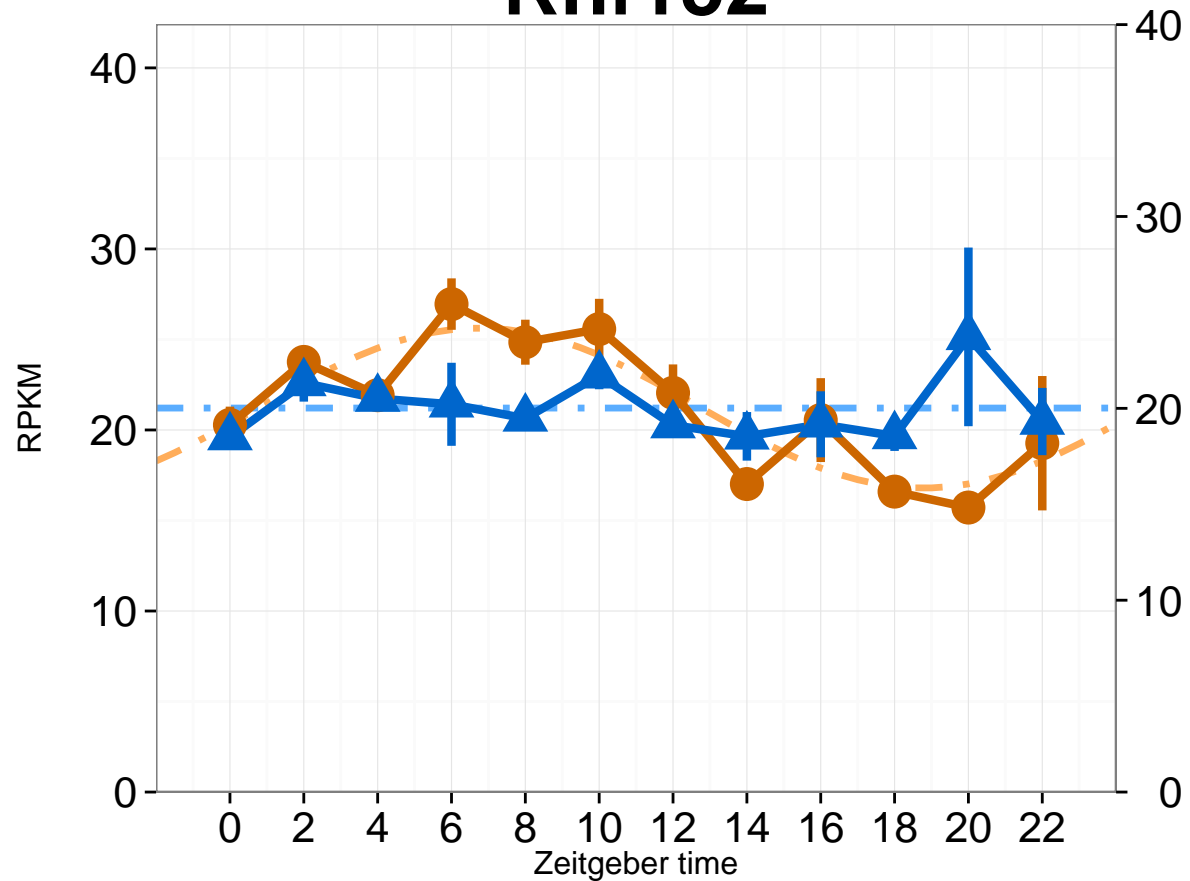

## Rnf152

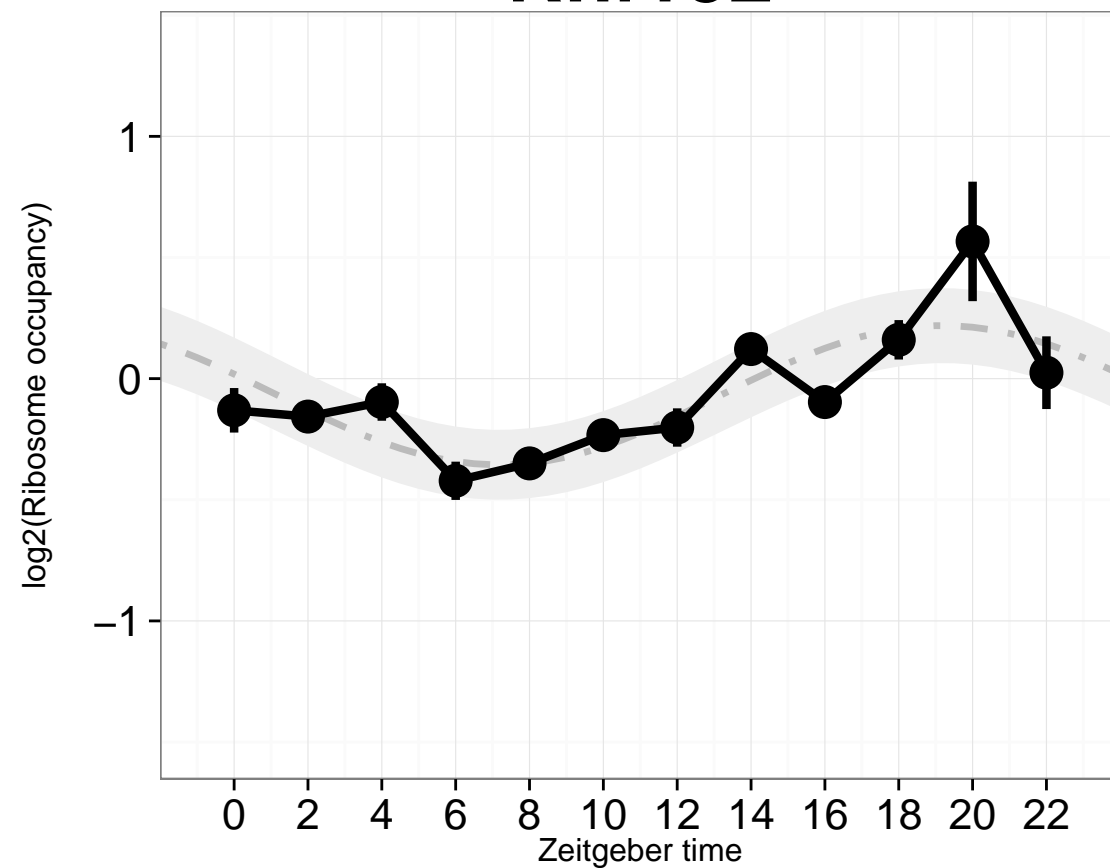

Supplement: Supplementary file 13234 [file 1]

# Hist1h2bc

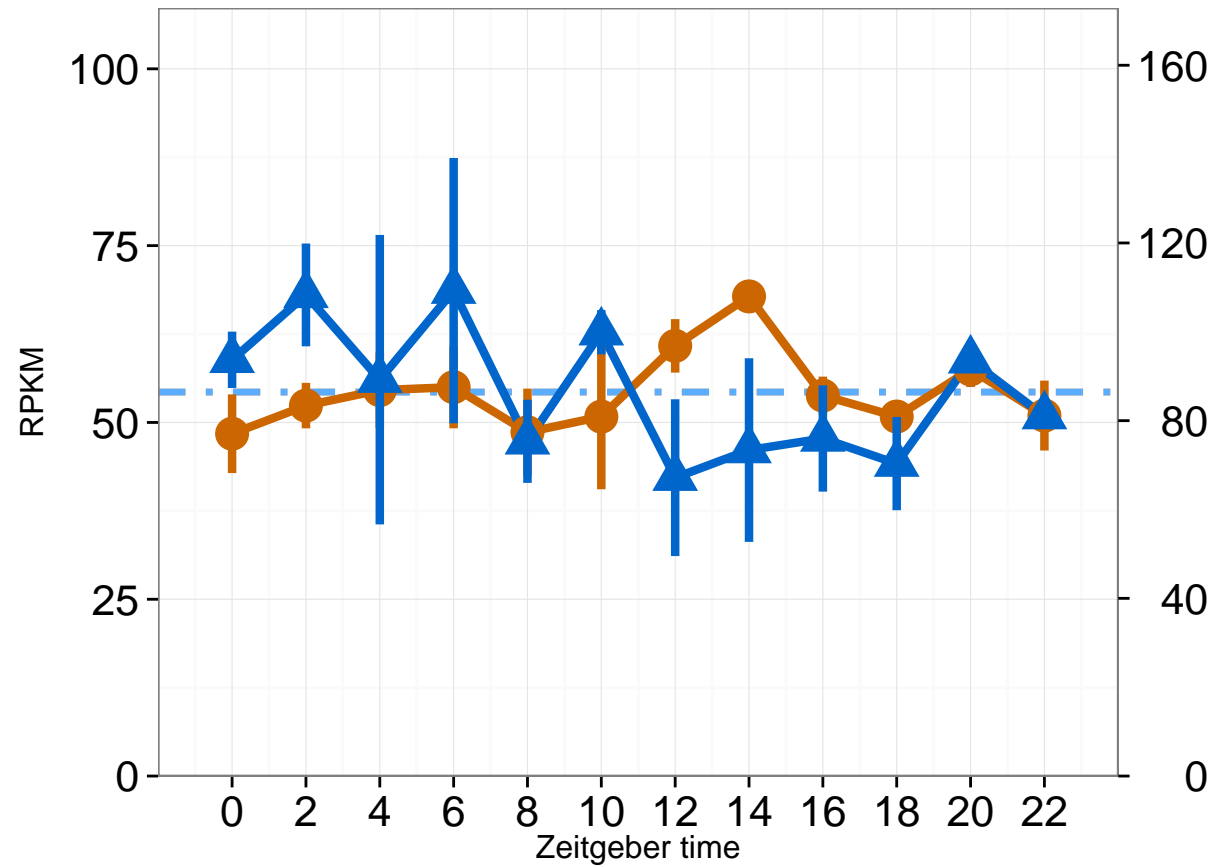

# Hist1h2bc

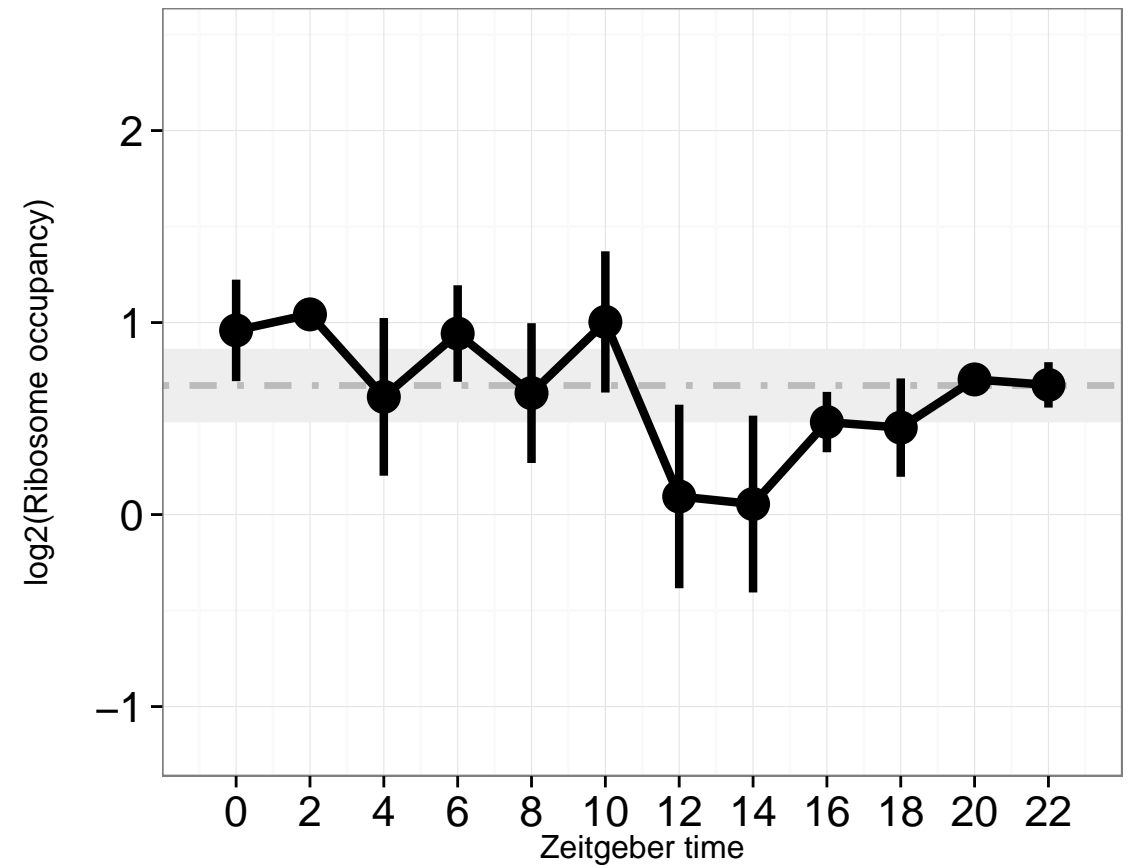

Supplement: Supplementary file 13235 [file 1]

## Cct3

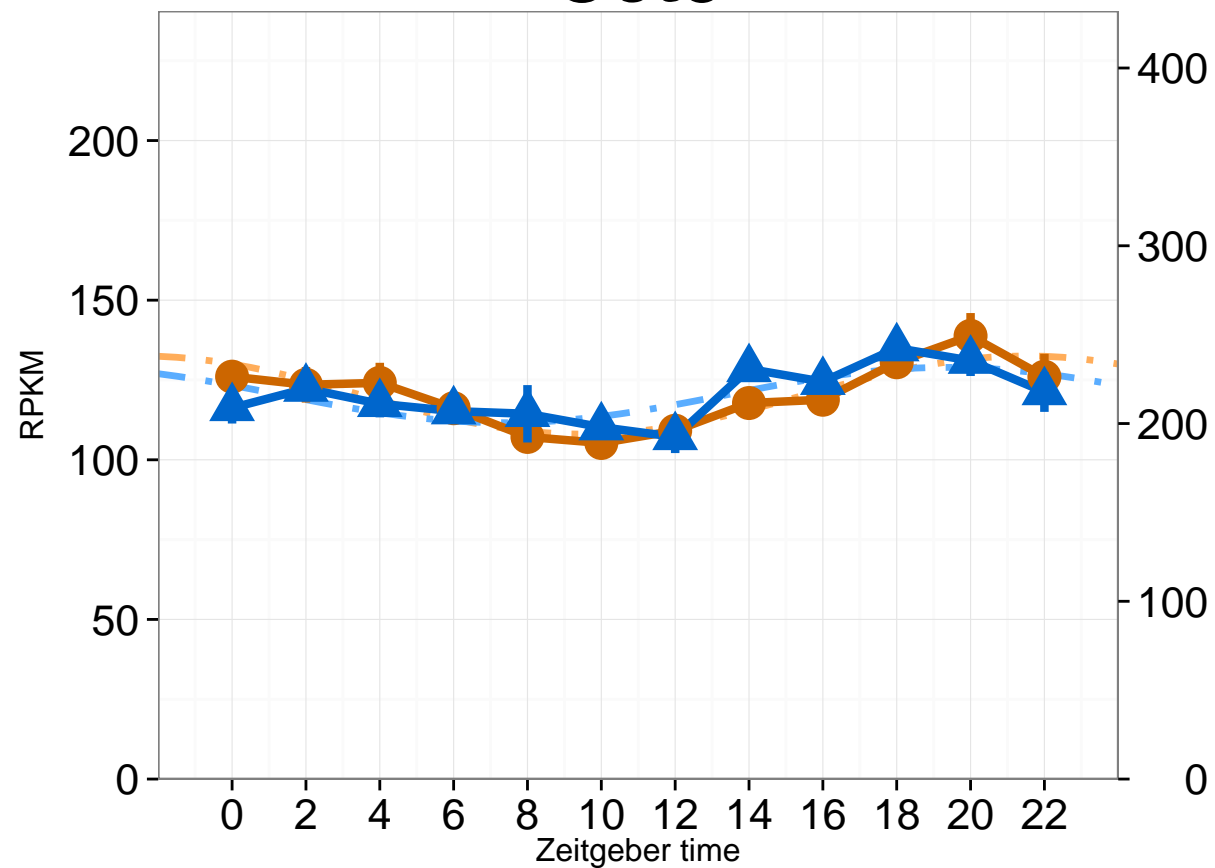

## Cct3

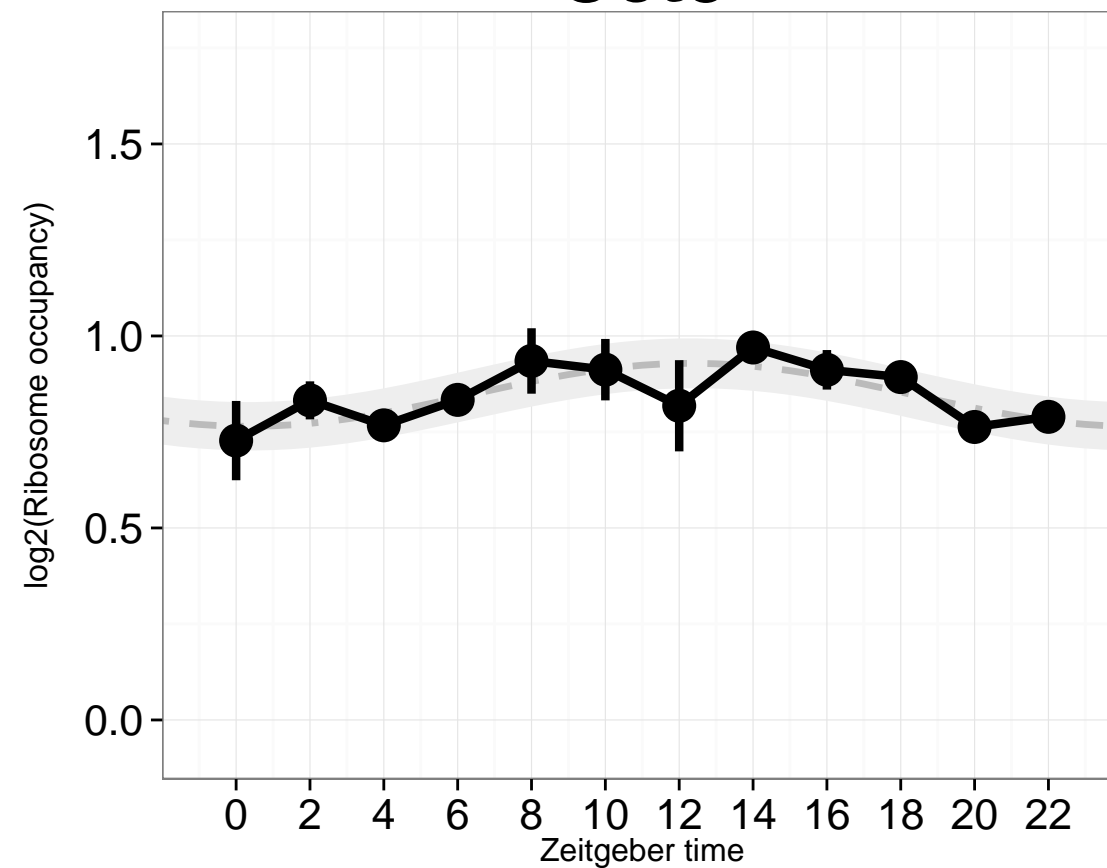

Supplement: Supplementary file 13236 [file 1]

# Ccdc64b

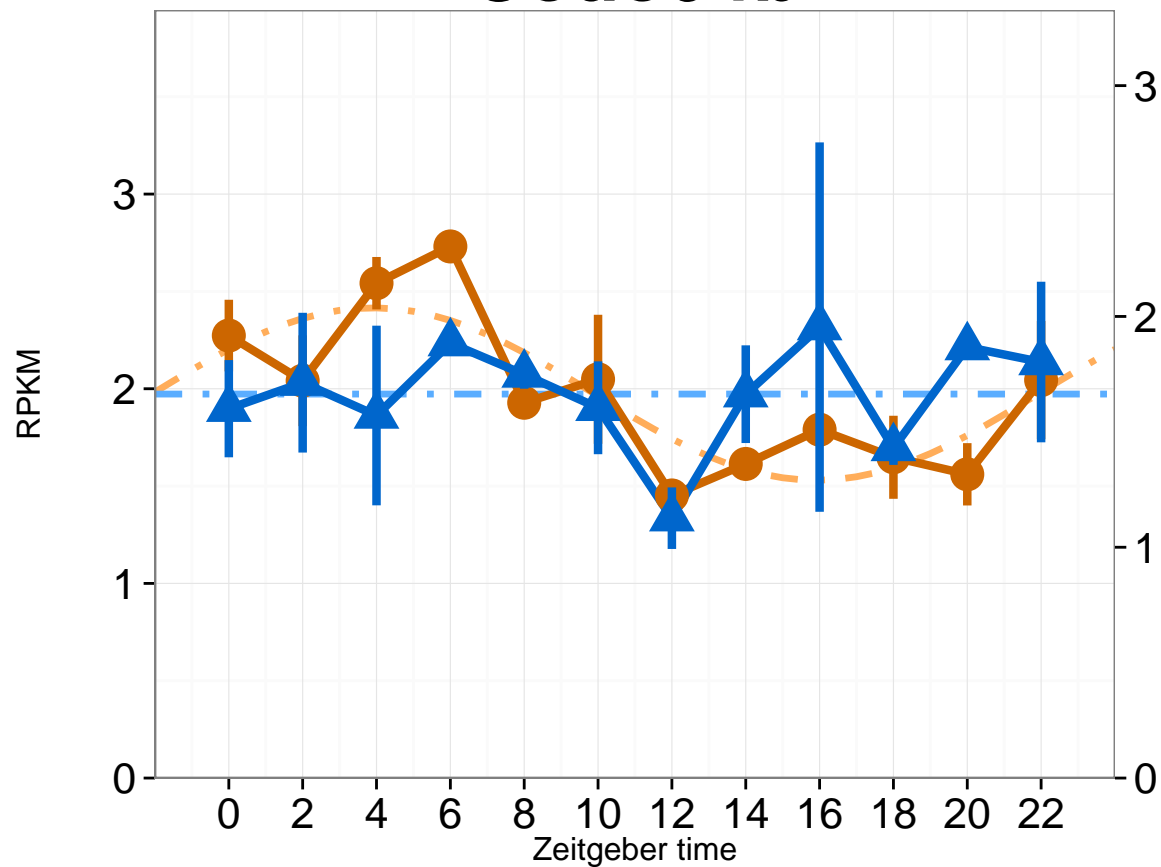

# Ccdc64b

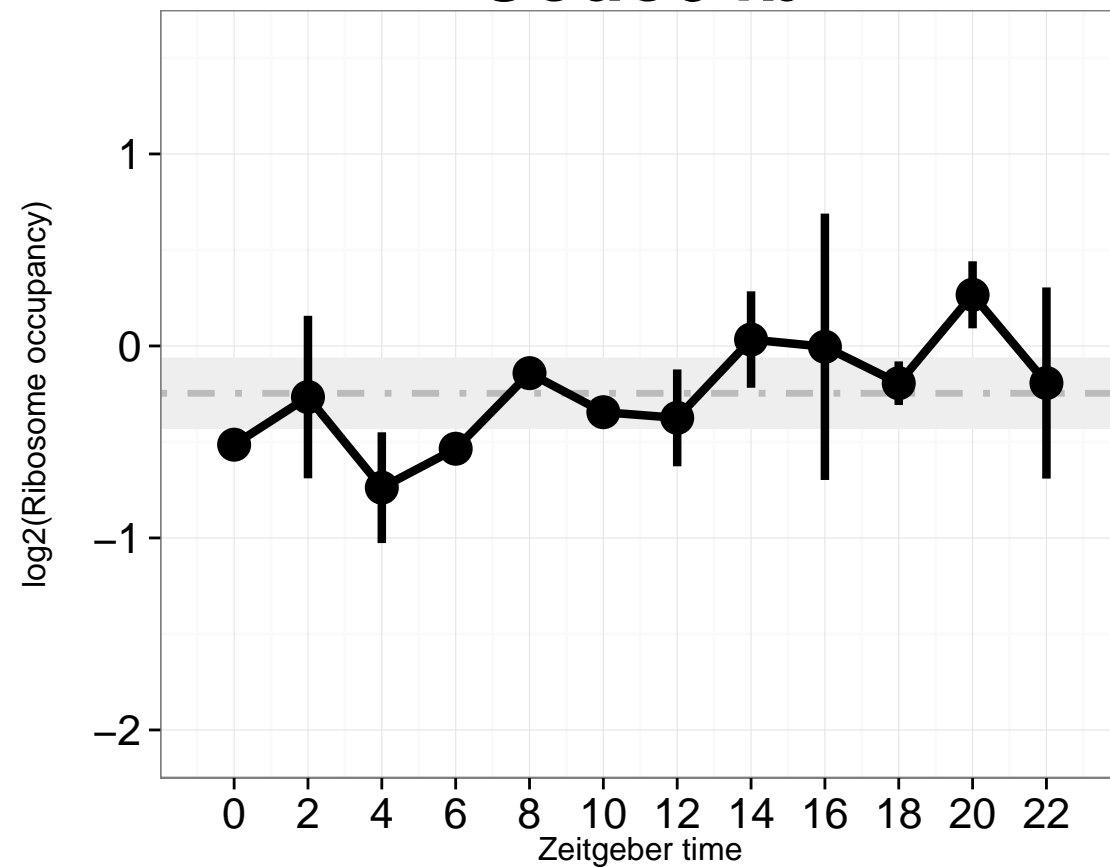

Supplement: Supplementary file 13237 [file 1]

## Nek5

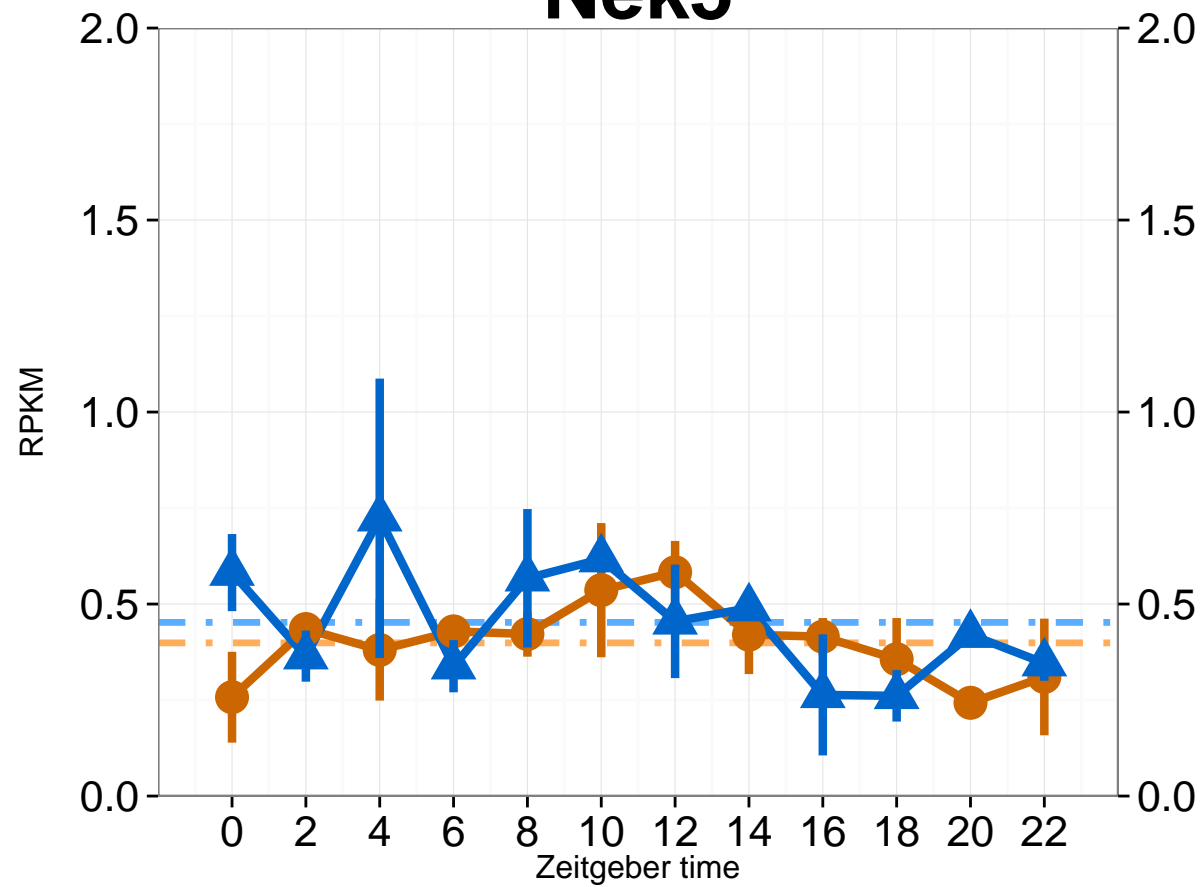

## Nek5

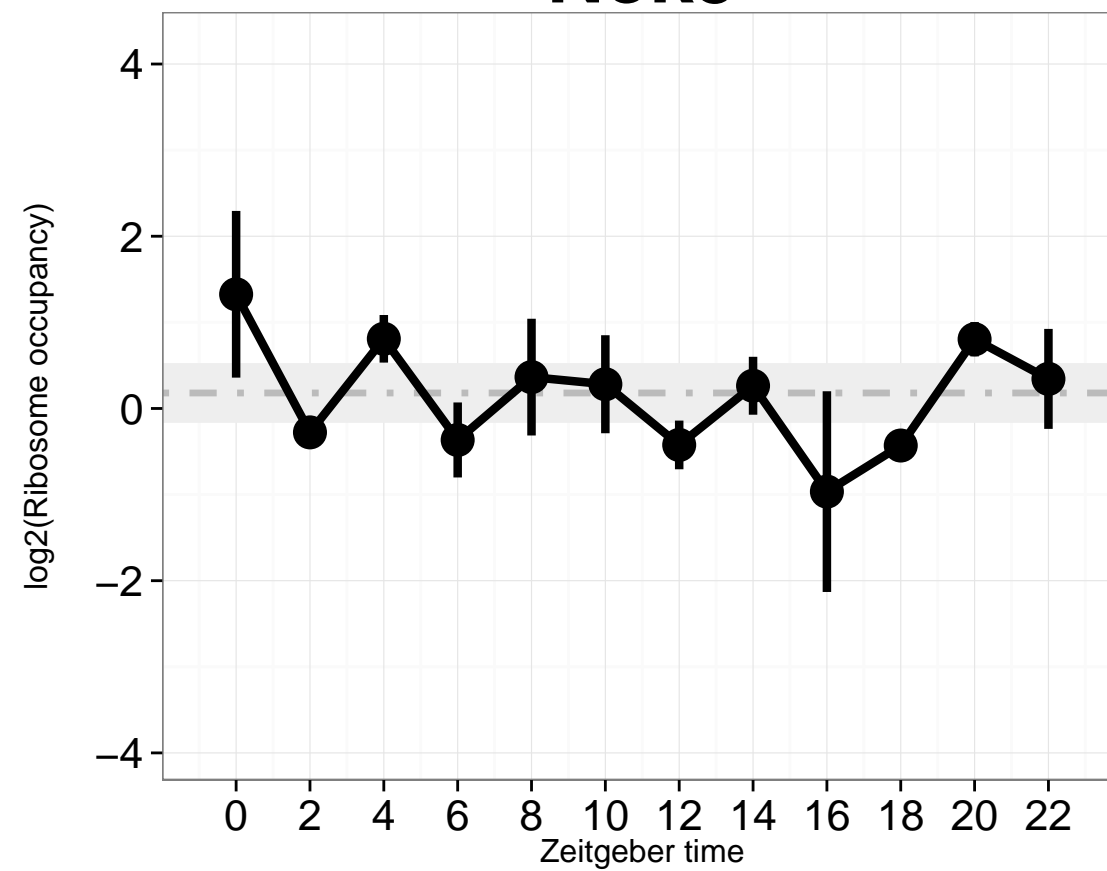

Supplement: Supplementary file 13238 [file 1]

## Adh6-ps1

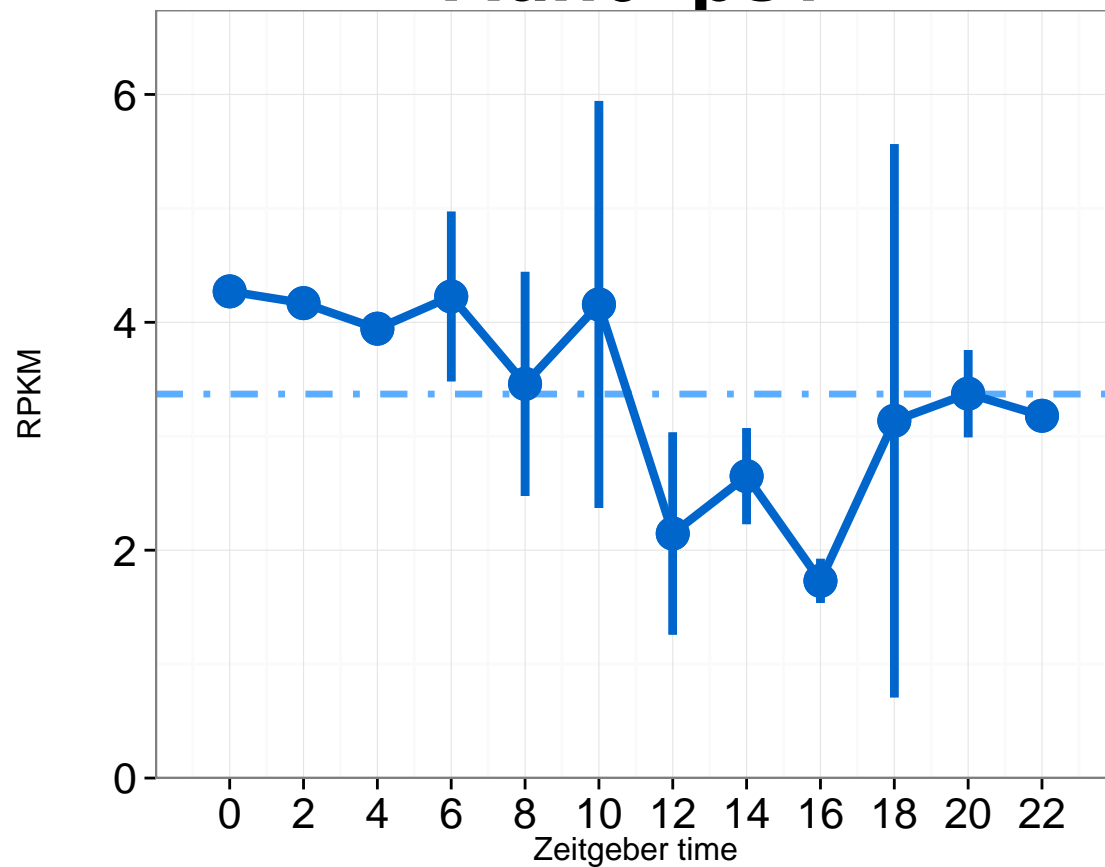

## Adh6-ps1 log2(Ribosome occupancy)

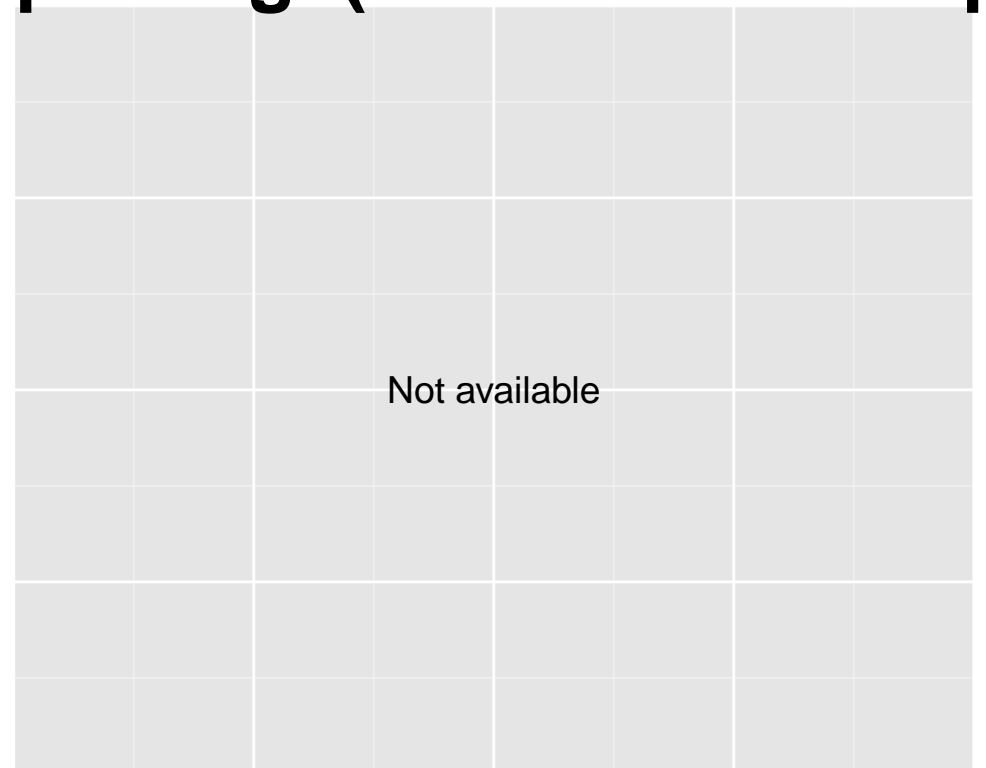

Supplement: Supplementary file 13239 [file 1]

## AamdC

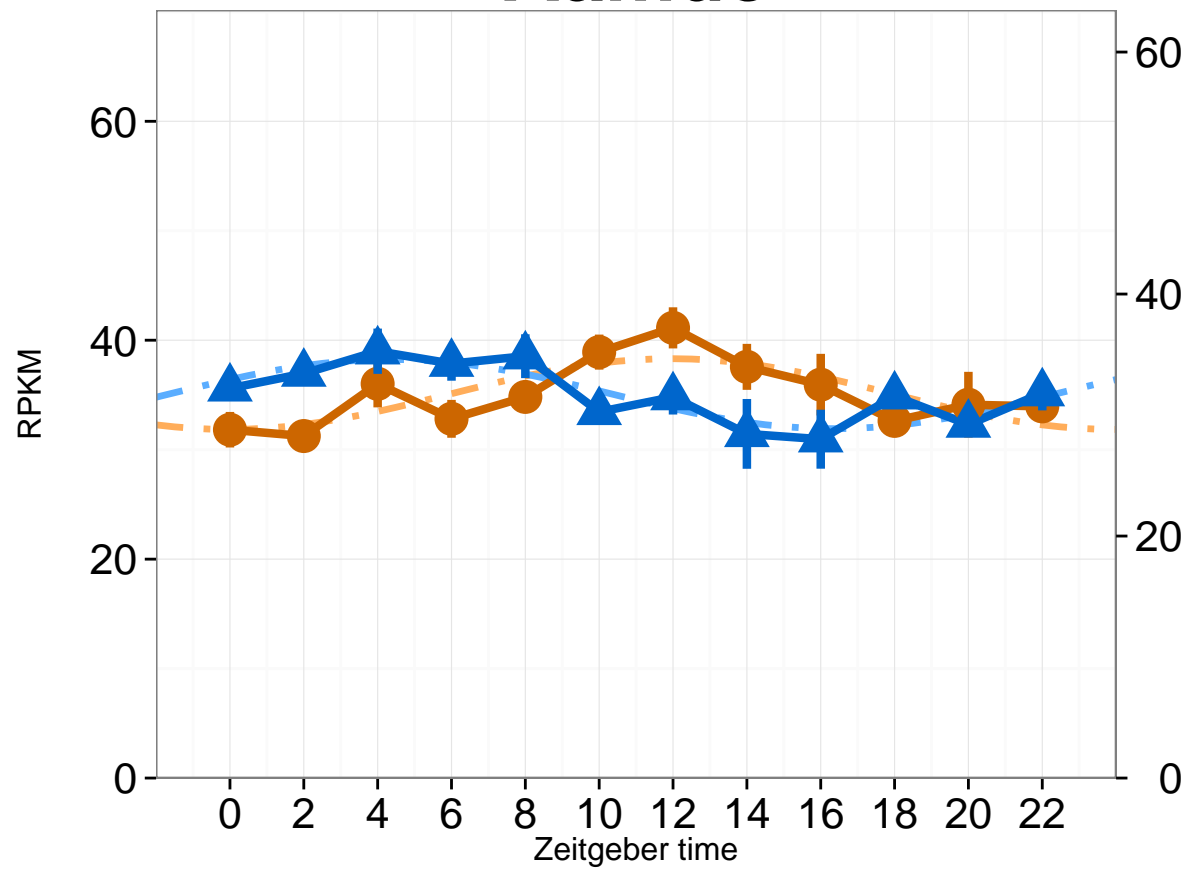

## AamdC

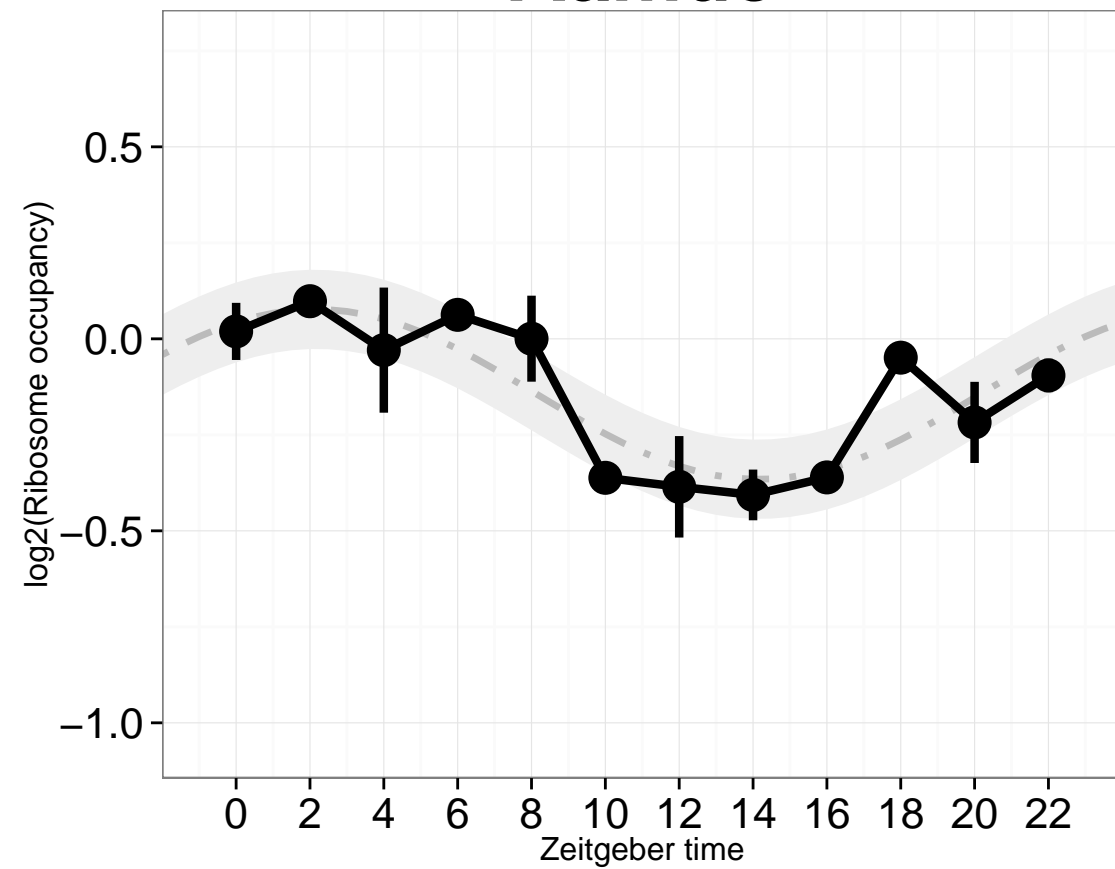

Supplement: Supplementary file 13240 [file 1]

## Wdr7

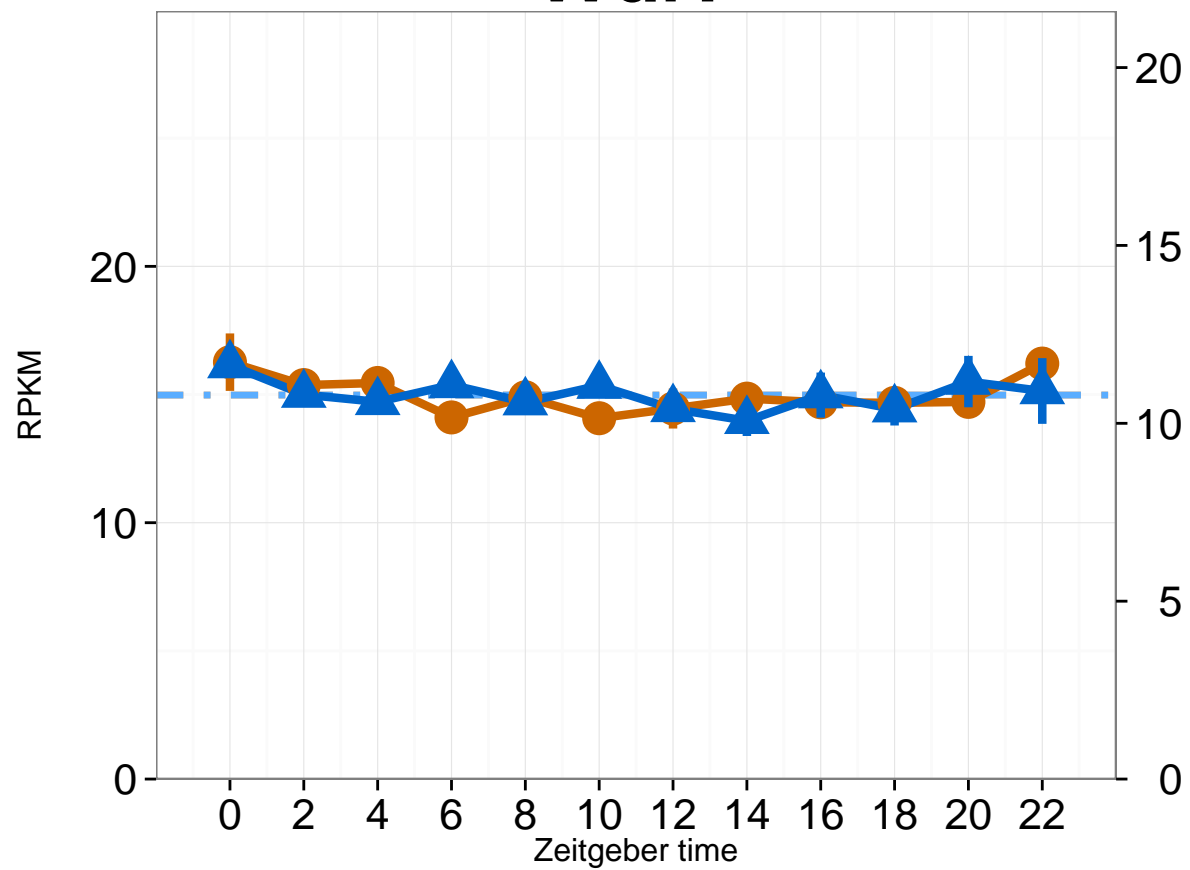

## Wdr7

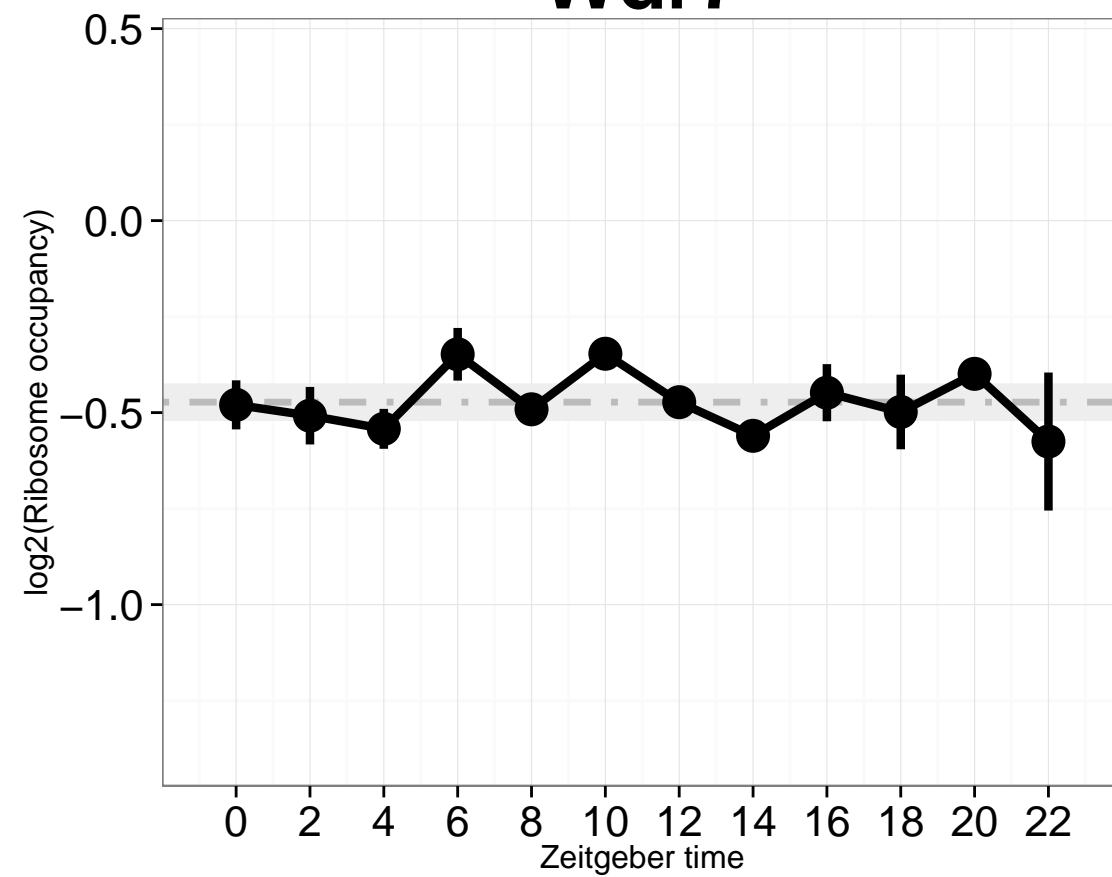

Supplement: Supplementary file 13241 [file 1]

## Sh2b3

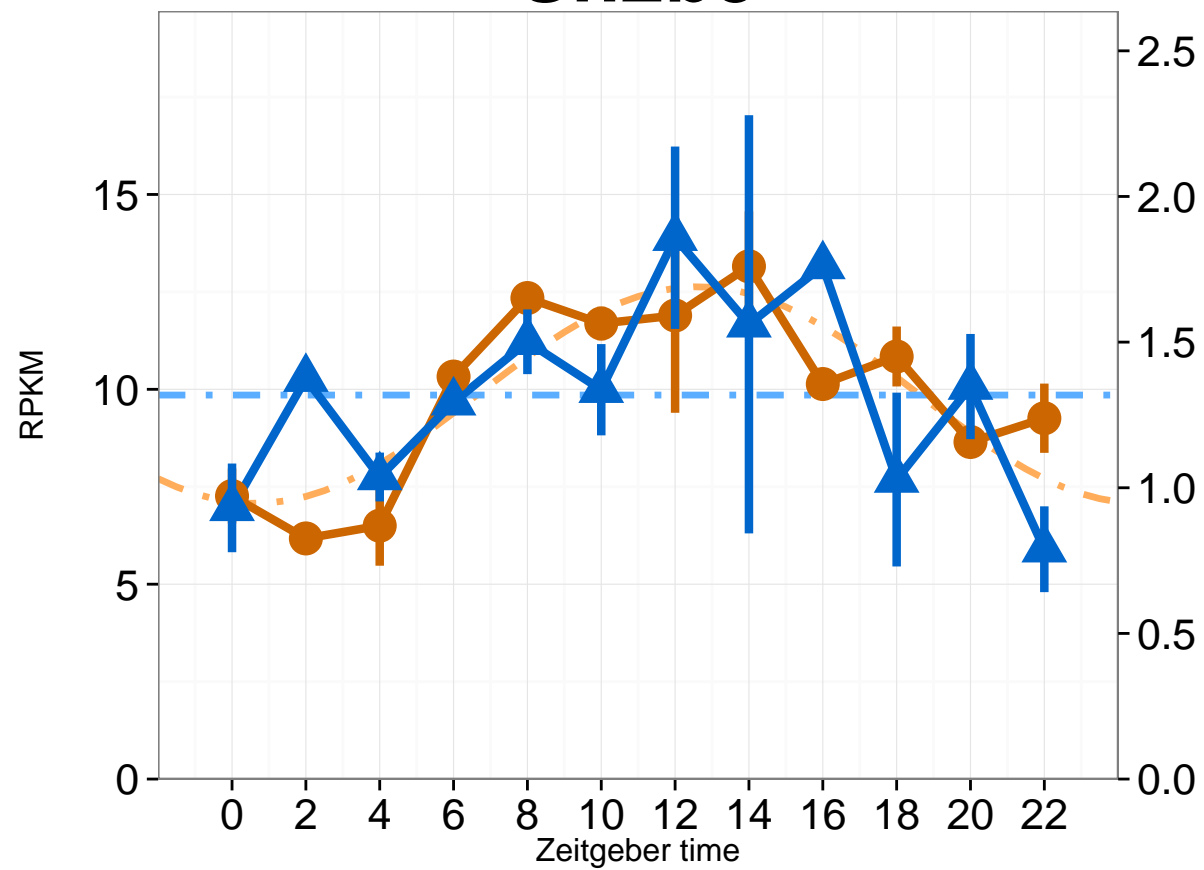

## Sh2b3

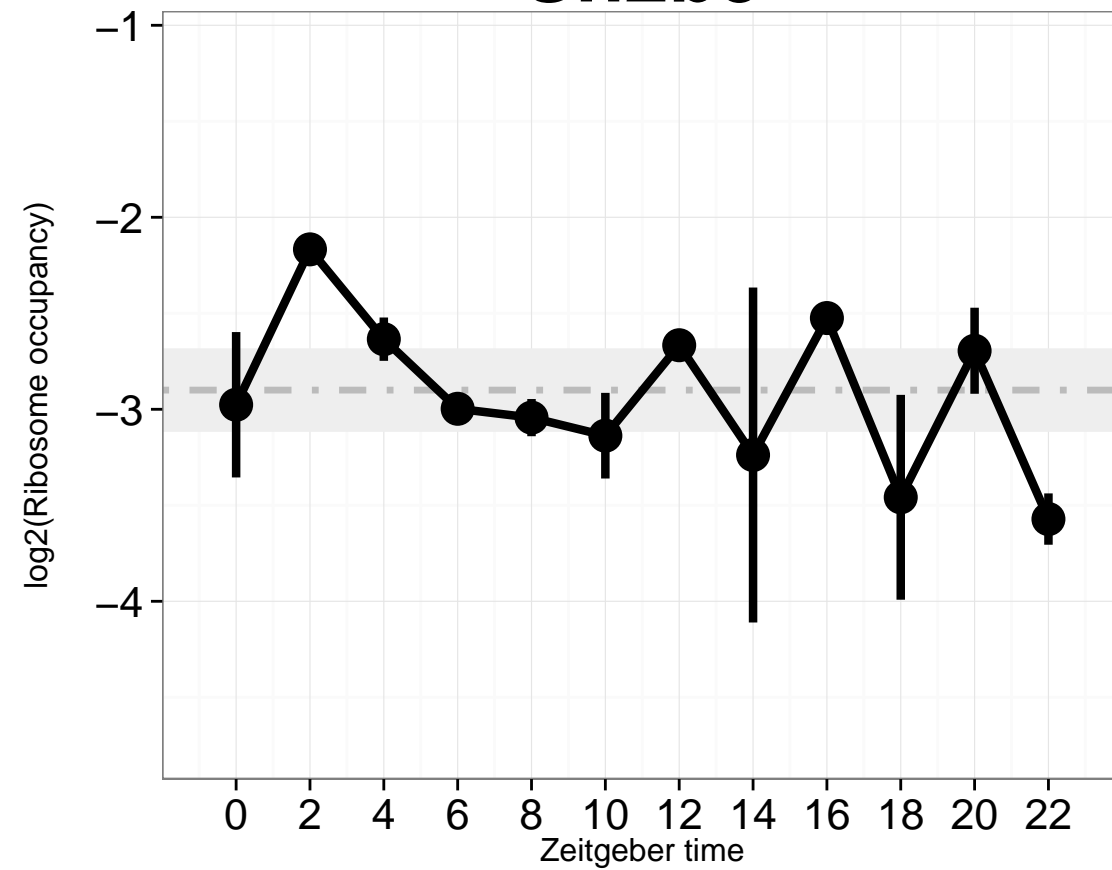

Supplement: Supplementary file 13242 [file 1]

## Suc1a2

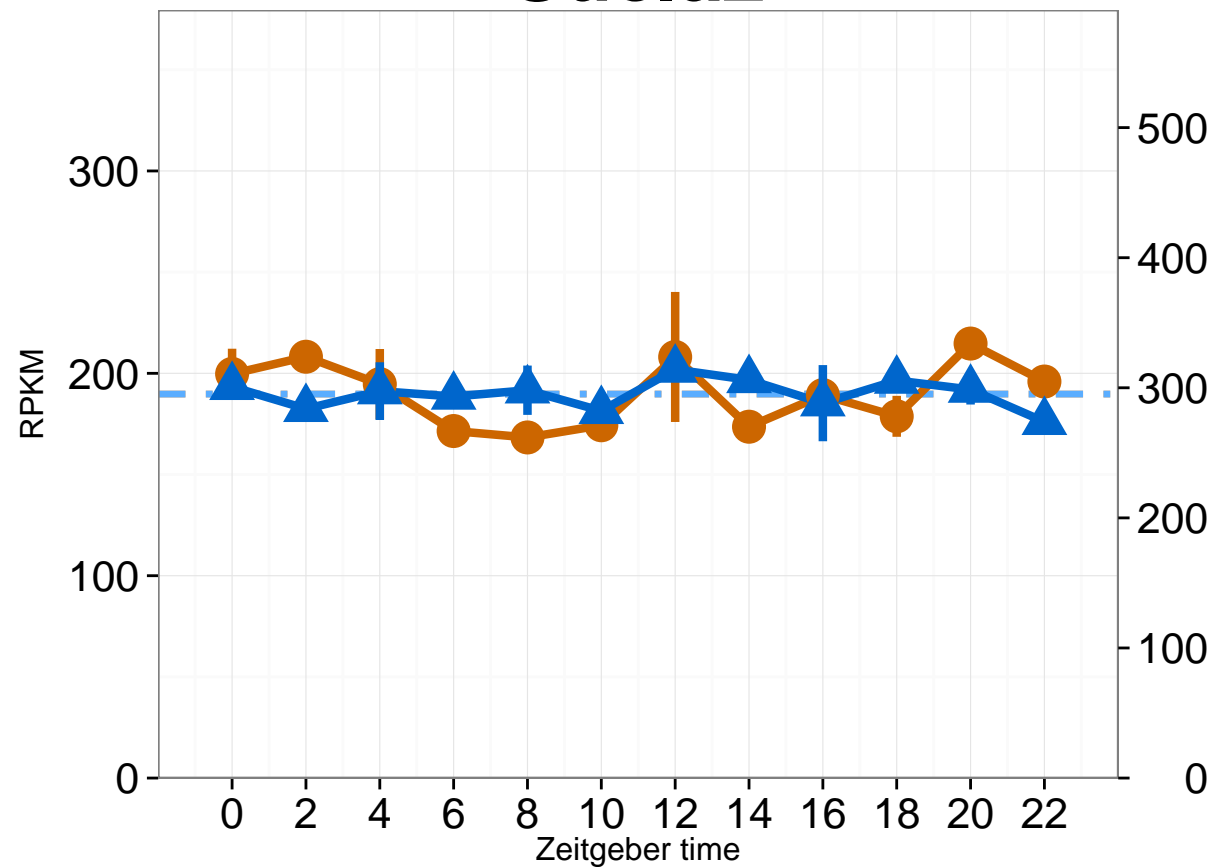

## Suc1a2

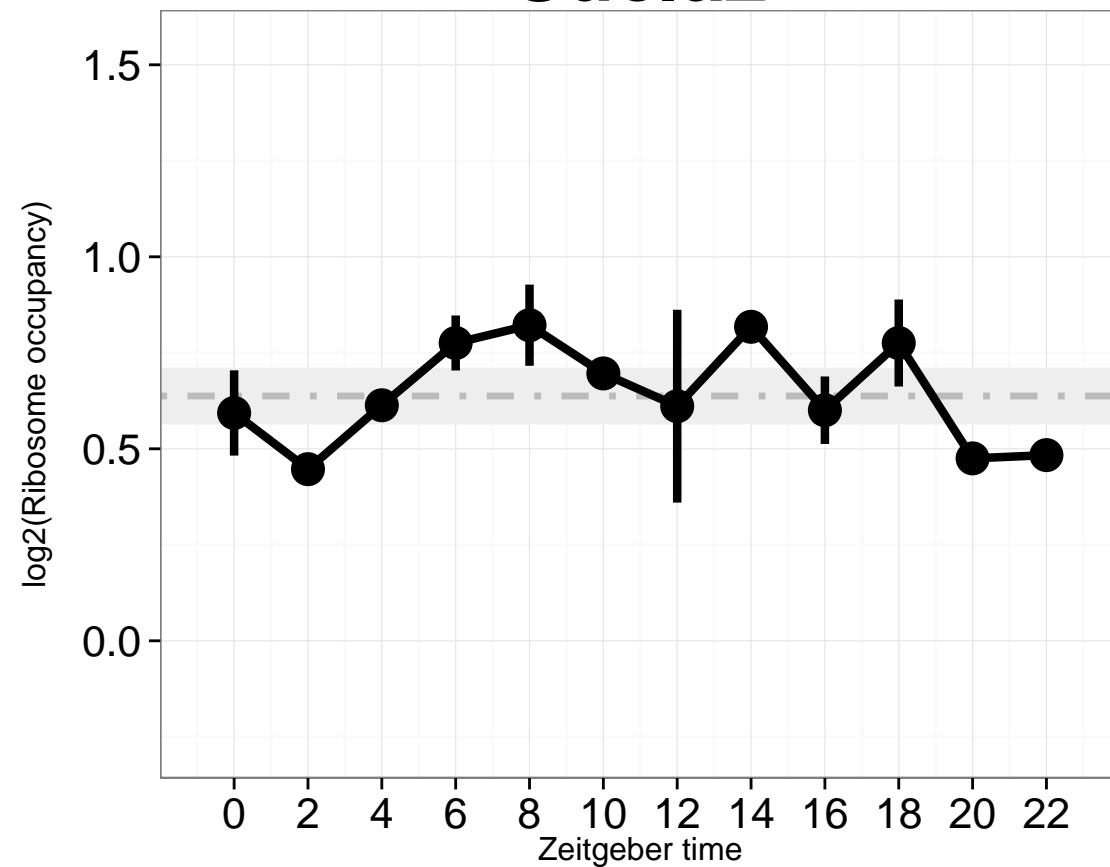

Supplement: Supplementary file 13243 [file 1]

# Mapre1

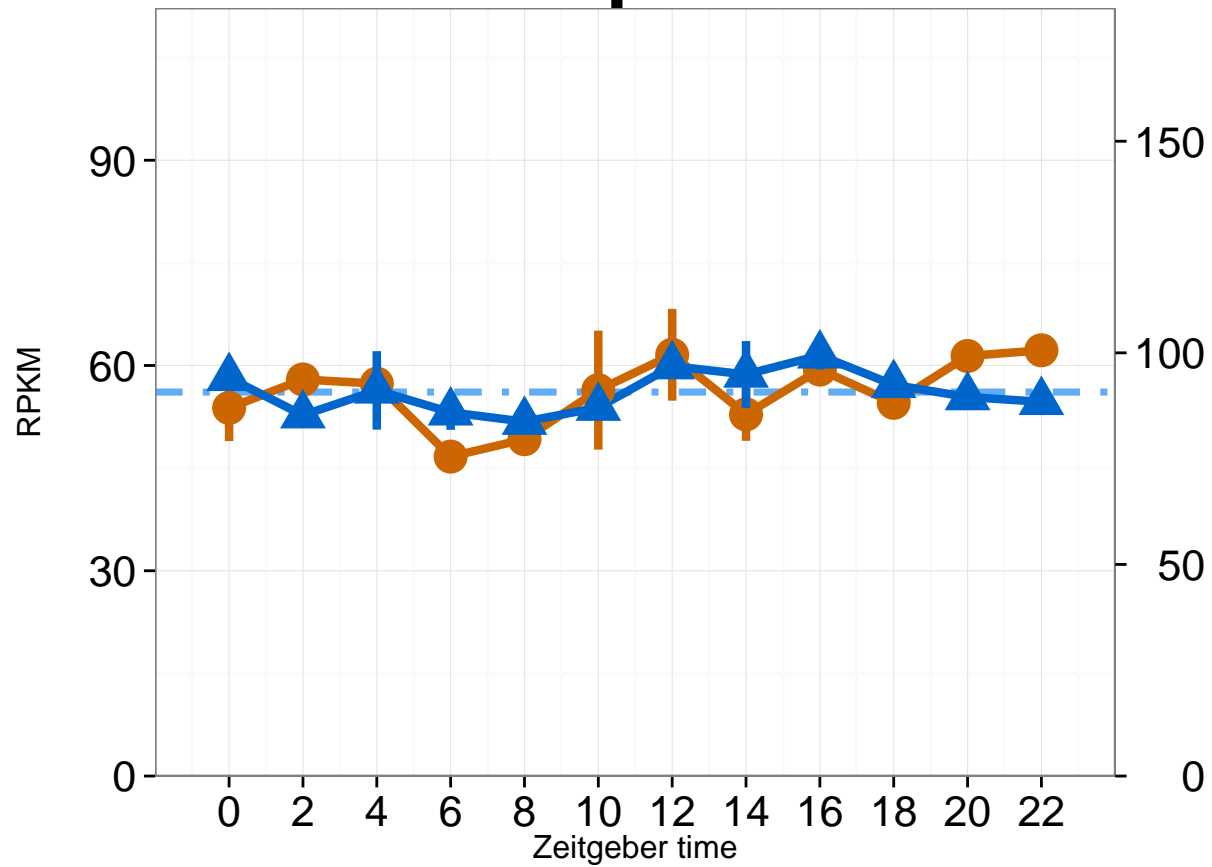

# Mapre1

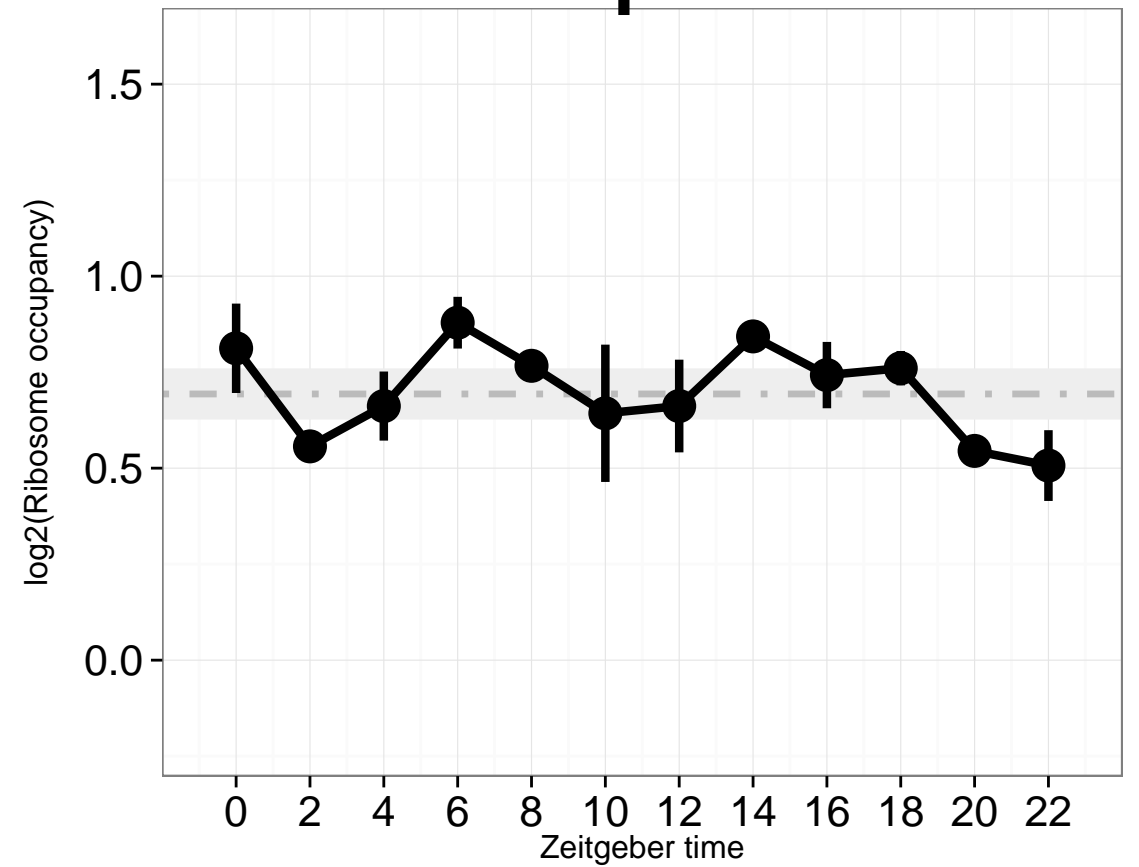

Supplement: Supplementary file 13244 [file 1]

## Psmc3

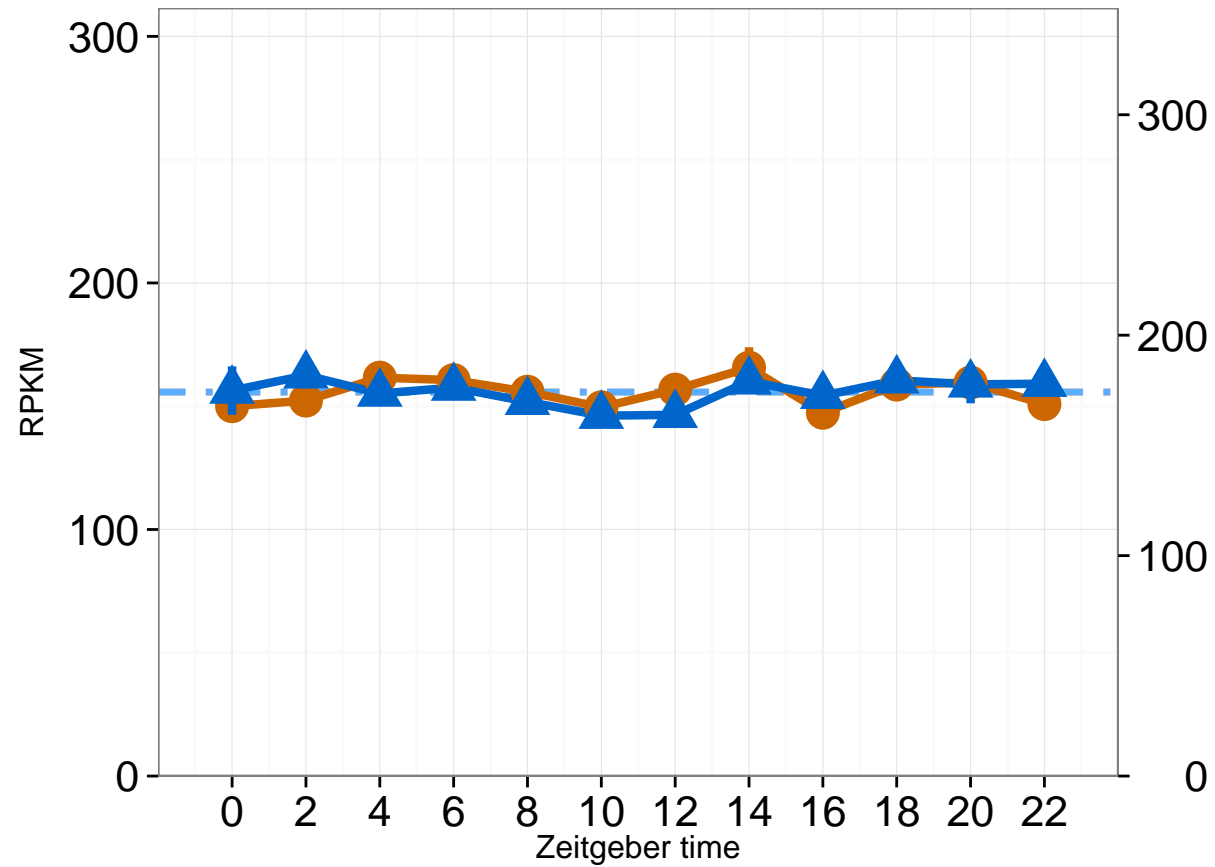

## Psmc3

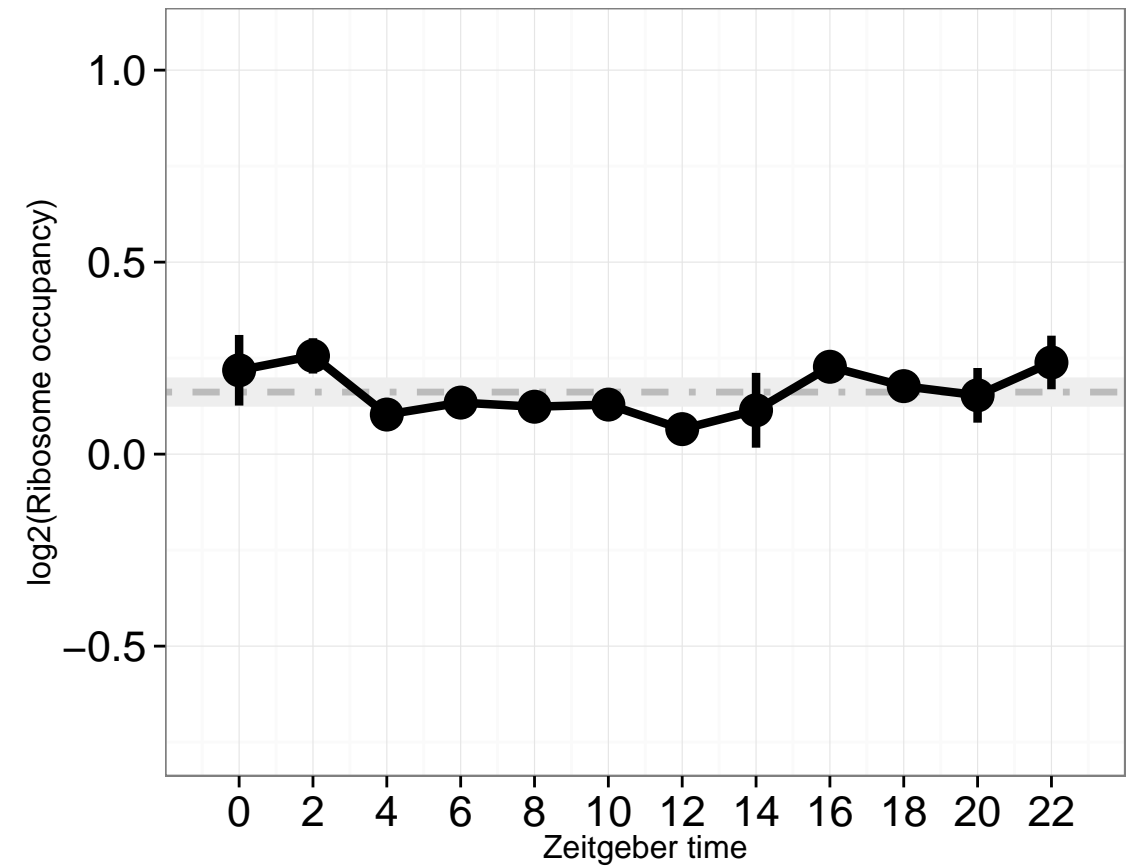

Supplement: Supplementary file 13245 [file 1]

## Miip

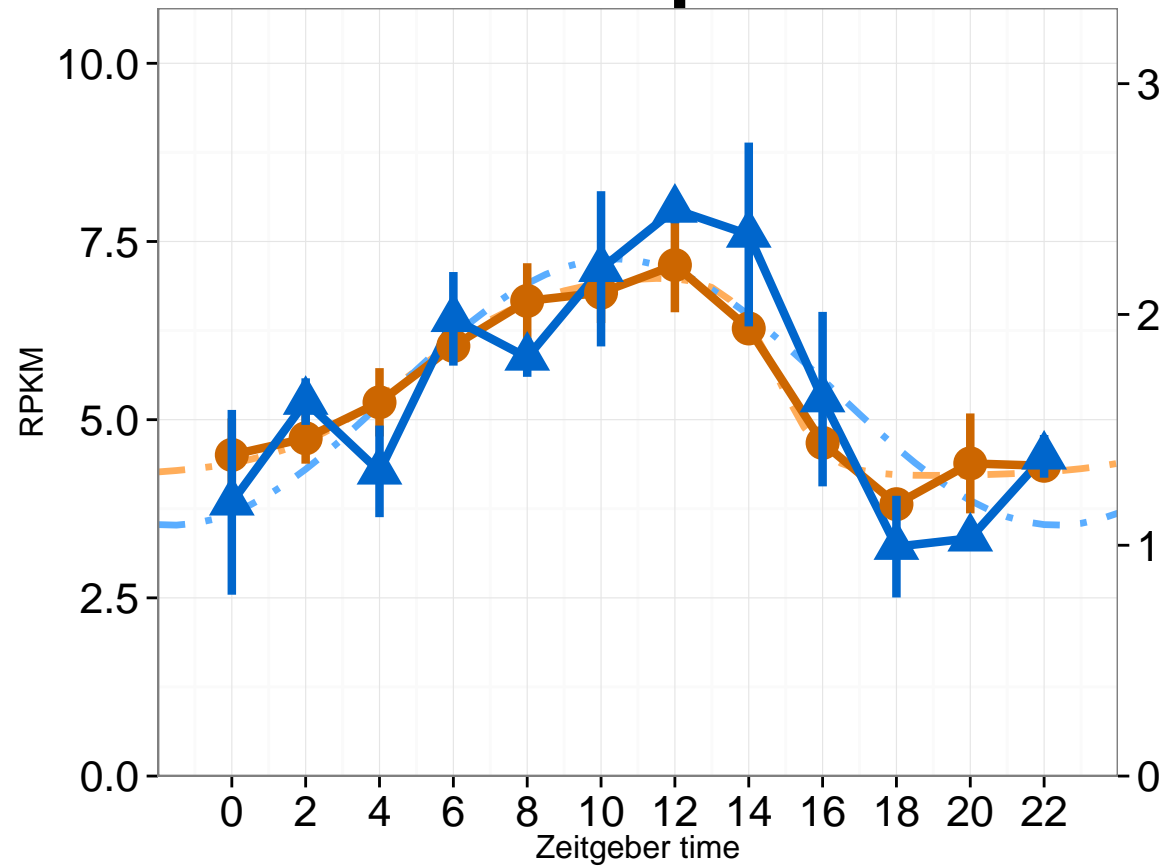

## Miip

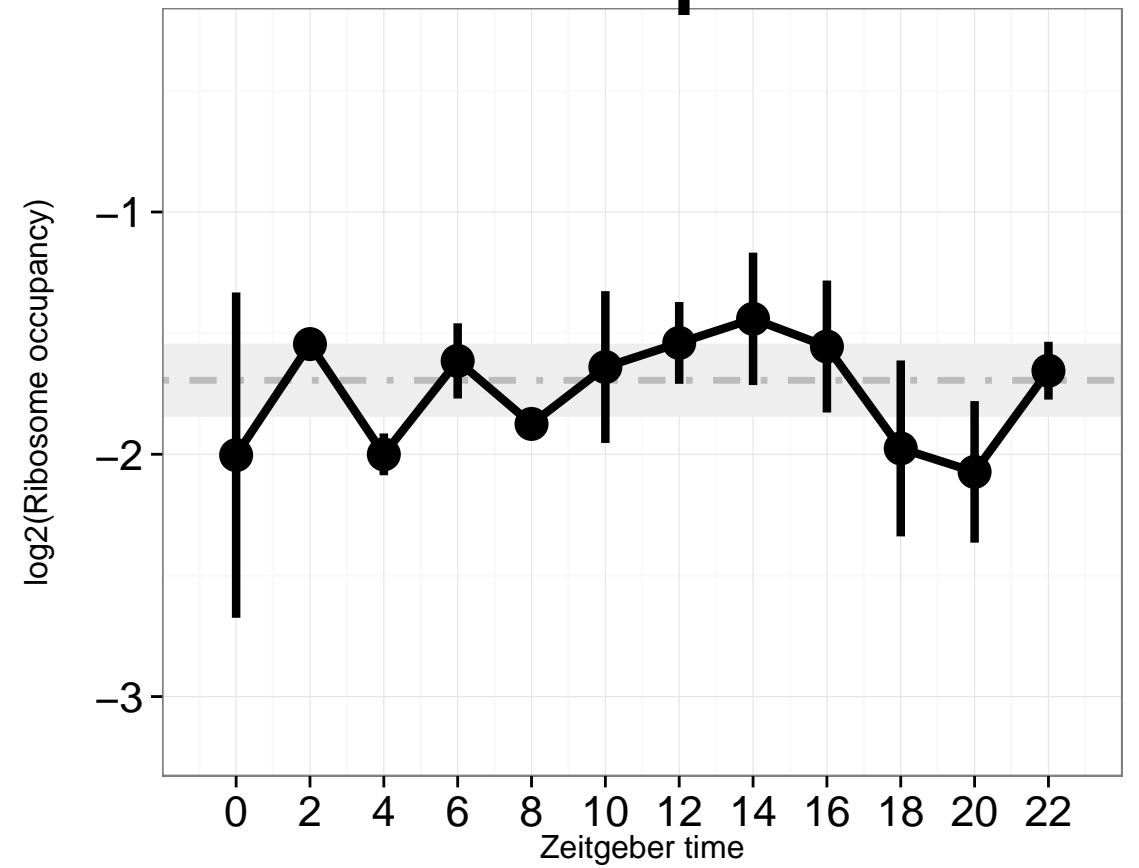

Supplement: Supplementary file 13246 [file 1]
