# Supplementary material (part 133 of 133)
Source: publisher figshare collection journal article supplement (https://springernature.figshare.com/articles/dataset/_/4903193)

## Dpy19l3

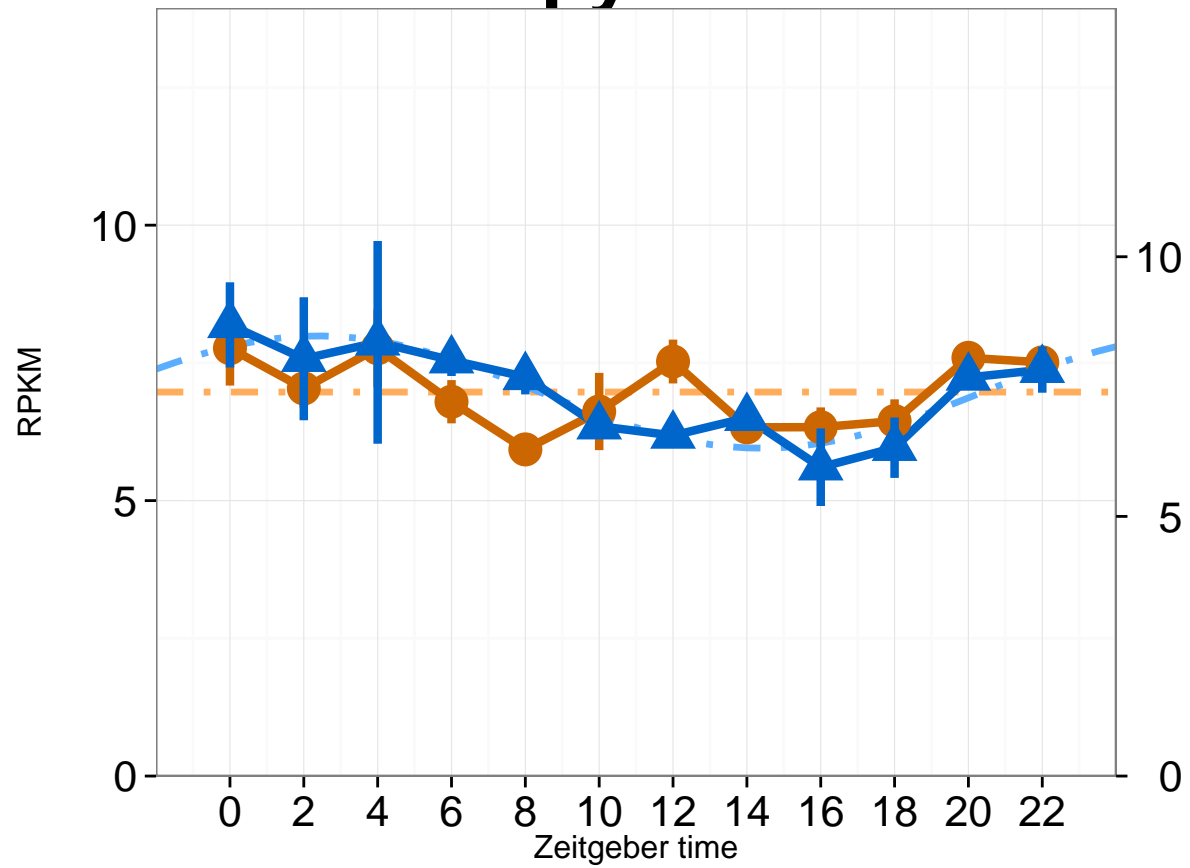

## Dpy19l3

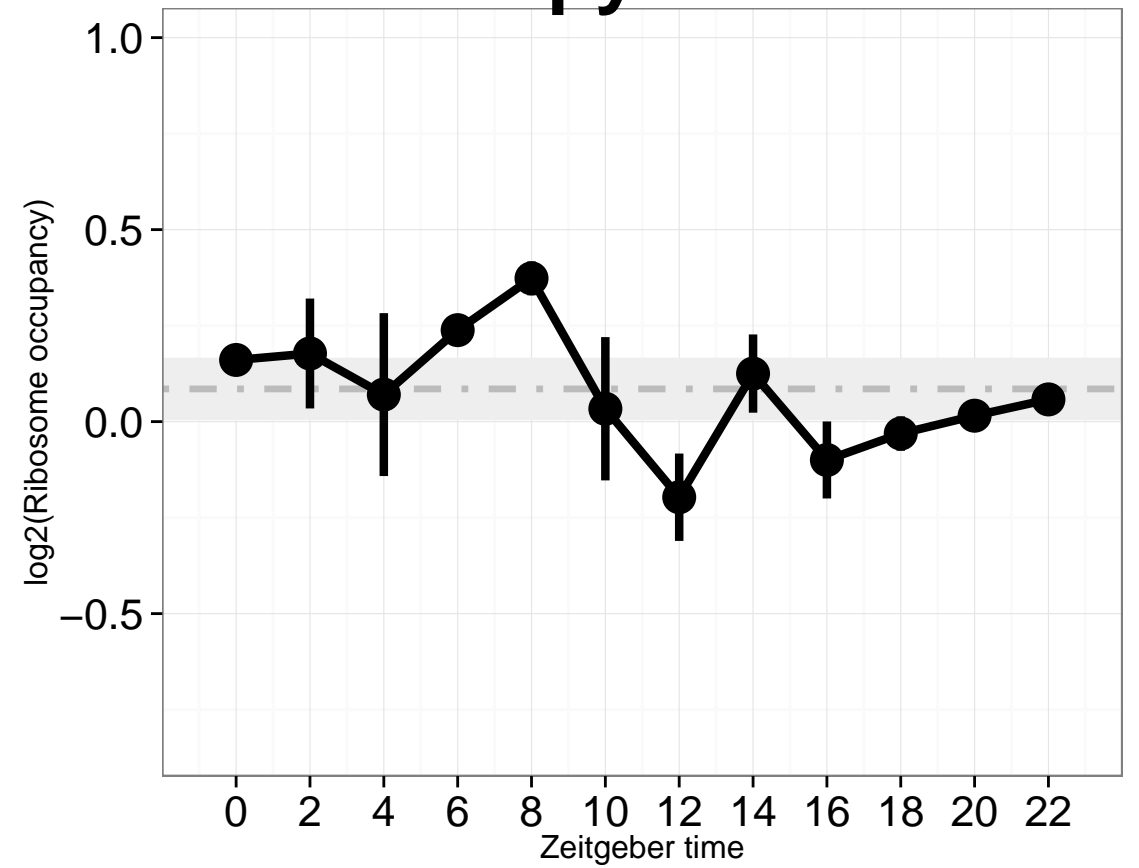

Supplement: Supplementary file 13247 [file 1]

## KIhI20

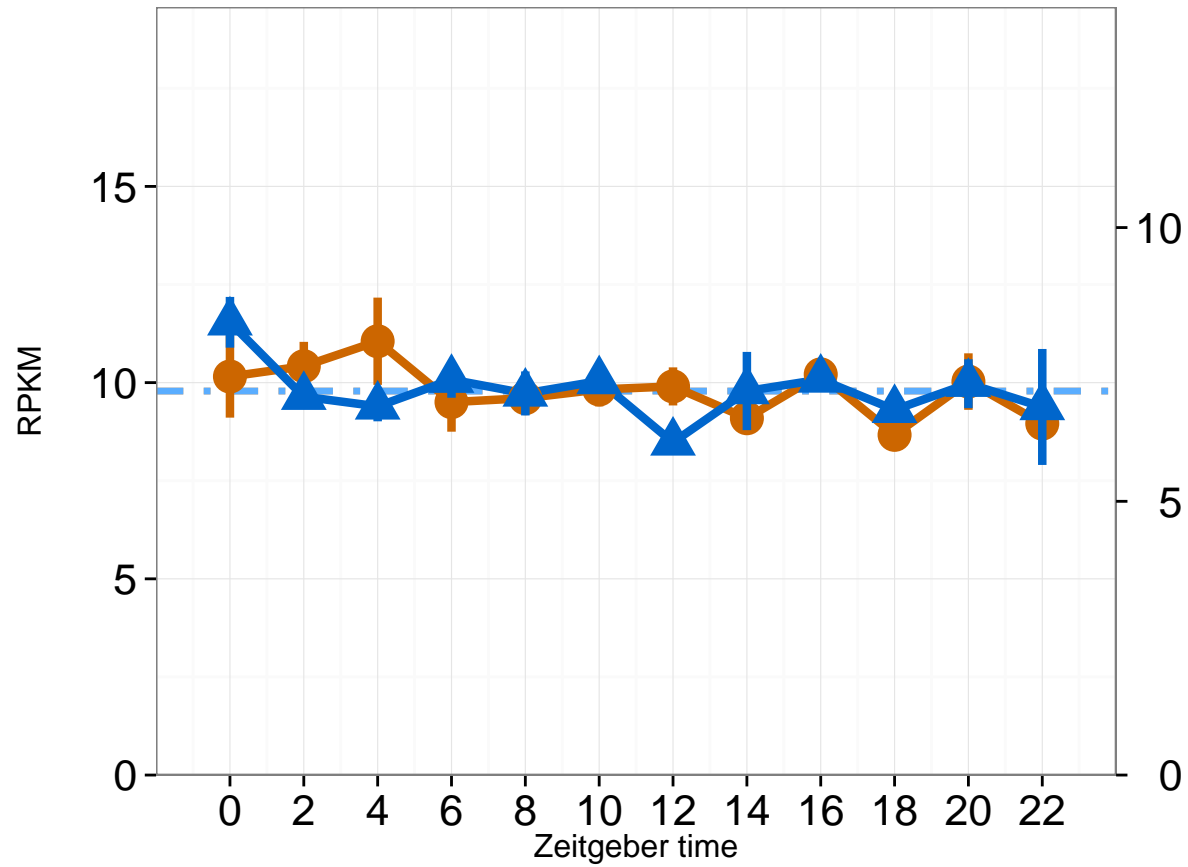

## KIhI20

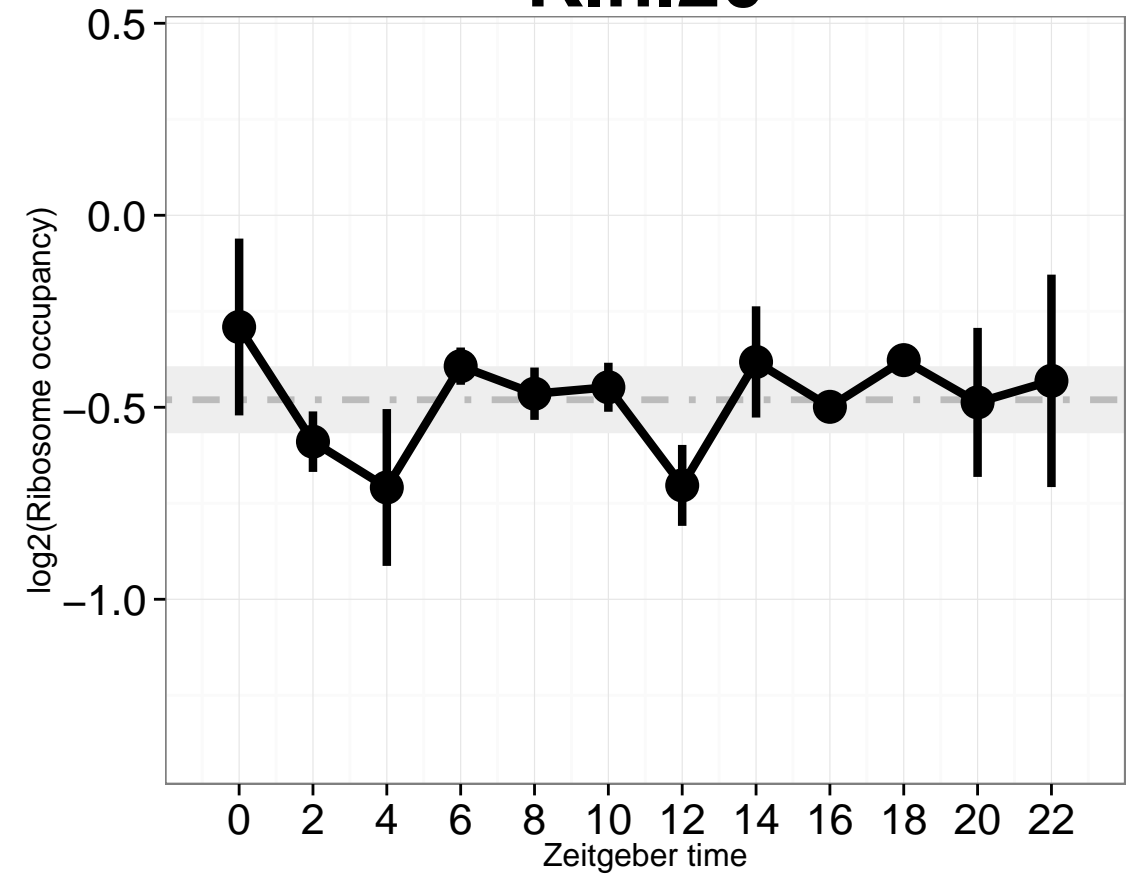

Supplement: Supplementary file 13248 [file 1]

# Rufy2

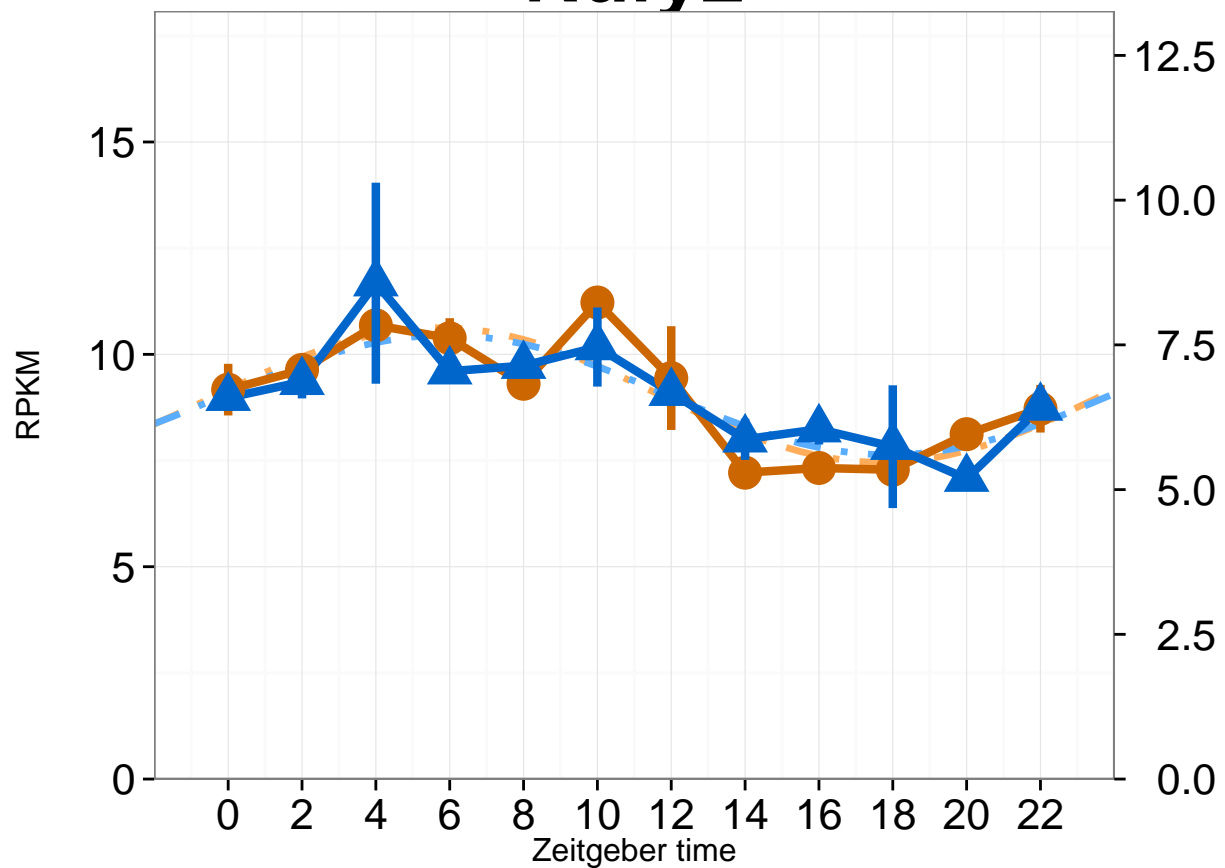

# Rufy2

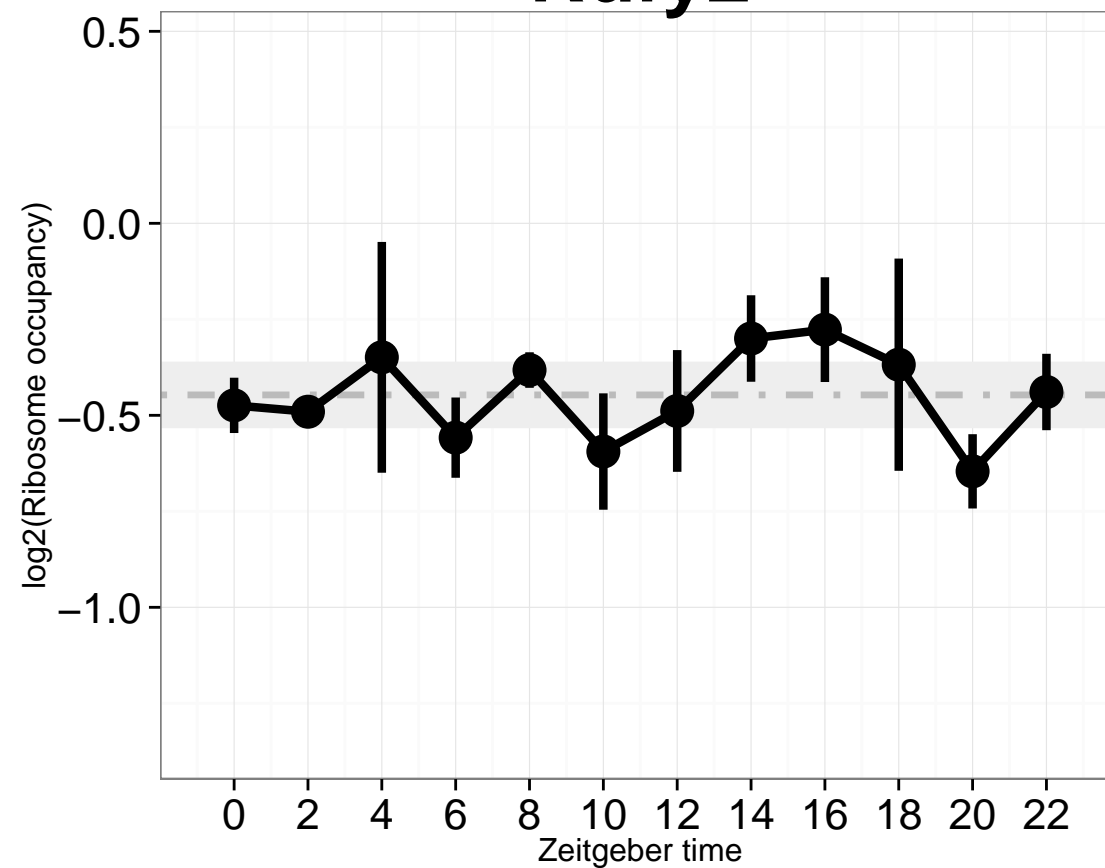

Supplement: Supplementary file 13249 [file 1]

## Morc3

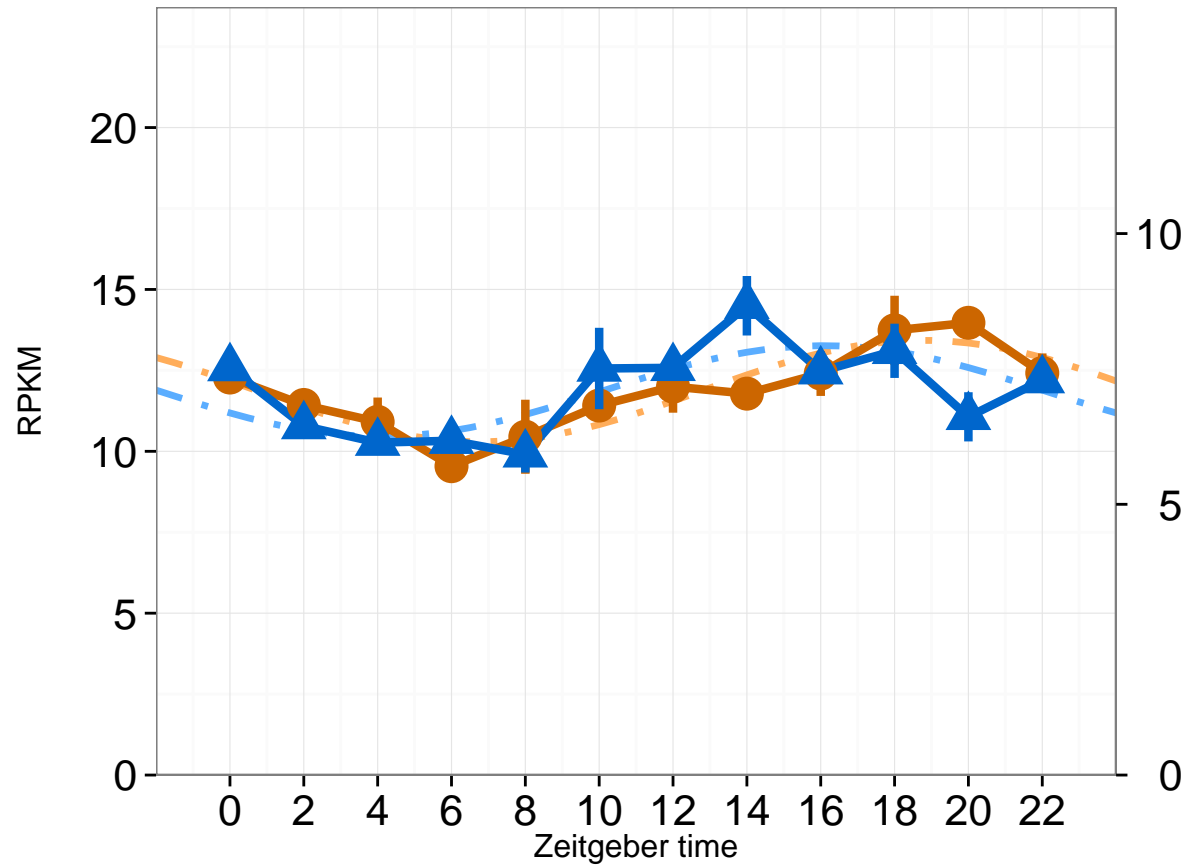

## Morc3

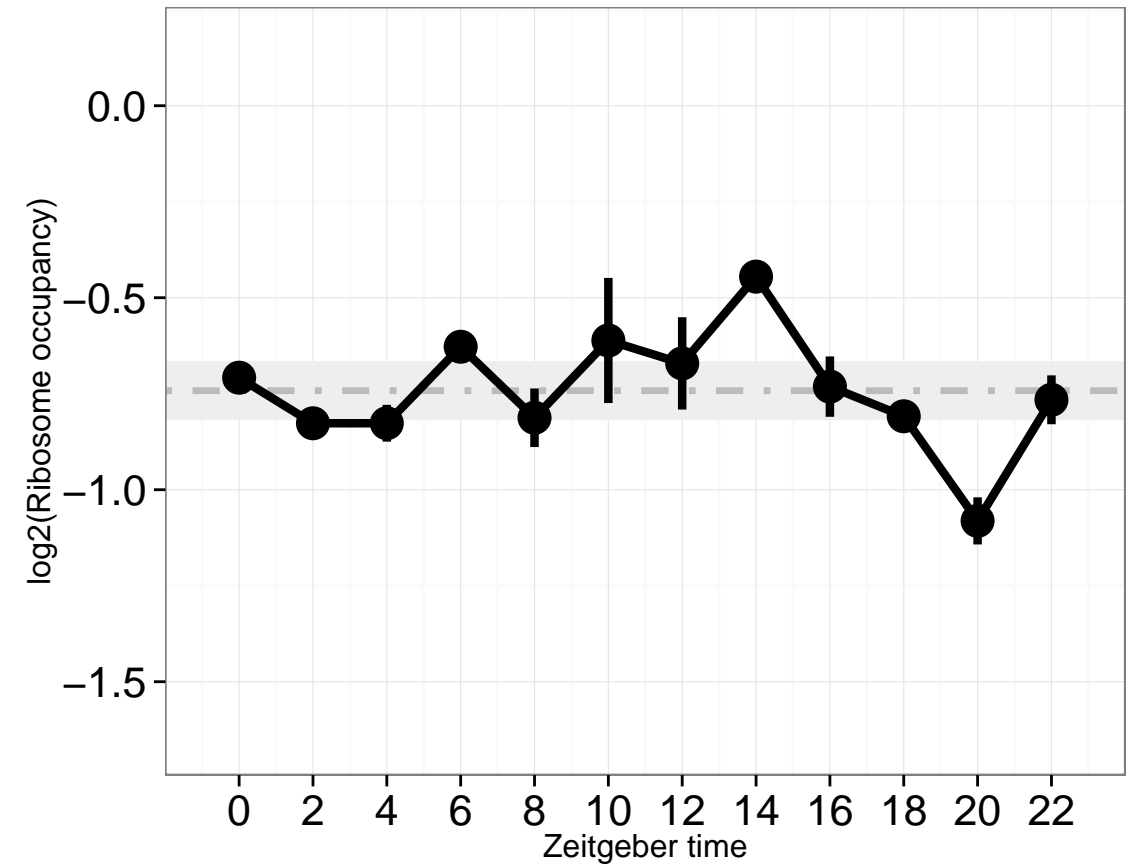

Supplement: Supplementary file 13250 [file 1]

# Wbp1l

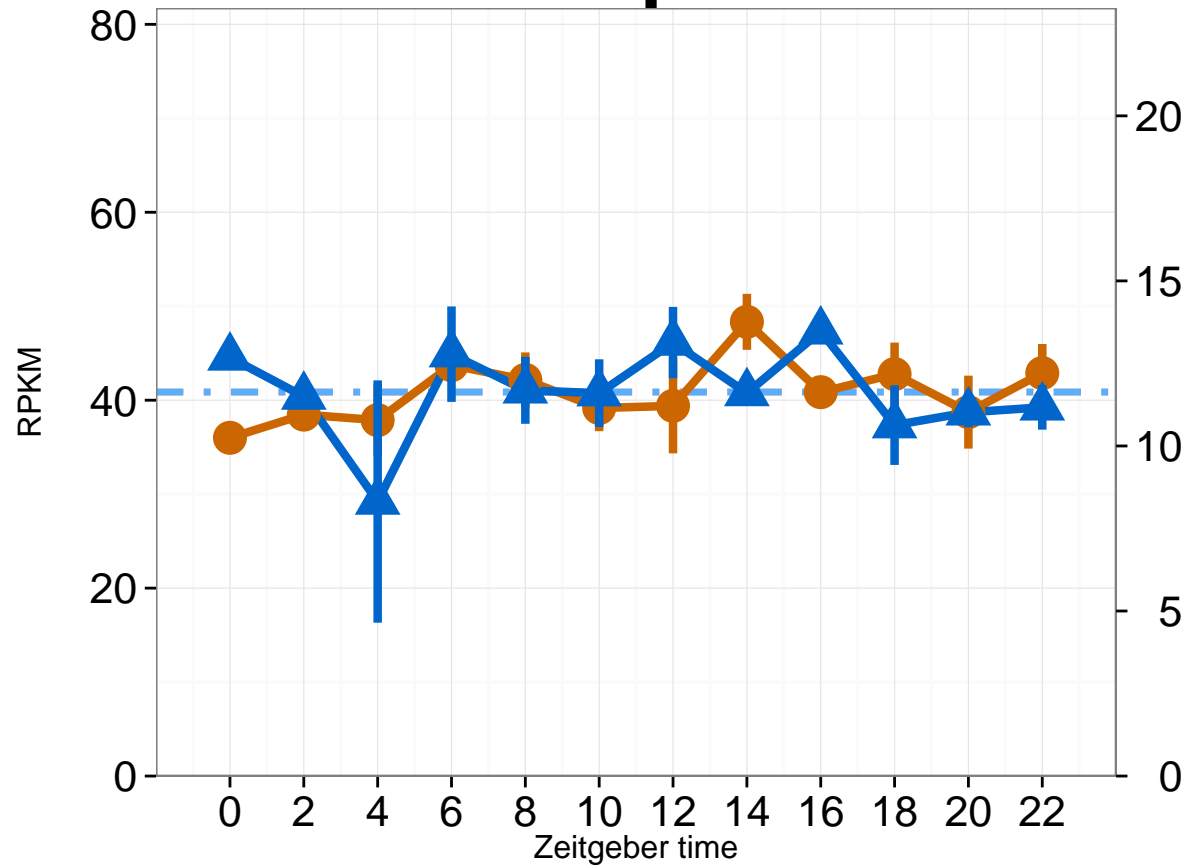

# Wbp1l

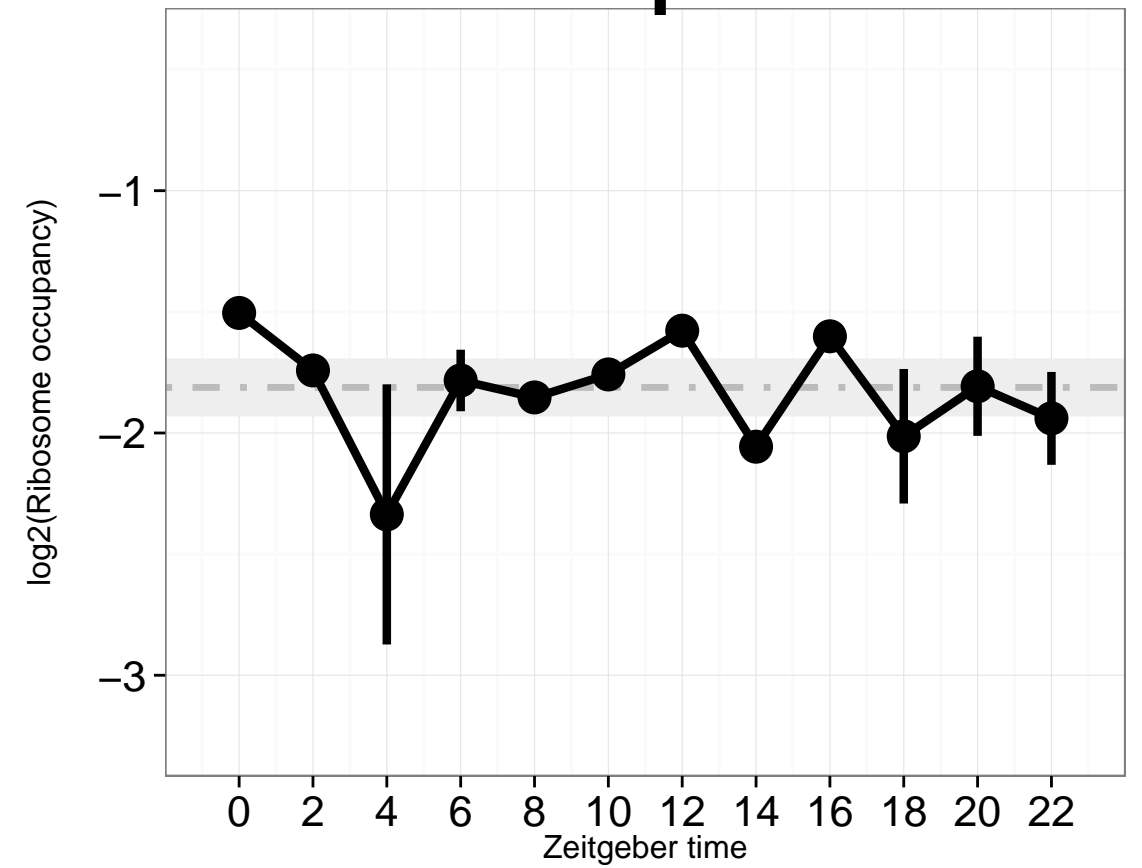

Supplement: Supplementary file 13251 [file 1]

# Rbm12b1

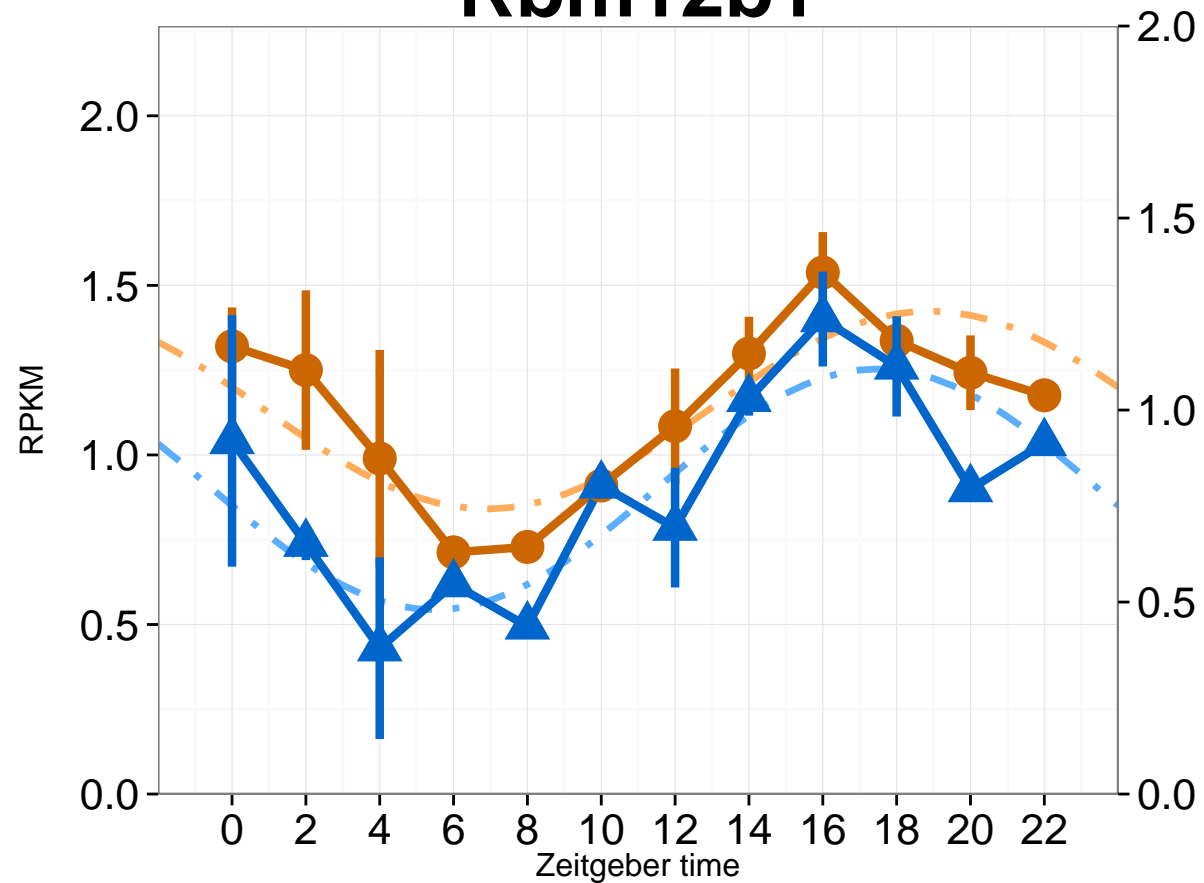

# Rbm12b1

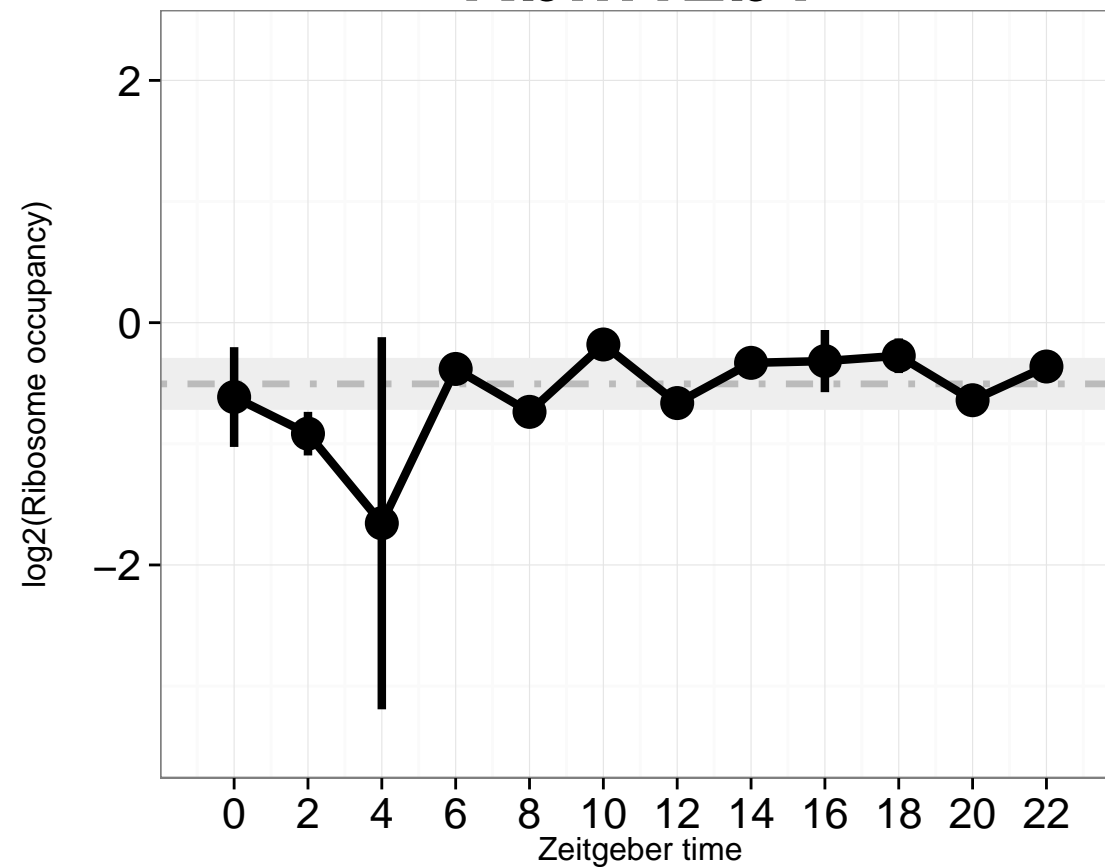

Supplement: Supplementary file 13252 [file 1]

**Klk1b22**

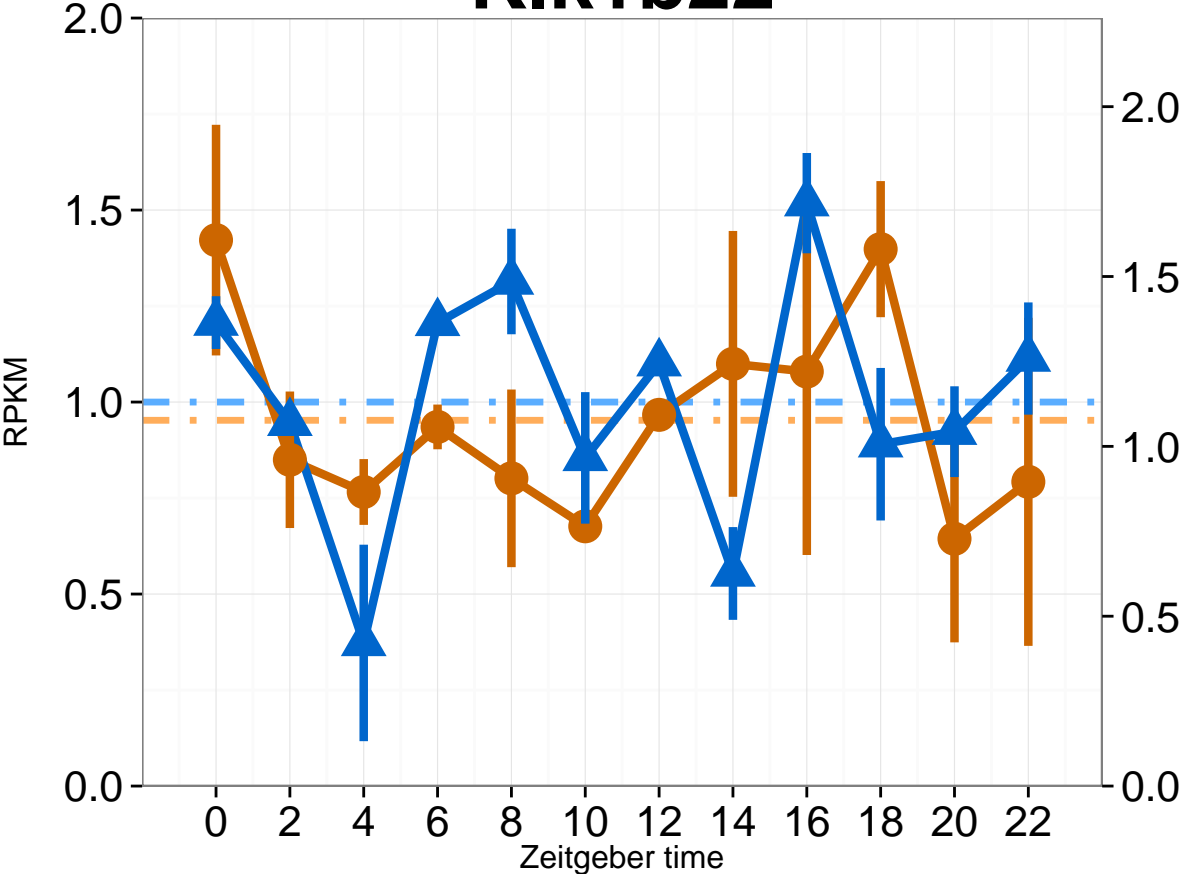

**Klk1b22**

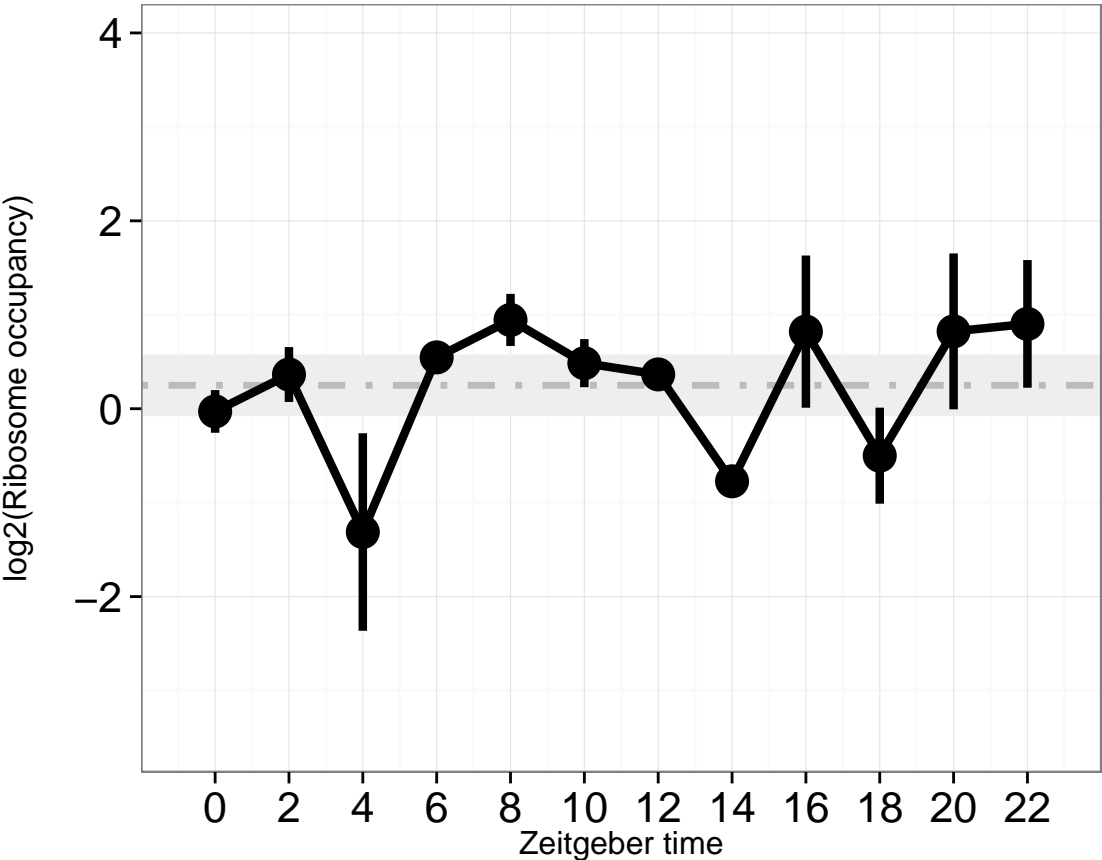

Supplement: Supplementary file 13253 [file 1]

# 9030624J02Rik

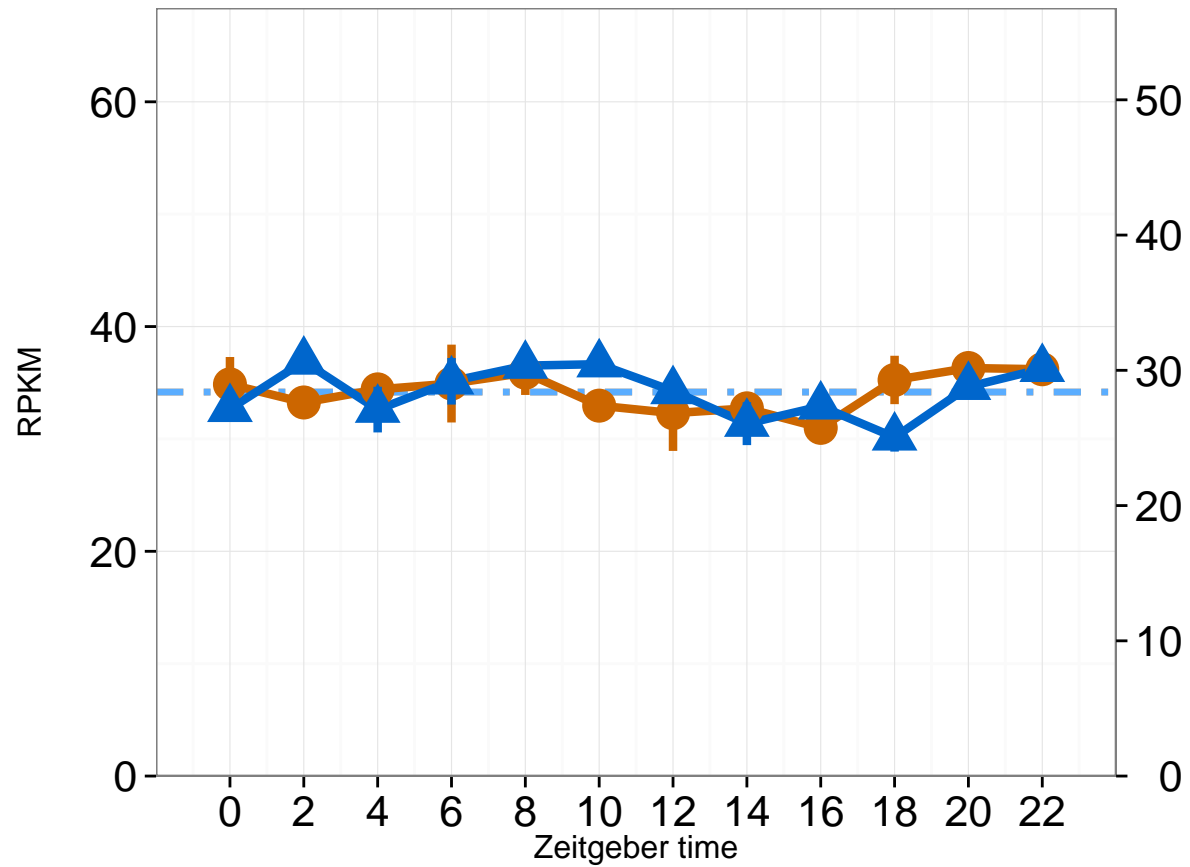

# 9030624J02Rik

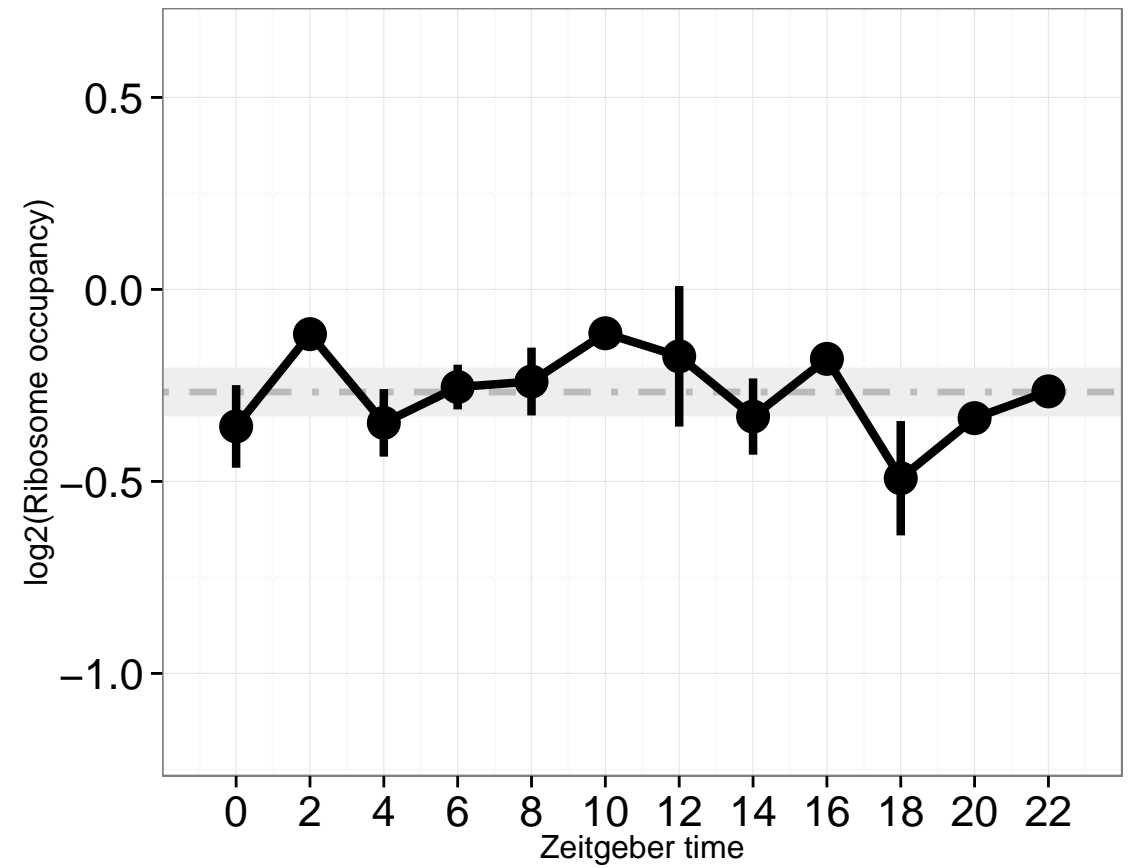

Supplement: Supplementary file 13254 [file 1]

## Aldh6a1

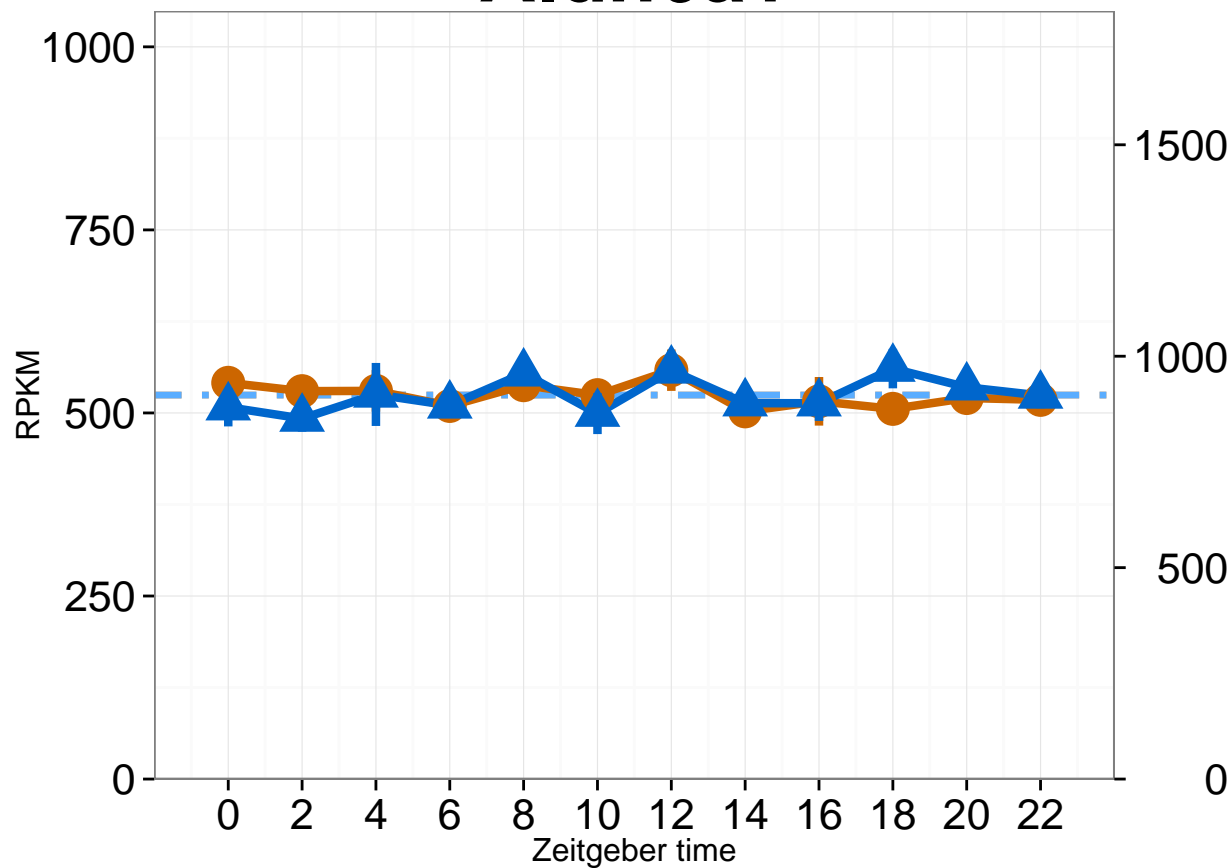

## Aldh6a1

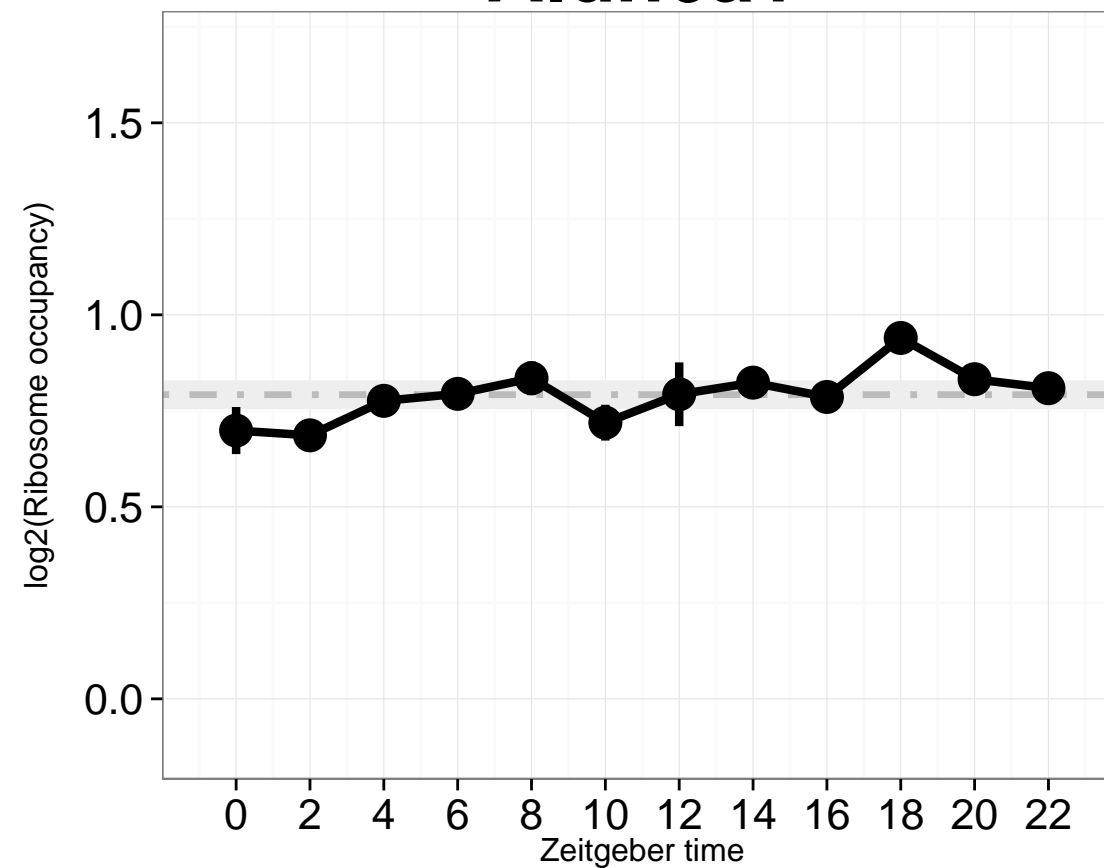

Supplement: Supplementary file 13255 [file 1]

# Thop1

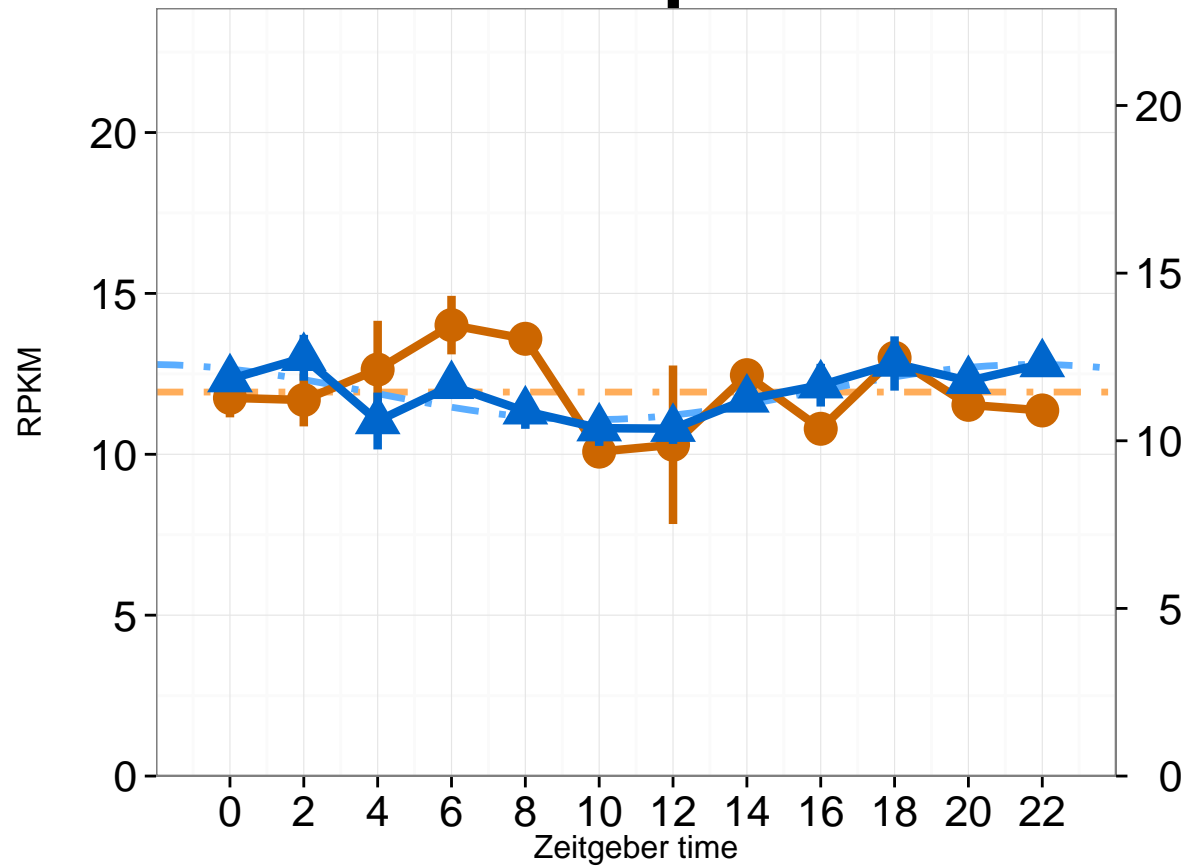

# Thop1

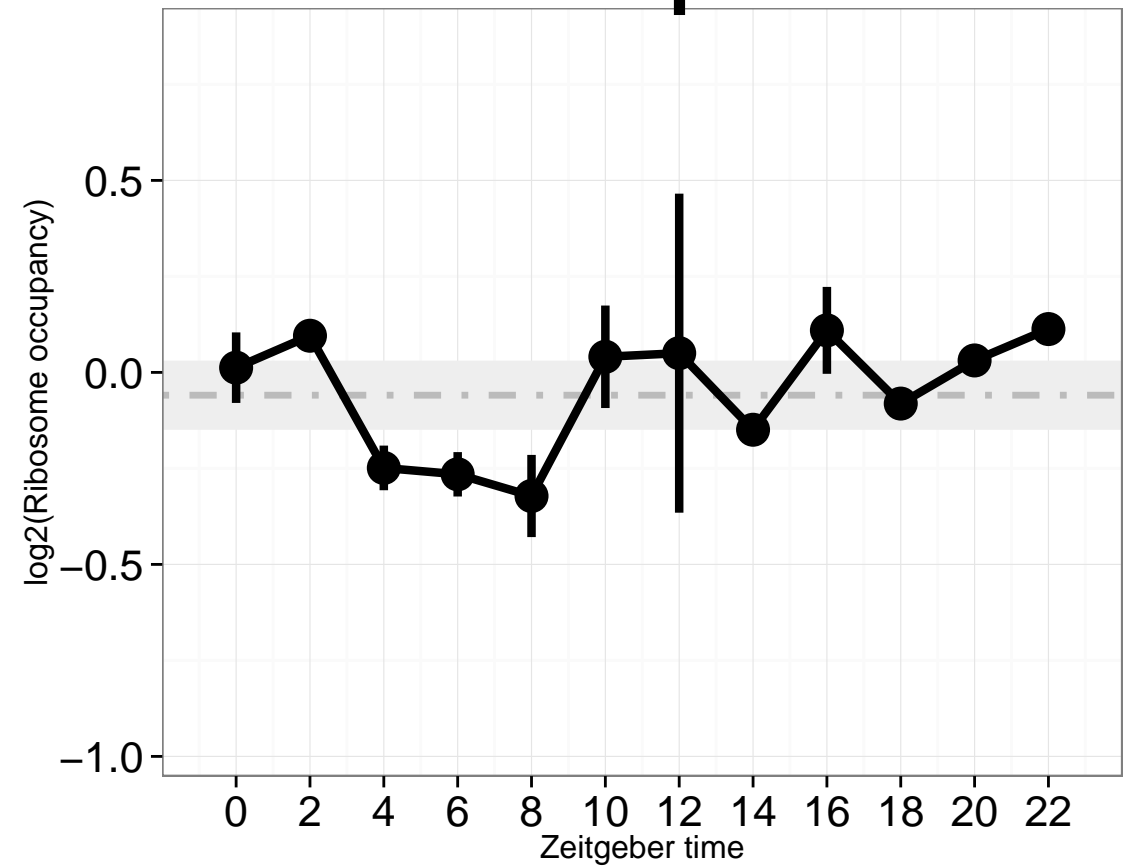

Supplement: Supplementary file 13256 [file 1]

# Hsd17b7

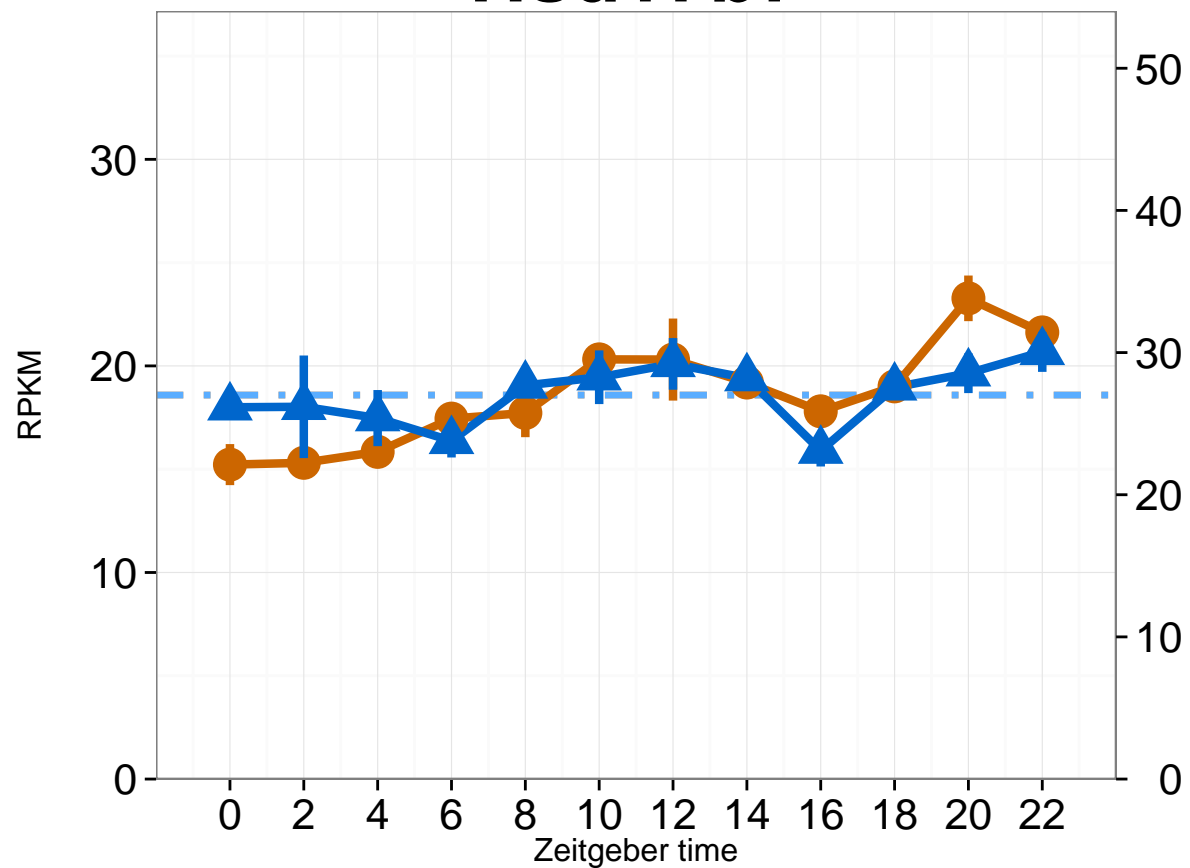

# Hsd17b7

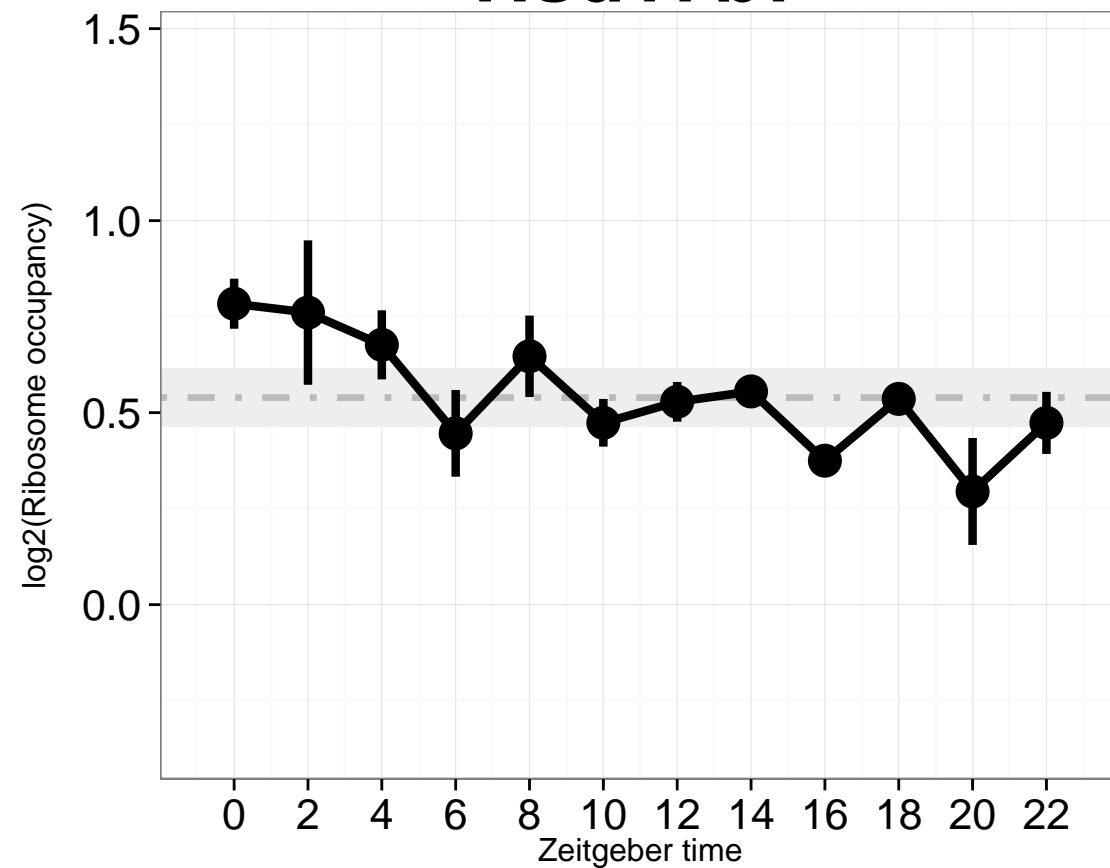

Supplement: Supplementary file 13257 [file 1]

# Arpp19

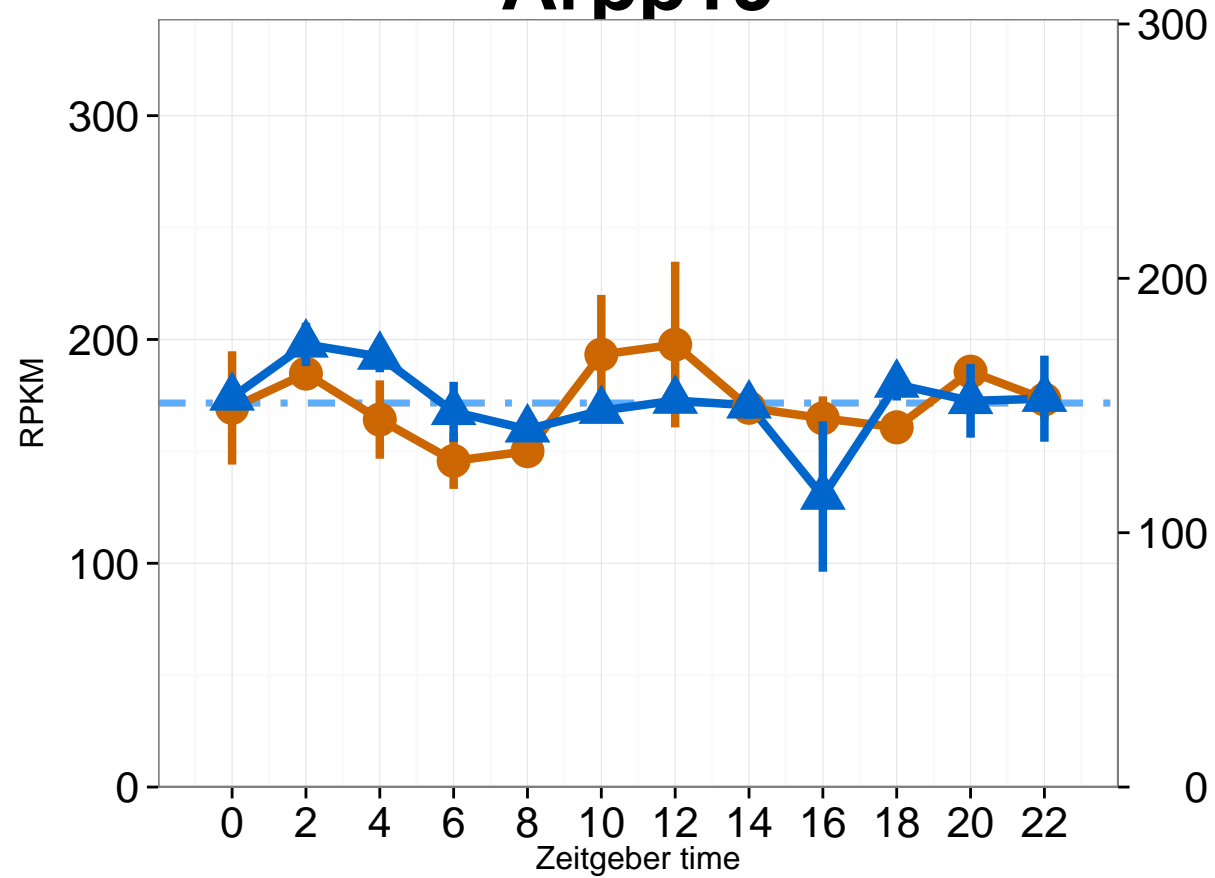

# Arpp19

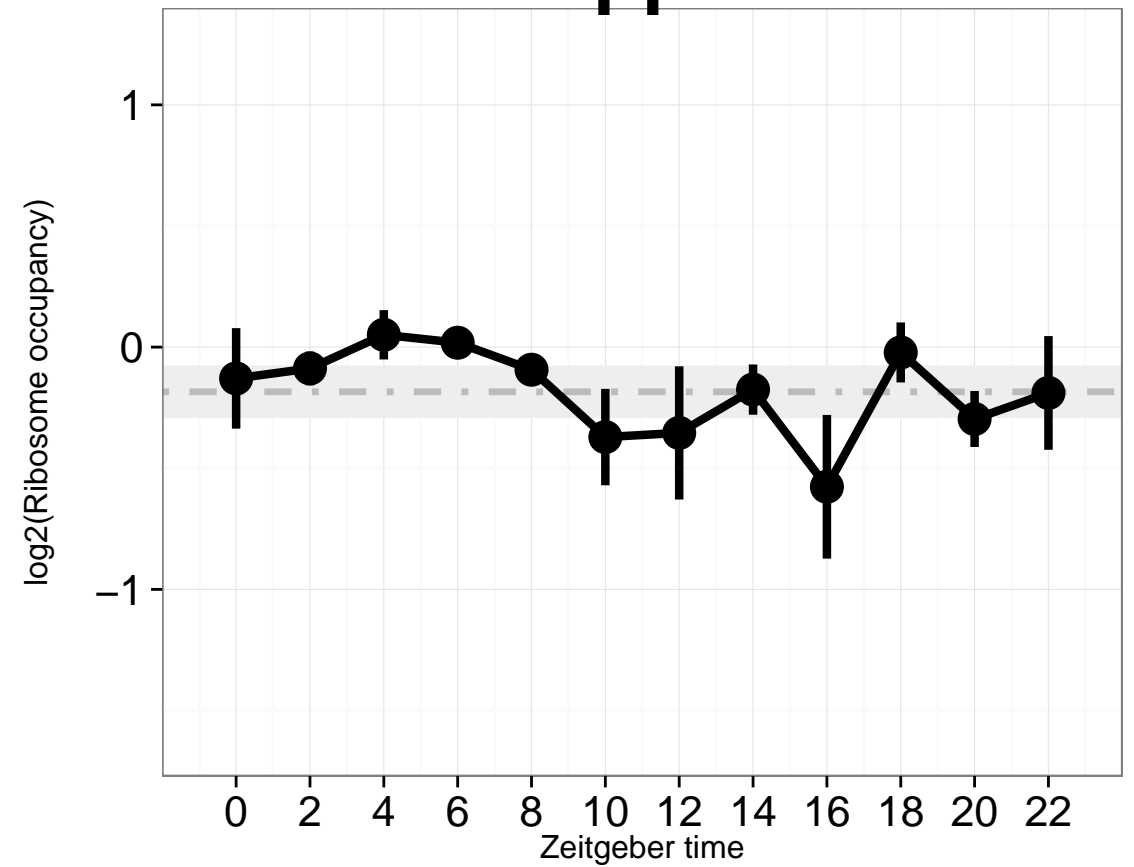

Supplement: Supplementary file 13258 [file 1]

# 1110008F13Rik

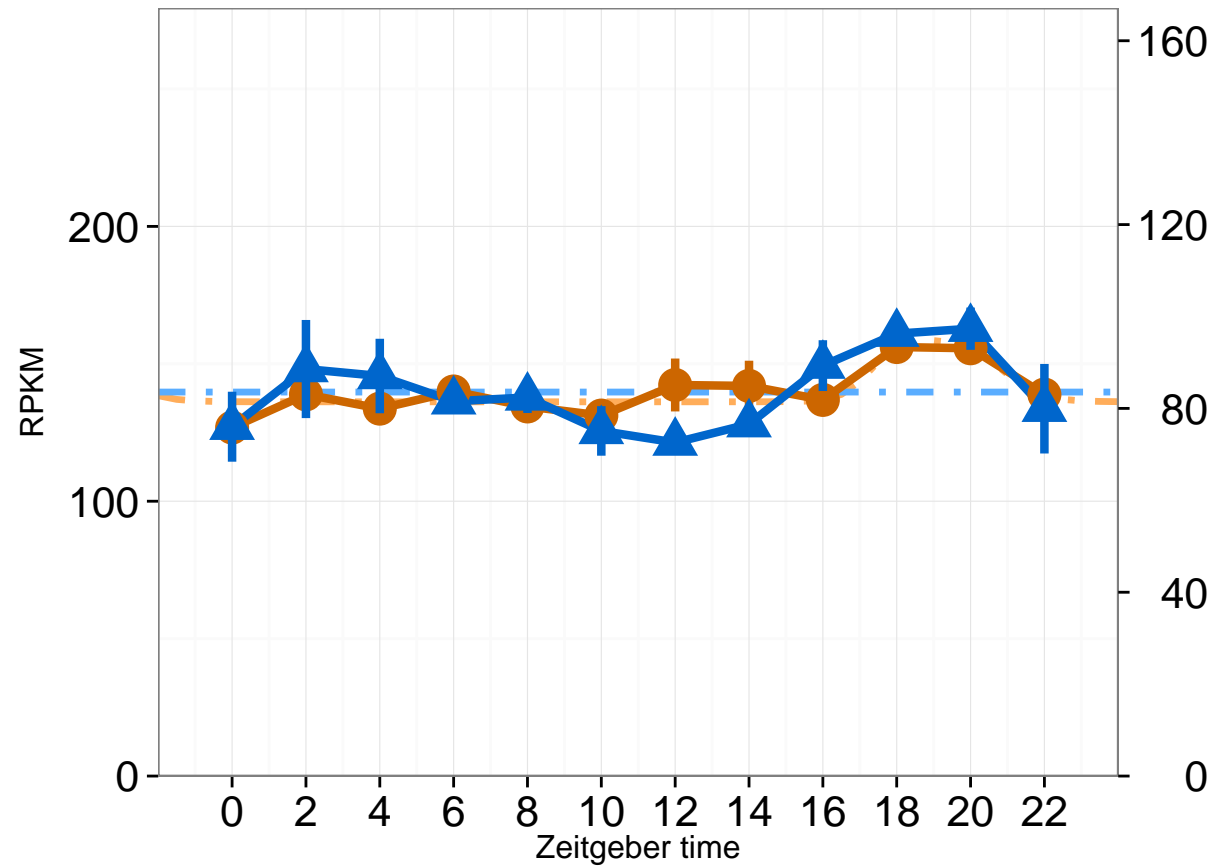

# 1110008F13Rik

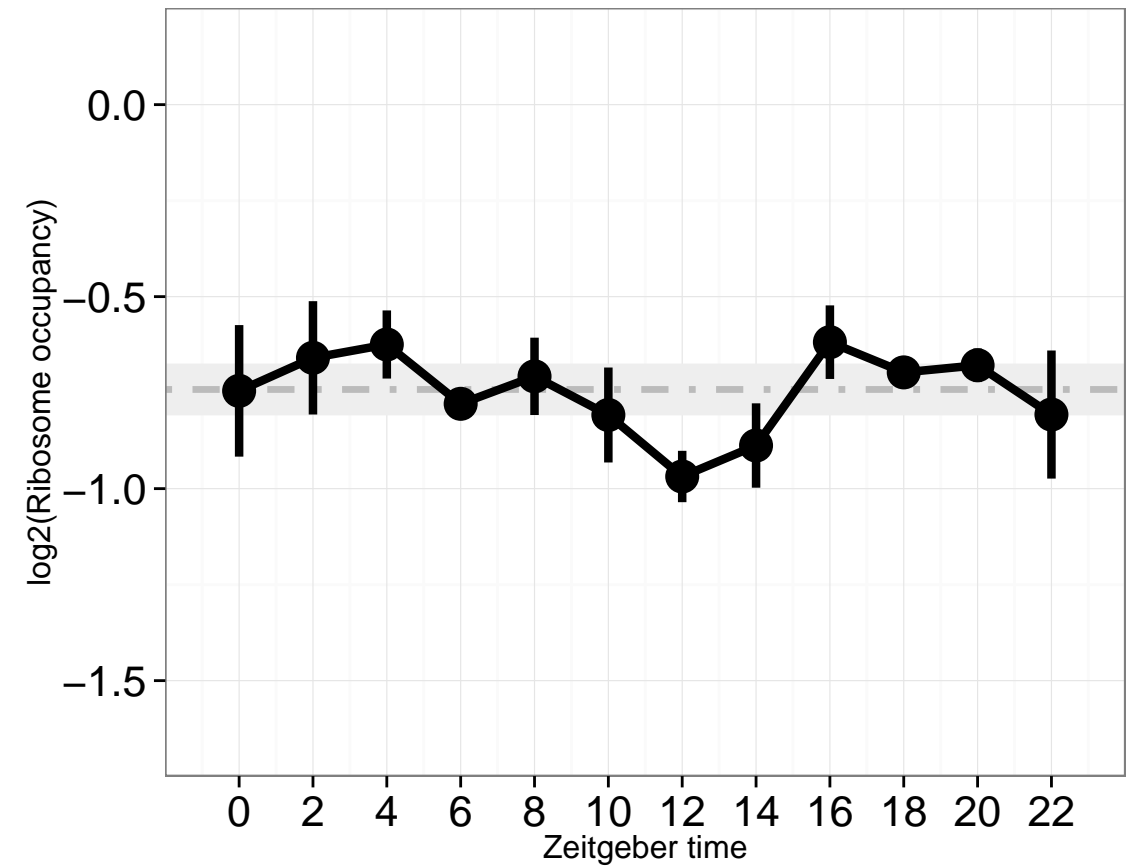

Supplement: Supplementary file 13259 [file 1]

## Lrrc47

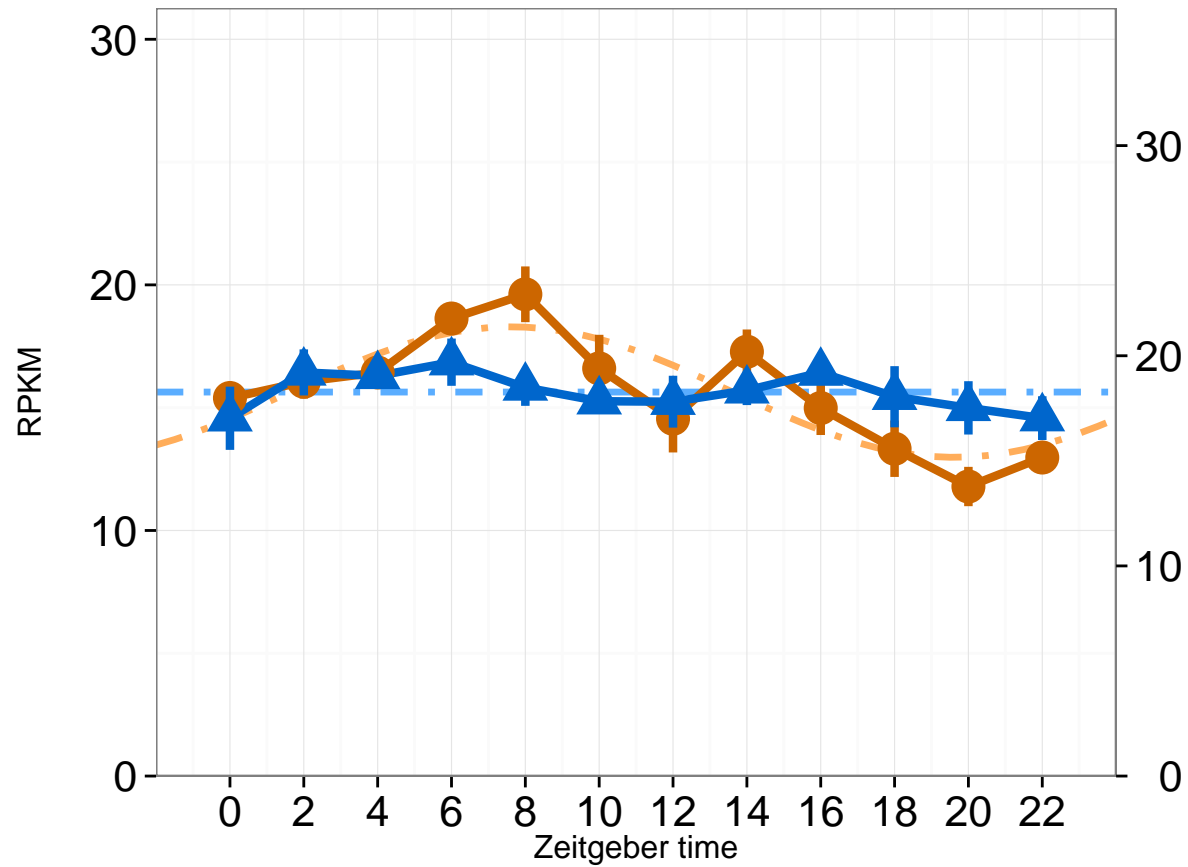

## Lrrc47

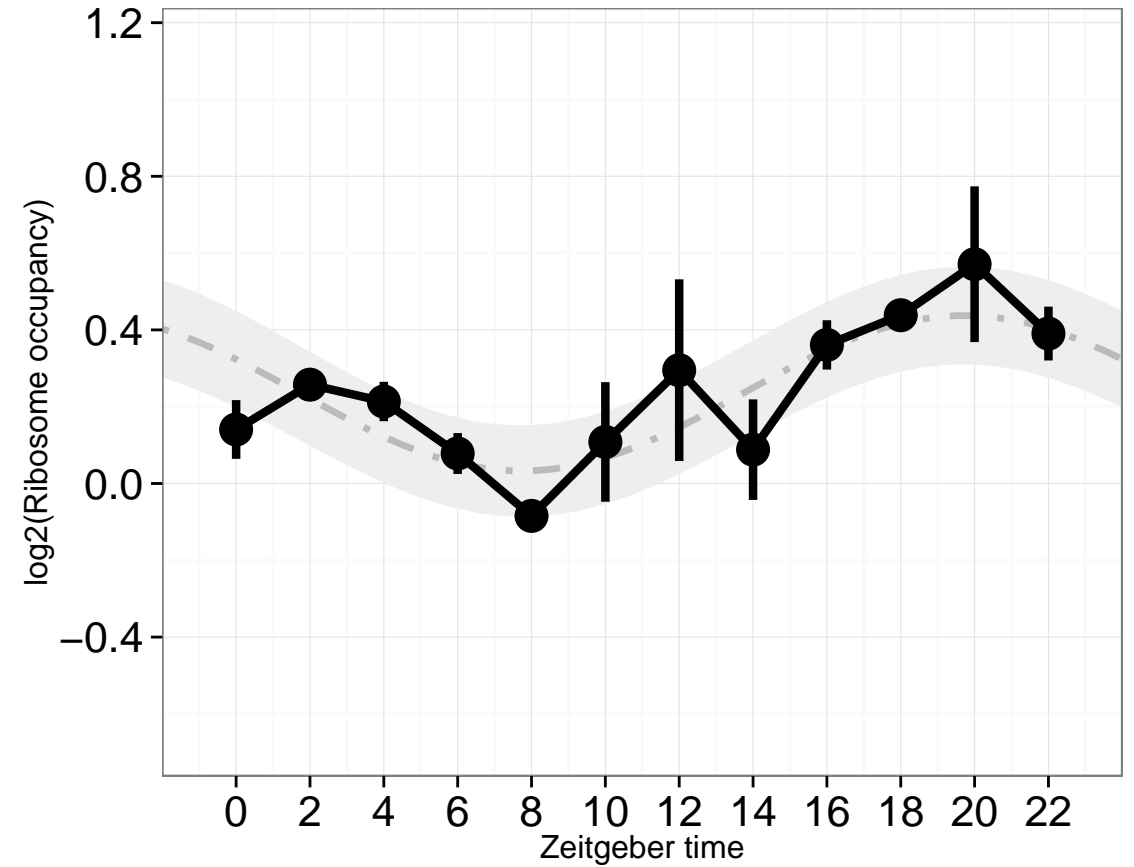

Supplement: Supplementary file 13260 [file 1]

## Dxo

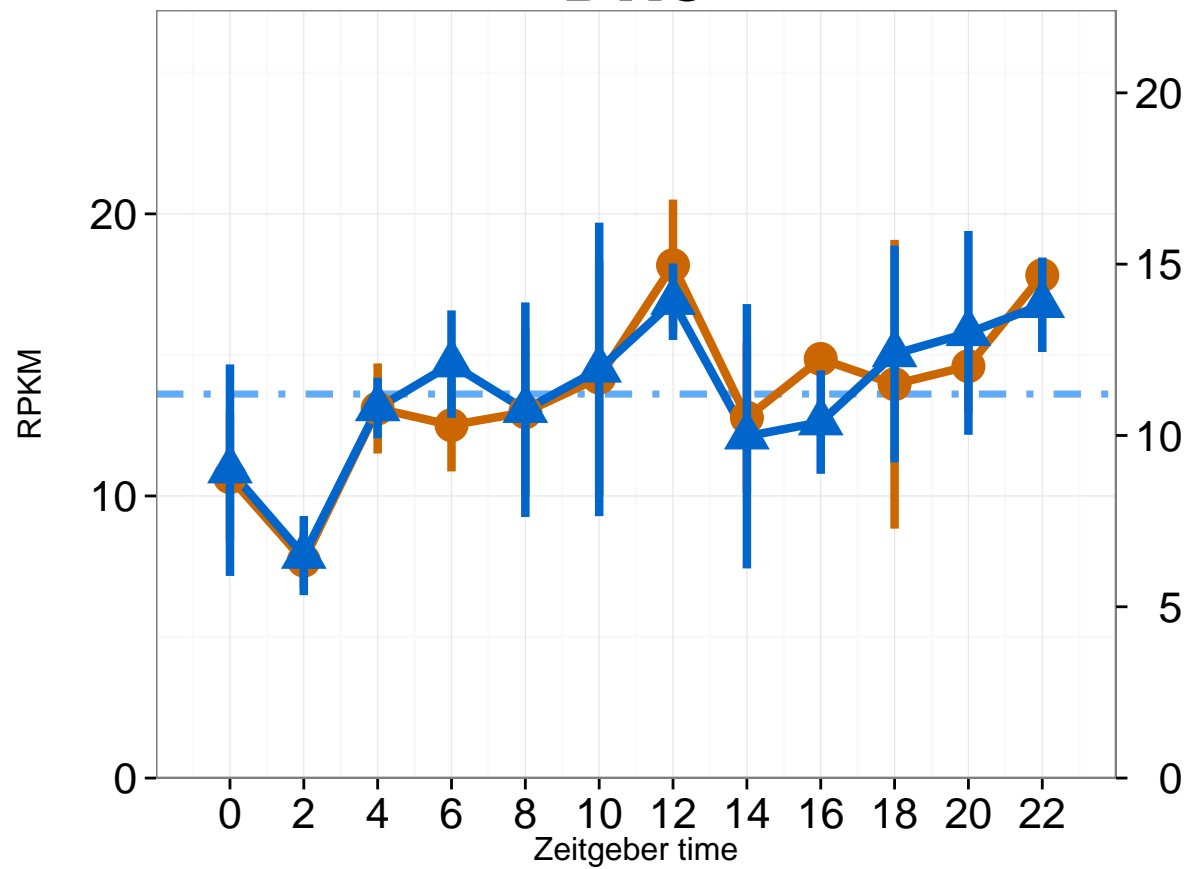

## Dxo

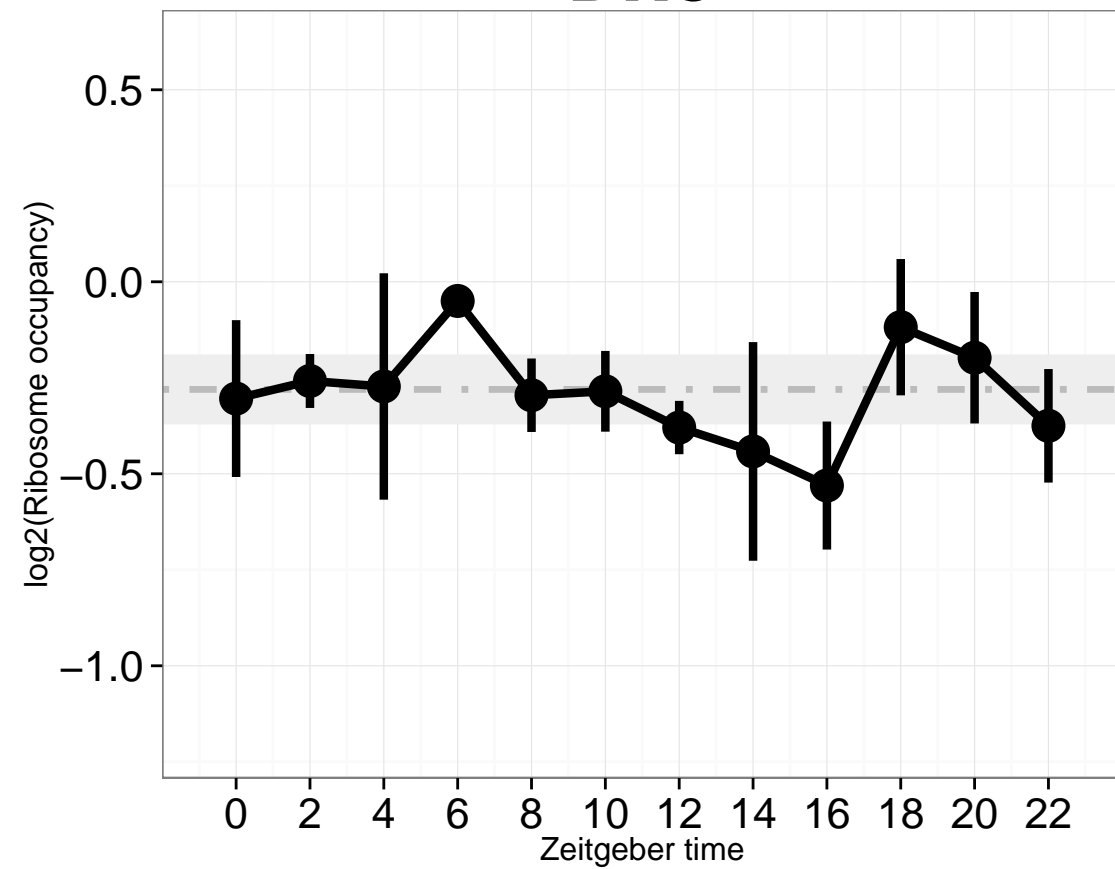

Supplement: Supplementary file 13261 [file 1]

## Ak4

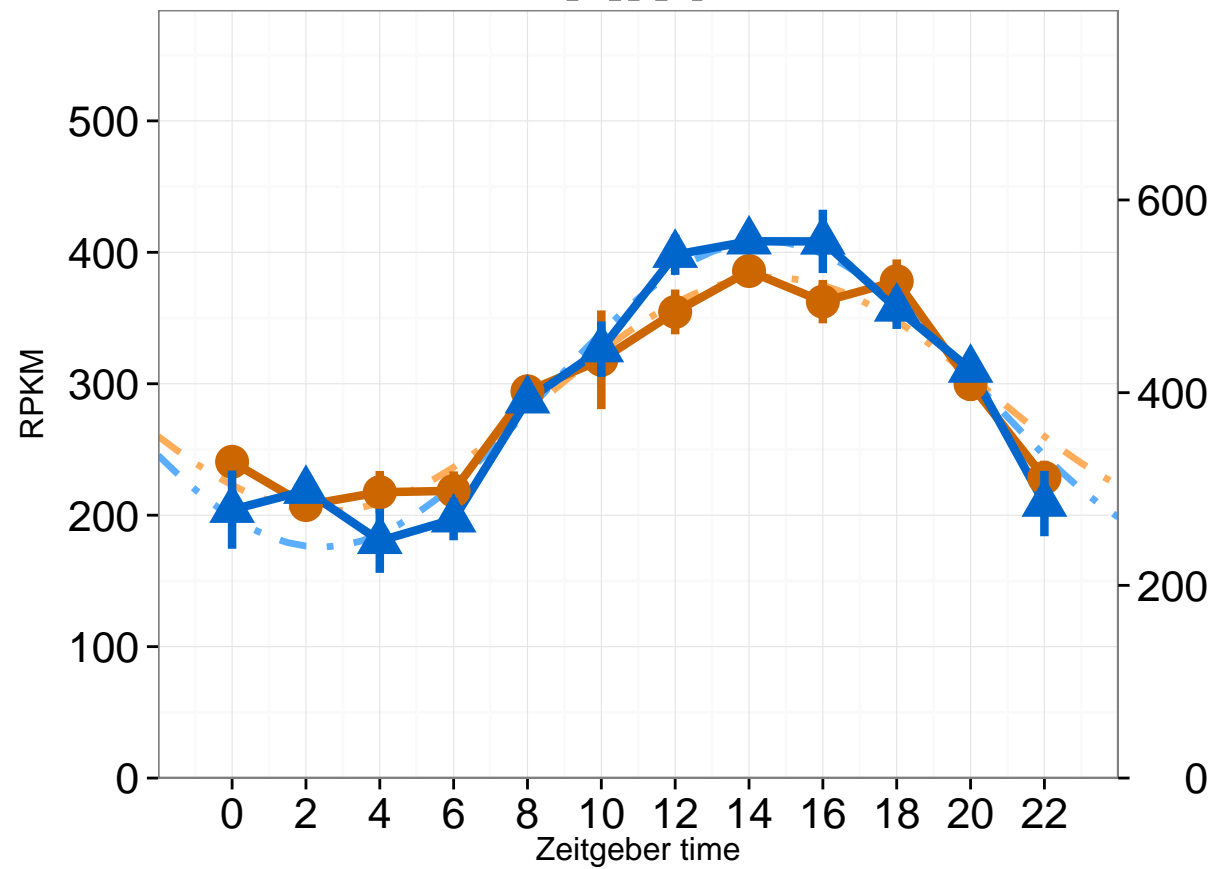

## Ak4

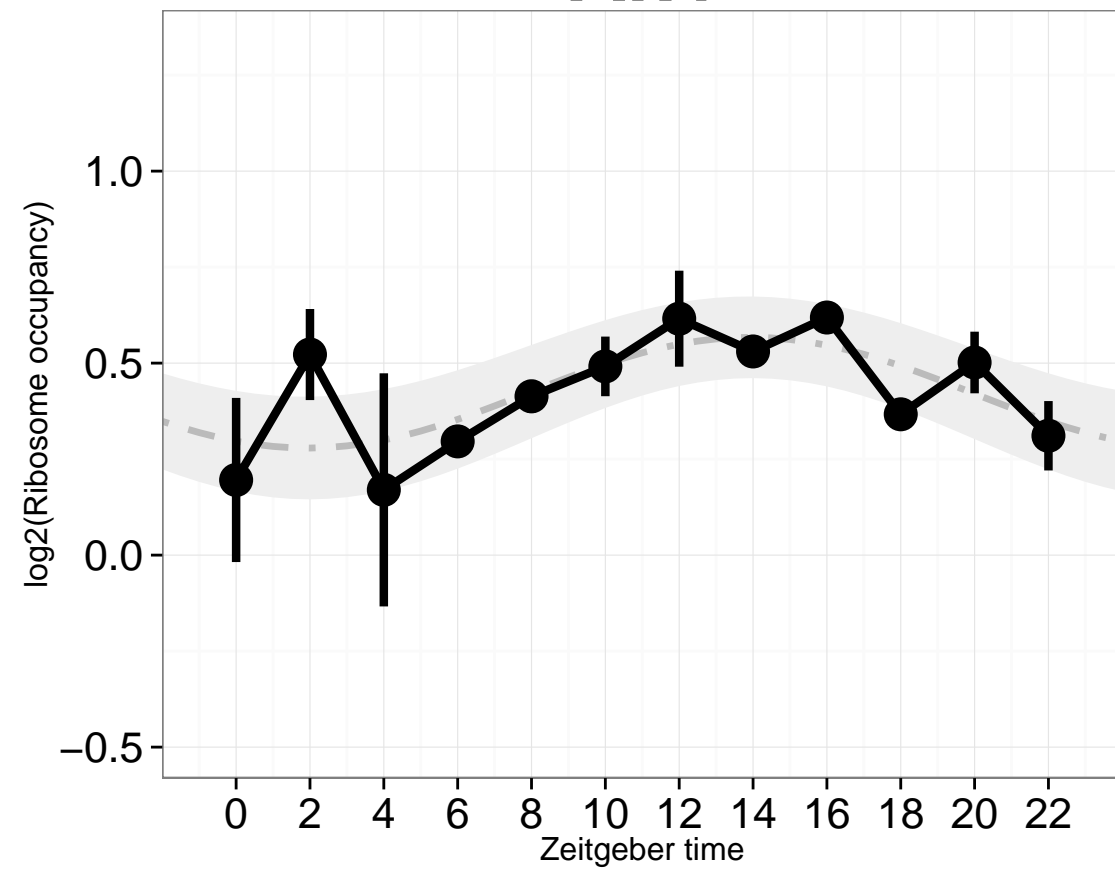

Supplement: Supplementary file 13262 [file 1]

**Trip13 TR**

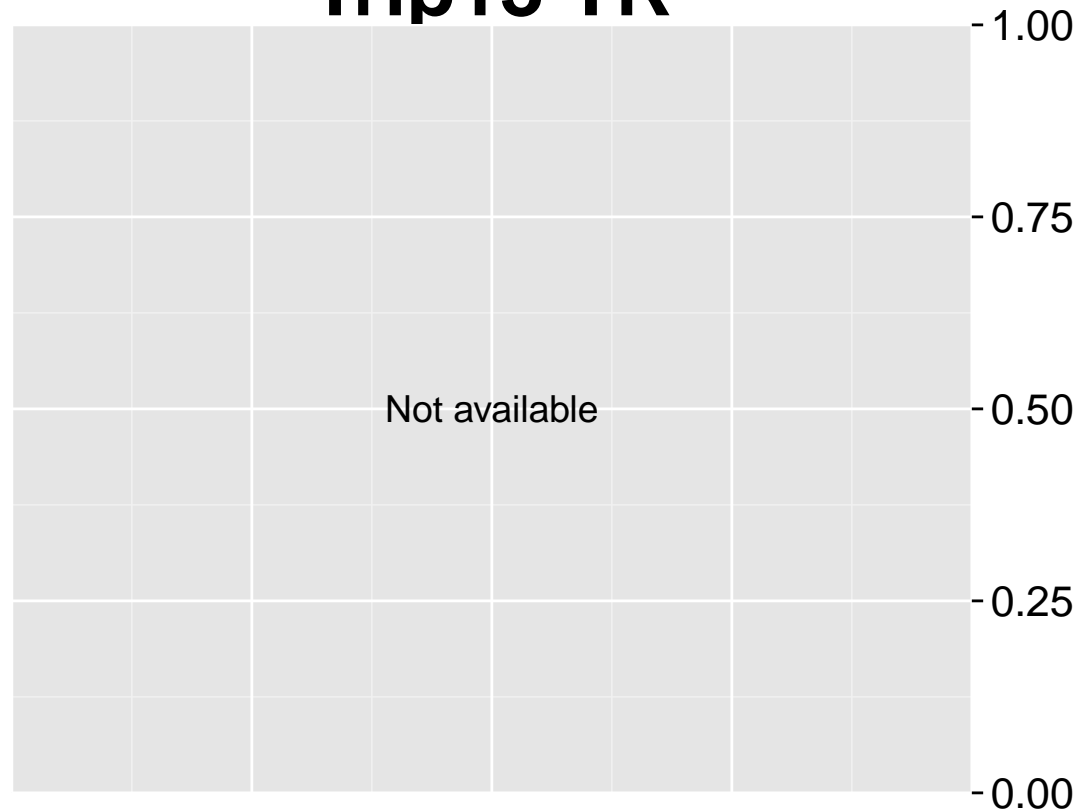

**Trip13 log2(Ribosome occupancy**

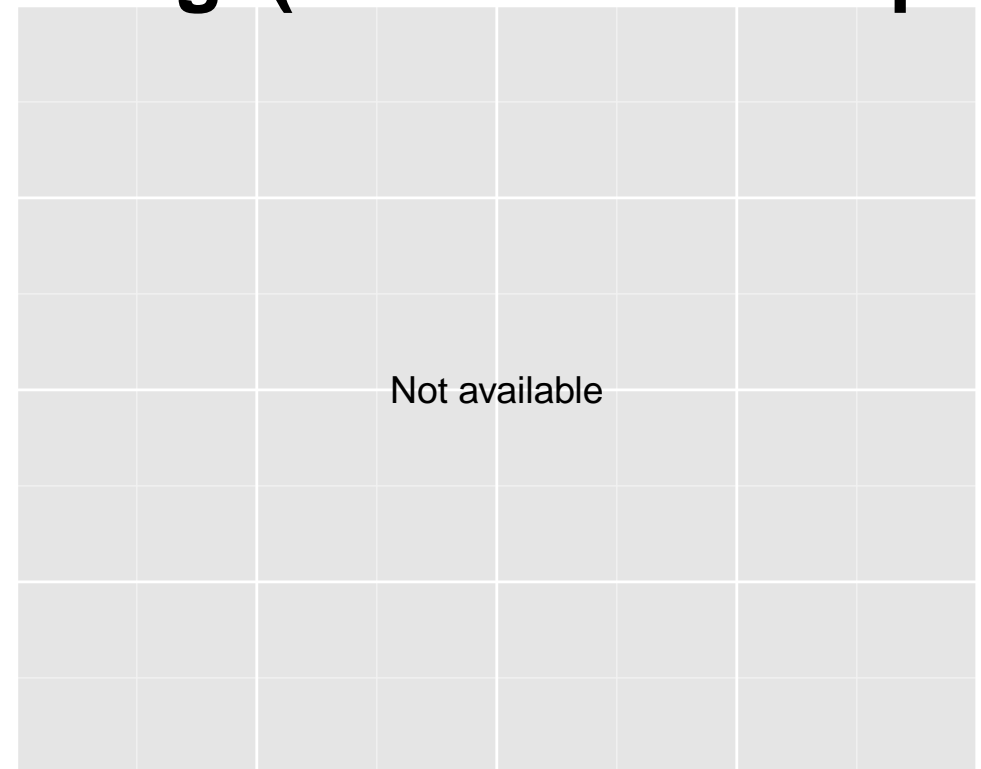

Supplement: Supplementary file 13263 [file 1]

# Ptger3

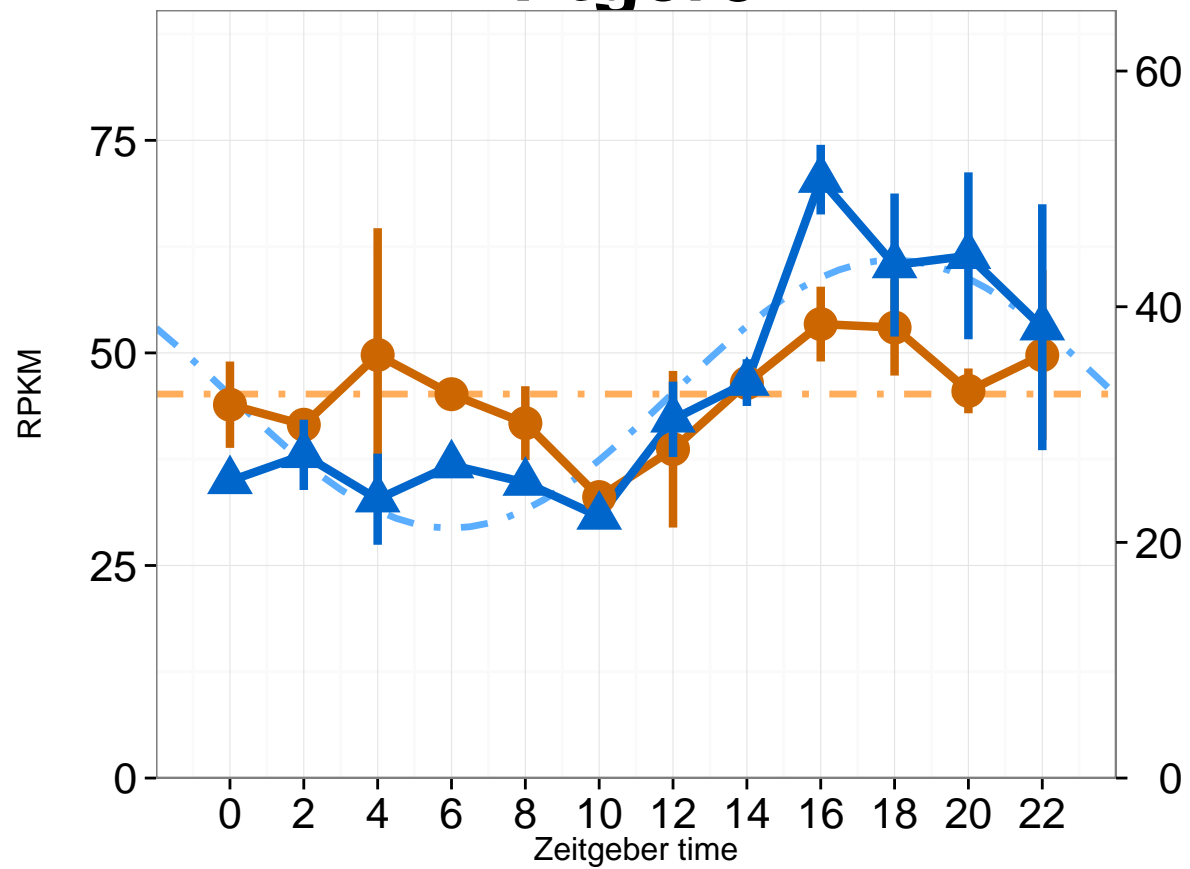

# Ptger3

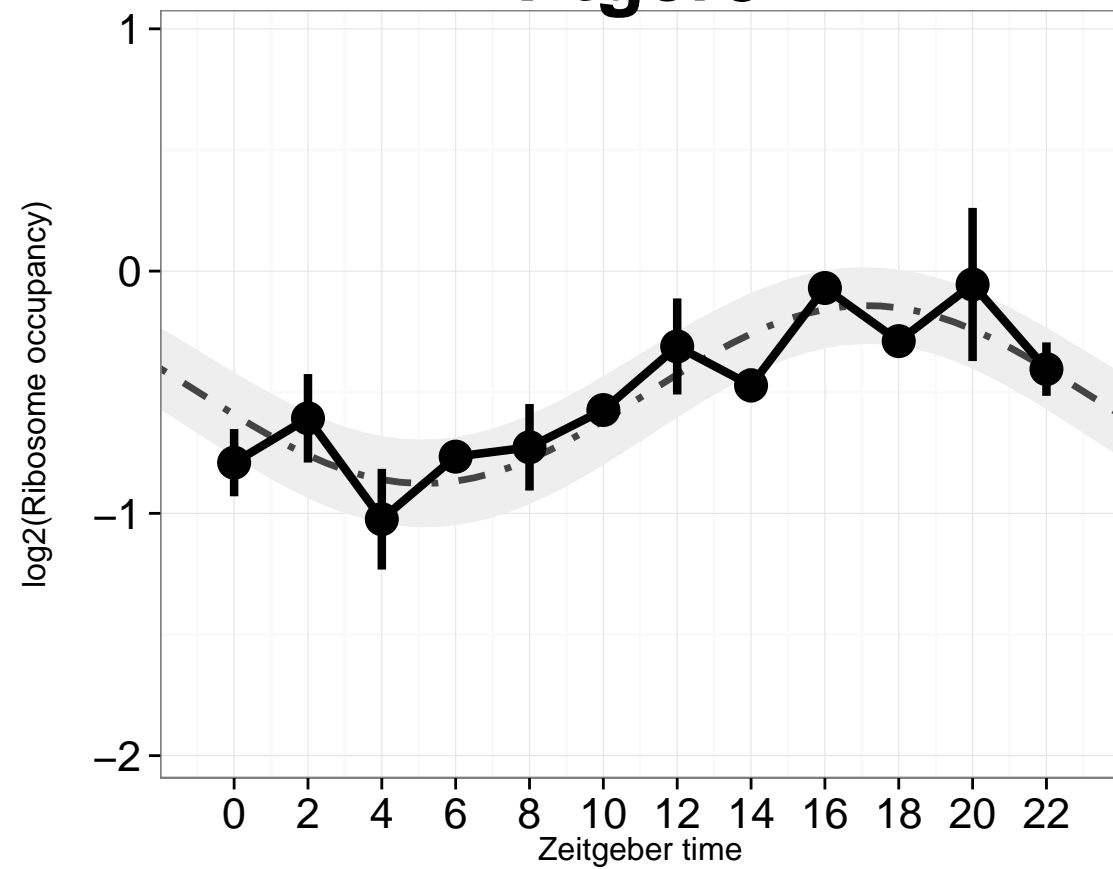

Supplement: Supplementary file 13264 [file 1]

# Lrmp

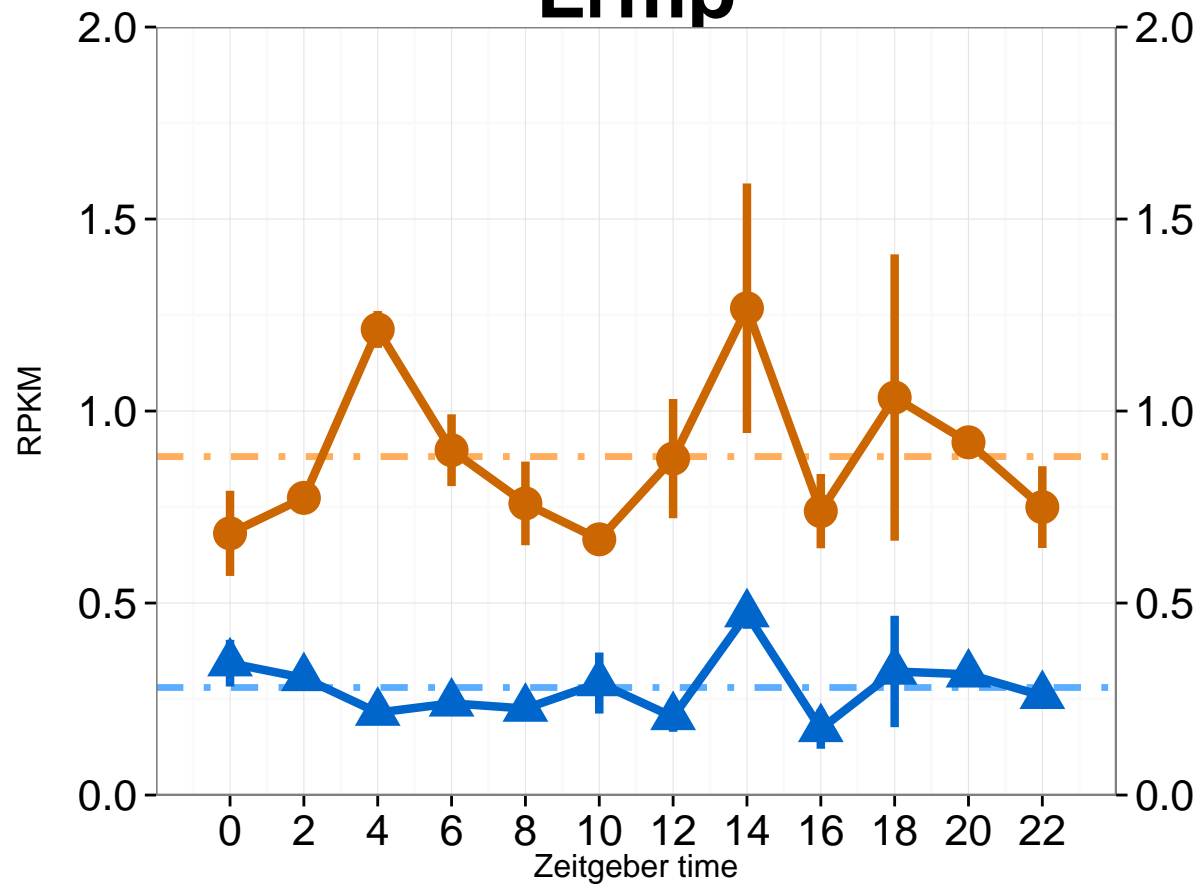

# Lrmp

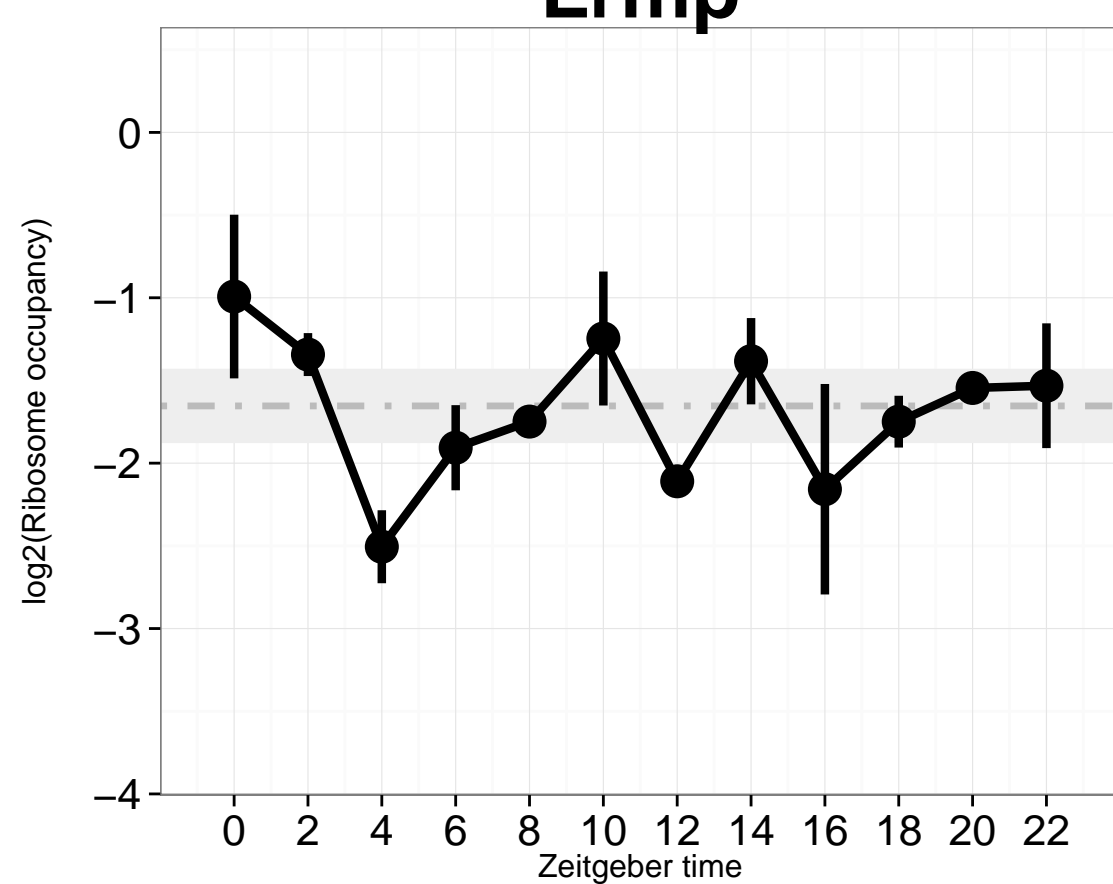

Supplement: Supplementary file 13265 [file 1]

# Gm853

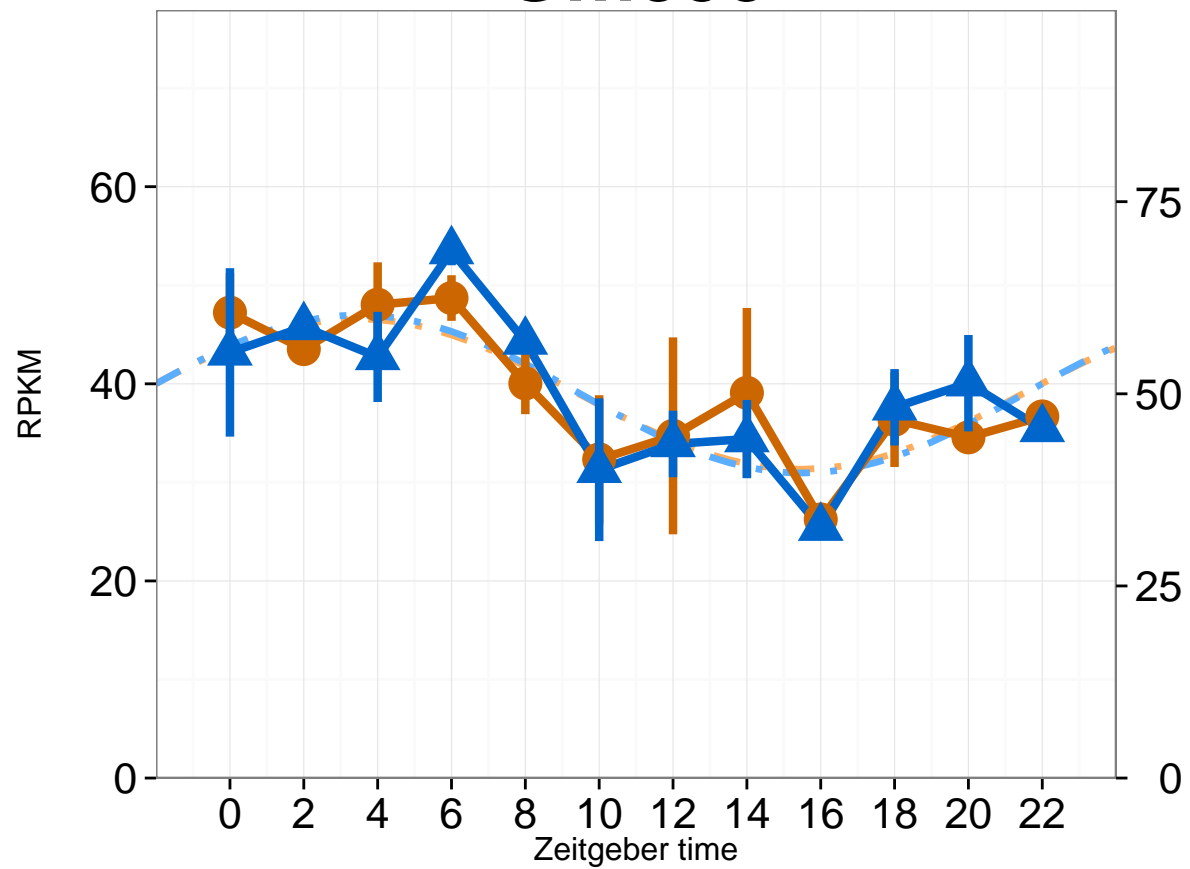

# Gm853

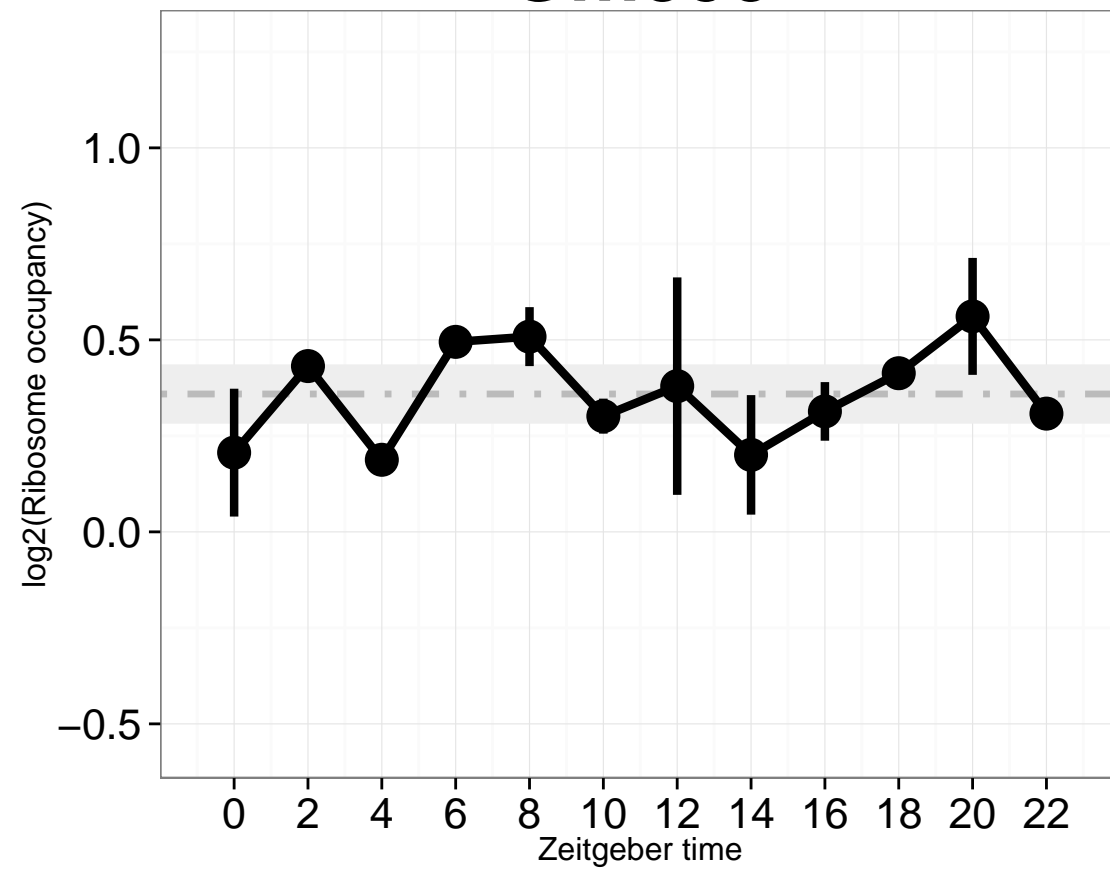

Supplement: Supplementary file 13266 [file 1]

## Baiap2l1

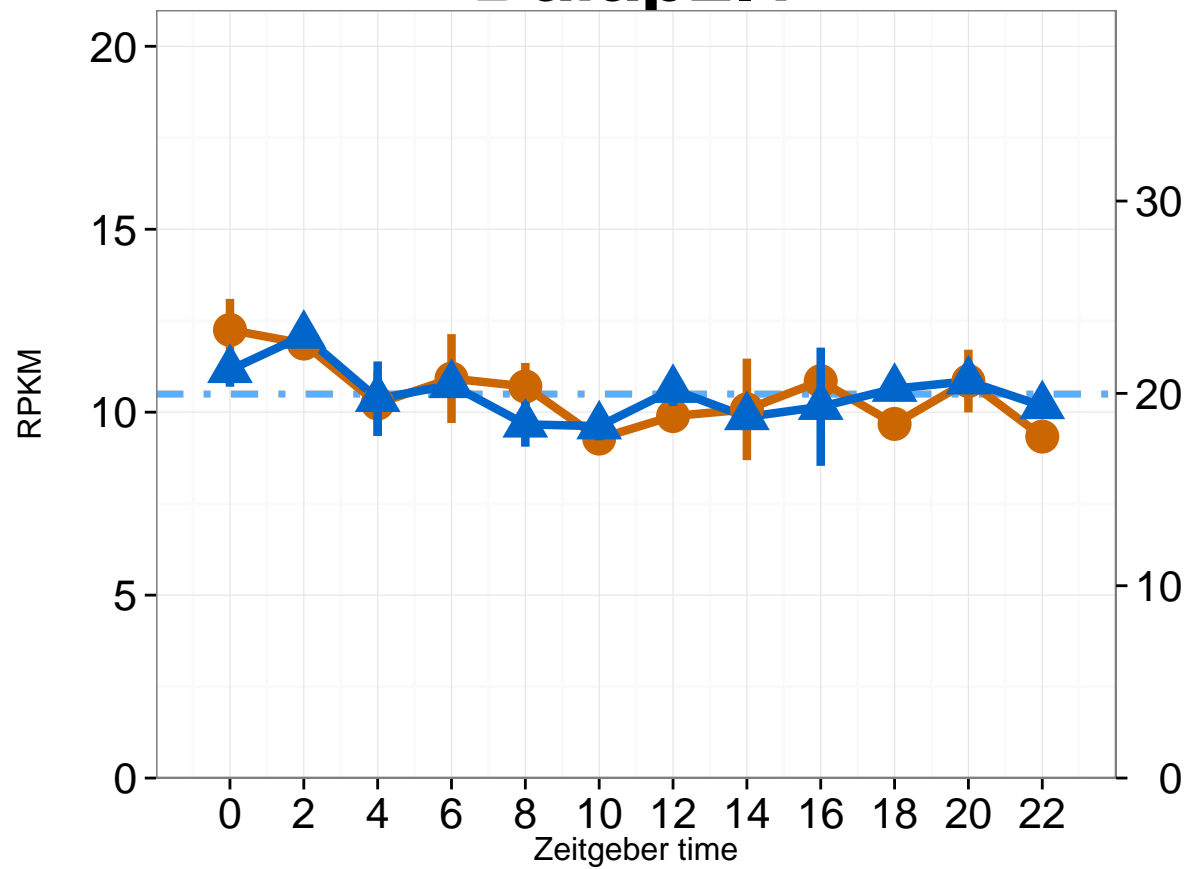

## Baiap2l1

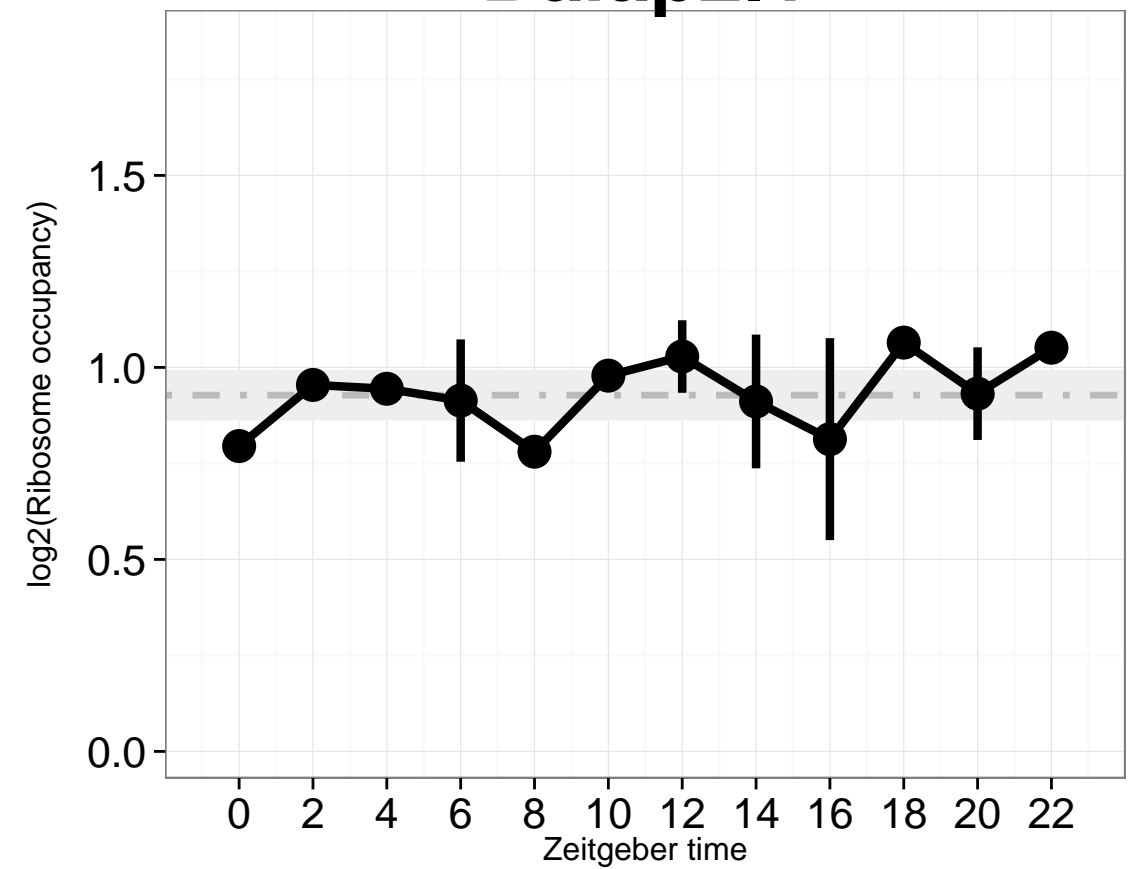

Supplement: Supplementary file 13267 [file 1]

# Cyp2u1

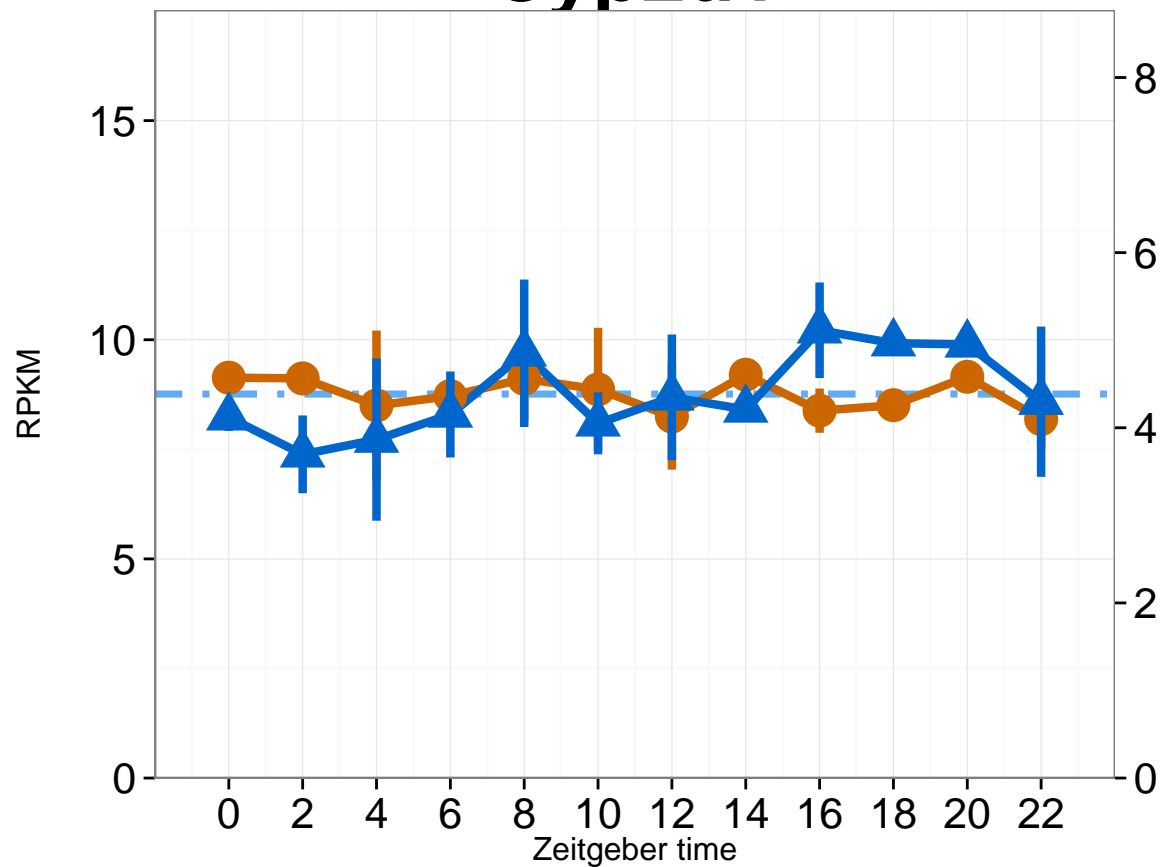

# Cyp2u1

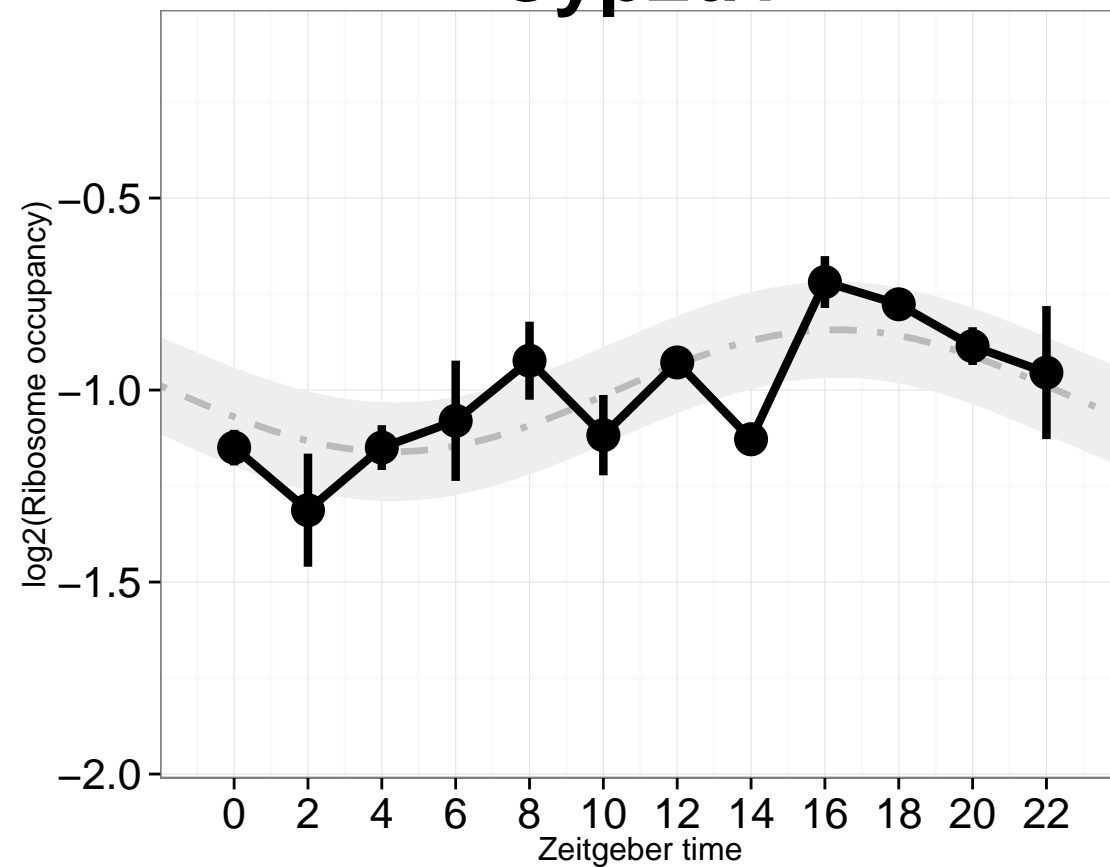

Supplement: Supplementary file 13268 [file 1]

# Slc38a9

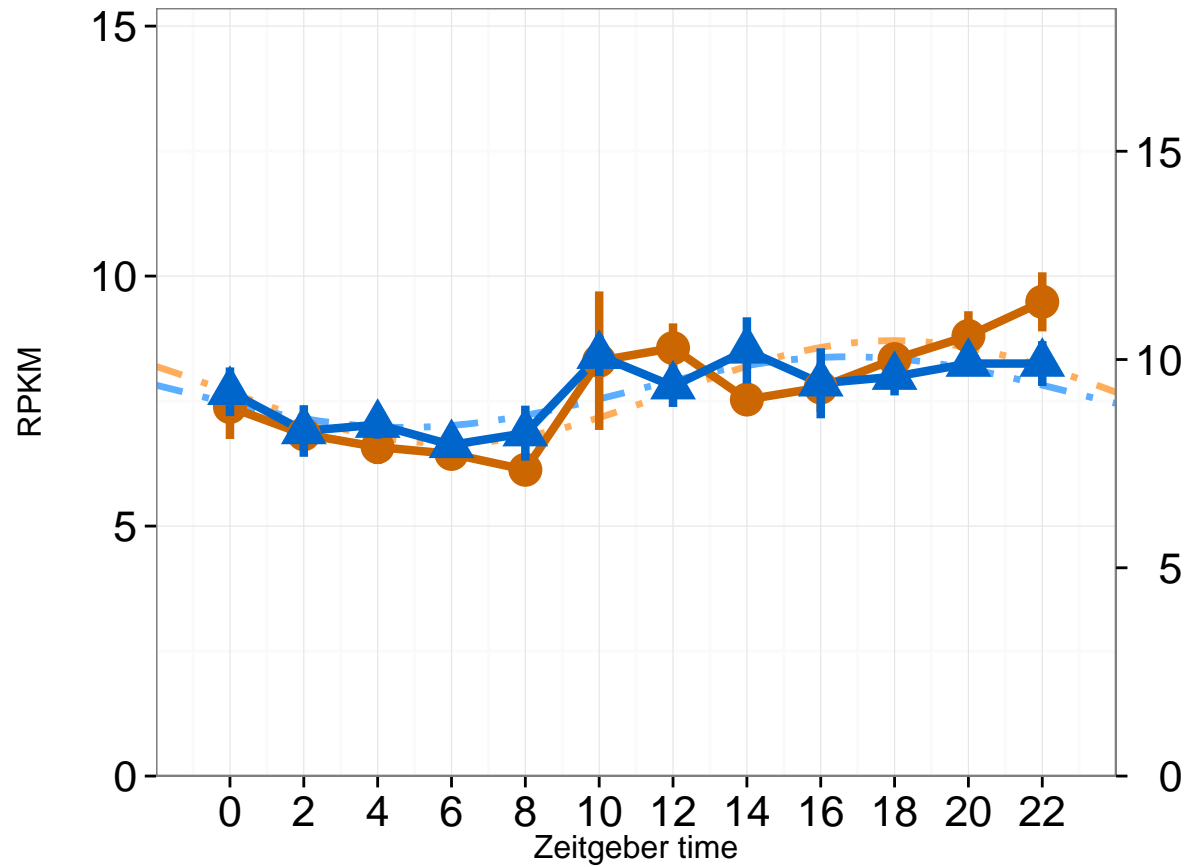

# Slc38a9

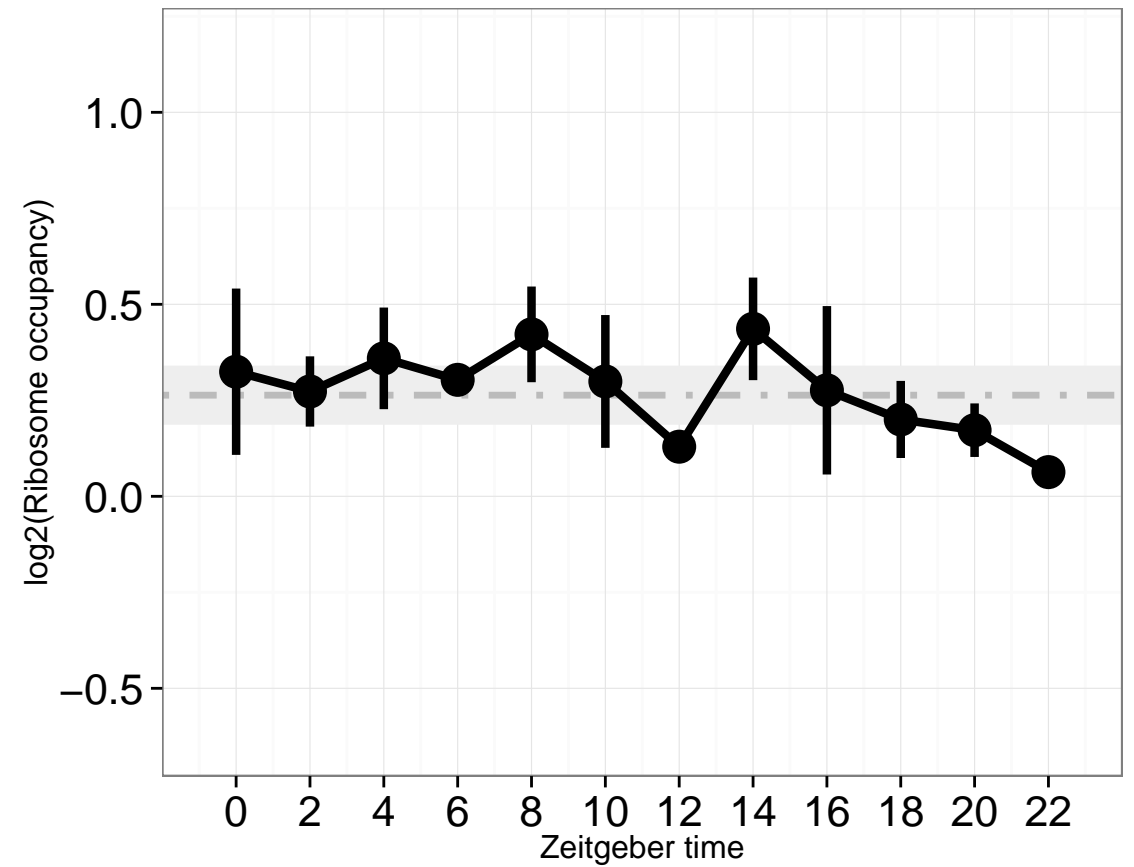

Supplement: Supplementary file 13269 [file 1]

# Zbtb12

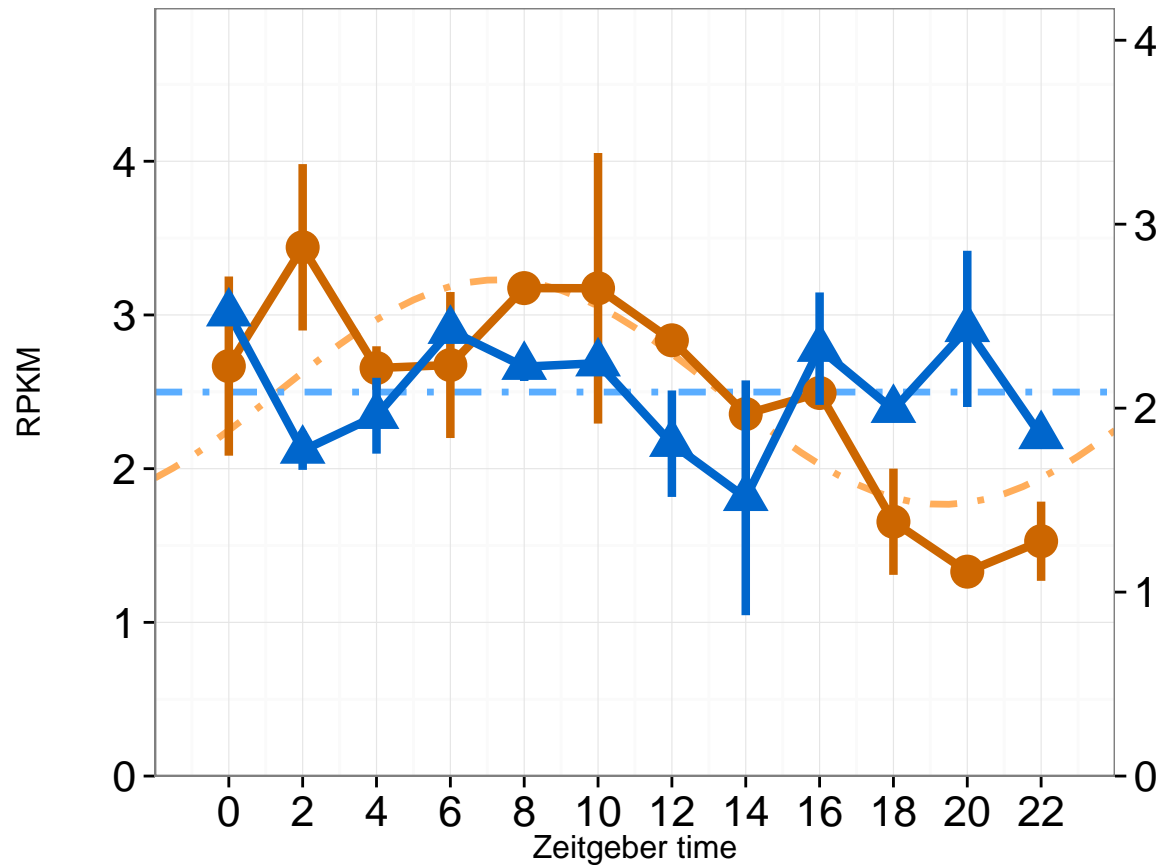

# Zbtb12

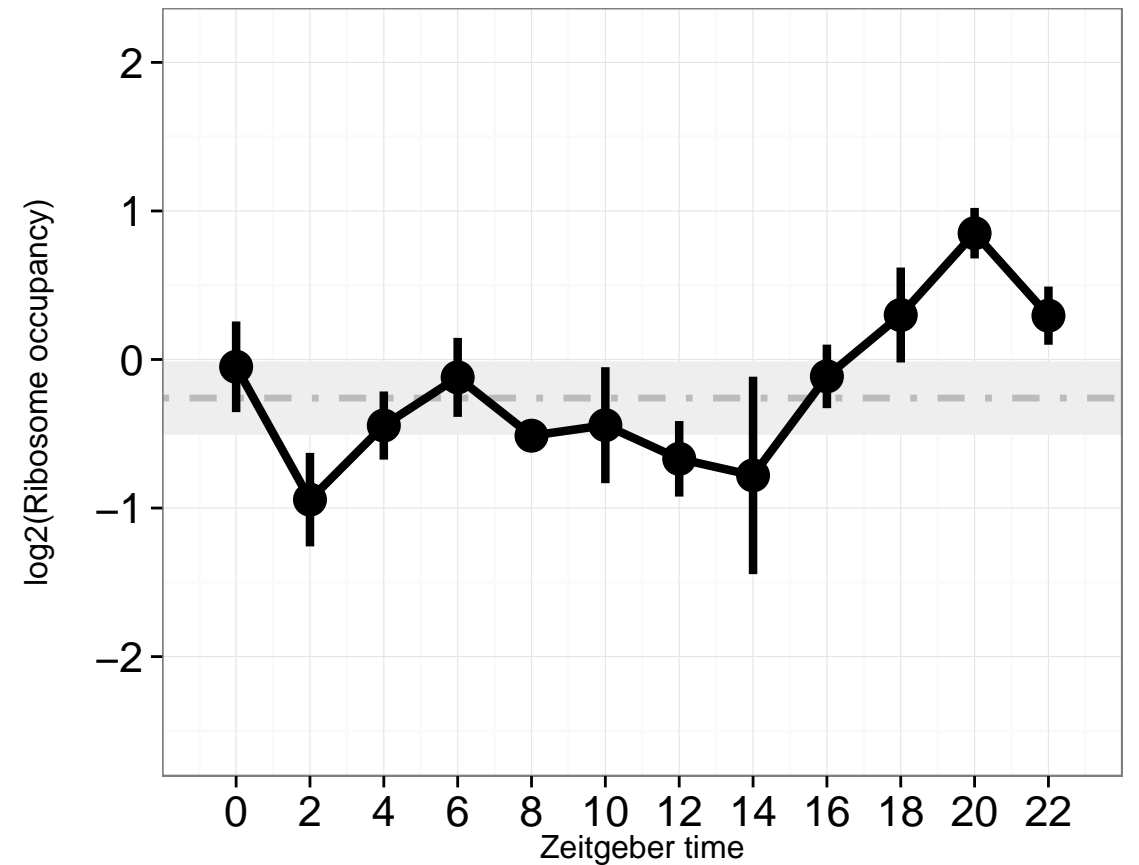

Supplement: Supplementary file 13270 [file 1]

## Oxnad1

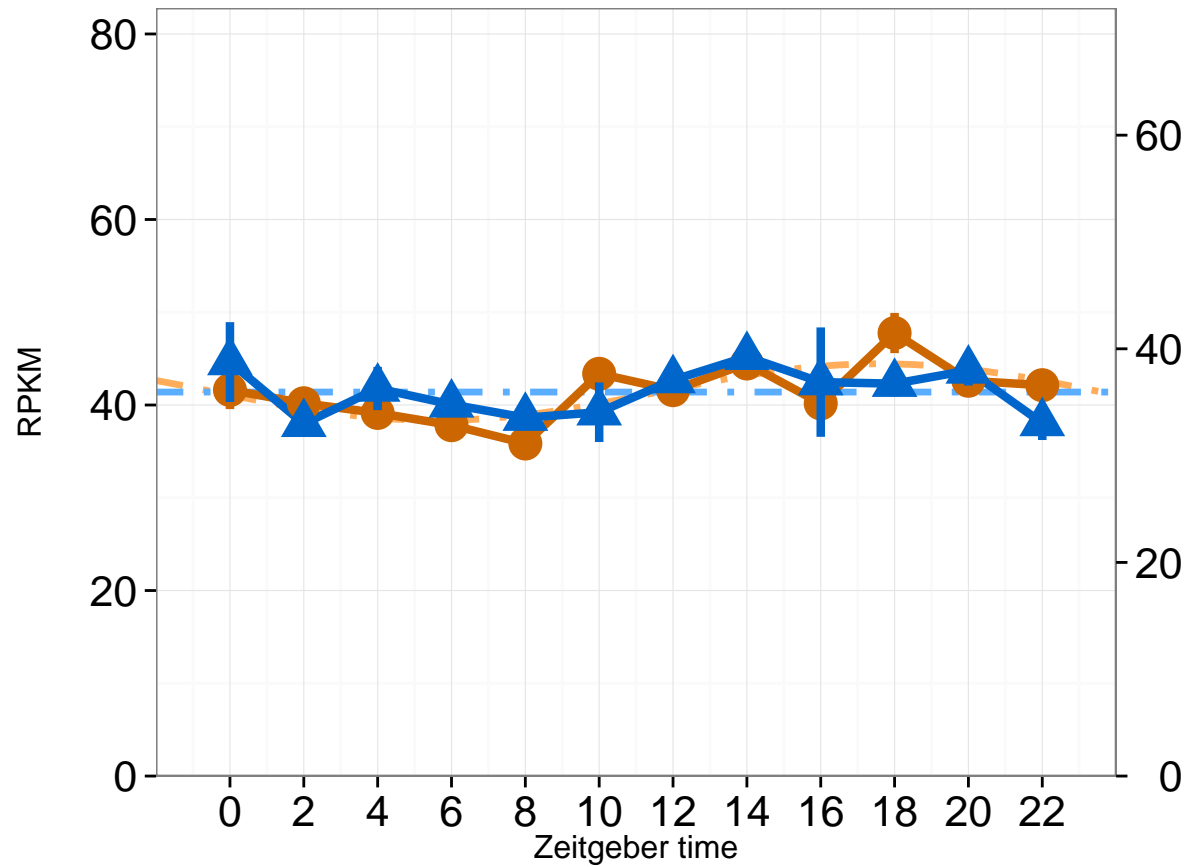

## Oxnad1

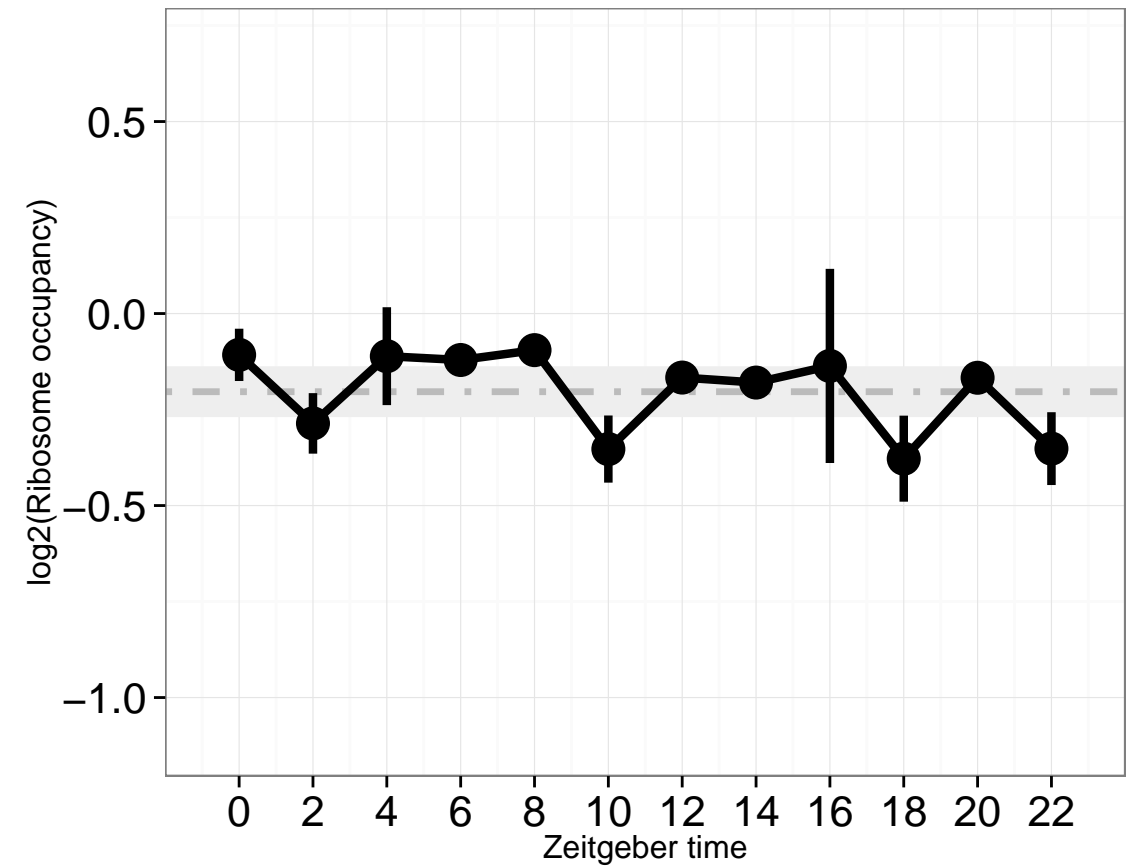

Supplement: Supplementary file 13271 [file 1]

# Tmub1

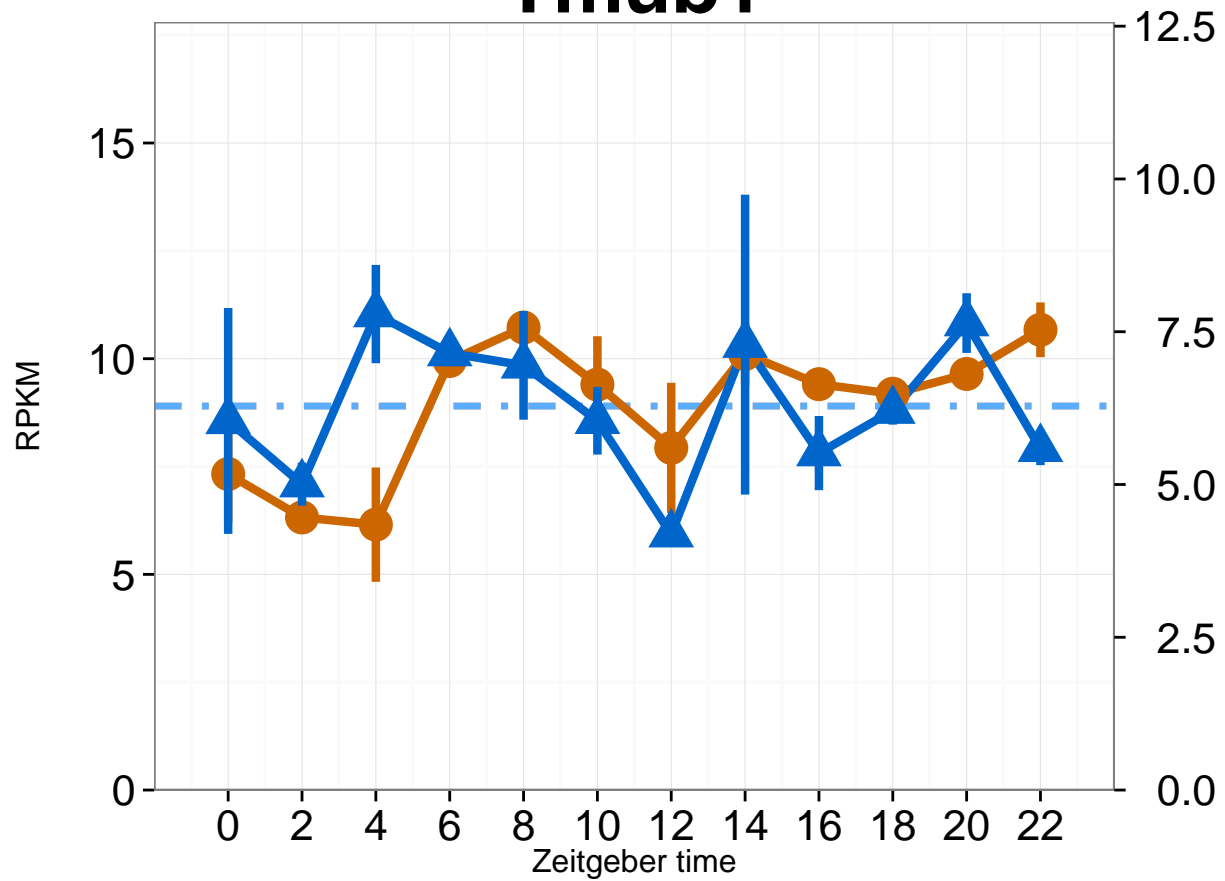

# Tmub1

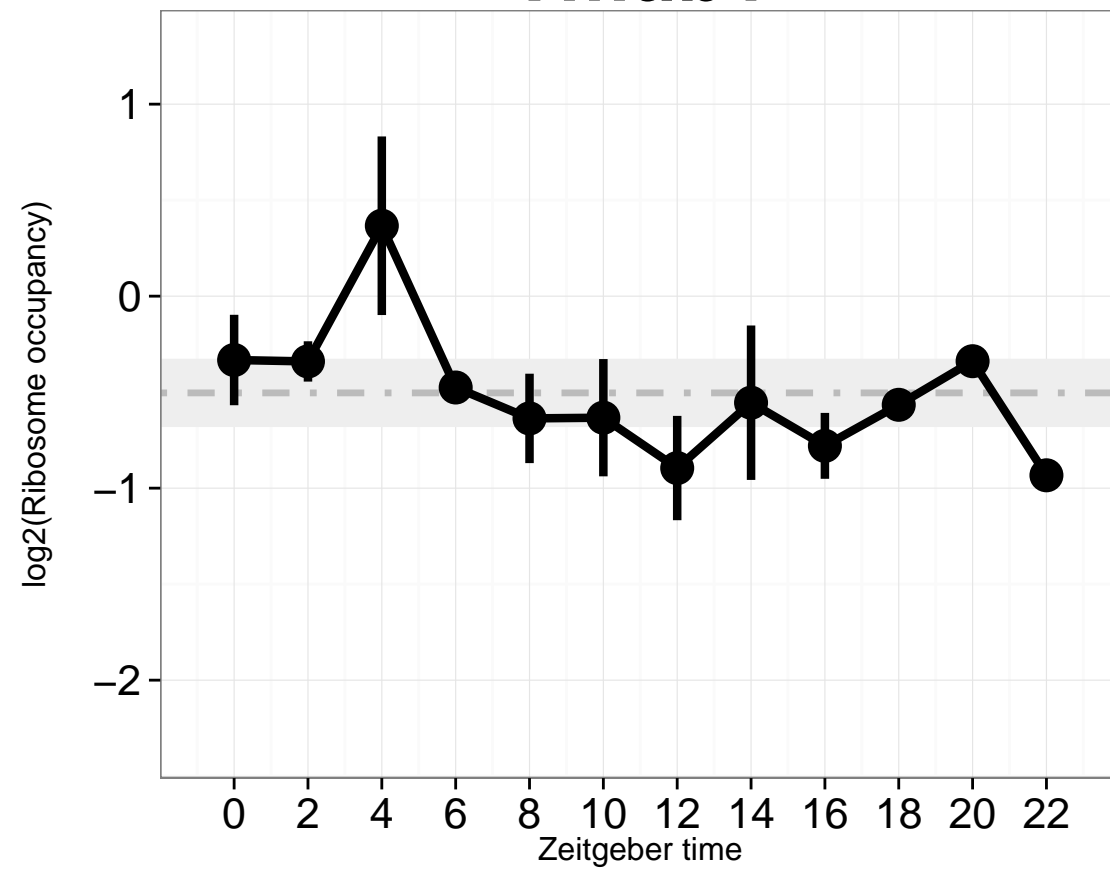

Supplement: Supplementary file 13272 [file 1]

# Pdpm1

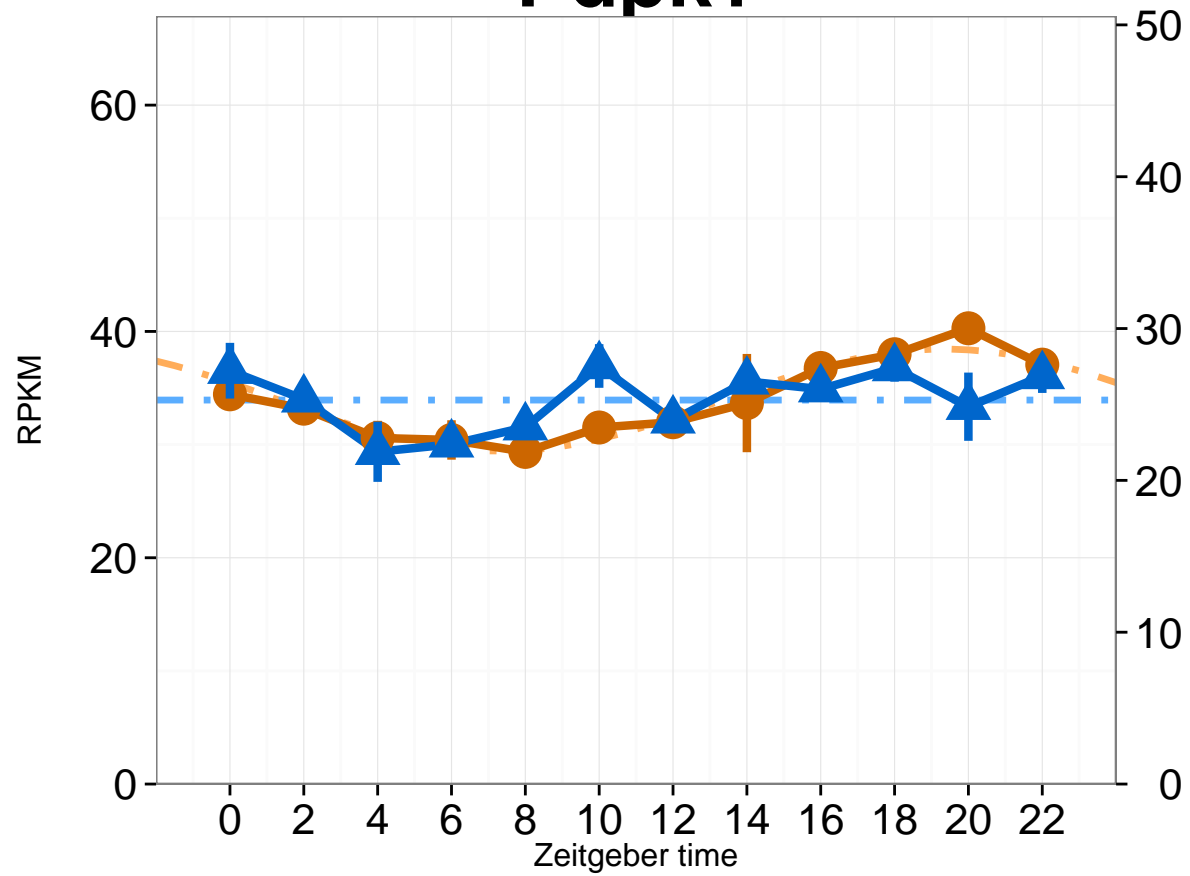

# Pdpm1

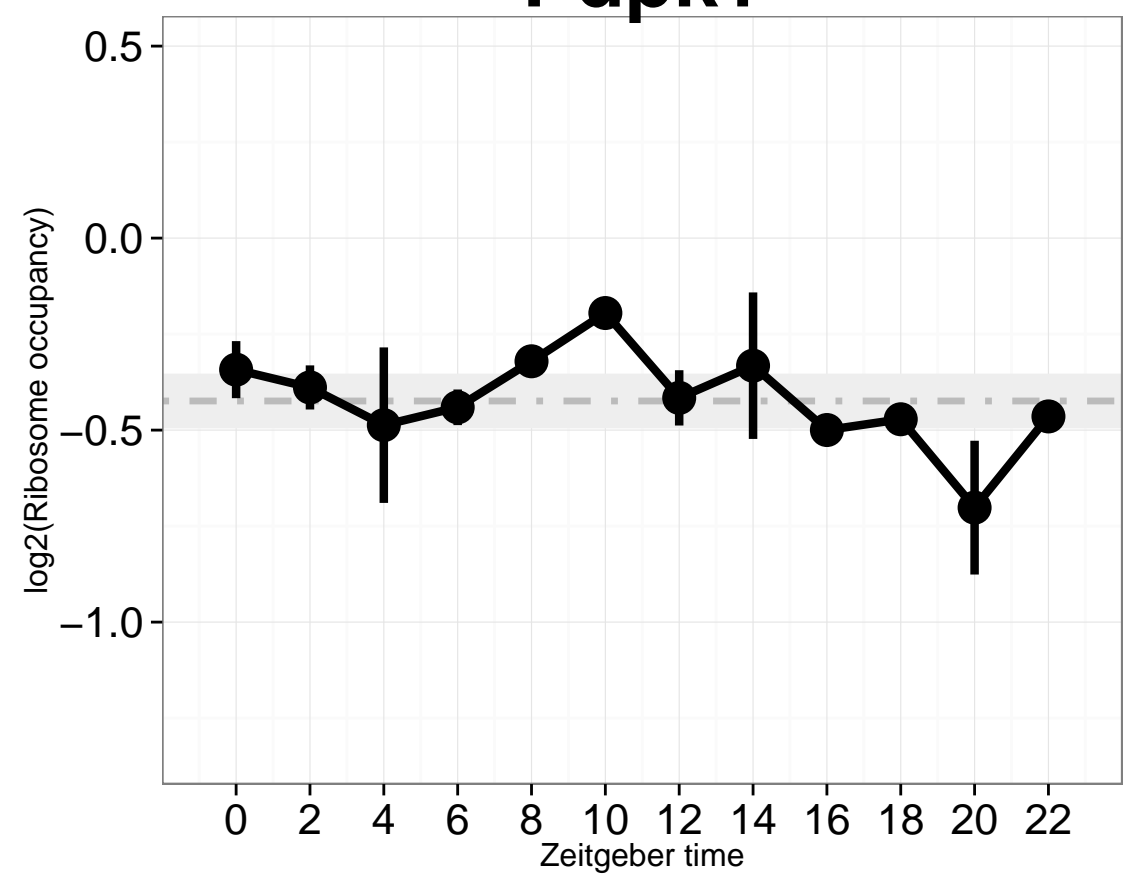

Supplement: Supplementary file 13273 [file 1]

**Gata5 TR**

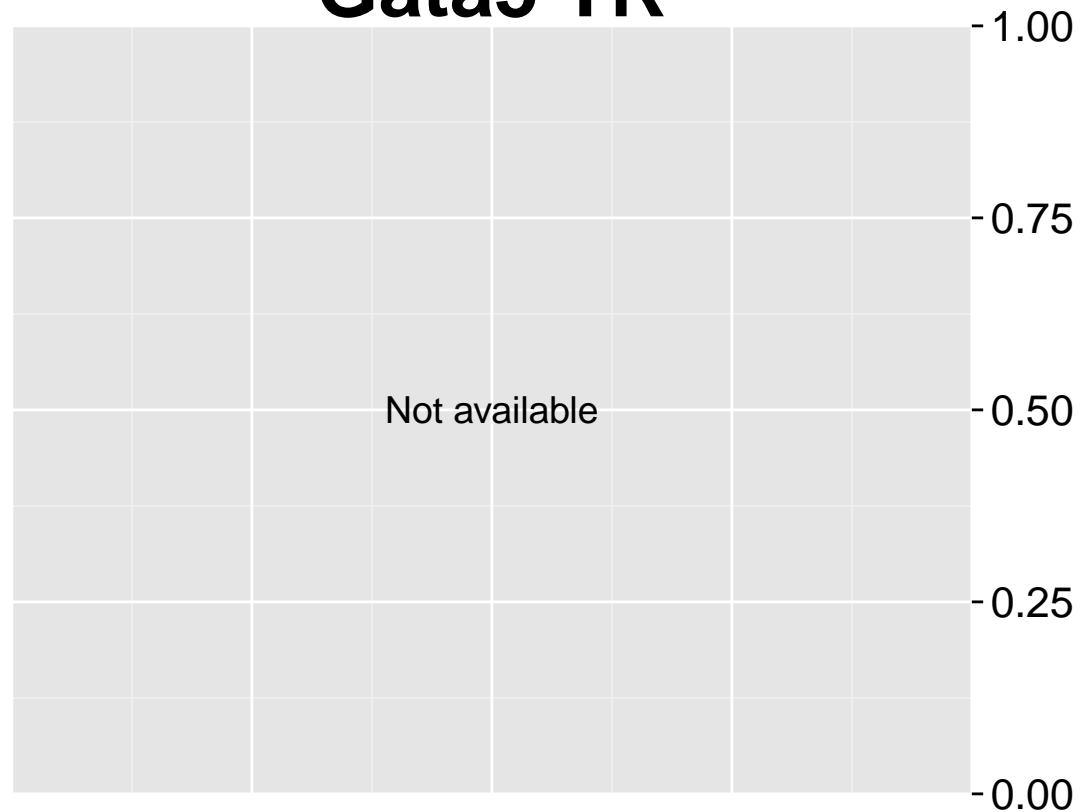

**Gata5 log2(Ribosome occupancy**

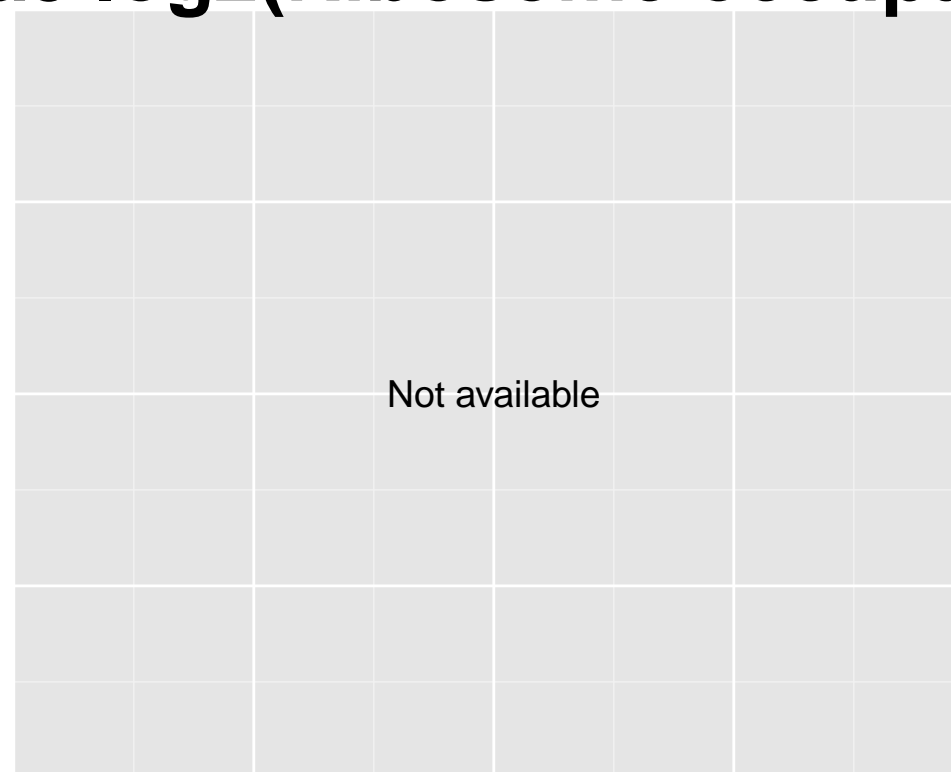

Supplement: Supplementary file 13274 [file 1]

## Gtpbp10

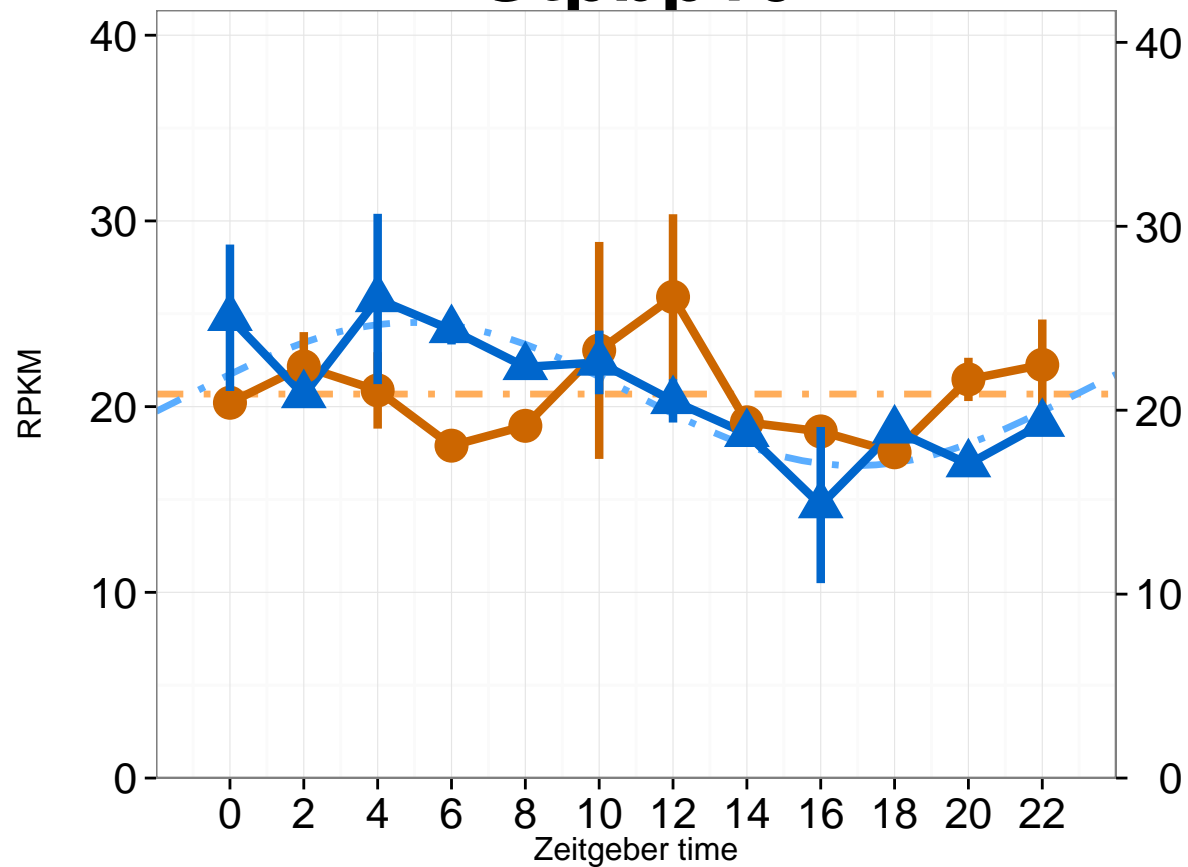

## Gtpbp10

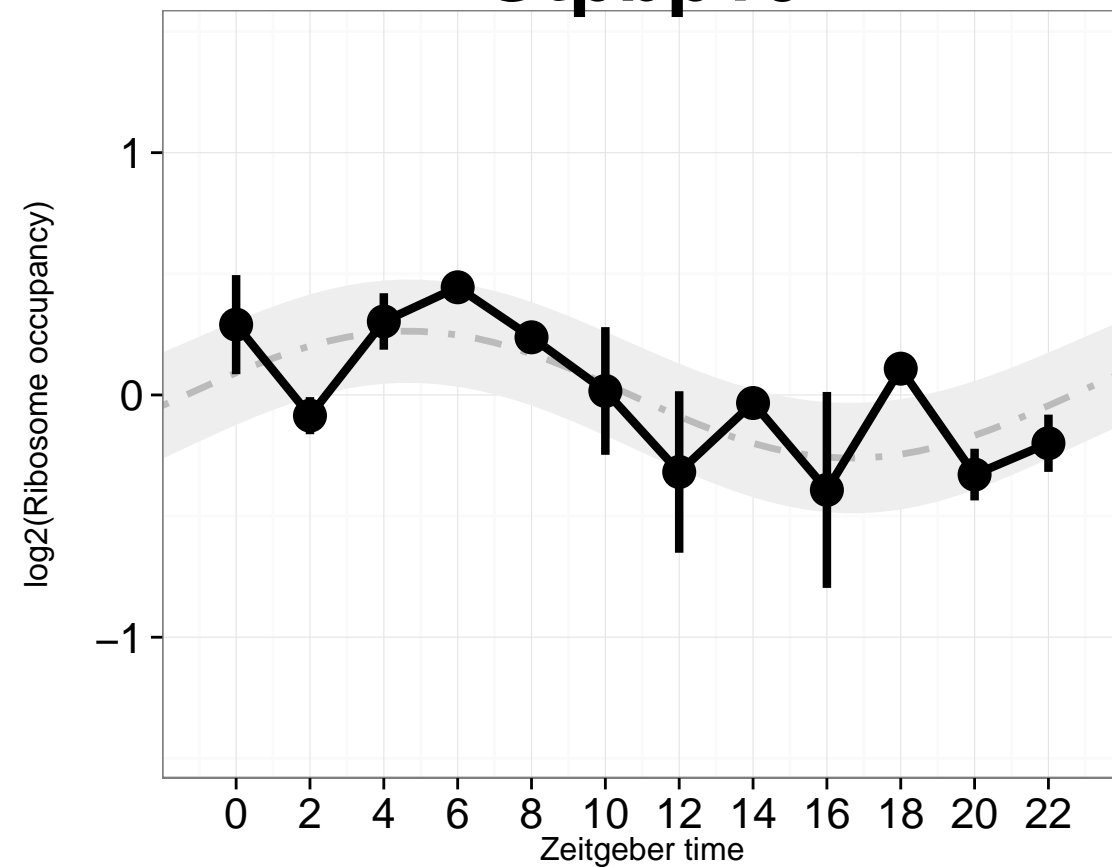

Supplement: Supplementary file 13275 [file 1]

# Uqcc1

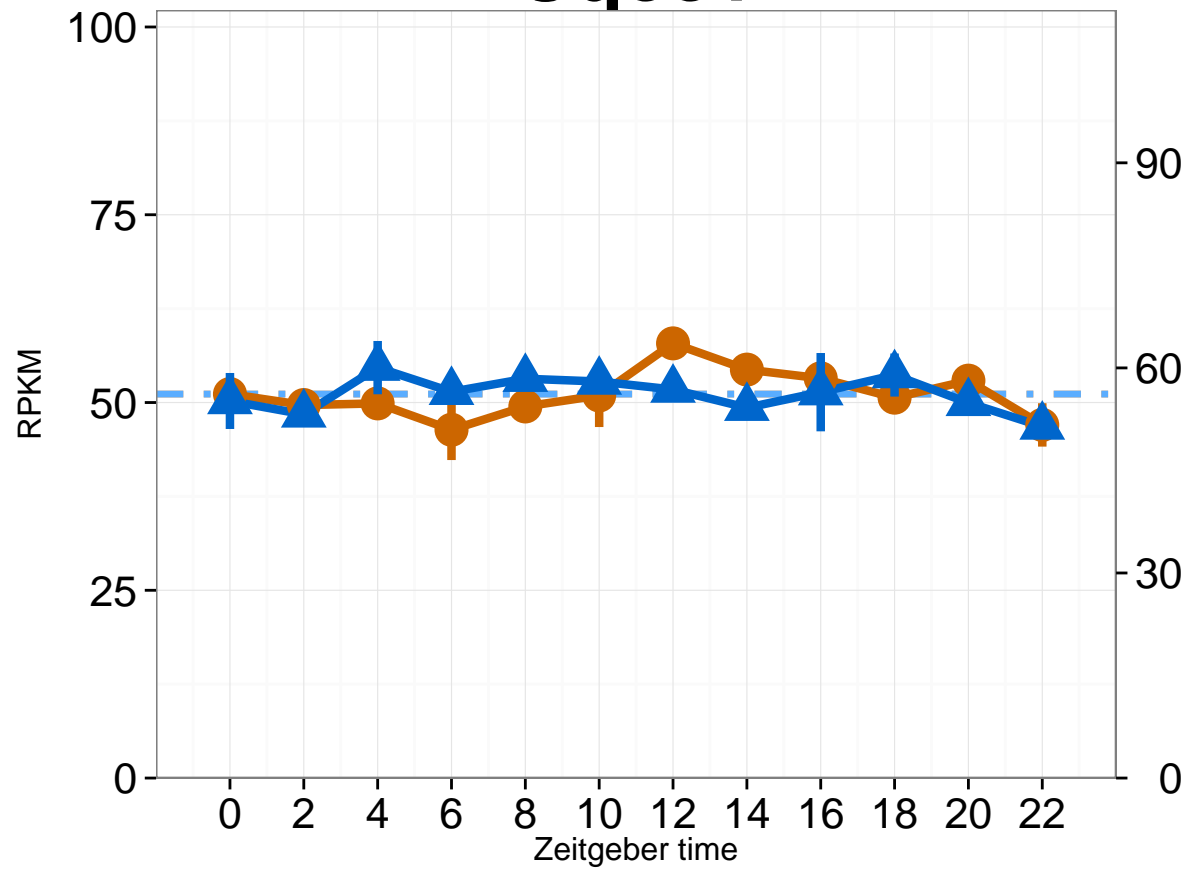

# Uqcc1

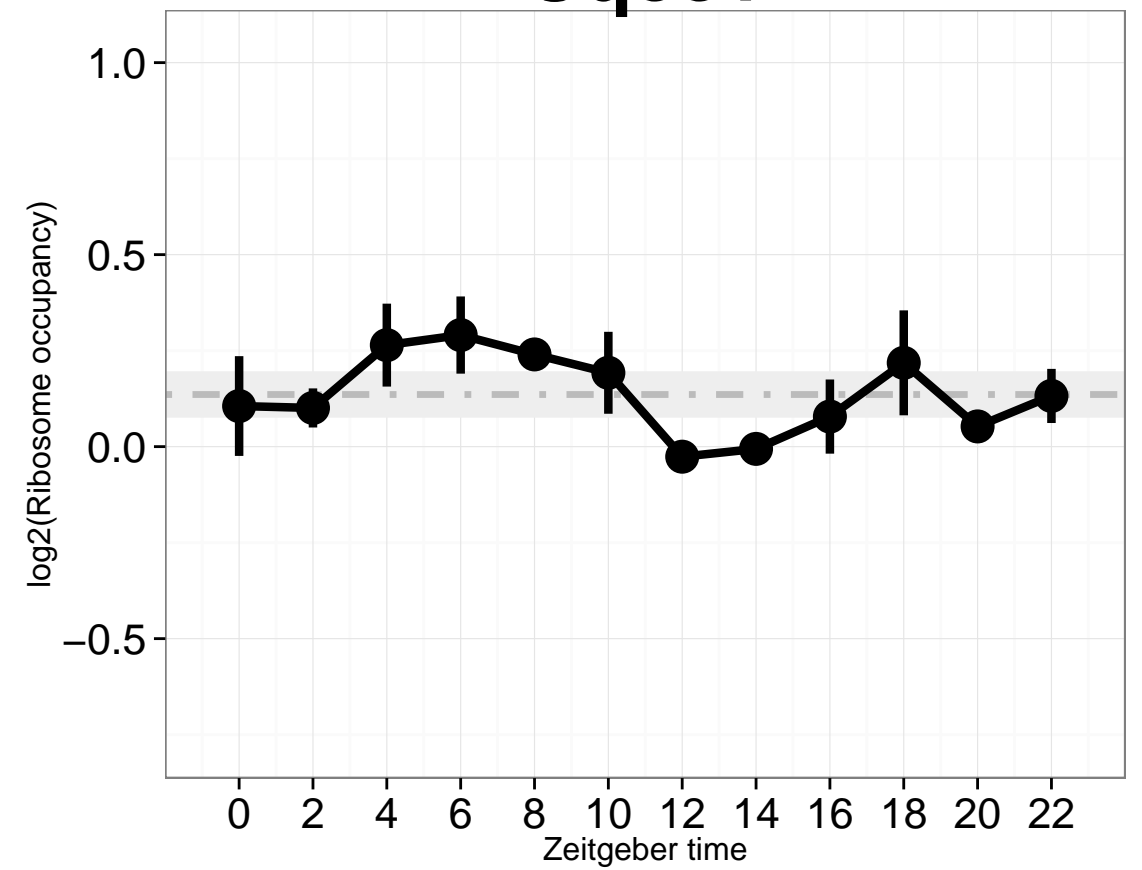

Supplement: Supplementary file 13276 [file 1]

## Tgfbr1

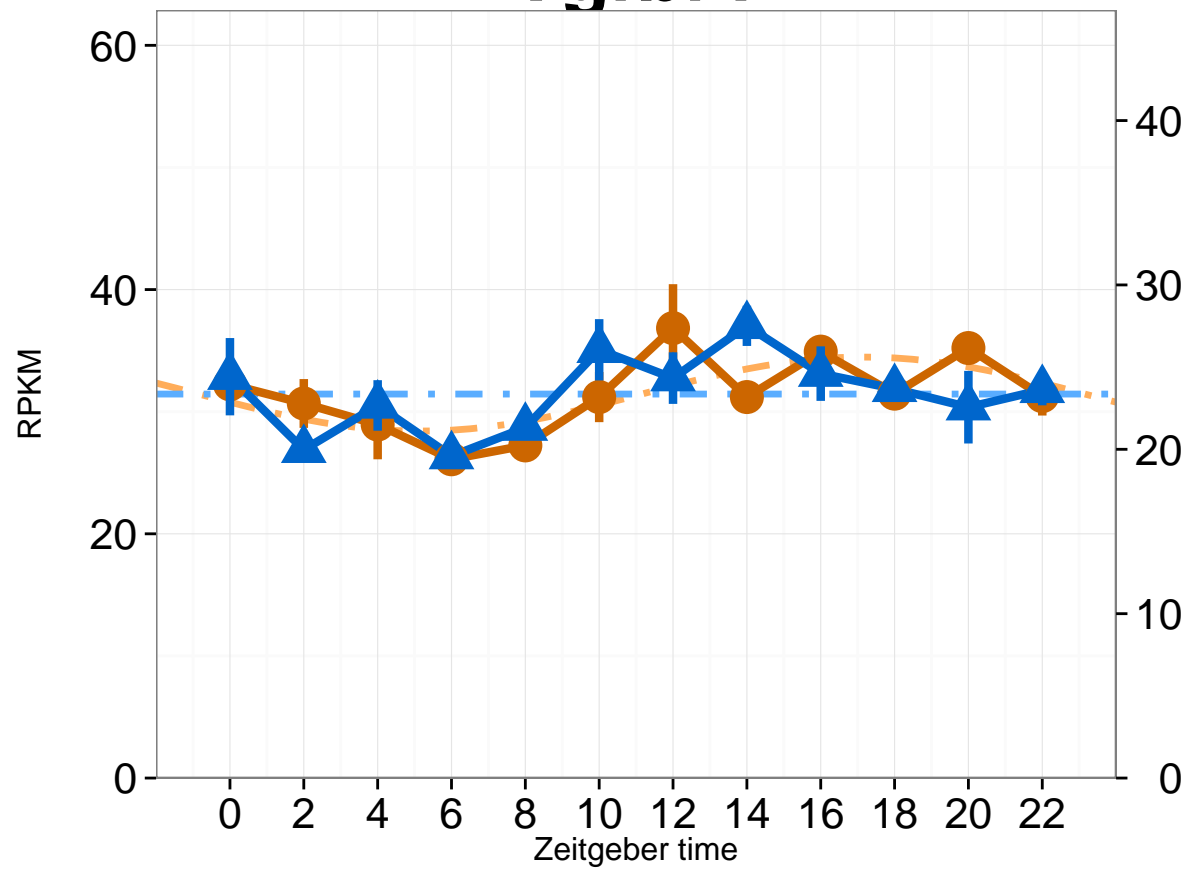

## Tgfbr1

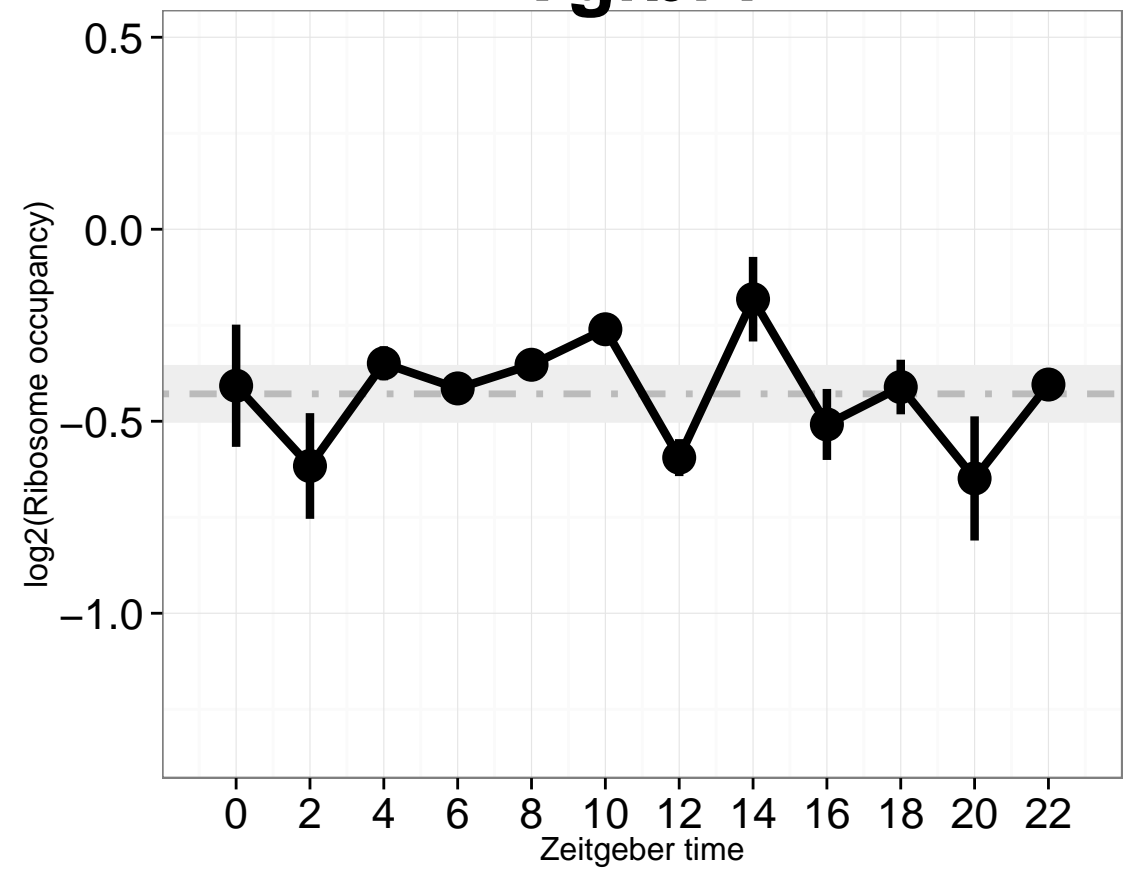

Supplement: Supplementary file 13277 [file 1]

# 1110001A16Rik

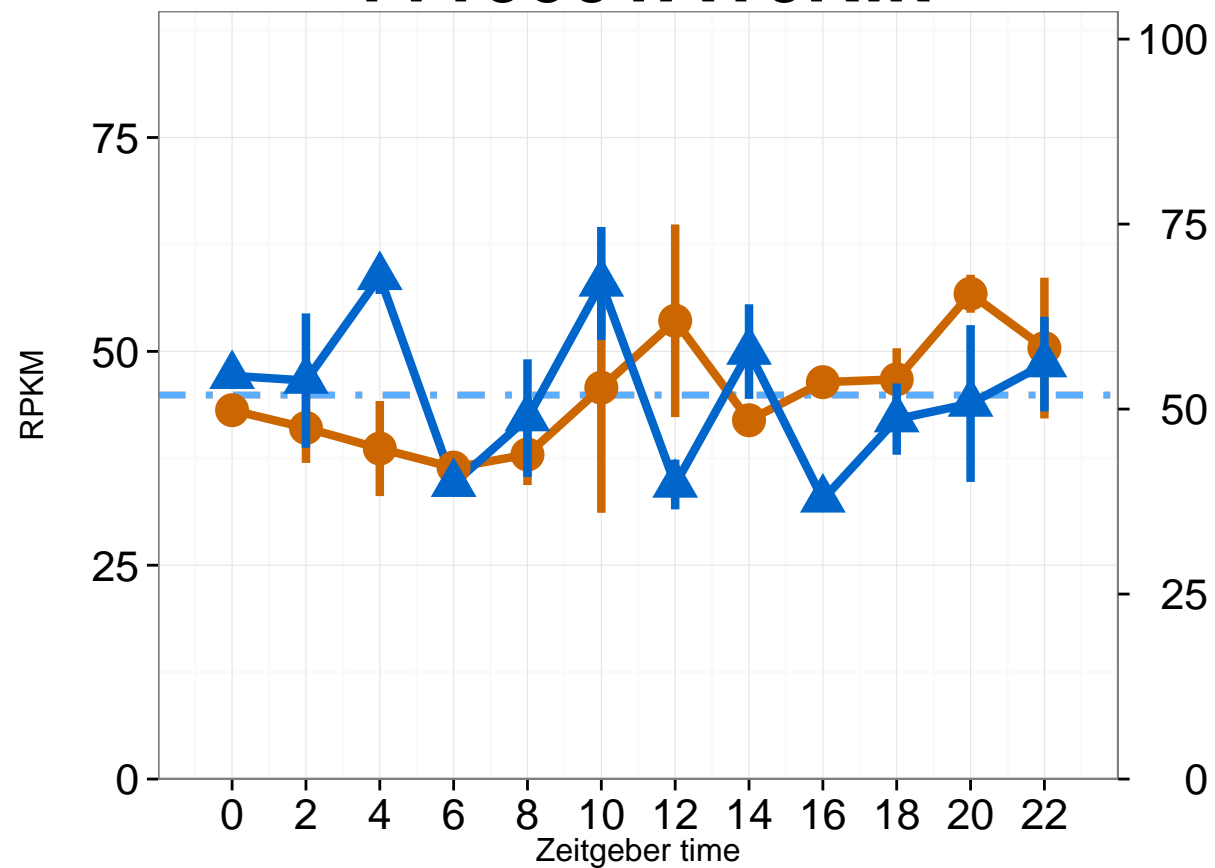

# 1110001A16Rik

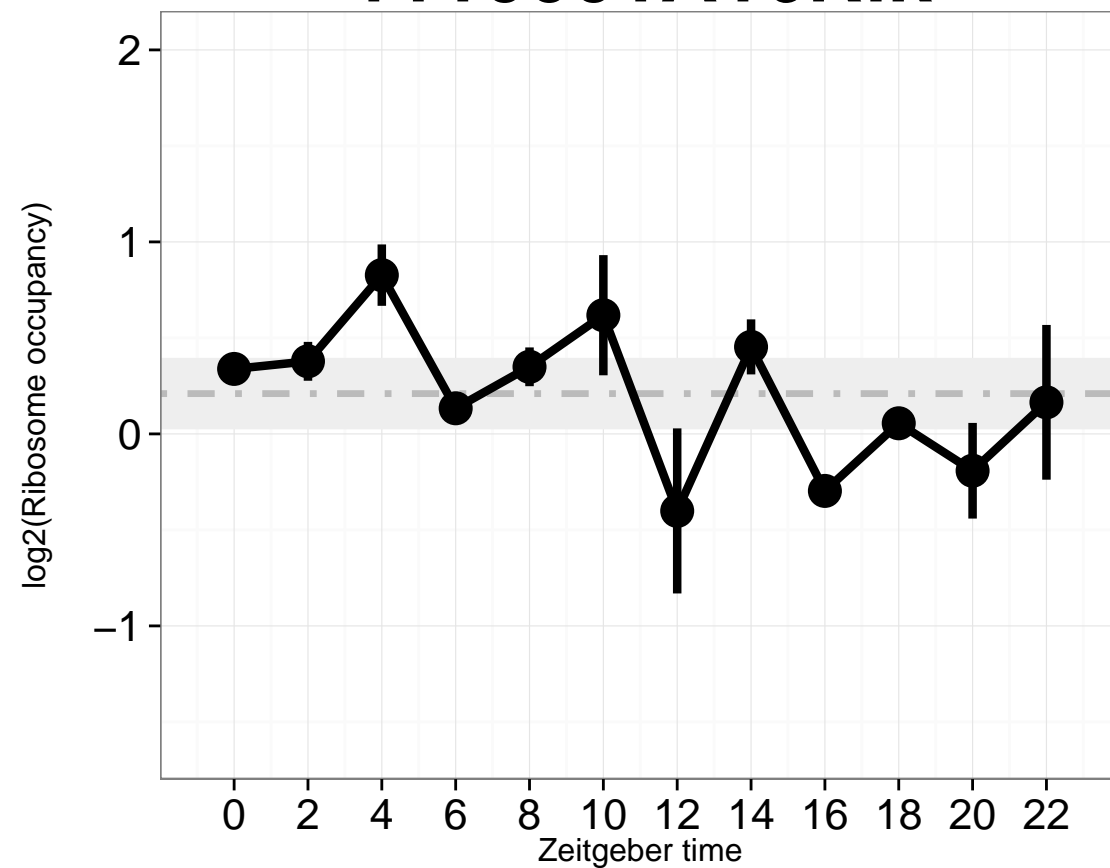

Supplement: Supplementary file 13278 [file 1]

# Zfp870

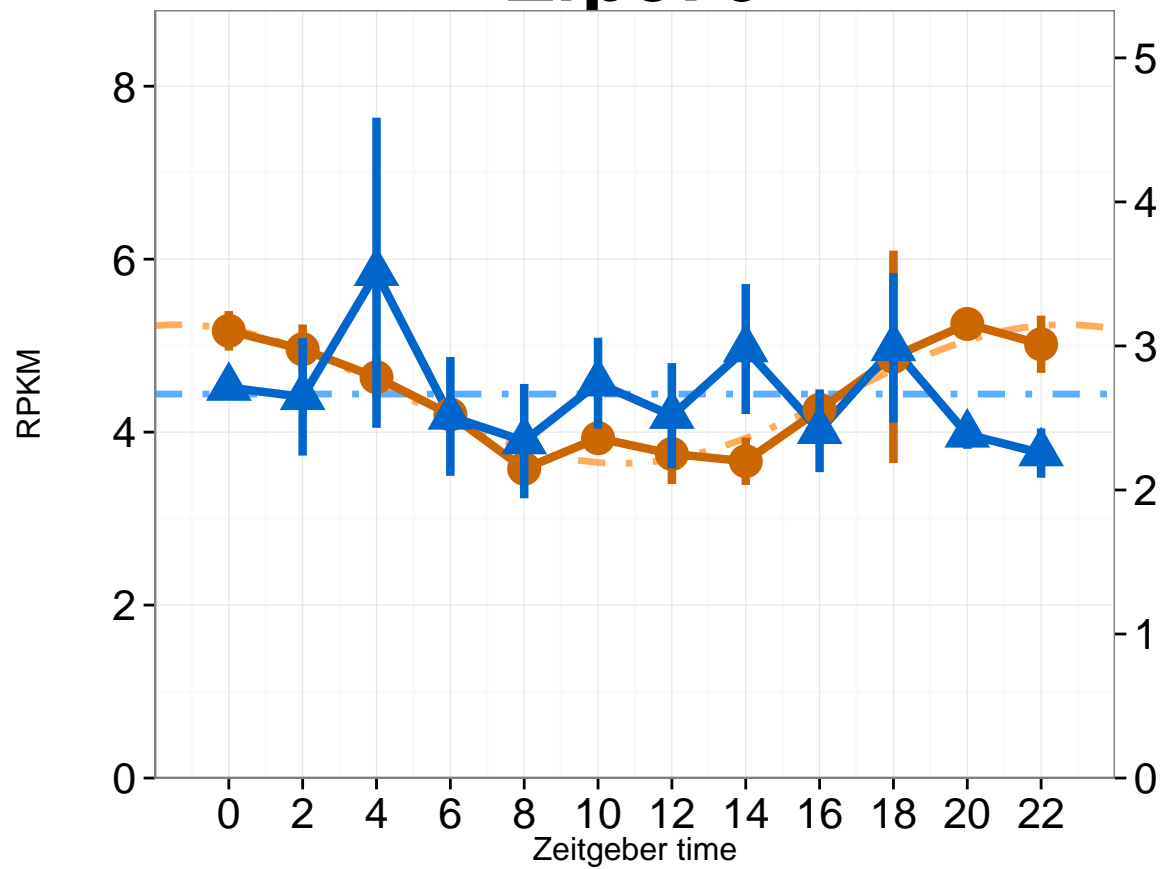

# Zfp870

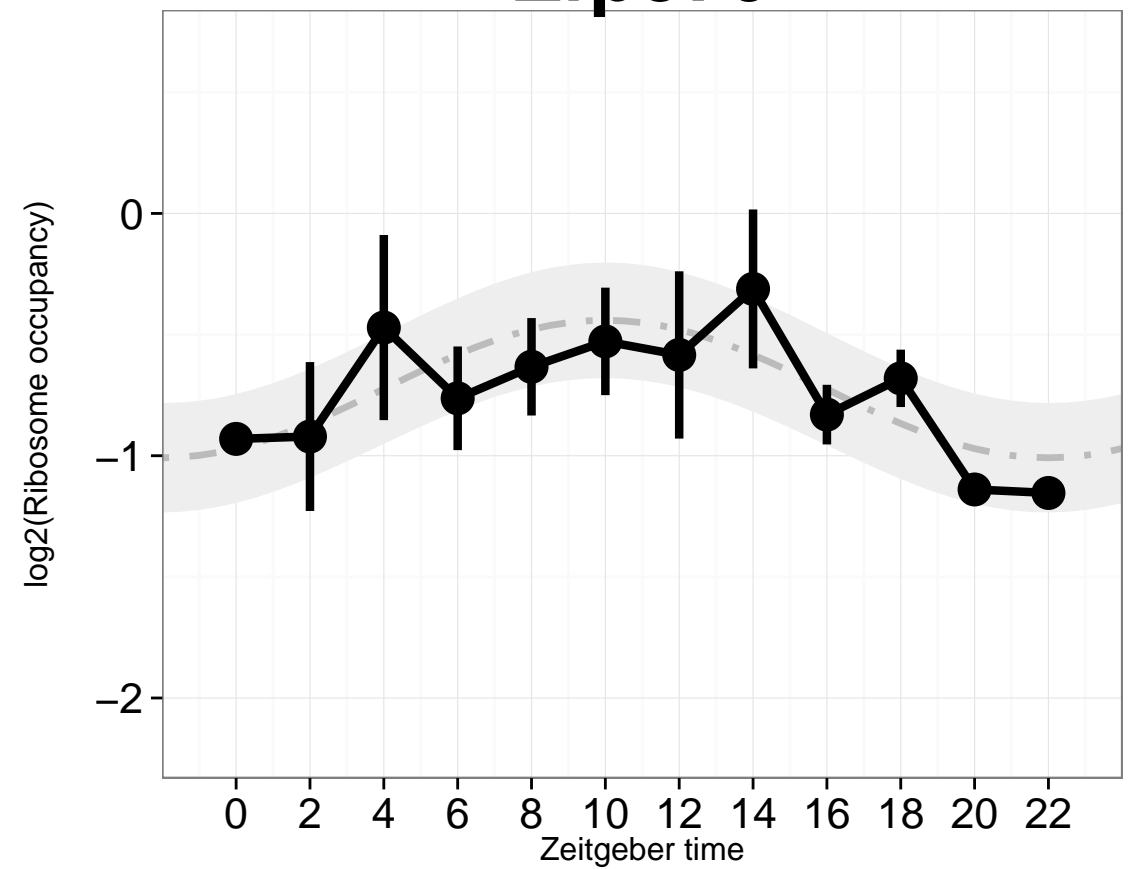

Supplement: Supplementary file 13279 [file 1]

## Chd7

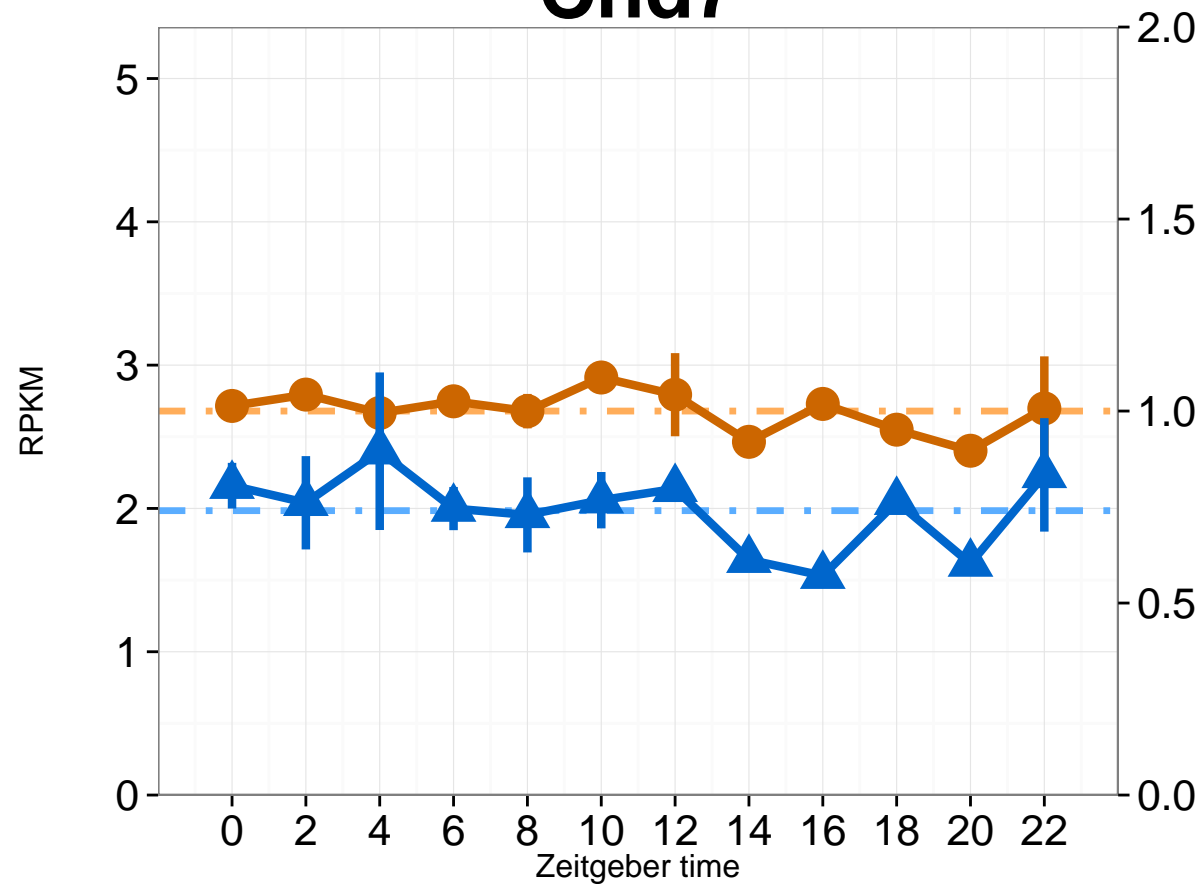

## Chd7

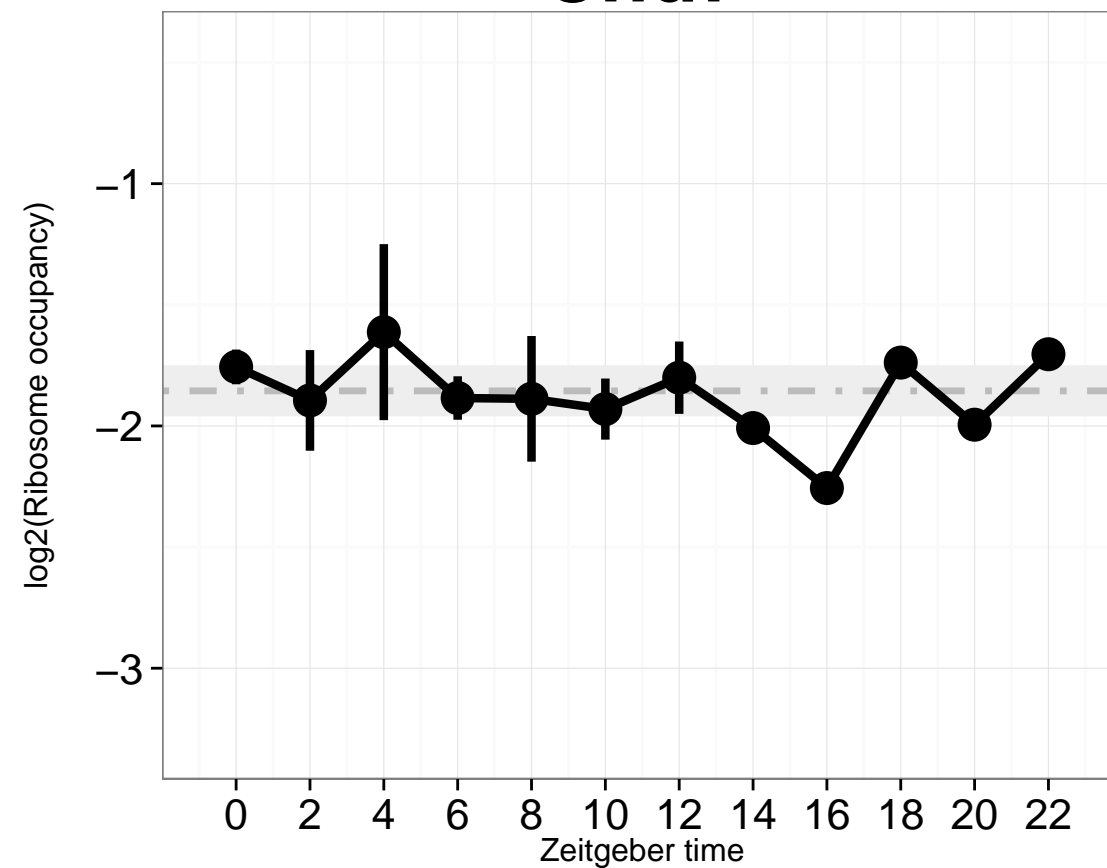

Supplement: Supplementary file 13280 [file 1]

# Bloc1s2

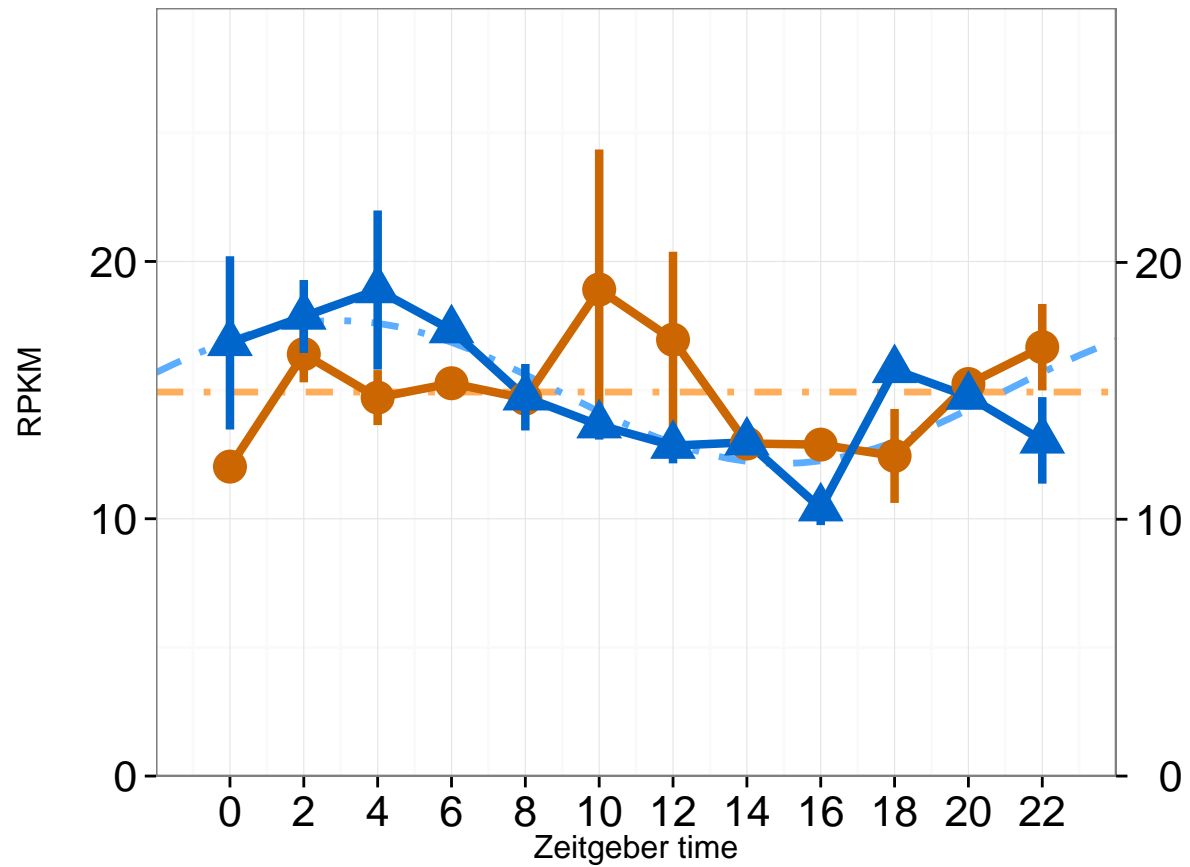

# Bloc1s2

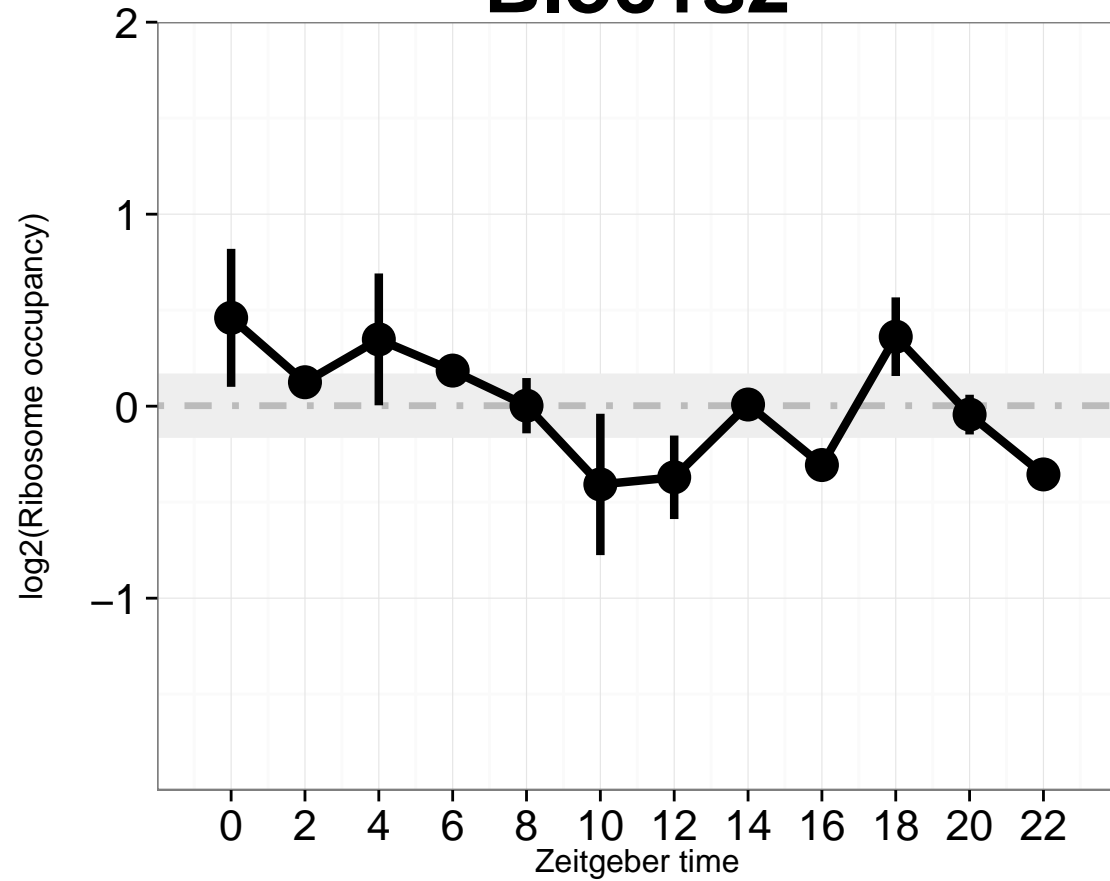

Supplement: Supplementary file 13281 [file 1]

## Ube2d2a

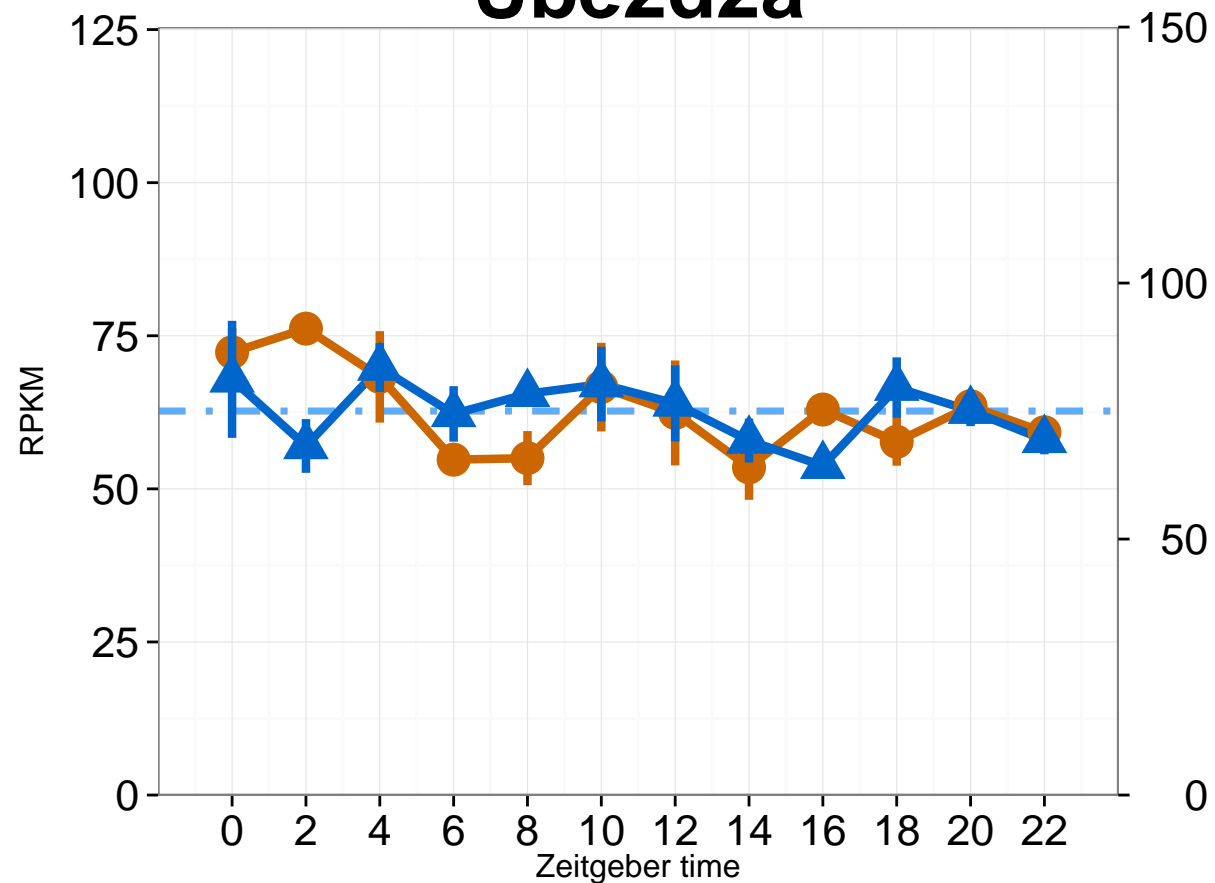

## Ube2d2a

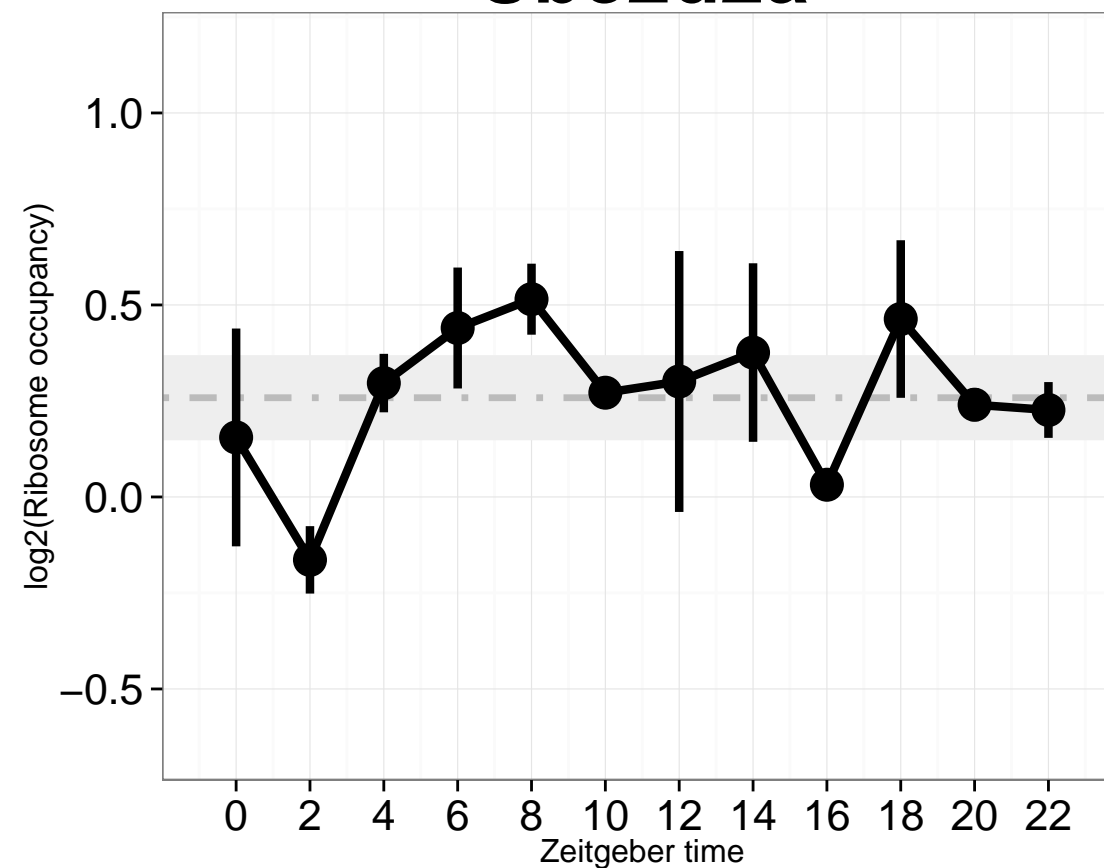

Supplement: Supplementary file 13282 [file 1]

## Nrp2

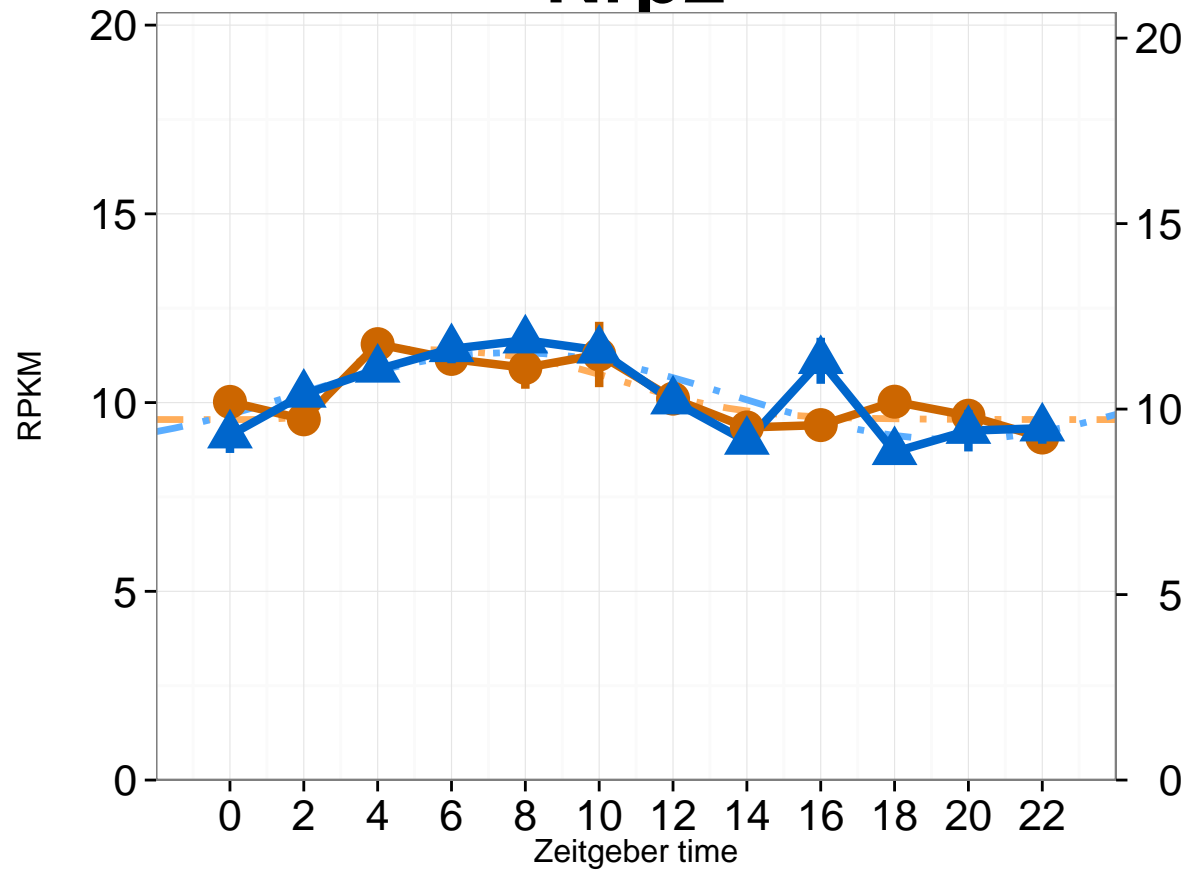

## Nrp2

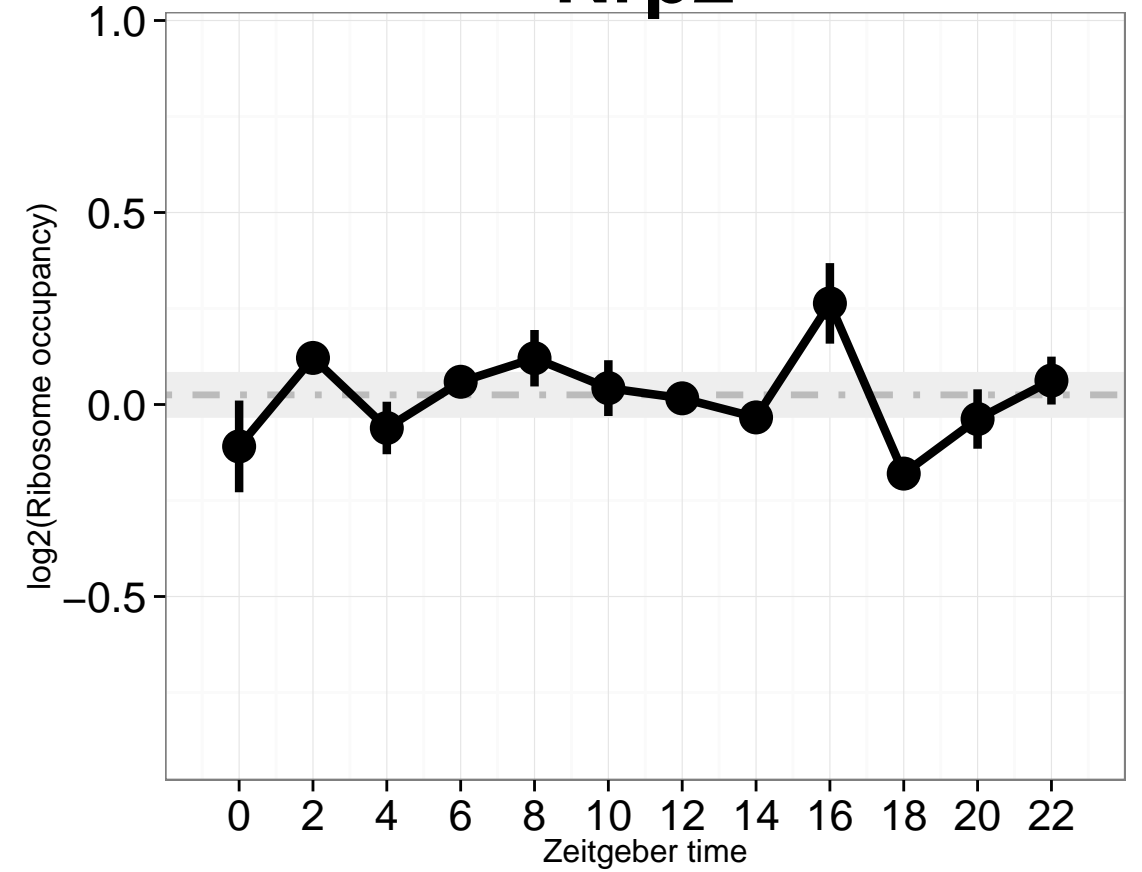

Supplement: Supplementary file 13283 [file 1]

# Zbtb16

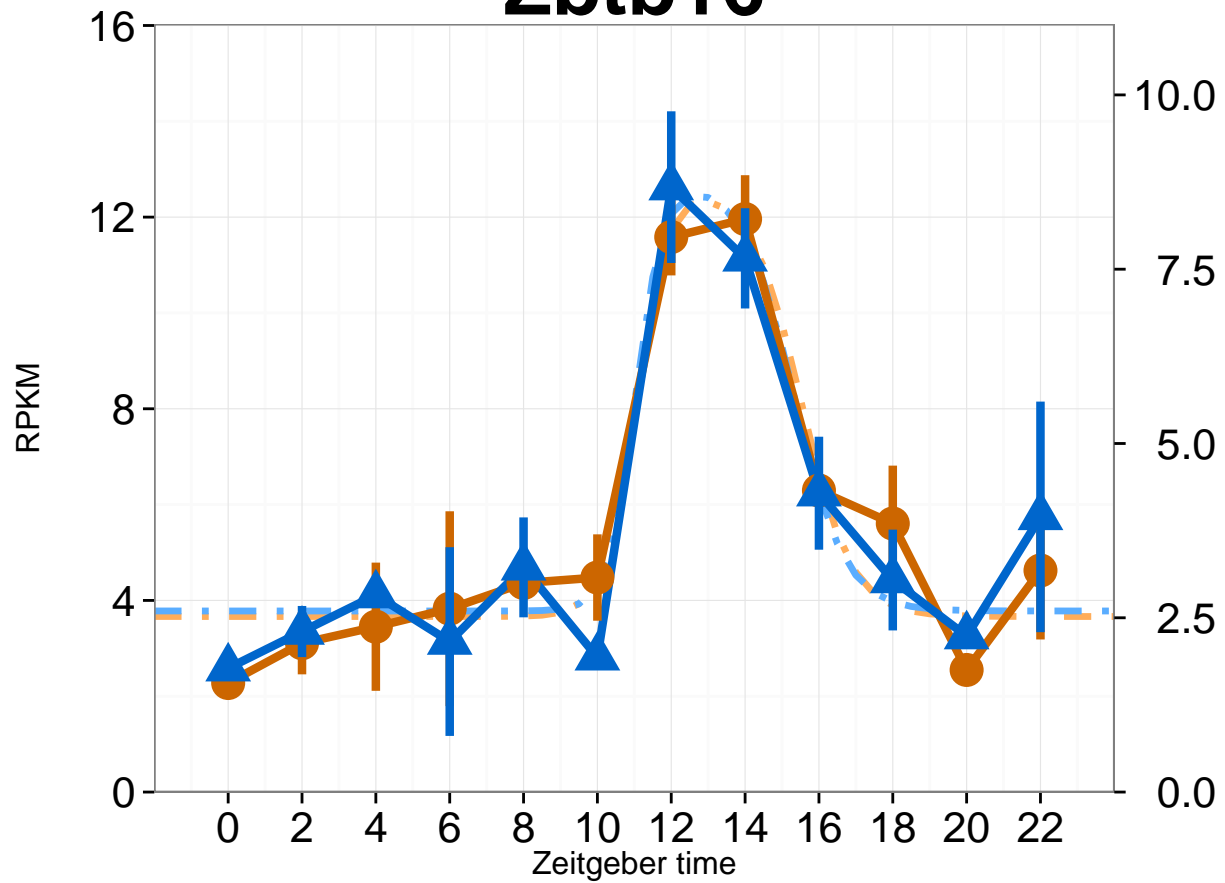

# Zbtb16

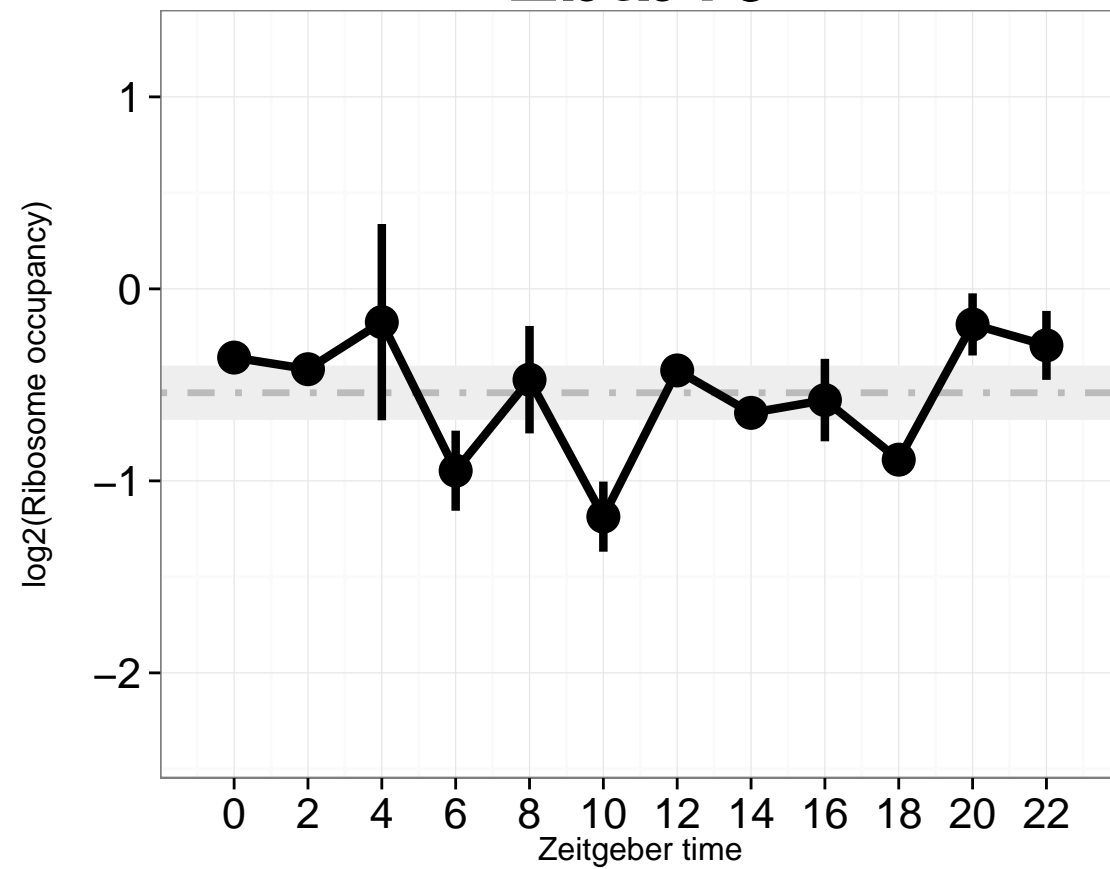

Supplement: Supplementary file 13284 [file 1]

# Zfp287

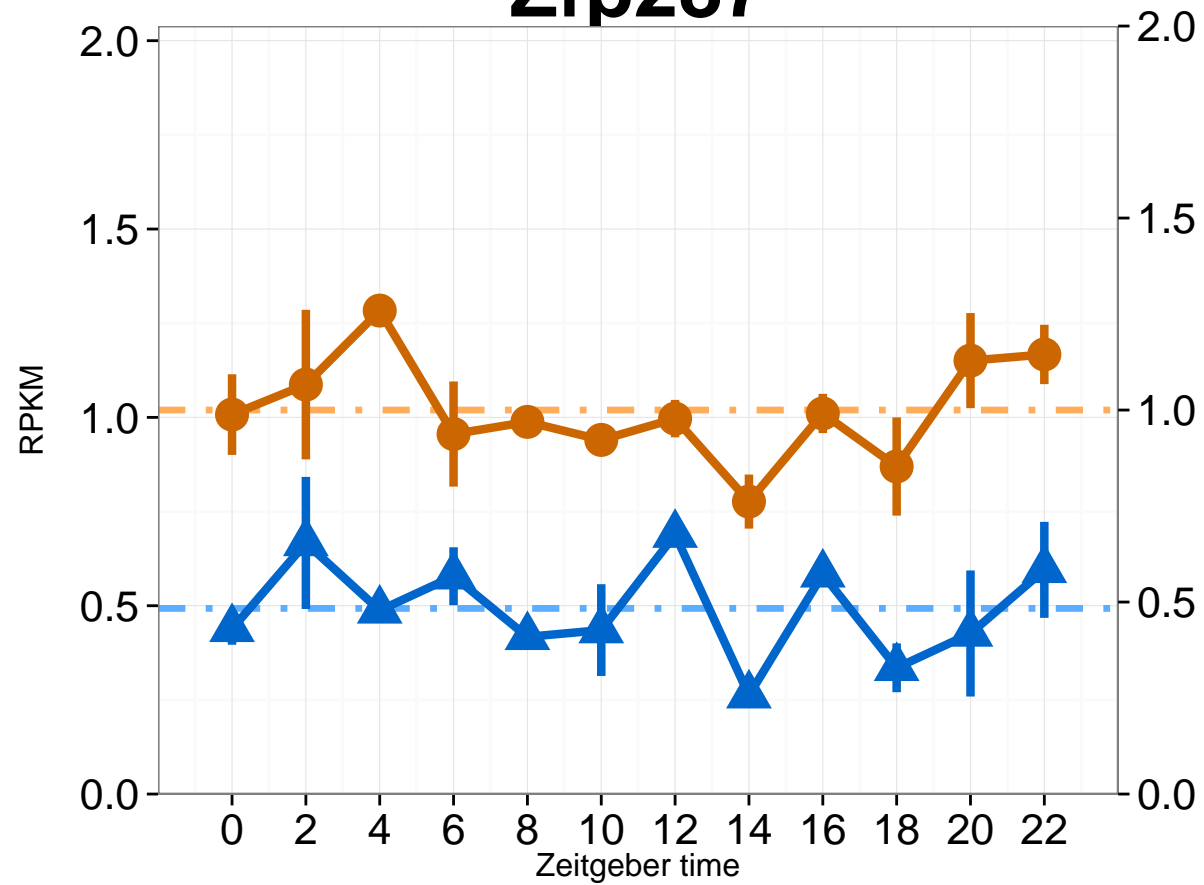

# Zfp287

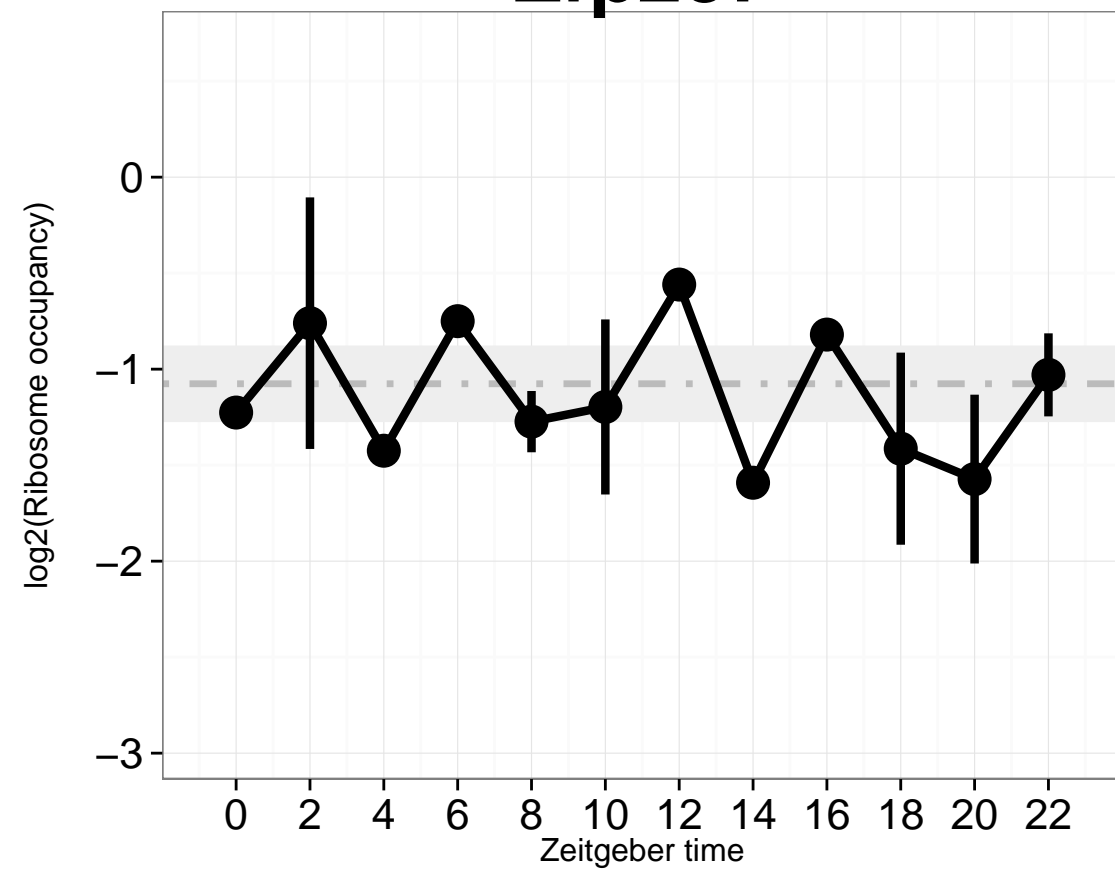

Supplement: Supplementary file 13285 [file 1]

# Qpct

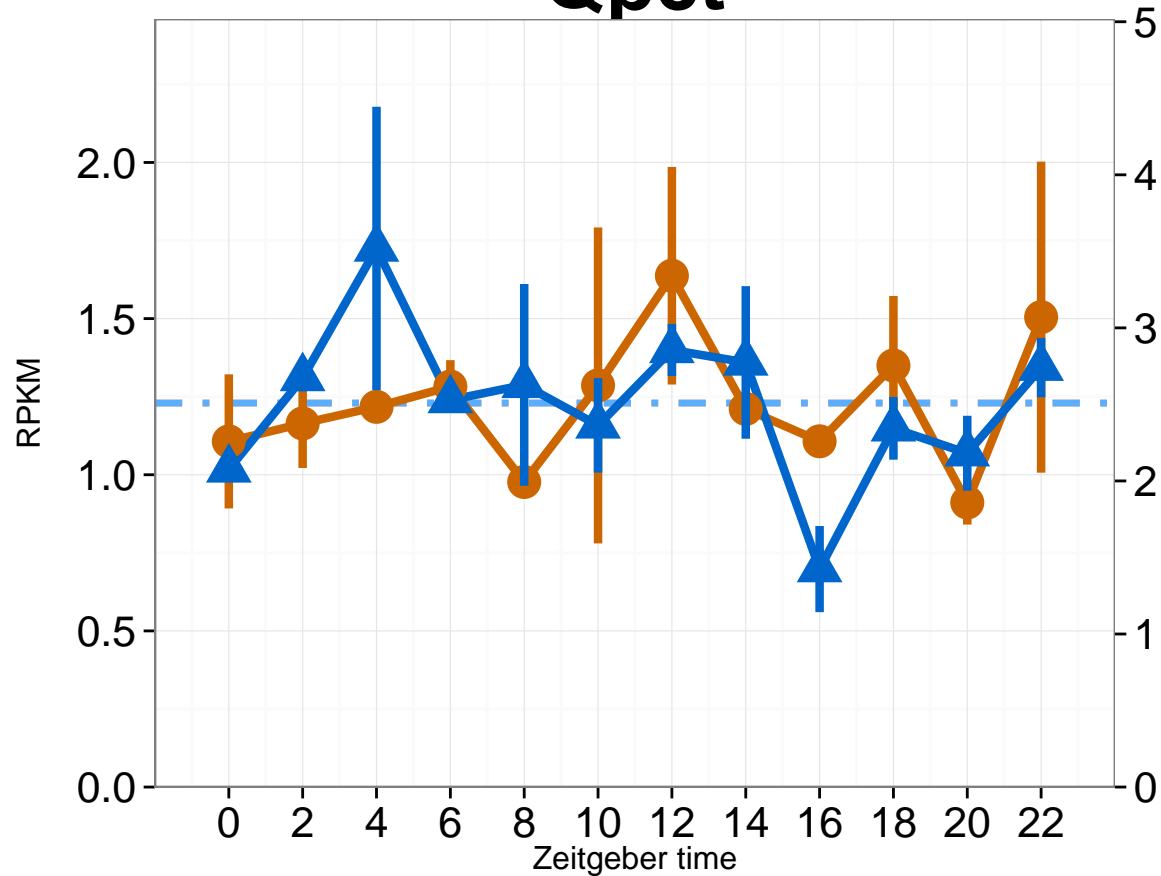

# Qpct

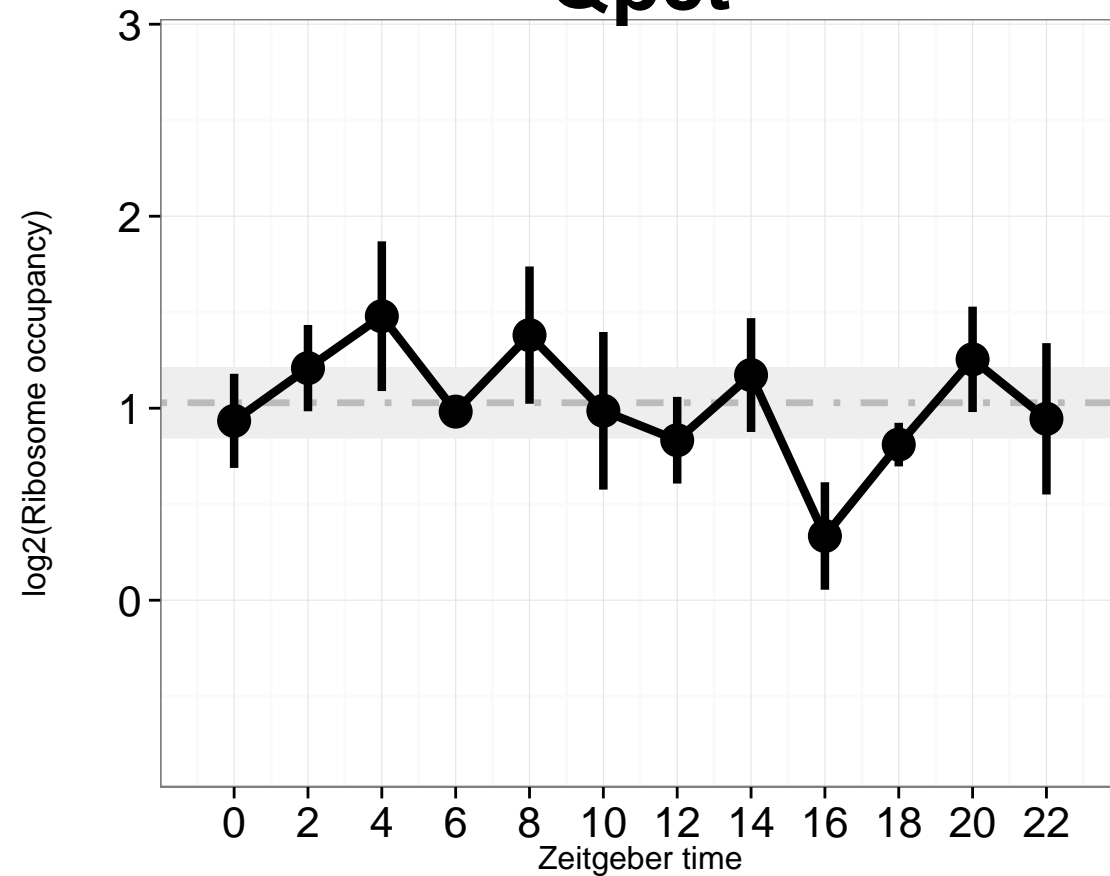

Supplement: Supplementary file 13286 [file 1]

# Ap1m2

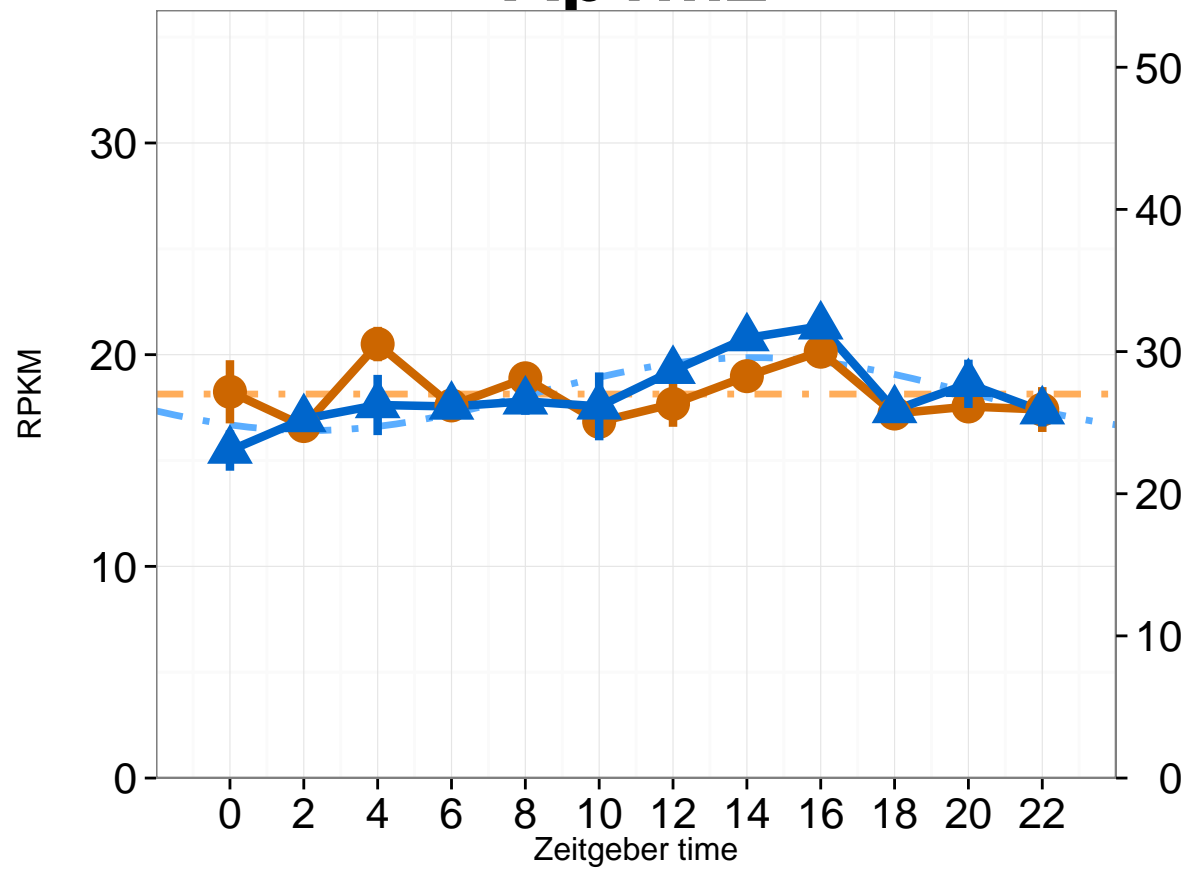

# Ap1m2

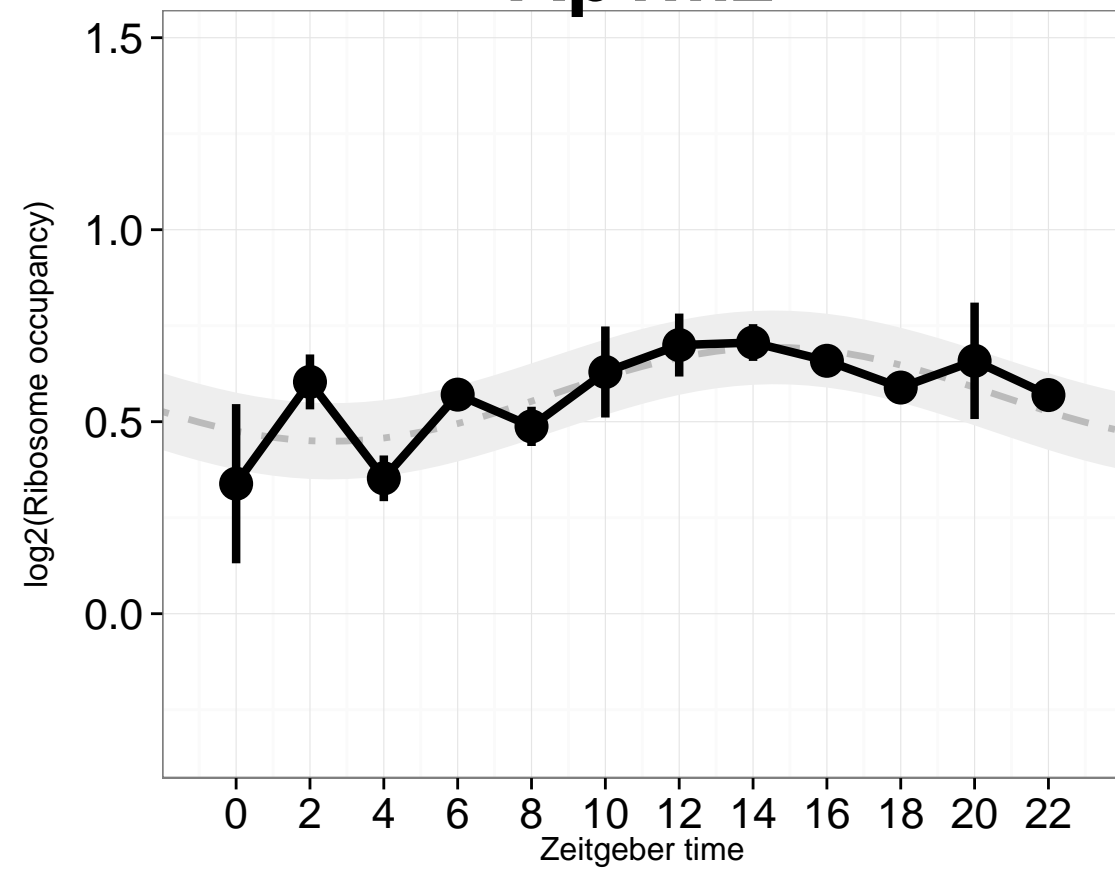

Supplement: Supplementary file 13287 [file 1]

## Spry2

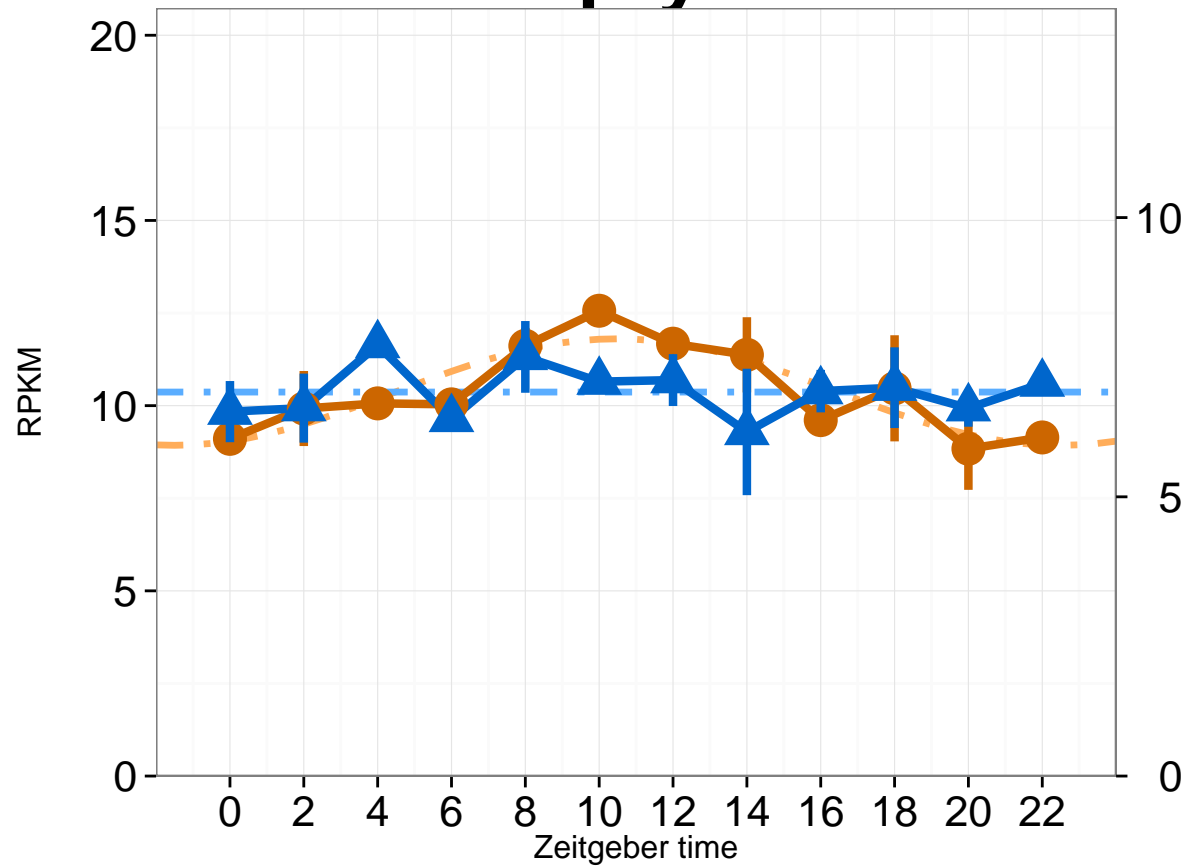

## Spry2

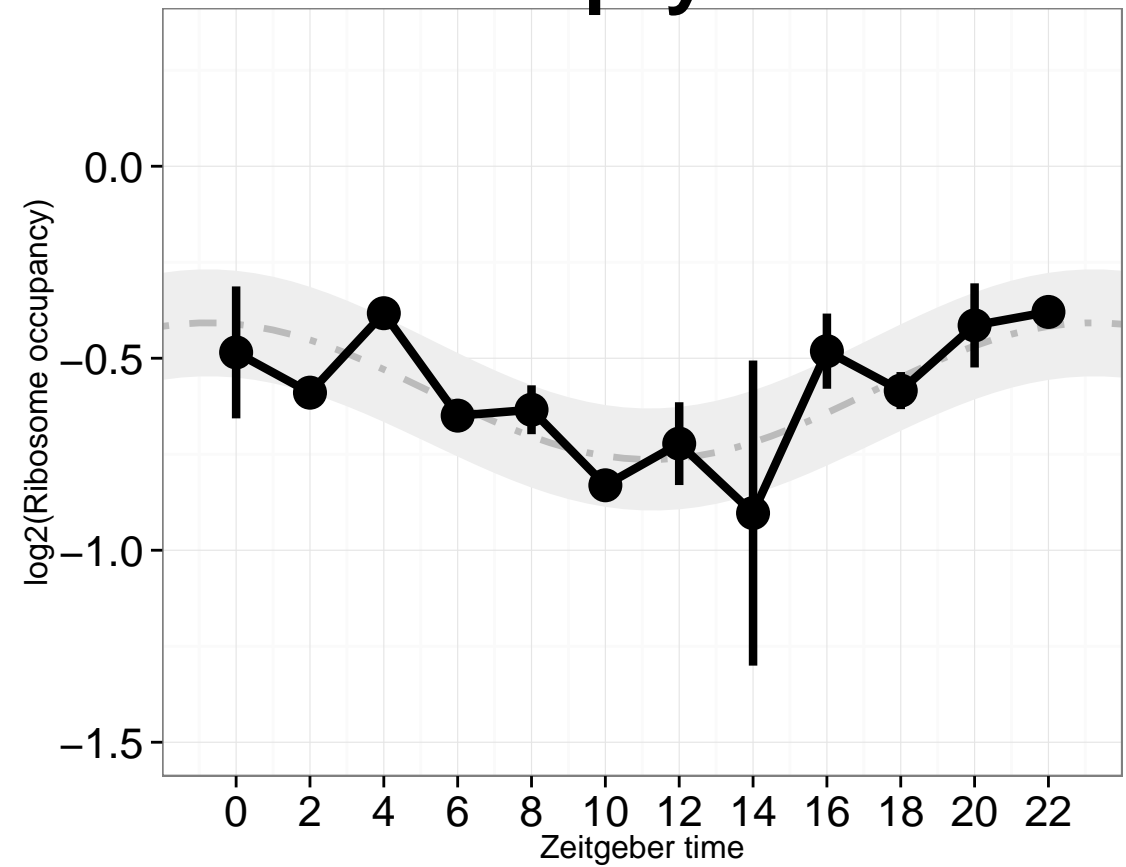

Supplement: Supplementary file 13288 [file 1]

# Spcs2

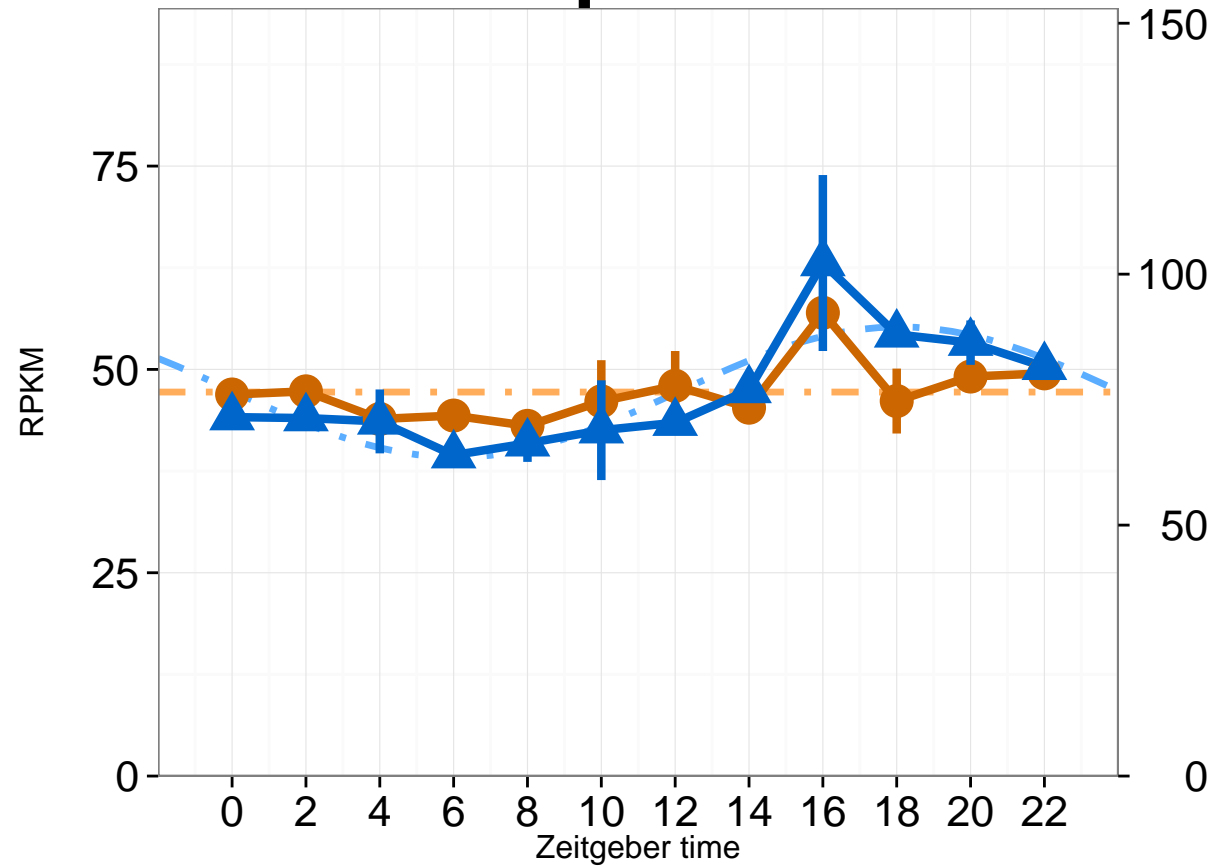

# Spcs2

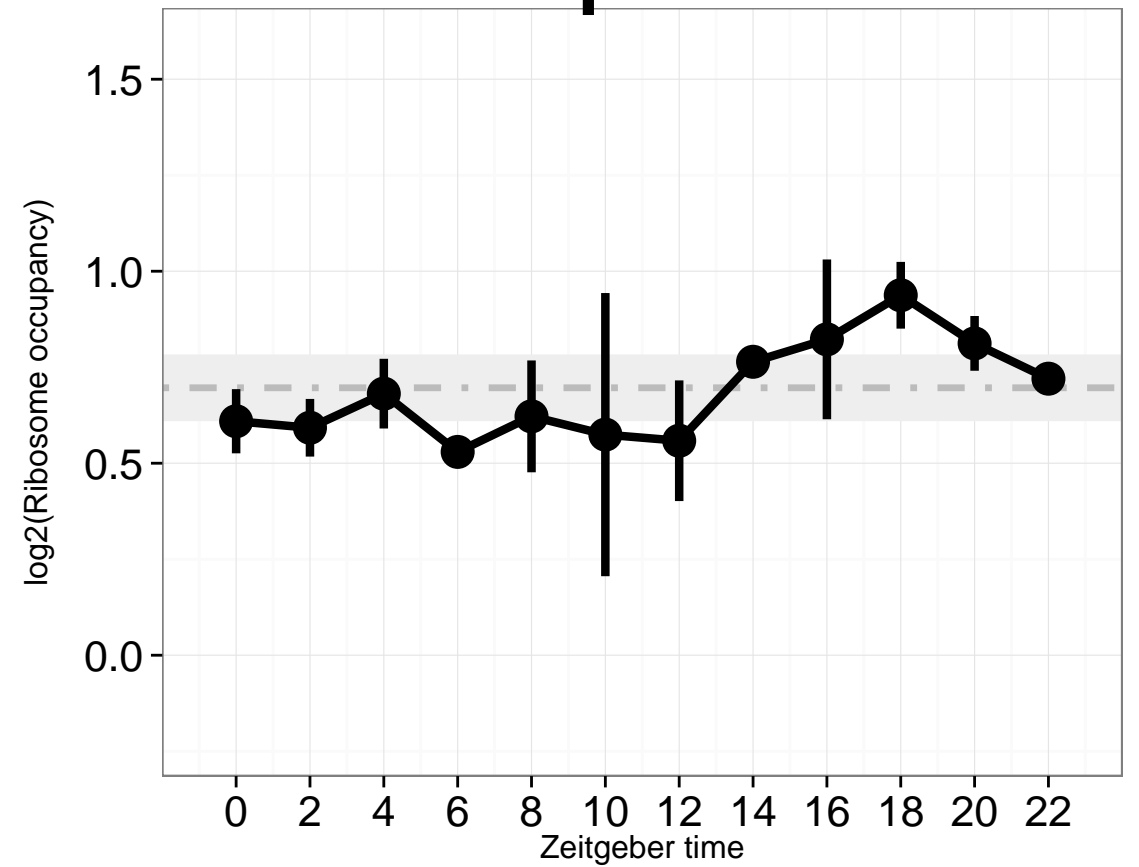

Supplement: Supplementary file 13289 [file 1]

## Crym

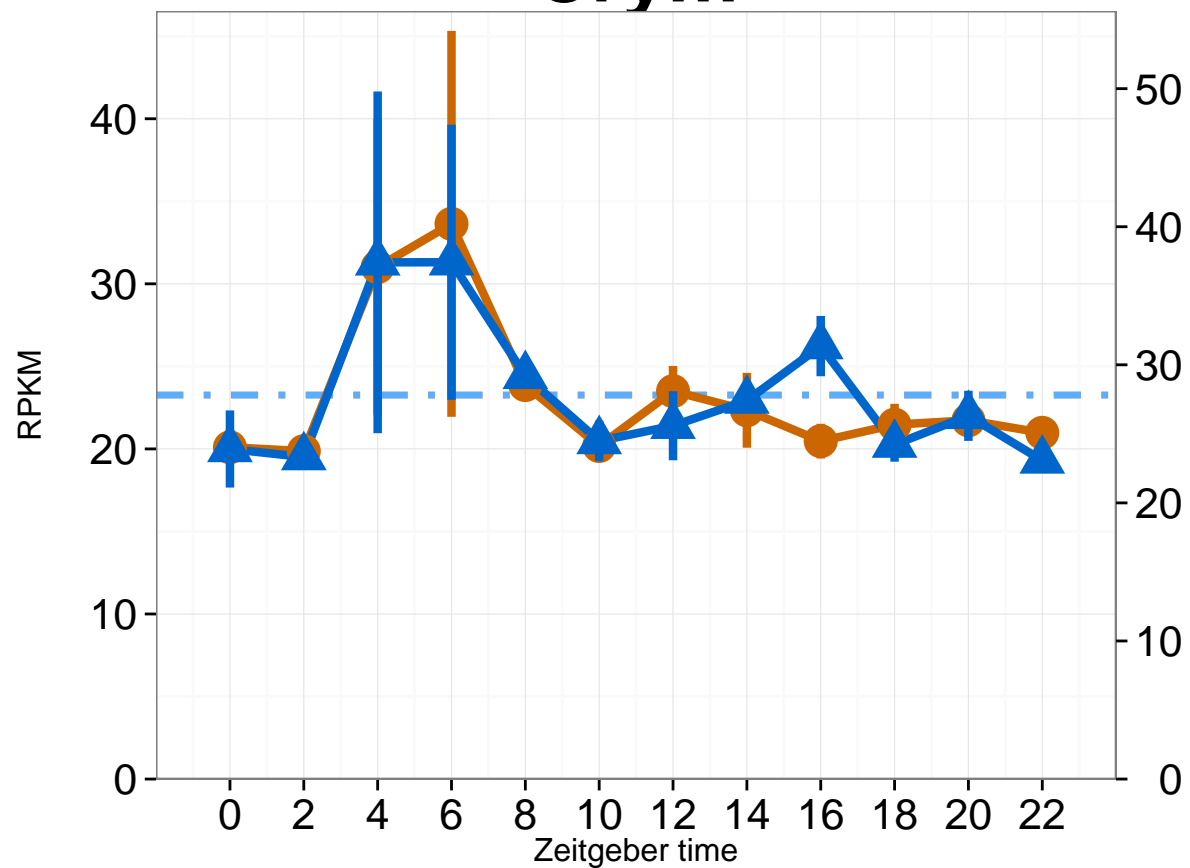

## Crym

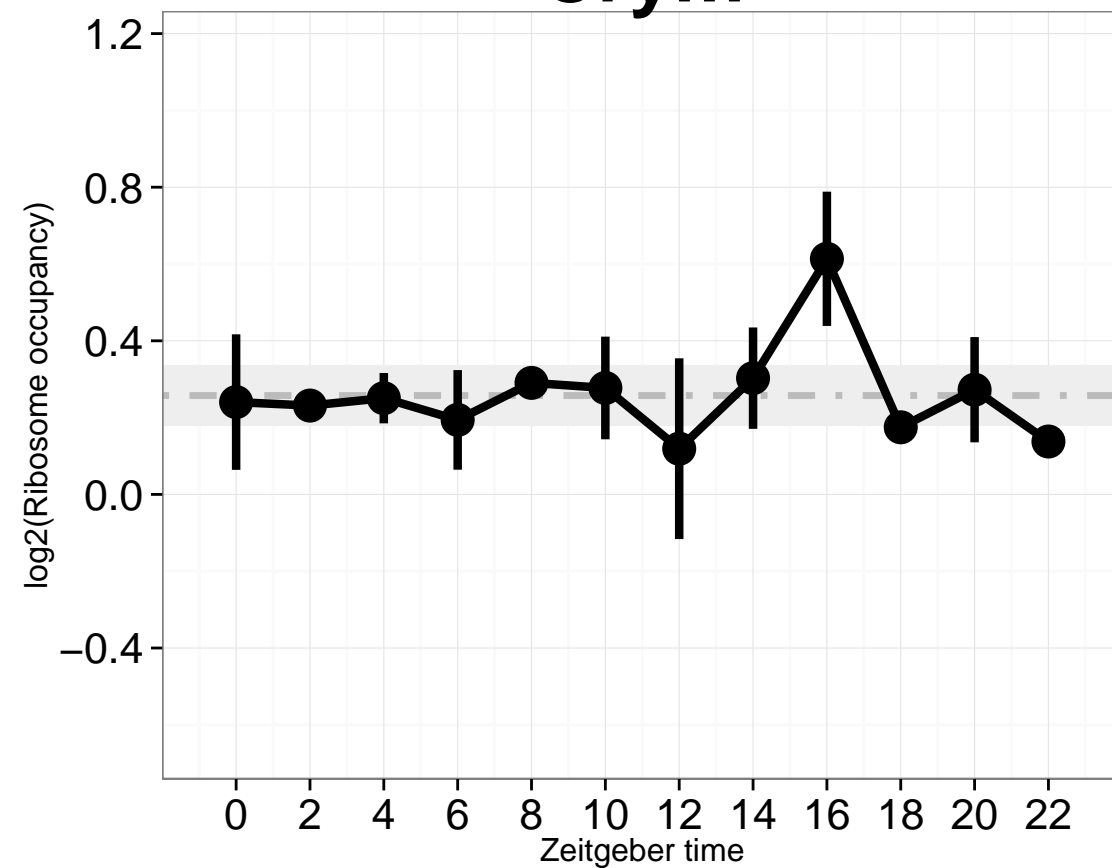

Supplement: Supplementary file 13290 [file 1]
